# Supplementary material
Source: PubMed Central journal article supplement (PMC4490005)
Supplement: NIHMS697850-supplement-S2.pdf [file NIHMS697850-supplement-S2.pdf]

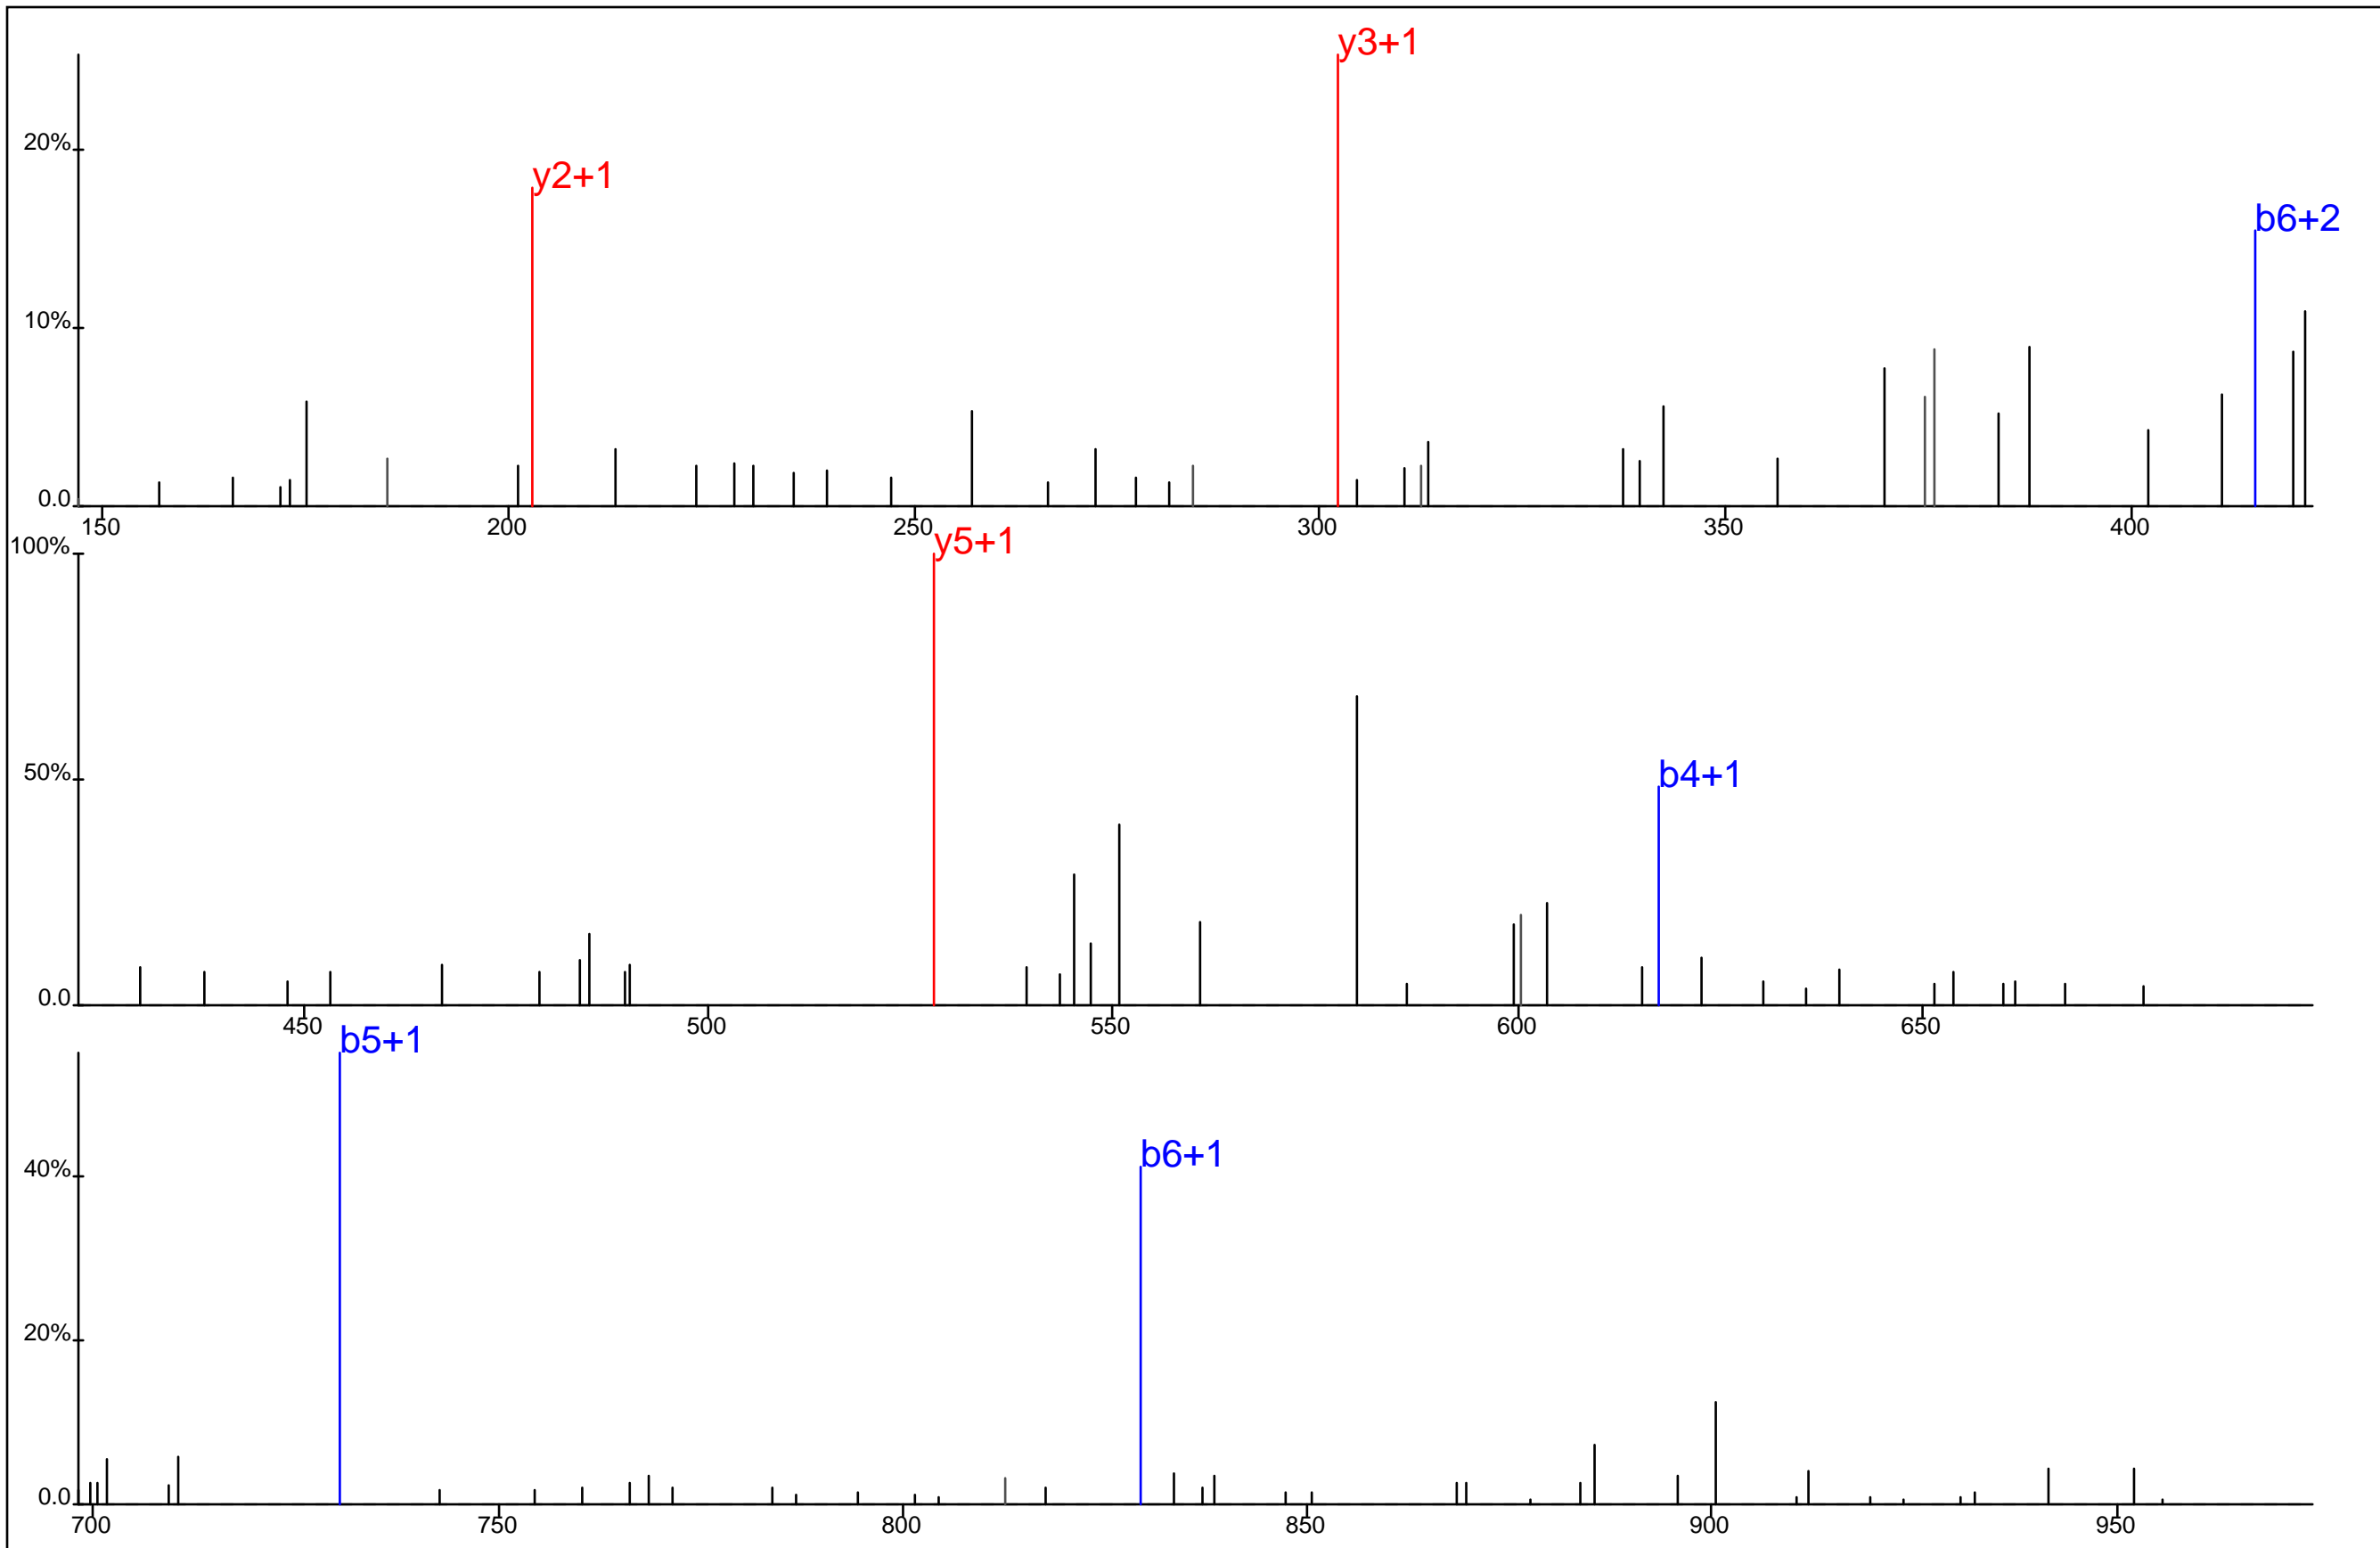

Y\* F I L I V L A

Protein Name: 0 Decoy hit, please disregard  
 gi Accession: 0  
 Precursor Mass: 516.2799+2  
 Delta Mass: 4.977 ppm  
 XCorr: 25.0

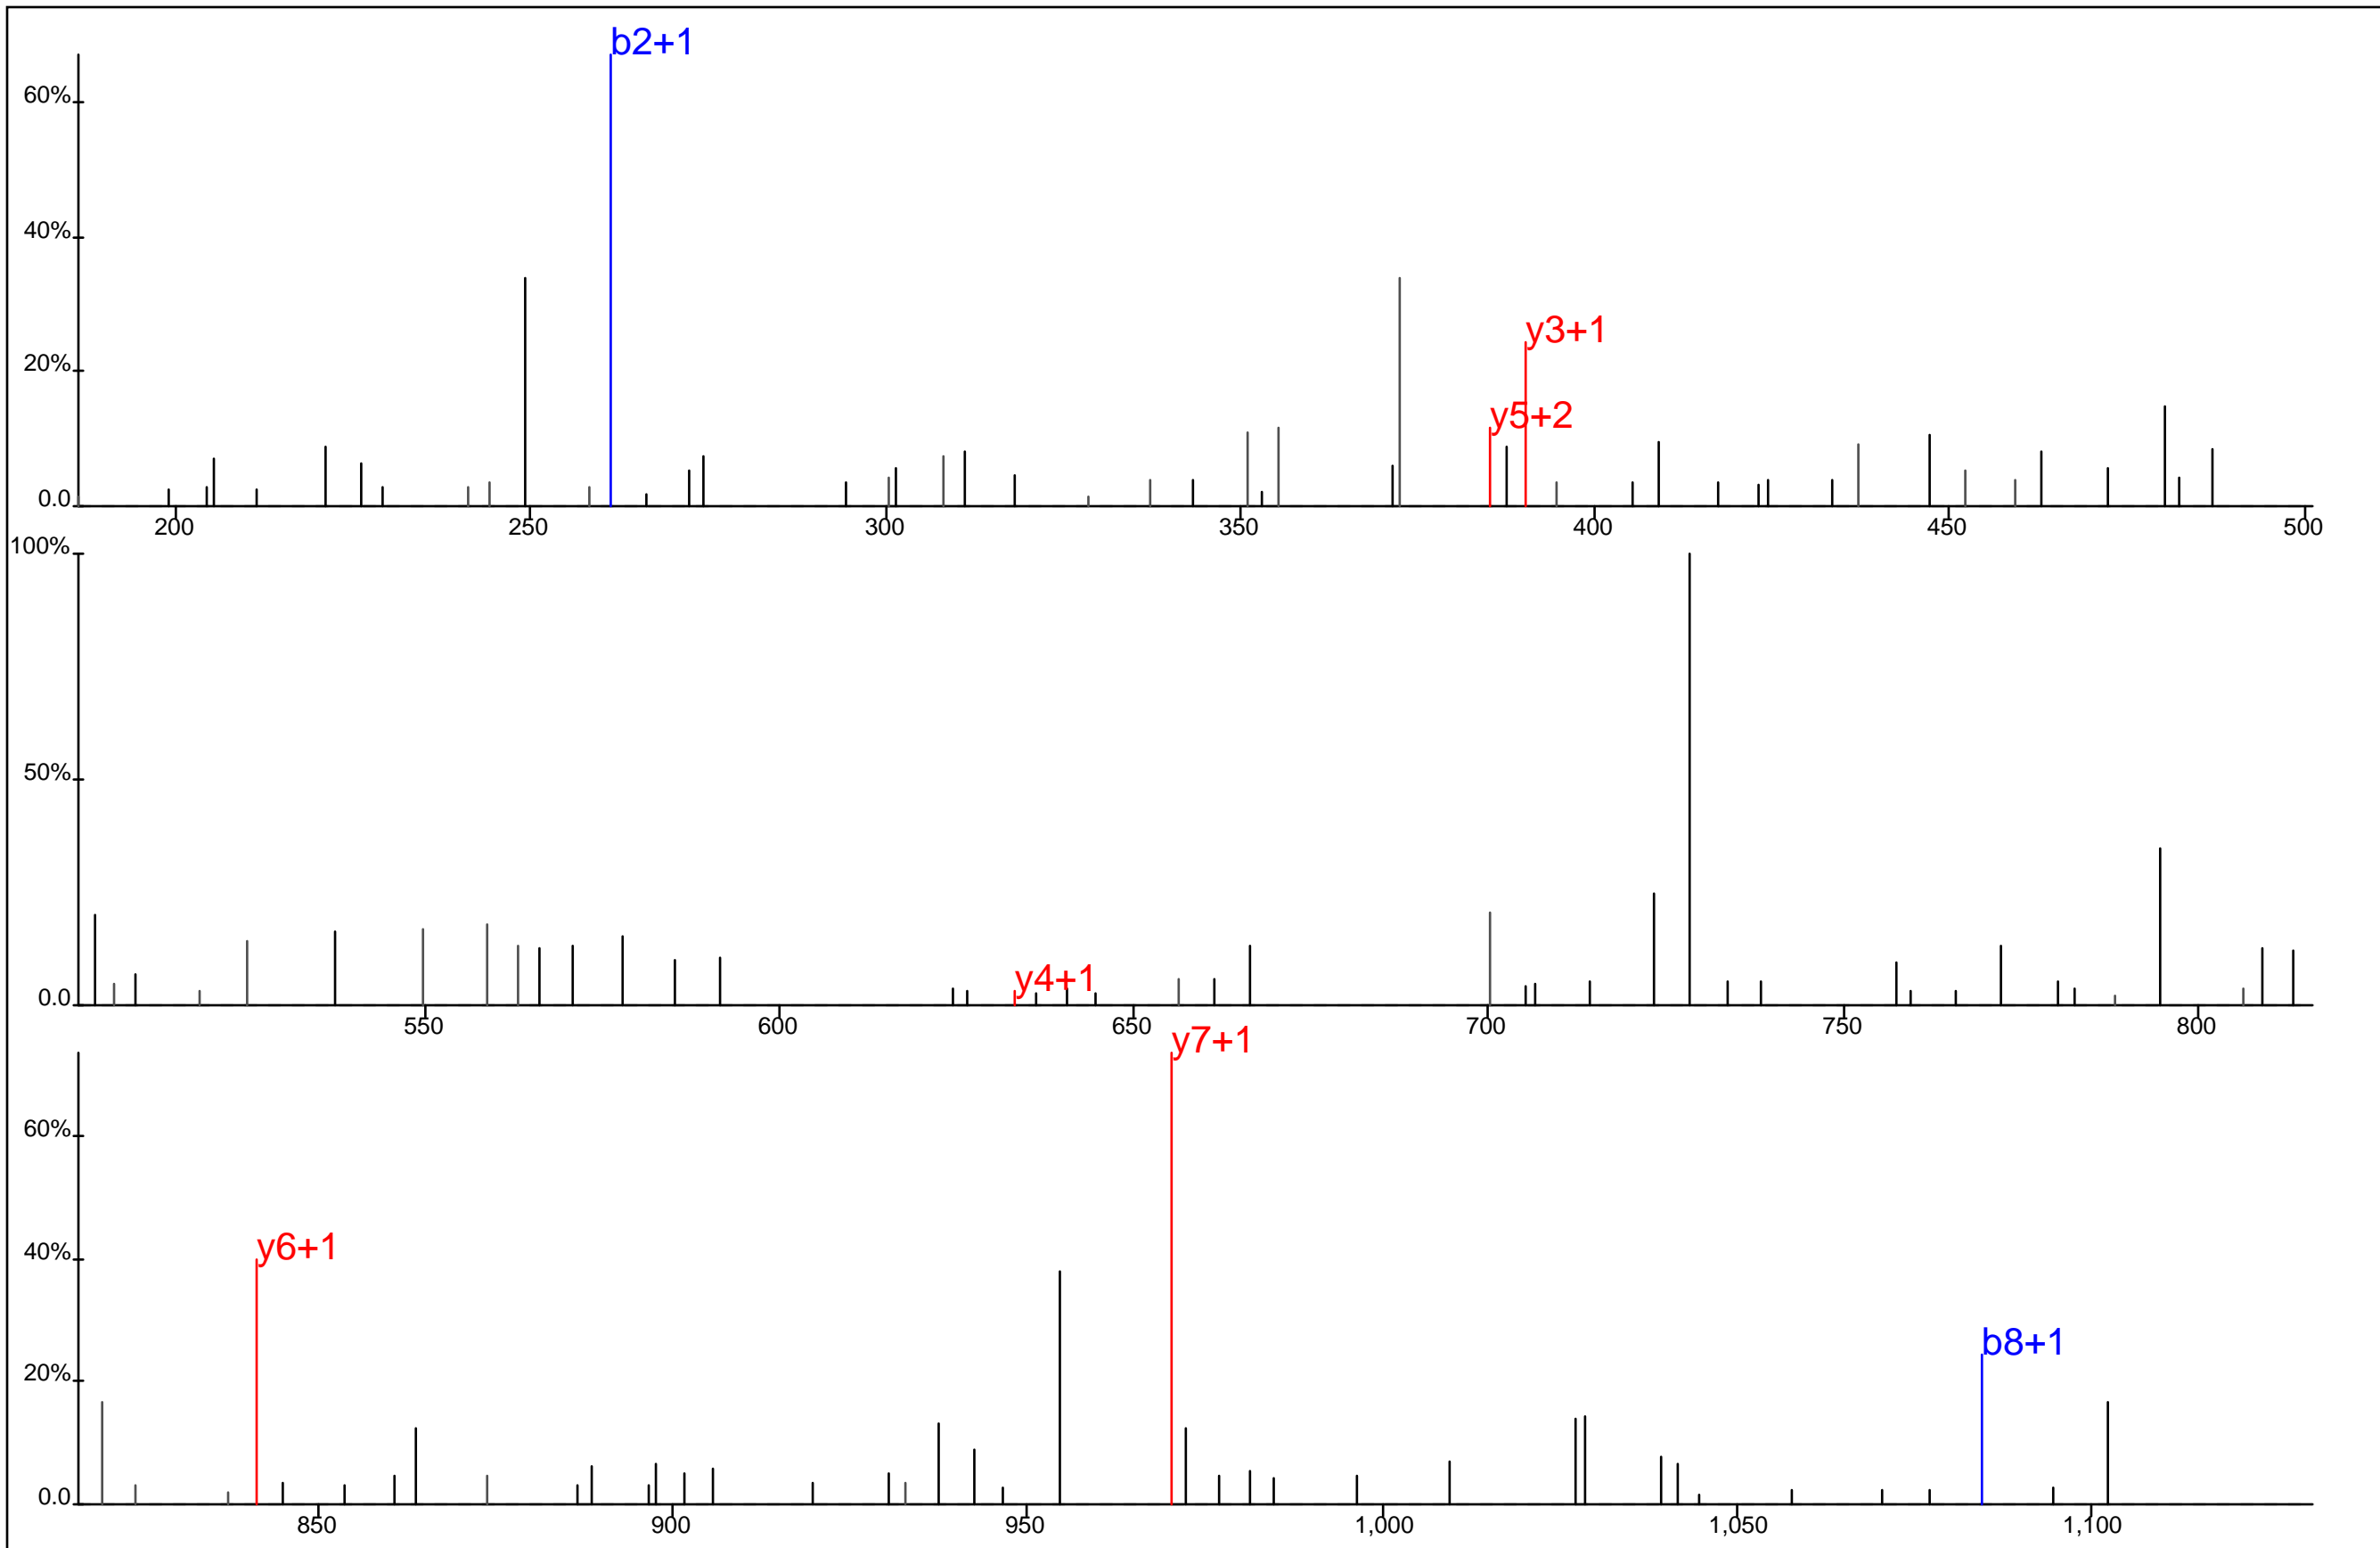

|    |   |   |   |    |   |   |   |   |   |
|----|---|---|---|----|---|---|---|---|---|
|    | ■ | □ | □ | □  | □ | □ | □ | ■ | ■ |
| M# | E | A | H | Y* | D | K | K |   |   |
|    | □ | □ | ■ | □  | □ | ■ | □ |   |   |

Protein Name: 0 Decoy hit, please disregard  
 gi Accession: 0  
 Precursor Mass: 615.7678+2  
 Delta Mass: 4.741 ppm  
 XCorr: 20.19

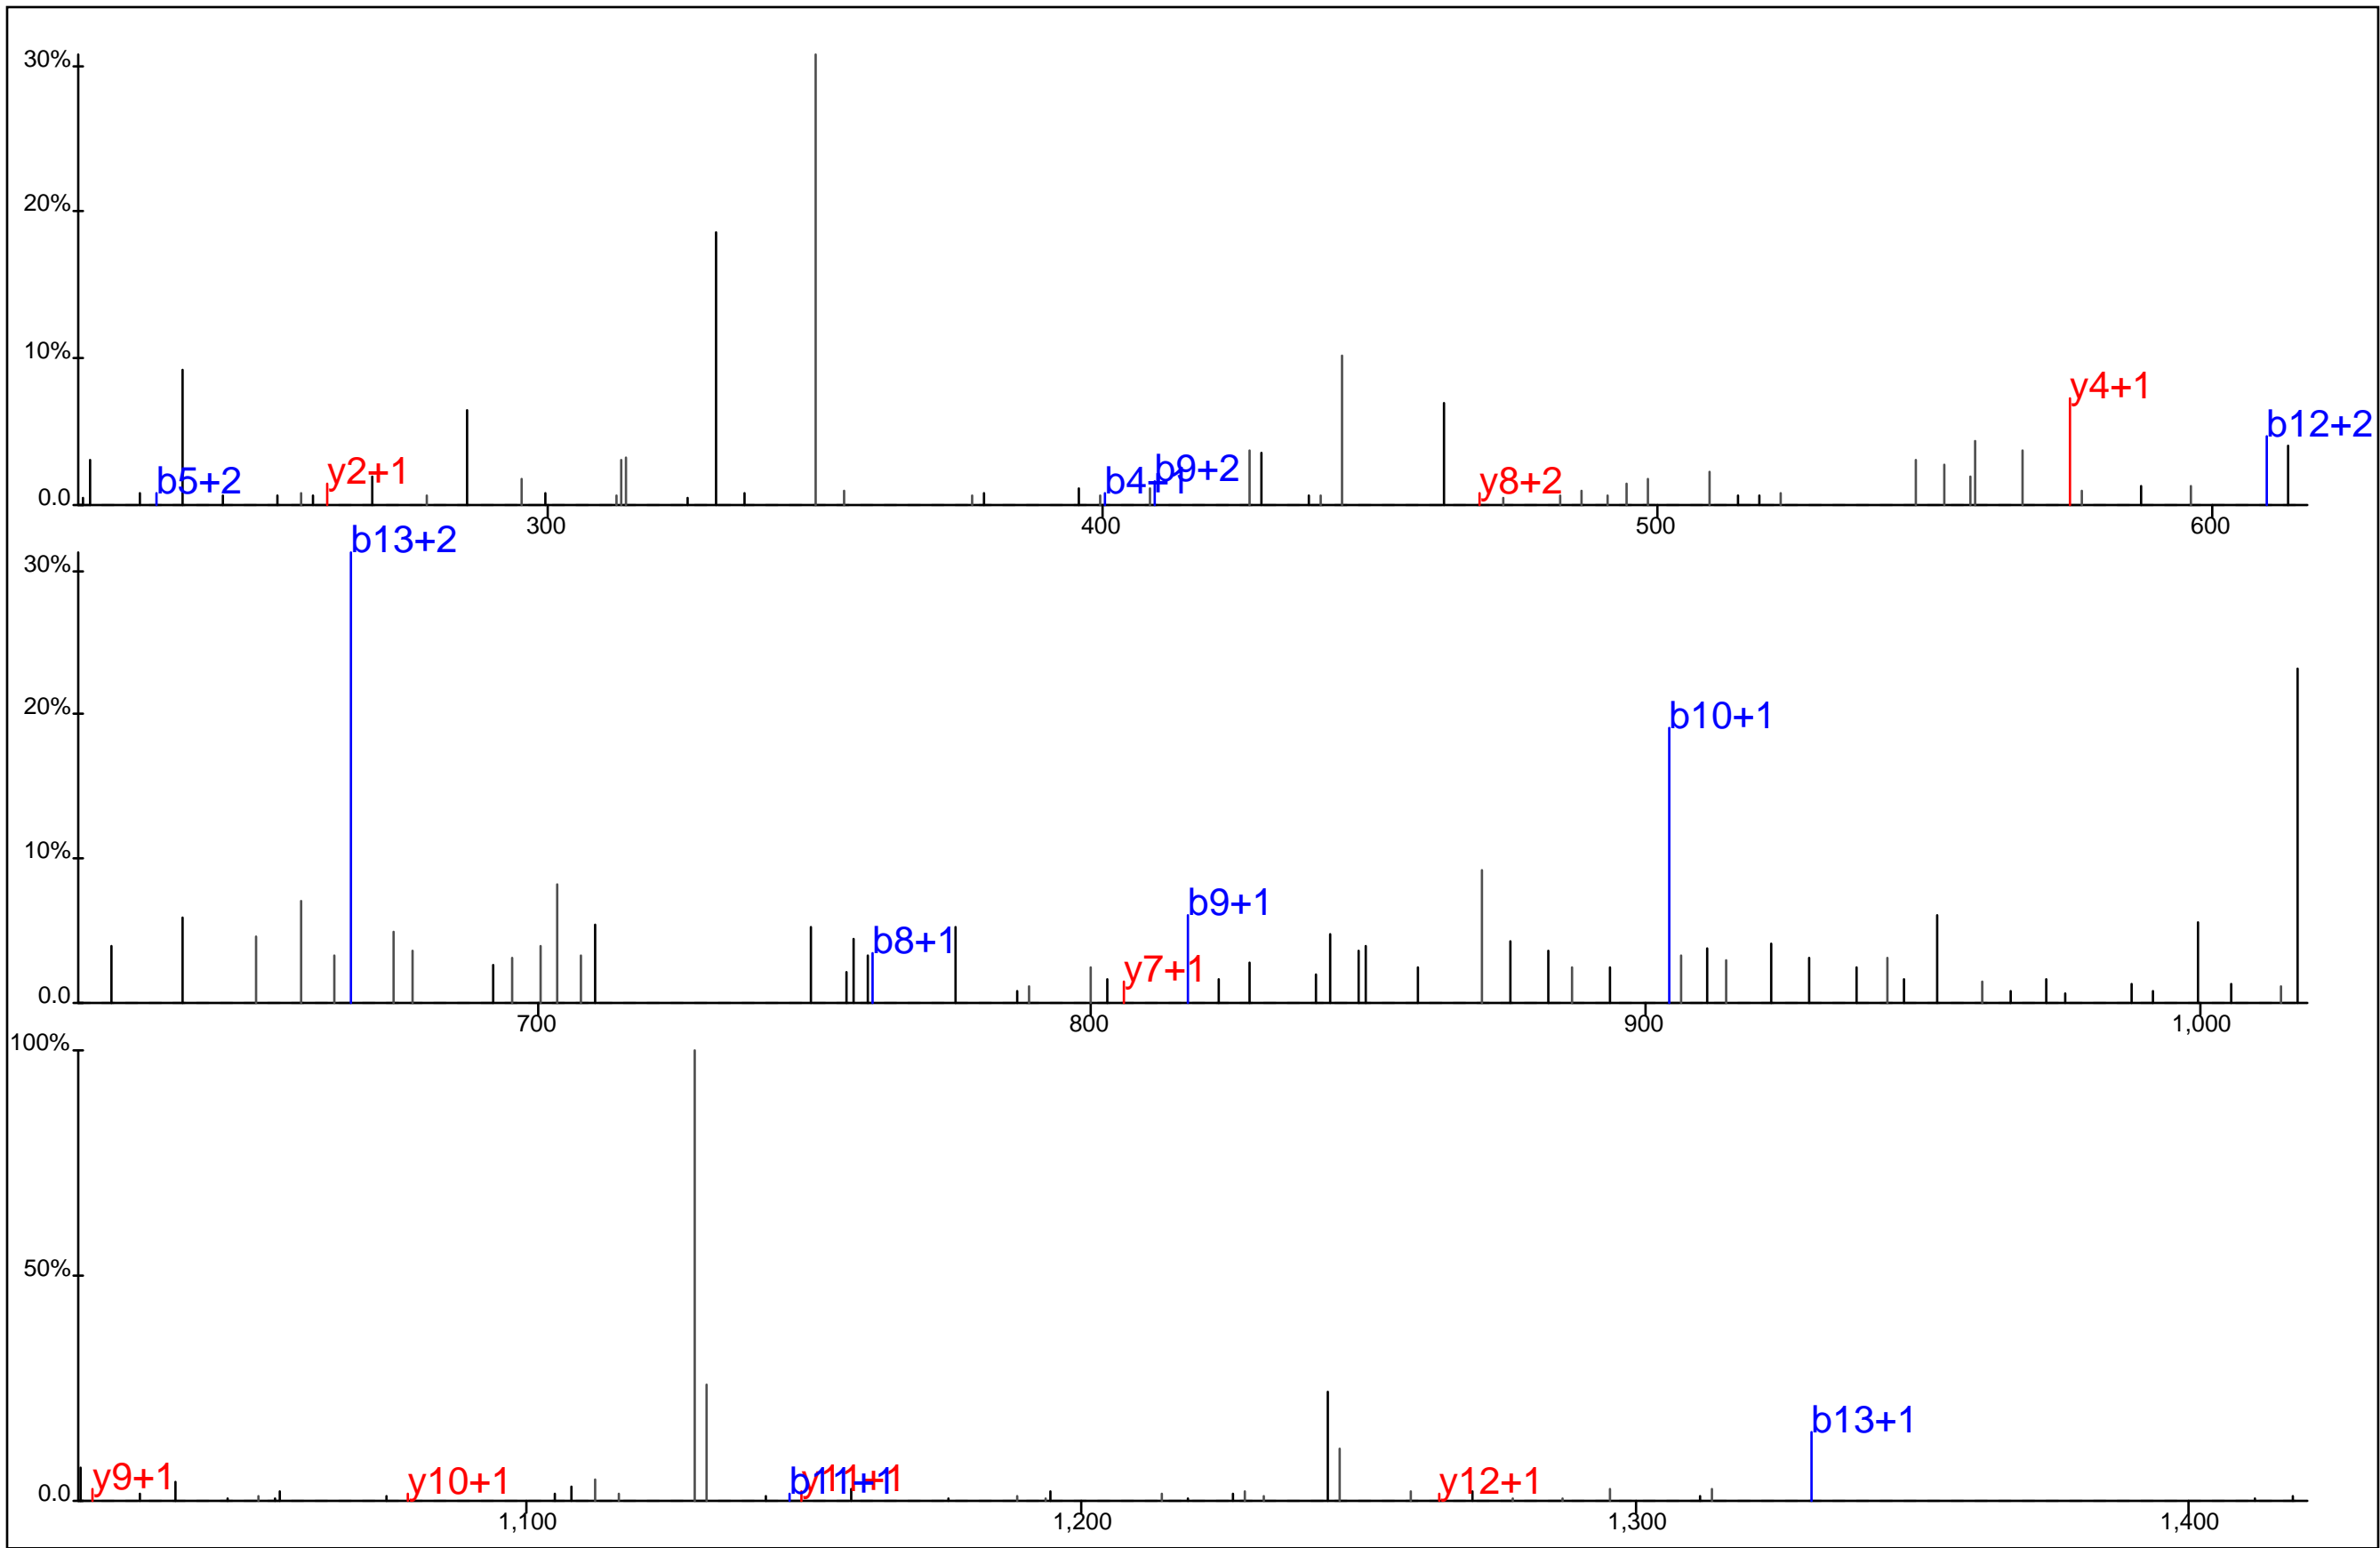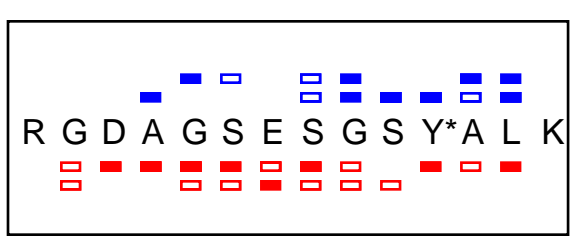

Protein Name: 0 Decoy hit, please disregard  
 gi Accession: 0  
 Precursor Mass: 739.3163+2  
 Delta Mass: 4.440 ppm  
 XCorr: 21.36

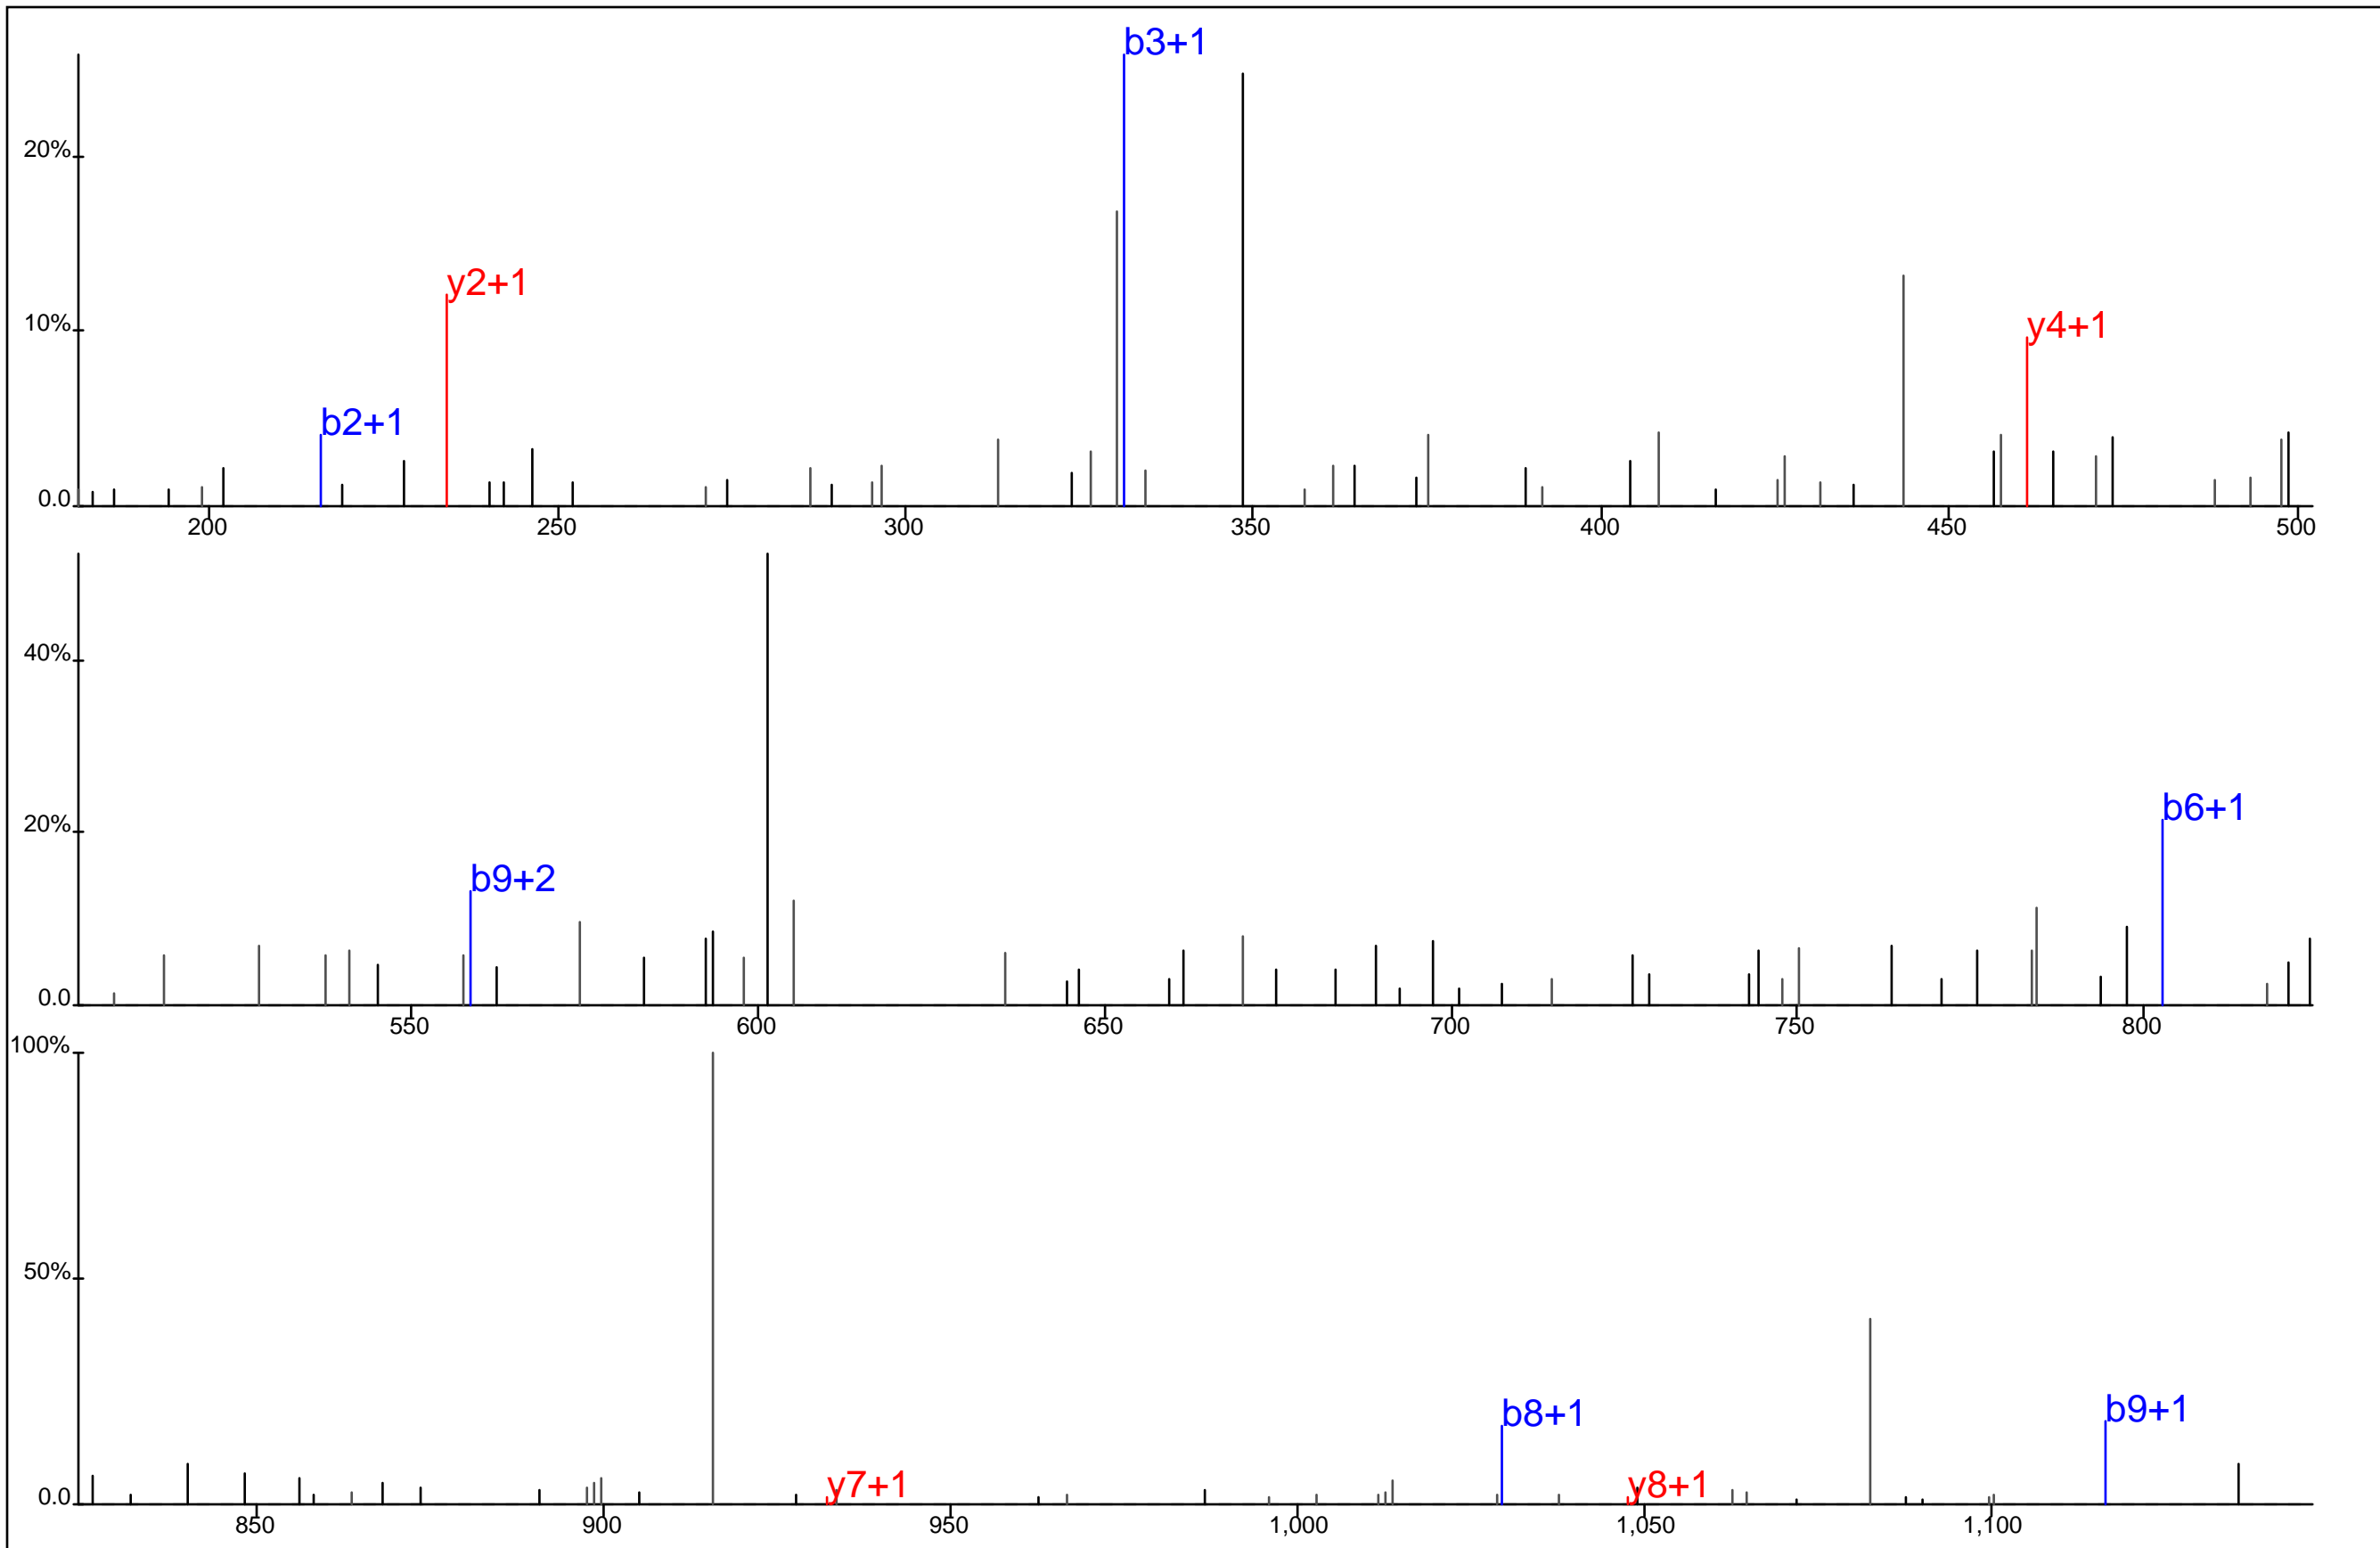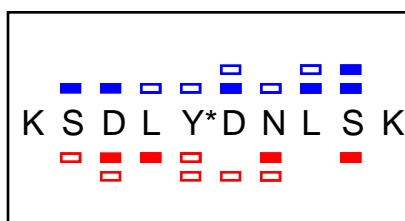

Protein Name: 0 Decoy hit, please disregard  
 gi Accession: 0  
 Precursor Mass: 631.7830+2  
 Delta Mass: 6.042 ppm  
 XCorr: 26.71



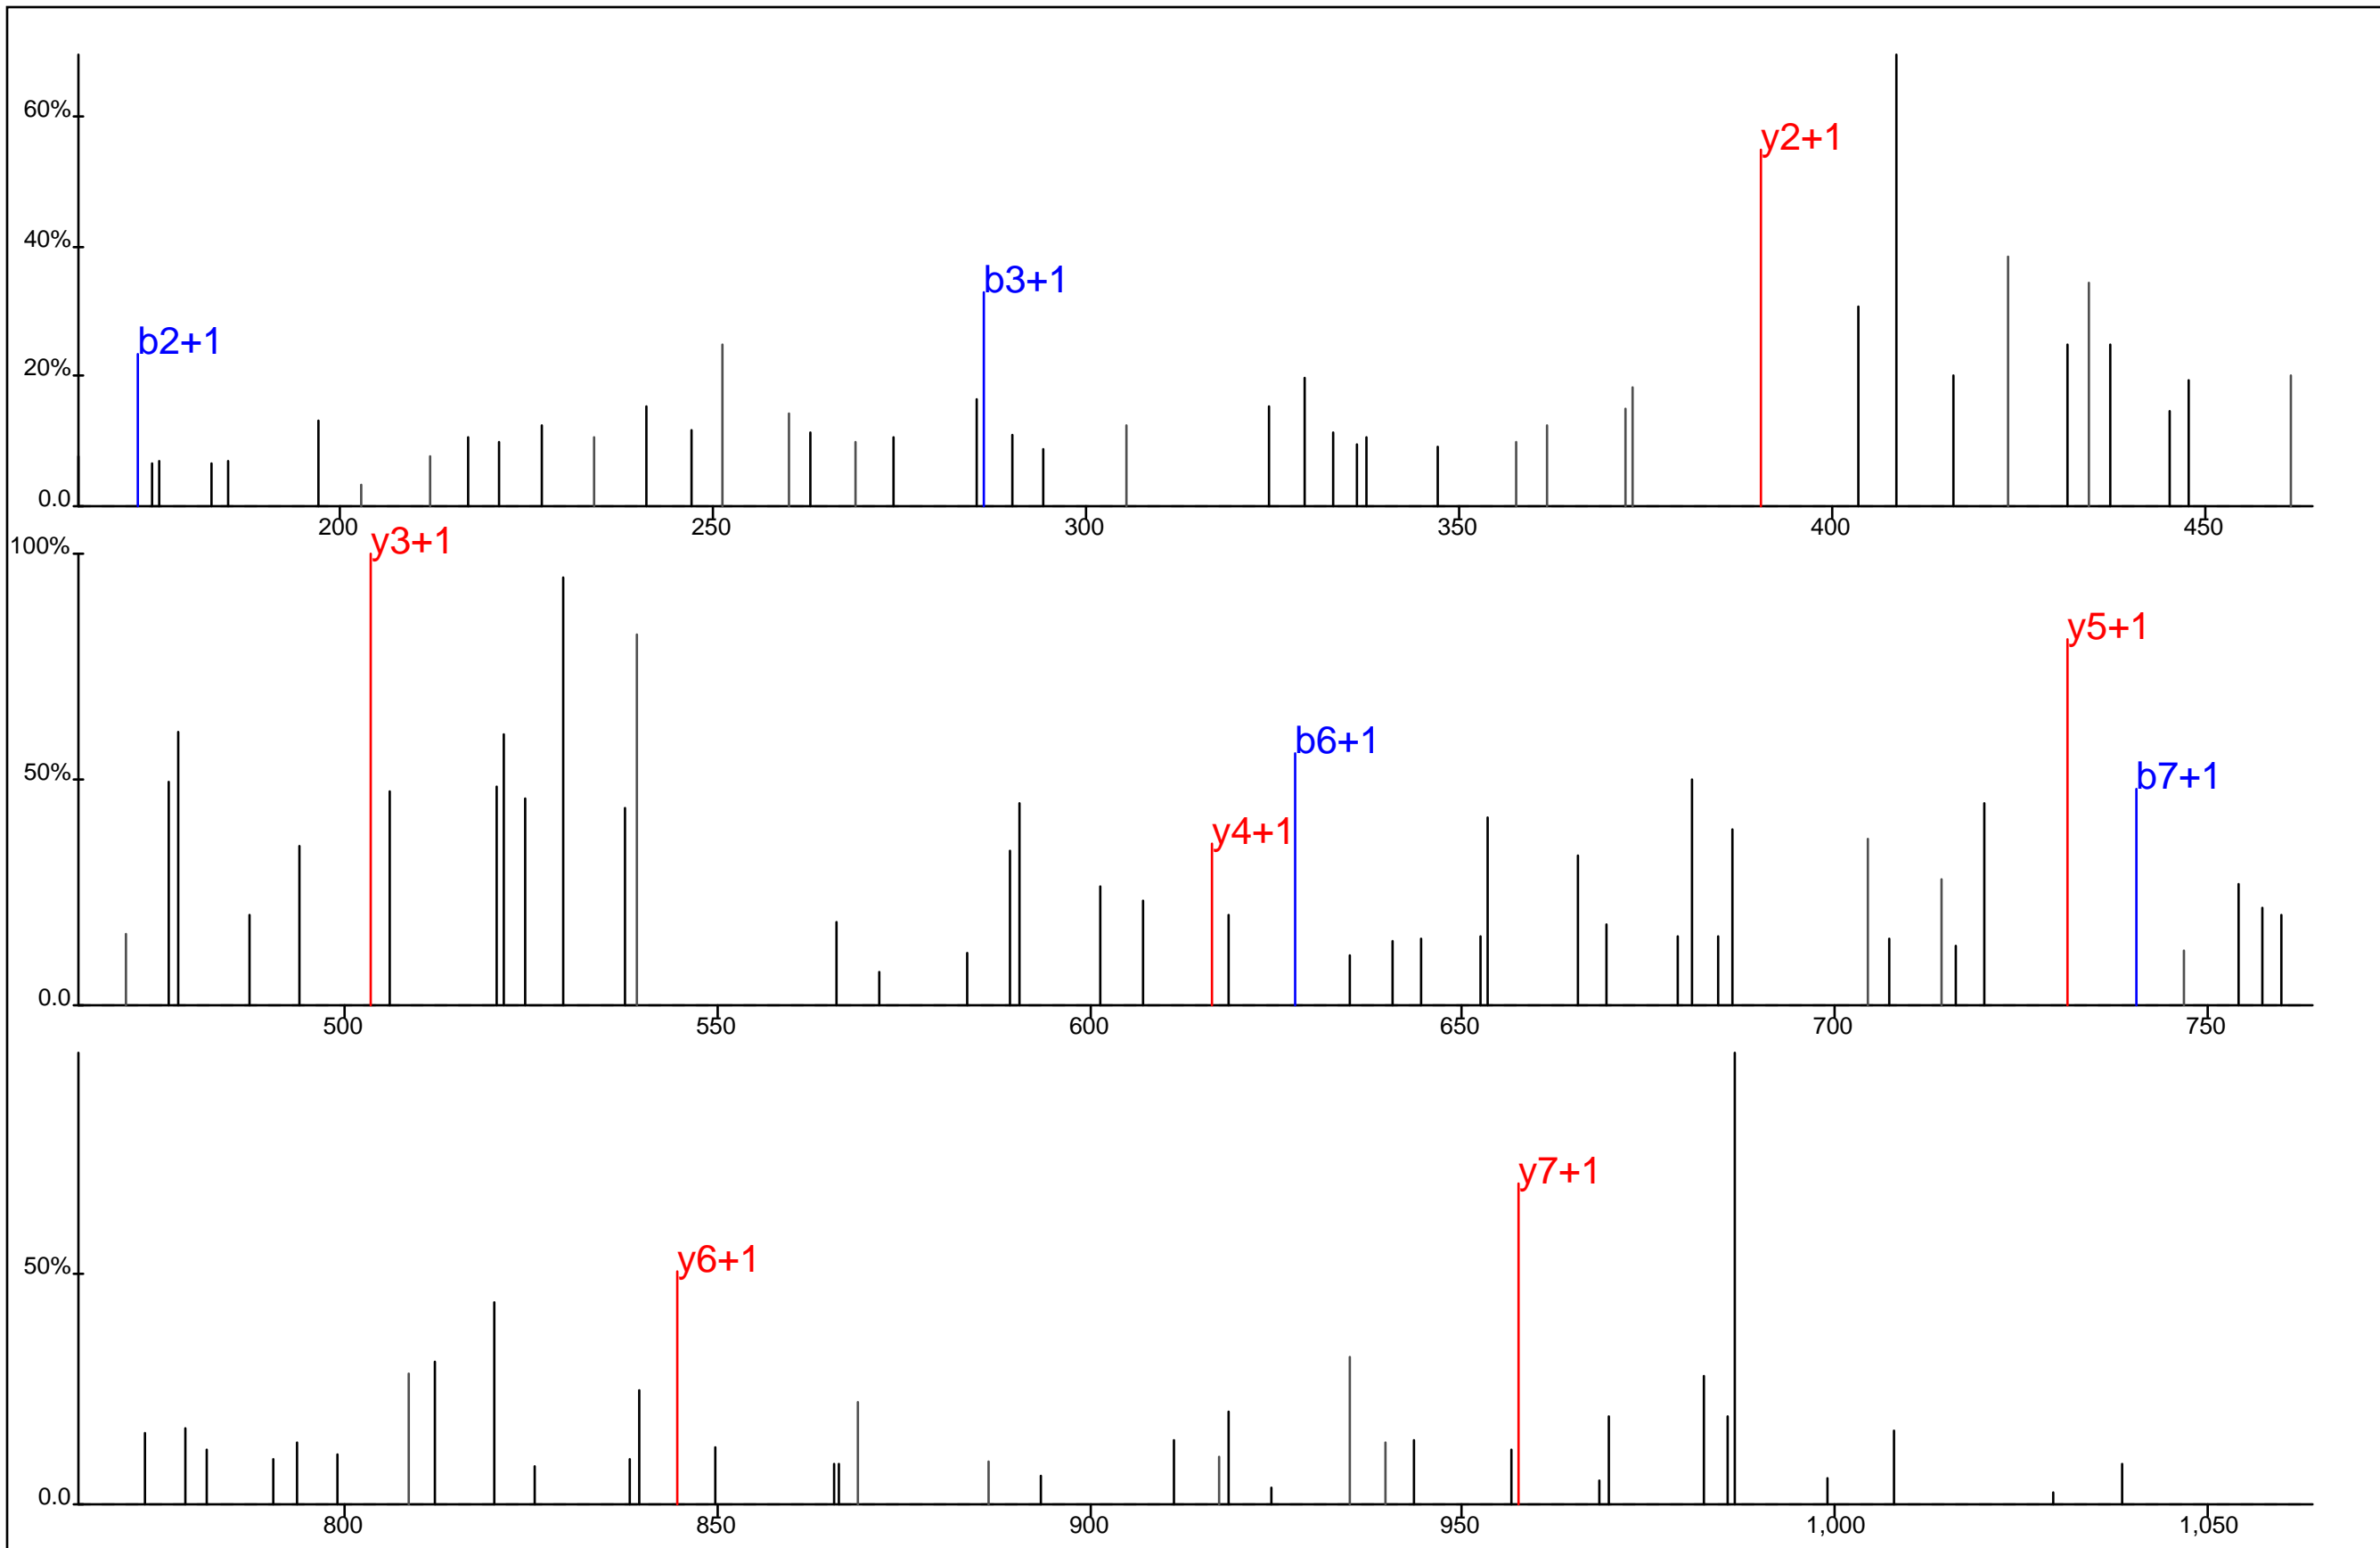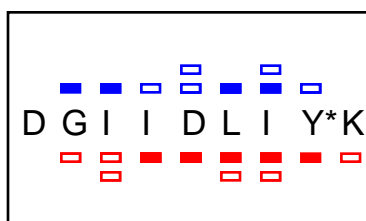

Protein Name: 0 Decoy hit, please disregard  
 gi Accession: 0  
 Precursor Mass: 565.2806+2  
 Delta Mass: 0.034 ppm  
 XCorr: 21.12



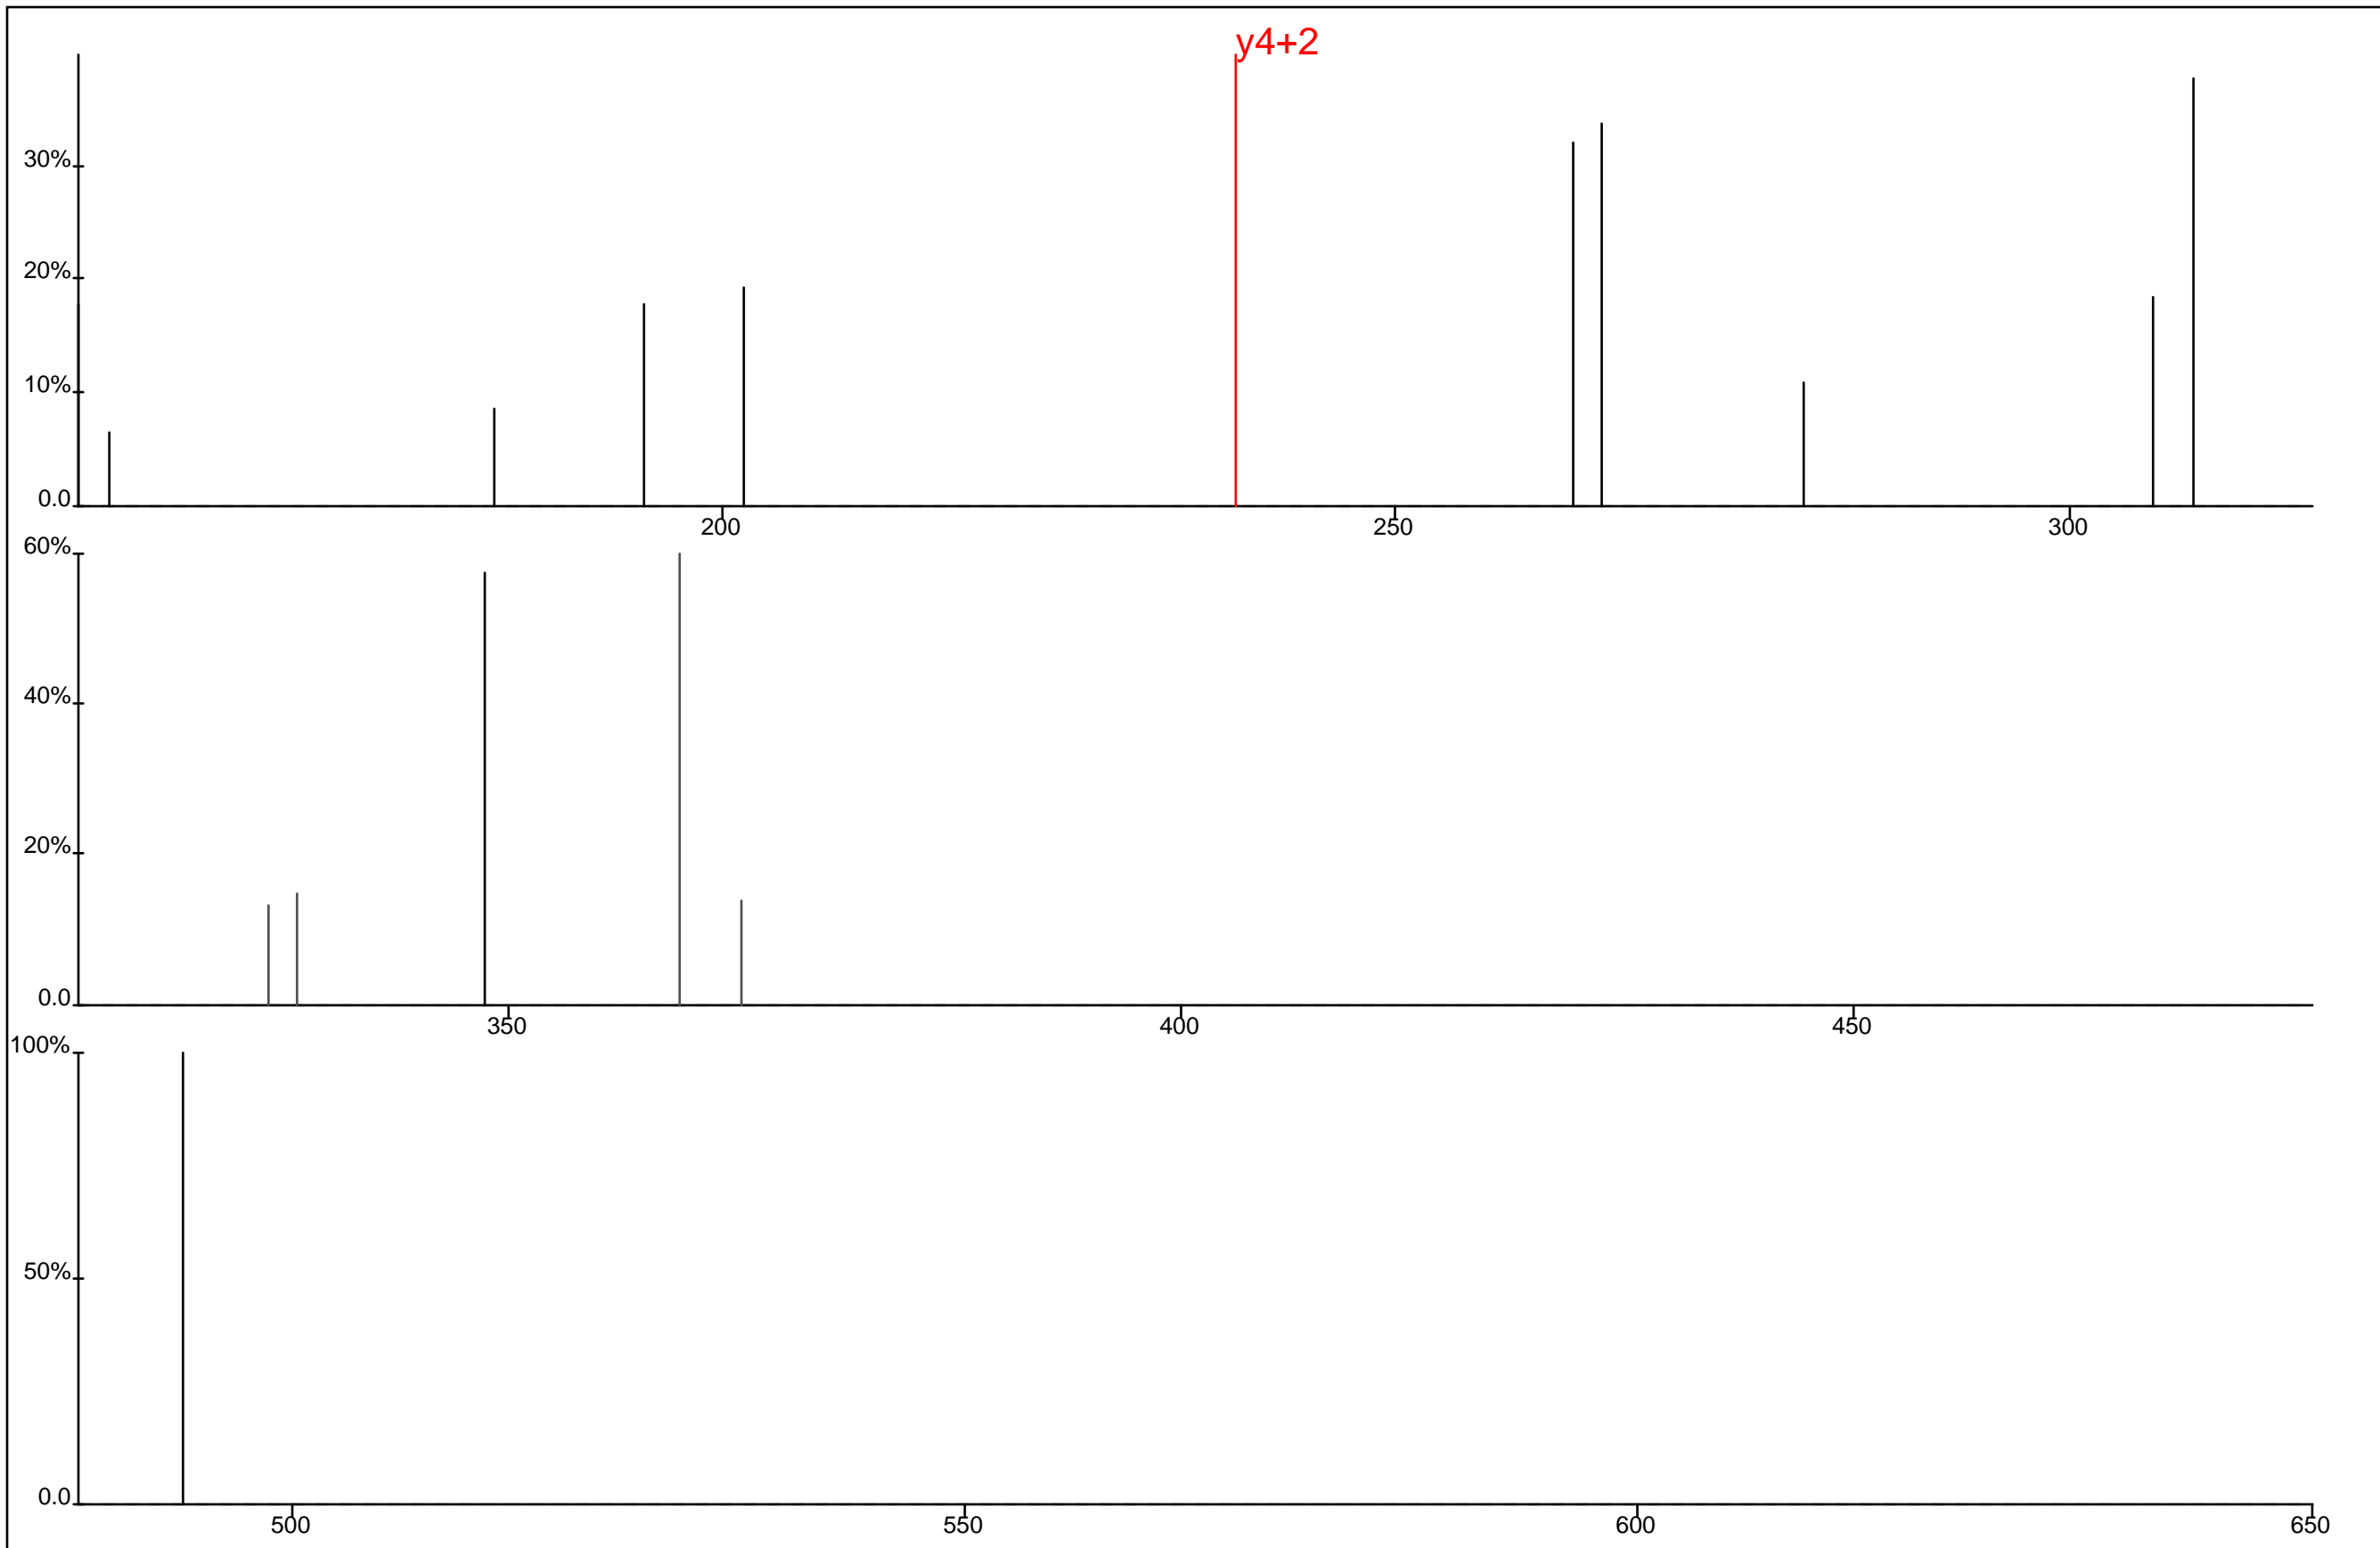

S\*S\*V G N I A Q I D F T\*Y\*P T\*H A W L S S I S V R

Protein Name: 0 Decoy hit, please disregard  
 gi Accession: 0  
 Precursor Mass: 394.5323+8  
 Delta Mass: 5.922 ppm  
 XCorr: 24.38

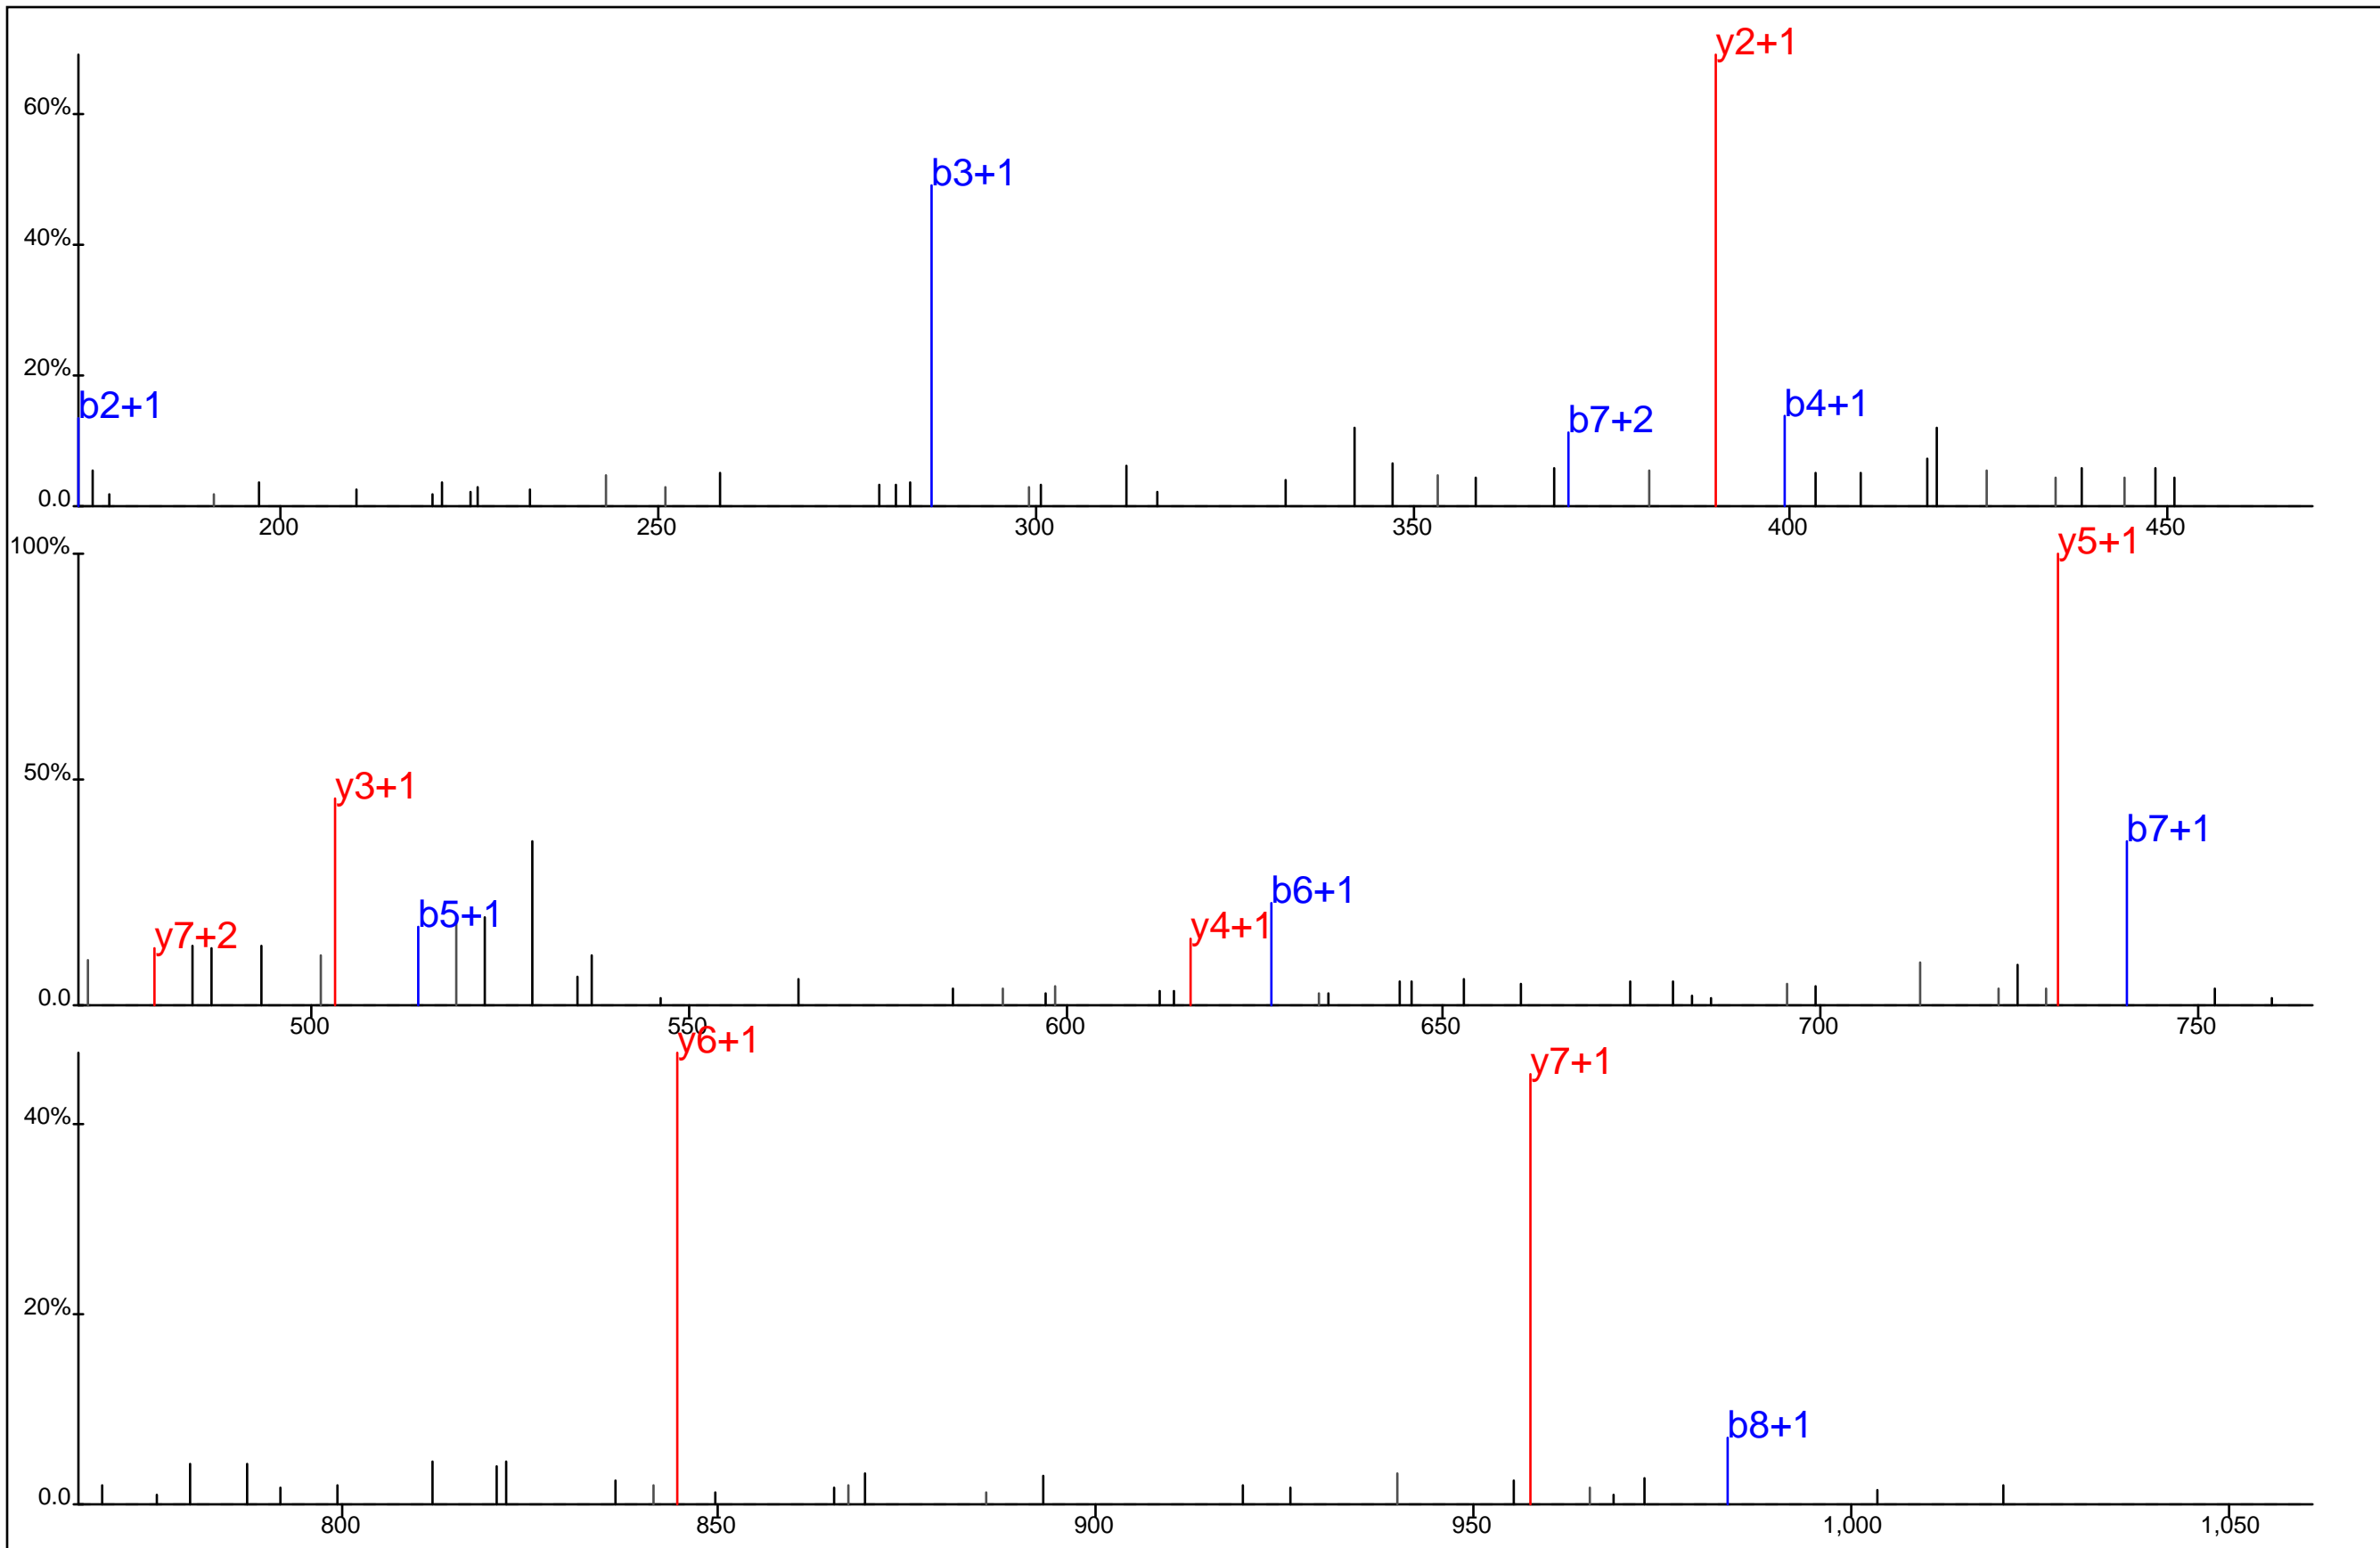

D G I I D L I Y\*K

Protein Name: 0 Decoy hit, please disregard  
 gi Accession: 0  
 Precursor Mass: 565.2814+2  
 Delta Mass: 1.370 ppm  
 XCorr: 52.71

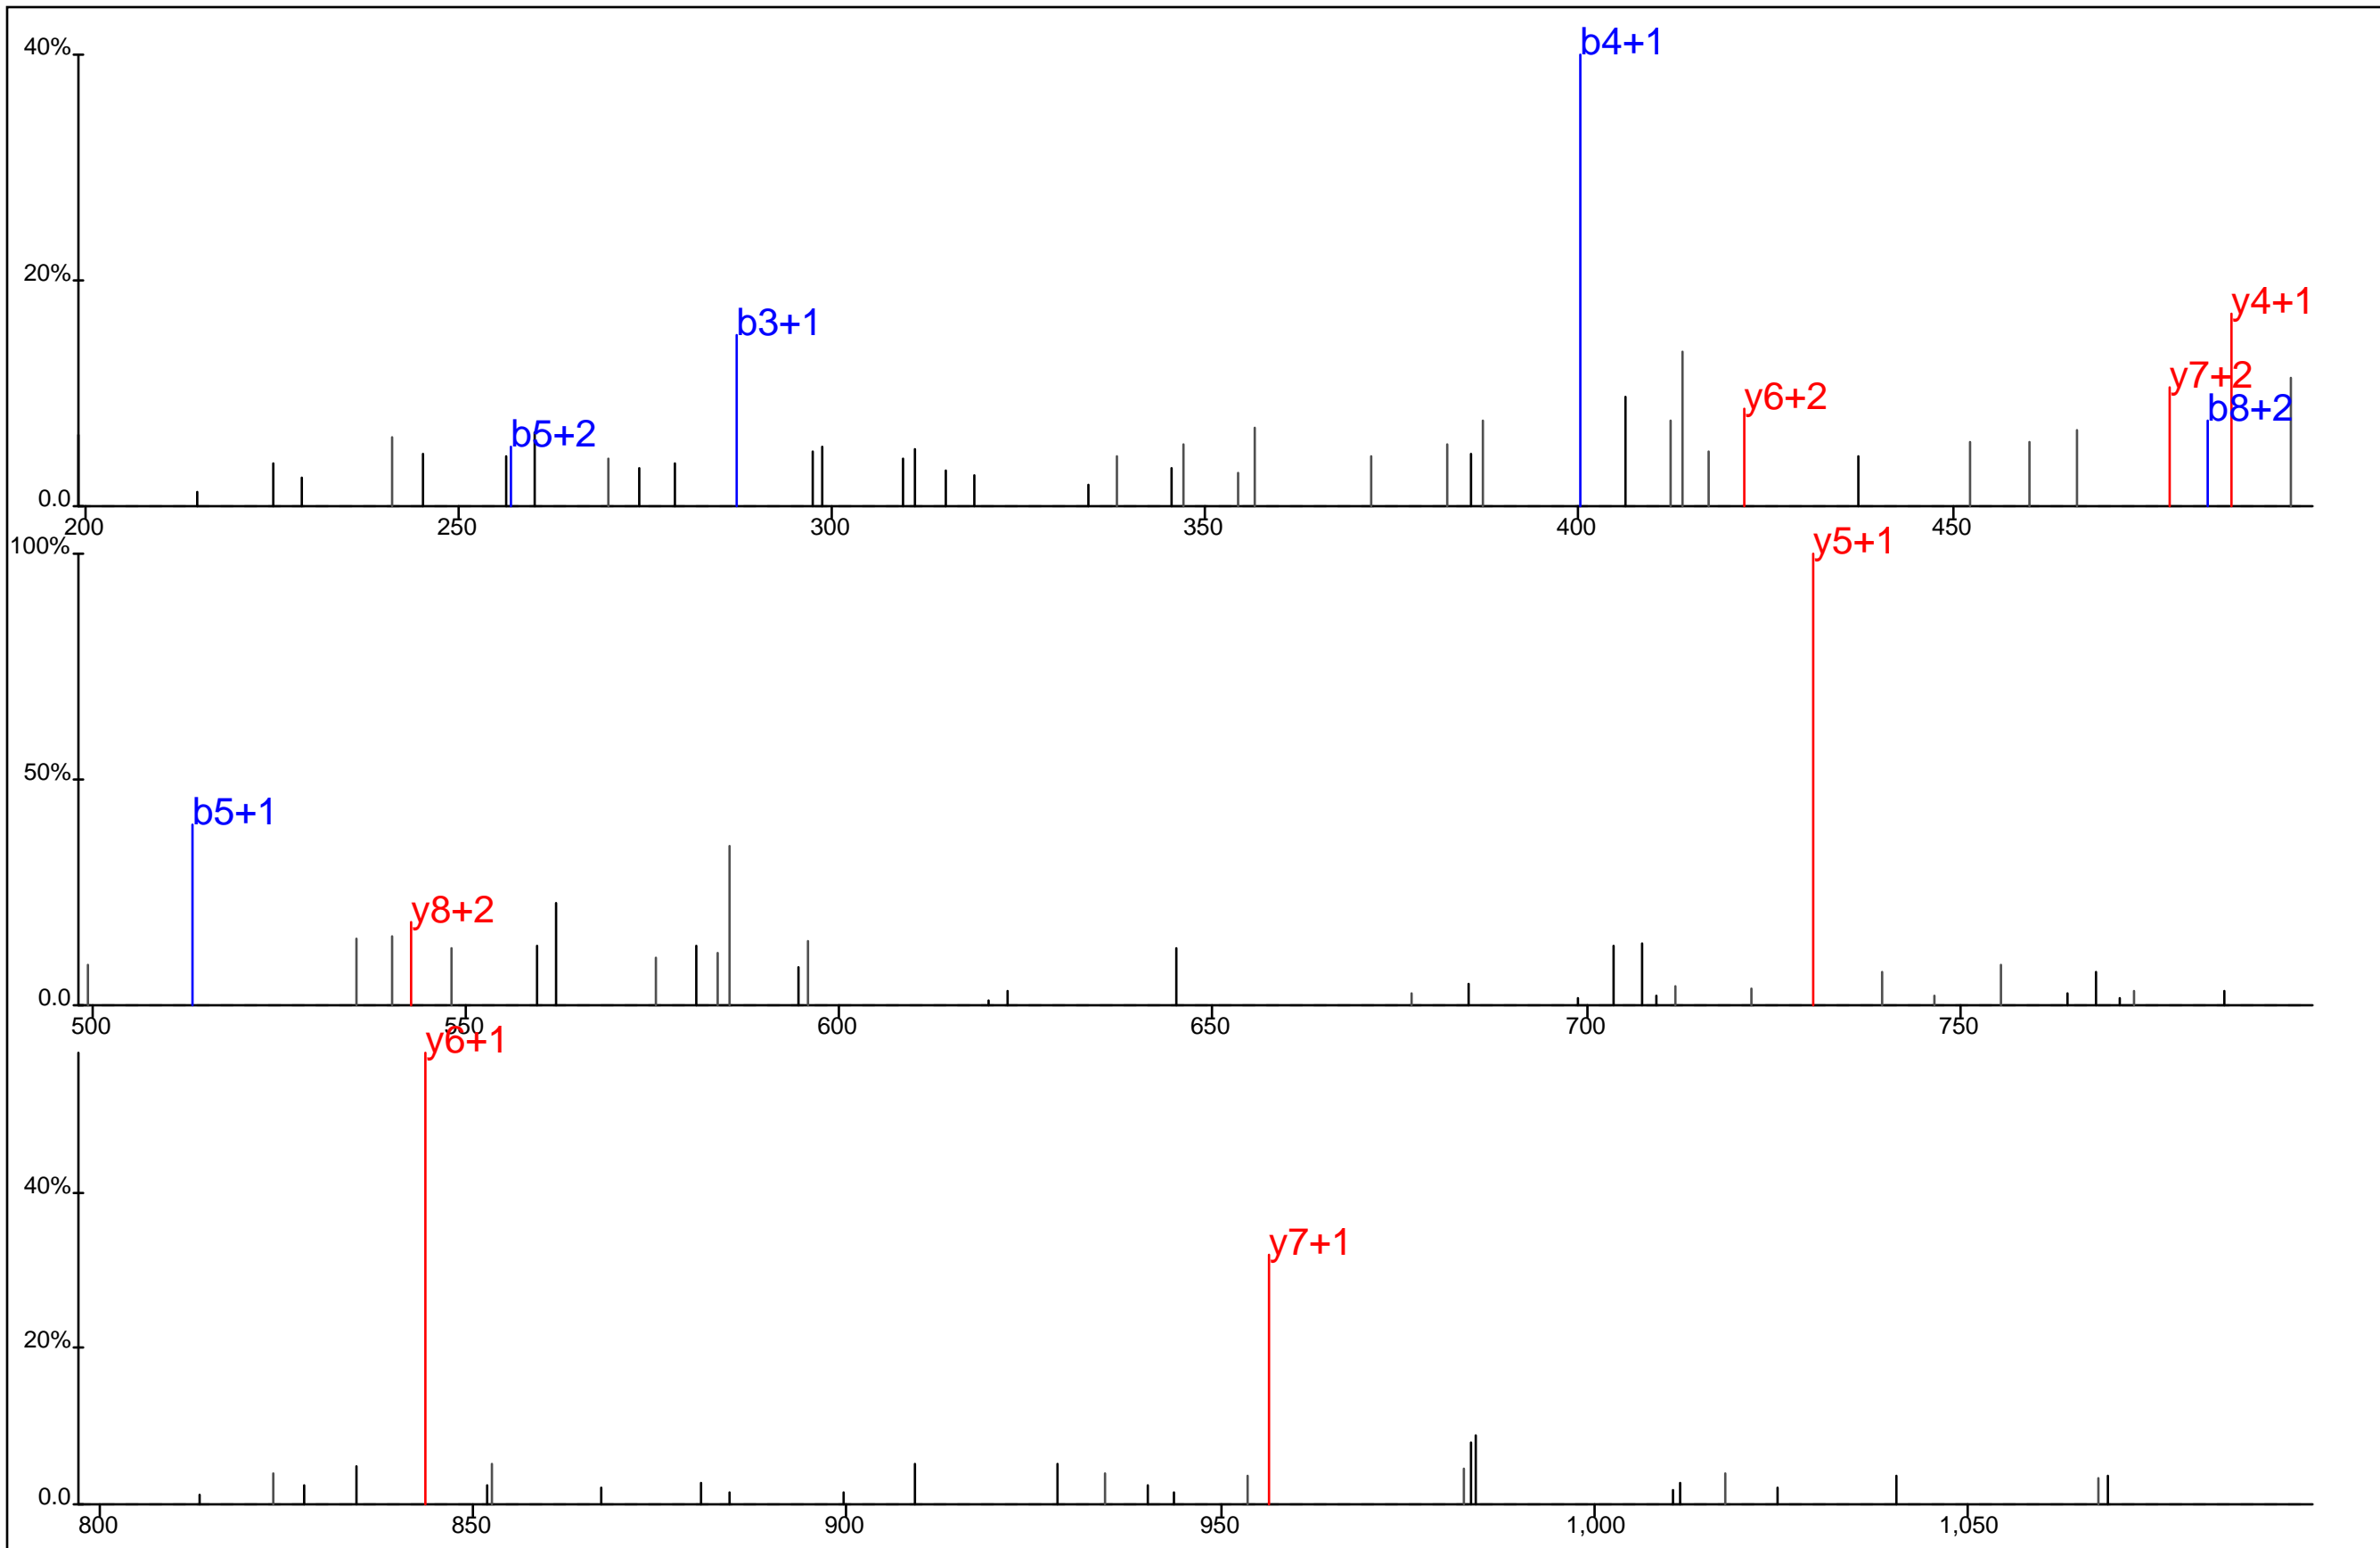

■ ■ ■ ■ ■ ■ ■  
 G T K L L Y\* P D Q K  
□ □ □ □ □ □ □

Protein Name: 0 Decoy hit, please disregard  
 gi Accession: 0  
 Precursor Mass: 621.8105+2  
 Delta Mass: 0.689 ppm  
 XCorr: 27.39

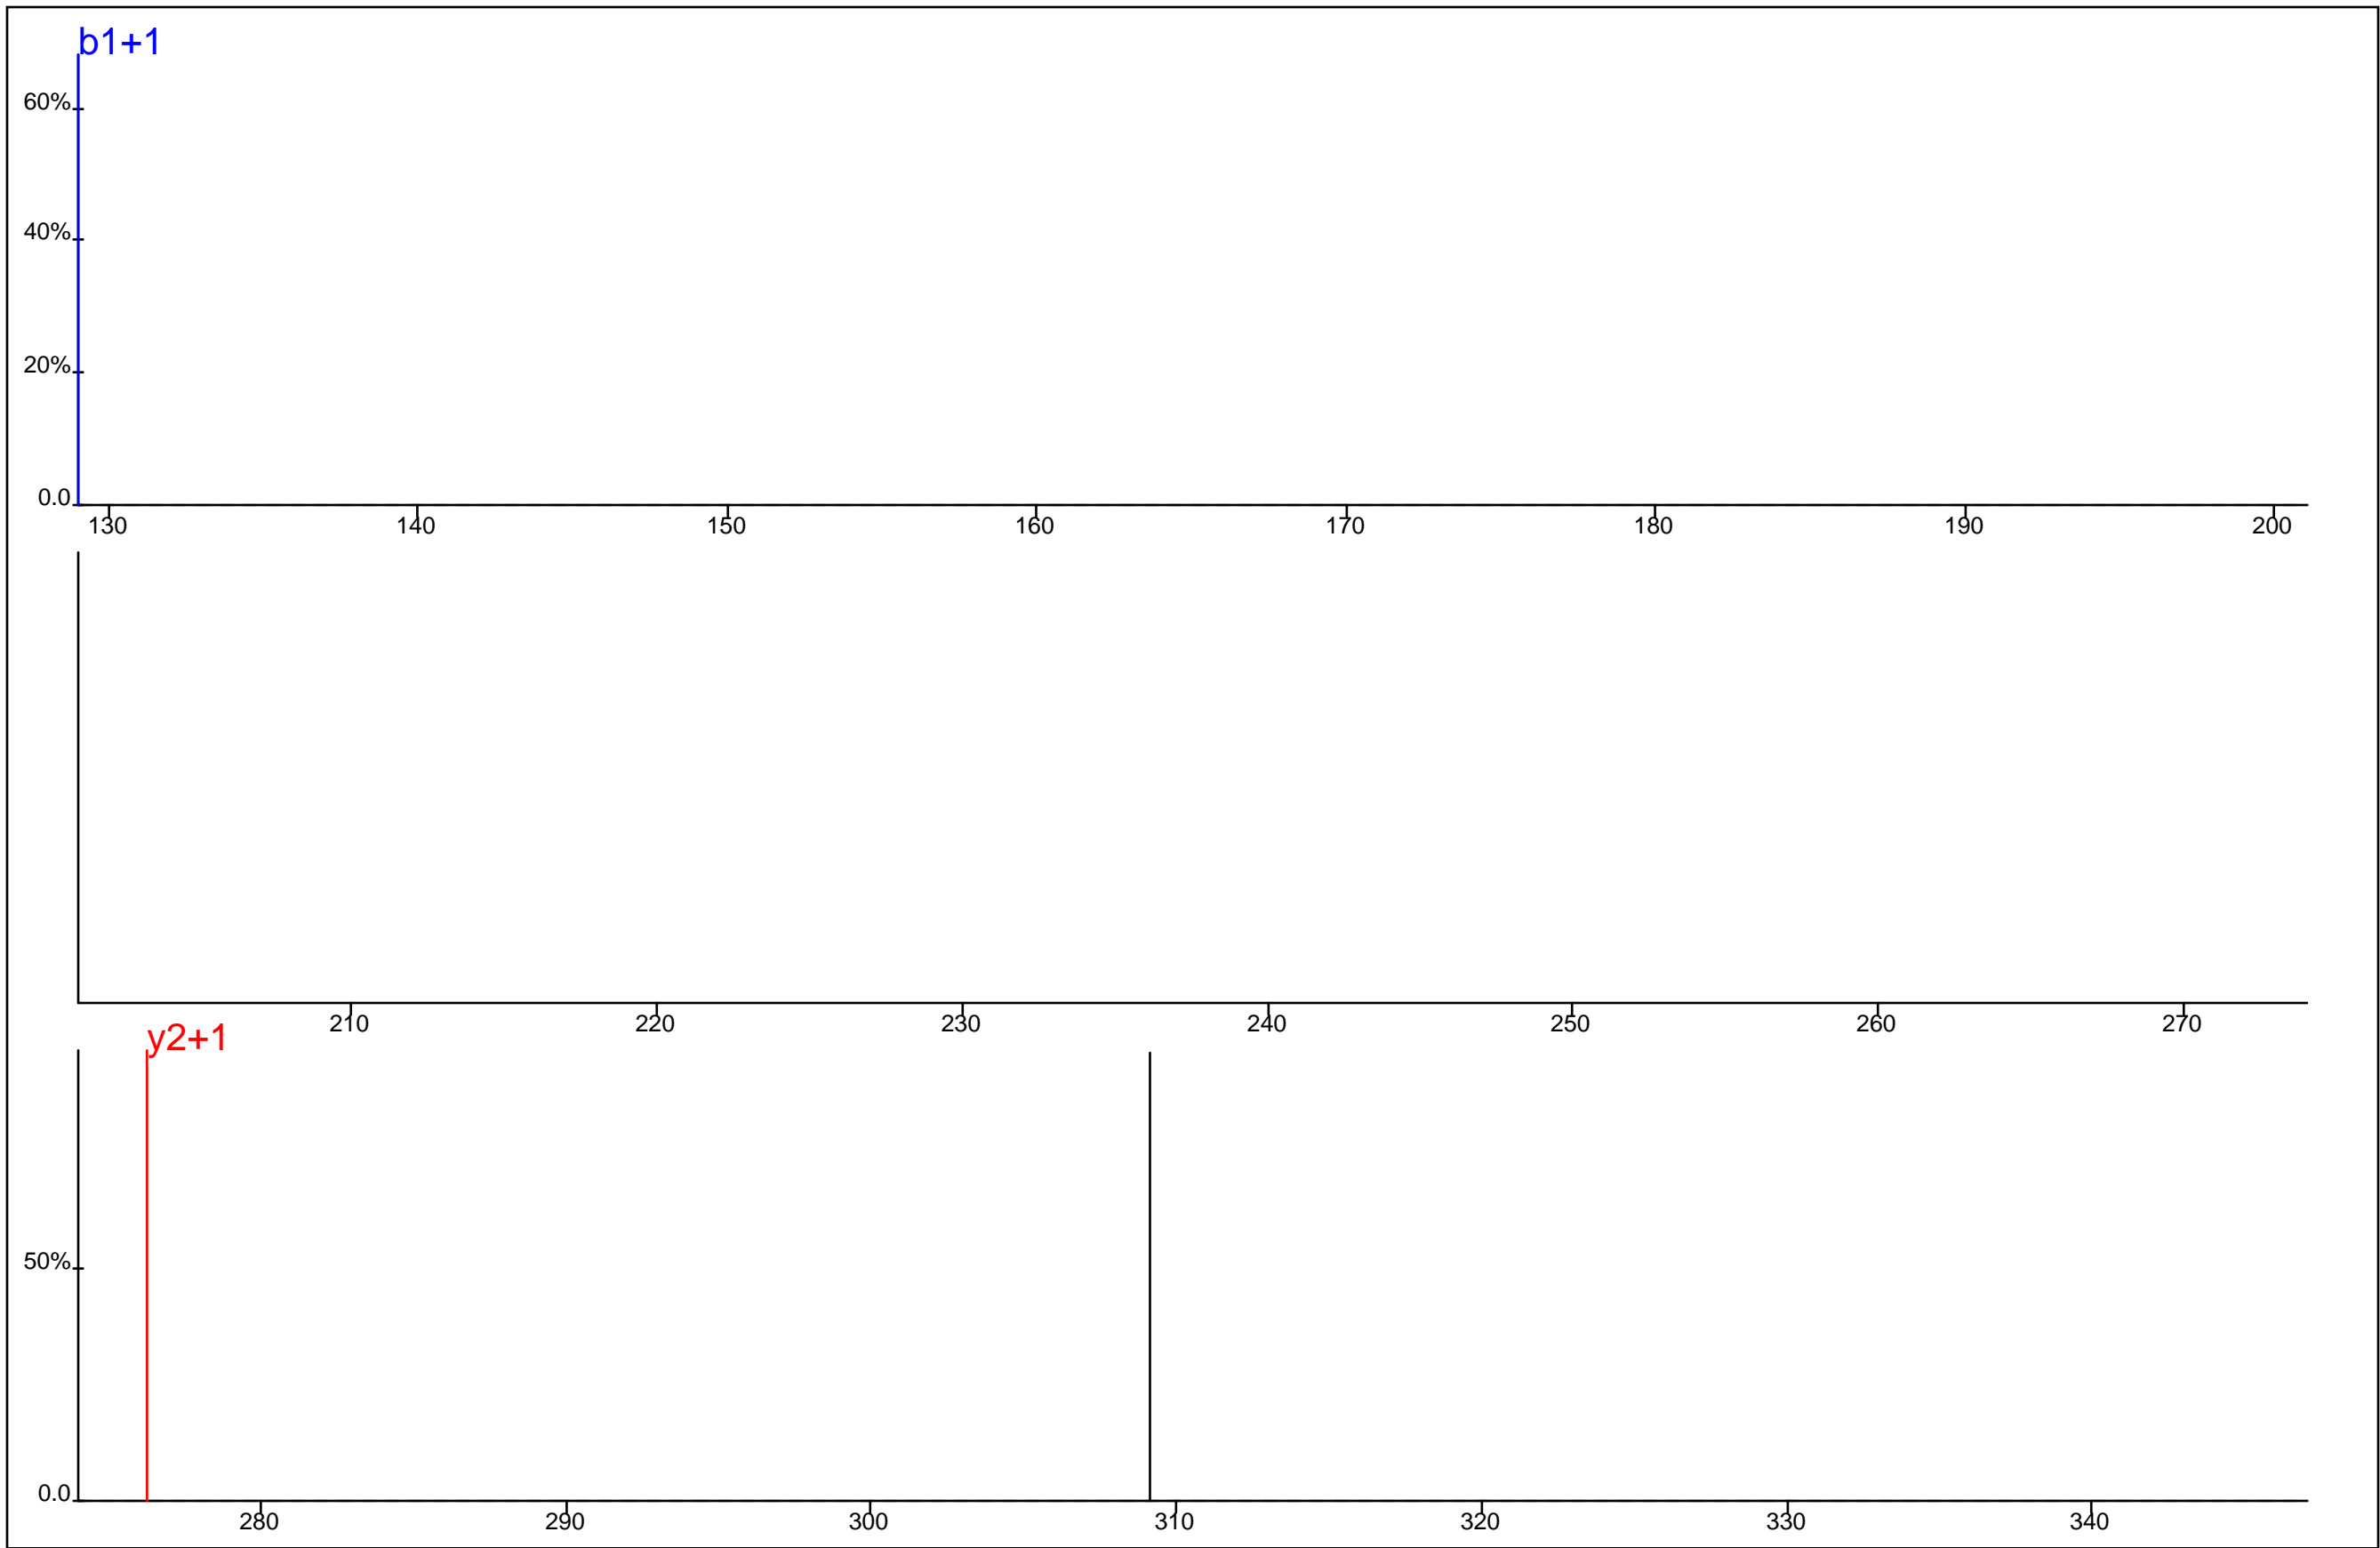

■ K P T\*F Y\*S\*T\*E L S\*T L S S R D I G M A V L A E K  
■ ■

Protein Name: 0 Decoy hit, please disregard  
 gi Accession: 0  
 Precursor Mass: 393.9129+8  
 Delta Mass: 1.015 ppm  
 XCorr: 21.81



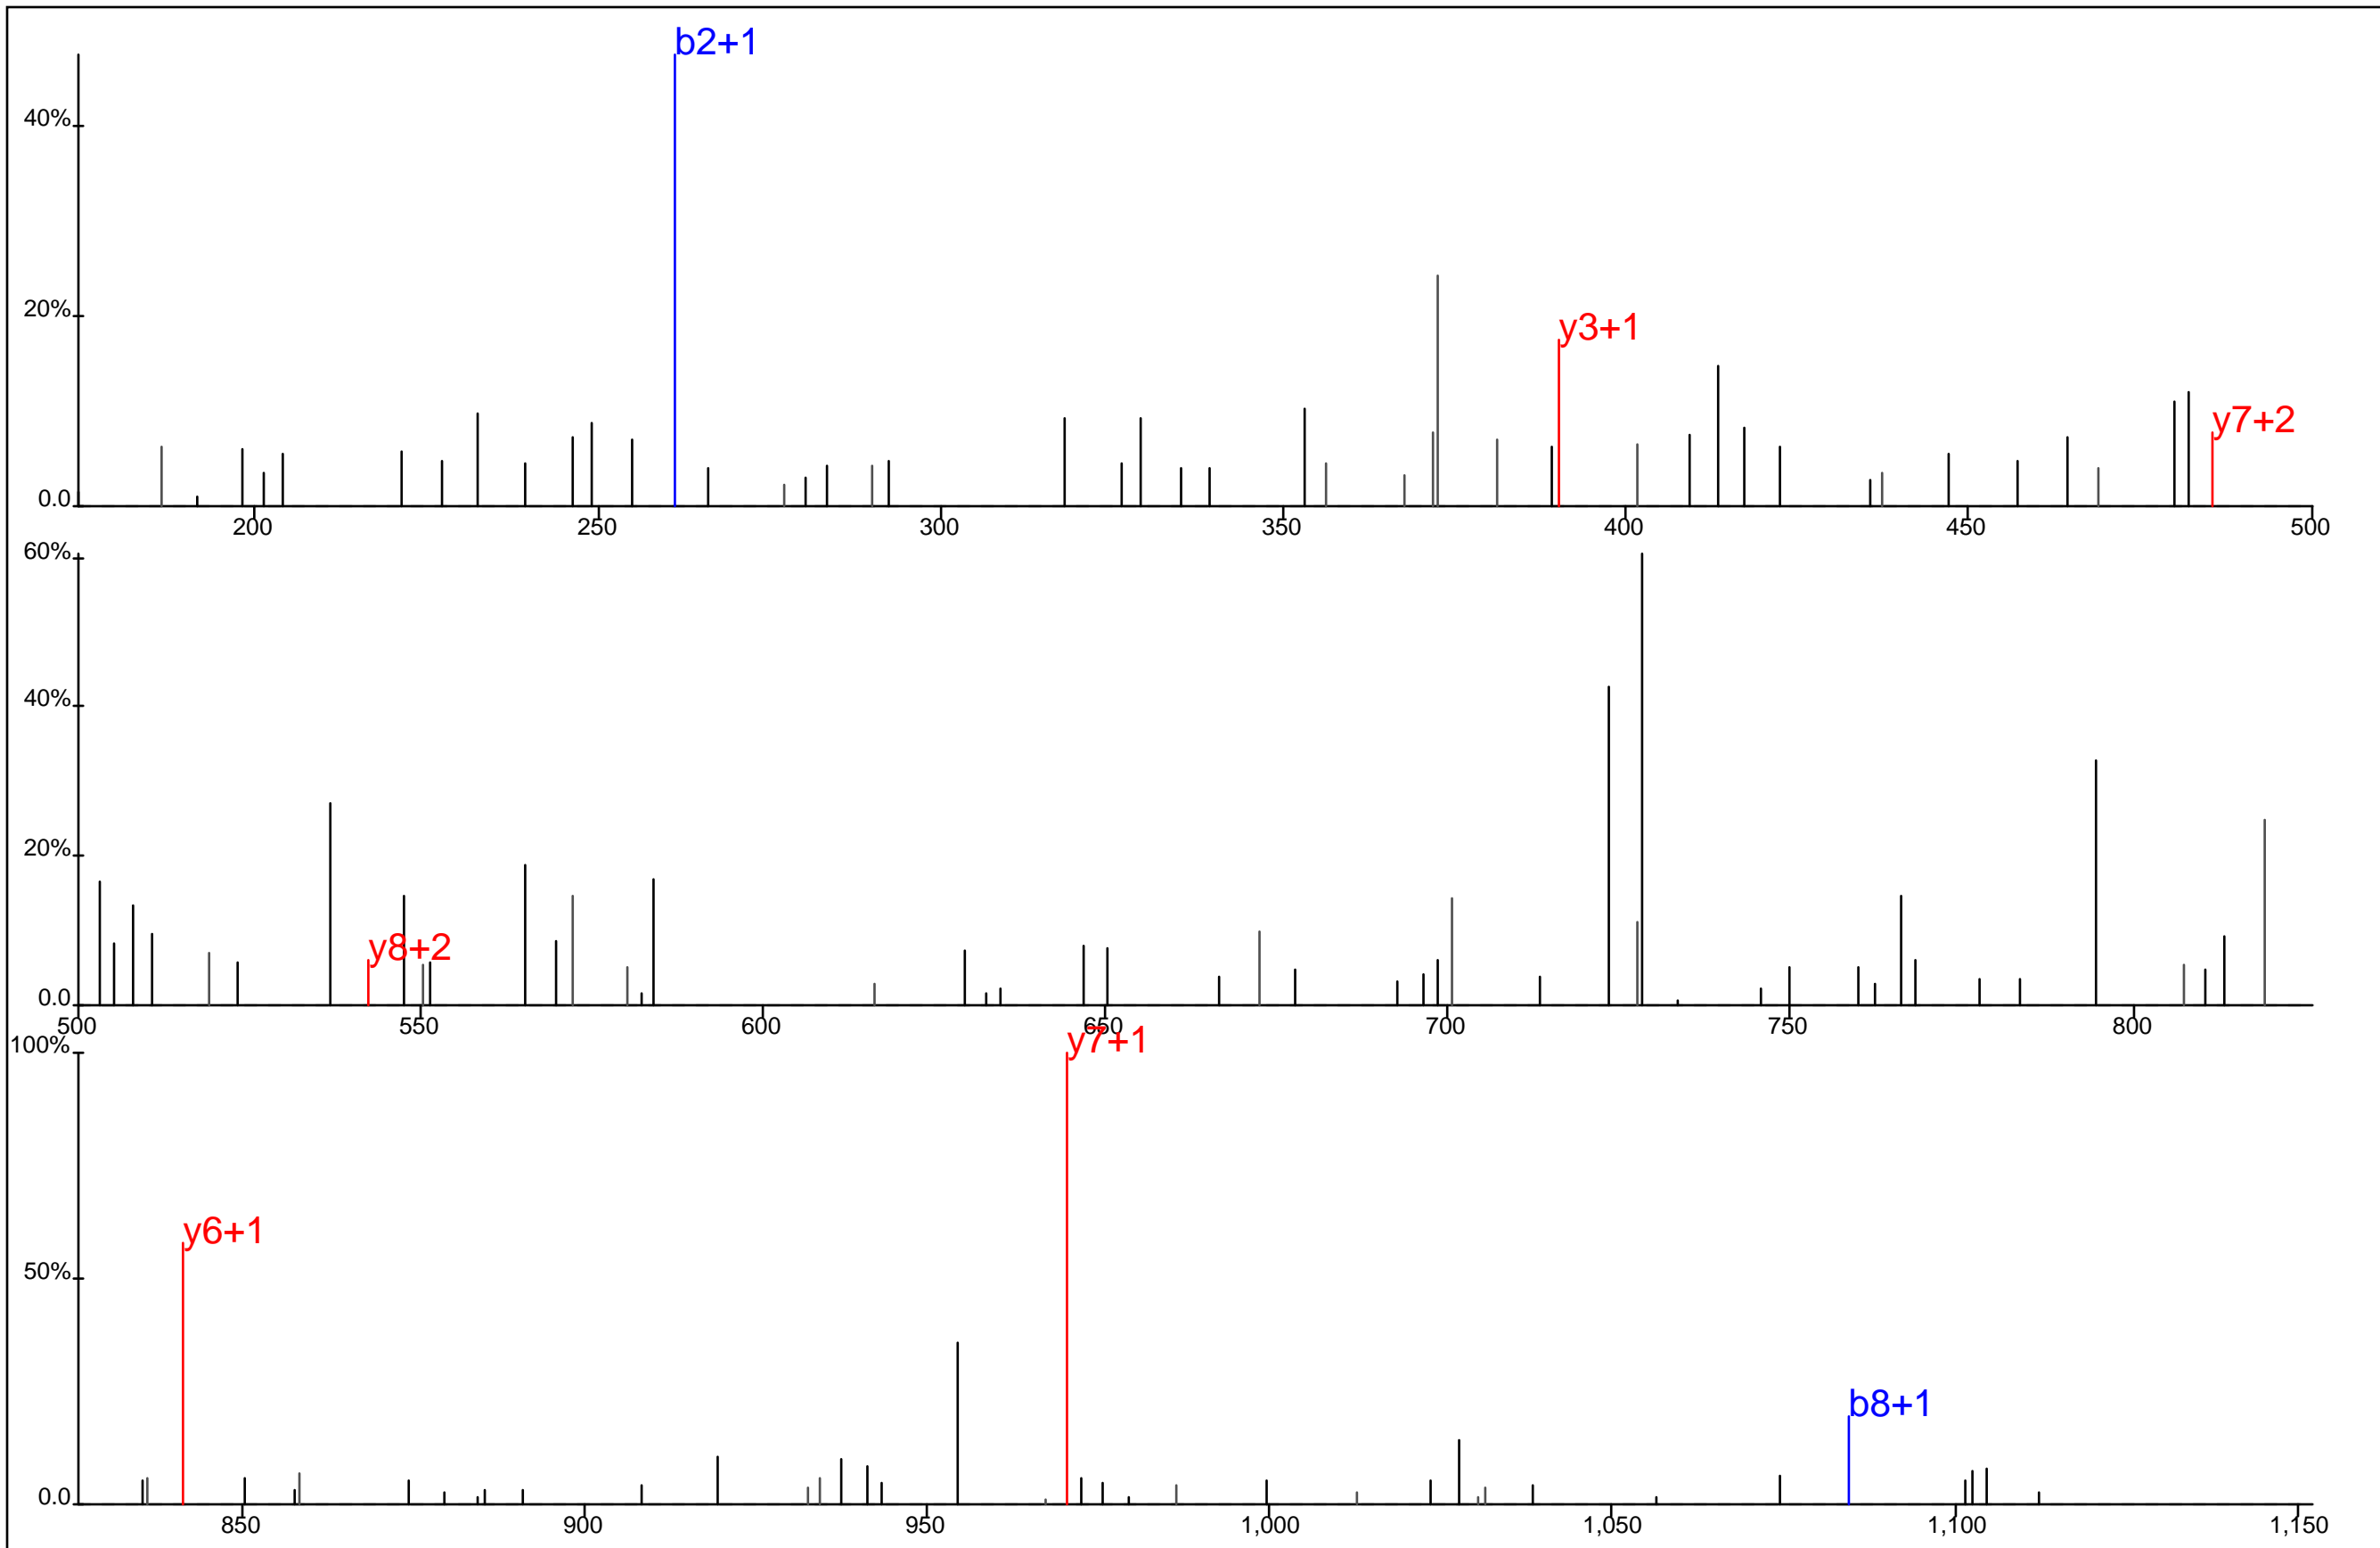

|           |          |          |          |           |          |          |
|-----------|----------|----------|----------|-----------|----------|----------|
|           |          |          |          |           |          |          |
|           |          |          |          |           |          |          |
| <b>M#</b> | <b>E</b> | <b>A</b> | <b>H</b> | <b>Y*</b> | <b>D</b> | <b>K</b> |
|           |          |          |          |           |          |          |
|           |          |          |          |           |          |          |

Protein Name: 0 Decoy hit, please disregard  
 gi Accession: 0  
 Precursor Mass: 615.7668+2  
 Delta Mass: 3.254 ppm  
 XCorr: 23.26



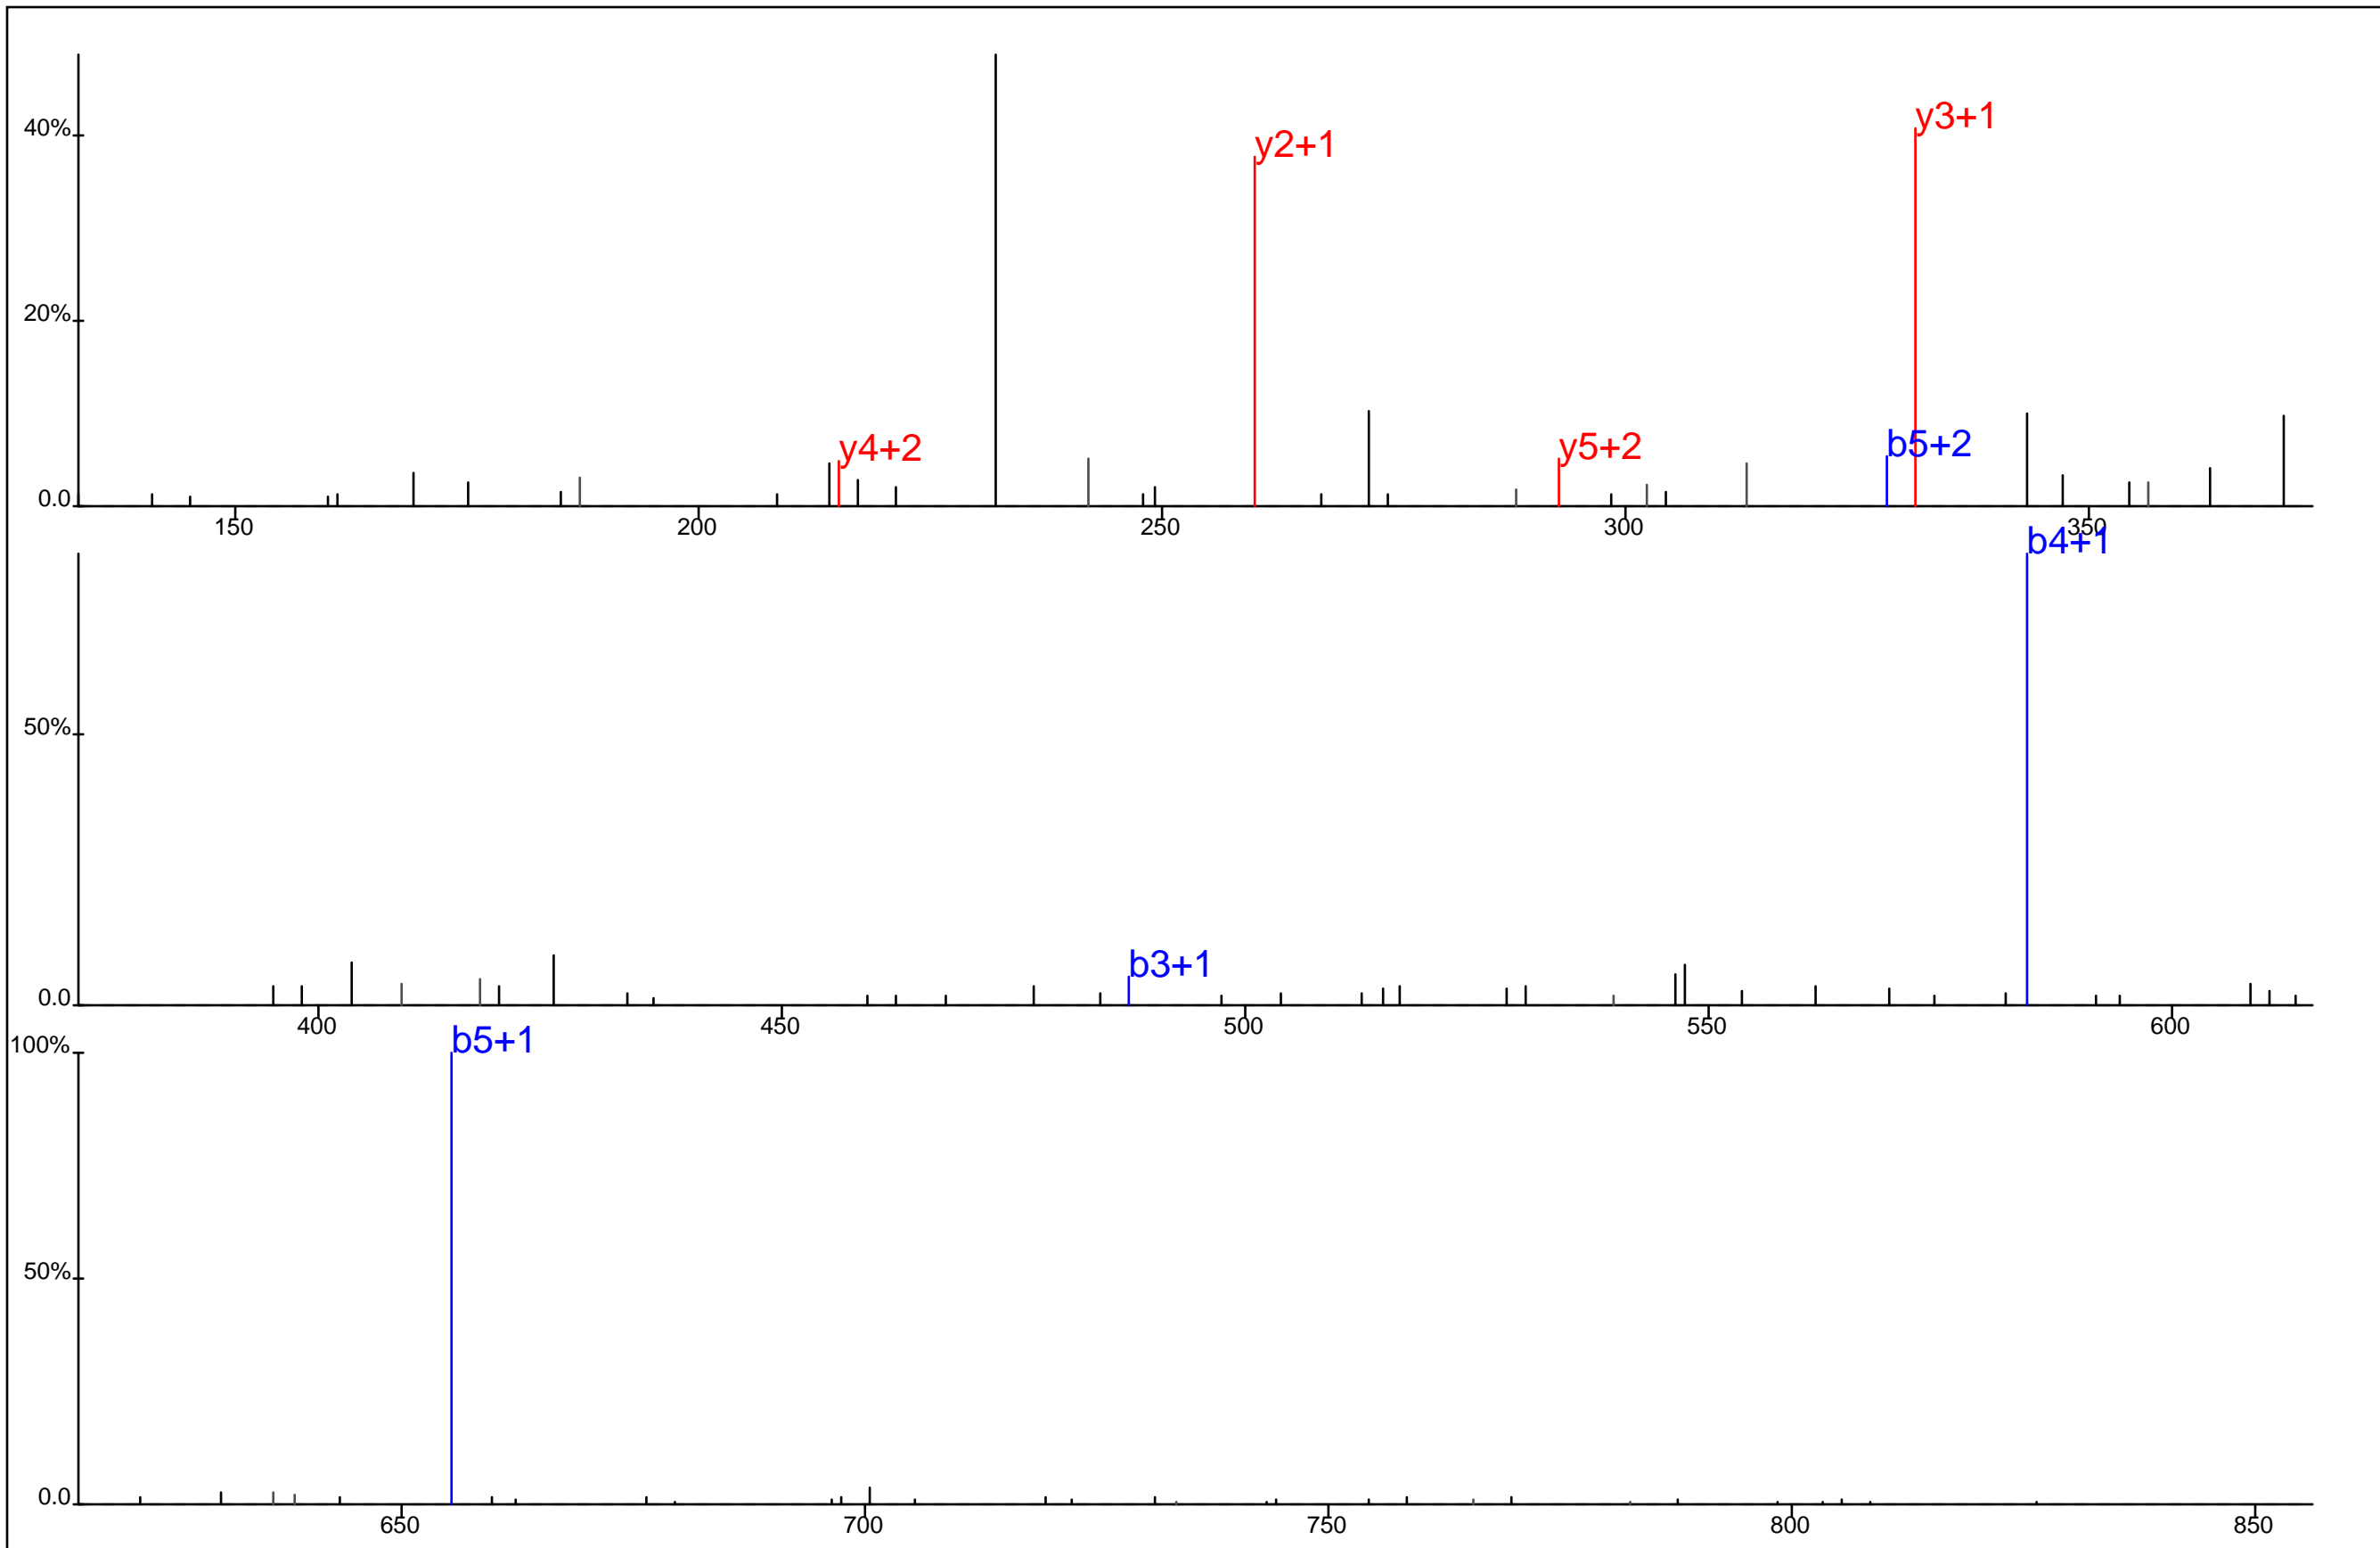

S Y\* R P A L K

Protein Name: 0 Decoy hit, please disregard  
 gi Accession: 0  
 Precursor Mass: 457.7299+2  
 Delta Mass: 3.346 ppm  
 XCorr: 24.13

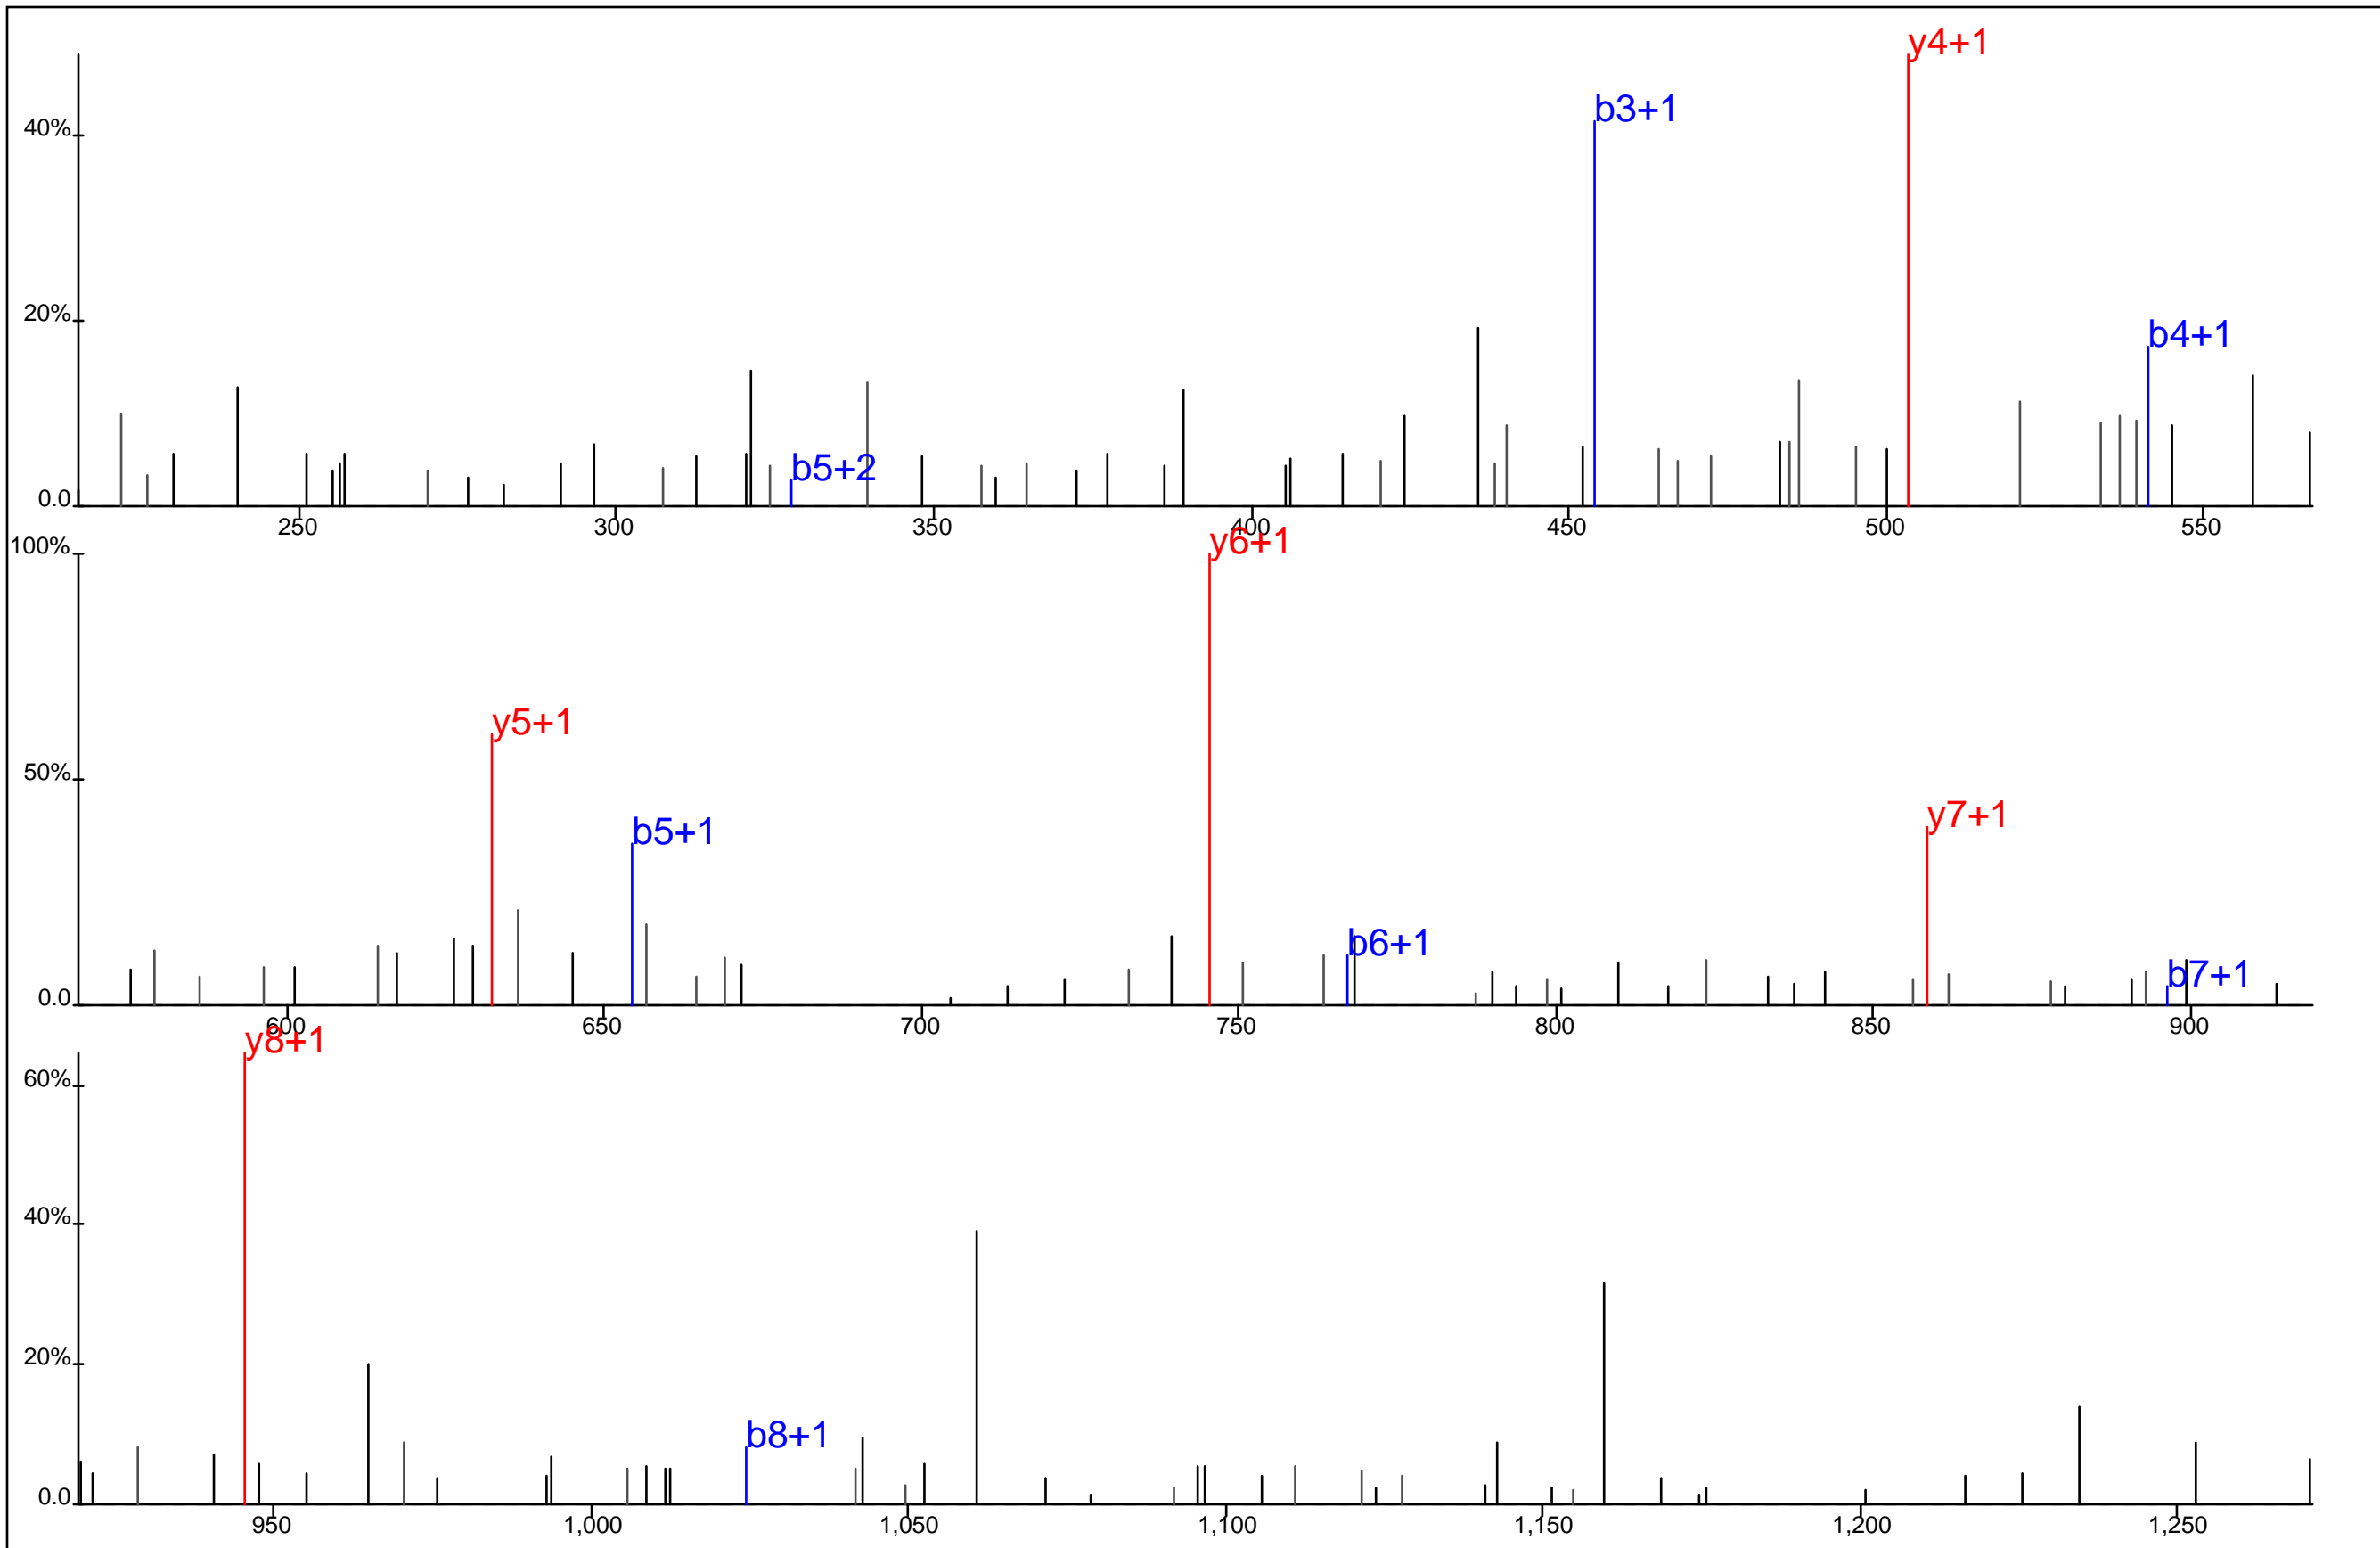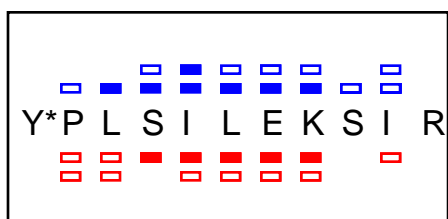

Protein Name: 0 Decoy hit, please disregard  
 gi Accession: 0  
 Precursor Mass: 699.8777+2  
 Delta Mass: 6.366 ppm  
 XCorr: 24.22

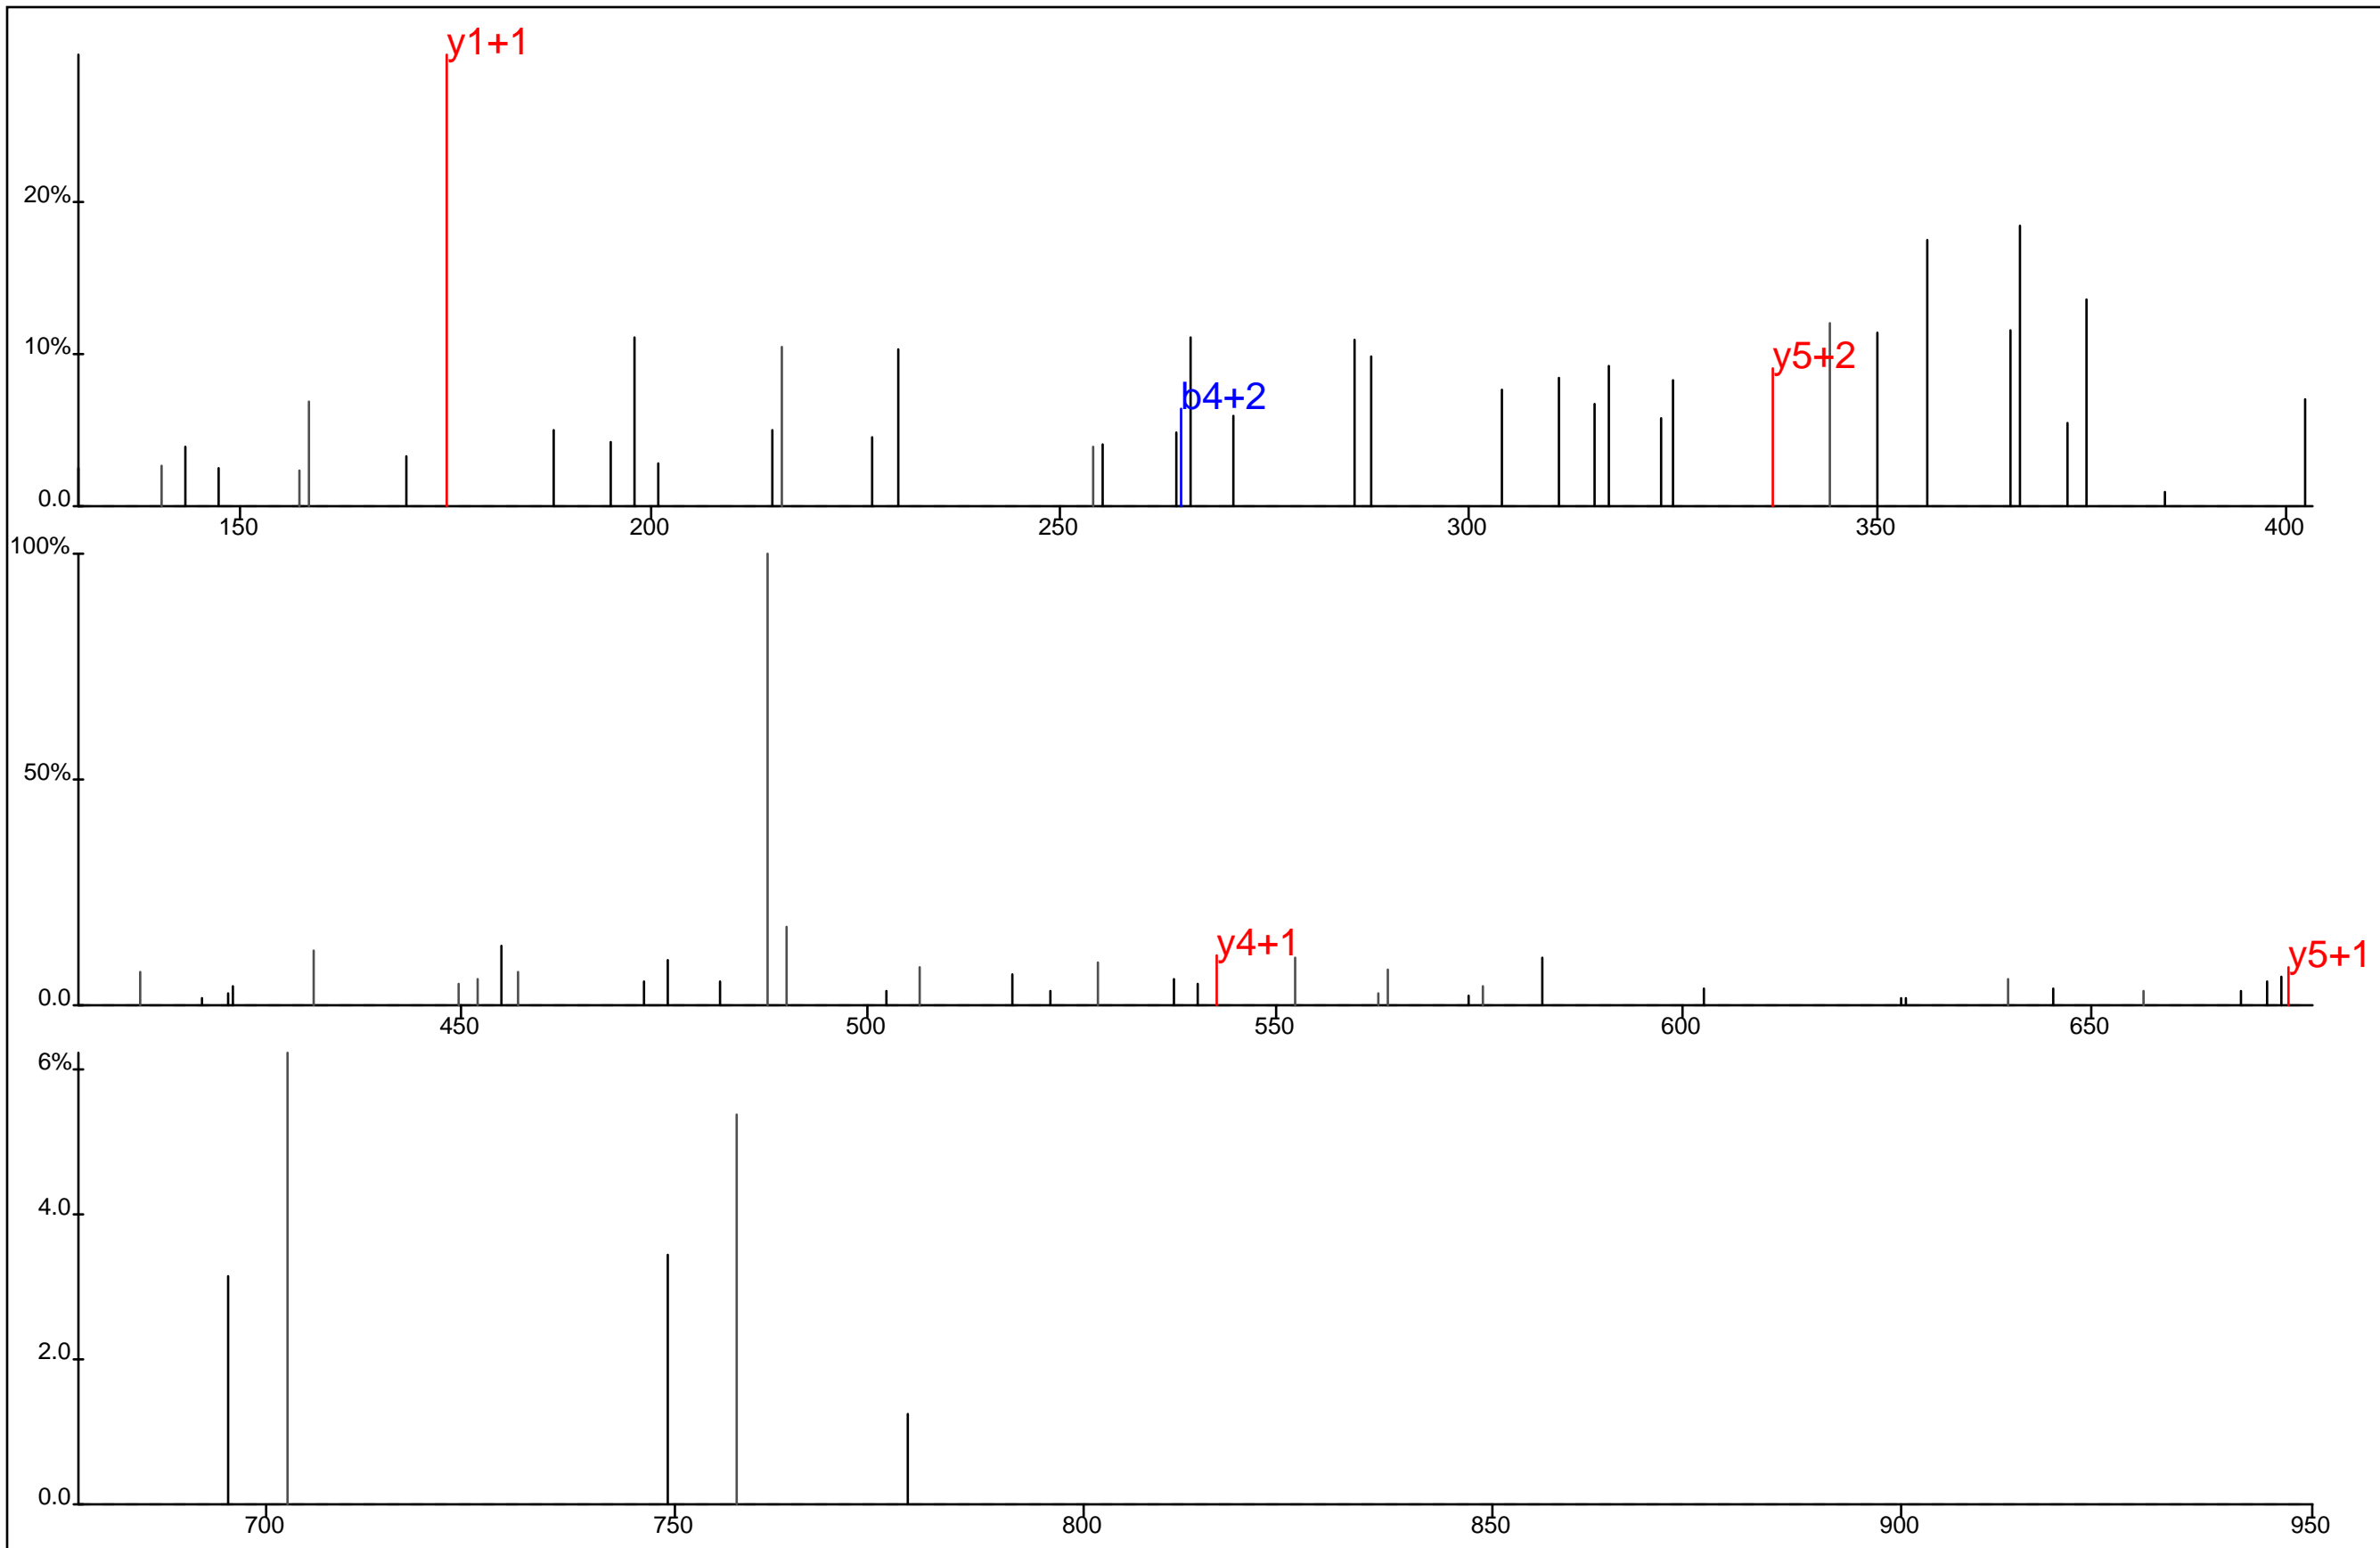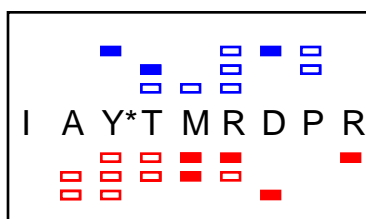

Protein Name: 0 Decoy hit, please disregard  
 gi Accession: 0  
 Precursor Mass: 401.5183+3  
 Delta Mass: 1.363 ppm  
 XCorr: 23.2

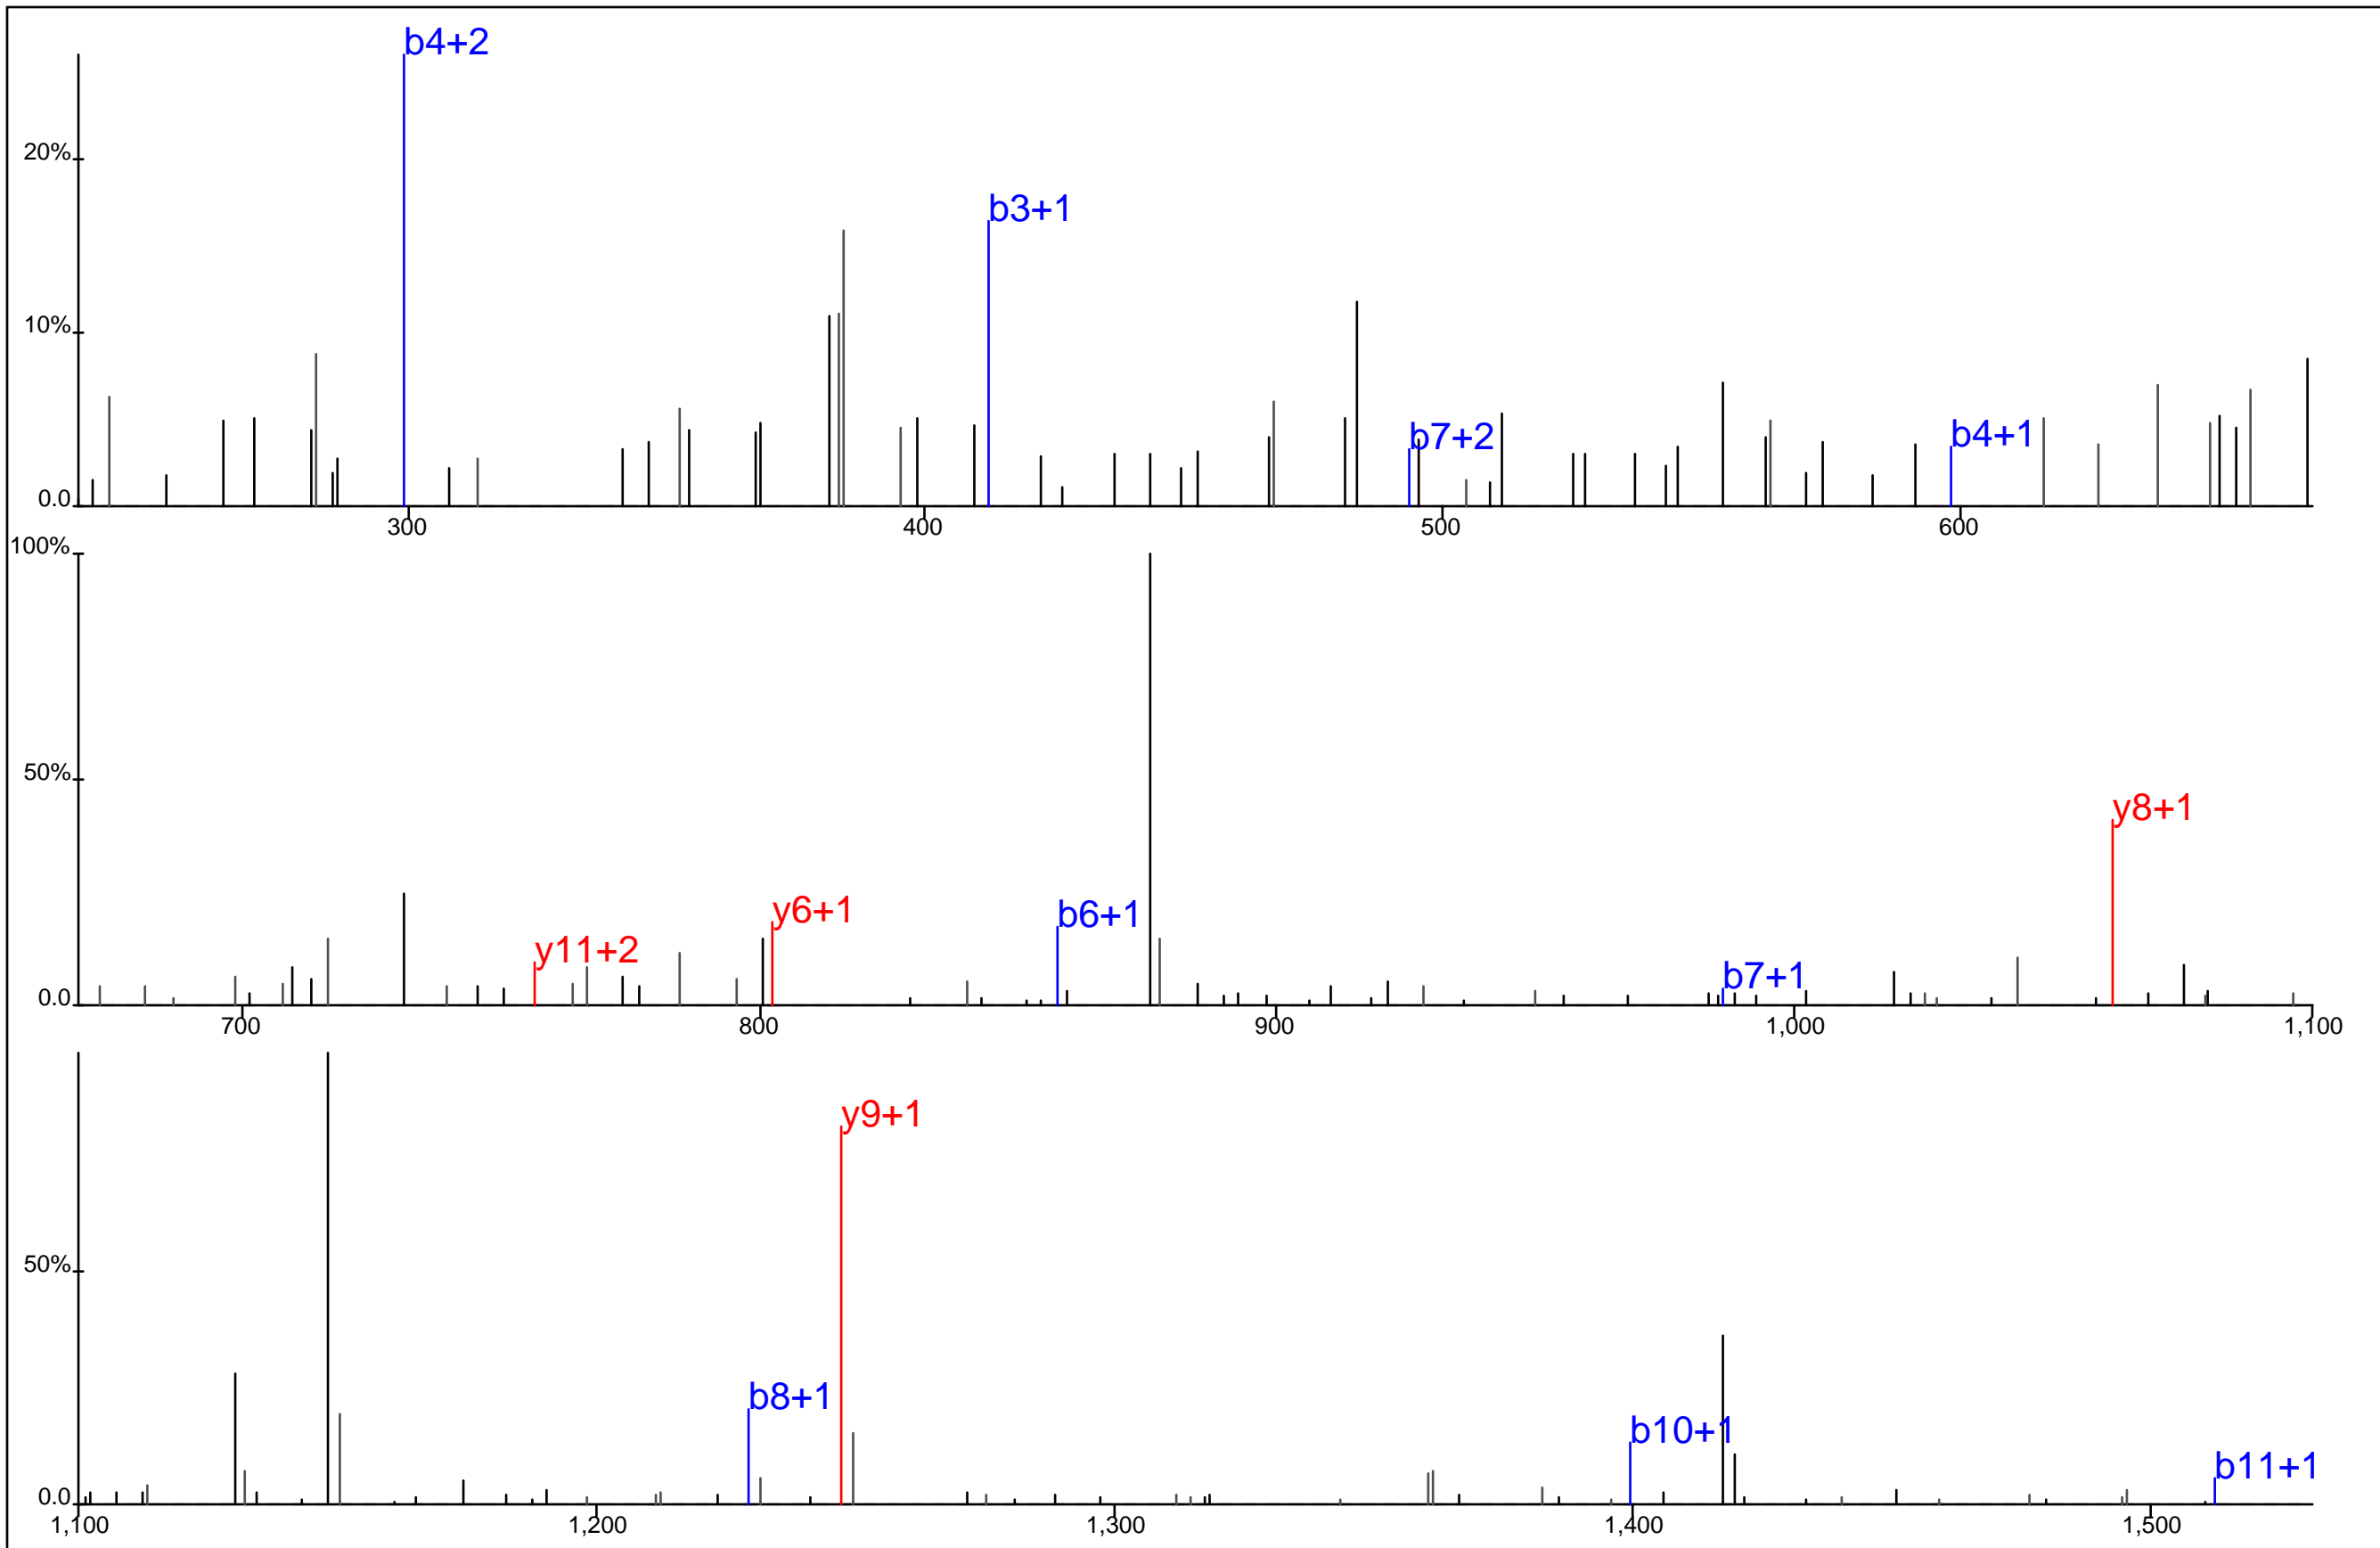

M#Y T W M K E Y\*V A I K  
 □ □ □ □ □ □ □ □ □ □  
 ■ ■ ■ ■ ■ ■ ■ ■ ■ ■

Protein Name: 0 Decoy hit, please disregard  
 gi Accession: 0  
 Precursor Mass: 829.8718+2  
 Delta Mass: 0.364 ppm  
 XCorr: 22.11

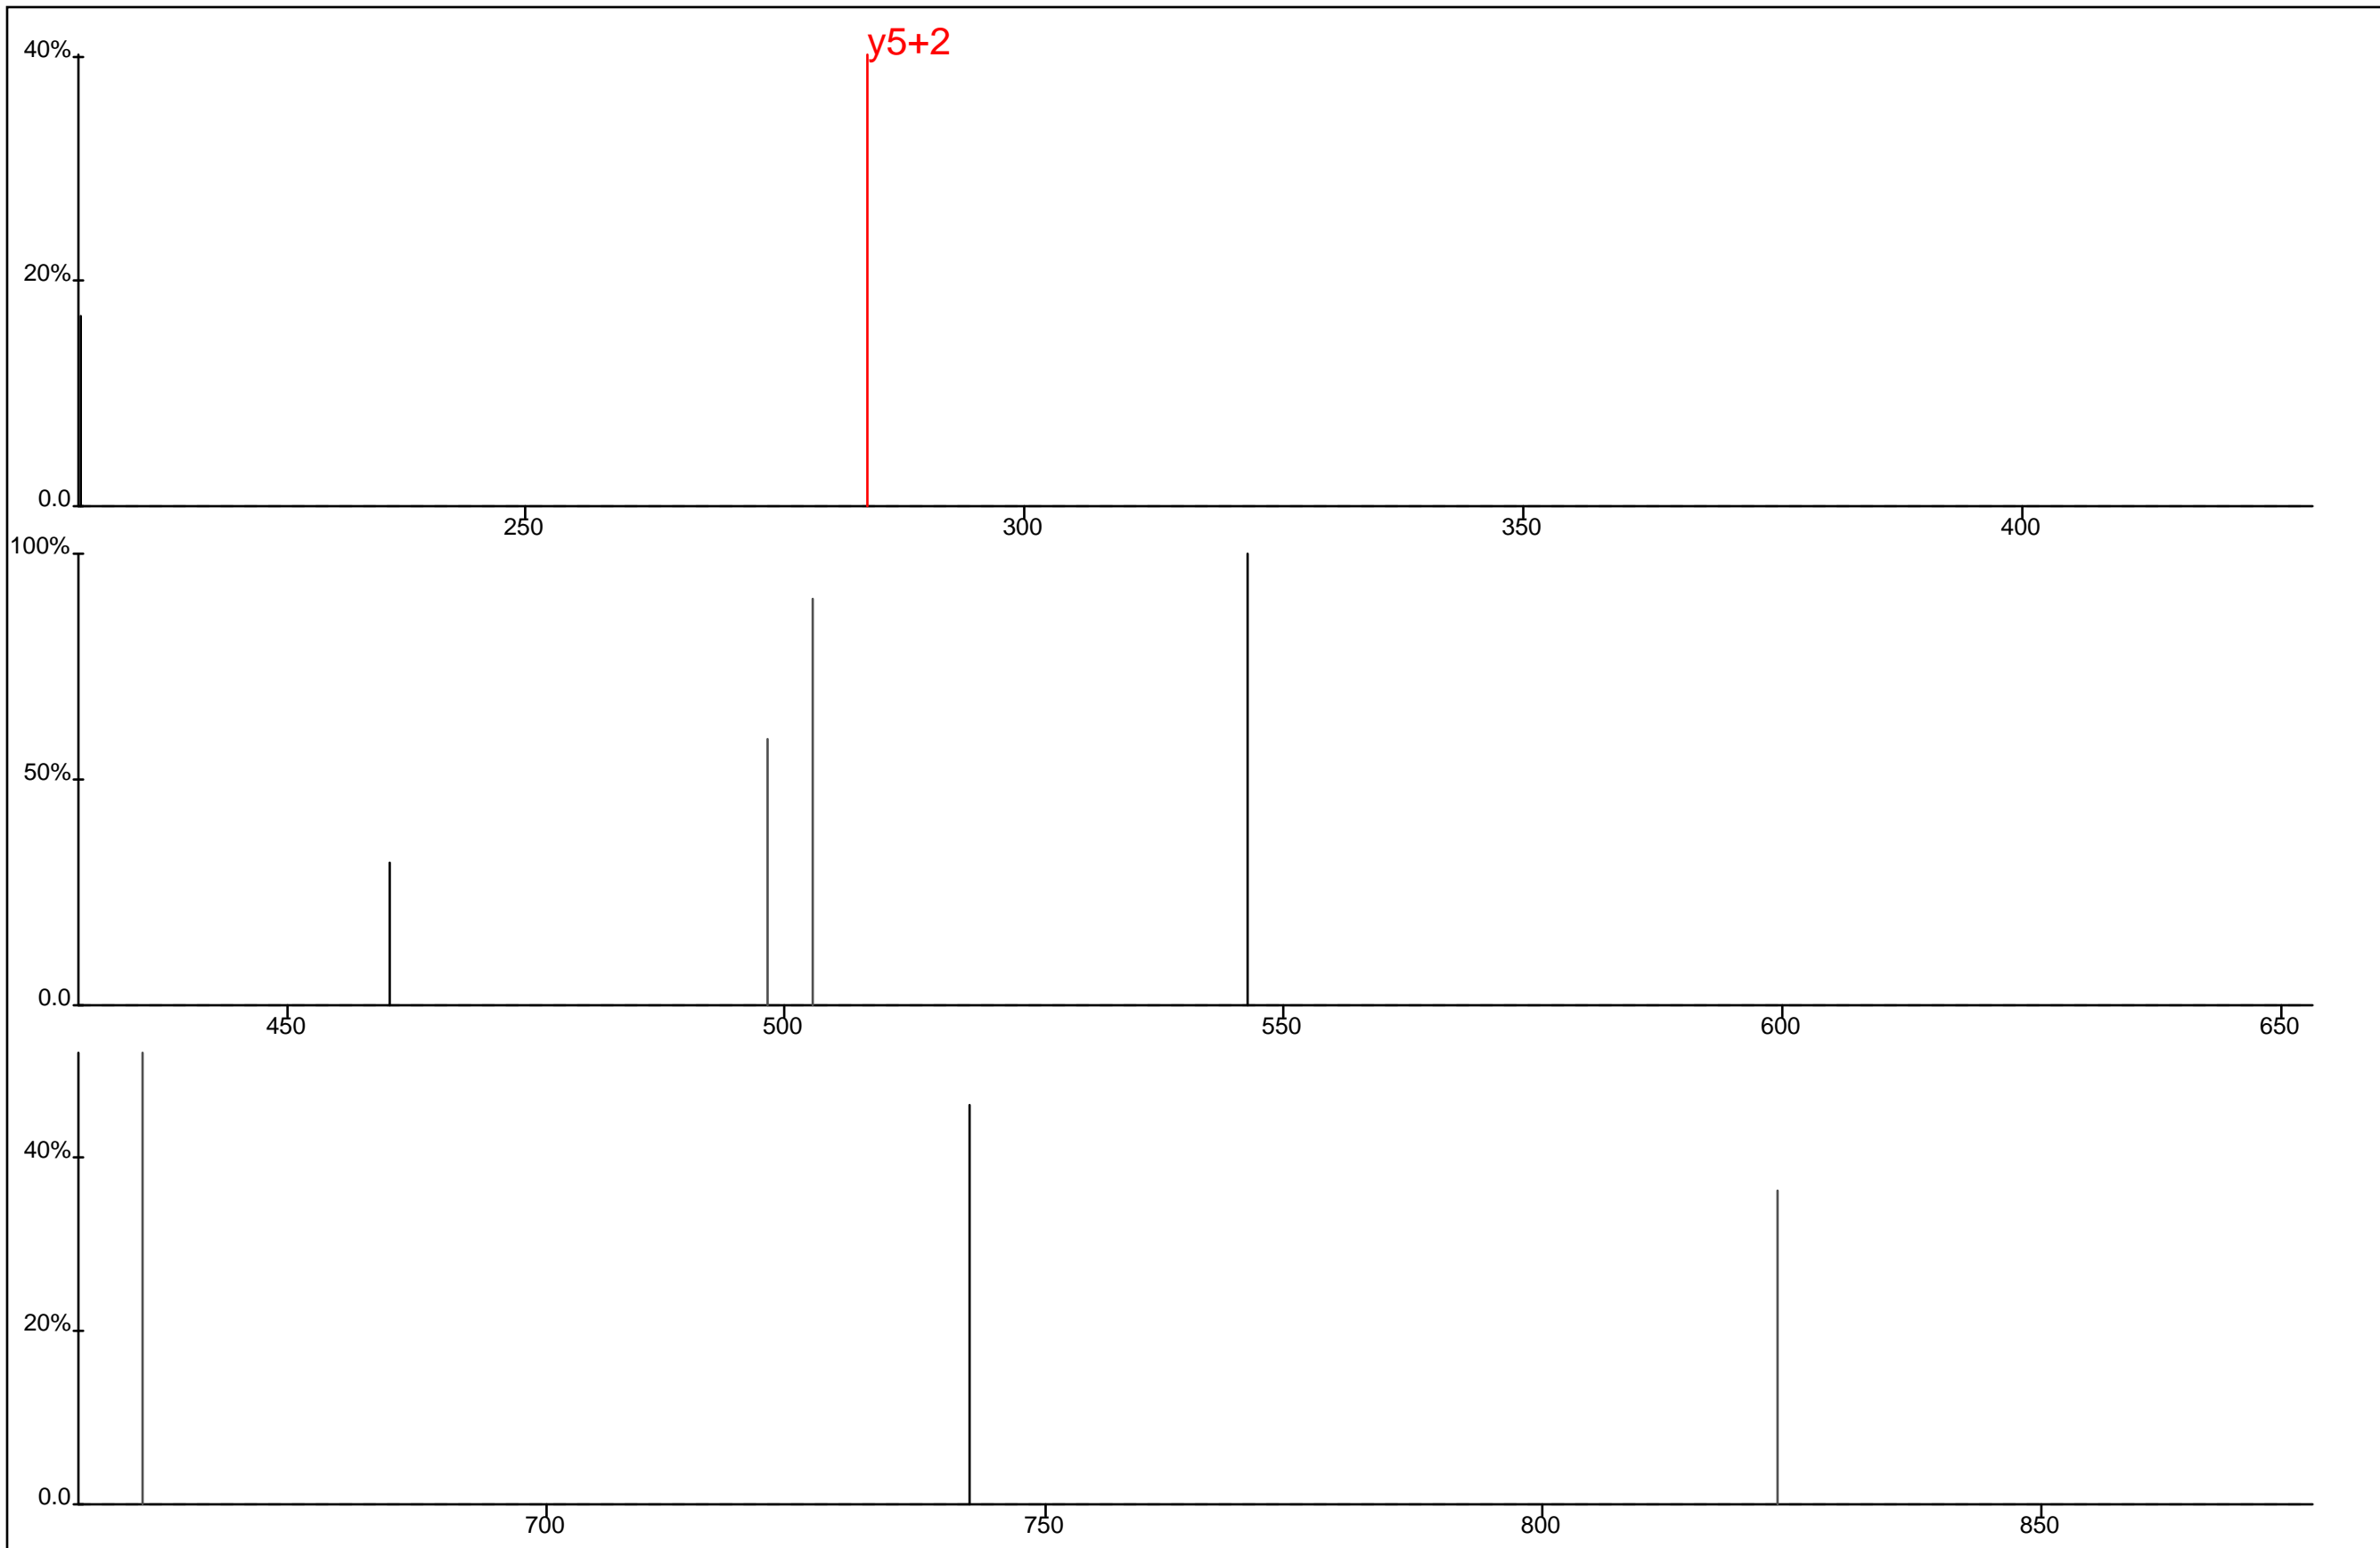

R S\*Q E I G L H A N I S\*A Y\*R V T G I L H K

Red squares are located under the 'S' and 'I' residues.

Protein Name: 0 Decoy hit, please disregard  
 gi Accession: 0  
 Precursor Mass: 541.4565+5  
 Delta Mass: 1.192 ppm  
 XCorr: 22.33

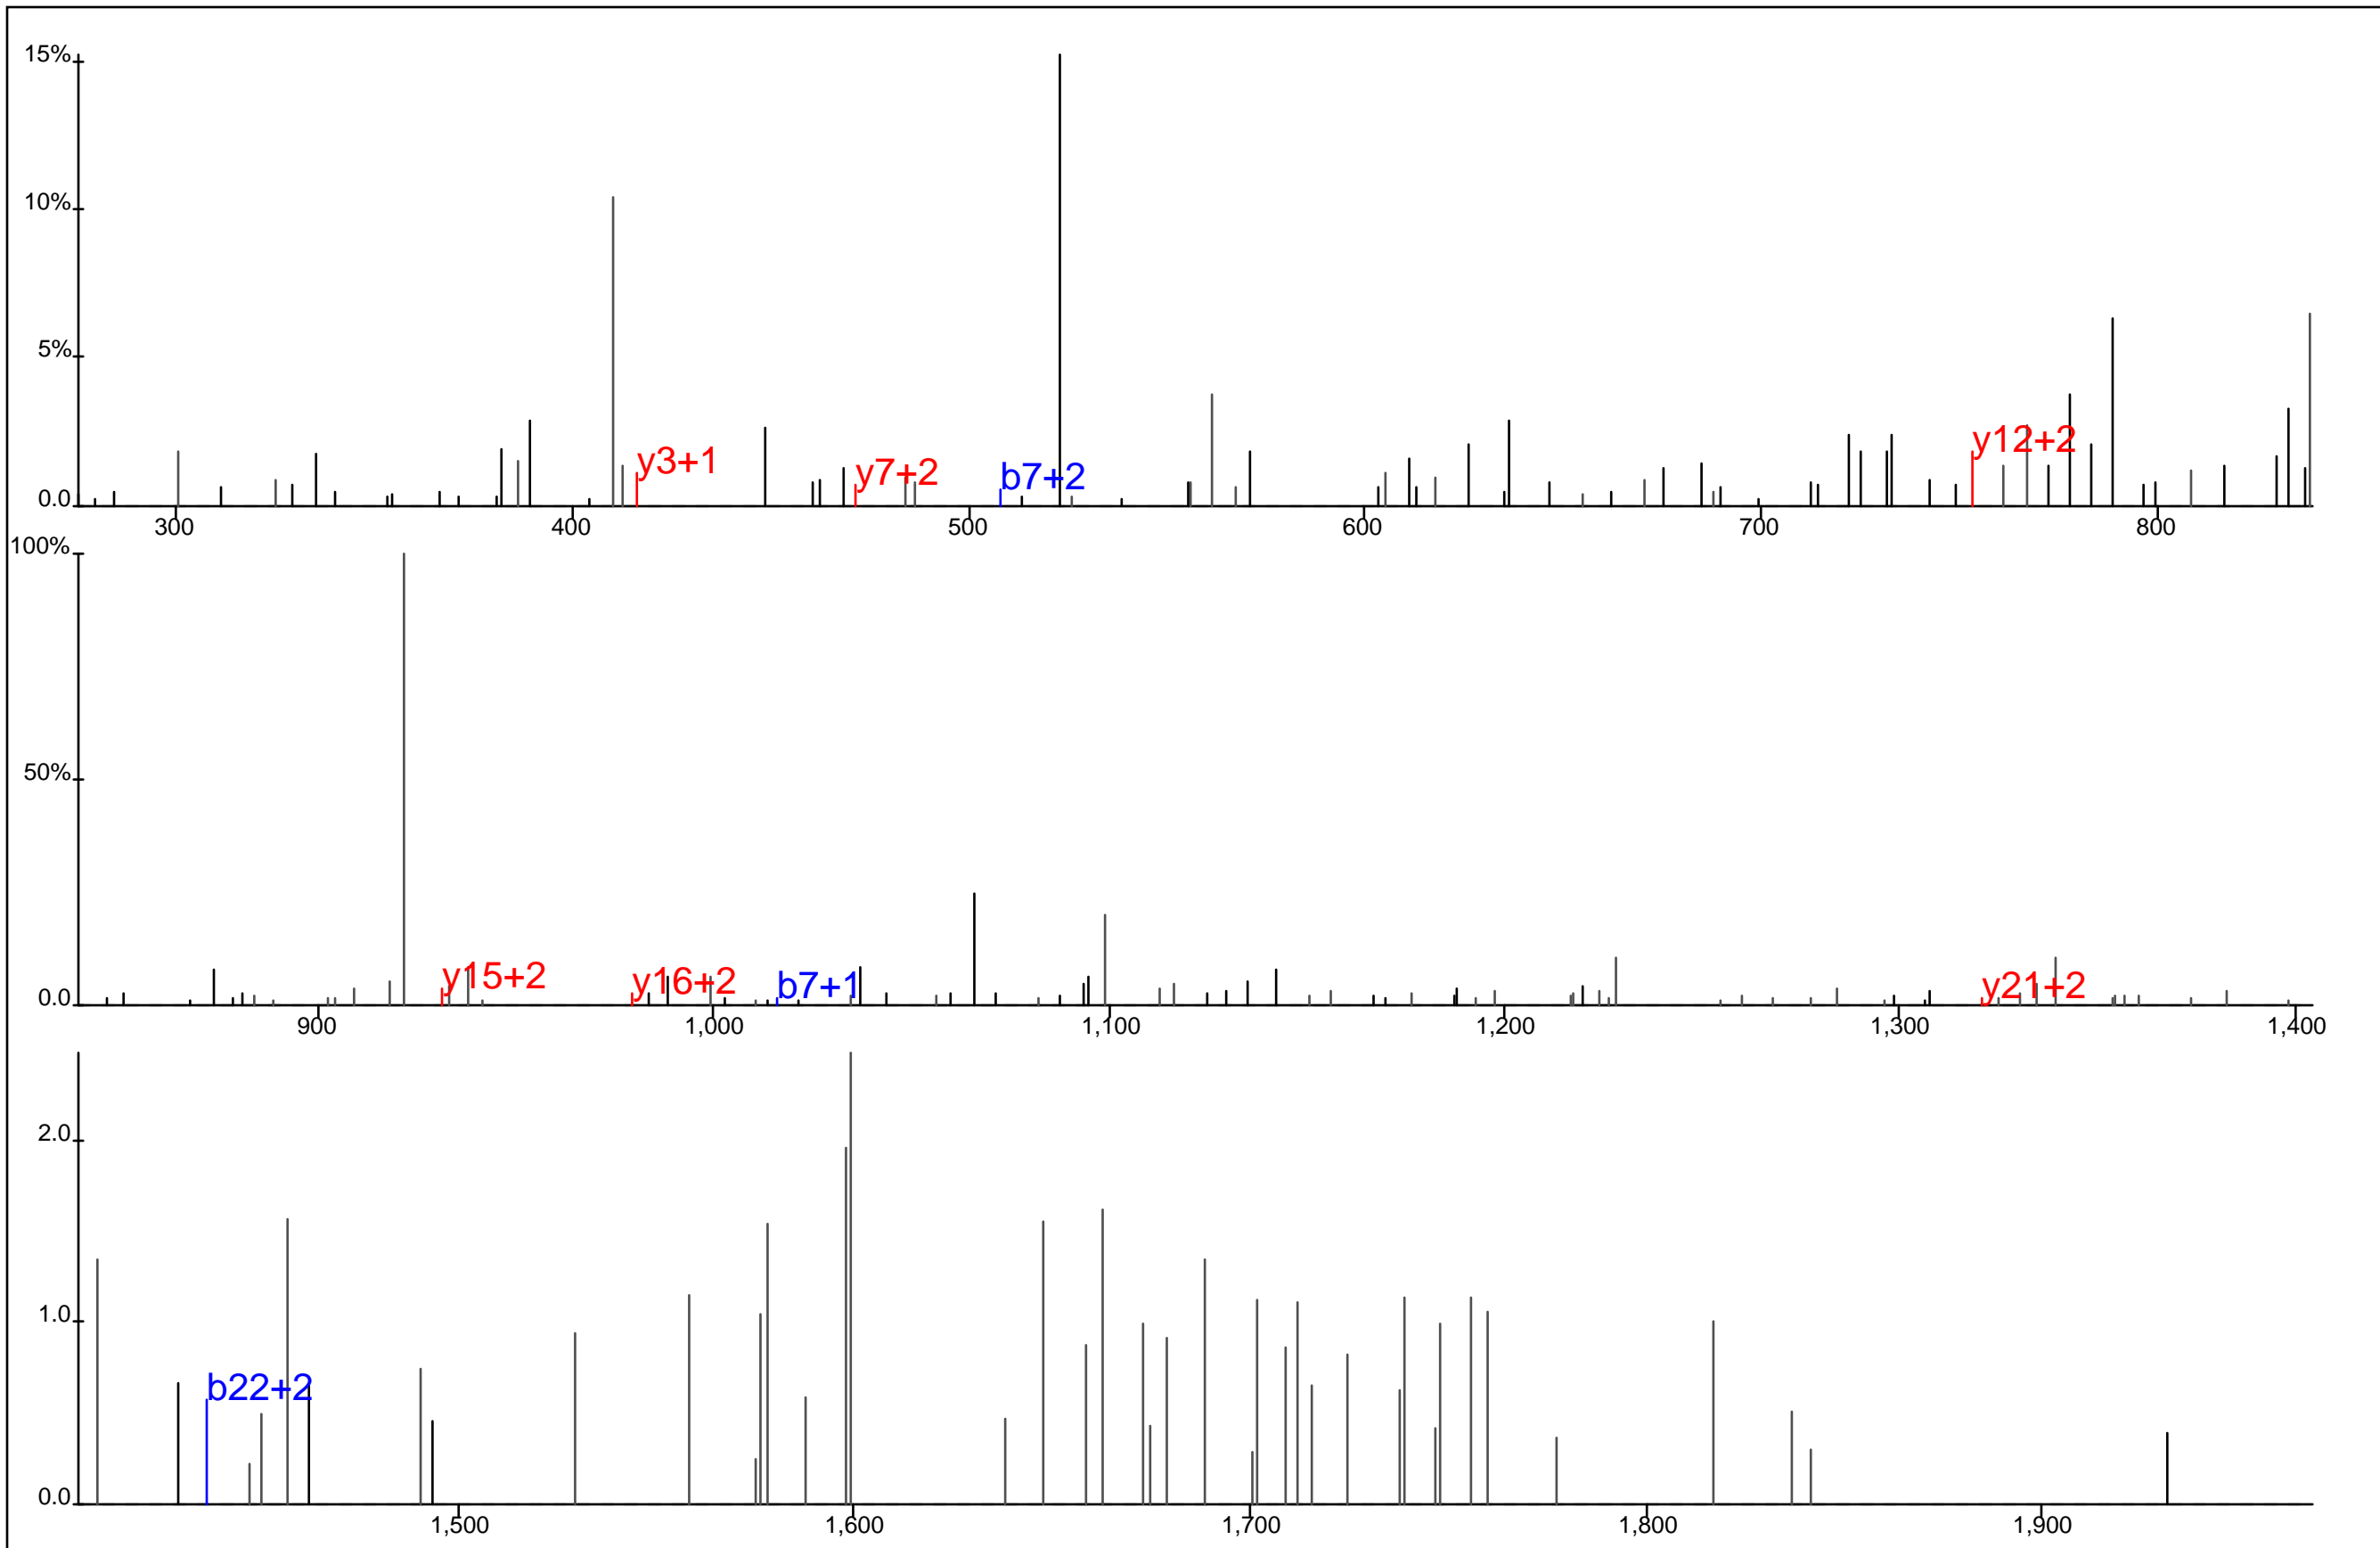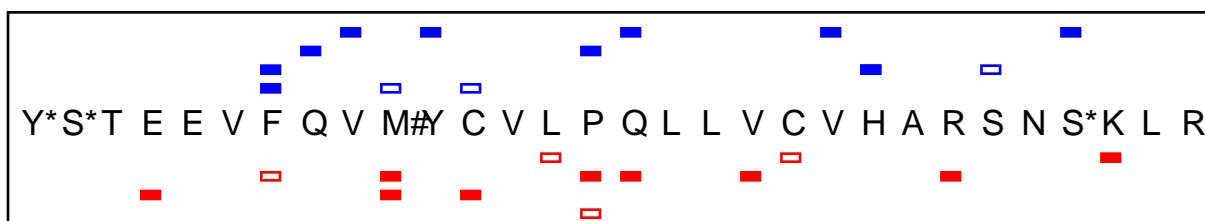

Protein Name: 0 Decoy hit, please disregard  
 gi Accession: 0  
 Precursor Mass: 971.4364+4  
 Delta Mass: 0.483 ppm  
 XCorr: 25.71

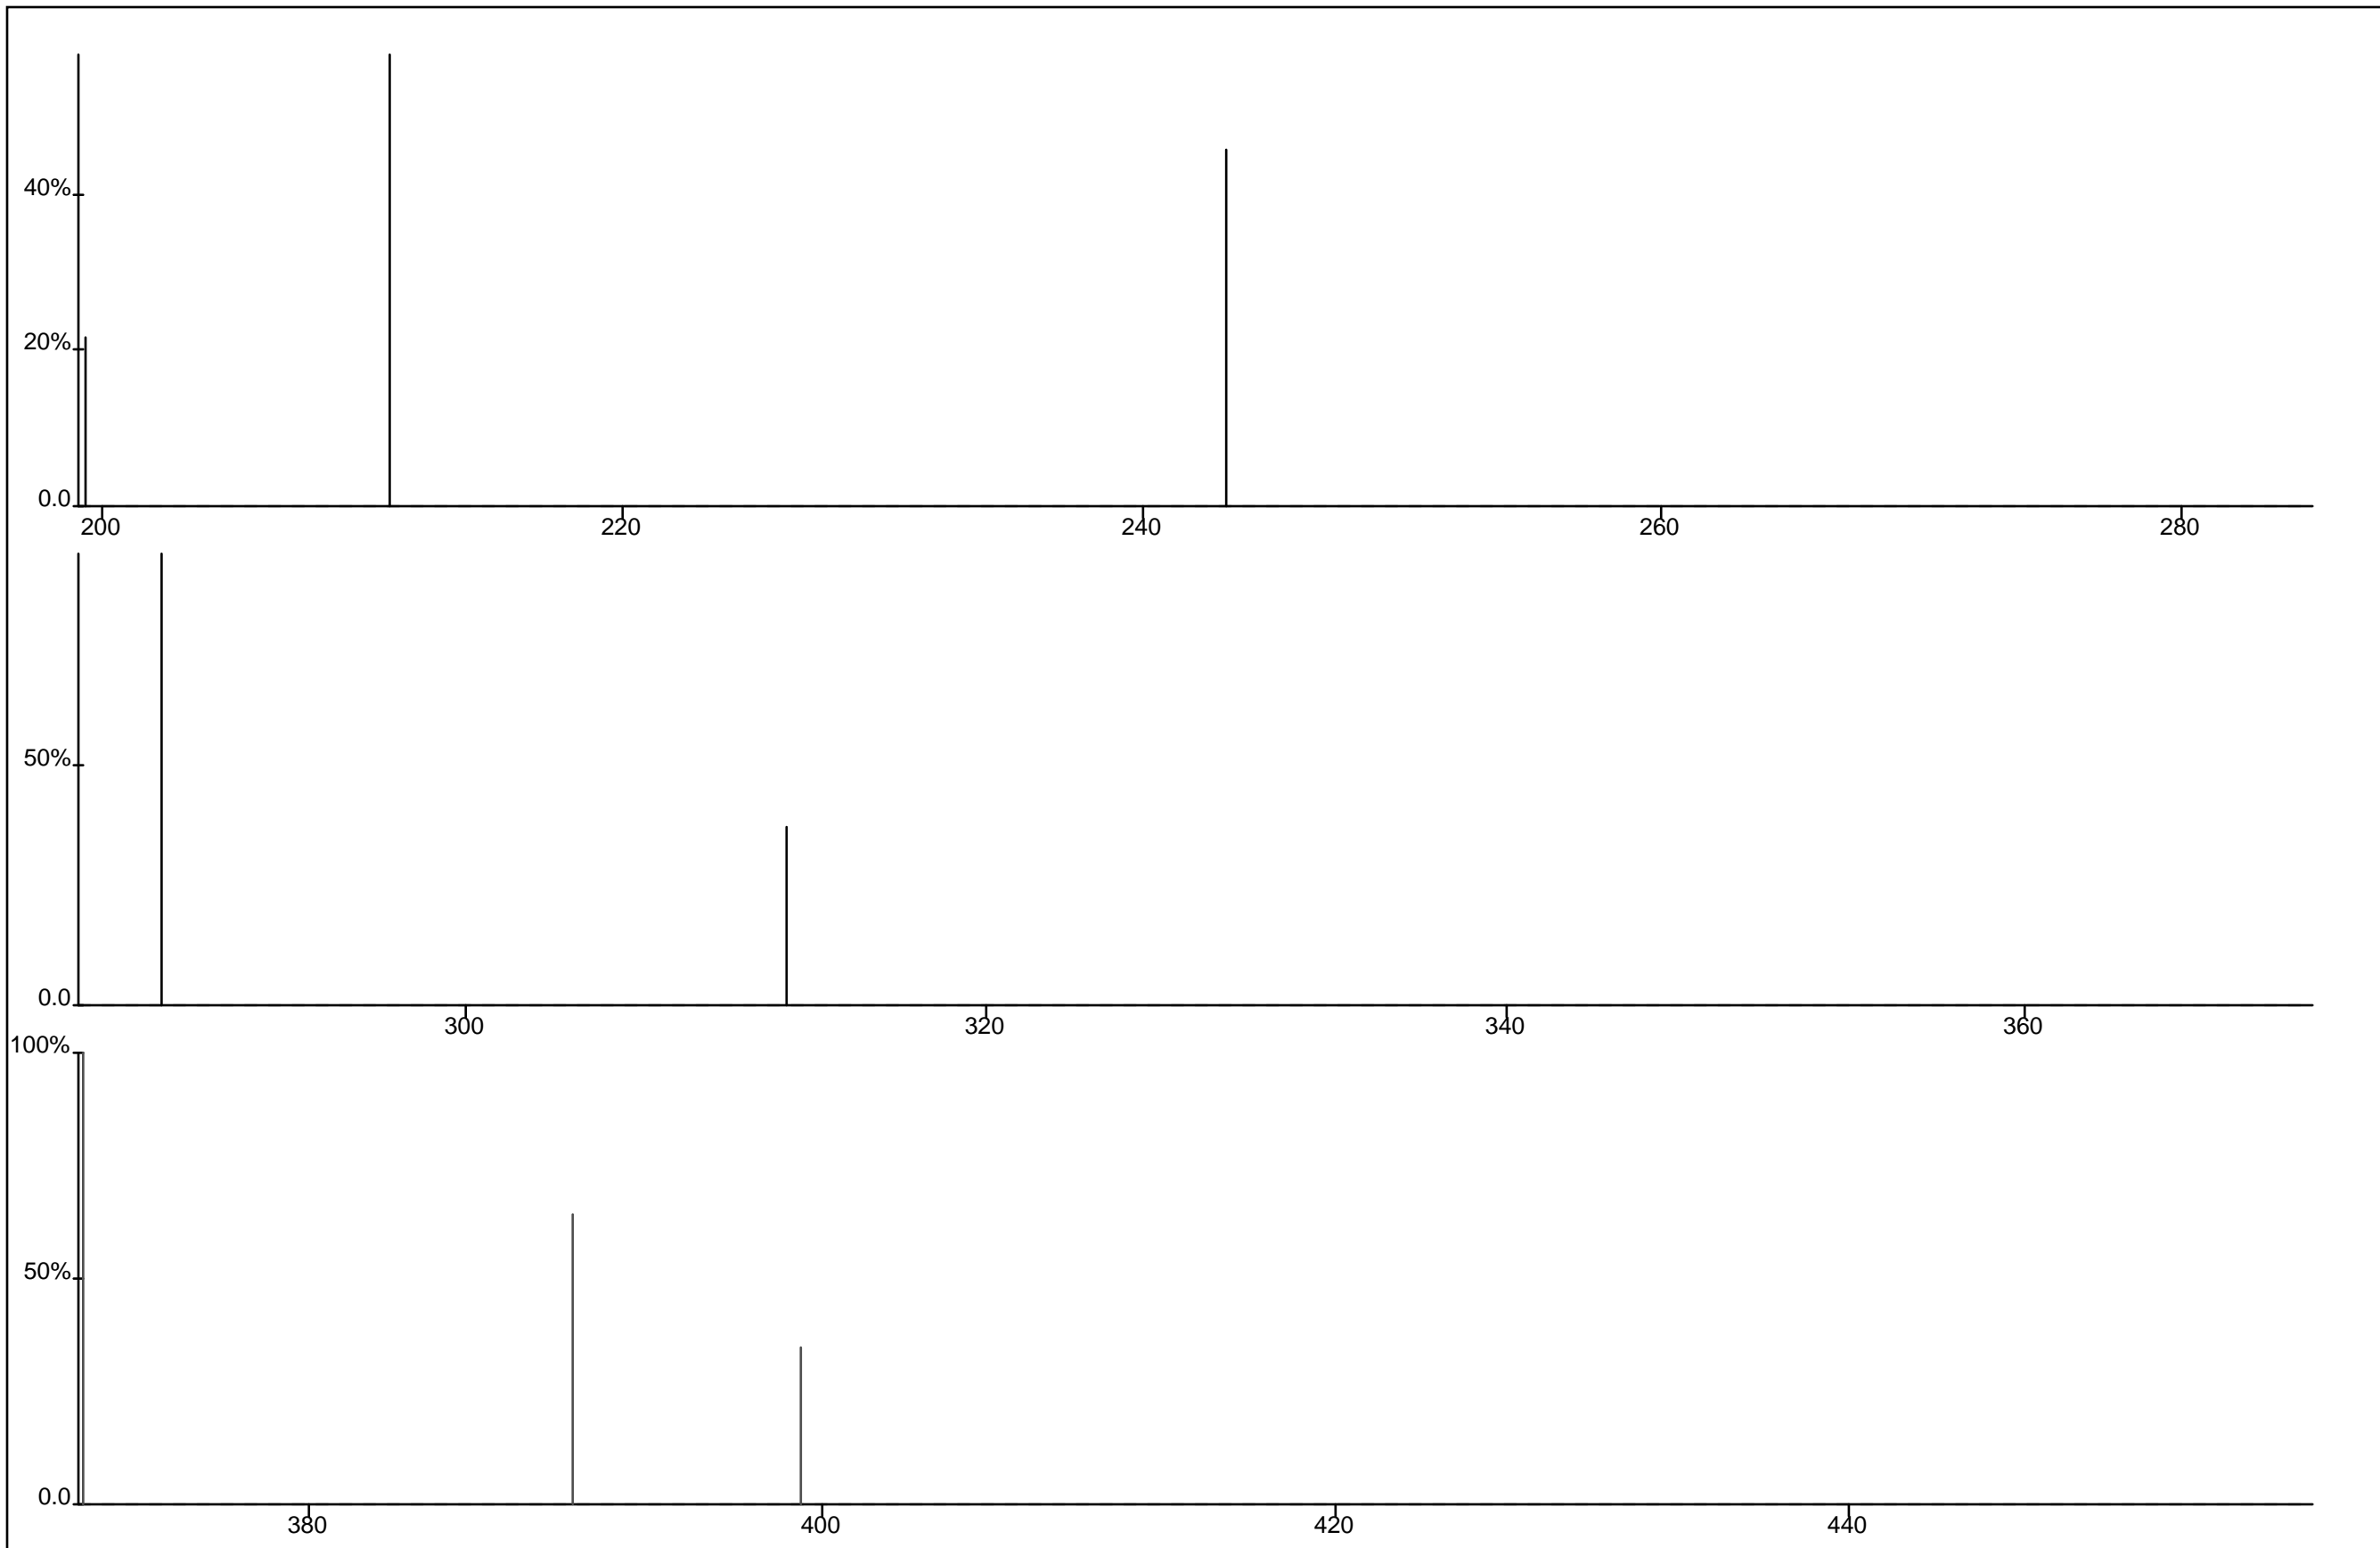

S\*T\*V M#A V E G D A E G Y\*P S\*A P R K S S M#V S\*M#

Protein Name: 0 Decoy hit, please disregard  
 gi Accession: 0  
 Precursor Mass: 434.4369+7  
 Delta Mass: 4.717 ppm  
 XCorr: 20.89

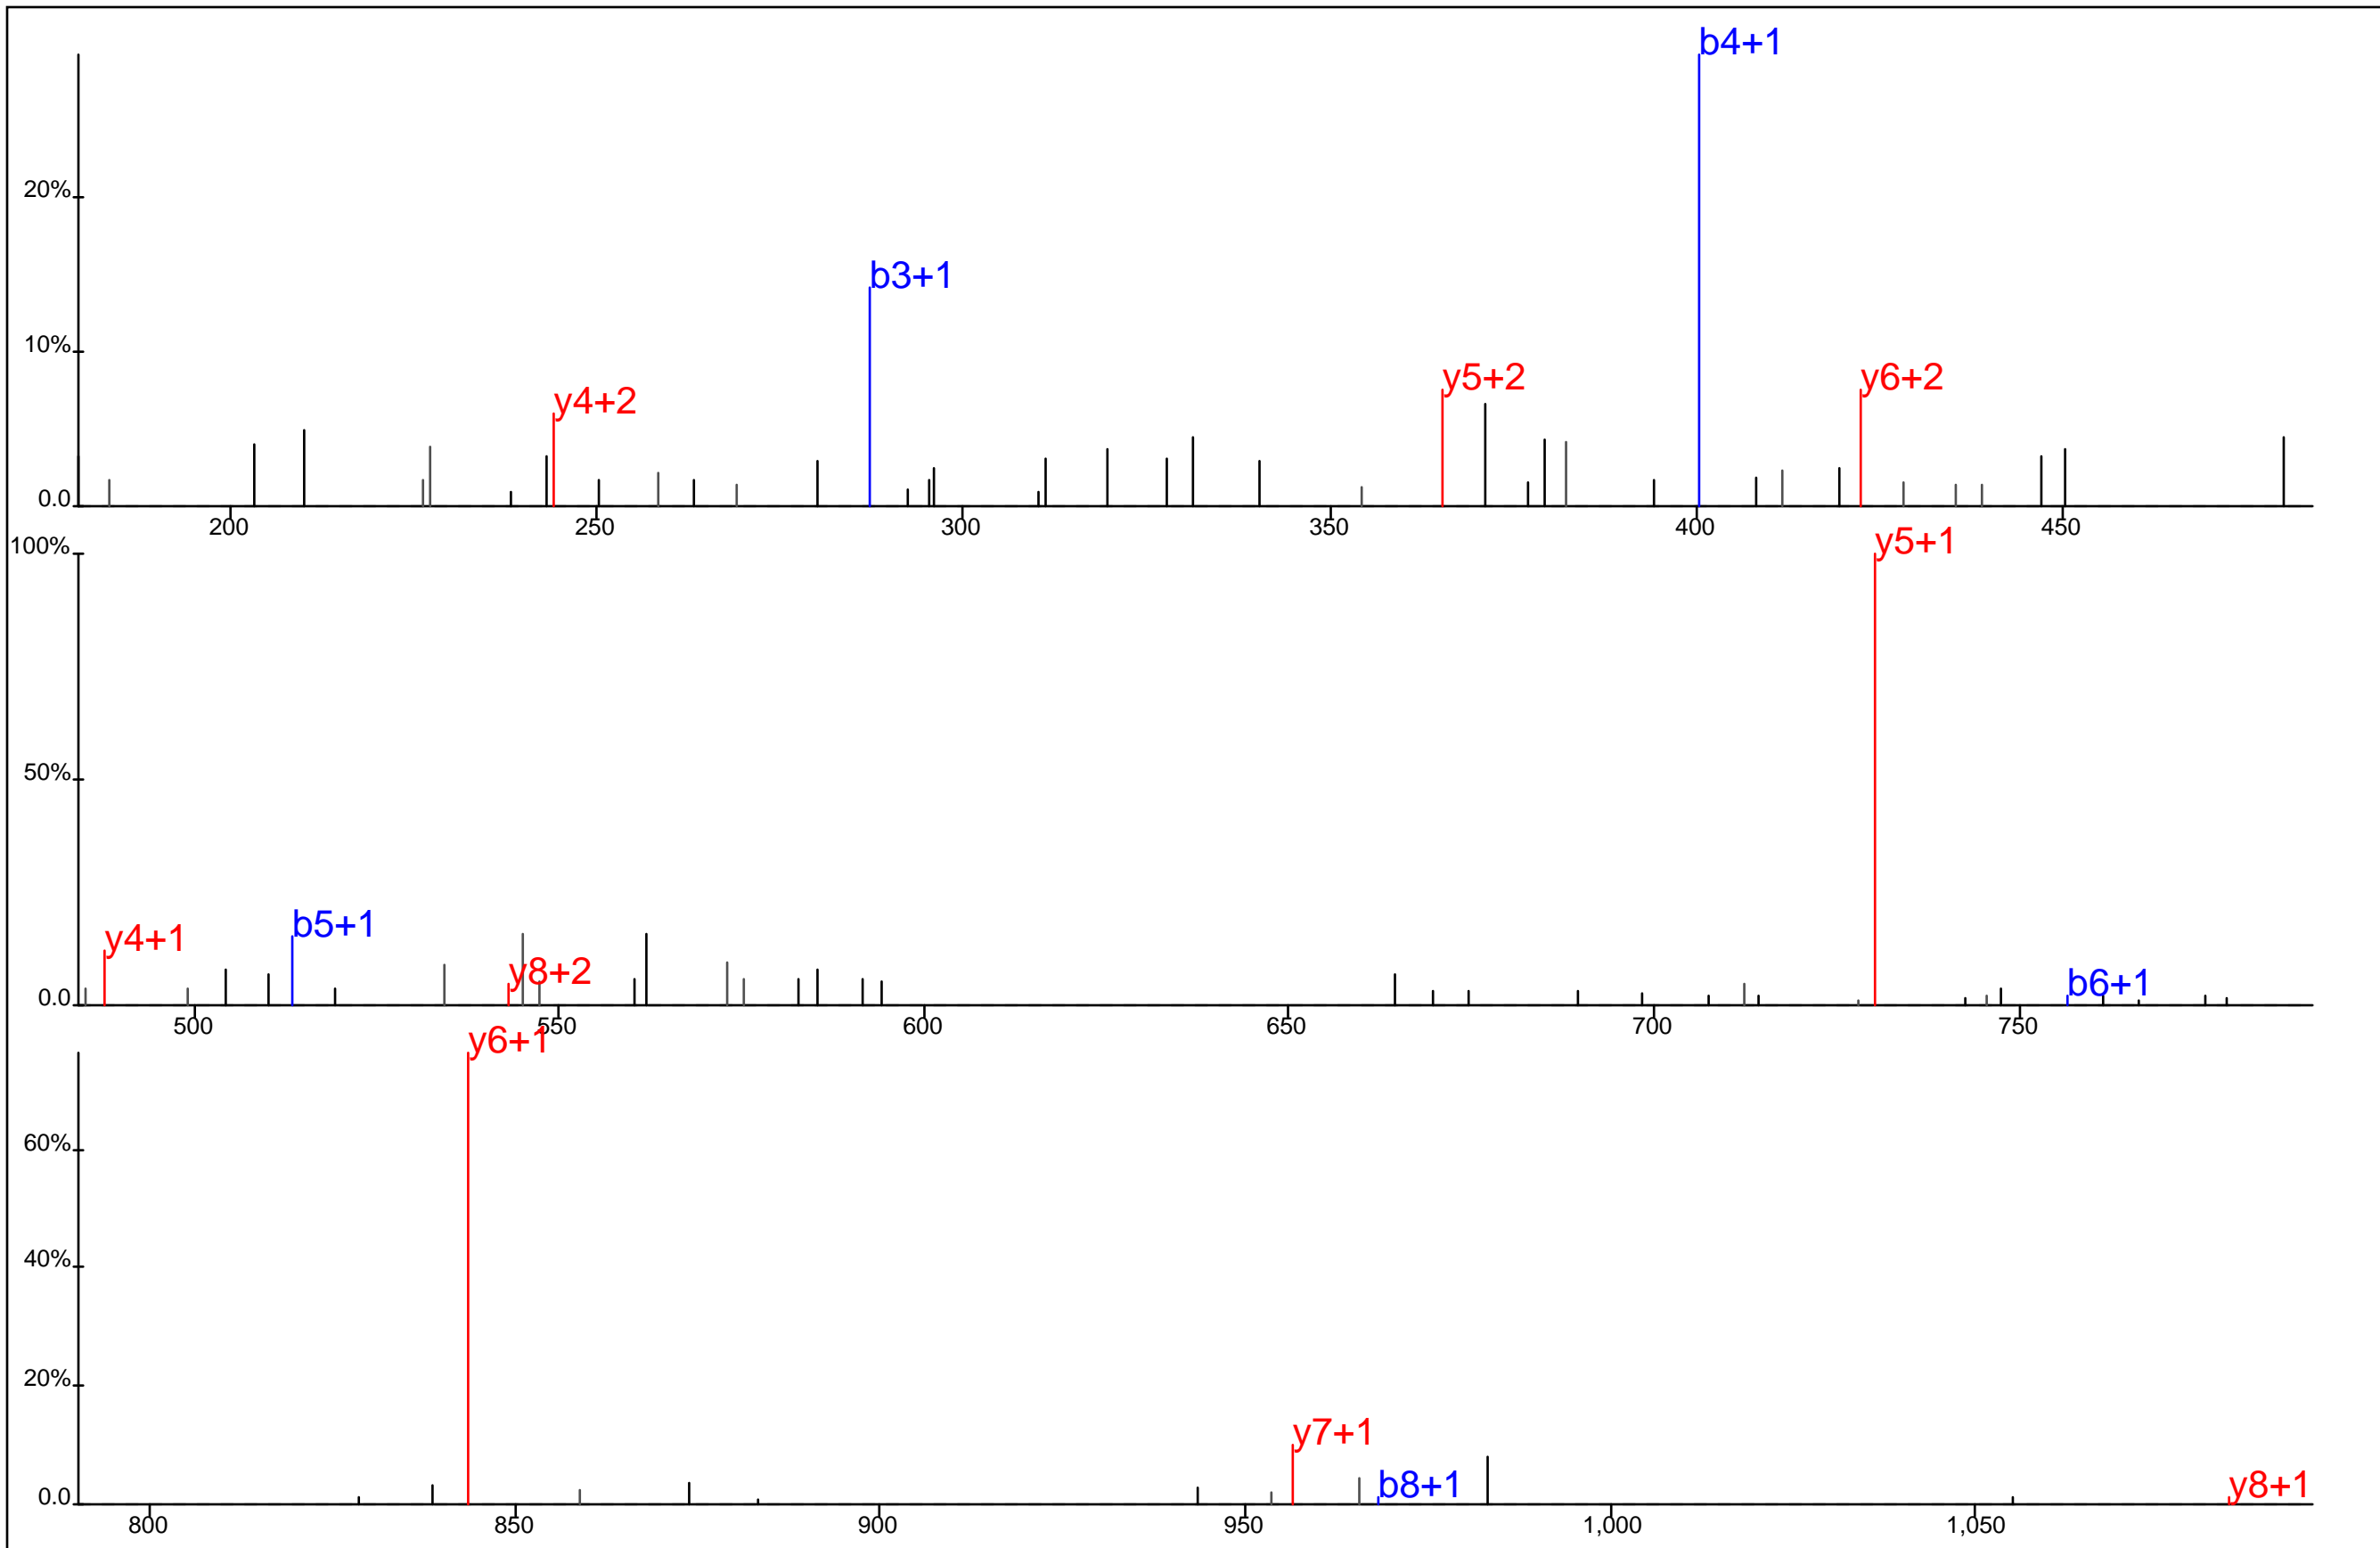

■ ■ □ □ □ ■  
 G T K L L Y\* P D Q K  
□ ■ ■ ■ ■ ■ □ □

Protein Name: 0 Decoy hit, please disregard  
 gi Accession: 0  
 Precursor Mass: 621.8091+2  
 Delta Mass: 1.669 ppm  
 XCorr: 20.84



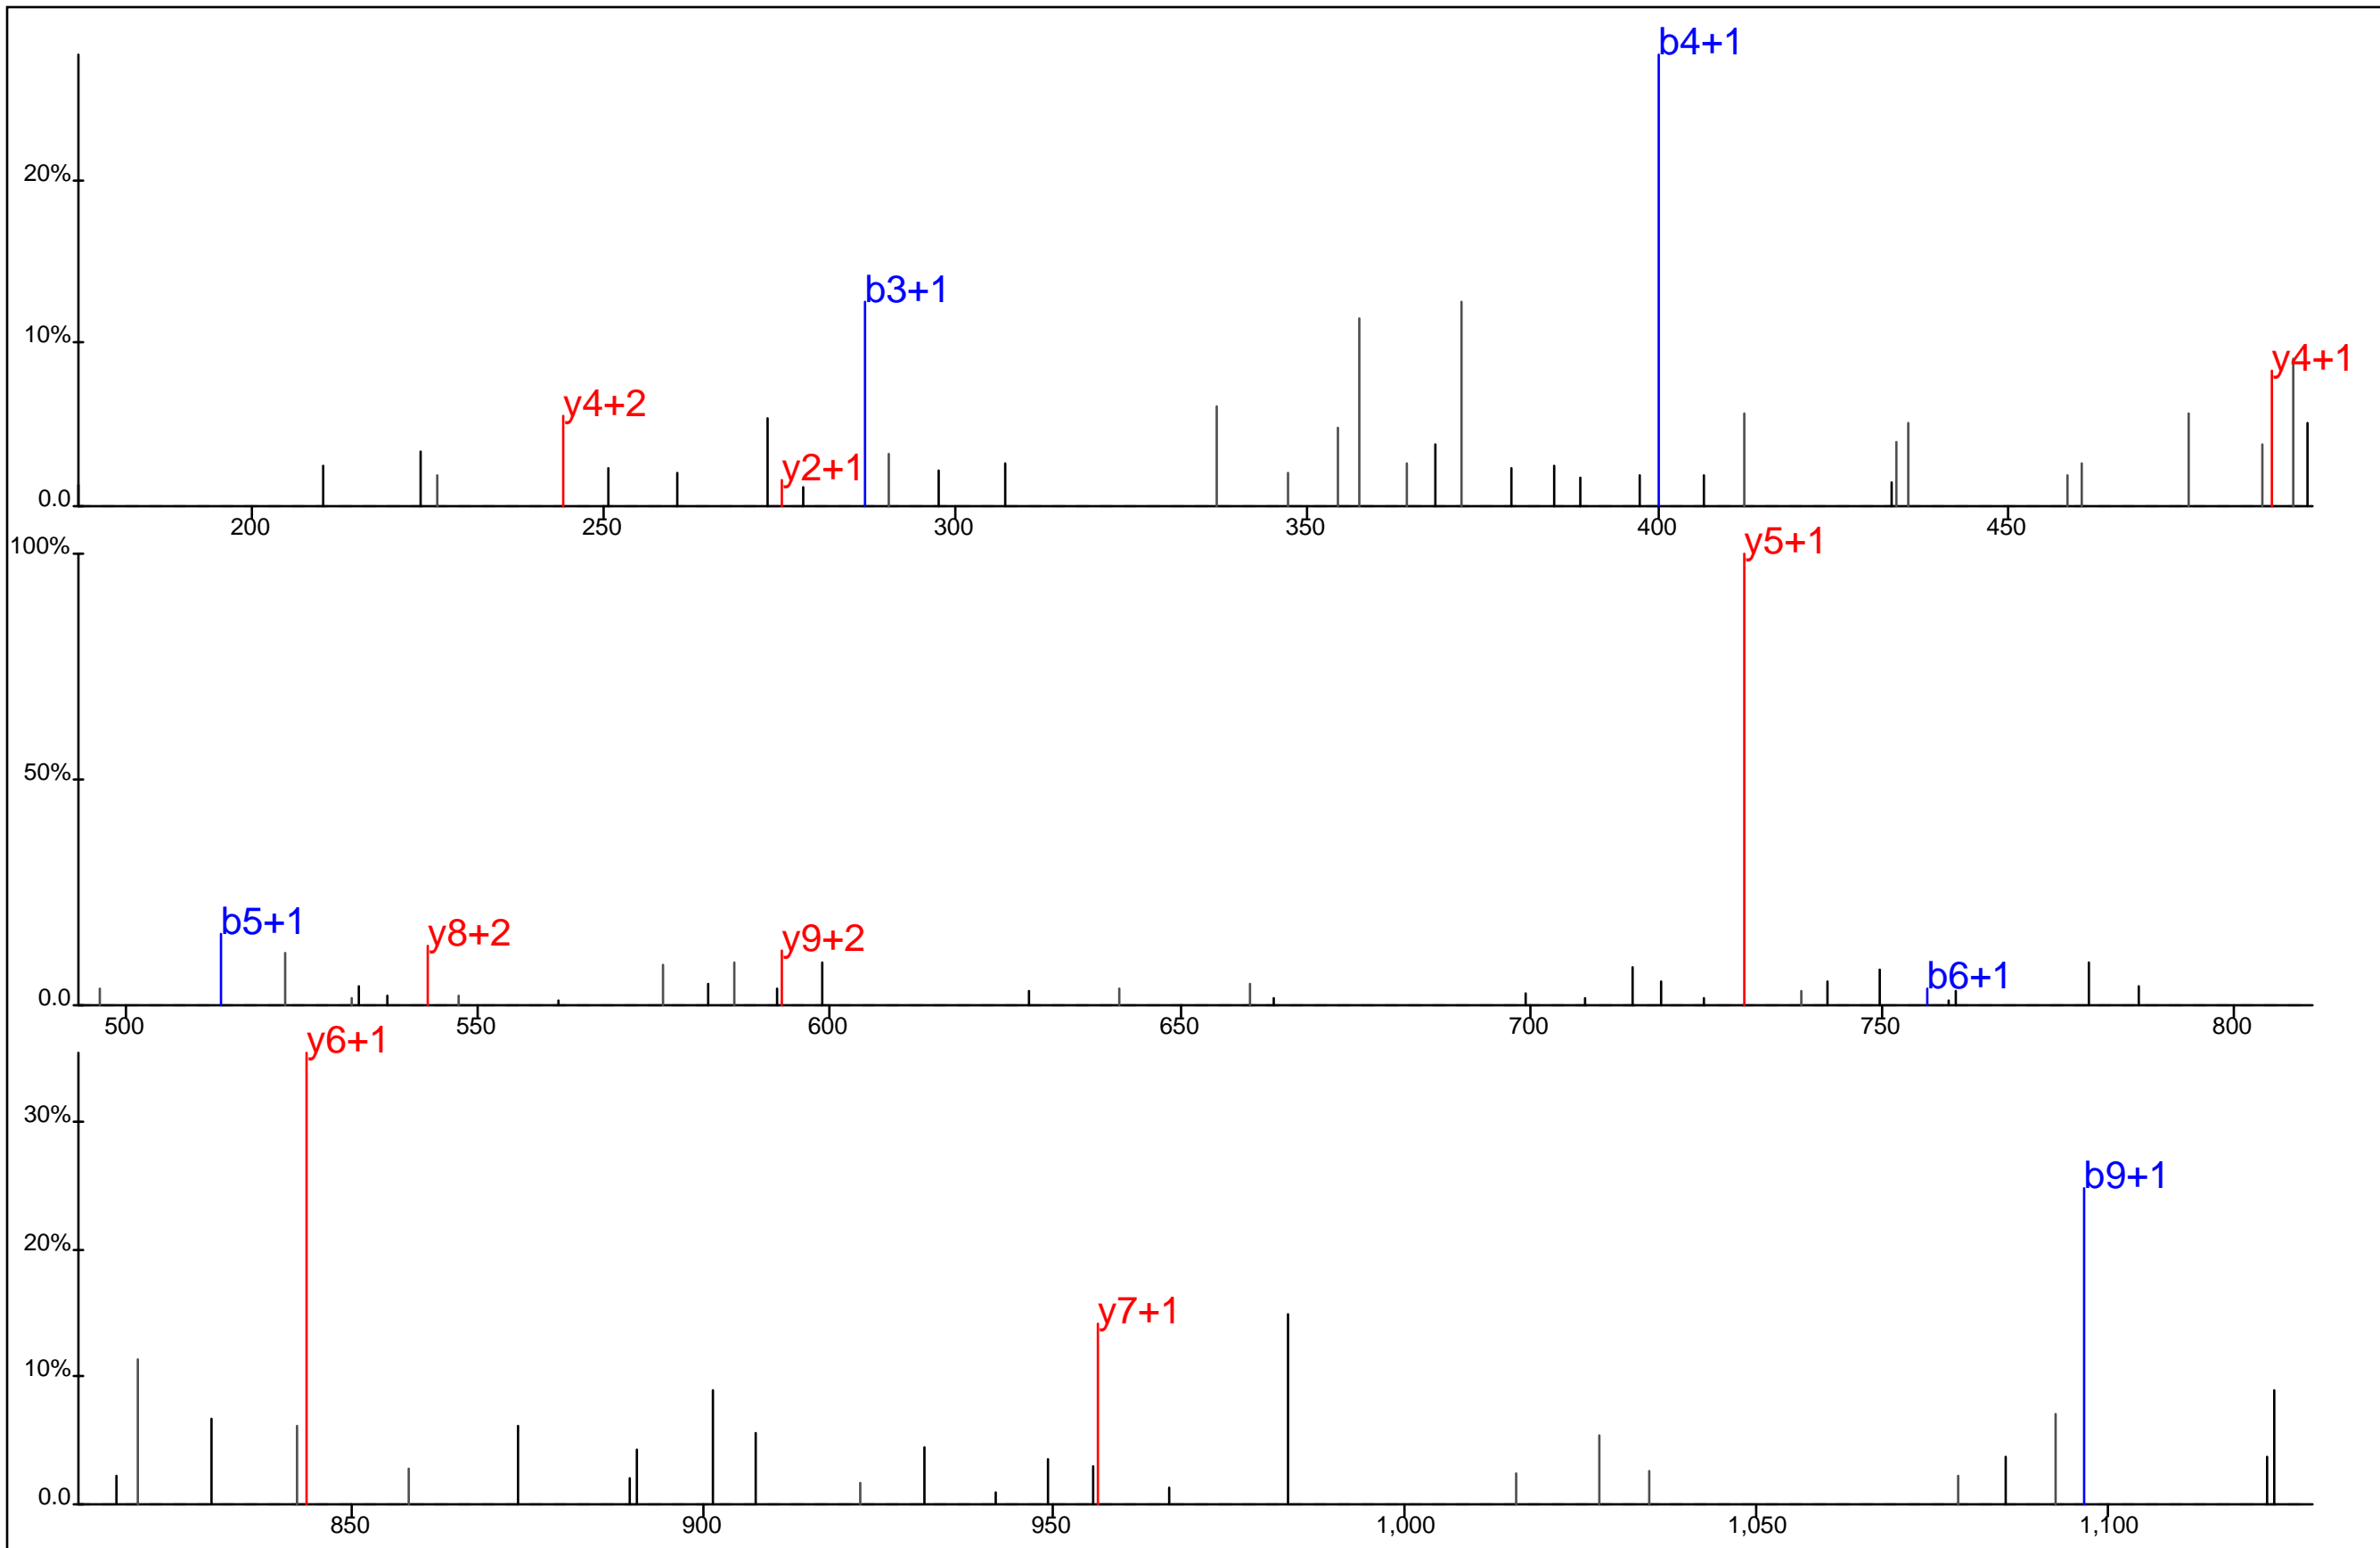

■ ■ ■ ■ ■ ■ ■ ■  
 G T K L L Y\* P D Q K  
■ ■ ■ ■ ■ ■ ■ ■

Protein Name: 0 Decoy hit, please disregard  
 gi Accession: 0  
 Precursor Mass: 621.8101+2  
 Delta Mass: 0.097 ppm  
 XCorr: 33.66

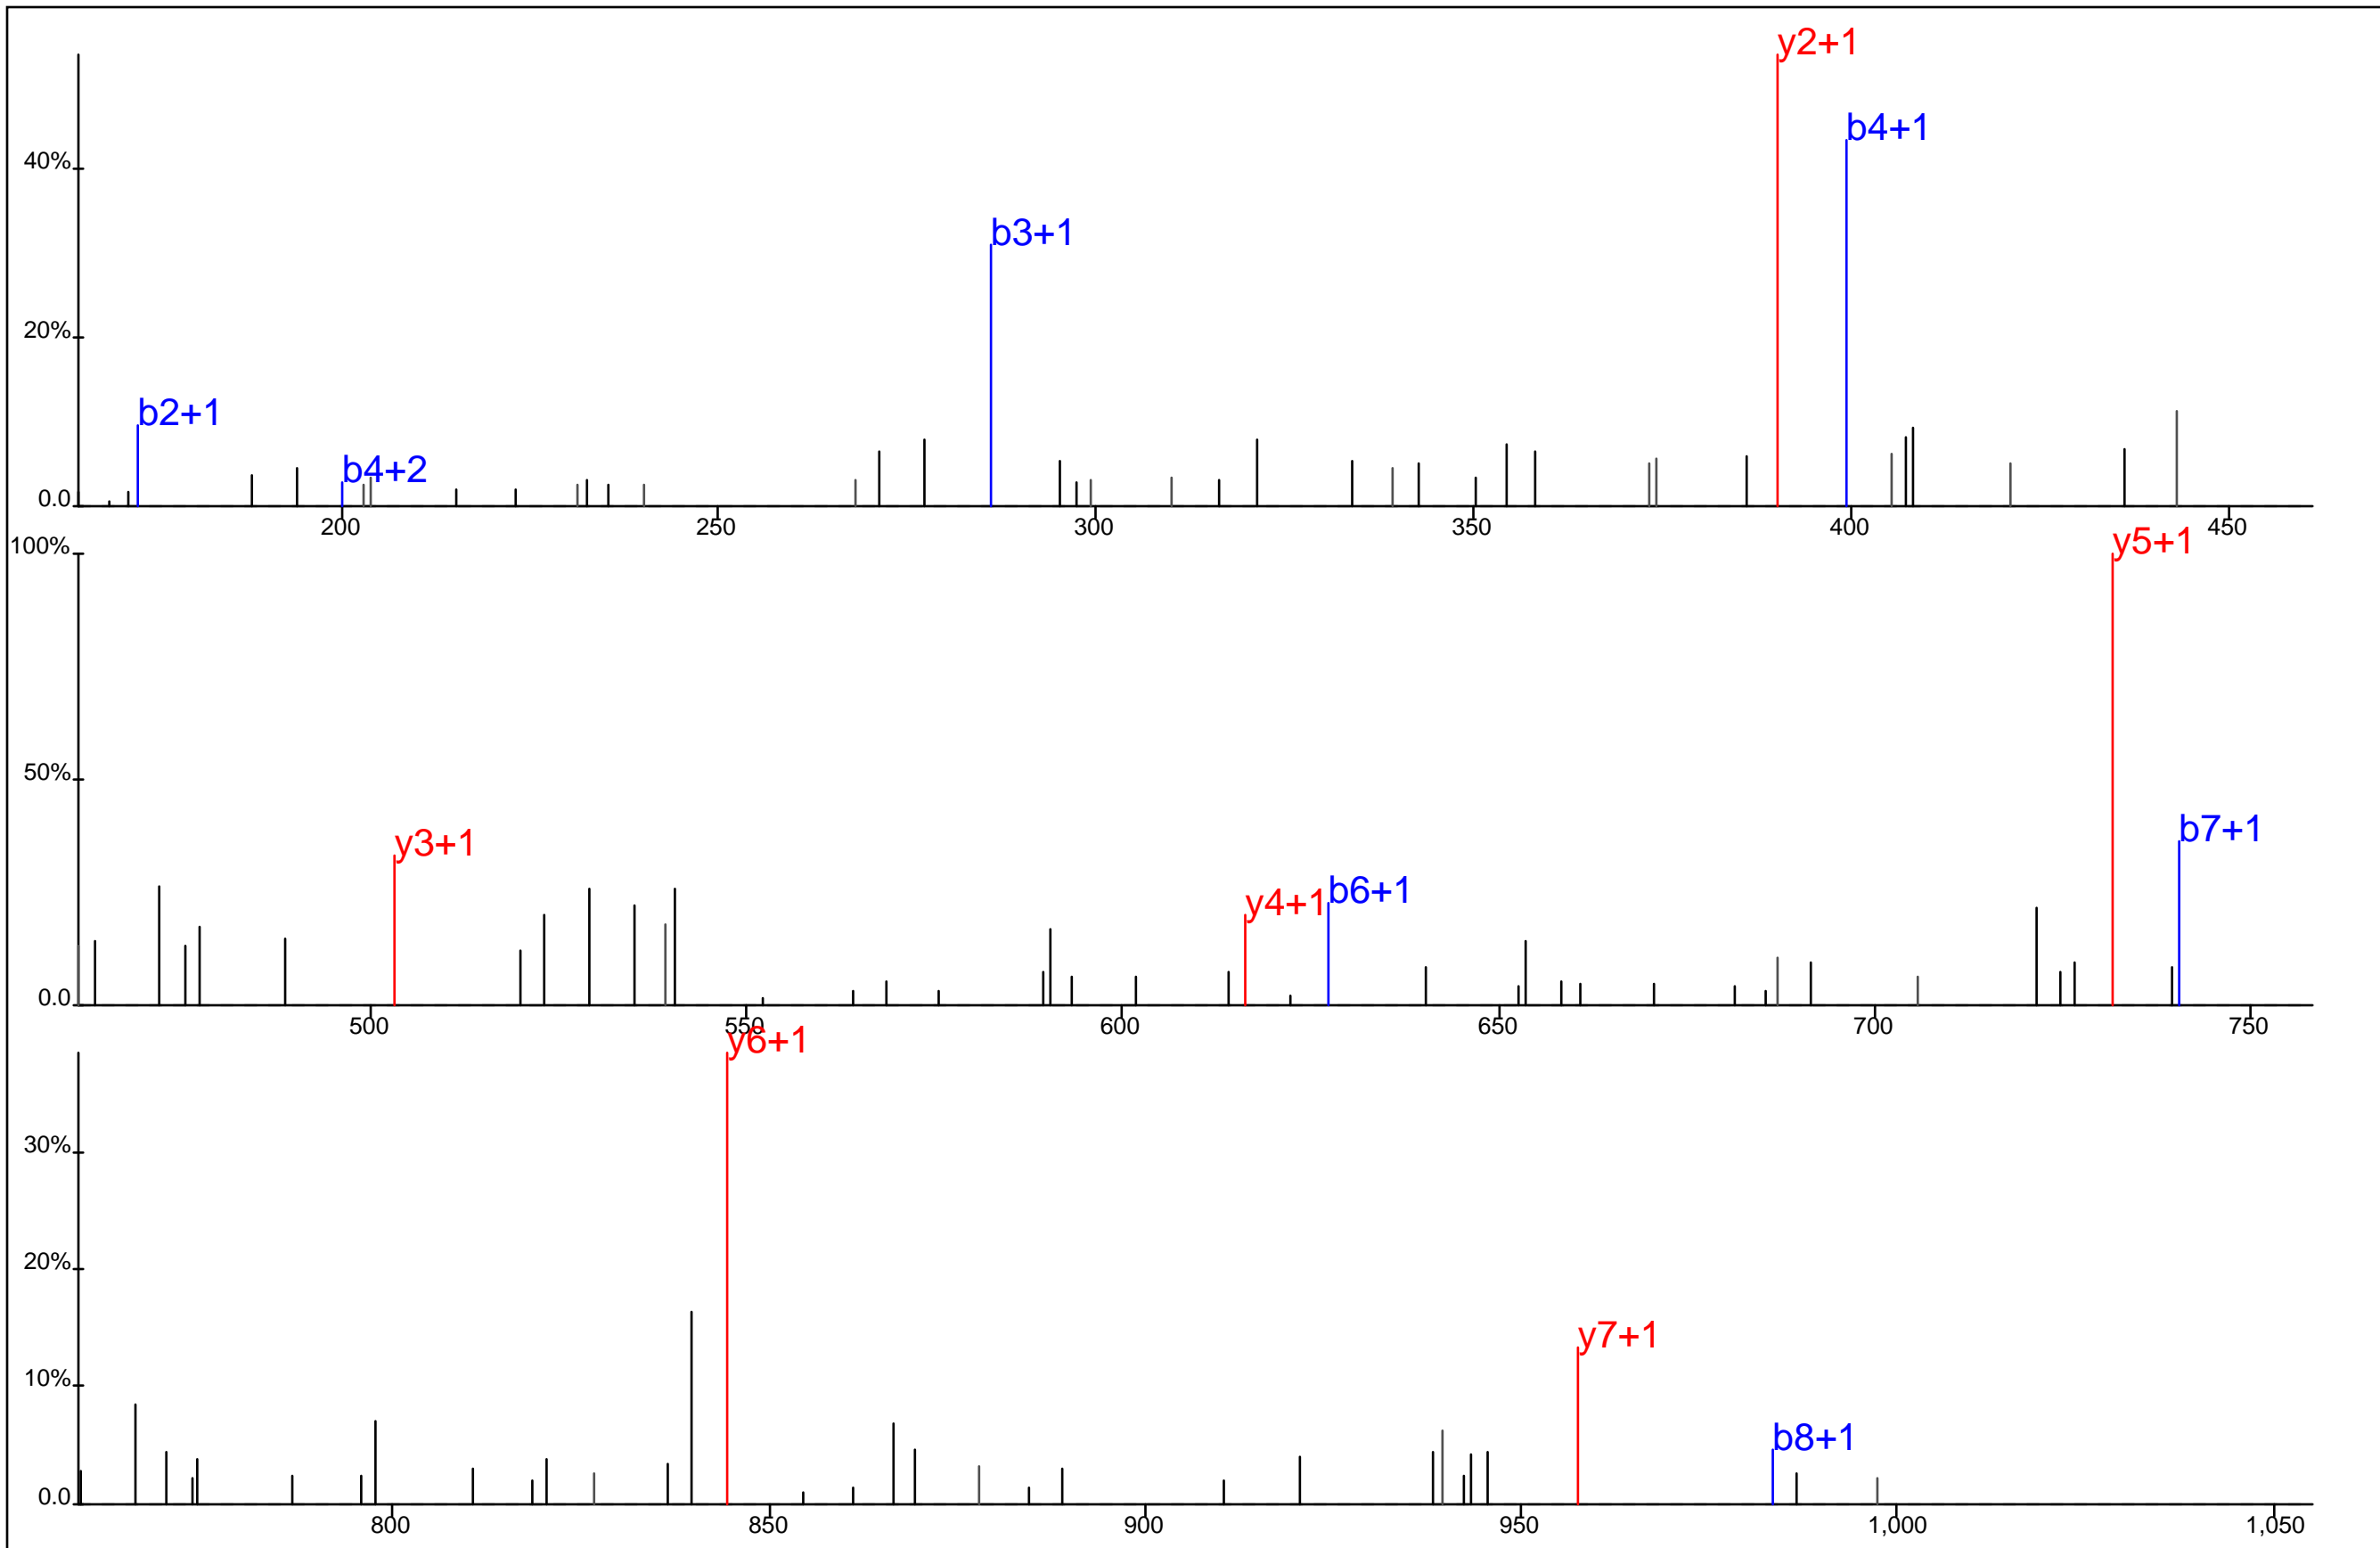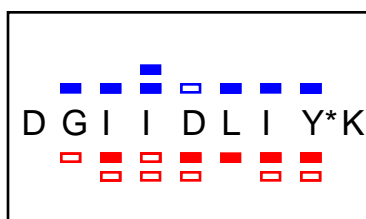

Protein Name: 0 Decoy hit, please disregard  
 gi Accession: 0  
 Precursor Mass: 565.2803+2  
 Delta Mass: 0.683 ppm  
 XCorr: 51.12



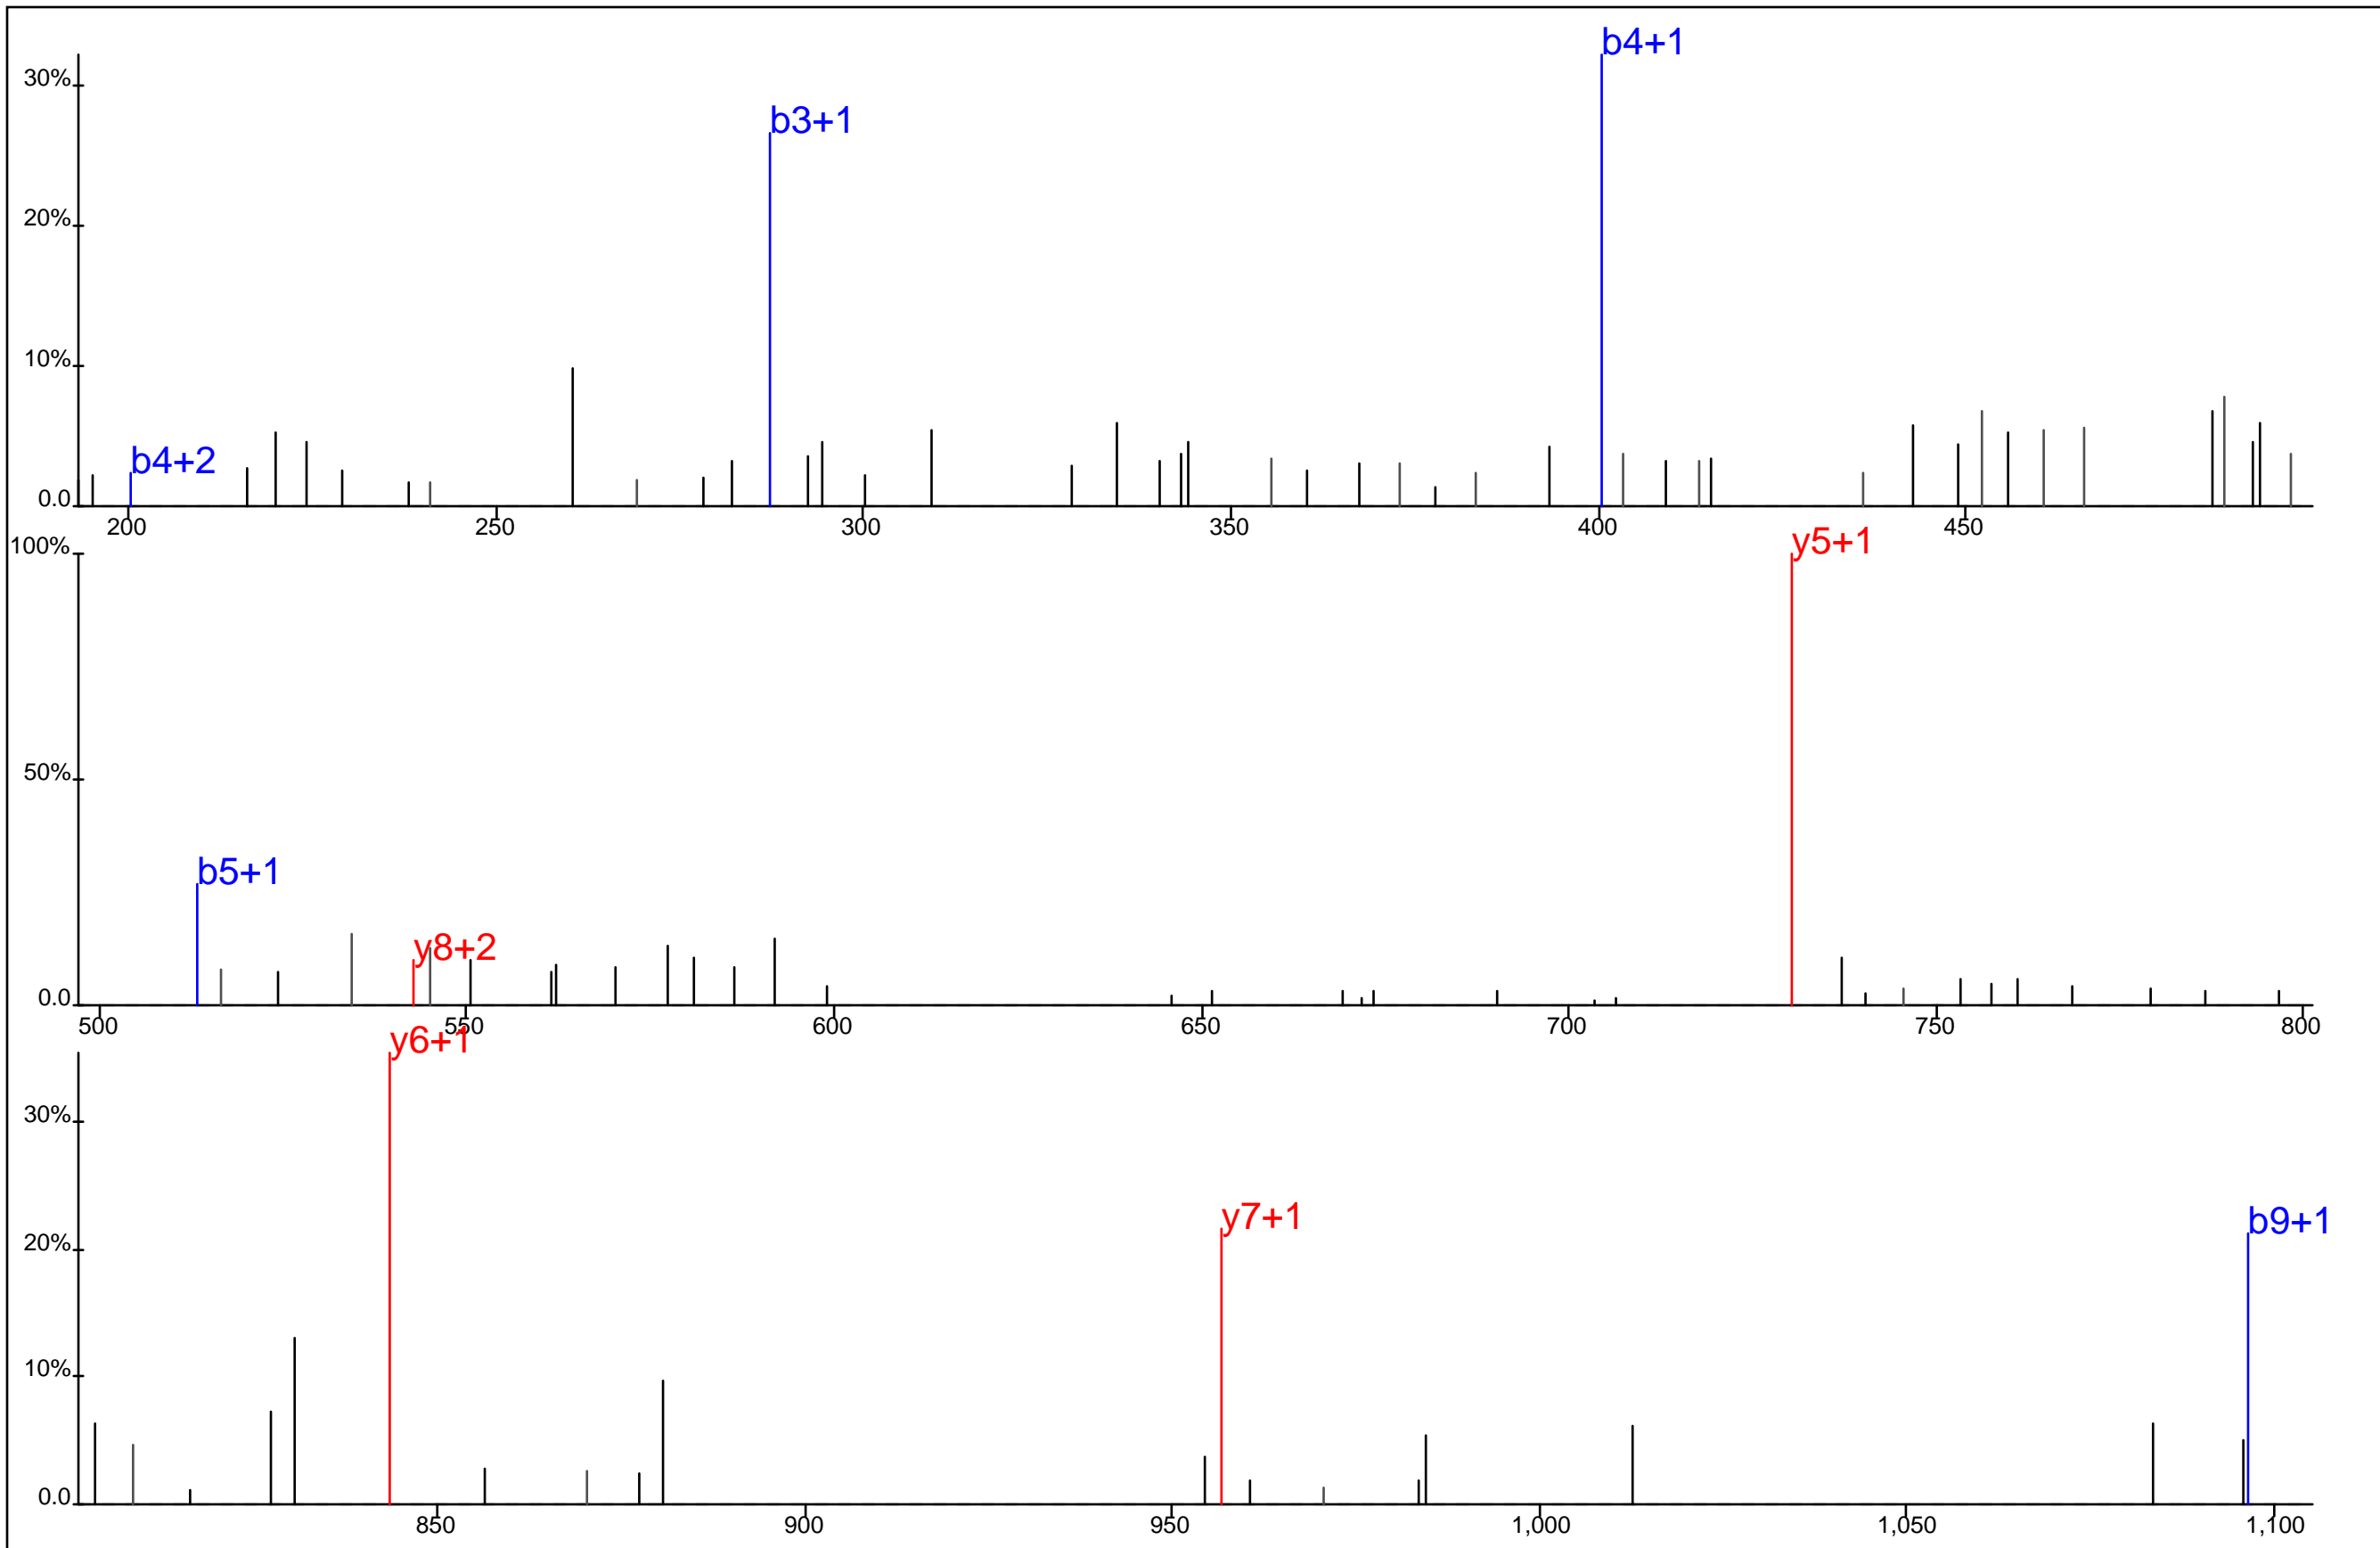

■ ■ ■ ■ ■ ■  
**G T K L L Y\* P D Q K**  
□ □ □ □ □ □

Protein Name: 0 Decoy hit, please disregard  
 gi Accession: 0  
 Precursor Mass: 621.8123+2  
 Delta Mass: 3.440 ppm  
 XCorr: 25.3

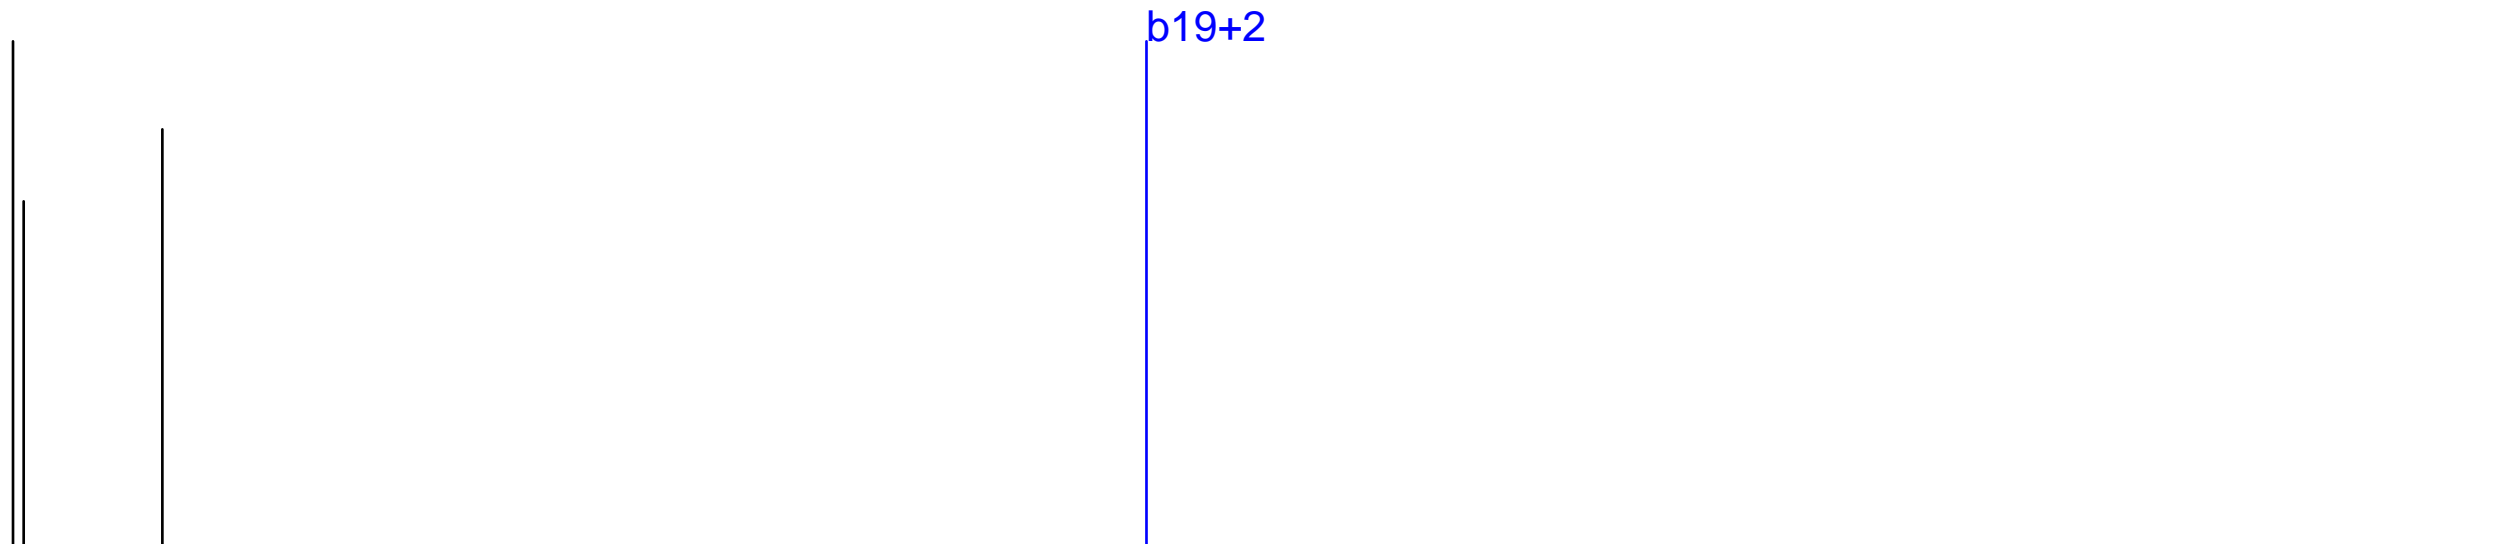

1,250

1,300

1,350

1,400

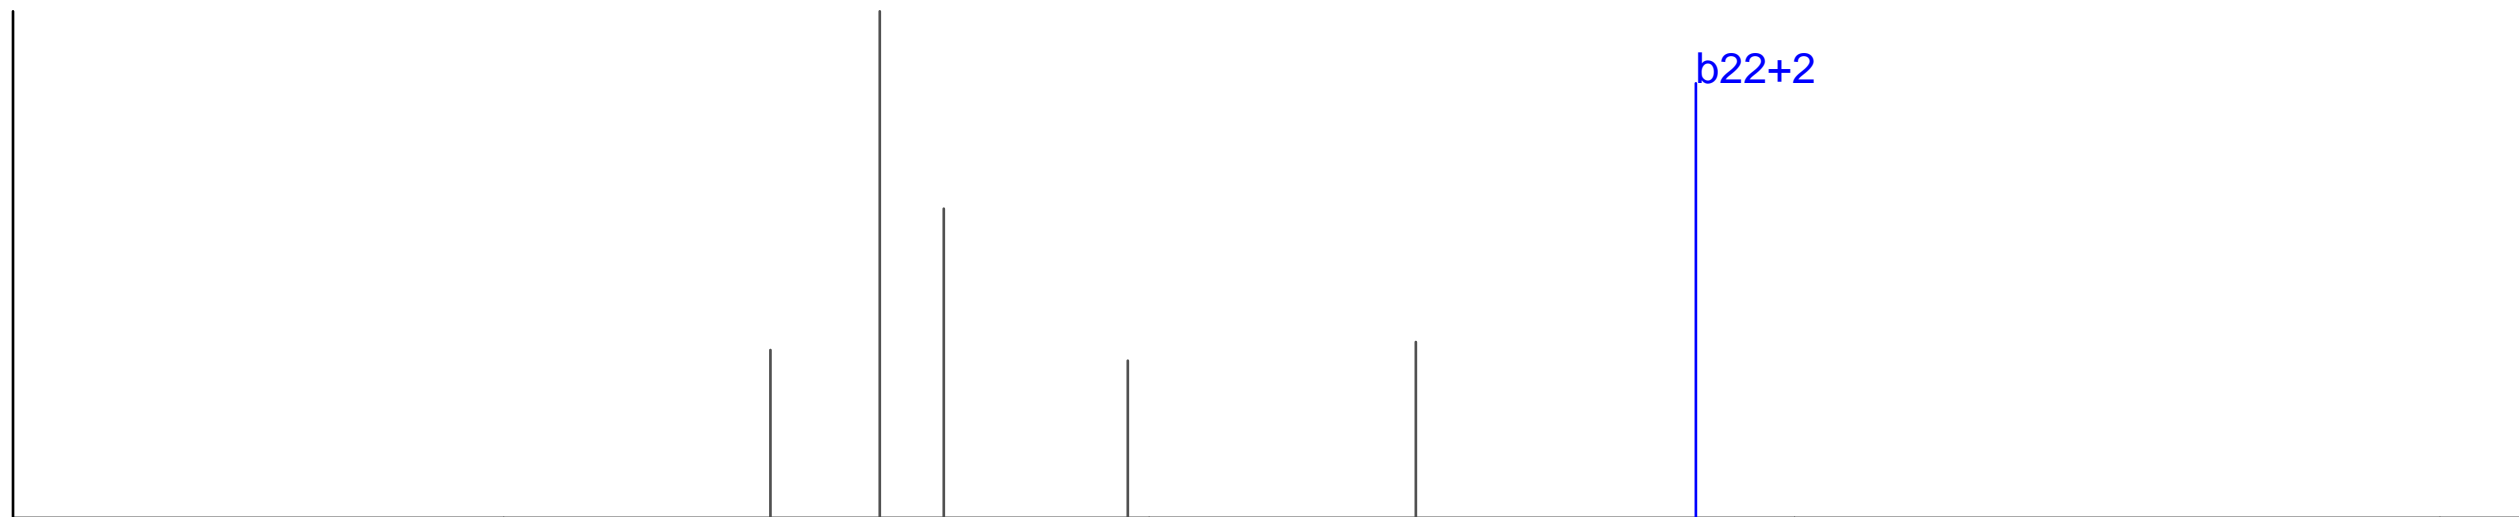

1,450

1,500

1,550

1,600

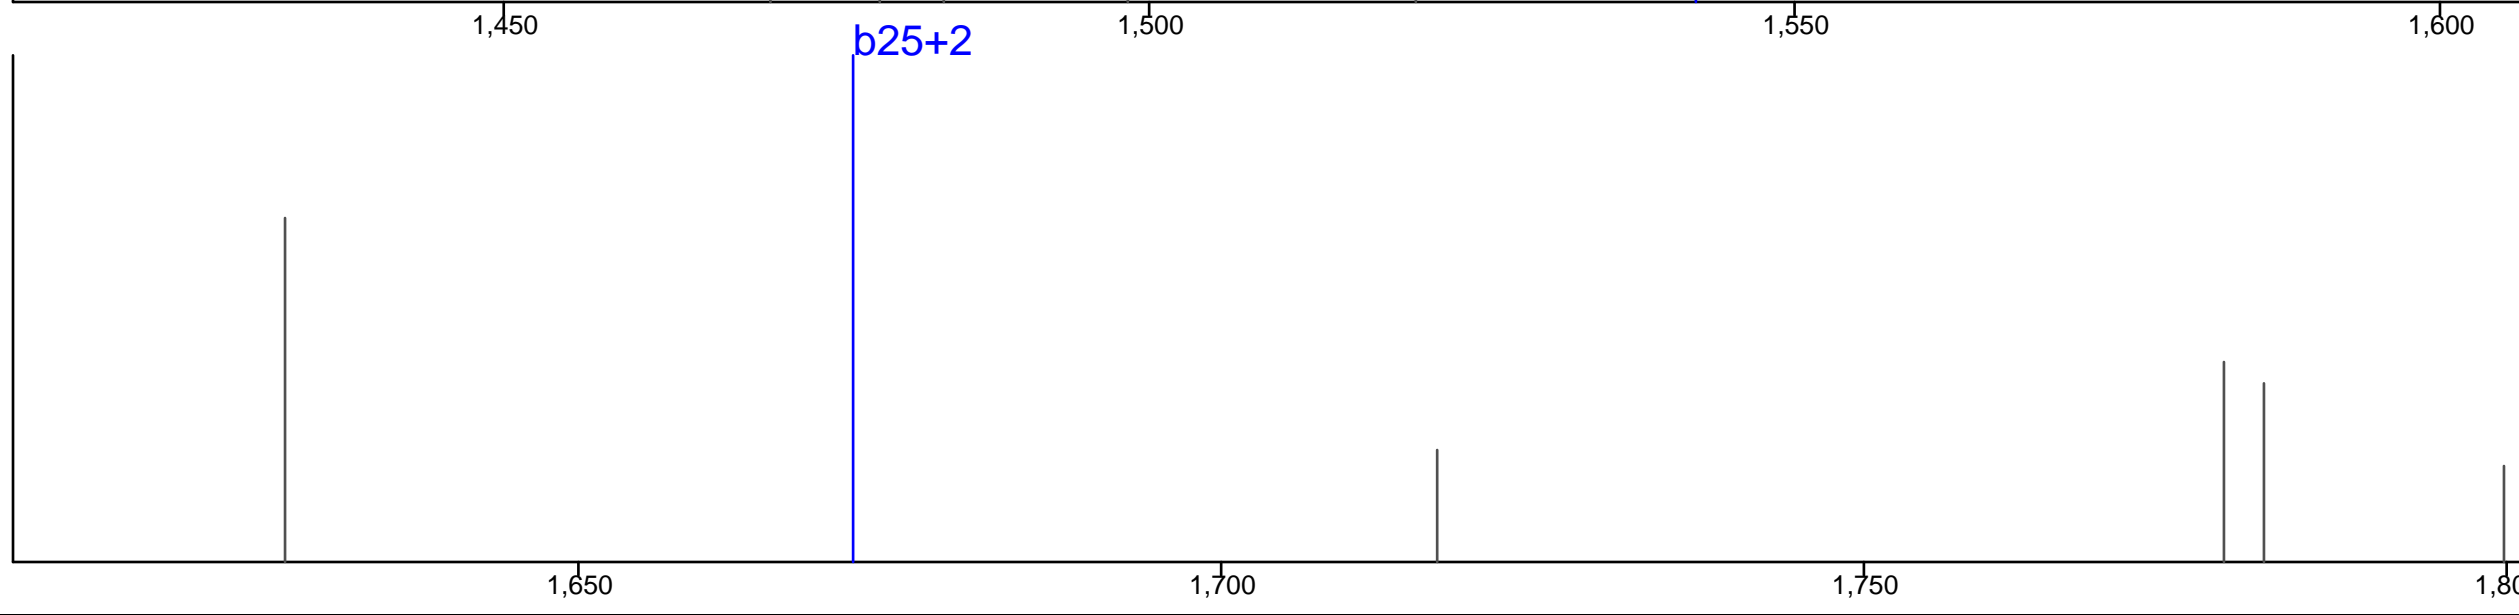

1,650

1,700

1,750

1,800

Q A D S\* E C C F Y\* D A C P T\* V I Y\* P I F Y Y N G S S A T N K Q T V M# D K

Protein Name: 0 Decoy hit, please disregard  
 gi Accession: 0  
 Precursor Mass: 1,527.2371+3  
 Delta Mass: 0.605 ppm  
 XCorr: 22.46

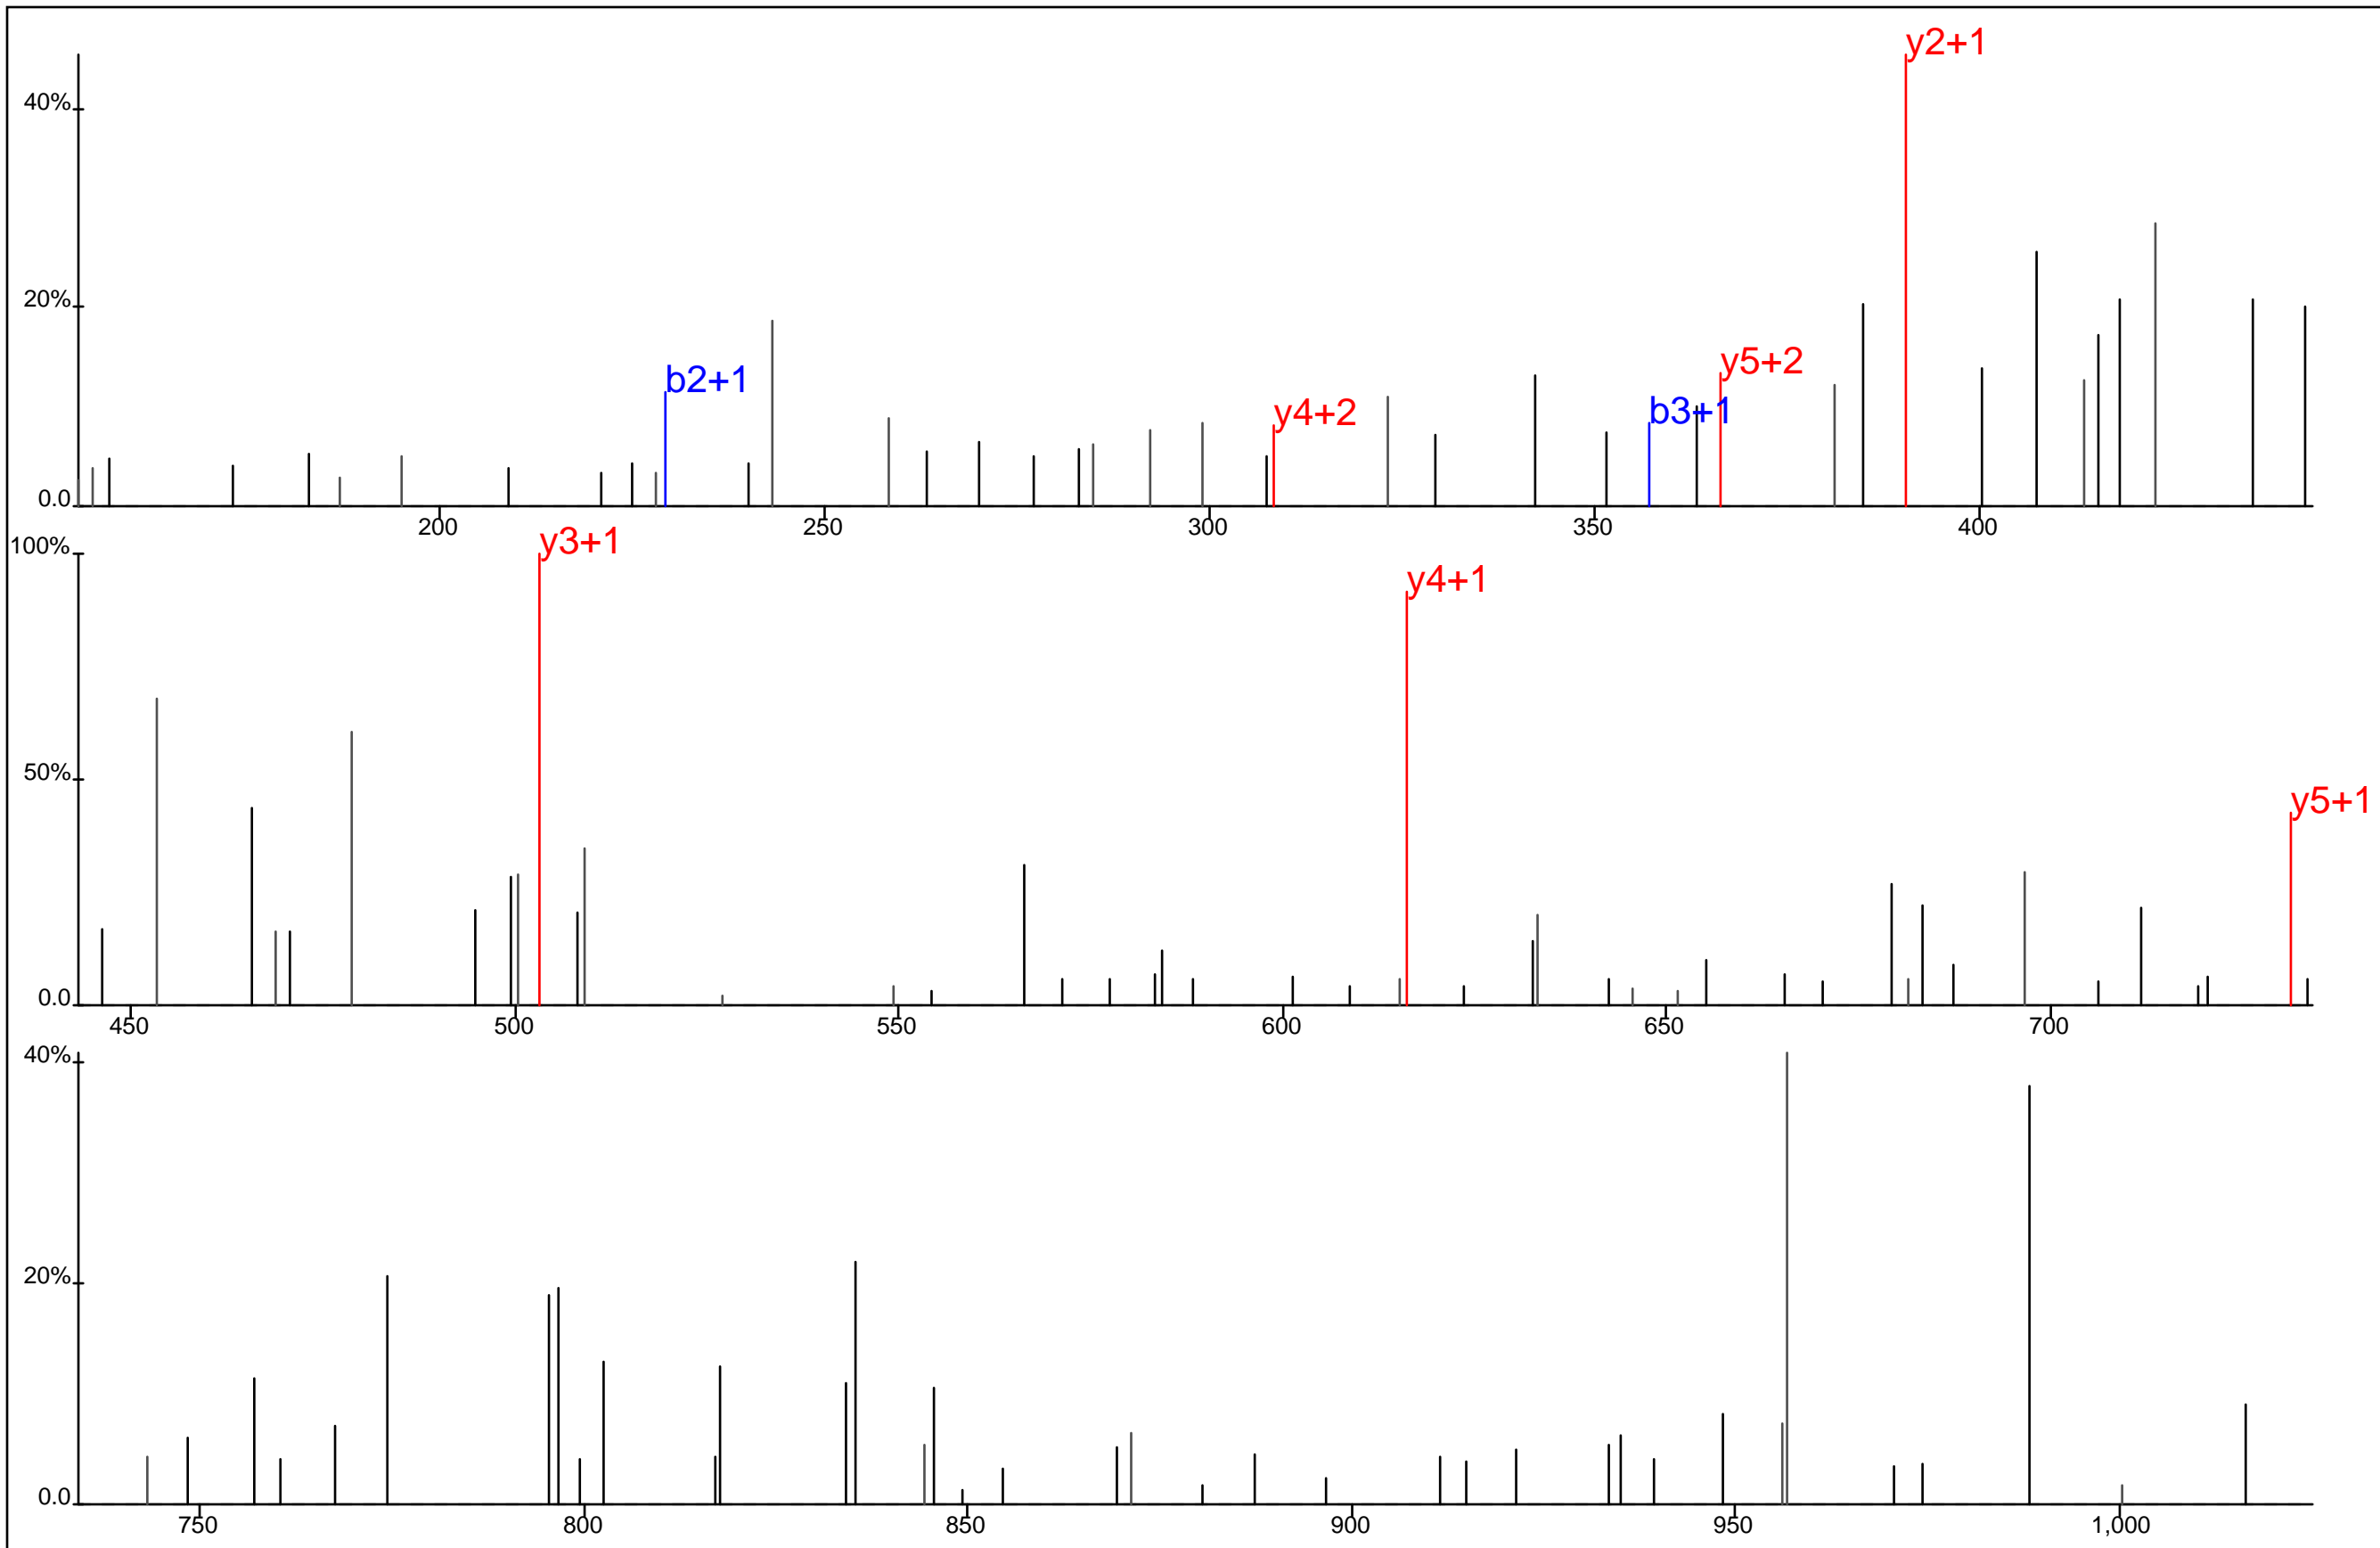

■ ■ ■ ■ ■ ■  
 D I K D L I Y\* K  
□ □ □ □ □ □

Protein Name: 0 Decoy hit, please disregard  
 gi Accession: 0  
 Precursor Mass: 544.2762+2  
 Delta Mass: 1.490 ppm  
 XCorr: 20.56

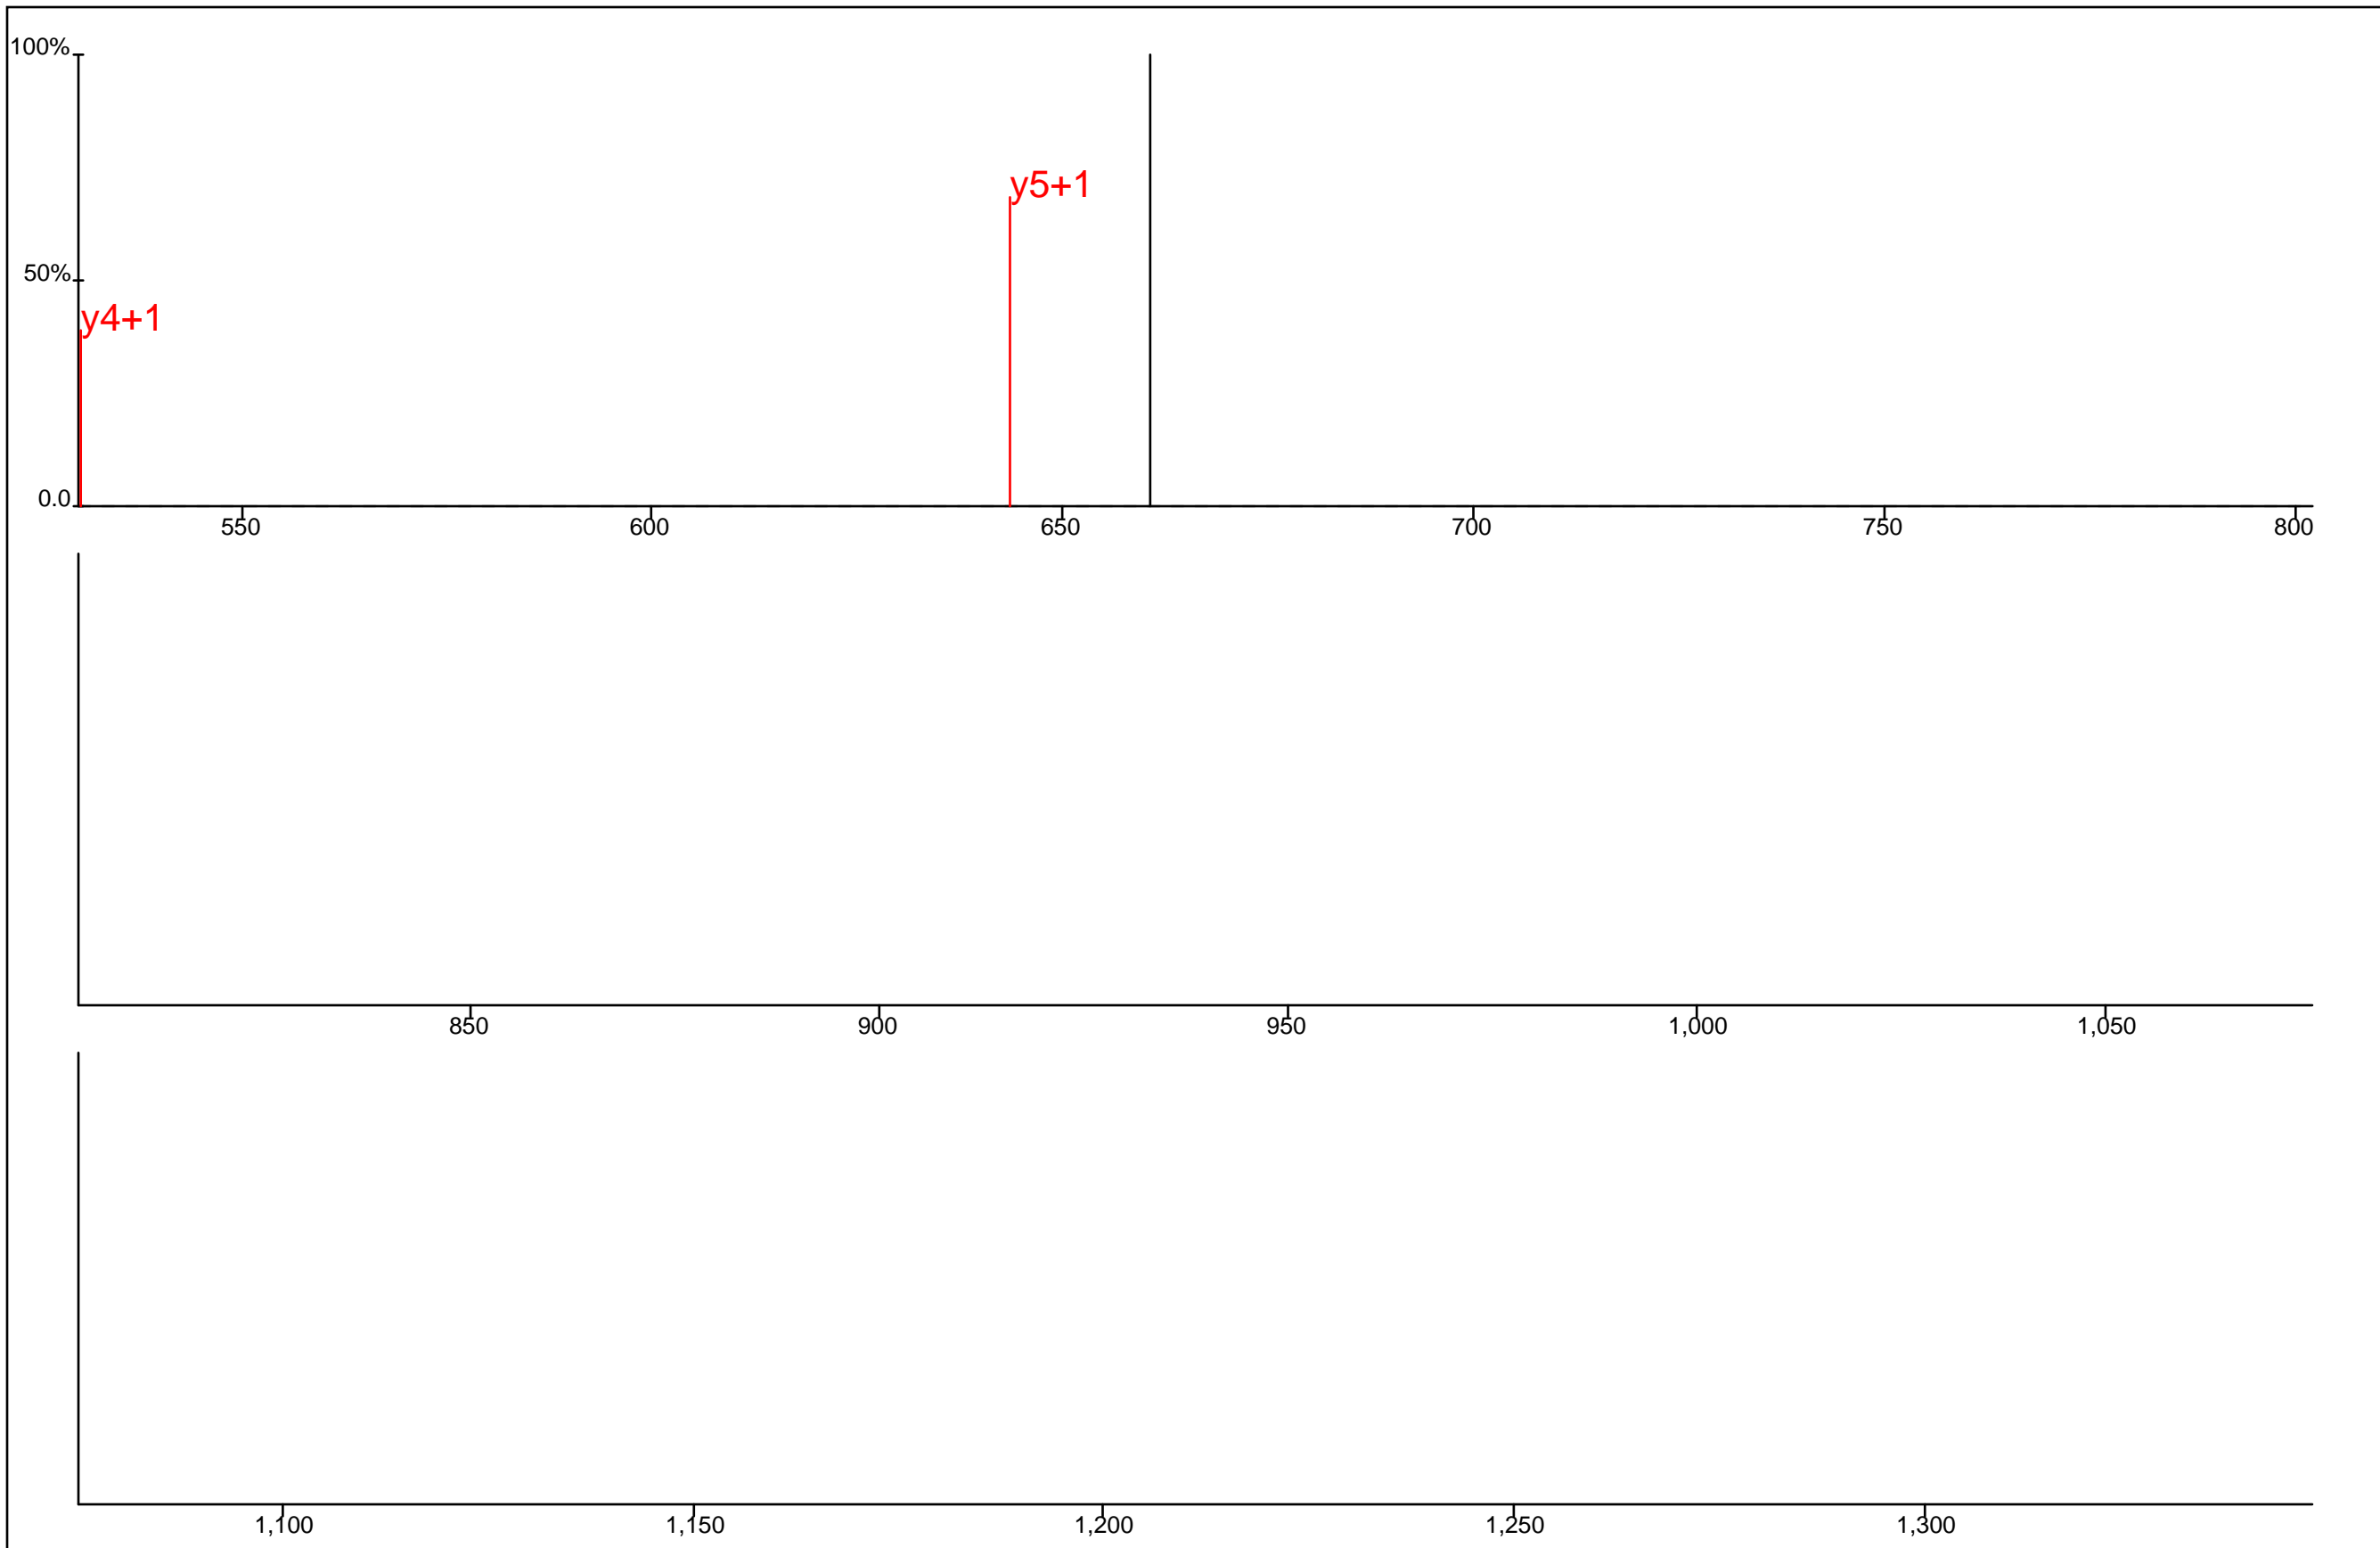

V E E S\*S\*Y\*S\*K S\*S\*L T\*E T\*N G S\*S\*T\*D L A S\*V A E Q S S L H S\*E E A S H P L V Q K R  
■ ■

Protein Name: 0 Decoy hit, please disregard  
 gi Accession: 0  
 Precursor Mass: 1,408.6859+4  
 Delta Mass: 4.865 ppm  
 XCorr: 20.06

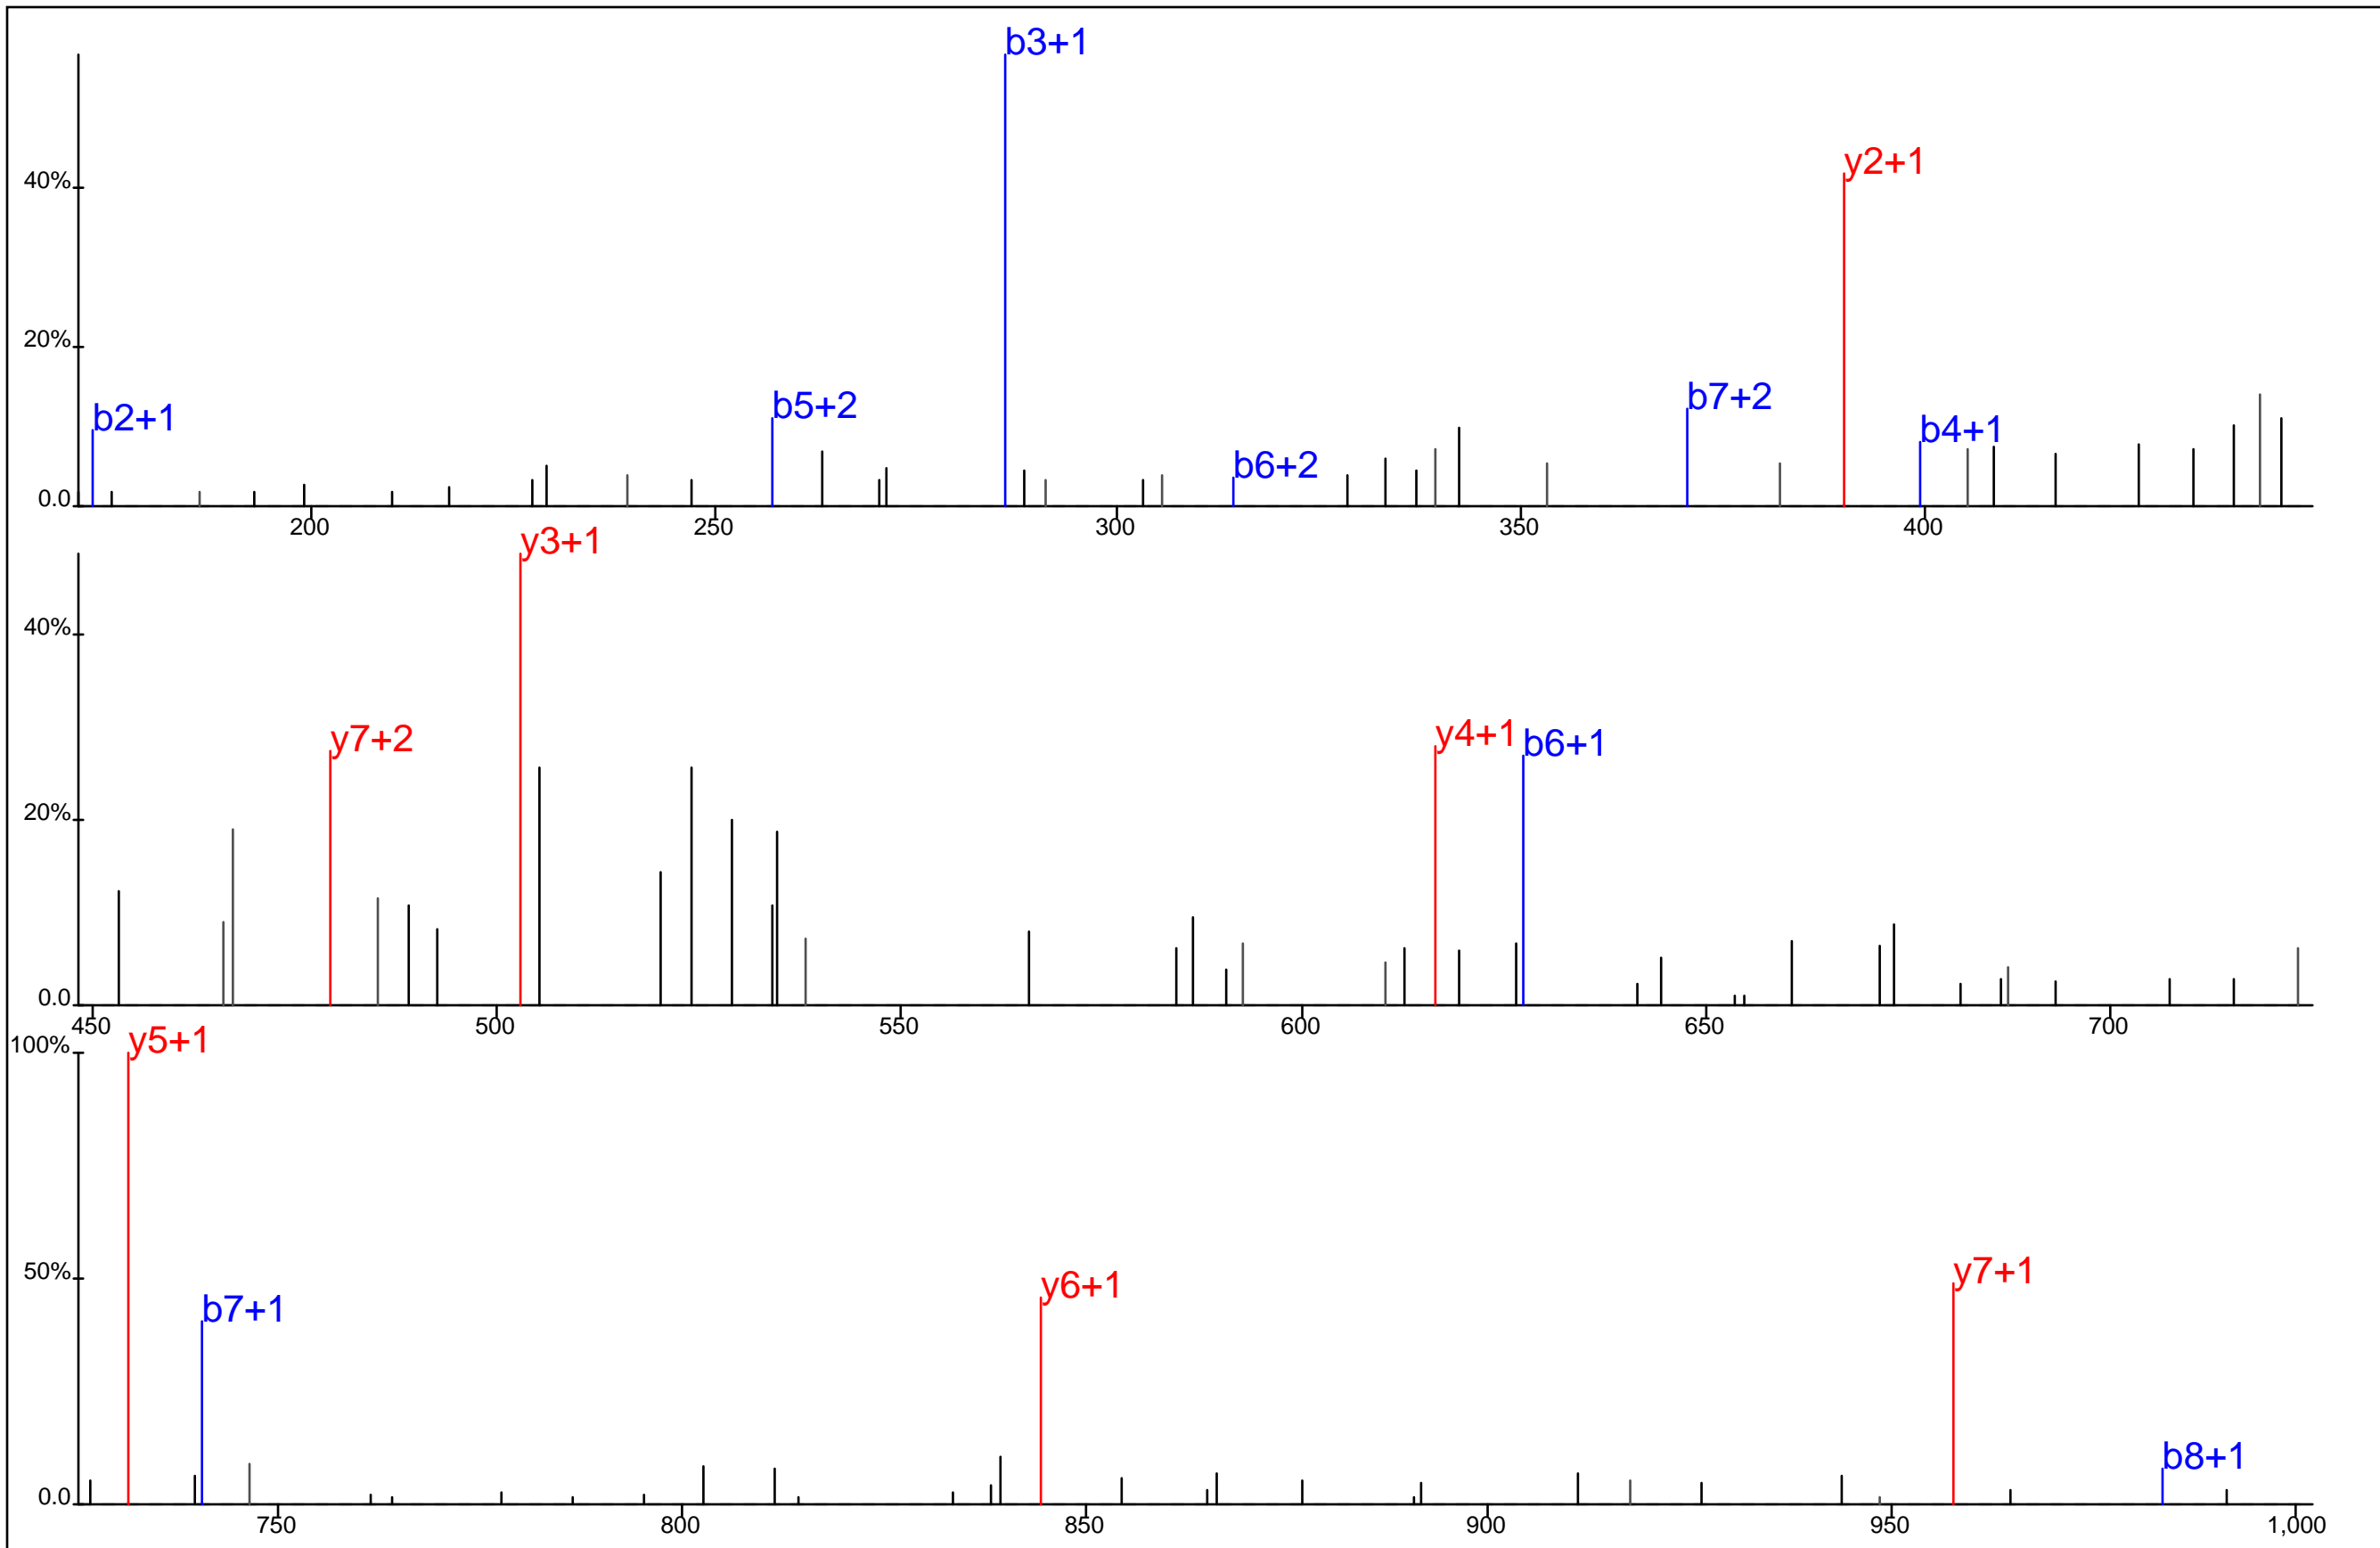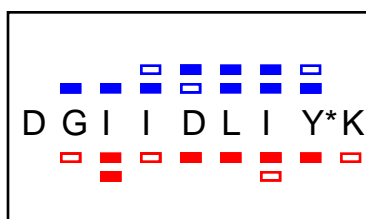

Protein Name: 0 Decoy hit, please disregard  
 gi Accession: 0  
 Precursor Mass: 565.2778+2  
 Delta Mass: 5.006 ppm  
 XCorr: 55.18



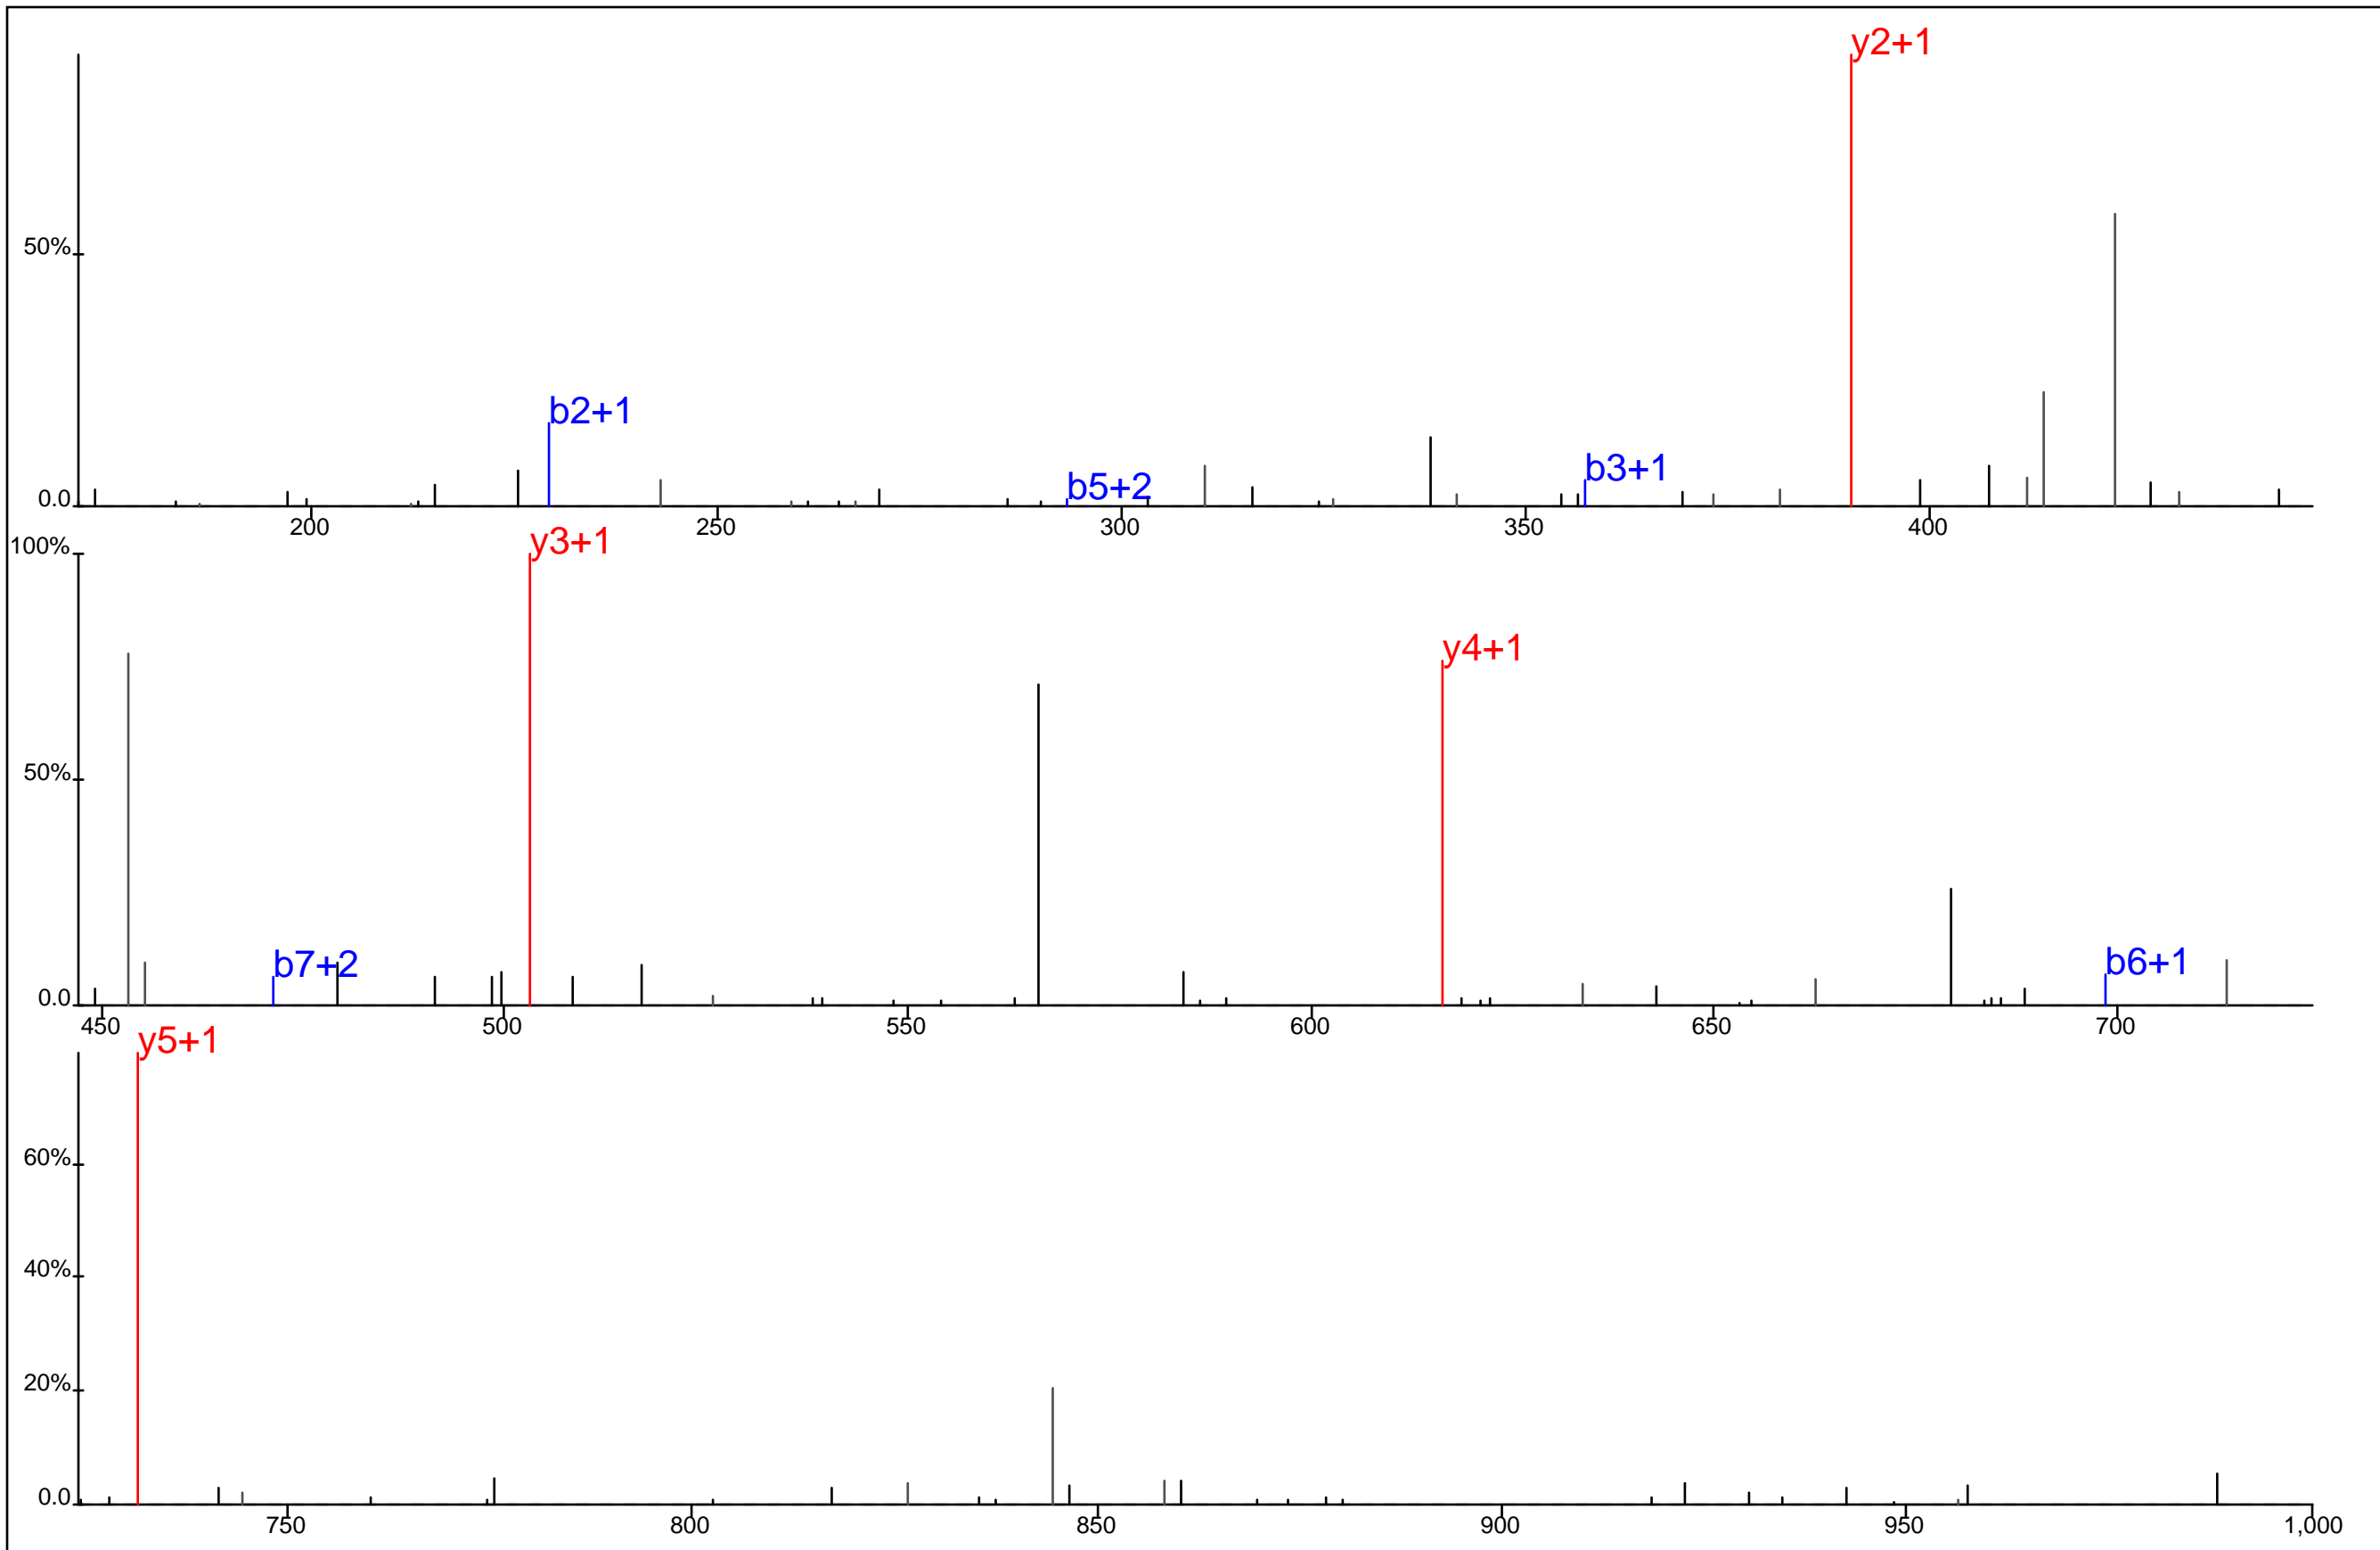

D I K D L I Y\* K

Protein Name: 0 Decoy hit, please disregard  
 gi Accession: 0  
 Precursor Mass: 544.2786+2  
 Delta Mass: 5.979 ppm  
 XCorr: 20.82

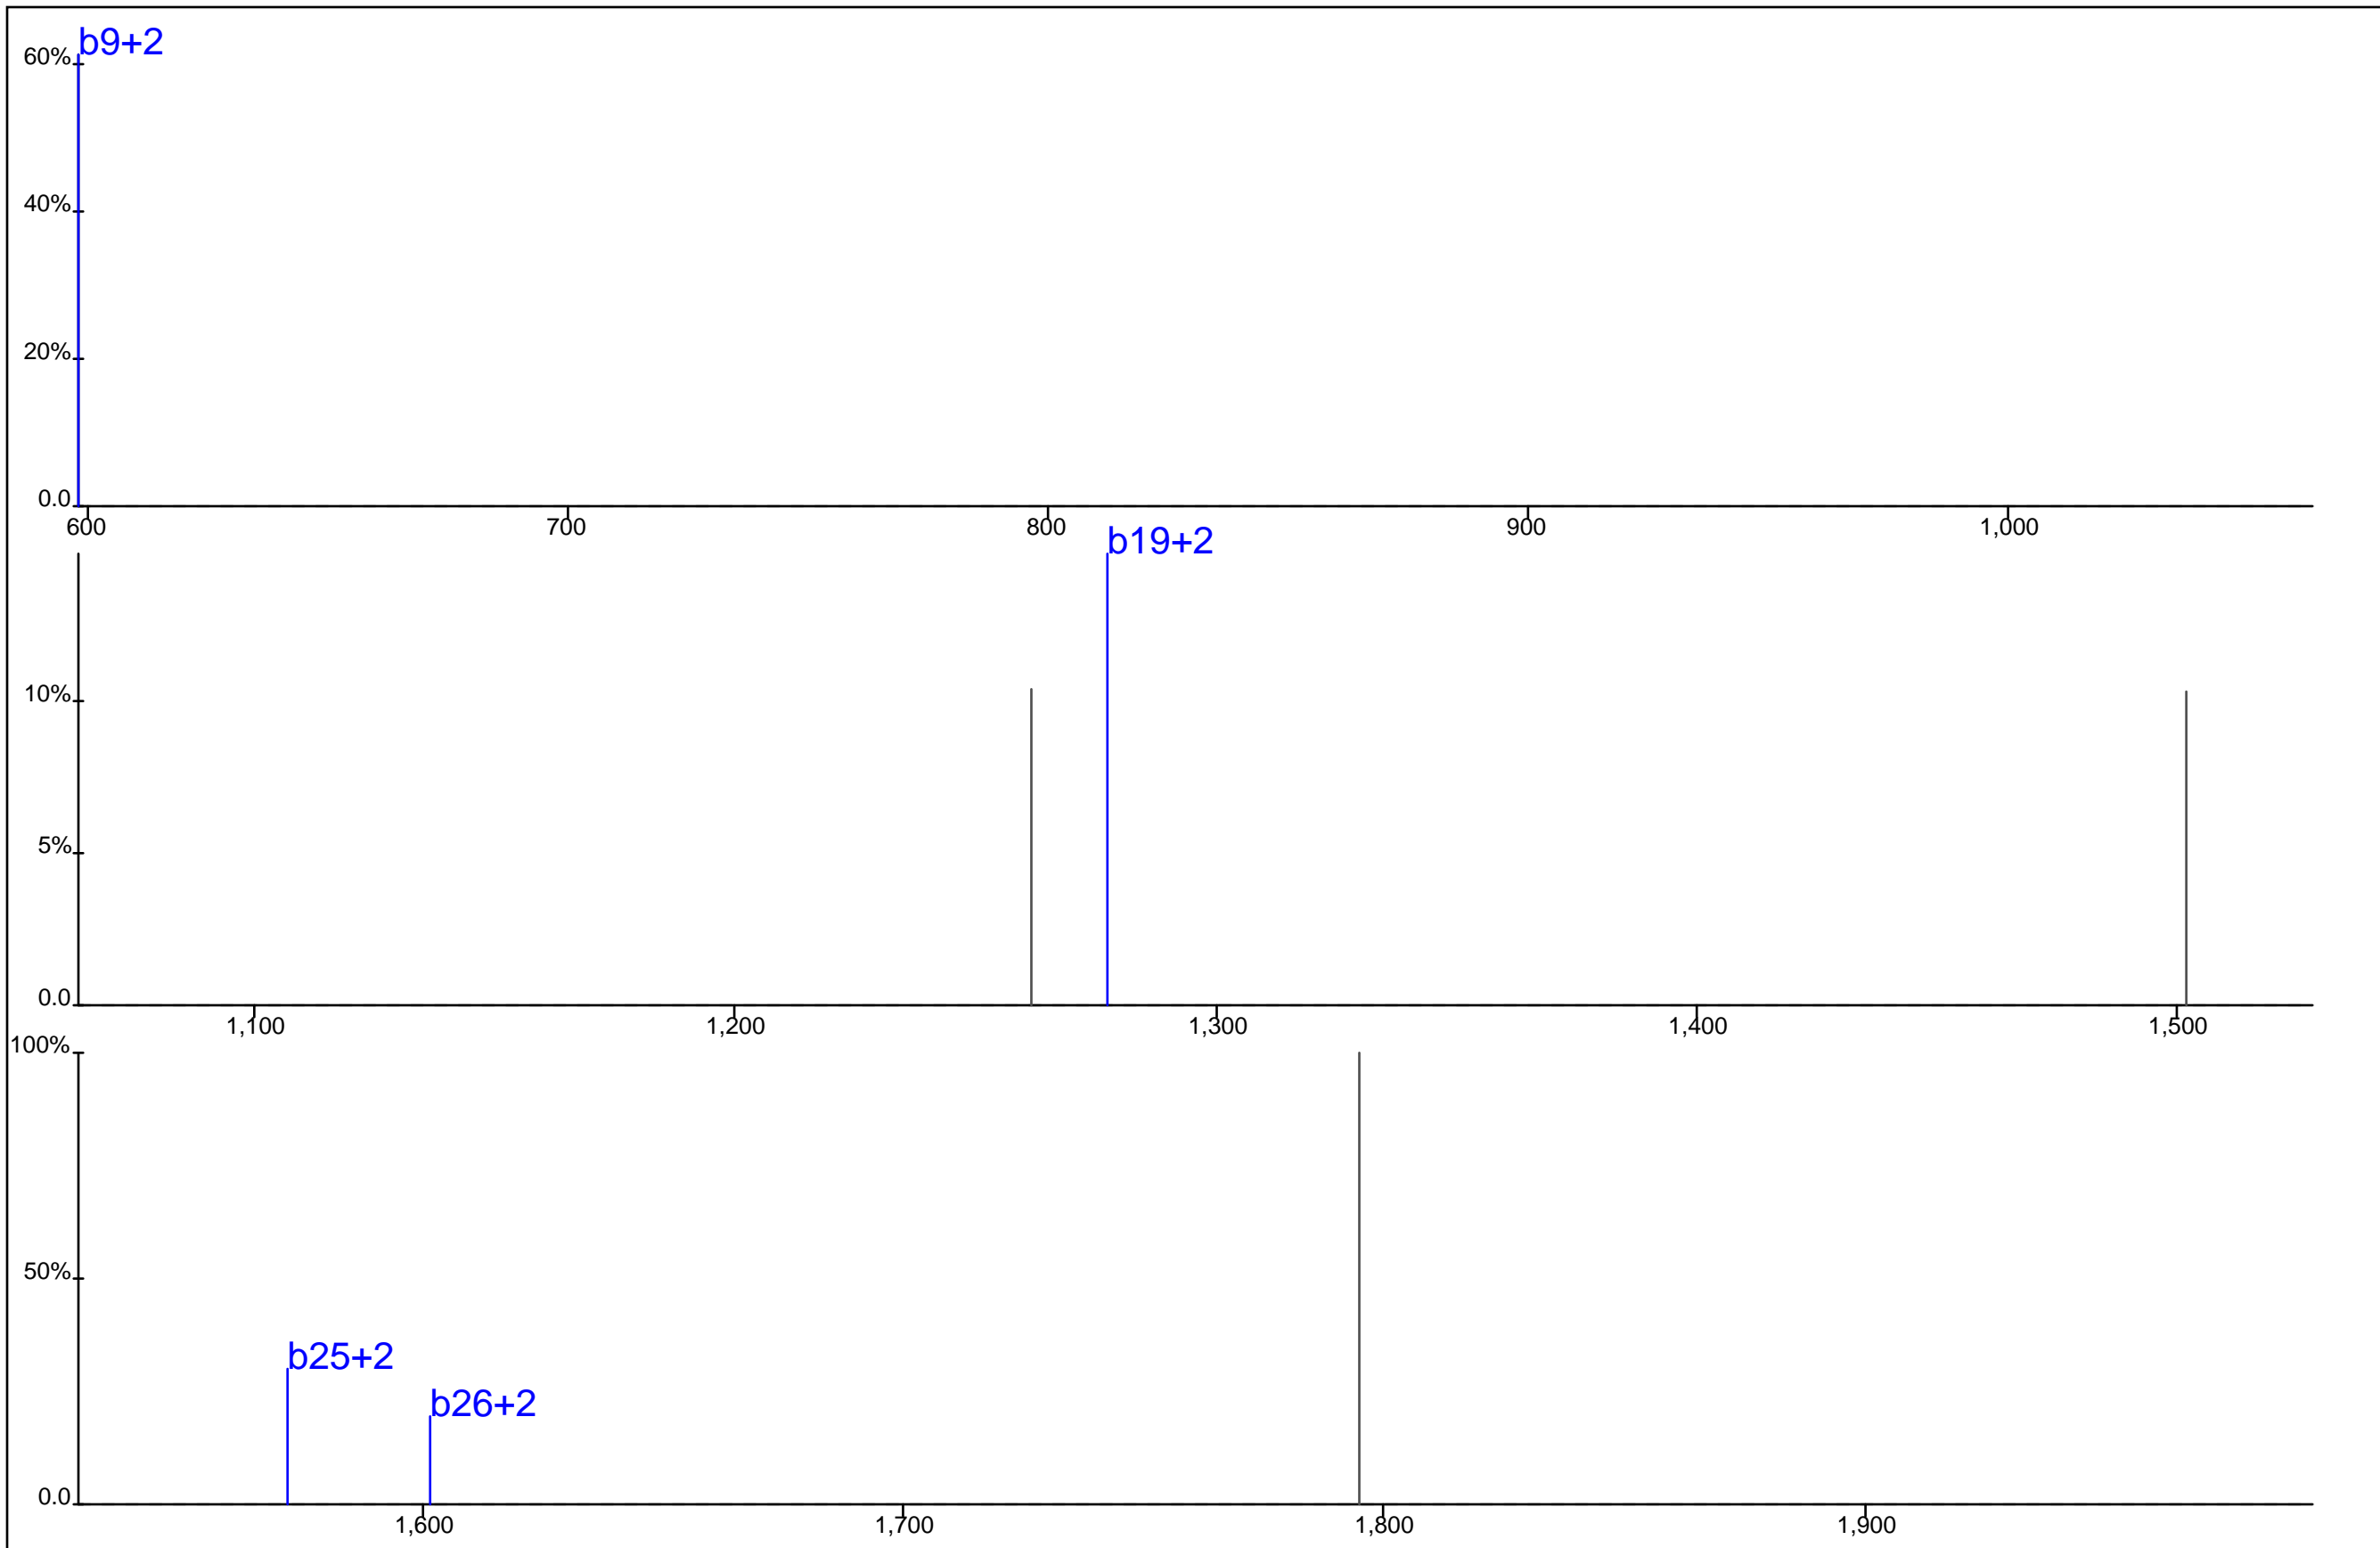

S\*L N M D Q F S\*L N E D Y\*Q S\*A D E F F G G A E Q G K K K

Protein Name: 0 Decoy hit, please disregard  
 gi Accession: 0  
 Precursor Mass: 1,201.7827+3  
 Delta Mass: 4.576 ppm  
 XCorr: 21.24

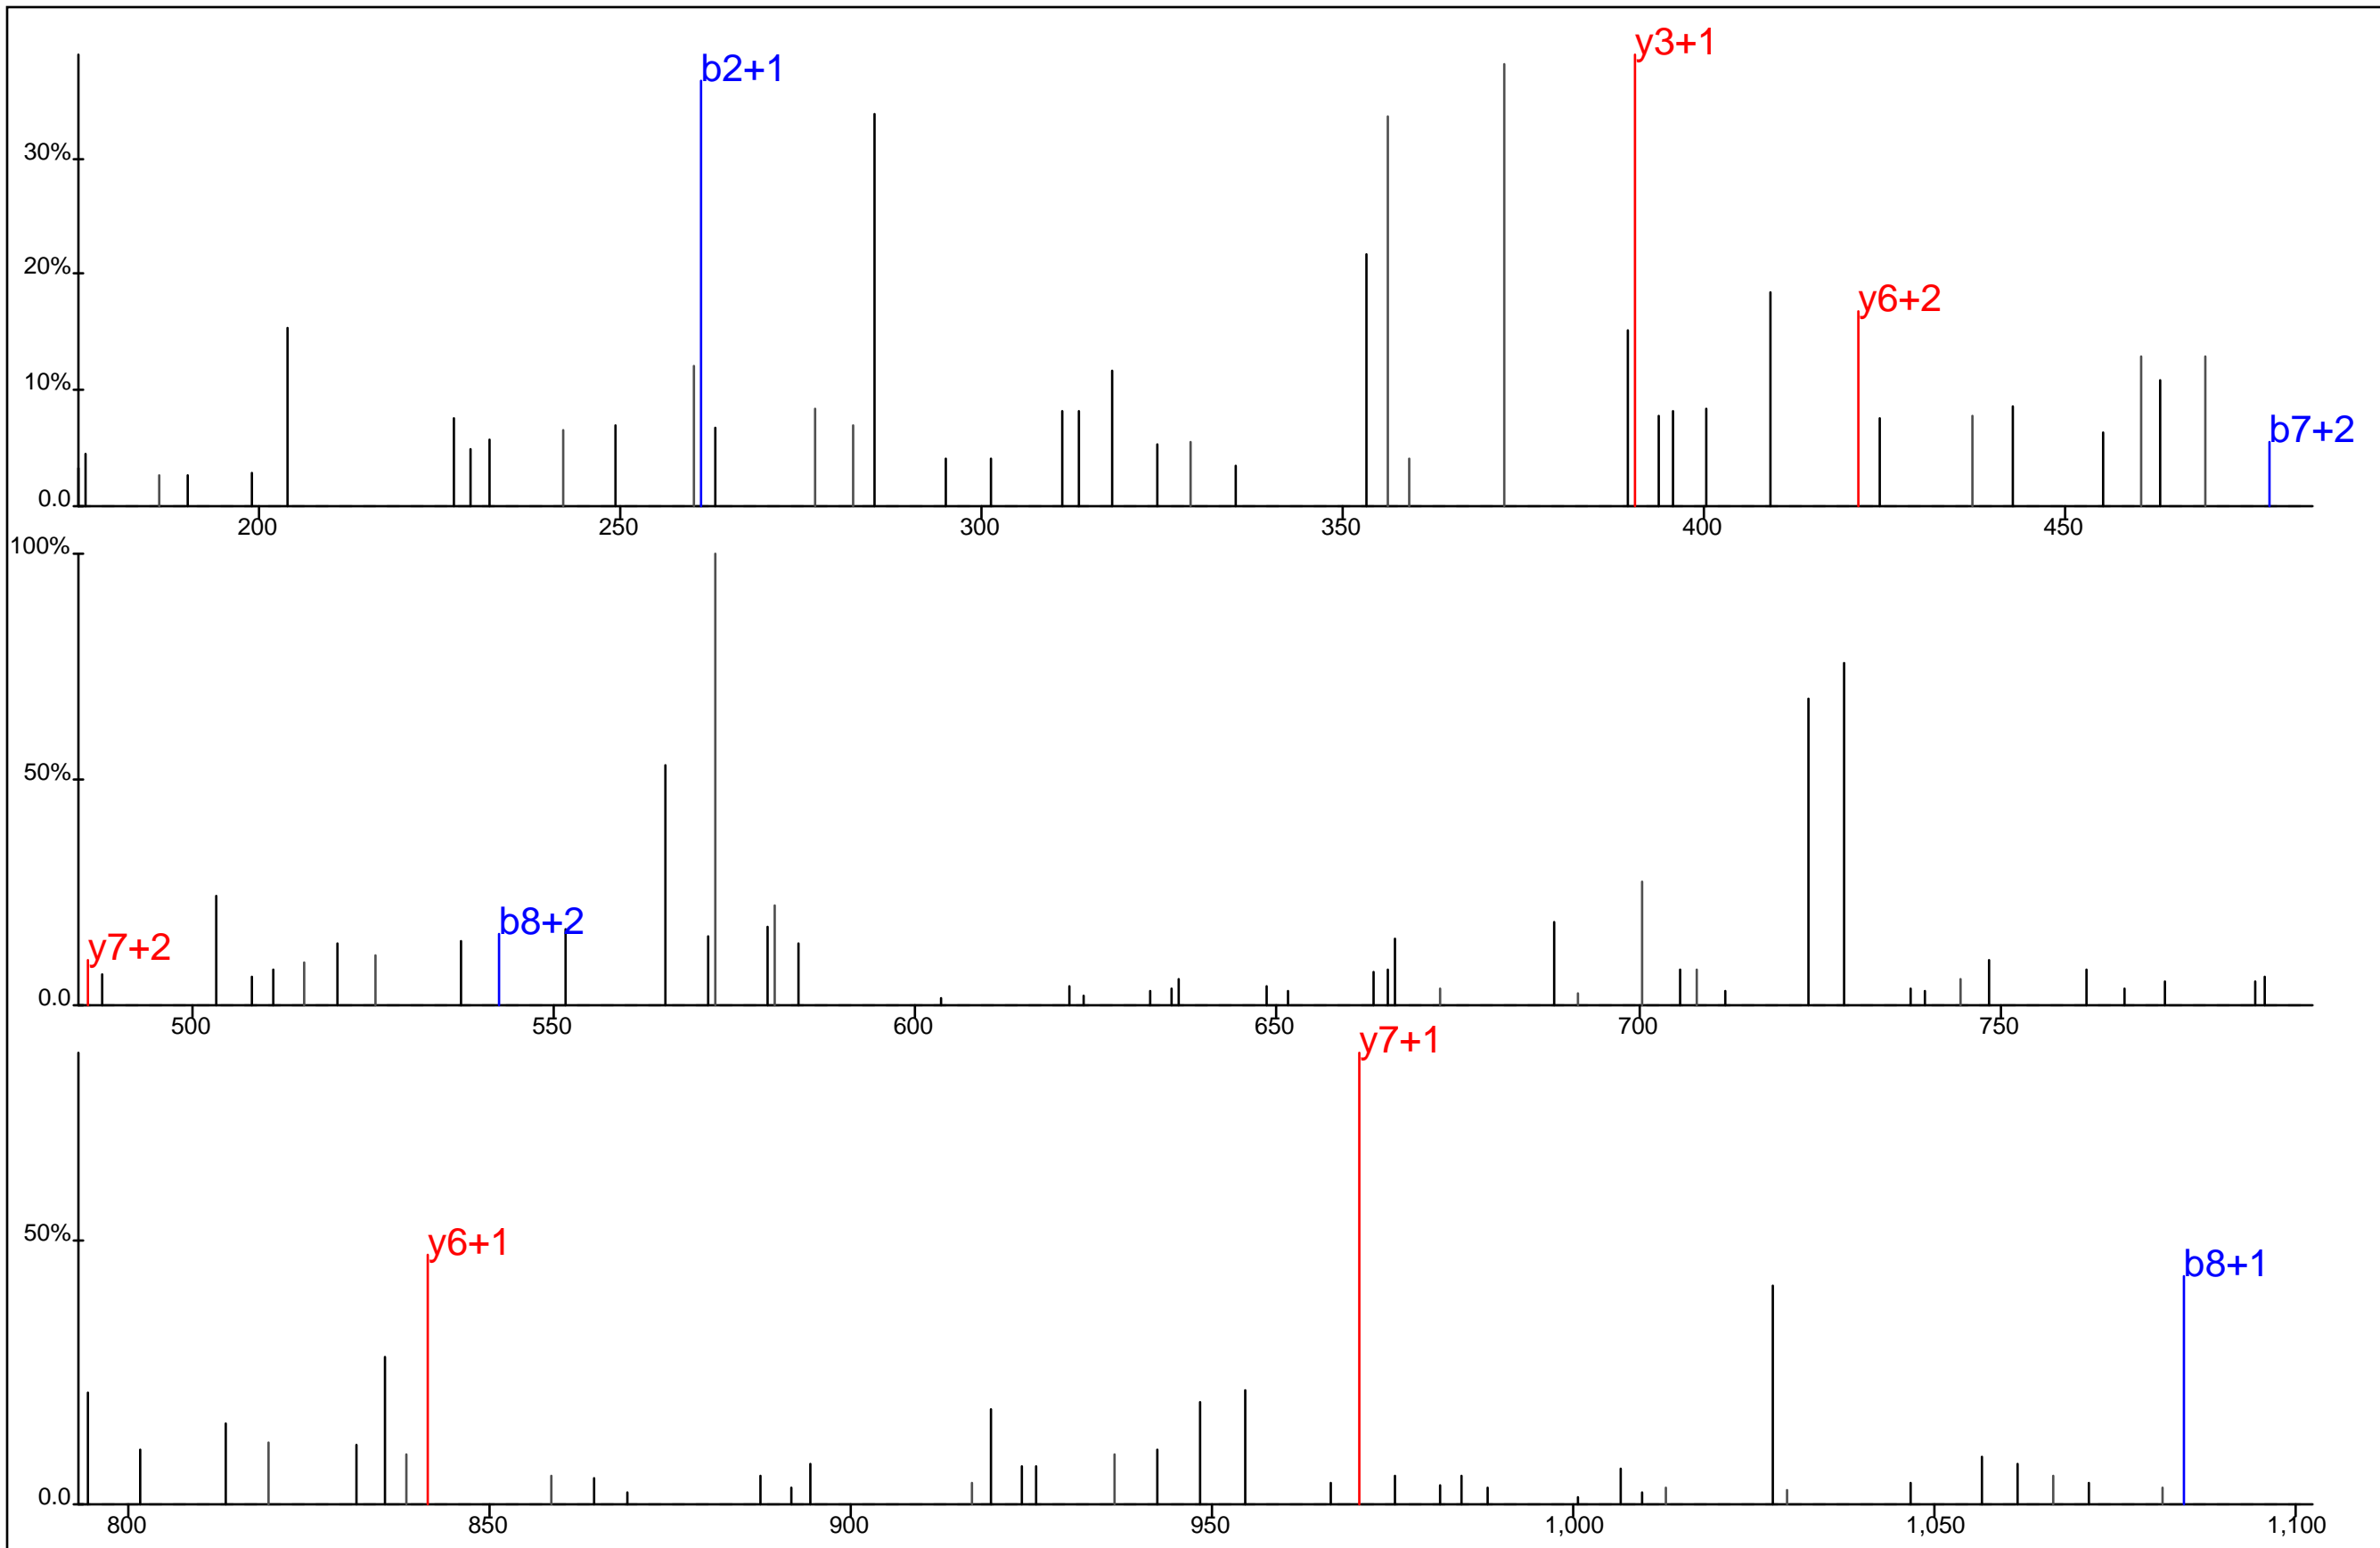

|    |   |   |   |    |   |   |   |
|----|---|---|---|----|---|---|---|
|    |   |   |   |    |   |   |   |
| M# | E | A | H | Y* | D | K | K |
|    |   |   |   |    |   |   |   |

Protein Name: 0 Decoy hit, please disregard  
 gi Accession: 0  
 Precursor Mass: 615.7673+2  
 Delta Mass: 3.948 ppm  
 XCorr: 22.16



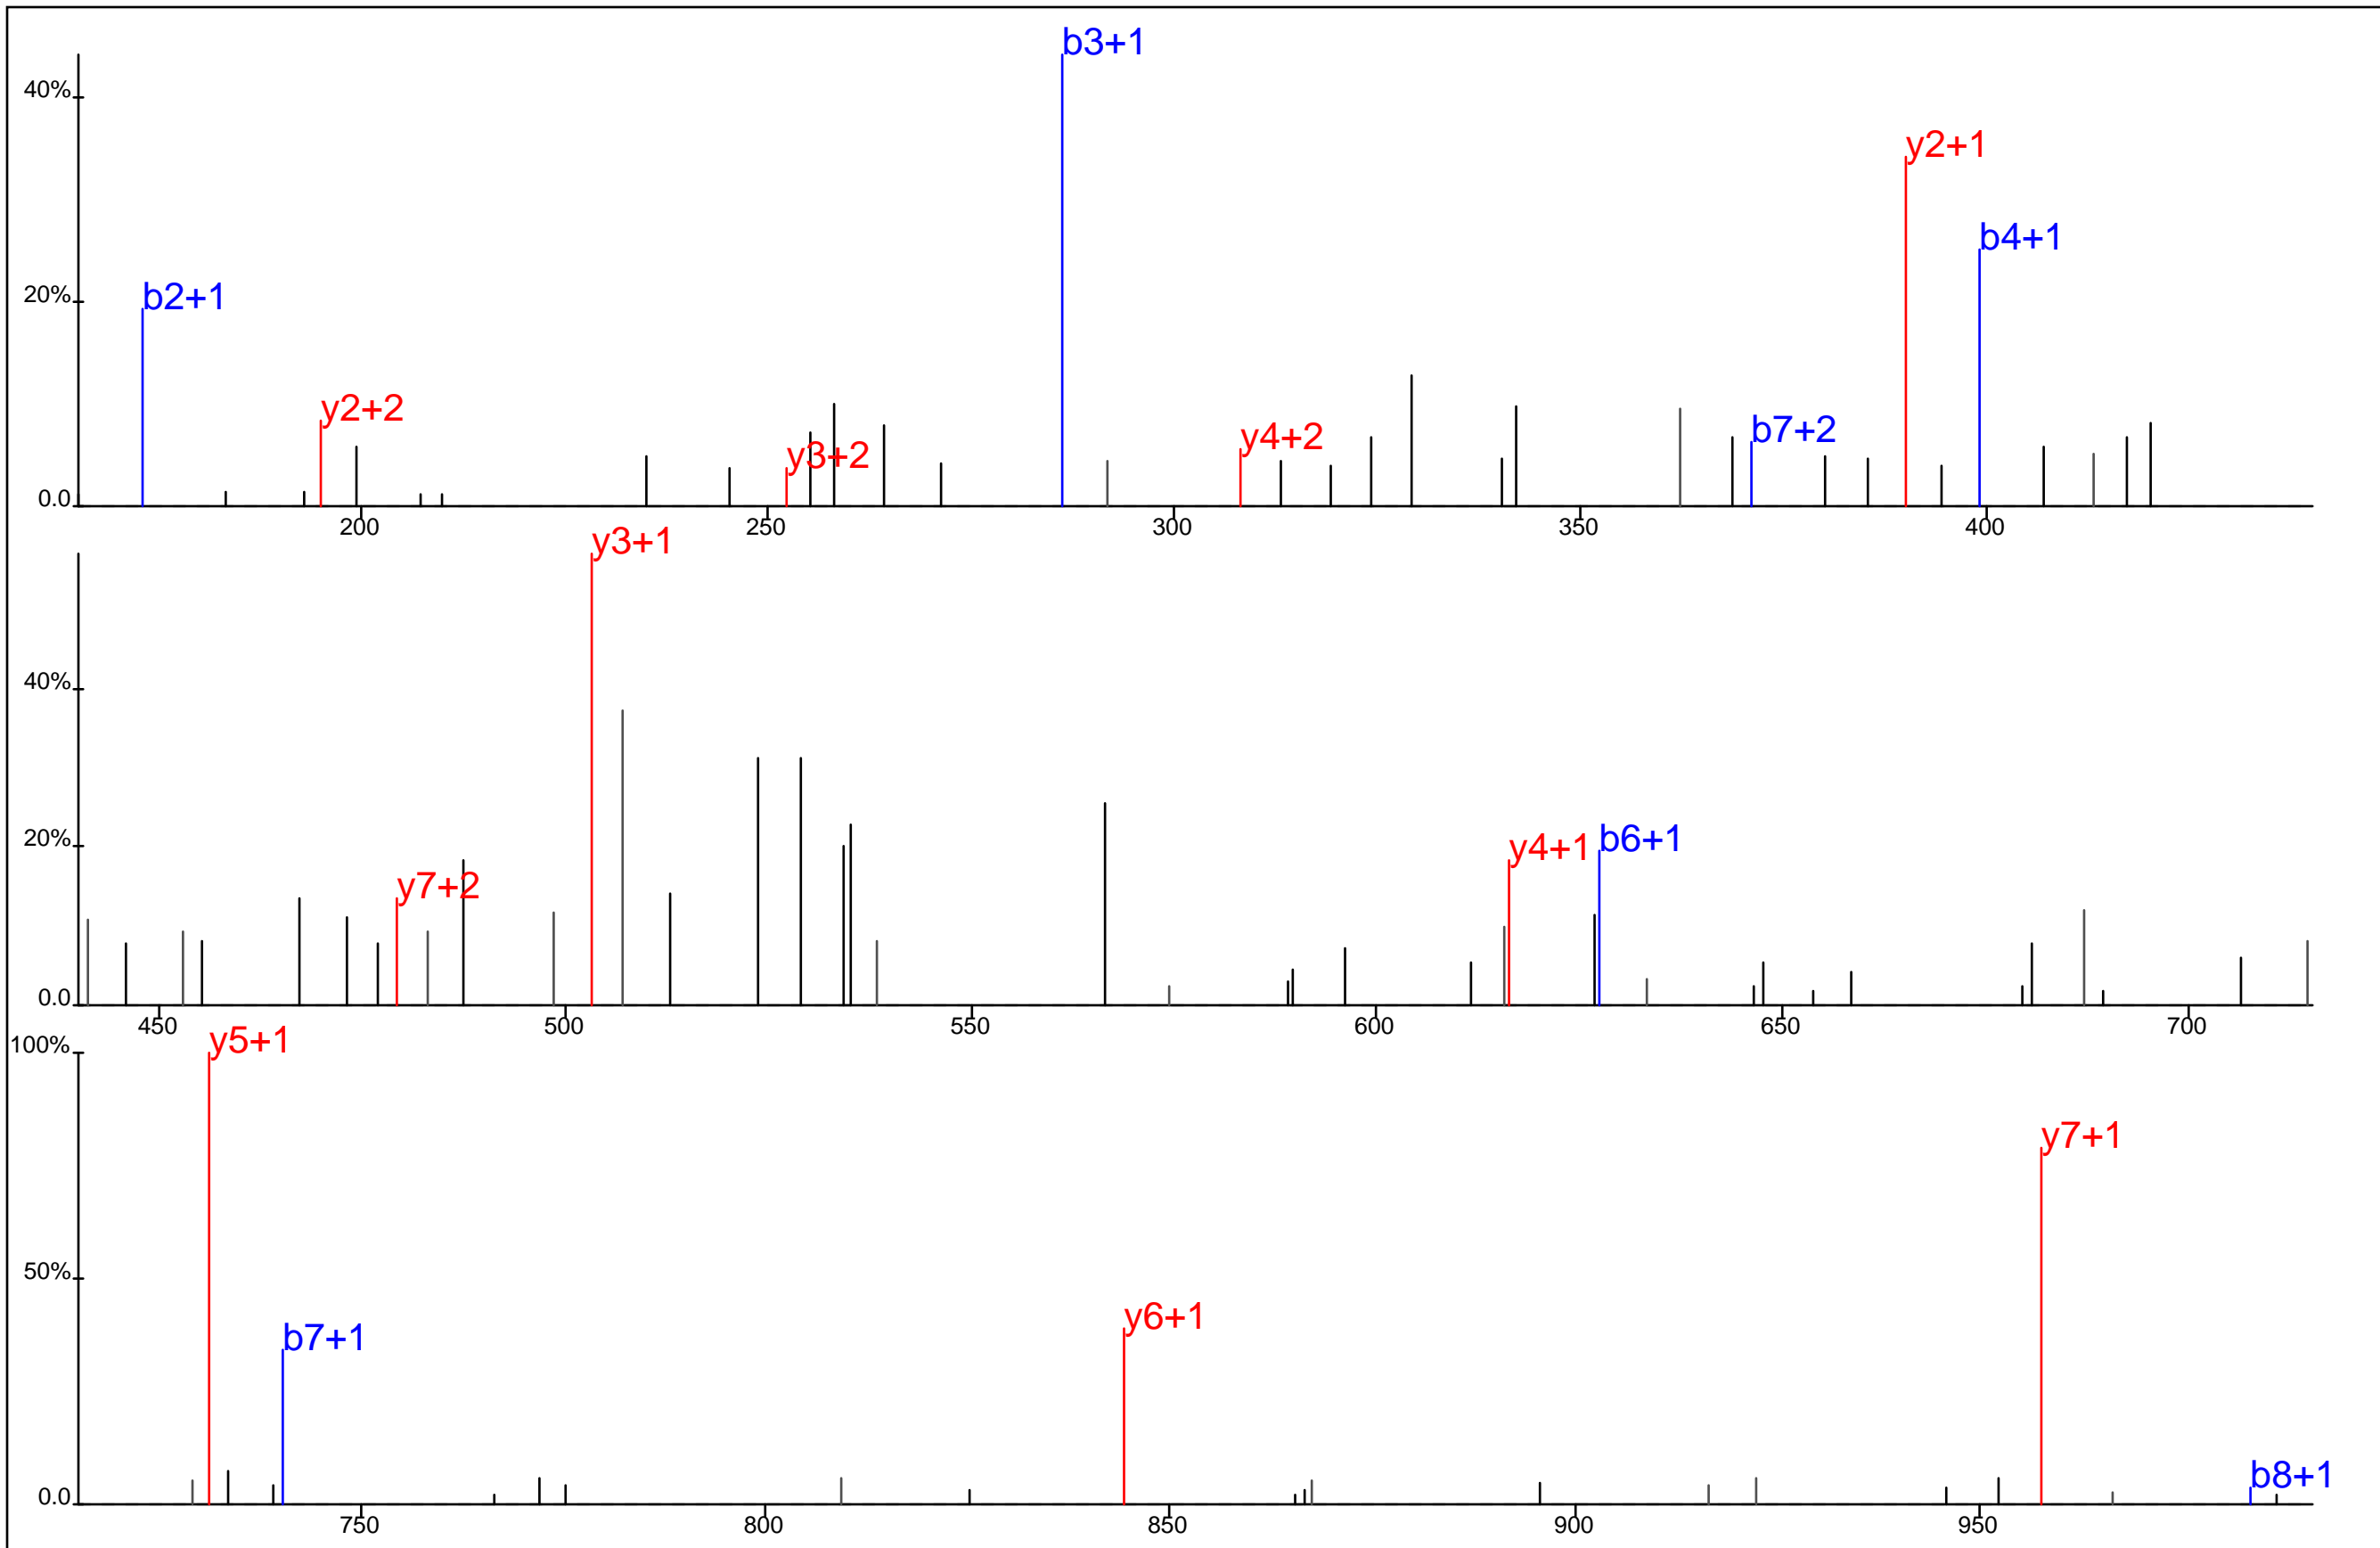

**D G I I D L I Y\*K**

Protein Name: 0 Decoy hit, please disregard  
 gi Accession: 0  
 Precursor Mass: 565.2797+2  
 Delta Mass: 1.656 ppm  
 XCorr: 52.12

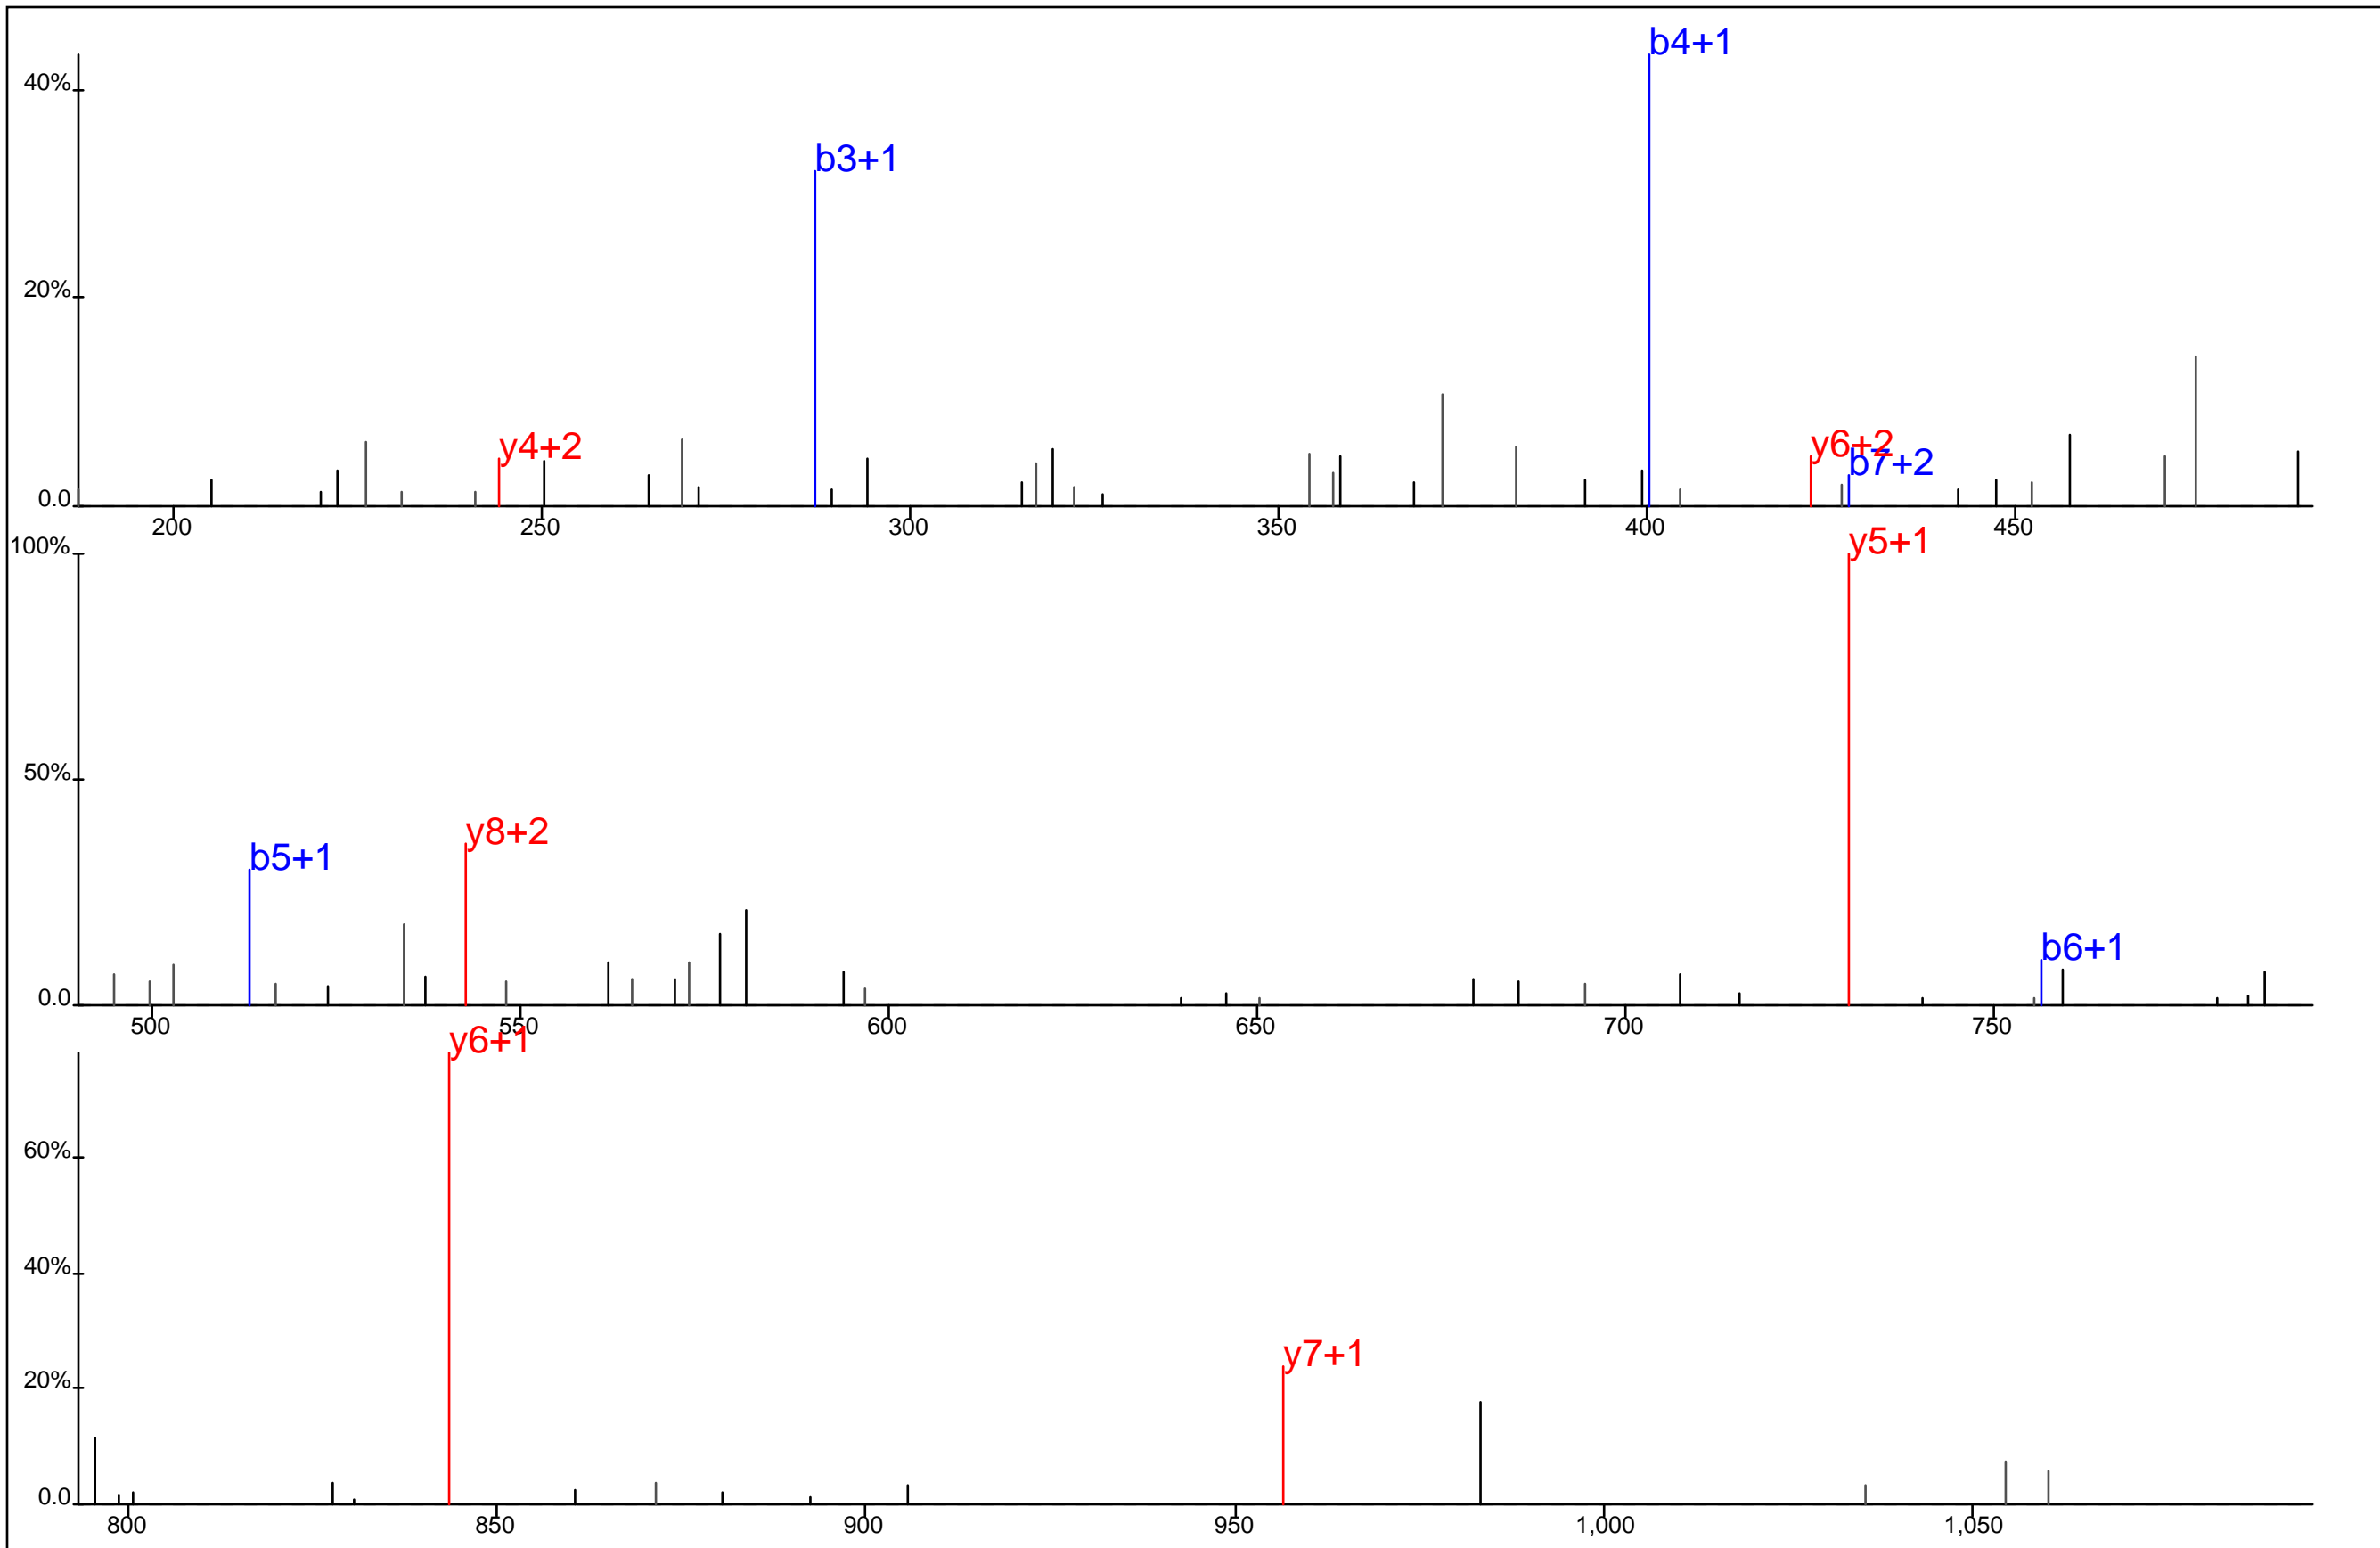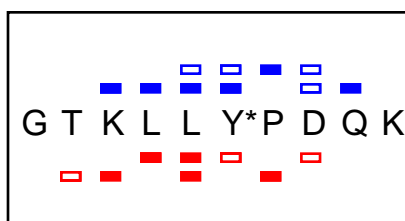

Protein Name: 0 Decoy hit, please disregard  
 gi Accession: 0  
 Precursor Mass: 621.8099+2  
 Delta Mass: 0.293 ppm  
 XCorr: 26.68

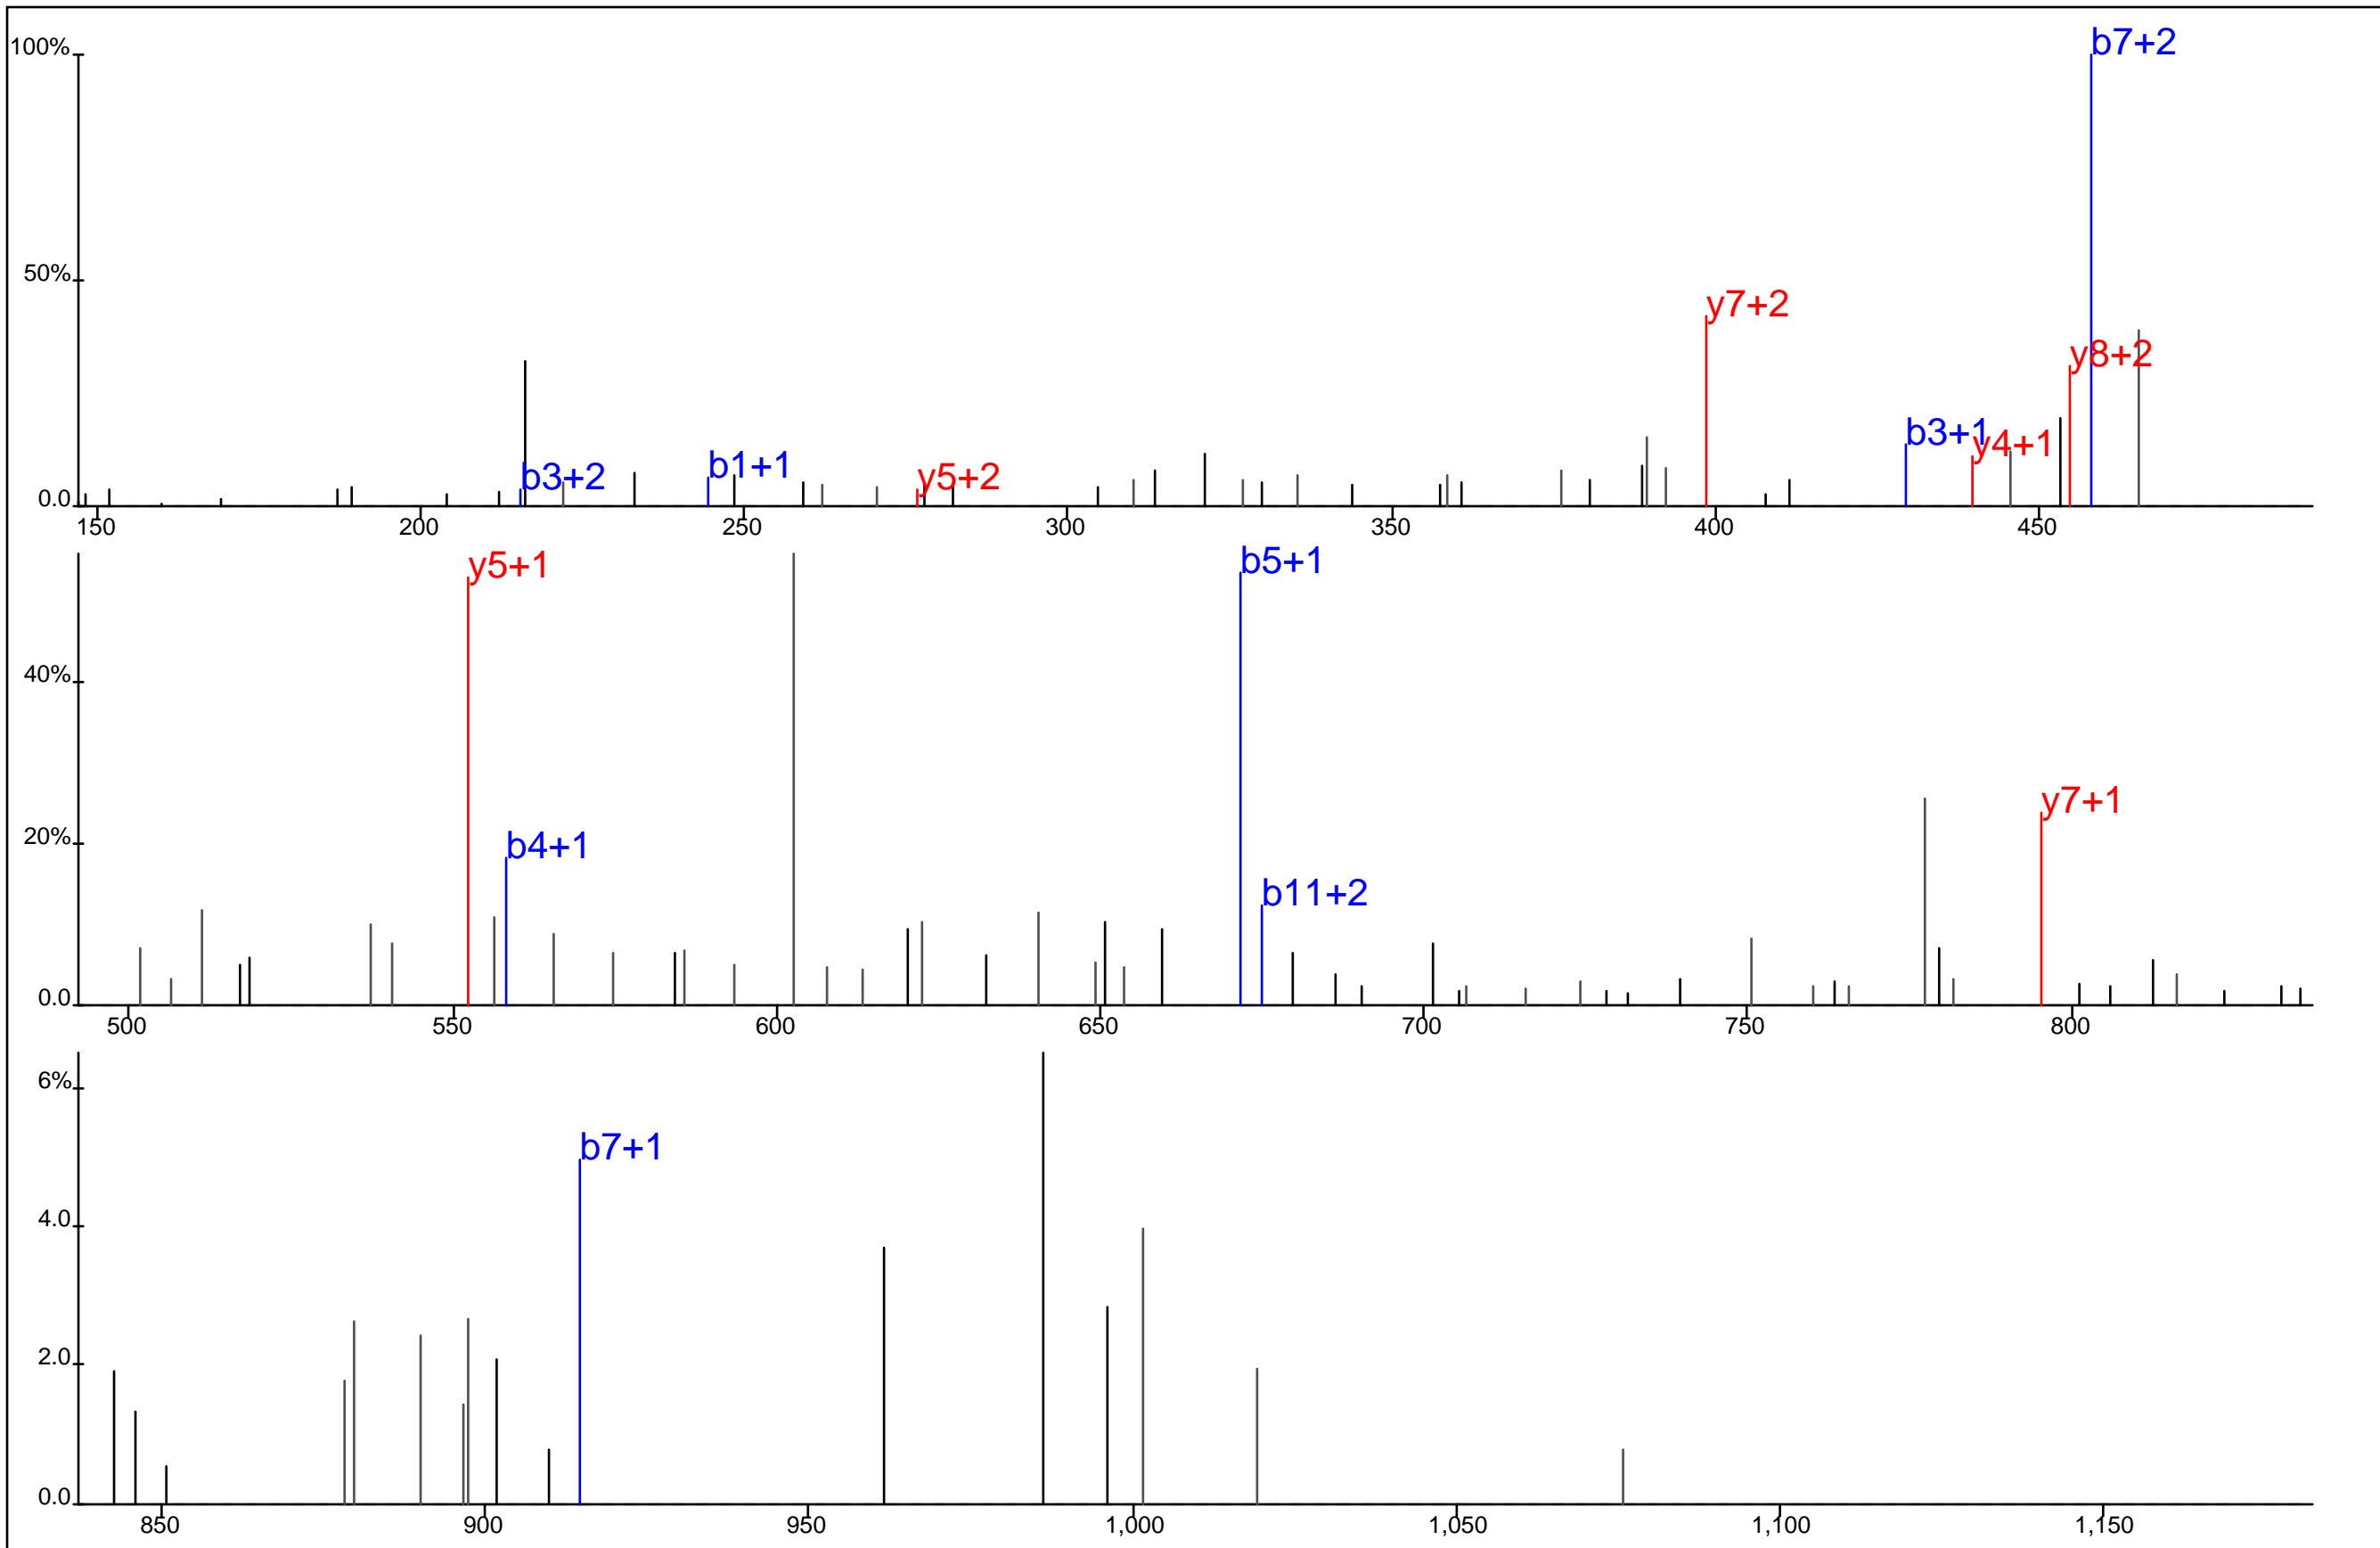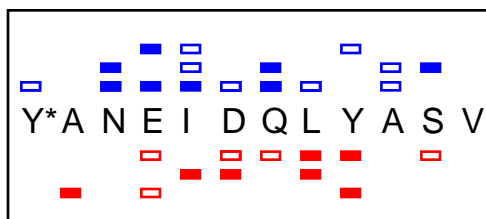

Protein Name: 0 Decoy hit, please disregard  
 gi Accession: 0  
 Precursor Mass: 489.2152+3  
 Delta Mass: 4.460 ppm  
 XCorr: 21.24

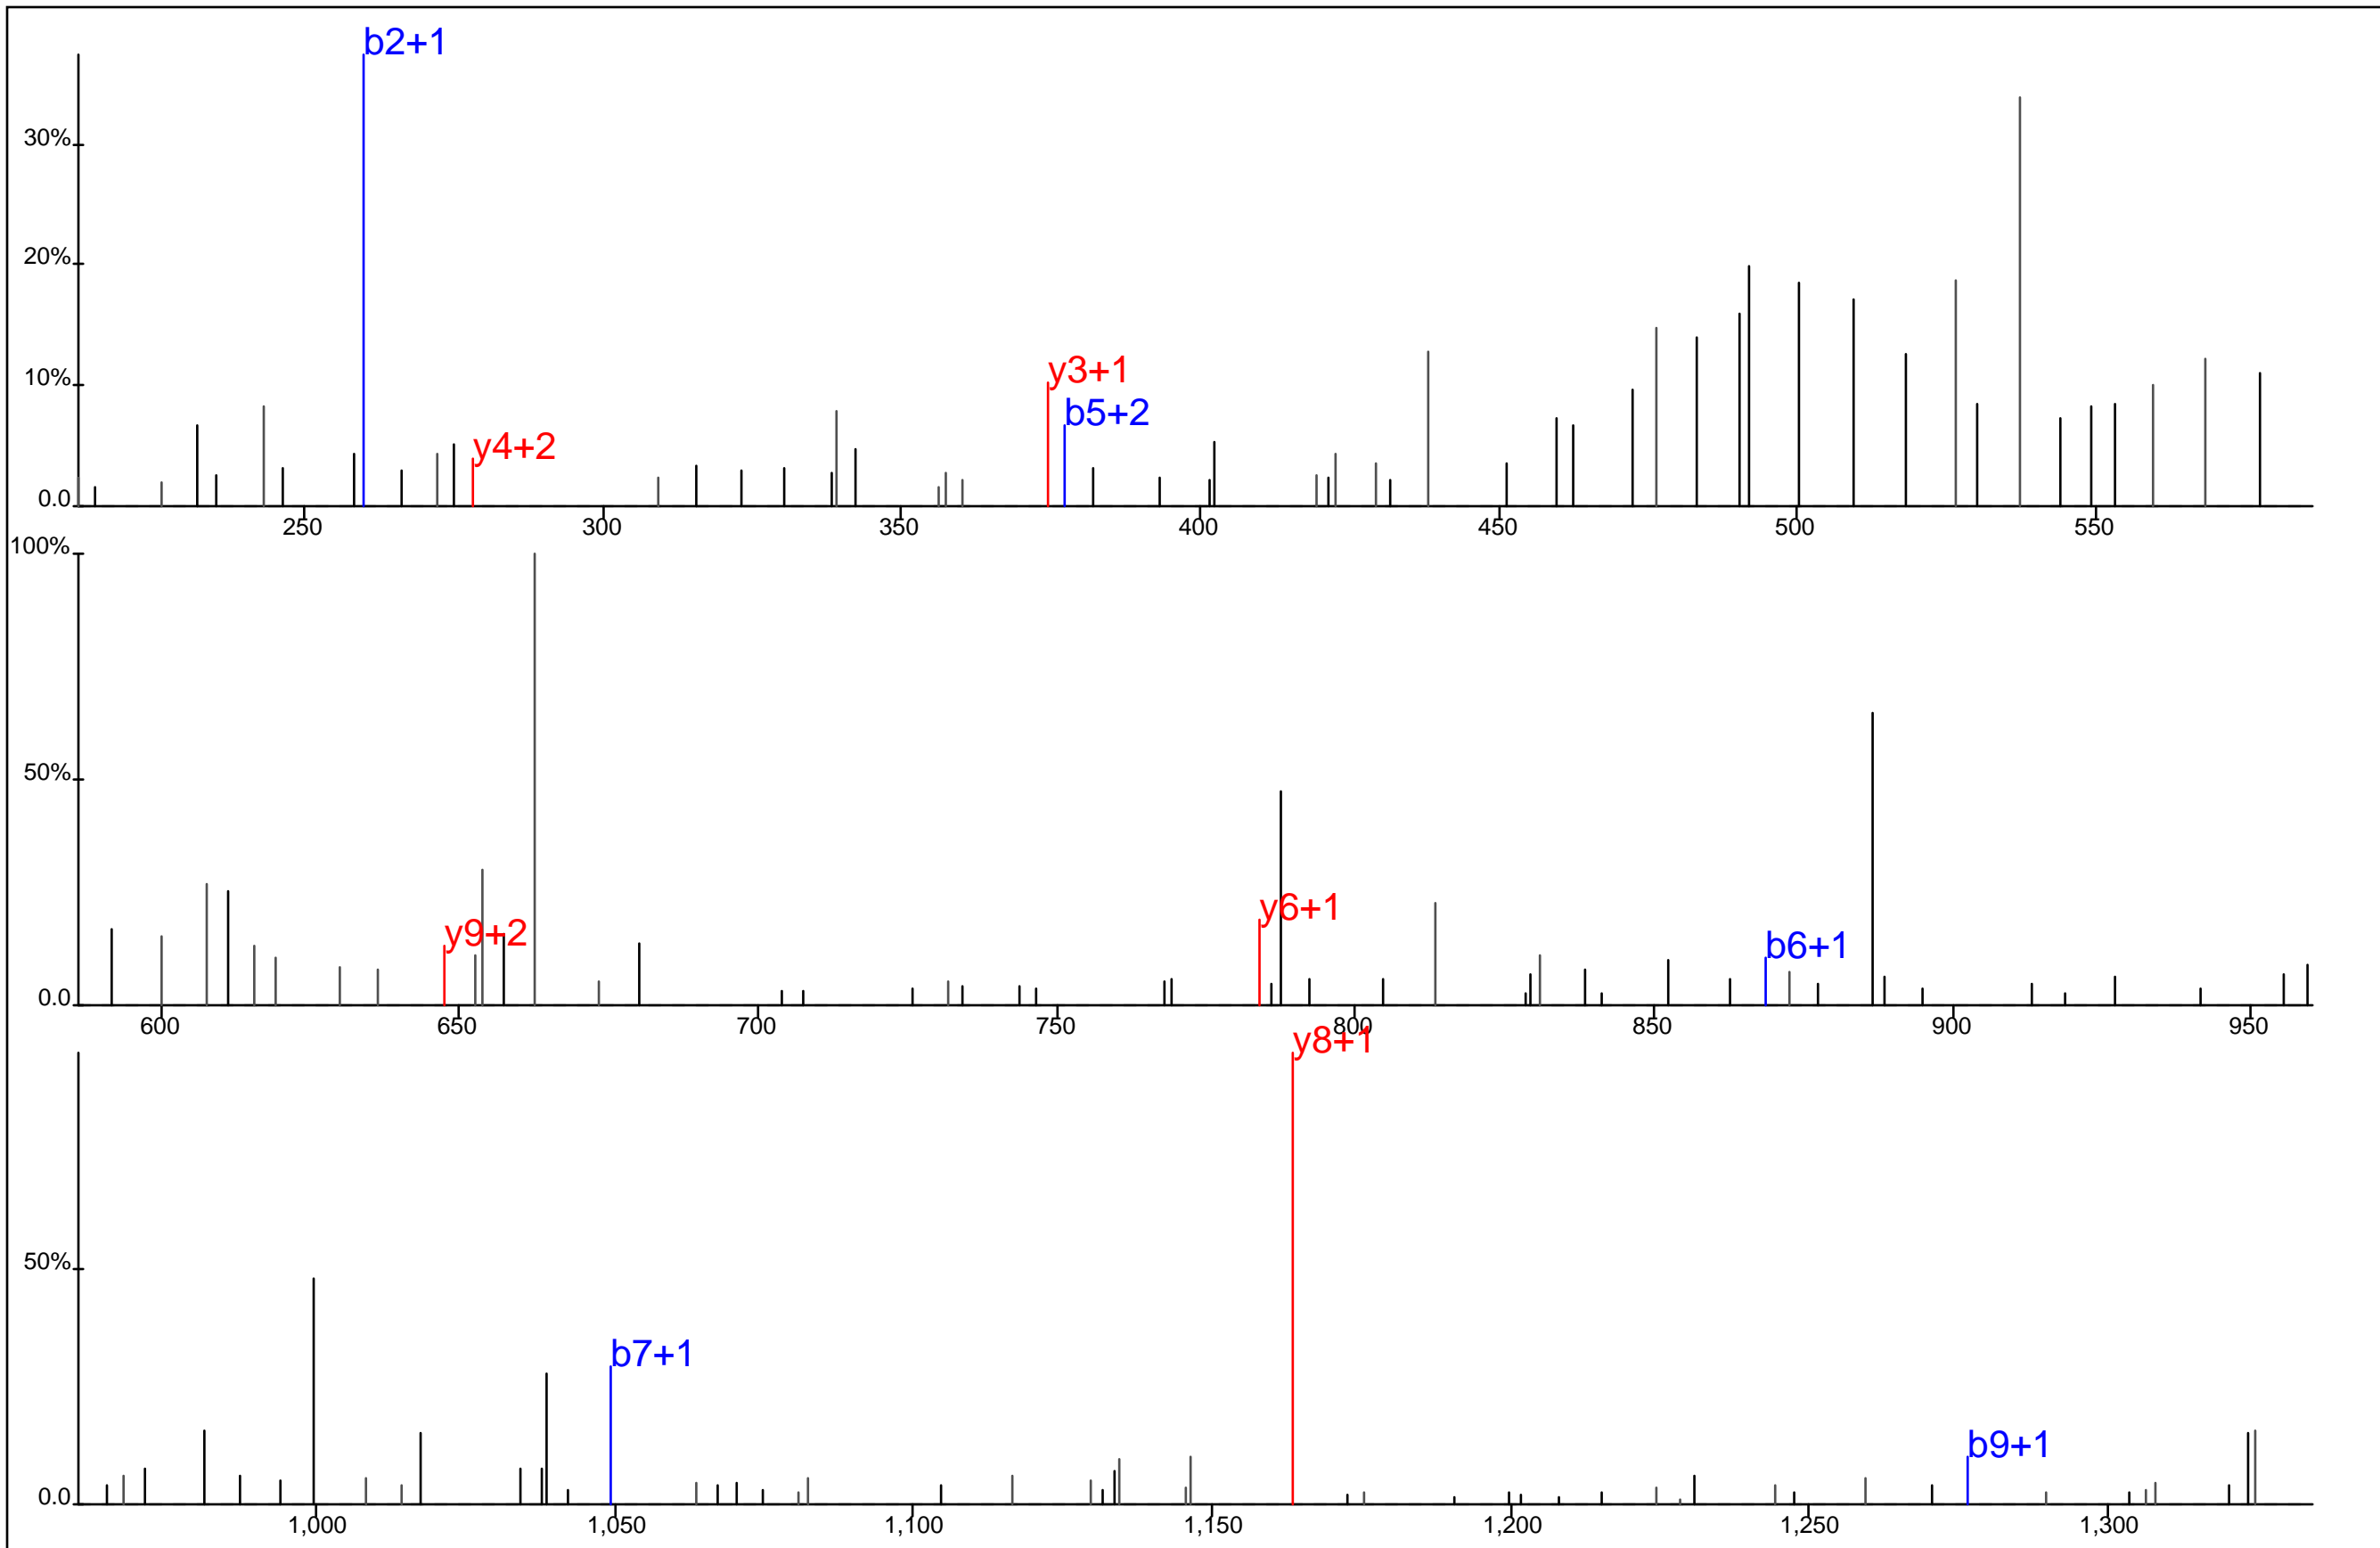

▢ ▢▢ ▢▢ ▢▢ ▢▢ ▢▢  
 K M H Y\*L D T\*N L K  
▢ ▢ ▢ ▢ ▢ ▢

Protein Name: 0 Decoy hit, please disregard  
 gi Accession: 0  
 Precursor Mass: 711.7957+2  
 Delta Mass: 3.260 ppm  
 XCorr: 20.59



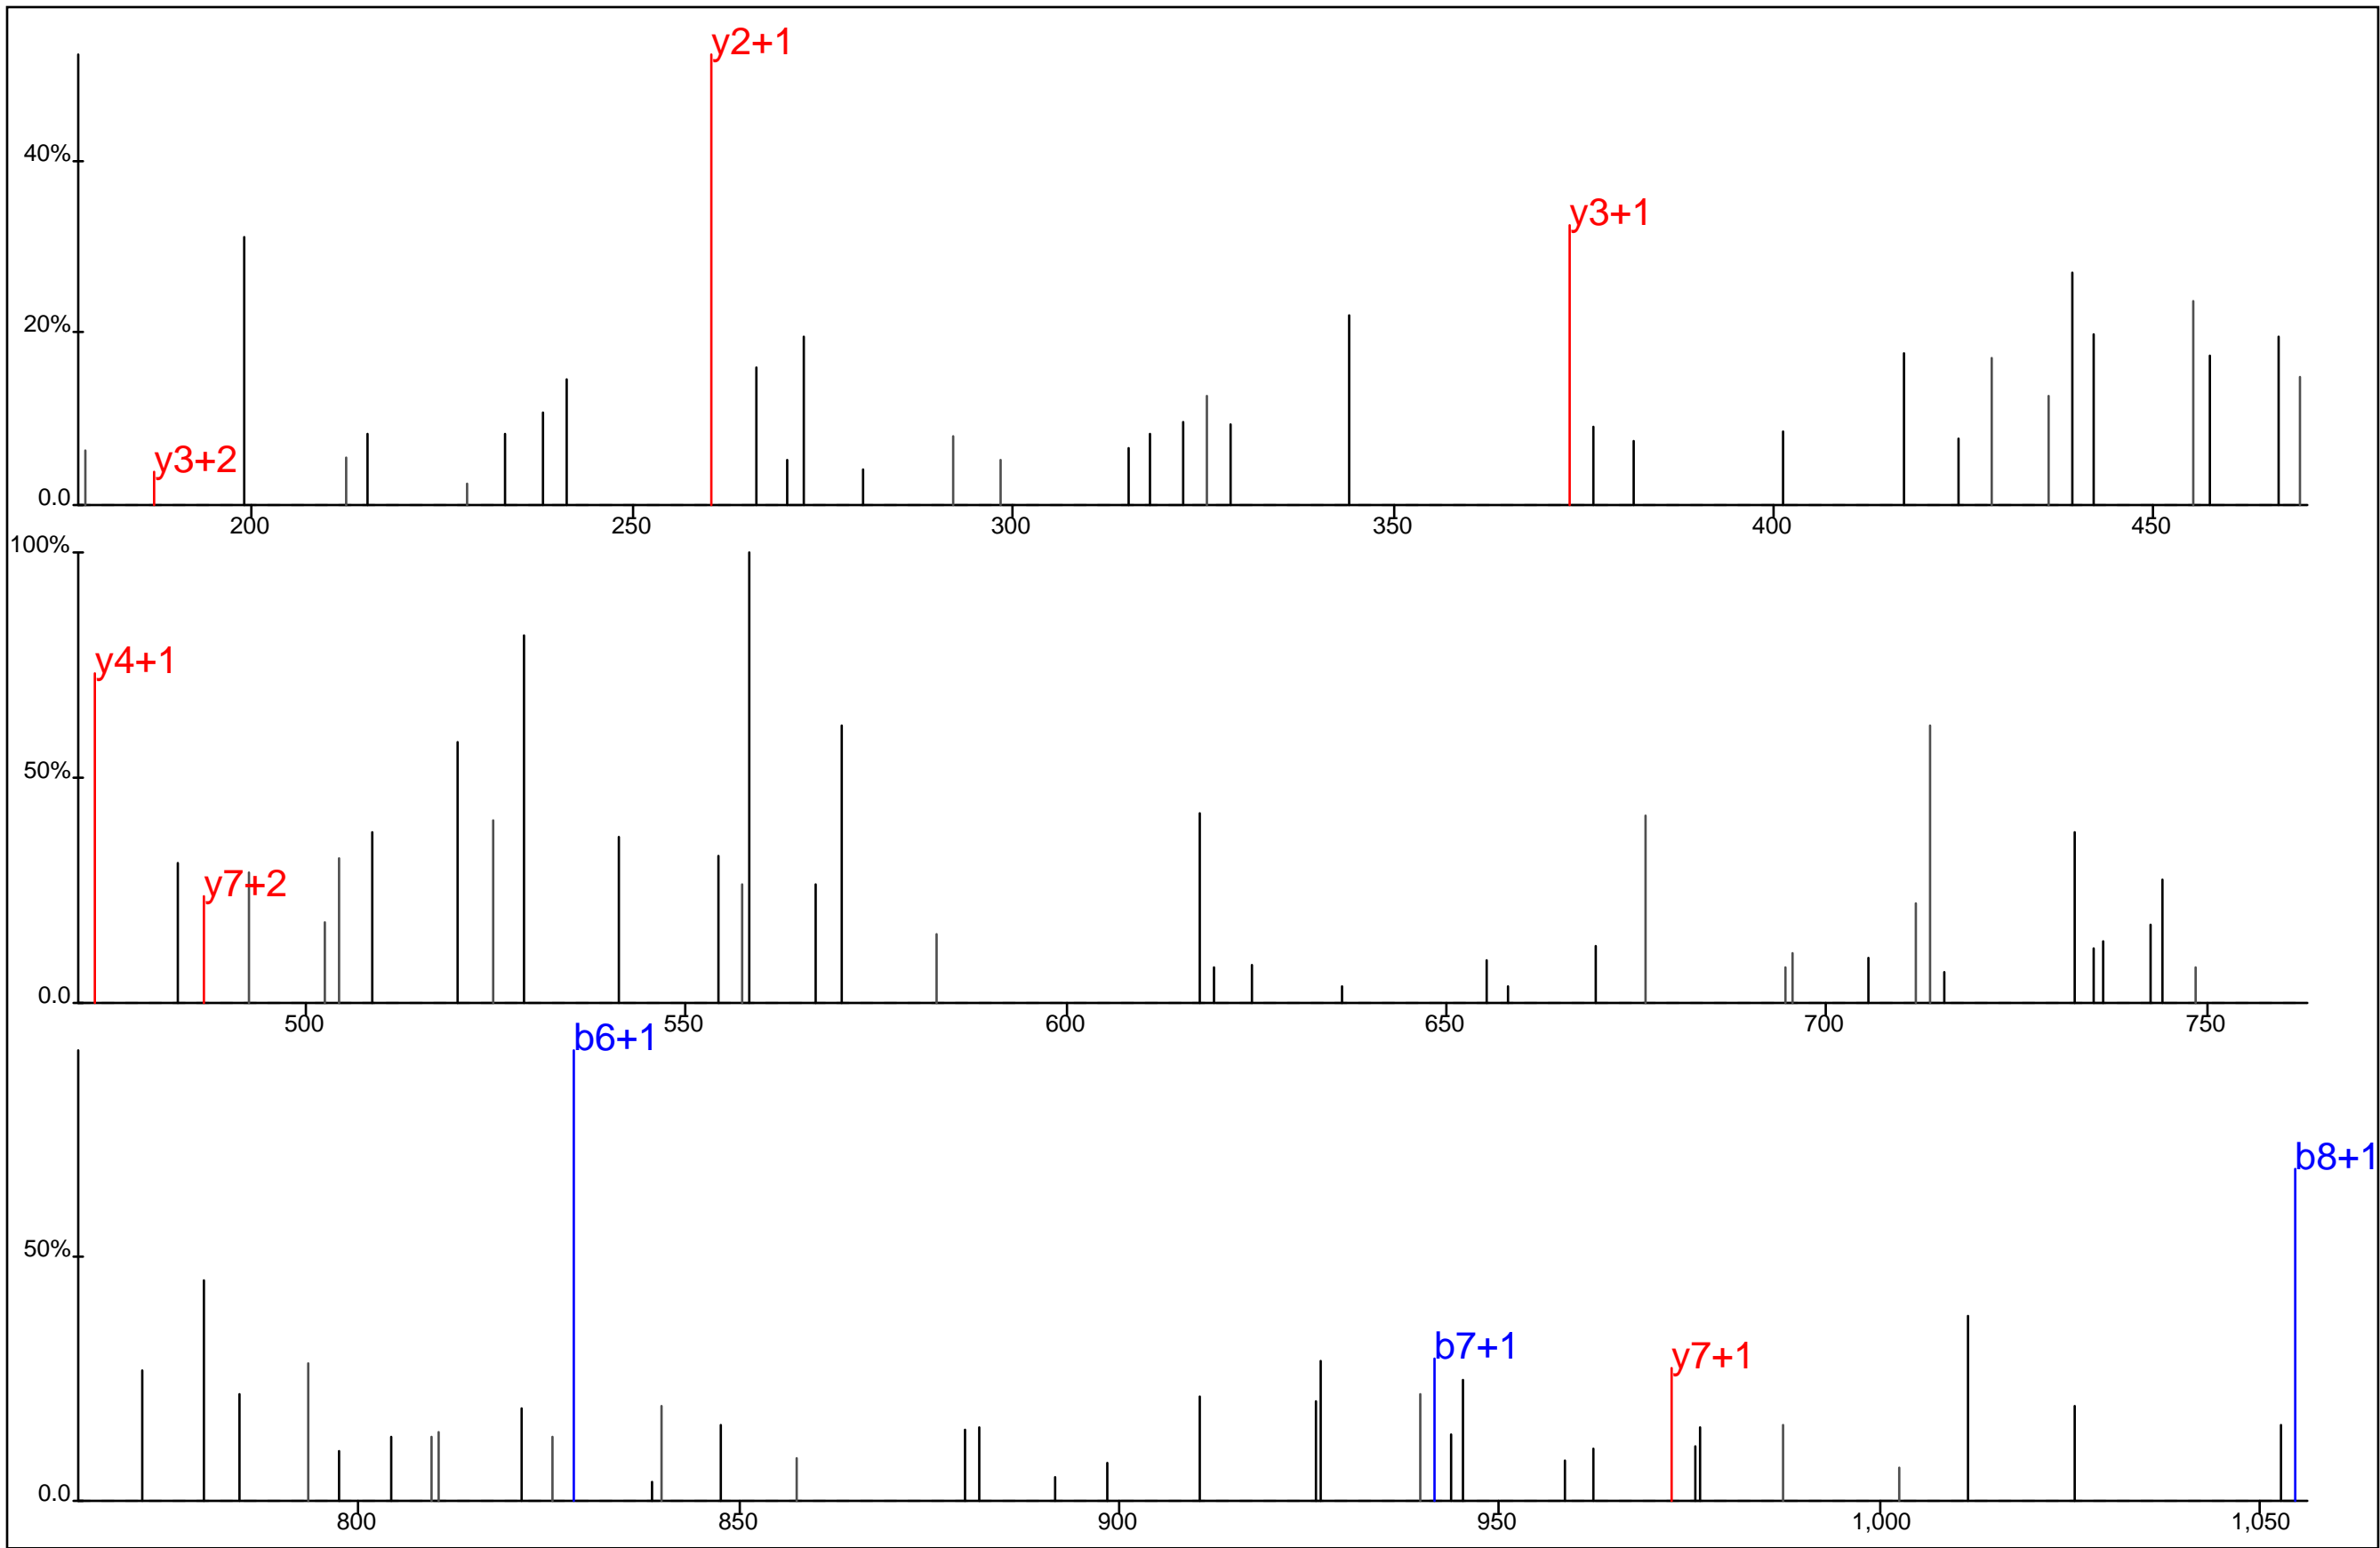

▢ ▢ ▢ ▢  
 V E Y\* E K V I L K  
▢ ▢ ▢ ▢ ▢ ▢ ▢

Protein Name: 0 Decoy hit, please disregard  
 gi Accession: 0  
 Precursor Mass: 600.8184+2  
 Delta Mass: 1.692 ppm  
 XCorr: 21.67

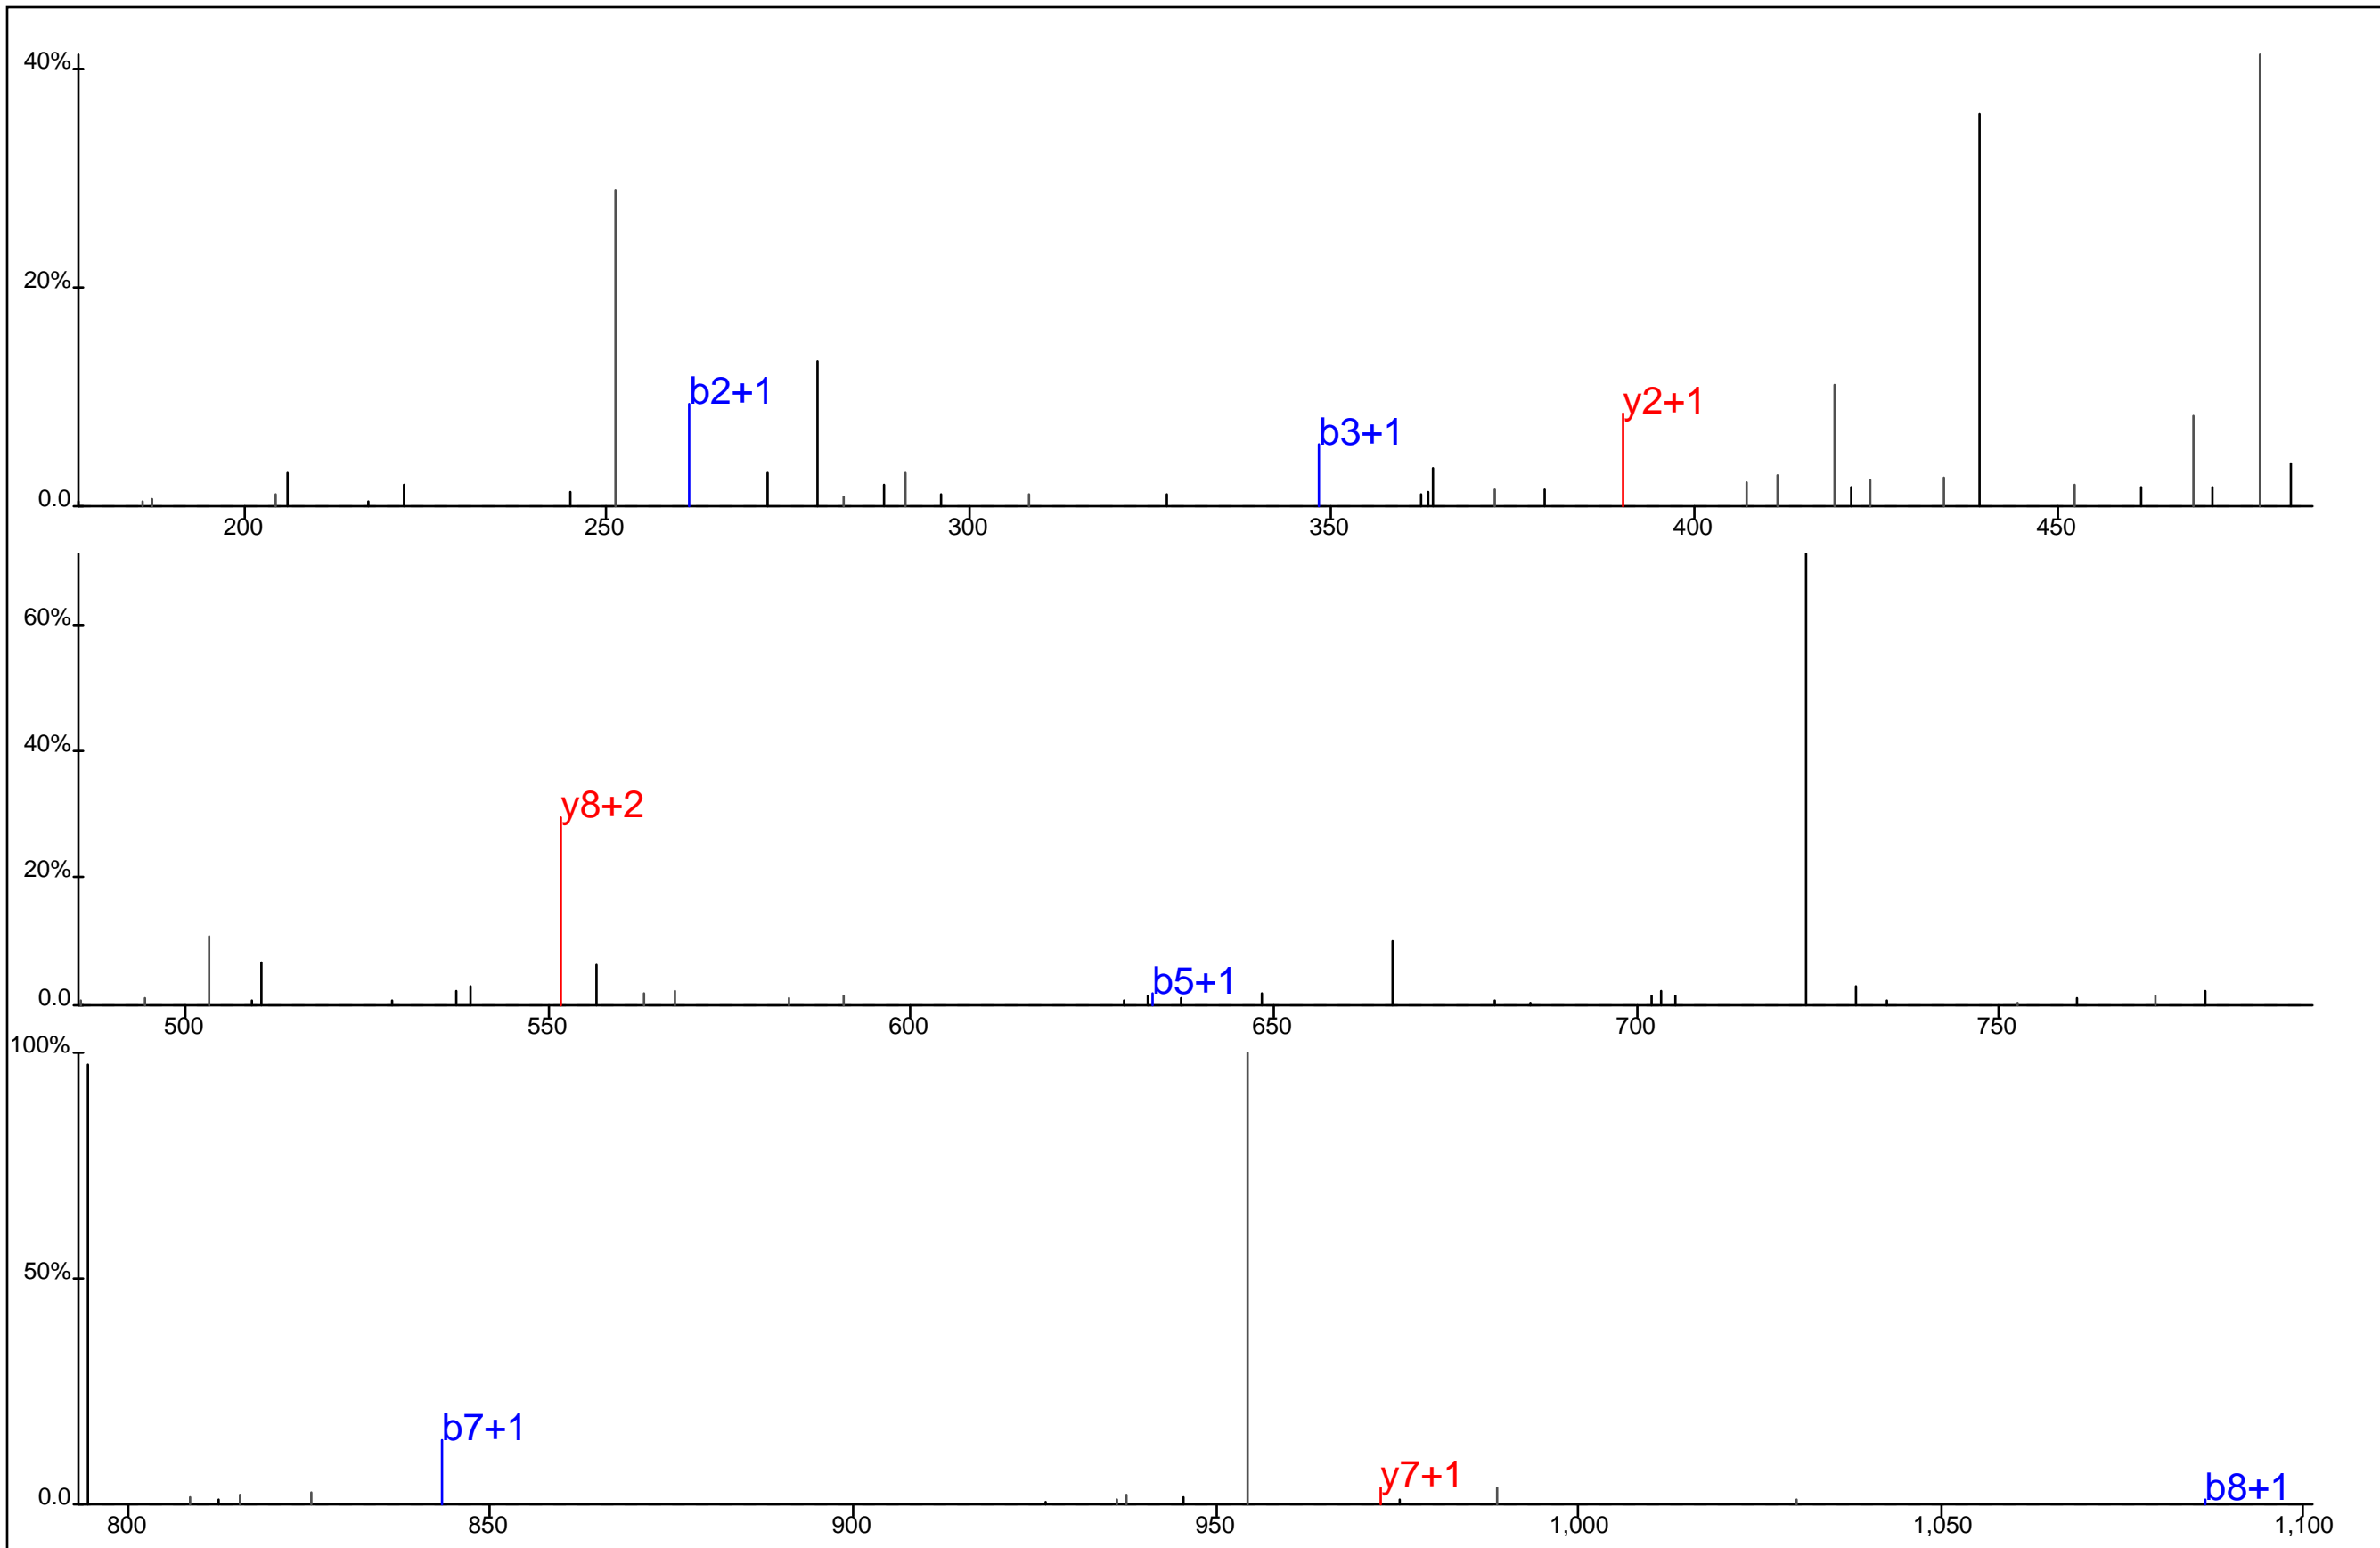

■ ■ □ □ ■ ■  
 M E S E R I P Y\* K  
■ ■ □ □ ■  
 M E S E R I P Y\* K

Protein Name: 0 Decoy hit, please disregard  
 gi Accession: 0  
 Precursor Mass: 616.7761+2  
 Delta Mass: 5.514 ppm  
 XCorr: 21.88



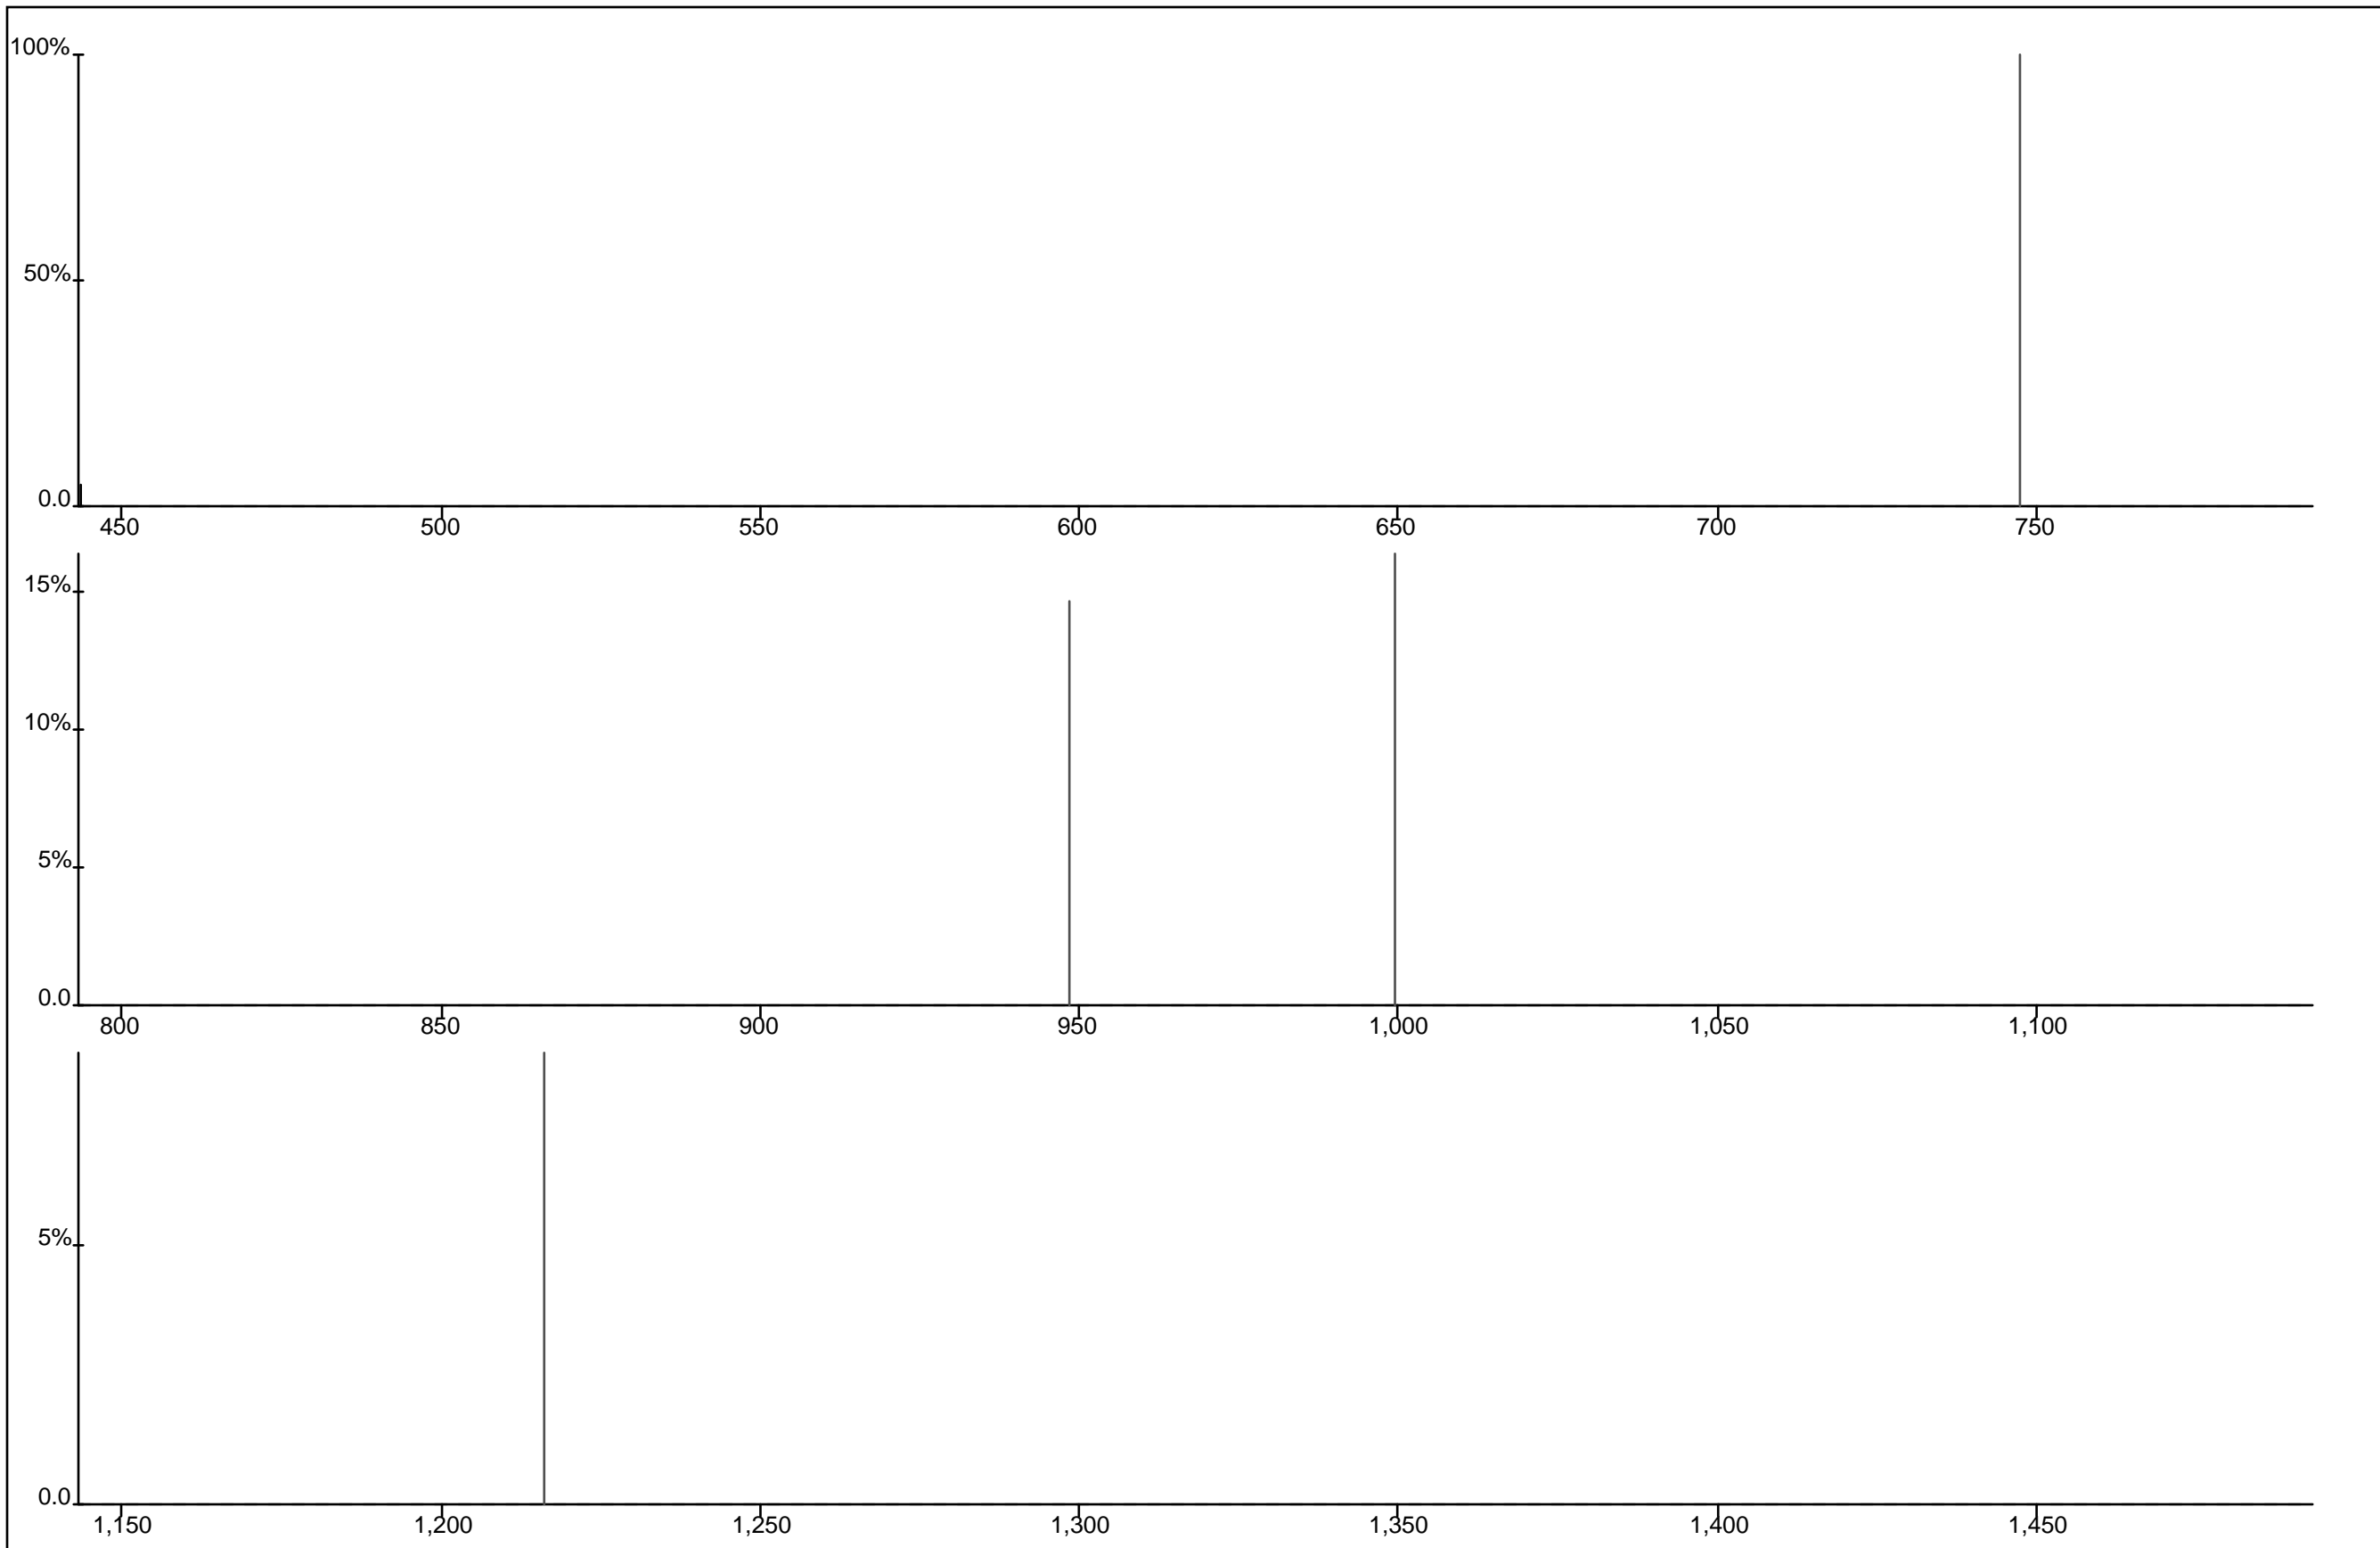

Y\*S\*P T P S R P S L S H T\*P S G P L S E G S\*S L S\*R

Protein Name: 0 Decoy hit, please disregard  
gi Accession: 0  
Precursor Mass: 1,028.7294+3  
Delta Mass: 4.703 ppm  
XCorr: 20.03

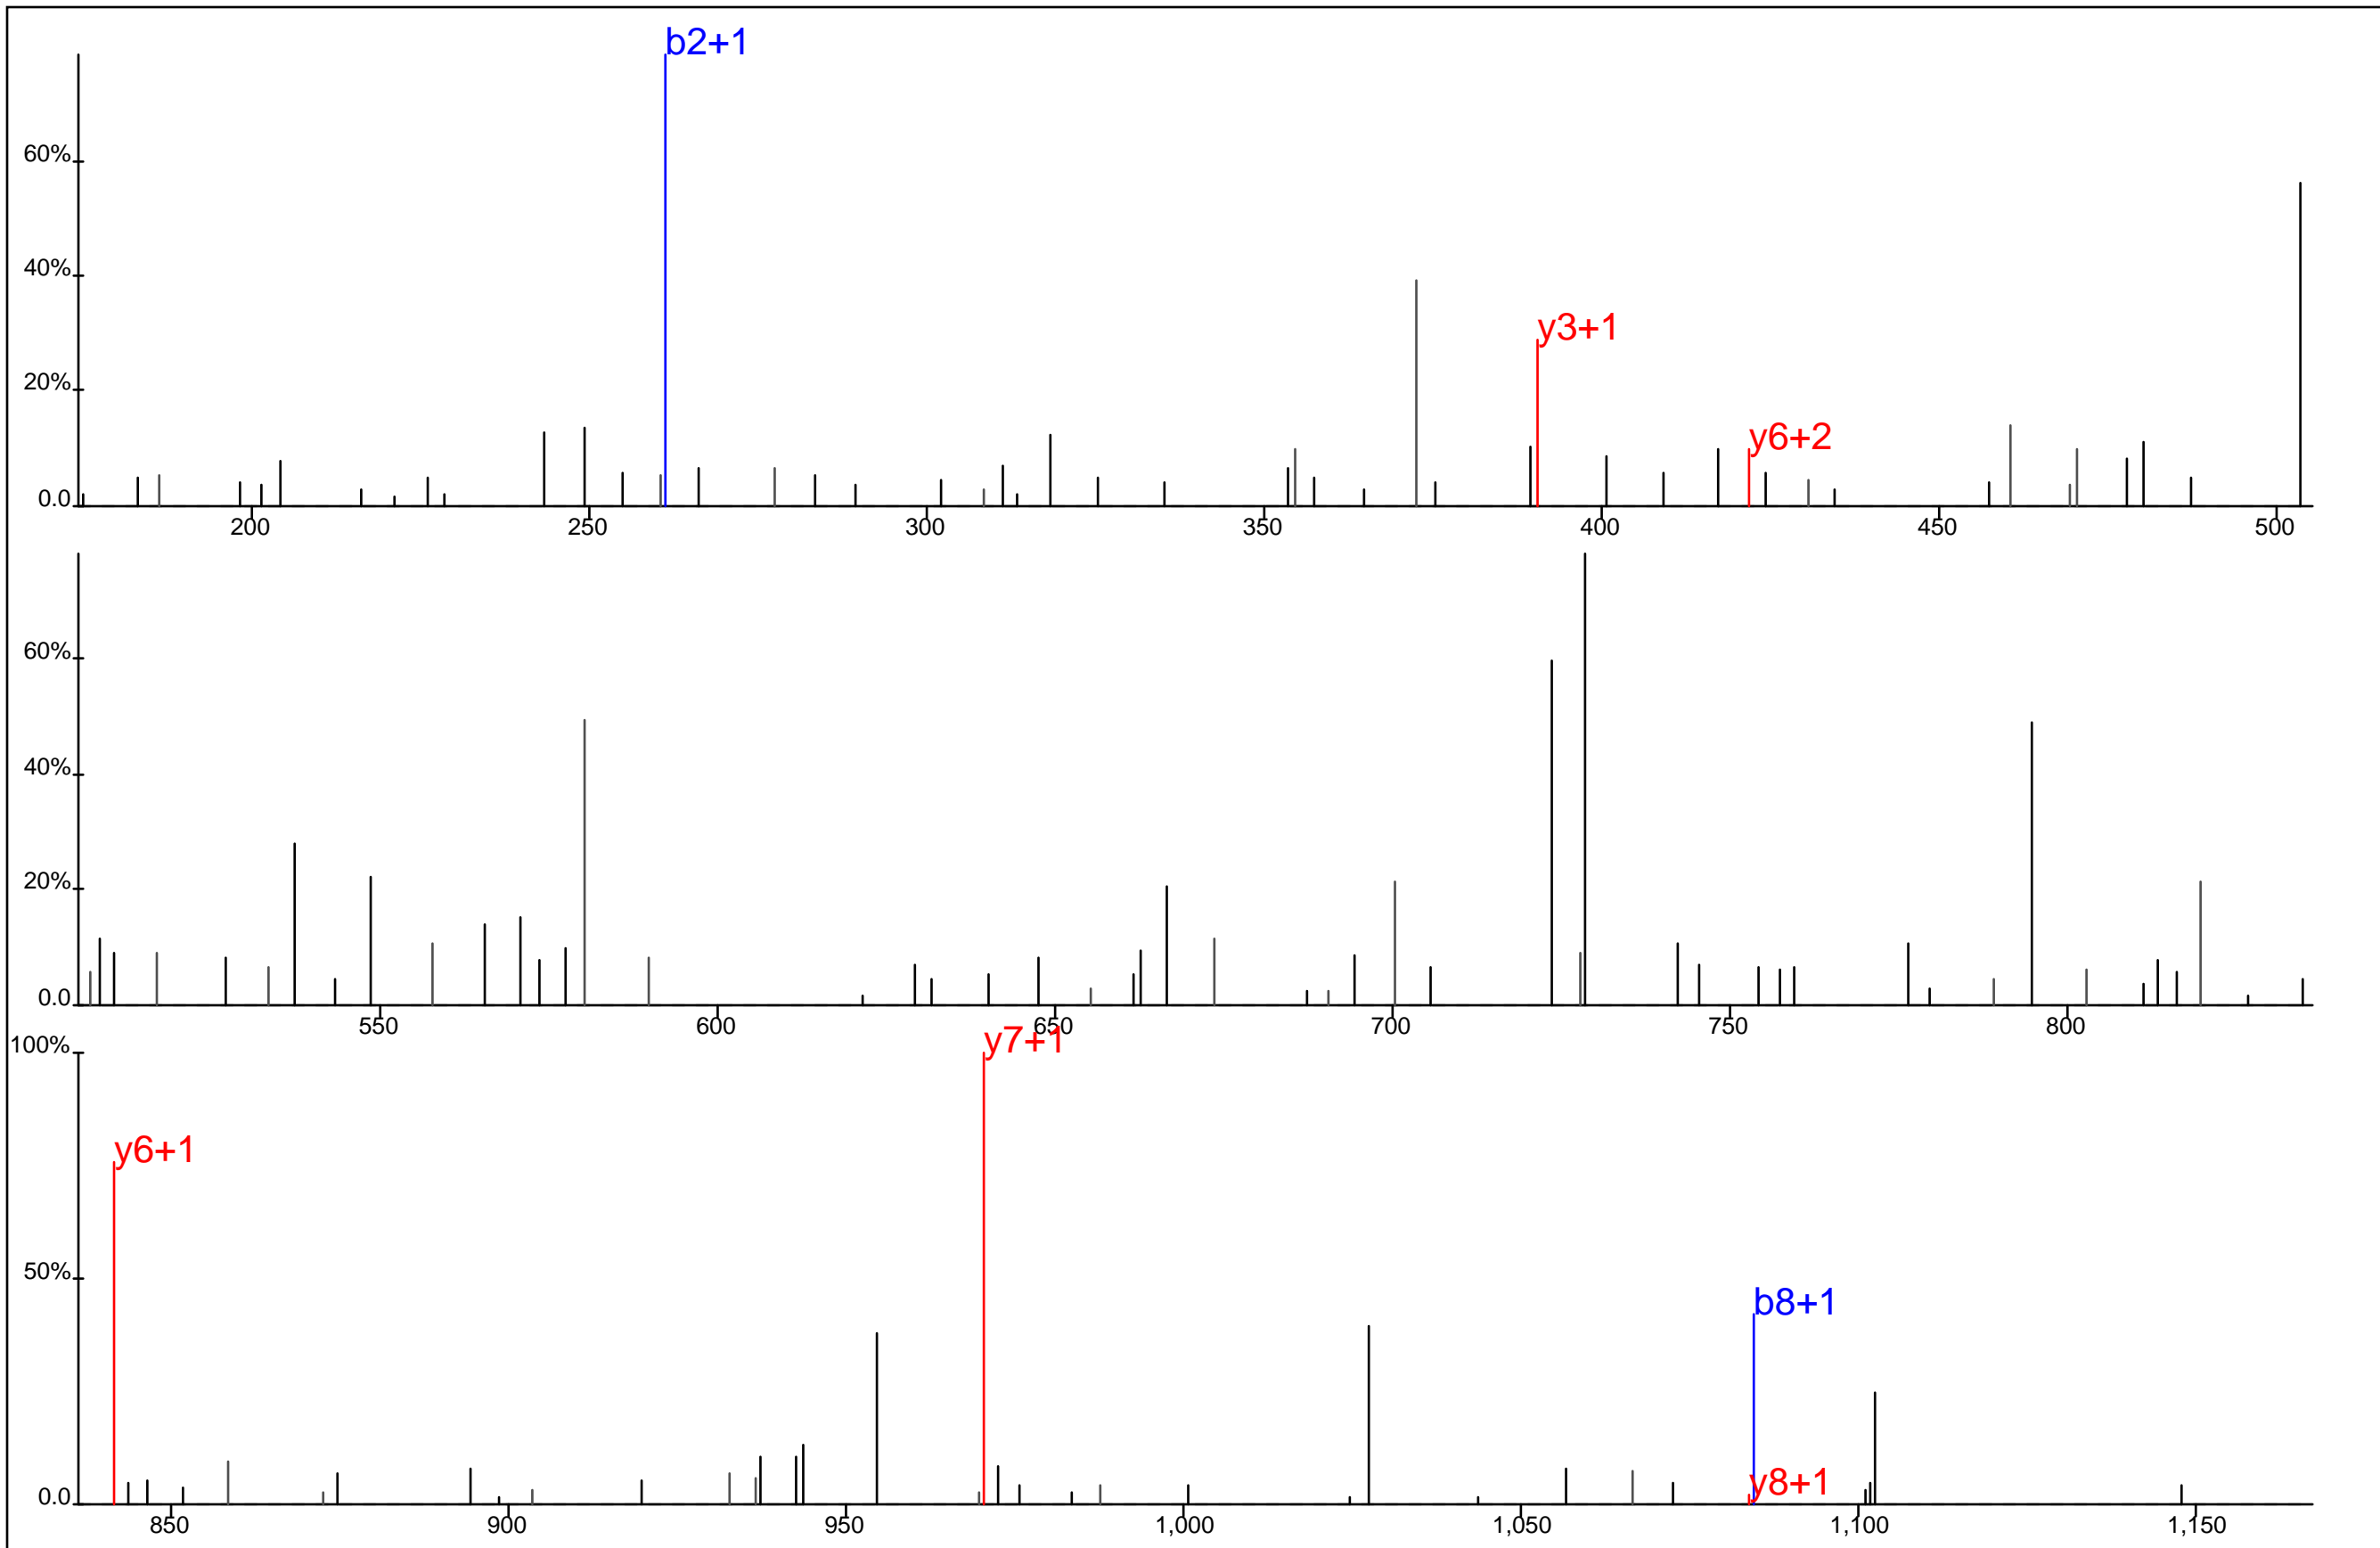

|    |   |   |   |    |   |   |   |
|----|---|---|---|----|---|---|---|
|    |   |   |   |    |   |   |   |
|    |   |   |   |    |   |   |   |
| M# | E | A | H | Y* | D | K | K |
|    |   |   |   |    |   |   |   |
|    |   |   |   |    |   |   |   |

Protein Name: 0 Decoy hit, please disregard  
 gi Accession: 0  
 Precursor Mass: 615.7677+2  
 Delta Mass: 4.642 ppm  
 XCorr: 23.7

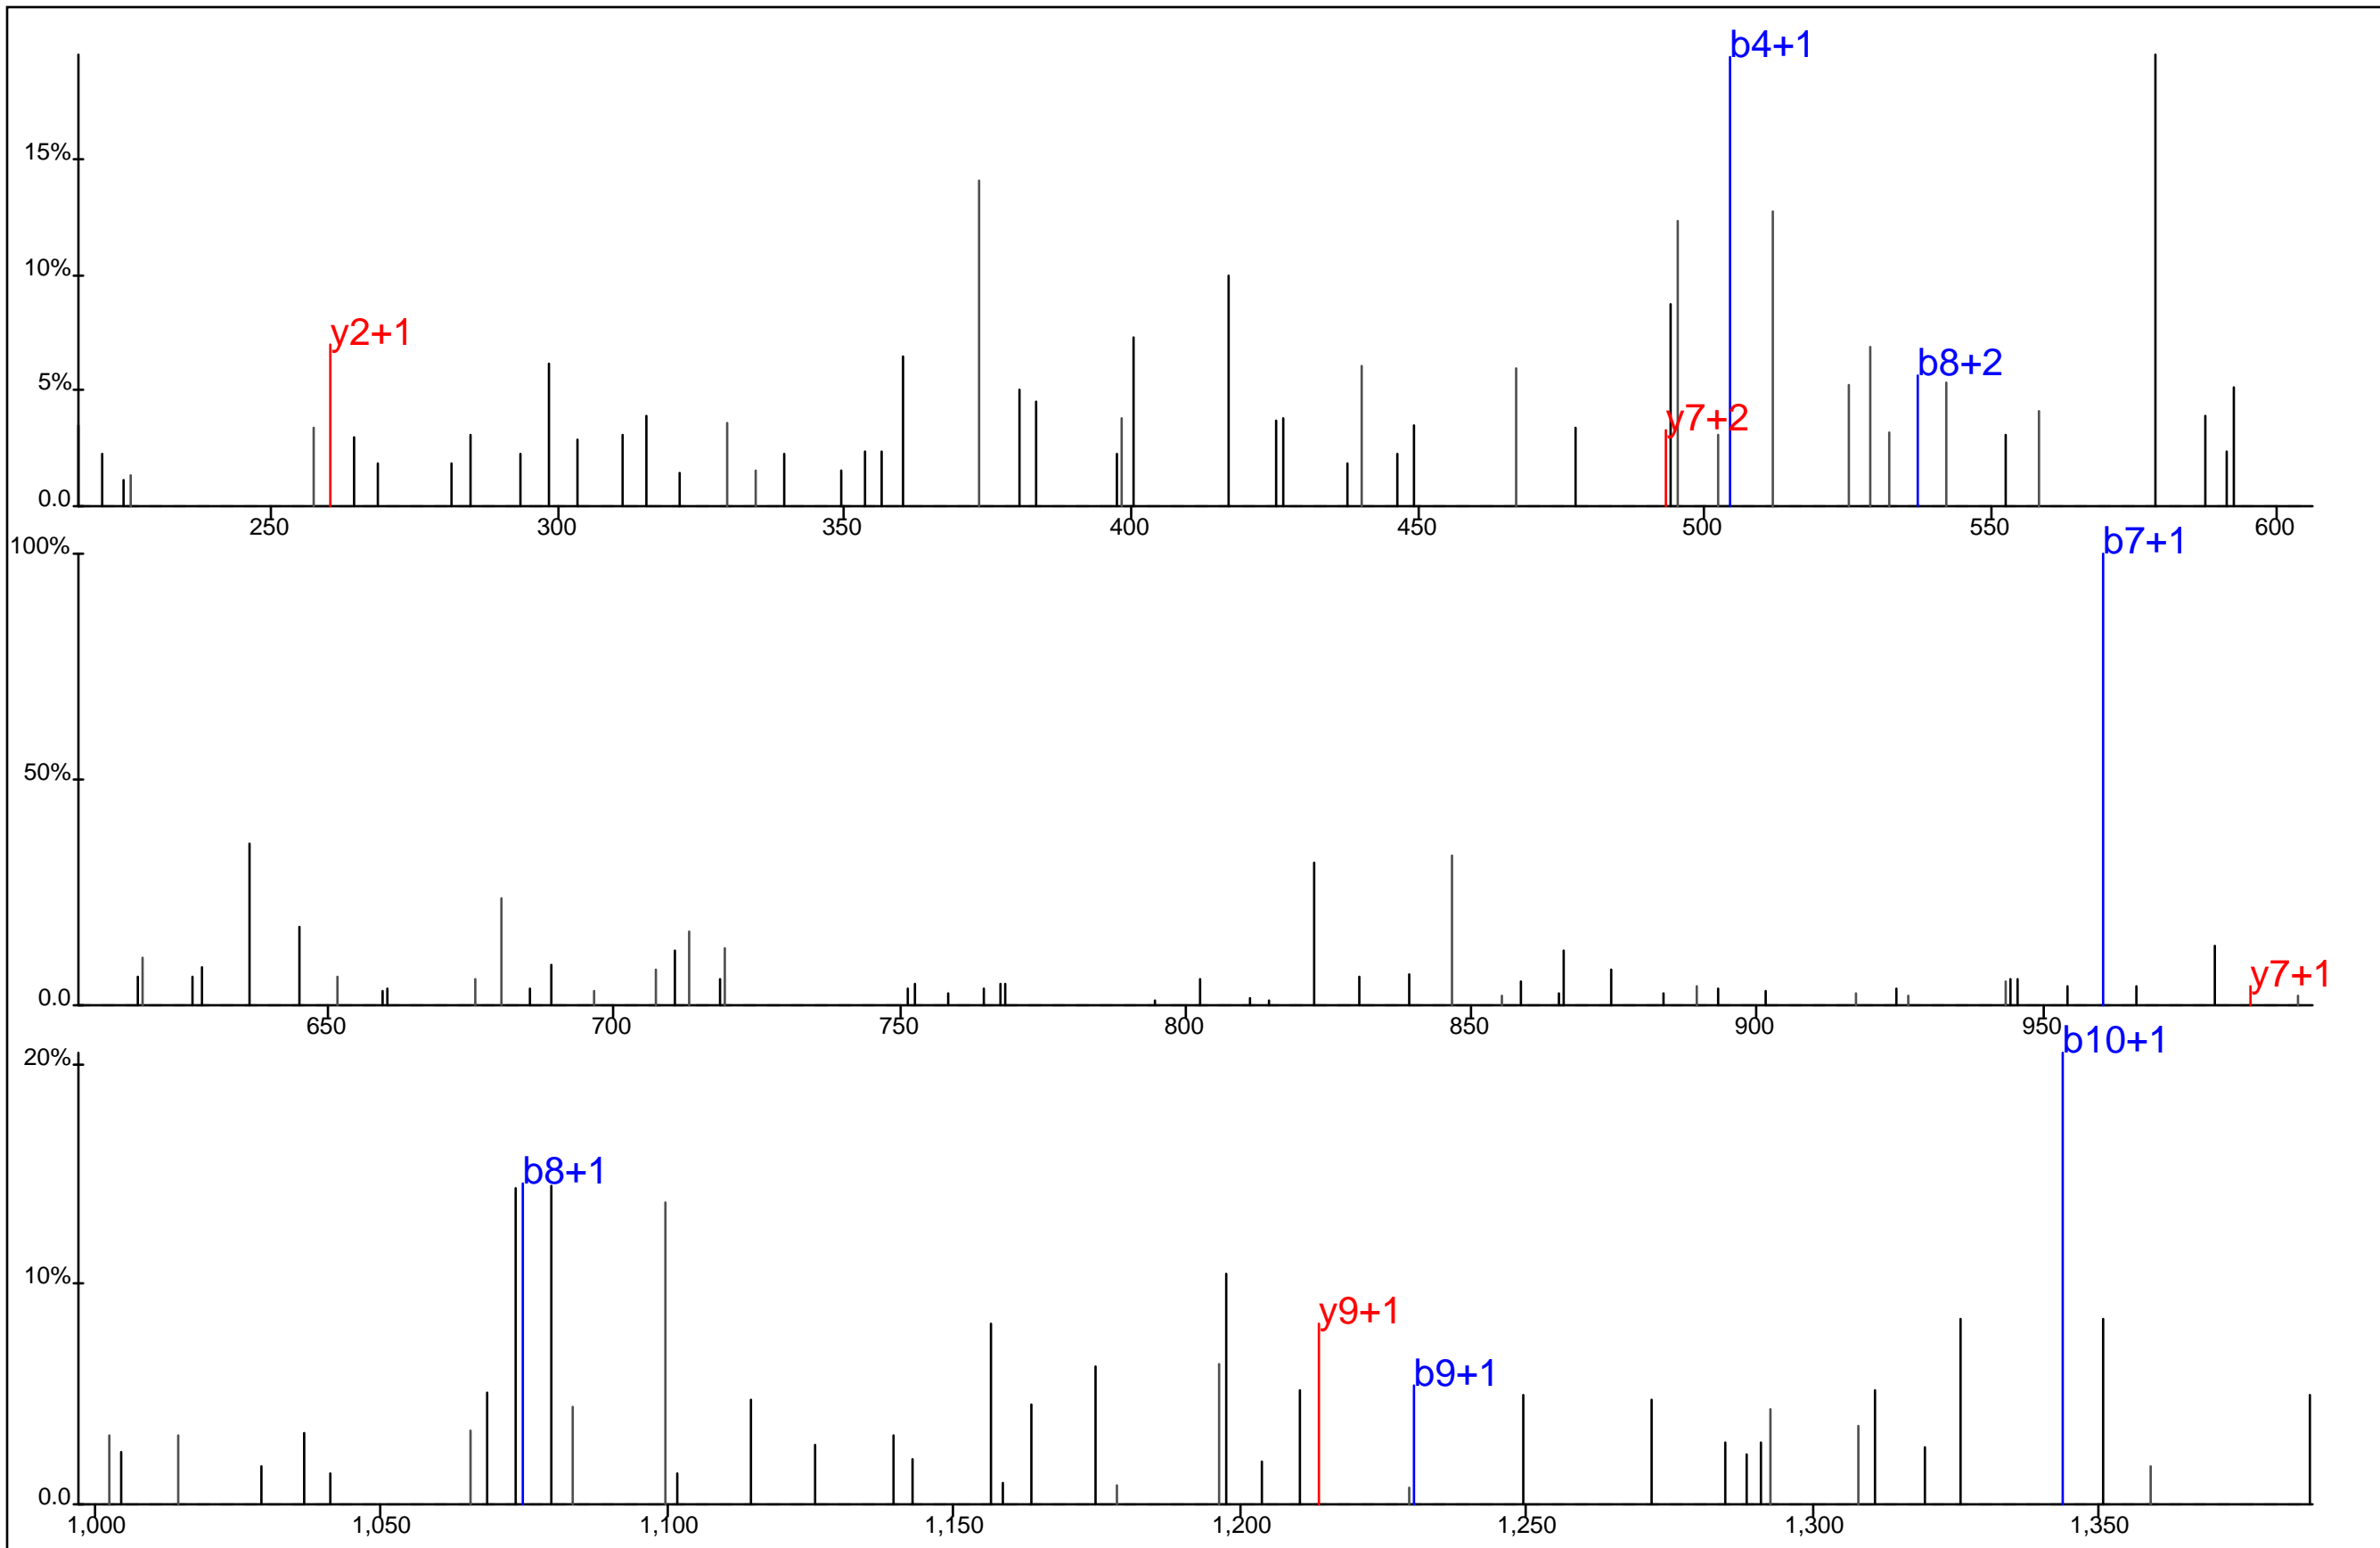

■ ■ ■ ■ ■ ■  
**Y I L N Y\* G R N R I K**  
■ ■ ■ ■ ■ ■ ■ ■

Protein Name: 0 Decoy hit, please disregard  
 gi Accession: 0  
 Precursor Mass: 745.3893+2  
 Delta Mass: 2.561 ppm  
 XCorr: 20.16

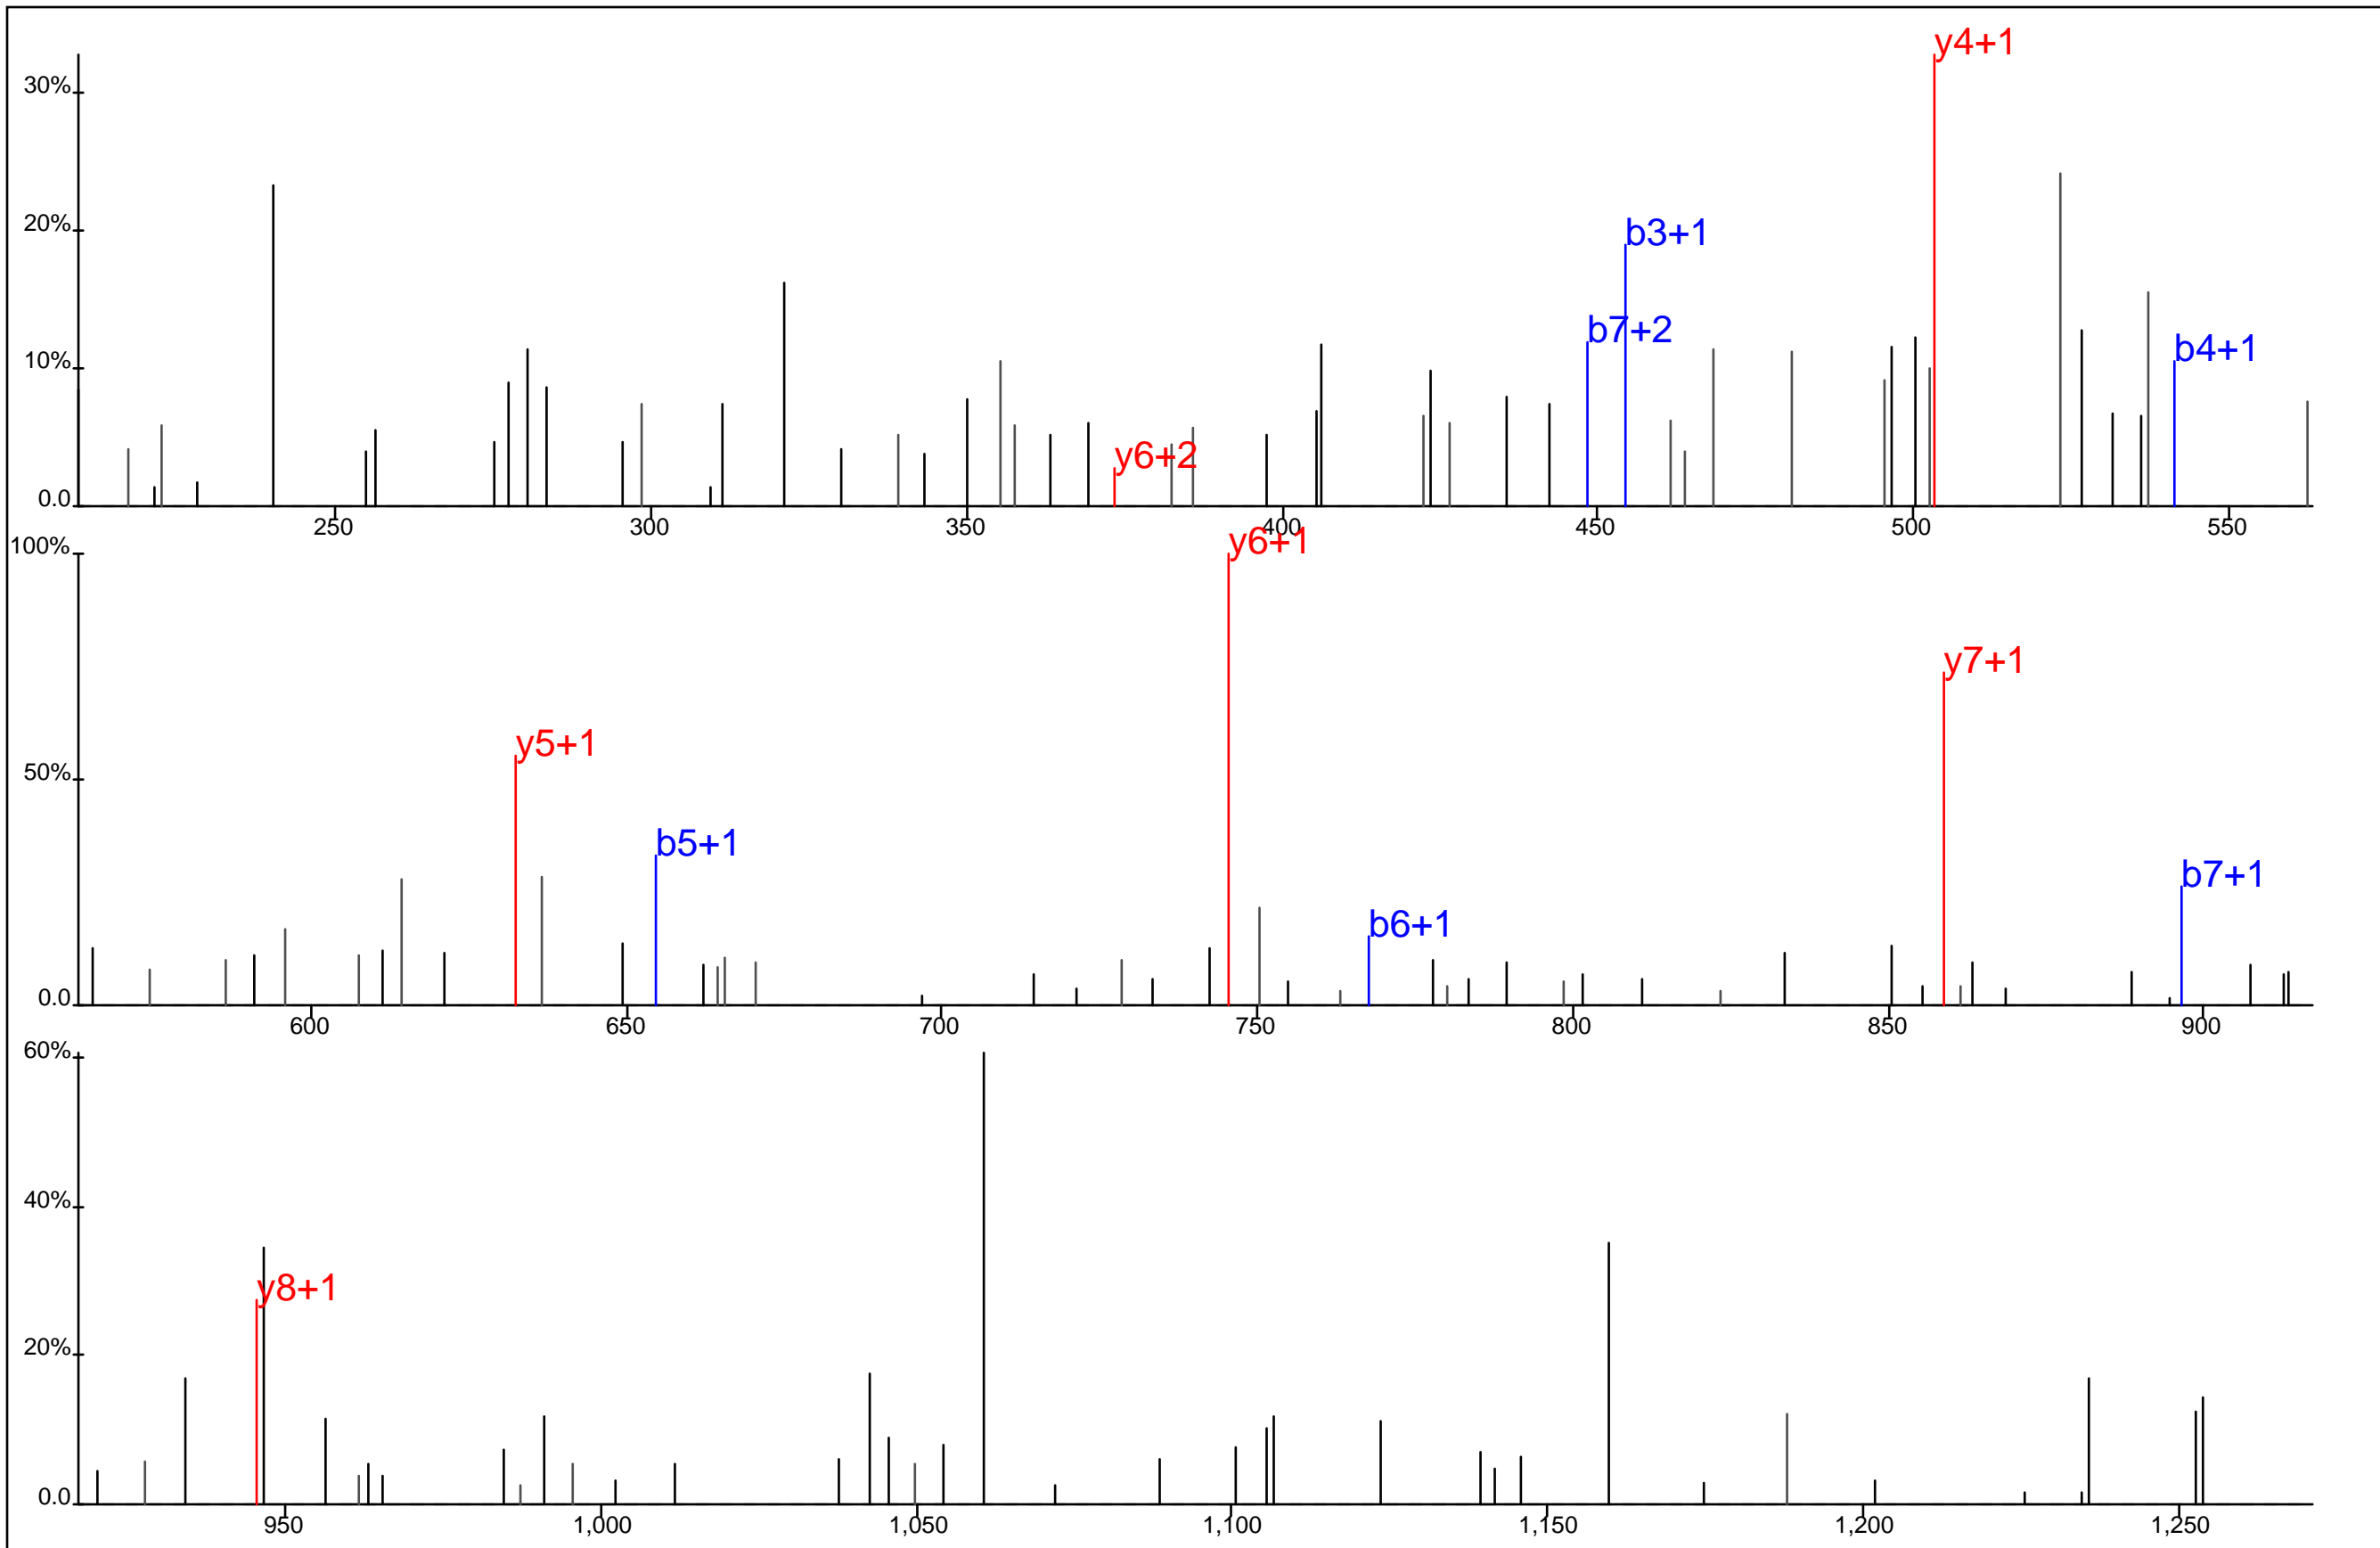

■          
**Y\* P L S I L E K S I R**  
□

Protein Name: 0 Decoy hit, please disregard  
 gi Accession: 0  
 Precursor Mass: 699.8781+2  
 Delta Mass: 6.976 ppm  
 XCorr: 23.3

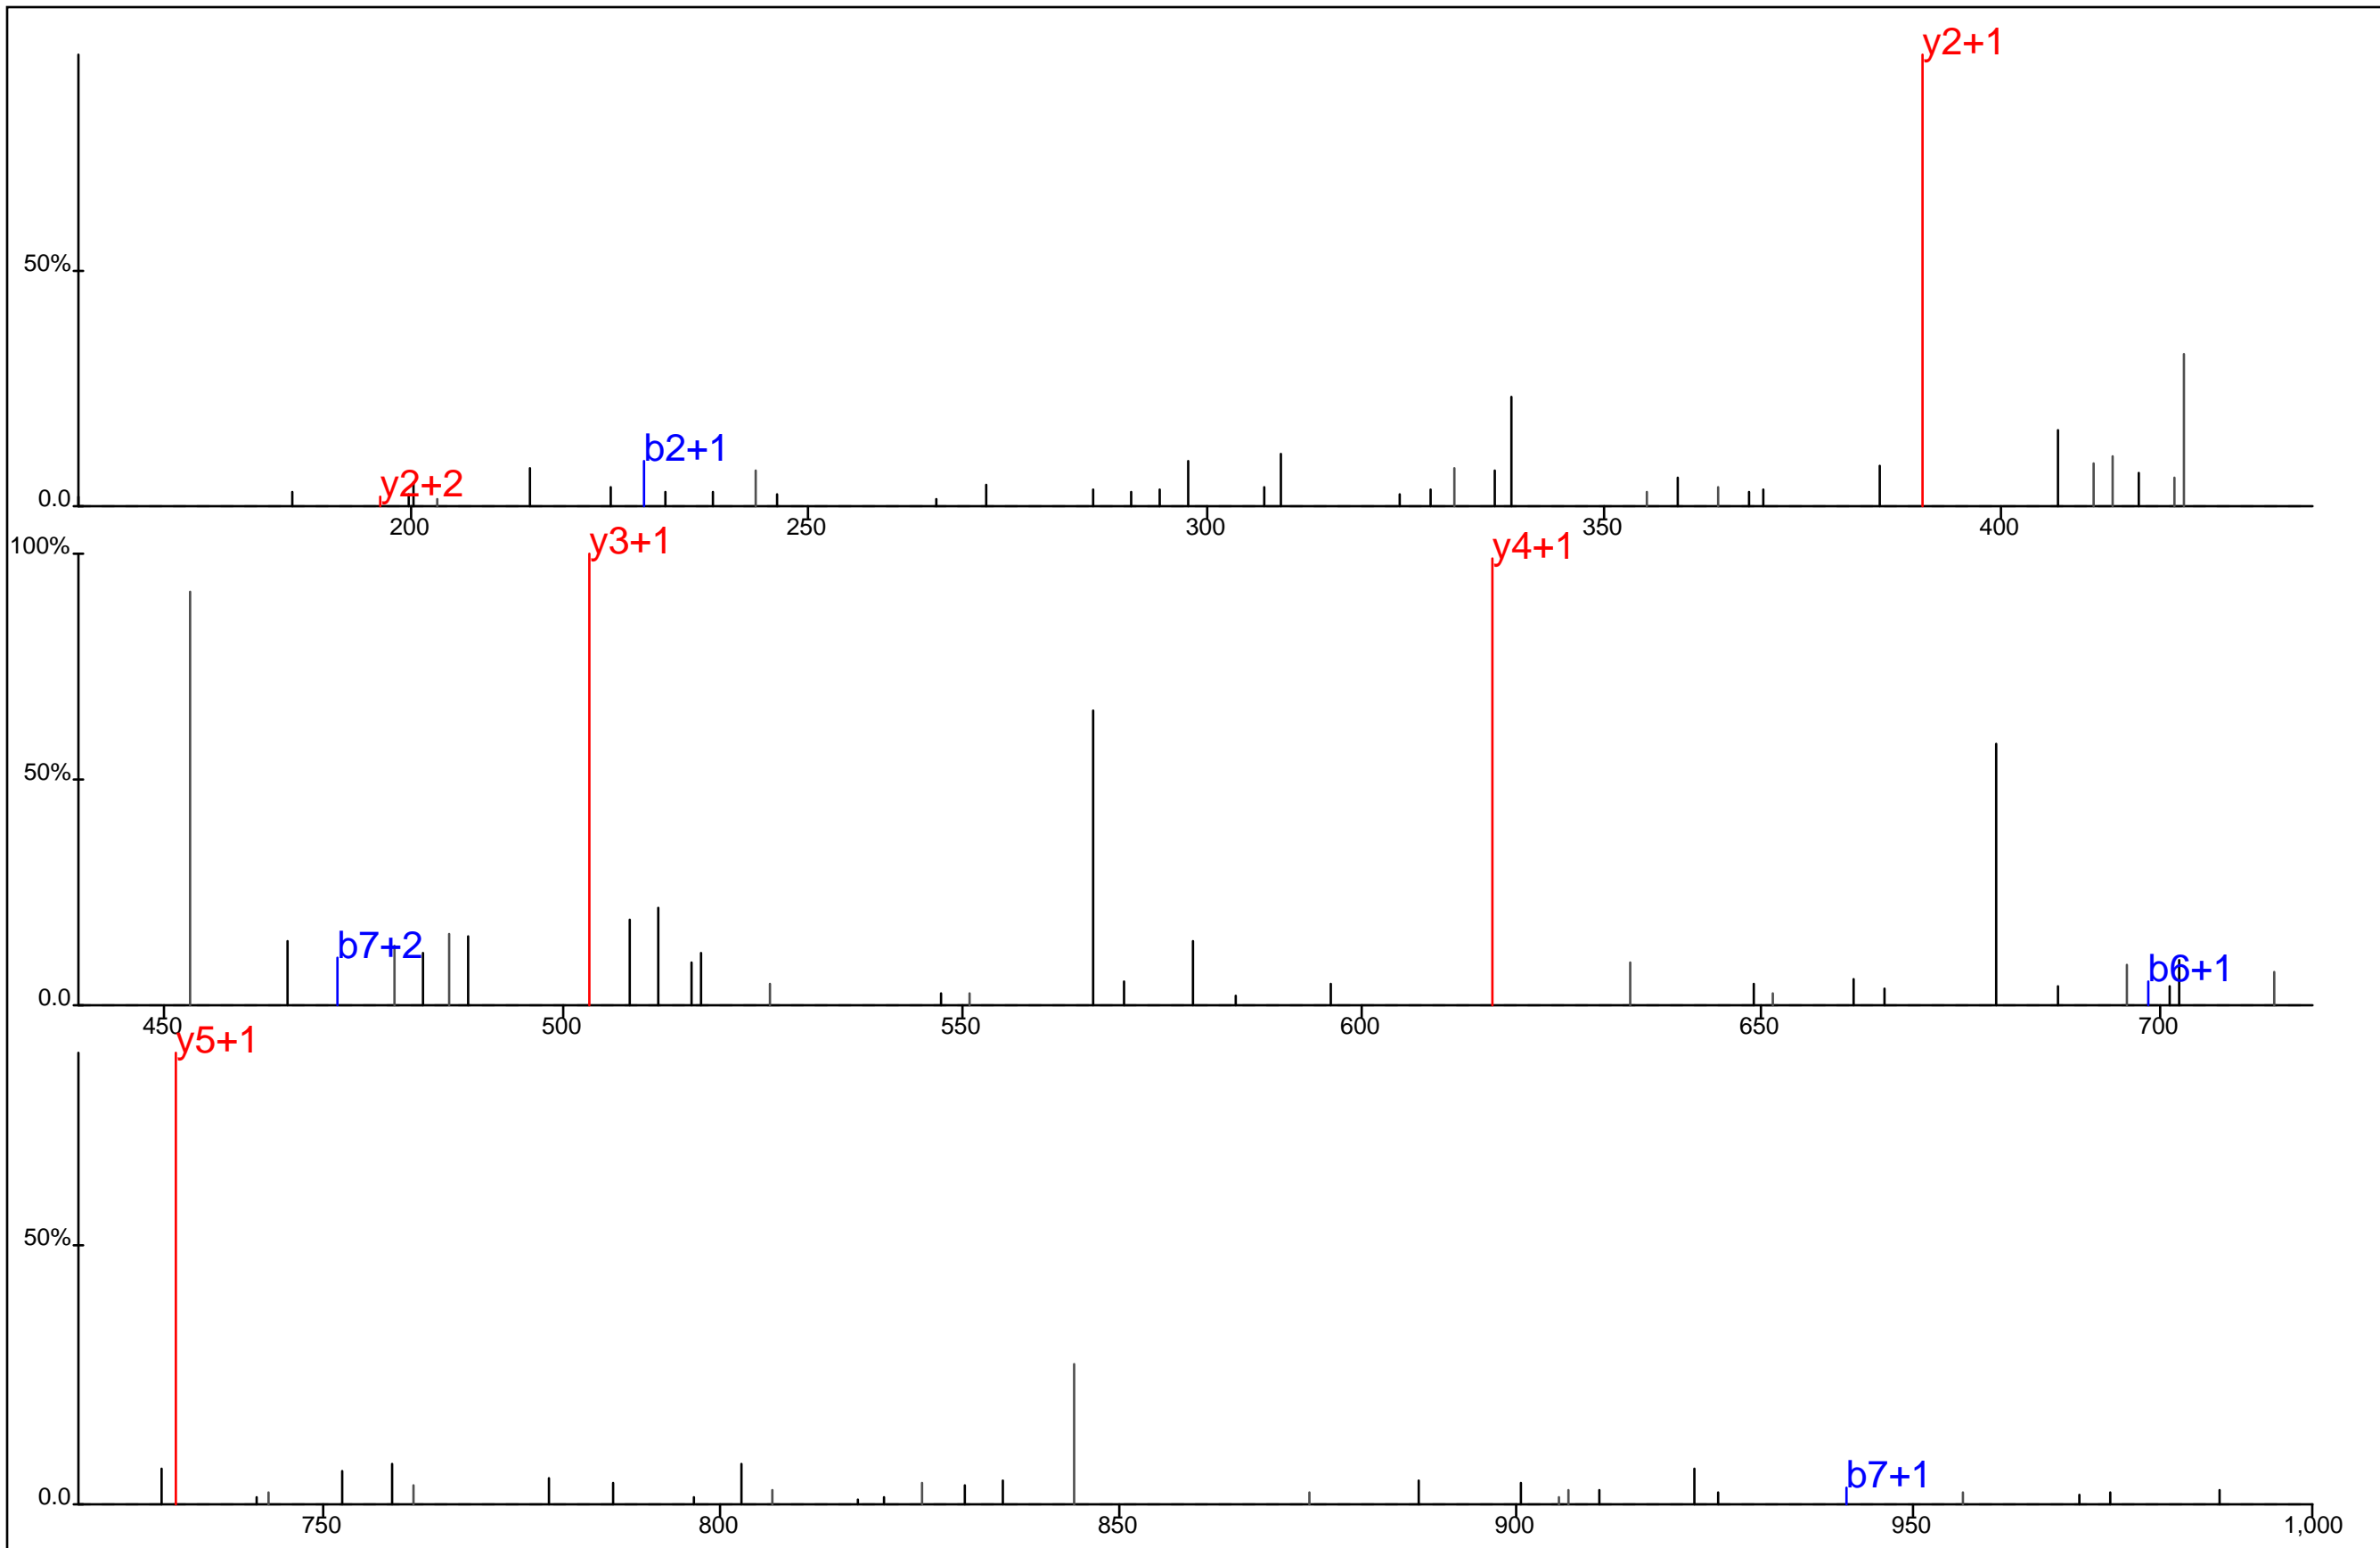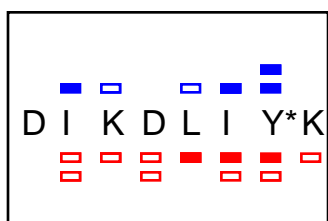

Protein Name: 0 Decoy hit, please disregard  
 gi Accession: 0  
 Precursor Mass: 544.2771+2  
 Delta Mass: 3.174 ppm  
 XCorr: 20.11





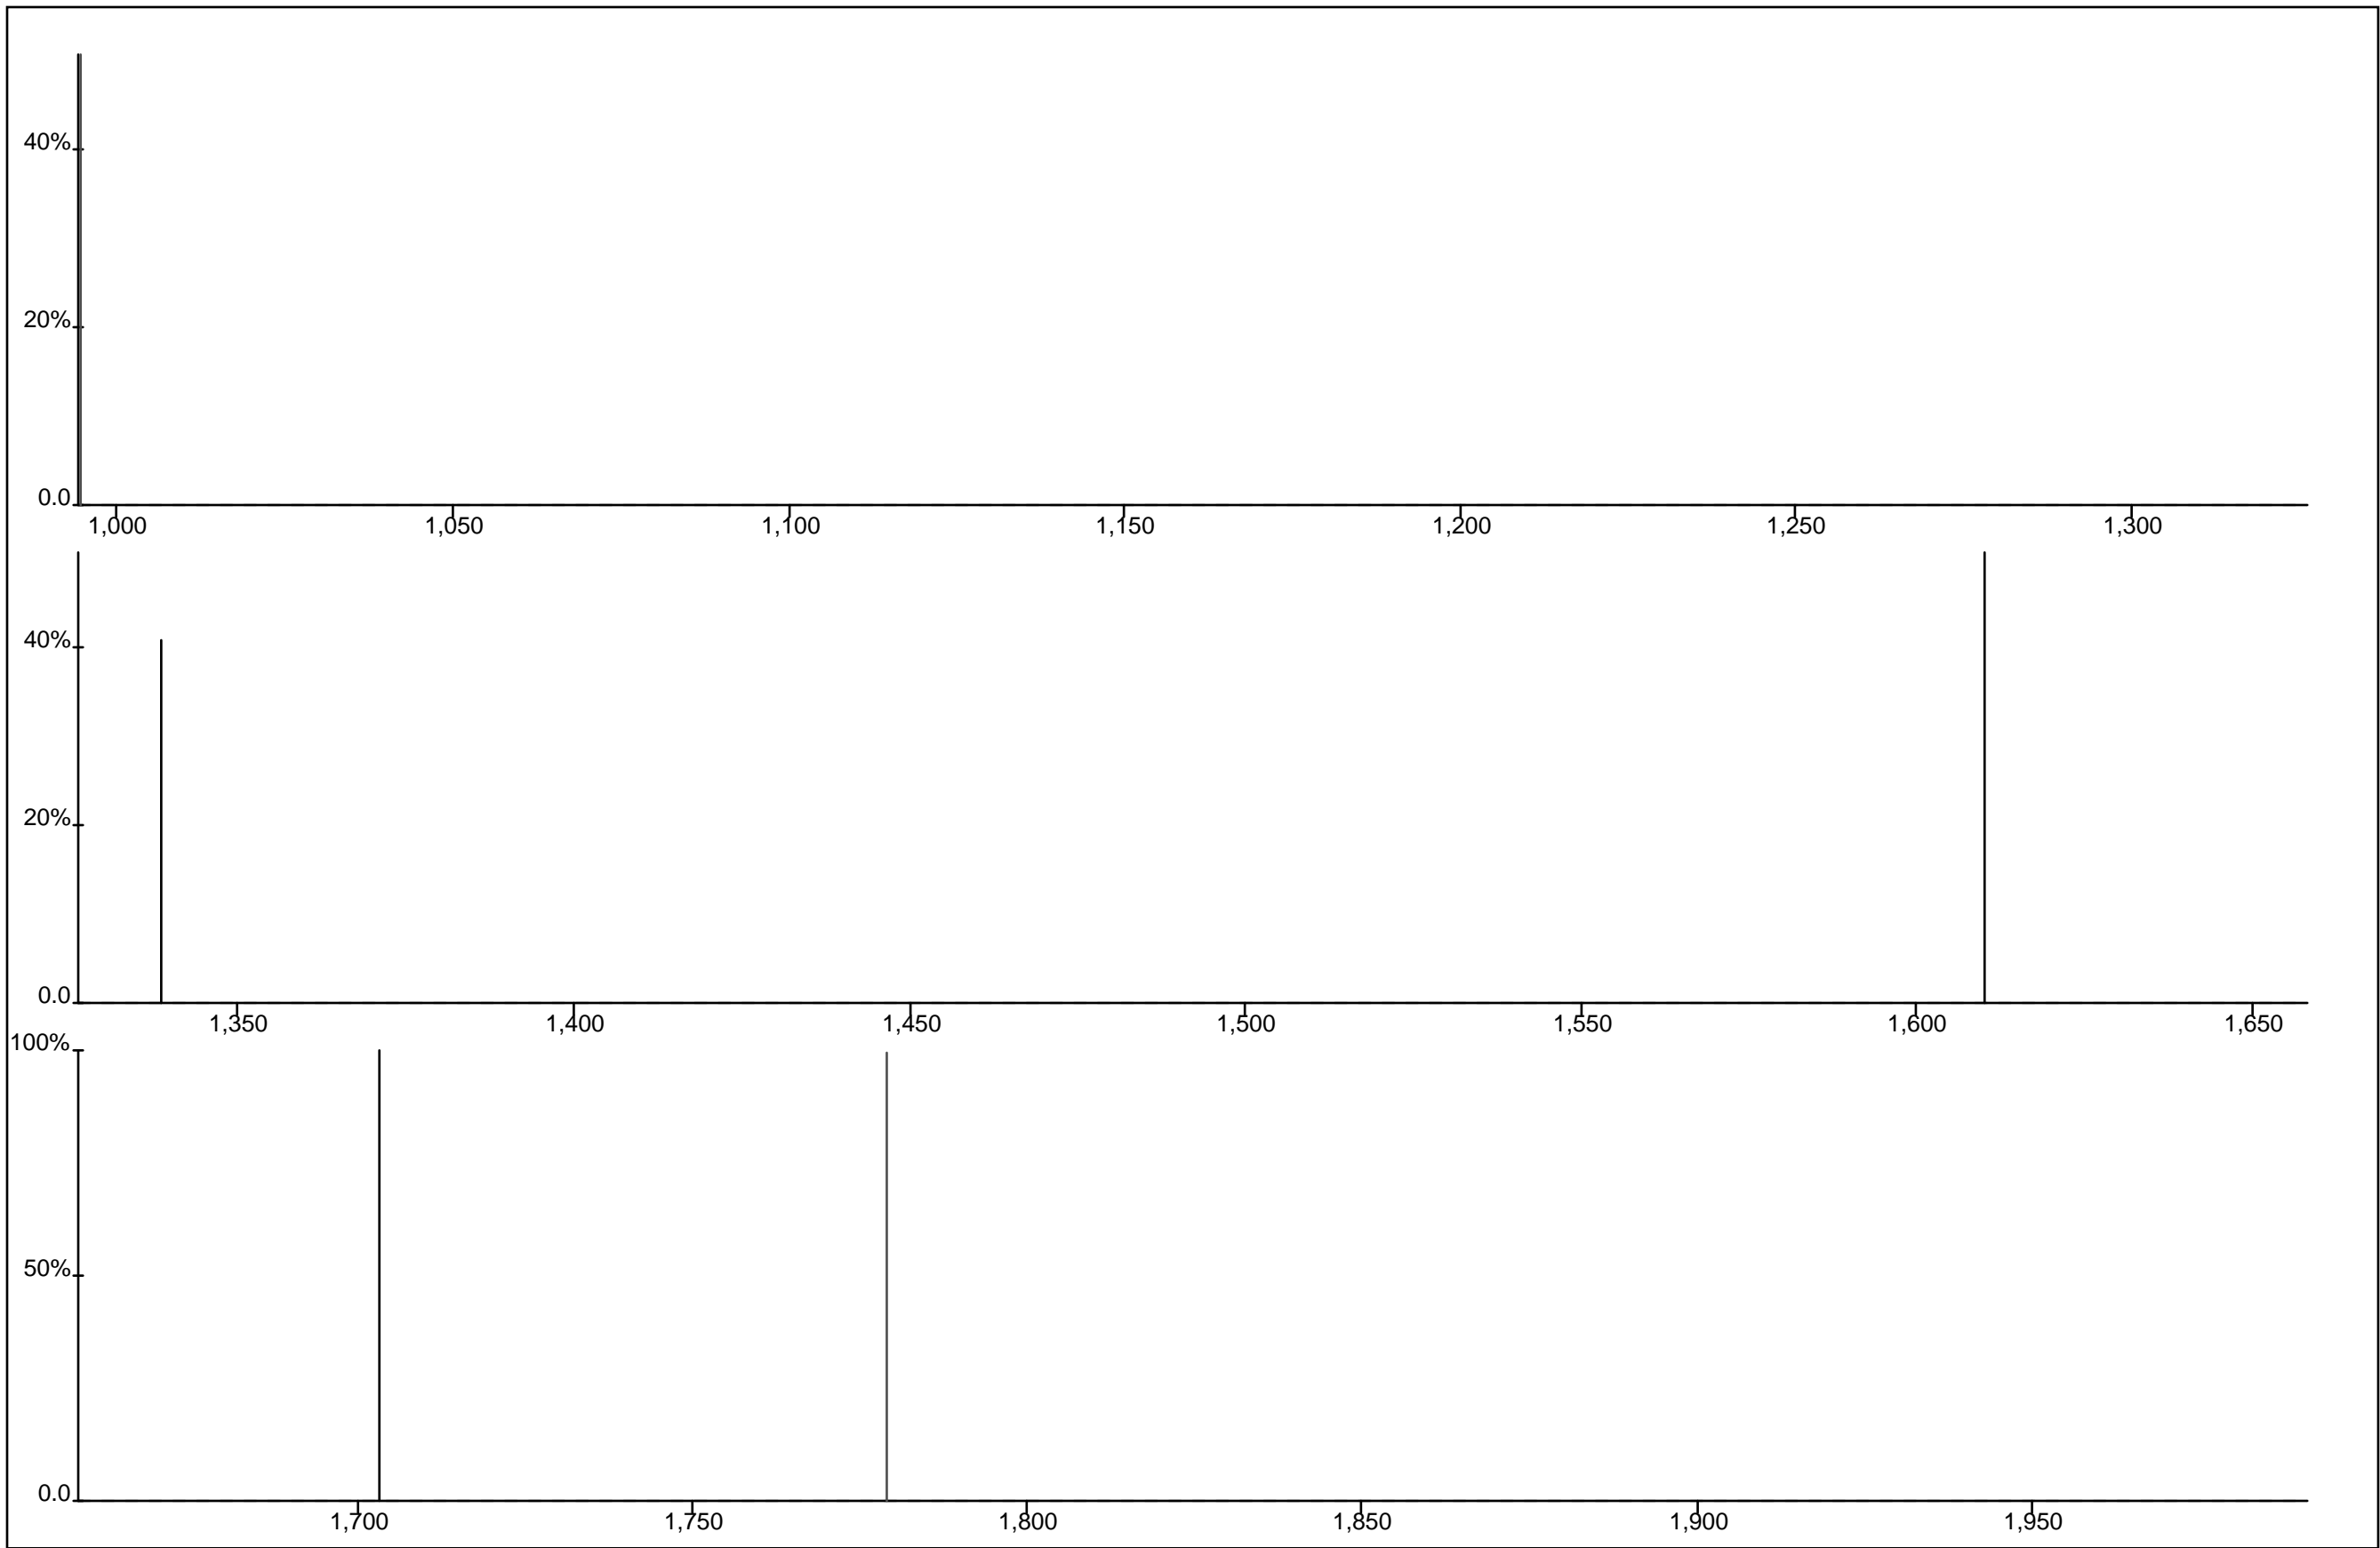

G S \* L Y \* V N G F H P R S \* S \* V P T T S T P G T S T V H L A T S G T P S S L P G H T A P V P L L I P F T L N F T I T N L H Y E E N M Q H P G

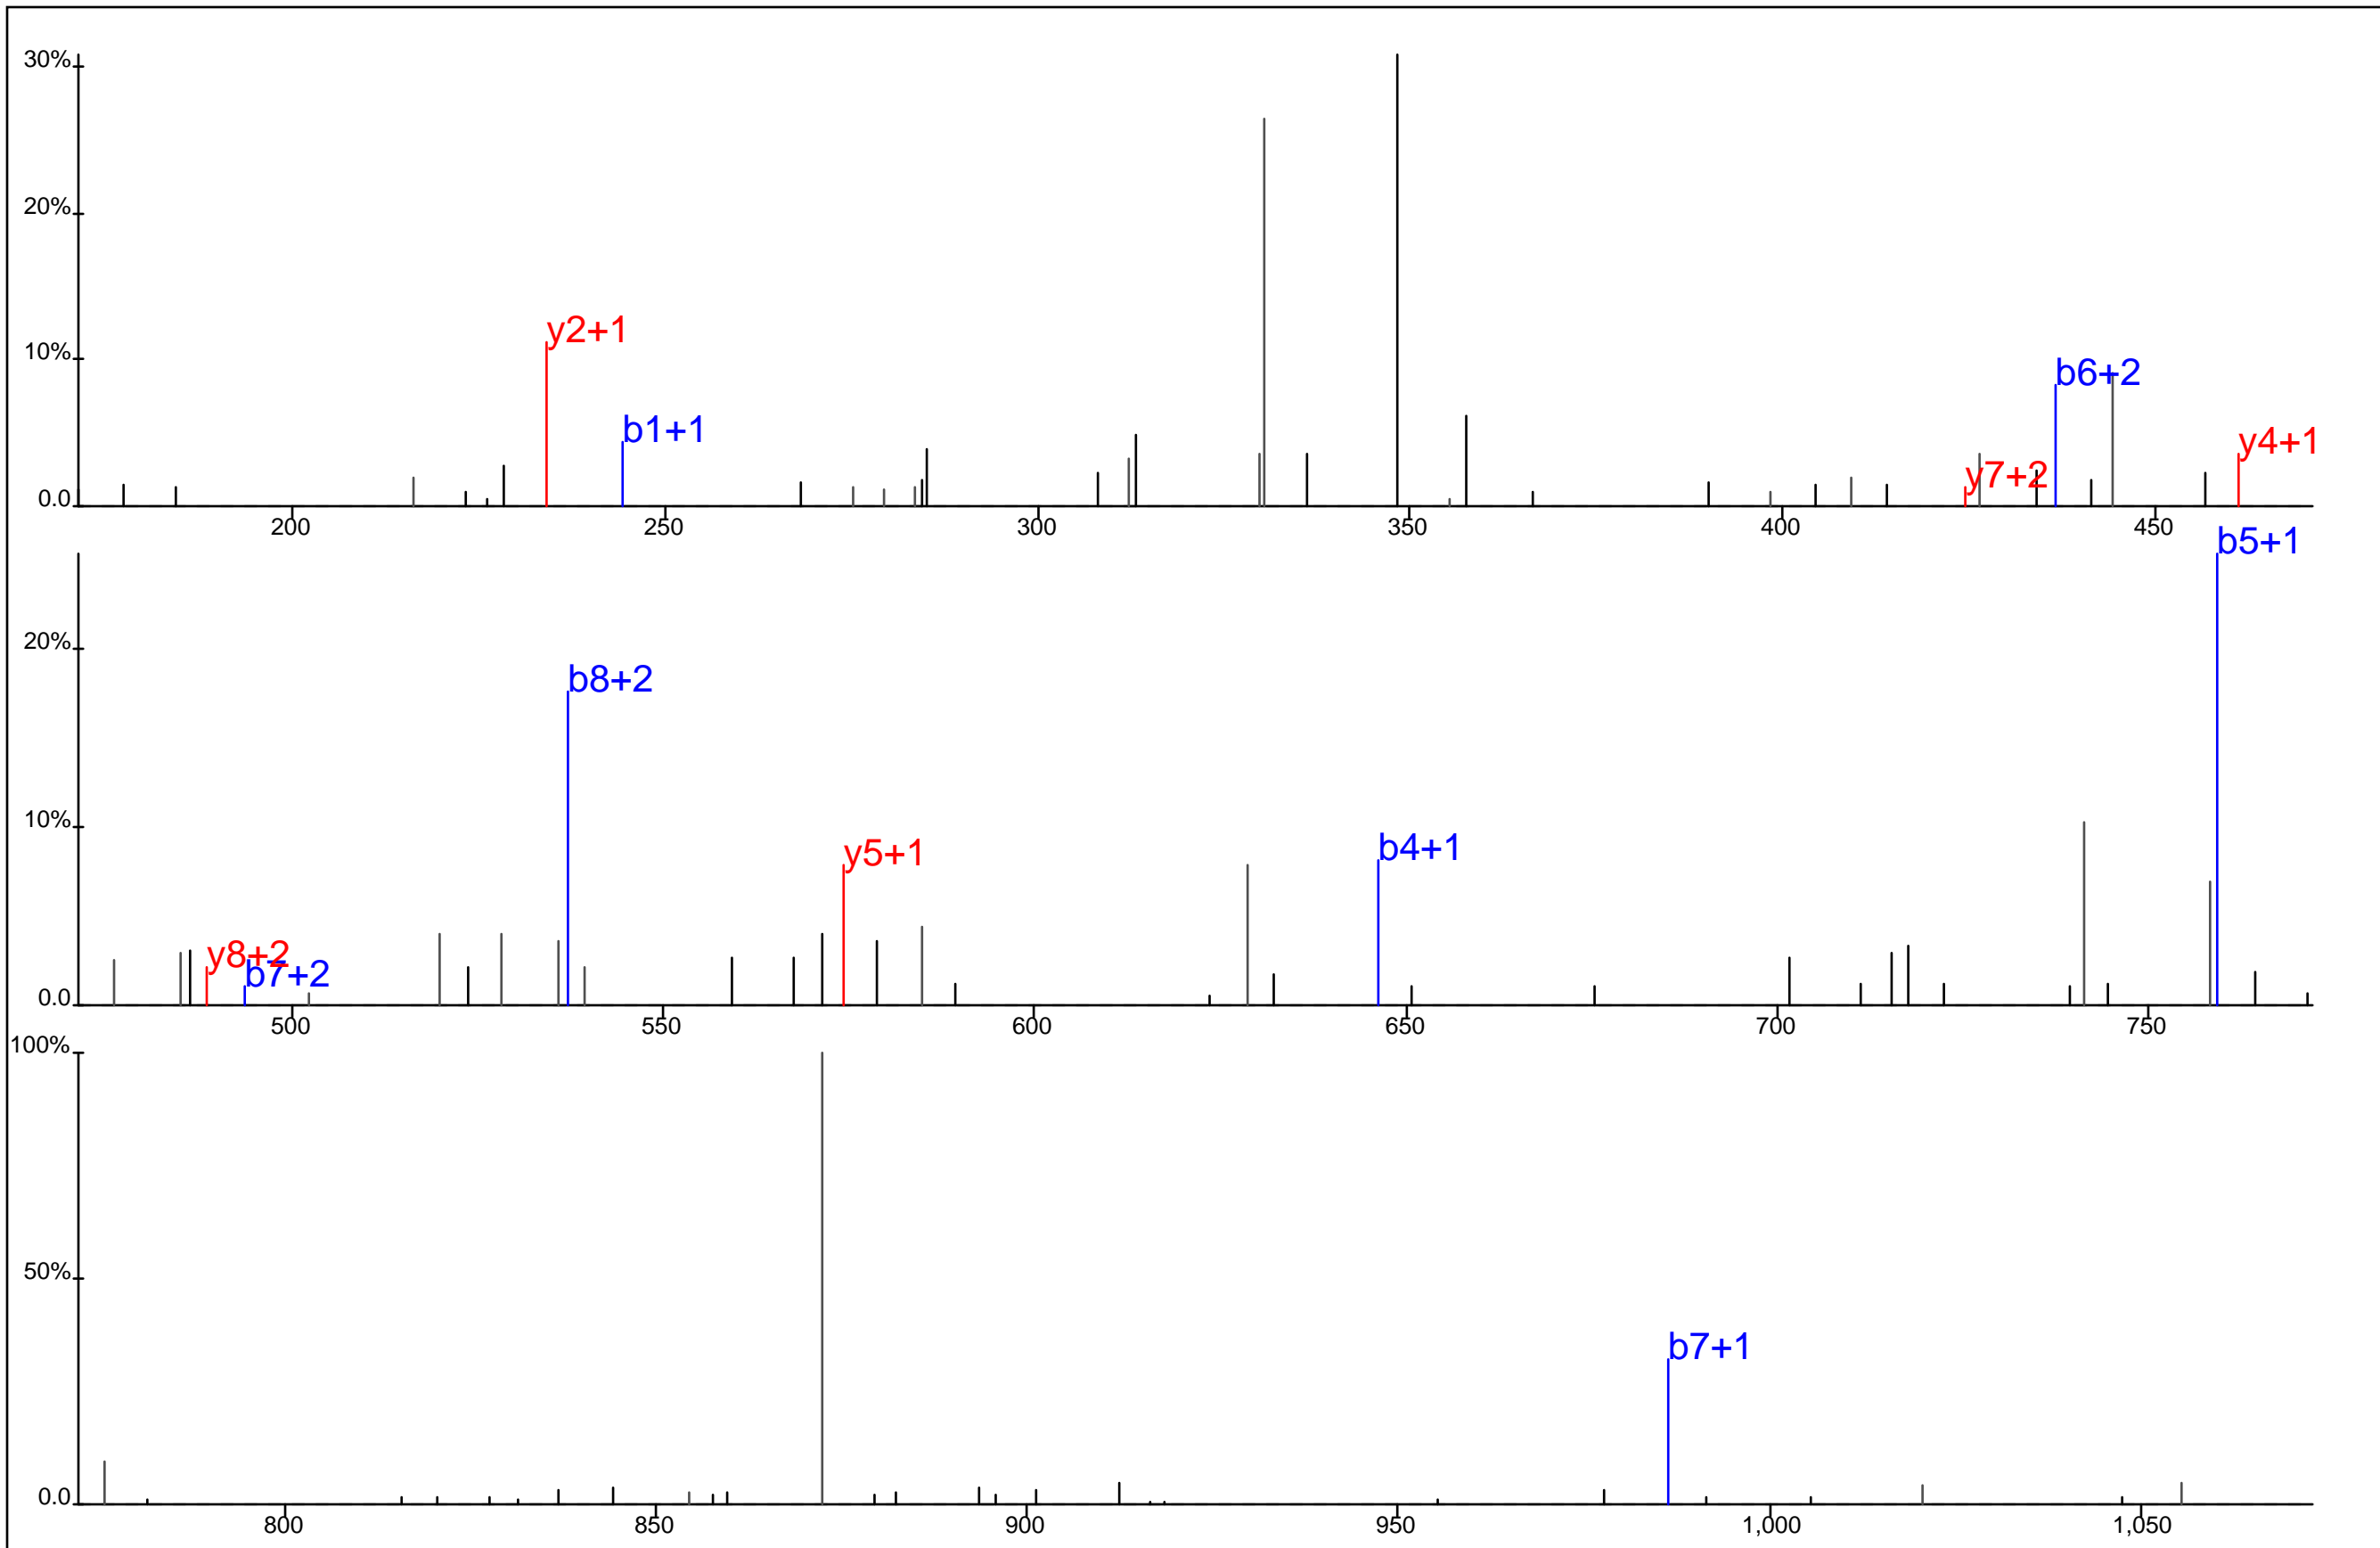

Y\* E C L I N I S K

Protein Name: tr|J3QLS2|J3QLS2\_HUMAN  
 gi Accession: 0  
 Precursor Mass: 610.2789+2  
 Delta Mass: 6.375 ppm  
 XCorr: 33.23

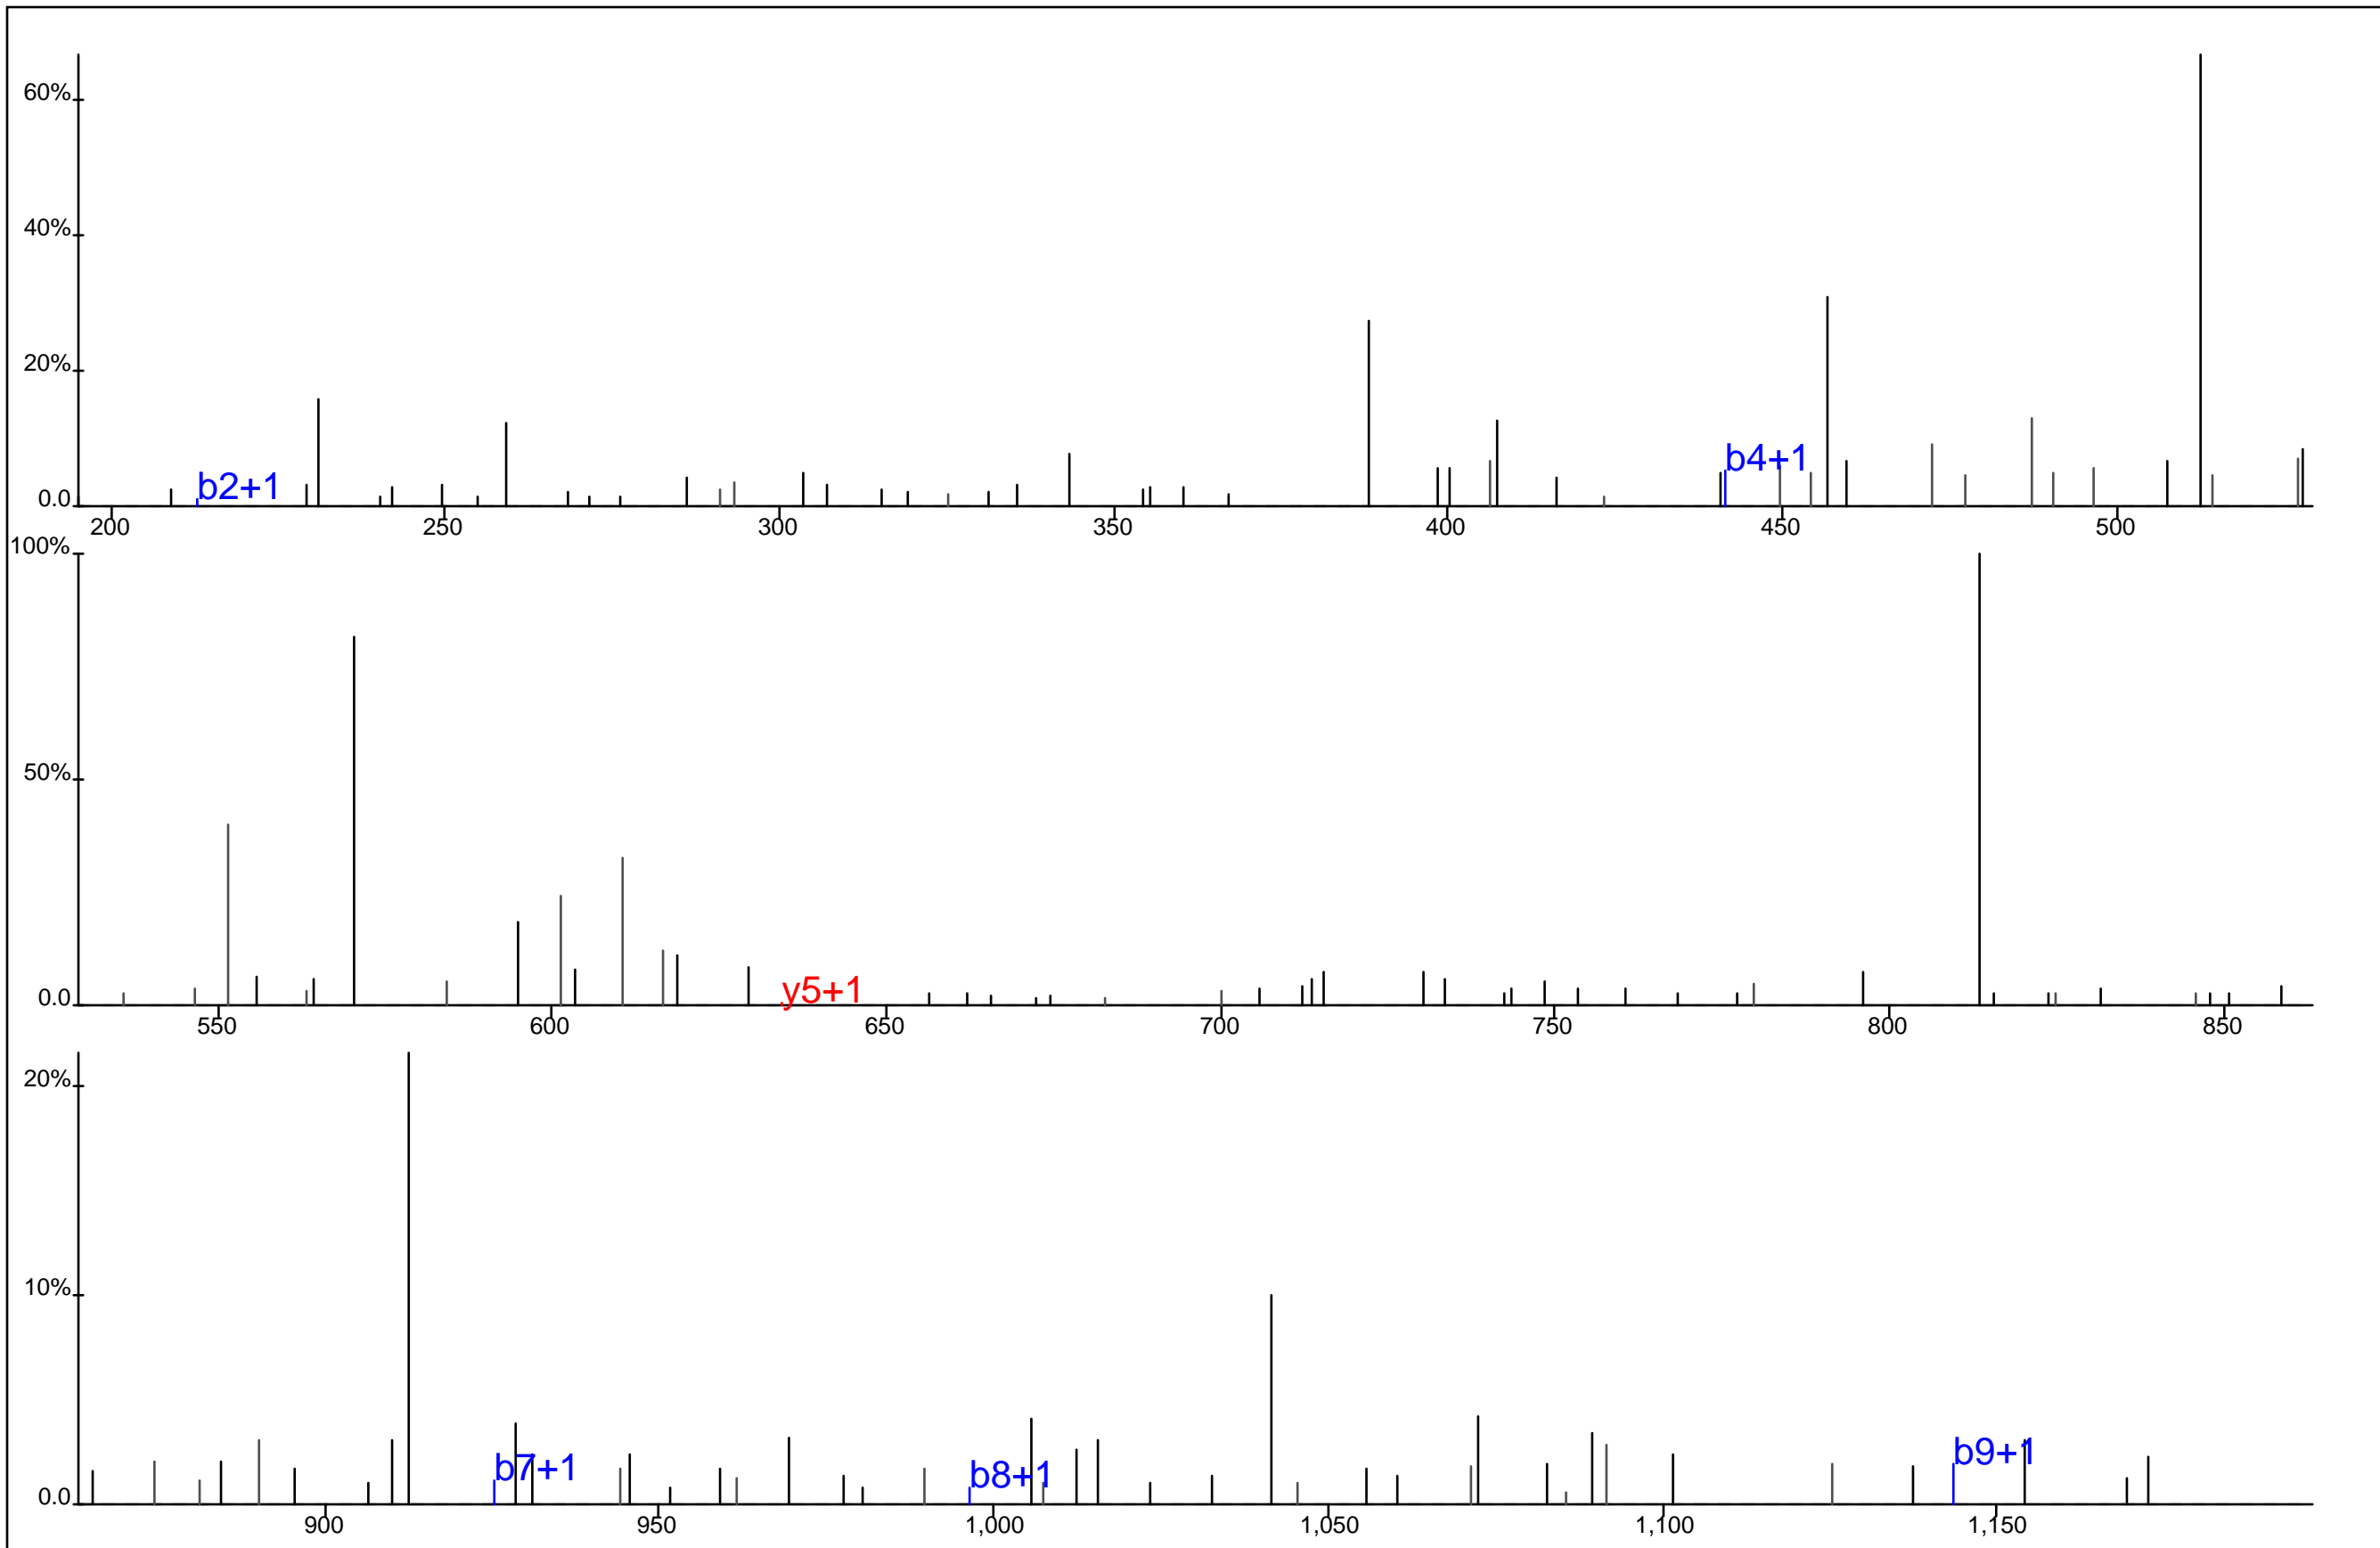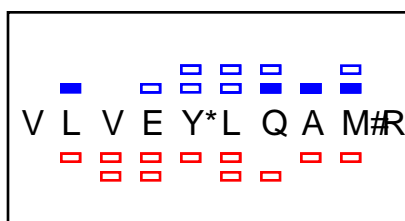

Protein Name: tr|H0YLG3|H0YLG3\_HUMAN  
 gi Accession: 0  
 Precursor Mass: 659.3162+2  
 Delta Mass: 1.557 ppm  
 XCorr: 25.14

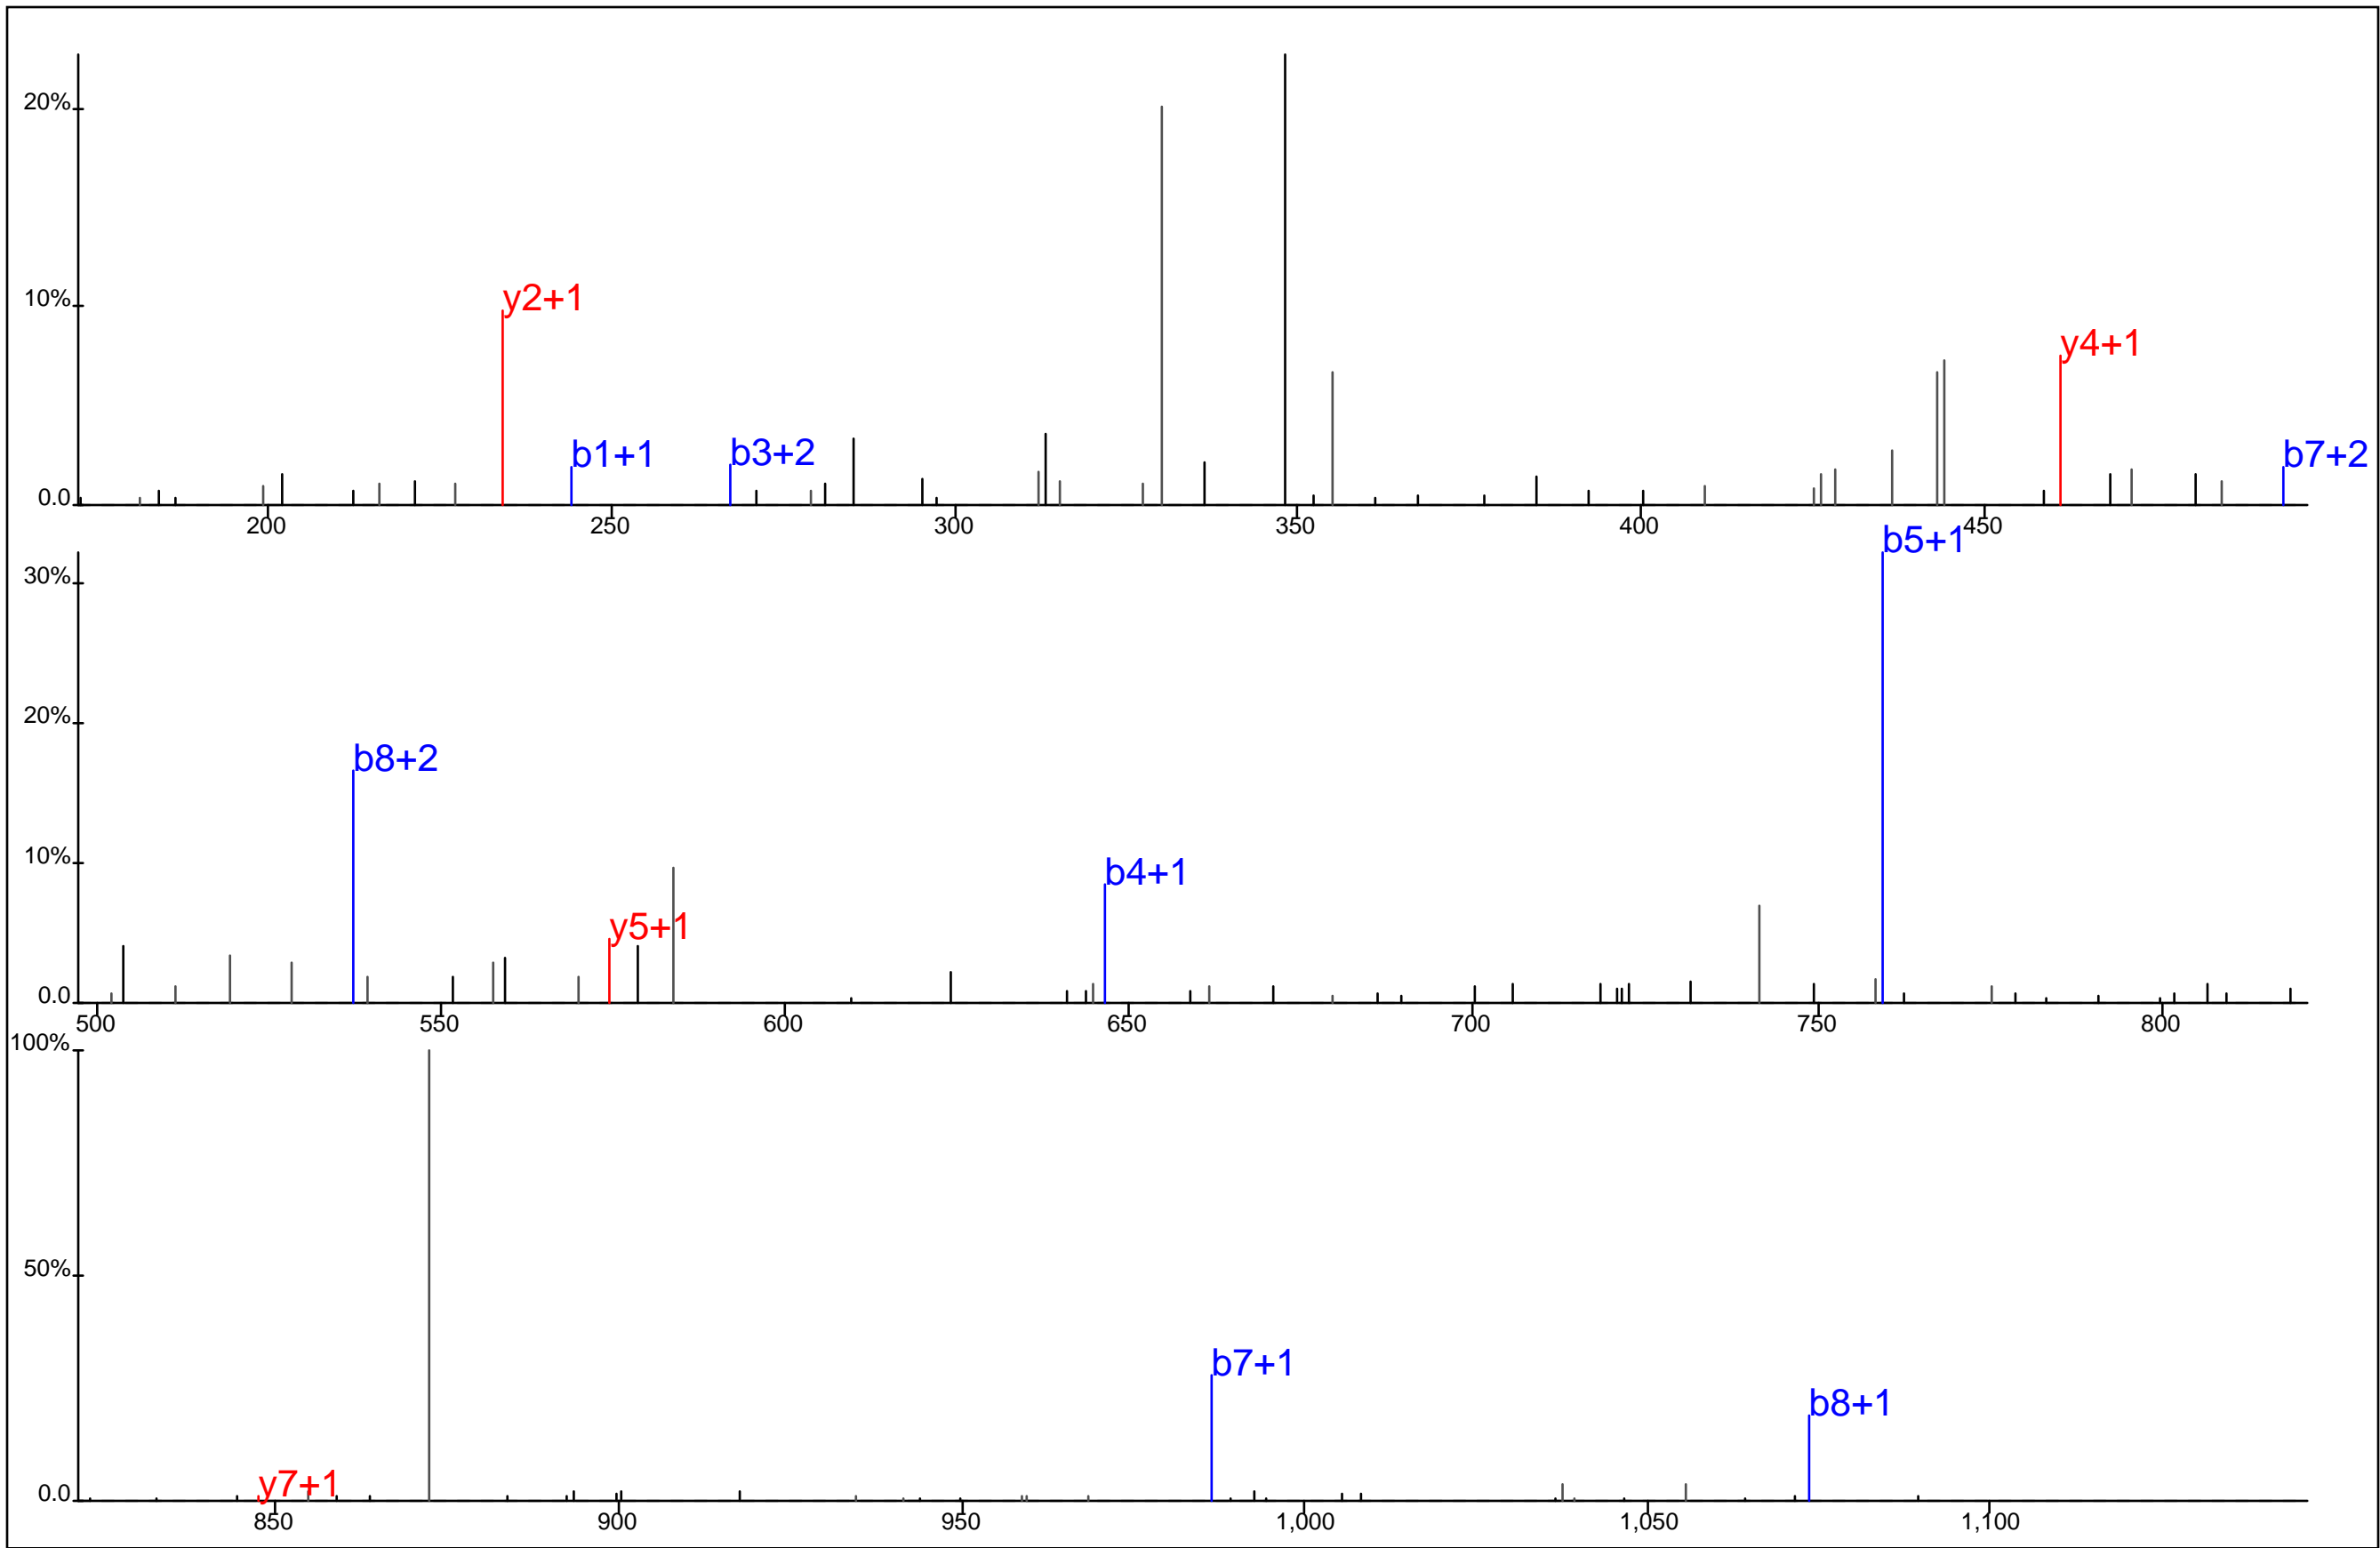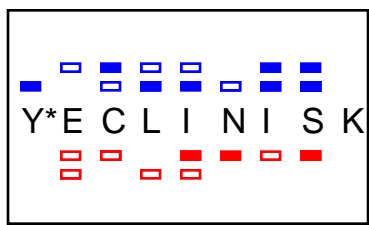

Protein Name: tr|J3QLS2|J3QLS2\_HUMAN  
 gi Accession: 0  
 Precursor Mass: 610.2789+2  
 Delta Mass: 6.274 ppm  
 XCorr: 23.44

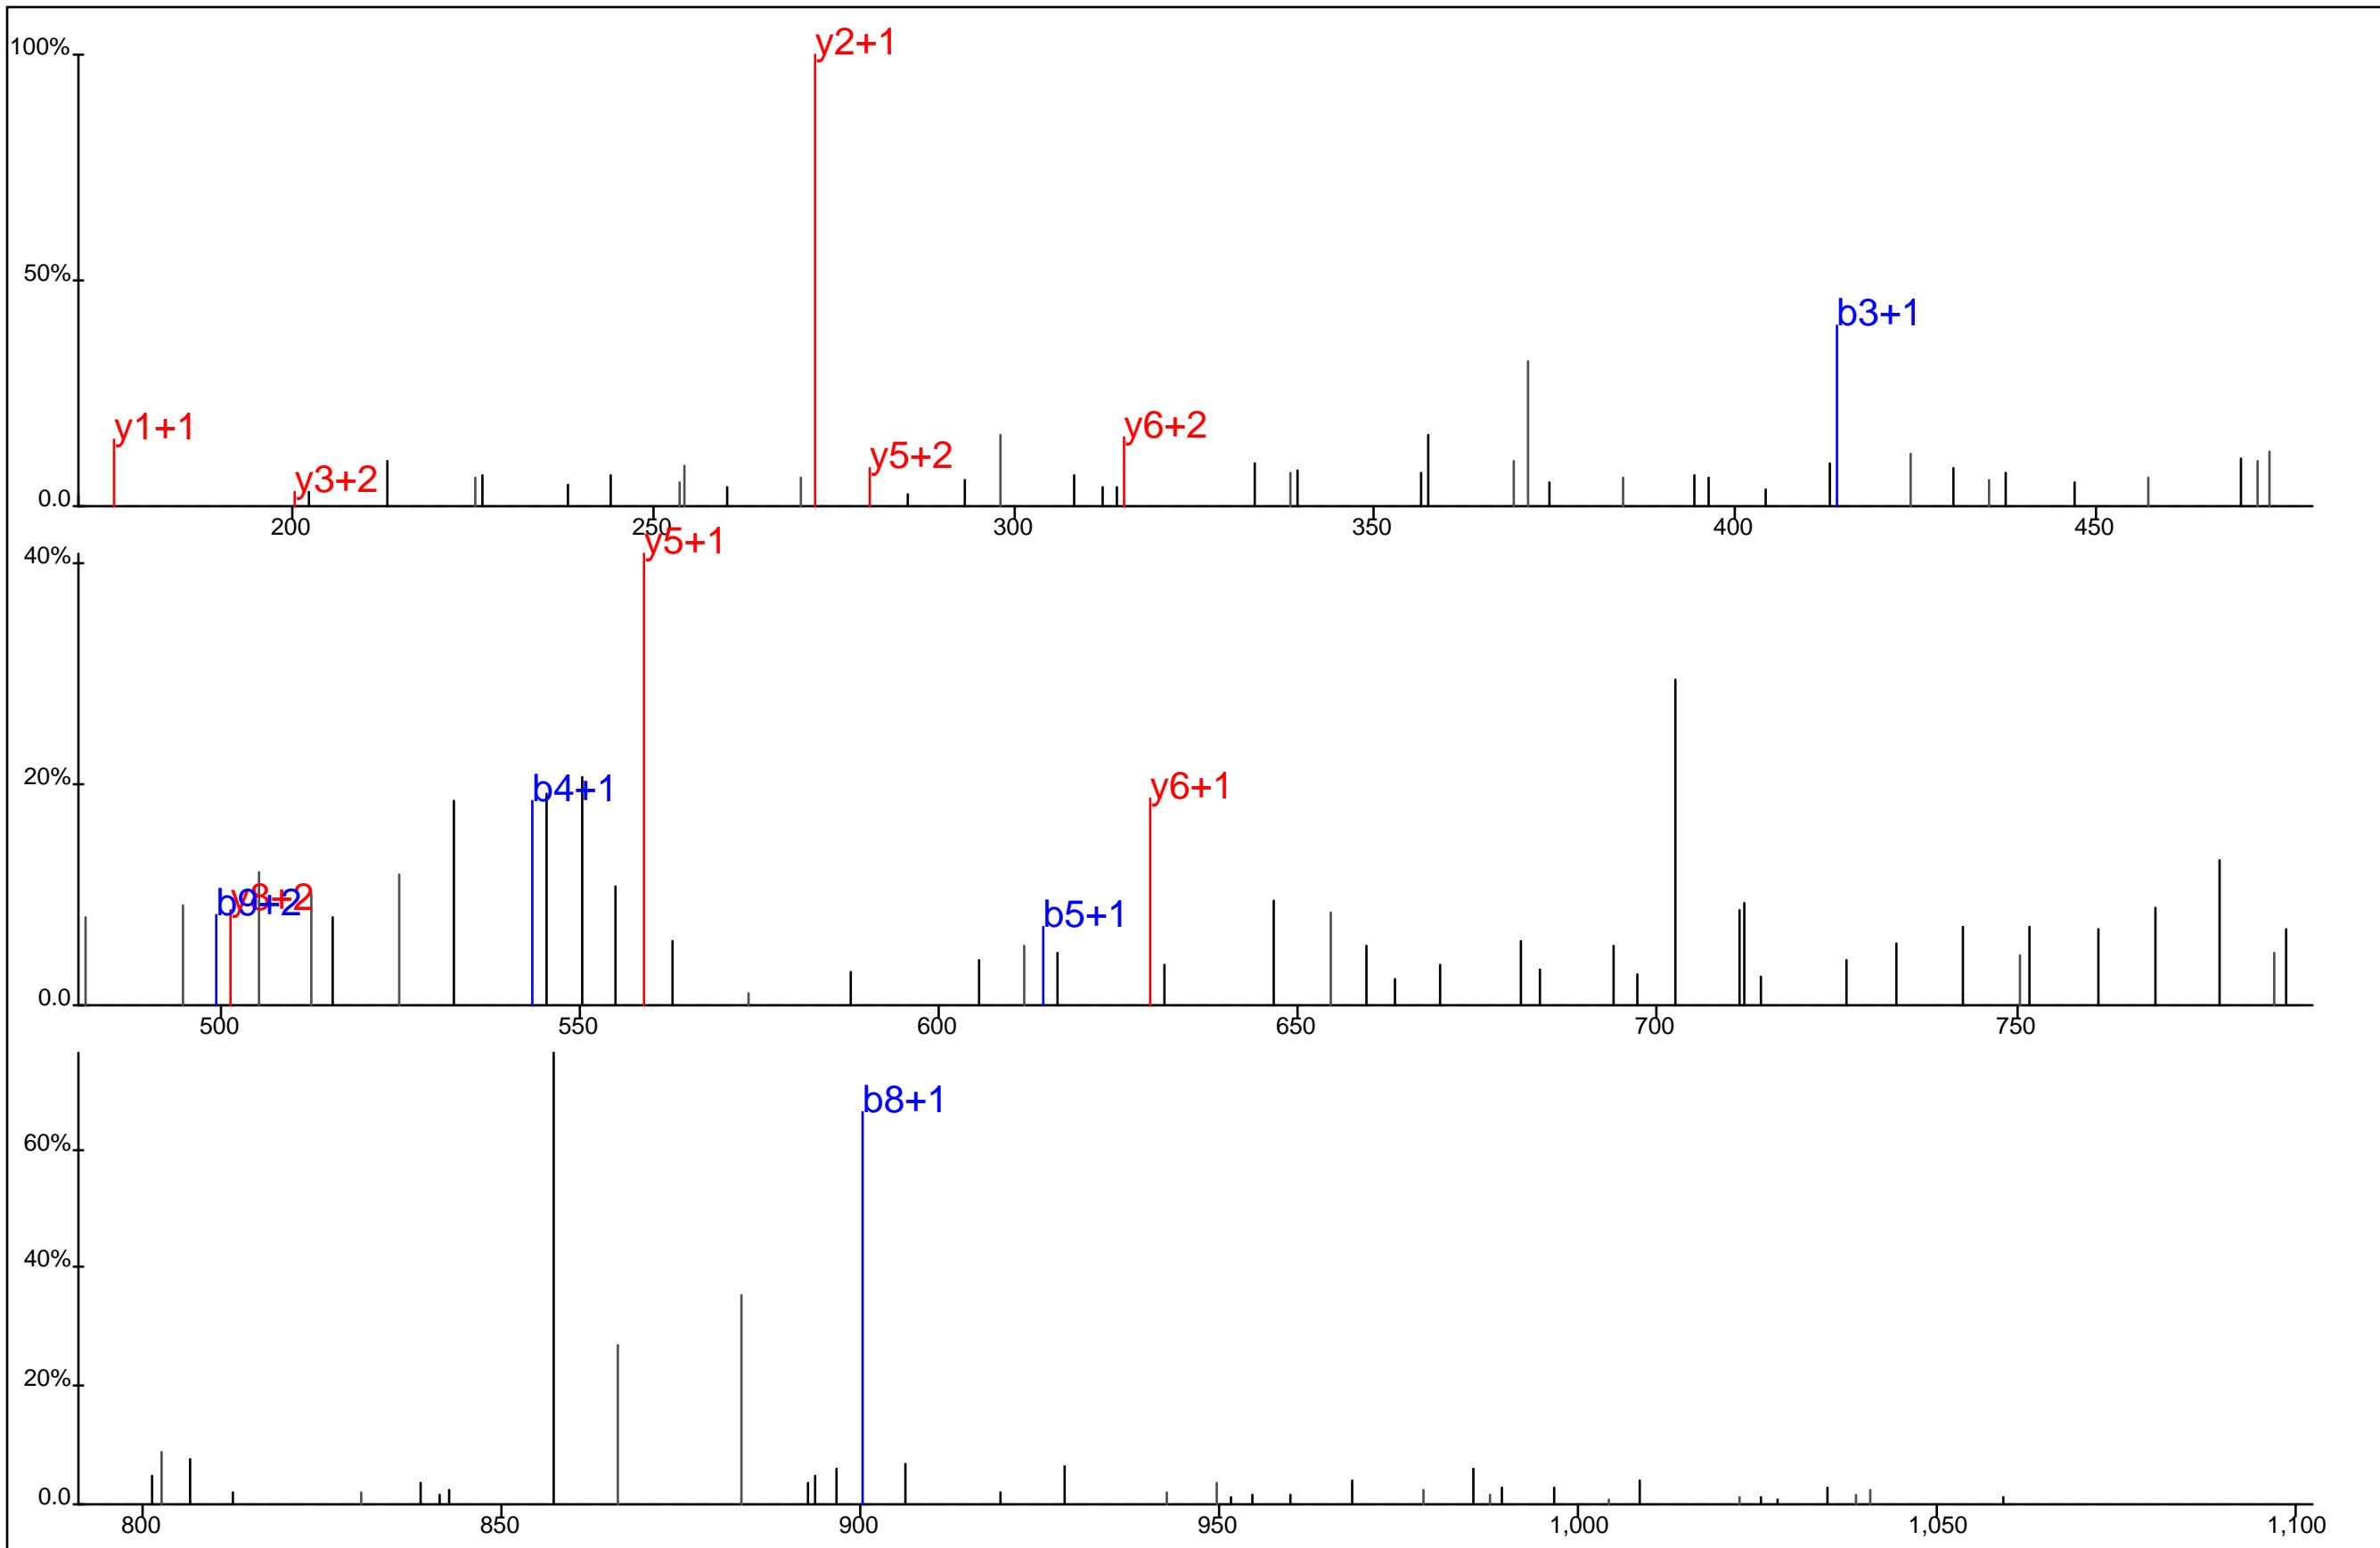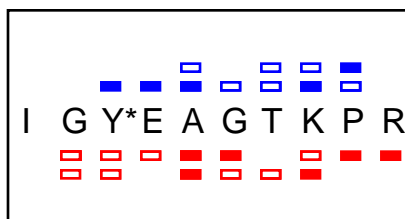

Protein Name: tr|H0YEG5|H0YEG5\_HUMAN  
 gi Accession: 0  
 Precursor Mass: 586.2828+2  
 Delta Mass: 6.473 ppm  
 XCorr: 21.57

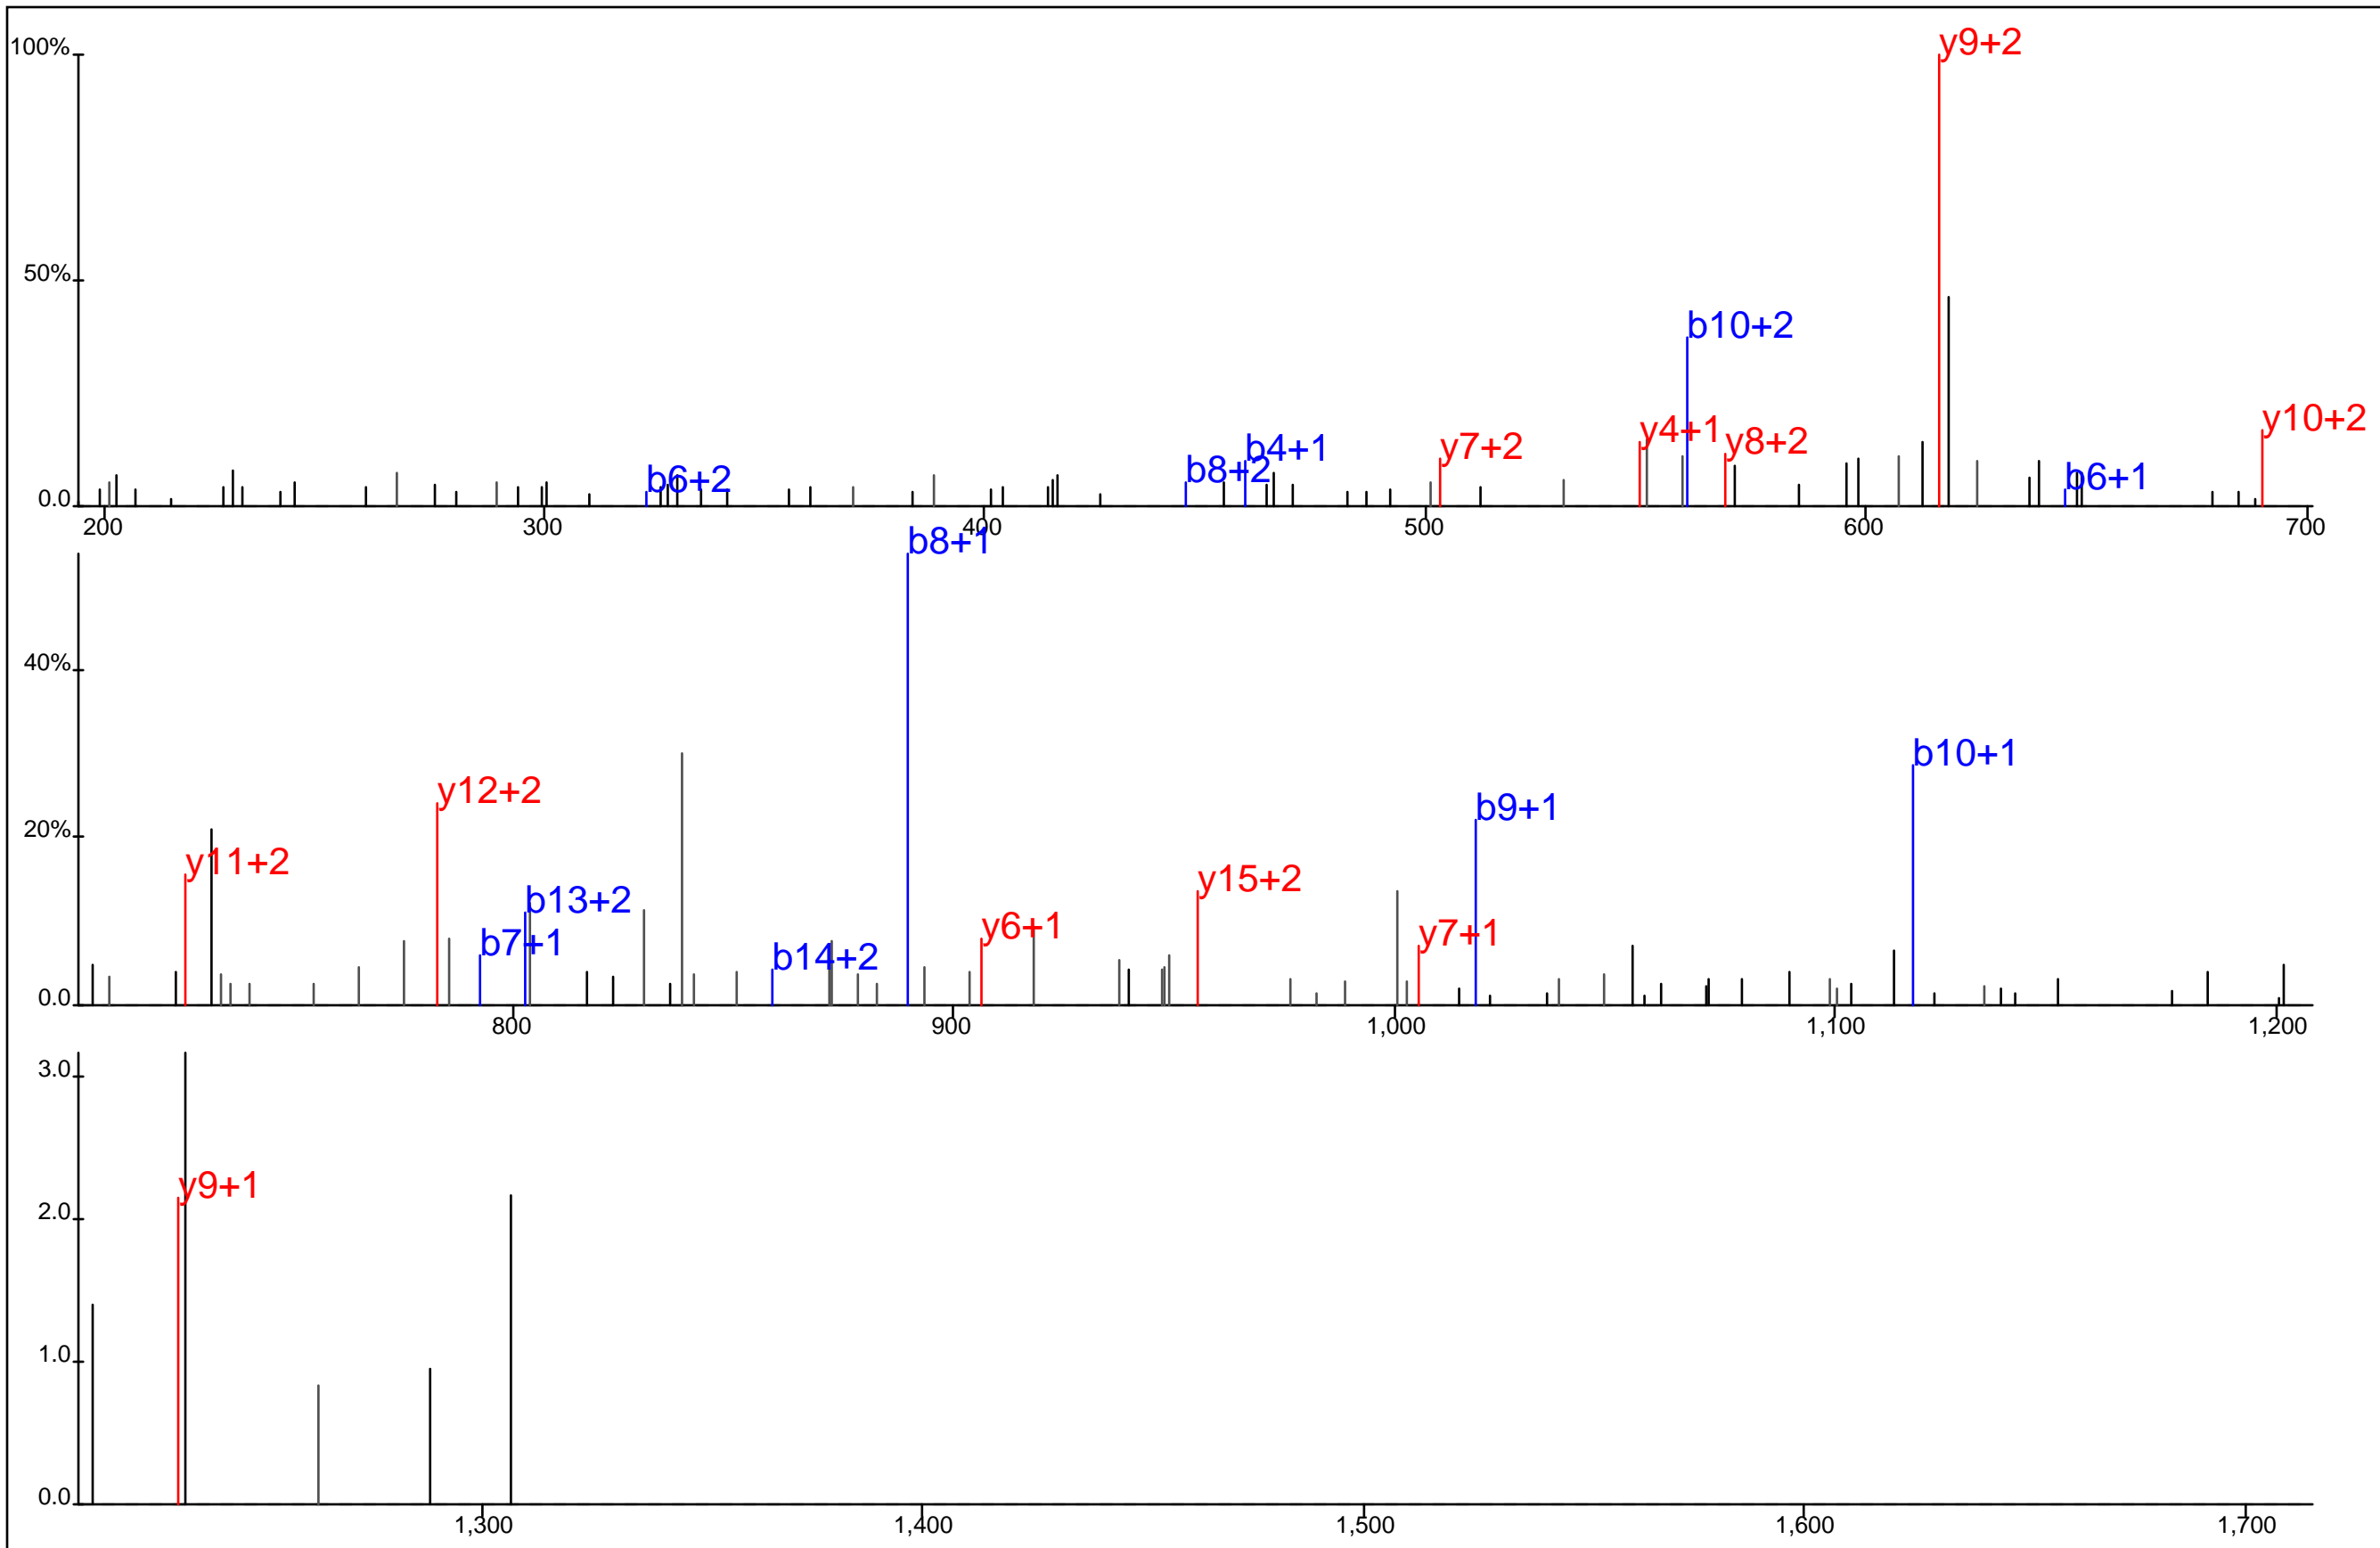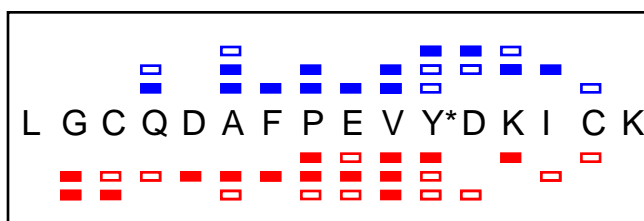

Protein Name: 24 dehydrocholesterol reductase  
 gi Accession: 0  
 Precursor Mass: 674.9620+3  
 Delta Mass: 0.643 ppm  
 XCorr: 23.84

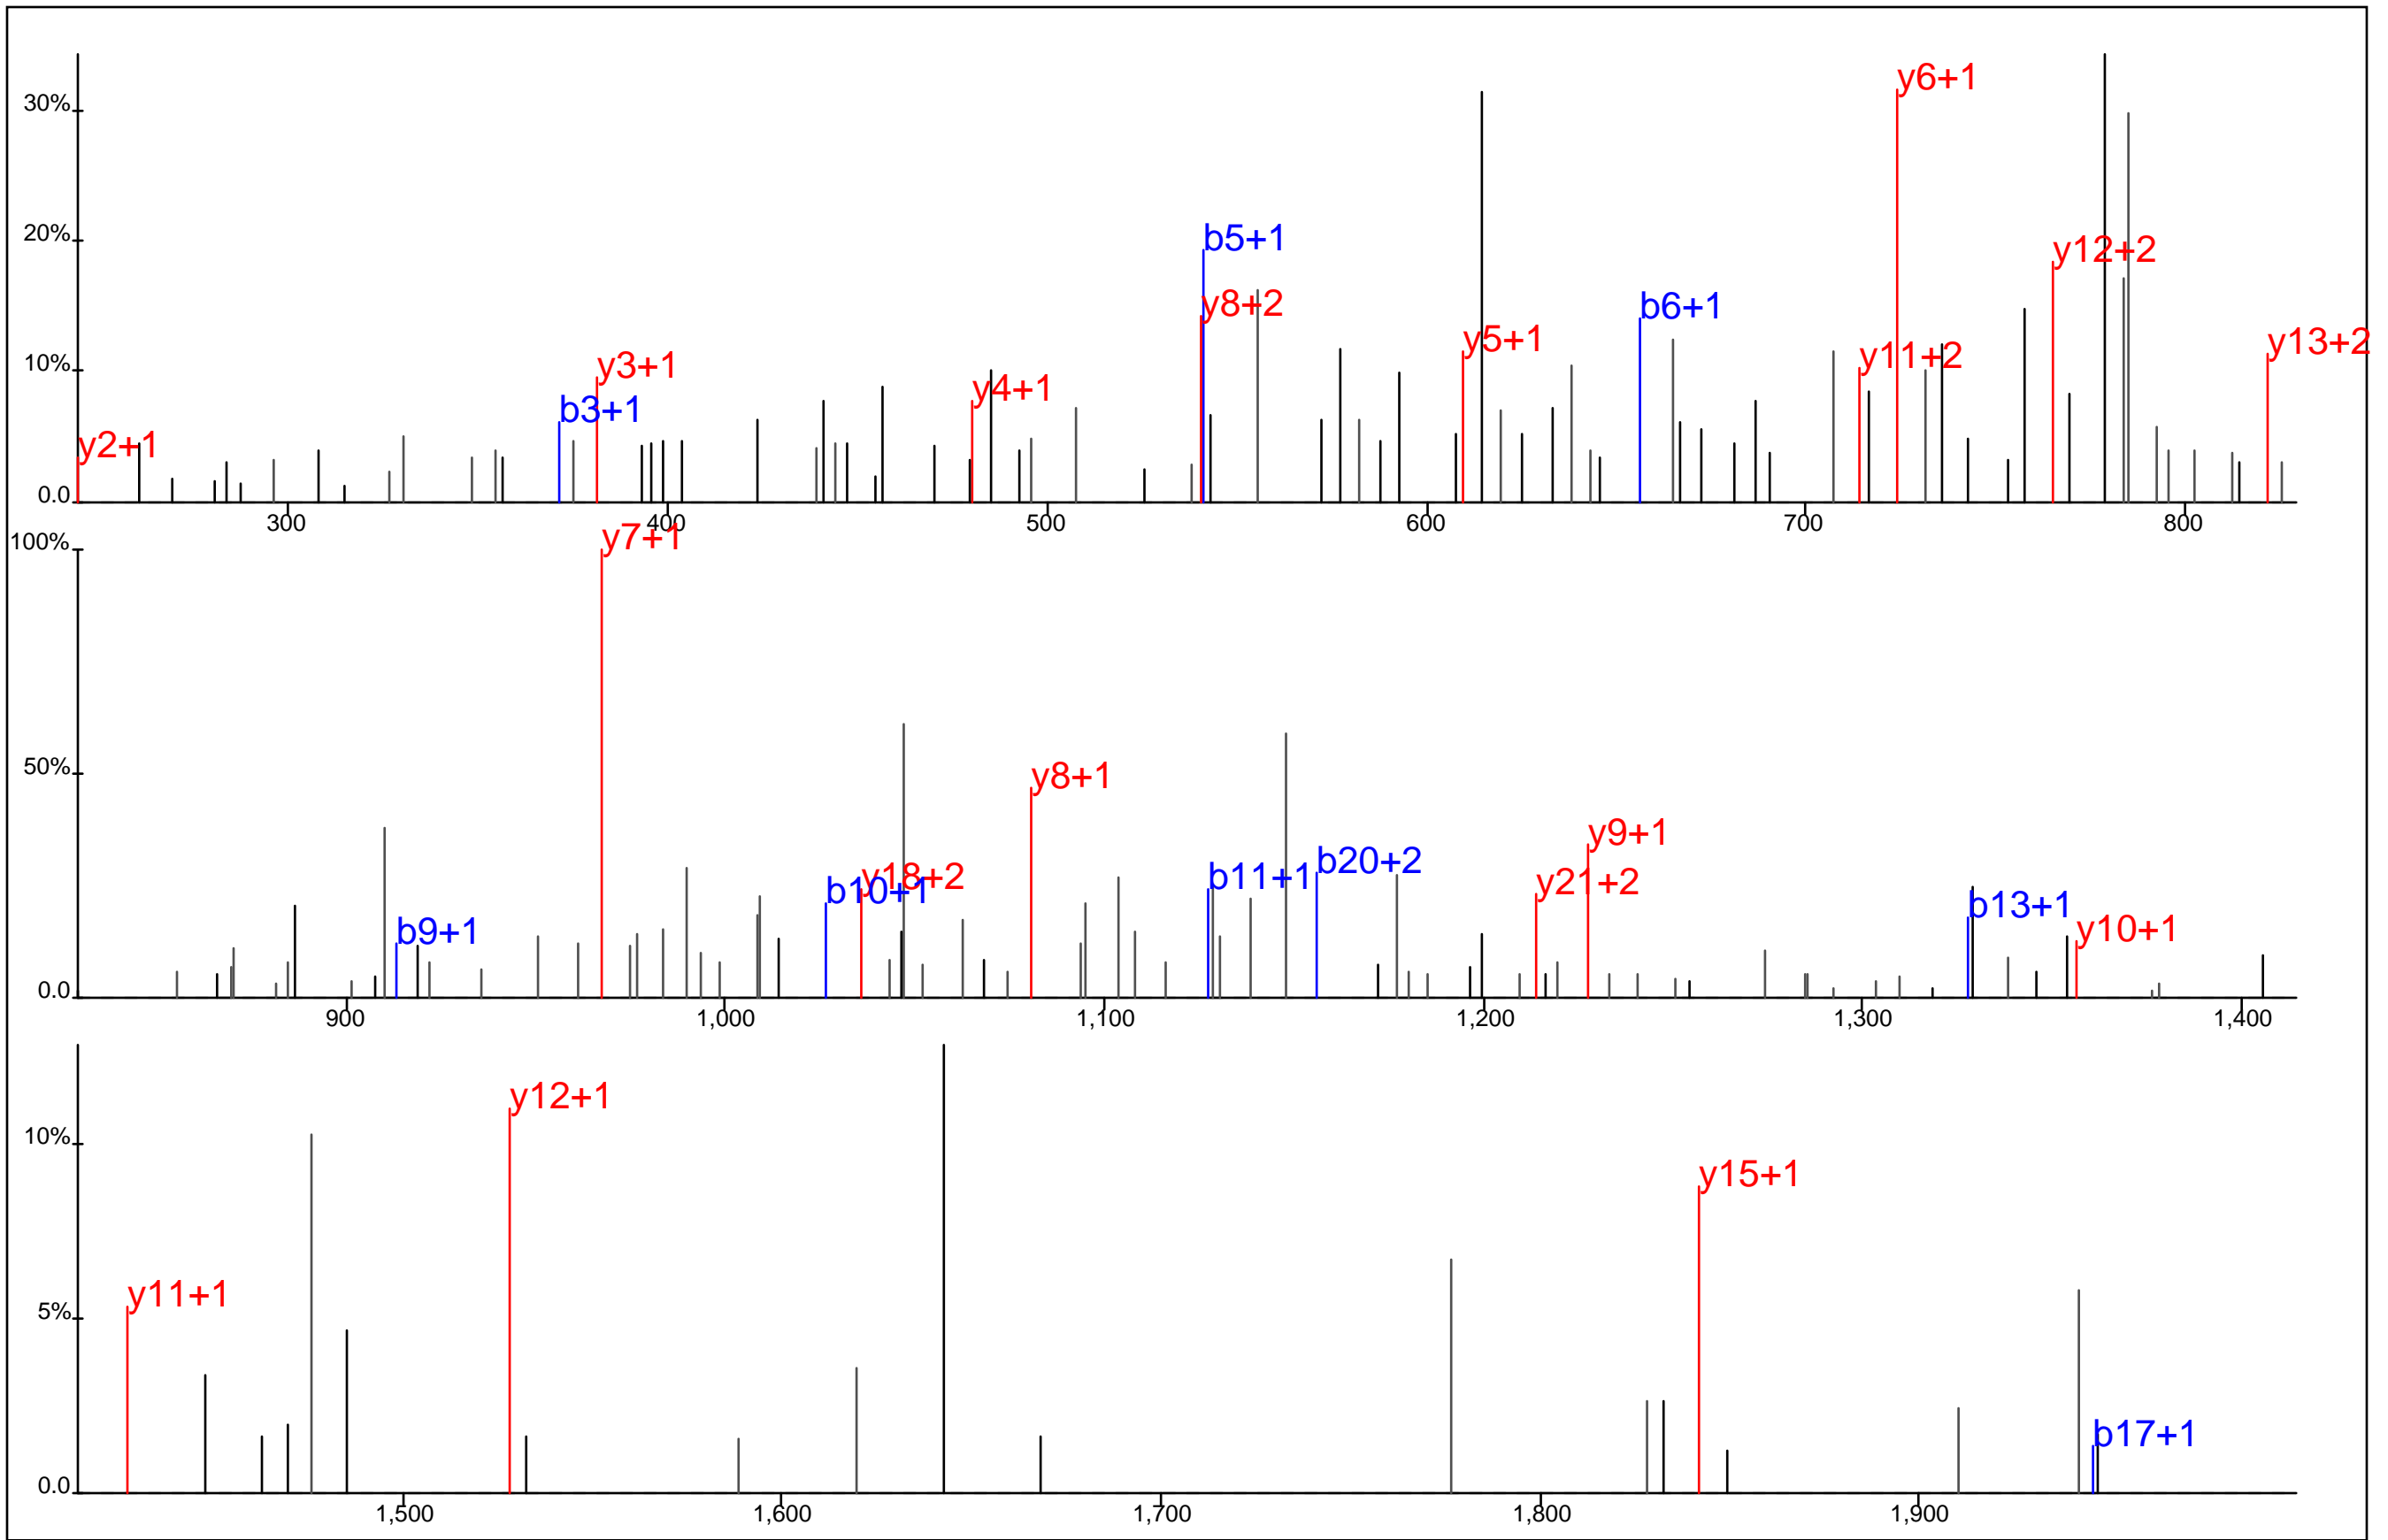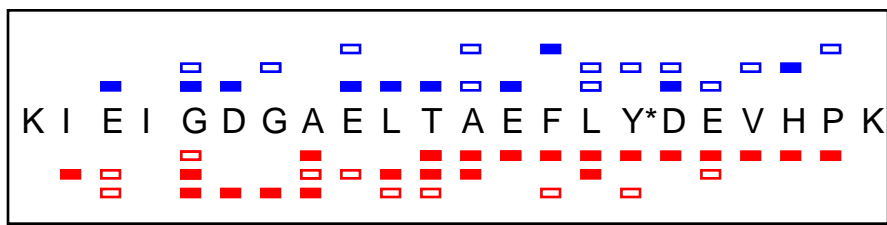

Protein Name: A6RP  
 gi Accession: 0  
 Precursor Mass: 852.0774+3  
 Delta Mass: 2.500 ppm  
 XCorr: 50.29





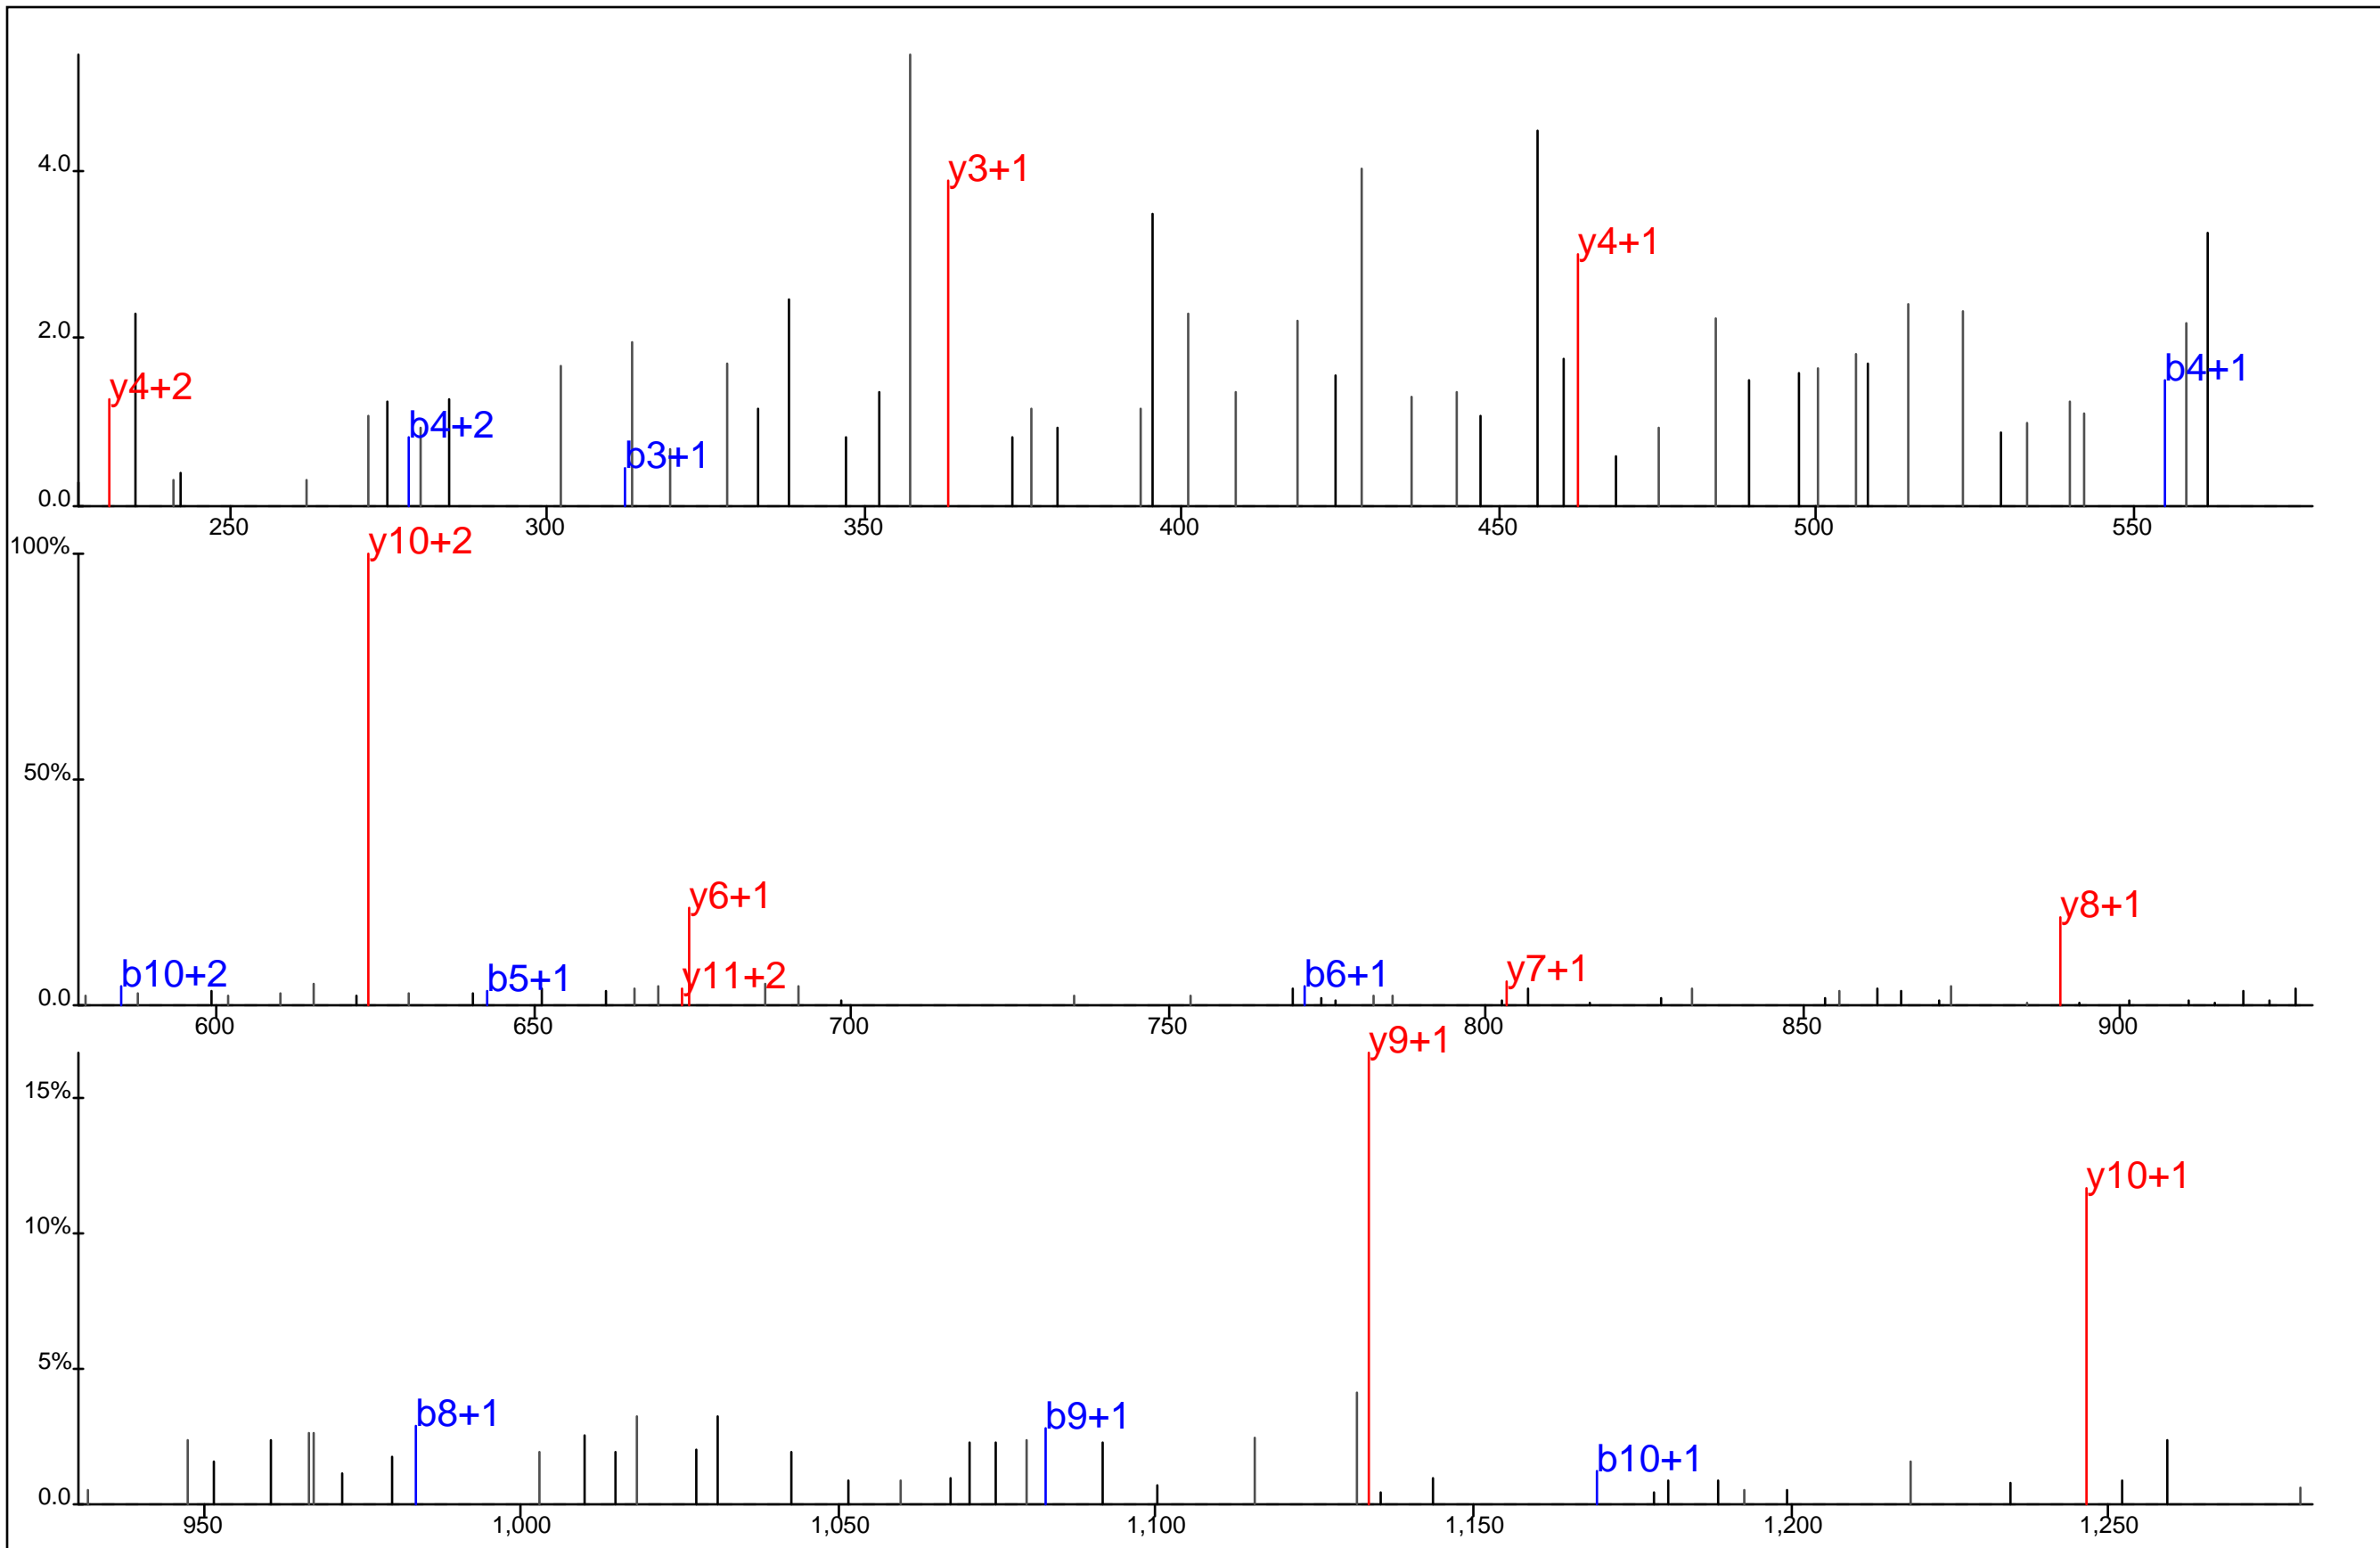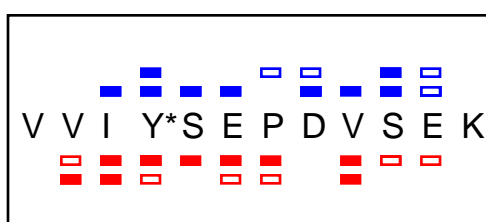

Protein Name: Absent in melanoma 1  
 gi Accession: 0  
 Precursor Mass: 722.8313+2  
 Delta Mass: 3.724 ppm  
 XCorr: 31.96

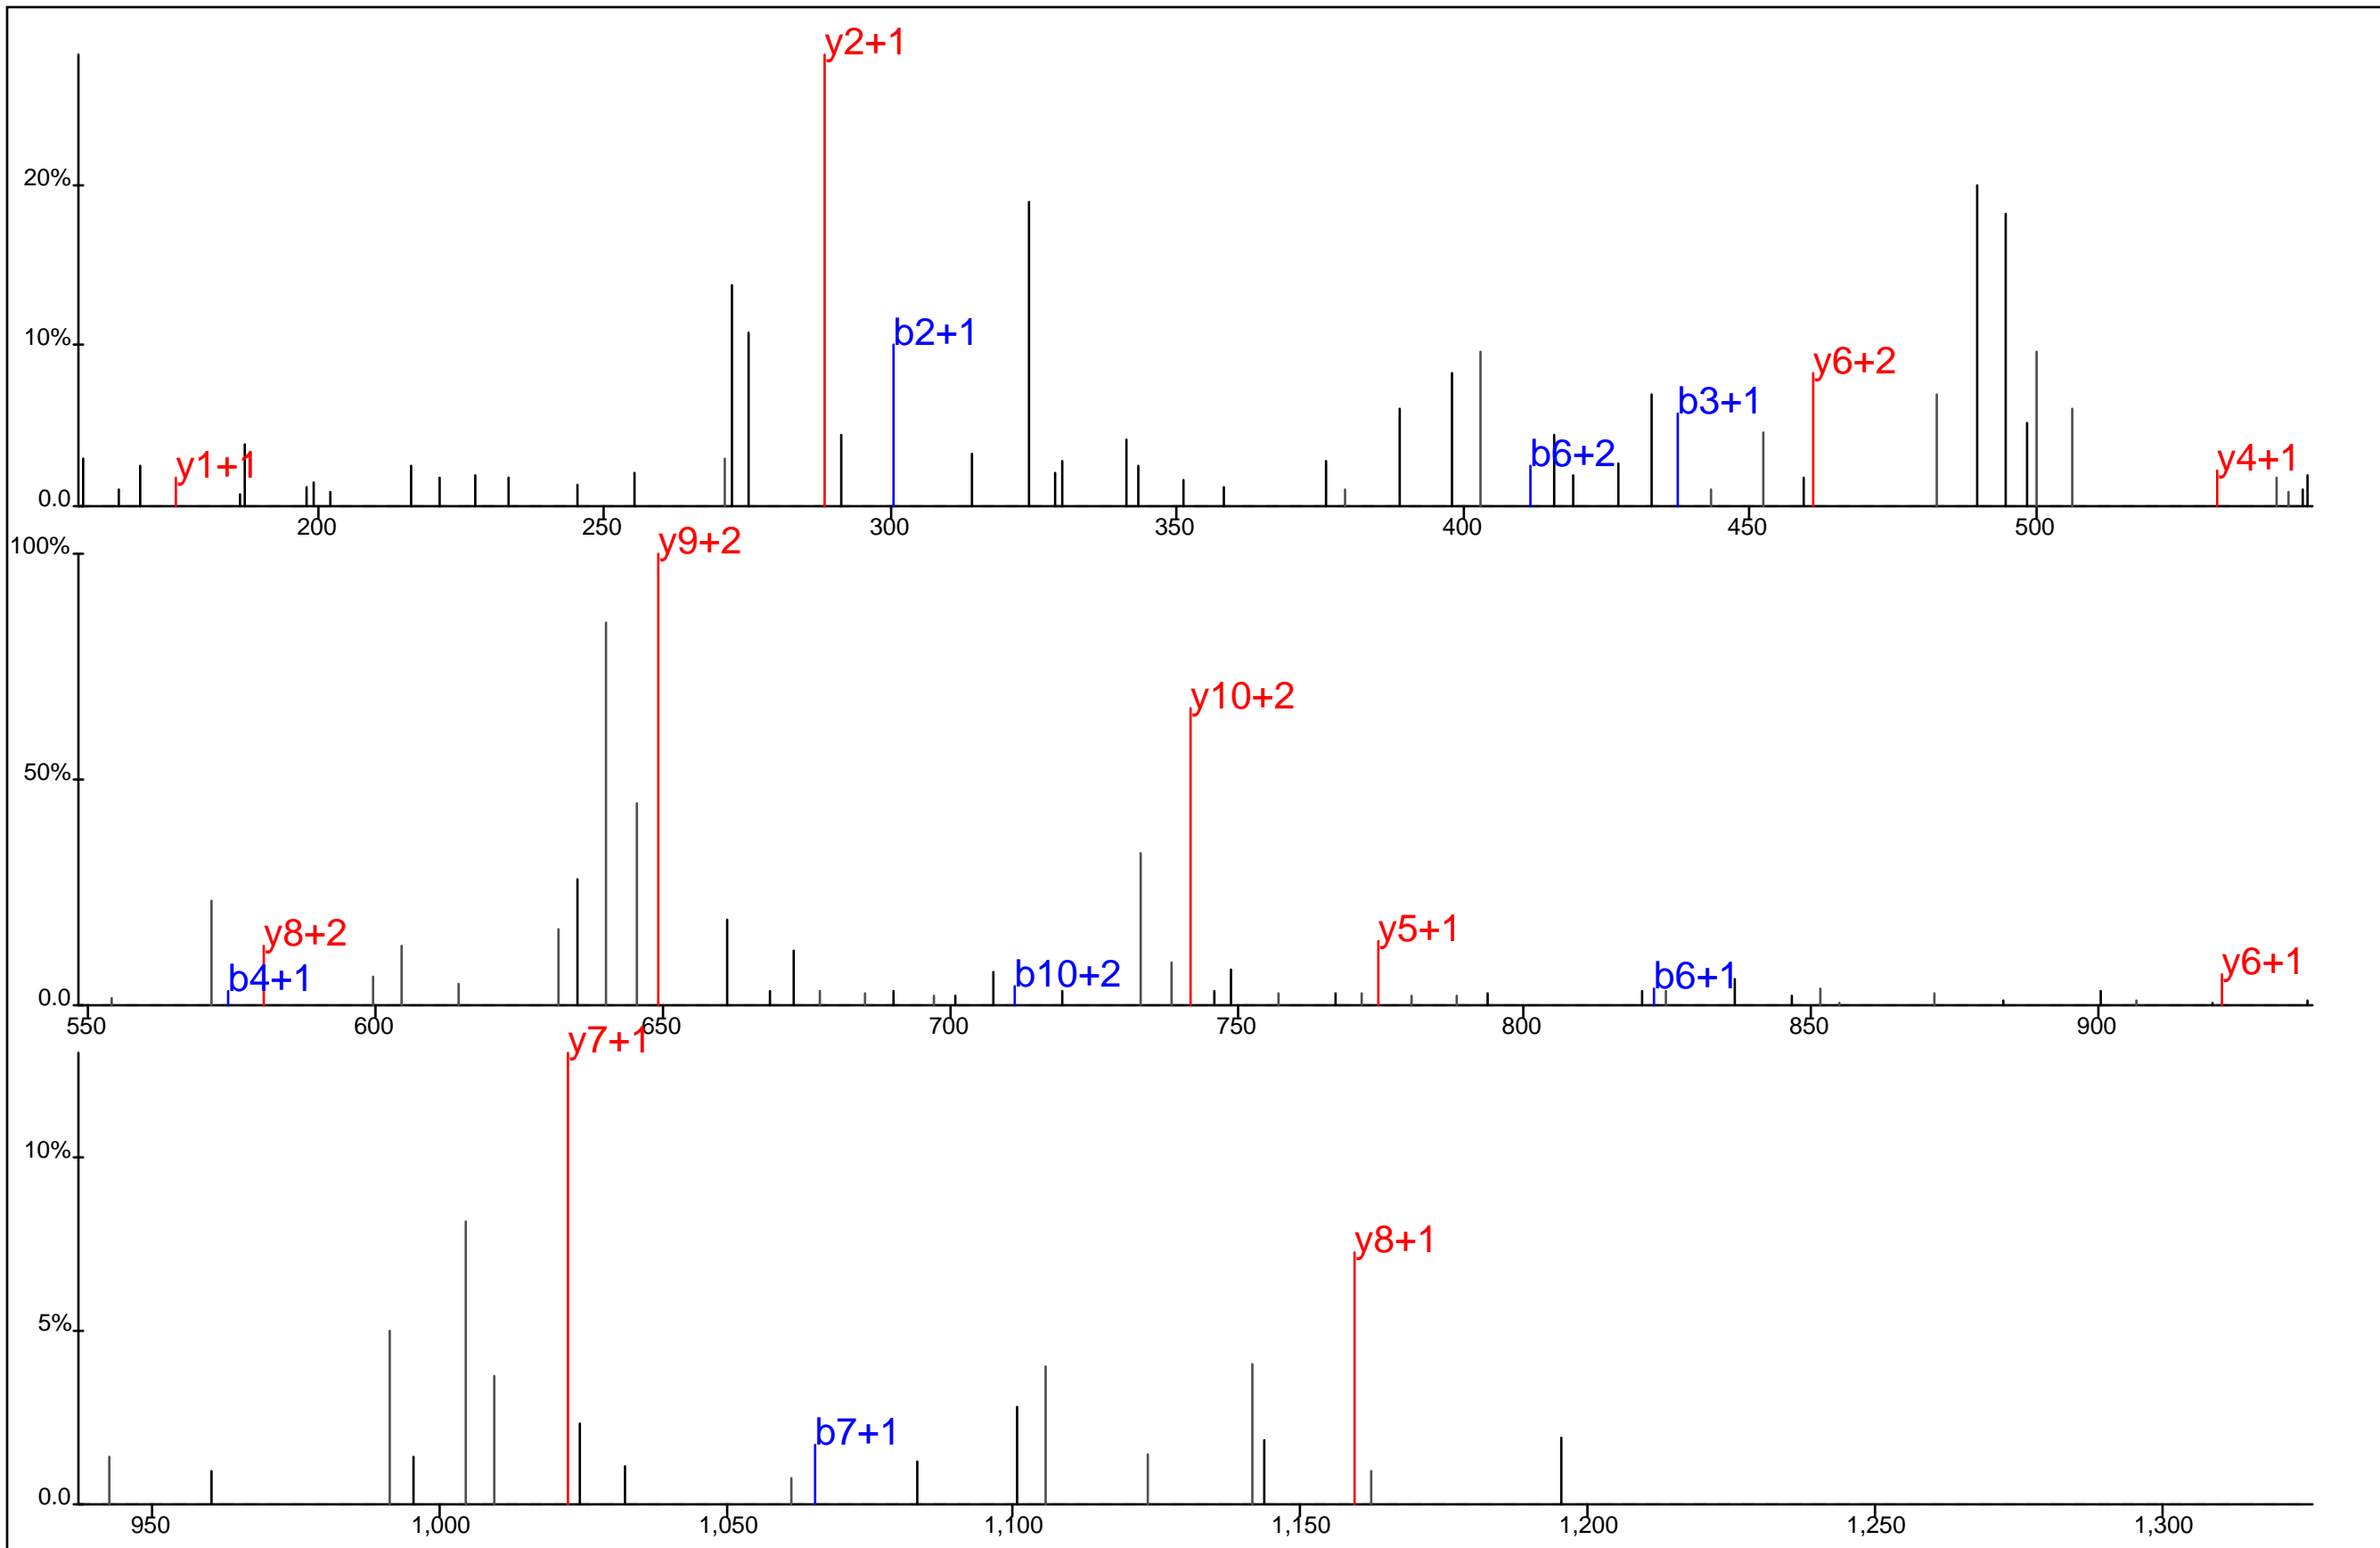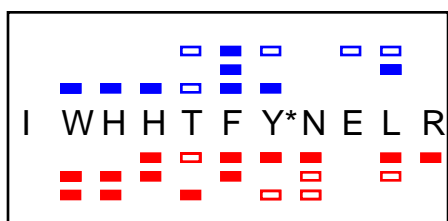

Protein Name: Actin alpha, cardiac muscle  
 gi Accession: 0  
 Precursor Mass: 532.5764+3  
 Delta Mass: 0.480 ppm  
 XCorr: 29.12

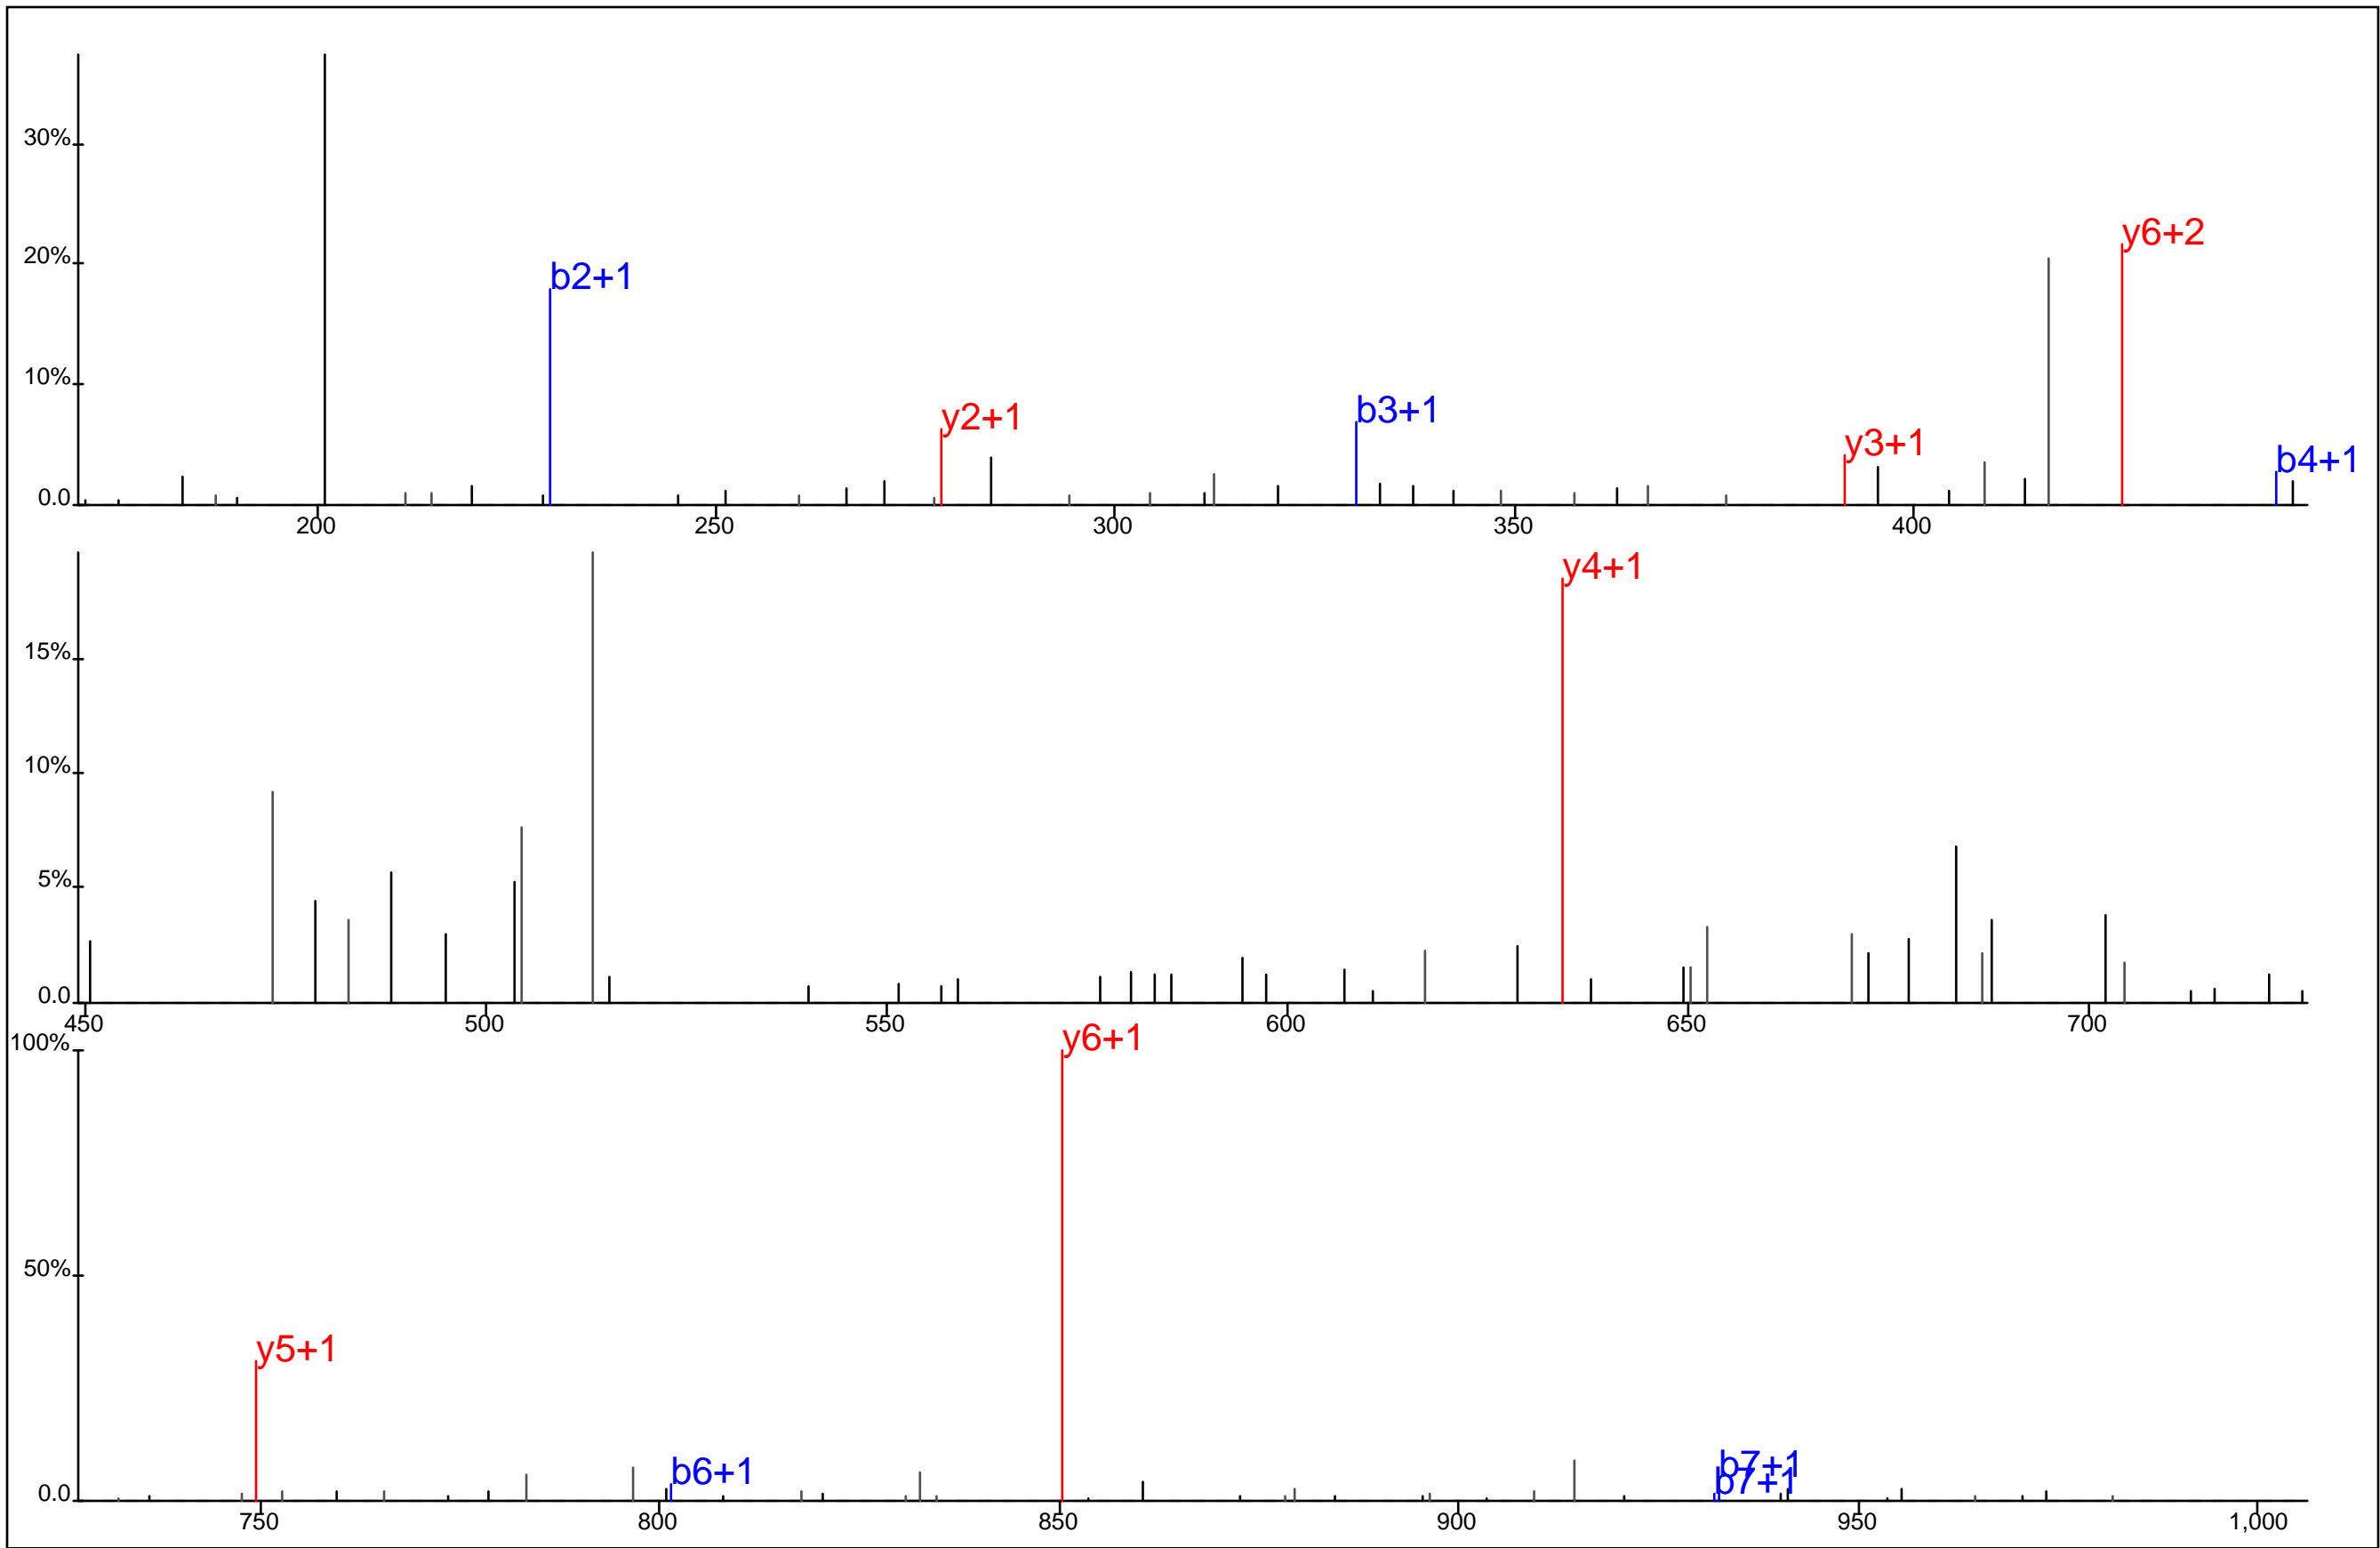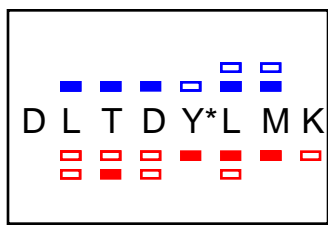

Protein Name: Actin alpha, cardiac muscle  
 gi Accession: 0  
 Precursor Mass: 539.7307+2  
 Delta Mass: 1.304 ppm  
 XCorr: 24.57

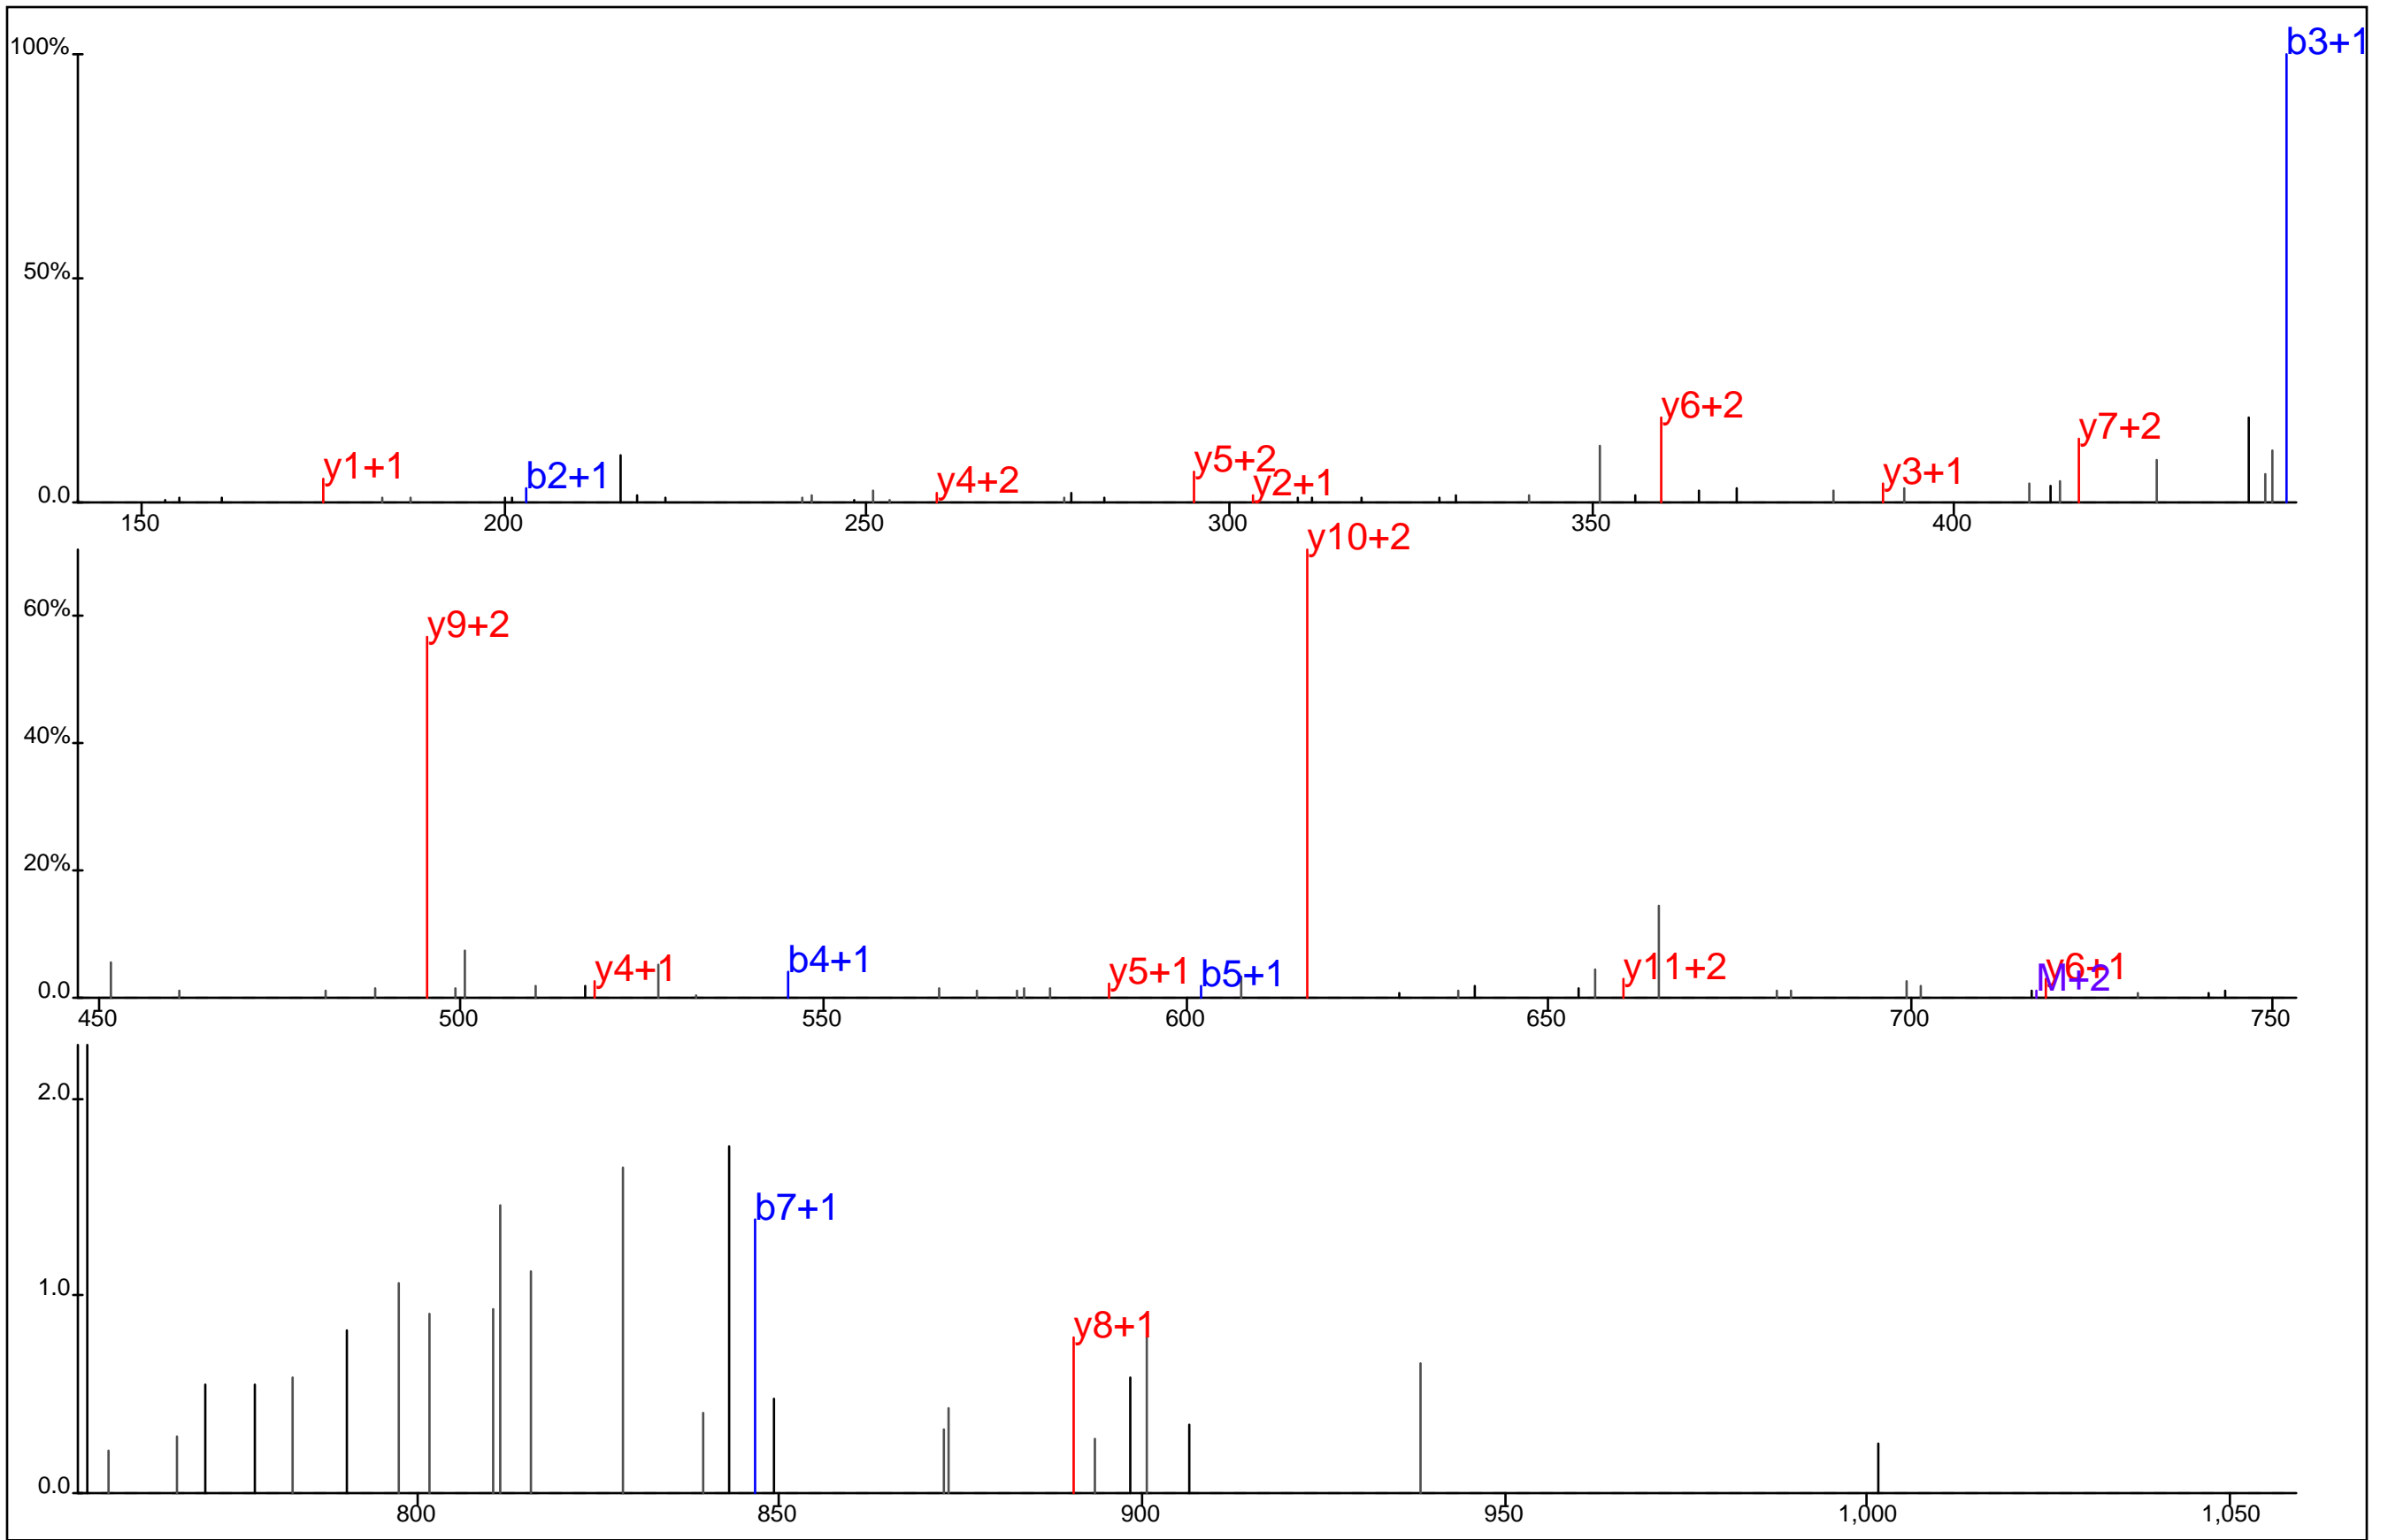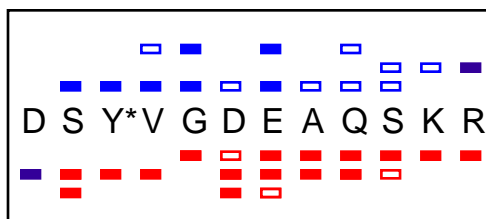

Protein Name: Actin alpha, cardiac muscle  
 gi Accession: 0  
 Precursor Mass: 478.8682+3  
 Delta Mass: 0.194 ppm  
 XCorr: 56.32

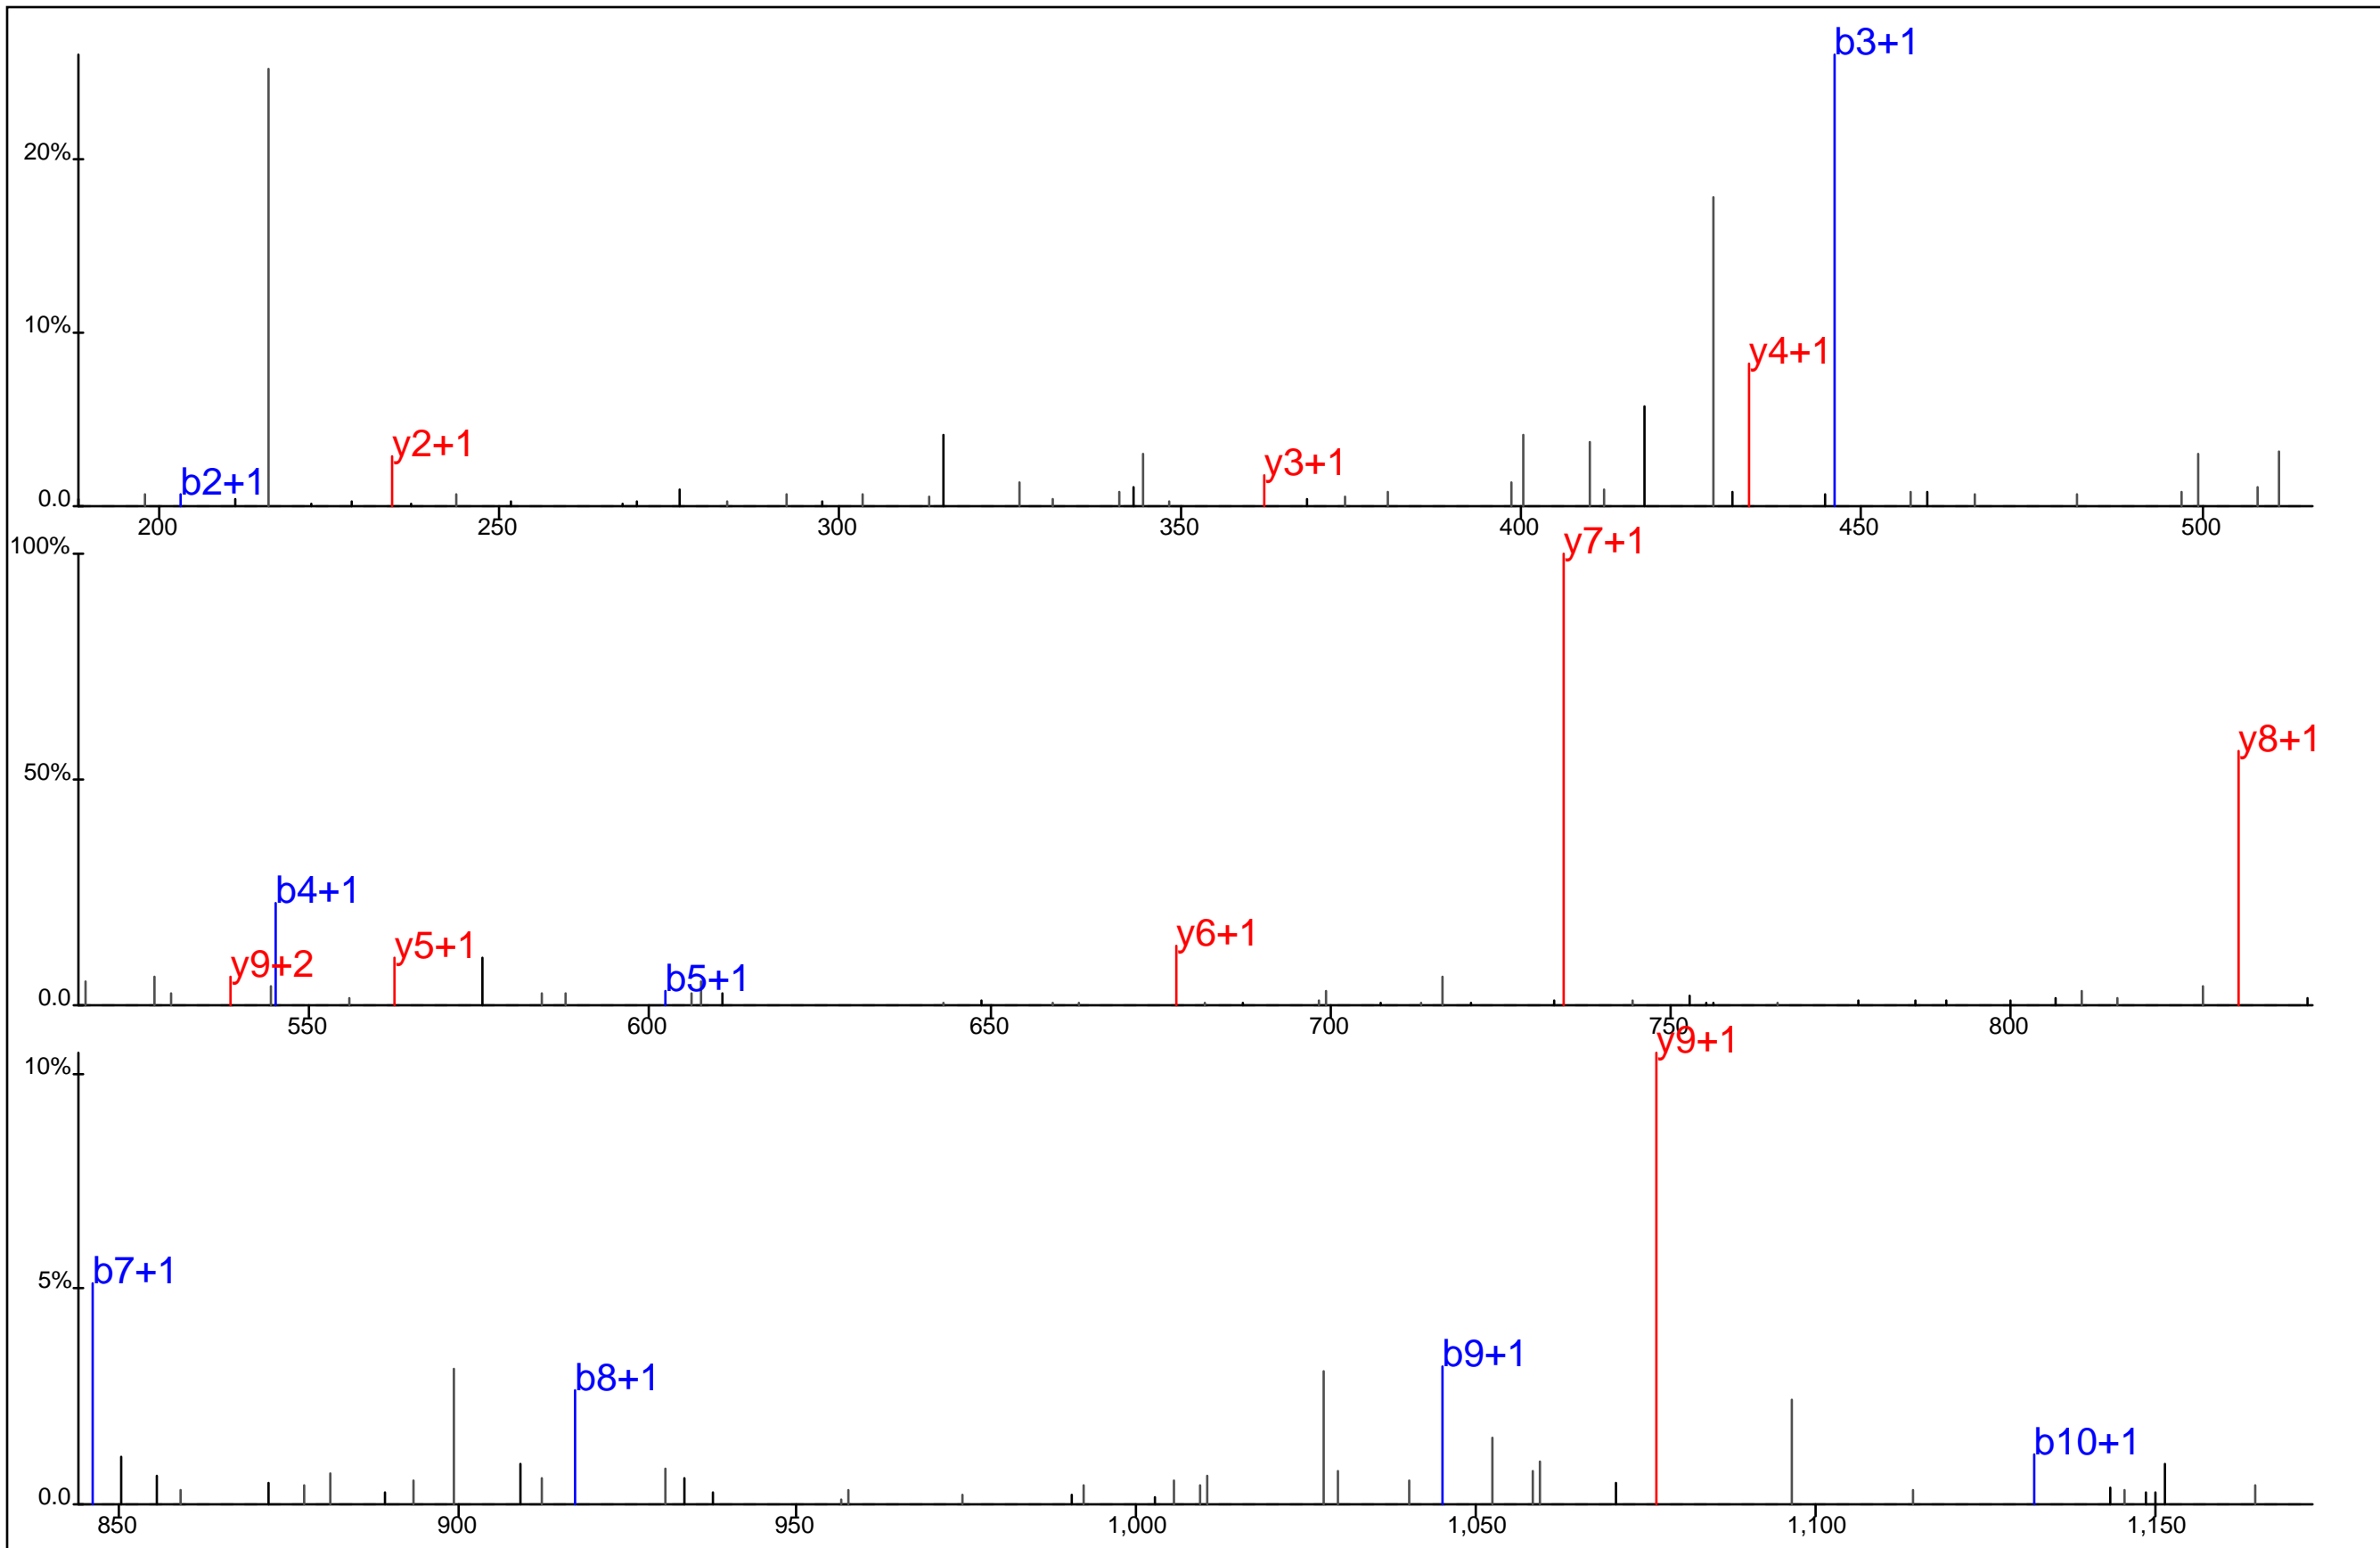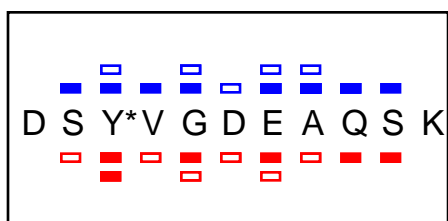

Protein Name: Actin alpha, cardiac muscle  
 gi Accession: 0  
 Precursor Mass: 639.7480+2  
 Delta Mass: 0.208 ppm  
 XCorr: 67.85

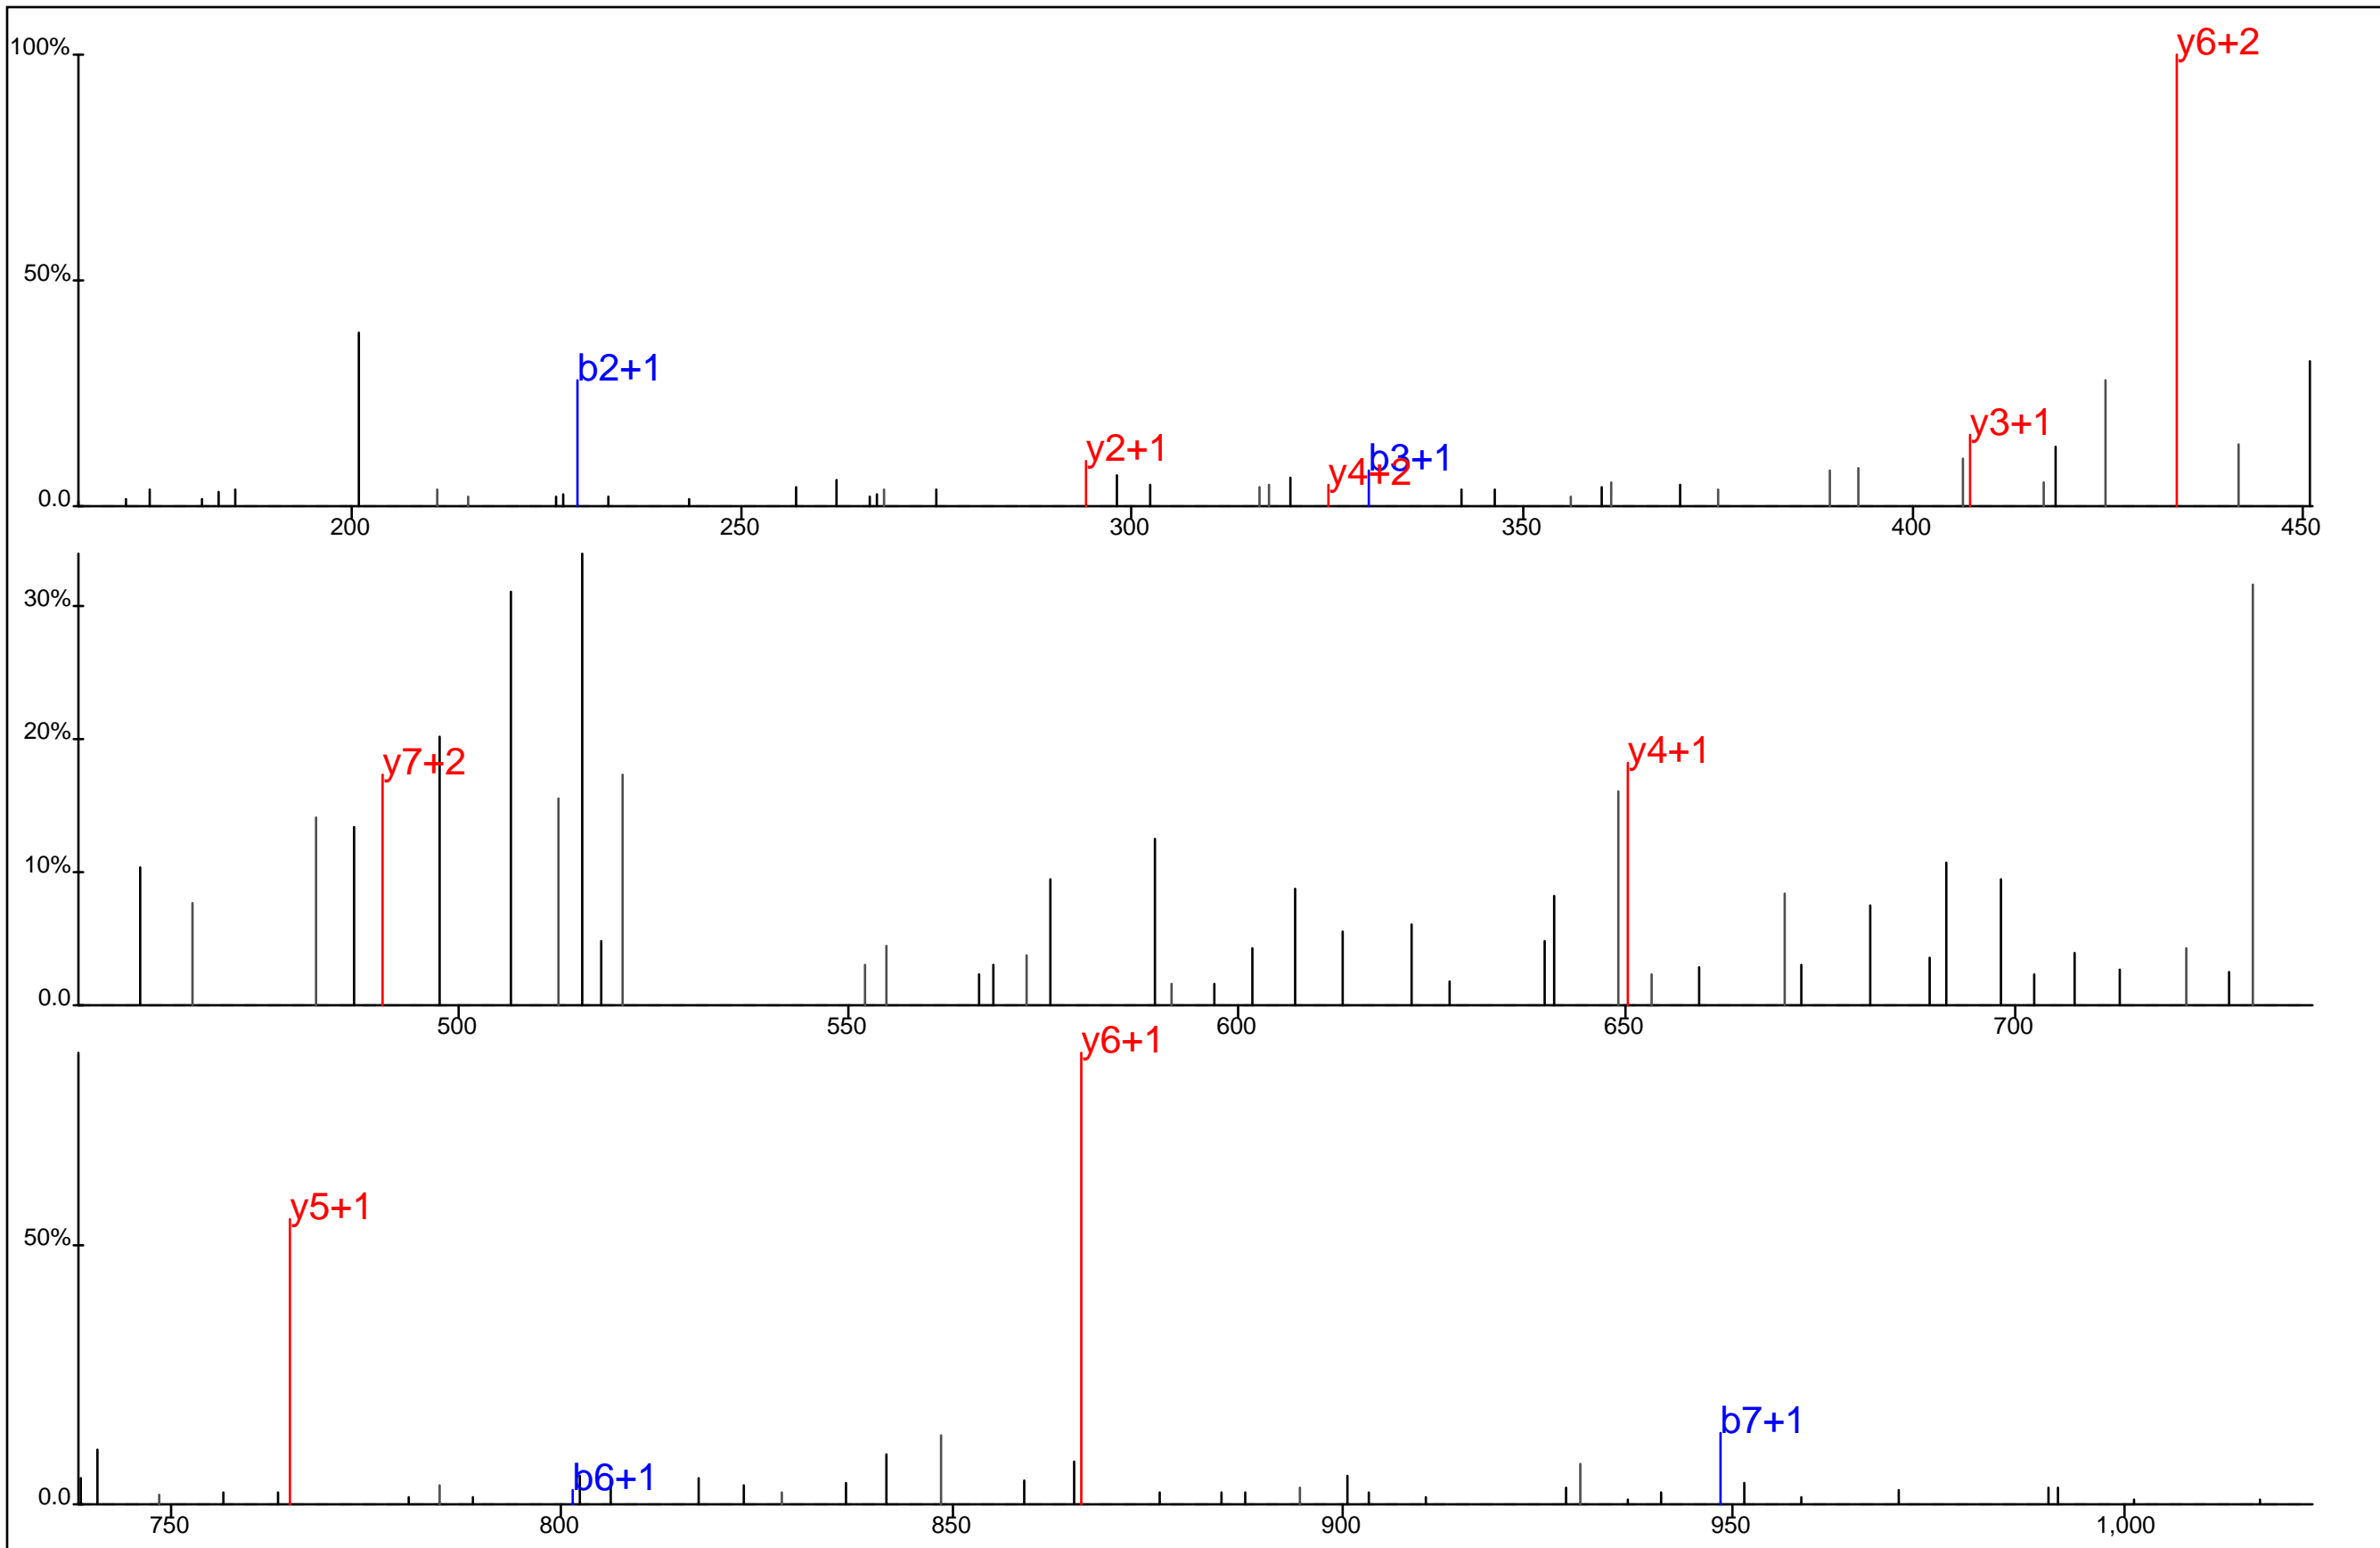

■ ■ ■ ■ ■ ■  
 D L T D Y\* L M#K  
■ ■ ■ ■ ■ ■

Protein Name: Actin alpha, cardiac muscle  
 gi Accession: 0  
 Precursor Mass: 547.7281+2  
 Delta Mass: 1.352 ppm  
 XCorr: 22.34

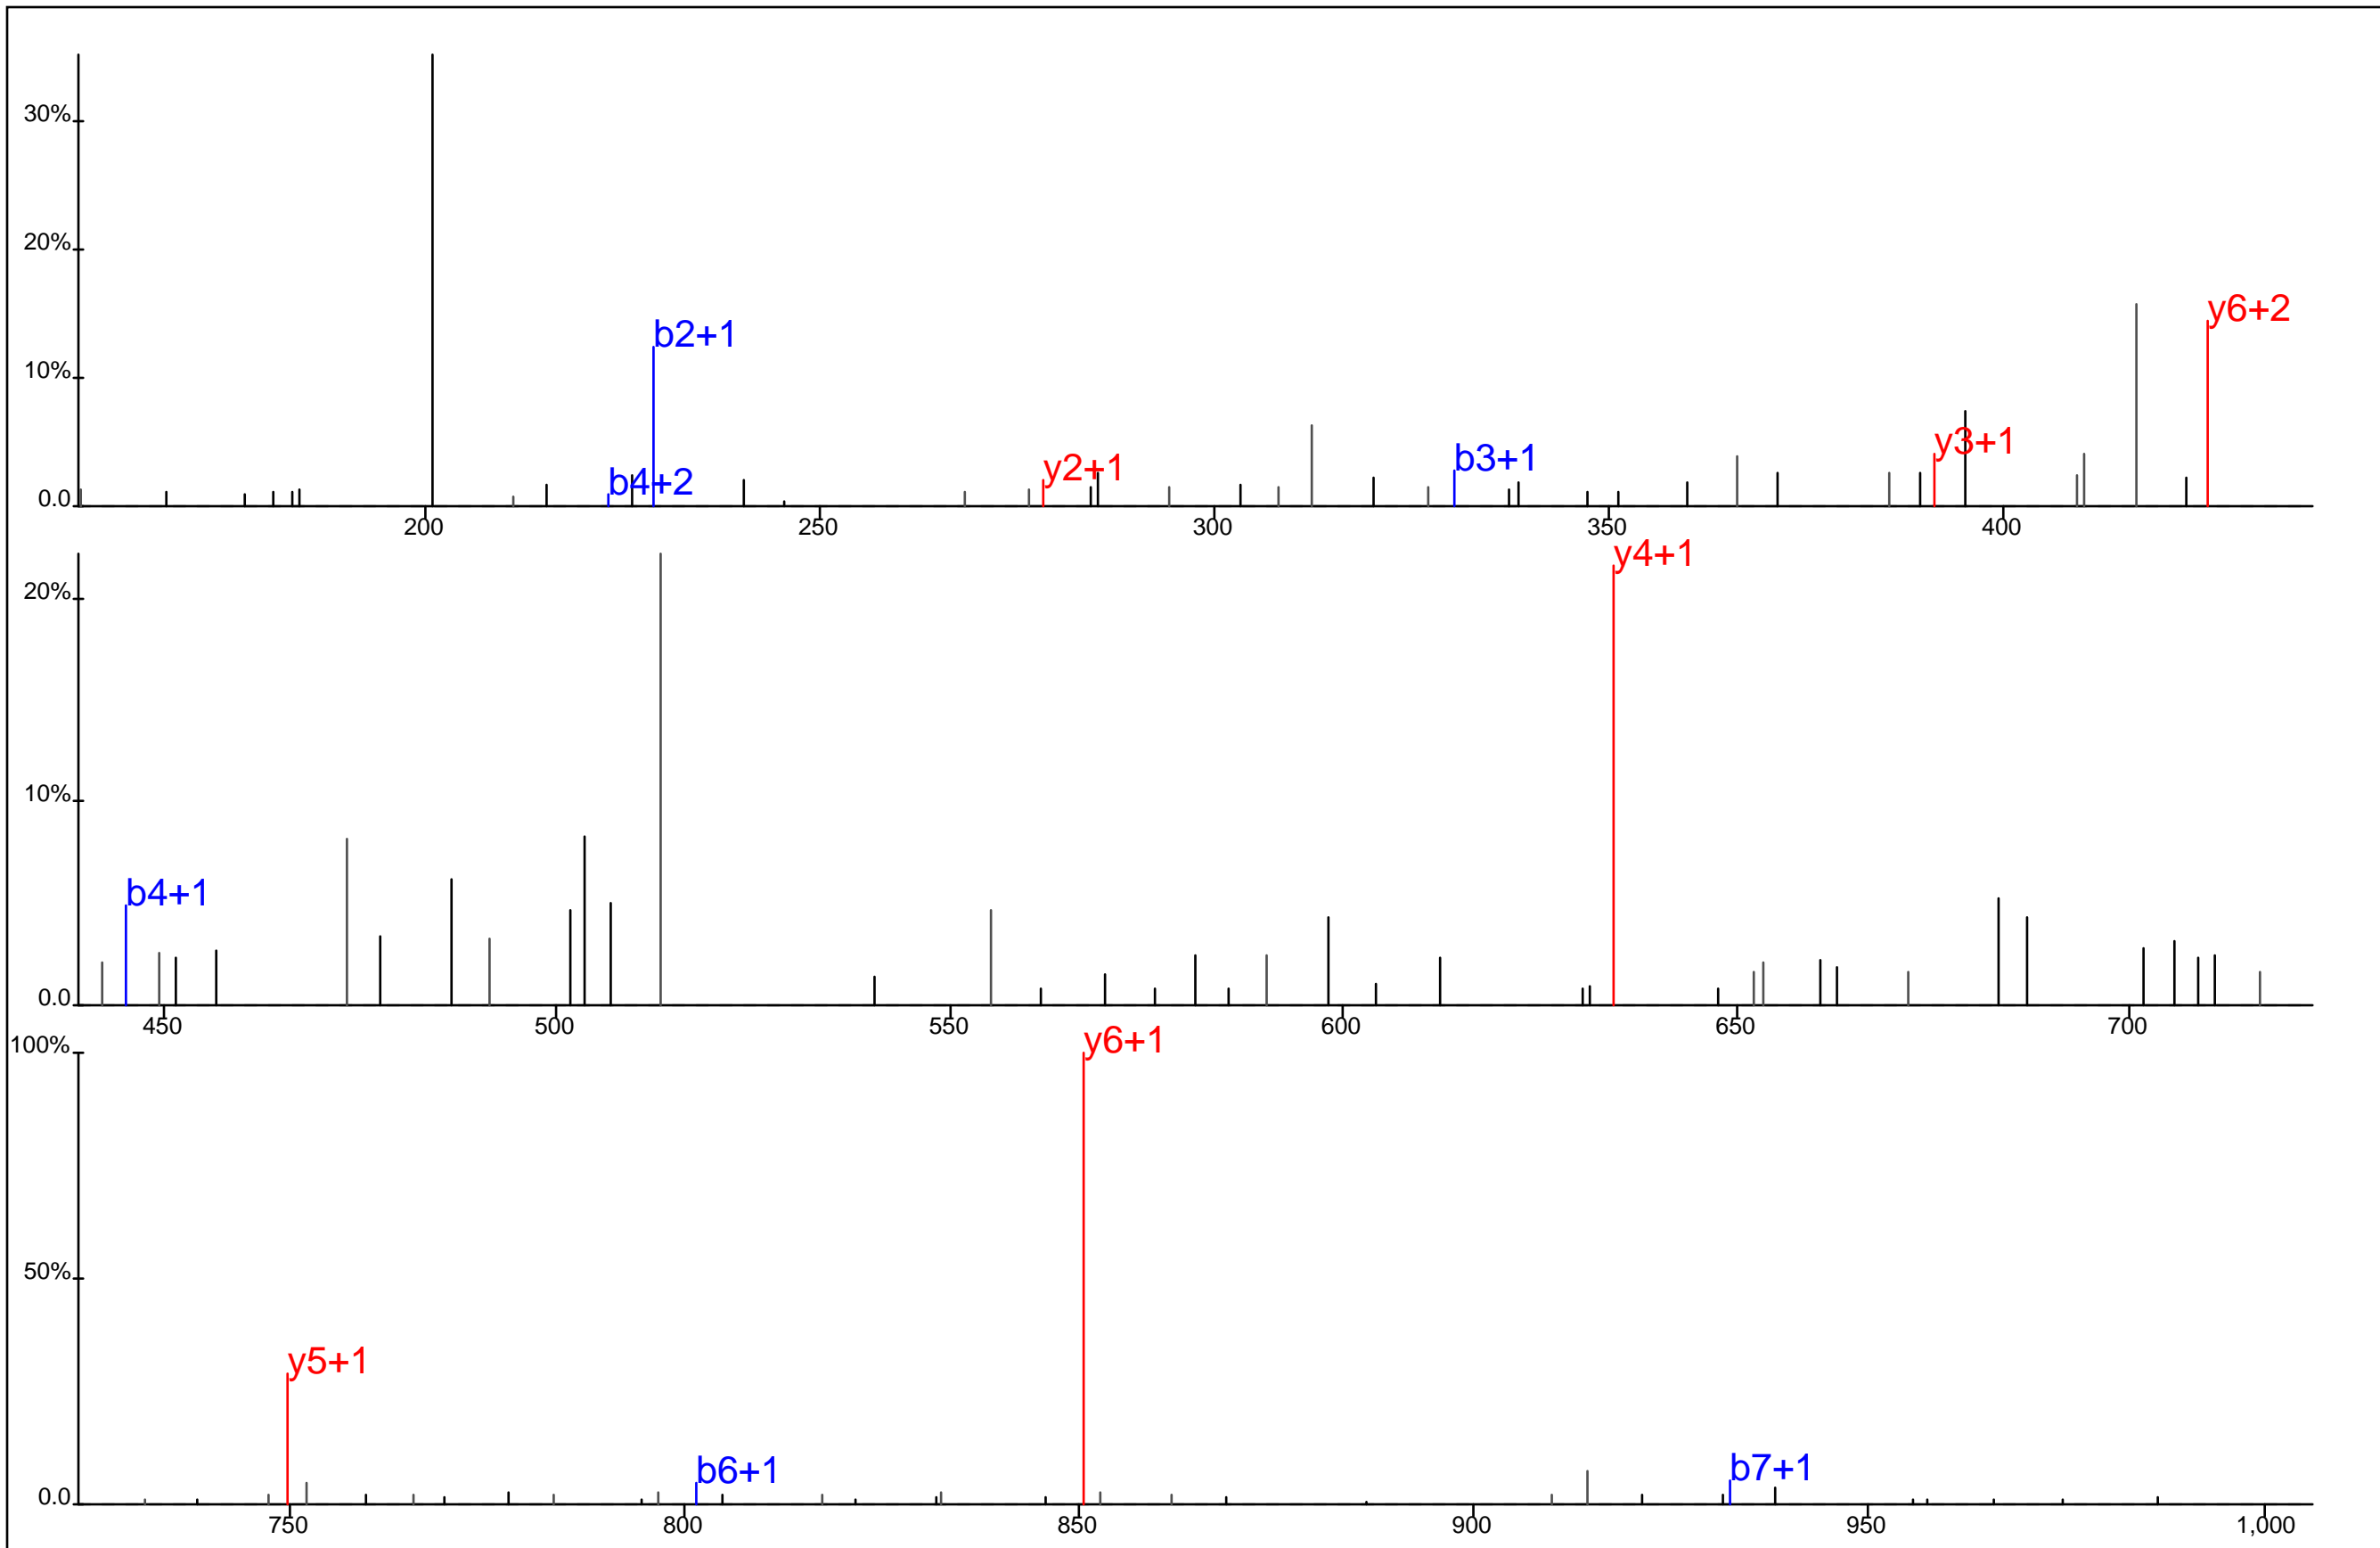

■ ■ ■ ■ ■ ■  
 D L T D Y\* L M K  
■ ■ ■ ■ ■ ■

Protein Name: Actin alpha, cardiac muscle  
 gi Accession: 0  
 Precursor Mass: 539.7299+2  
 Delta Mass: 0.169 ppm  
 XCorr: 21.77





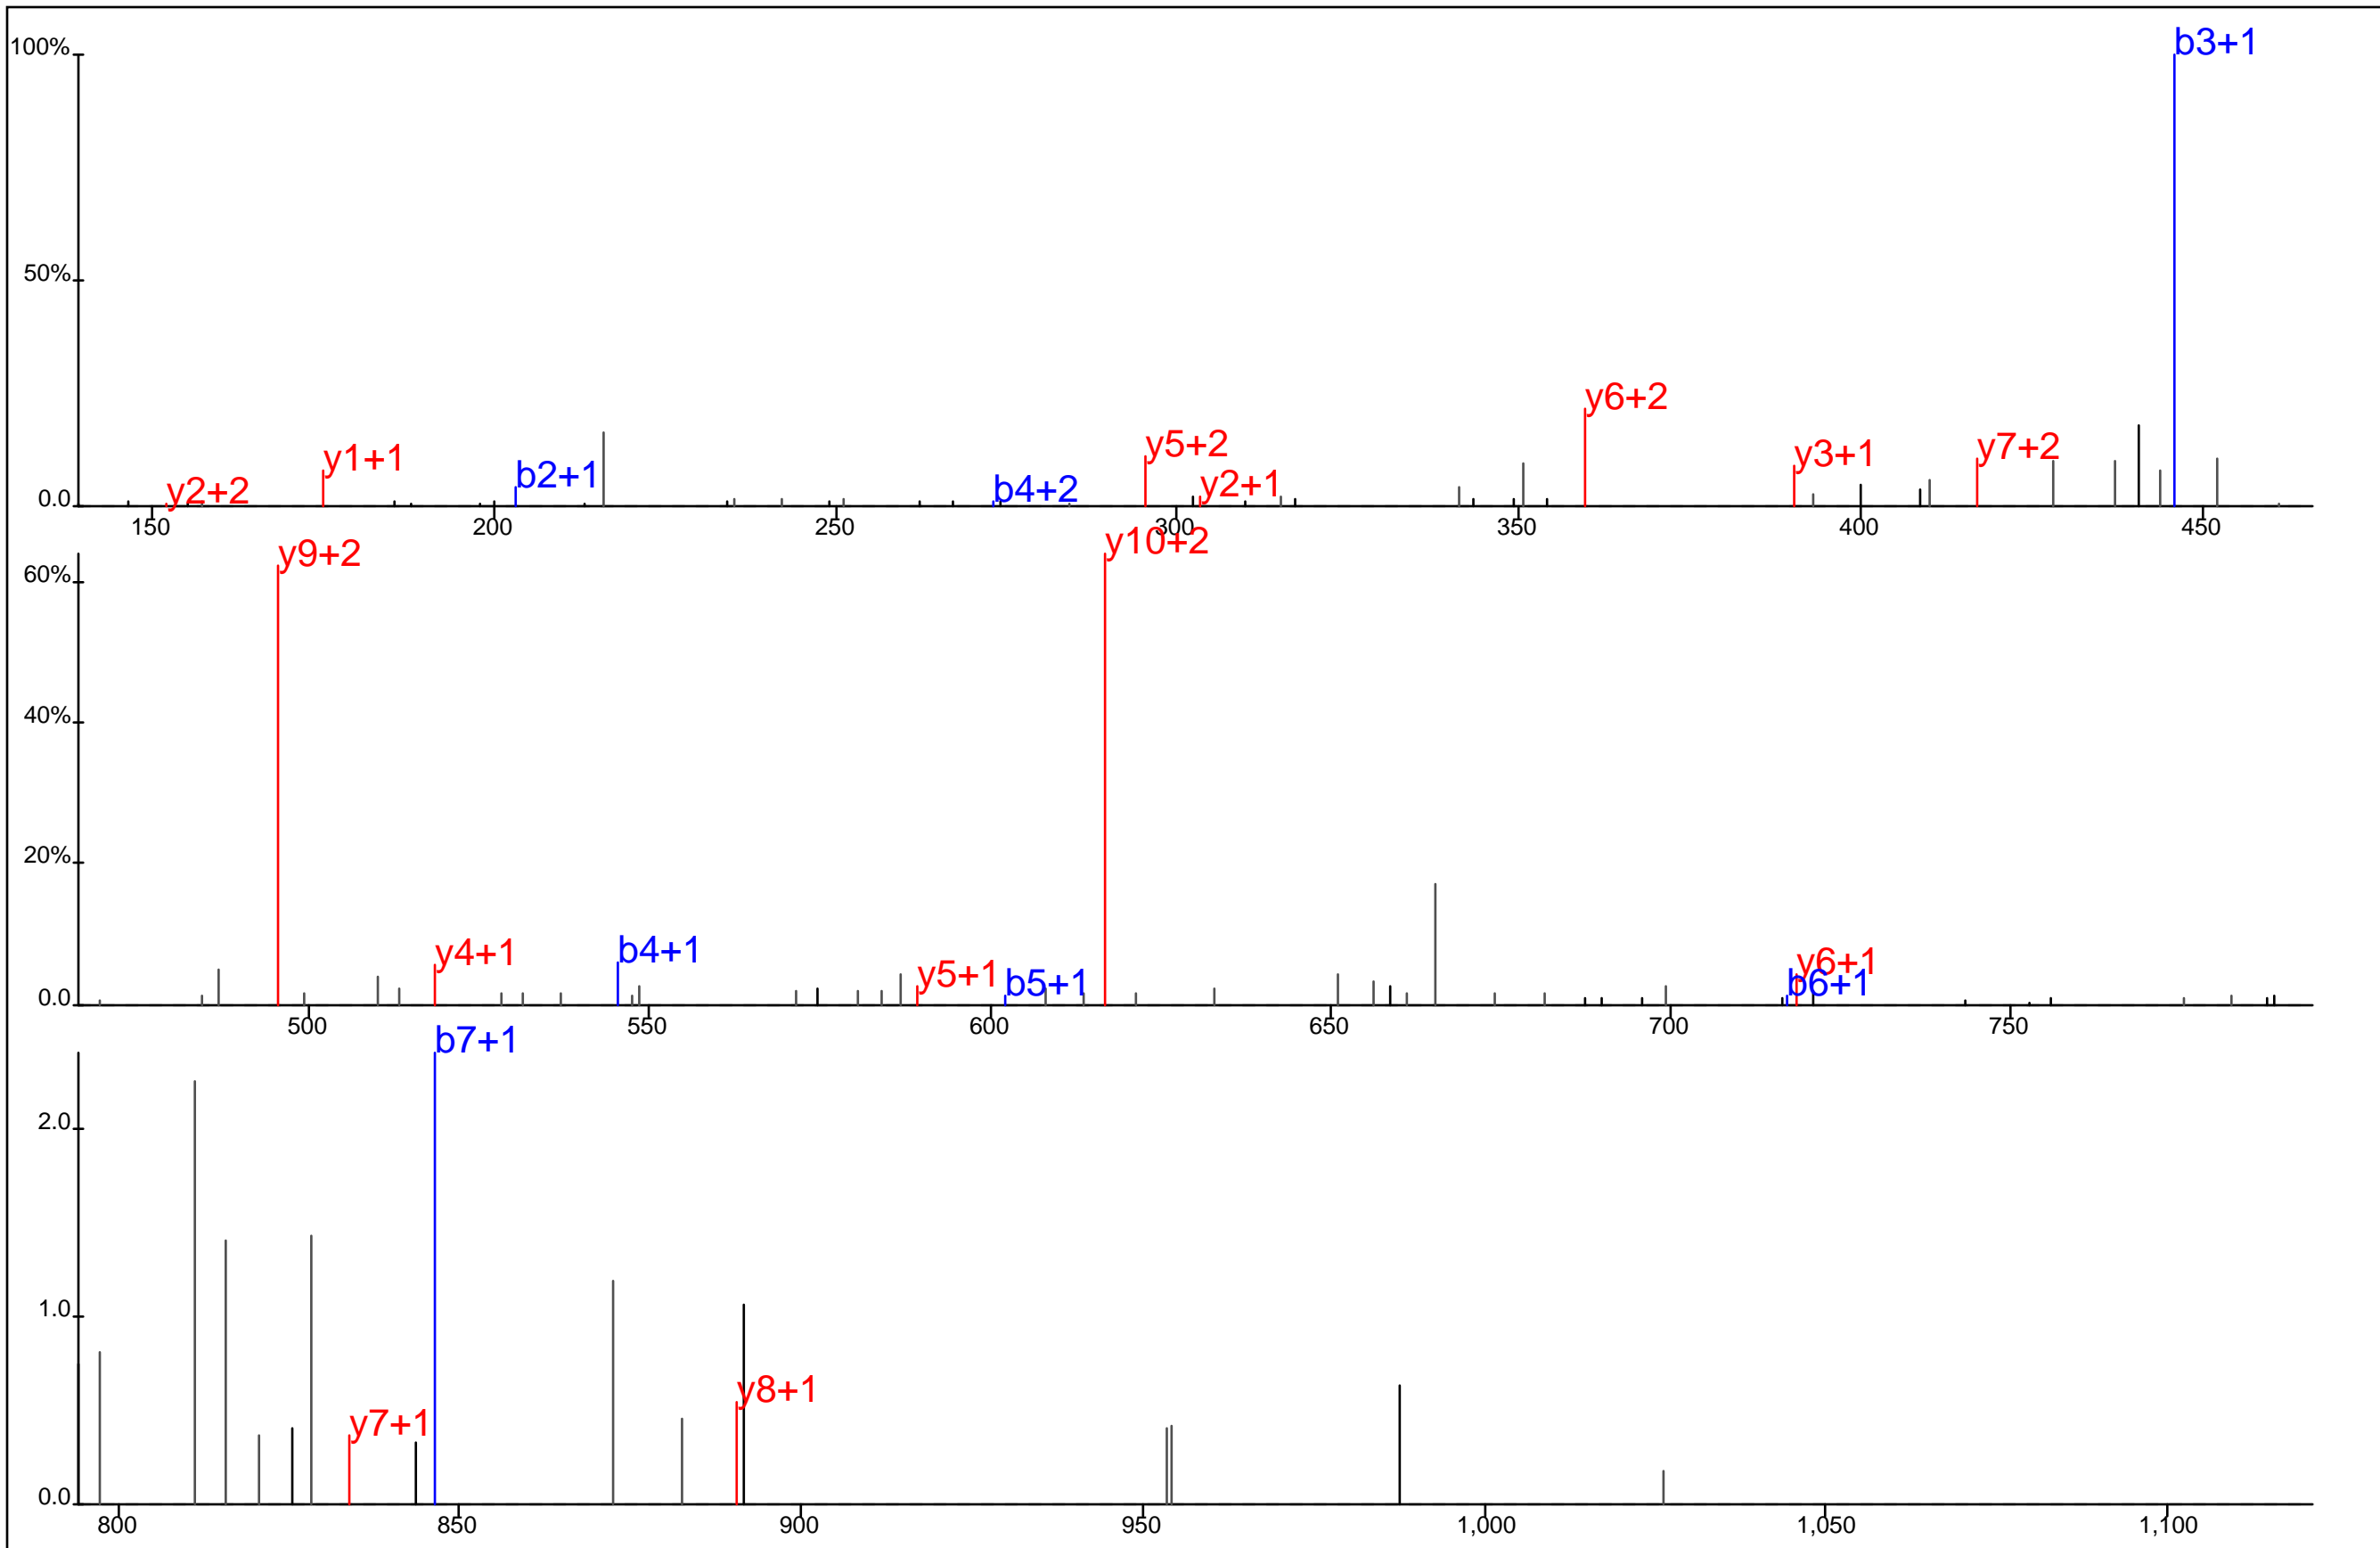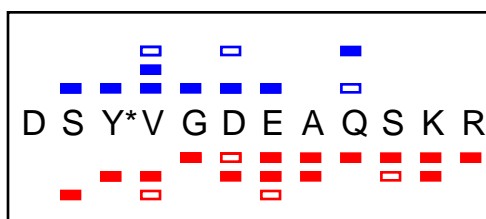

Protein Name: Actin alpha, cardiac muscle  
 gi Accession: 0  
 Precursor Mass: 478.8683+3  
 Delta Mass: 0.386 ppm  
 XCorr: 40.11

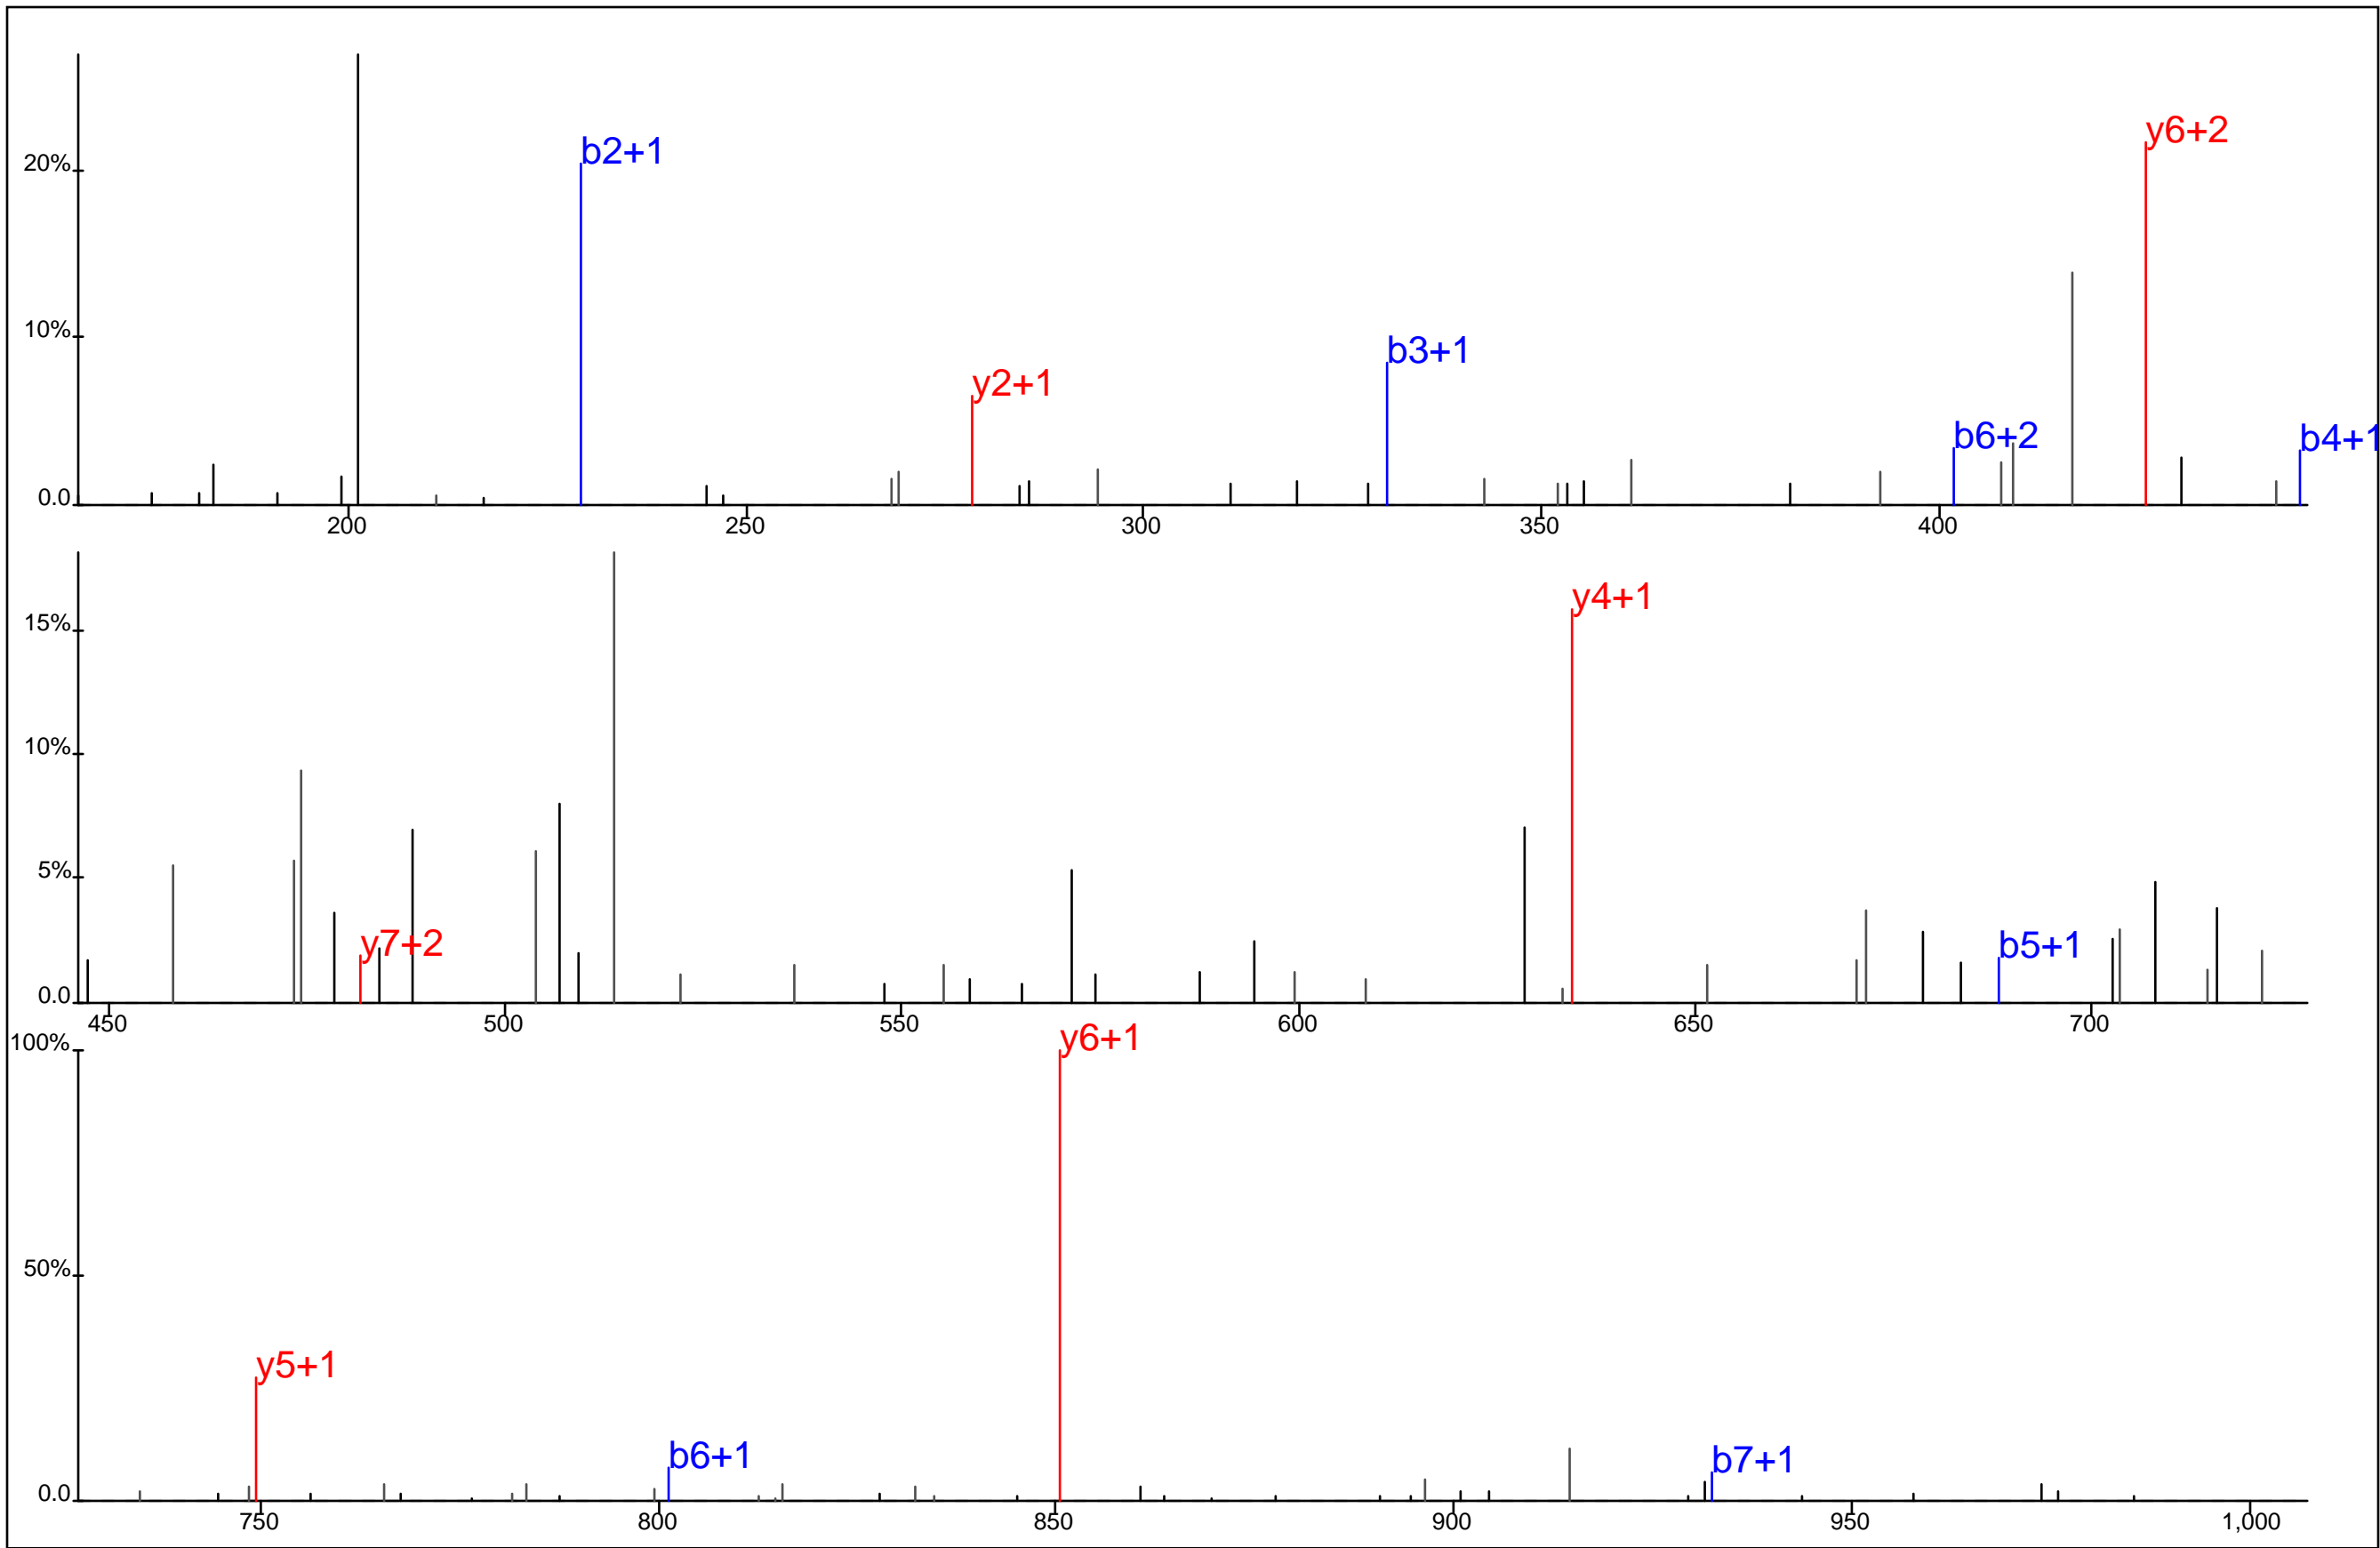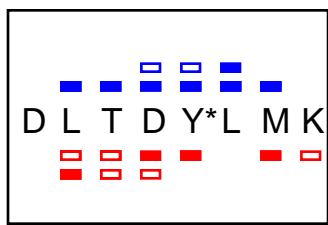

Protein Name: Actin alpha, cardiac muscle  
 gi Accession: 0  
 Precursor Mass: 539.7294+2  
 Delta Mass: 1.074 ppm  
 XCorr: 26.65

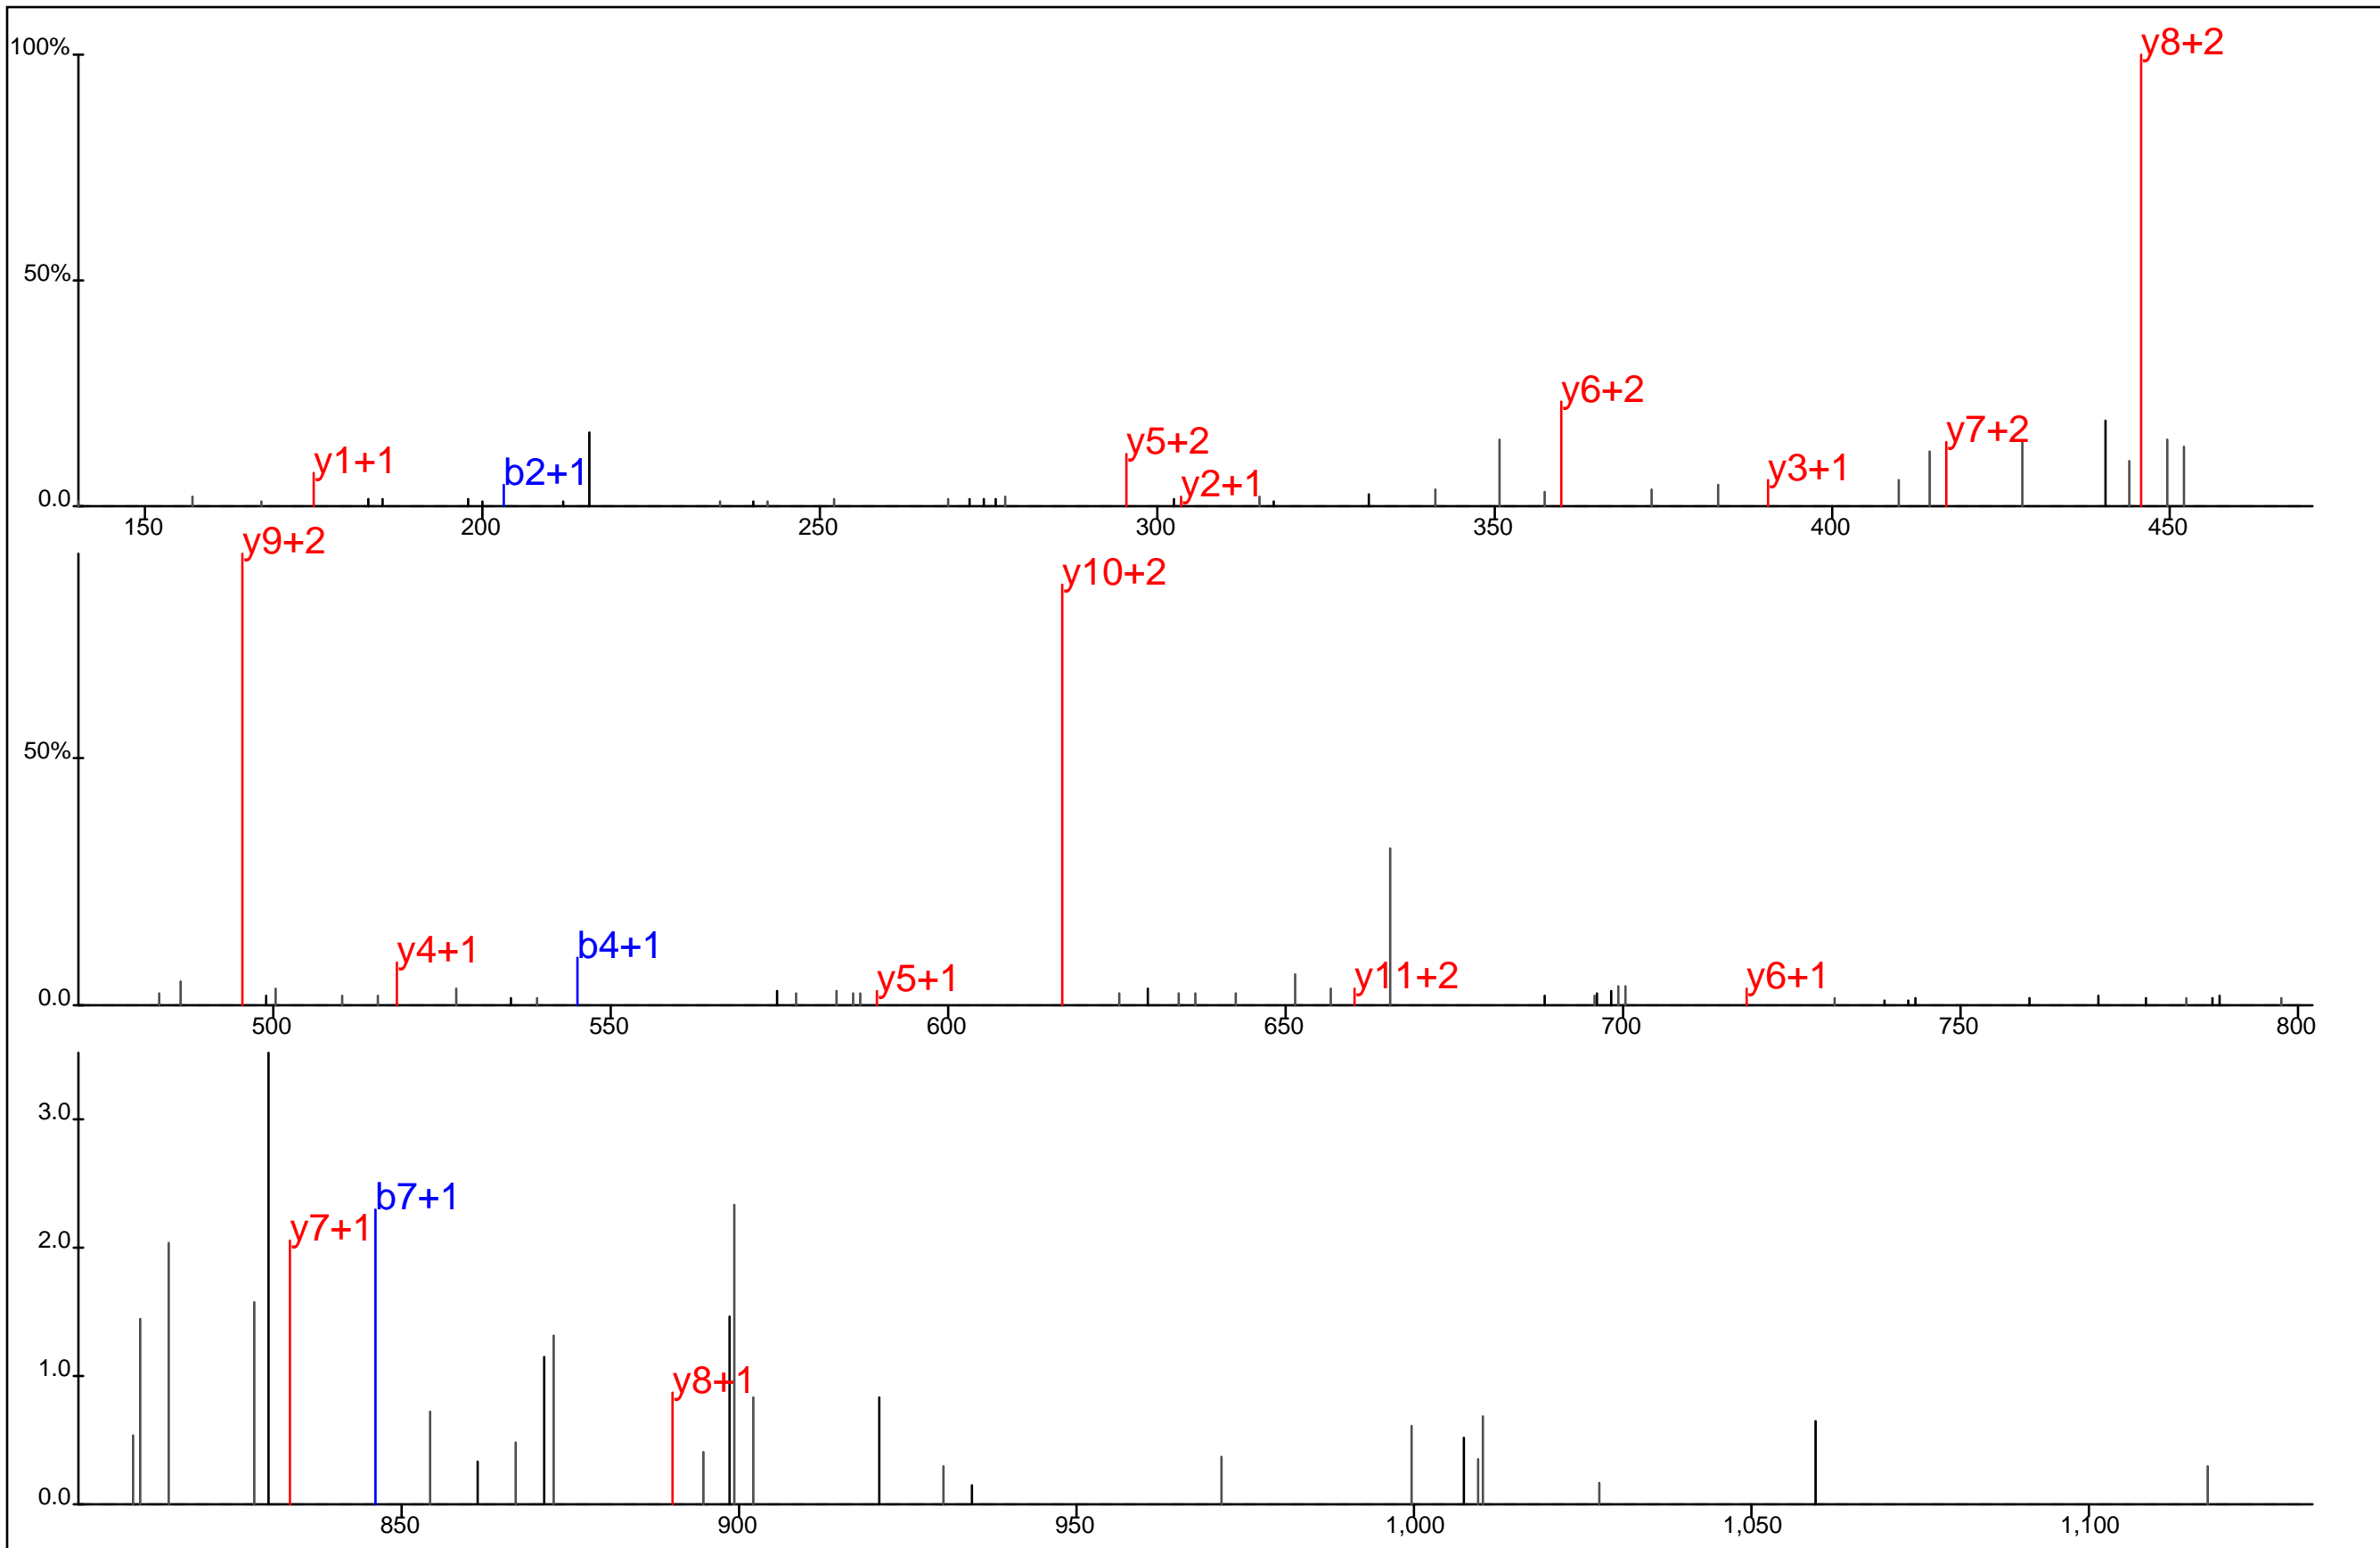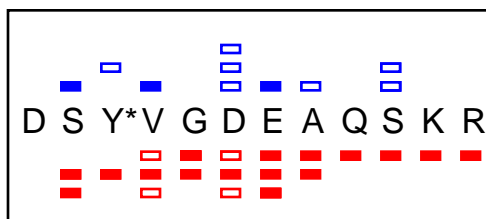

Protein Name: Actin alpha, cardiac muscle  
 gi Accession: 0  
 Precursor Mass: 478.8684+3  
 Delta Mass: 0.769 ppm  
 XCorr: 47.54

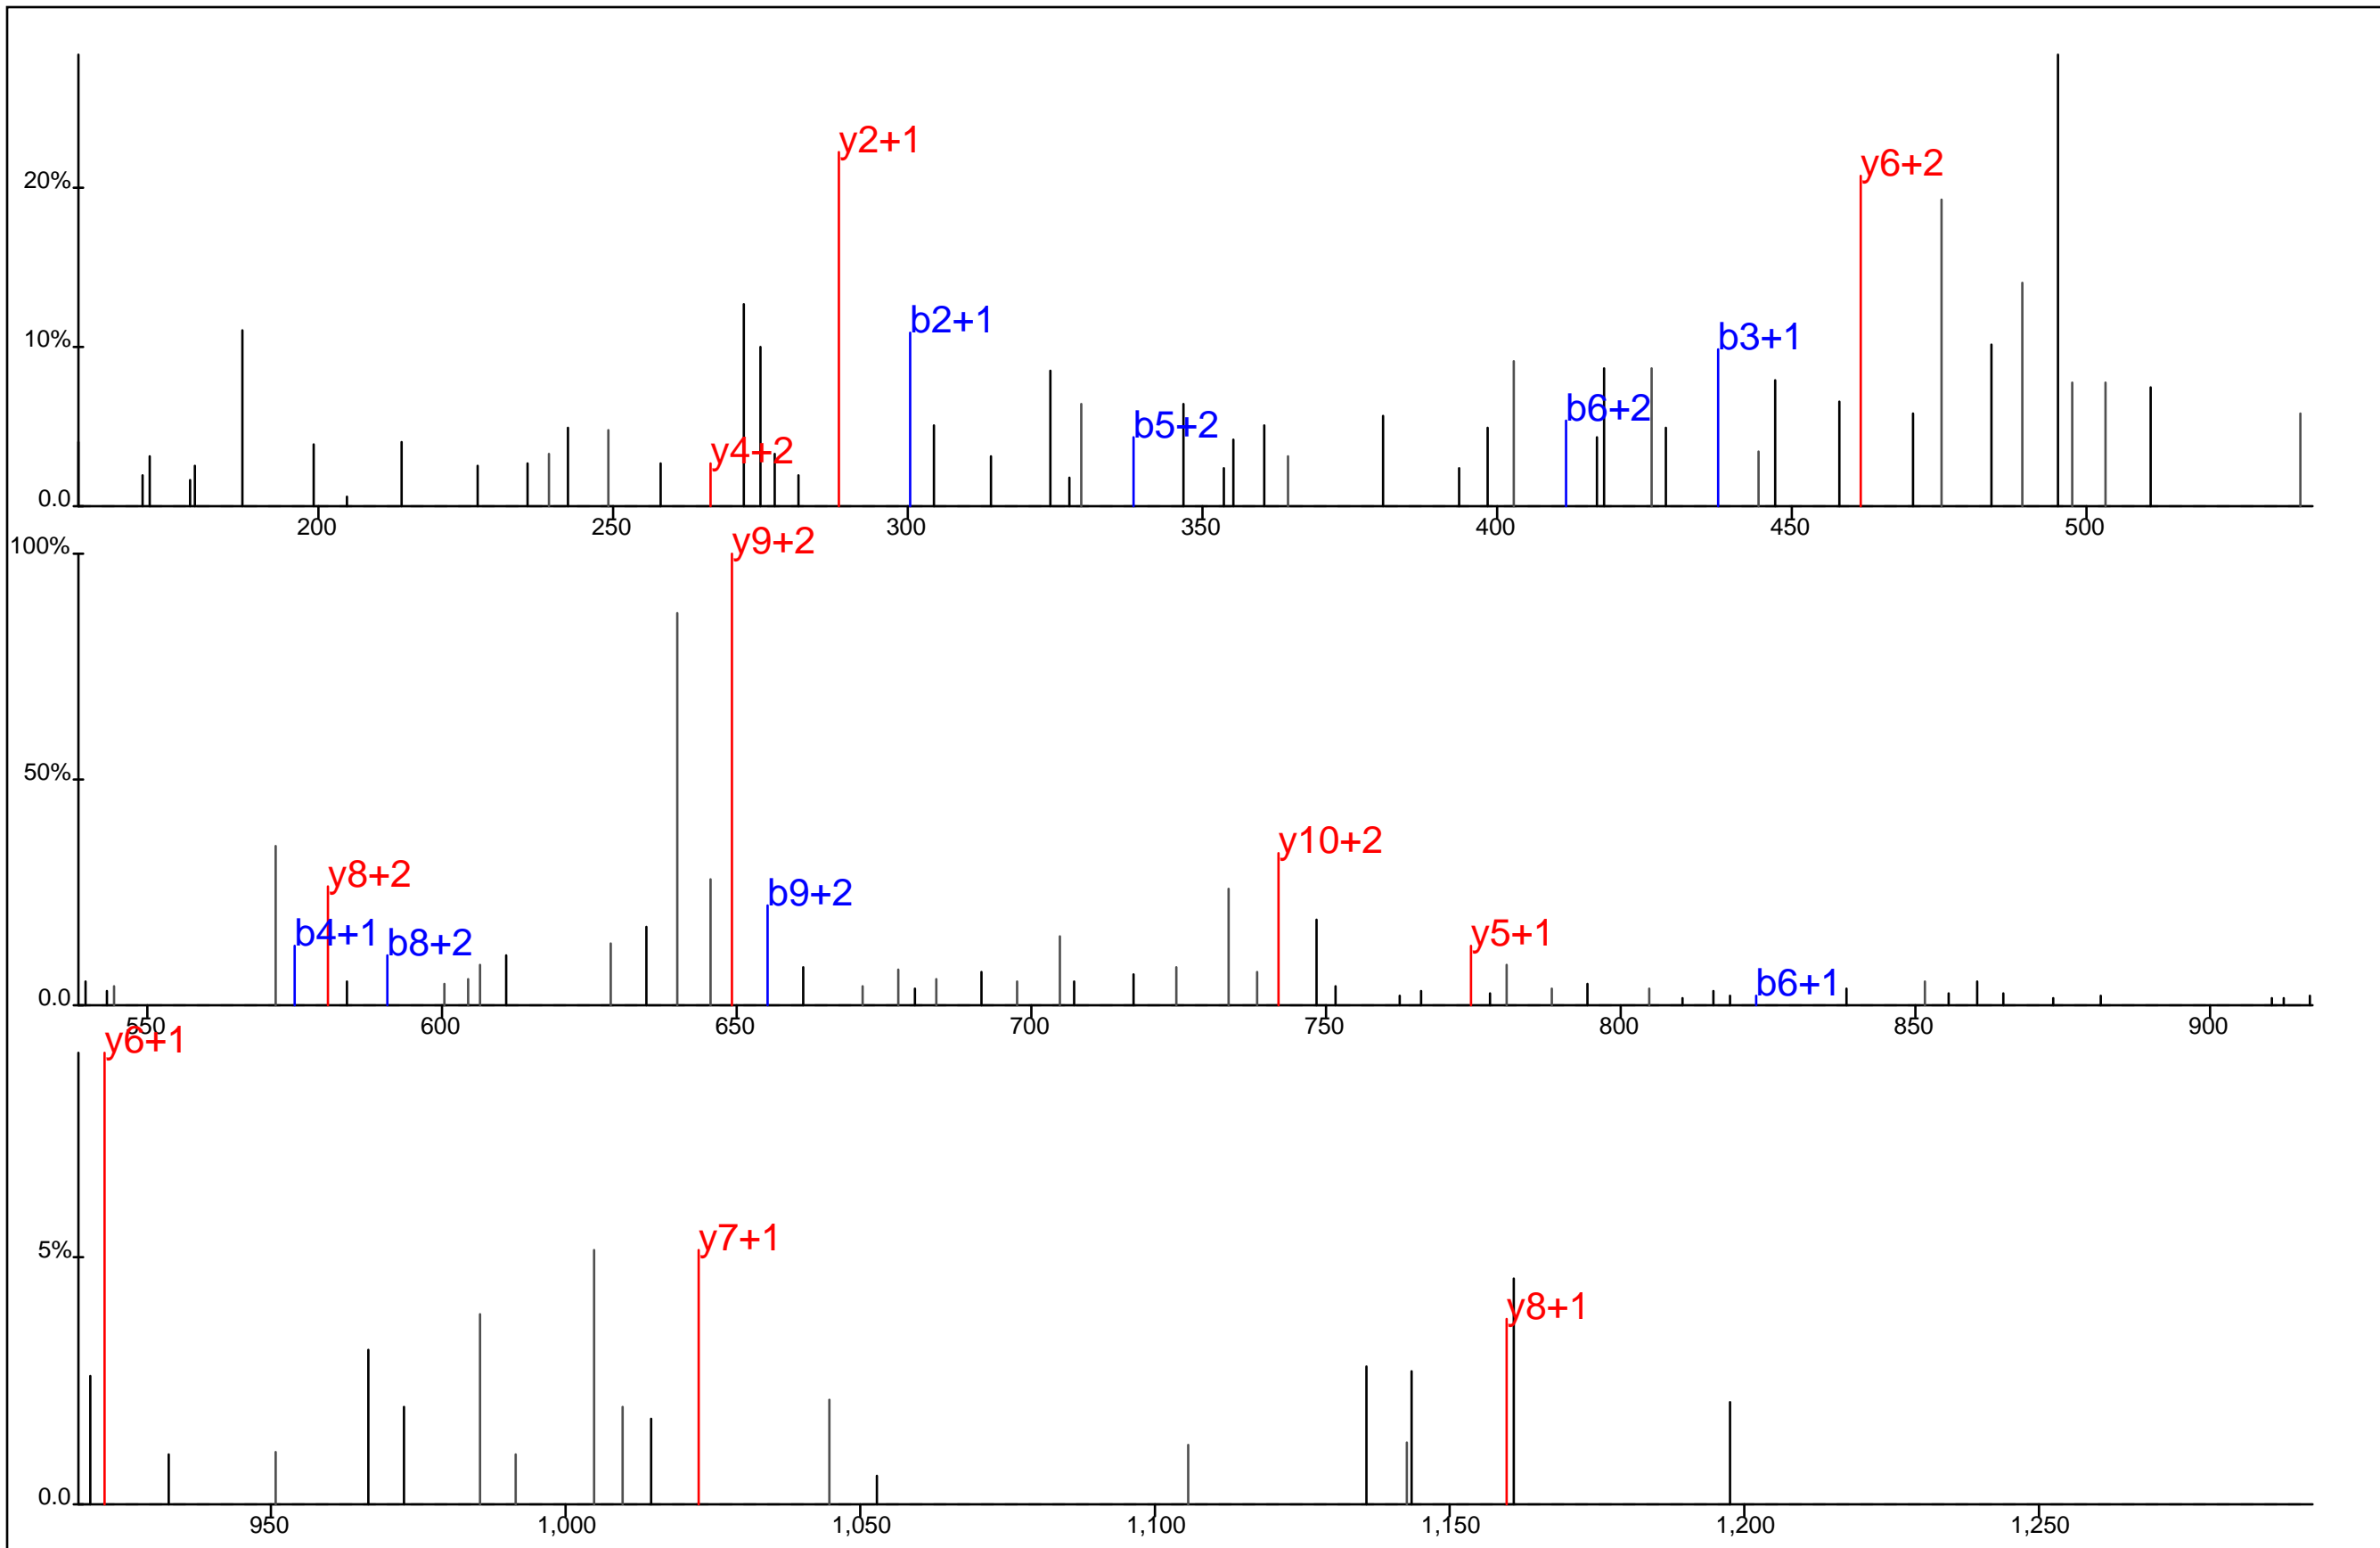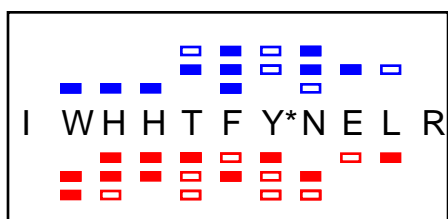

Protein Name: Actin alpha, cardiac muscle  
 gi Accession: 0  
 Precursor Mass: 532.5765+3  
 Delta Mass: 0.365 ppm  
 XCorr: 29.18

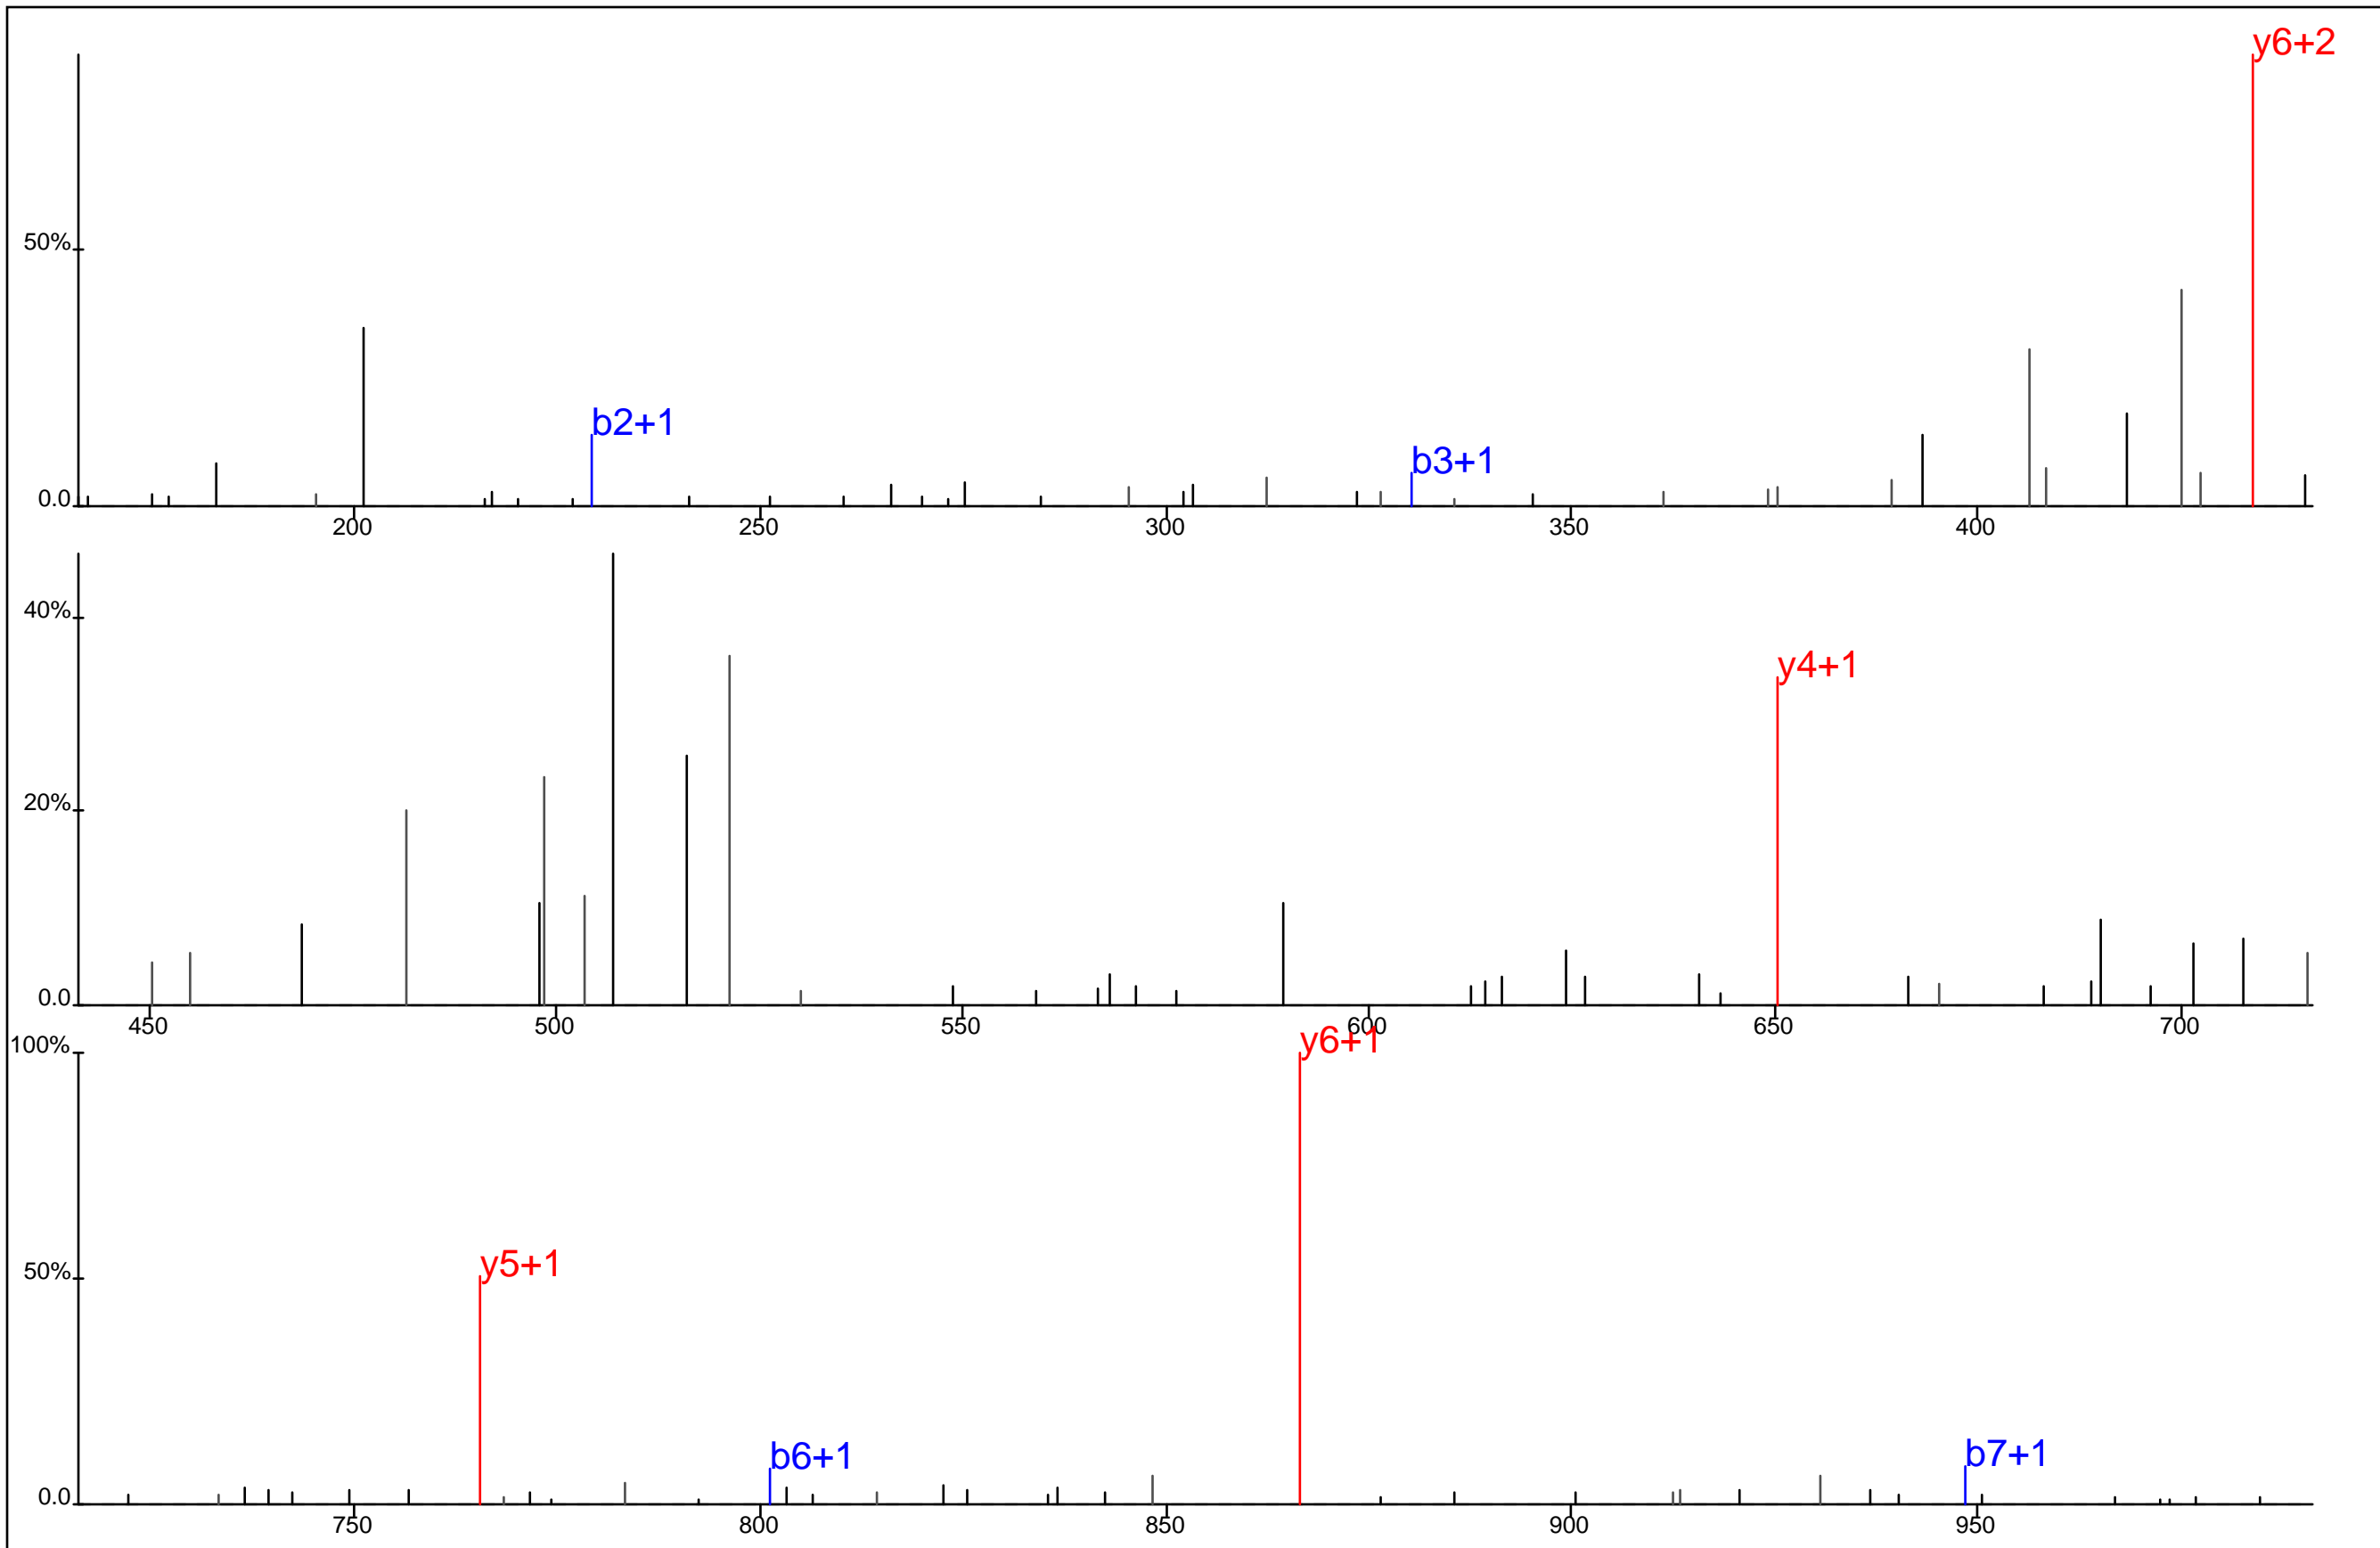

■ □ □ □ ■ ■  
 D L T D Y\* L M#K  
□ □ ■ □ □ □

Protein Name: Actin alpha, cardiac muscle  
 gi Accession: 0  
 Precursor Mass: 547.7272+2  
 Delta Mass: 0.320 ppm  
 XCorr: 23.37

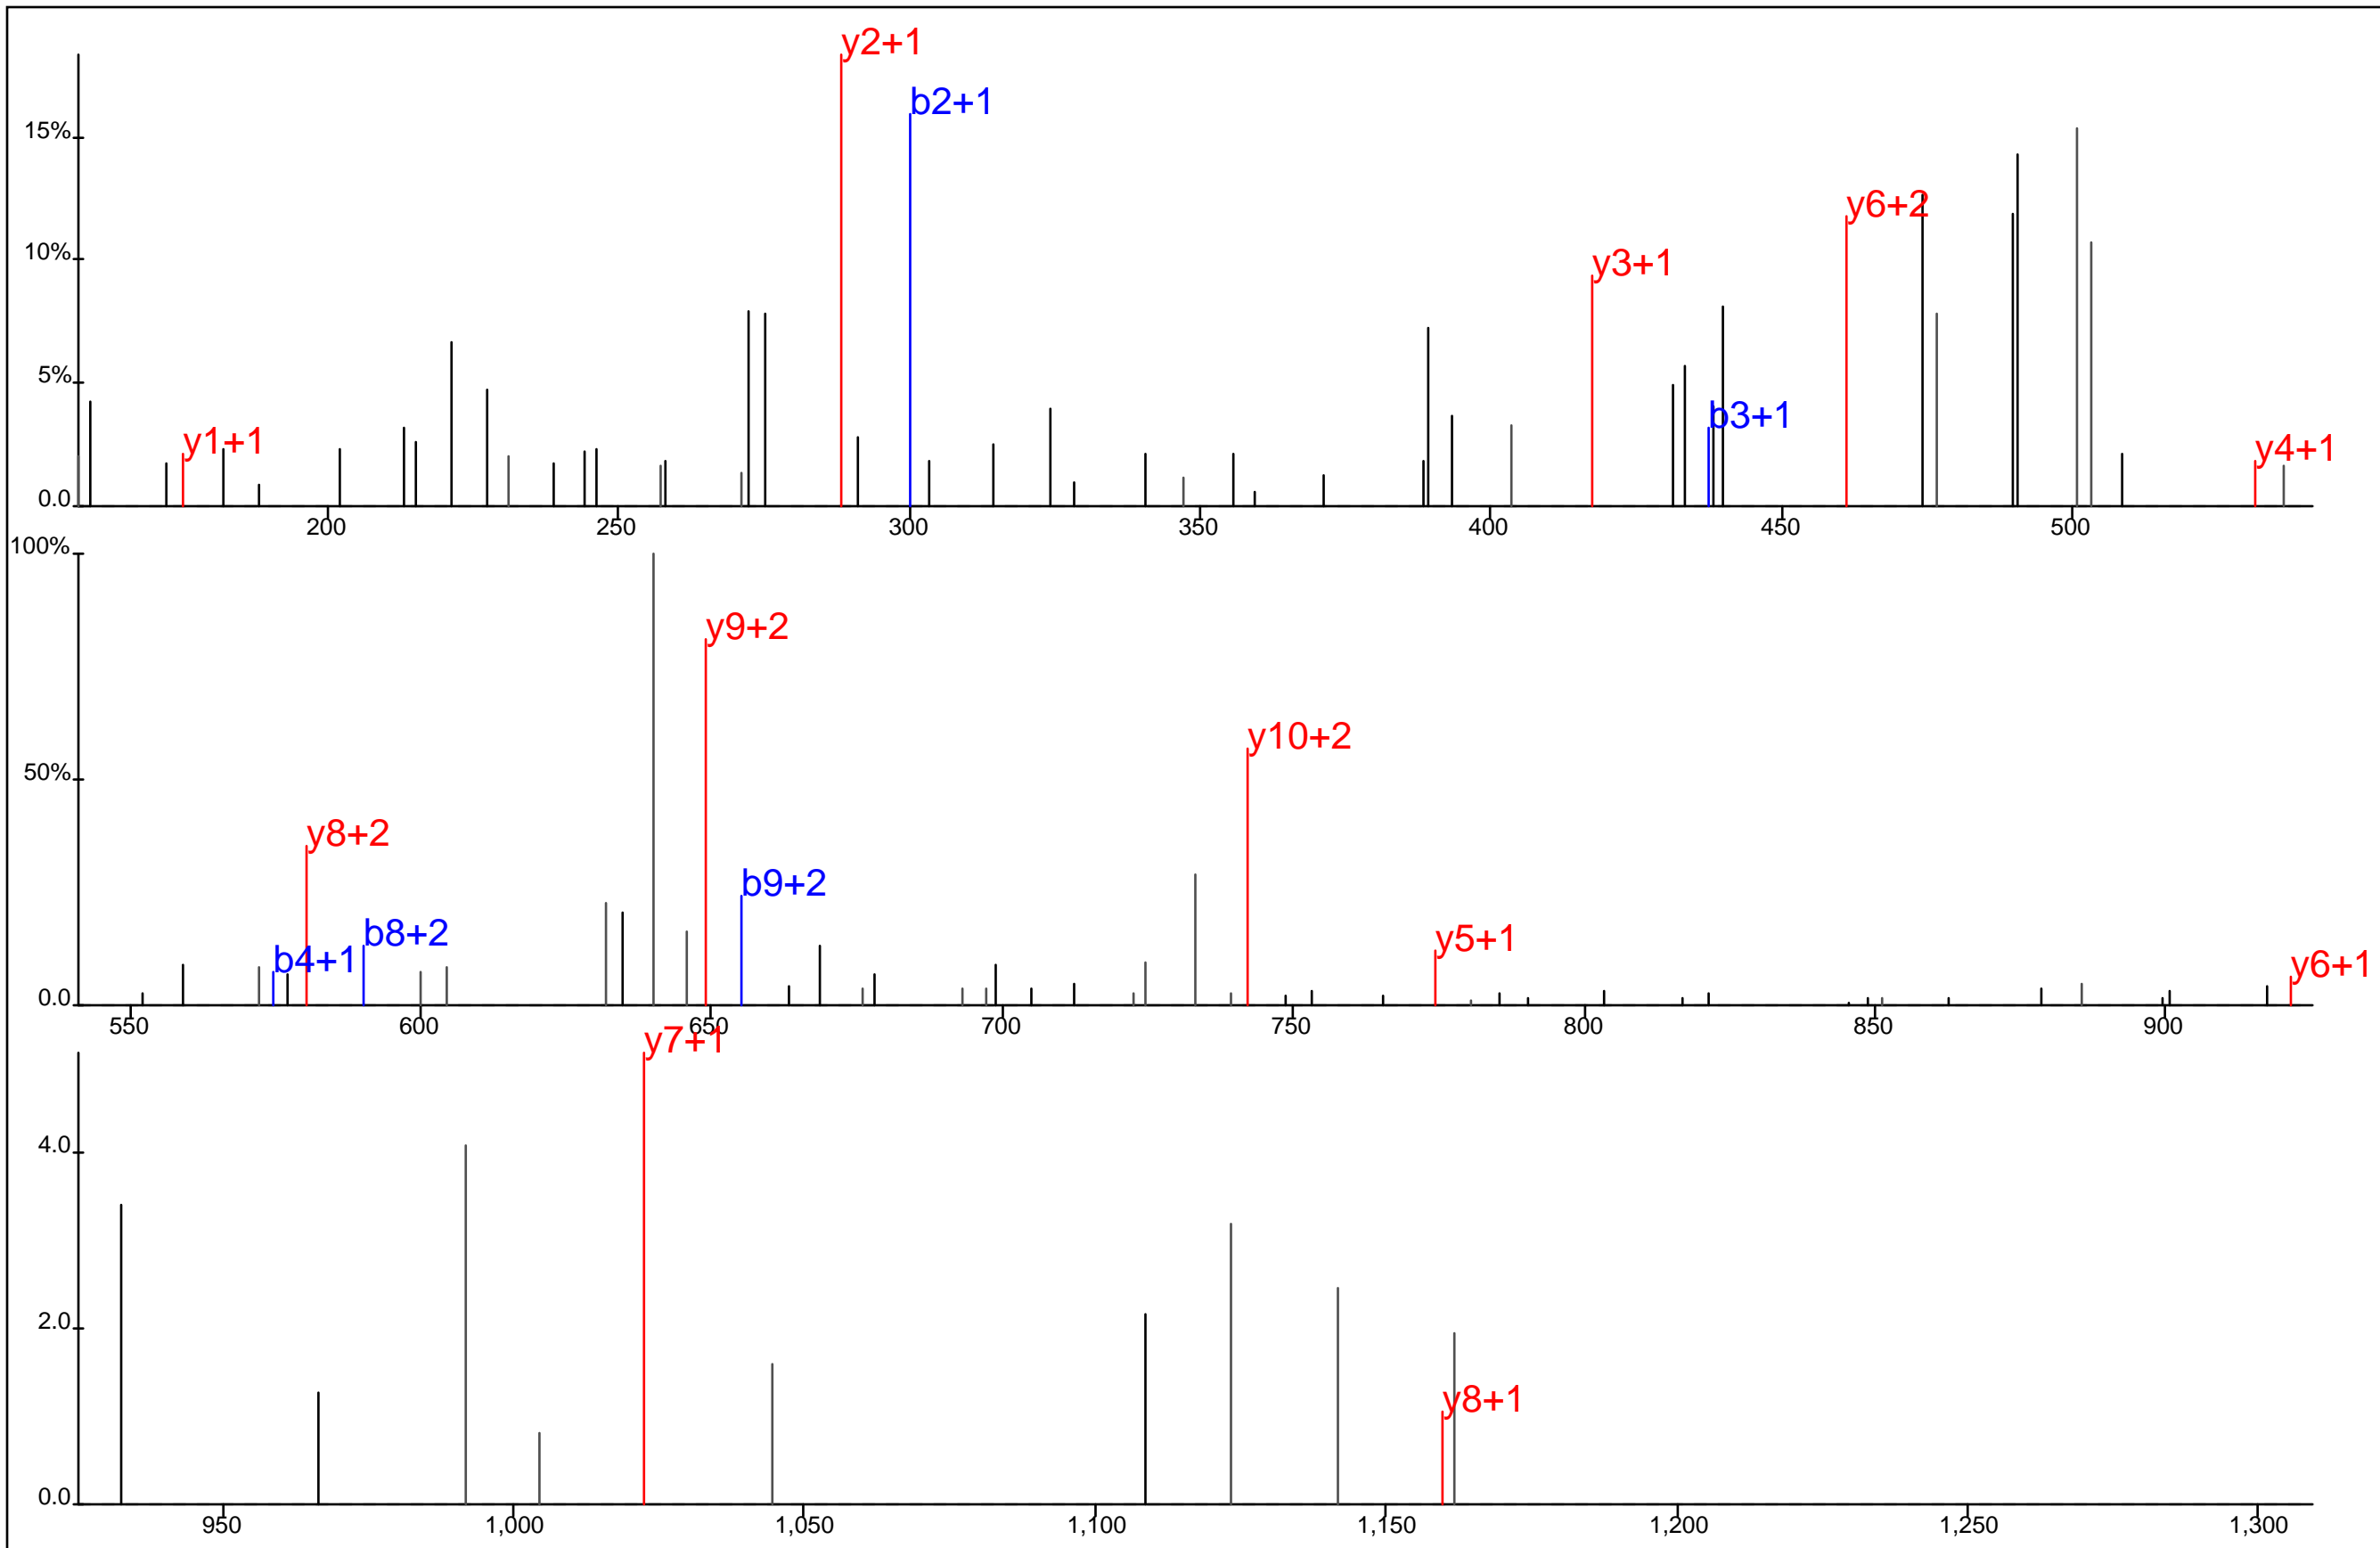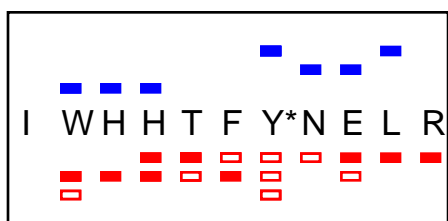

Protein Name: Actin alpha, cardiac muscle  
 gi Accession: 0  
 Precursor Mass: 532.5768+3  
 Delta Mass: 0.208 ppm  
 XCorr: 28.07

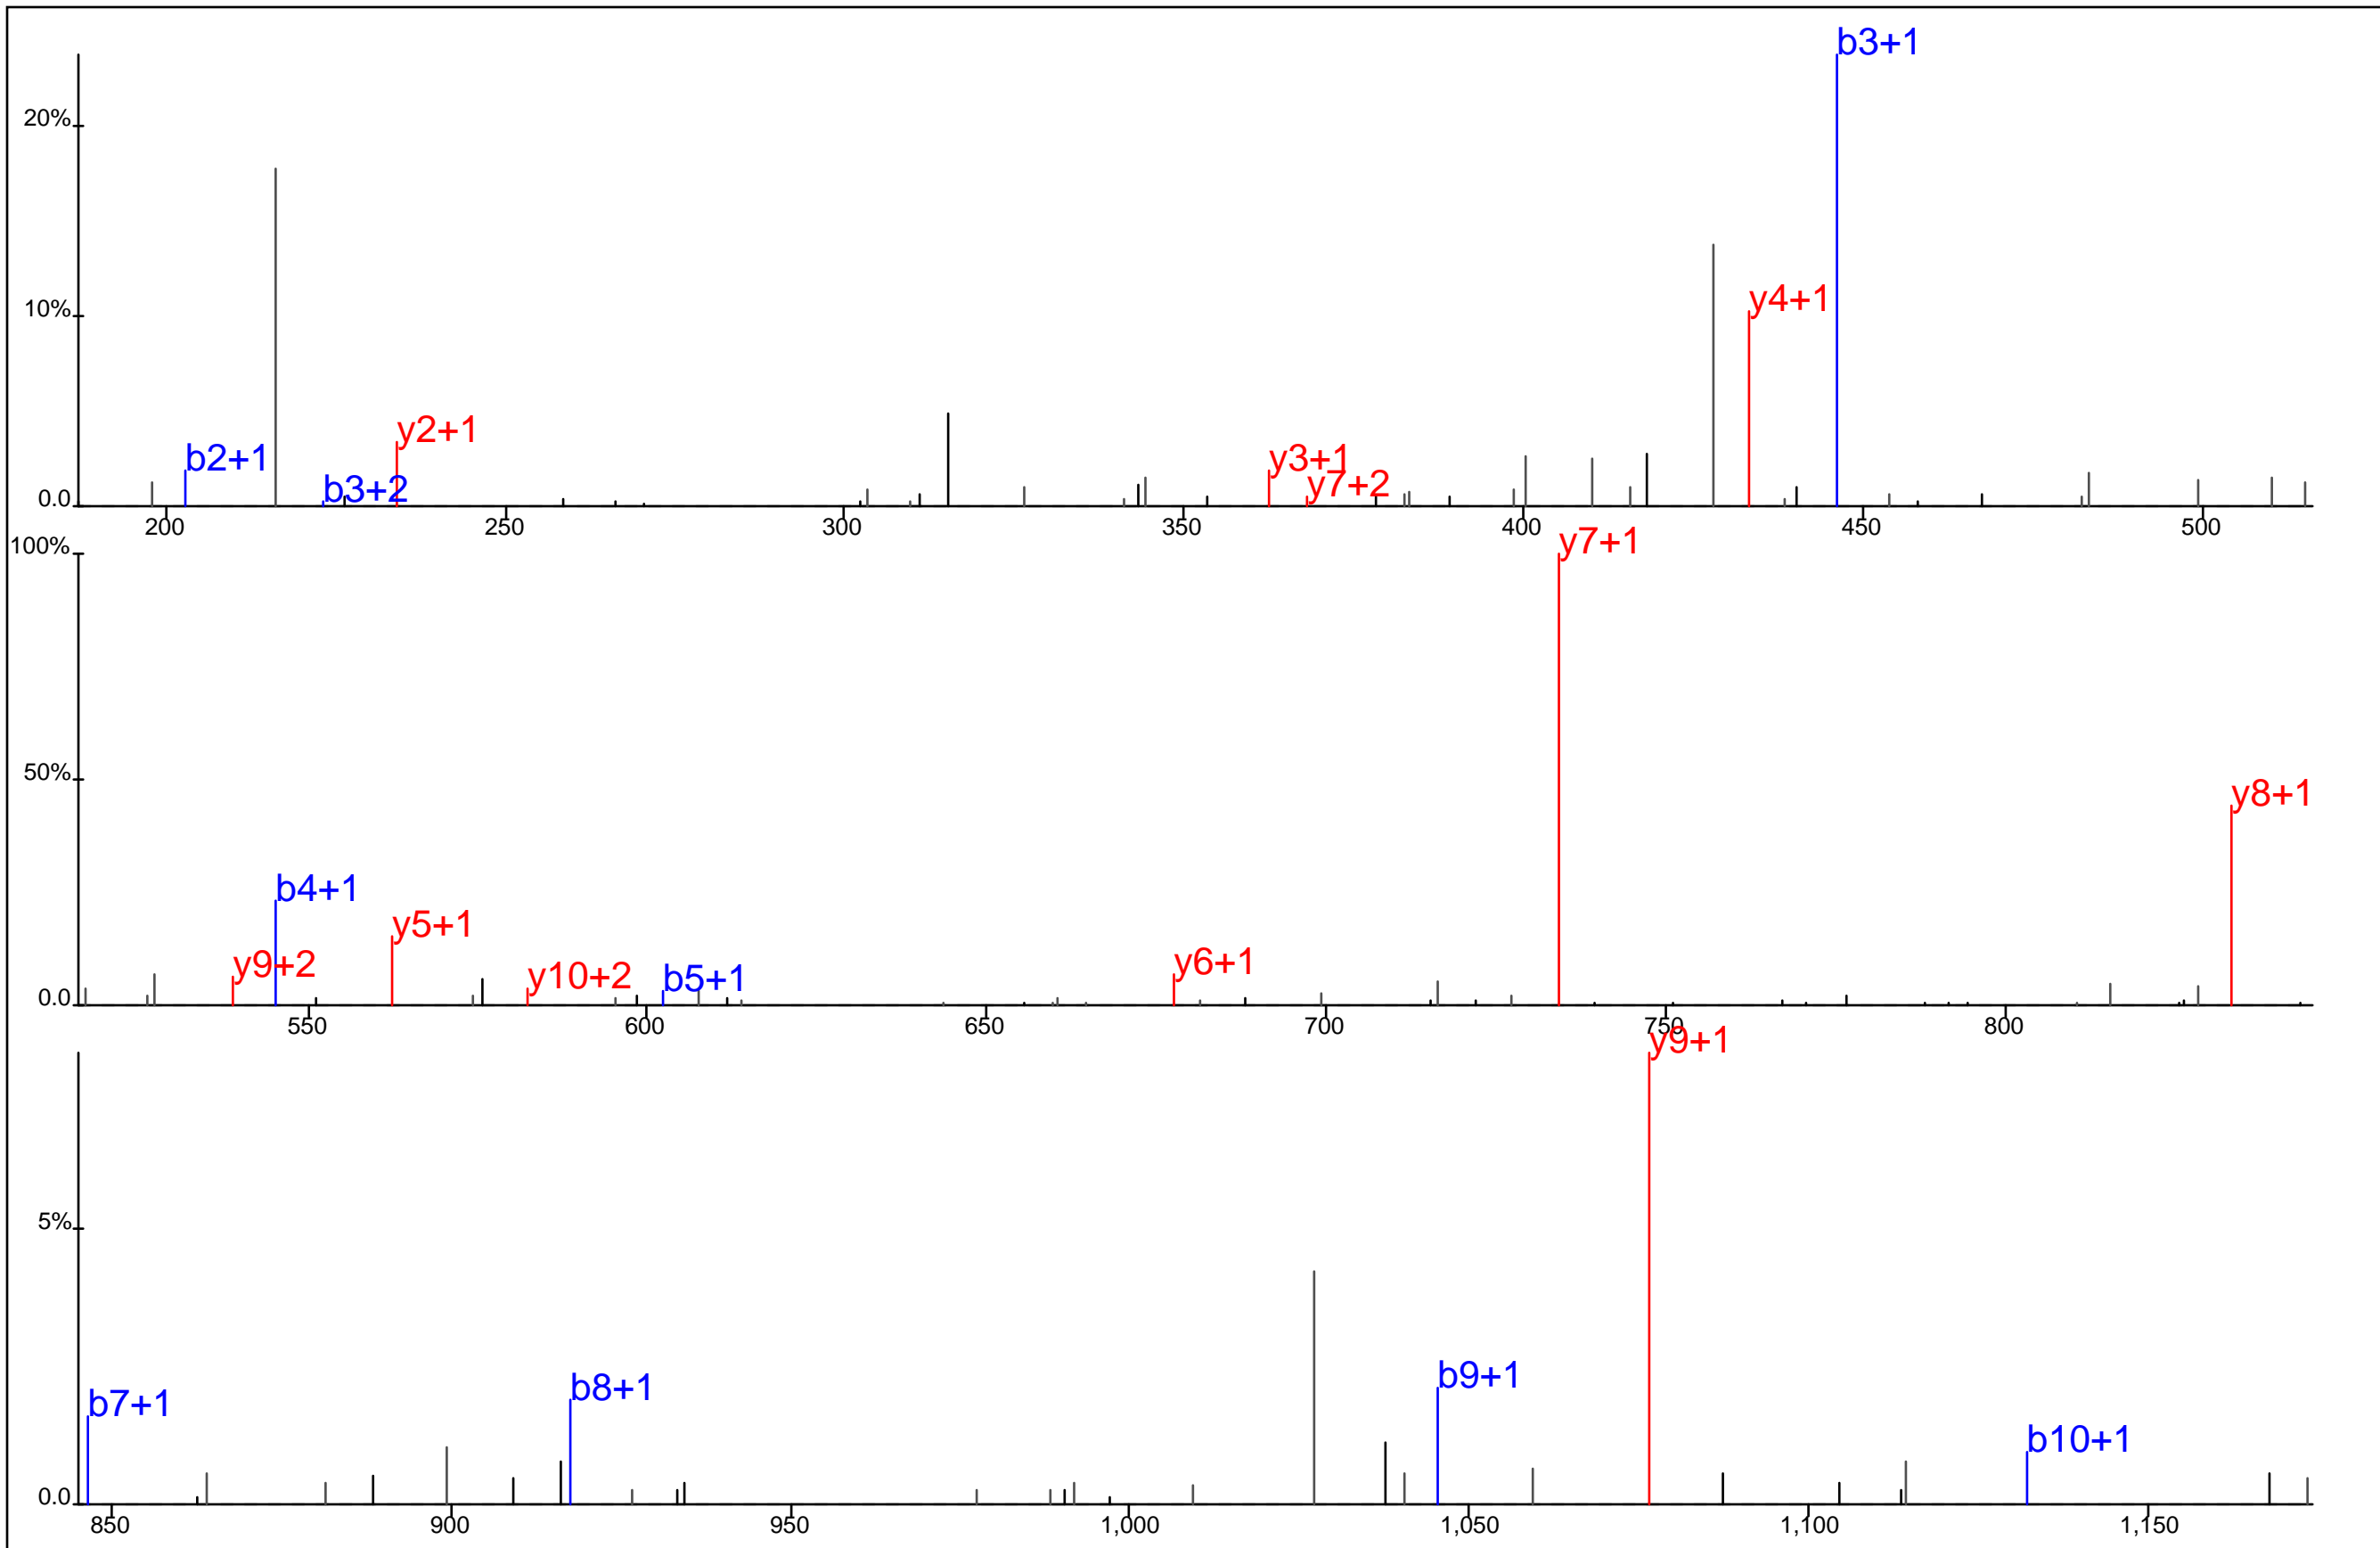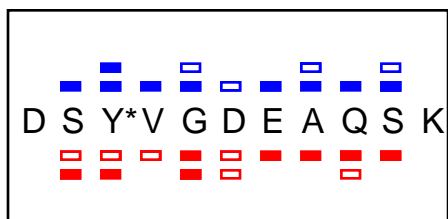

Protein Name: Actin alpha, cardiac muscle  
 gi Accession: 0  
 Precursor Mass: 639.7489+2  
 Delta Mass: 1.544 ppm  
 XCorr: 76.33



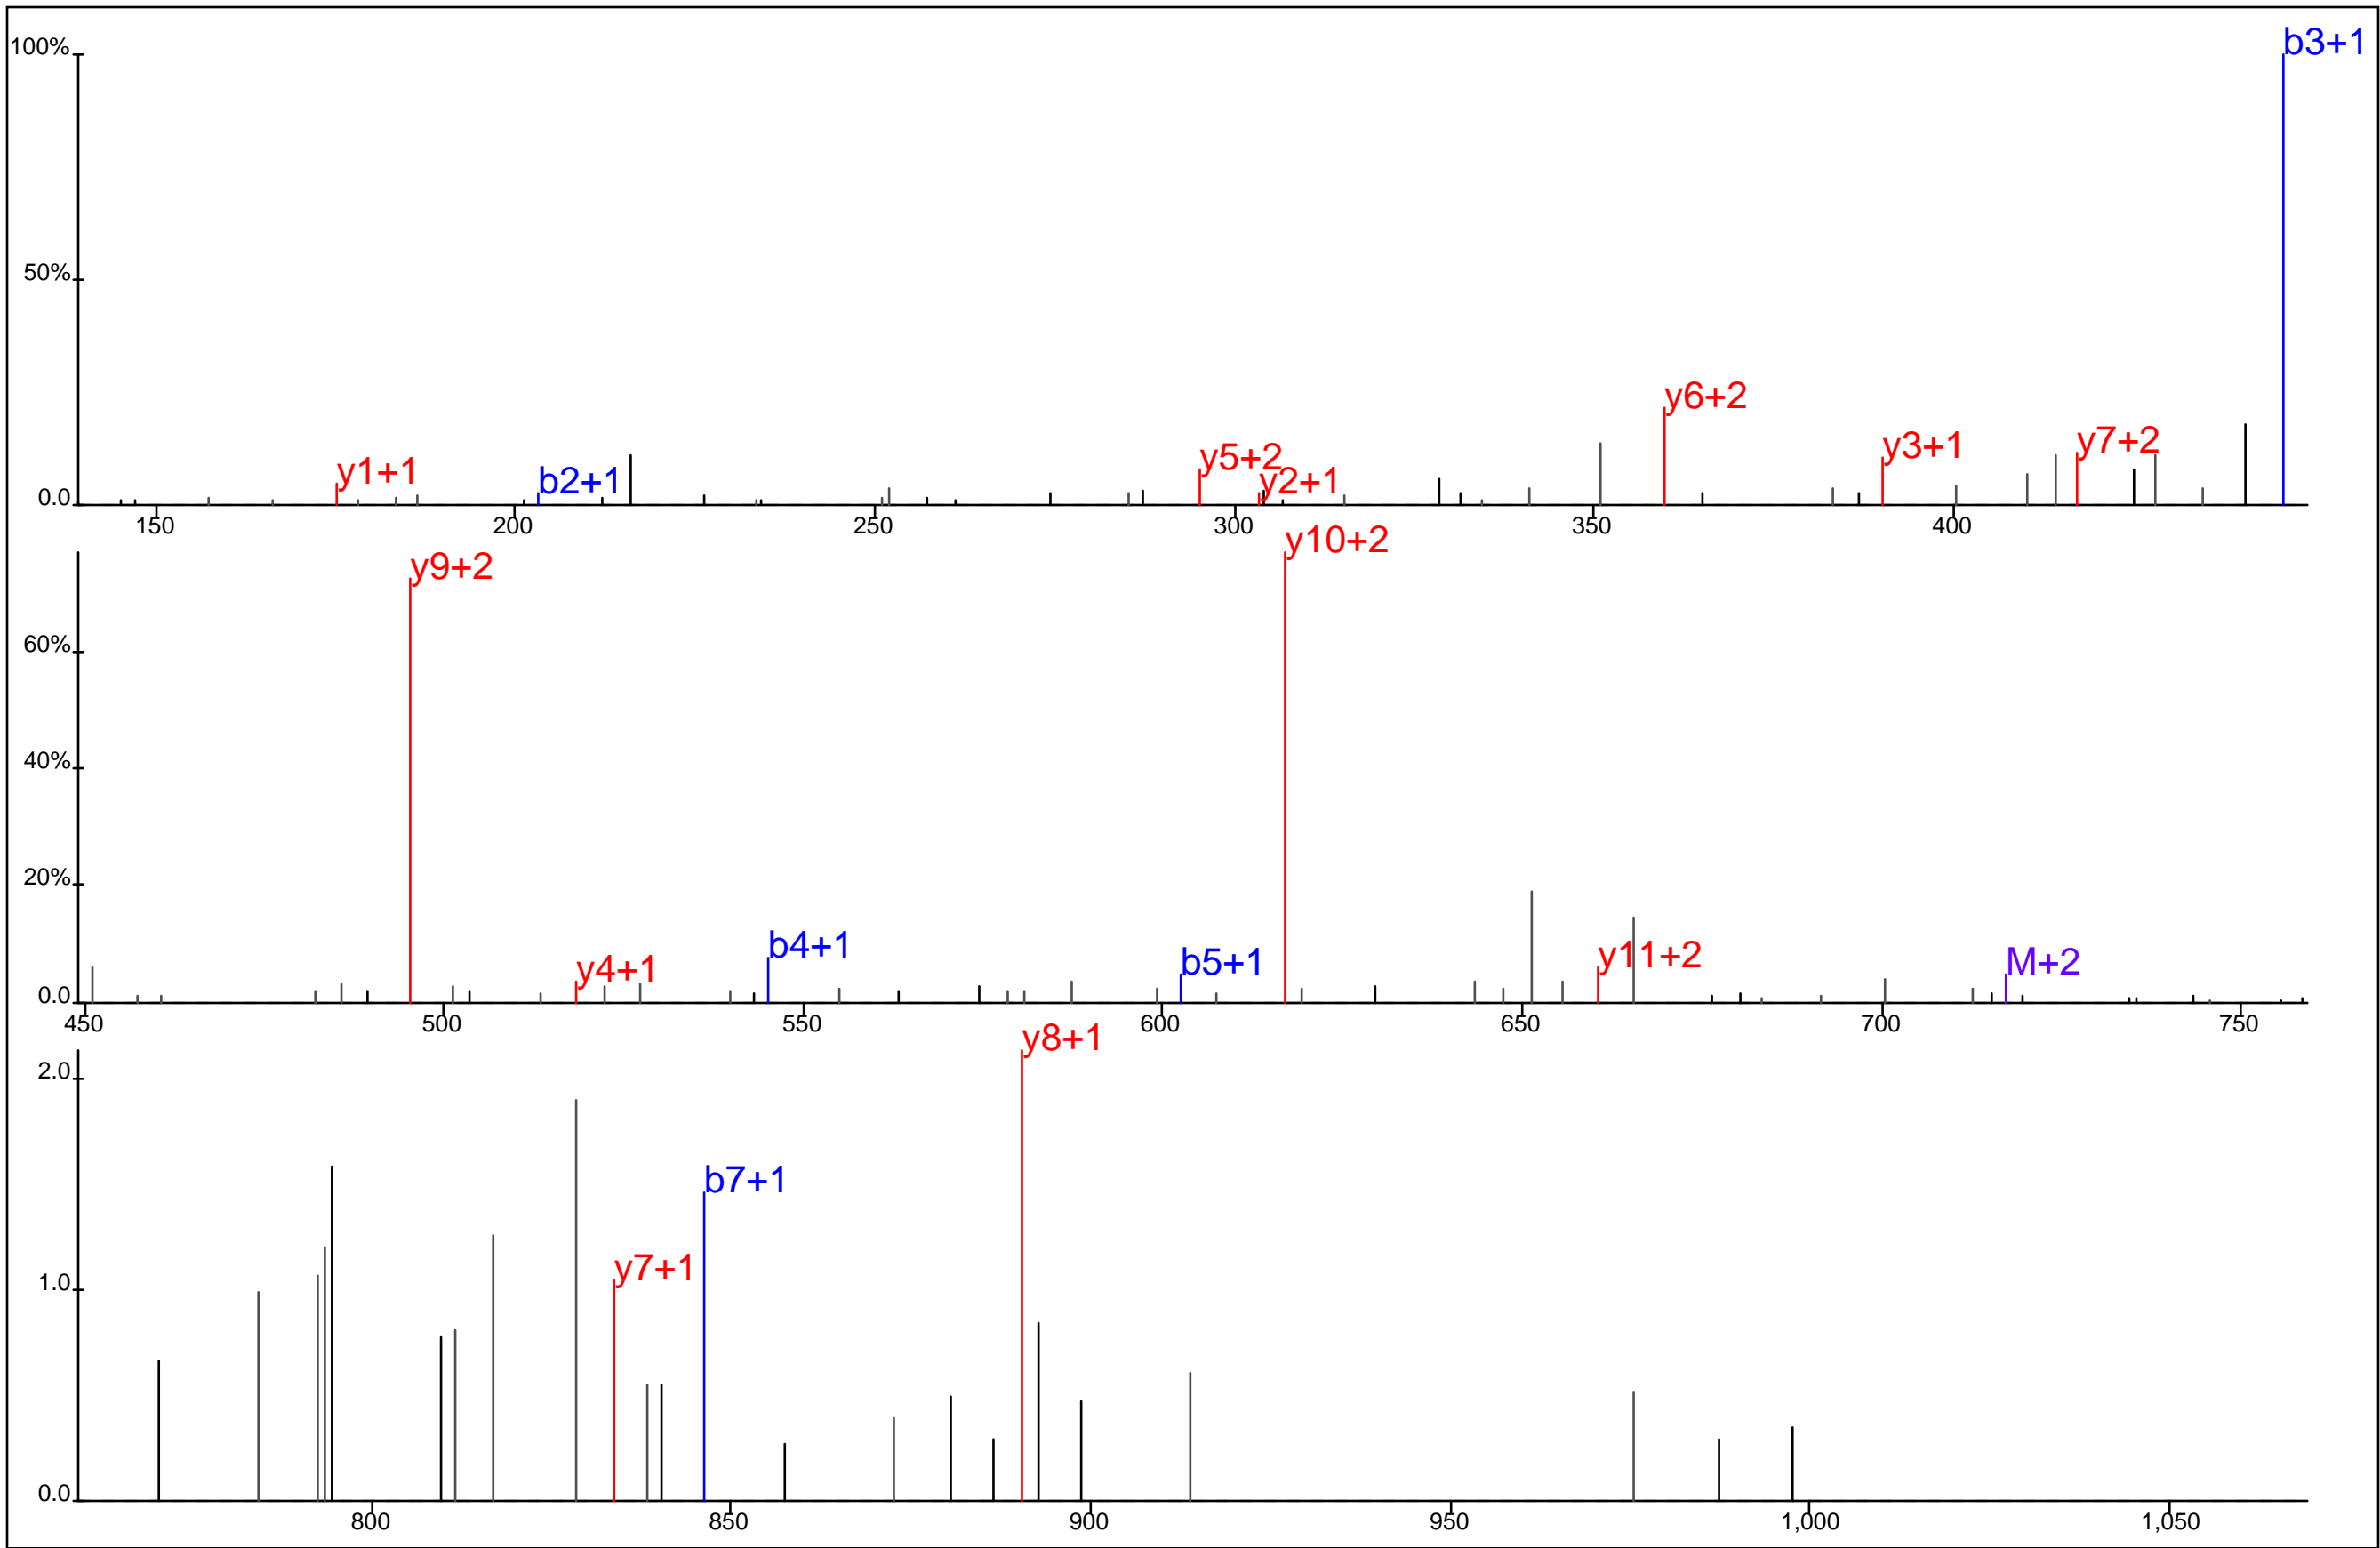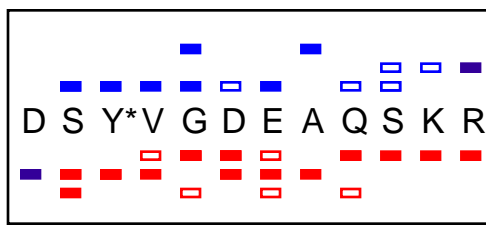

Protein Name: Actin alpha, cardiac muscle  
 gi Accession: 0  
 Precursor Mass: 478.8688+3  
 Delta Mass: 1.469 ppm  
 XCorr: 44.71

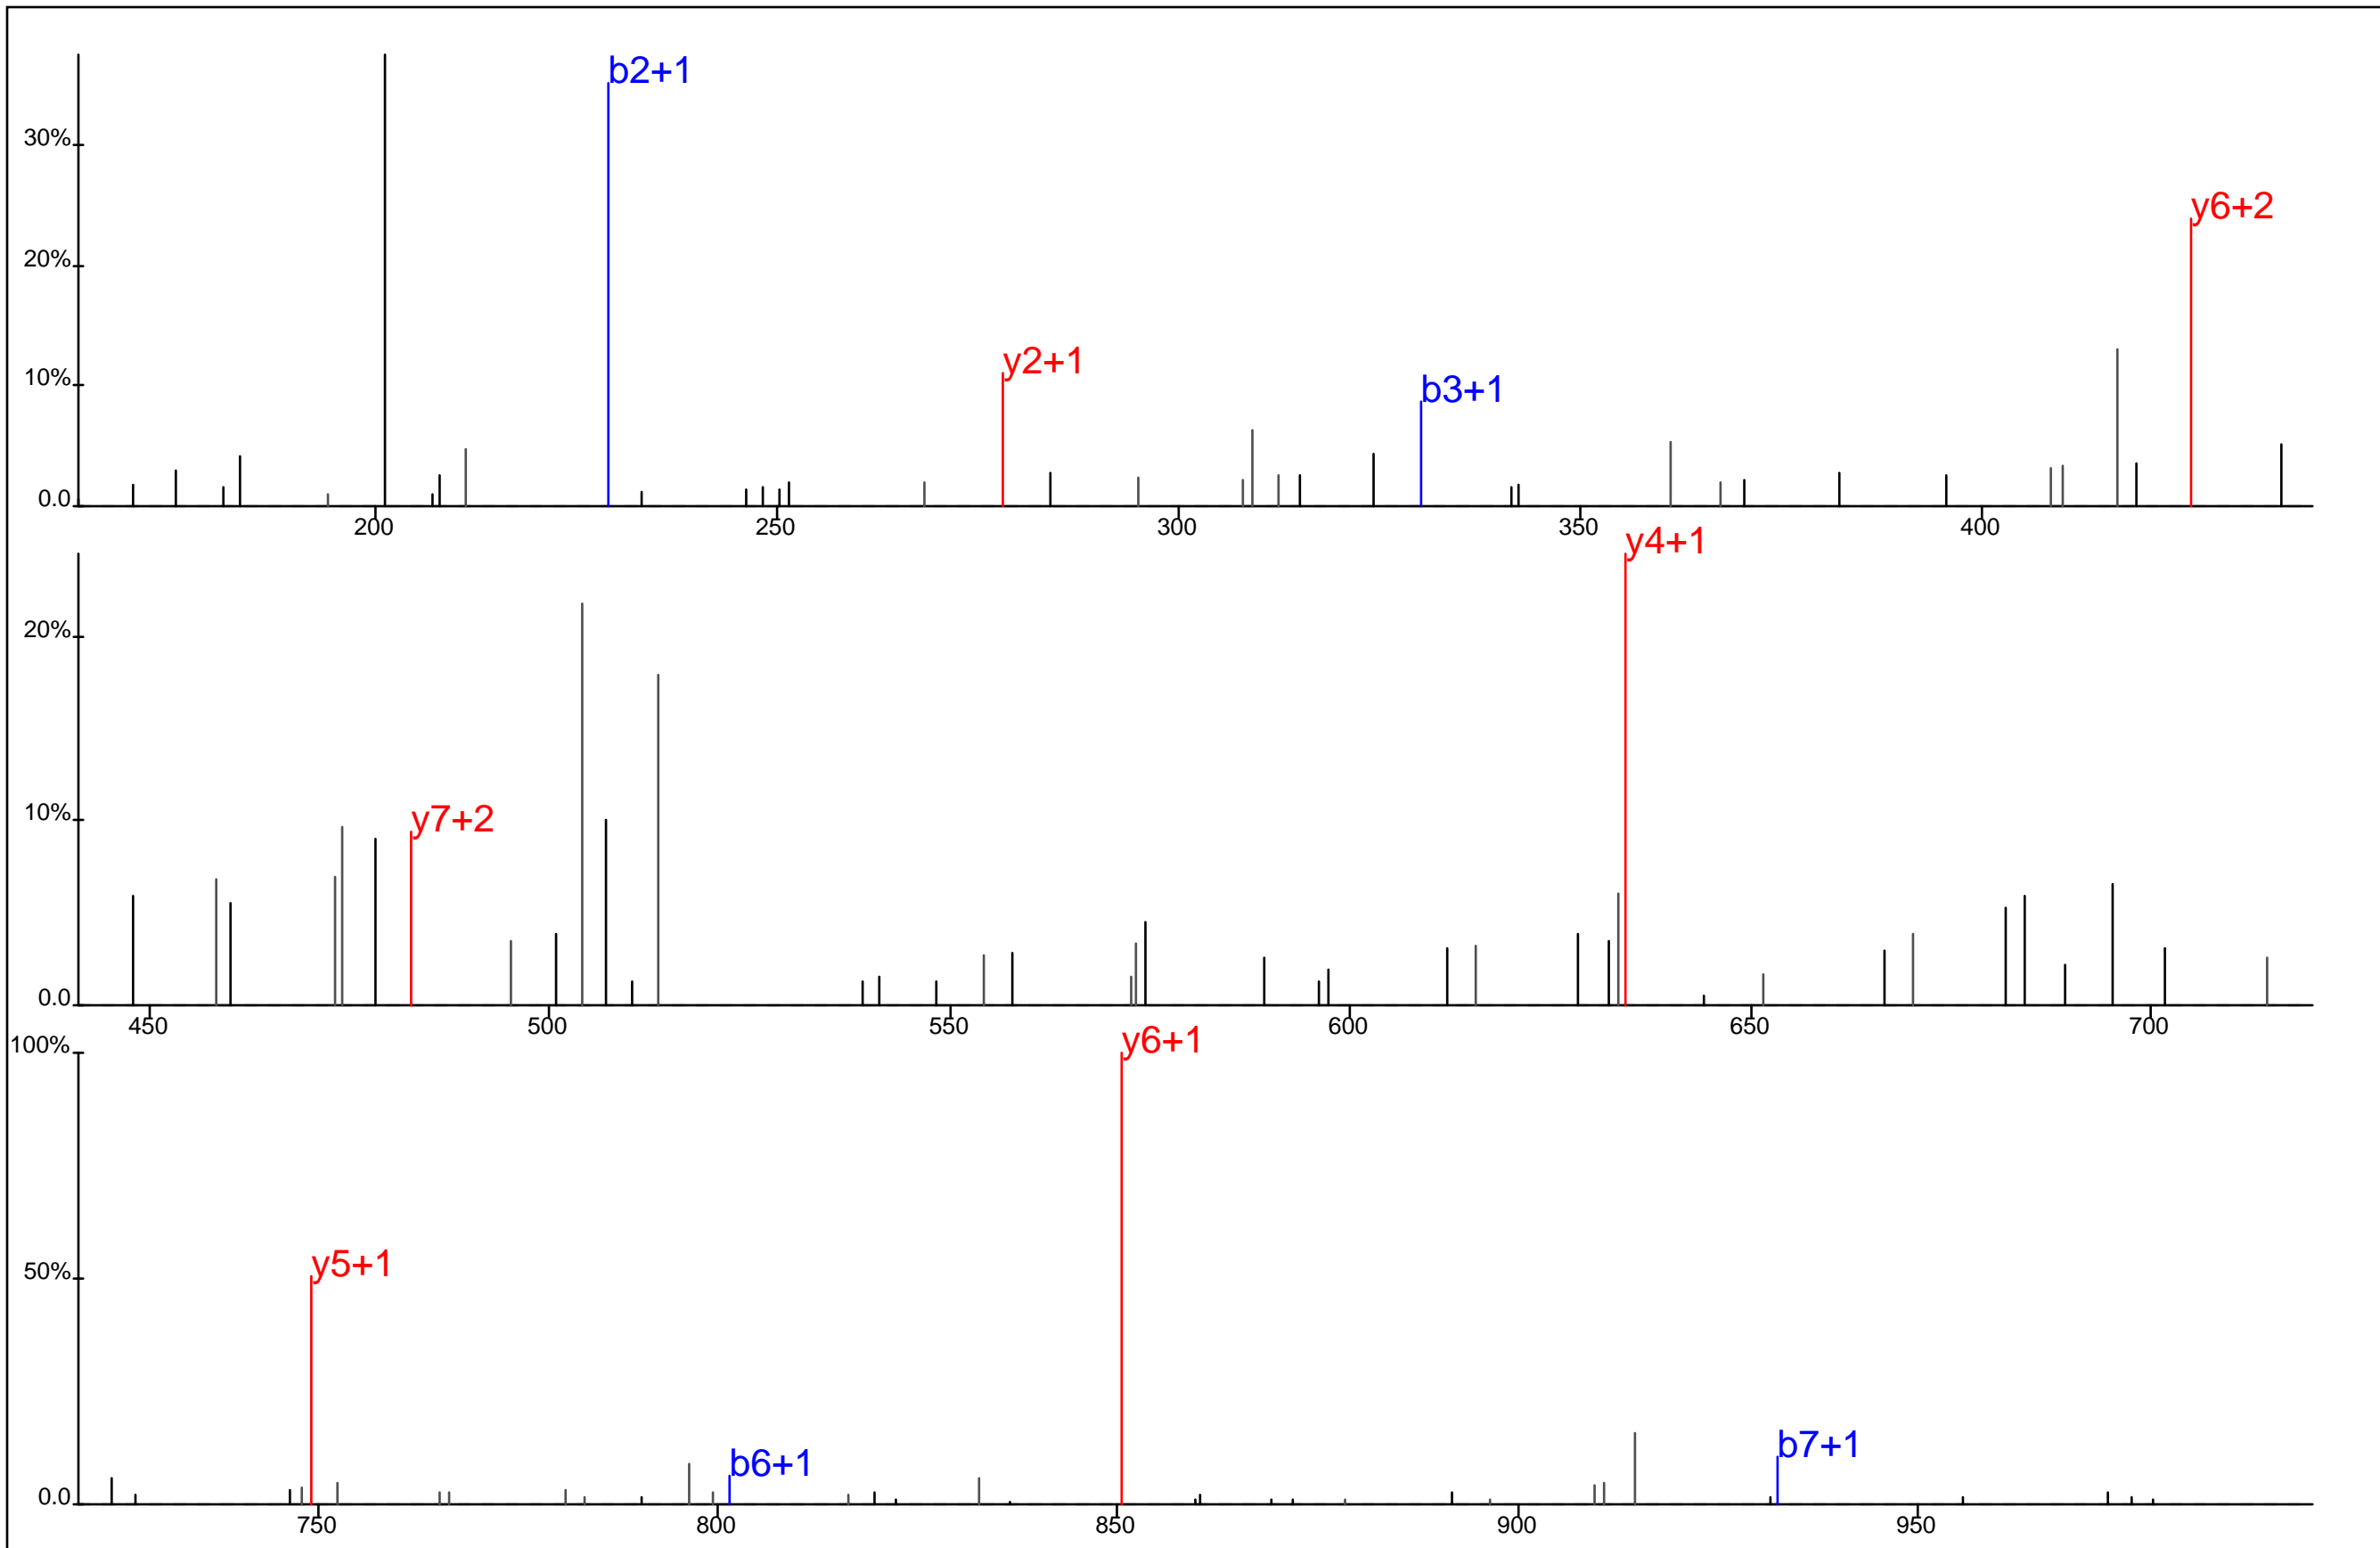

■ ■ ■ ■ ■ ■  
■ ■ ■ ■ ■ ■  
**D L T D Y\* L M K**

Protein Name: Actin alpha, cardiac muscle  
 gi Accession: 0  
 Precursor Mass: 539.7299+2  
 Delta Mass: 0.056 ppm  
 XCorr: 20.24

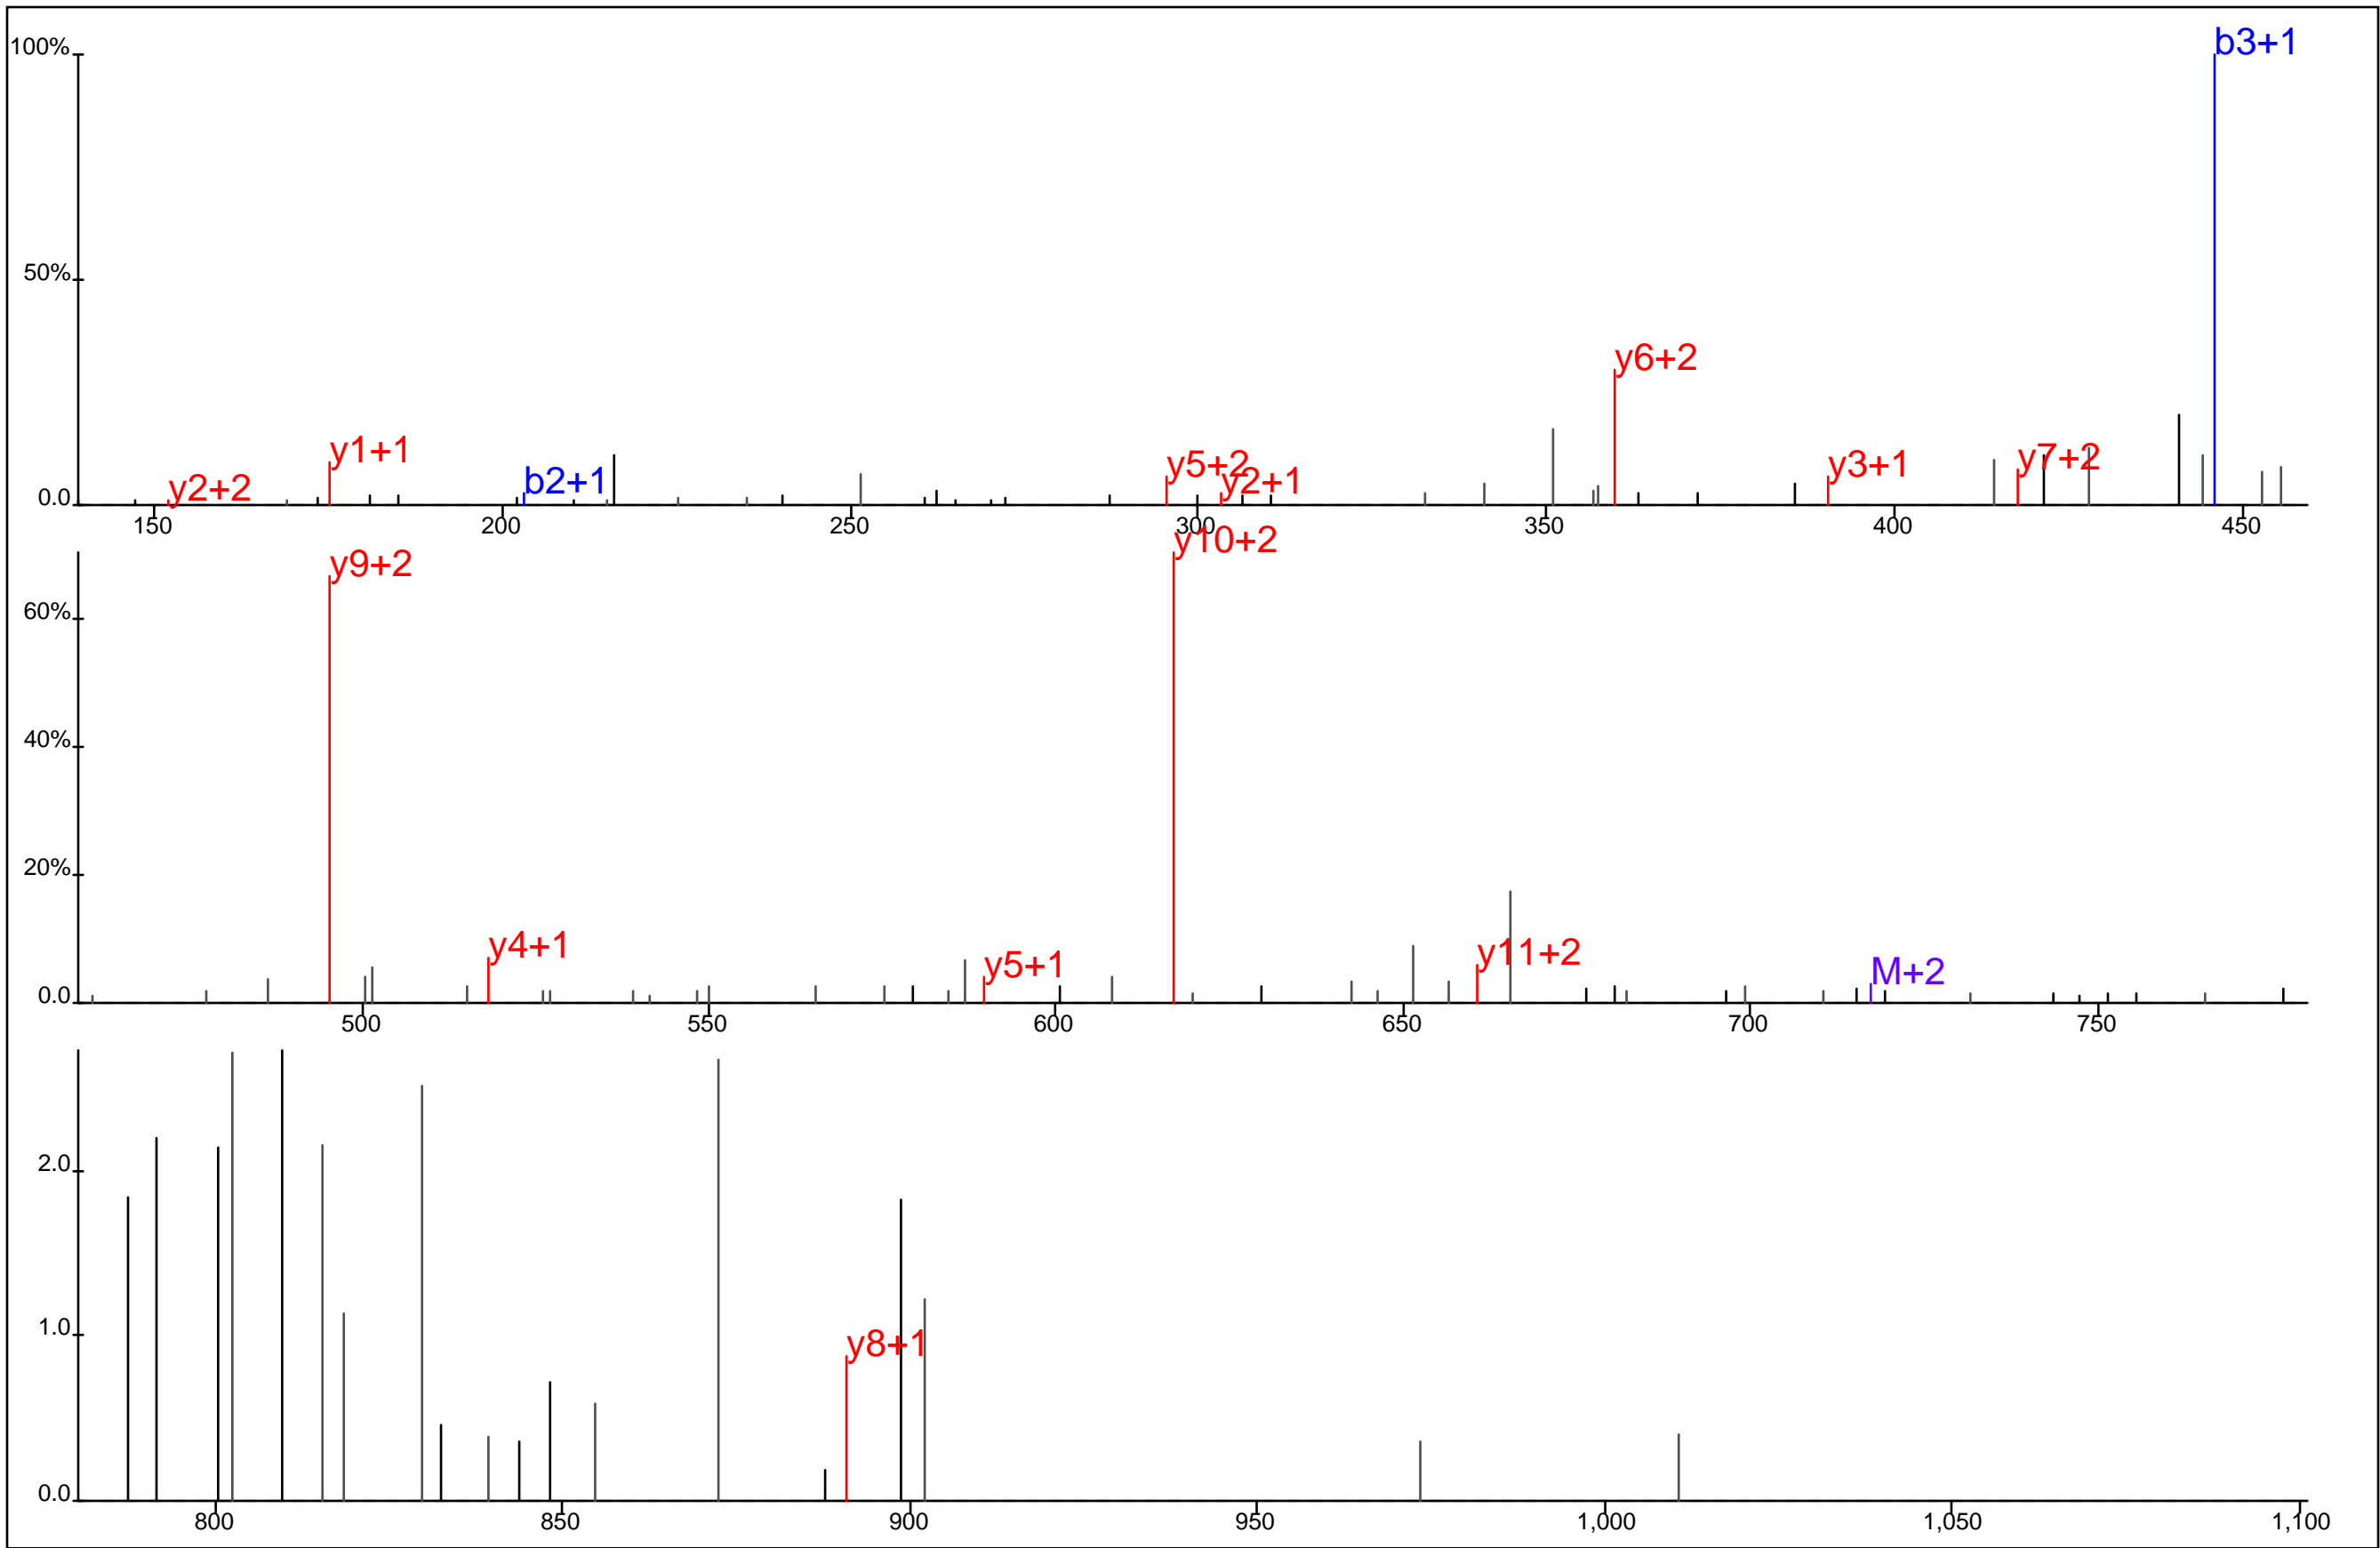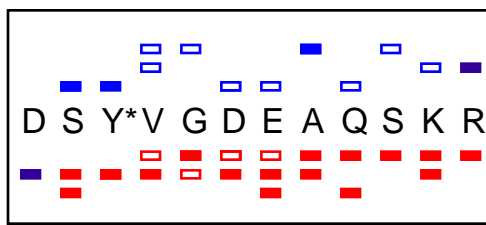

Protein Name: Actin alpha, cardiac muscle  
 gi Accession: 0  
 Precursor Mass: 478.8682+3  
 Delta Mass: 0.259 ppm  
 XCorr: 39.85

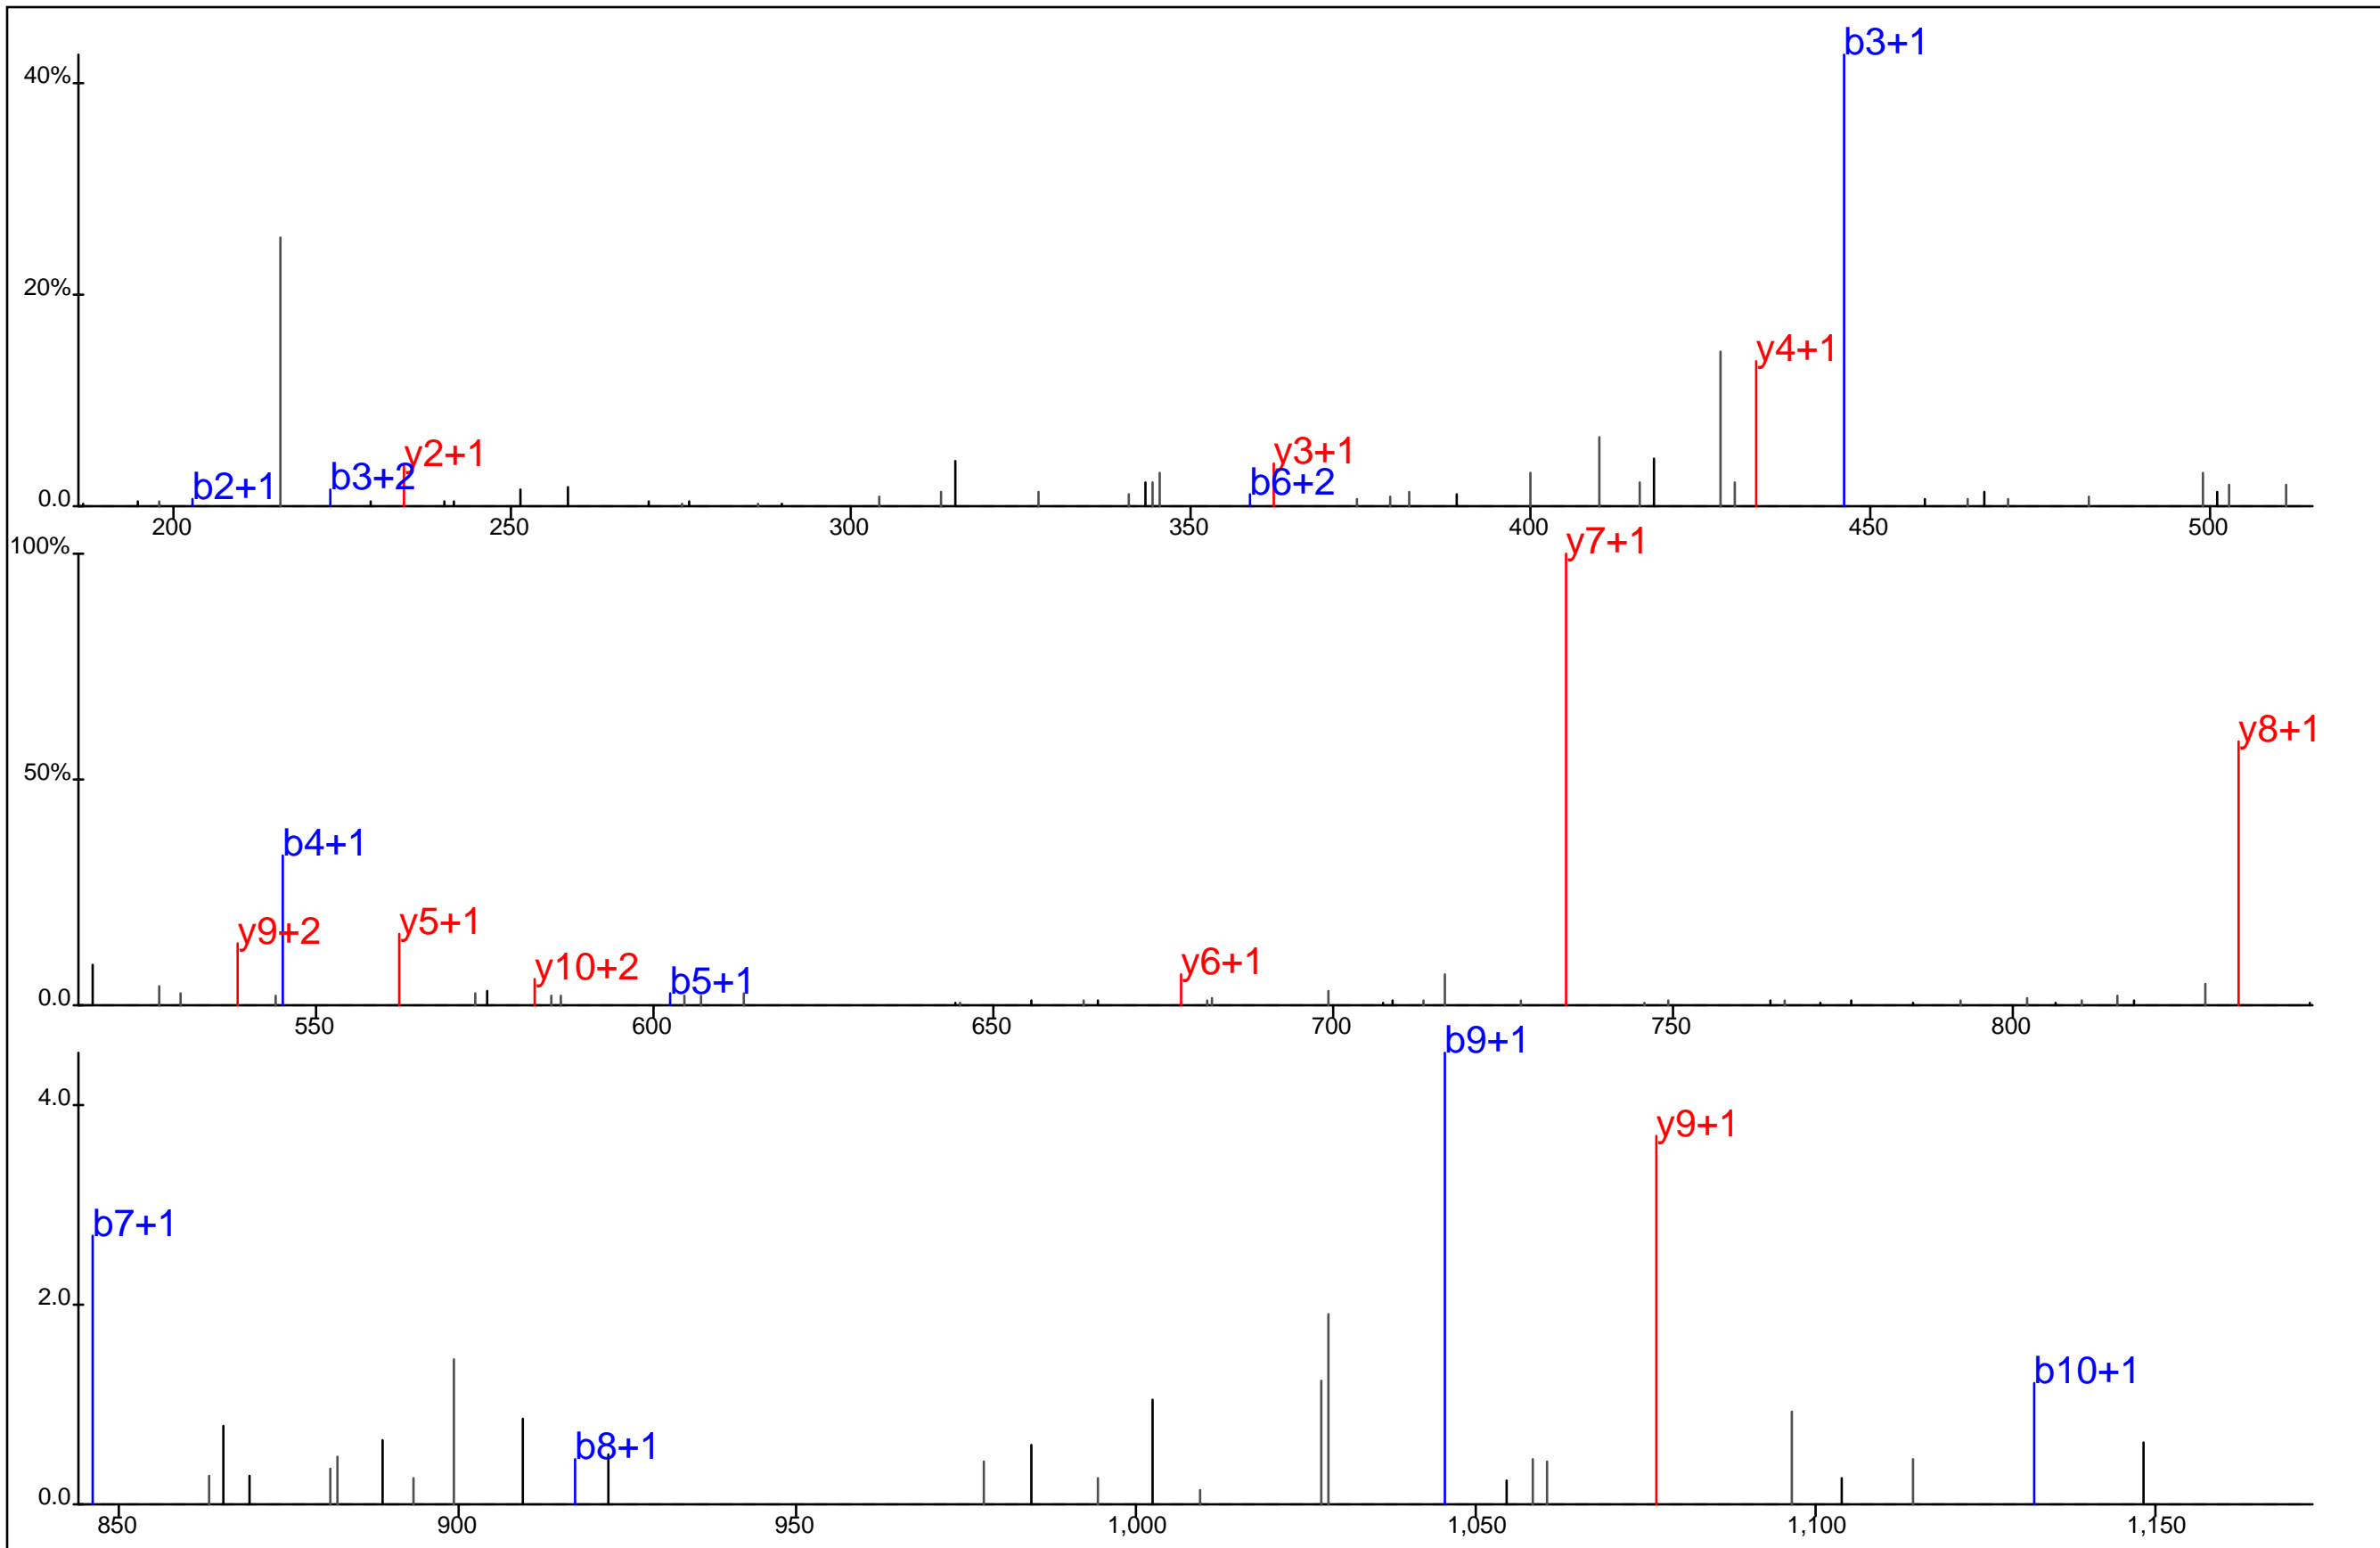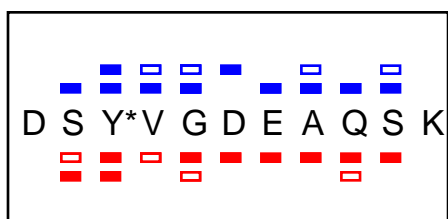

Protein Name: Actin alpha, cardiac muscle  
 gi Accession: 0  
 Precursor Mass: 639.7468+2  
 Delta Mass: 1.702 ppm  
 XCorr: 64.57

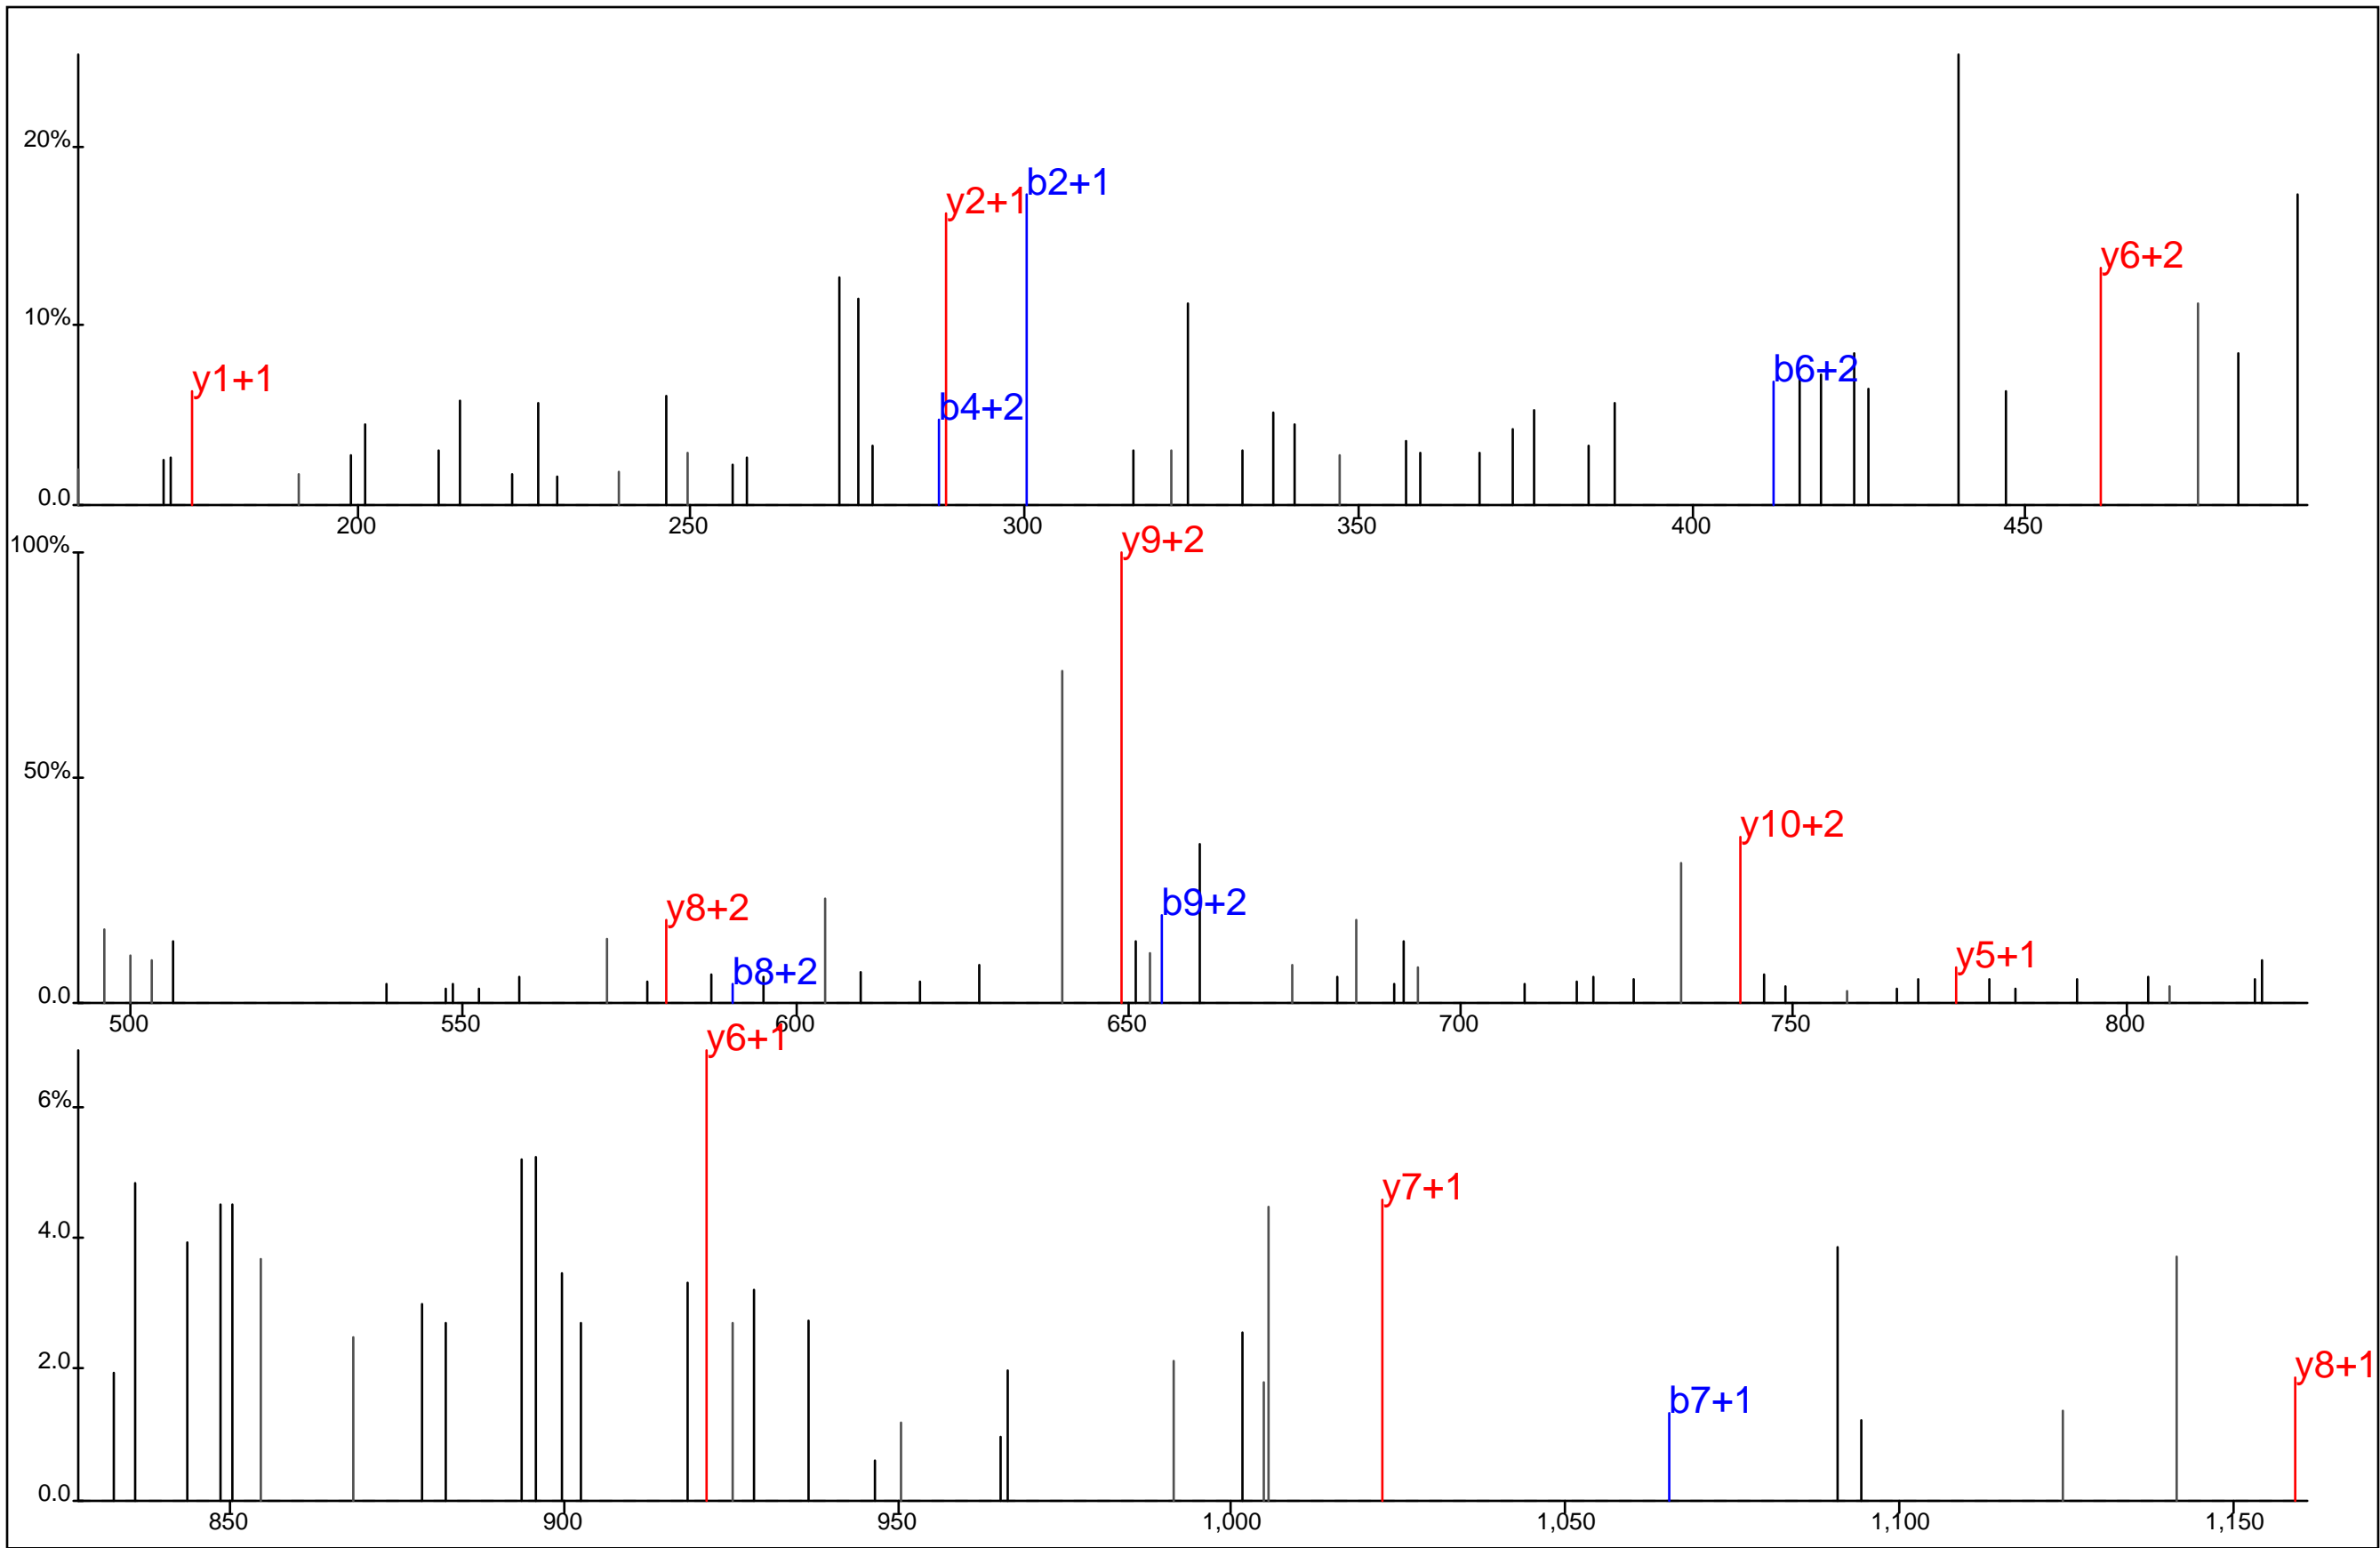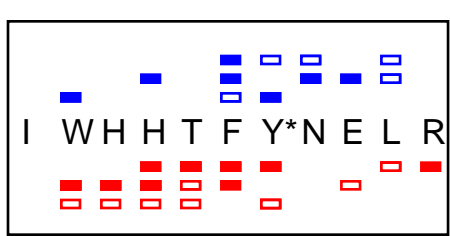

Protein Name: Actin alpha, cardiac muscle  
 gi Accession: 0  
 Precursor Mass: 532.5775+3  
 Delta Mass: 1.586 ppm  
 XCorr: 27.92

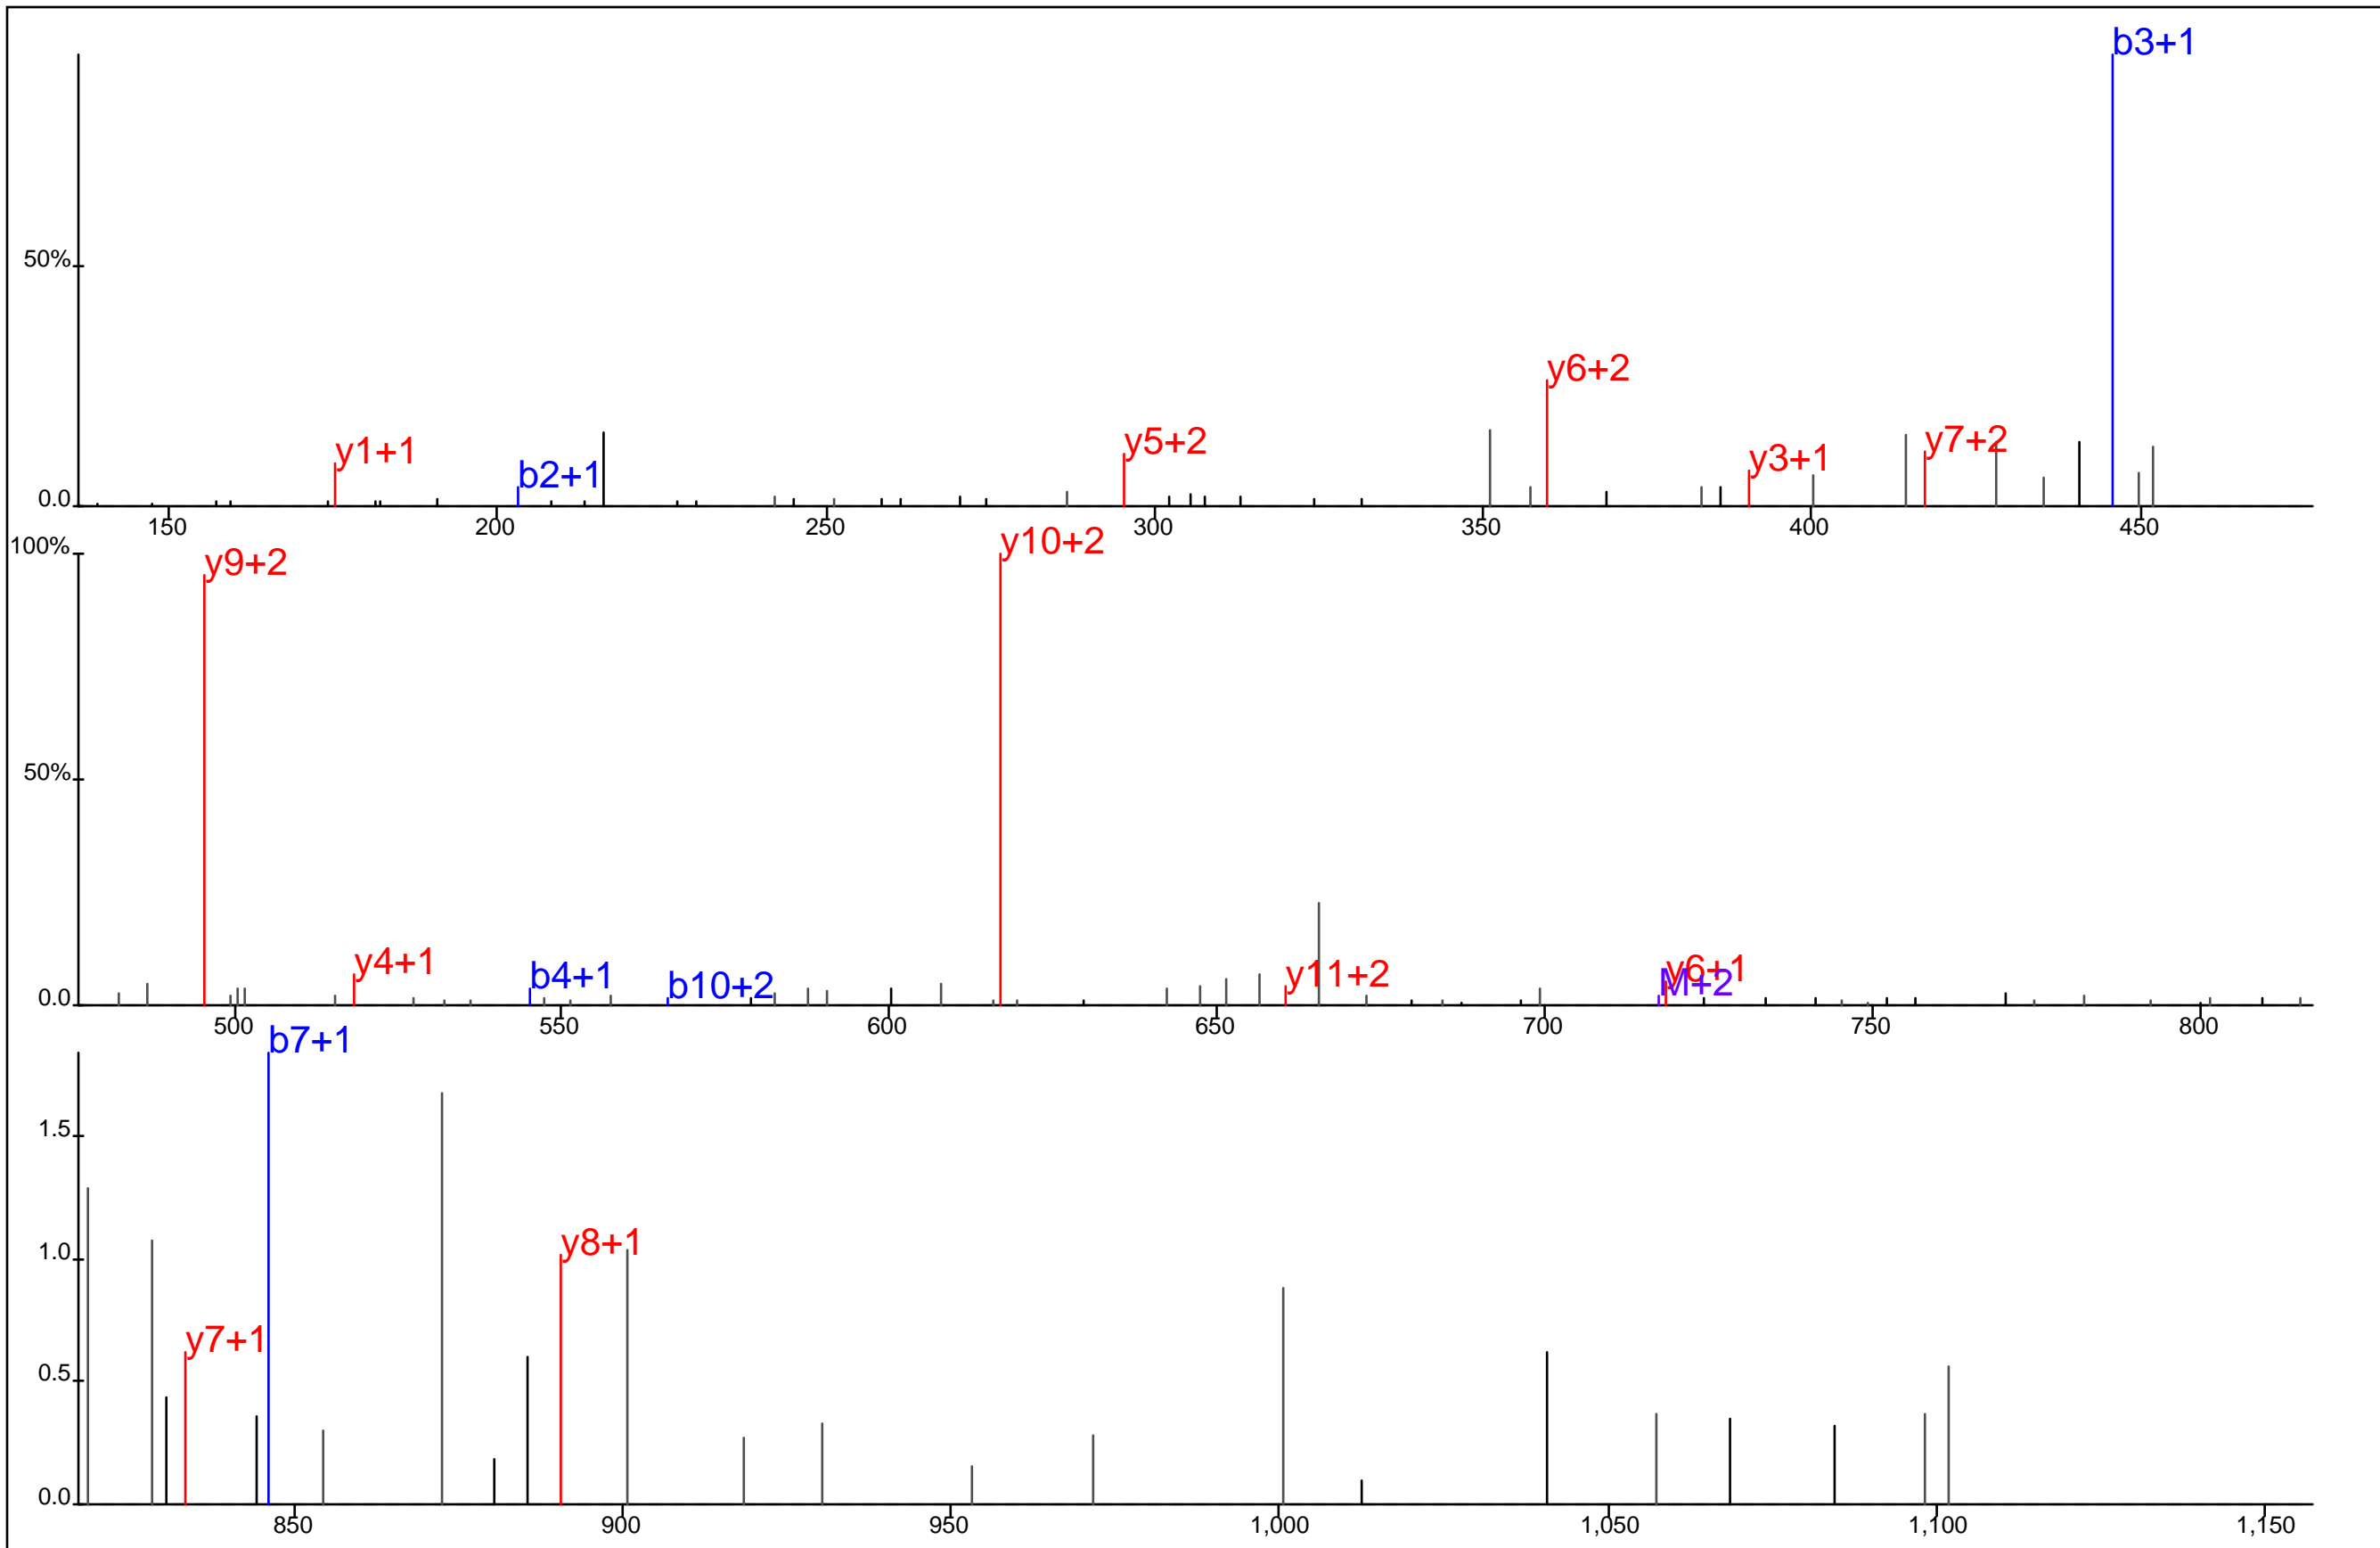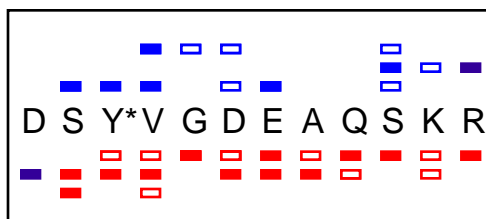

Protein Name: Actin alpha, cardiac muscle  
 gi Accession: 0  
 Precursor Mass: 478.8681+3  
 Delta Mass: 0.131 ppm  
 XCorr: 33.95



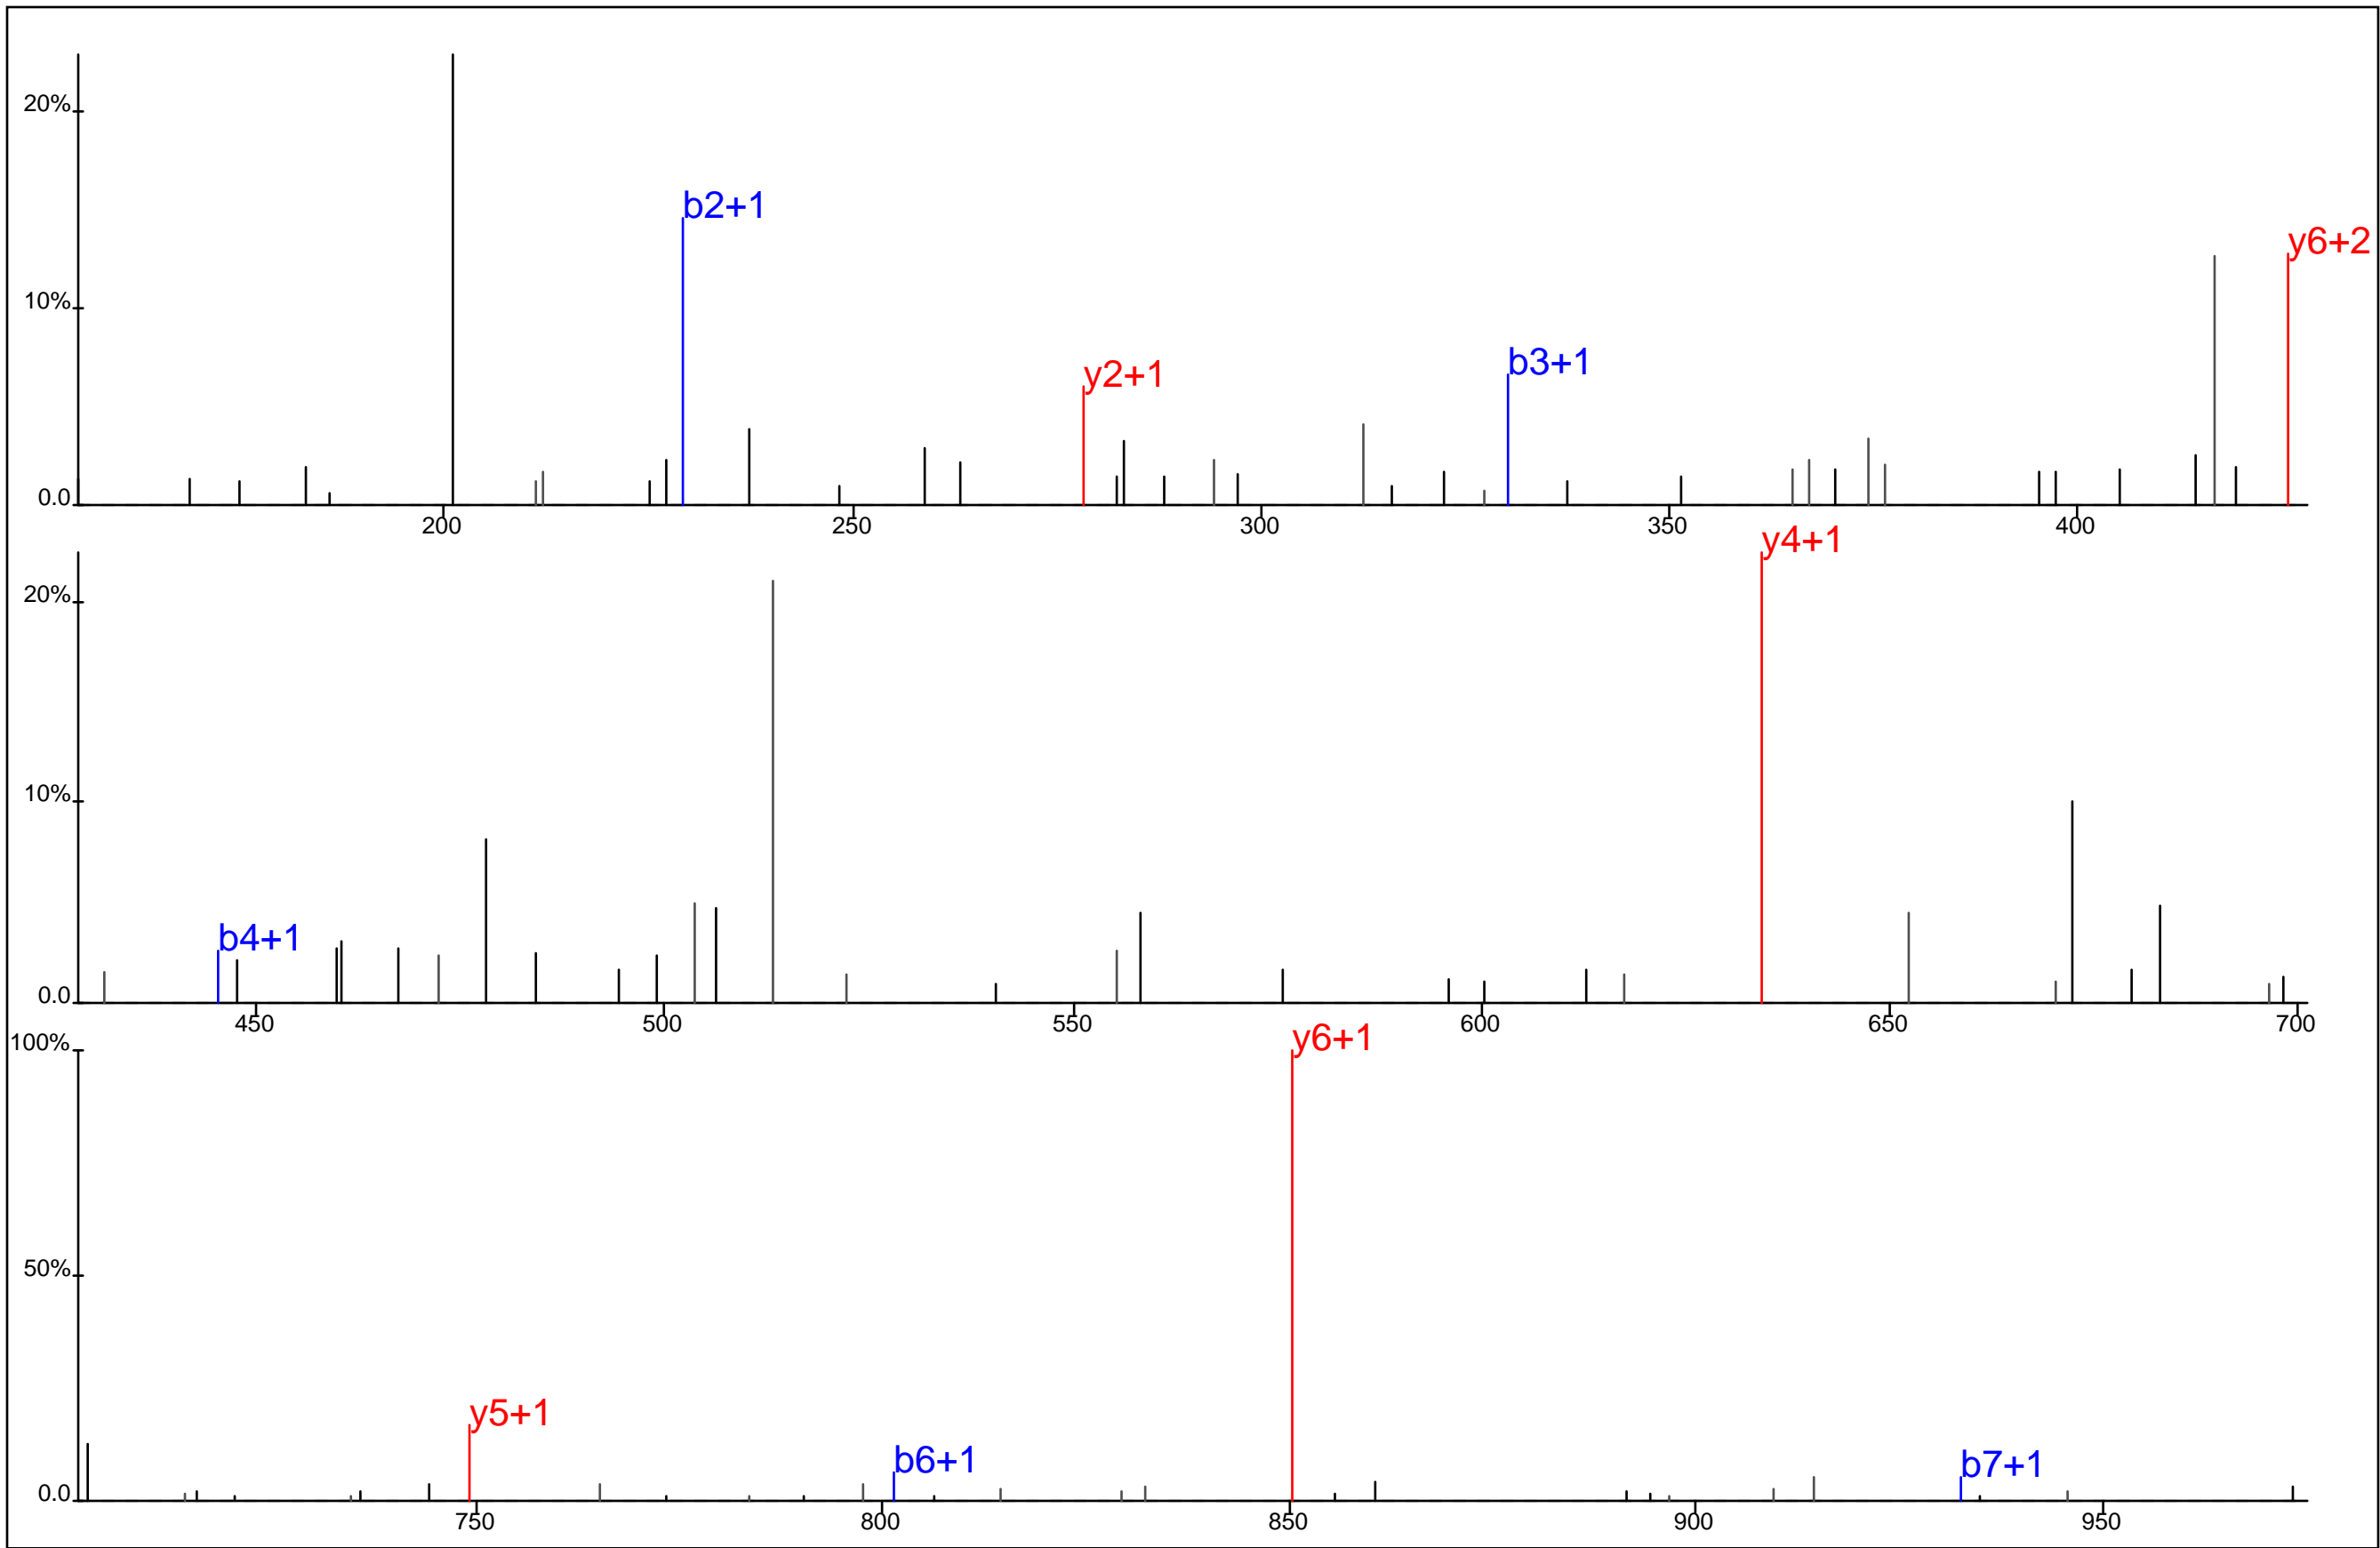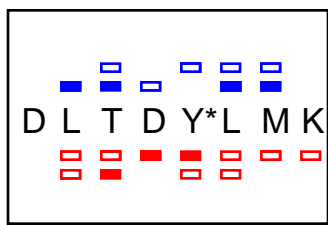

Protein Name: Actin alpha, cardiac muscle  
 gi Accession: 0  
 Precursor Mass: 539.7306+2  
 Delta Mass: 1.191 ppm  
 XCorr: 24.59



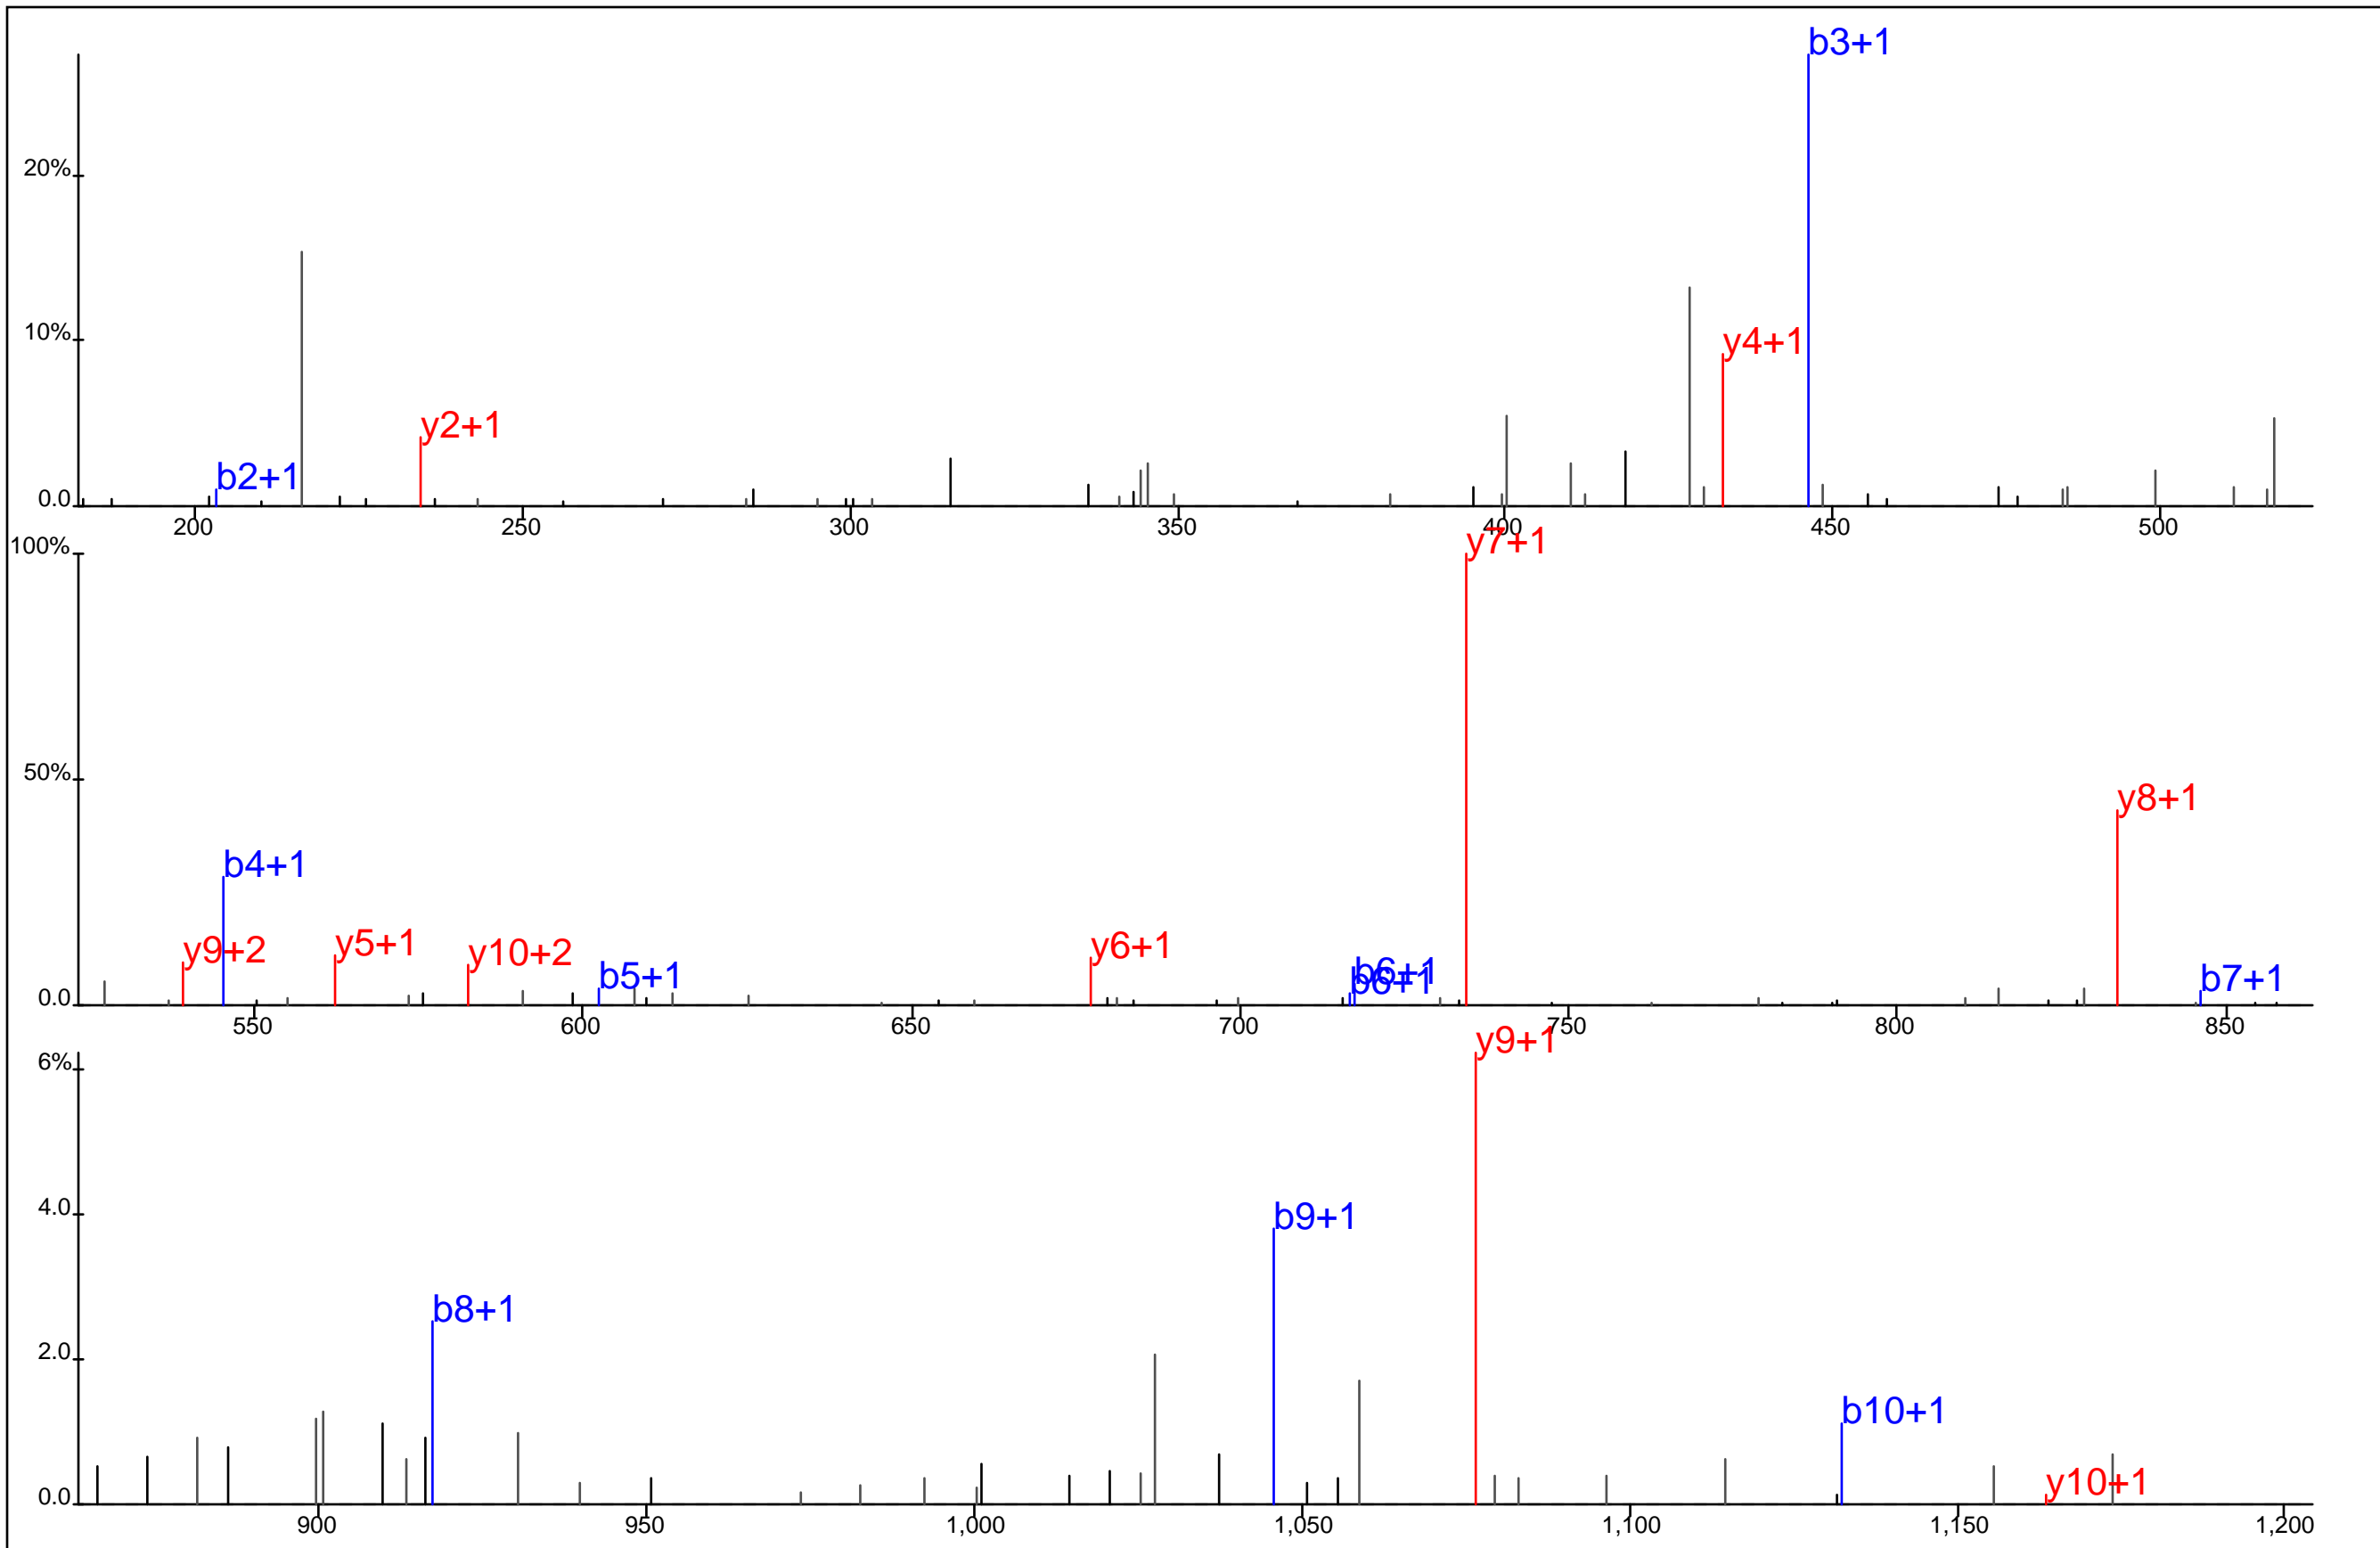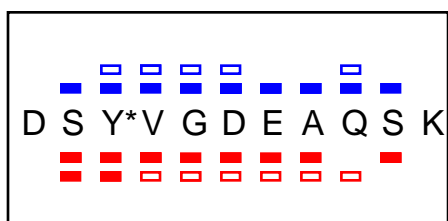

Protein Name: Actin alpha, cardiac muscle  
 gi Accession: 0  
 Precursor Mass: 639.7480+2  
 Delta Mass: 0.208 ppm  
 XCorr: 73.22

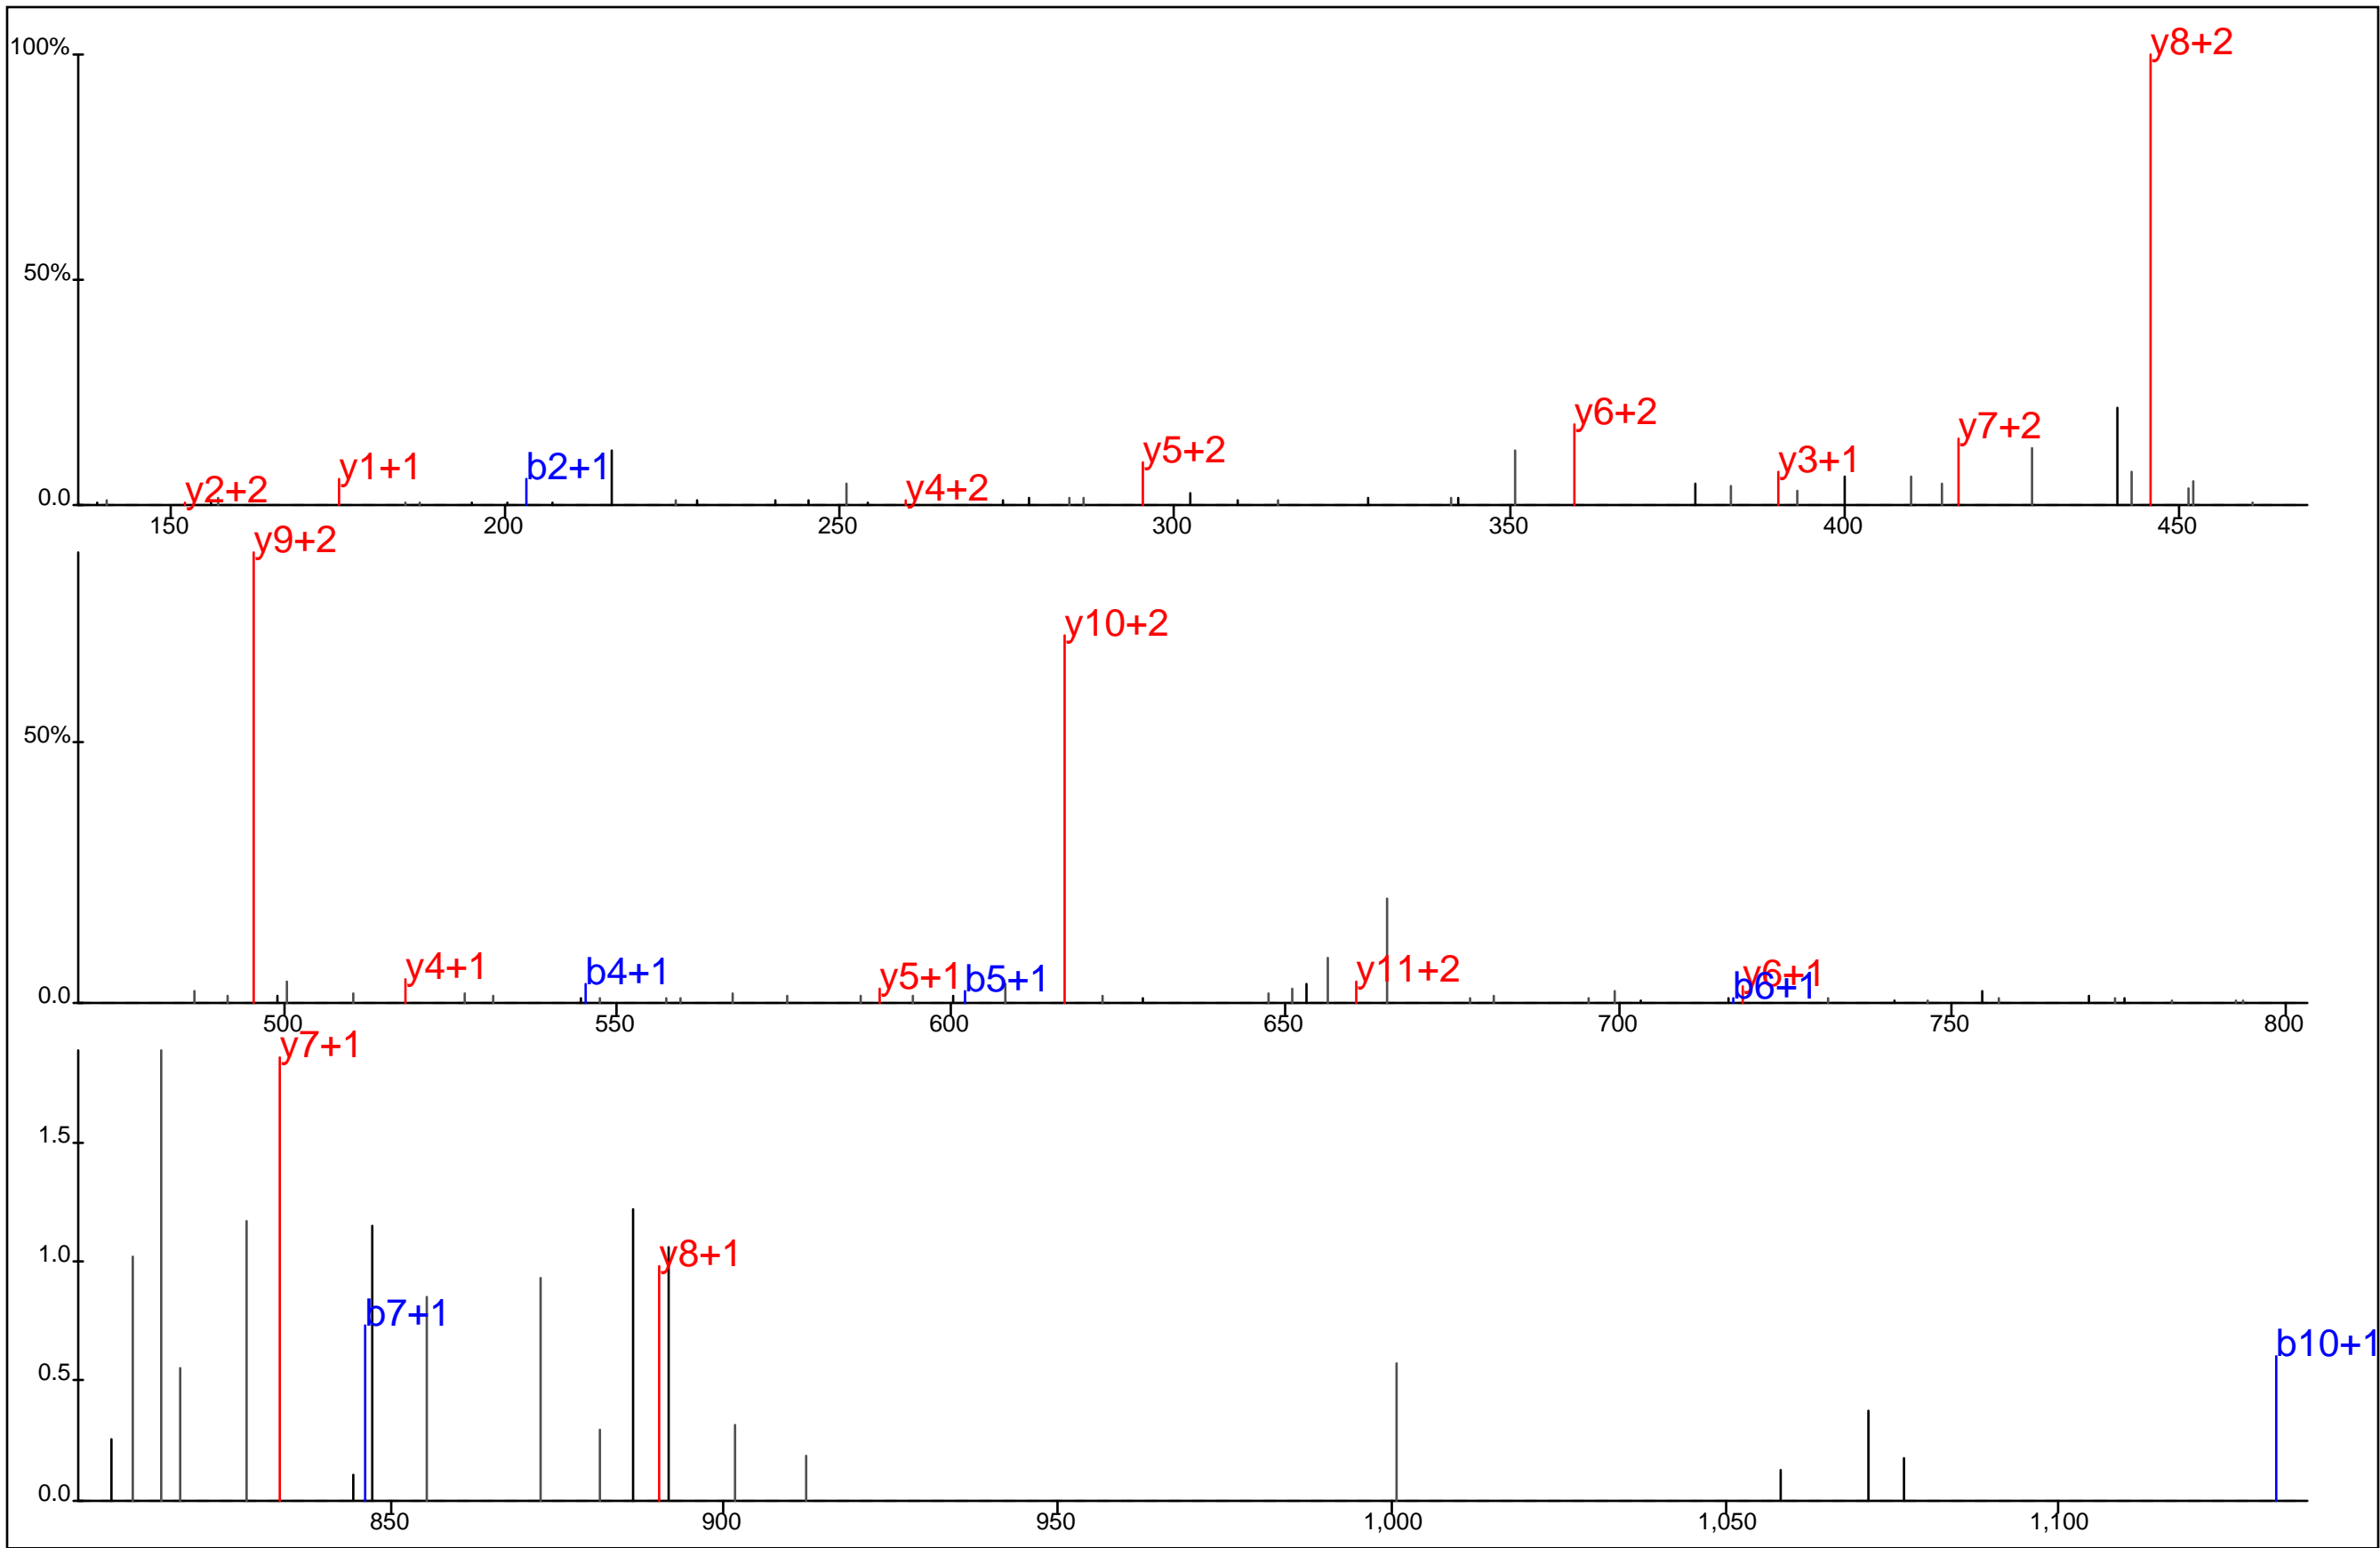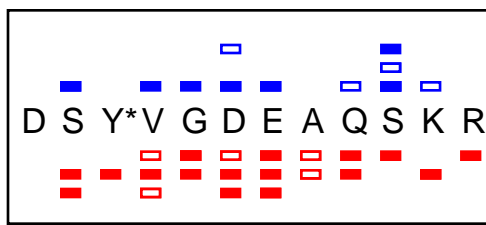

Protein Name: Actin alpha, cardiac muscle  
 gi Accession: 0  
 Precursor Mass: 478.8677+3  
 Delta Mass: 0.827 ppm  
 XCorr: 43.5



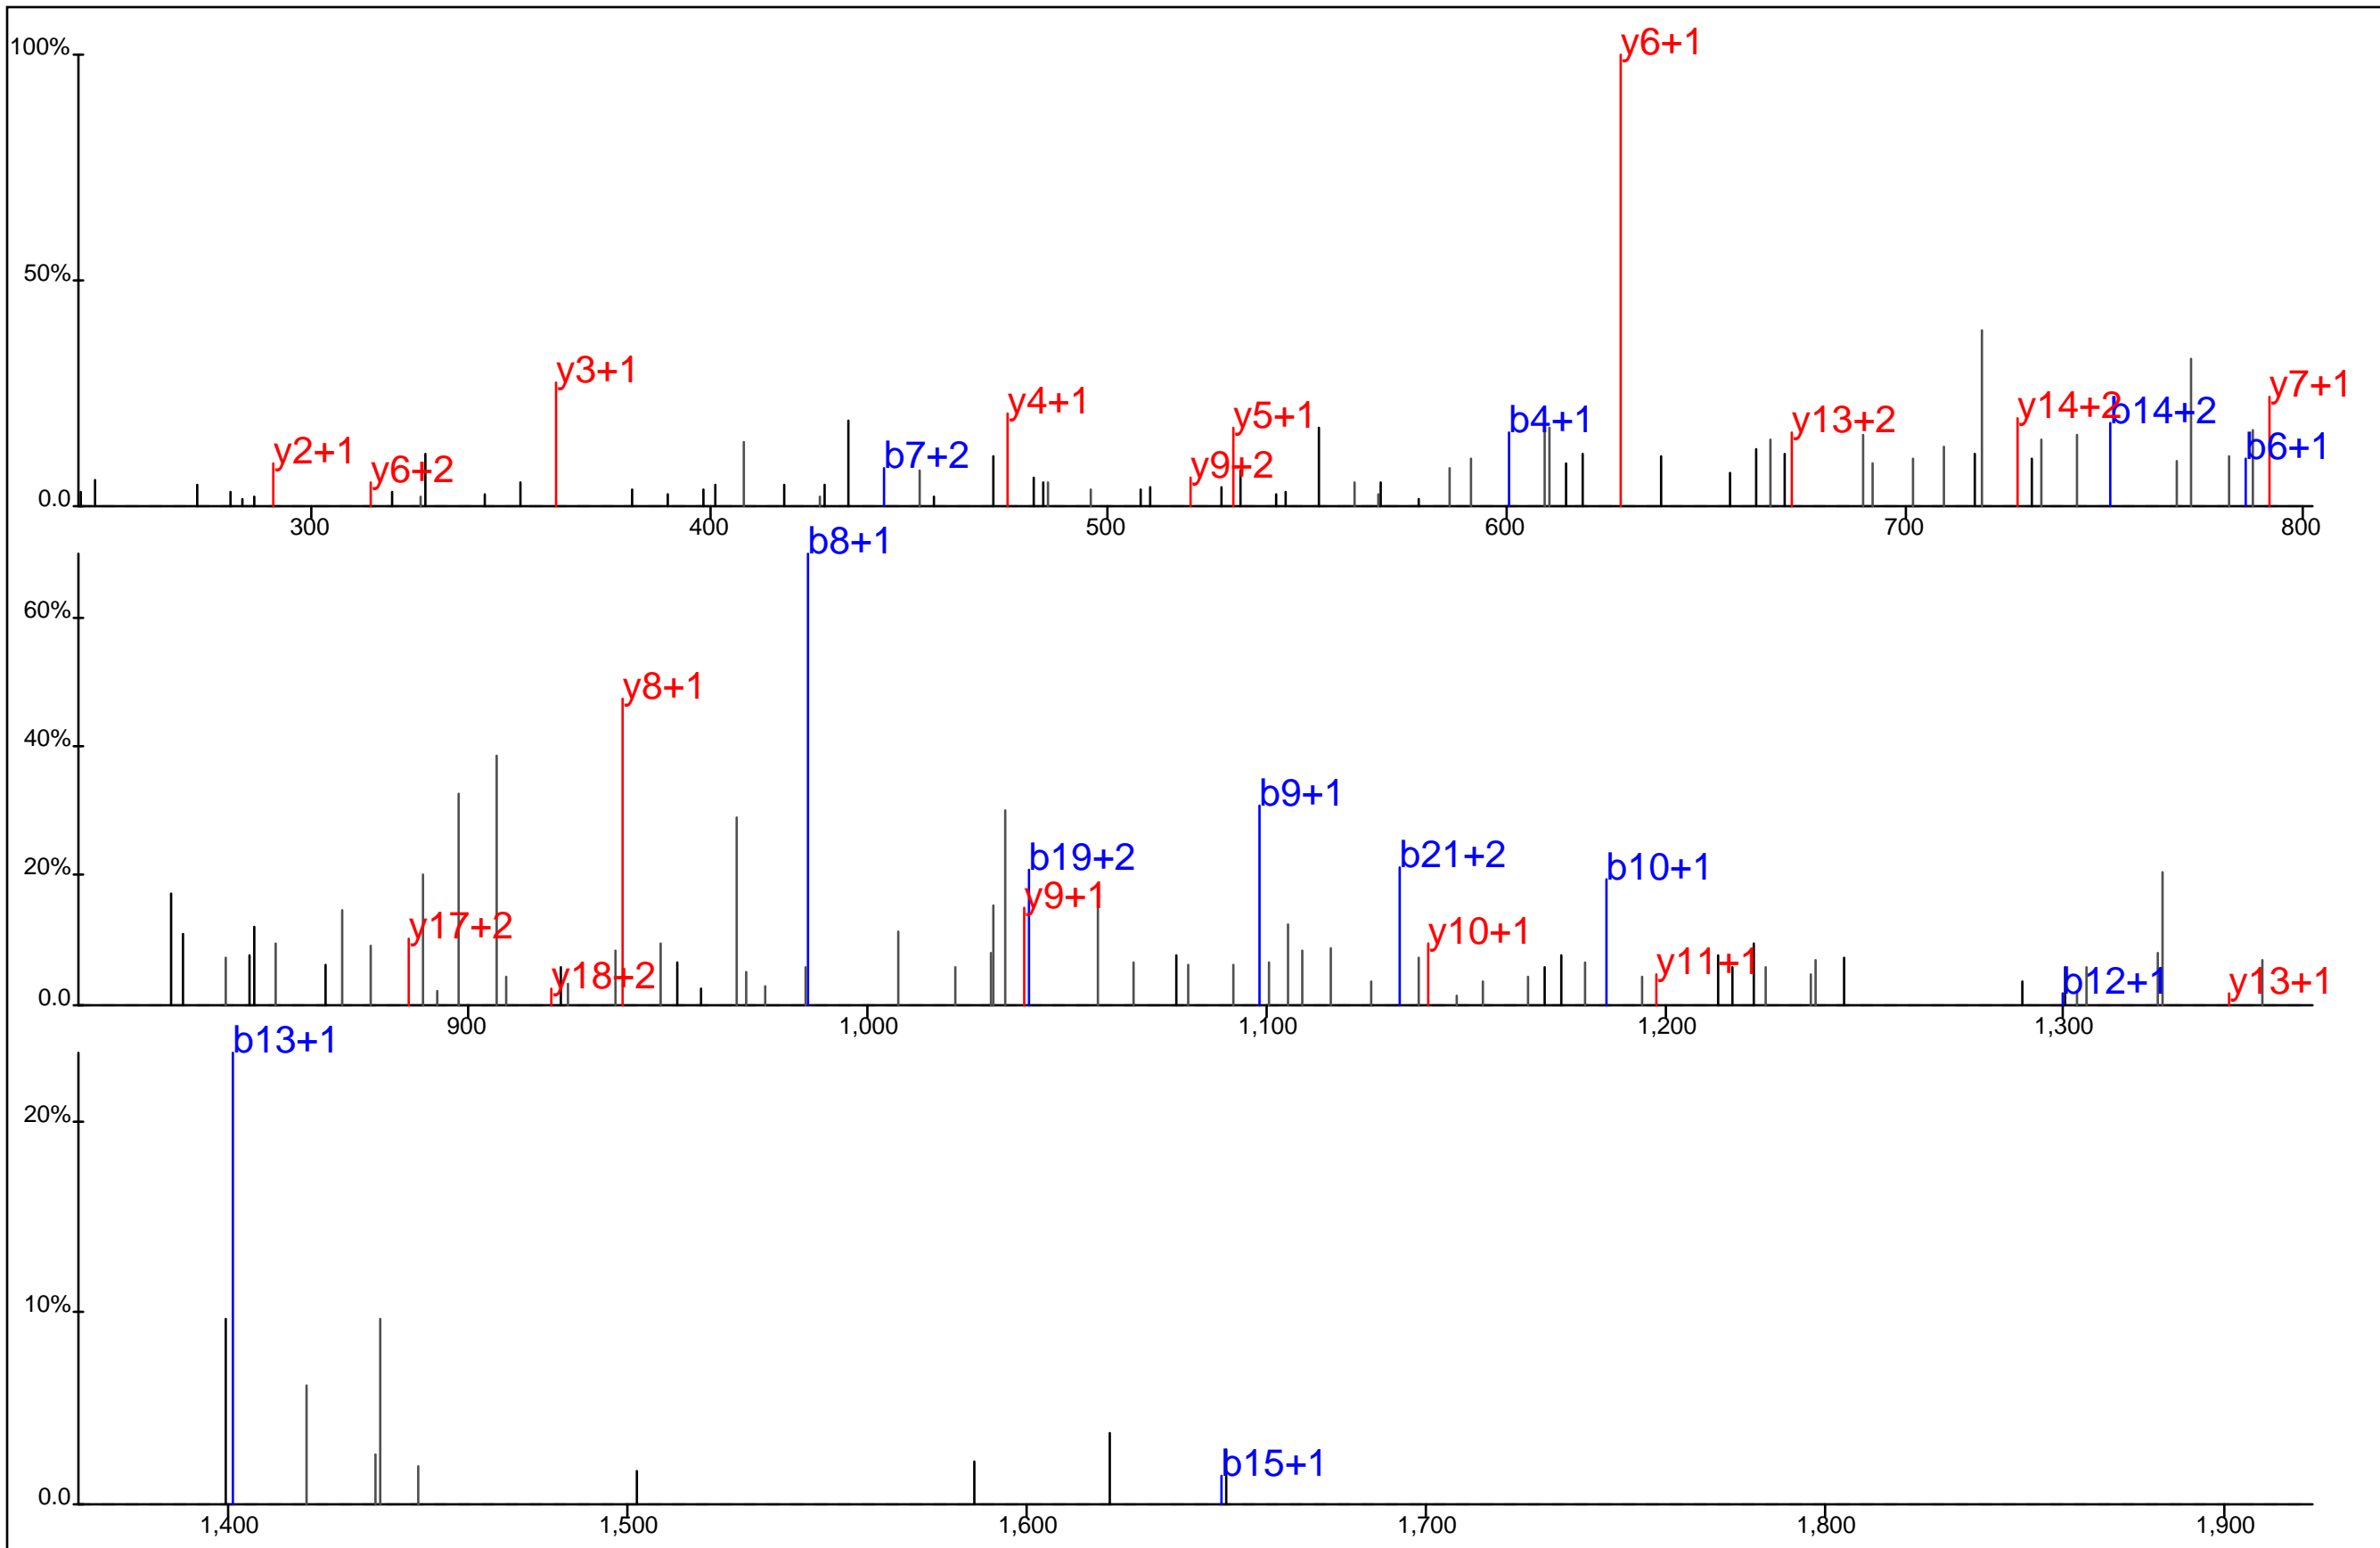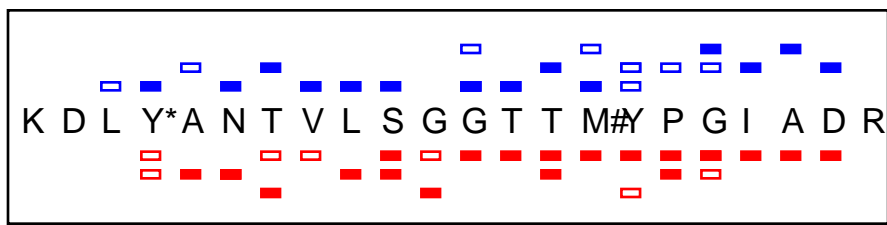

Protein Name: Actin gamma 1  
 gi Accession: 0  
 Precursor Mass: 813.7134+3  
 Delta Mass: 0.162 ppm  
 XCorr: 50.09

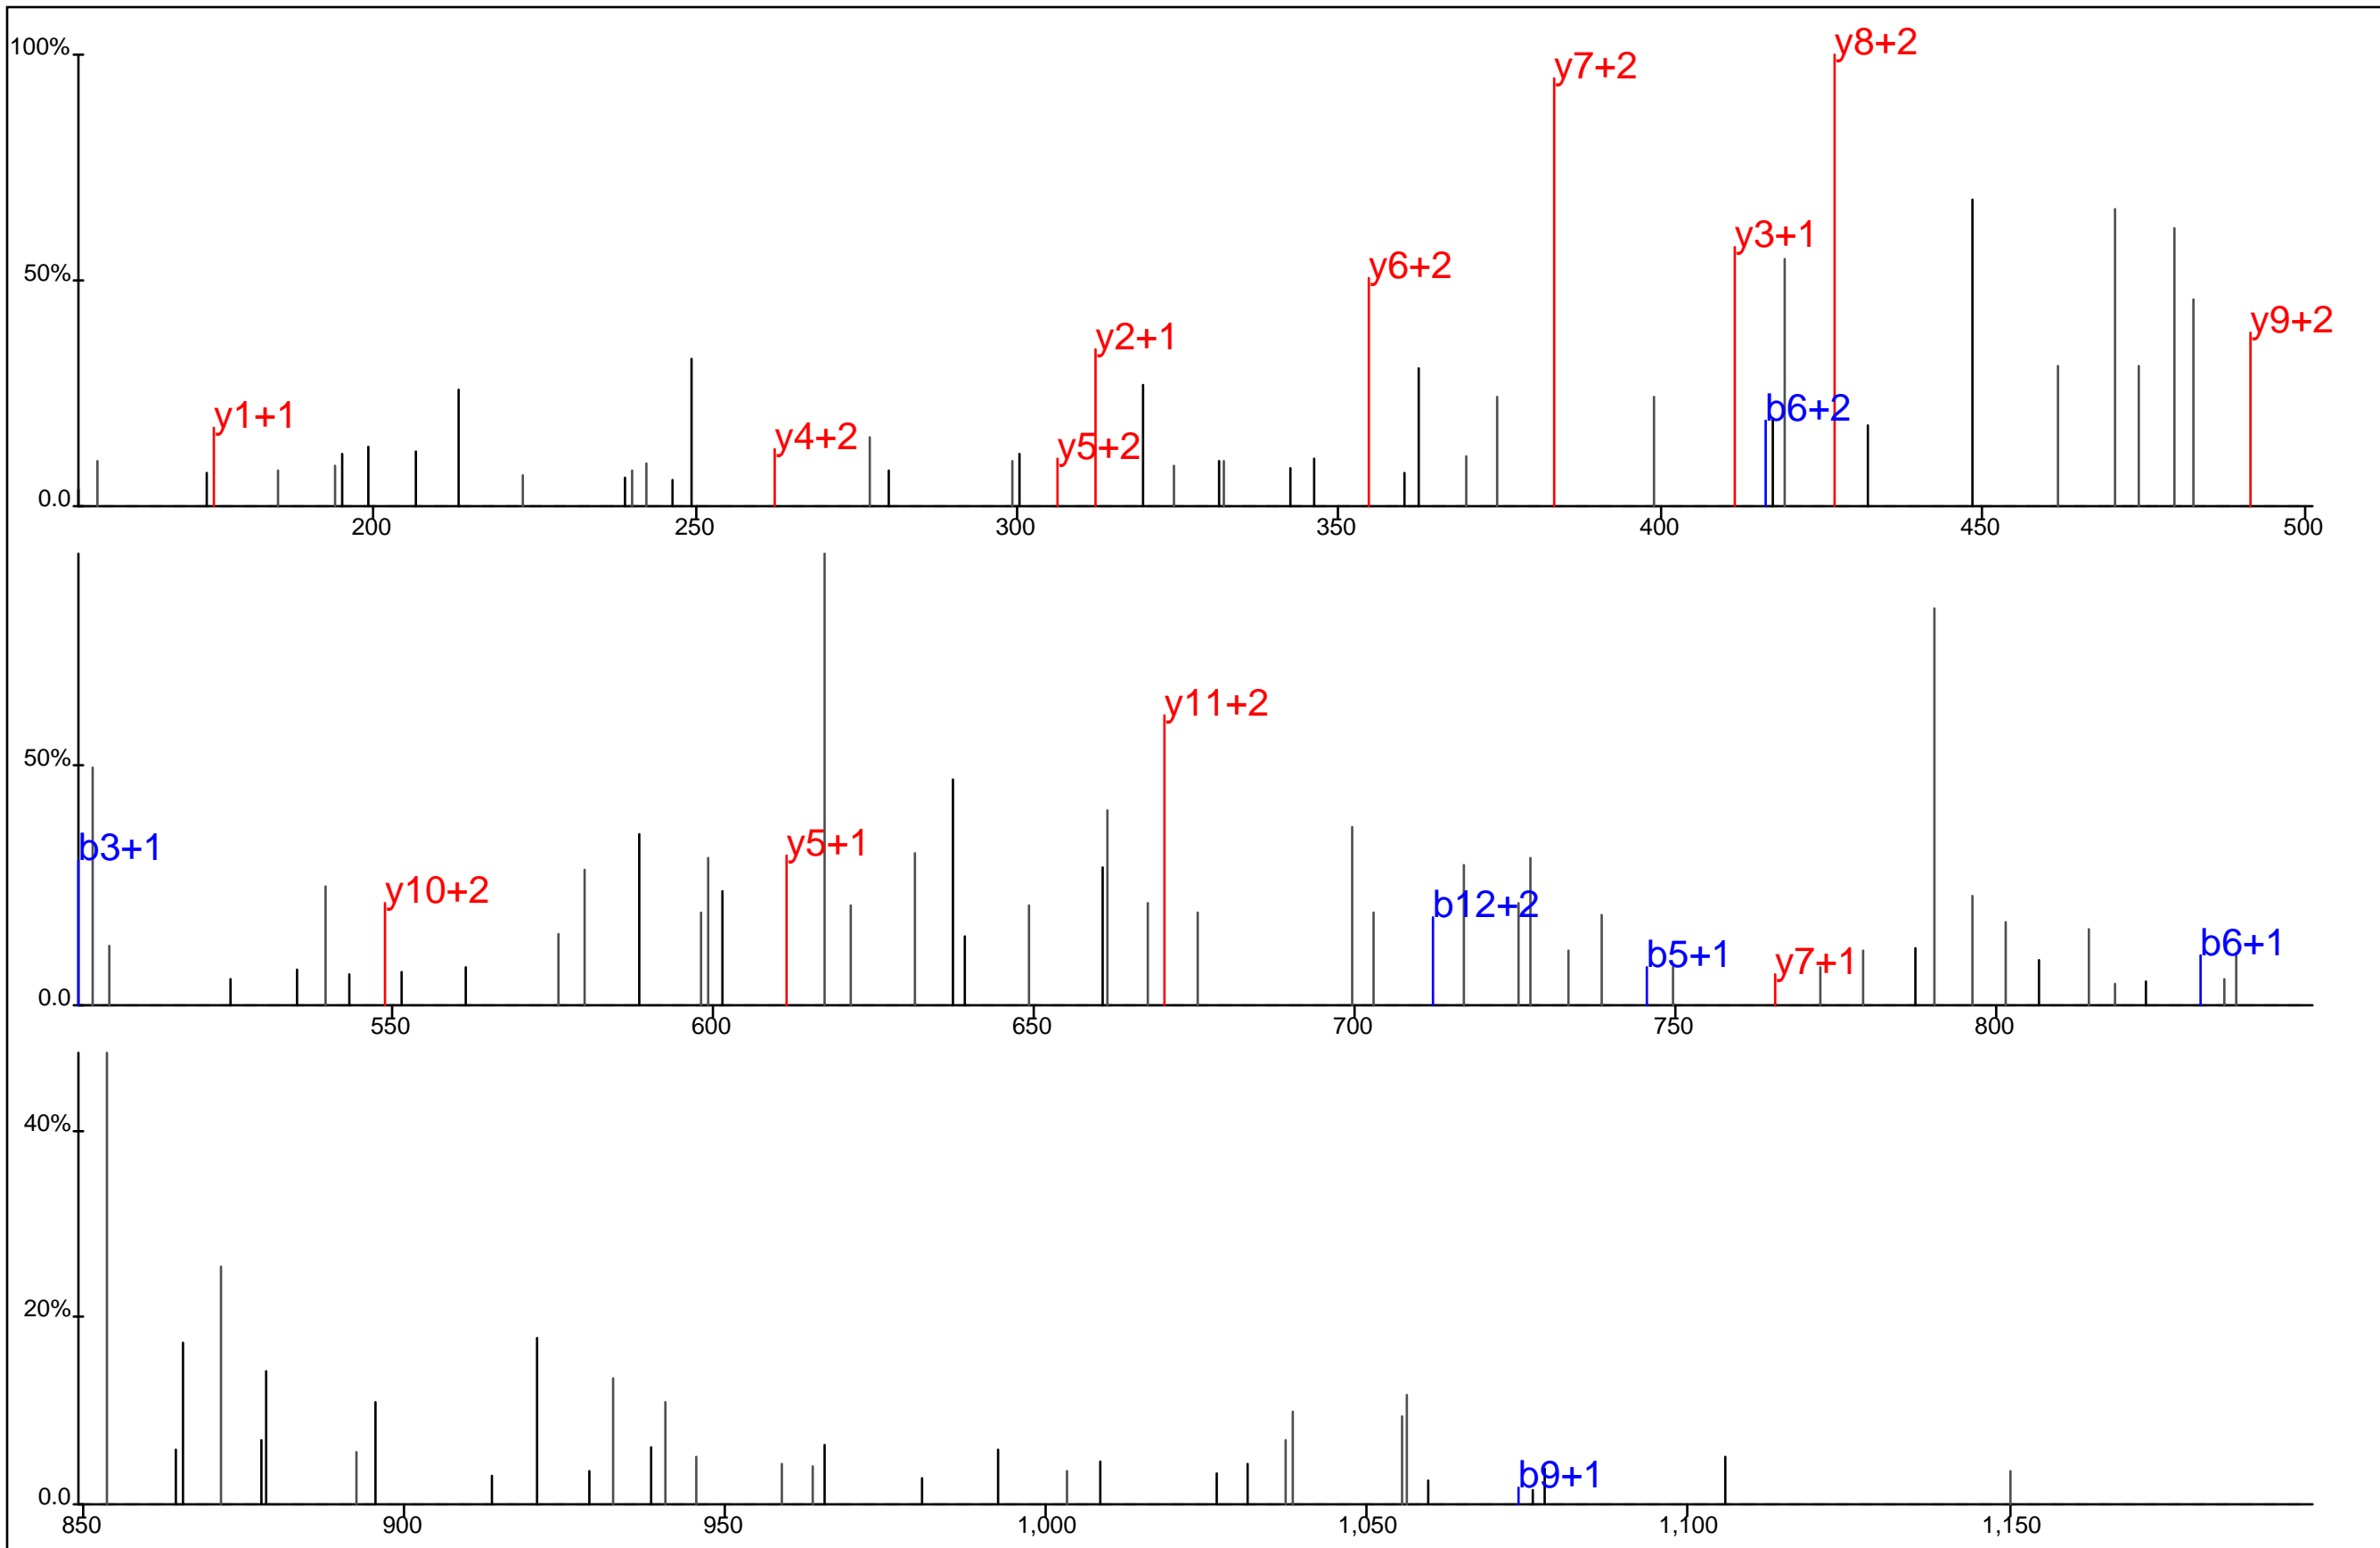

Q E Y\* D E S G P S I V H R  
 (Fragmentation pattern diagram showing b and y ion series)

Protein Name: Actin gamma 1  
 gi Accession: 0  
 Precursor Mass: 532.8954+3  
 Delta Mass: 1.764 ppm  
 XCorr: 22.03

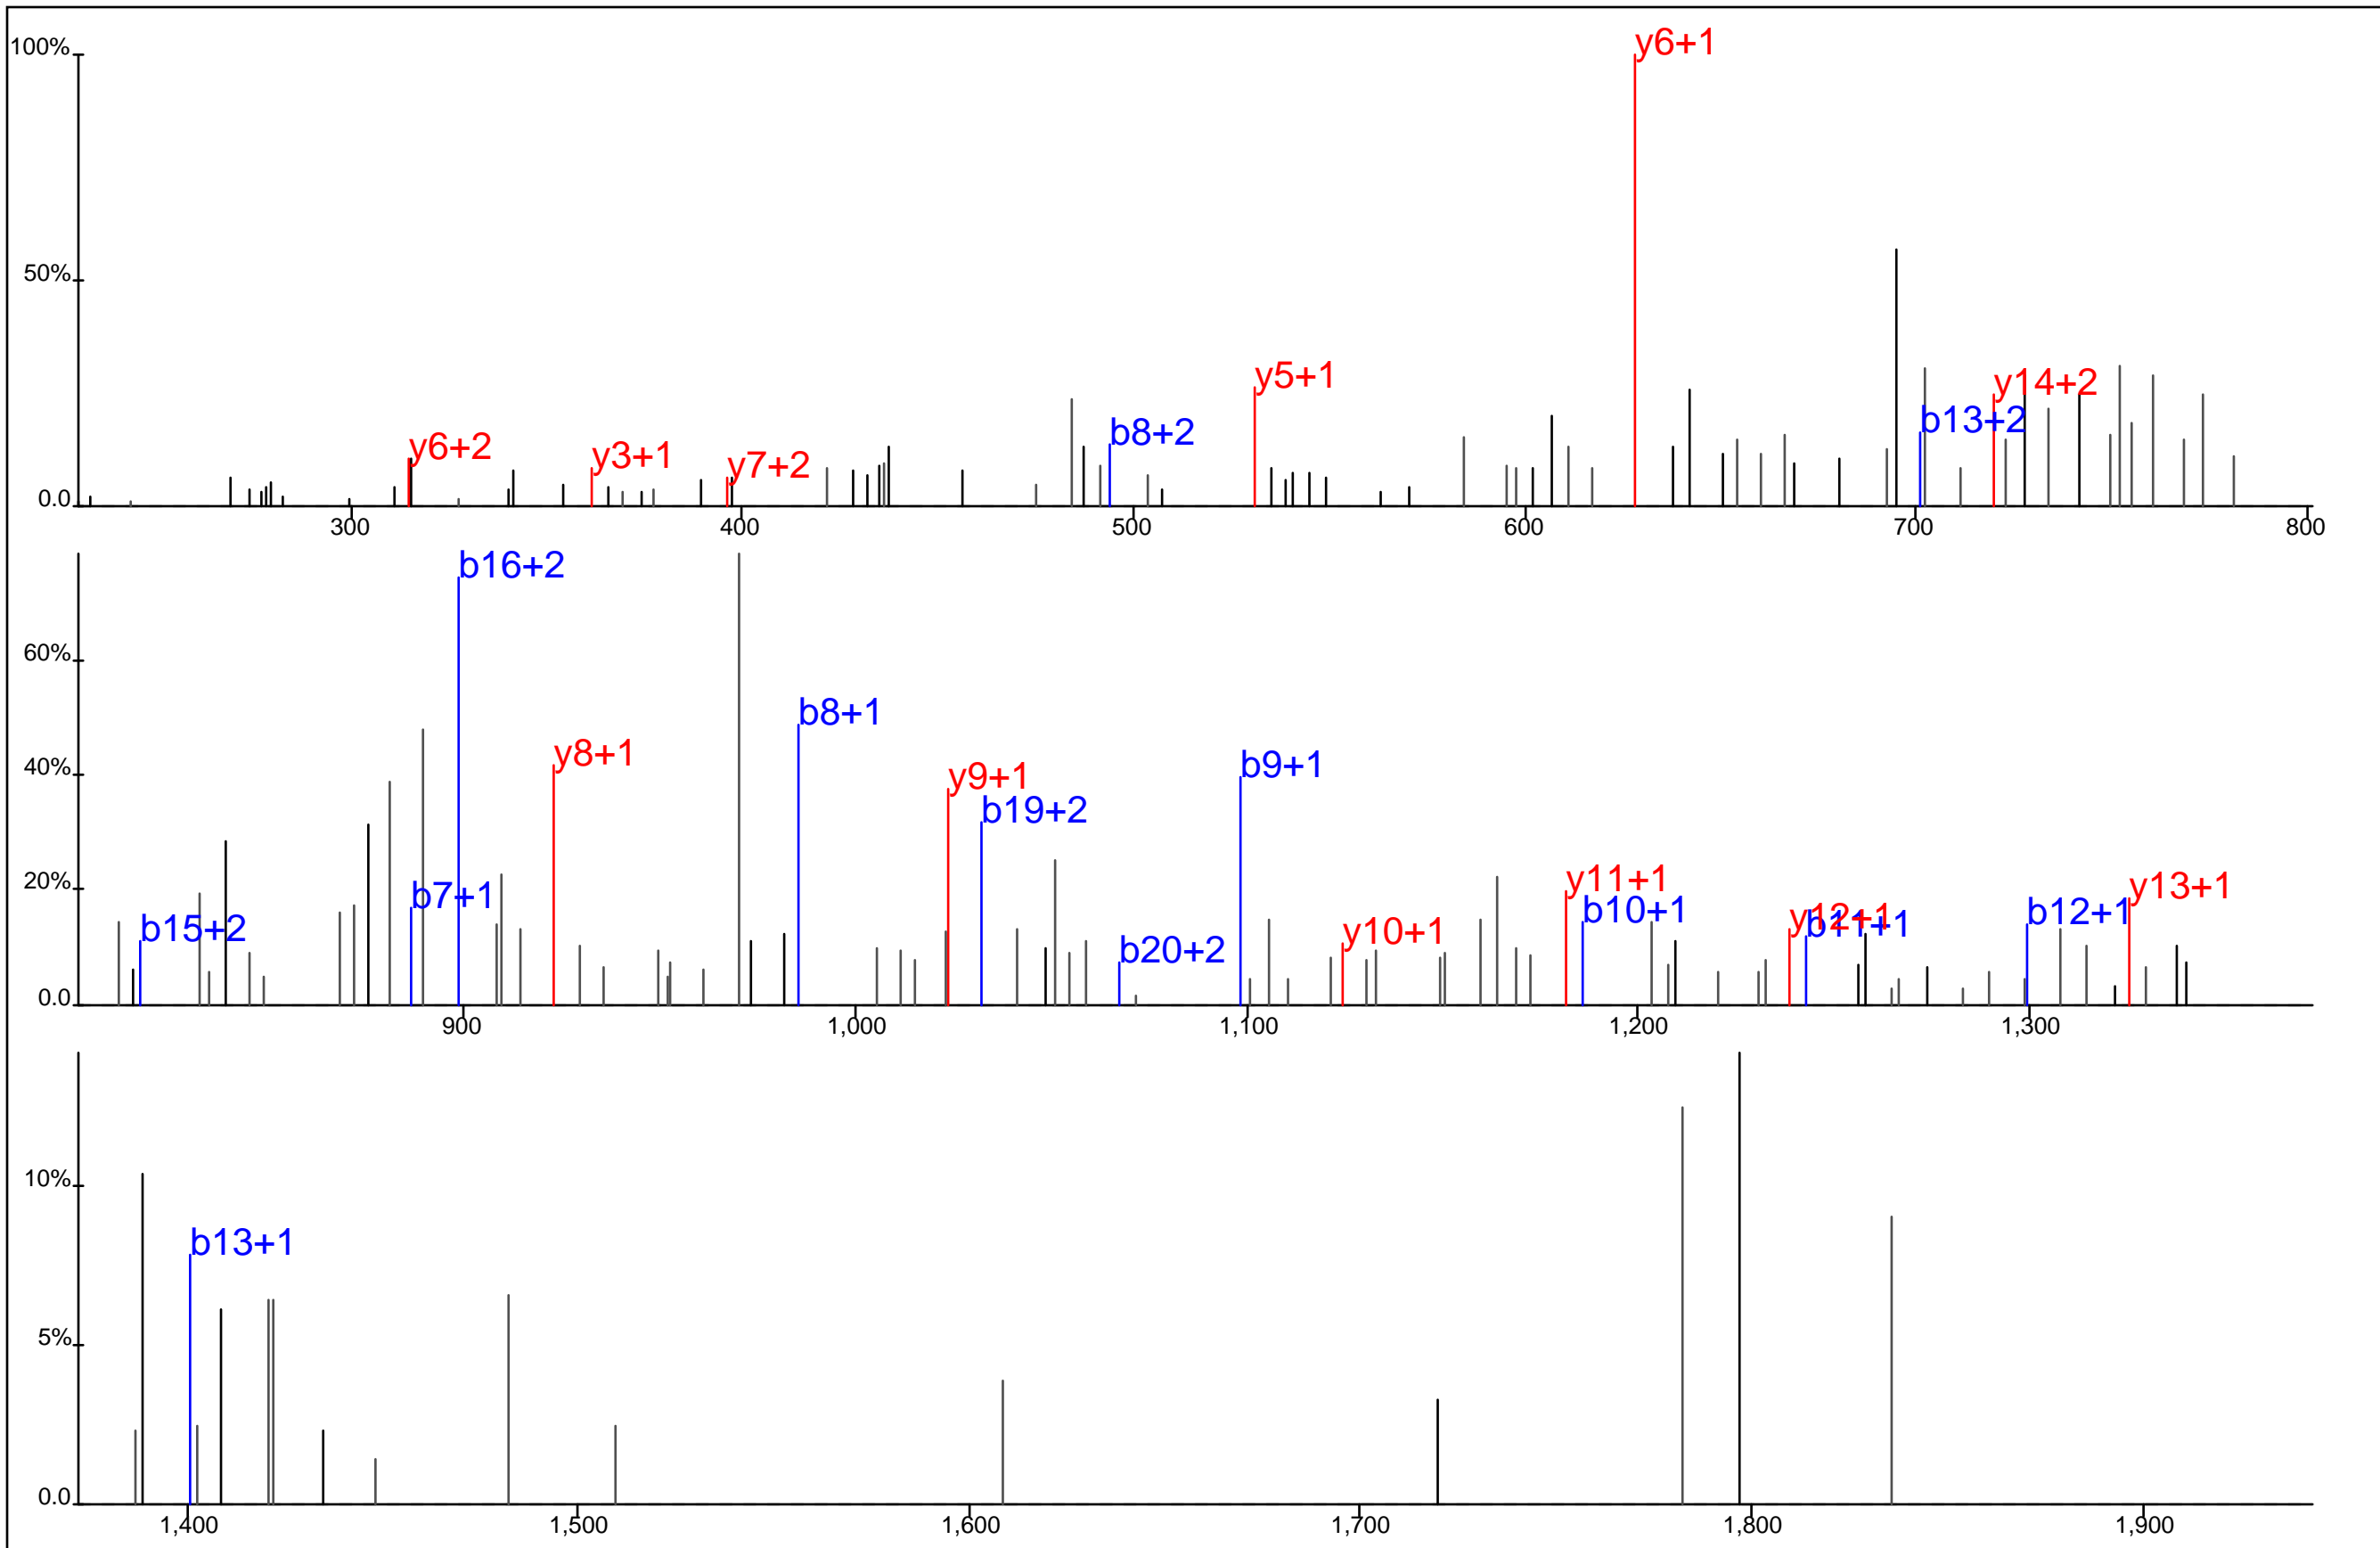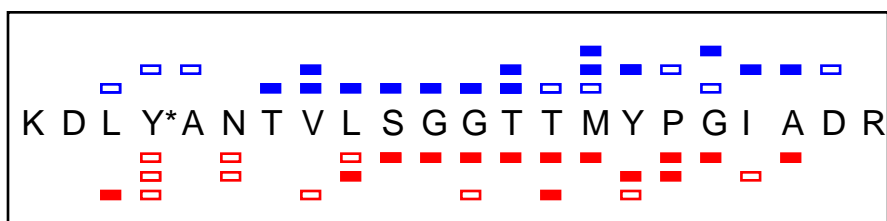

Protein Name: Actin gamma 1  
 gi Accession: 0  
 Precursor Mass: 808.3840+3  
 Delta Mass: 2.526 ppm  
 XCorr: 27.1

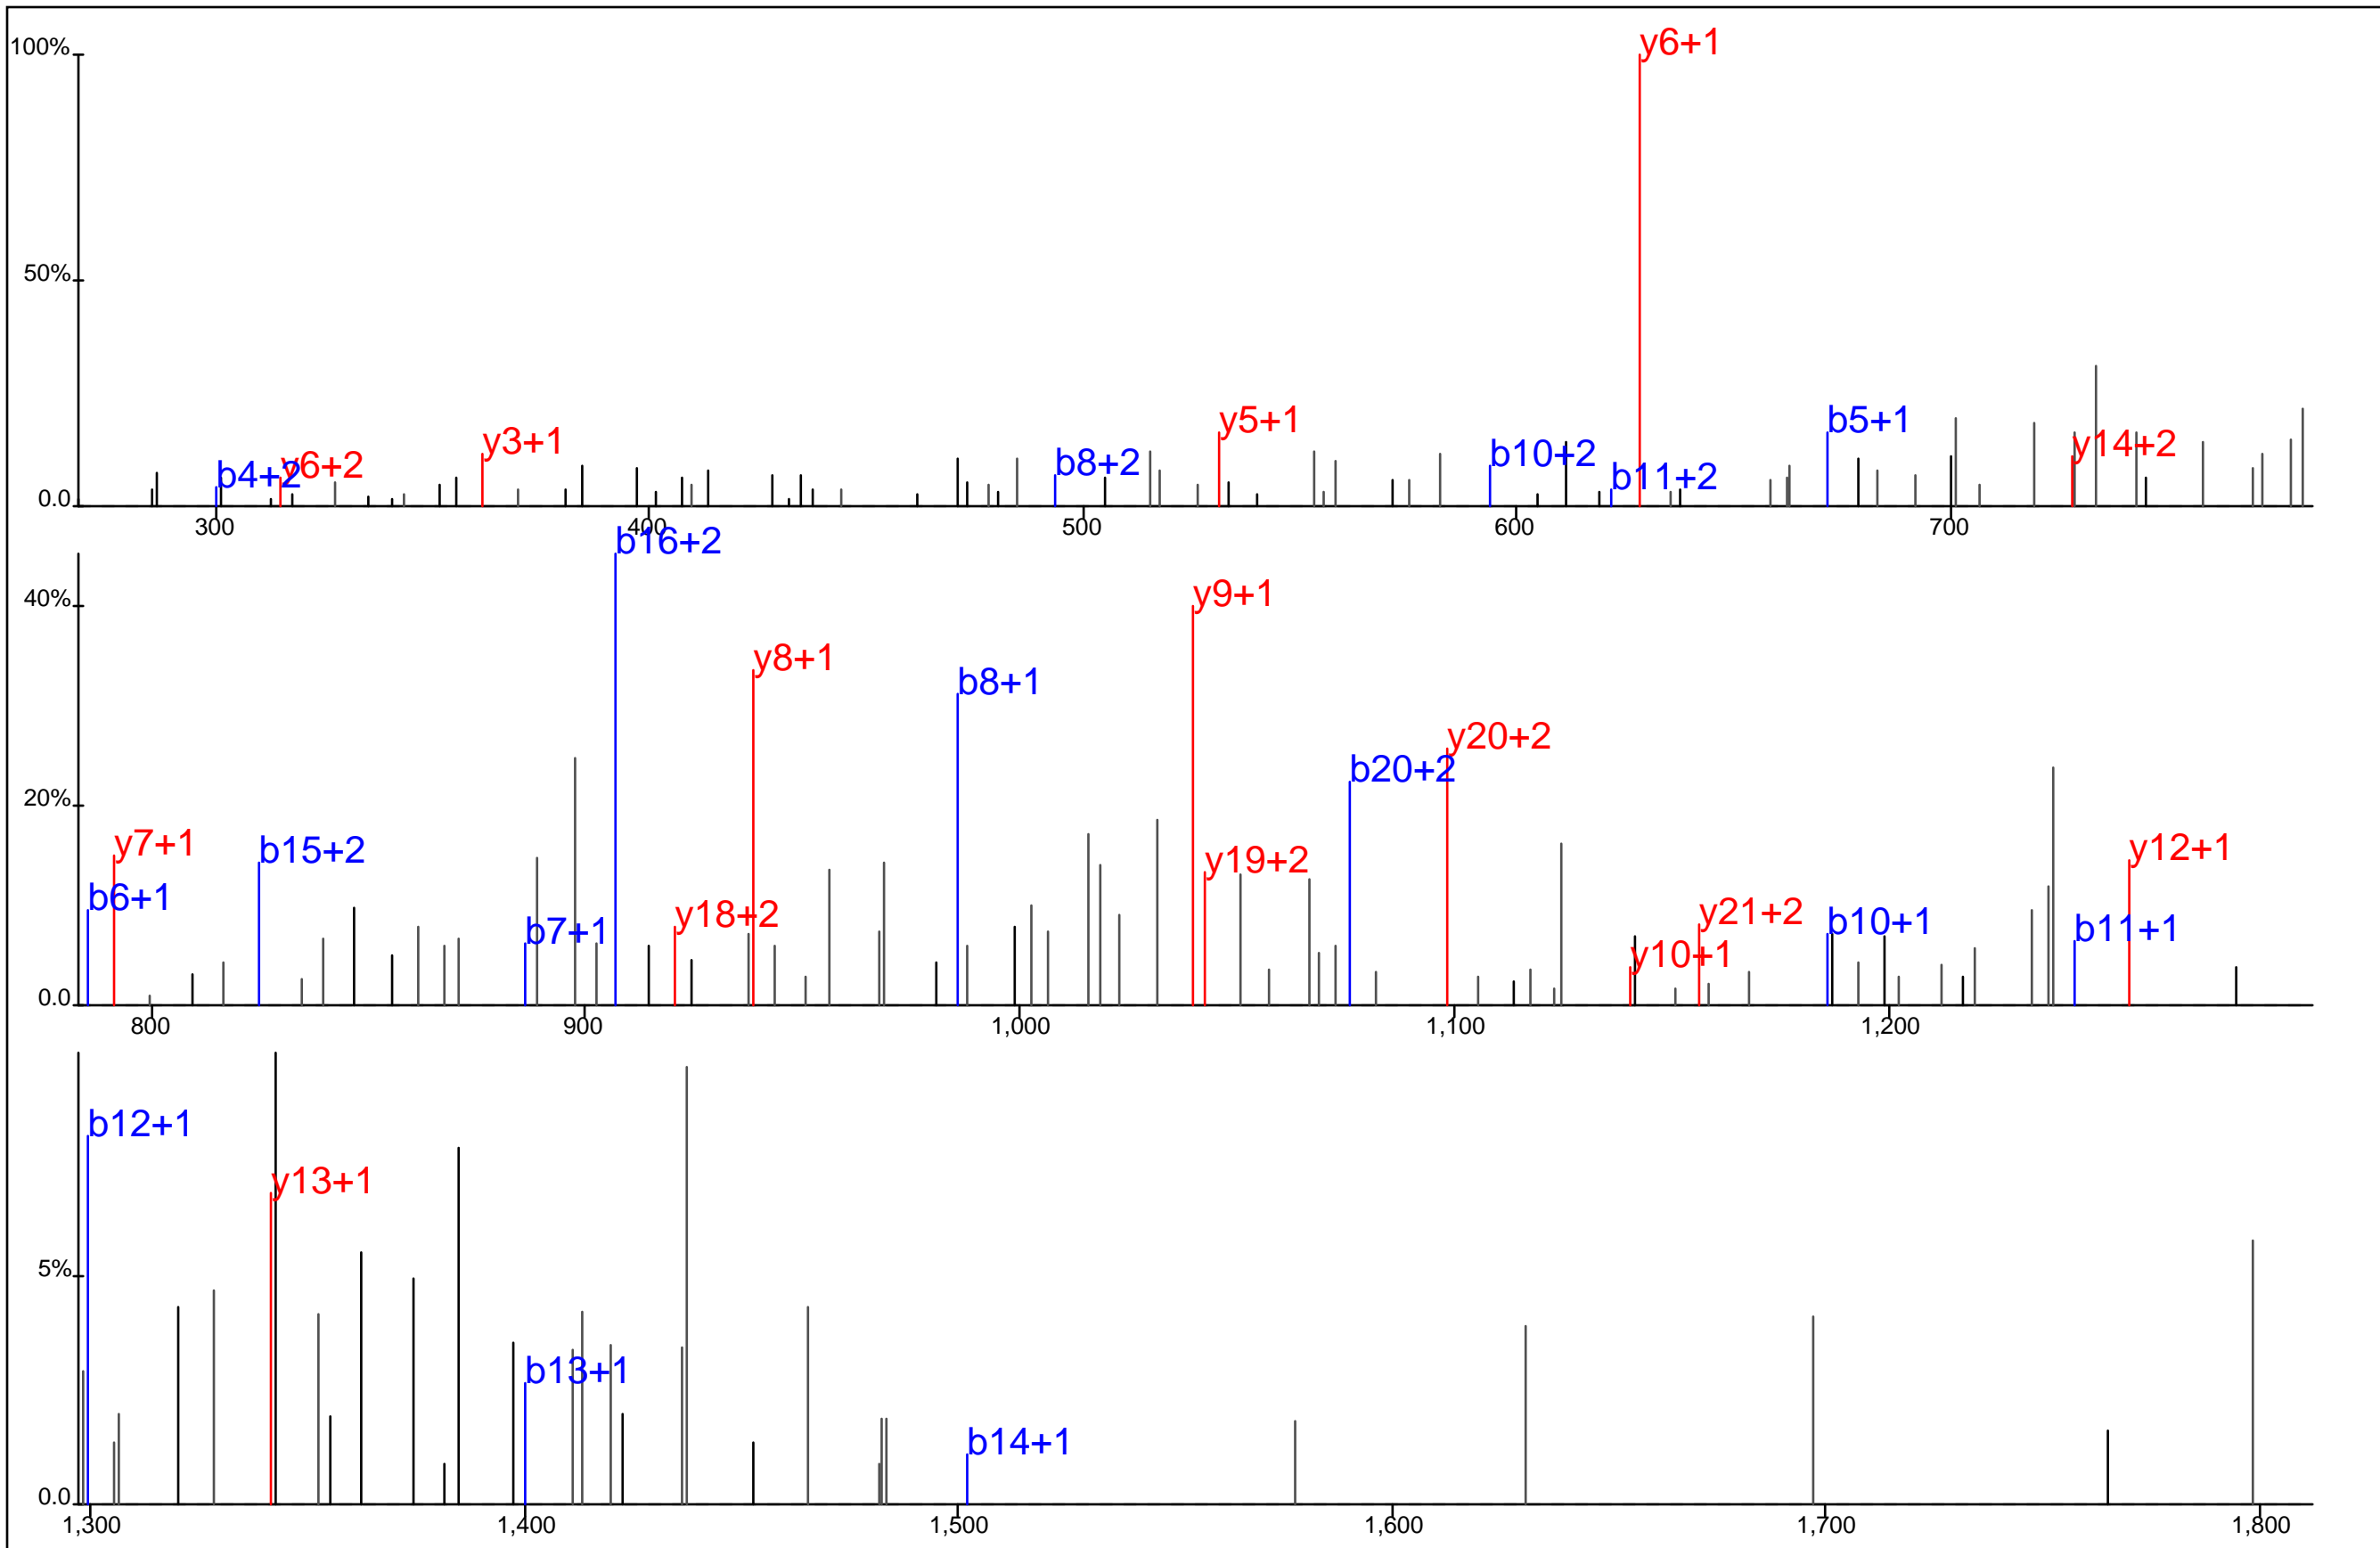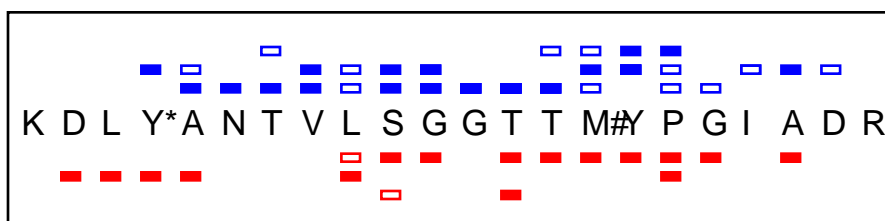

Protein Name: Actin gamma 1  
 gi Accession: 0  
 Precursor Mass: 813.7141+3  
 Delta Mass: 0.664 ppm  
 XCorr: 43.03

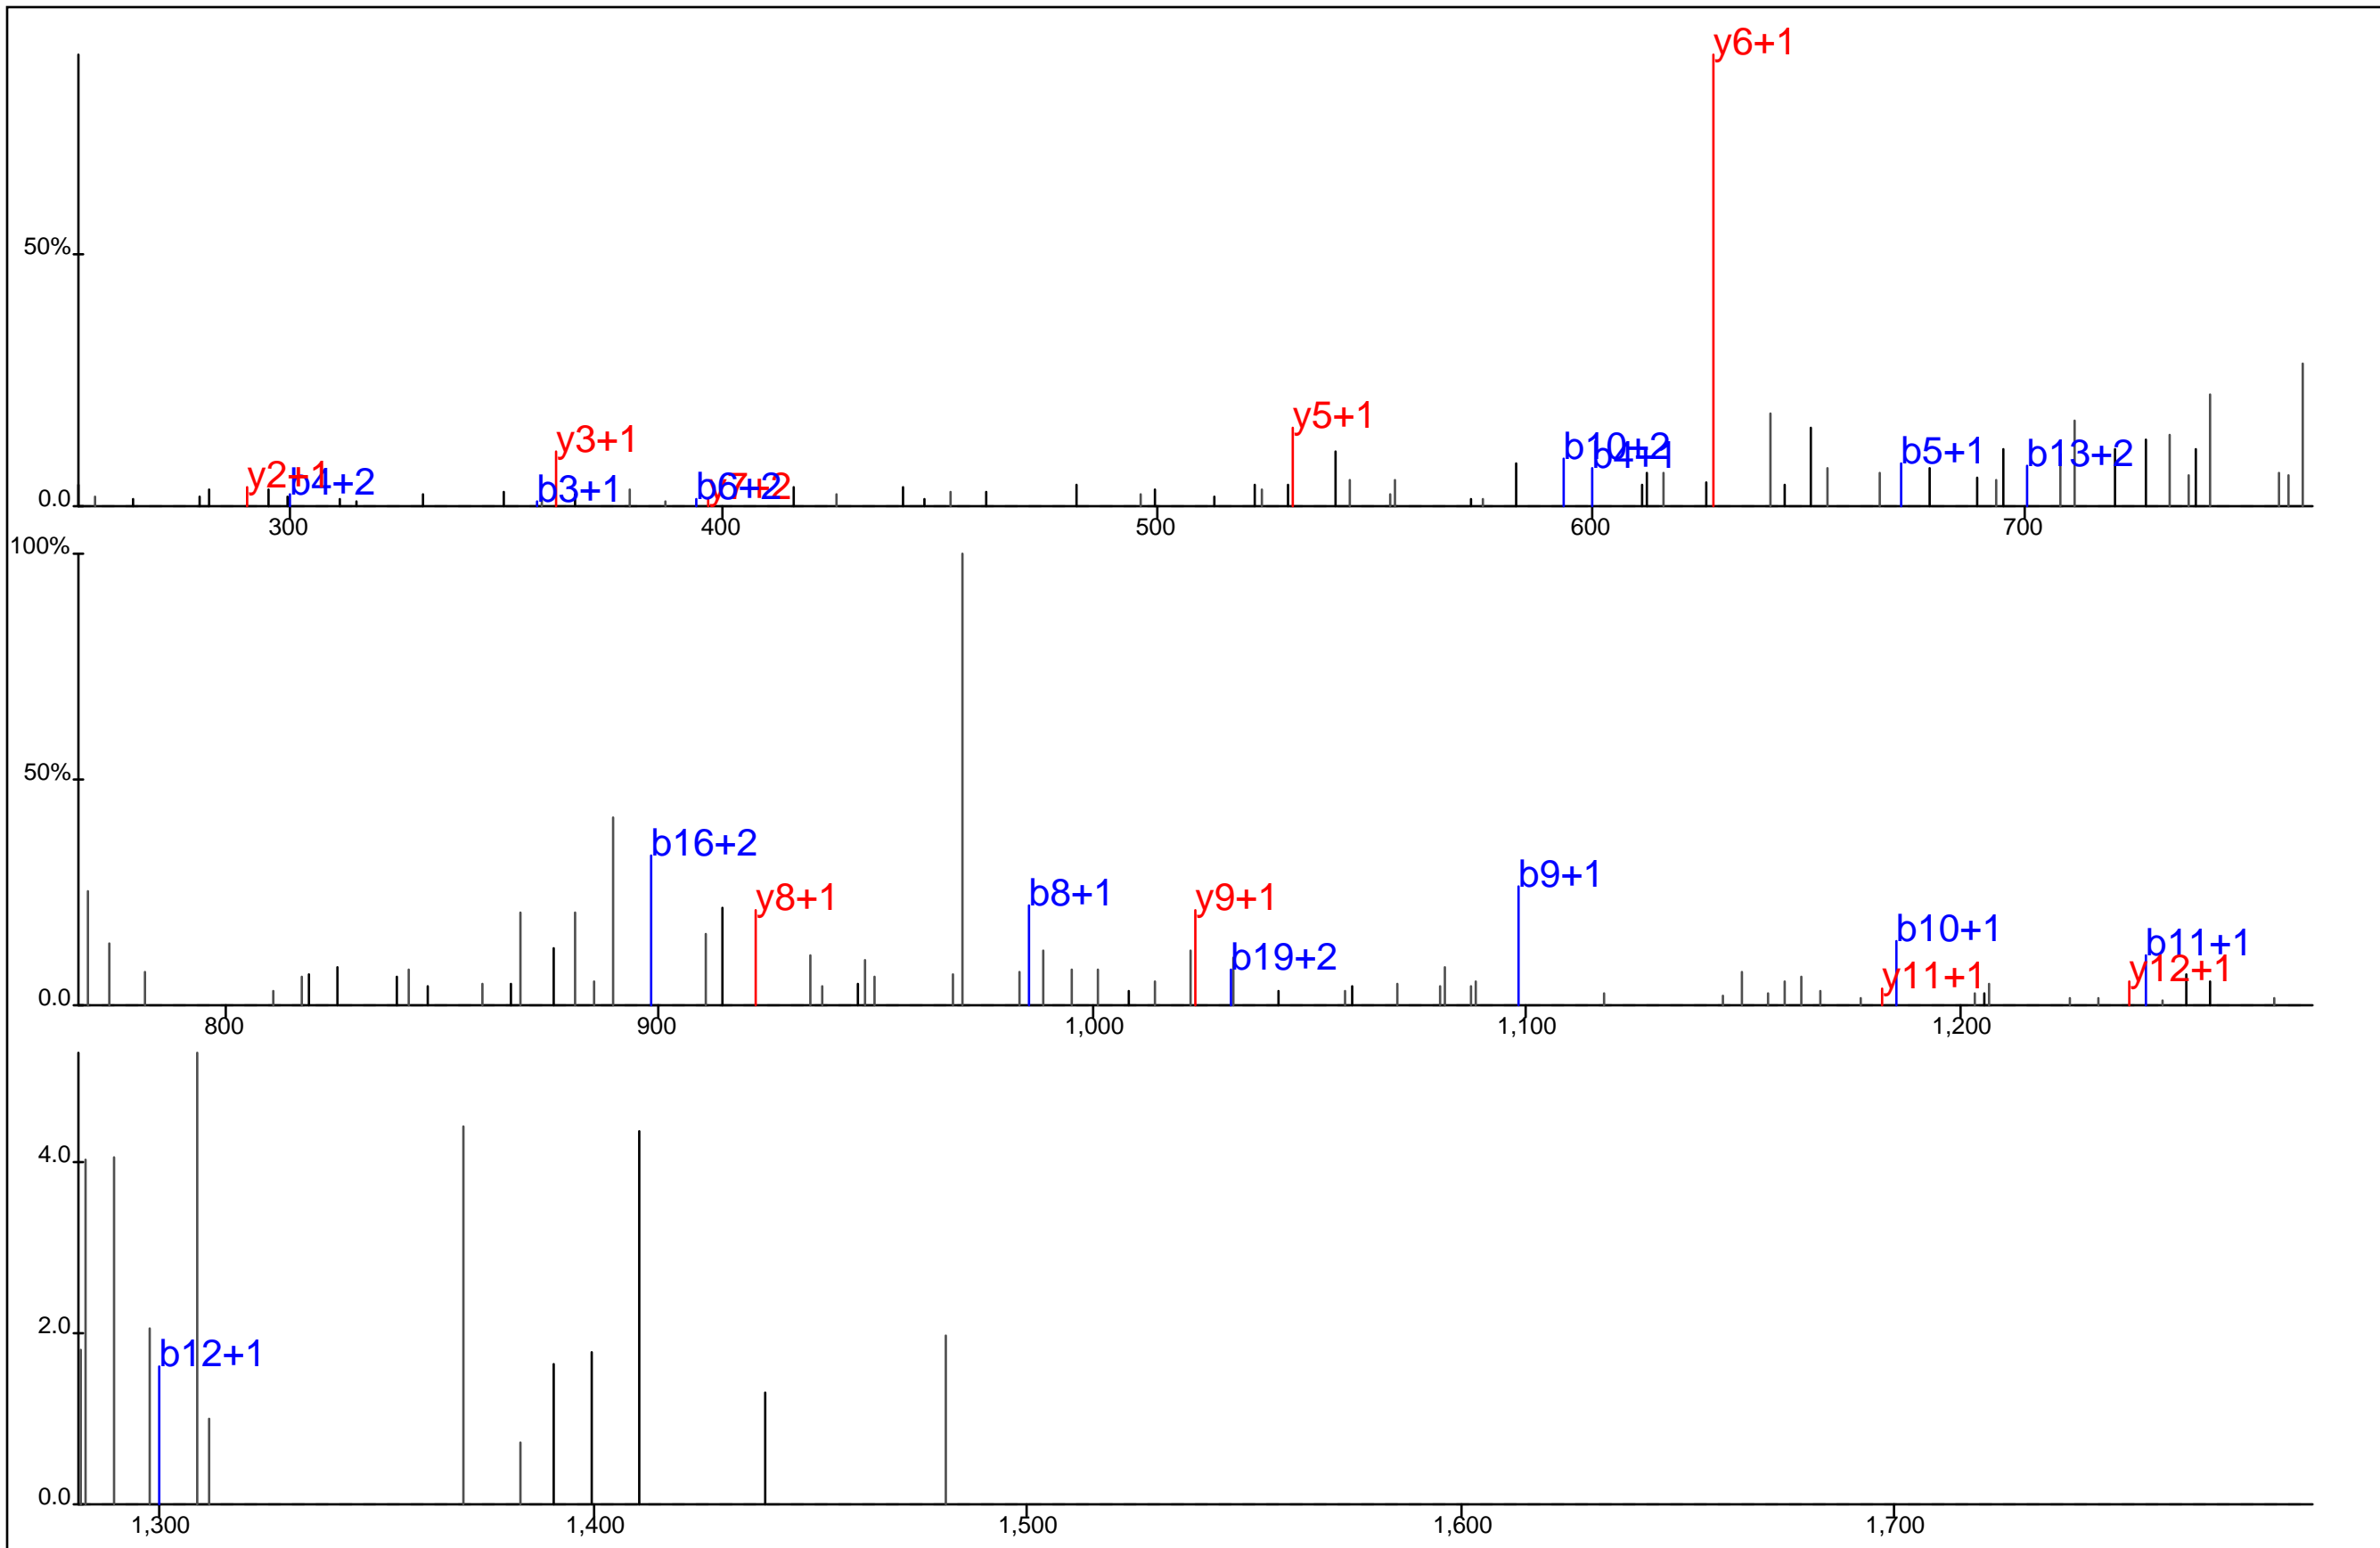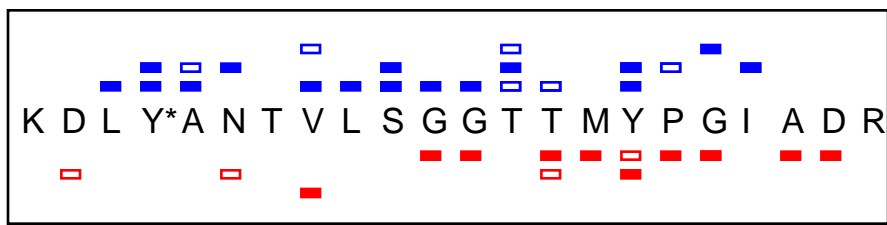

Protein Name: Actin gamma 1  
 gi Accession: 0  
 Precursor Mass: 808.3807+3  
 Delta Mass: 1.554 ppm  
 XCorr: 30.28



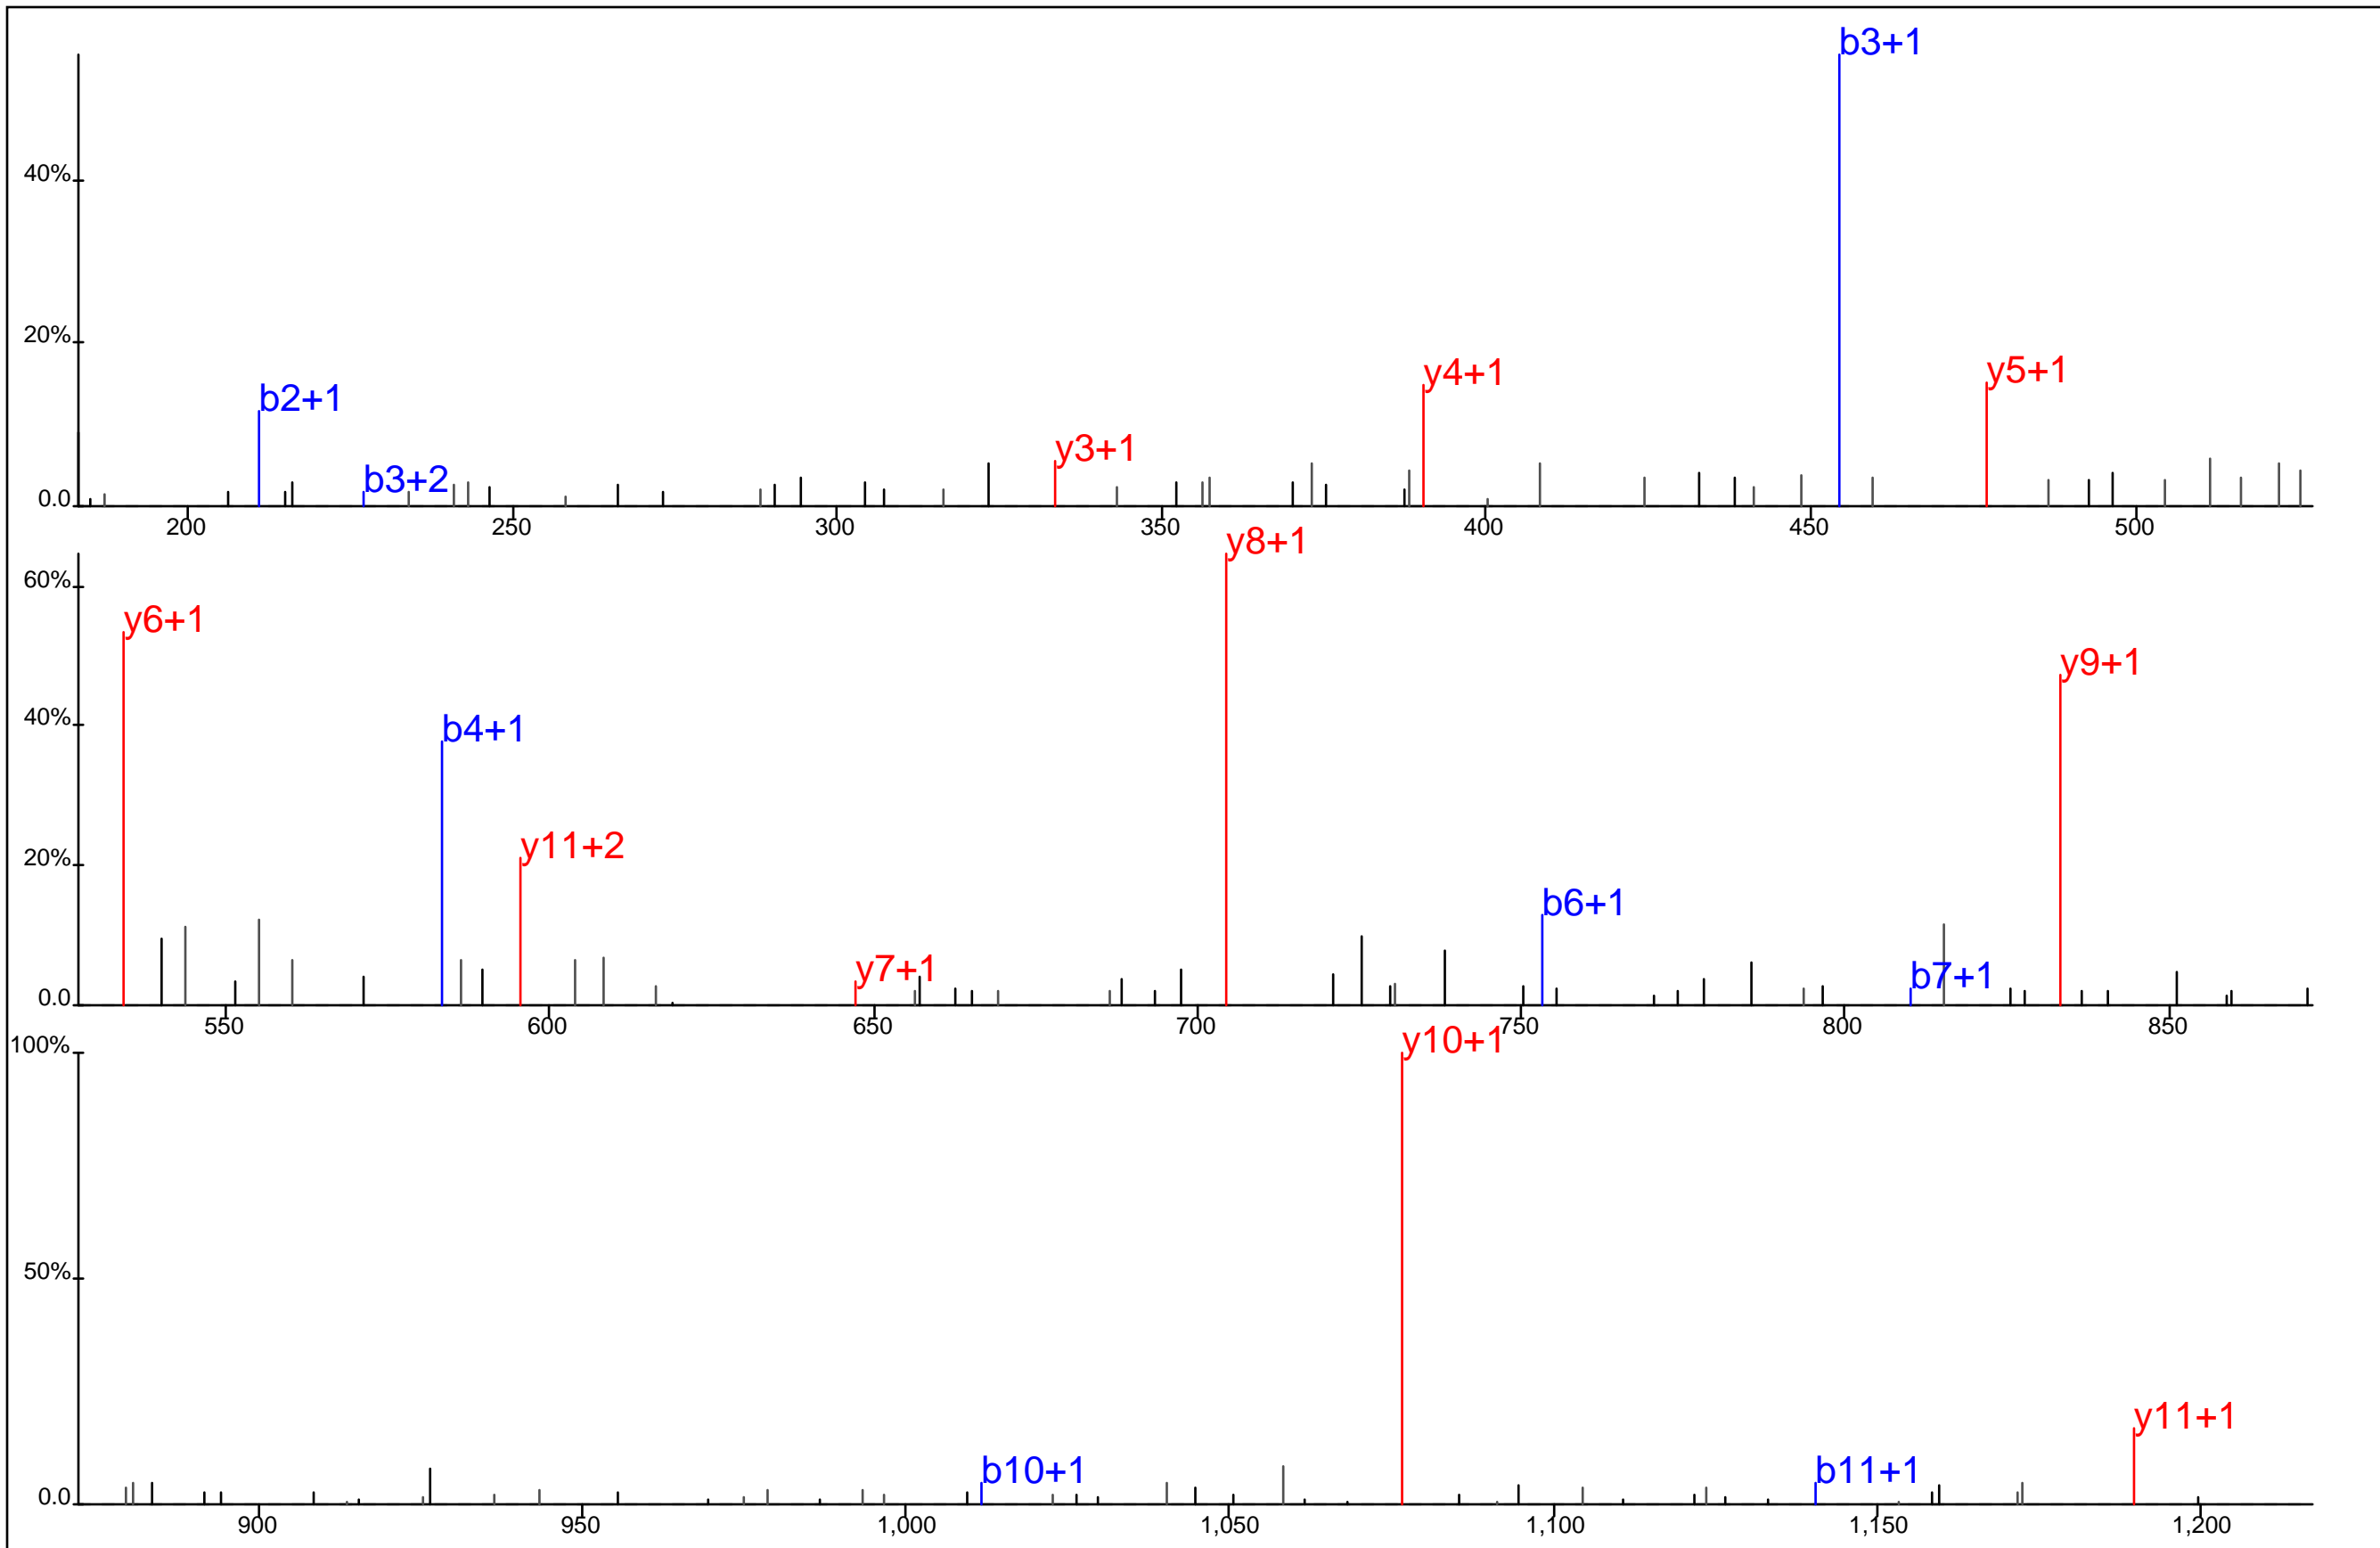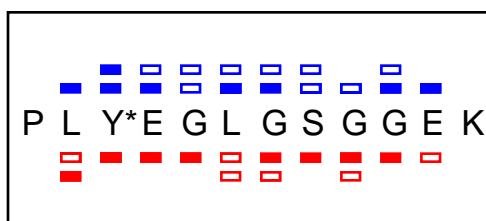

Protein Name: Actin related protein 10  
 gi Accession: 0  
 Precursor Mass: 643.7878+2  
 Delta Mass: 1.464 ppm  
 XCorr: 55.1

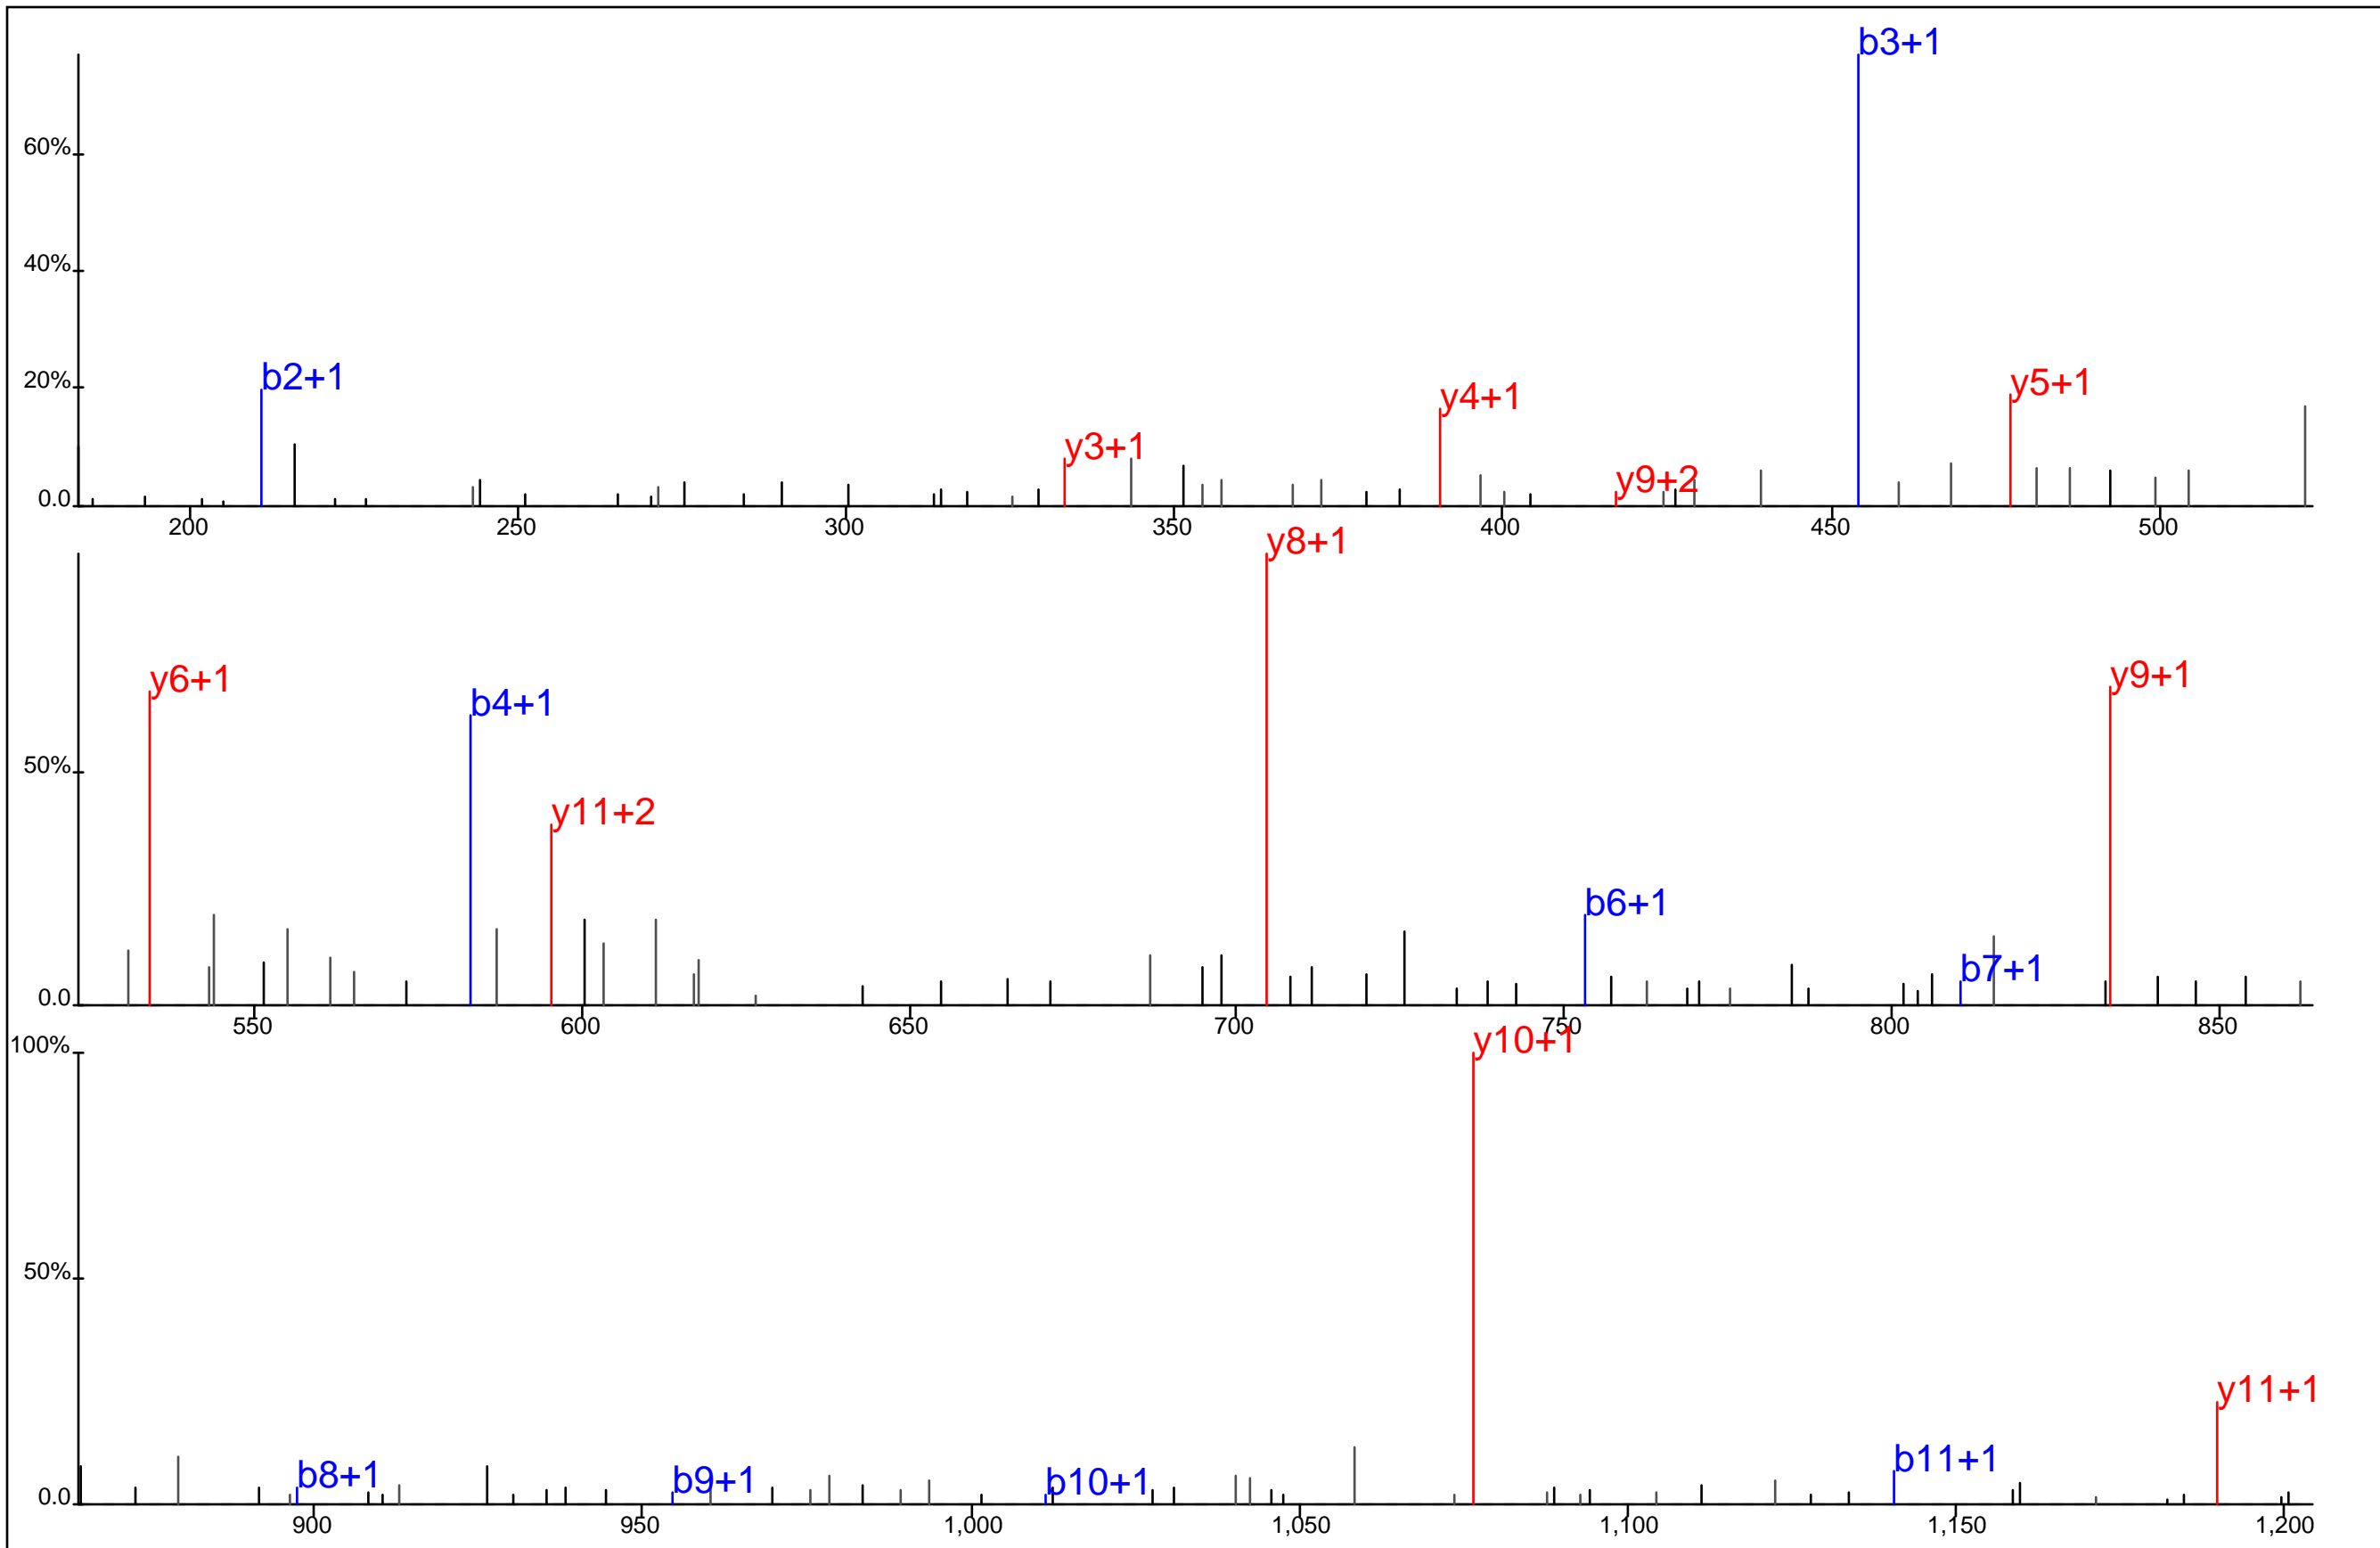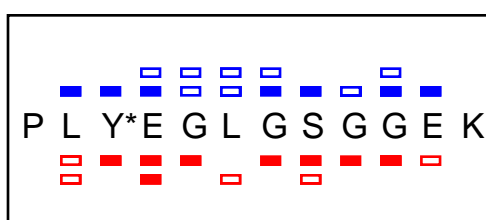

Protein Name: Actin related protein 10  
 gi Accession: 0  
 Precursor Mass: 643.7873+2  
 Delta Mass: 0.704 ppm  
 XCorr: 53.86

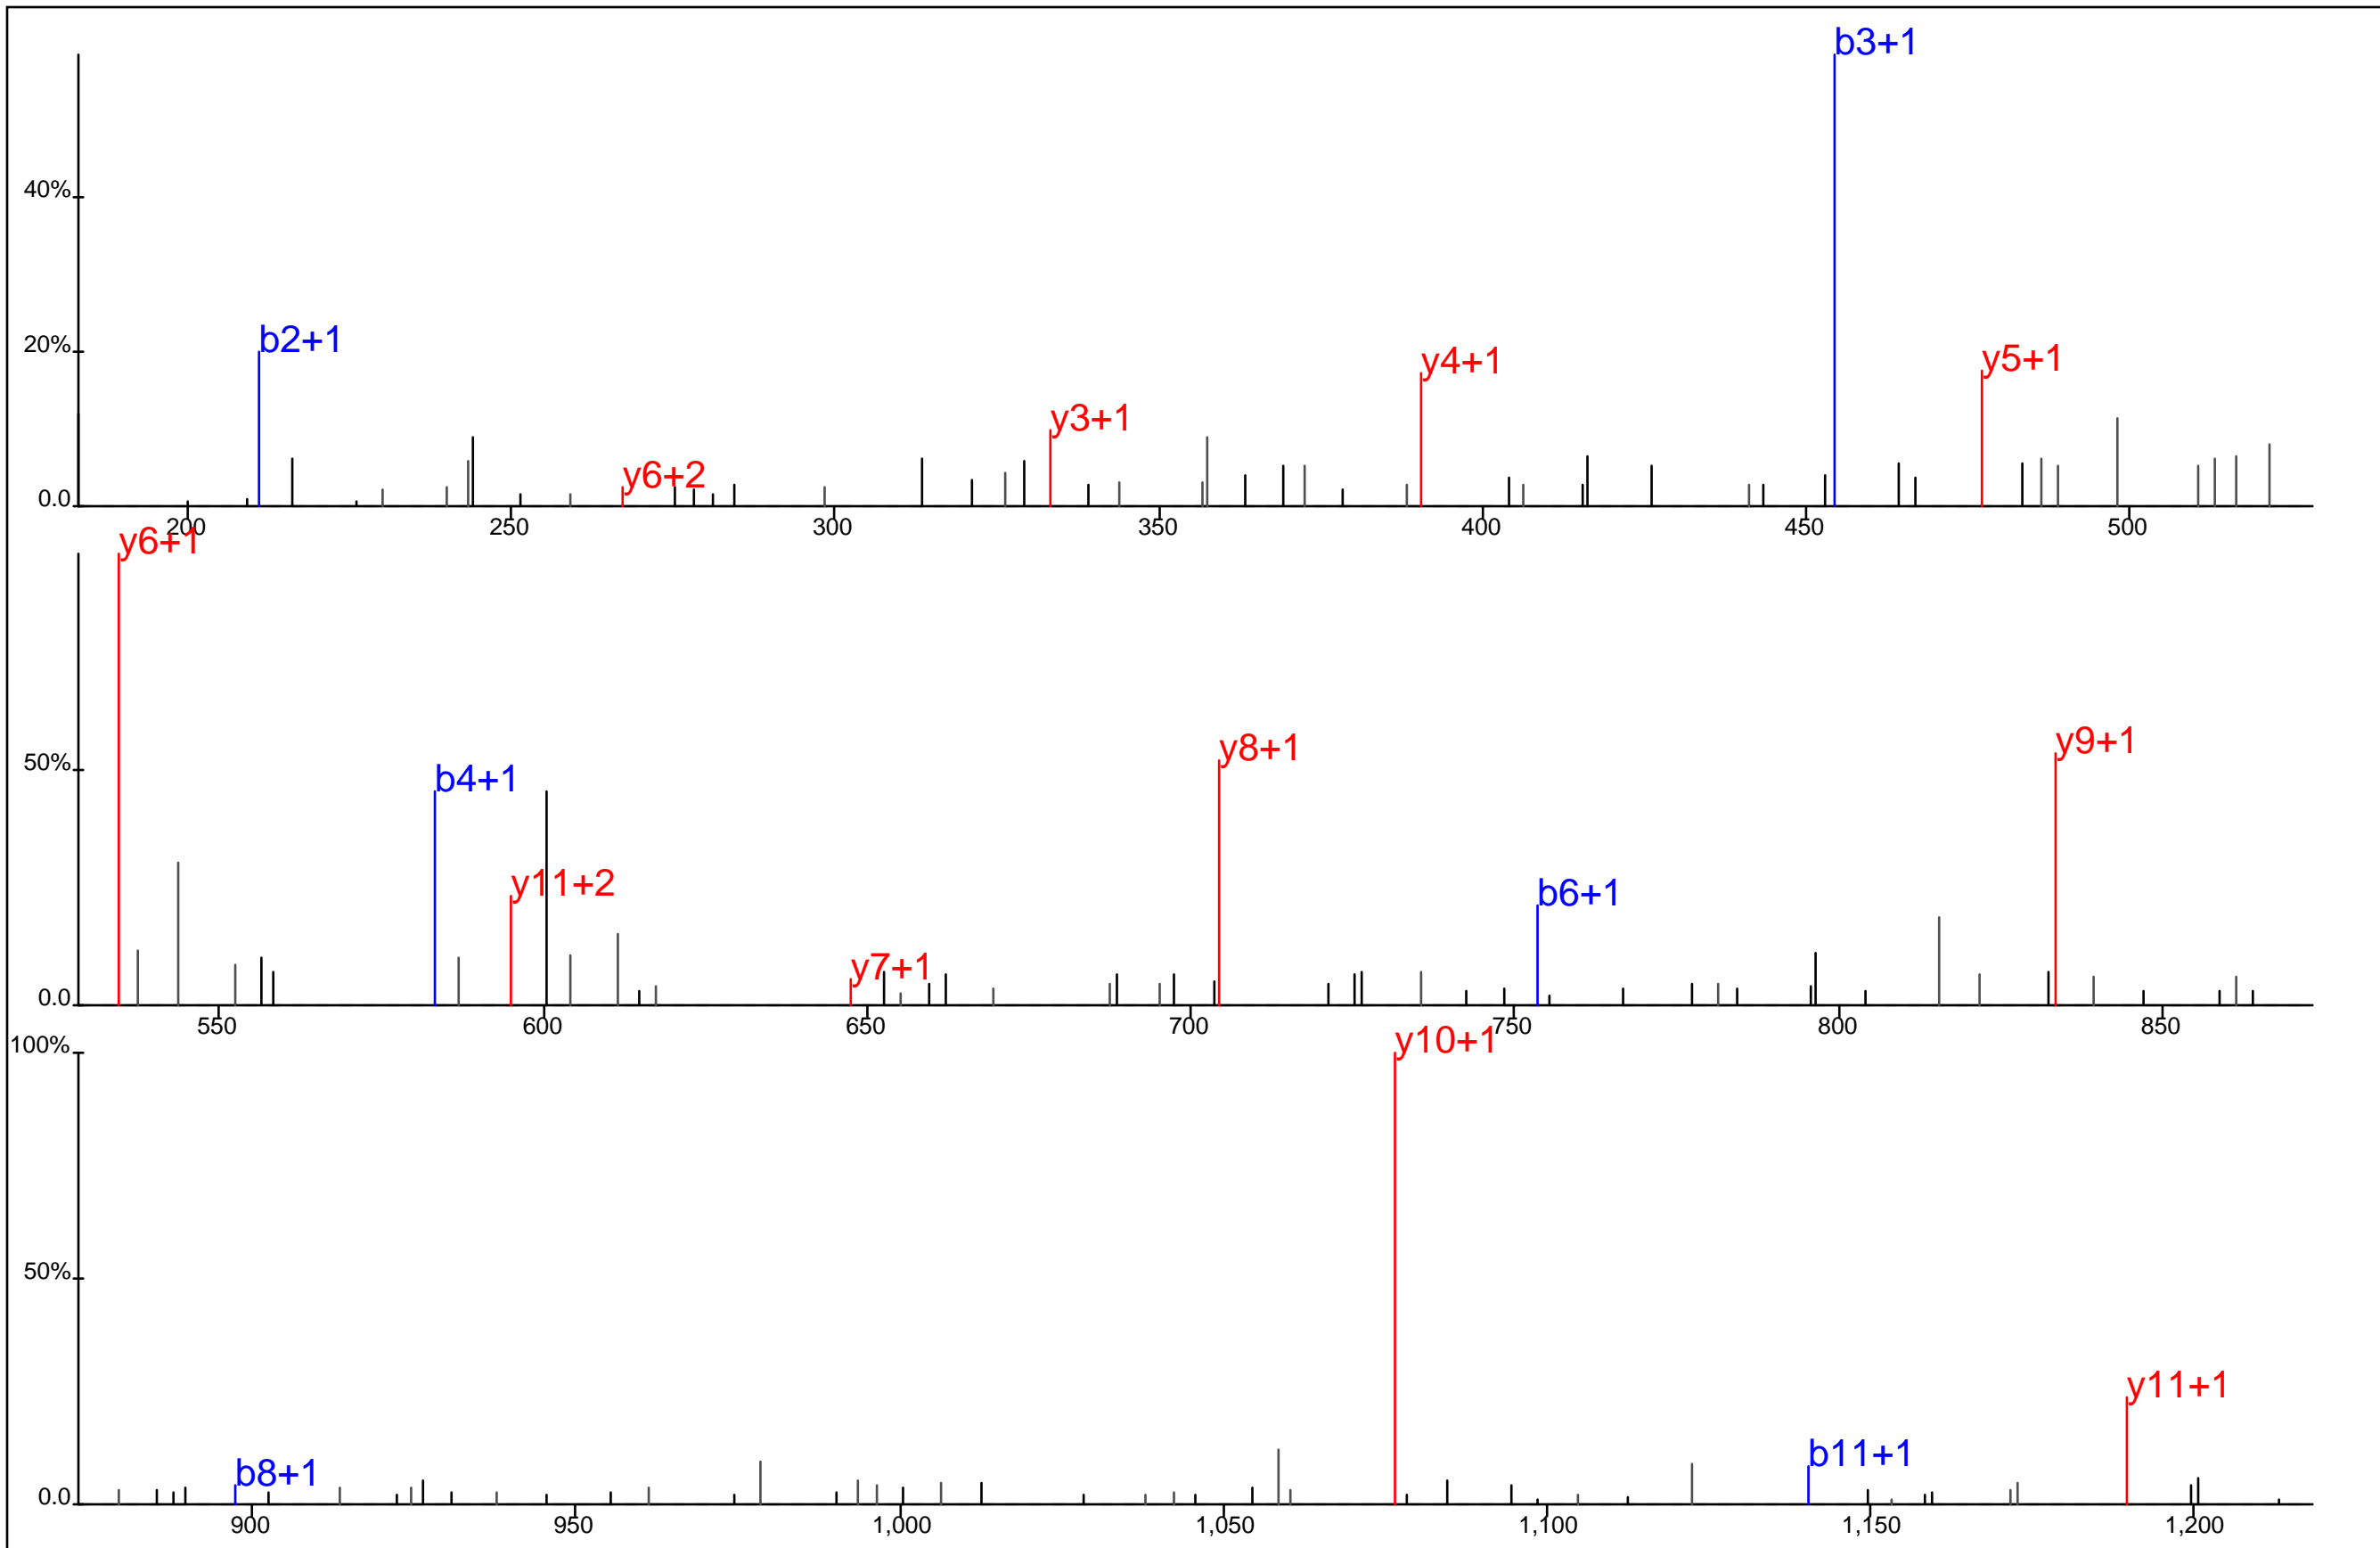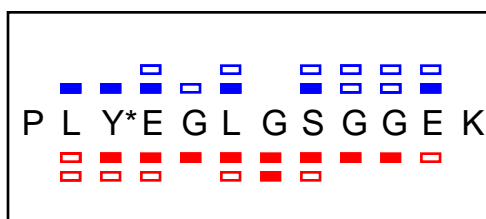

Protein Name: Actin related protein 10  
 gi Accession: 0  
 Precursor Mass: 643.7894+2  
 Delta Mass: 4.026 ppm  
 XCorr: 52.68

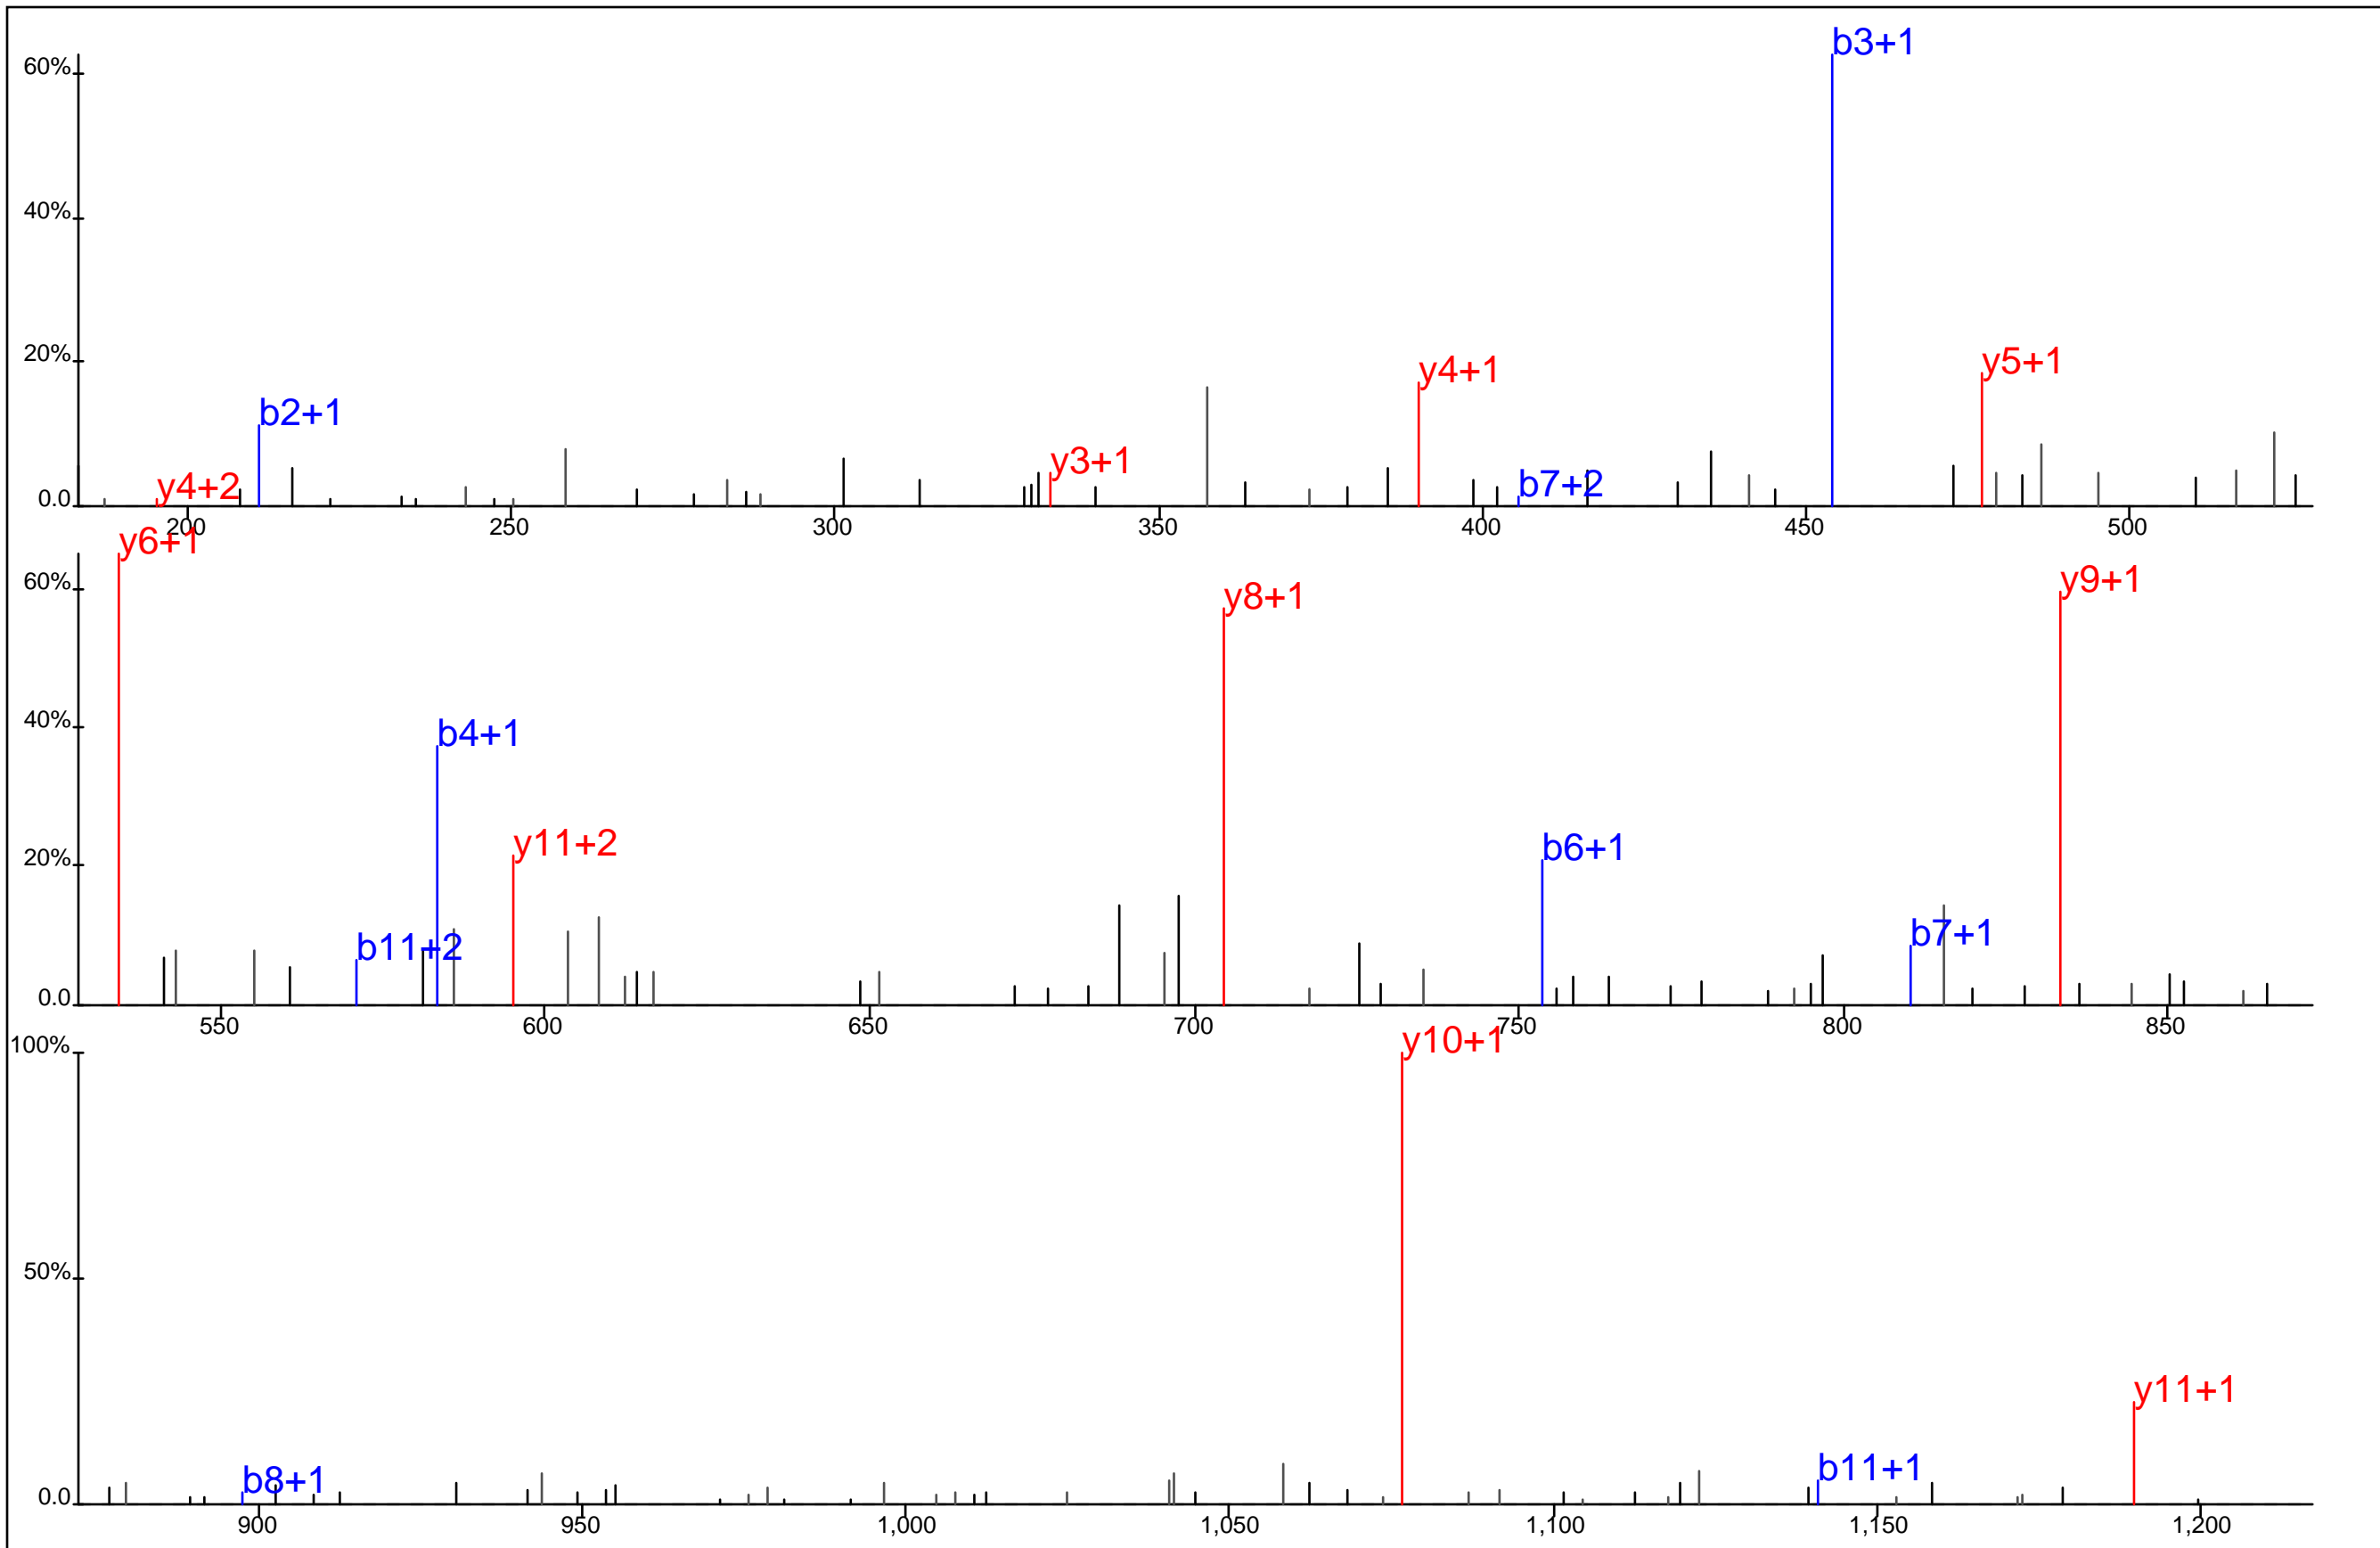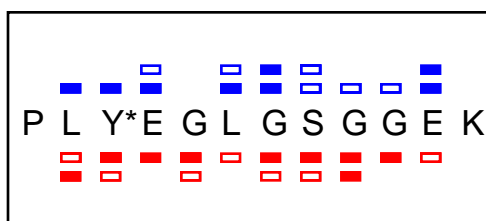

Protein Name: Actin related protein 10  
 gi Accession: 0  
 Precursor Mass: 643.7886+2  
 Delta Mass: 2.792 ppm  
 XCorr: 51.21

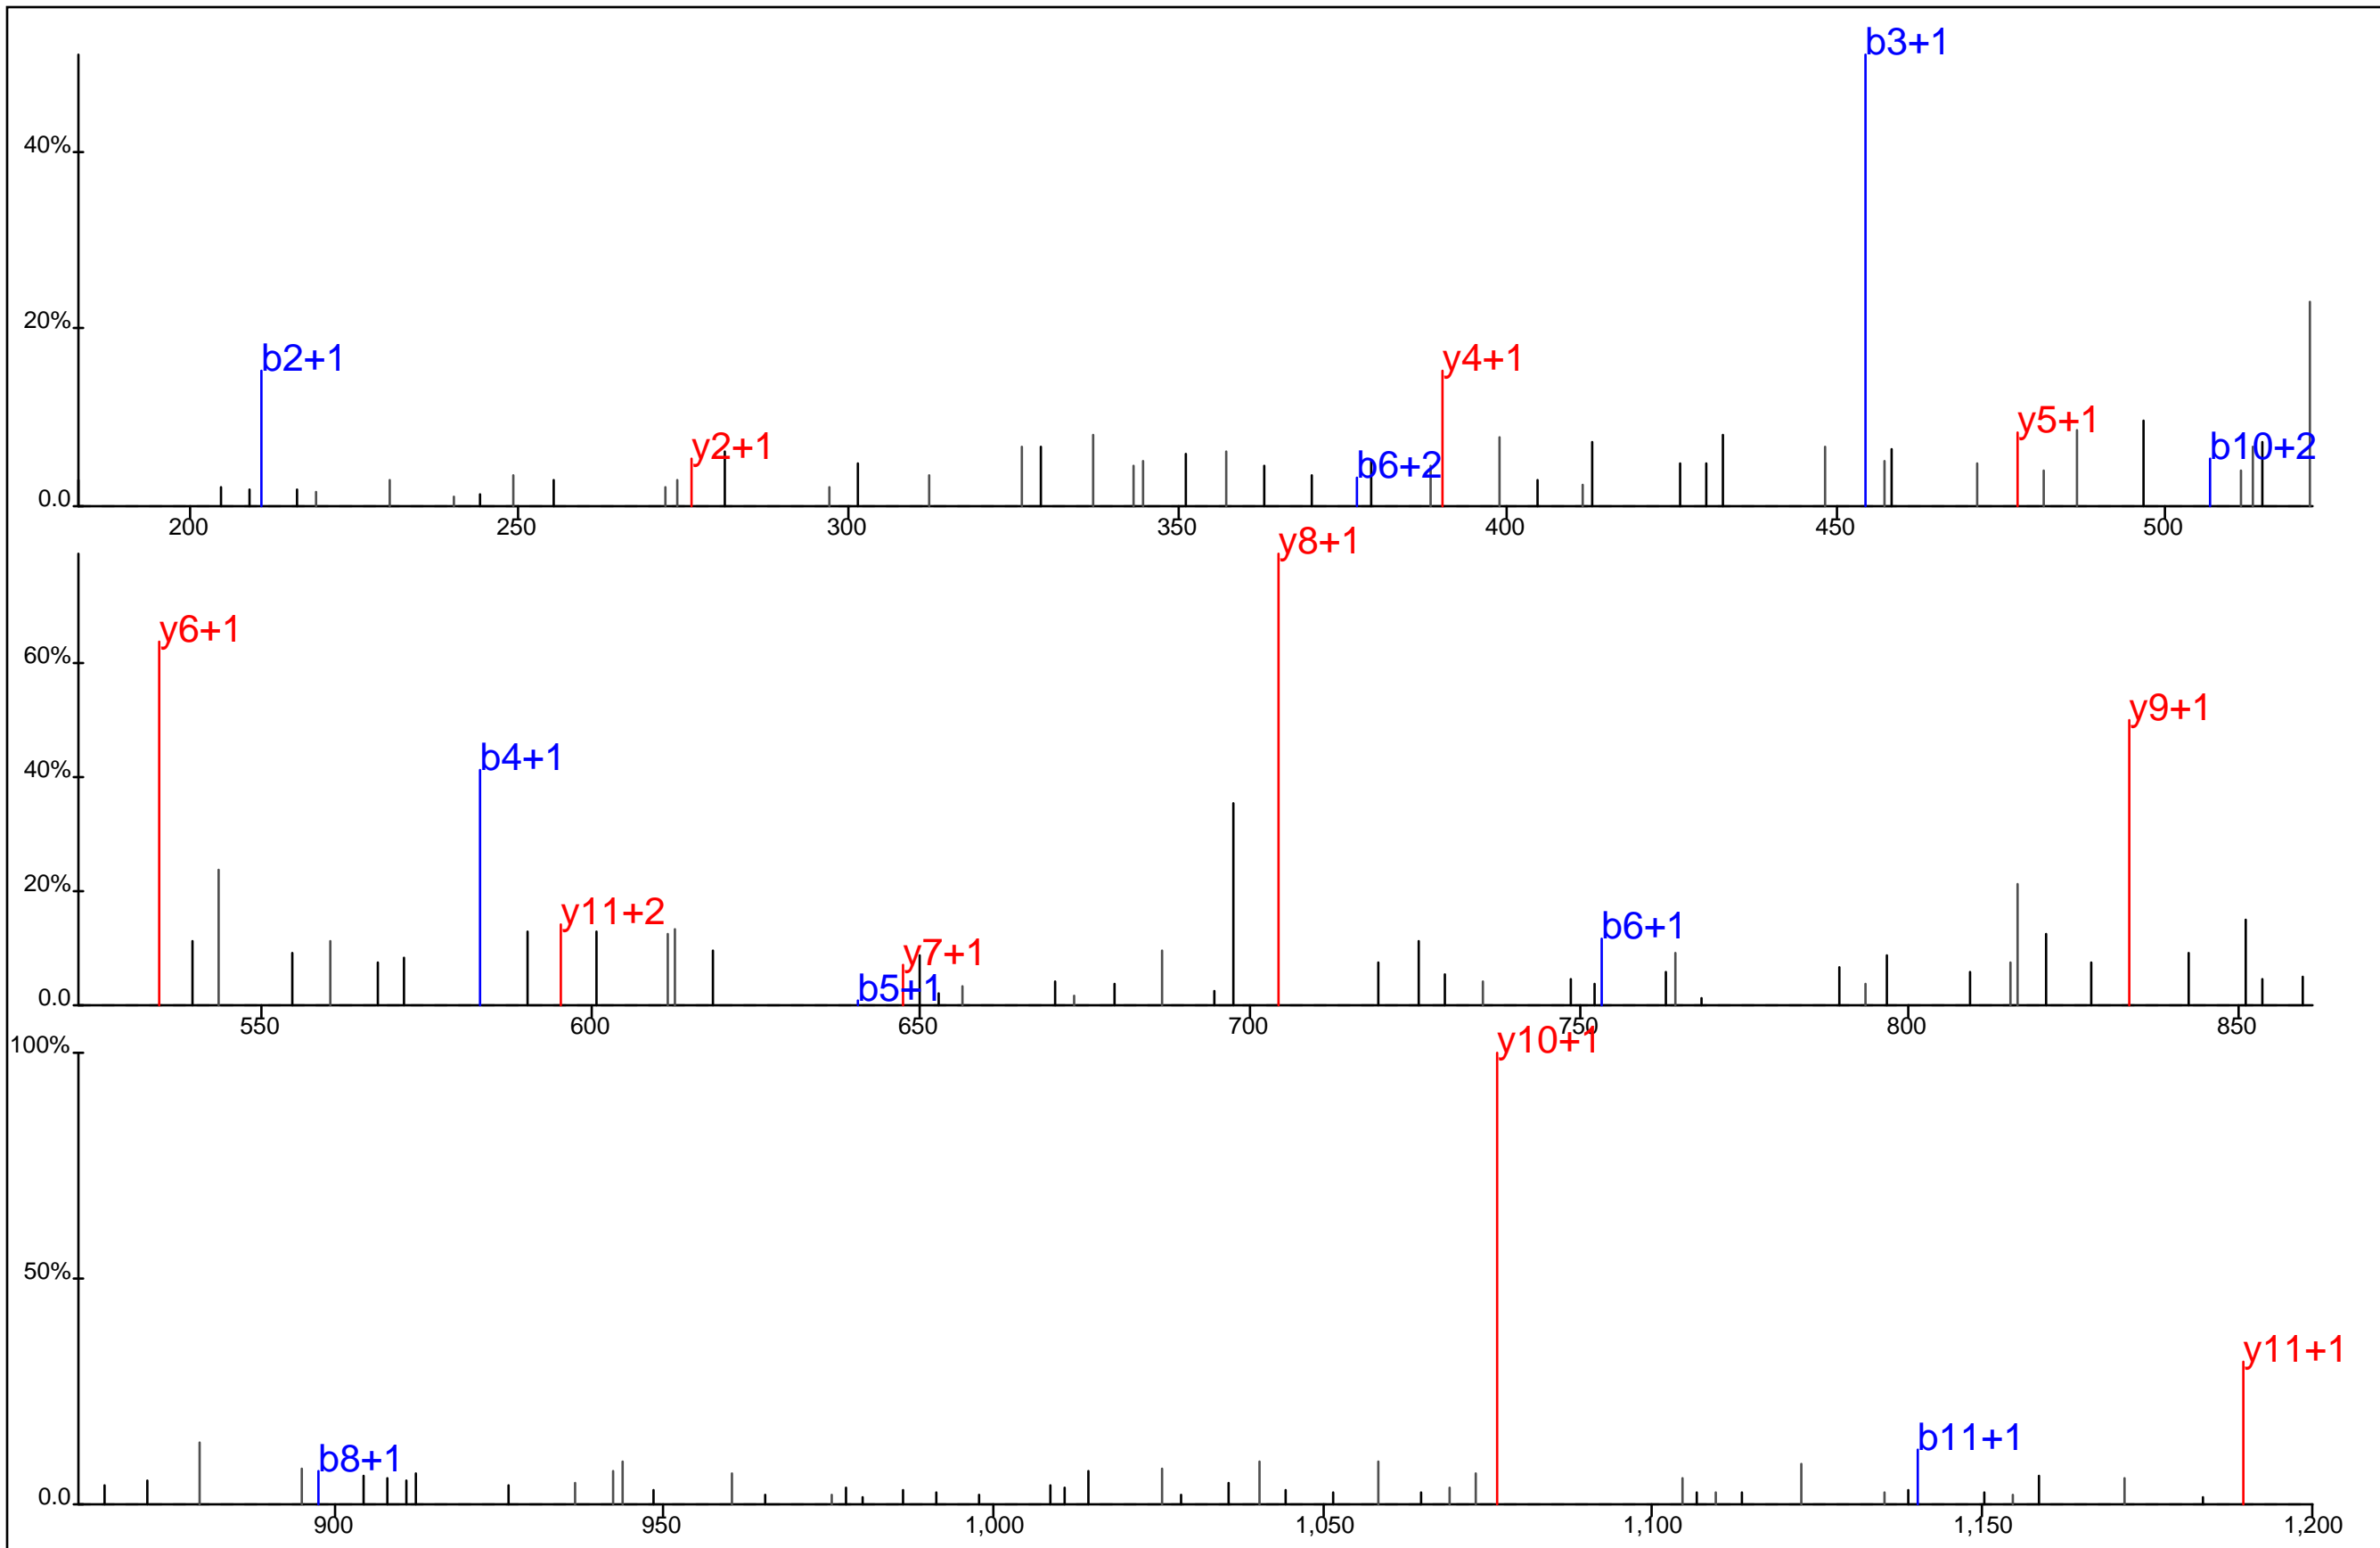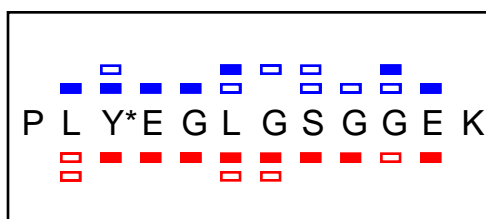

Protein Name: Actin related protein 10  
 gi Accession: 0  
 Precursor Mass: 643.7866+2  
 Delta Mass: 0.339 ppm  
 XCorr: 48.61

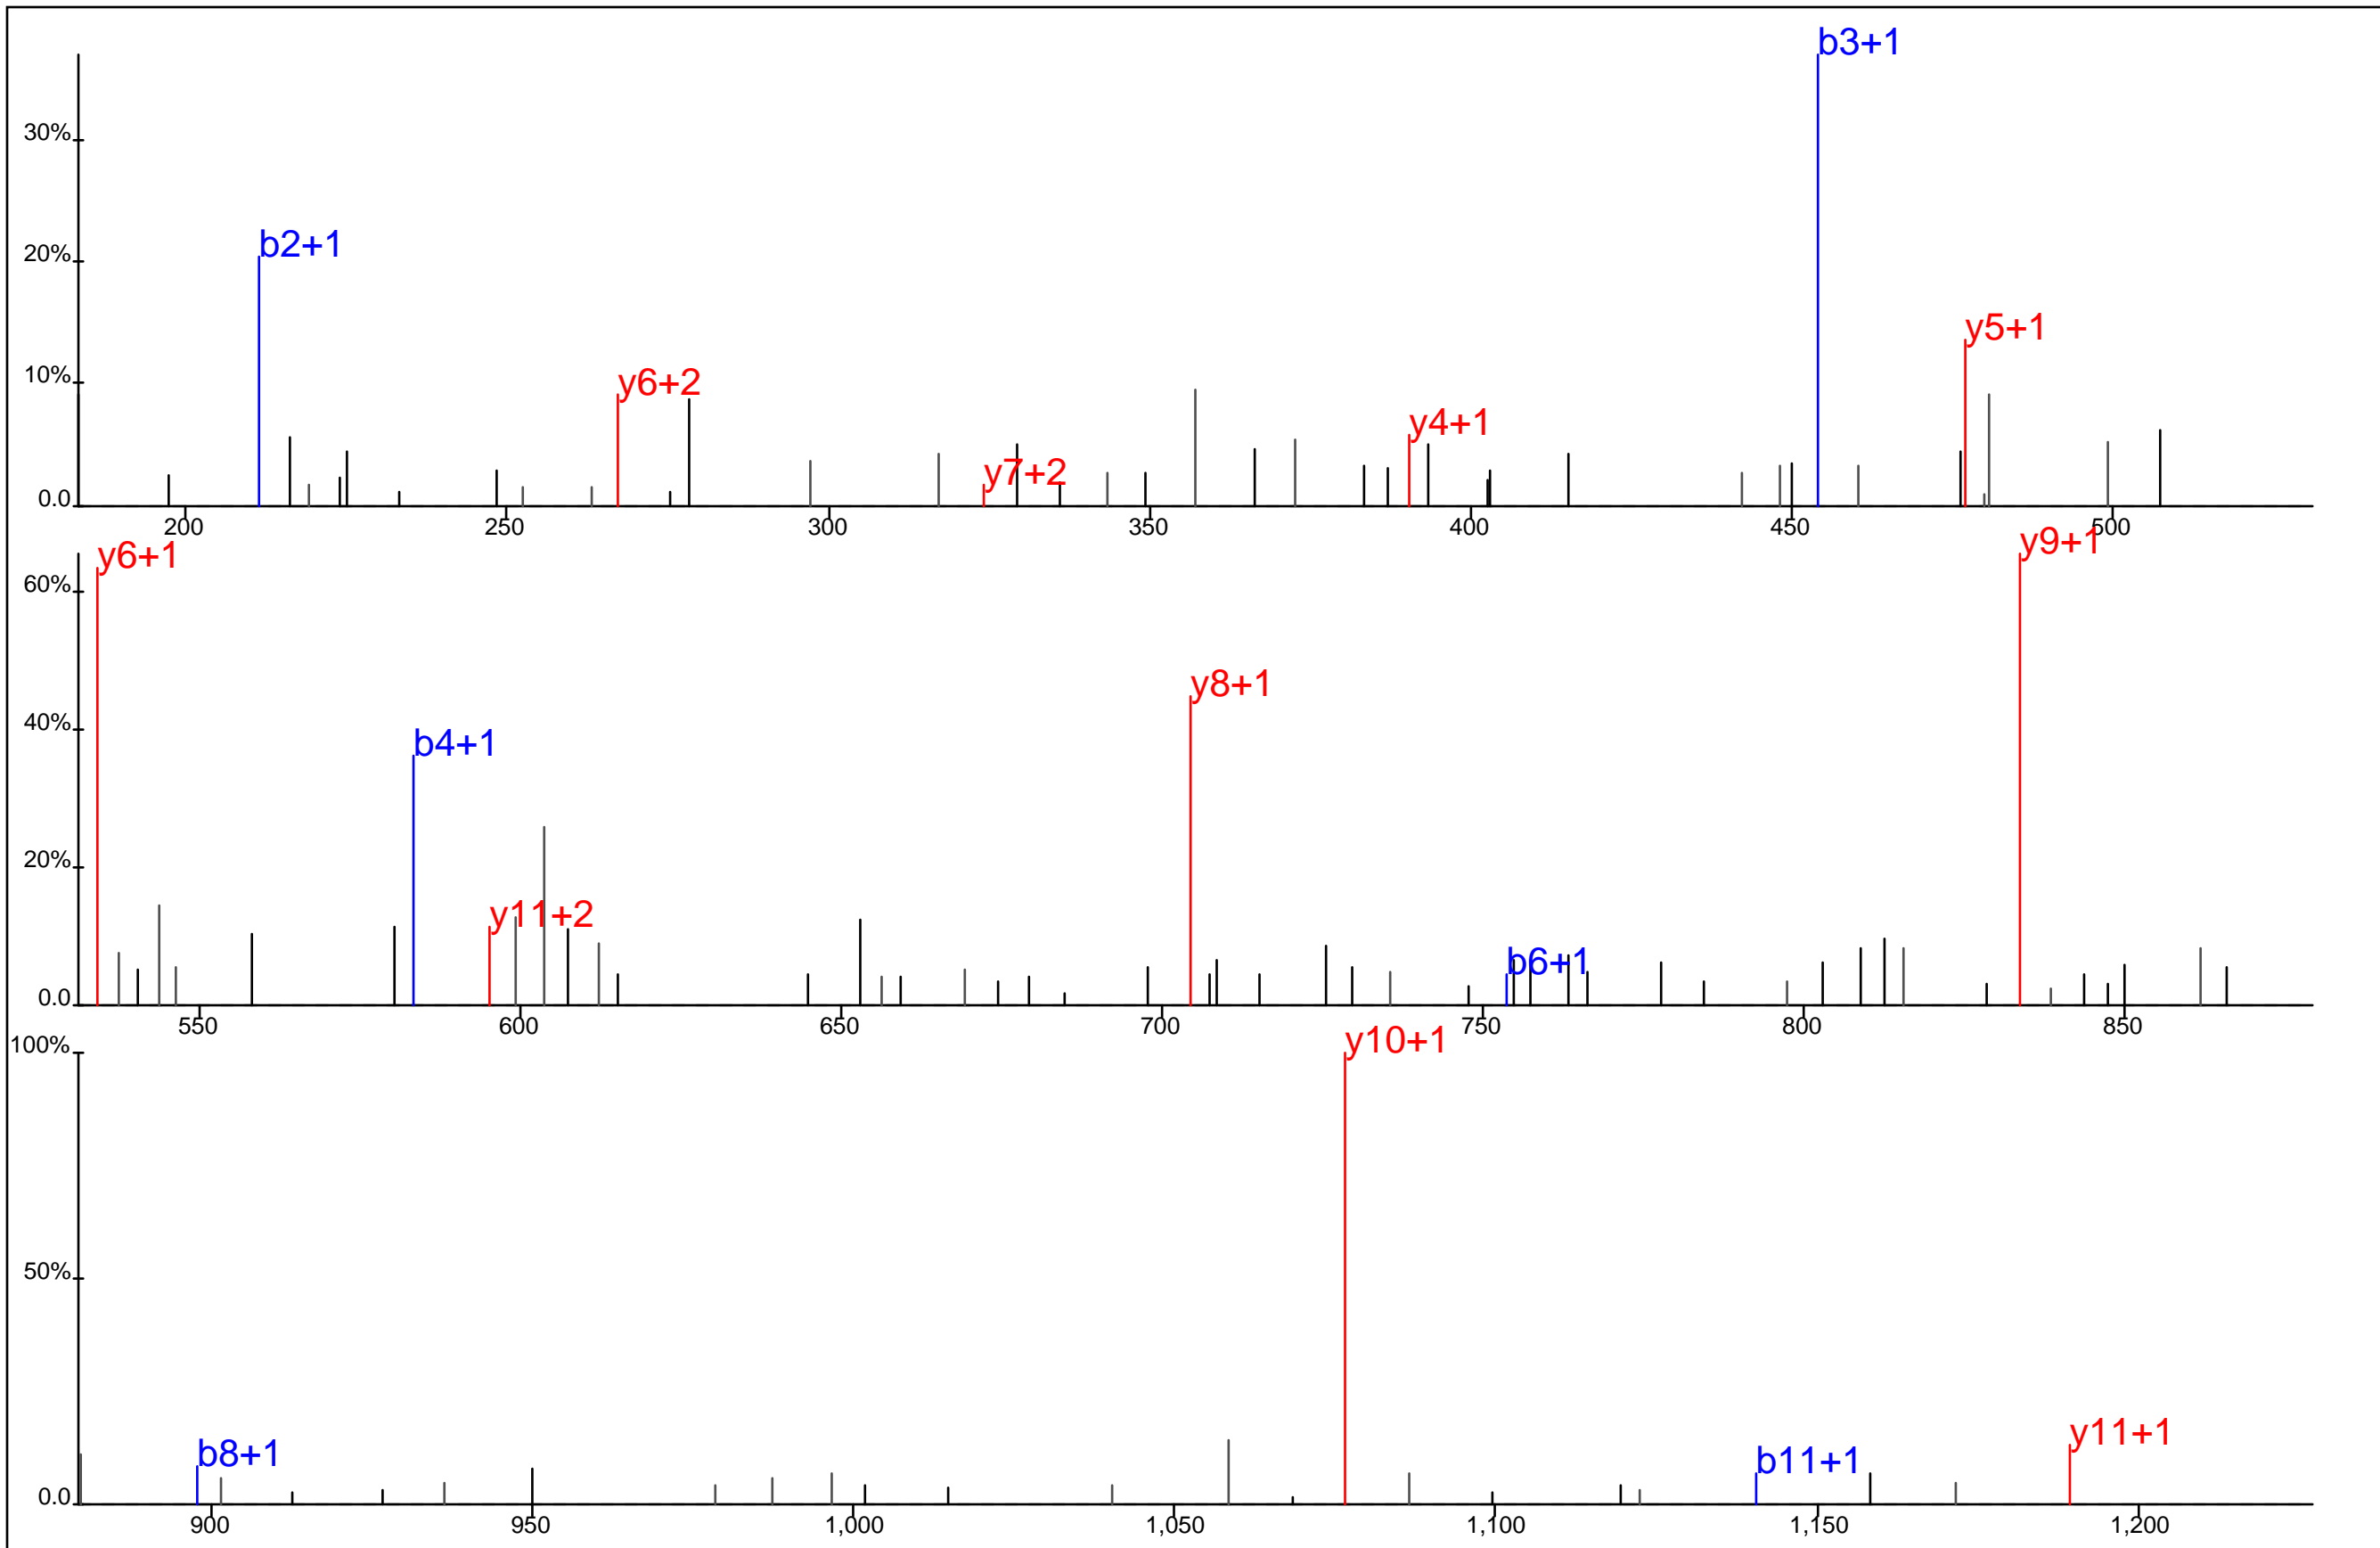

■ ■ ▢ ▢ ▢ ▢ ▢ ▢ ▢ ▢  
 P L Y\* E G L G S G G E K  
■ ■ ▢ ▢ ▢ ▢ ▢ ▢ ▢ ▢

Protein Name: Actin related protein 10  
 gi Accession: 0  
 Precursor Mass: 643.7881+2  
 Delta Mass: 1.938 ppm  
 XCorr: 44.29



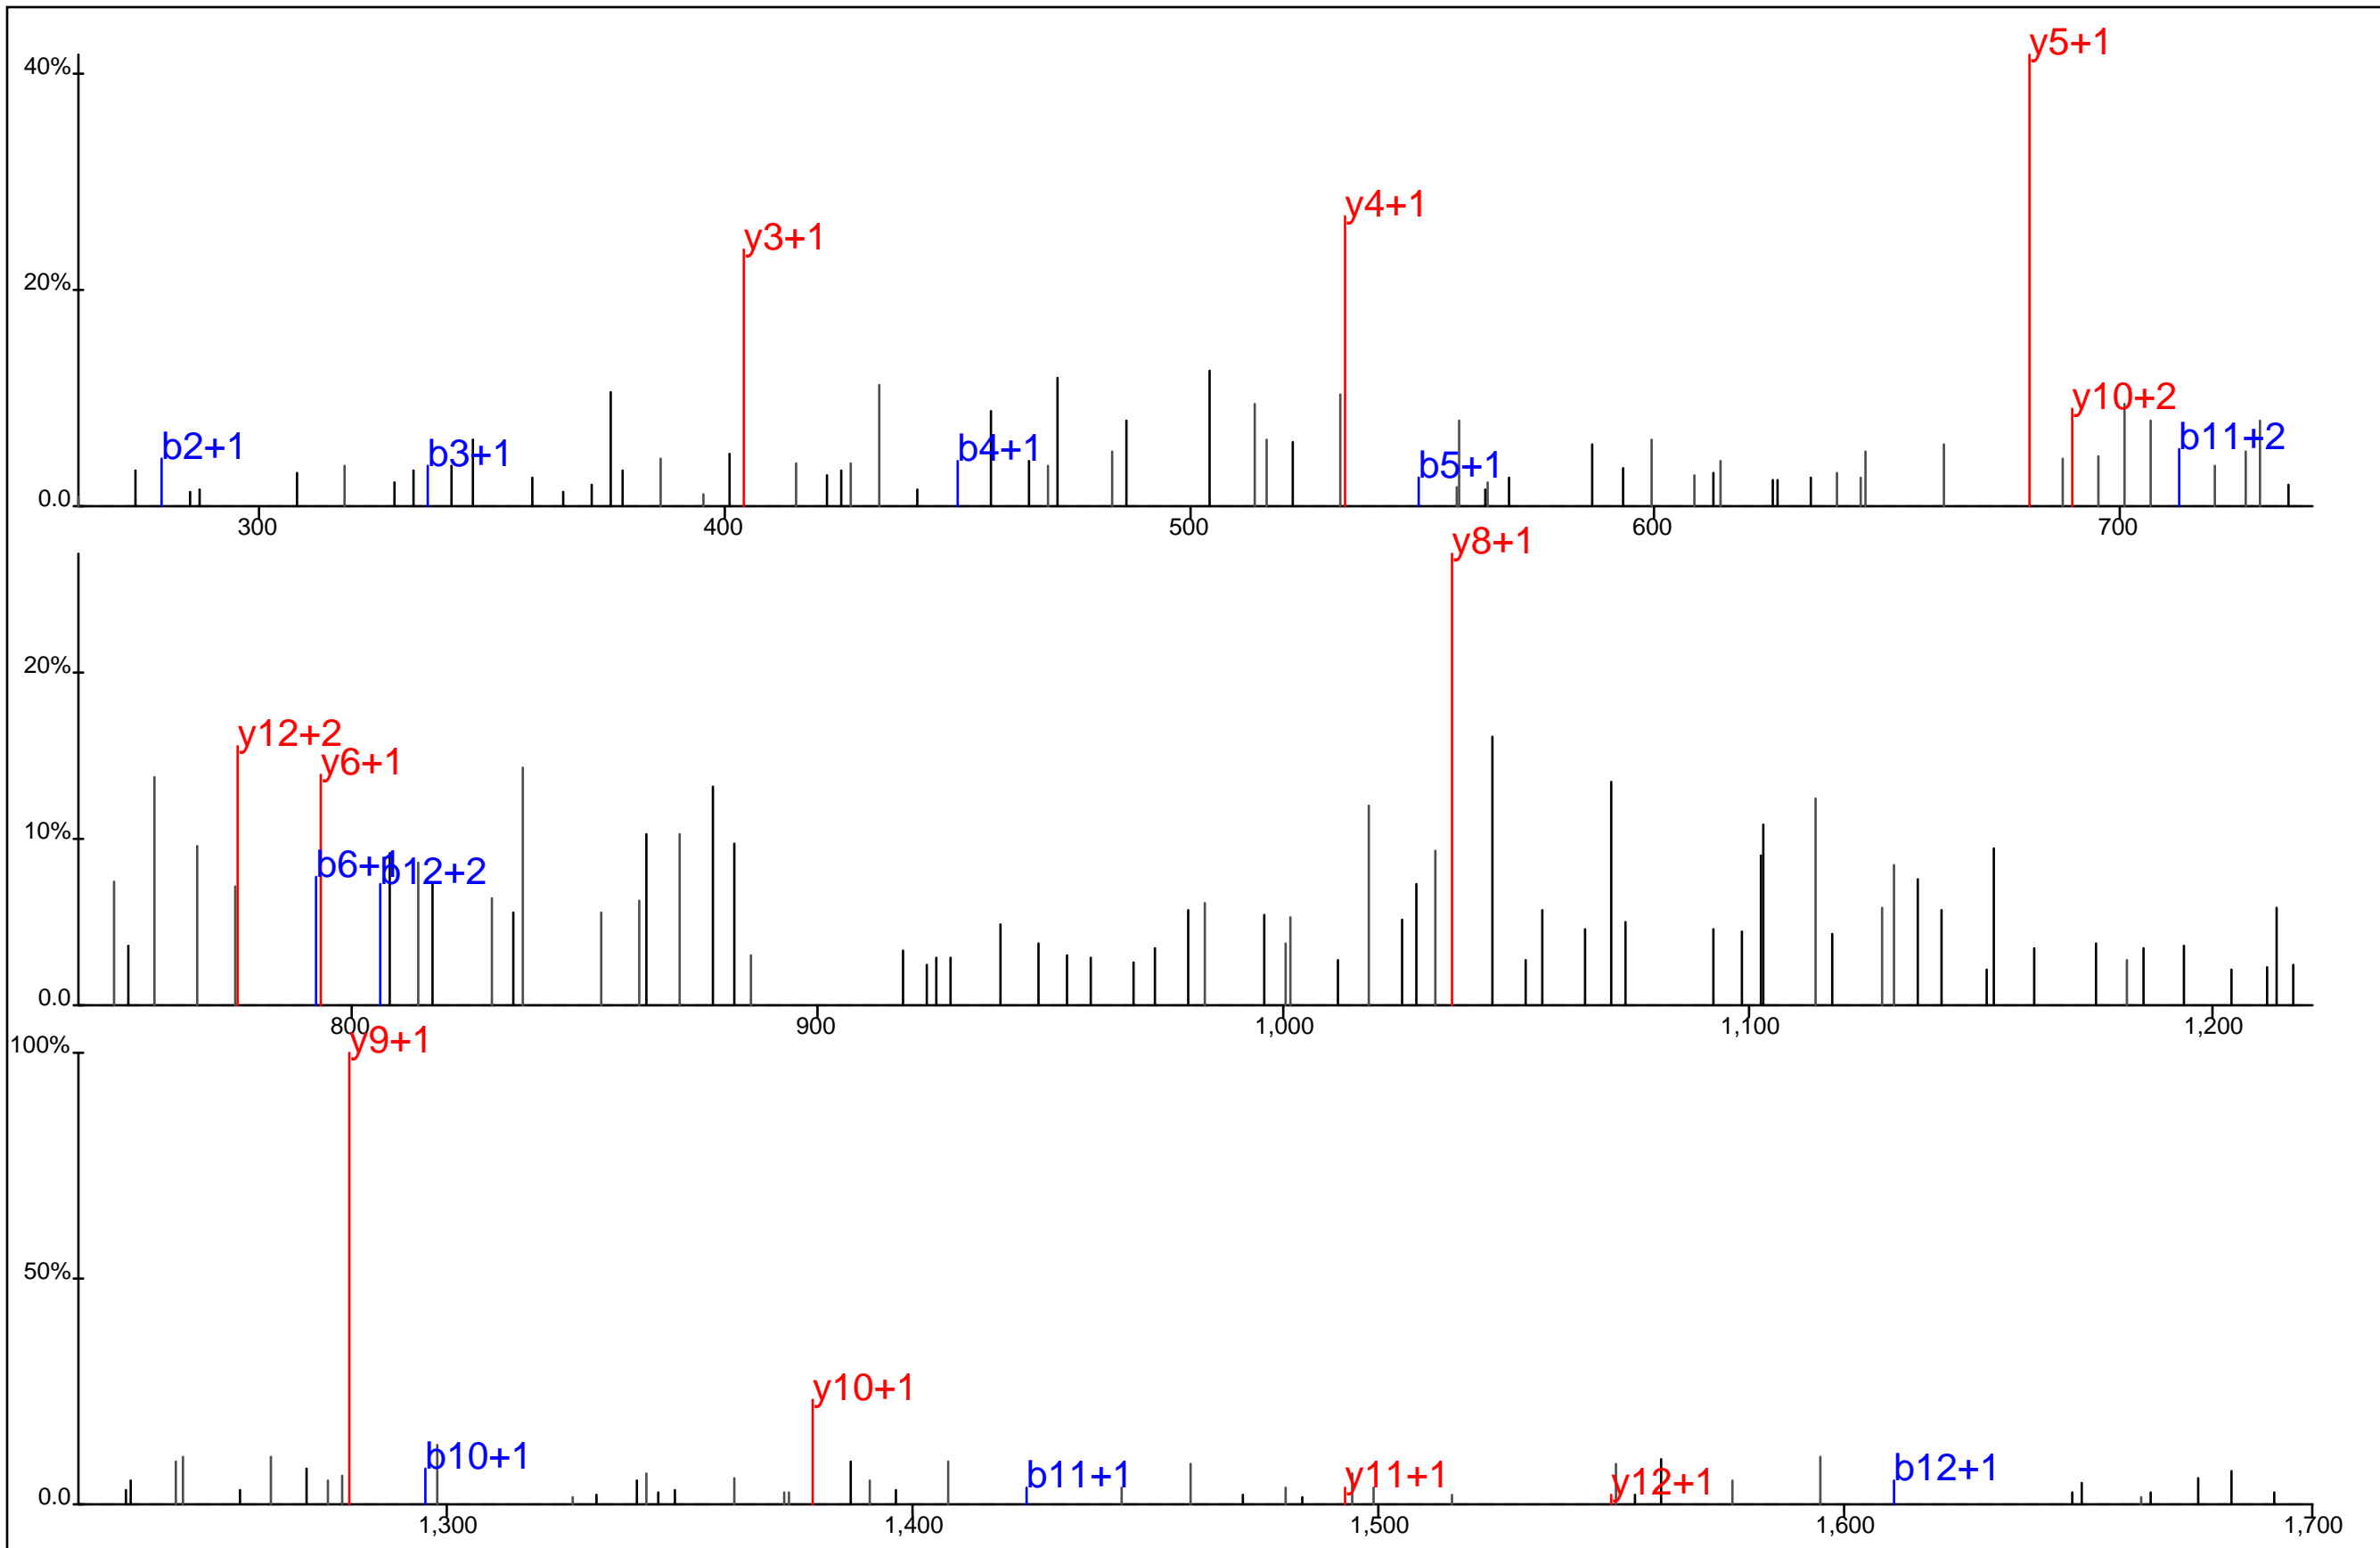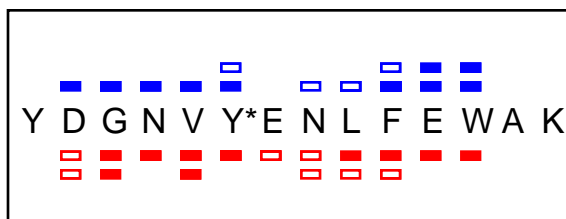

Protein Name: Acyl-CoA oxidase 1, peroximal  
 gi Accession: 0  
 Precursor Mass: 914.3848+2  
 Delta Mass: 0.079 ppm  
 XCorr: 27.22



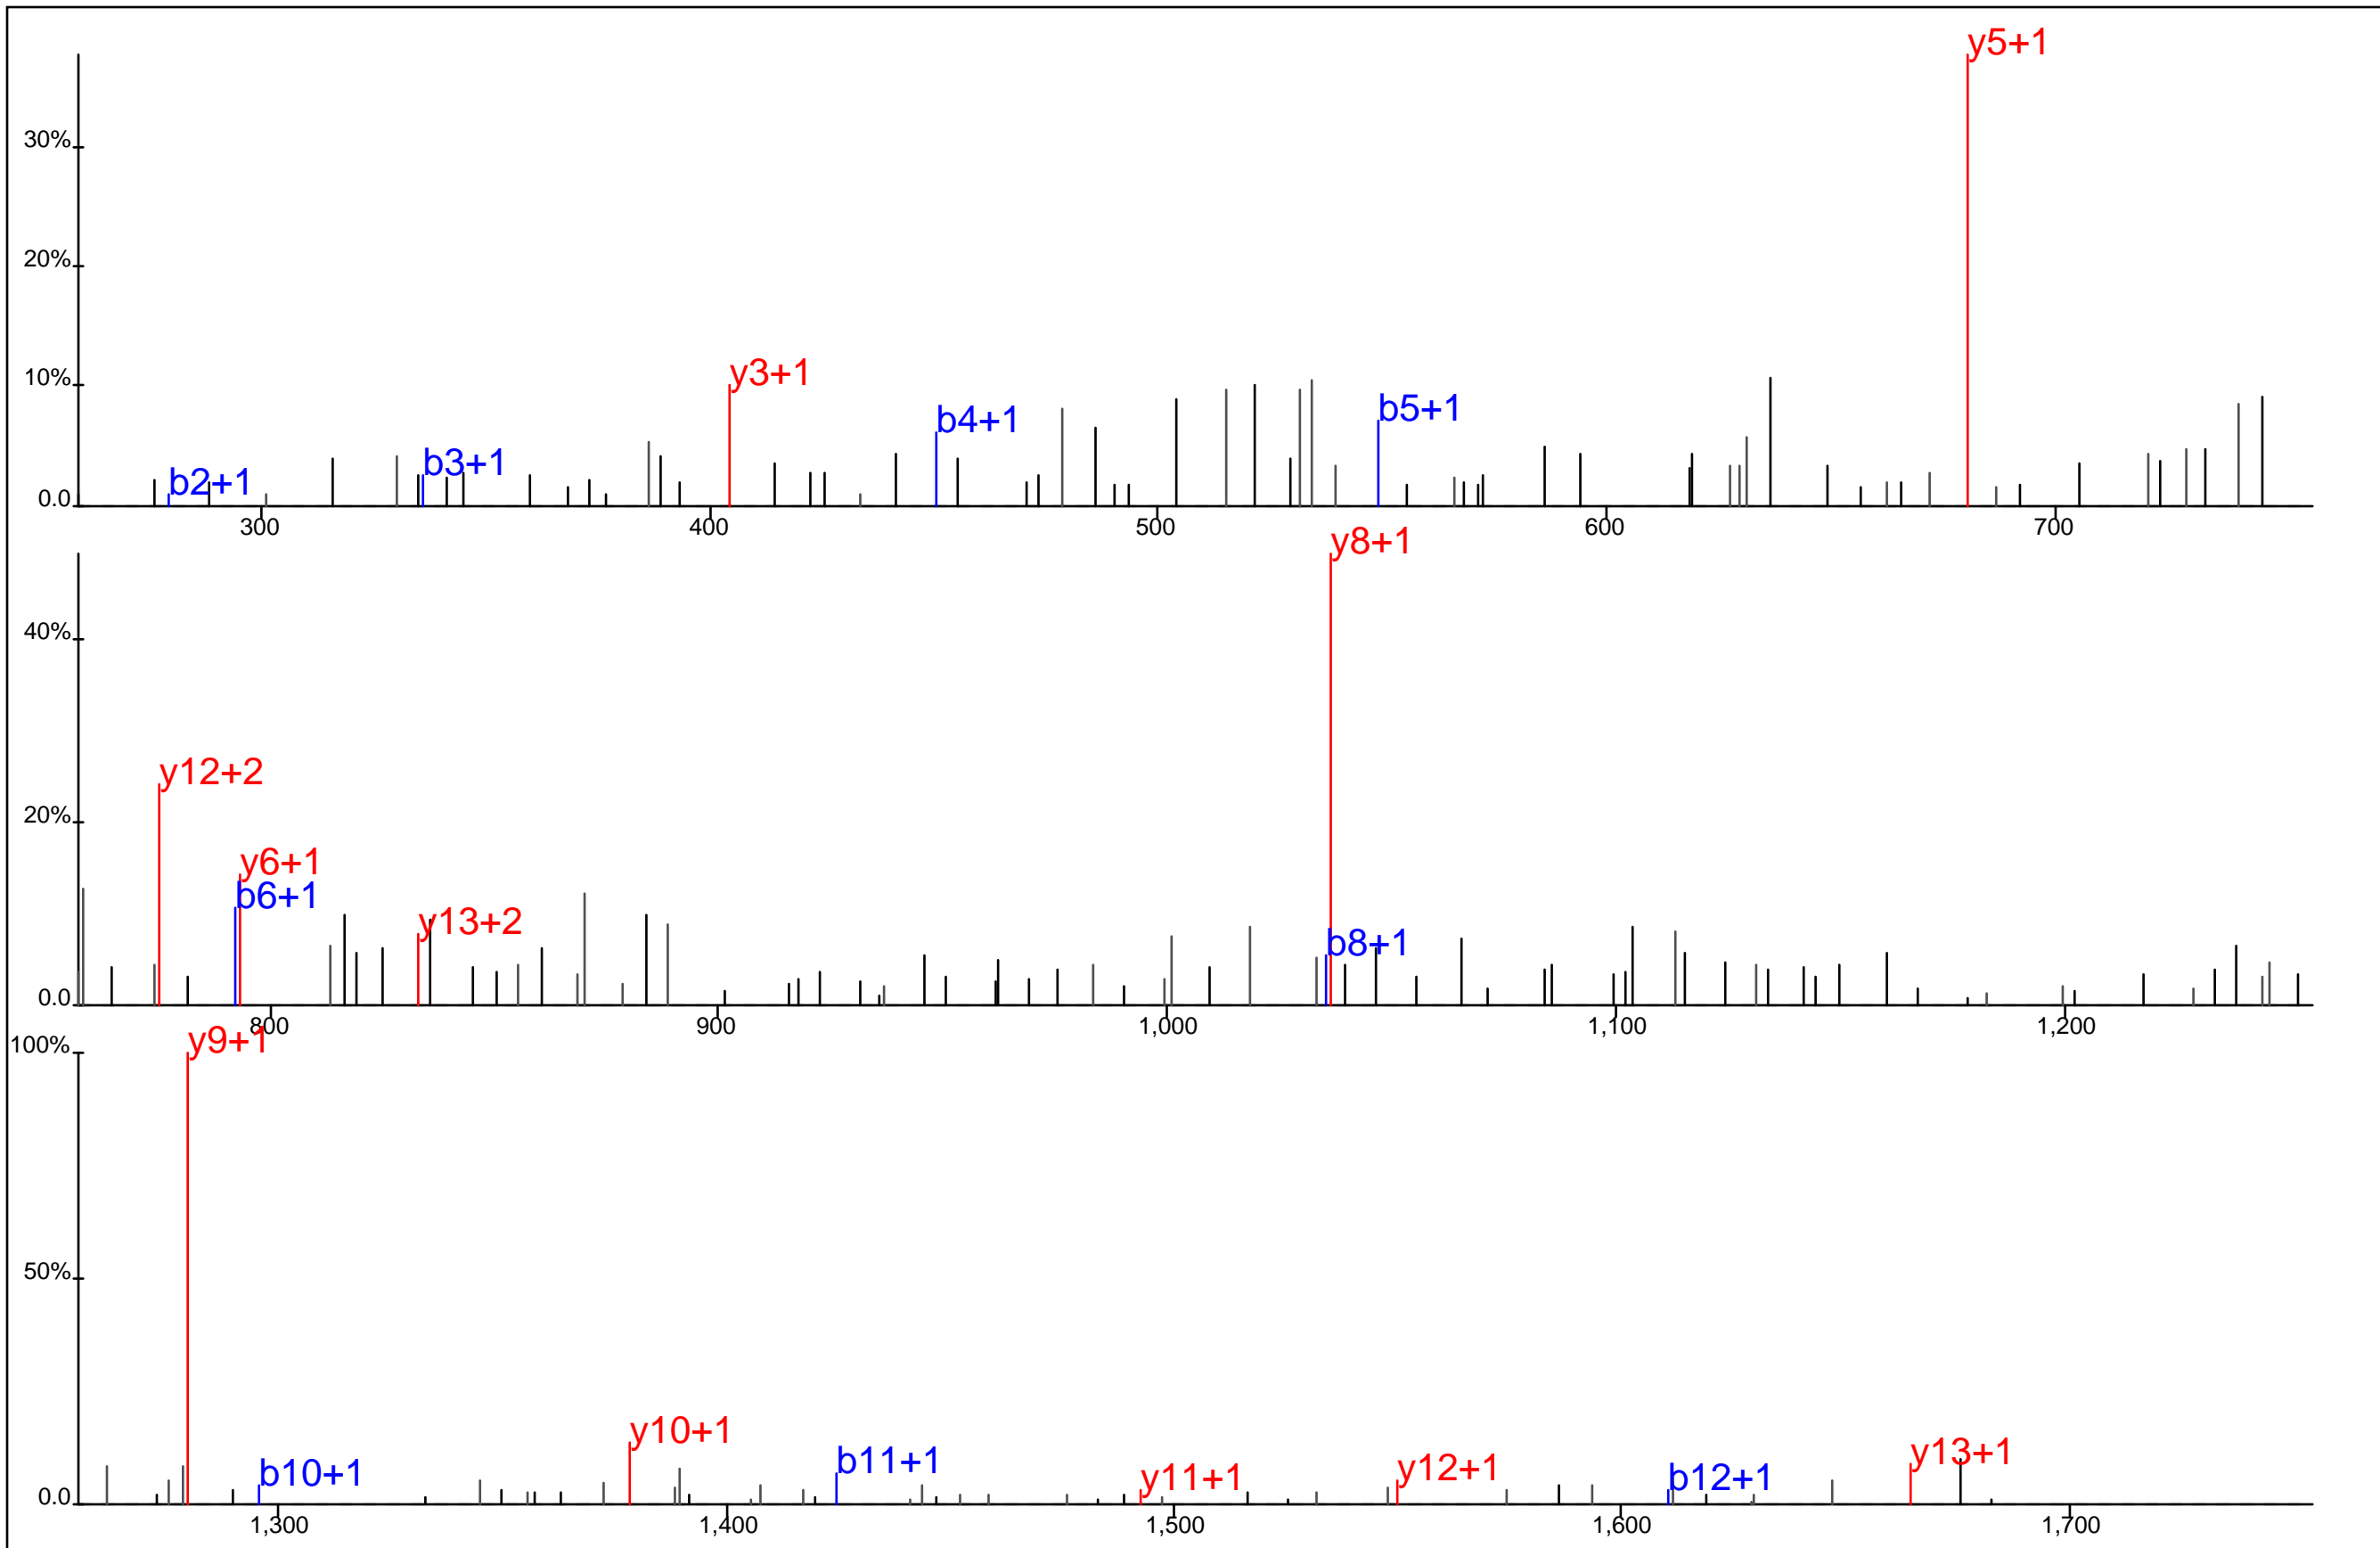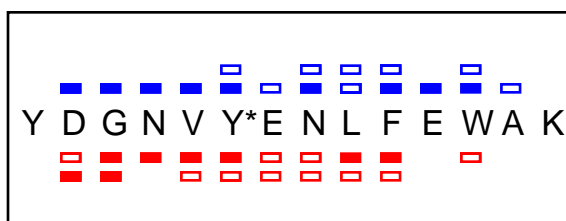

Protein Name: Acyl-CoA oxidase 1, peroximal  
 gi Accession: 0  
 Precursor Mass: 914.3829+2  
 Delta Mass: 2.149 ppm  
 XCorr: 39.35

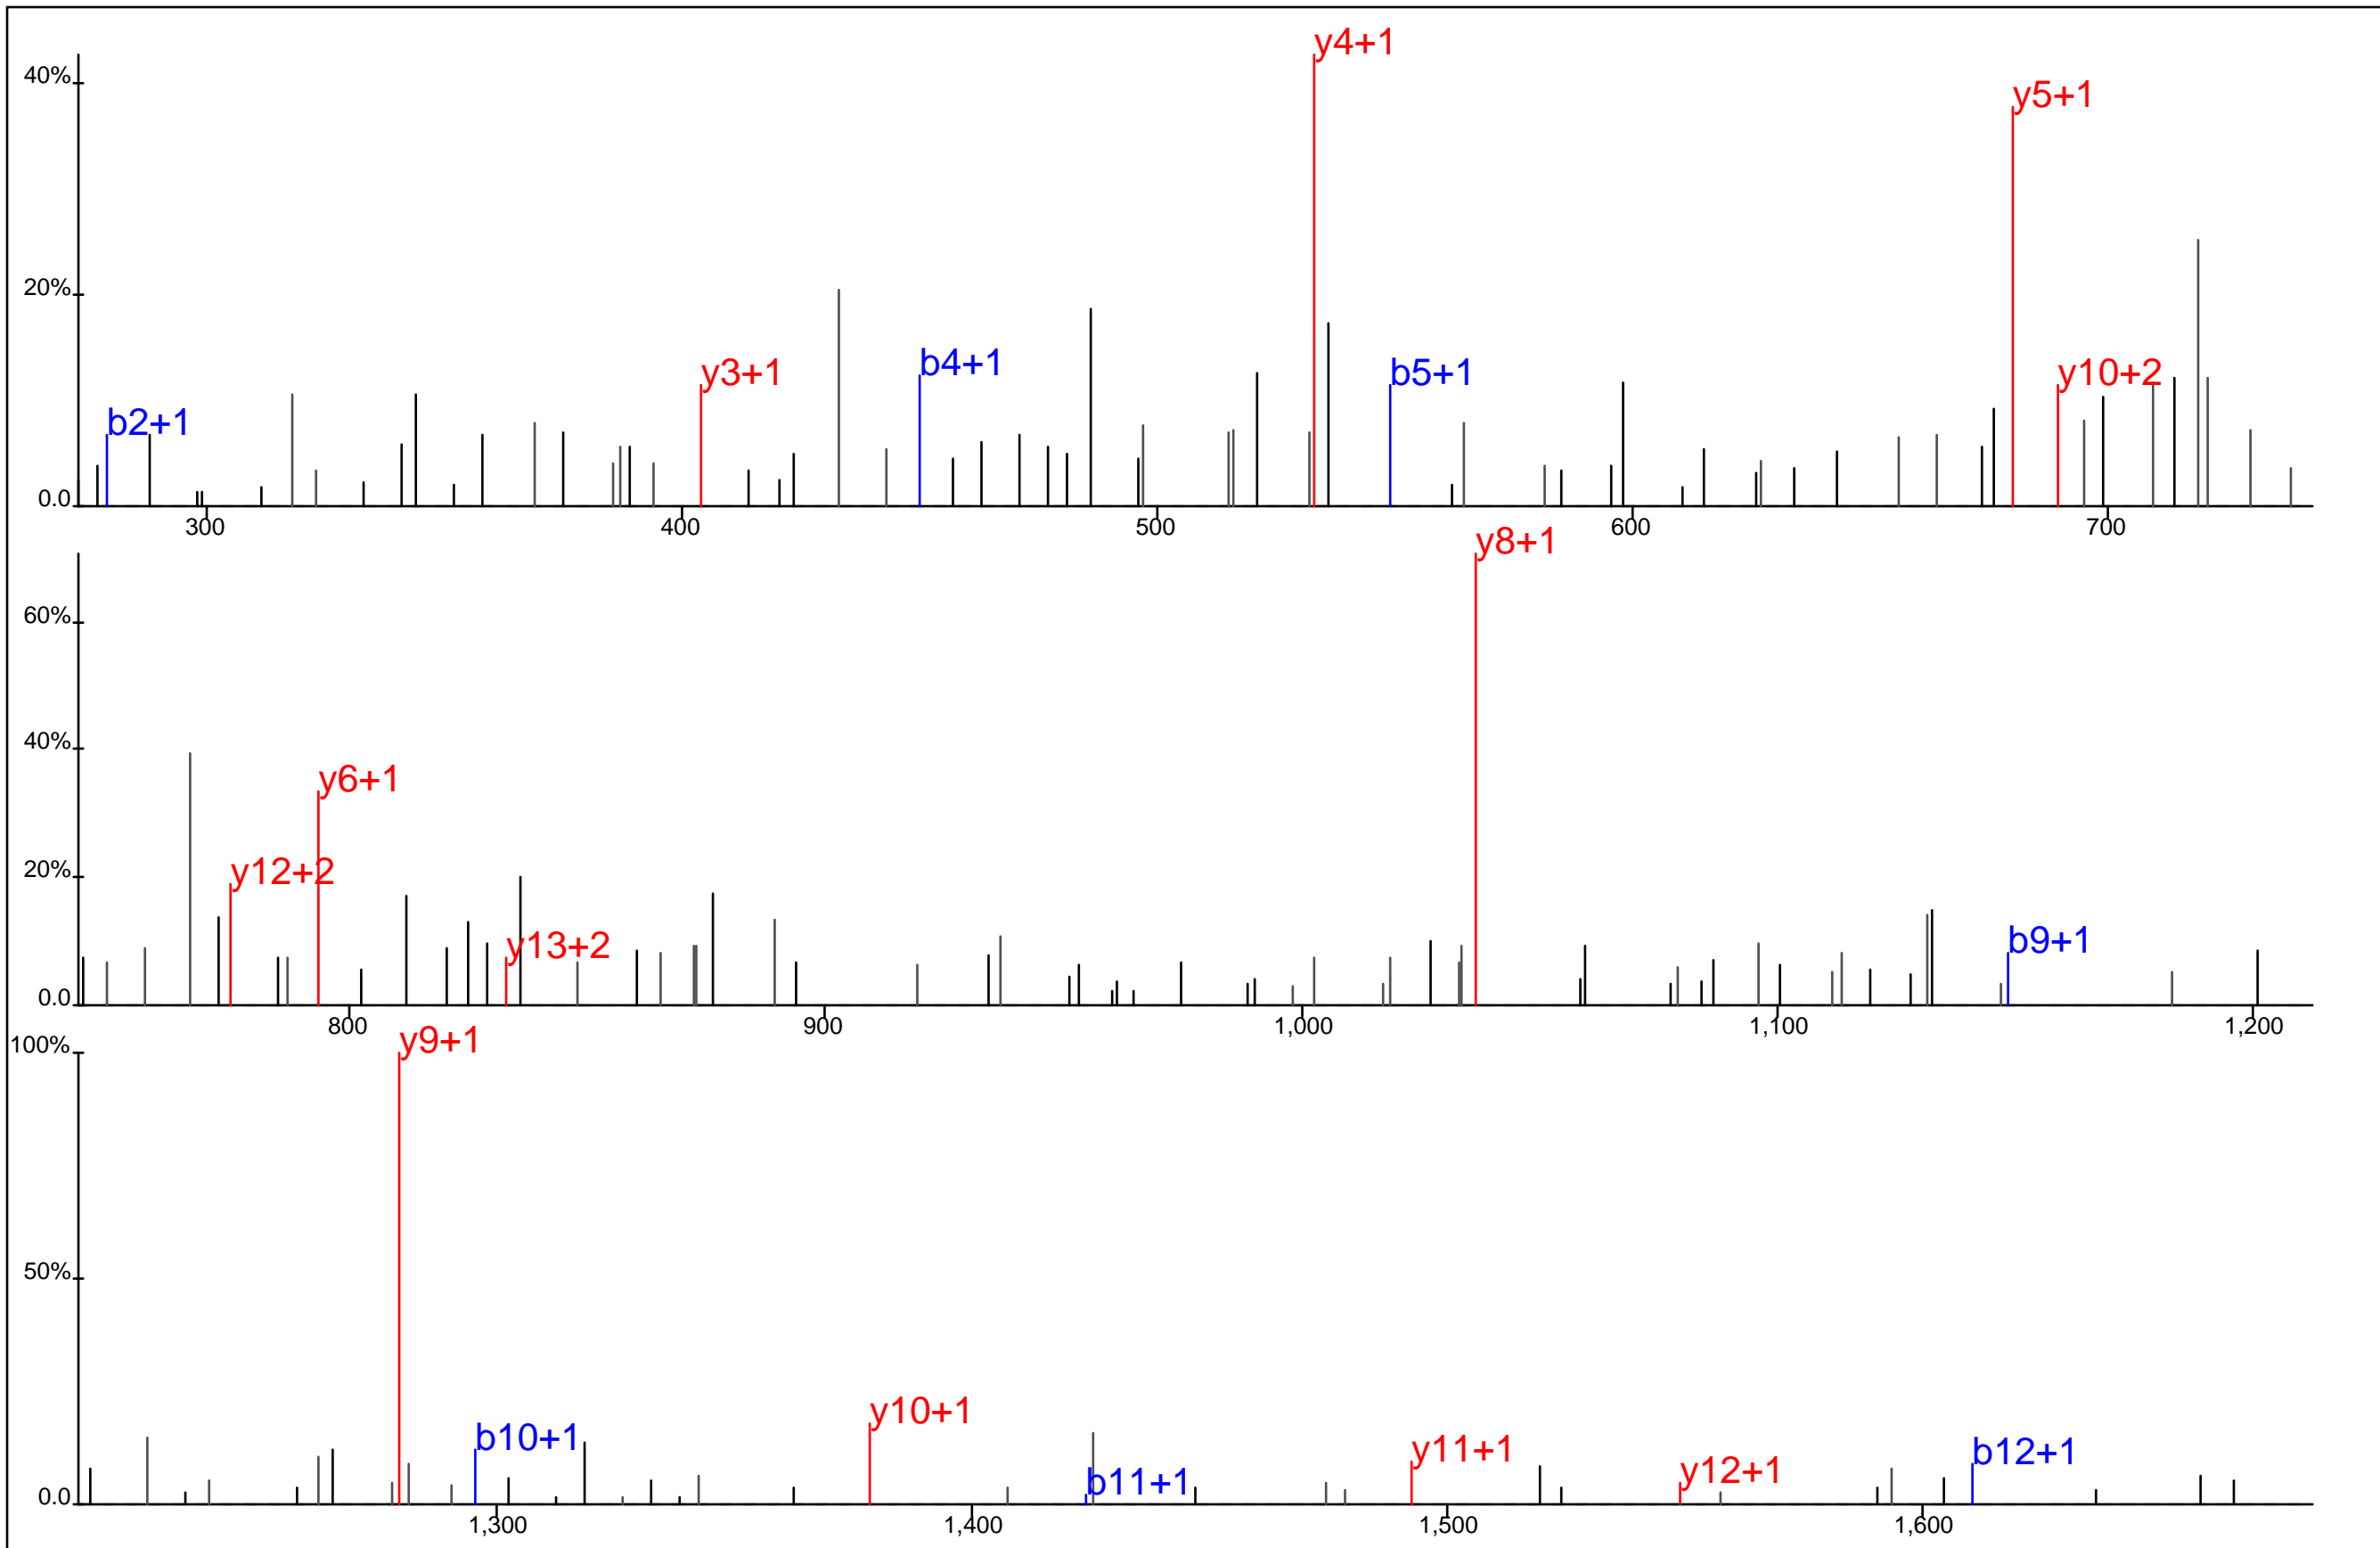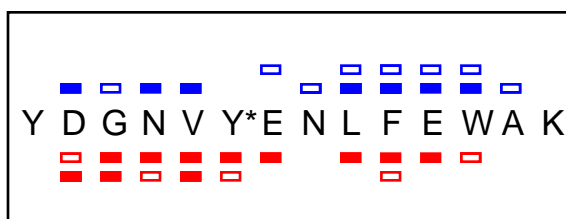

Protein Name: Acyl-CoA oxidase 1, peroximal  
 gi Accession: 0  
 Precursor Mass: 914.3870+2  
 Delta Mass: 2.258 ppm  
 XCorr: 34.4

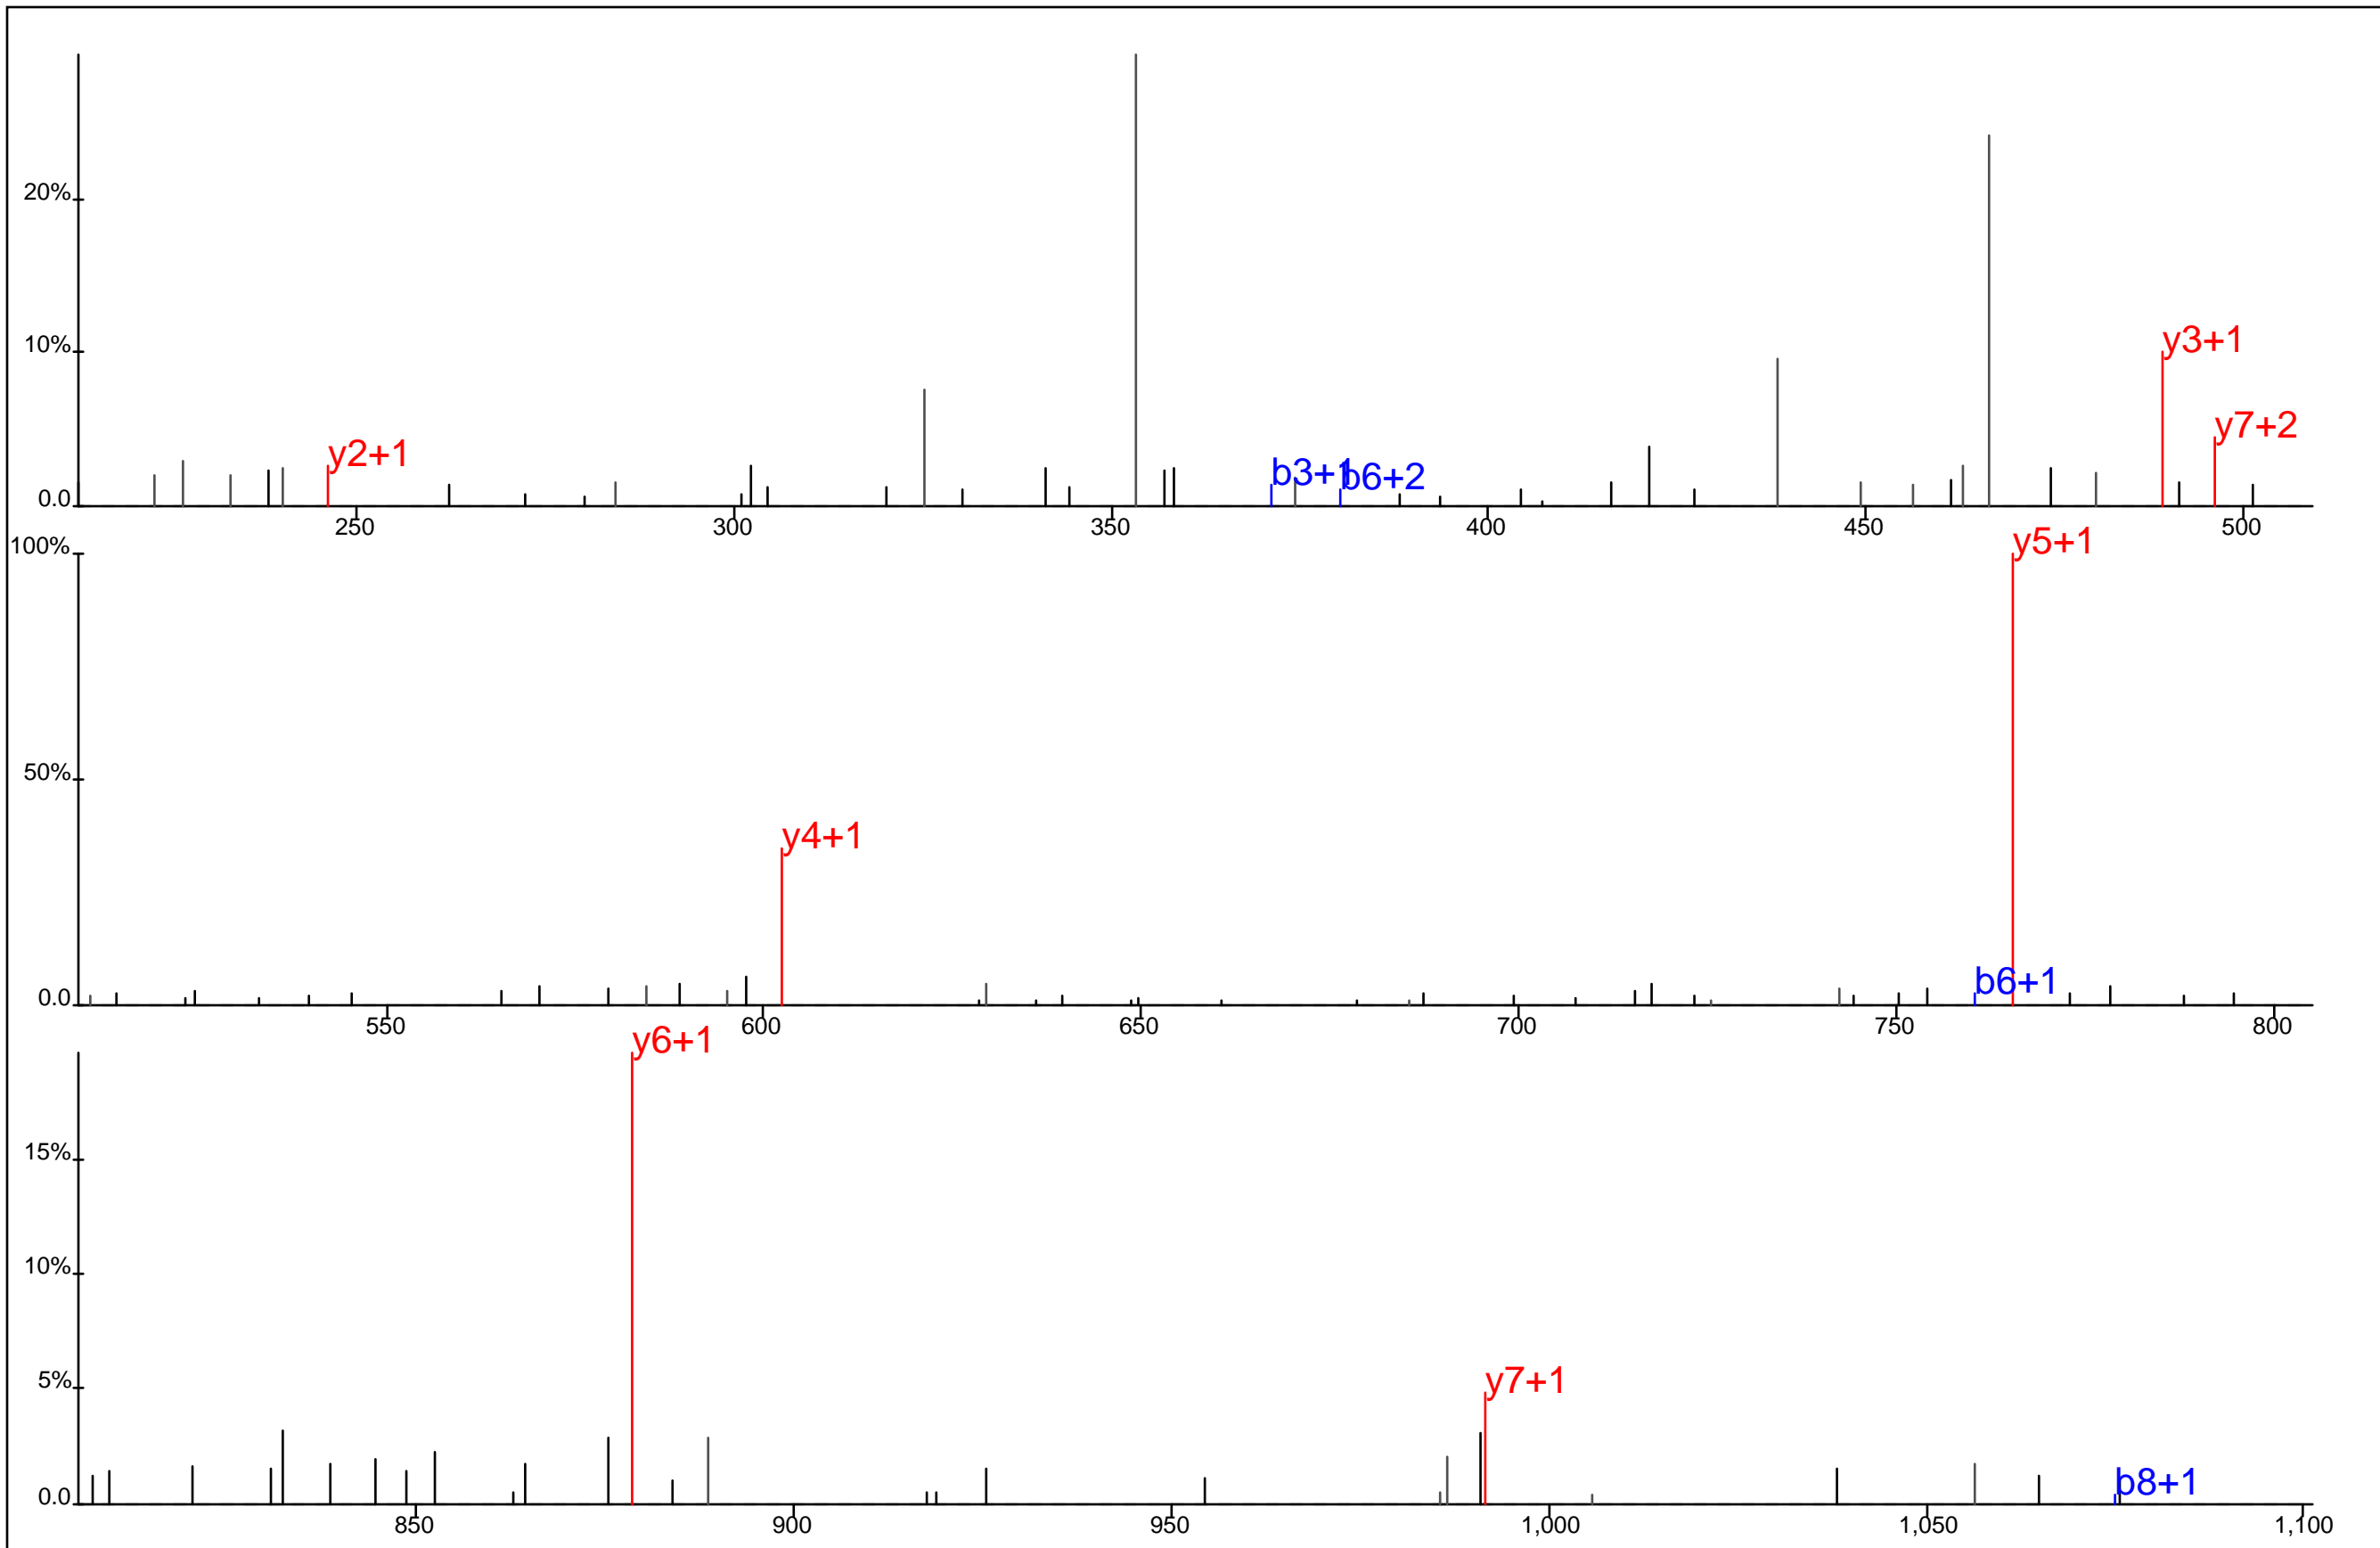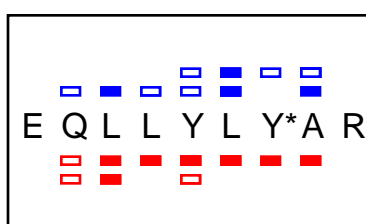

Protein Name: Acyl Coenzyme A binding domain containing 6  
 gi Accession: 0  
 Precursor Mass: 624.8033+2  
 Delta Mass: 2.369 ppm  
 XCorr: 20.75

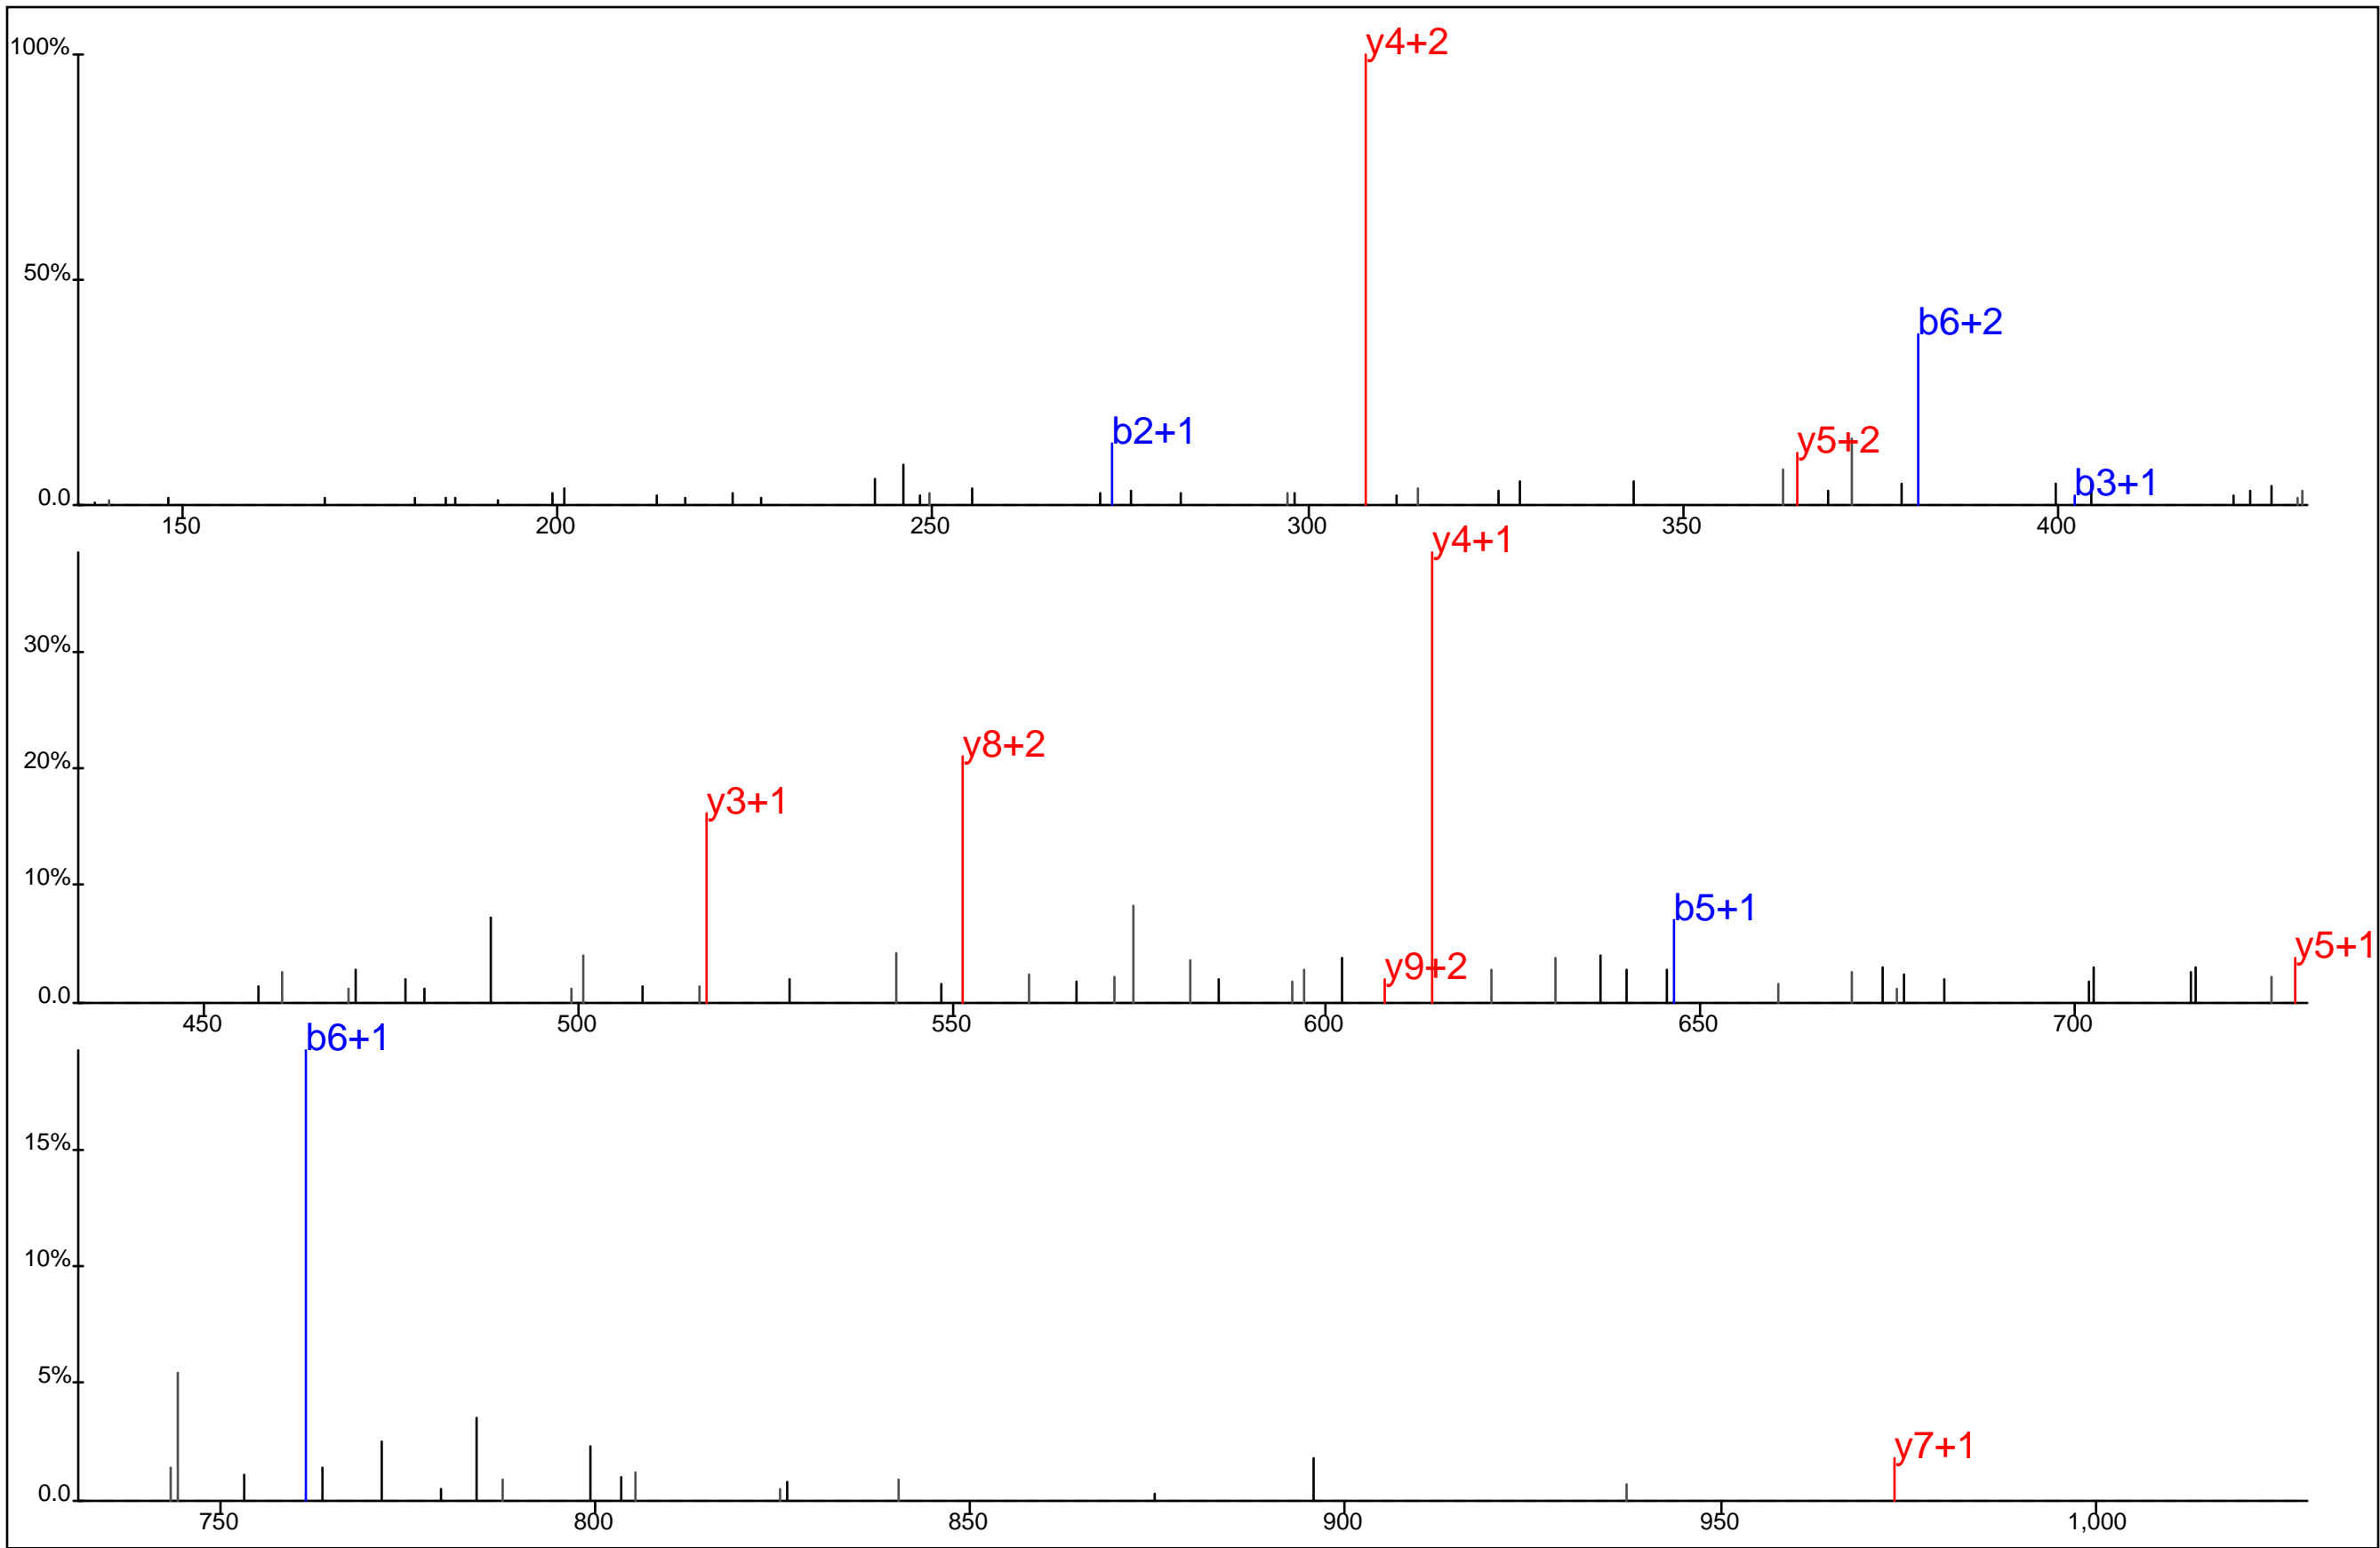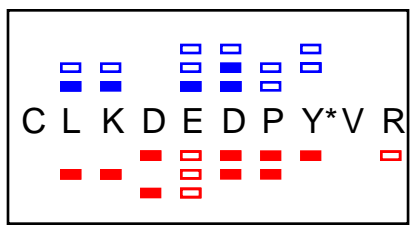

Protein Name: Adaptin, beta 1  
 gi Accession: 0  
 Precursor Mass: 458.8637+3  
 Delta Mass: 0.473 ppm  
 XCorr: 26.78



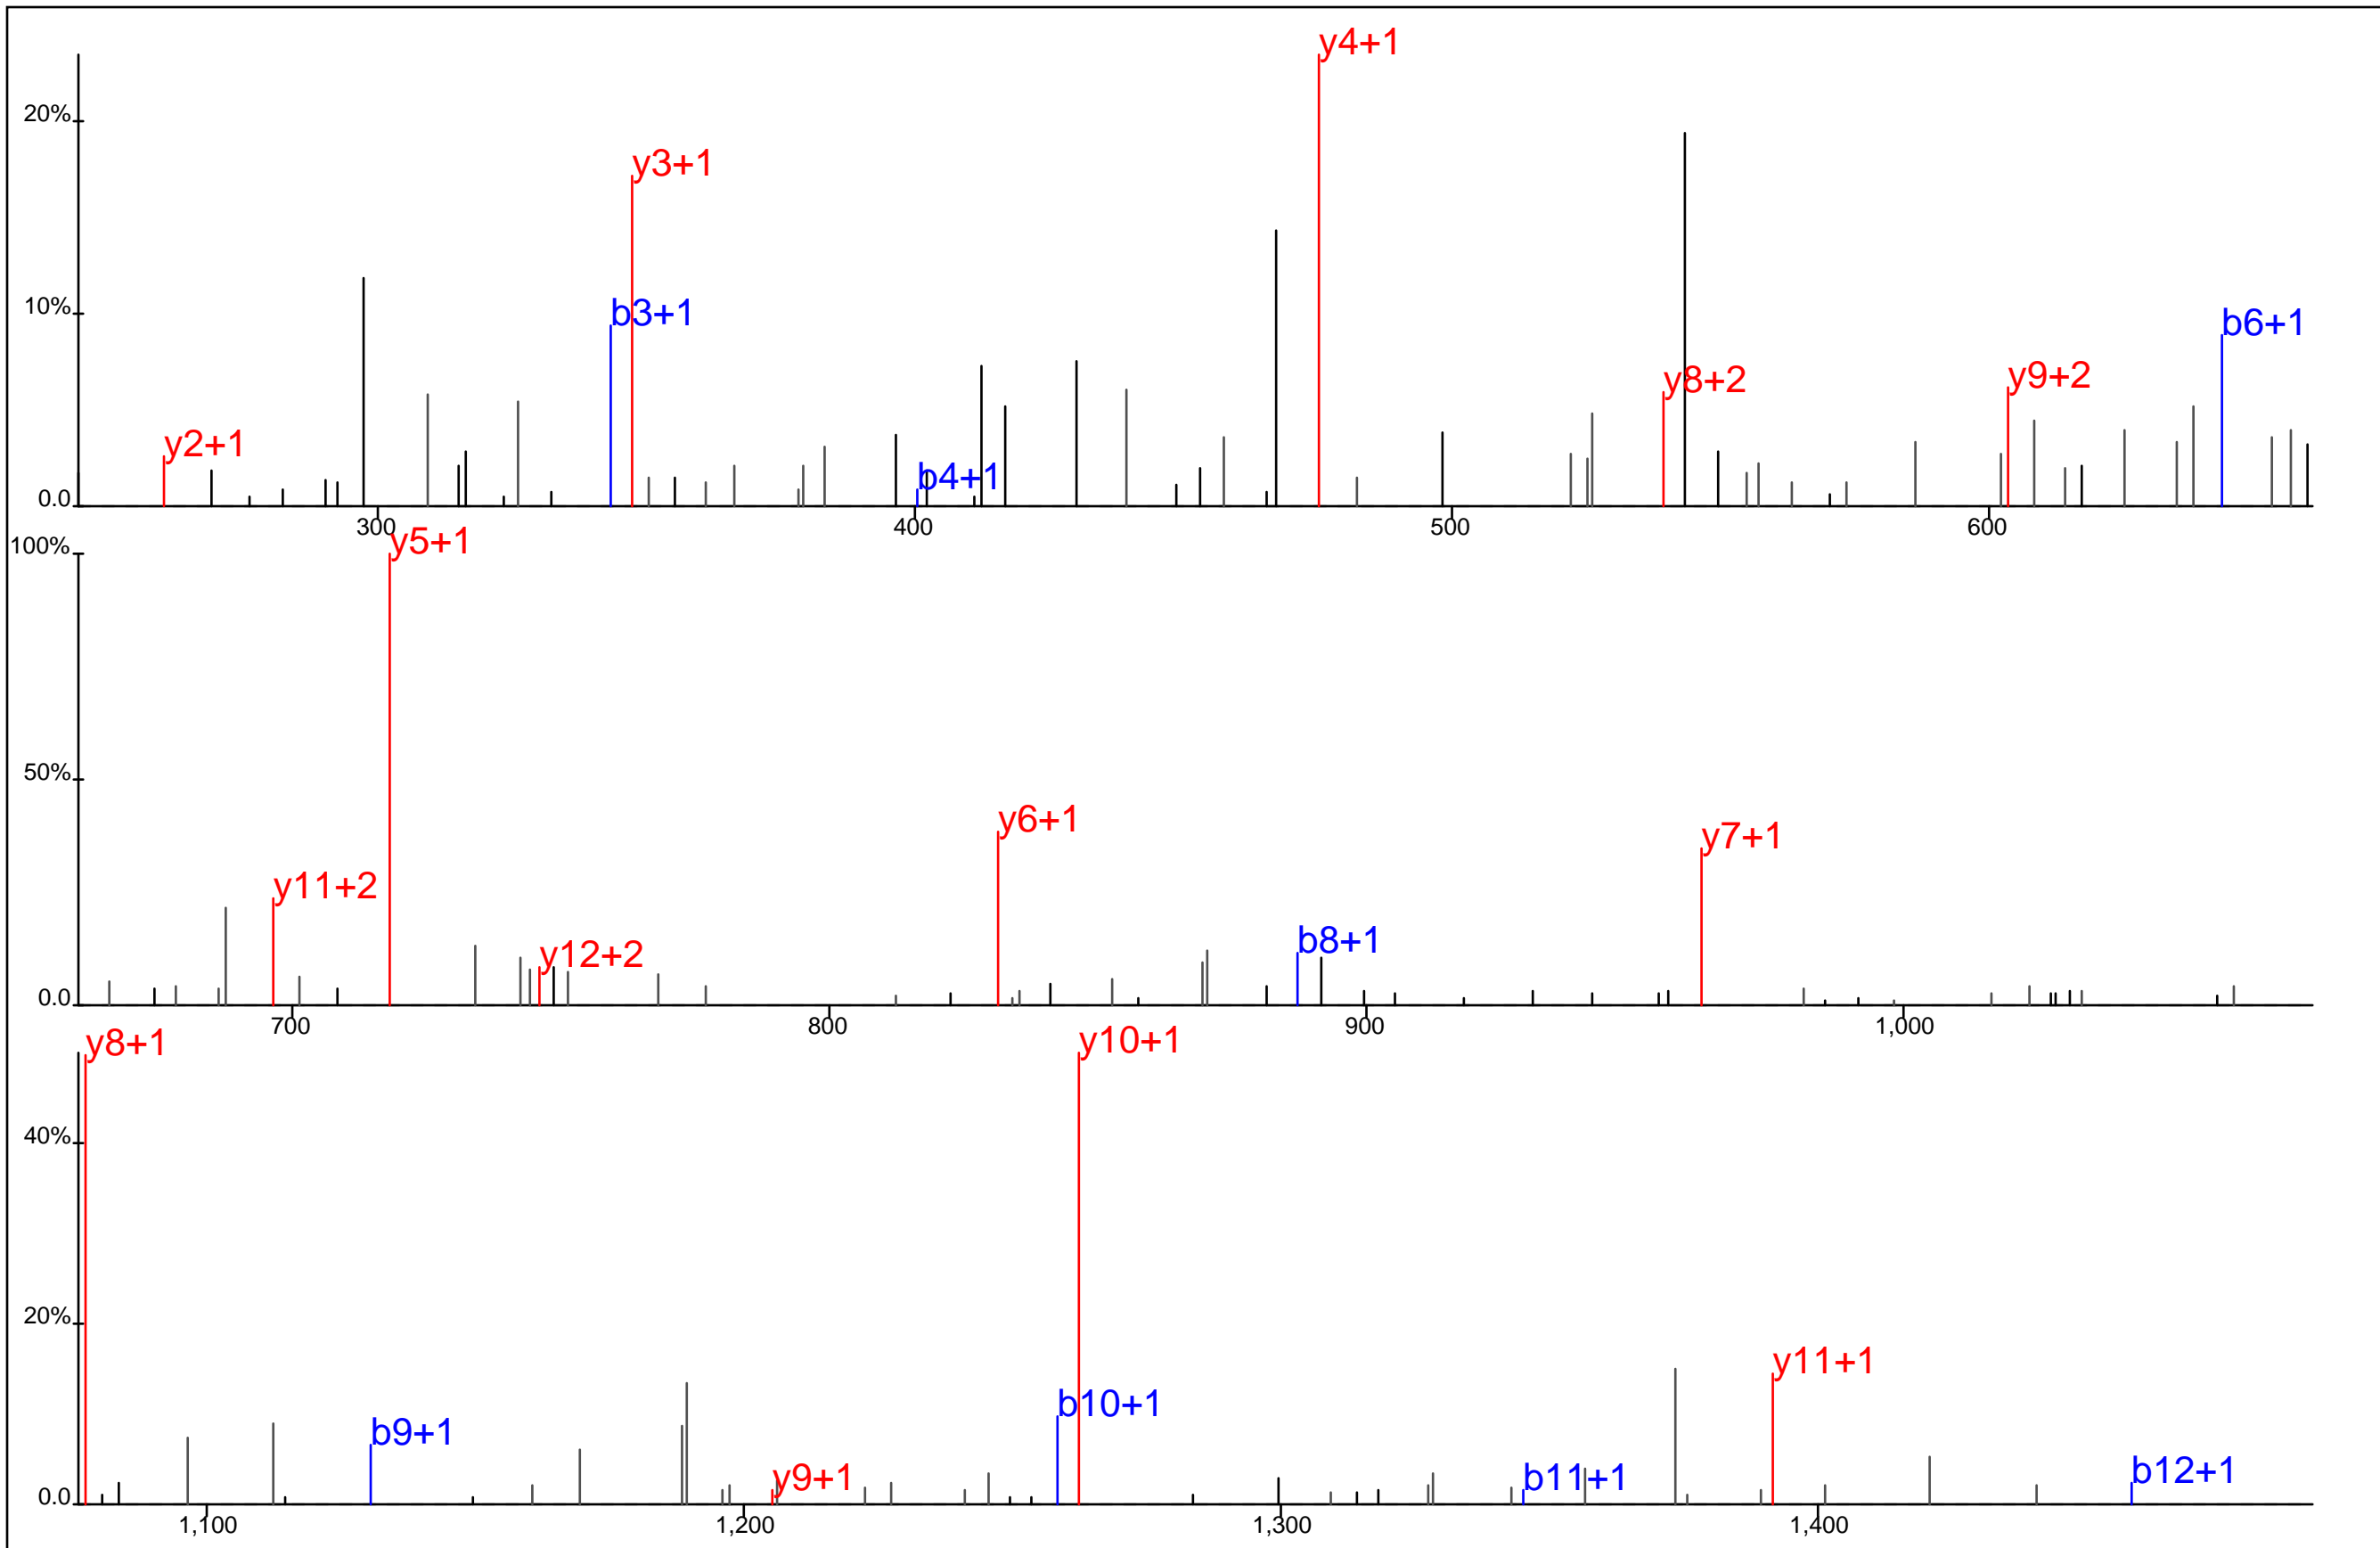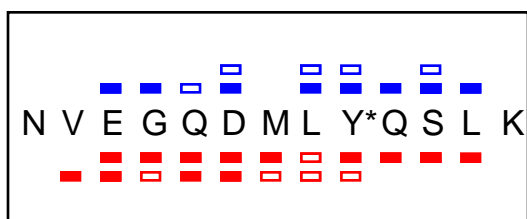

Protein Name: Adaptin, beta 1  
 gi Accession: 0  
 Precursor Mass: 802.8564+2  
 Delta Mass: 1.896 ppm  
 XCorr: 61.36

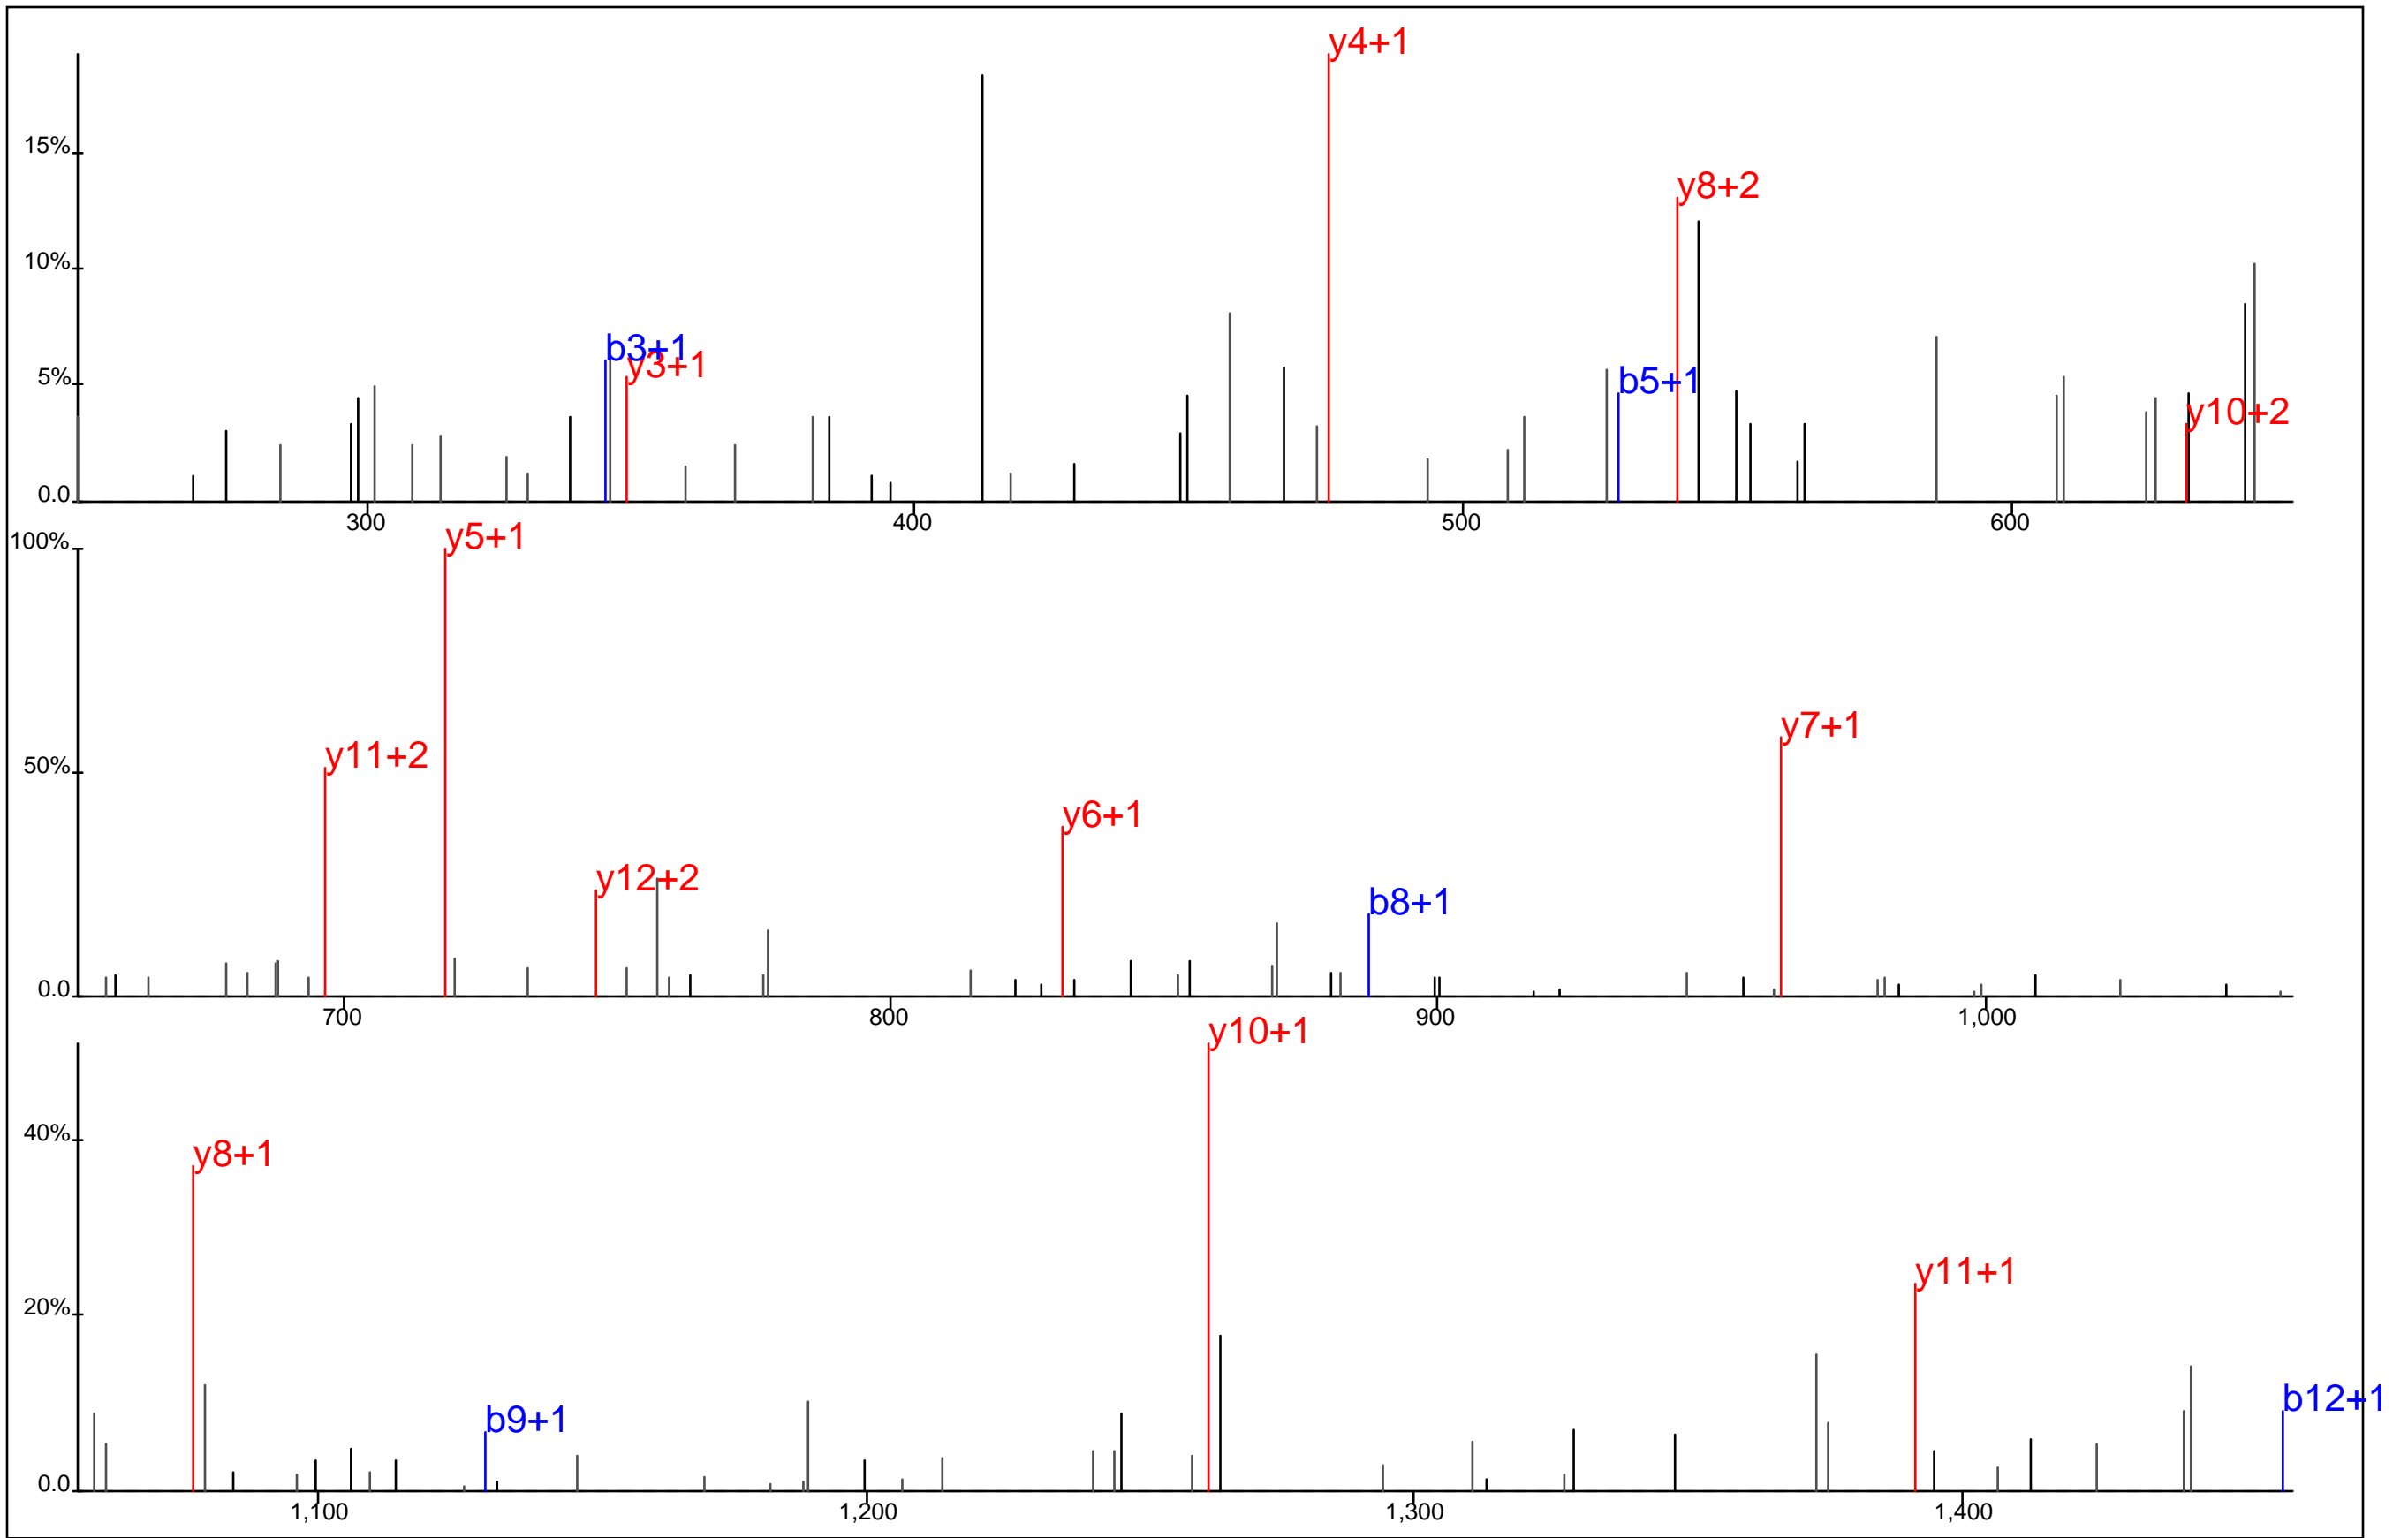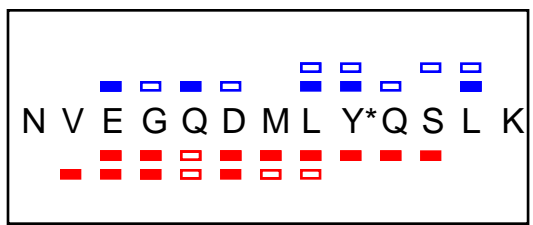

Protein Name: Adaptin, beta 1  
 gi Accession: 0  
 Precursor Mass: 802.8563+2  
 Delta Mass: 1.668 ppm  
 XCorr: 52.01

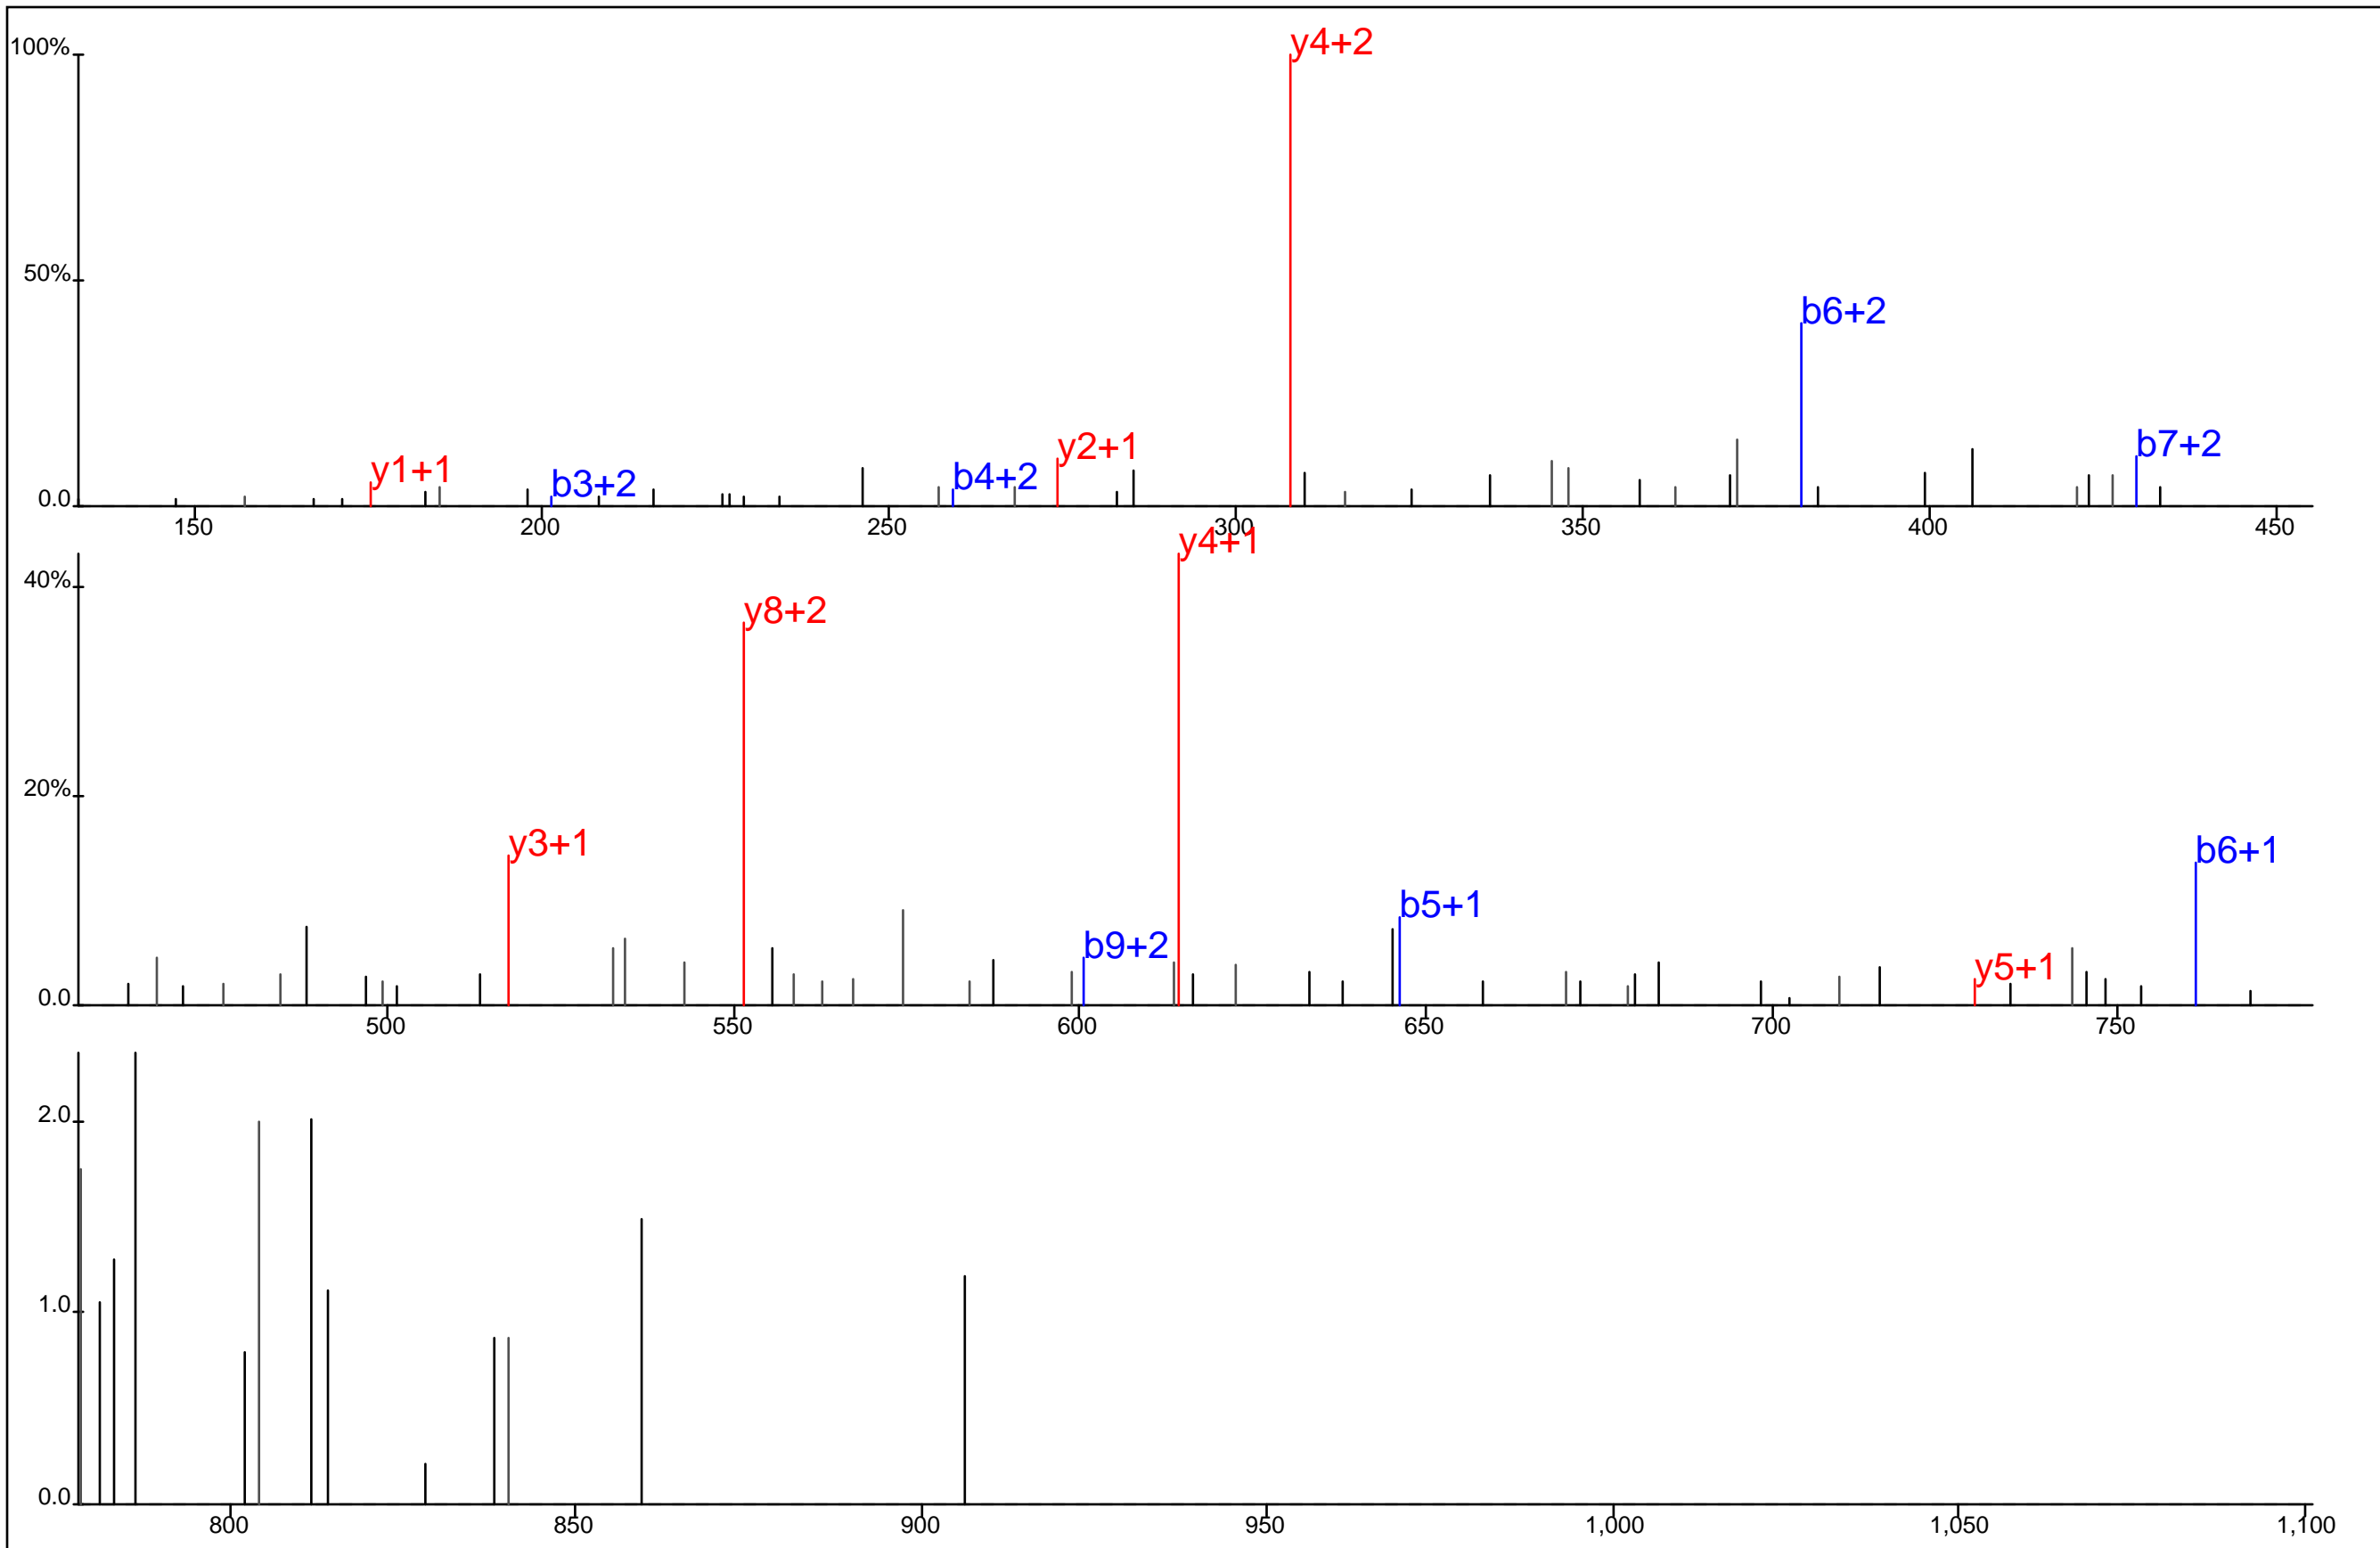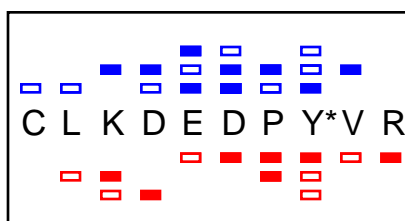

Protein Name: Adaptin, beta 1  
 gi Accession: 0  
 Precursor Mass: 458.8631+3  
 Delta Mass: 0.791 ppm  
 XCorr: 37.95



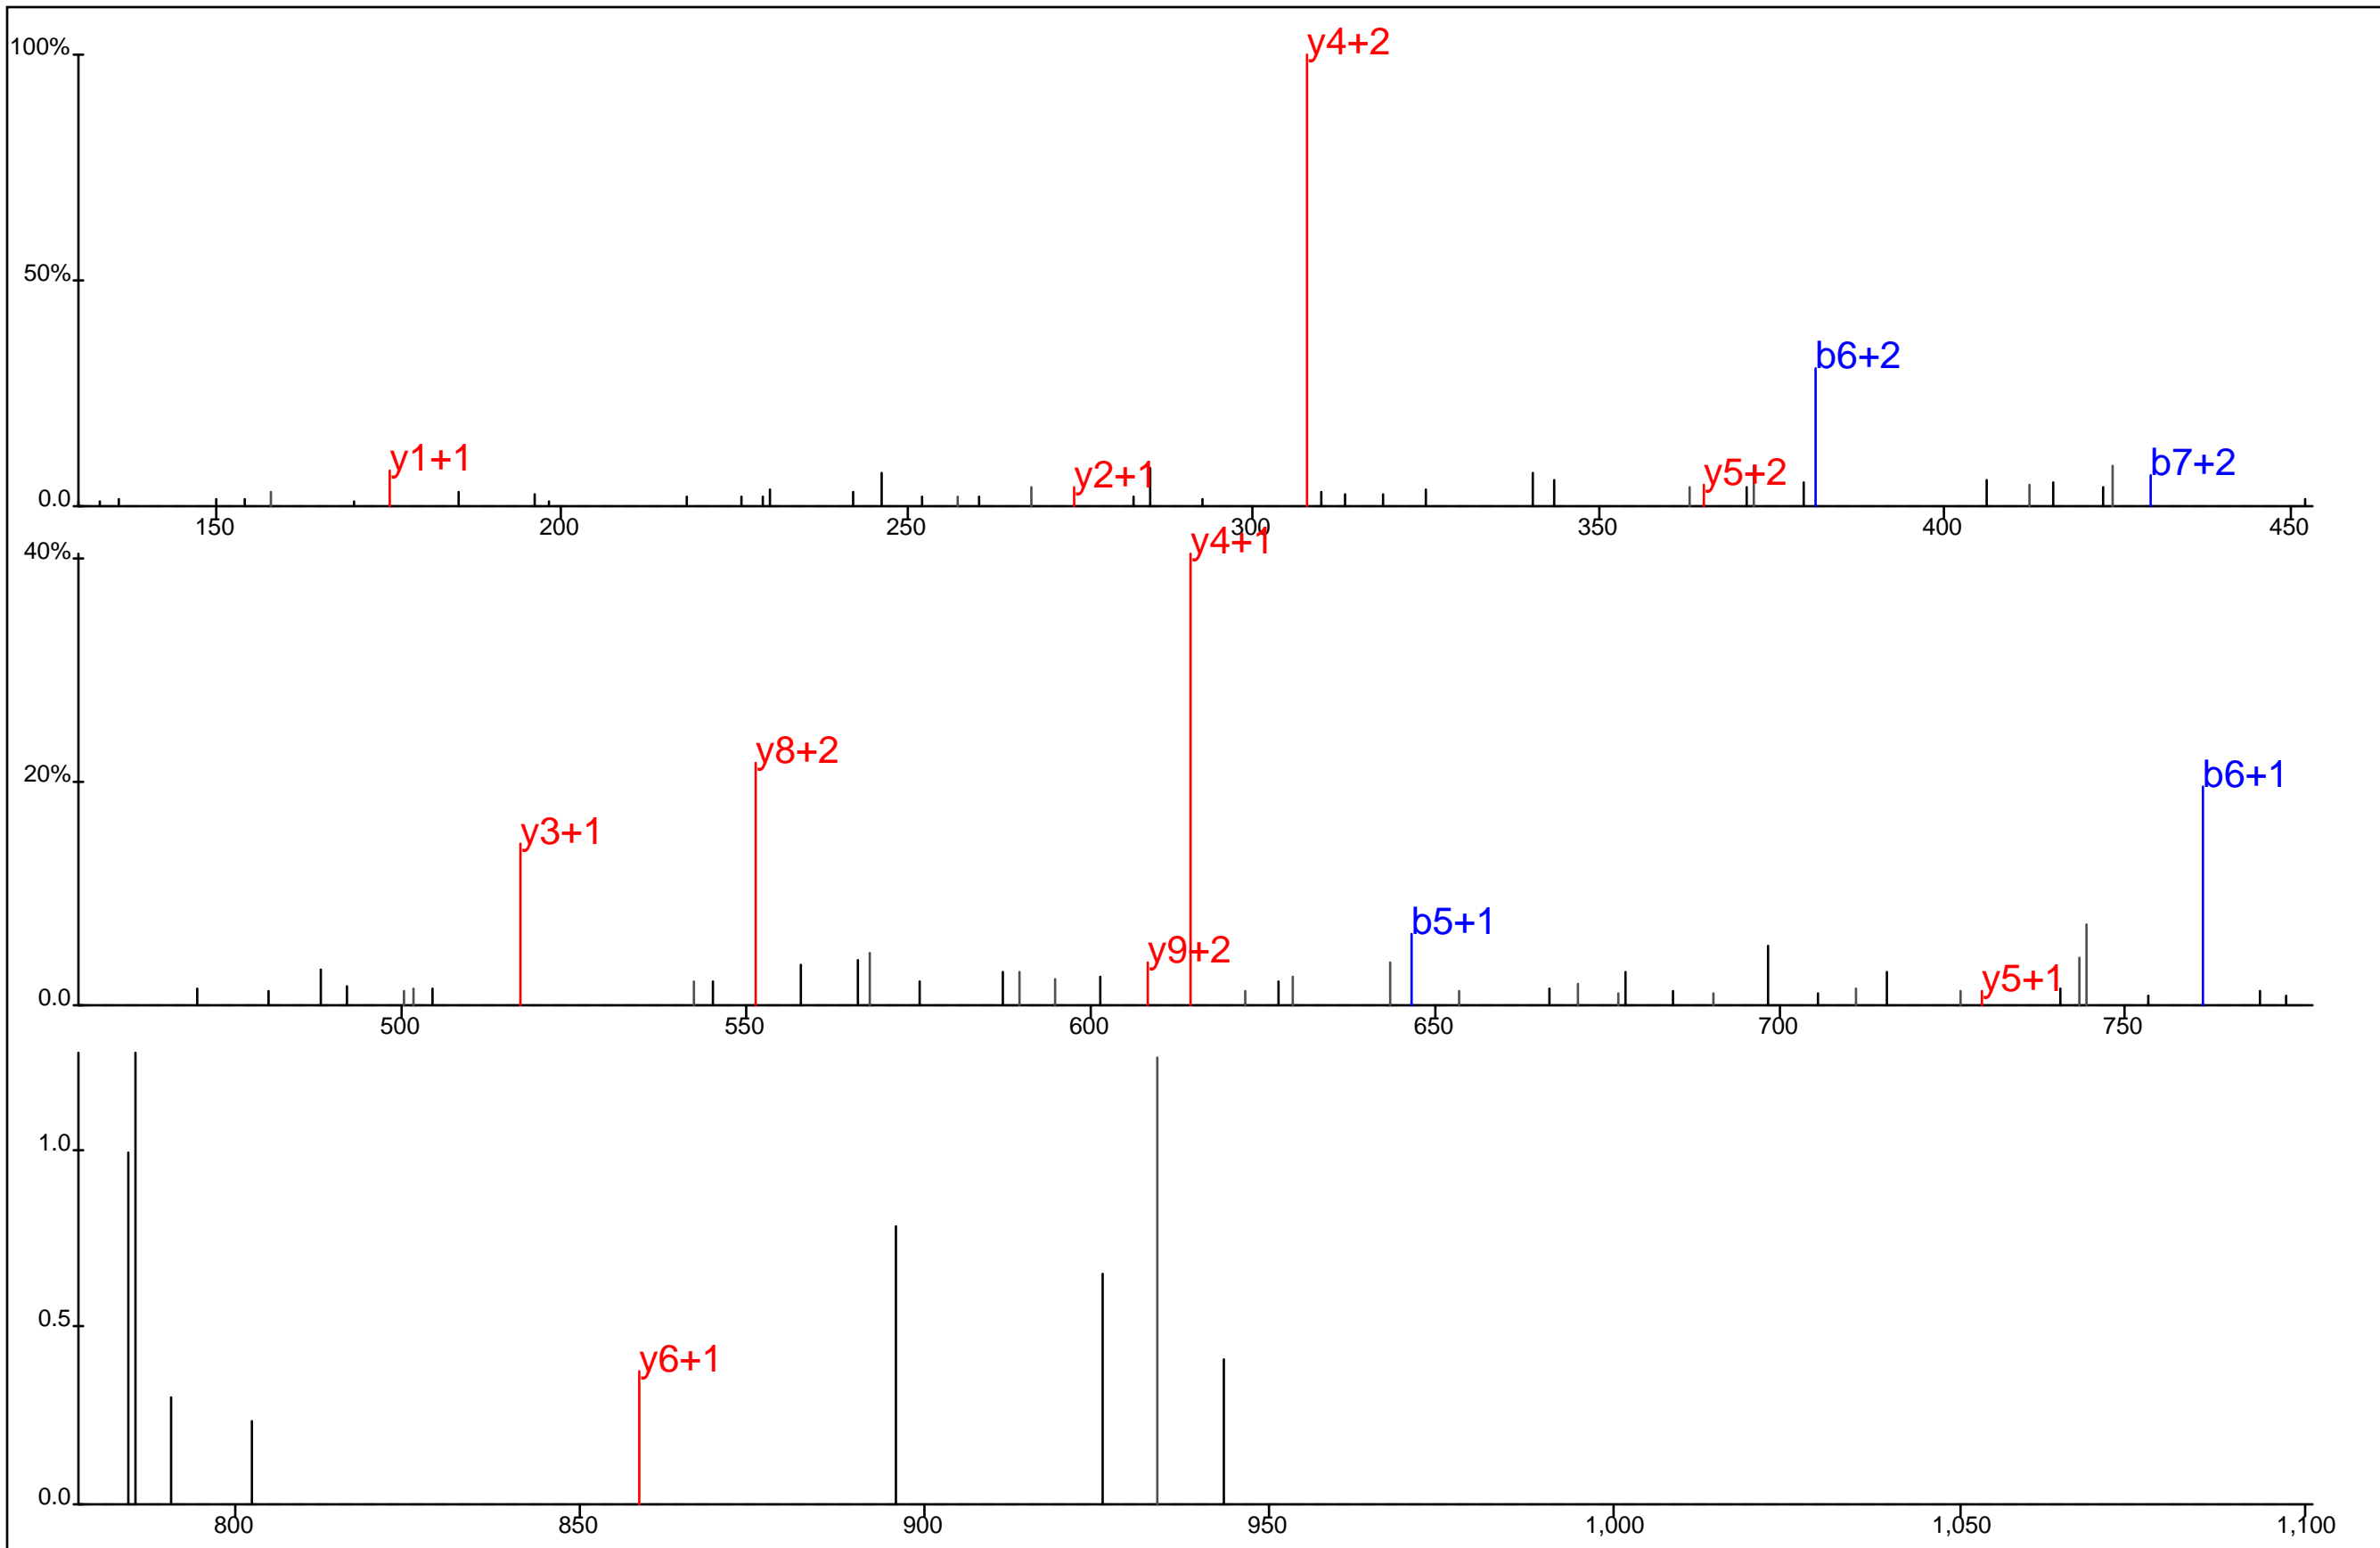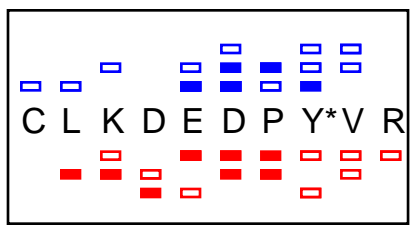

Protein Name: Adaptin, beta 1  
 gi Accession: 0  
 Precursor Mass: 458.8640+3  
 Delta Mass: 1.008 ppm  
 XCorr: 28.37

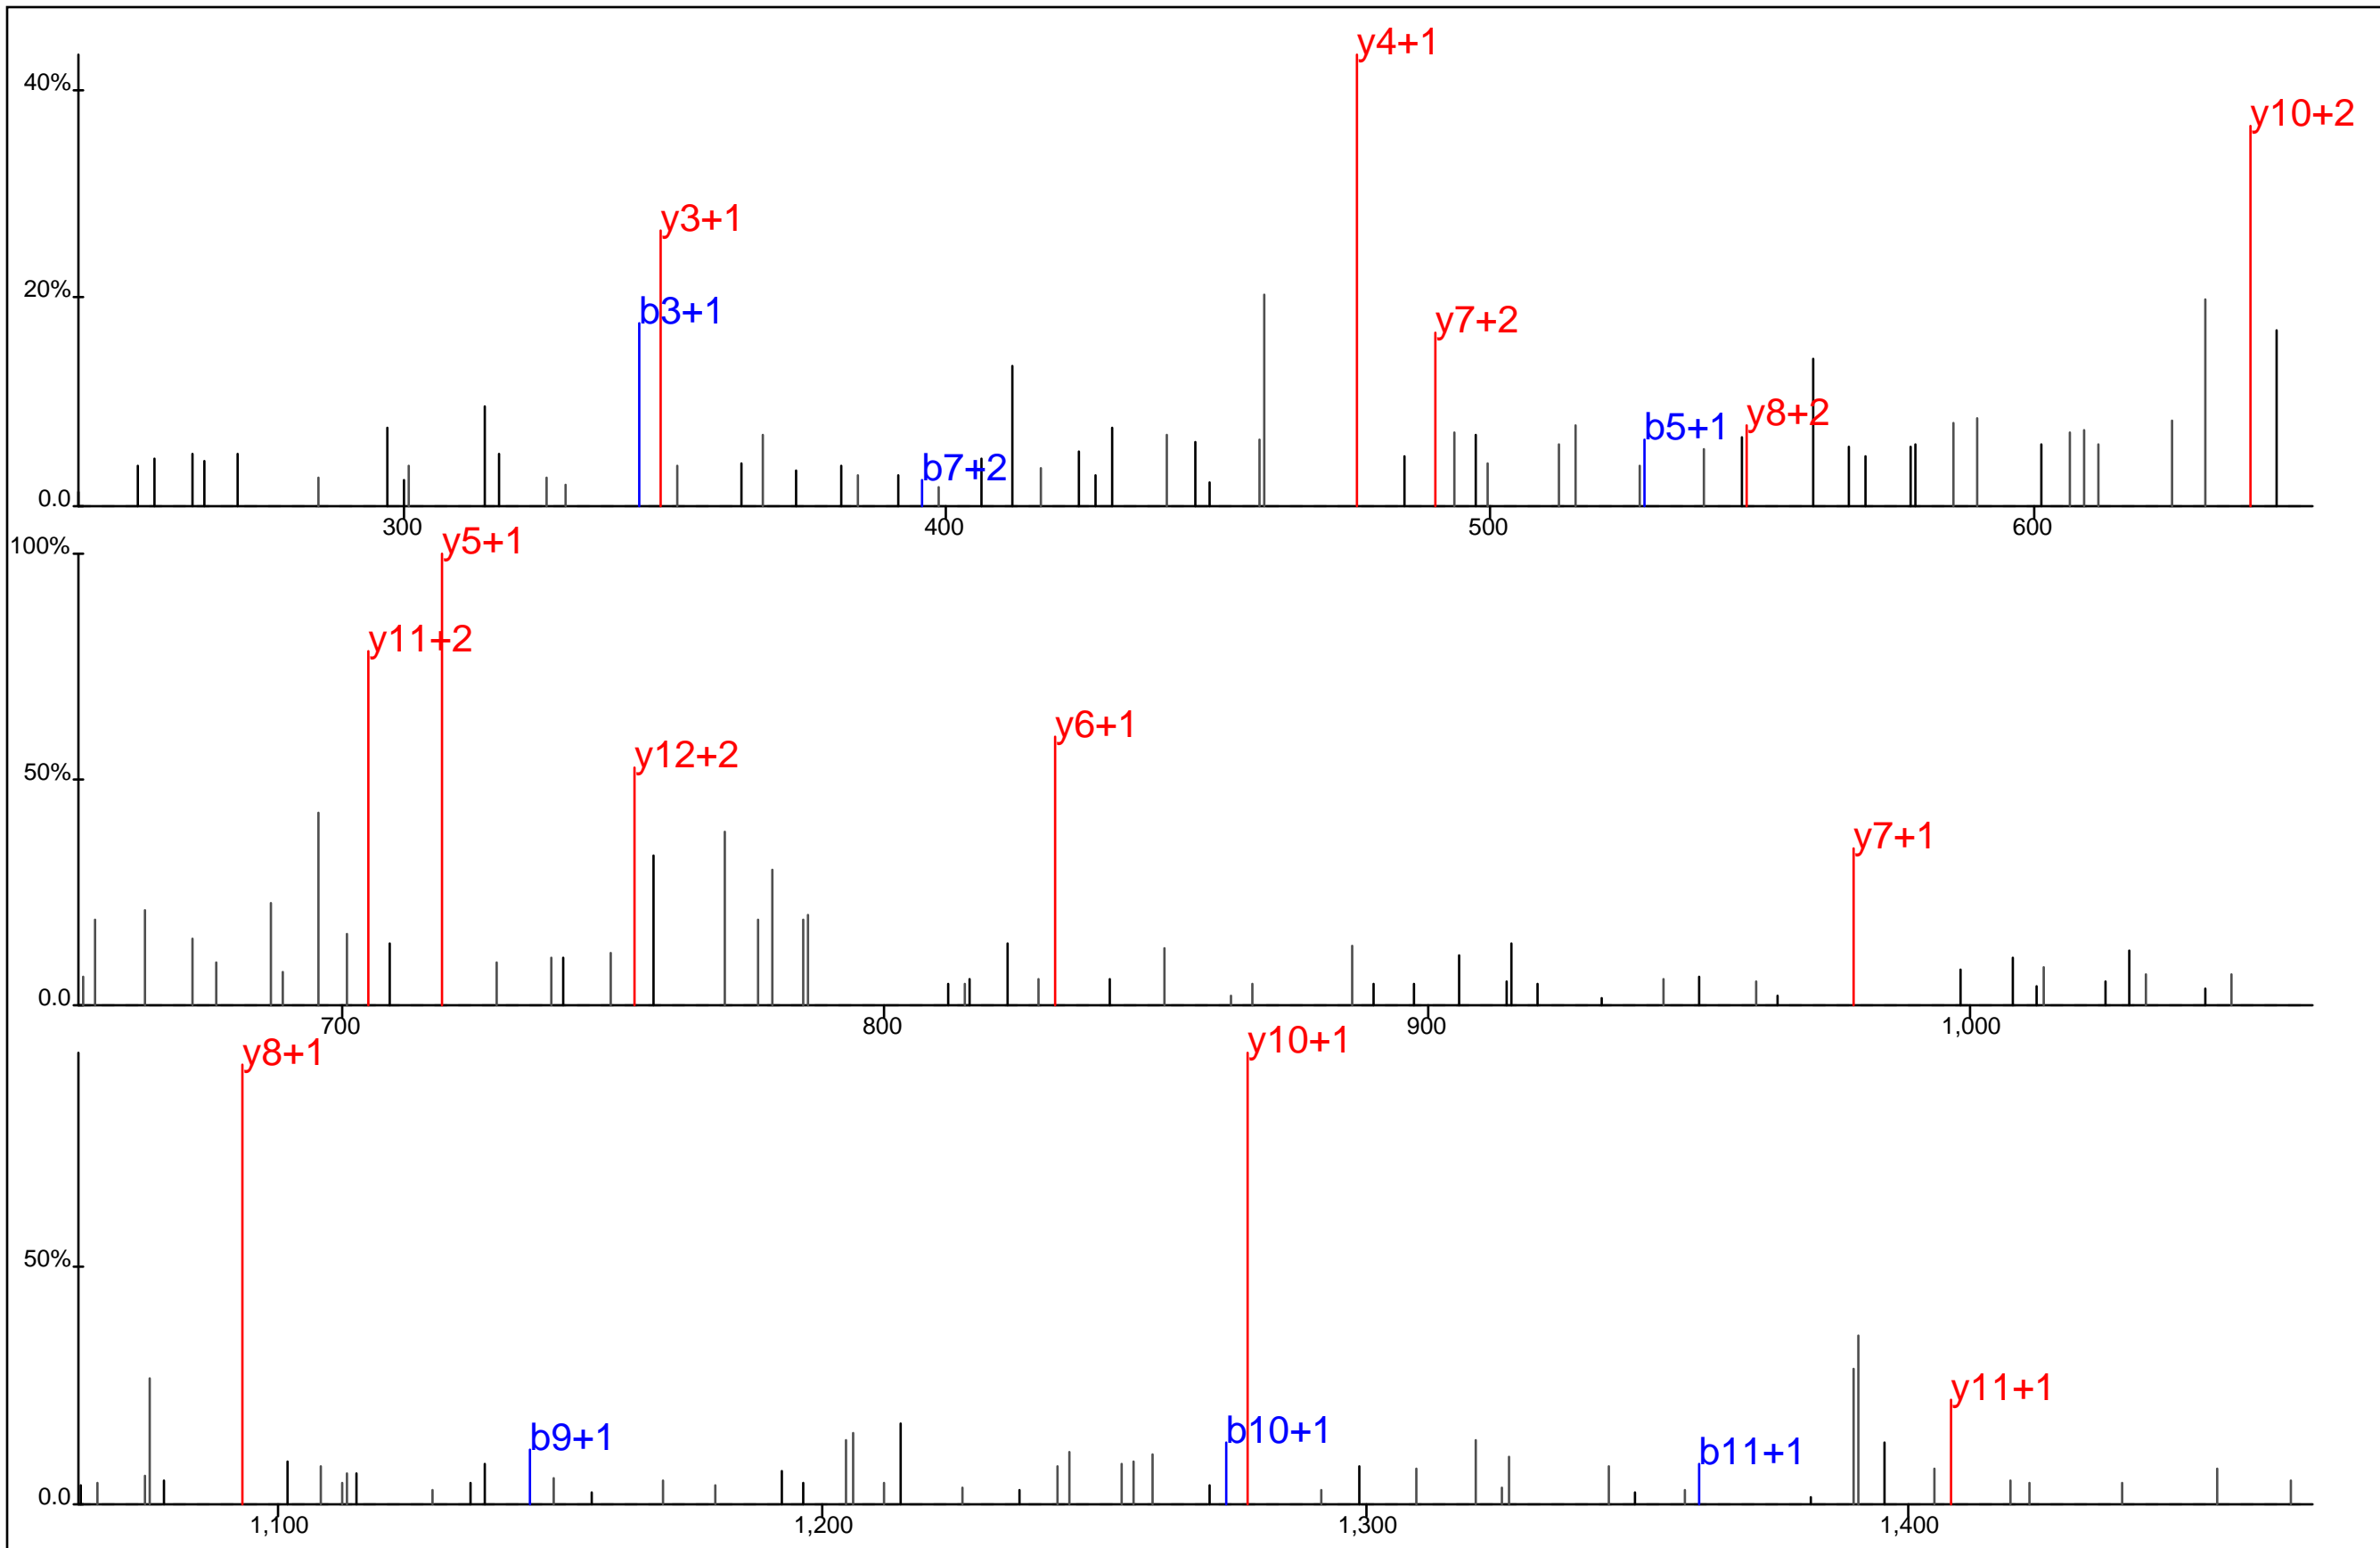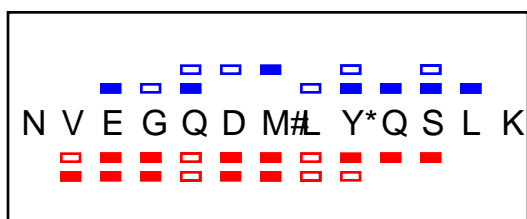

Protein Name: Adaptin, beta 1  
 gi Accession: 0  
 Precursor Mass: 810.8511+2  
 Delta Mass: 1.617 ppm  
 XCorr: 52.09



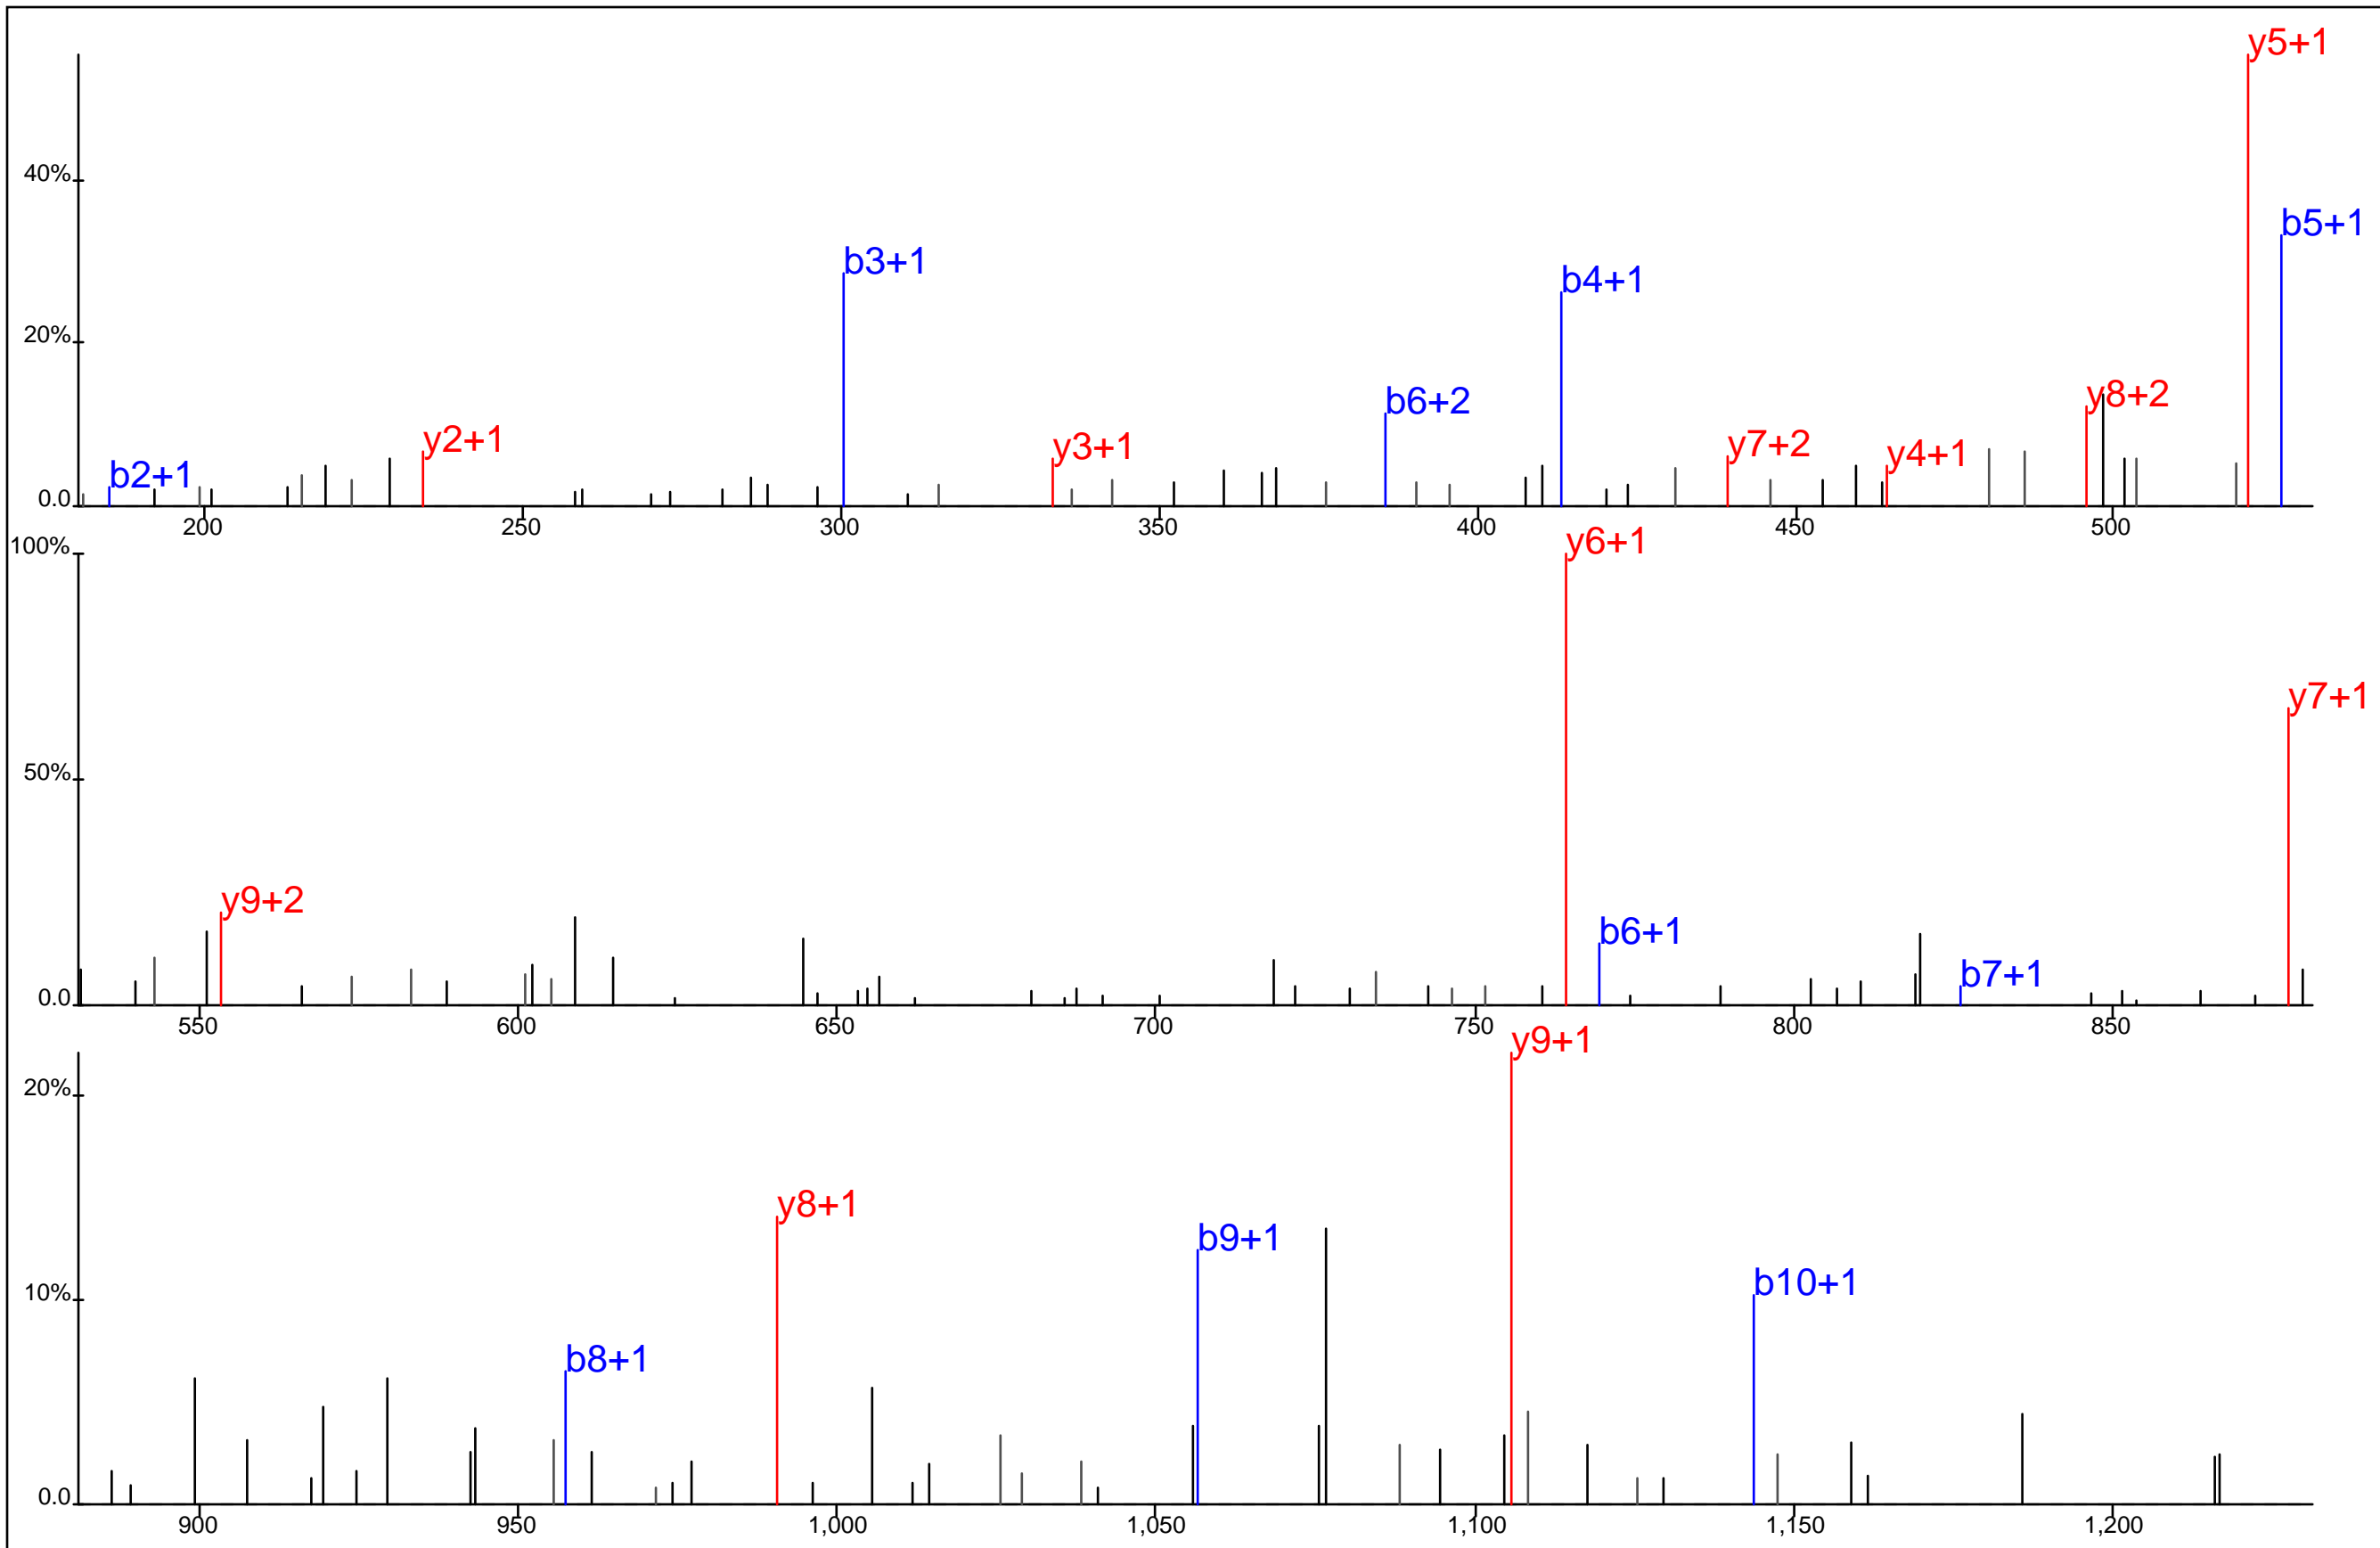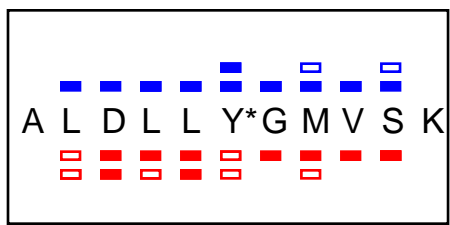

Protein Name: Adaptin, delta  
 gi Accession: 0  
 Precursor Mass: 645.3151+2  
 Delta Mass: 1.379 ppm  
 XCorr: 50.34



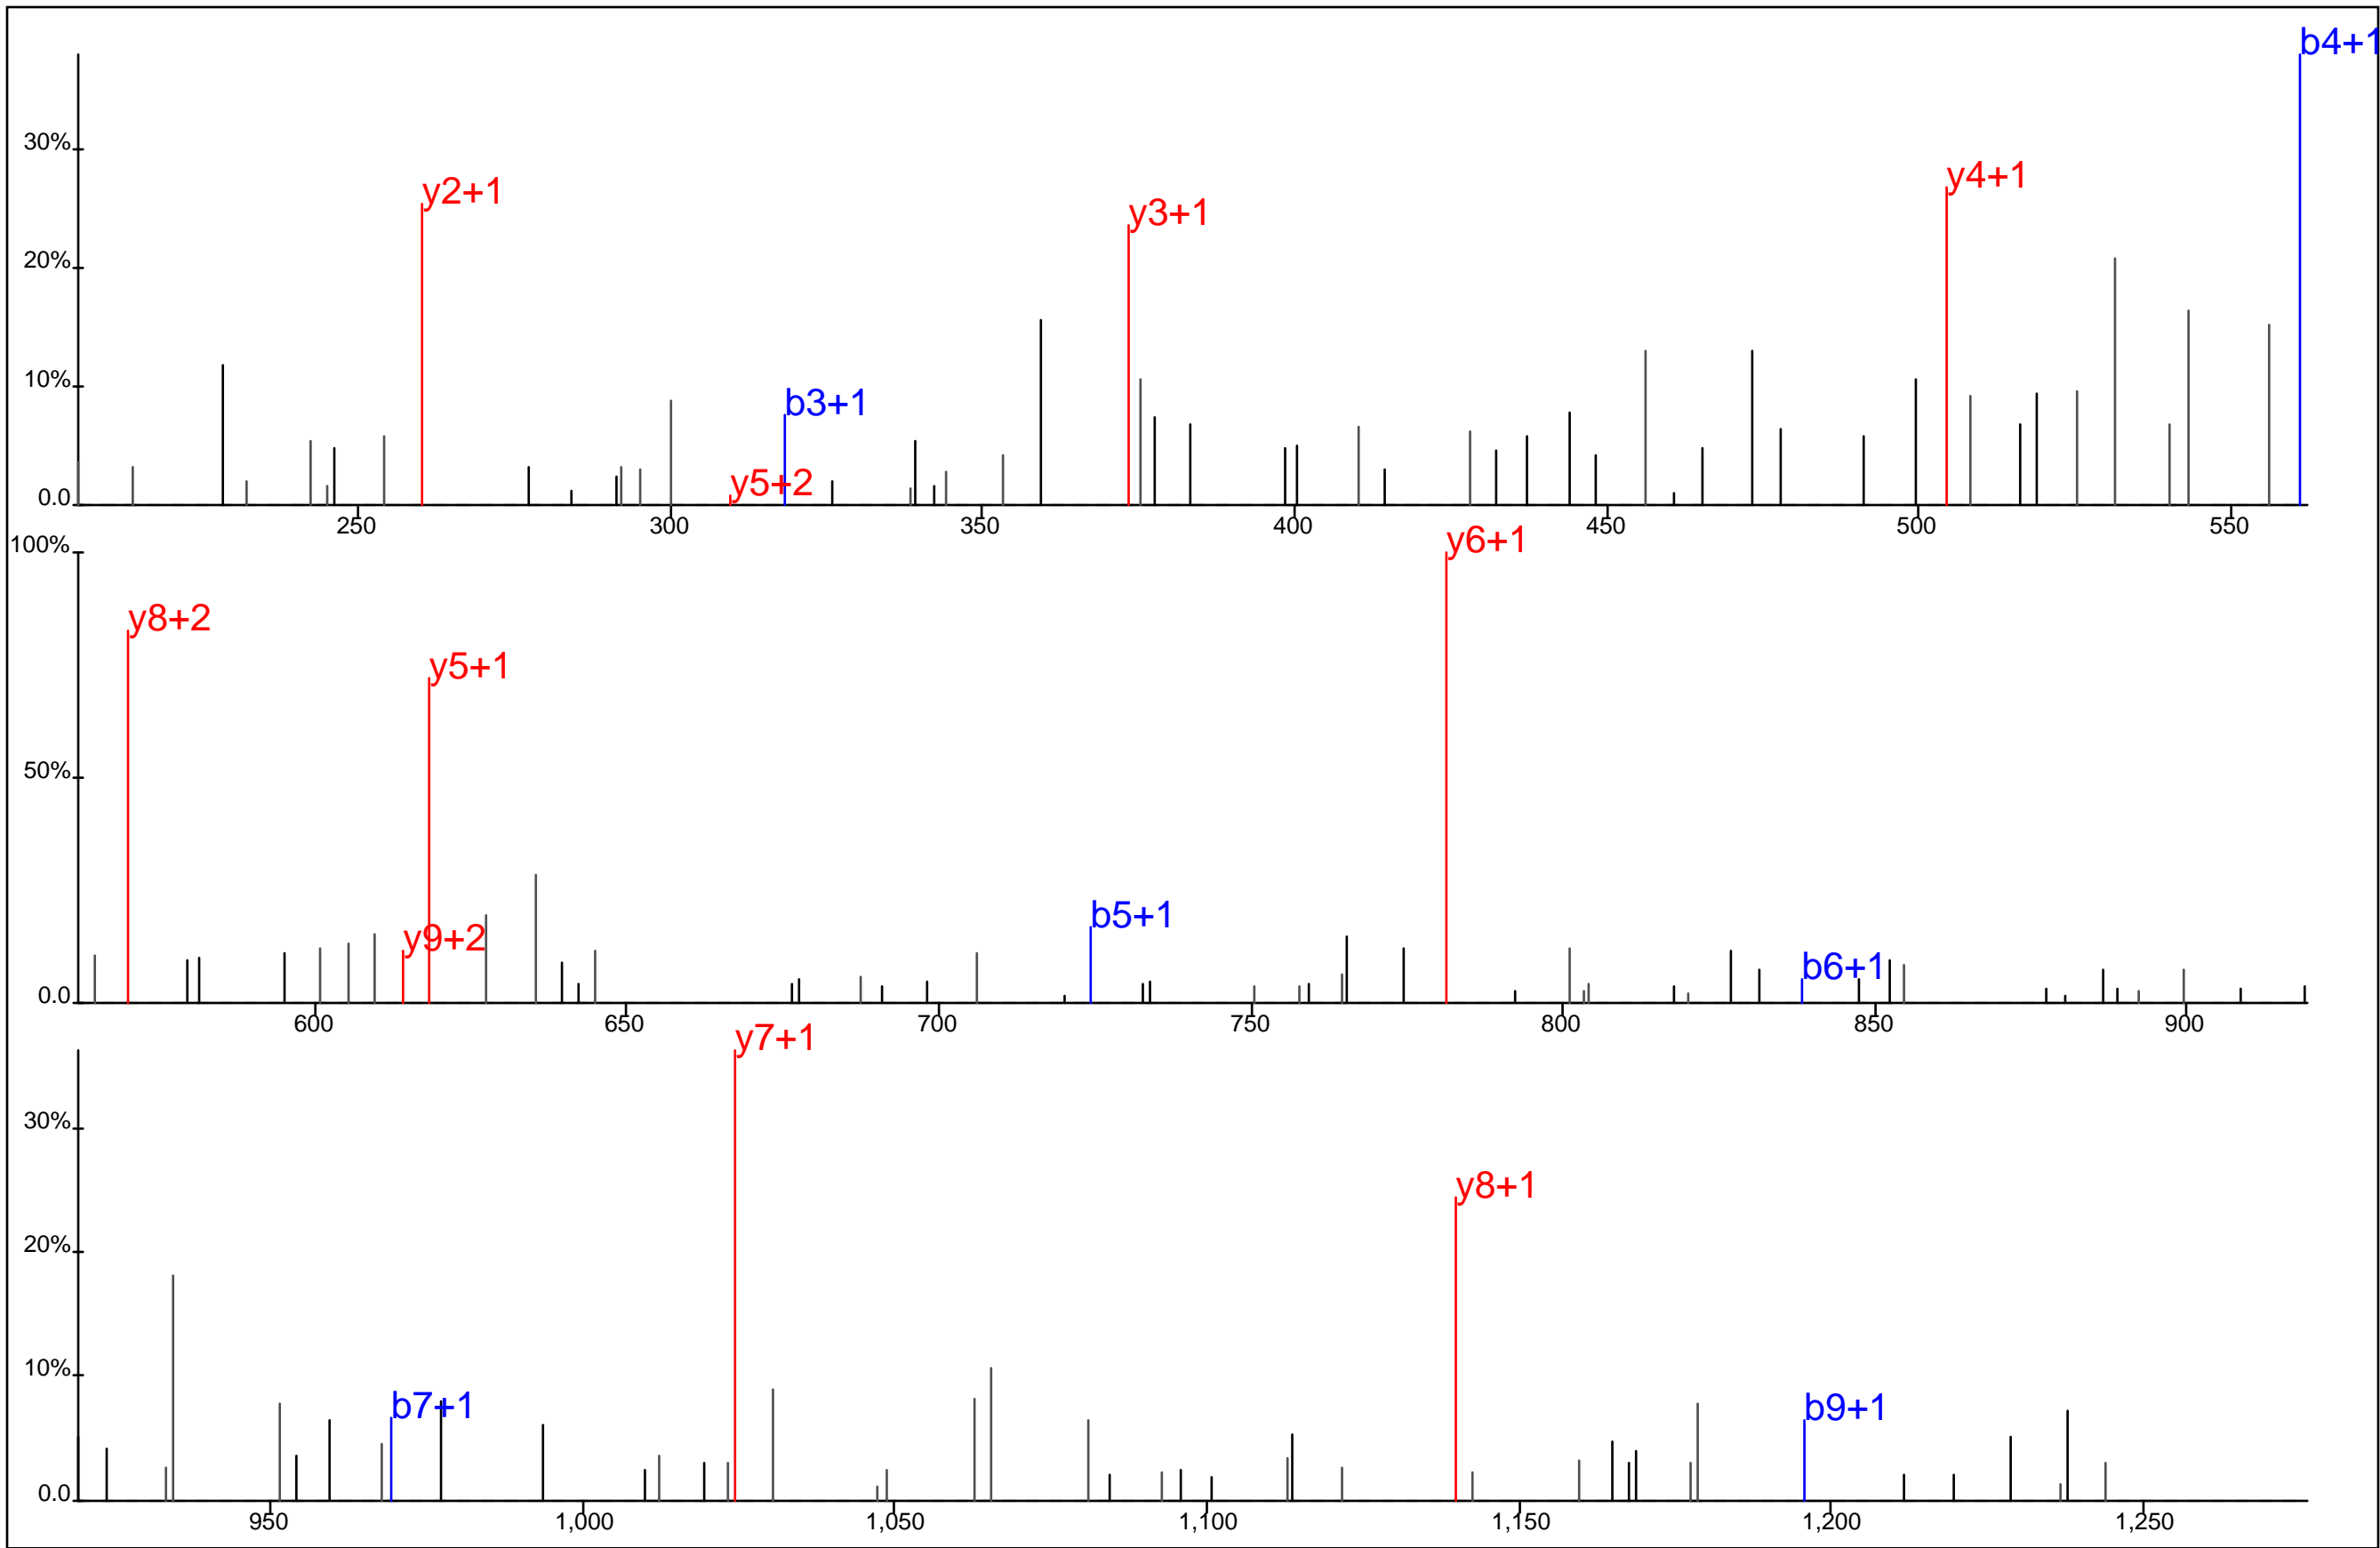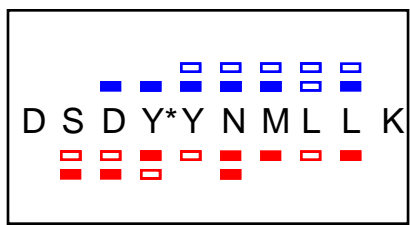

Protein Name: Adaptor related protein complex 2 beta 1 subunit  
 gi Accession: 0  
 Precursor Mass: 671.2754+2  
 Delta Mass: 0.219 ppm  
 XCorr: 51.71

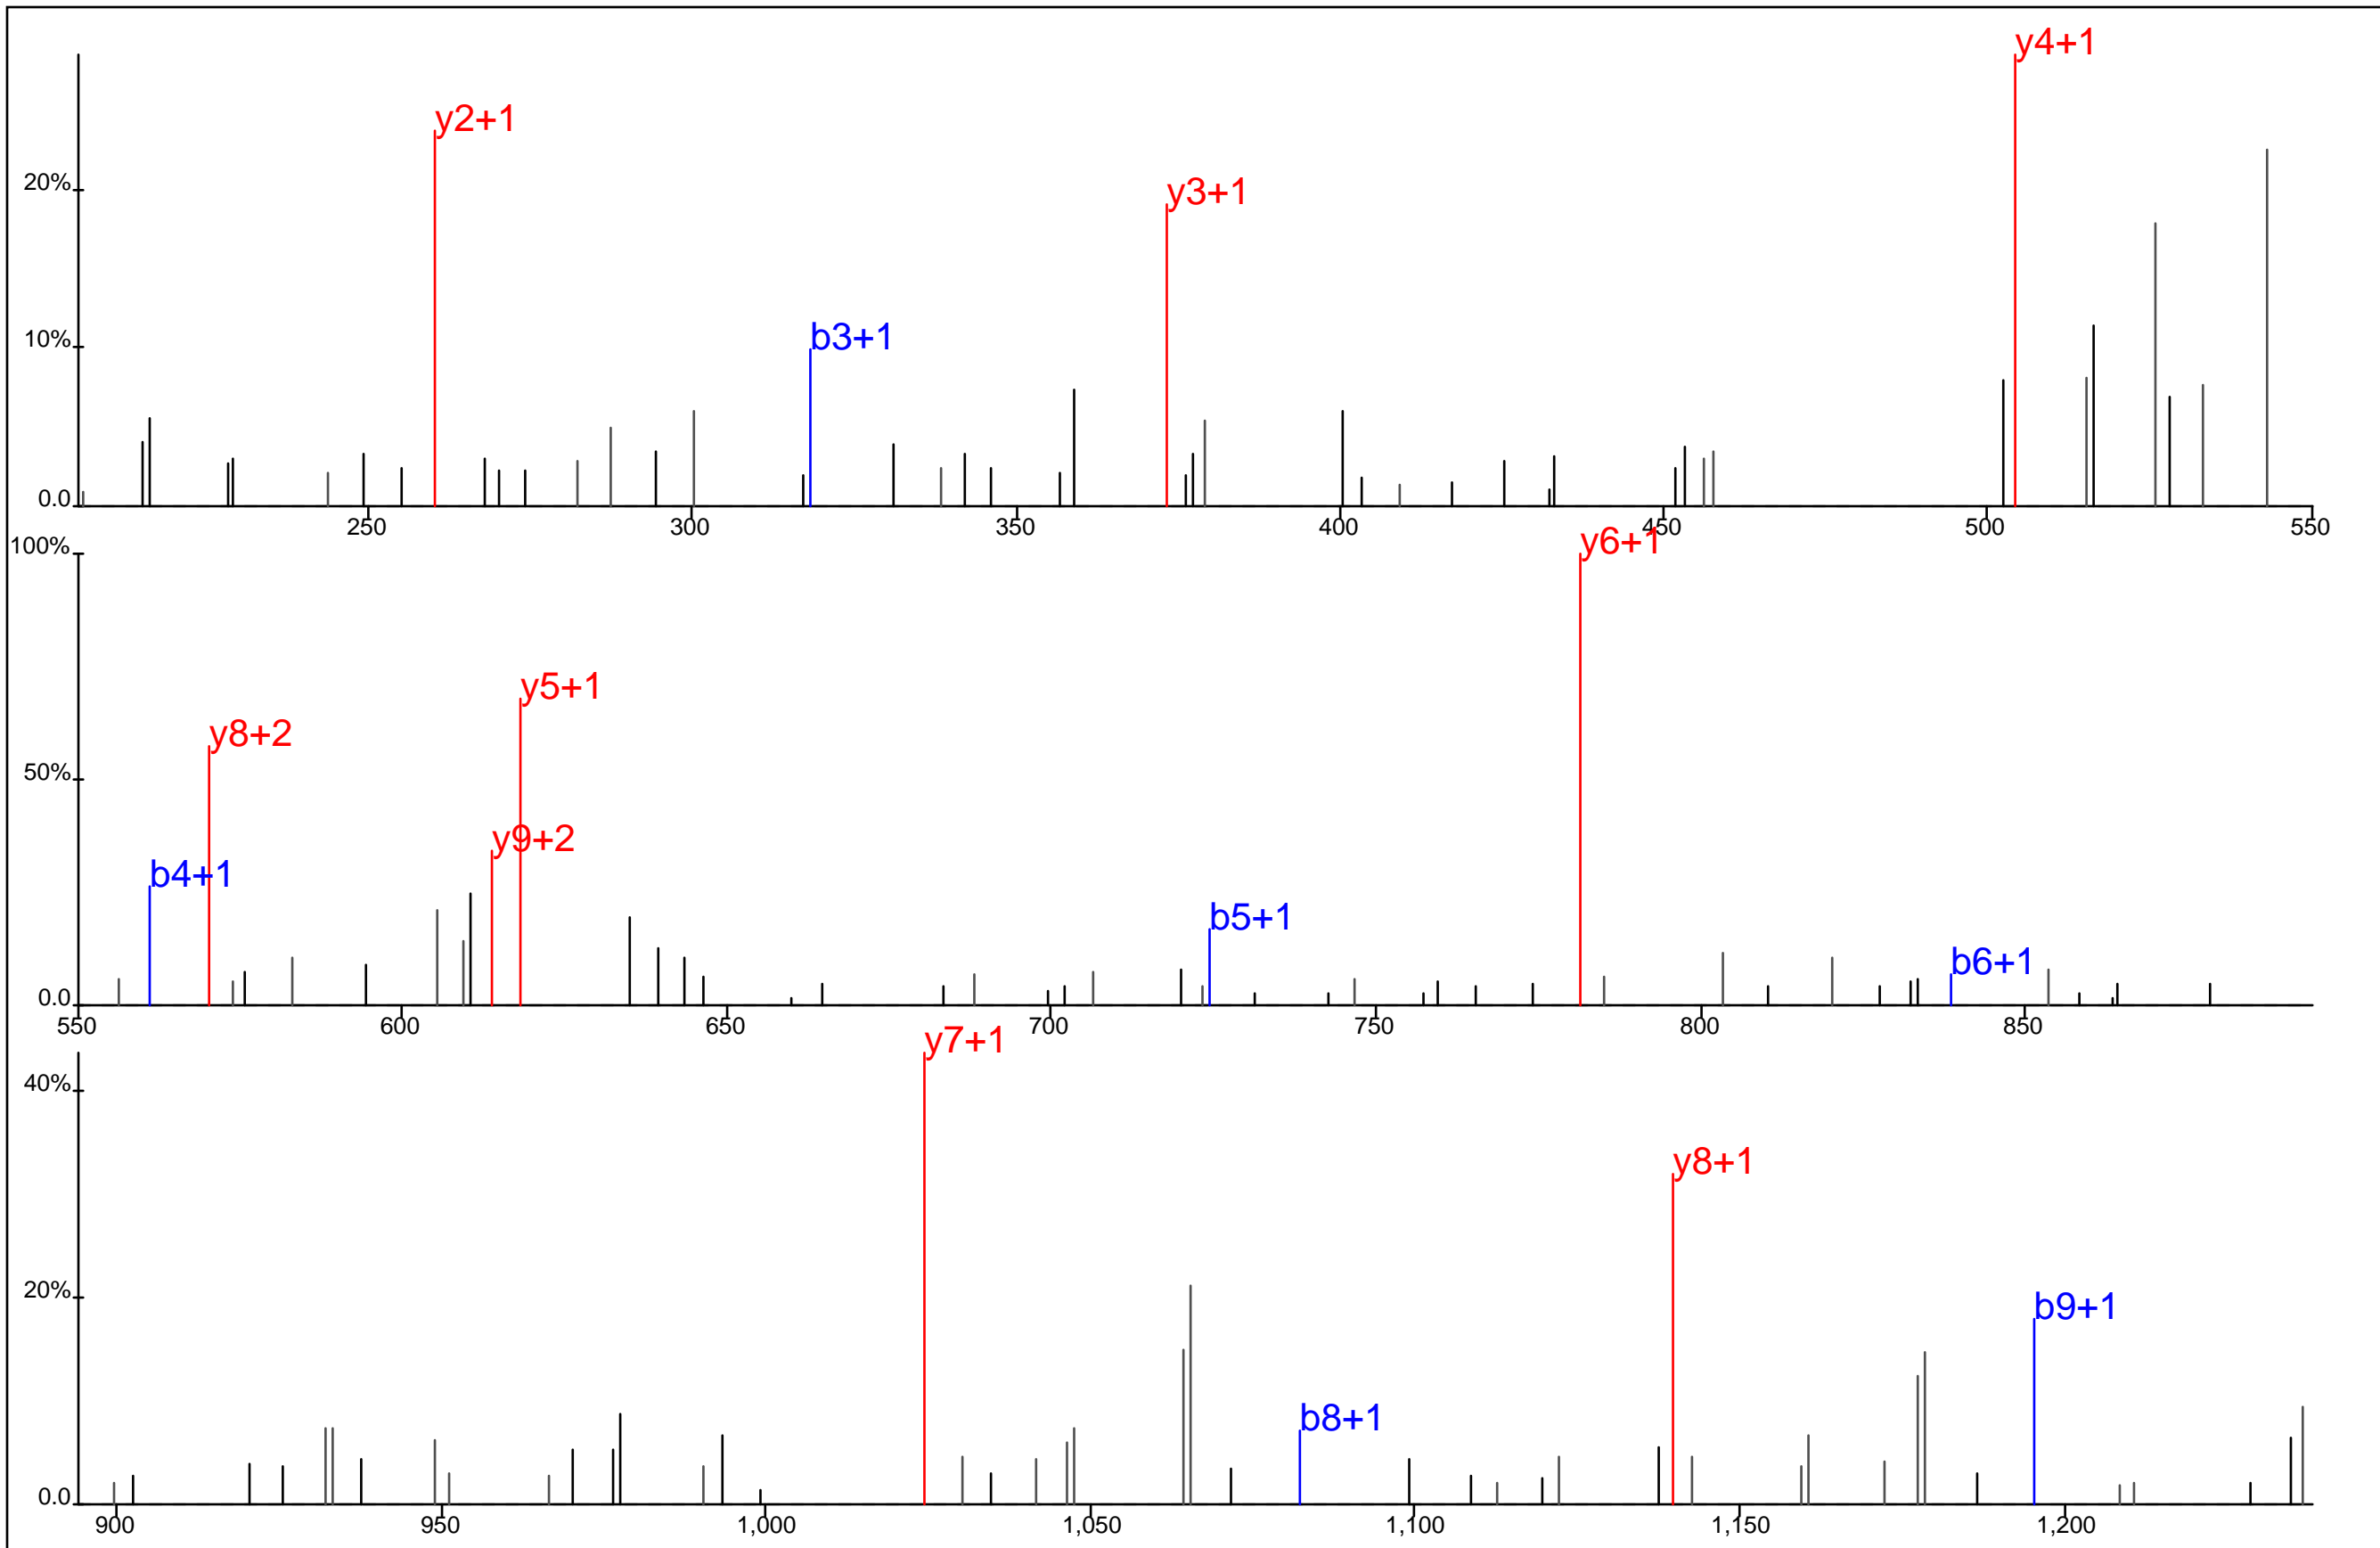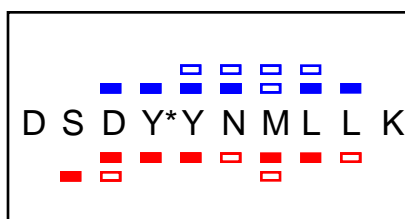

Protein Name: Adaptor related protein complex 2 beta 1 subunit  
 gi Accession: 0  
 Precursor Mass: 671.2753+2  
 Delta Mass: 0.037 ppm  
 XCorr: 51.89

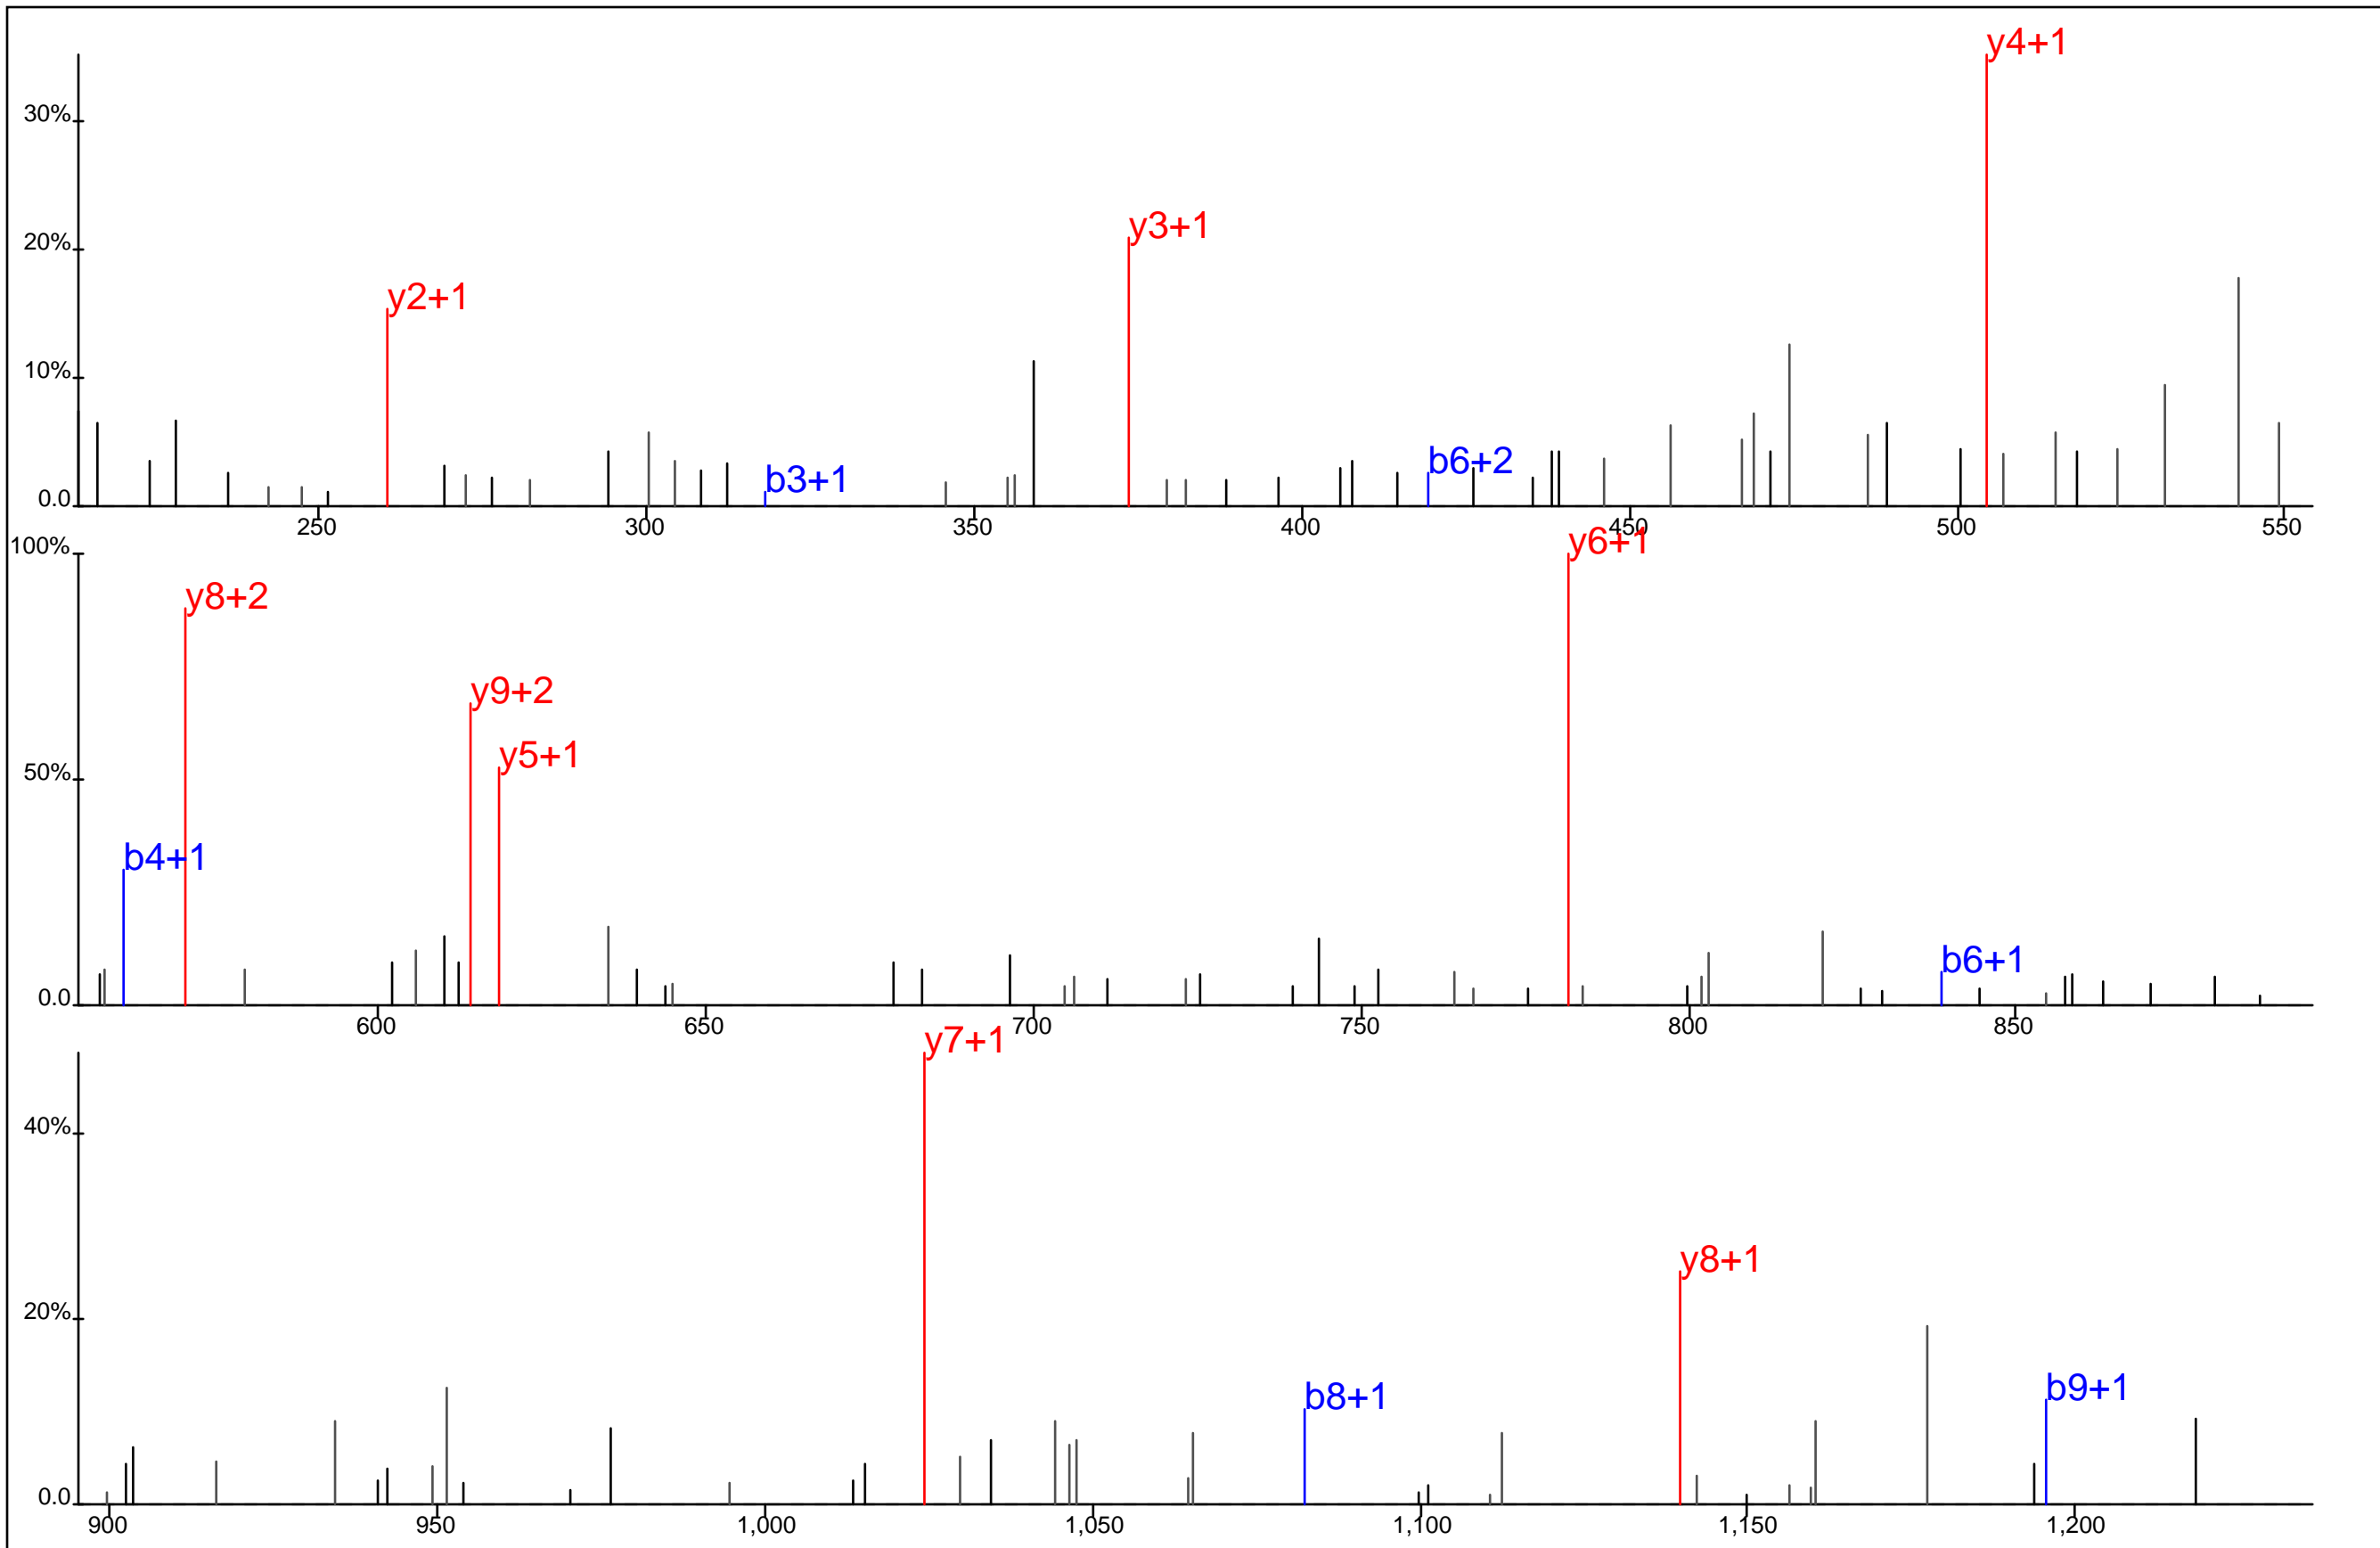

D S D Y\*Y N M L L K

Protein Name: Adaptor related protein complex 2 beta 1 subunit  
 gi Accession: 0  
 Precursor Mass: 671.2766+2  
 Delta Mass: 1.947 ppm  
 XCorr: 49.75



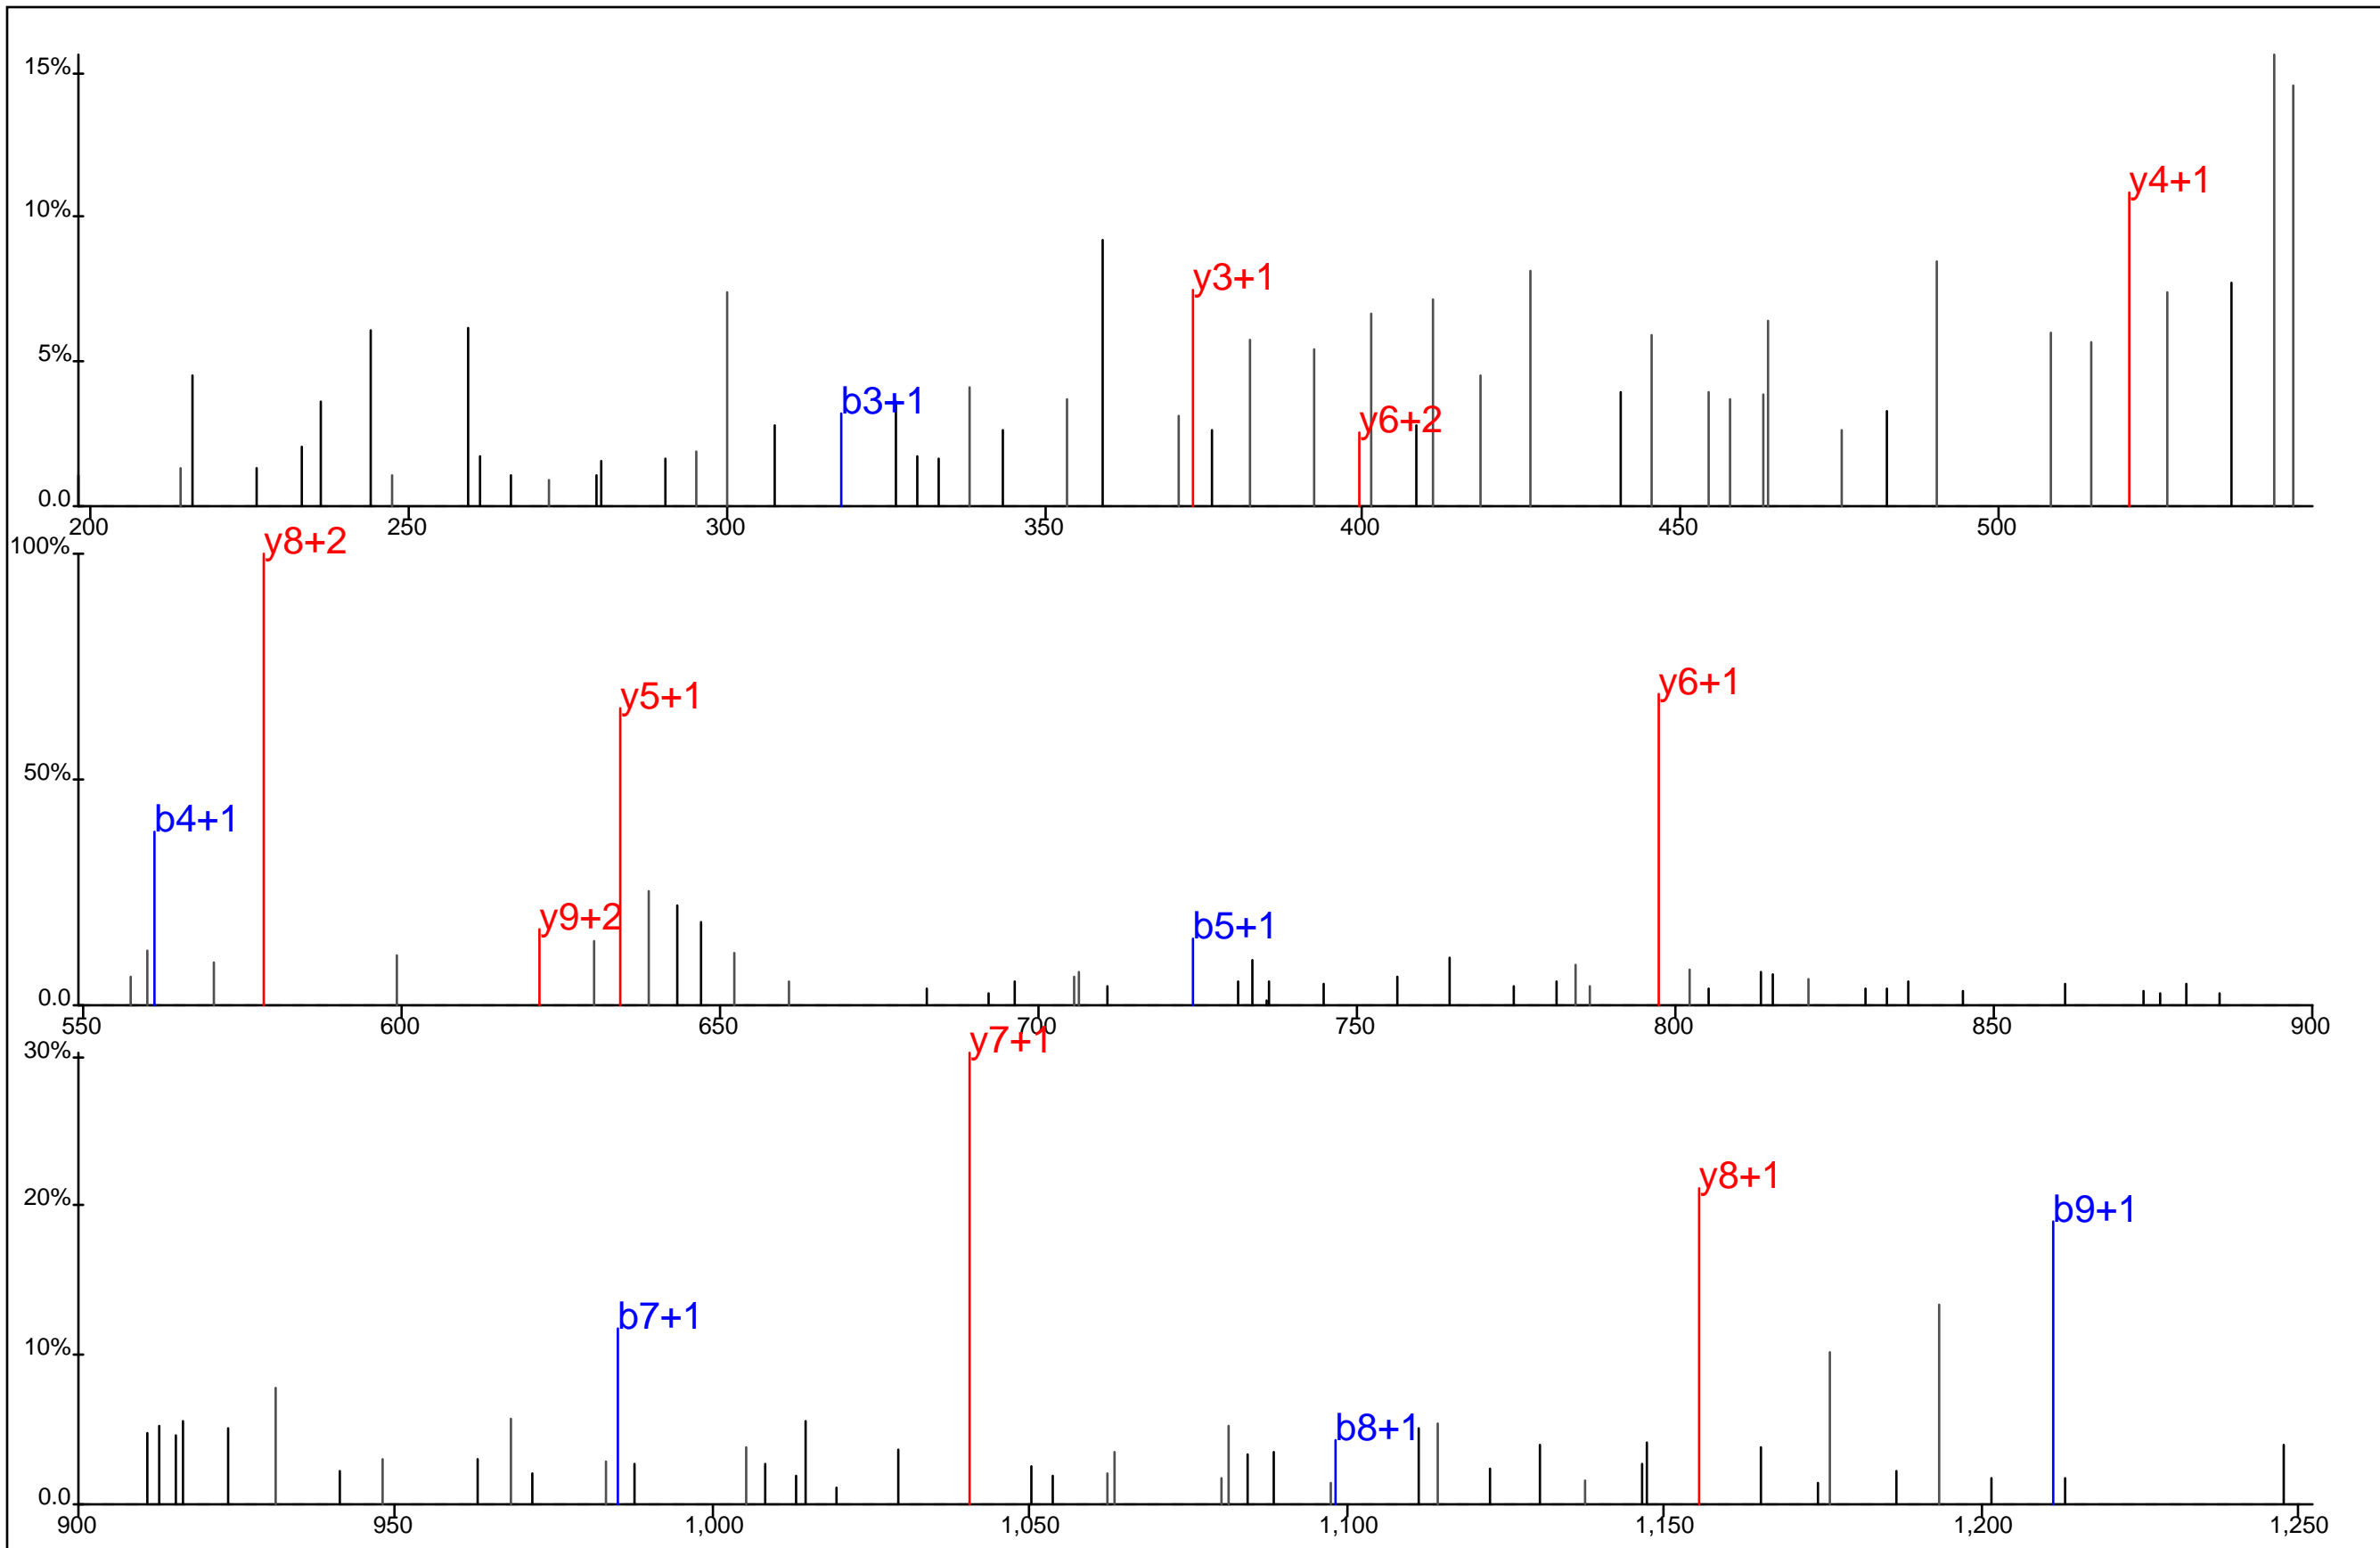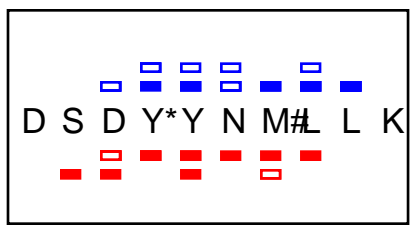

Protein Name: Adaptor related protein complex 2 beta 1 subunit  
 gi Accession: 0  
 Precursor Mass: 679.2731+2  
 Delta Mass: 0.631 ppm  
 XCorr: 22.61

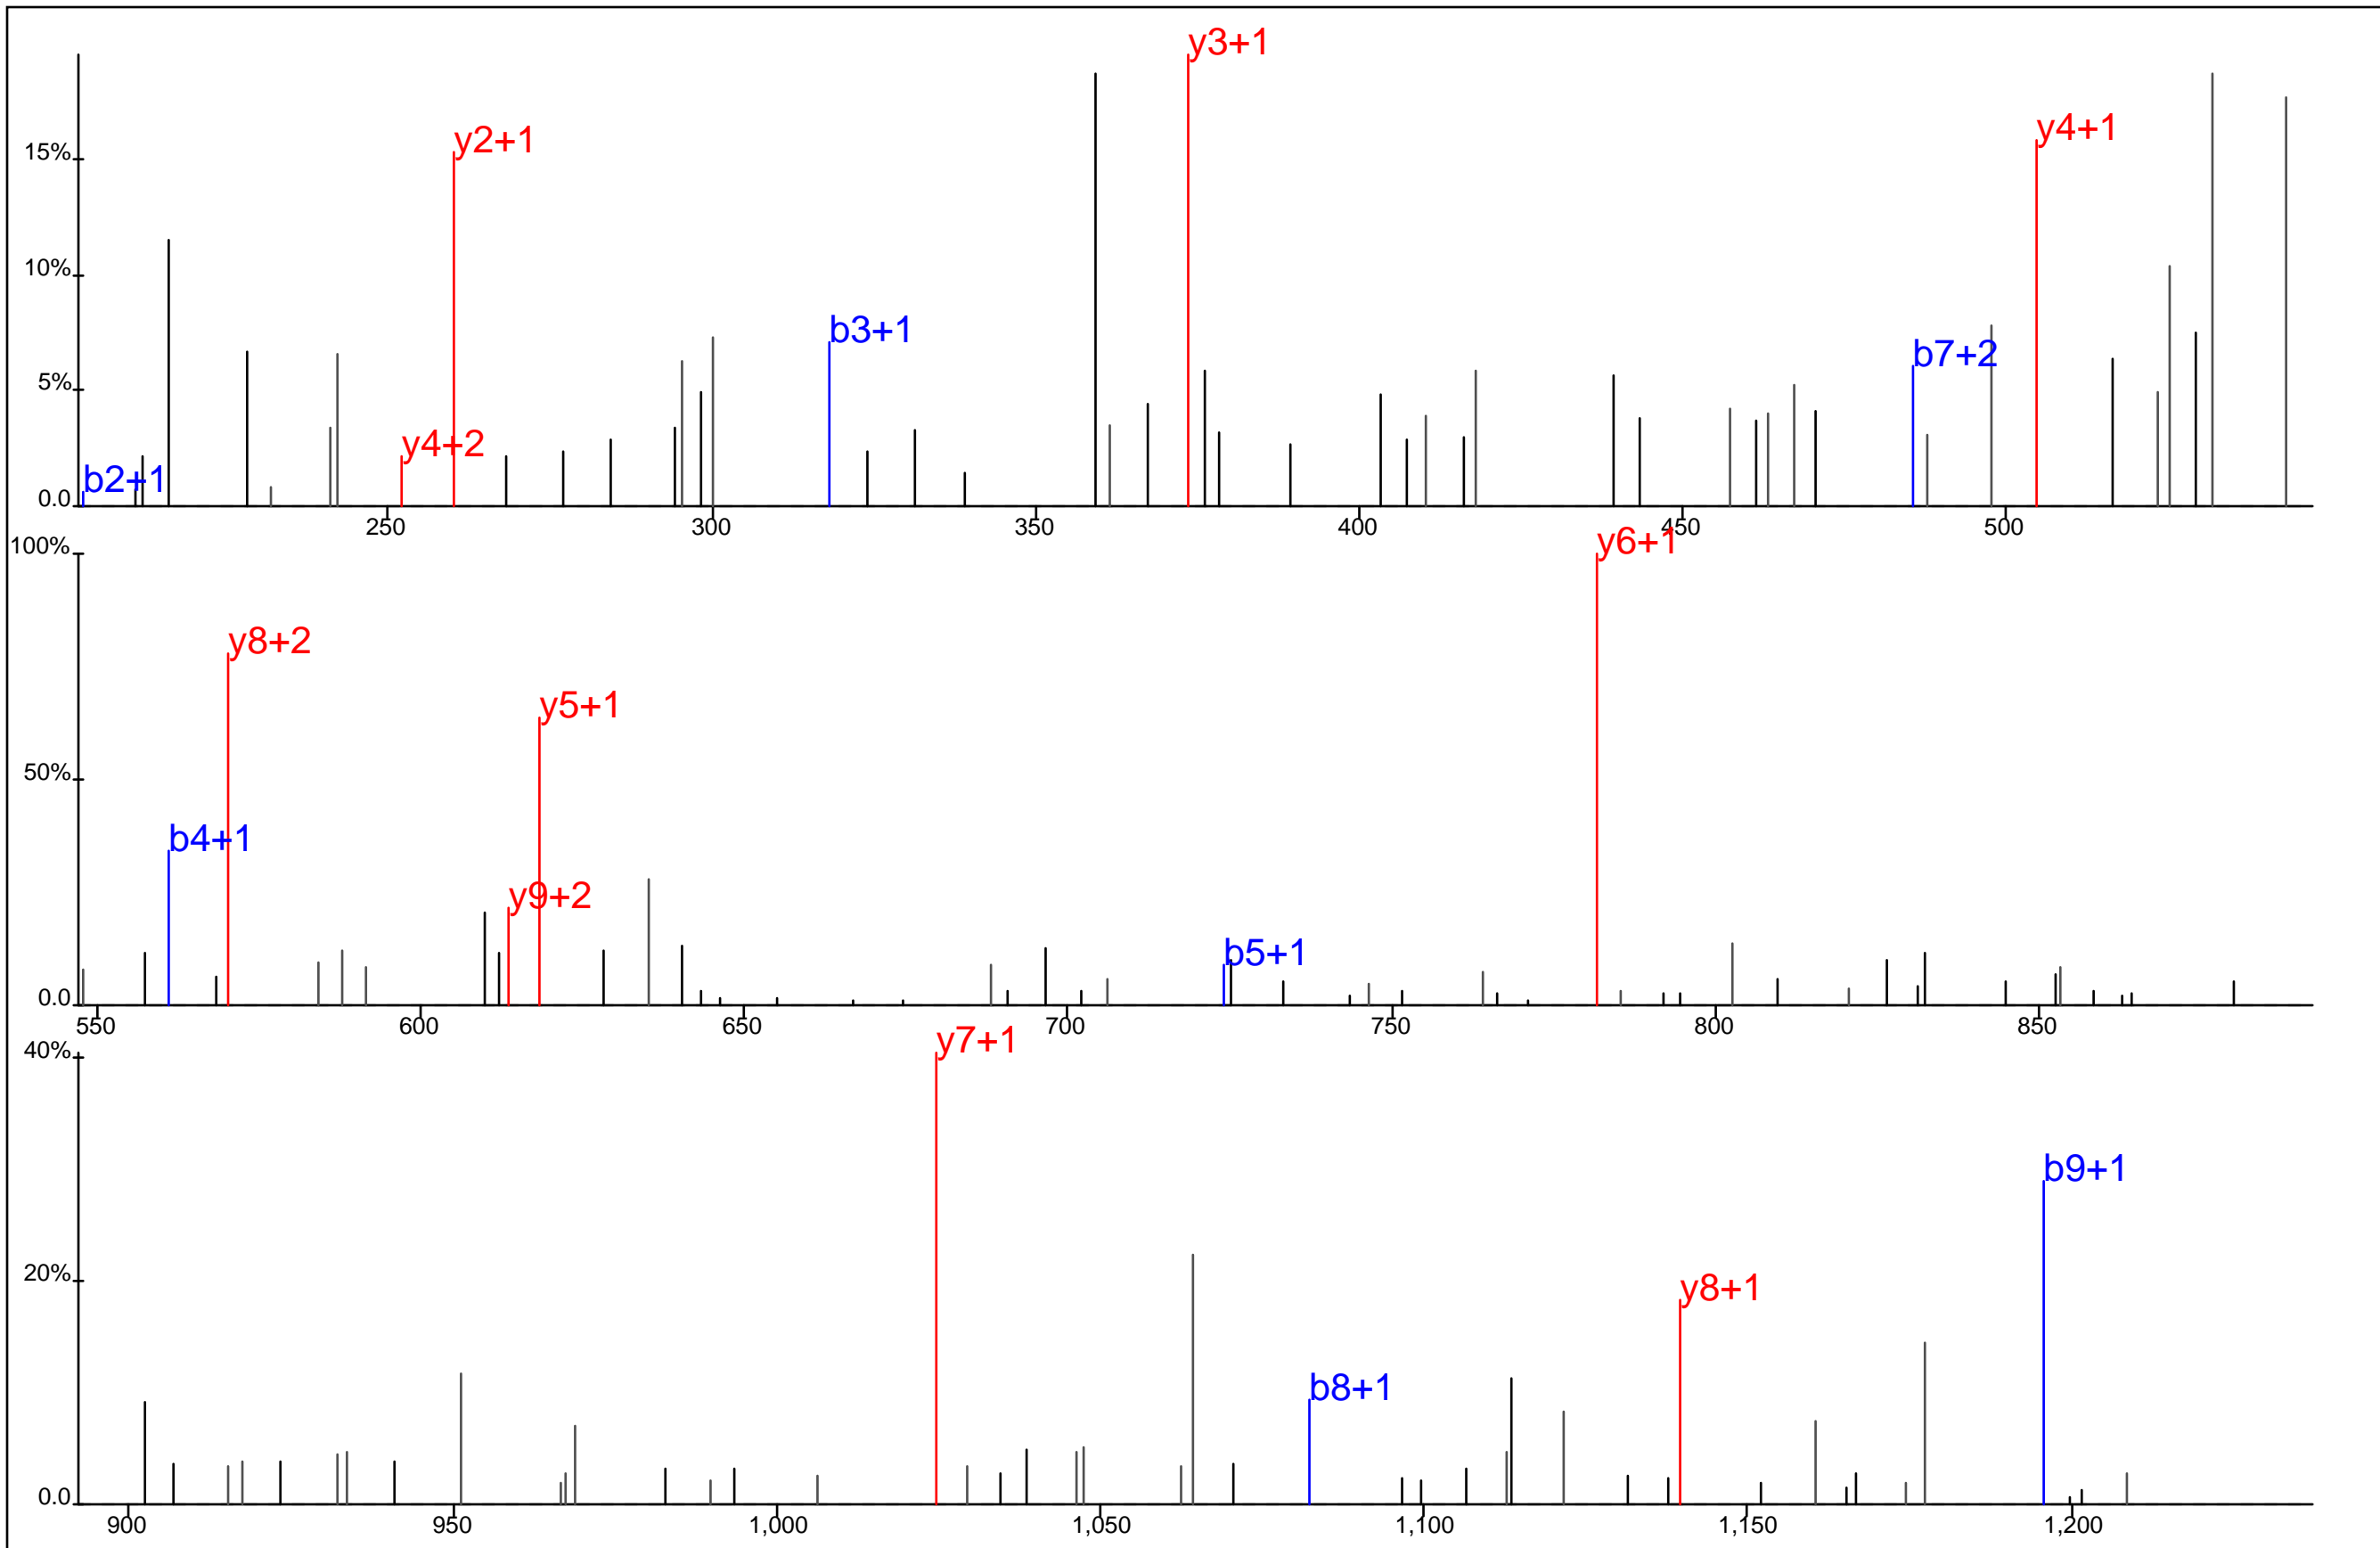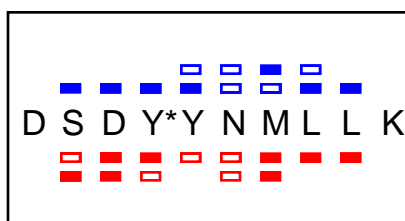

Protein Name: Adaptor related protein complex 2 beta 1 subunit  
 gi Accession: 0  
 Precursor Mass: 671.2756+2  
 Delta Mass: 0.492 ppm  
 XCorr: 30.96

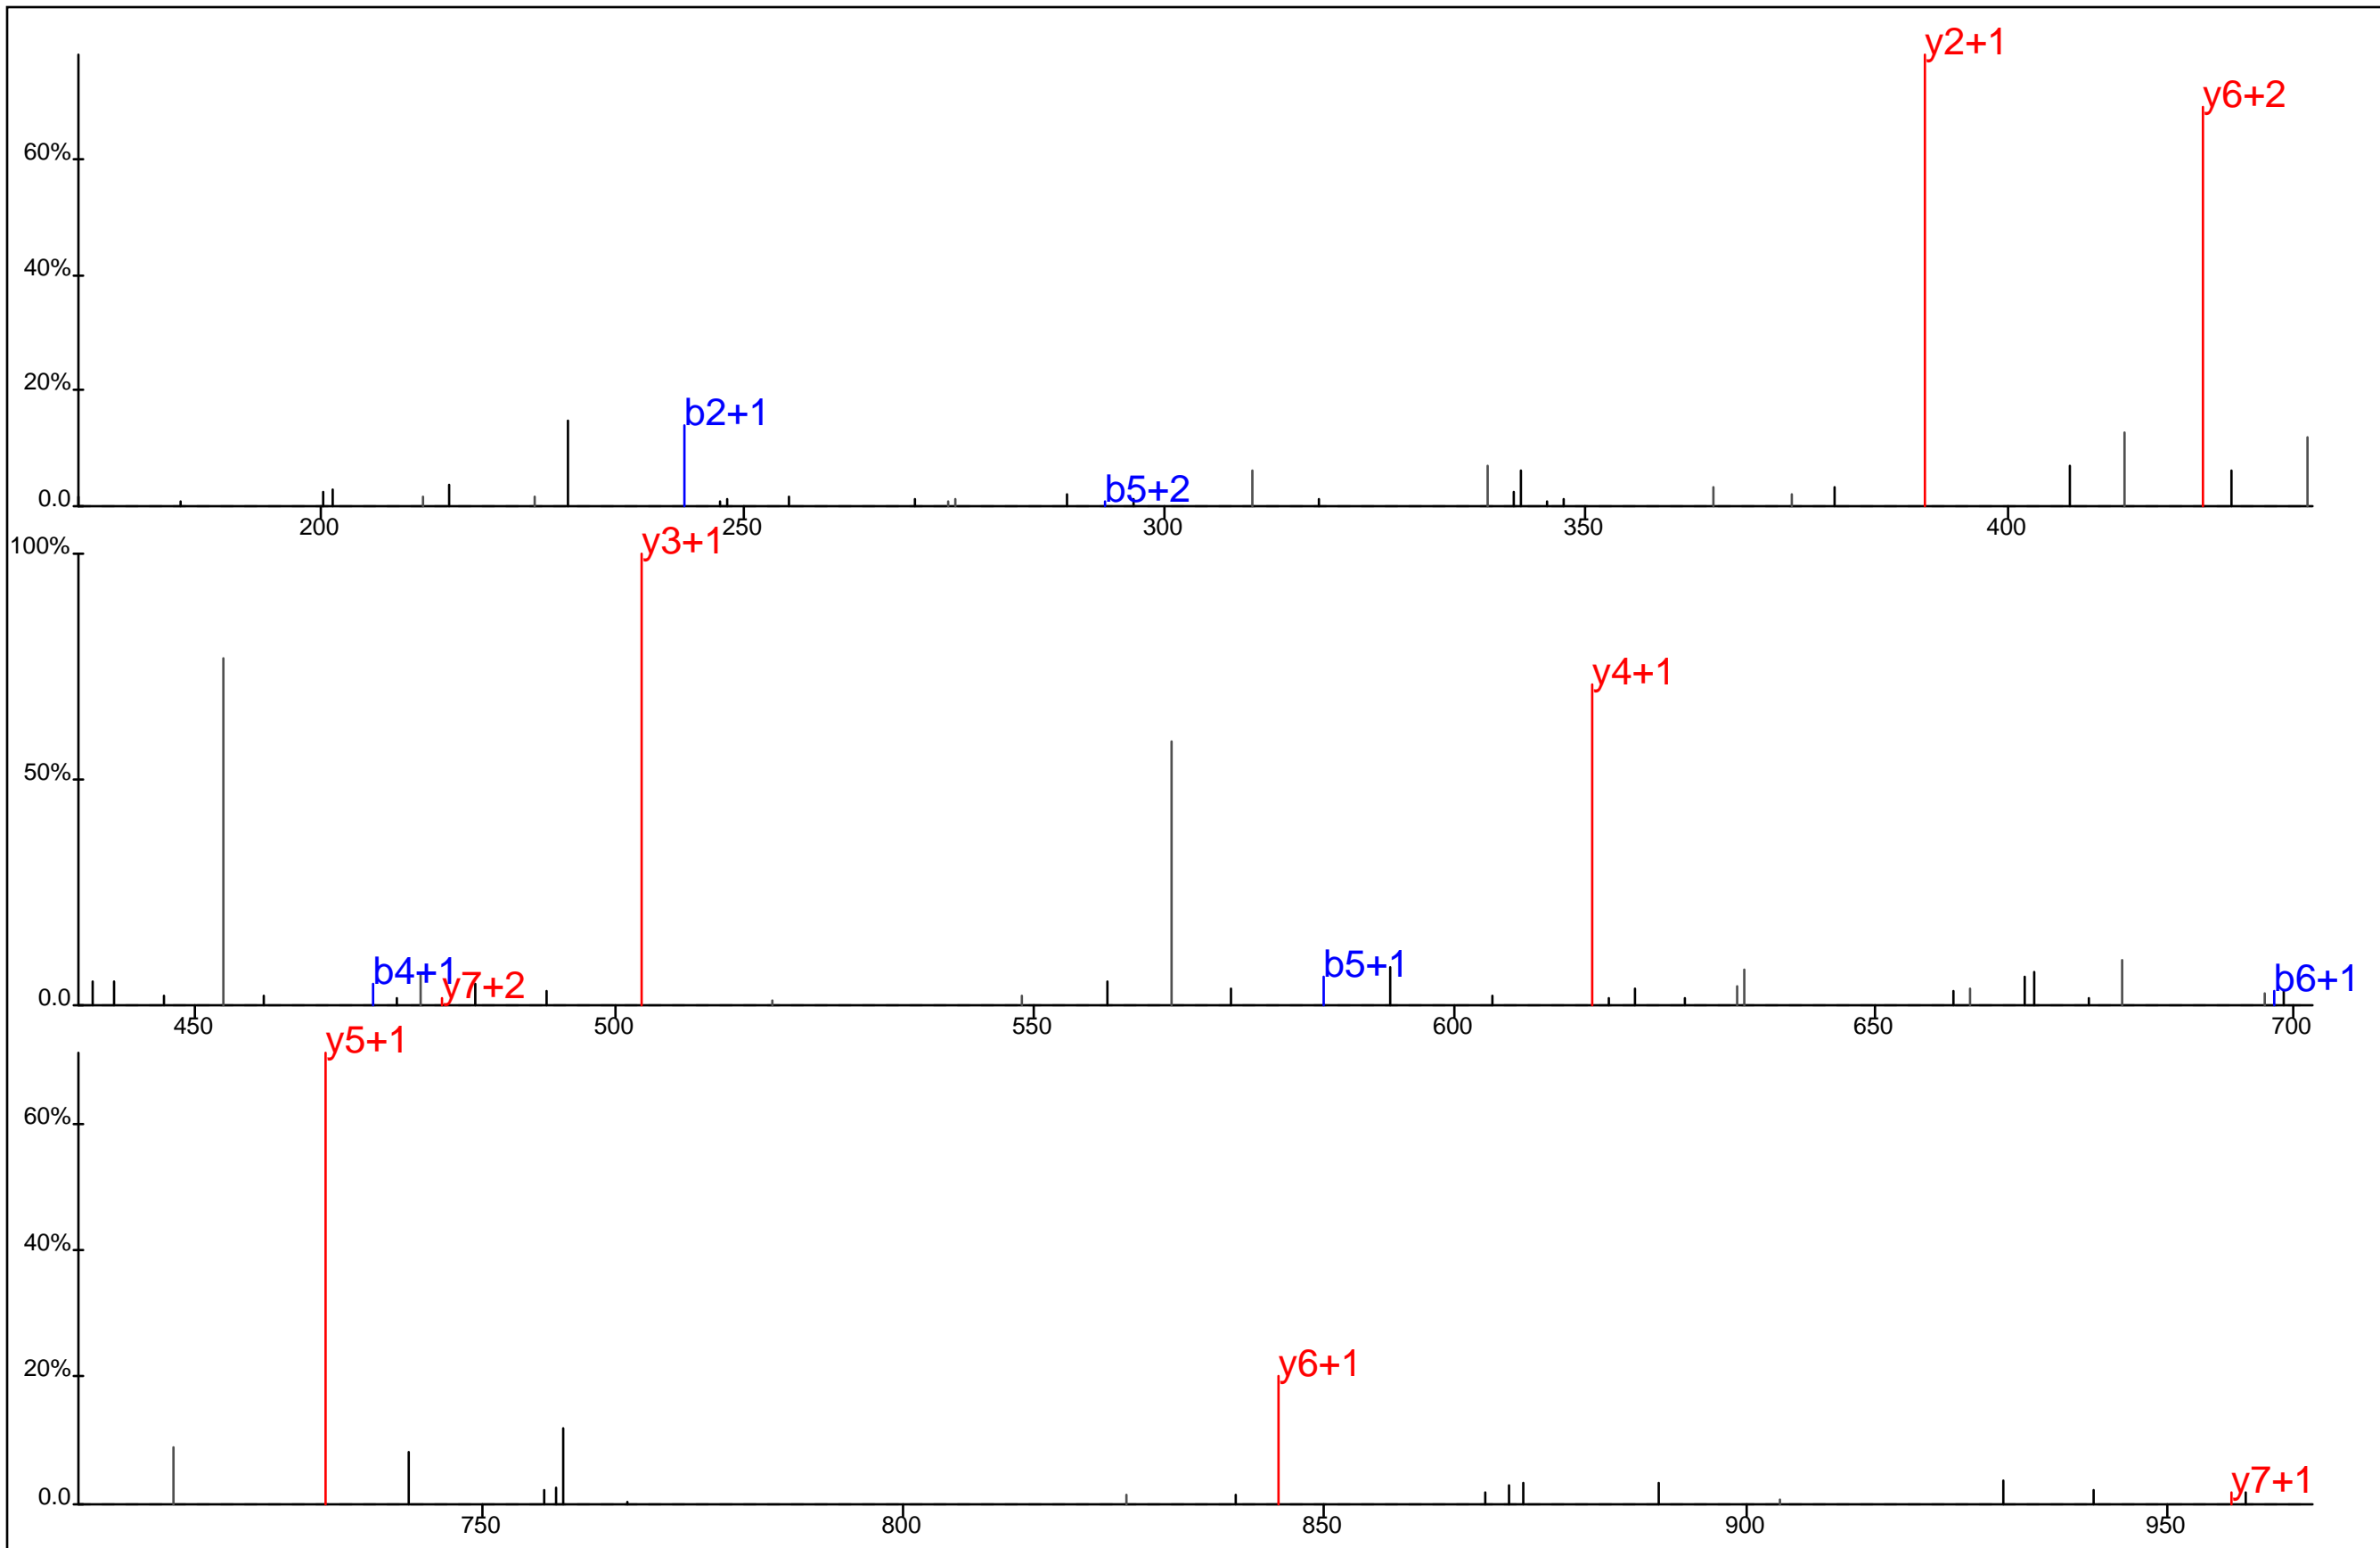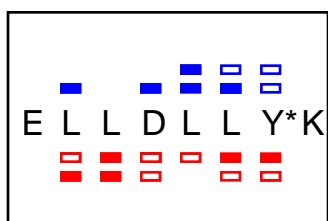

Protein Name: Adenosine deaminase  
 gi Accession: 0  
 Precursor Mass: 543.7787+2  
 Delta Mass: 1.736 ppm  
 XCorr: 36.38

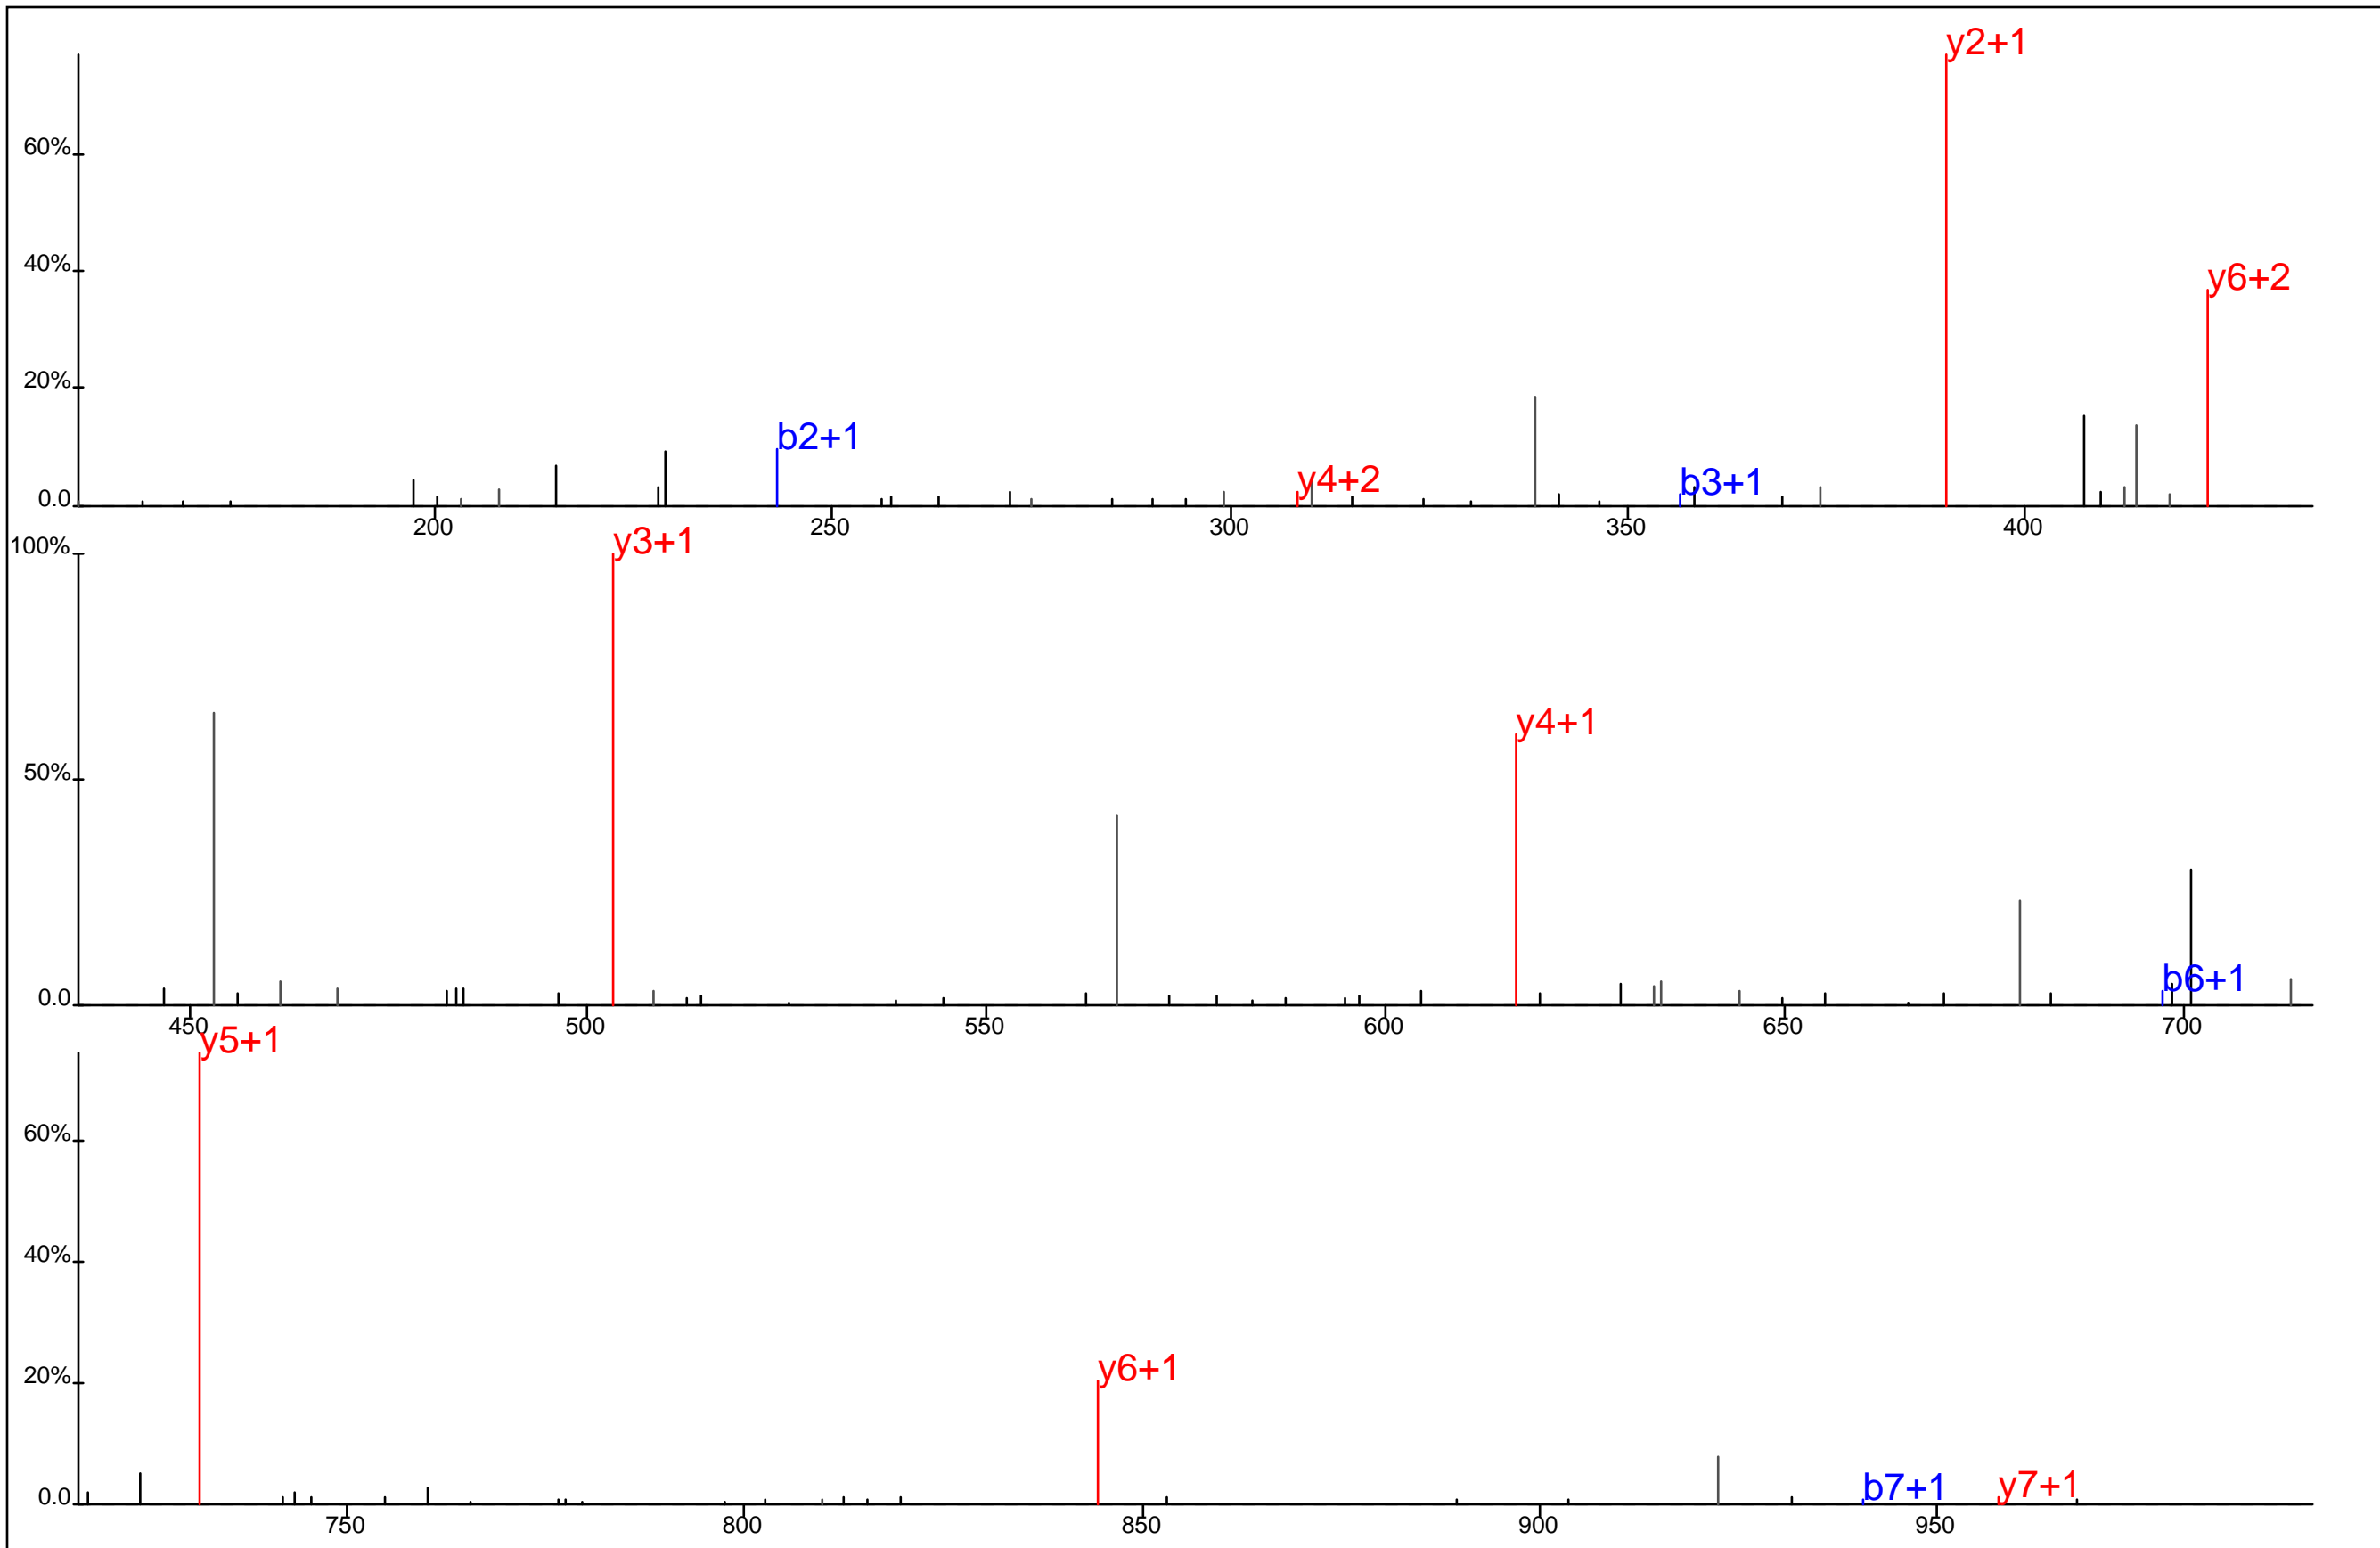

E L L D L L Y\* K

Protein Name: Adenosine deaminase  
 gi Accession: 0  
 Precursor Mass: 543.7783+2  
 Delta Mass: 0.948 ppm  
 XCorr: 37.65

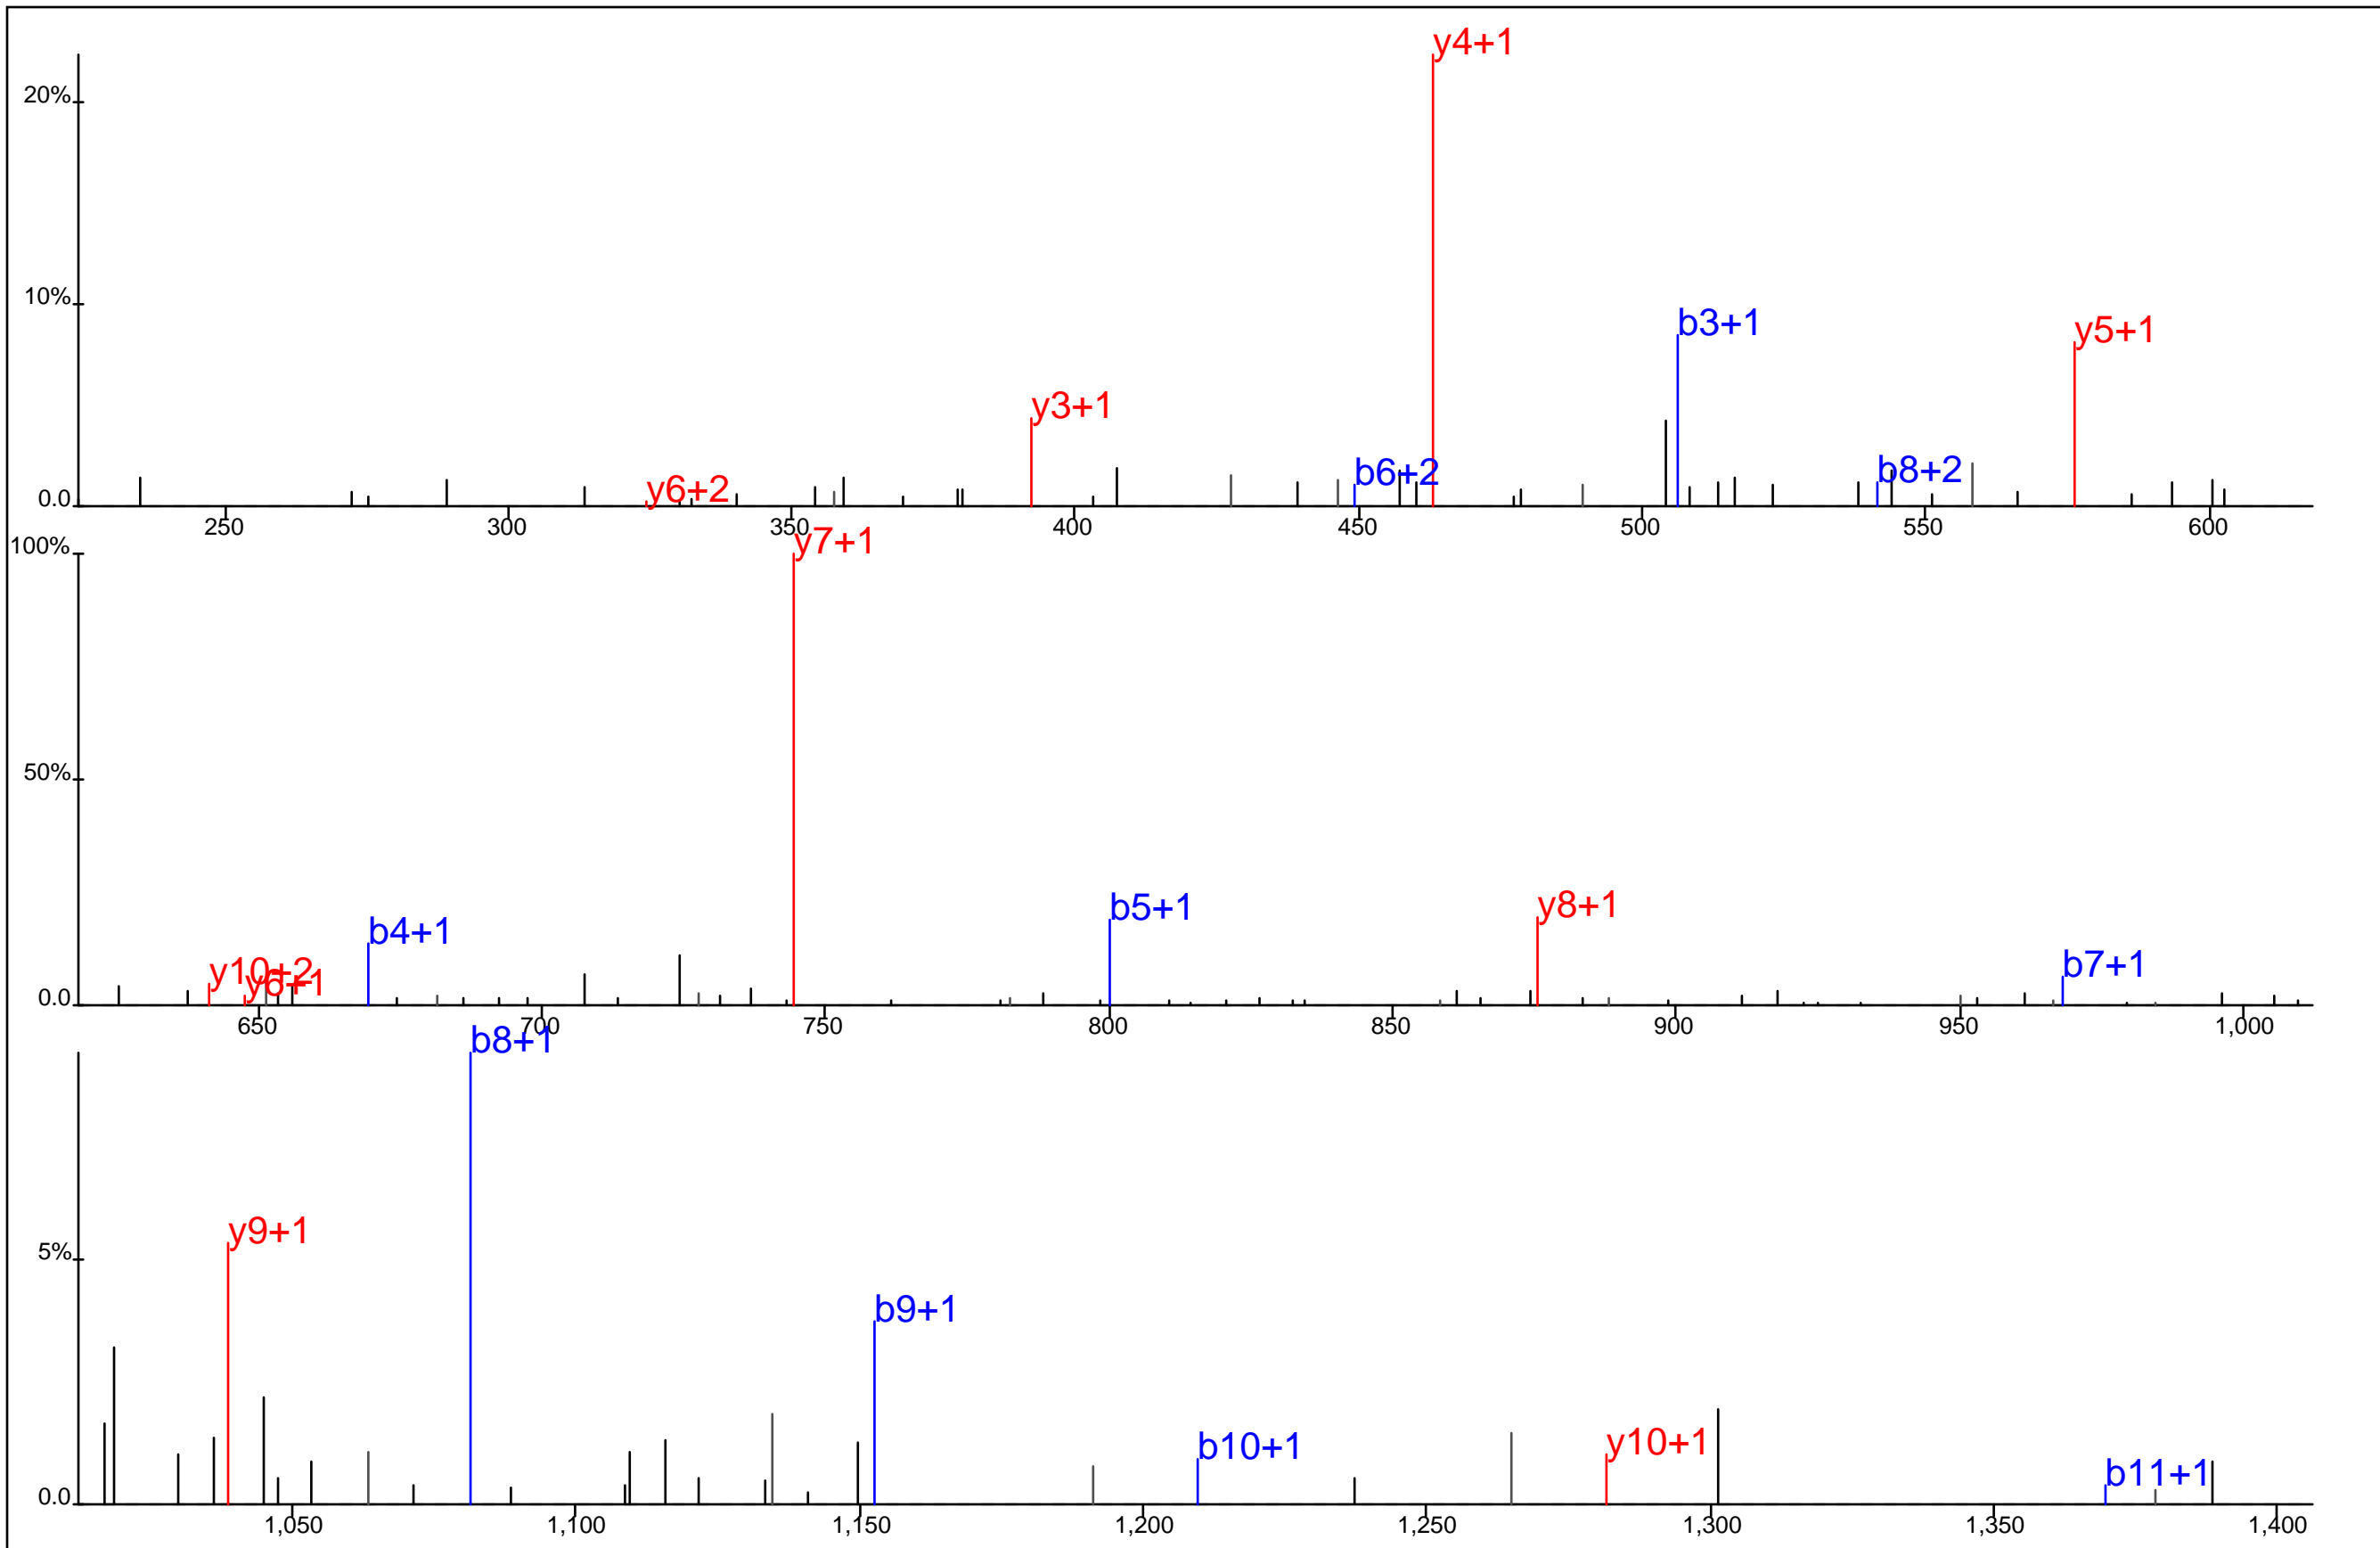

▢ ▢ ▢ ▢ ▢ ▢ ▢ ▢  
▢ ▢ ▢ ▢ ▢ ▢ ▢ ▢

F D Y\*Y M P A I A G C R

Protein Name: Adenosine deaminase  
 gi Accession: 0  
 Precursor Mass: 772.3051+2  
 Delta Mass: 5.247 ppm  
 XCorr: 37.66

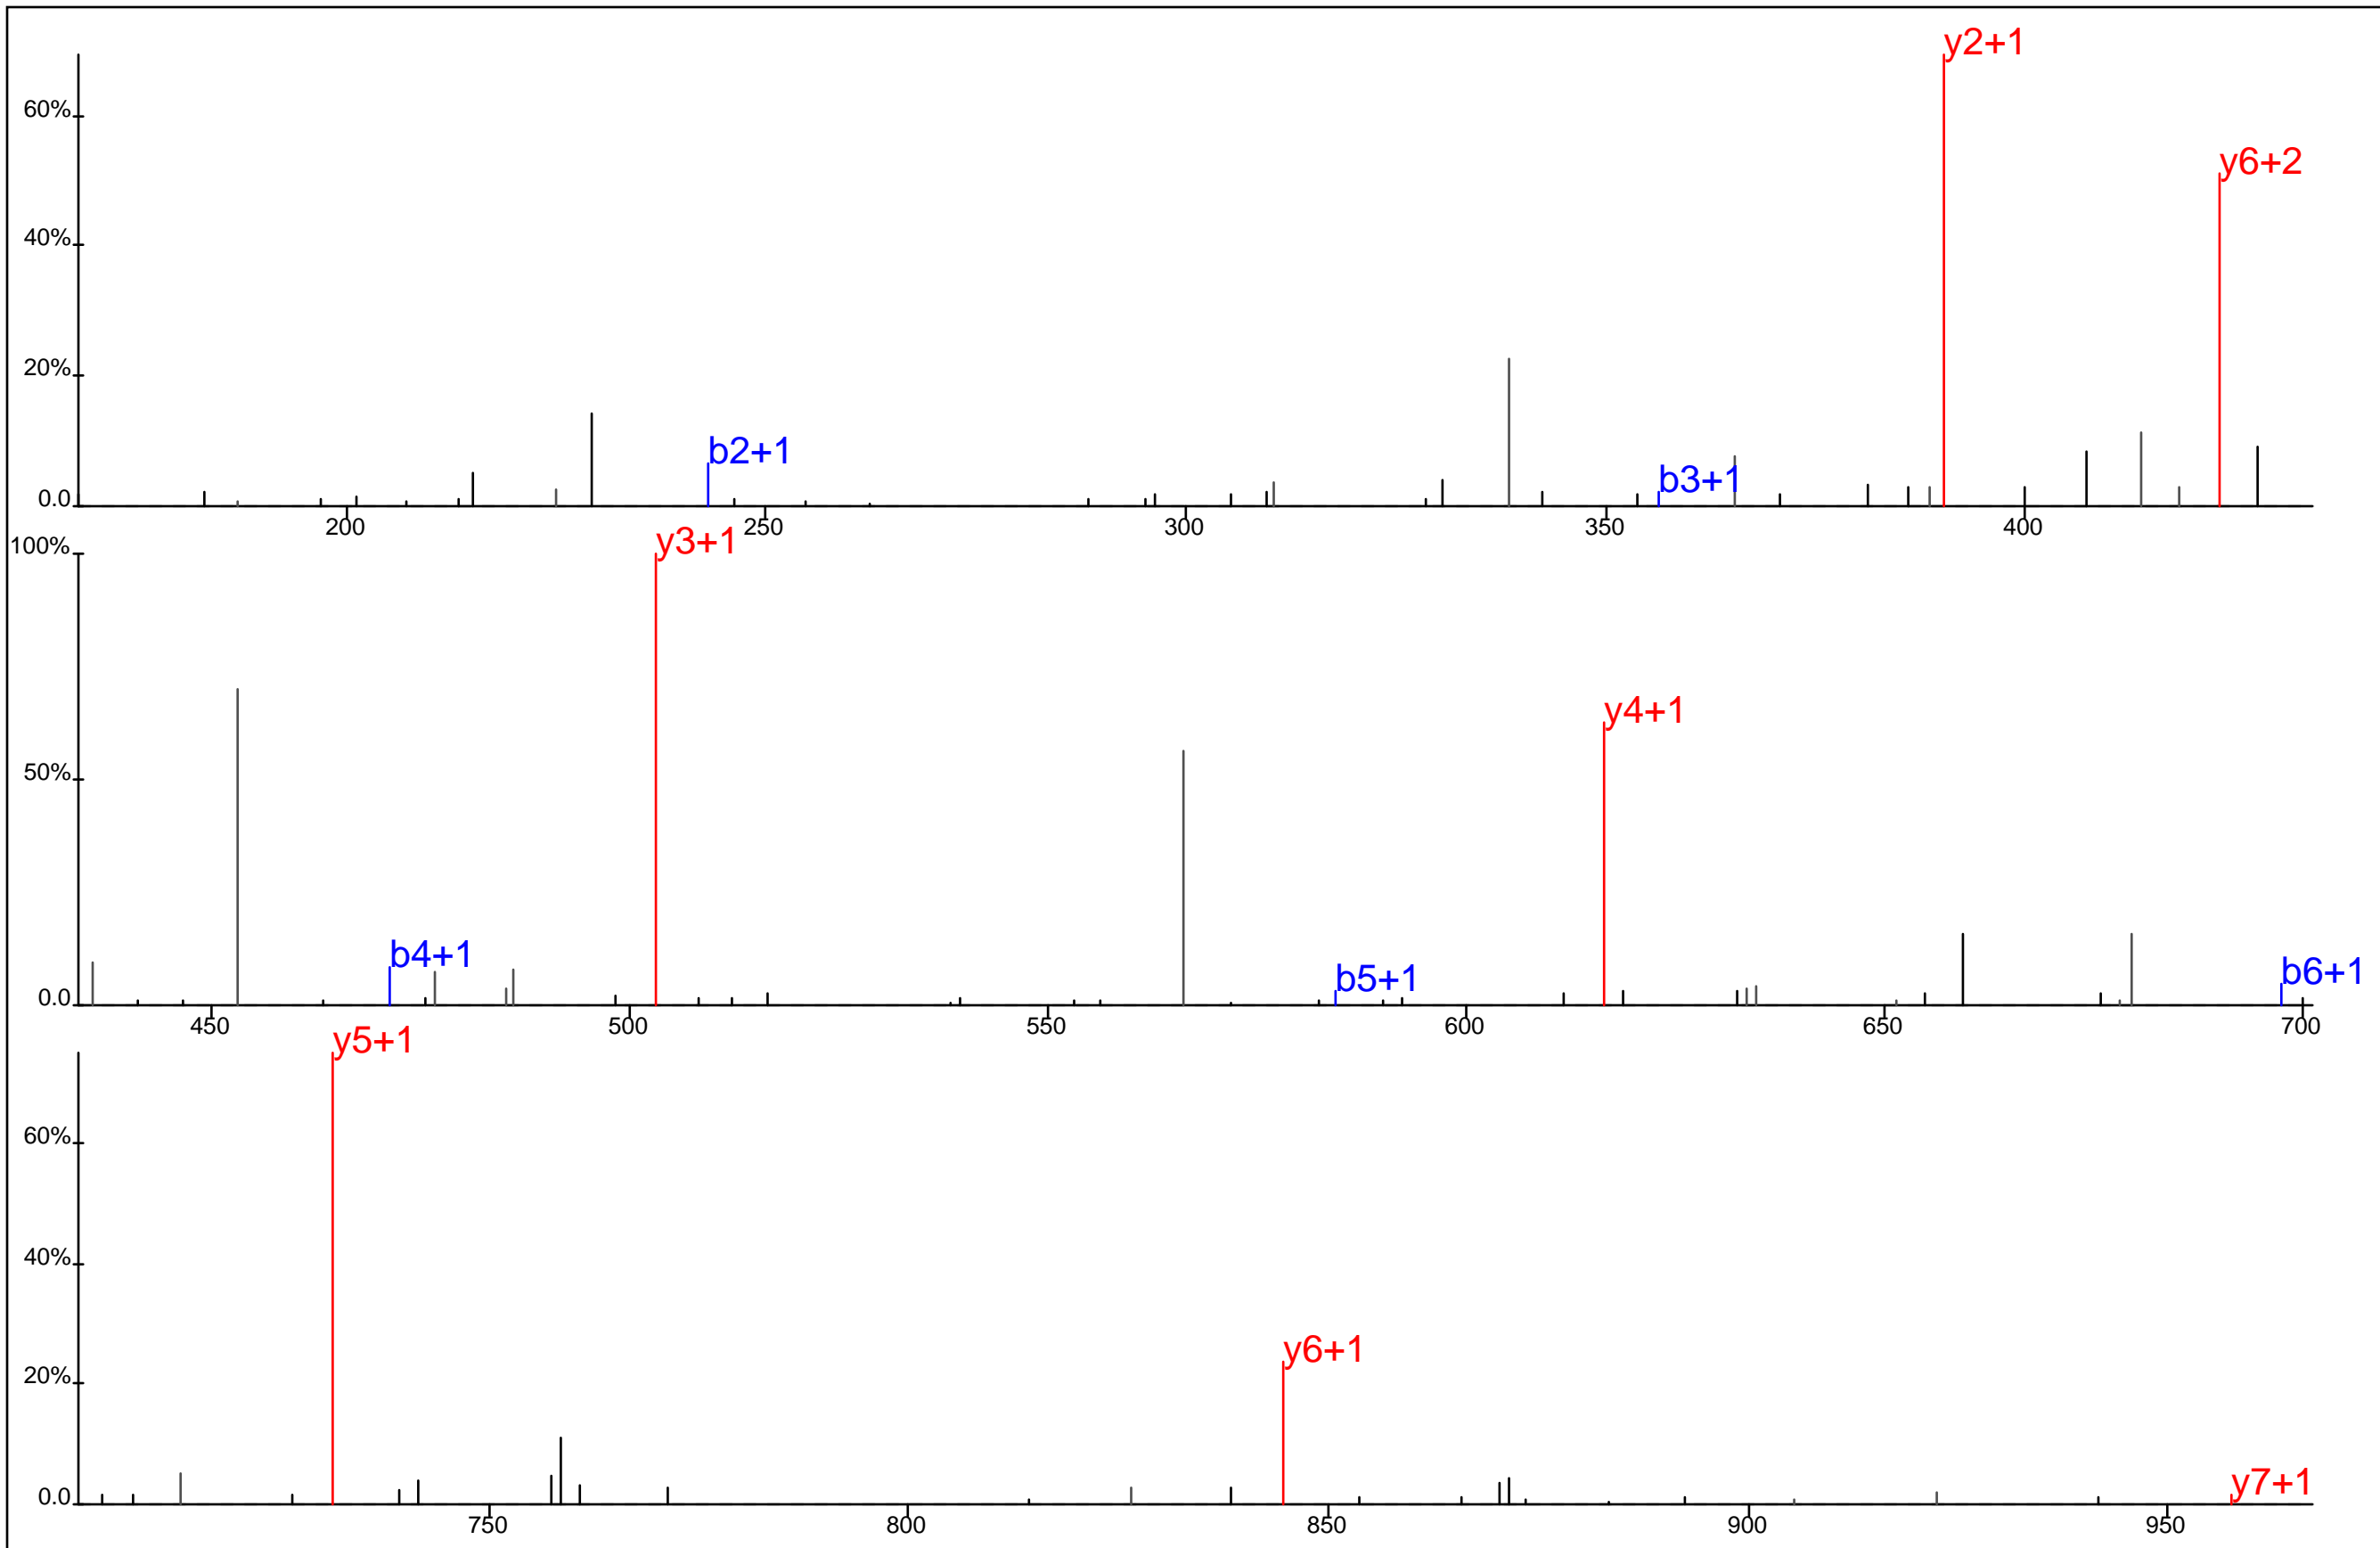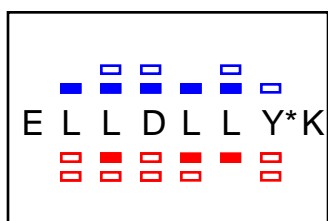

Protein Name: Adenosine deaminase  
 gi Accession: 0  
 Precursor Mass: 543.7792+2  
 Delta Mass: 2.746 ppm  
 XCorr: 36.77

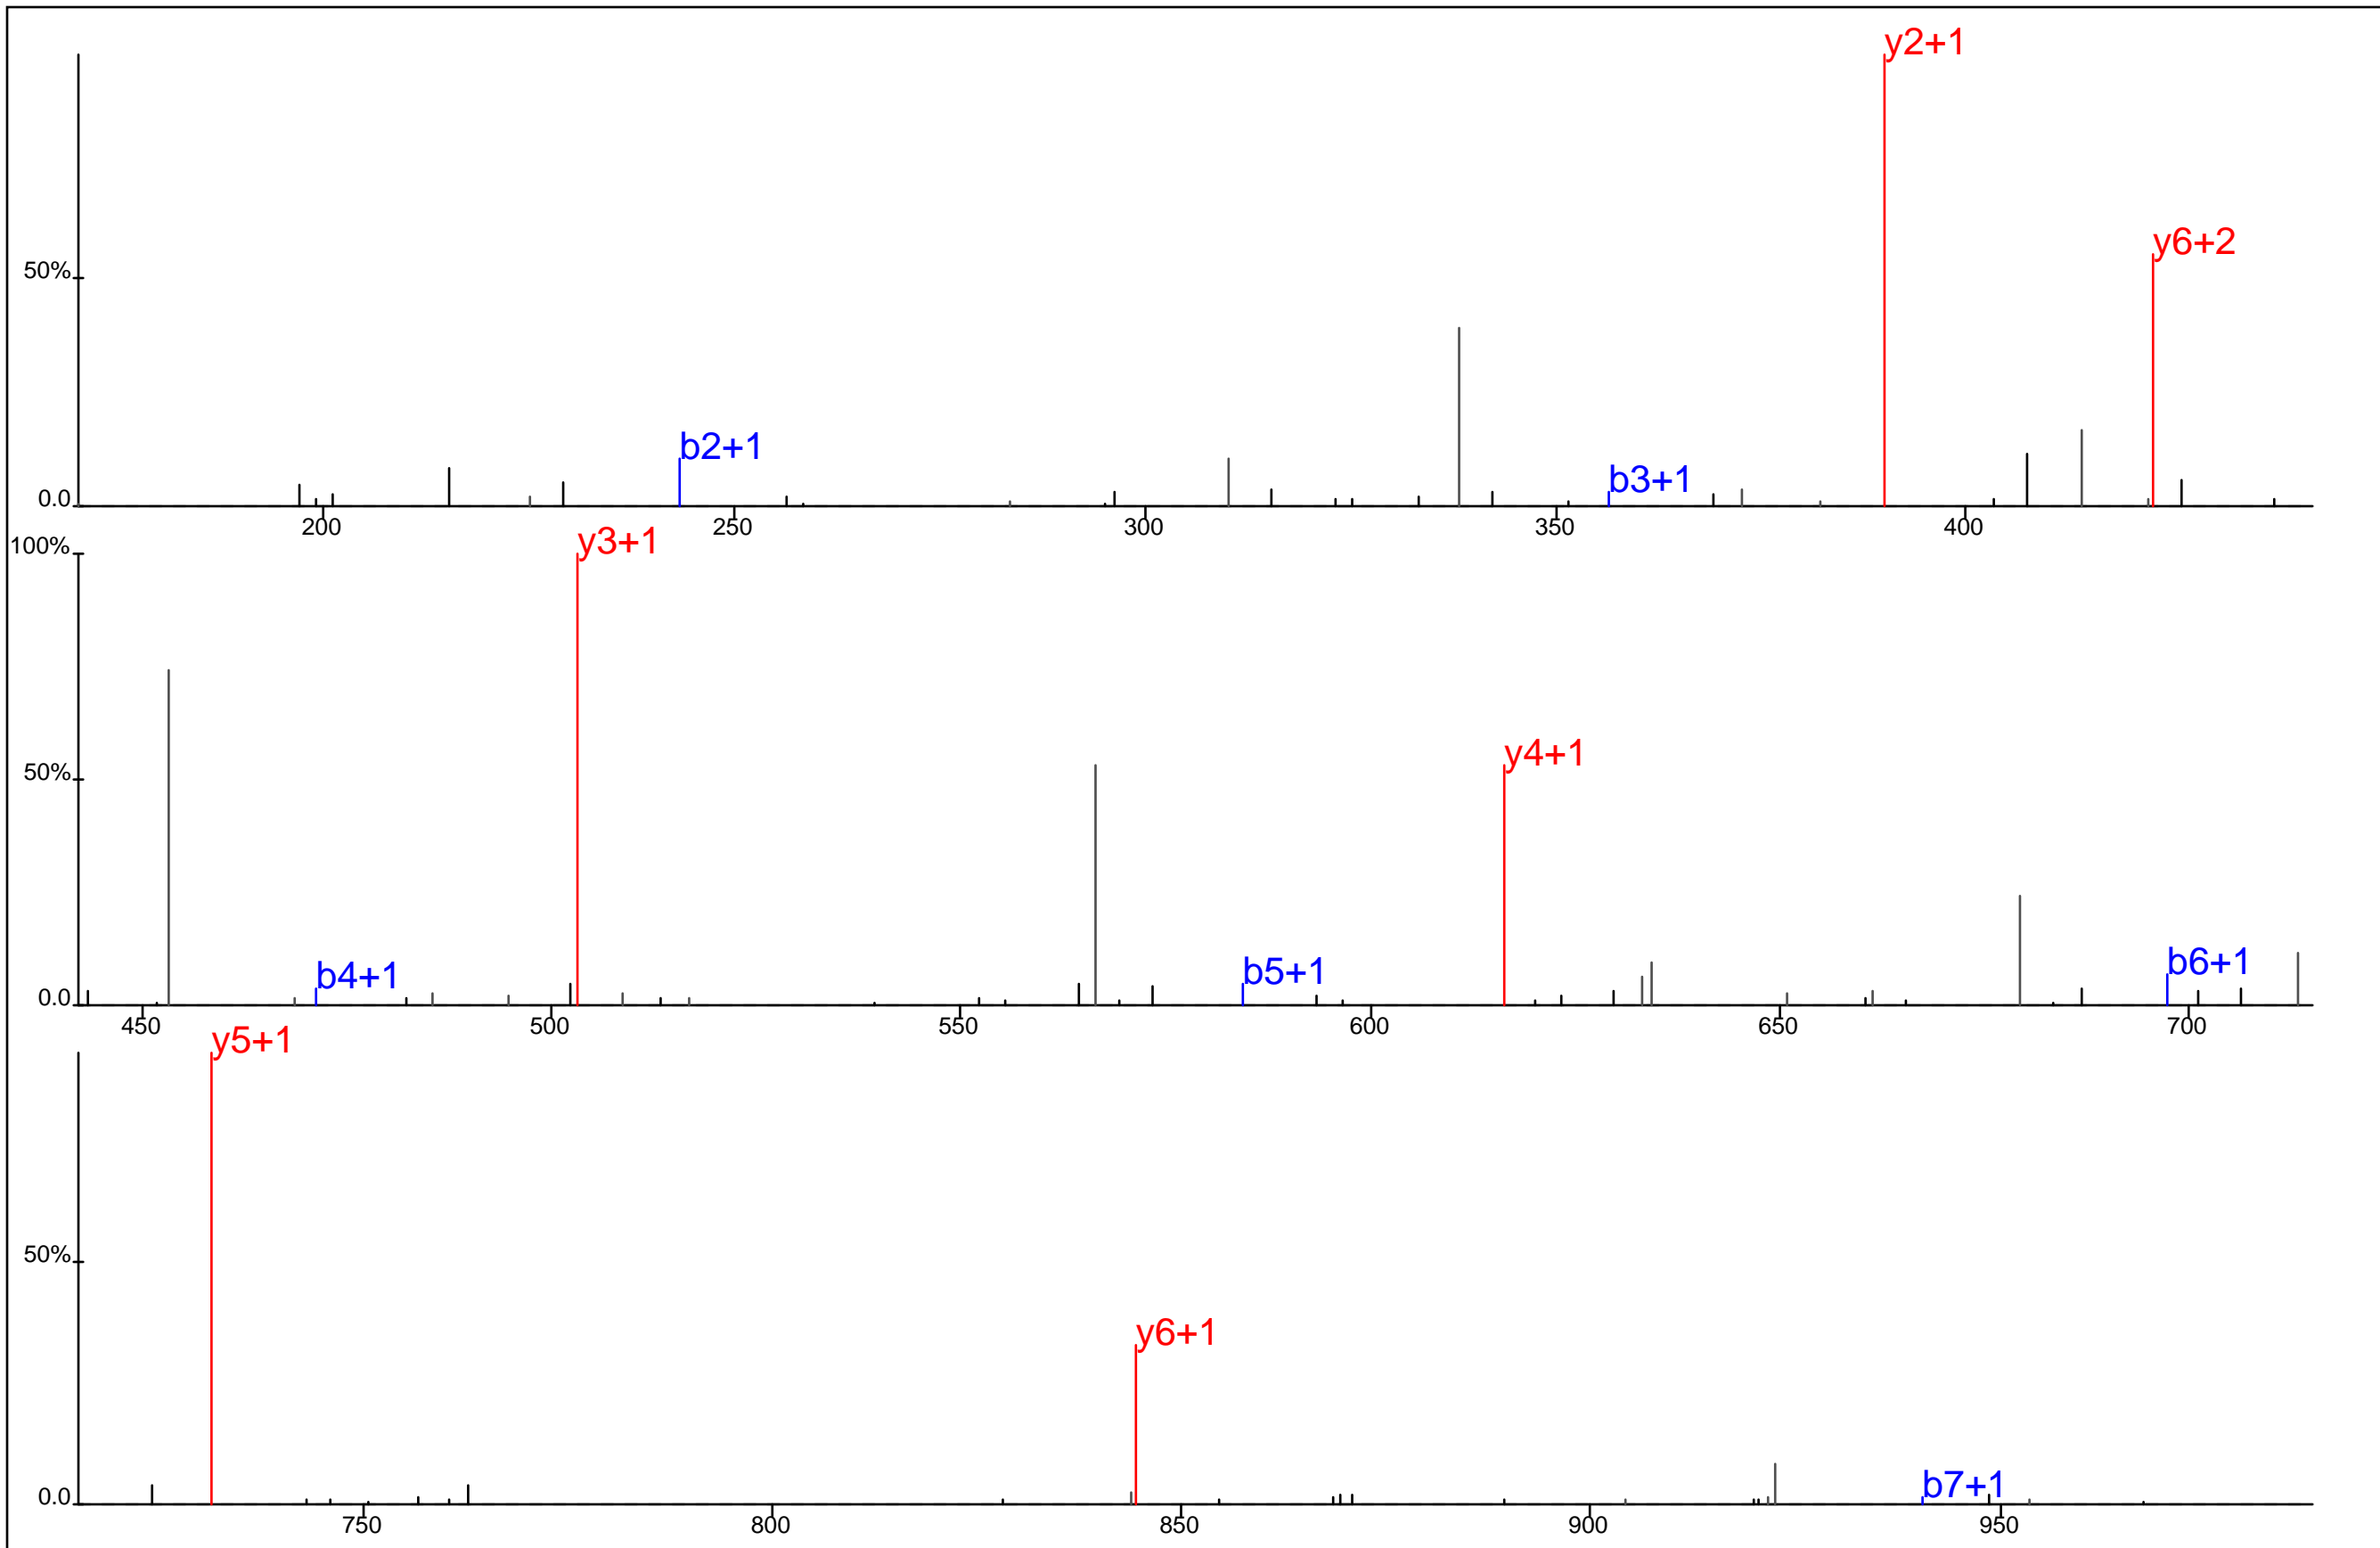

E L L D L L Y\* K

Protein Name: Adenosine deaminase  
 gi Accession: 0  
 Precursor Mass: 543.7782+2  
 Delta Mass: 0.836 ppm  
 XCorr: 37.86

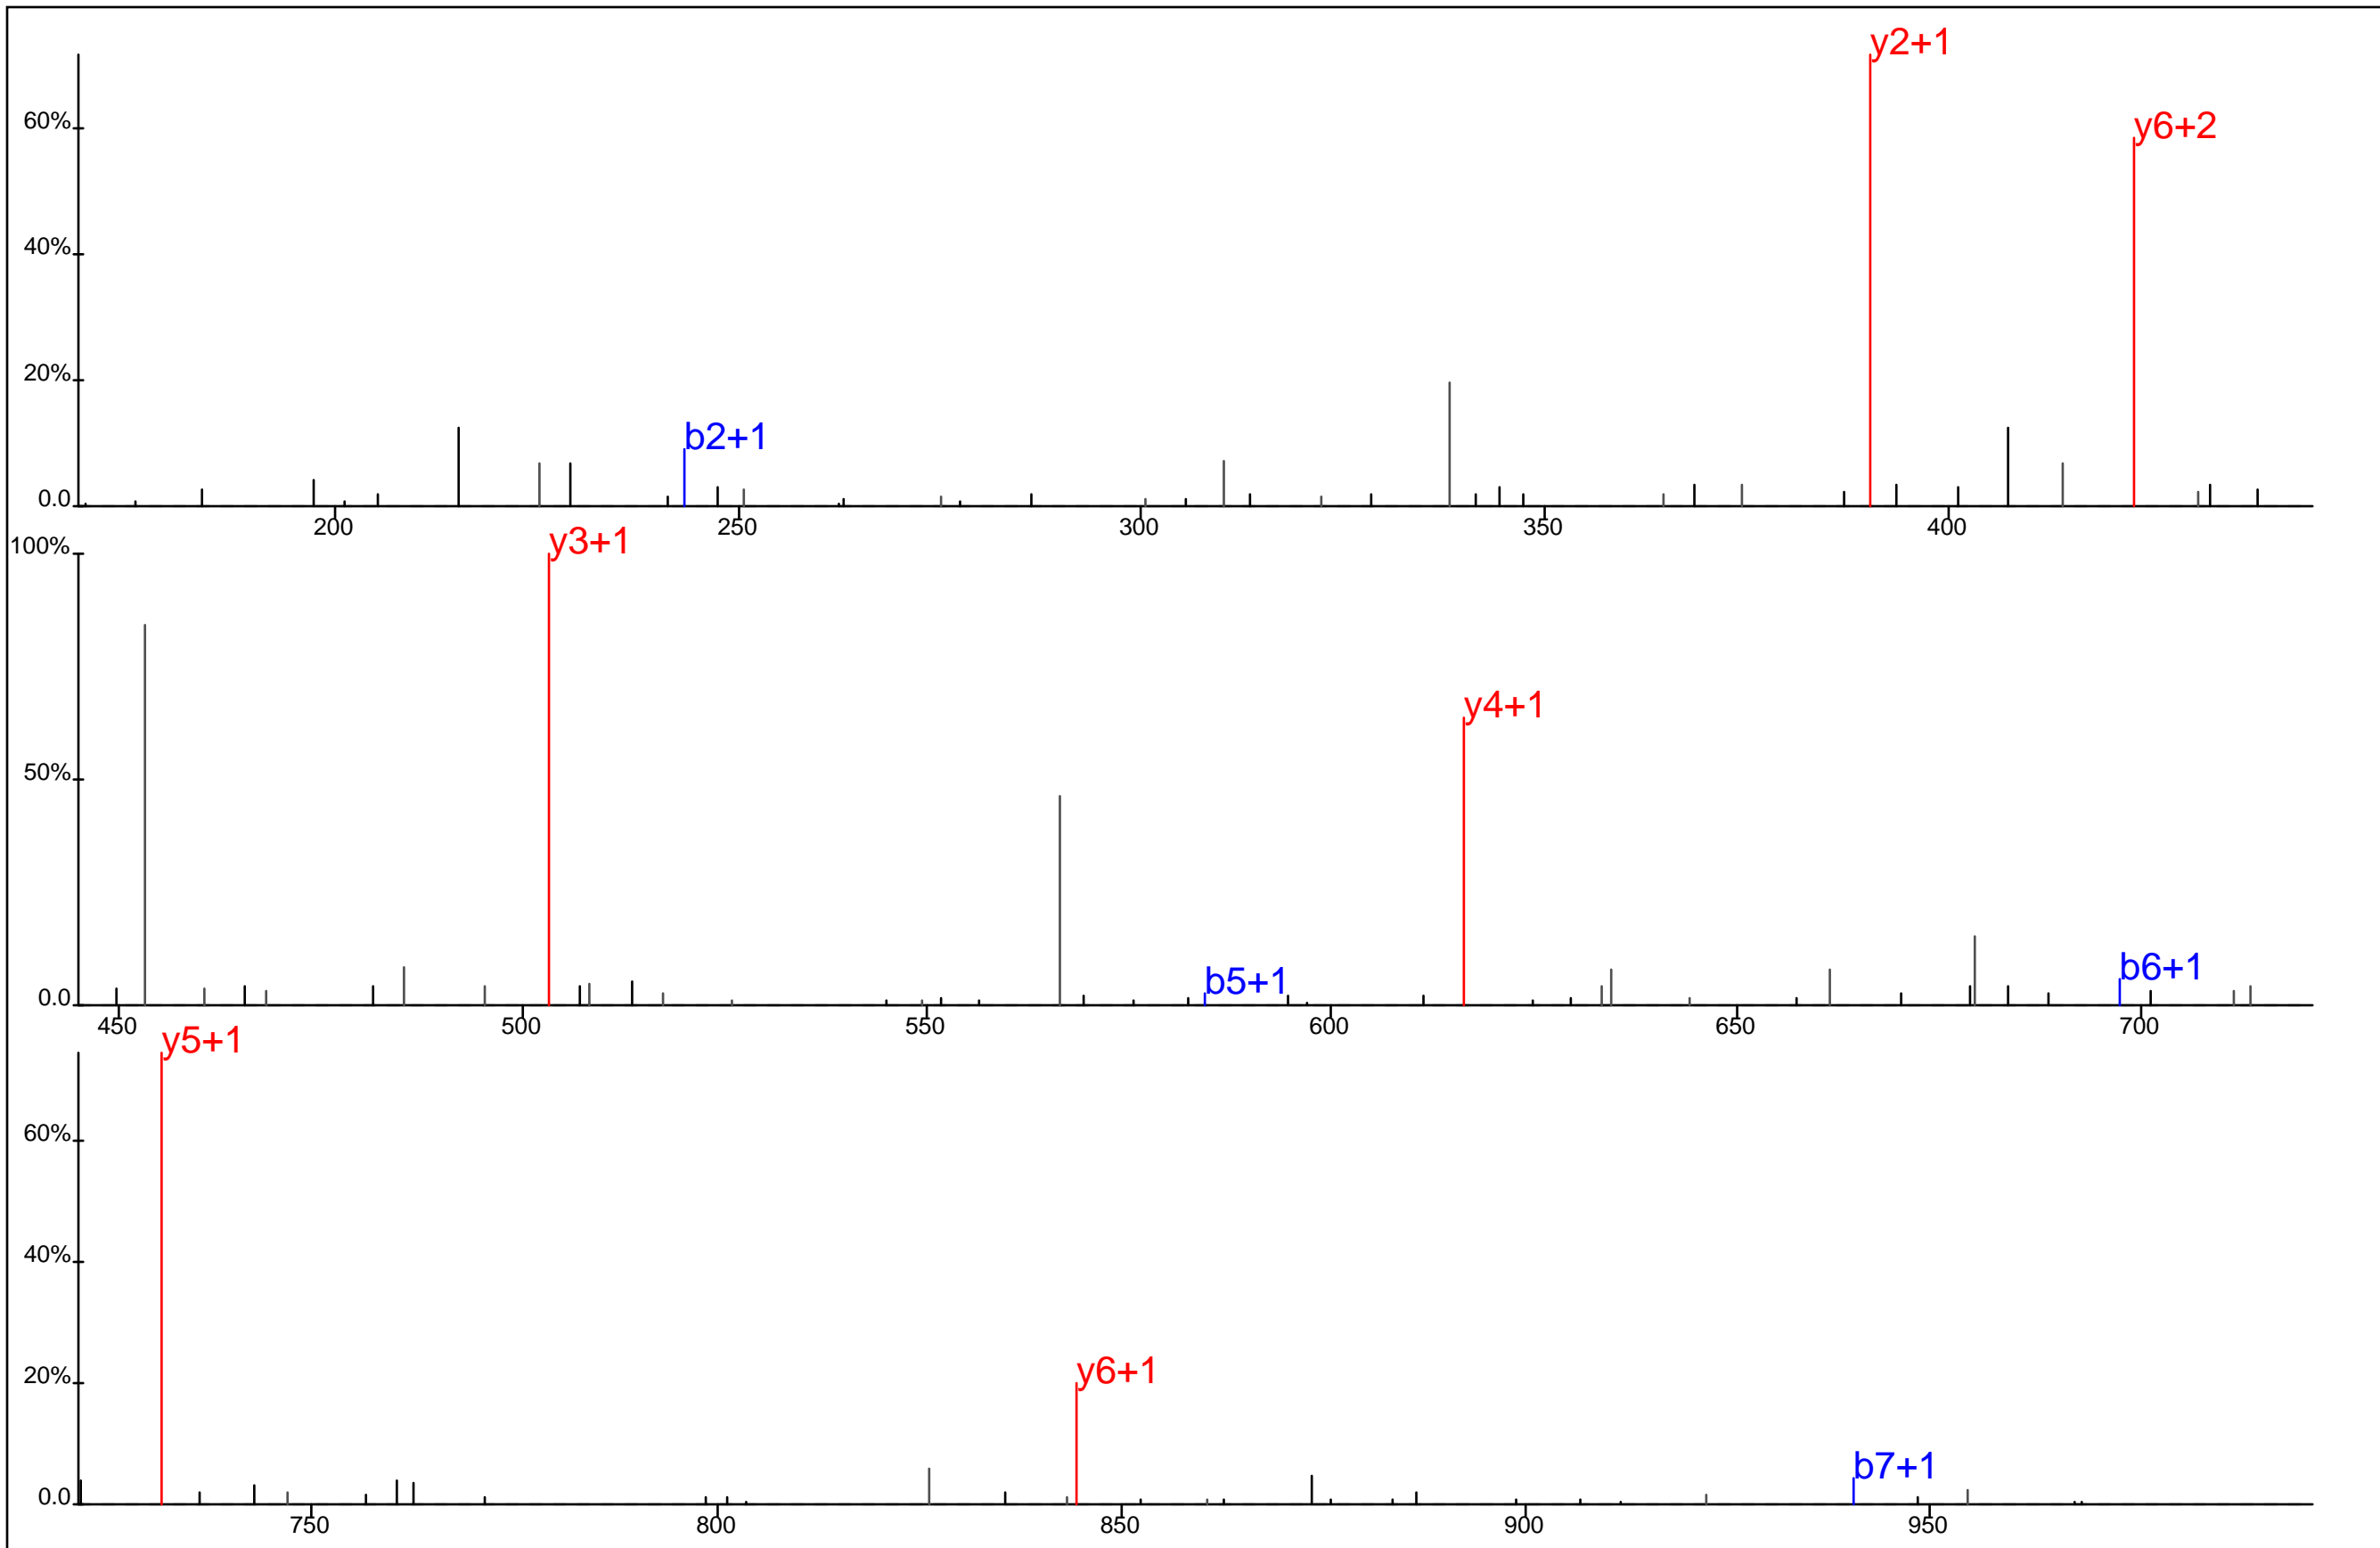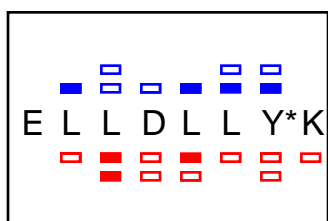

Protein Name: Adenosine deaminase  
 gi Accession: 0  
 Precursor Mass: 543.7787+2  
 Delta Mass: 1.736 ppm  
 XCorr: 36.43



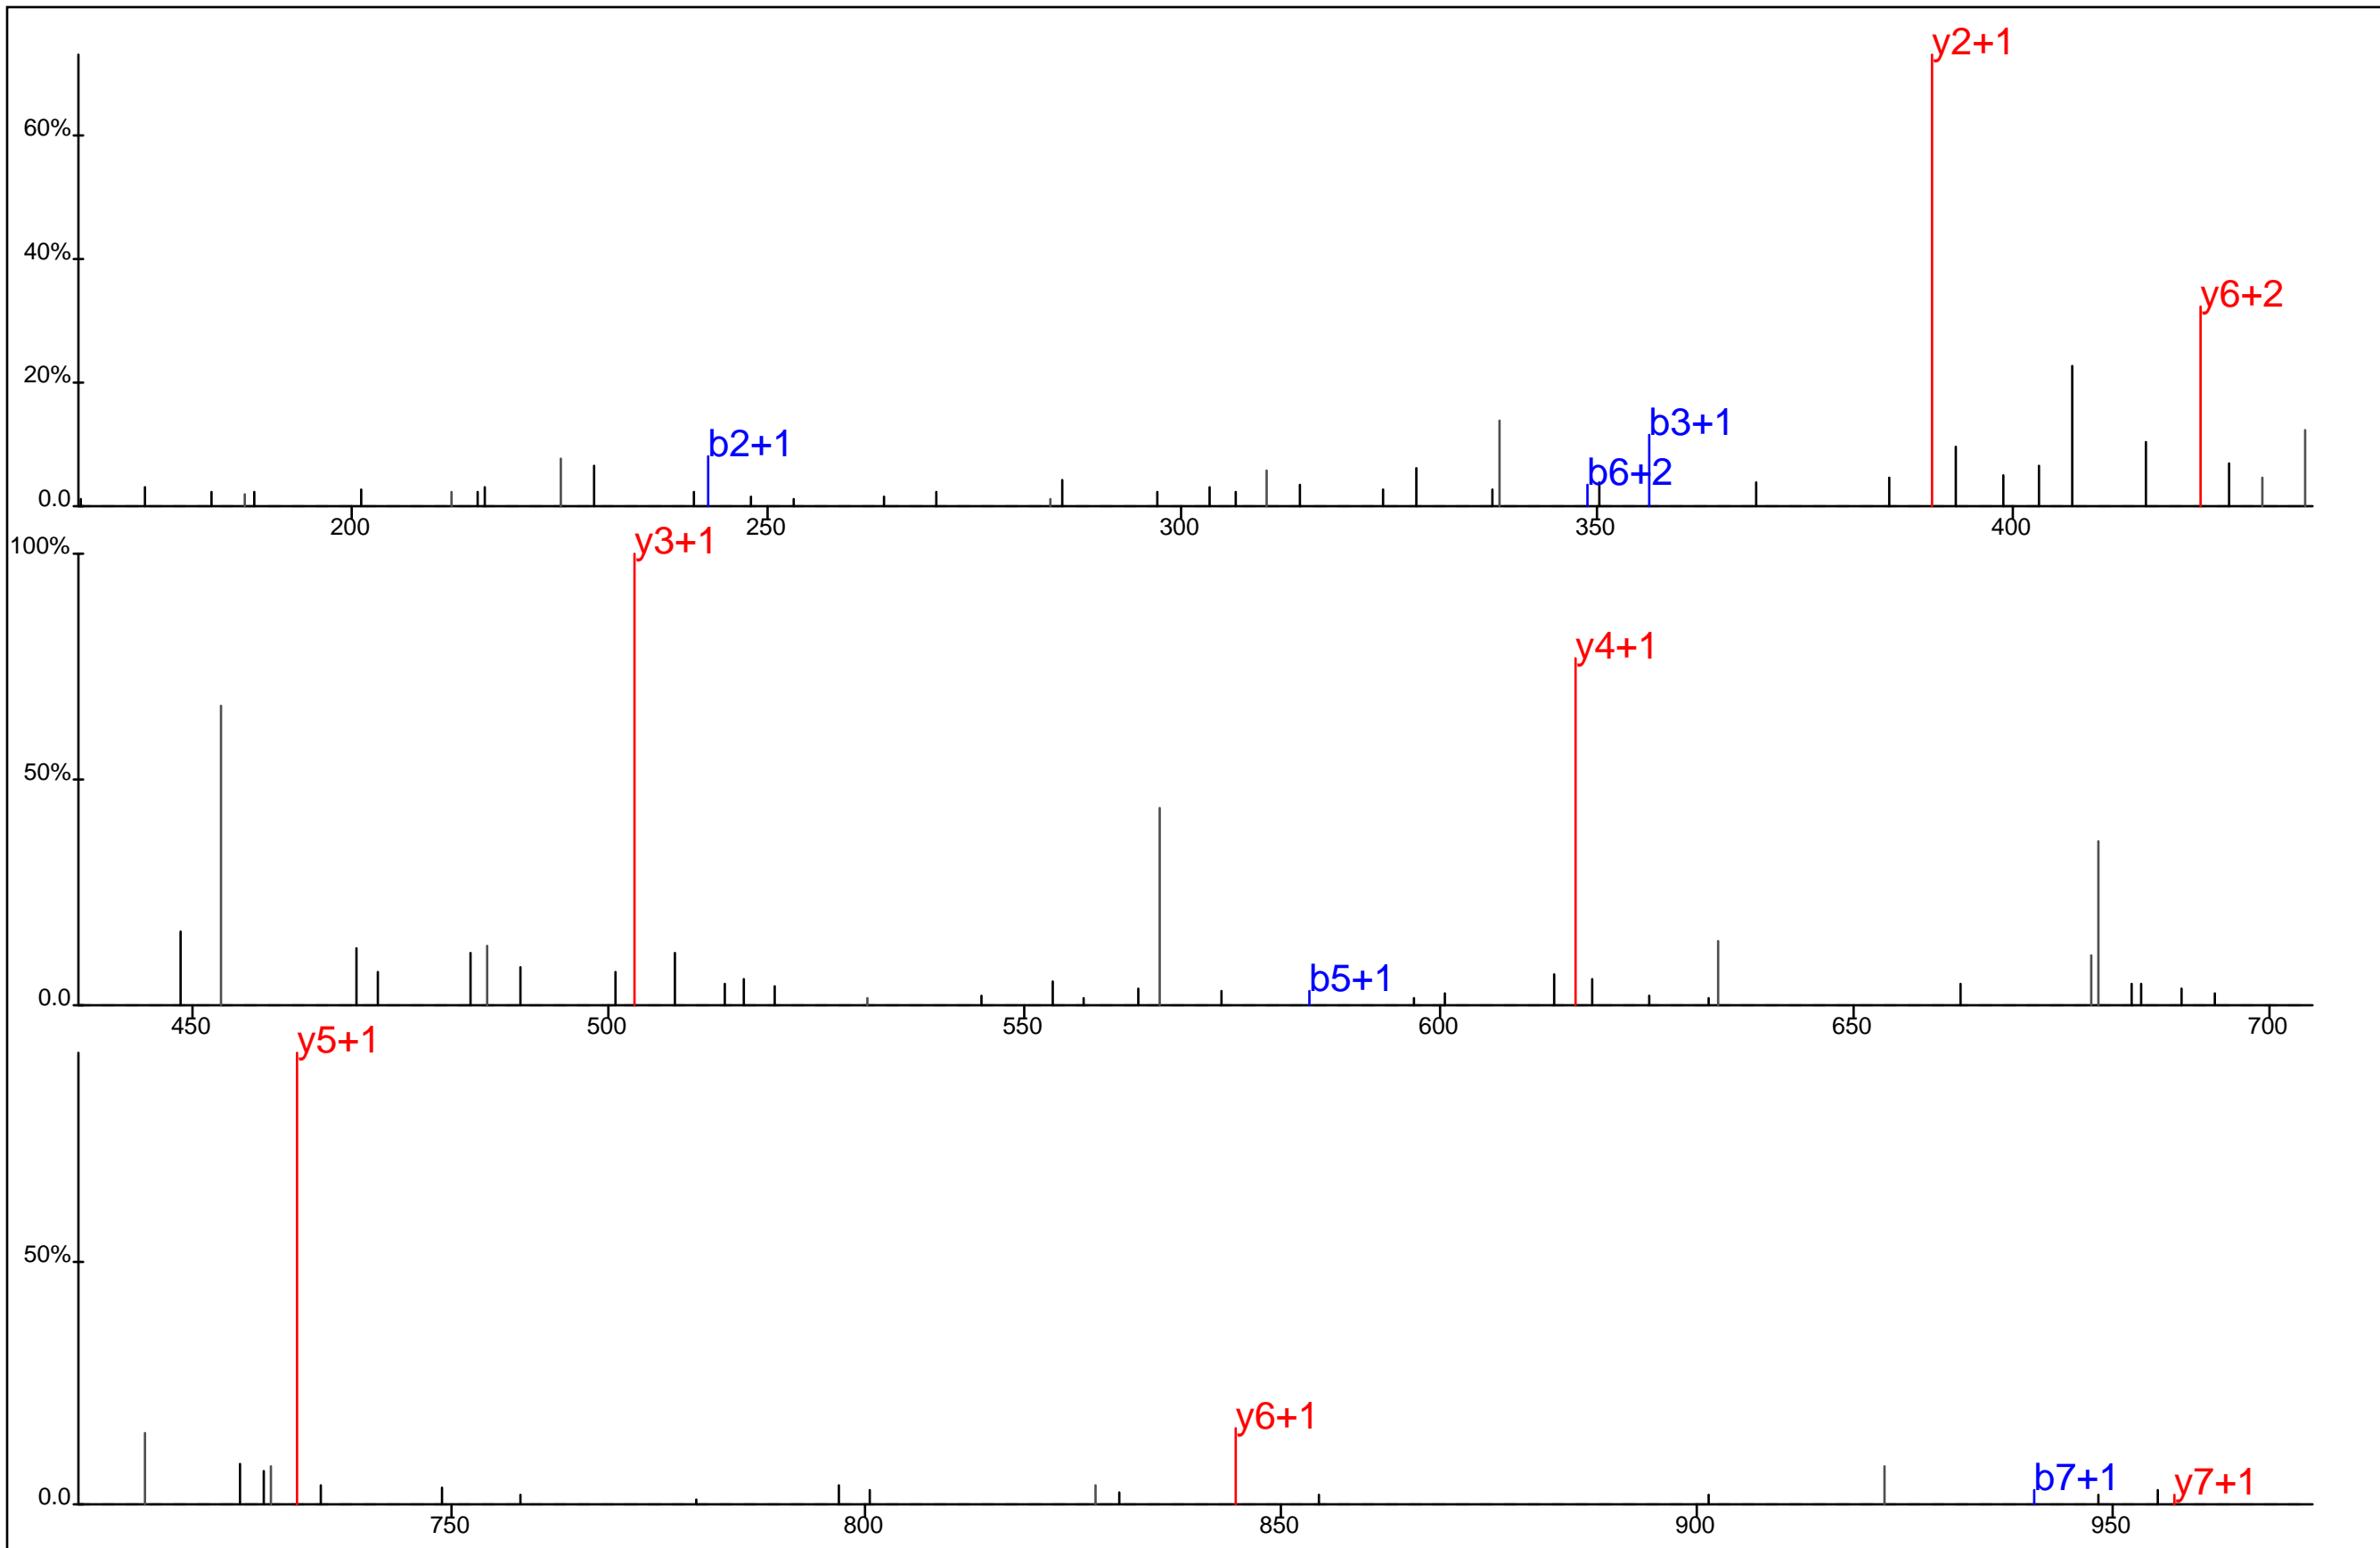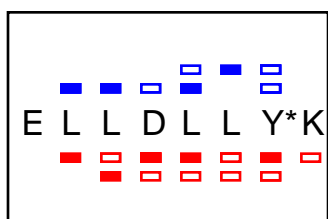

Protein Name: Adenosine deaminase  
 gi Accession: 0  
 Precursor Mass: 543.7778+2  
 Delta Mass: 0.162 ppm  
 XCorr: 43.41

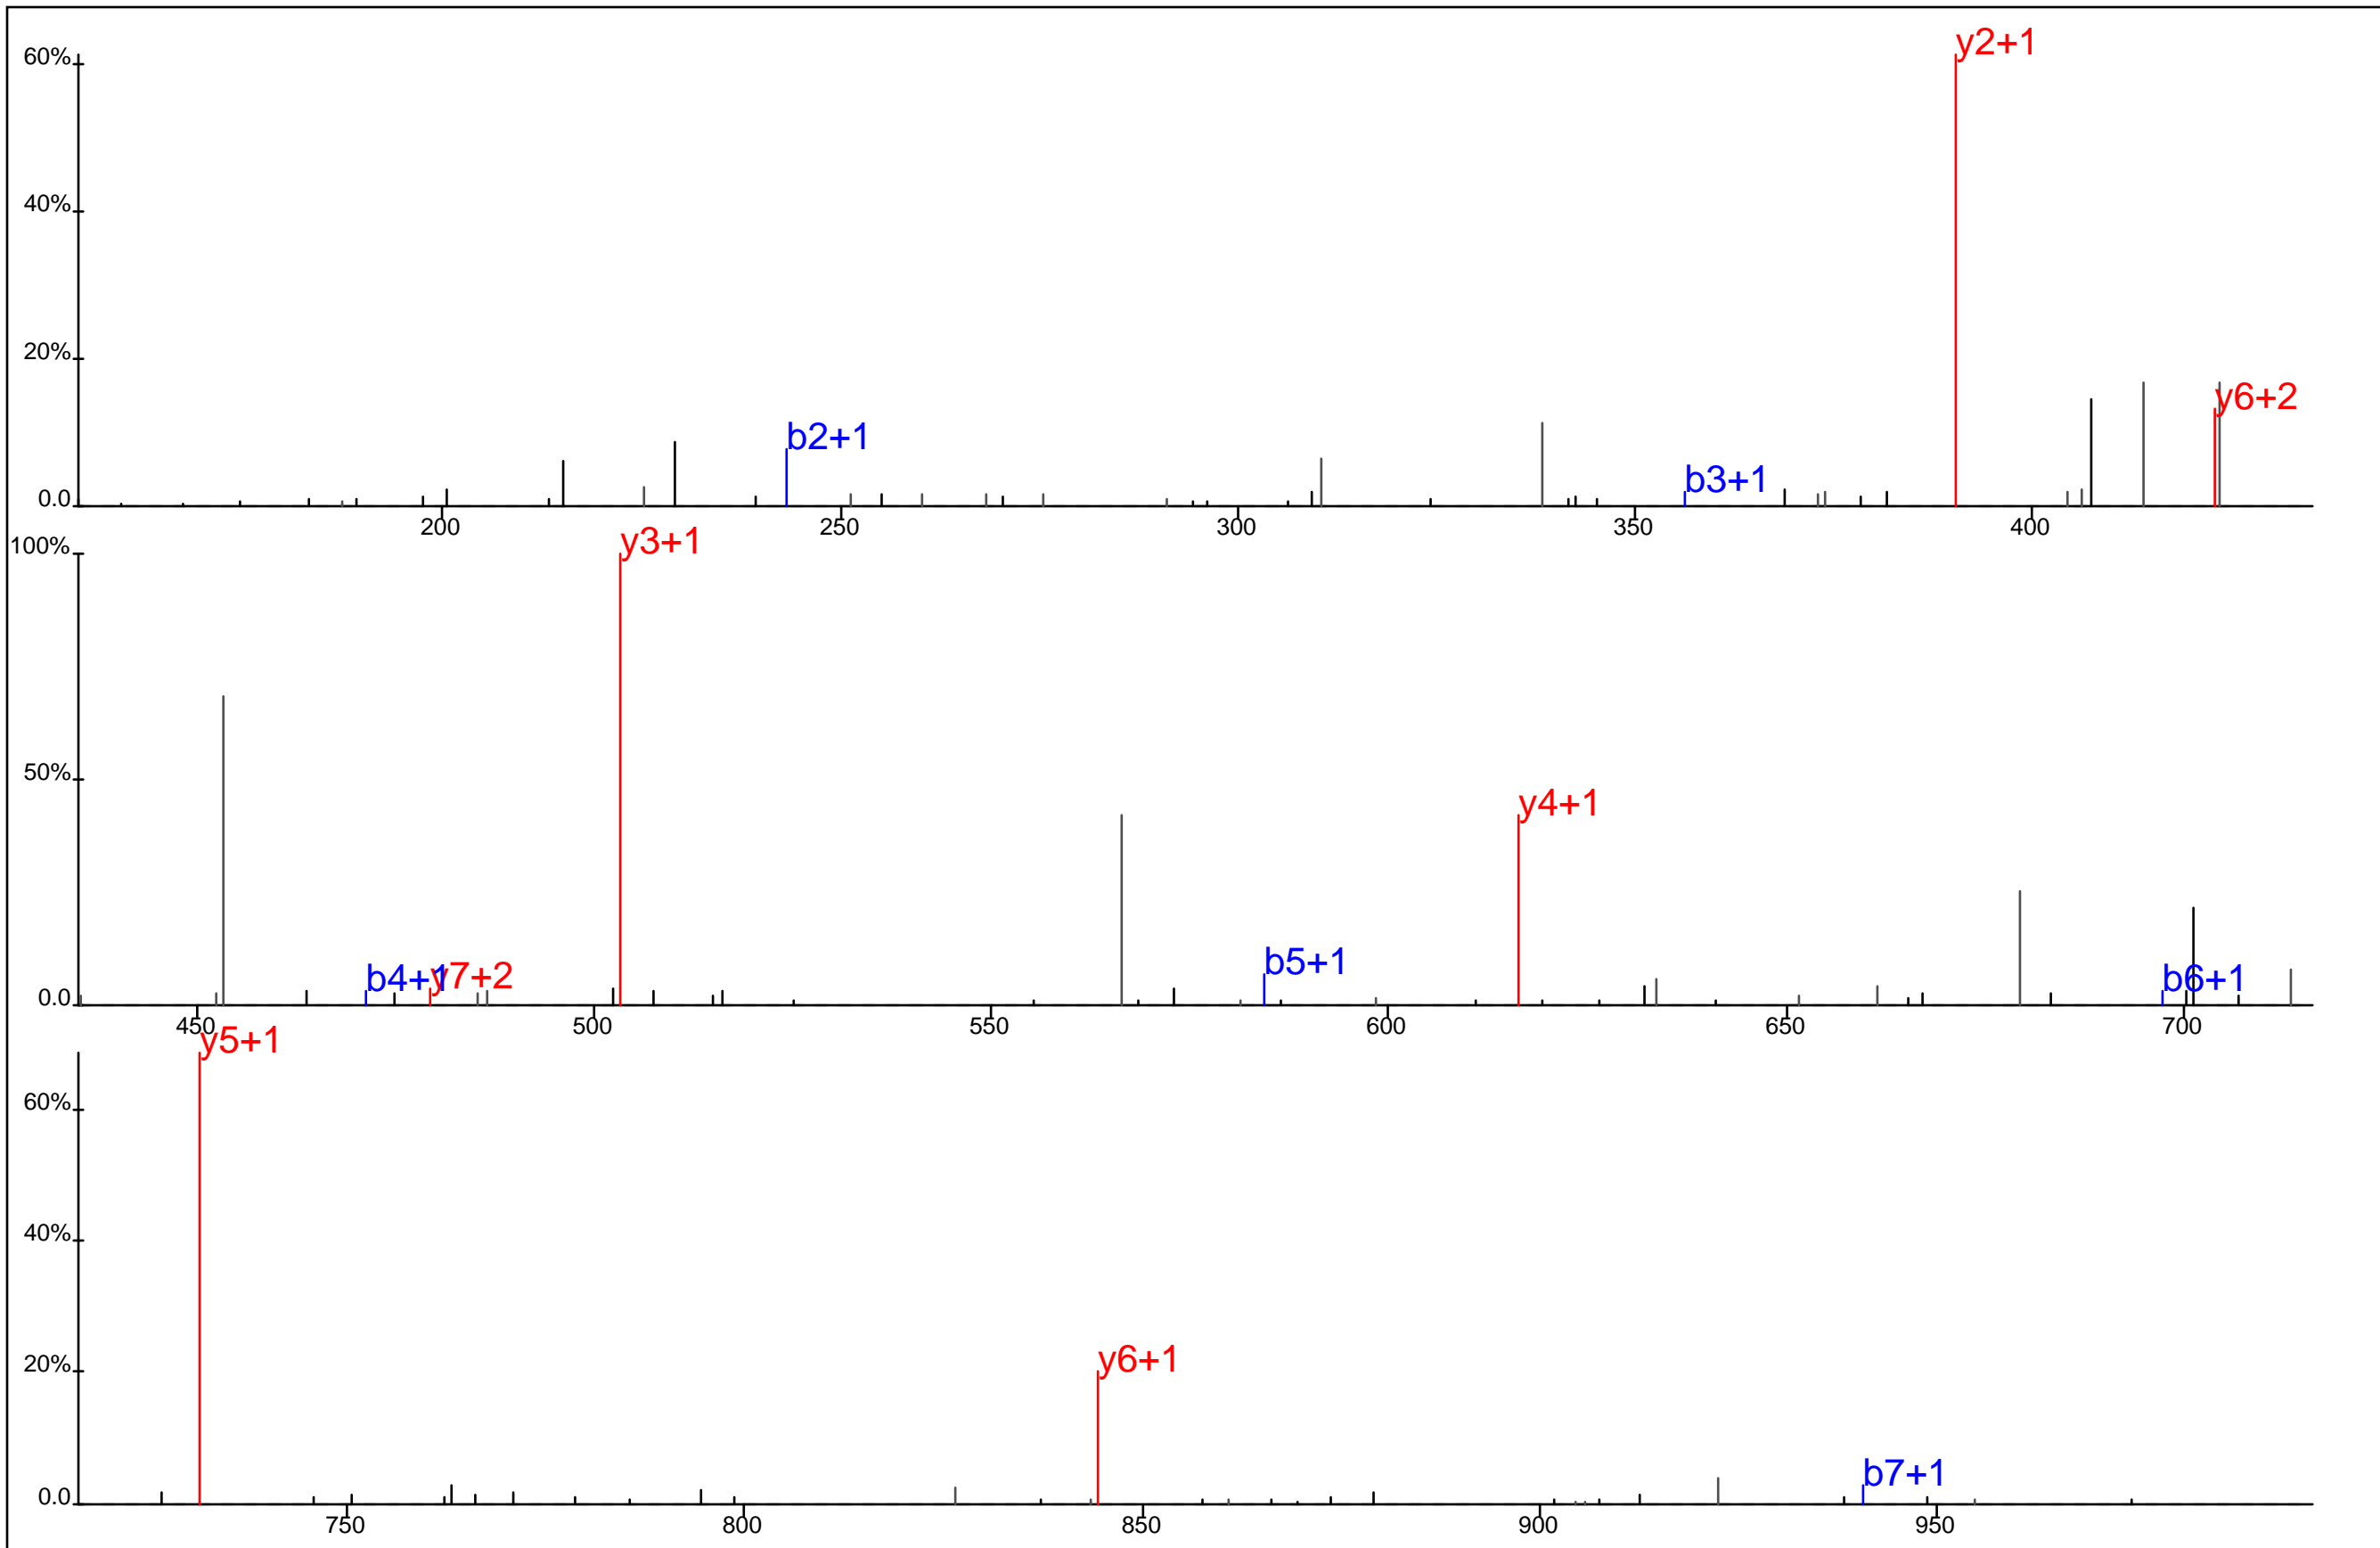

■ ■ □ □ ■ ■  
 E L L D L L Y\* K  
■ ■ □ □ ■ ■

Protein Name: Adenosine deaminase  
 gi Accession: 0  
 Precursor Mass: 543.7783+2  
 Delta Mass: 1.060 ppm  
 XCorr: 34.76

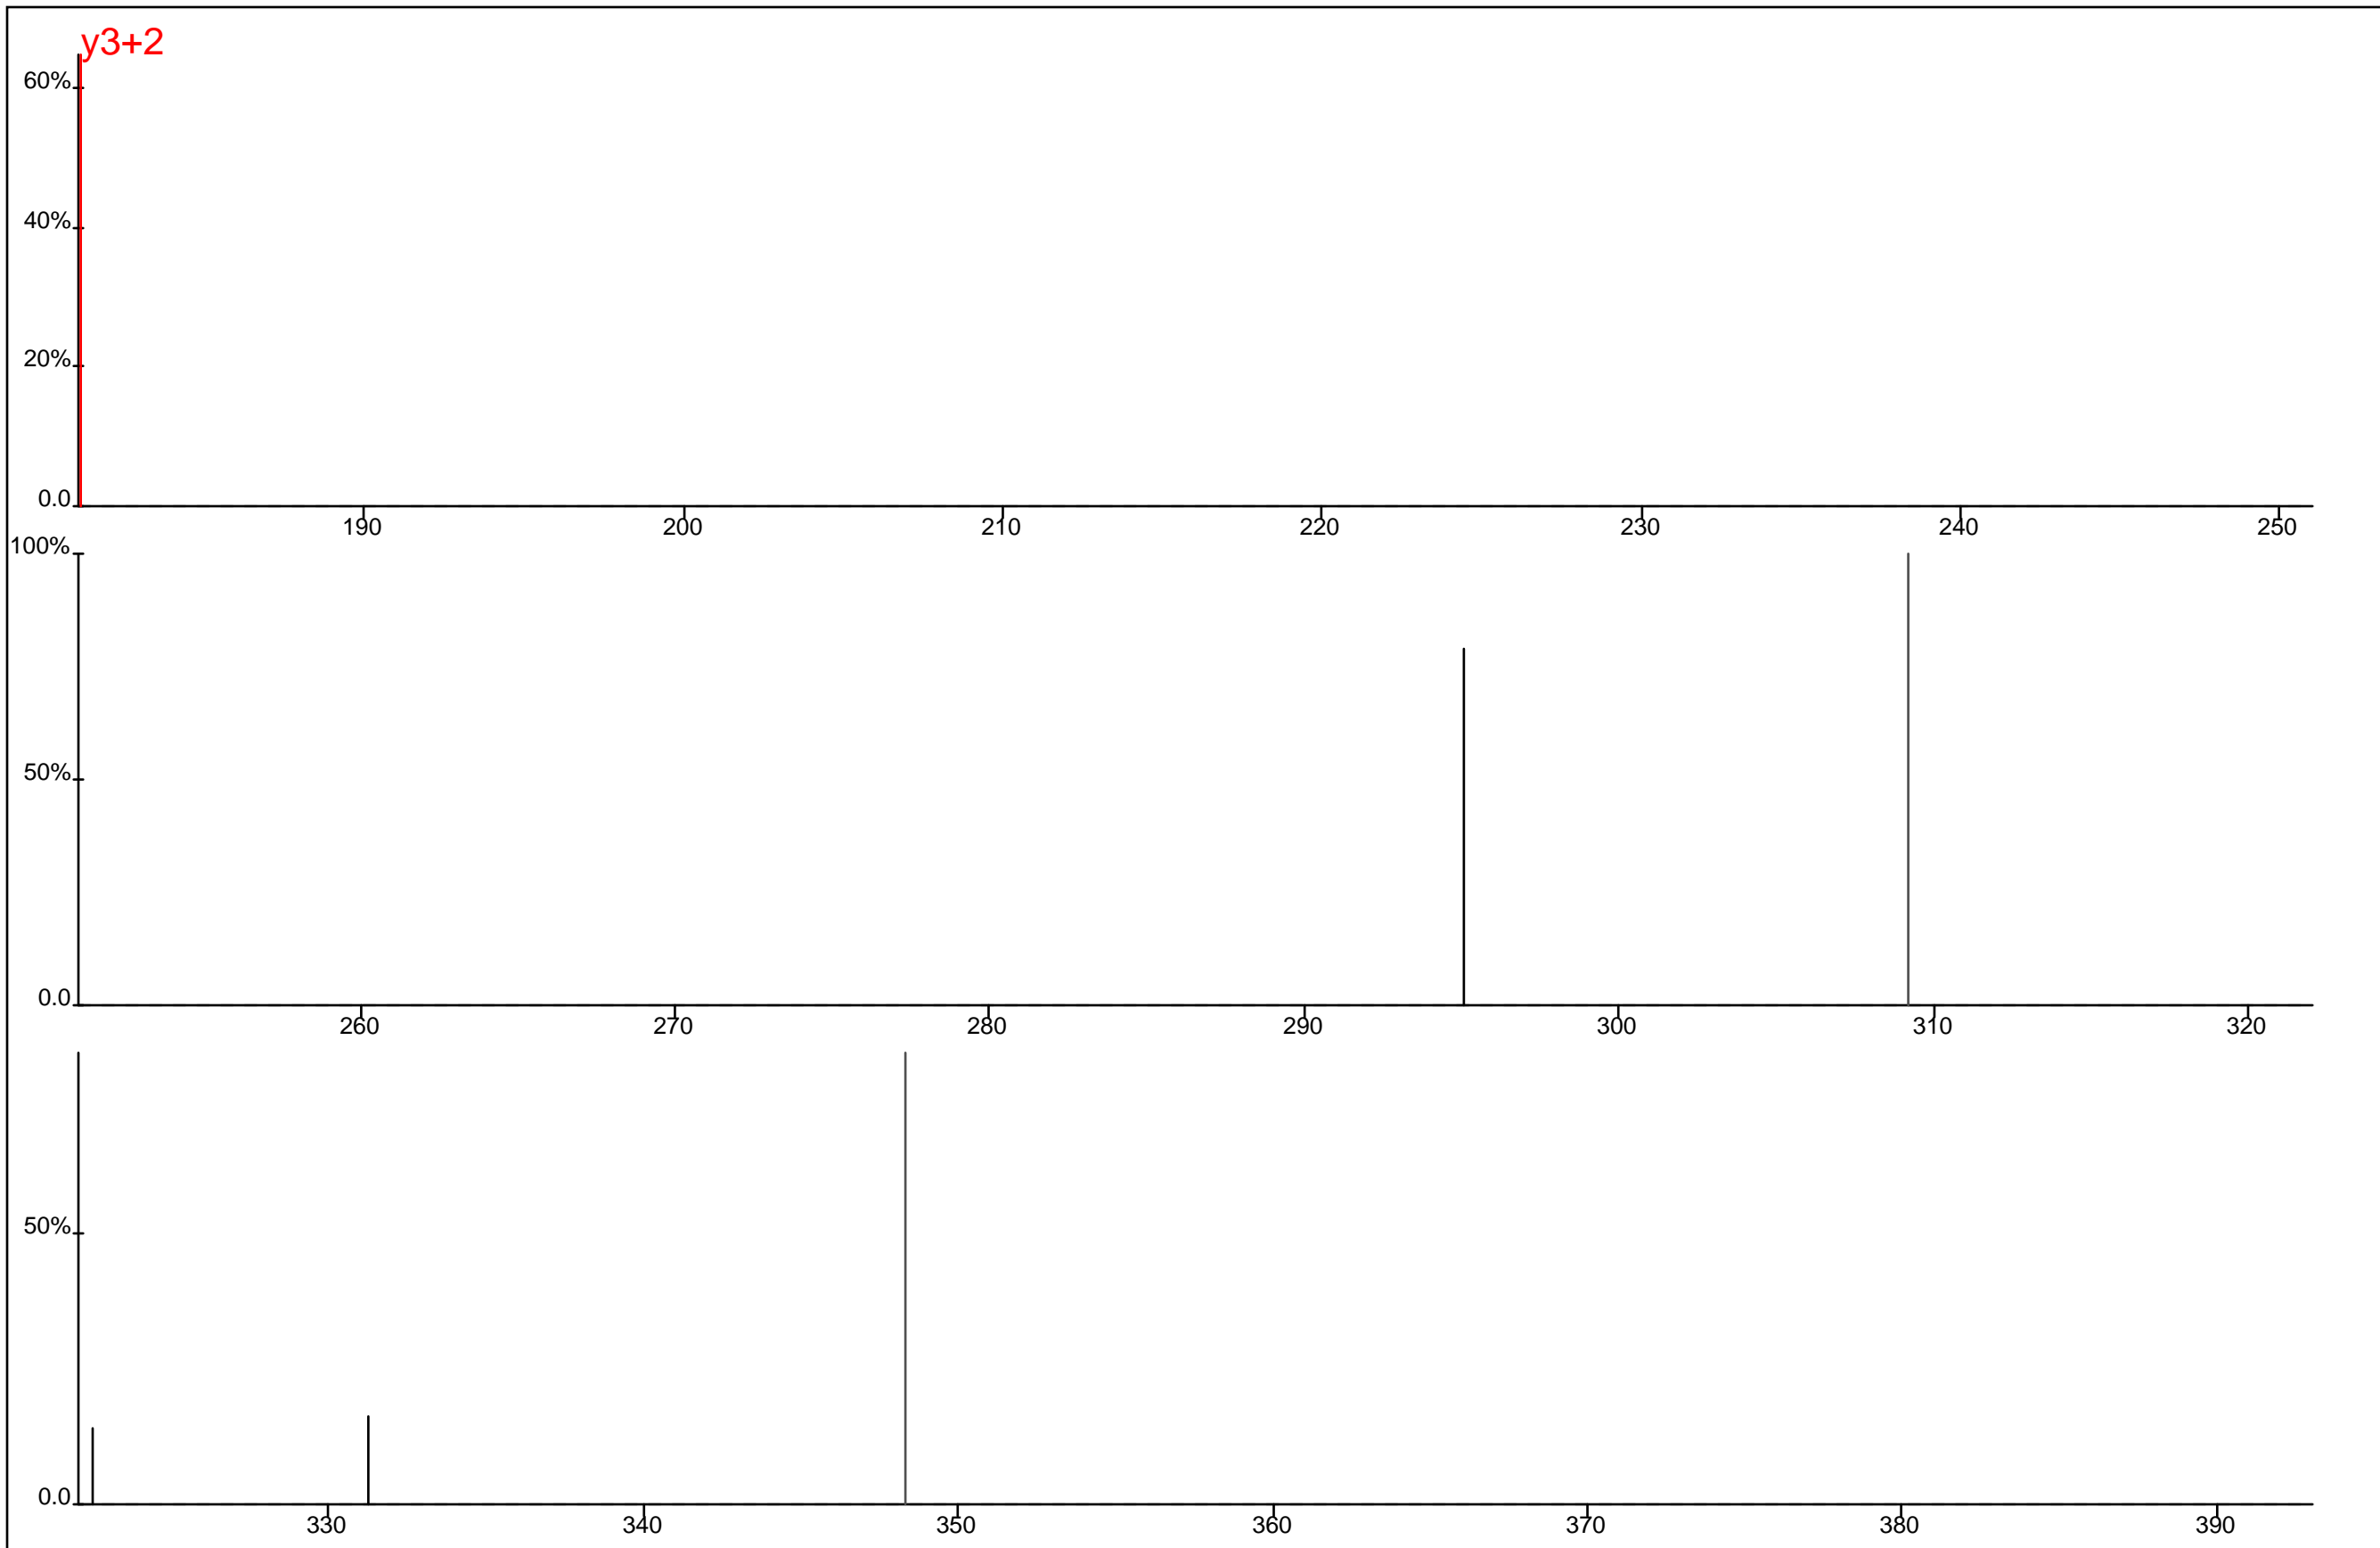

R P Q Y\***D** I W G N T V N V A S\*R M**D** S\*T\*G V Q G R

■

Protein Name: Adenylate cyclase 1  
 gi Accession: 0  
 Precursor Mass: 393.7857+8  
 Delta Mass: 3.355 ppm  
 XCorr: 21.52

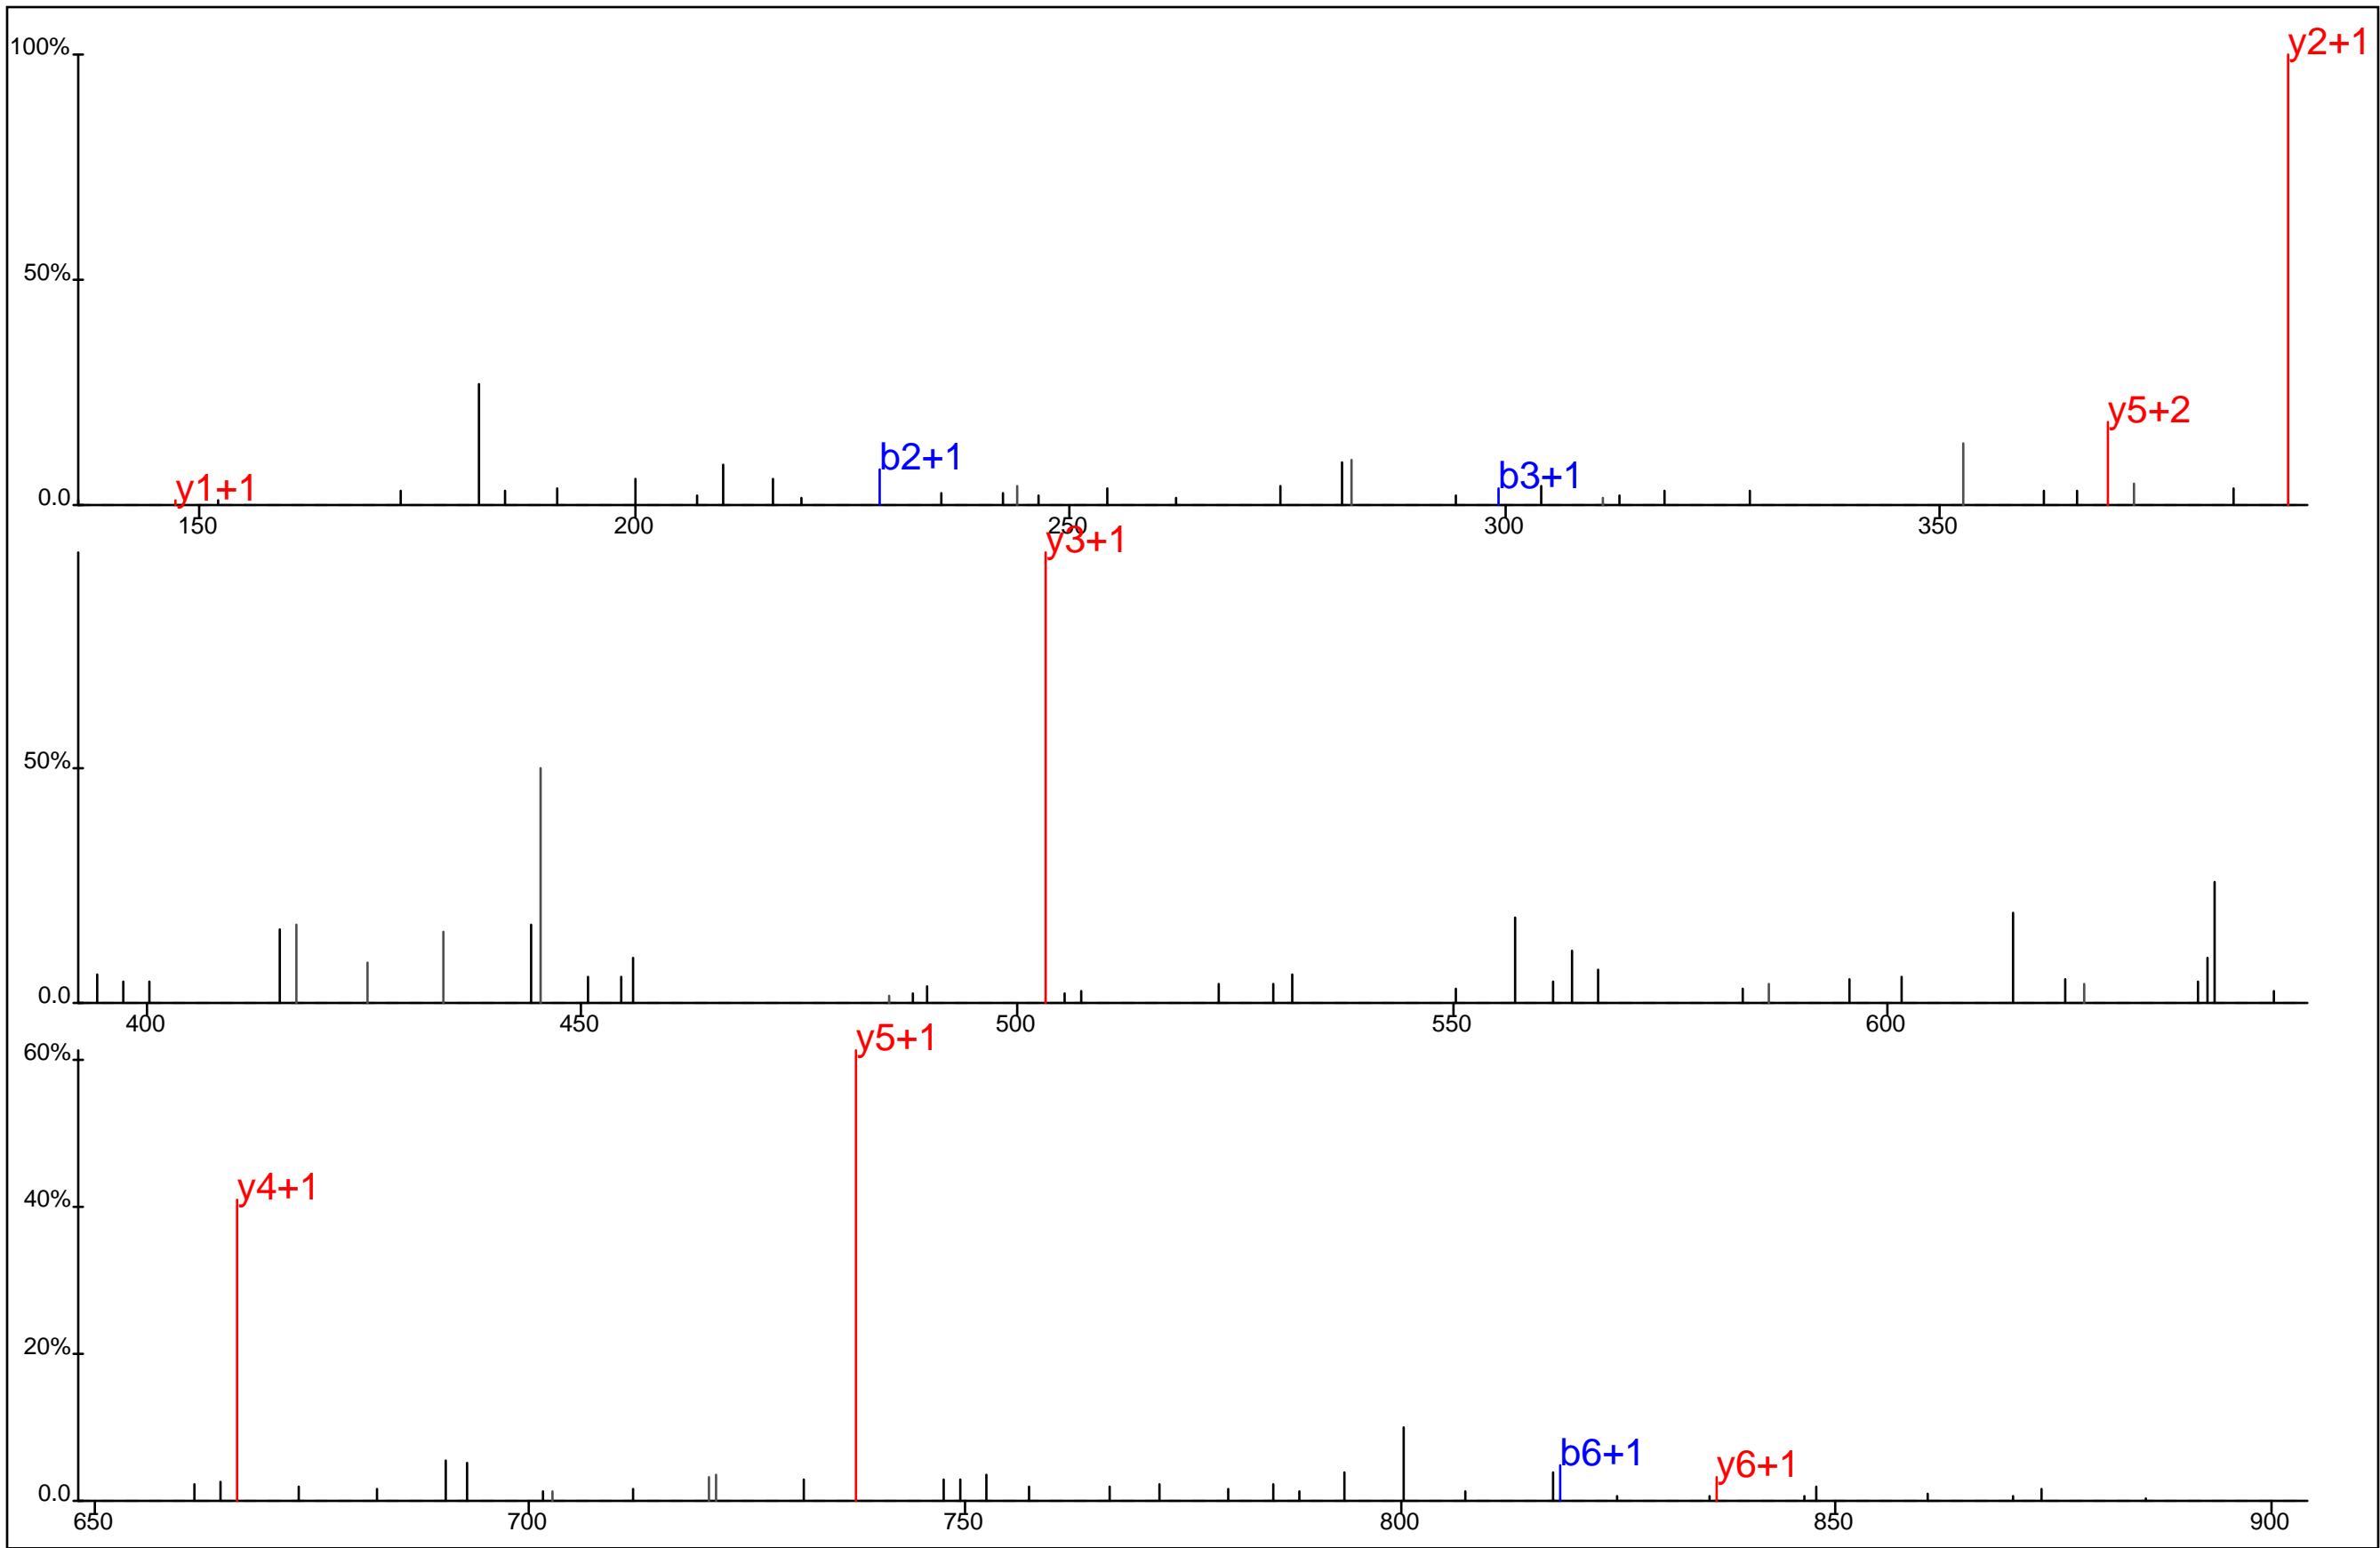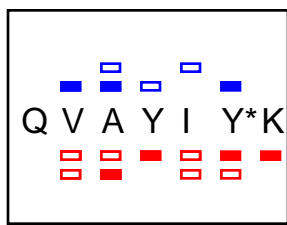

Protein Name: Adenylyl cyclase-associated protein  
 gi Accession: 0  
 Precursor Mass: 482.7324+2  
 Delta Mass: 3.770 ppm  
 XCorr: 37.33

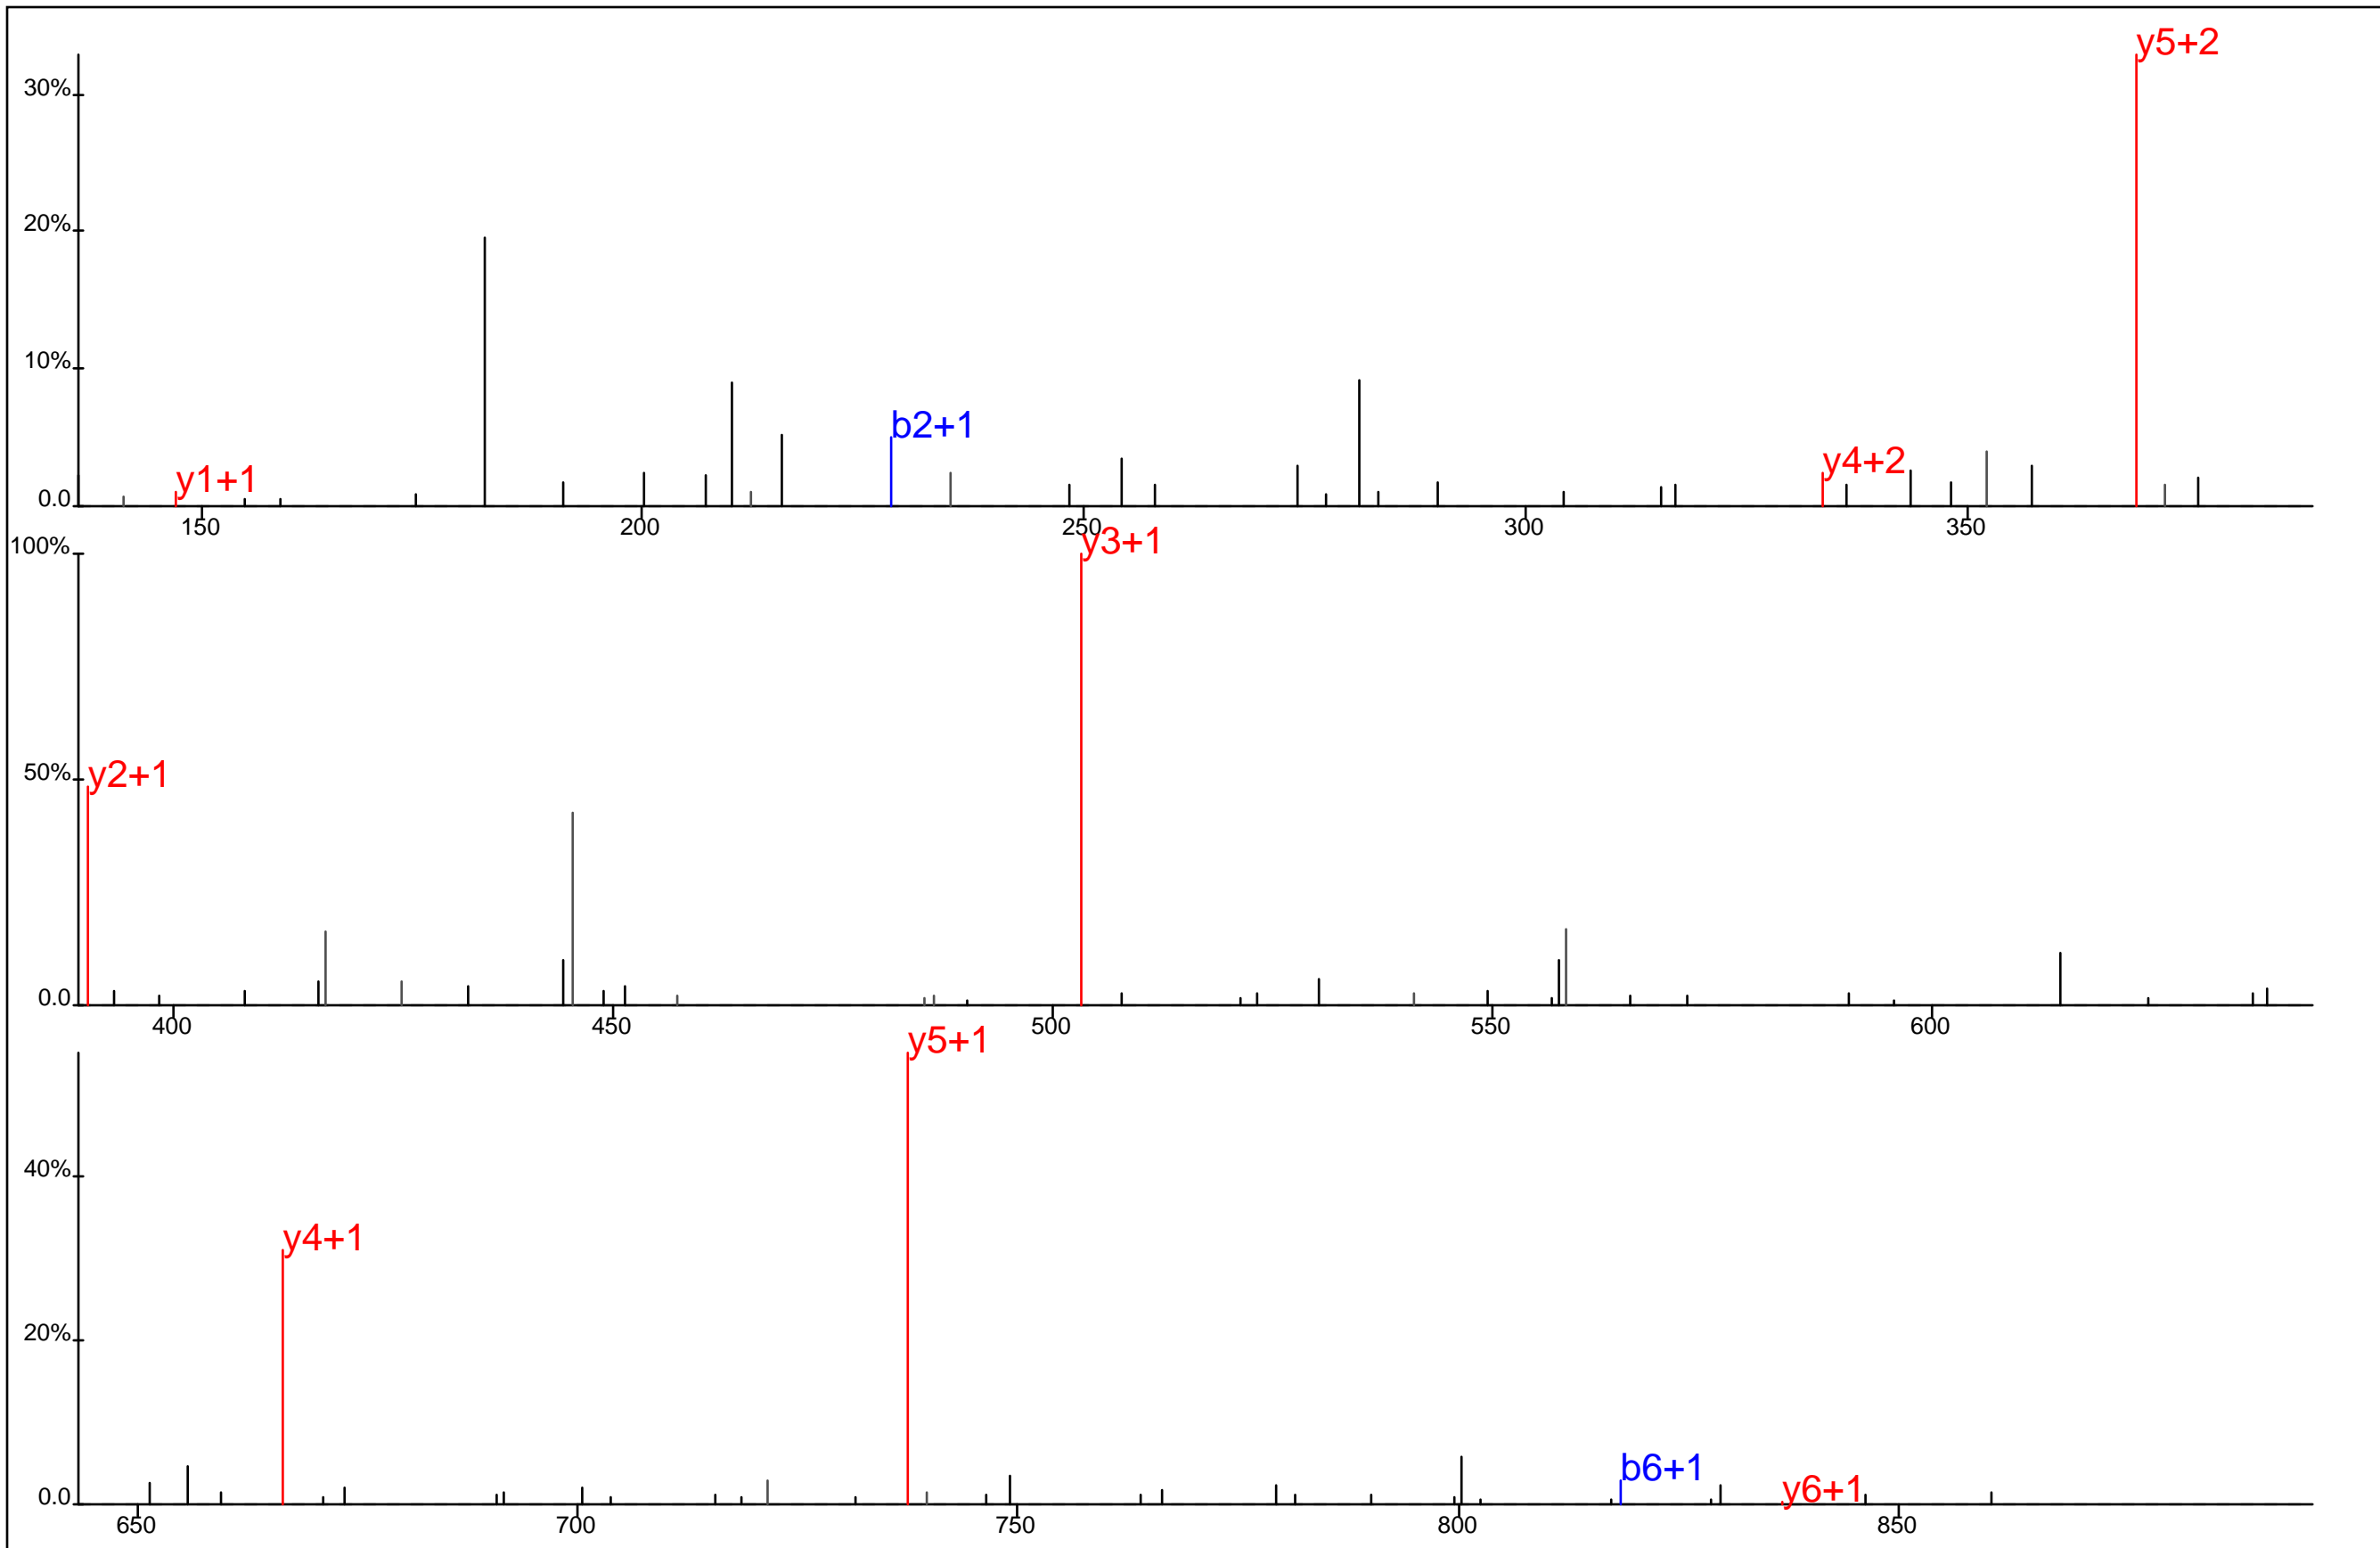

Q V A Y I Y\*K

Protein Name: Adenylyl cyclase-associated protein  
 gi Accession: 0  
 Precursor Mass: 482.7310+2  
 Delta Mass: 0.923 ppm  
 XCorr: 24.18

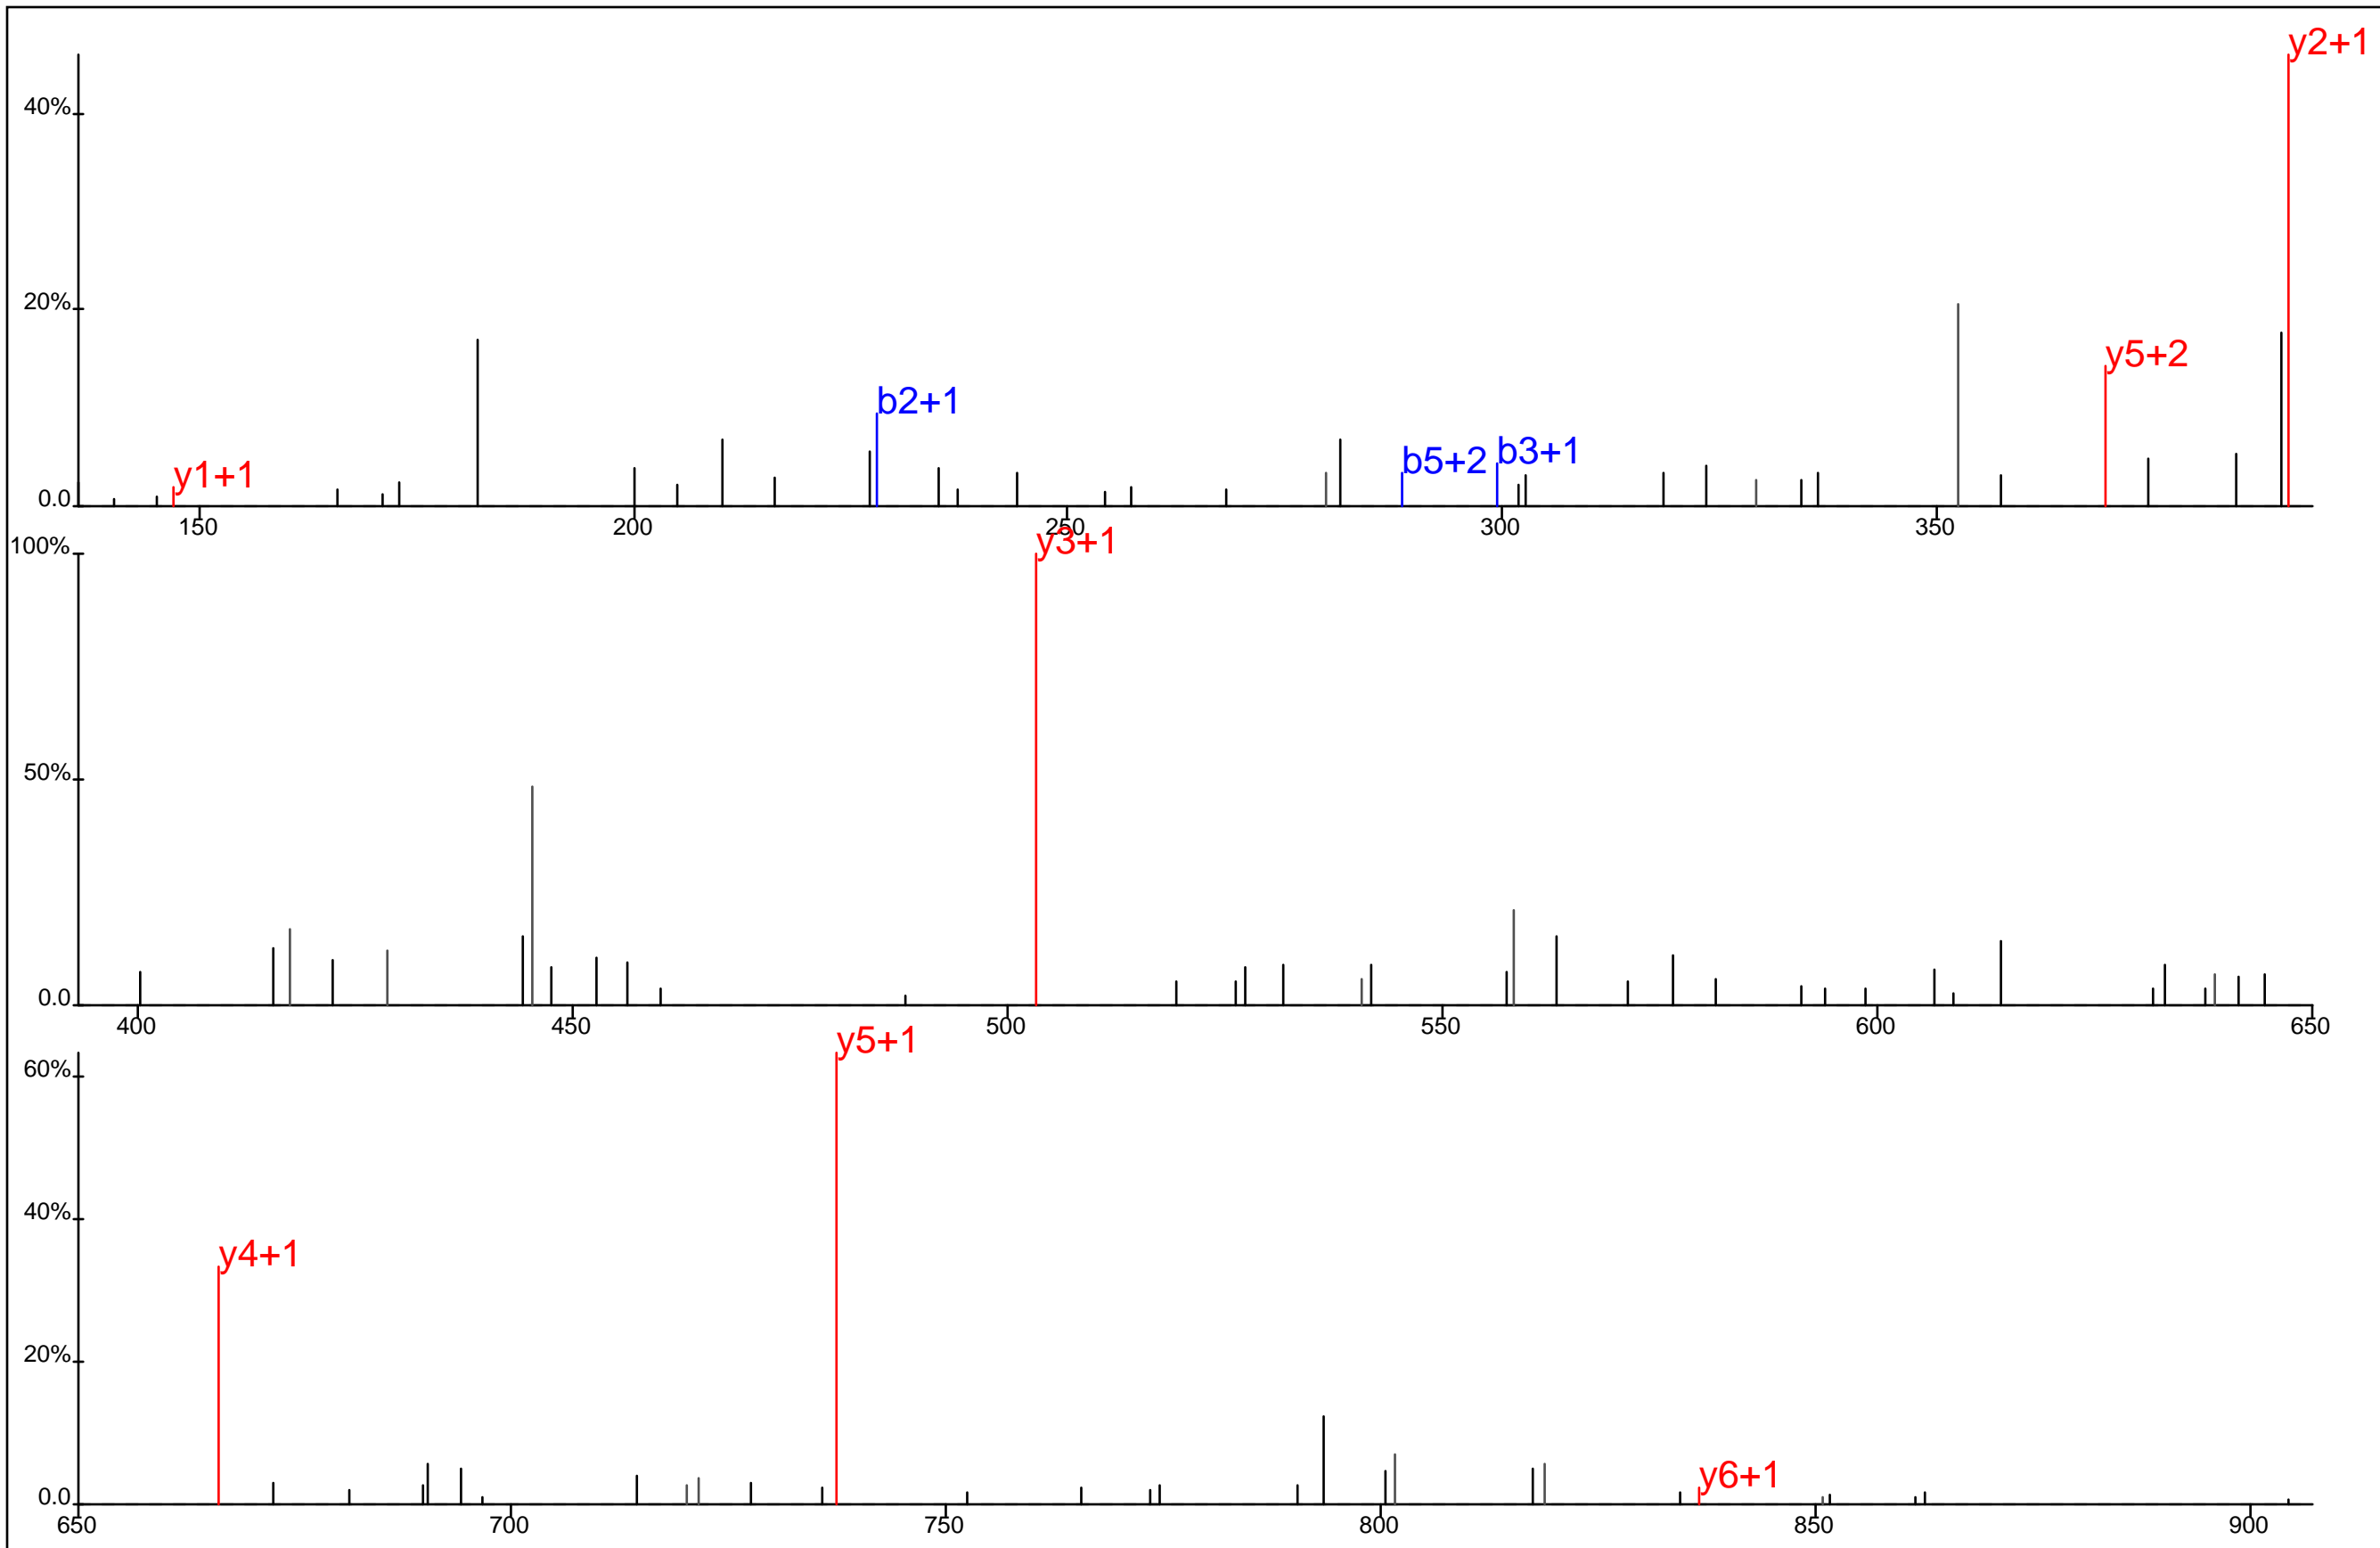

**Q V A Y I Y\* K**

Protein Name: Adenylyl cyclase-associated protein  
 gi Accession: 0  
 Precursor Mass: 482.7320+2  
 Delta Mass: 2.885 ppm  
 XCorr: 36.85

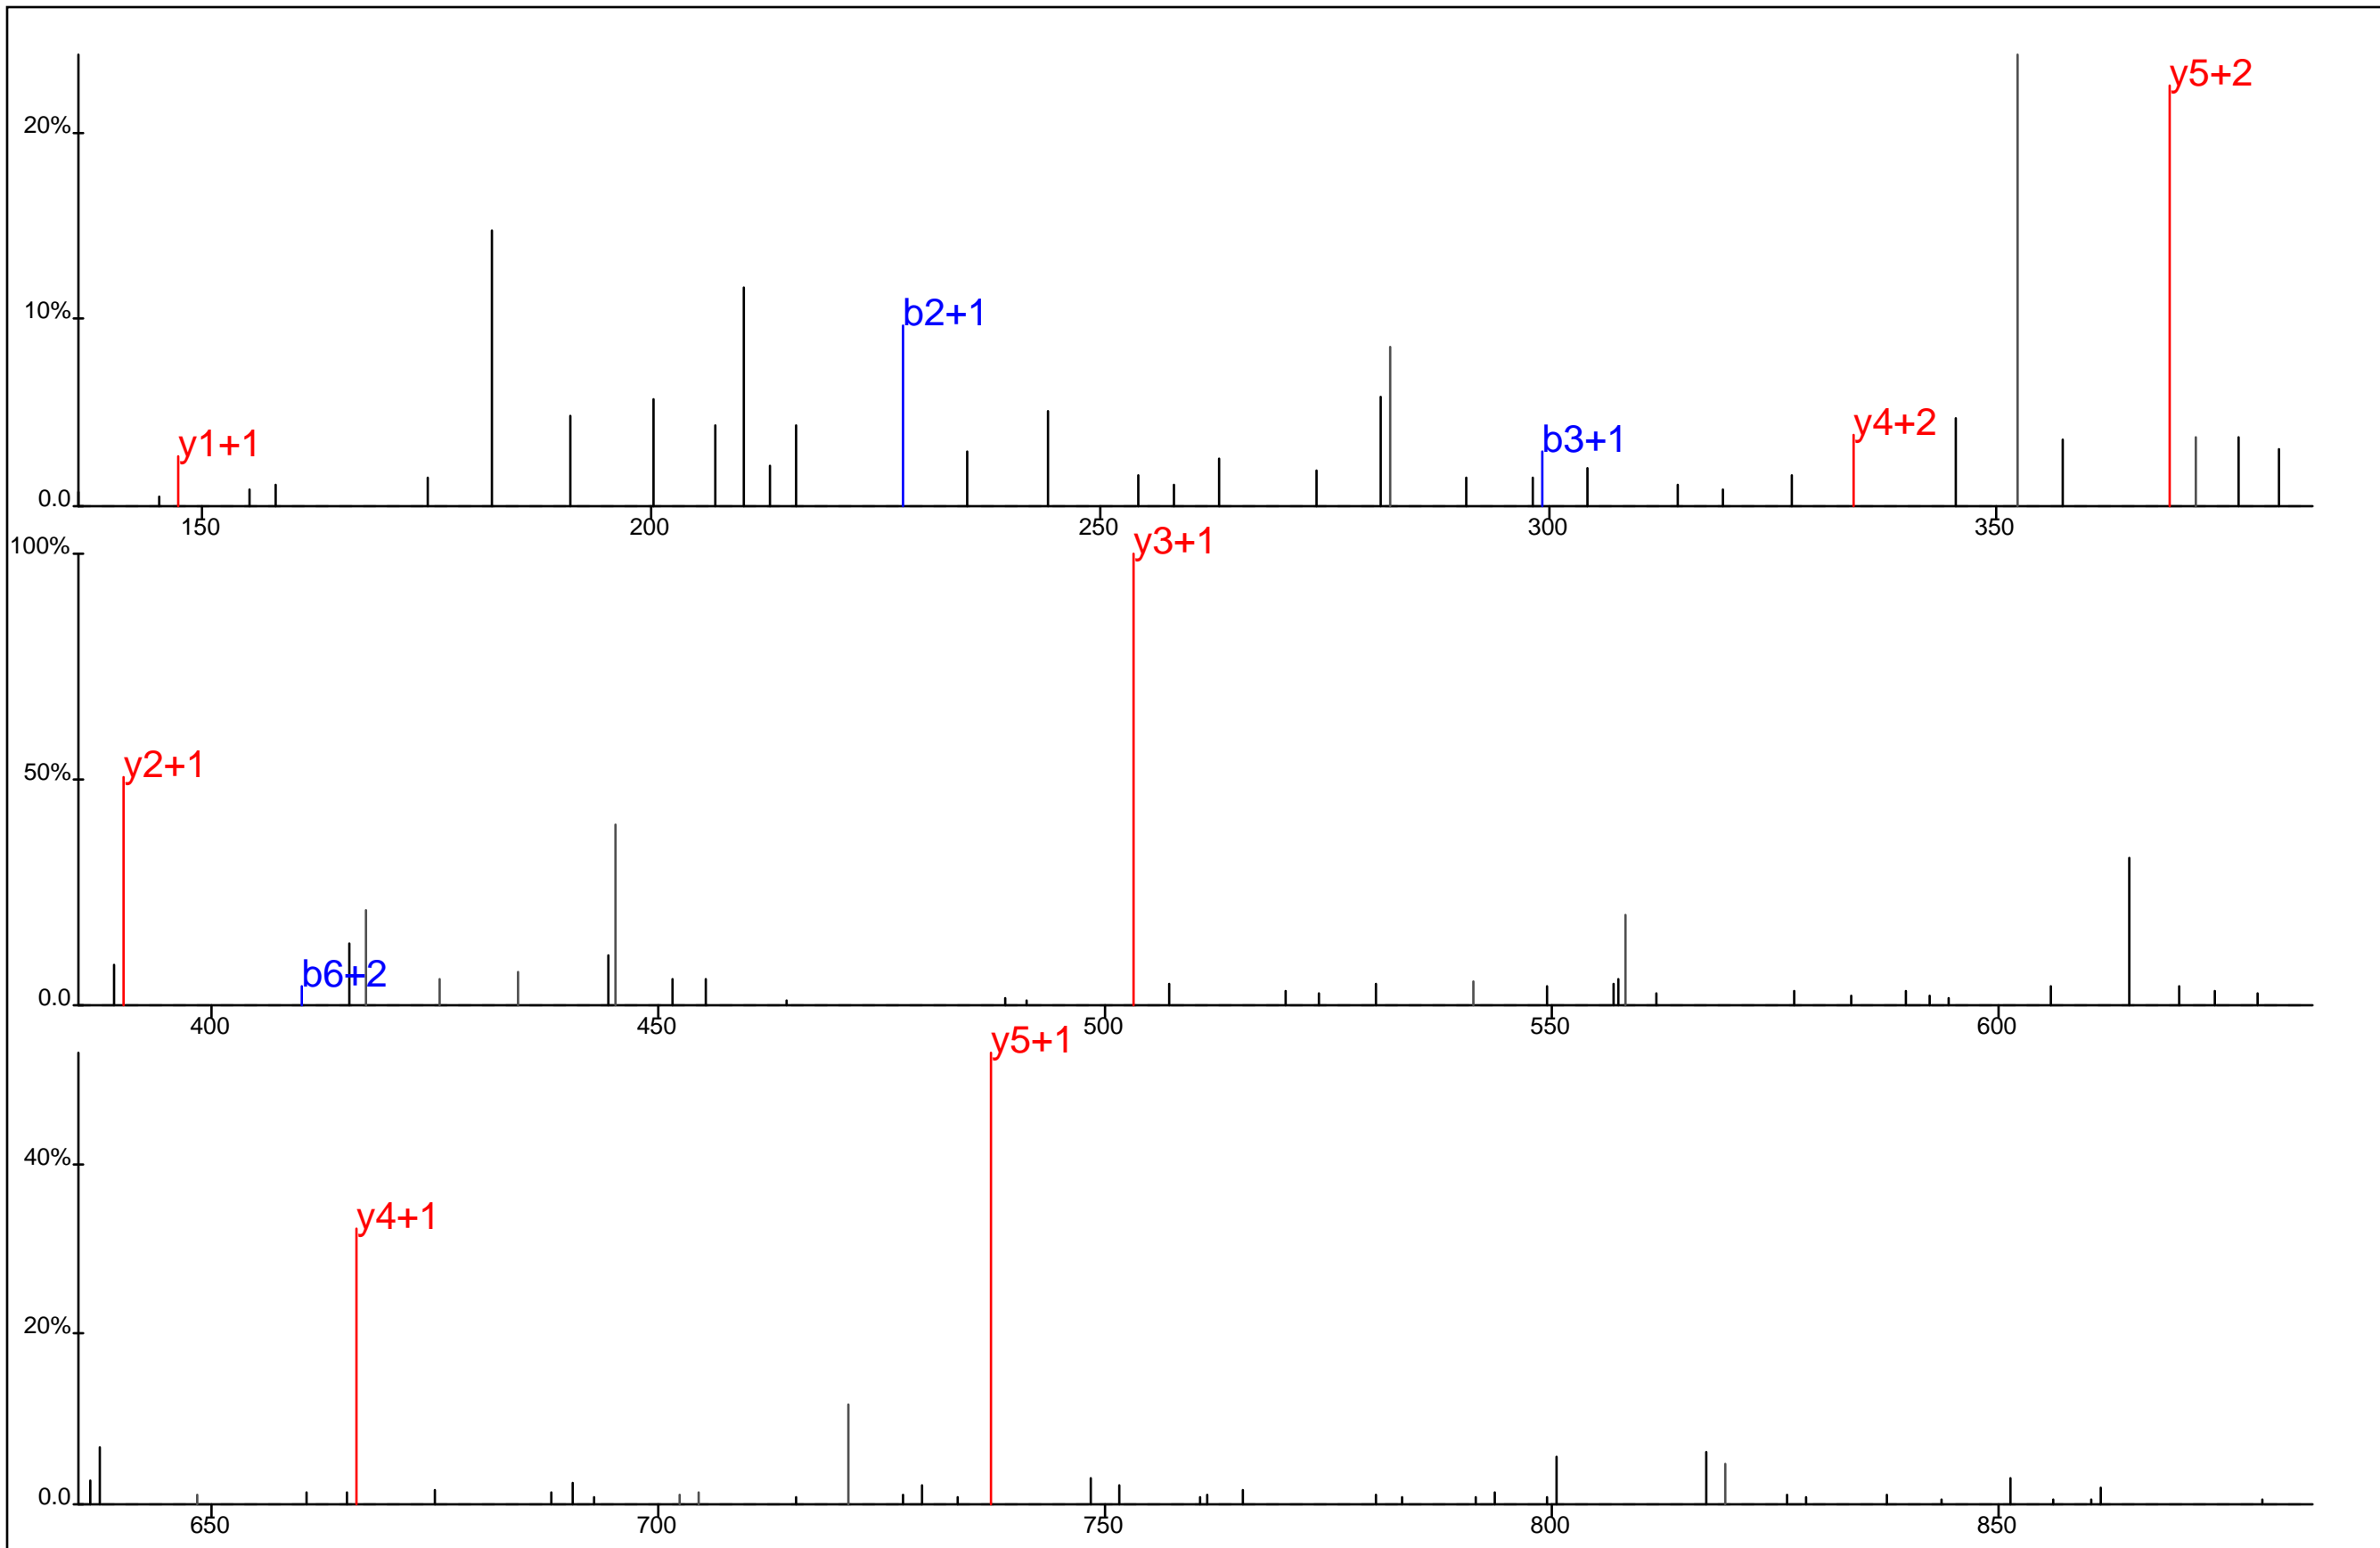

■ ▢ ▣ ▤  
 Q V A Y I Y\*K  
▢ ▣ ▤ ▥ ▦

Protein Name: Adenylyl cyclase-associated protein  
 gi Accession: 0  
 Precursor Mass: 482.7324+2  
 Delta Mass: 3.770 ppm  
 XCorr: 23.24

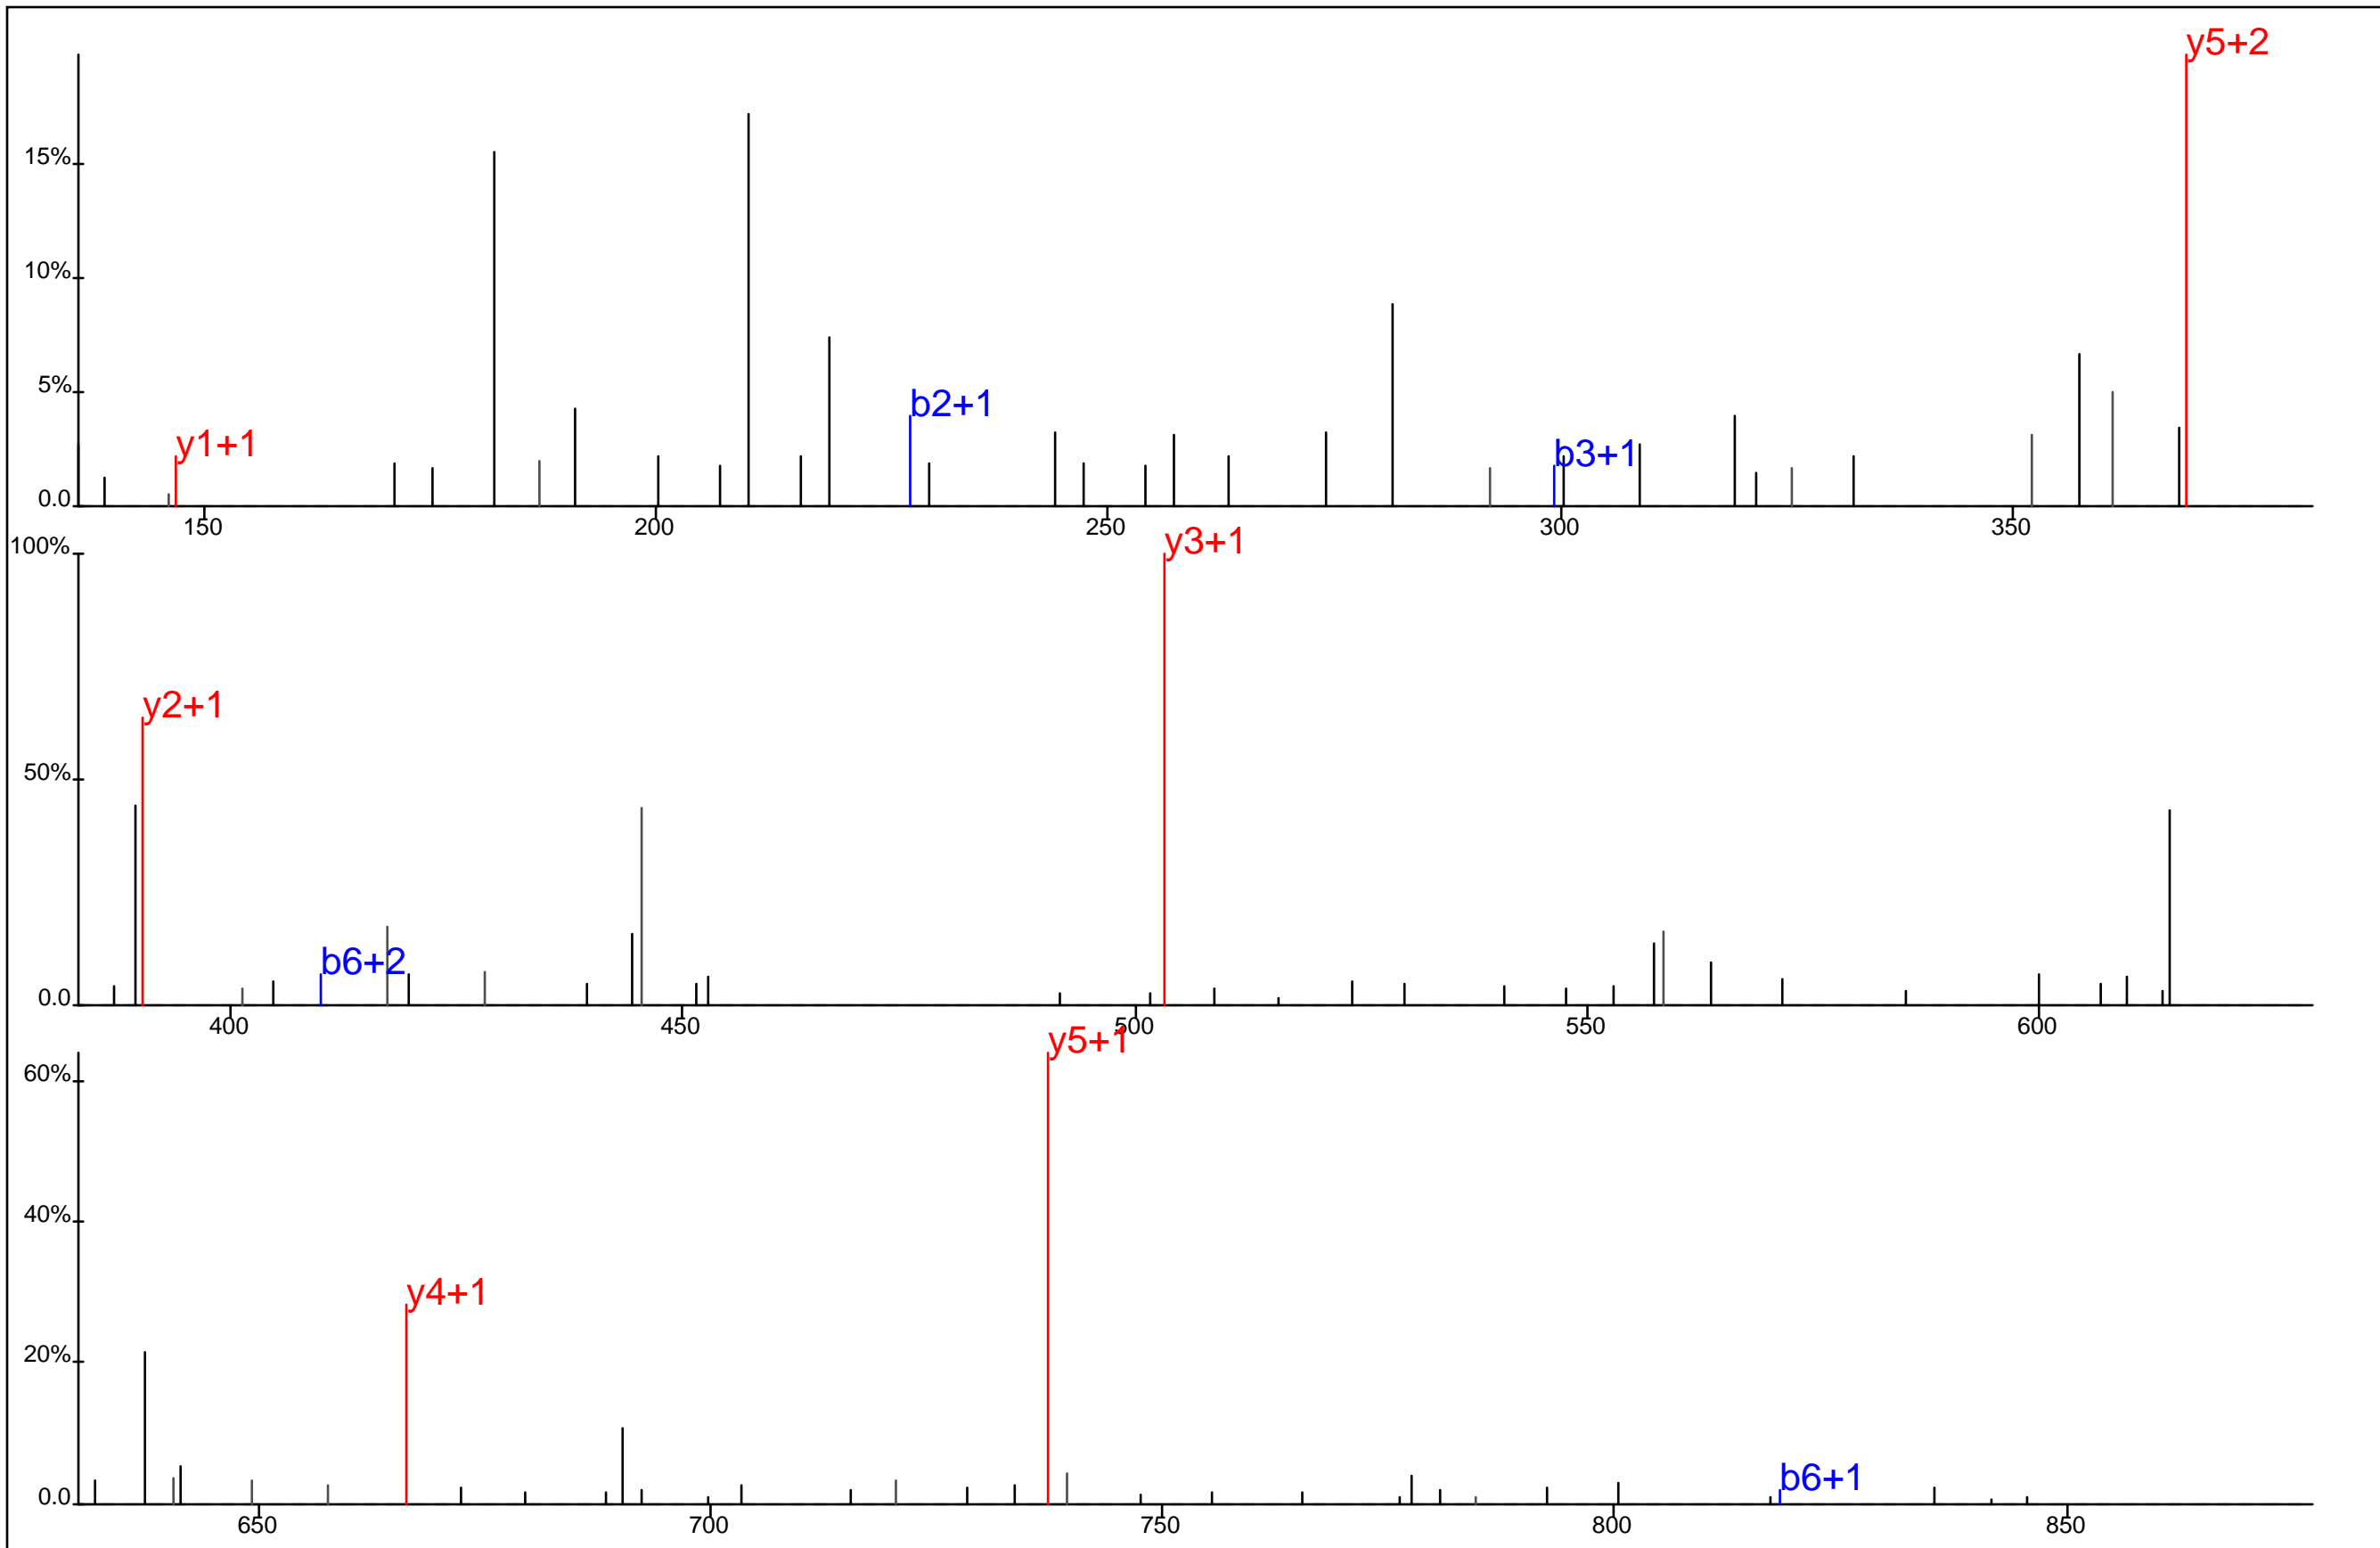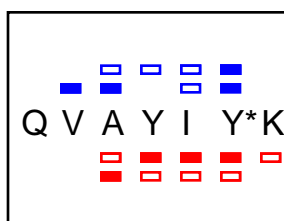

Protein Name: Adenylyl cyclase-associated protein  
 gi Accession: 0  
 Precursor Mass: 482.7304+2  
 Delta Mass: 0.406 ppm  
 XCorr: 22.98



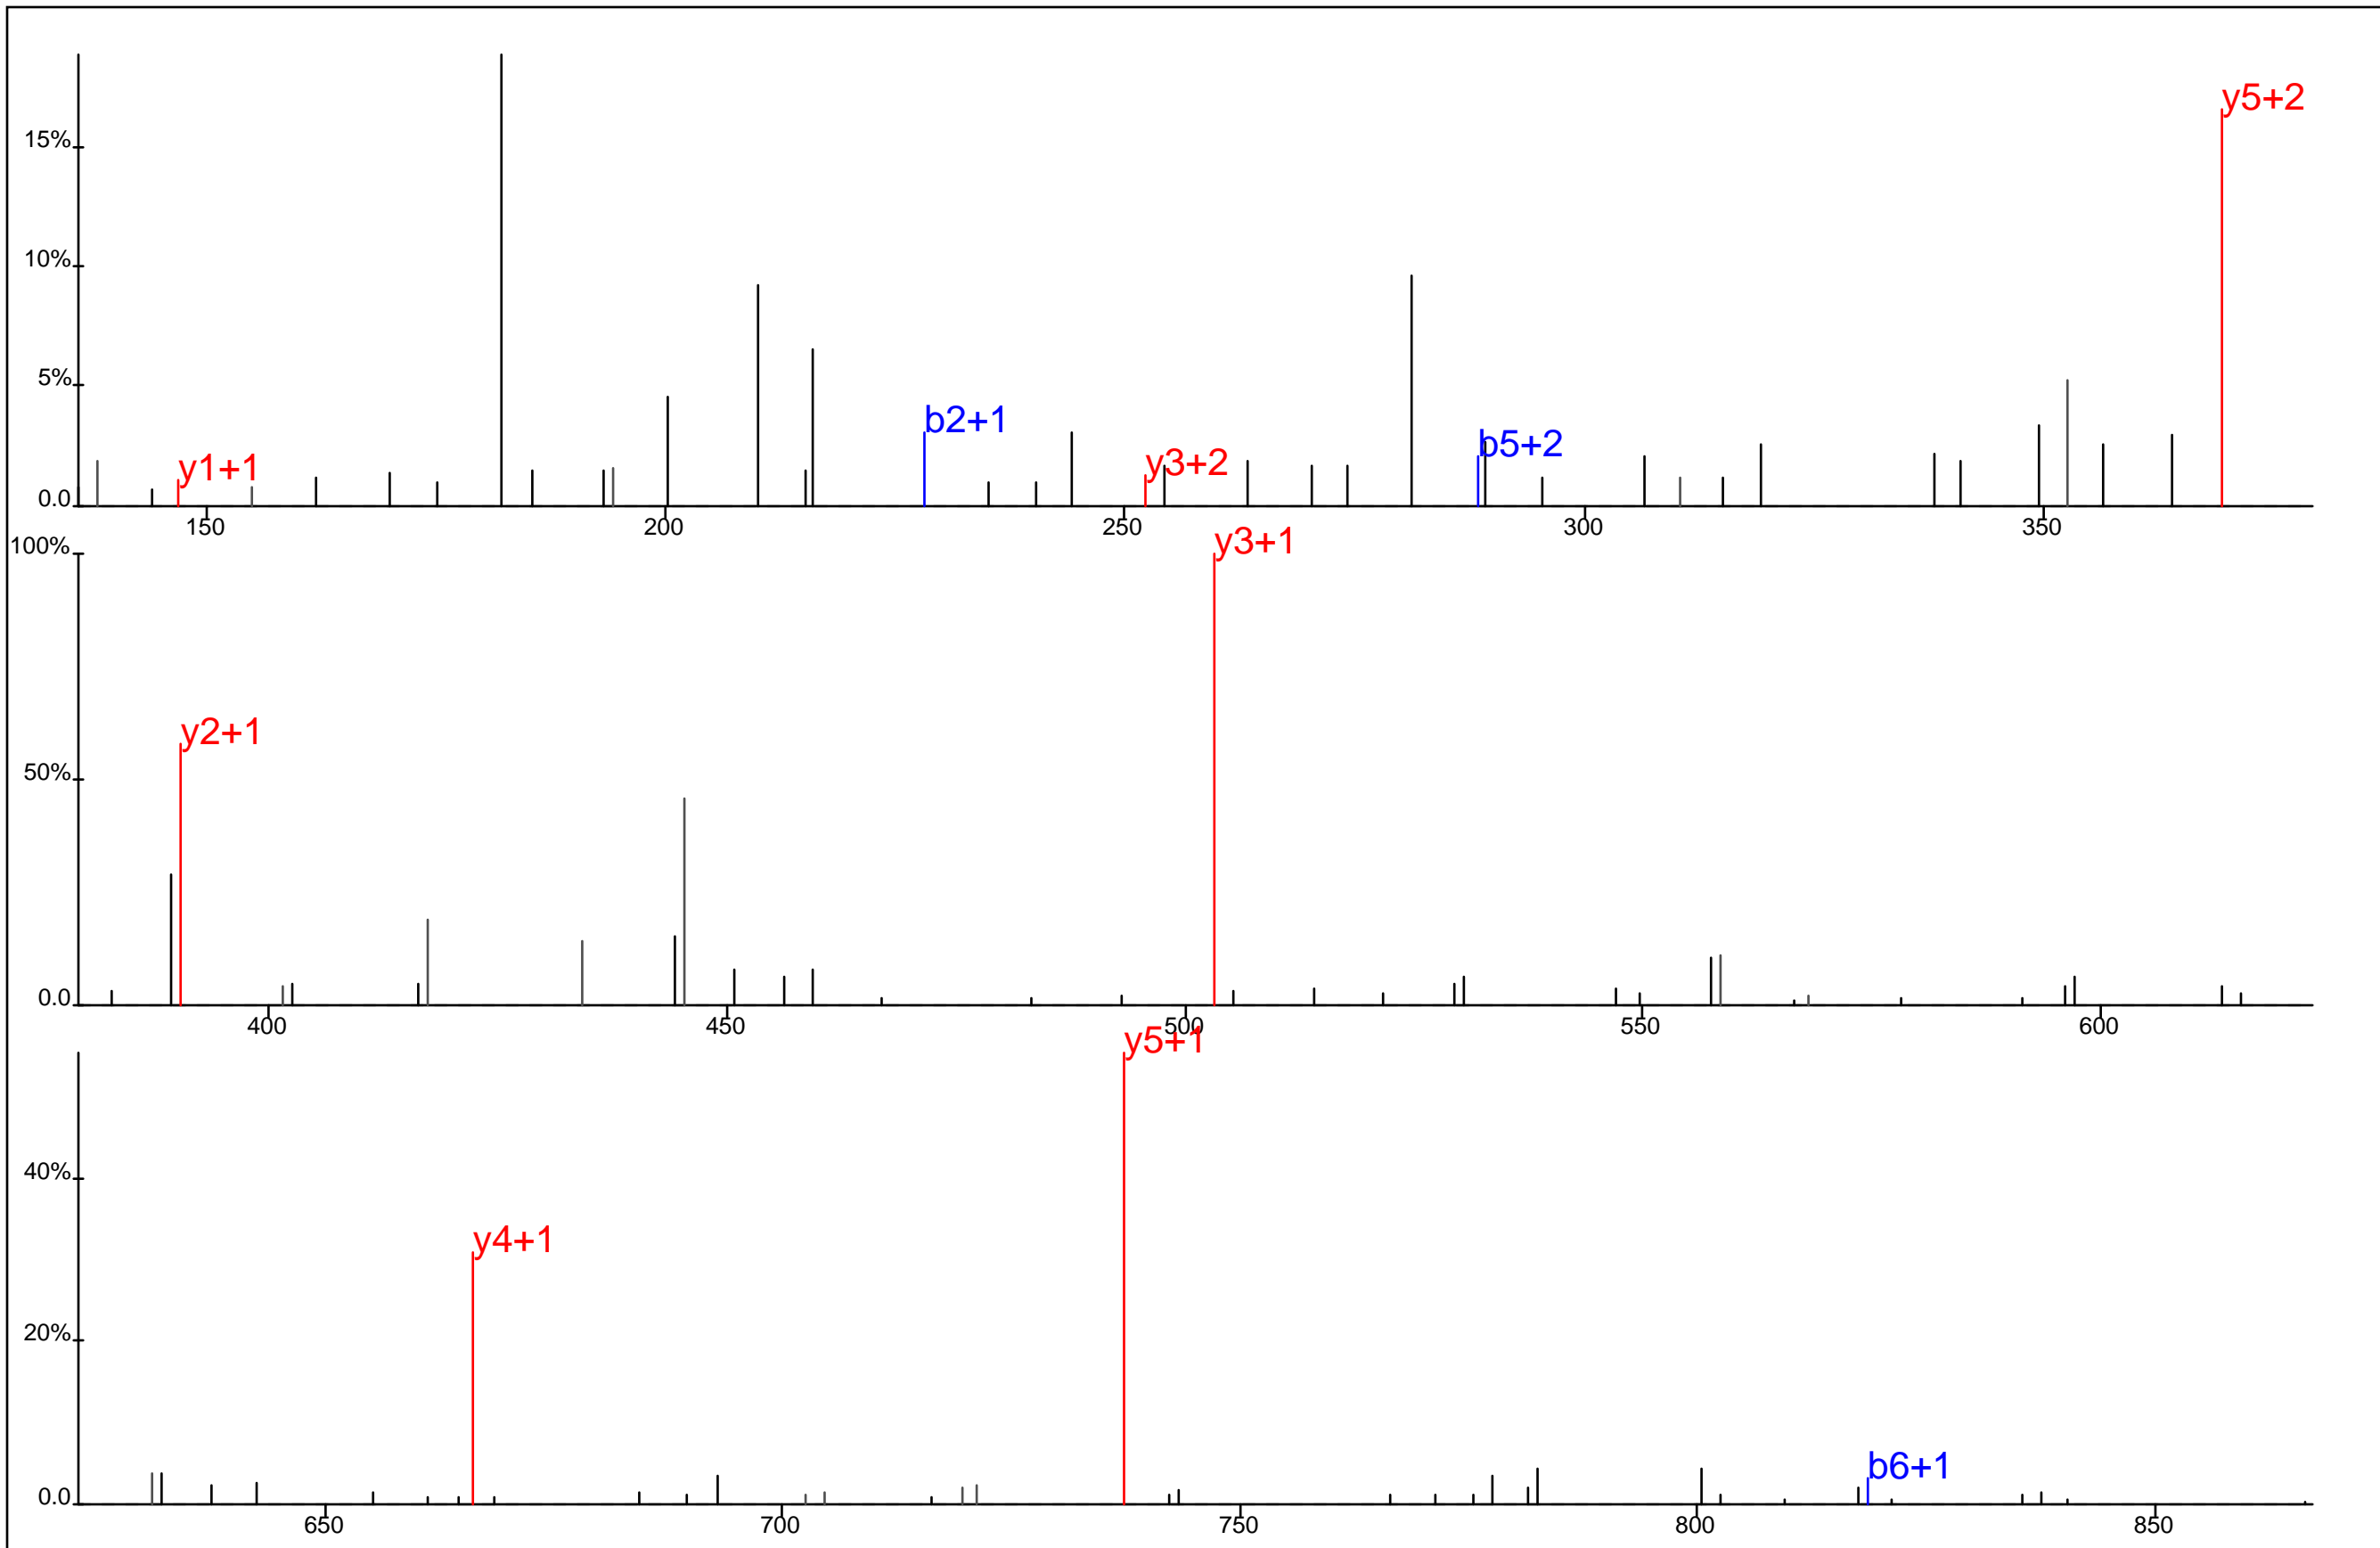

Q V A Y I Y\*K

Protein Name: Adenylyl cyclase-associated protein  
 gi Accession: 0  
 Precursor Mass: 482.7313+2  
 Delta Mass: 1.365 ppm  
 XCorr: 23.82

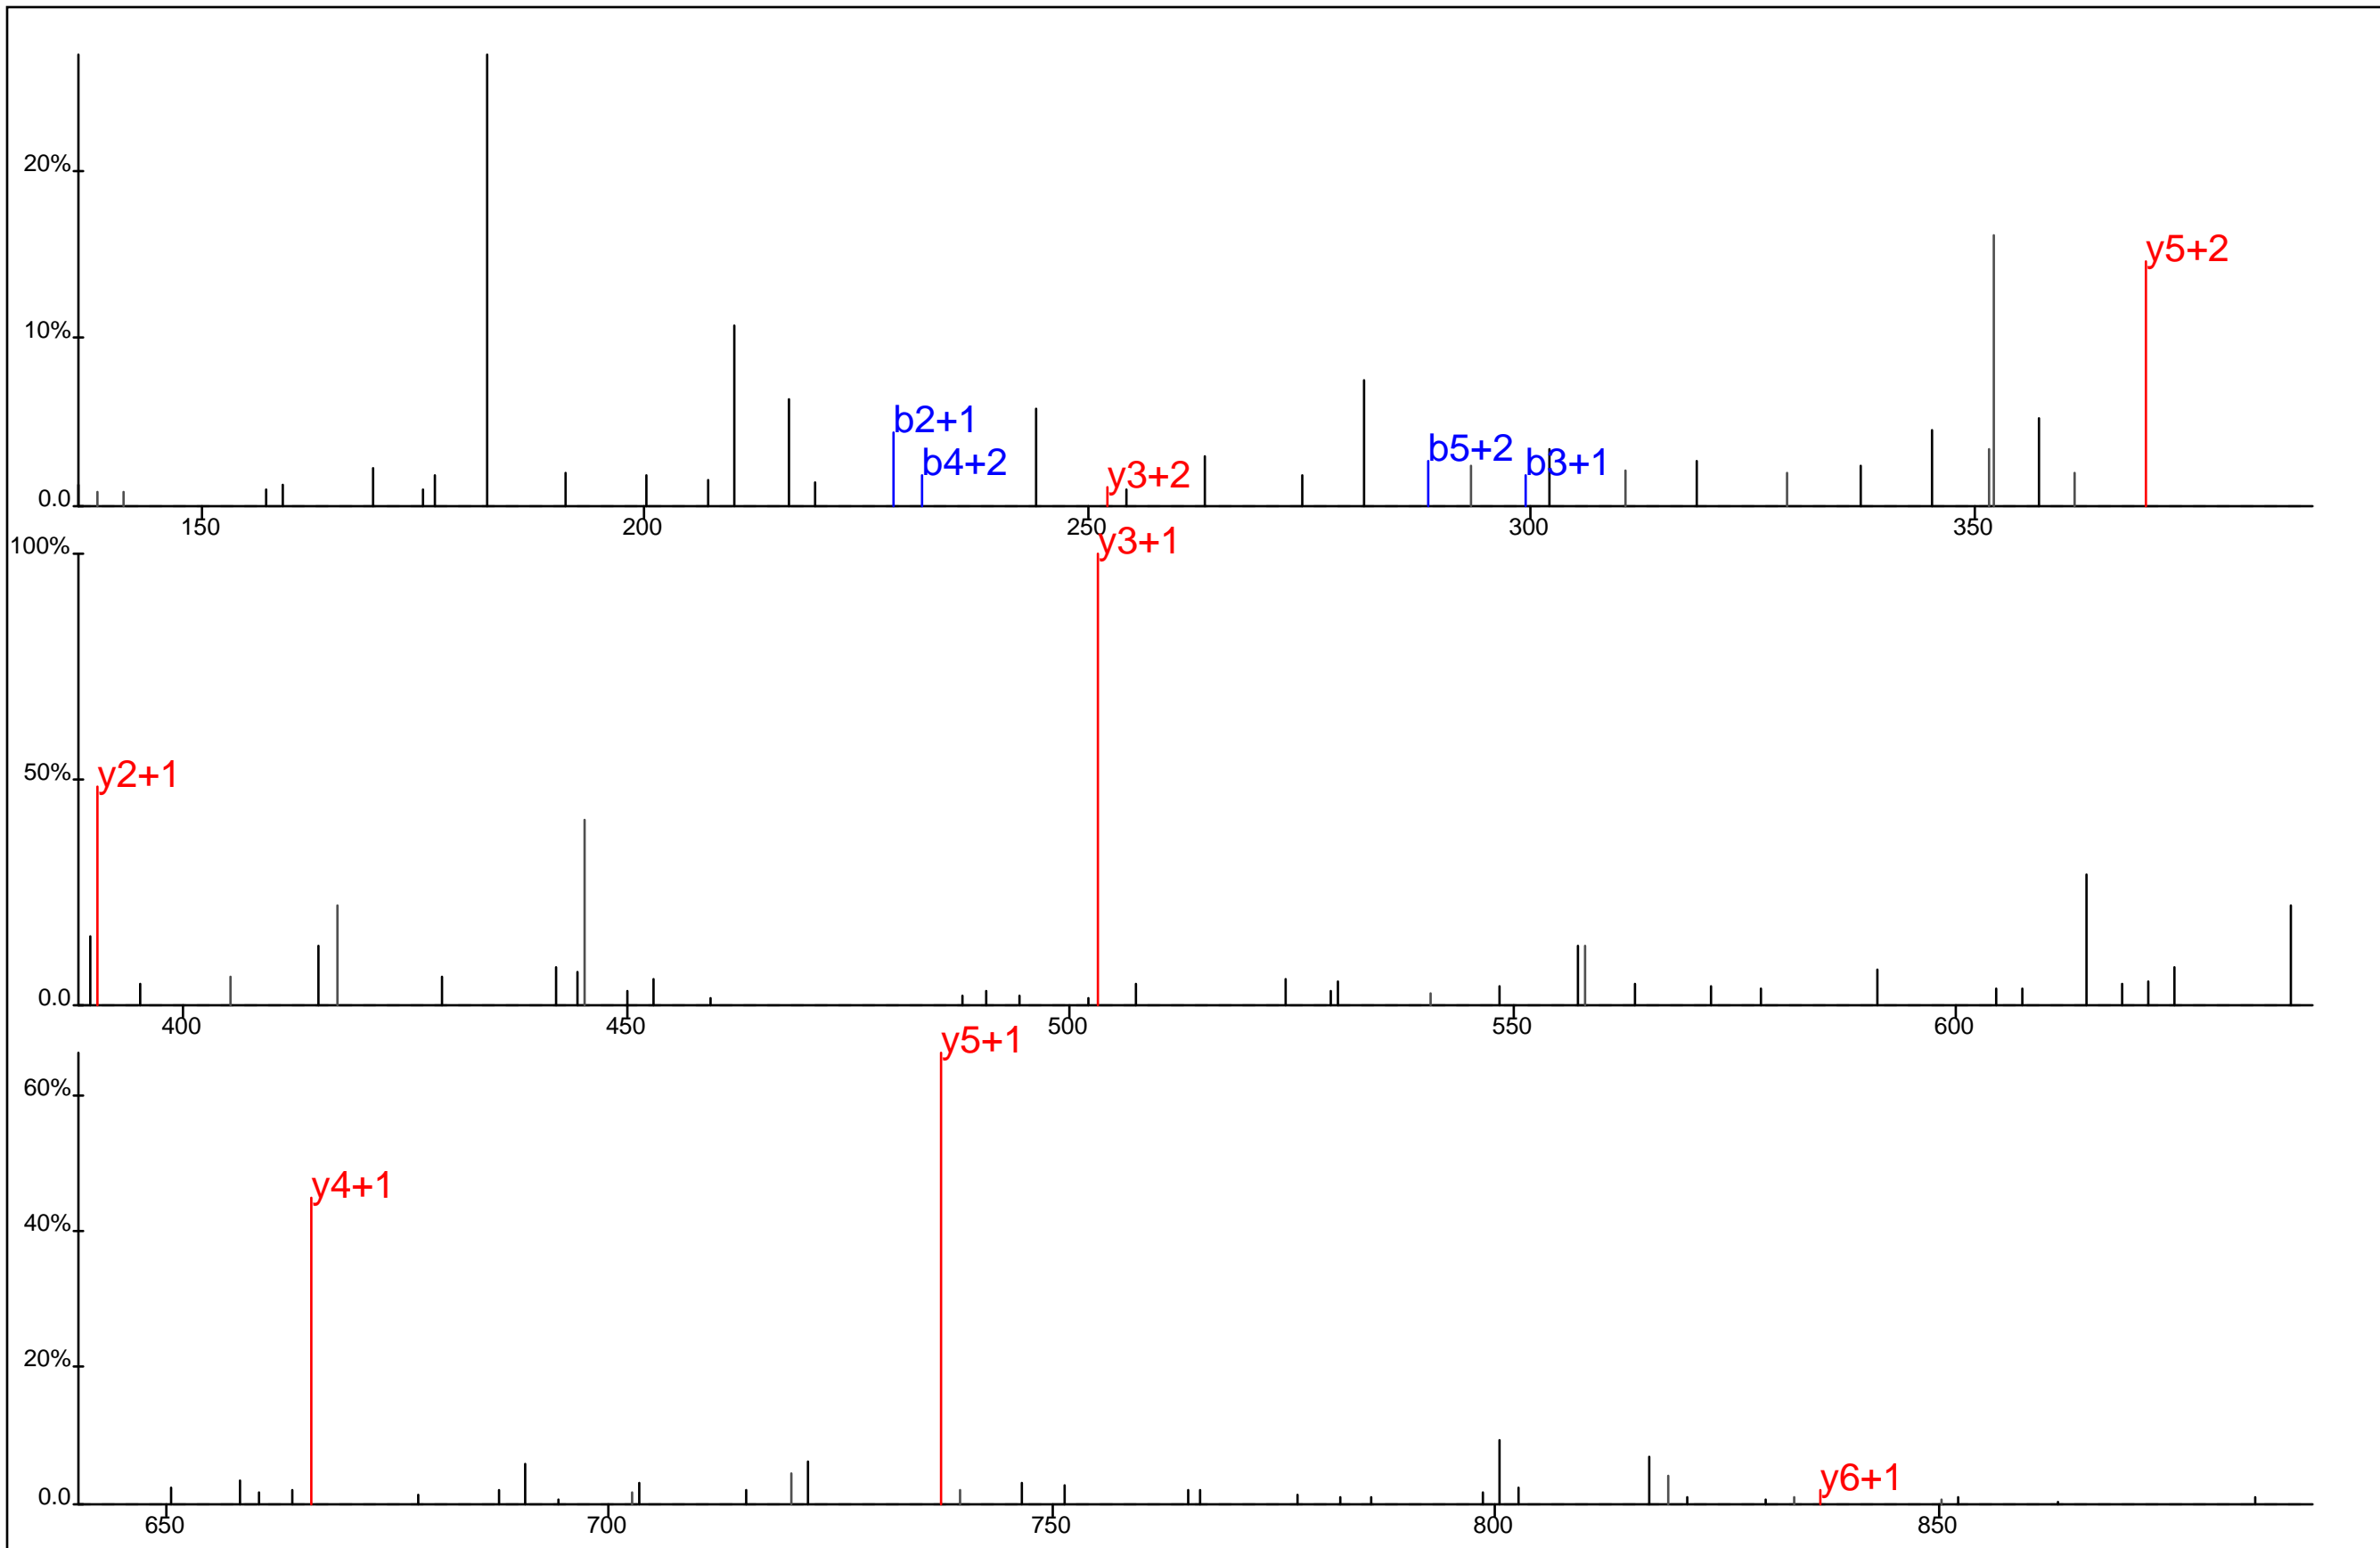

**Q V A Y I Y\*K**

Protein Name: Adenylyl cyclase-associated protein  
 gi Accession: 0  
 Precursor Mass: 482.7308+2  
 Delta Mass: 0.353 ppm  
 XCorr: 37.03

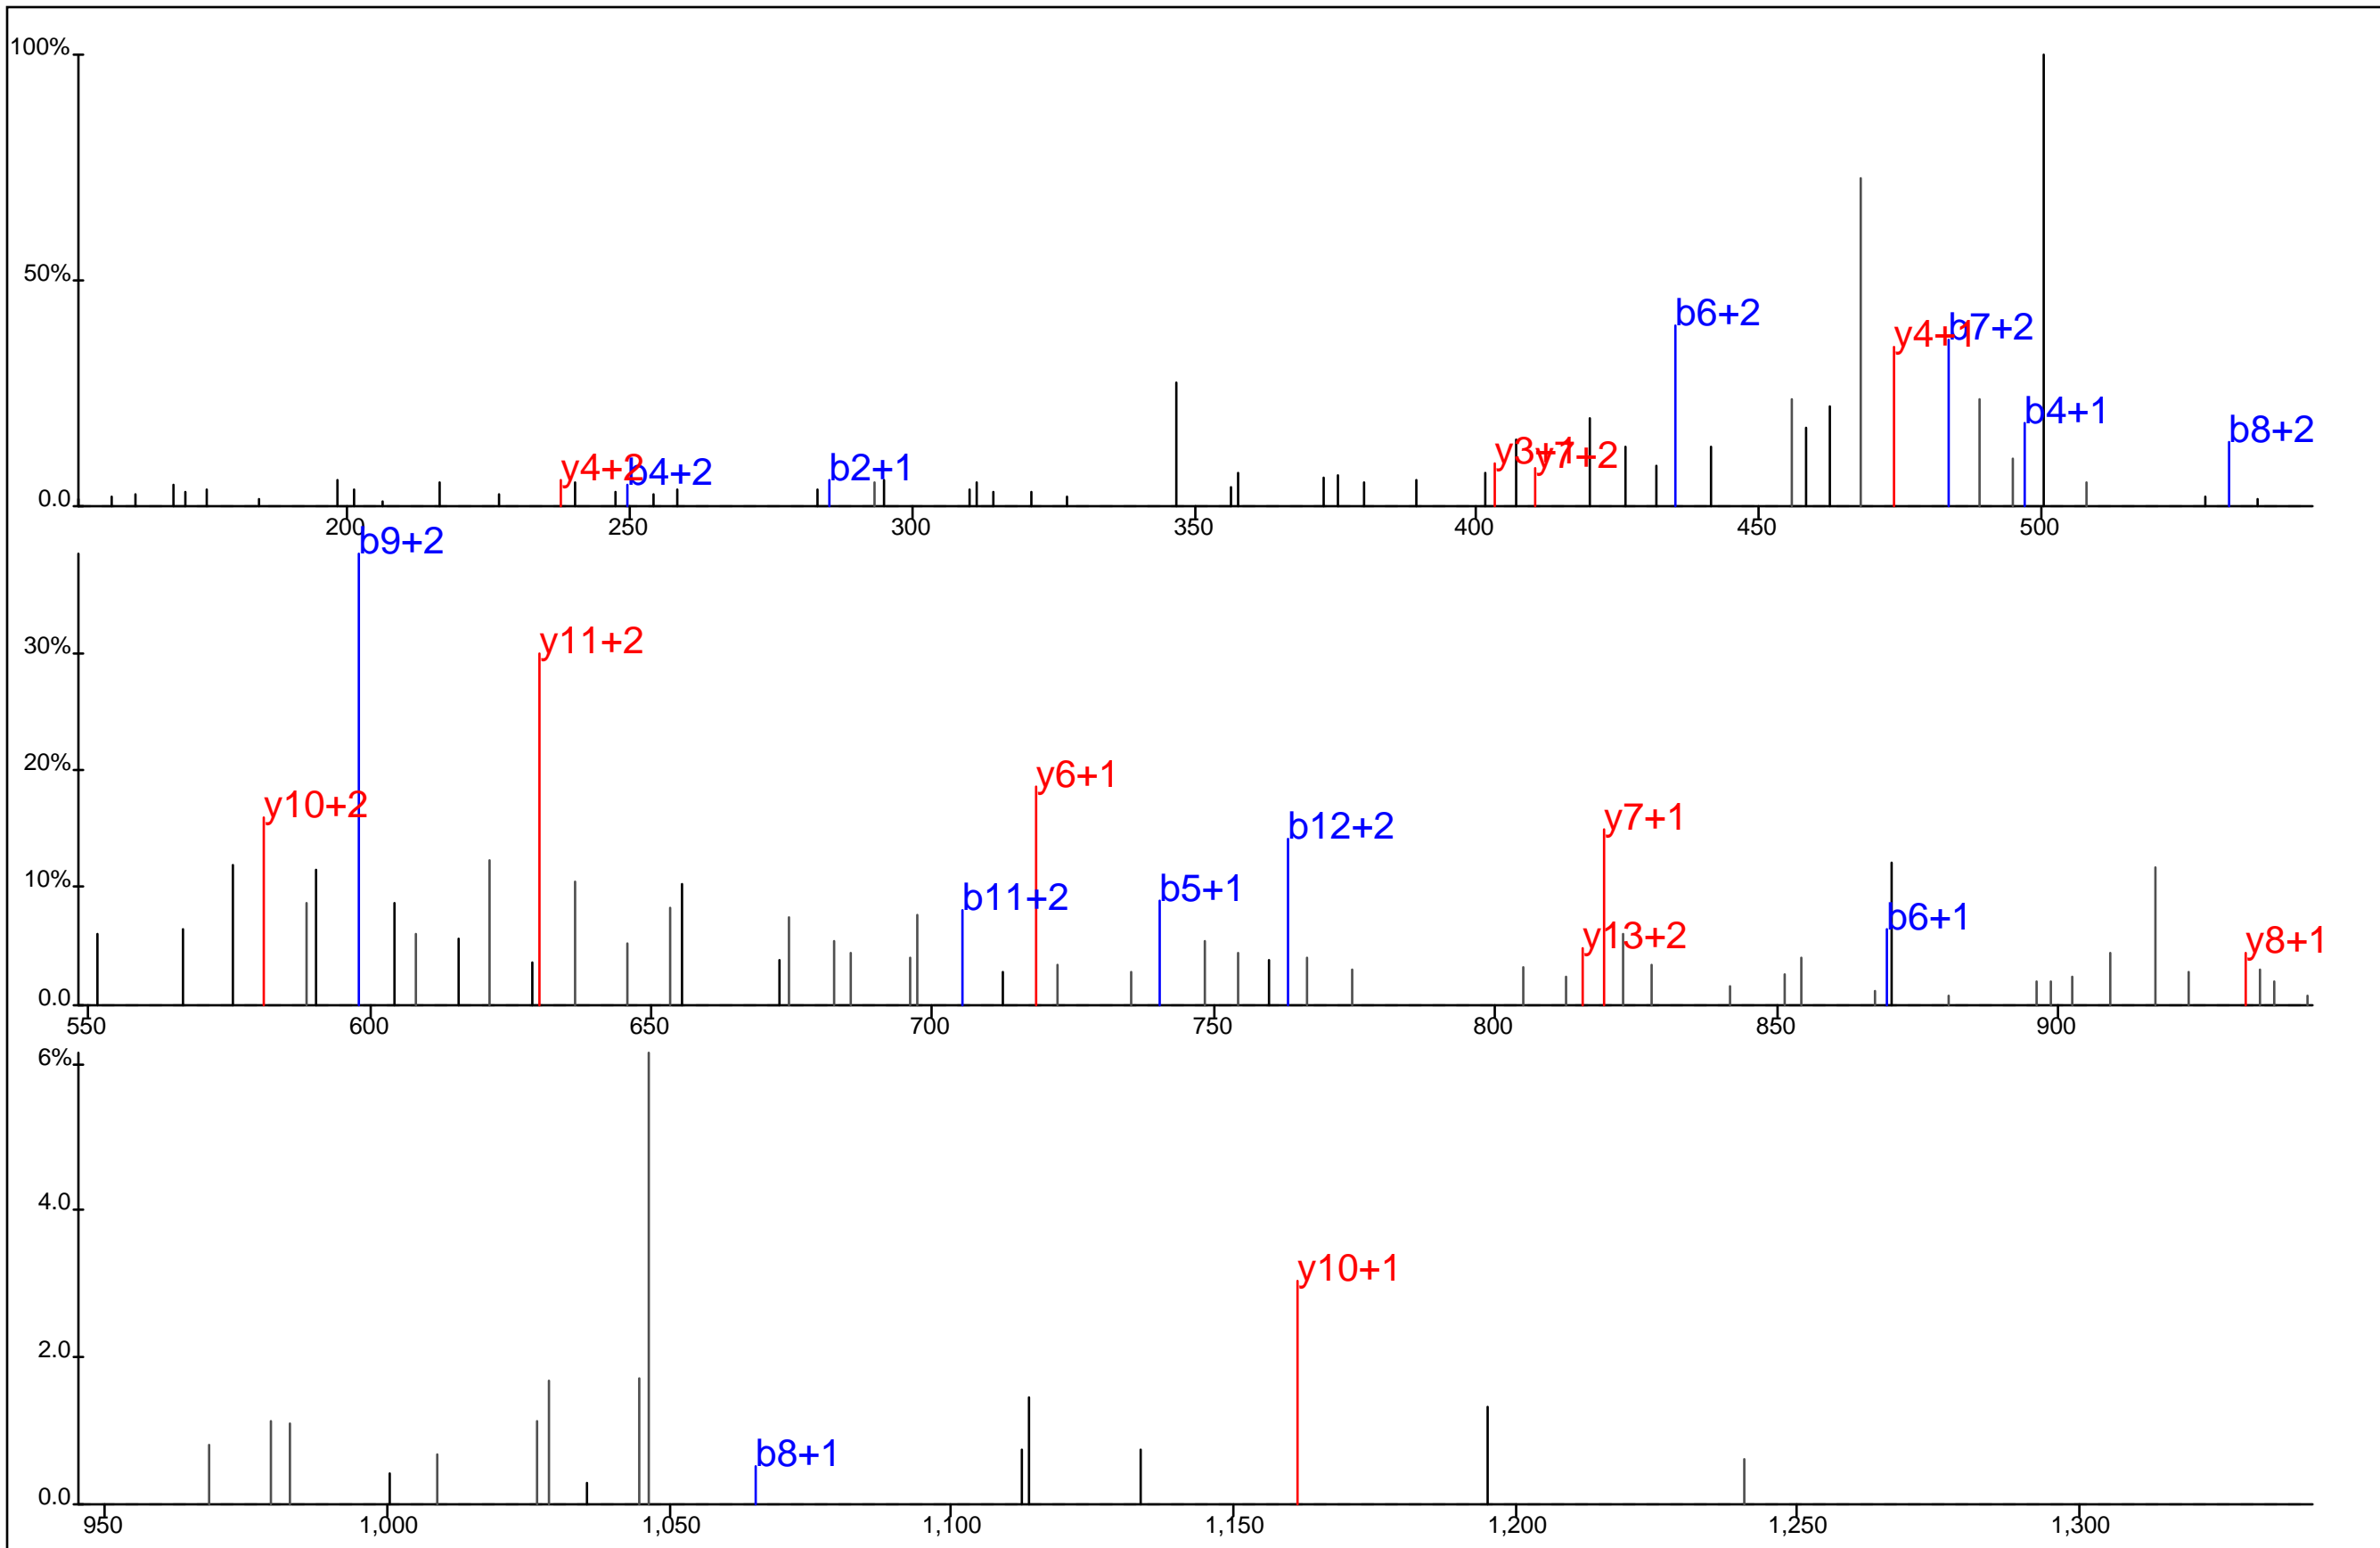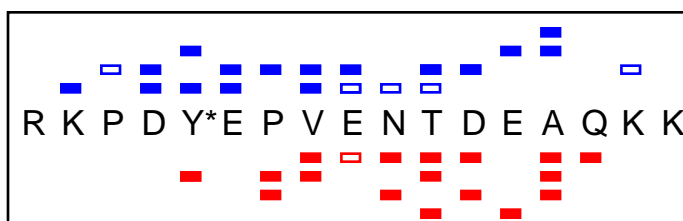

Protein Name: ADP ribosylation factor GTPase activating protein 3  
 gi Accession: 0  
 Precursor Mass: 532.4996+4  
 Delta Mass: 0.523 ppm  
 XCorr: 27.85

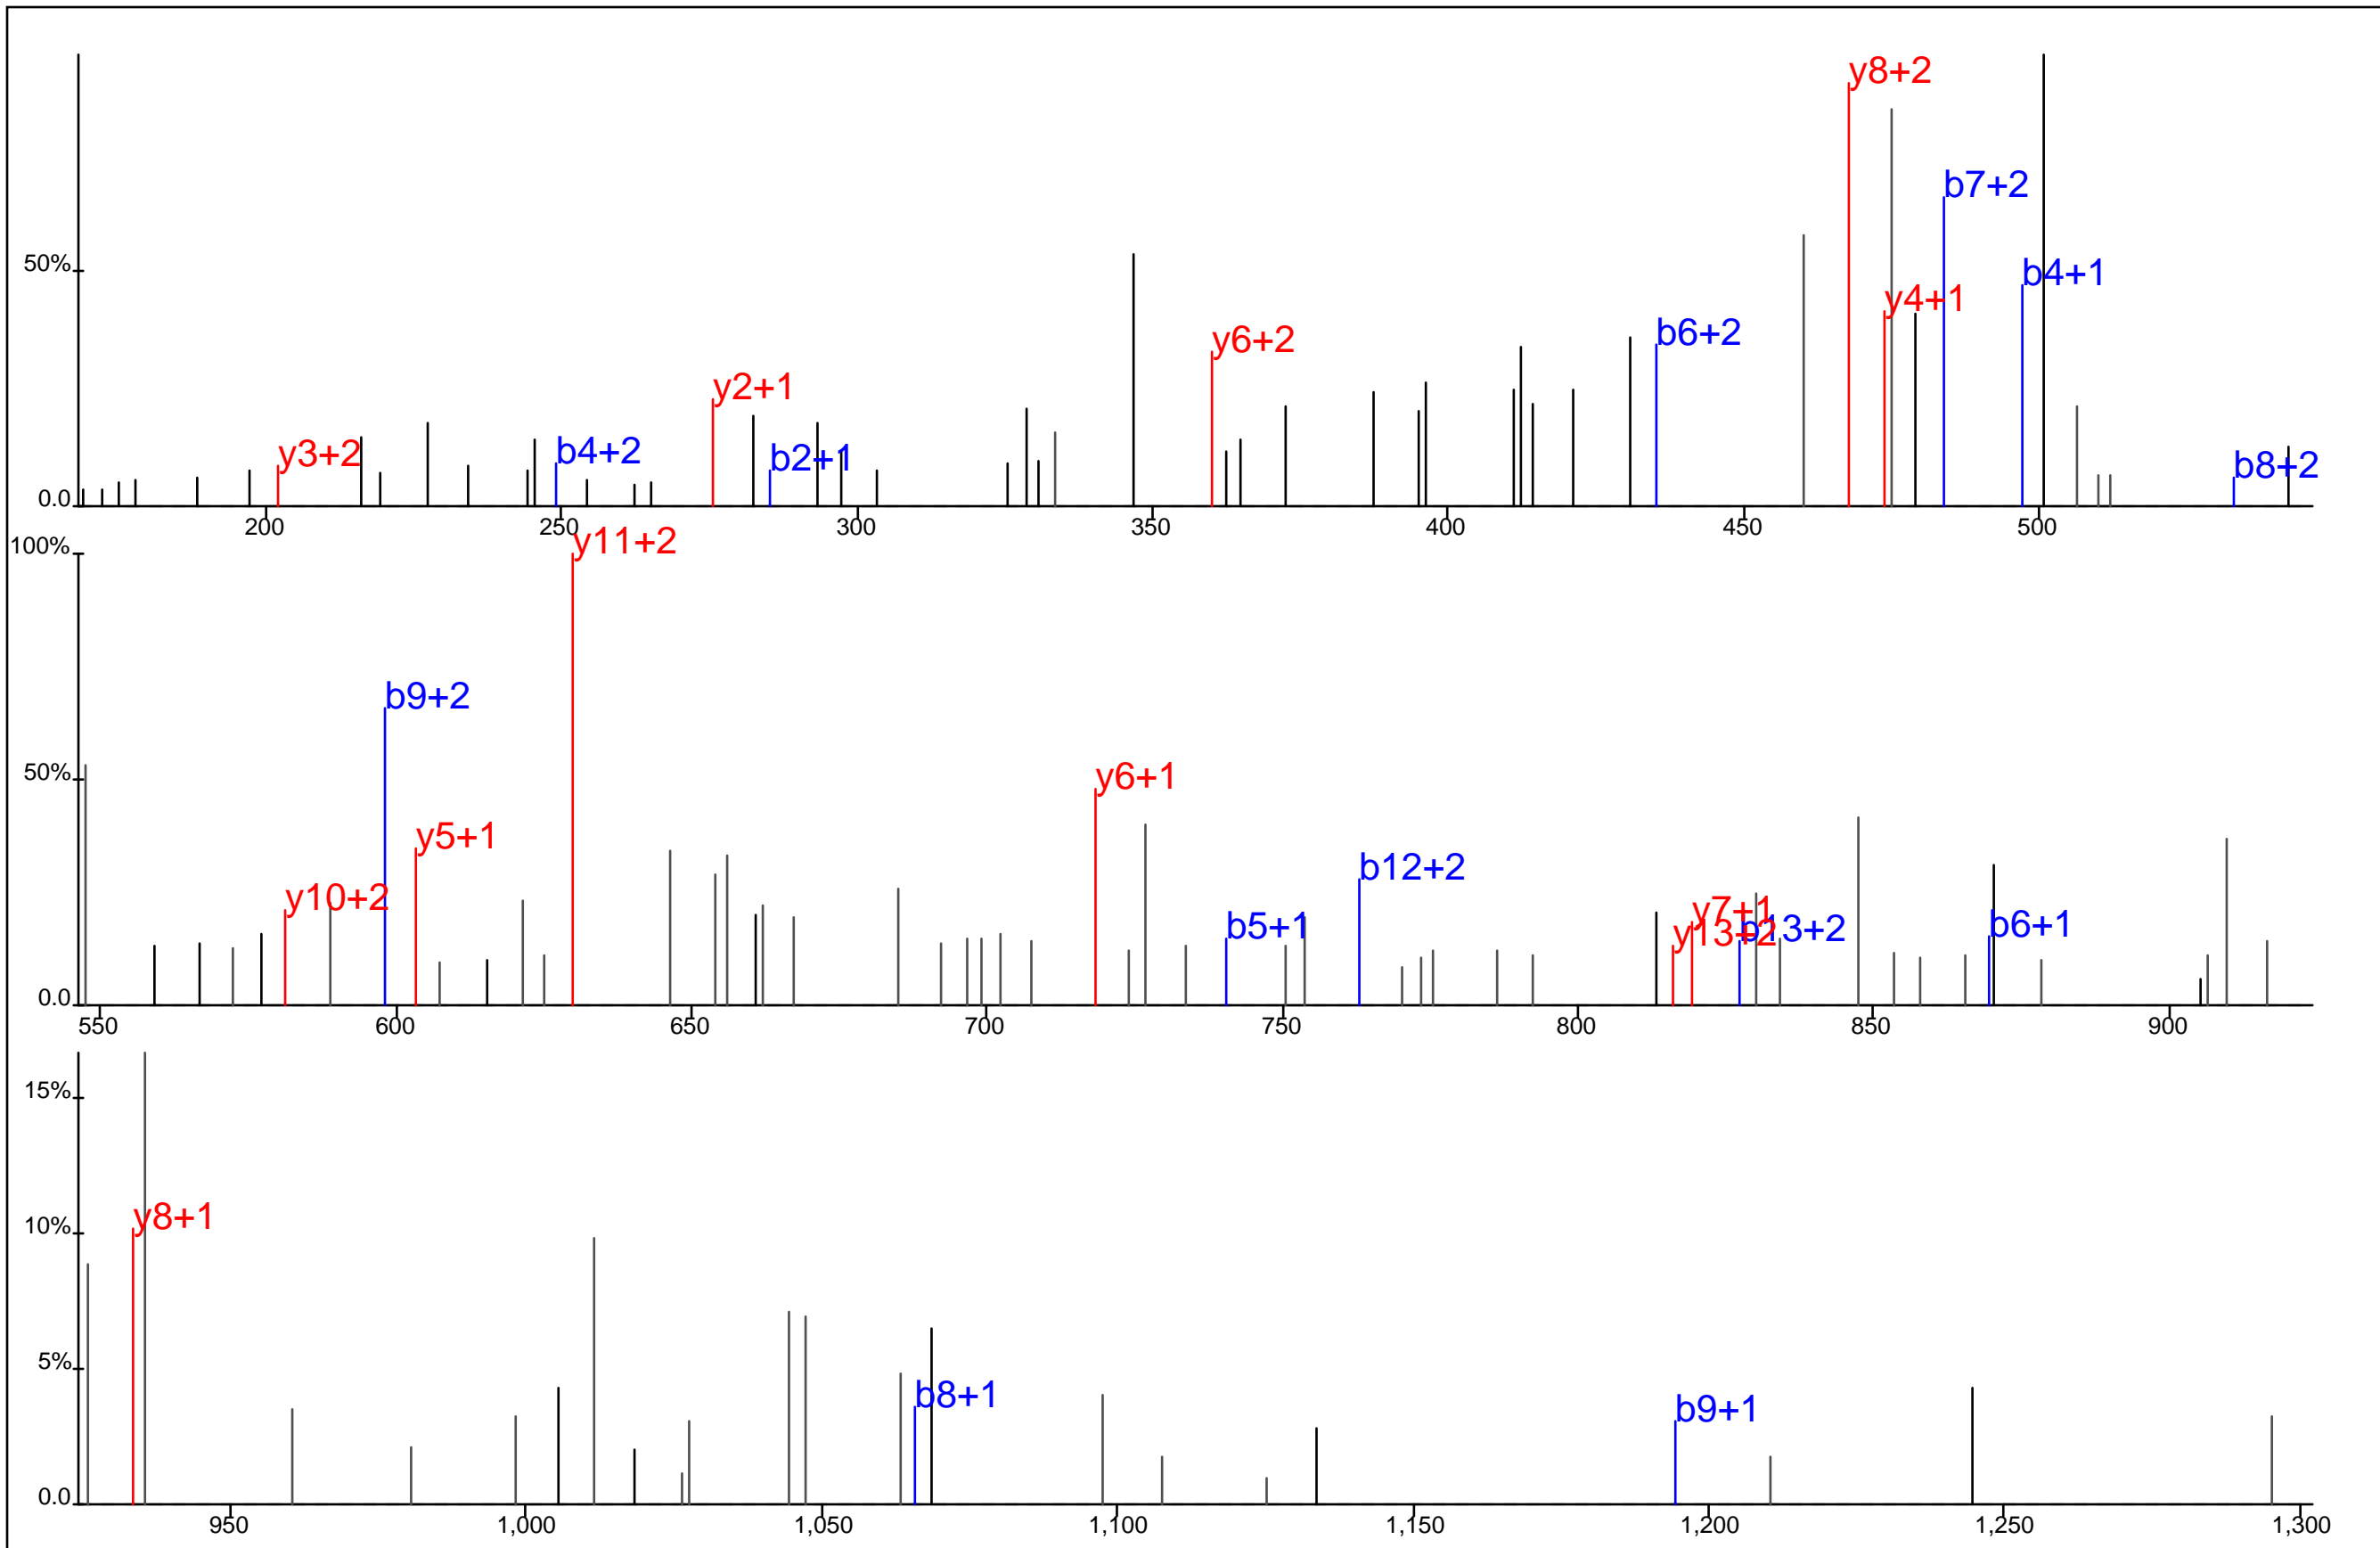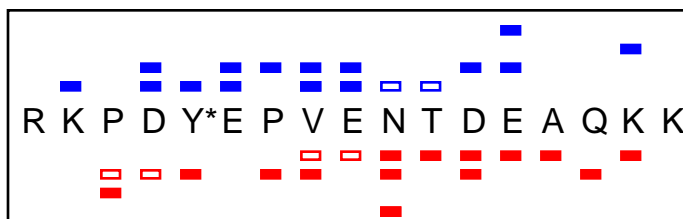

Protein Name: ADP ribosylation factor GTPase activating protein 3  
 gi Accession: 0  
 Precursor Mass: 532.4980+4  
 Delta Mass: 2.462 ppm  
 XCorr: 22.28

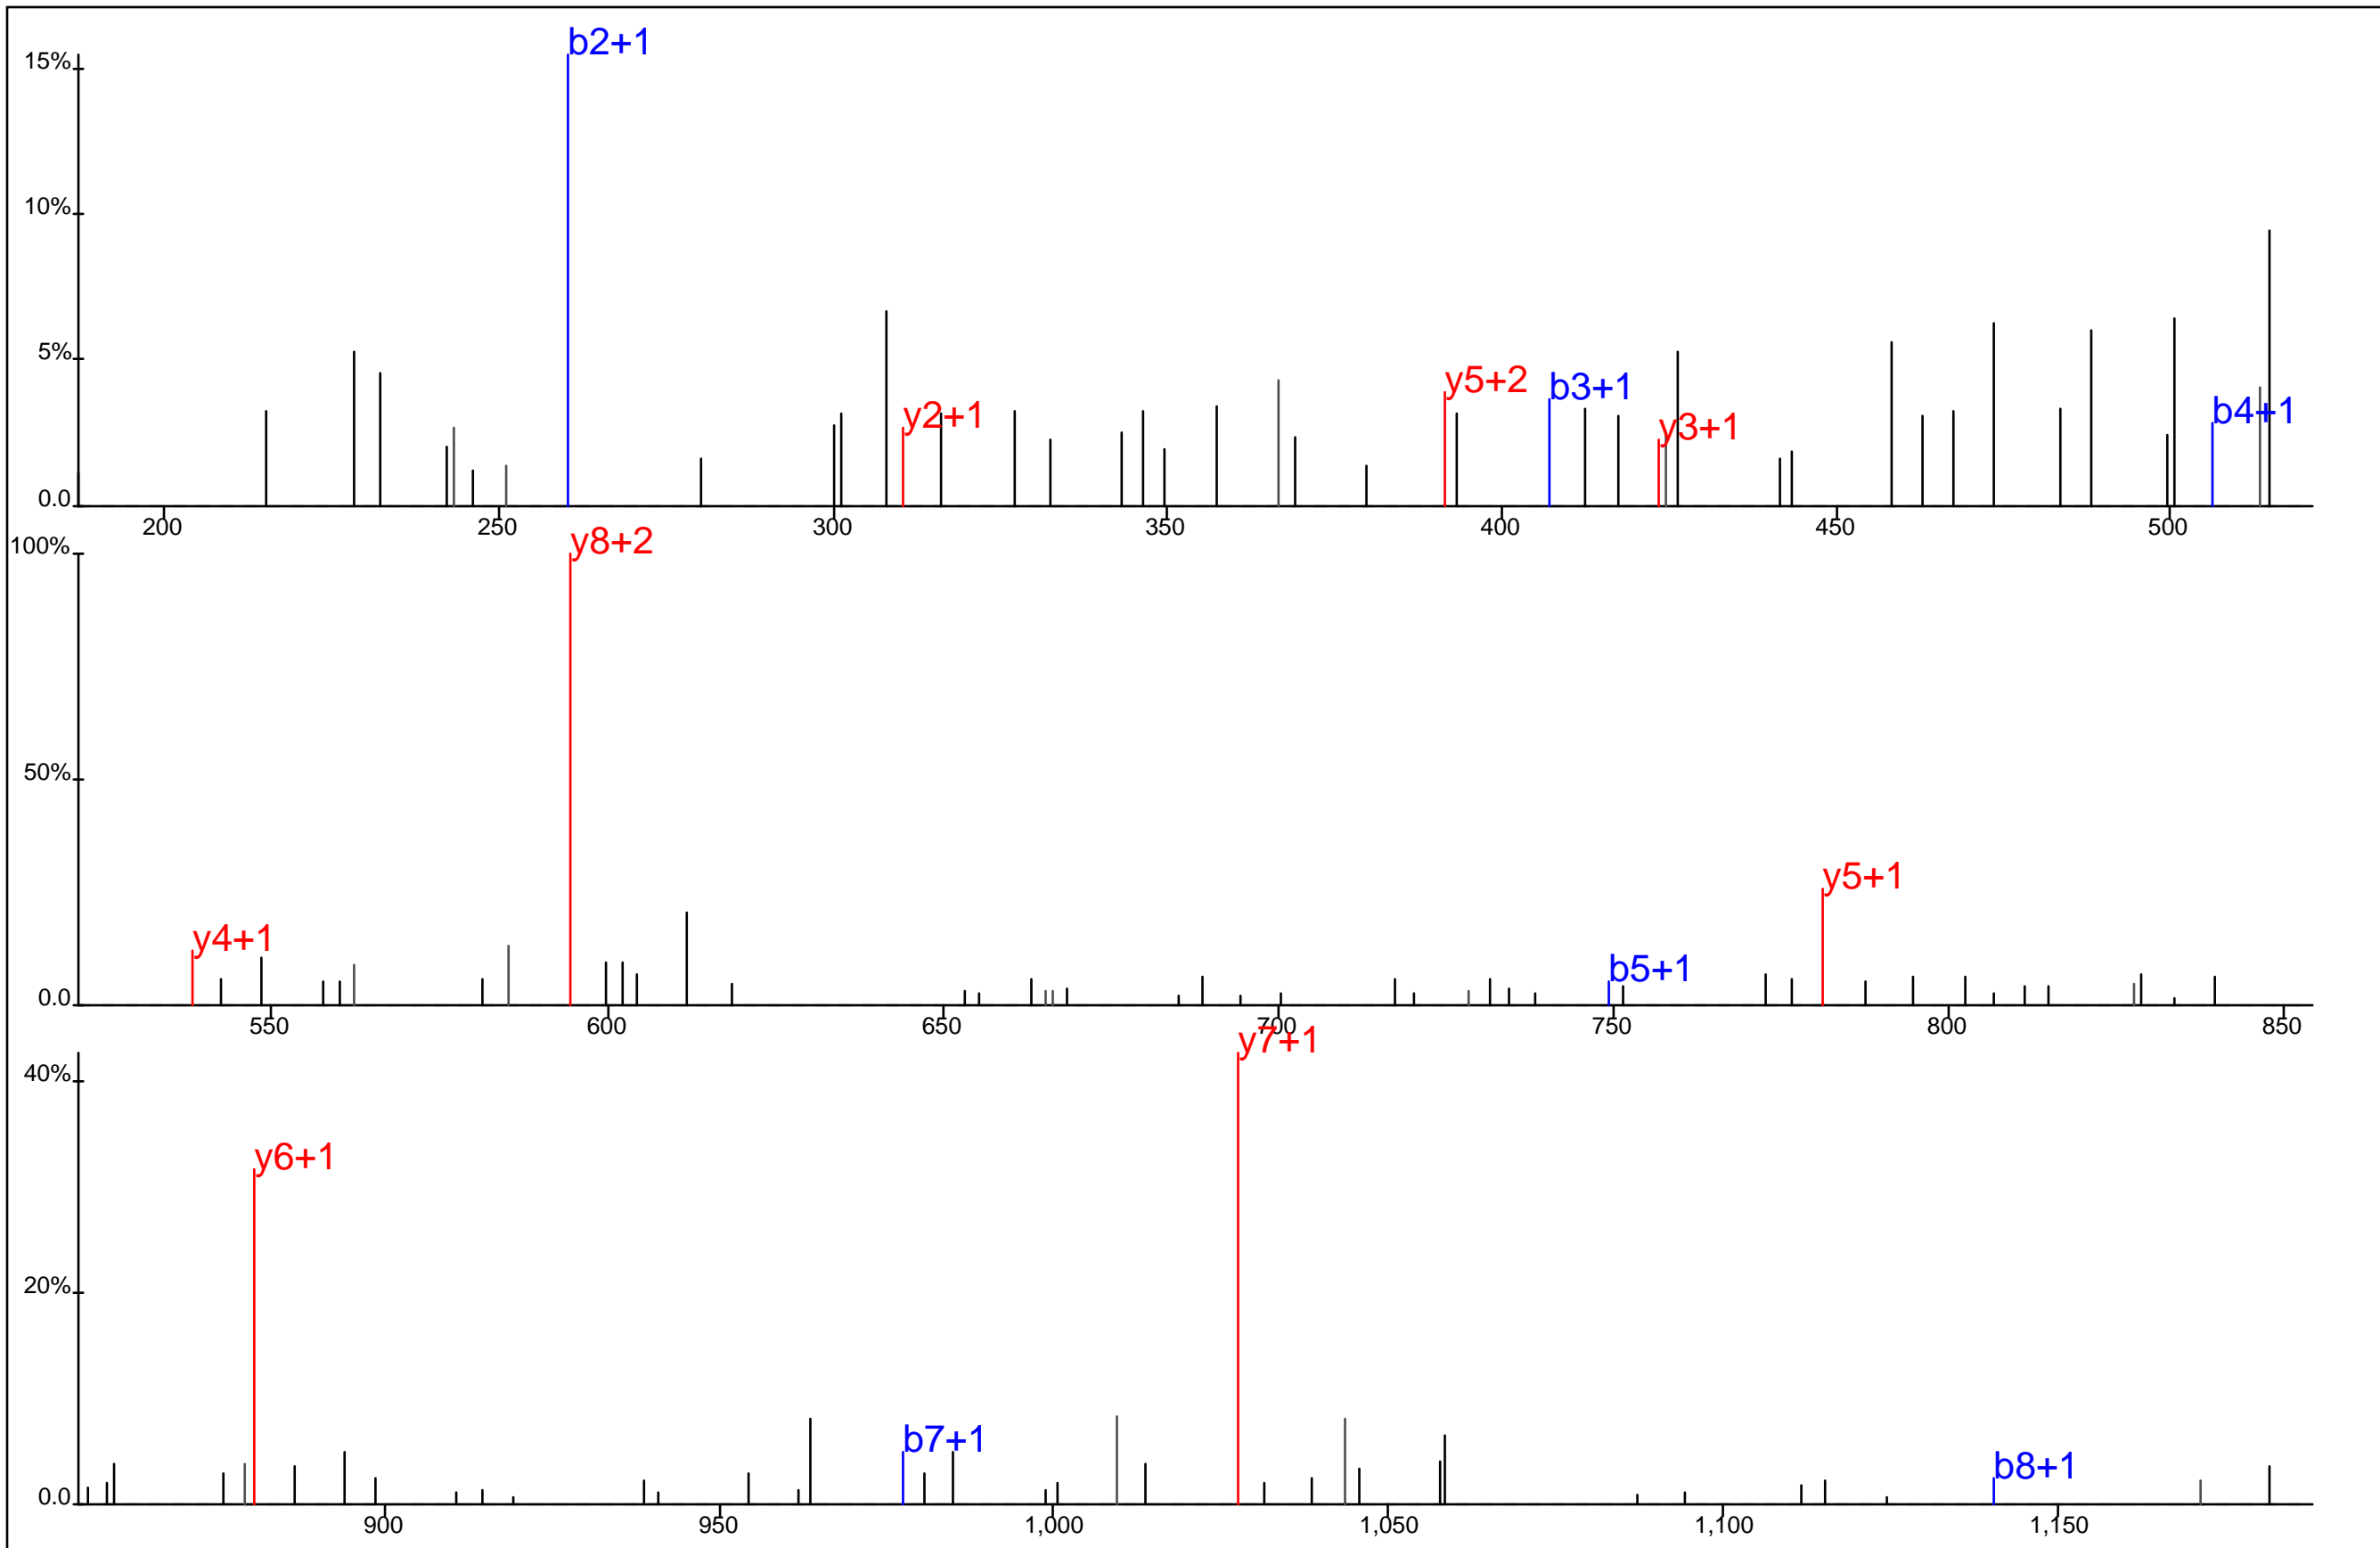

■ ■ ■ ■ ■ ■ ■  
 V C M#V Y\* D L Y K  
■ ■ ■ ■ ■ ■ ■

Protein Name: AICAR transformylase, IMP cyclohydrolase  
 gi Accession: 0  
 Precursor Mass: 643.7673+2  
 Delta Mass: 6.008 ppm  
 XCorr: 21.24

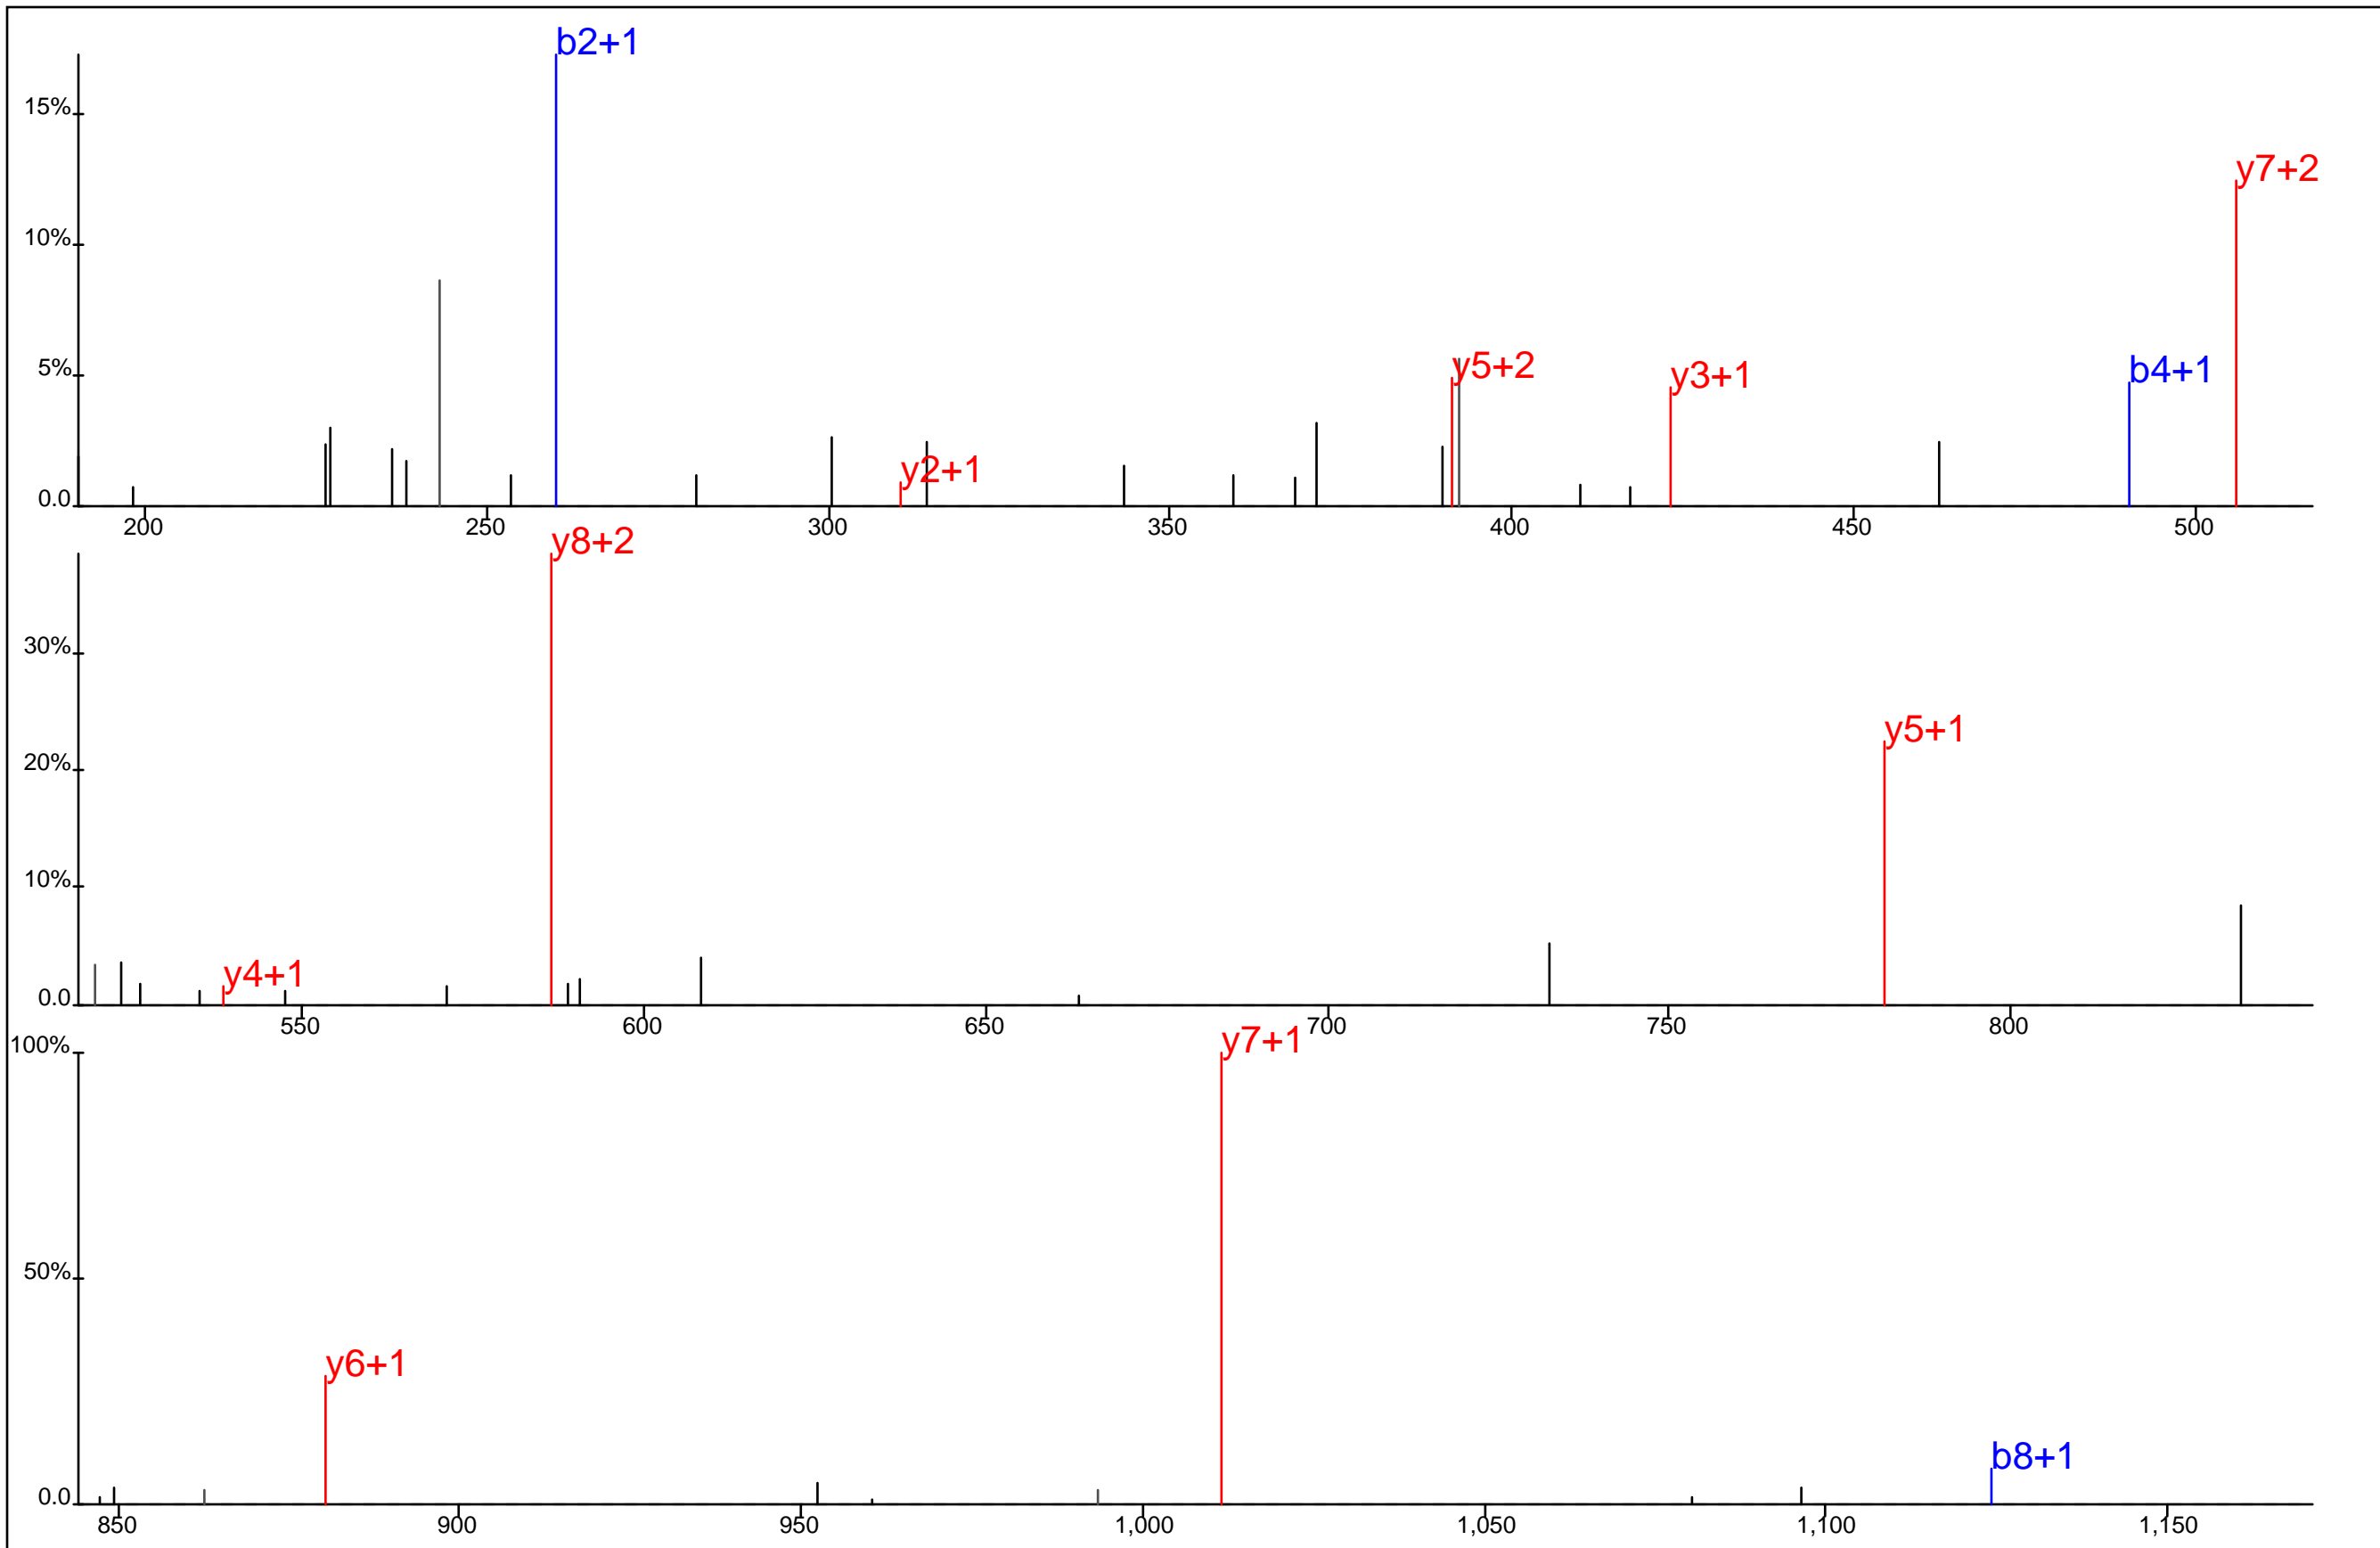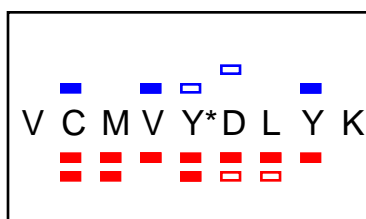

Protein Name: AICAR transformylase, IMP cyclohydrolase  
 gi Accession: 0  
 Precursor Mass: 635.7670+2  
 Delta Mass: 1.510 ppm  
 XCorr: 26.35

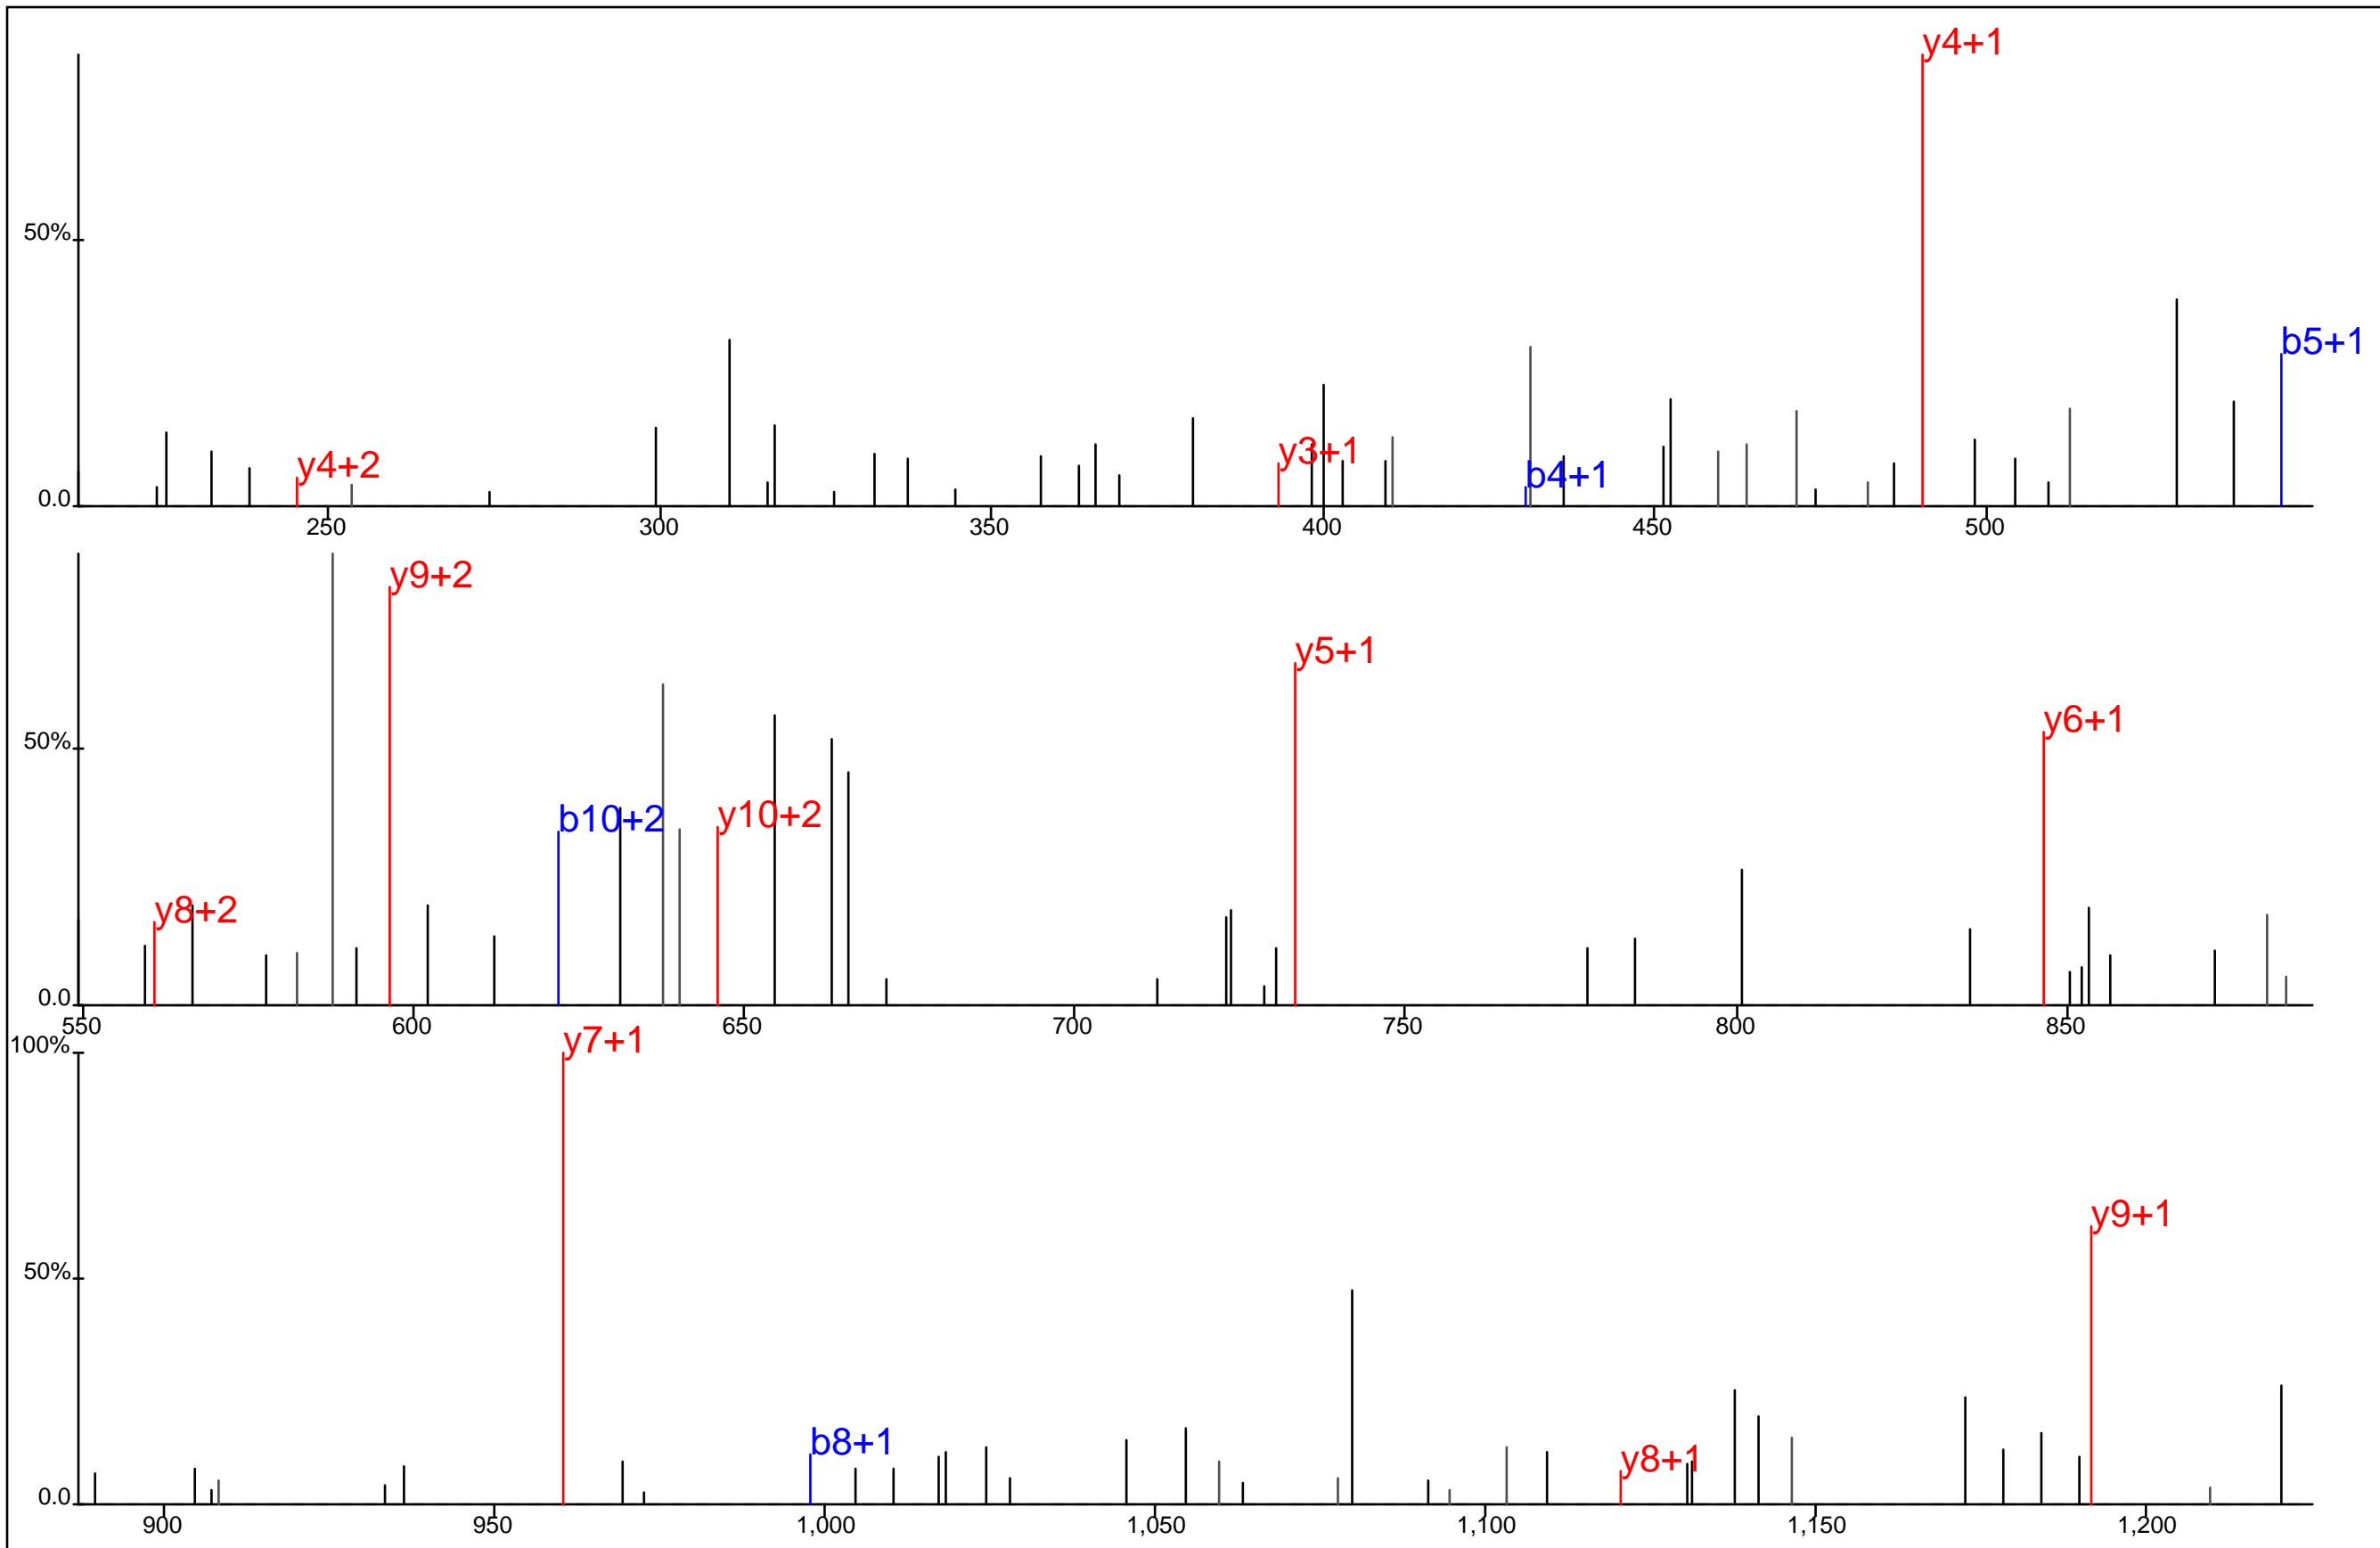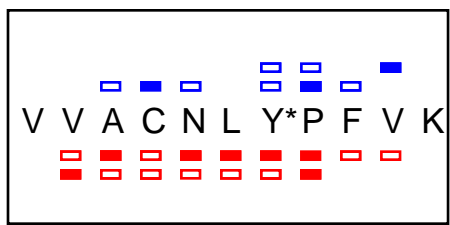

Protein Name: AICAR transformylase, IMP cyclohydrolase  
 gi Accession: 0  
 Precursor Mass: 695.3361+2  
 Delta Mass: 0.960 ppm  
 XCorr: 29.73

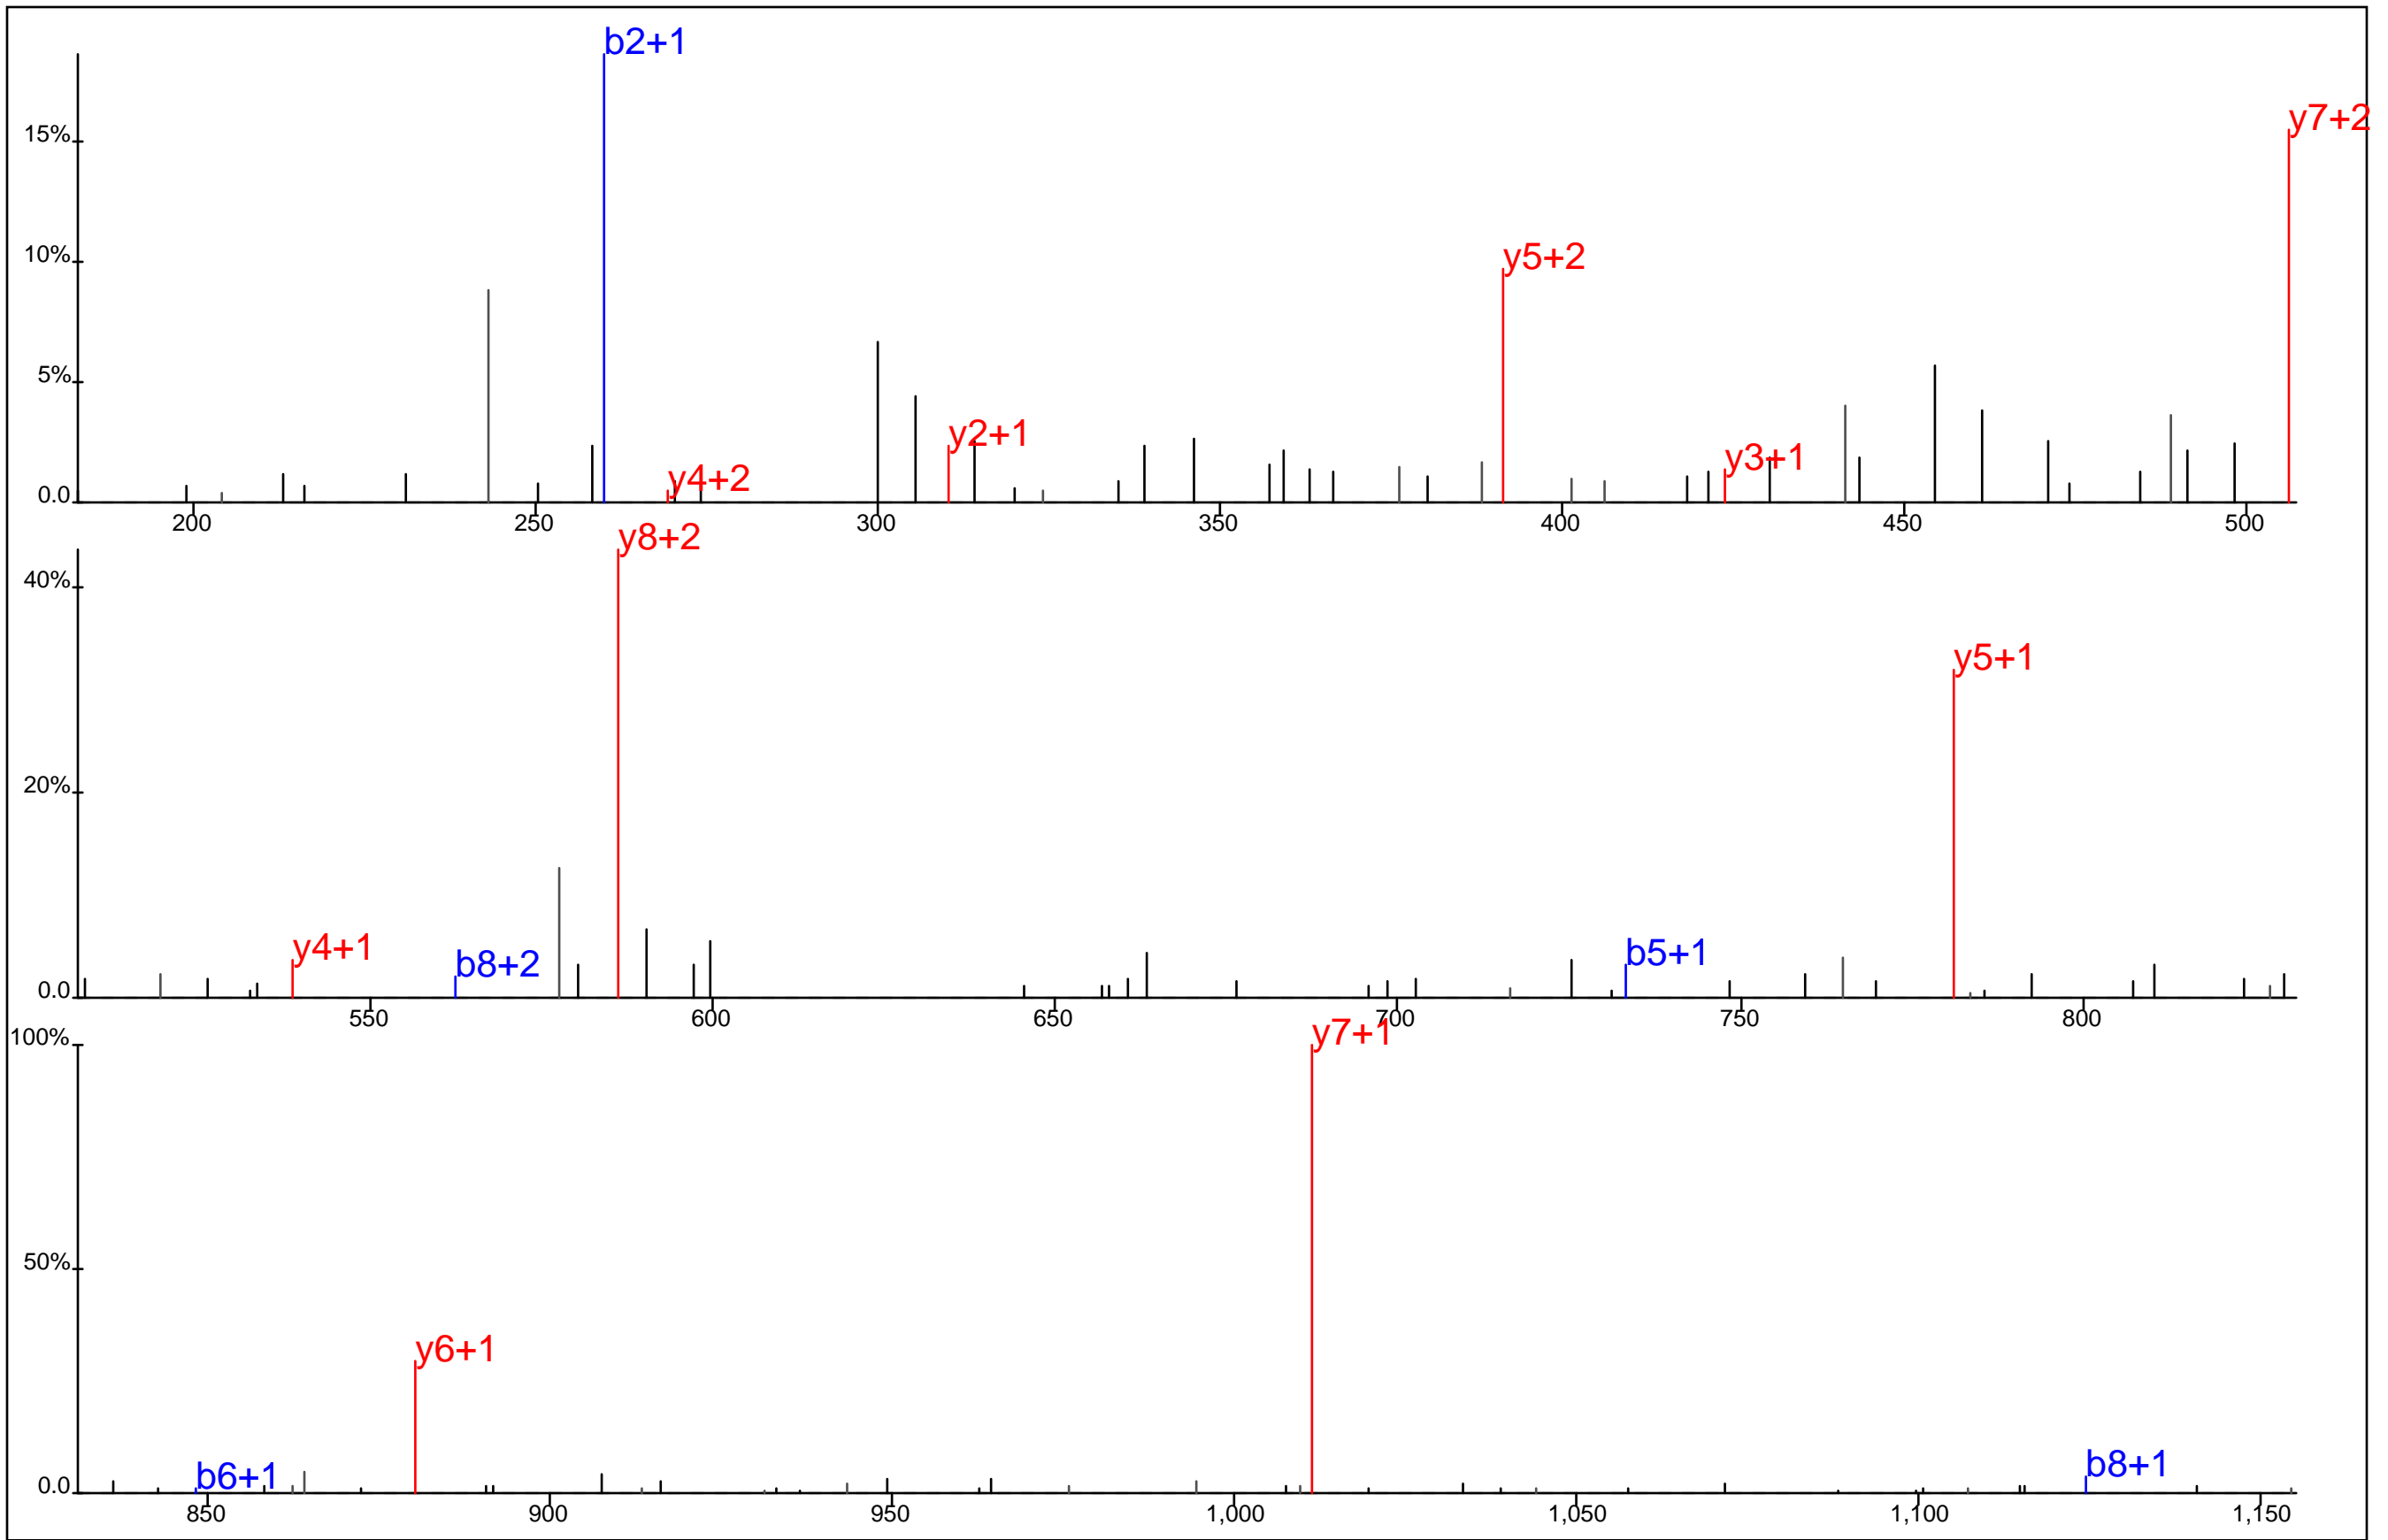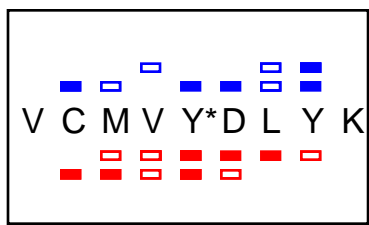

Protein Name: AICAR transformylase, IMP cyclohydrolase  
 gi Accession: 0  
 Precursor Mass: 635.7654+2  
 Delta Mass: 0.989 ppm  
 XCorr: 31.09



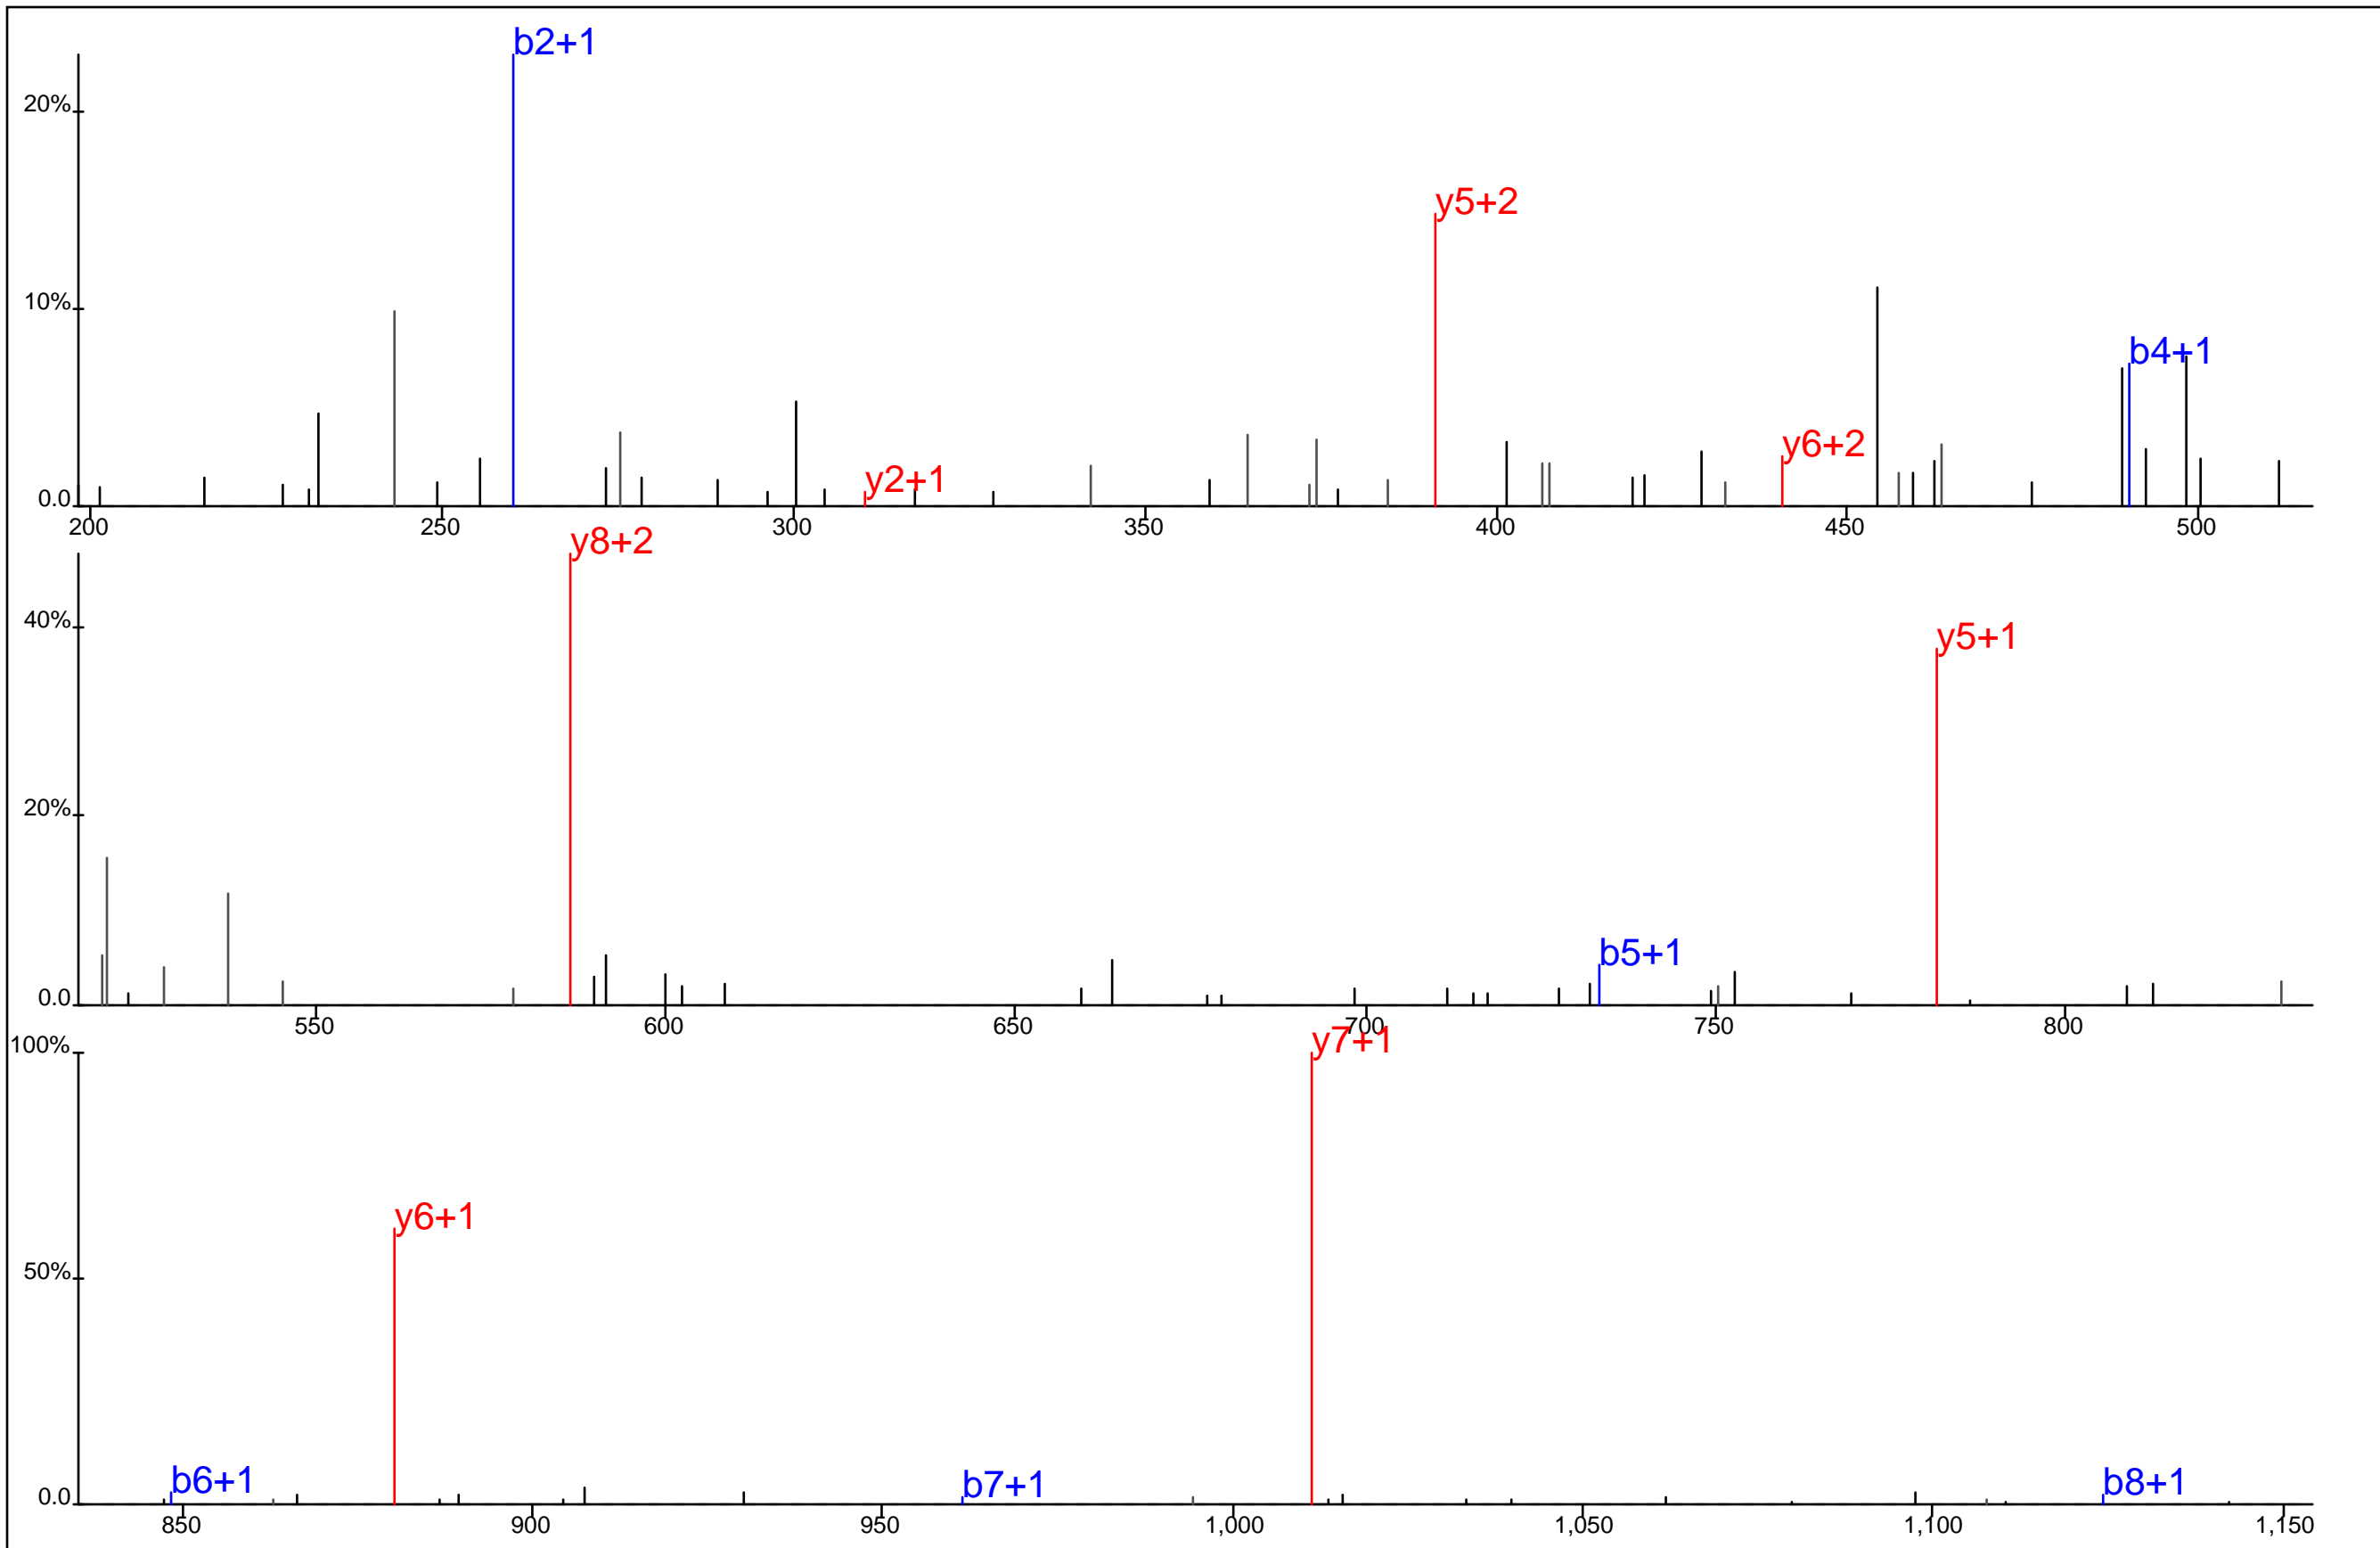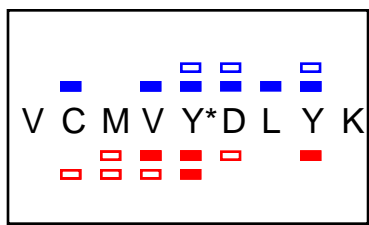

Protein Name: AICAR transformylase, IMP cyclohydrolase  
 gi Accession: 0  
 Precursor Mass: 635.7665+2  
 Delta Mass: 0.740 ppm  
 XCorr: 38.81

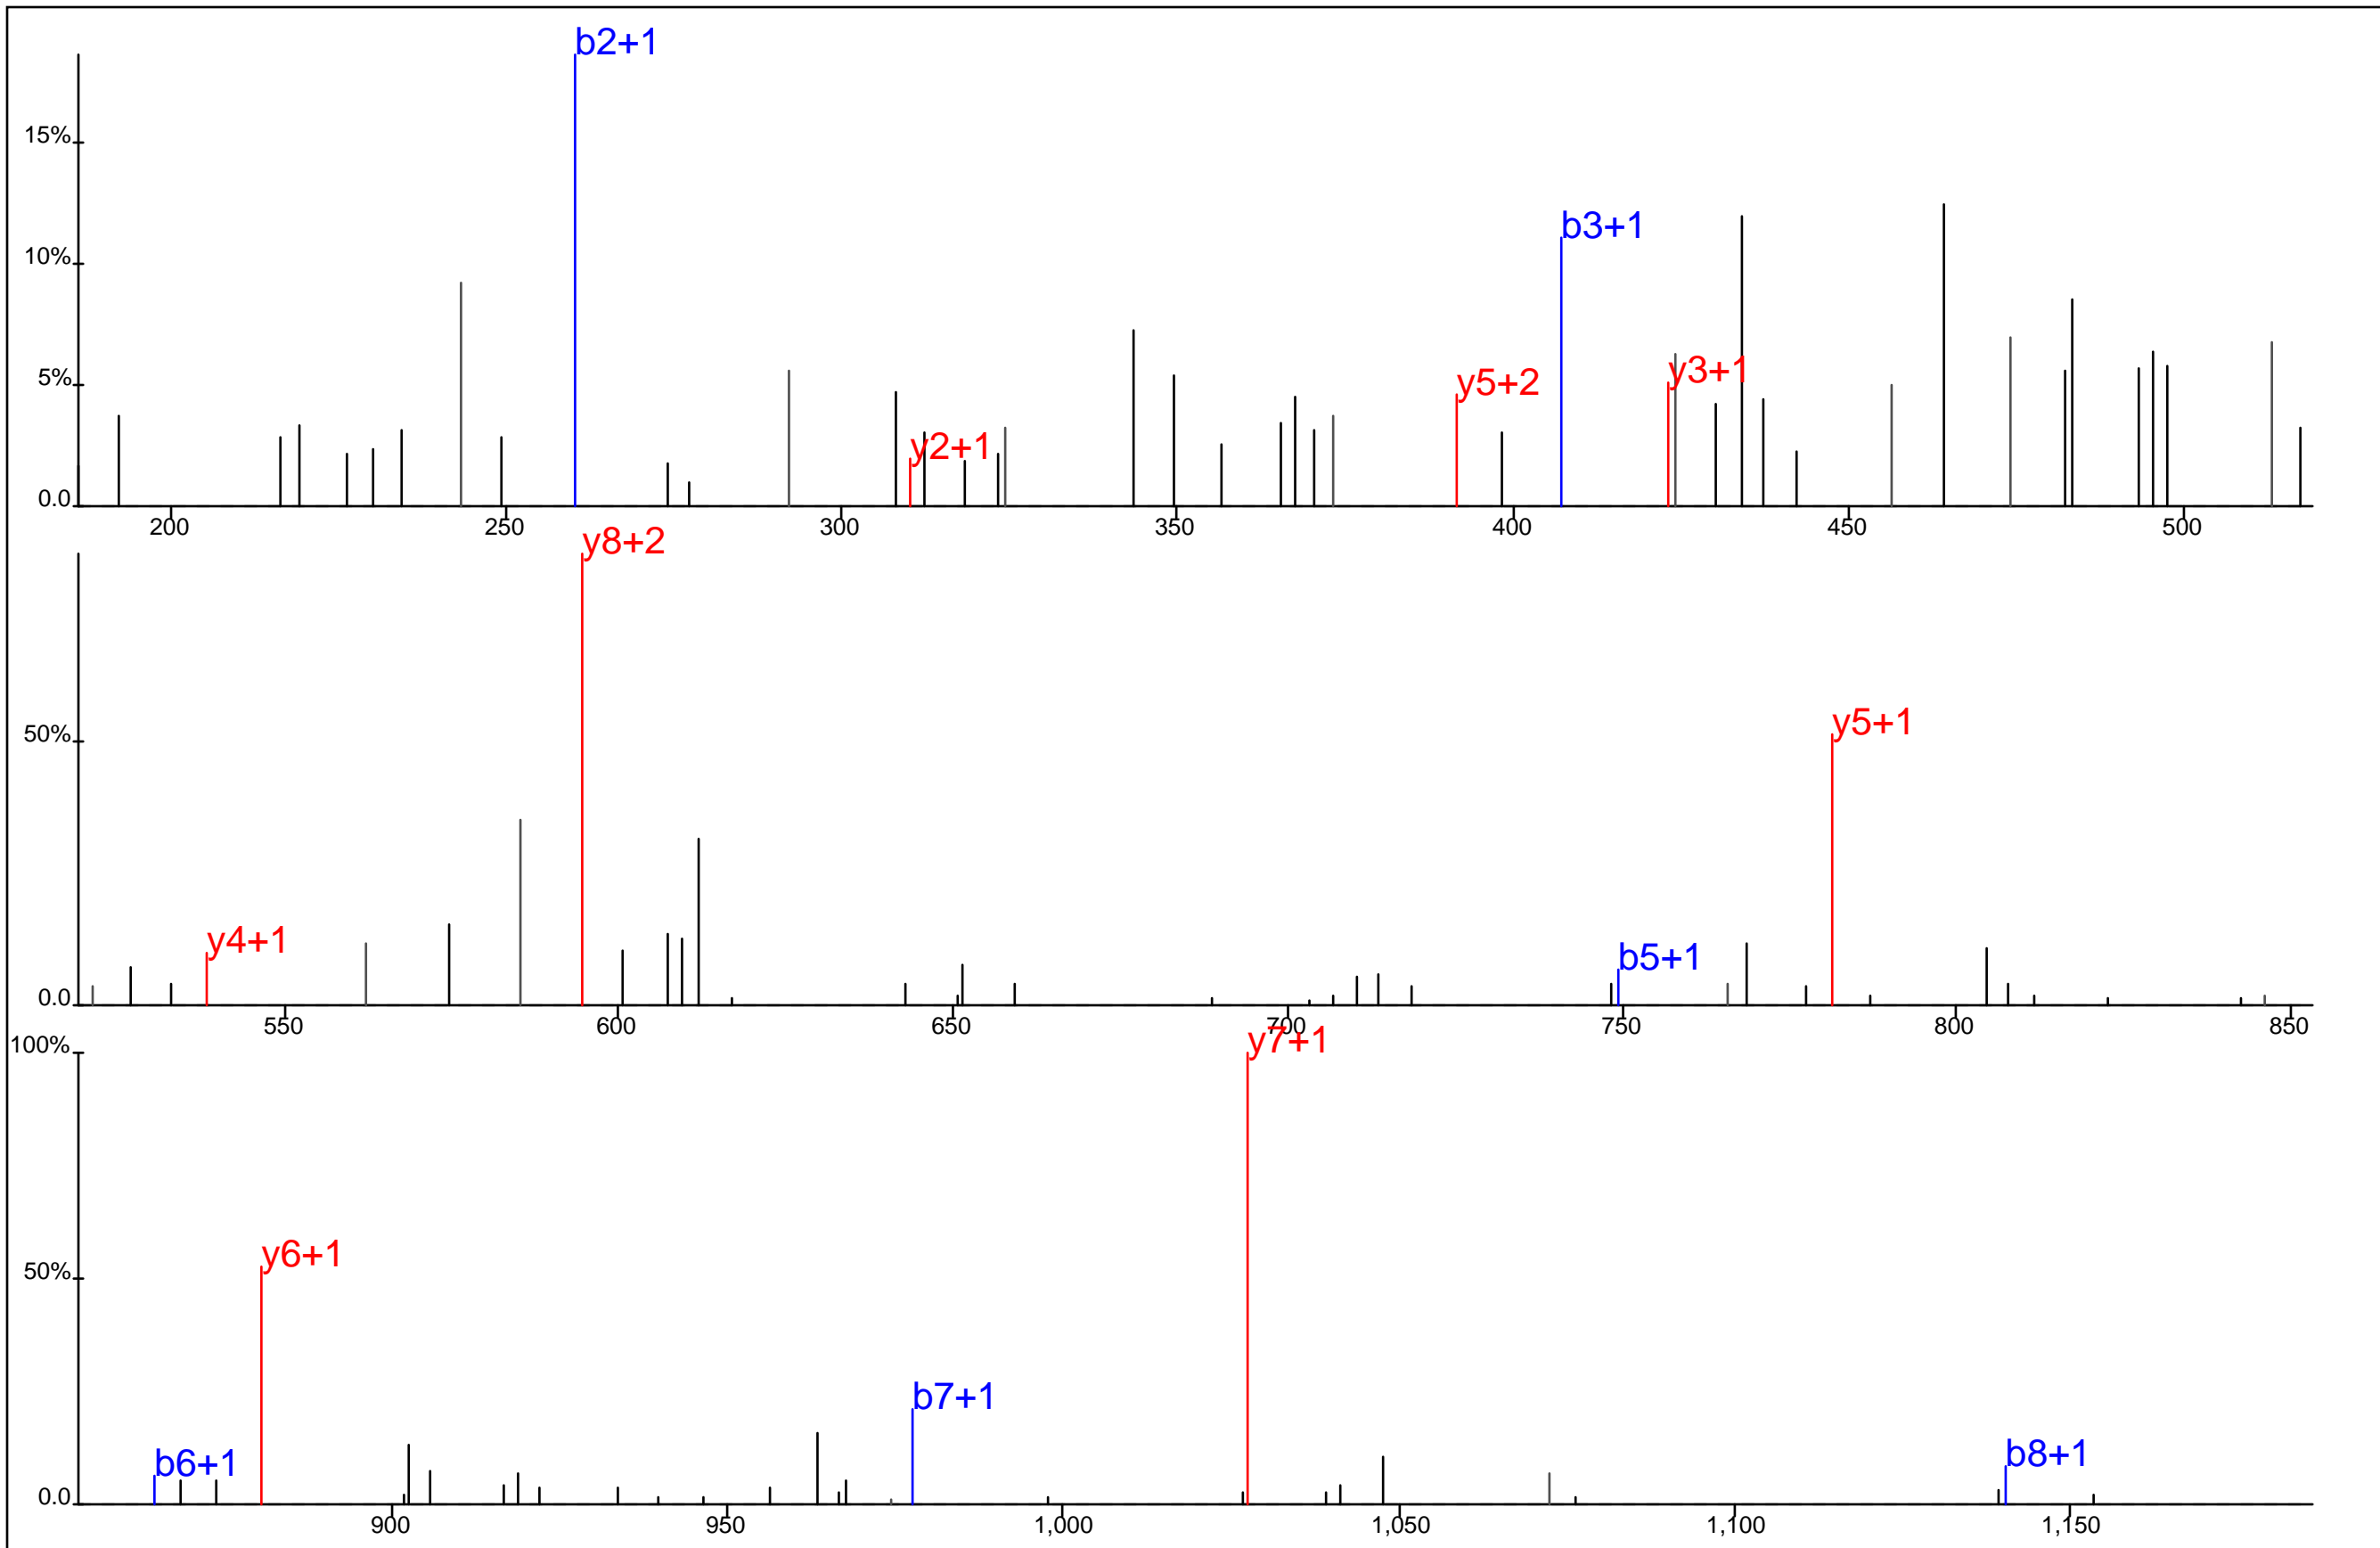

■ ■ ■ ■ ■ ■ ■ ■  
■ ■ ■ ■ ■ ■ ■ ■

Protein Name: AICAR transformylase, IMP cyclohydrolase  
 gi Accession: 0  
 Precursor Mass: 643.7623+2  
 Delta Mass: 1.772 ppm  
 XCorr: 28.21

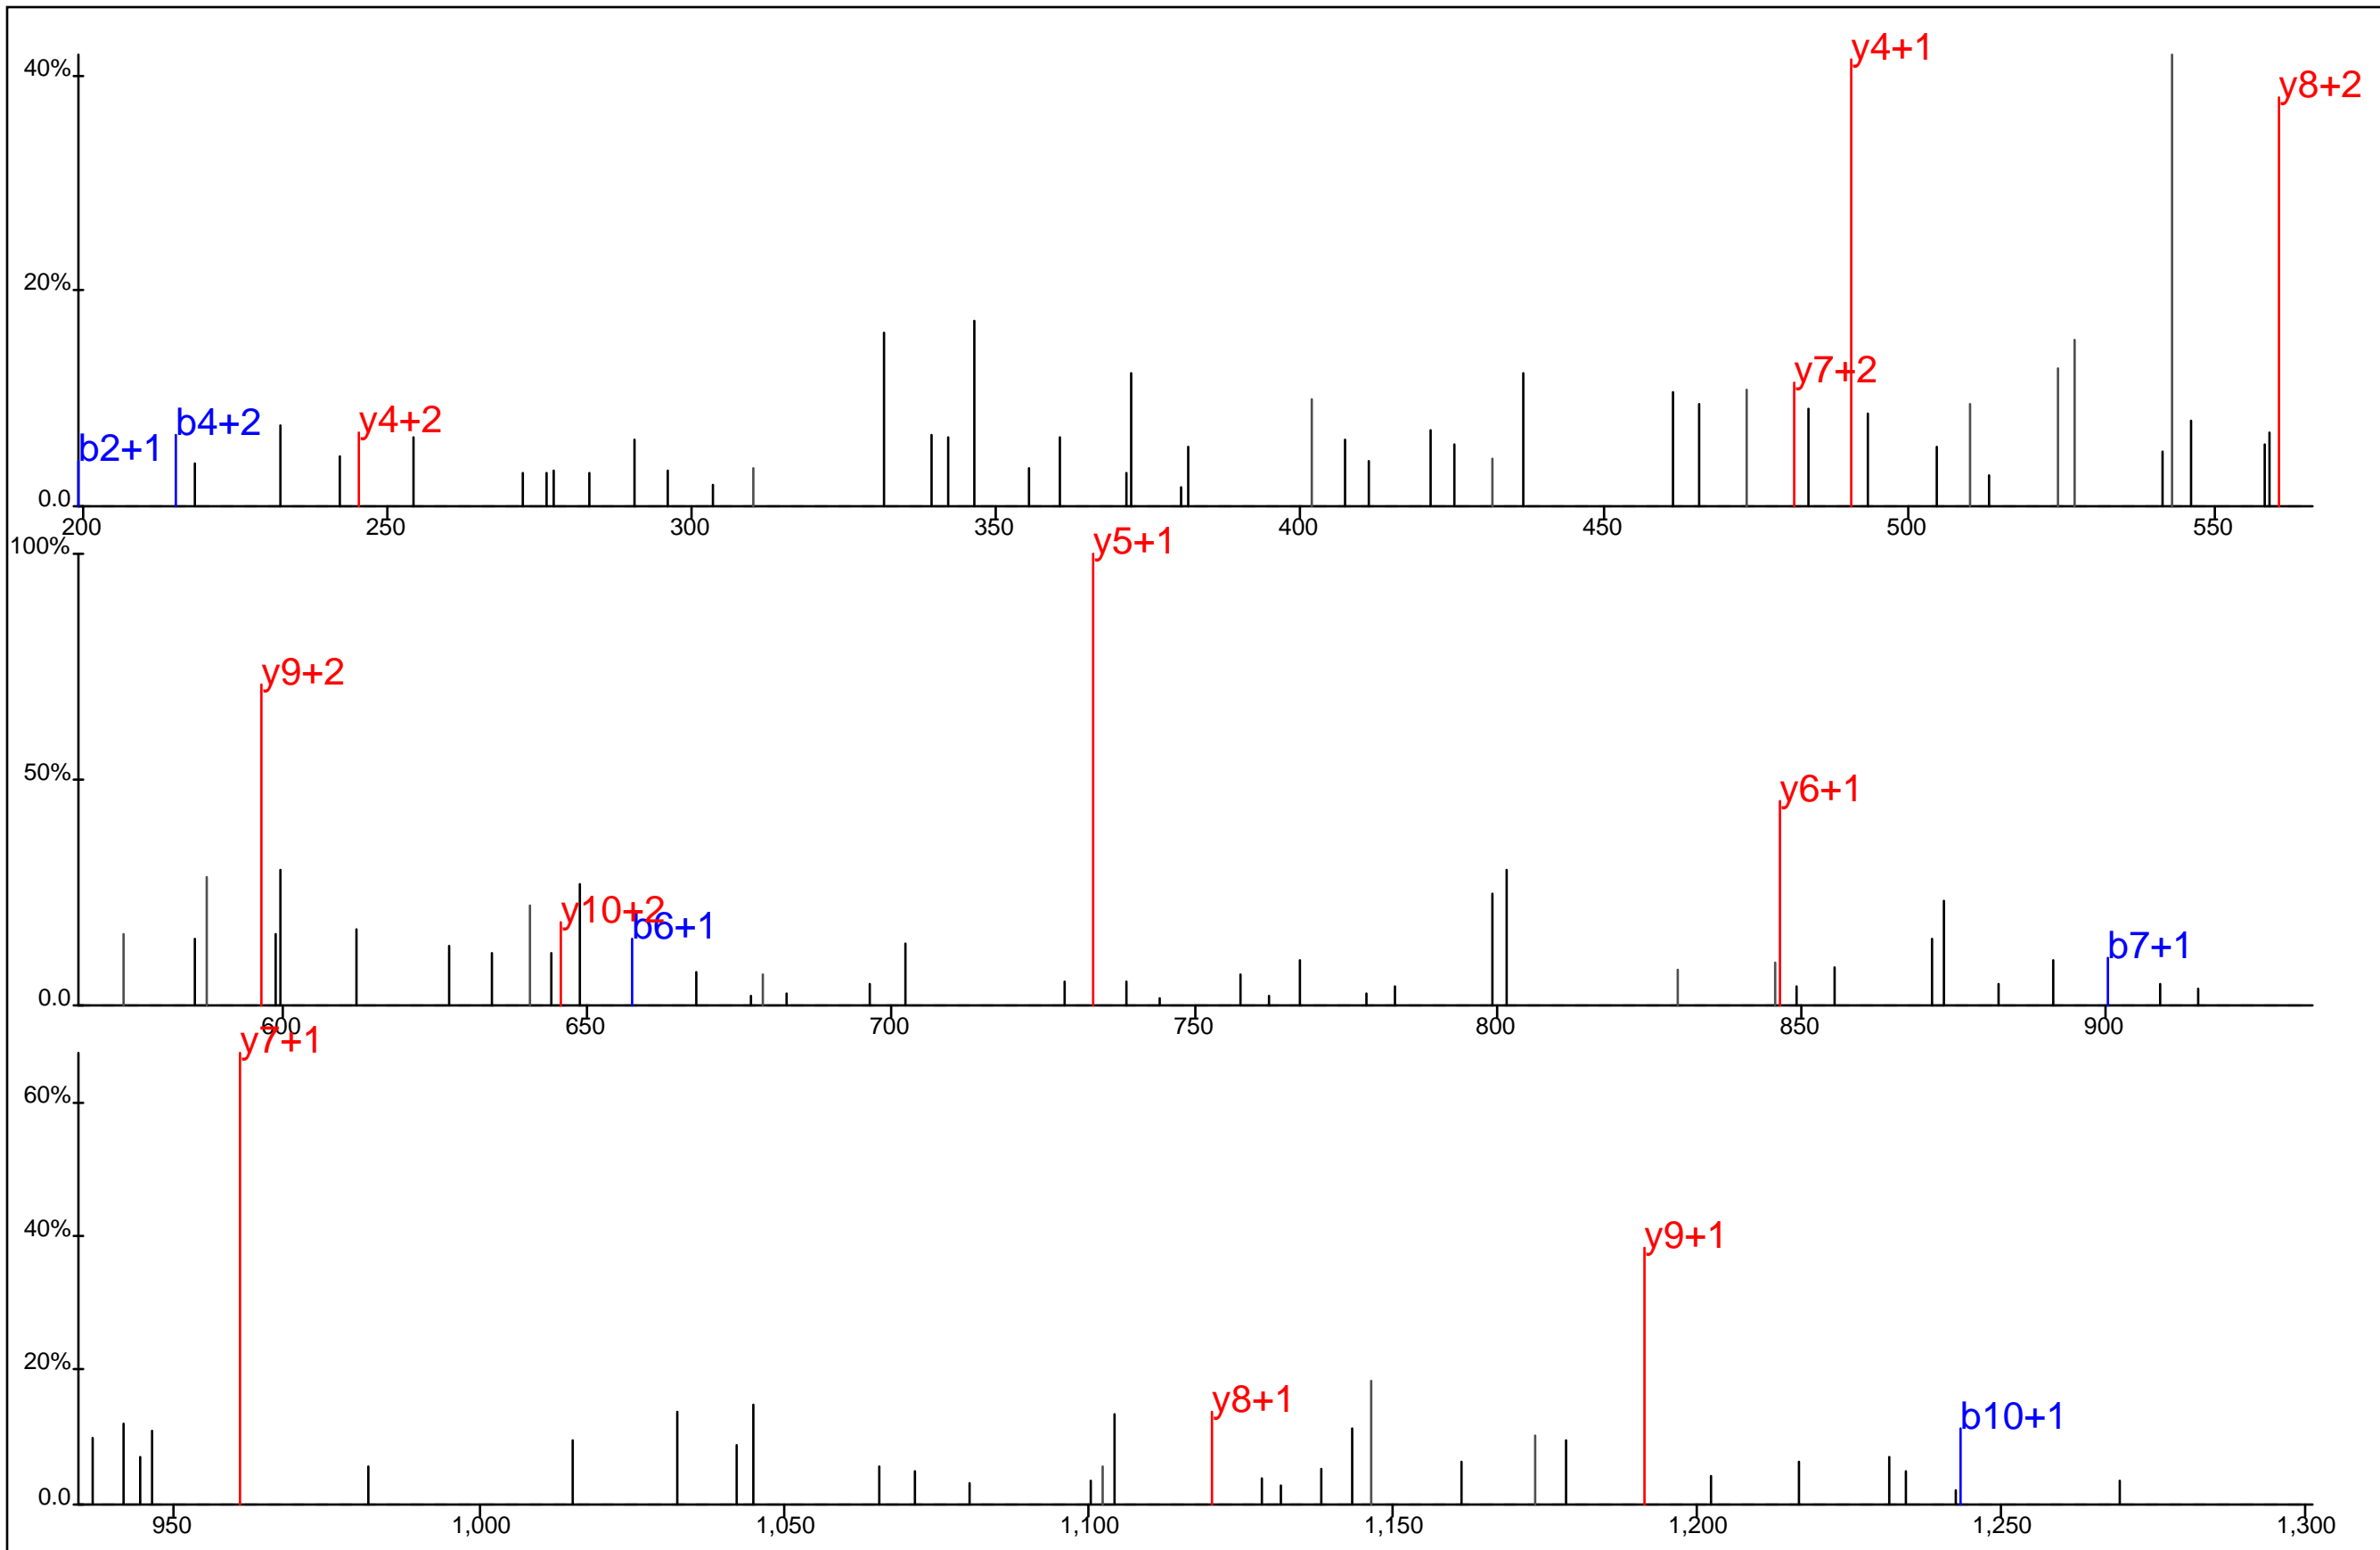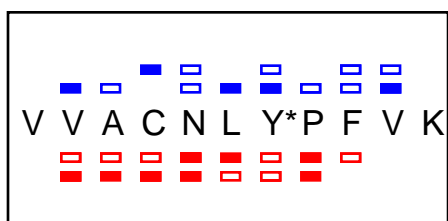

Protein Name: AICAR transformylase, IMP cyclohydrolase  
 gi Accession: 0  
 Precursor Mass: 695.3353+2  
 Delta Mass: 0.183 ppm  
 XCorr: 22.5

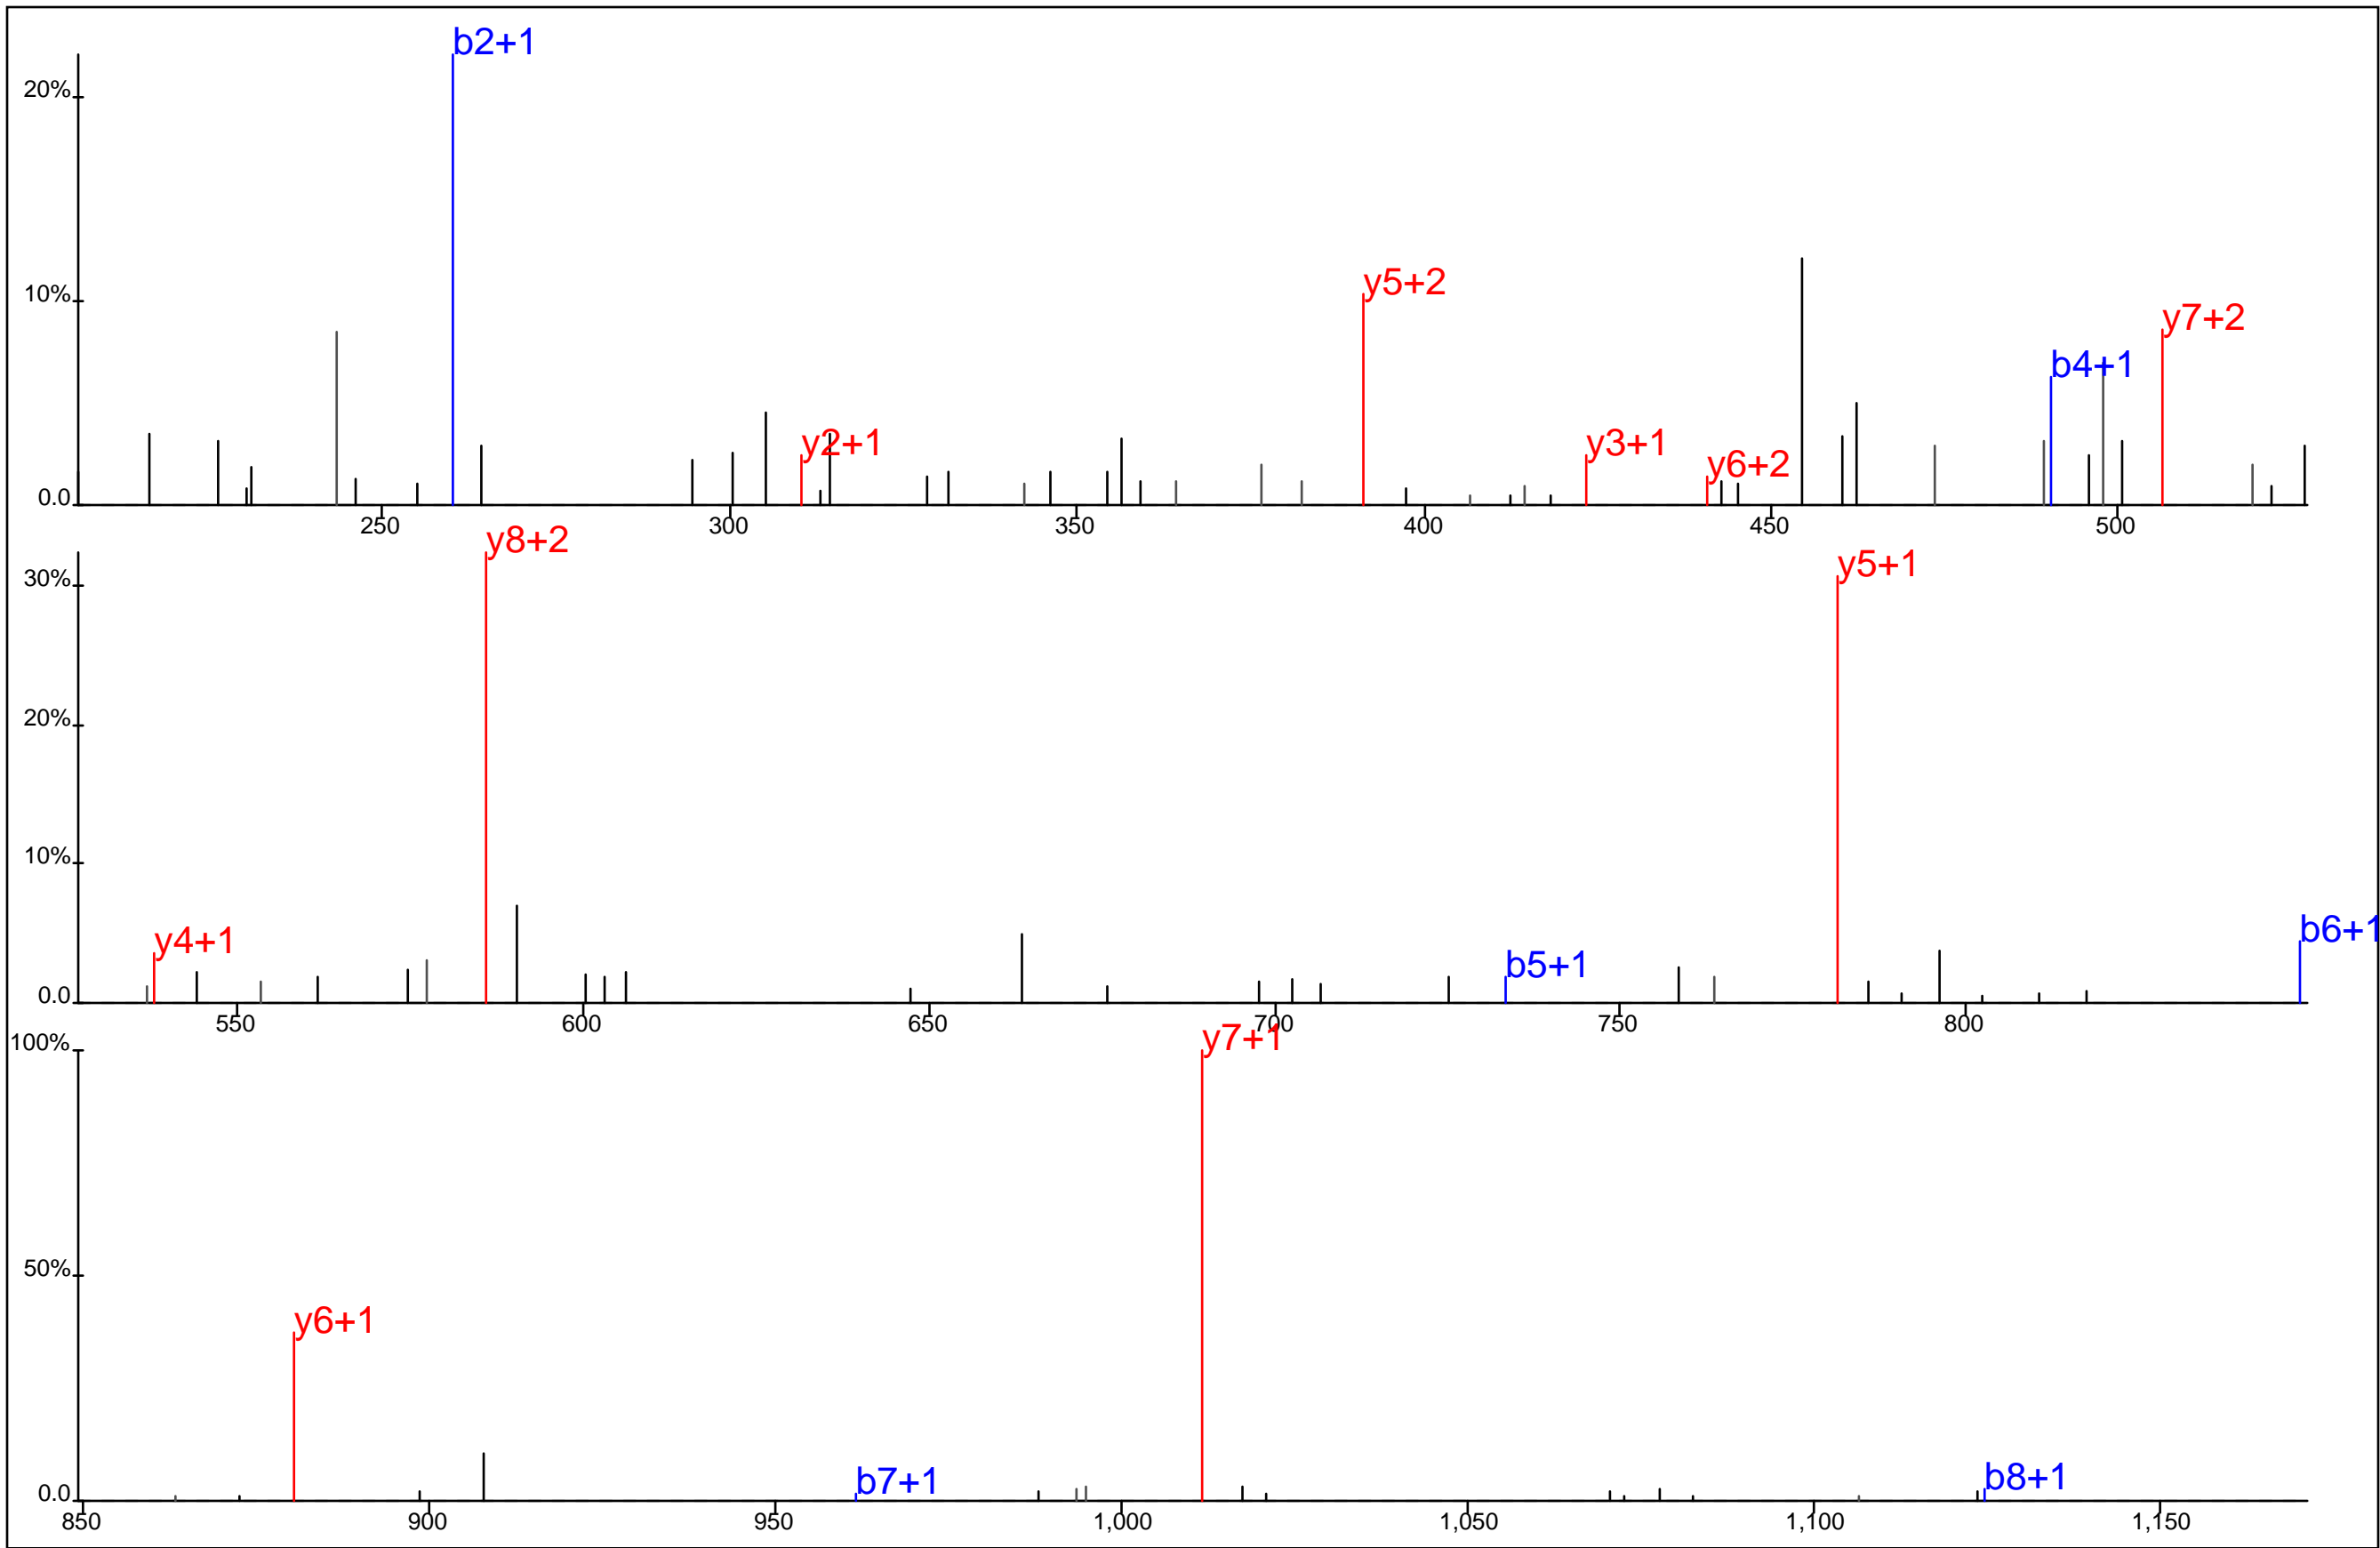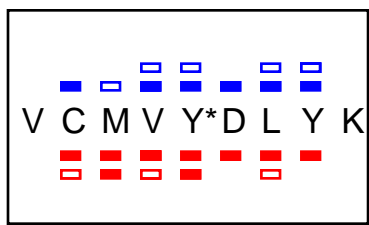

Protein Name: AICAR transformylase, IMP cyclohydrolase  
 gi Accession: 0  
 Precursor Mass: 635.7667+2  
 Delta Mass: 1.029 ppm  
 XCorr: 30.72





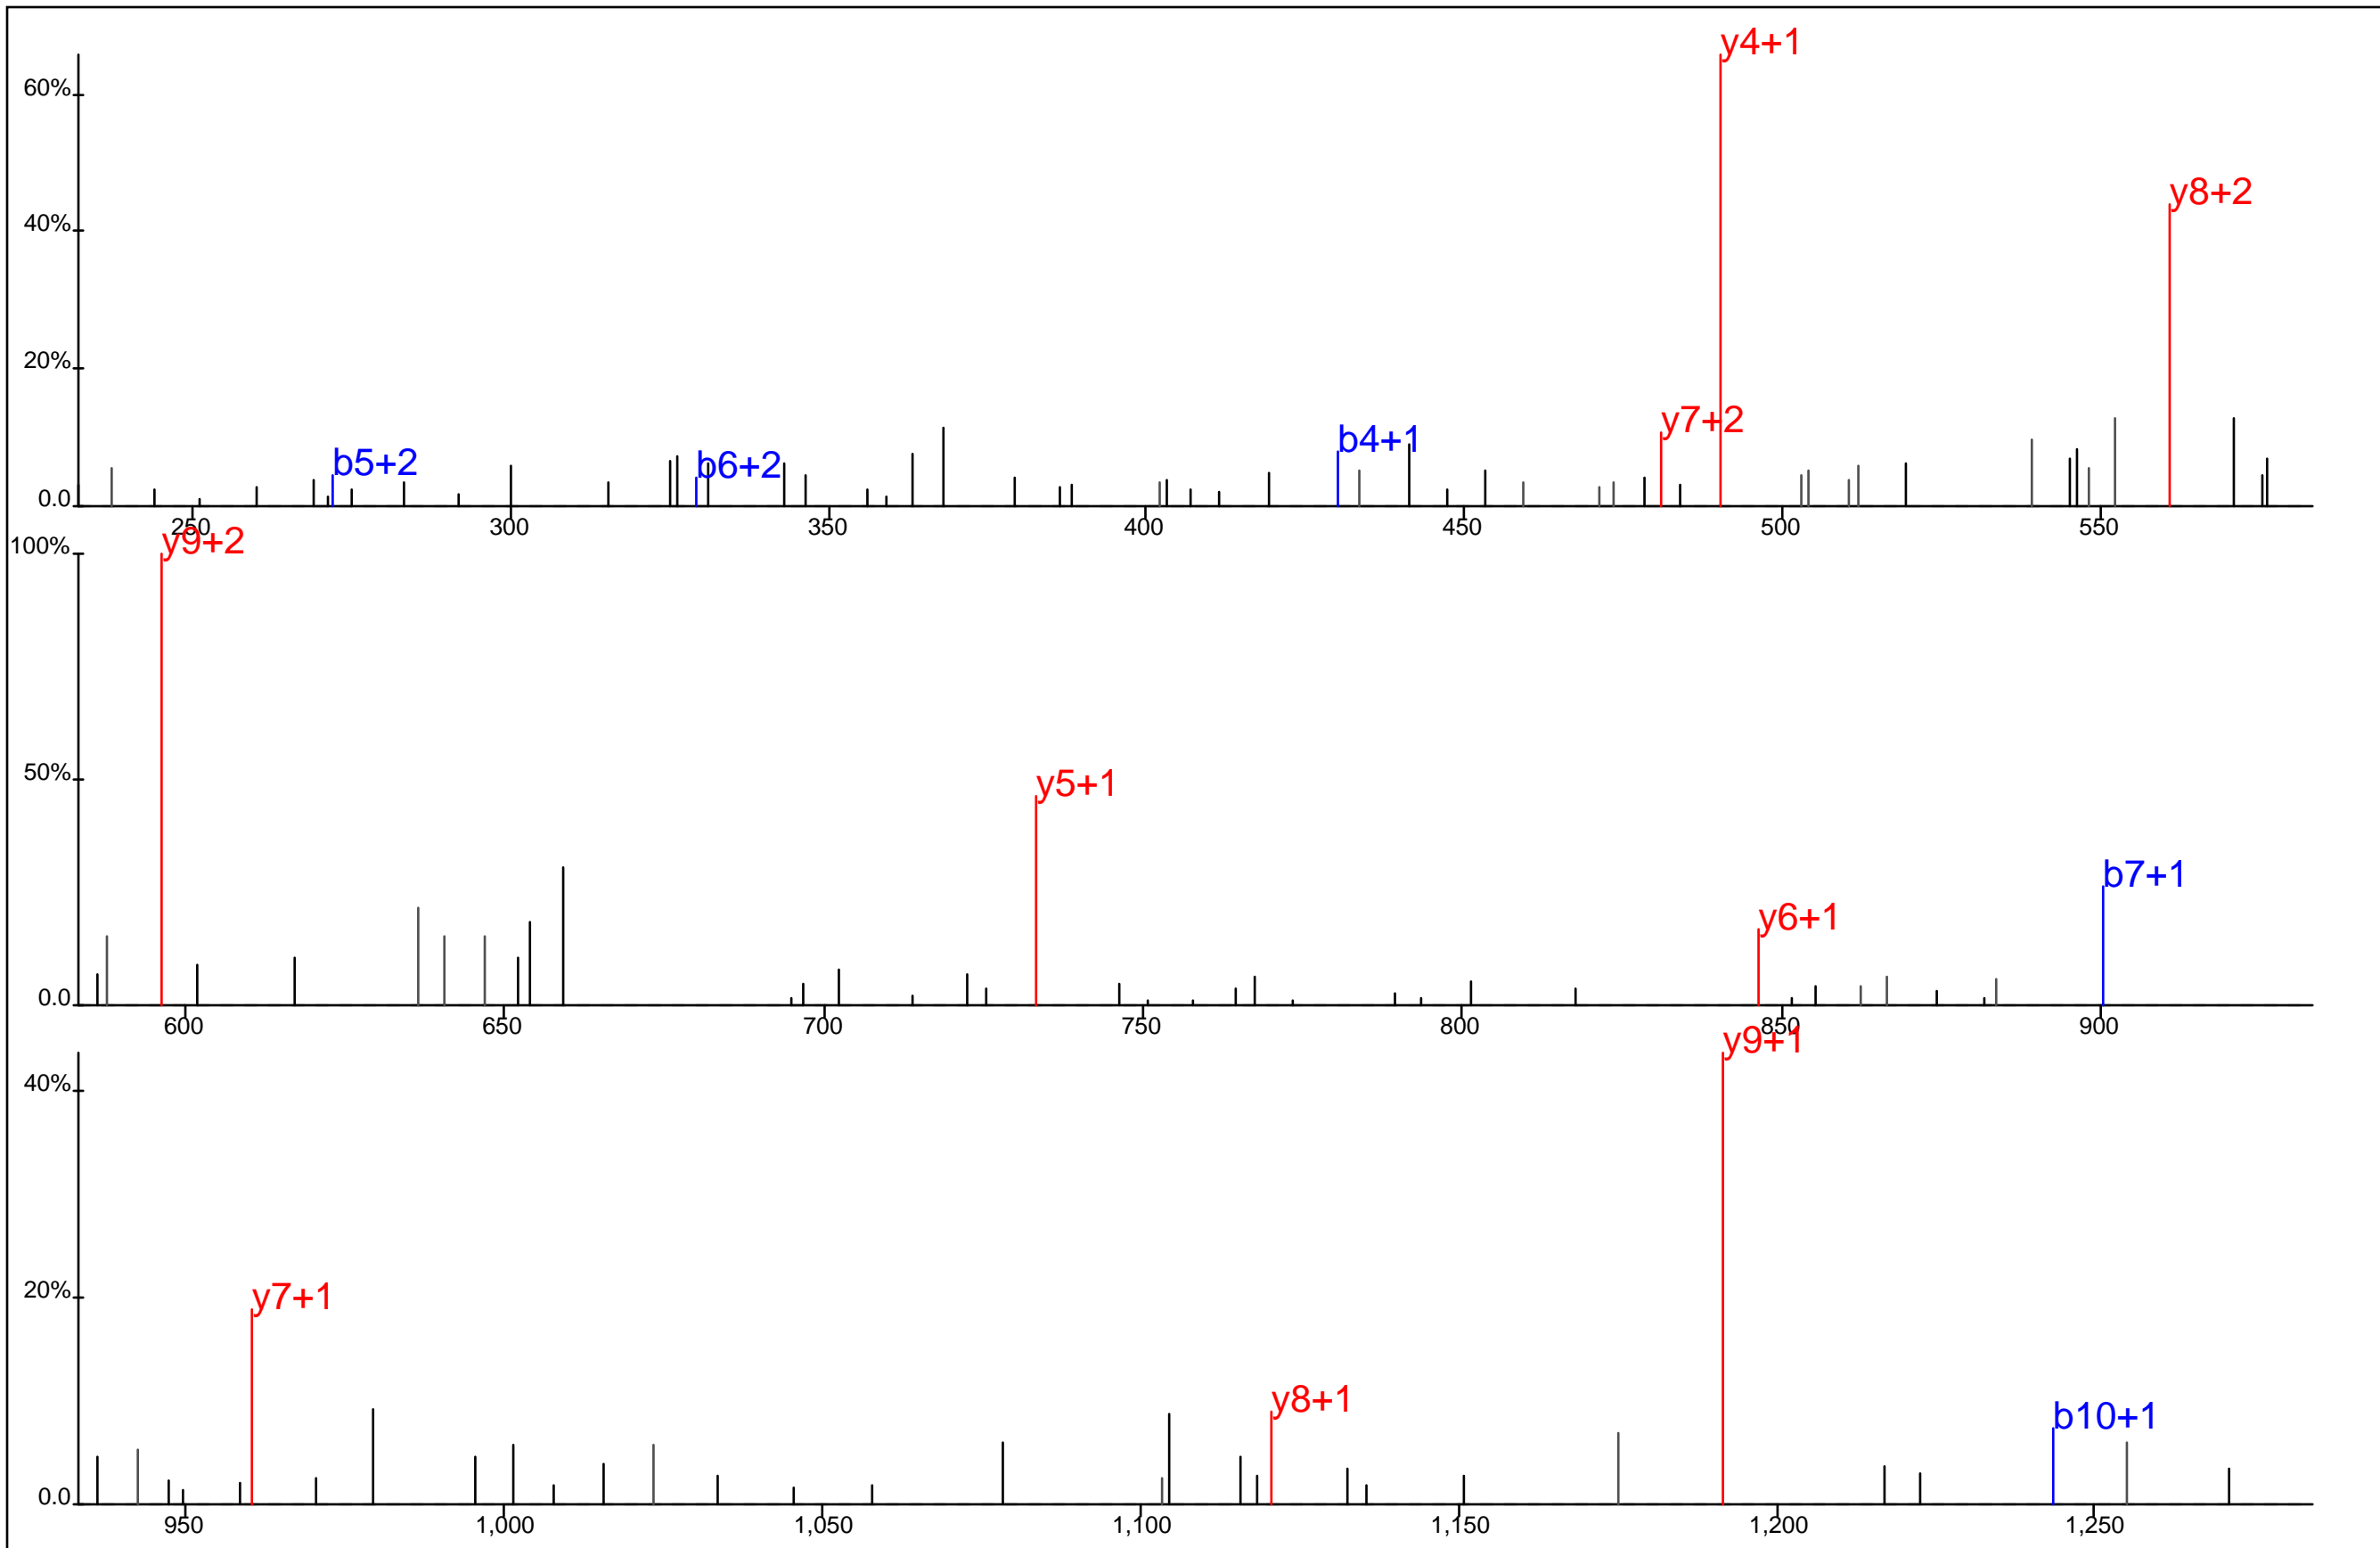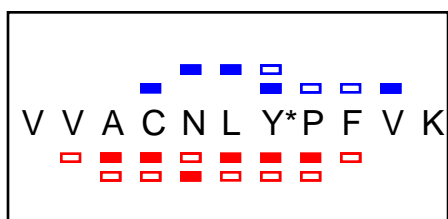

Protein Name: AICAR transformylase, IMP cyclohydrolase  
 gi Accession: 0  
 Precursor Mass: 695.3353+2  
 Delta Mass: 0.271 ppm  
 XCorr: 33.06

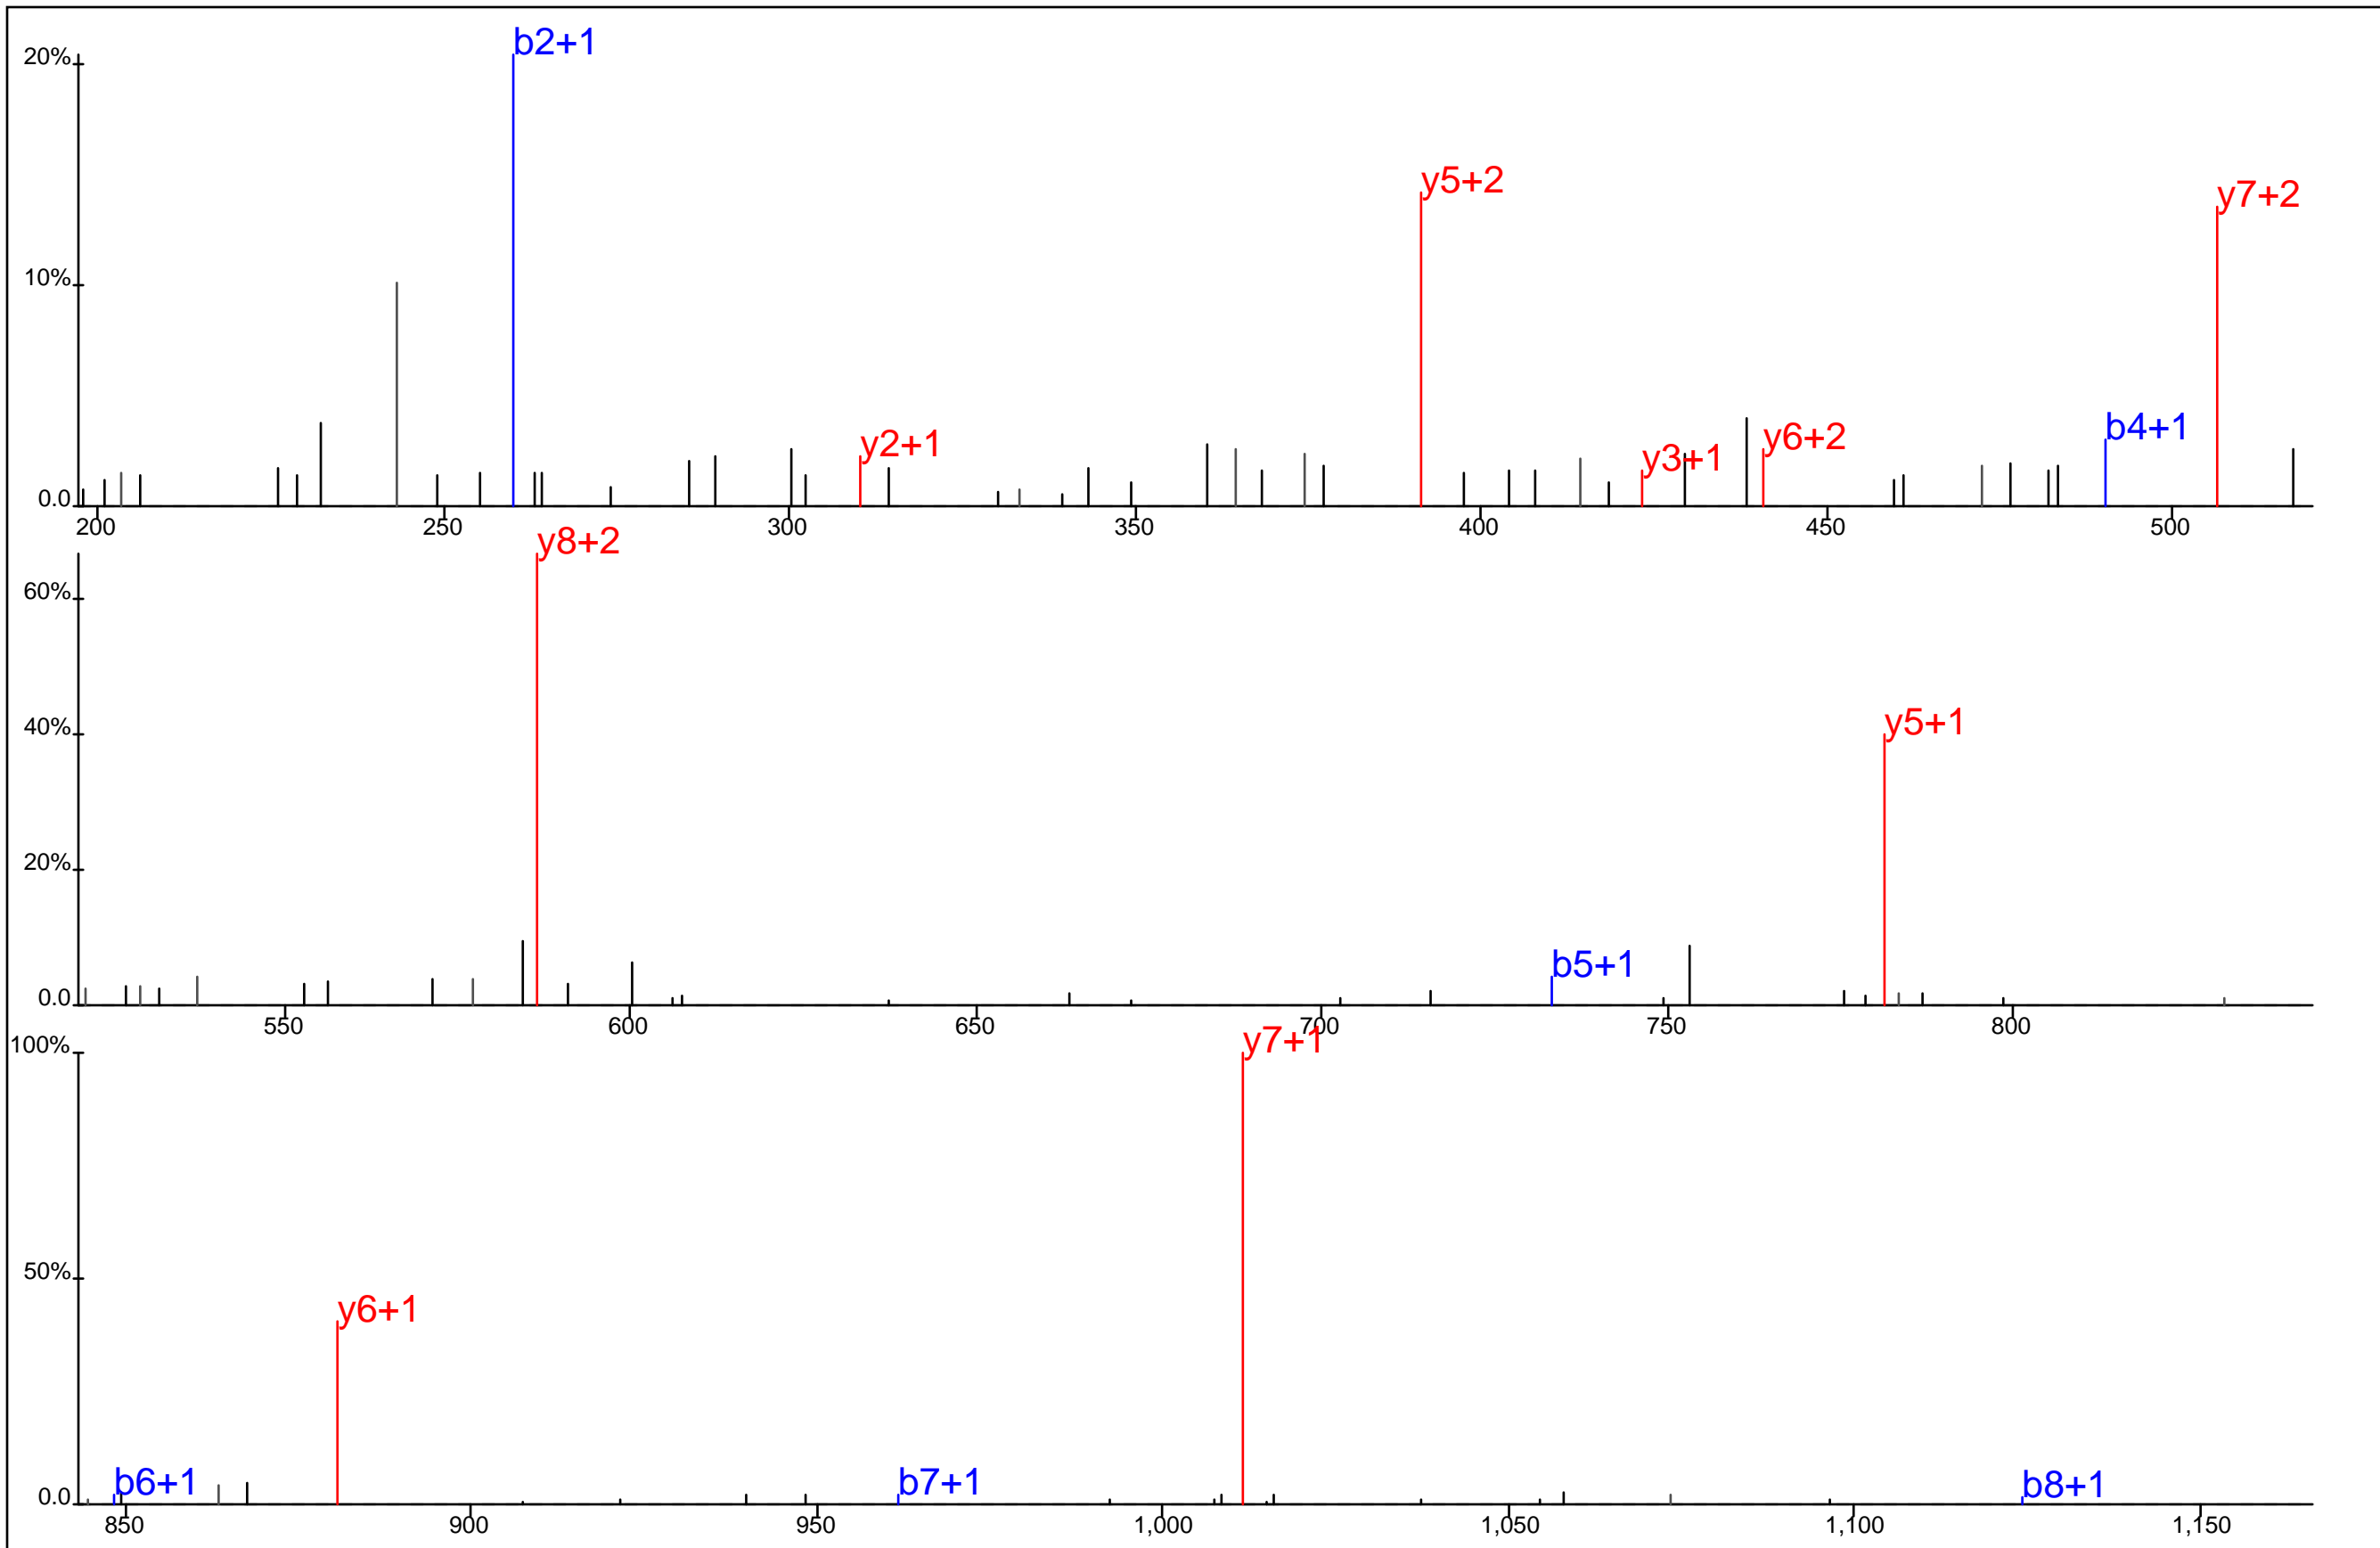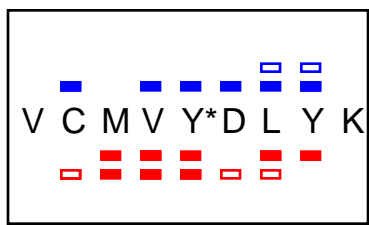

Protein Name: AICAR transformylase, IMP cyclohydrolase  
 gi Accession: 0  
 Precursor Mass: 635.7665+2  
 Delta Mass: 0.837 ppm  
 XCorr: 32.07



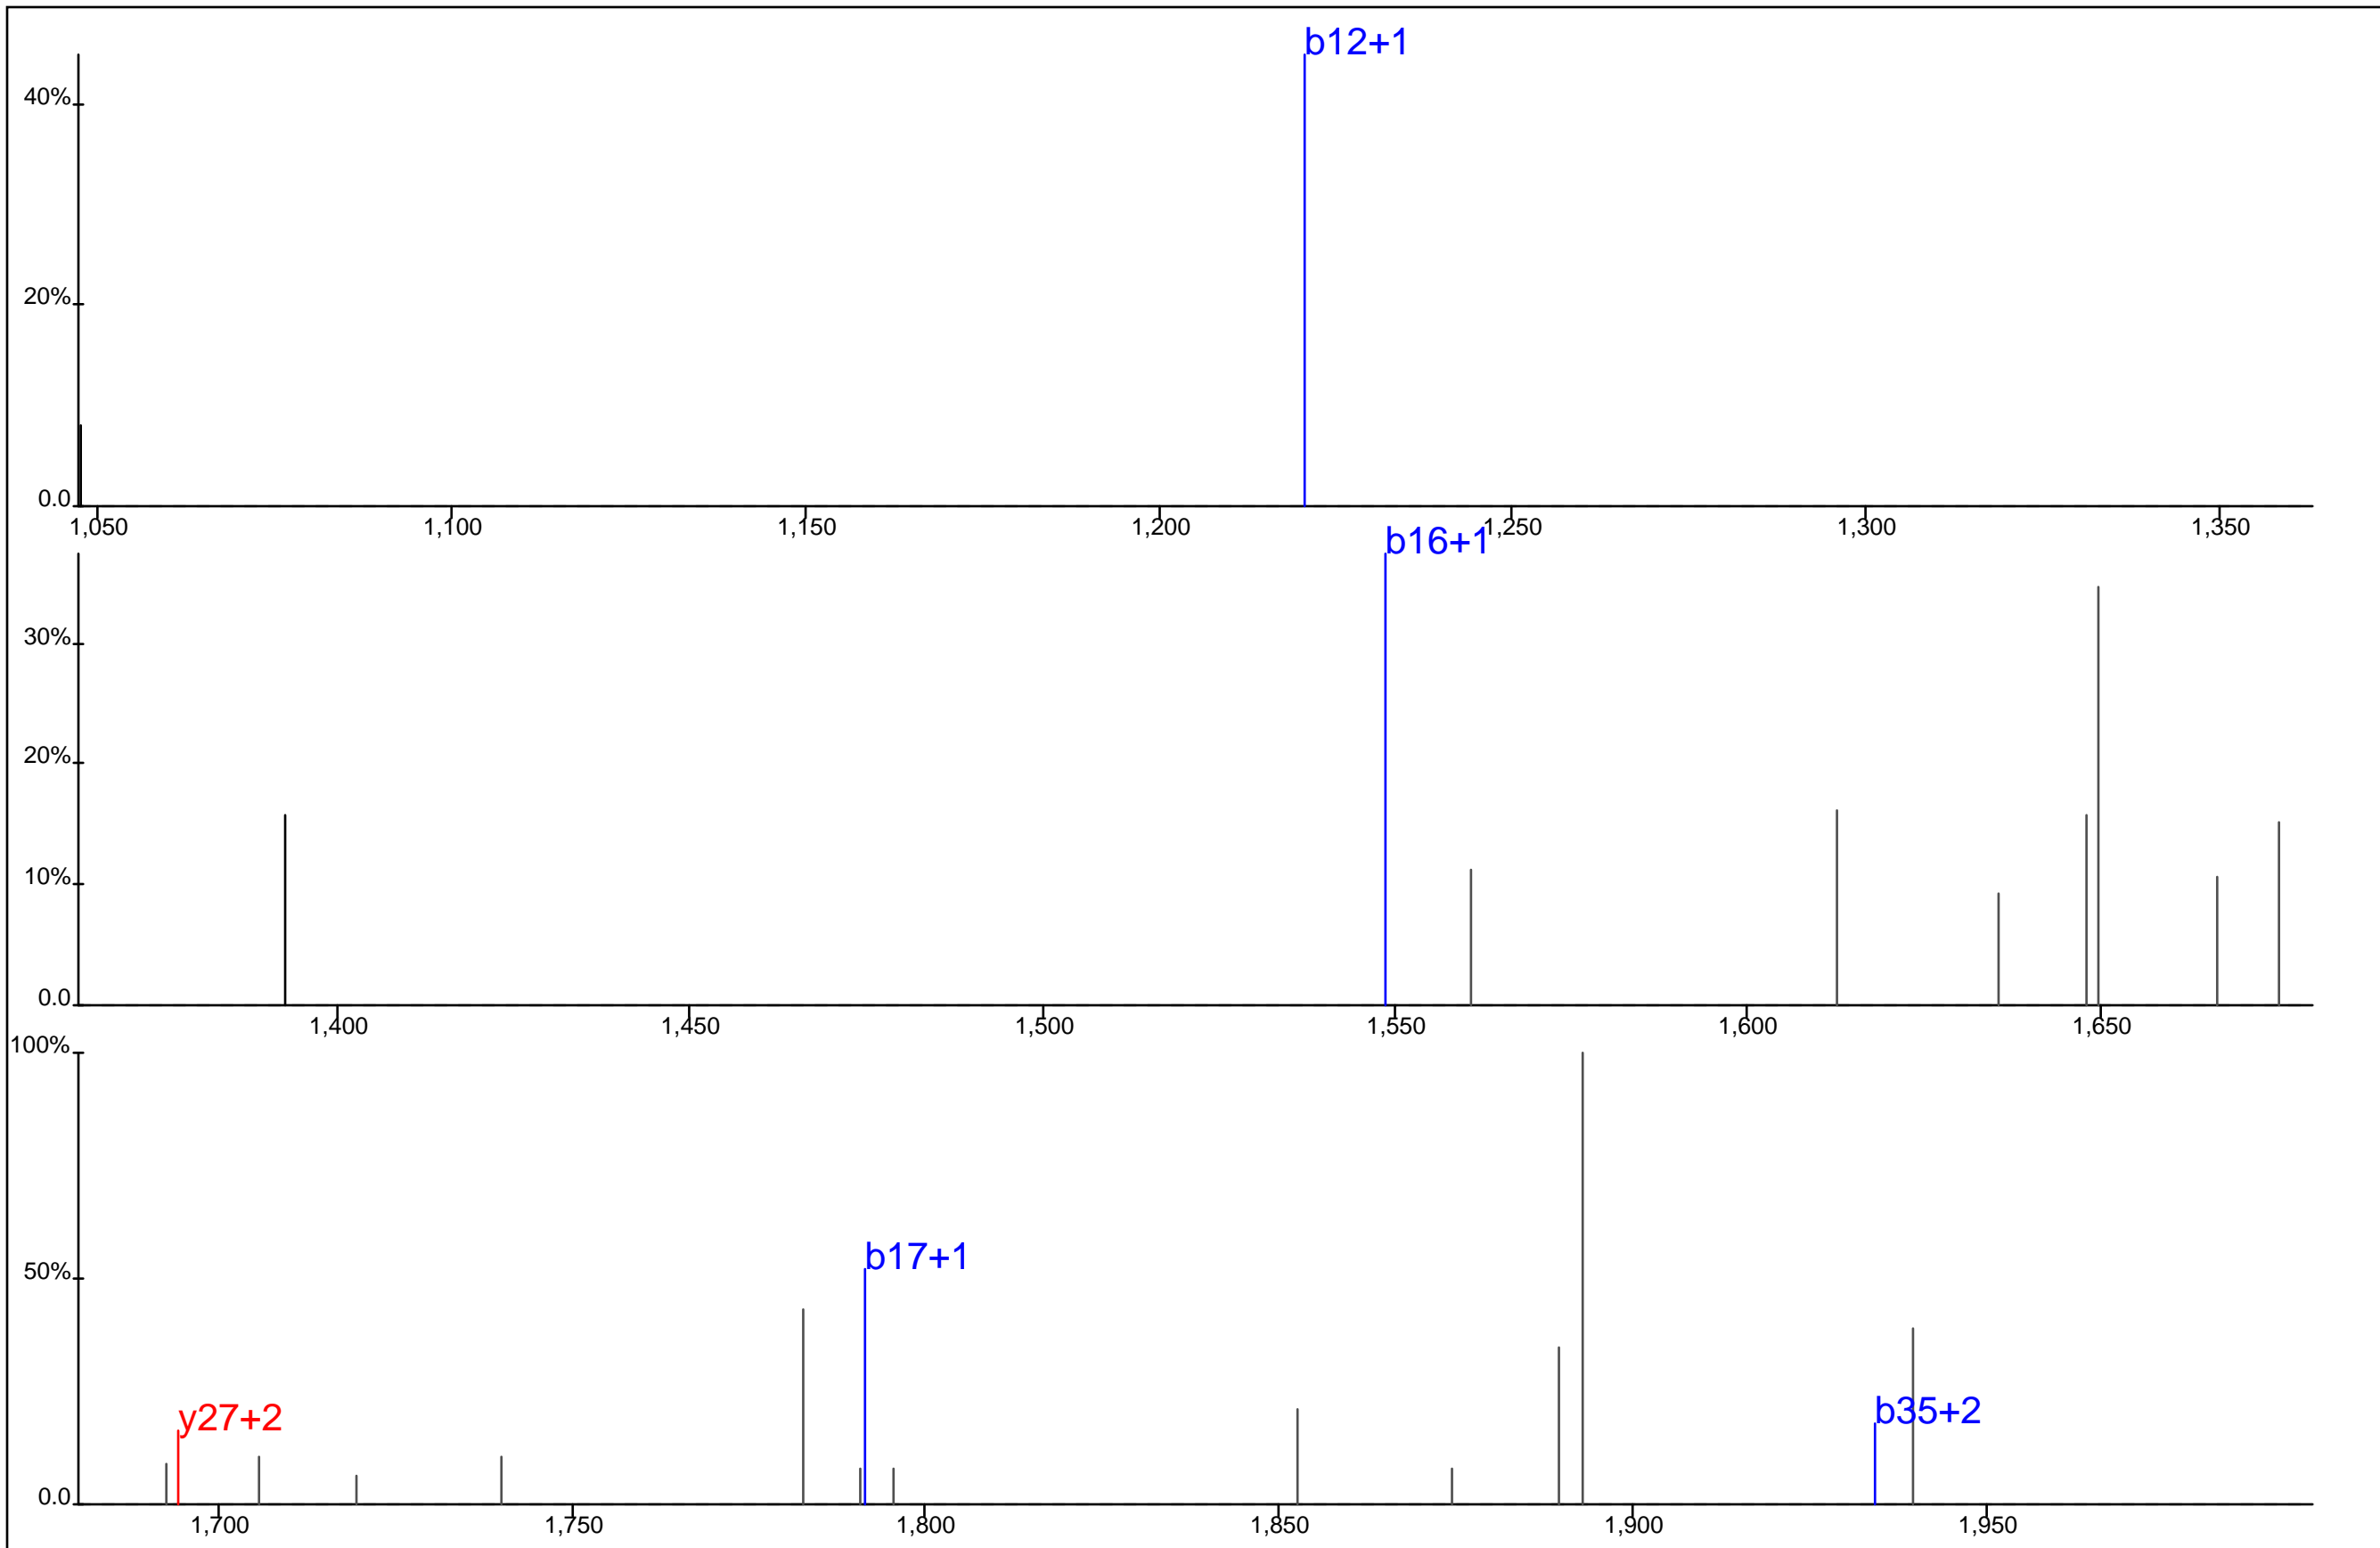

I P L S D G N S I P I I G L G T Y \* S E P K S L W A T N H V P E M # W R P T \* L E R T L R

Color-coded dashes in the sequence indicate the positions of the labeled peptides: blue dashes for b12+1, b16+1, b17+1, and b35+2; a red dash for y27+2.

Protein Name: AKR1D1 Uncharacterized protein  
 gi Accession: 0  
 Precursor Mass: 1,612.1427+3  
 Delta Mass: 2.010 ppm  
 XCorr: 24.3

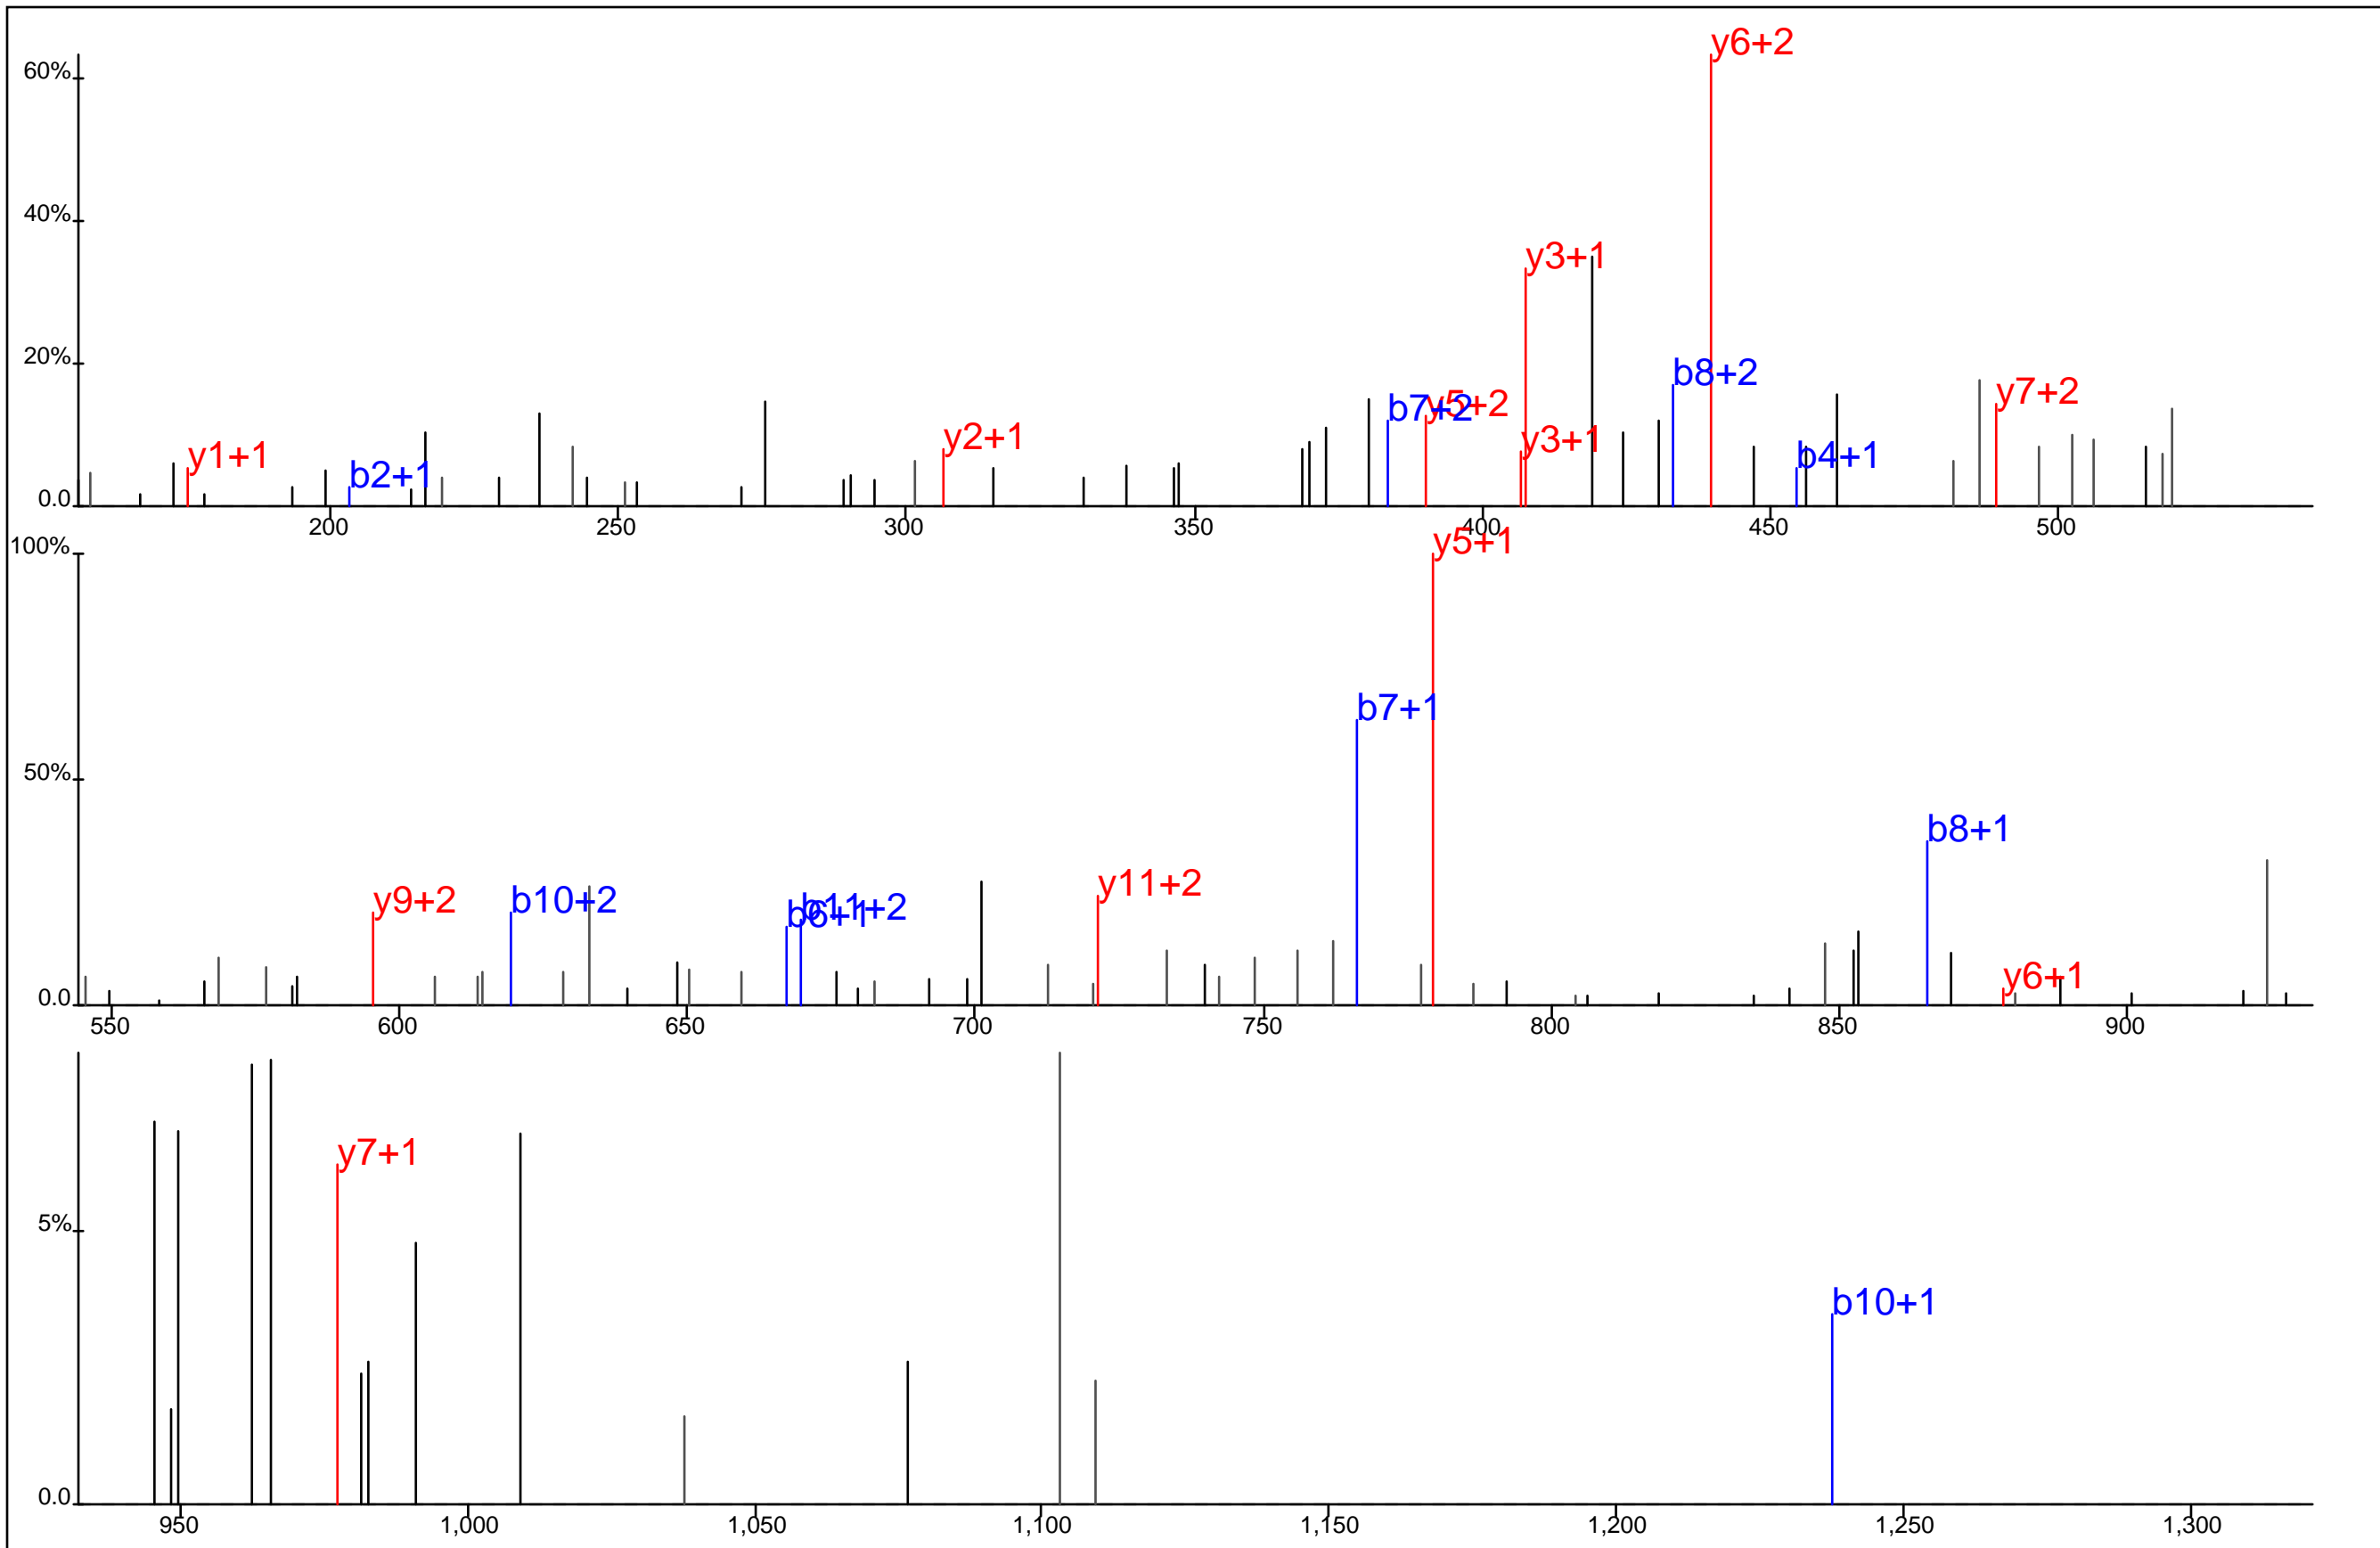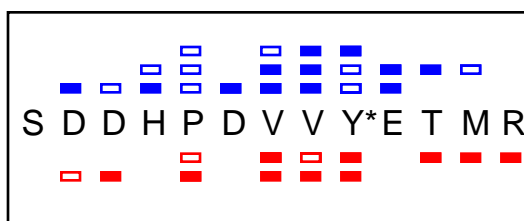

Protein Name: AKT2 interactor  
 gi Accession: 0  
 Precursor Mass: 548.5533+3  
 Delta Mass: 2.779 ppm  
 XCorr: 21.34

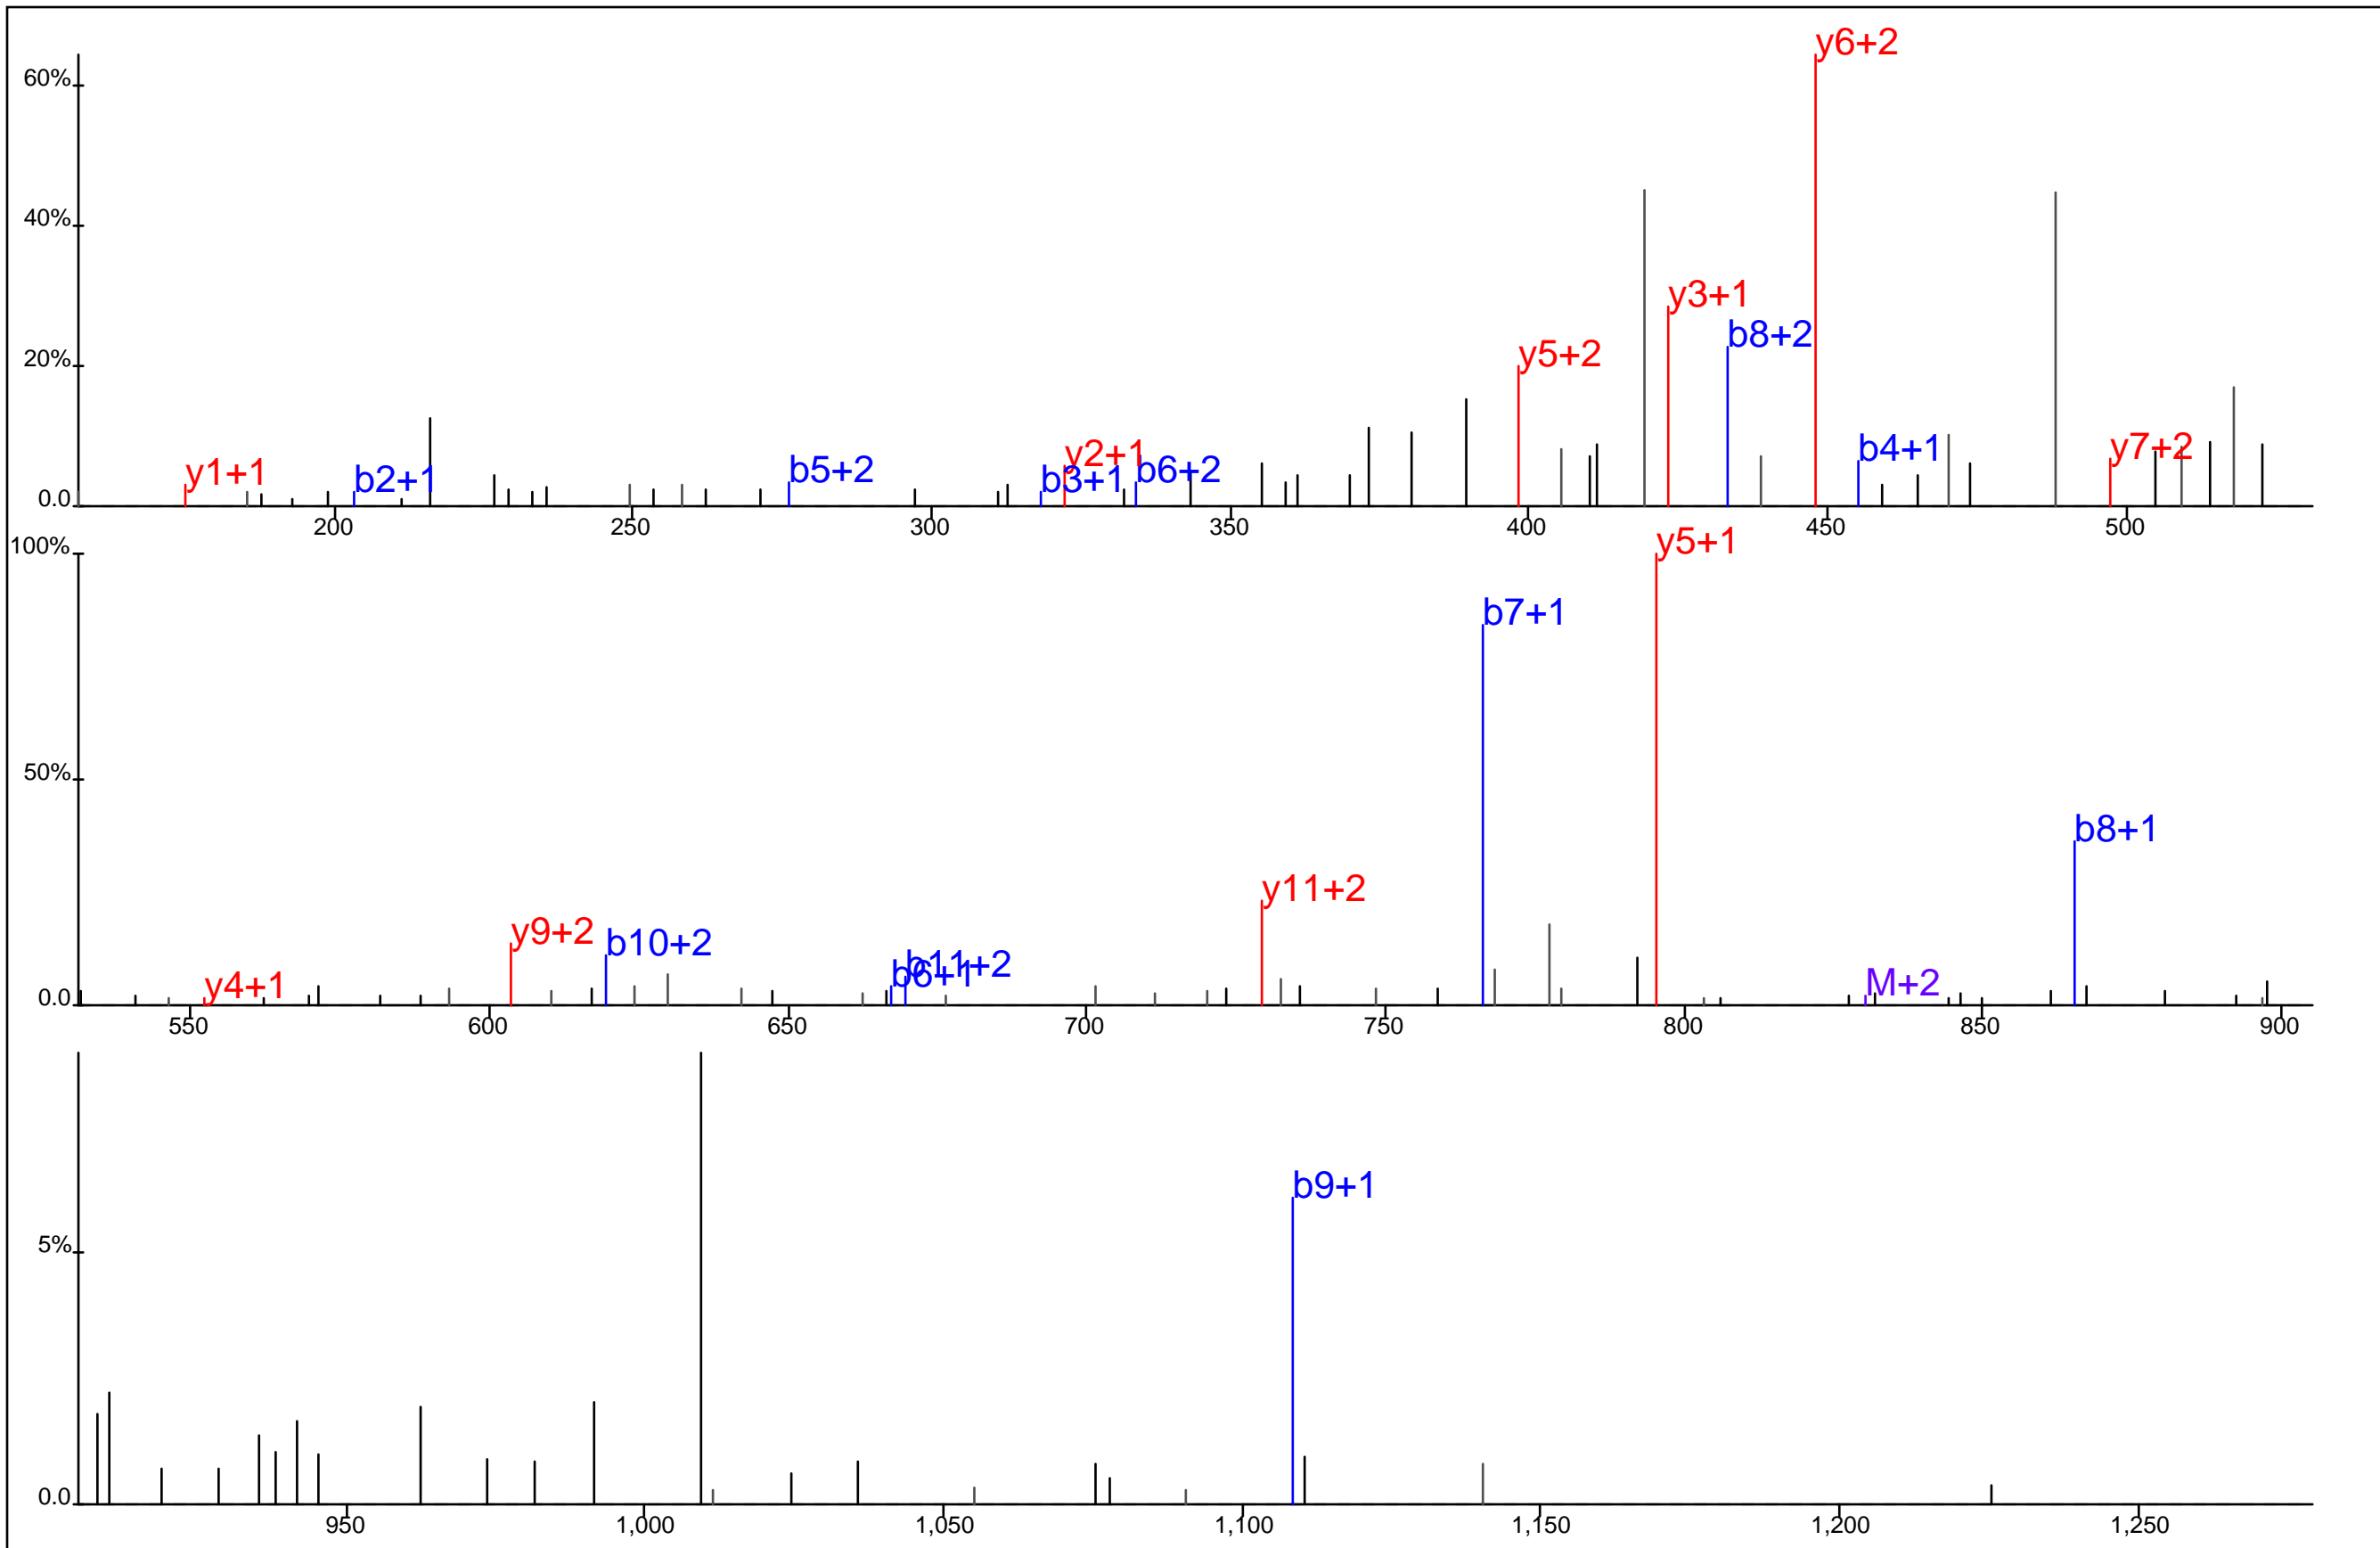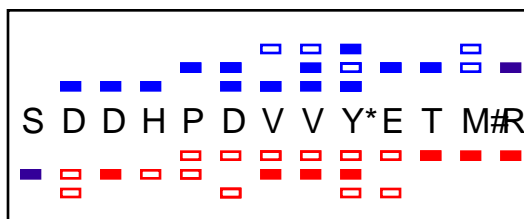

Protein Name: AKT2 interactor  
 gi Accession: 0  
 Precursor Mass: 553.8828+3  
 Delta Mass: 1.063 ppm  
 XCorr: 21.58

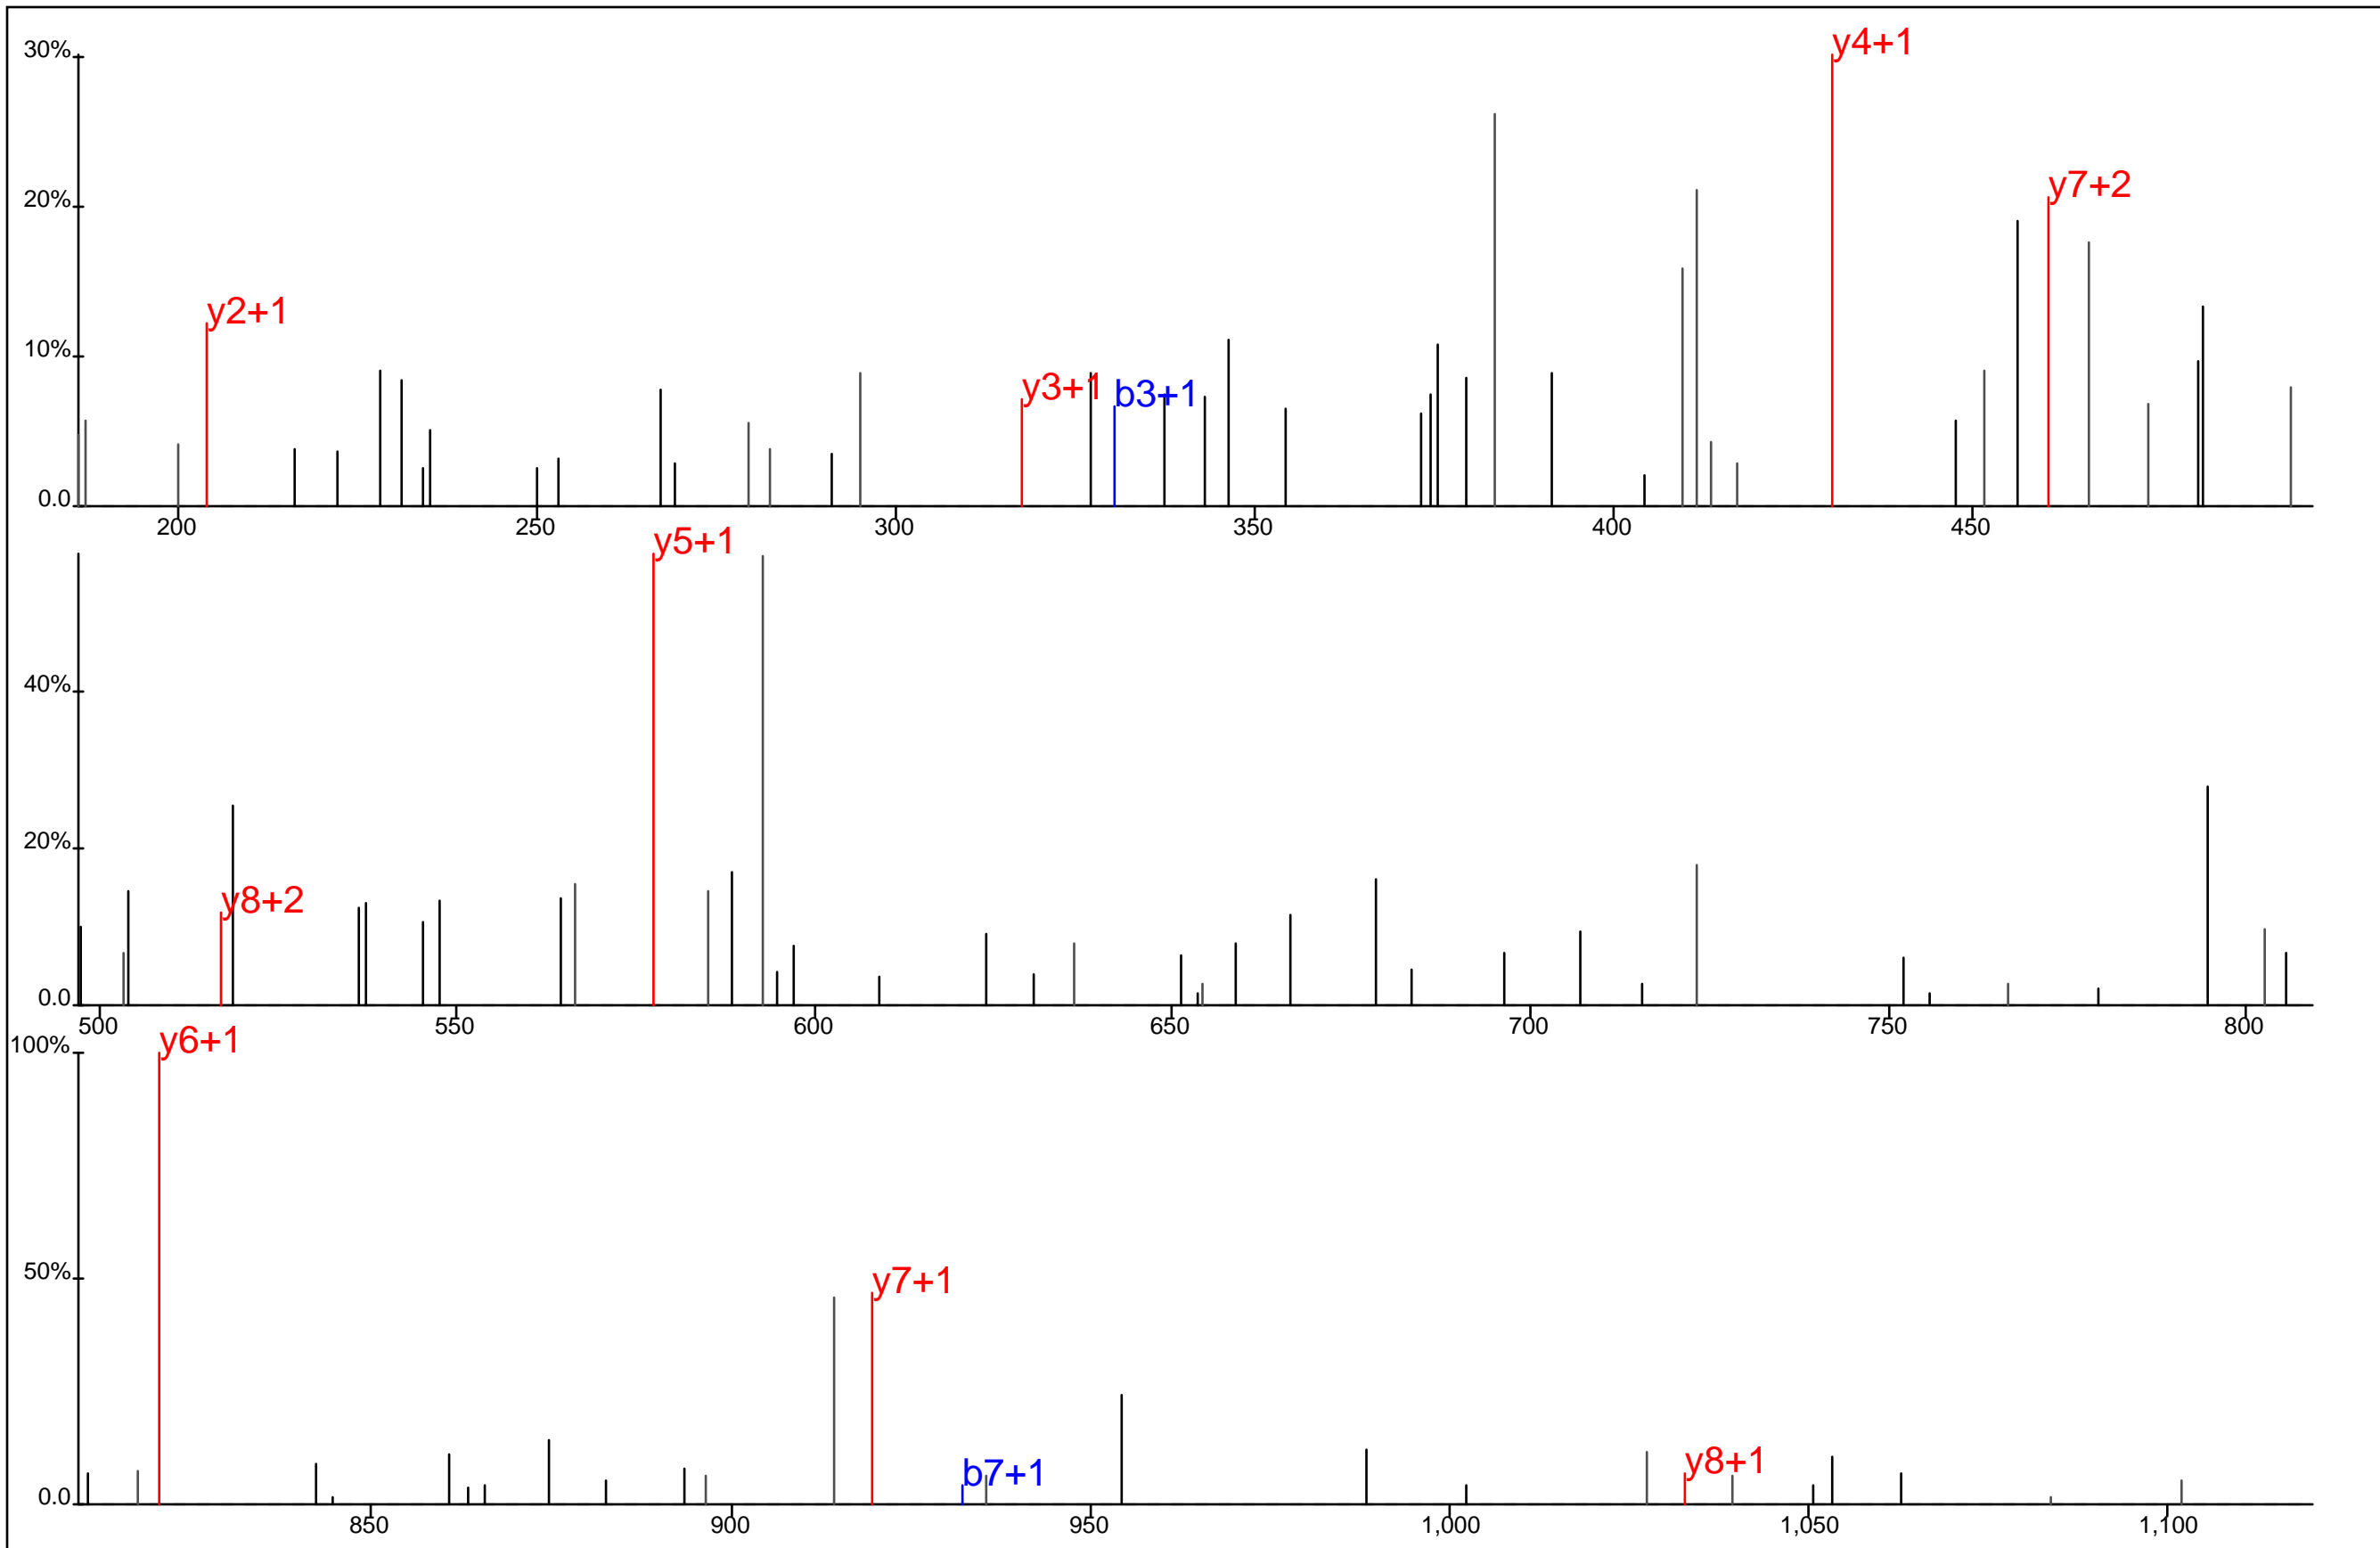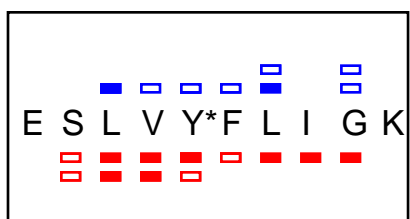

Protein Name: Anaphase promoting complex, subunit 3  
 gi Accession: 0  
 Precursor Mass: 624.8163+2  
 Delta Mass: 1.802 ppm  
 XCorr: 26.29

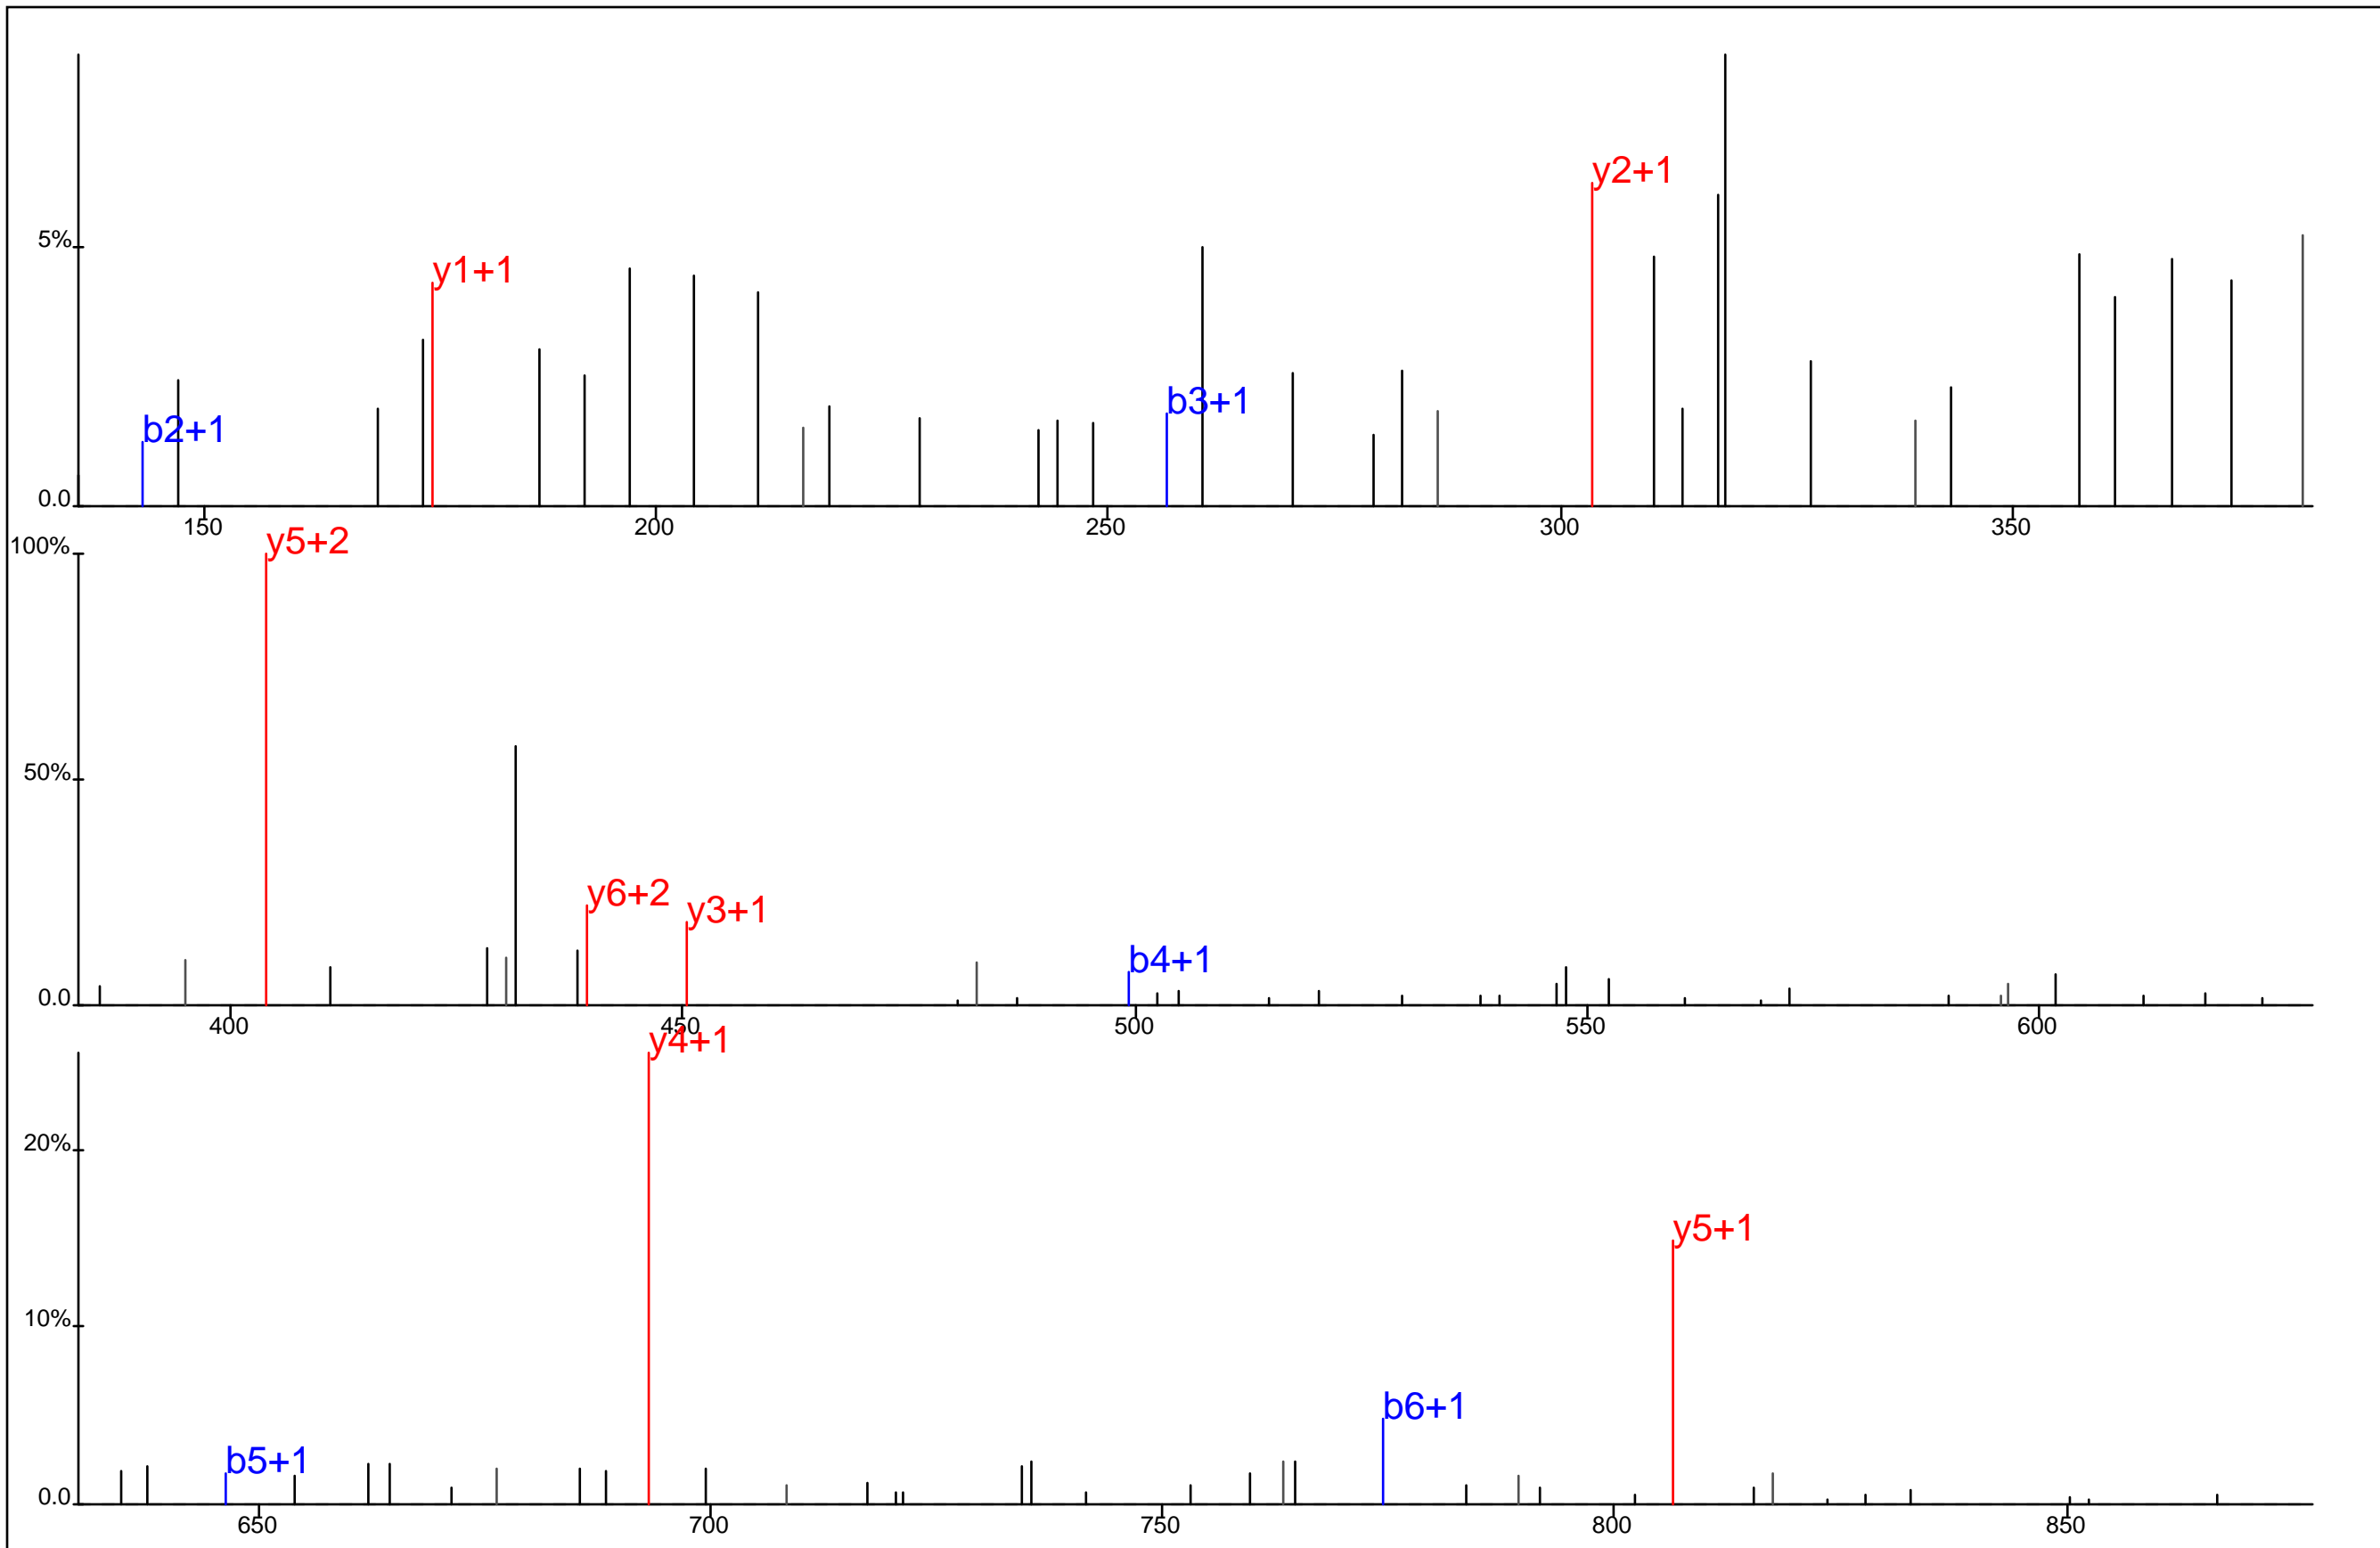

**A A L Y\* F Q R**

Protein Name: Anaphase promoting complex, subunit 8  
 gi Accession: 0  
 Precursor Mass: 474.7207+2  
 Delta Mass: 0.219 ppm  
 XCorr: 28.27

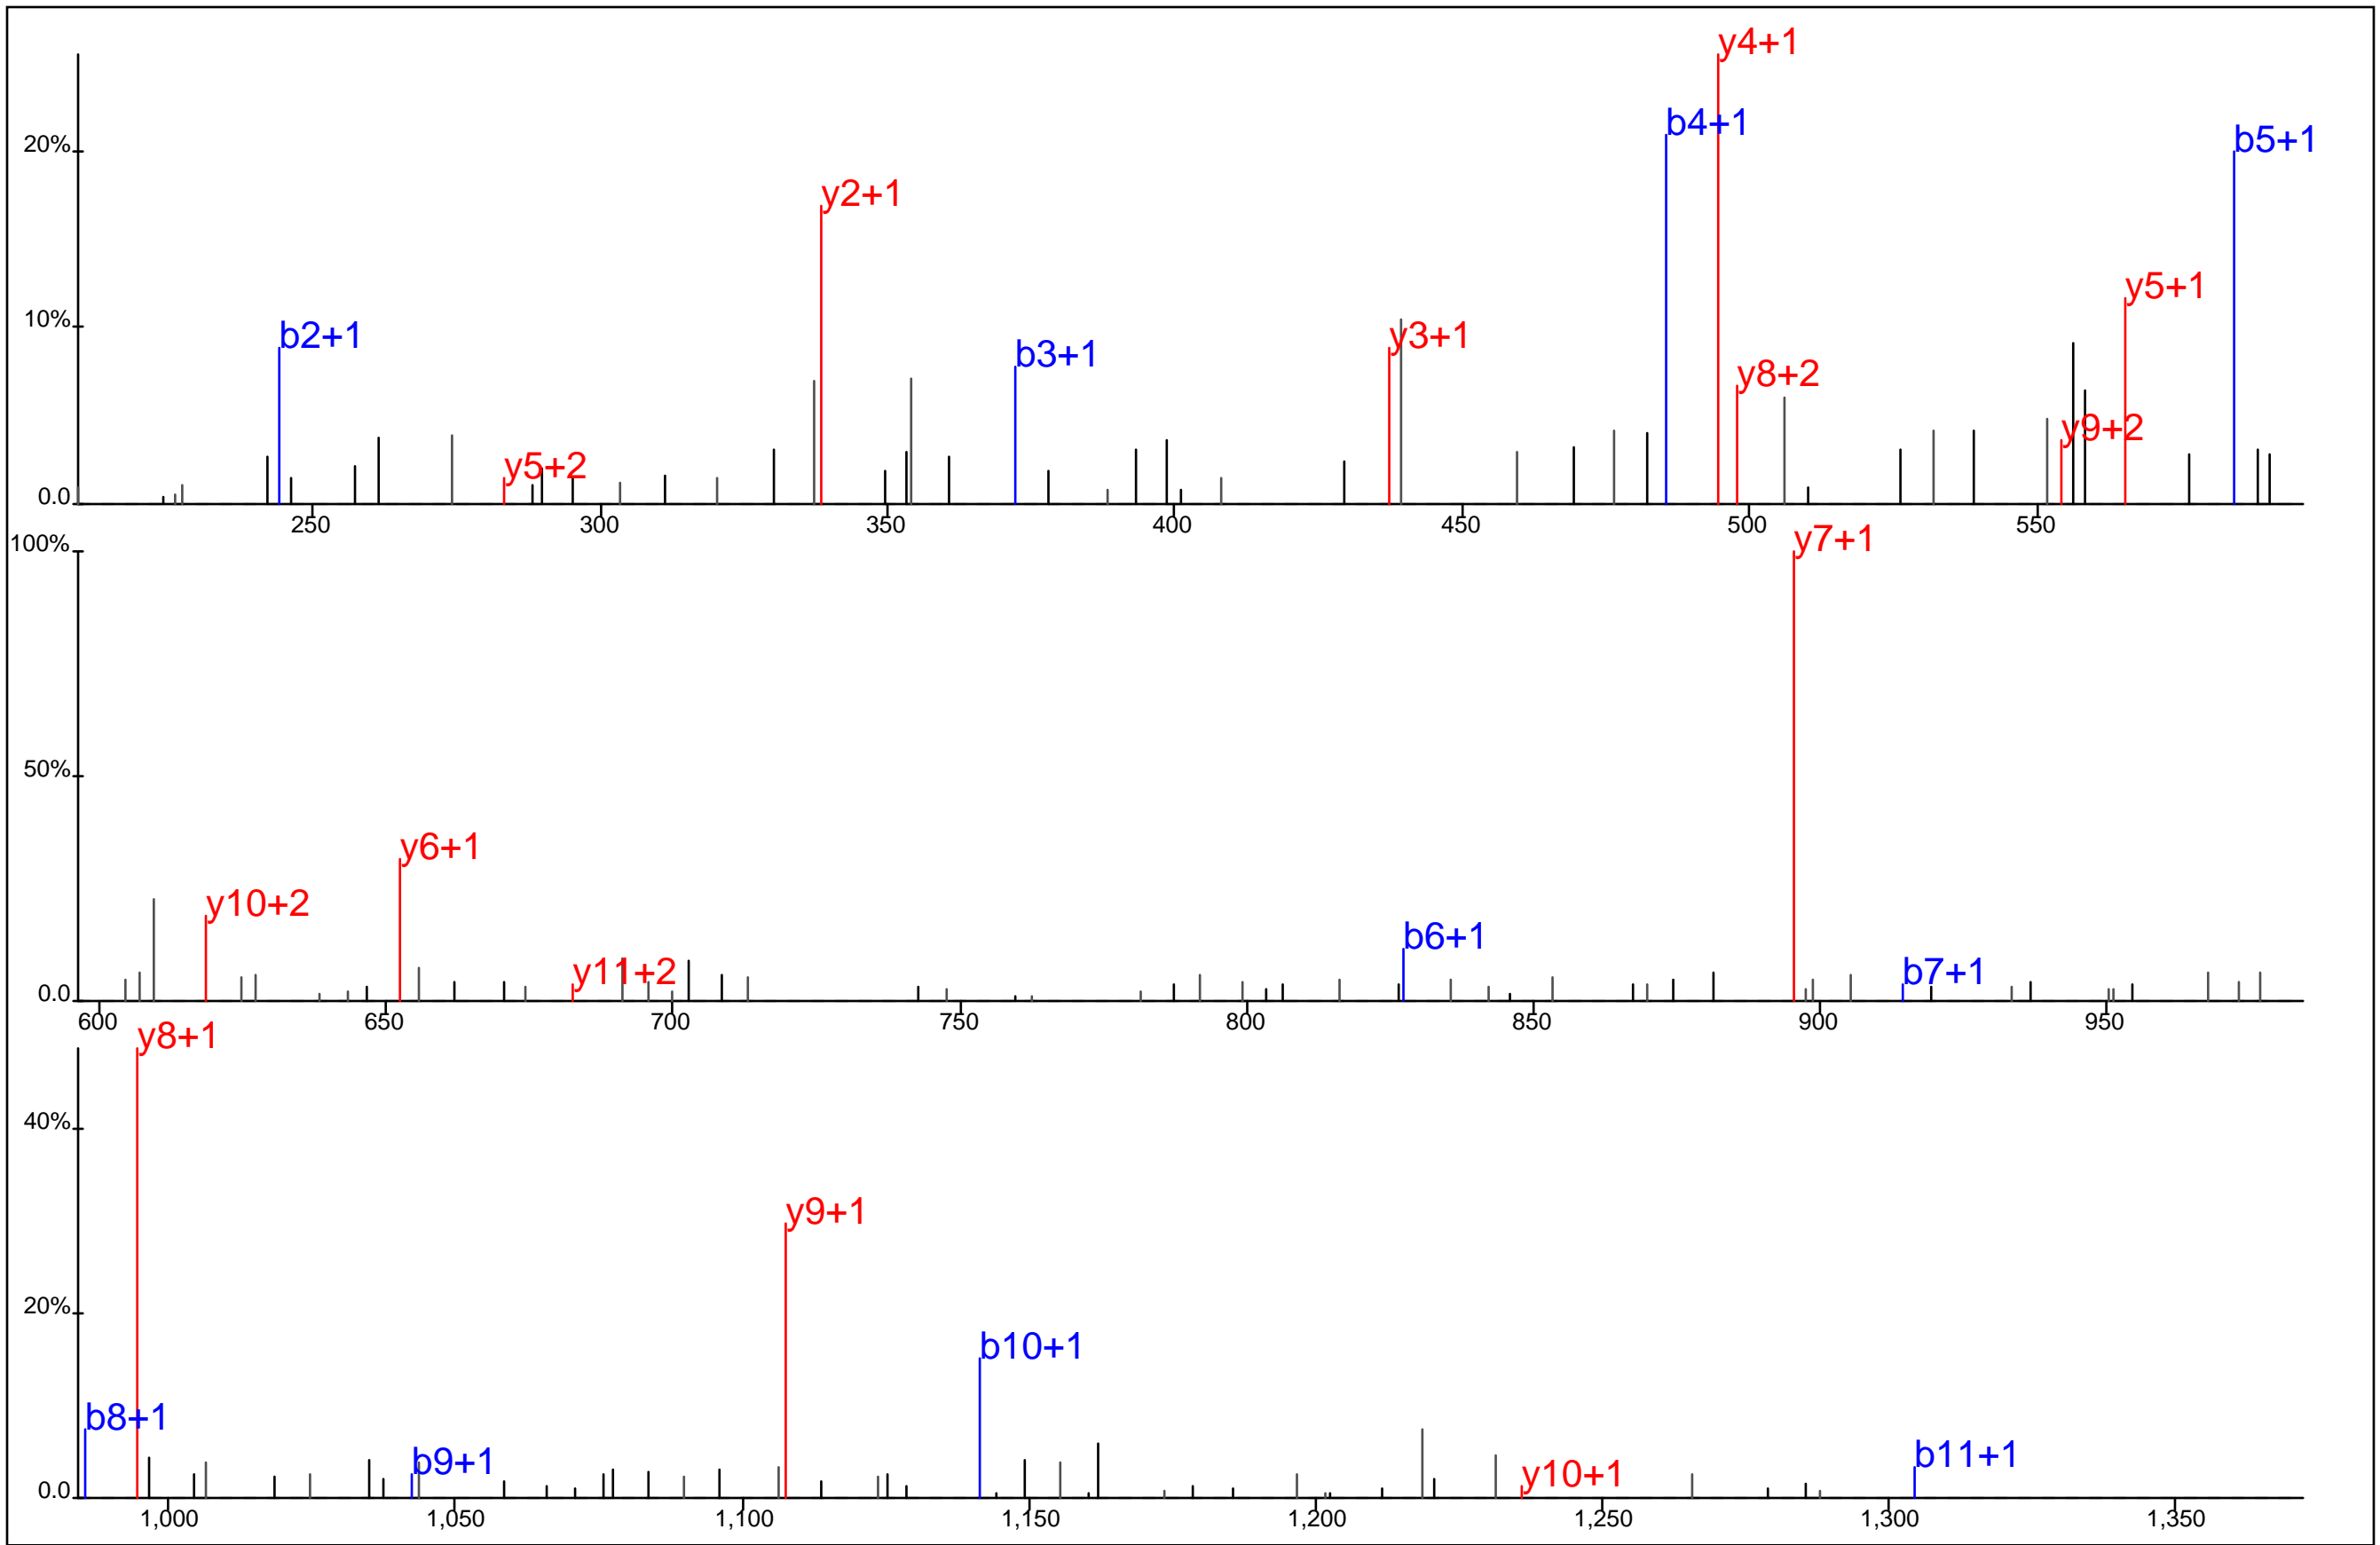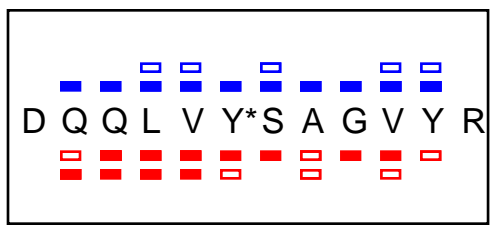

Protein Name: Anaphase promoting complex subunit 2  
gi Accession: 0  
Precursor Mass: 739.8345+2  
Delta Mass: 3.958 ppm  
XCorr: 56.84

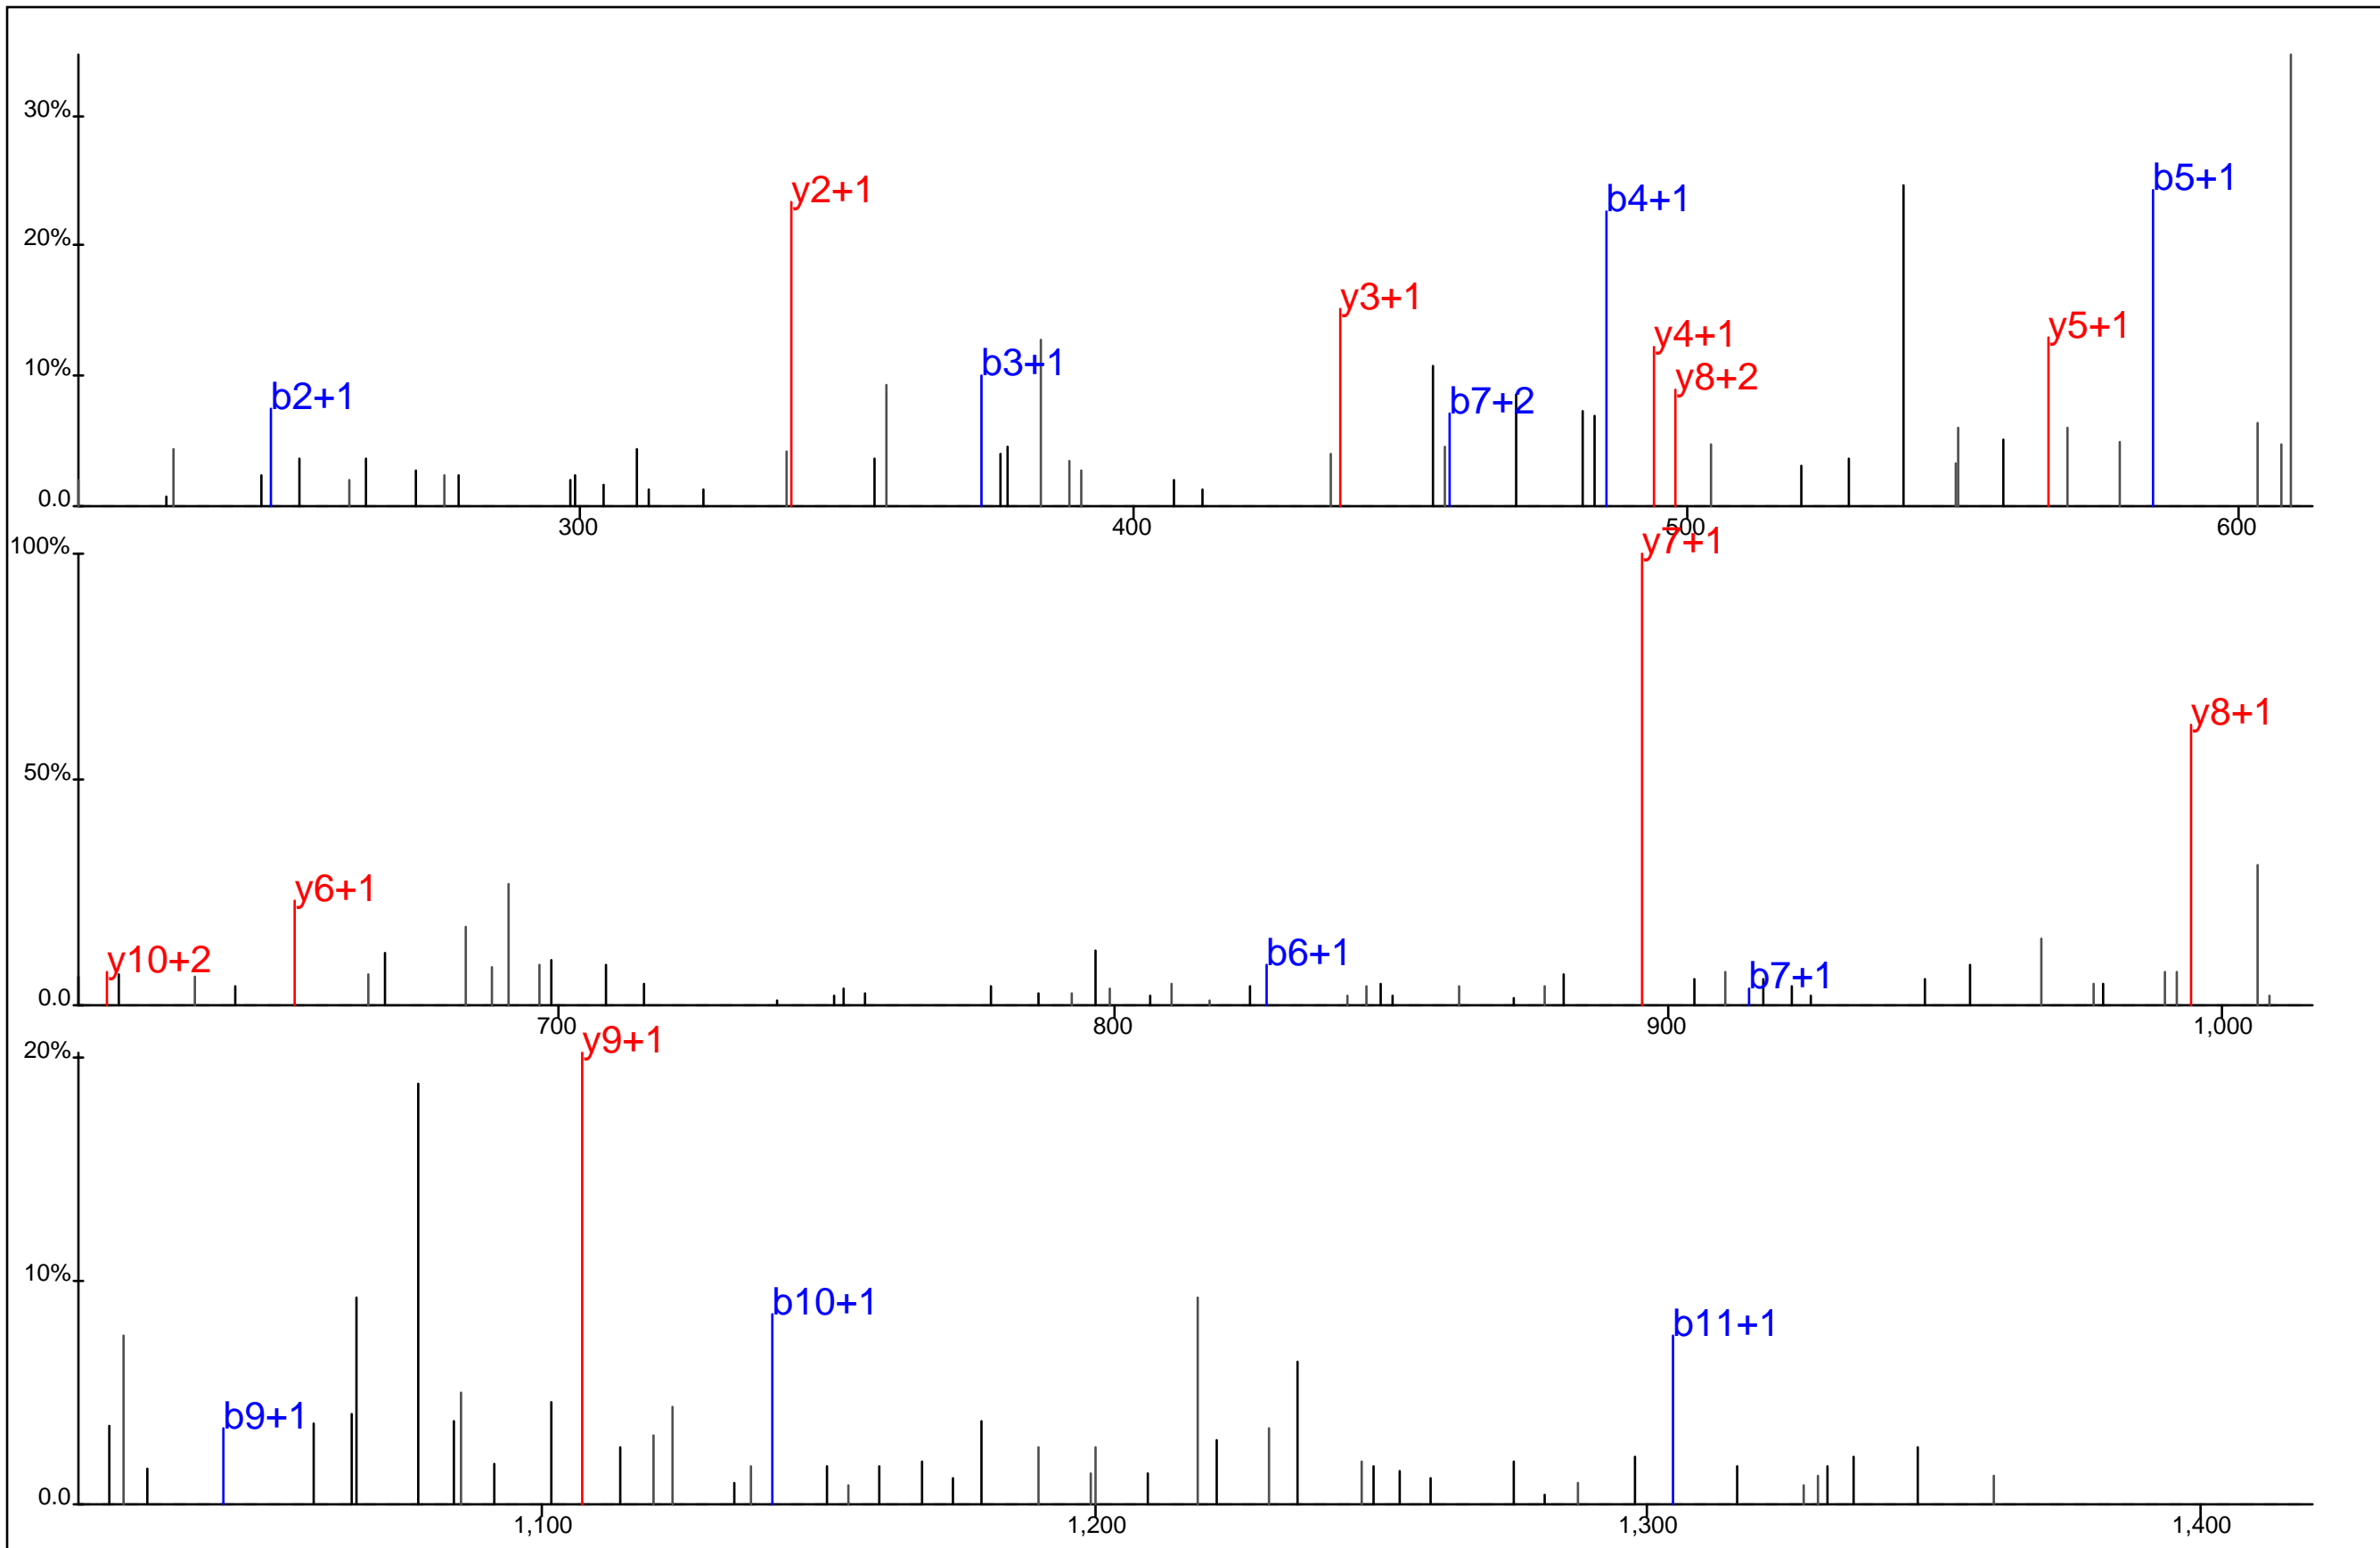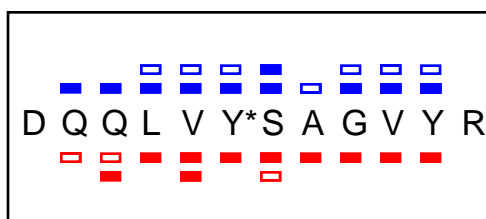

Protein Name: Anaphase promoting complex subunit 2  
 gi Accession: 0  
 Precursor Mass: 739.8383+2  
 Delta Mass: 1.243 ppm  
 XCorr: 49.91

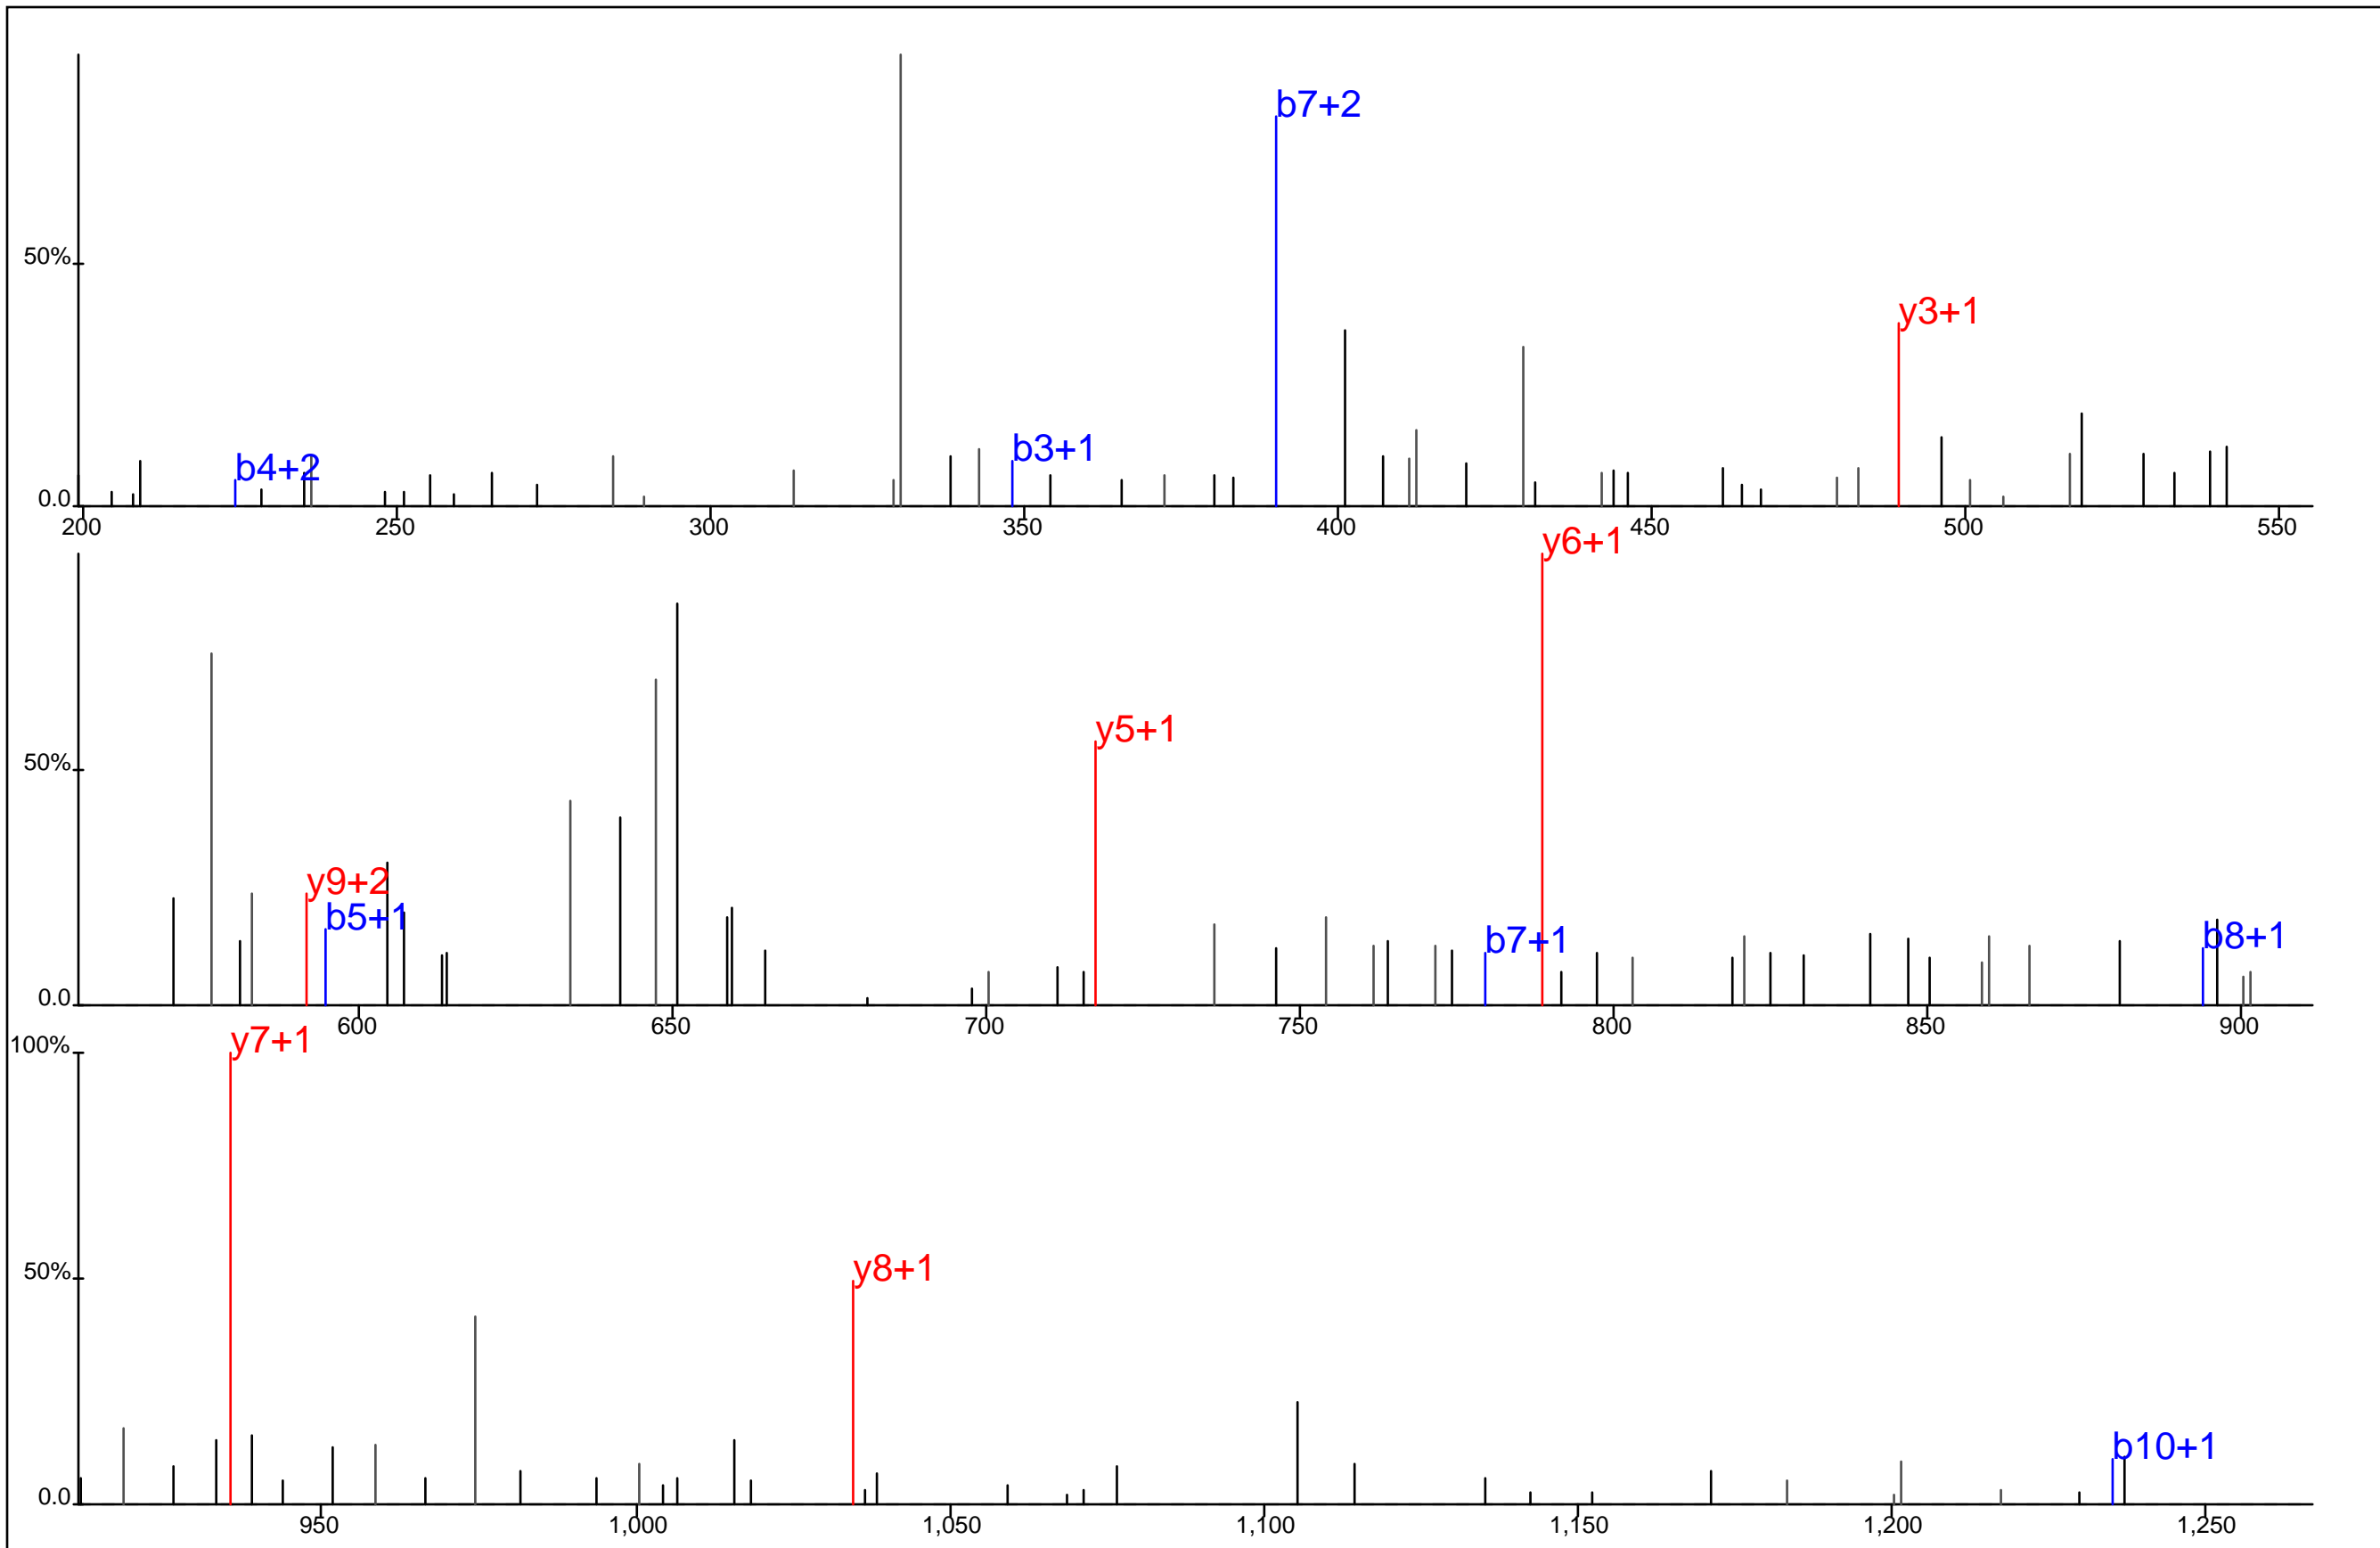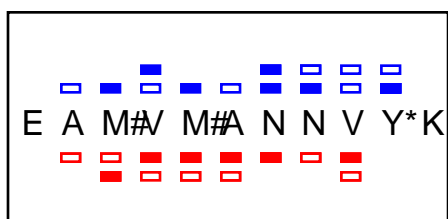

Protein Name: Anaphase promoting complex subunit 7  
 gi Accession: 0  
 Precursor Mass: 691.2795+2  
 Delta Mass: 0.759 ppm  
 XCorr: 23.15



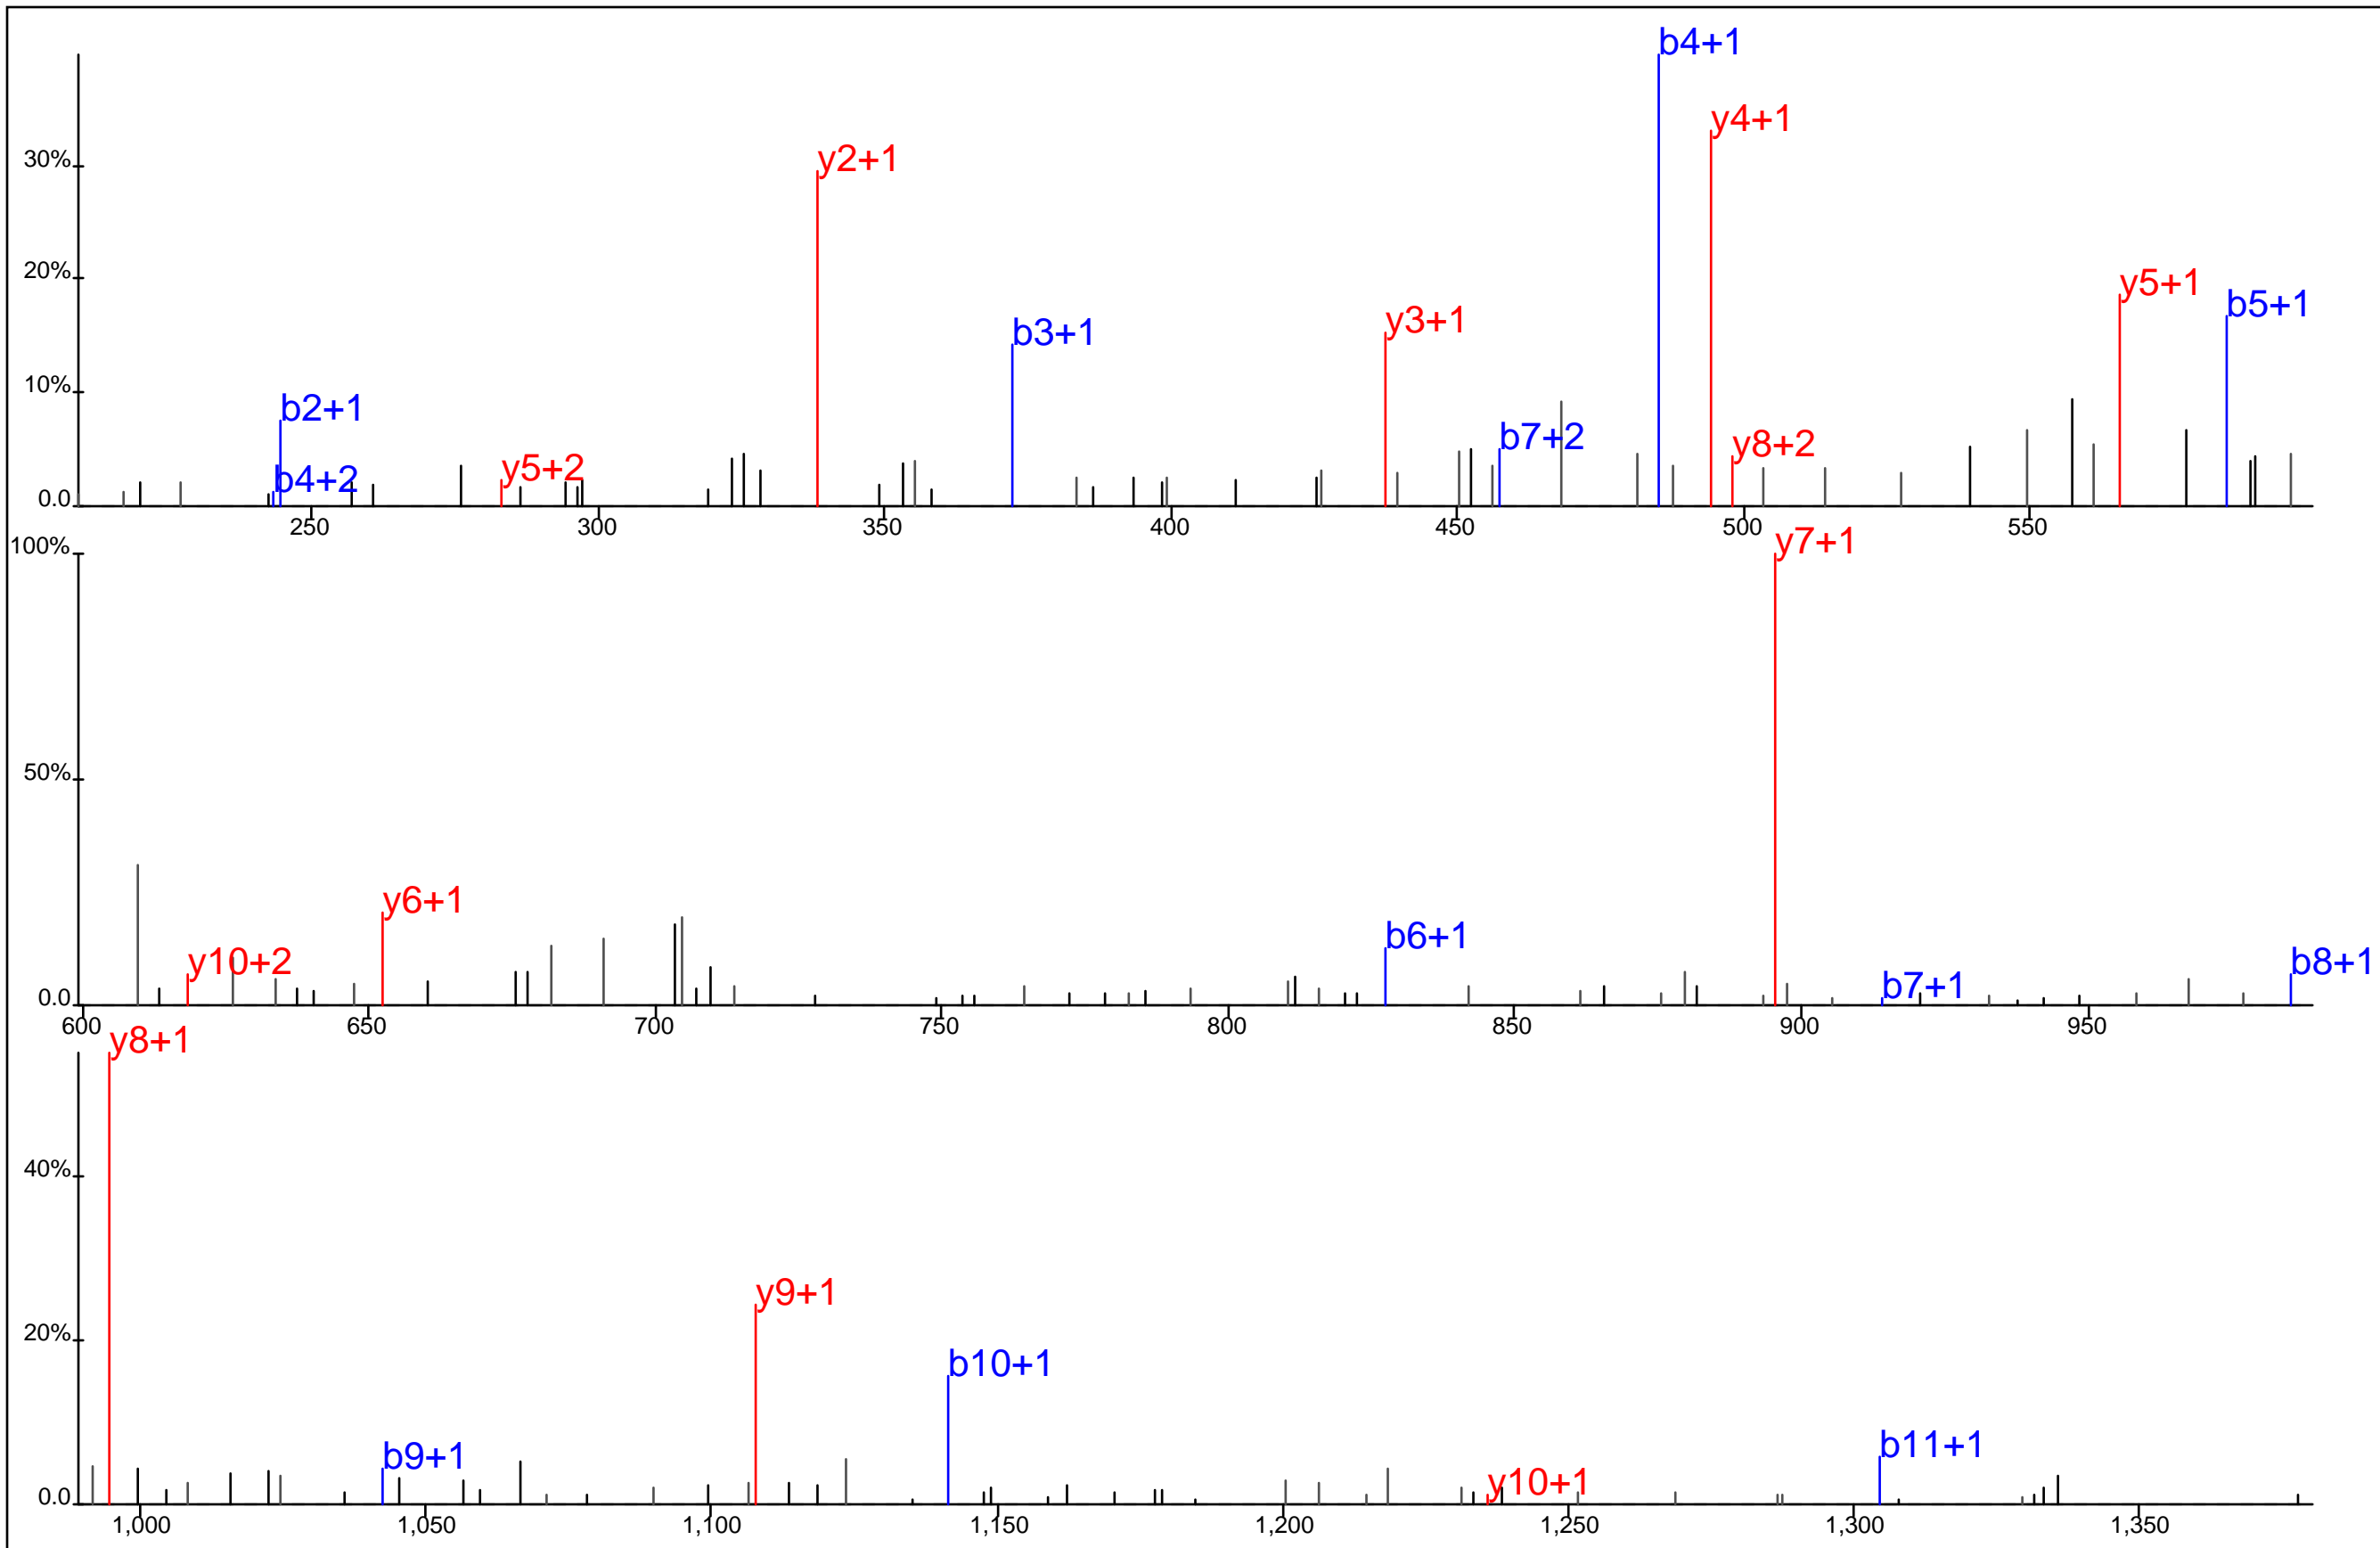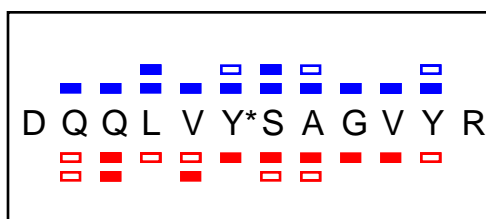

Protein Name: Anaphase promoting complex subunit 2  
 gi Accession: 0  
 Precursor Mass: 739.8406+2  
 Delta Mass: 4.297 ppm  
 XCorr: 65.0

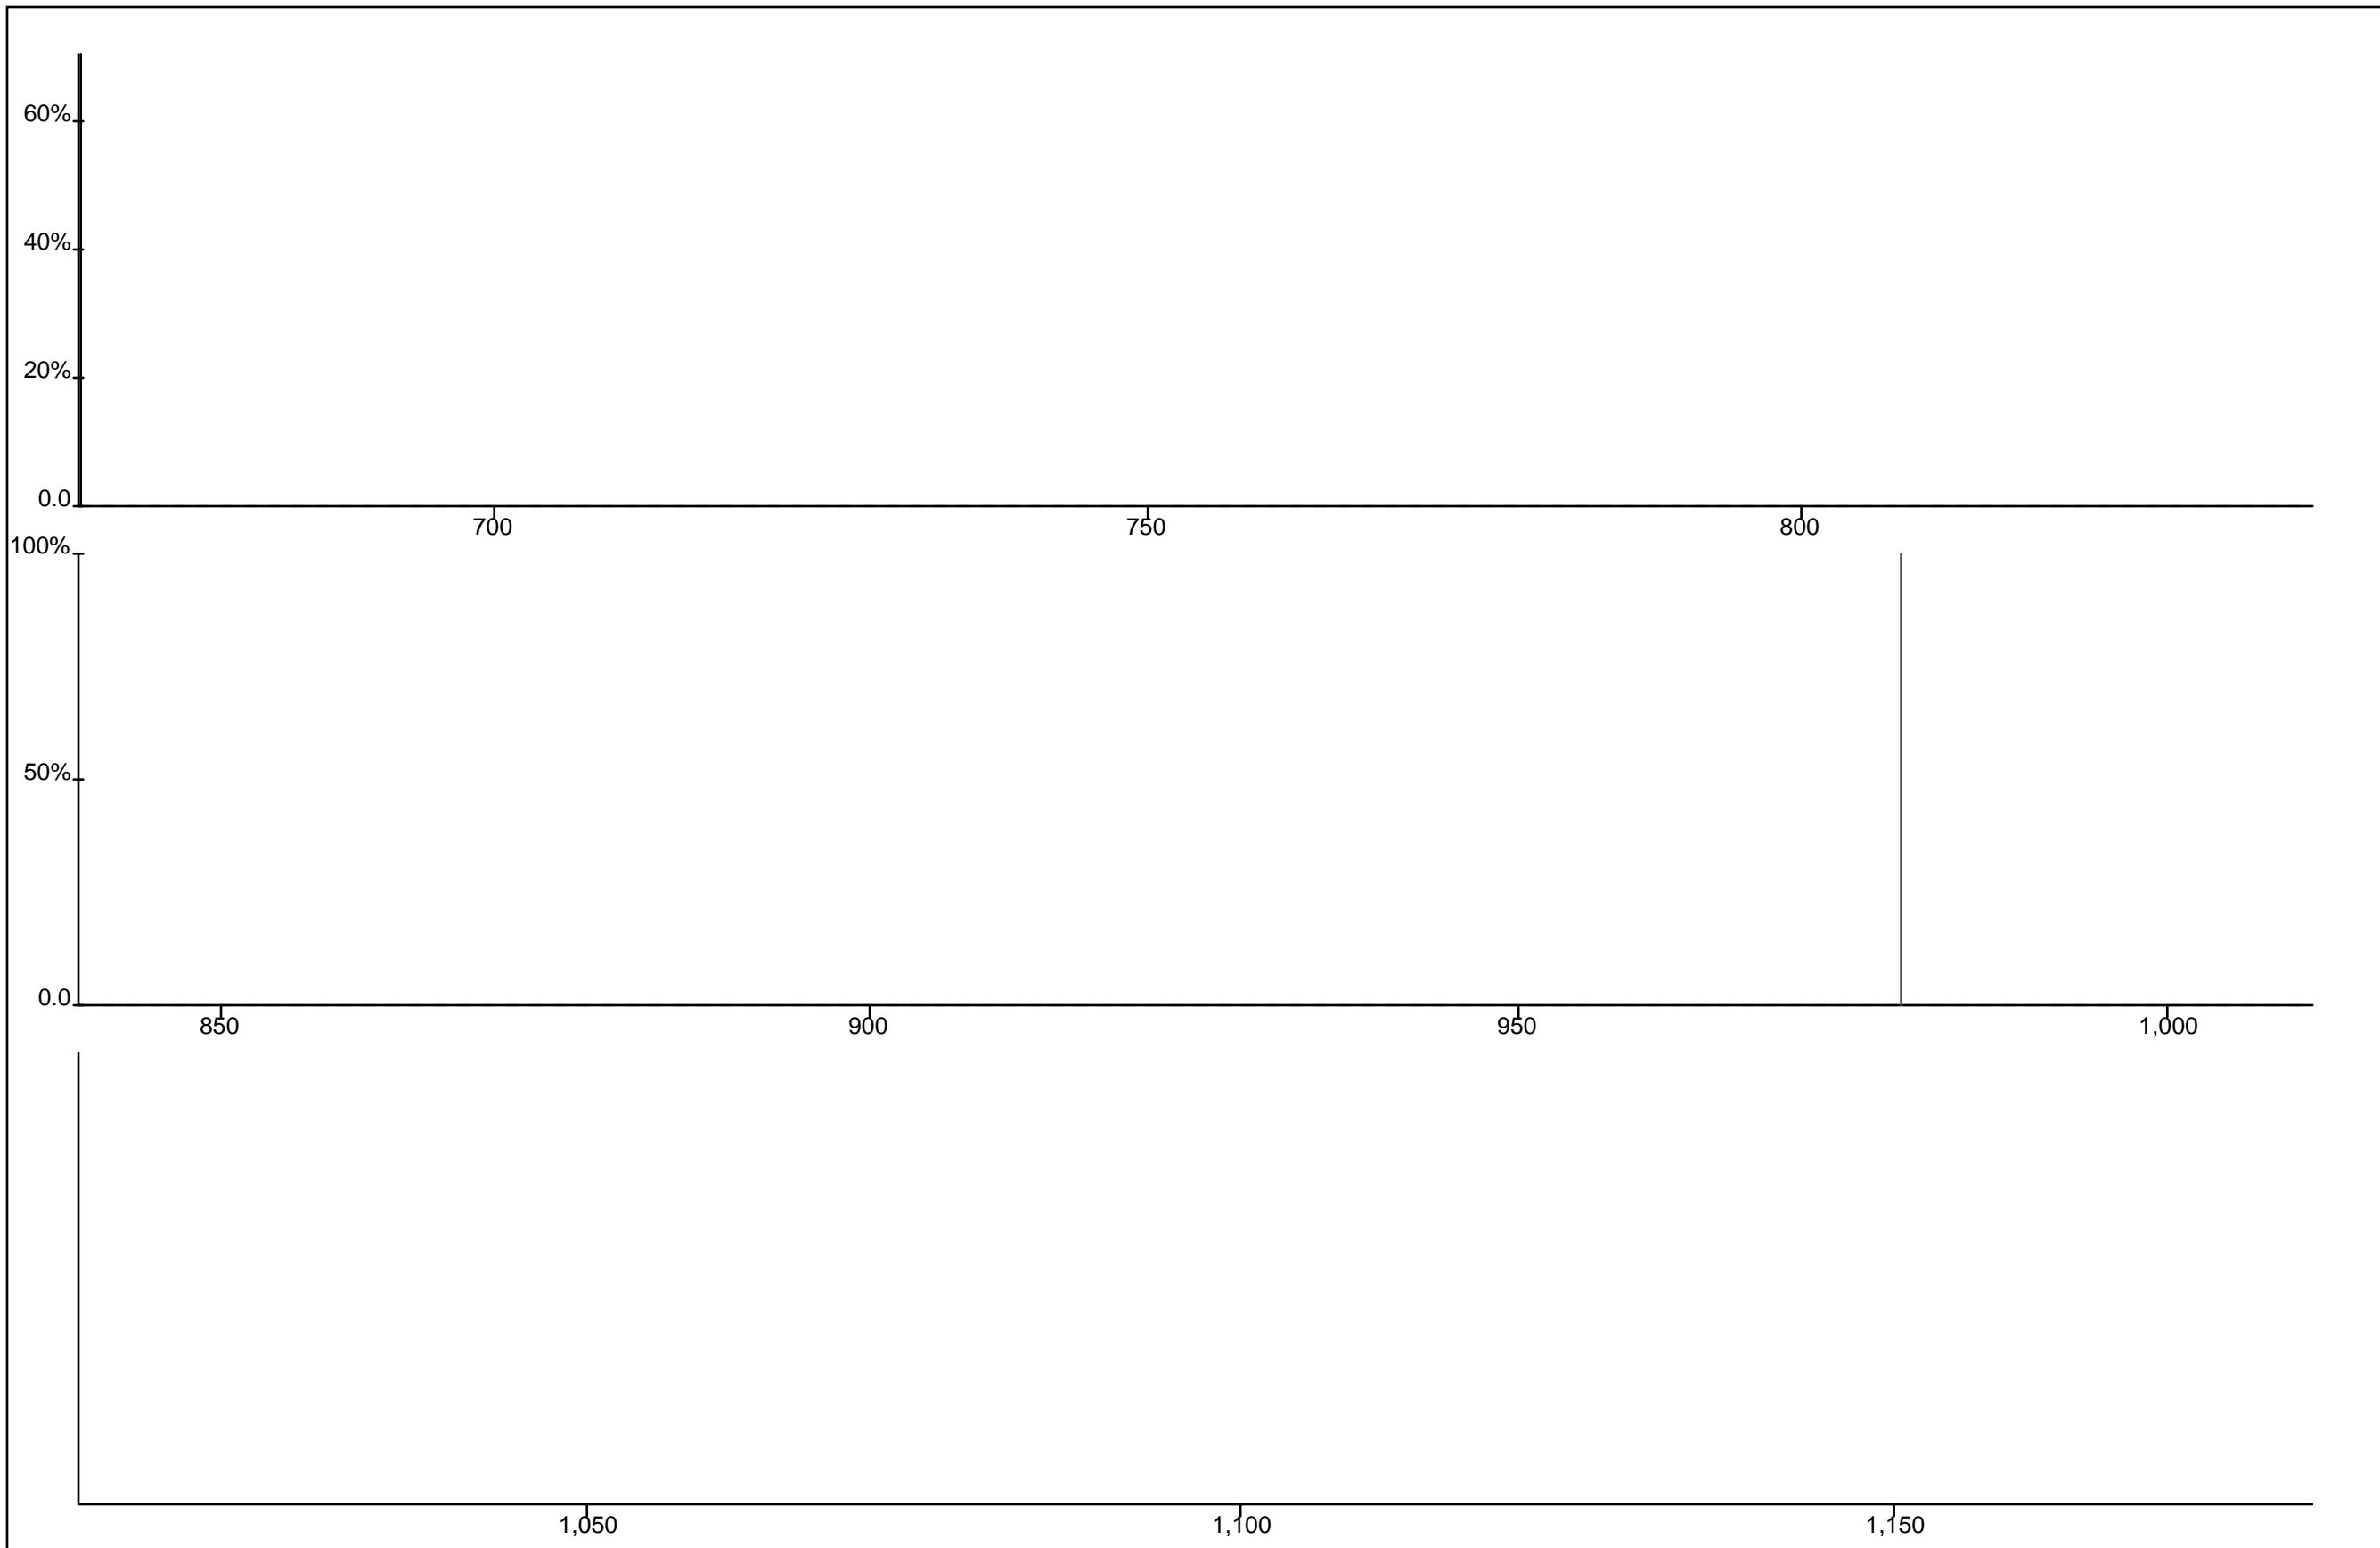

T\*P S G L Y I I H P E G S S Y P F E V M# C D M# D Y\*R

Protein Name: ANGPTL5  
gi Accession: 0  
Precursor Mass: 1,086.0897+3  
Delta Mass: 6.267 ppm  
XCorr: 23.84

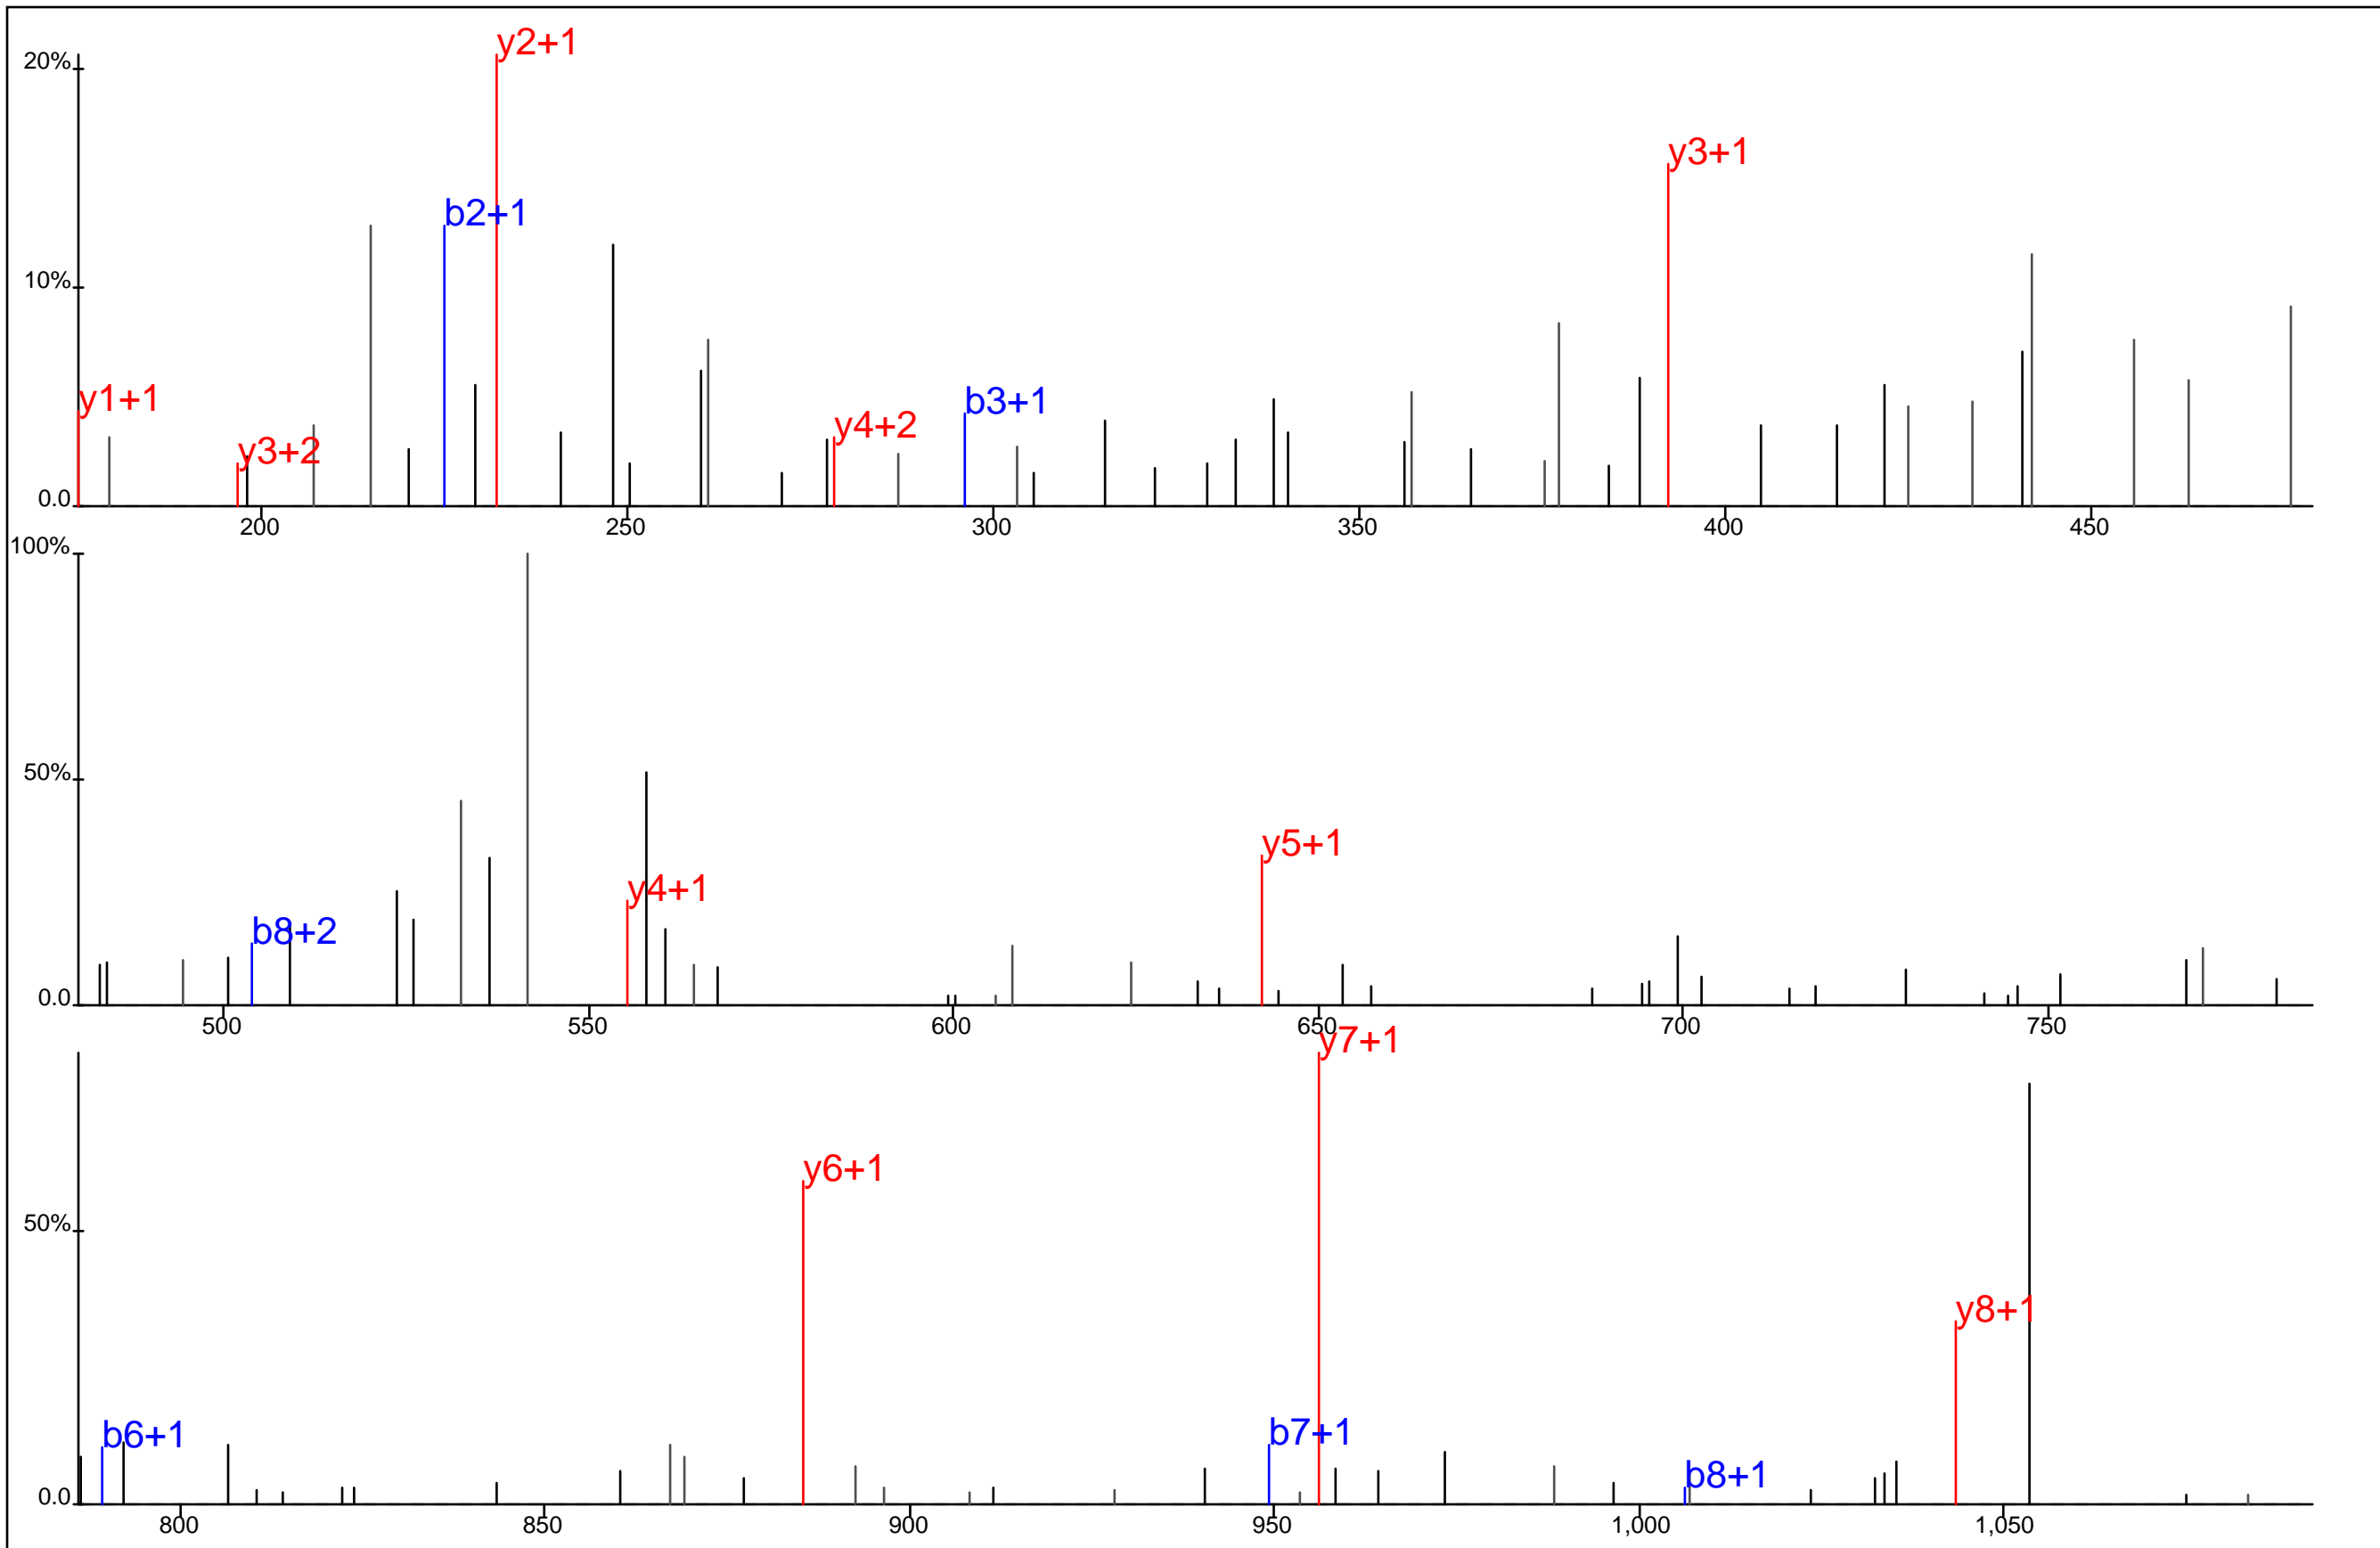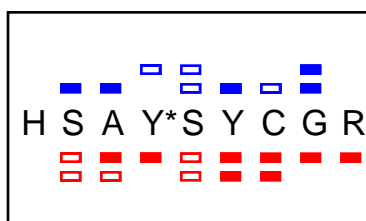

Protein Name: Ankyrin repeat domain 25  
 gi Accession: 0  
 Precursor Mass: 590.7168+2  
 Delta Mass: 1.869 ppm  
 XCorr: 28.73

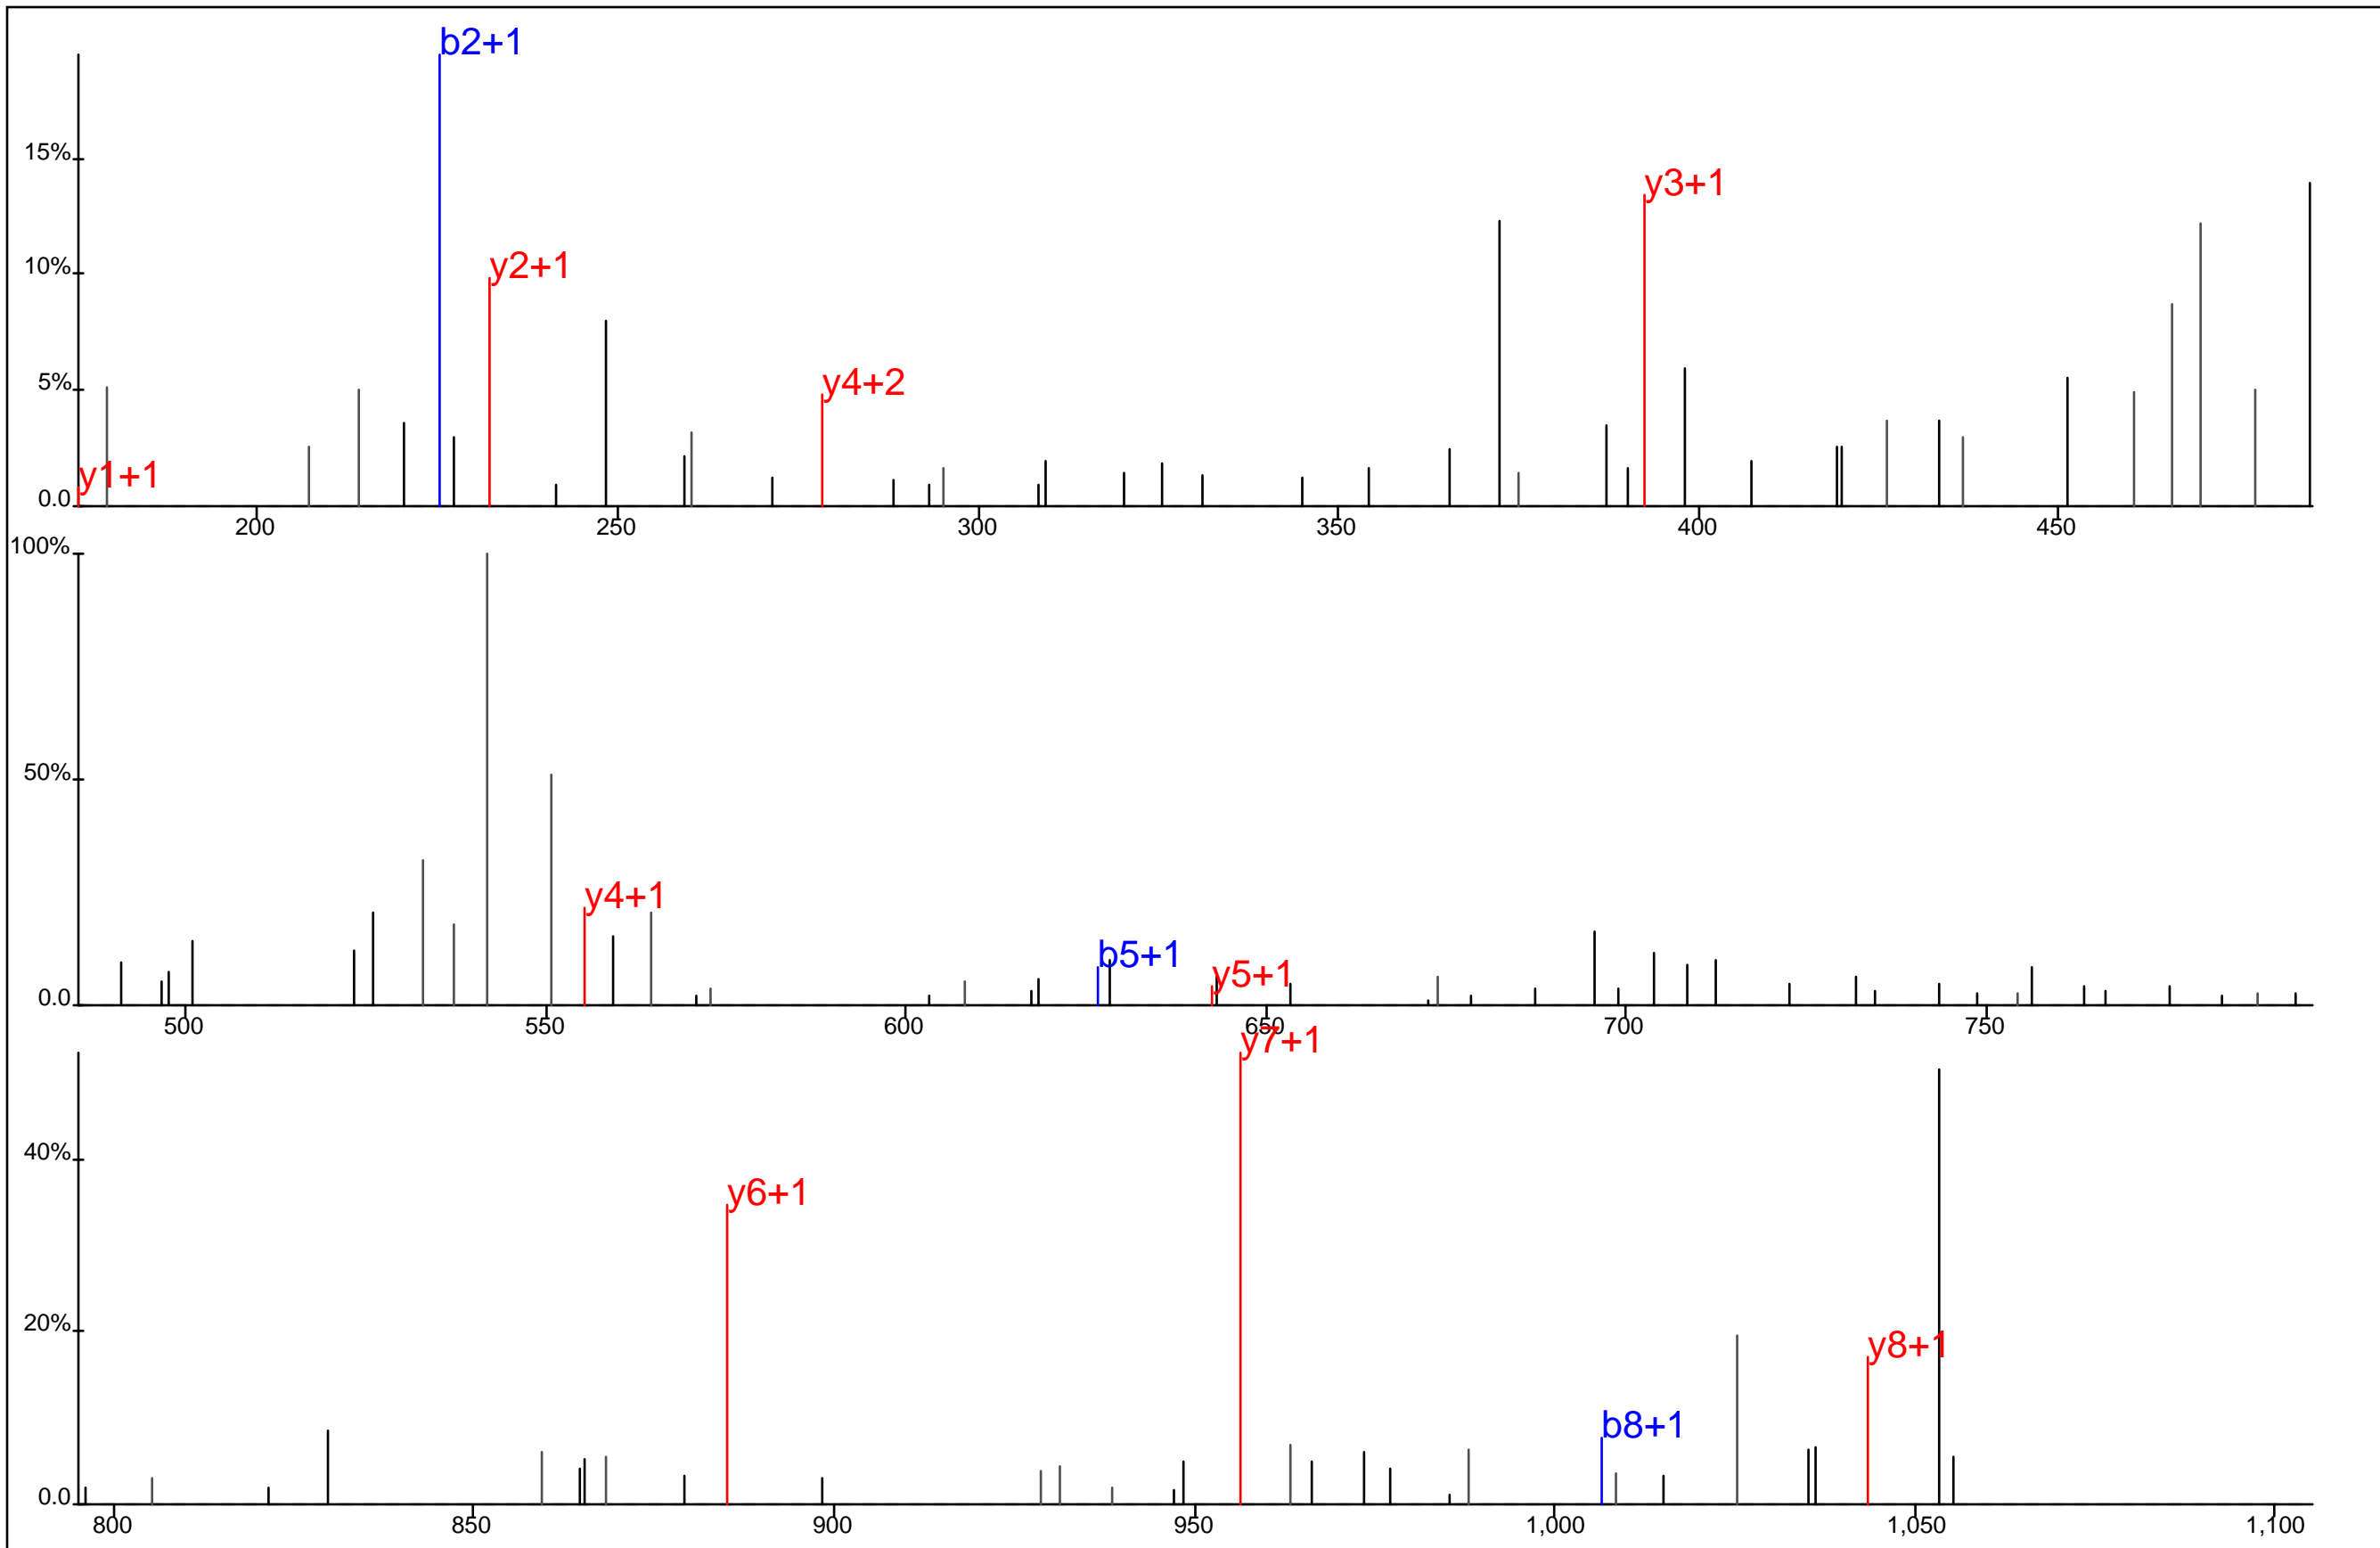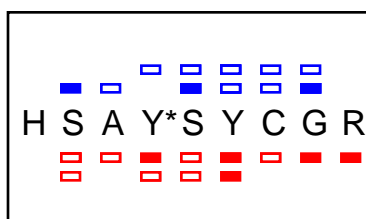

Protein Name: Ankyrin repeat domain 25  
 gi Accession: 0  
 Precursor Mass: 590.7156+2  
 Delta Mass: 0.097 ppm  
 XCorr: 27.22

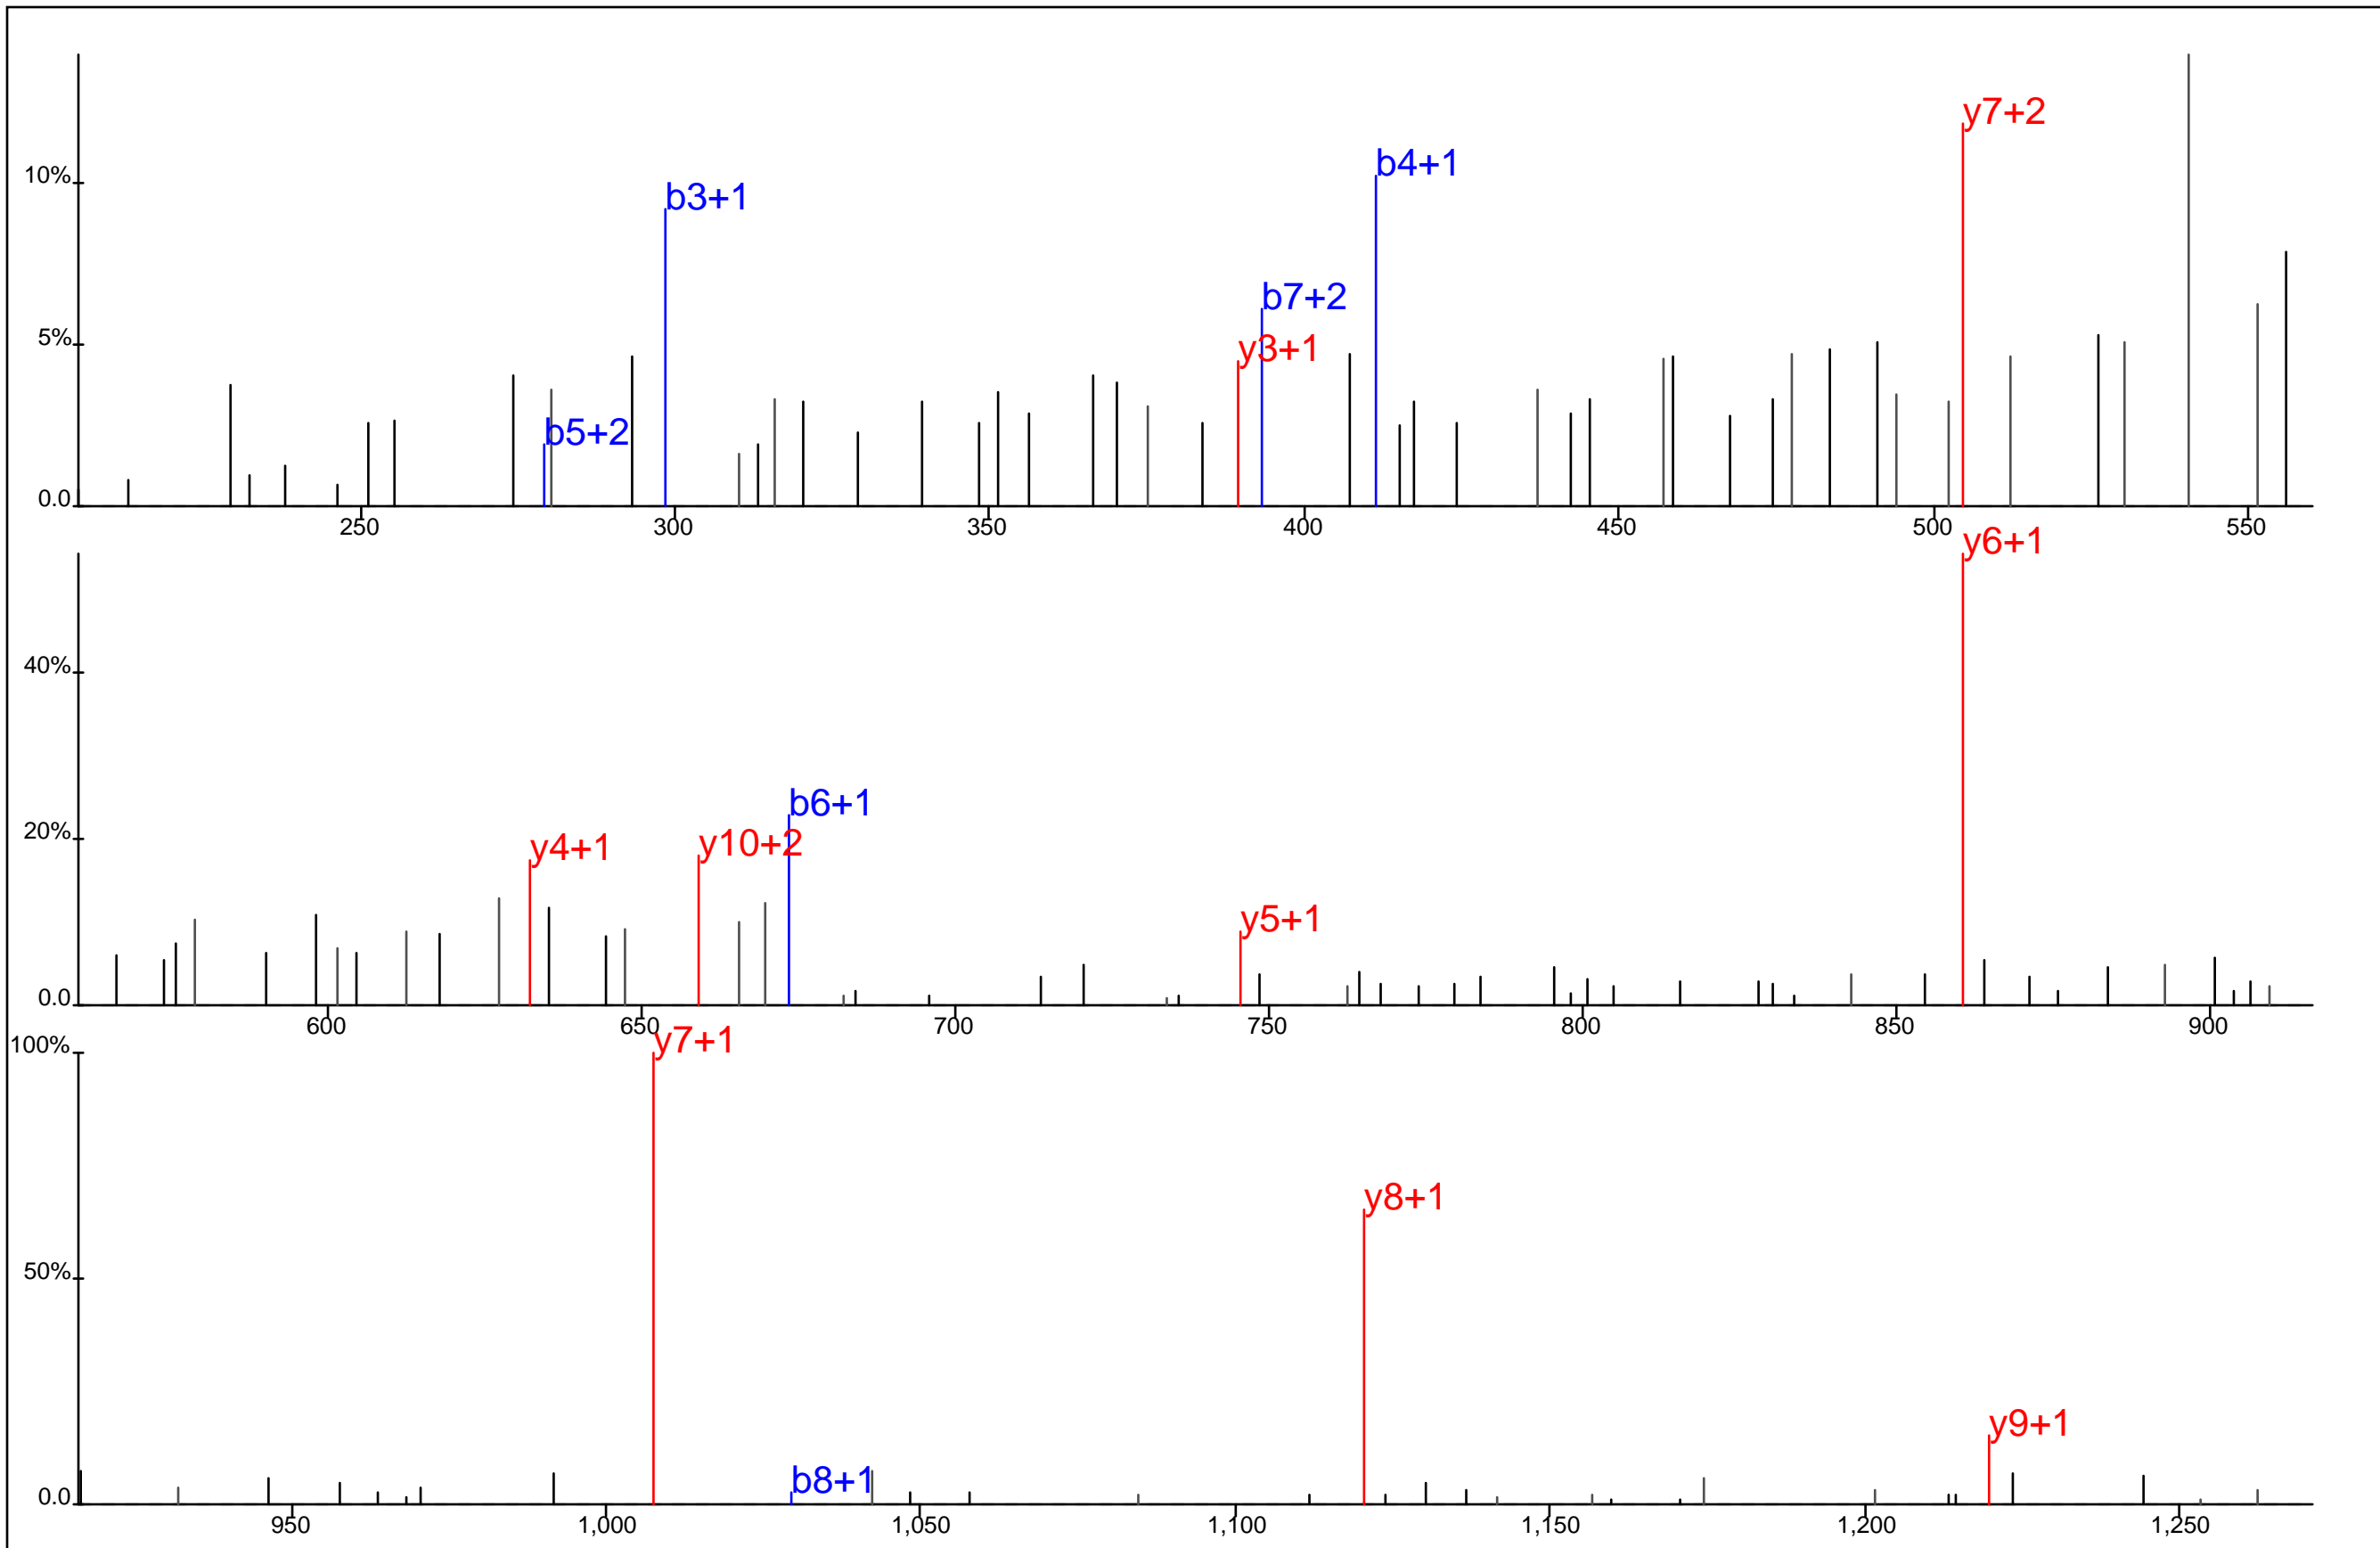

T P V L F D I Y\*E I K

■ ■ ■ ■ ■ ■ ■ ■

■ ■ ■ ■ ■ ■ ■ ■

Protein Name: Annexin A11  
 gi Accession: 0  
 Precursor Mass: 709.3530+2  
 Delta Mass: 1.965 ppm  
 XCorr: 37.78



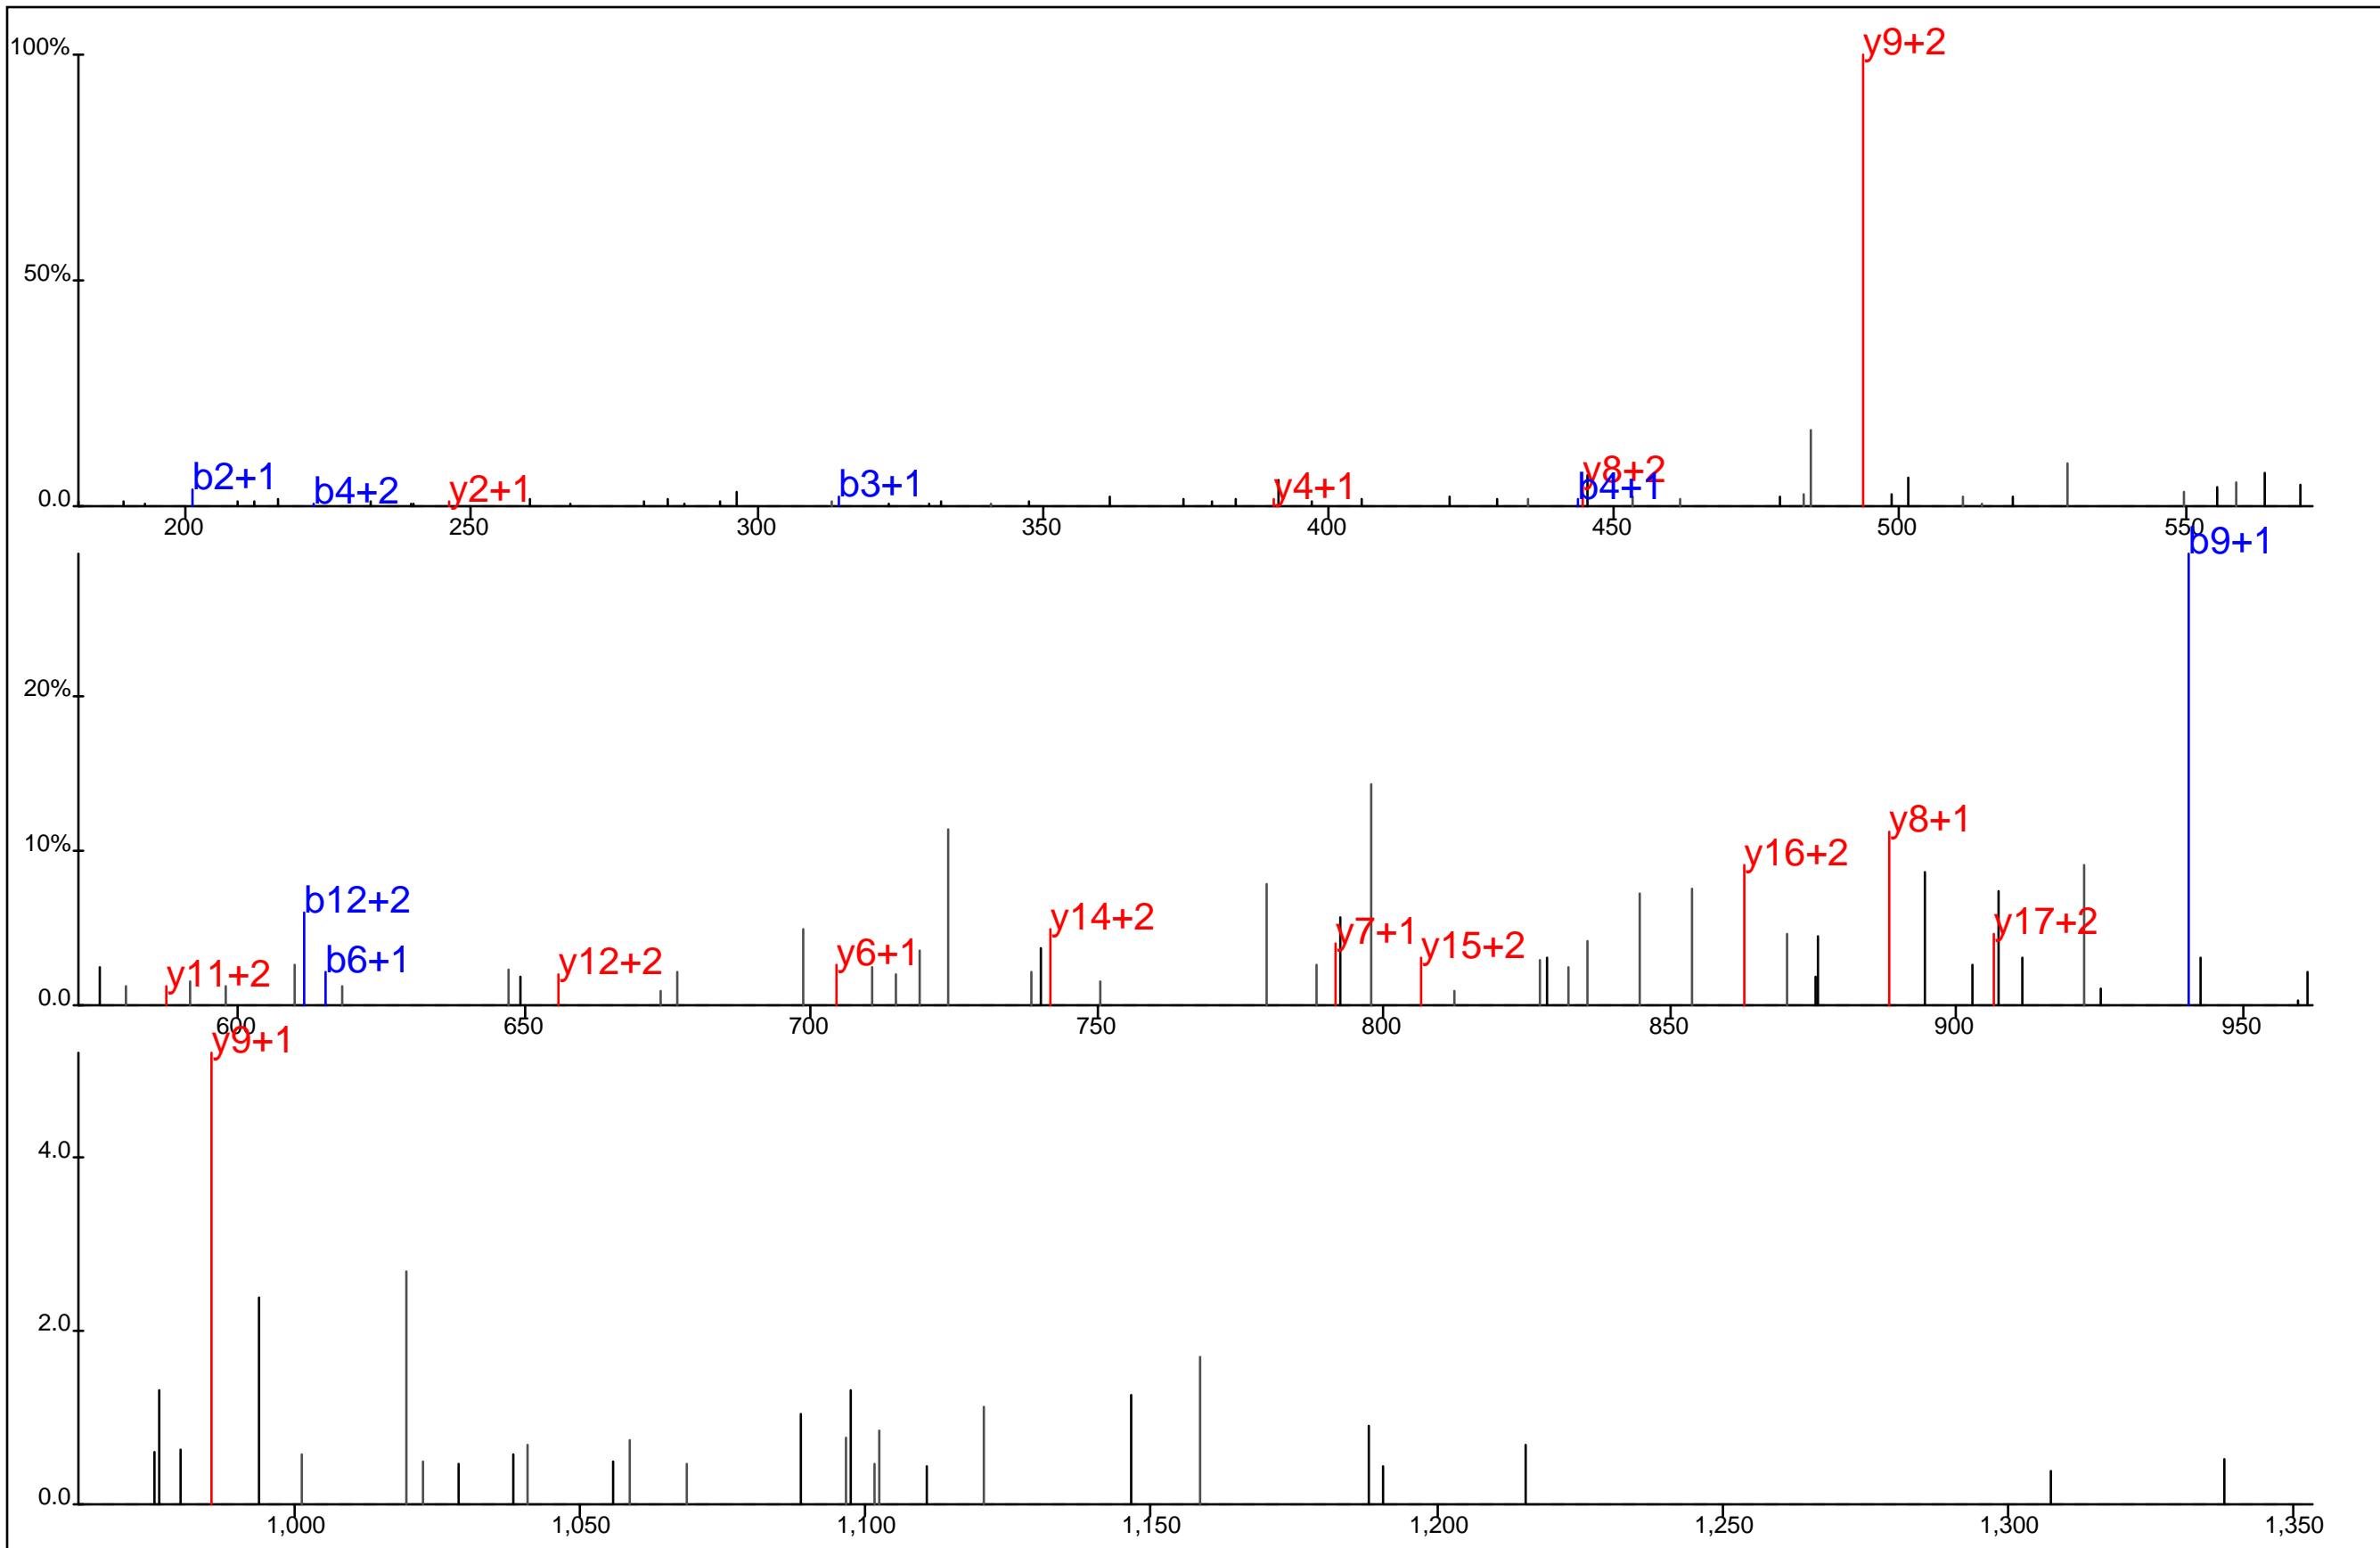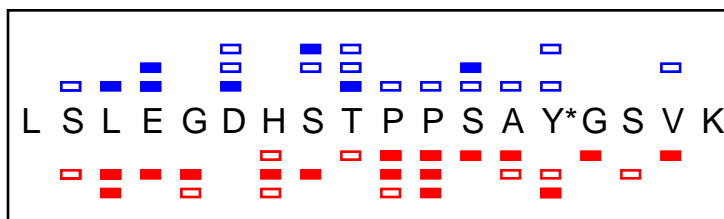

Protein Name: Annexin II  
 gi Accession: 0  
 Precursor Mass: 642.2932+3  
 Delta Mass: 2.025 ppm  
 XCorr: 24.94

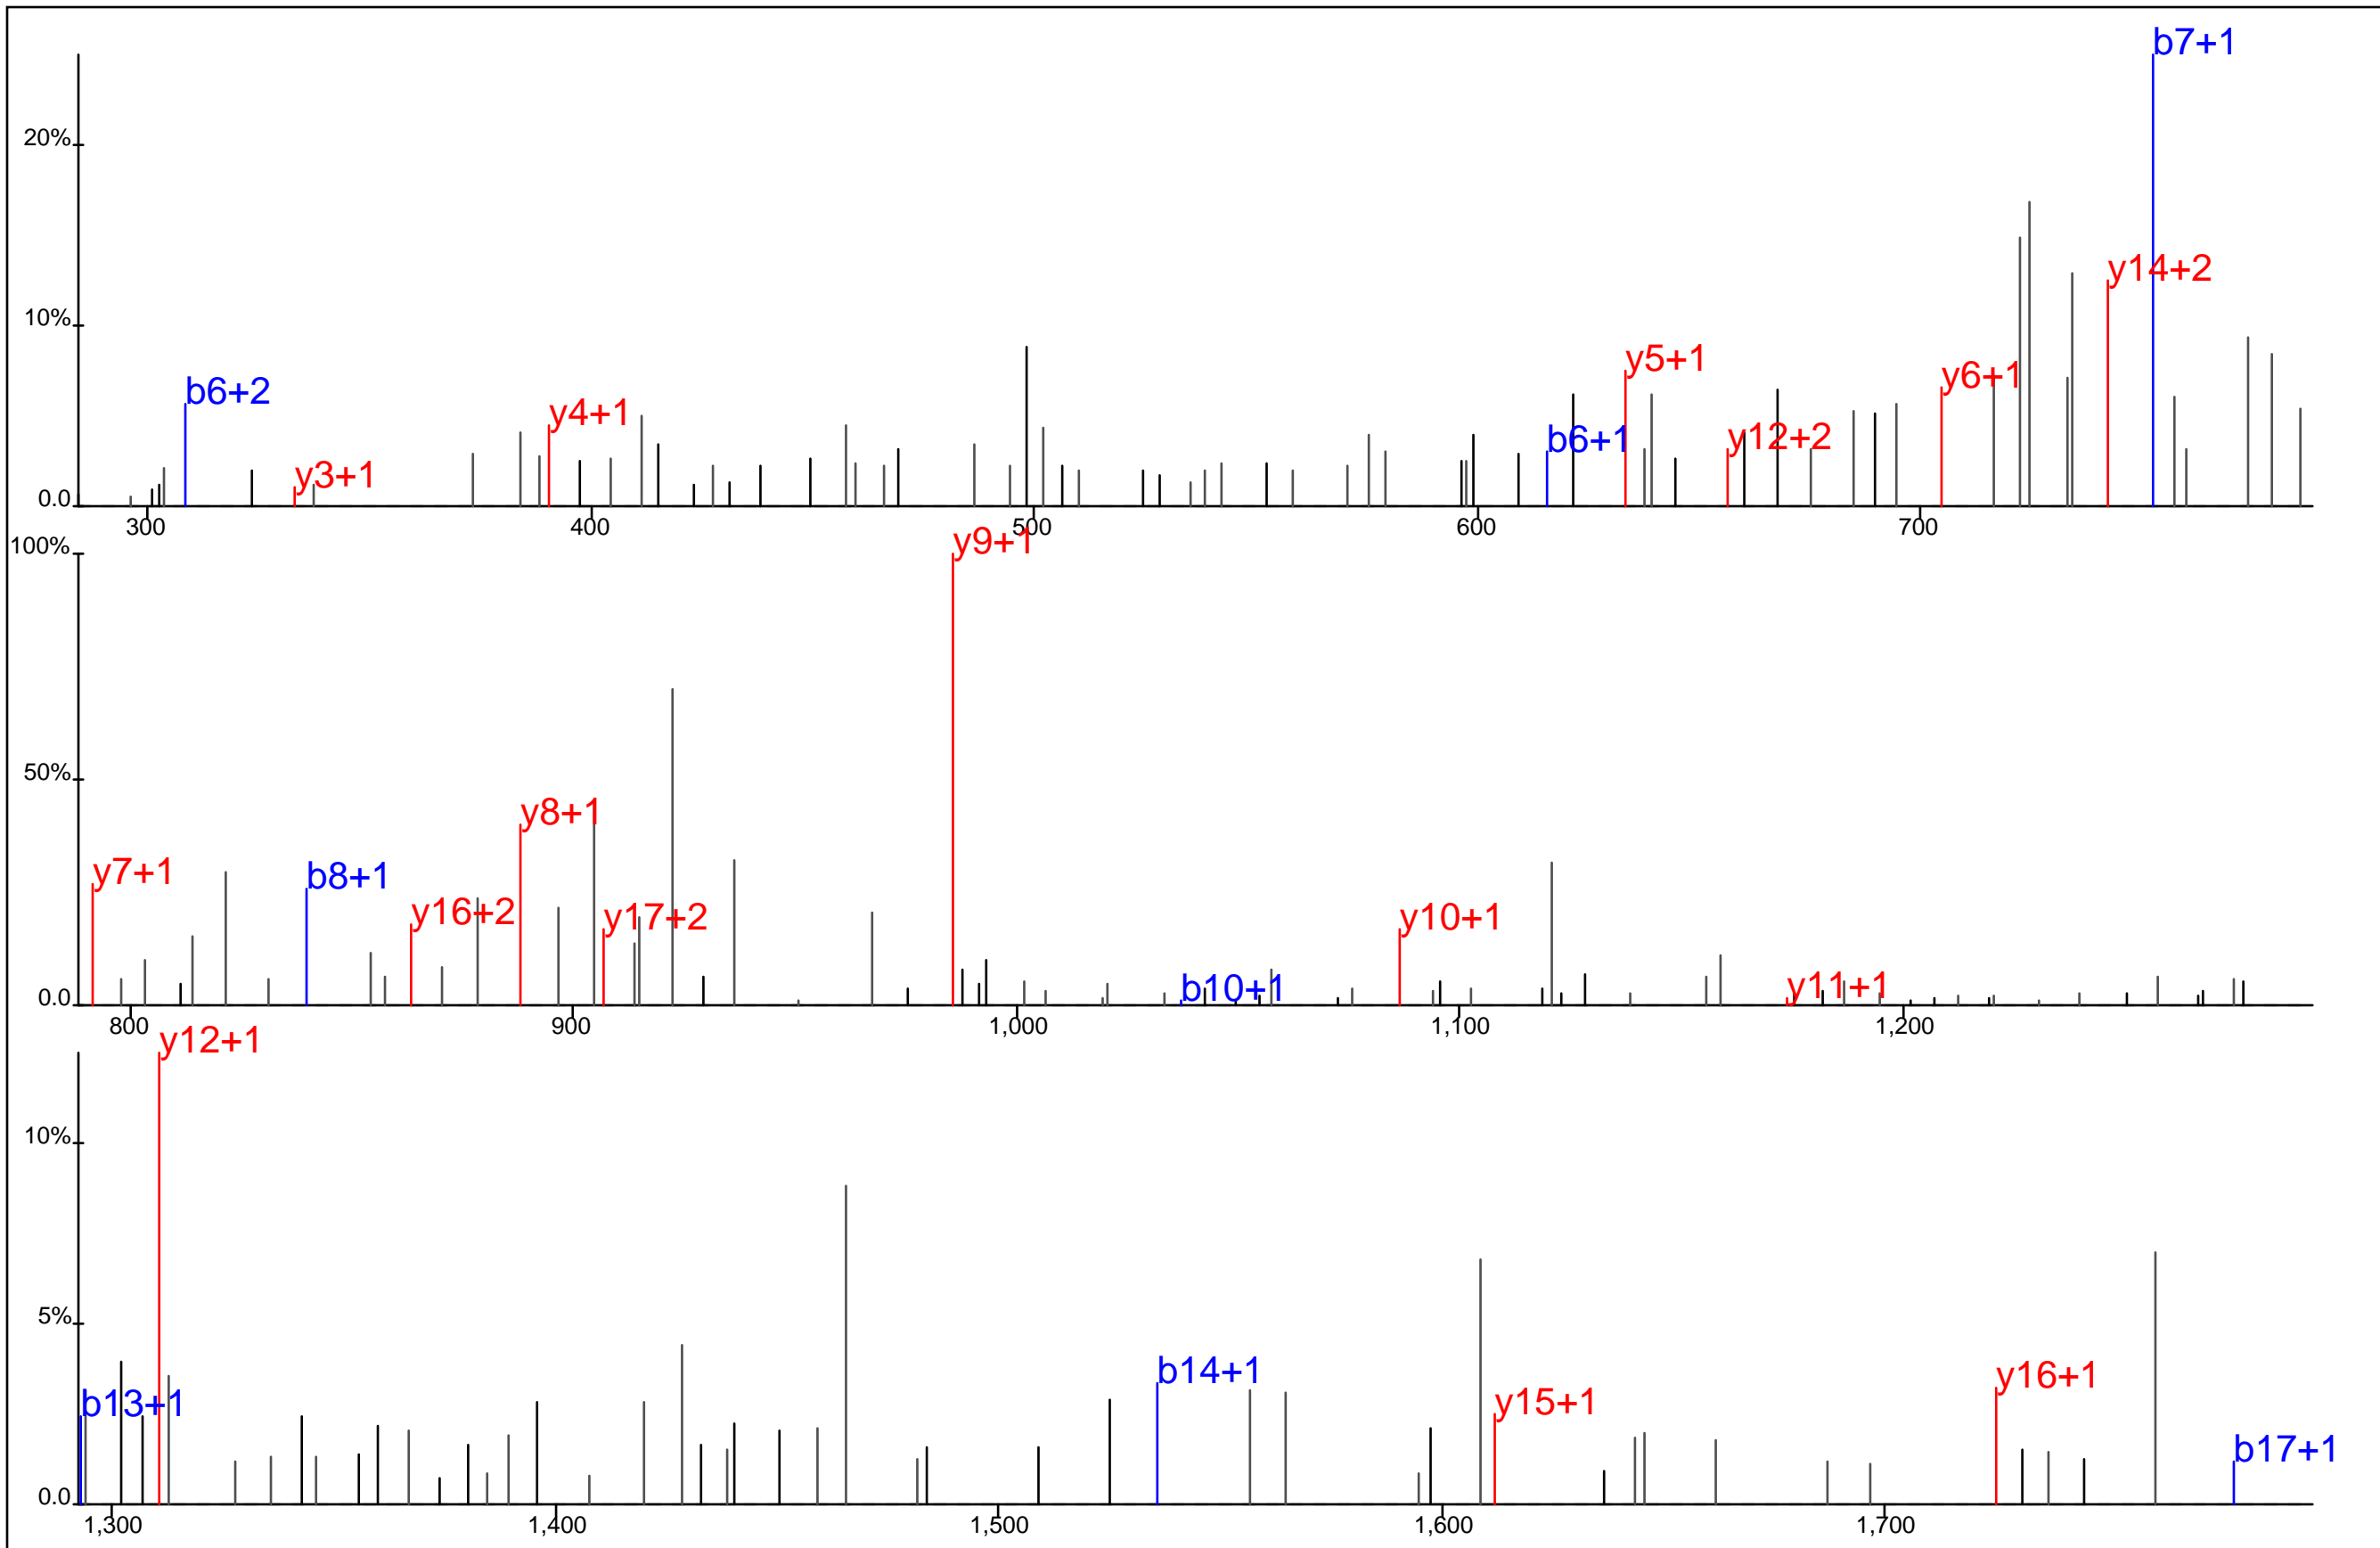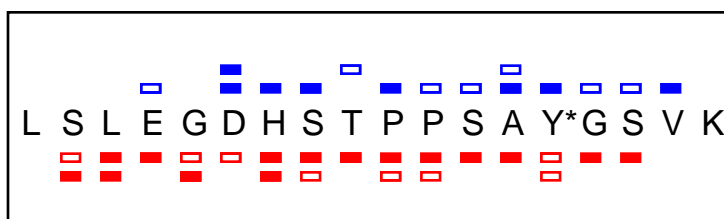

Protein Name: Annexin II  
 gi Accession: 0  
 Precursor Mass: 962.9373+2  
 Delta Mass: 0.814 ppm  
 XCorr: 40.85





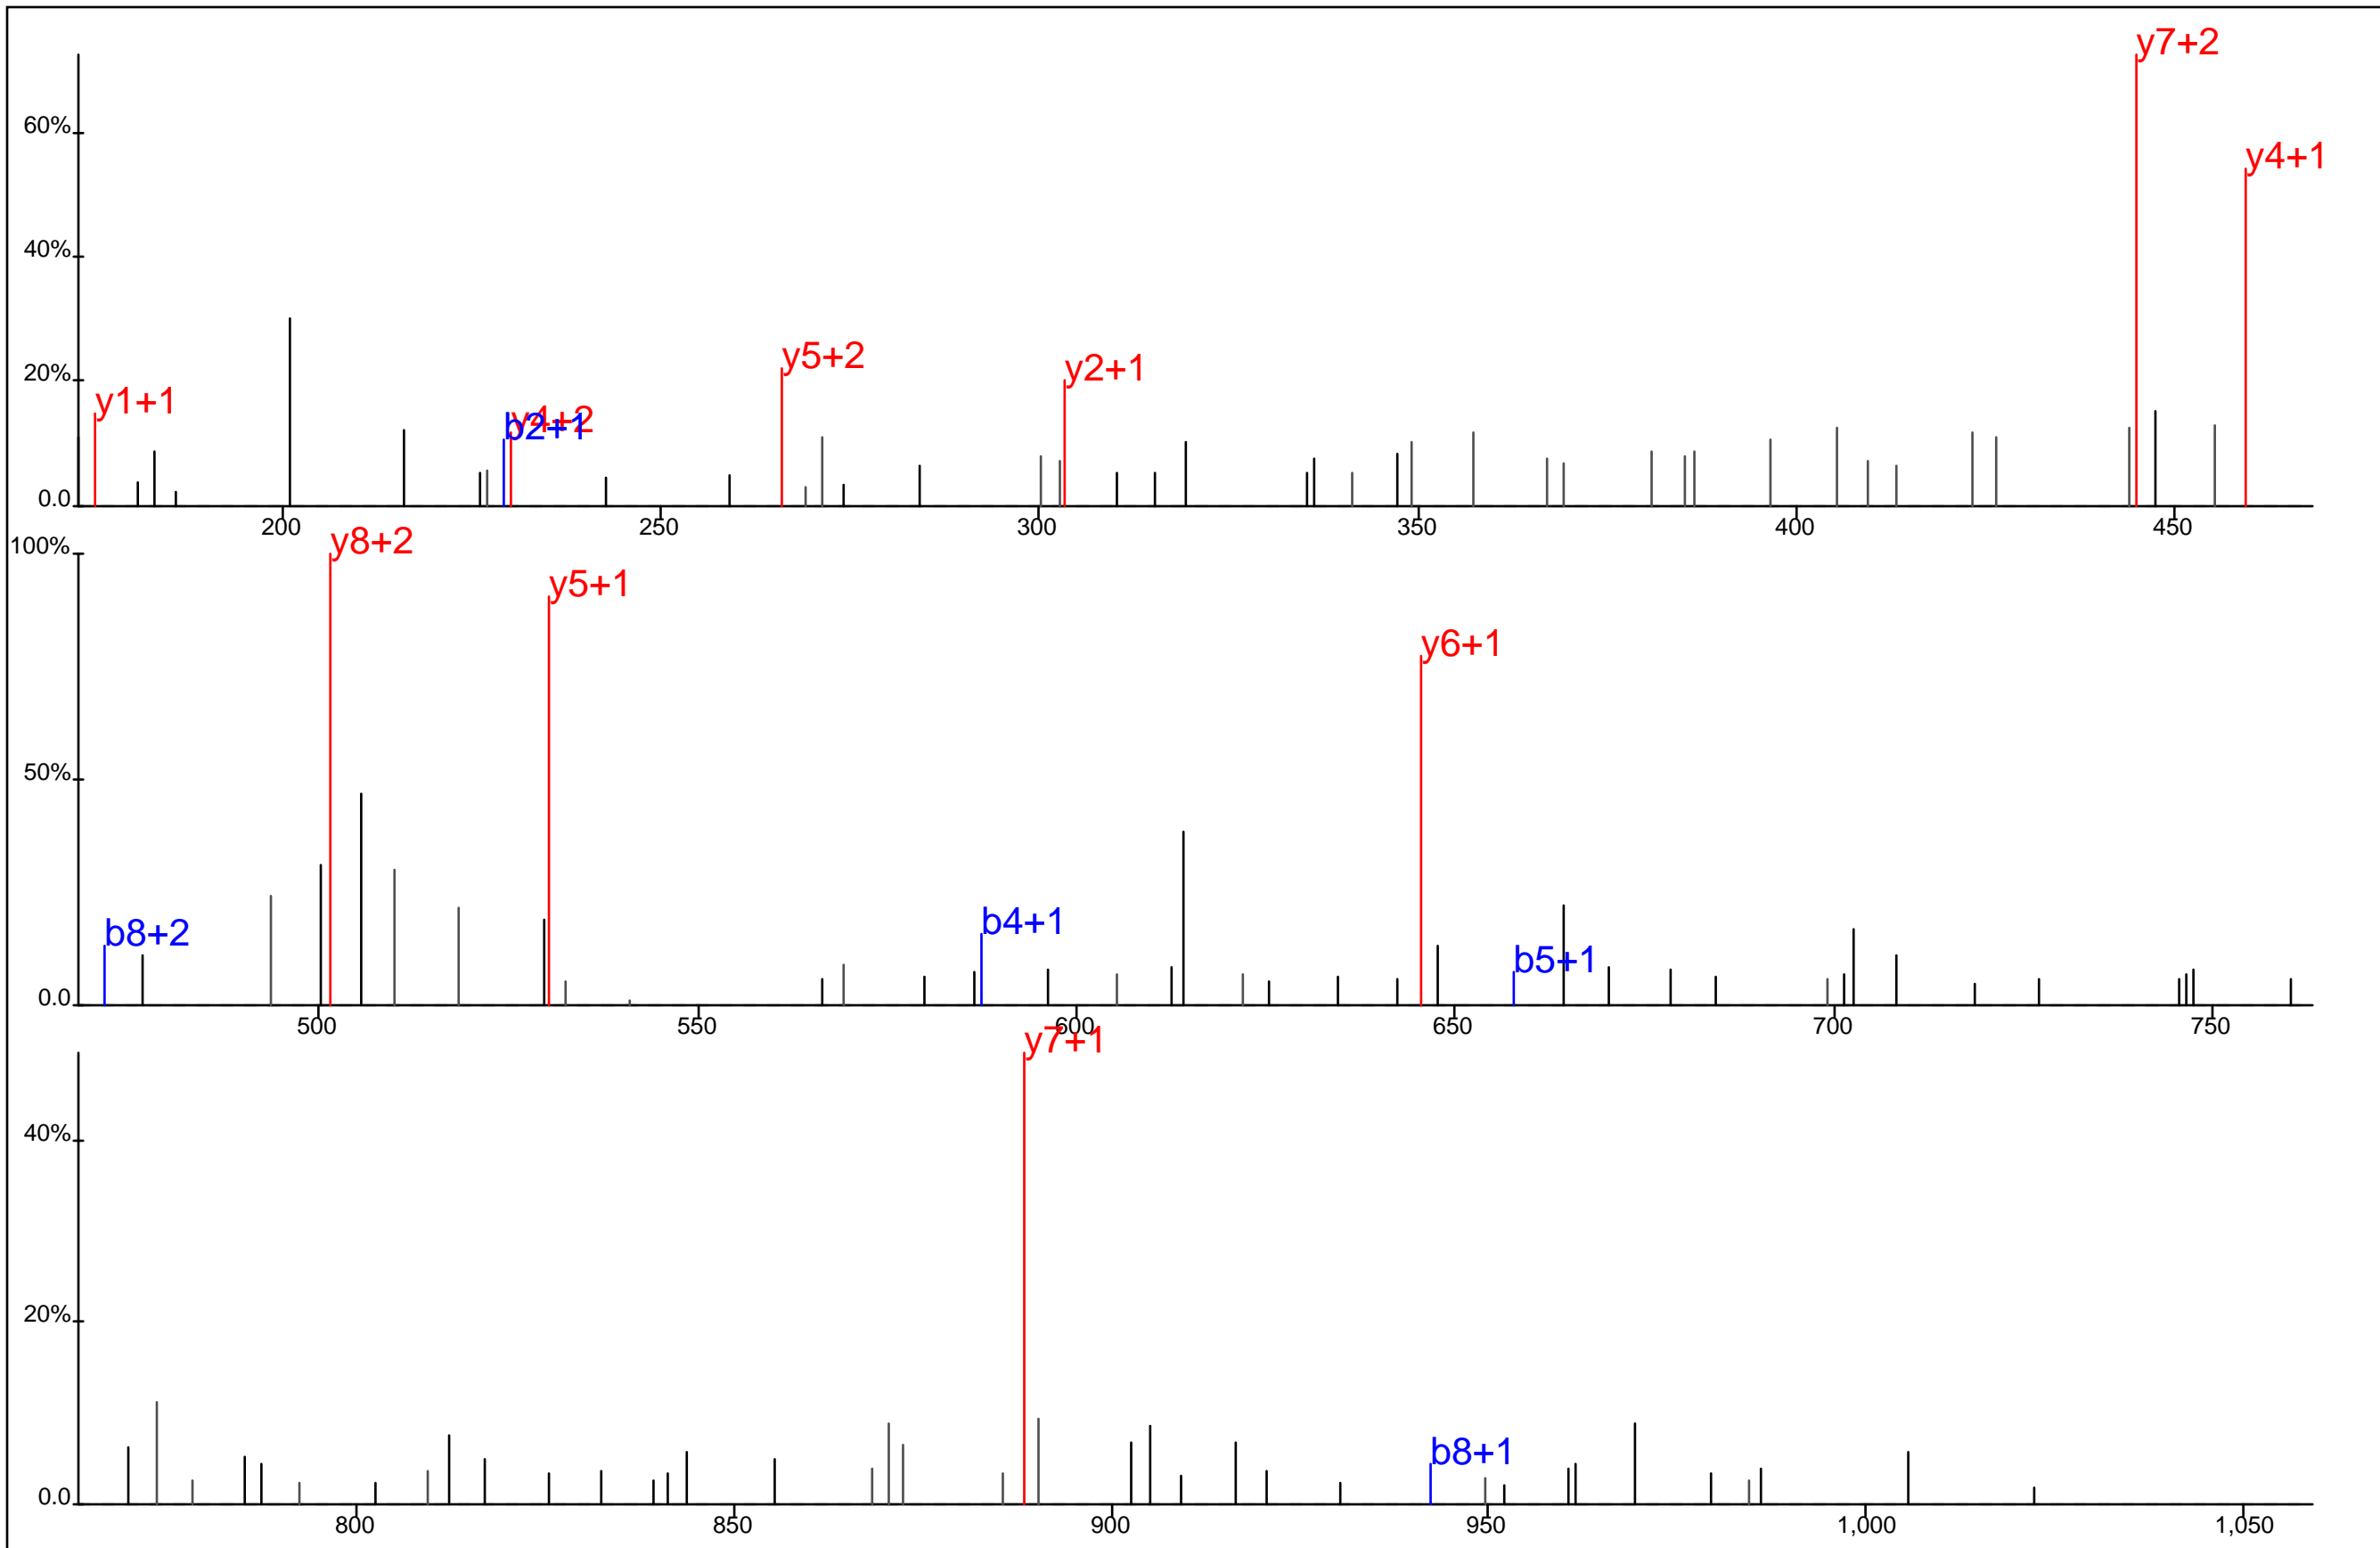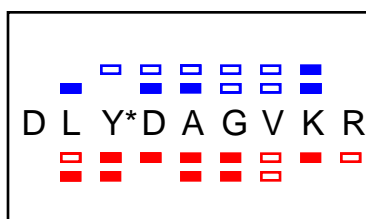

Protein Name: Annexin II  
 gi Accession: 0  
 Precursor Mass: 558.7595+2  
 Delta Mass: 2.923 ppm  
 XCorr: 25.78

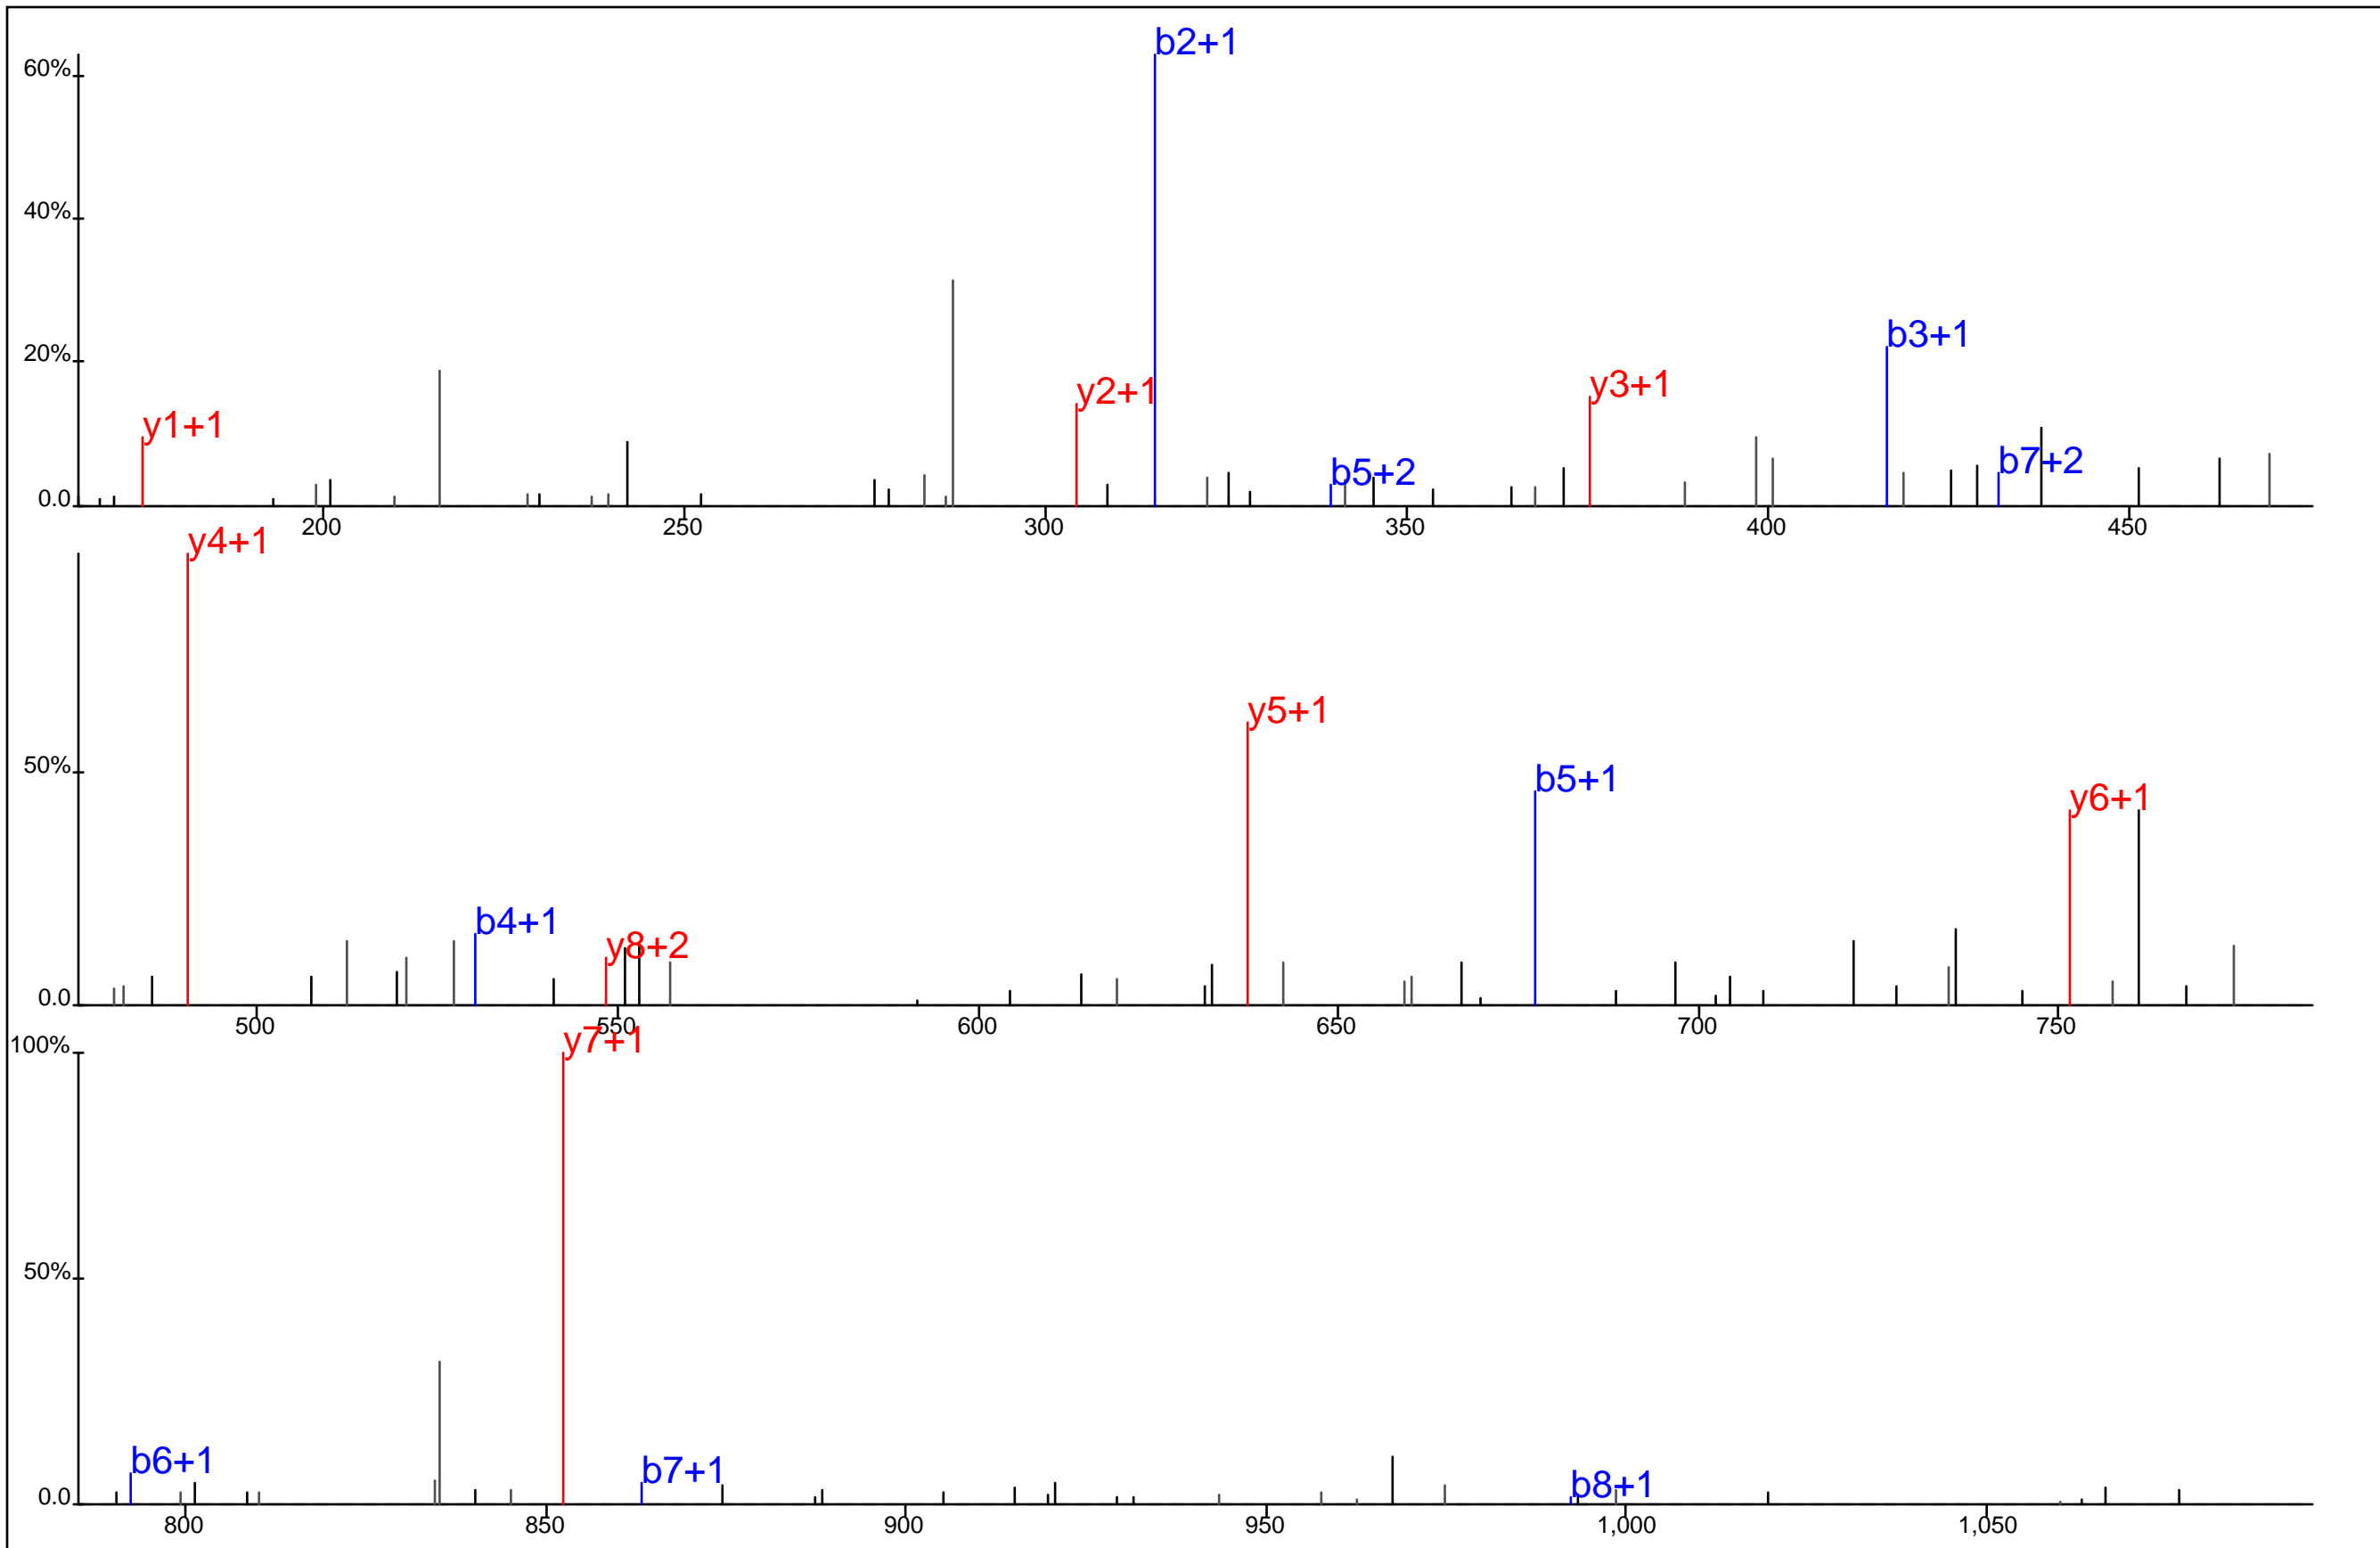

■ ■ ■ ■ ■ ■ ■ ■  
■ ■ ■ ■ ■ ■ ■ ■  
A Y\* T N F D A E R

Protein Name: Annexin II  
 gi Accession: 0  
 Precursor Mass: 583.7325+2  
 Delta Mass: 5.521 ppm  
 XCorr: 55.69



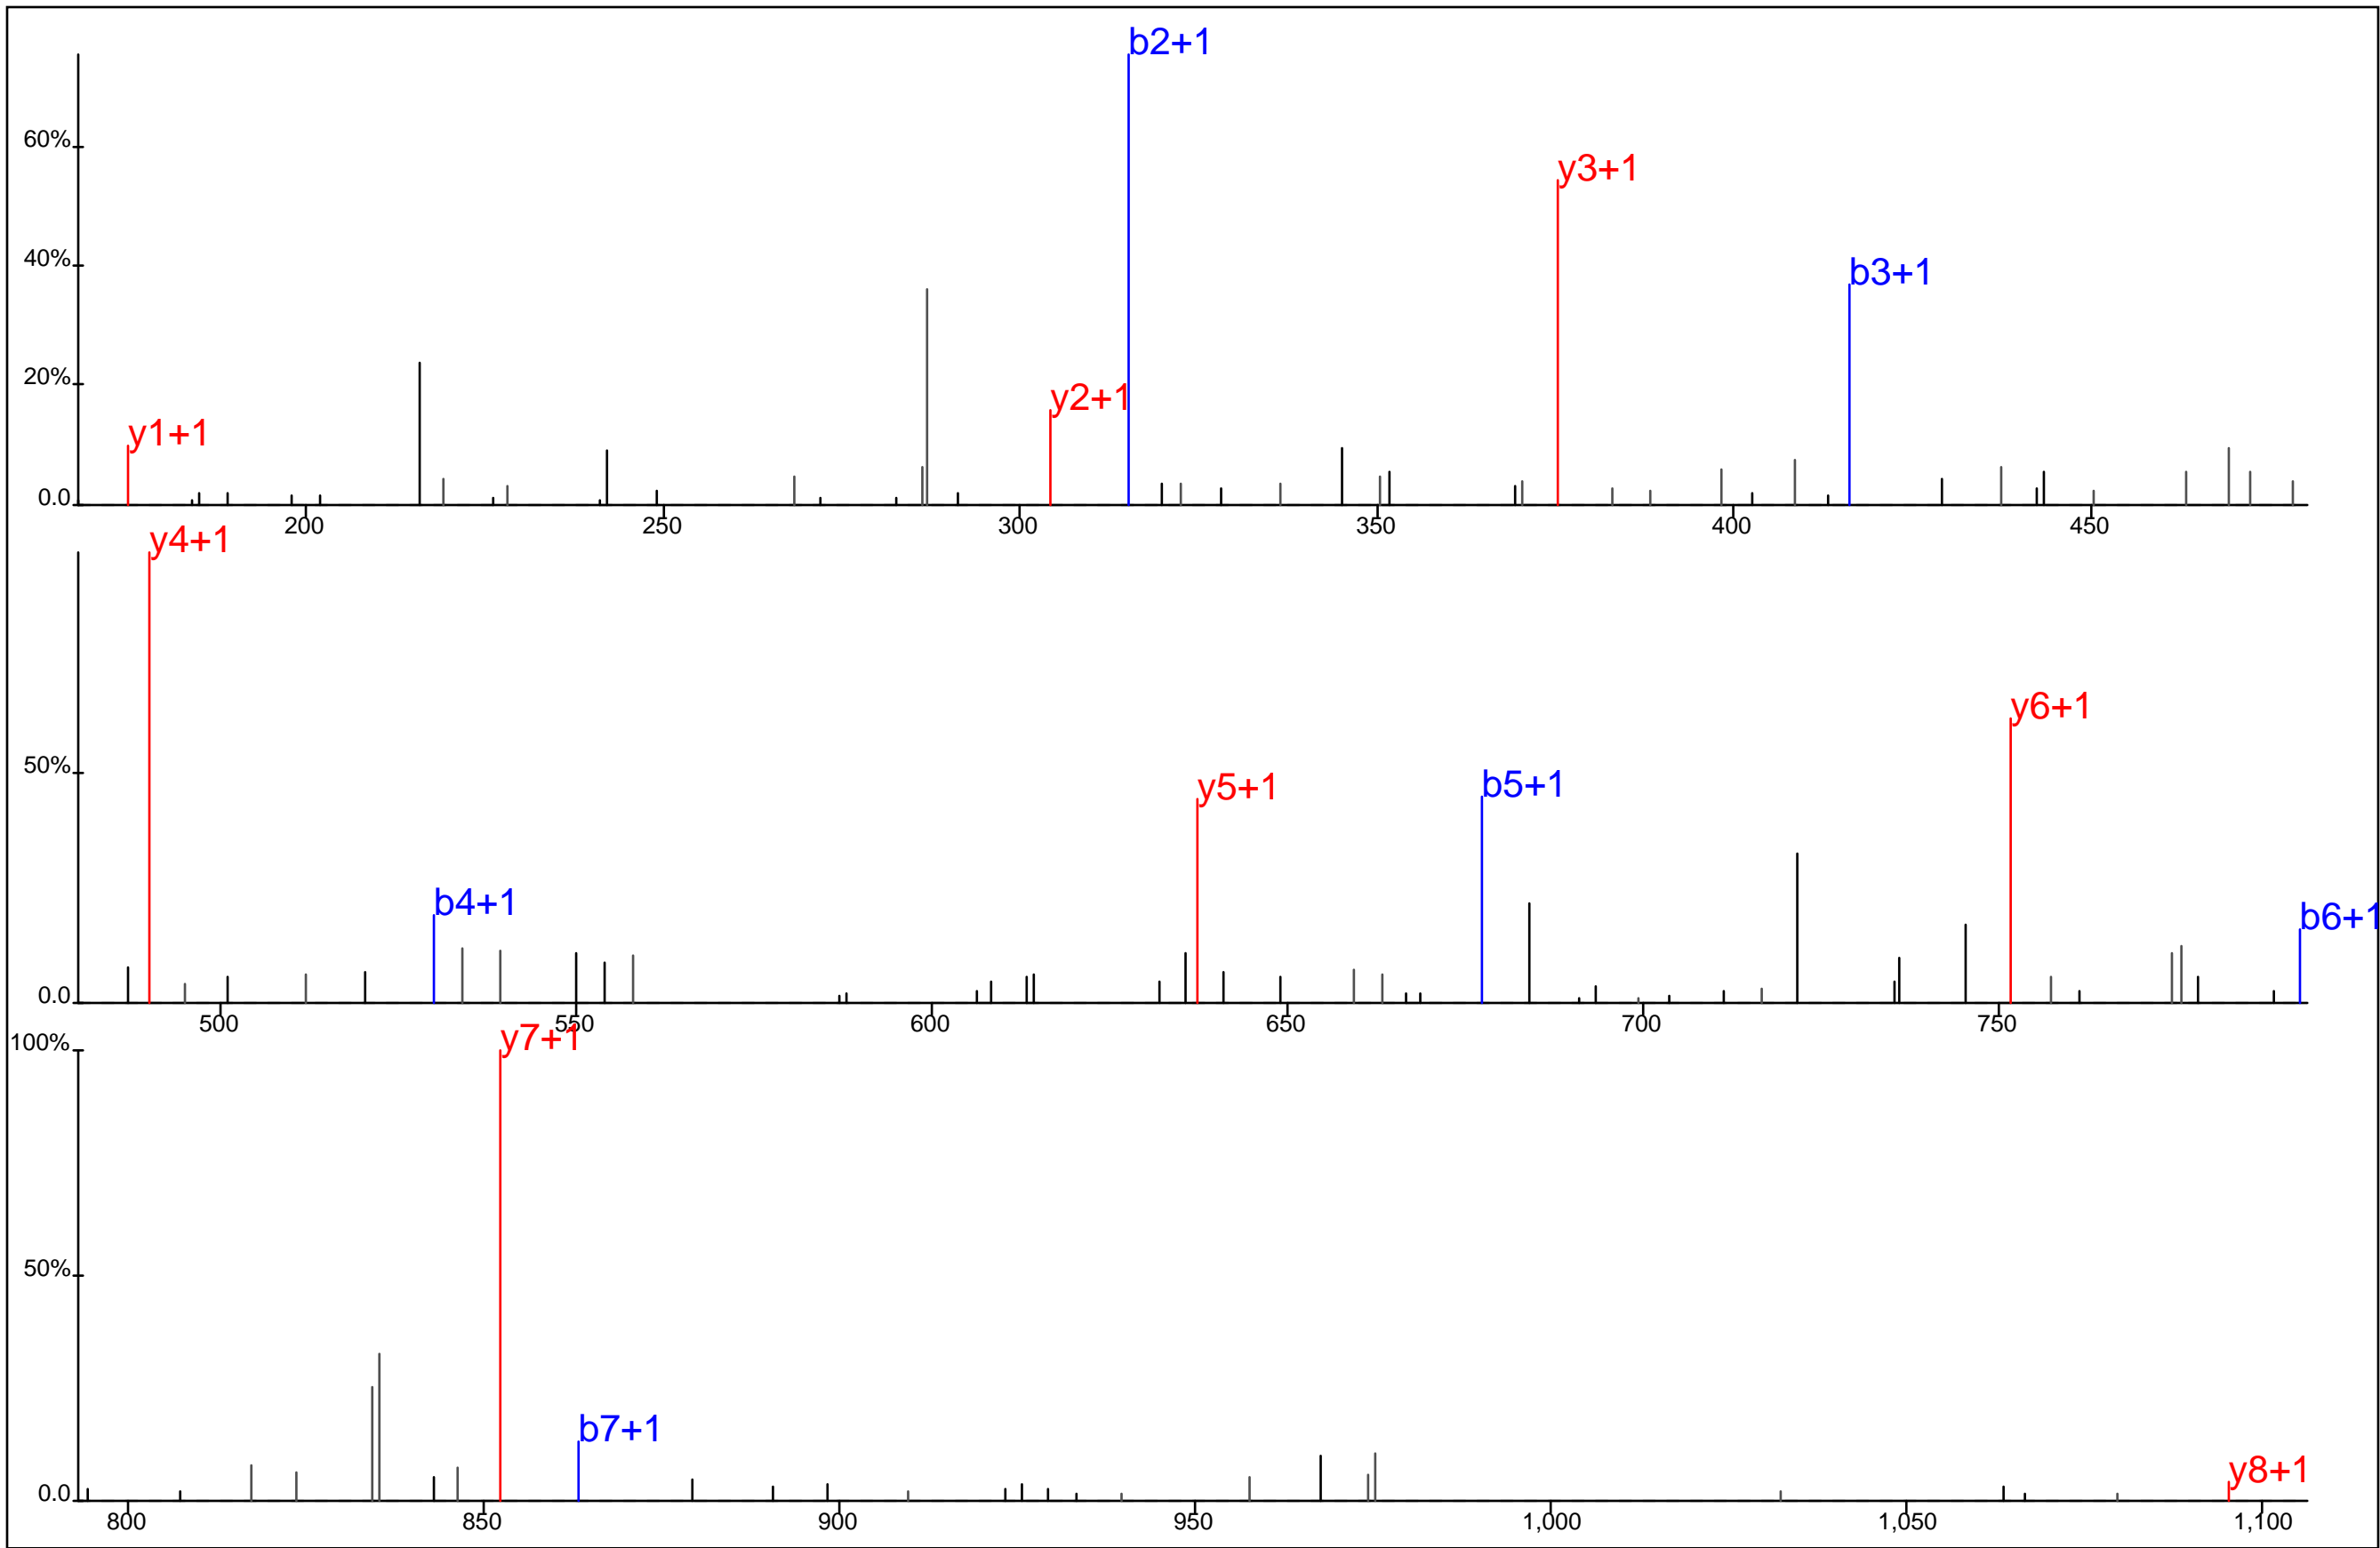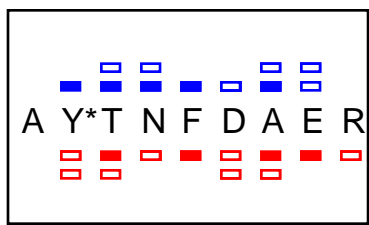

Protein Name: Annexin II  
 gi Accession: 0  
 Precursor Mass: 583.7297+2  
 Delta Mass: 0.602 ppm  
 XCorr: 57.72

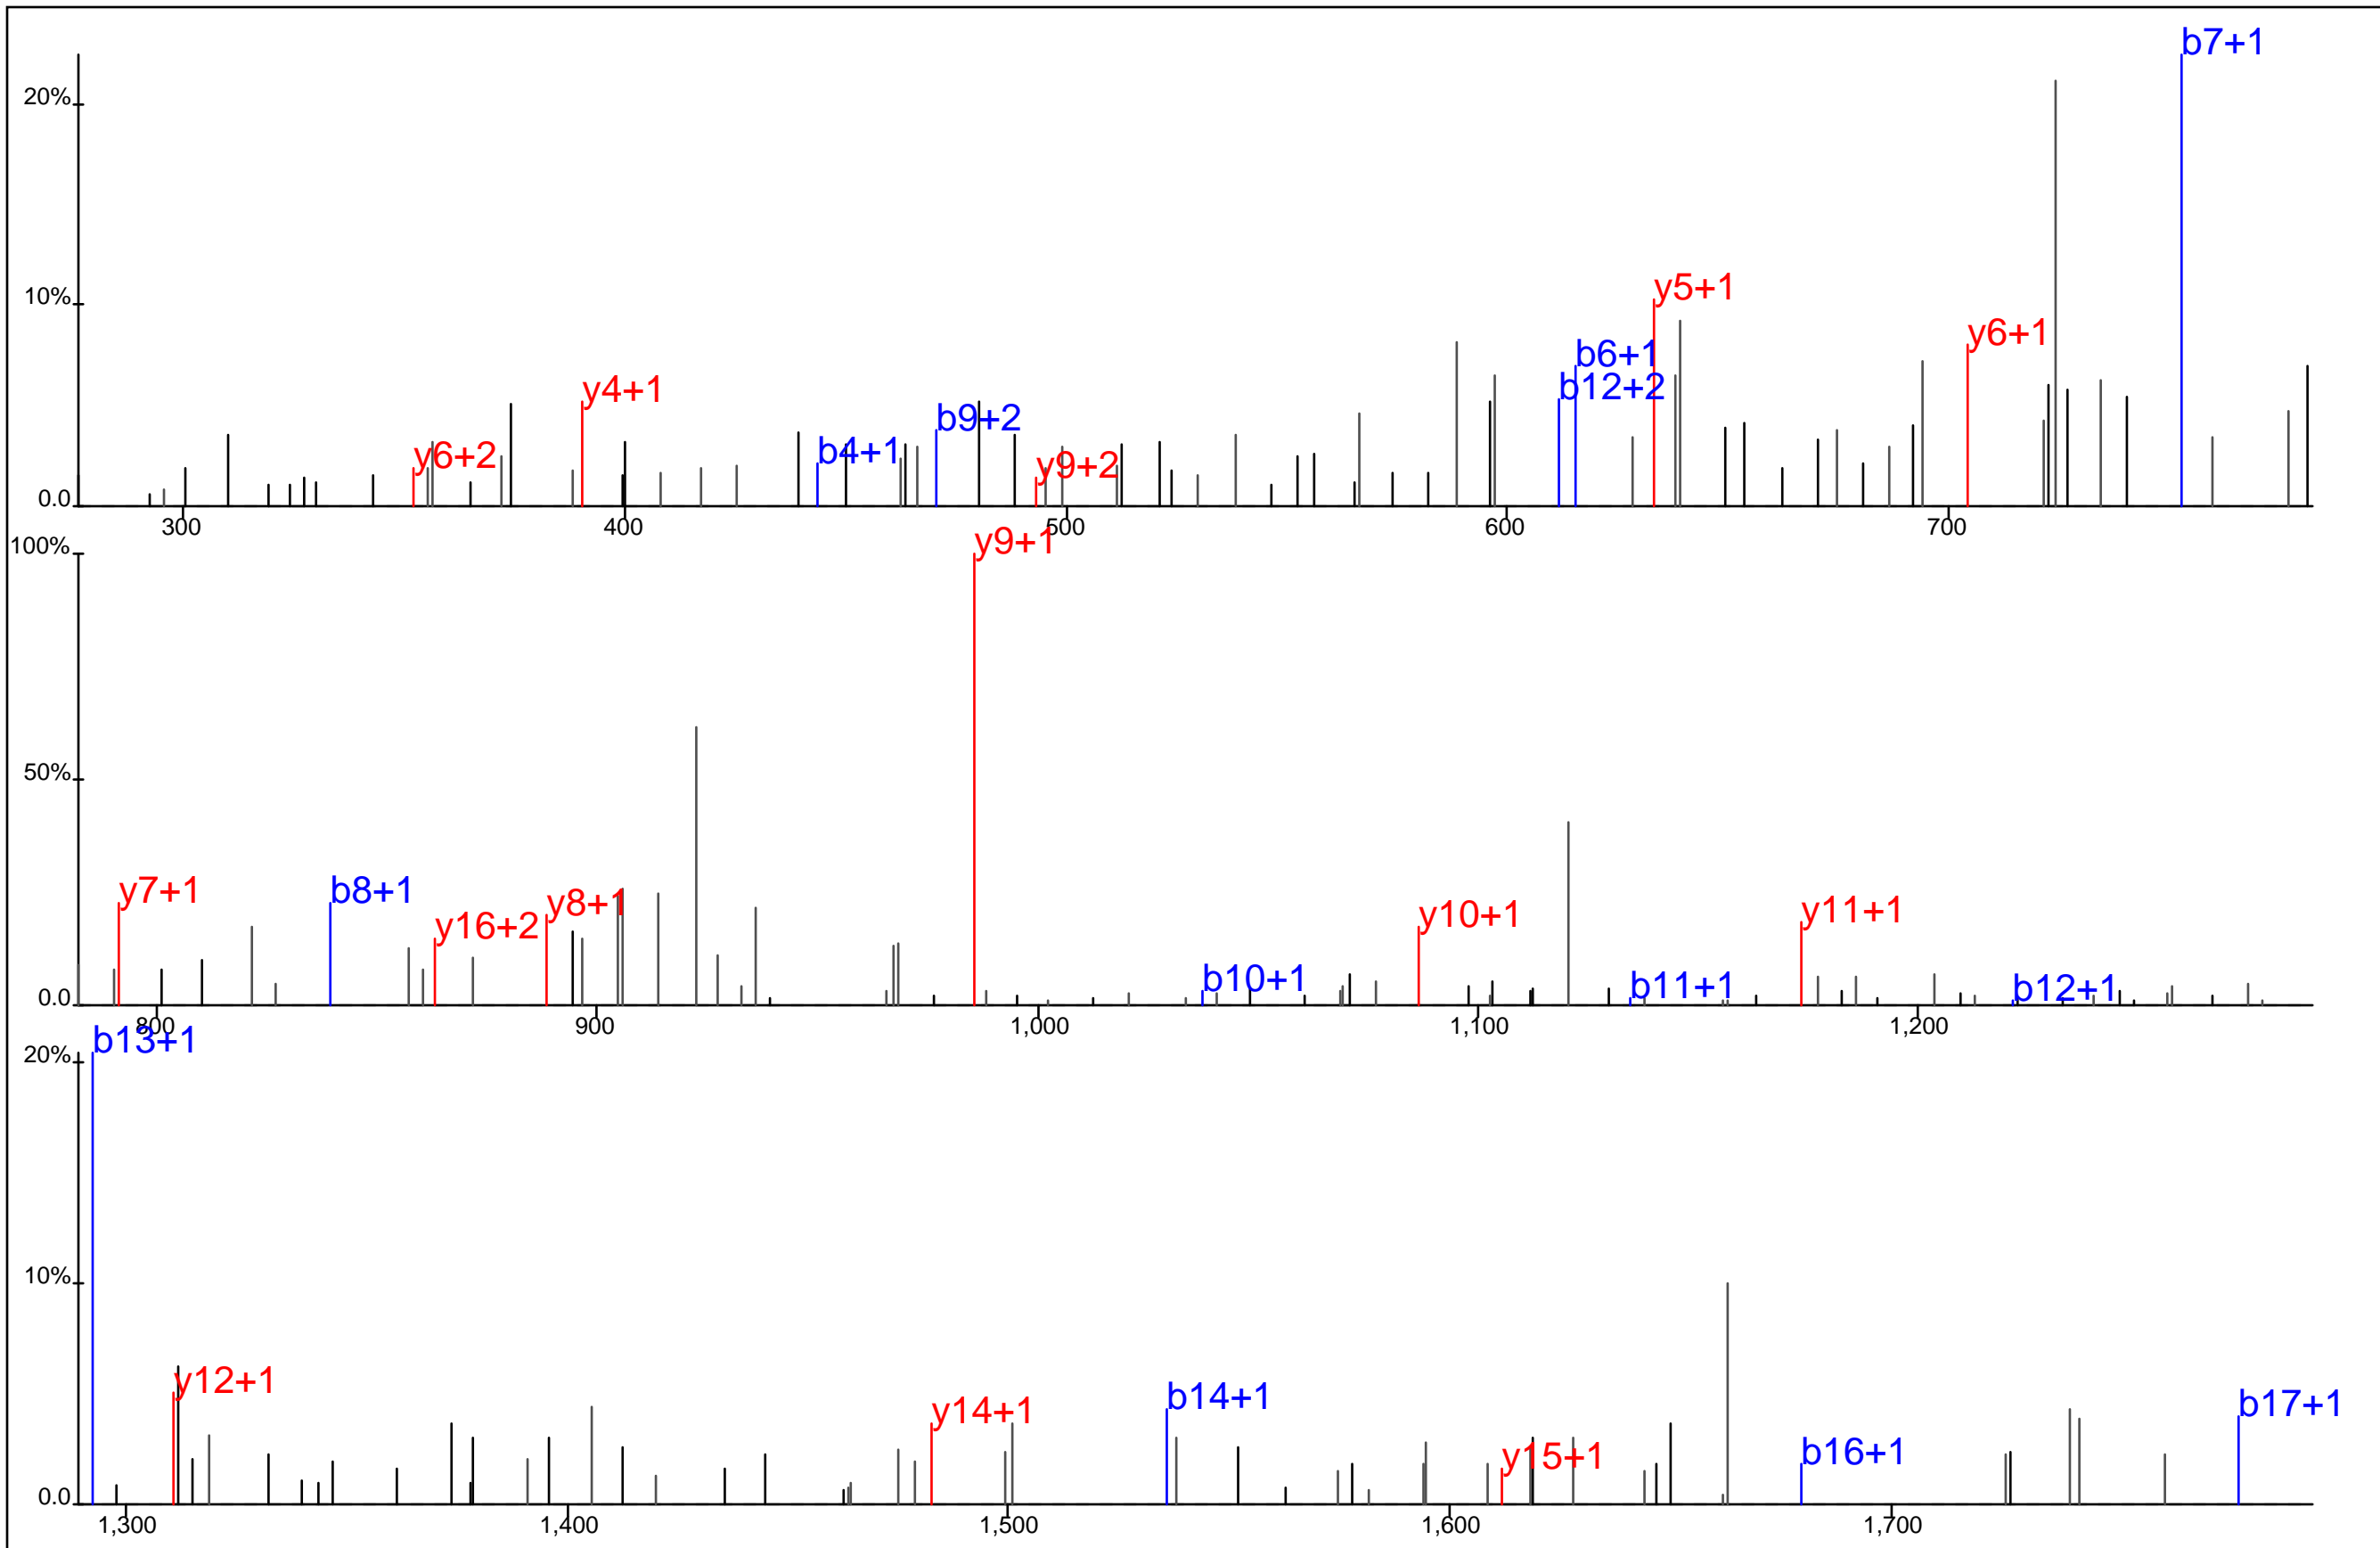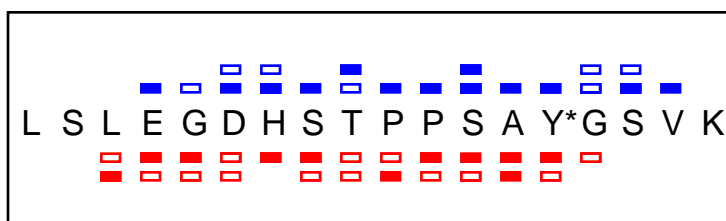

Protein Name: Annexin II  
 gi Accession: 0  
 Precursor Mass: 962.9389+2  
 Delta Mass: 0.899 ppm  
 XCorr: 34.84

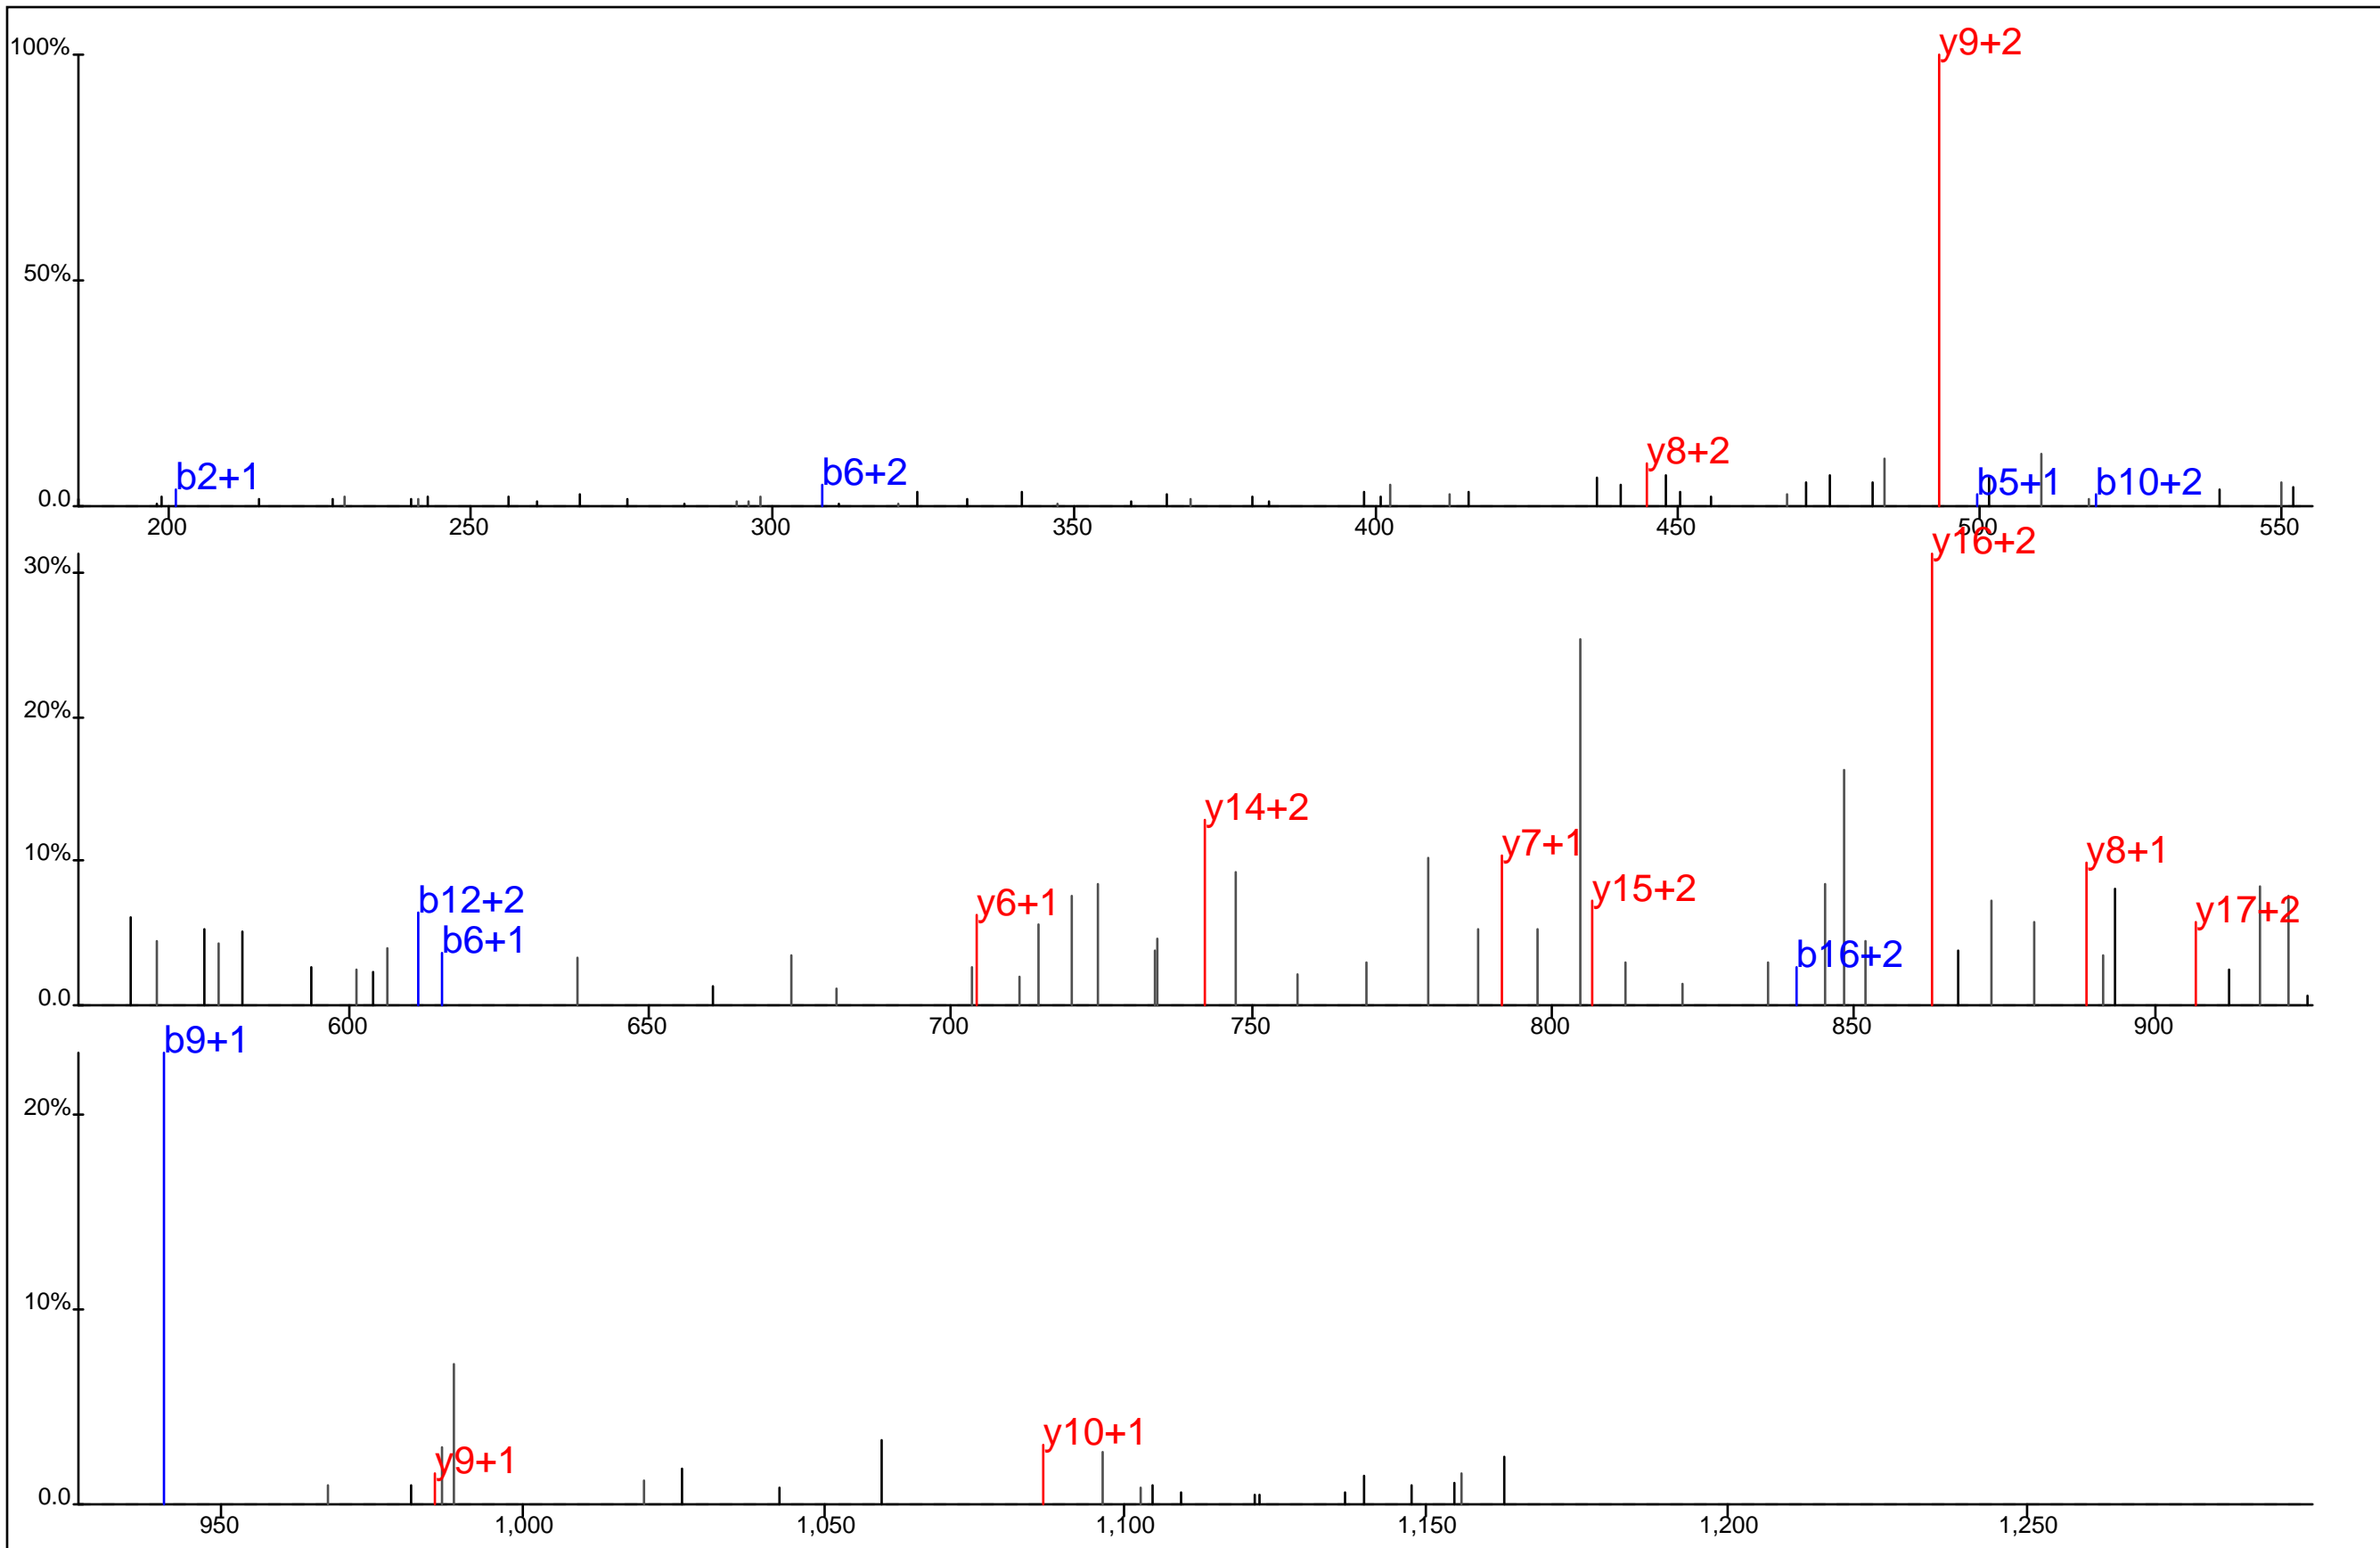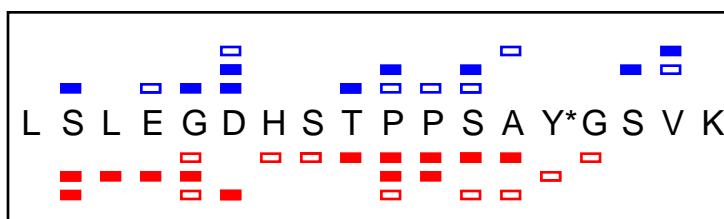

Protein Name: Annexin II  
 gi Accession: 0  
 Precursor Mass: 642.2949+3  
 Delta Mass: 0.638 ppm  
 XCorr: 22.79

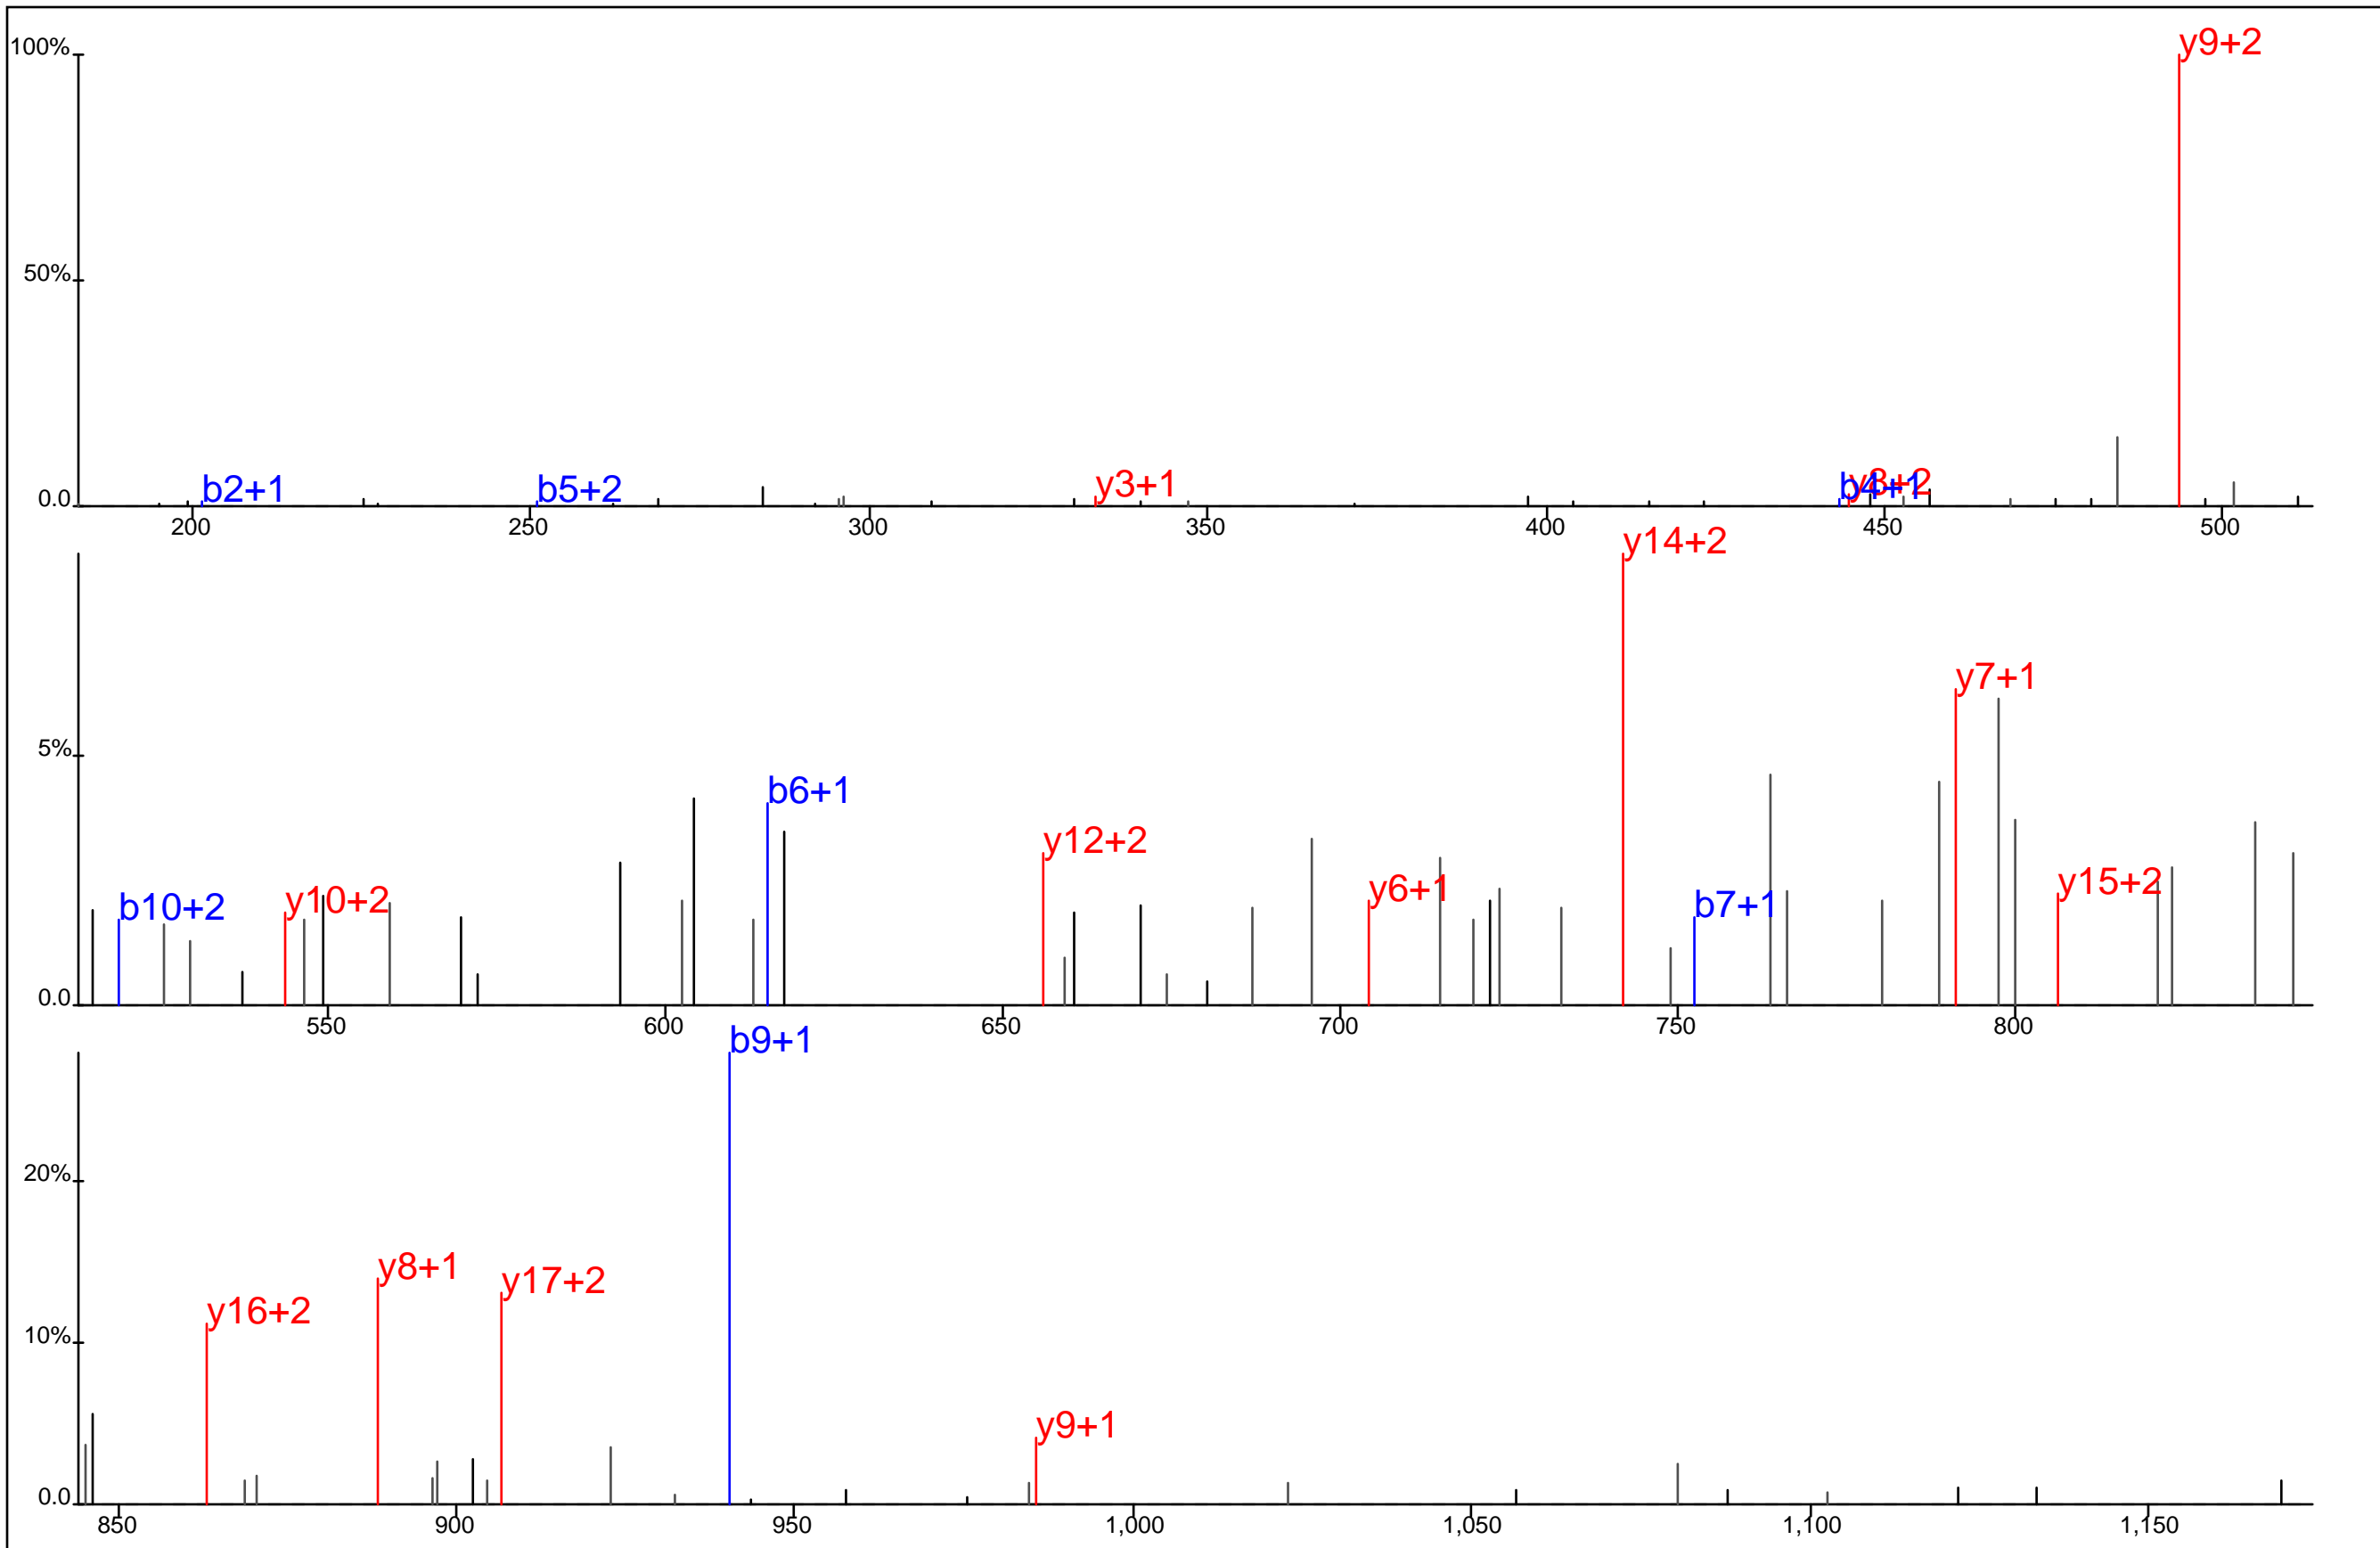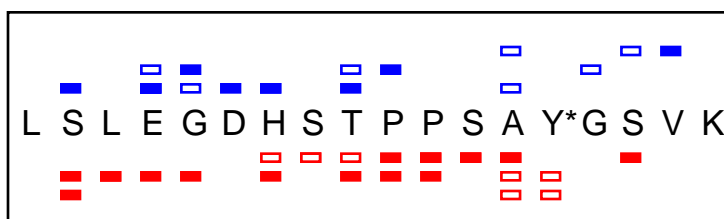

Protein Name: Annexin II  
 gi Accession: 0  
 Precursor Mass: 642.2944+3  
 Delta Mass: 0.122 ppm  
 XCorr: 23.42



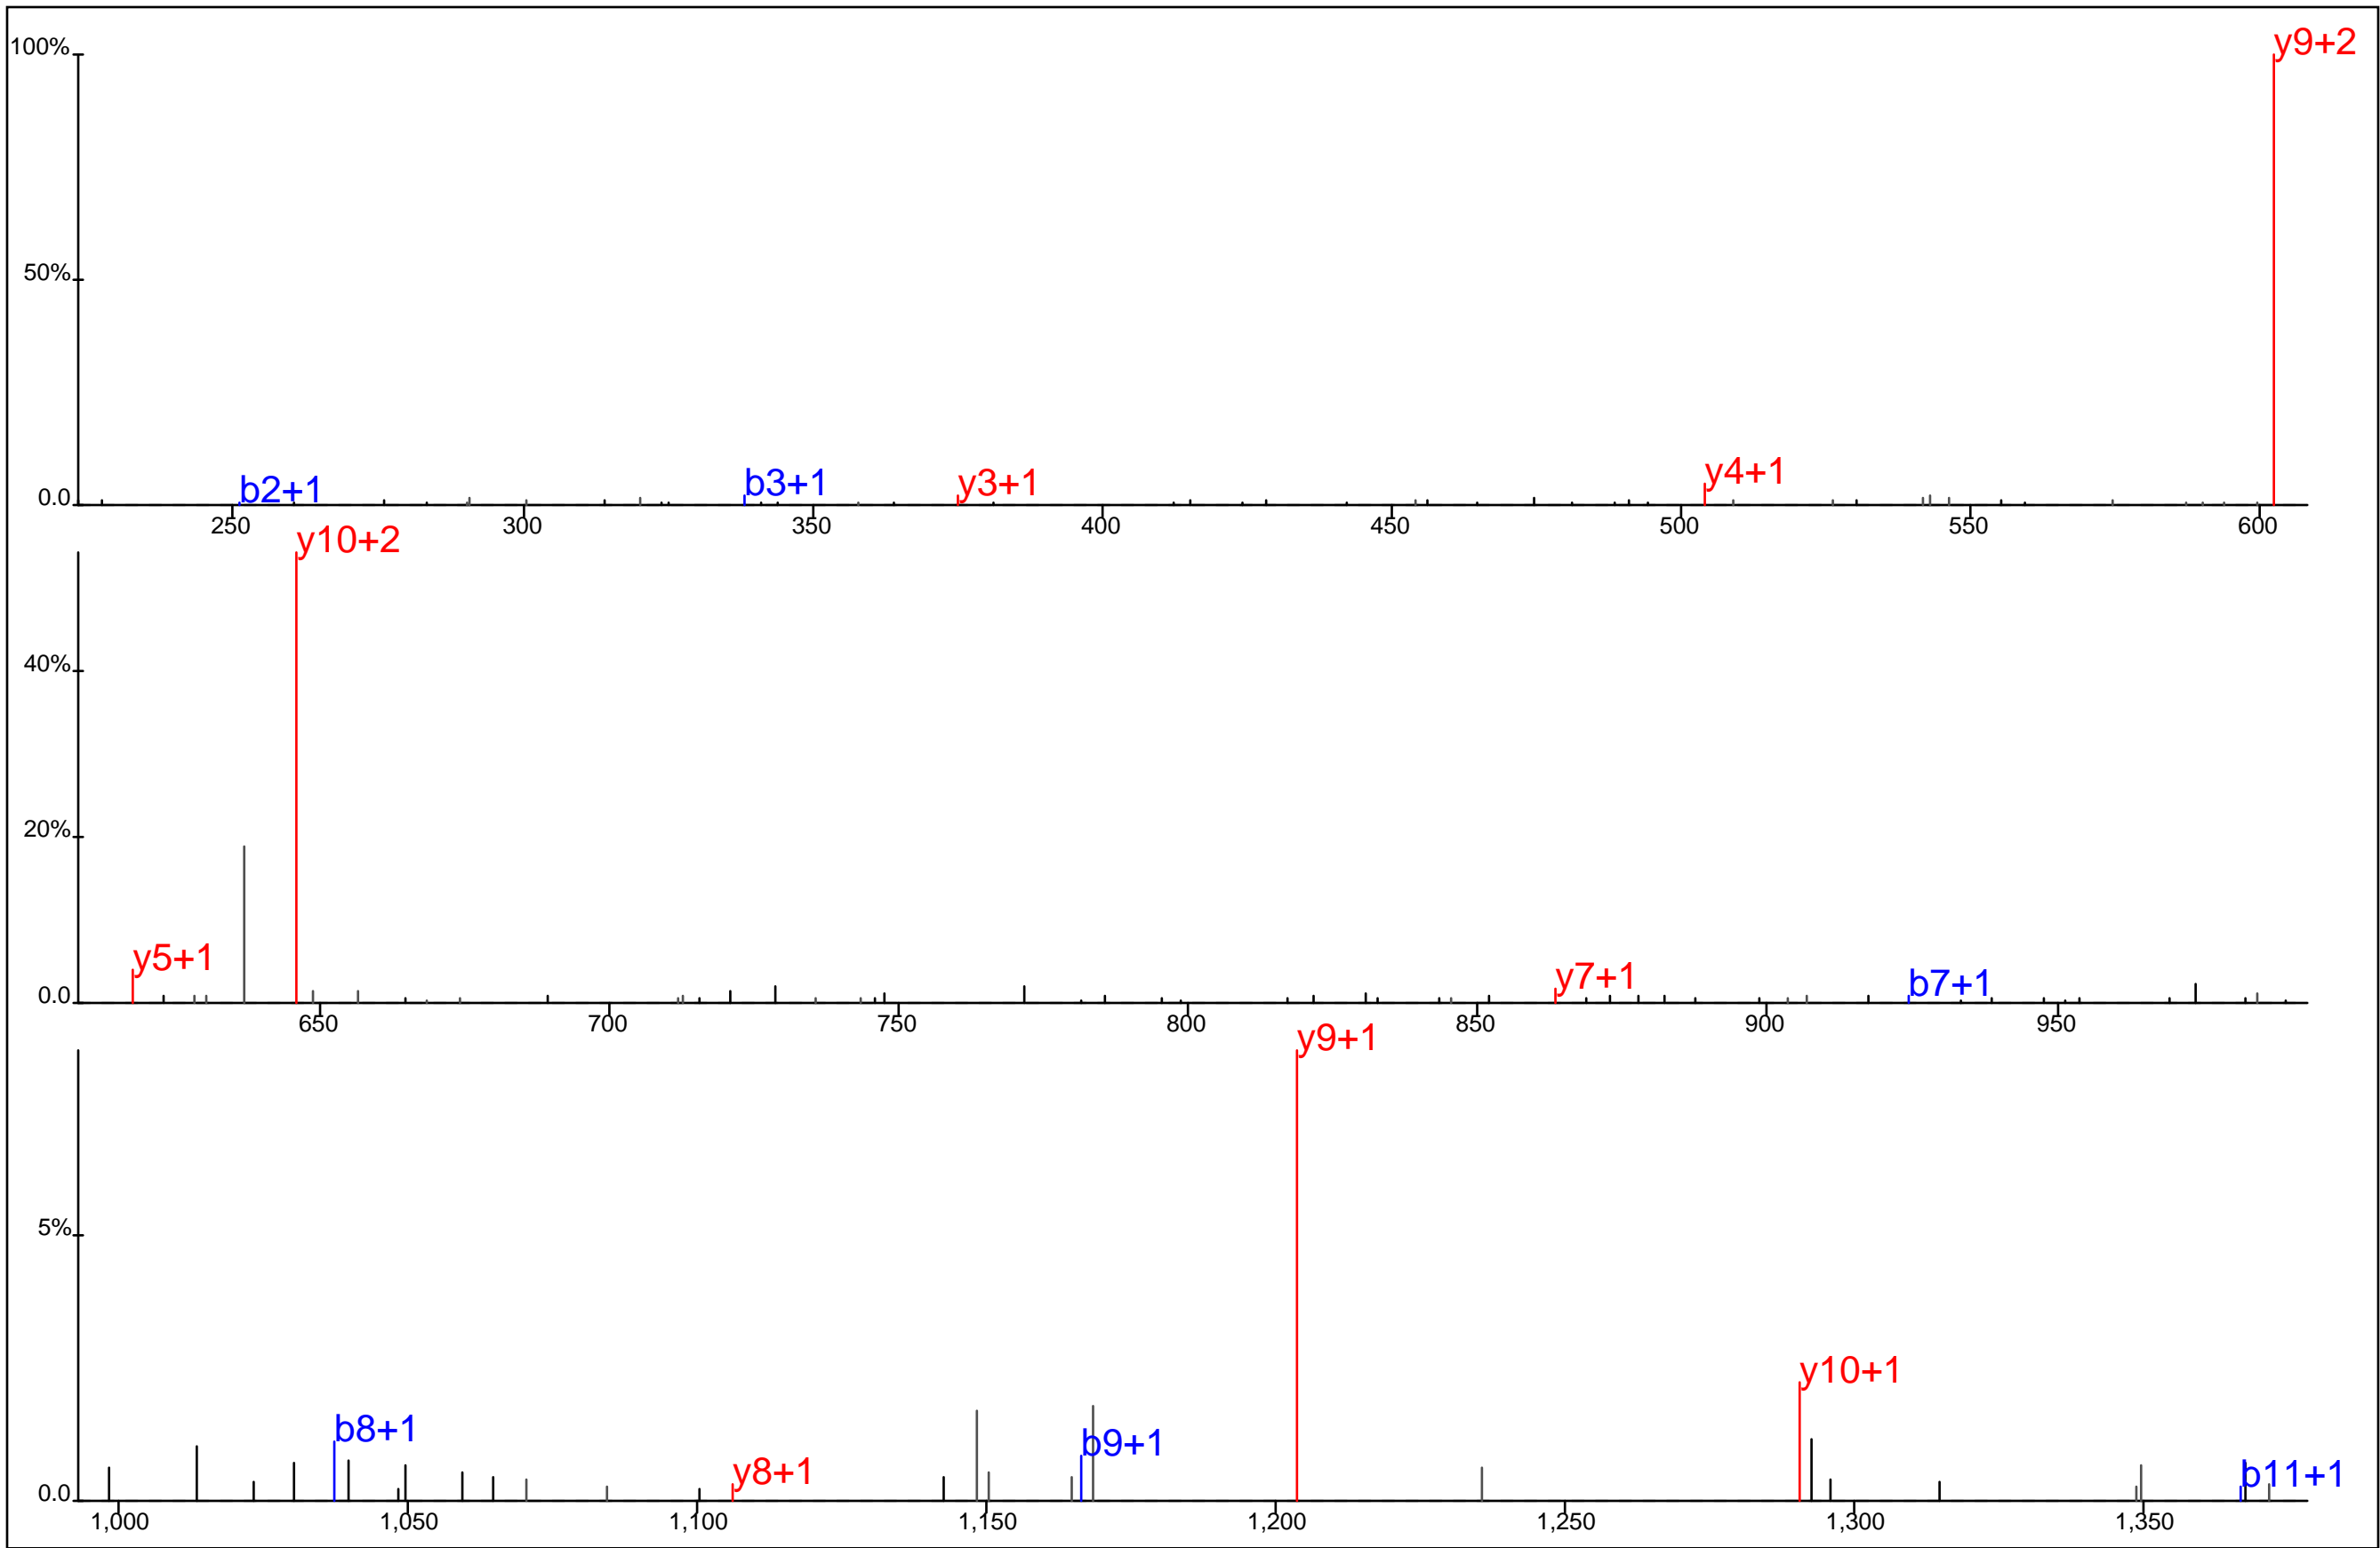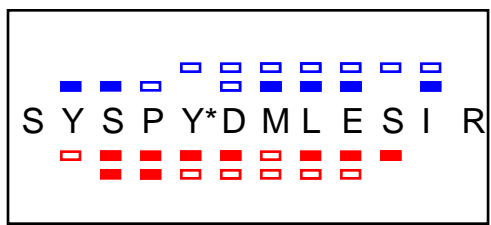

Protein Name: Annexin II  
 gi Accession: 0  
 Precursor Mass: 770.8242+2  
 Delta Mass: 1.467 ppm  
 XCorr: 31.87

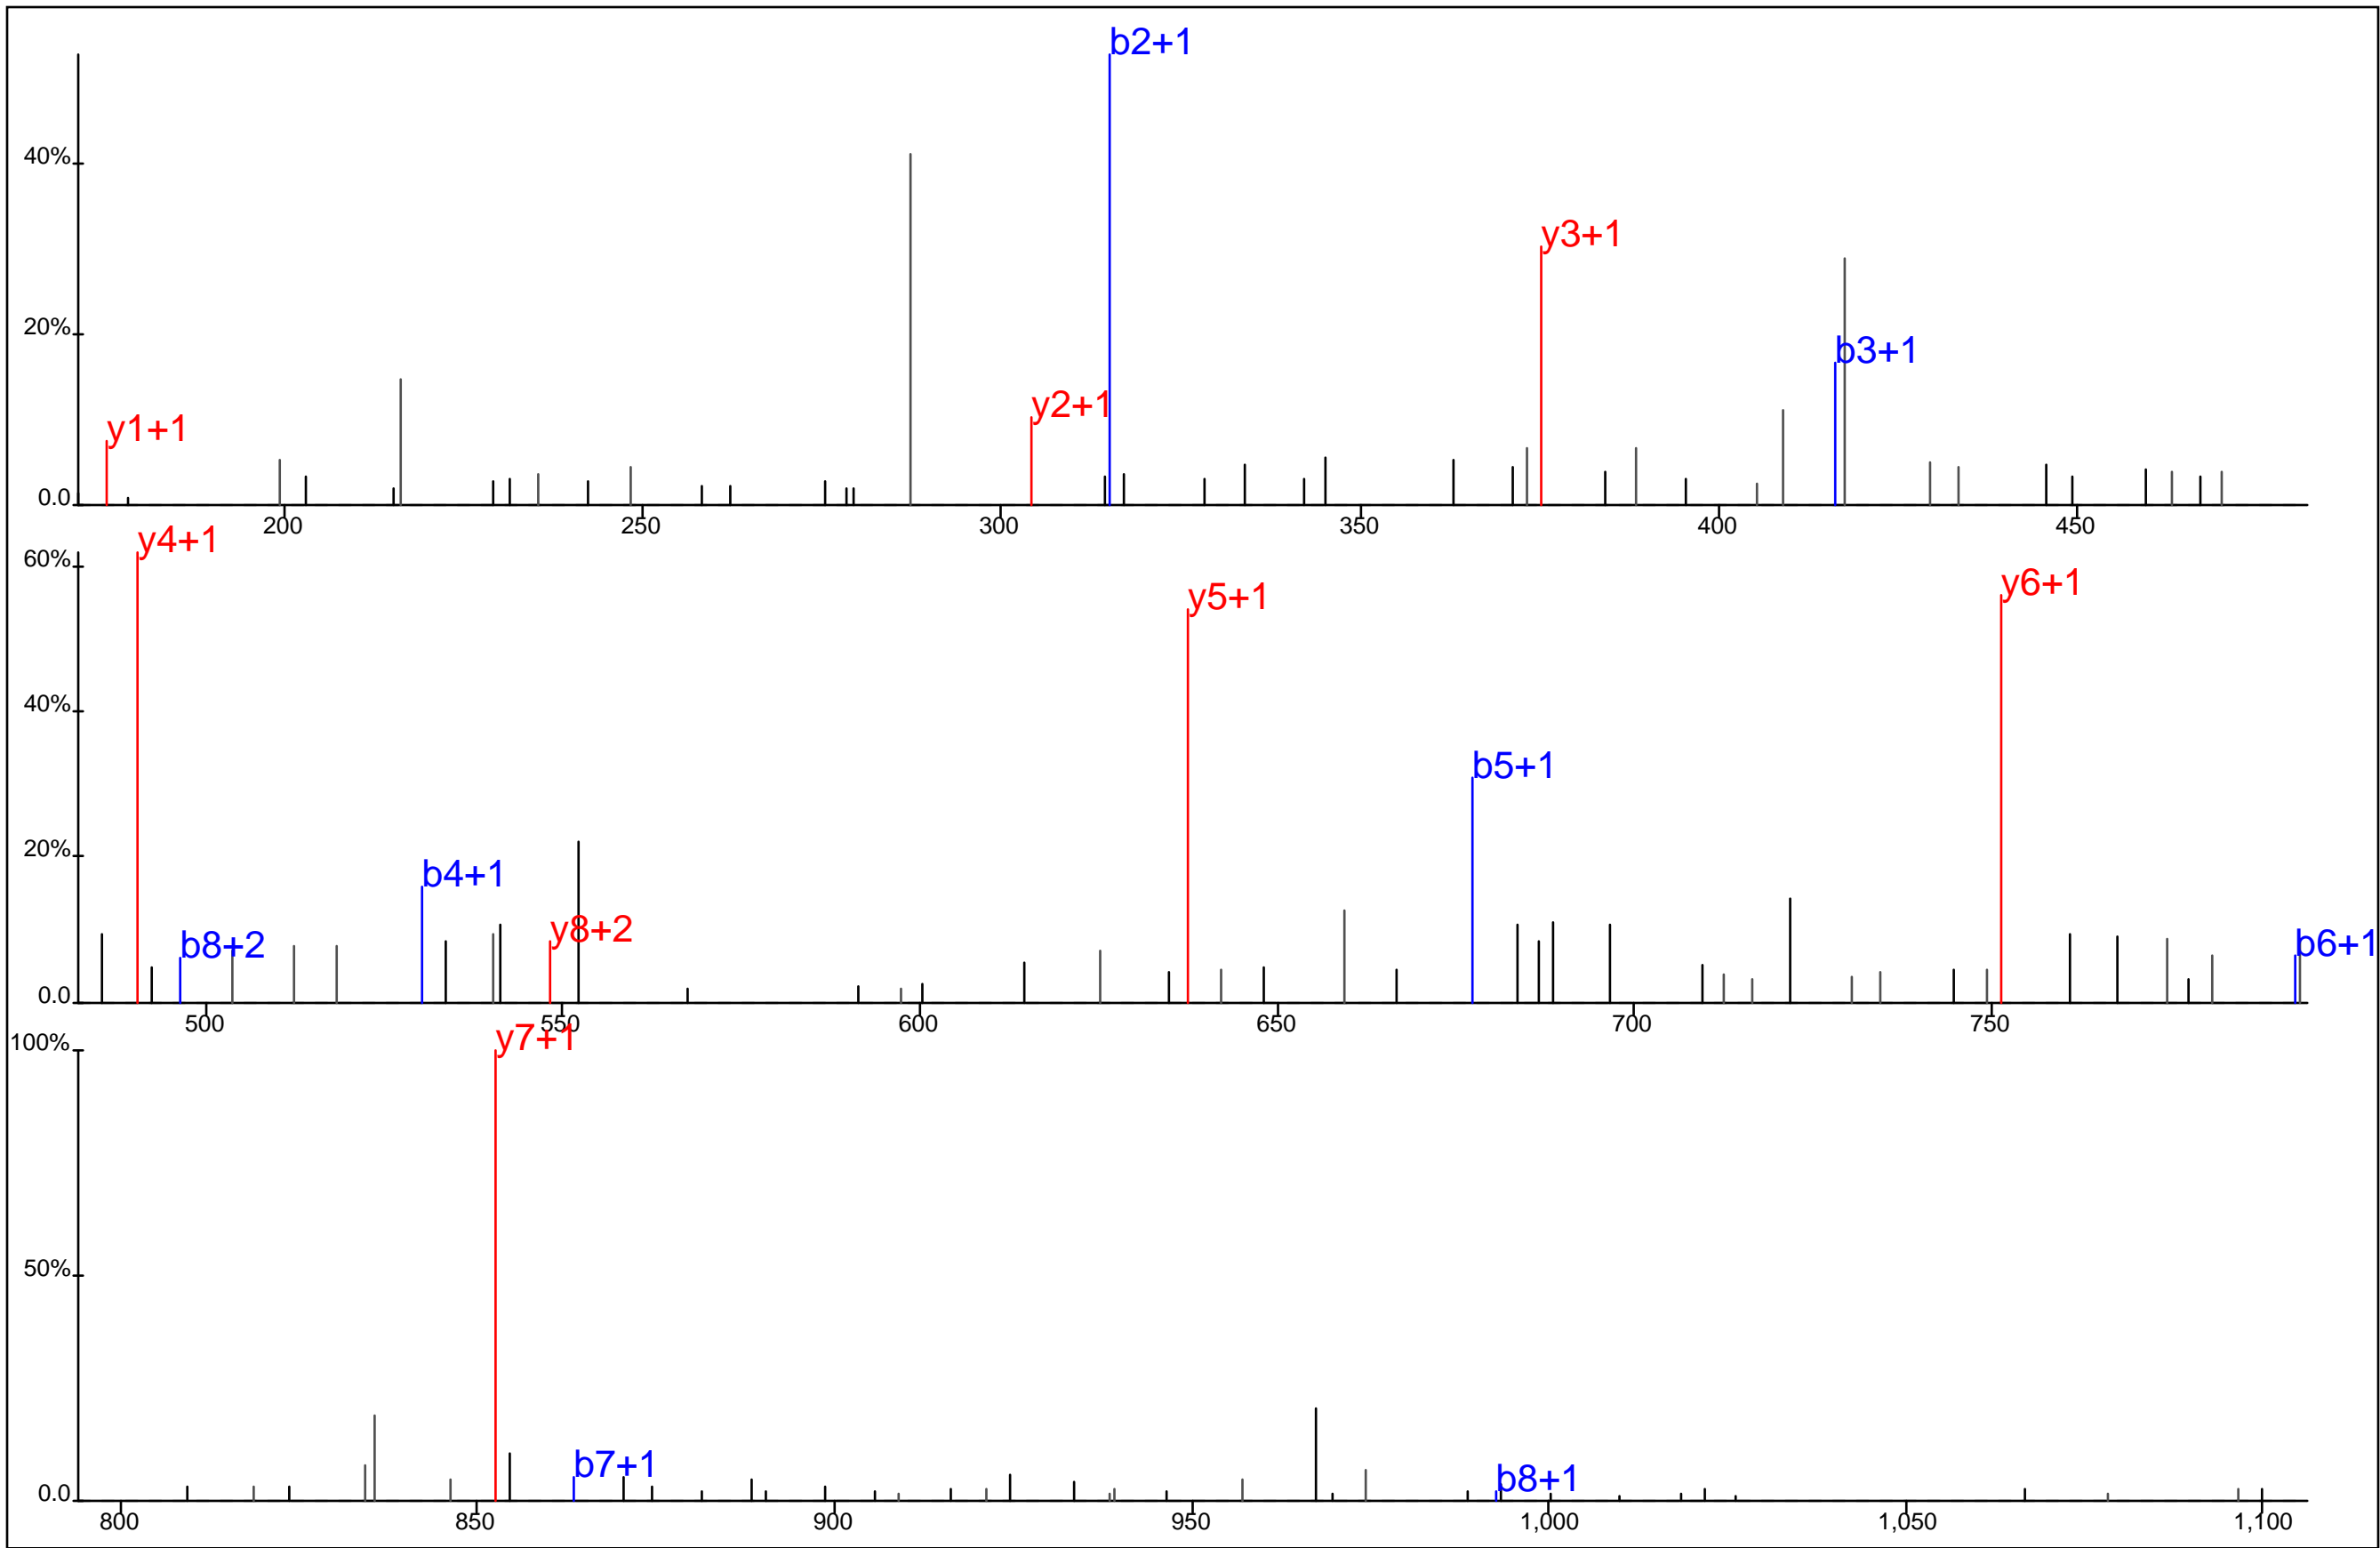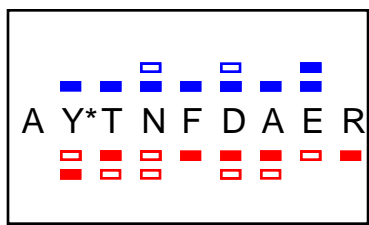

Protein Name: Annexin II  
 gi Accession: 0  
 Precursor Mass: 583.7301+2  
 Delta Mass: 1.336 ppm  
 XCorr: 44.64

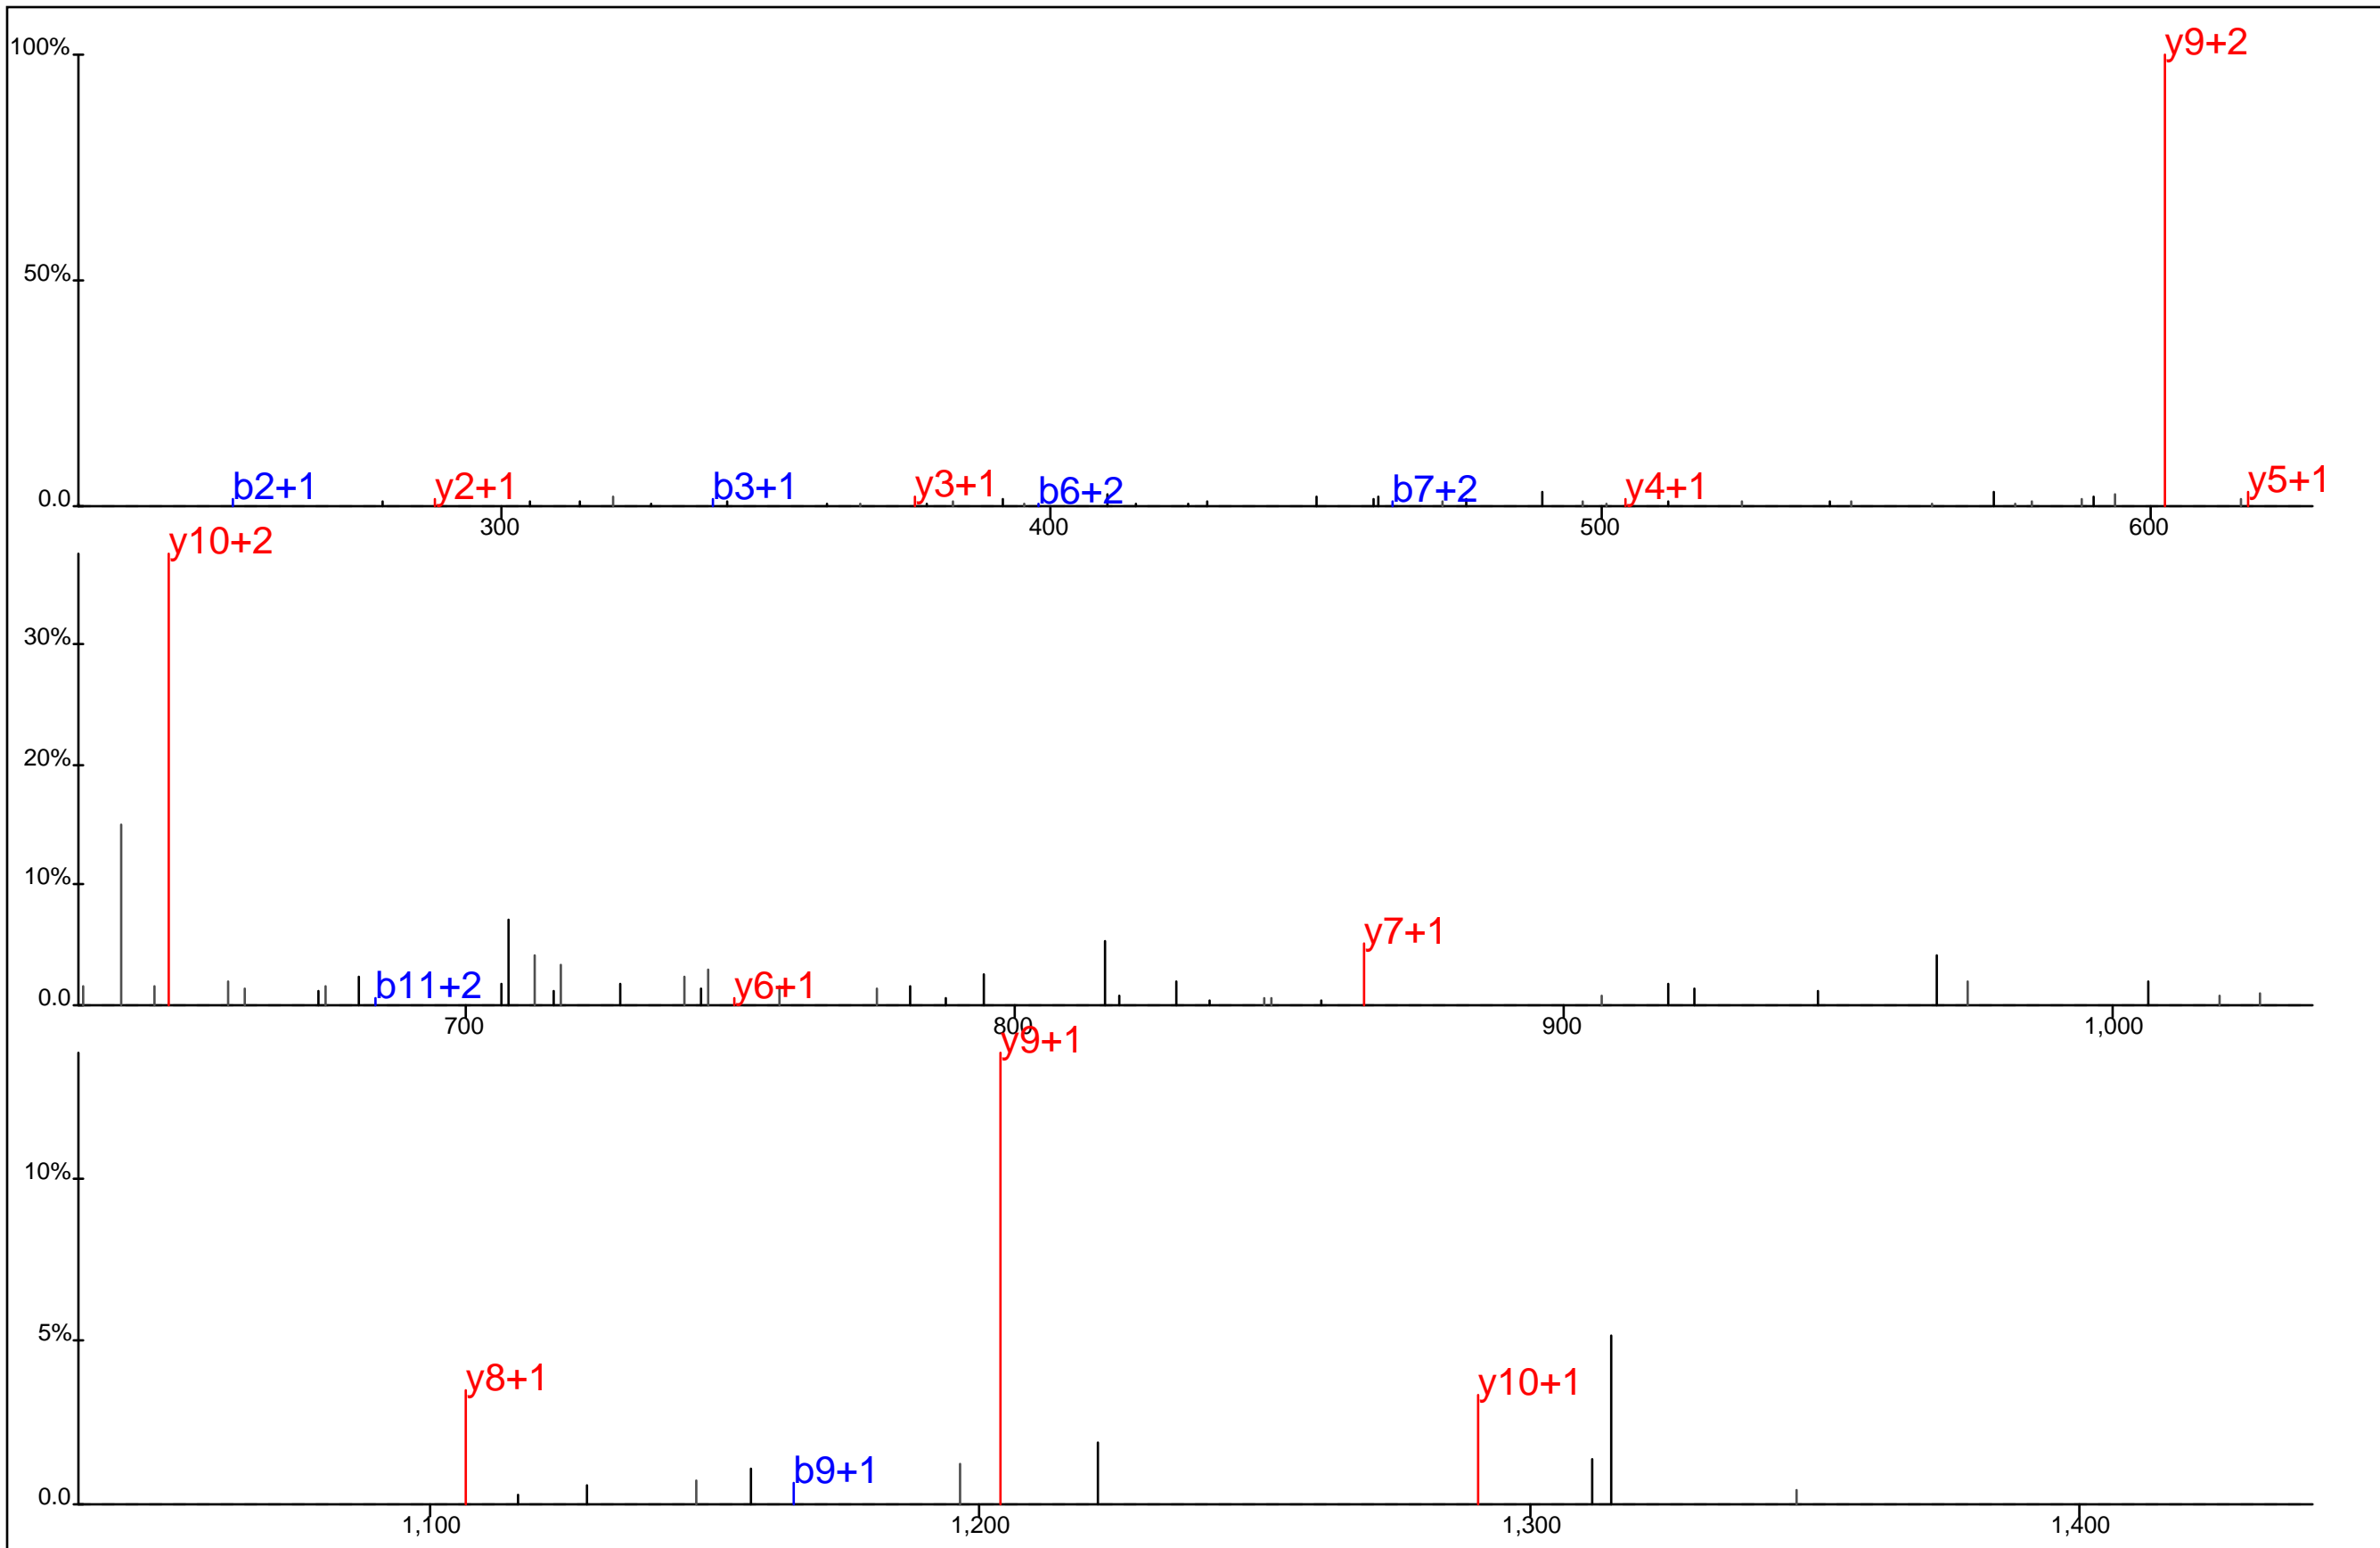

■ □  
■ □ ■ ■ □ ■ ■ ■ ■ □  
**S Y S P Y\* D M L E S I R**  
■ ■ ■ ■ ■ ■ ■ ■ ■ ■

Protein Name: Annexin II  
 gi Accession: 0  
 Precursor Mass: 770.8211+2  
 Delta Mass: 2.574 ppm  
 XCorr: 27.98

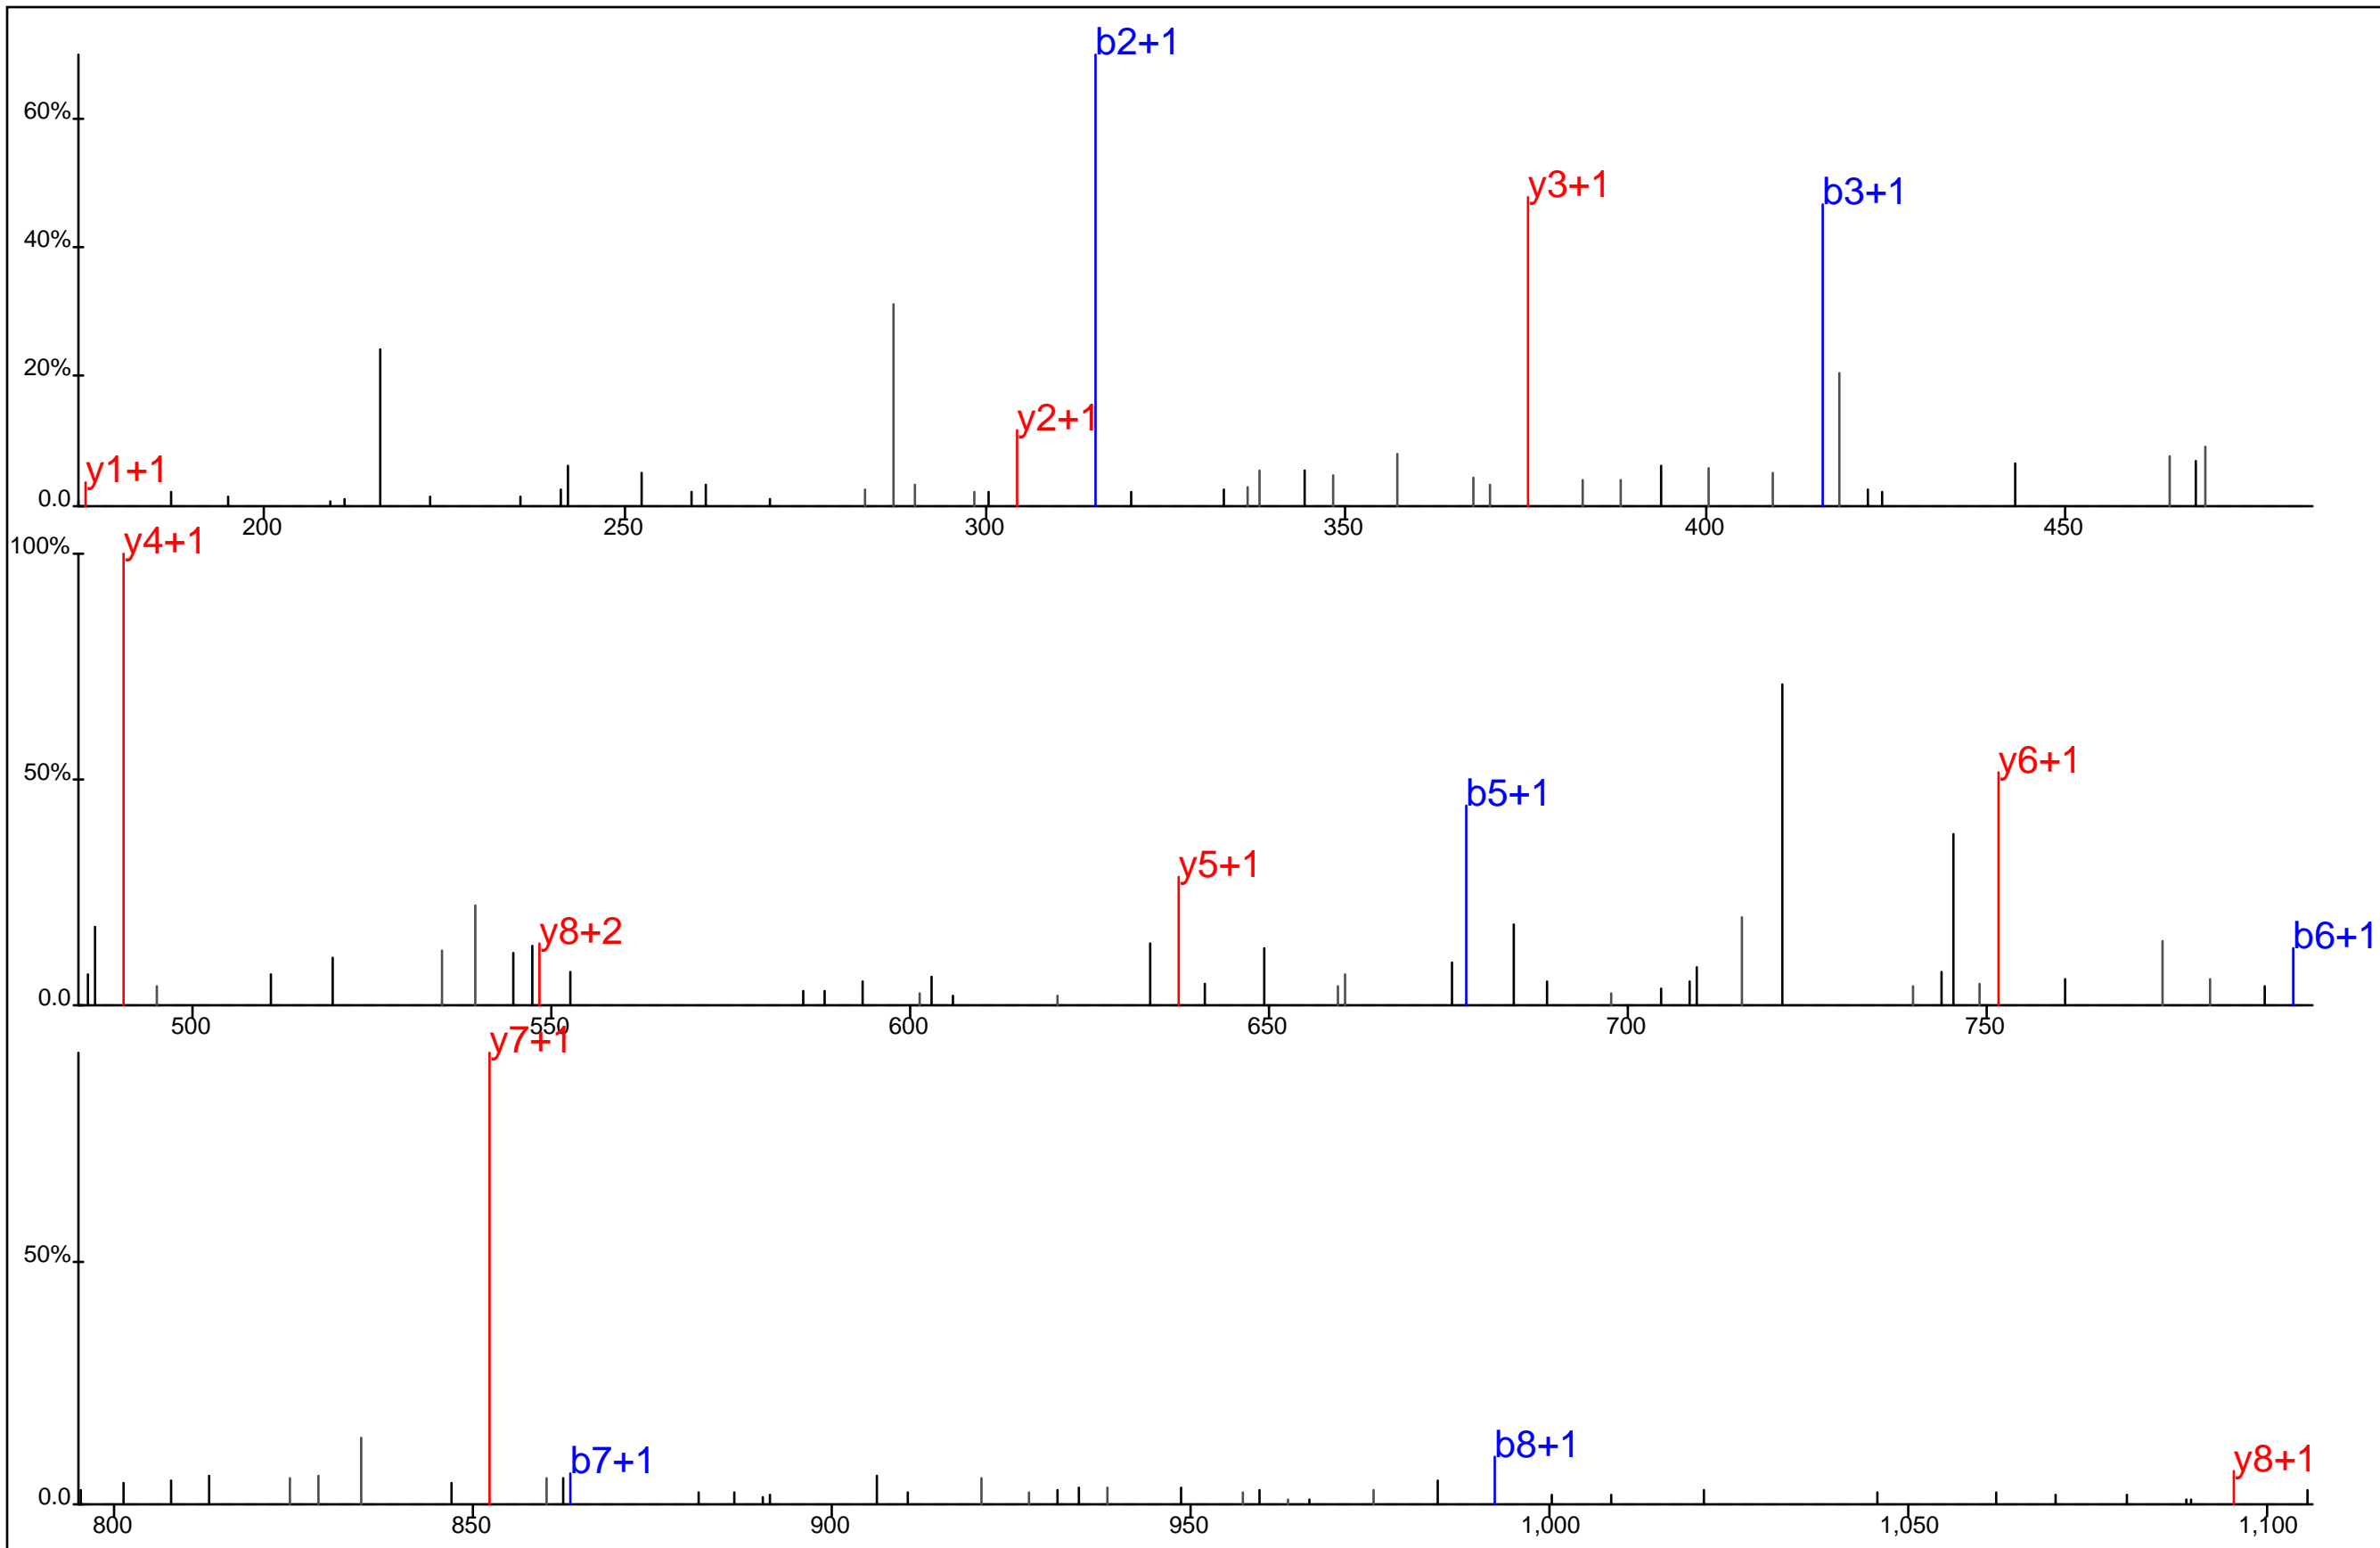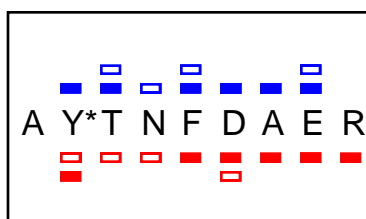

Protein Name: Annexin II  
 gi Accession: 0  
 Precursor Mass: 583.7311+2  
 Delta Mass: 3.114 ppm  
 XCorr: 49.8

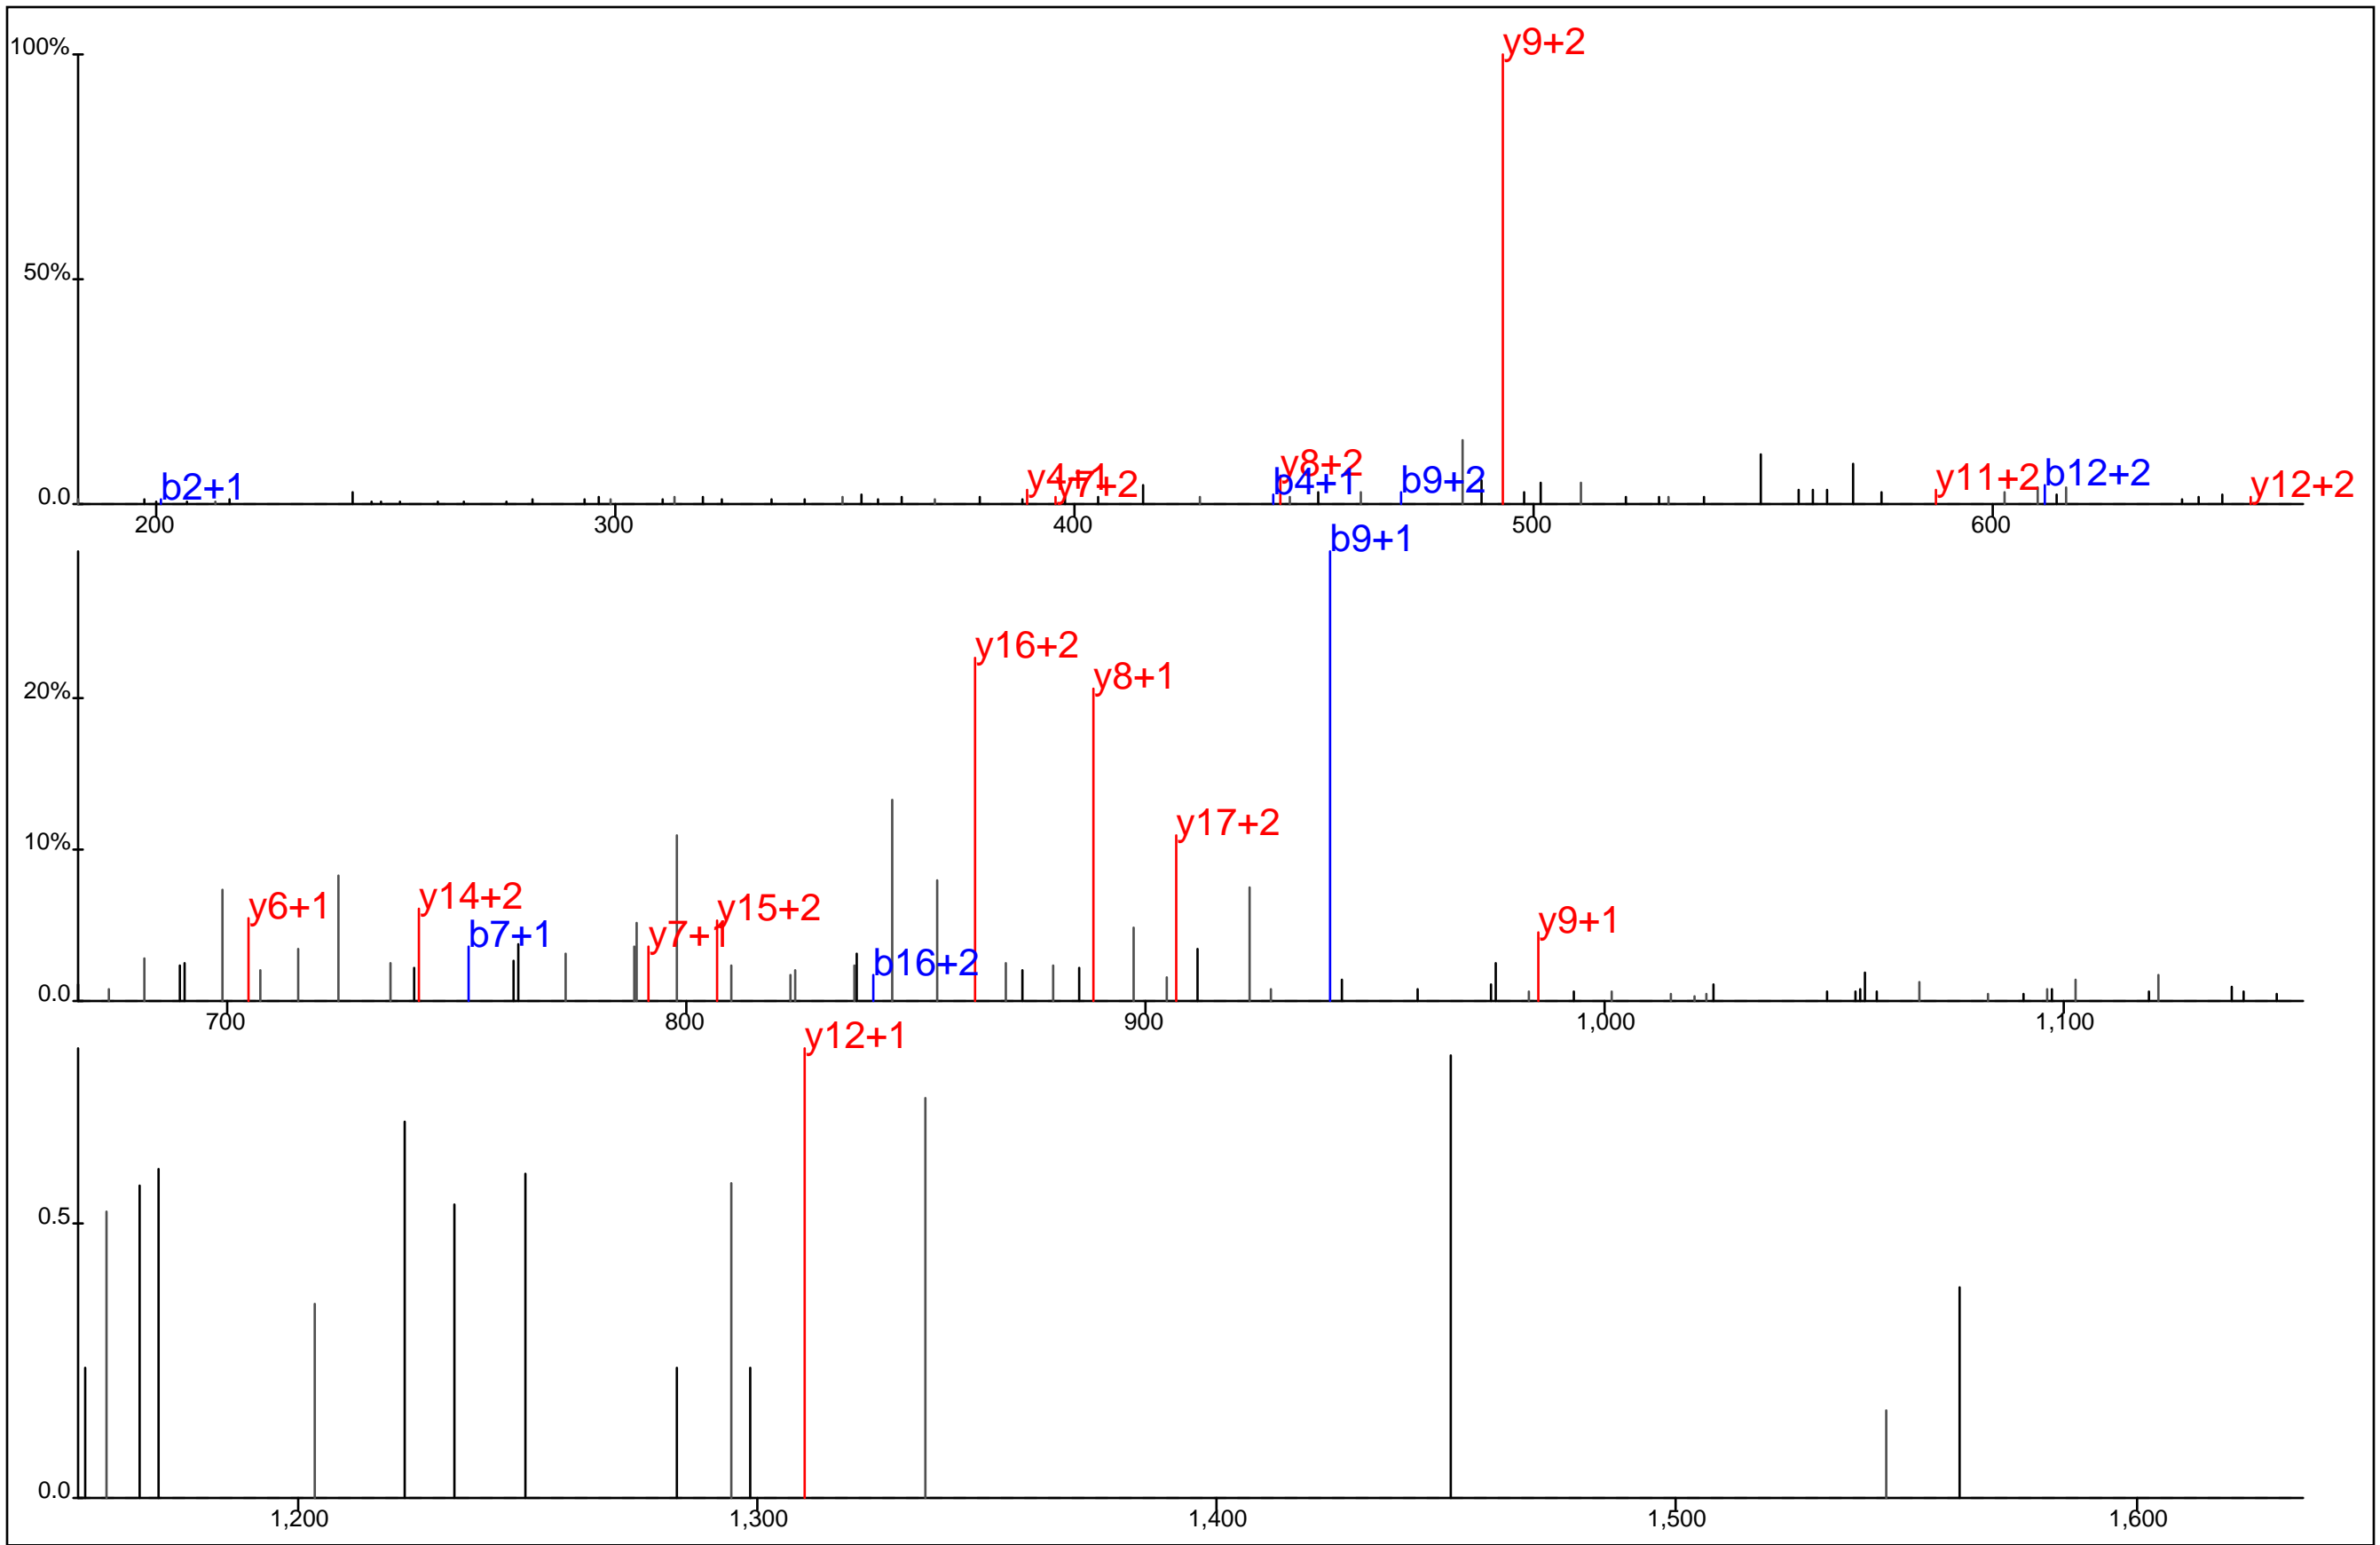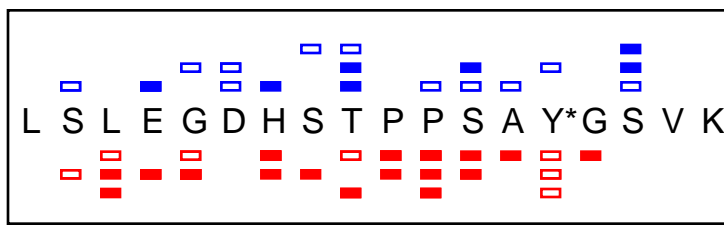

Protein Name: Annexin II  
 gi Accession: 0  
 Precursor Mass: 642.2980+3  
 Delta Mass: 5.585 ppm  
 XCorr: 26.05

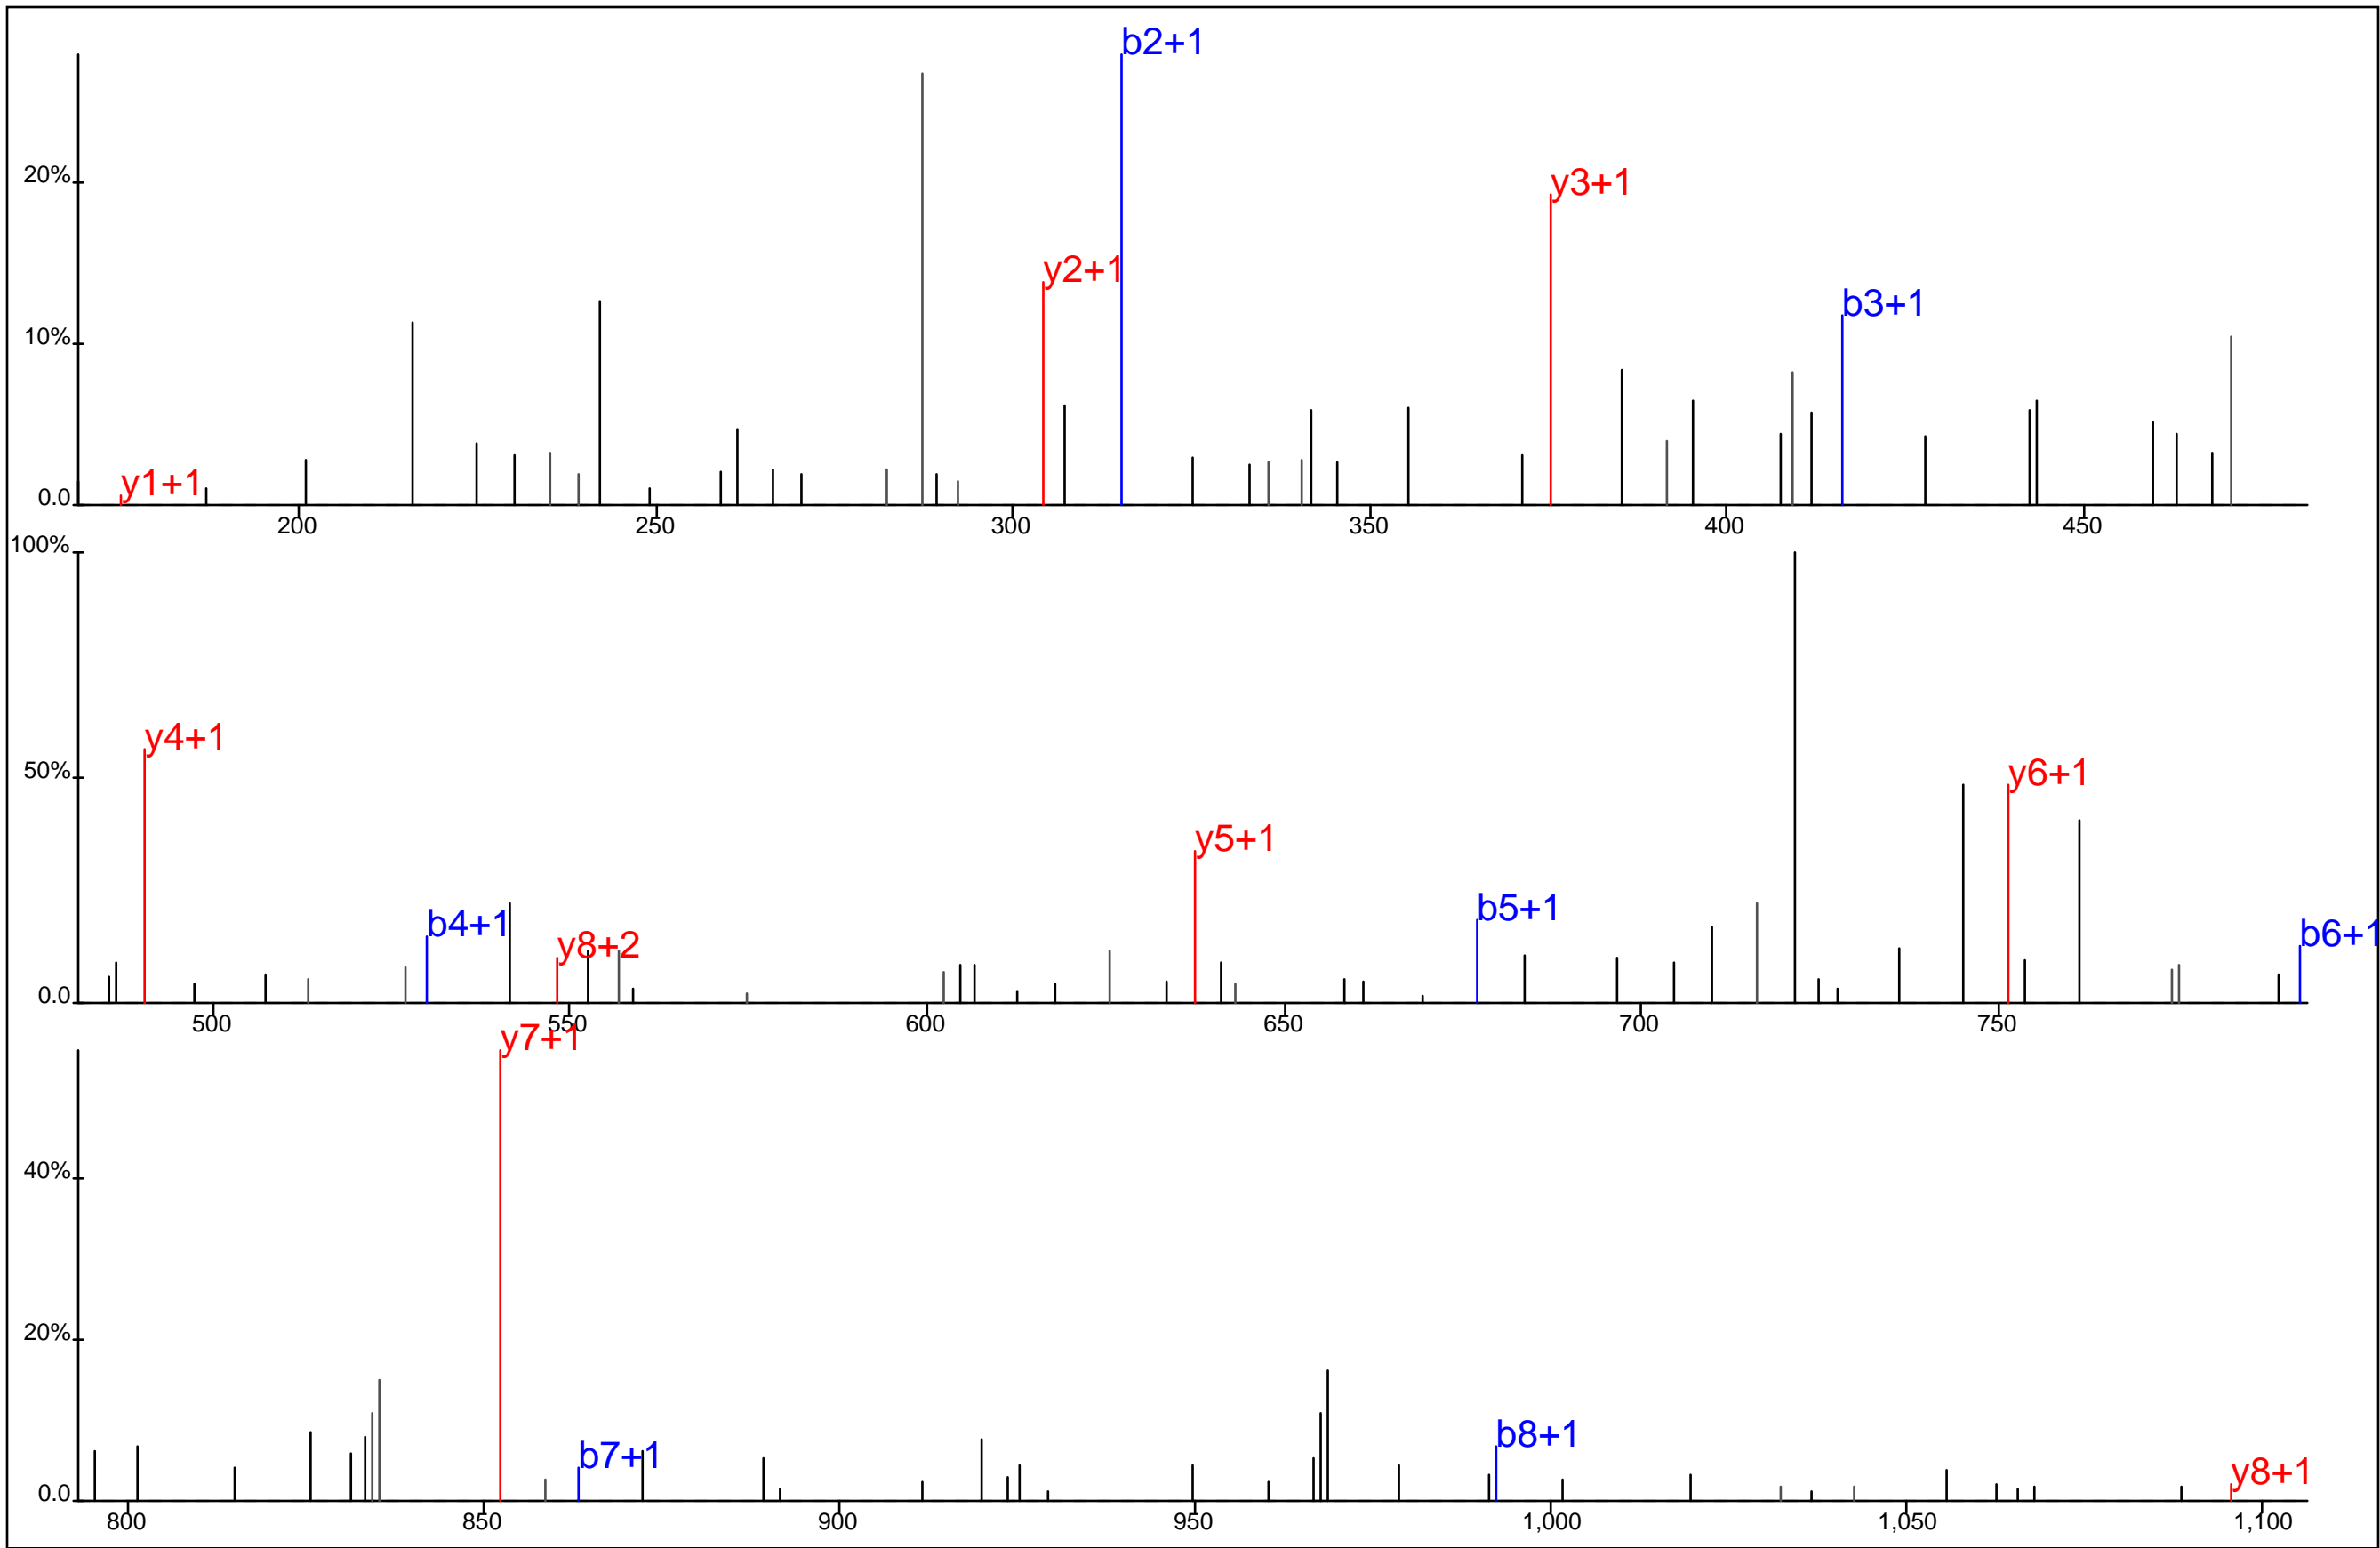

■ ▢ ▢ ▢ ▢ ▢ ▢ ▢  
 A Y \* T N F D A E R  
▢ ▢ ▢ ▢ ▢ ▢ ▢ ▢

Protein Name: Annexin II  
 gi Accession: 0  
 Precursor Mass: 583.7314+2  
 Delta Mass: 3.637 ppm  
 XCorr: 37.46

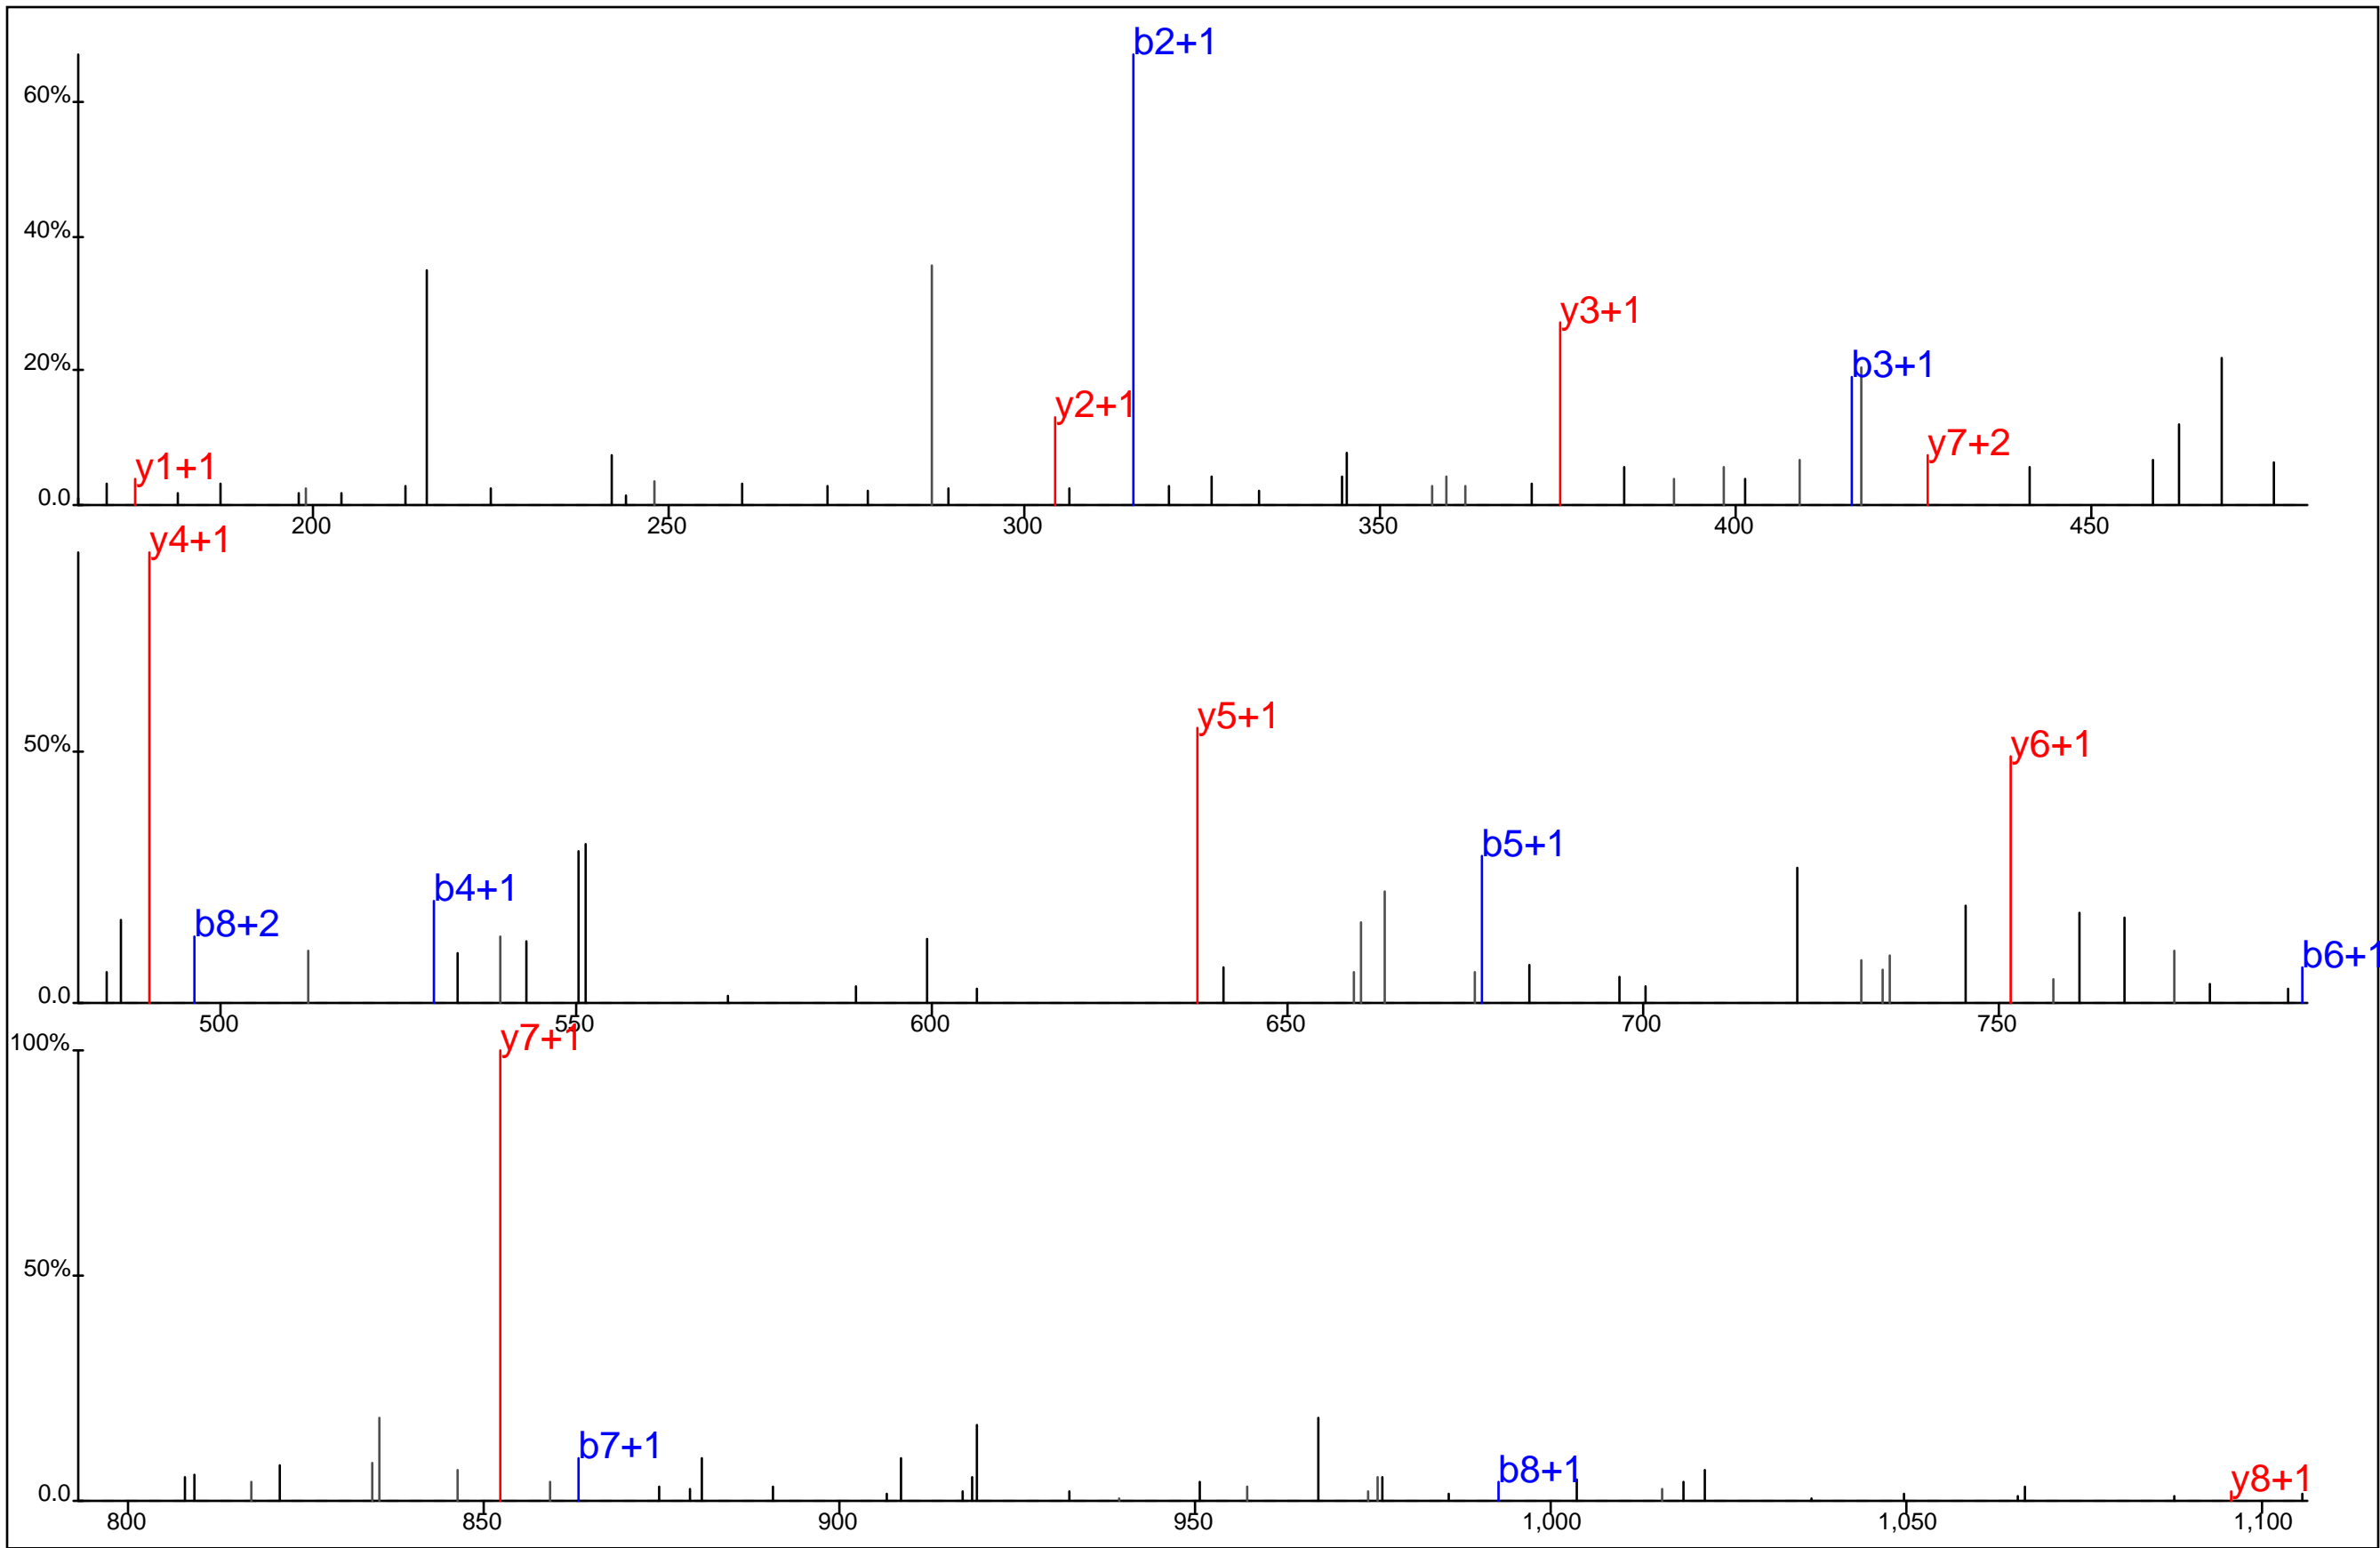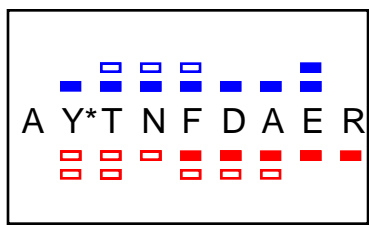

Protein Name: Annexin II  
 gi Accession: 0  
 Precursor Mass: 583.7281+2  
 Delta Mass: 2.015 ppm  
 XCorr: 50.92

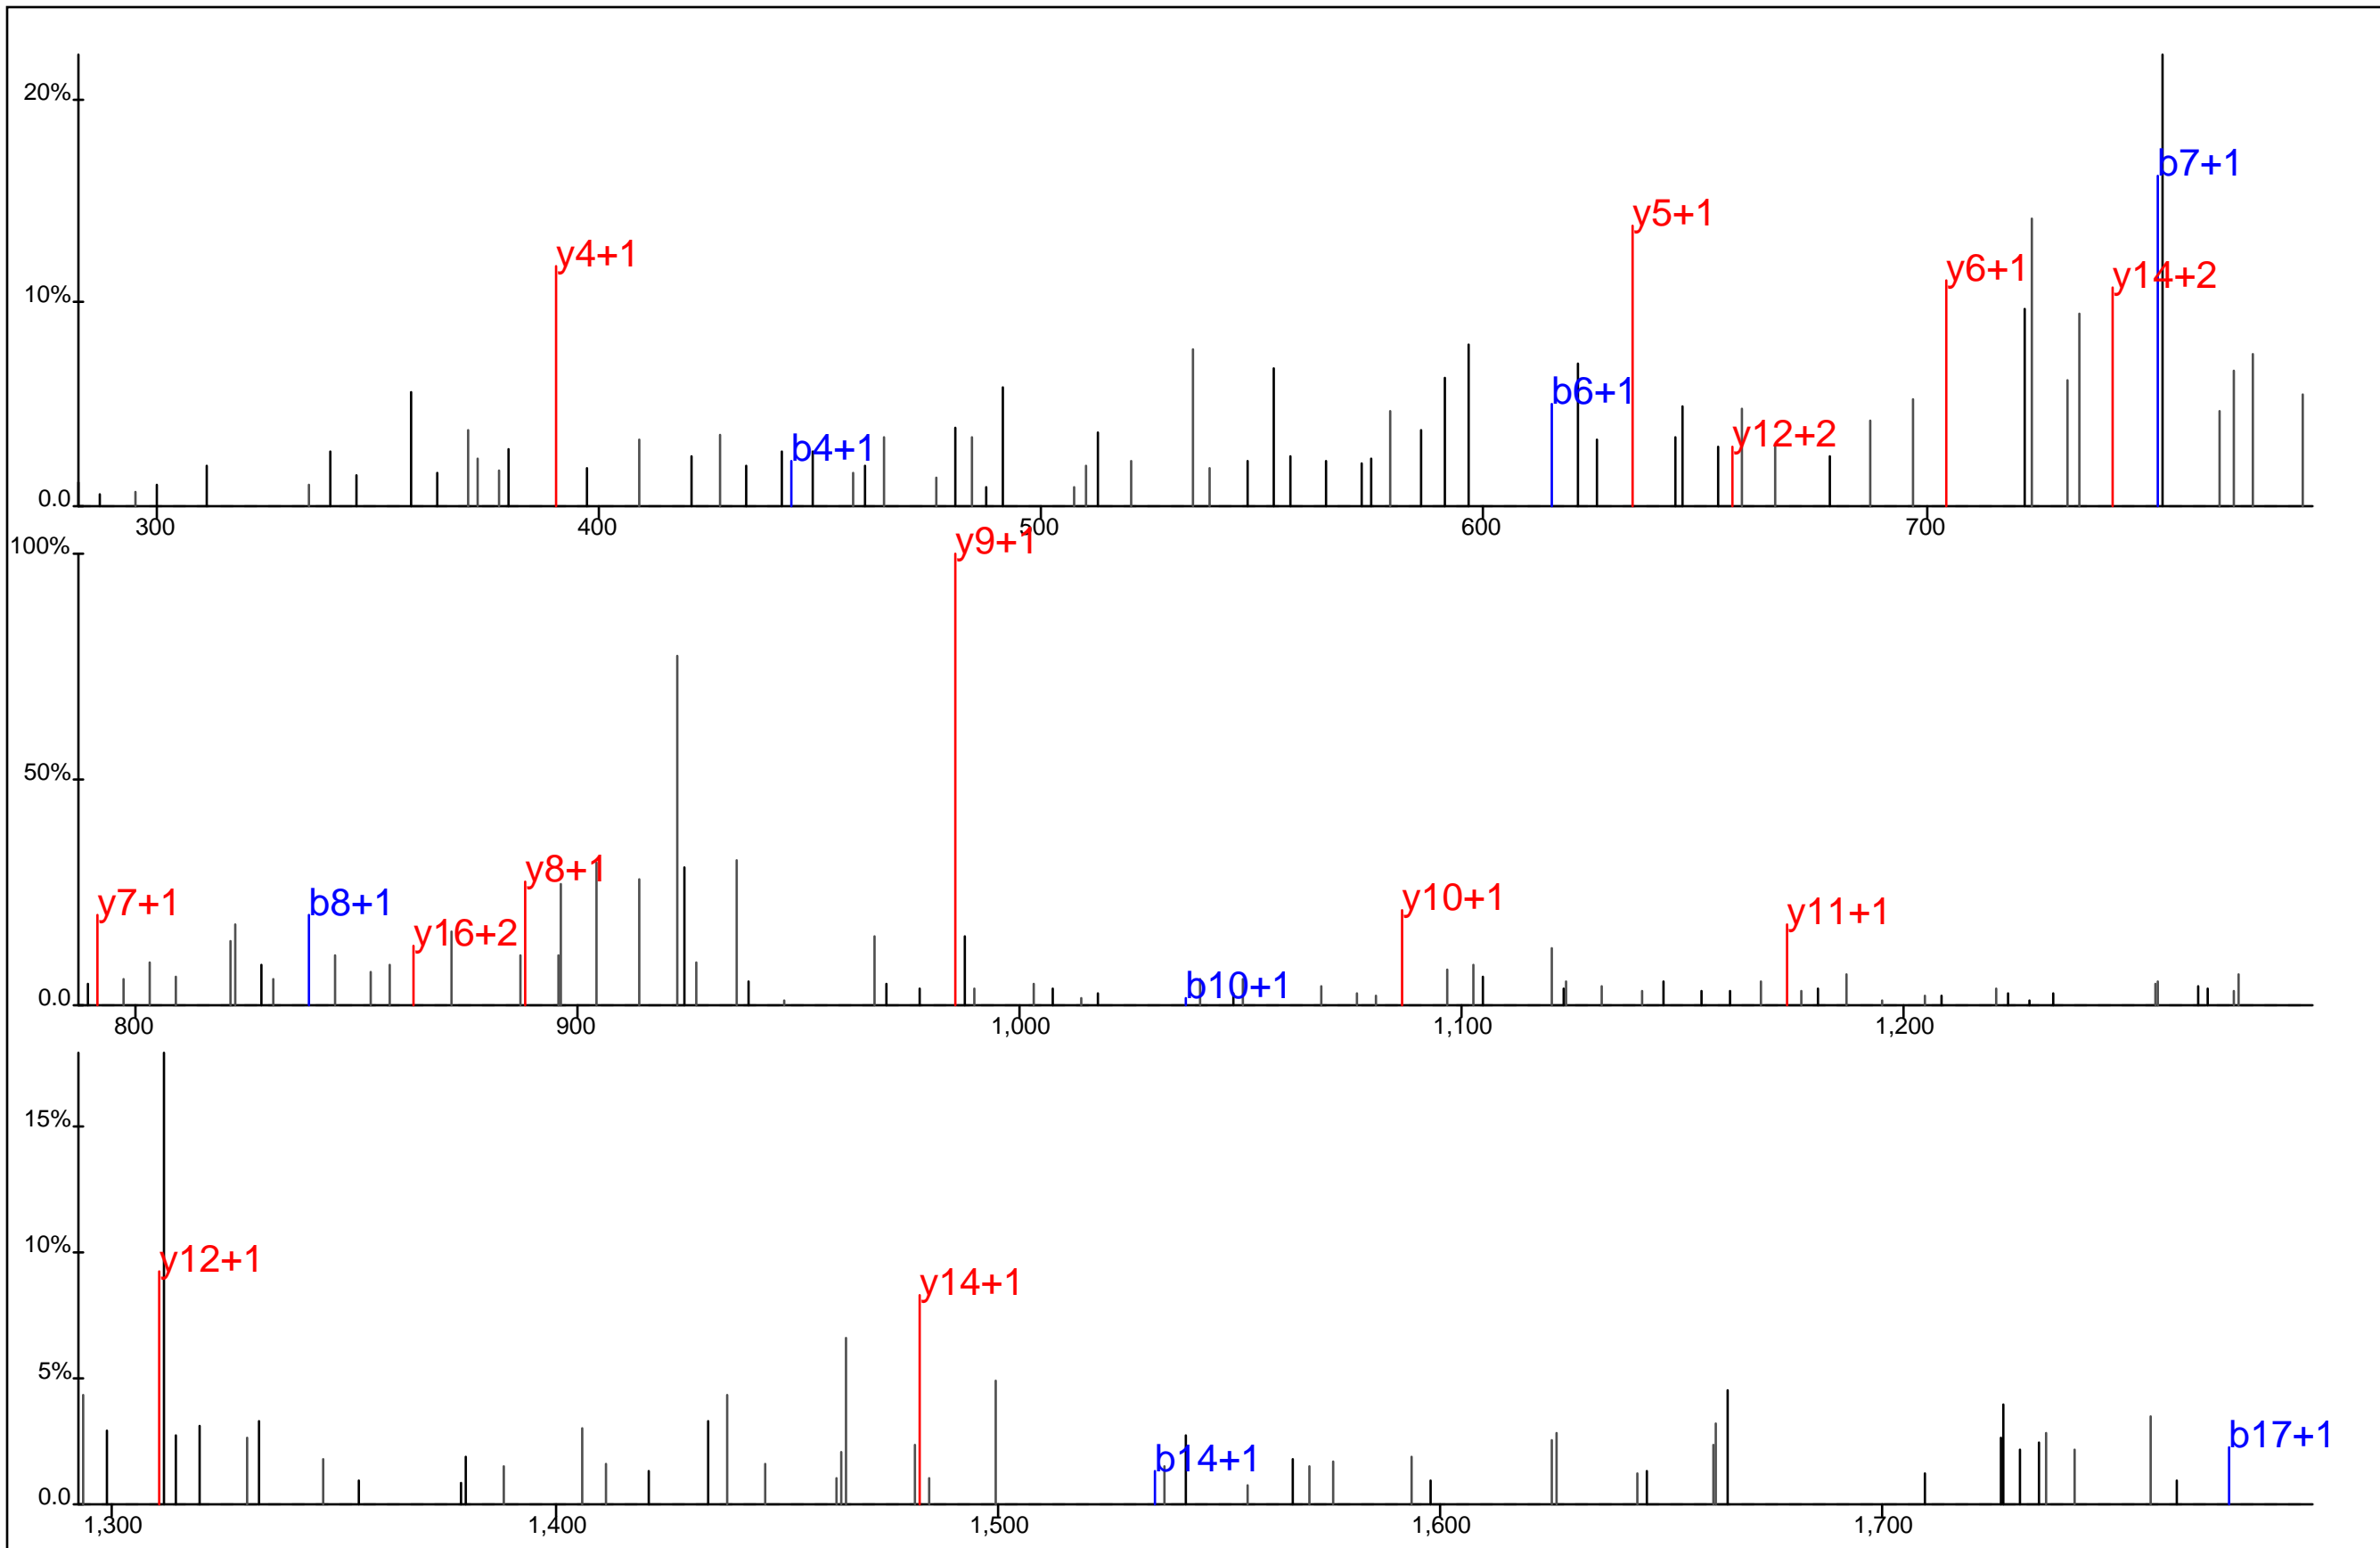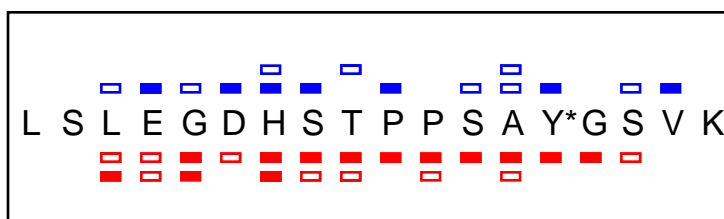

Protein Name: Annexin II  
 gi Accession: 0  
 Precursor Mass: 962.9391+2  
 Delta Mass: 1.152 ppm  
 XCorr: 35.53



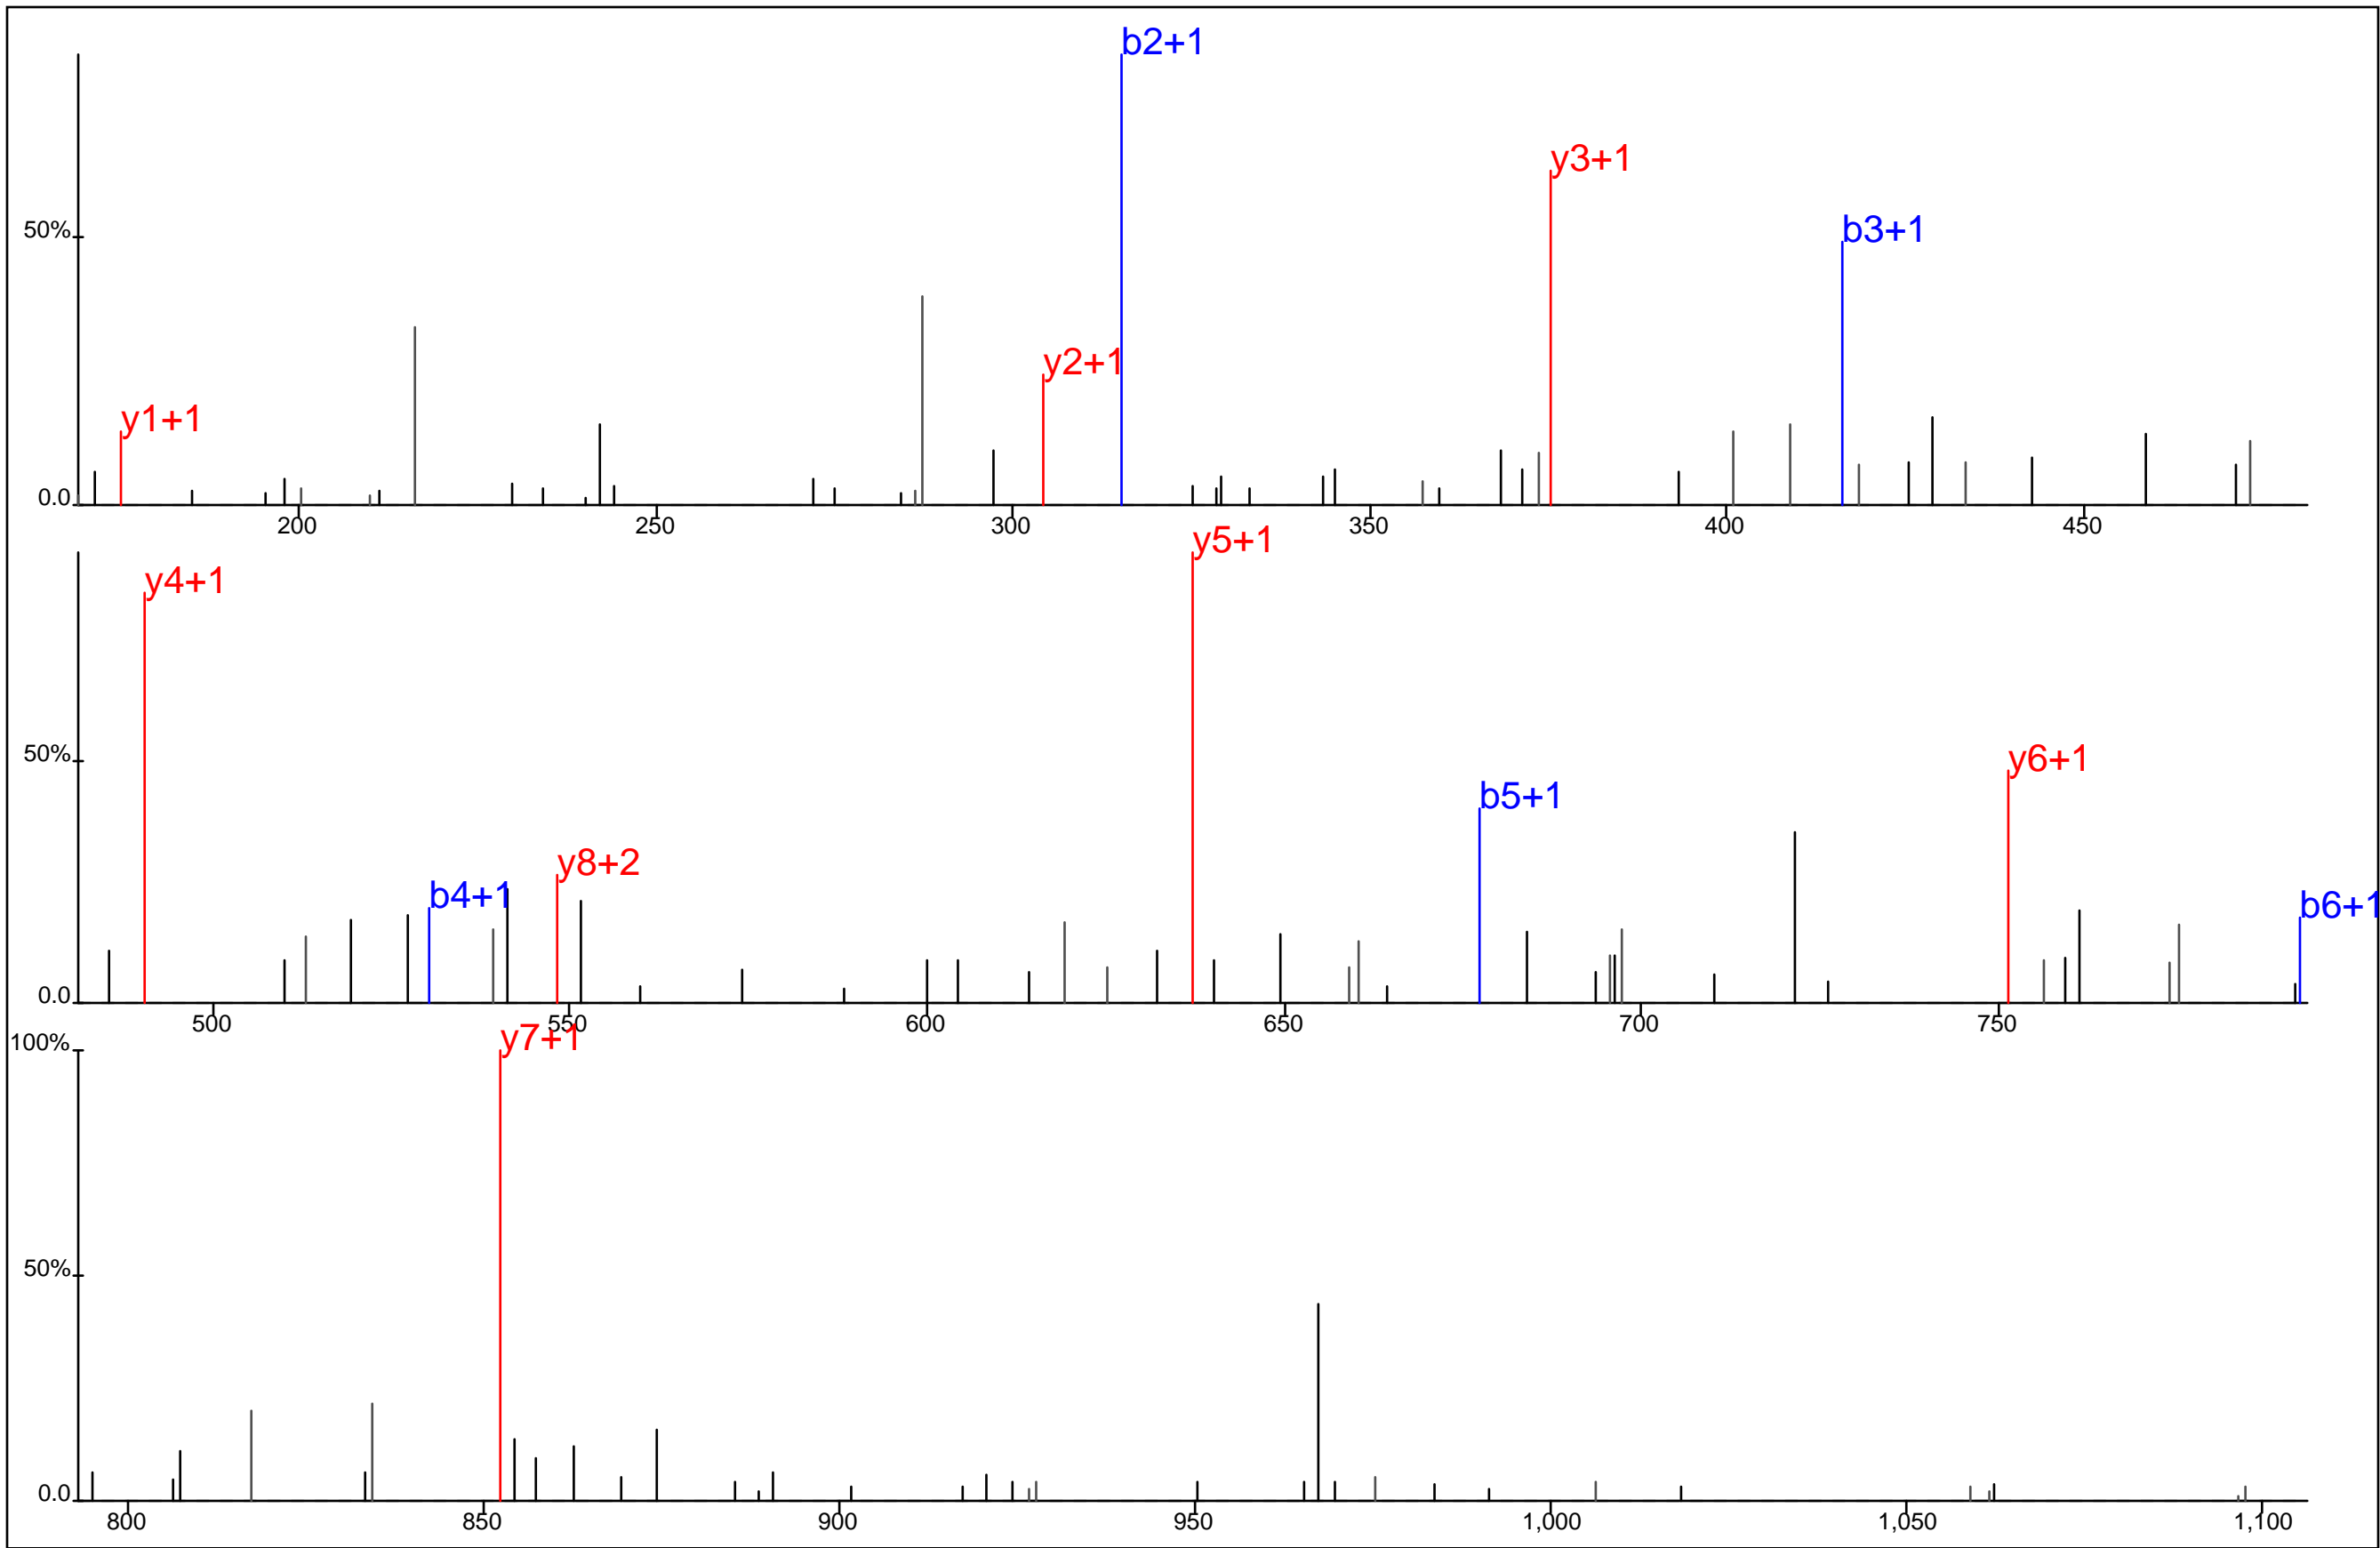

■ ■ ■ ■ ■ ■ ■ ■  
 A Y \* T N F D A E R  
■ ■ ■ ■ ■ ■ ■ ■

Protein Name: Annexin II  
 gi Accession: 0  
 Precursor Mass: 583.7298+2  
 Delta Mass: 0.811 ppm  
 XCorr: 39.05

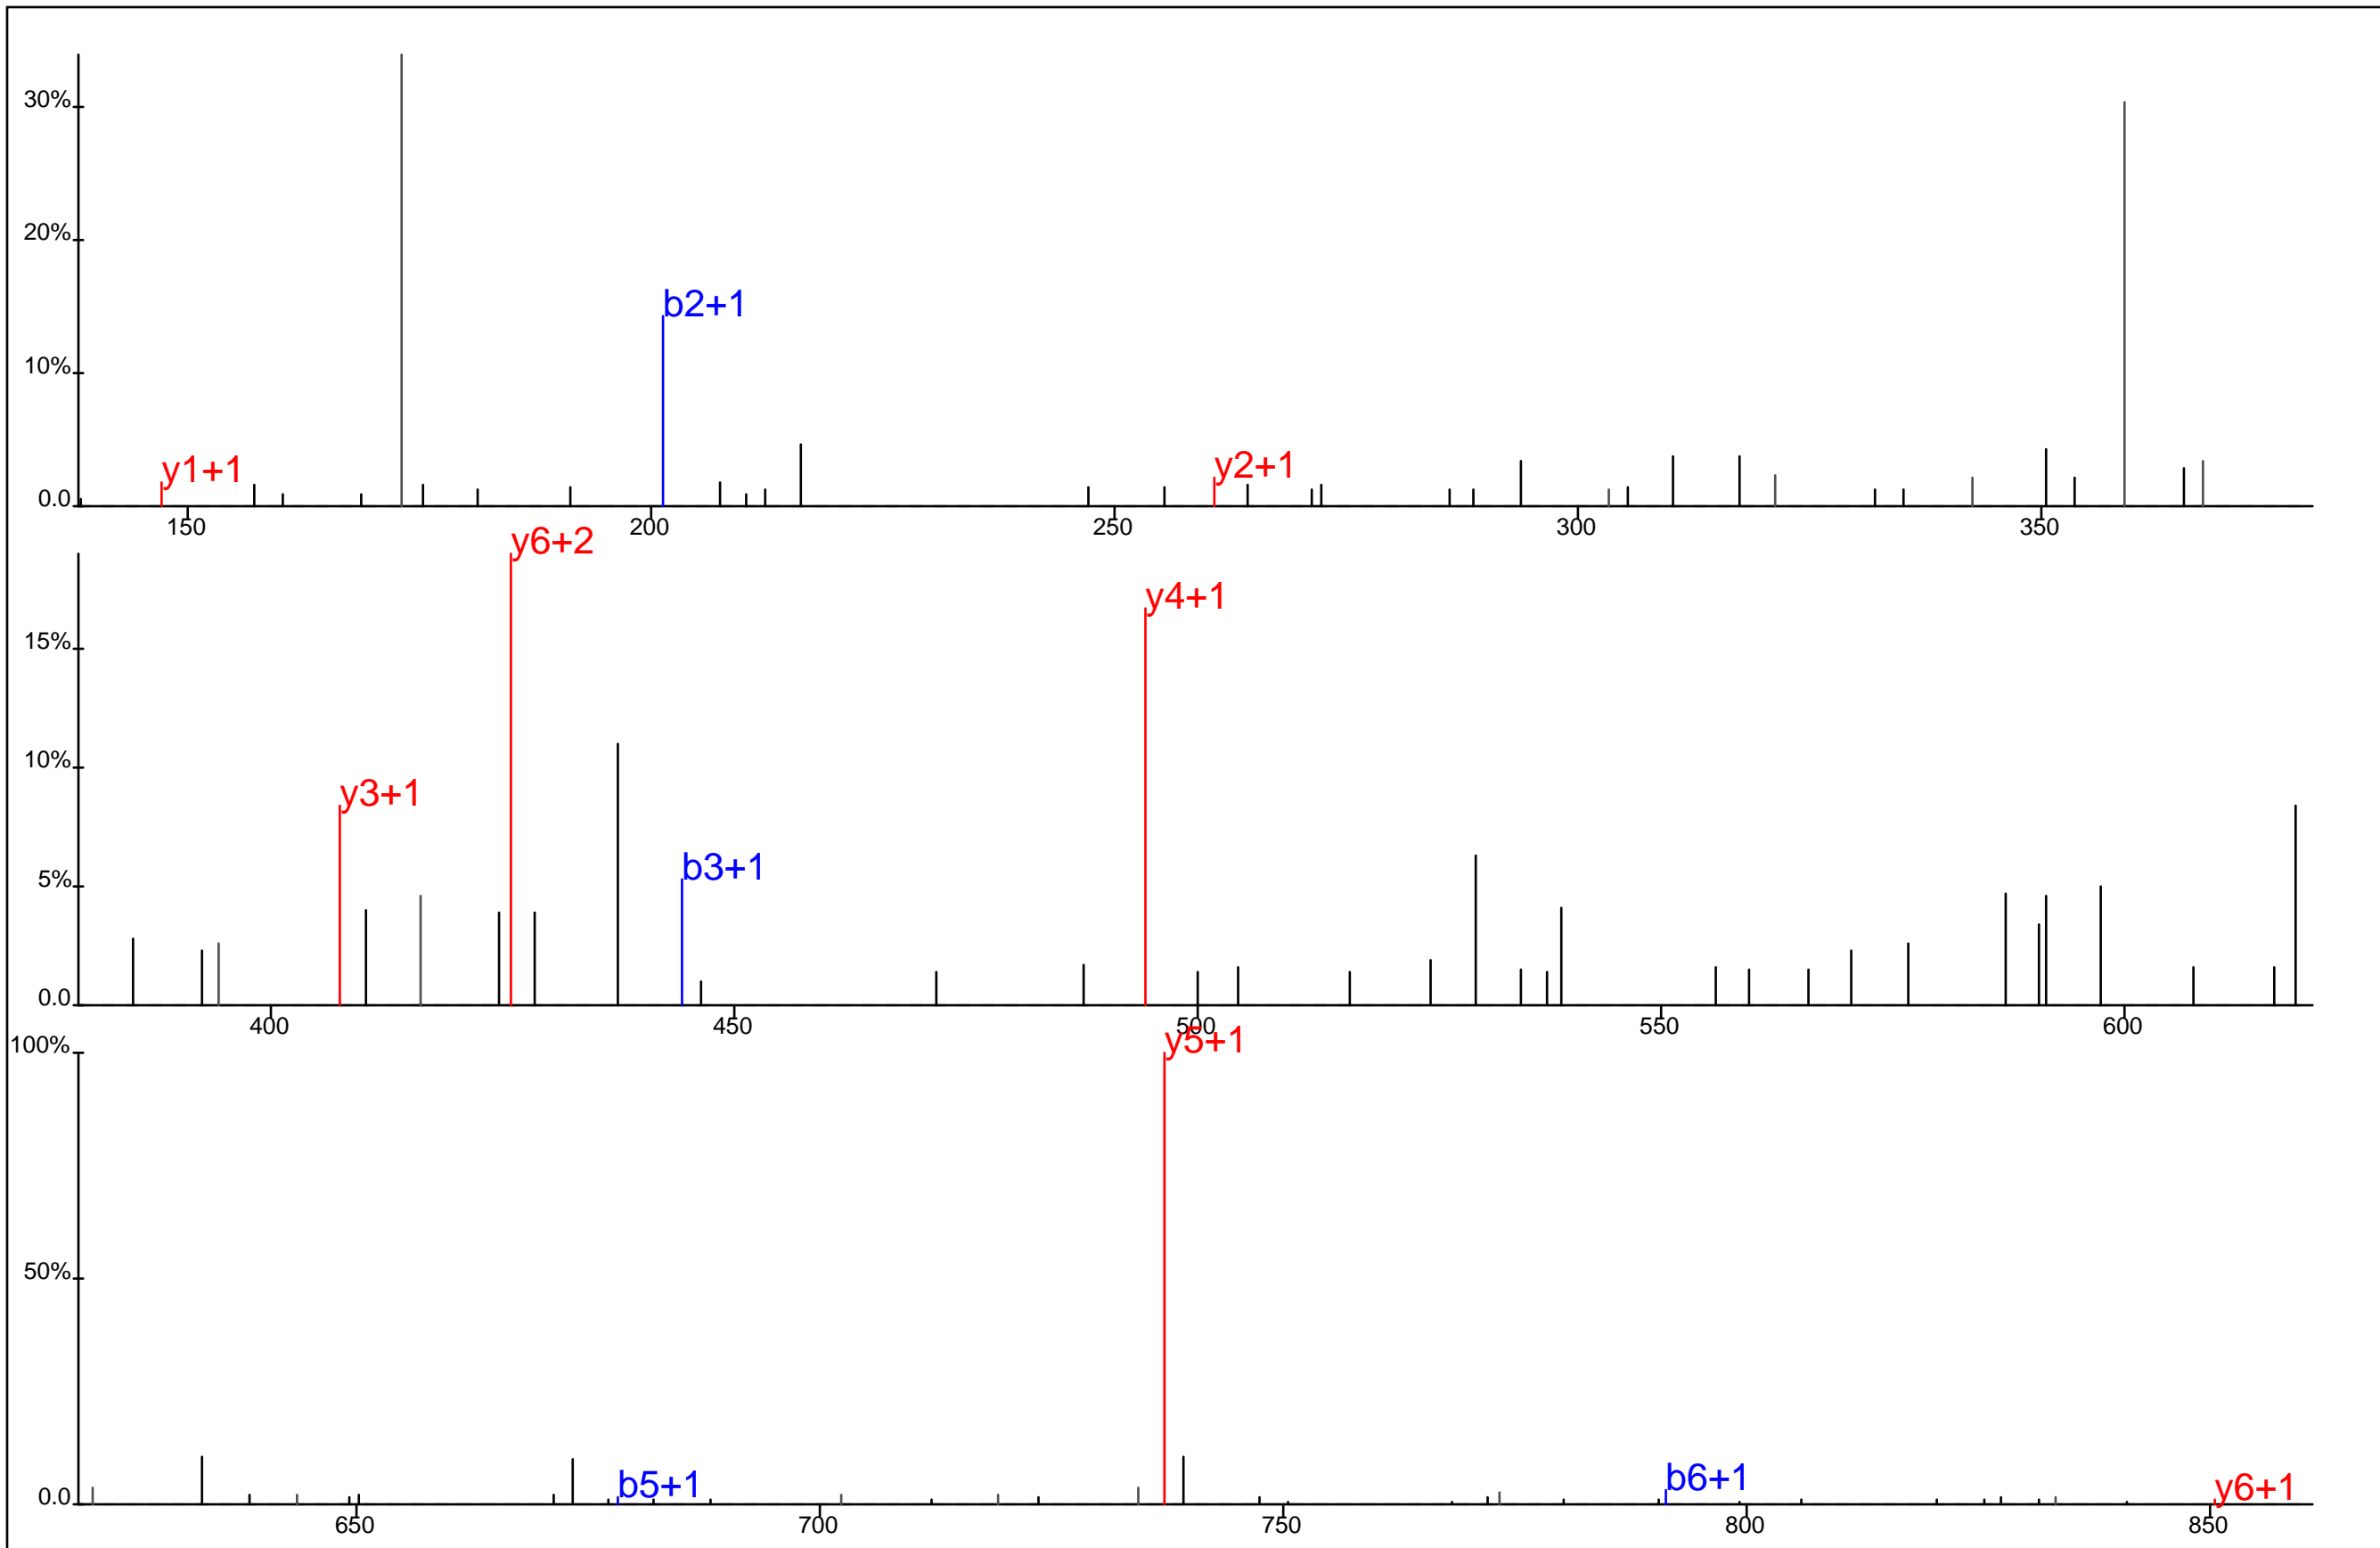

**S** **L** **Y\*** **S** **M**# **K**

Protein Name: Annexin VI  
 gi Accession: 0  
 Precursor Mass: 469.2084+2  
 Delta Mass: 0.576 ppm  
 XCorr: 27.88

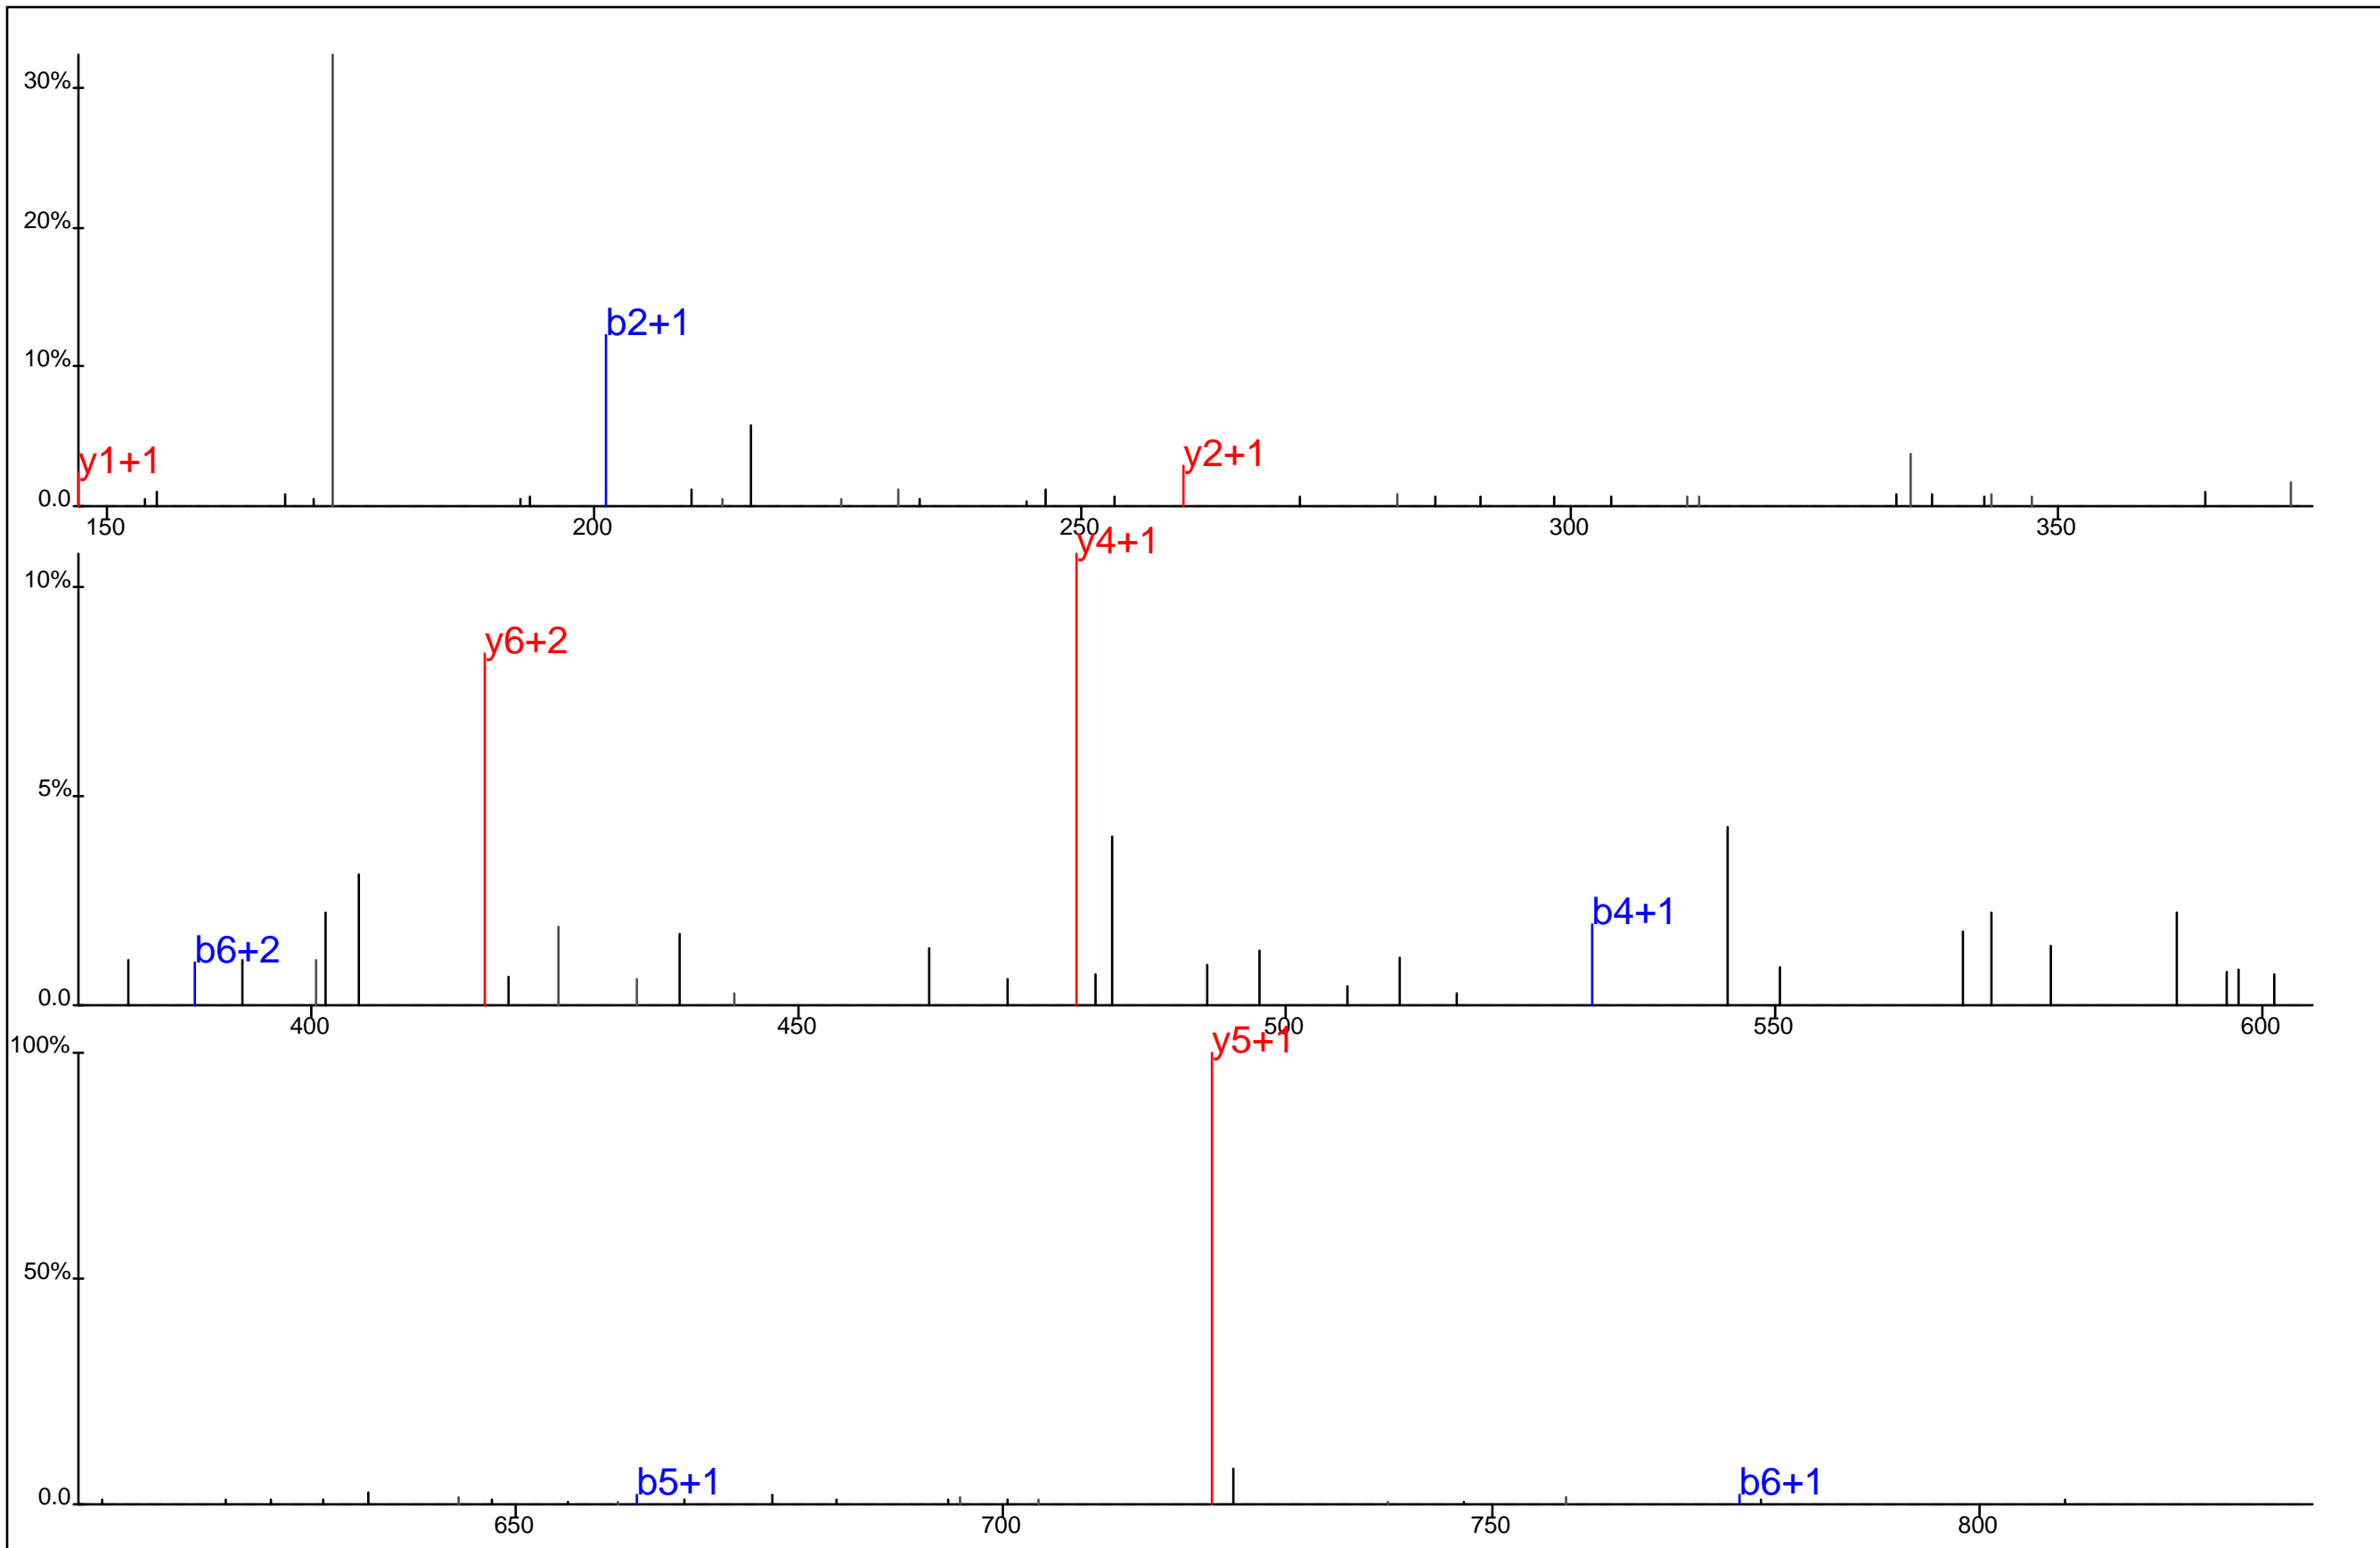

**S L Y\* S M I K**

Protein Name: Annexin VI  
 gi Accession: 0  
 Precursor Mass: 461.2114+2  
 Delta Mass: 0.514 ppm  
 XCorr: 22.26

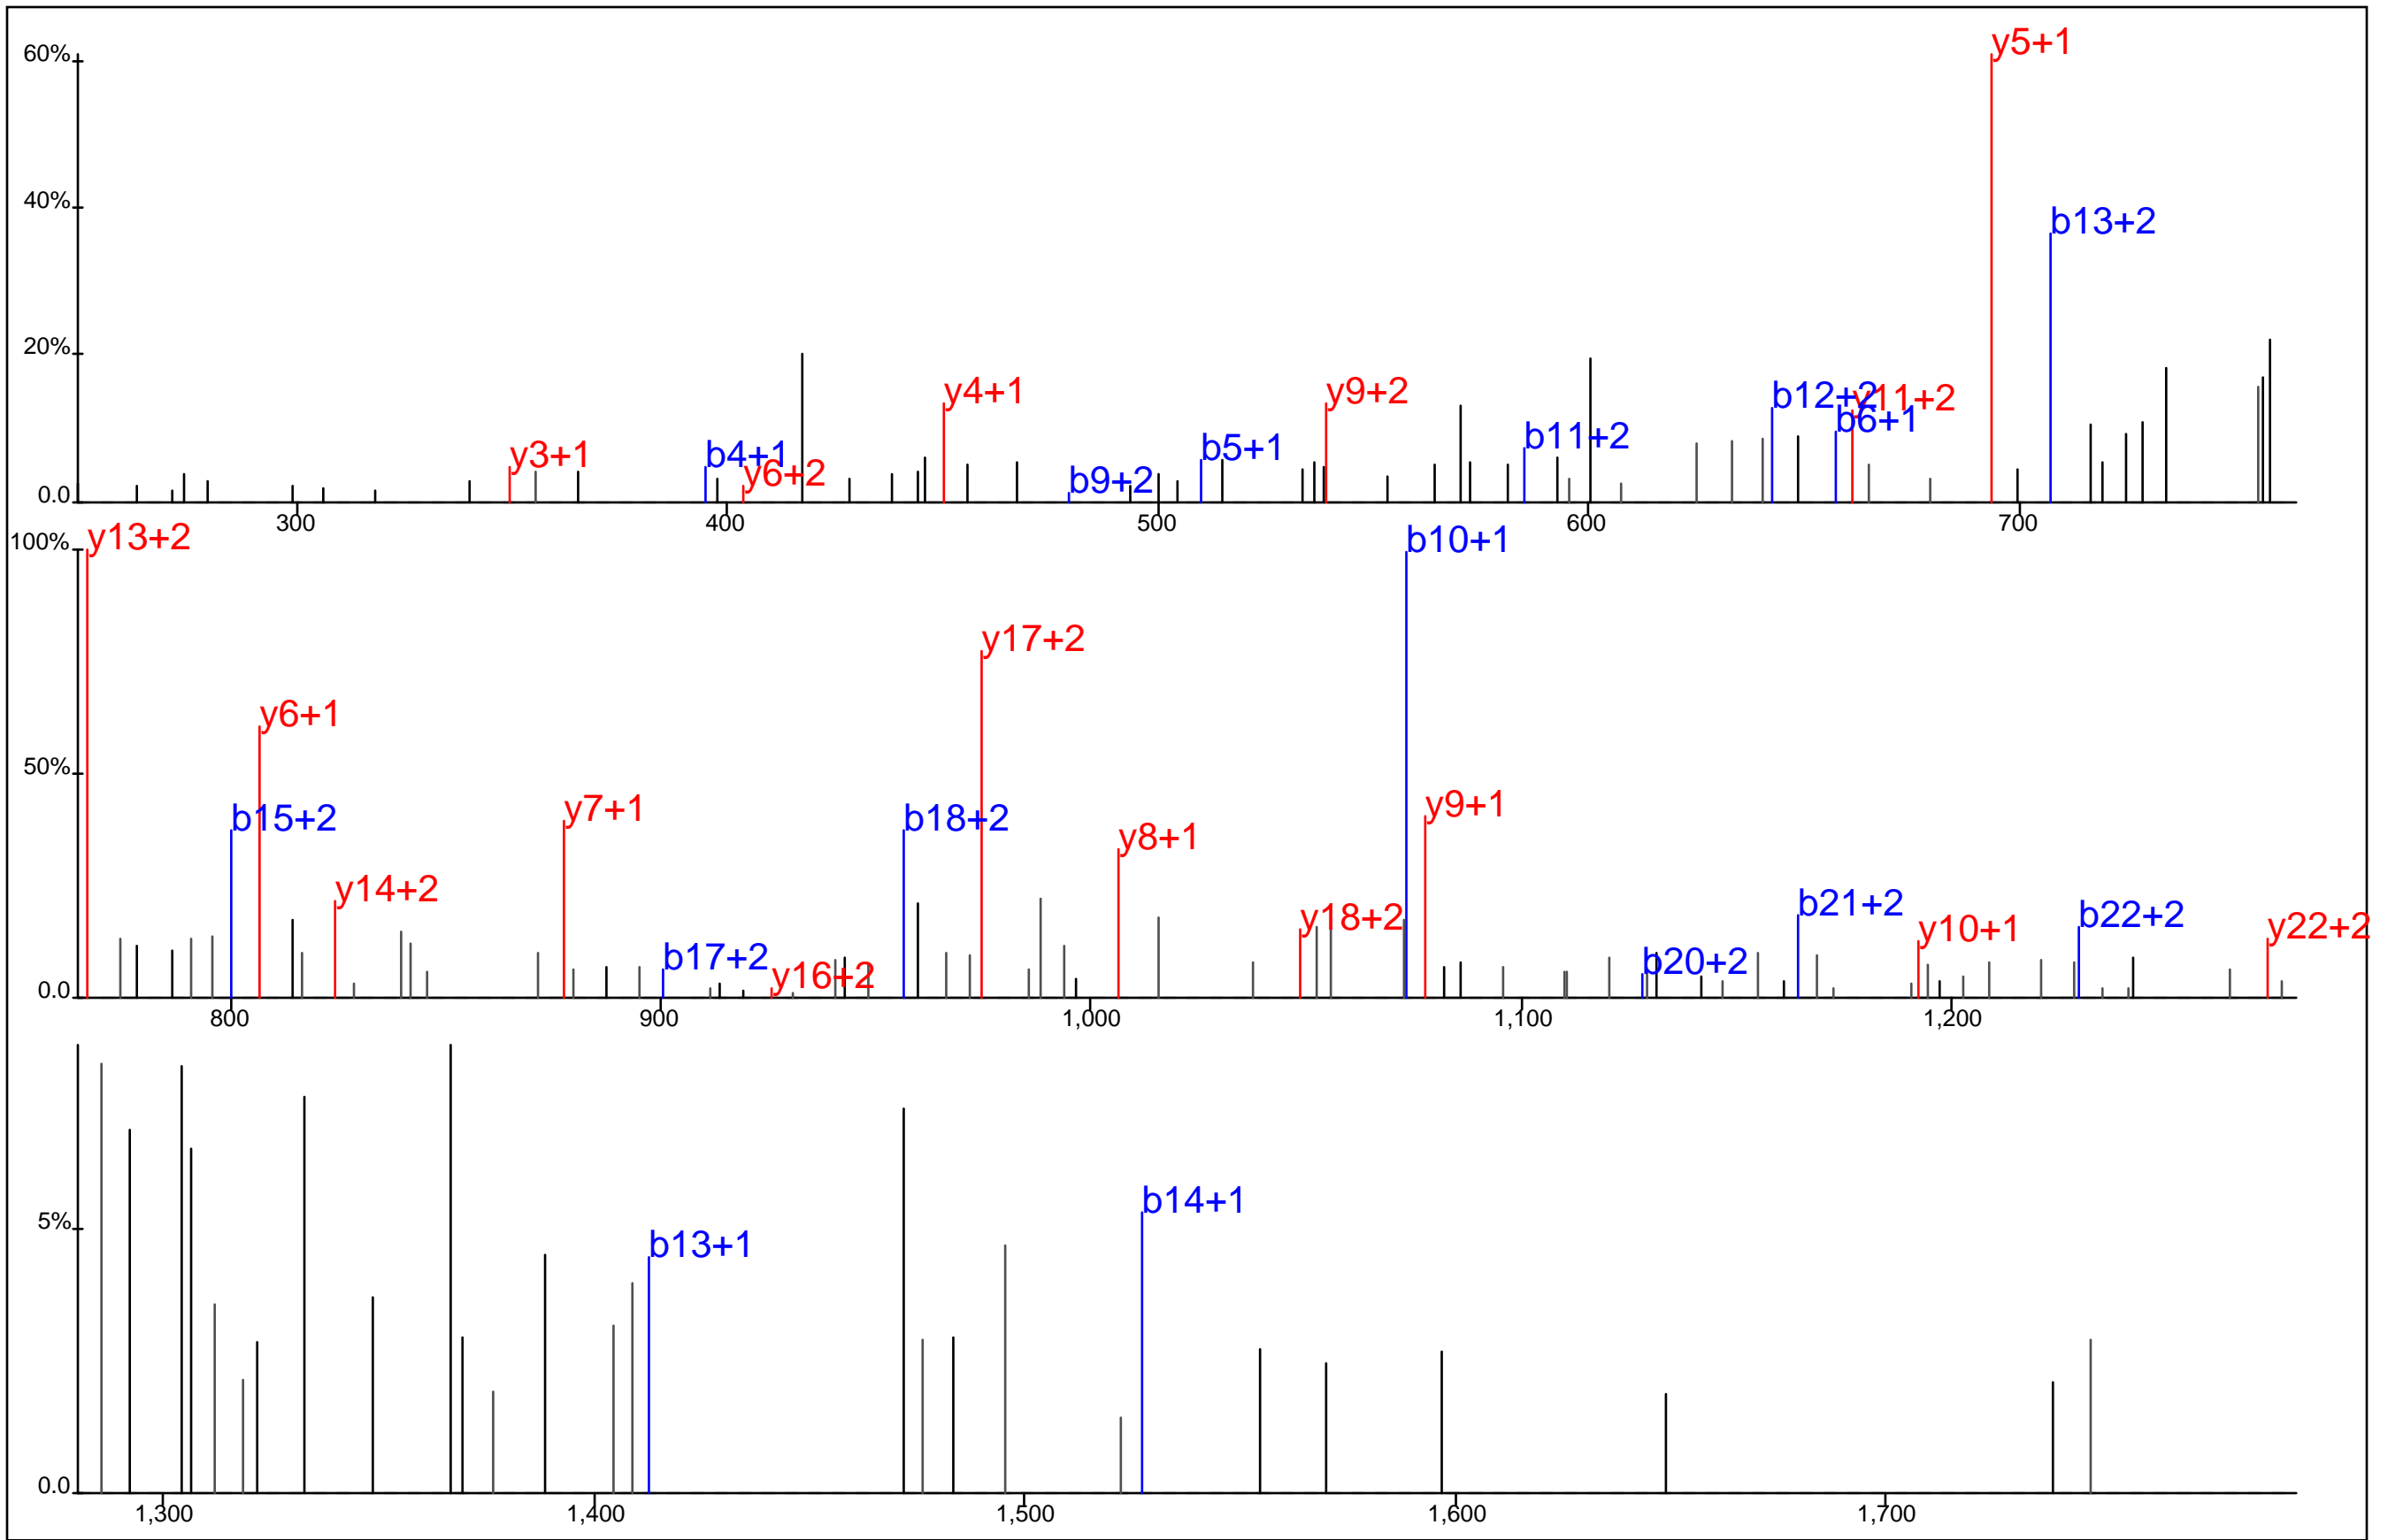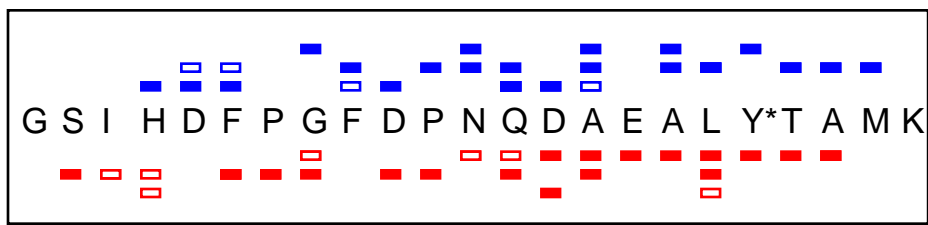

Protein Name: Annexin VI  
 gi Accession: 0  
 Precursor Mass: 868.7073+3  
 Delta Mass: 1.520 ppm  
 XCorr: 37.11

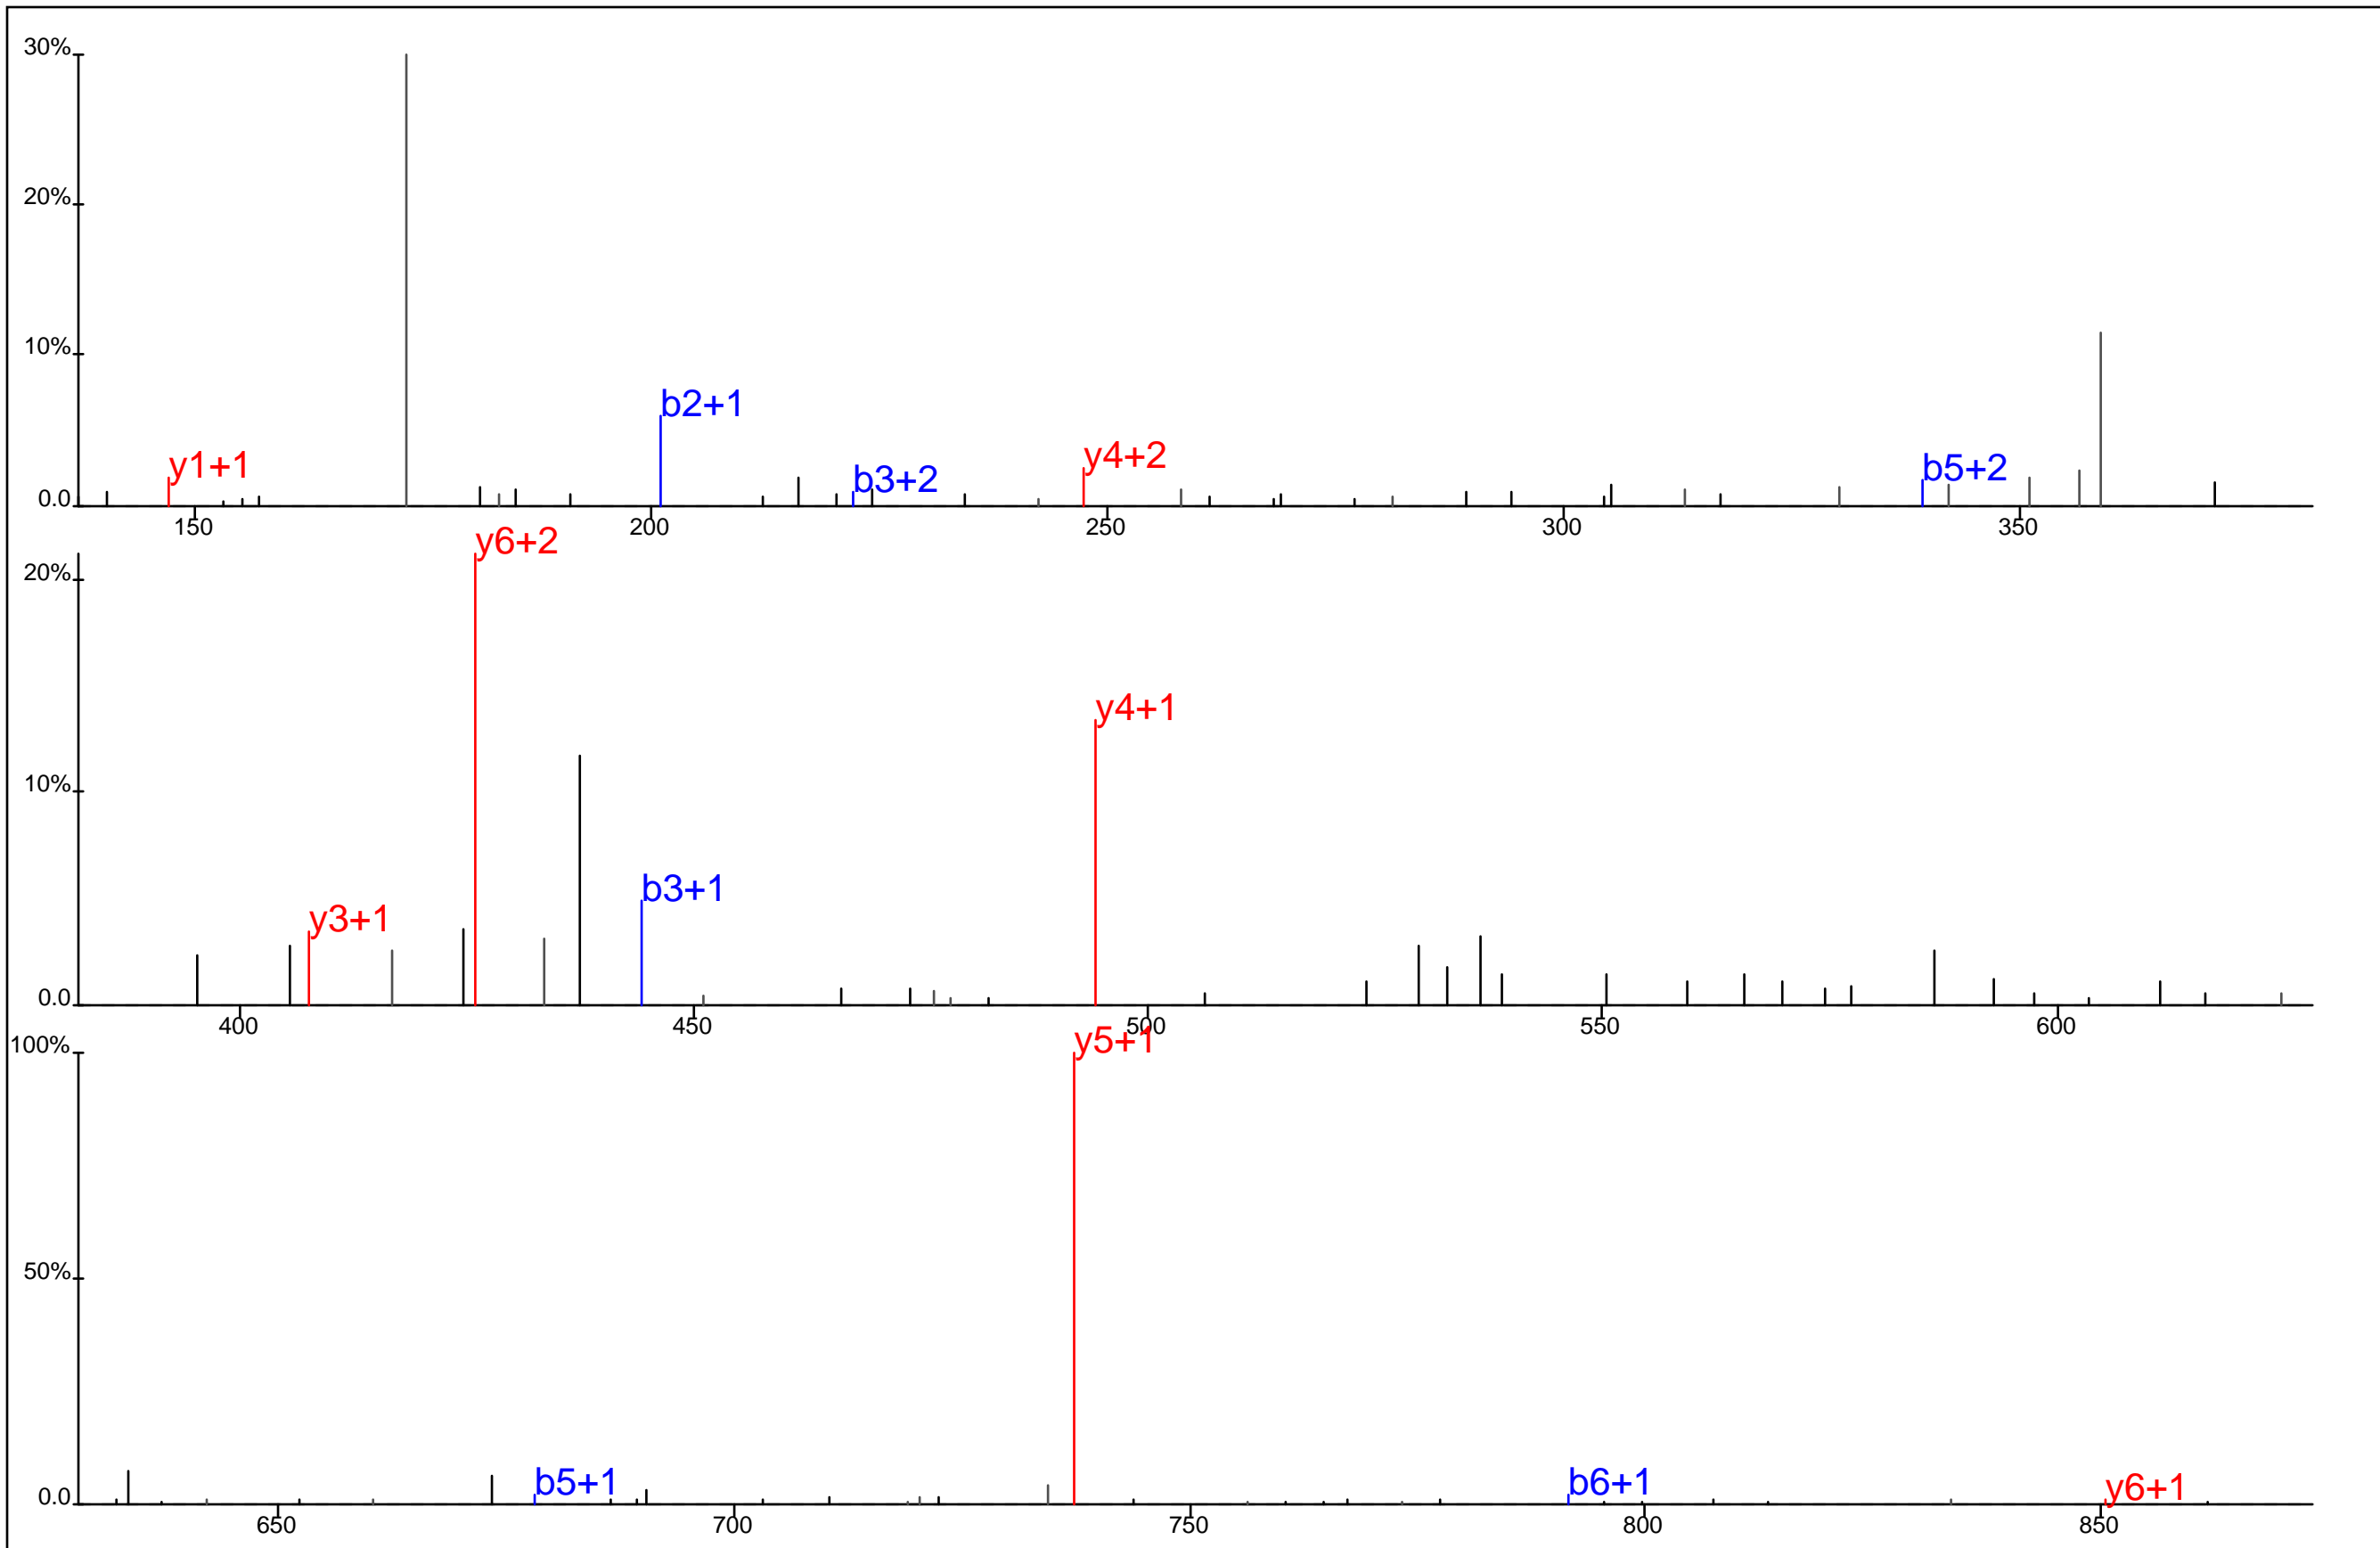

S L Y\* S M# K

Protein Name: Annexin VI  
 gi Accession: 0  
 Precursor Mass: 469.2089+2  
 Delta Mass: 0.595 ppm  
 XCorr: 25.94

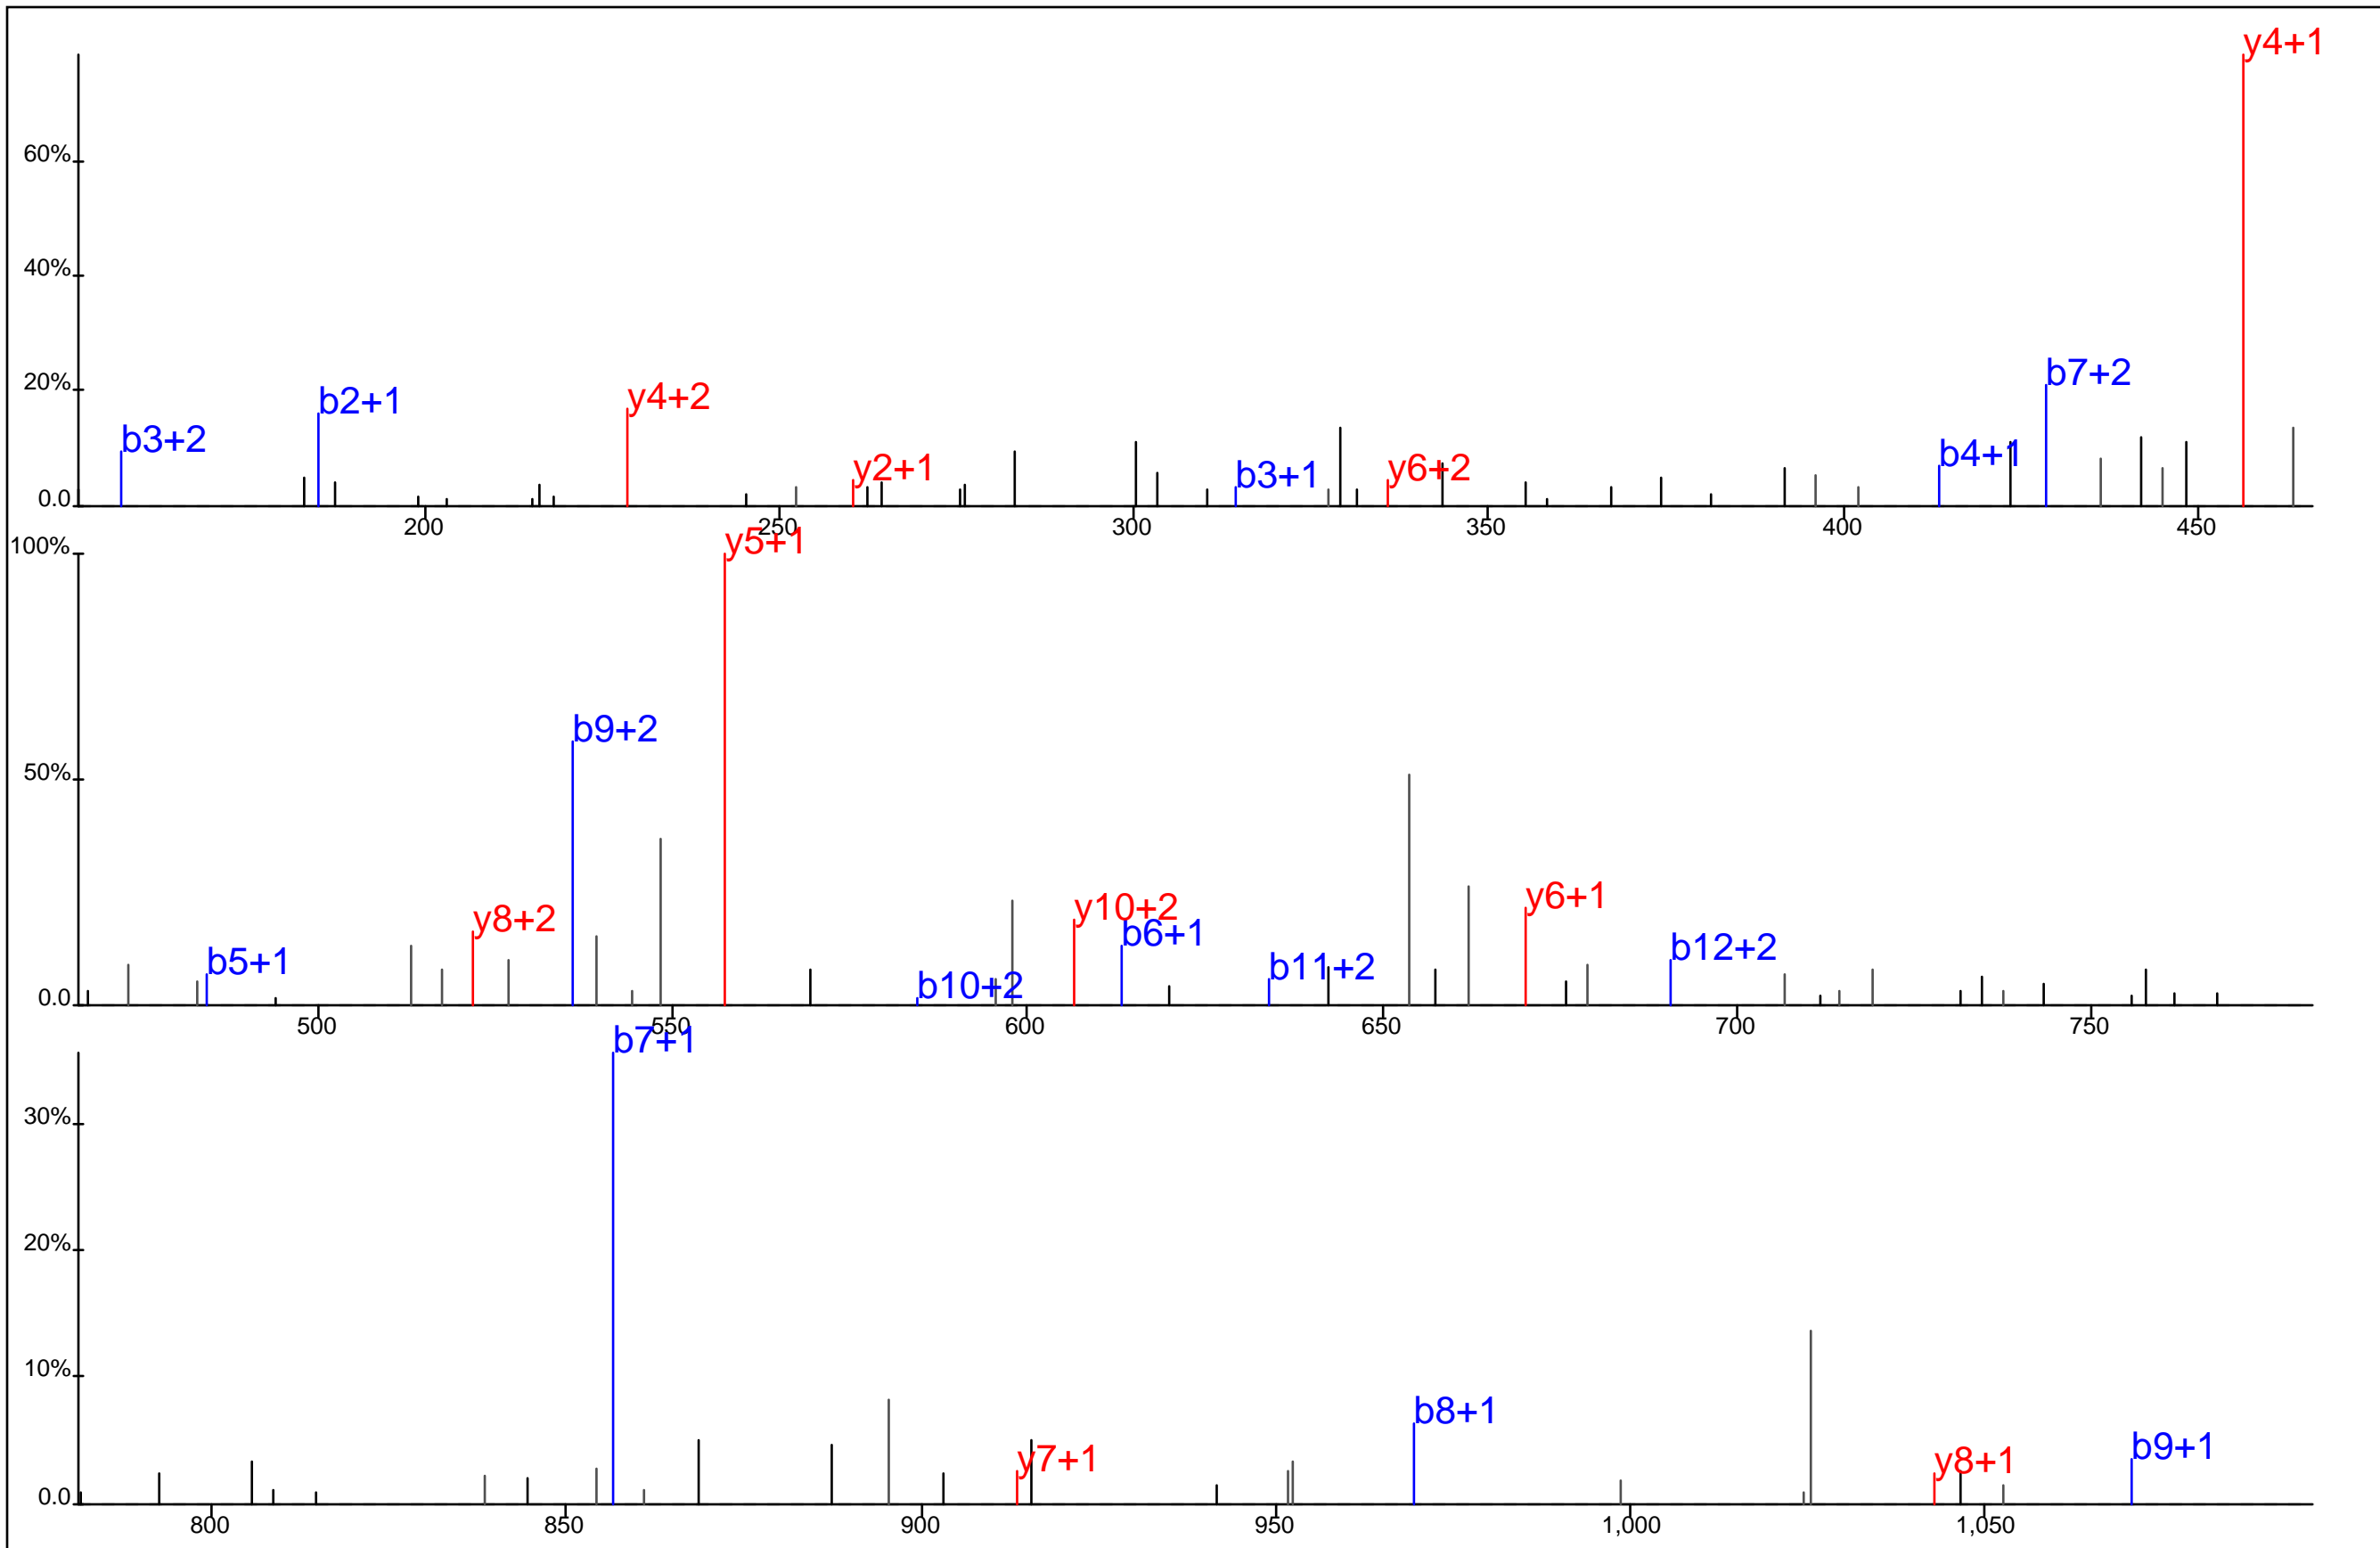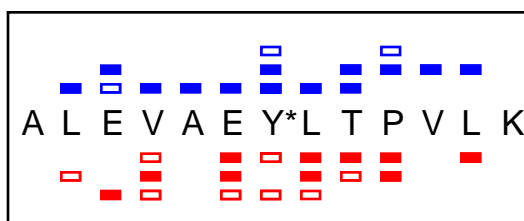

Protein Name: APG3 autophagy 3 like  
 gi Accession: 0  
 Precursor Mass: 509.2687+3  
 Delta Mass: 0.236 ppm  
 XCorr: 31.2

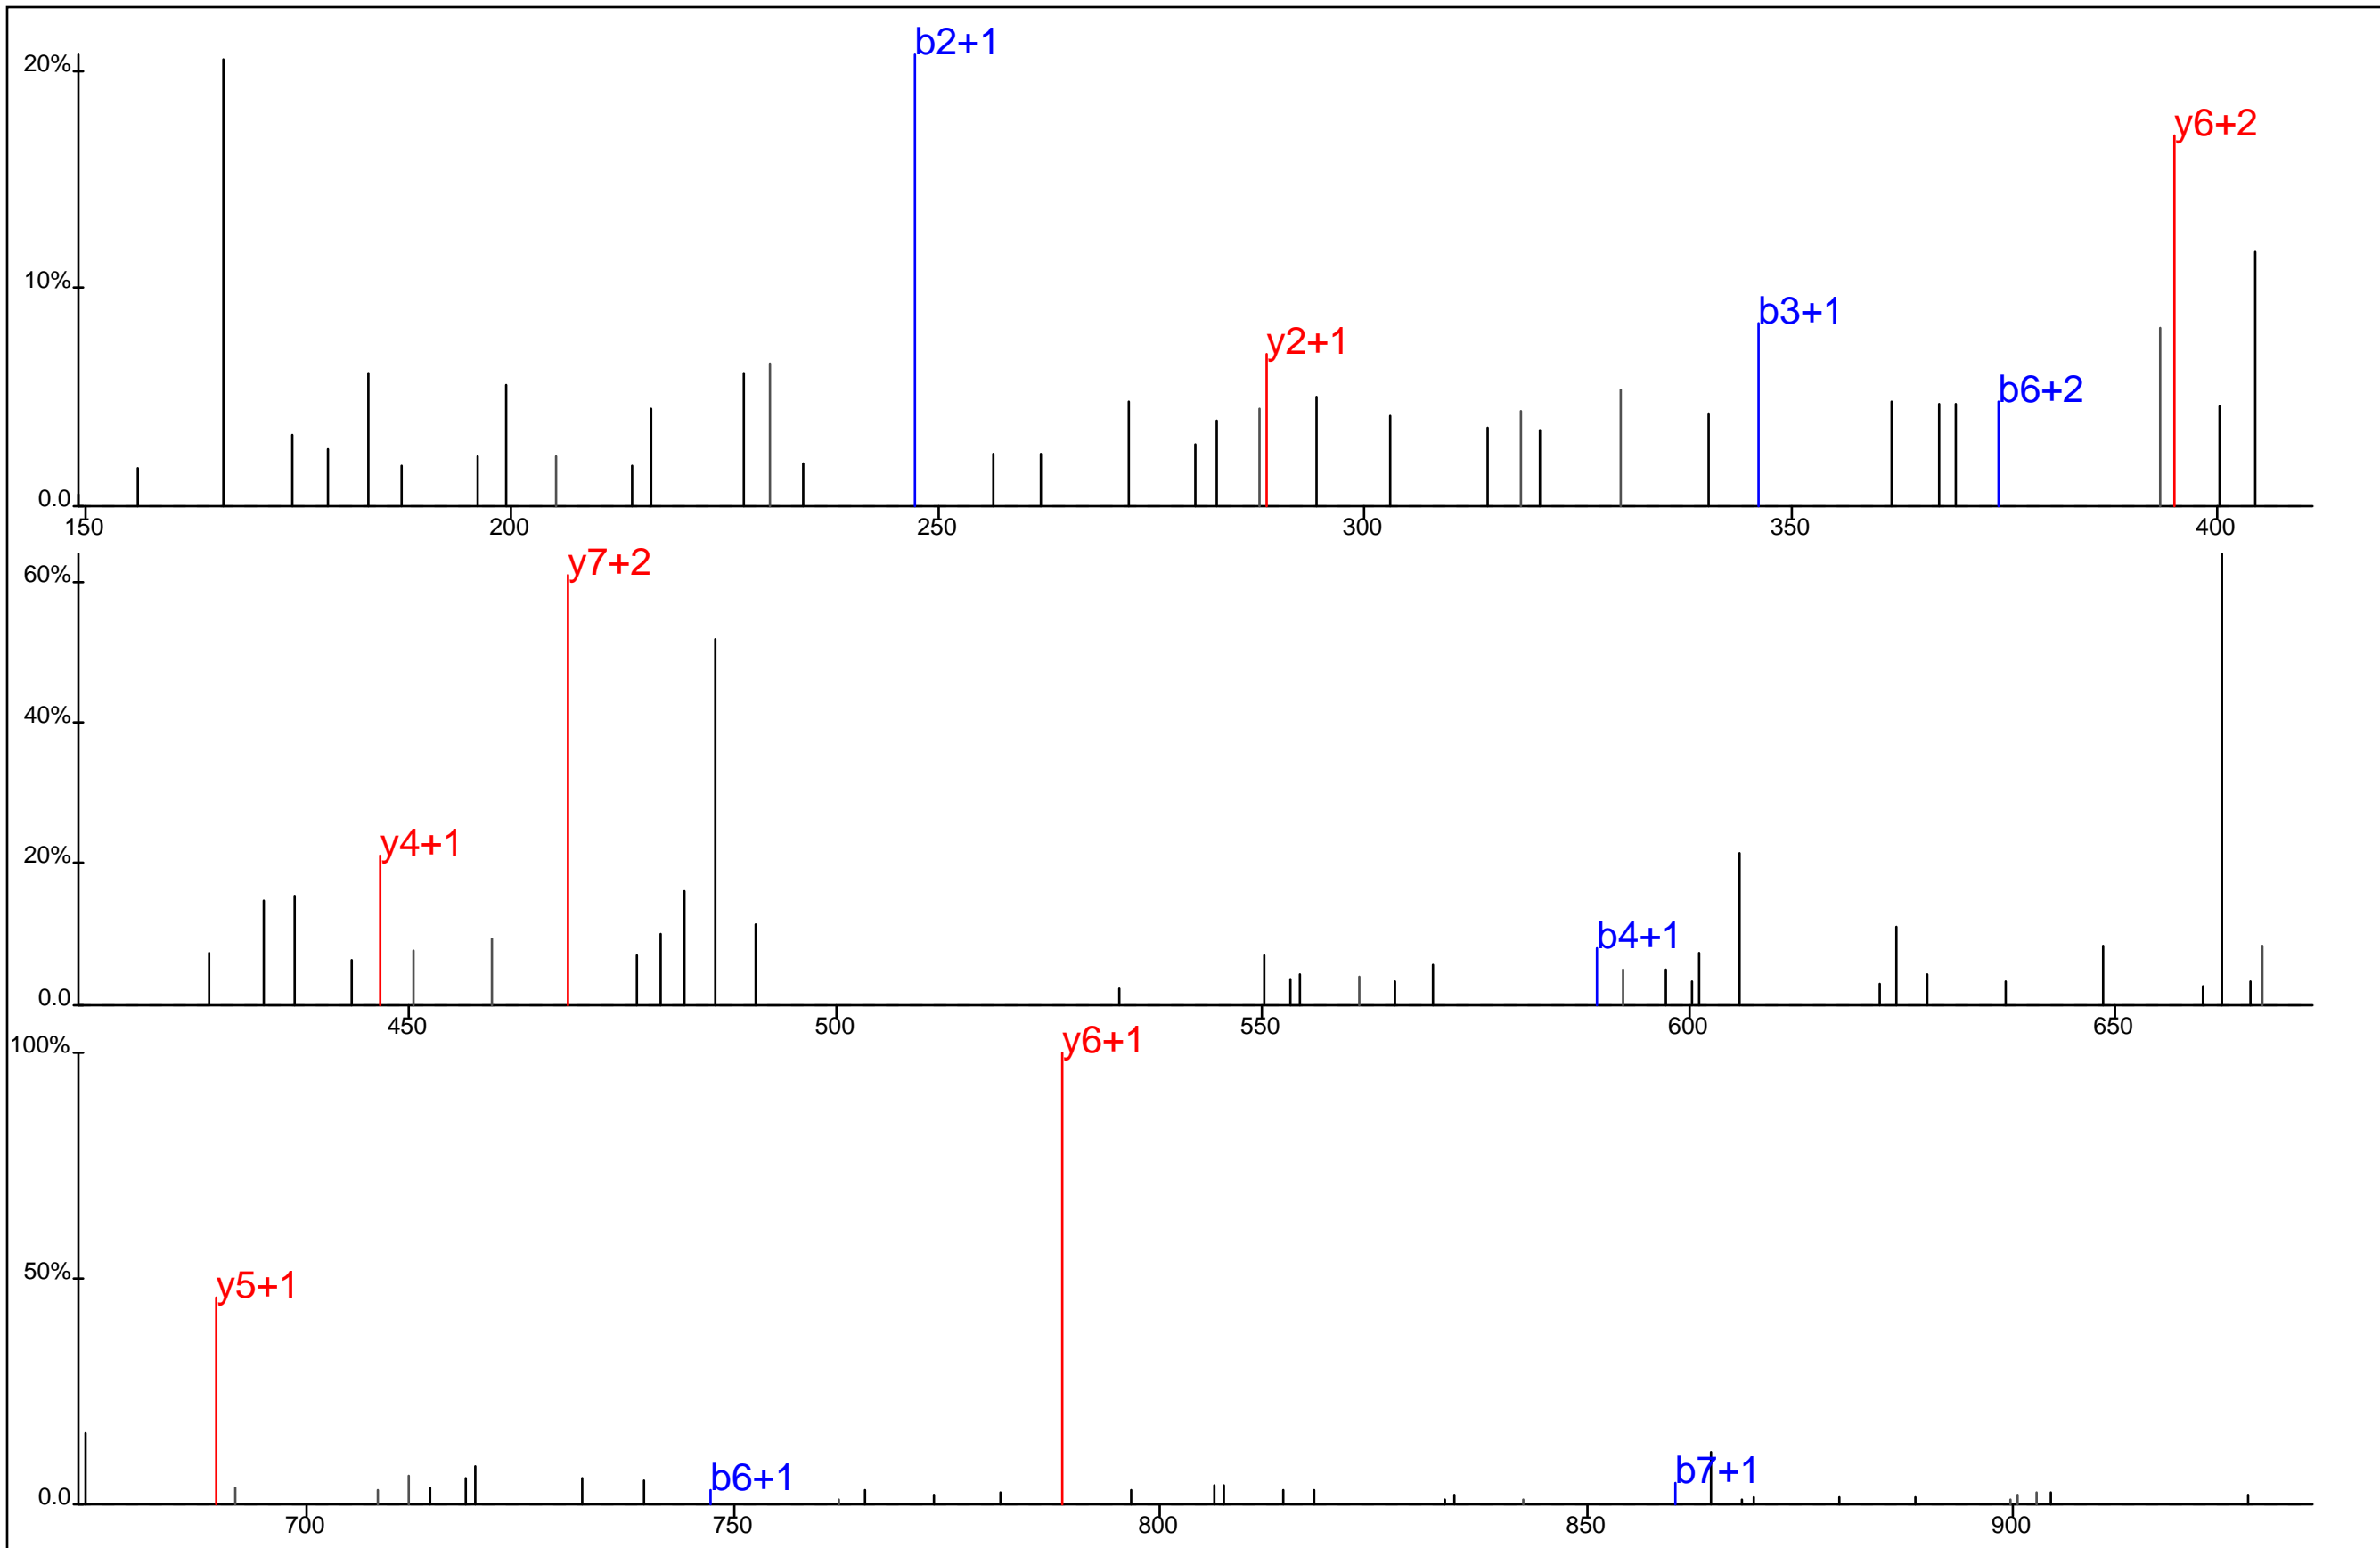

|   |   |   |    |   |   |   |   |
|---|---|---|----|---|---|---|---|
| V | M | A | Y* | S | A | L | R |
| □ | □ | □ | □  | □ | □ | □ | □ |
| □ | □ | □ | □  | □ | □ | □ | □ |

Protein Name: APH1A  
 gi Accession: 0  
 Precursor Mass: 517.7403+2  
 Delta Mass: 0.684 ppm  
 XCorr: 31.99

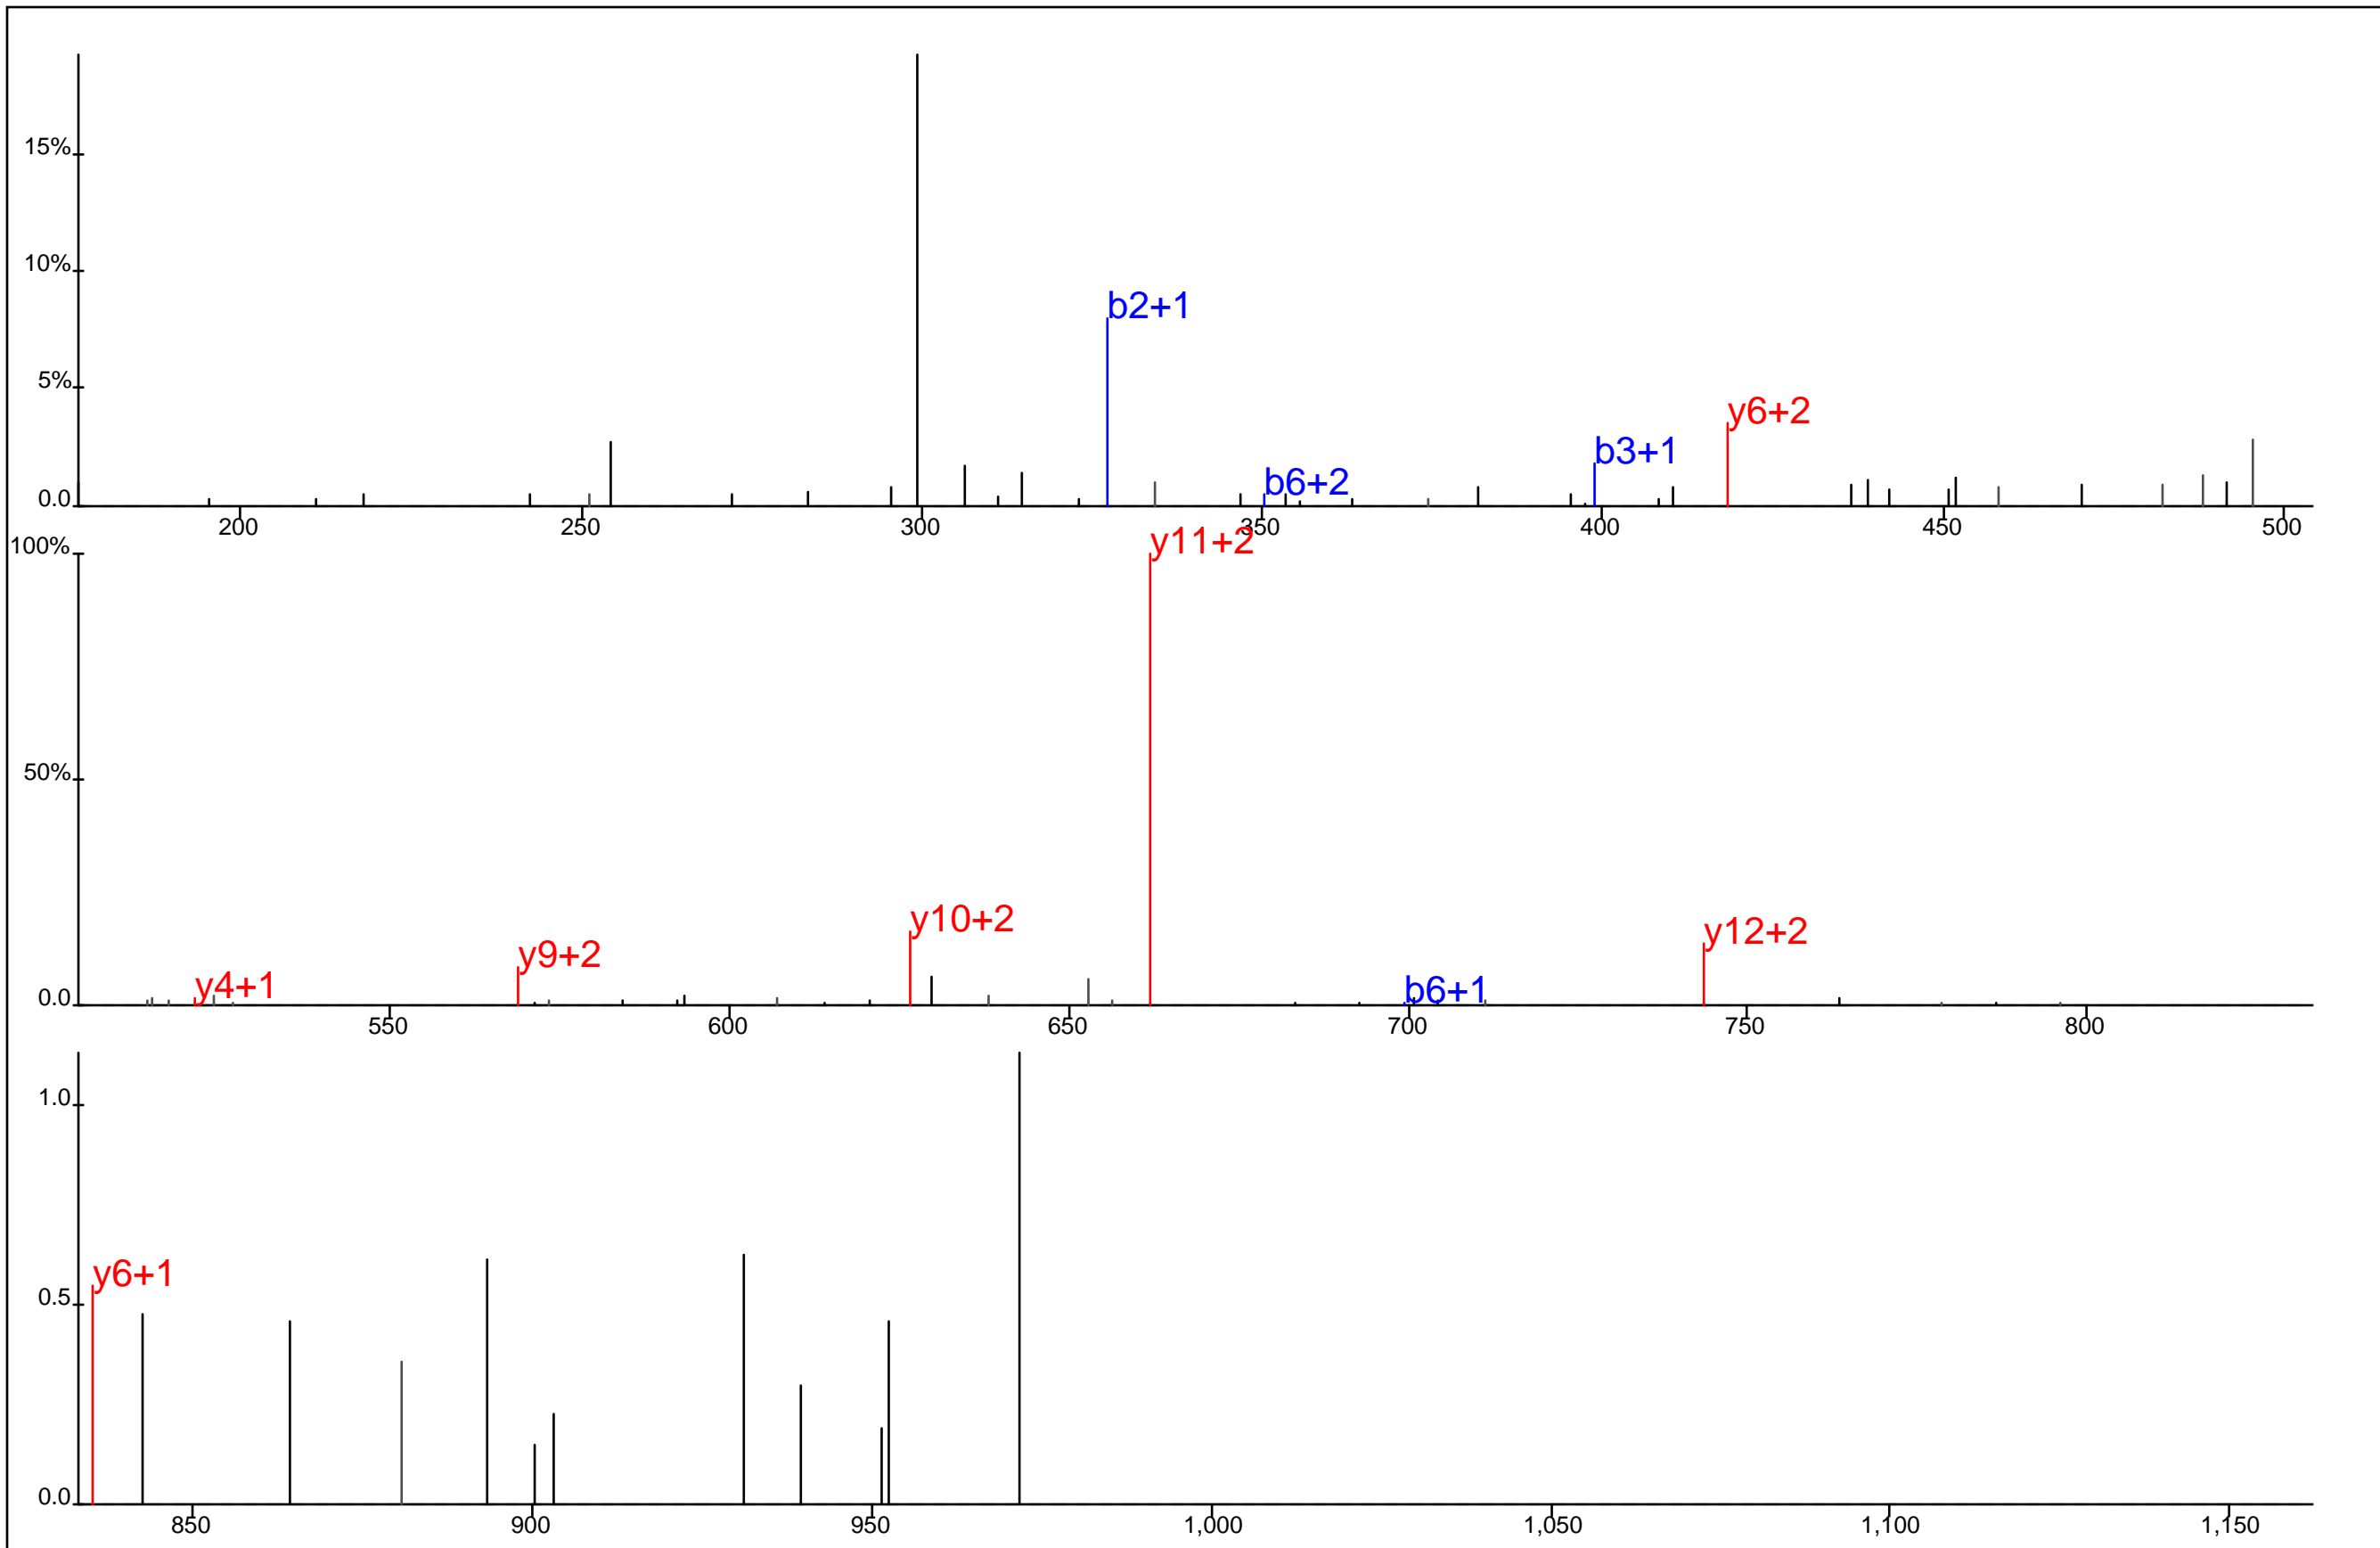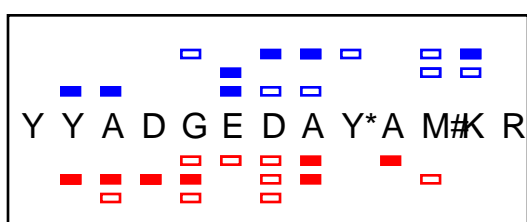

Protein Name: ARD1  
 gi Accession: 0  
 Precursor Mass: 550.2174+3  
 Delta Mass: 1.697 ppm  
 XCorr: 24.33



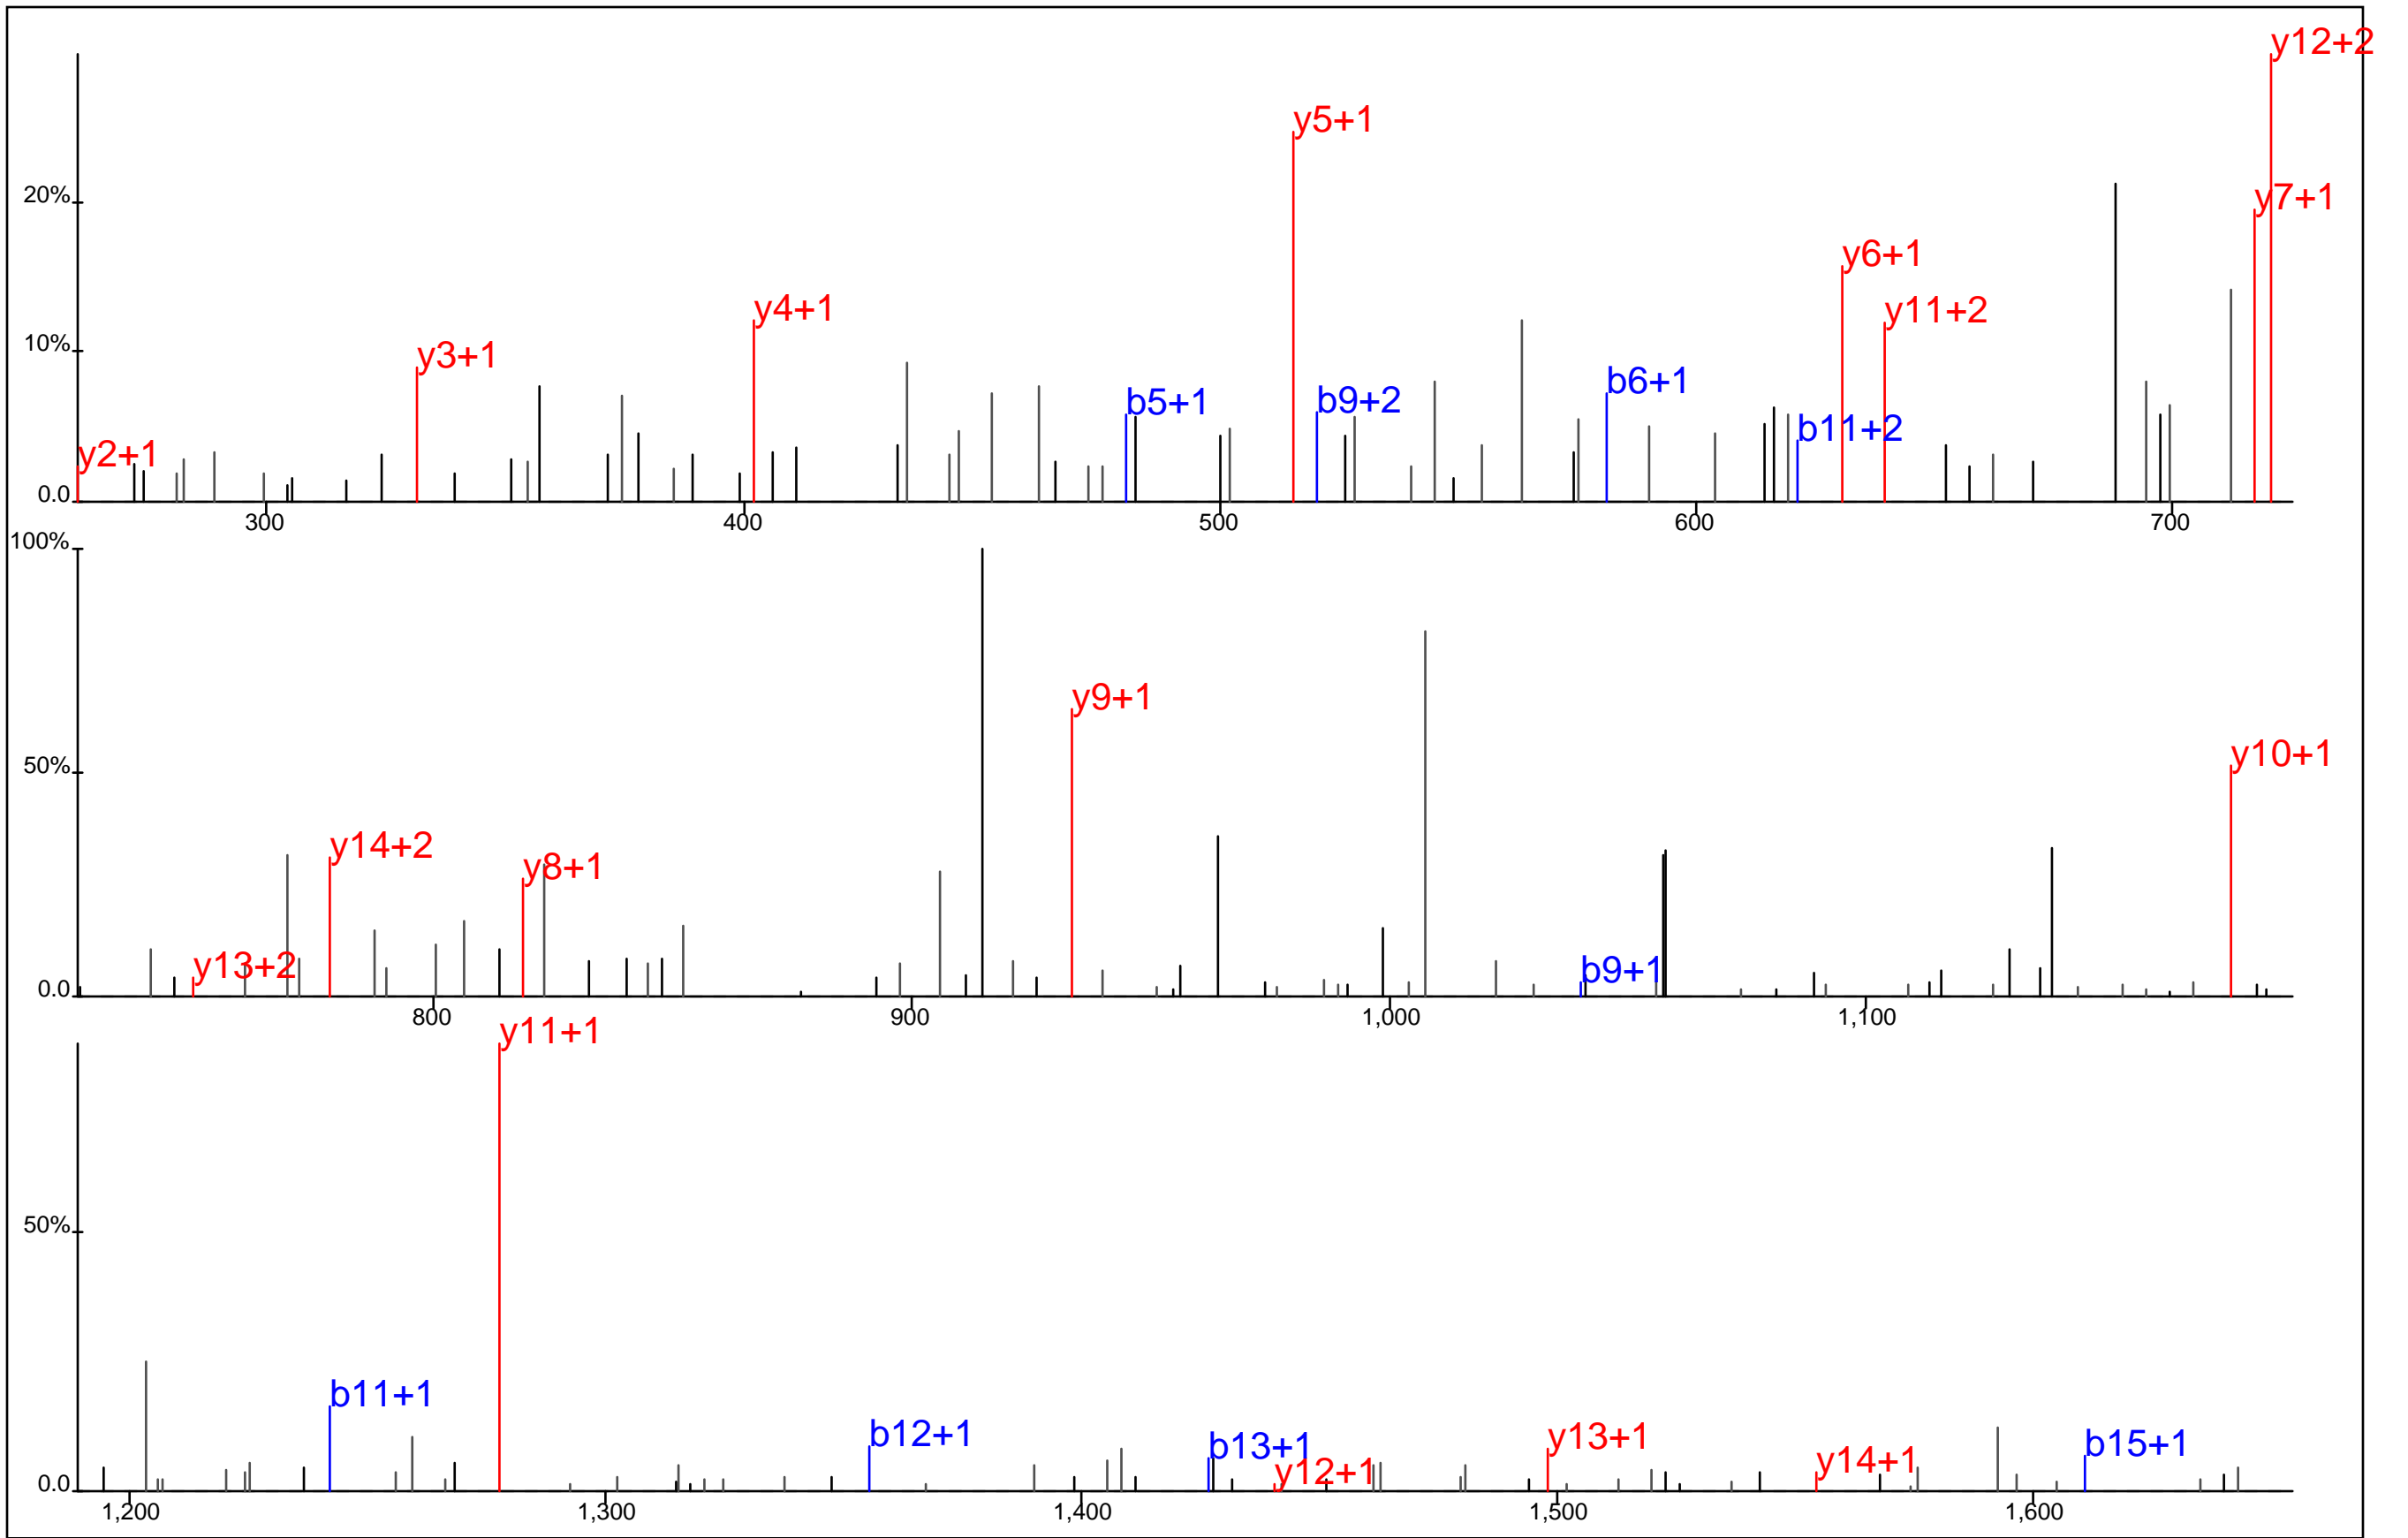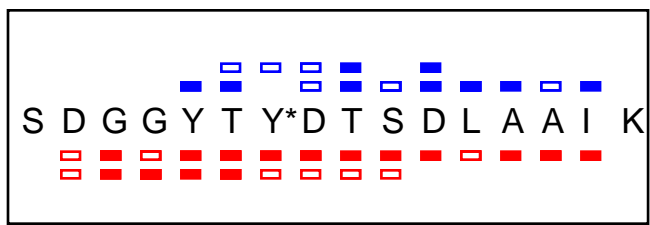

Protein Name: Arginyl-tRNA synthetase  
 gi Accession: 0  
 Precursor Mass: 878.8693+2  
 Delta Mass: 0.030 ppm  
 XCorr: 50.5

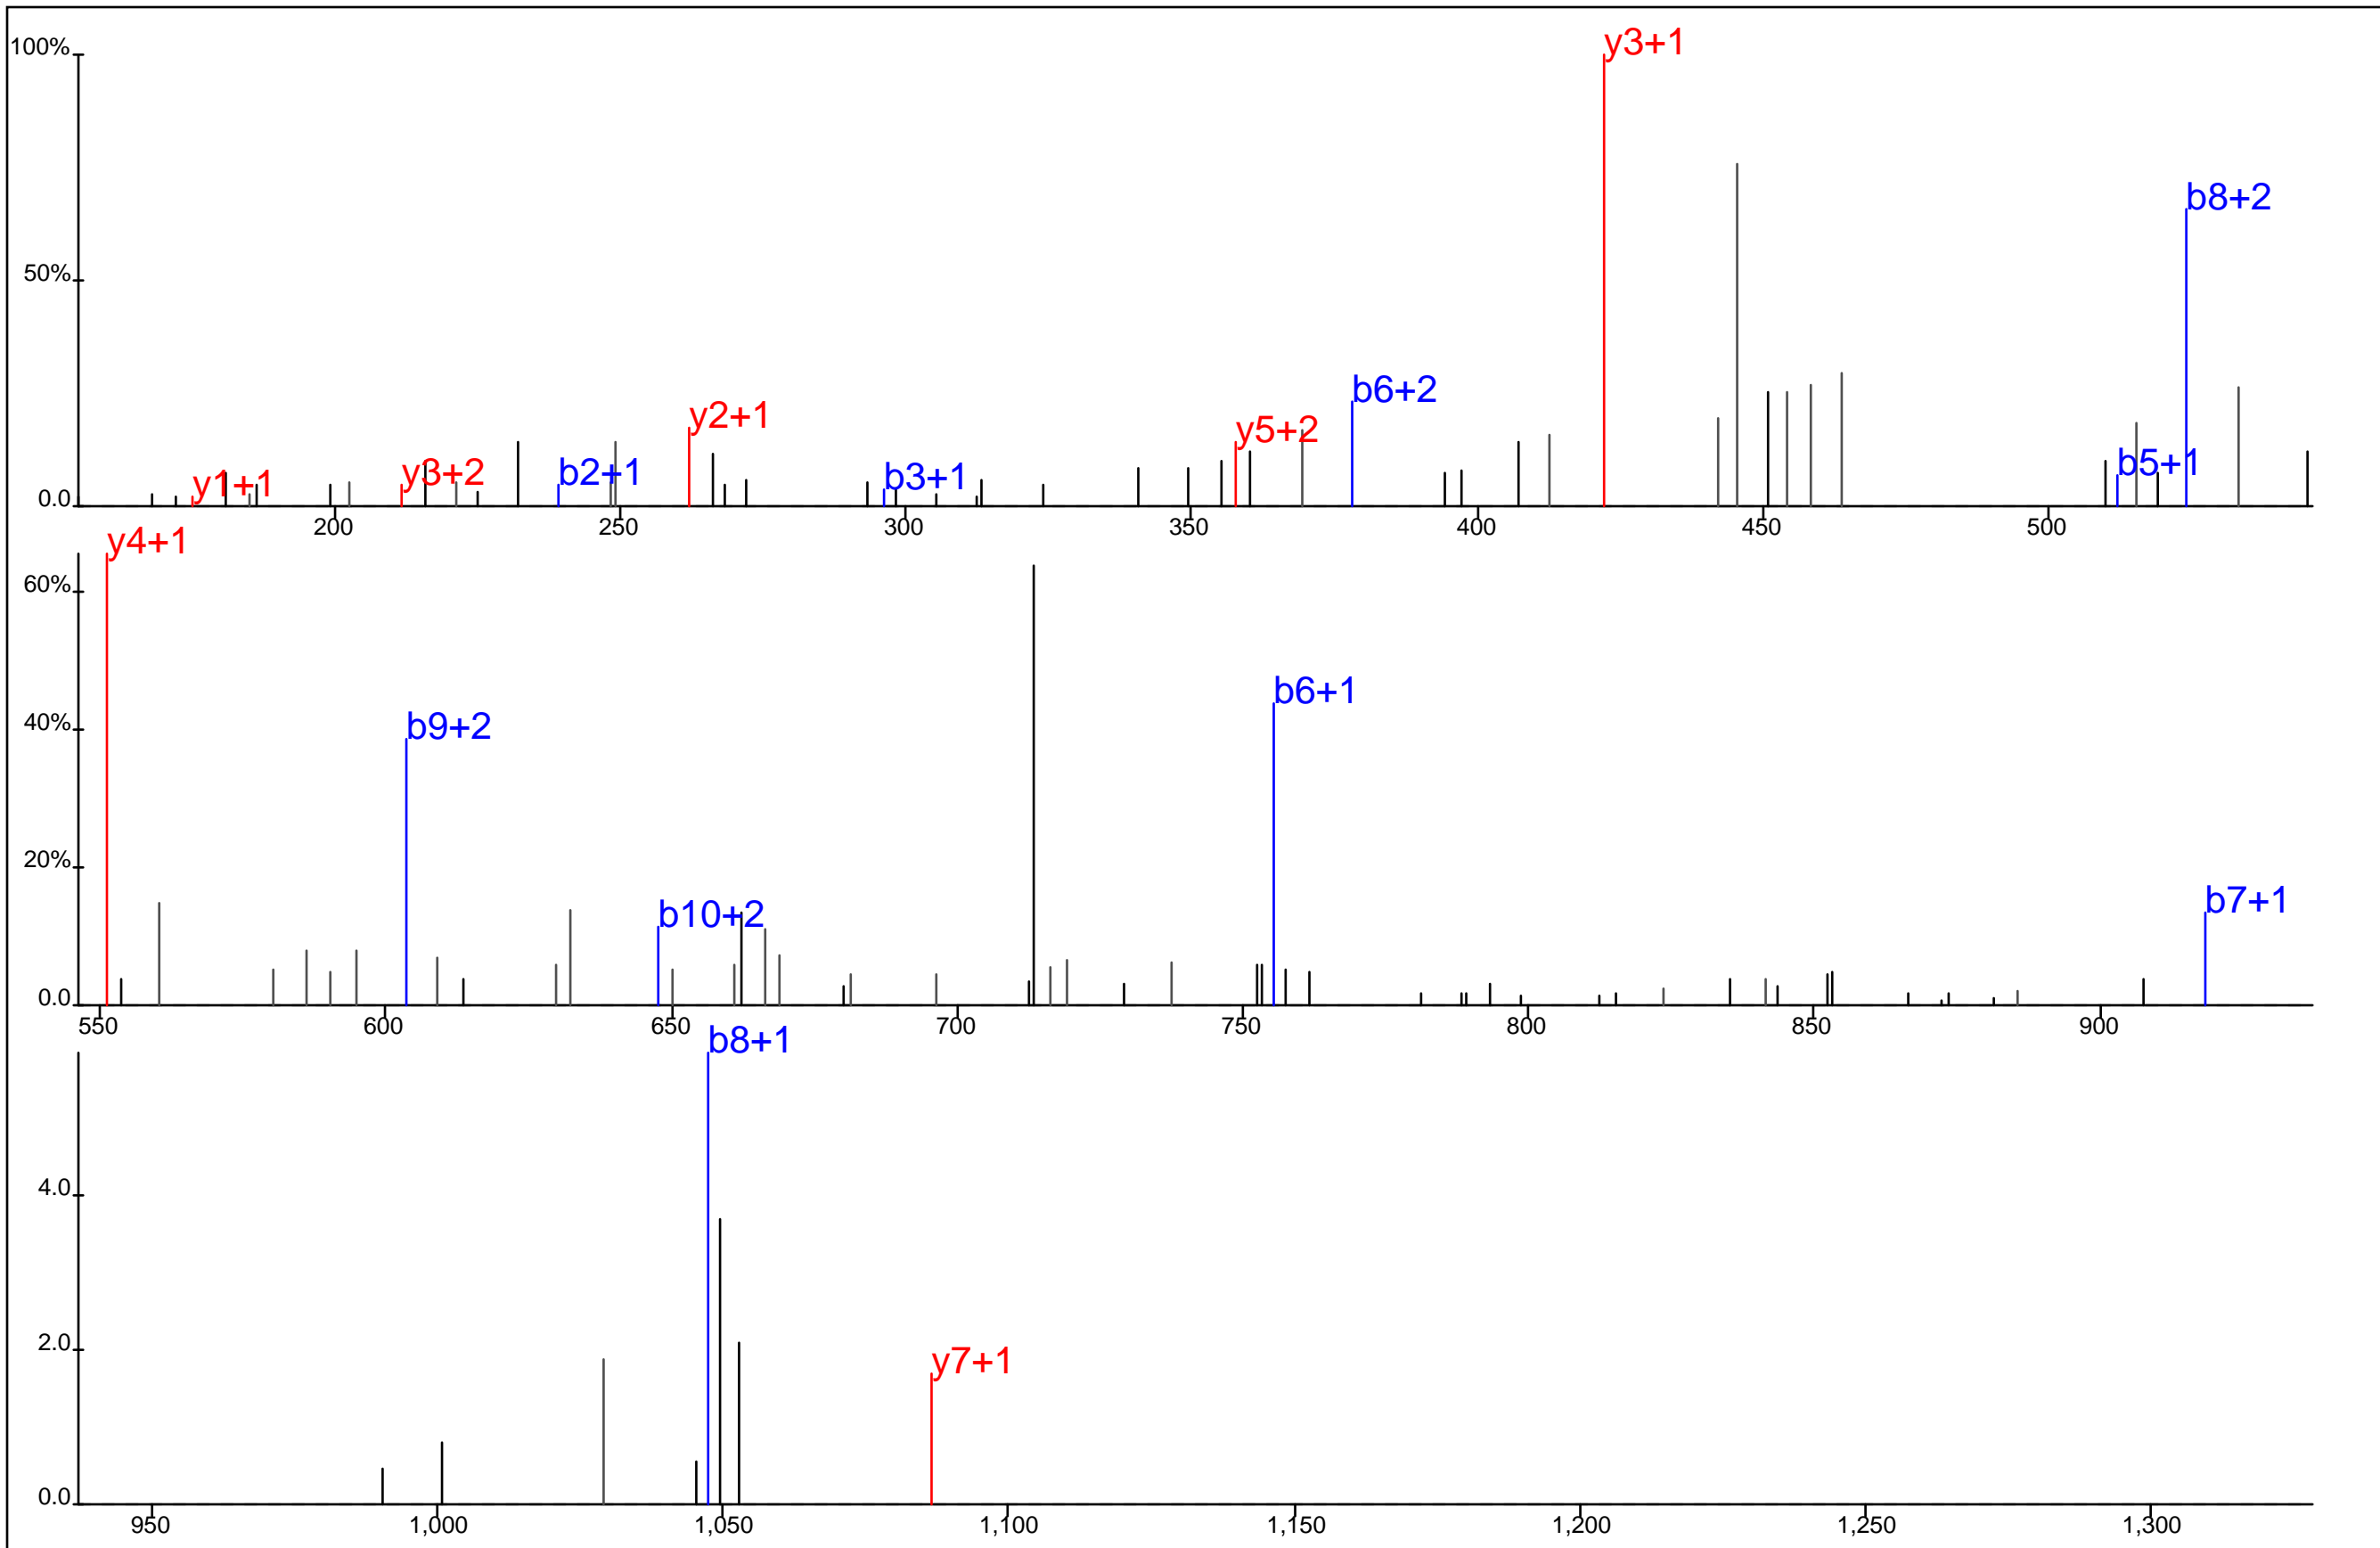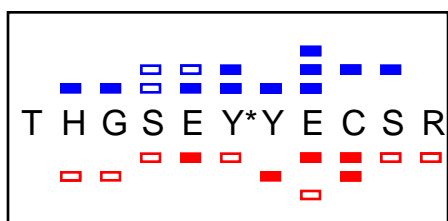

Protein Name: Ariadne 2  
 gi Accession: 0  
 Precursor Mass: 490.1780+3  
 Delta Mass: 0.200 ppm  
 XCorr: 22.01

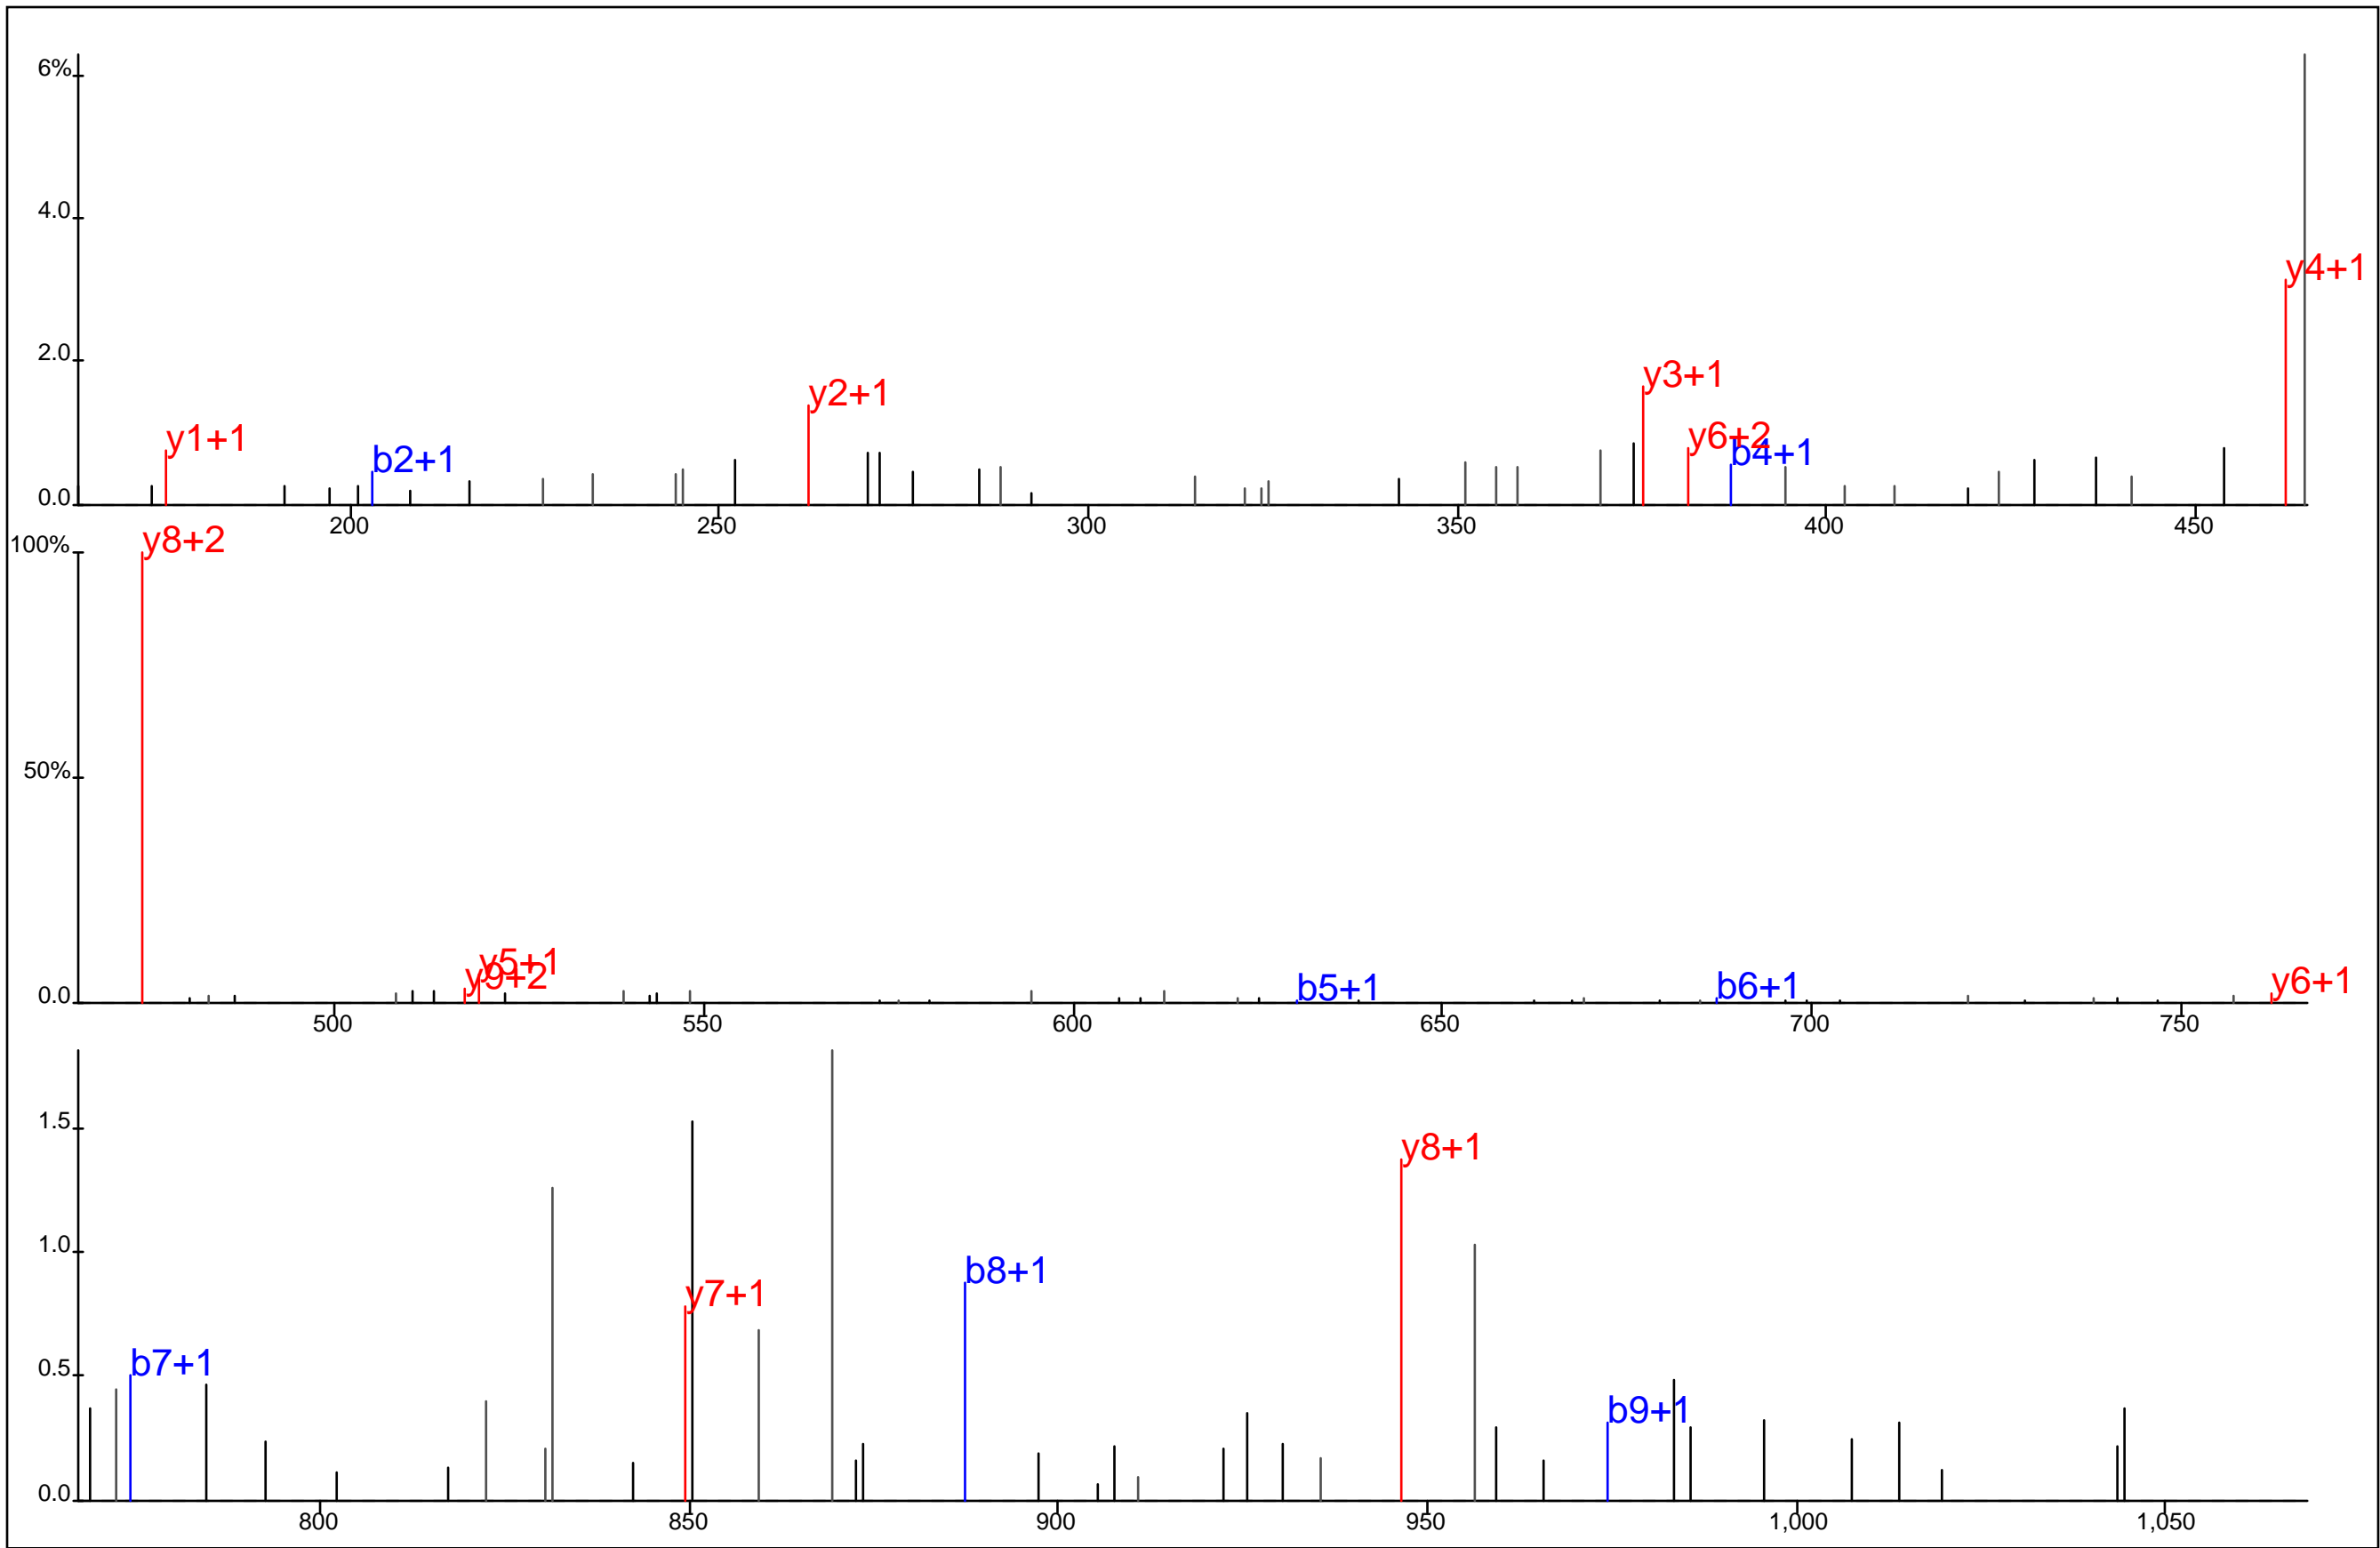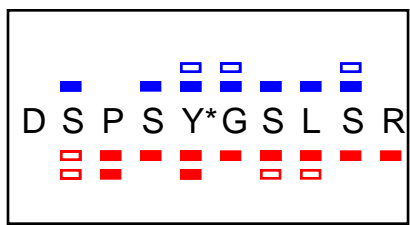

Protein Name: Armadillo repeat gene deleted in VCFS  
 gi Accession: 0  
 Precursor Mass: 574.7348+2  
 Delta Mass: 0.336 ppm  
 XCorr: 46.73

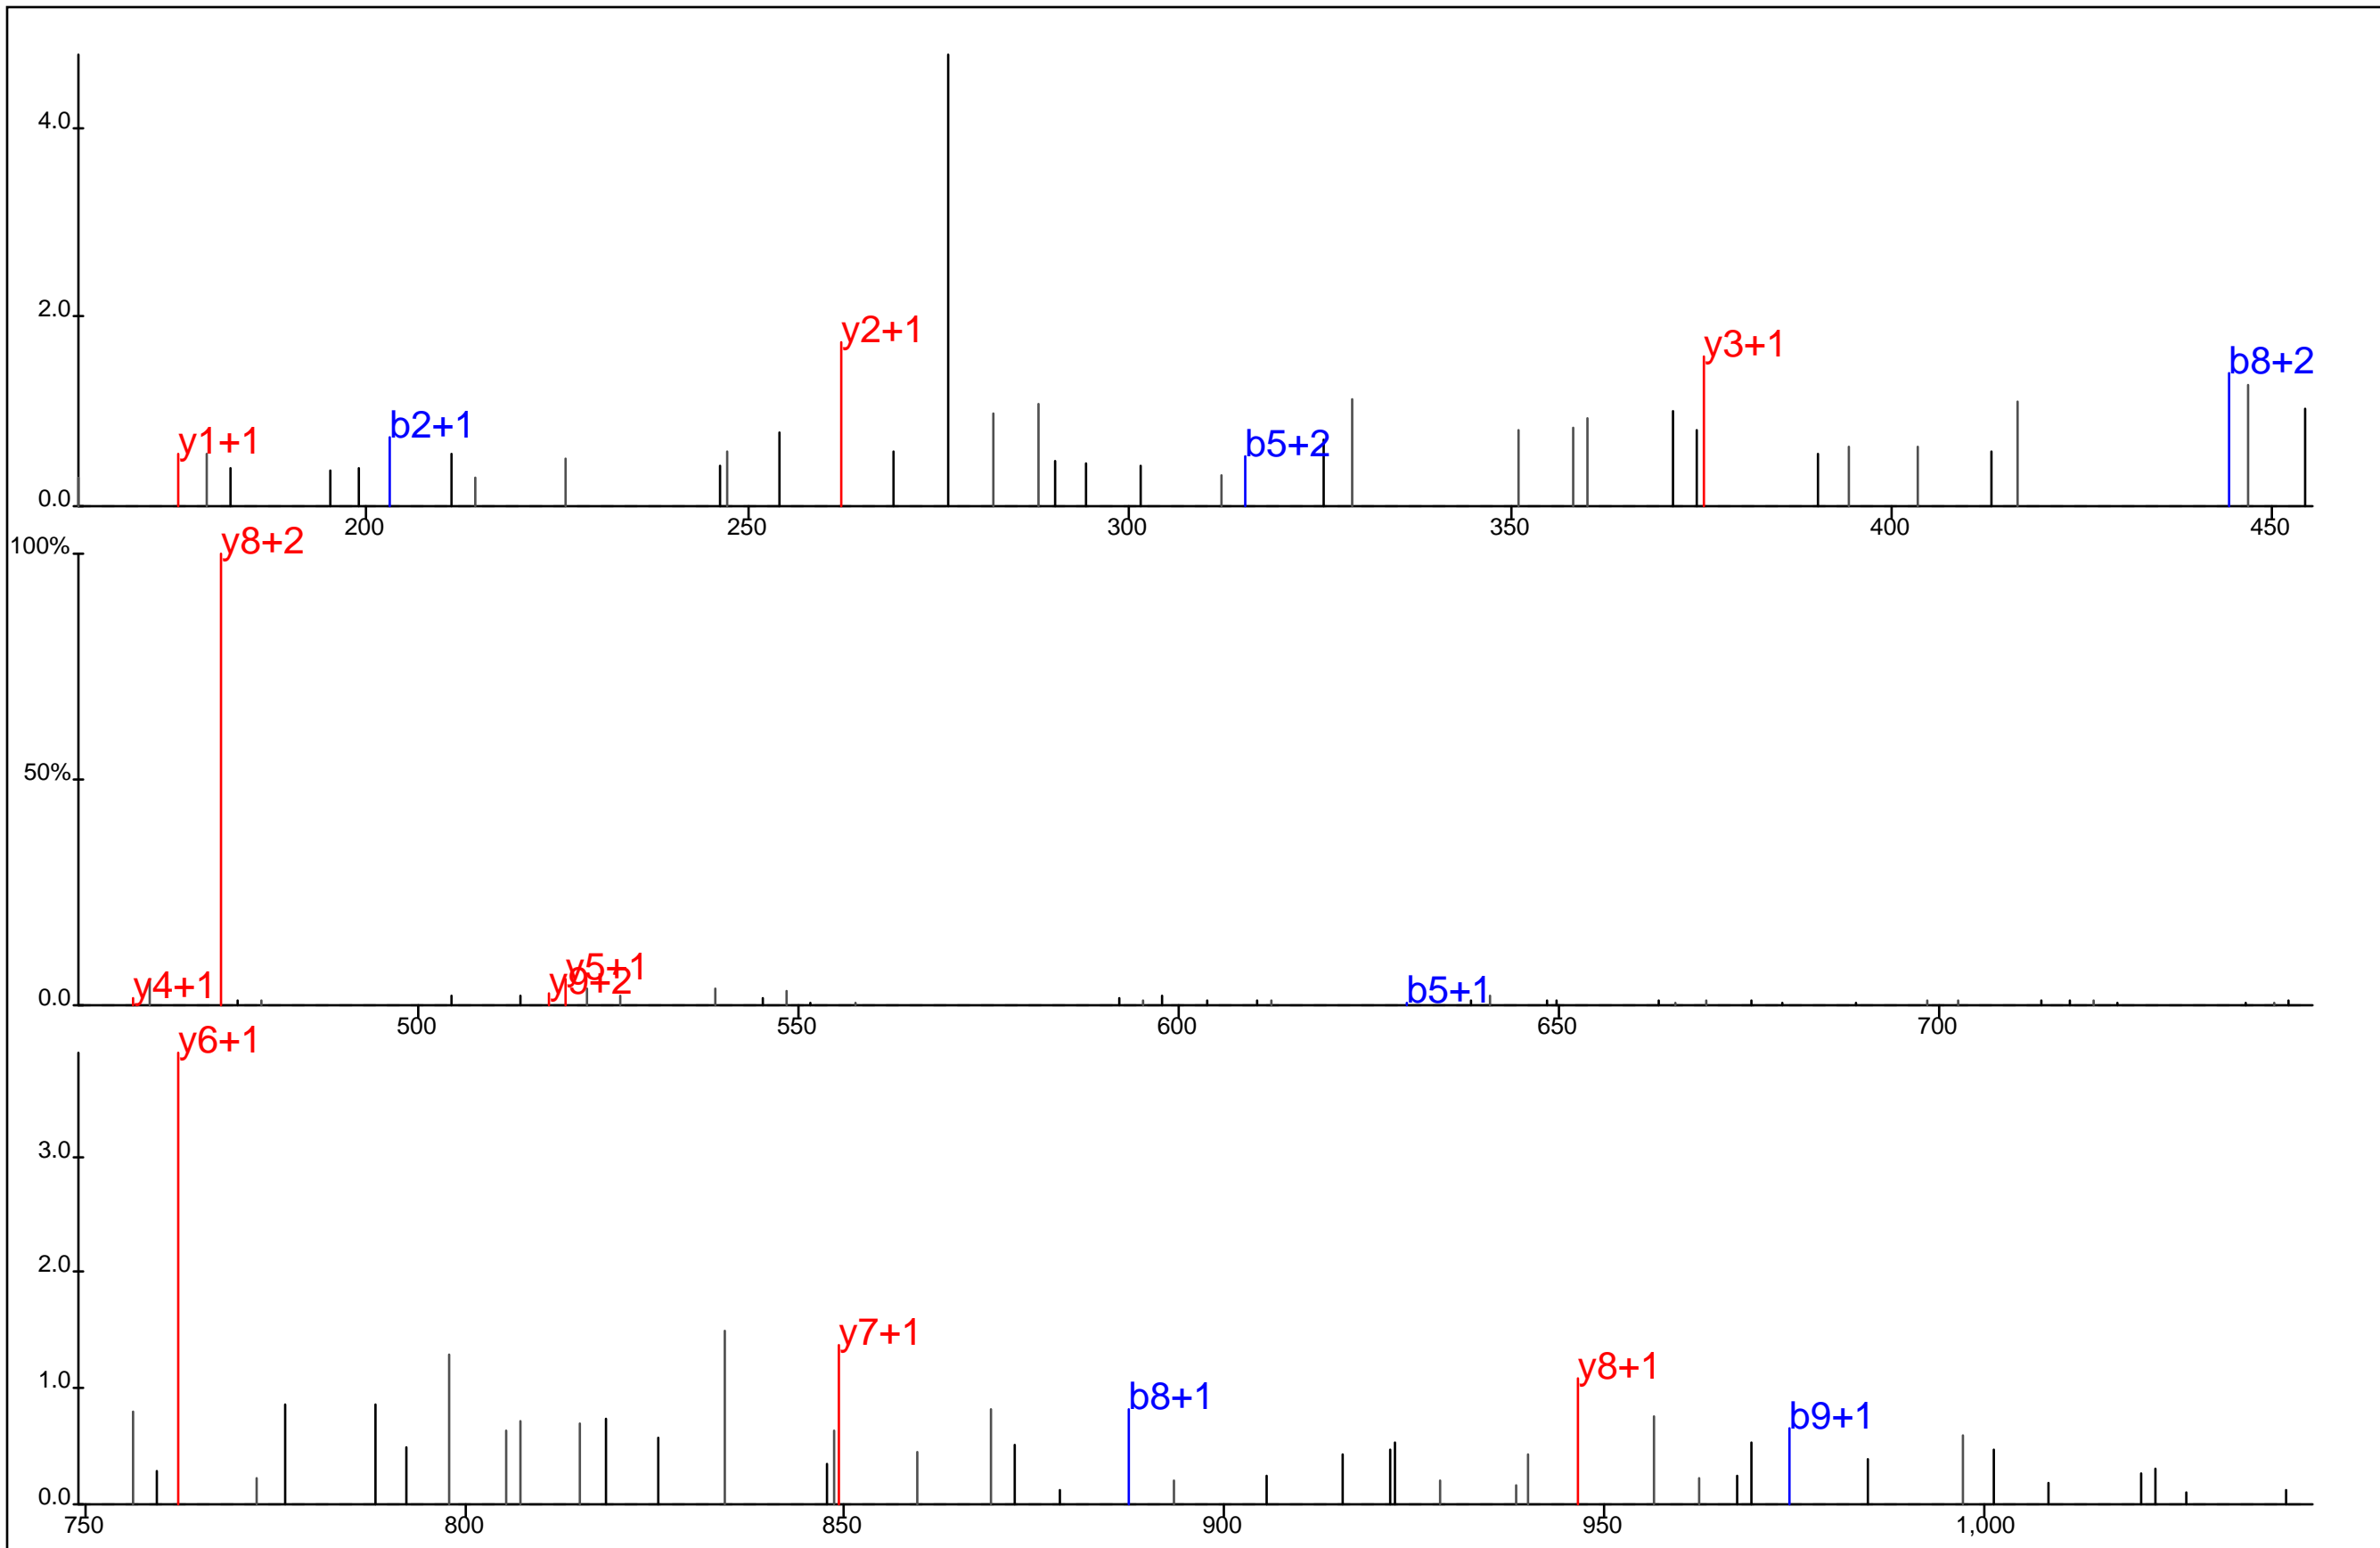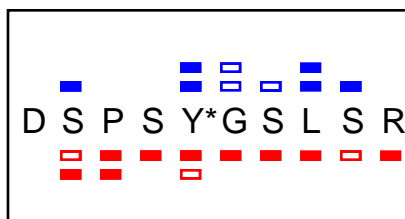

Protein Name: Armadillo repeat gene deleted in VCFS  
 gi Accession: 0  
 Precursor Mass: 574.7345+2  
 Delta Mass: 0.195 ppm  
 XCorr: 33.99

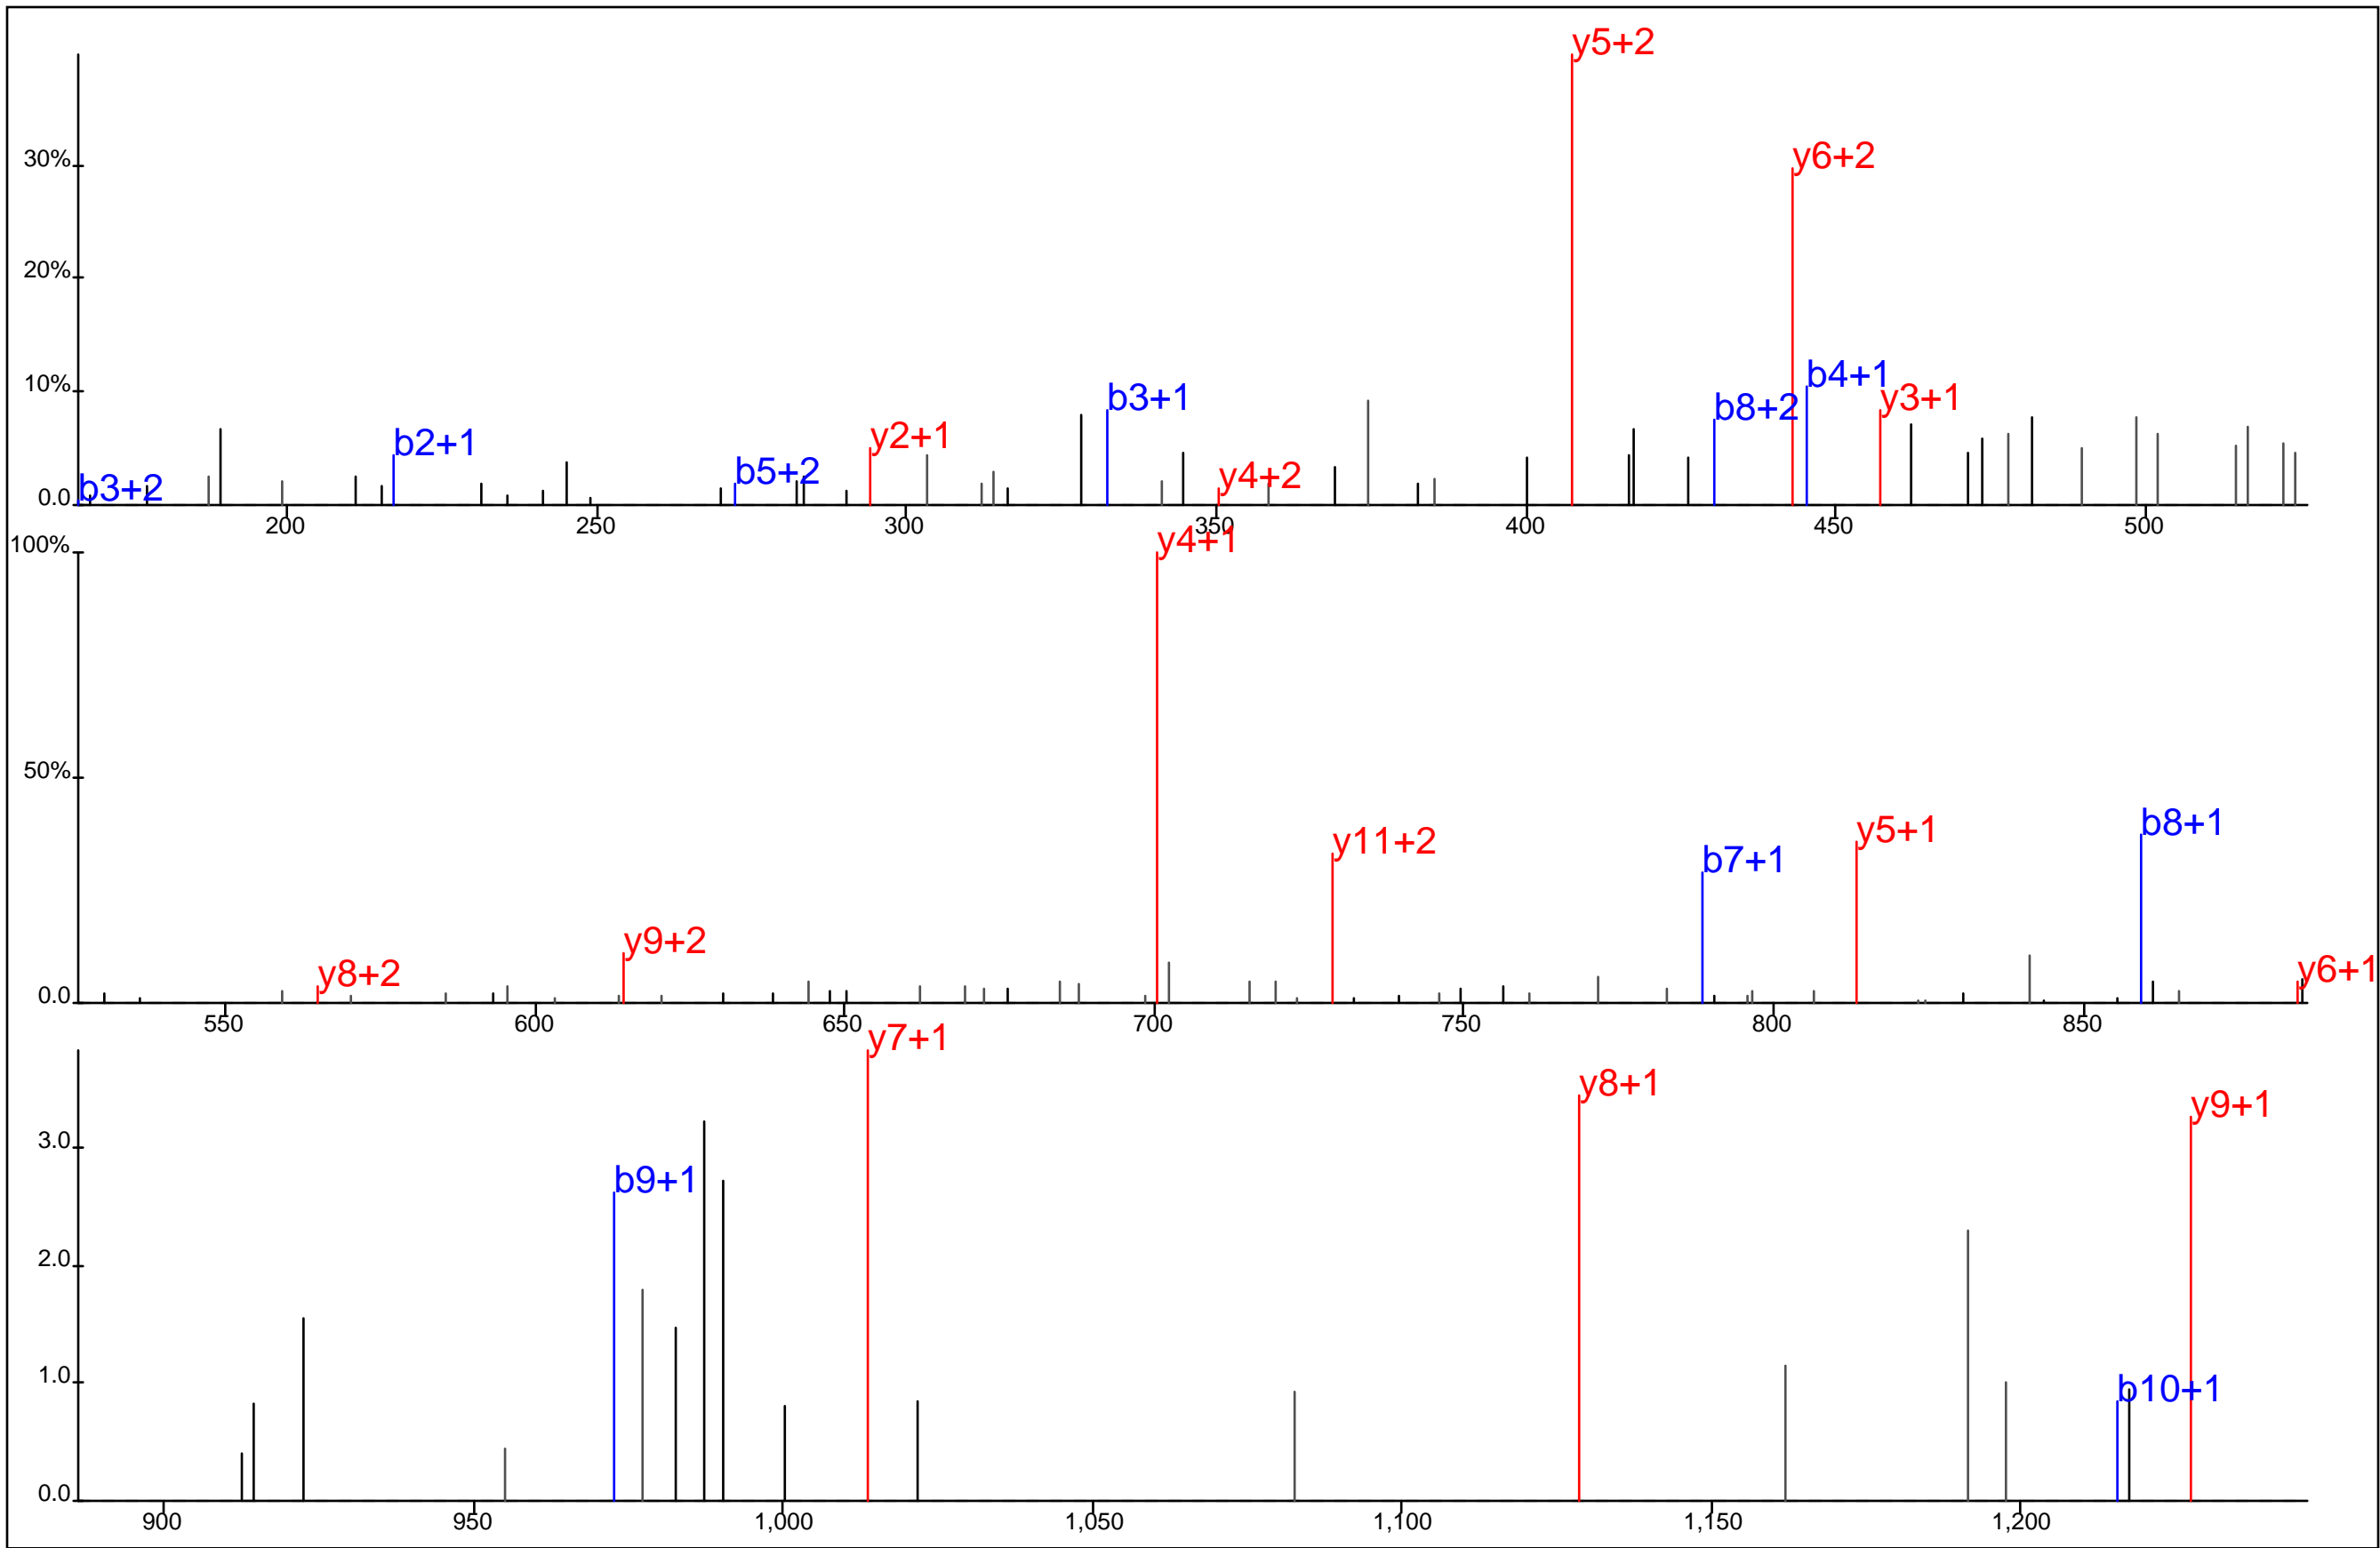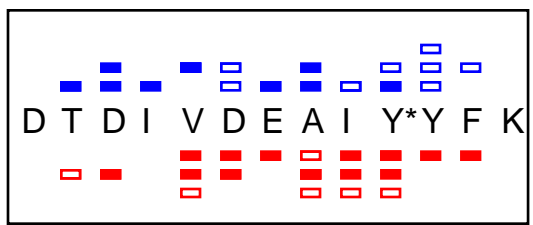

Protein Name: ARP2/3 protein complex subunit p21  
 gi Accession: 0  
 Precursor Mass: 557.9120+3  
 Delta Mass: 1.585 ppm  
 XCorr: 38.65

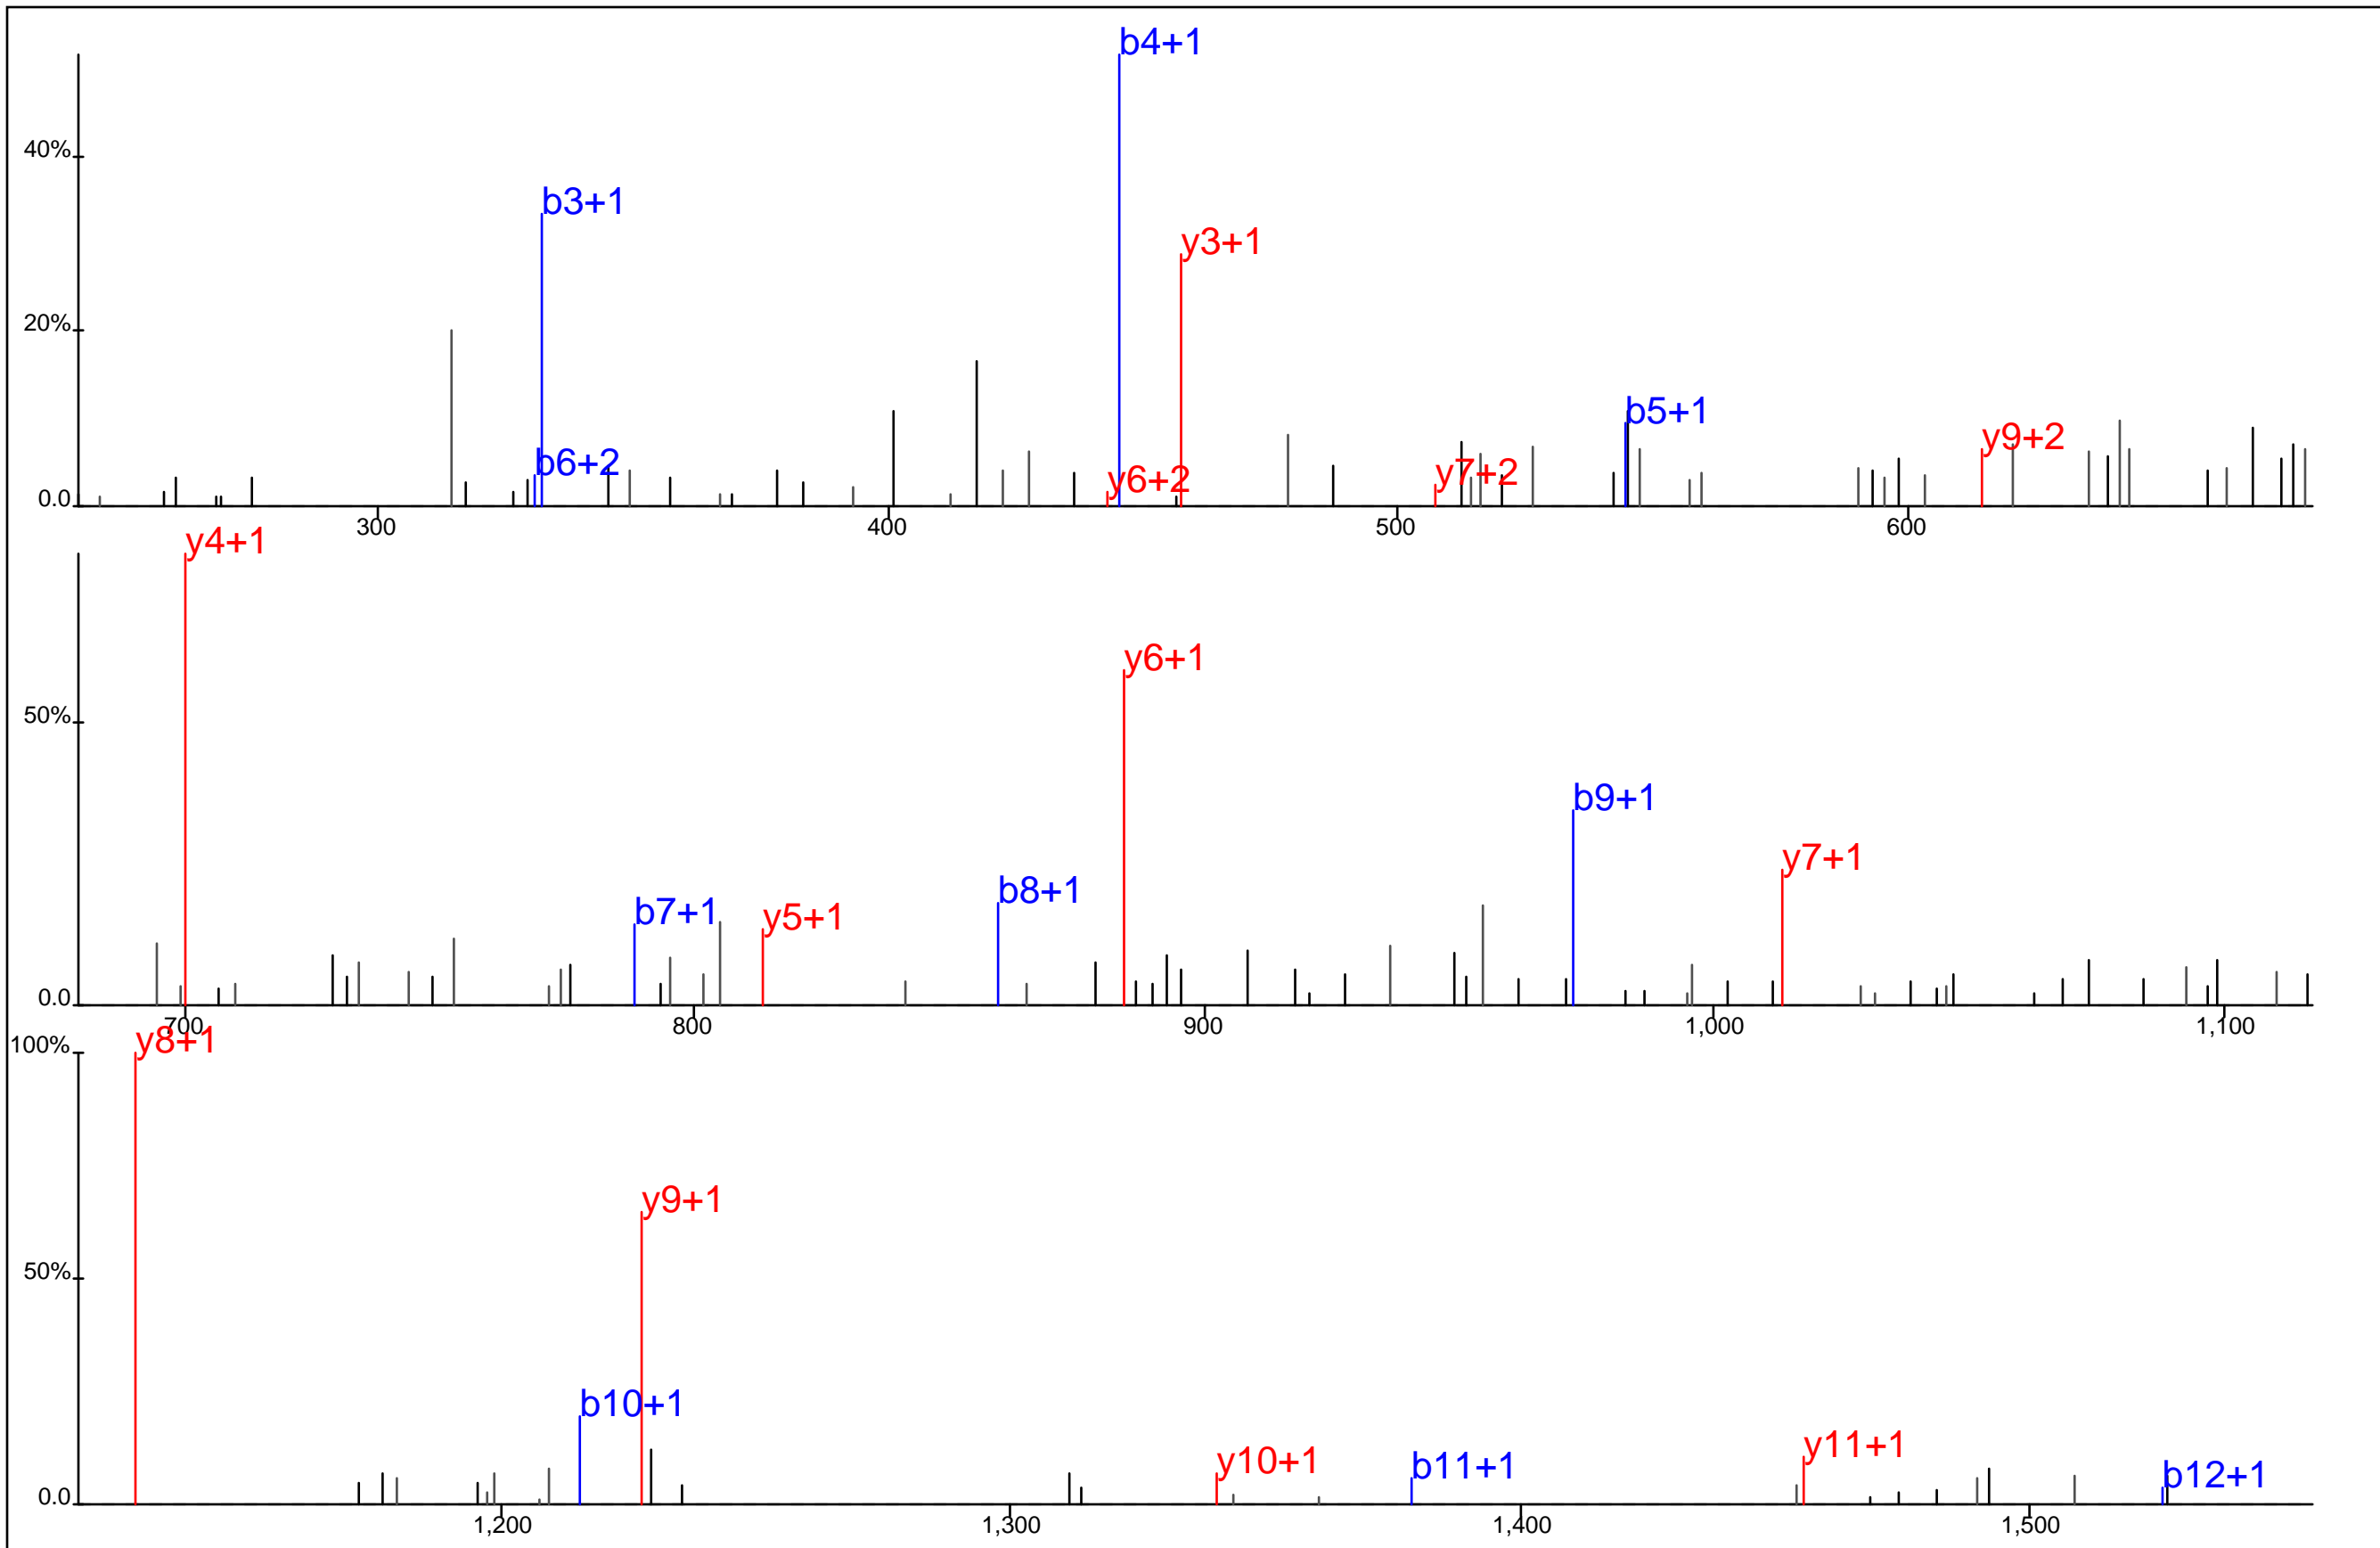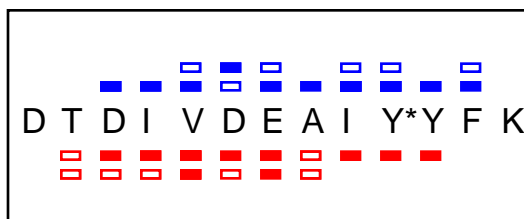

Protein Name: ARP2/3 protein complex subunit p21  
 gi Accession: 0  
 Precursor Mass: 836.3625+2  
 Delta Mass: 0.743 ppm  
 XCorr: 57.54

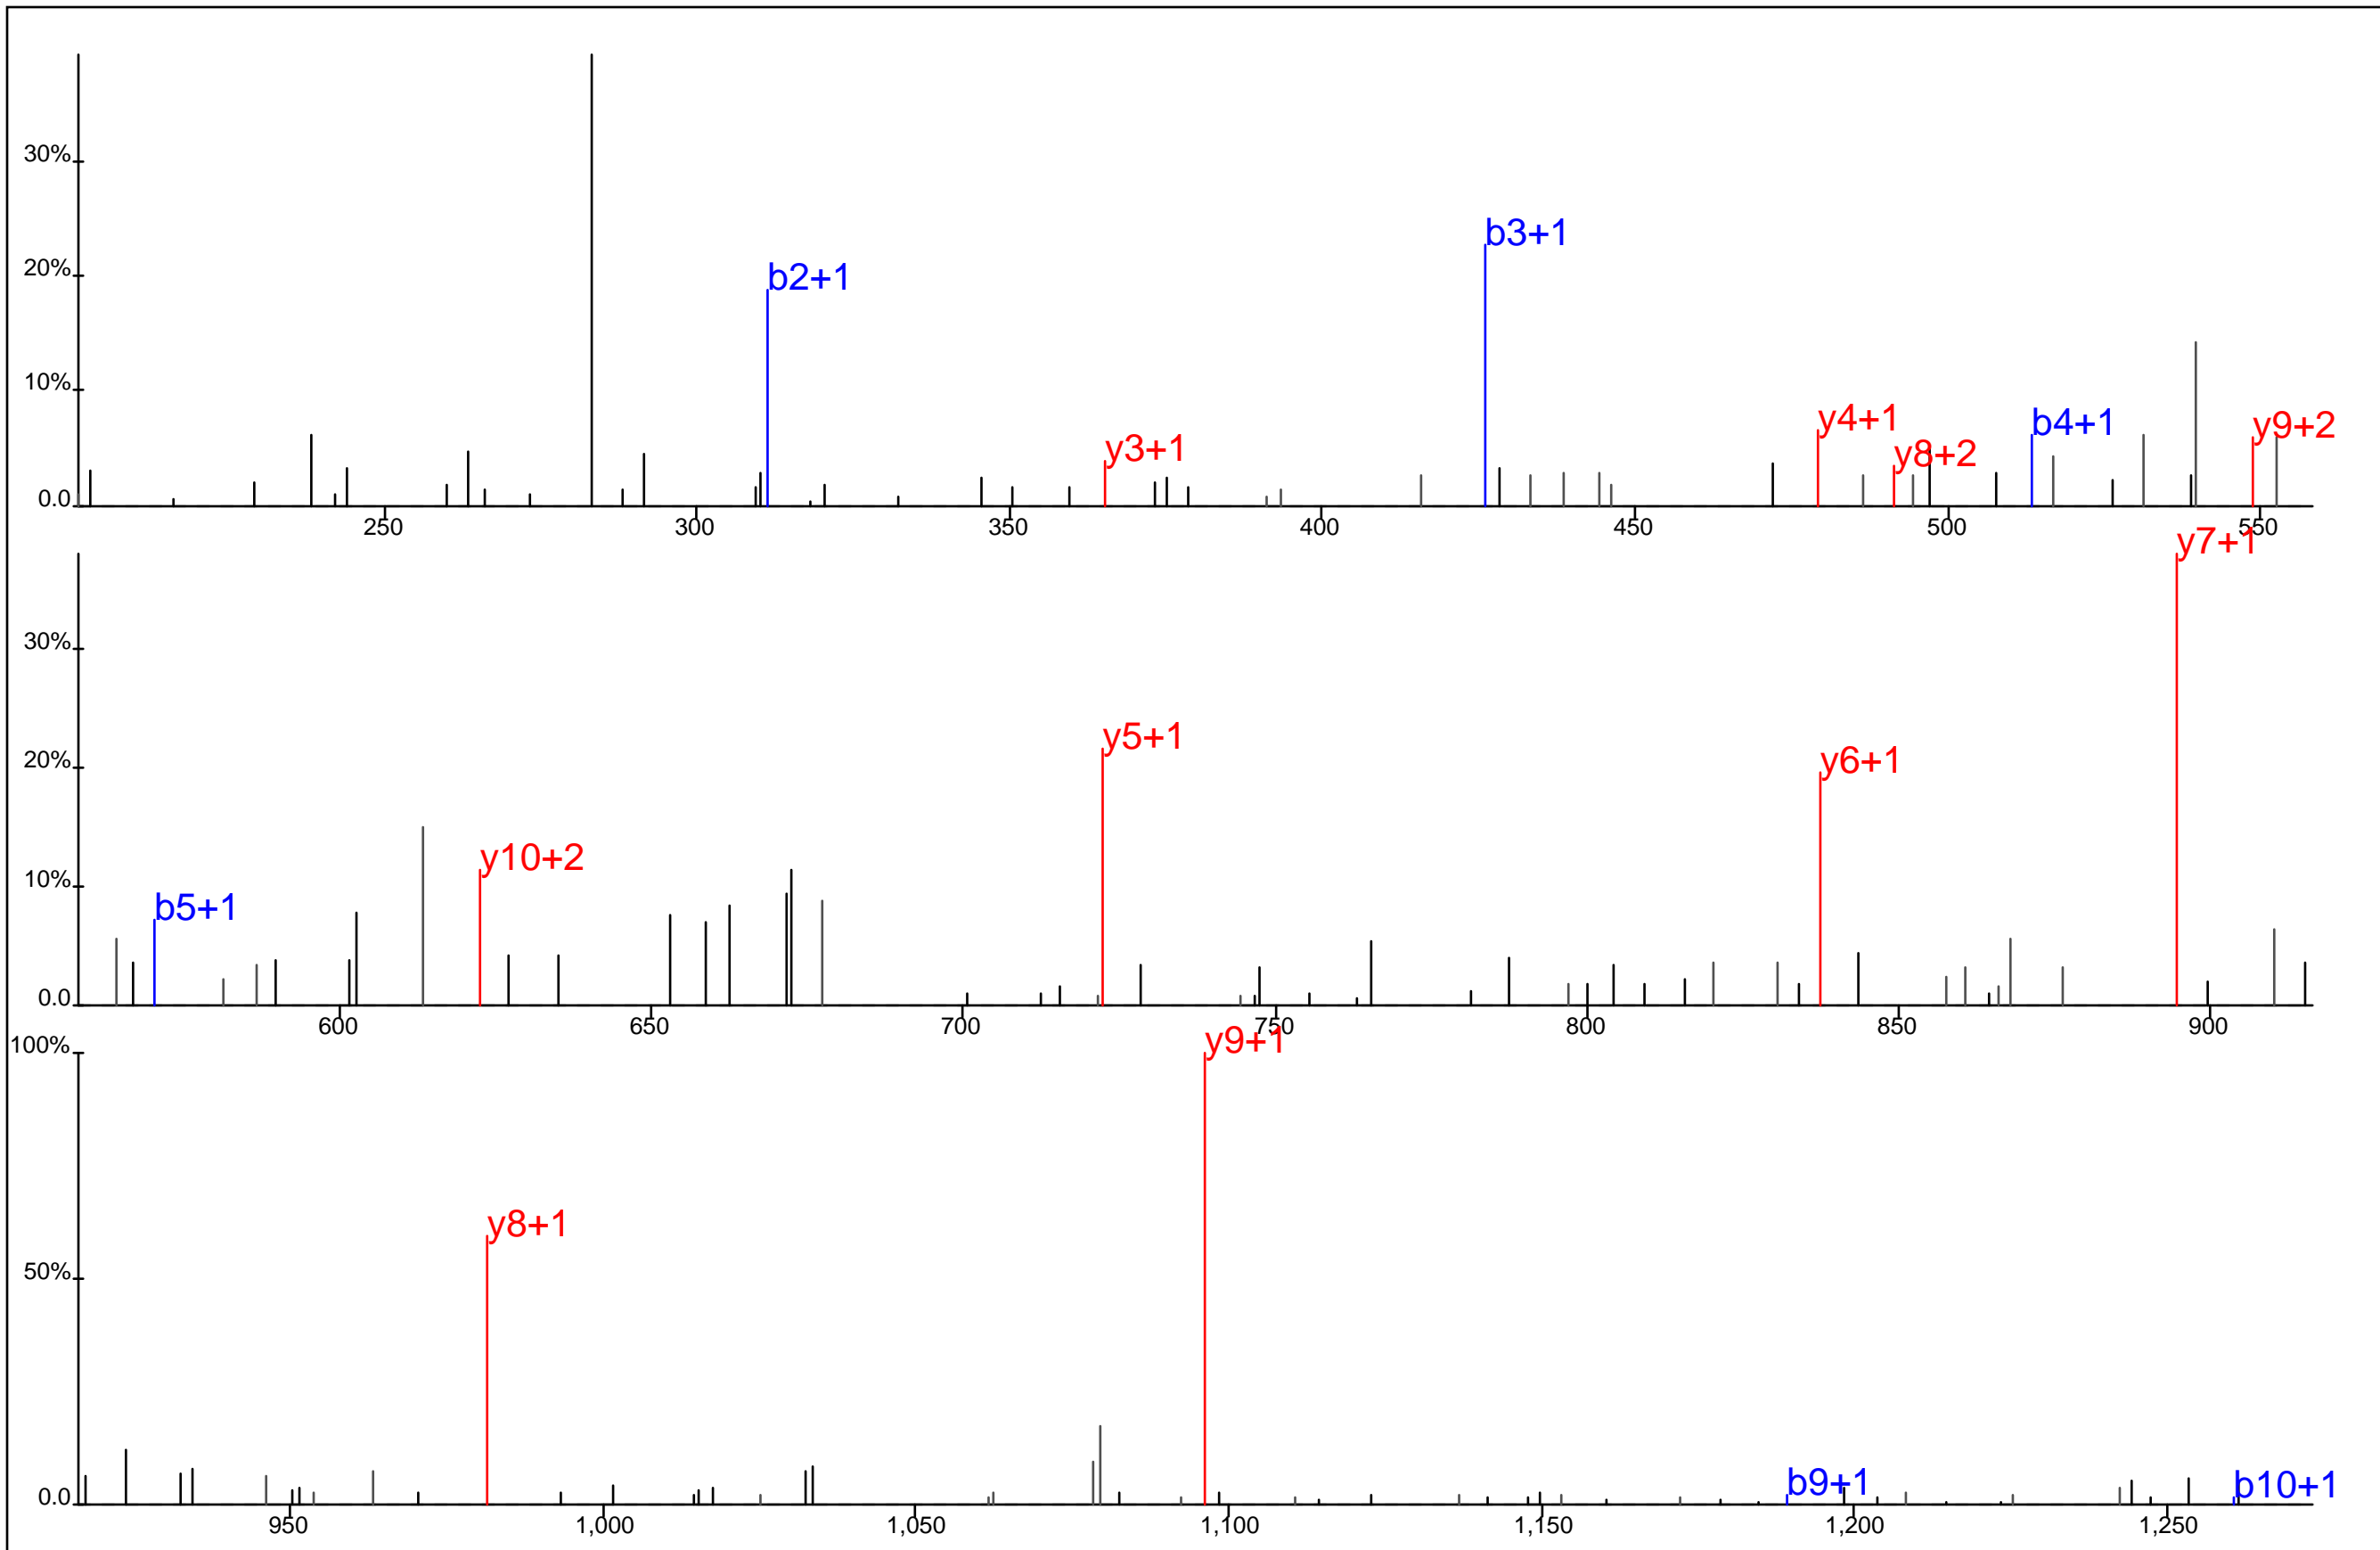

■ ■ □ □ □ □ □ □  
 Y F D S G D Y\* N M# A K  
■ ■ ■ ■ ■ ■ ■ ■

Protein Name: ARPP19  
 gi Accession: 0  
 Precursor Mass: 703.7526+2  
 Delta Mass: 0.603 ppm  
 XCorr: 44.85

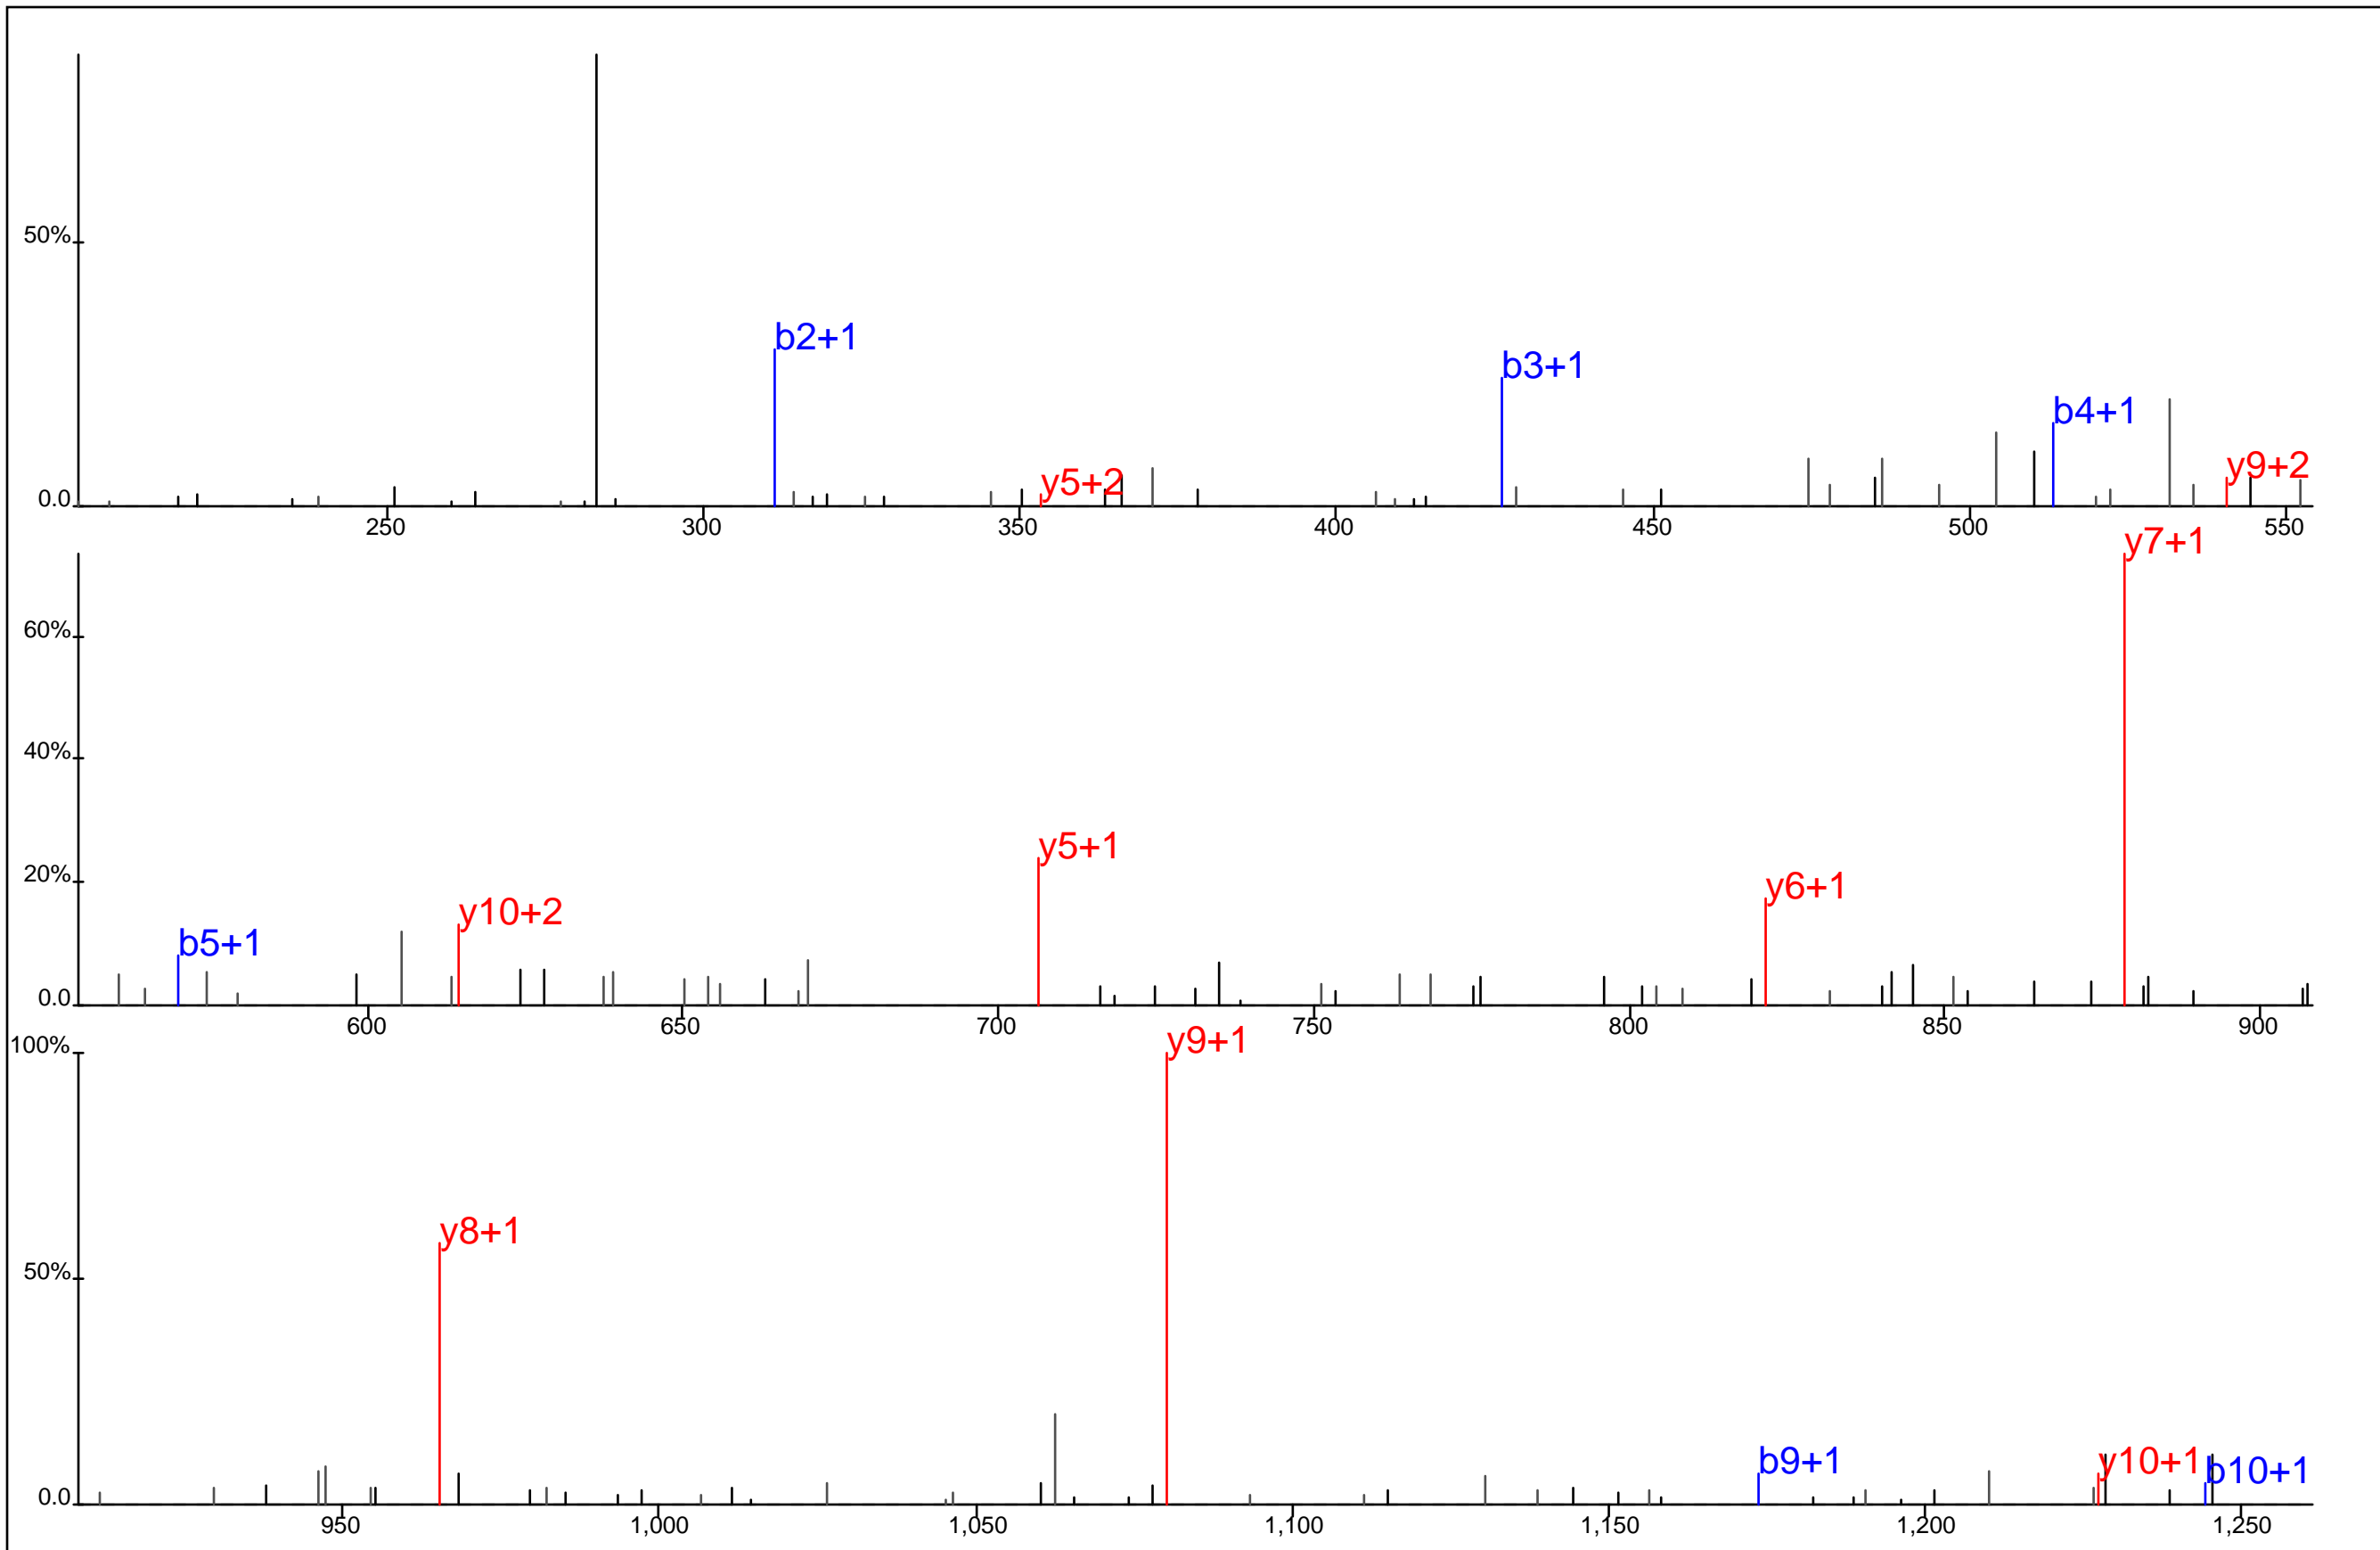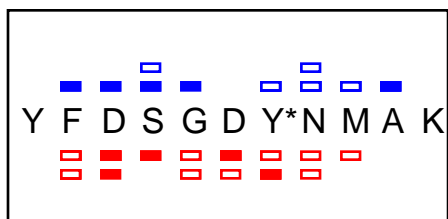

Protein Name: ARPP19  
 gi Accession: 0  
 Precursor Mass: 695.7538+2  
 Delta Mass: 1.207 ppm  
 XCorr: 31.18



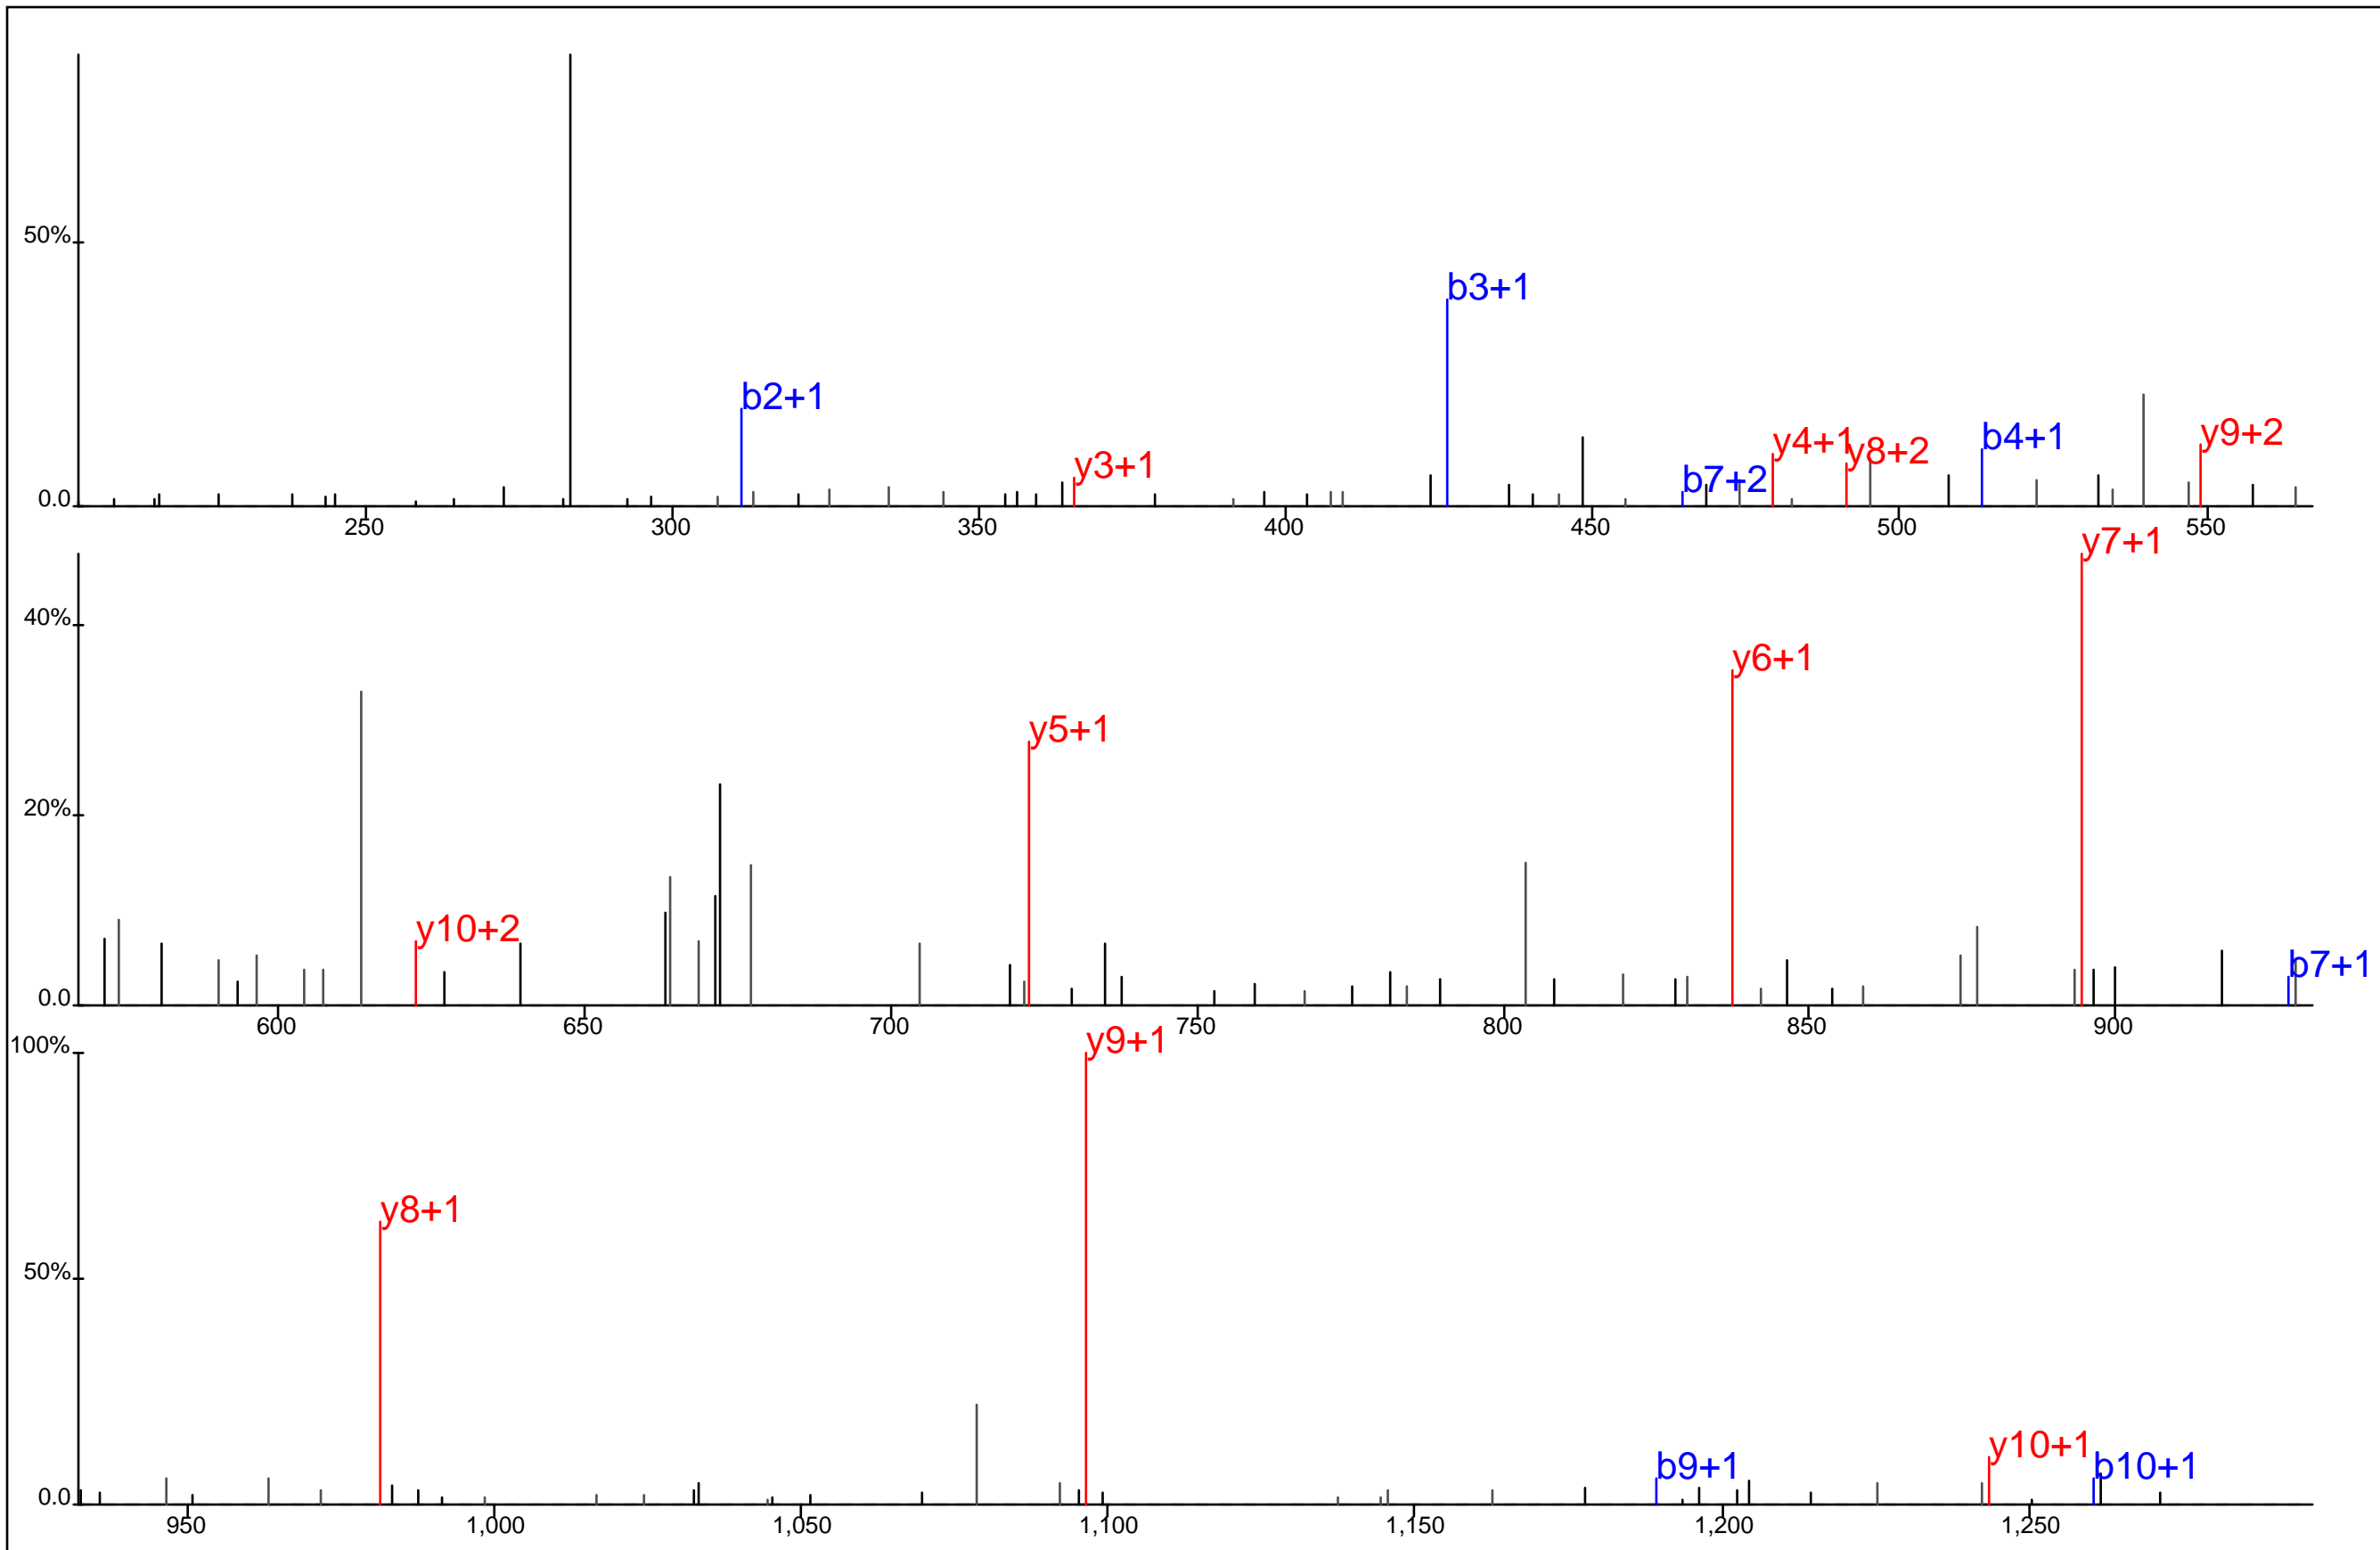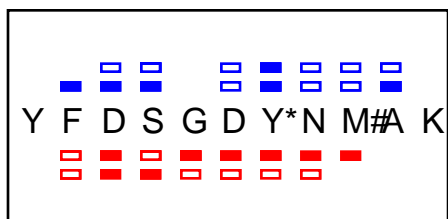

Protein Name: ARPP19  
 gi Accession: 0  
 Precursor Mass: 703.7540+2  
 Delta Mass: 2.599 ppm  
 XCorr: 52.5

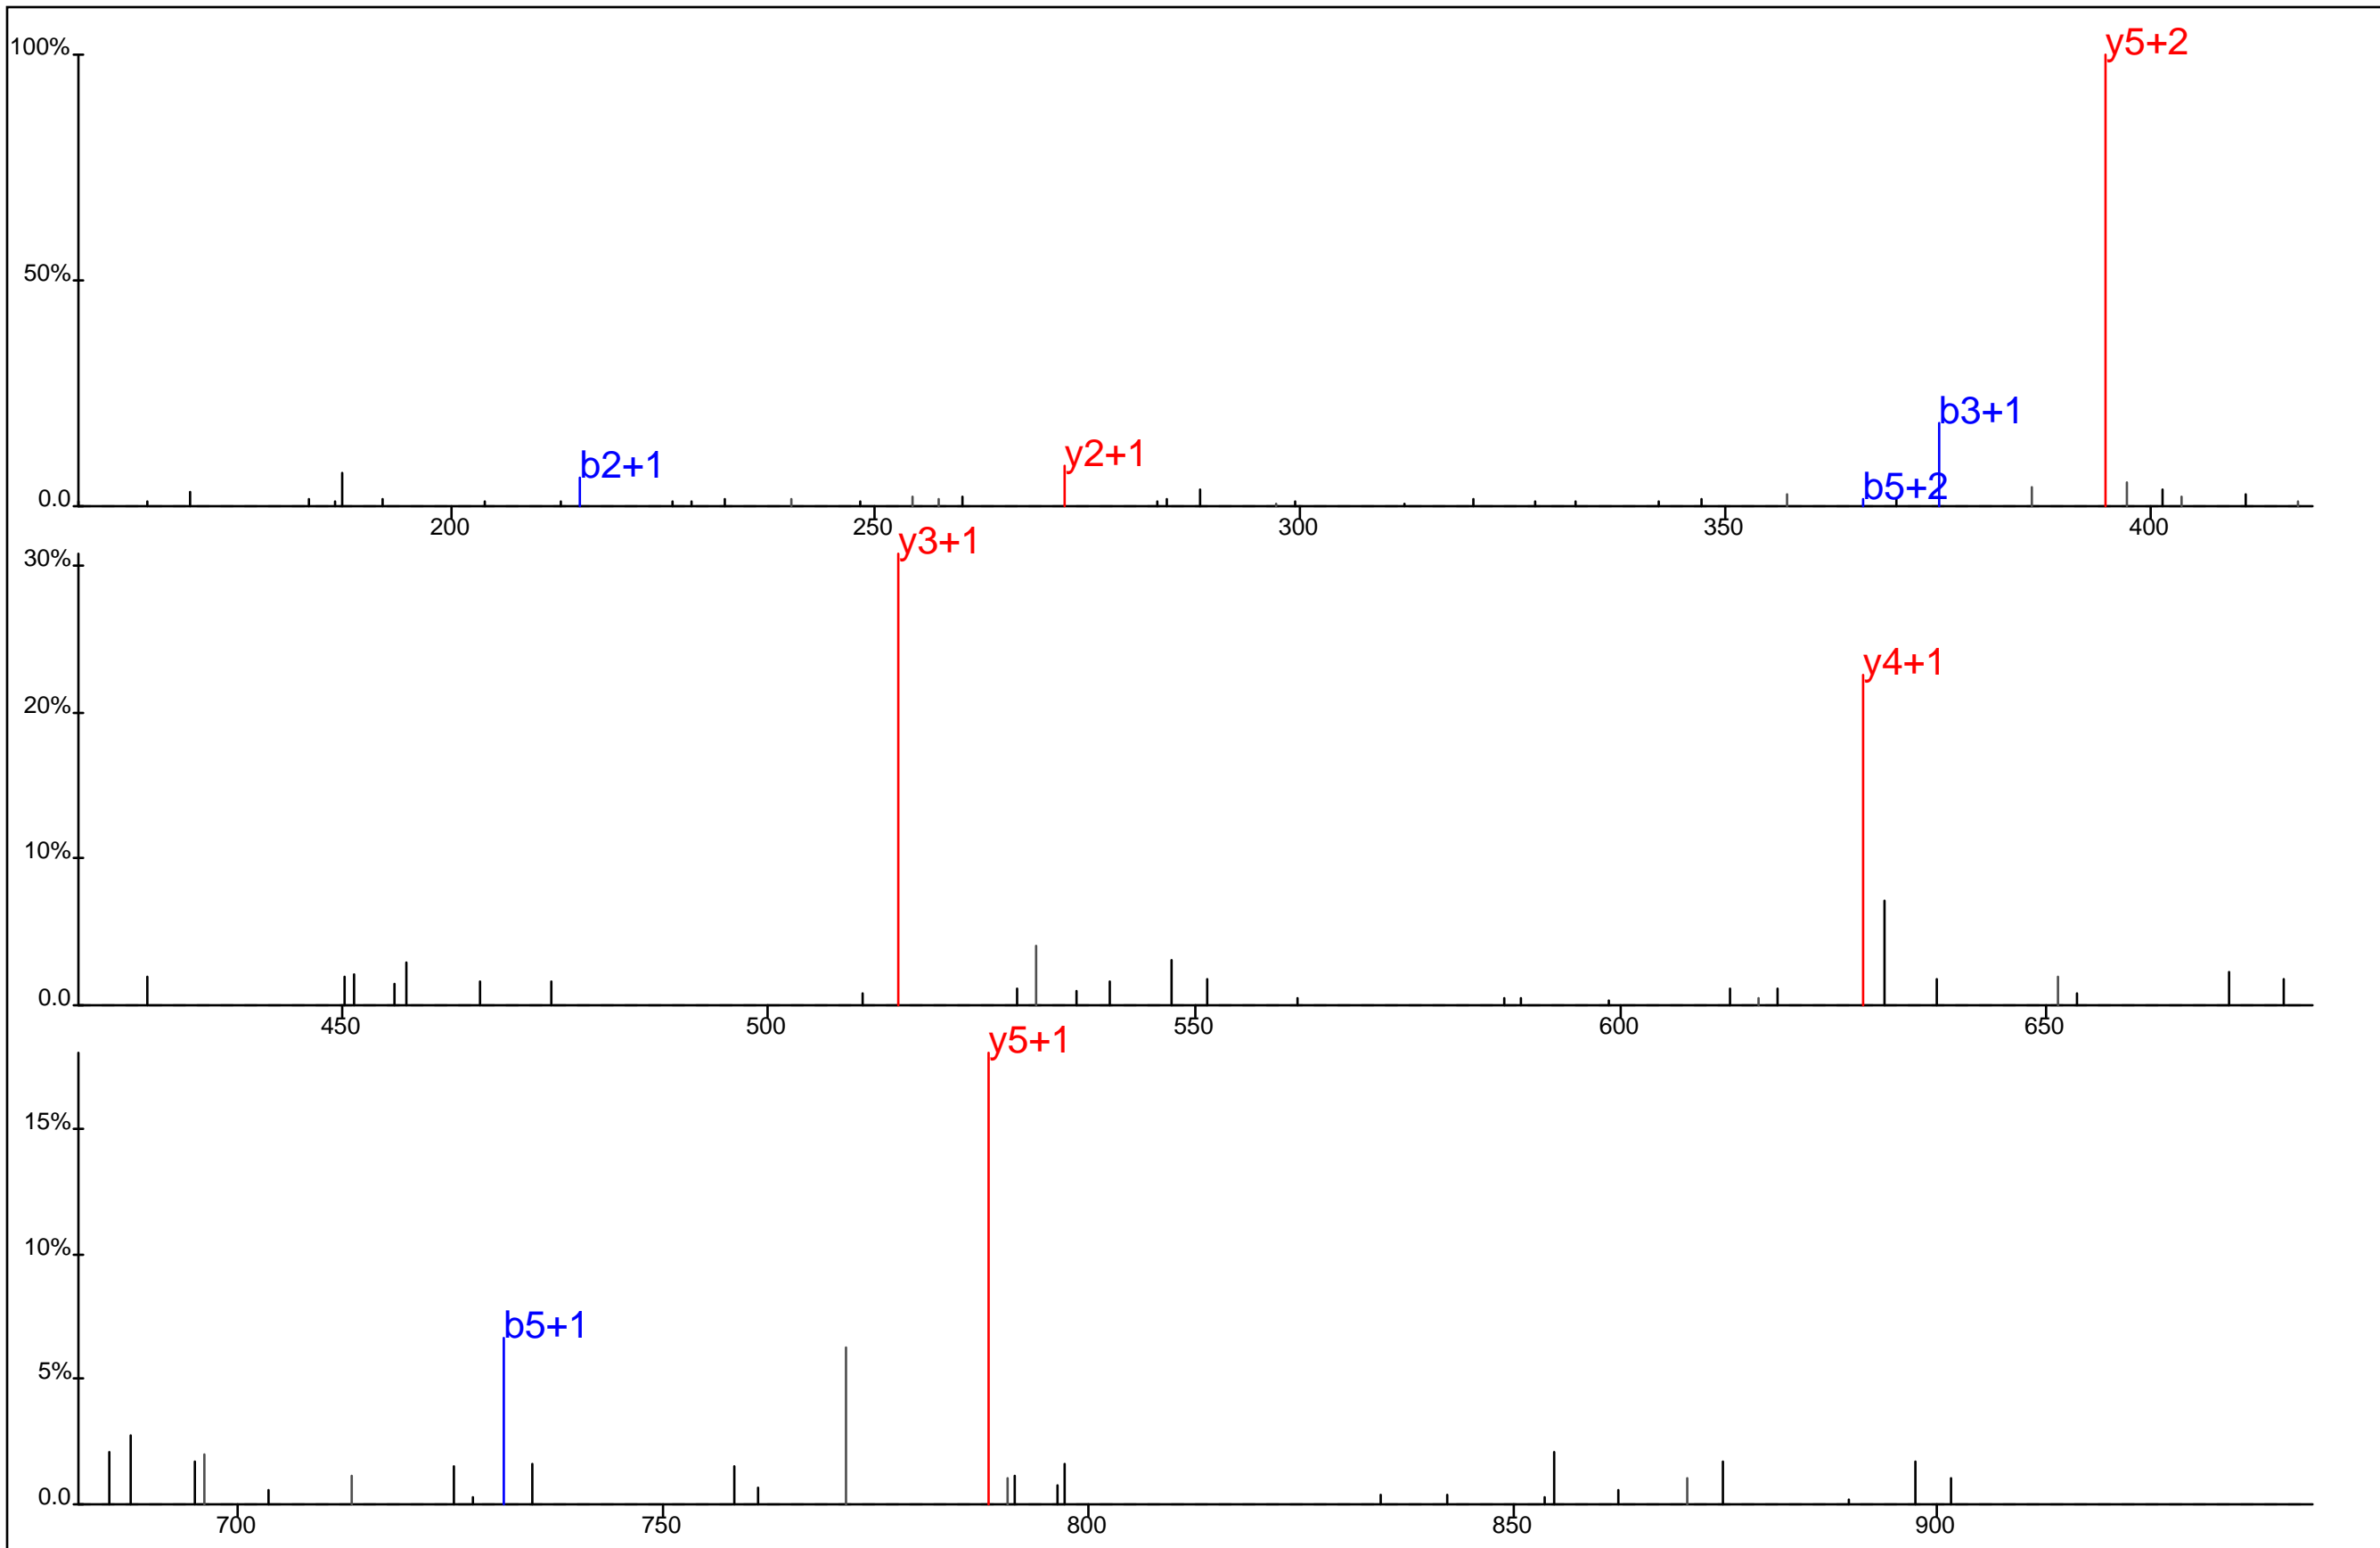

**D V C L Y\* P R**

Protein Name: Asparaginyl tRNA synthetase  
 gi Accession: 0  
 Precursor Mass: 501.7097+2  
 Delta Mass: 0.603 ppm  
 XCorr: 24.19

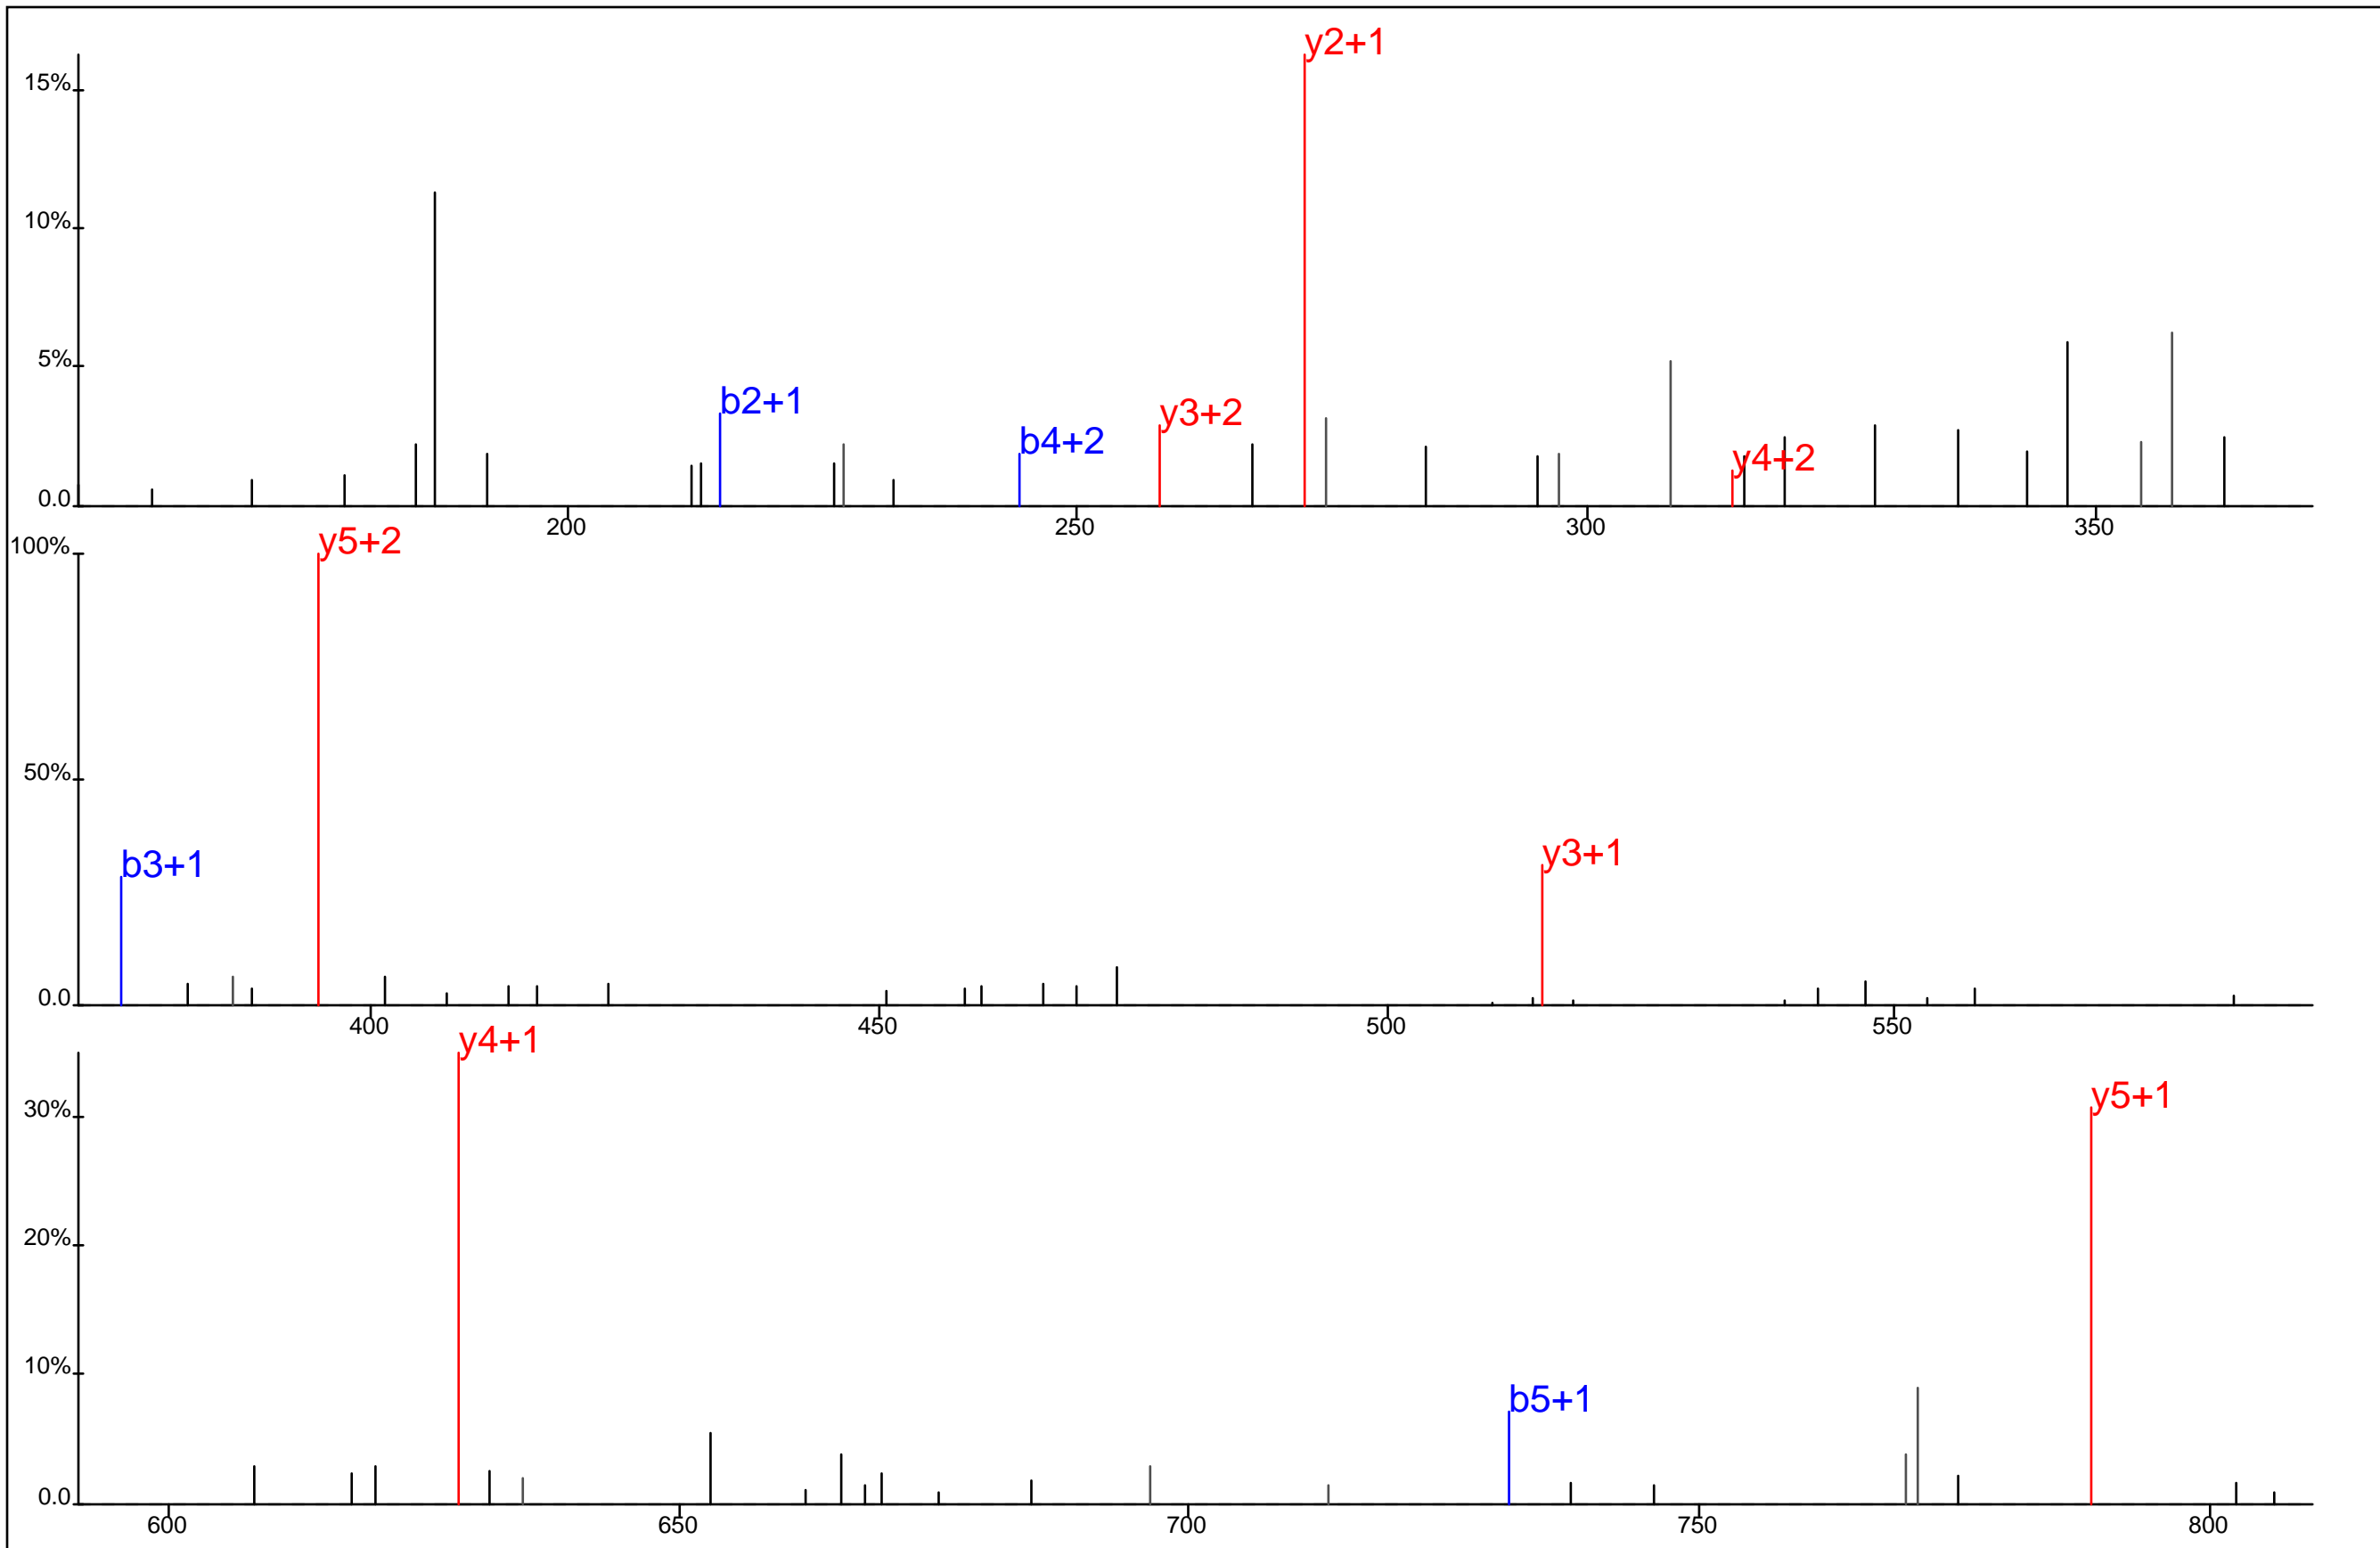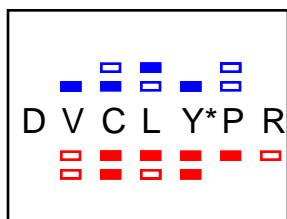

Protein Name: Asparaginyl tRNA synthetase  
 gi Accession: 0  
 Precursor Mass: 501.7095+2  
 Delta Mass: 0.359 ppm  
 XCorr: 26.13

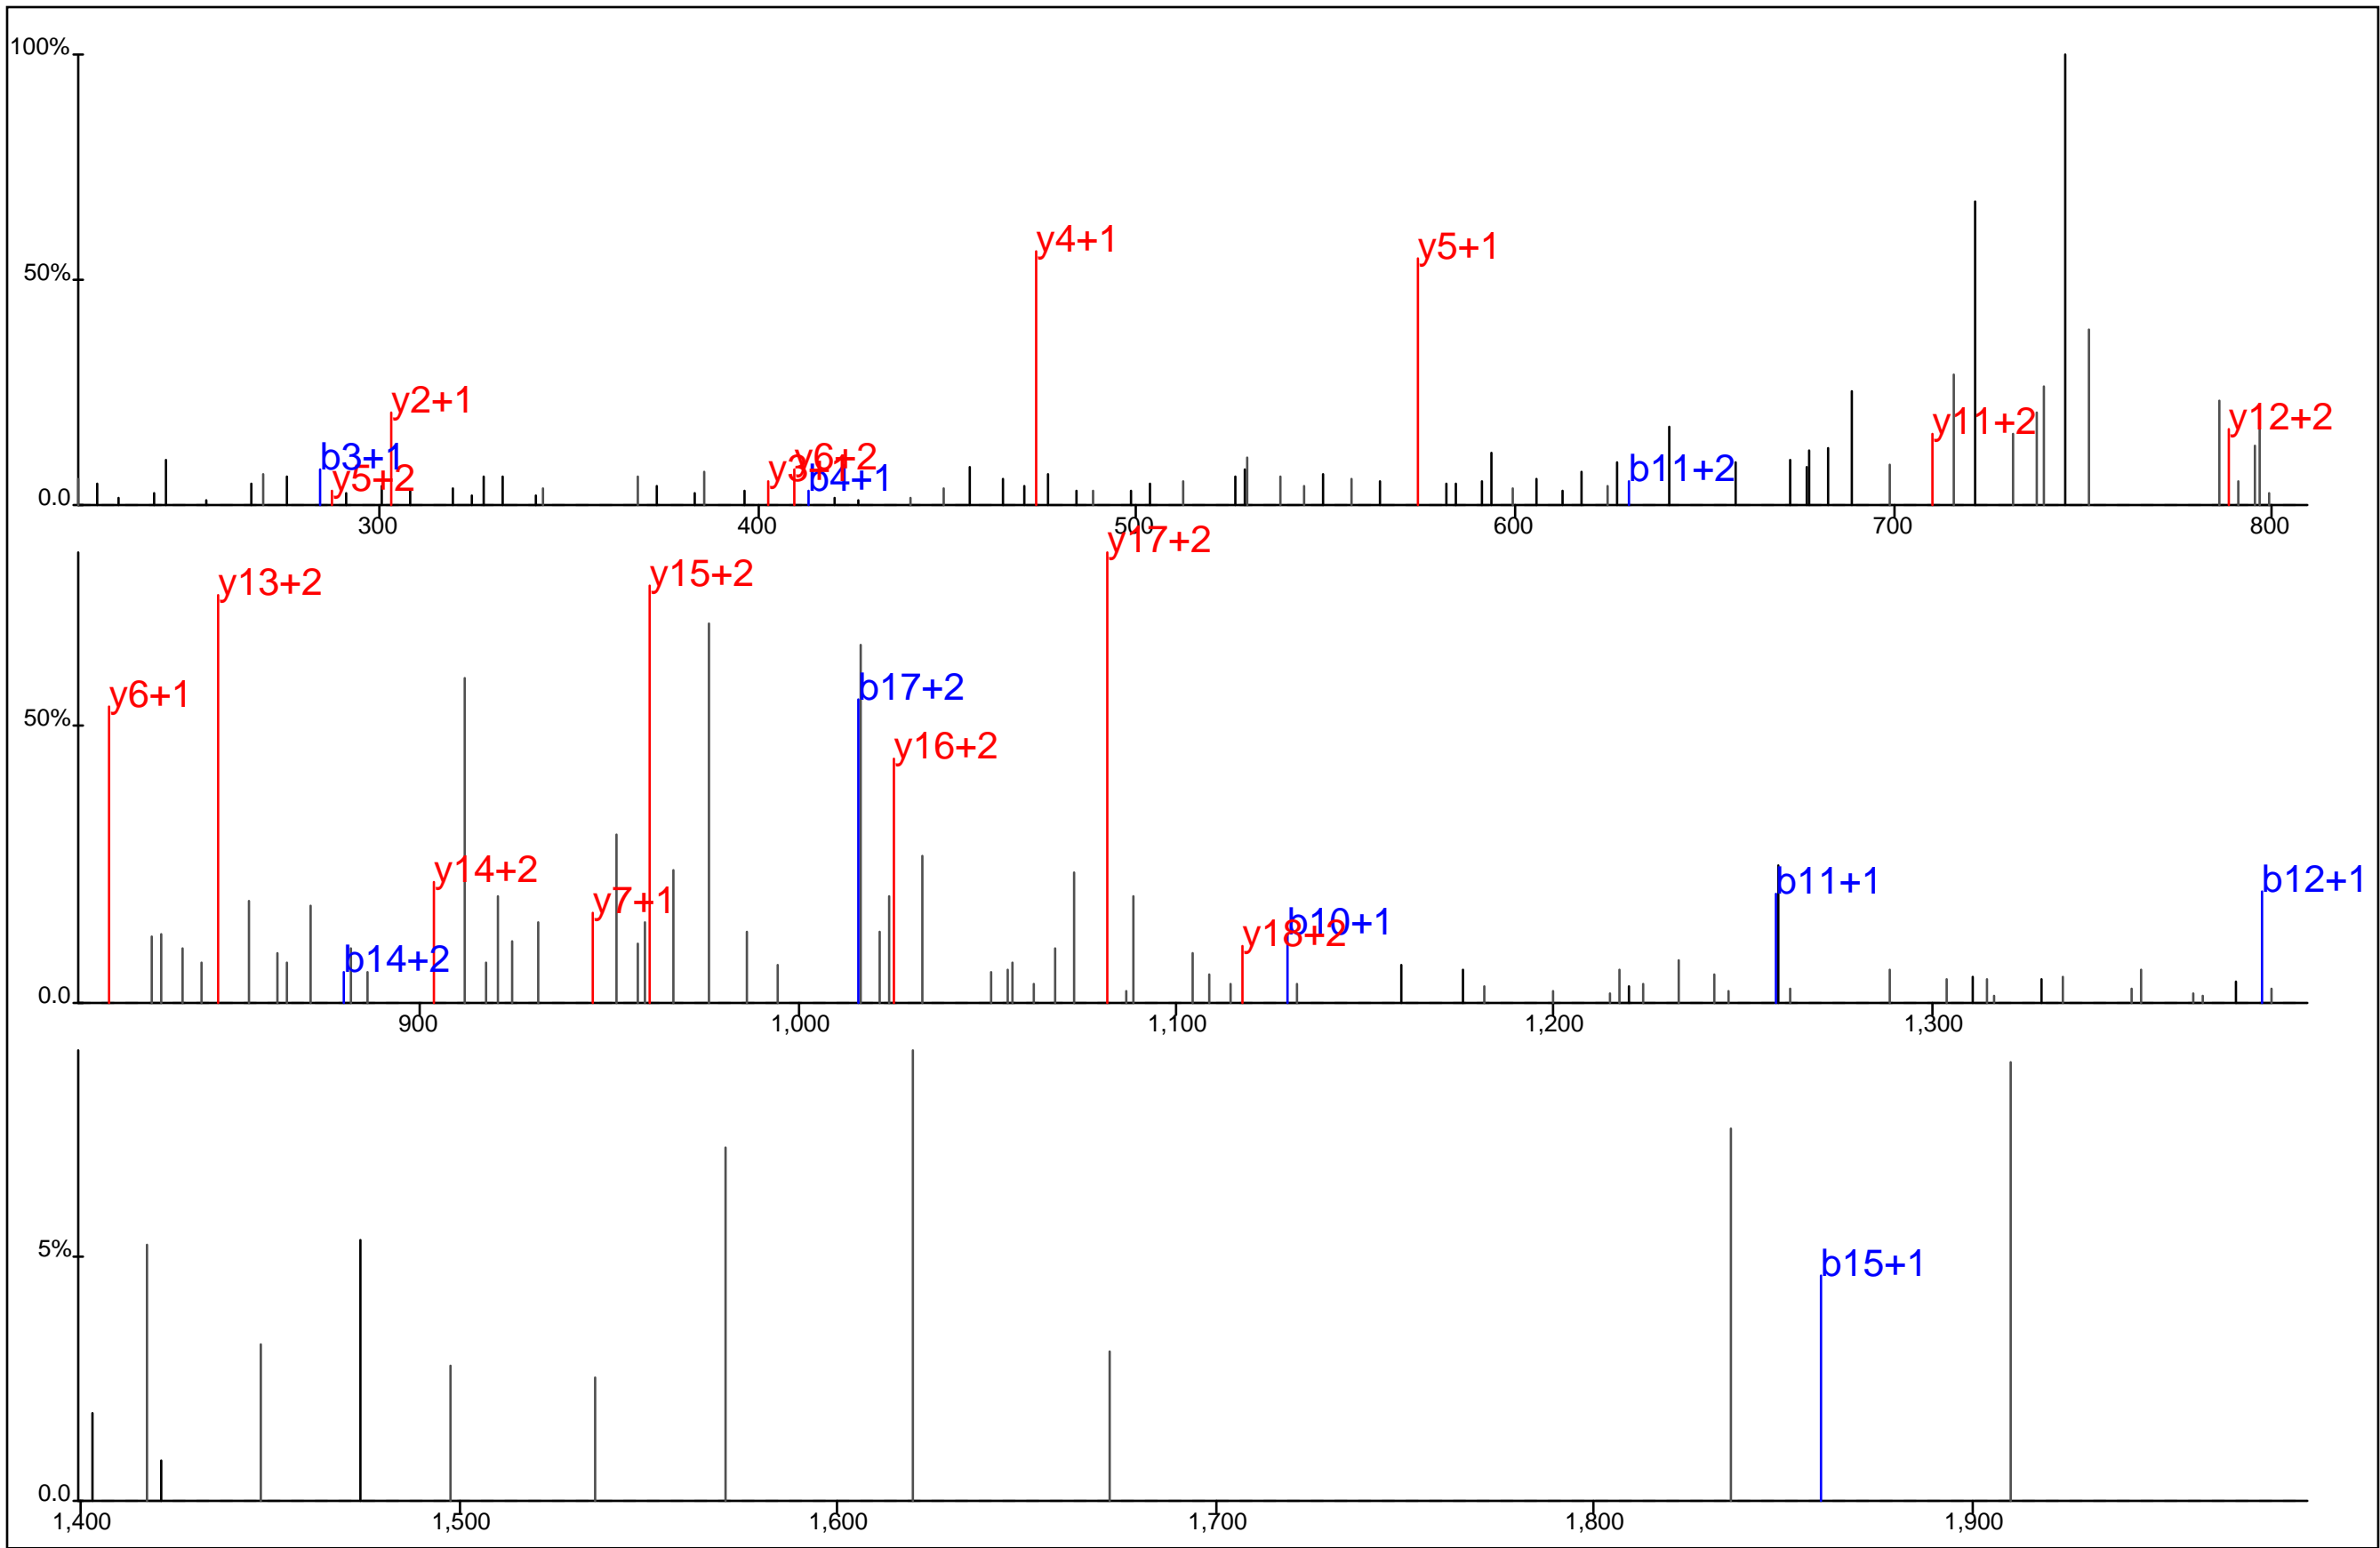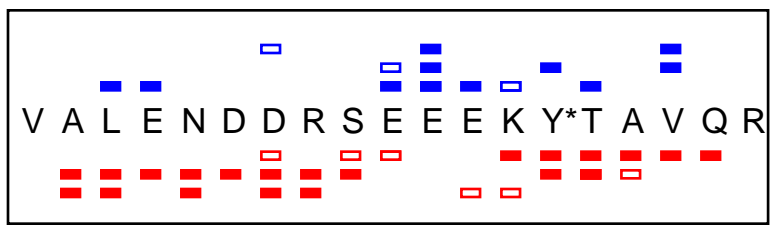

Protein Name: Ataxin 2  
 gi Accession: 0  
 Precursor Mass: 778.0218+3  
 Delta Mass: 2.400 ppm  
 XCorr: 37.21

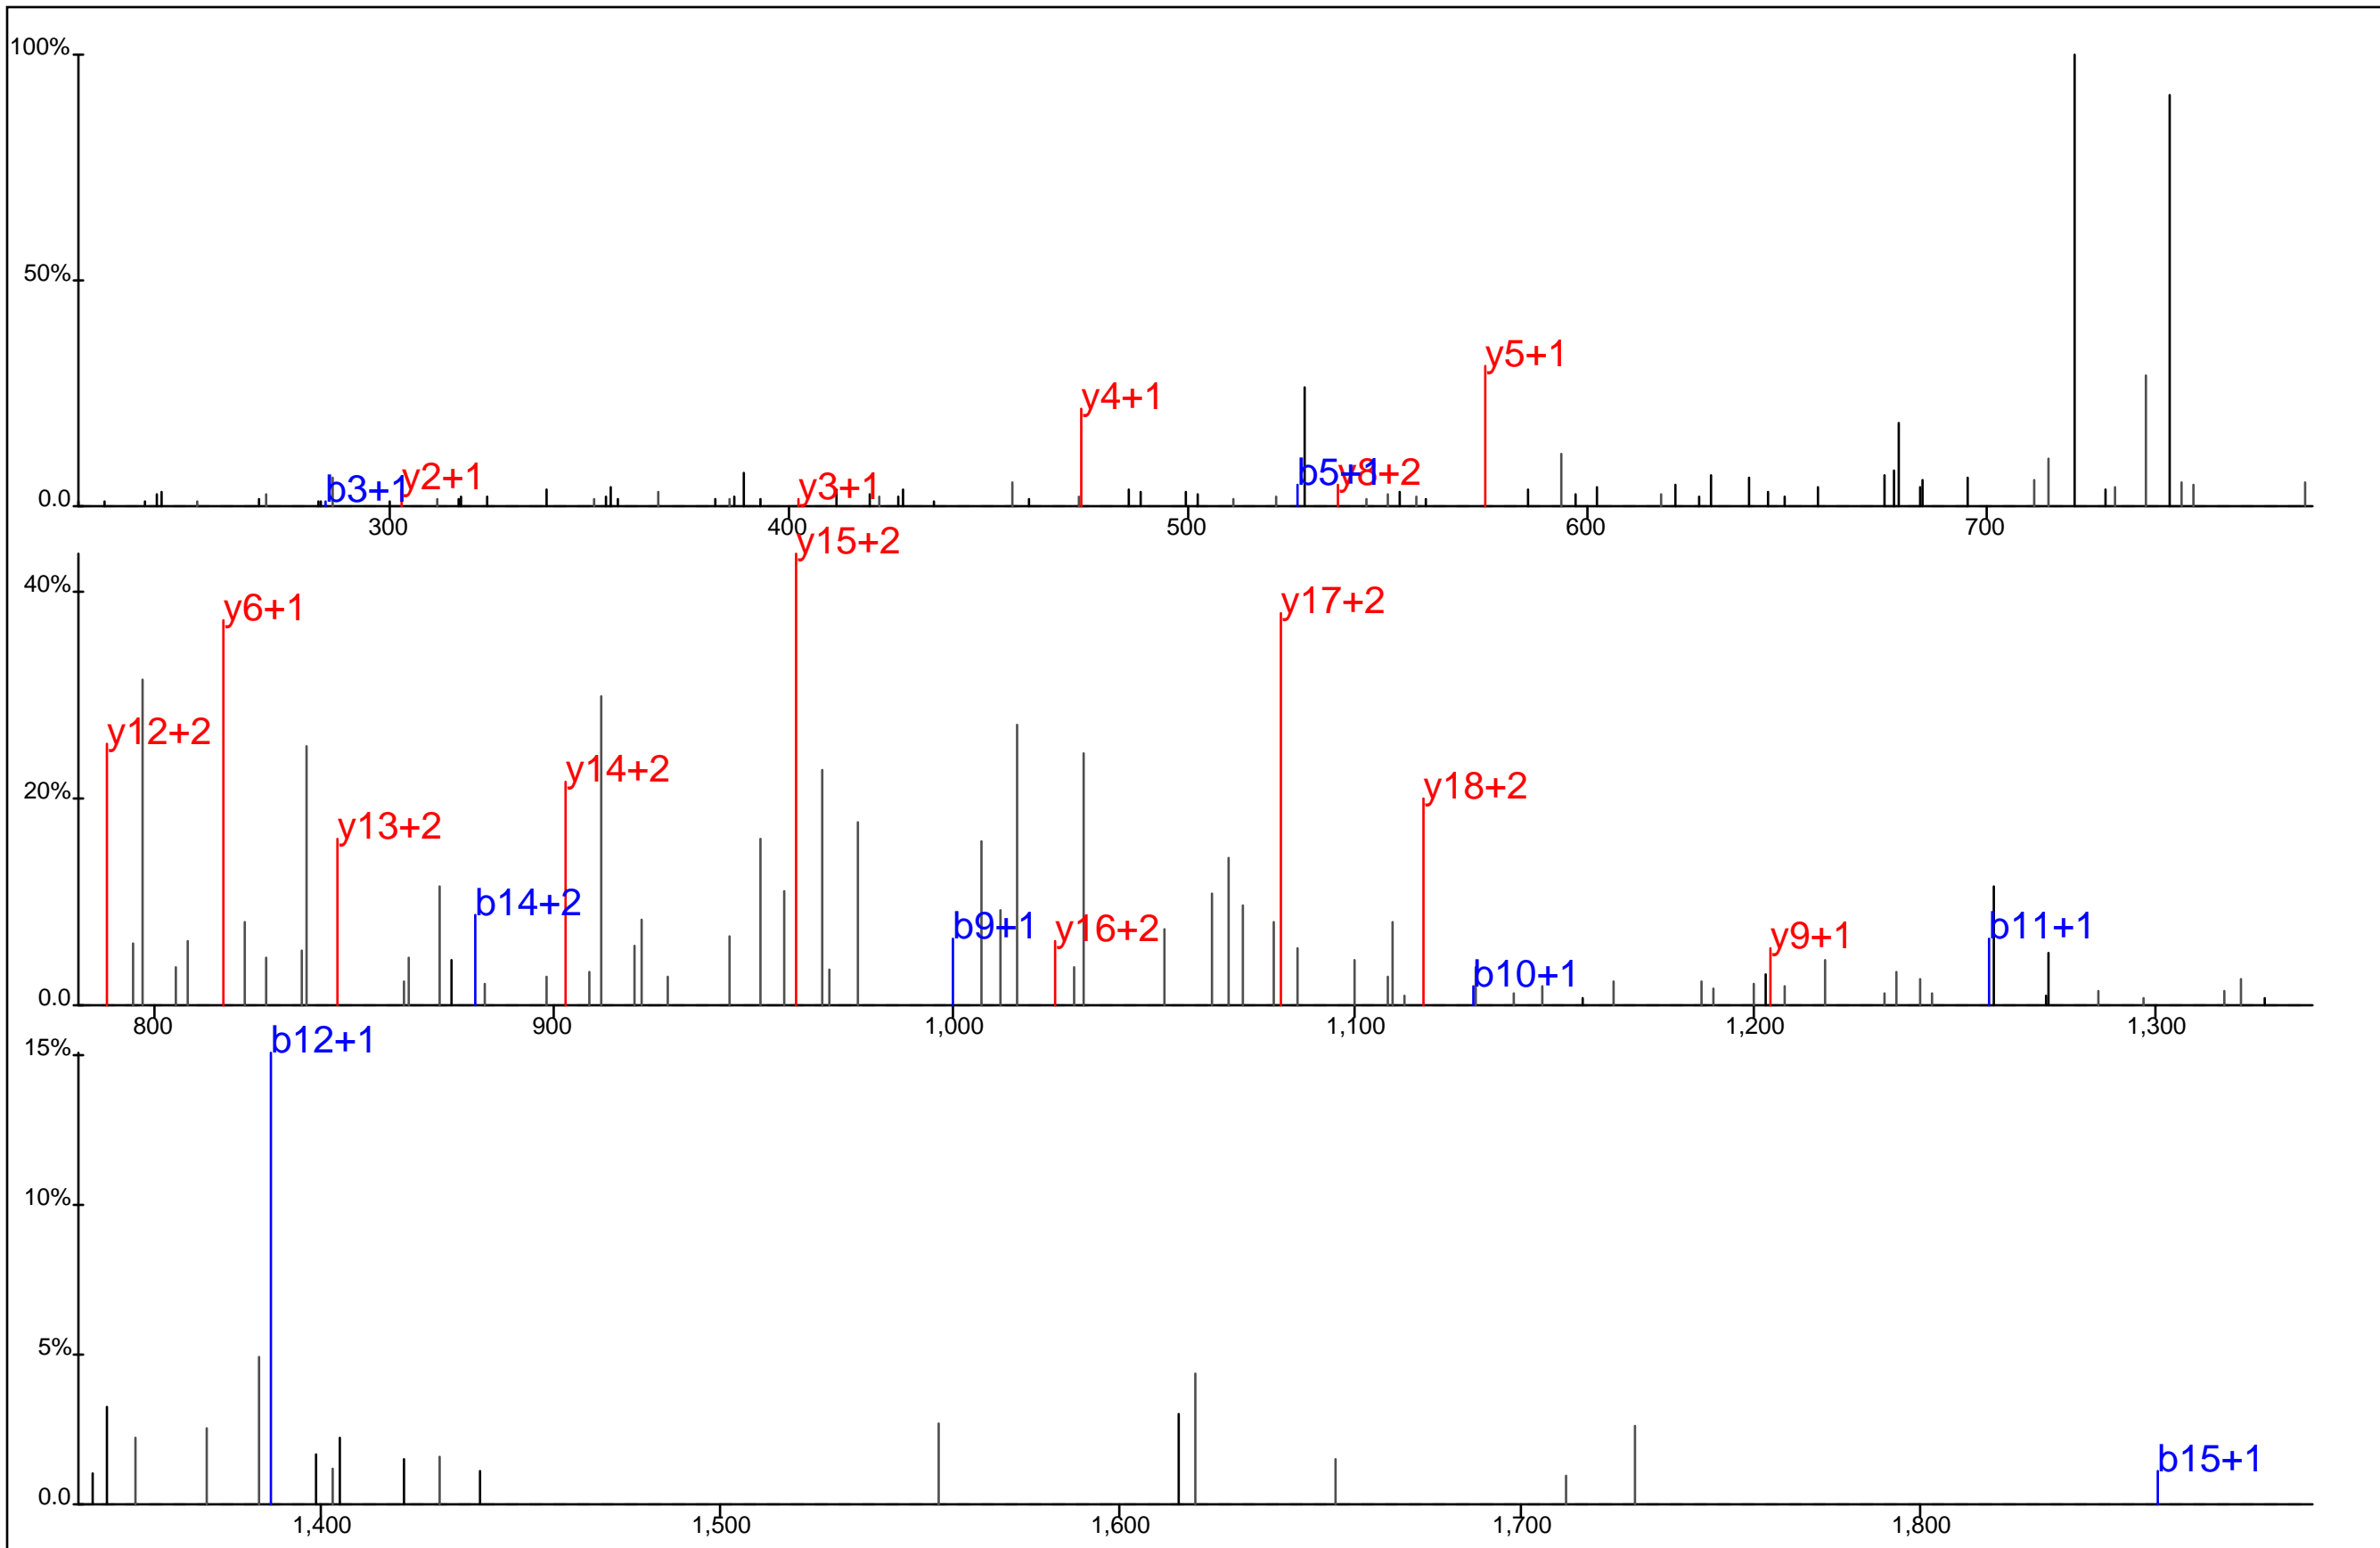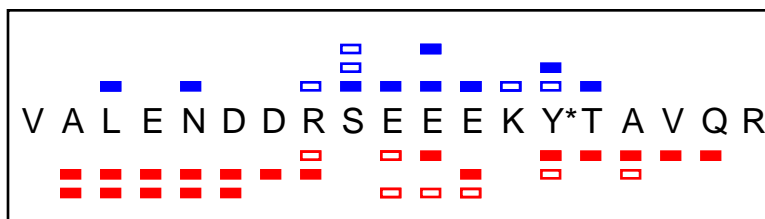

Protein Name: Ataxin 2  
 gi Accession: 0  
 Precursor Mass: 778.0218+3  
 Delta Mass: 2.400 ppm  
 XCorr: 23.28

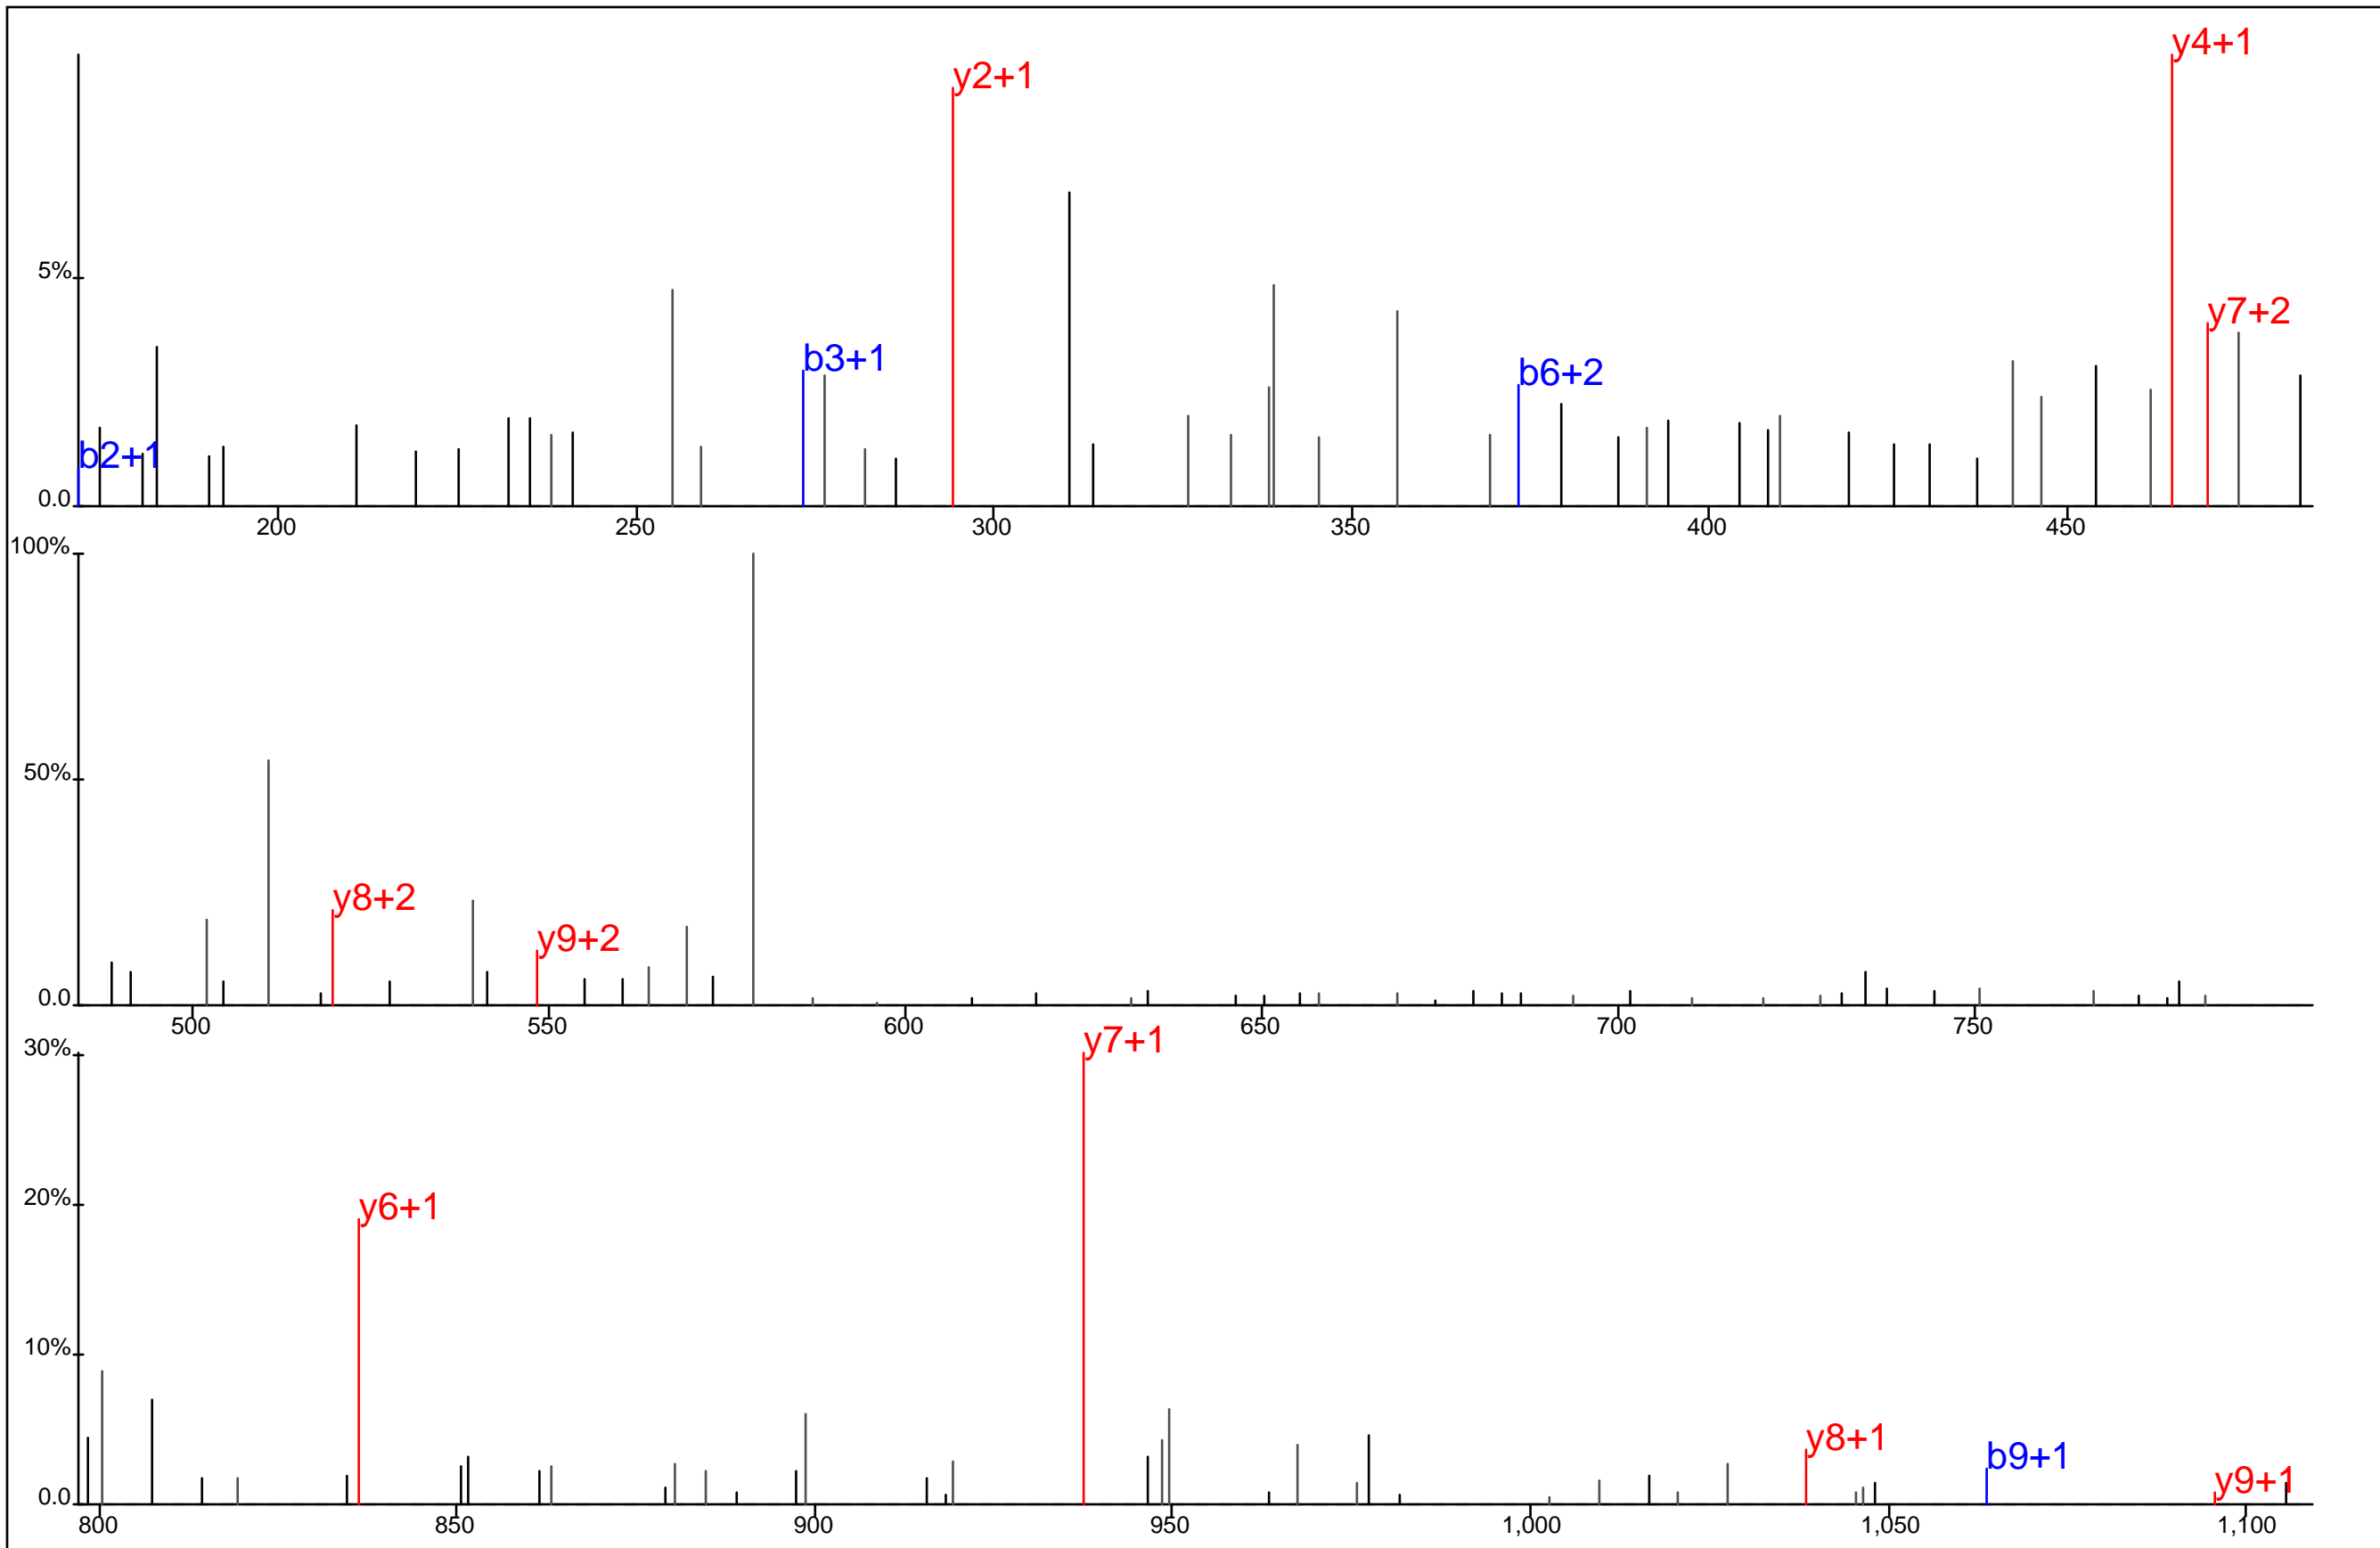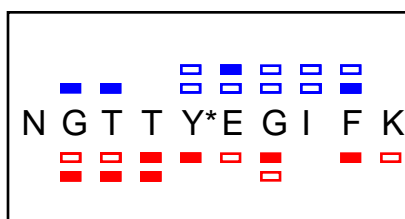

Protein Name: Ataxin 2 domain protein  
 gi Accession: 0  
 Precursor Mass: 605.2620+2  
 Delta Mass: 1.620 ppm  
 XCorr: 22.12

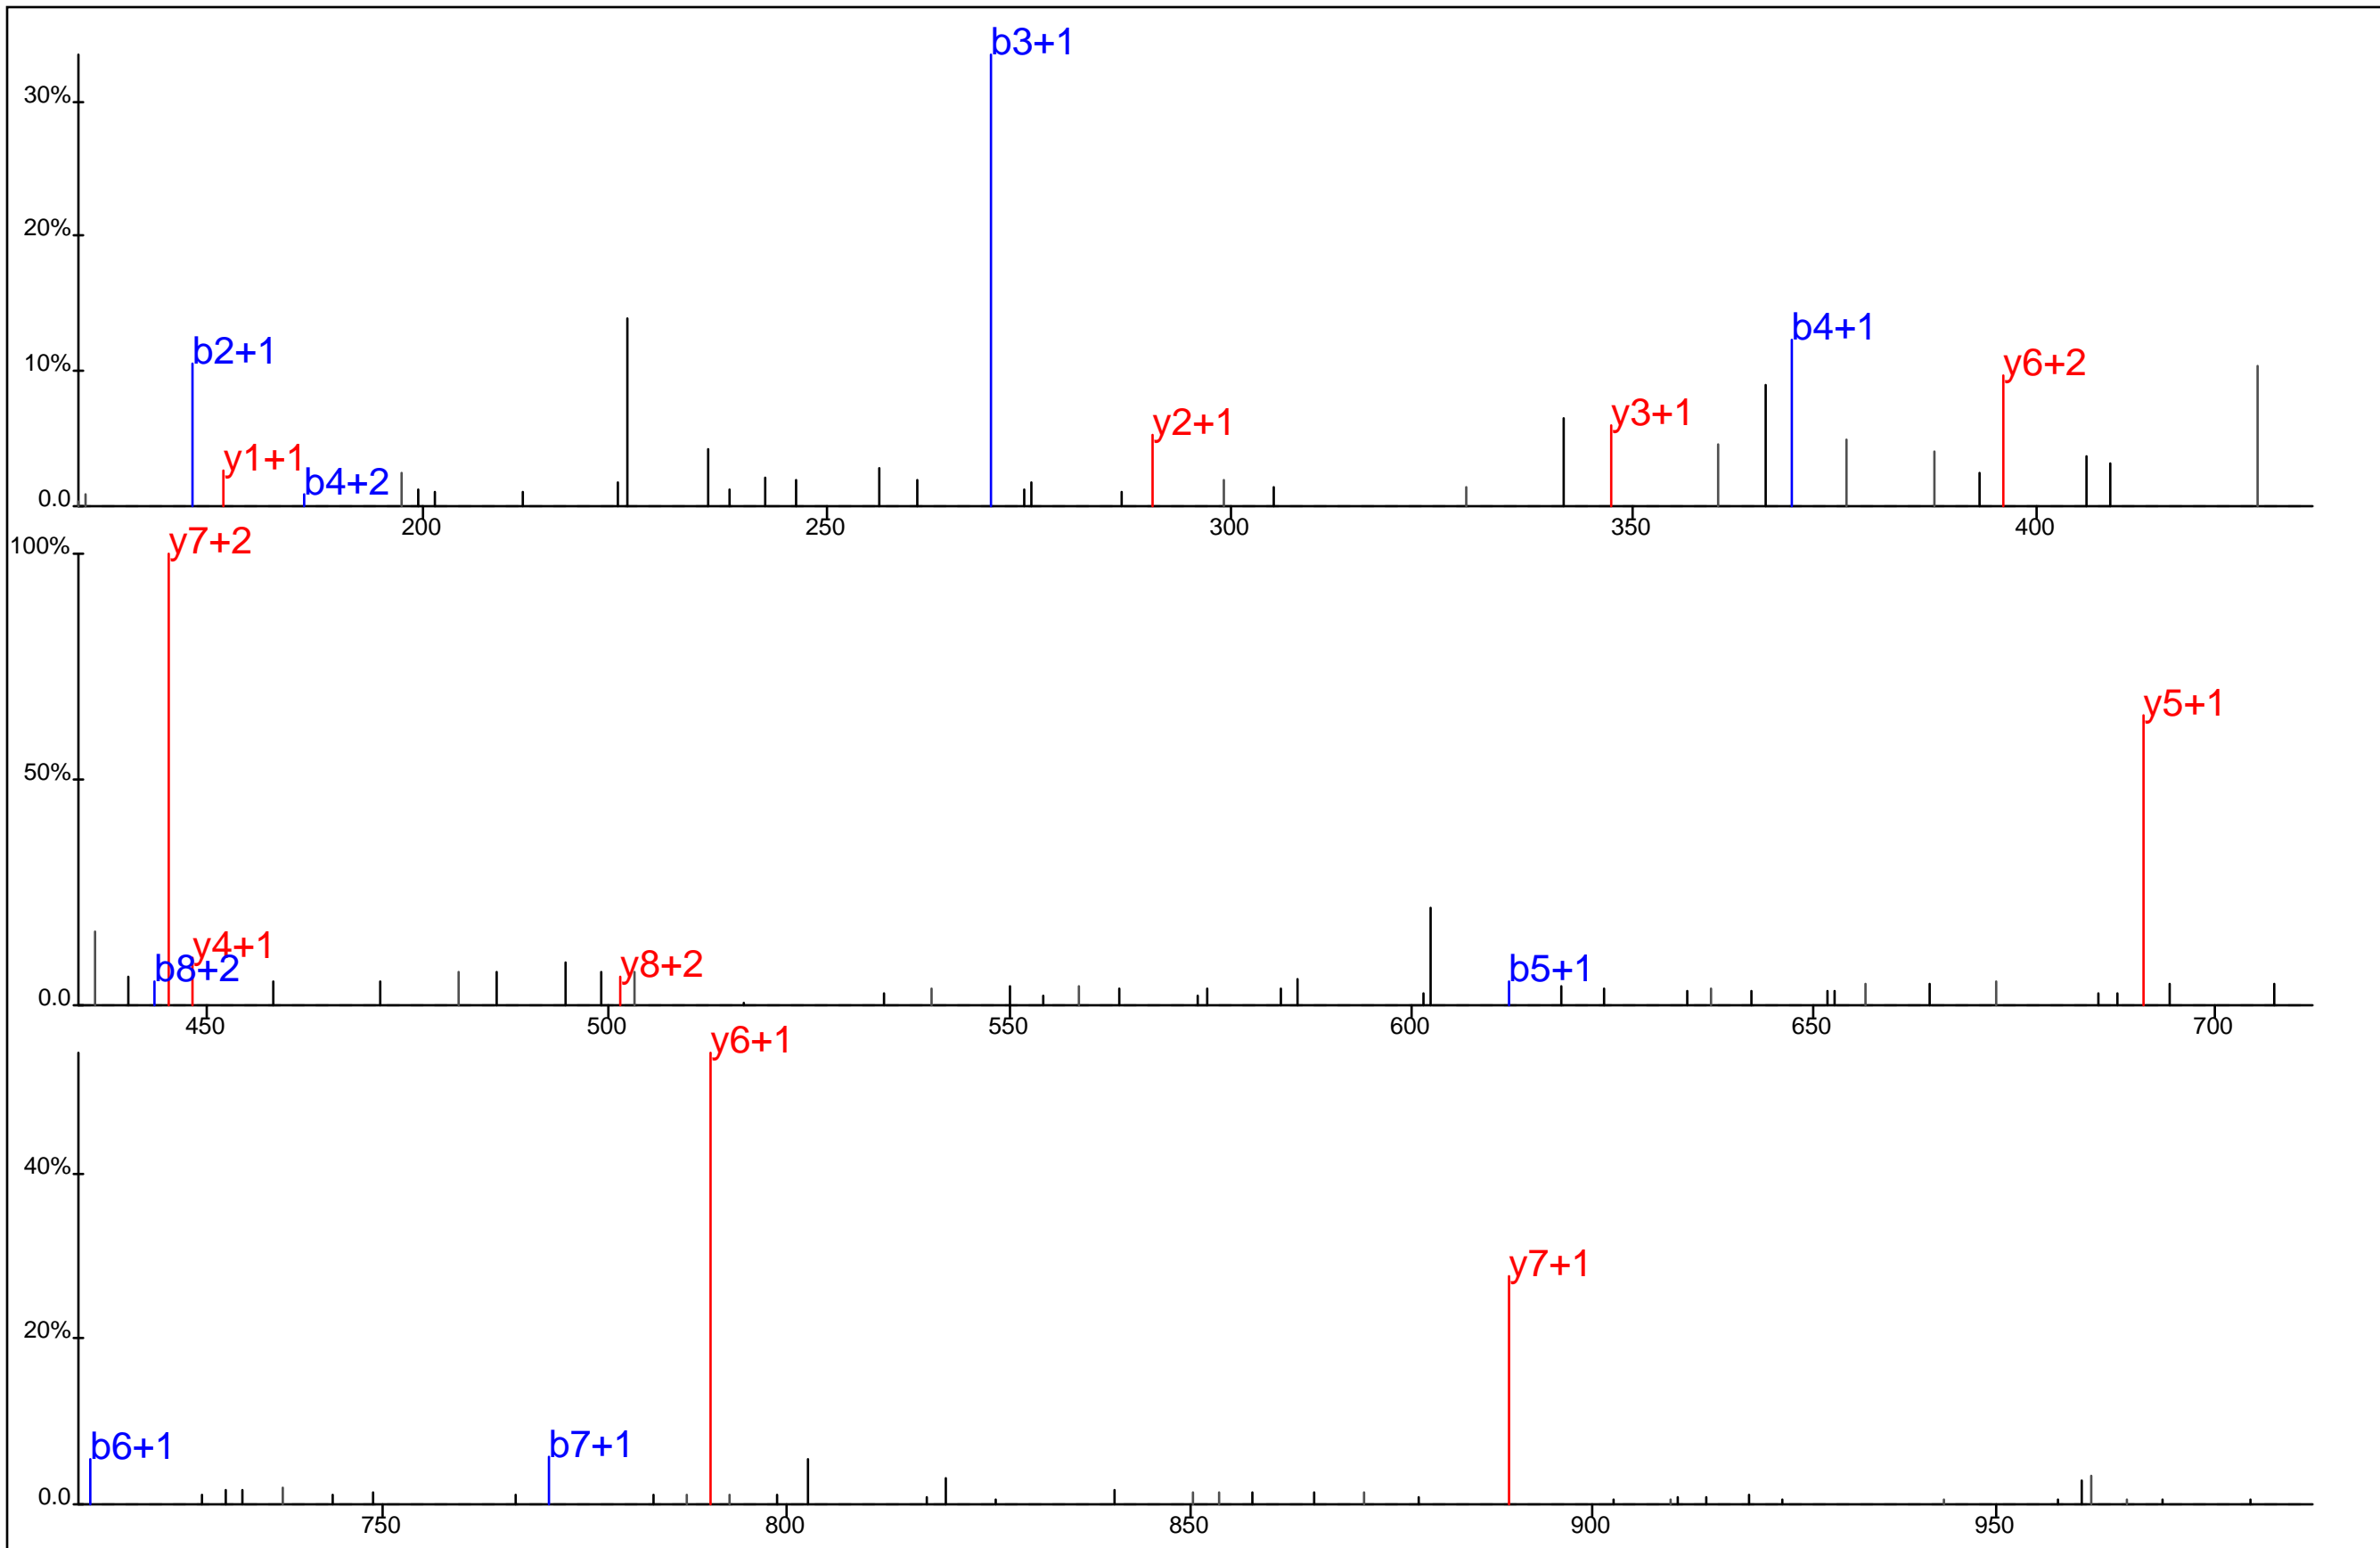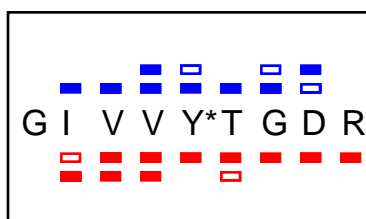

Protein Name: ATP1A1  
 gi Accession: 0  
 Precursor Mass: 530.2490+2  
 Delta Mass: 3.385 ppm  
 XCorr: 33.58

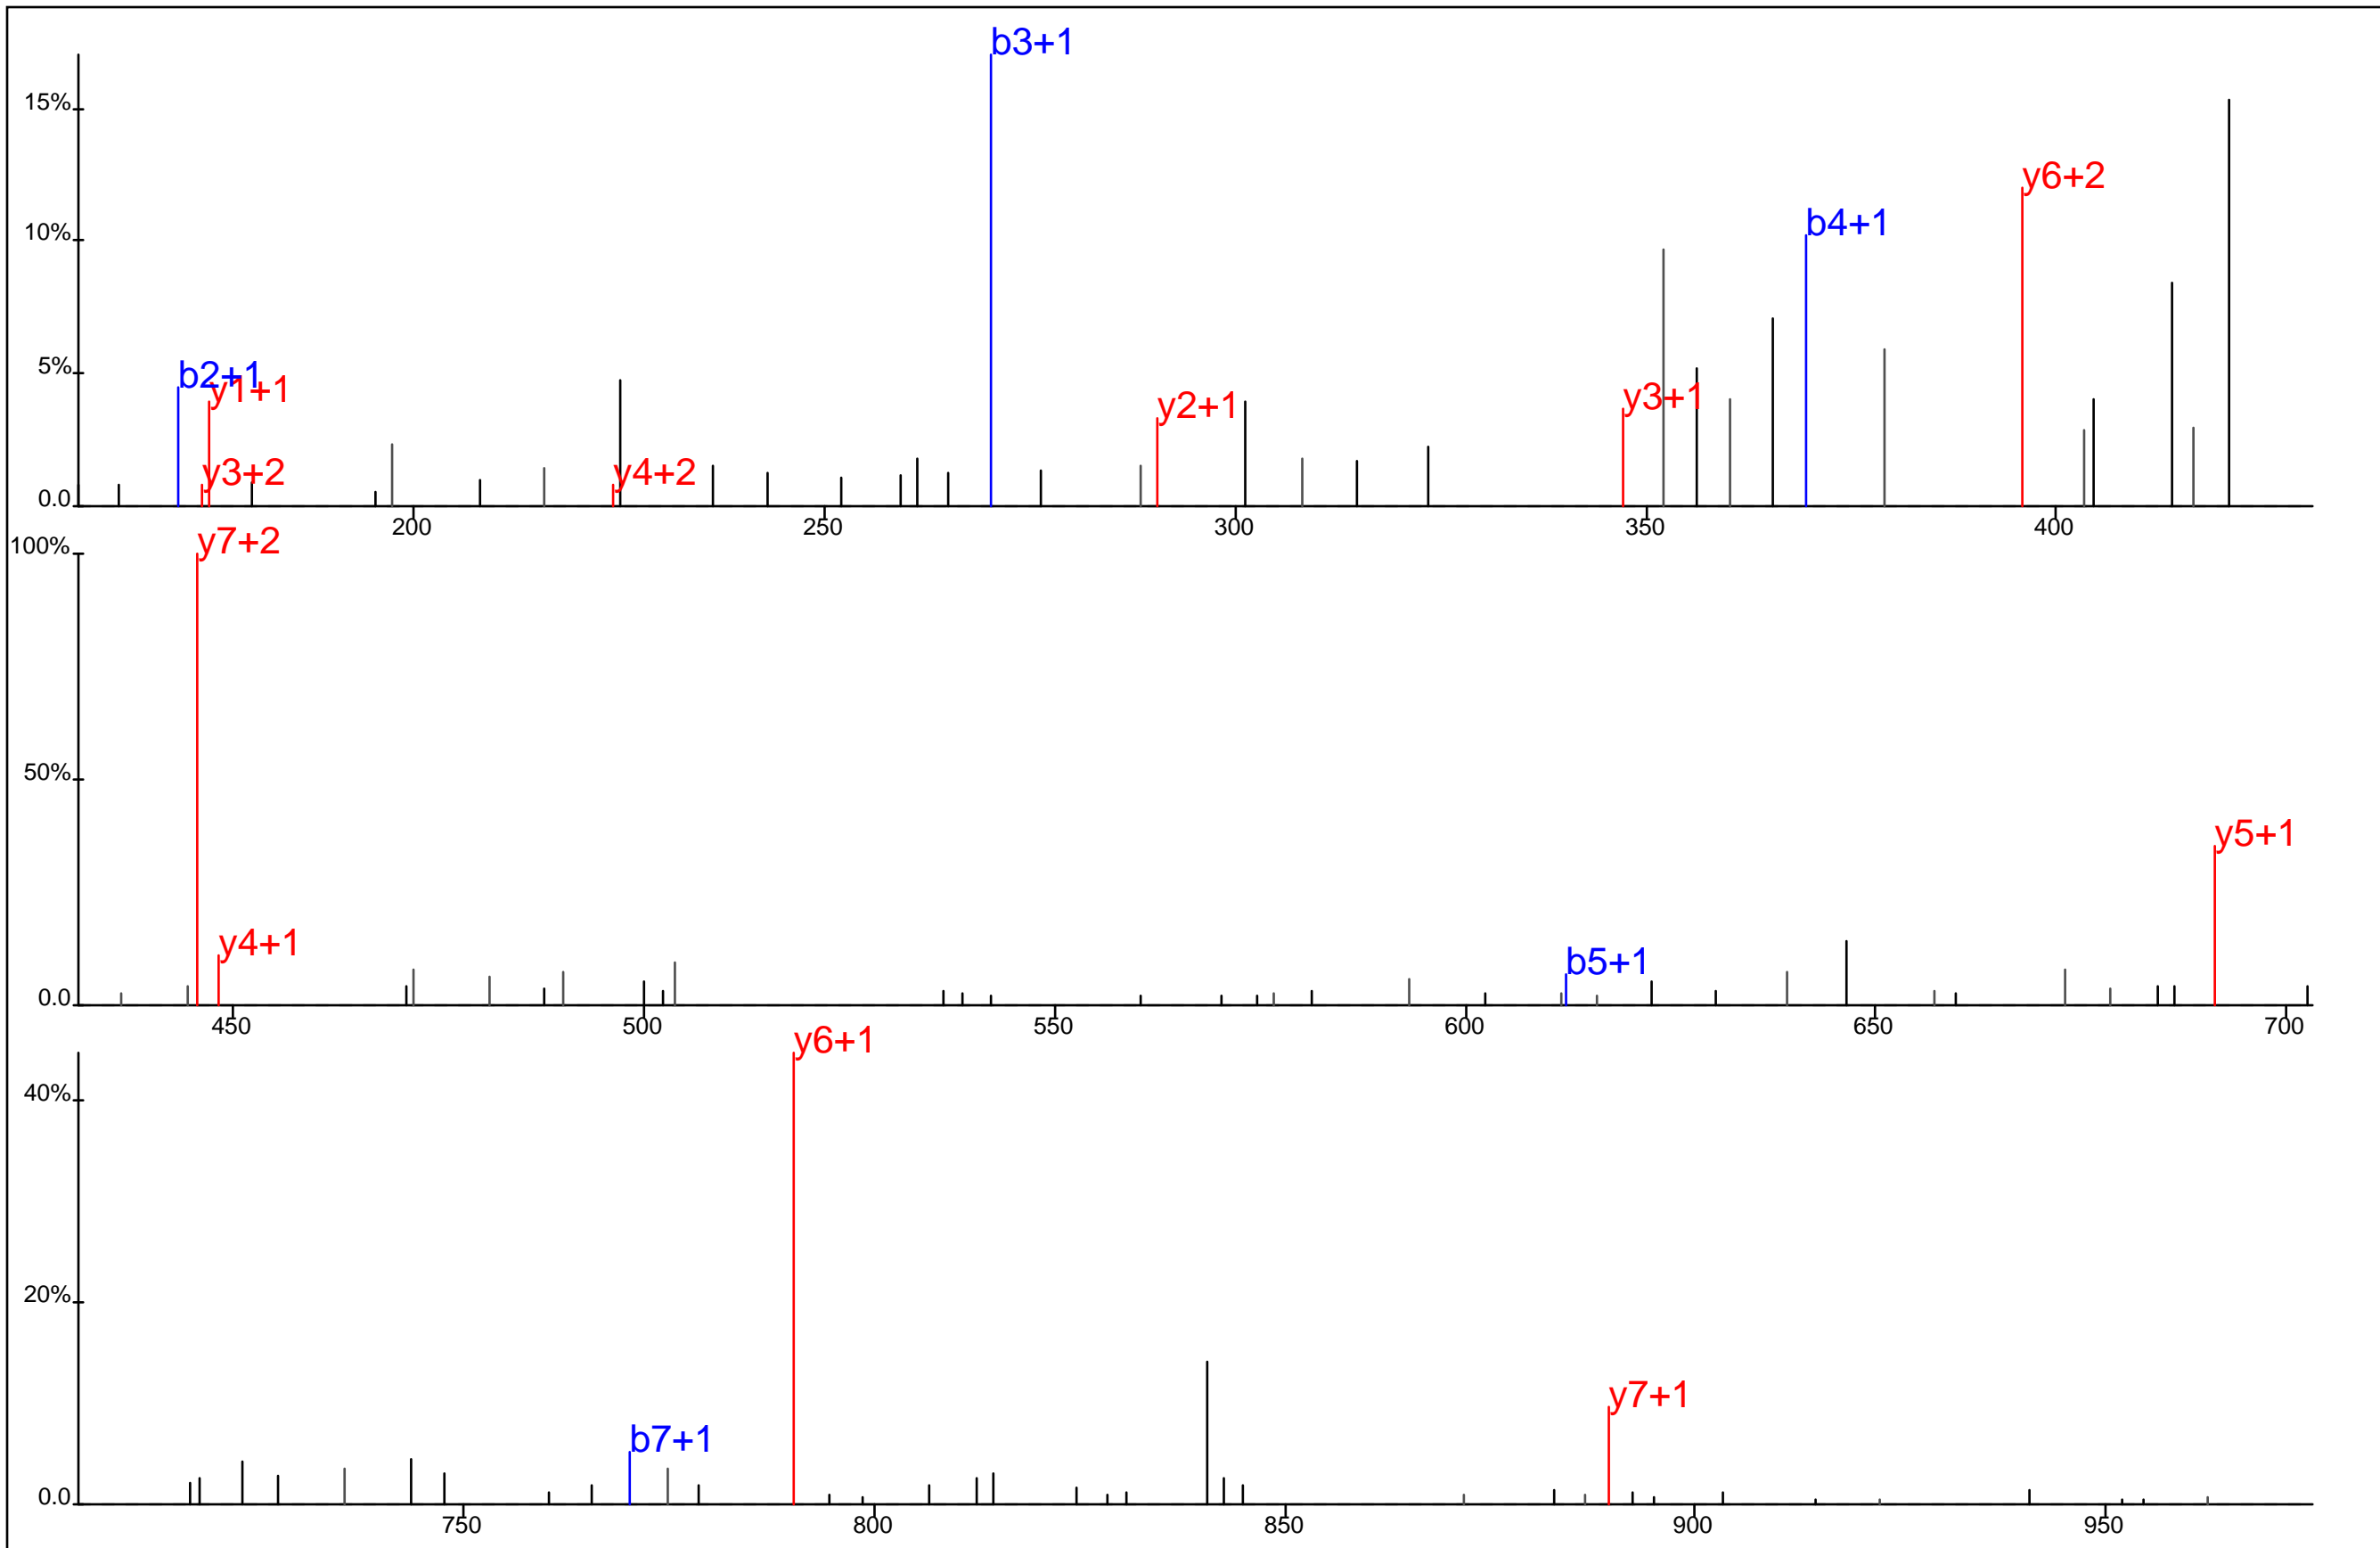

■ ■ ■ ■ ■ ■ ■  
 G I V V Y\* T G D R  
□ □ □ □ □ □ □

Protein Name: ATP1A1  
 gi Accession: 0  
 Precursor Mass: 530.2481+2  
 Delta Mass: 1.773 ppm  
 XCorr: 27.13



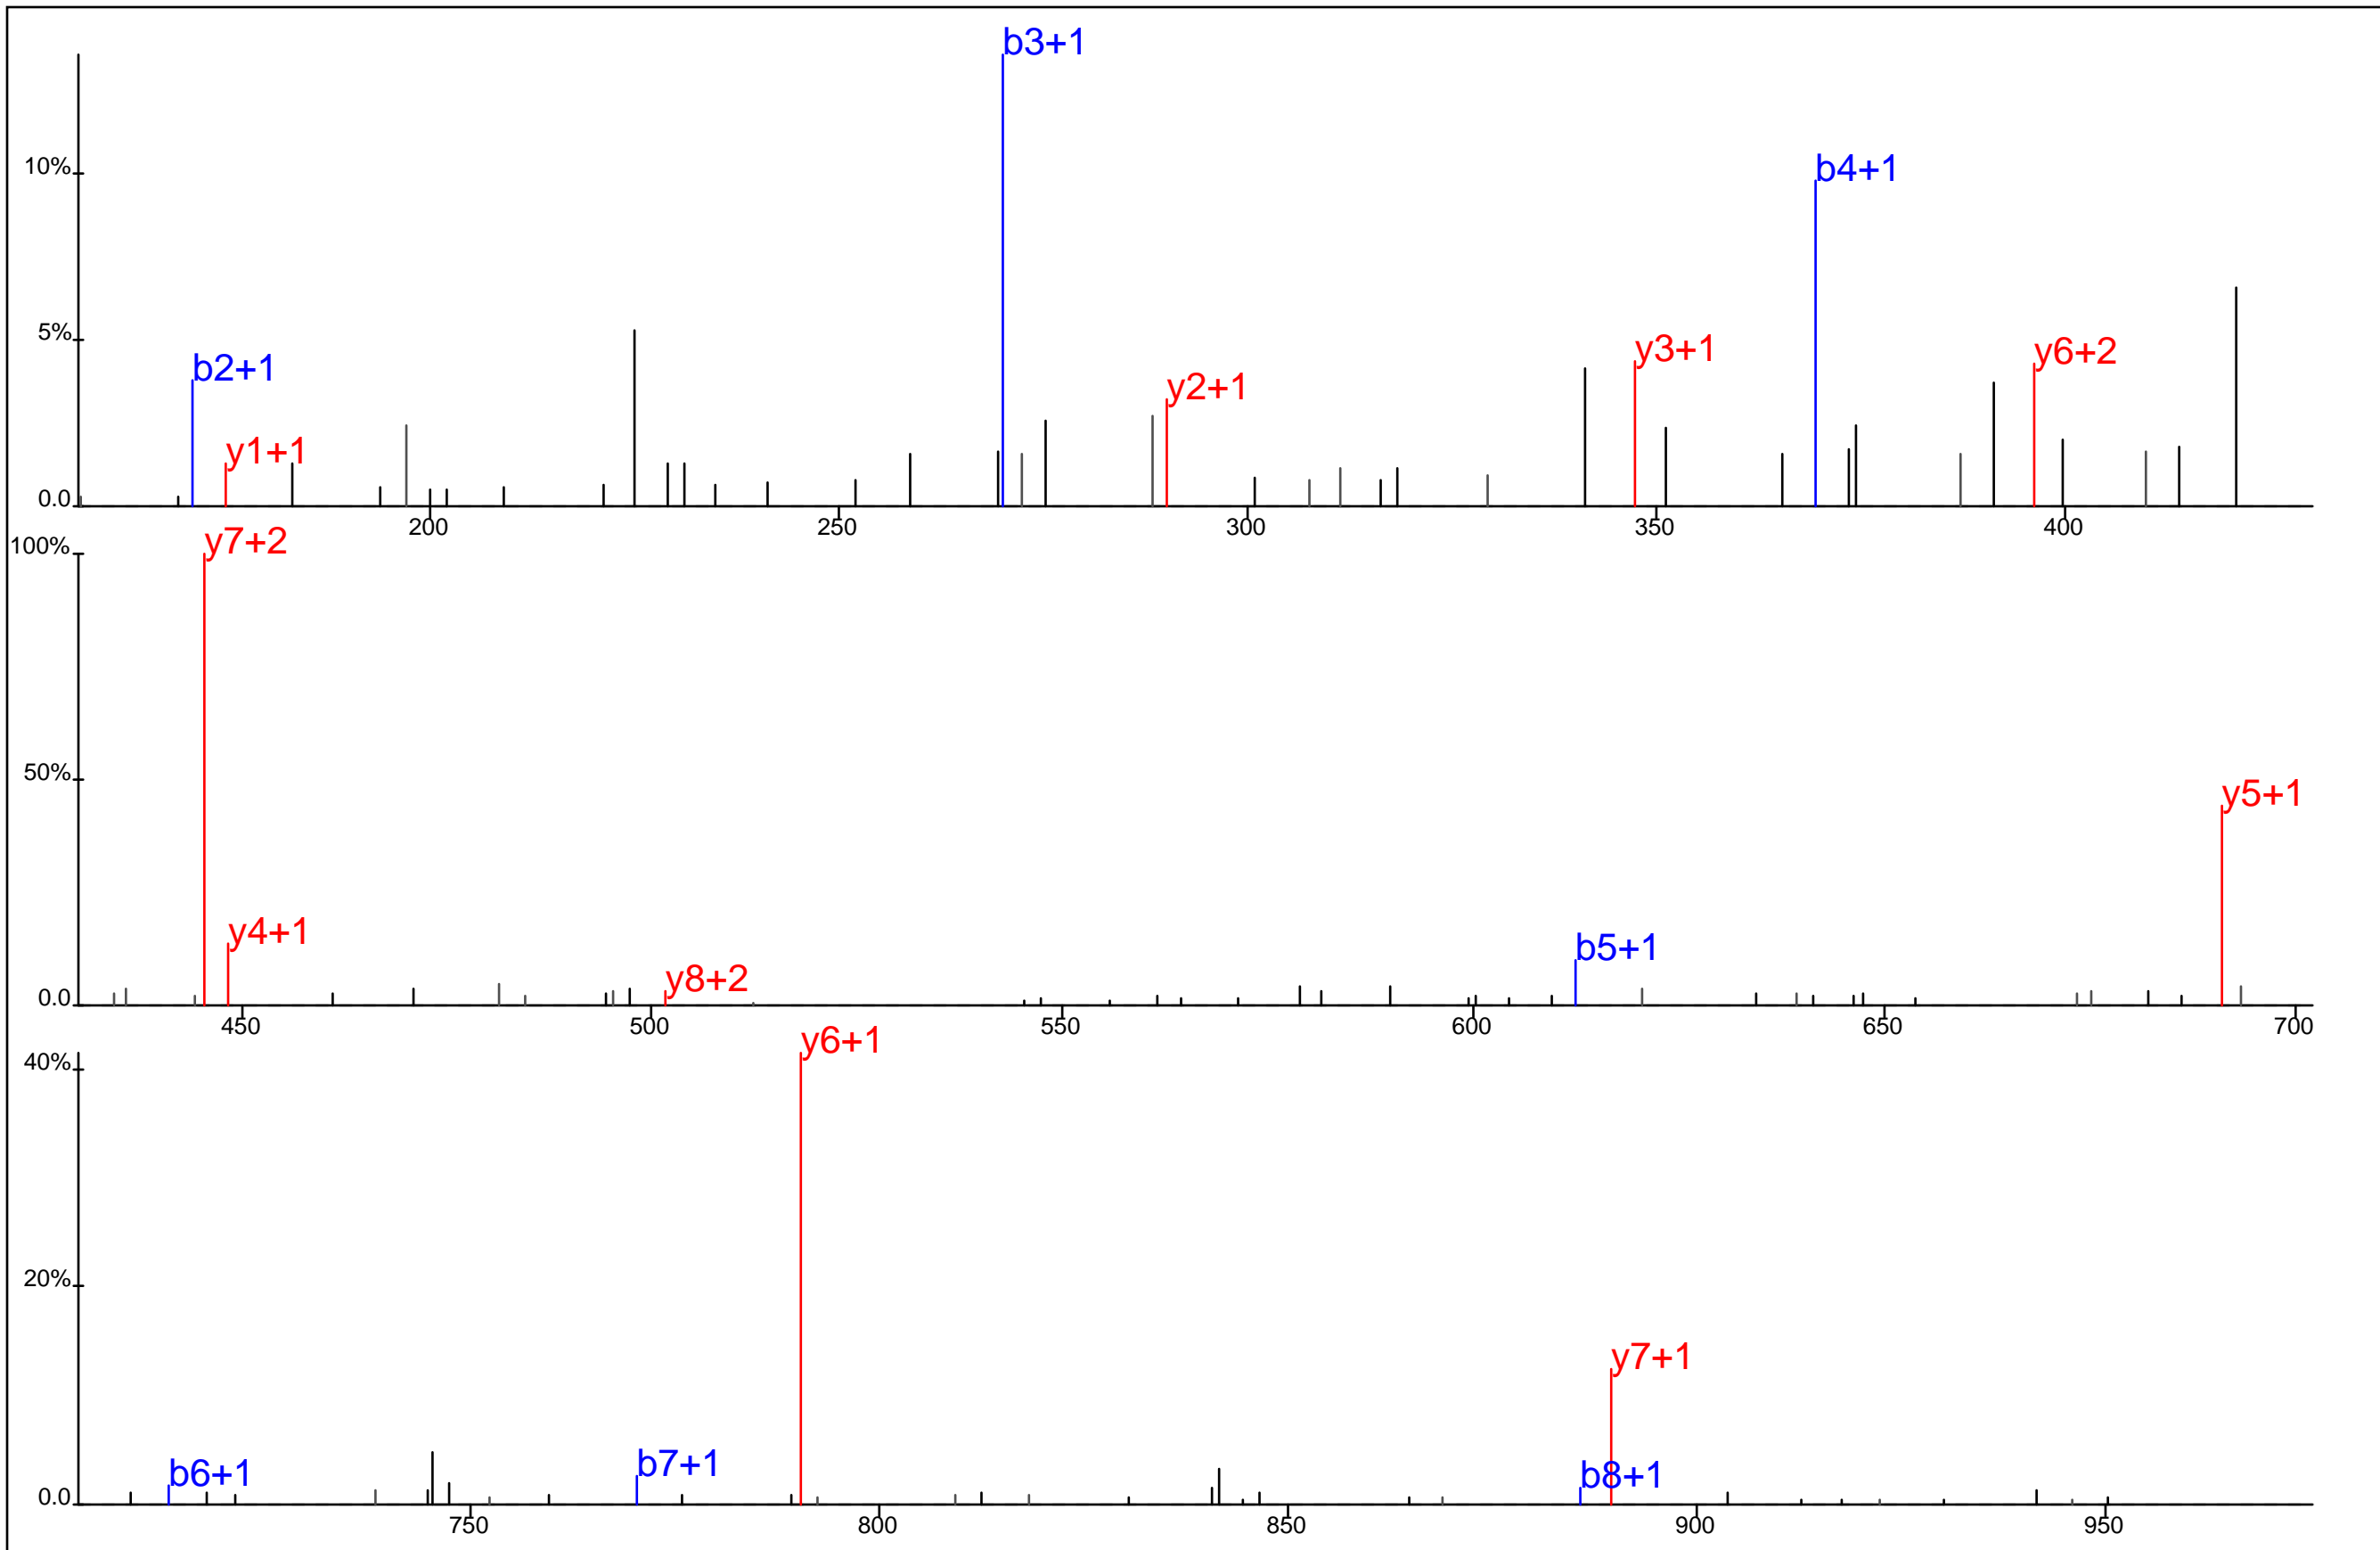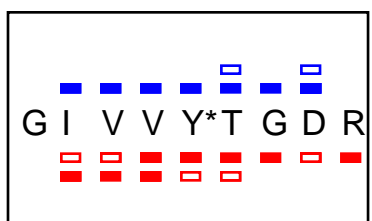

Protein Name: ATP1A1  
 gi Accession: 0  
 Precursor Mass: 530.2473+2  
 Delta Mass: 0.274 ppm  
 XCorr: 35.19

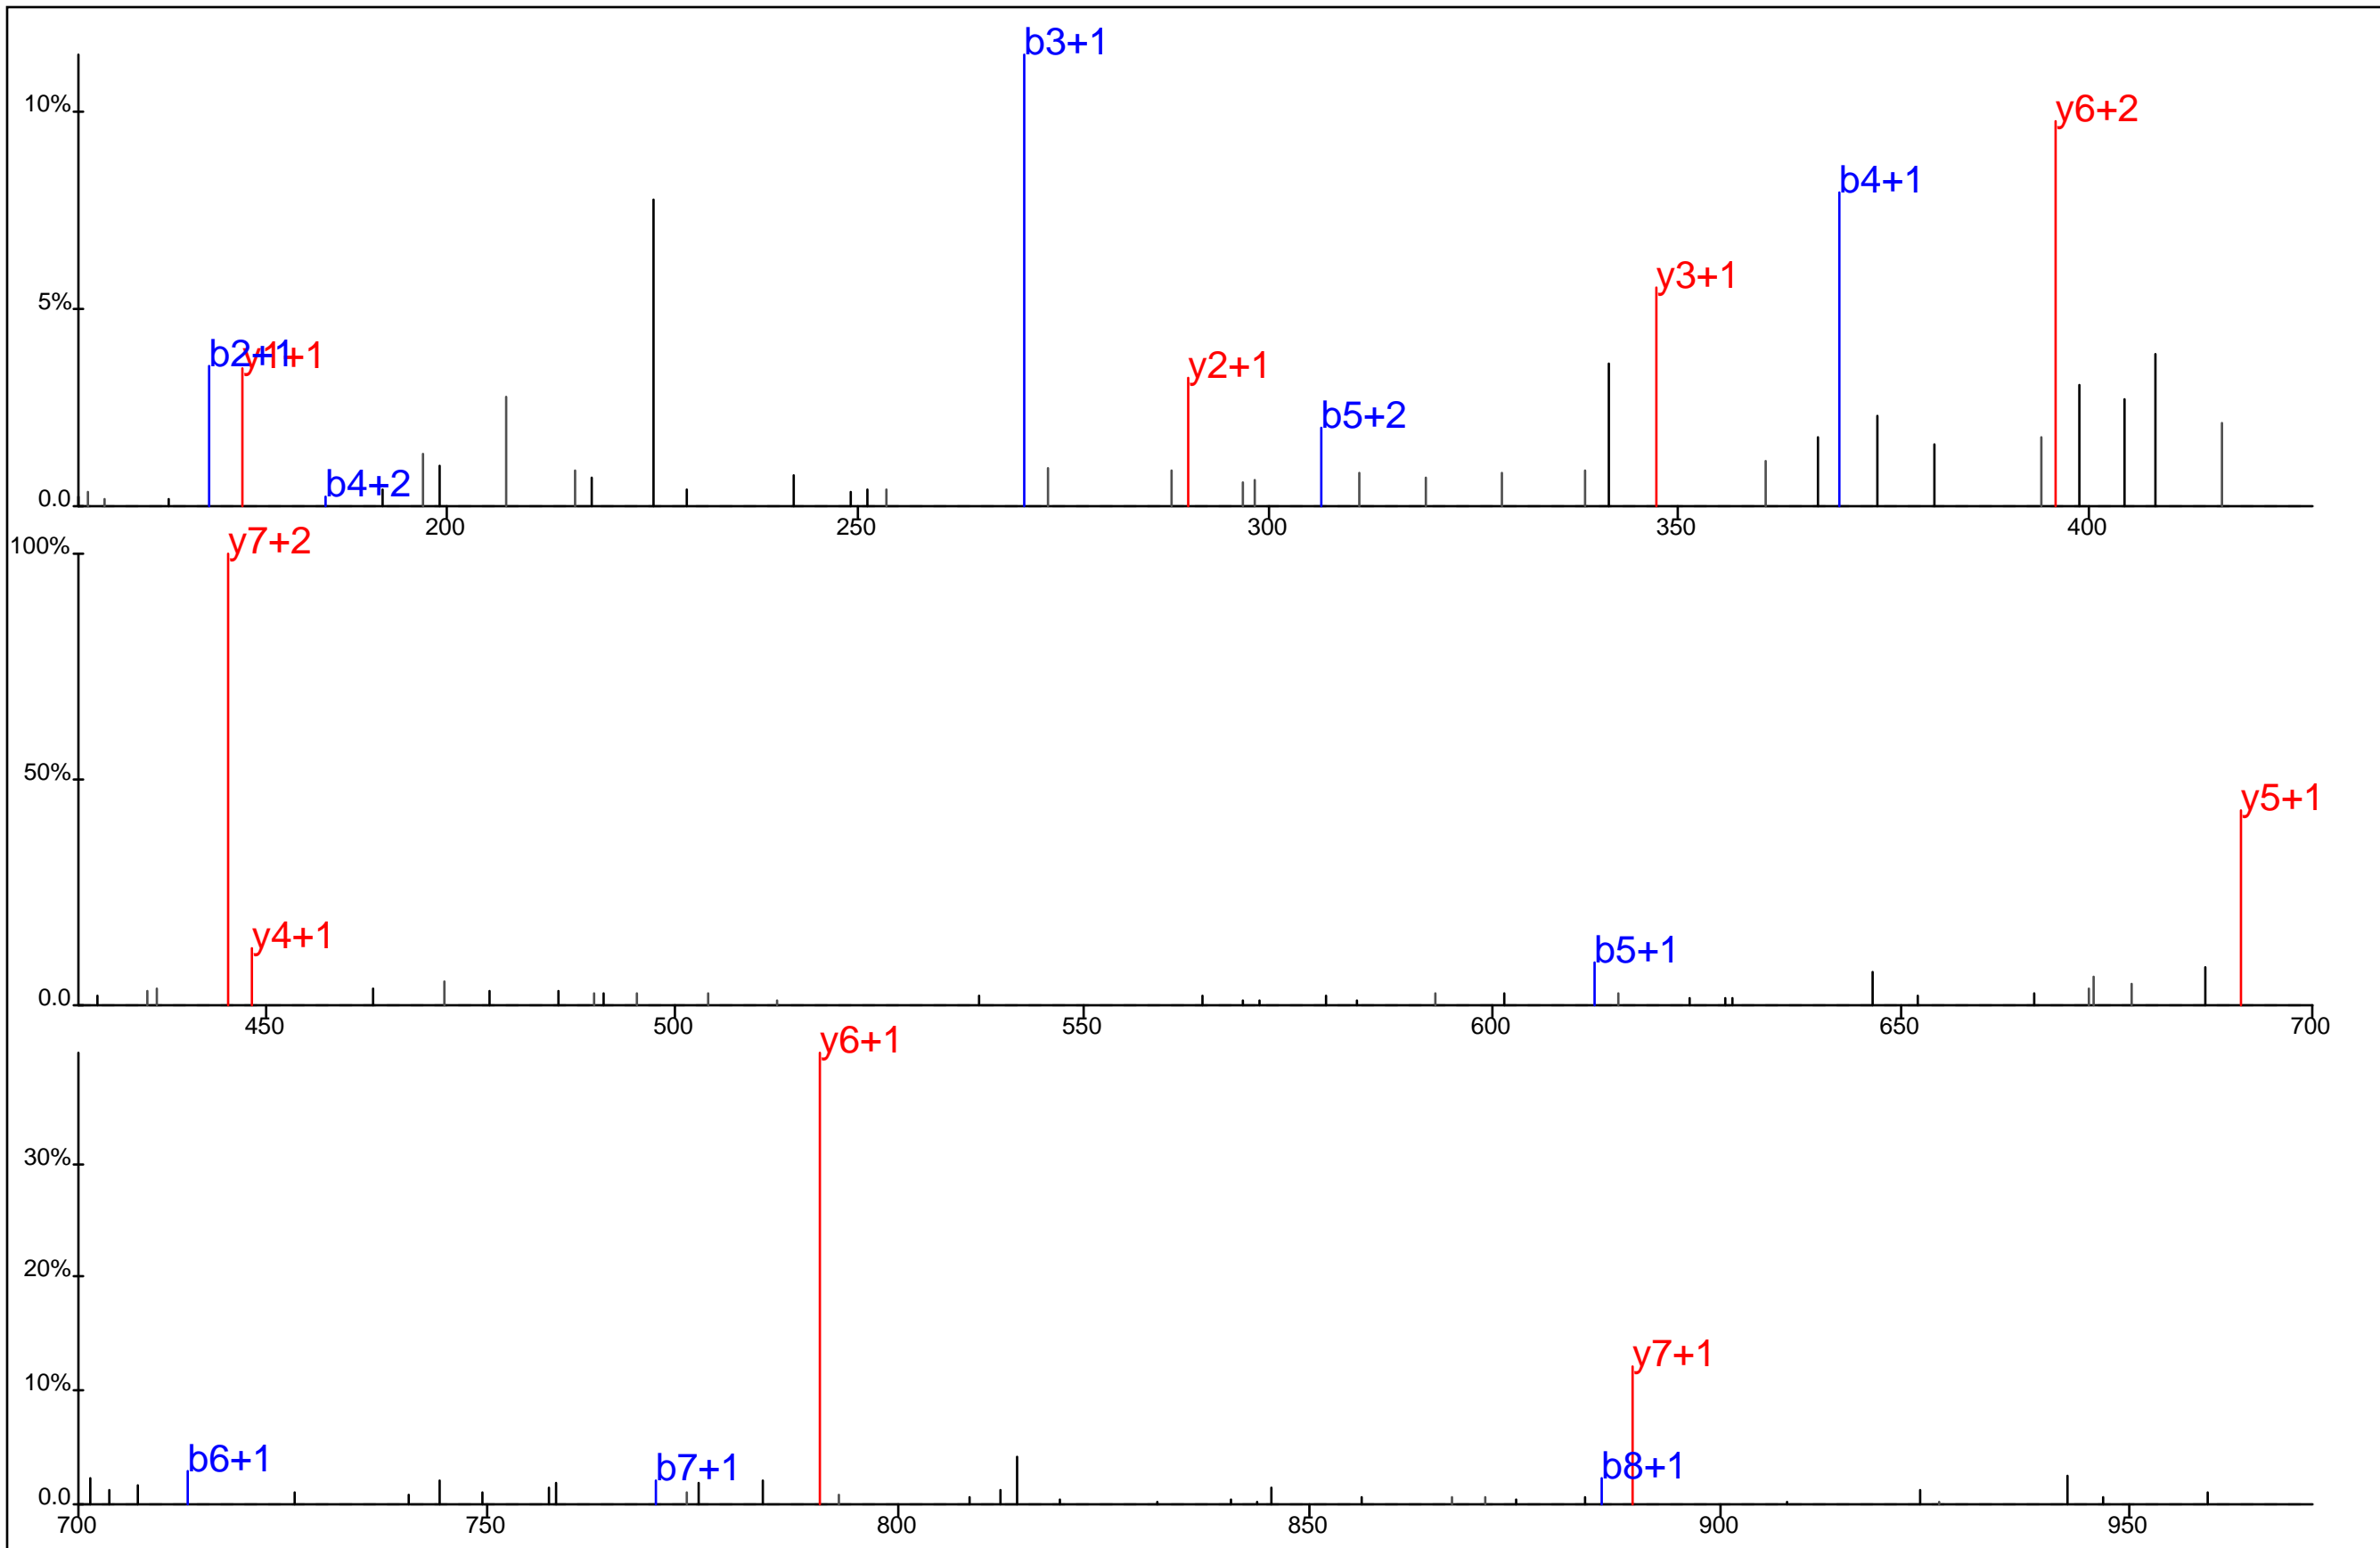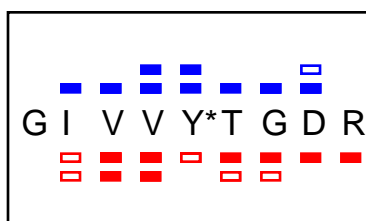

Protein Name: ATP1A1  
 gi Accession: 0  
 Precursor Mass: 530.2476+2  
 Delta Mass: 0.736 ppm  
 XCorr: 41.28

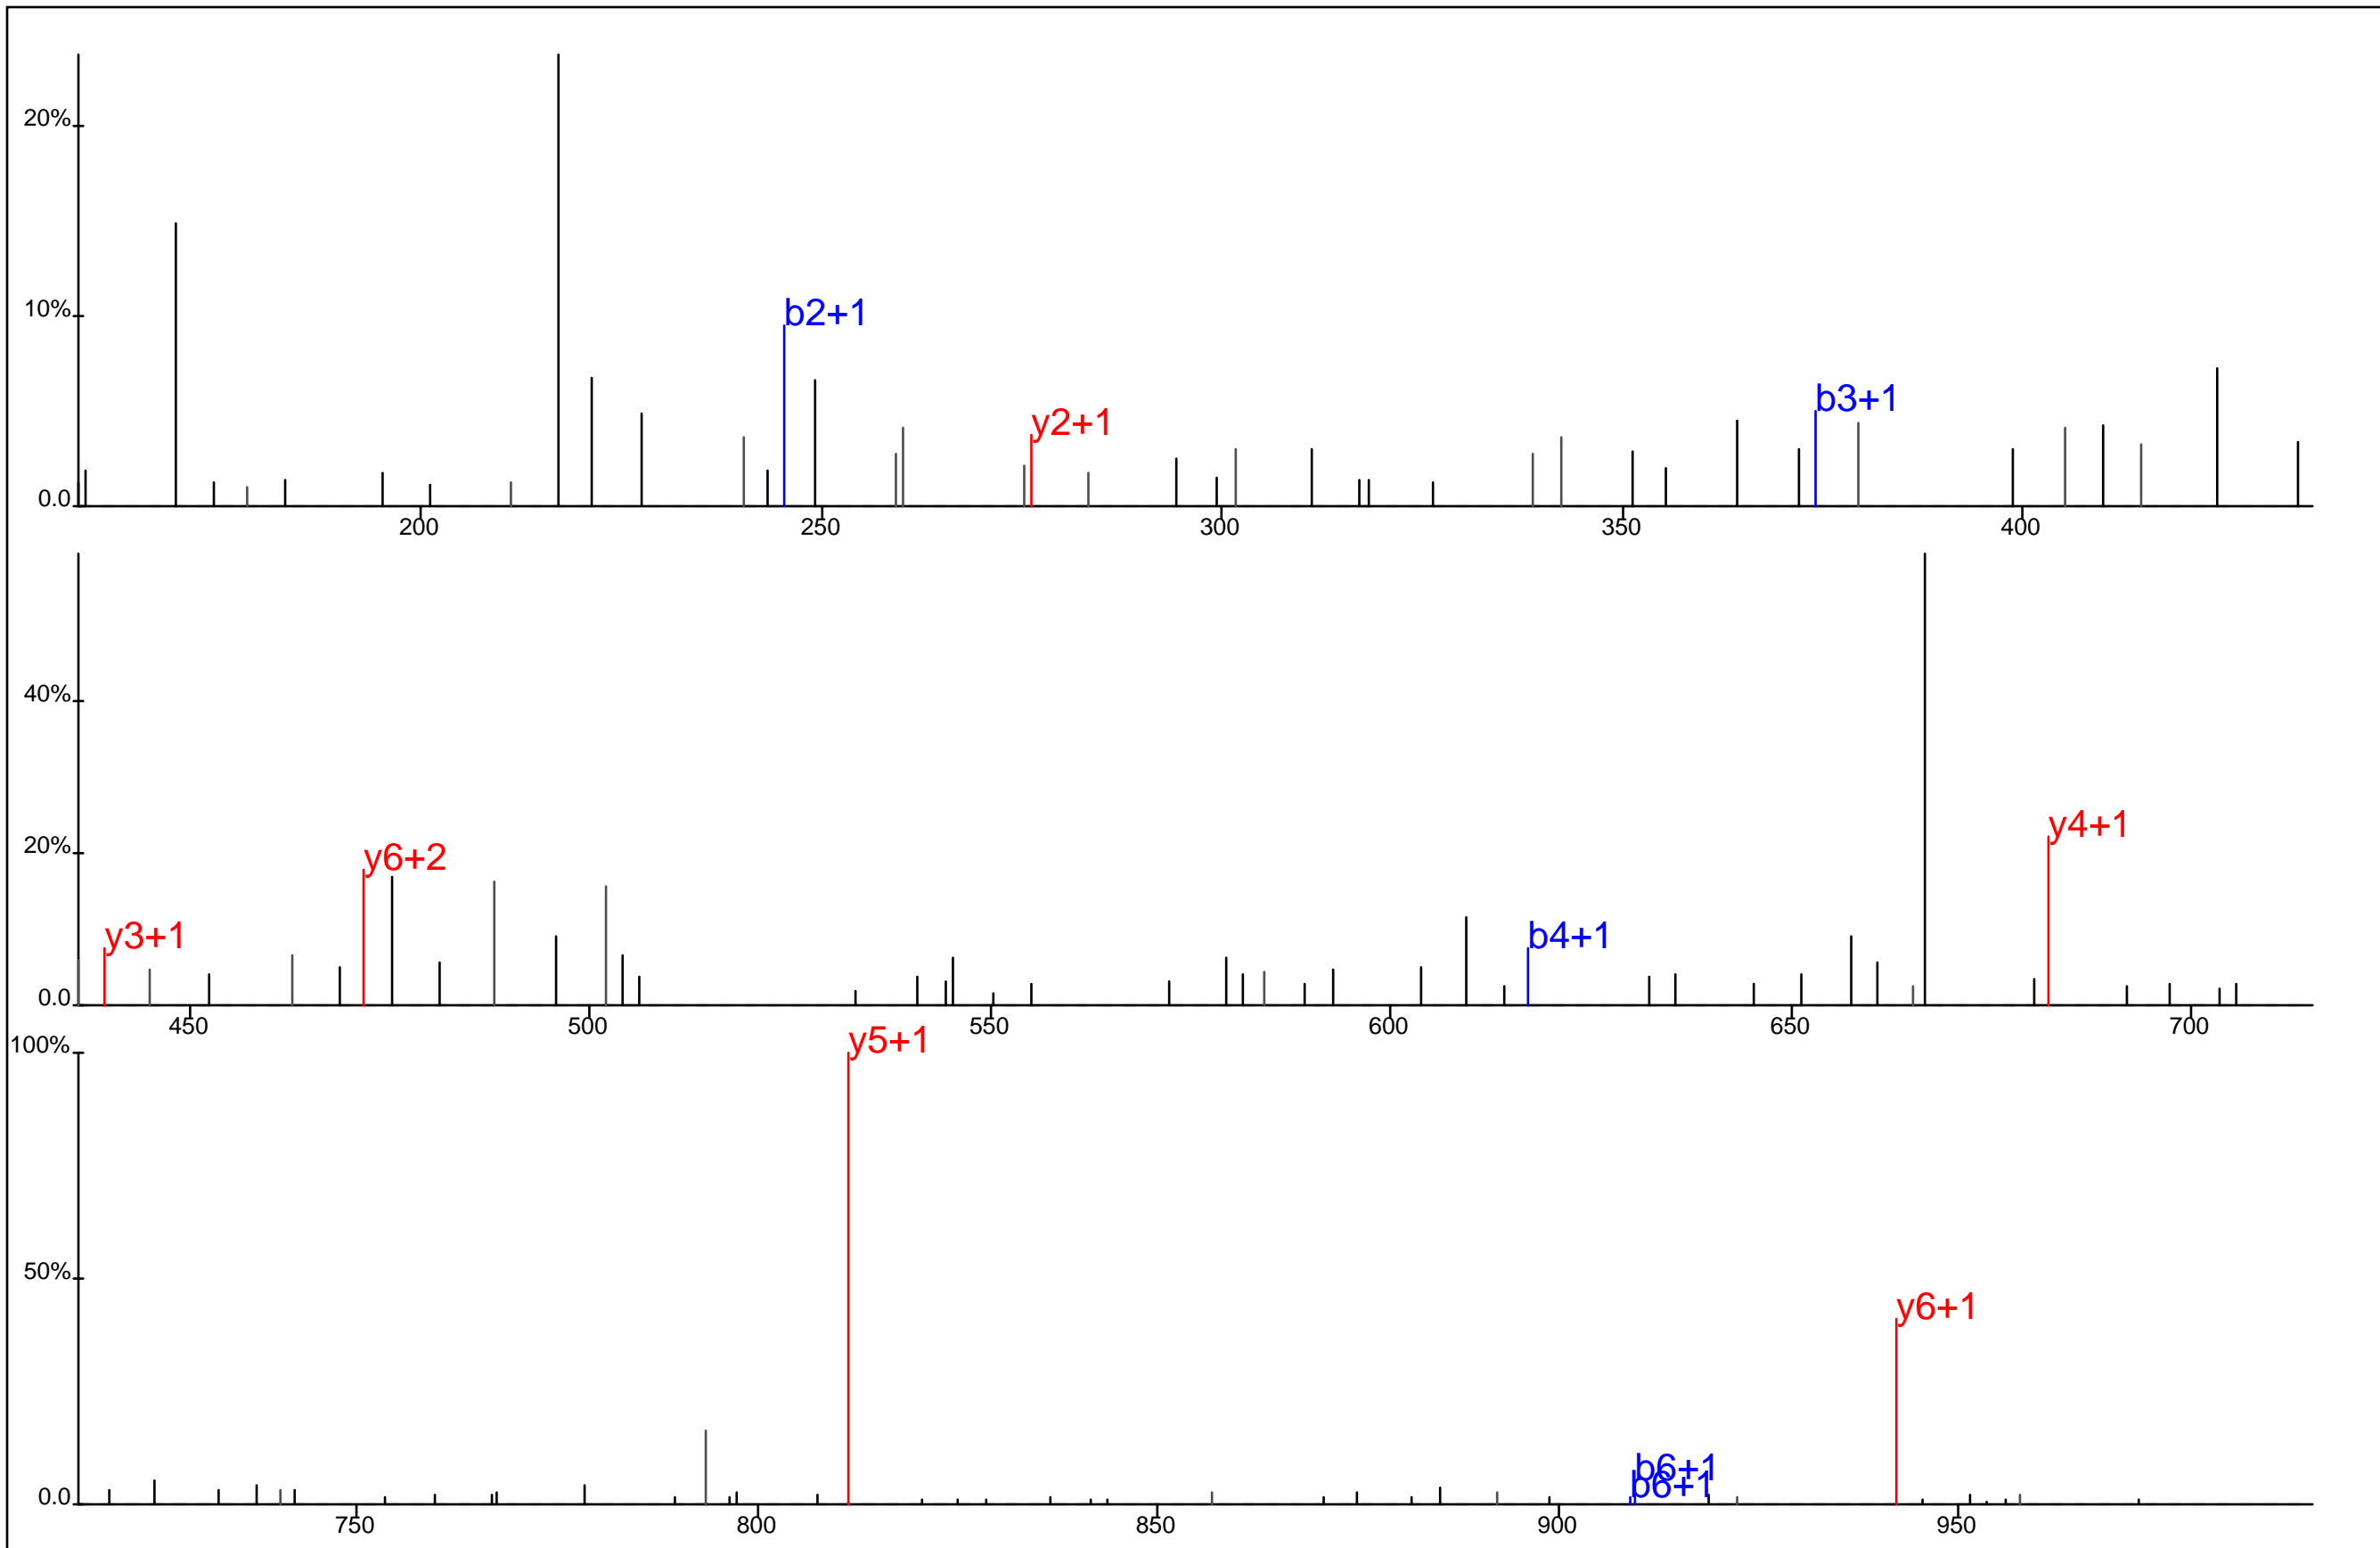

■ ▢ ▣ ▤ ▥  
▦ ▧ ▨ ▩ ▪

Protein Name: ATP6V1E  
 gi Accession: 0  
 Precursor Mass: 528.2115+2  
 Delta Mass: 0.320 ppm  
 XCorr: 24.38

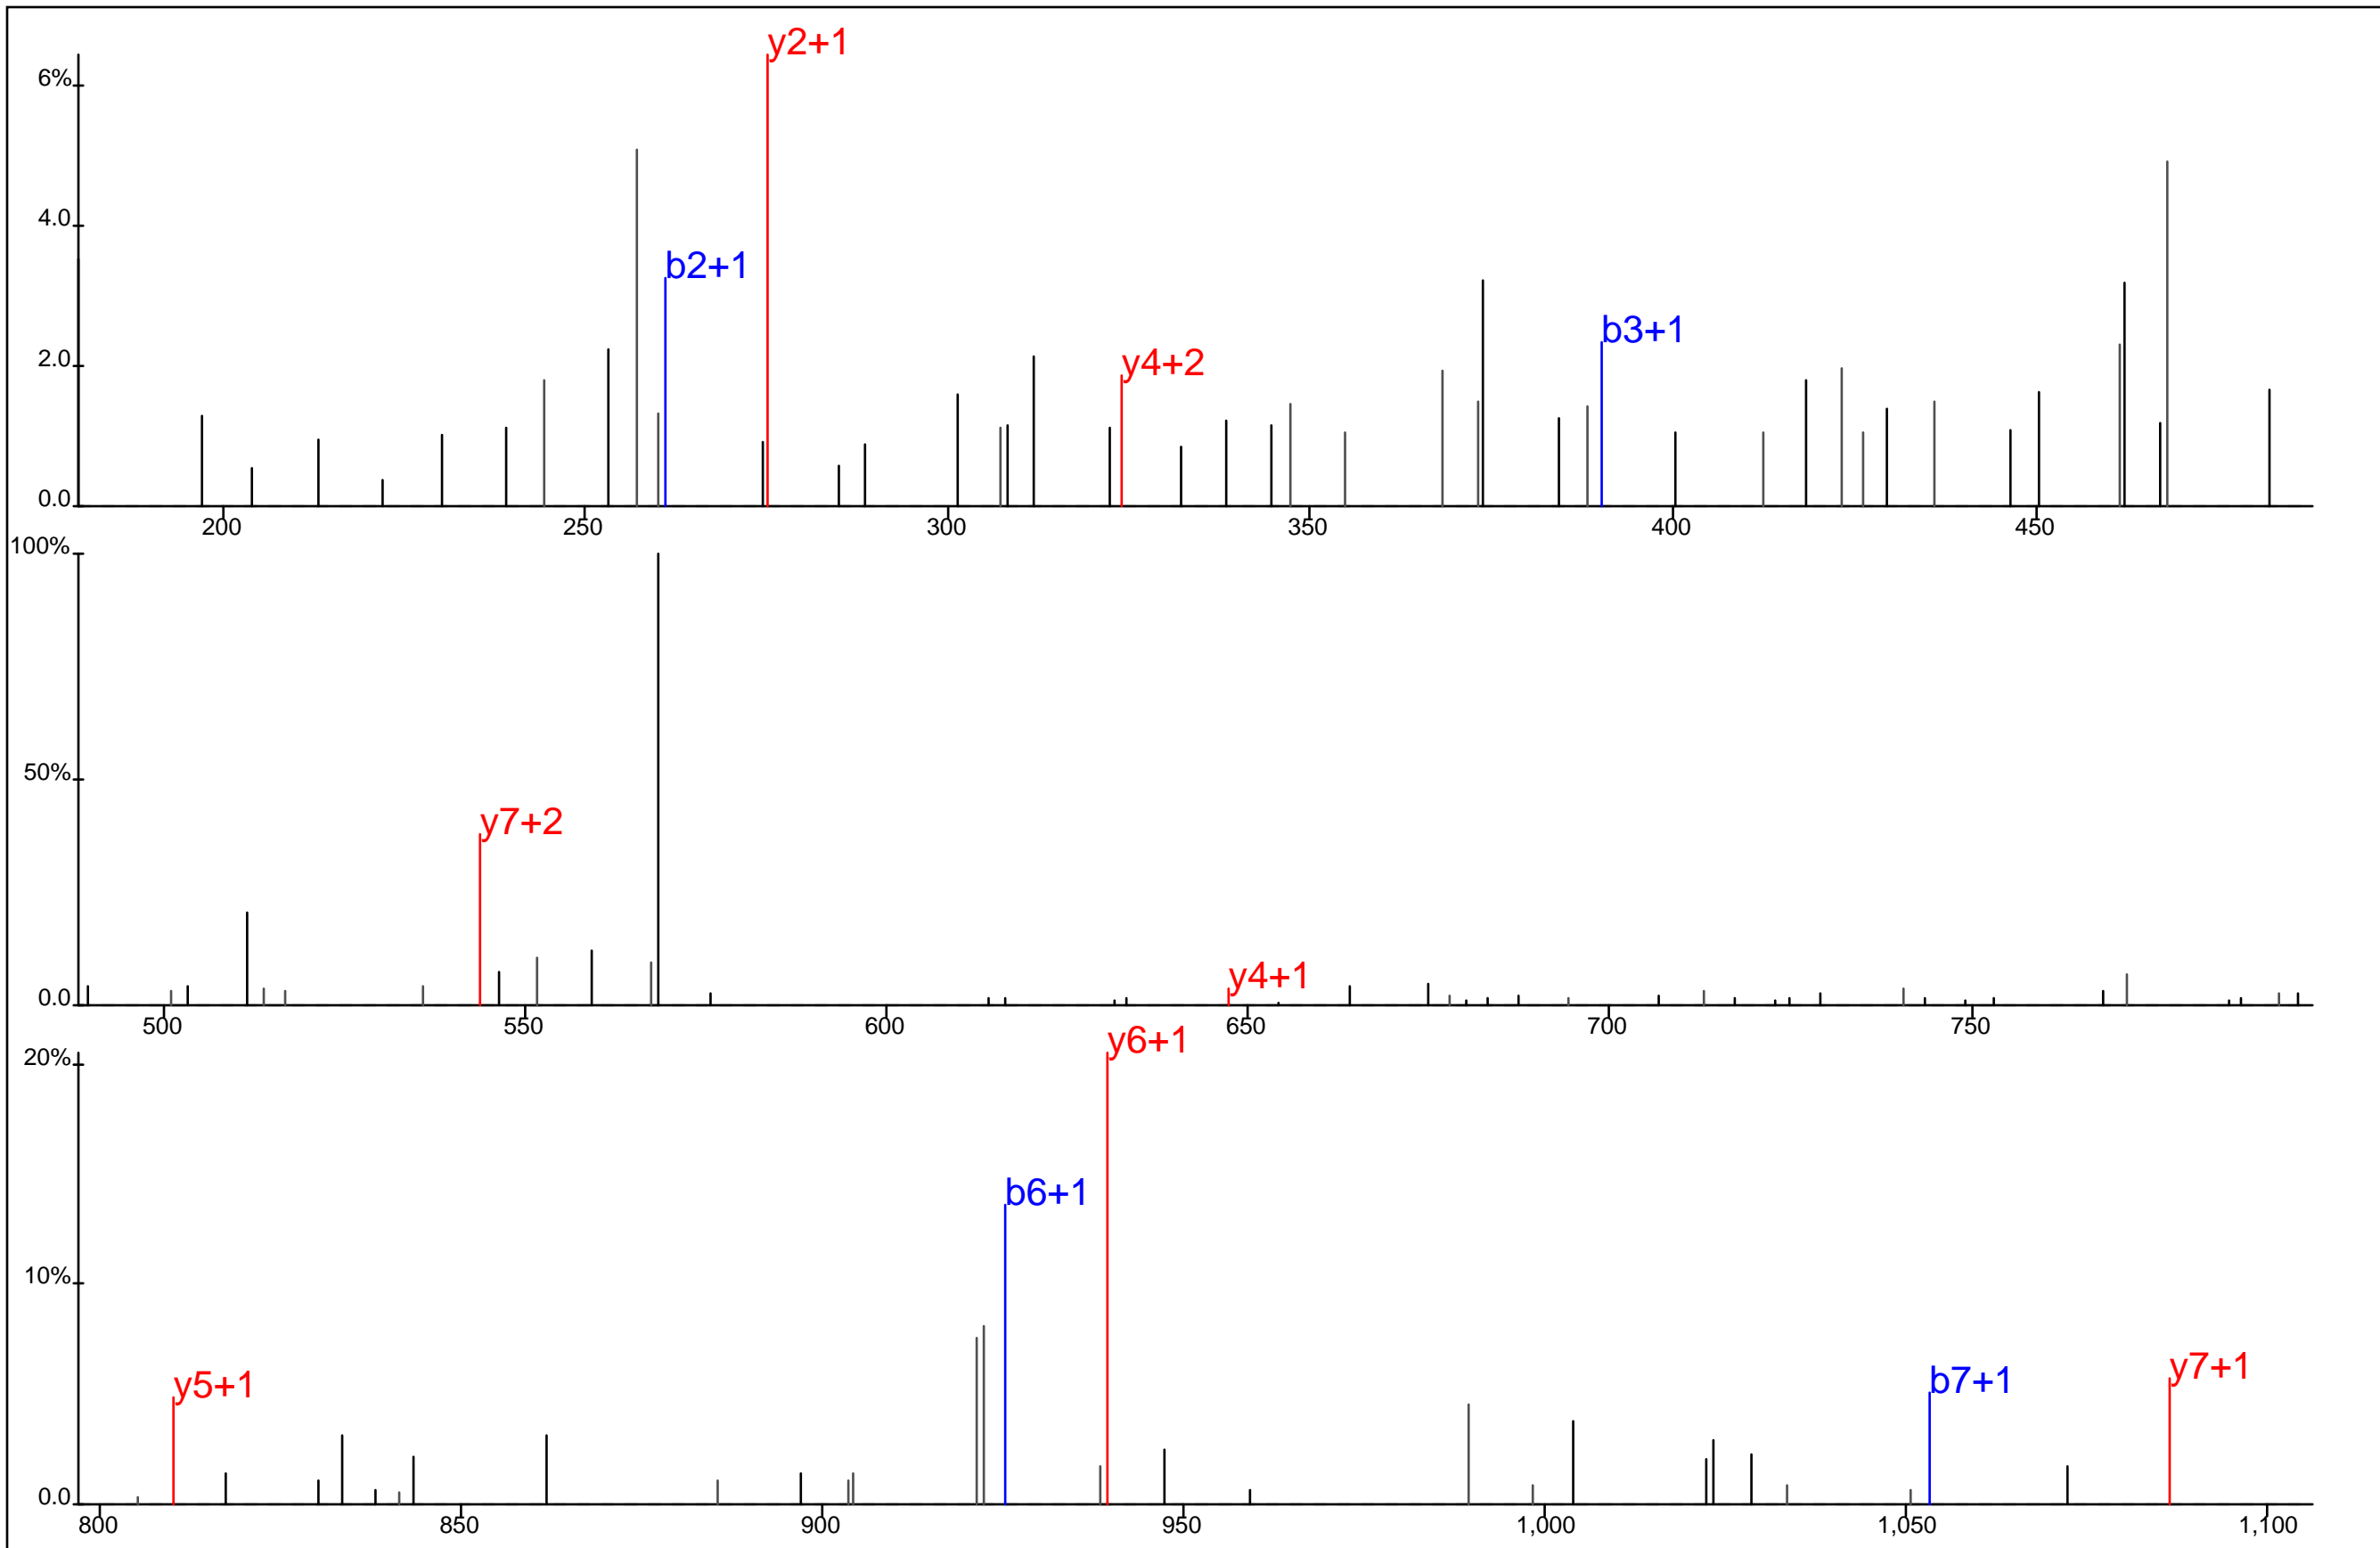

|                                   |                                   |                                   |                                   |                                   |                                   |                                   |                                   |
|-----------------------------------|-----------------------------------|-----------------------------------|-----------------------------------|-----------------------------------|-----------------------------------|-----------------------------------|-----------------------------------|
| I                                 | M                                 | E                                 | Y                                 | Y*                                | E                                 | K                                 | K                                 |
| <span style="color:blue">■</span> |
| <span style="color:red">■</span>  |

Protein Name: ATP6V1E  
 gi Accession: 0  
 Precursor Mass: 600.2562+2  
 Delta Mass: 0.248 ppm  
 XCorr: 21.78

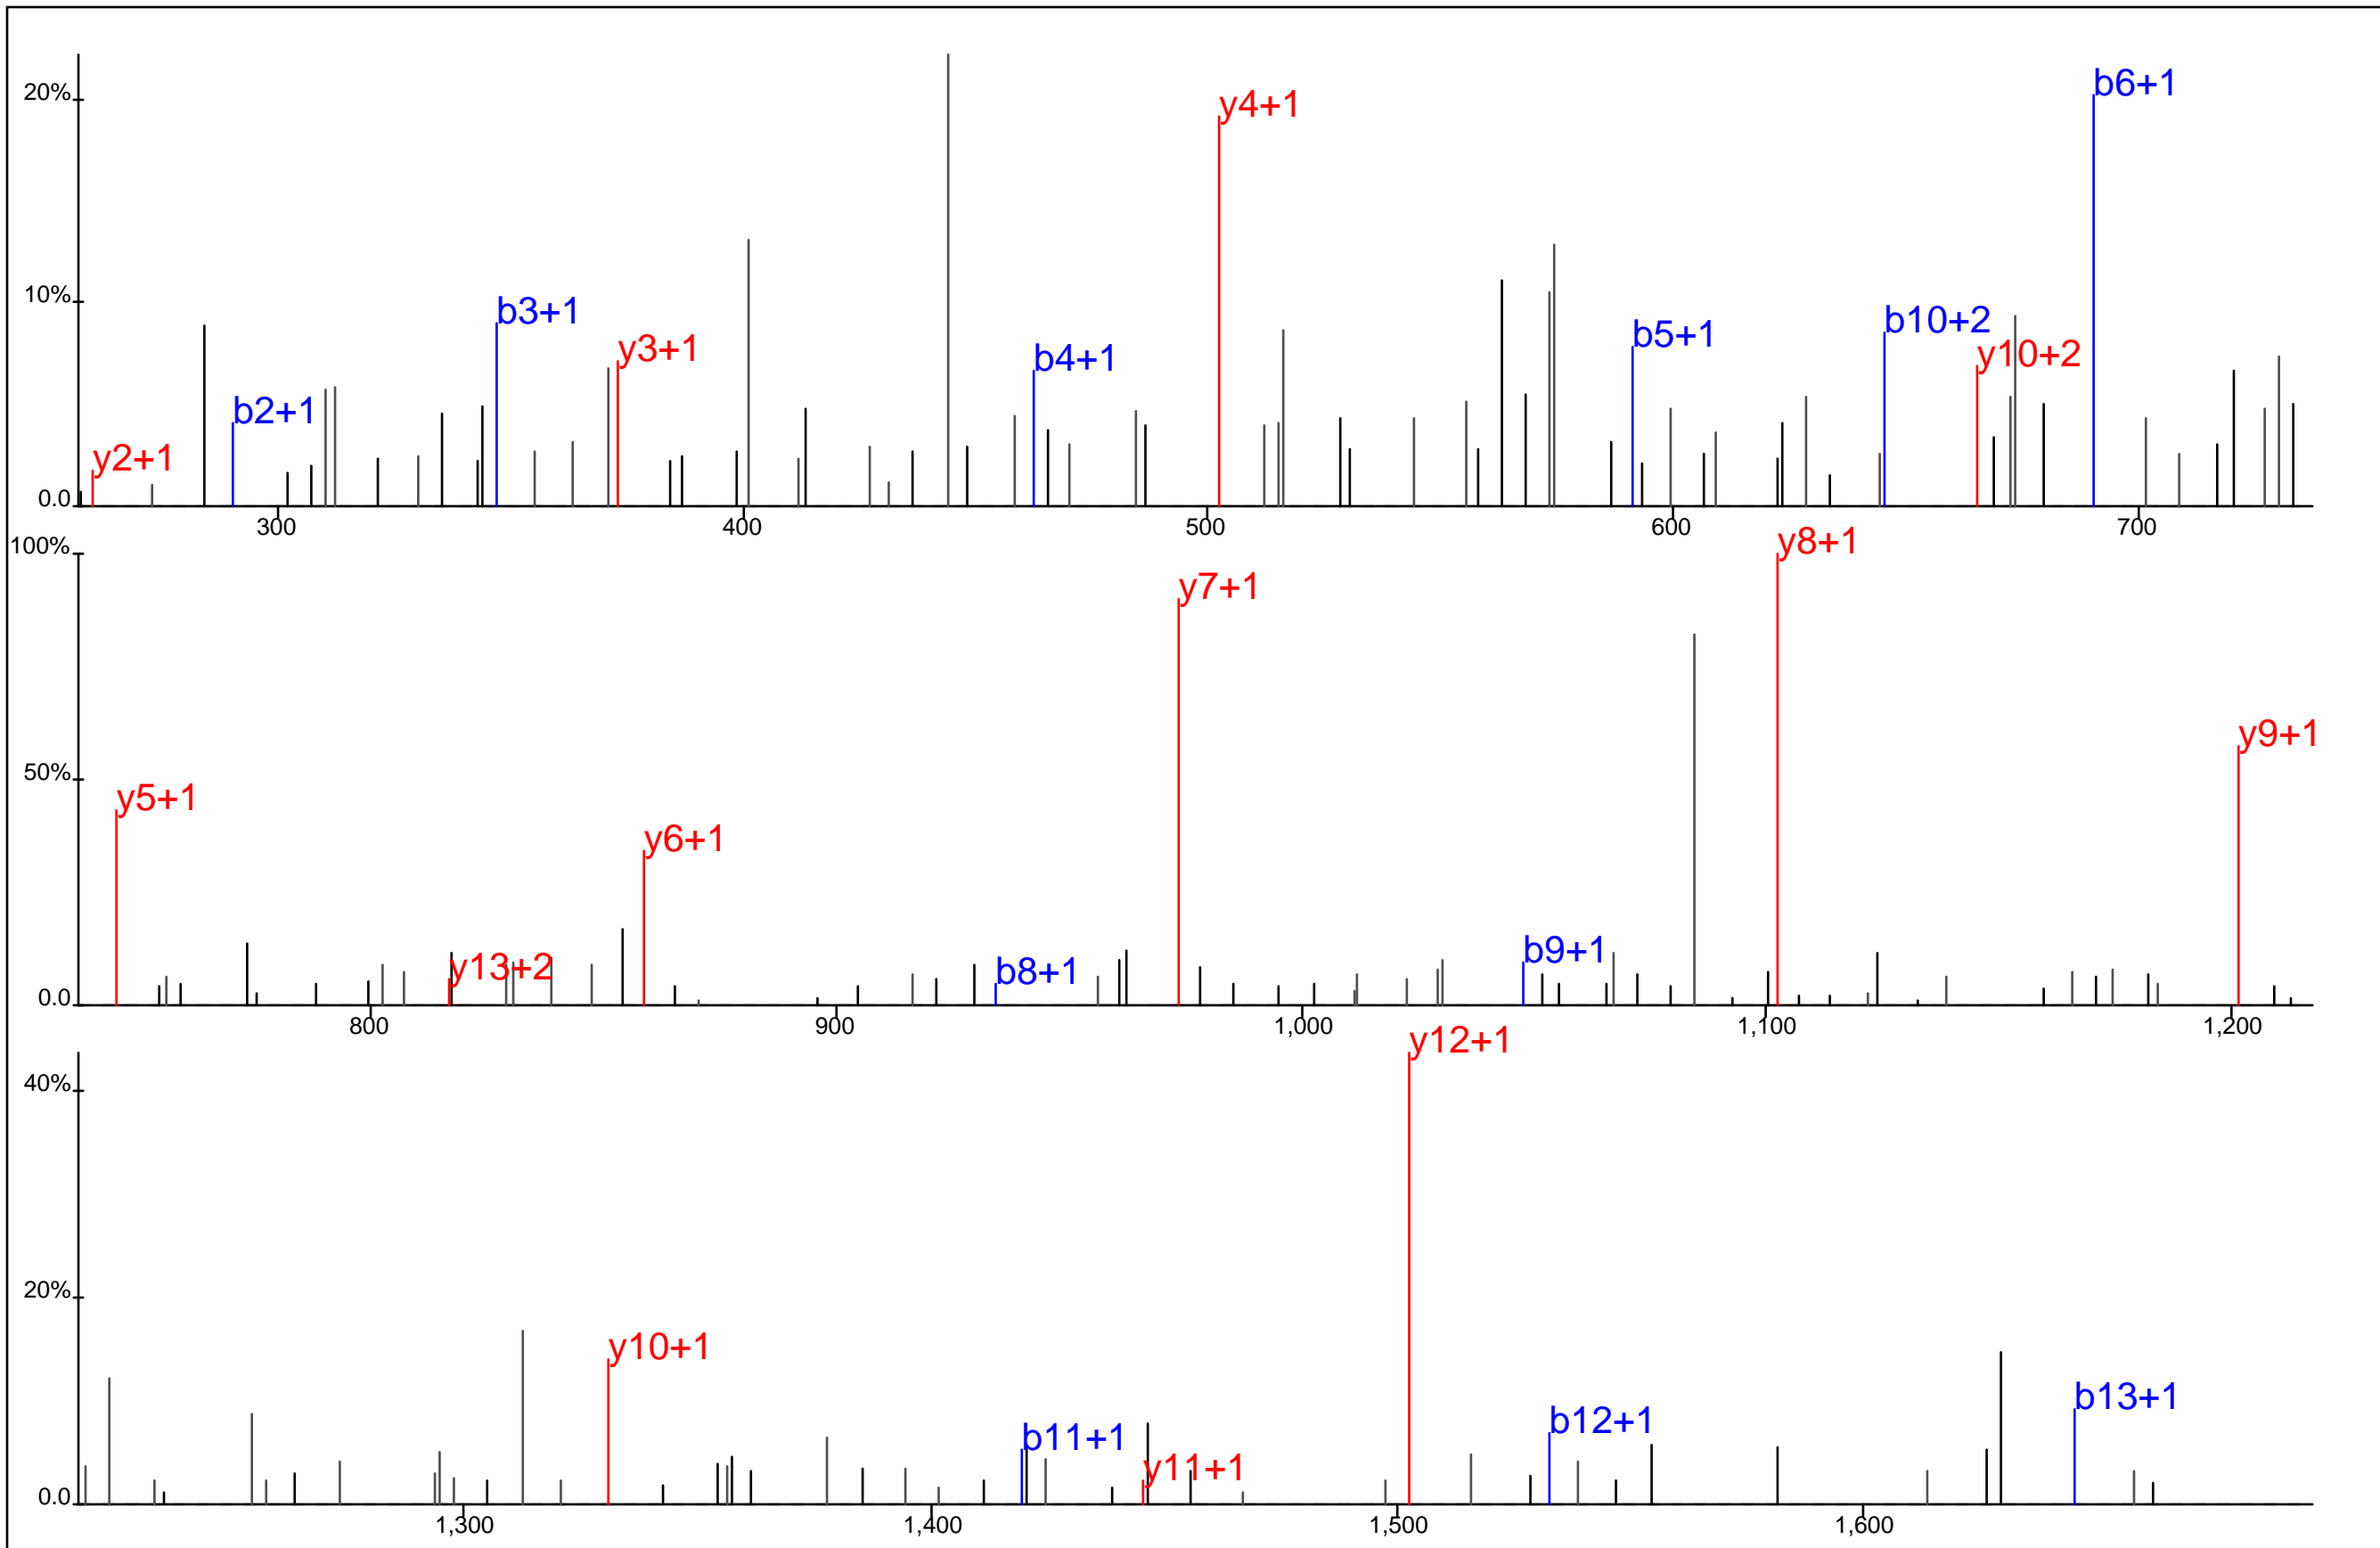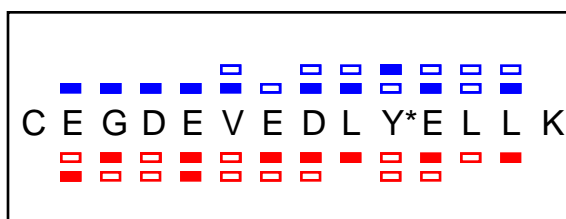

Protein Name: ATP binding domain 4  
 gi Accession: 0  
 Precursor Mass: 896.3705+2  
 Delta Mass: 3.194 ppm  
 XCorr: 45.1

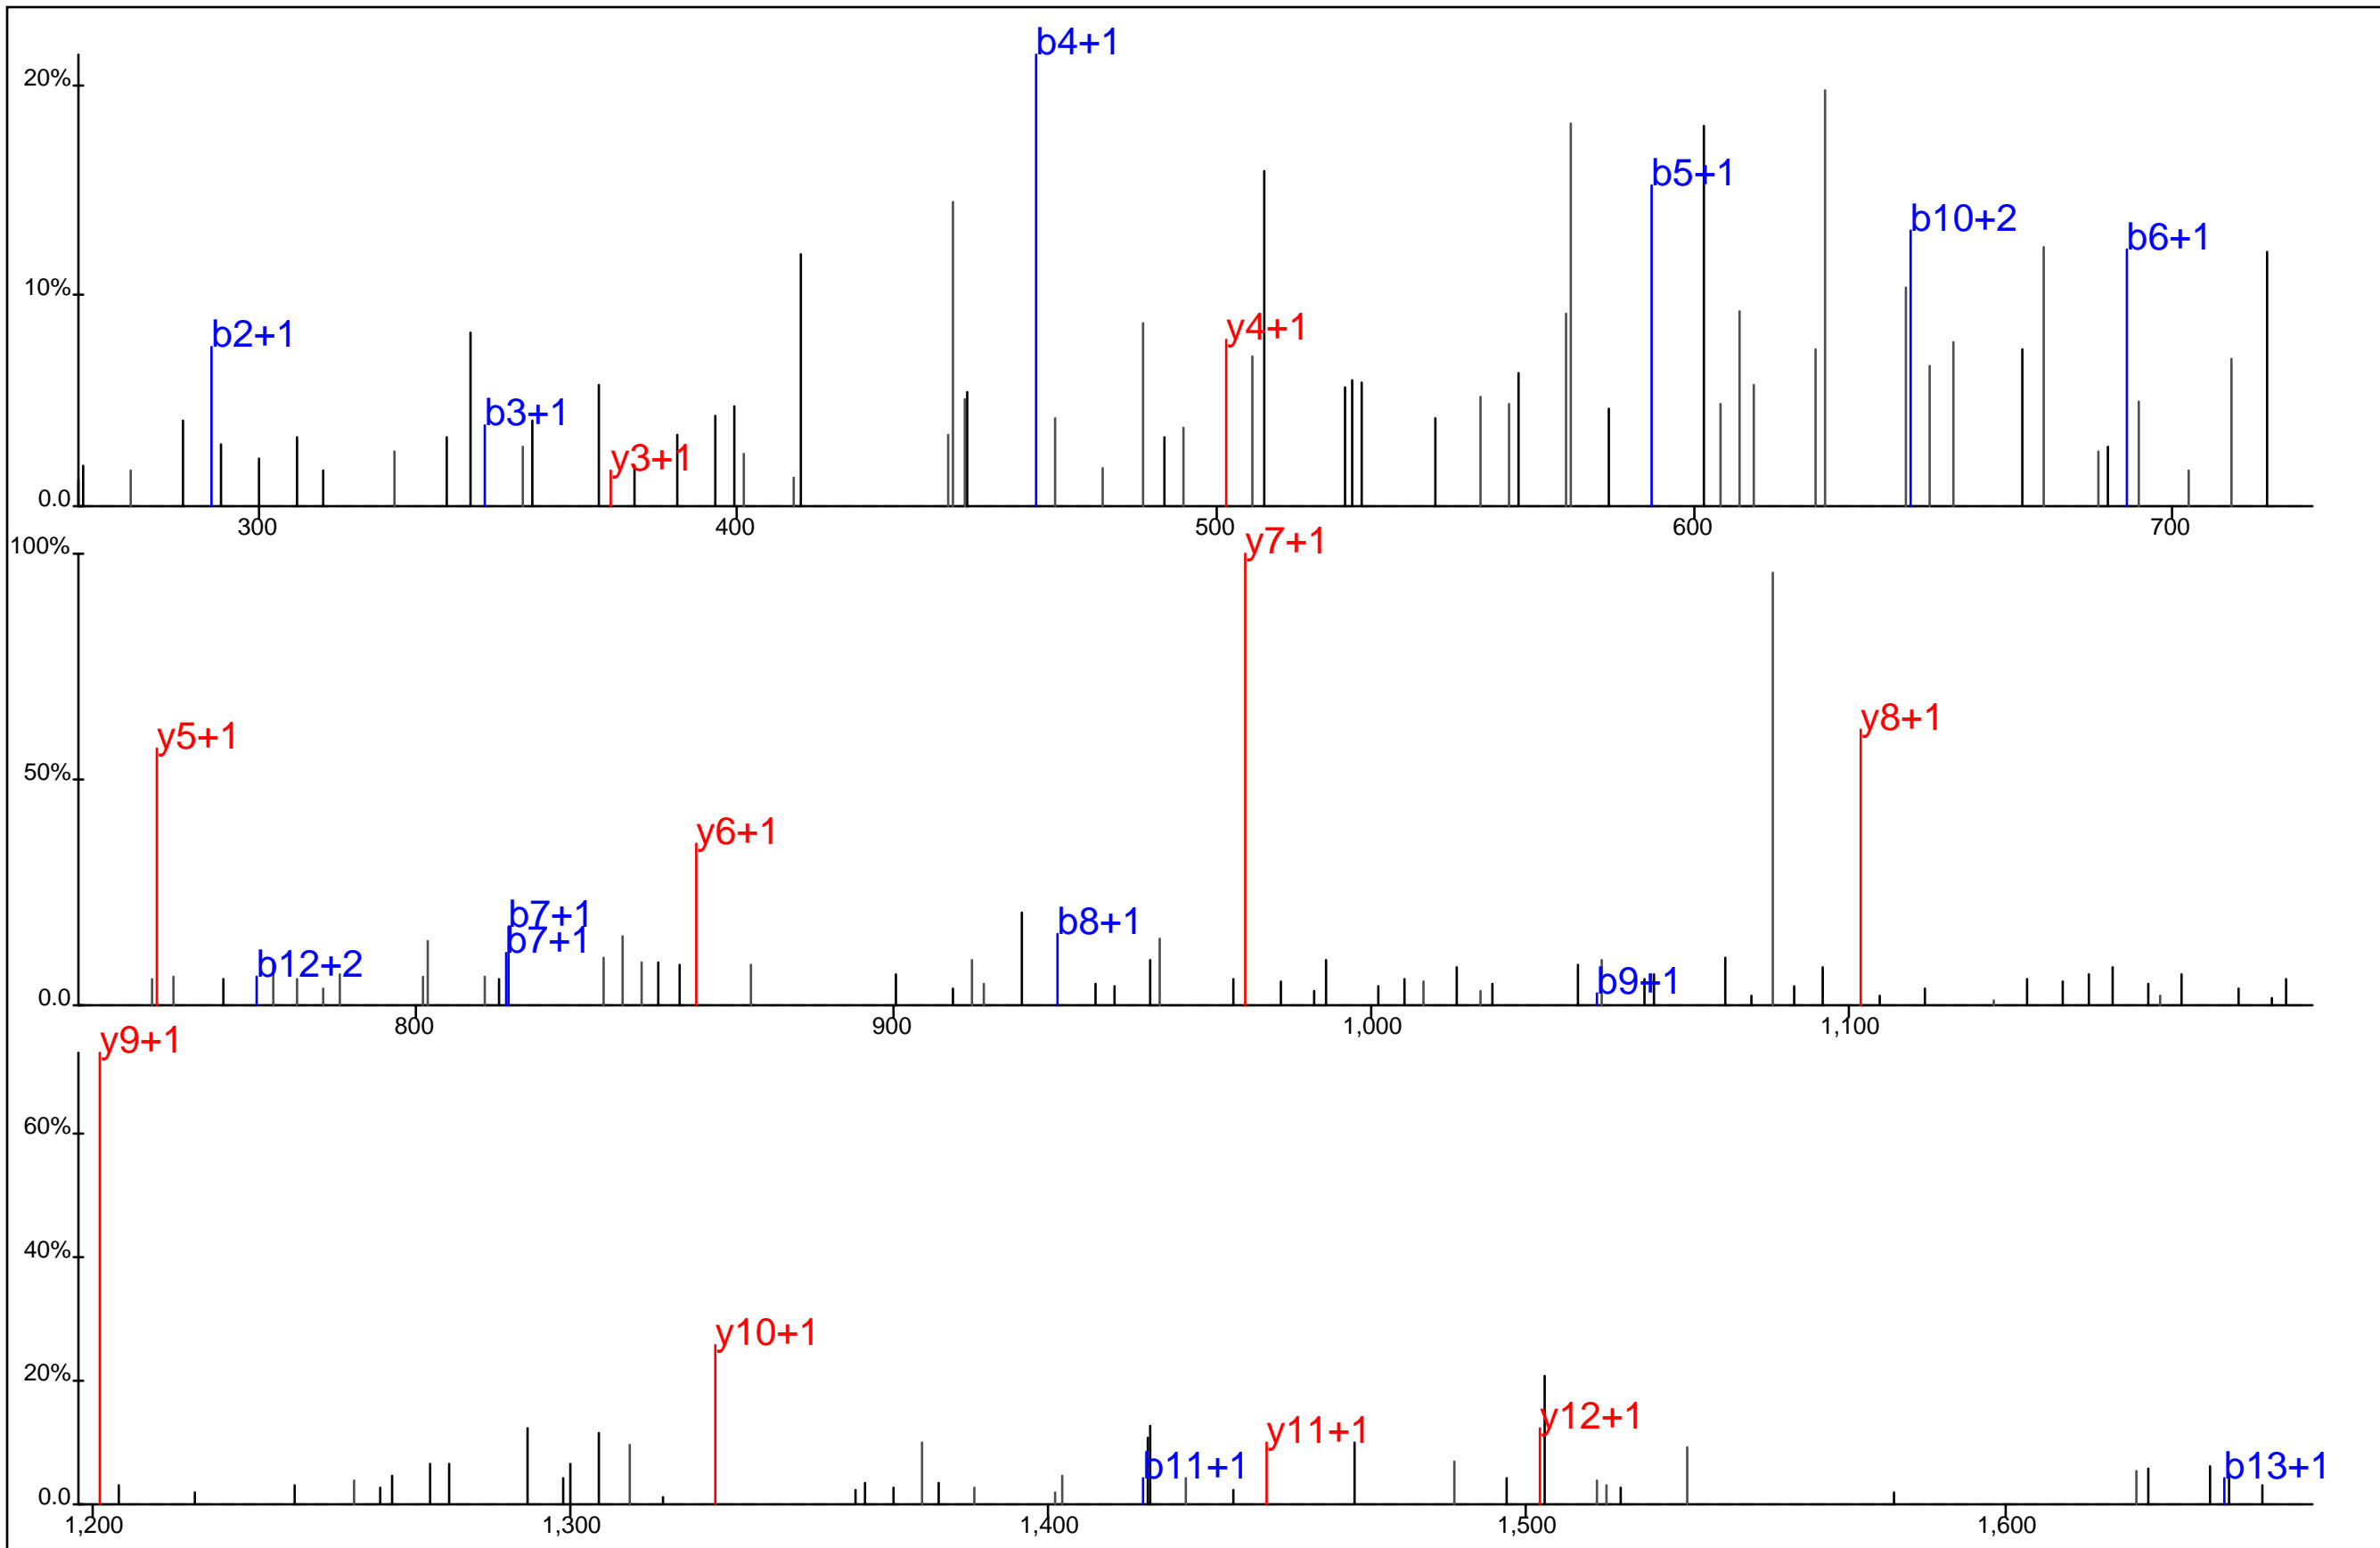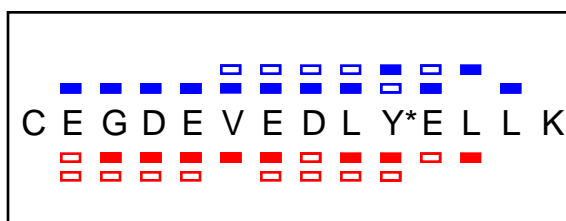

Protein Name: ATP binding domain 4  
 gi Accession: 0  
 Precursor Mass: 896.3782+2  
 Delta Mass: 5.459 ppm  
 XCorr: 33.28

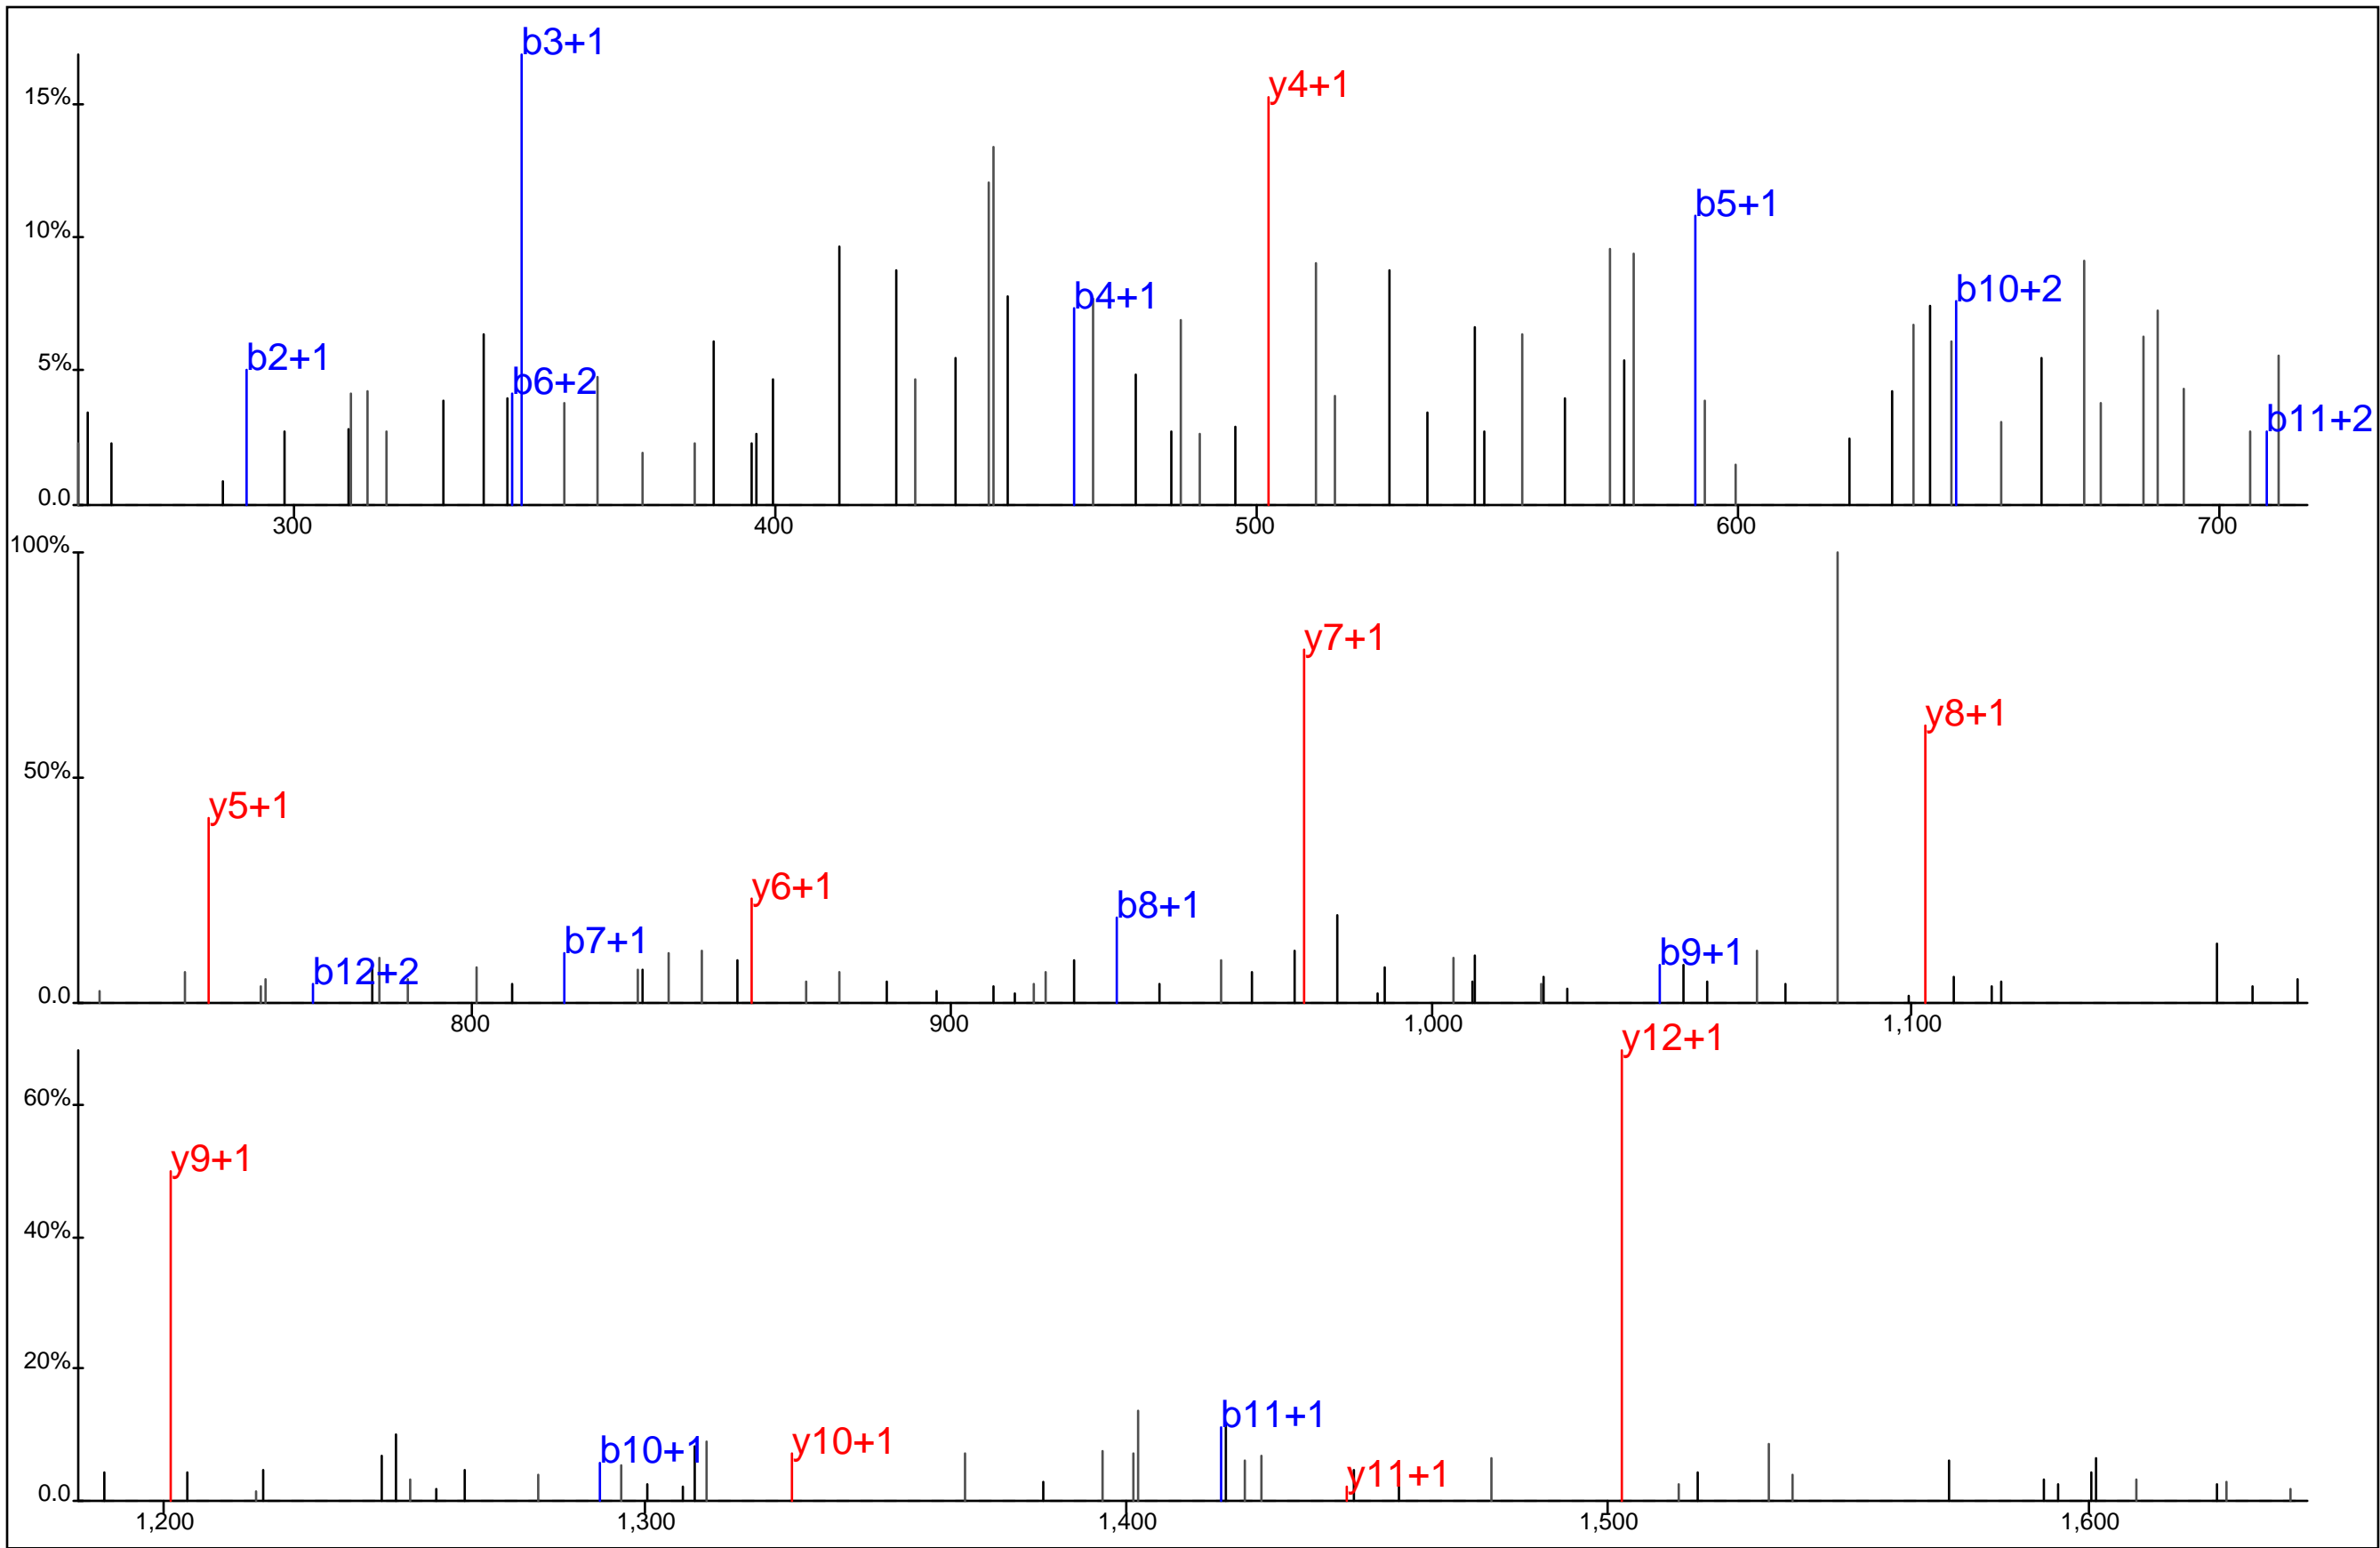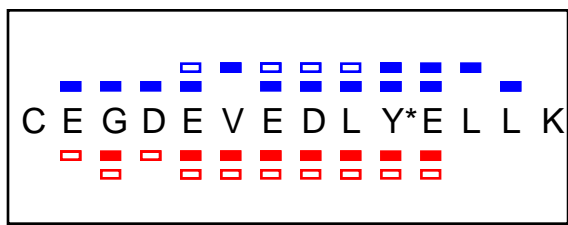

Protein Name: ATP binding domain 4  
 gi Accession: 0  
 Precursor Mass: 896.3749+2  
 Delta Mass: 1.780 ppm  
 XCorr: 38.51

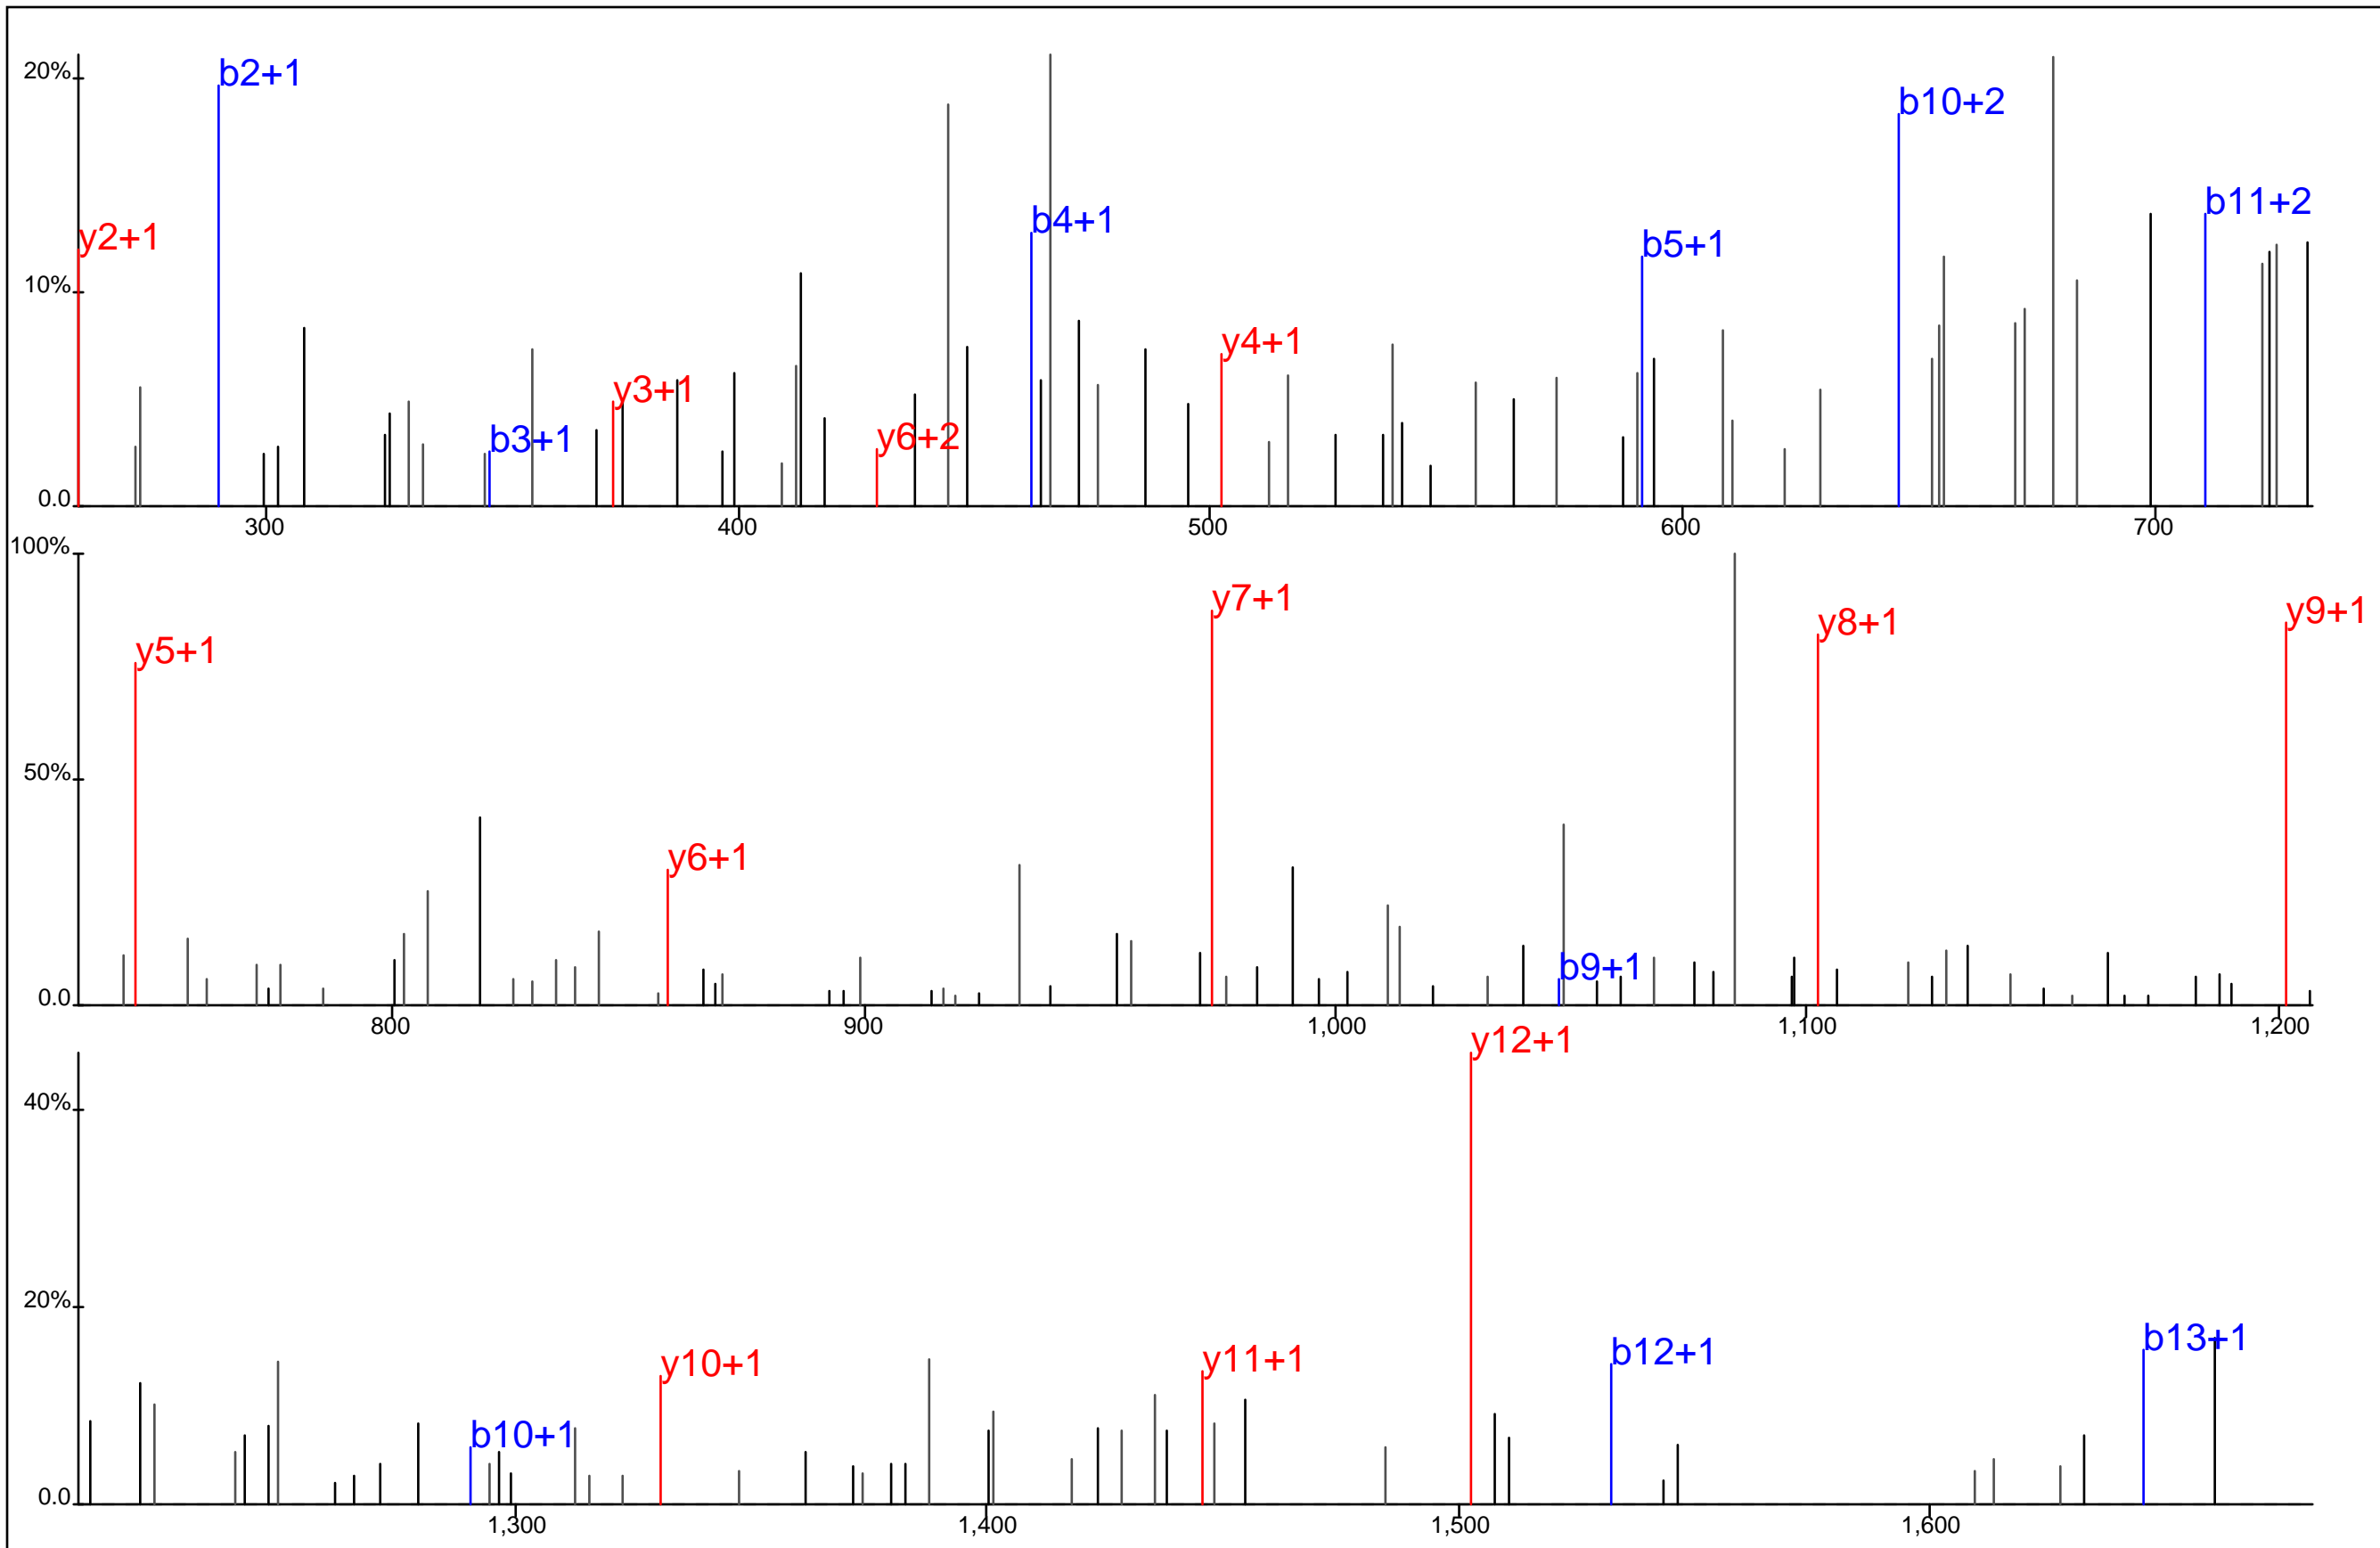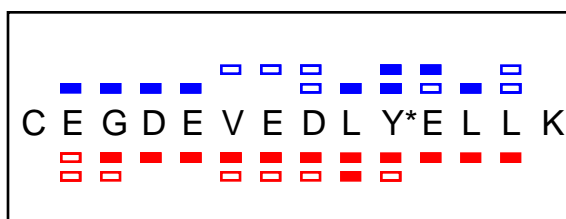

Protein Name: ATP binding domain 4  
 gi Accession: 0  
 Precursor Mass: 896.3745+2  
 Delta Mass: 1.304 ppm  
 XCorr: 49.59



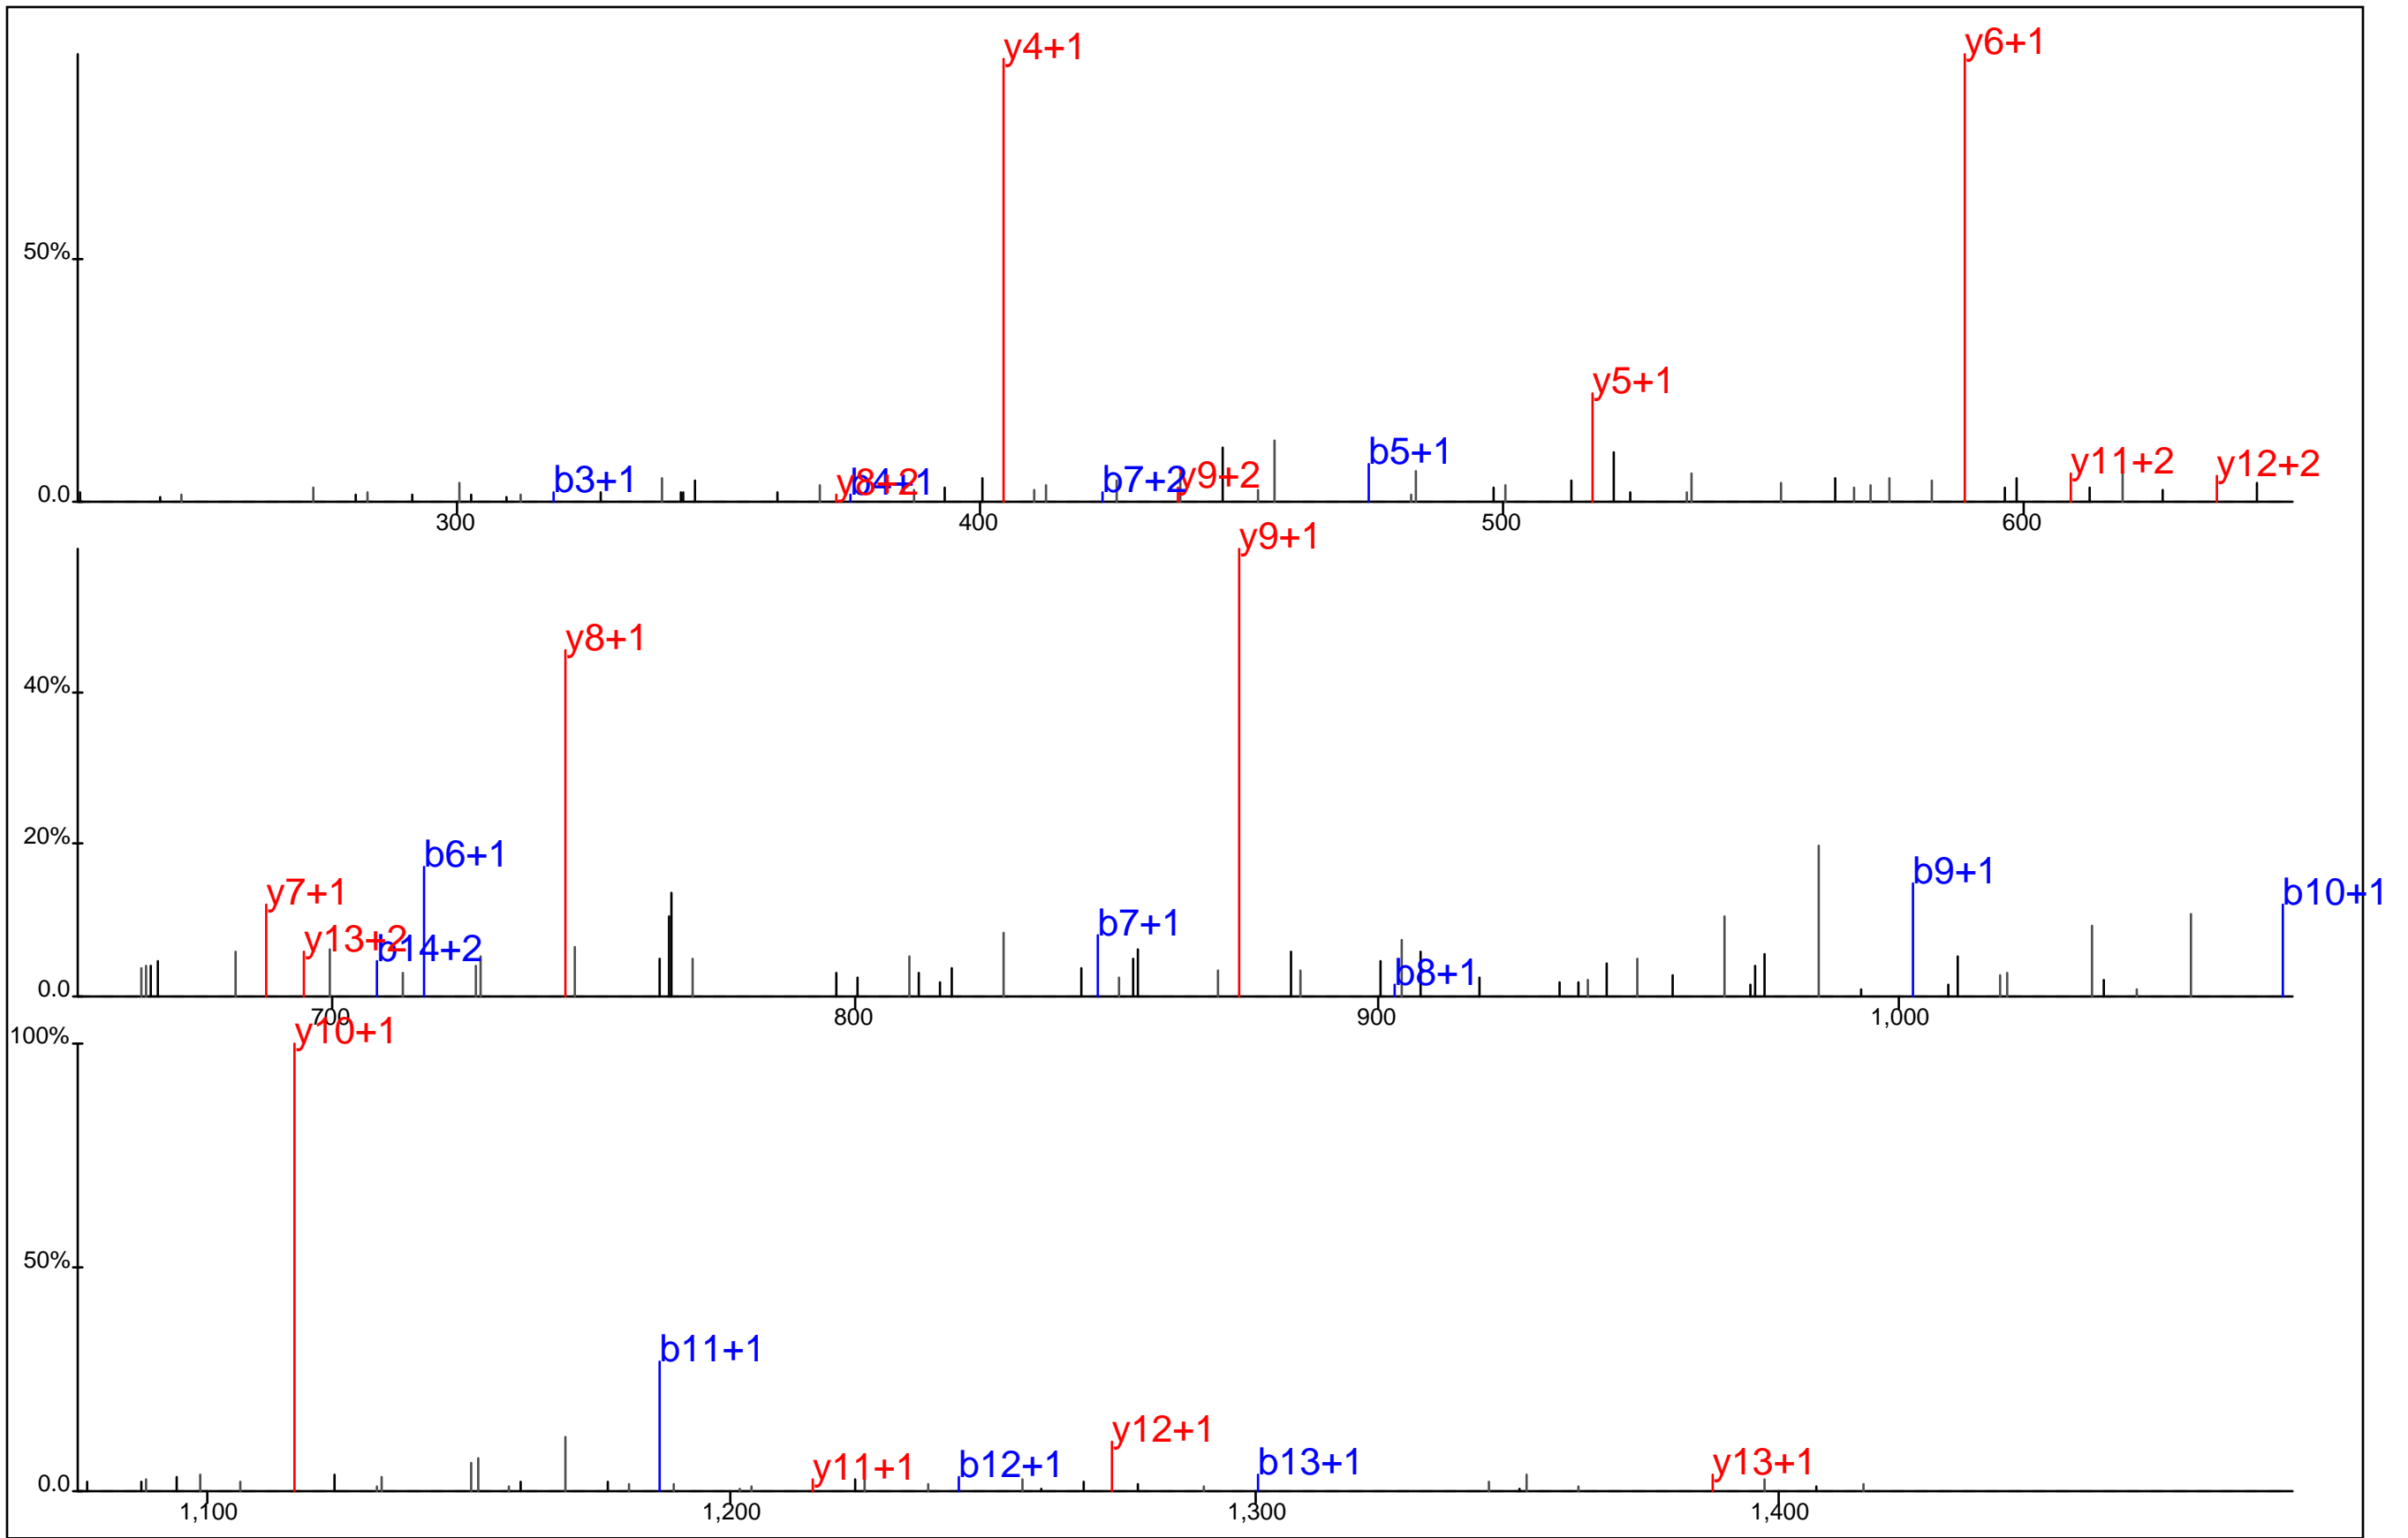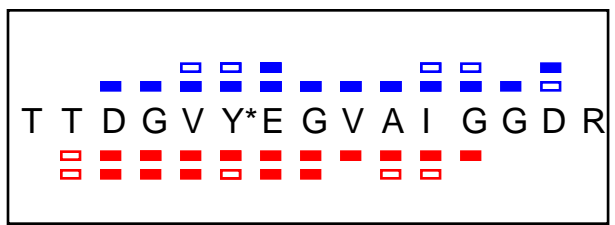

Protein Name: ATP citrate lyase  
 gi Accession: 0  
 Precursor Mass: 795.3457+2  
 Delta Mass: 0.121 ppm  
 XCorr: 76.2

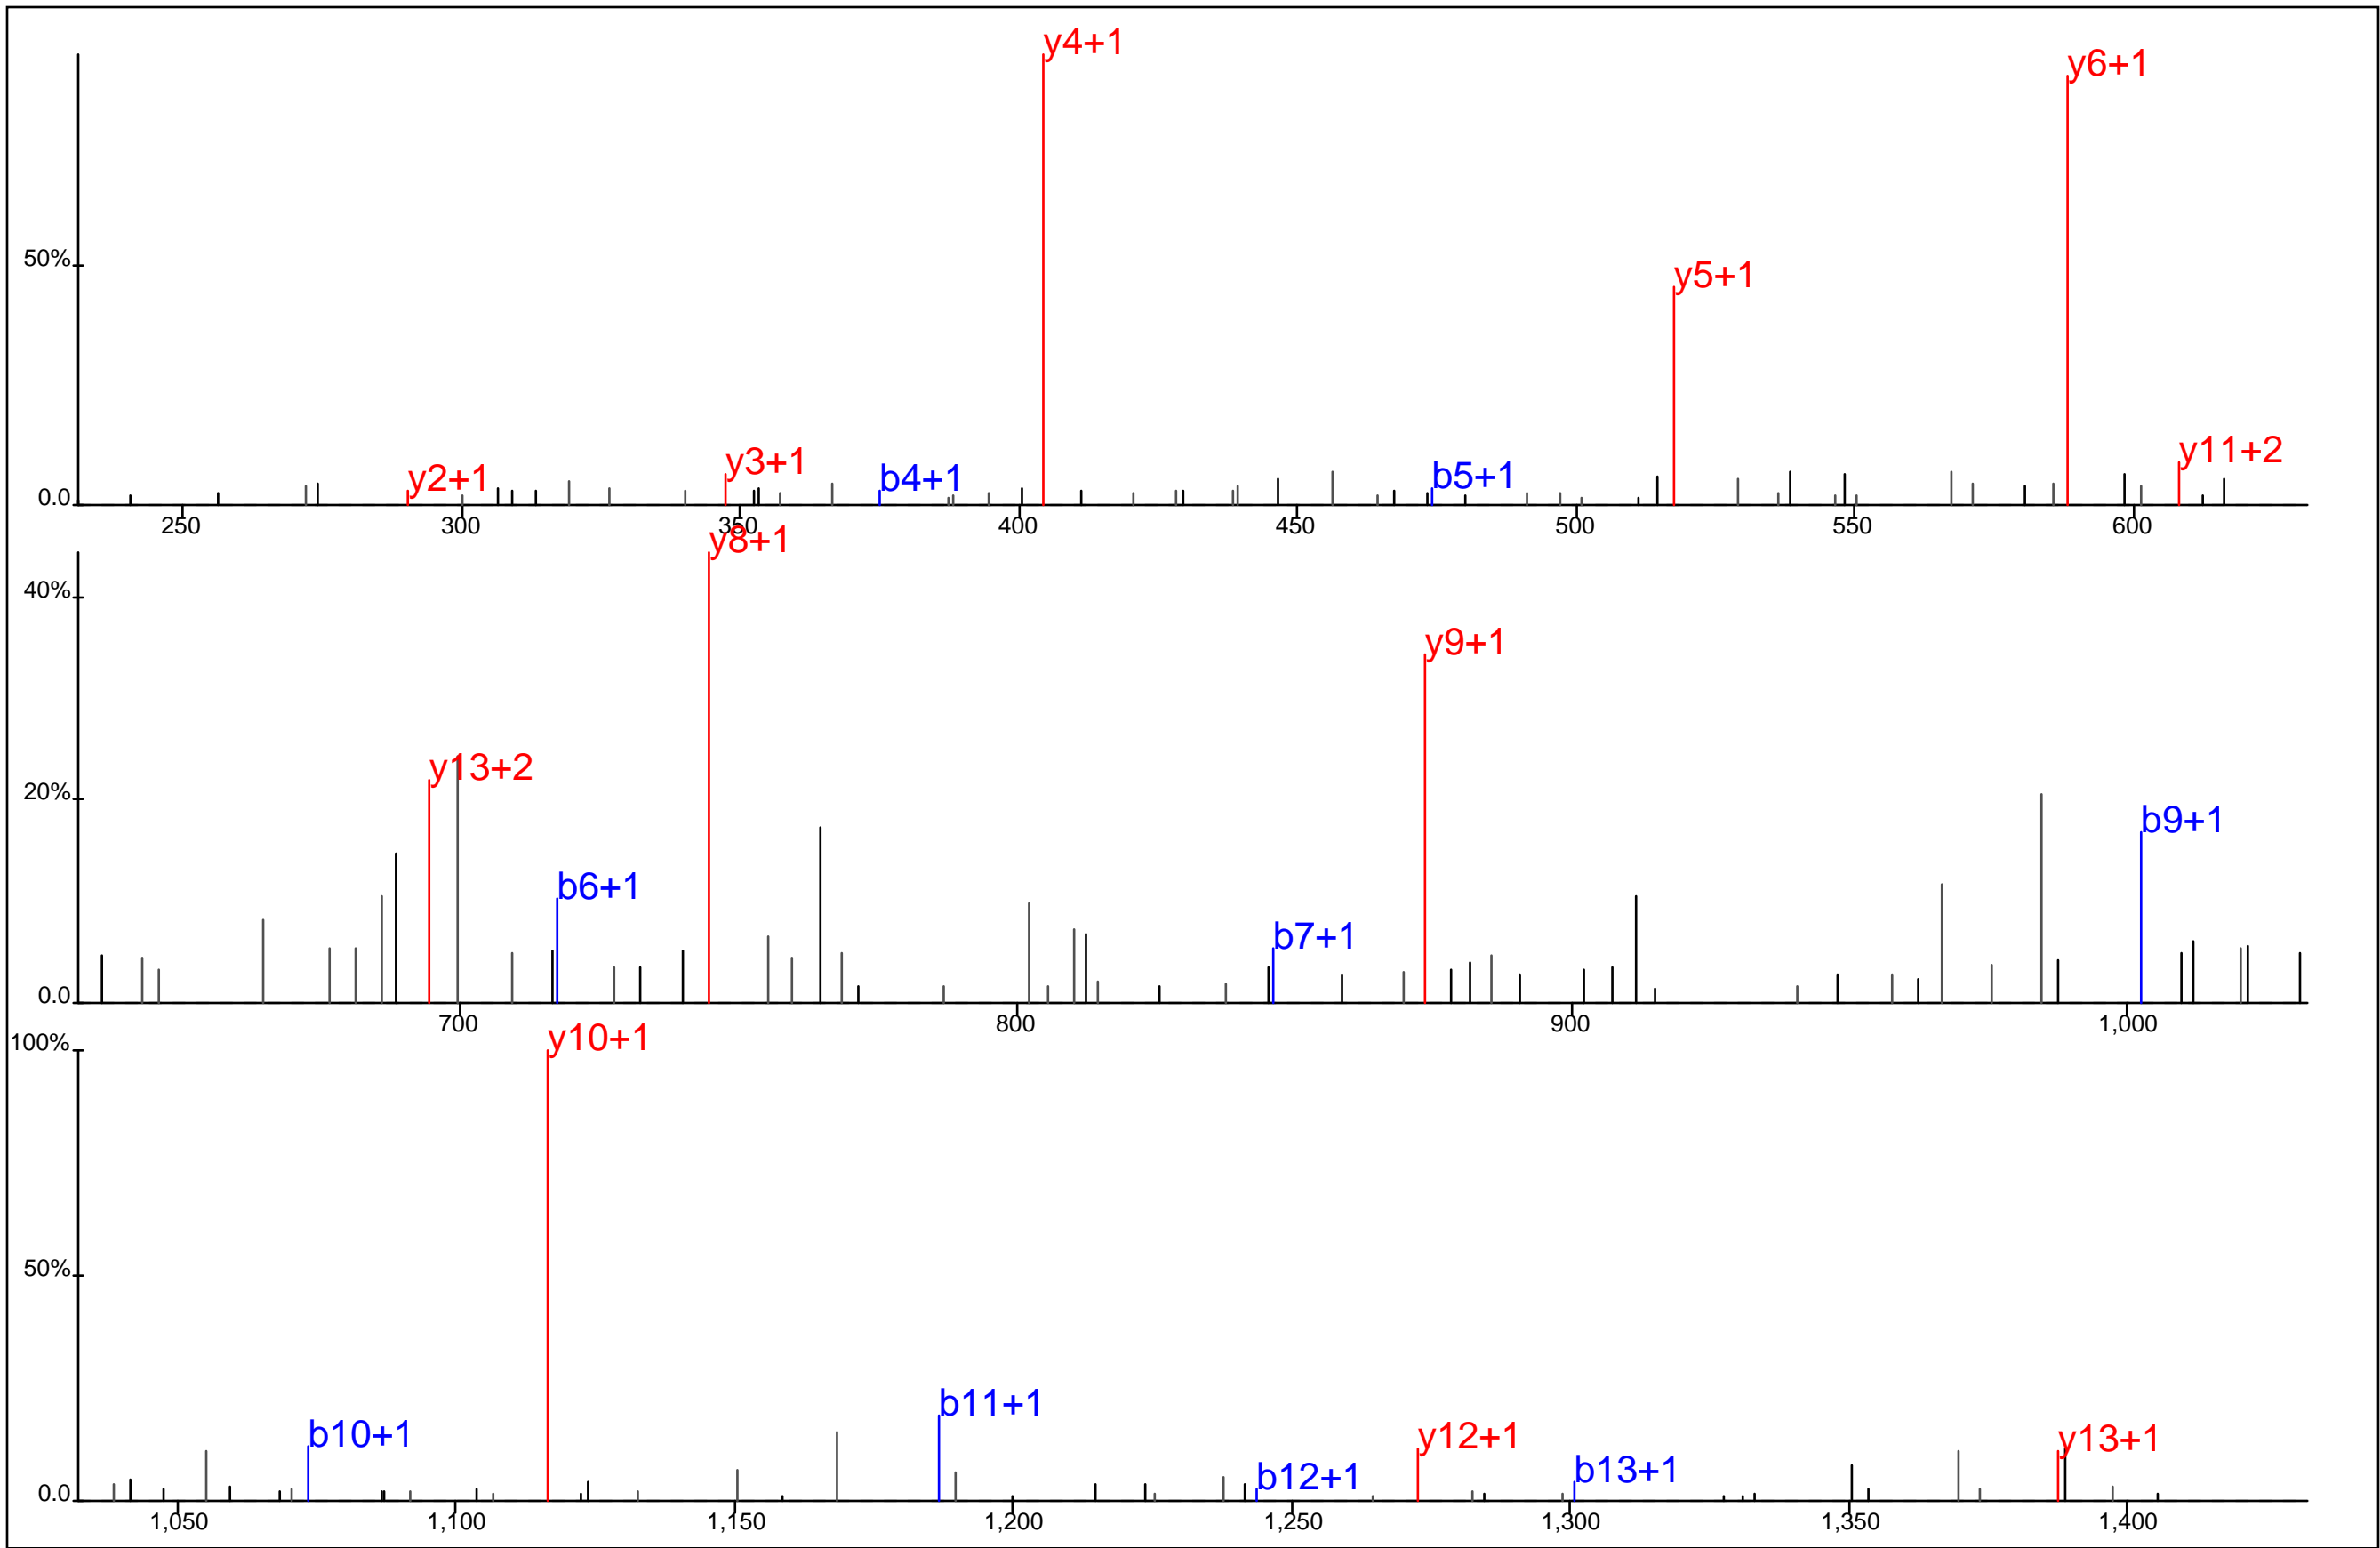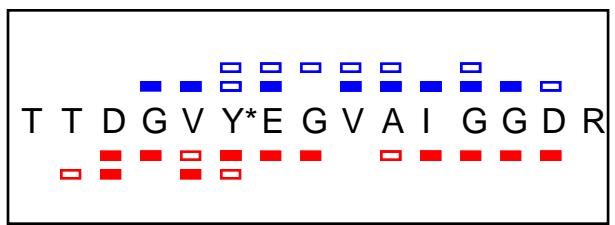

Protein Name: ATP citrate lyase  
gi Accession: 0  
Precursor Mass: 795.3481+2  
Delta Mass: 2.874 ppm  
XCorr: 59.51

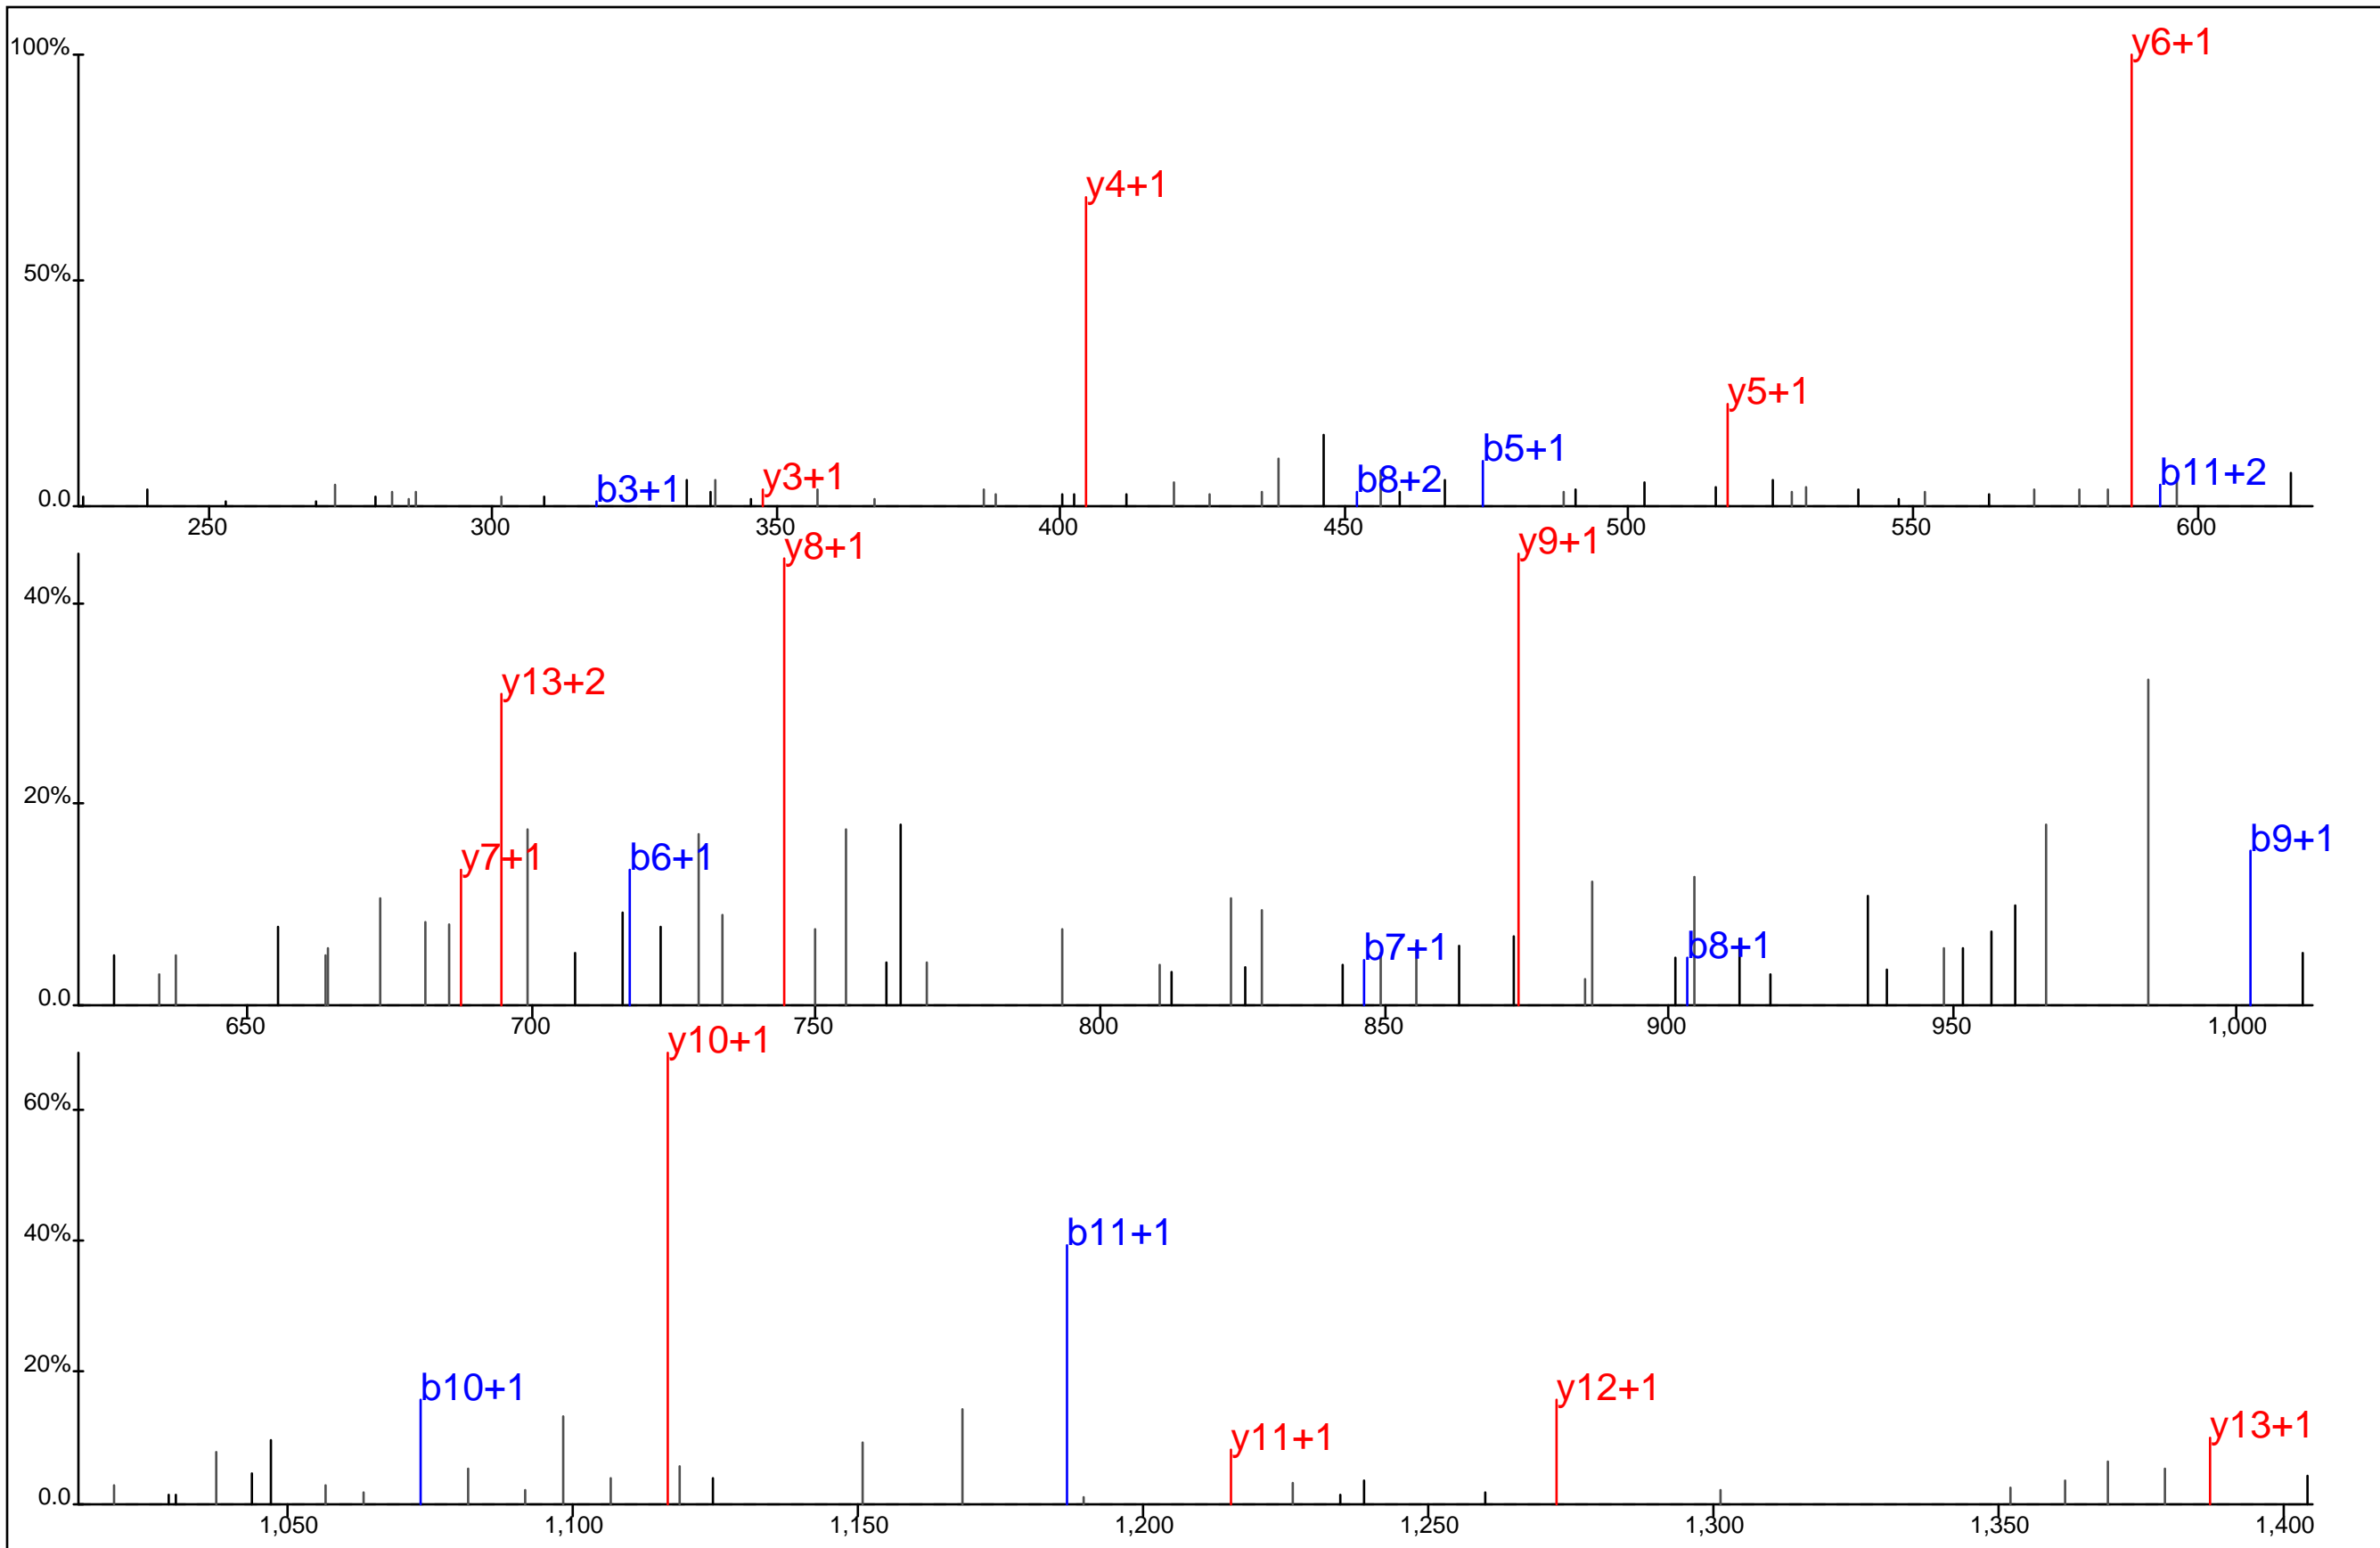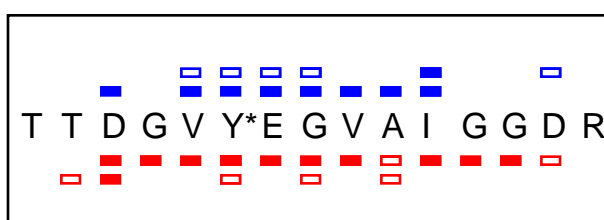

Protein Name: ATP citrate lyase  
gi Accession: 0  
Precursor Mass: 795.3470+2  
Delta Mass: 1.569 ppm  
XCorr: 70.56

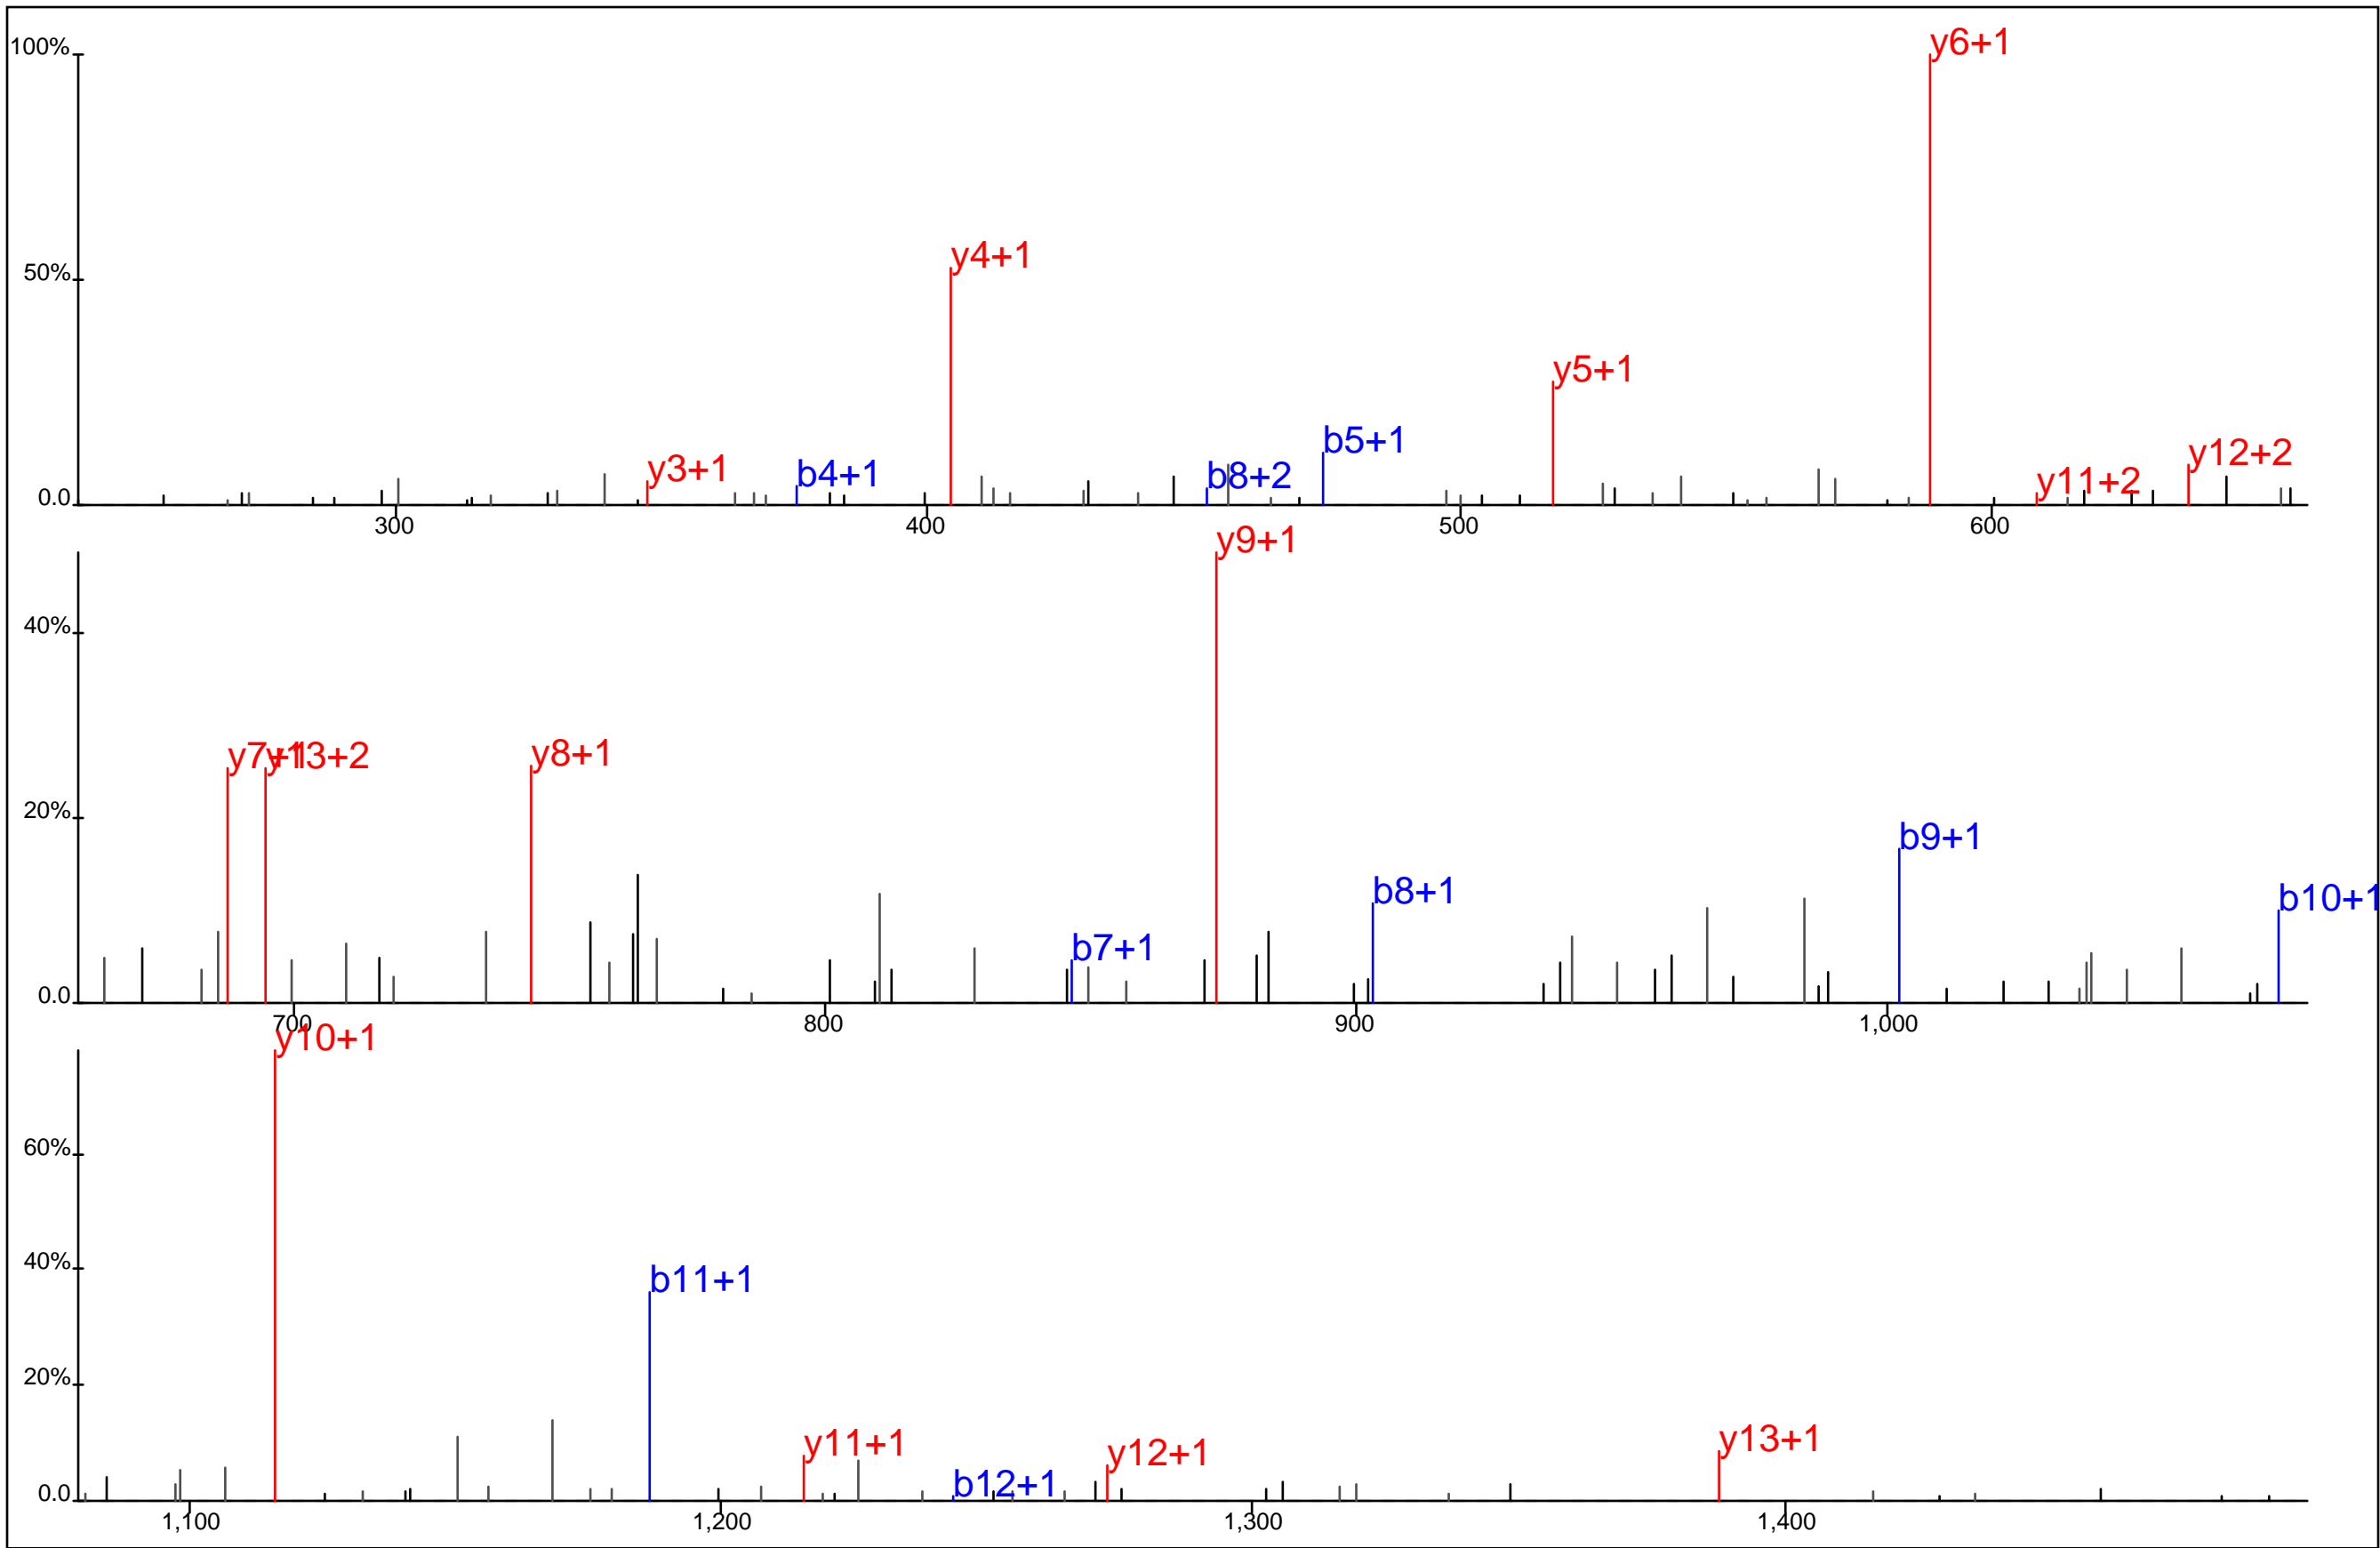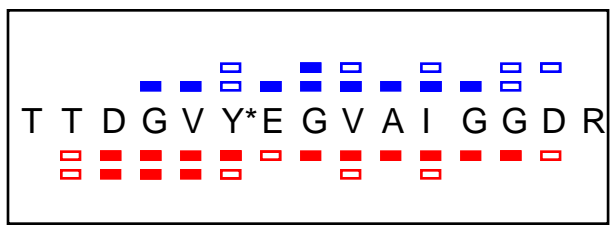

Protein Name: ATP citrate lyase  
 gi Accession: 0  
 Precursor Mass: 795.3478+2  
 Delta Mass: 2.490 ppm  
 XCorr: 71.08

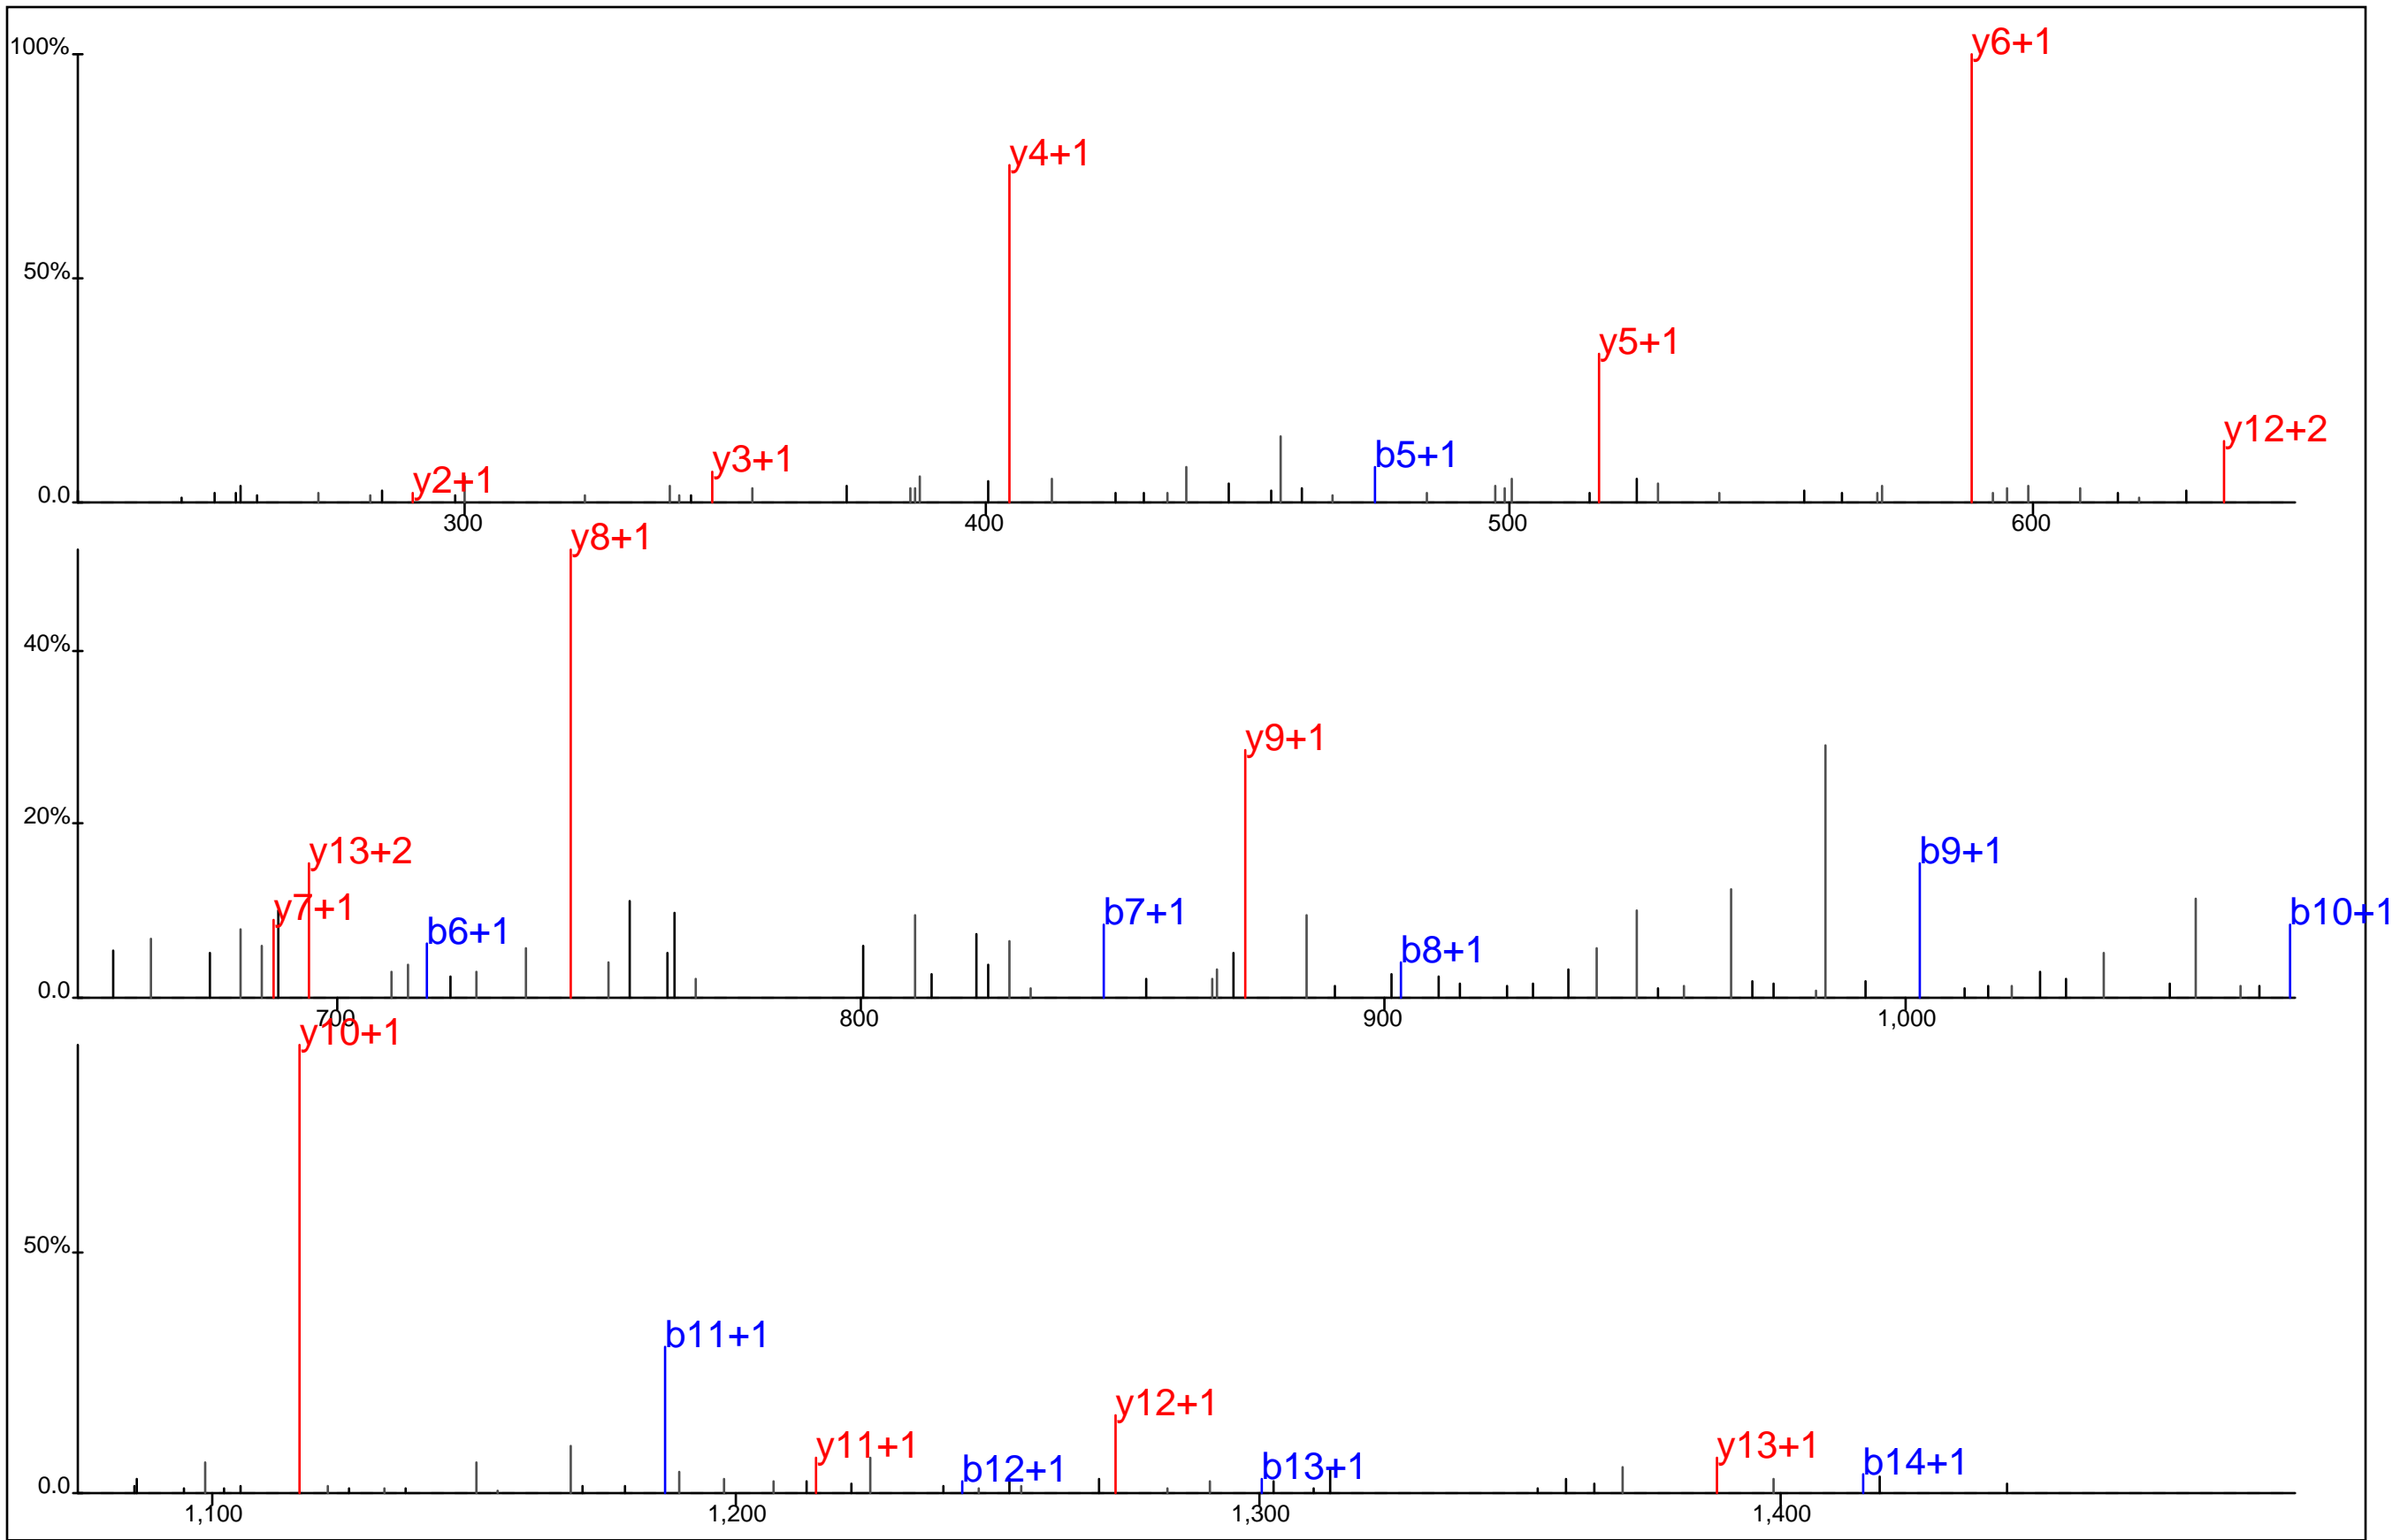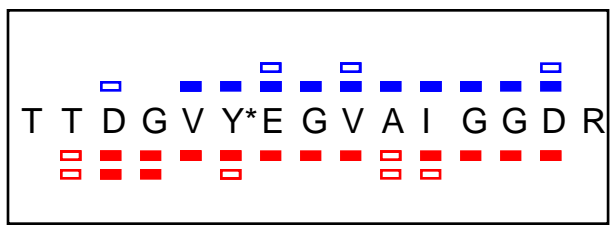

Protein Name: ATP citrate lyase  
 gi Accession: 0  
 Precursor Mass: 795.3459+2  
 Delta Mass: 0.109 ppm  
 XCorr: 81.07

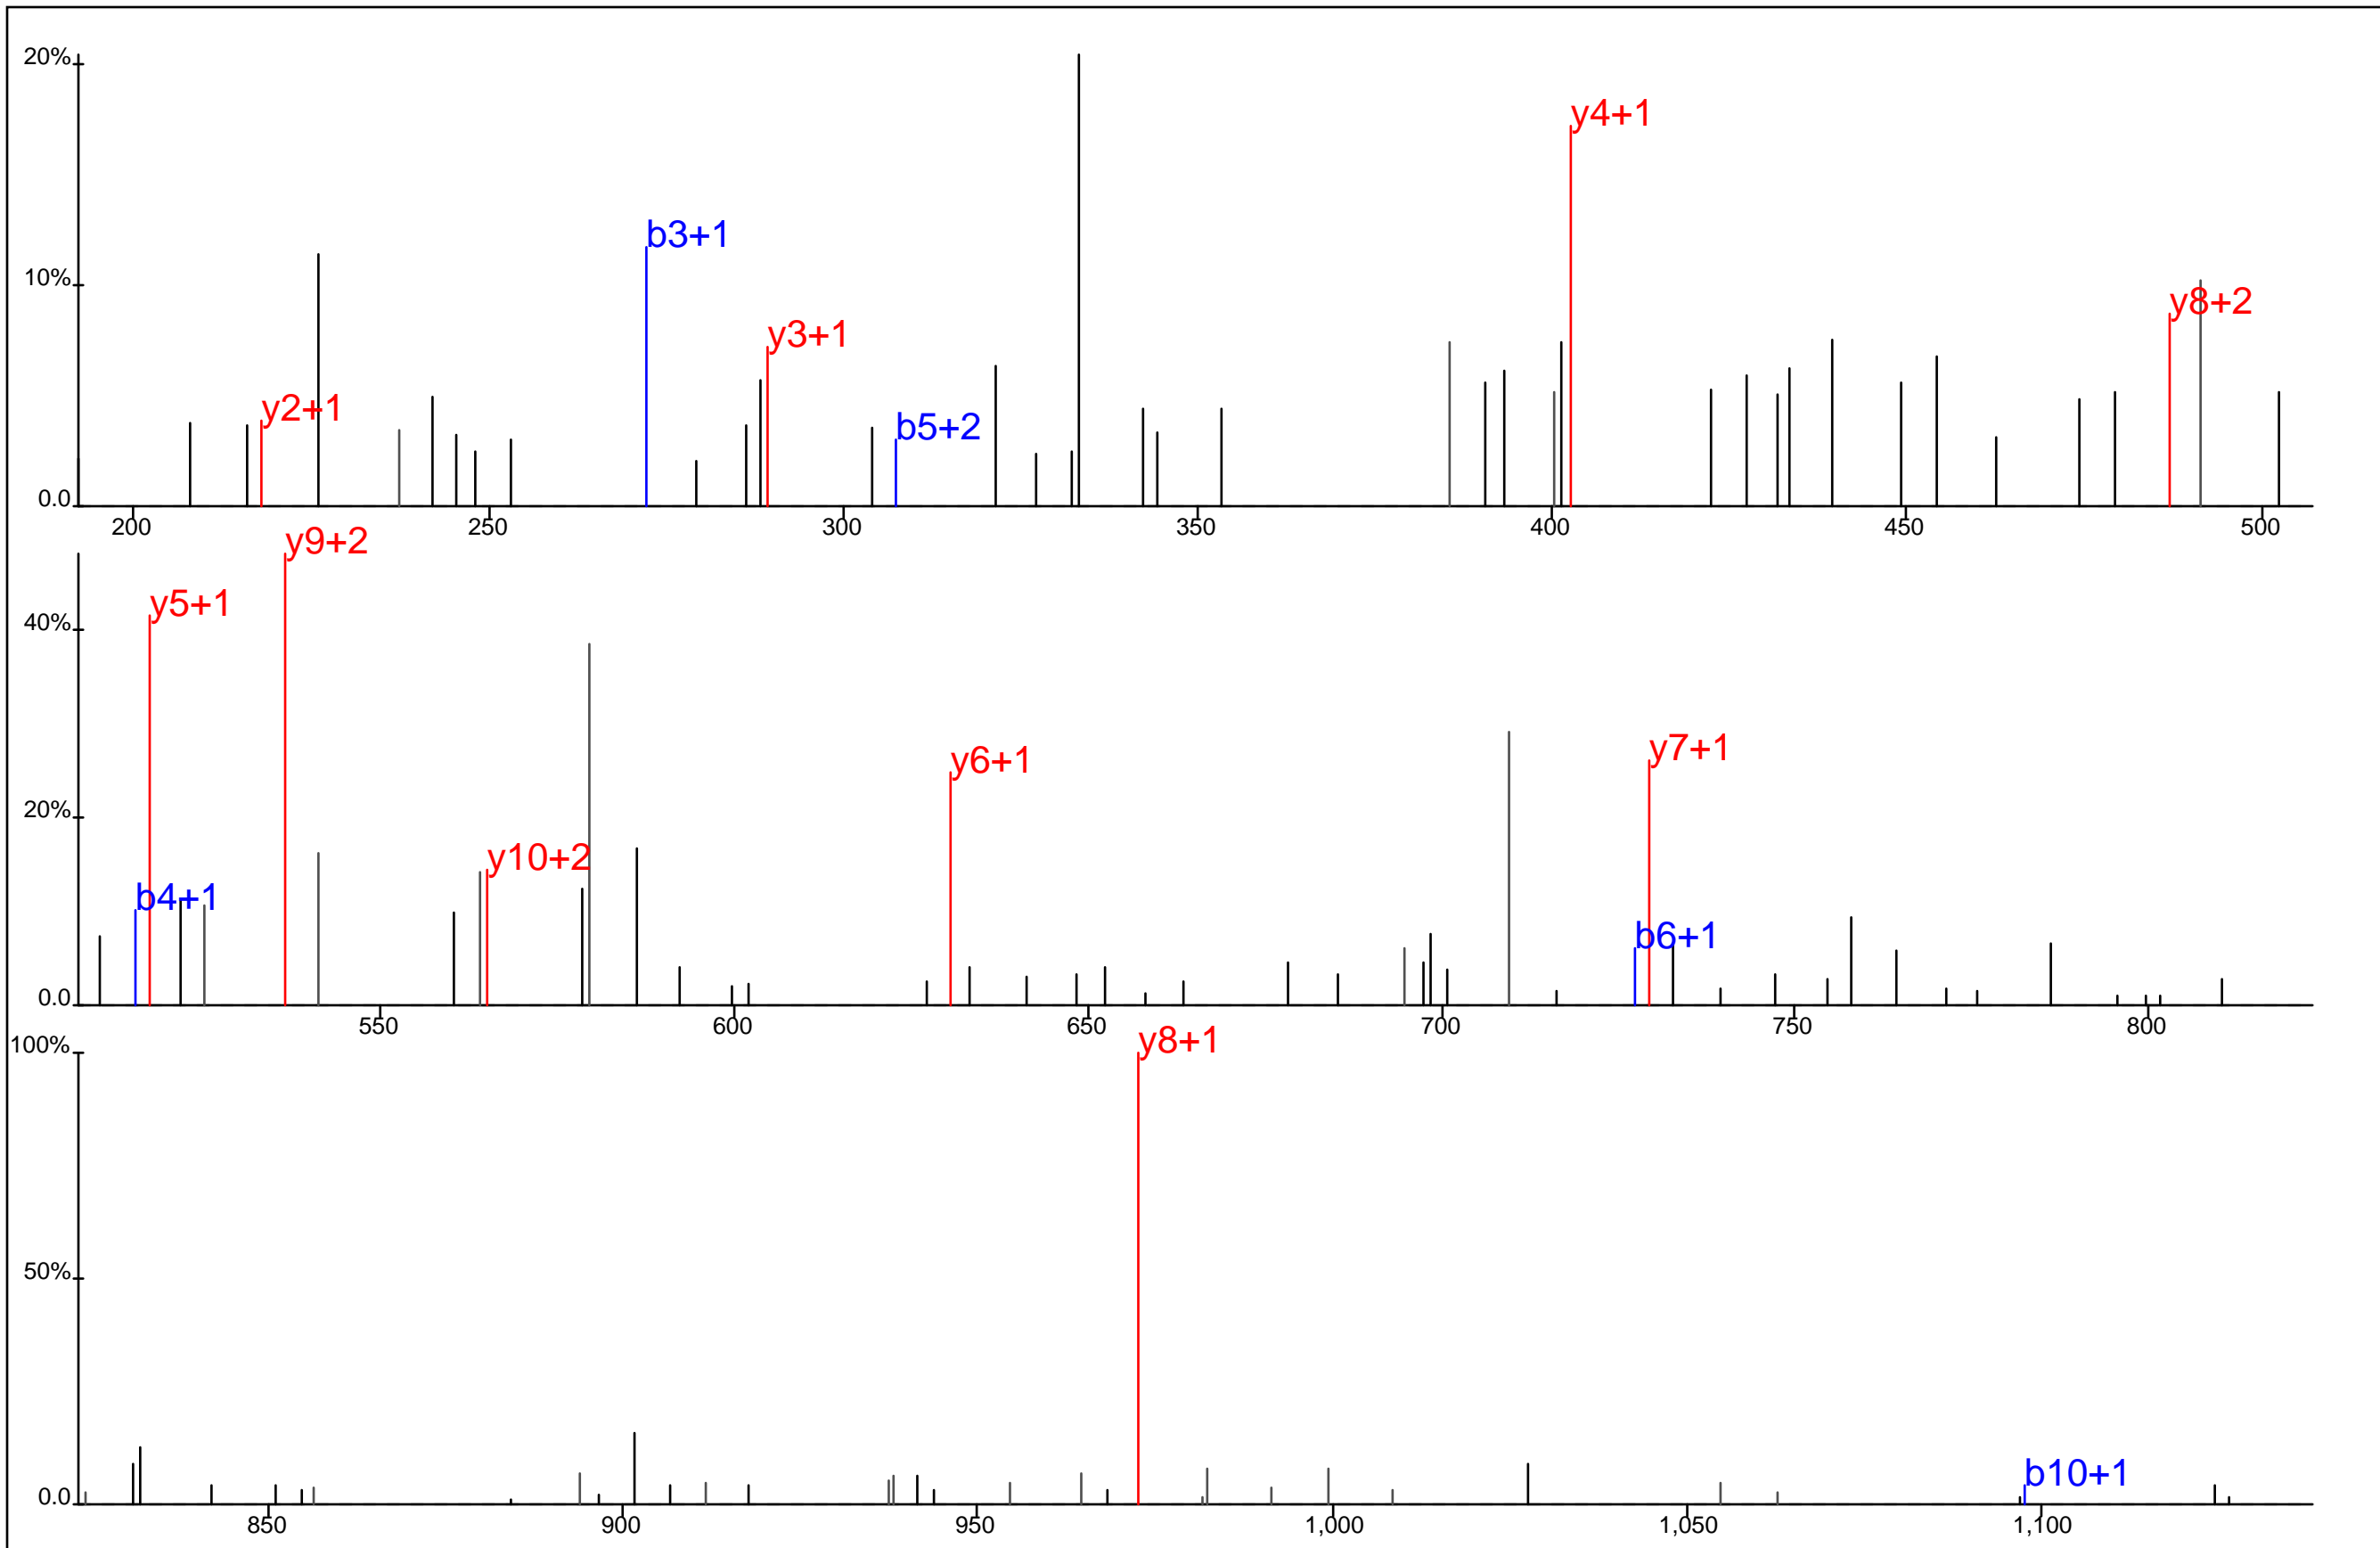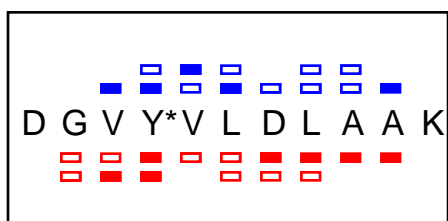

Protein Name: ATP citrate lyase  
 gi Accession: 0  
 Precursor Mass: 622.3024+2  
 Delta Mass: 0.482 ppm  
 XCorr: 26.44

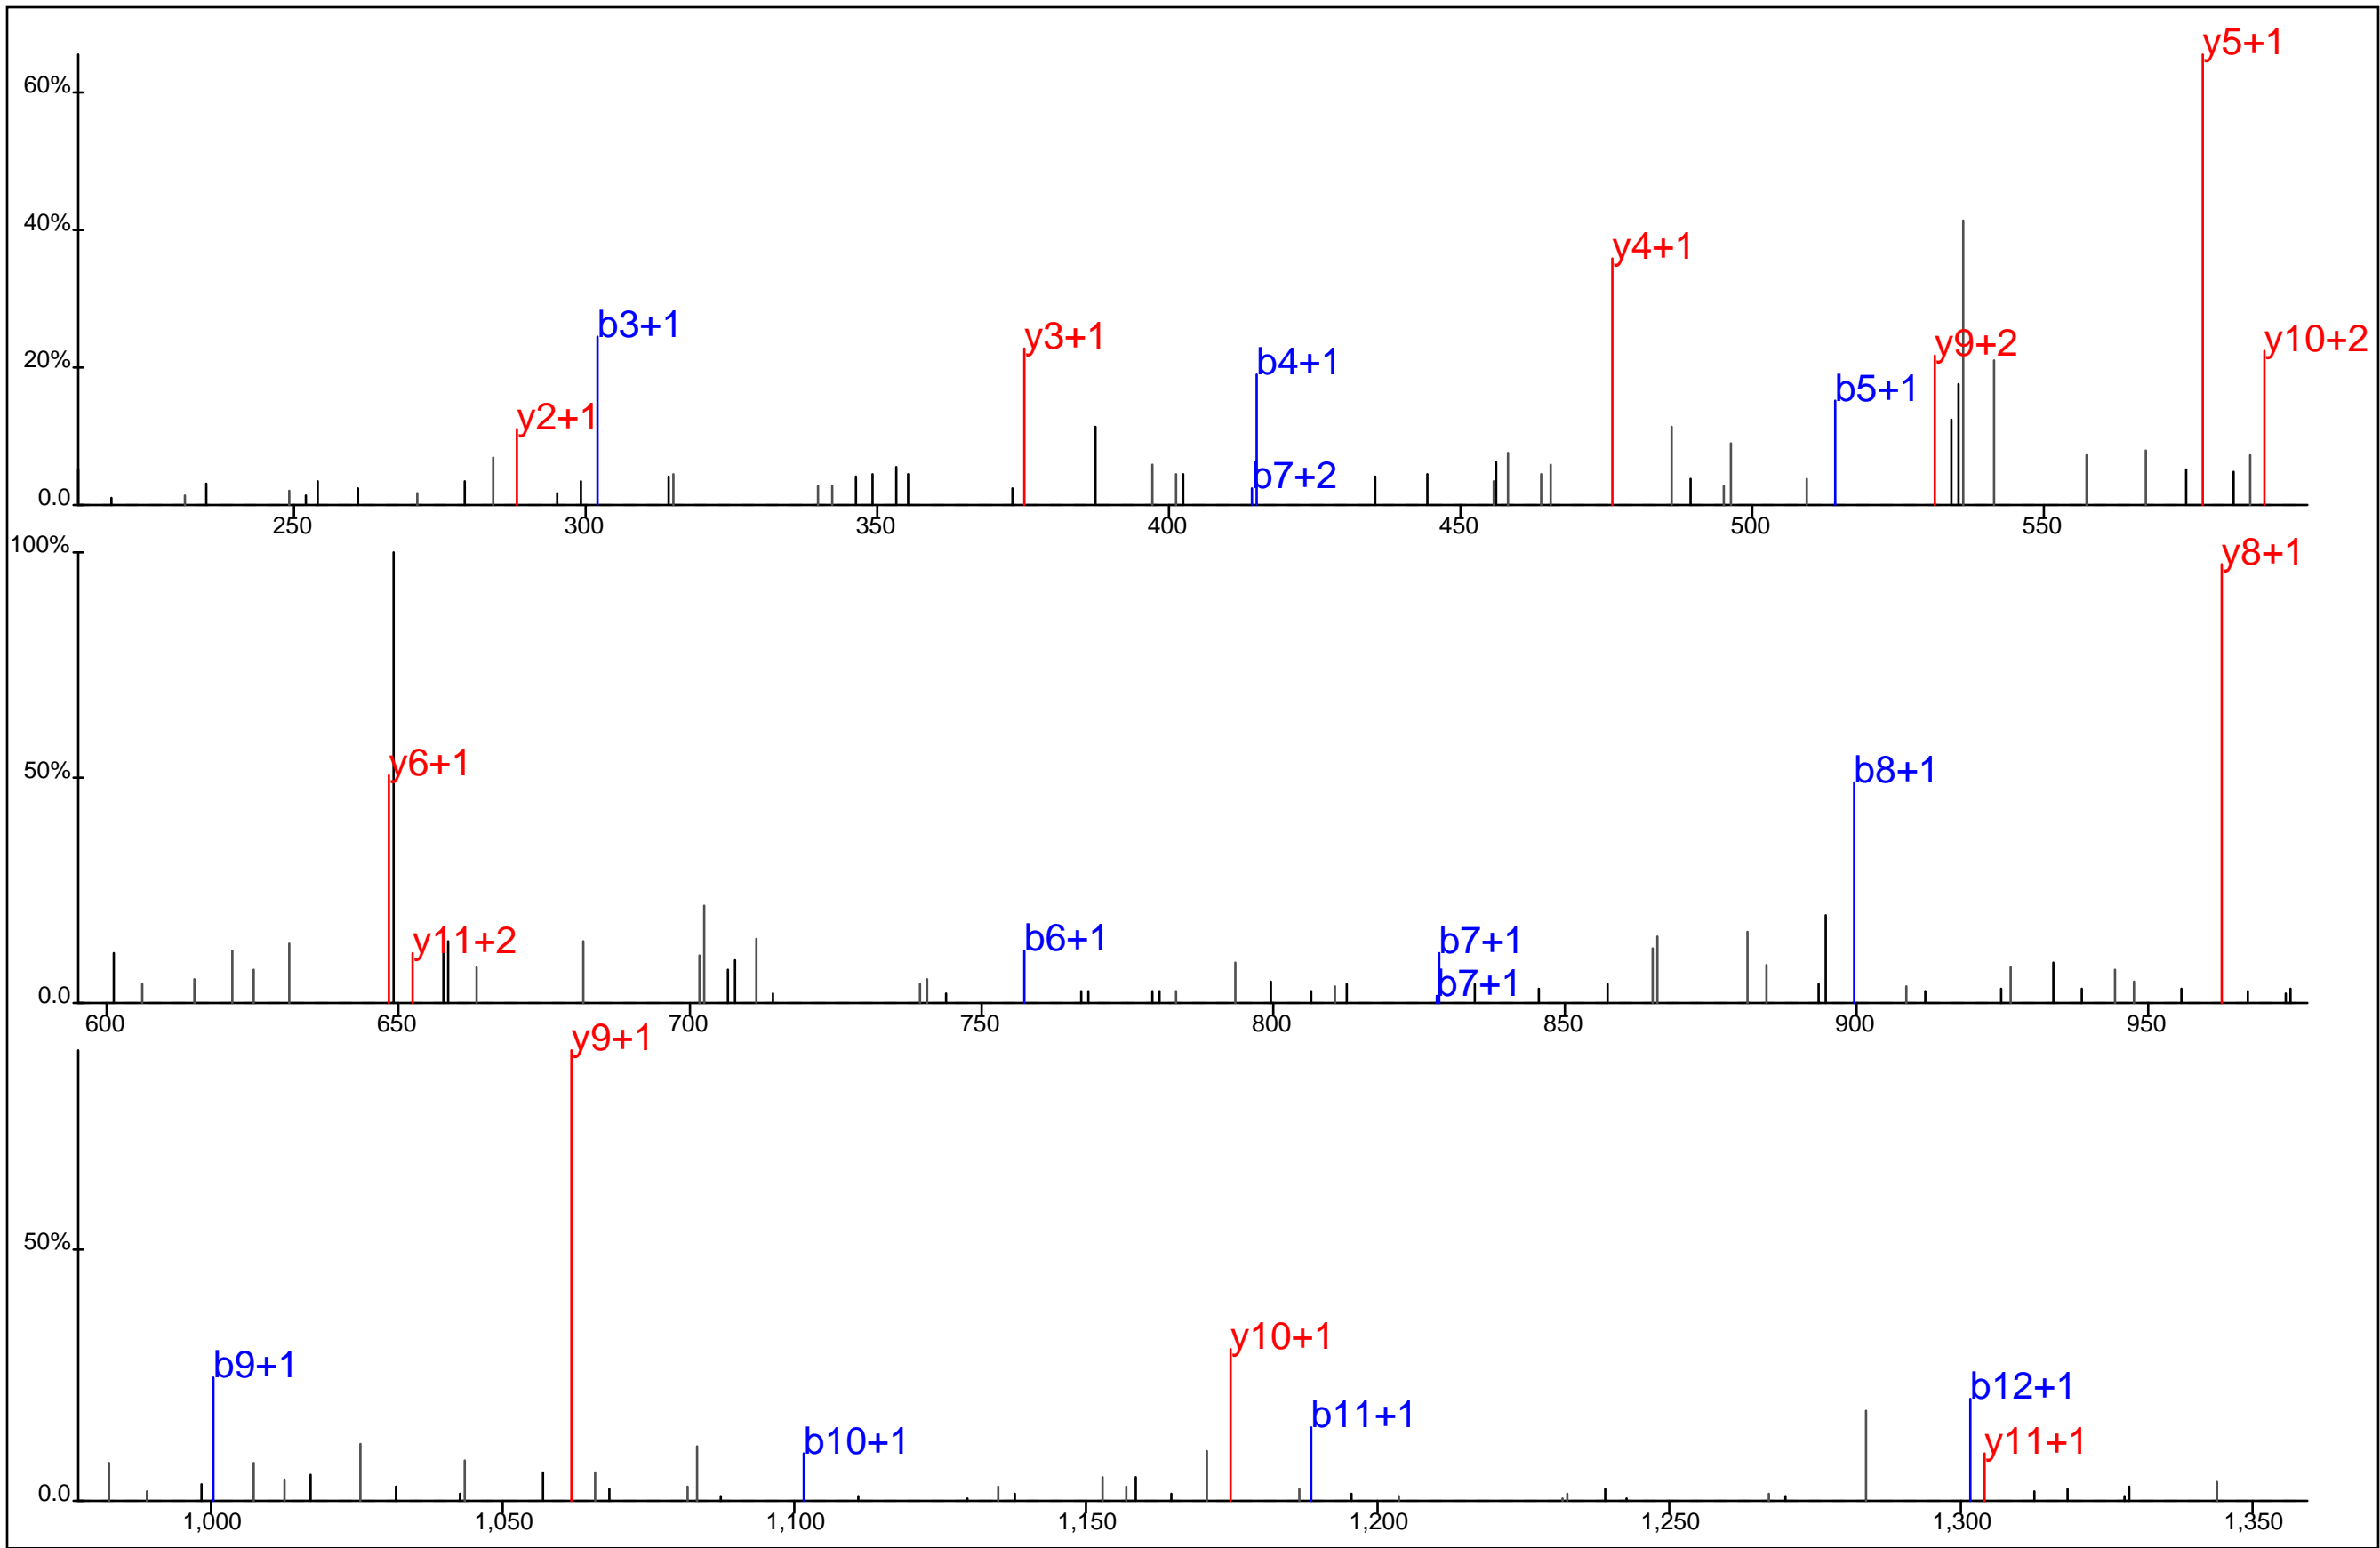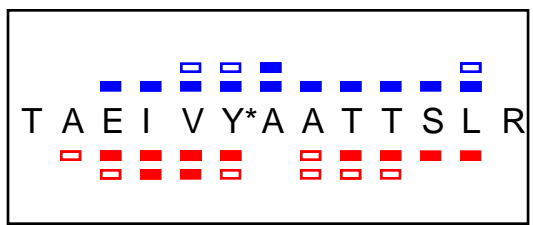

Protein Name: Baculoviral IAP repeat containing protein 6  
 gi Accession: 0  
 Precursor Mass: 738.3600+2  
 Delta Mass: 0.947 ppm  
 XCorr: 64.78

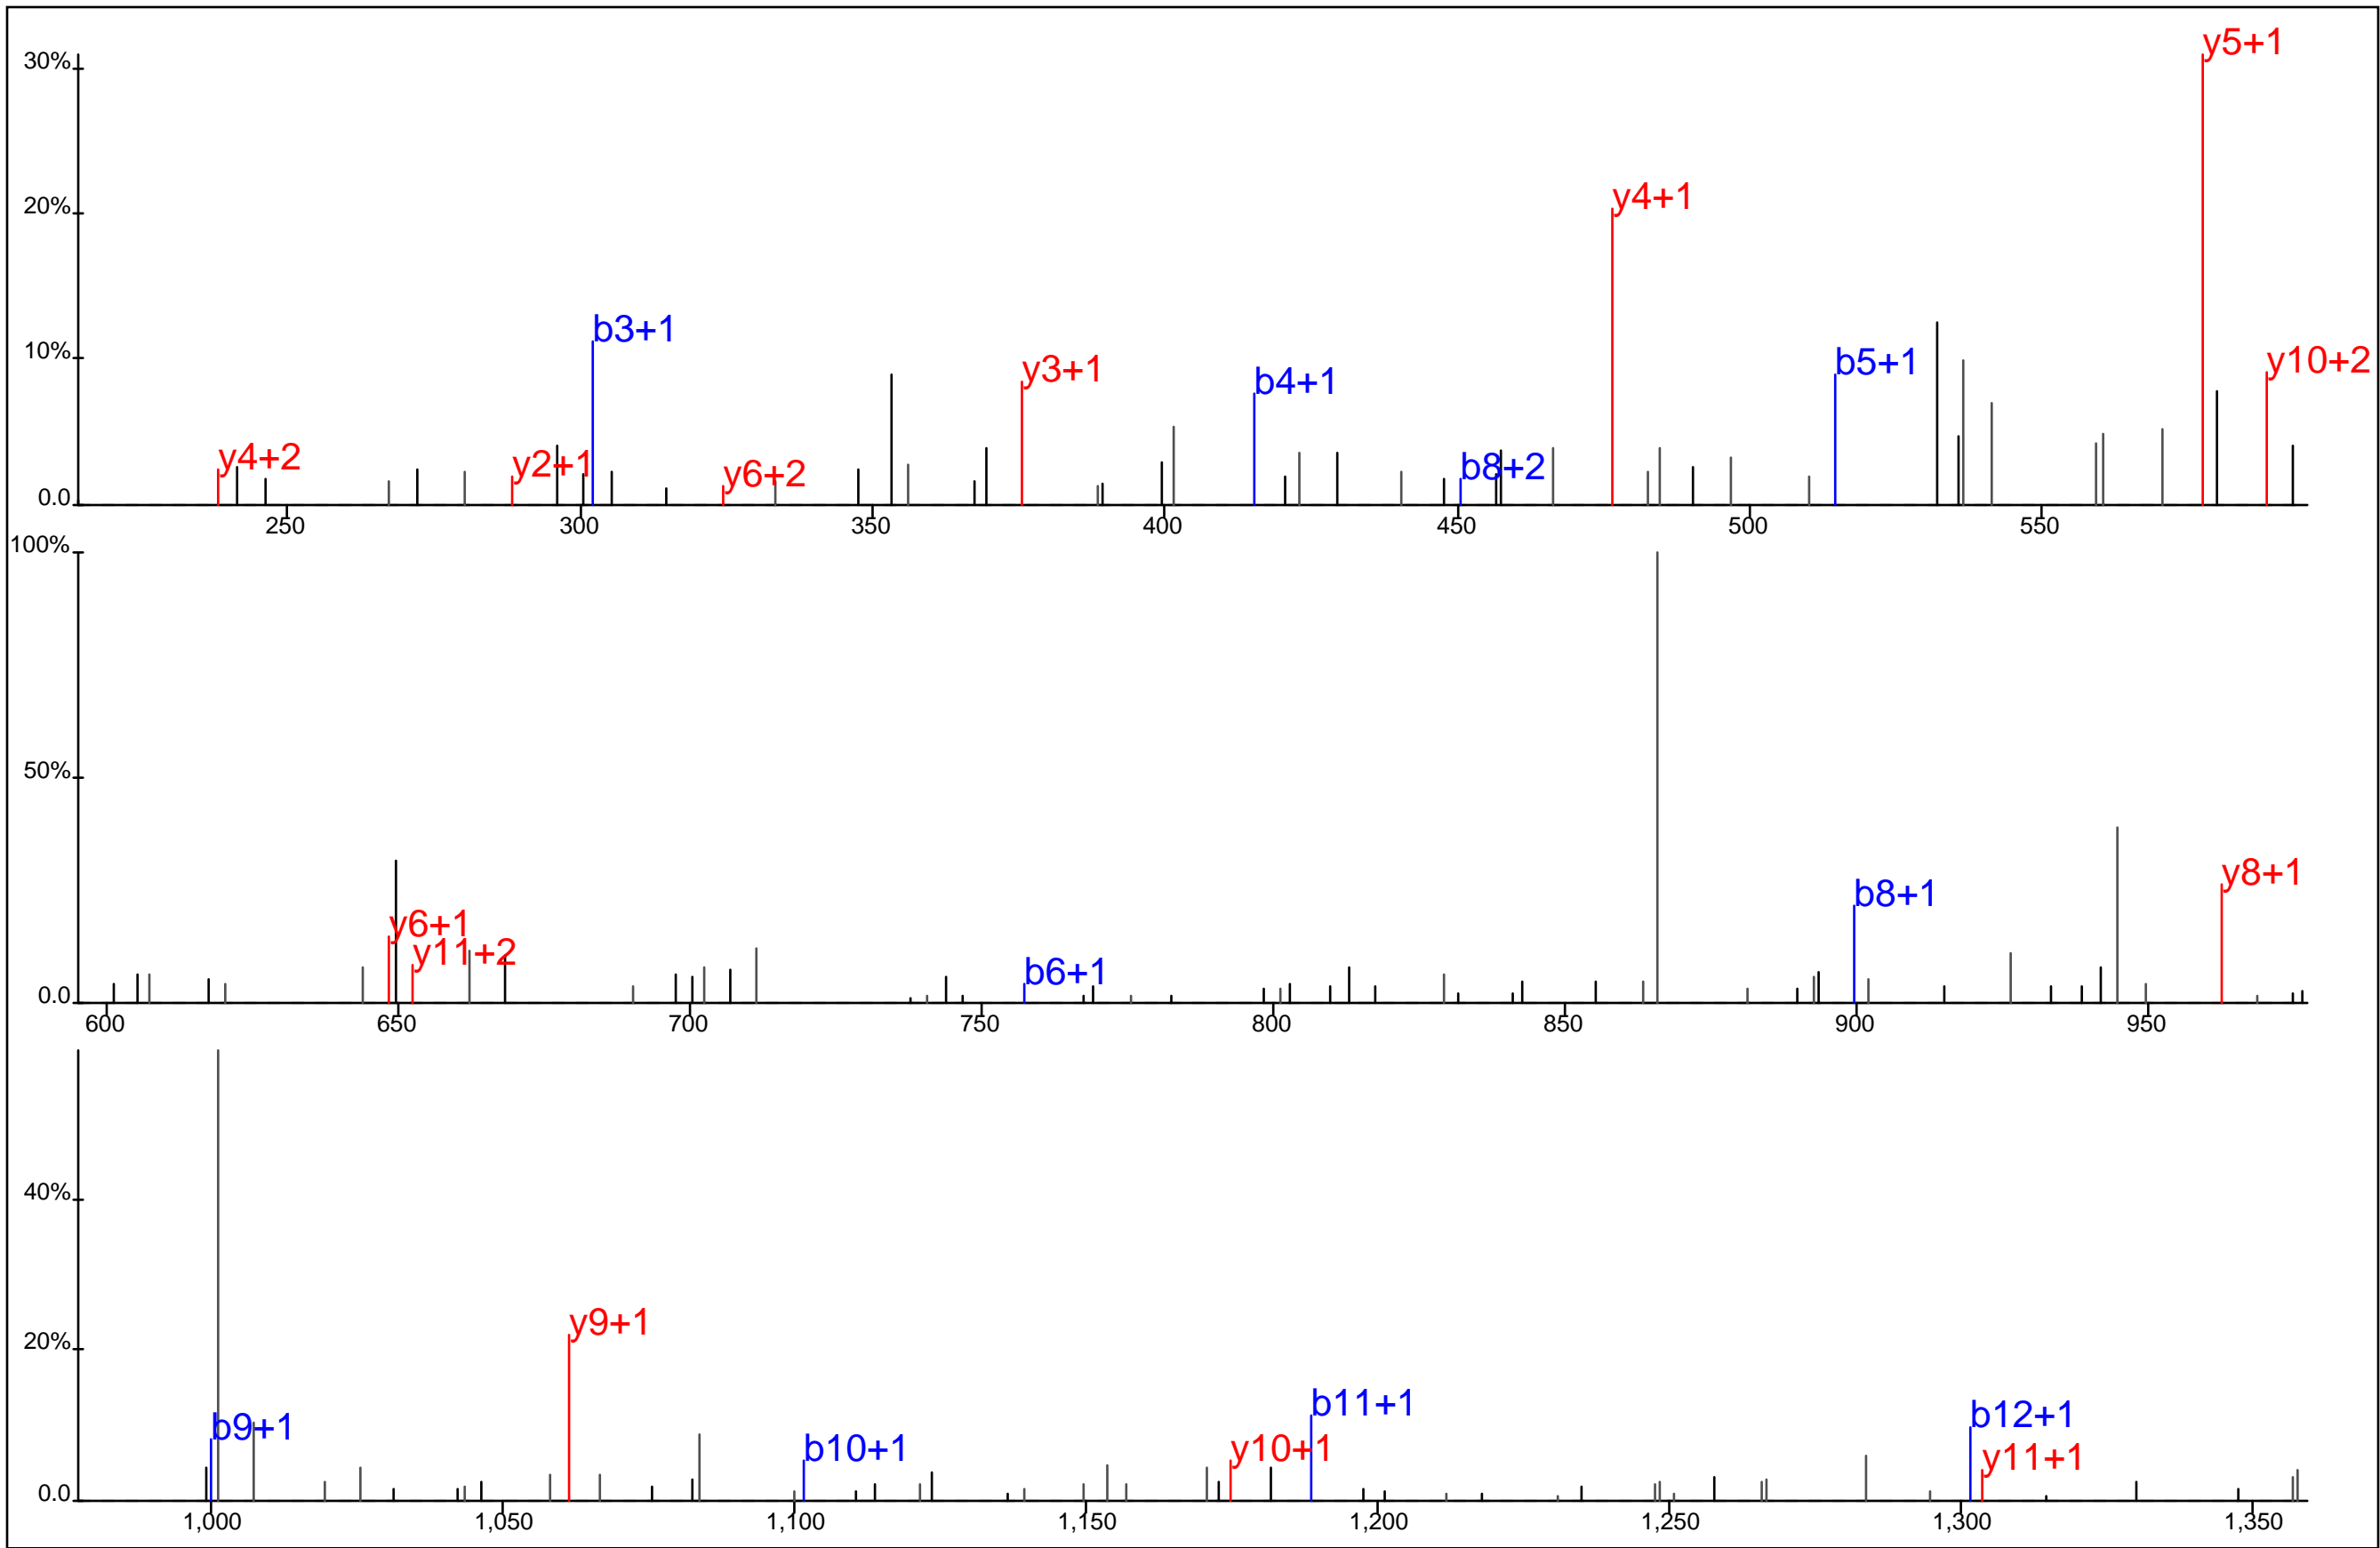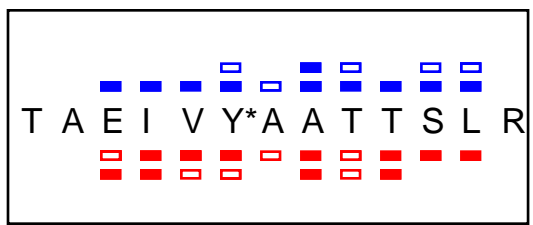

Protein Name: Baculoviral IAP repeat containing protein 6  
 gi Accession: 0  
 Precursor Mass: 738.3607+2  
 Delta Mass: 0.026 ppm  
 XCorr: 54.39



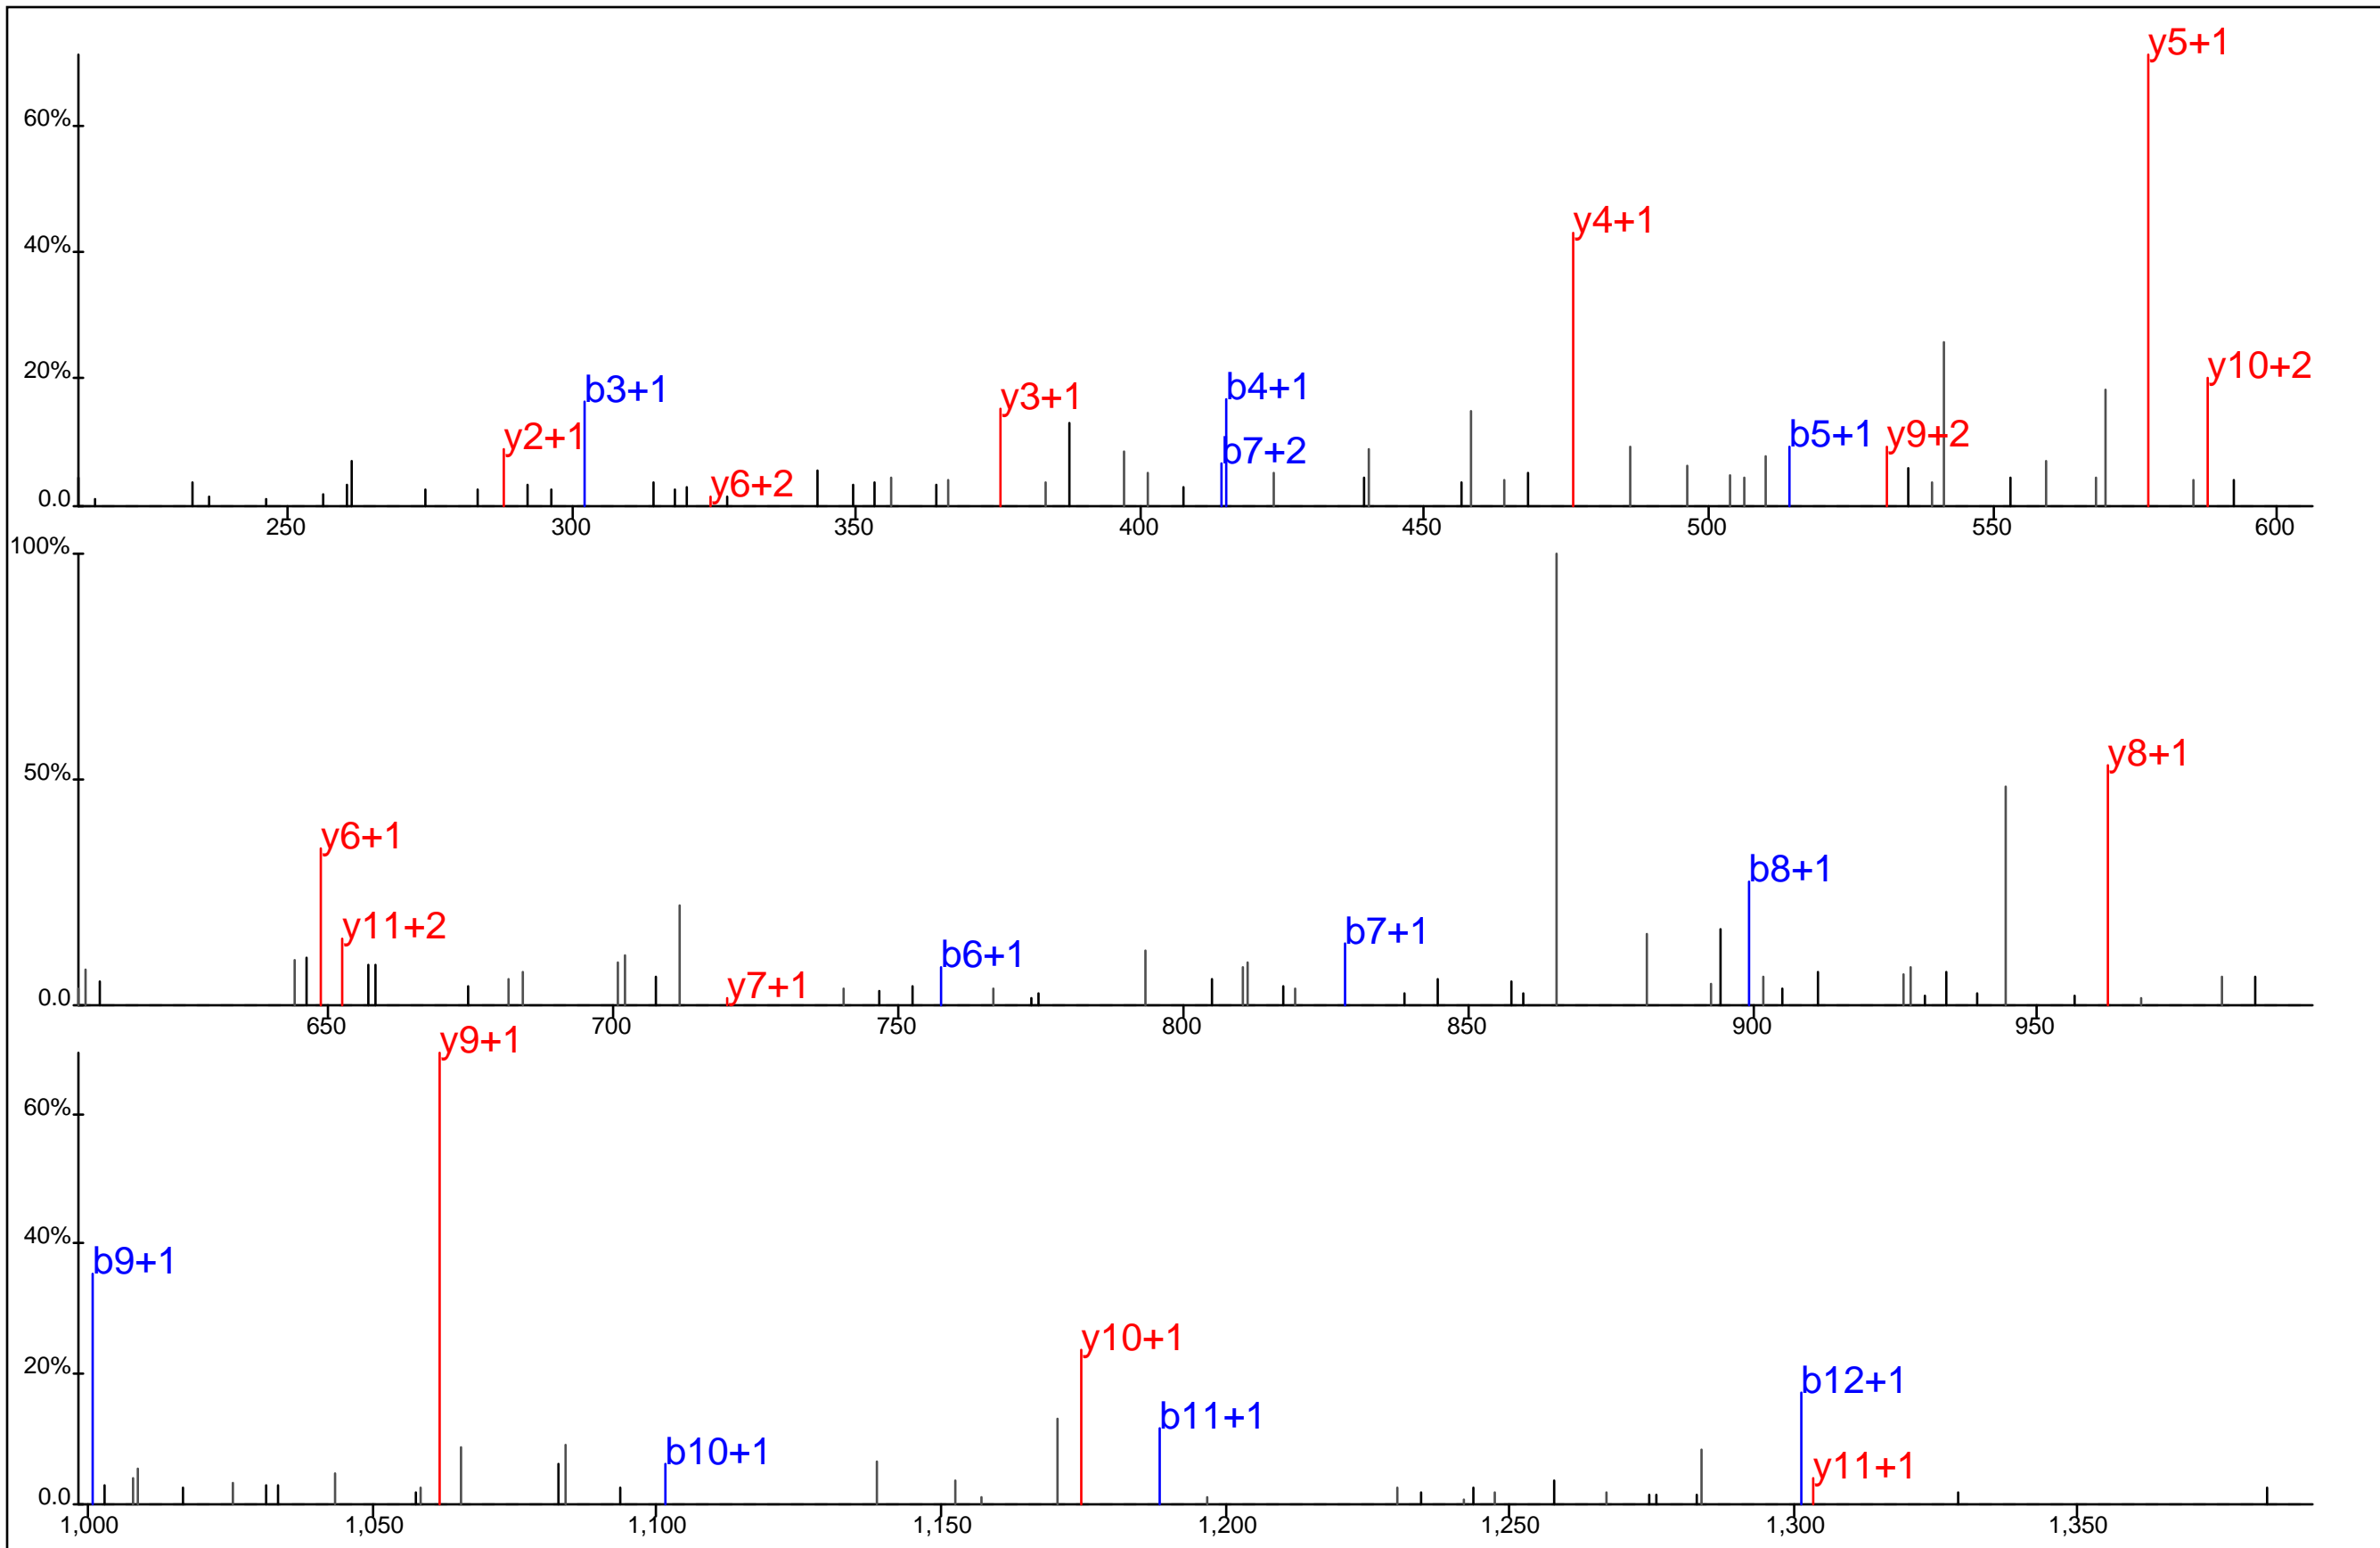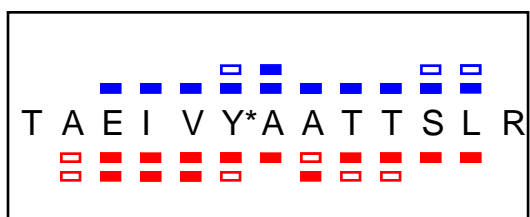

Protein Name: Baculoviral IAP repeat containing protein 6  
 gi Accession: 0  
 Precursor Mass: 738.3588+2  
 Delta Mass: 2.621 ppm  
 XCorr: 66.58

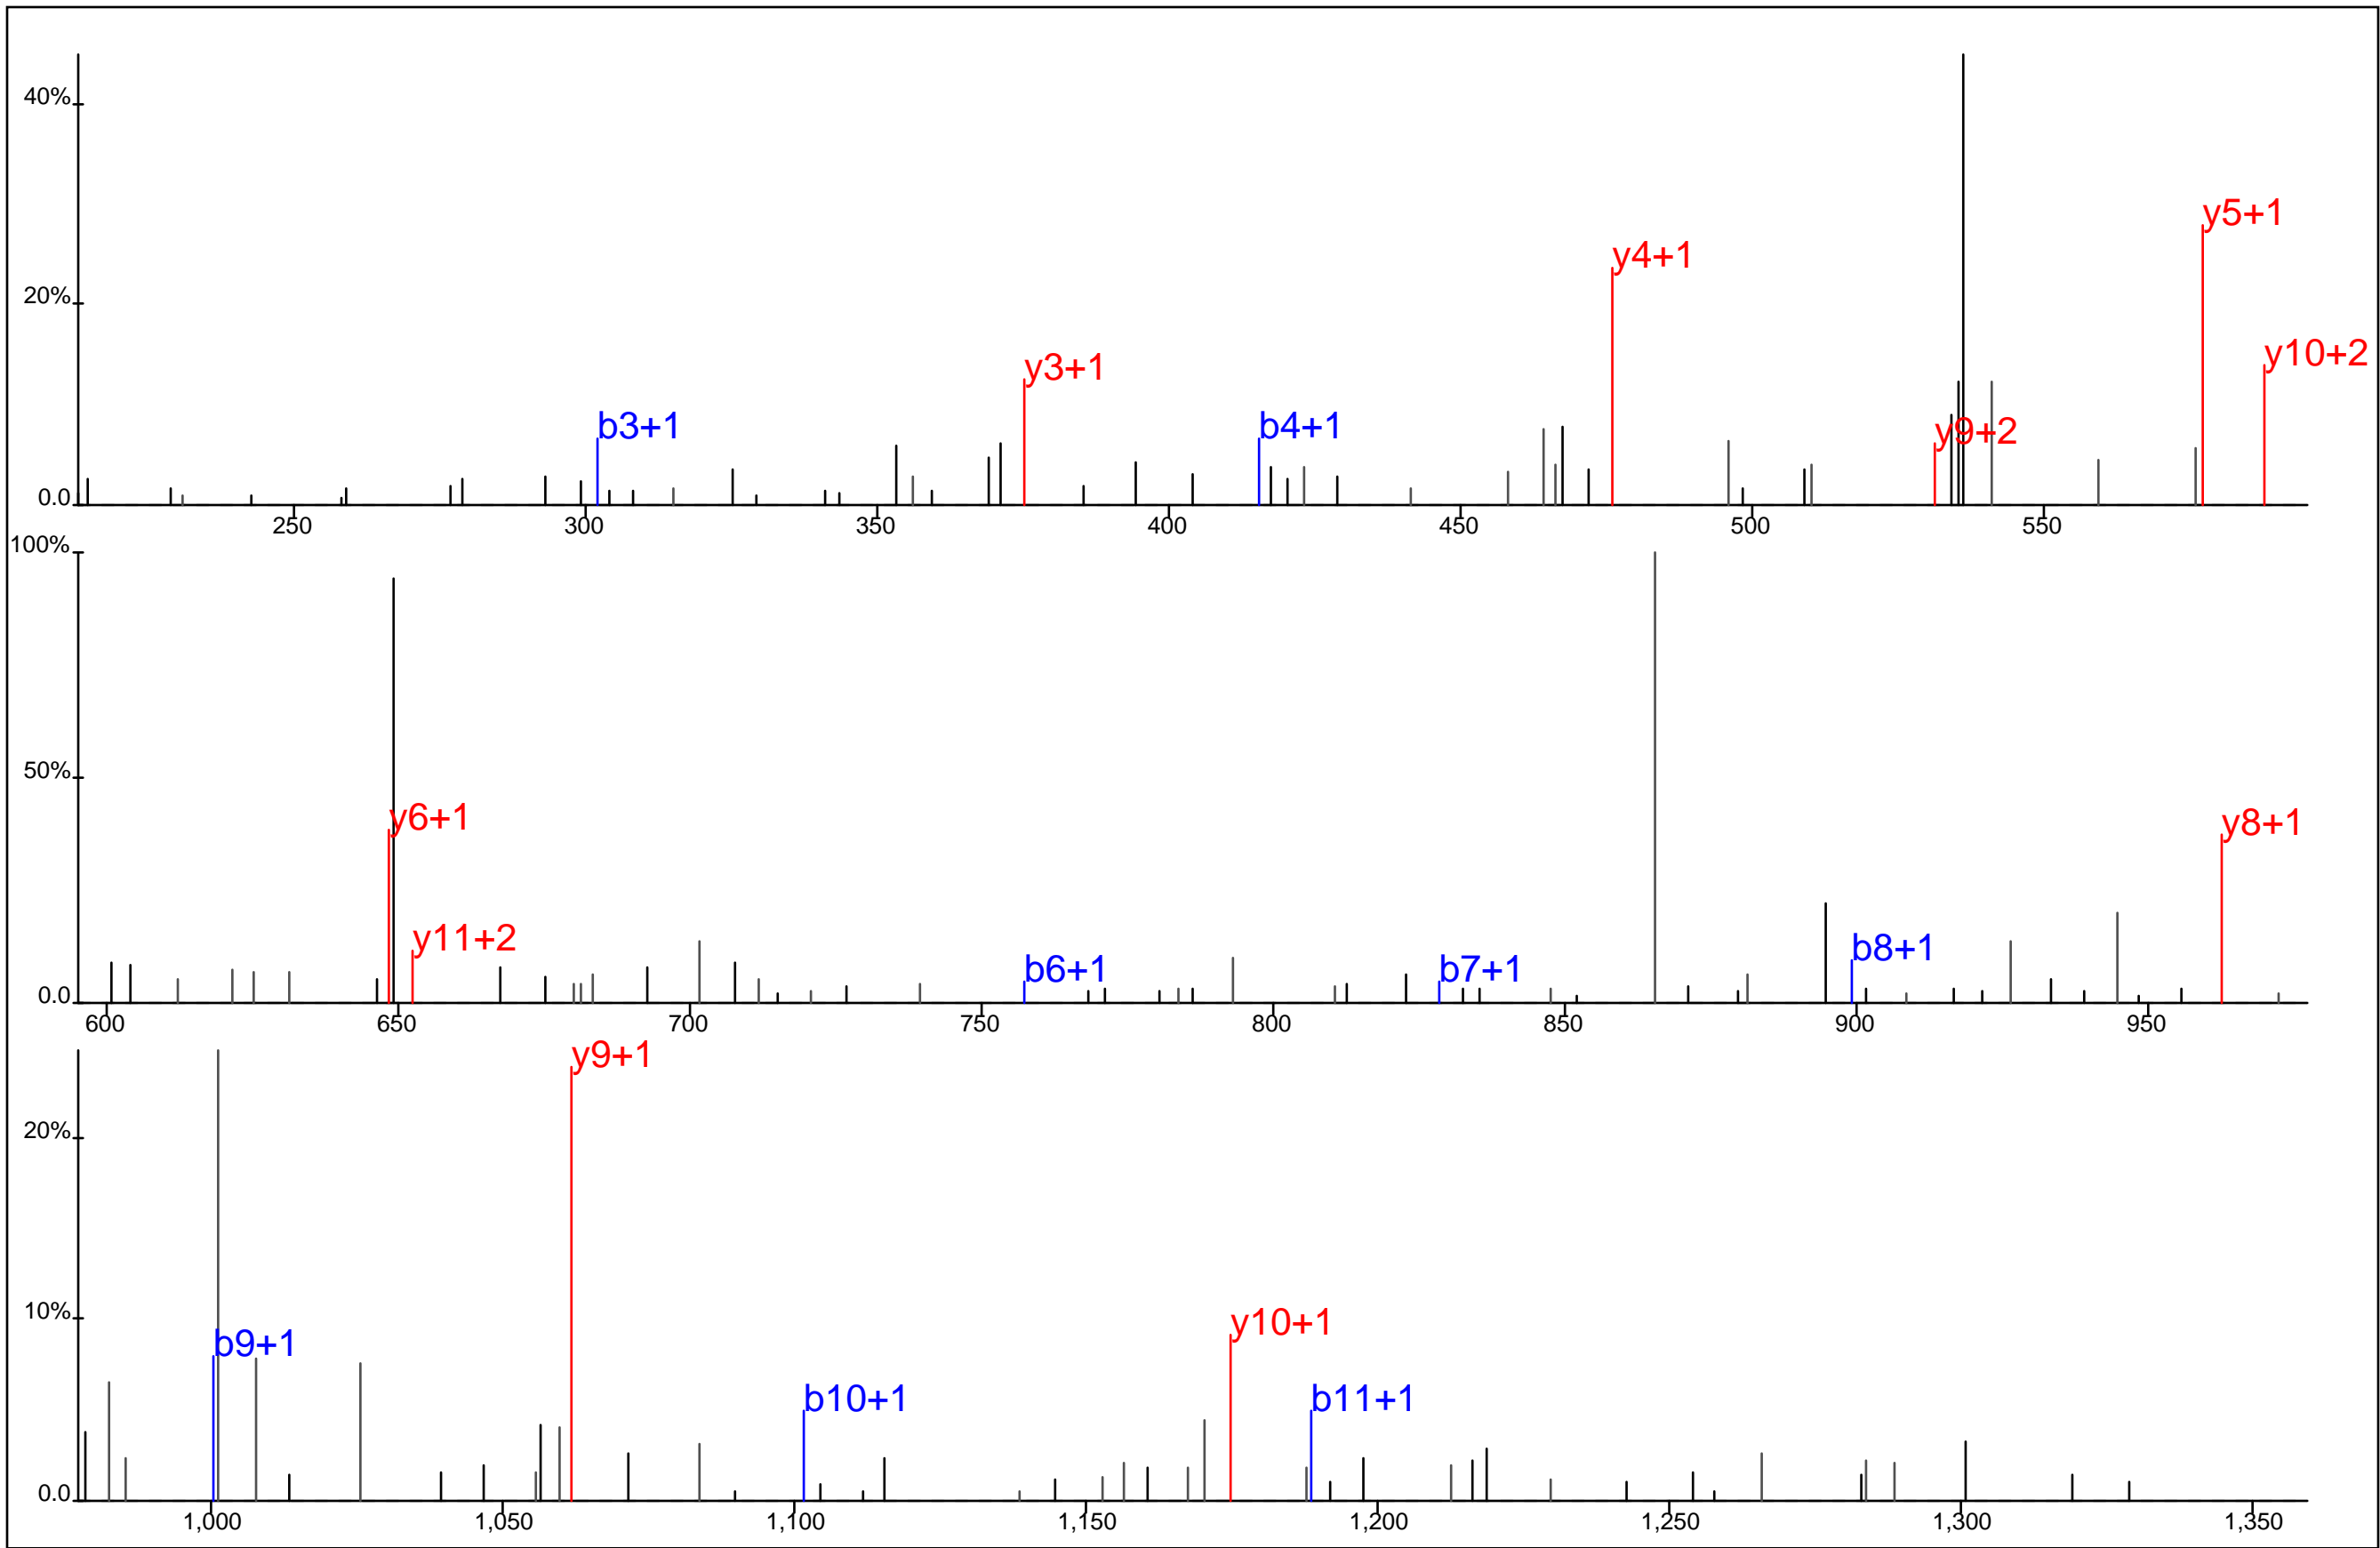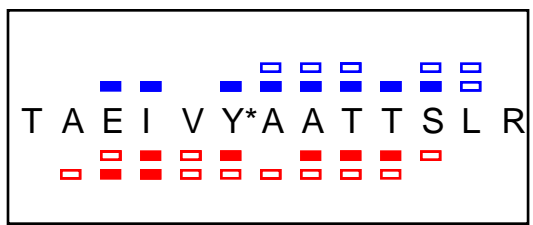

Protein Name: Baculoviral IAP repeat containing protein 6  
 gi Accession: 0  
 Precursor Mass: 738.3600+2  
 Delta Mass: 0.947 ppm  
 XCorr: 30.9

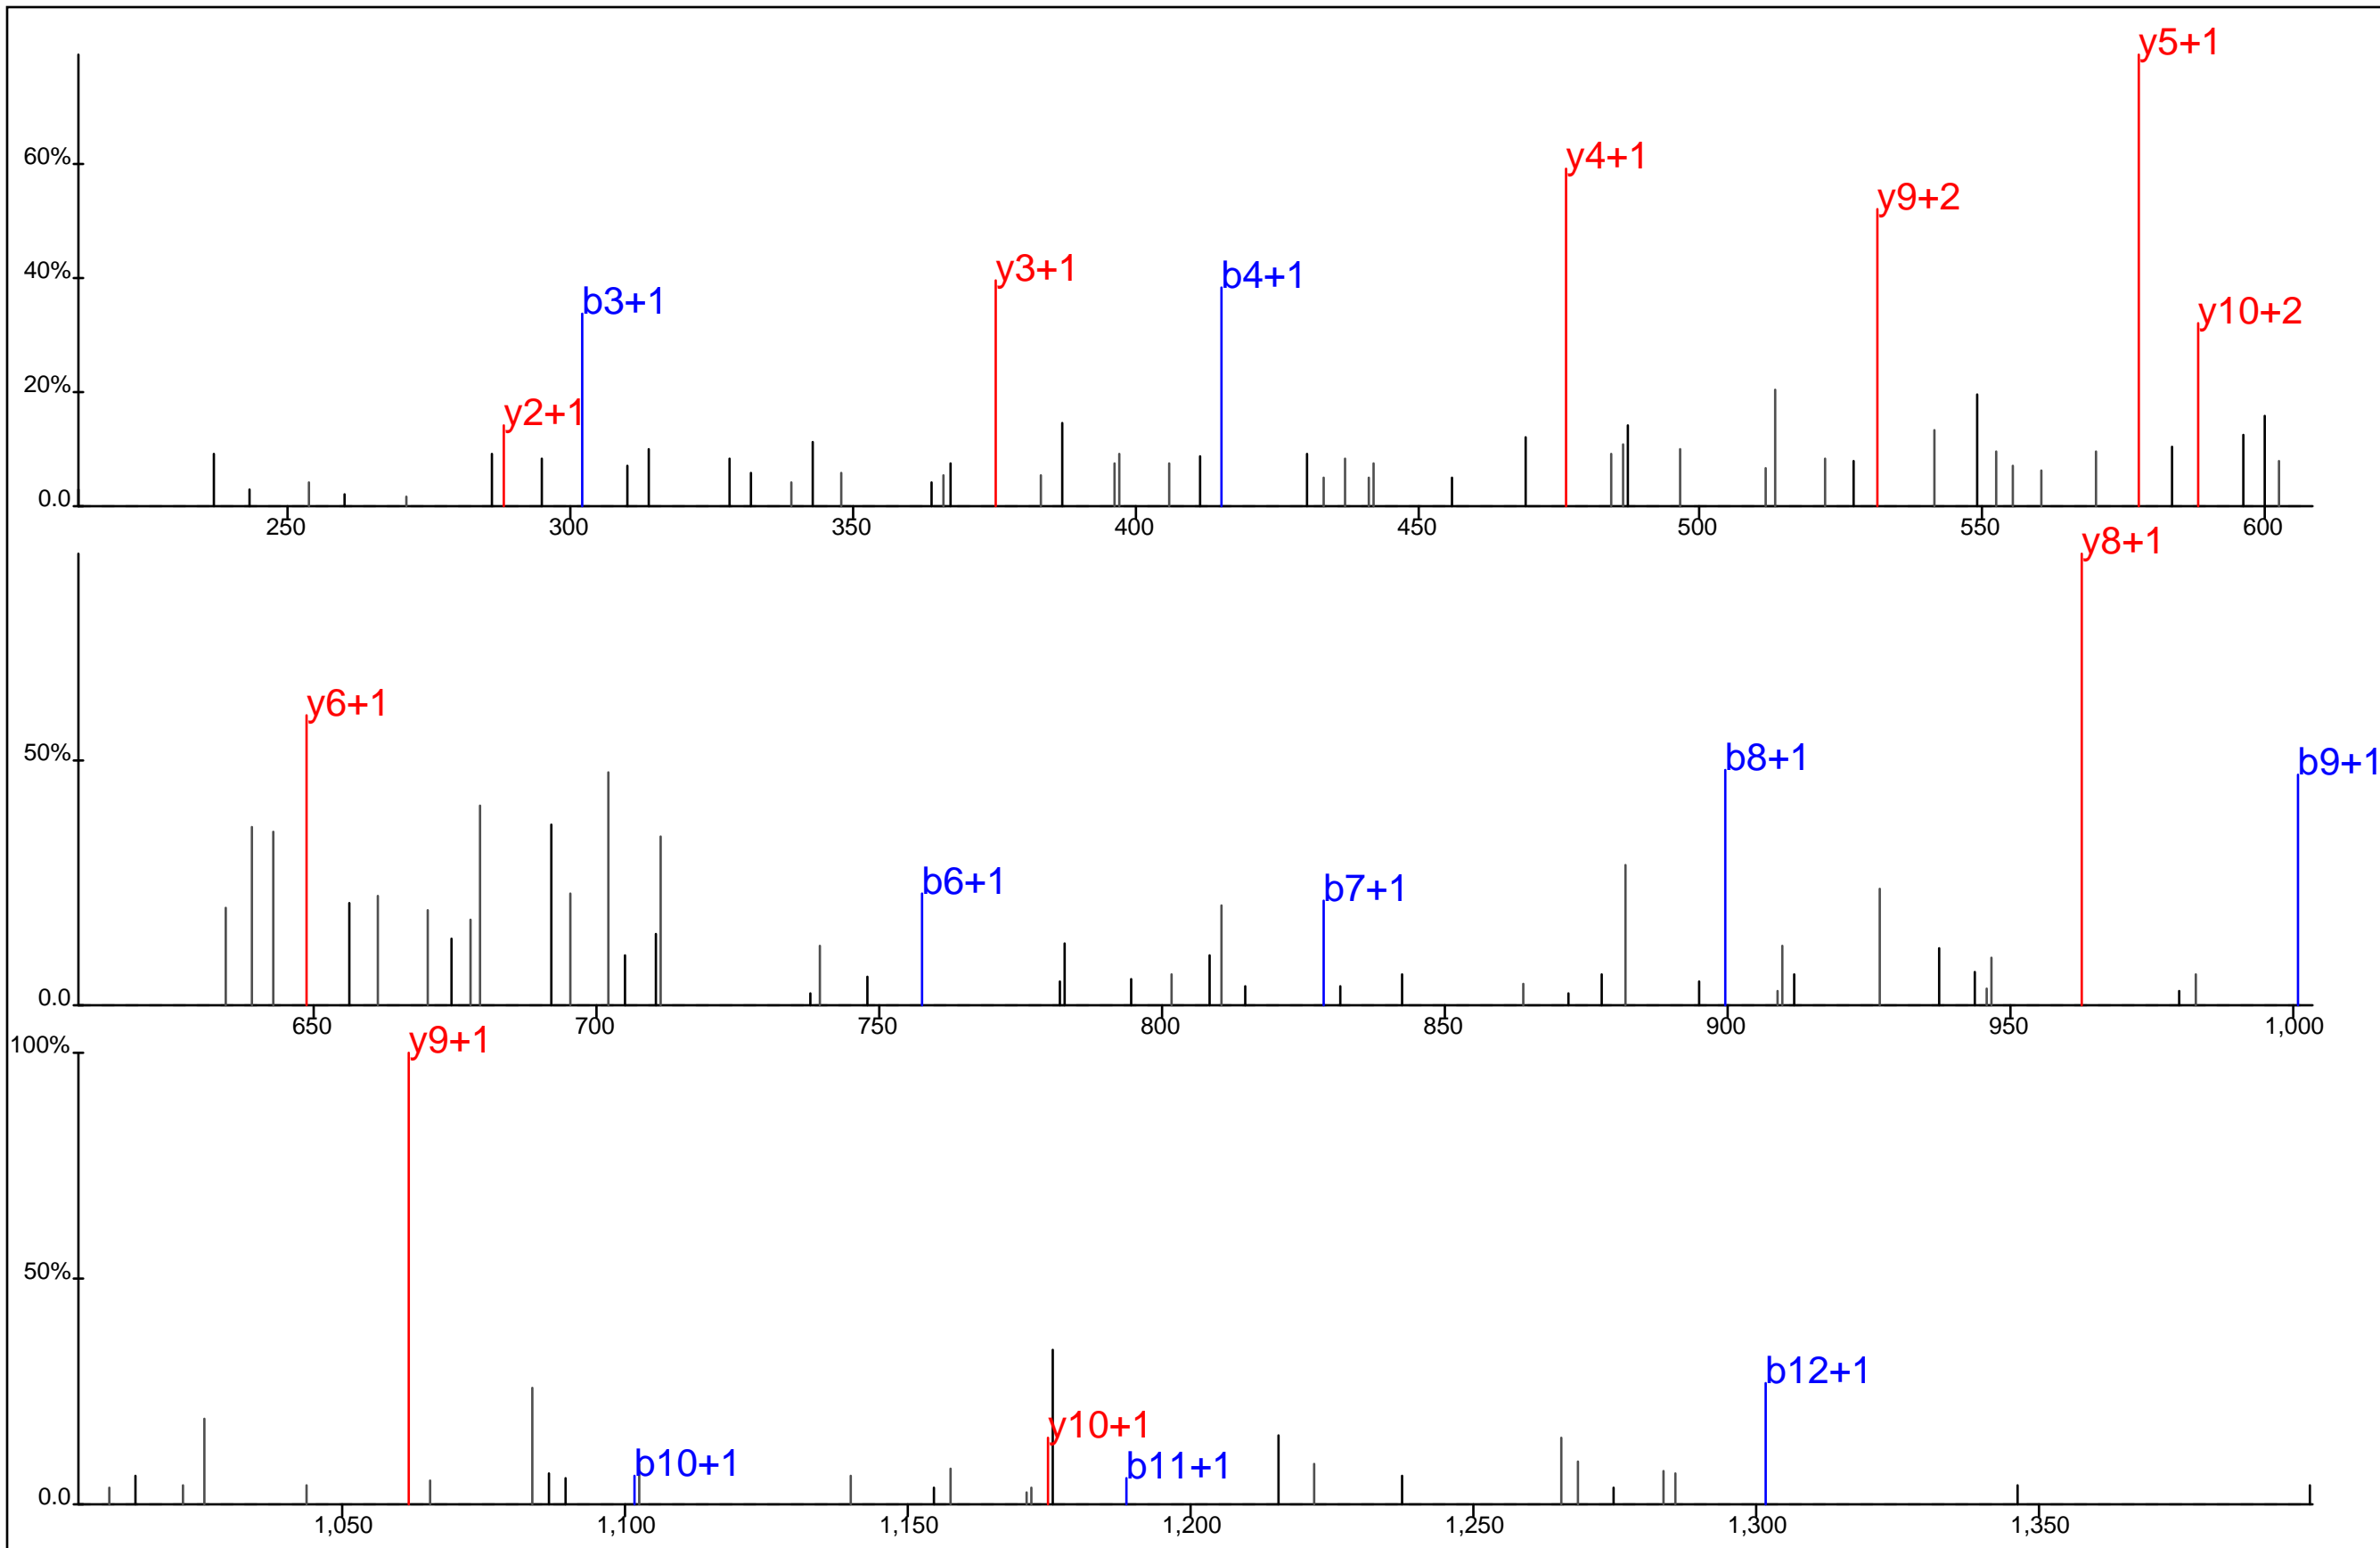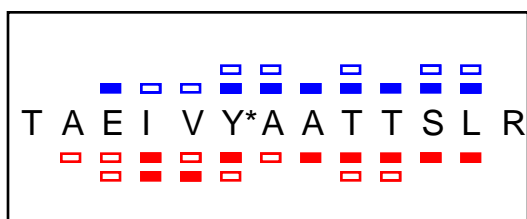

Protein Name: Baculoviral IAP repeat containing protein 6  
 gi Accession: 0  
 Precursor Mass: 738.3631+2  
 Delta Mass: 3.251 ppm  
 XCorr: 65.88

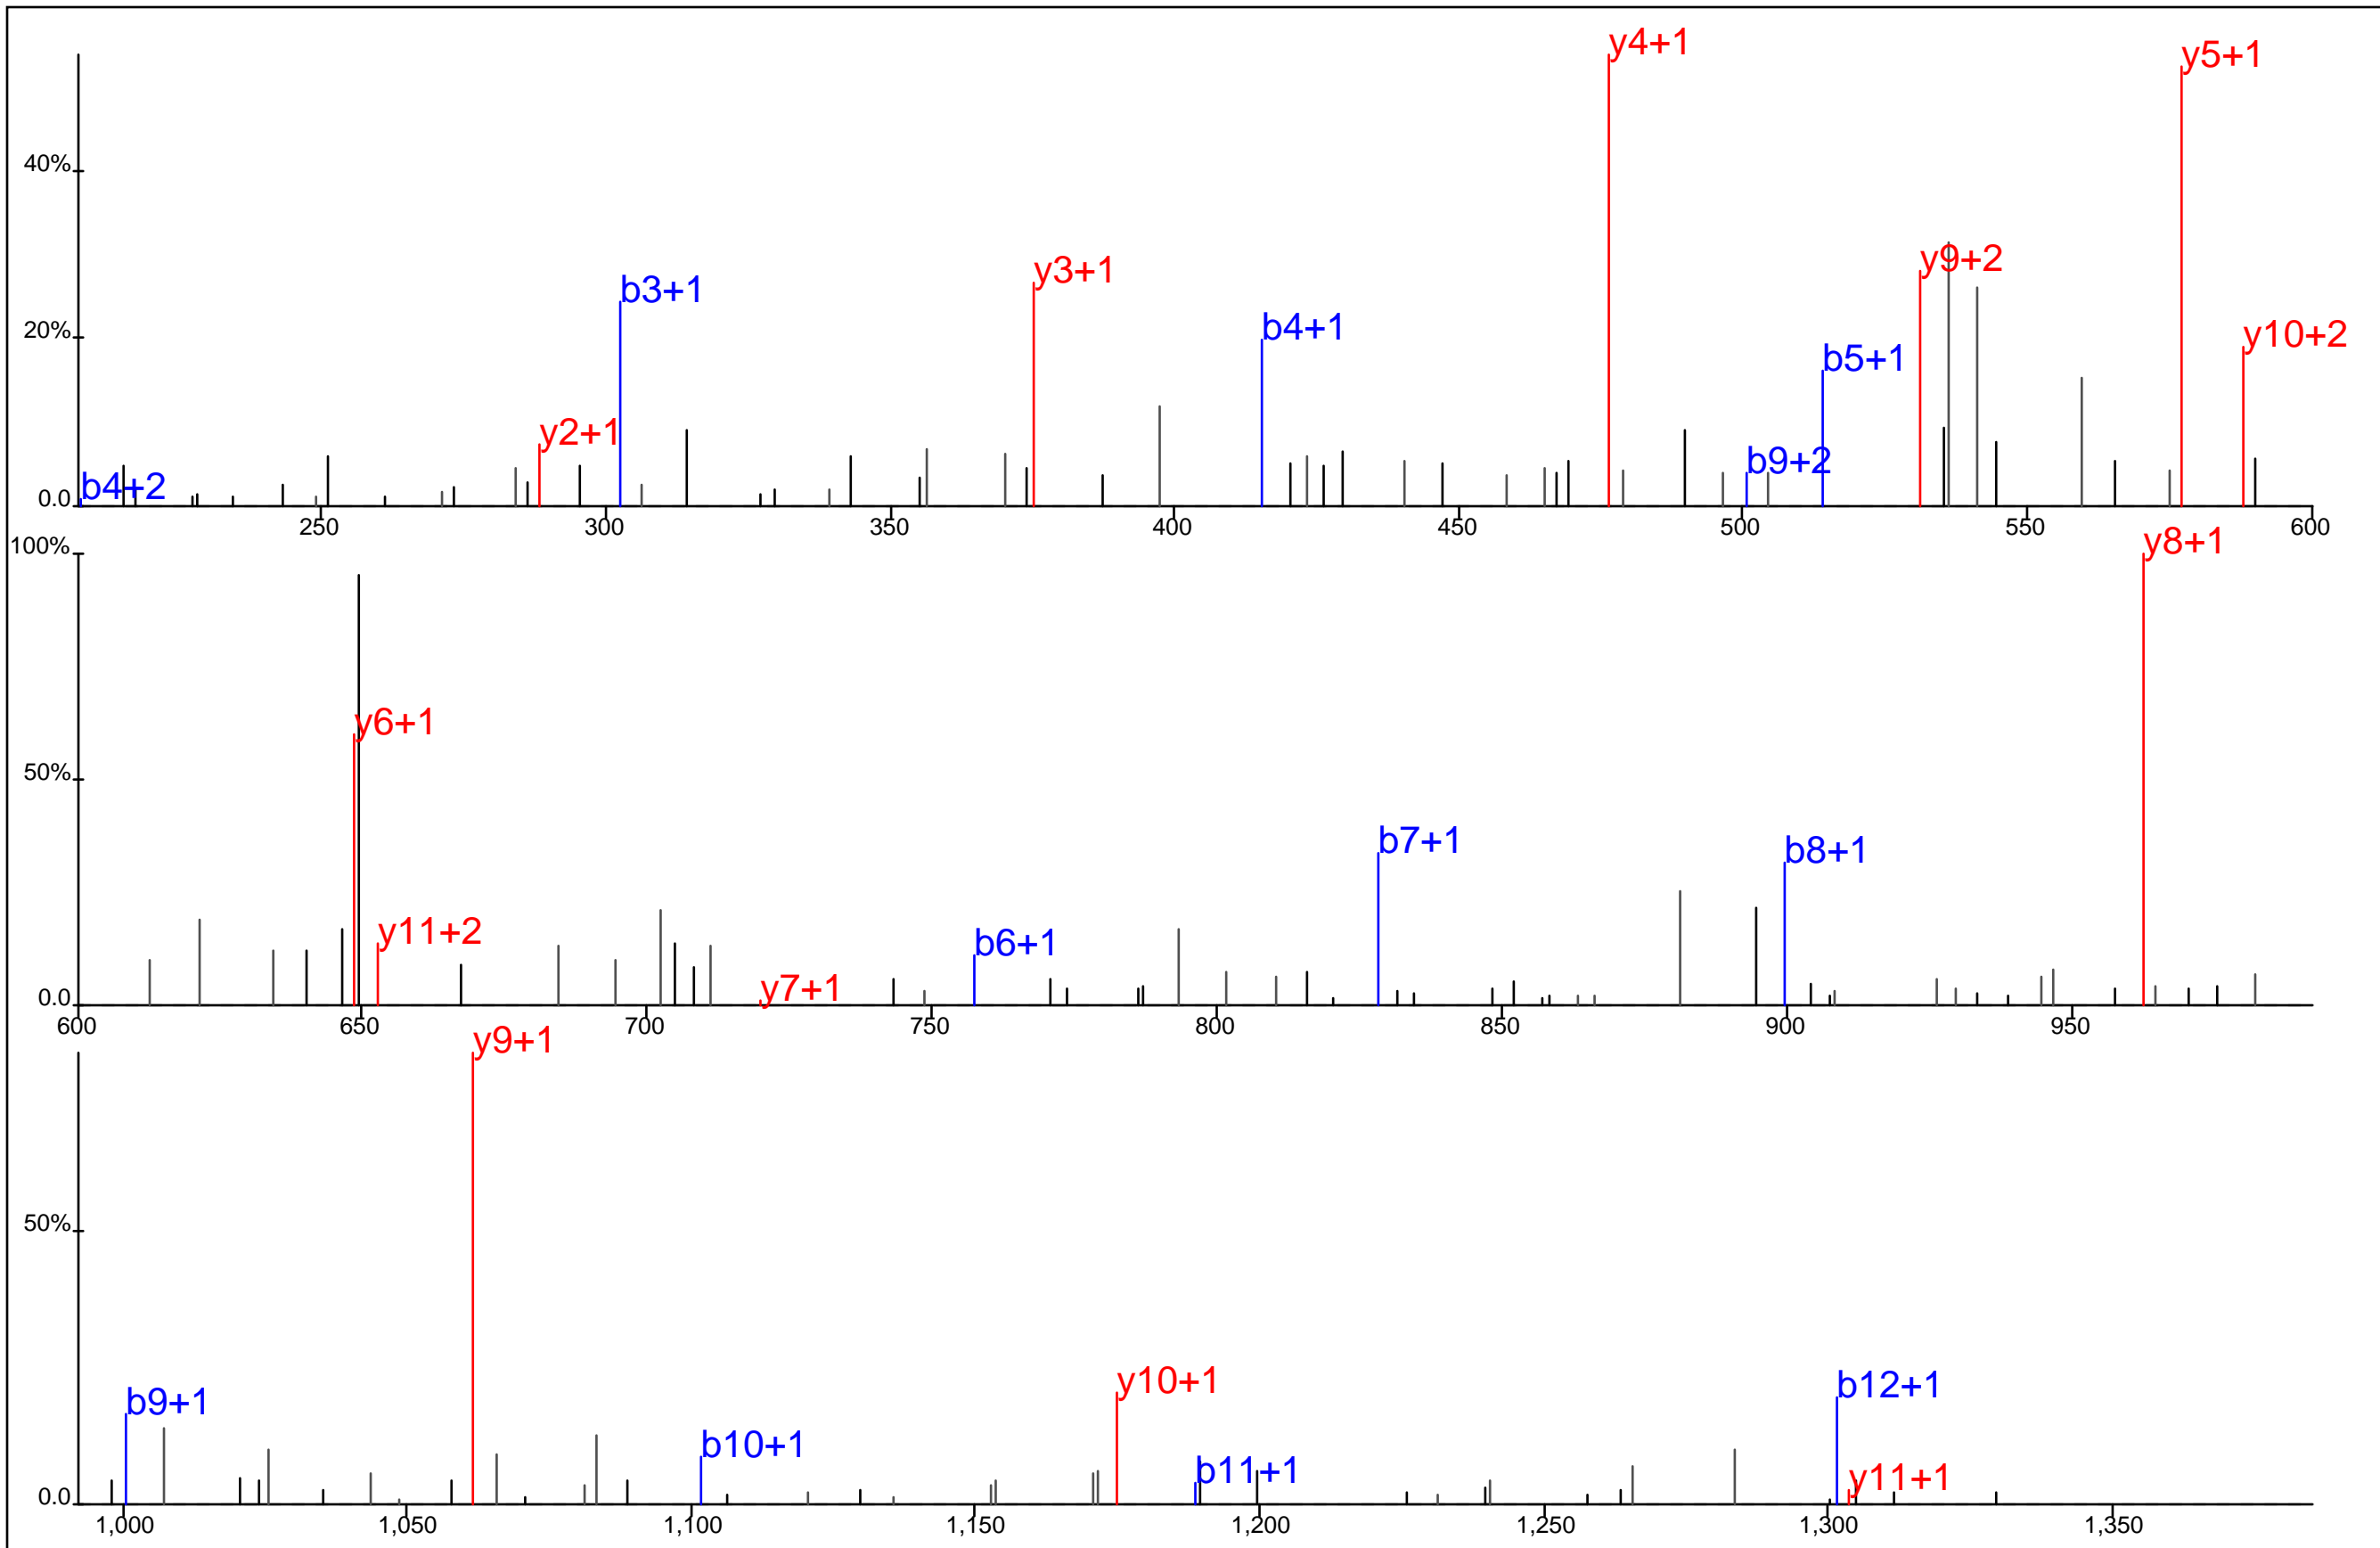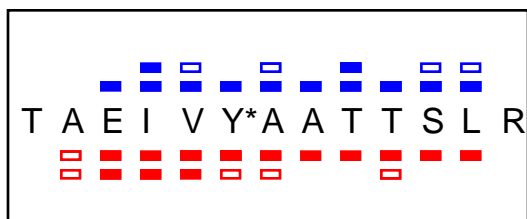

Protein Name: Baculoviral IAP repeat containing protein 6  
 gi Accession: 0  
 Precursor Mass: 738.3600+2  
 Delta Mass: 0.947 ppm  
 XCorr: 59.07

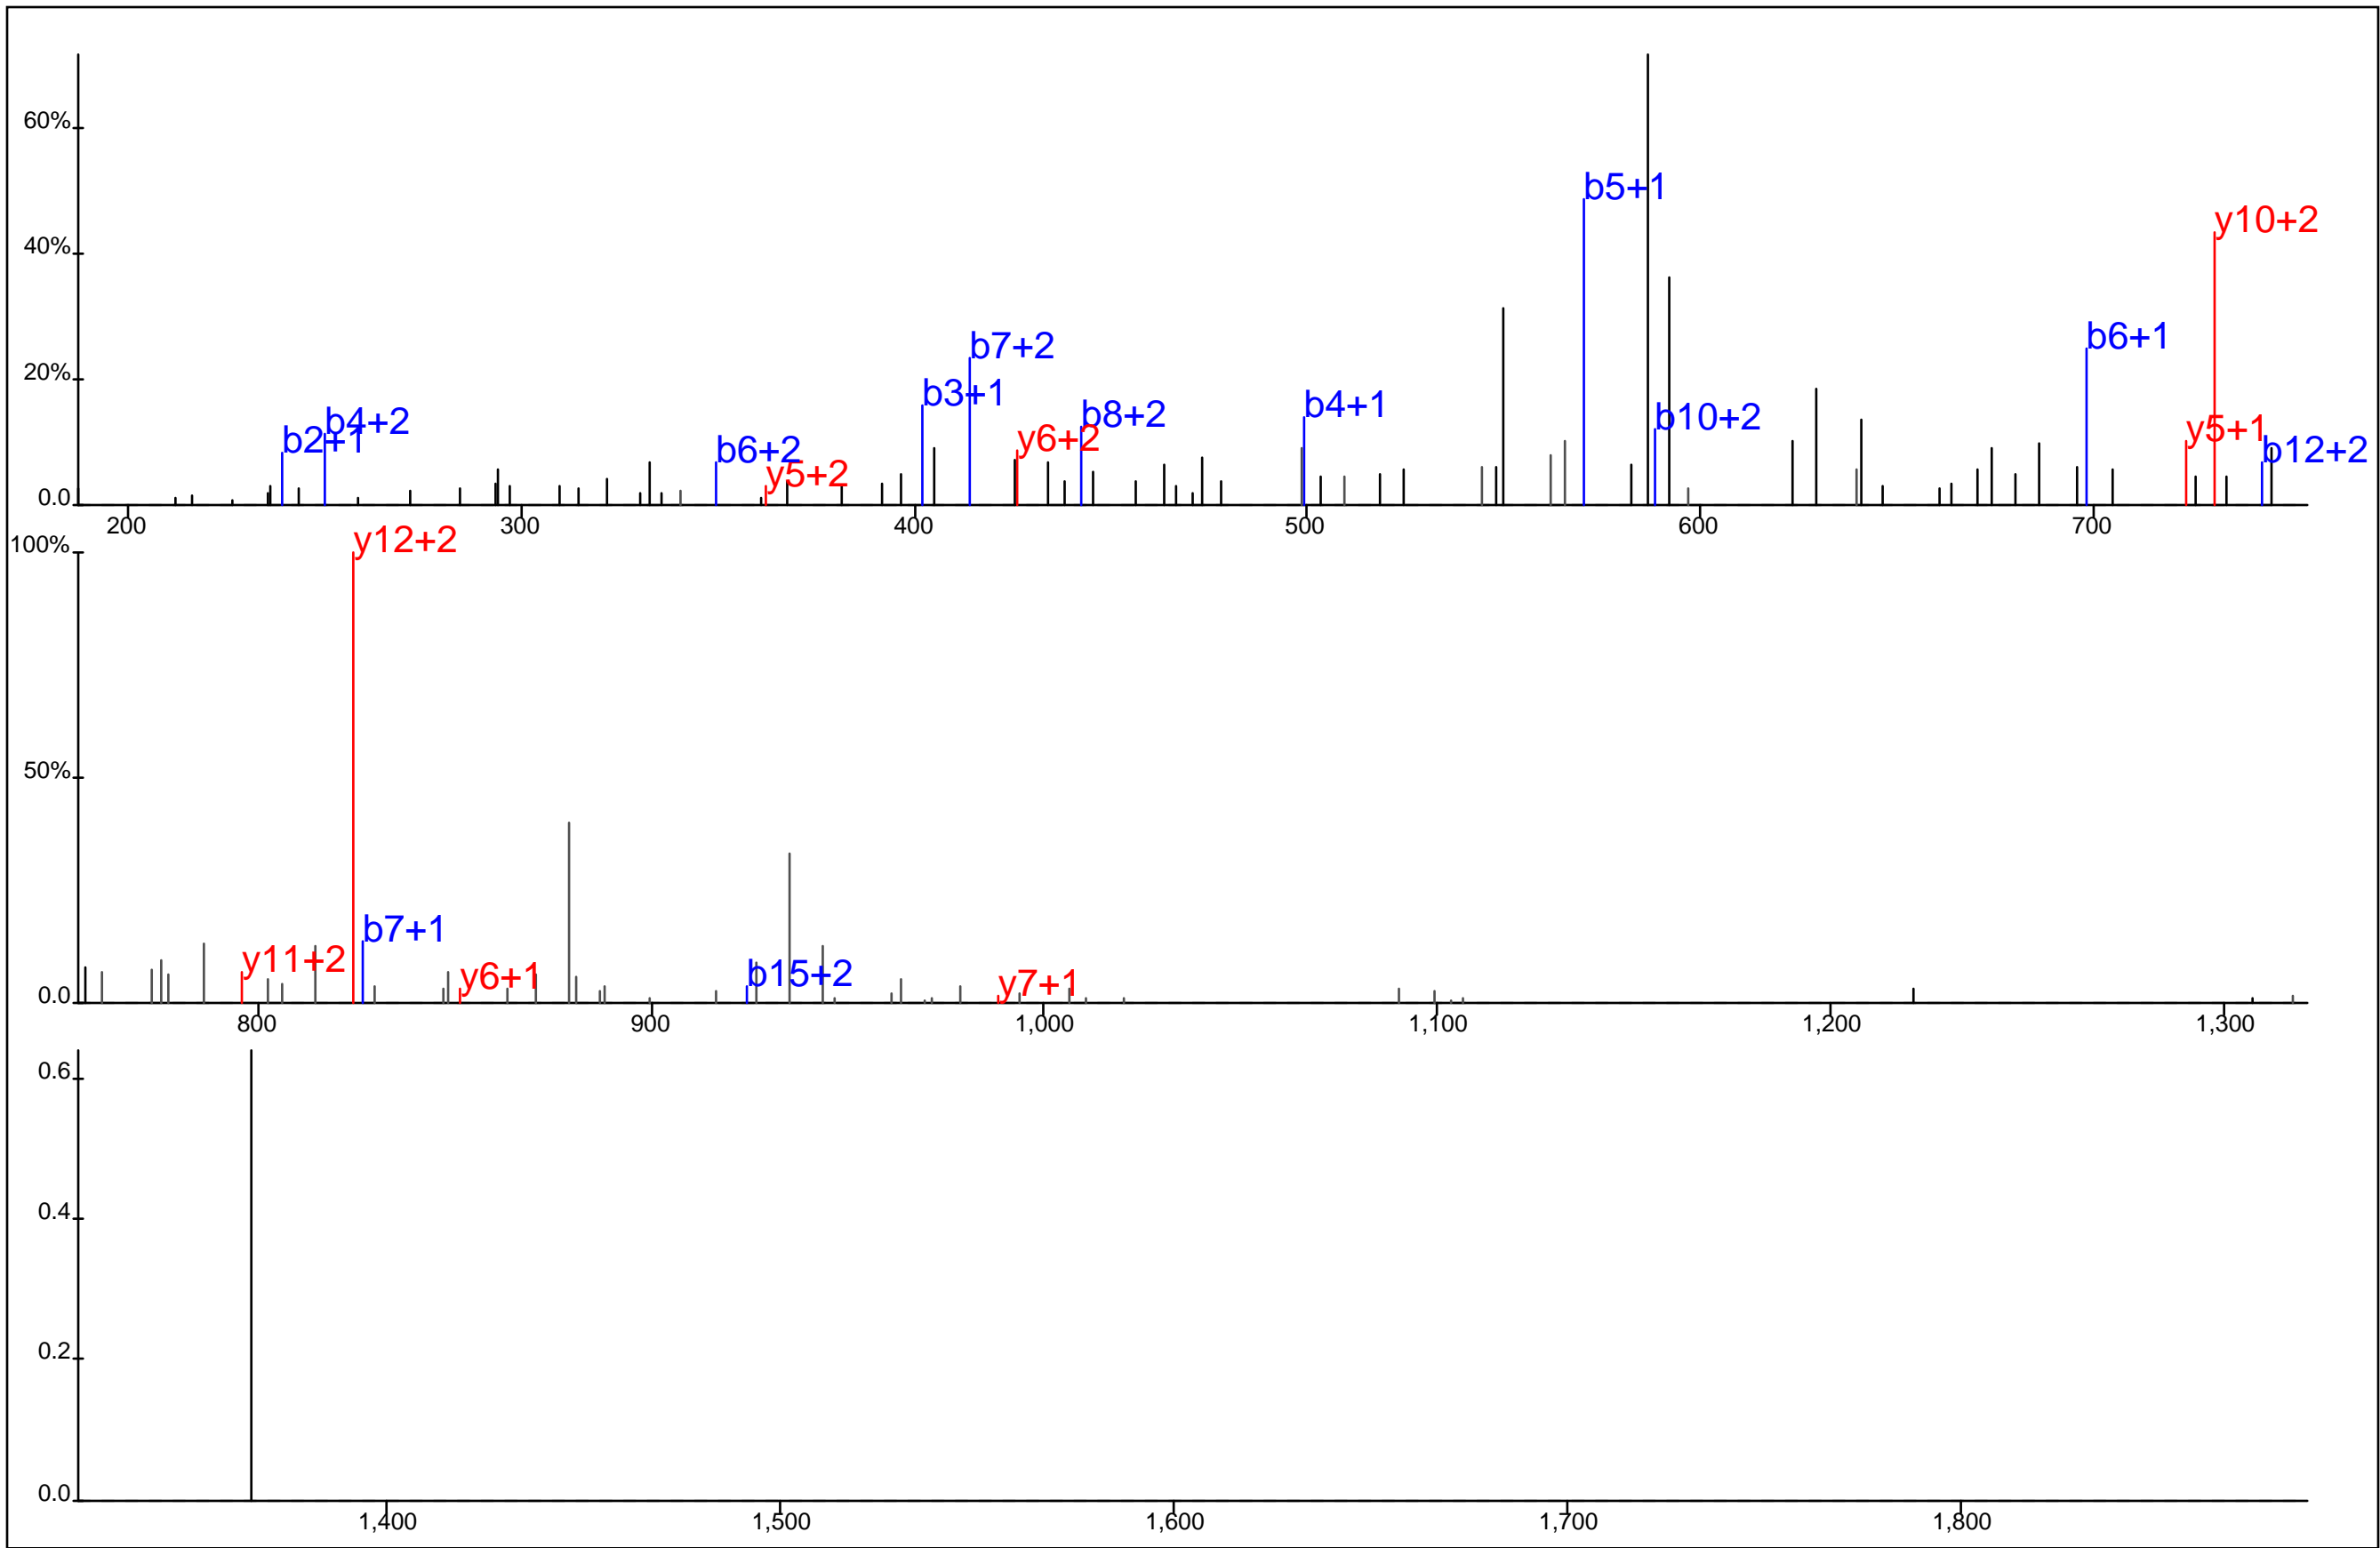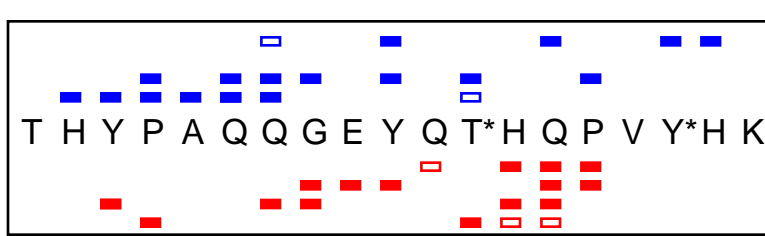

Protein Name: BCL2 associated athanogene 3  
 gi Accession: 0  
 Precursor Mass: 618.7587+4  
 Delta Mass: 1.663 ppm  
 XCorr: 23.51

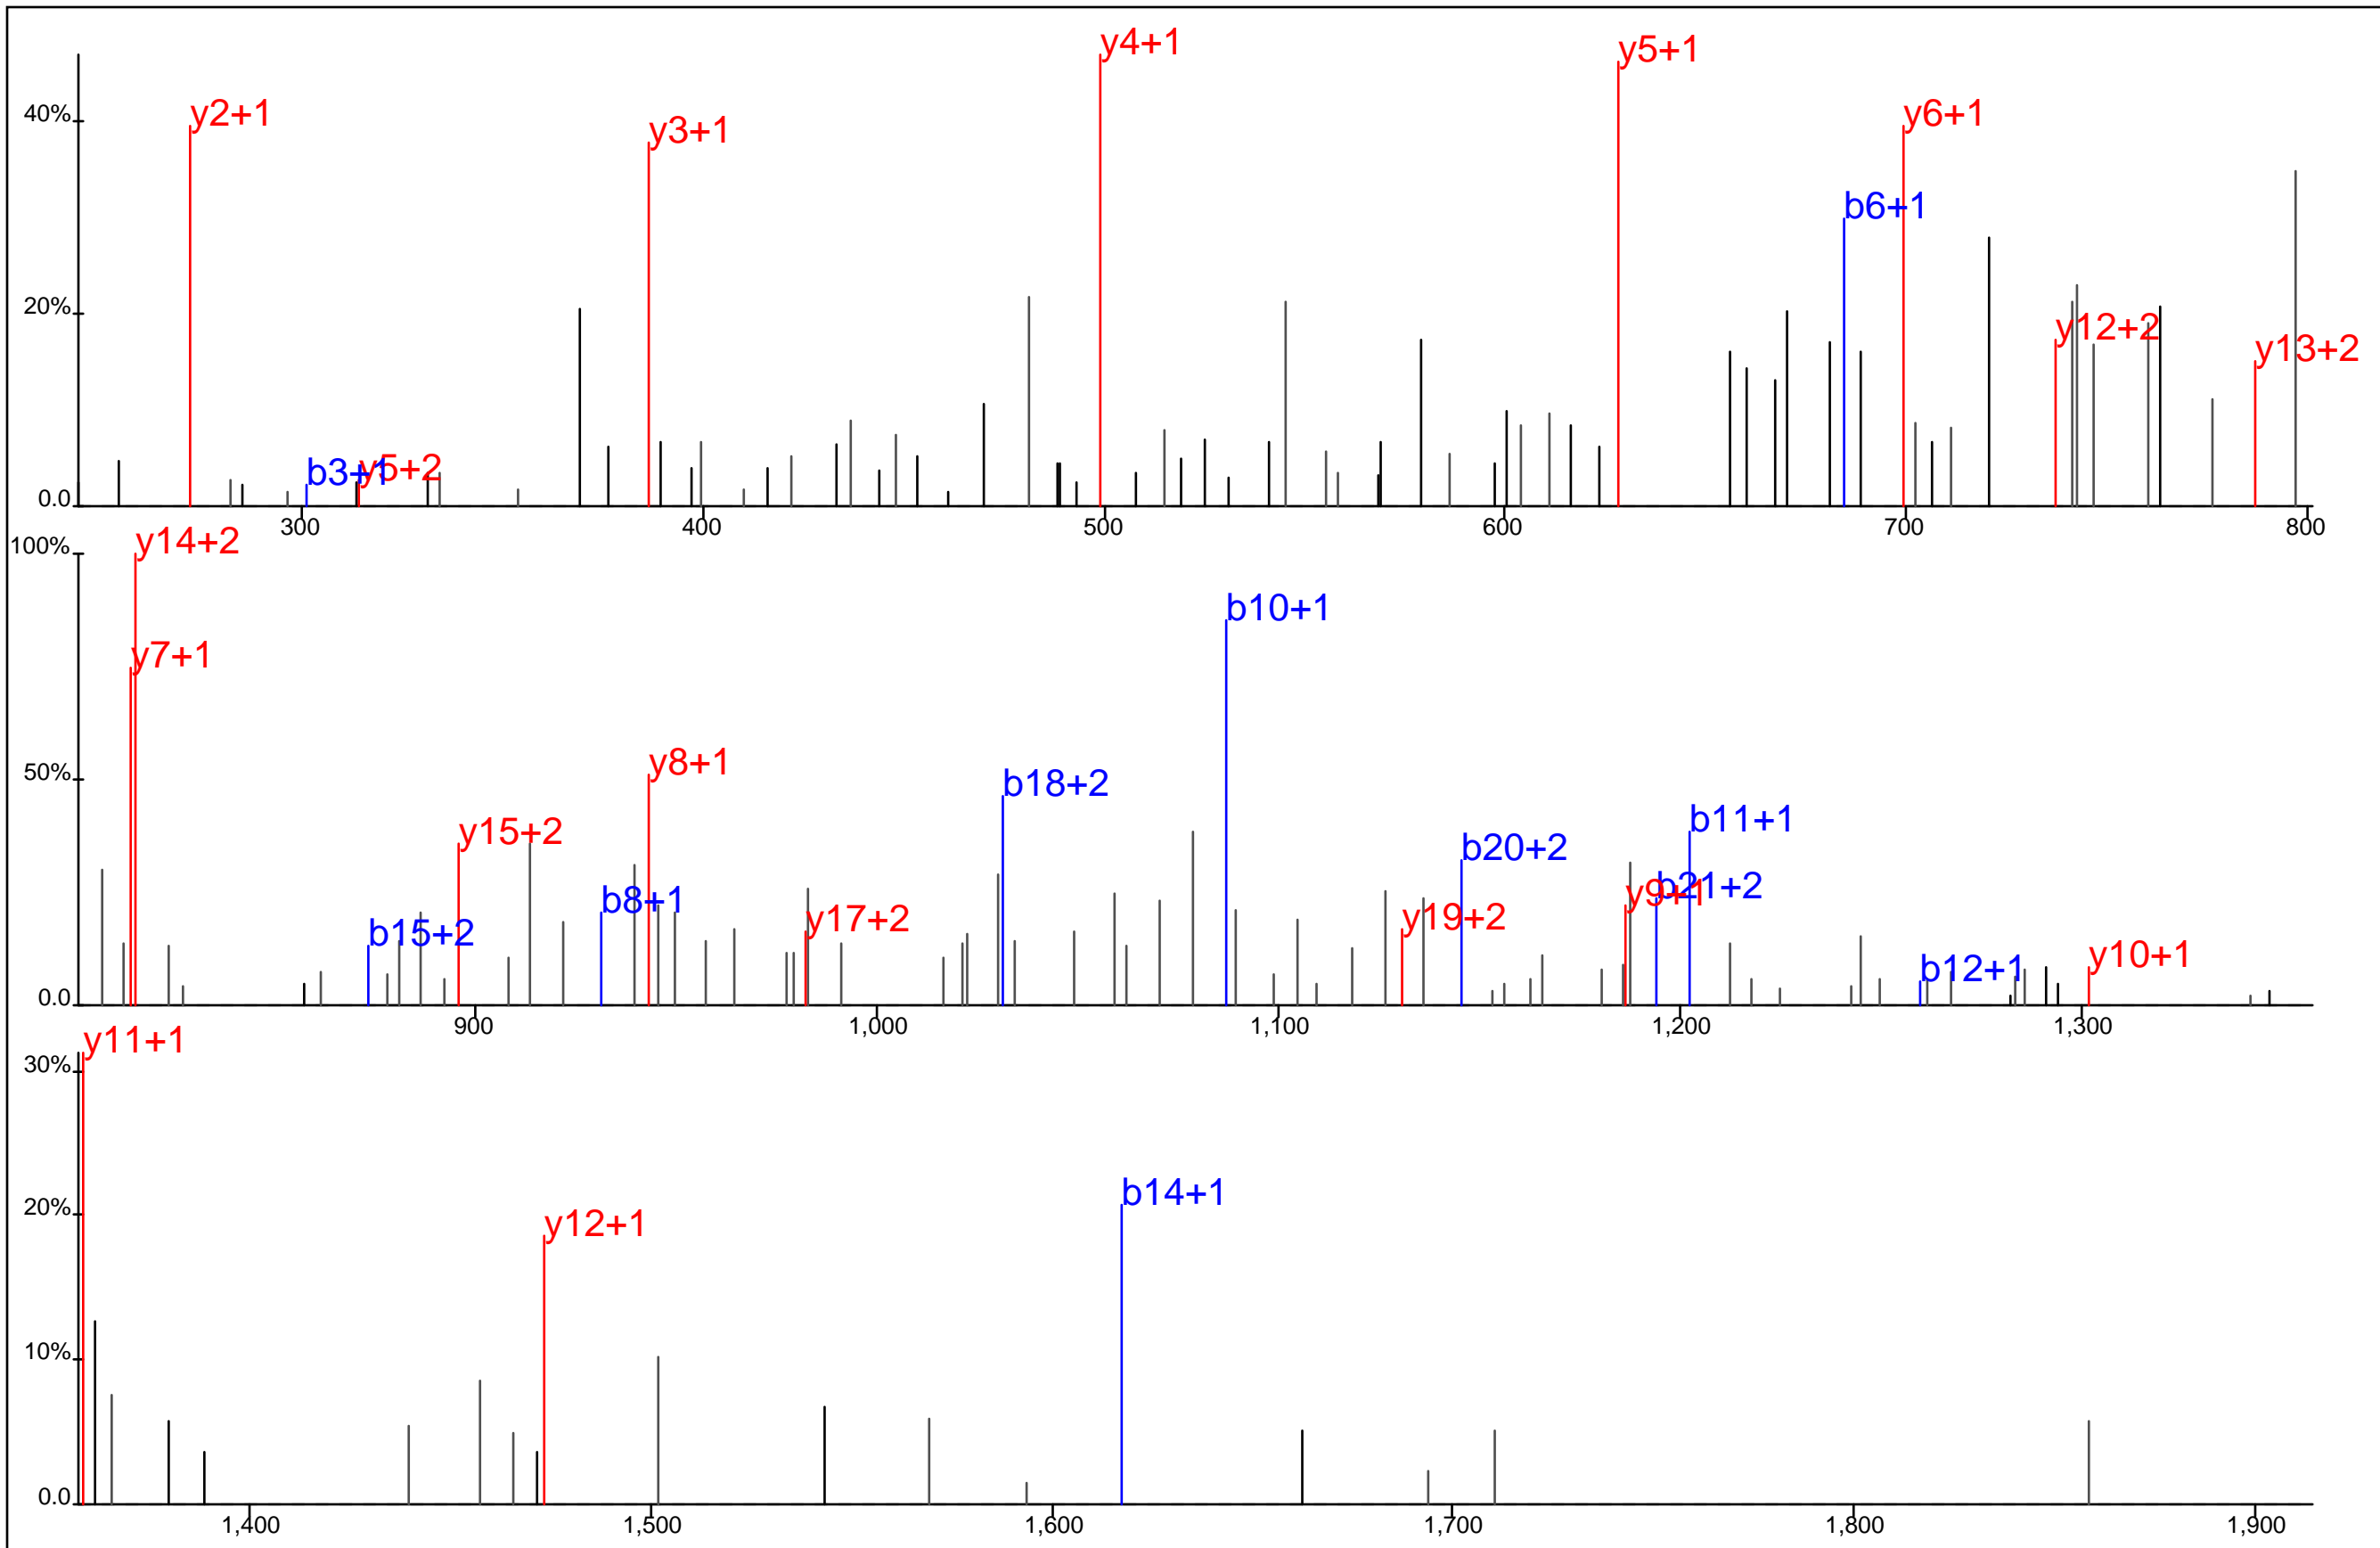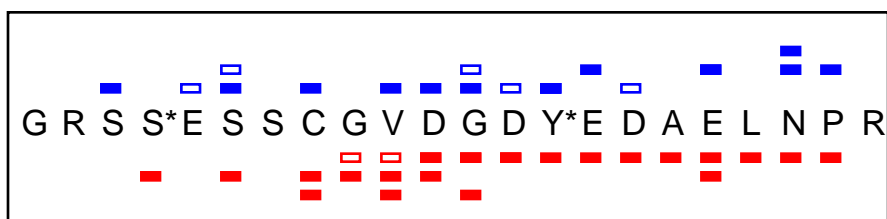

Protein Name: BCR  
 gi Accession: 0  
 Precursor Mass: 853.9772+3  
 Delta Mass: 6.291 ppm  
 XCorr: 62.84

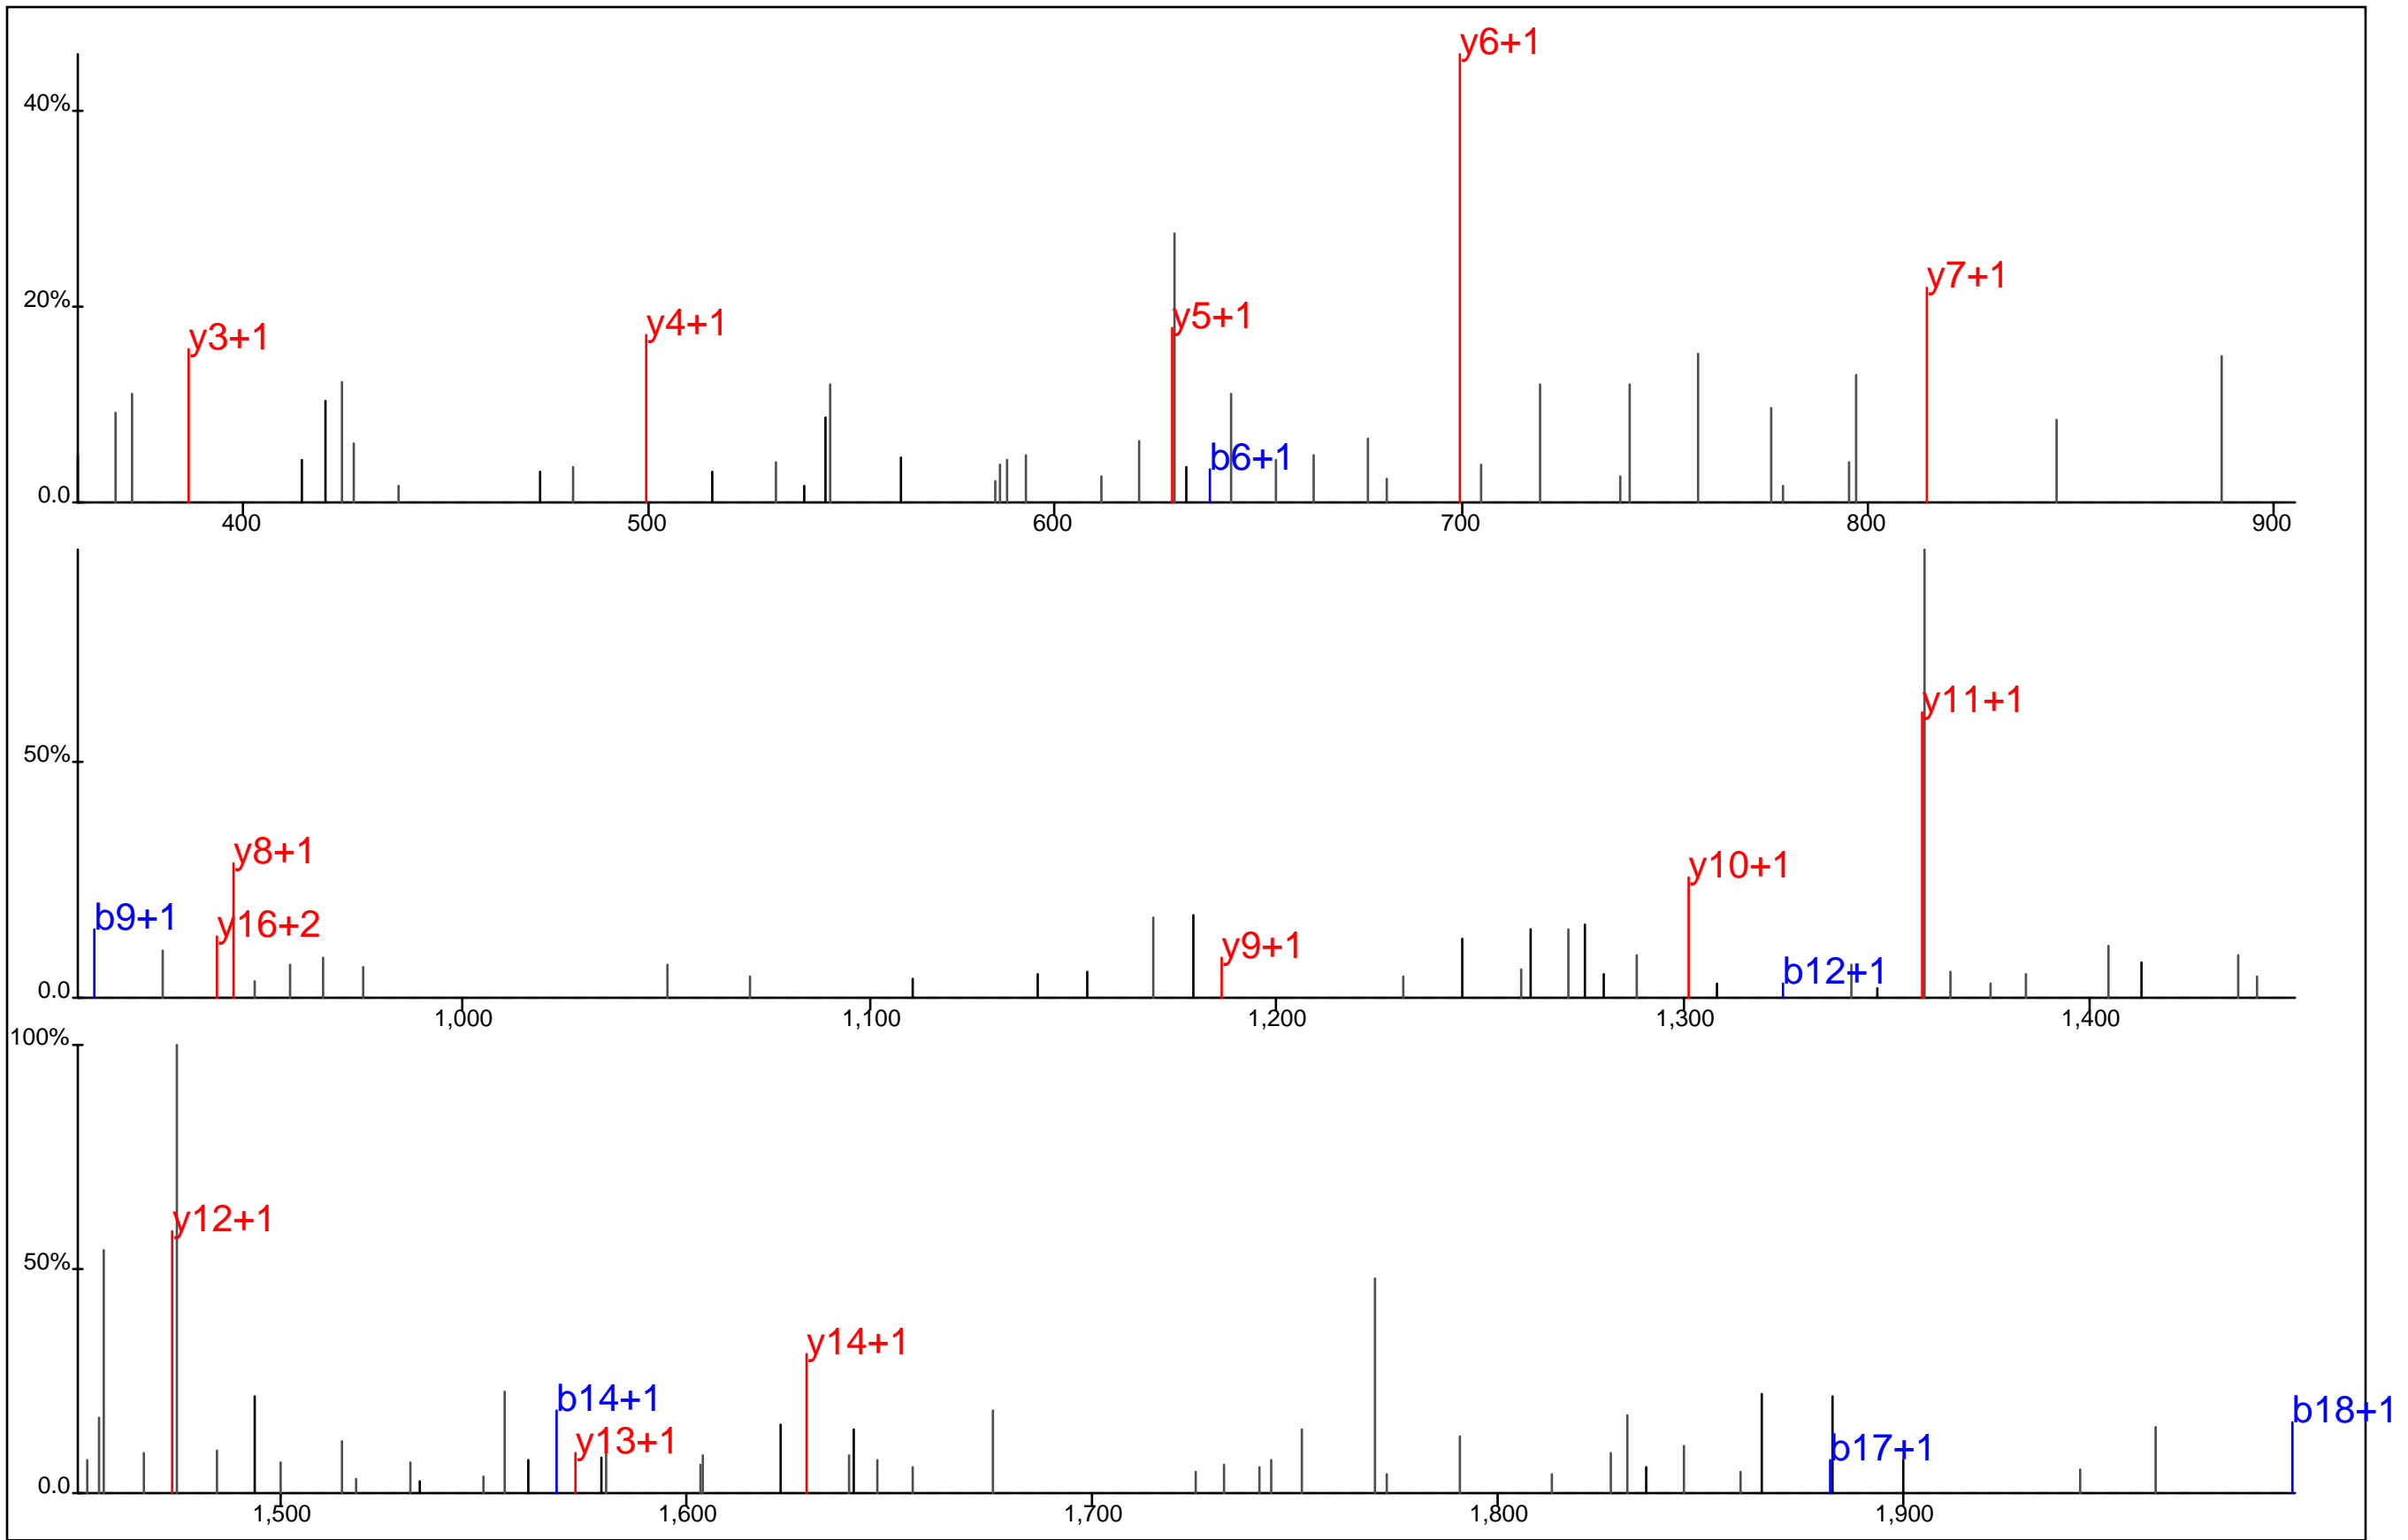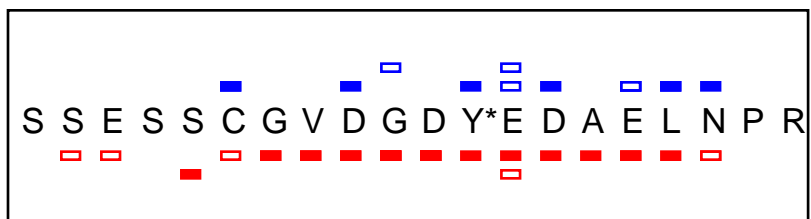

Protein Name: BCR  
 gi Accession: 0  
 Precursor Mass: 1,133.9231+2  
 Delta Mass: 2.319 ppm  
 XCorr: 48.97

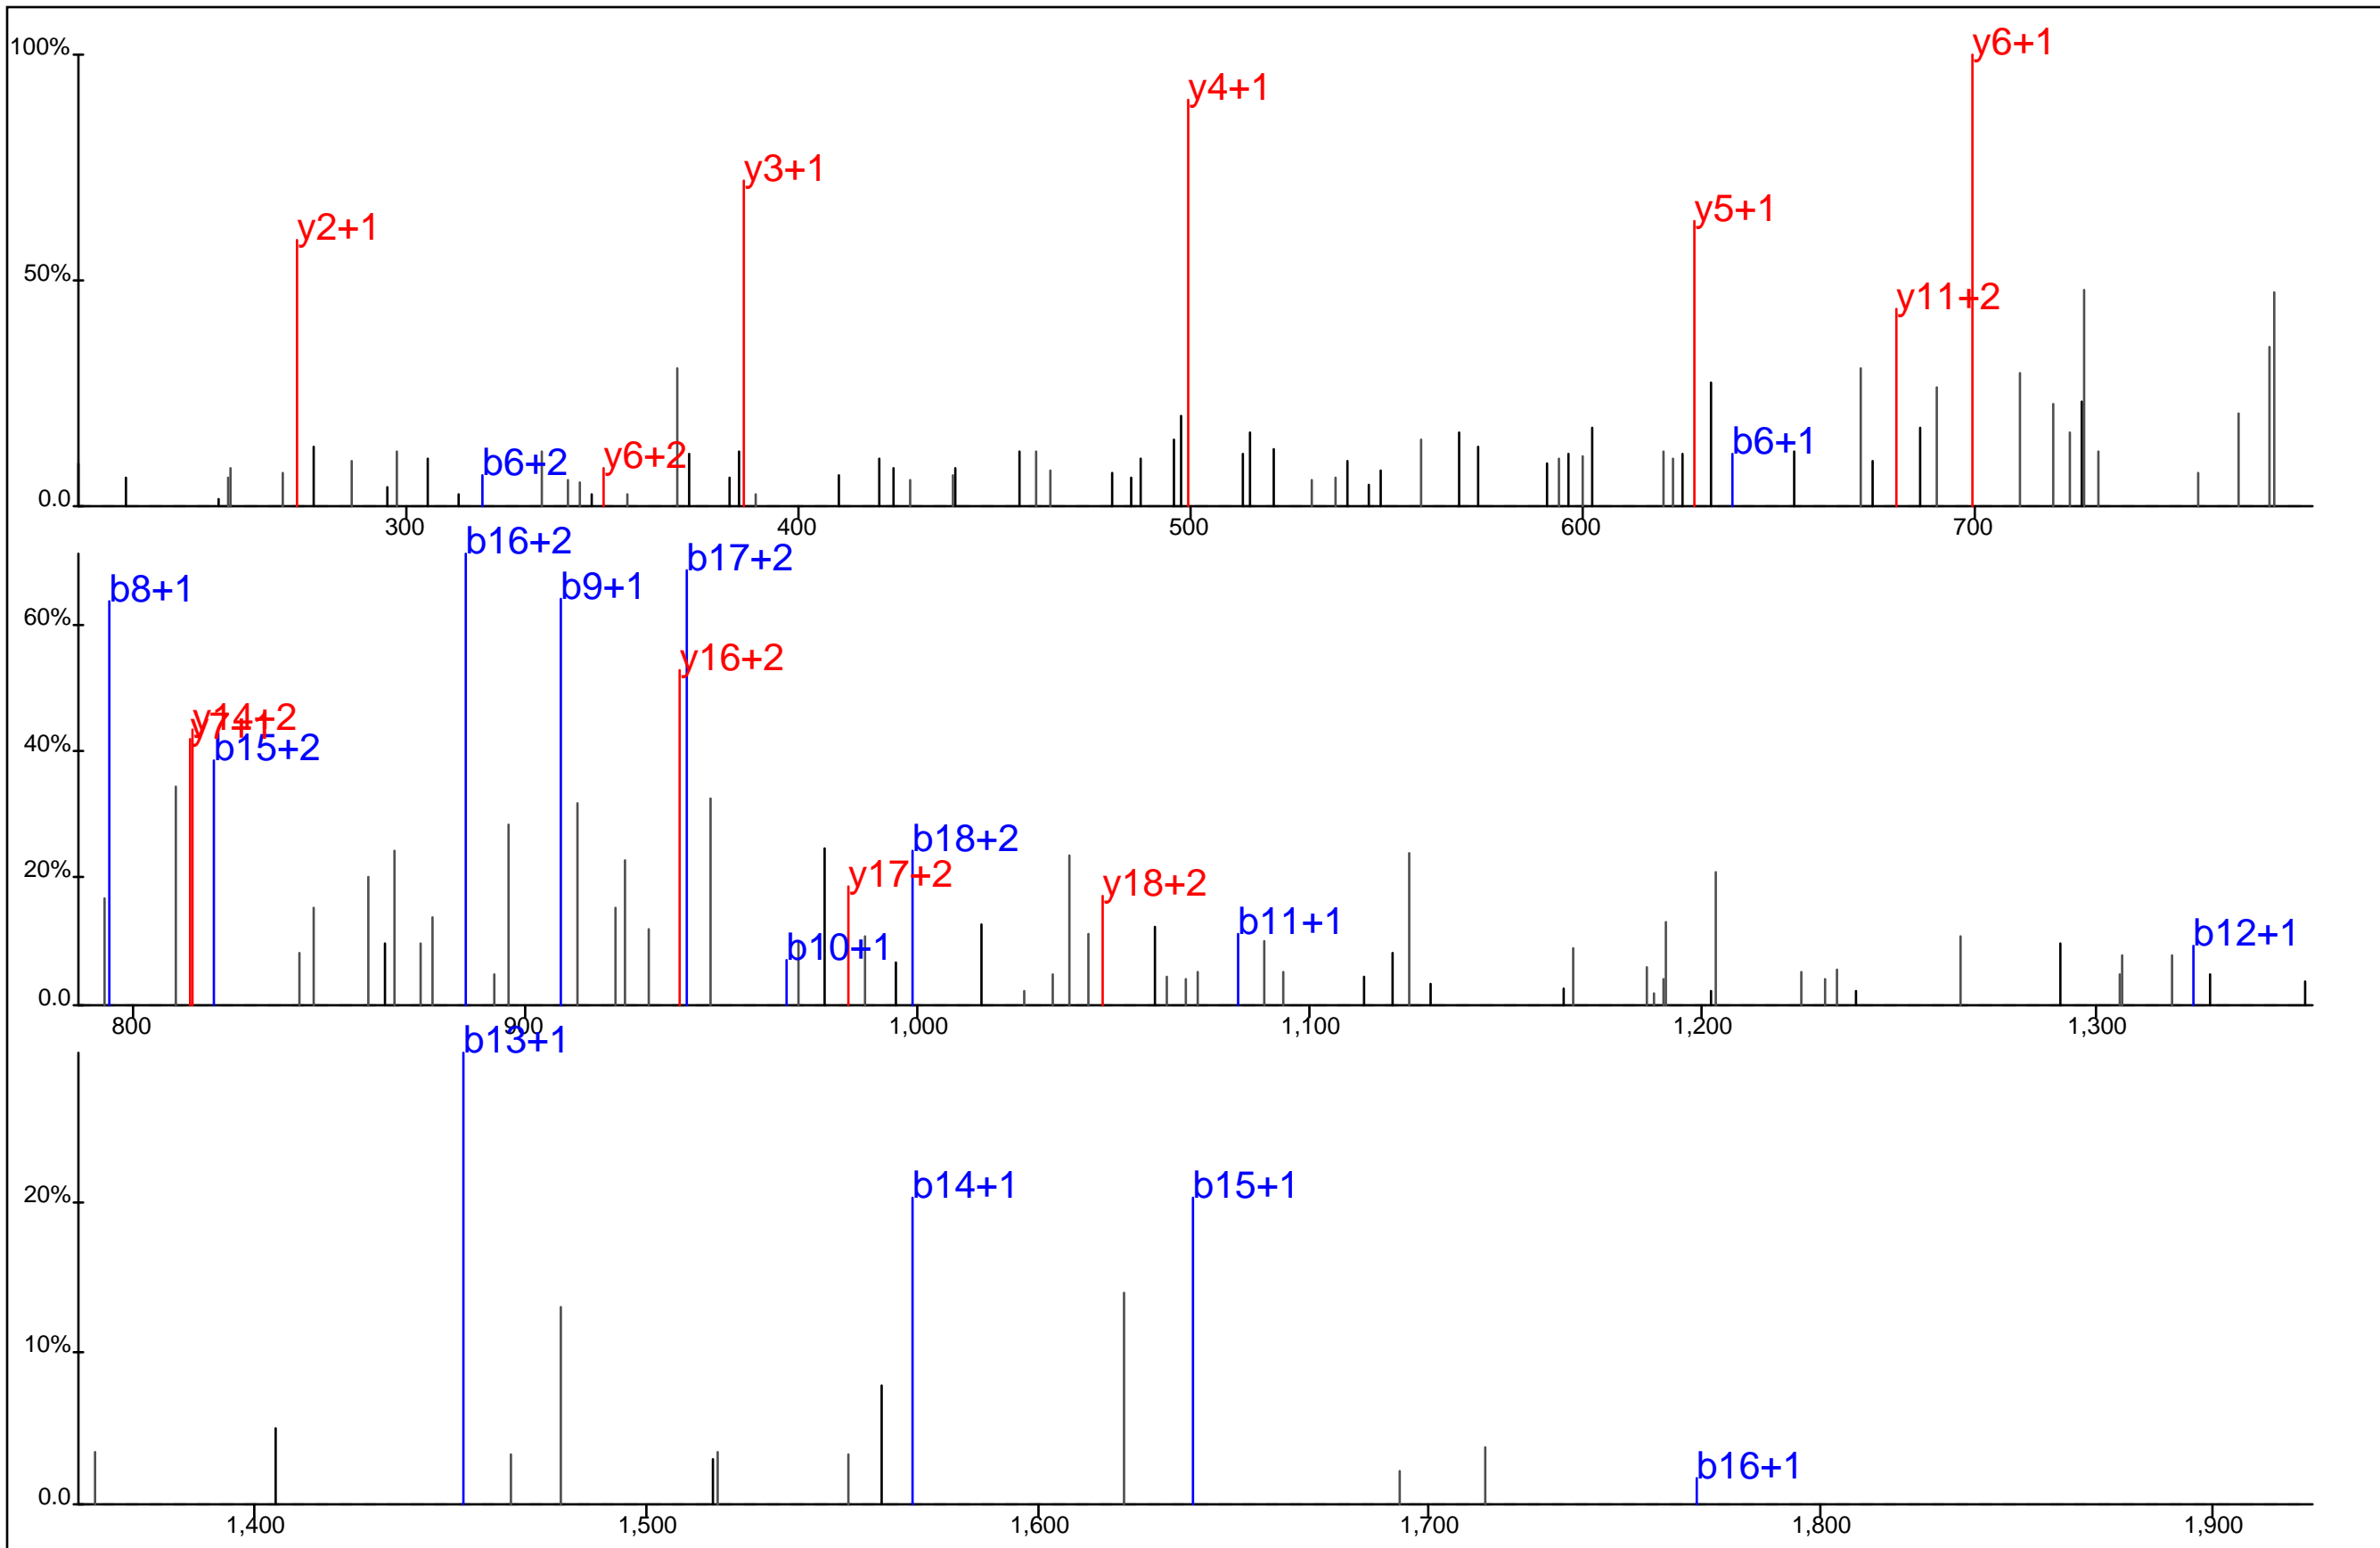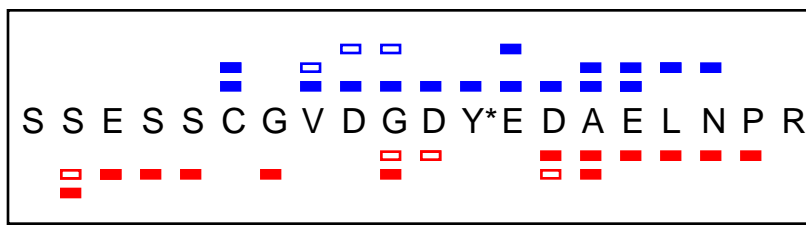

Protein Name: BCR  
 gi Accession: 0  
 Precursor Mass: 756.2851+3  
 Delta Mass: 1.517 ppm  
 XCorr: 42.14



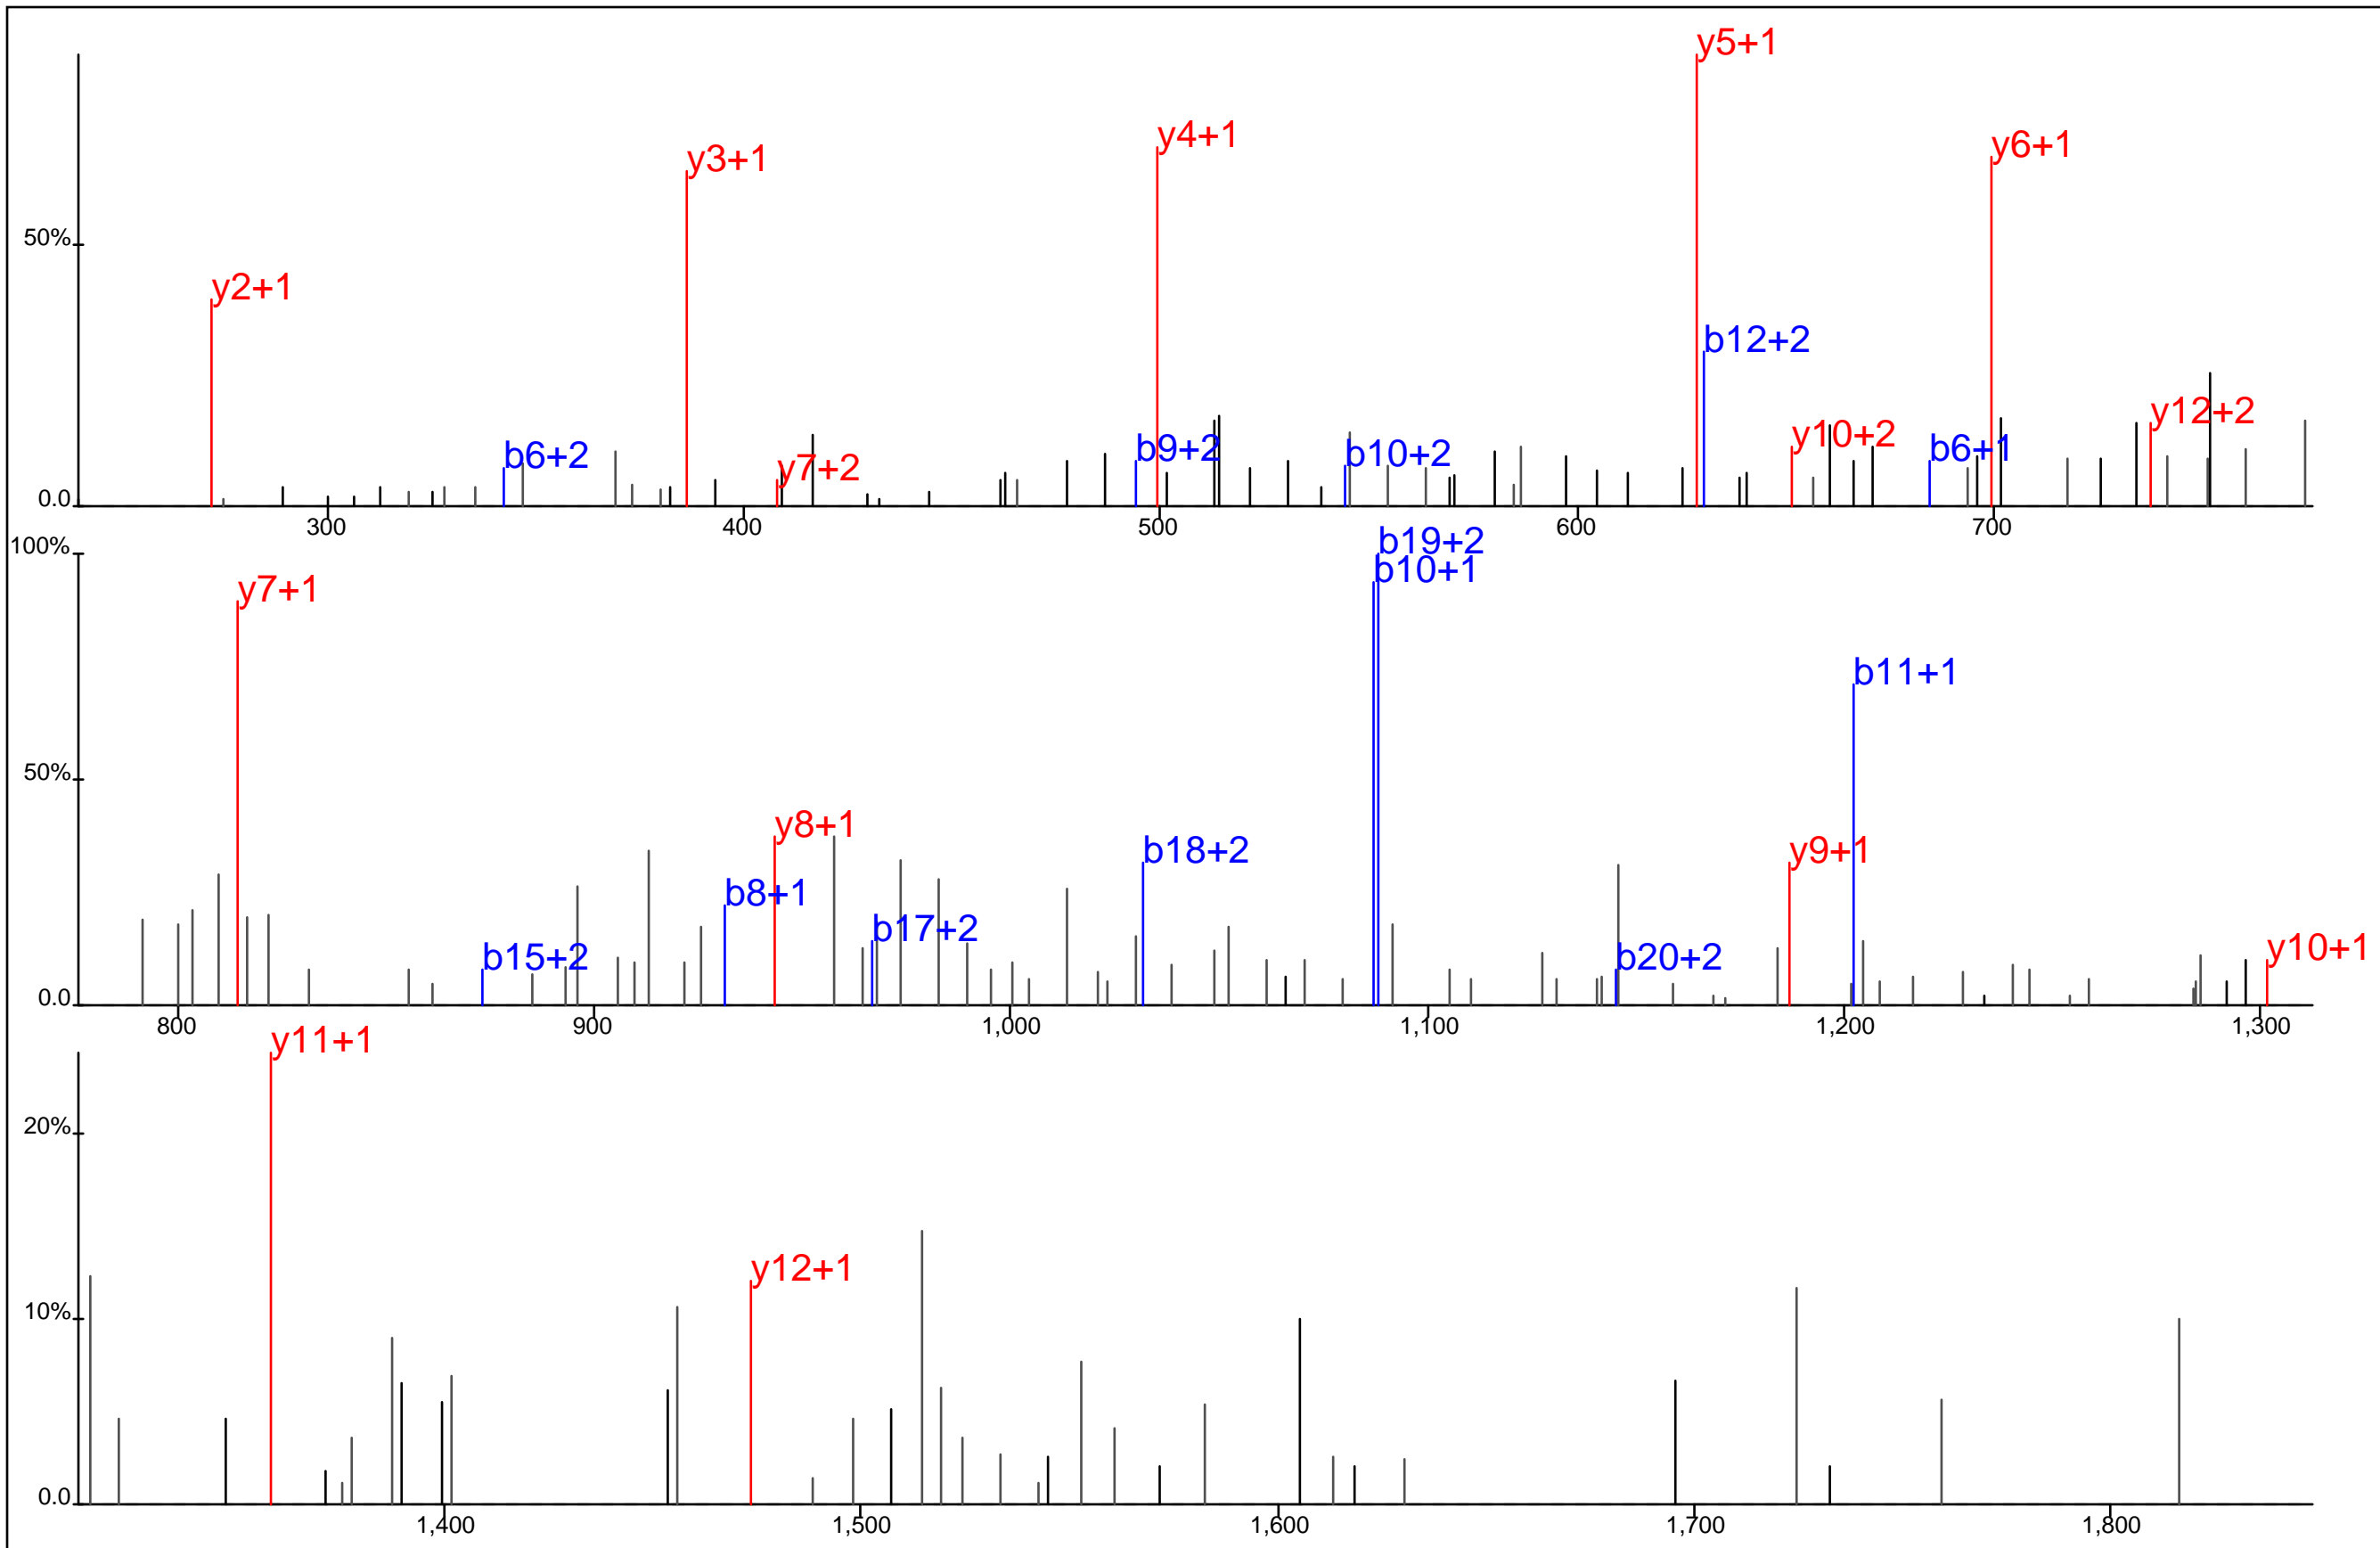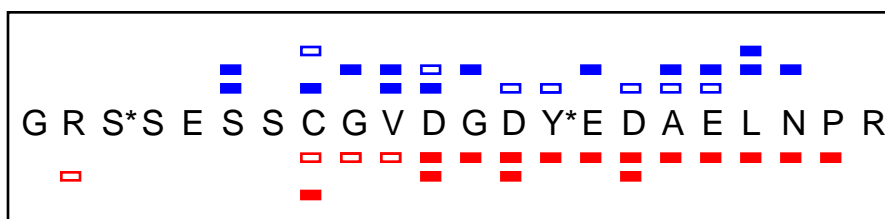

Protein Name: BCR  
 gi Accession: 0  
 Precursor Mass: 853.9801+3  
 Delta Mass: 2.857 ppm  
 XCorr: 49.03

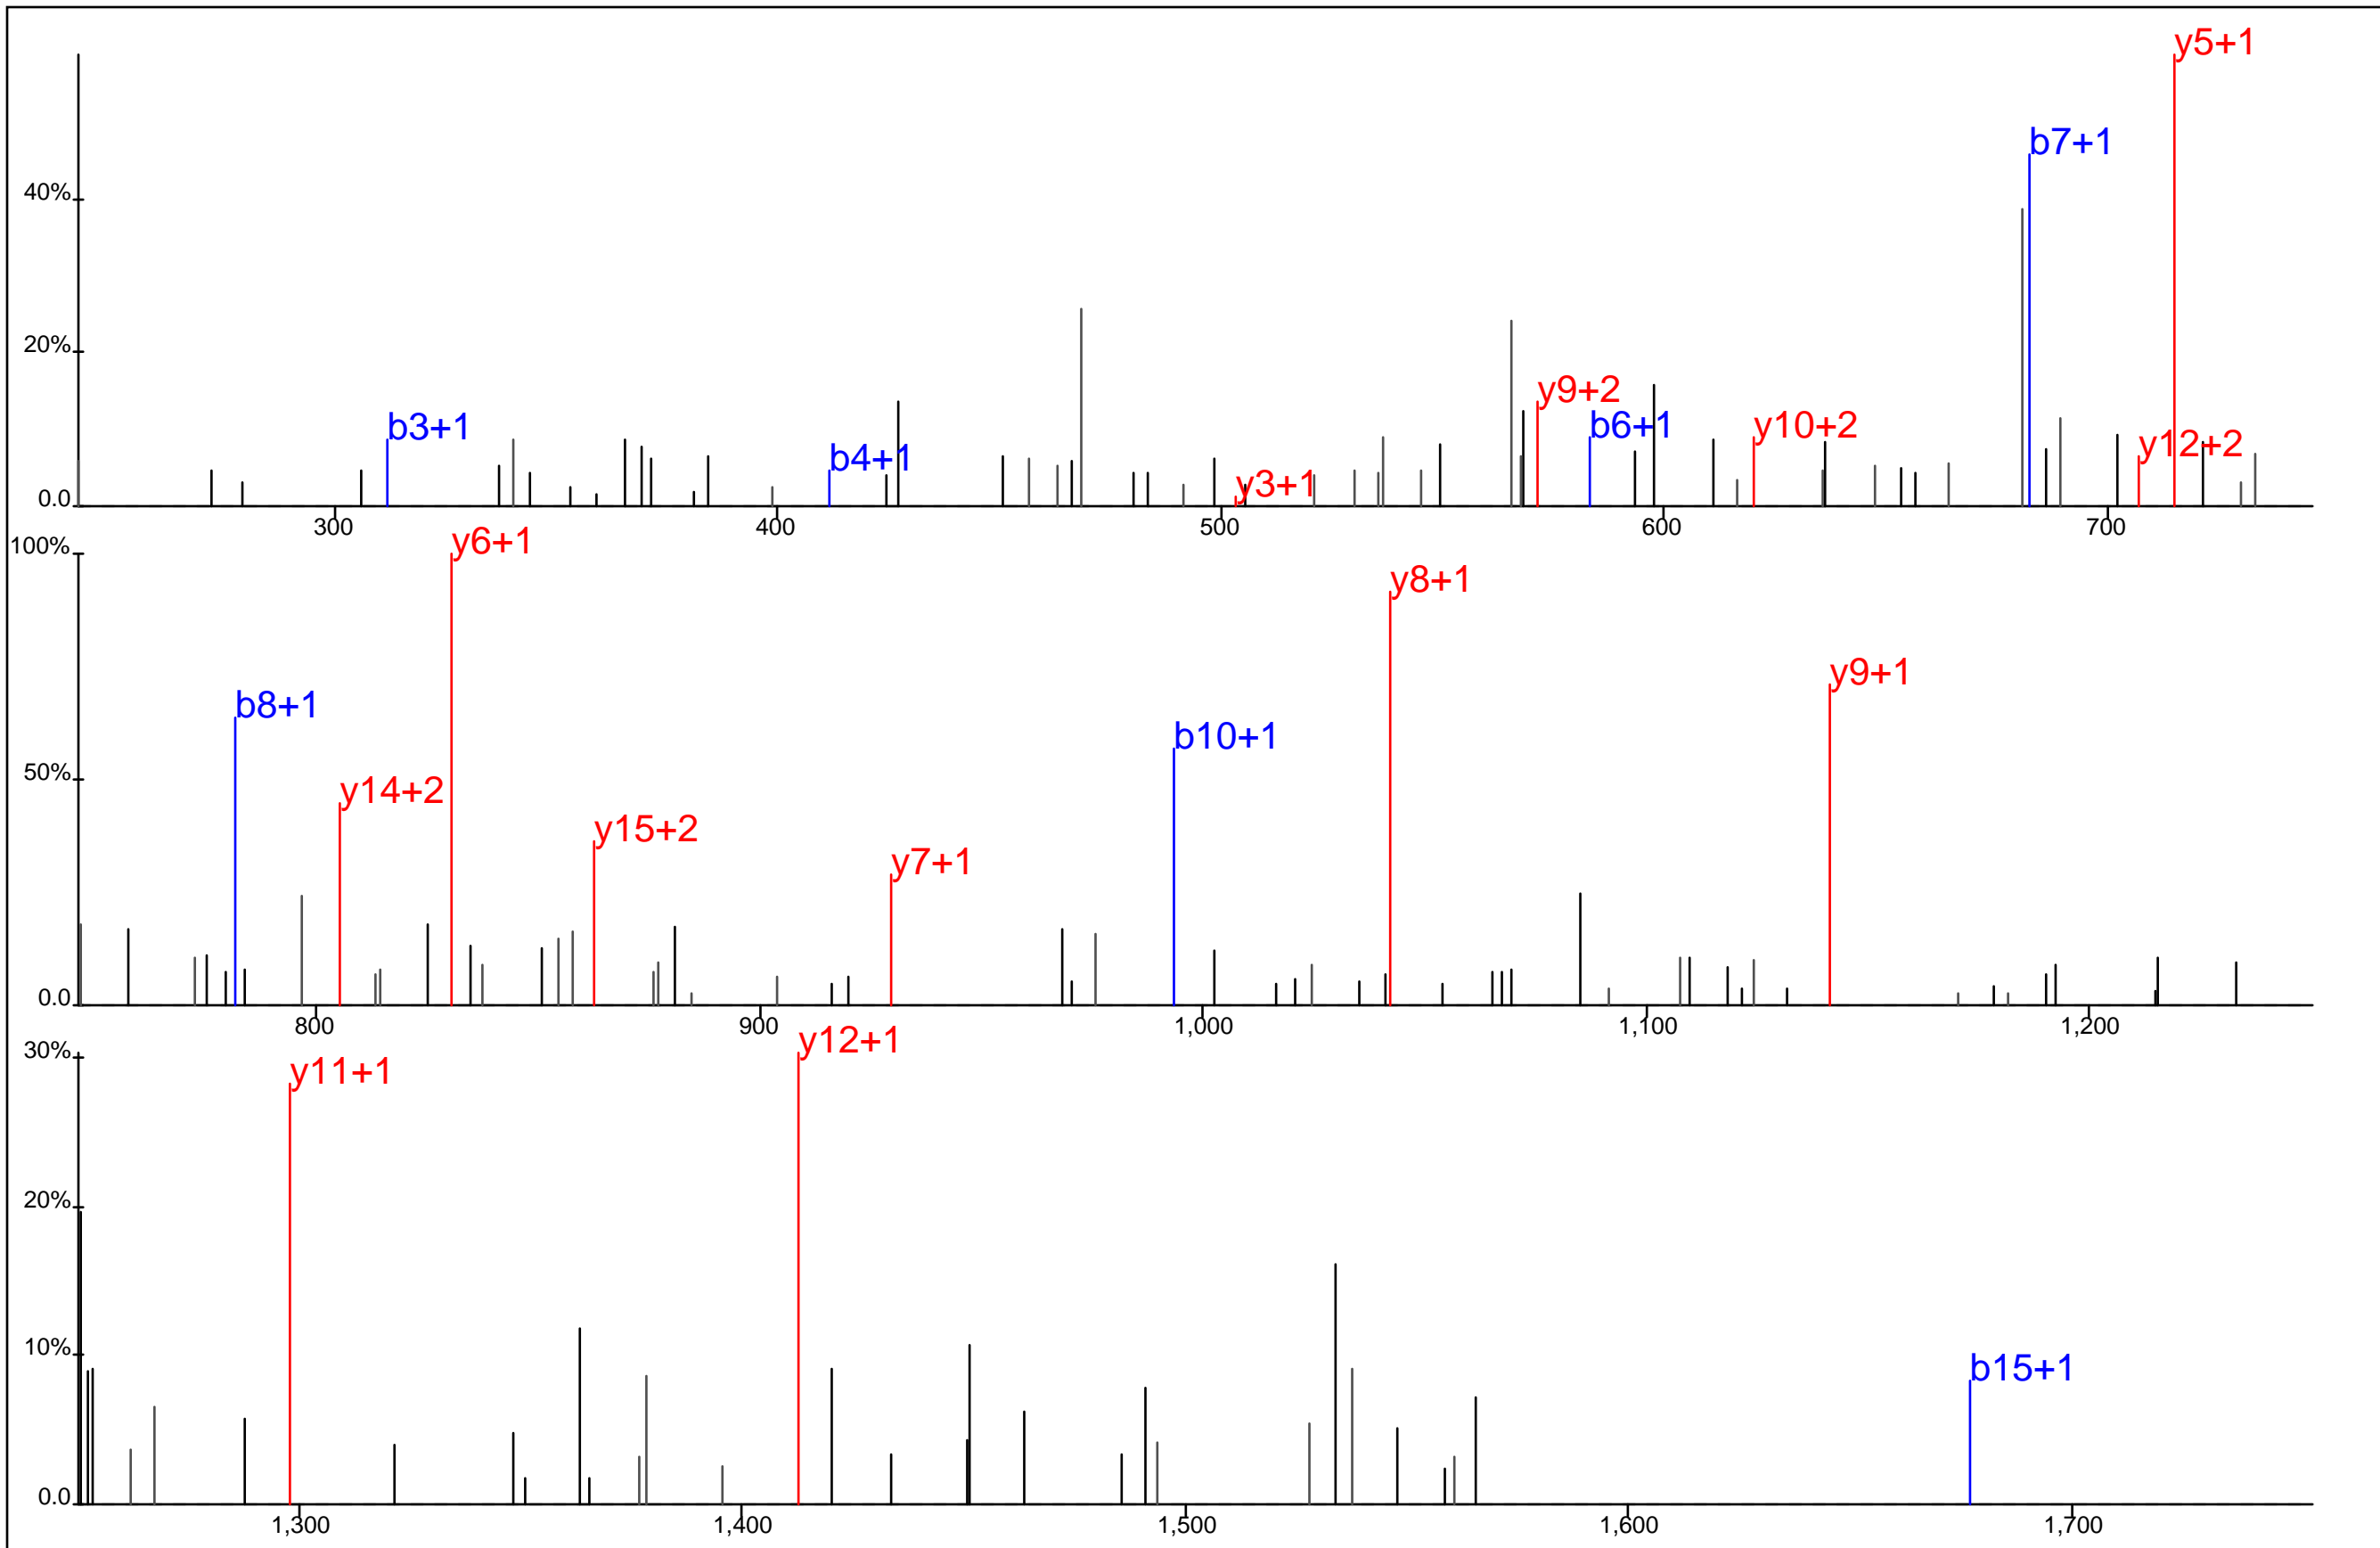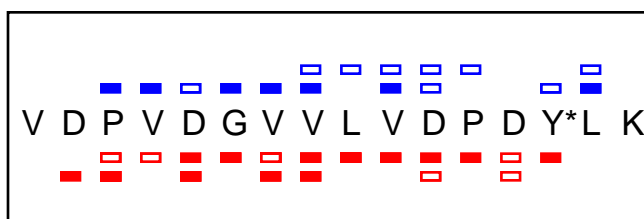

Protein Name: Beta arrestin 2  
 gi Accession: 0  
 Precursor Mass: 911.9446+2  
 Delta Mass: 3.054 ppm  
 XCorr: 31.85

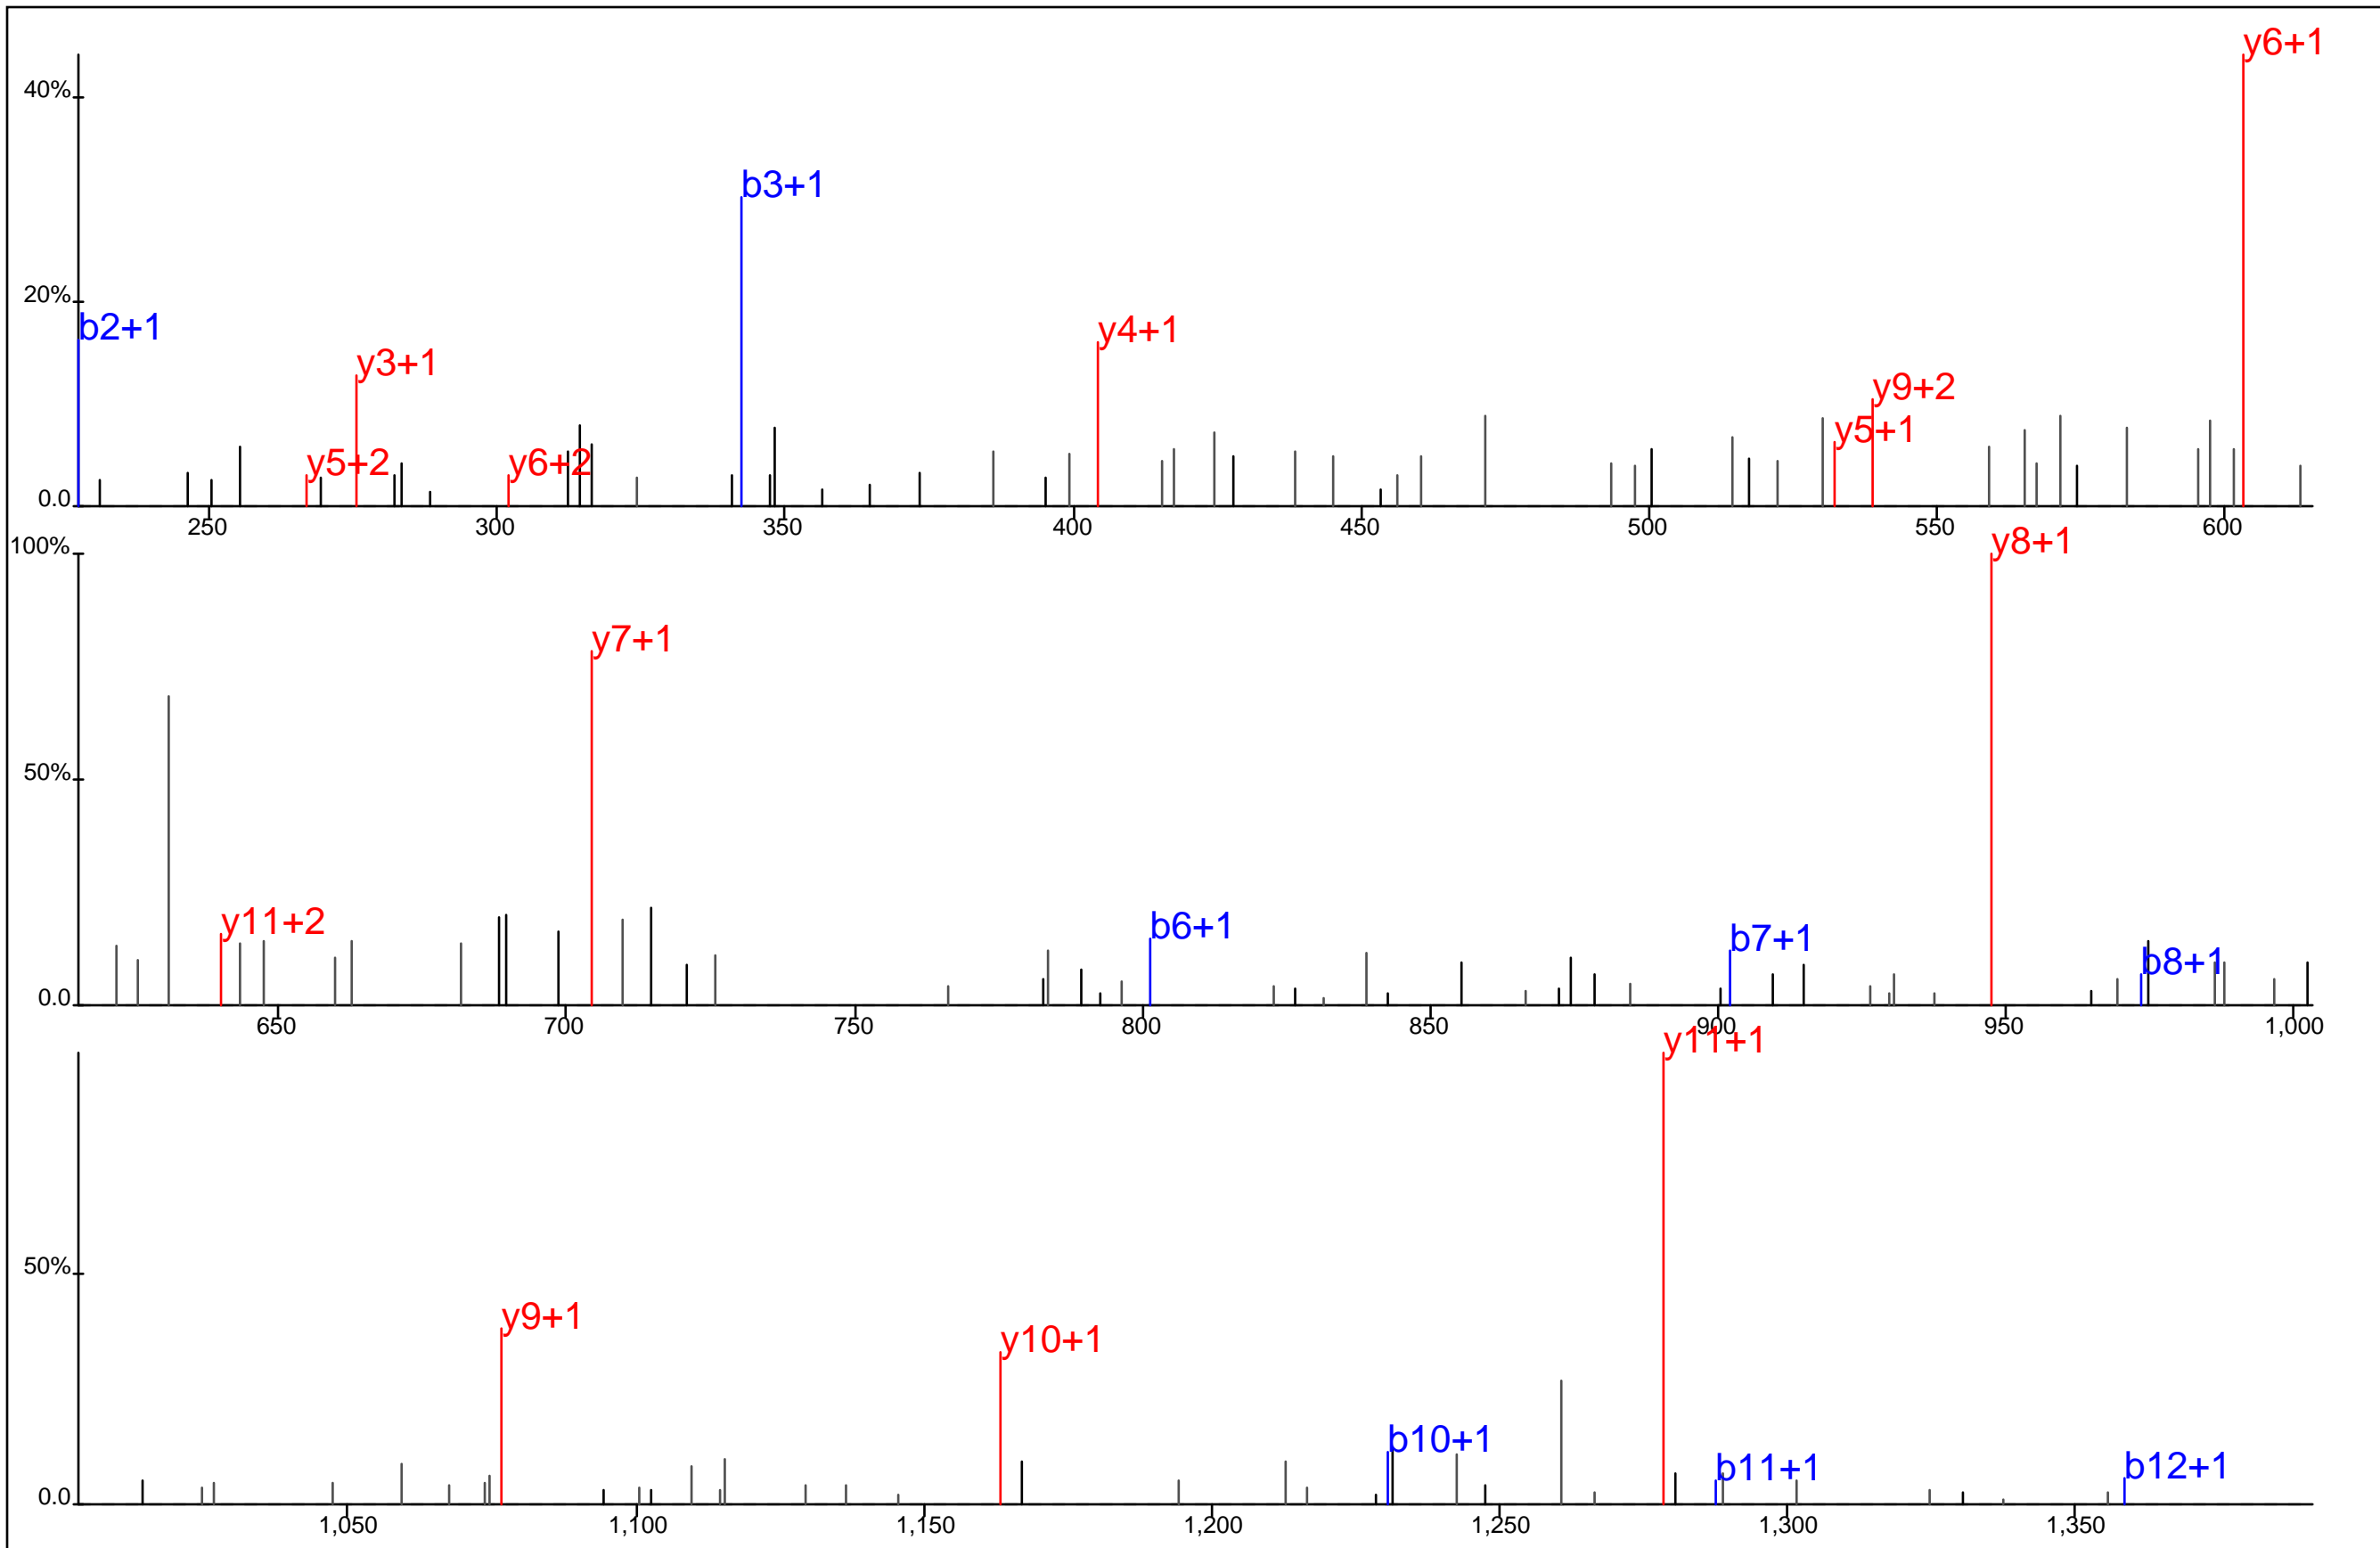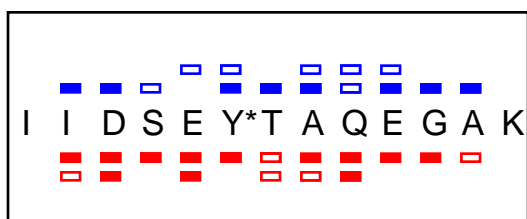

Protein Name: BLK  
 gi Accession: 0  
 Precursor Mass: 752.8330+2  
 Delta Mass: 1.381 ppm  
 XCorr: 74.13

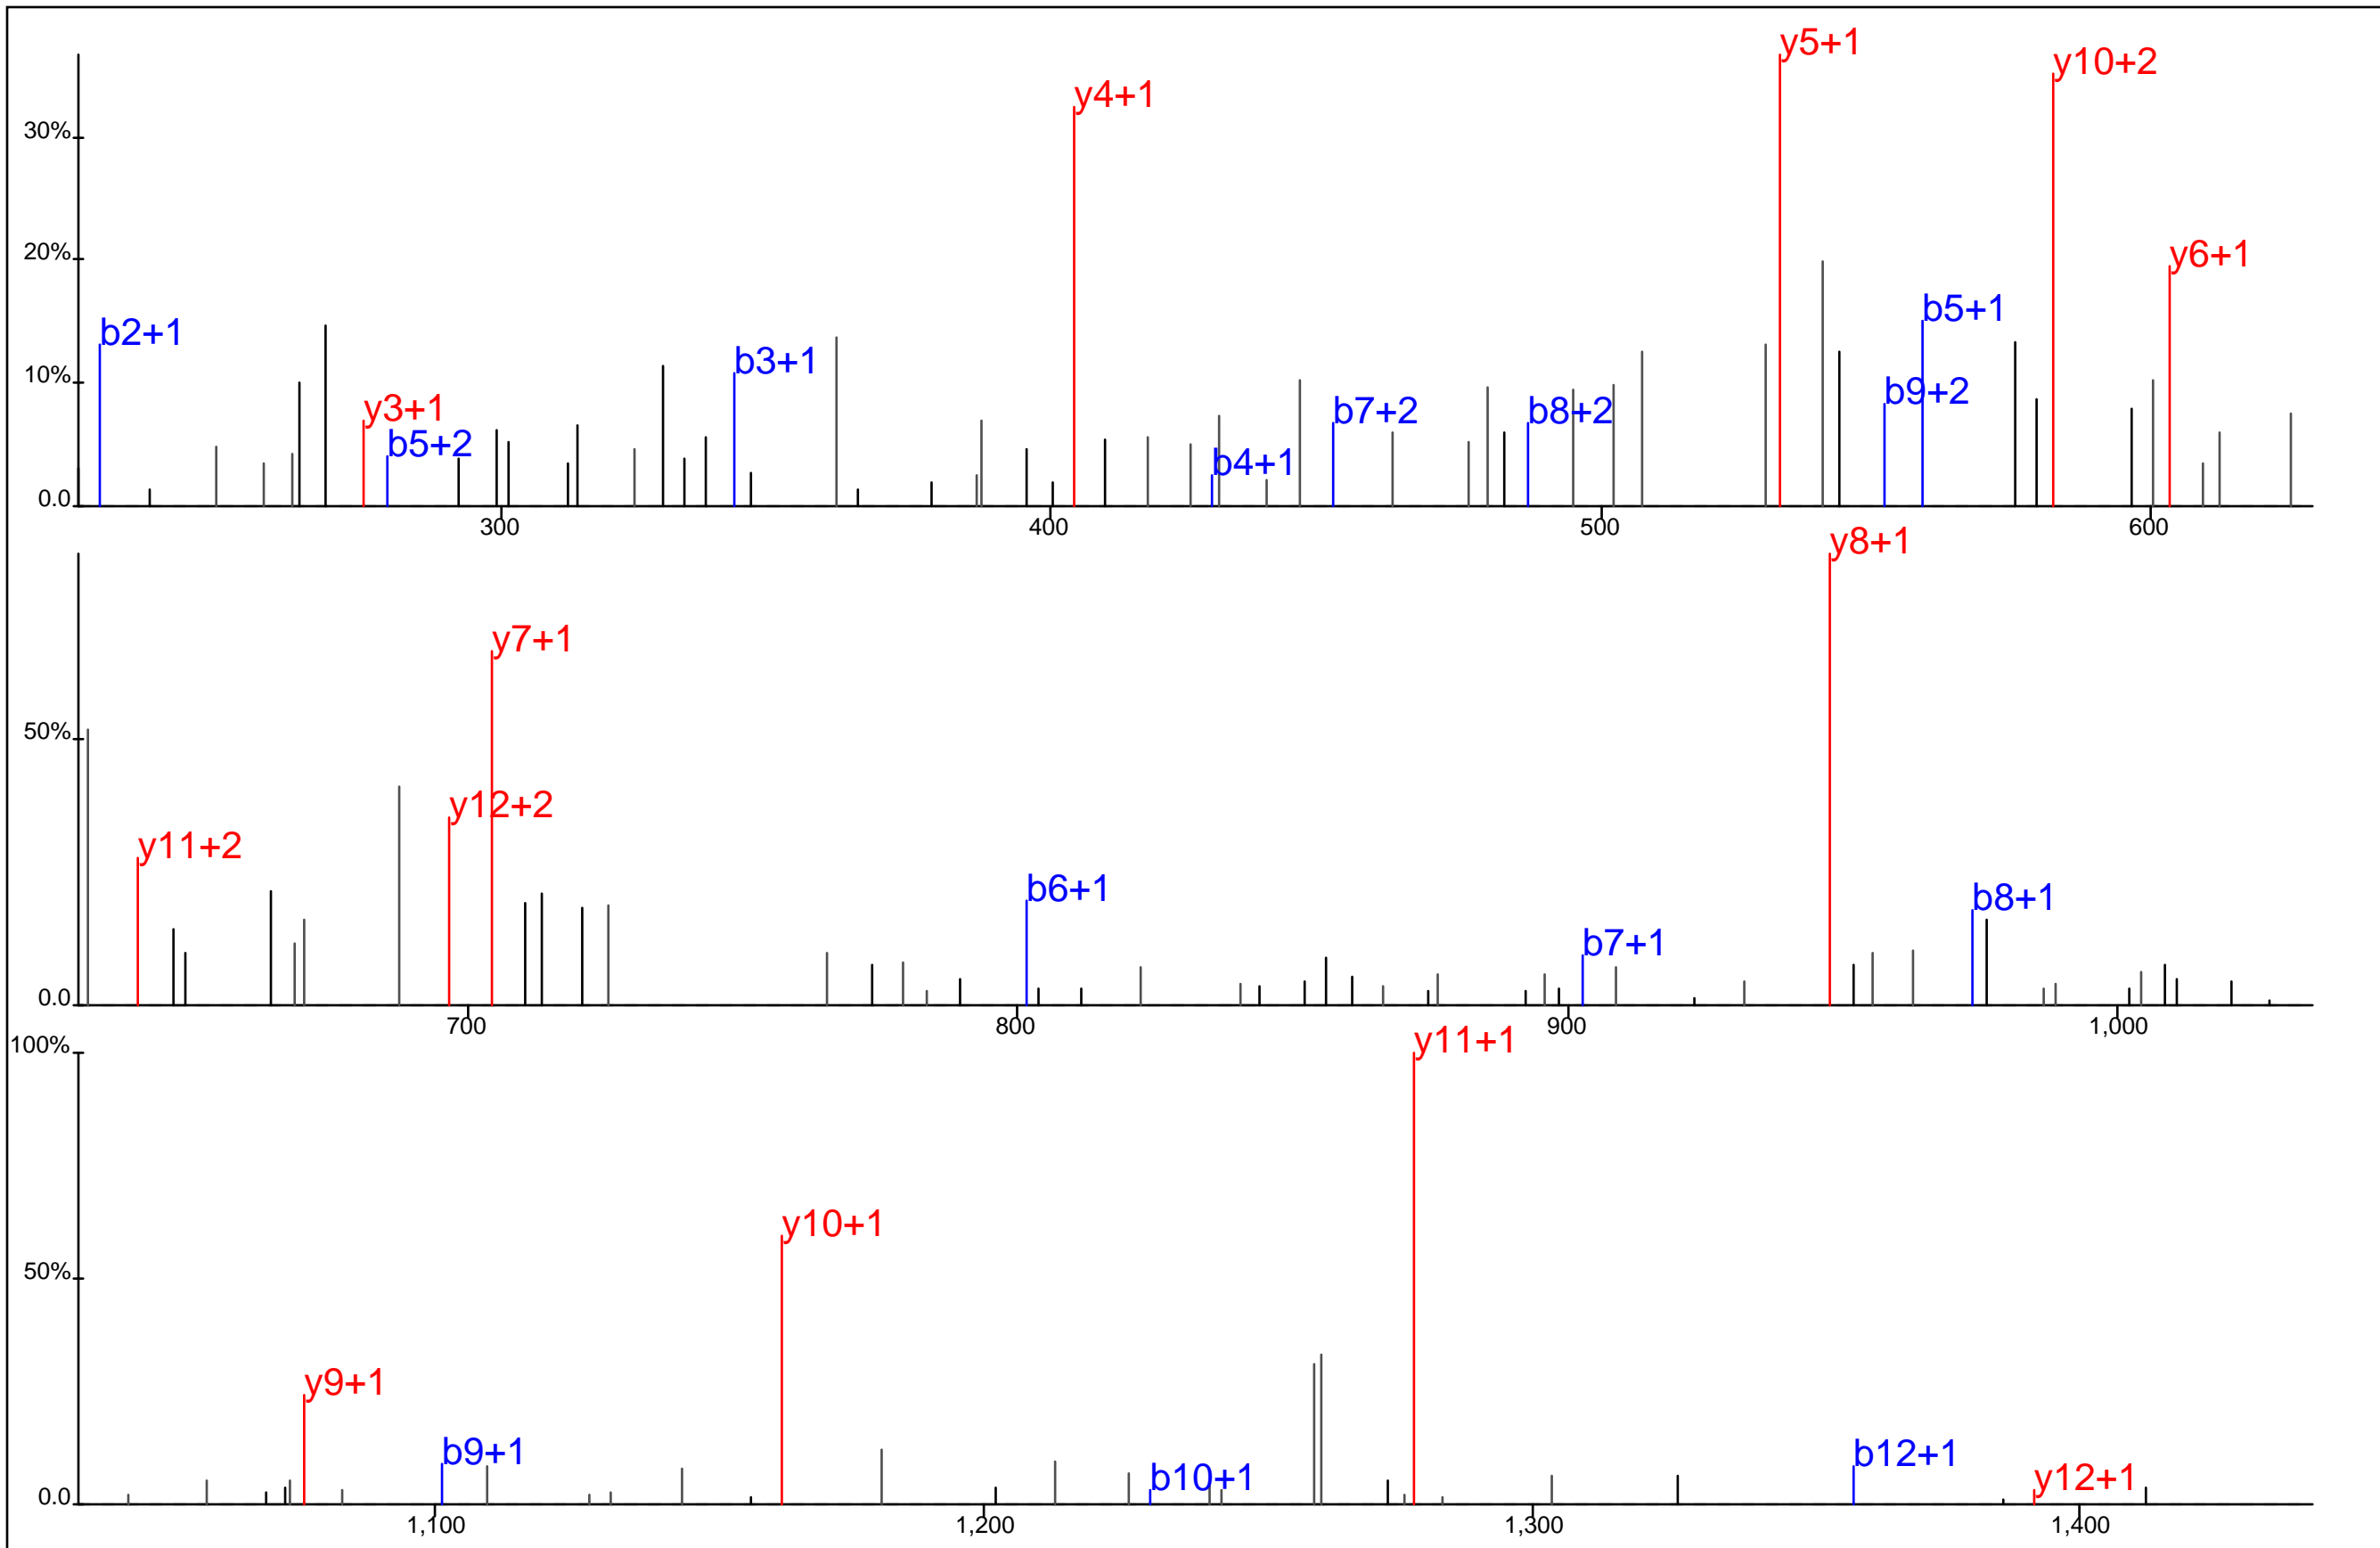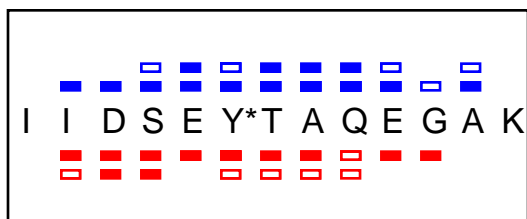

Protein Name: BLK  
 gi Accession: 0  
 Precursor Mass: 752.8322+2  
 Delta Mass: 0.245 ppm  
 XCorr: 60.21

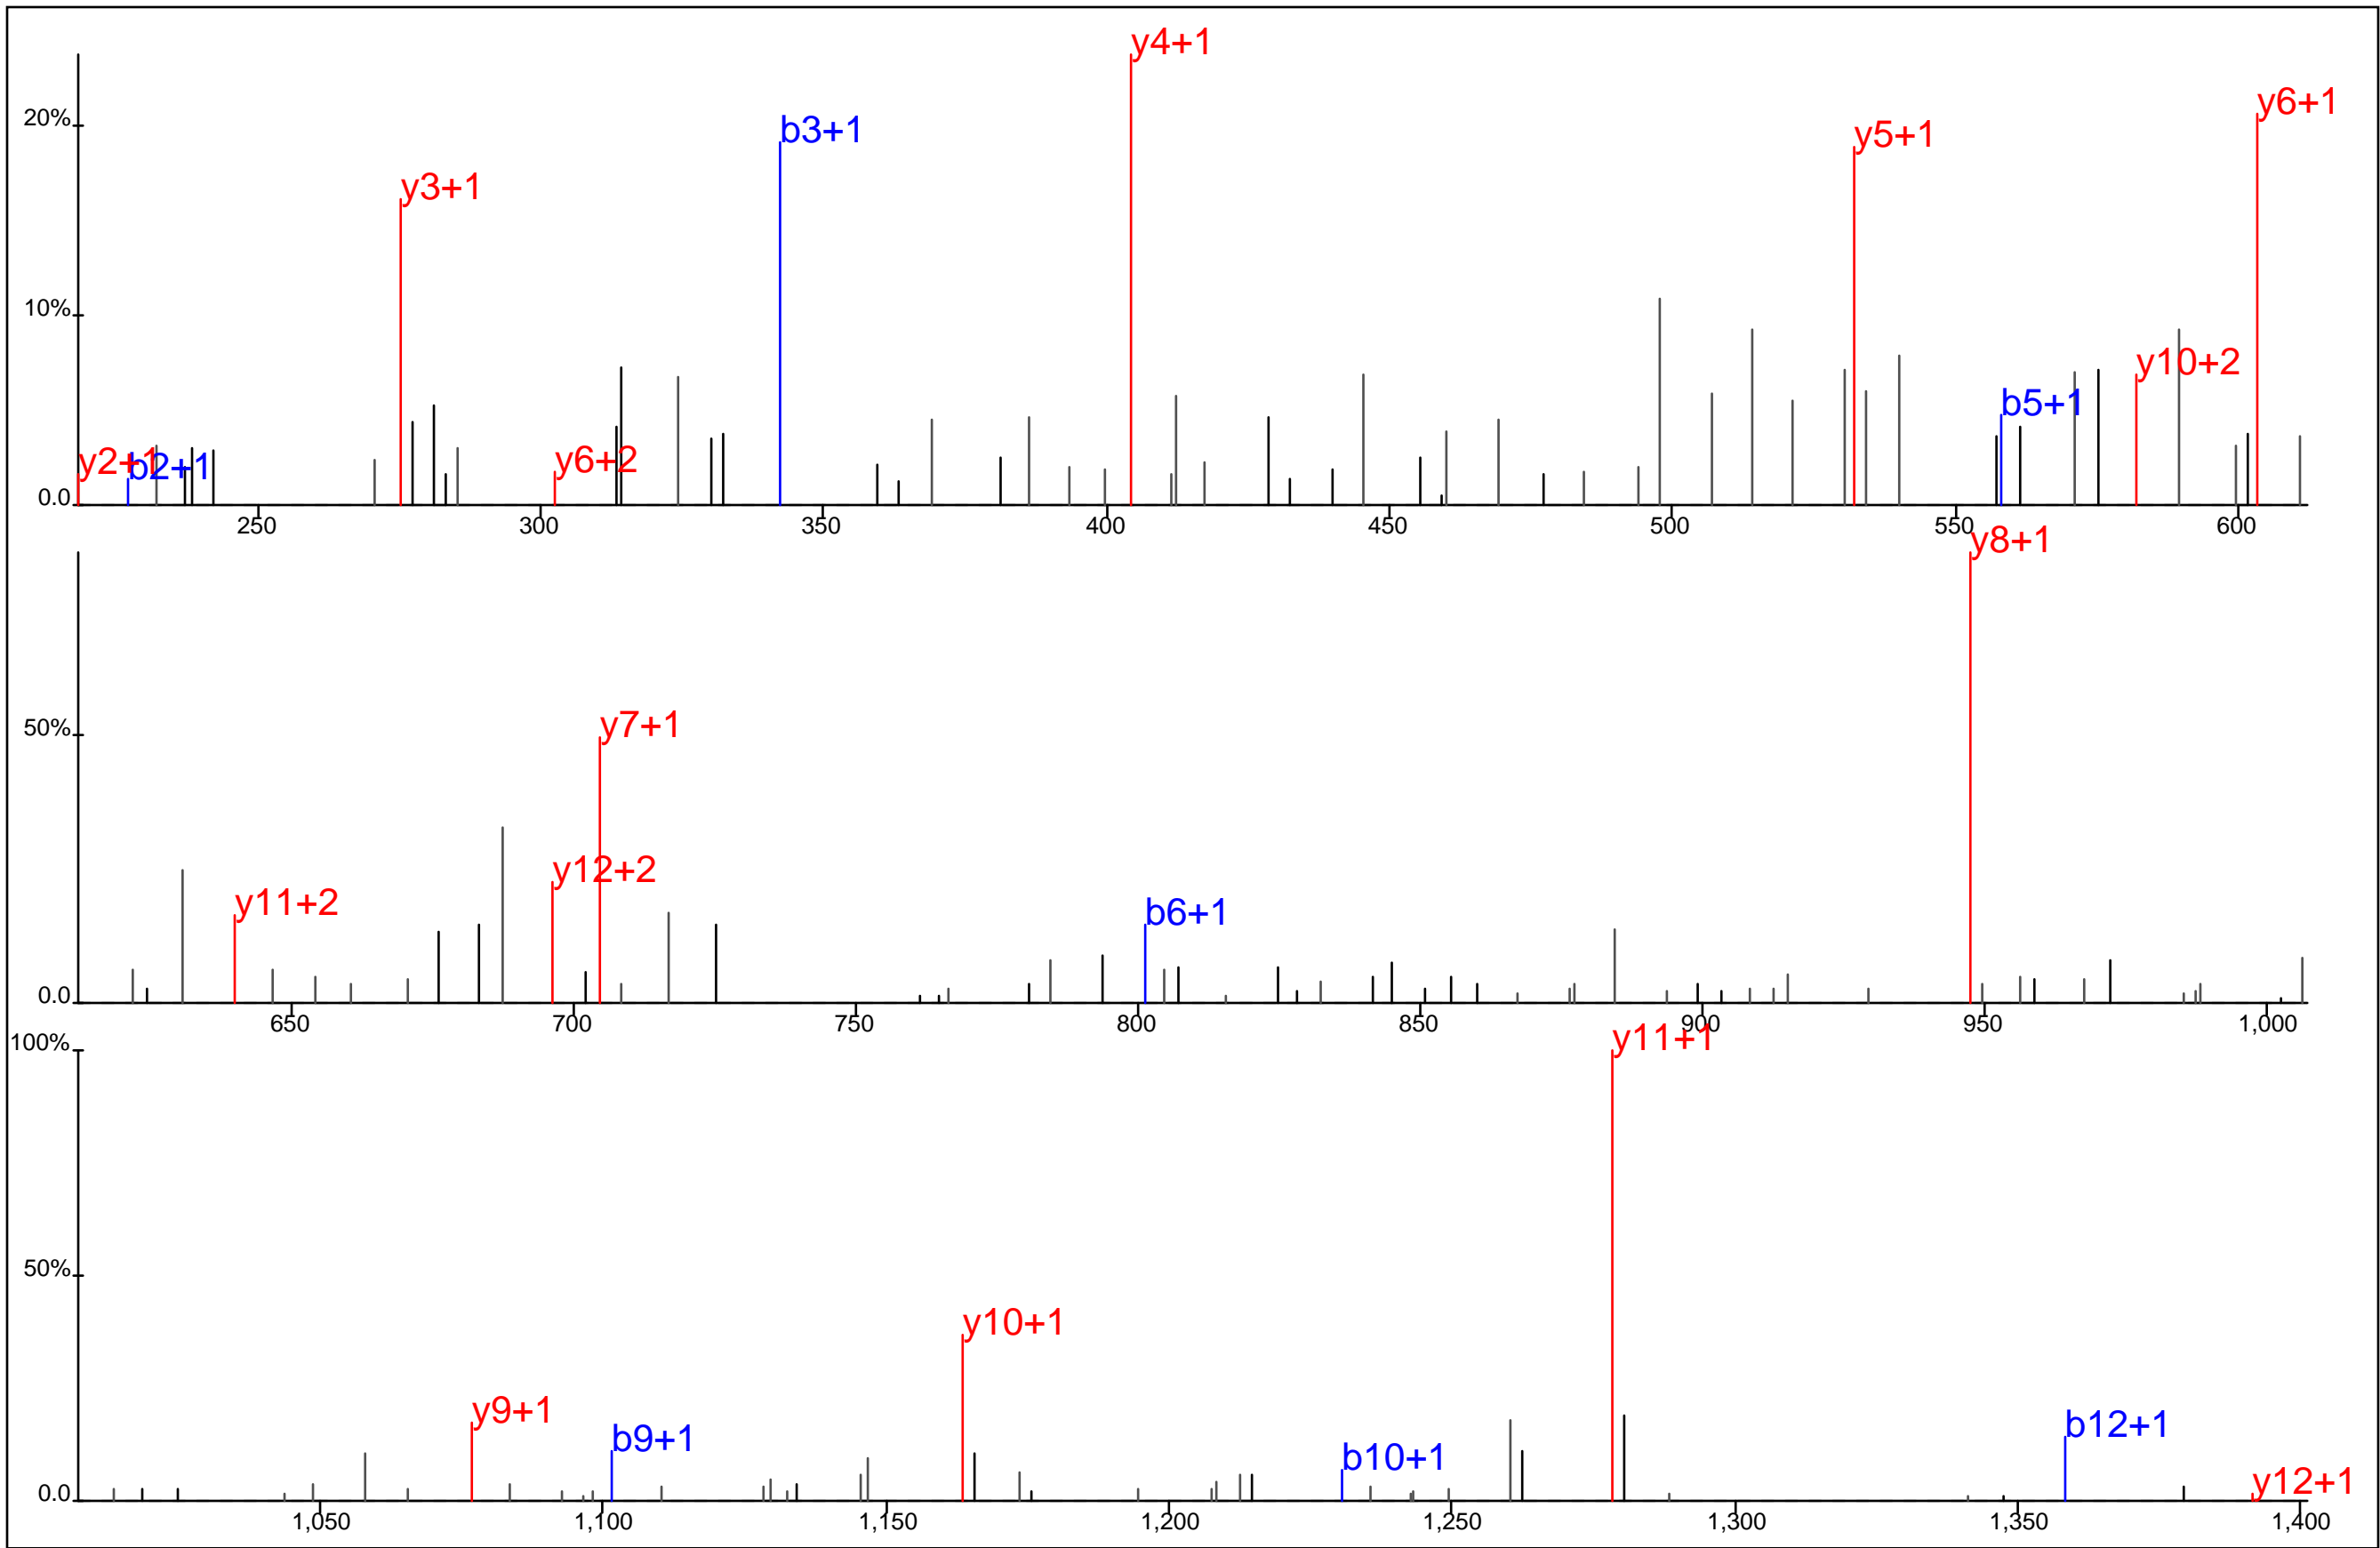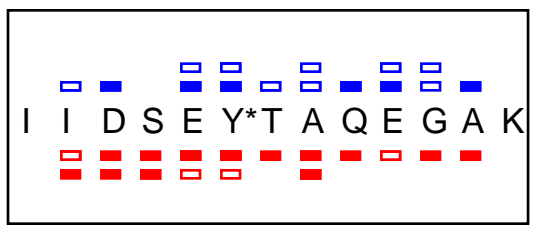

Protein Name: BLK  
 gi Accession: 0  
 Precursor Mass: 752.8306+2  
 Delta Mass: 1.784 ppm  
 XCorr: 76.4

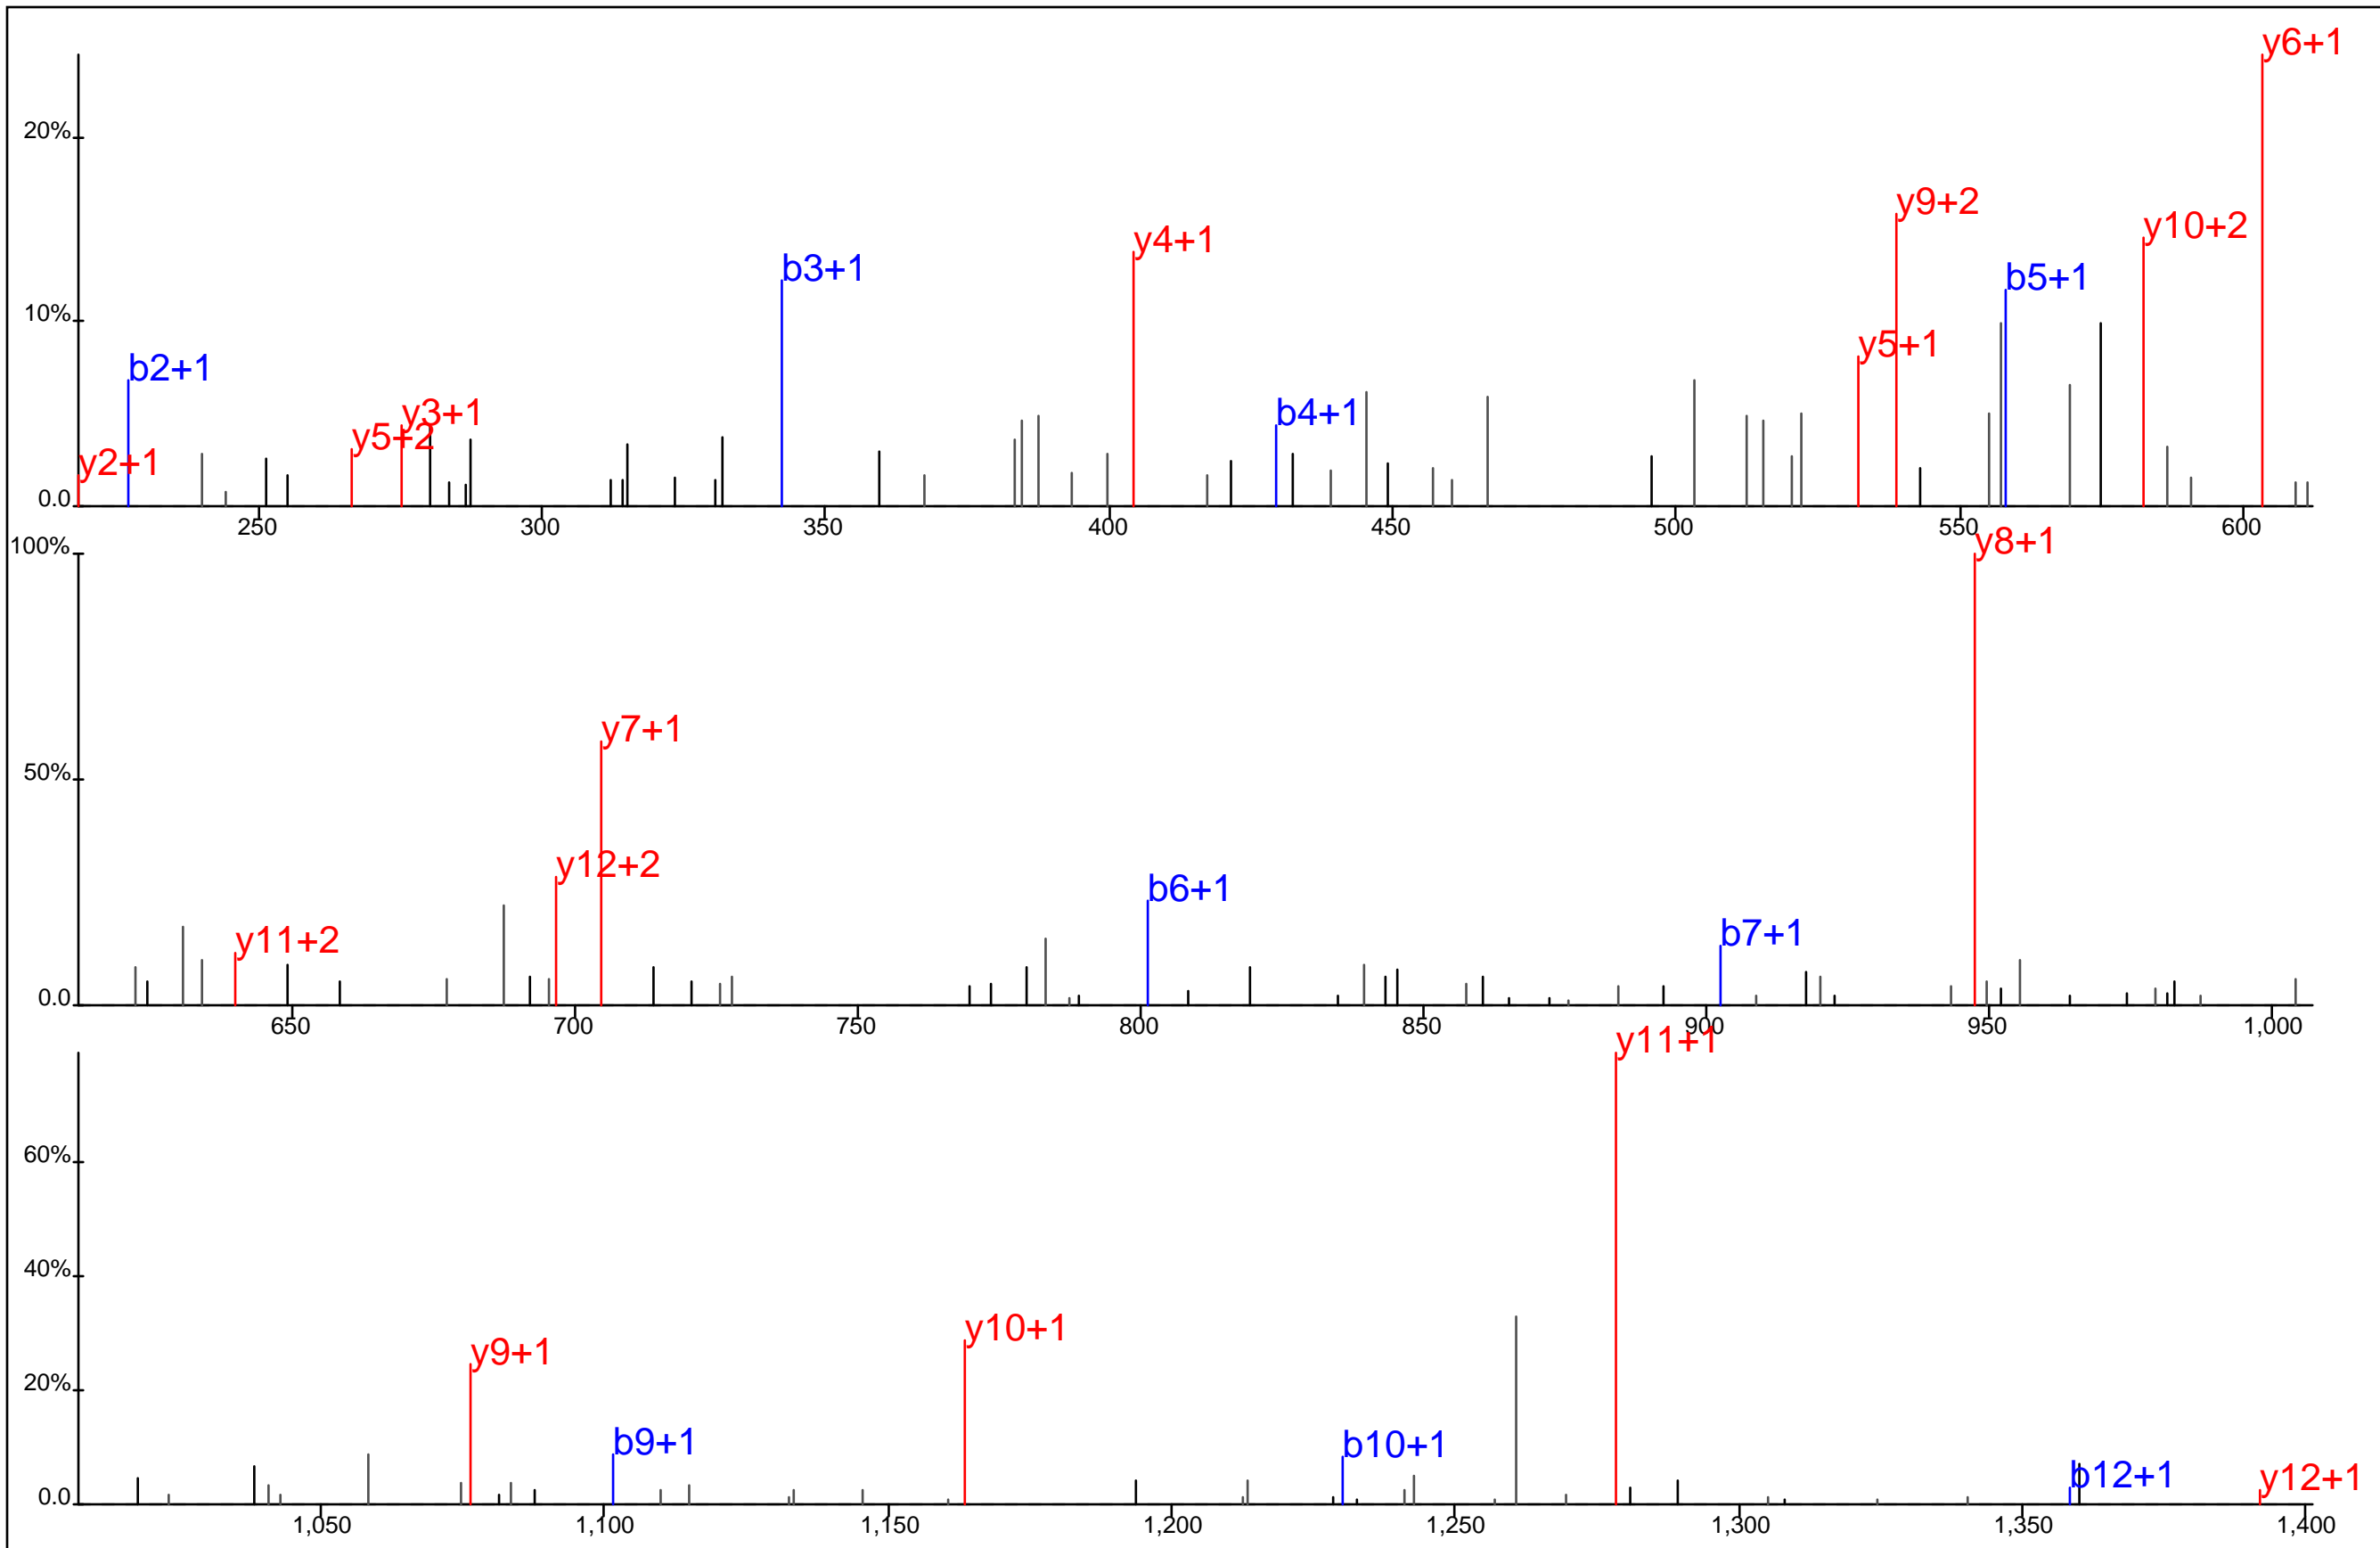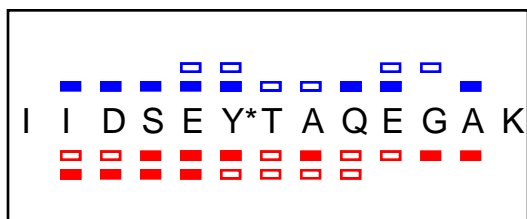

Protein Name: BLK  
 gi Accession: 0  
 Precursor Mass: 752.8309+2  
 Delta Mass: 1.377 ppm  
 XCorr: 62.44

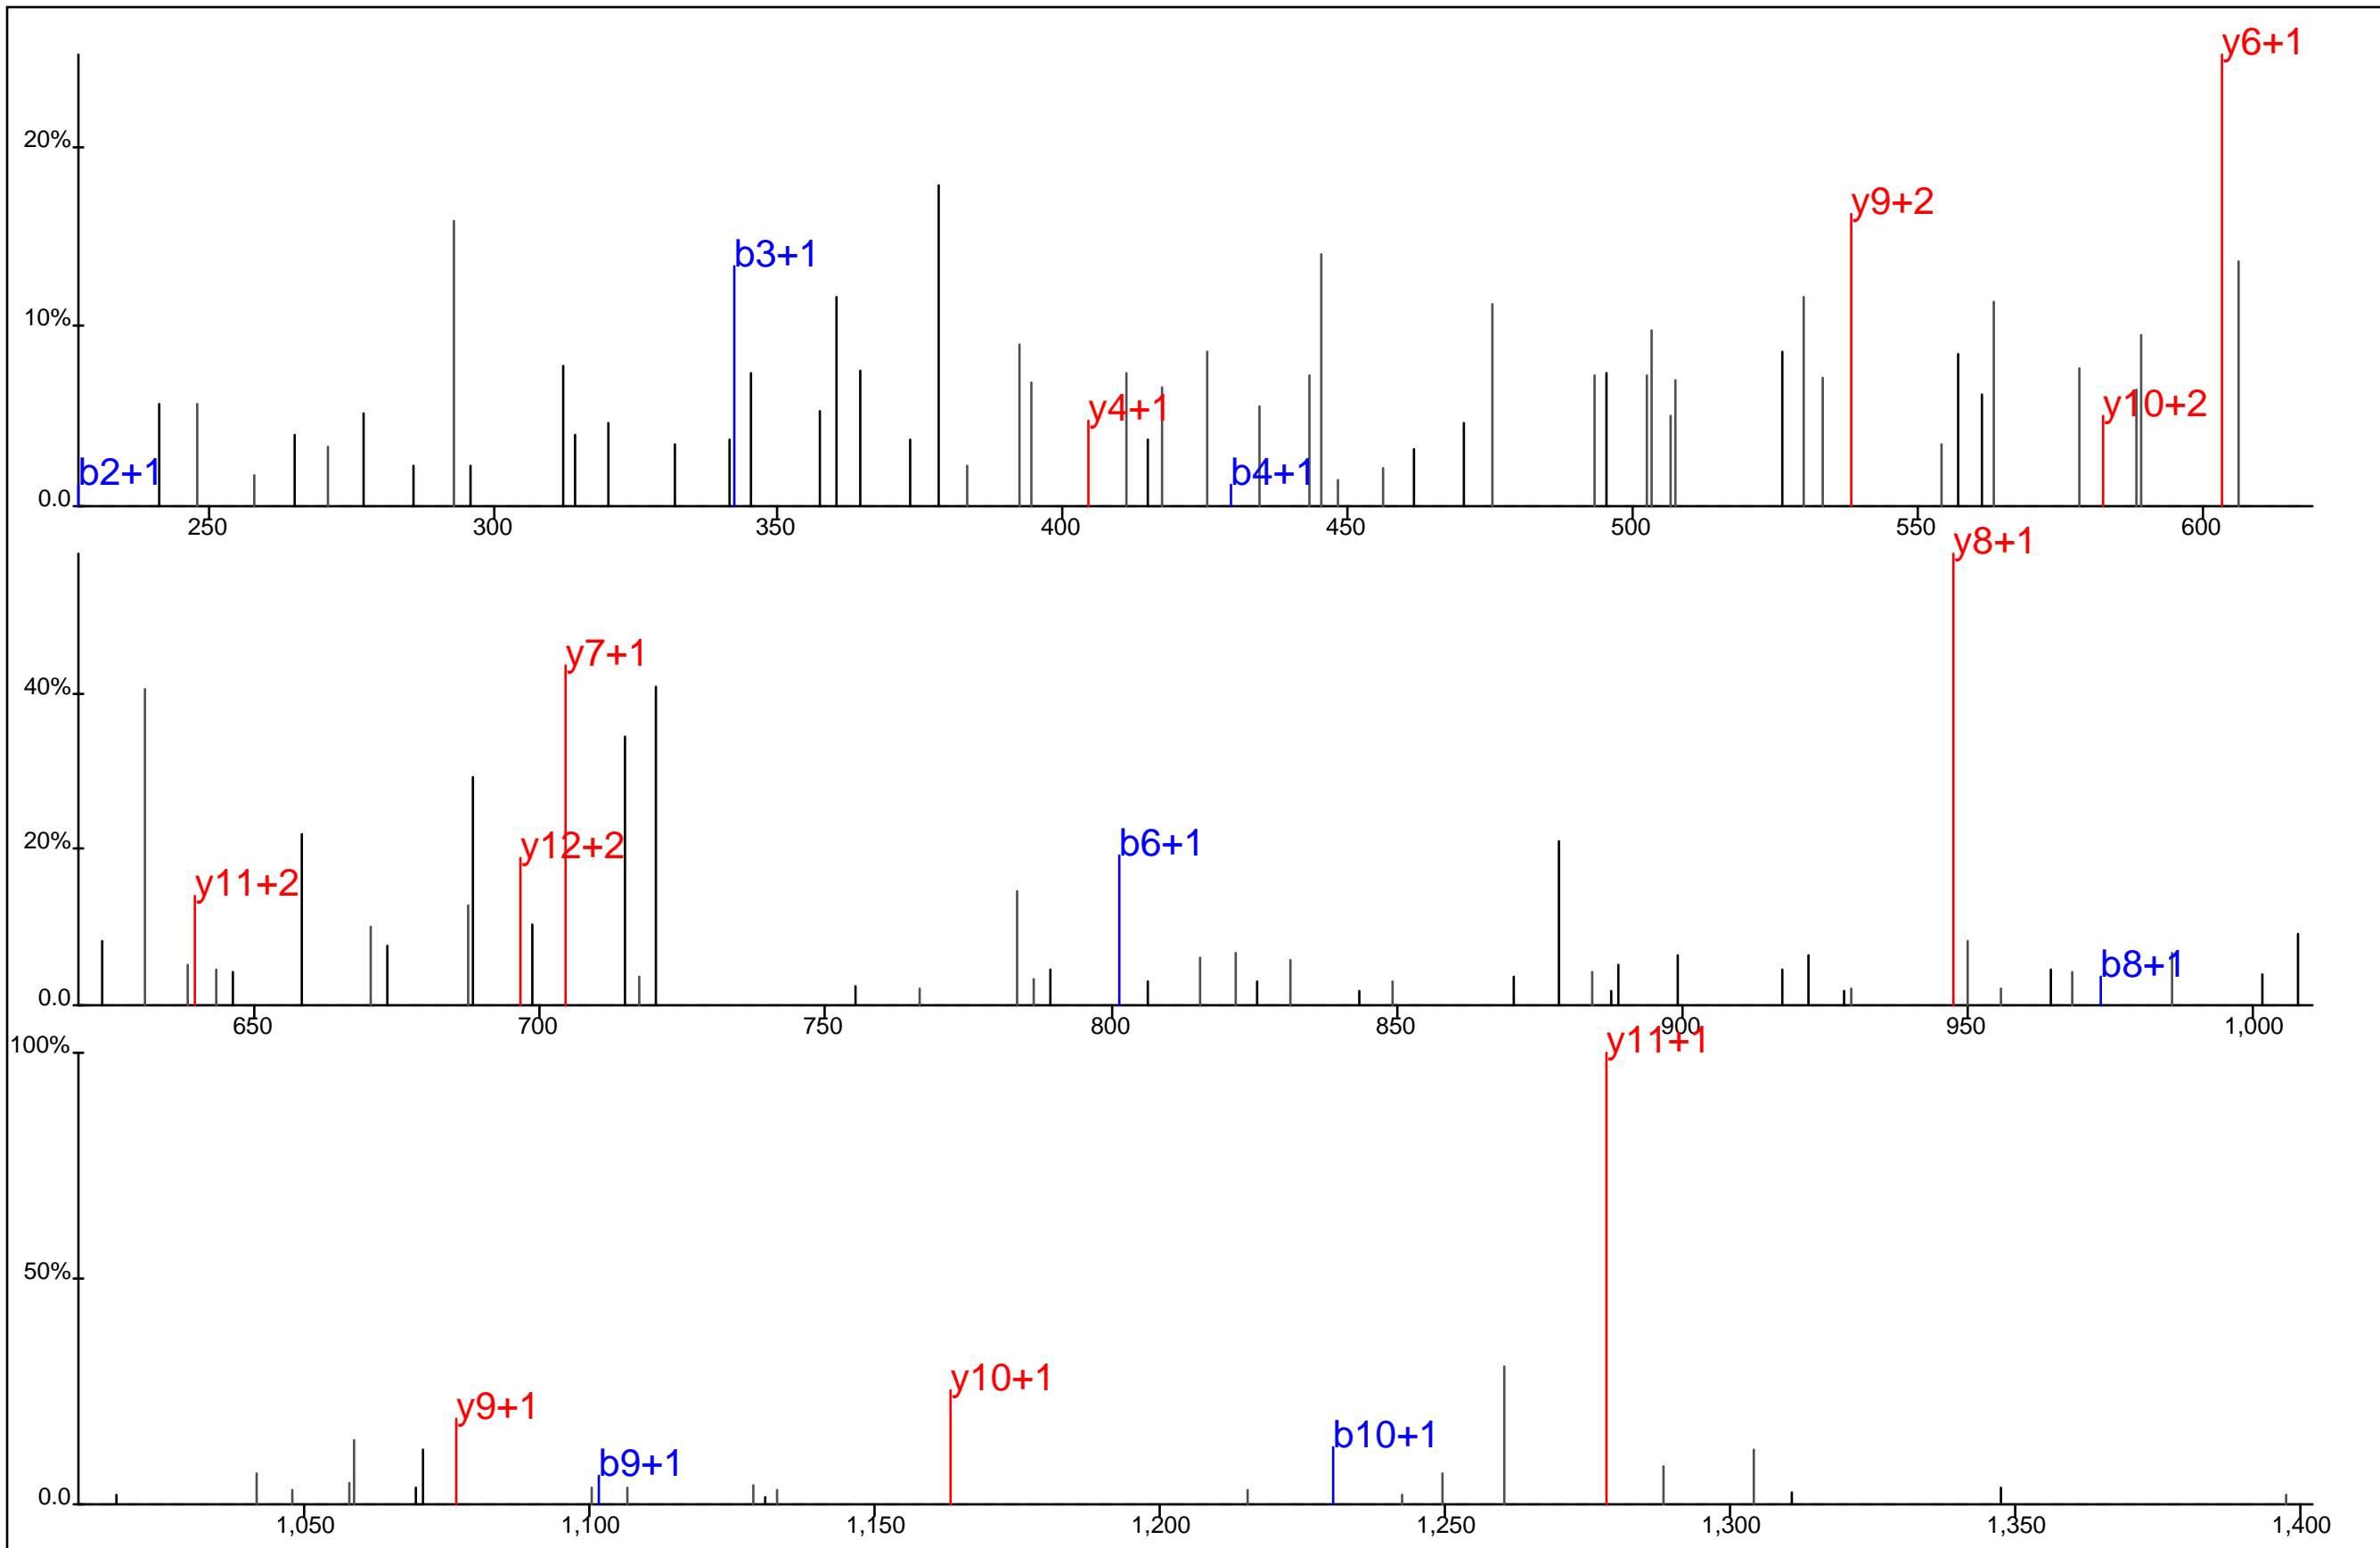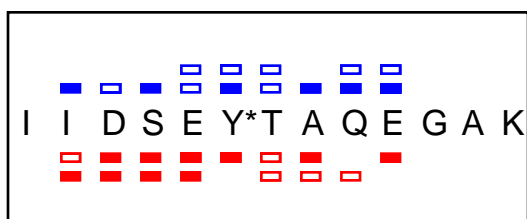

Protein Name: BLK  
 gi Accession: 0  
 Precursor Mass: 752.8362+2  
 Delta Mass: 5.600 ppm  
 XCorr: 36.34

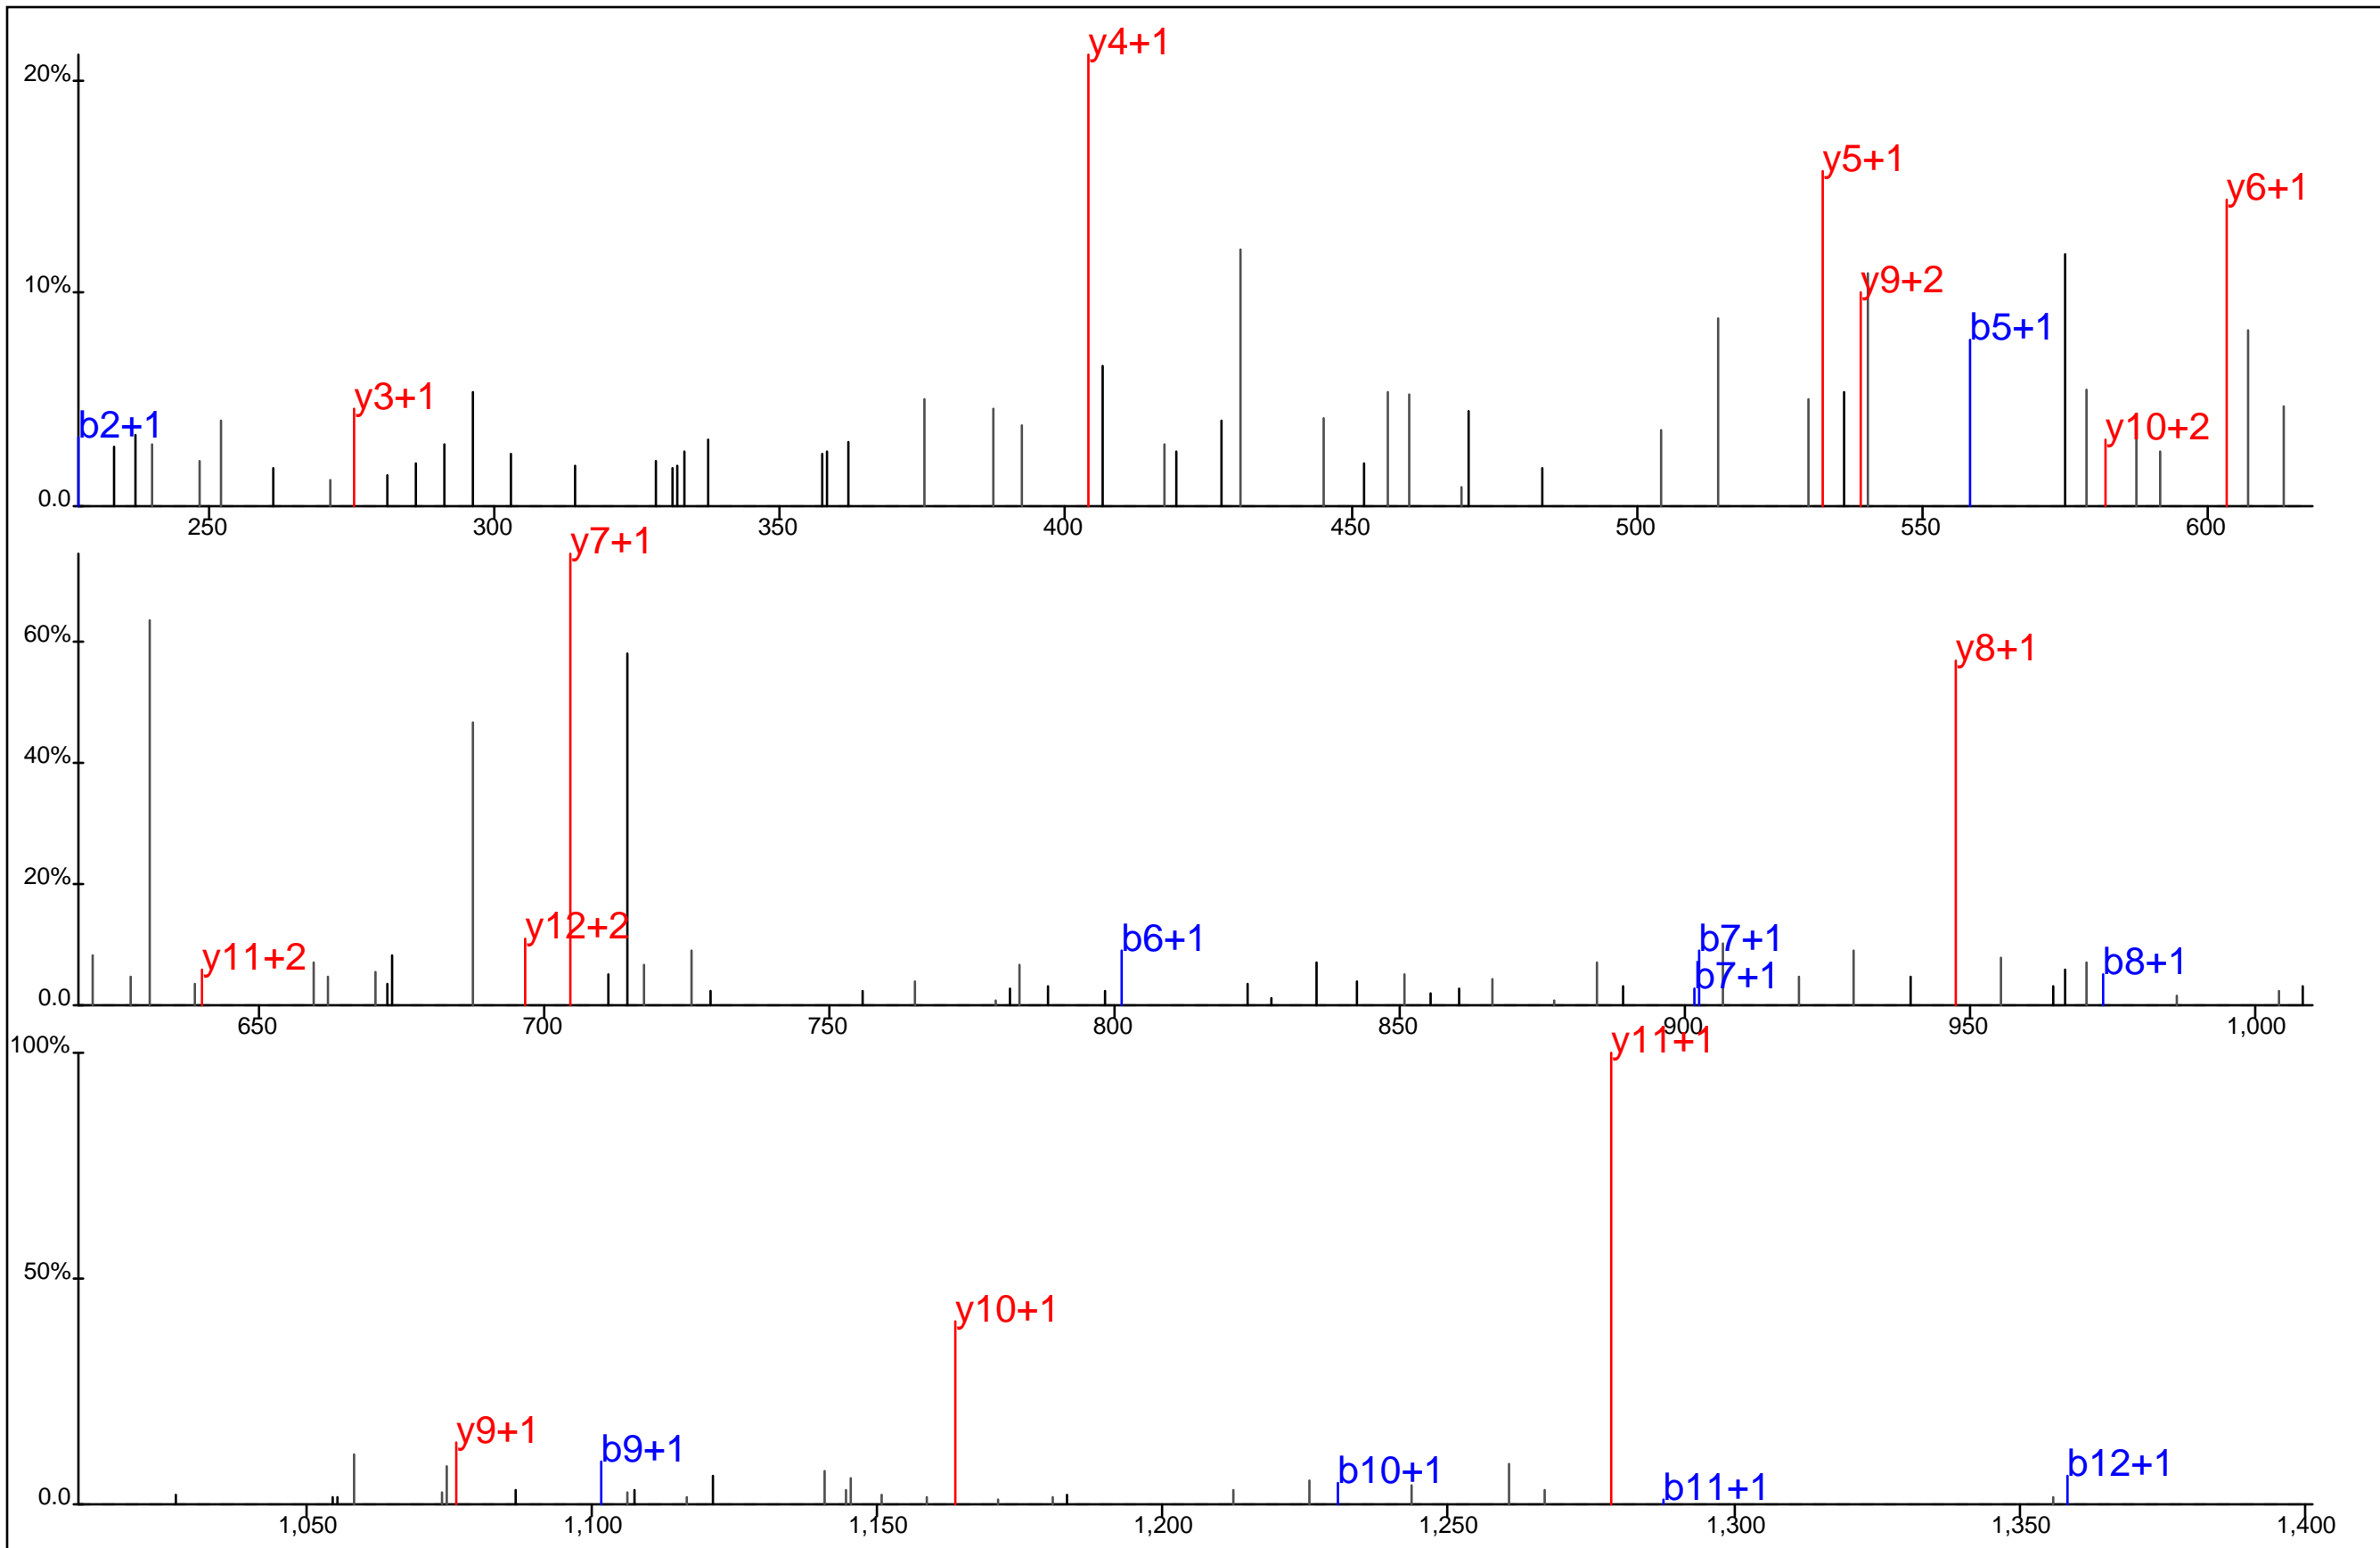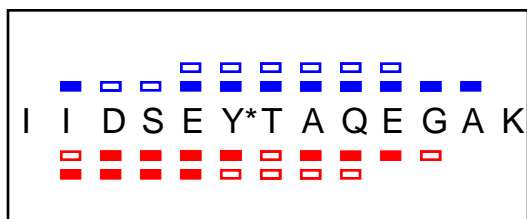

Protein Name: BLK  
 gi Accession: 0  
 Precursor Mass: 752.8331+2  
 Delta Mass: 1.462 ppm  
 XCorr: 74.11



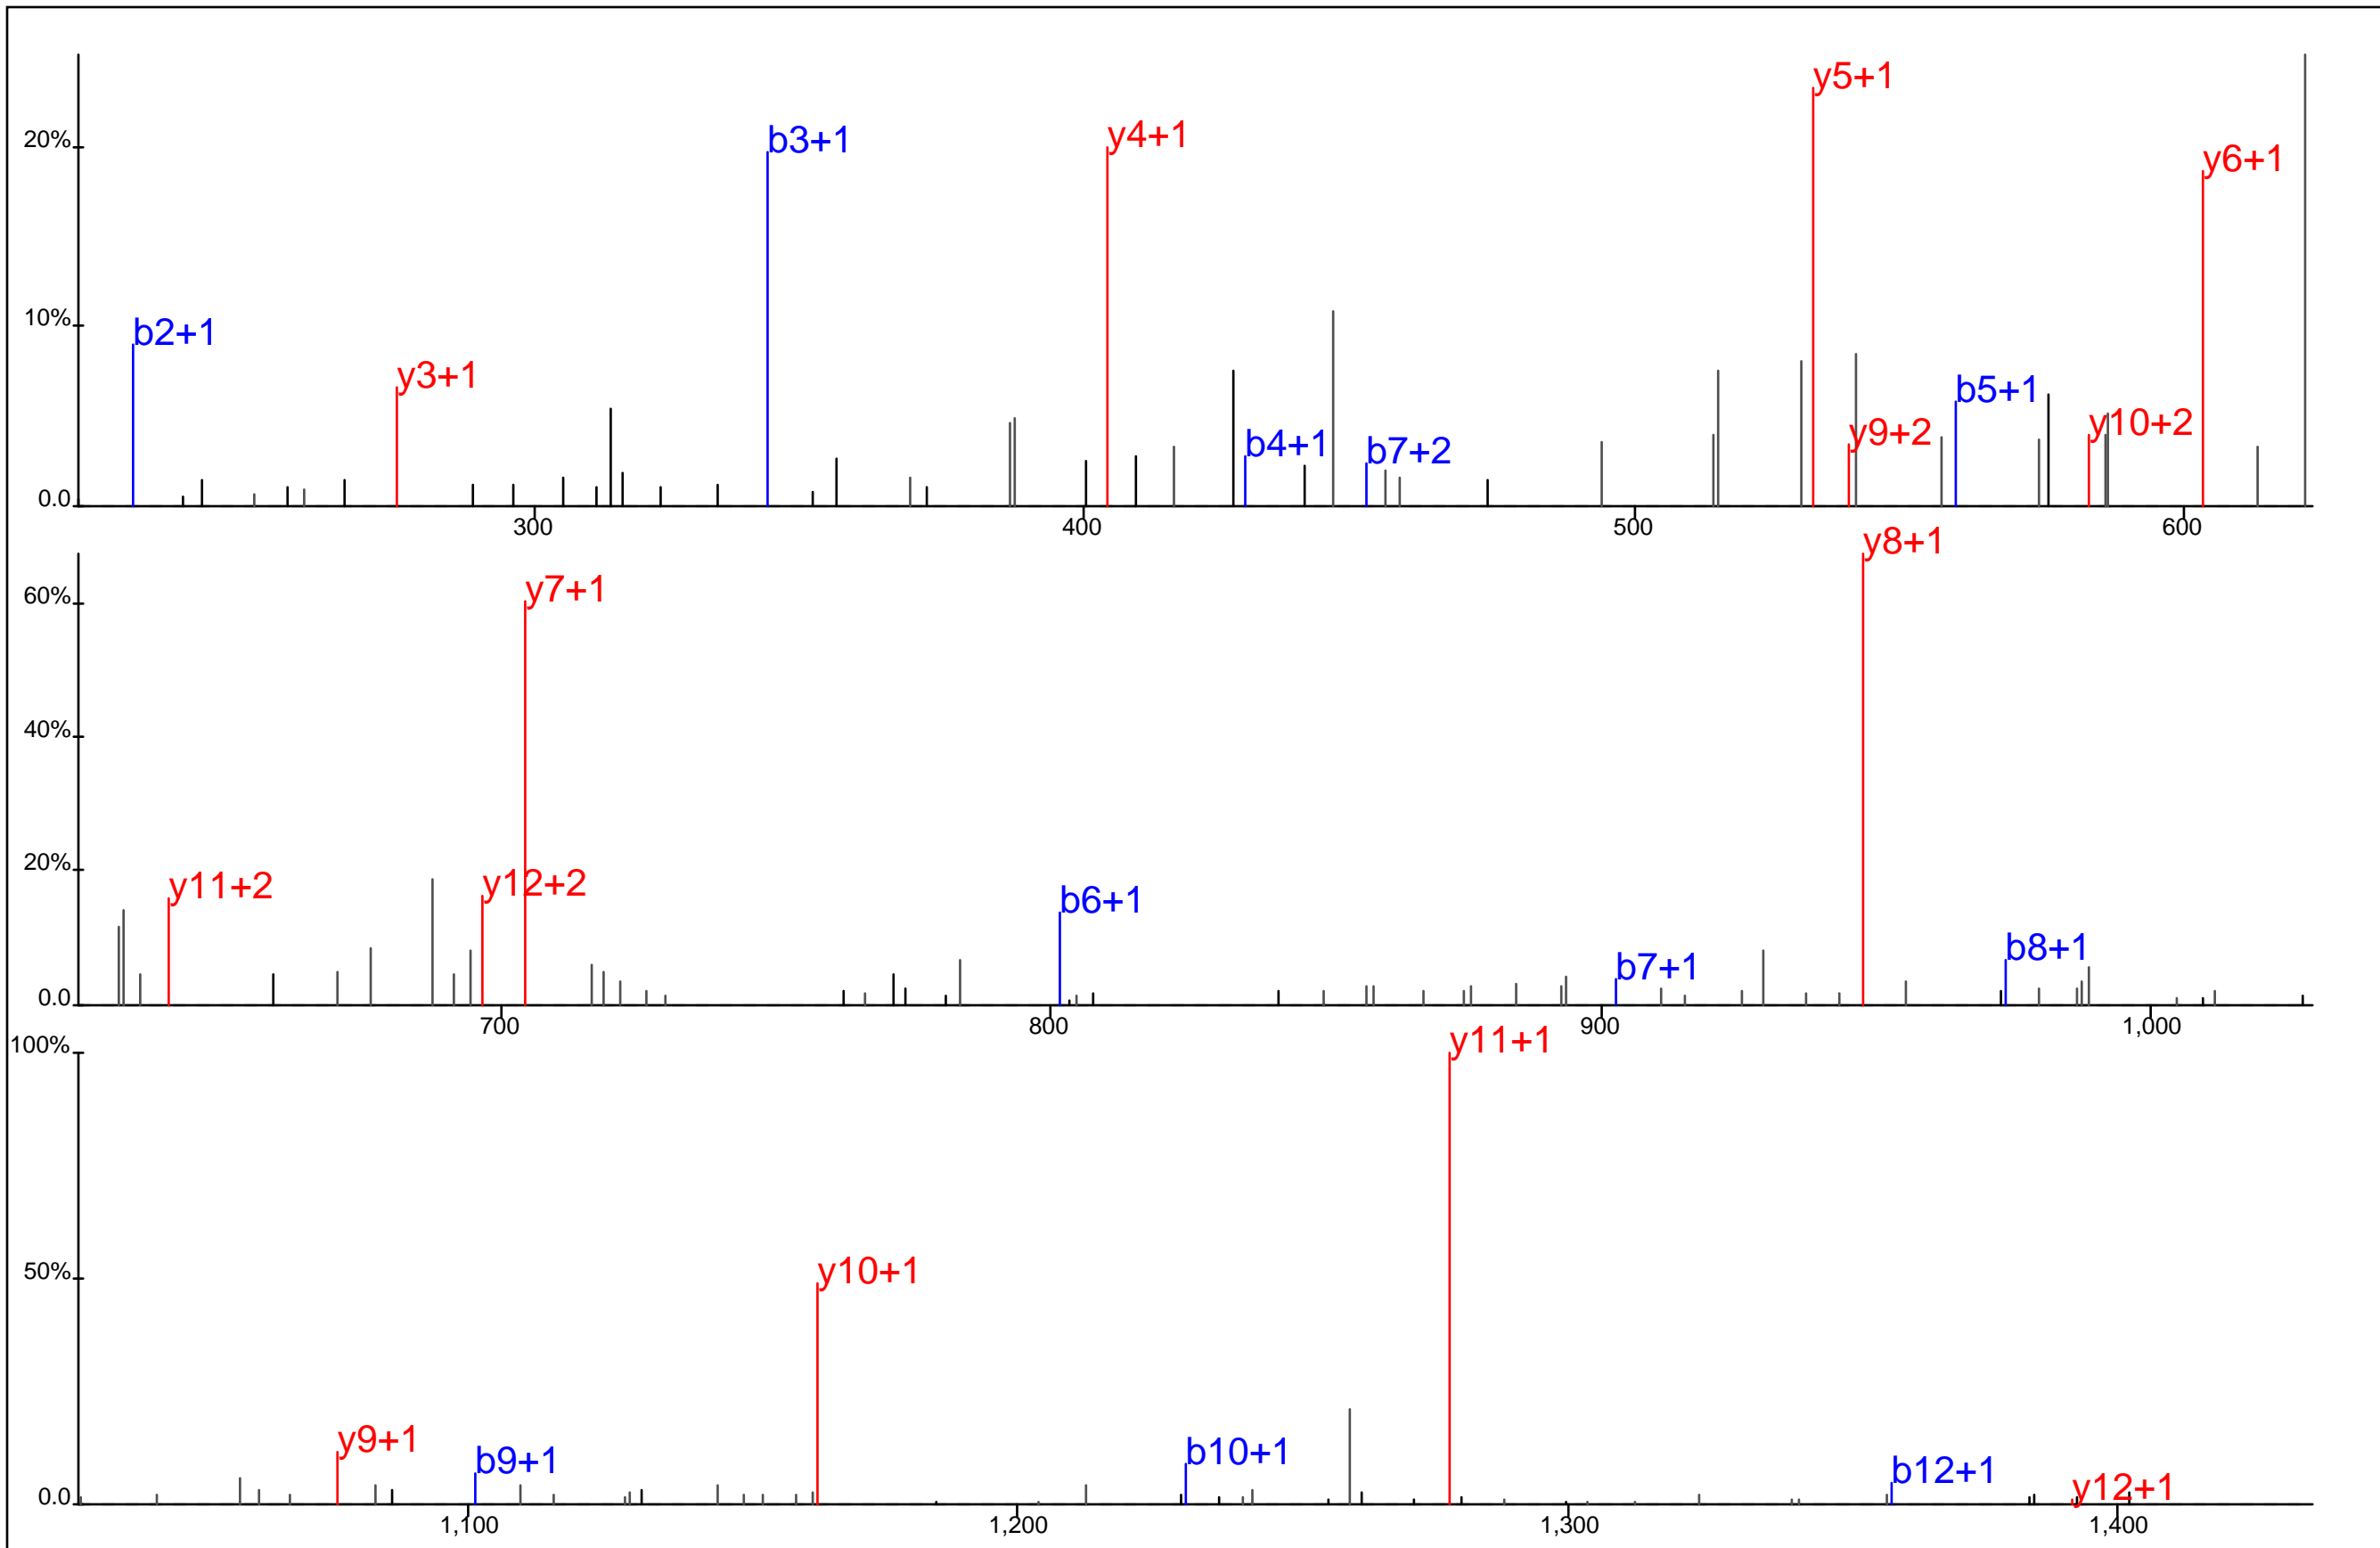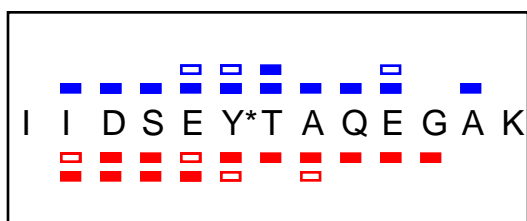

Protein Name: BLK  
 gi Accession: 0  
 Precursor Mass: 752.8338+2  
 Delta Mass: 2.435 ppm  
 XCorr: 74.77

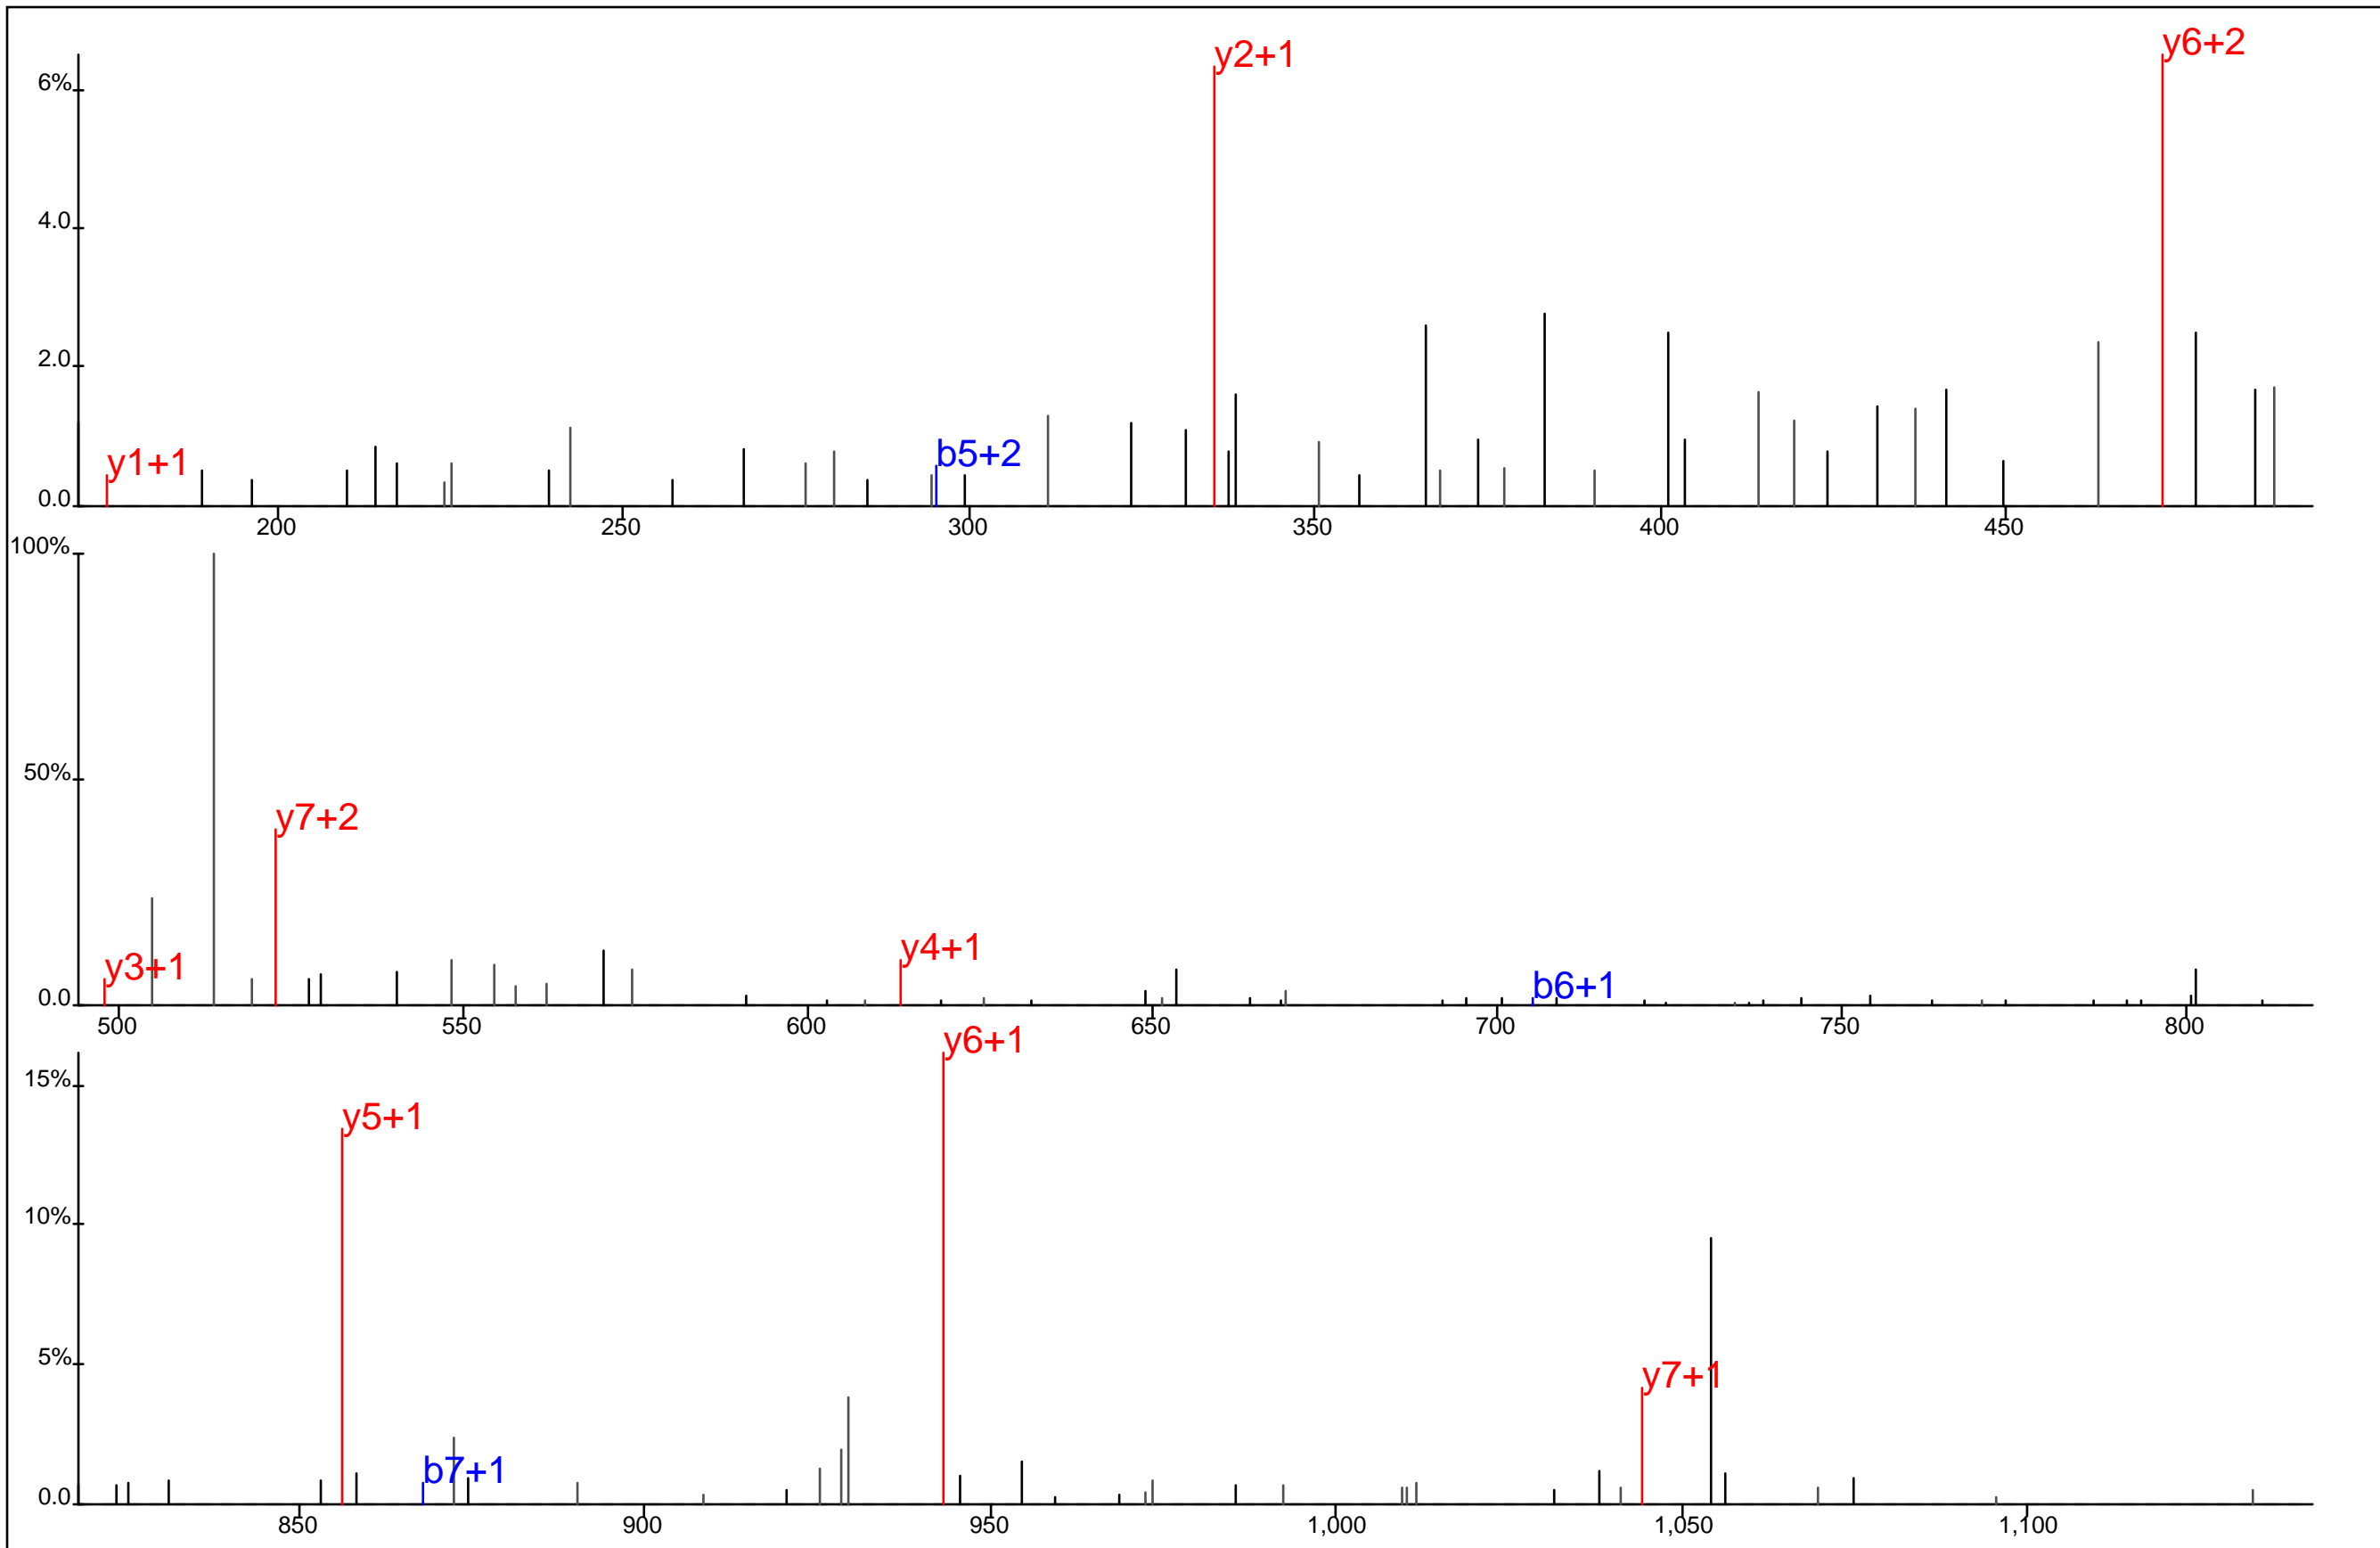

■ ■ ■ ■ ■ ■  
 A S T S Y\* D Y C R  
■ ■ ■ ■ ■ ■ ■

Protein Name: Bone marrow stromal cell antigen 2  
 gi Accession: 0  
 Precursor Mass: 601.7156+2  
 Delta Mass: 4.687 ppm  
 XCorr: 20.58

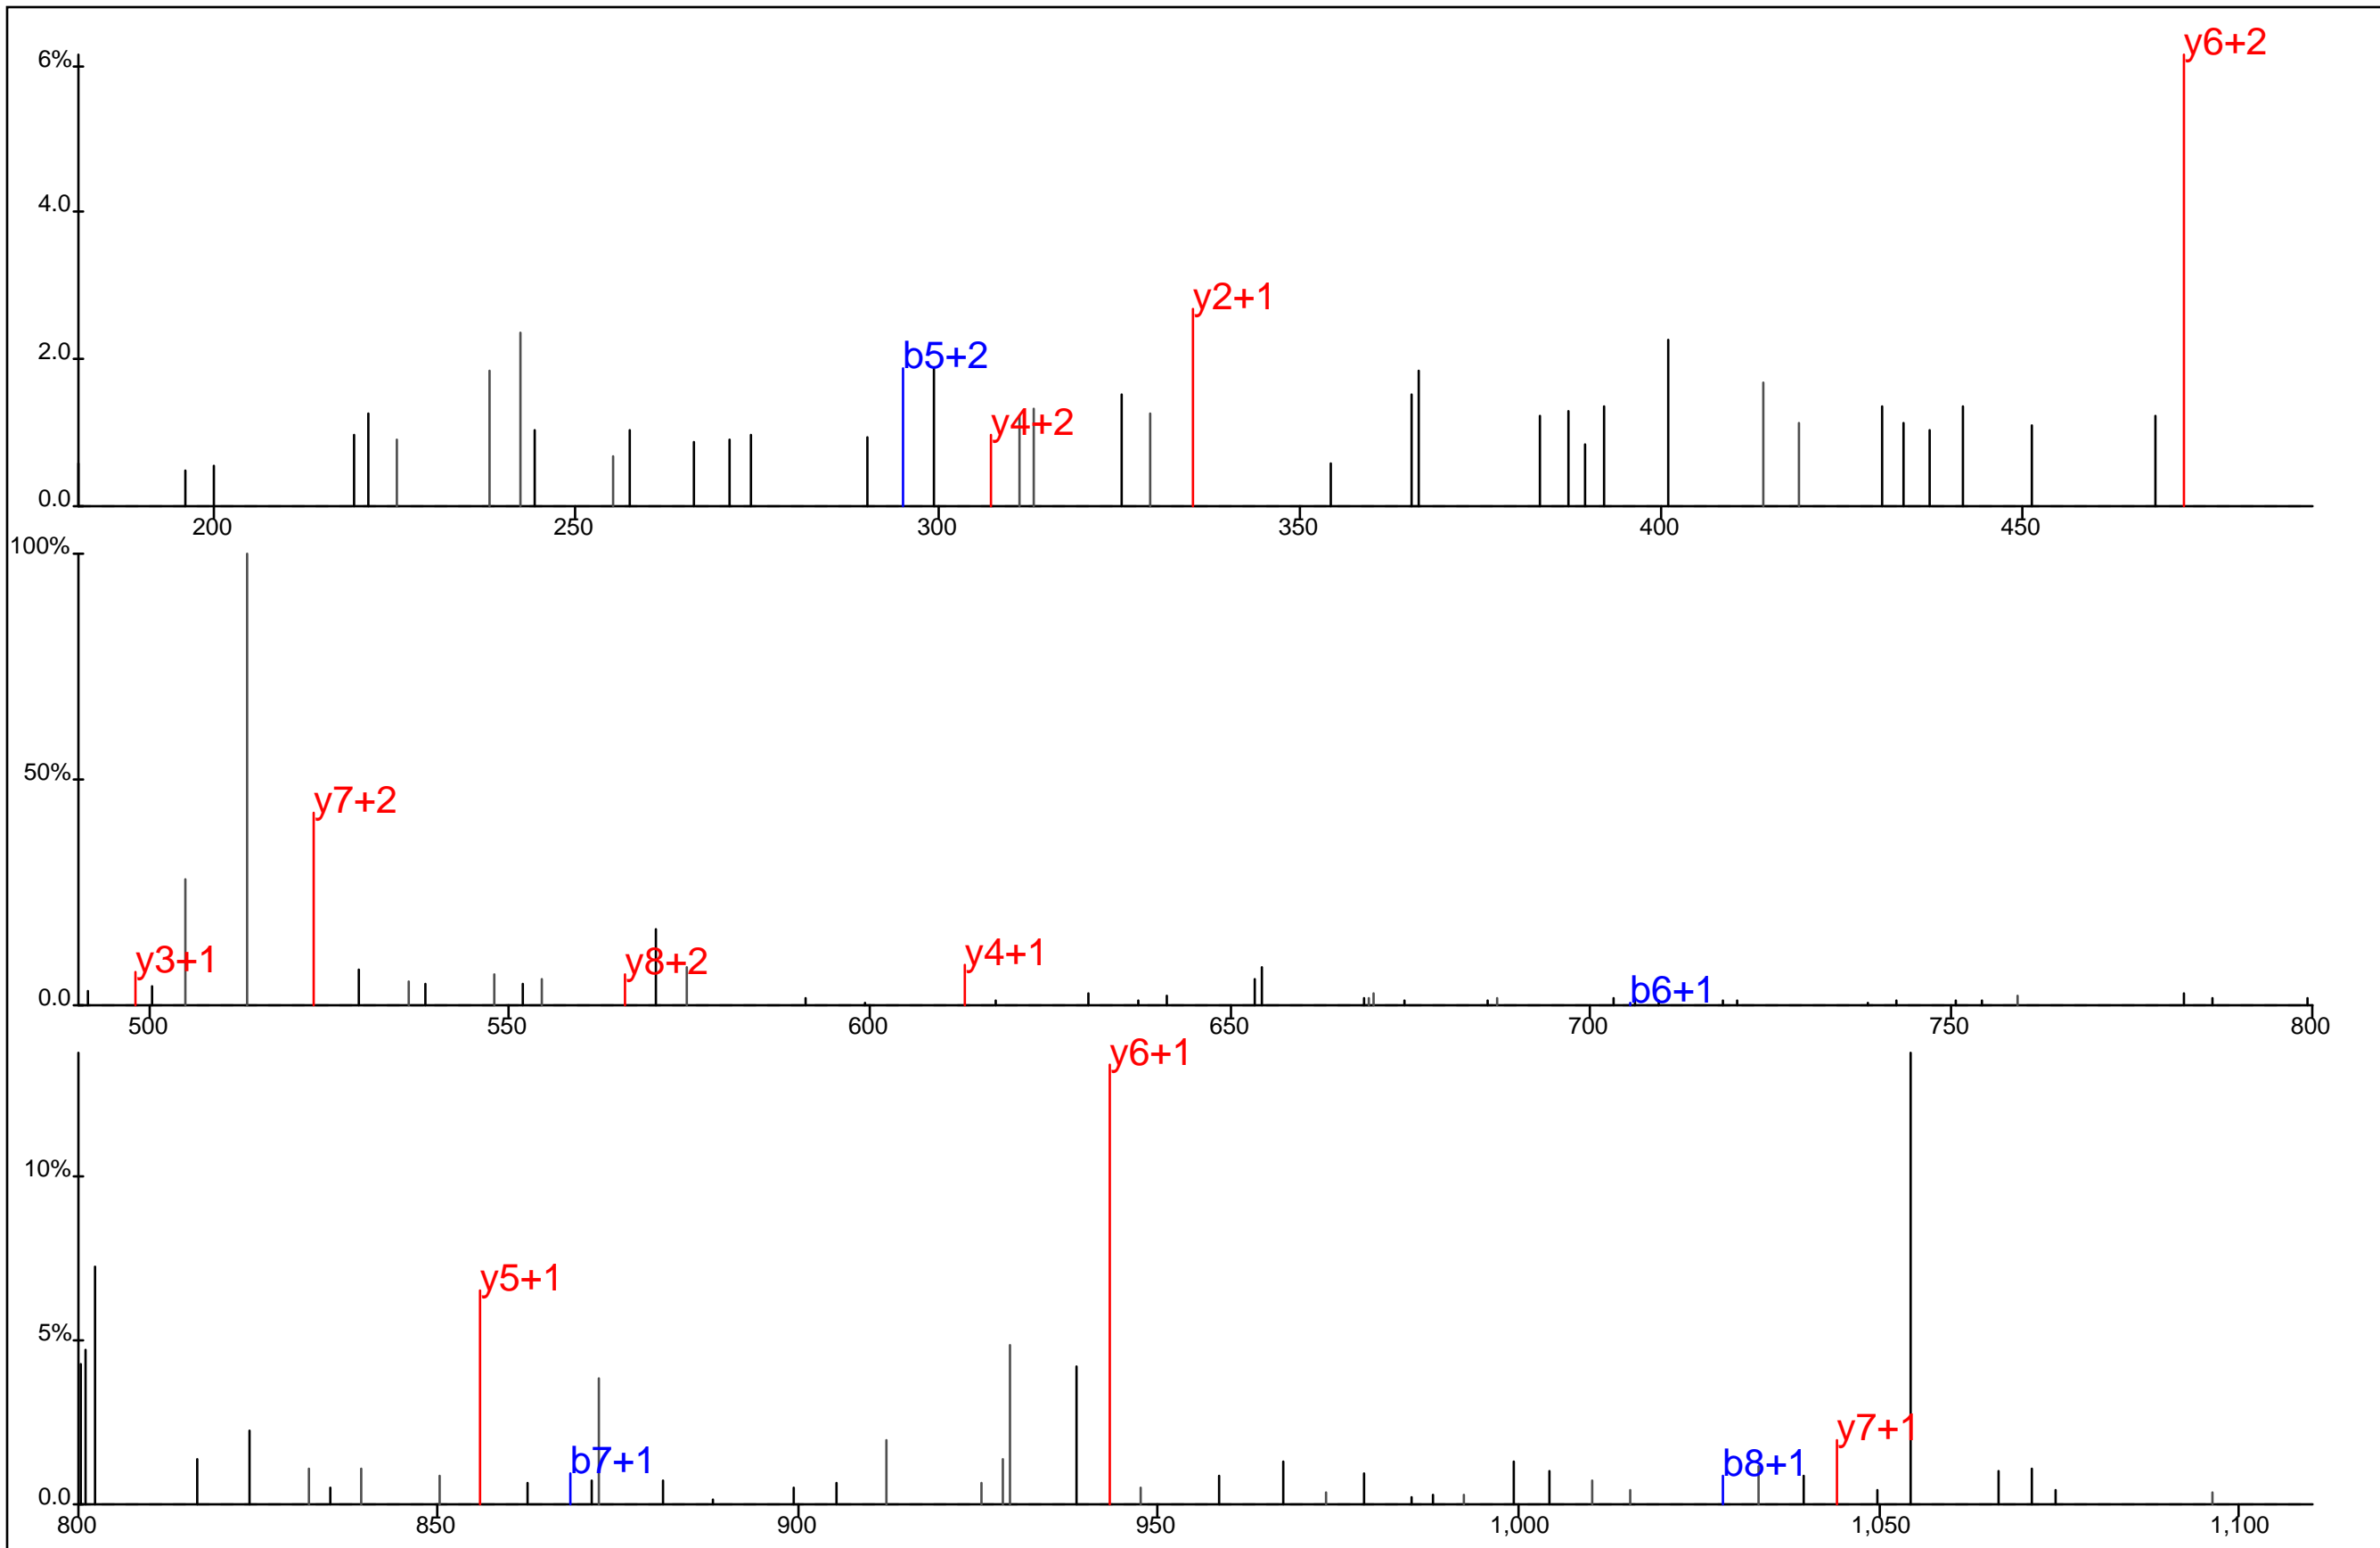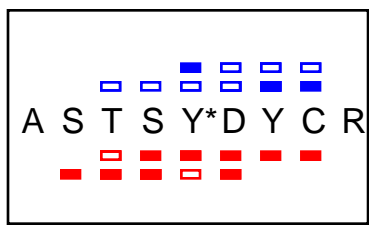

Protein Name: Bone marrow stromal cell antigen 2  
 gi Accession: 0  
 Precursor Mass: 601.7132+2  
 Delta Mass: 0.627 ppm  
 XCorr: 22.13

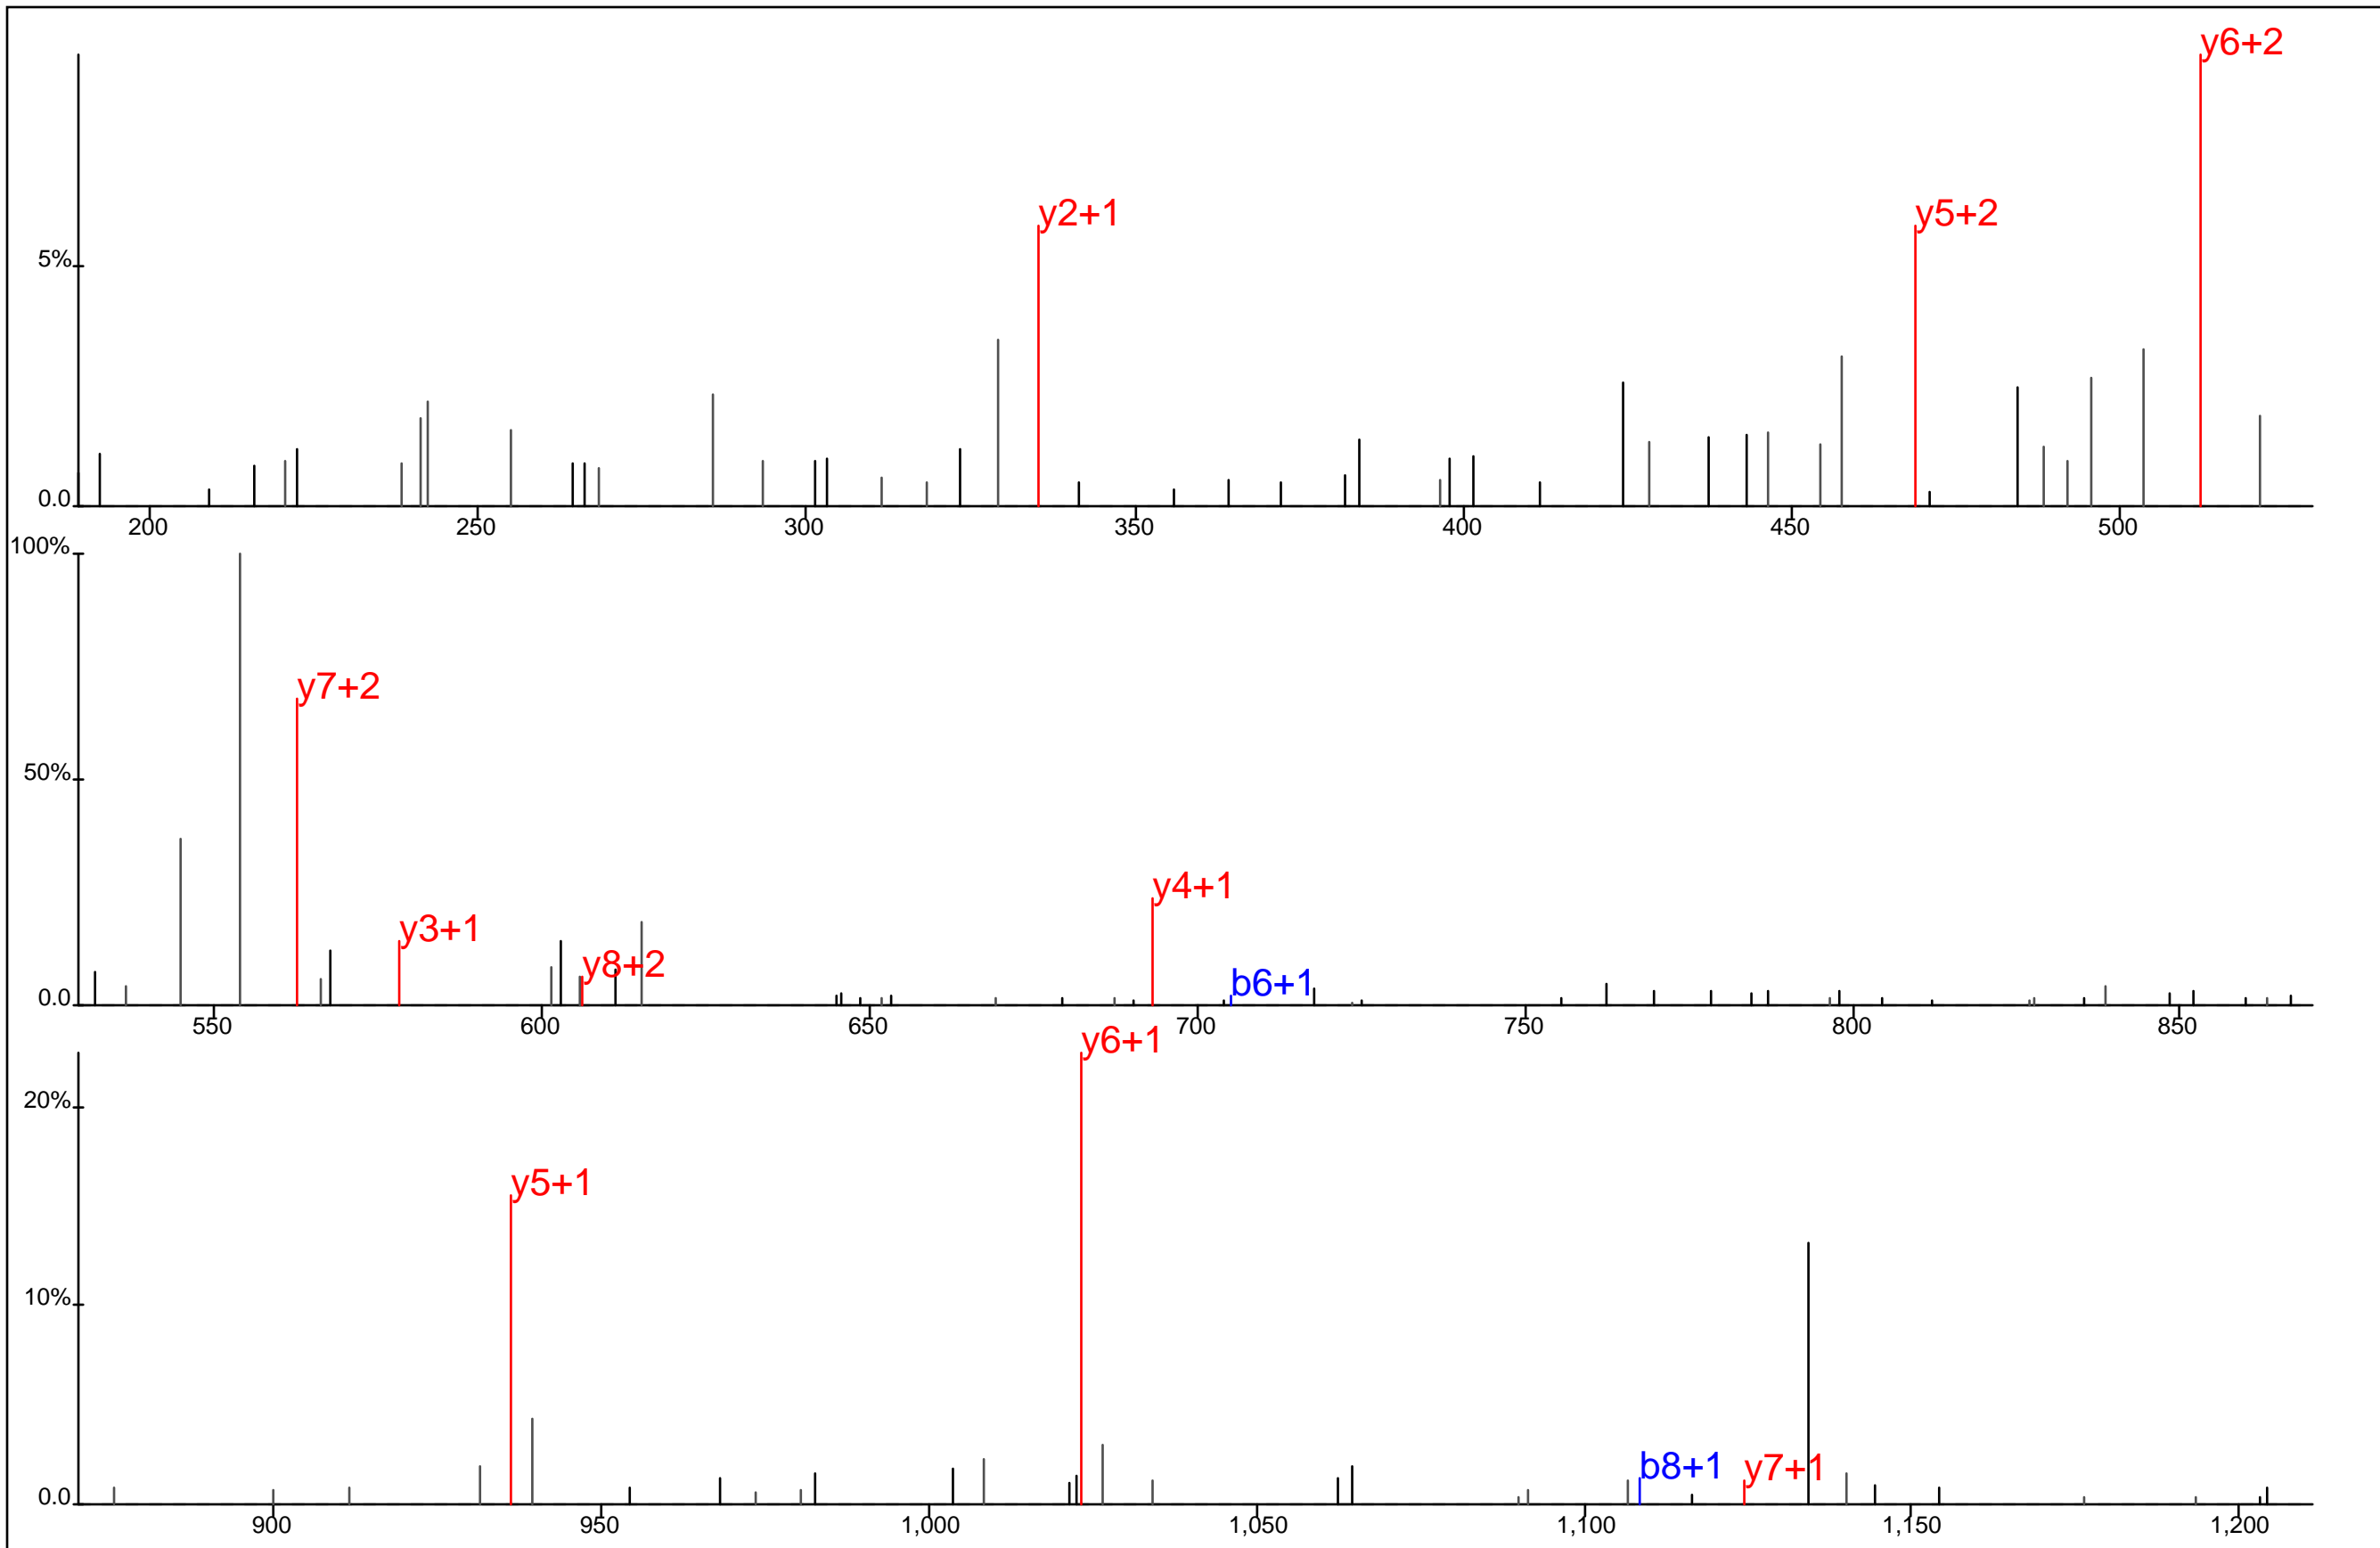

□ □ □ □ □ □  
 A S T S Y\* D Y\* C R  
□ □ □ □ □ □

Protein Name: Bone marrow stromal cell antigen 2  
 gi Accession: 0  
 Precursor Mass: 641.6964+2  
 Delta Mass: 0.674 ppm  
 XCorr: 28.81

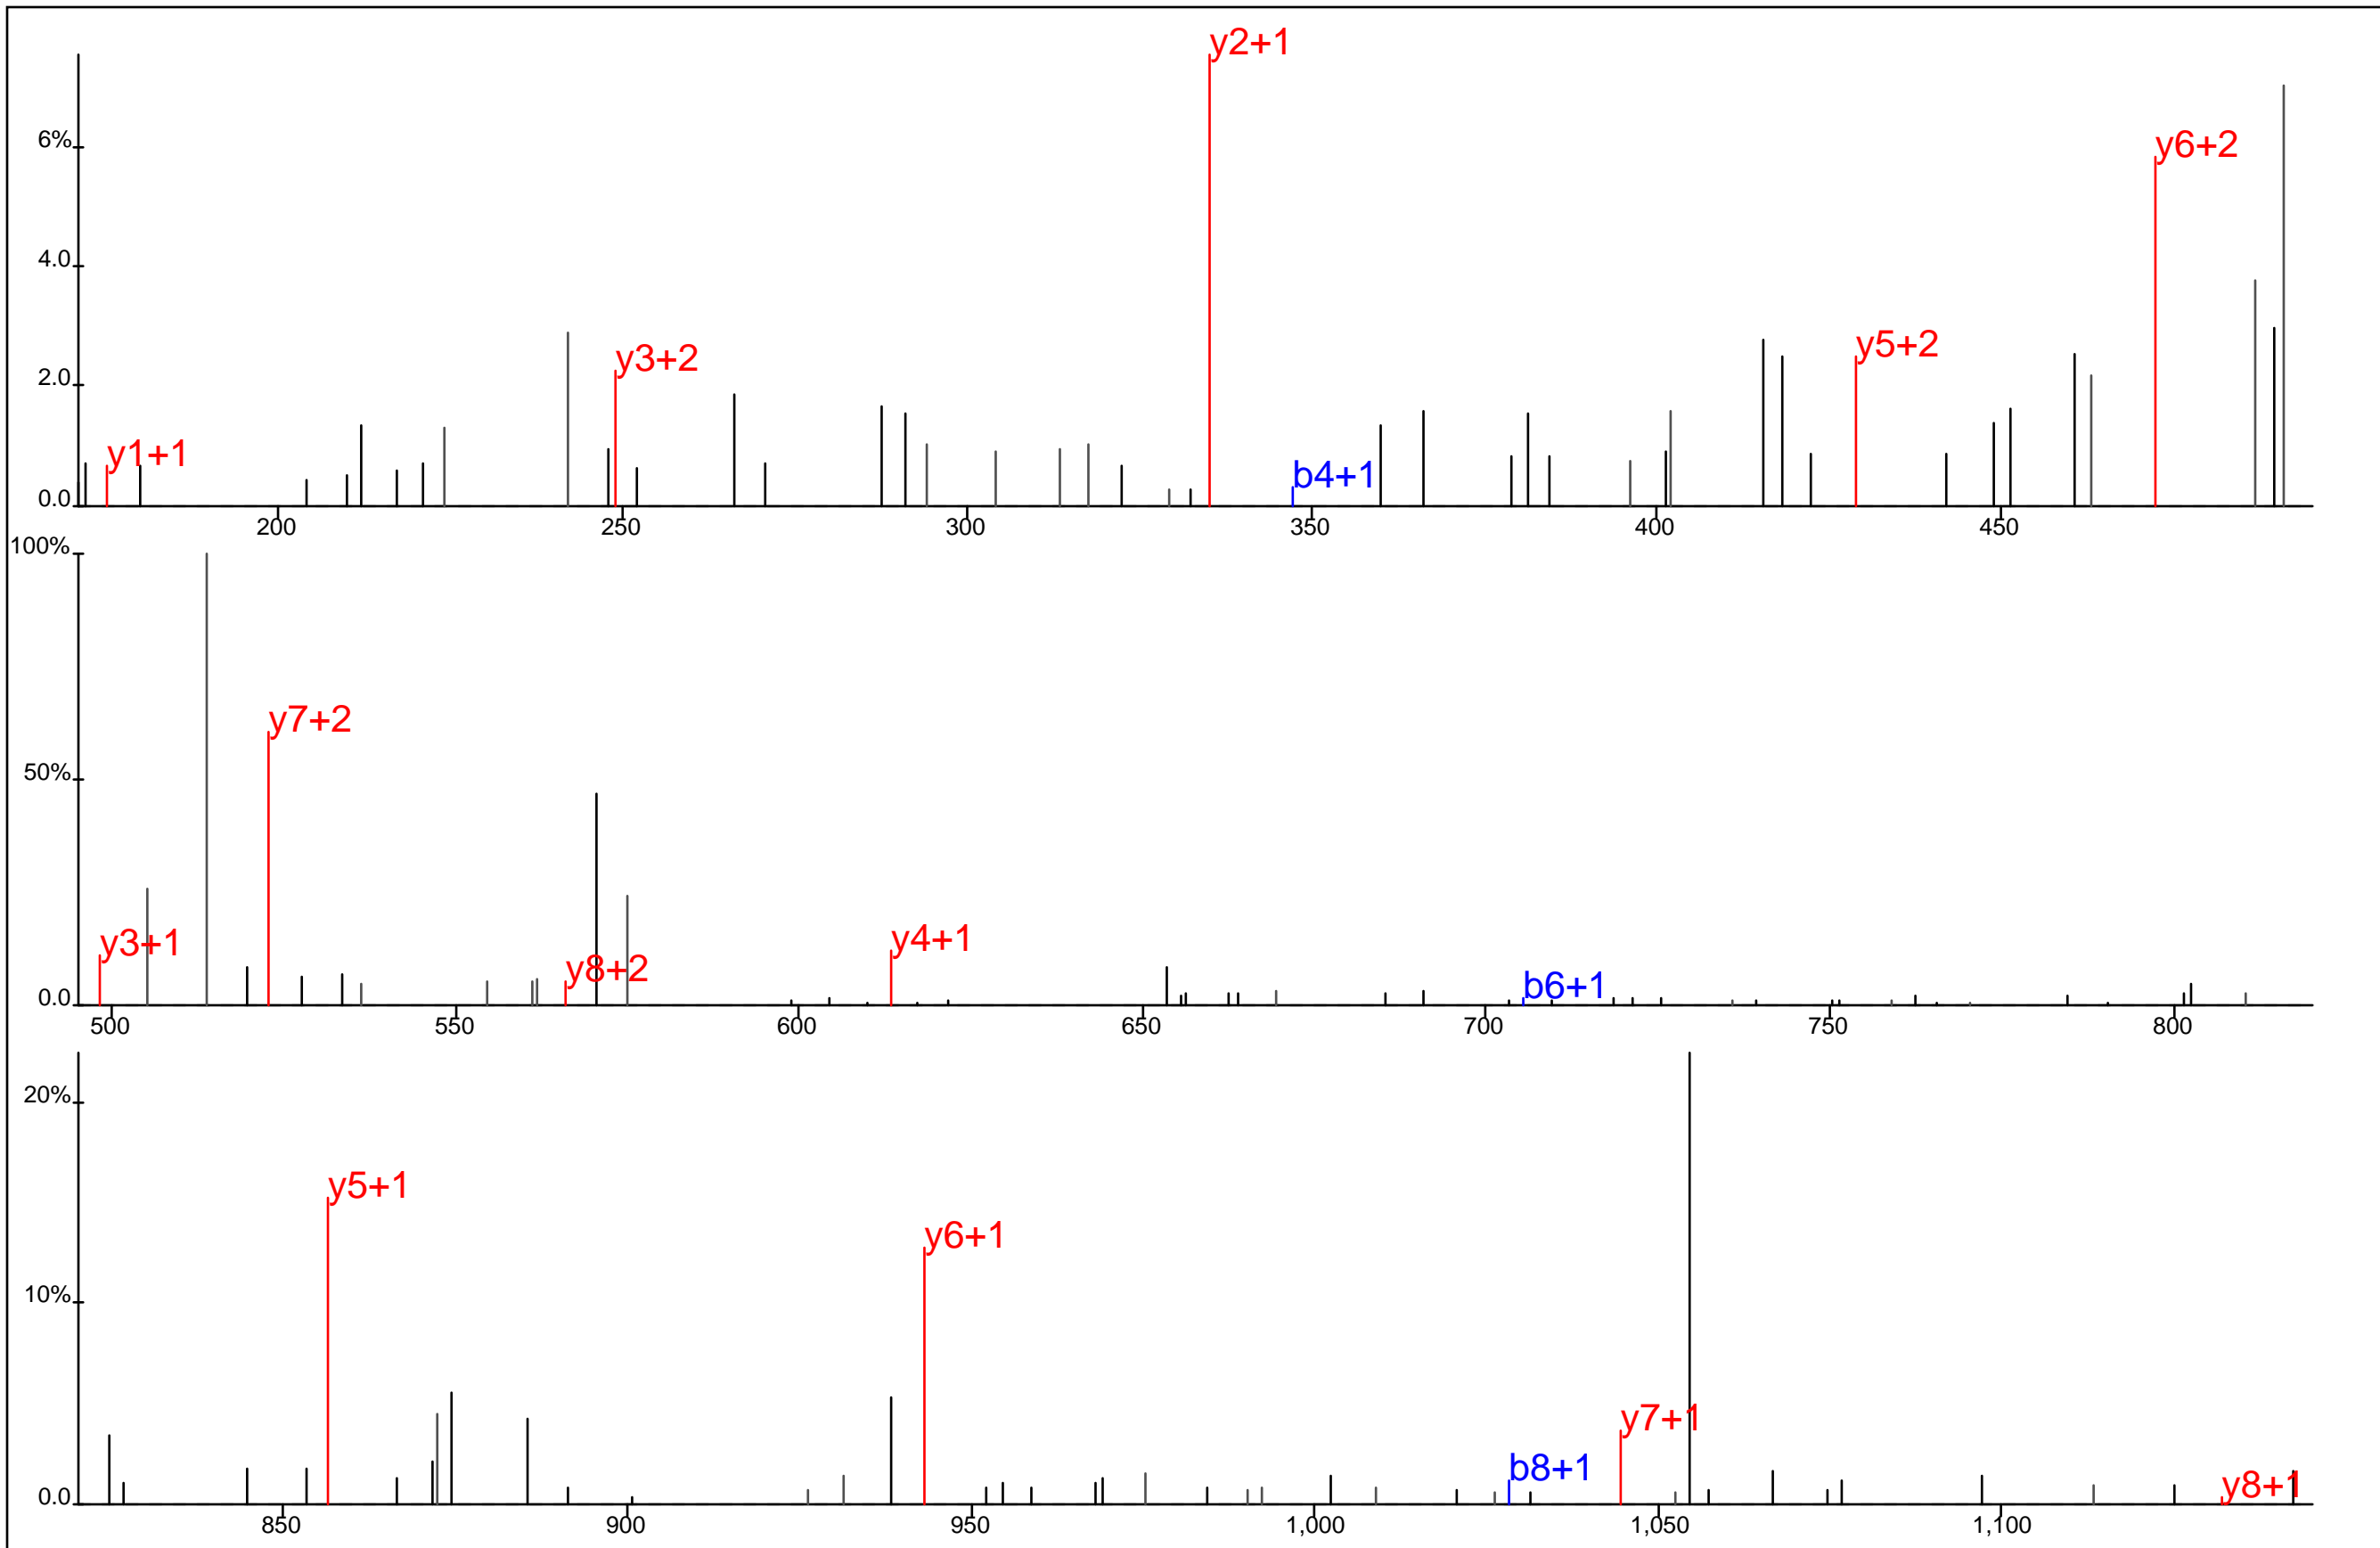

■ □ ■ □ ■ □  
 A S T S Y\* D Y C R  
■ □ ■ □ ■ □ ■ □

Protein Name: Bone marrow stromal cell antigen 2  
 gi Accession: 0  
 Precursor Mass: 601.7139+2  
 Delta Mass: 1.845 ppm  
 XCorr: 21.75

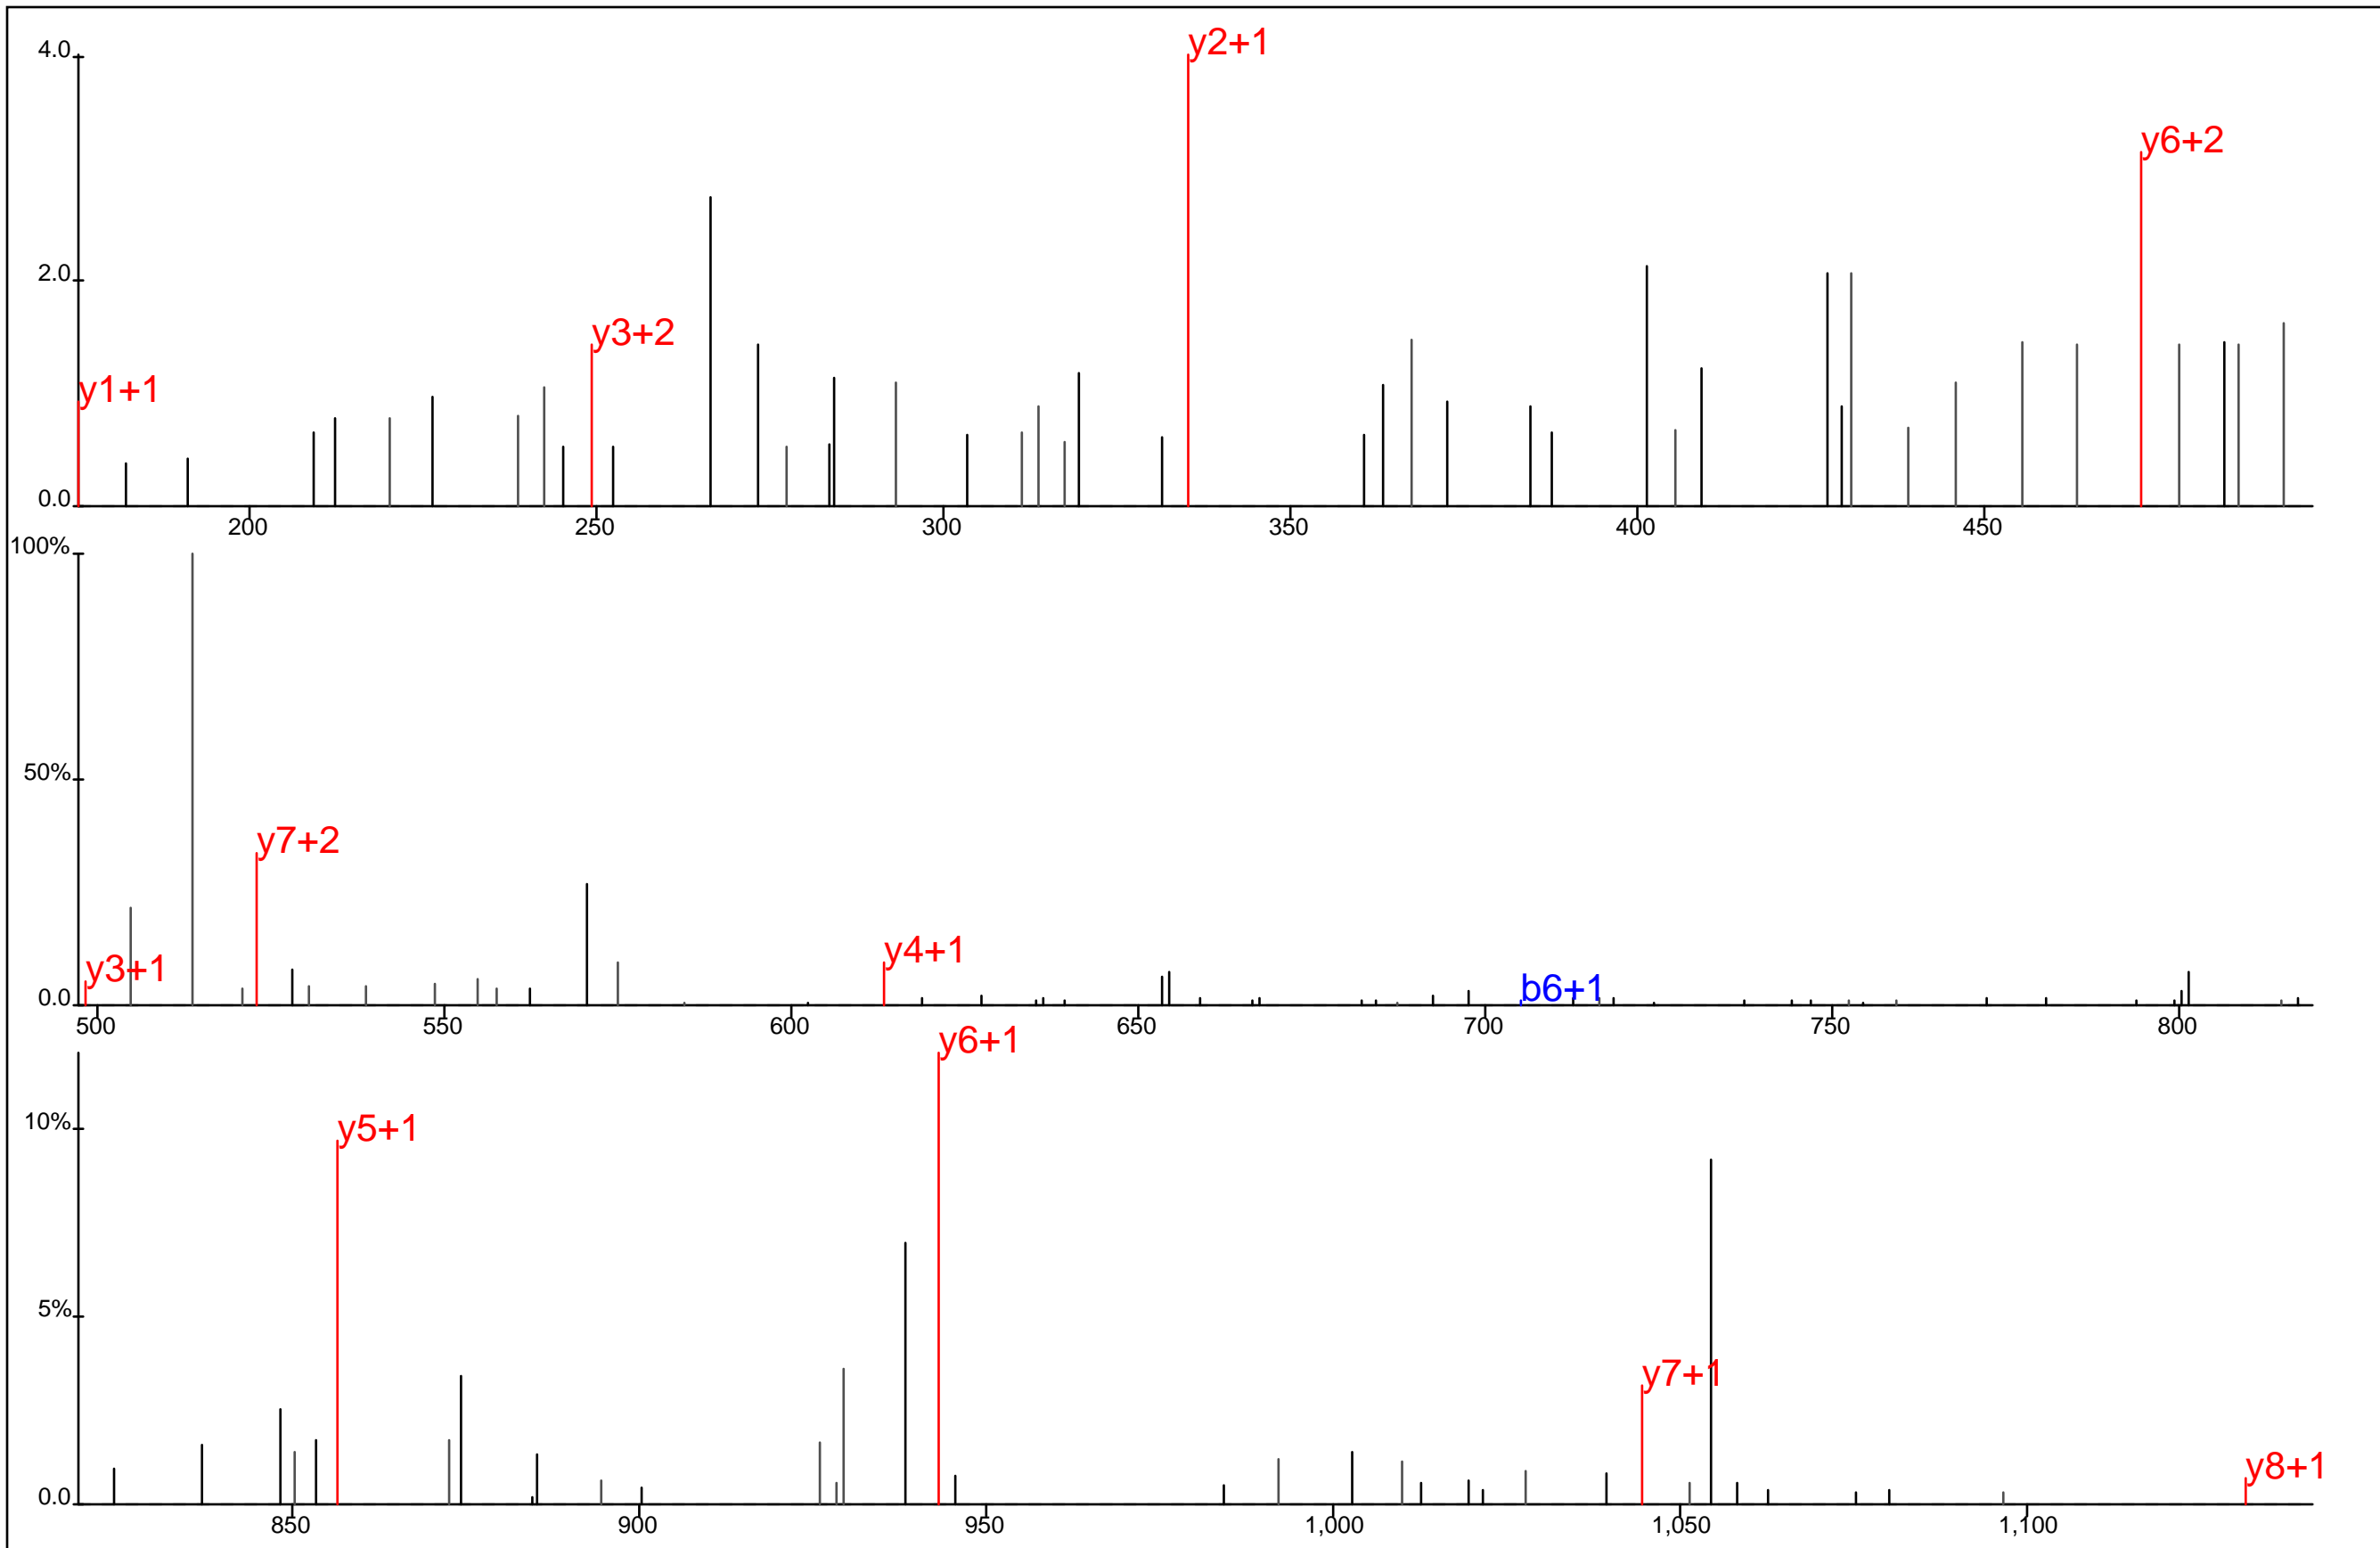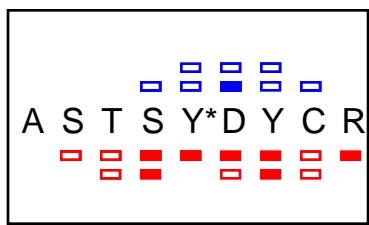

Protein Name: Bone marrow stromal cell antigen 2  
 gi Accession: 0  
 Precursor Mass: 601.7144+2  
 Delta Mass: 2.555 ppm  
 XCorr: 34.69

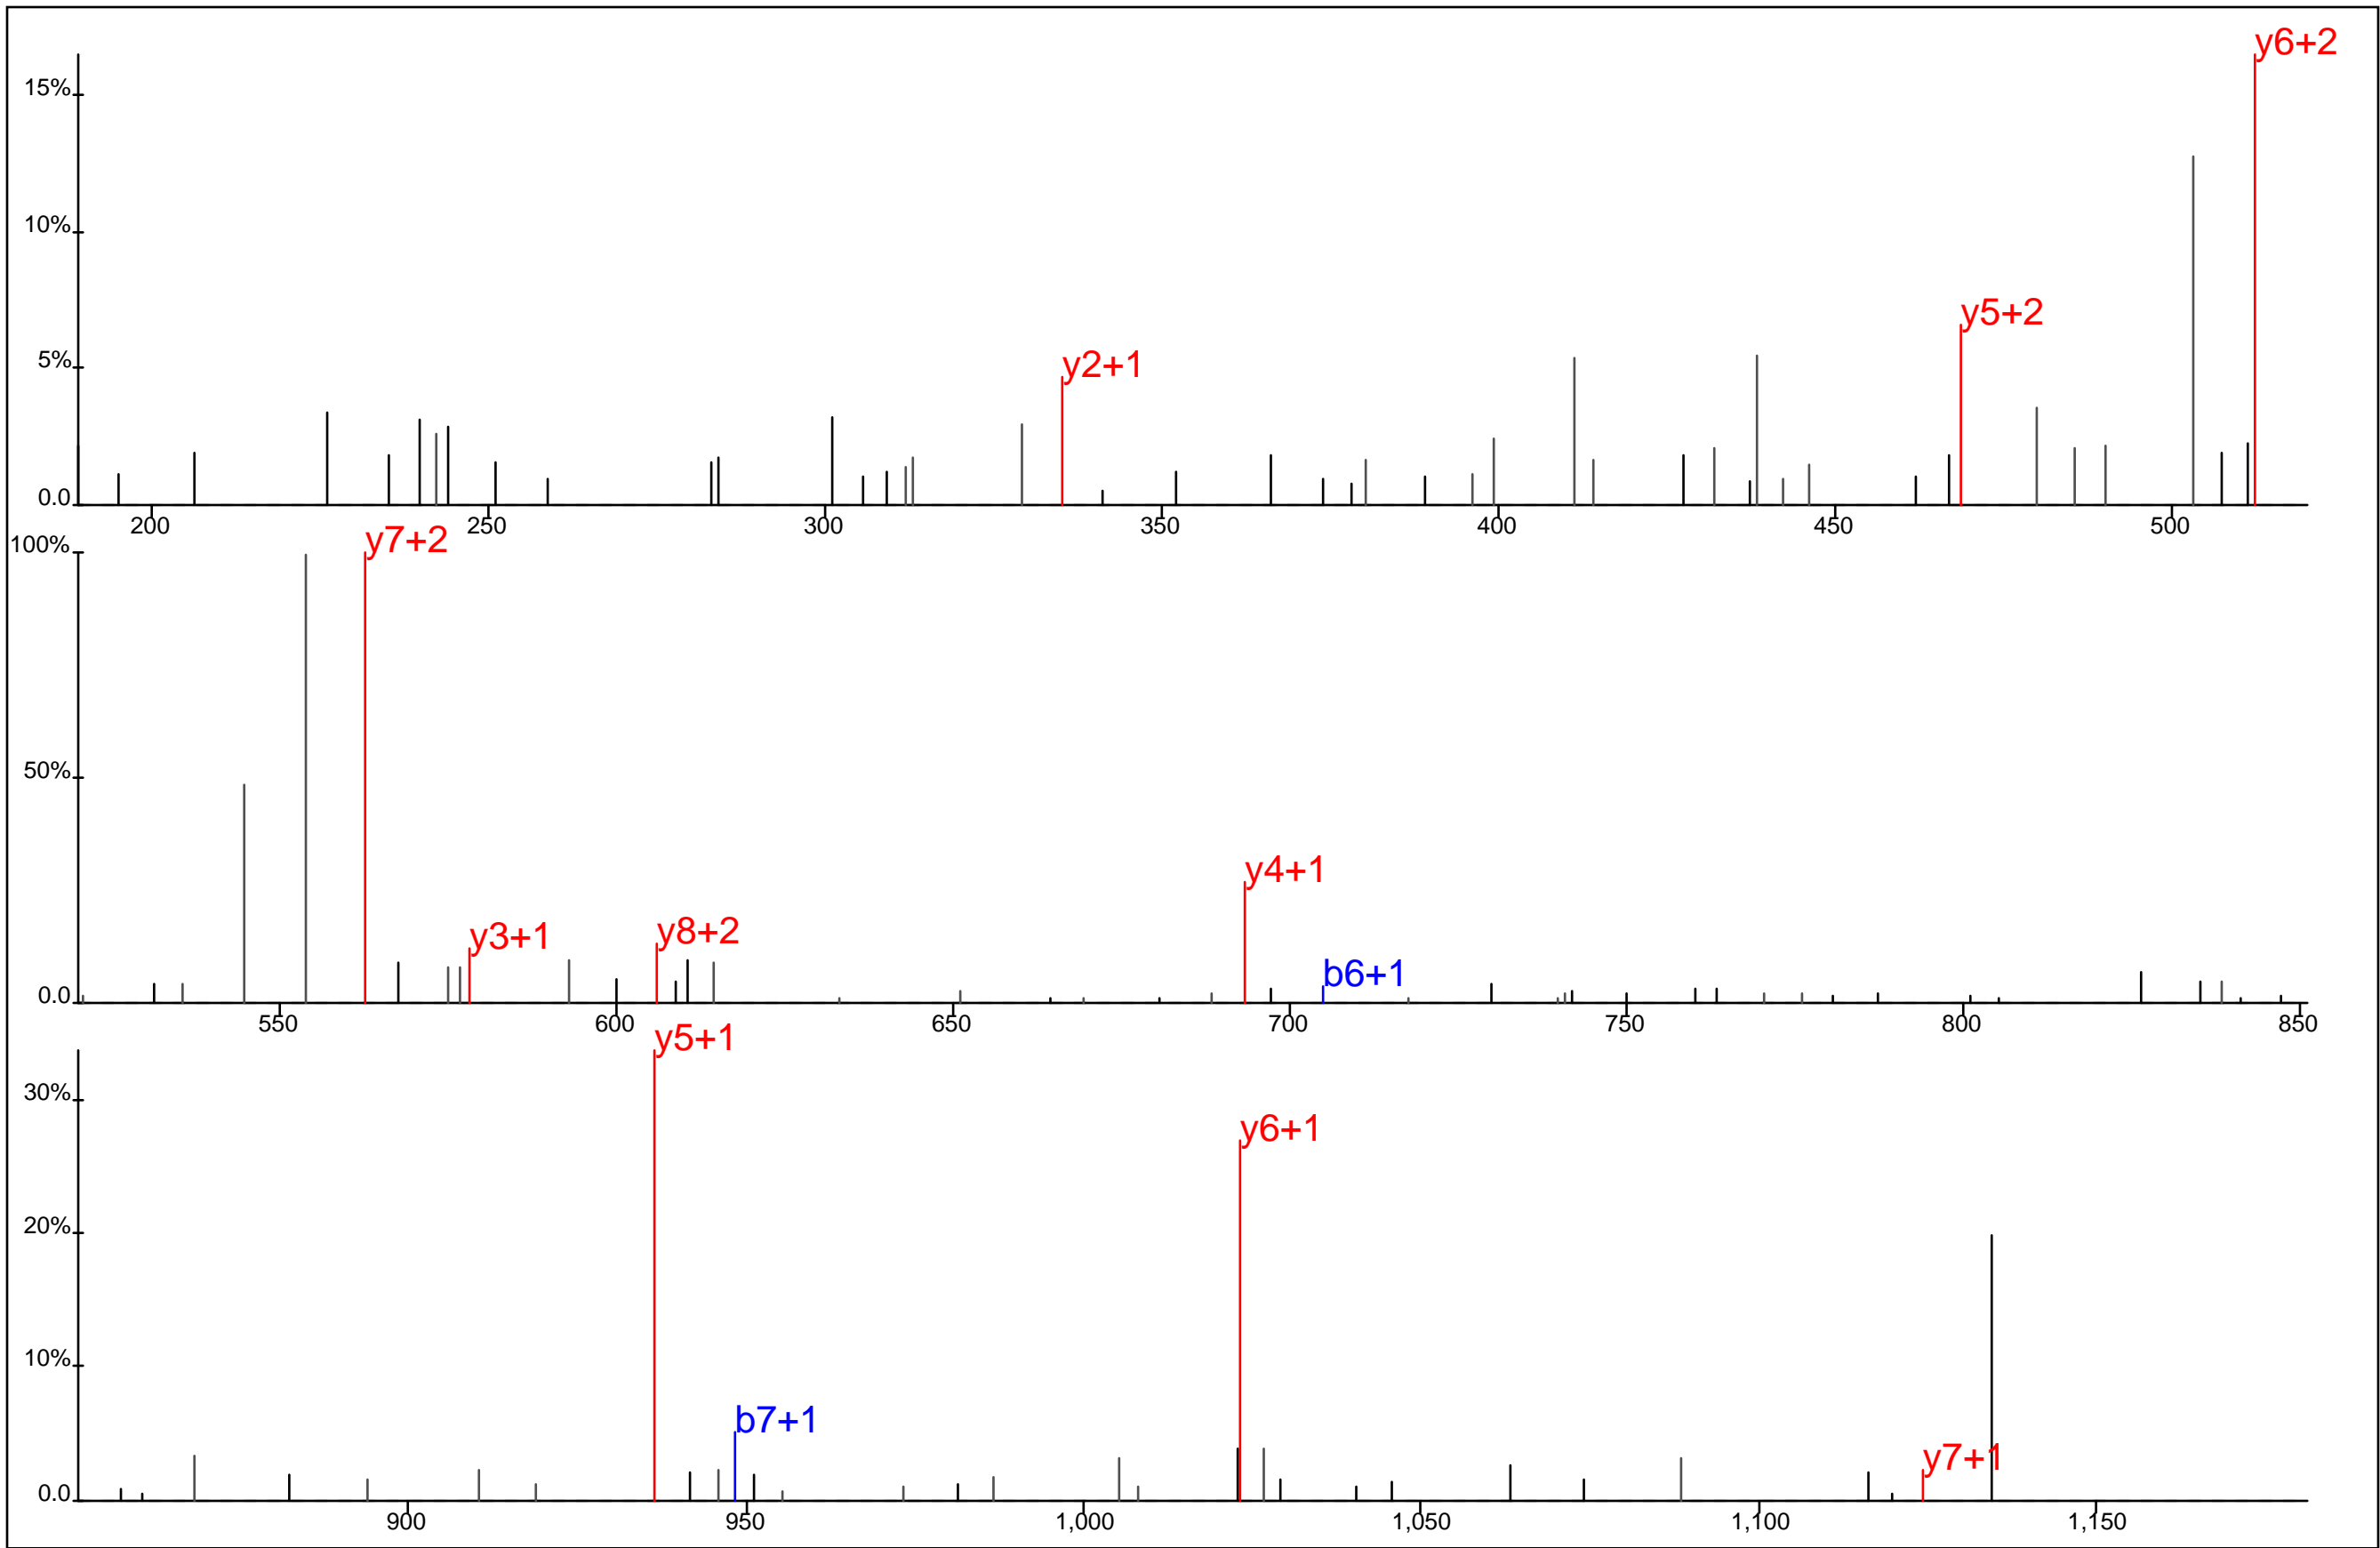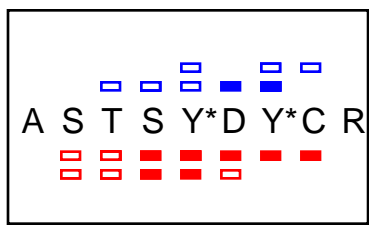

Protein Name: Bone marrow stromal cell antigen 2  
 gi Accession: 0  
 Precursor Mass: 641.6920+2  
 Delta Mass: 6.179 ppm  
 XCorr: 29.83

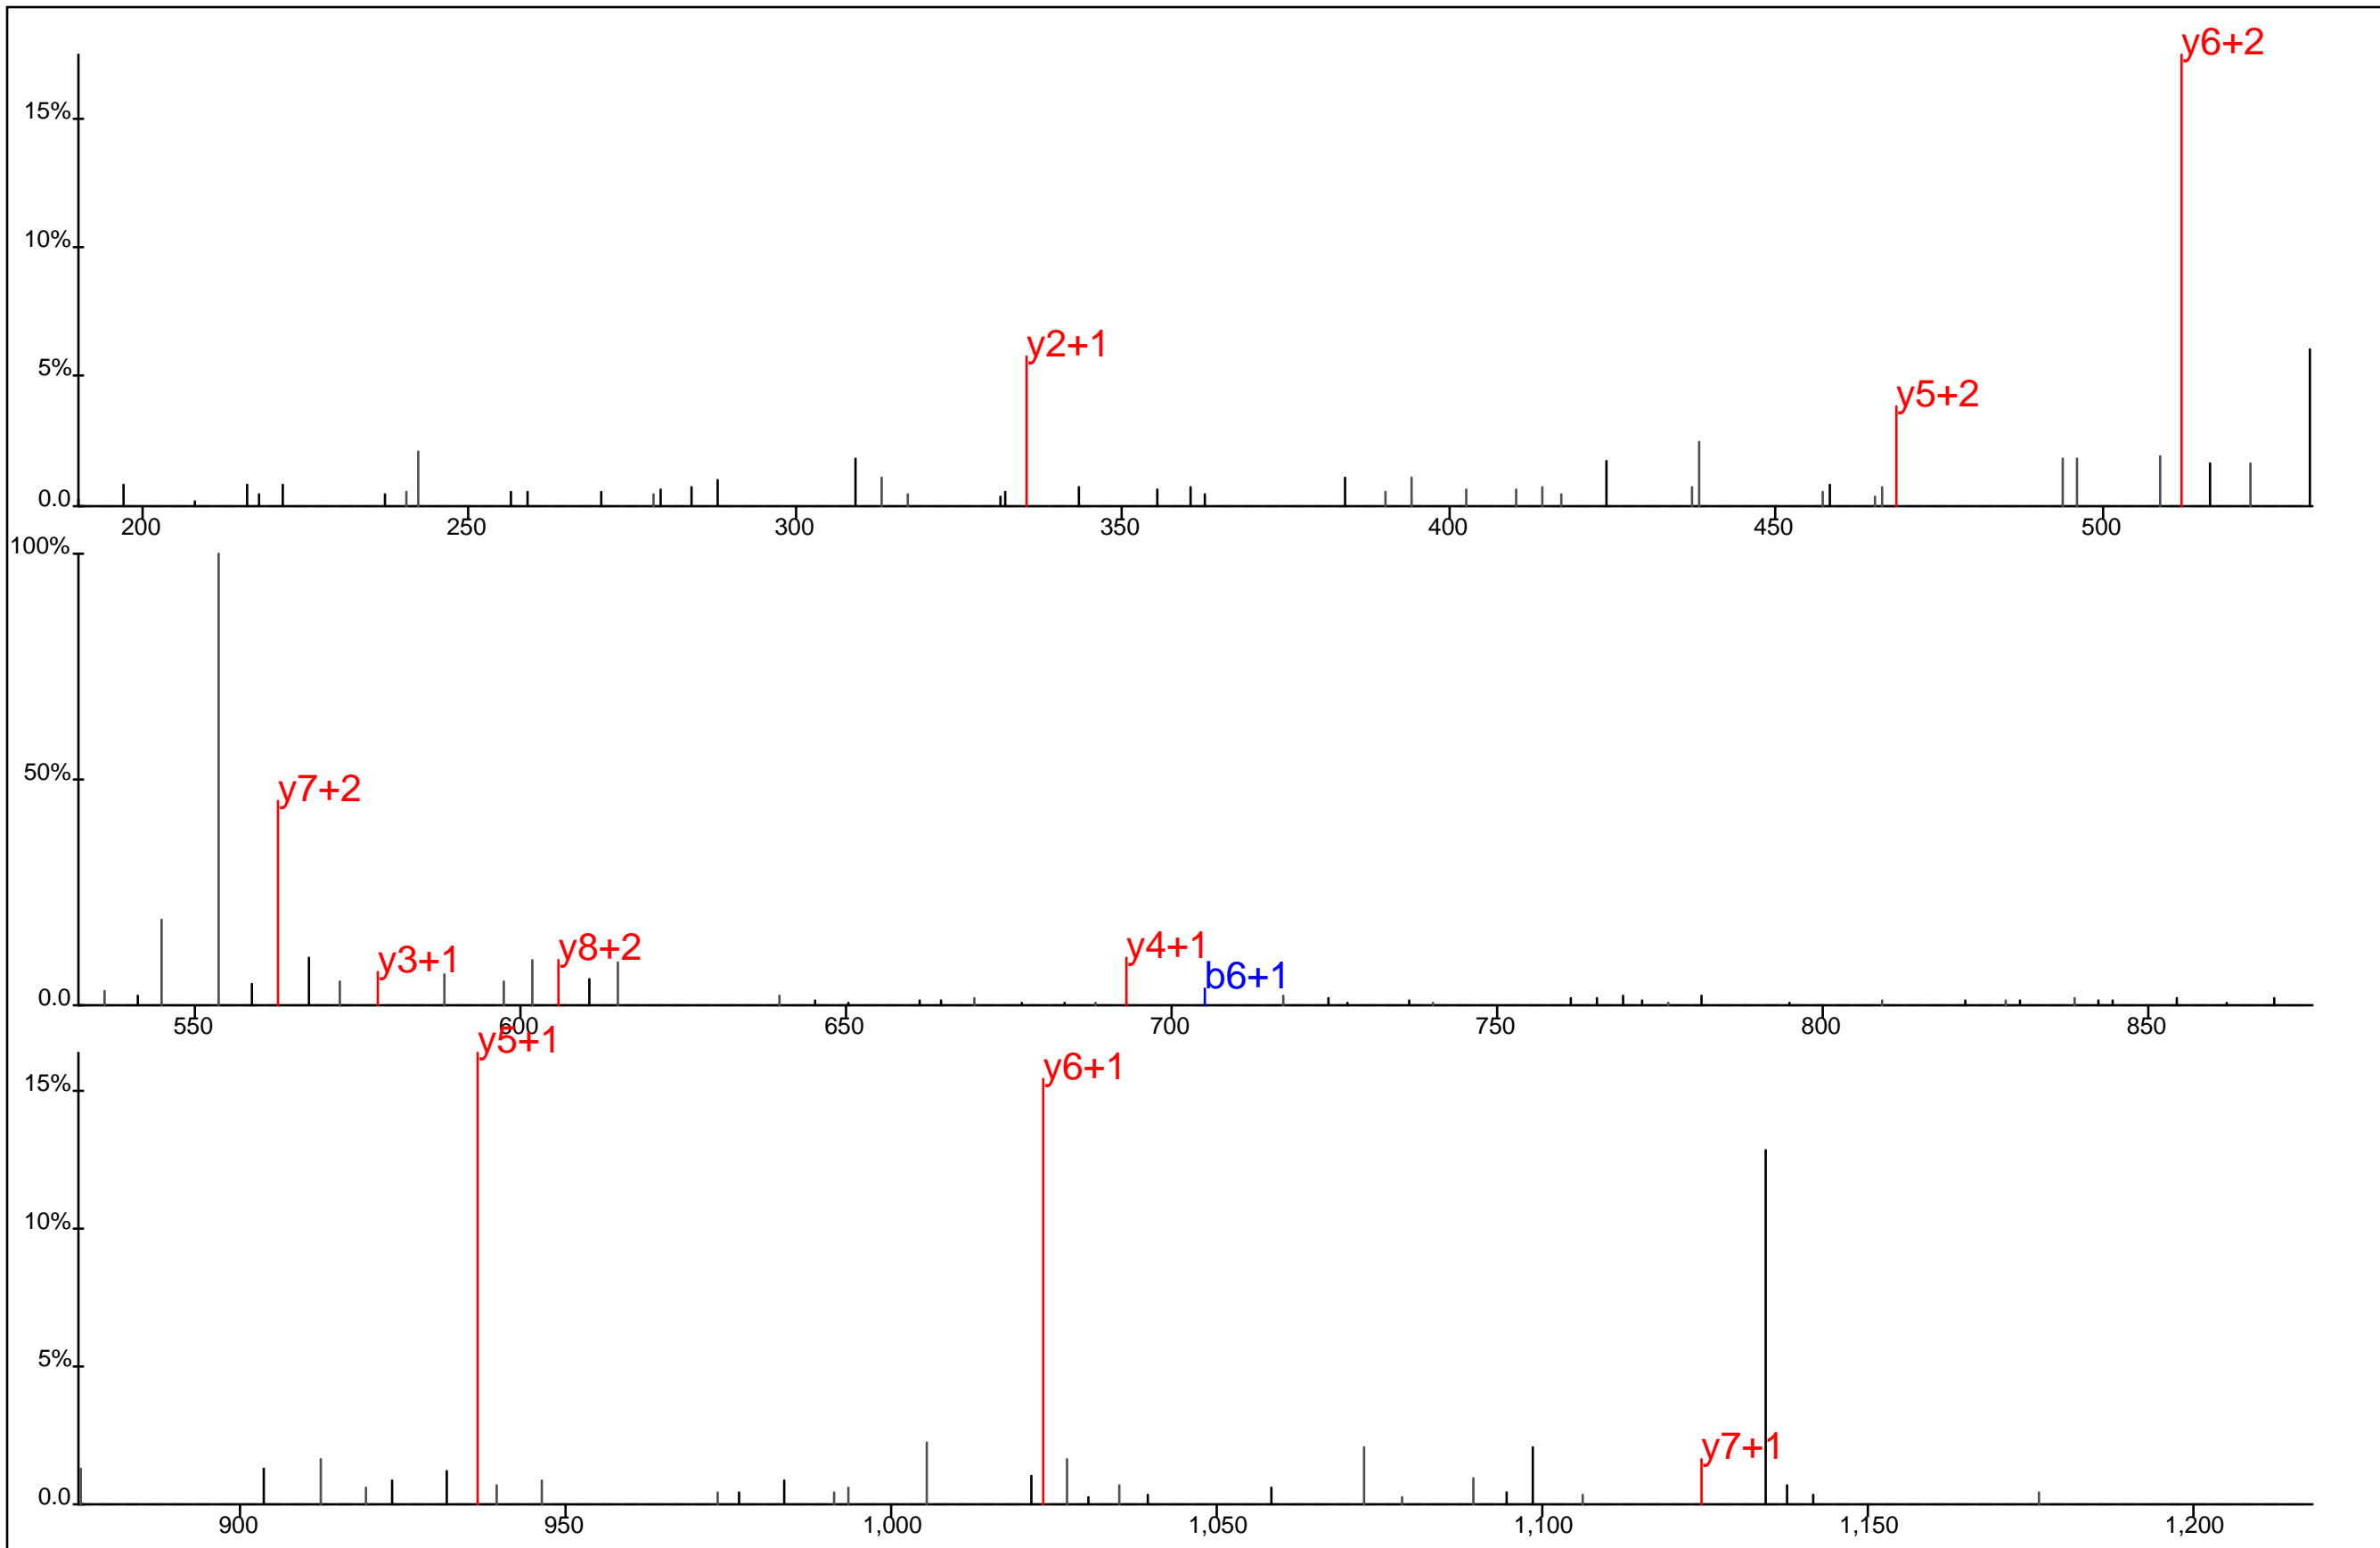

□ □ □ □ □ □ □  
 A S T S Y\* D Y\* C R  
□ □ □ □ □ □ □

Protein Name: Bone marrow stromal cell antigen 2  
 gi Accession: 0  
 Precursor Mass: 641.6960+2  
 Delta Mass: 0.008 ppm  
 XCorr: 23.07



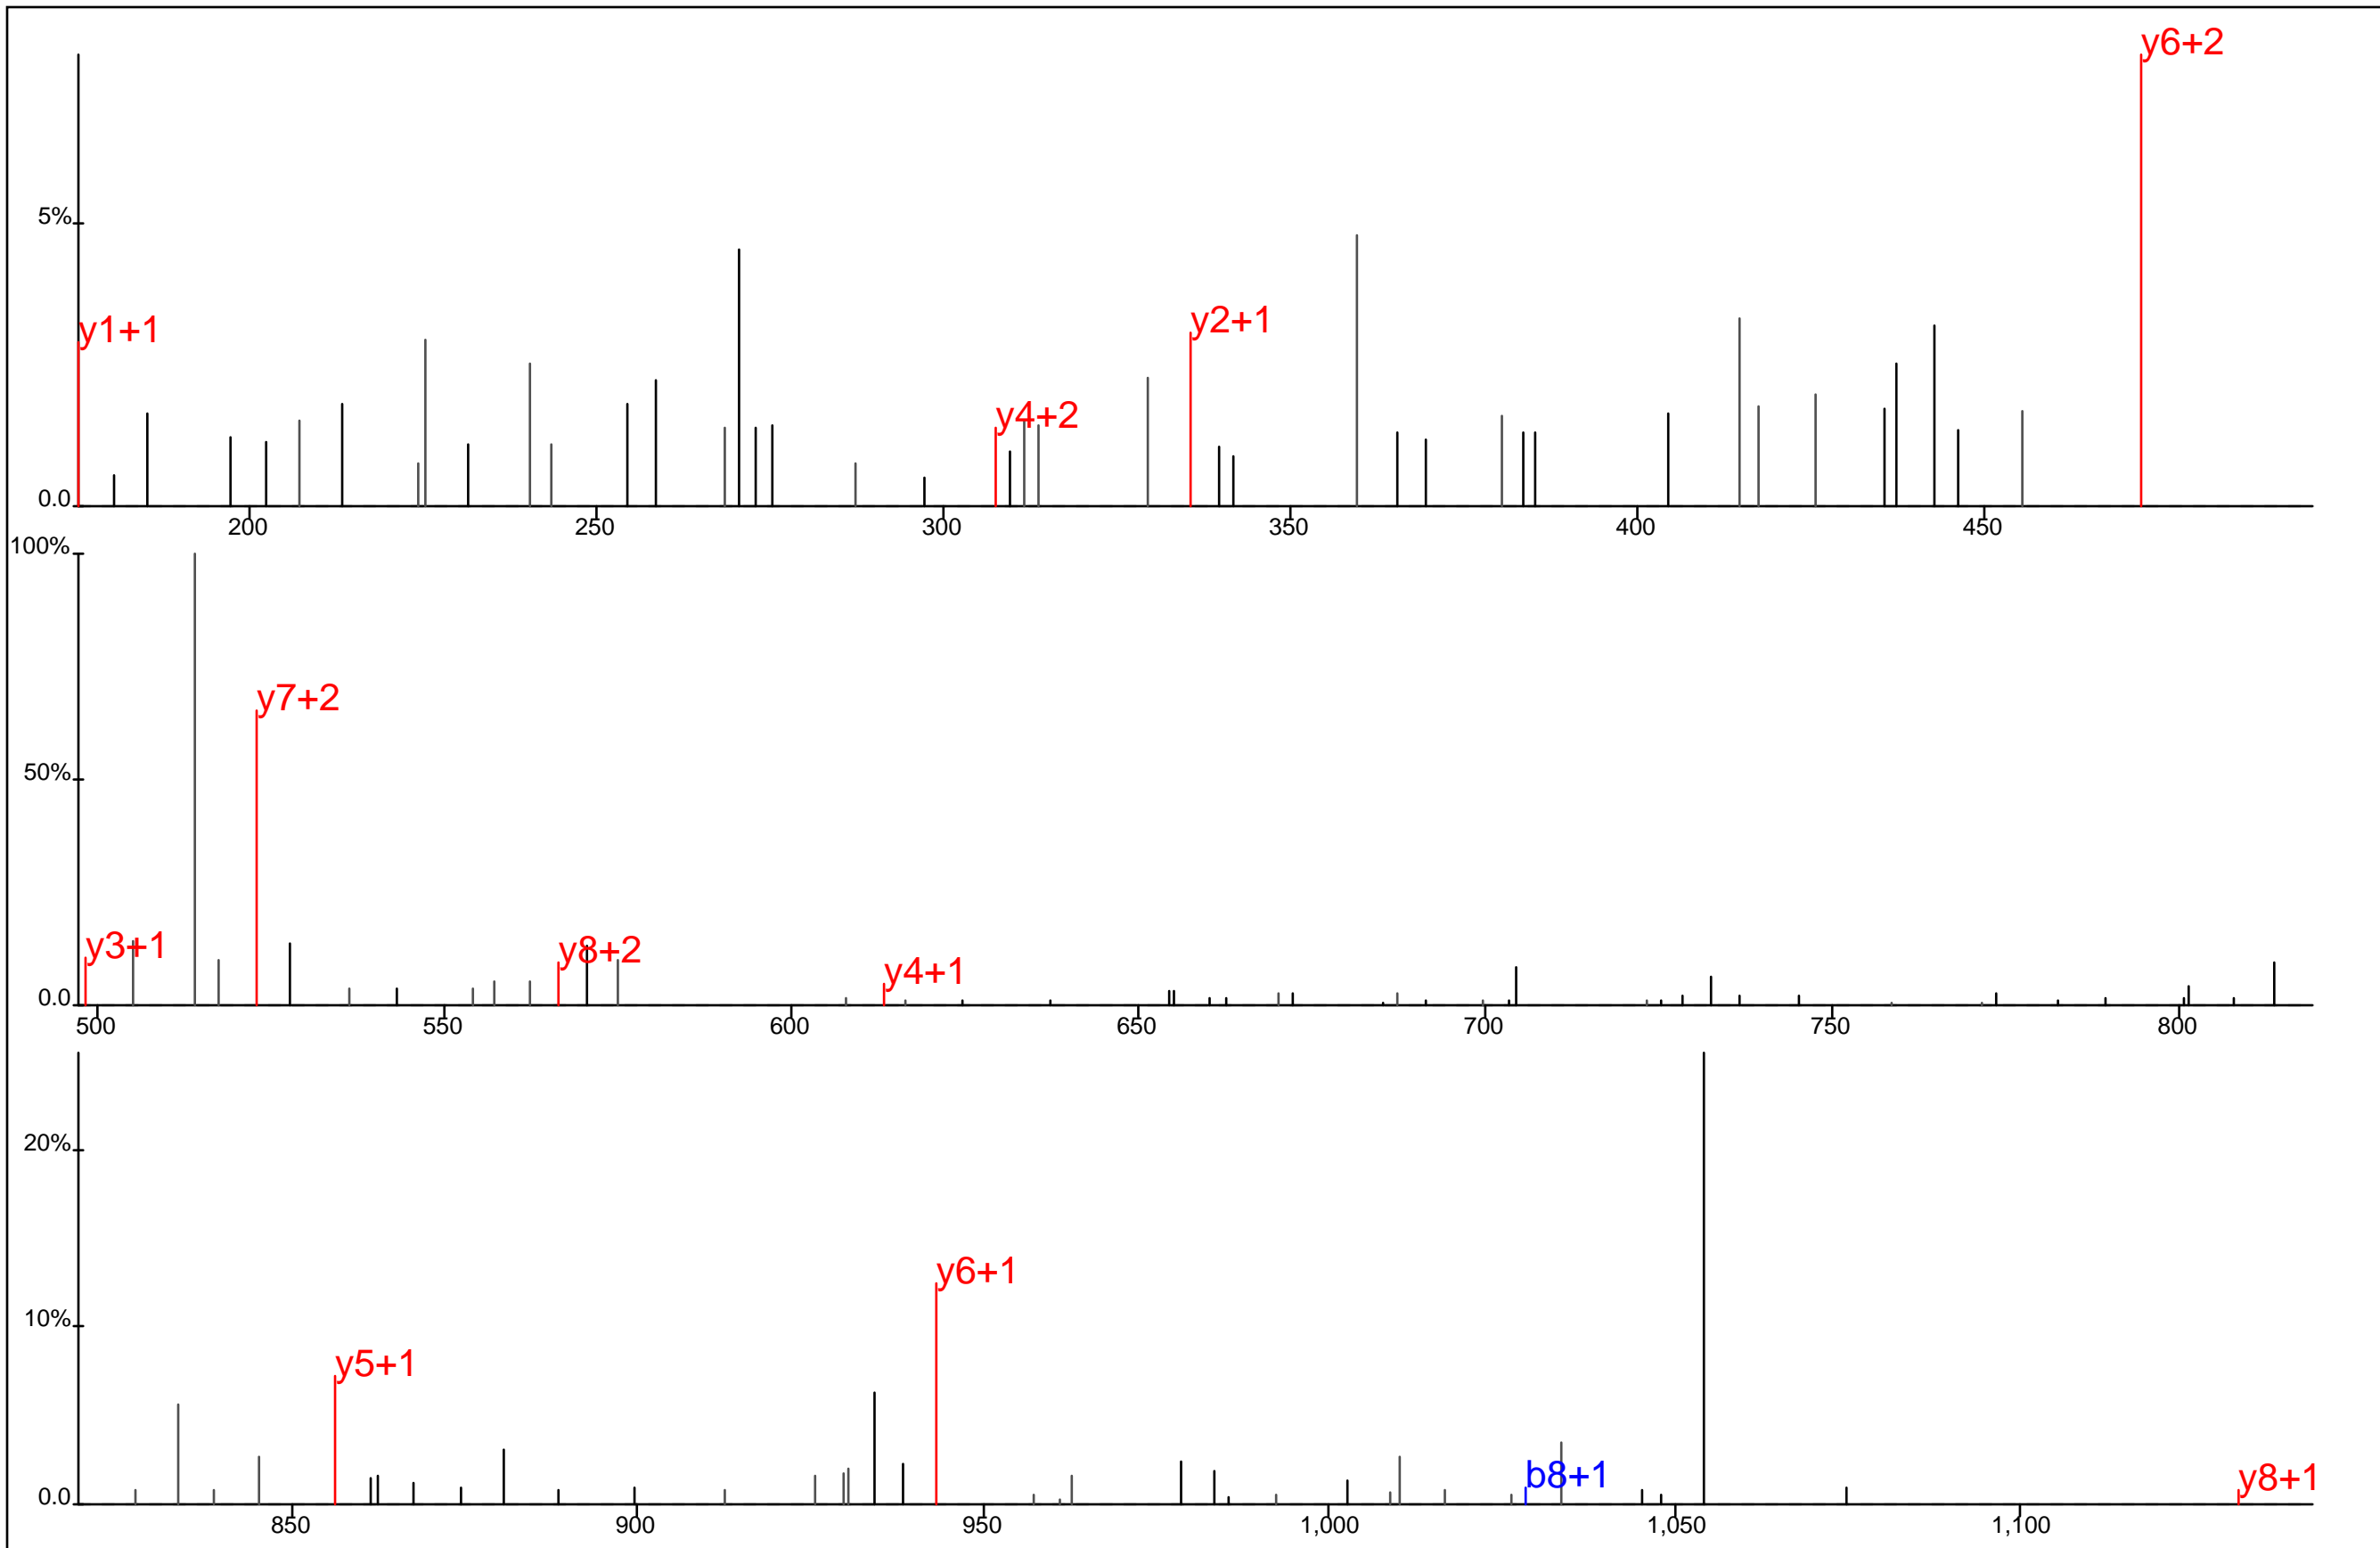

▢ ▢ ▢ ▢ ▢ ▢  
 A S T S Y\* D Y C R  
▢ ▢ ▢ ▢ ▢ ▢ ▢

Protein Name: Bone marrow stromal cell antigen 2  
 gi Accession: 0  
 Precursor Mass: 601.7138+2  
 Delta Mass: 1.642 ppm  
 XCorr: 22.77

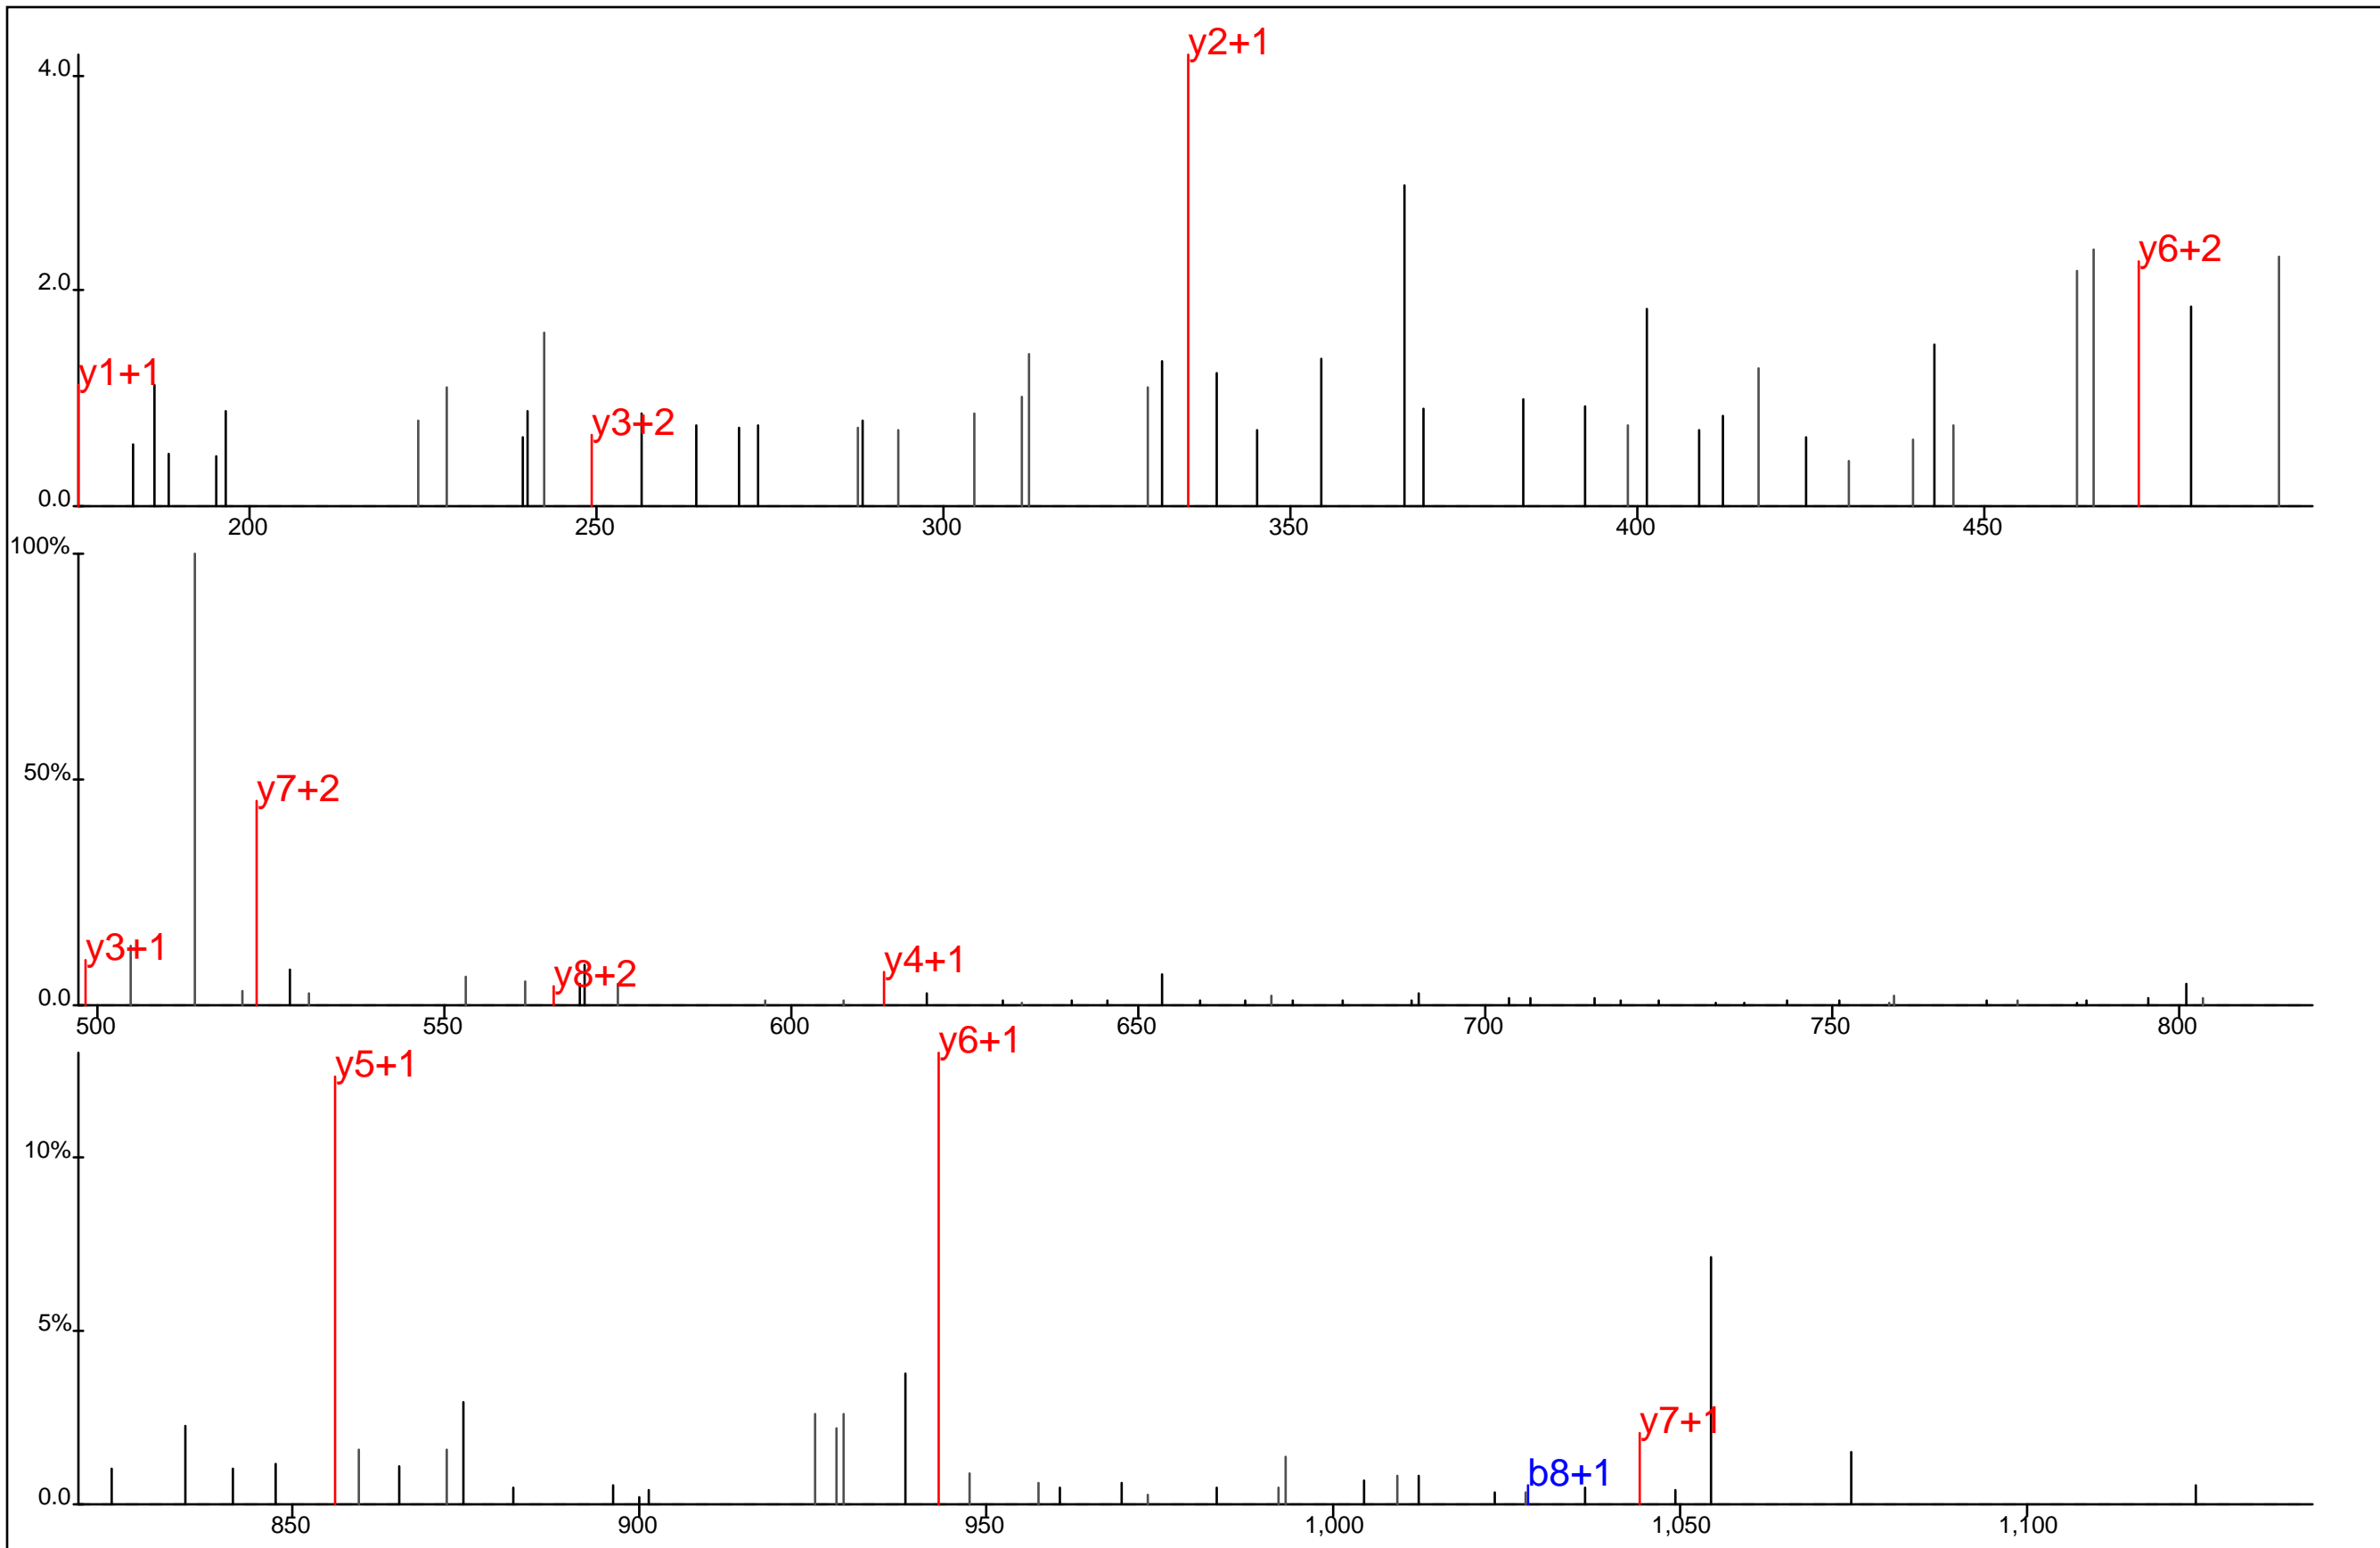

▢ ▢▢ ▢▢▢ ▢▢▢▢  
 A S T S Y\* D Y C R  
▢ ▢ ▢ ▢ ▢ ▢ ▢ ▢

Protein Name: Bone marrow stromal cell antigen 2  
 gi Accession: 0  
 Precursor Mass: 601.7136+2  
 Delta Mass: 1.337 ppm  
 XCorr: 33.24

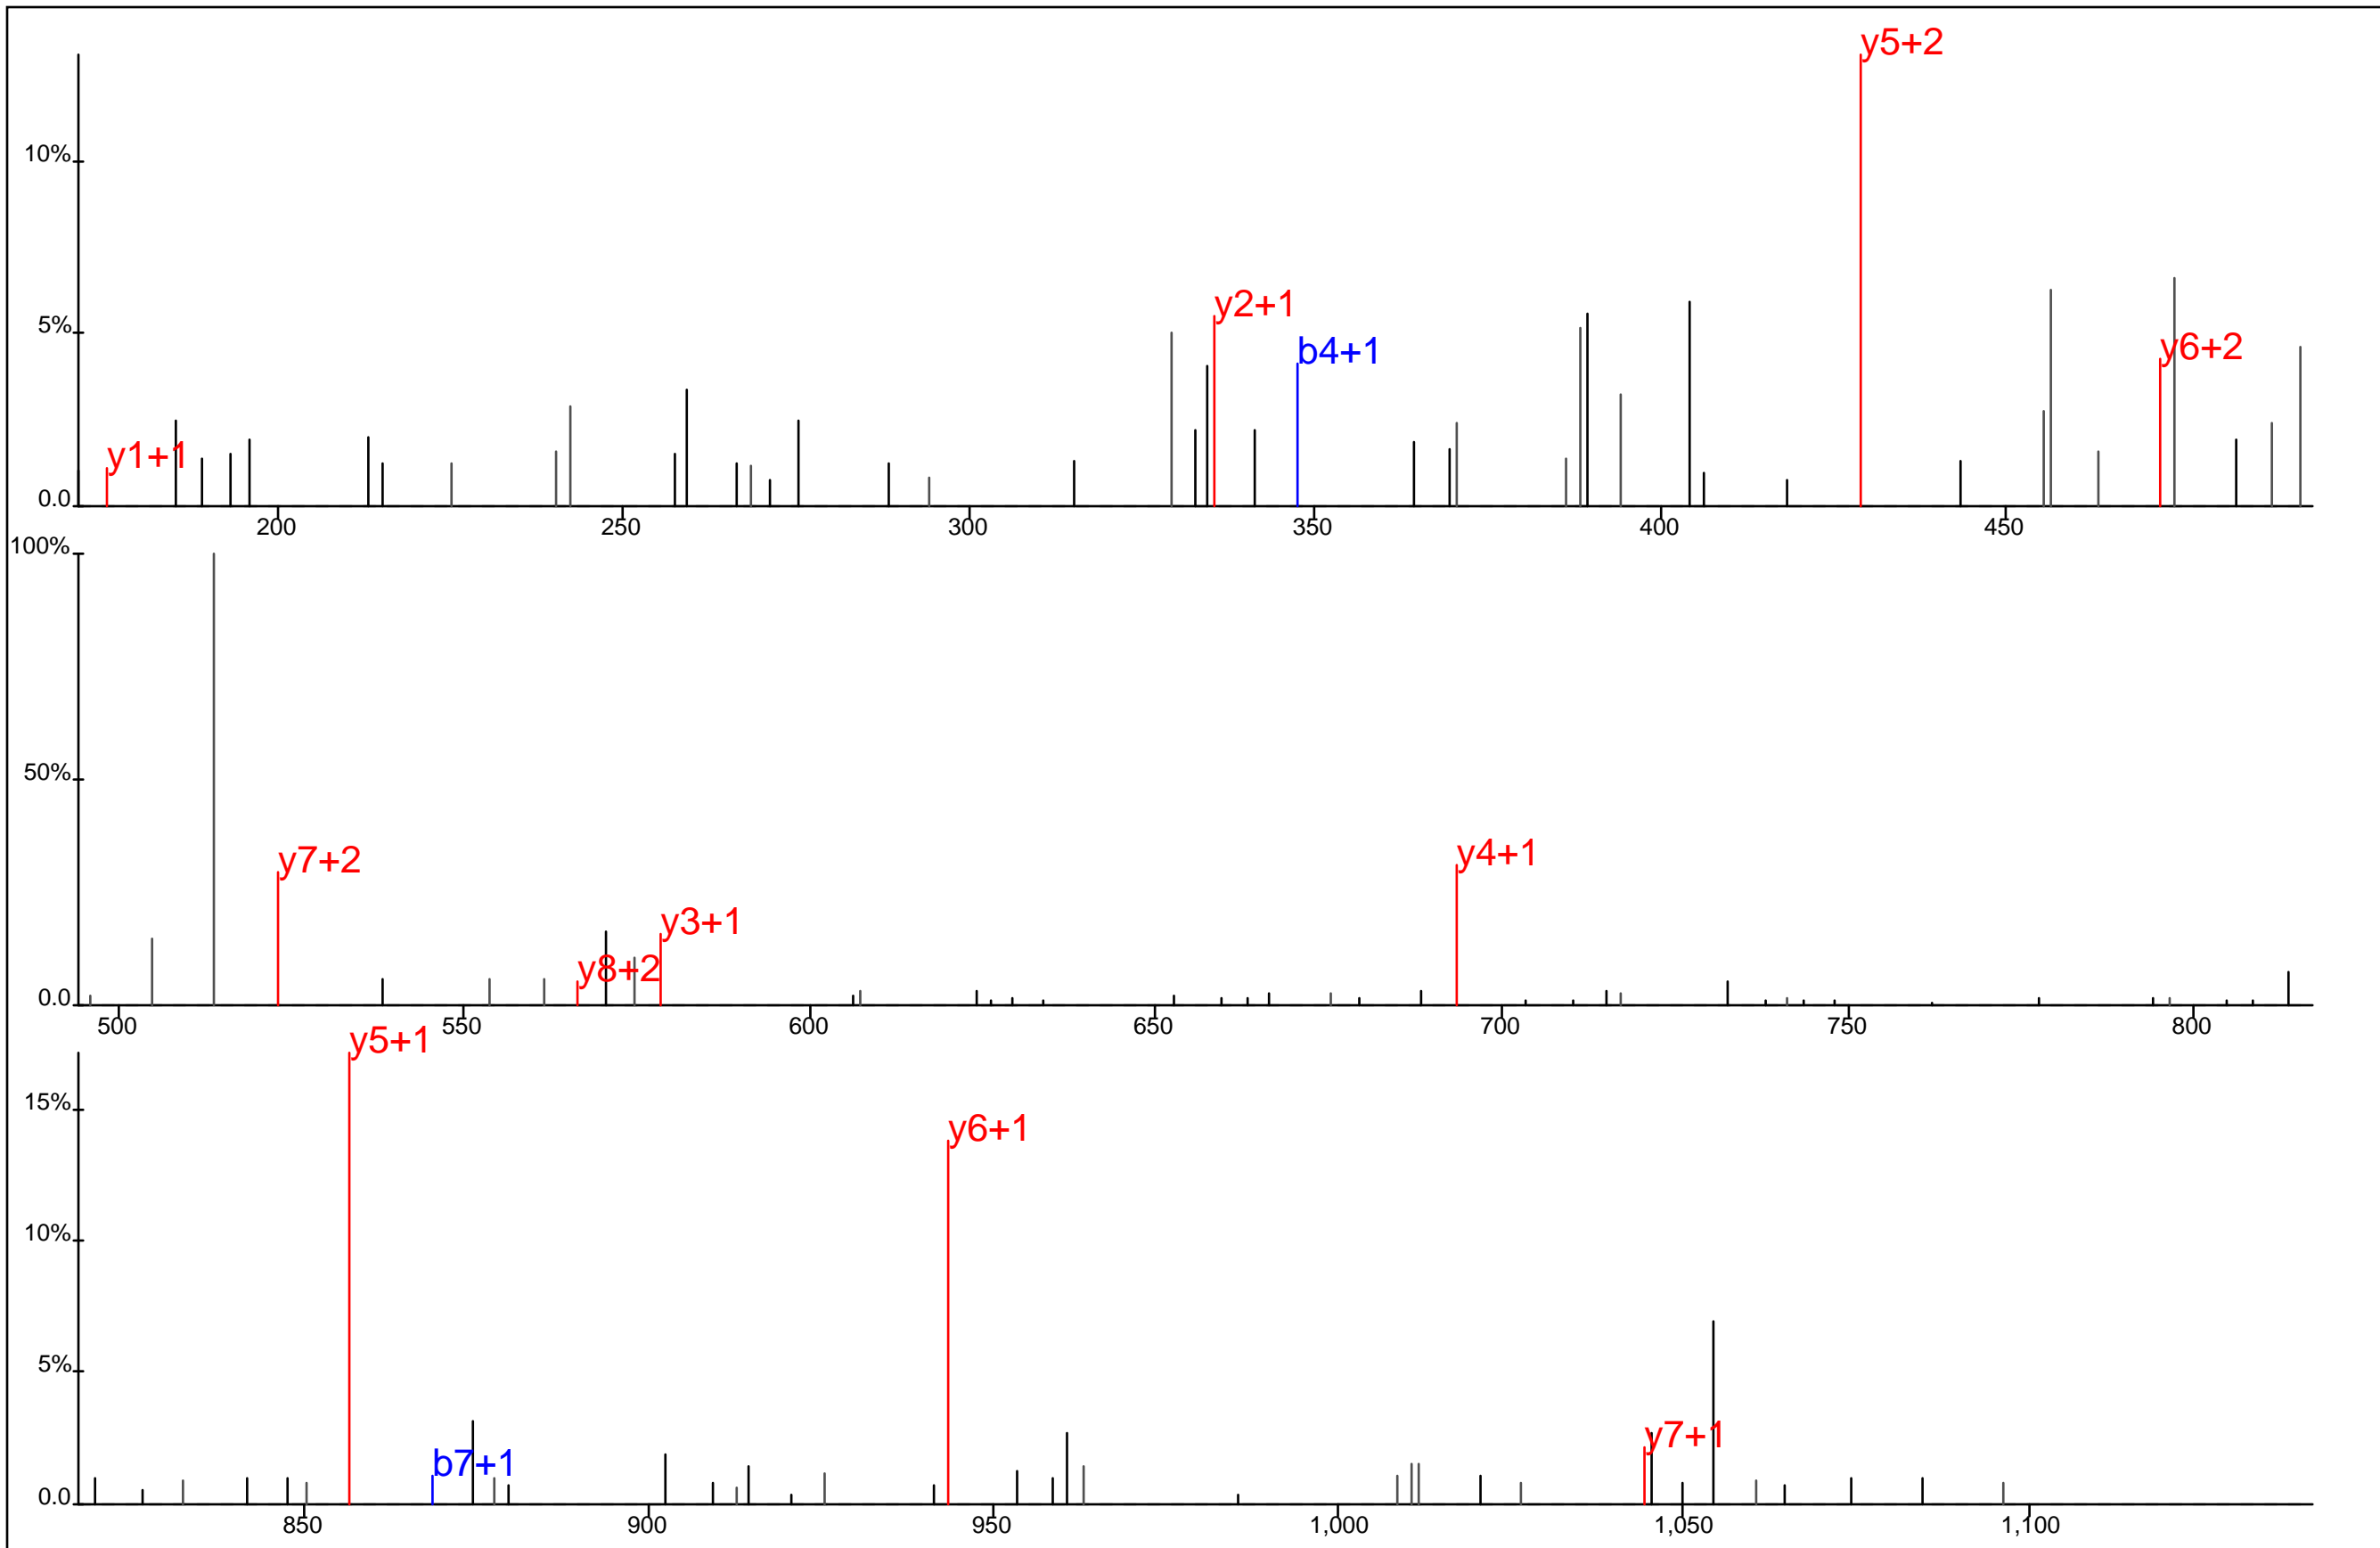

▢ ▢ ▢▢ ▢▢  
 A S T S Y D Y\* C R  
▢ ▢ ▢ ▢ ▢ ▢ ▢ ▢

Protein Name: Bone marrow stromal cell antigen 2  
 gi Accession: 0  
 Precursor Mass: 601.7120+2  
 Delta Mass: 1.302 ppm  
 XCorr: 33.2

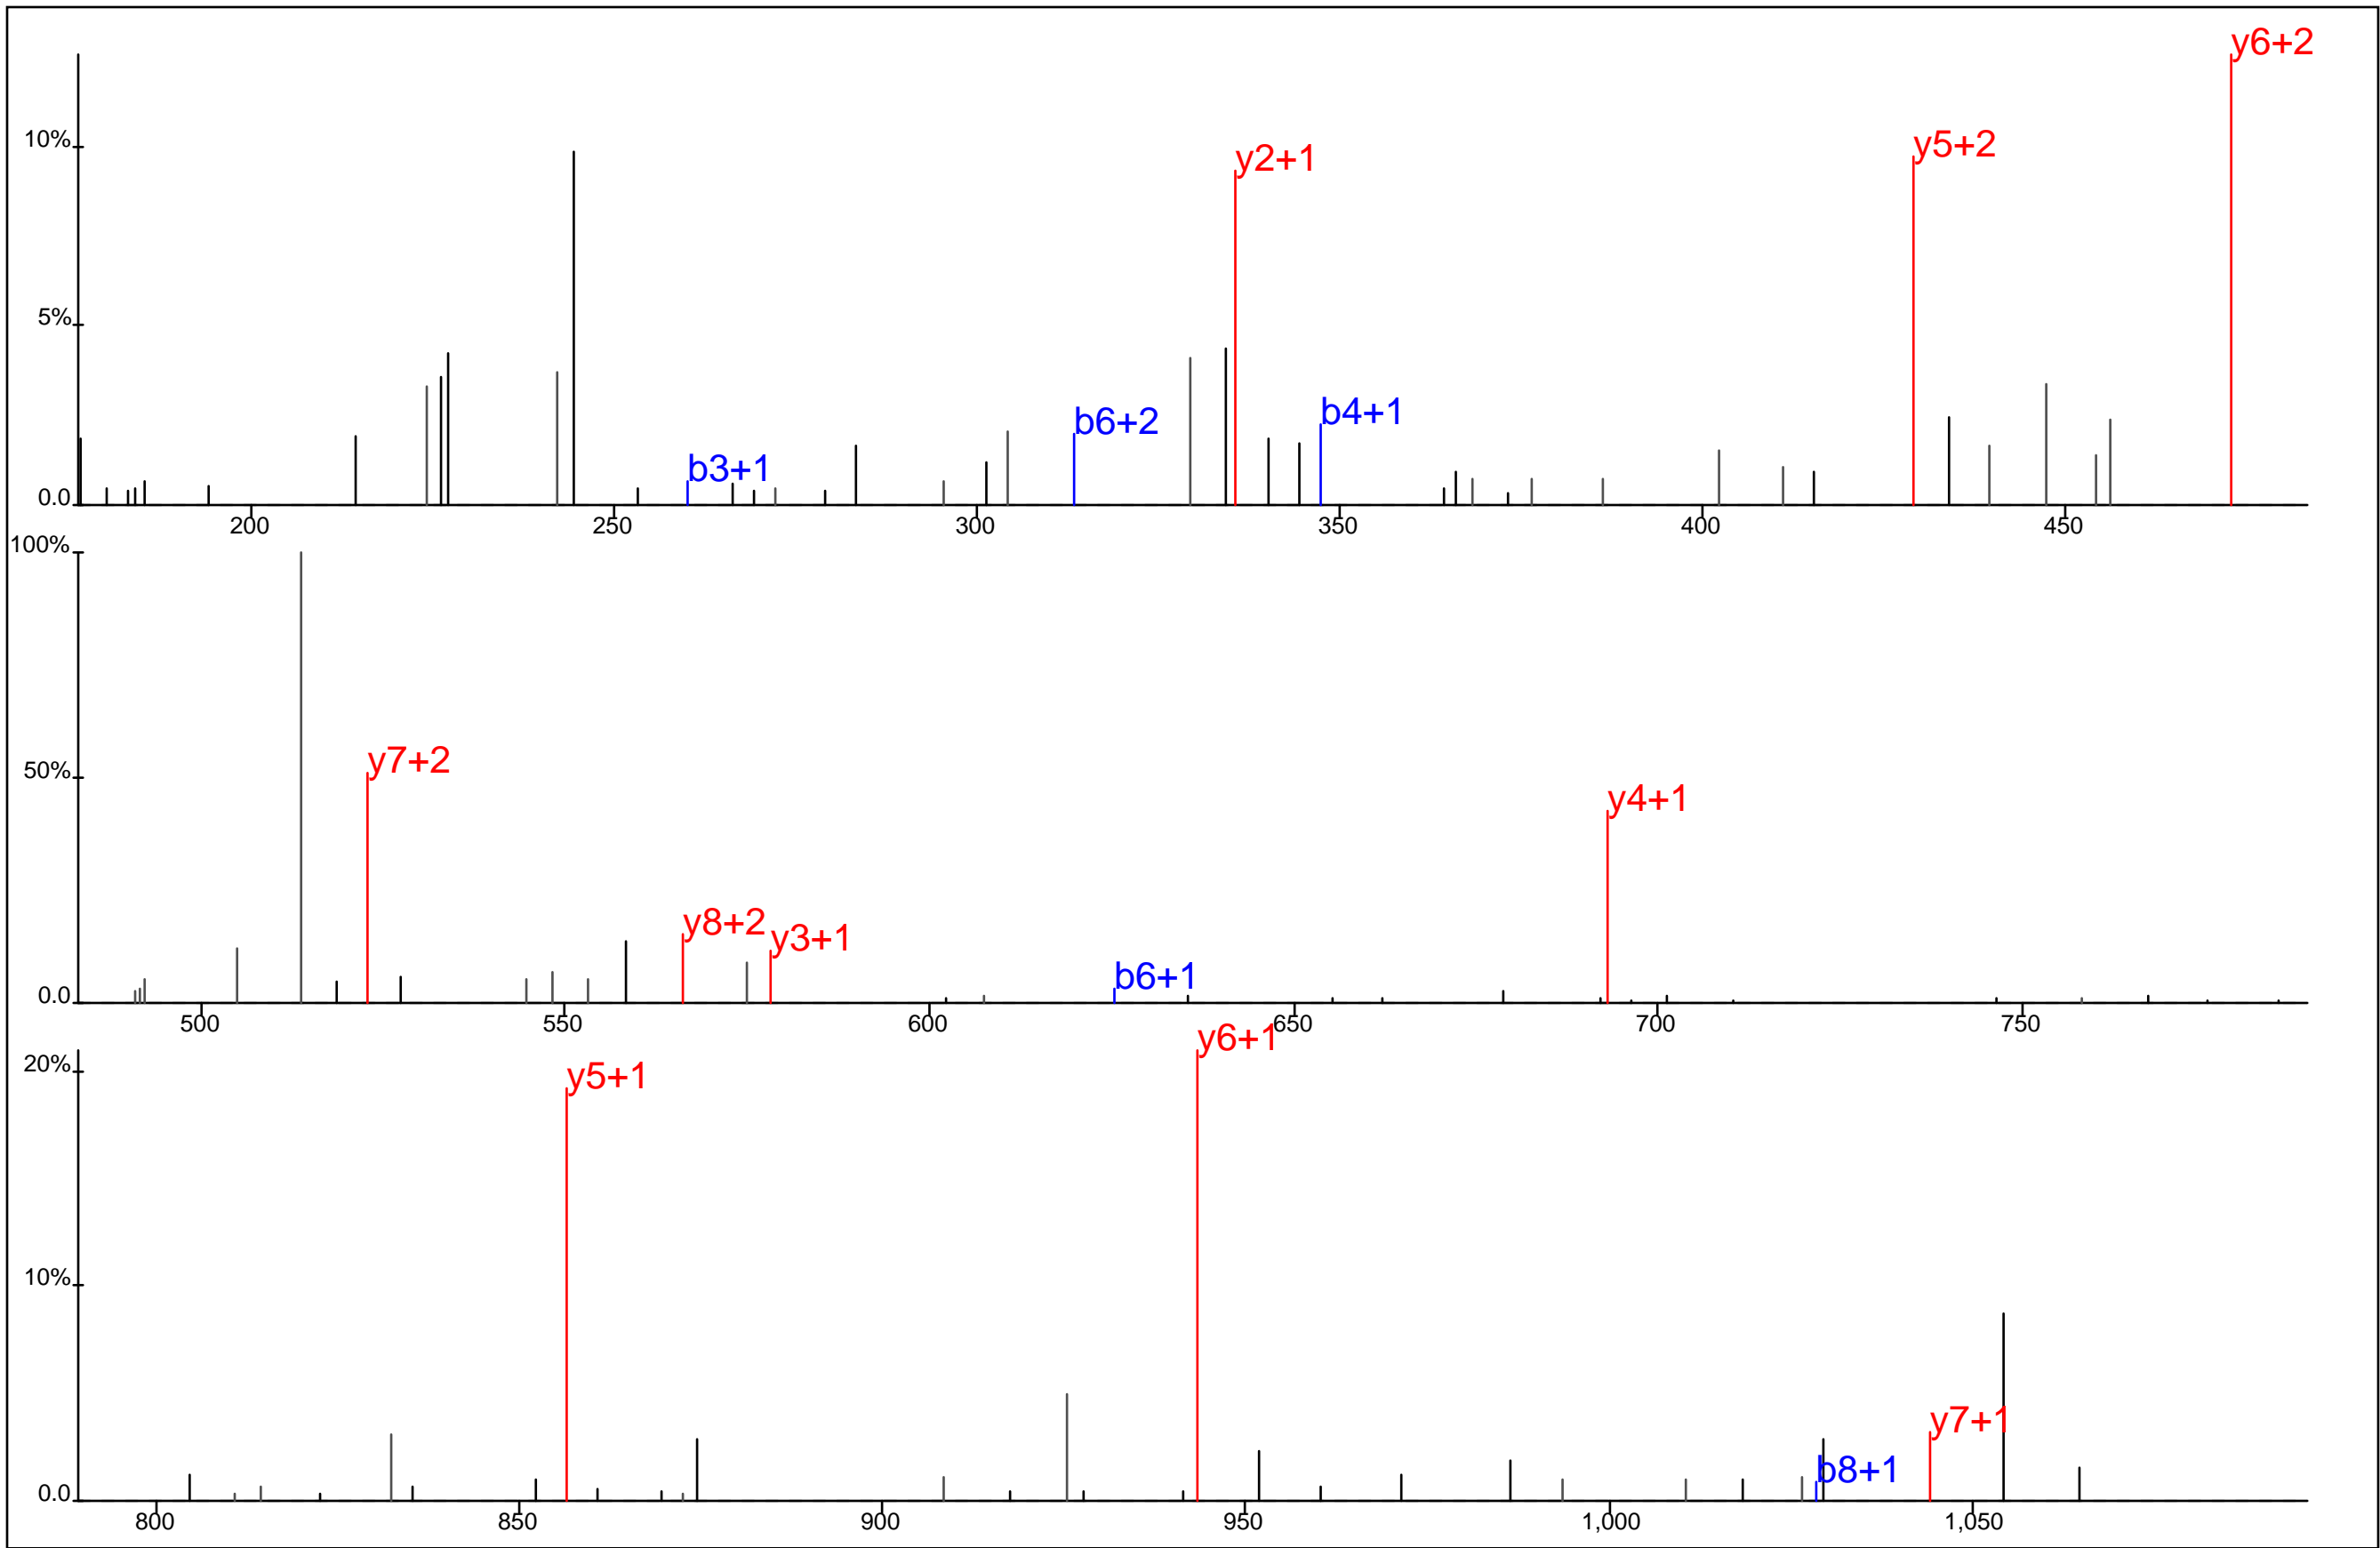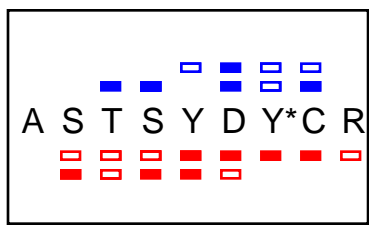

Protein Name: Bone marrow stromal cell antigen 2  
 gi Accession: 0  
 Precursor Mass: 601.7133+2  
 Delta Mass: 0.729 ppm  
 XCorr: 39.54

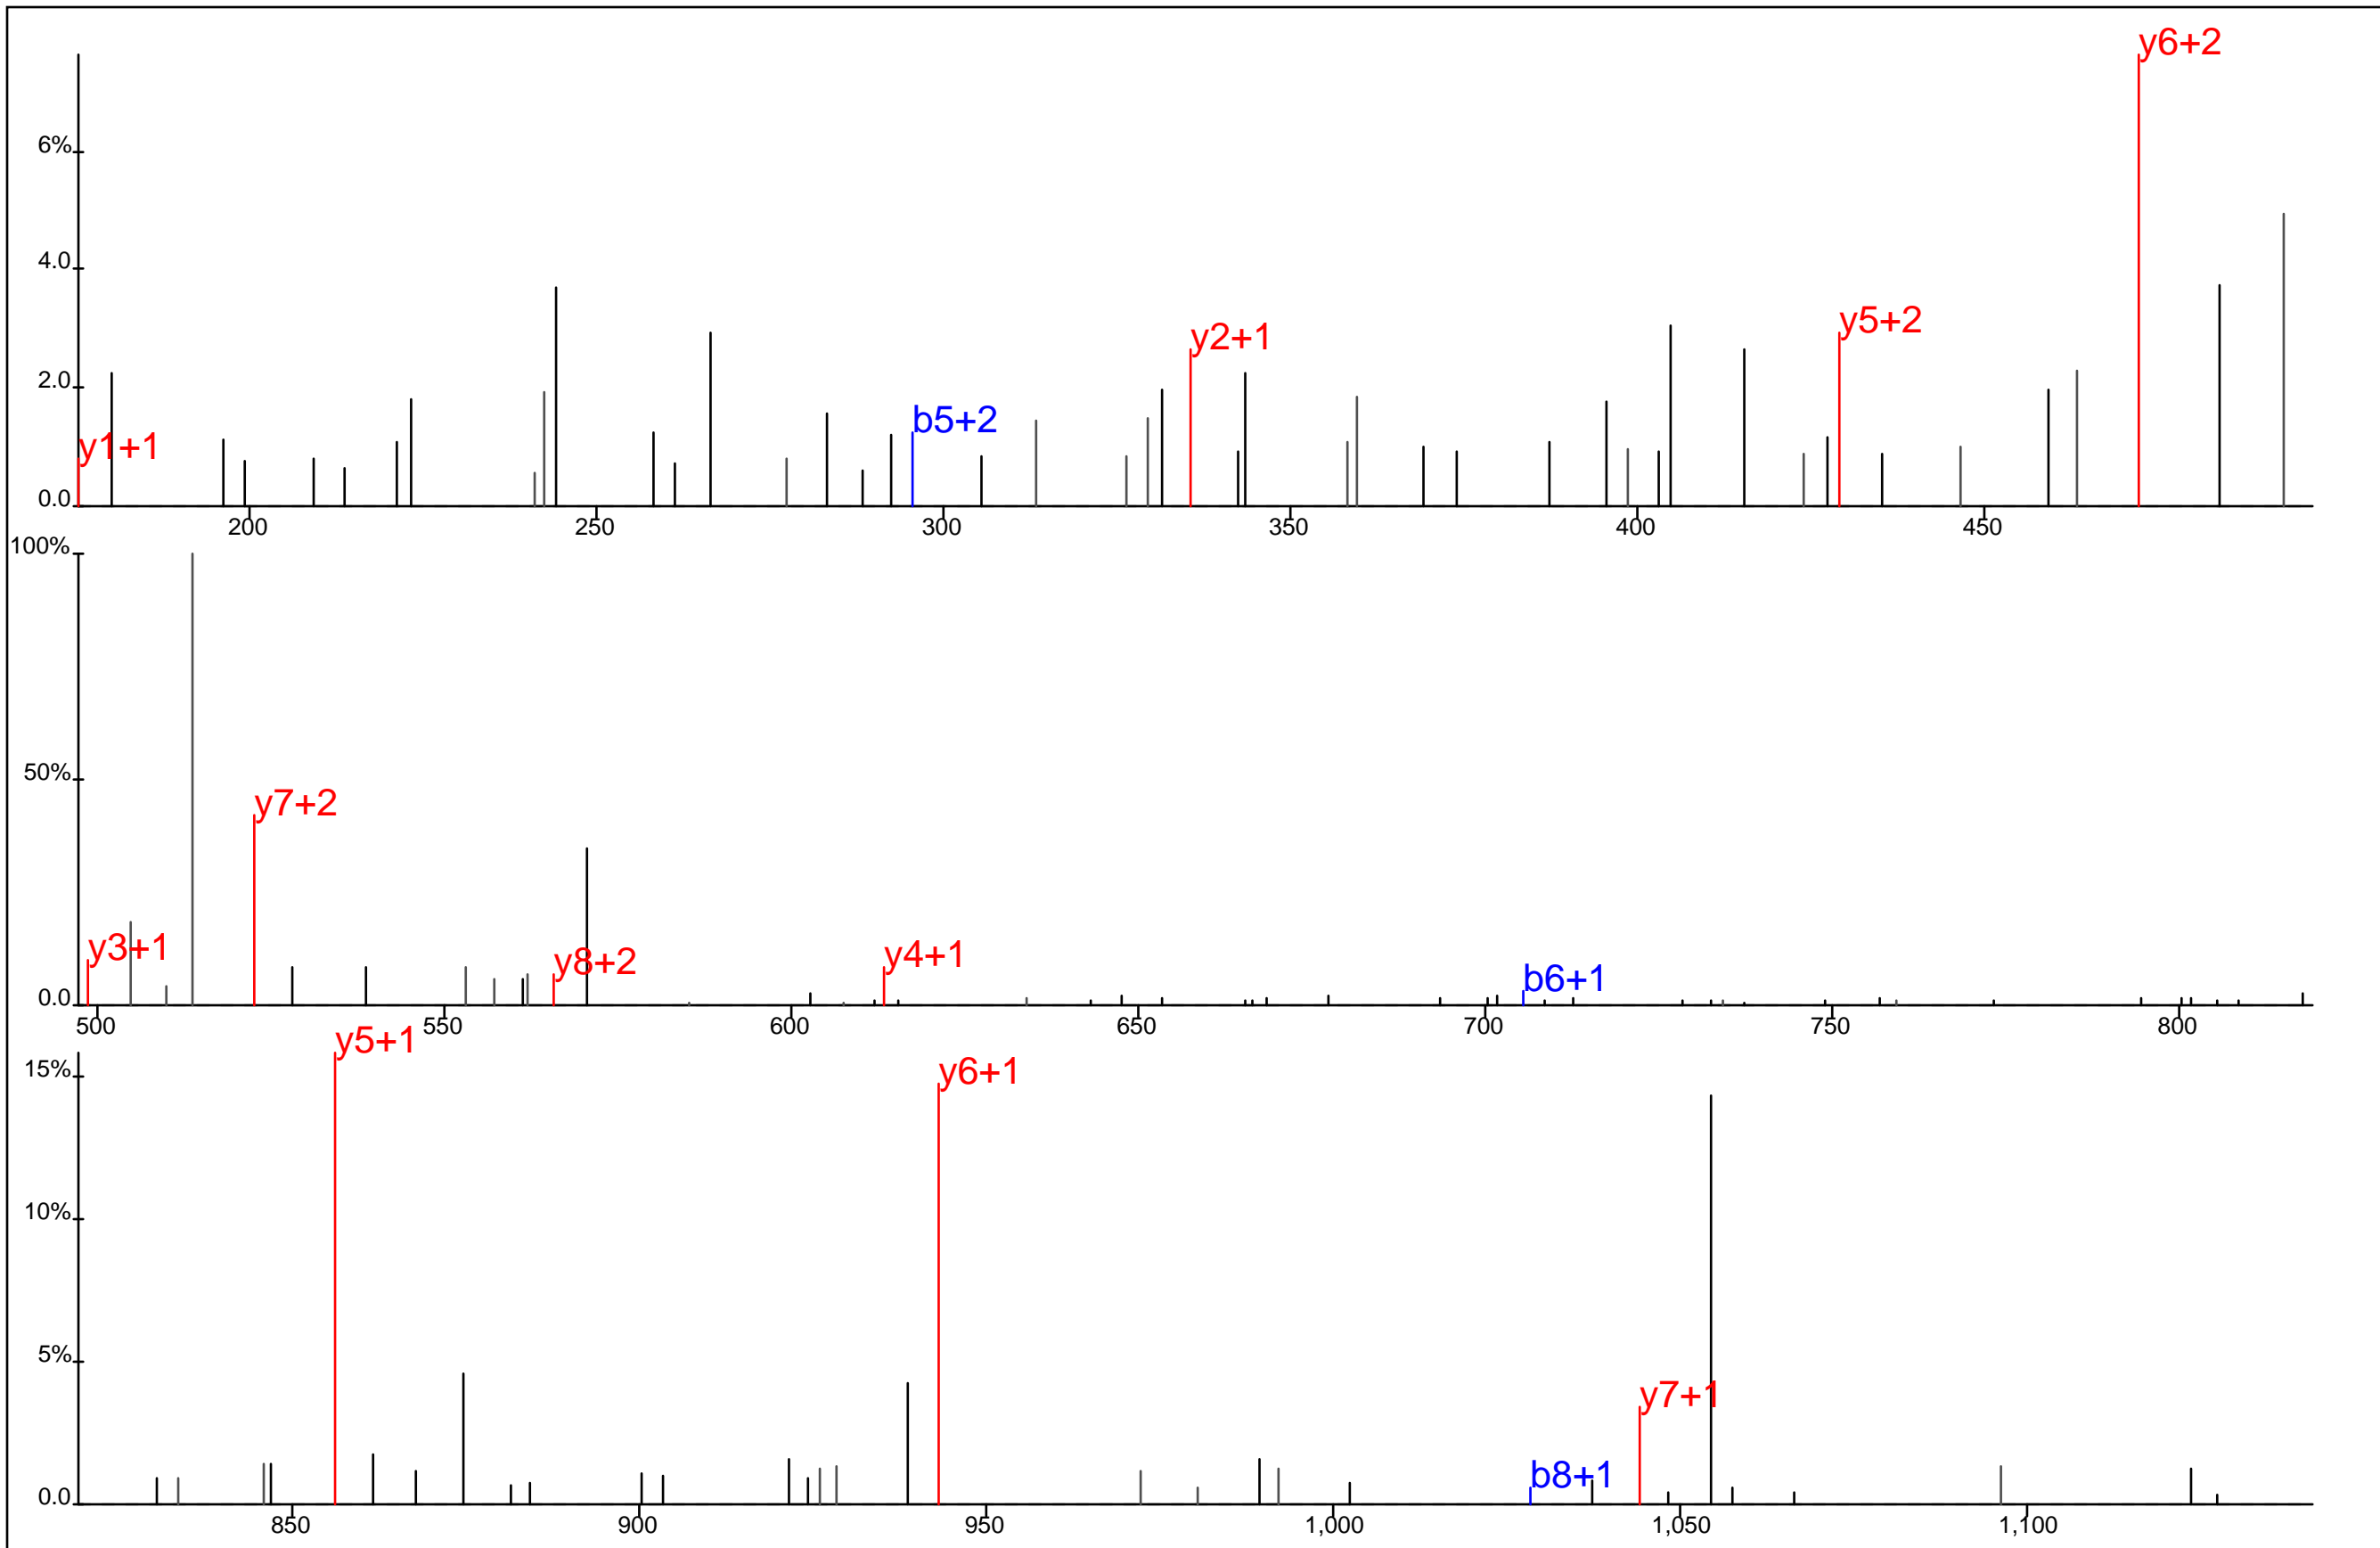

▢ ▢ ▢▢ ▢▢ ▢▢ ▢  
 A S T S Y\* D Y C R  
▢ ▢ ▢▢ ▢▢ ▢▢ ▢▢ ▢▢

Protein Name: Bone marrow stromal cell antigen 2  
 gi Accession: 0  
 Precursor Mass: 601.7128+2  
 Delta Mass: 0.083 ppm  
 XCorr: 22.31

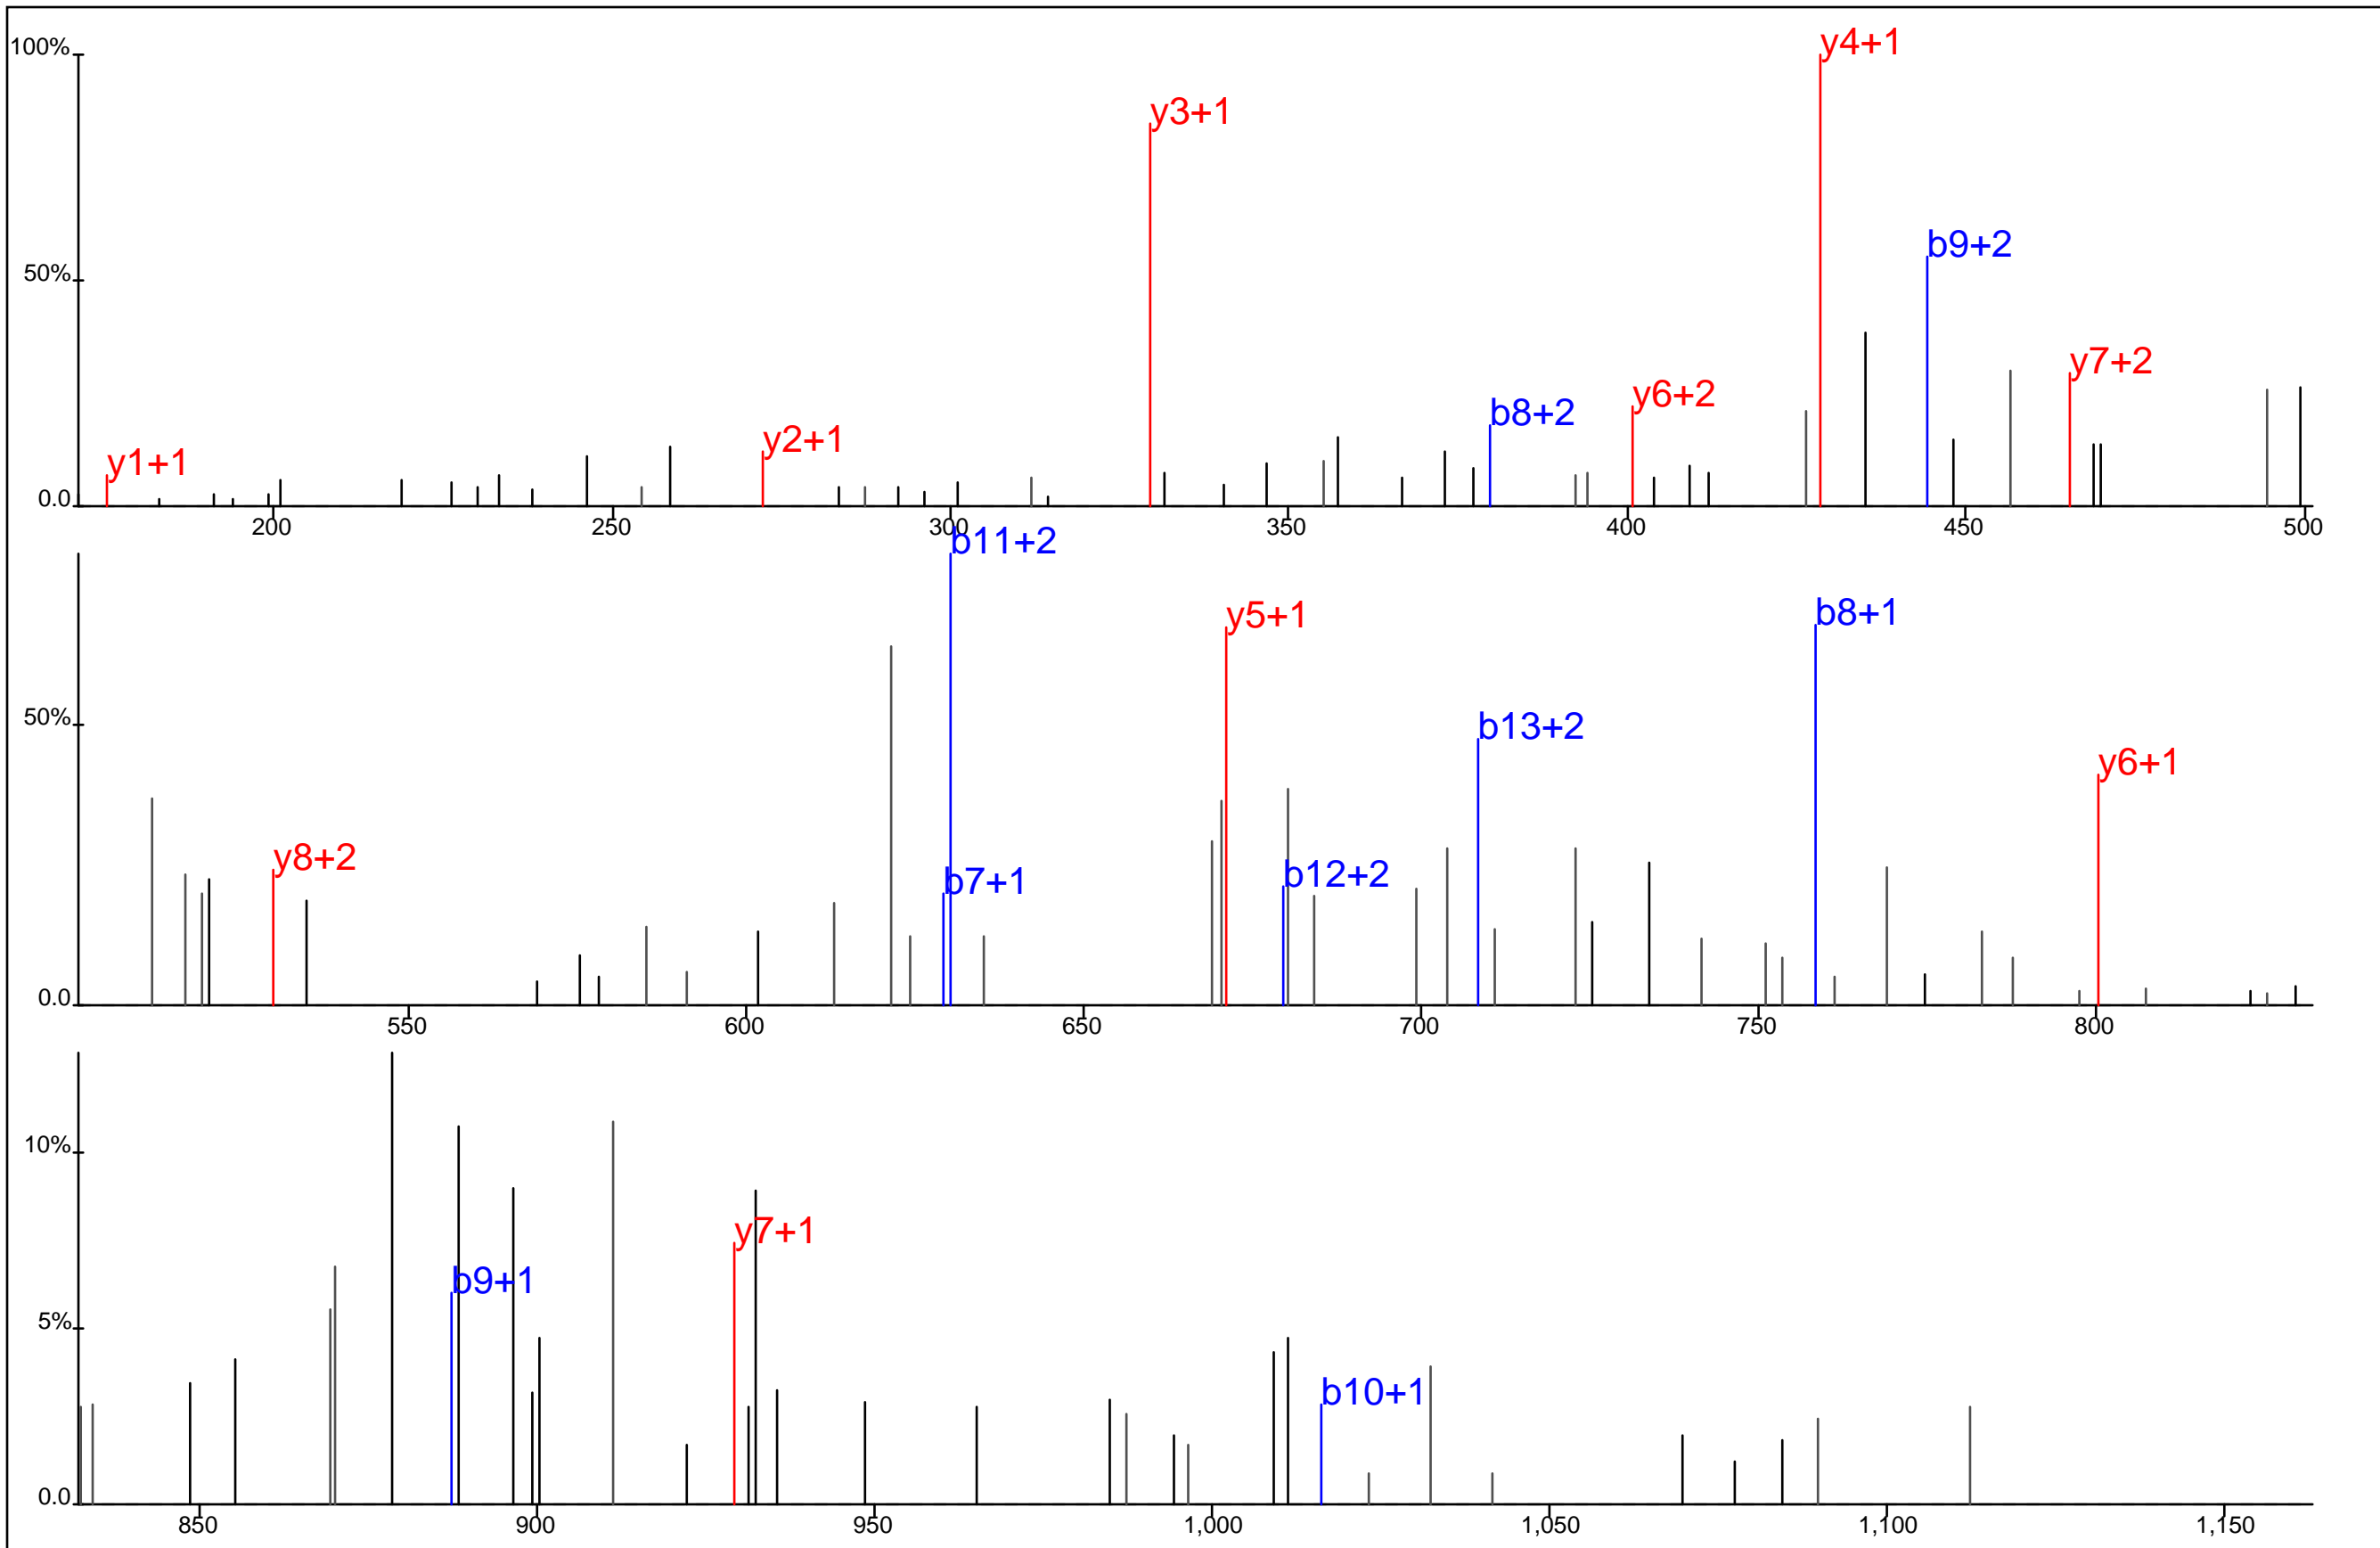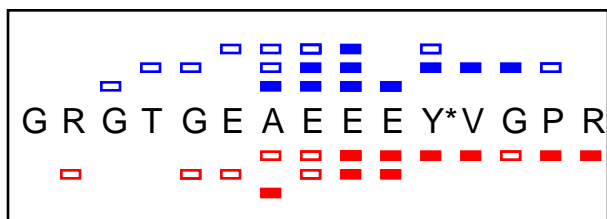

Protein Name: Bystin  
 gi Accession: 0  
 Precursor Mass: 562.9083+3  
 Delta Mass: 0.871 ppm  
 XCorr: 26.73

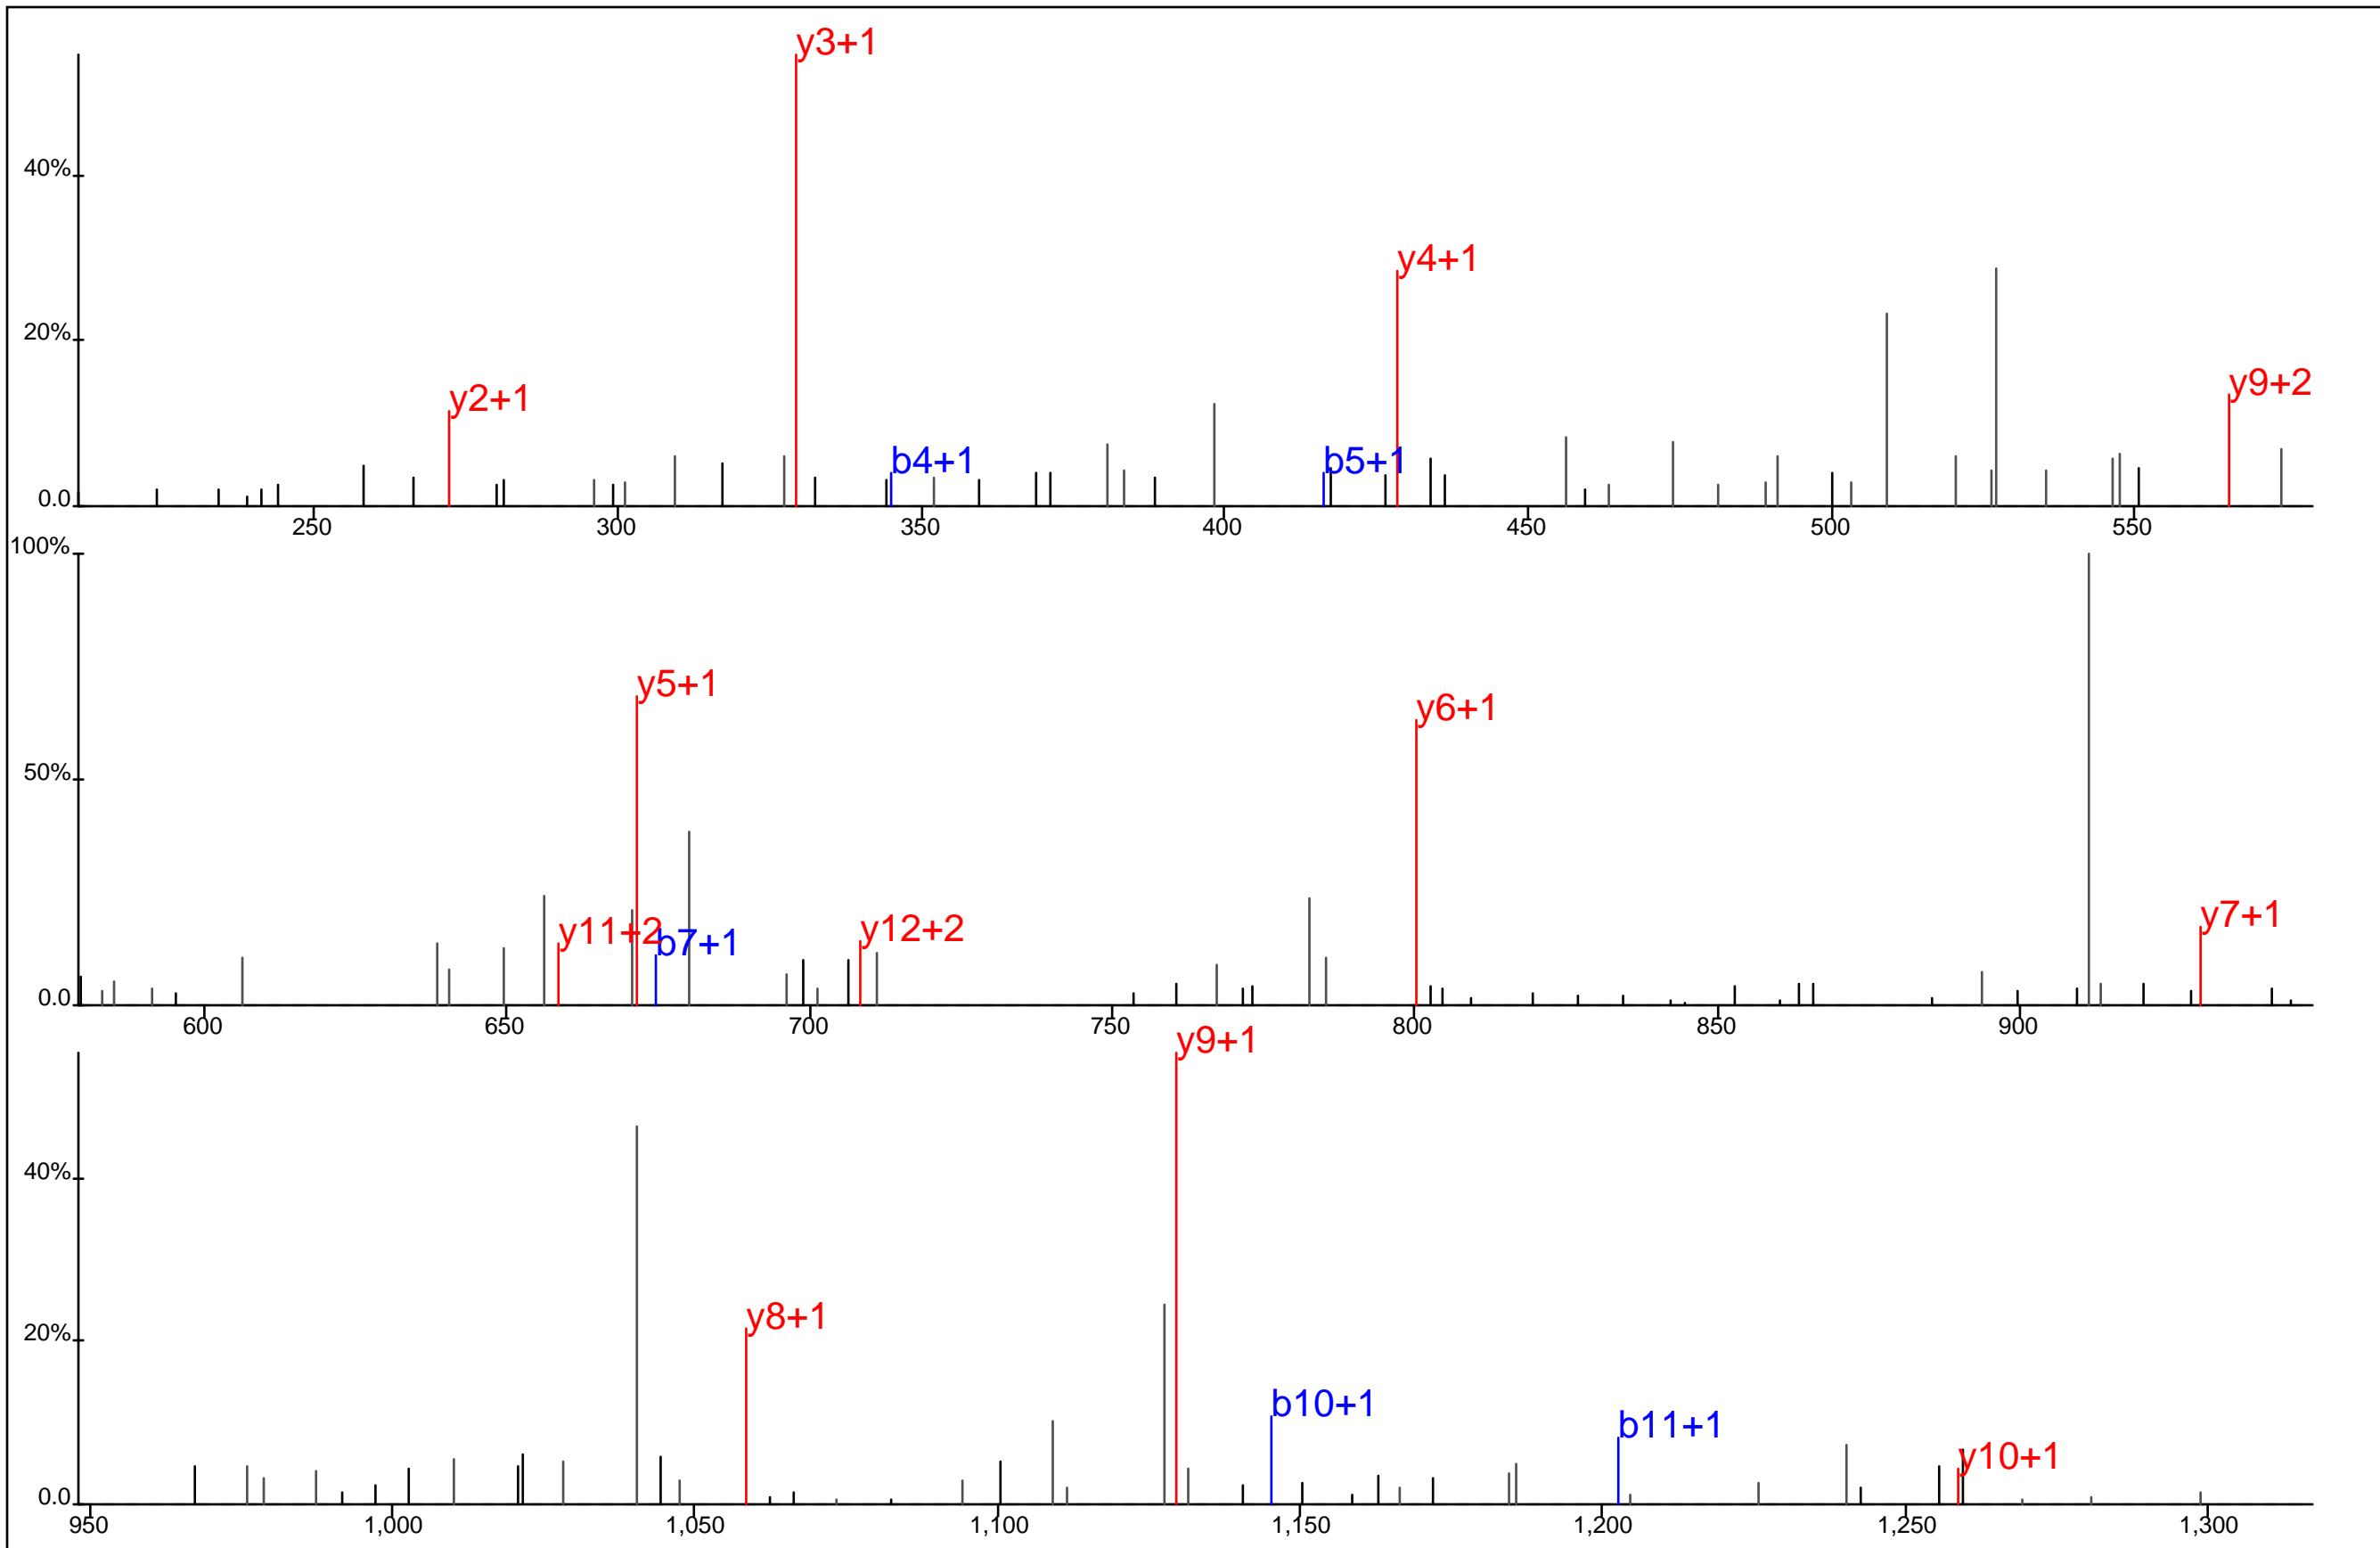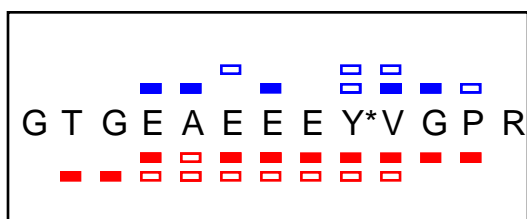

Protein Name: Bystin  
 gi Accession: 0  
 Precursor Mass: 737.2995+2  
 Delta Mass: 1.630 ppm  
 XCorr: 50.07

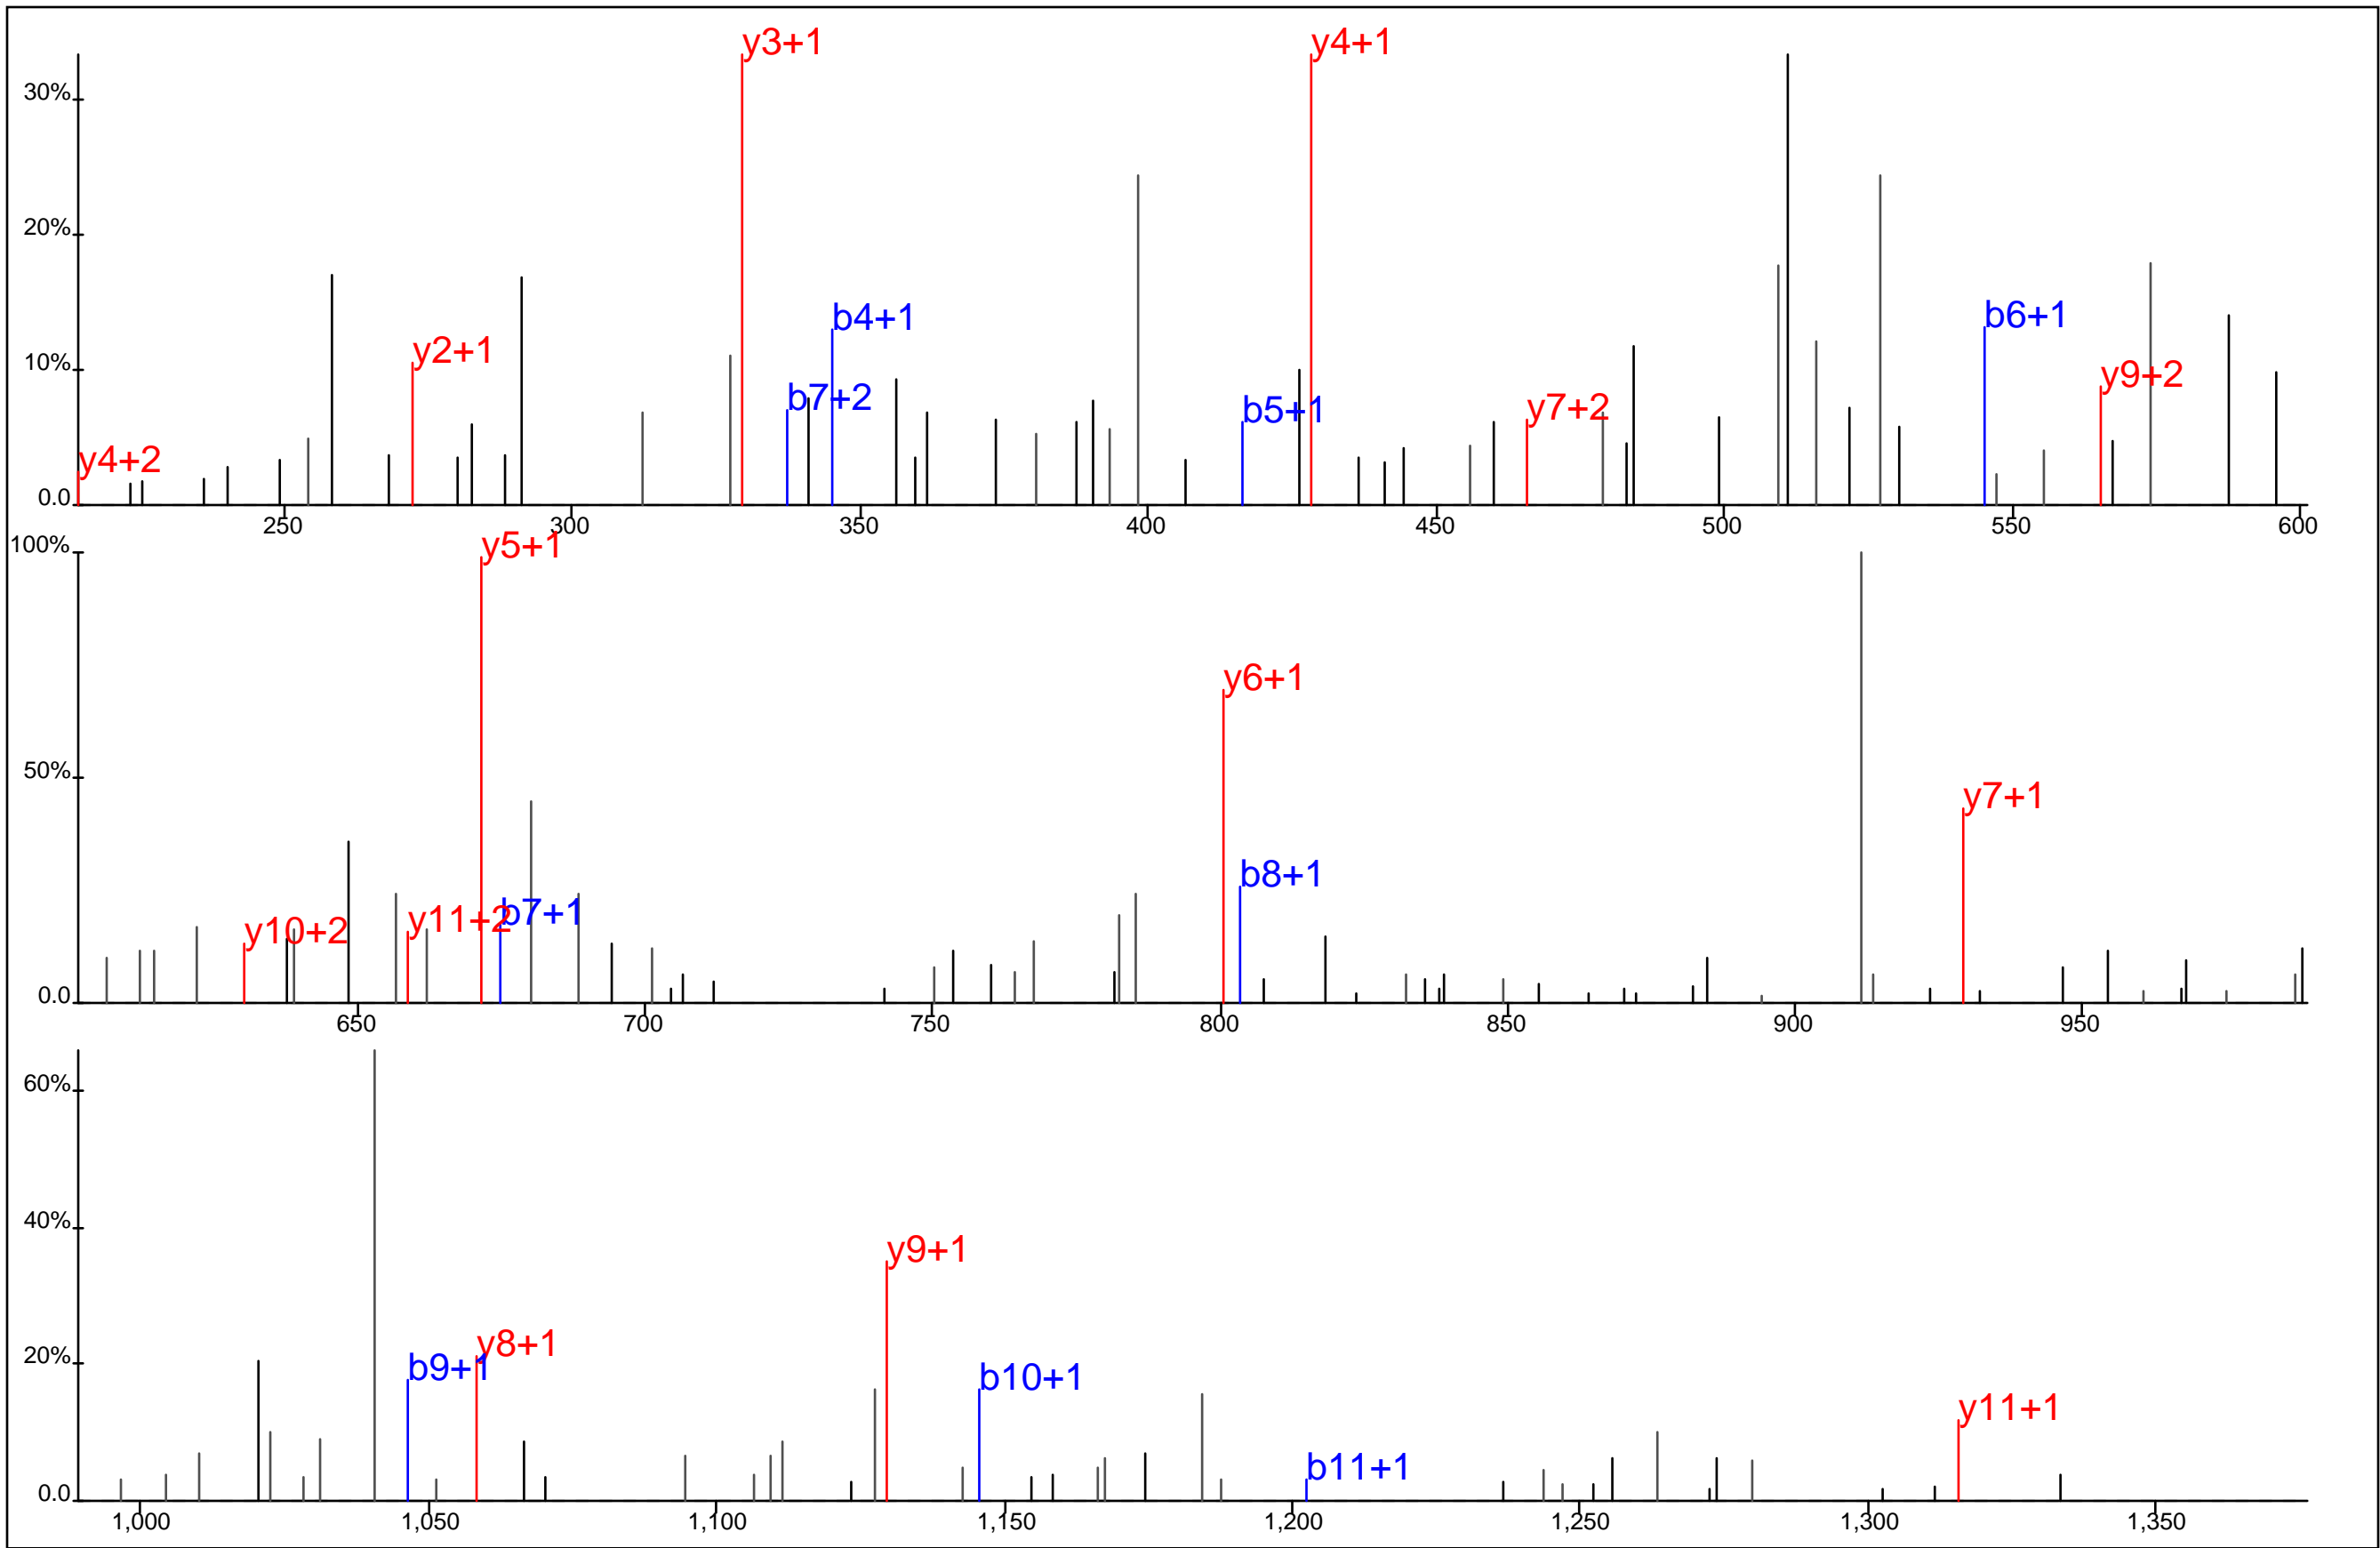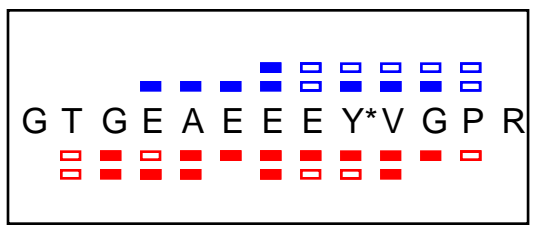

Protein Name: Bystin  
 gi Accession: 0  
 Precursor Mass: 737.3019+2  
 Delta Mass: 4.943 ppm  
 XCorr: 52.5



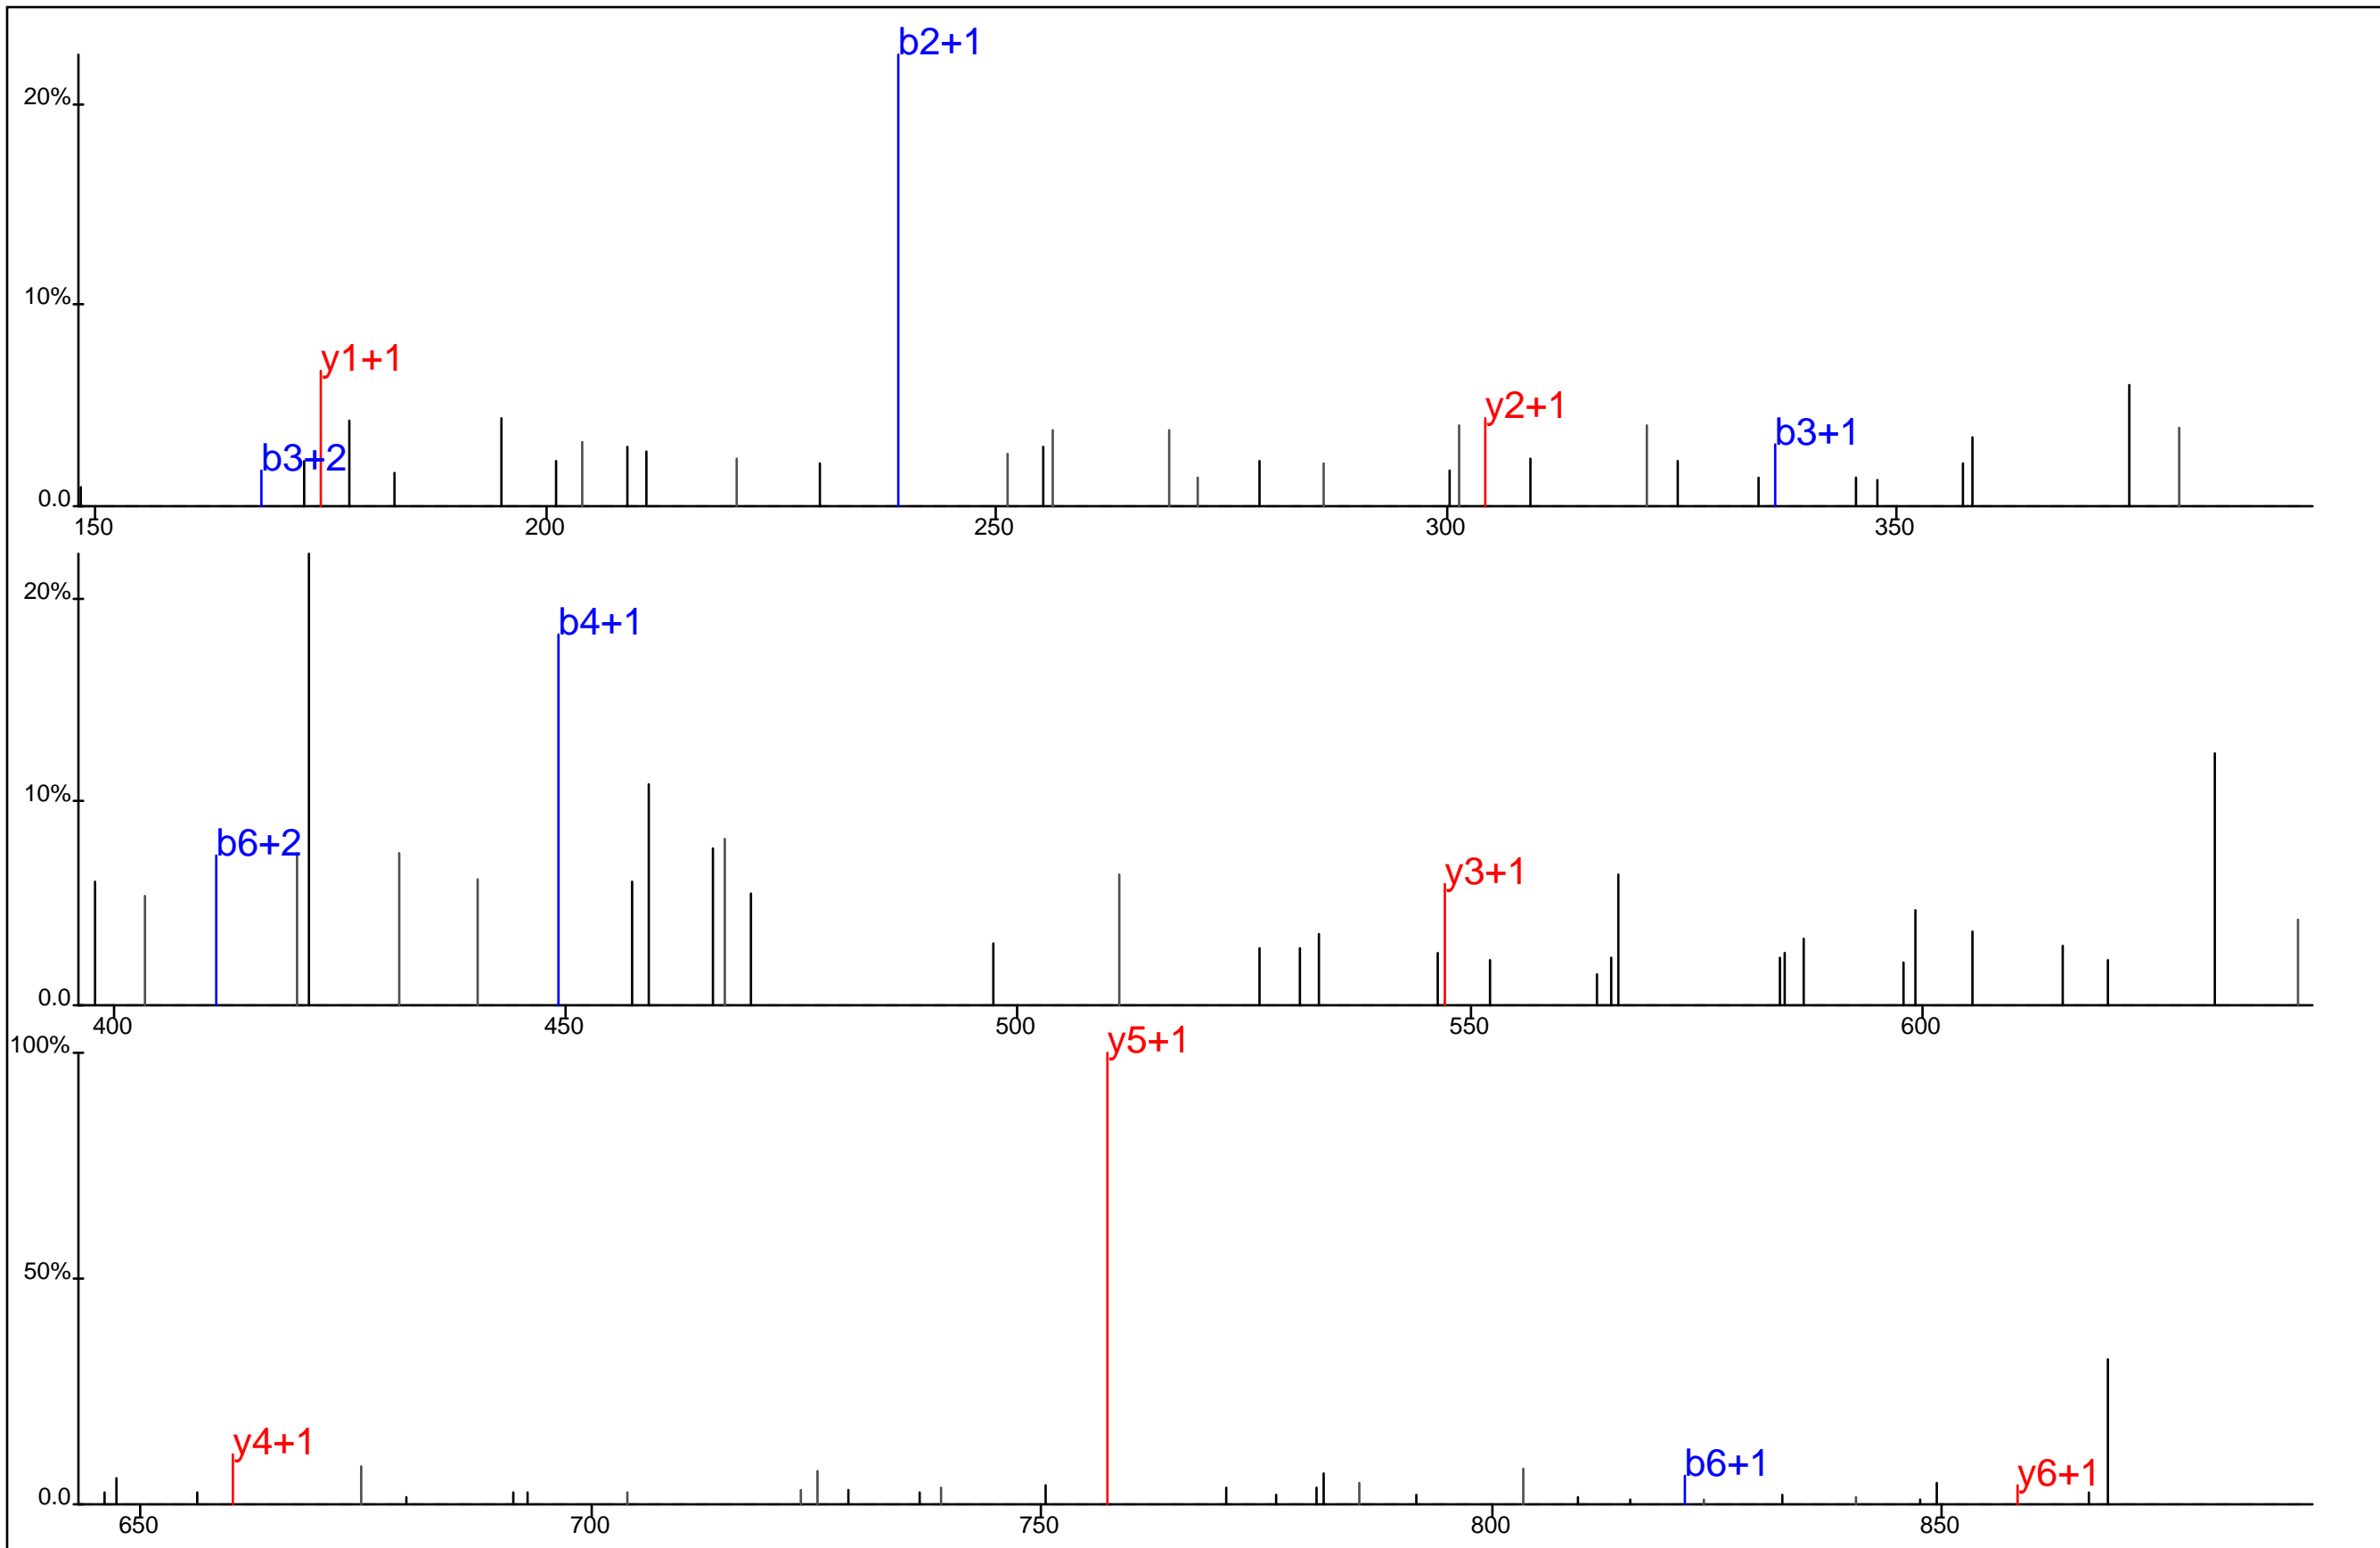

**H T P L Y\* E R**

Protein Name: C9orf10 protein  
 gi Accession: 0  
 Precursor Mass: 498.2195+2  
 Delta Mass: 2.988 ppm  
 XCorr: 25.94

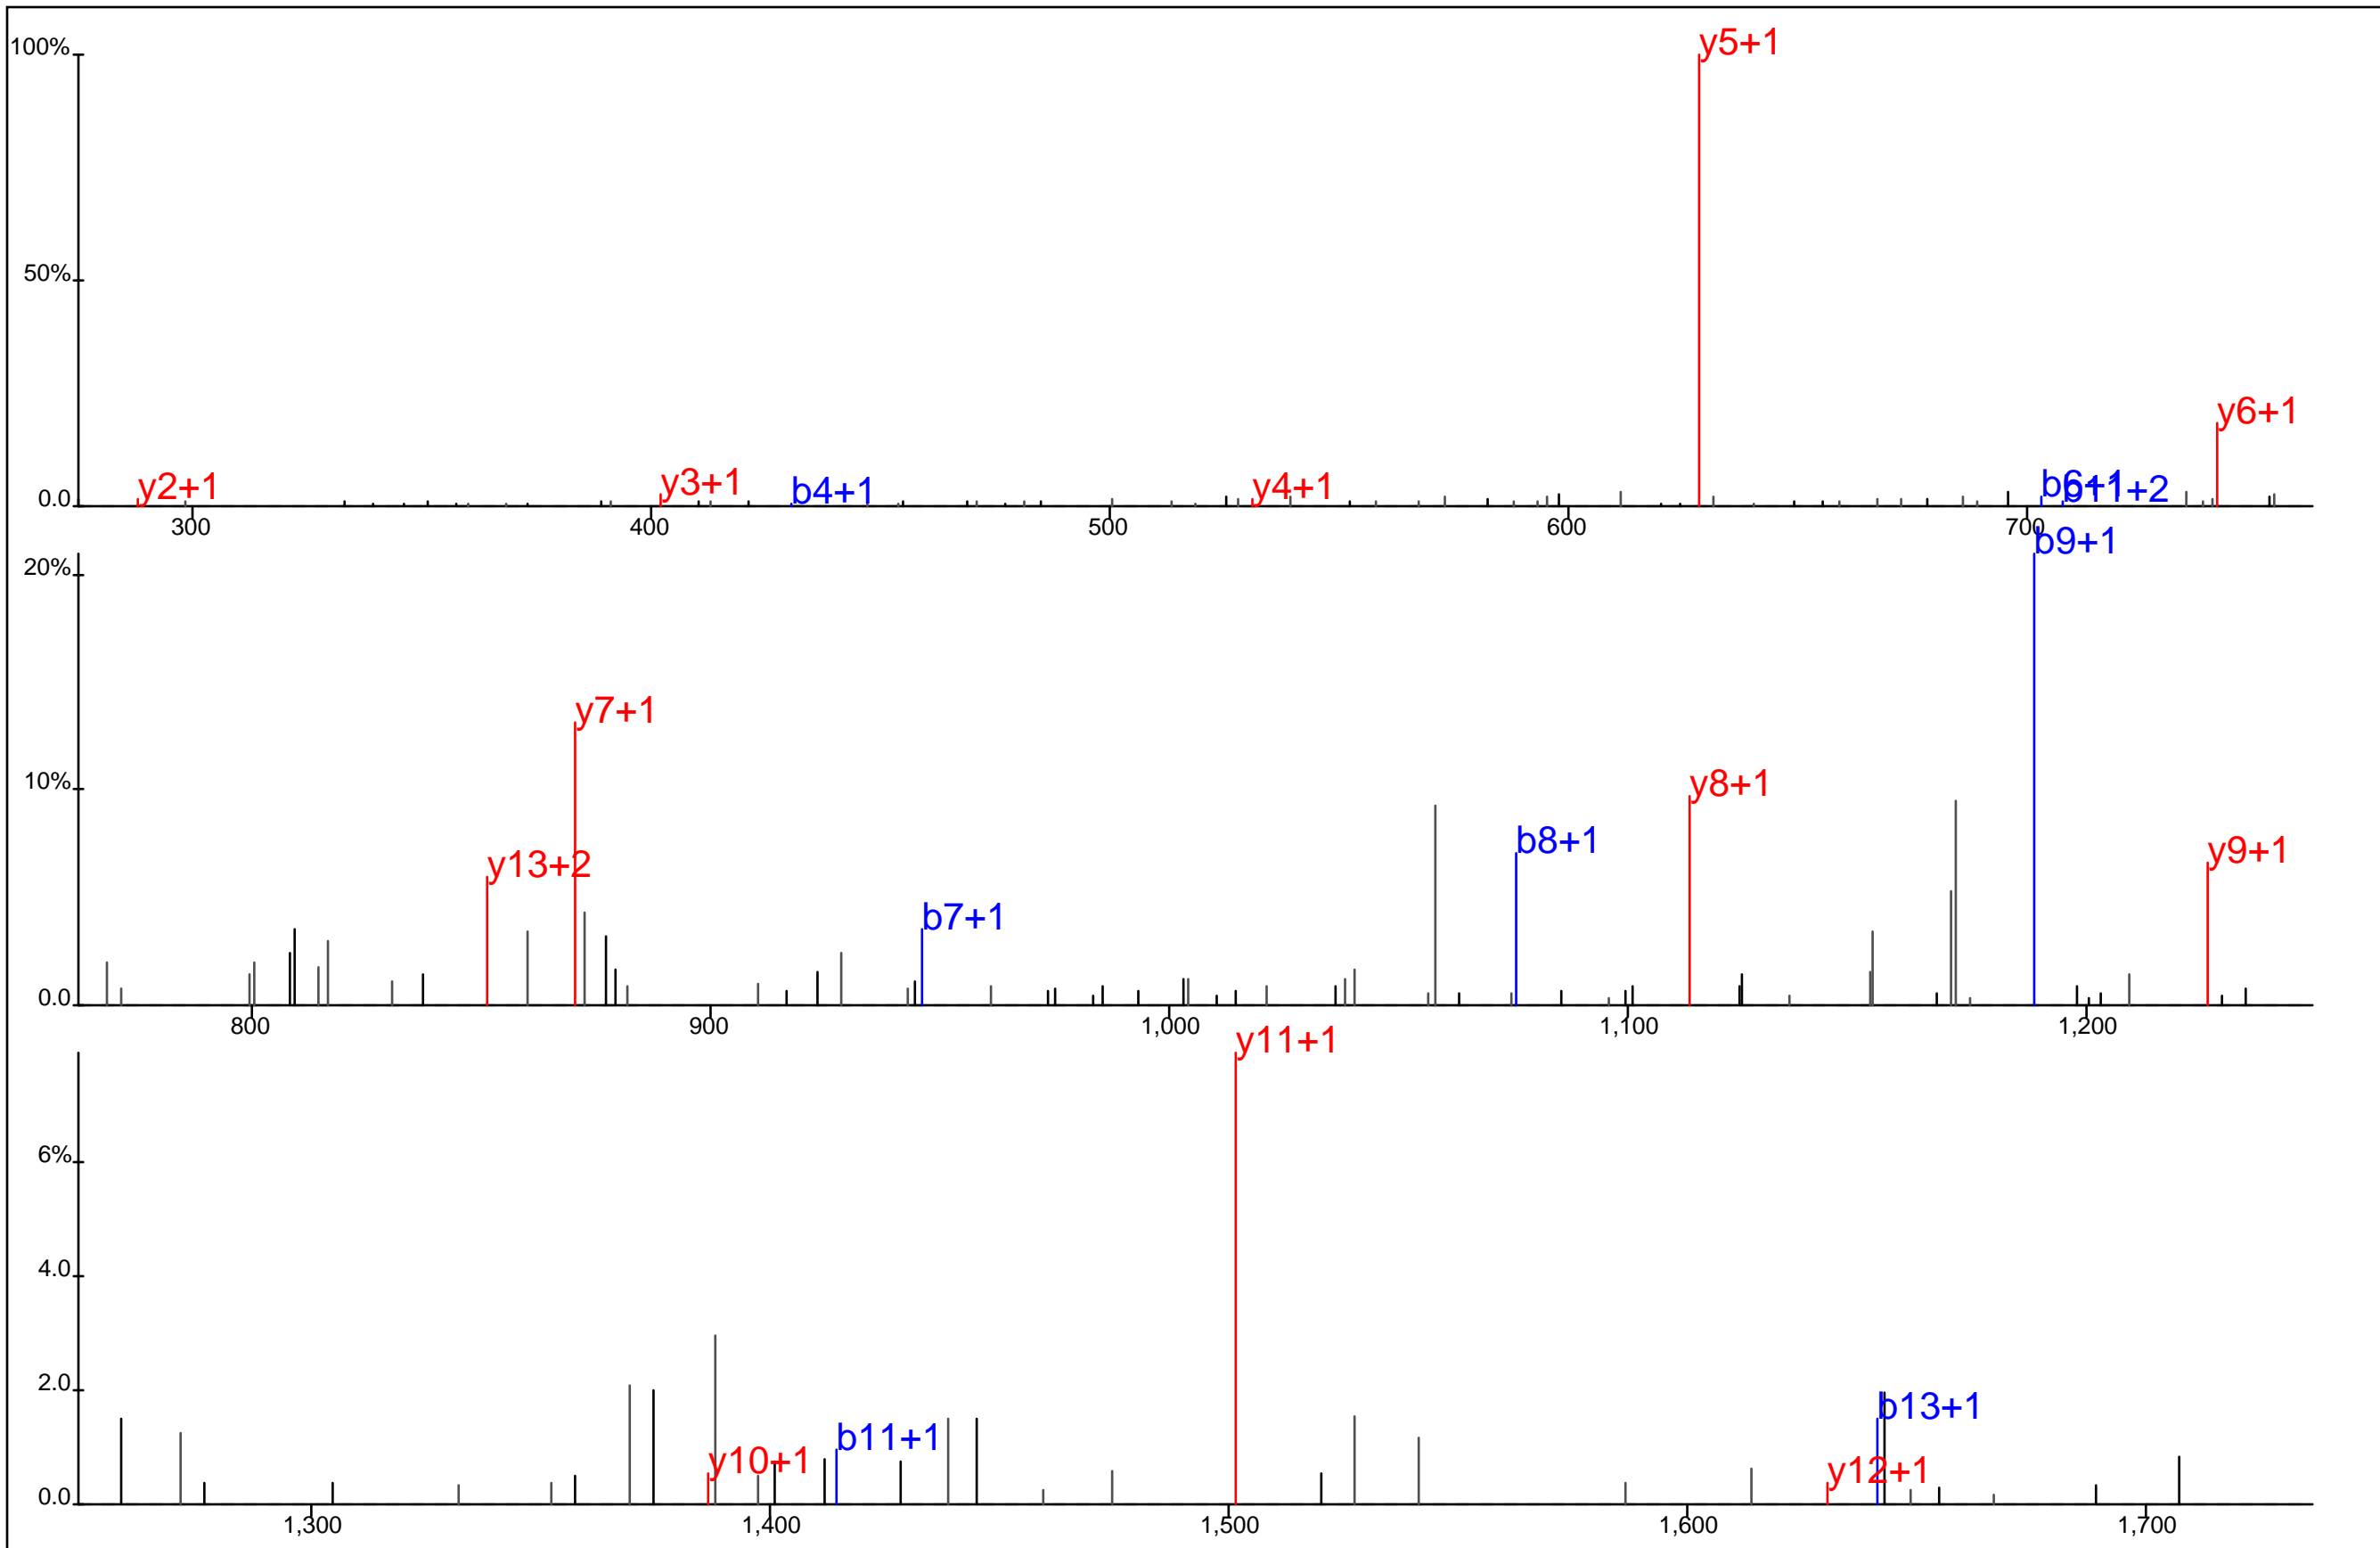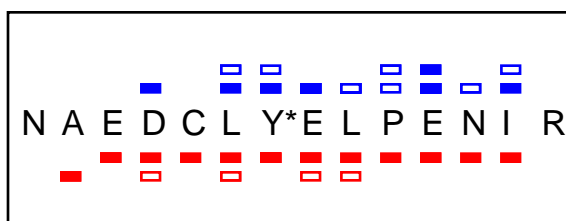

Protein Name: C9orf78  
 gi Accession: 0  
 Precursor Mass: 908.3830+2  
 Delta Mass: 1.727 ppm  
 XCorr: 46.26

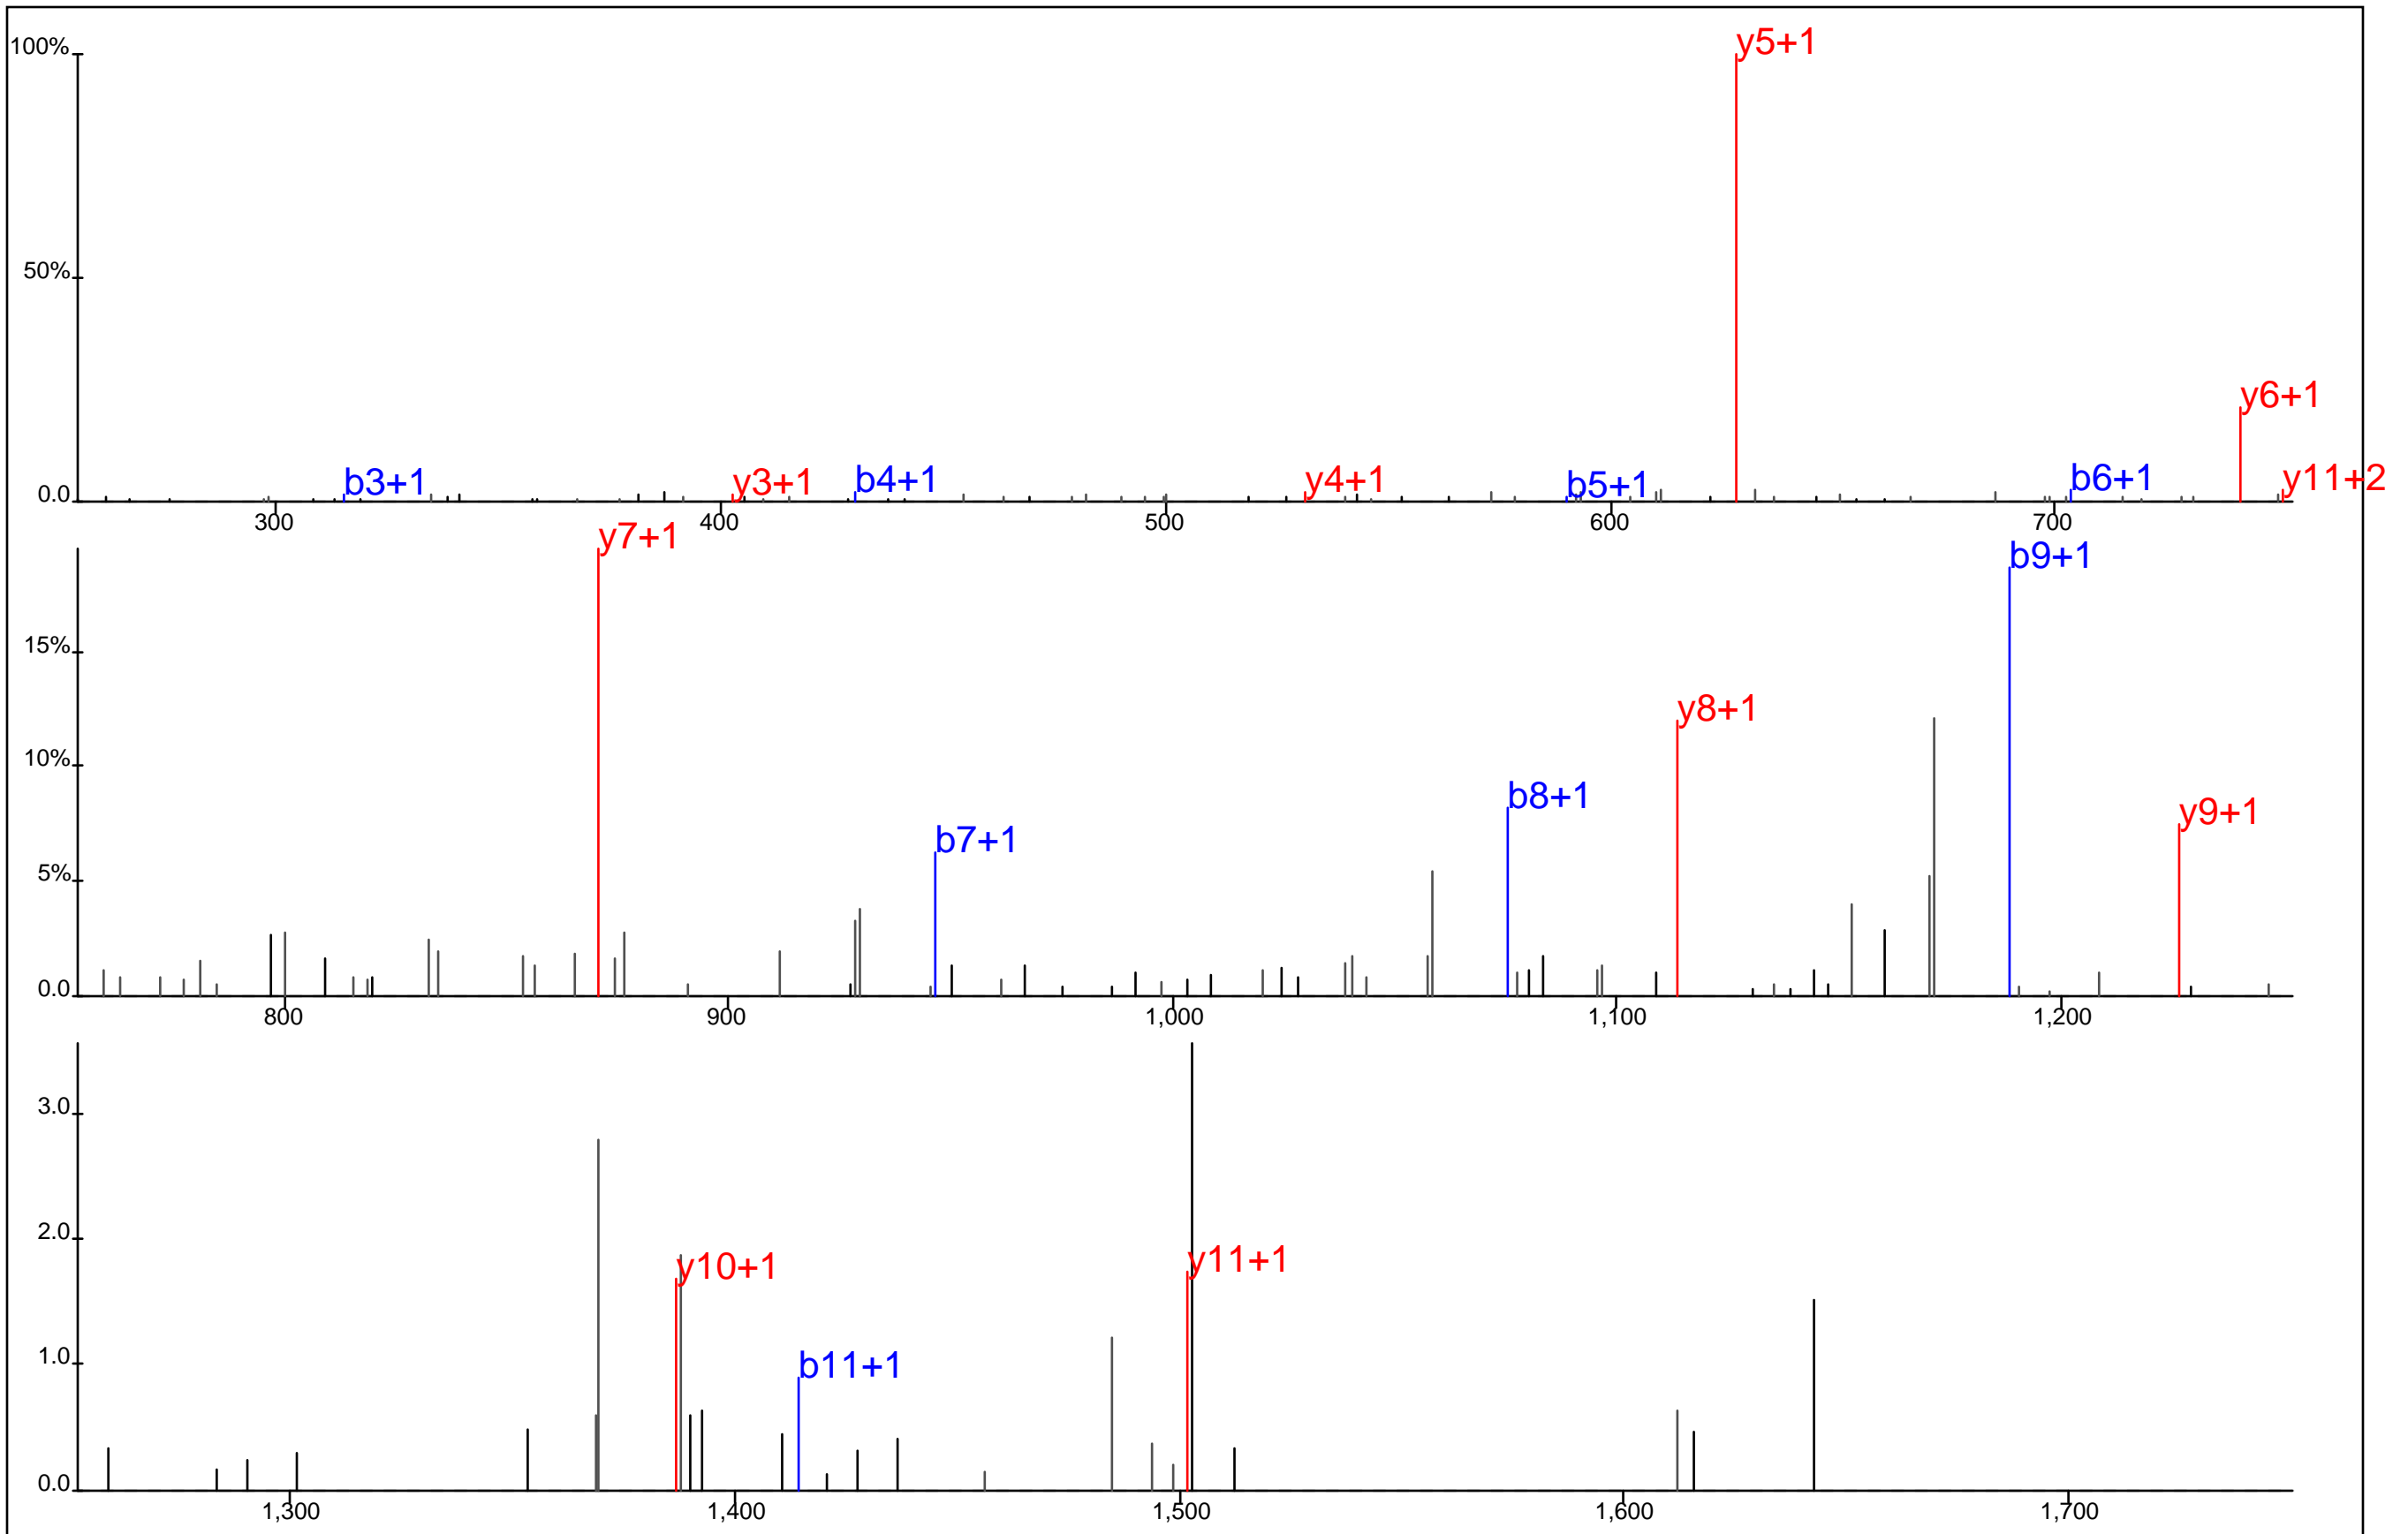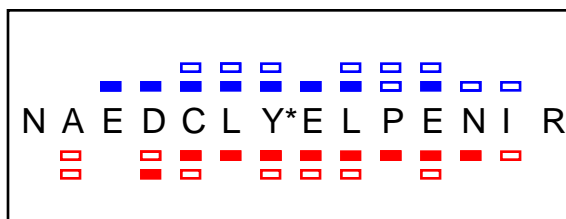

Protein Name: C9orf78  
 gi Accession: 0  
 Precursor Mass: 908.3835+2  
 Delta Mass: 1.122 ppm  
 XCorr: 46.62

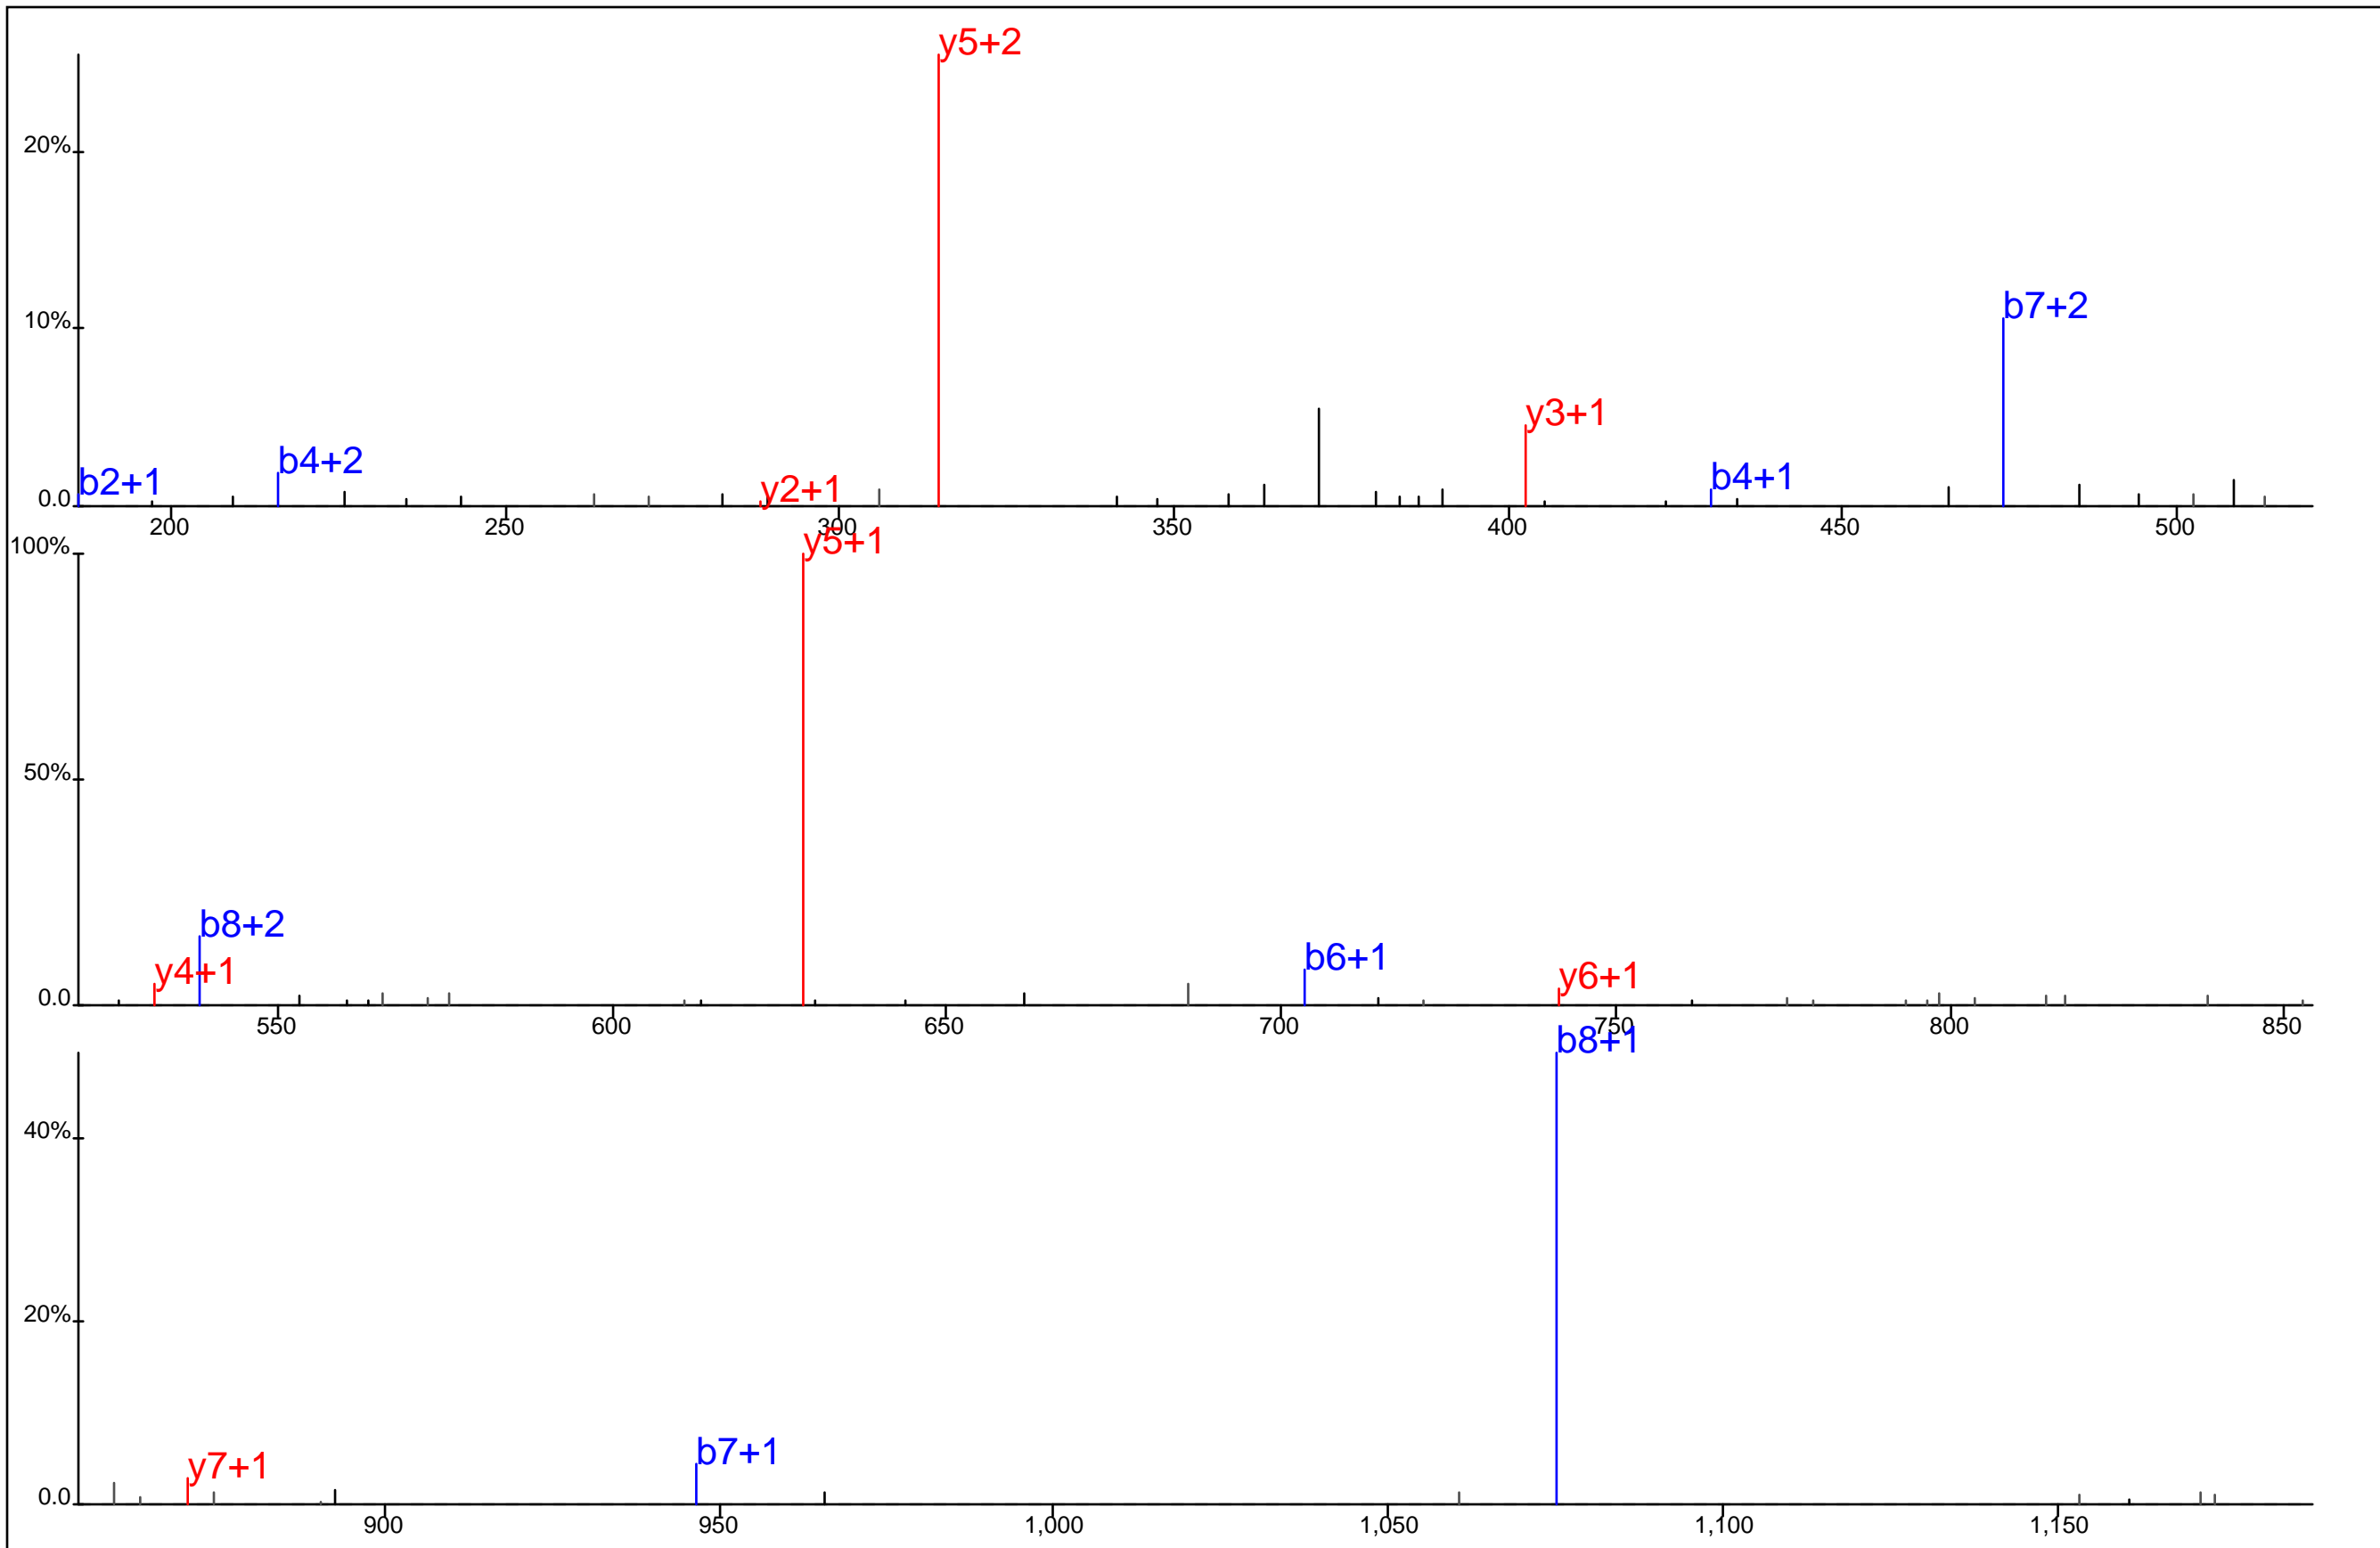

N A E D C L Y\* E L P E N I R  
 (Red boxes highlight Y\* and E L P E N I R)

Protein Name: C9orf78  
 gi Accession: 0  
 Precursor Mass: 605.9261+3  
 Delta Mass: 1.021 ppm  
 XCorr: 45.8

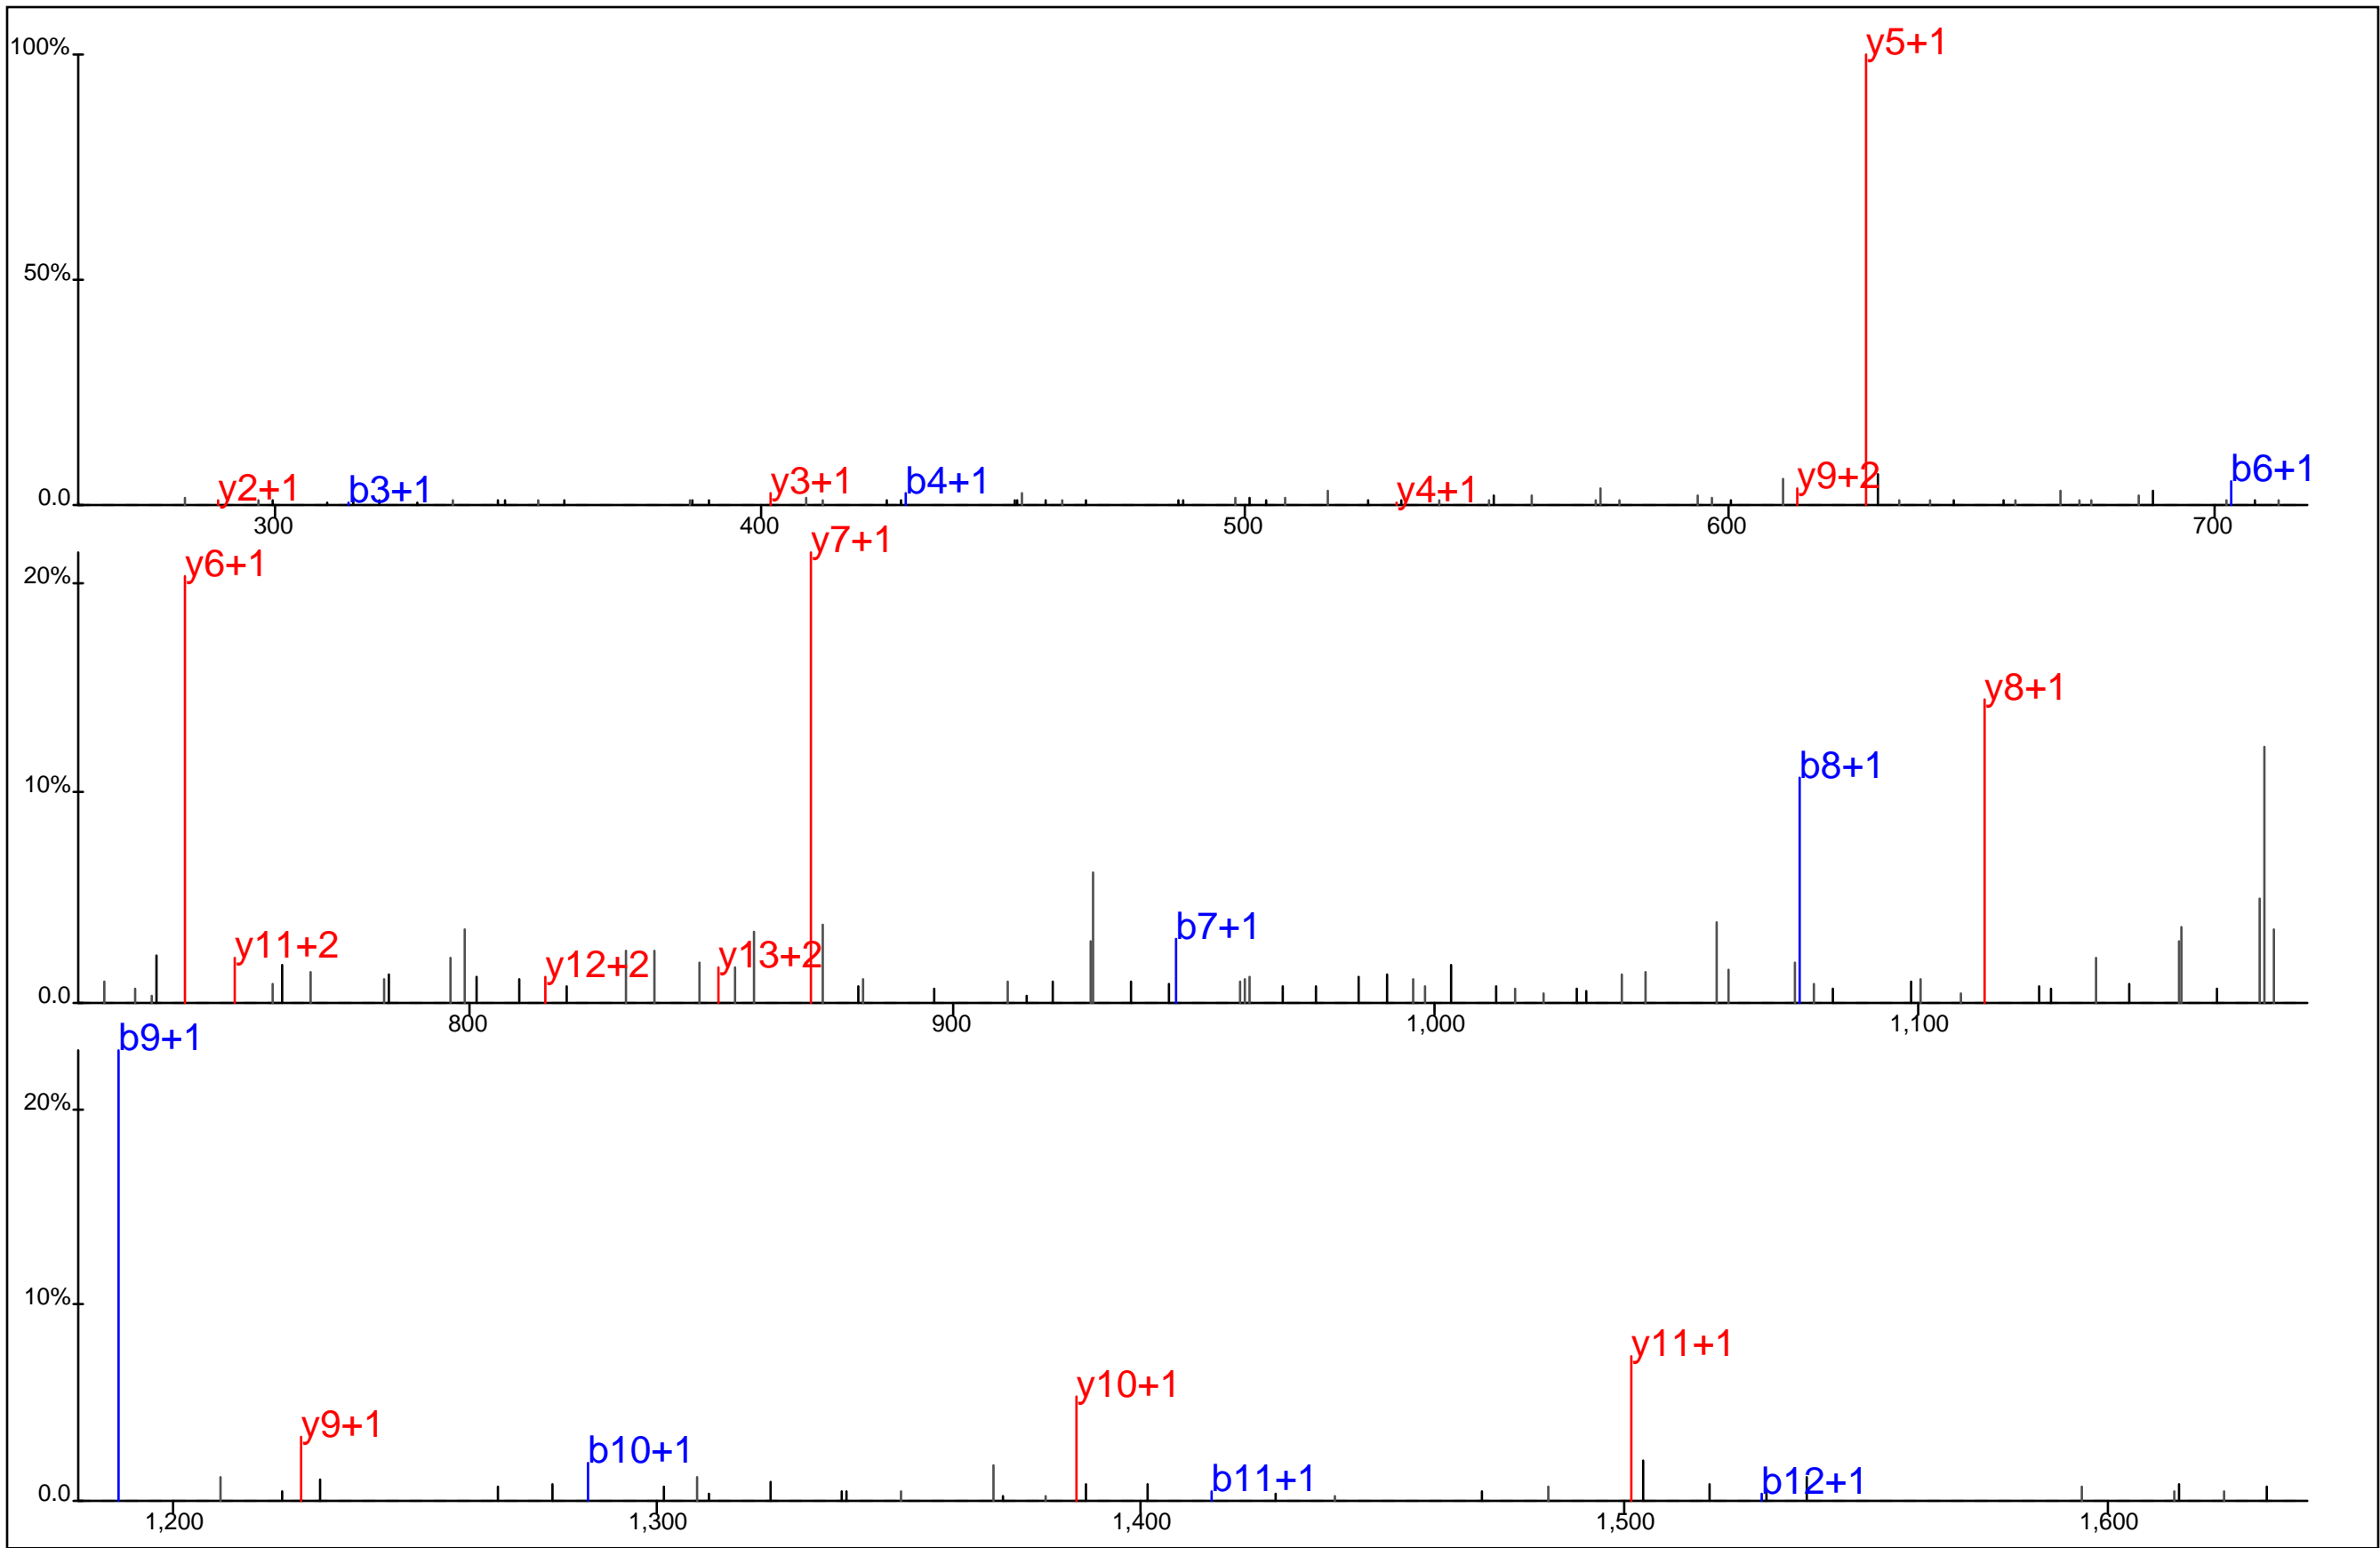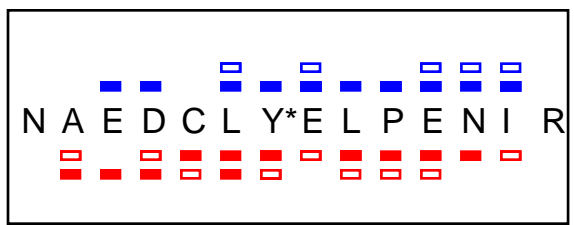

Protein Name: C9orf78  
gi Accession: 0  
Precursor Mass: 908.3854+2  
Delta Mass: 0.894 ppm  
XCorr: 40.43

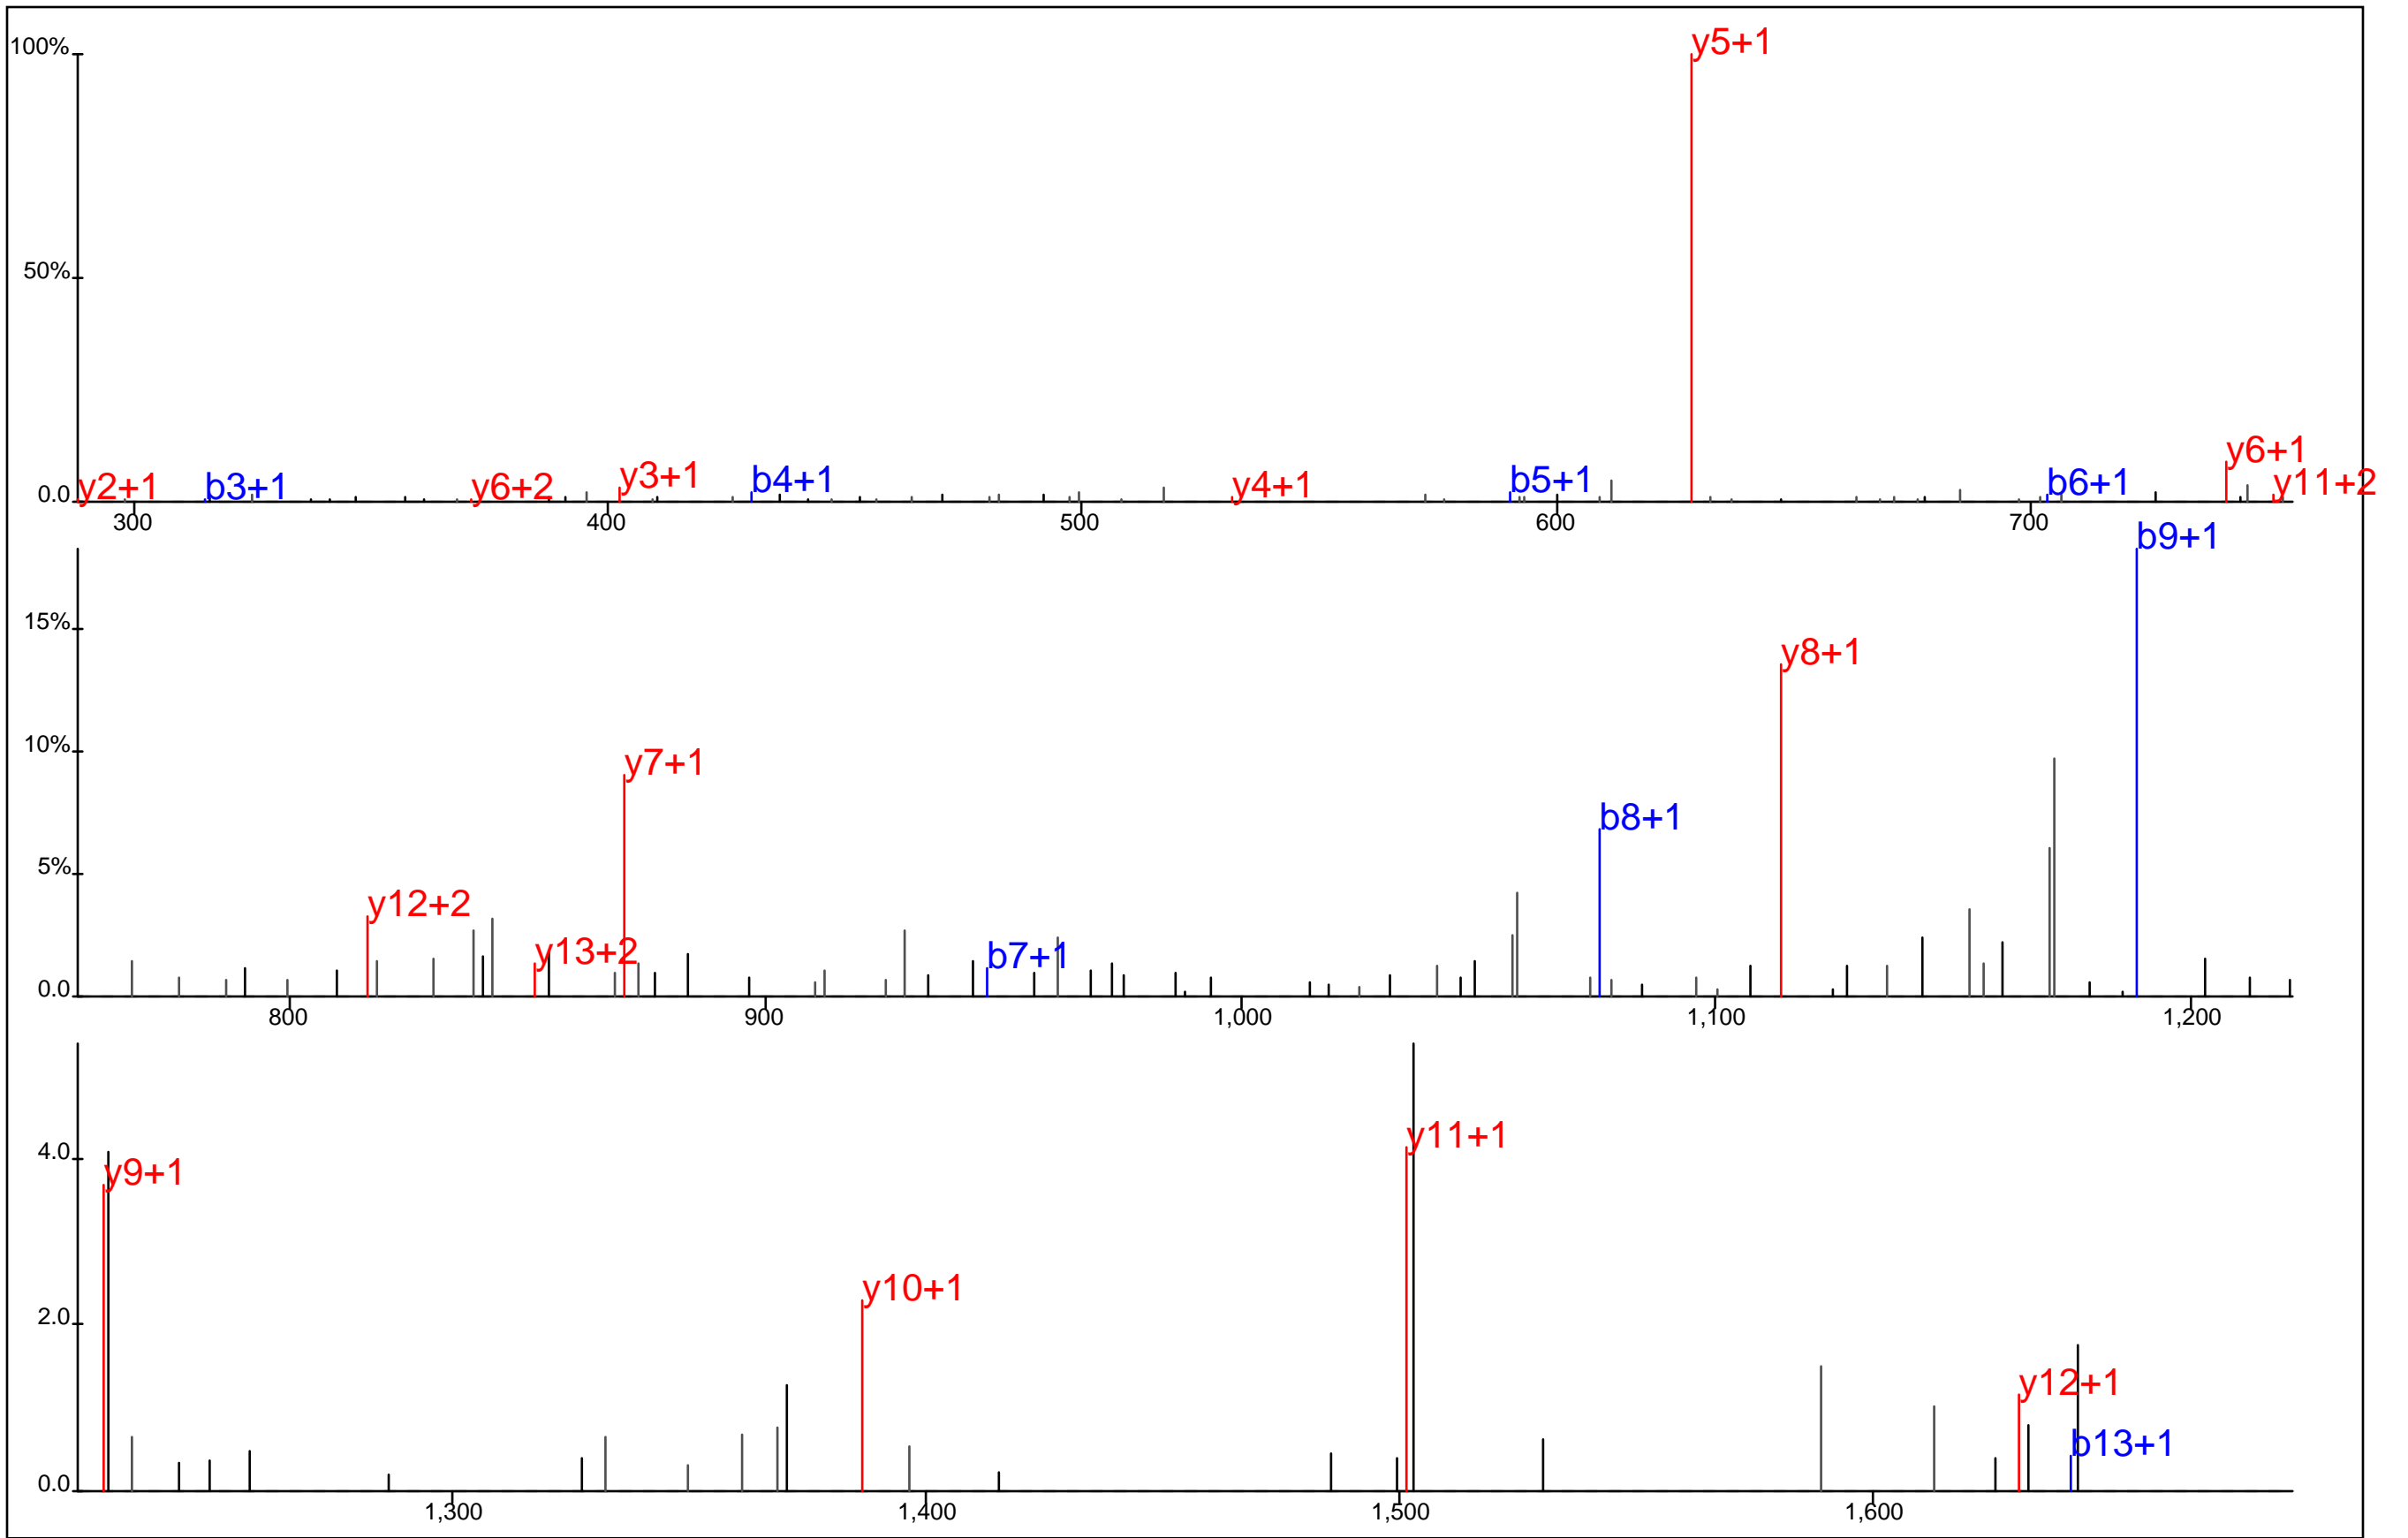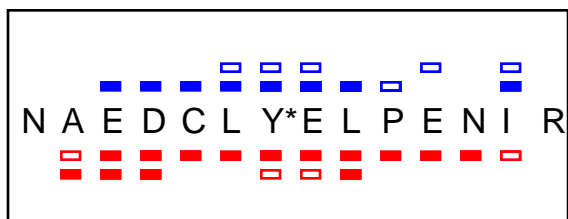

Protein Name: C9orf78  
 gi Accession: 0  
 Precursor Mass: 908.3847+2  
 Delta Mass: 0.155 ppm  
 XCorr: 48.04

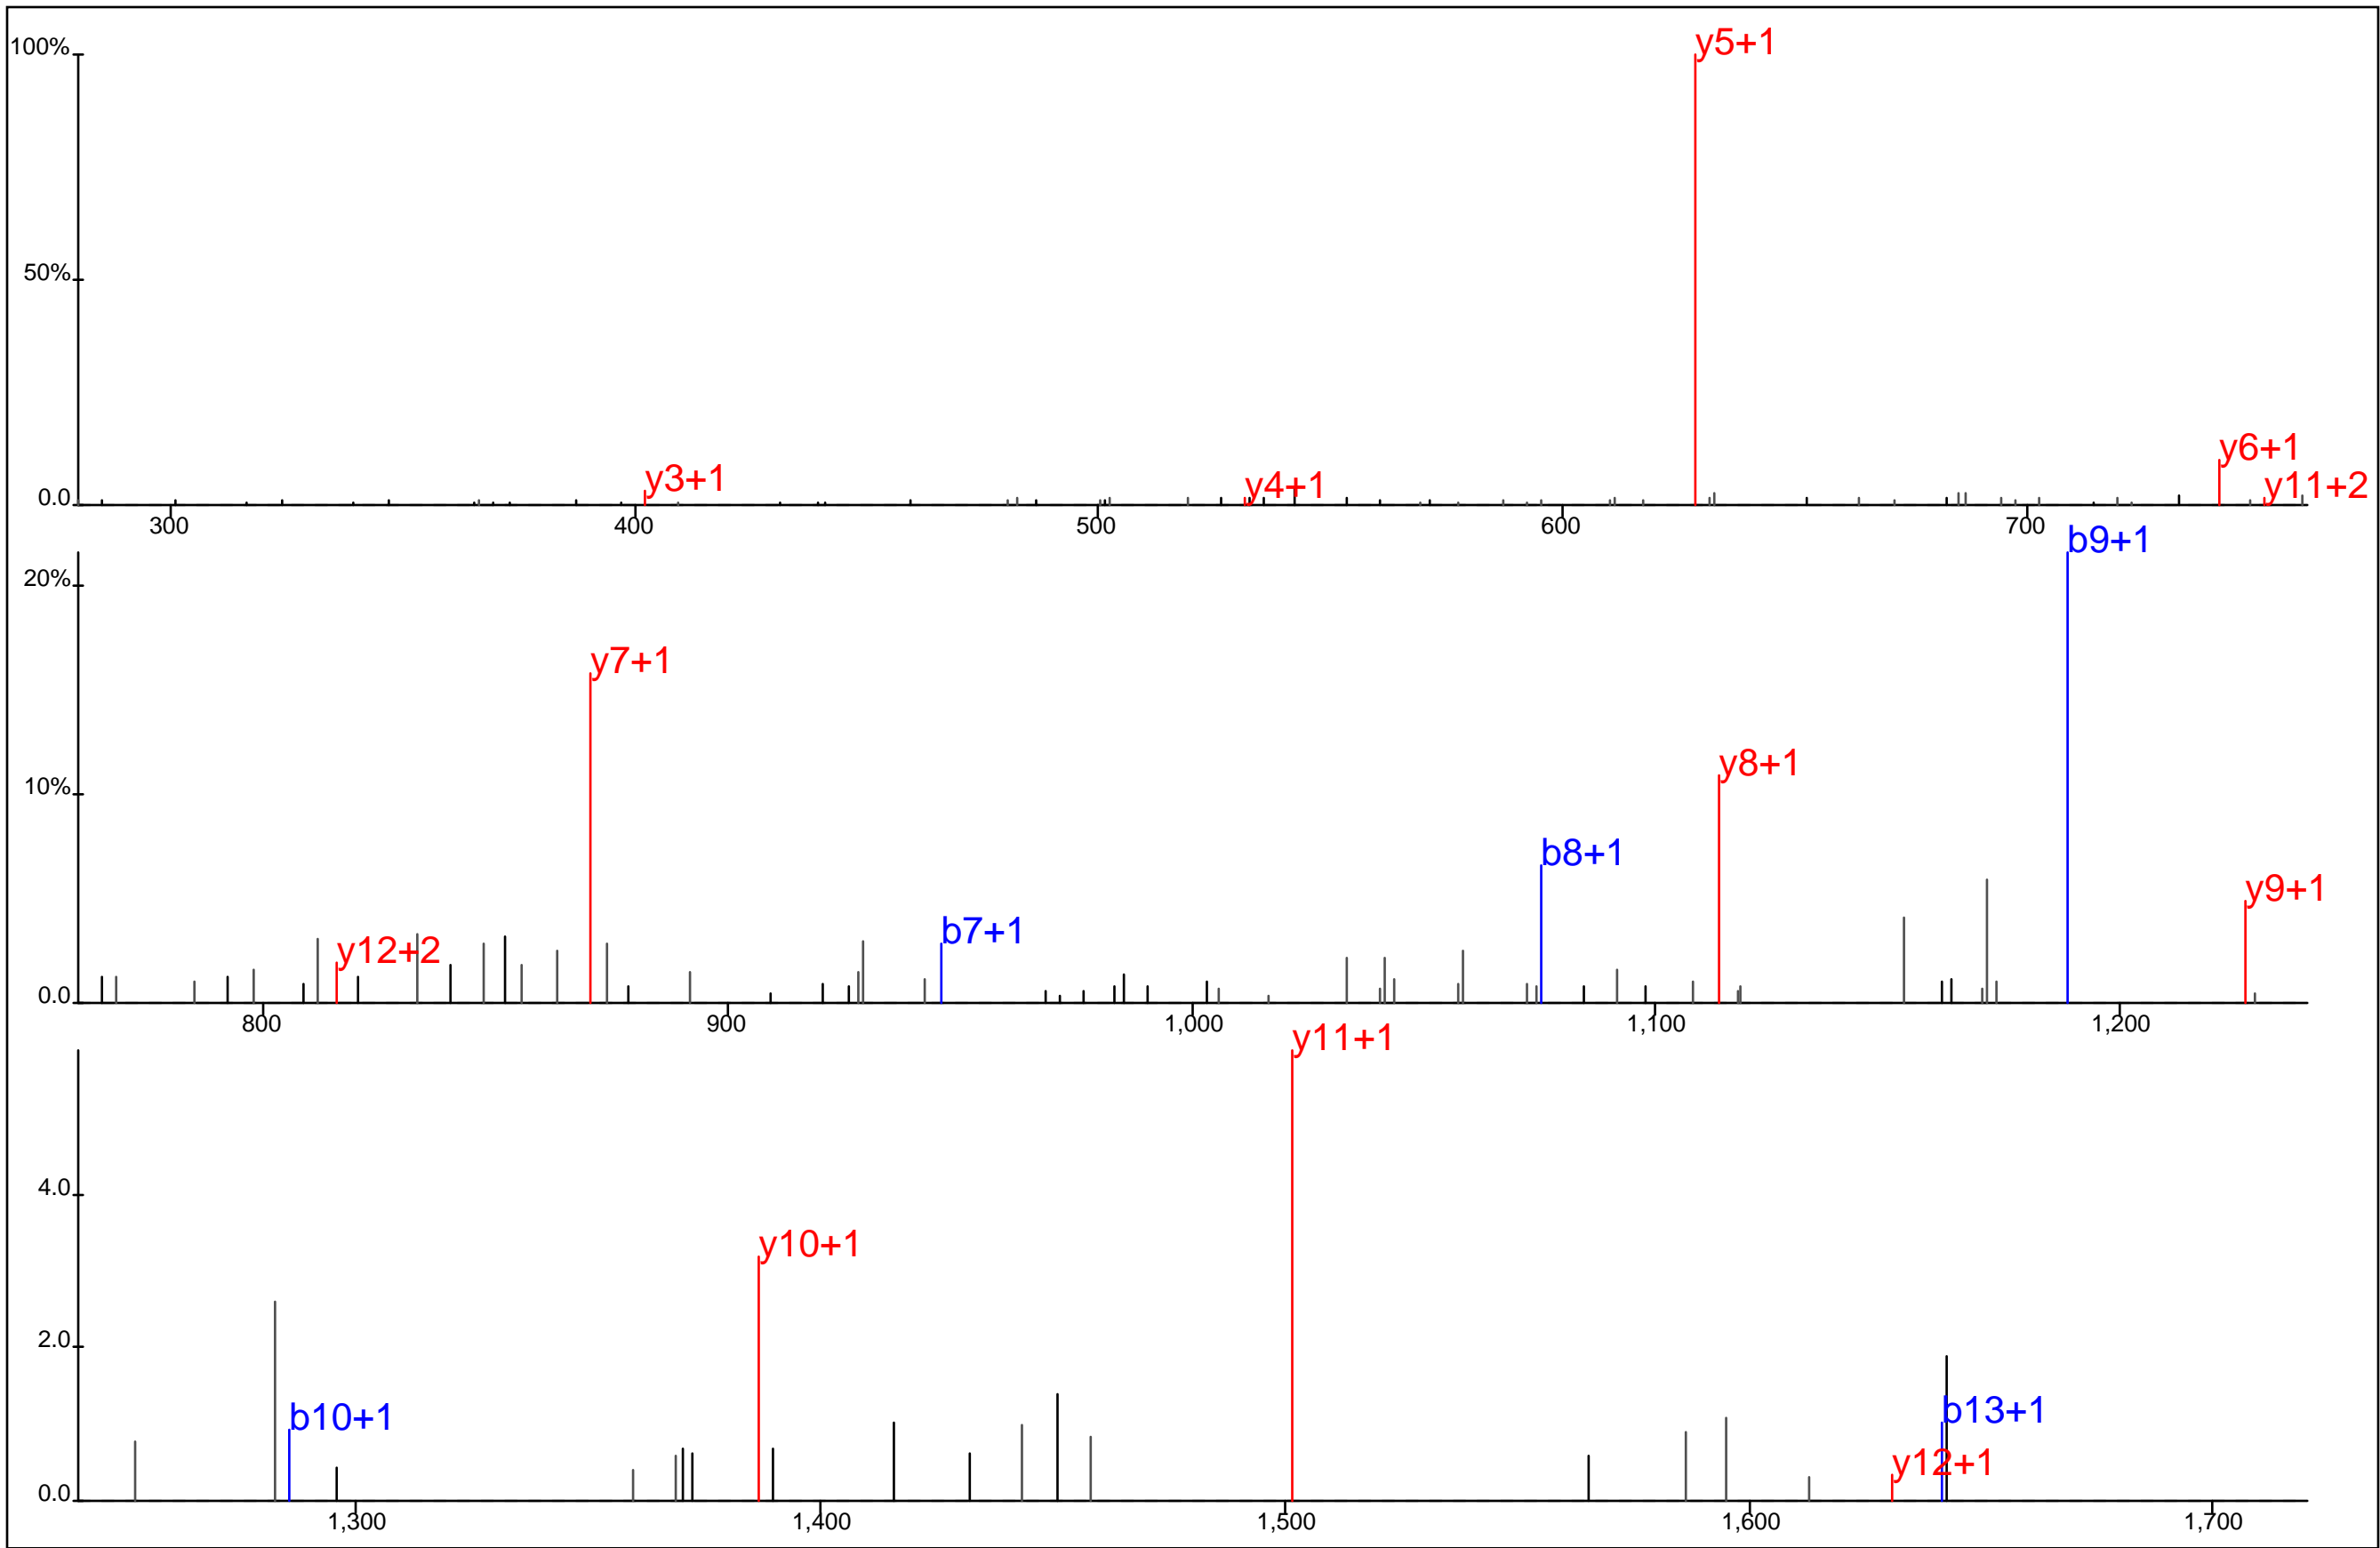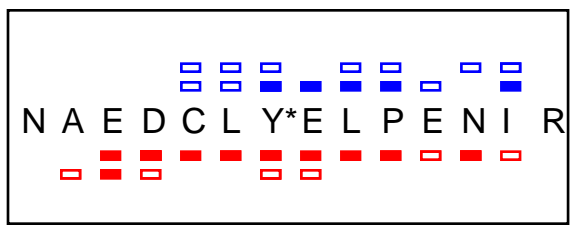

Protein Name: C9orf78  
 gi Accession: 0  
 Precursor Mass: 908.3832+2  
 Delta Mass: 1.458 ppm  
 XCorr: 48.32

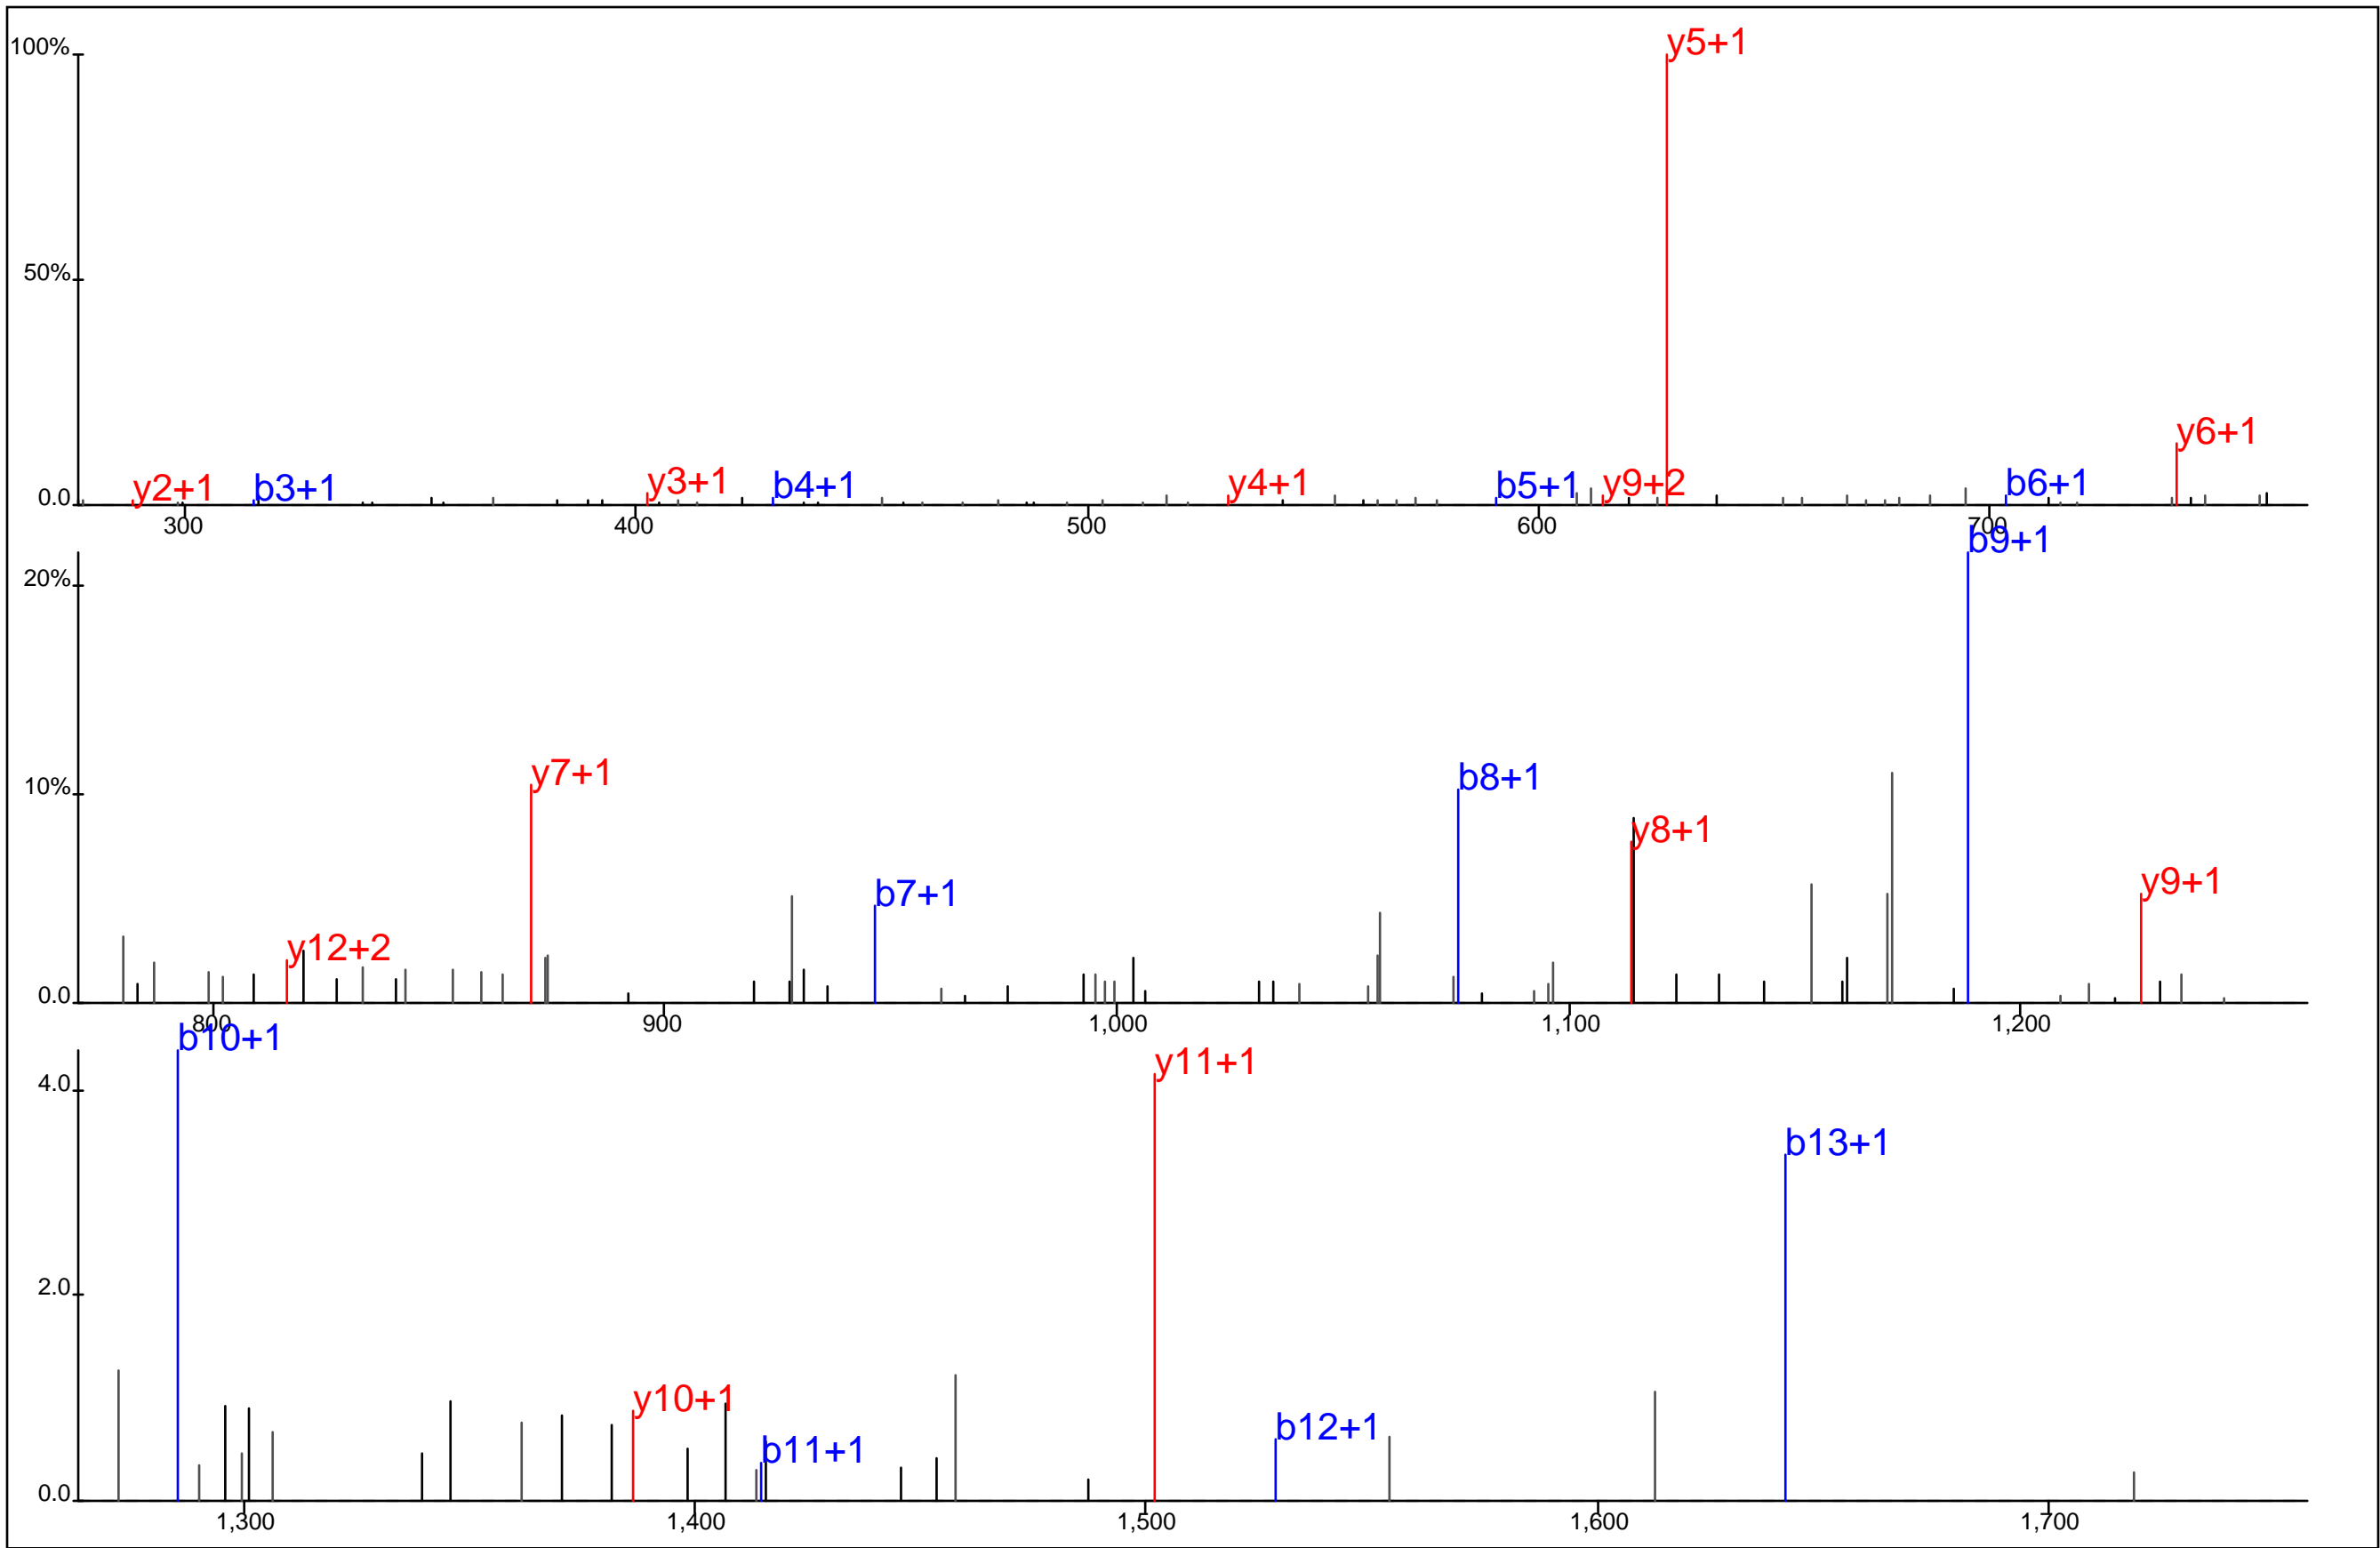

|                                                                                                                                              |                                                                                                                               |
|----------------------------------------------------------------------------------------------------------------------------------------------|-------------------------------------------------------------------------------------------------------------------------------|
| <pre>       [ ] [ ] [ ] [ ] [ ] [ ] [ ] [ ] [ ] [ ]       N A E D C L Y * E L P E N I R       [ ] [ ] [ ] [ ] [ ] [ ] [ ] [ ] [ ] [ ] </pre> | <p>Protein Name: C9orf78<br/> gi Accession: 0<br/> Precursor Mass: 908.3840+2<br/> Delta Mass: 0.585 ppm<br/> XCorr: 48.6</p> |
|----------------------------------------------------------------------------------------------------------------------------------------------|-------------------------------------------------------------------------------------------------------------------------------|



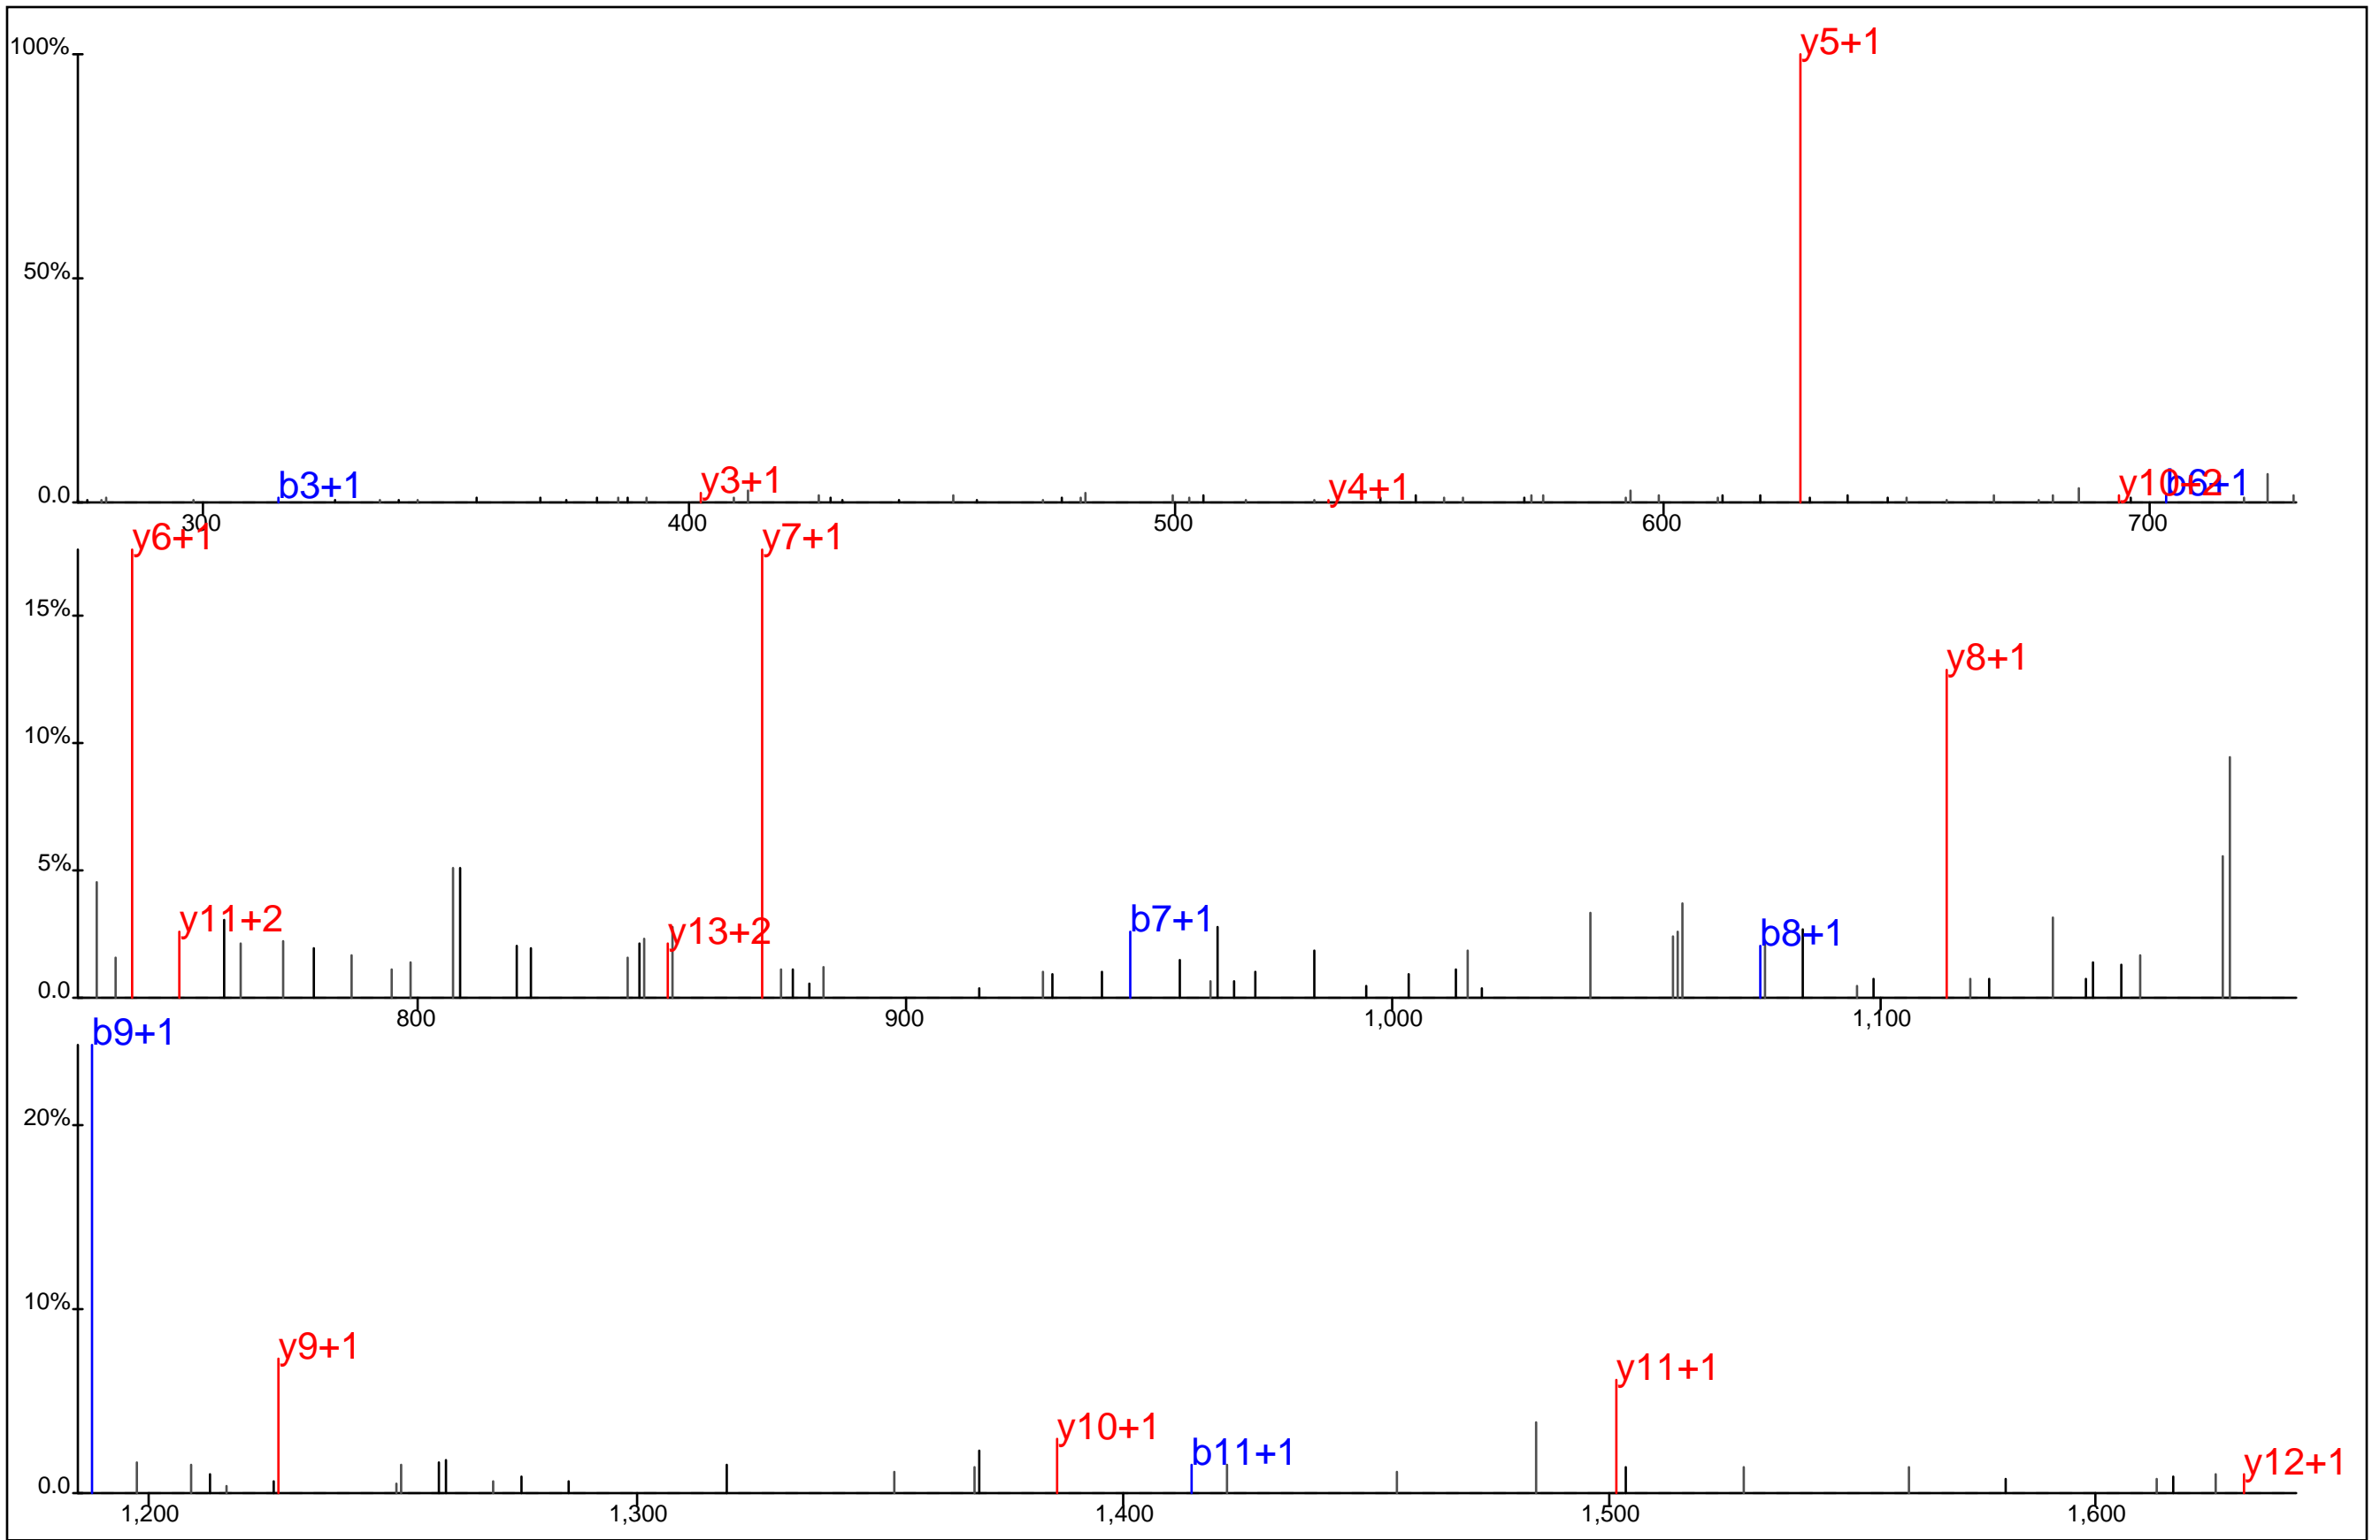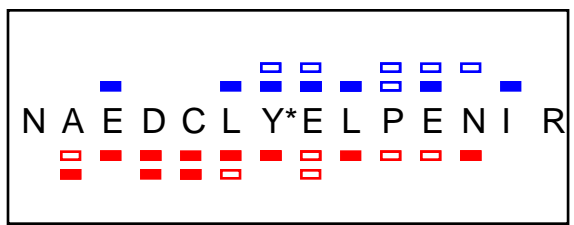

Protein Name: C9orf78  
 gi Accession: 0  
 Precursor Mass: 908.3818+2  
 Delta Mass: 3.072 ppm  
 XCorr: 61.31

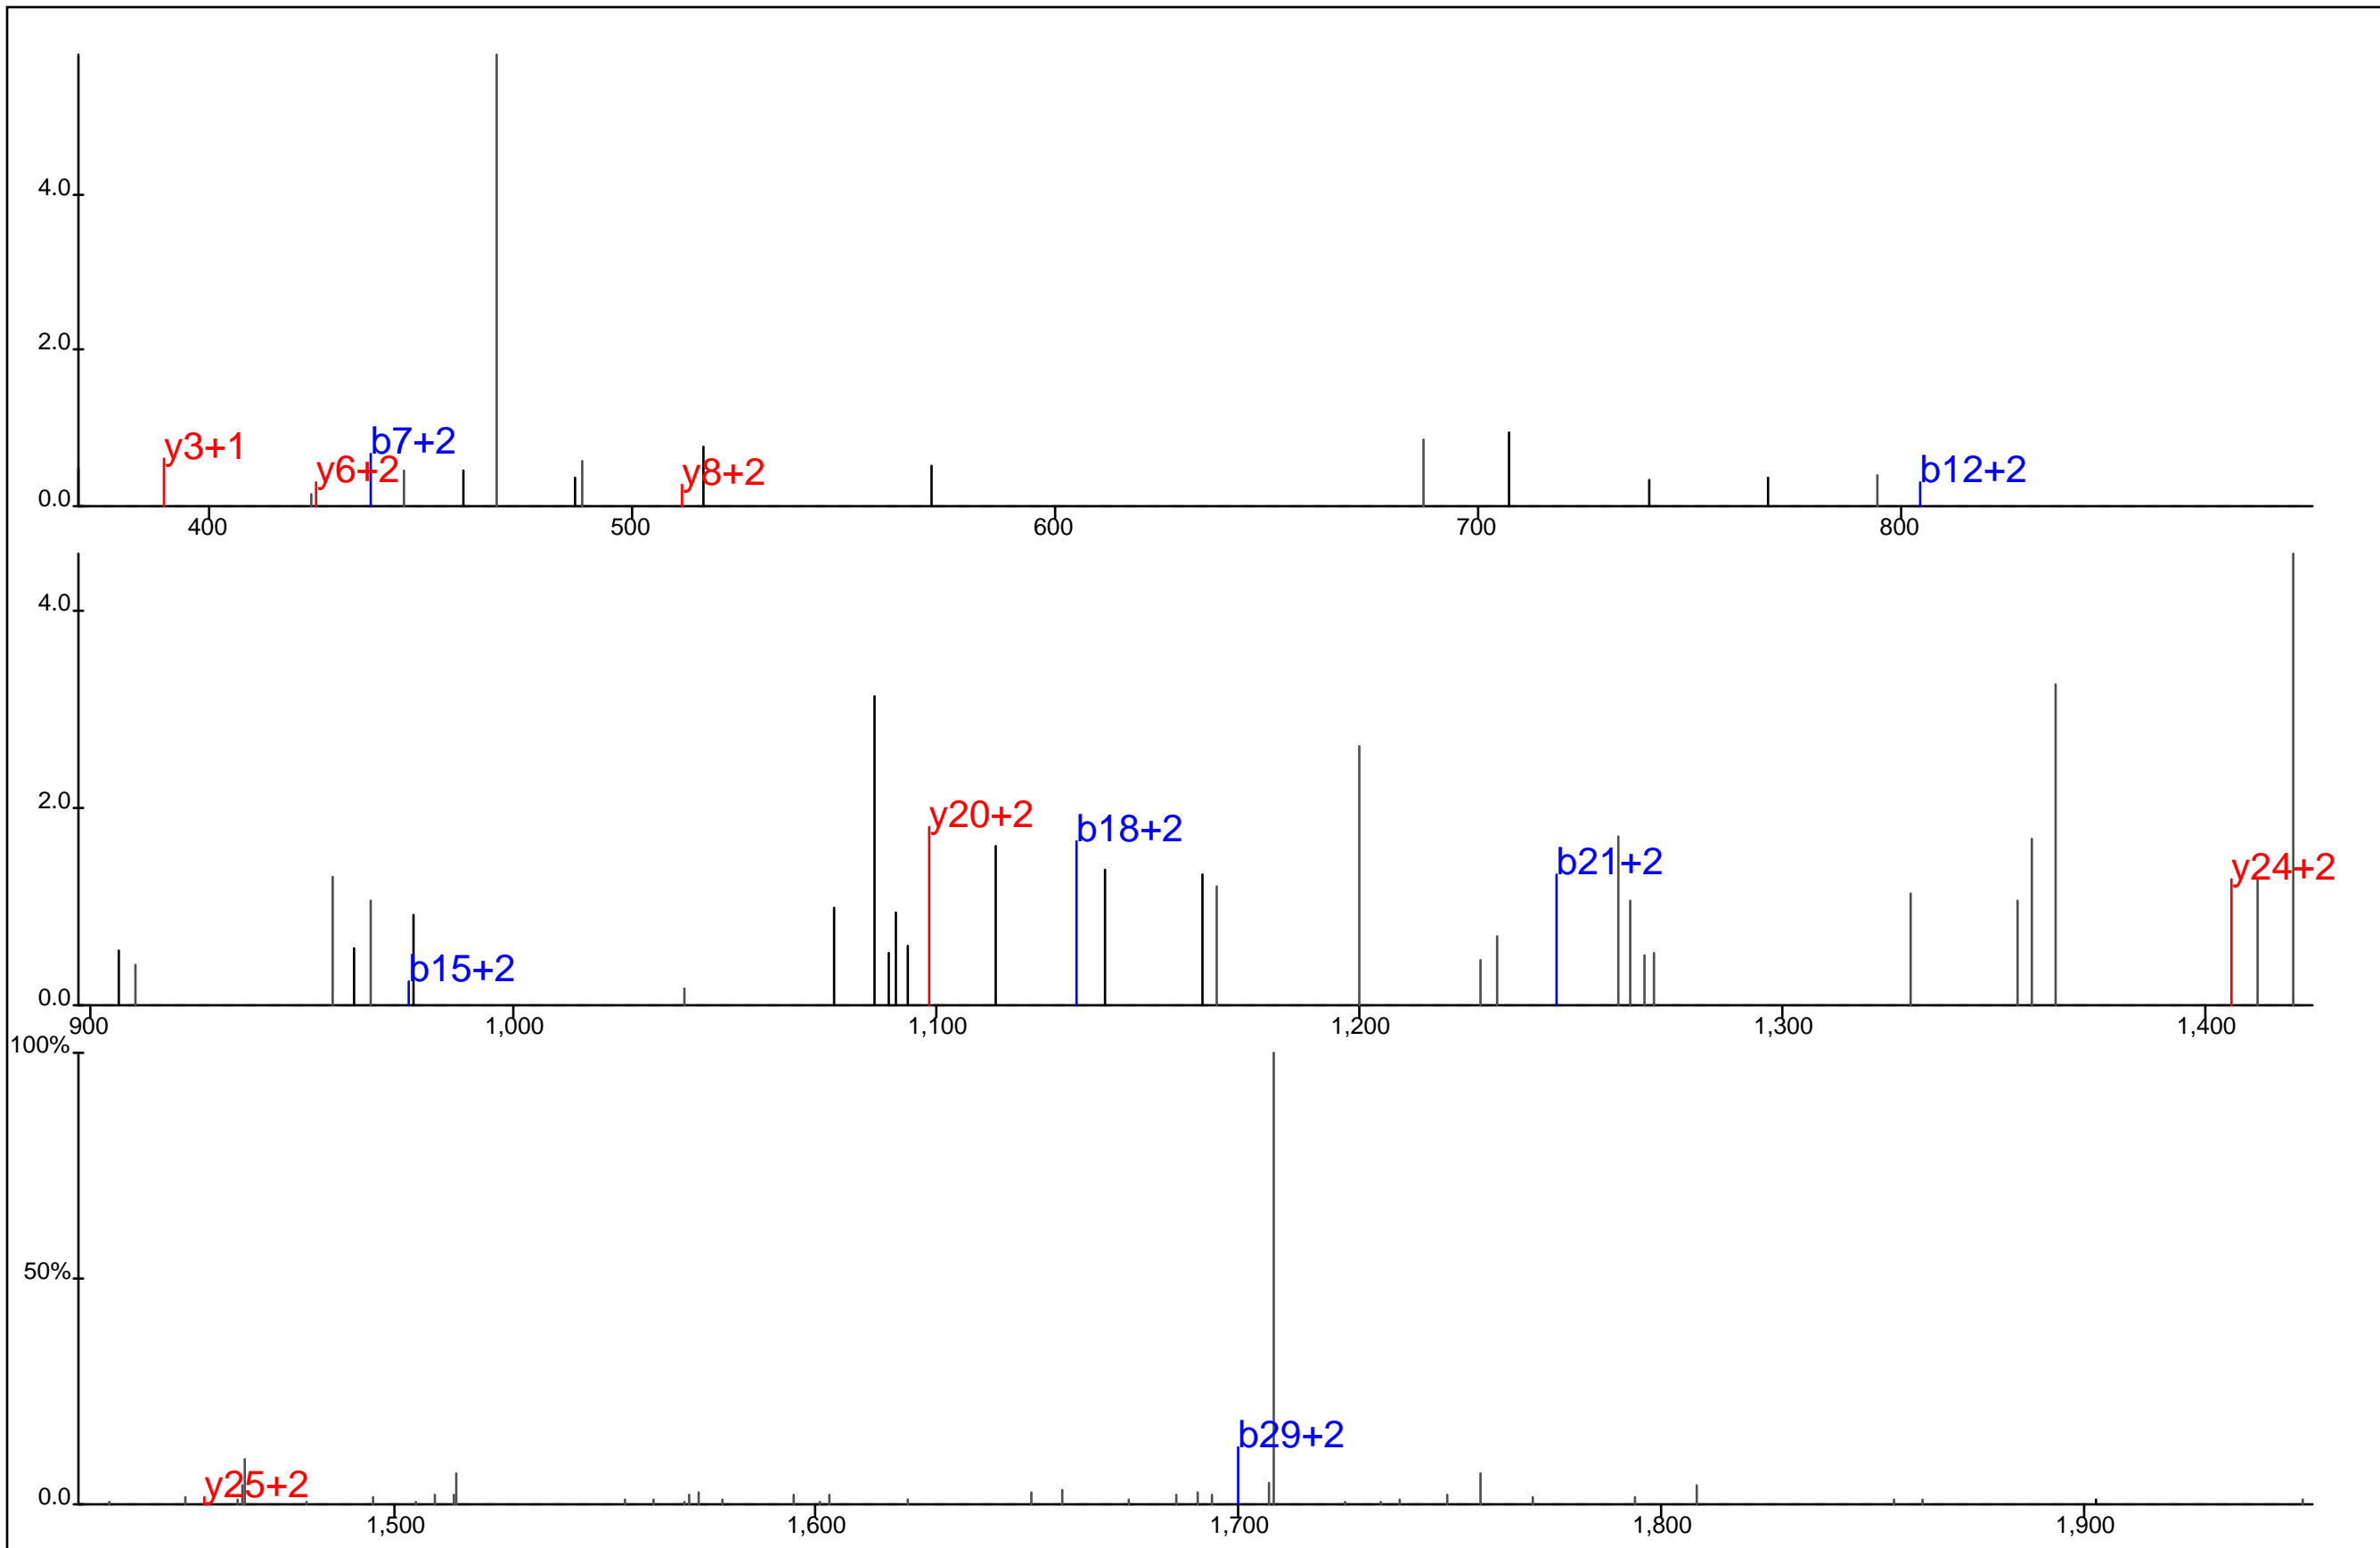

■ □ ■ ■ □ ■ ■ ■ ■ ■ ■ ■ ■ ■ ■ ■ ■

R F S R T V Q D V Y\*Y L P I M I S D G G I P S L S S S S\*T\*L T I R

Protein Name: Cadherin 18  
 gi Accession: 0  
 Precursor Mass: 1,300.6086+3  
 Delta Mass: 0.578 ppm  
 XCorr: 22.57

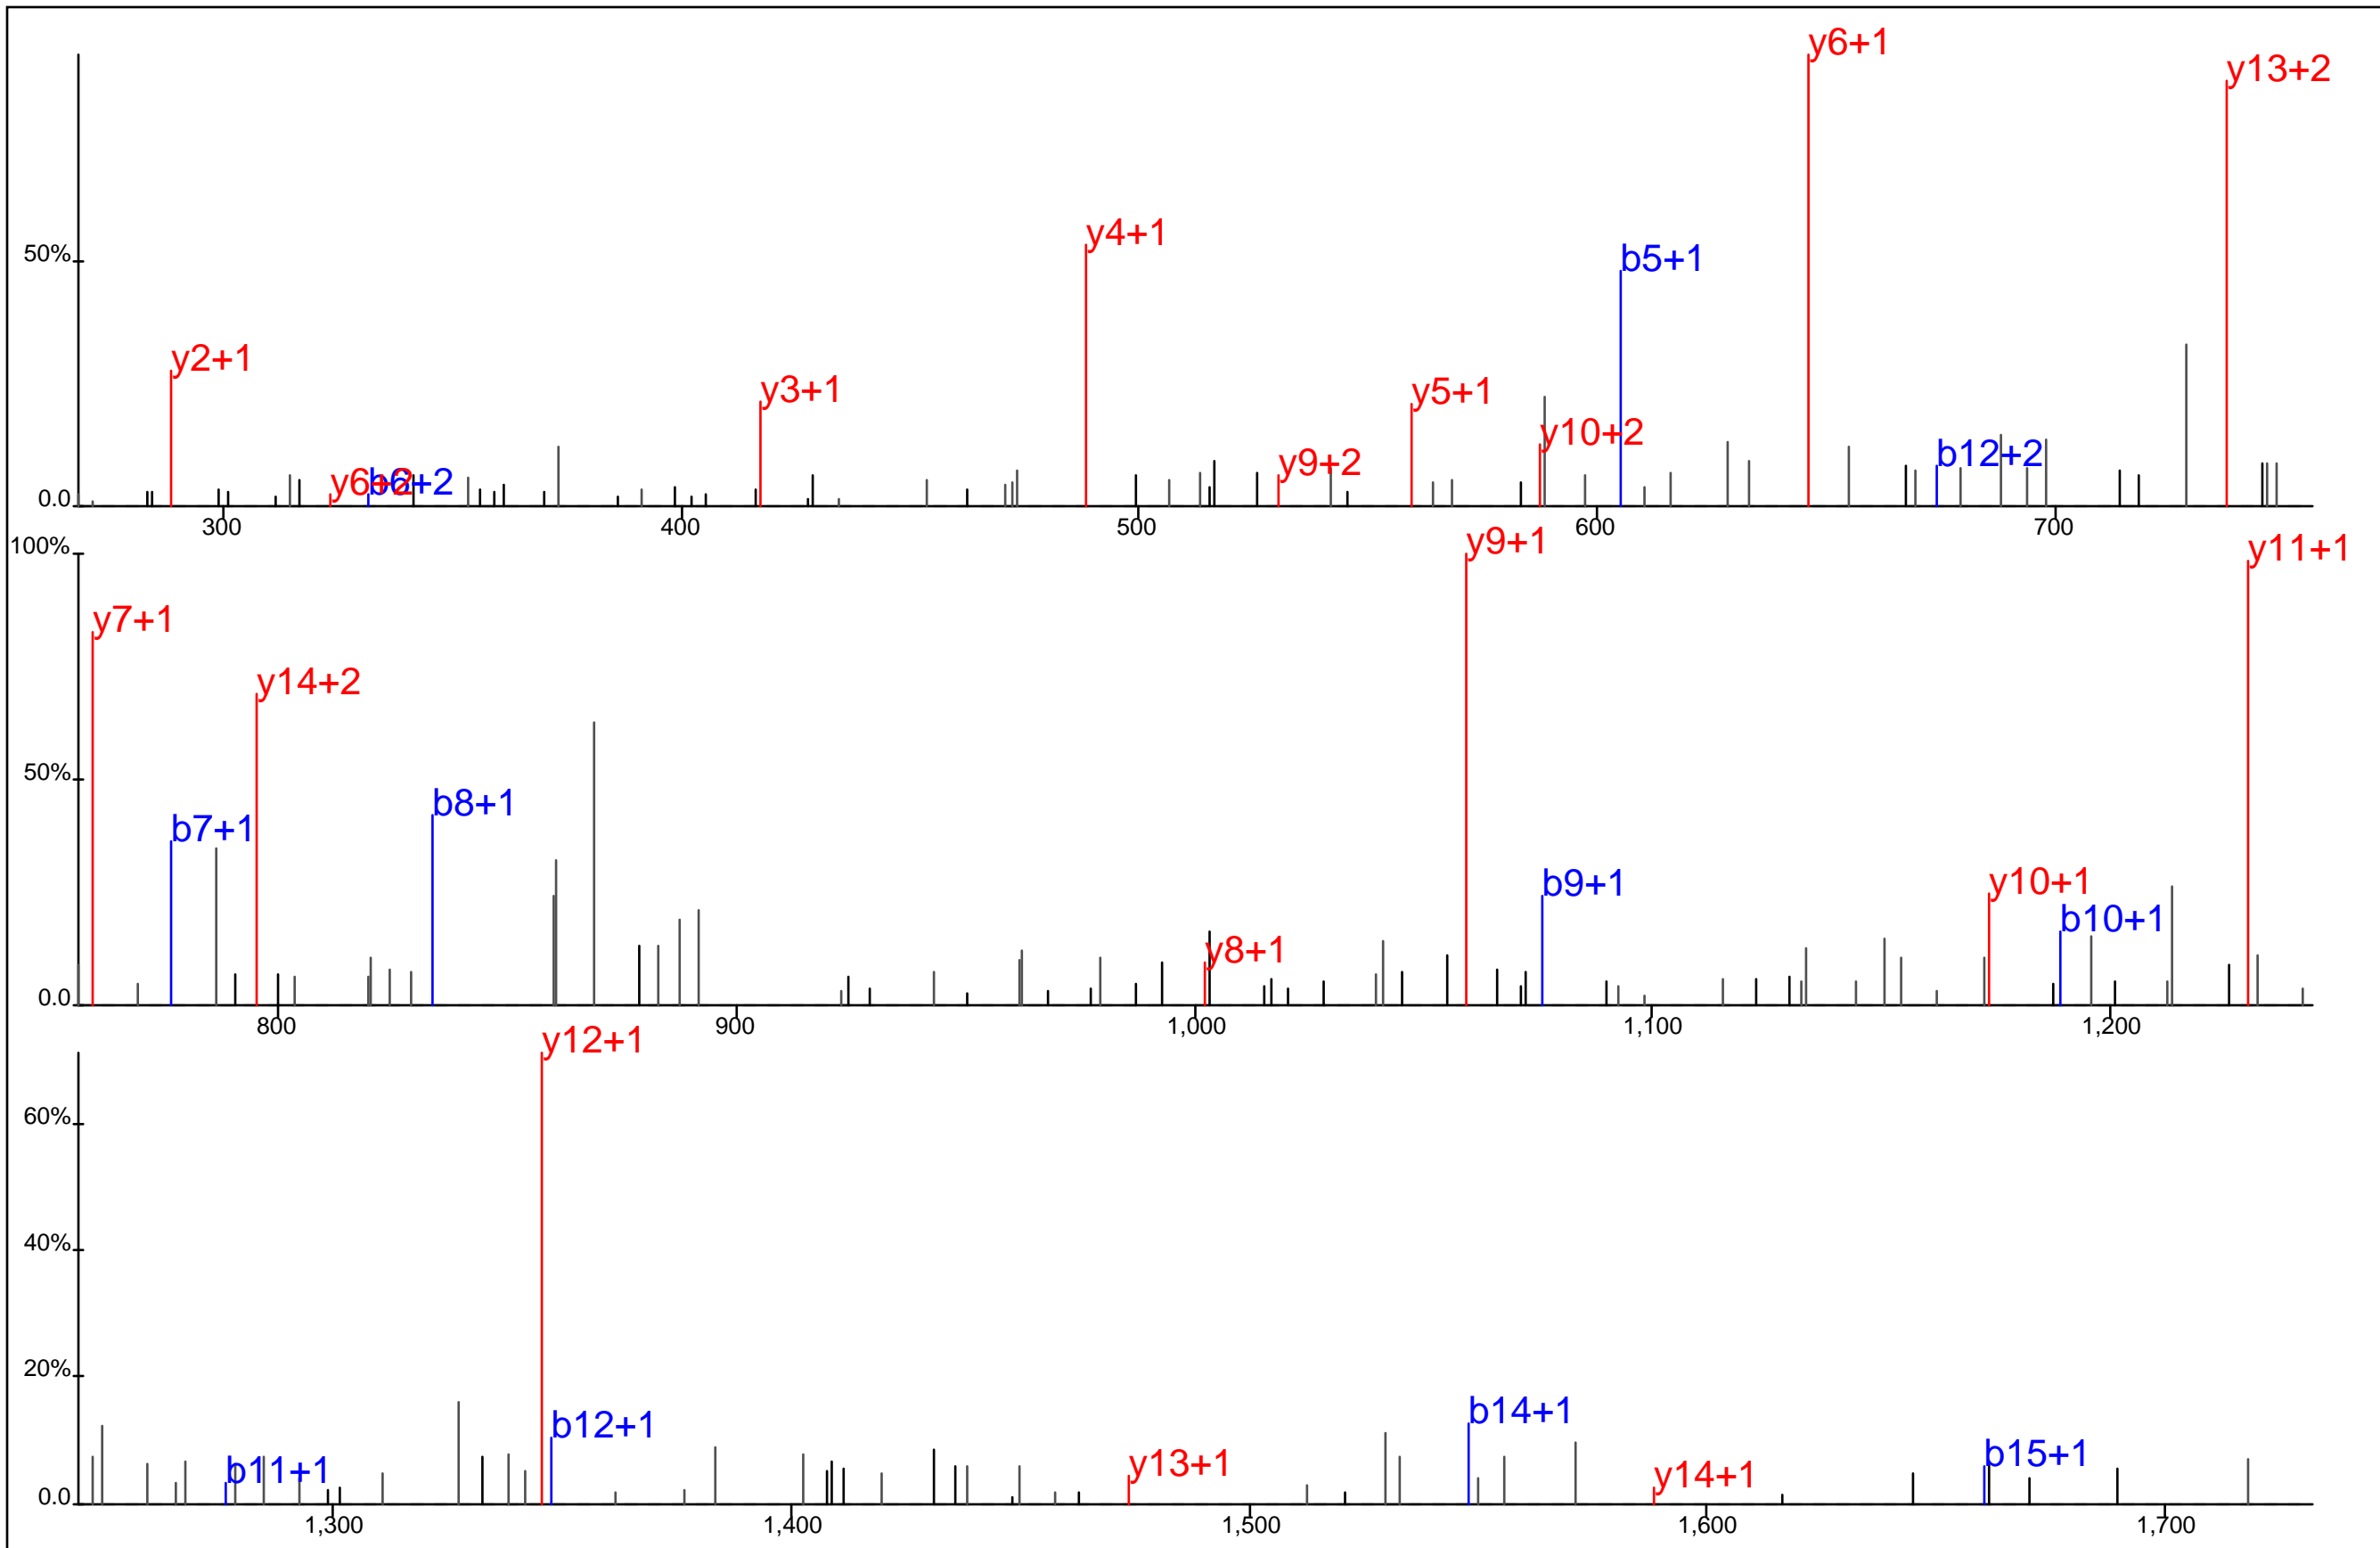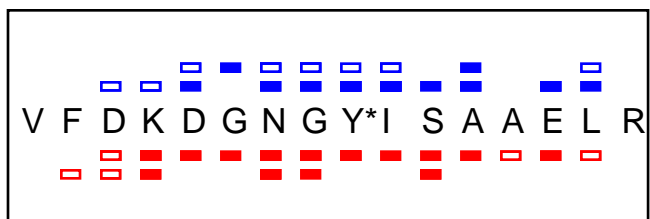

Protein Name: Calmodulin 1  
 gi Accession: 0  
 Precursor Mass: 917.9226+2  
 Delta Mass: 0.461 ppm  
 XCorr: 67.05

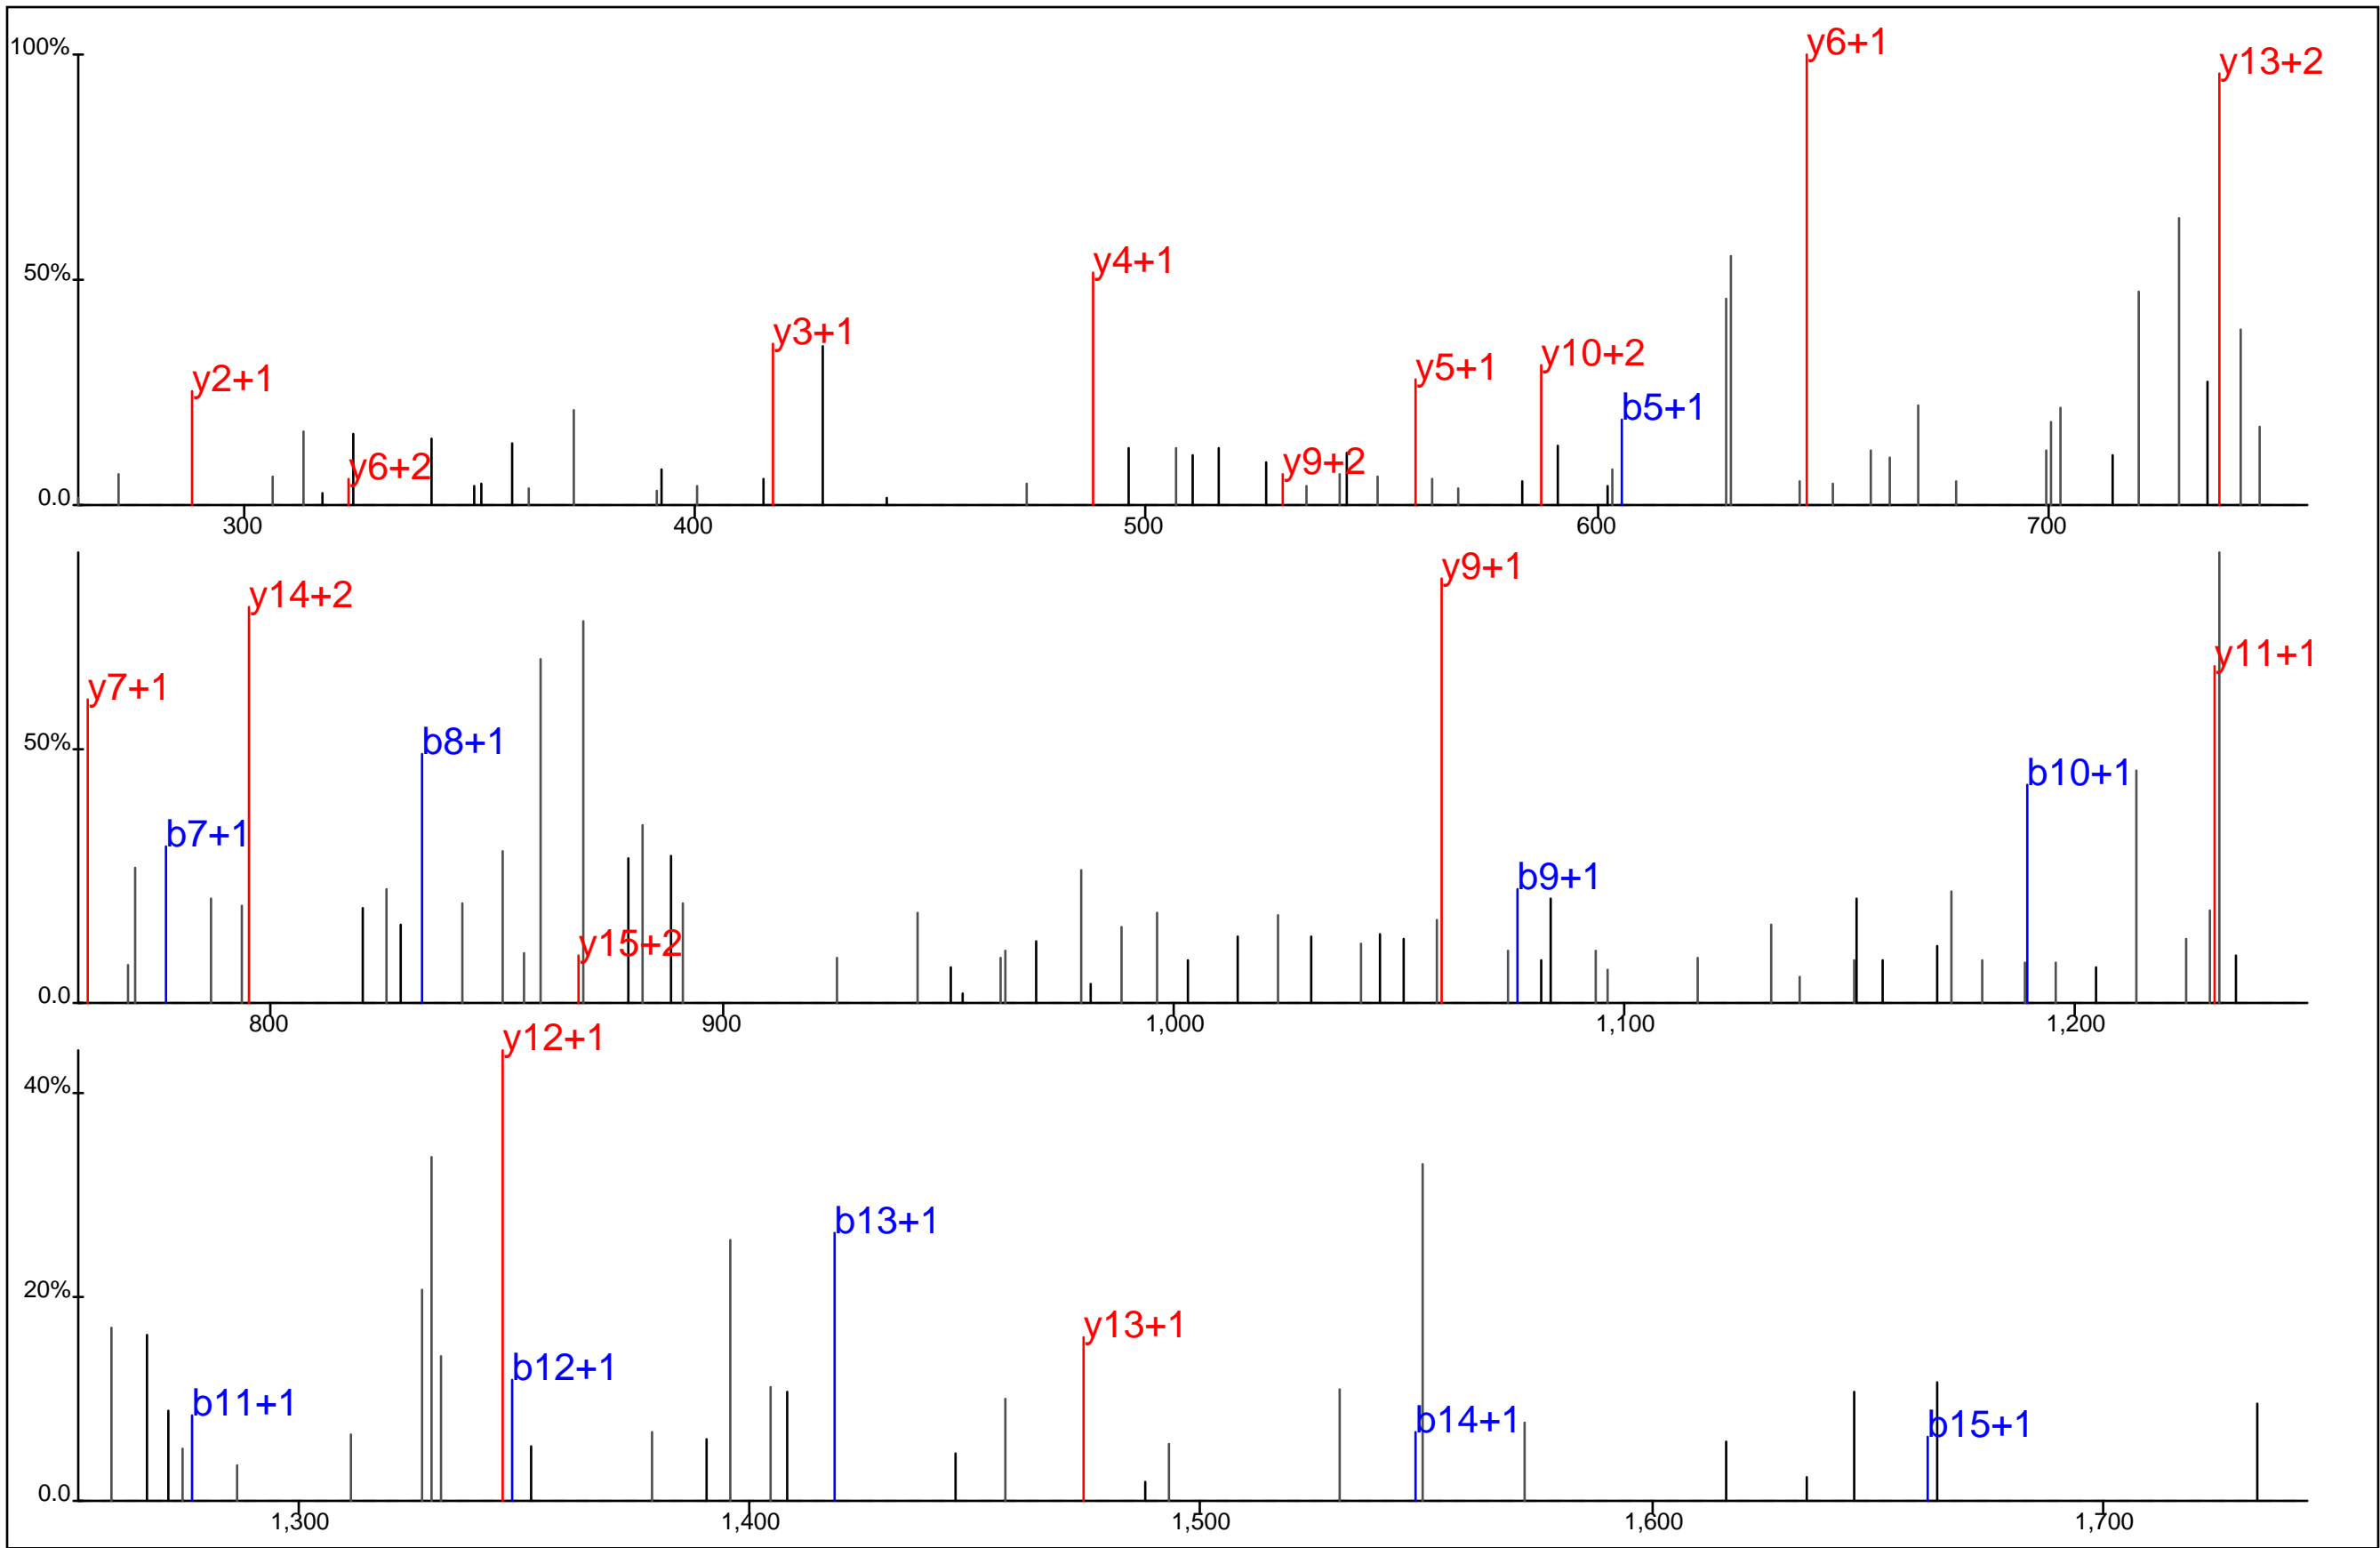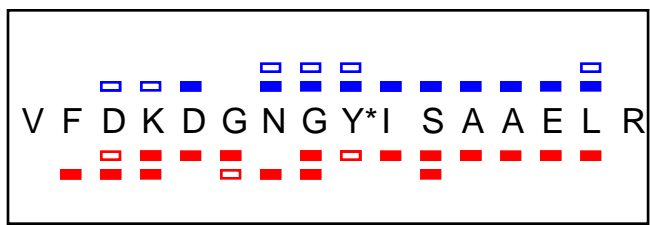

Protein Name: Calmodulin 1  
 gi Accession: 0  
 Precursor Mass: 917.9180+2  
 Delta Mass: 4.528 ppm  
 XCorr: 54.06

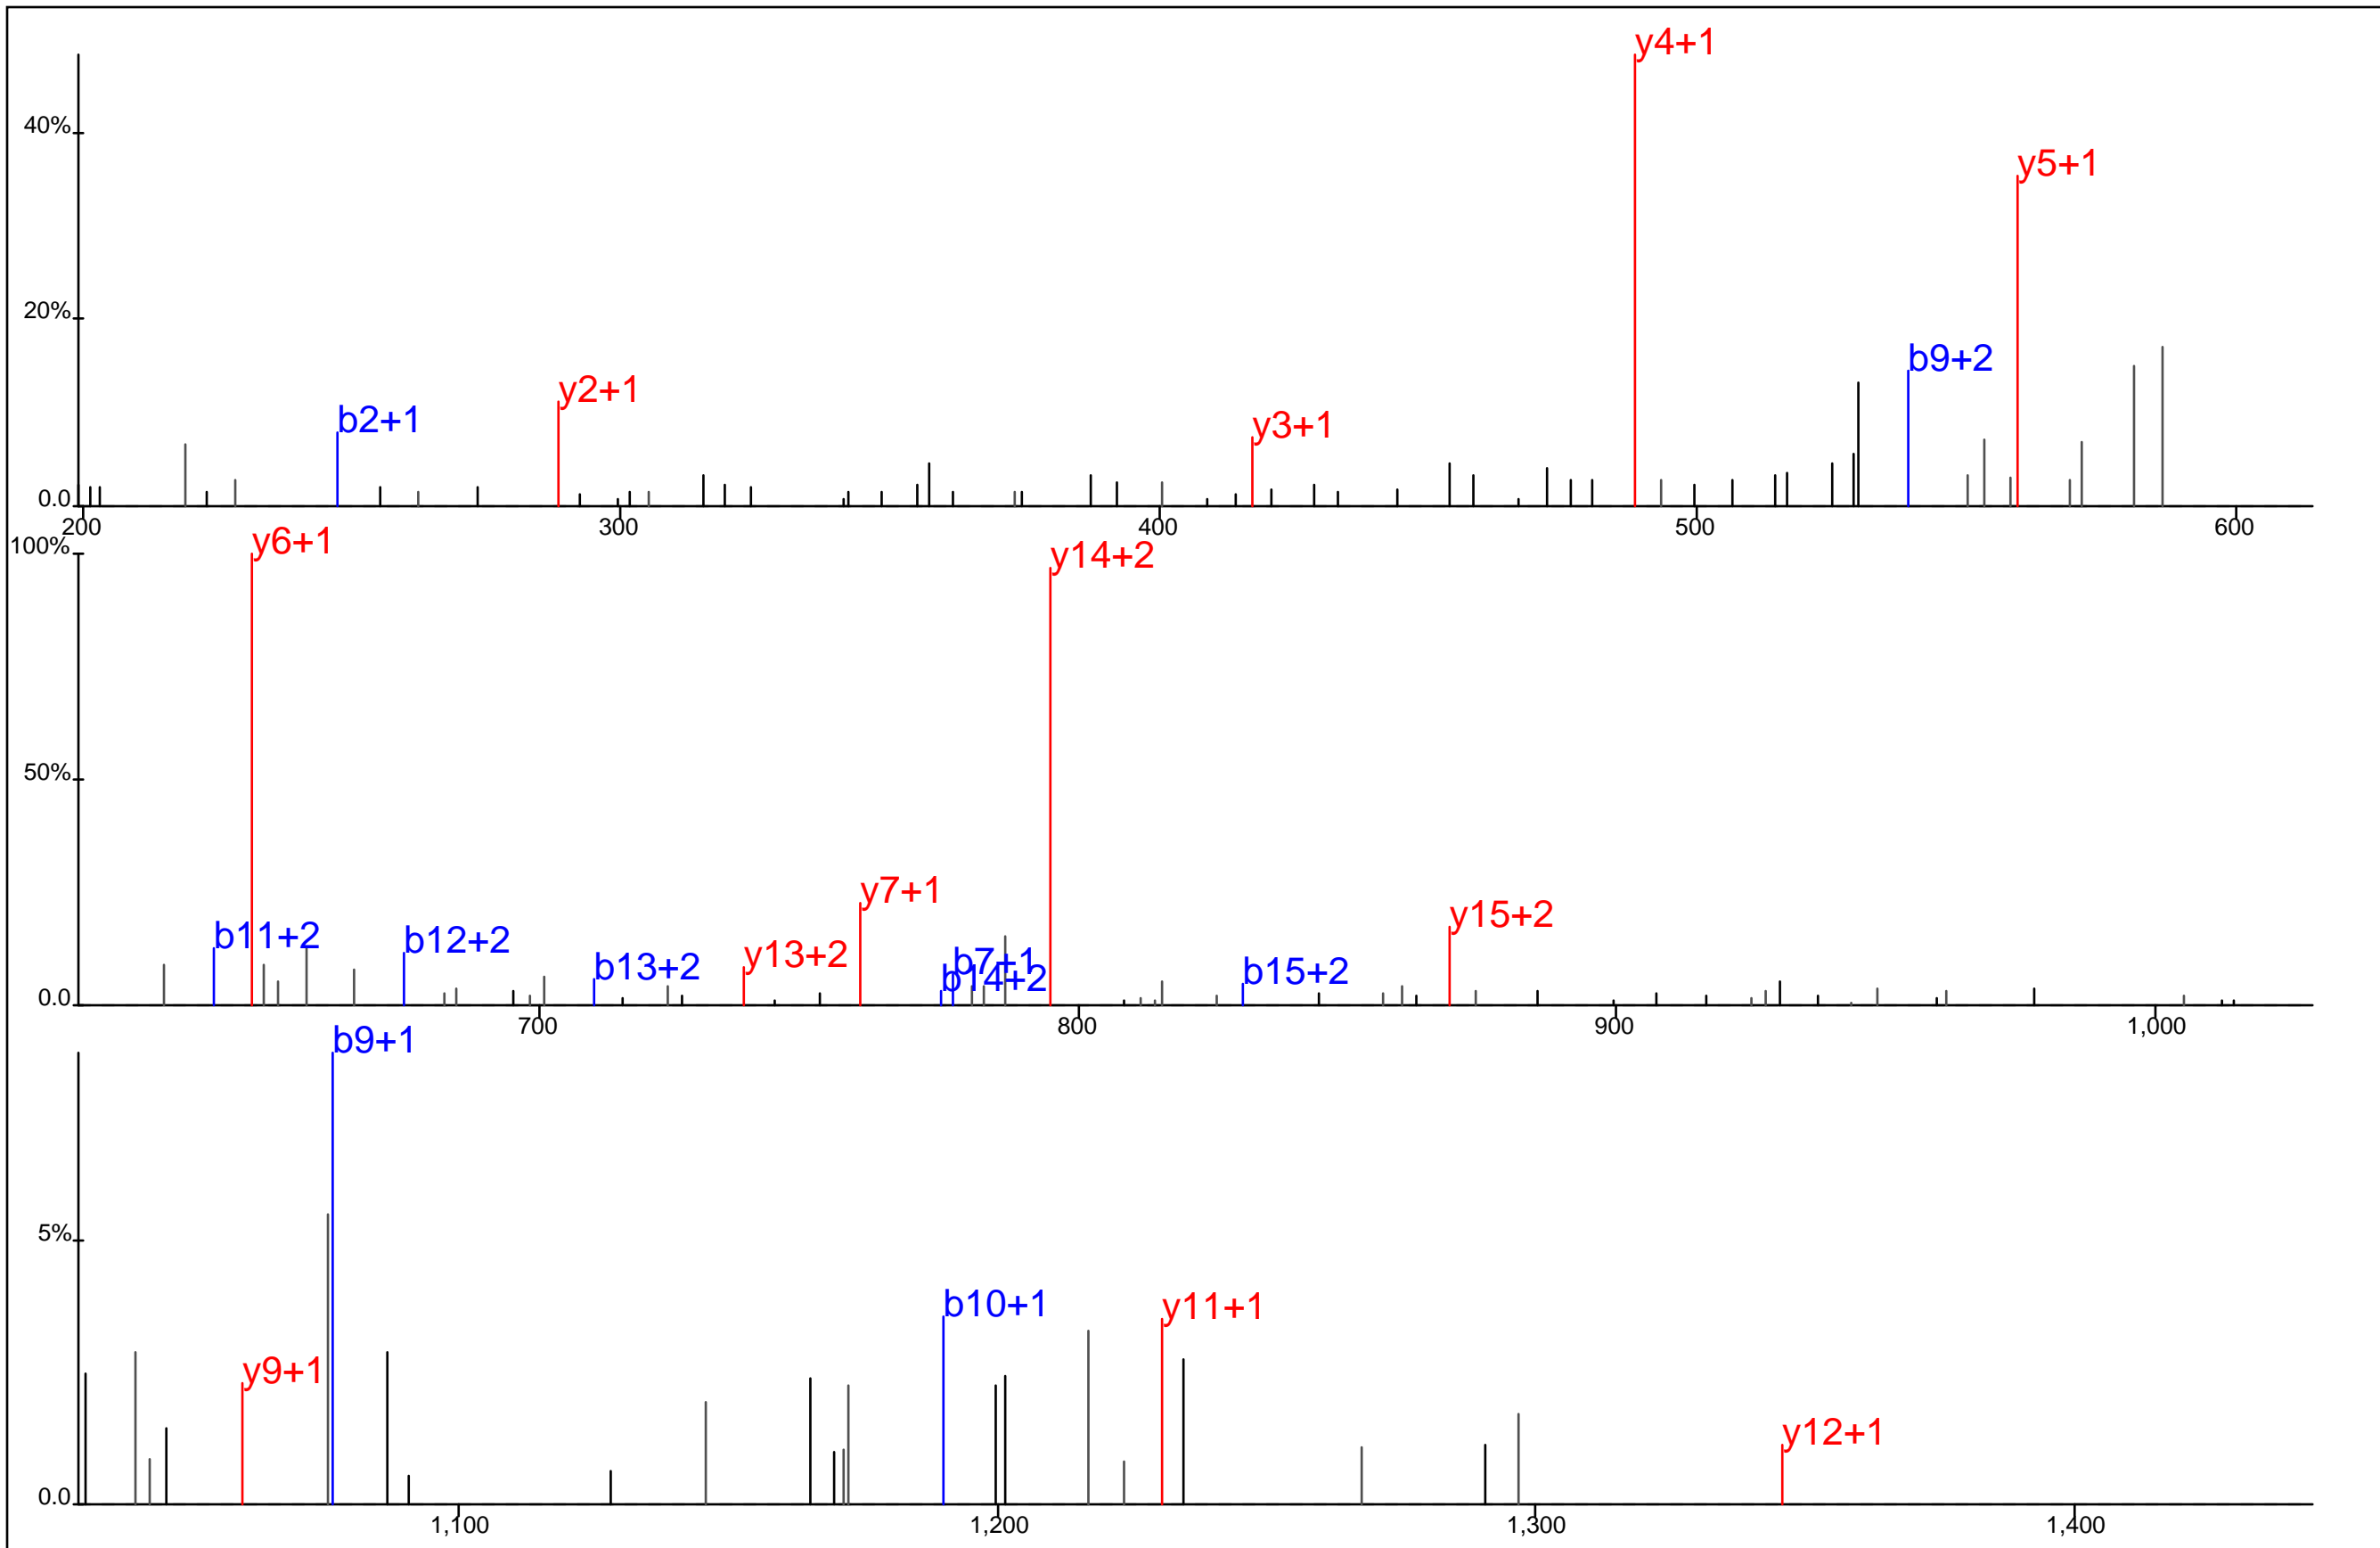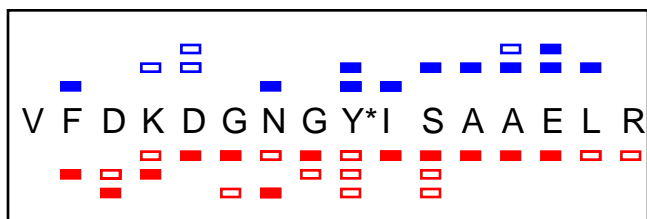

Protein Name: Calmodulin 1  
 gi Accession: 0  
 Precursor Mass: 612.2839+3  
 Delta Mass: 0.010 ppm  
 XCorr: 51.3

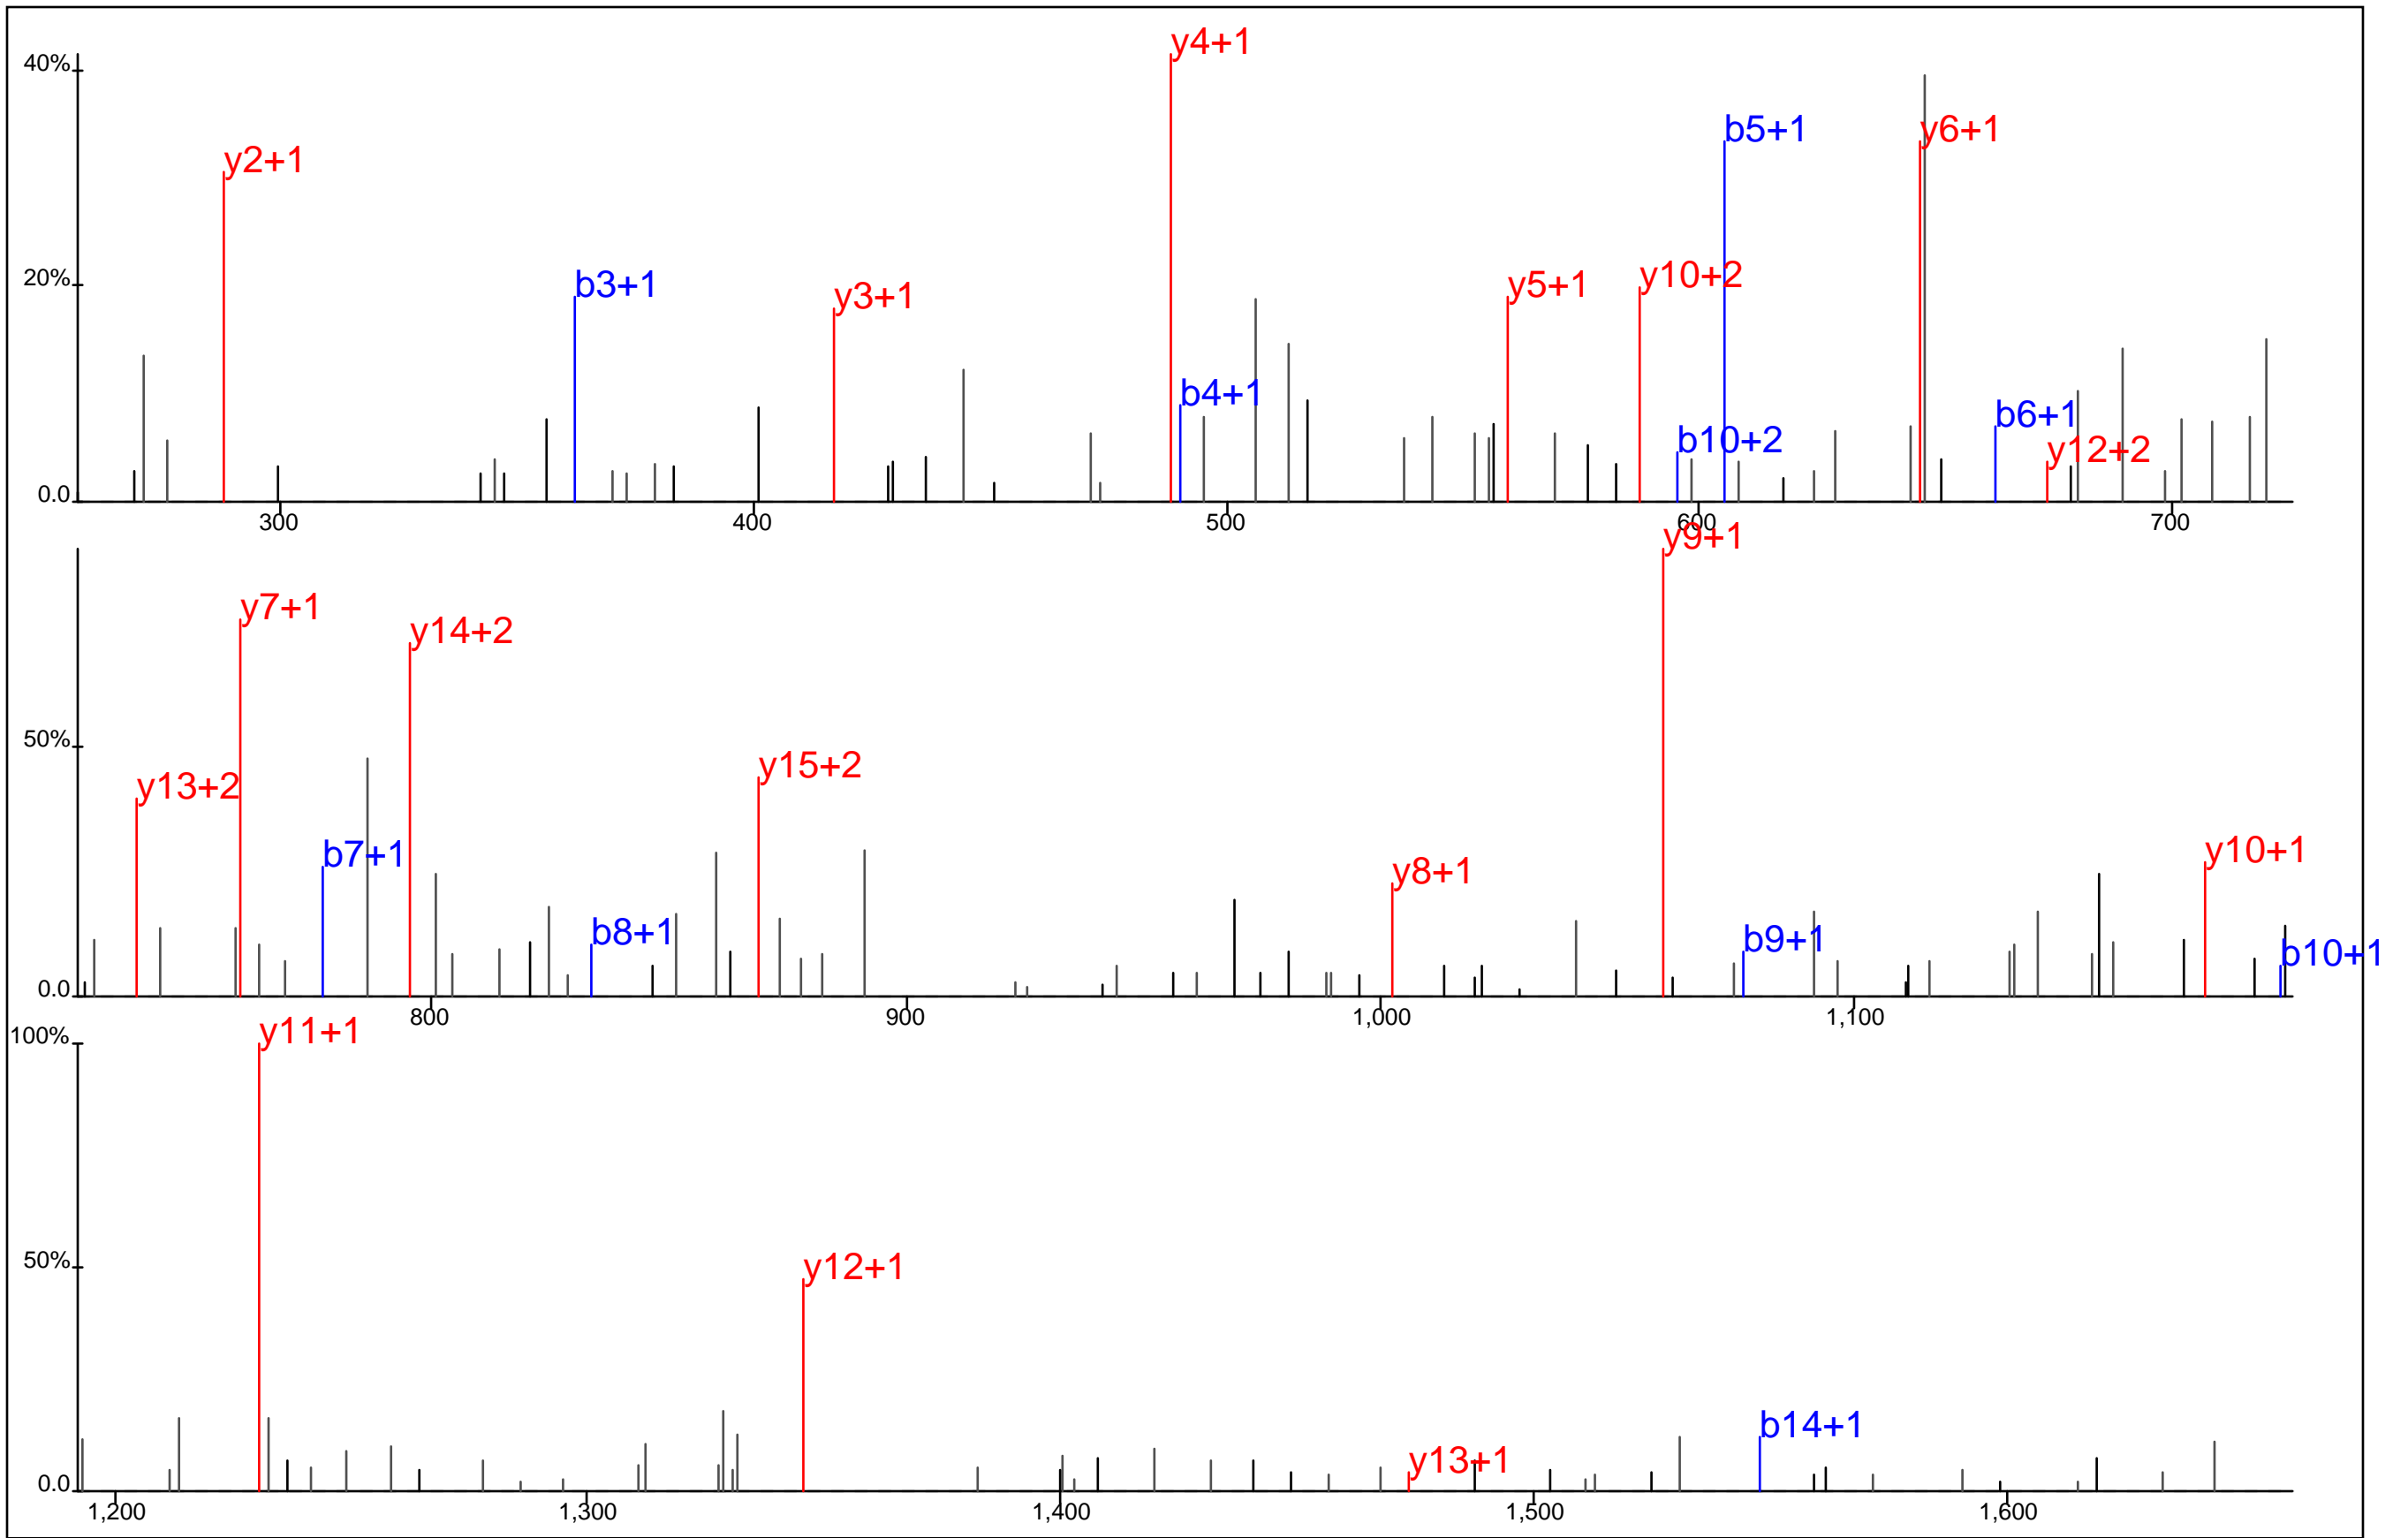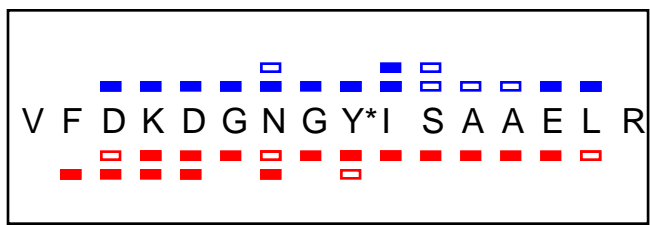

Protein Name: Calmodulin 1  
 gi Accession: 0  
 Precursor Mass: 917.9230+2  
 Delta Mass: 0.861 ppm  
 XCorr: 75.76

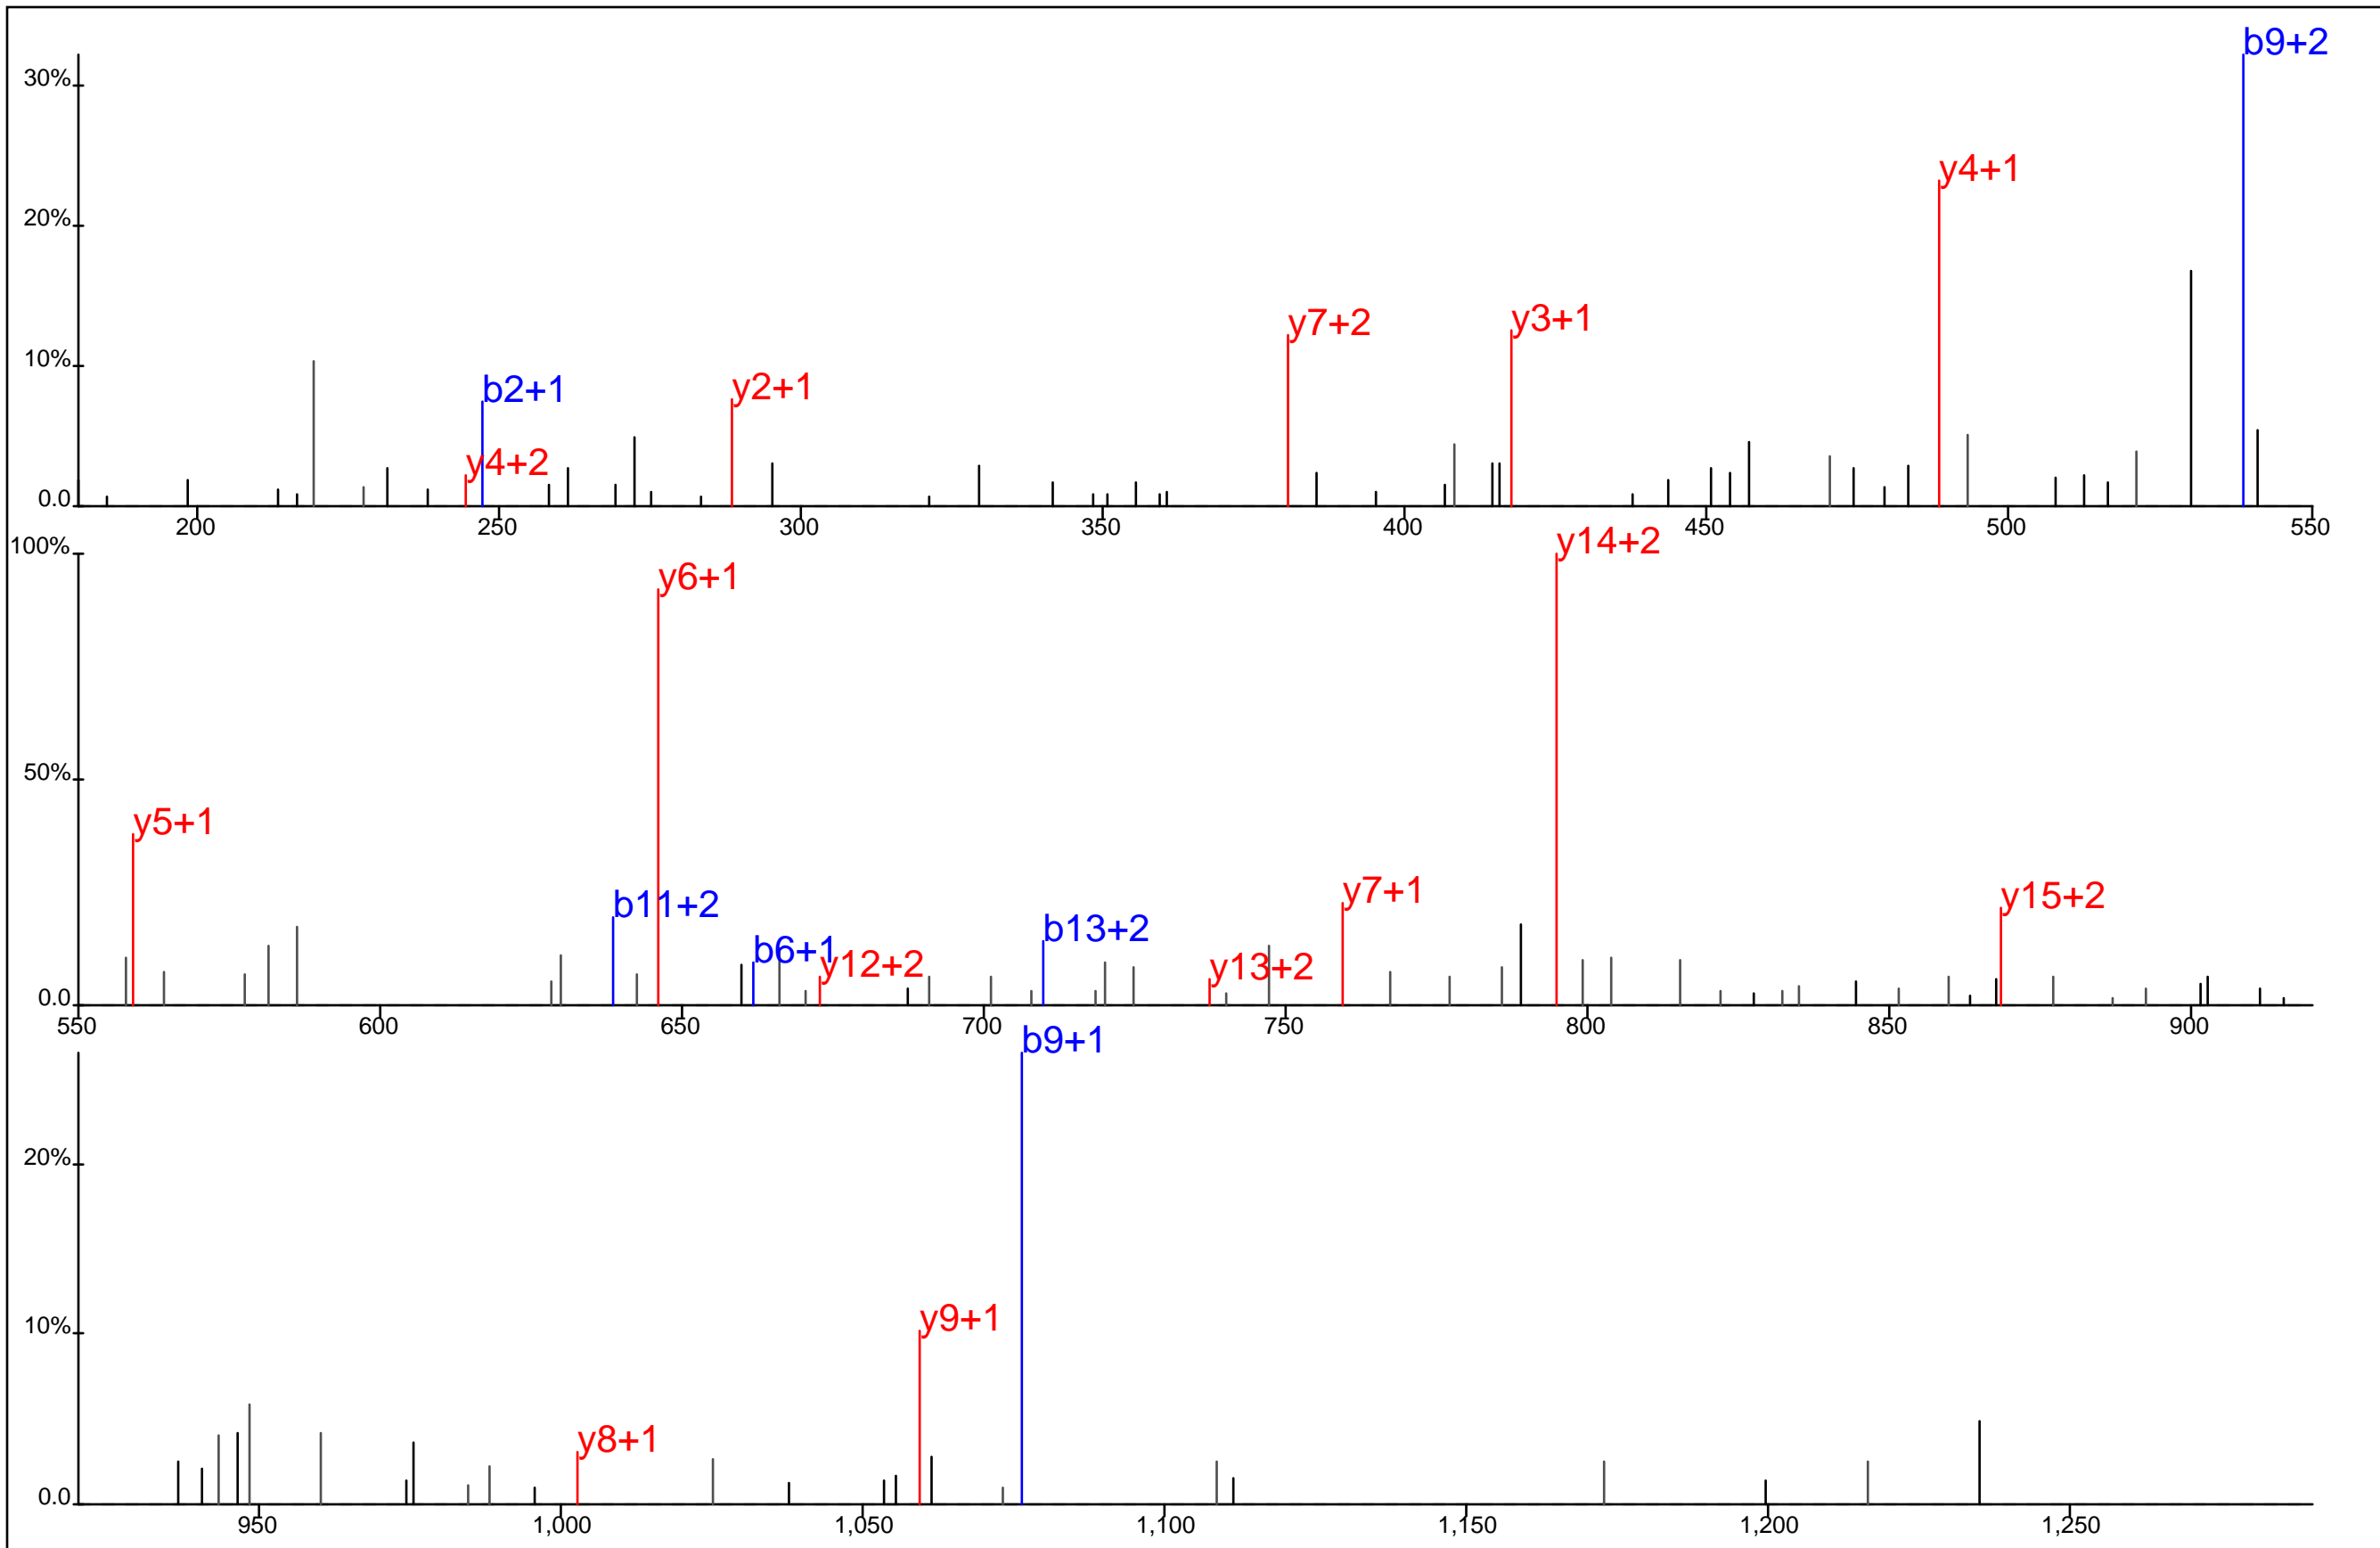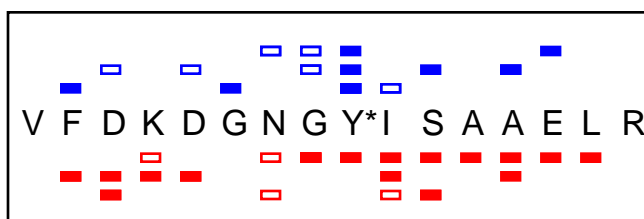

Protein Name: Calmodulin 1  
 gi Accession: 0  
 Precursor Mass: 612.2846+3  
 Delta Mass: 1.186 ppm  
 XCorr: 42.33

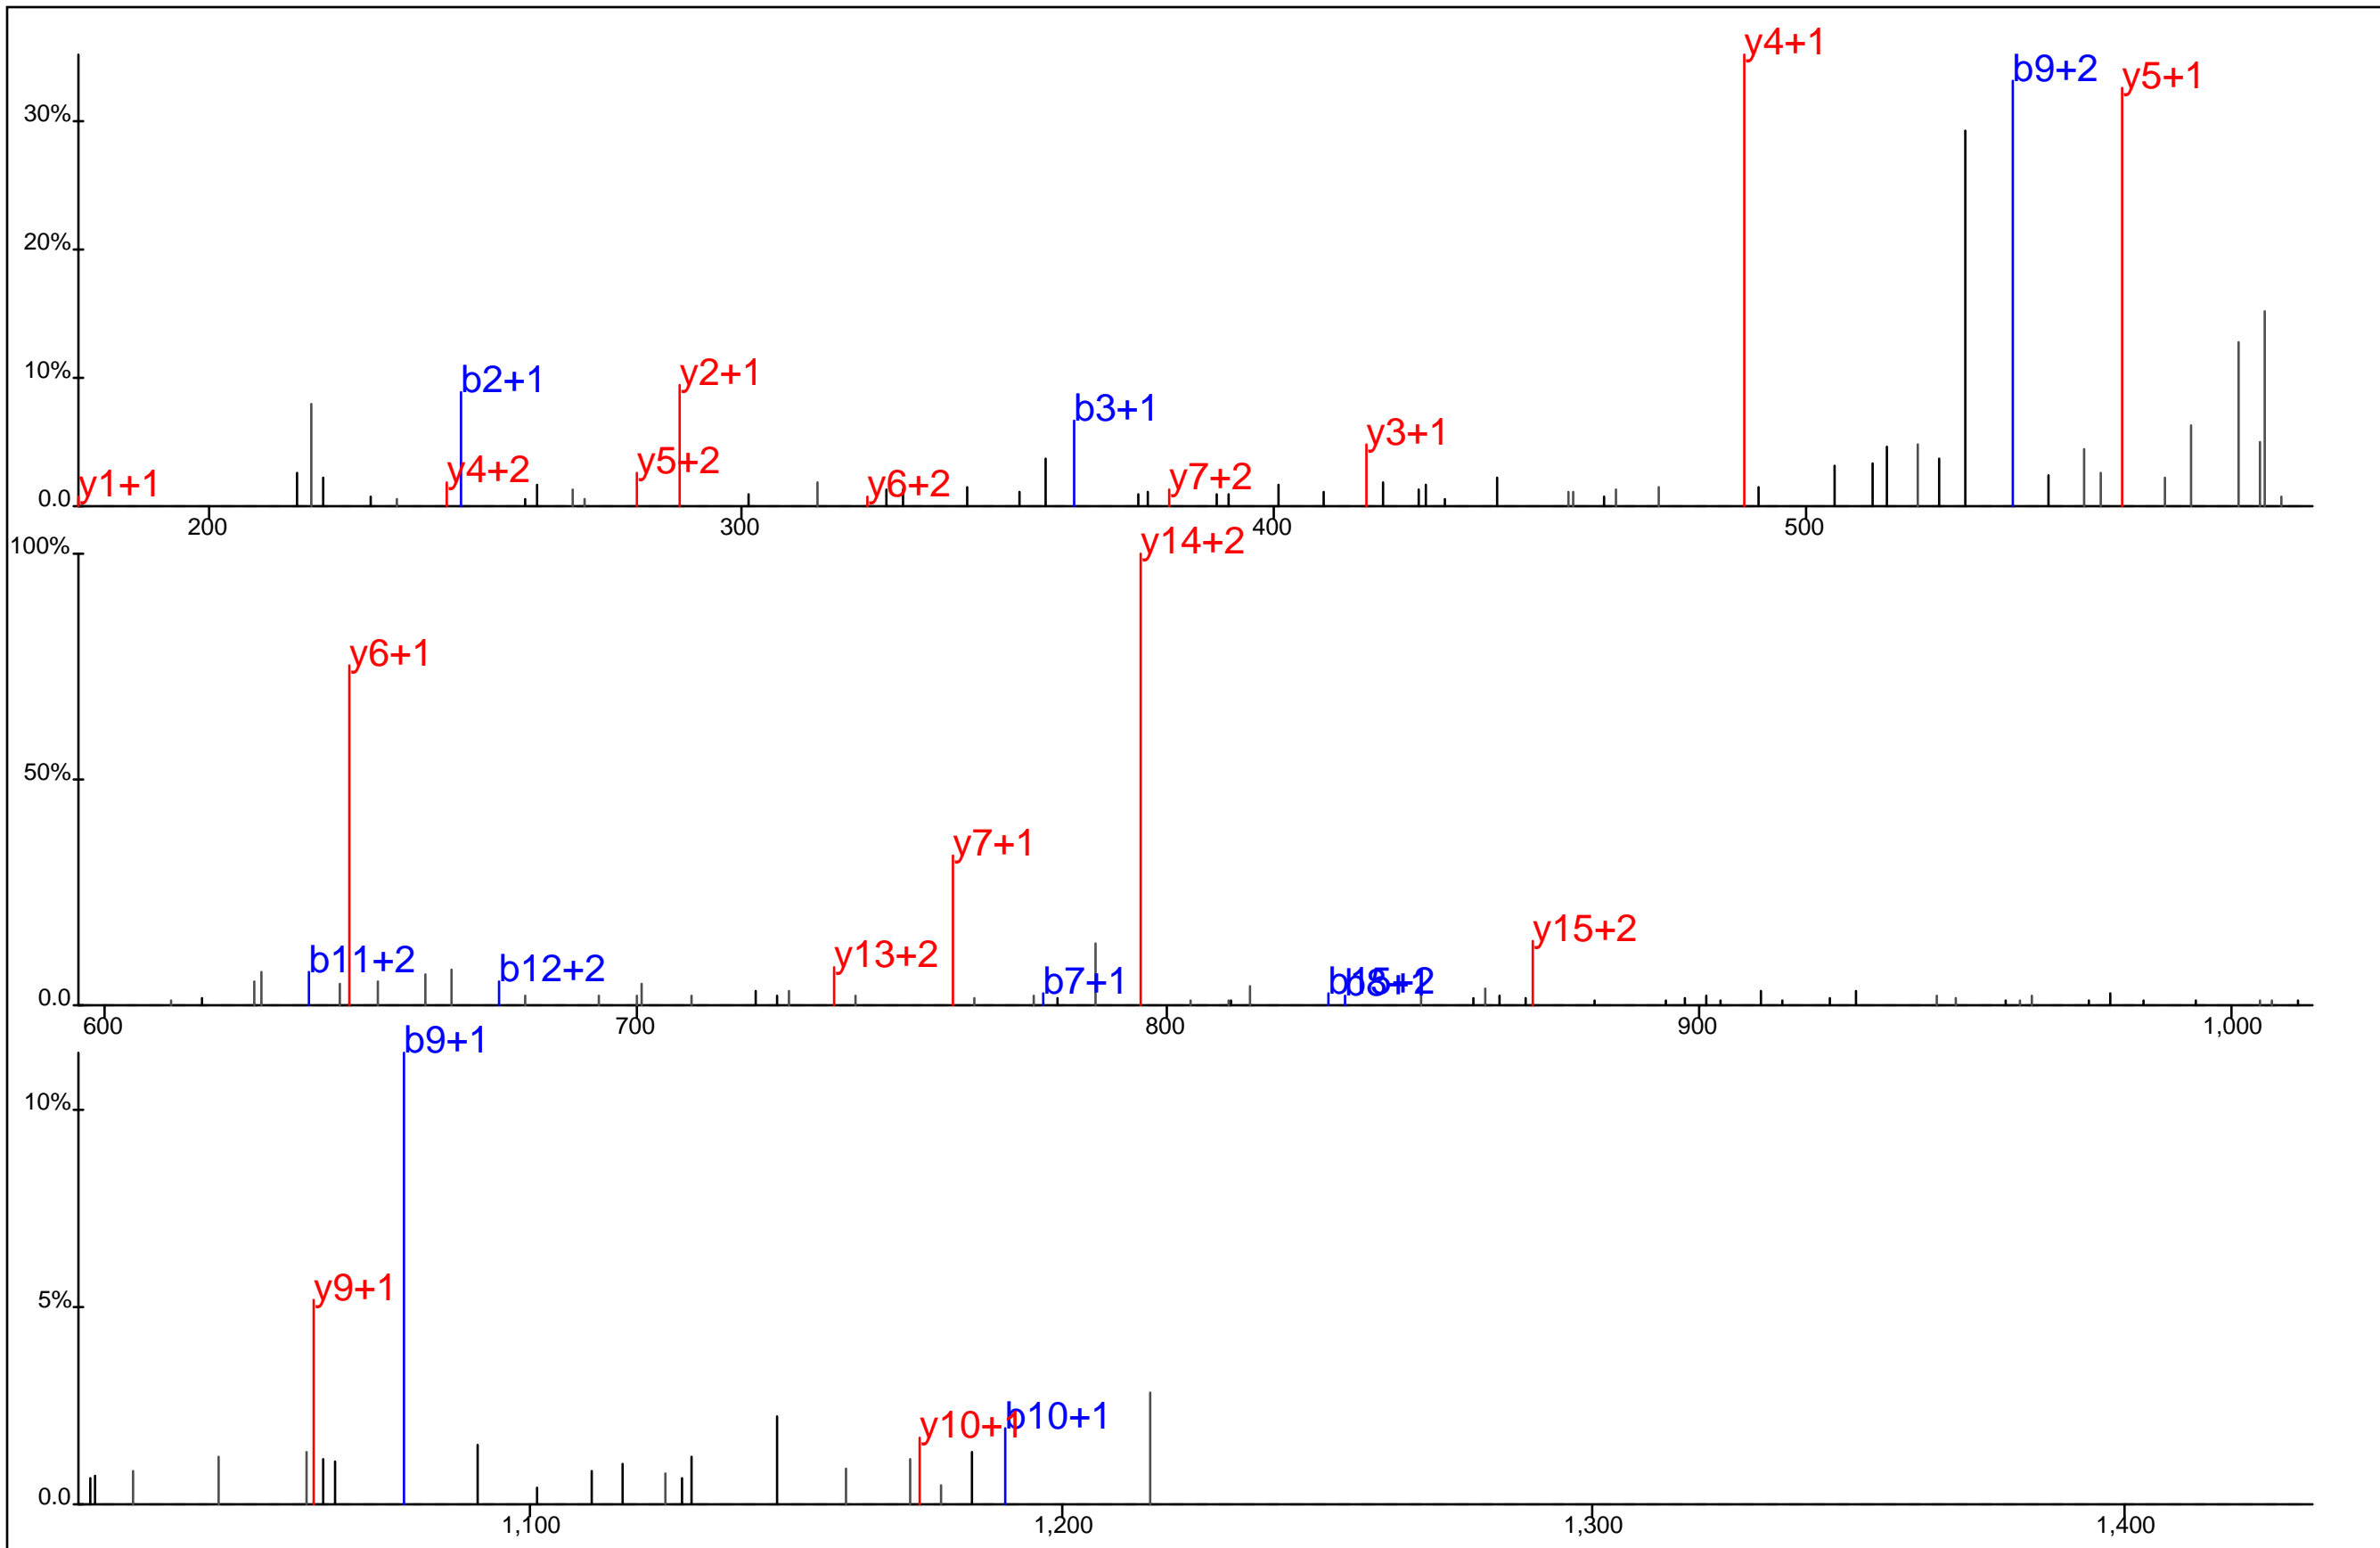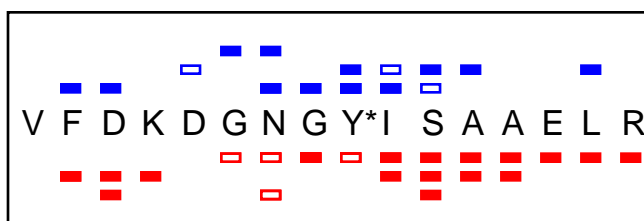

Protein Name: Calmodulin 1  
 gi Accession: 0  
 Precursor Mass: 612.2830+3  
 Delta Mass: 1.508 ppm  
 XCorr: 46.28



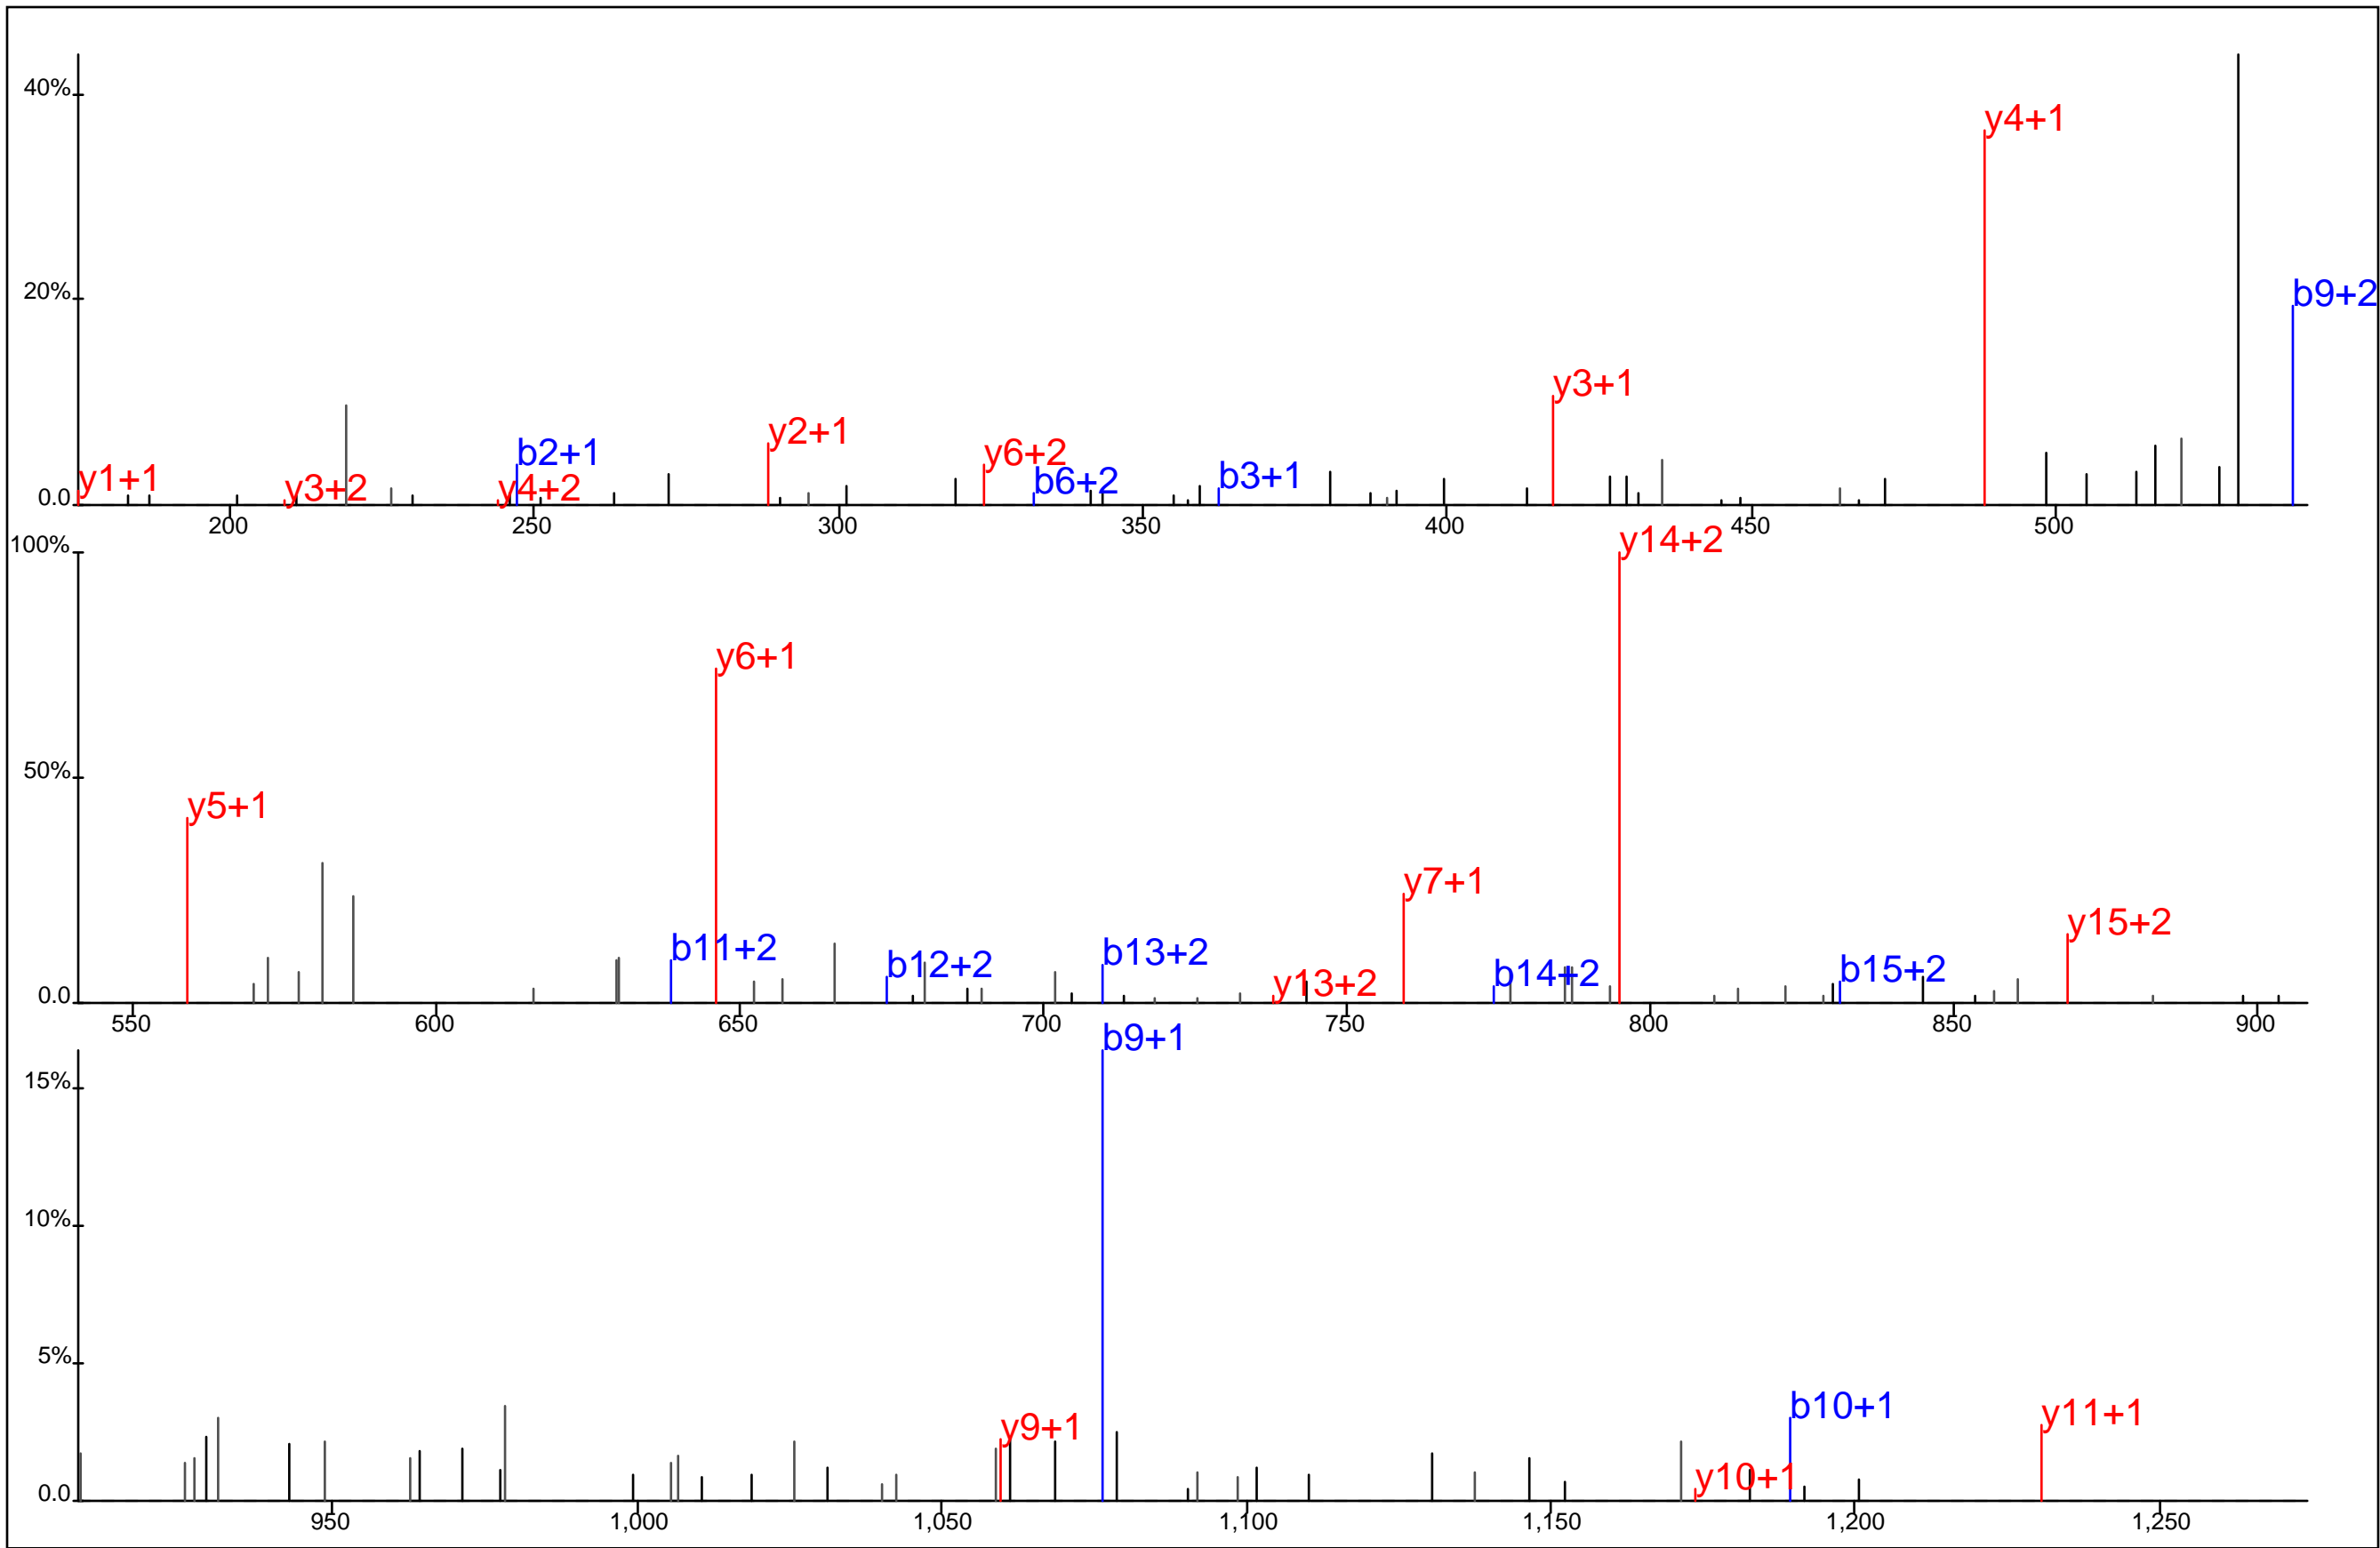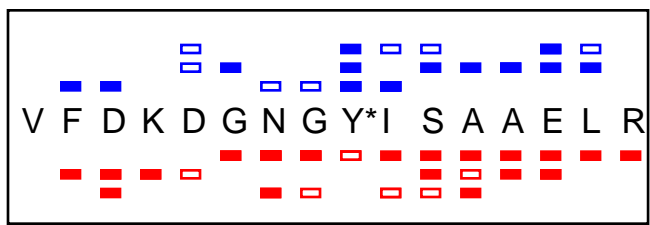

Protein Name: Calmodulin 1  
 gi Accession: 0  
 Precursor Mass: 612.2838+3  
 Delta Mass: 0.112 ppm  
 XCorr: 43.72

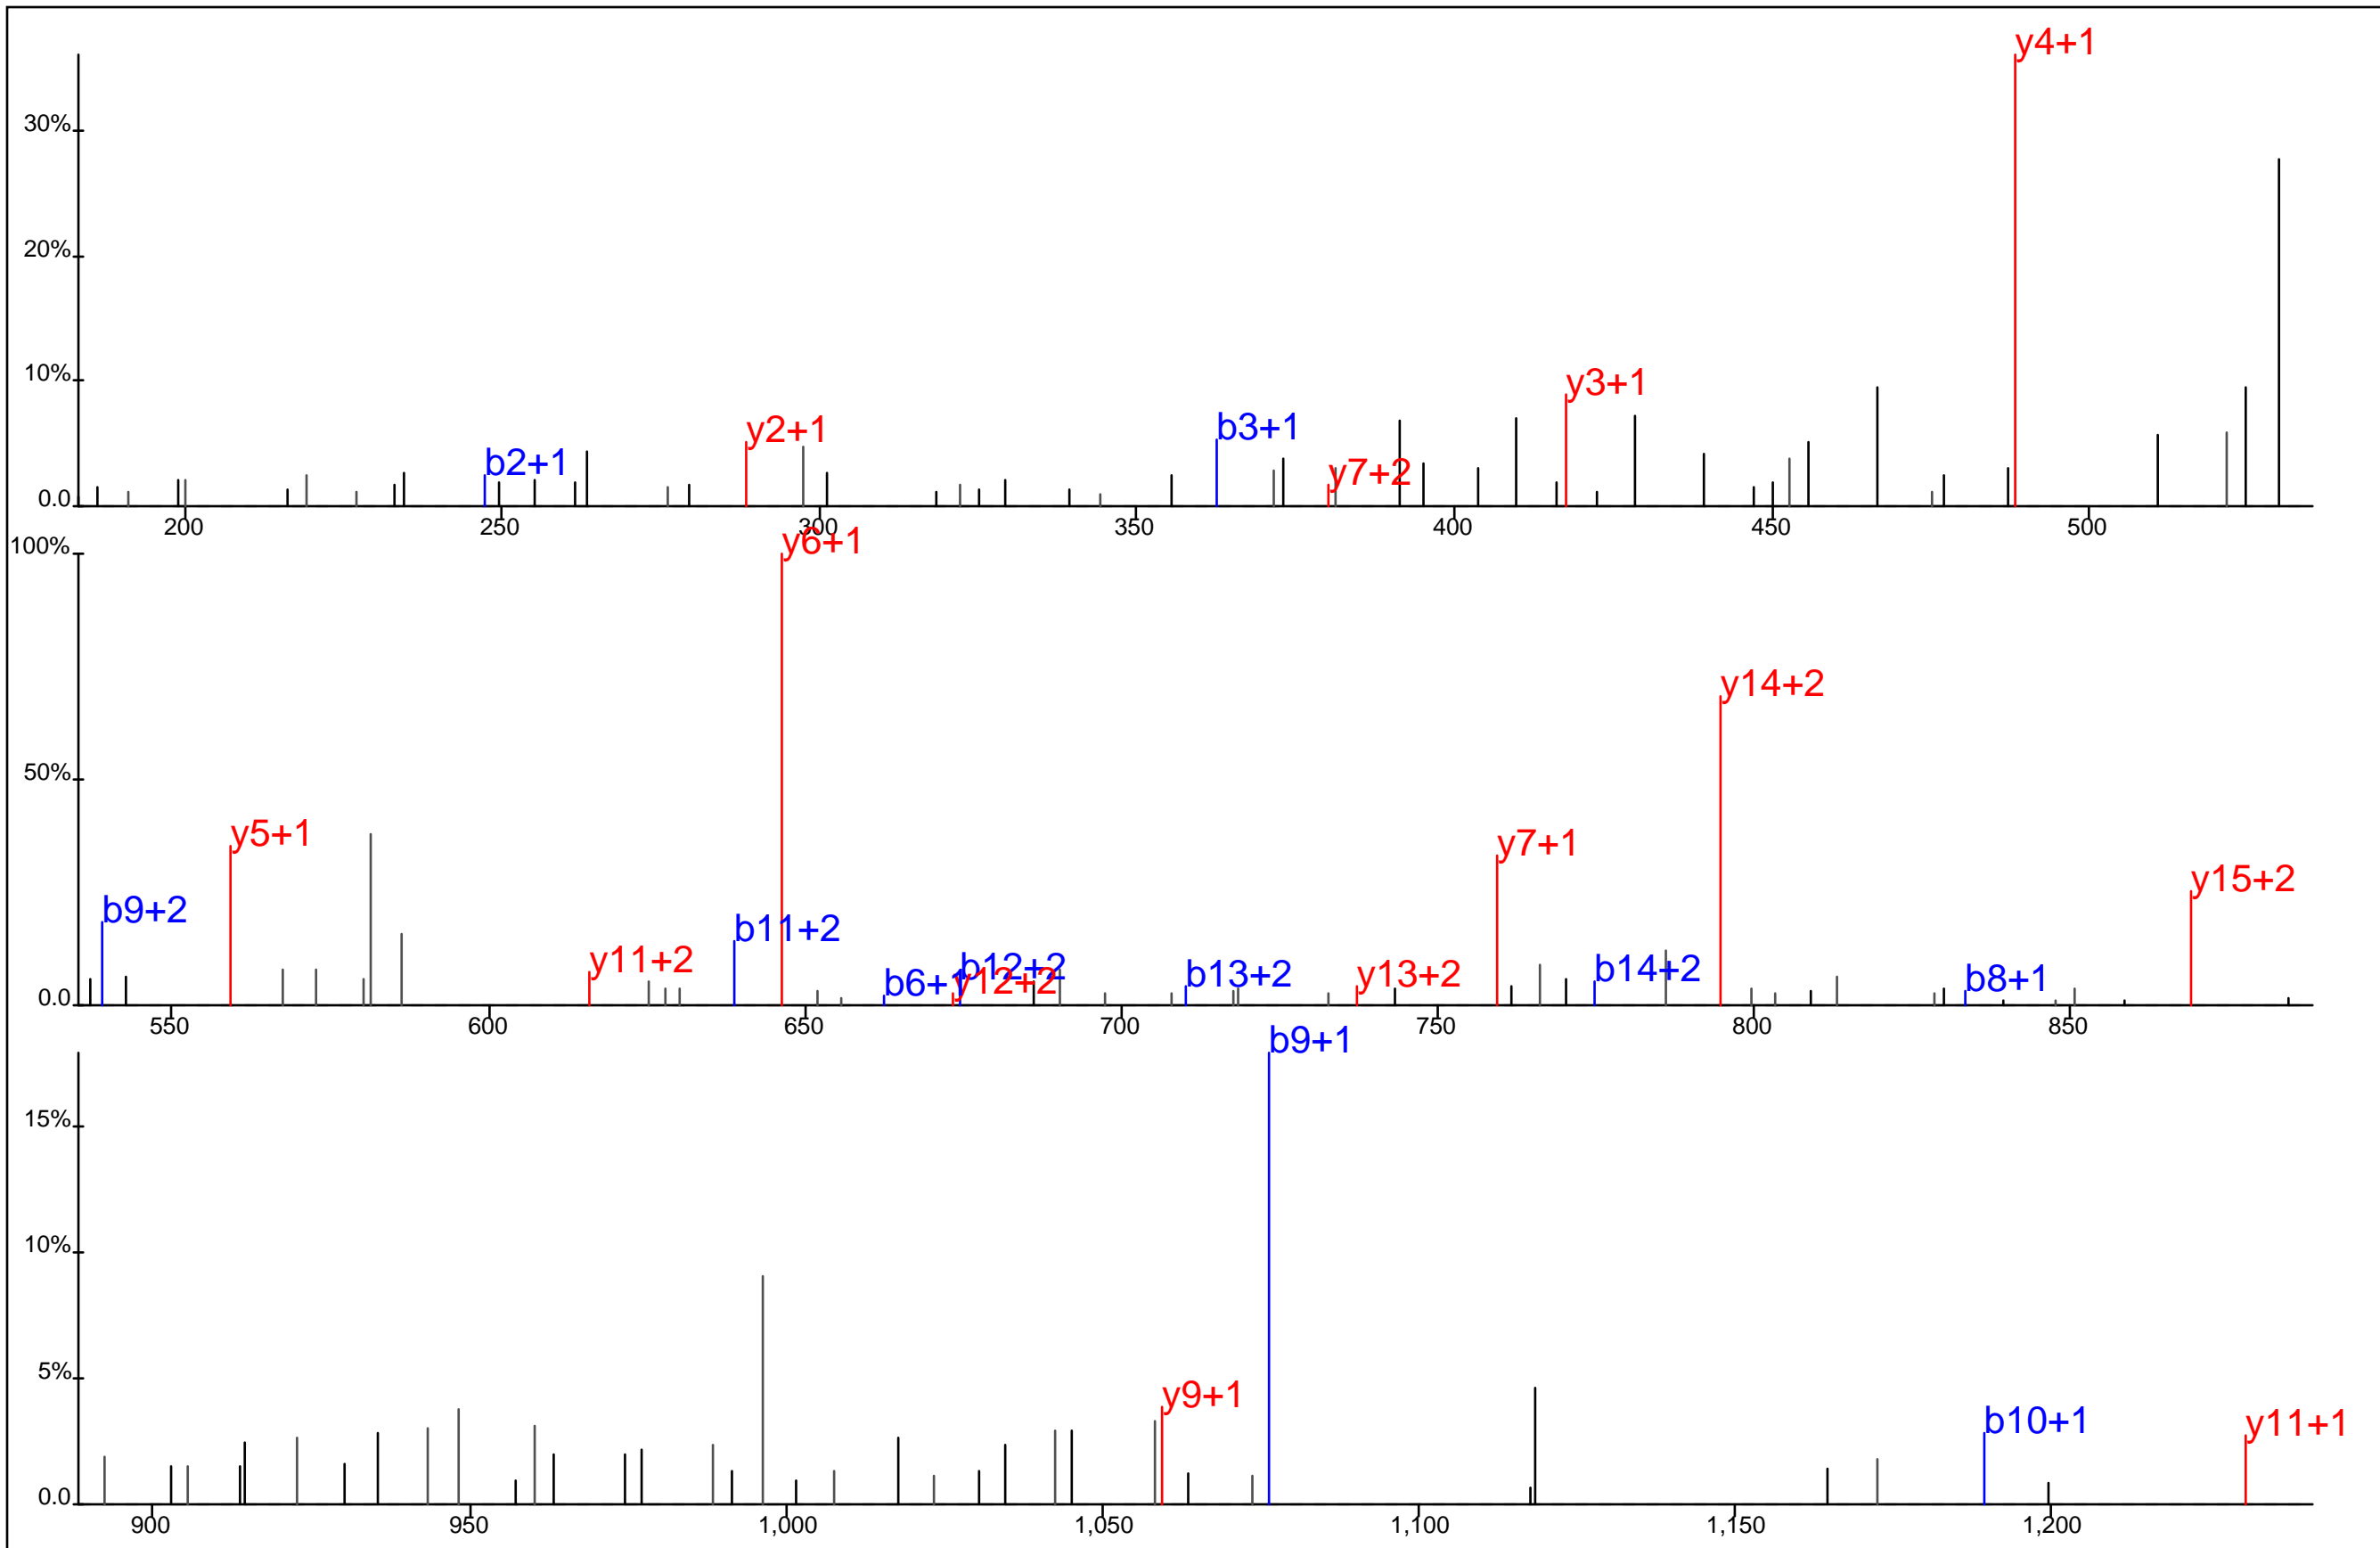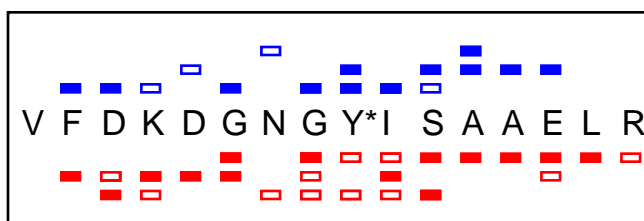

Protein Name: Calmodulin 1  
 gi Accession: 0  
 Precursor Mass: 612.2839+3  
 Delta Mass: 0.010 ppm  
 XCorr: 45.03

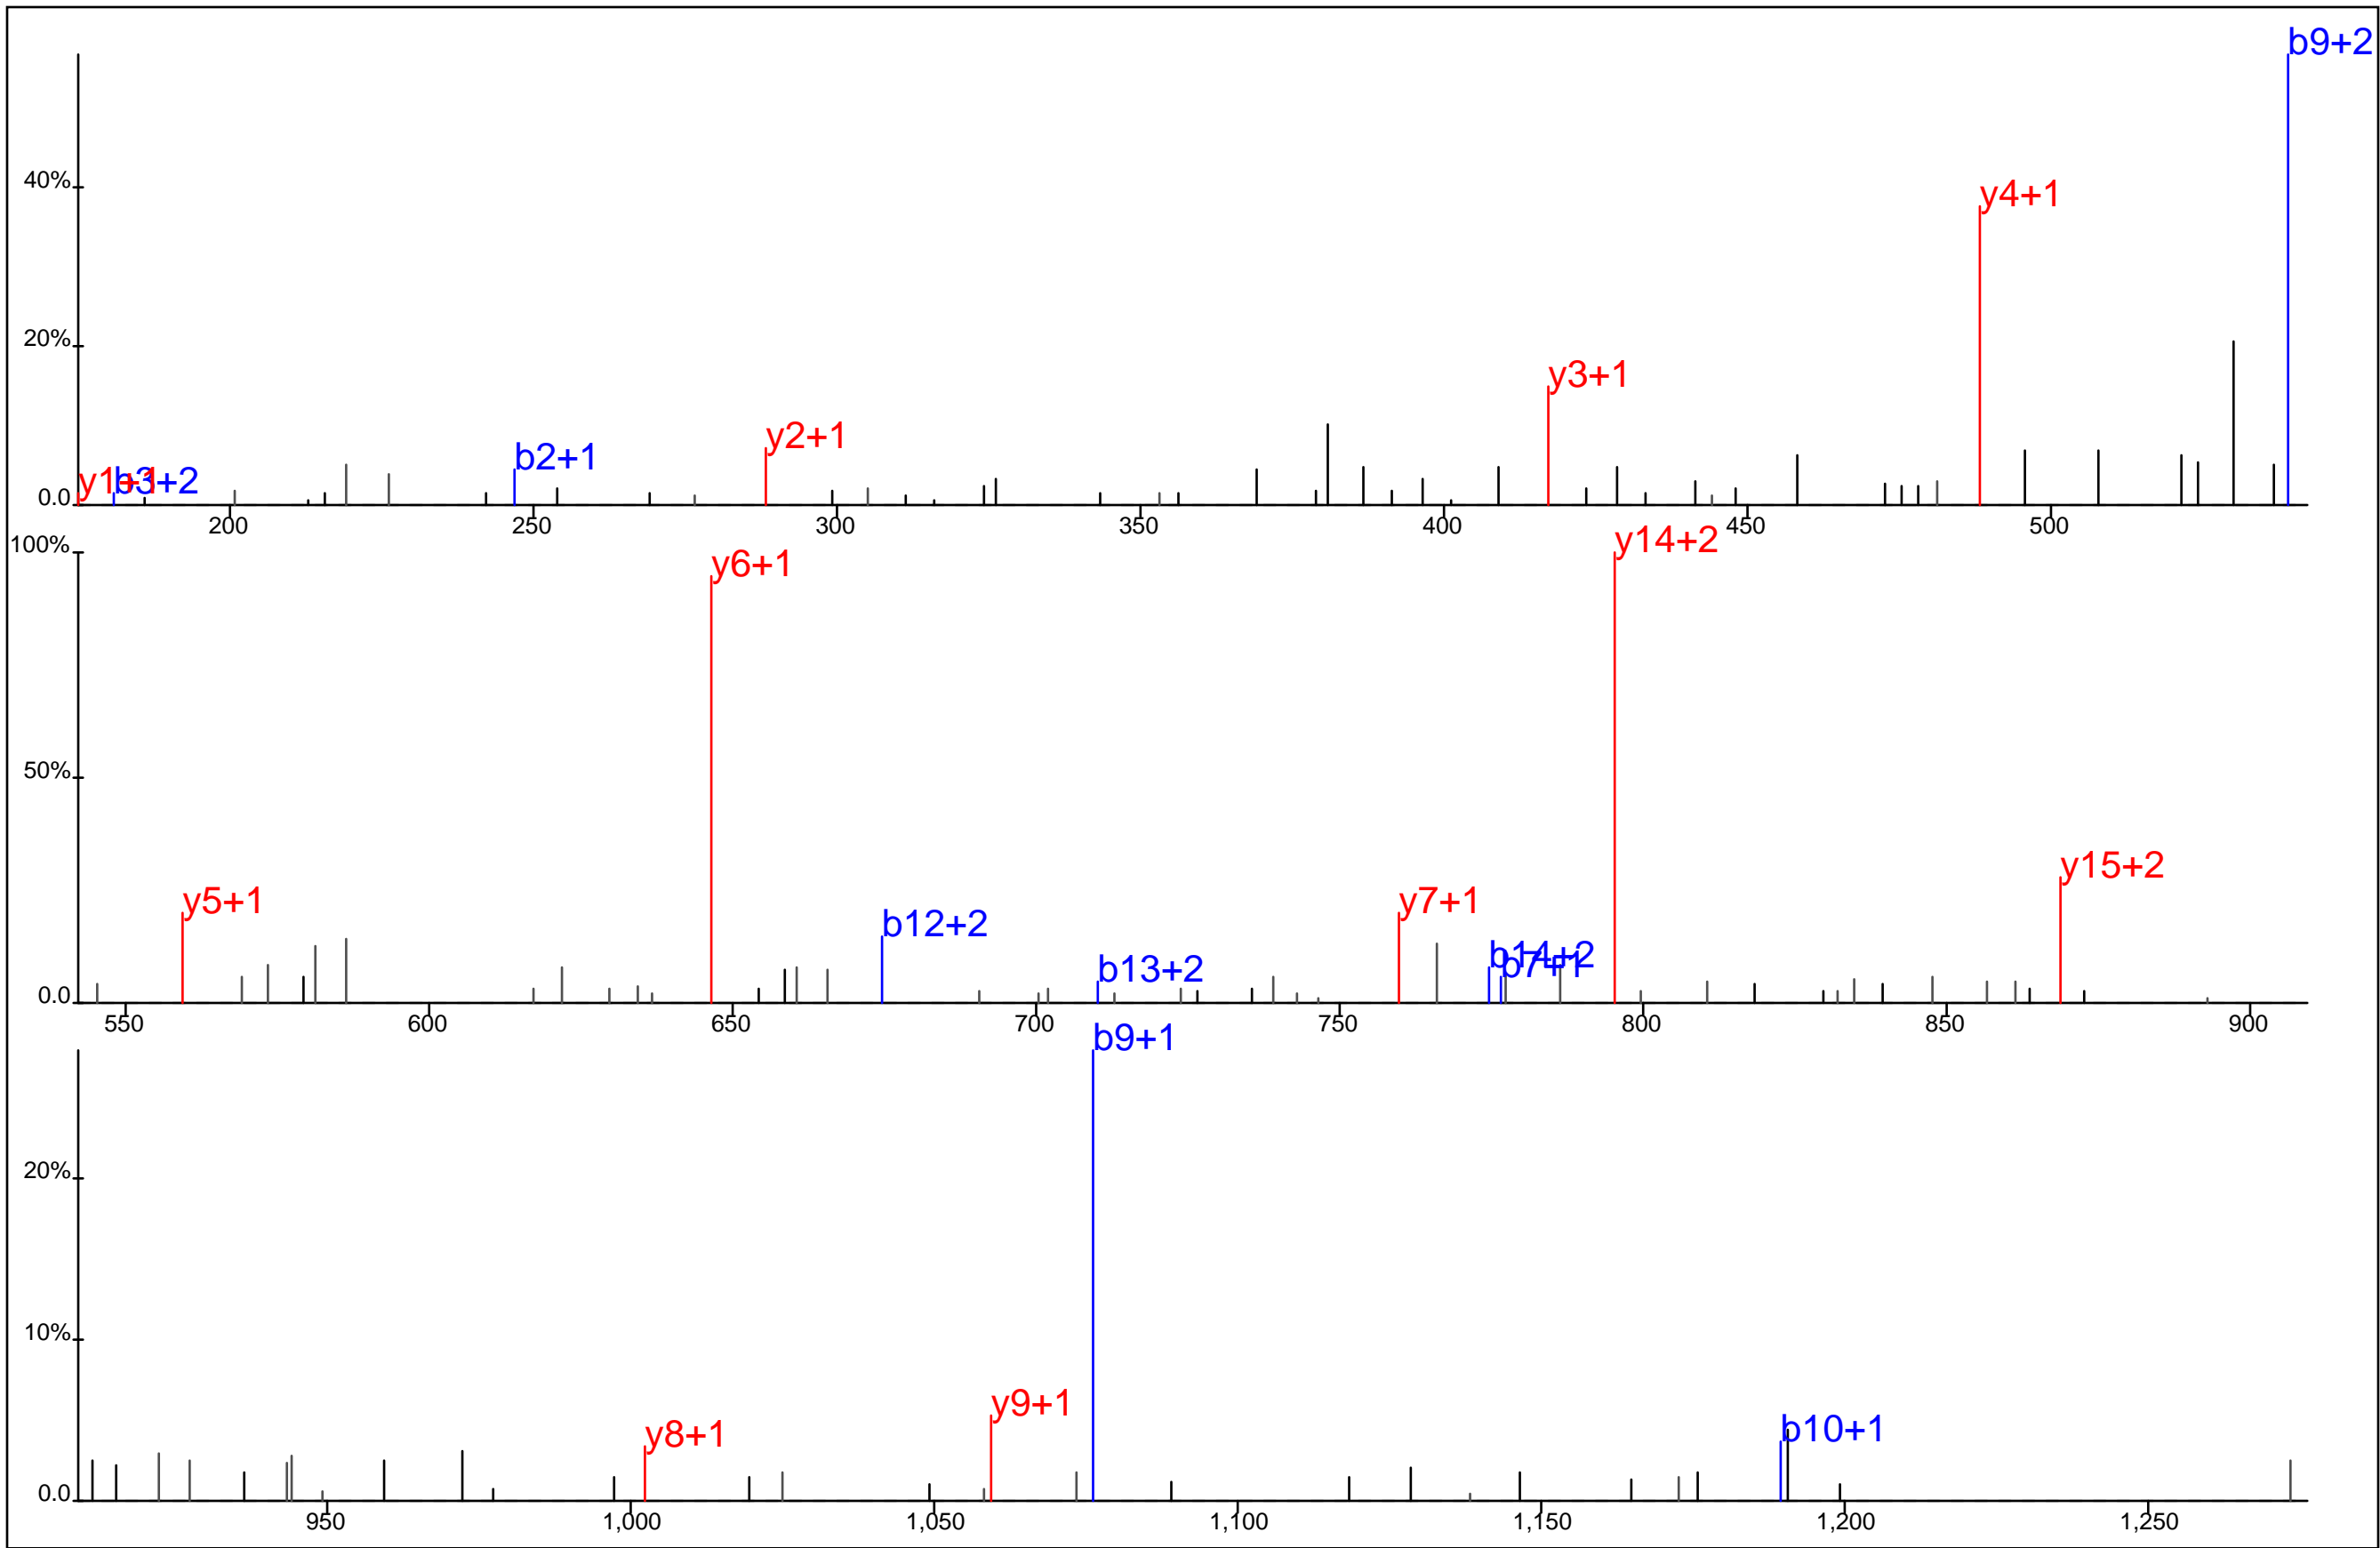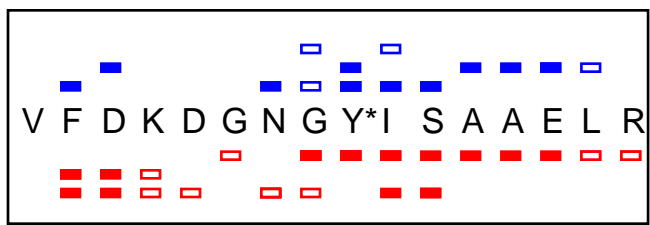

Protein Name: Calmodulin 1  
 gi Accession: 0  
 Precursor Mass: 612.2841+3  
 Delta Mass: 0.389 ppm  
 XCorr: 45.83

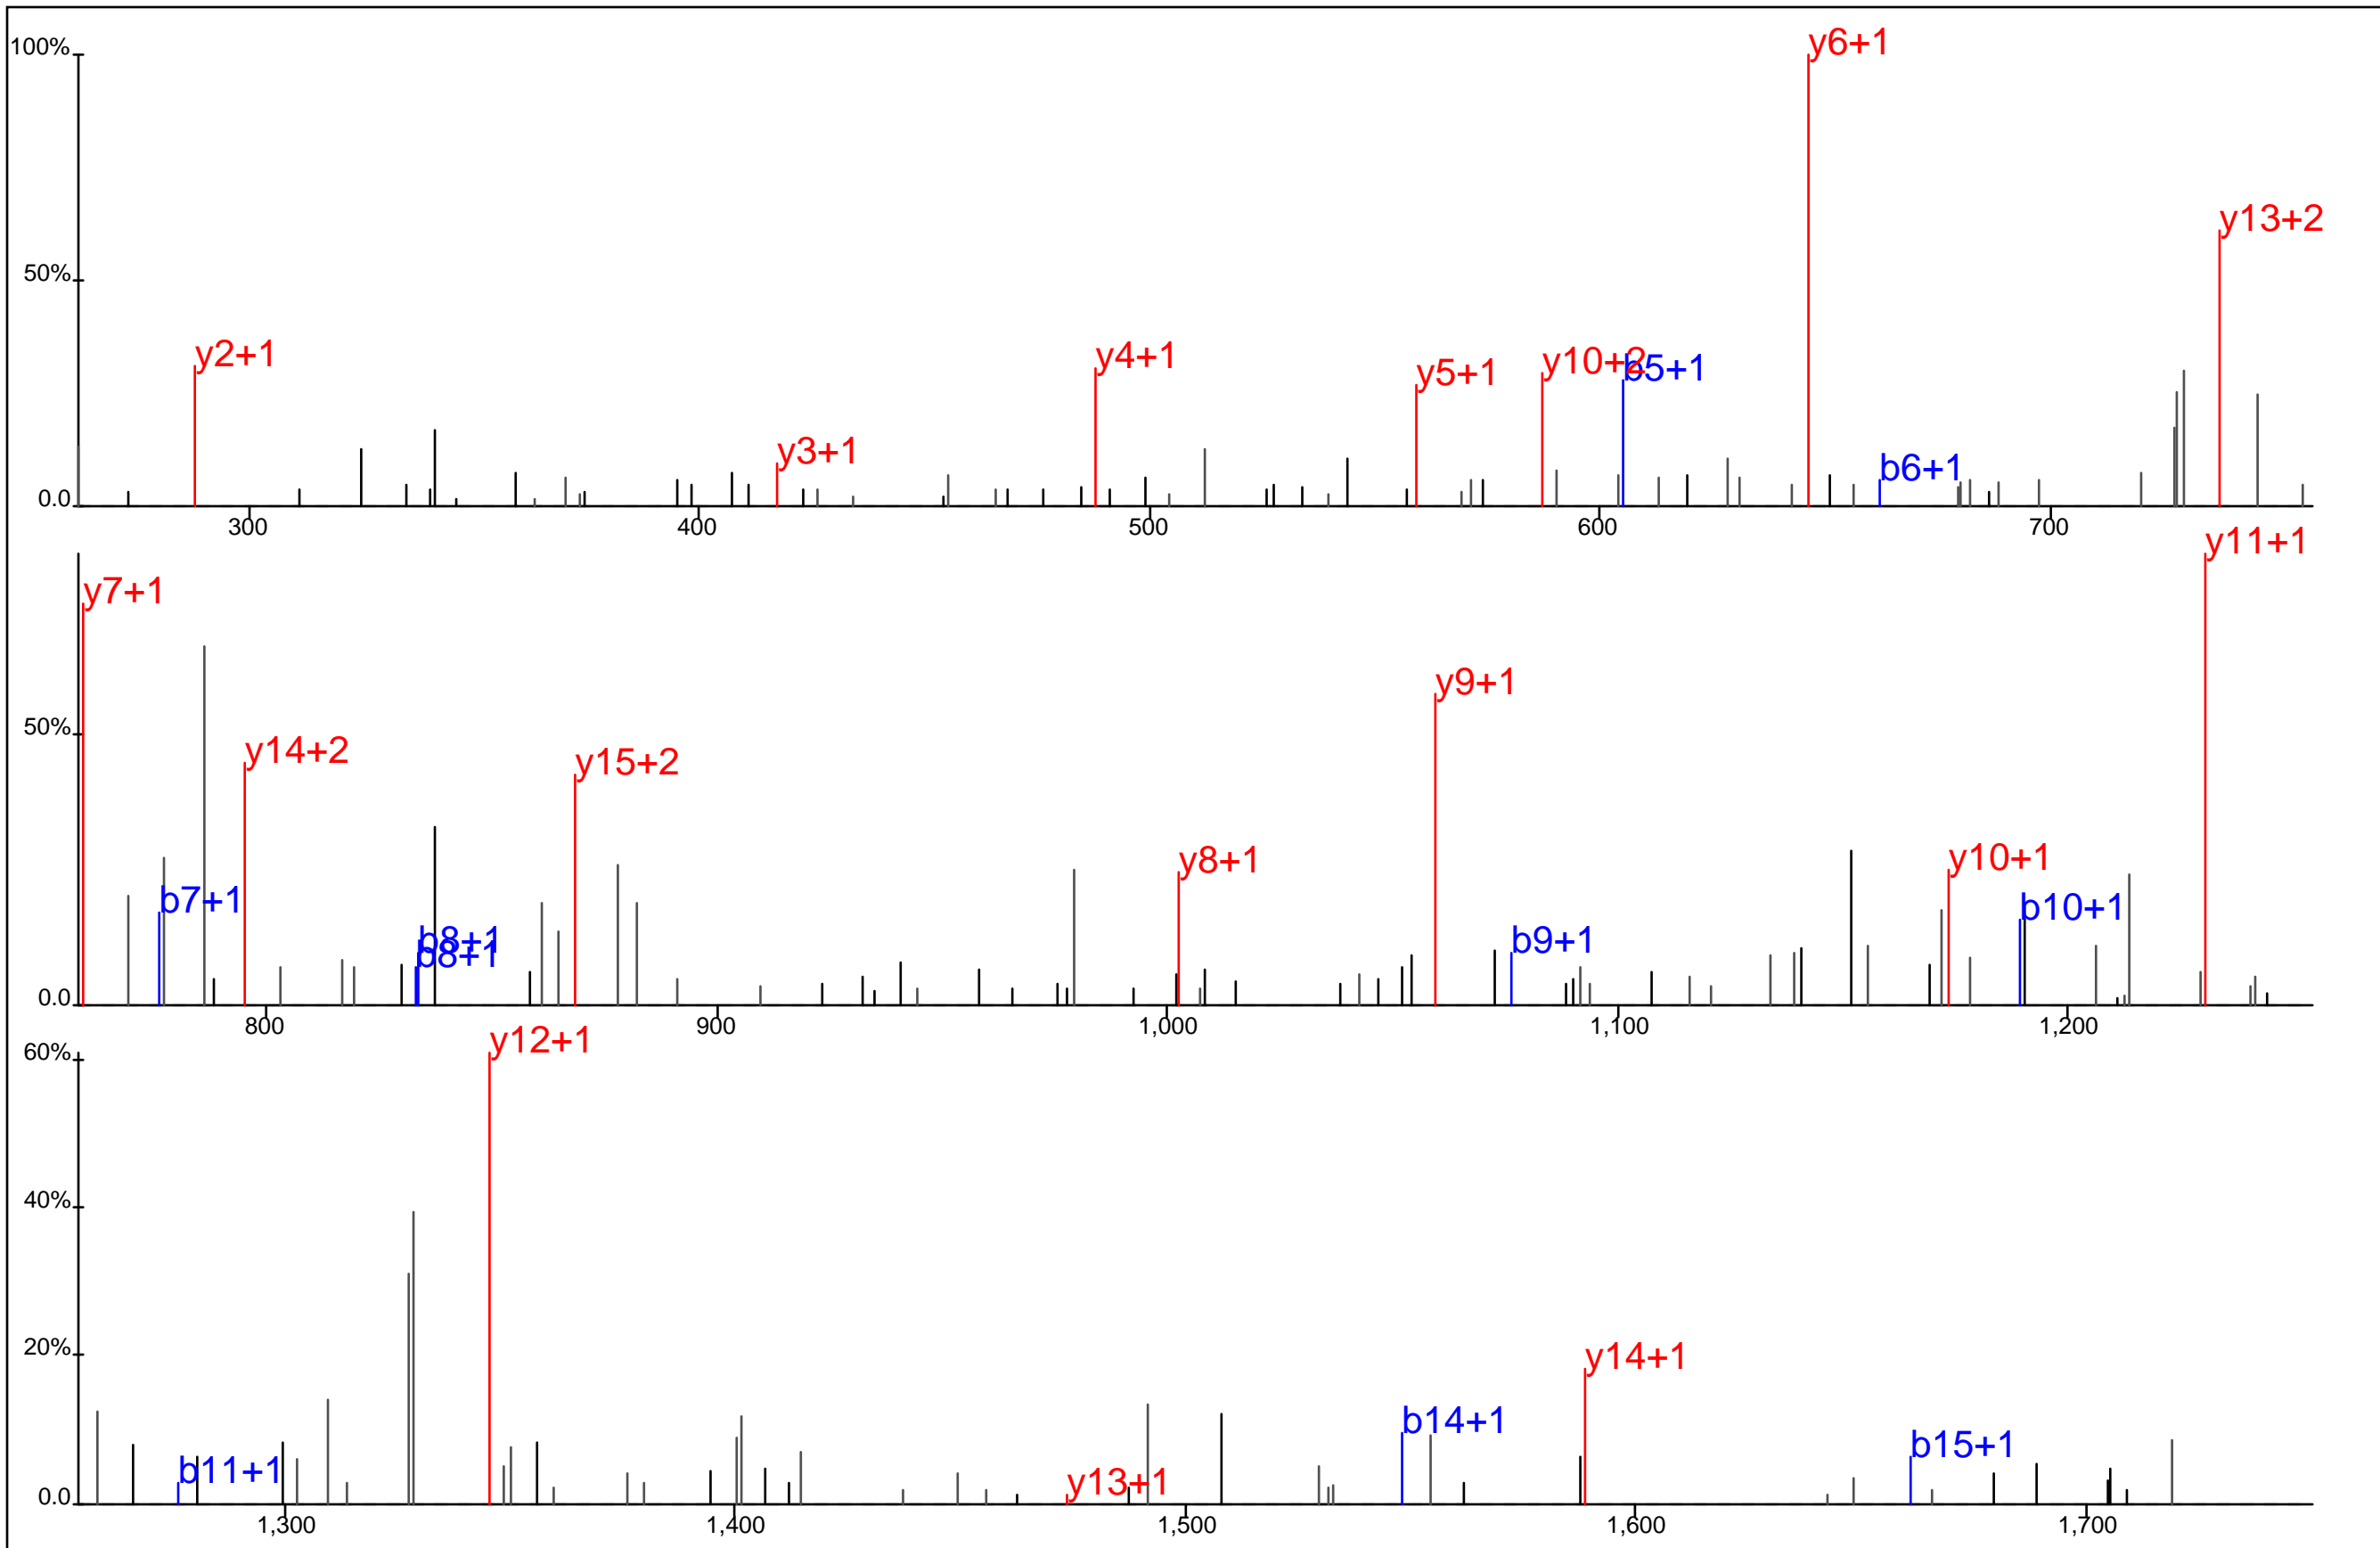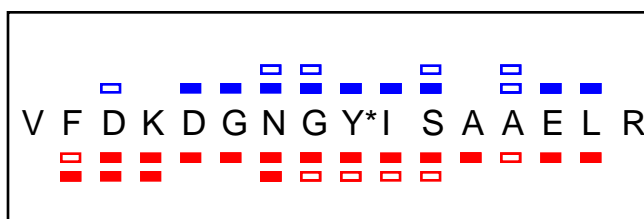

Protein Name: Calmodulin 1  
 gi Accession: 0  
 Precursor Mass: 917.9238+2  
 Delta Mass: 1.725 ppm  
 XCorr: 83.28

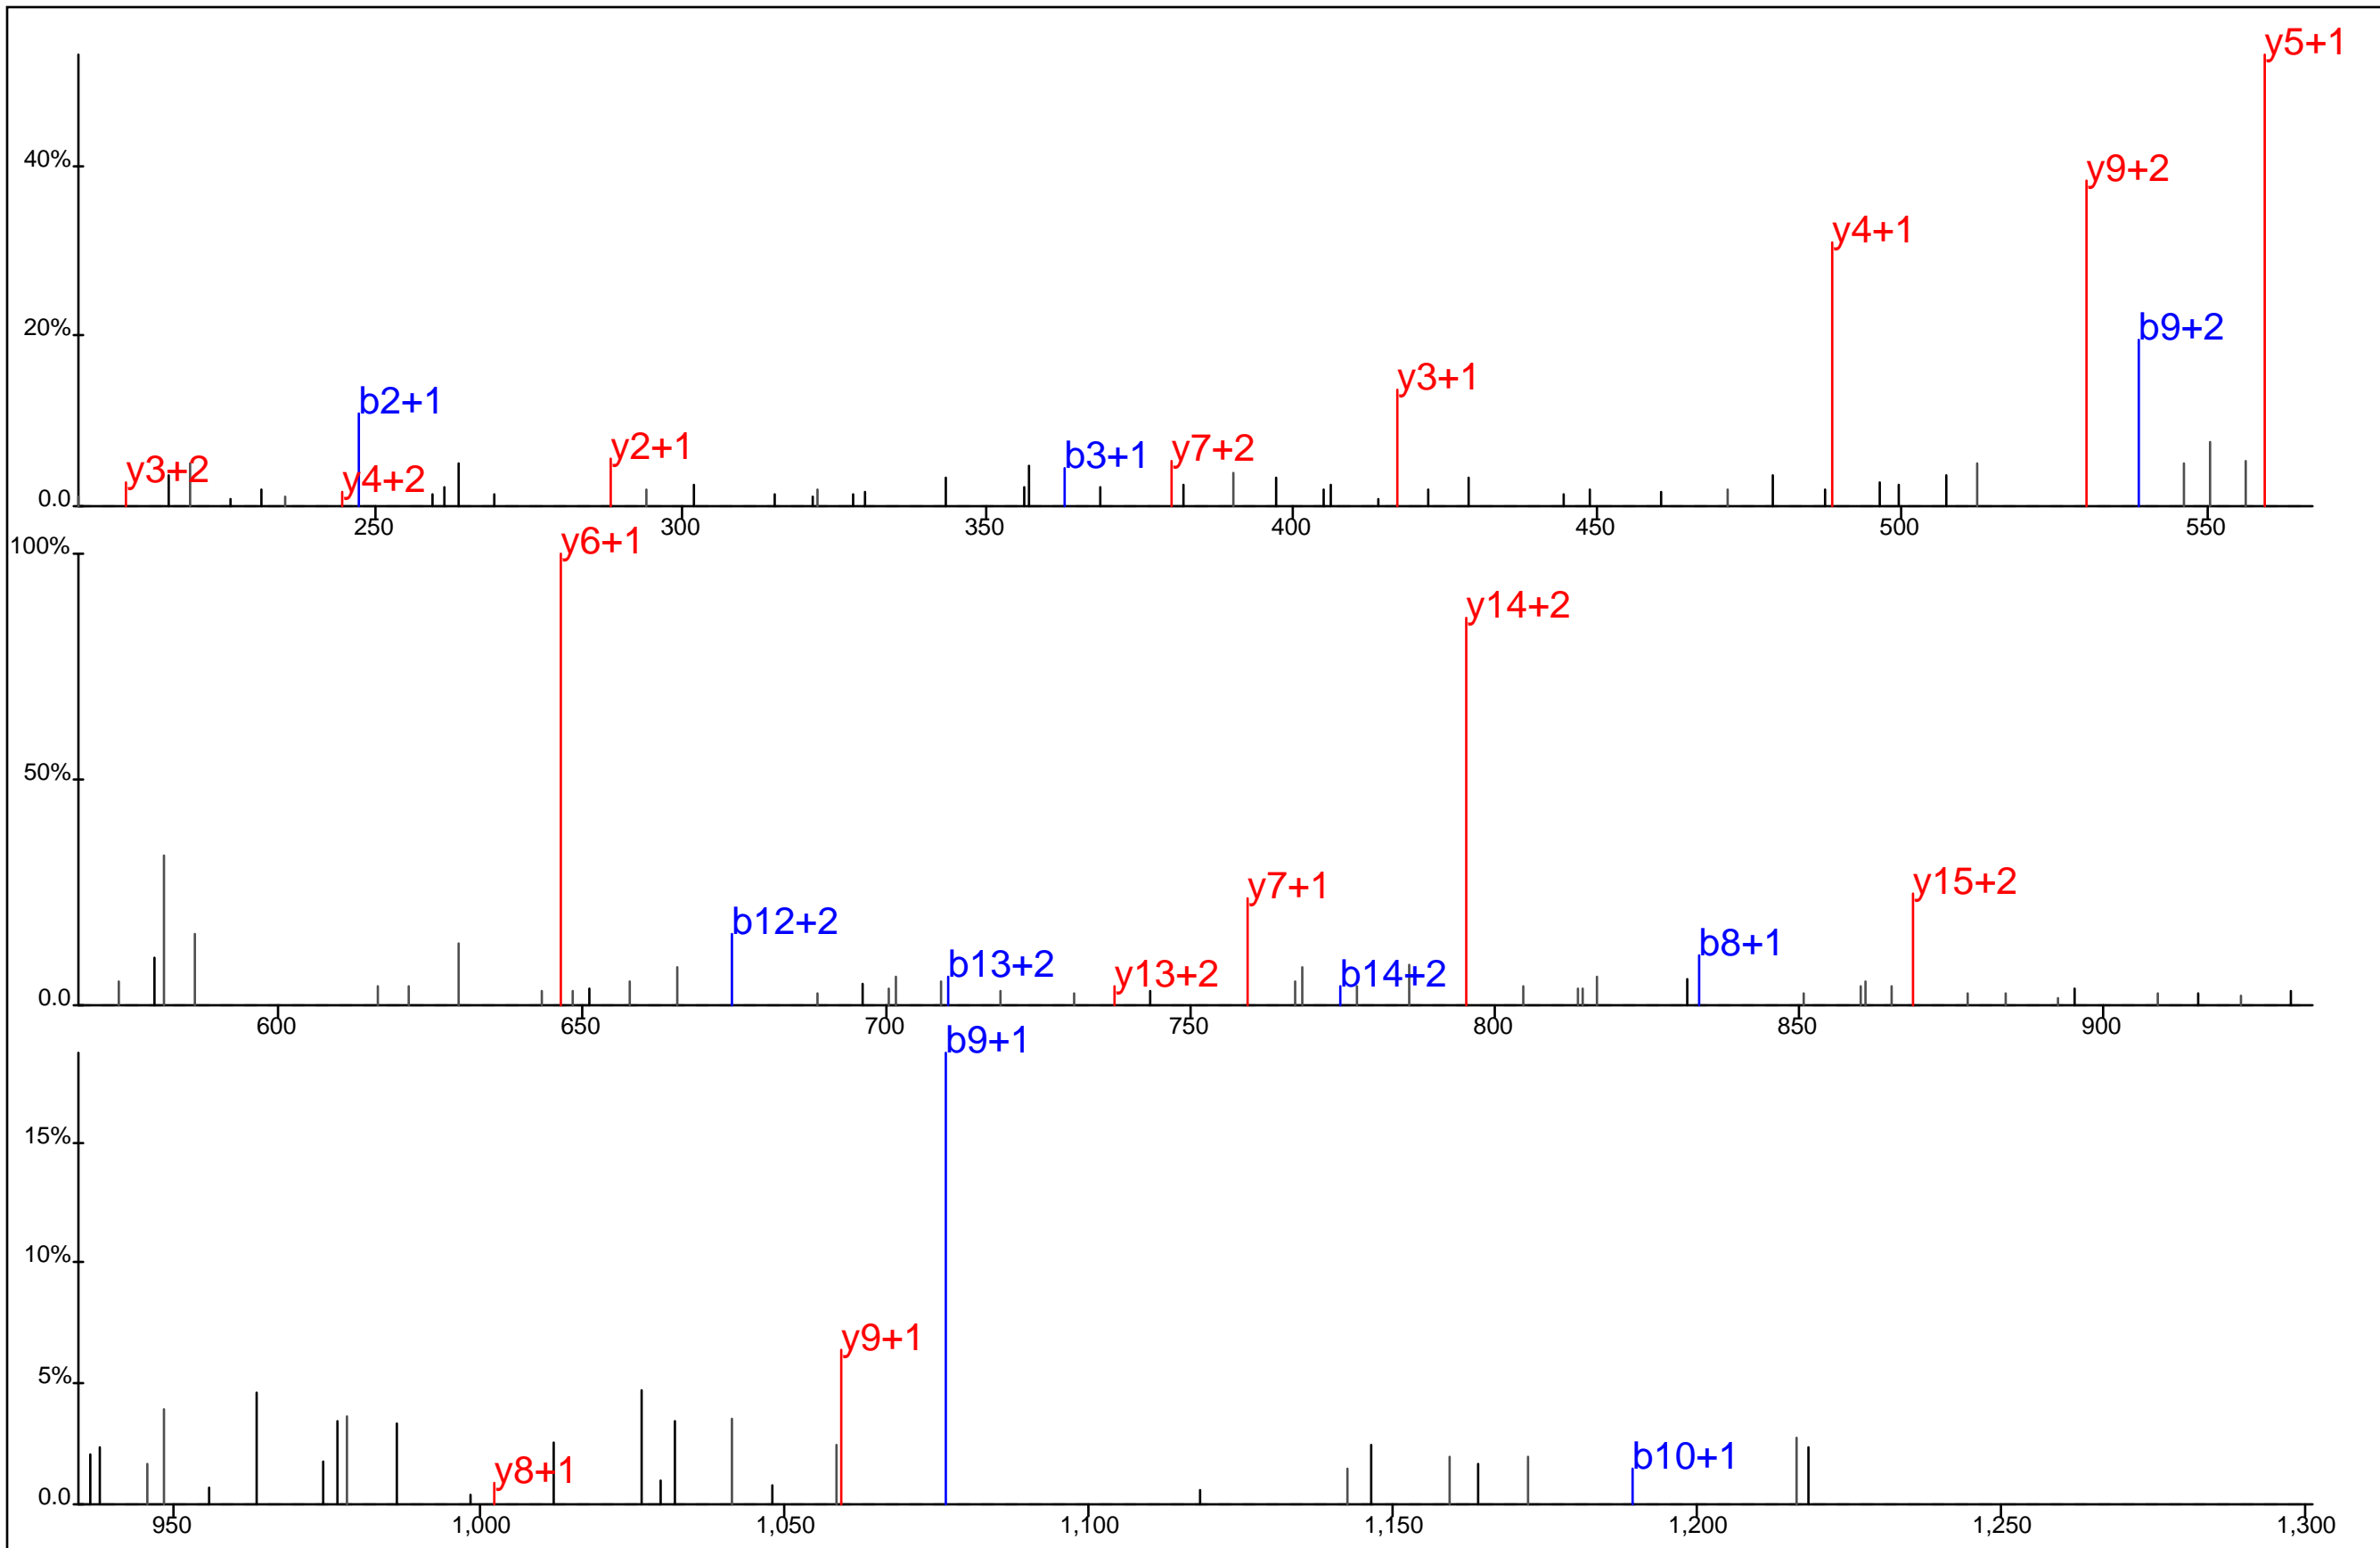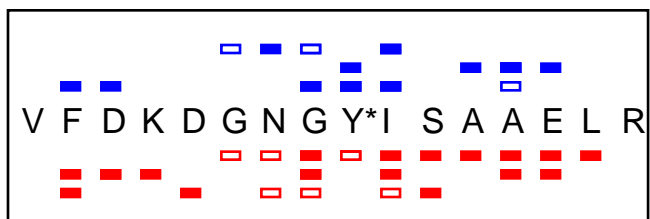

Protein Name: Calmodulin 1  
 gi Accession: 0  
 Precursor Mass: 612.2844+3  
 Delta Mass: 0.887 ppm  
 XCorr: 45.79

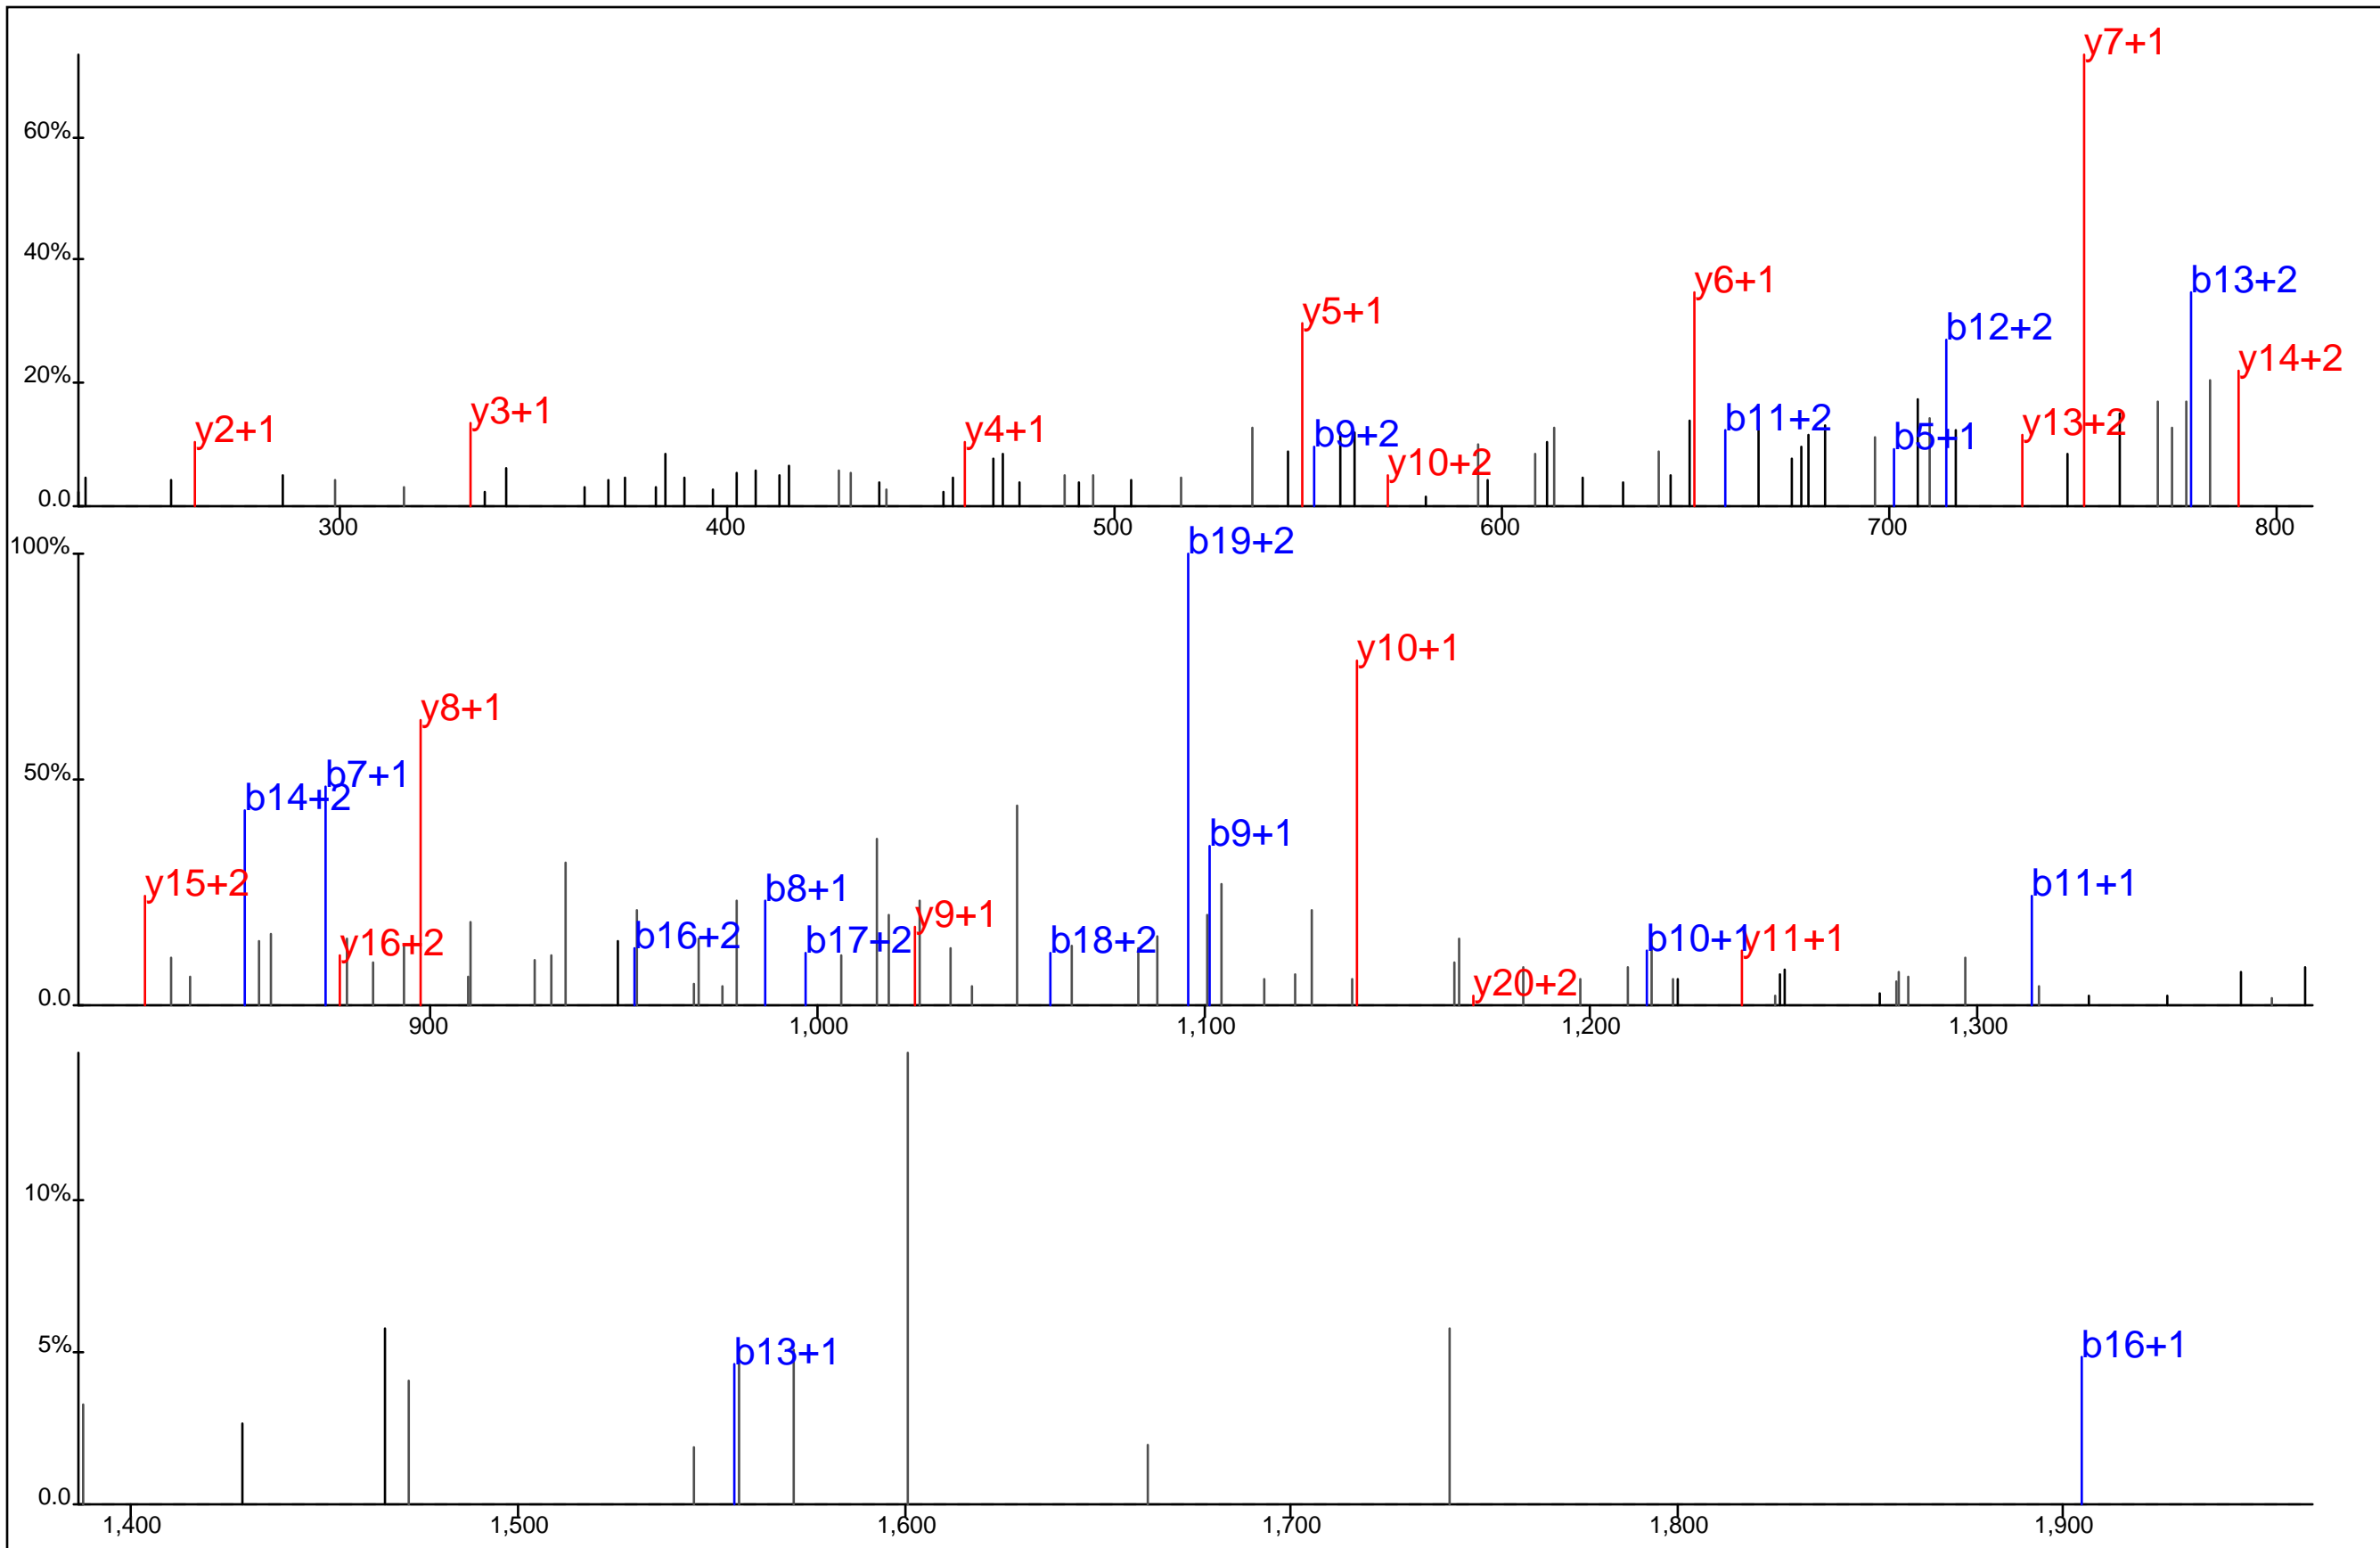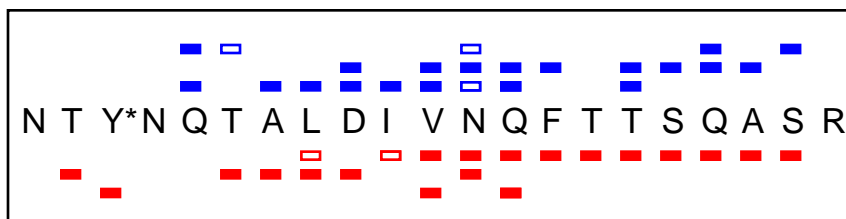

Protein Name: Cask-interacting protein 2  
 gi Accession: 0  
 Precursor Mass: 818.0433+3  
 Delta Mass: 0.513 ppm  
 XCorr: 44.98

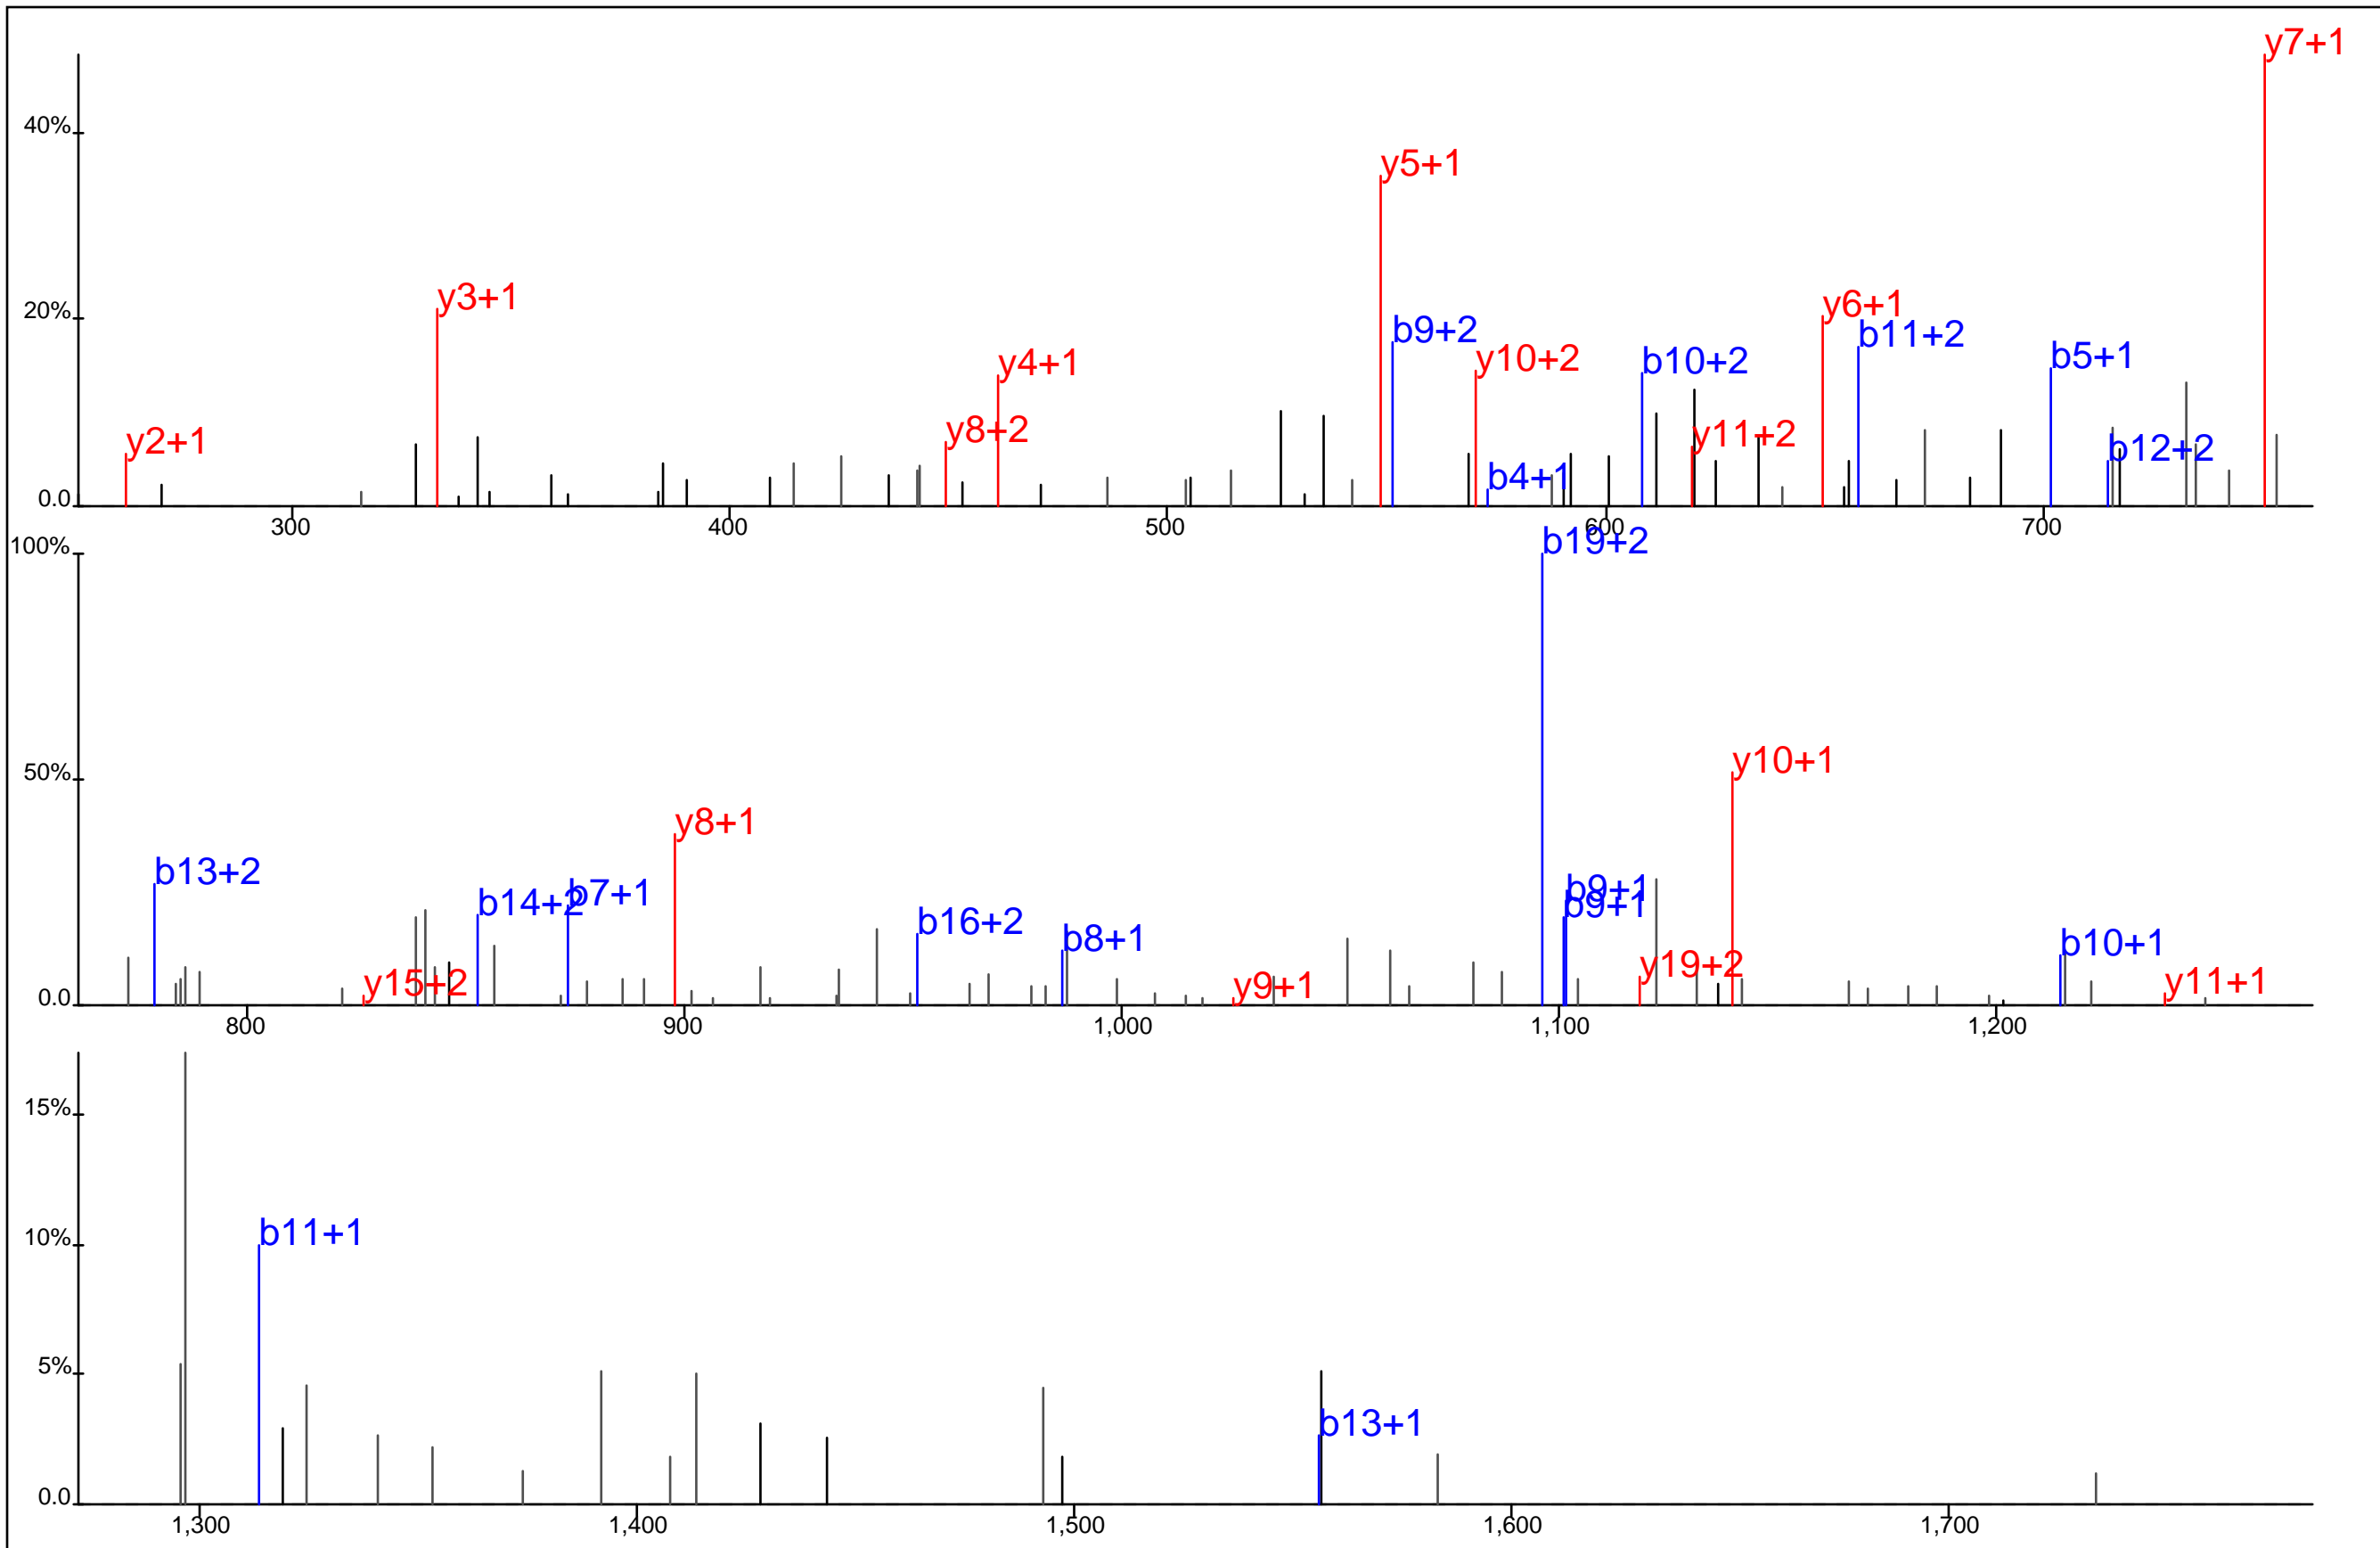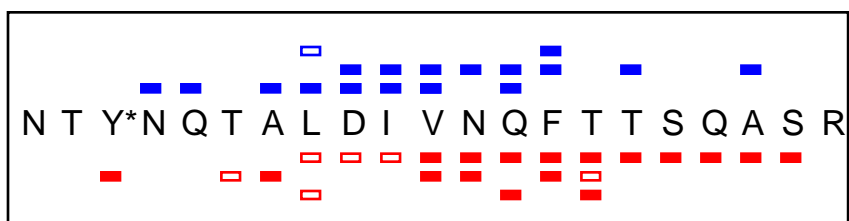

Protein Name: Cask-interacting protein 2  
 gi Accession: 0  
 Precursor Mass: 818.0434+3  
 Delta Mass: 0.662 ppm  
 XCorr: 50.15

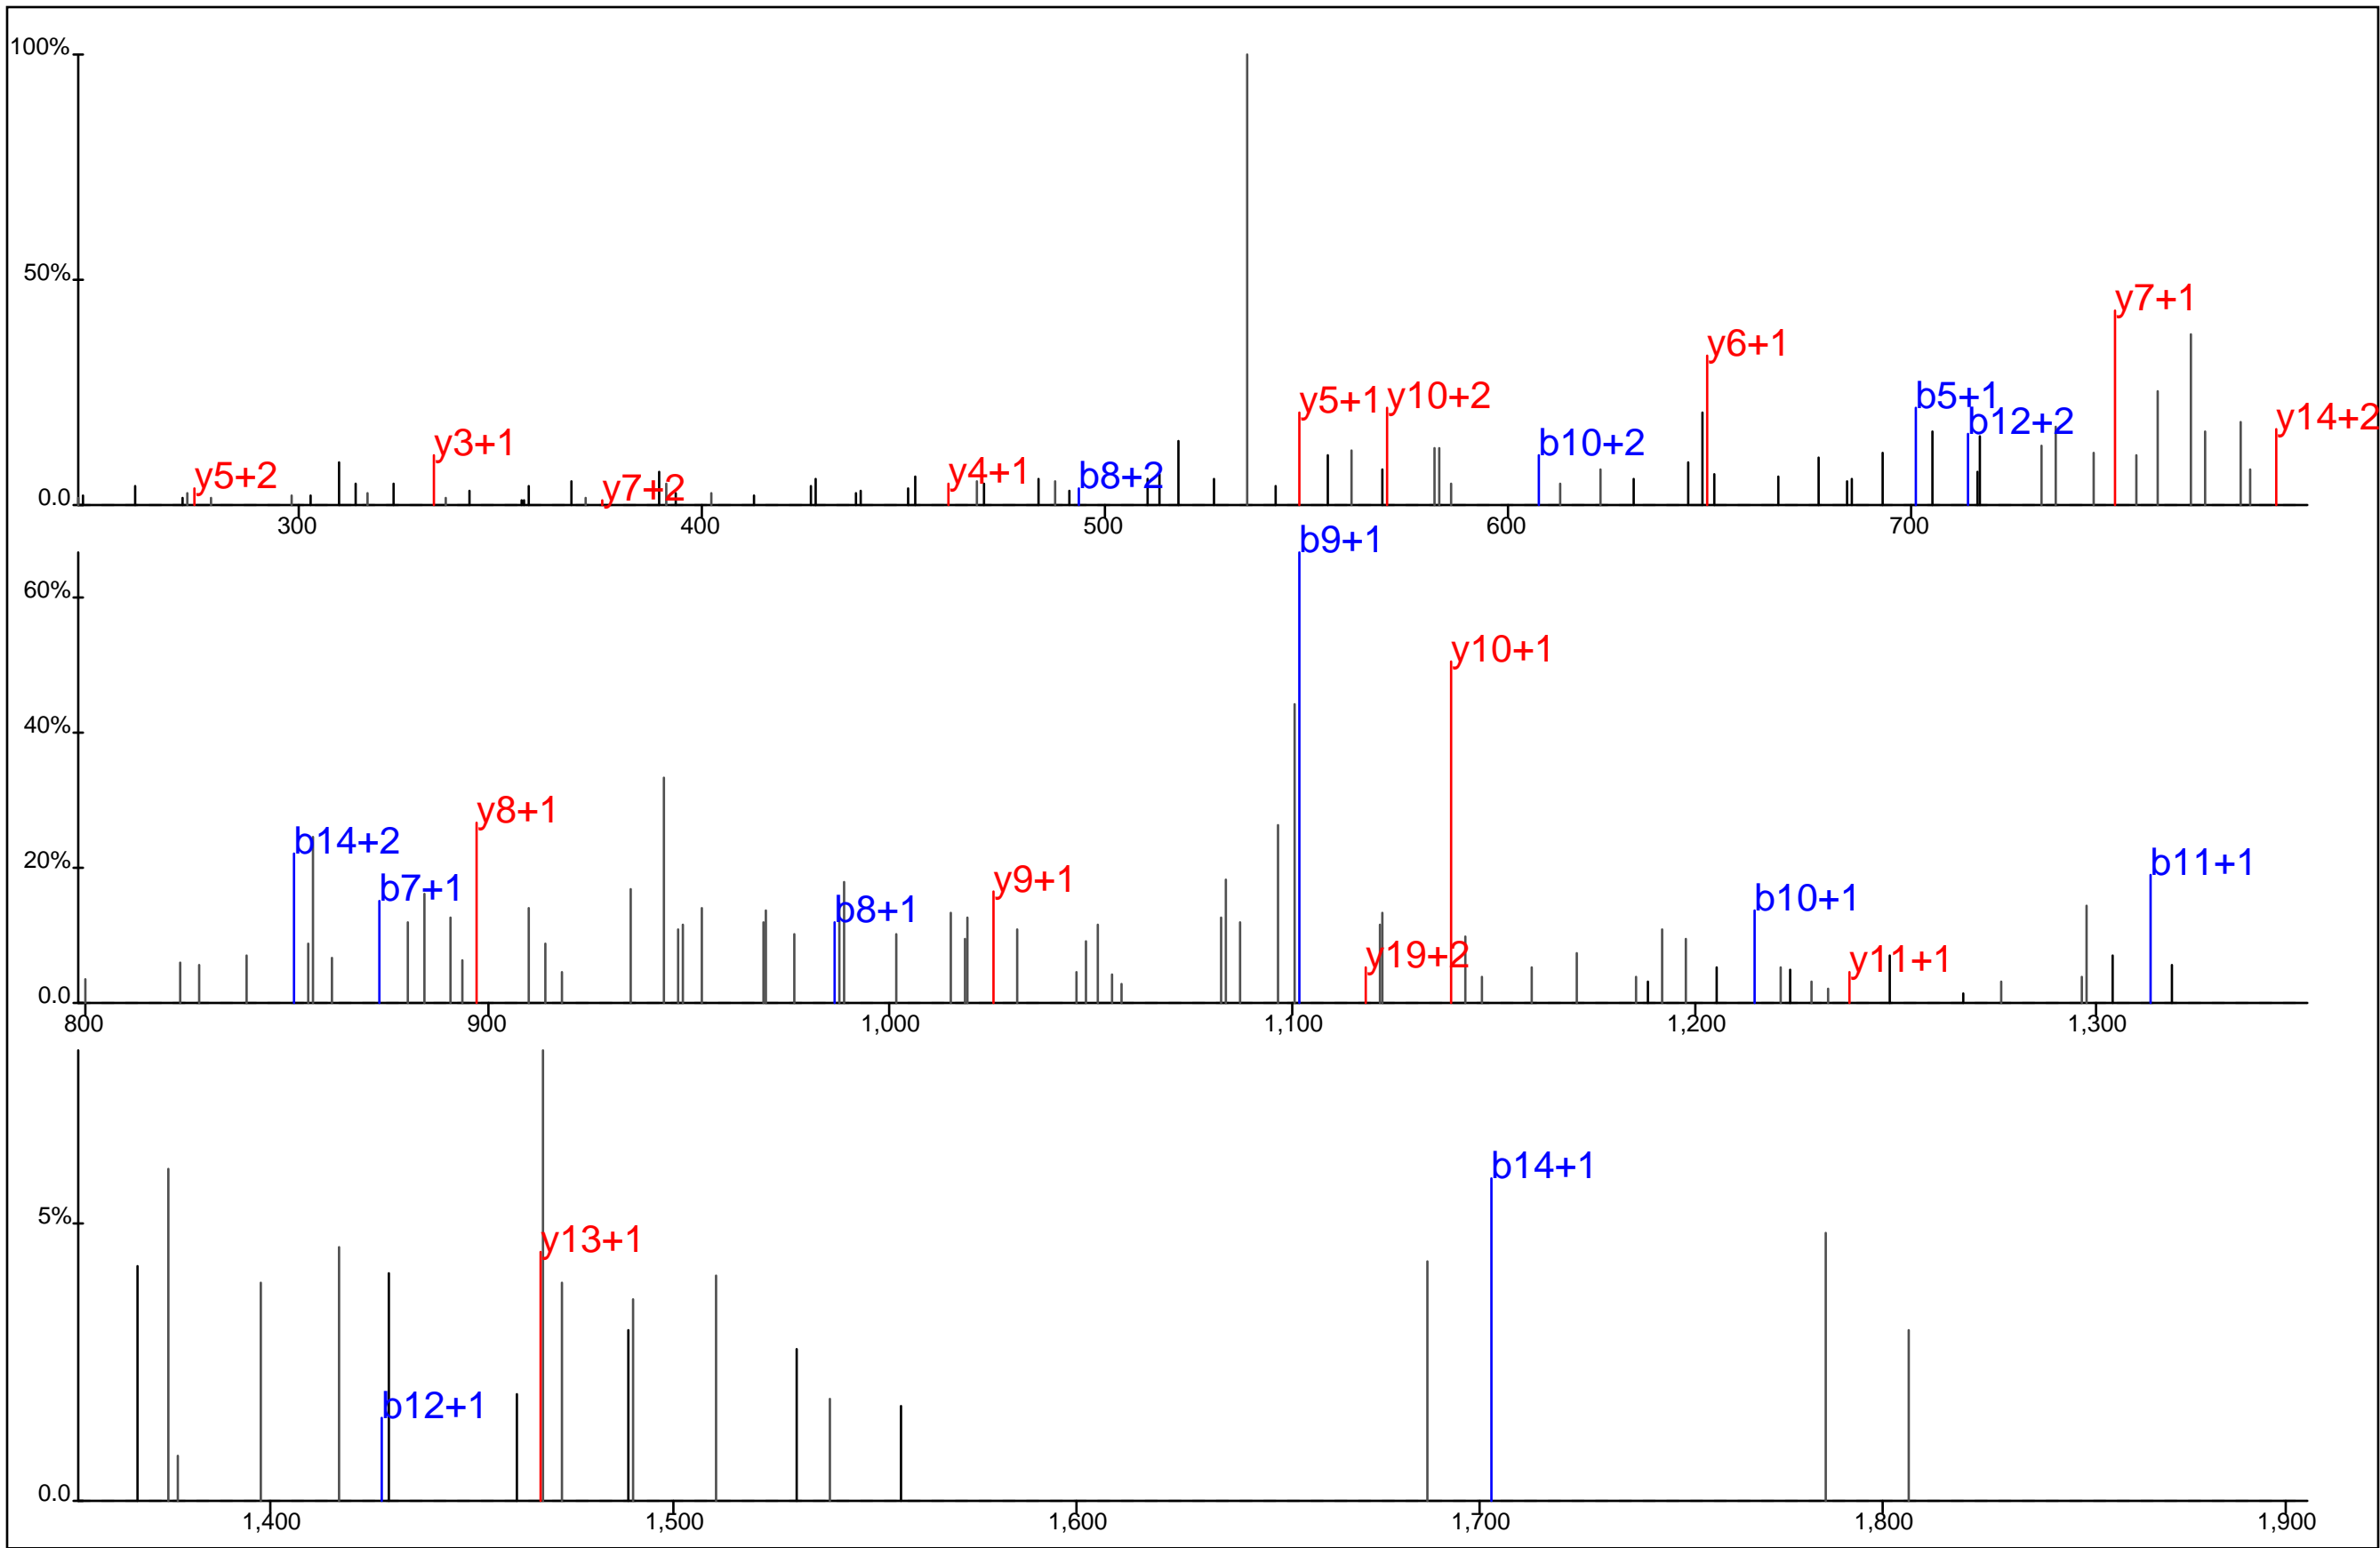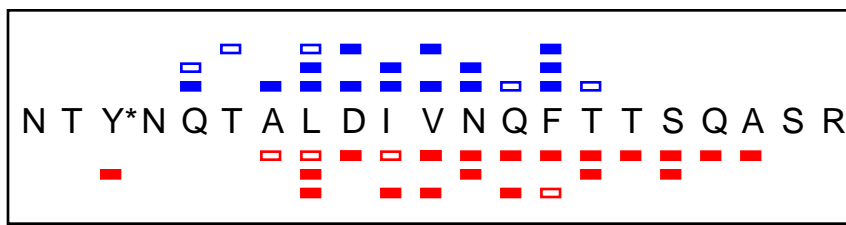

Protein Name: Cask-interacting protein 2  
 gi Accession: 0  
 Precursor Mass: 818.0421+3  
 Delta Mass: 0.906 ppm  
 XCorr: 40.44



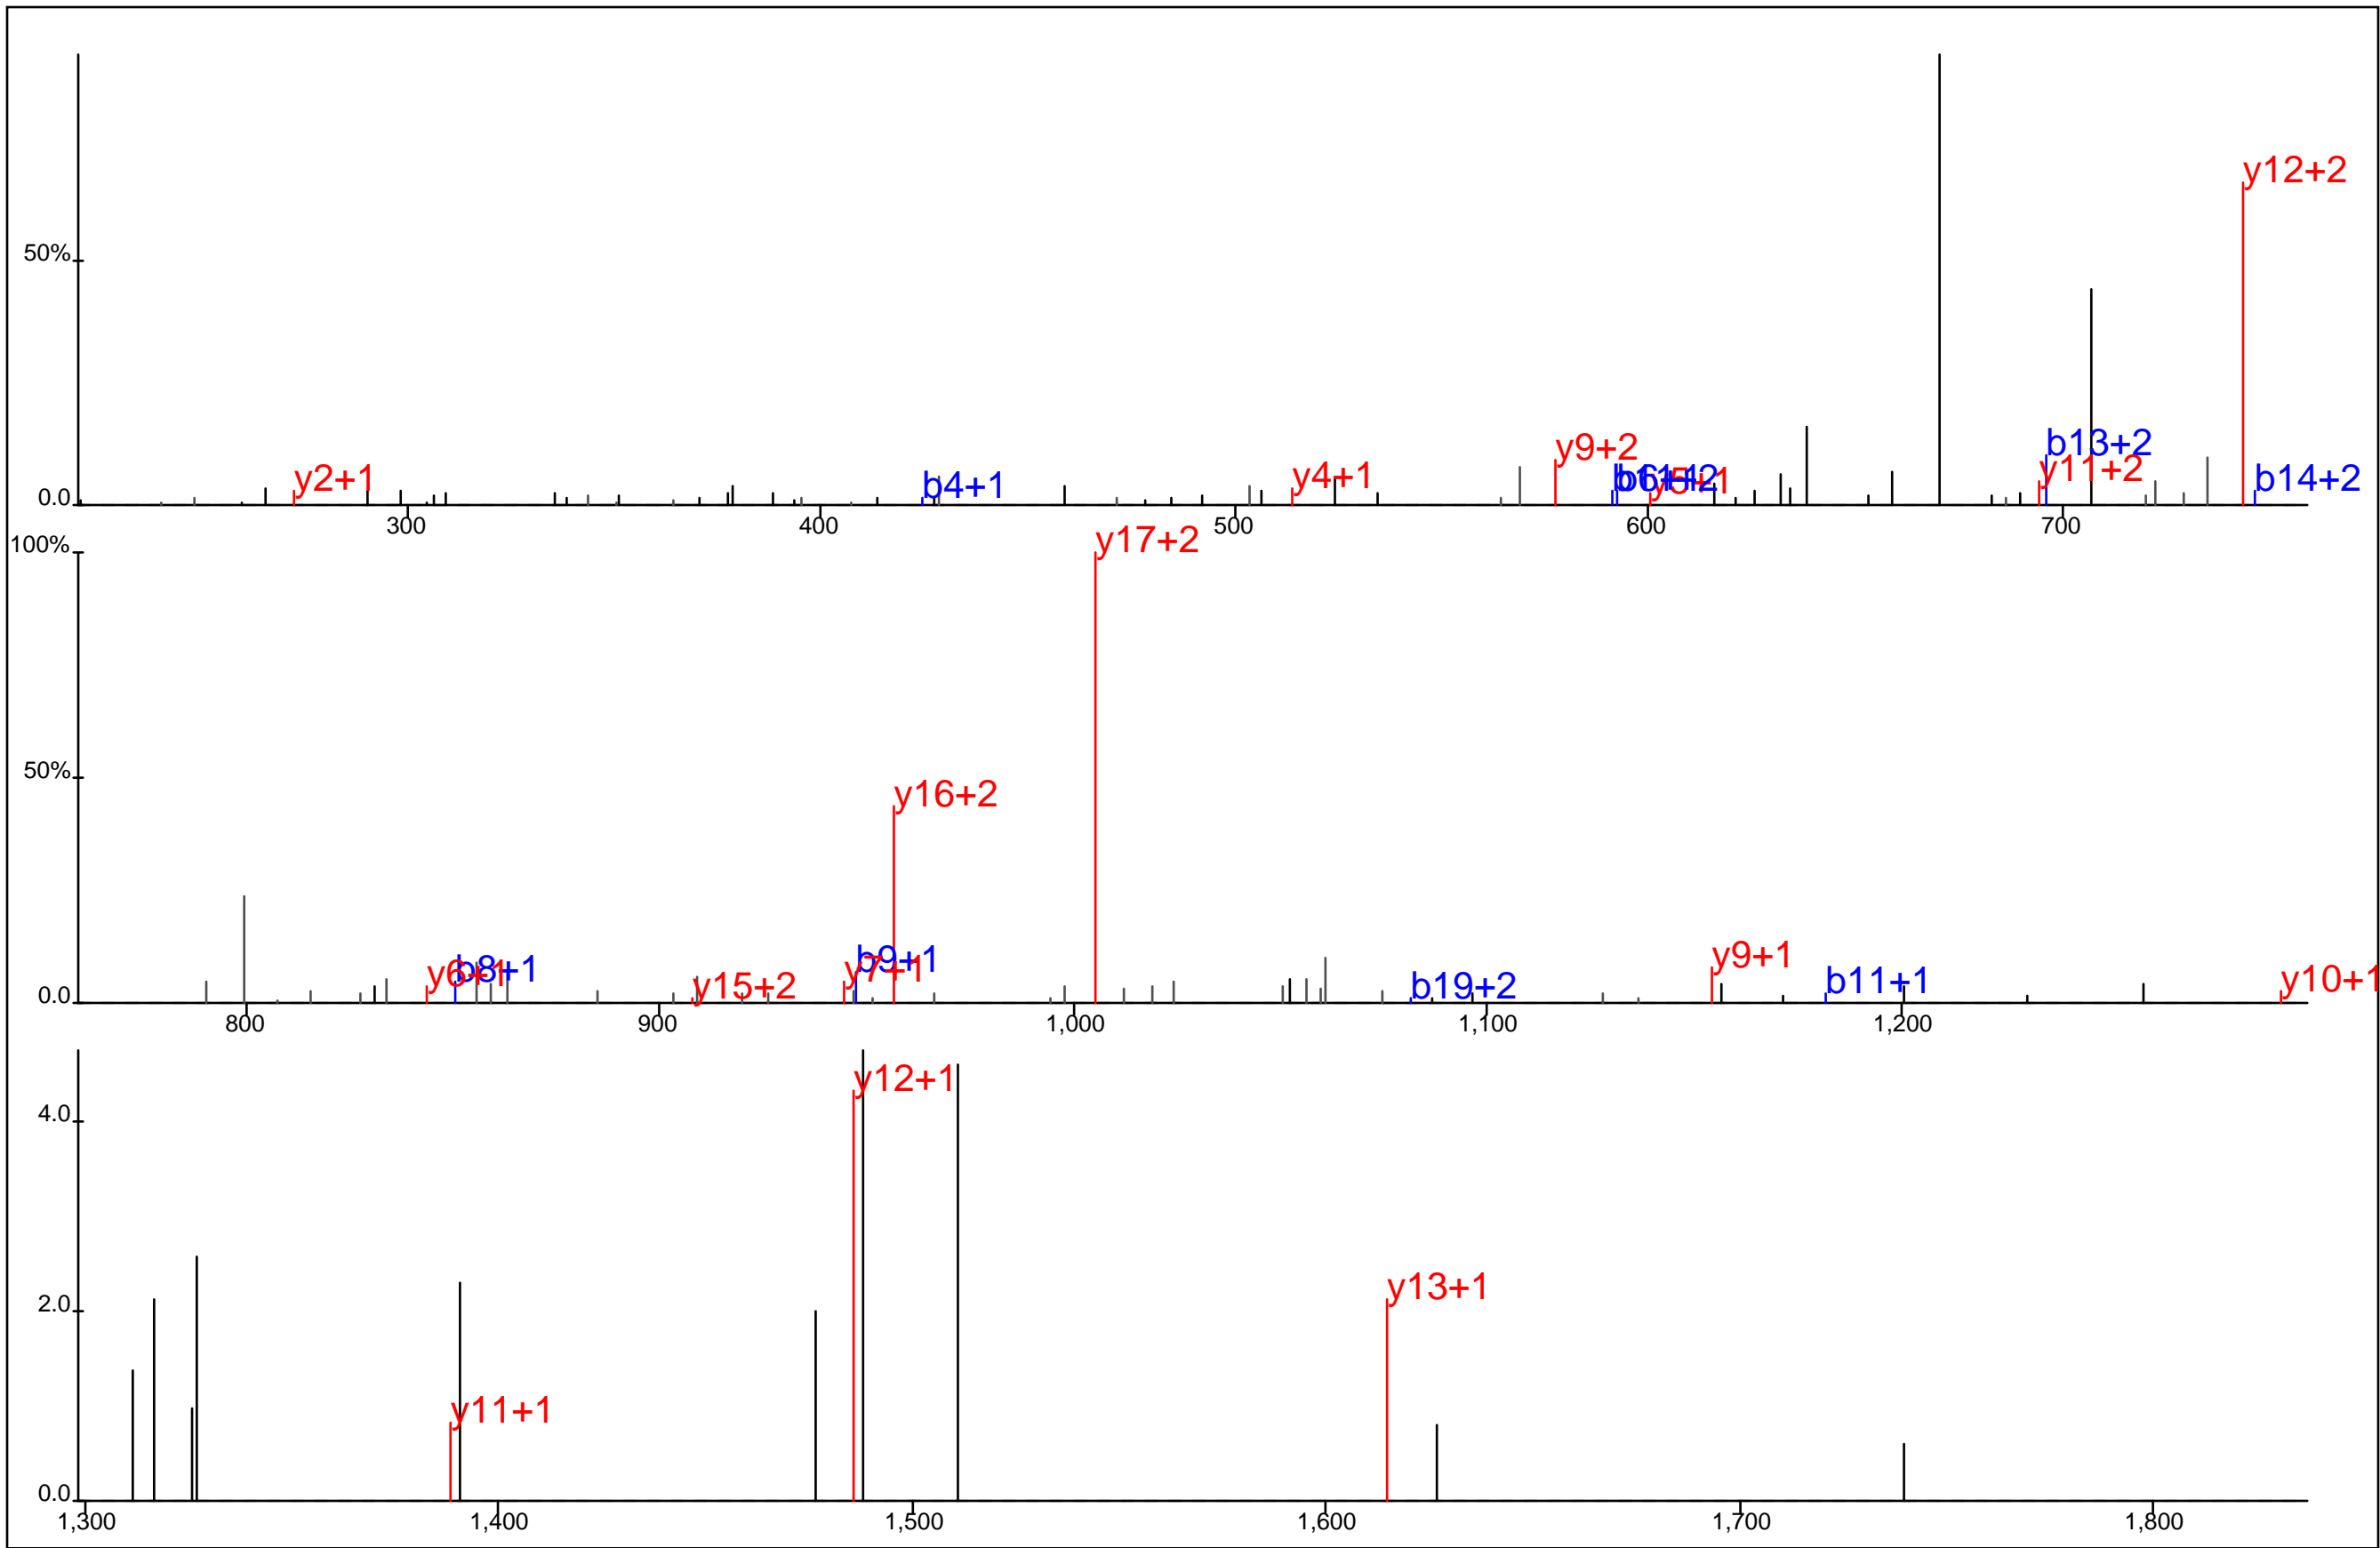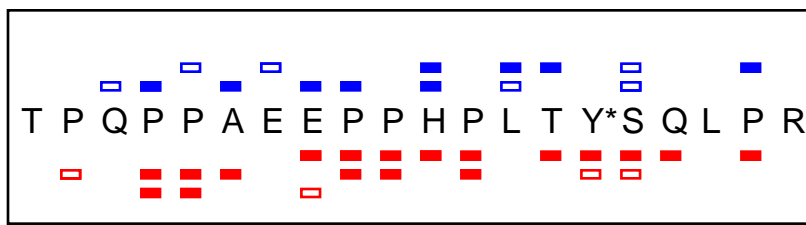

Protein Name: Cask-interacting protein 2  
 gi Accession: 0  
 Precursor Mass: 779.0439+3  
 Delta Mass: 2.343 ppm  
 XCorr: 27.41

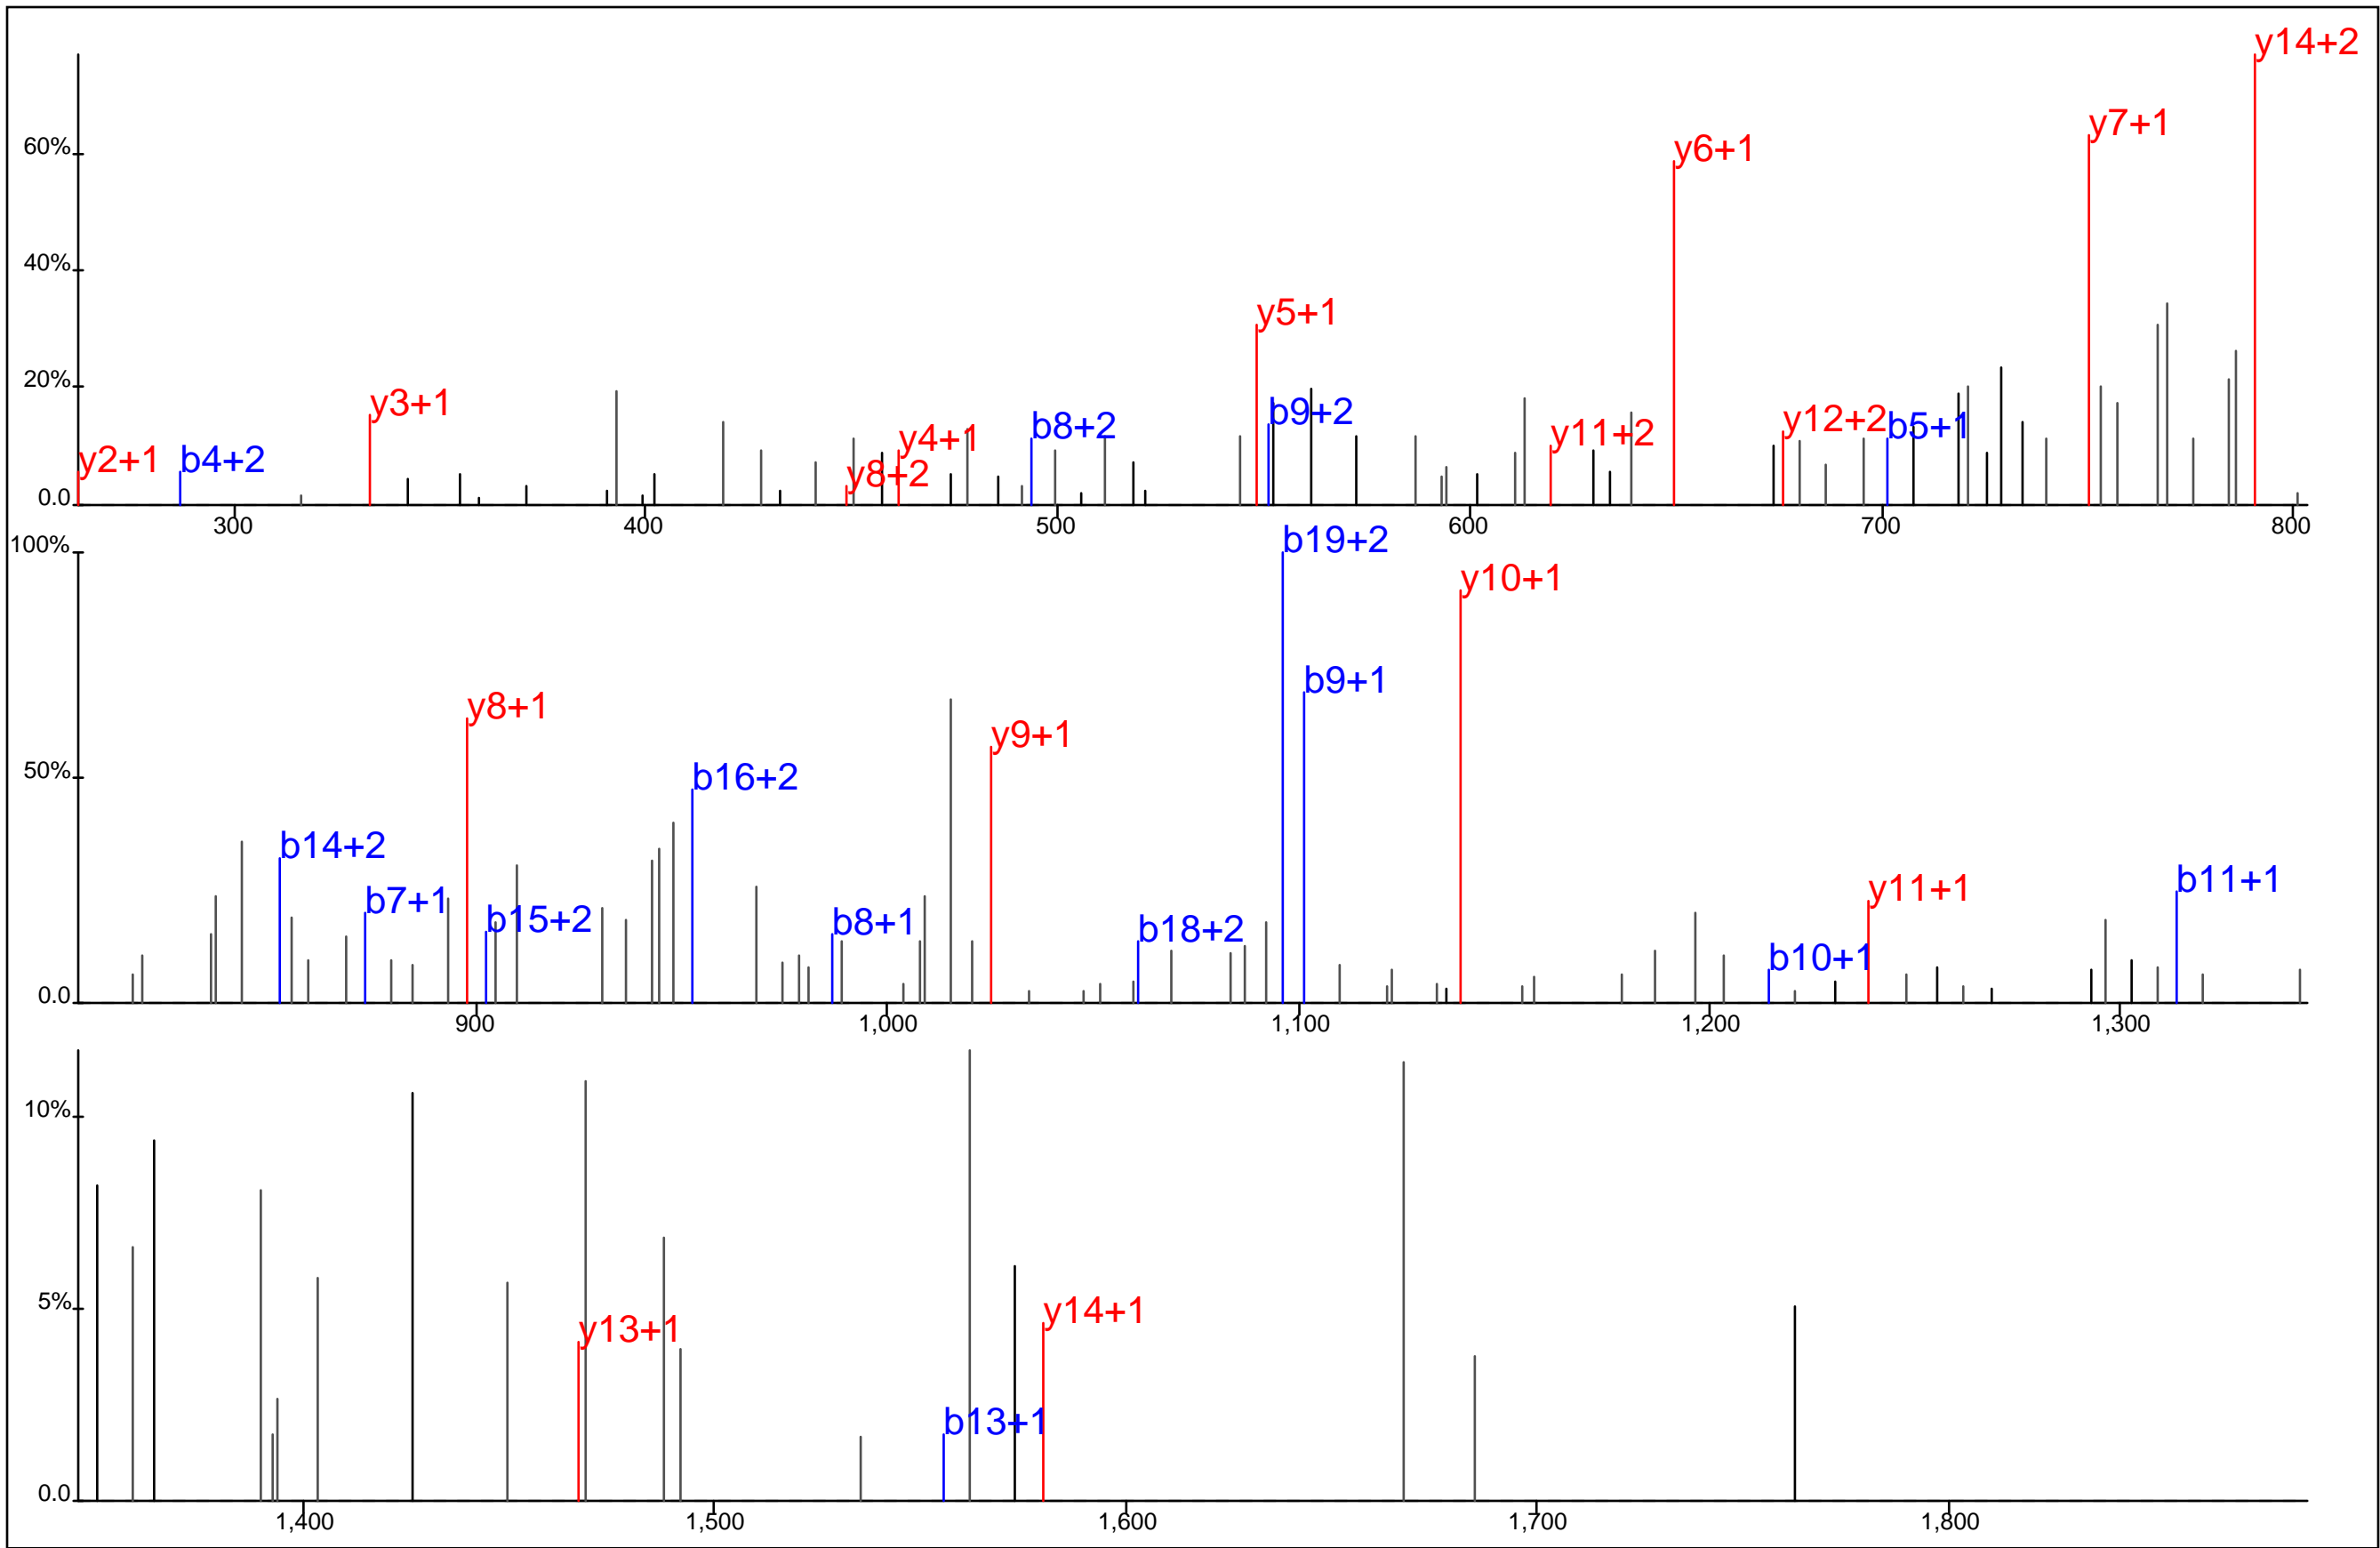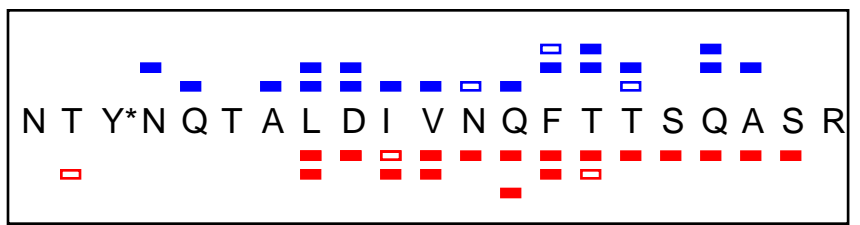

Protein Name: Cask-interacting protein 2  
 gi Accession: 0  
 Precursor Mass: 818.0404+3  
 Delta Mass: 2.997 ppm  
 XCorr: 58.09

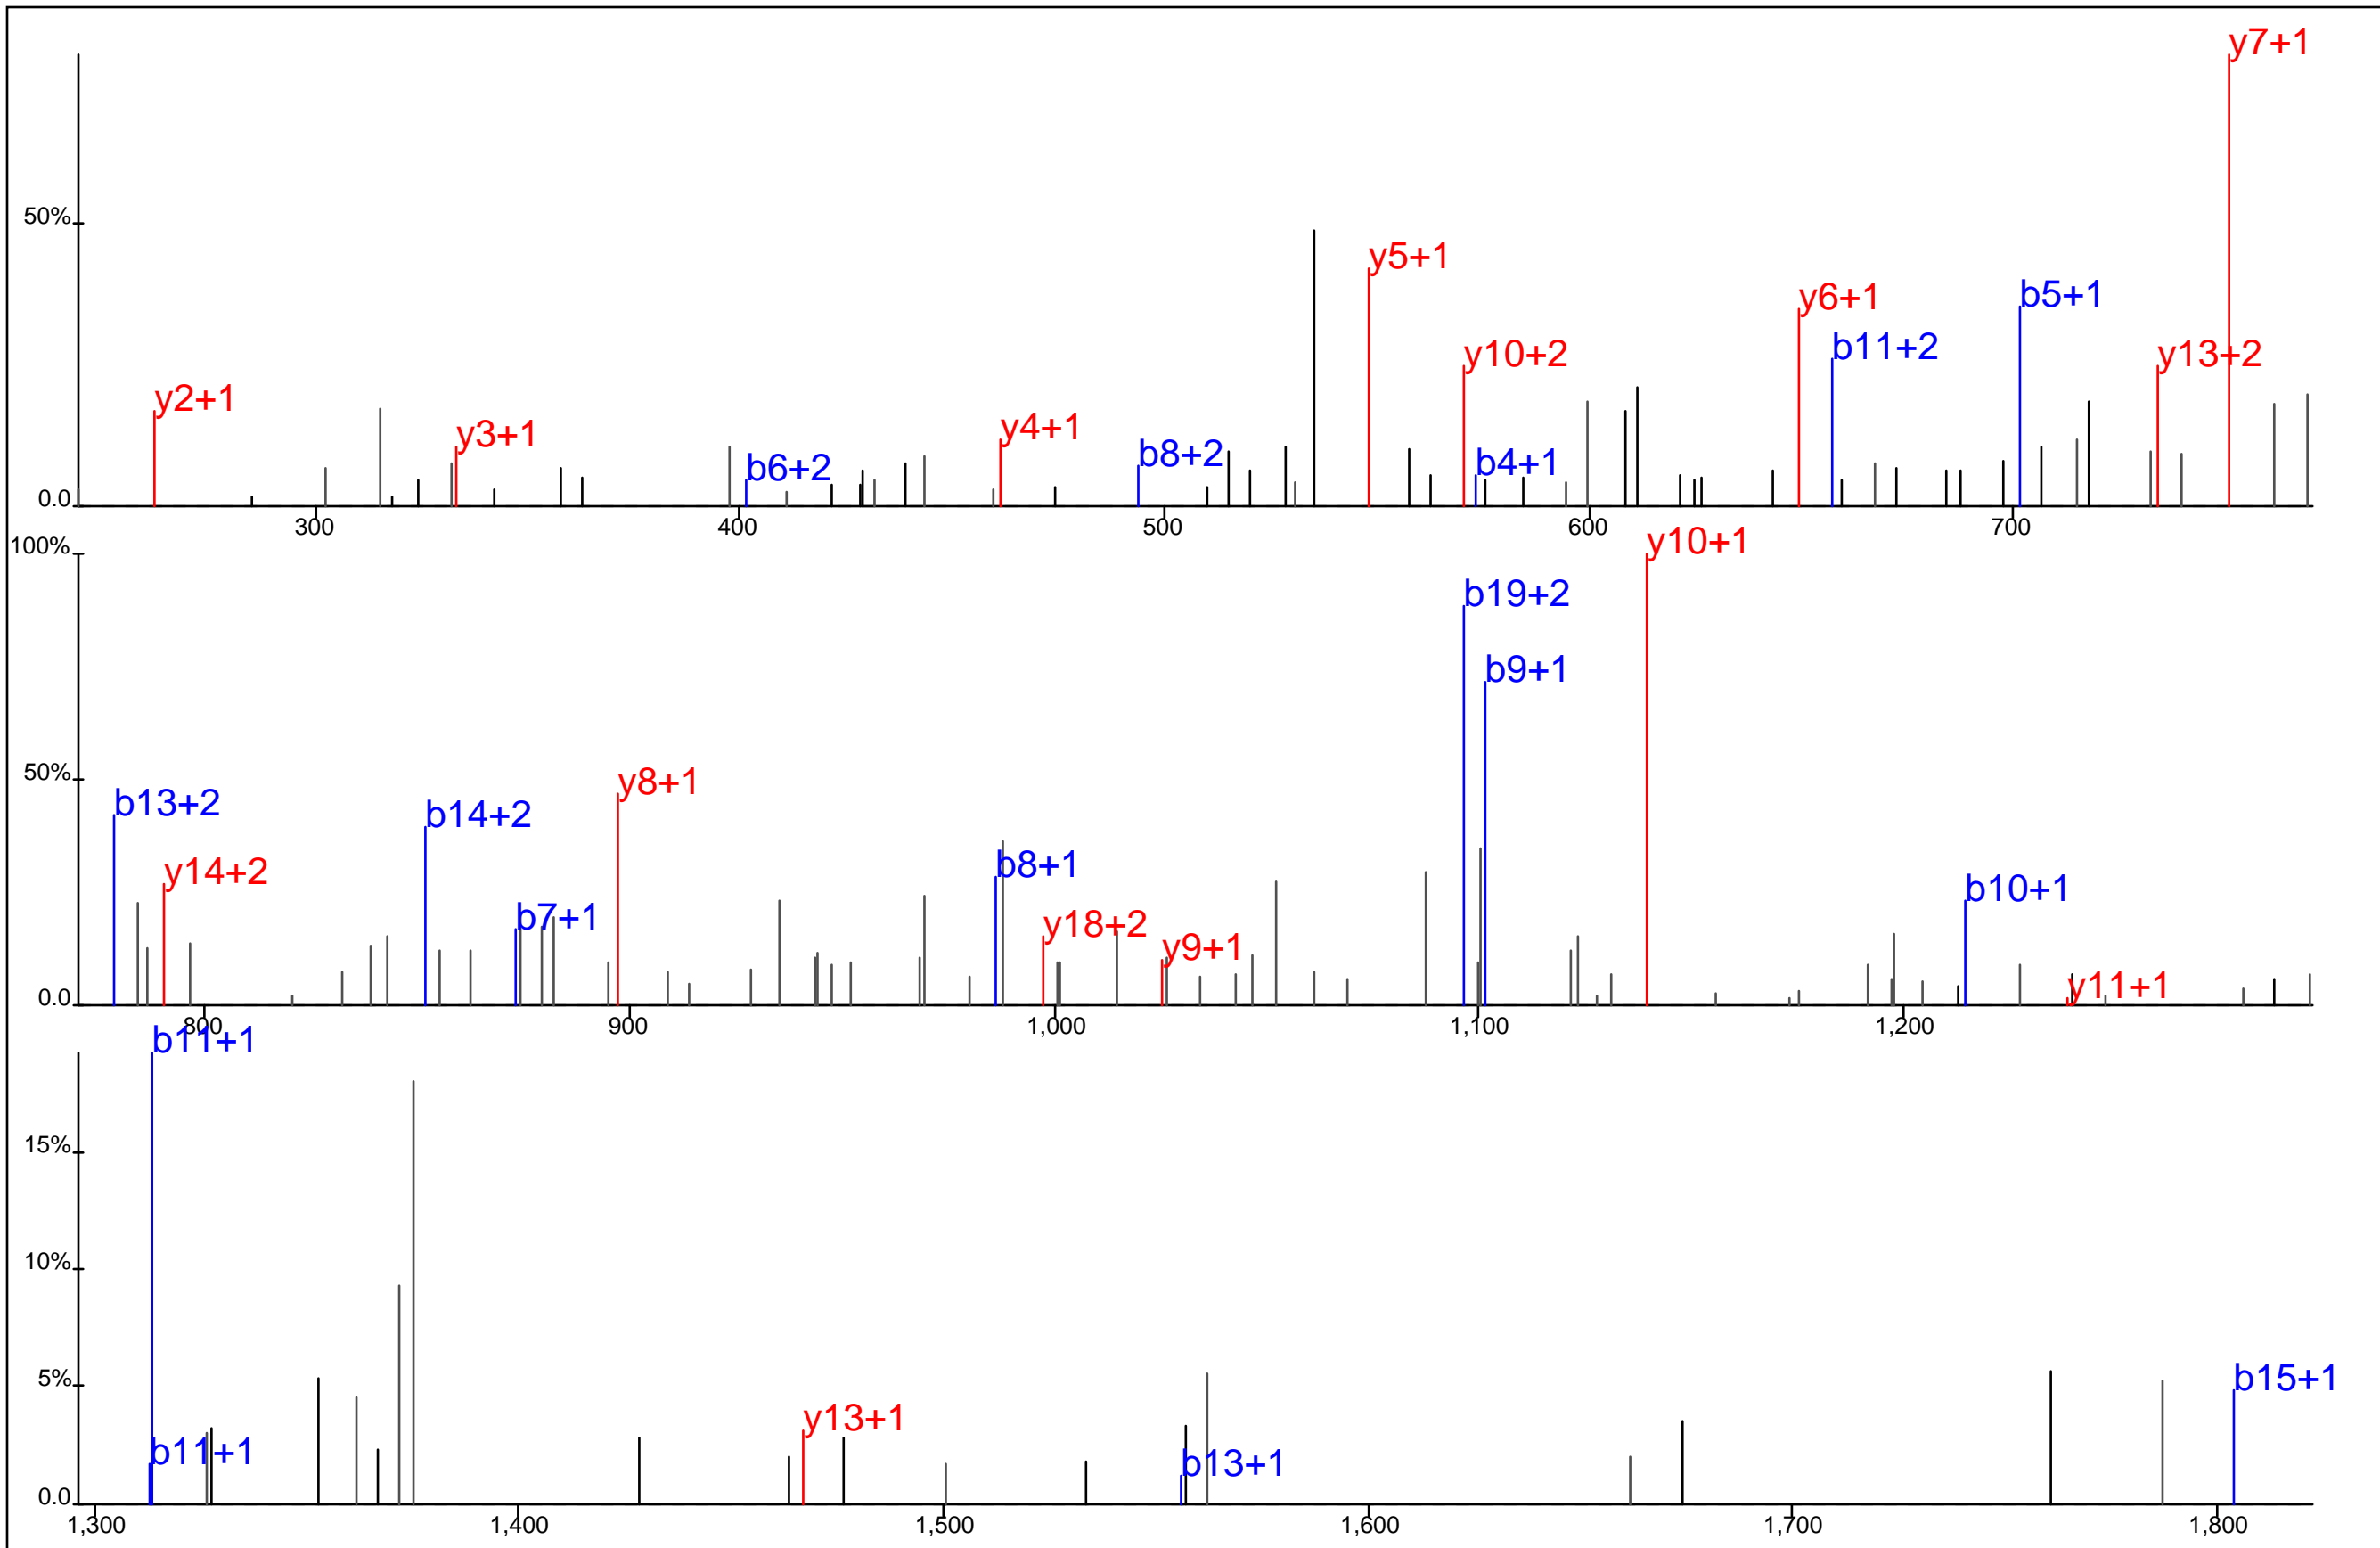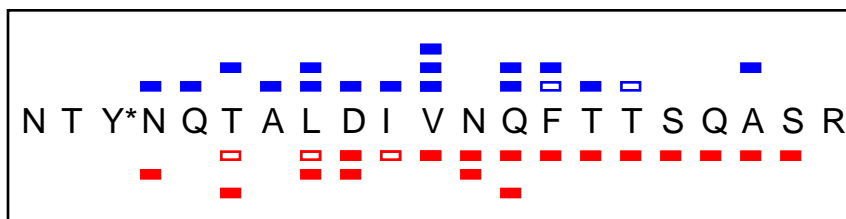

Protein Name: Cask-interacting protein 2  
 gi Accession: 0  
 Precursor Mass: 818.0436+3  
 Delta Mass: 0.961 ppm  
 XCorr: 51.83

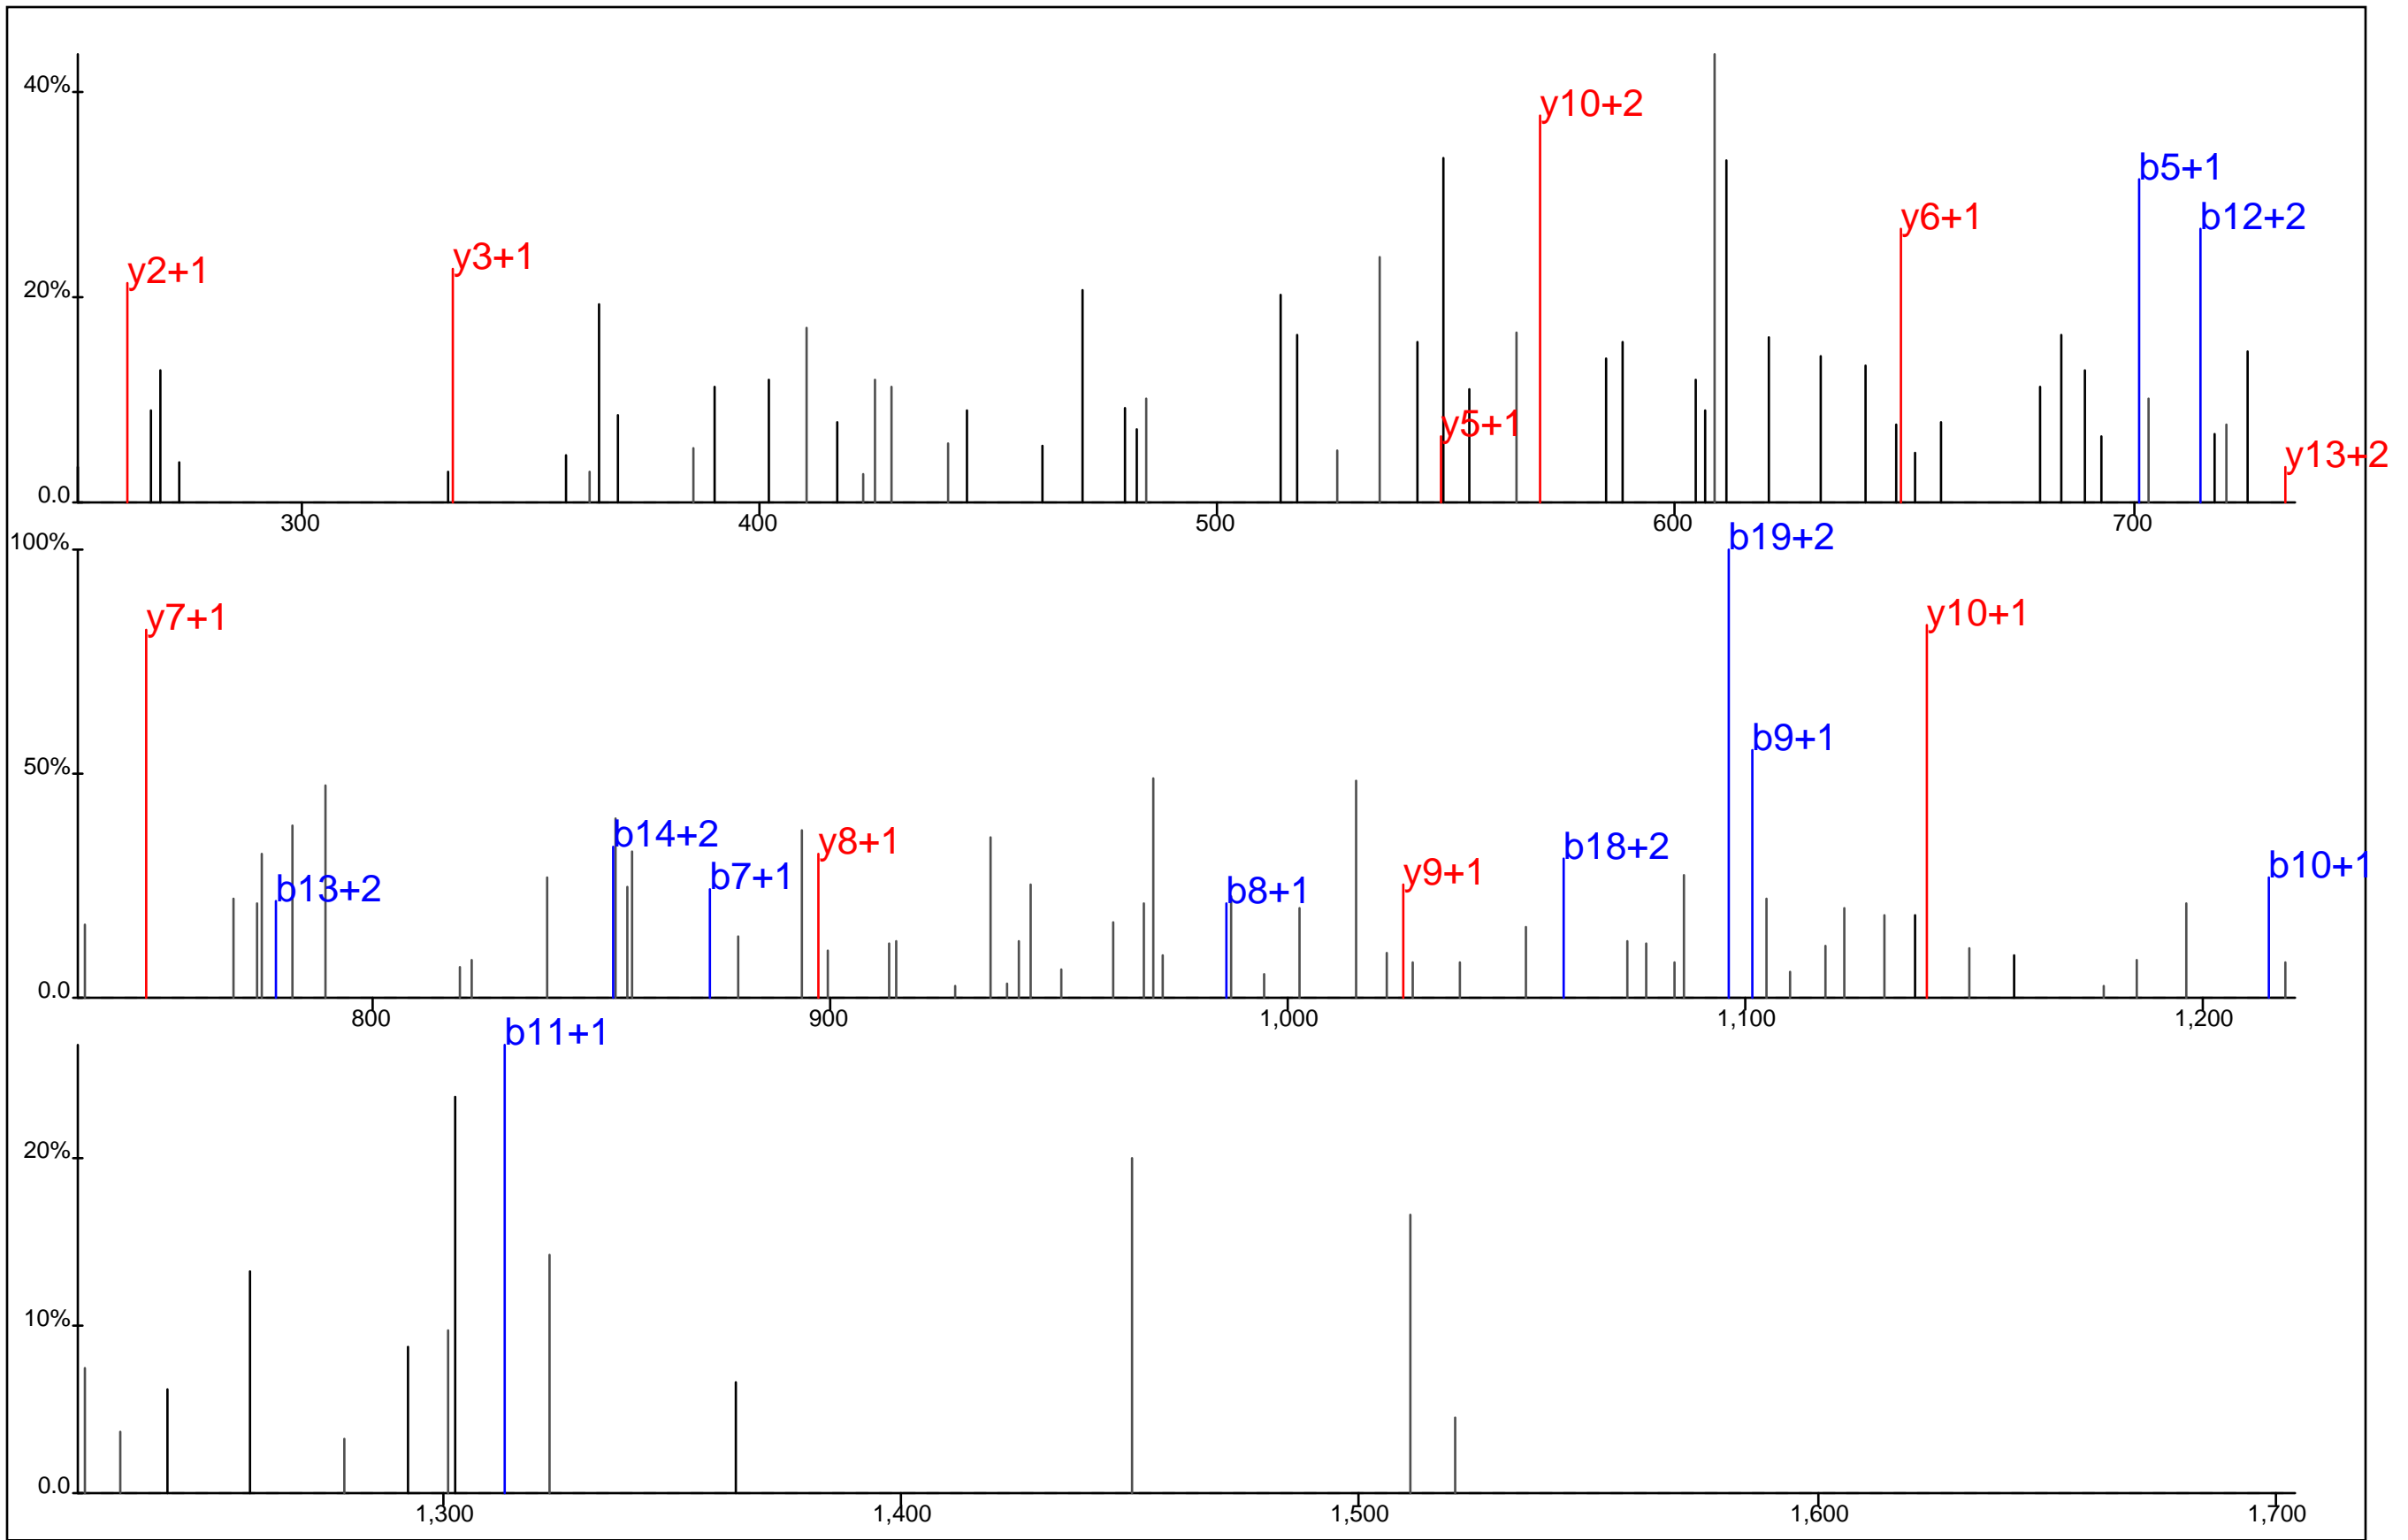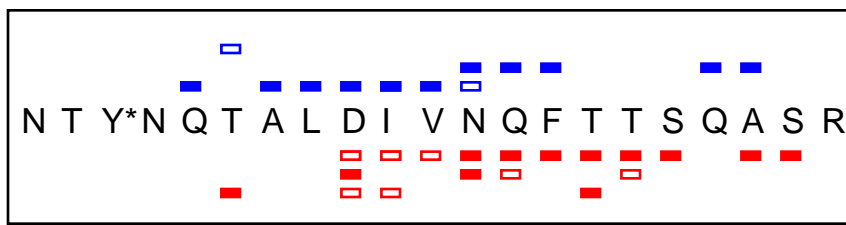

Protein Name: Cask-interacting protein 2  
 gi Accession: 0  
 Precursor Mass: 818.0449+3  
 Delta Mass: 2.529 ppm  
 XCorr: 28.52

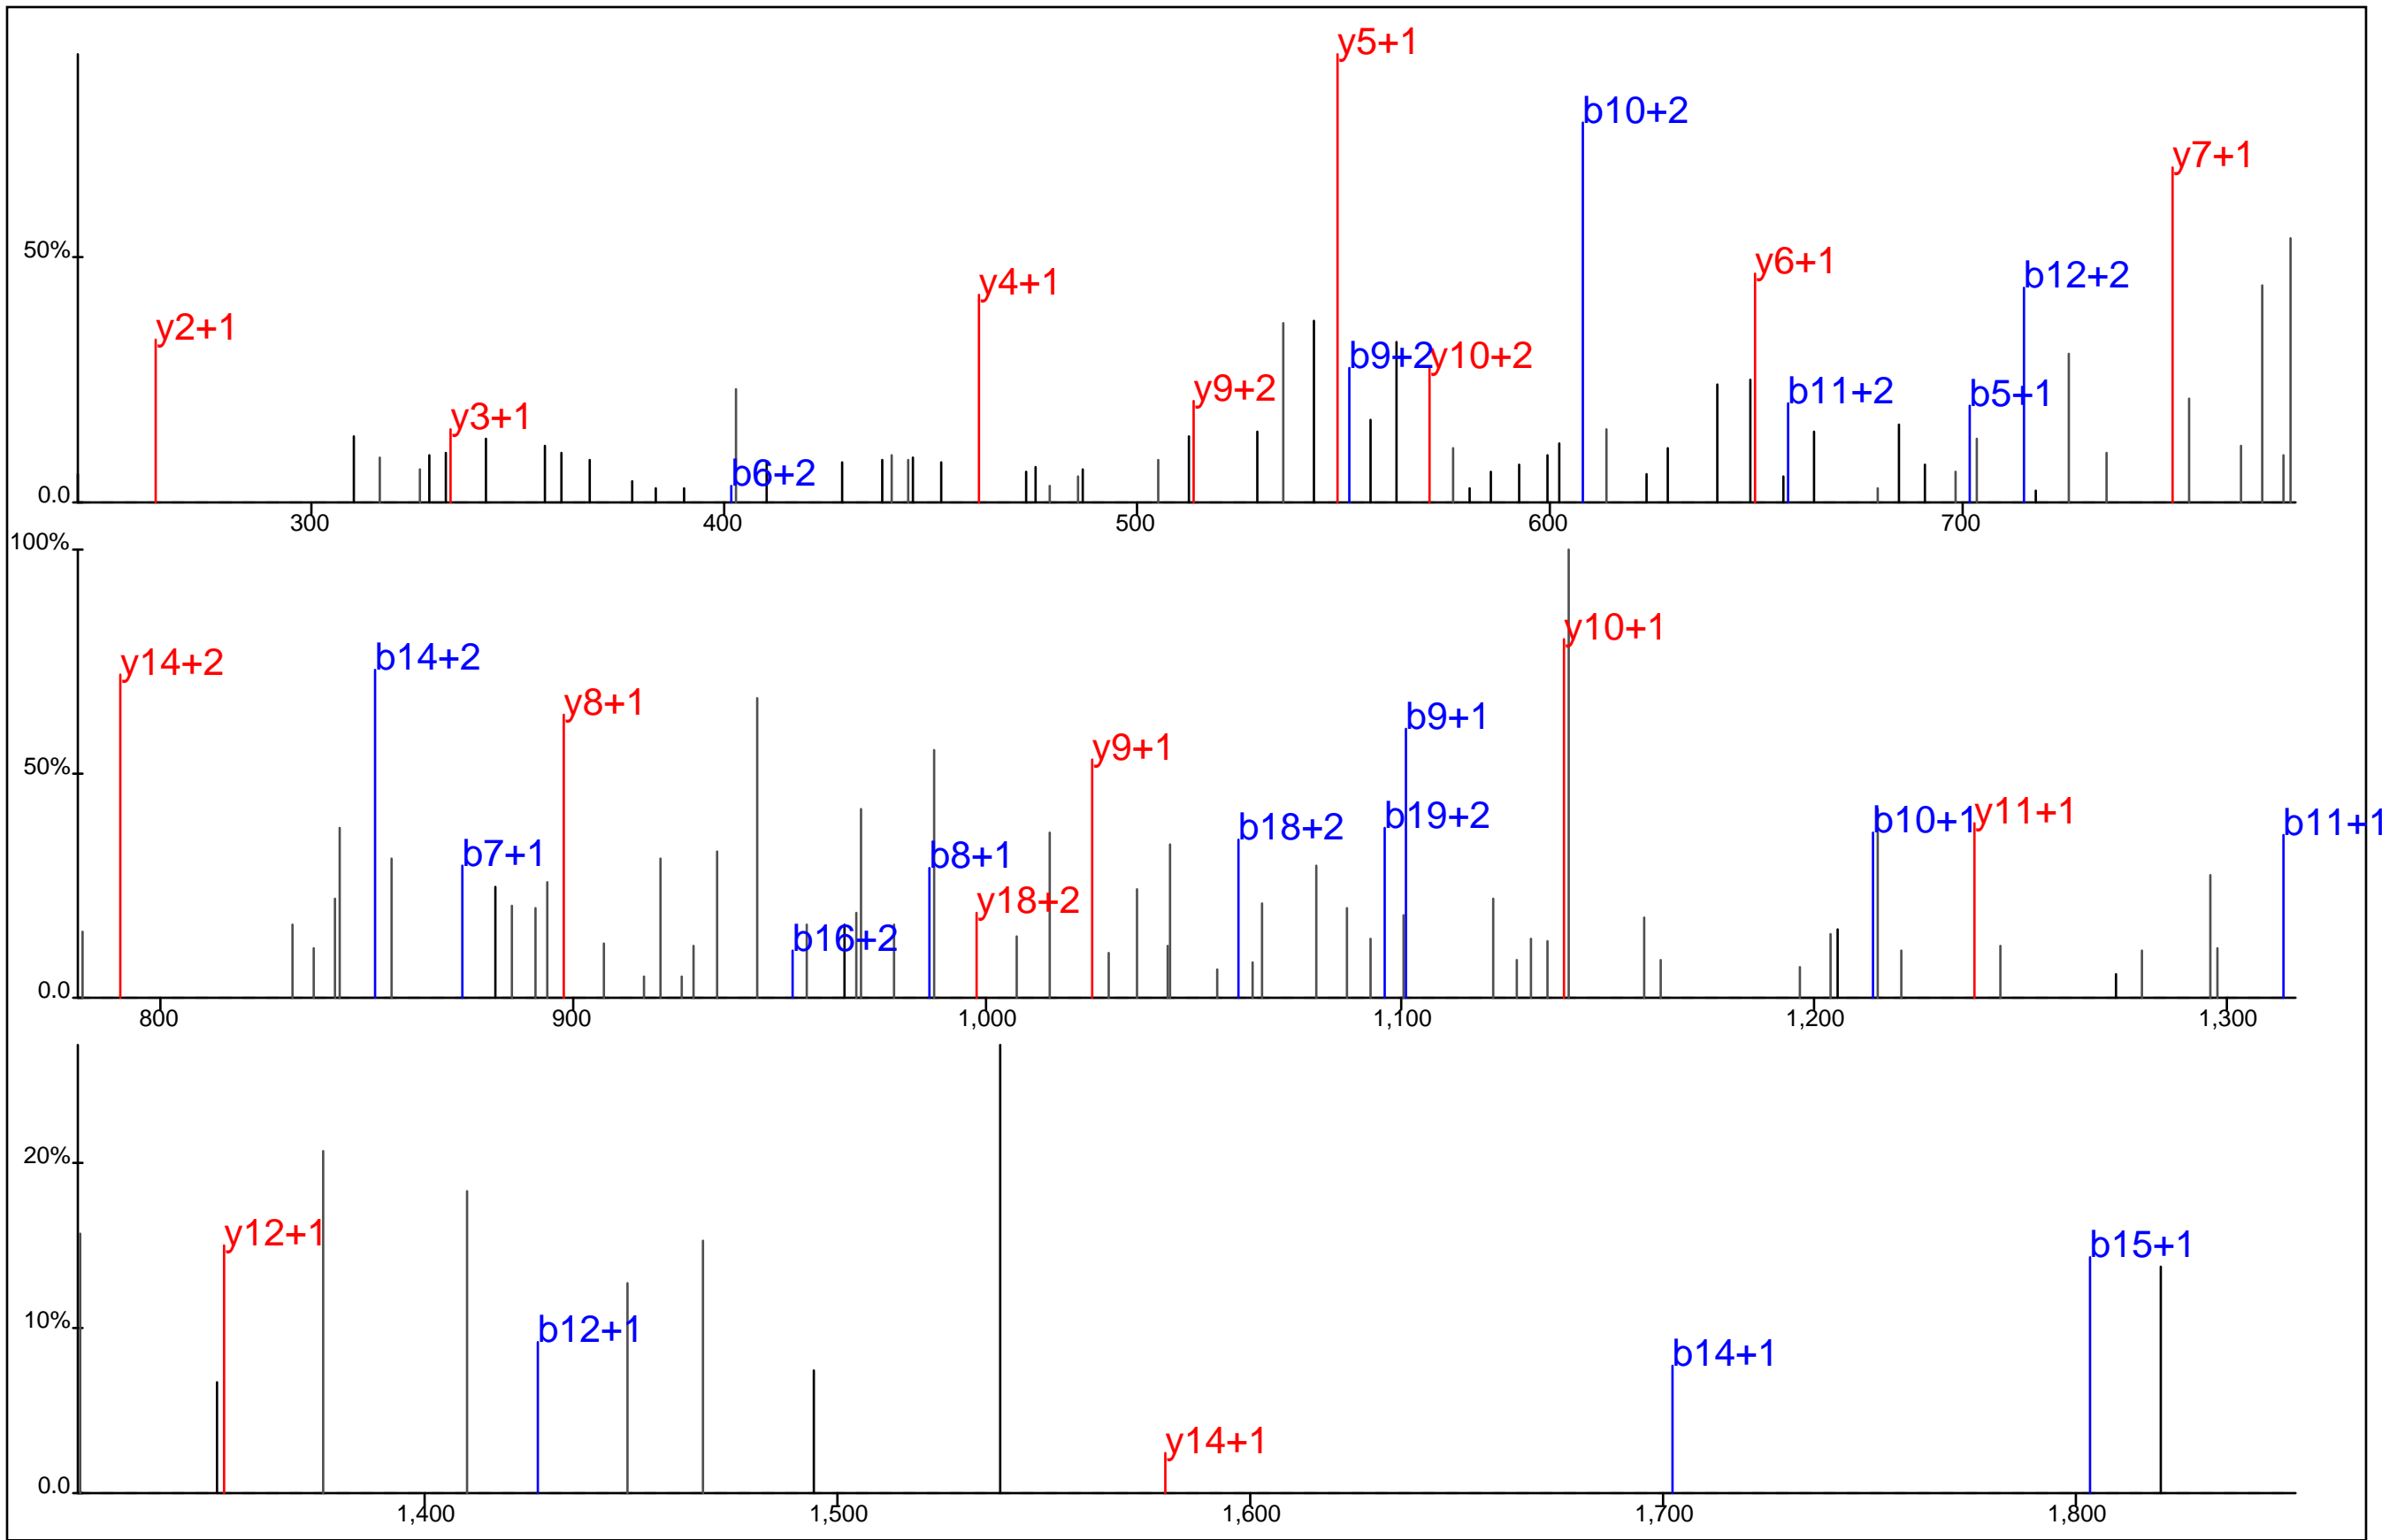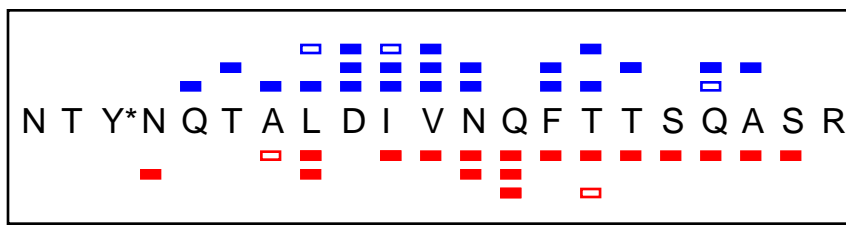

Protein Name: Cask-interacting protein 2  
 gi Accession: 0  
 Precursor Mass: 818.0433+3  
 Delta Mass: 0.513 ppm  
 XCorr: 77.6

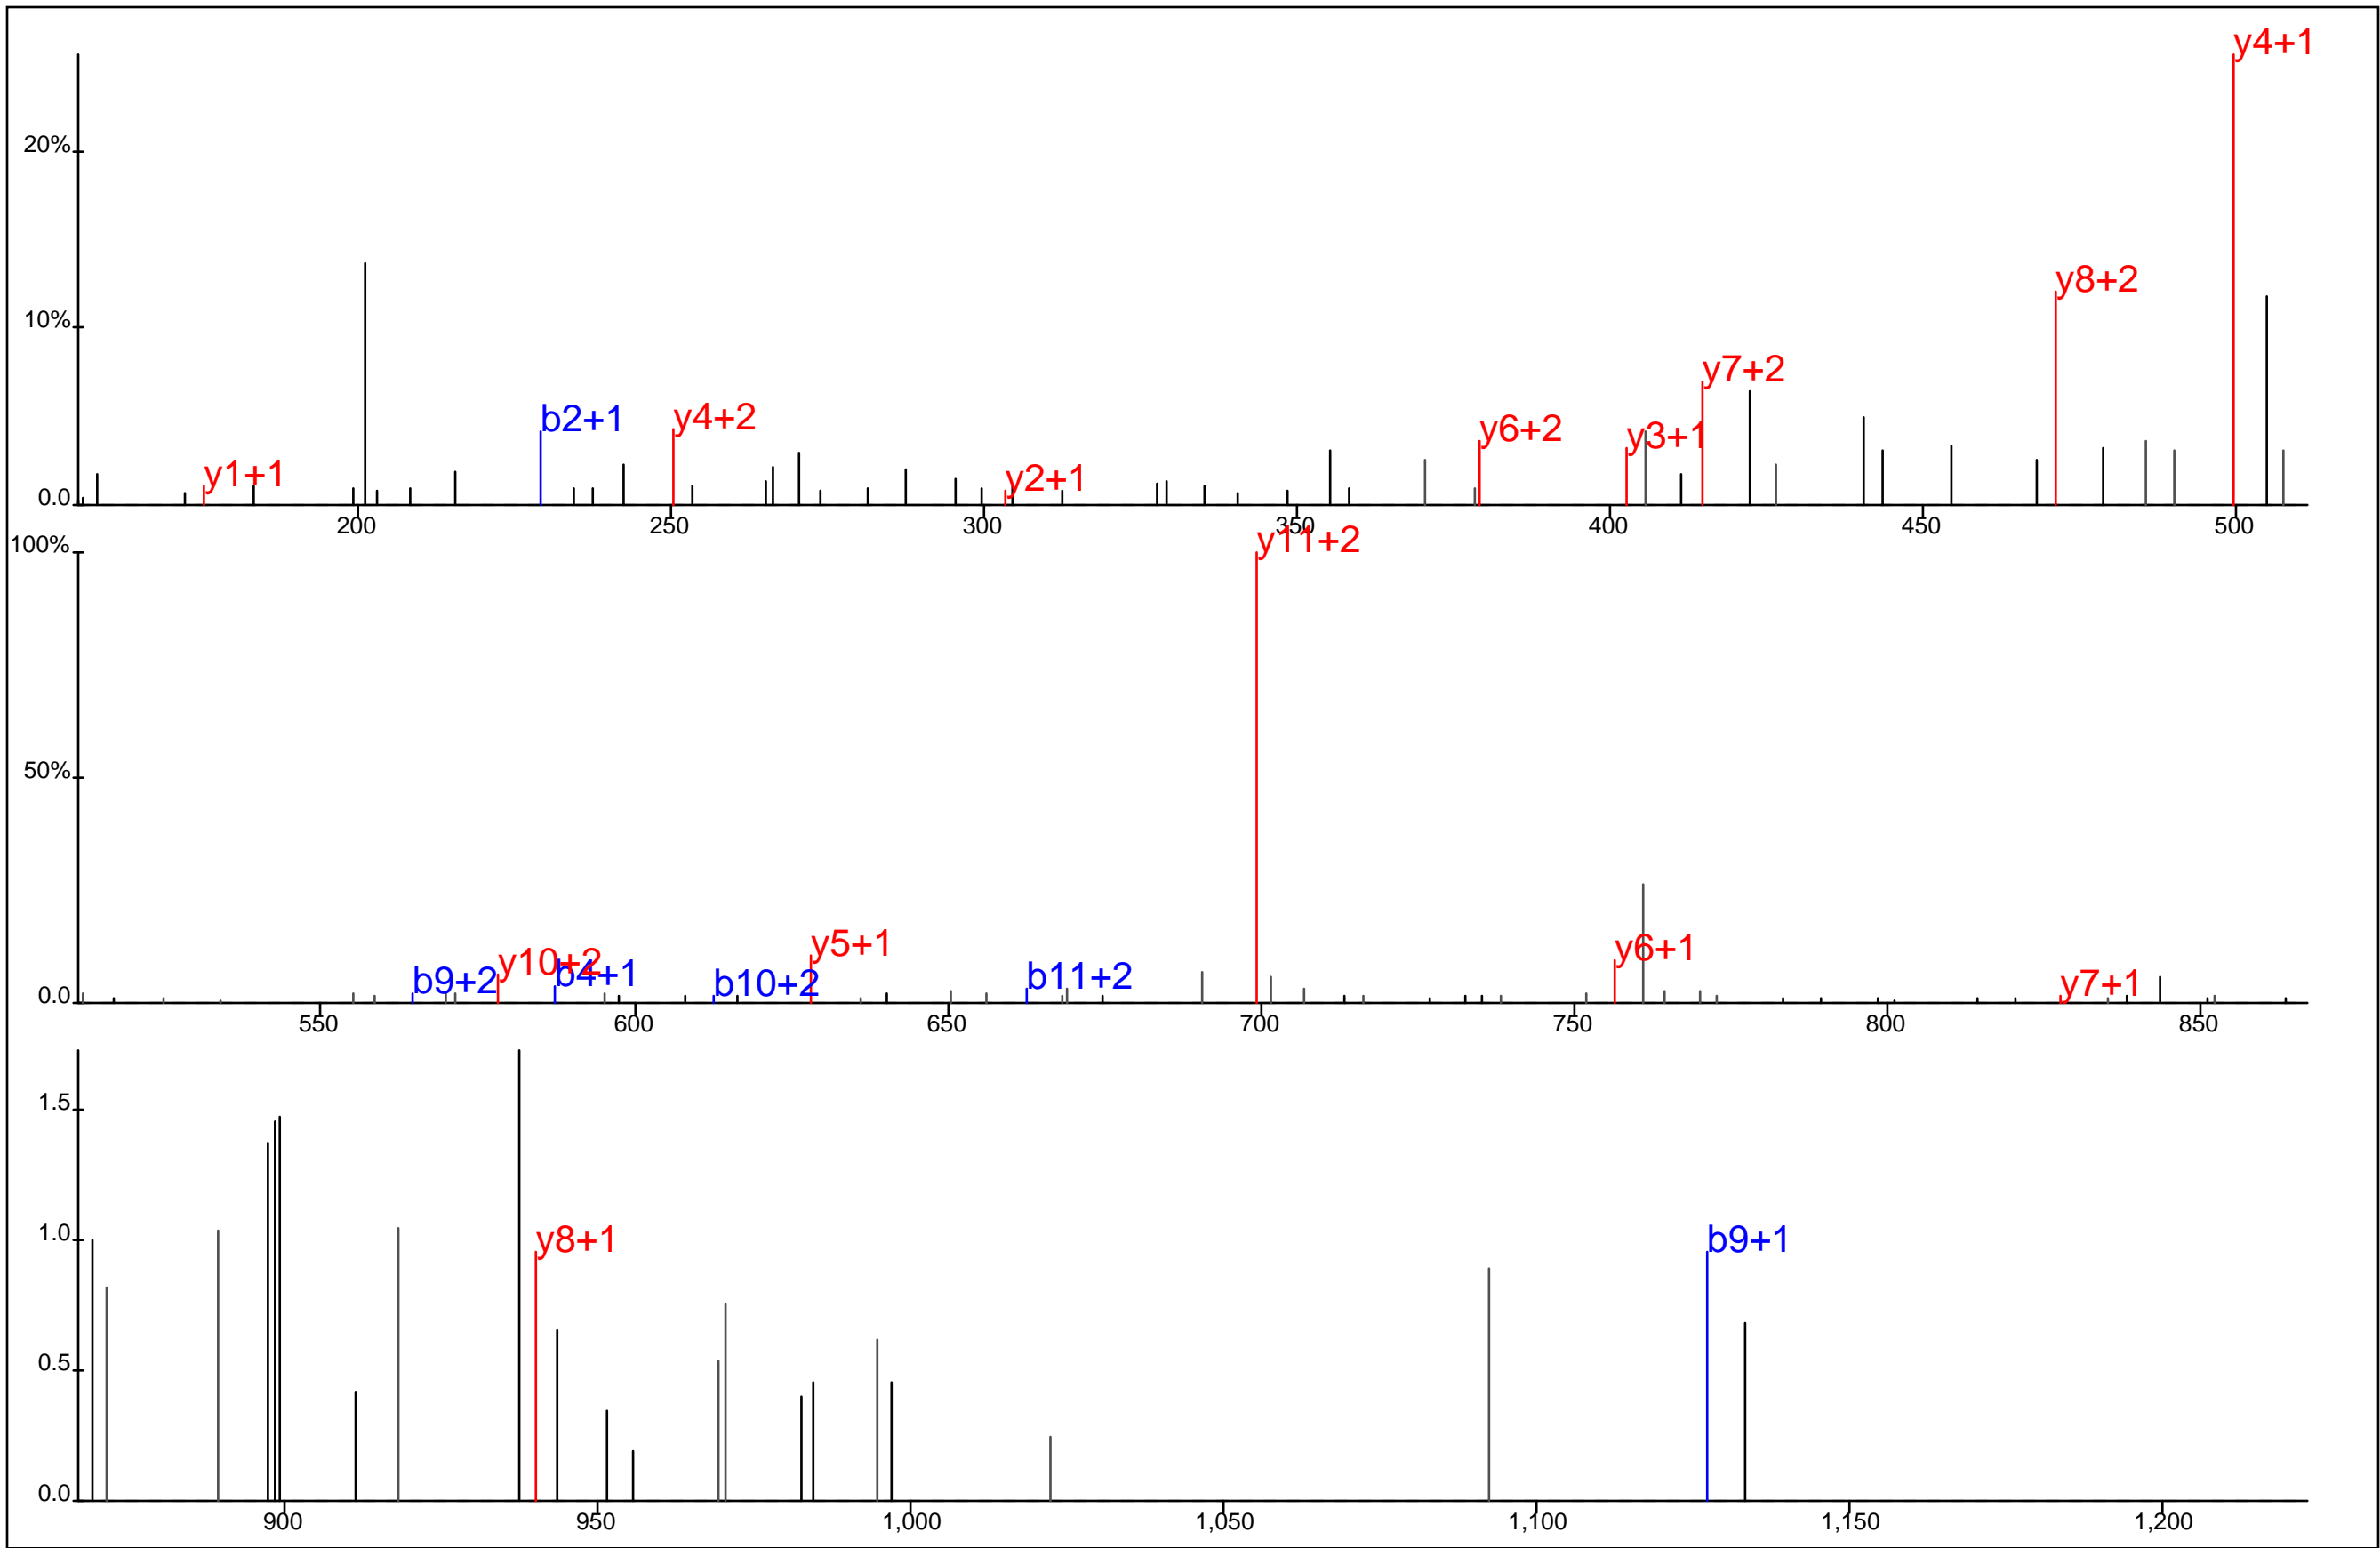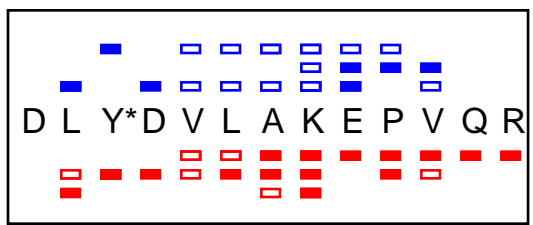

Protein Name: CasL interacting molecule  
 gi Accession: 0  
 Precursor Mass: 542.6037+3  
 Delta Mass: 1.909 ppm  
 XCorr: 21.91

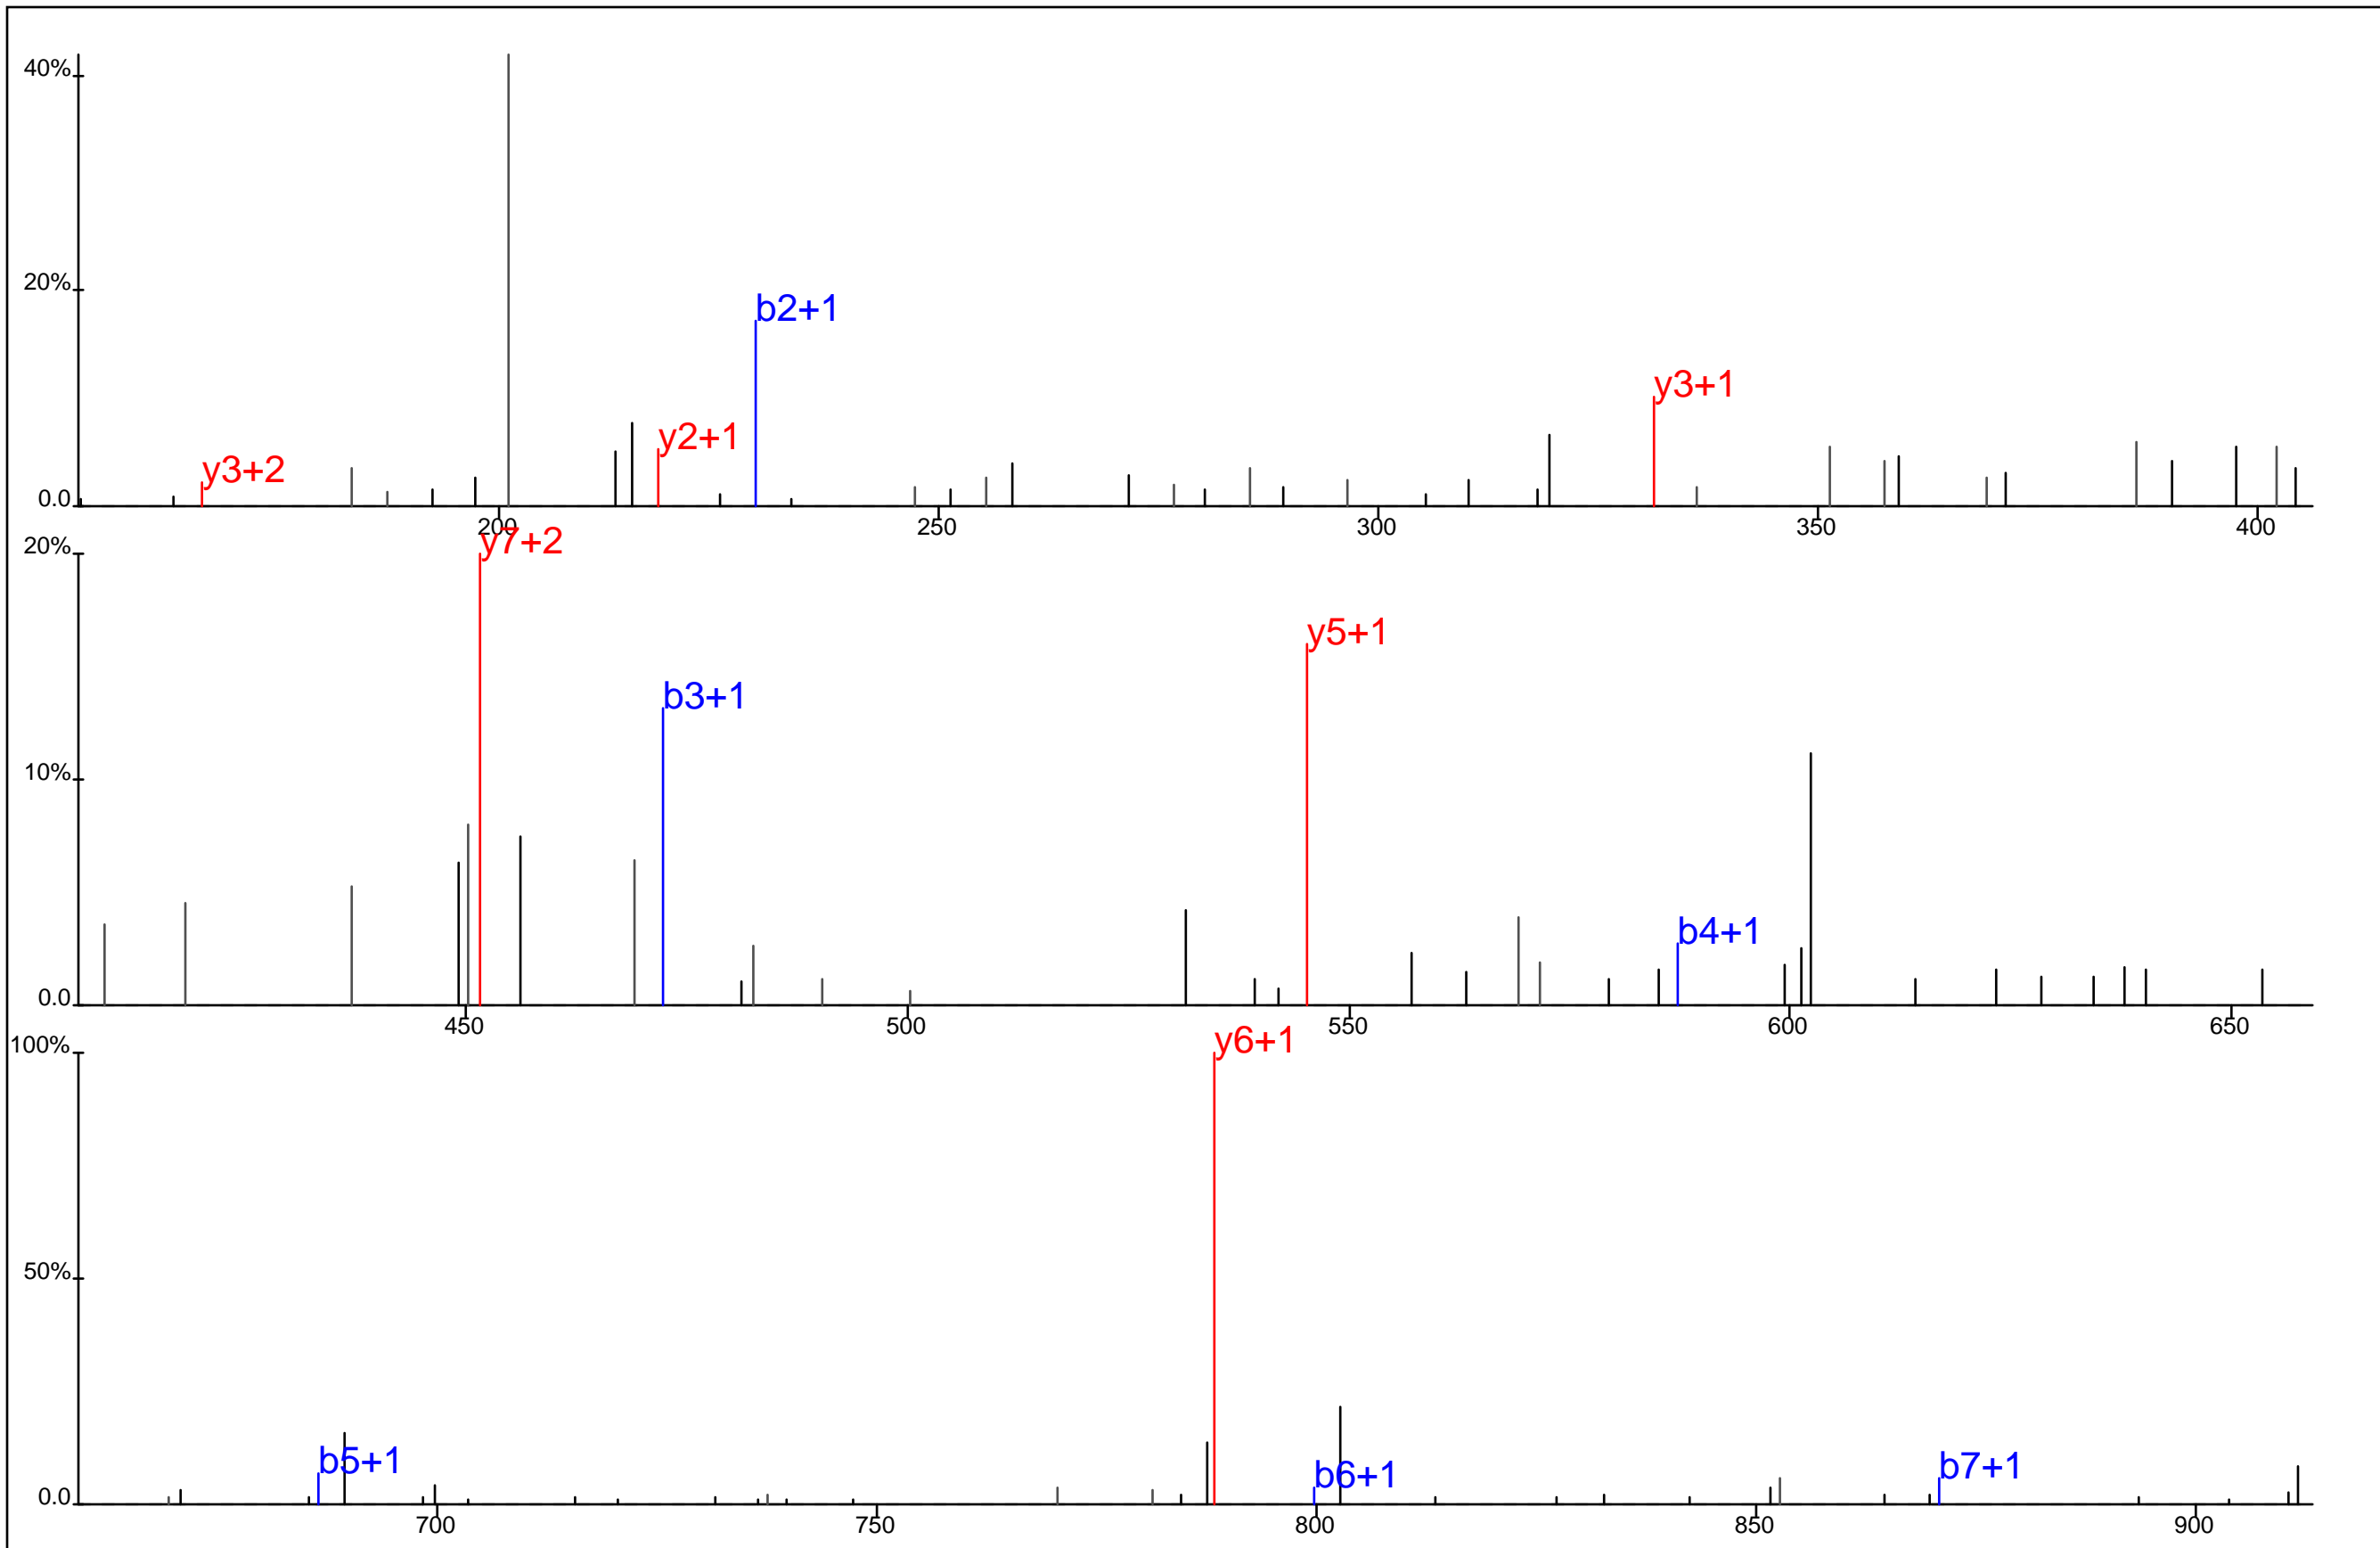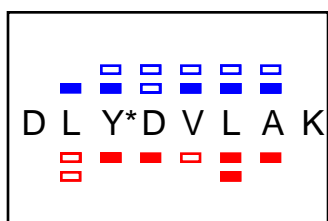

Protein Name: CasL interacting molecule  
 gi Accession: 0  
 Precursor Mass: 508.7385+2  
 Delta Mass: 0.264 ppm  
 XCorr: 29.77

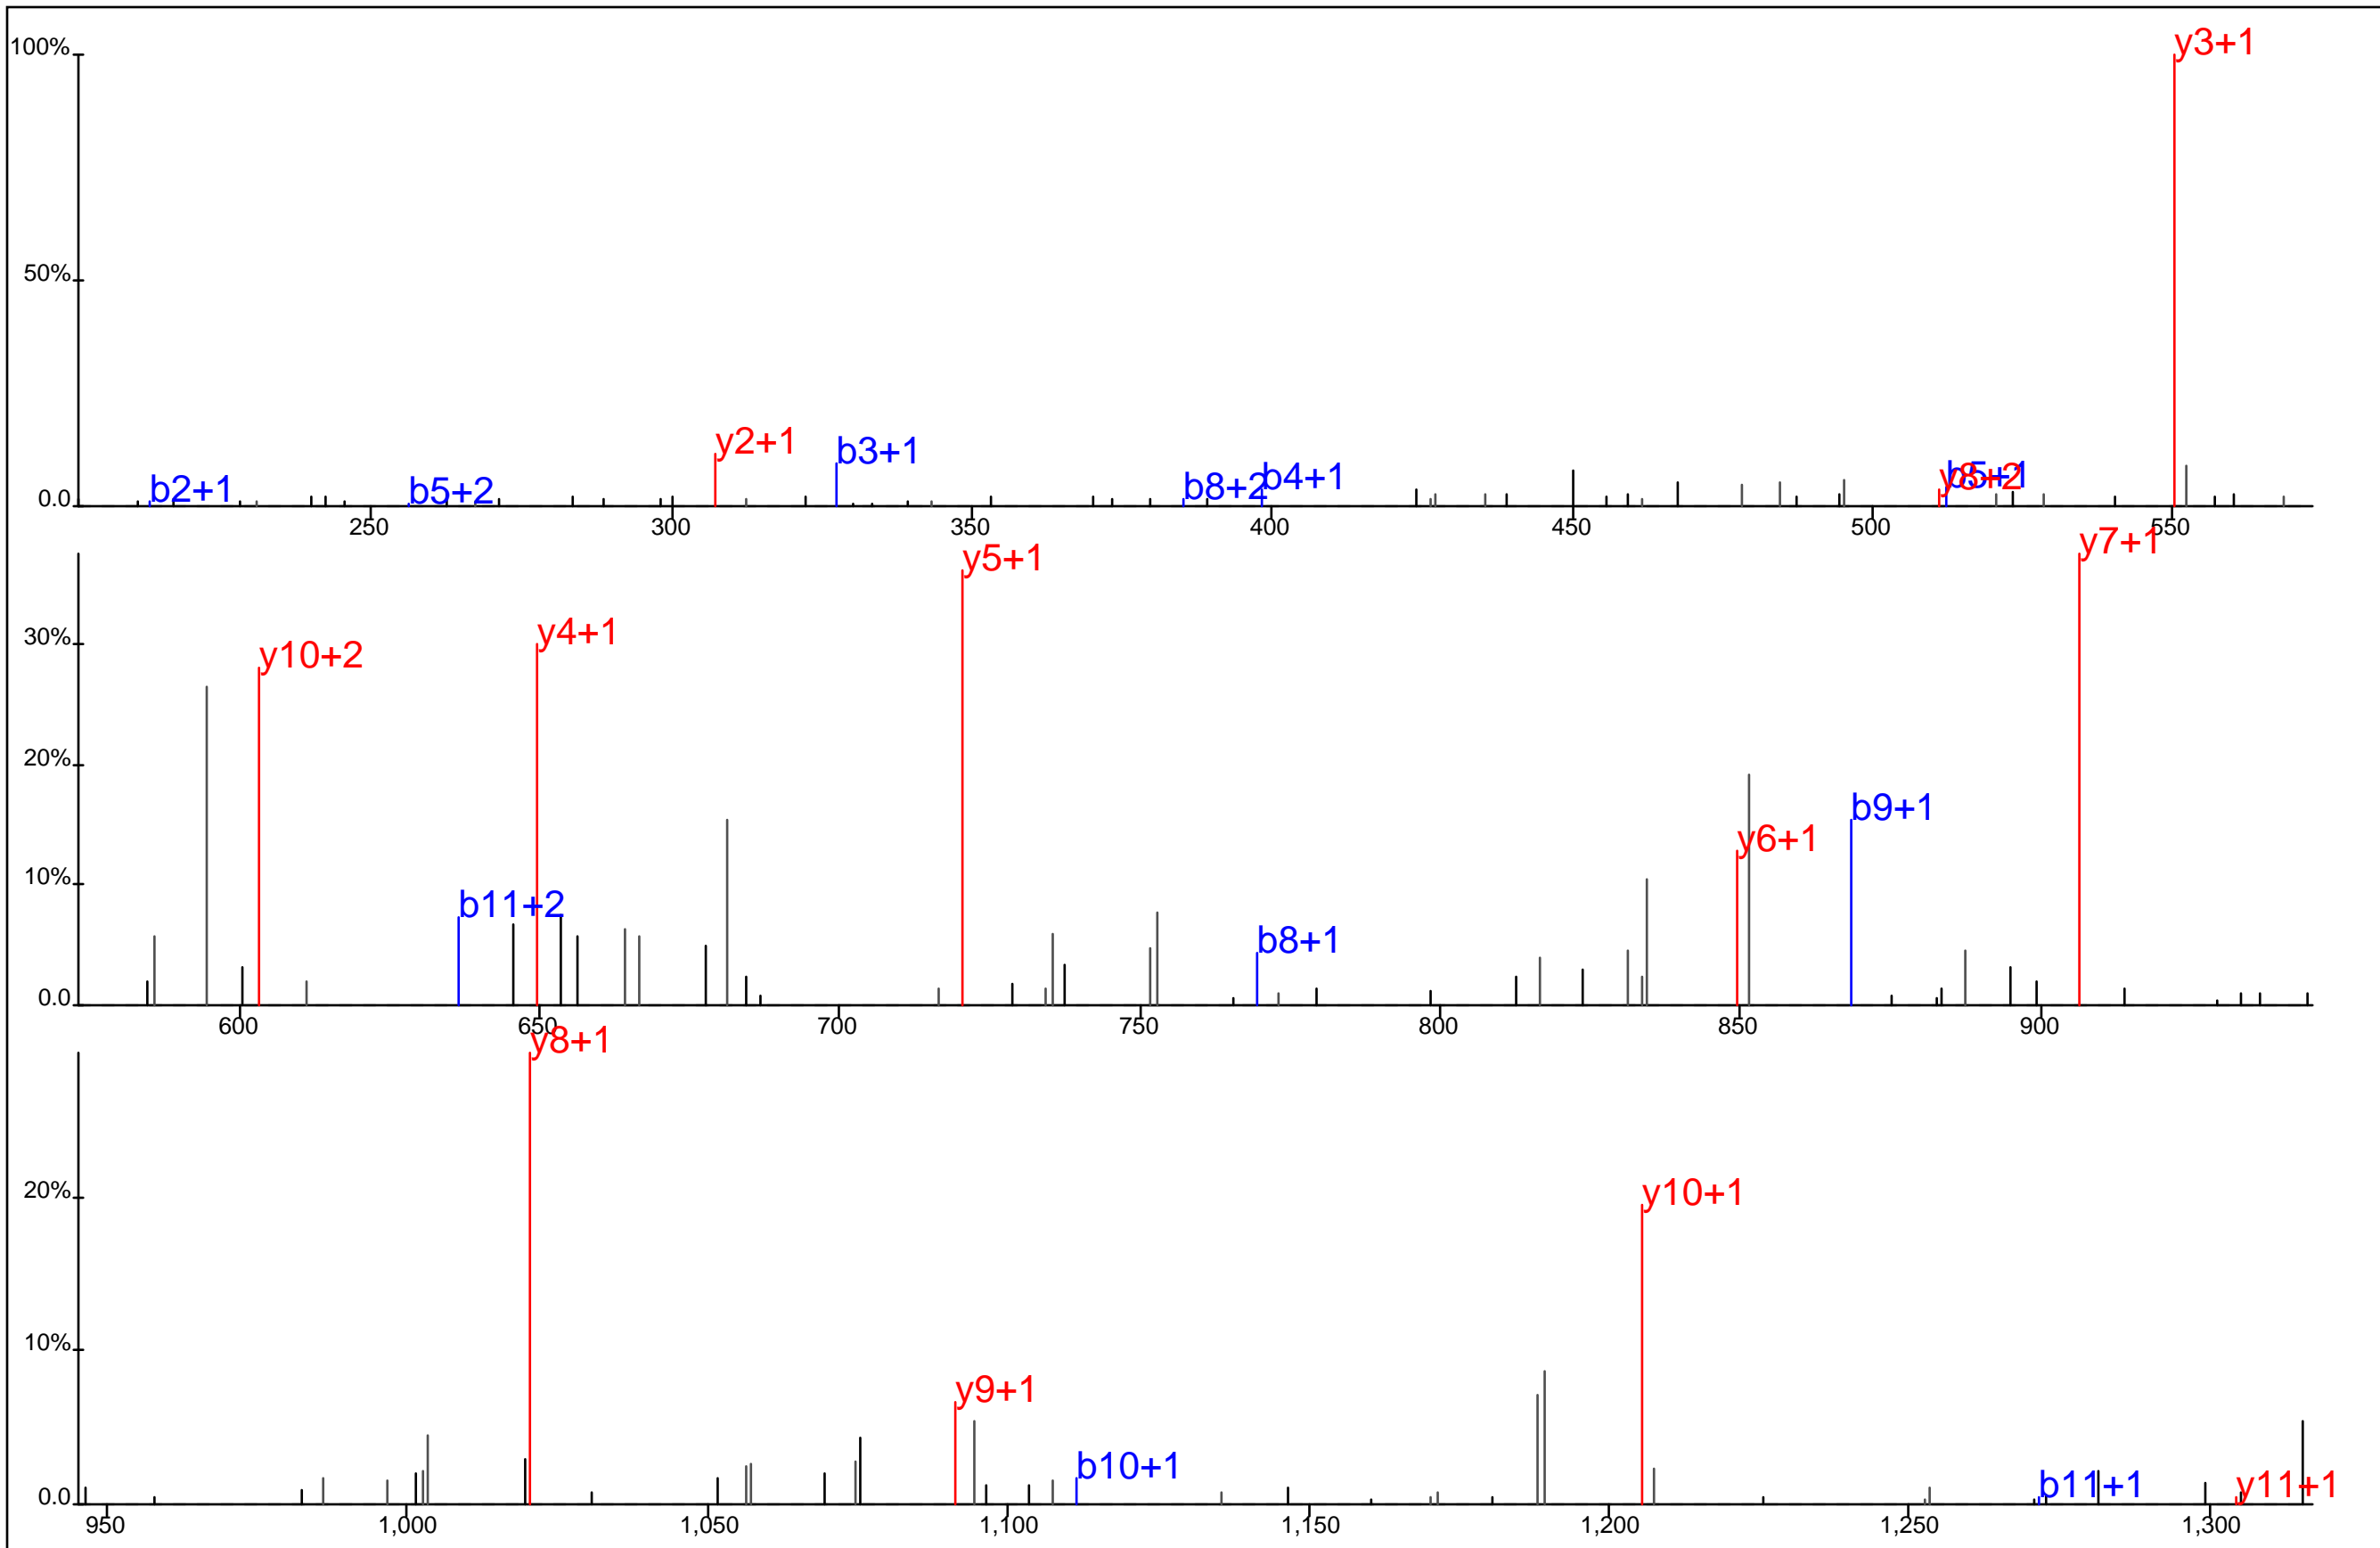

L V N A N G E A V Y\* C K

Protein Name: Catalase  
 gi Accession: 0  
 Precursor Mass: 709.3124+2  
 Delta Mass: 0.360 ppm  
 XCorr: 63.06



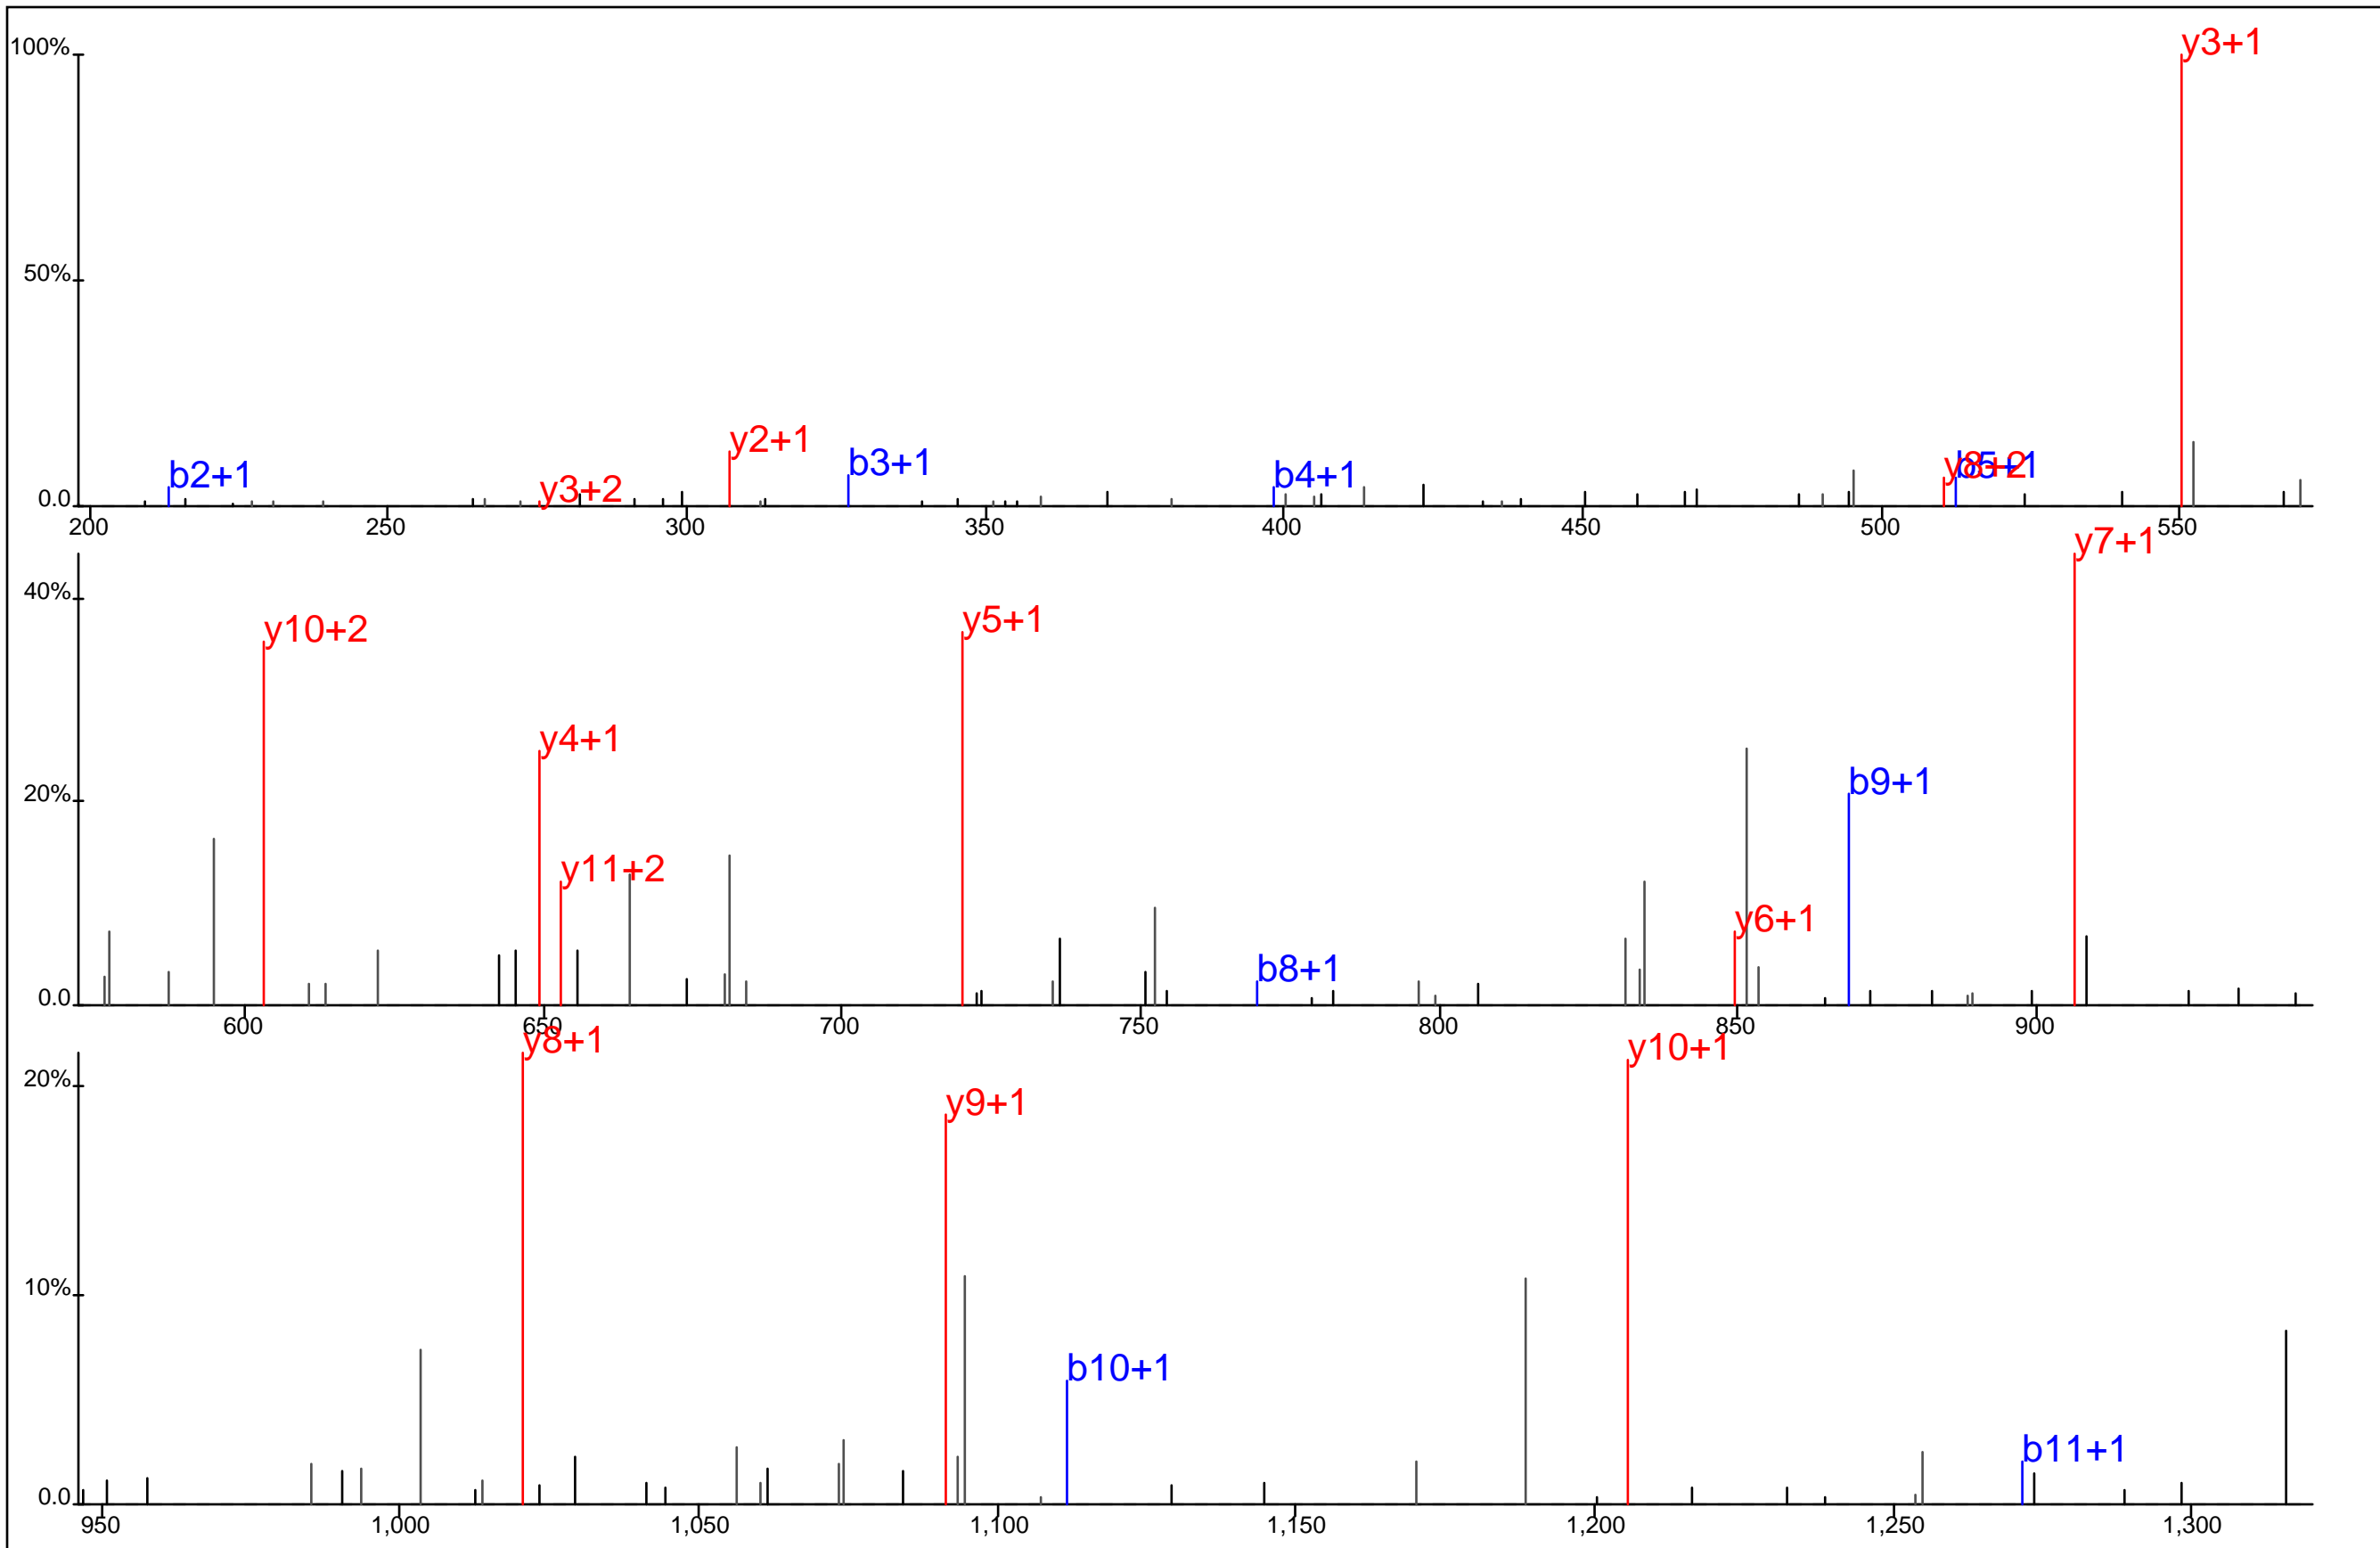

■ ■ ▢ ▢ ▢ ▢ ■ ■ ■ ■  
 L V N A N G E A V Y\* C K  
▢ ▢ ▢ ▢ ▢ ▢ ▢ ▢ ▢ ▢

Protein Name: Catalase  
 gi Accession: 0  
 Precursor Mass: 709.3137+2  
 Delta Mass: 1.449 ppm  
 XCorr: 64.75





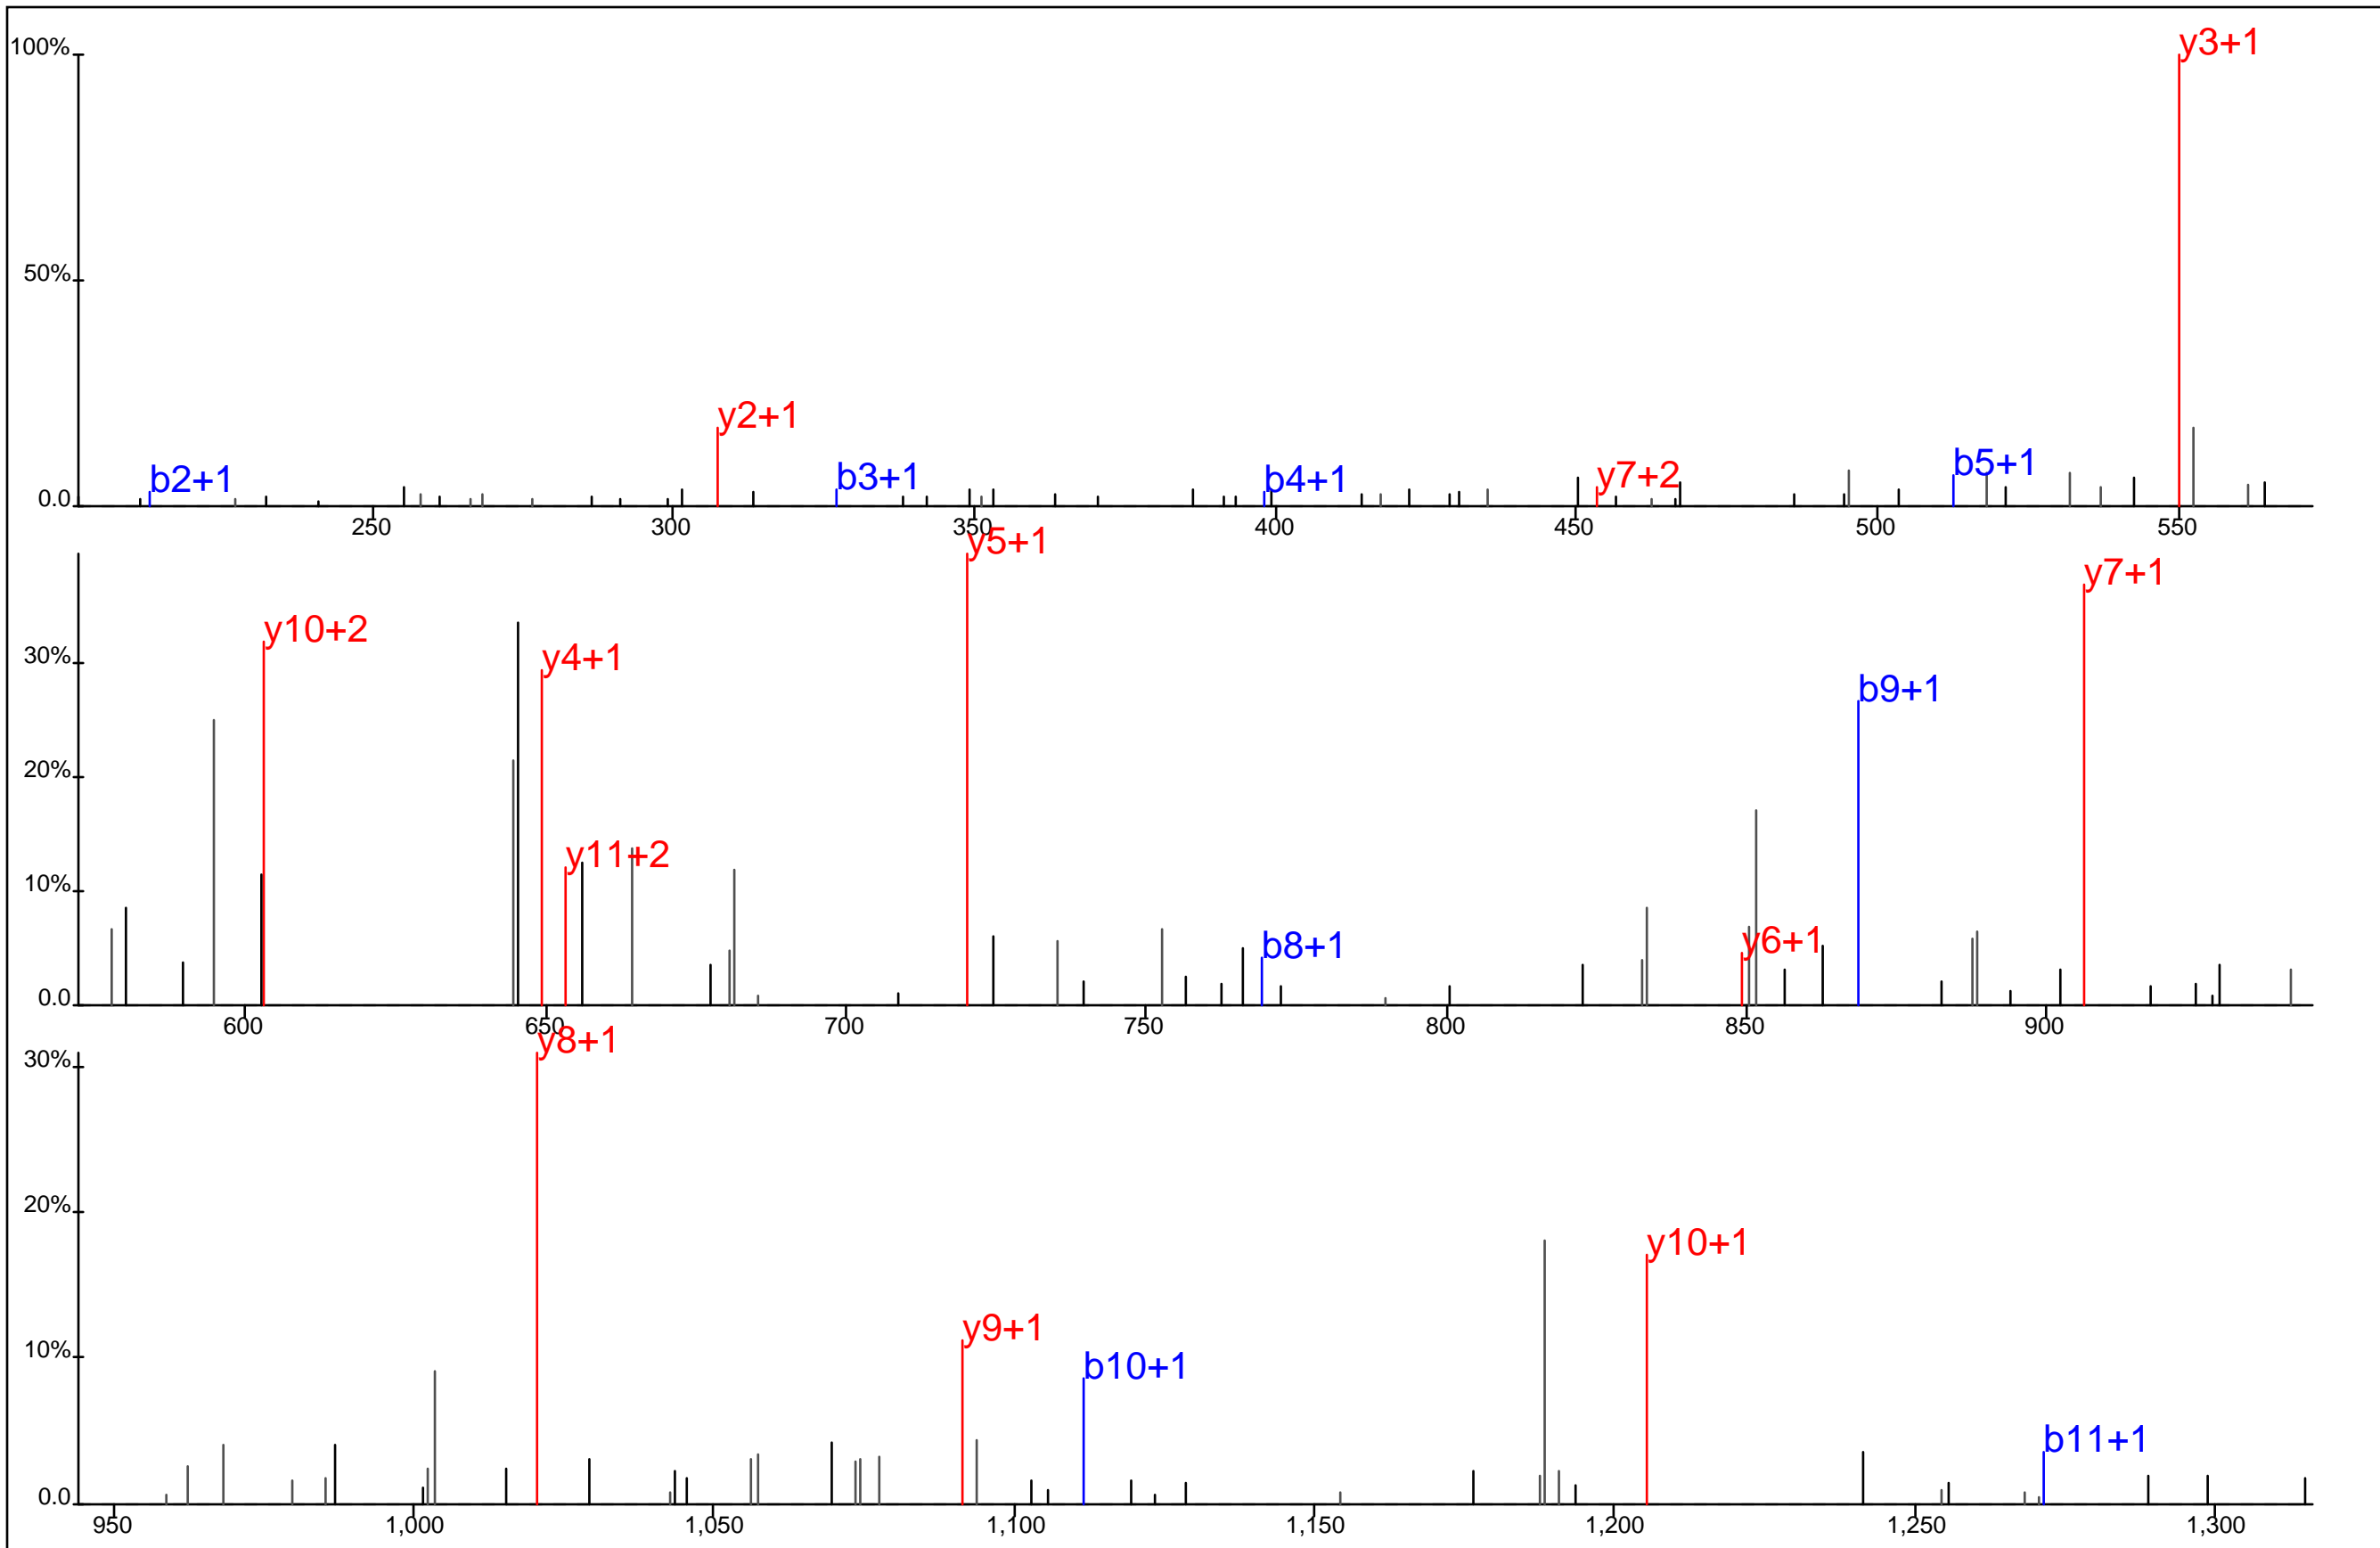

L V N A N G E A V Y\* C K

Protein Name: Catalase  
 gi Accession: 0  
 Precursor Mass: 709.3101+2  
 Delta Mass: 3.718 ppm  
 XCorr: 48.18

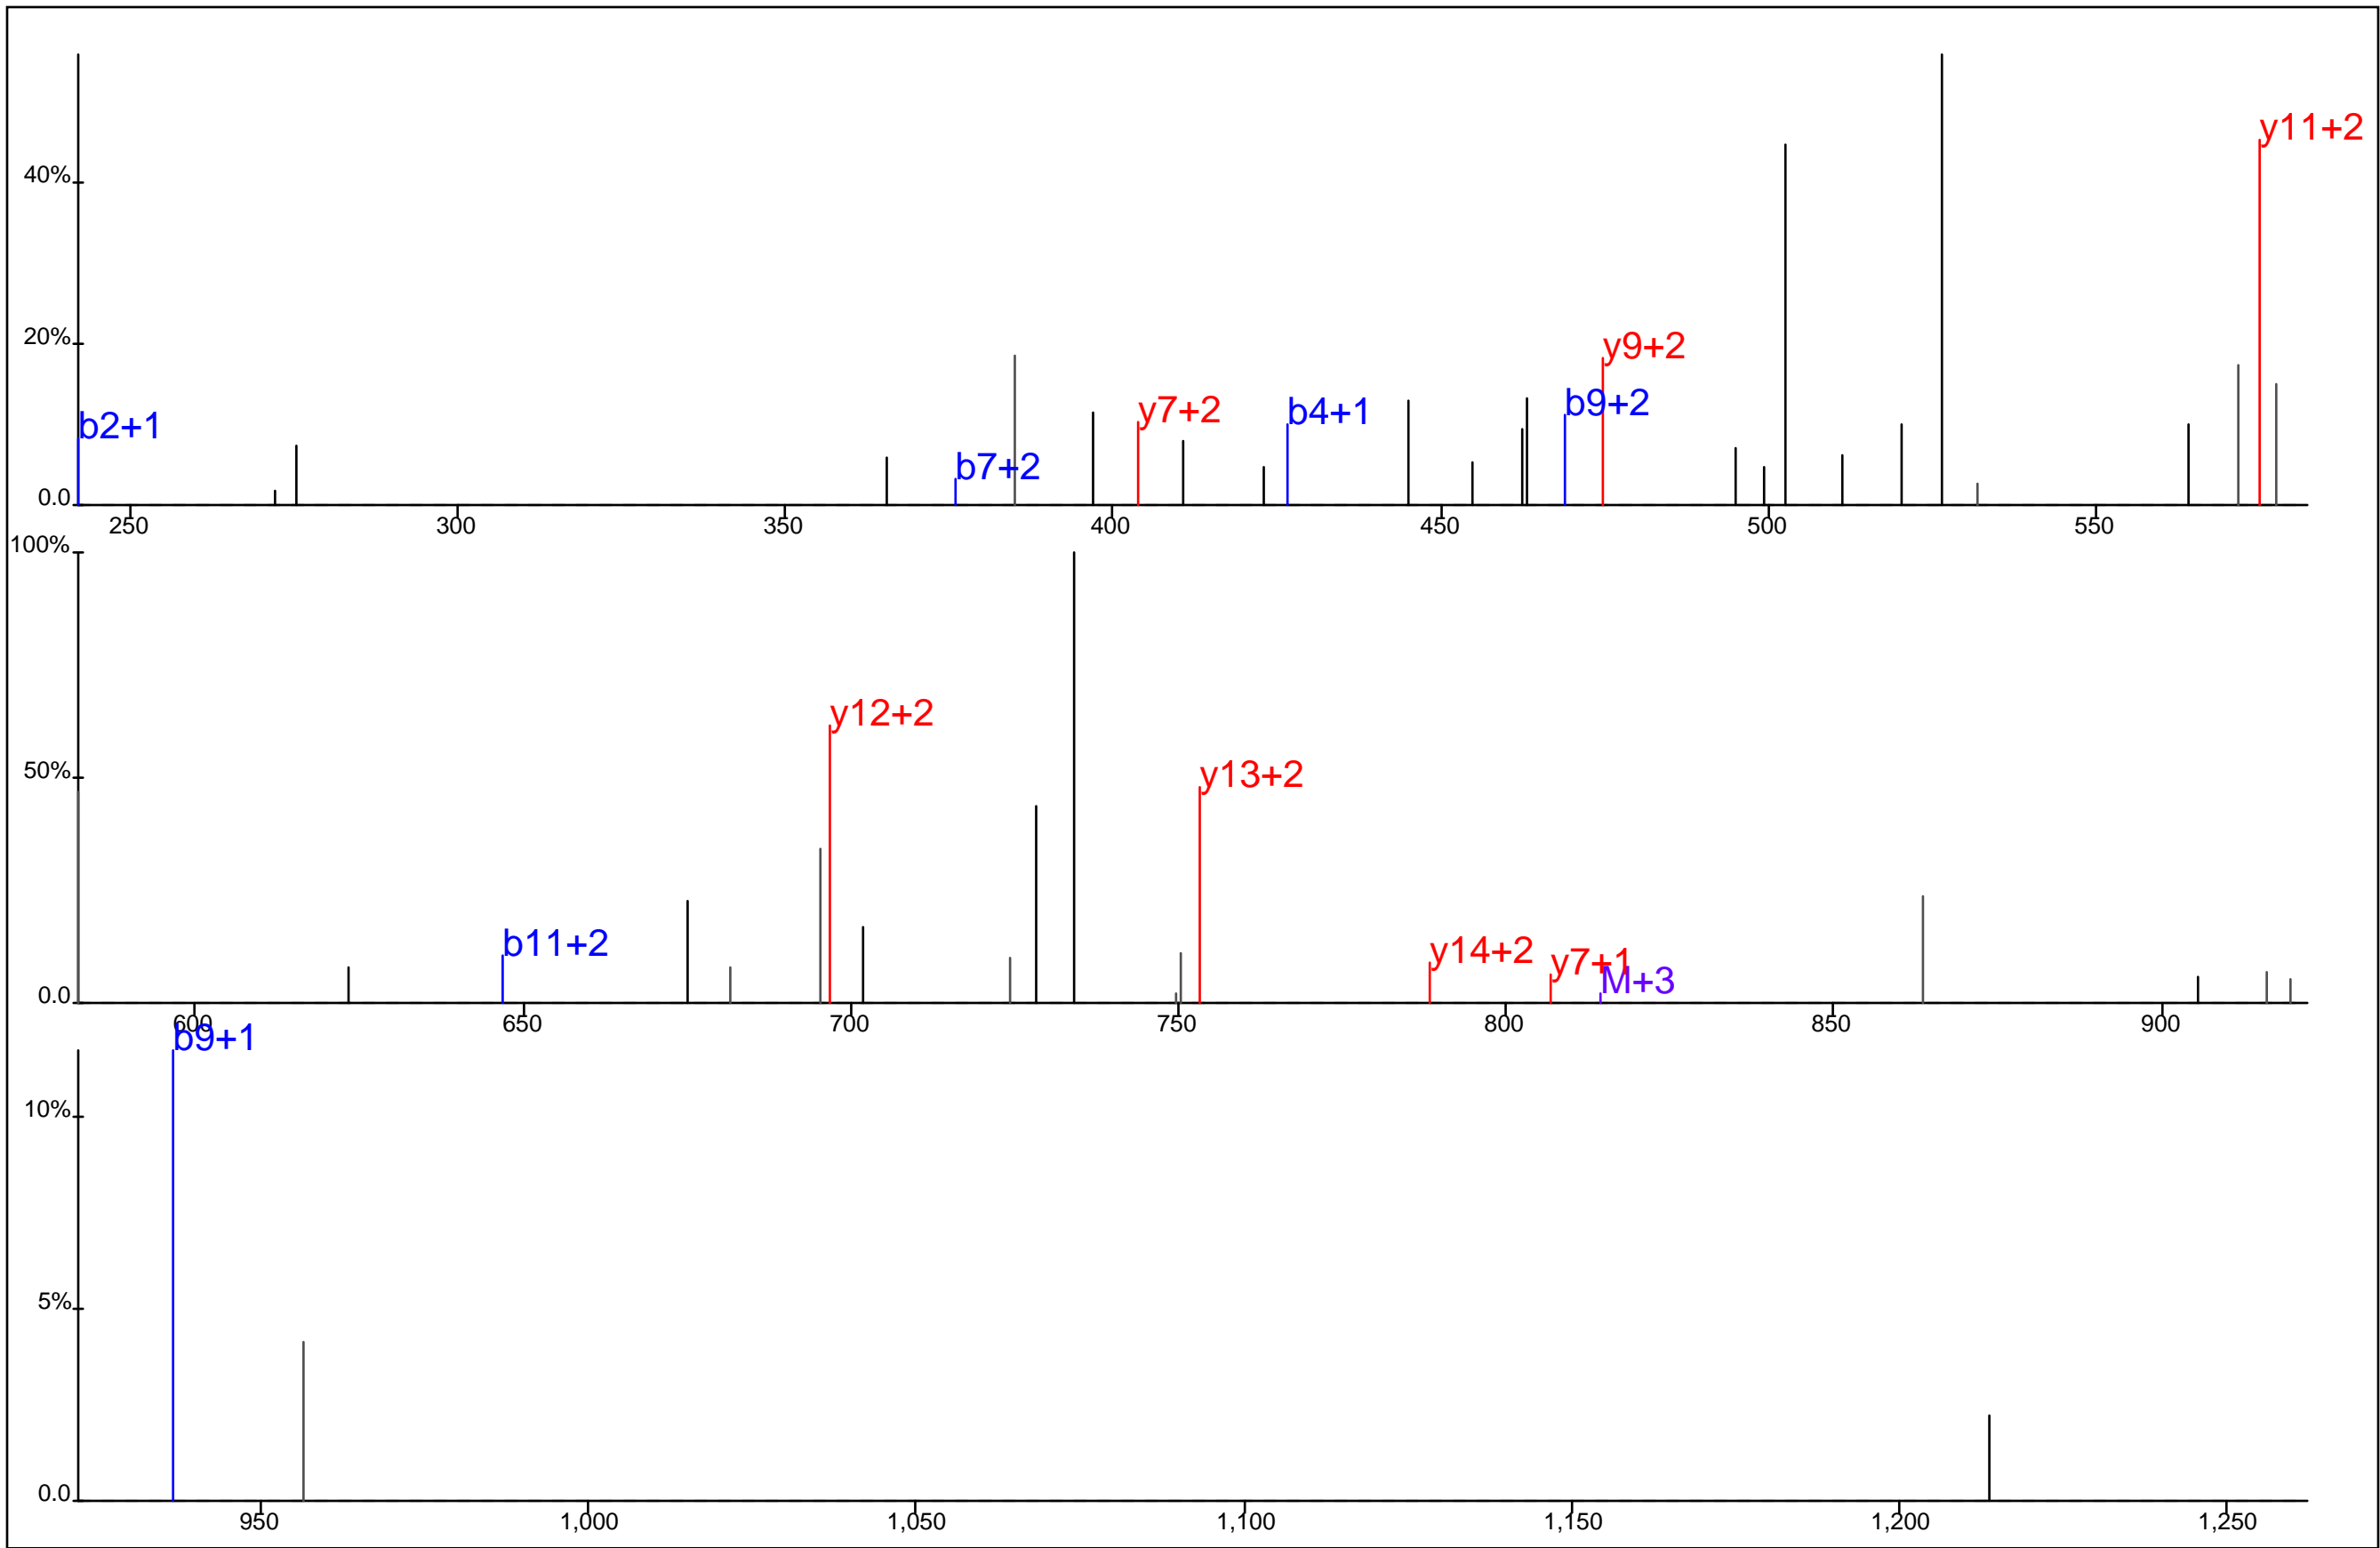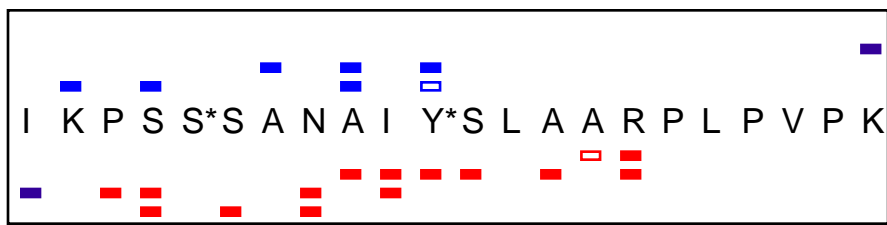

Protein Name: CBL  
 gi Accession: 0  
 Precursor Mass: 610.8159+4  
 Delta Mass: 0.647 ppm  
 XCorr: 21.2

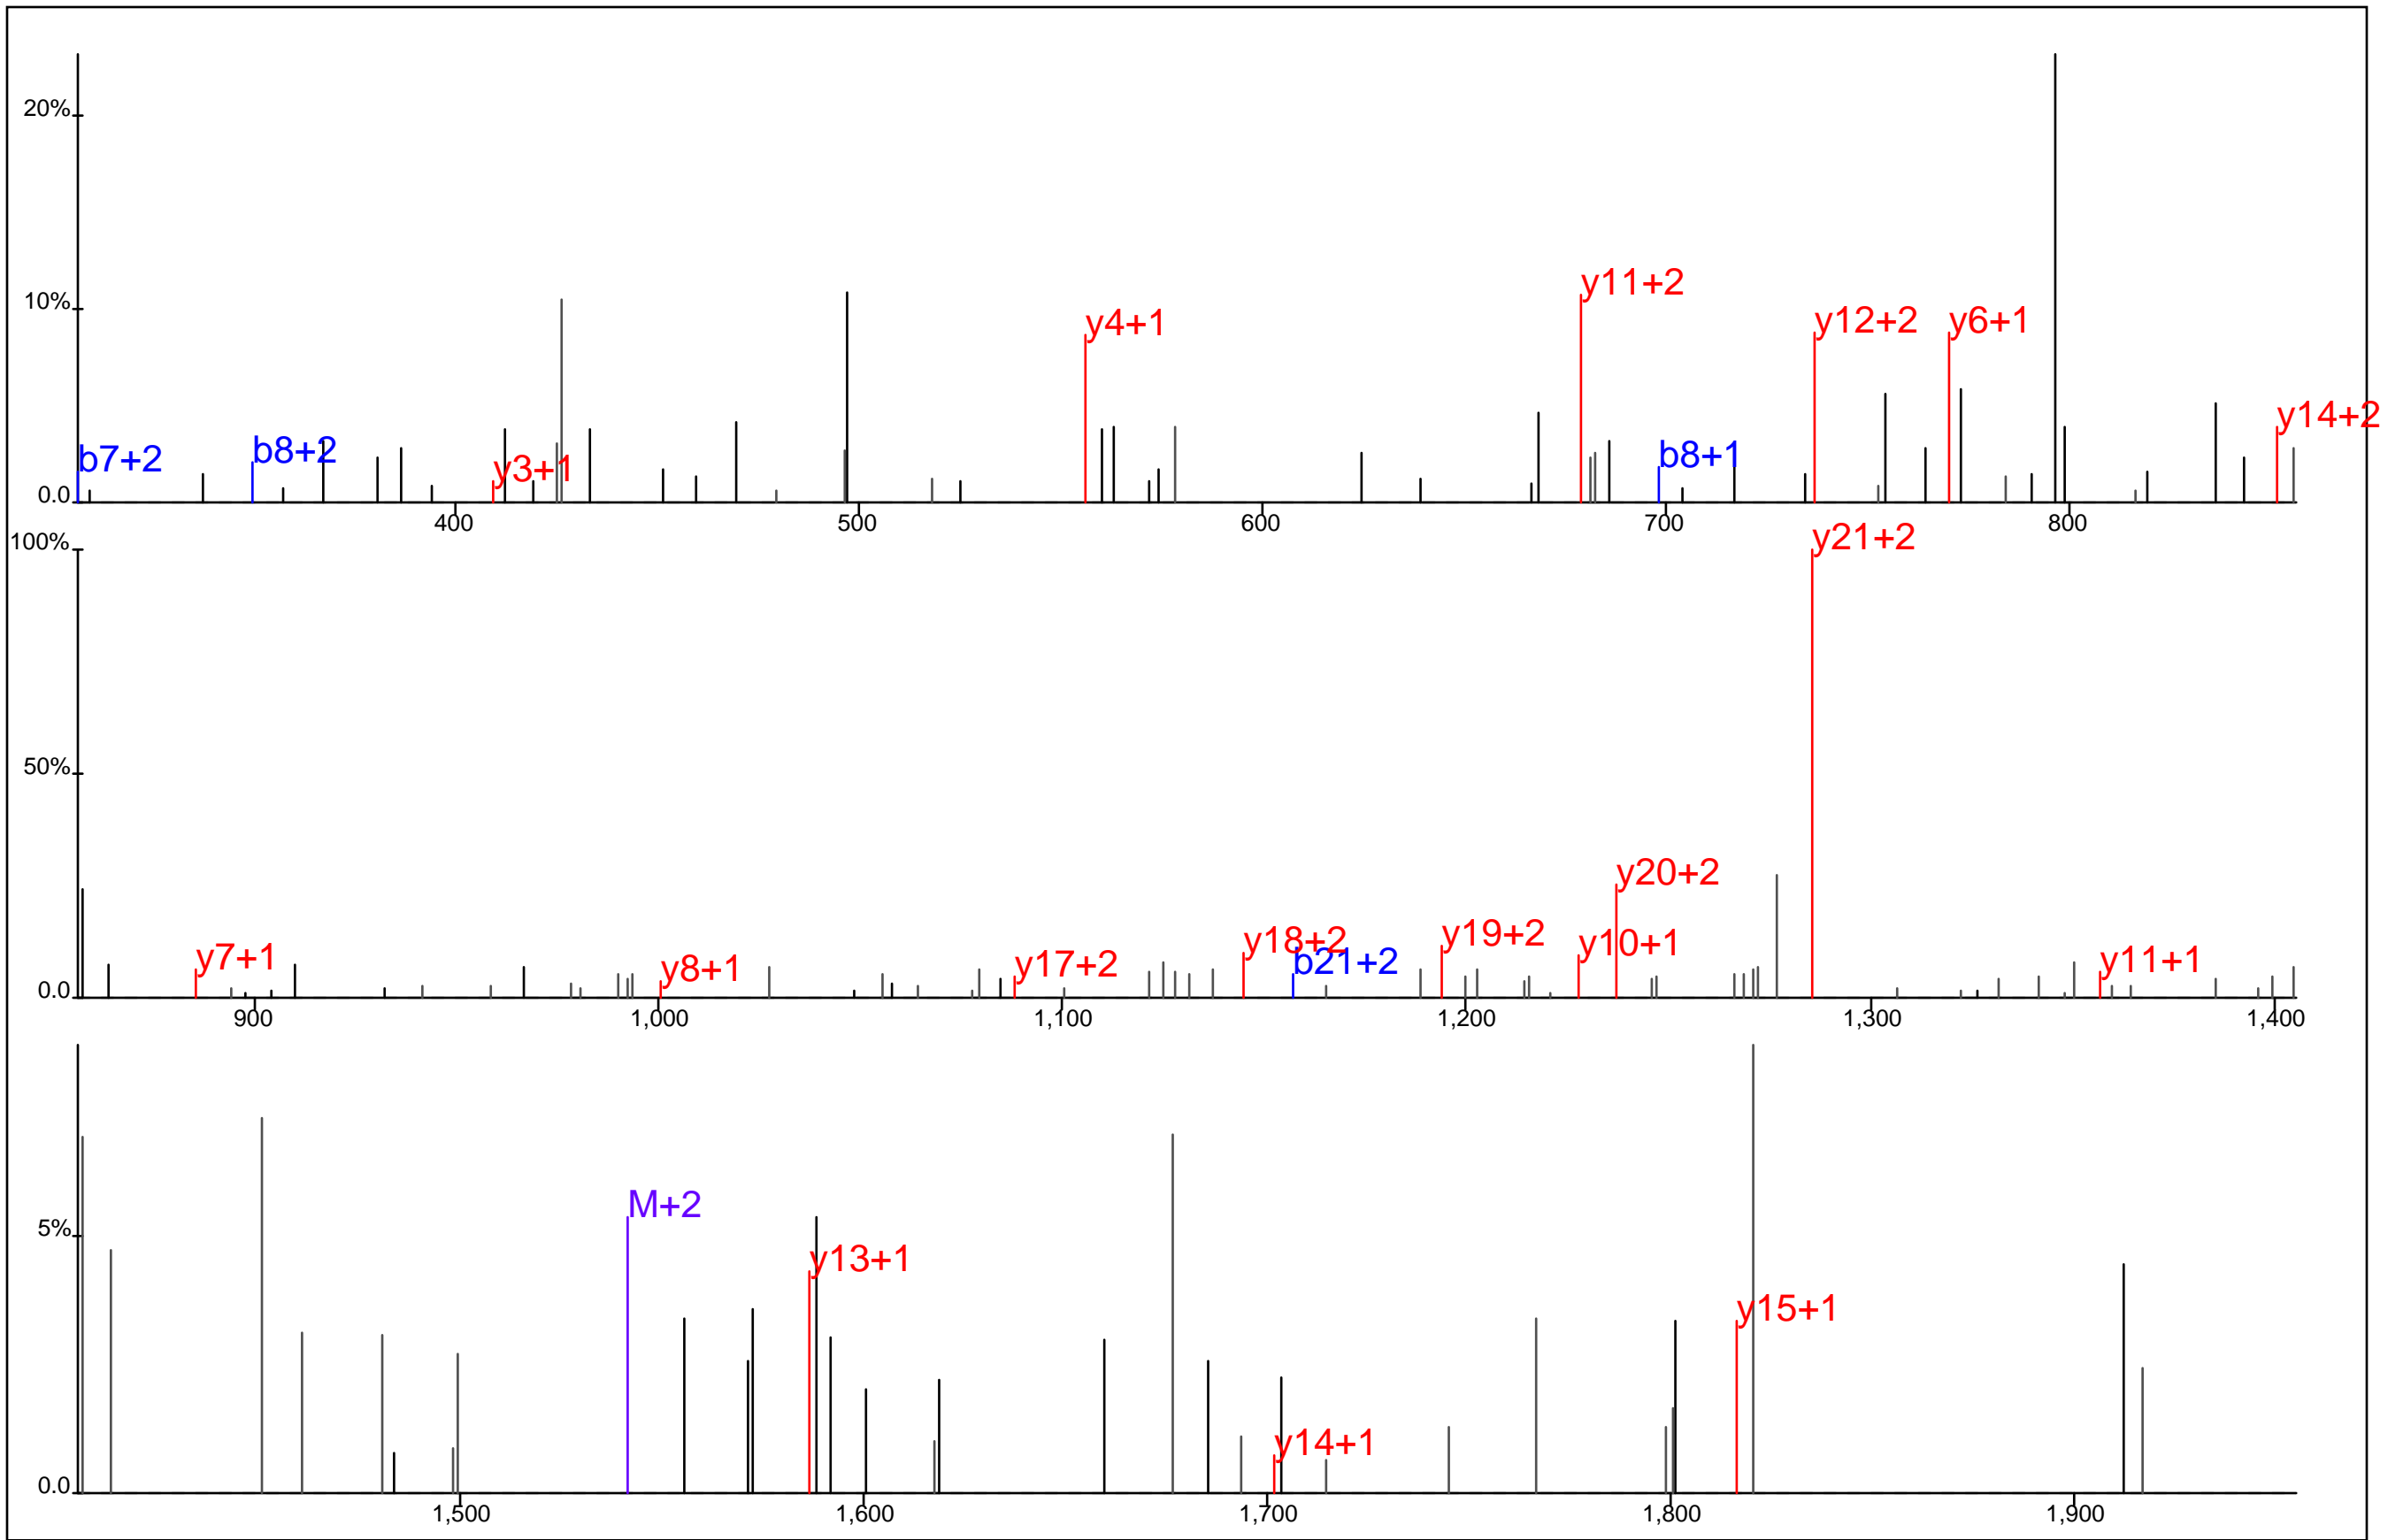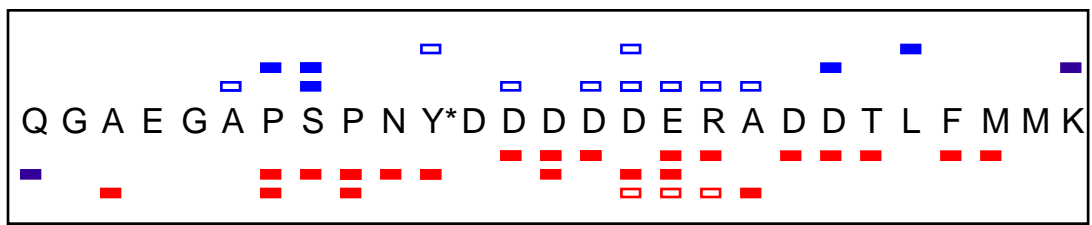

Protein Name: CBL  
 gi Accession: 0  
 Precursor Mass: 1,028.4033+3  
 Delta Mass: 1.170 ppm  
 XCorr: 24.0

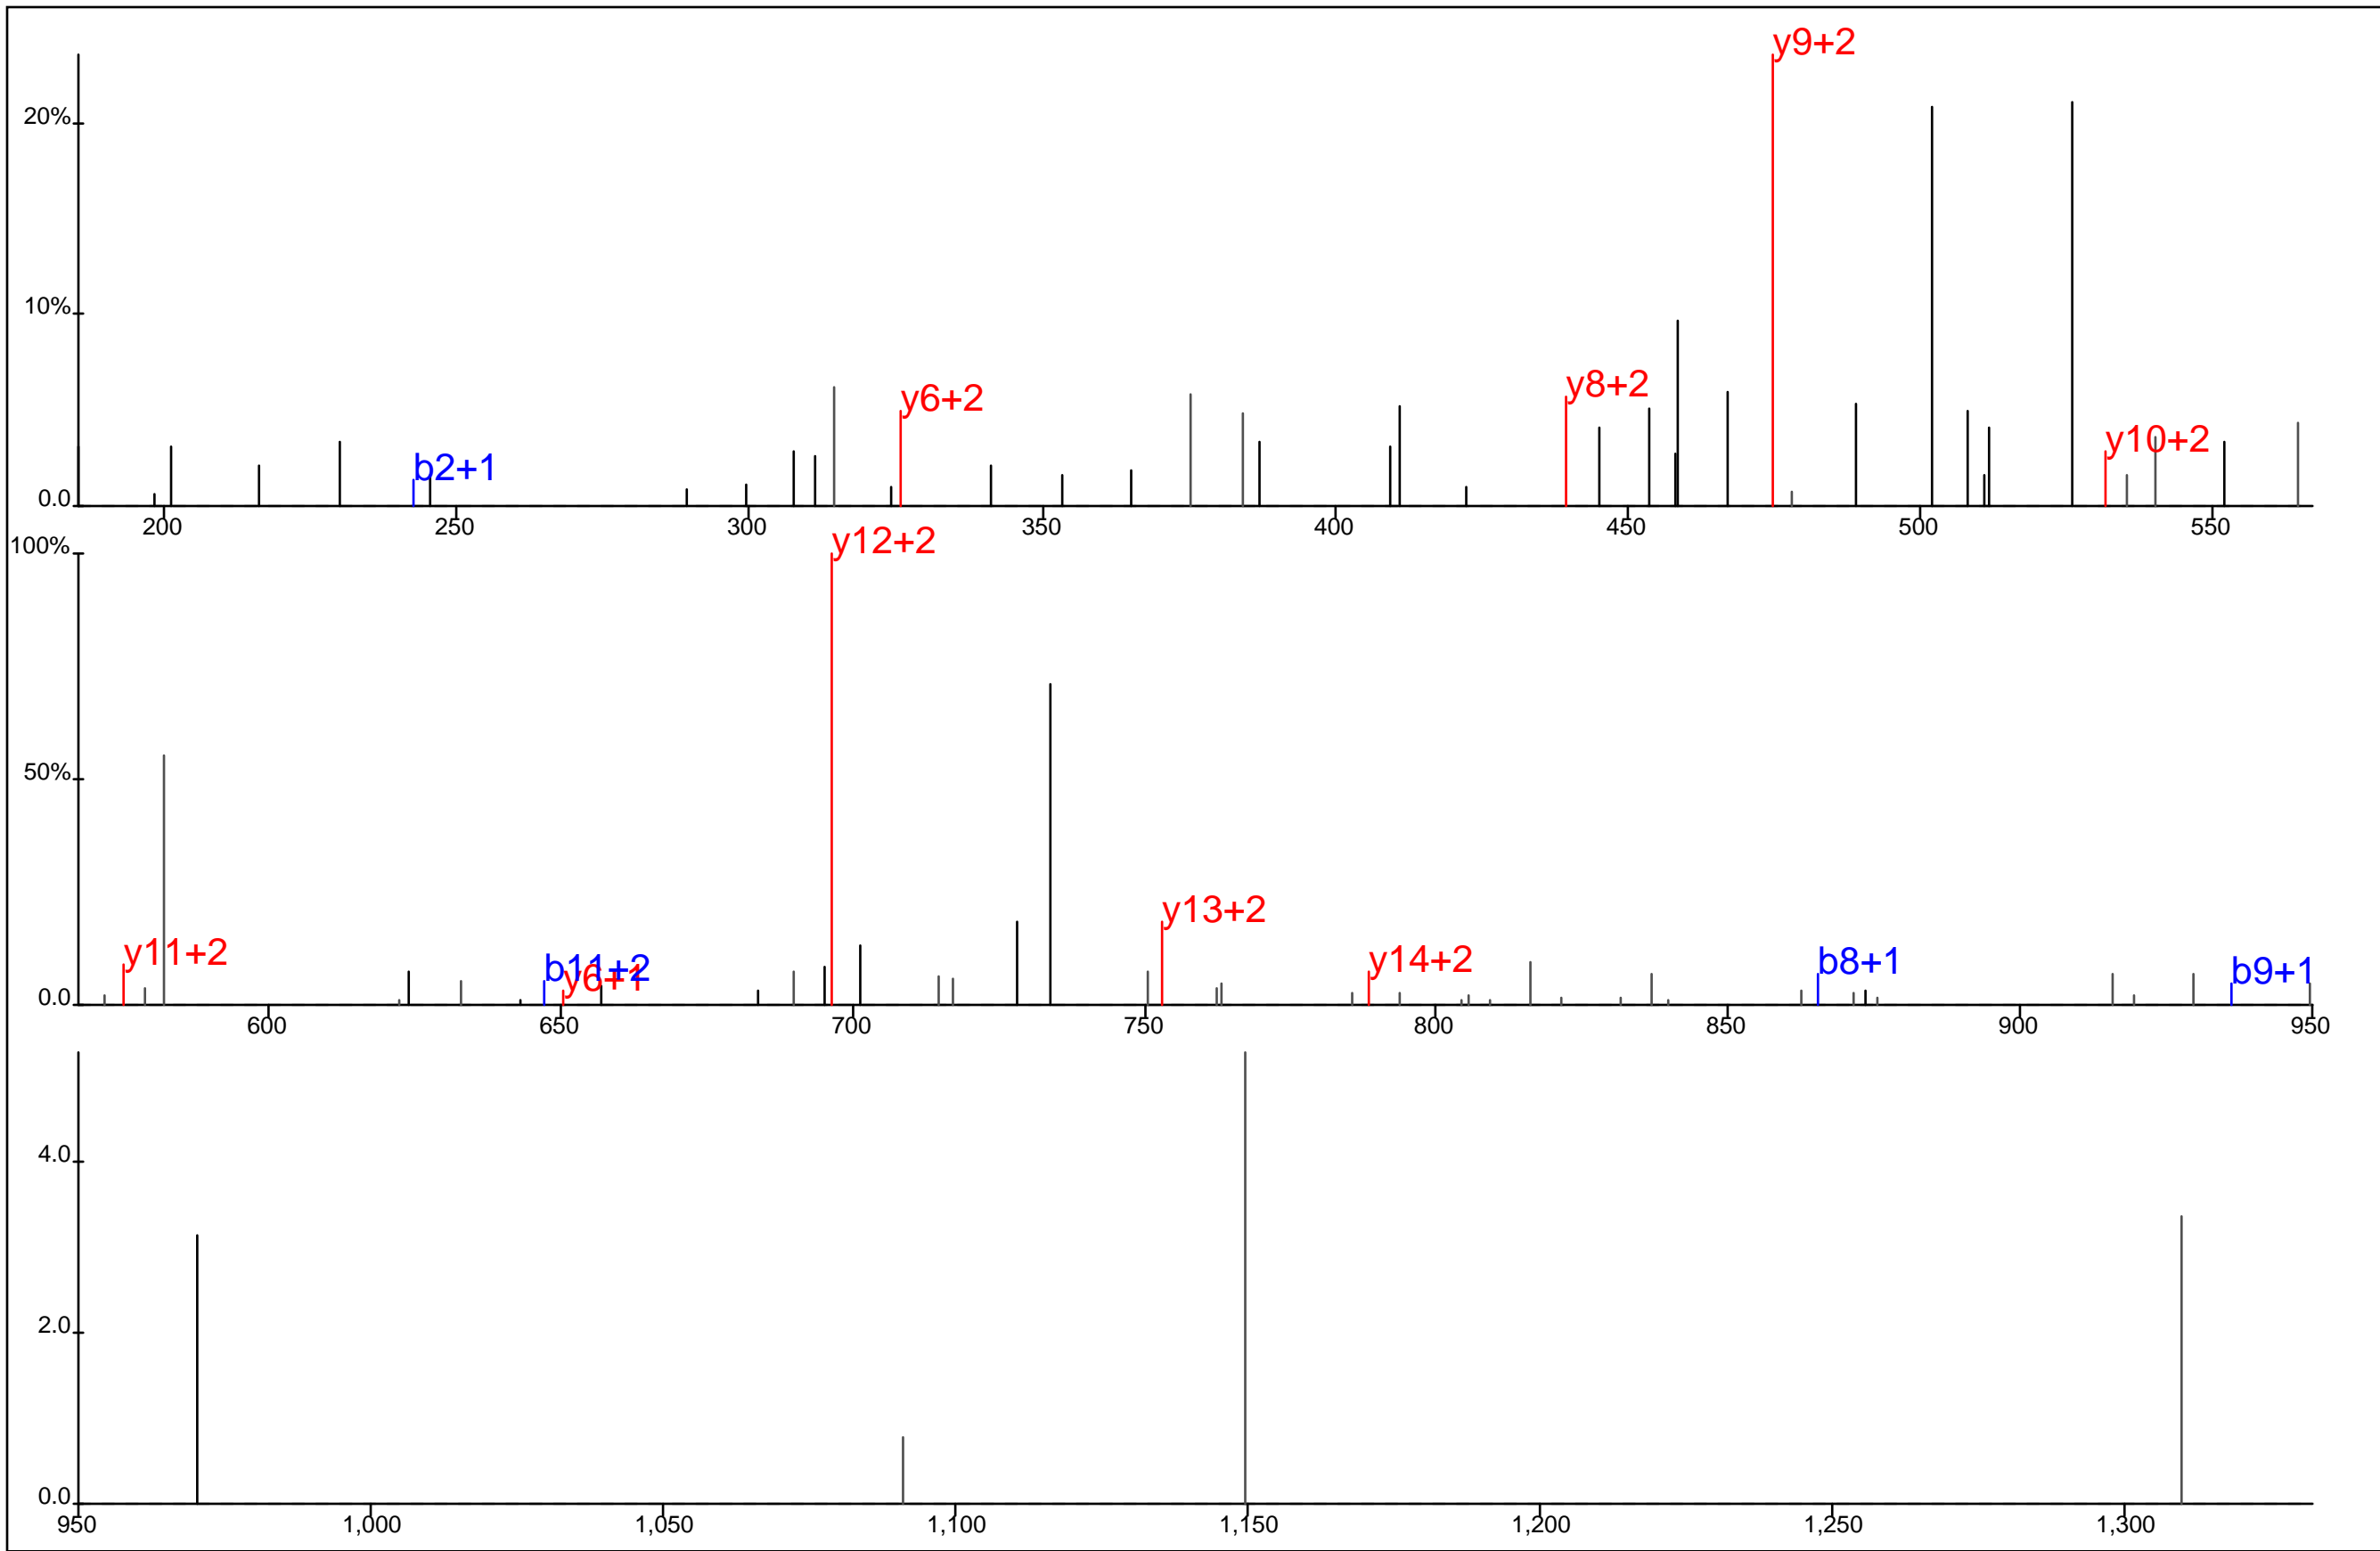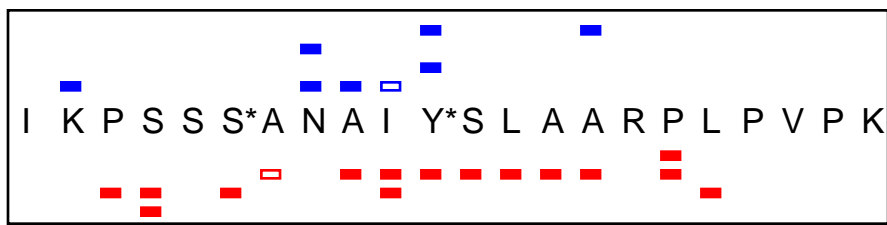

Protein Name: CBL  
 gi Accession: 0  
 Precursor Mass: 610.8157+4  
 Delta Mass: 0.447 ppm  
 XCorr: 20.83

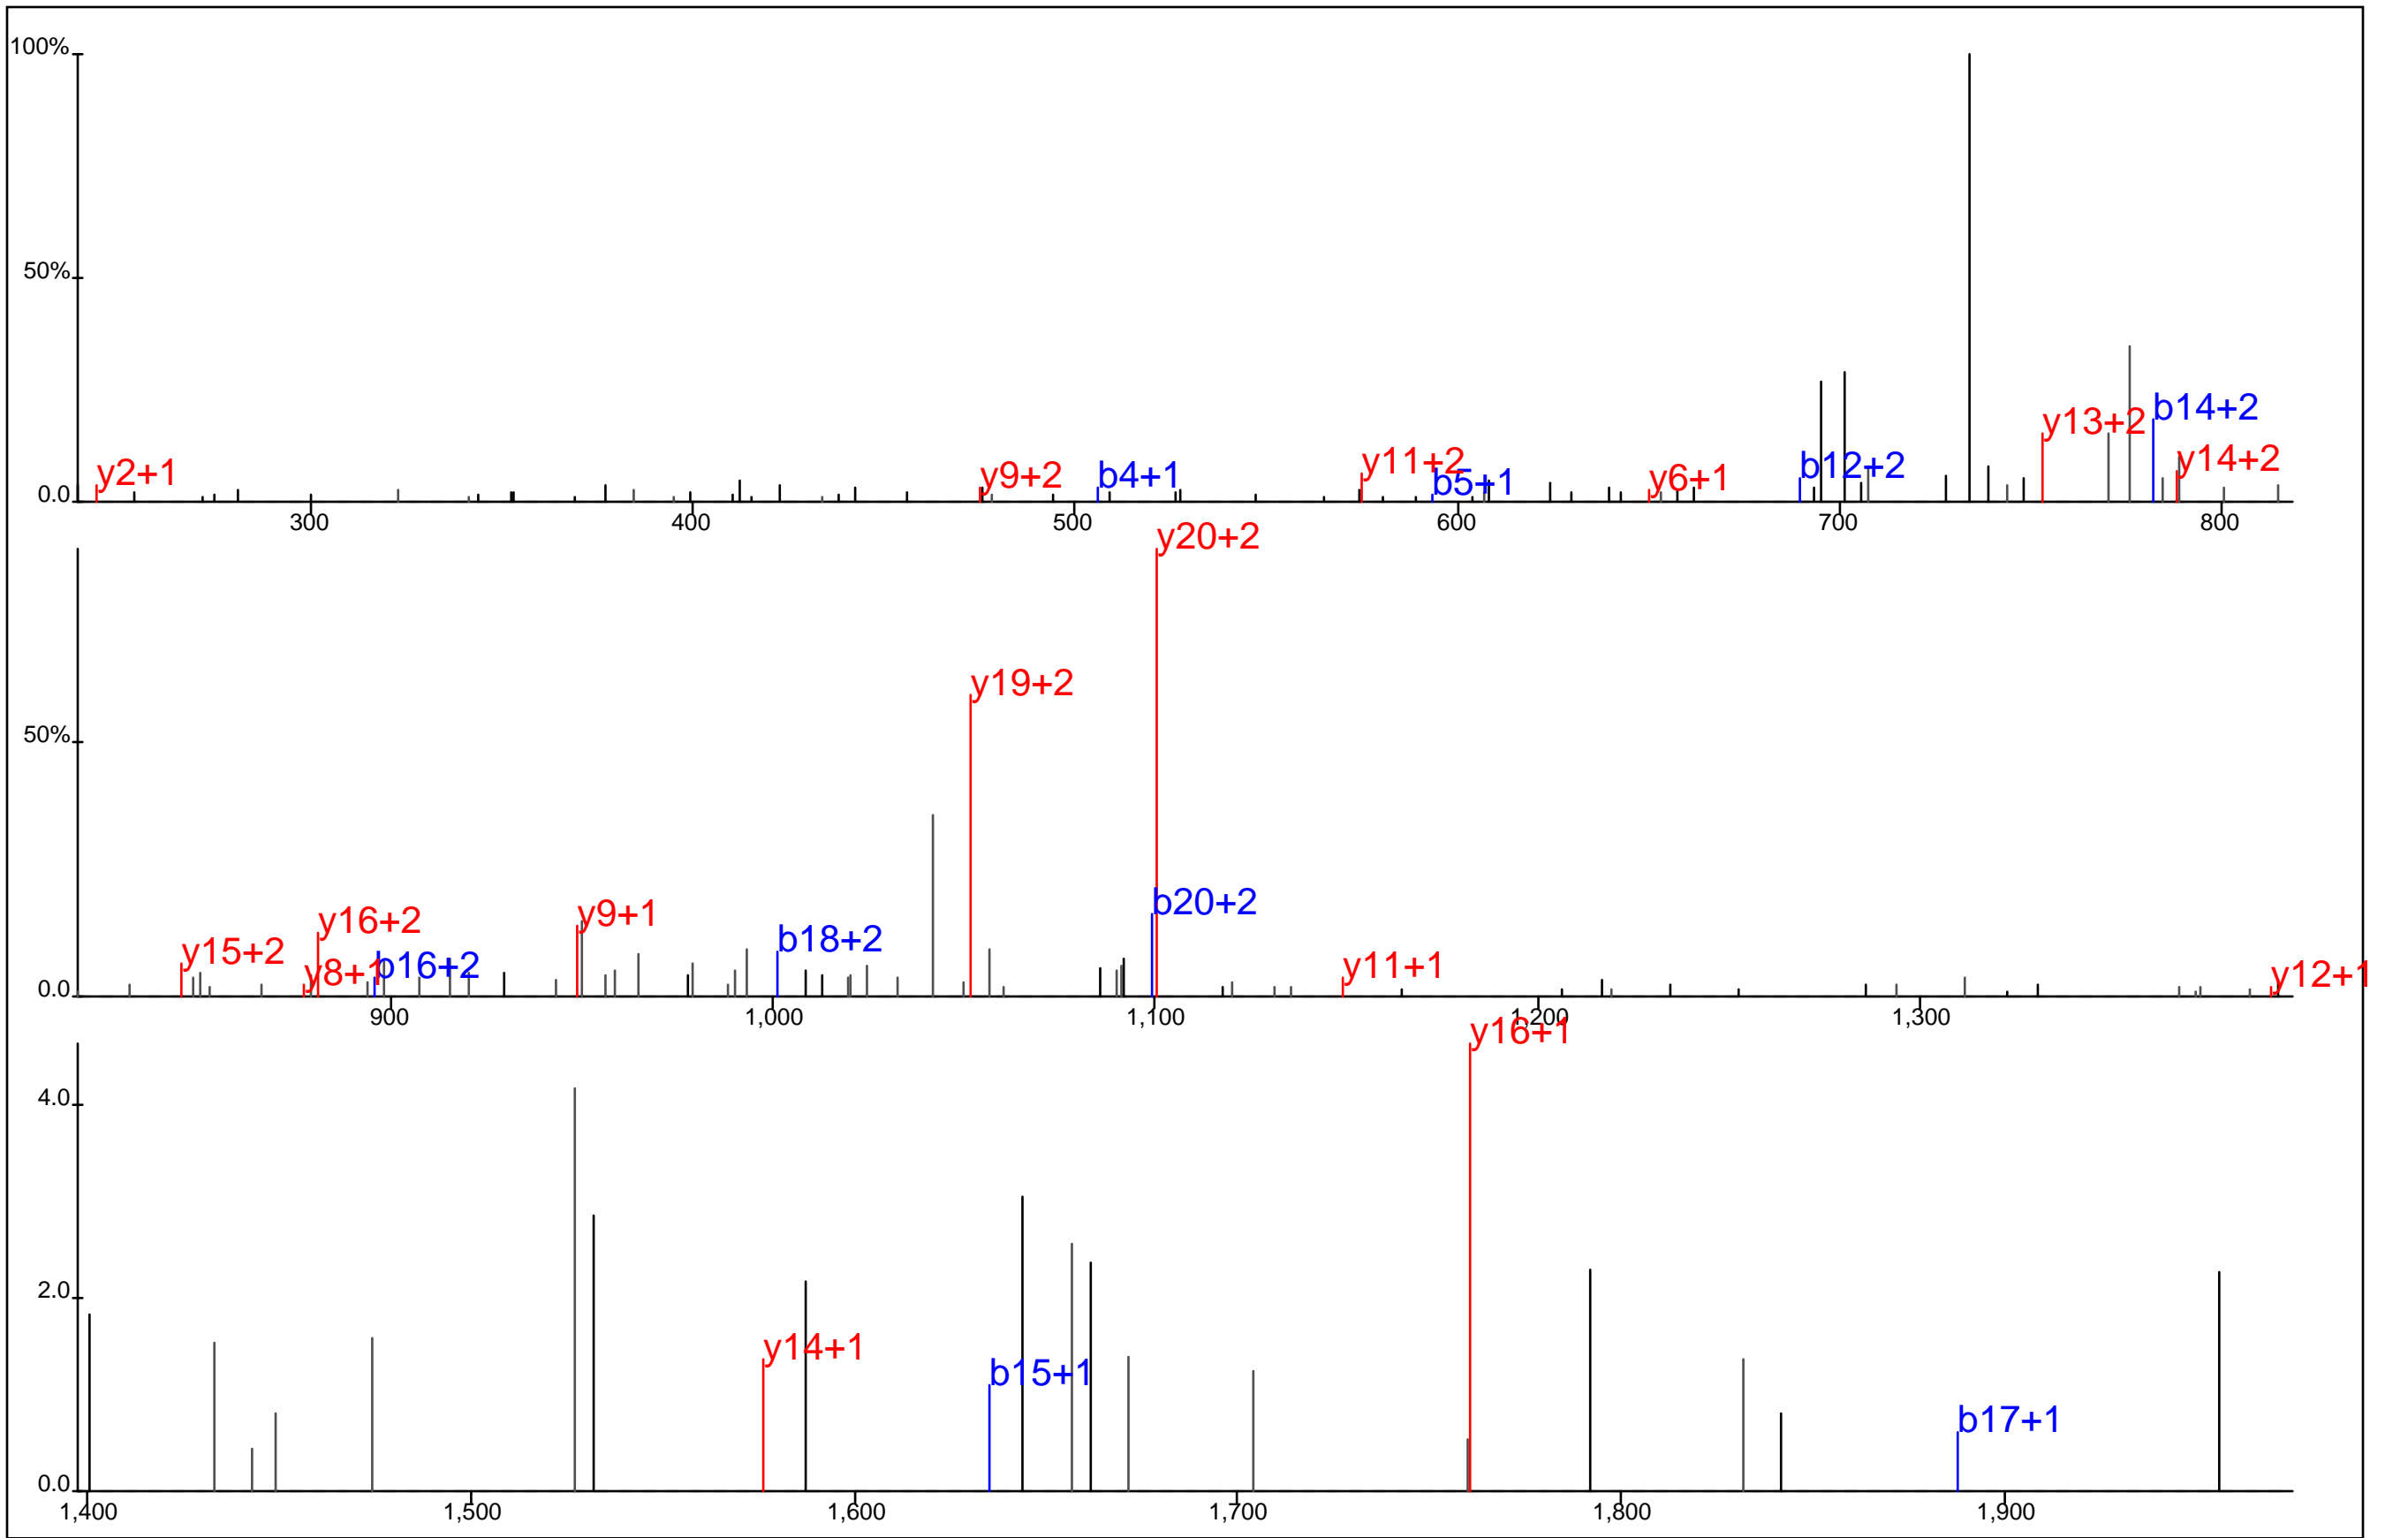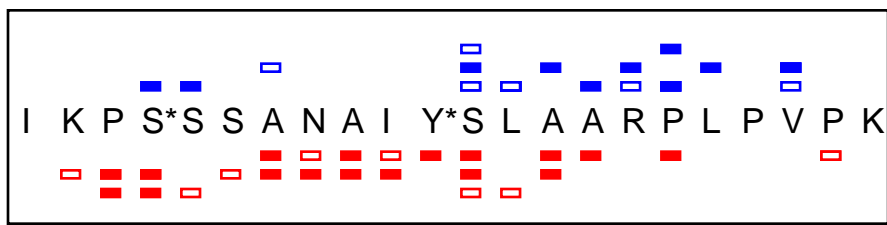

Protein Name: CBL  
 gi Accession: 0  
 Precursor Mass: 814.0890+3  
 Delta Mass: 5.079 ppm  
 XCorr: 21.75



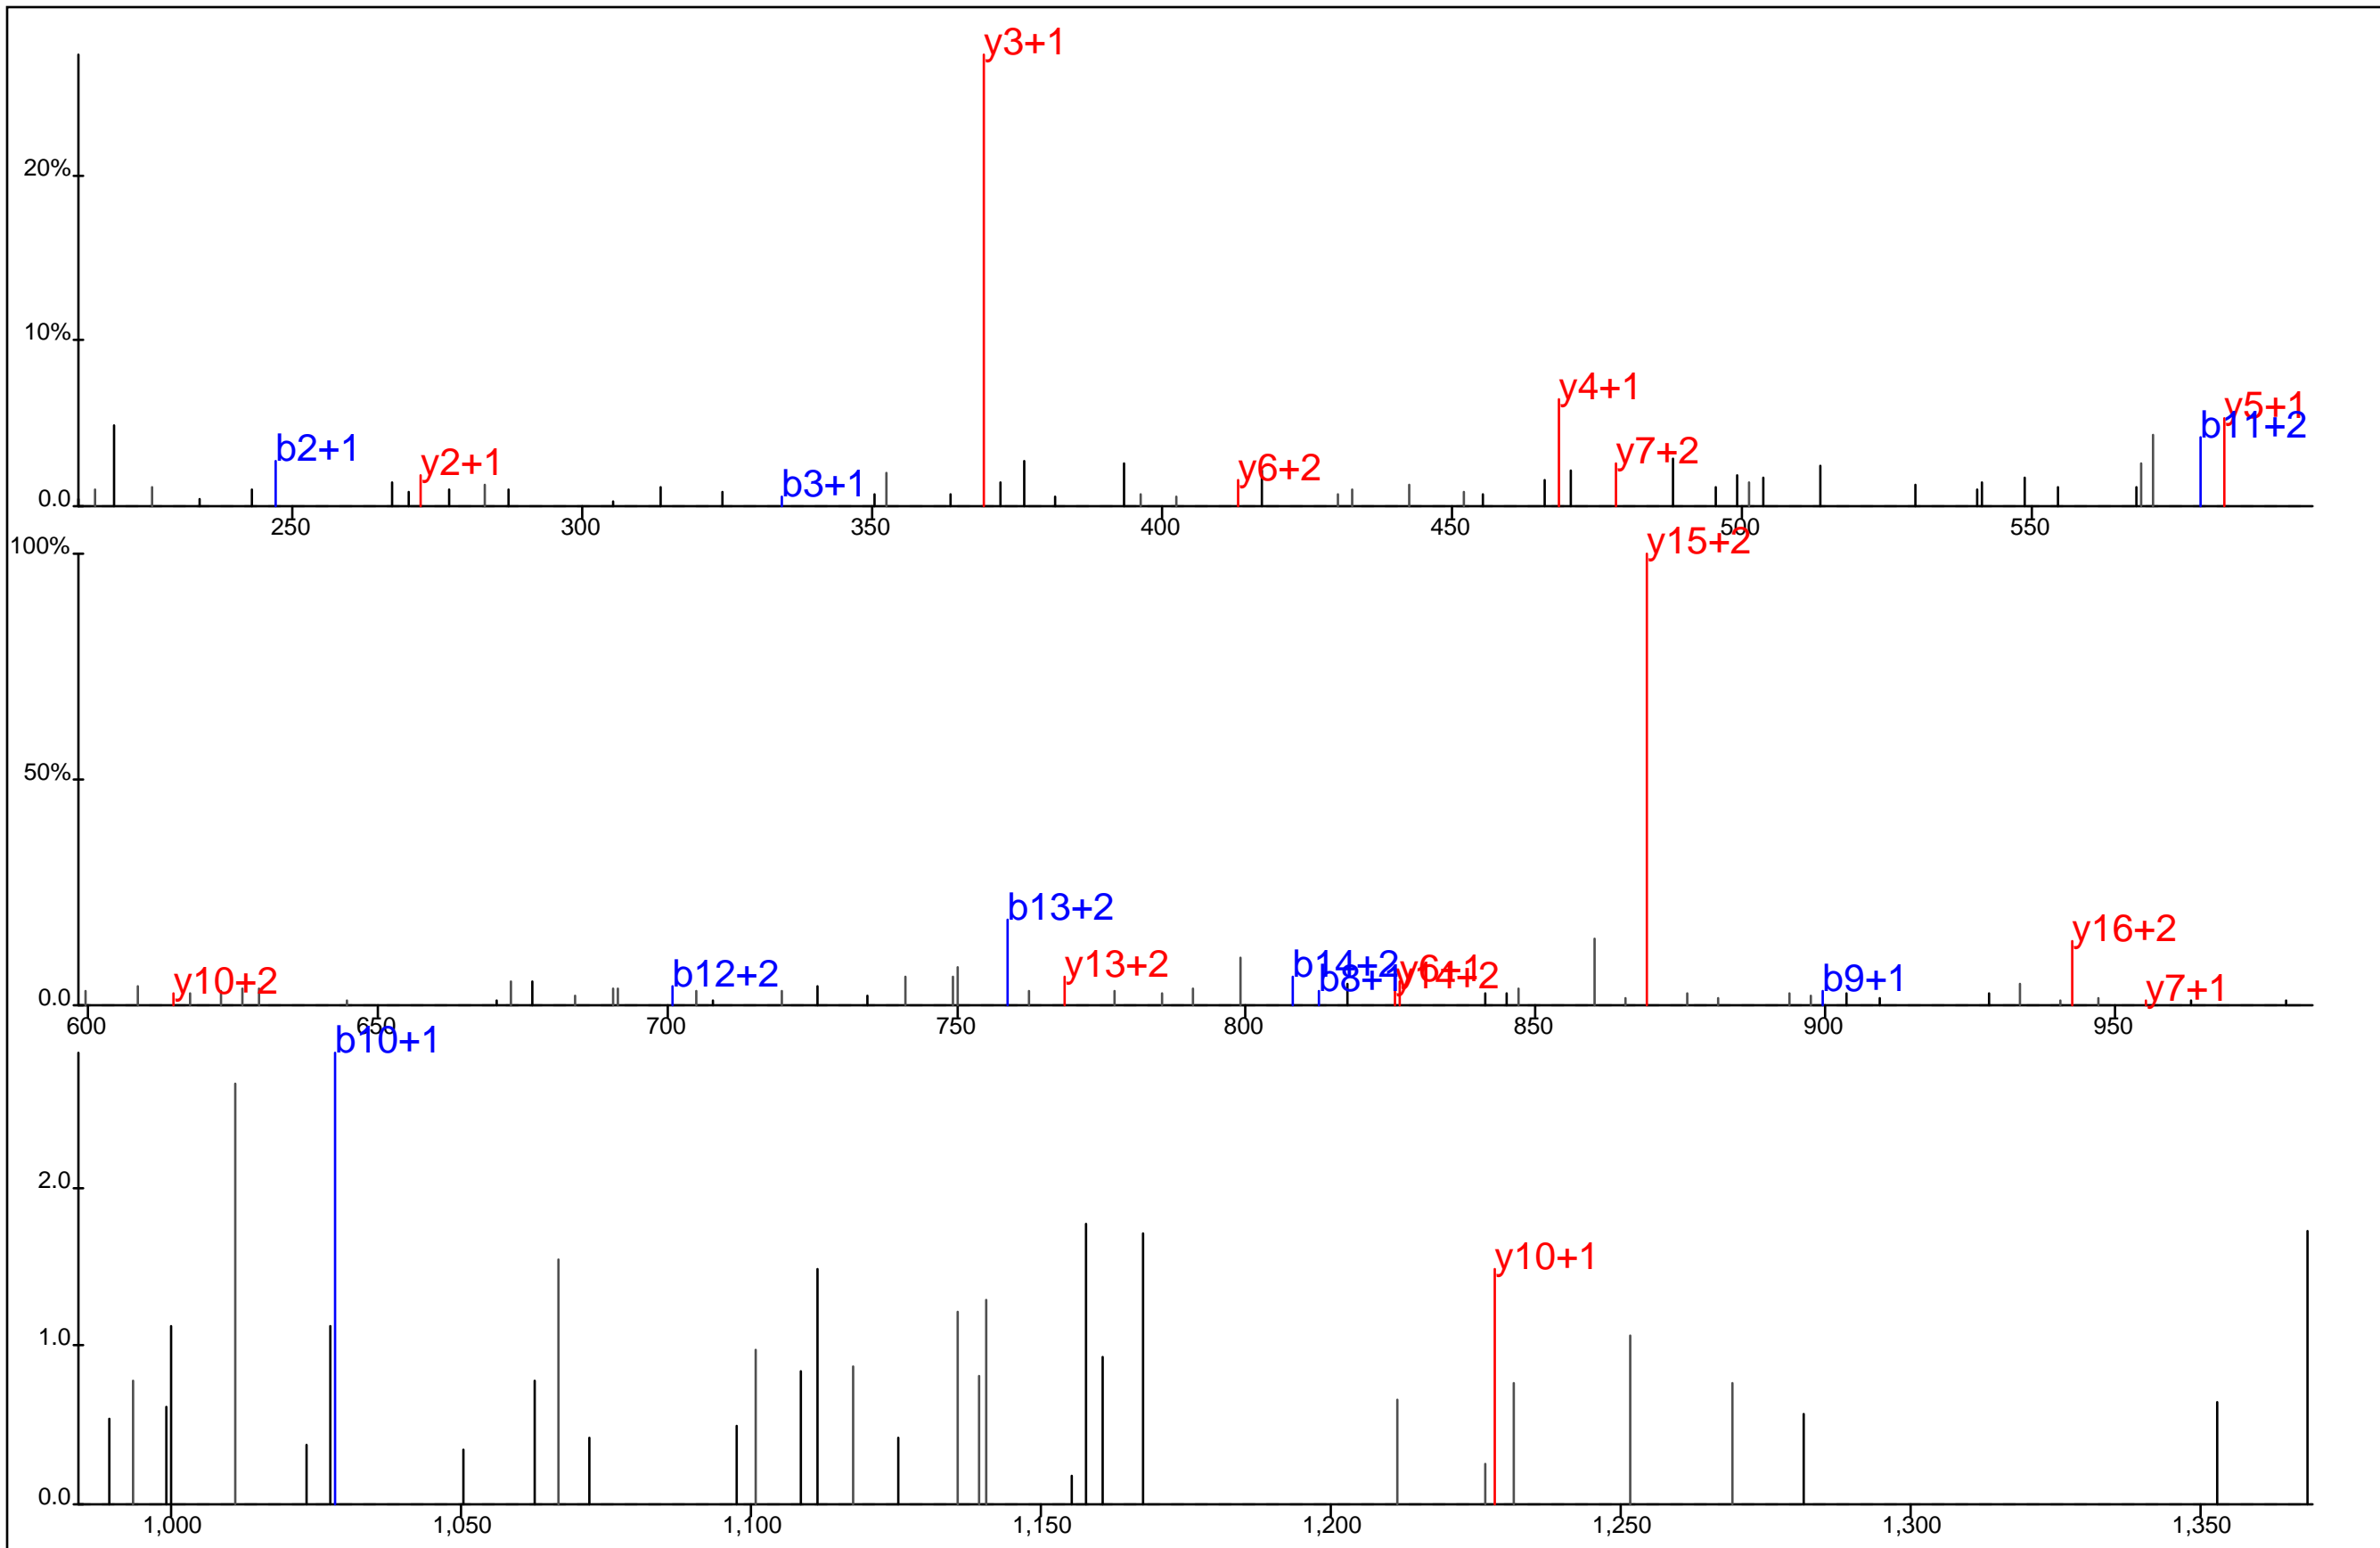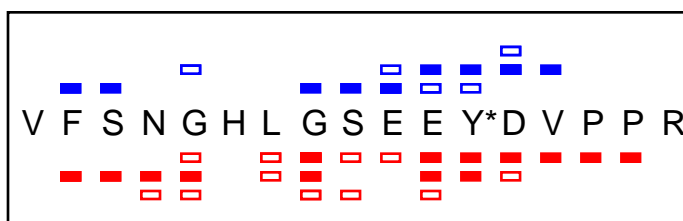

Protein Name: CbIB  
 gi Accession: 0  
 Precursor Mass: 661.6251+3  
 Delta Mass: 1.897 ppm  
 XCorr: 32.98

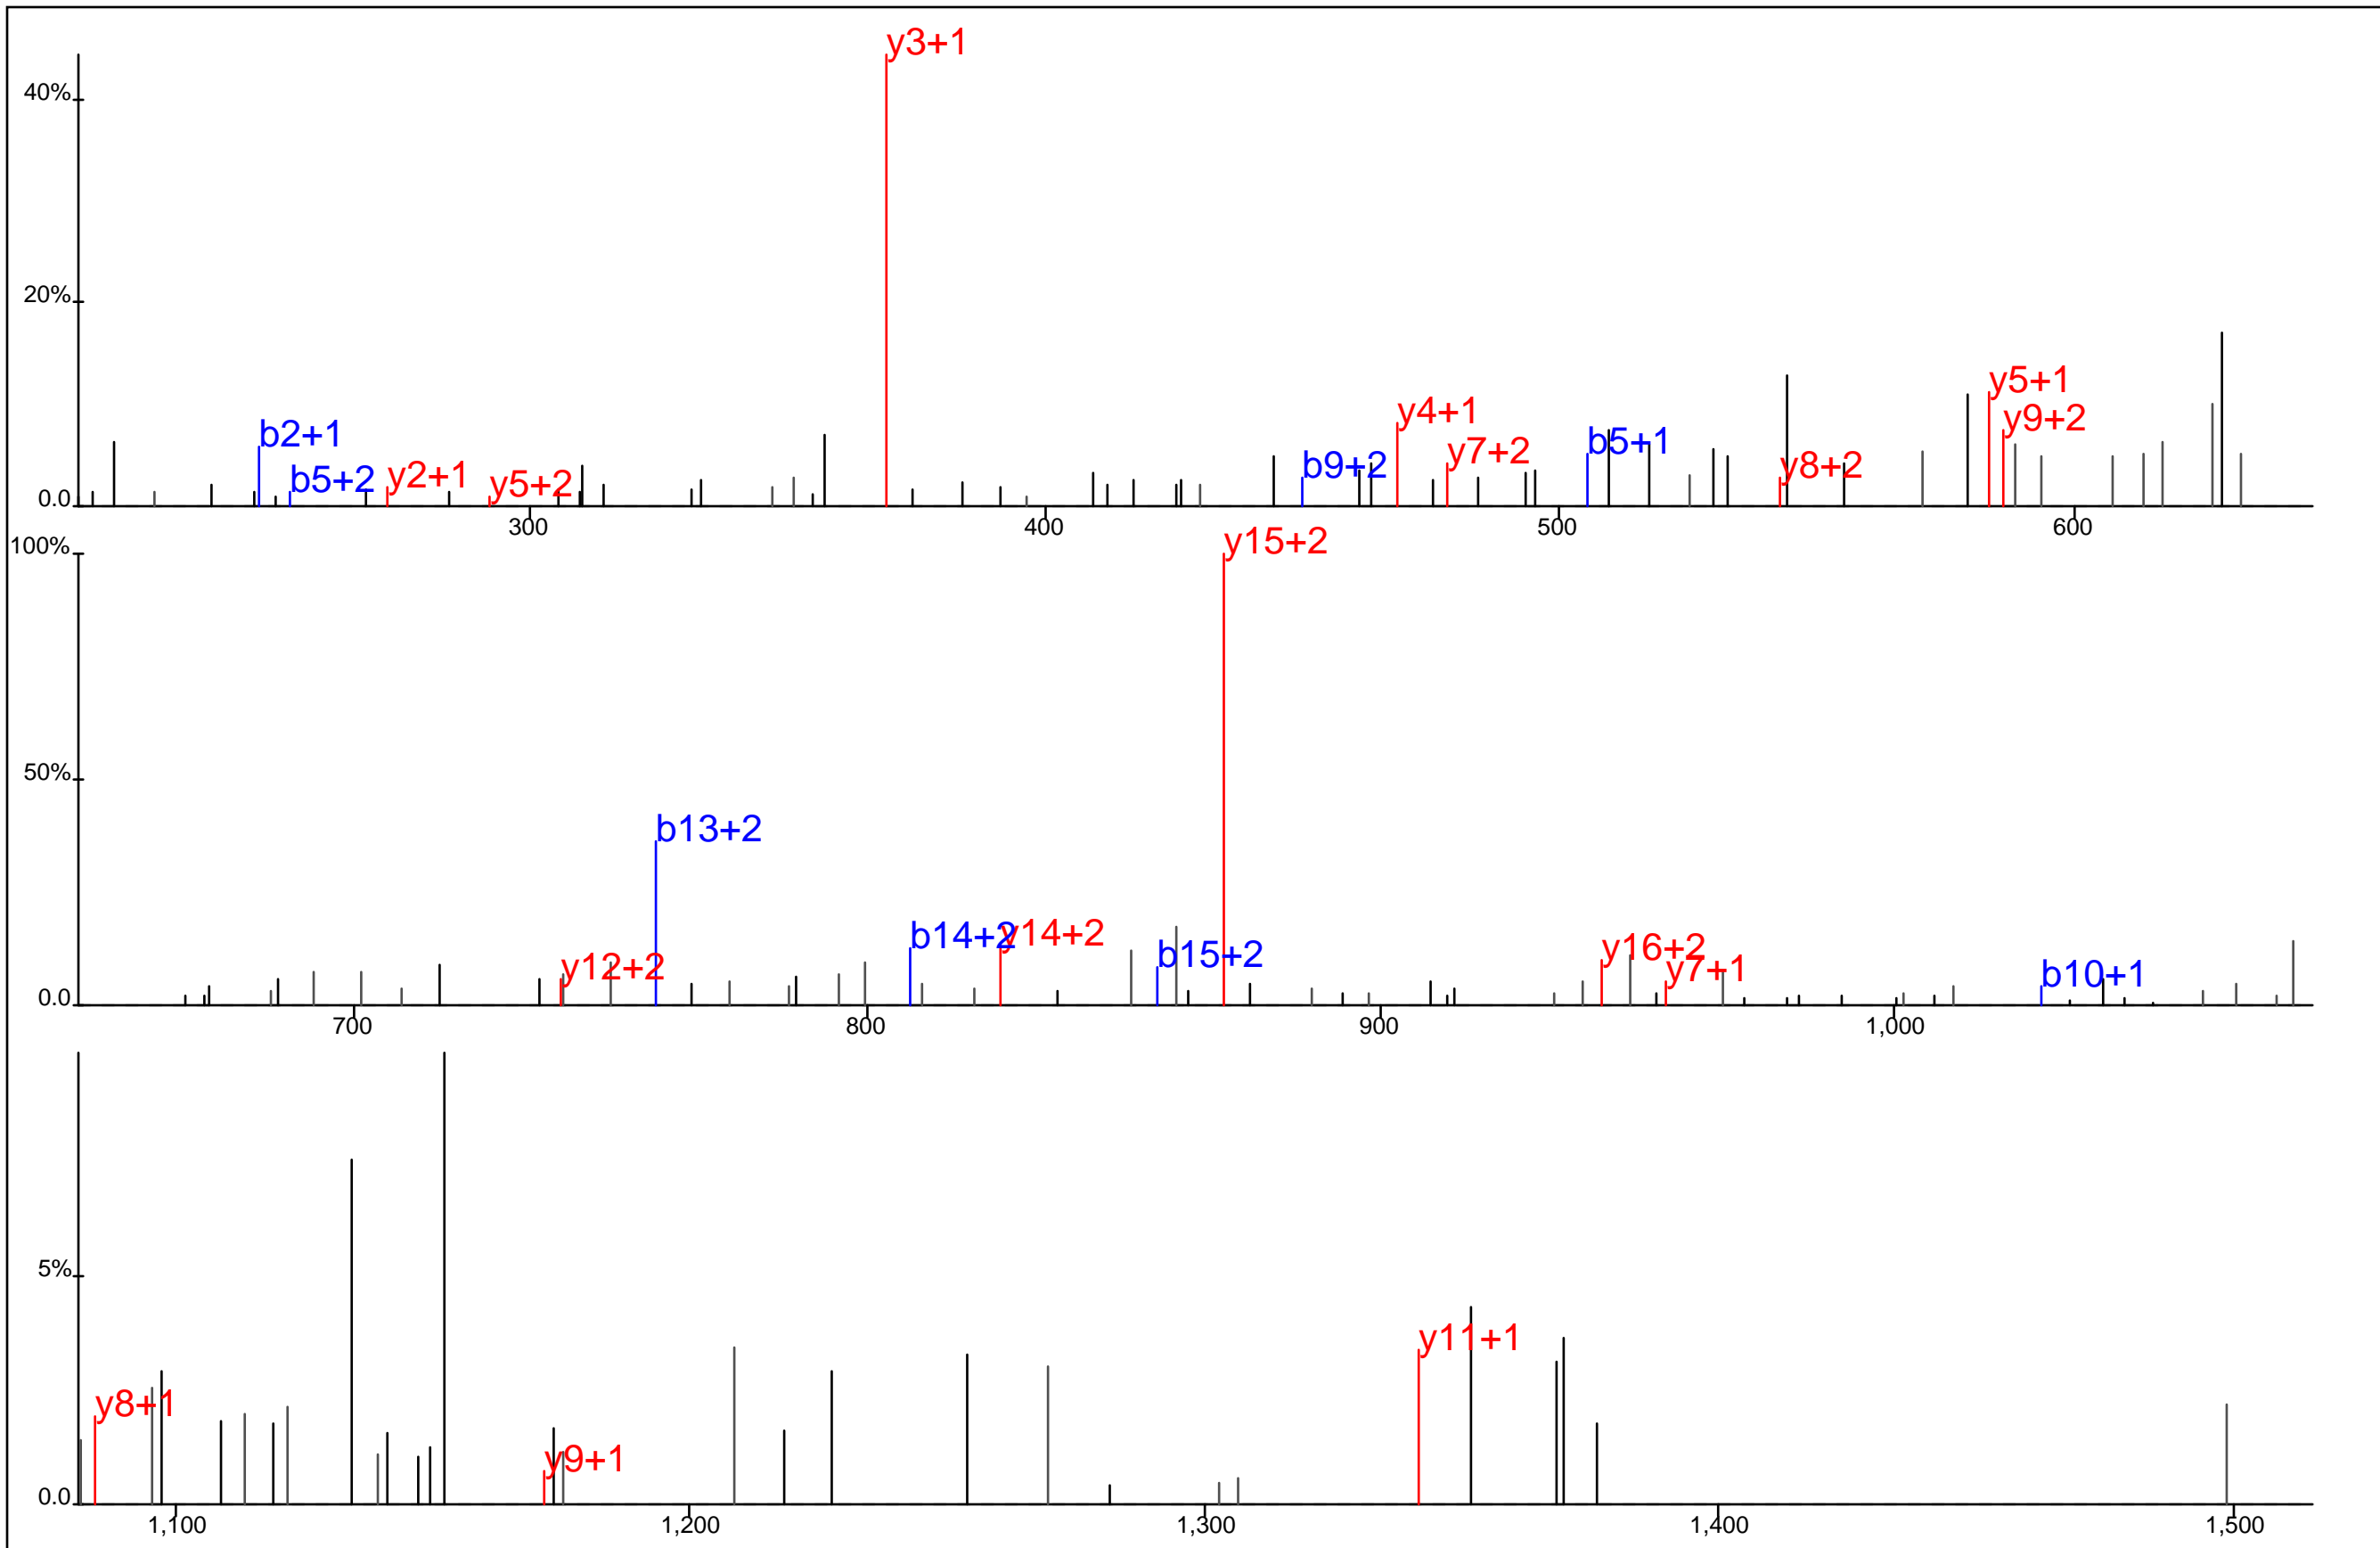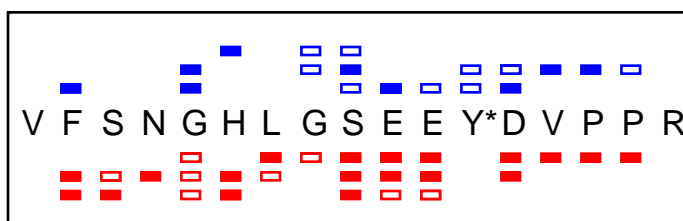

Protein Name: CbIB  
 gi Accession: 0  
 Precursor Mass: 661.6292+3  
 Delta Mass: 4.382 ppm  
 XCorr: 23.49

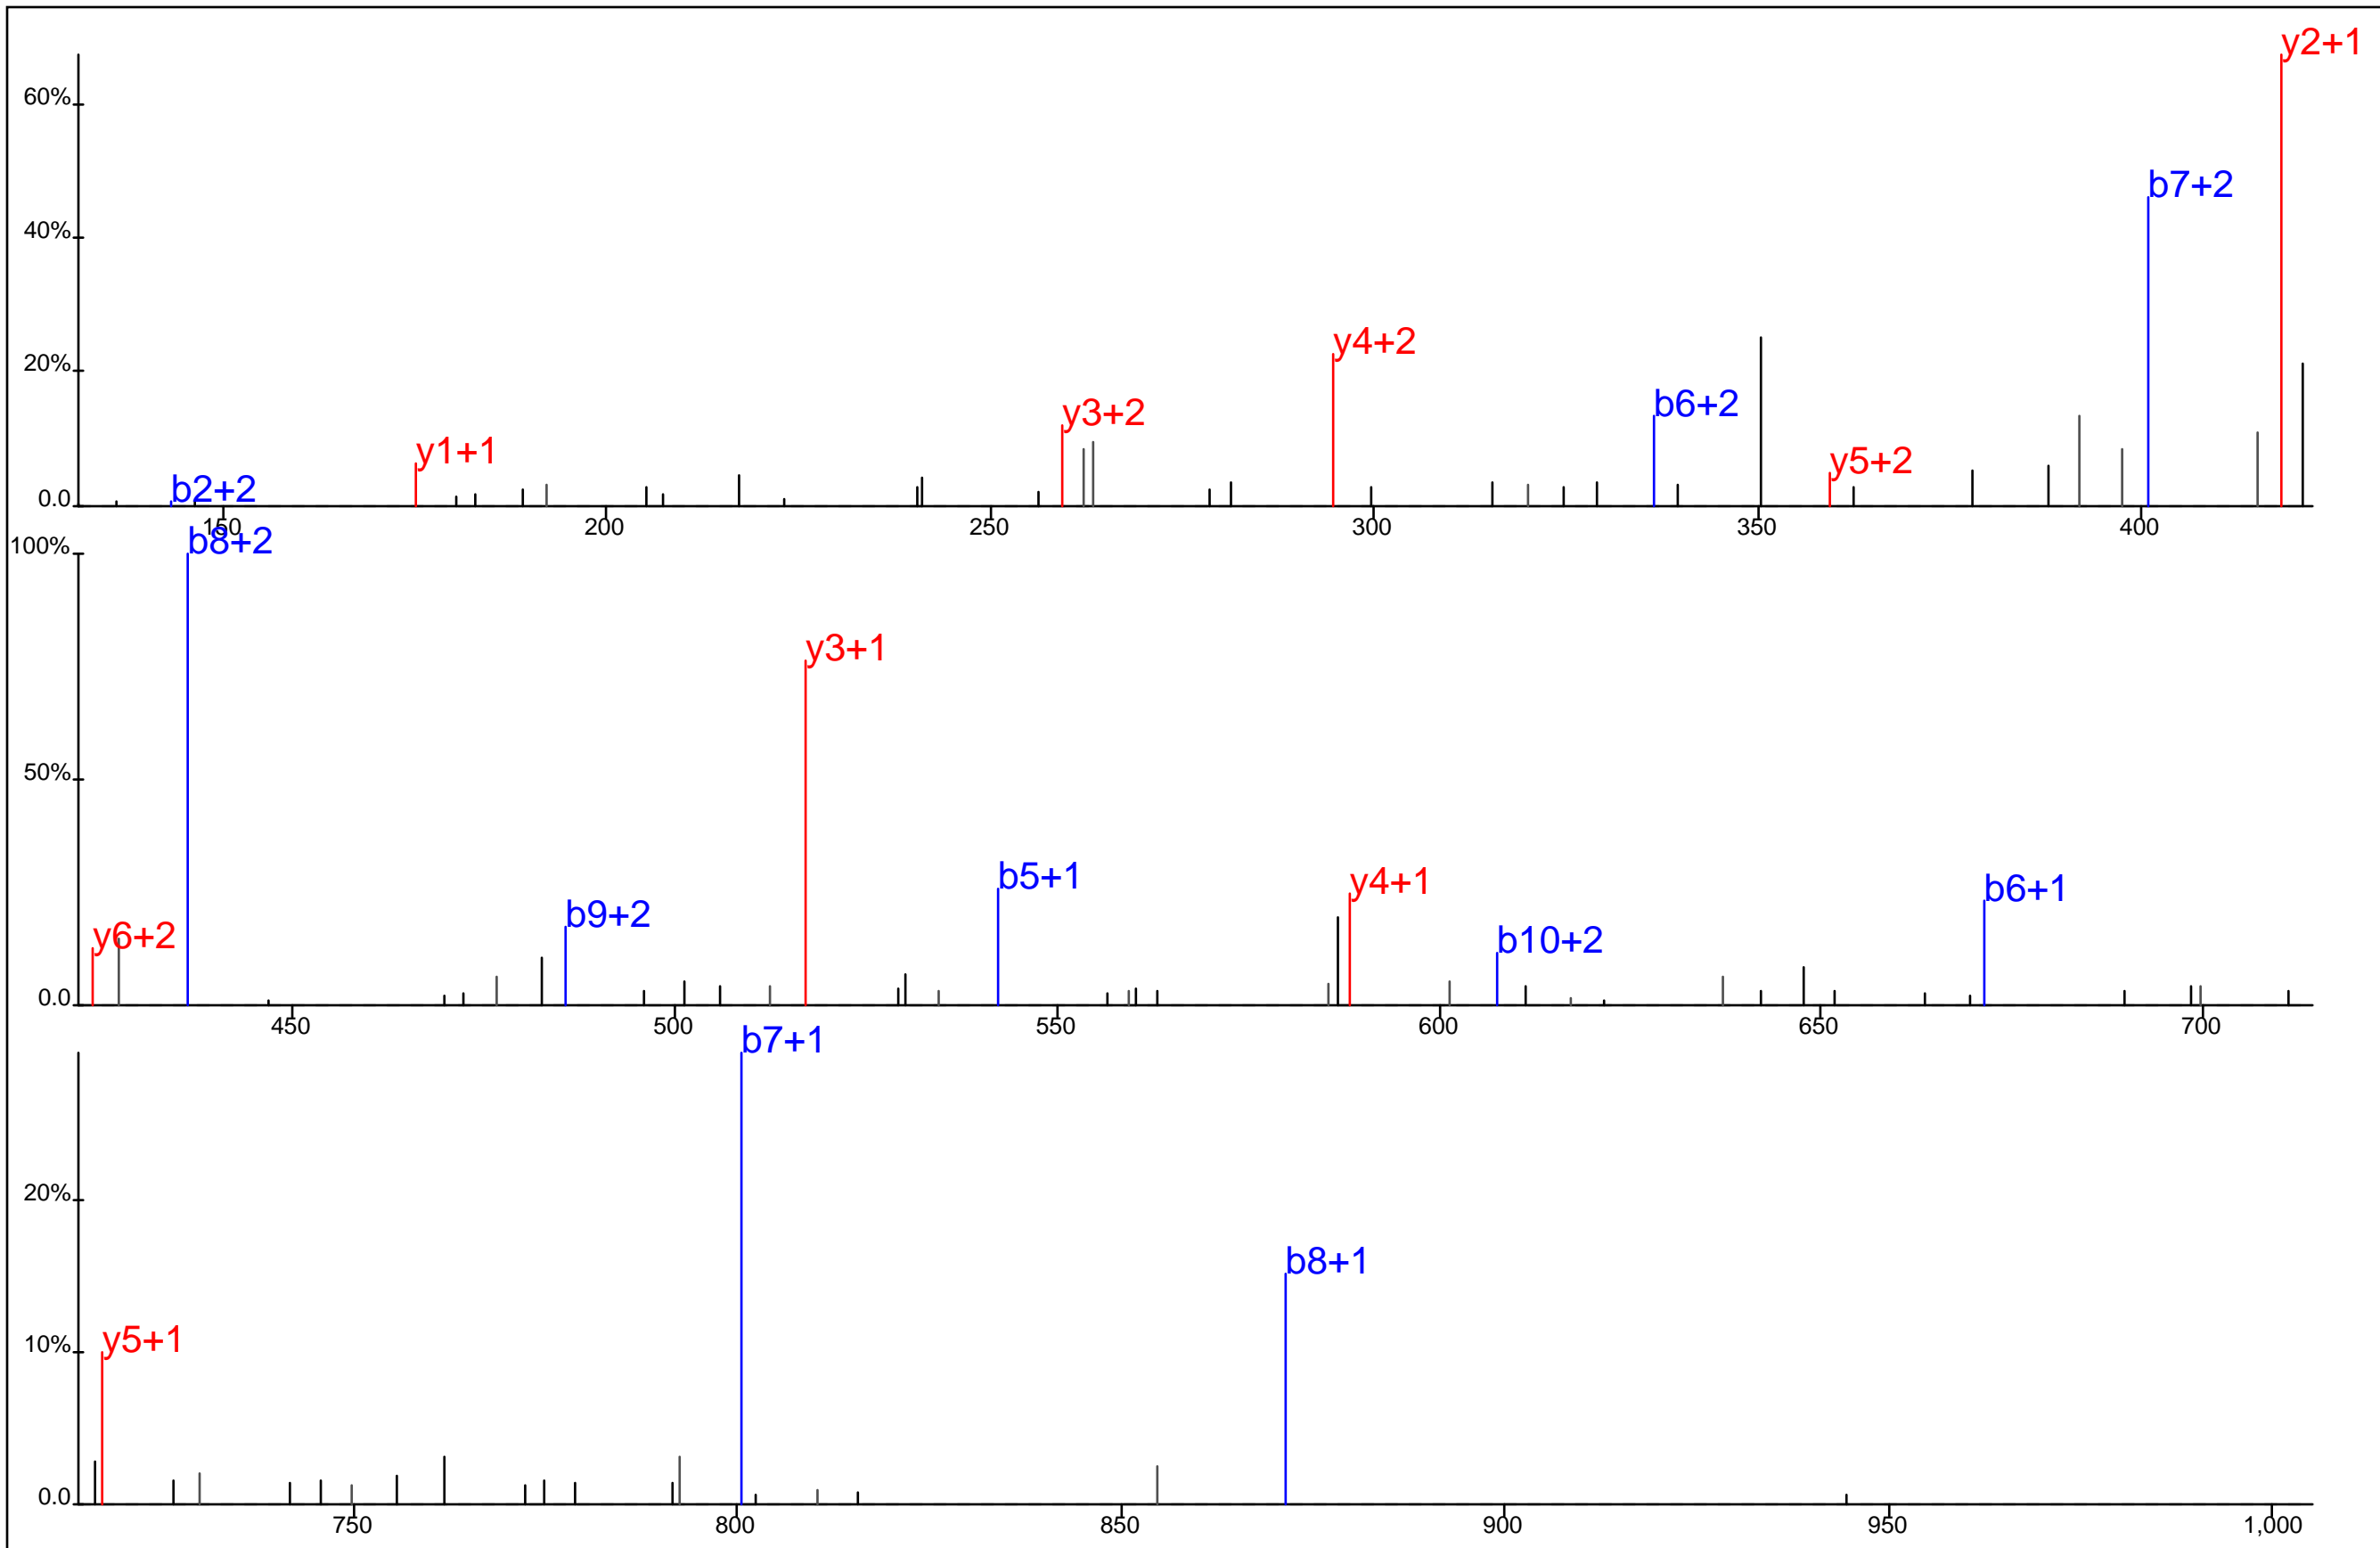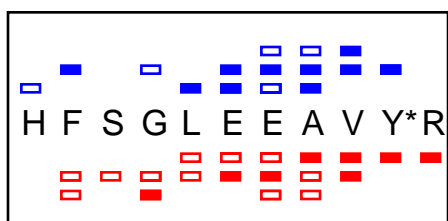

Protein Name: CCT8  
 gi Accession: 0  
 Precursor Mass: 463.2071+3  
 Delta Mass: 1.767 ppm  
 XCorr: 35.19

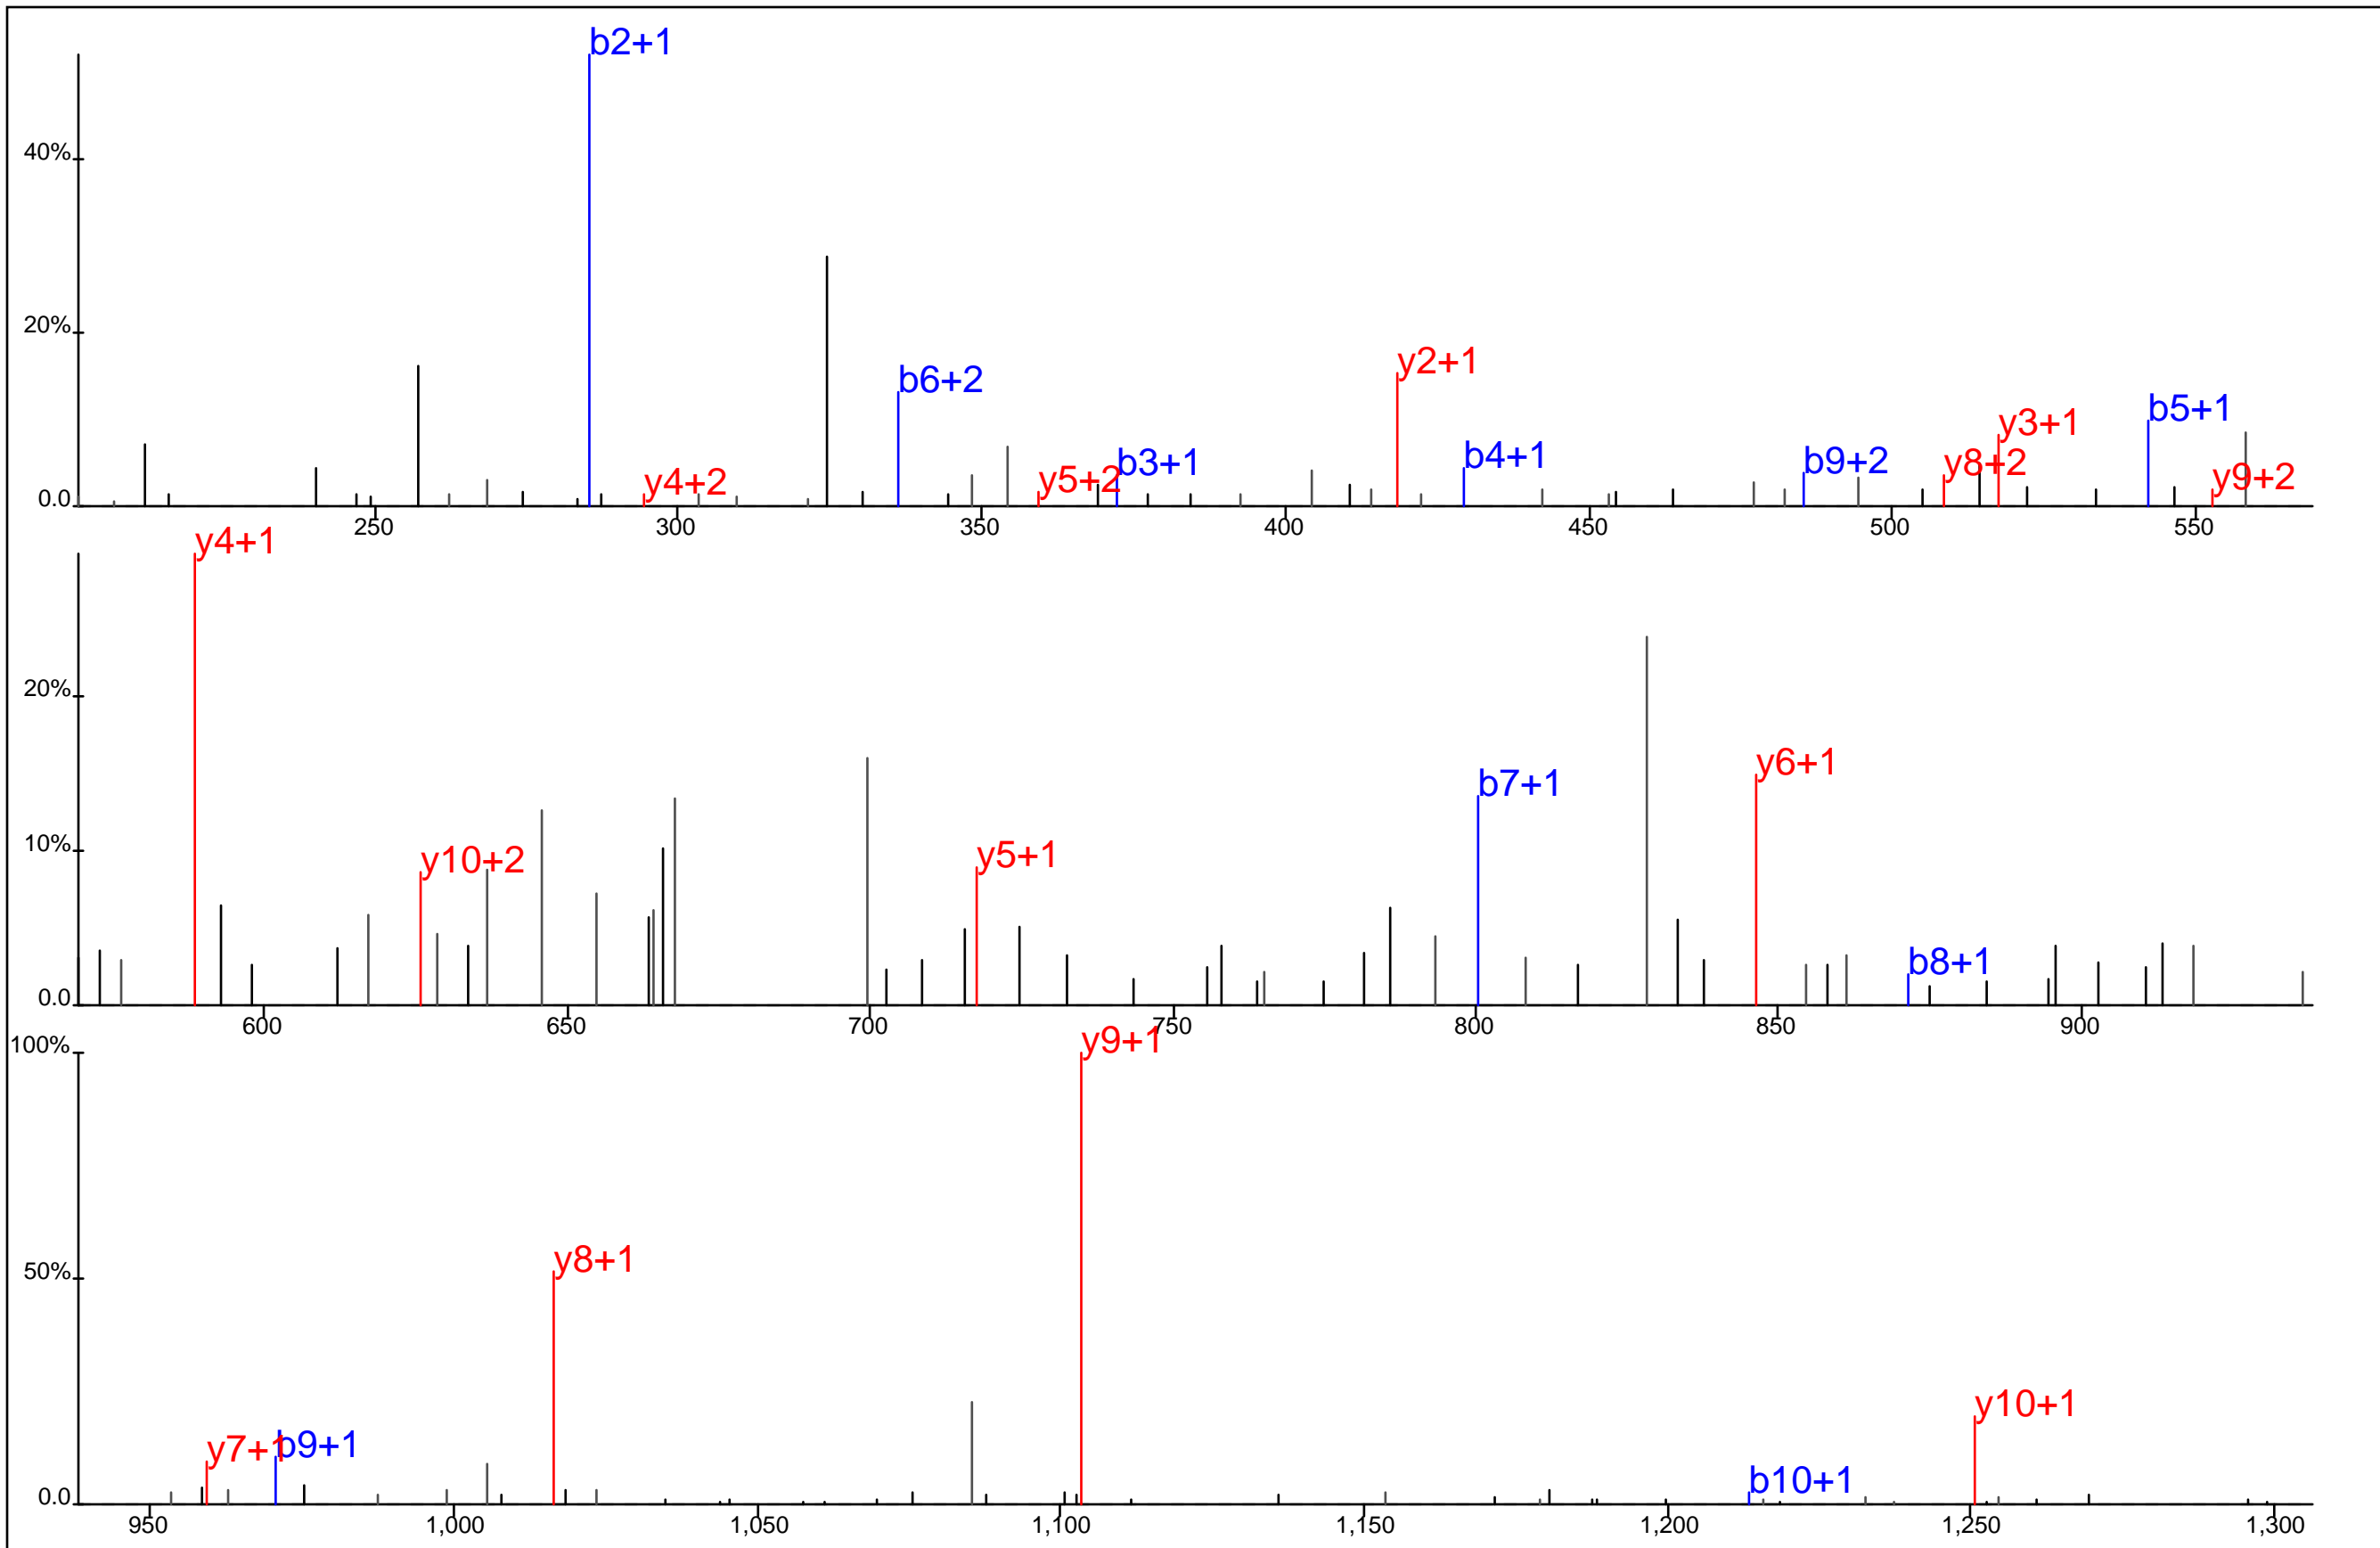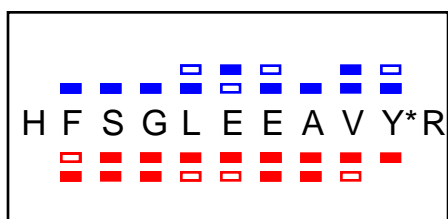

Protein Name: CCT8  
 gi Accession: 0  
 Precursor Mass: 694.3074+2  
 Delta Mass: 2.370 ppm  
 XCorr: 64.1

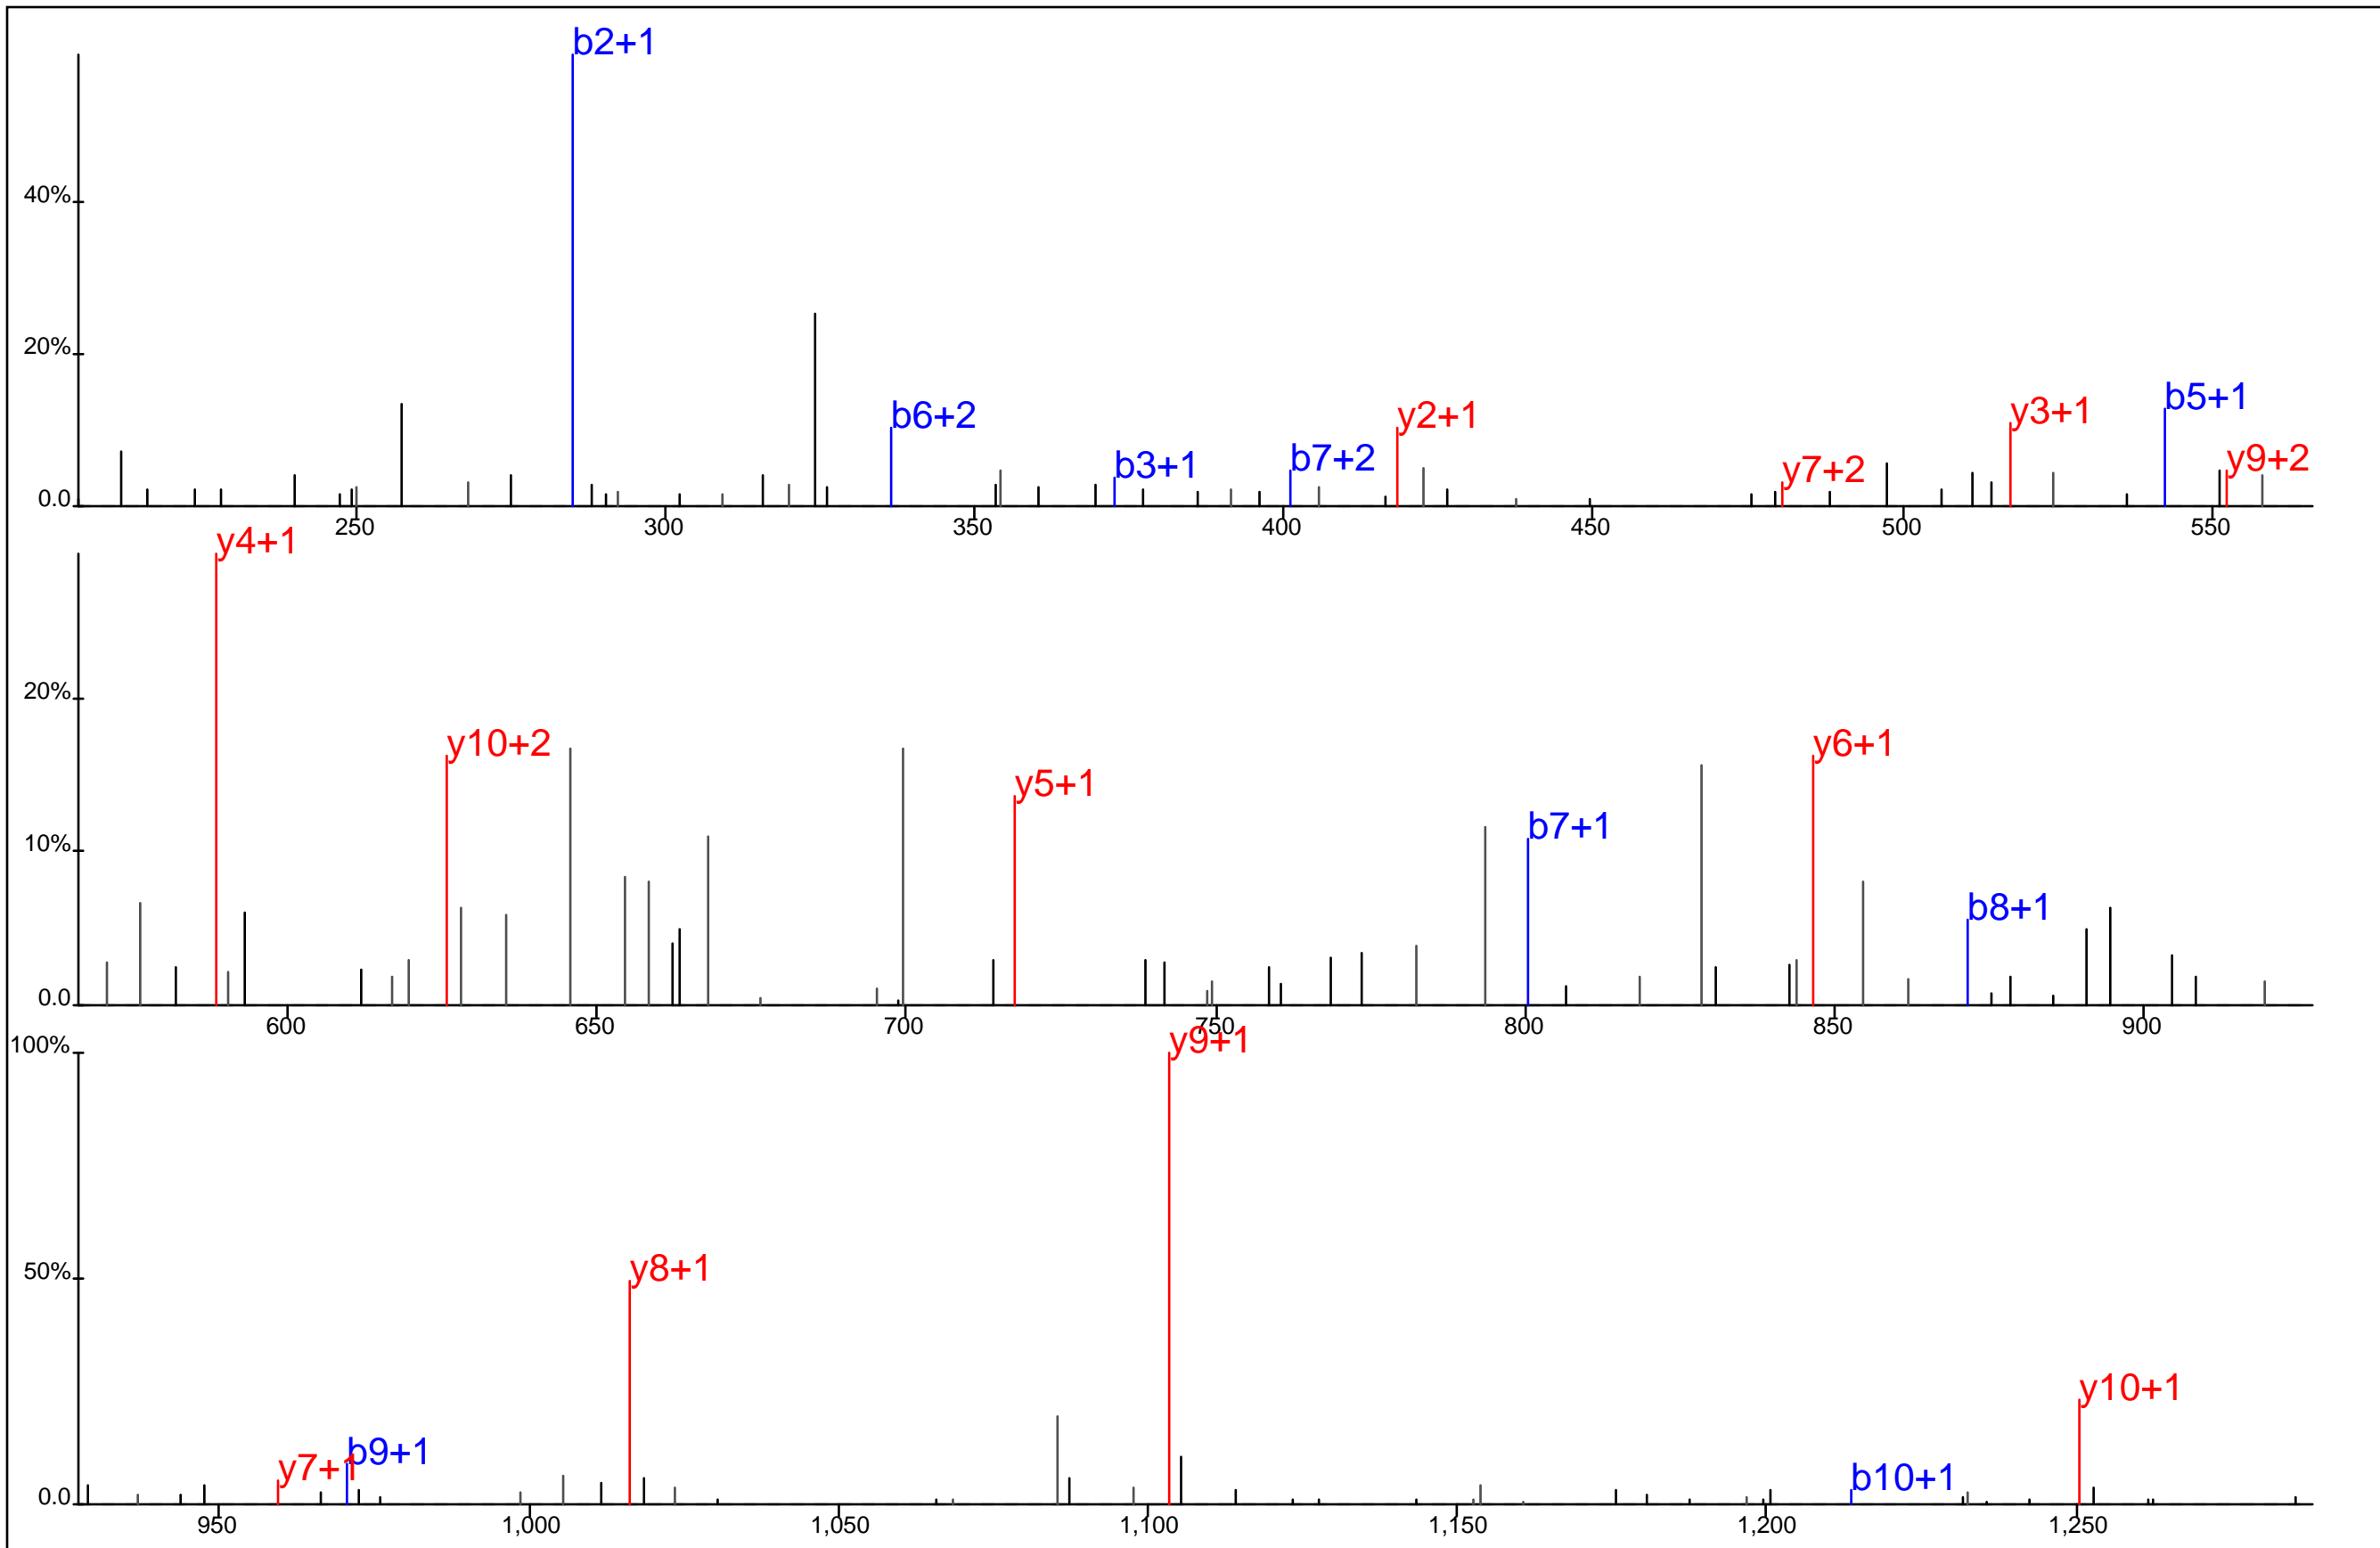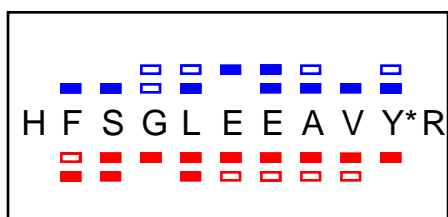

Protein Name: CCT8  
 gi Accession: 0  
 Precursor Mass: 694.3068+2  
 Delta Mass: 1.578 ppm  
 XCorr: 61.56

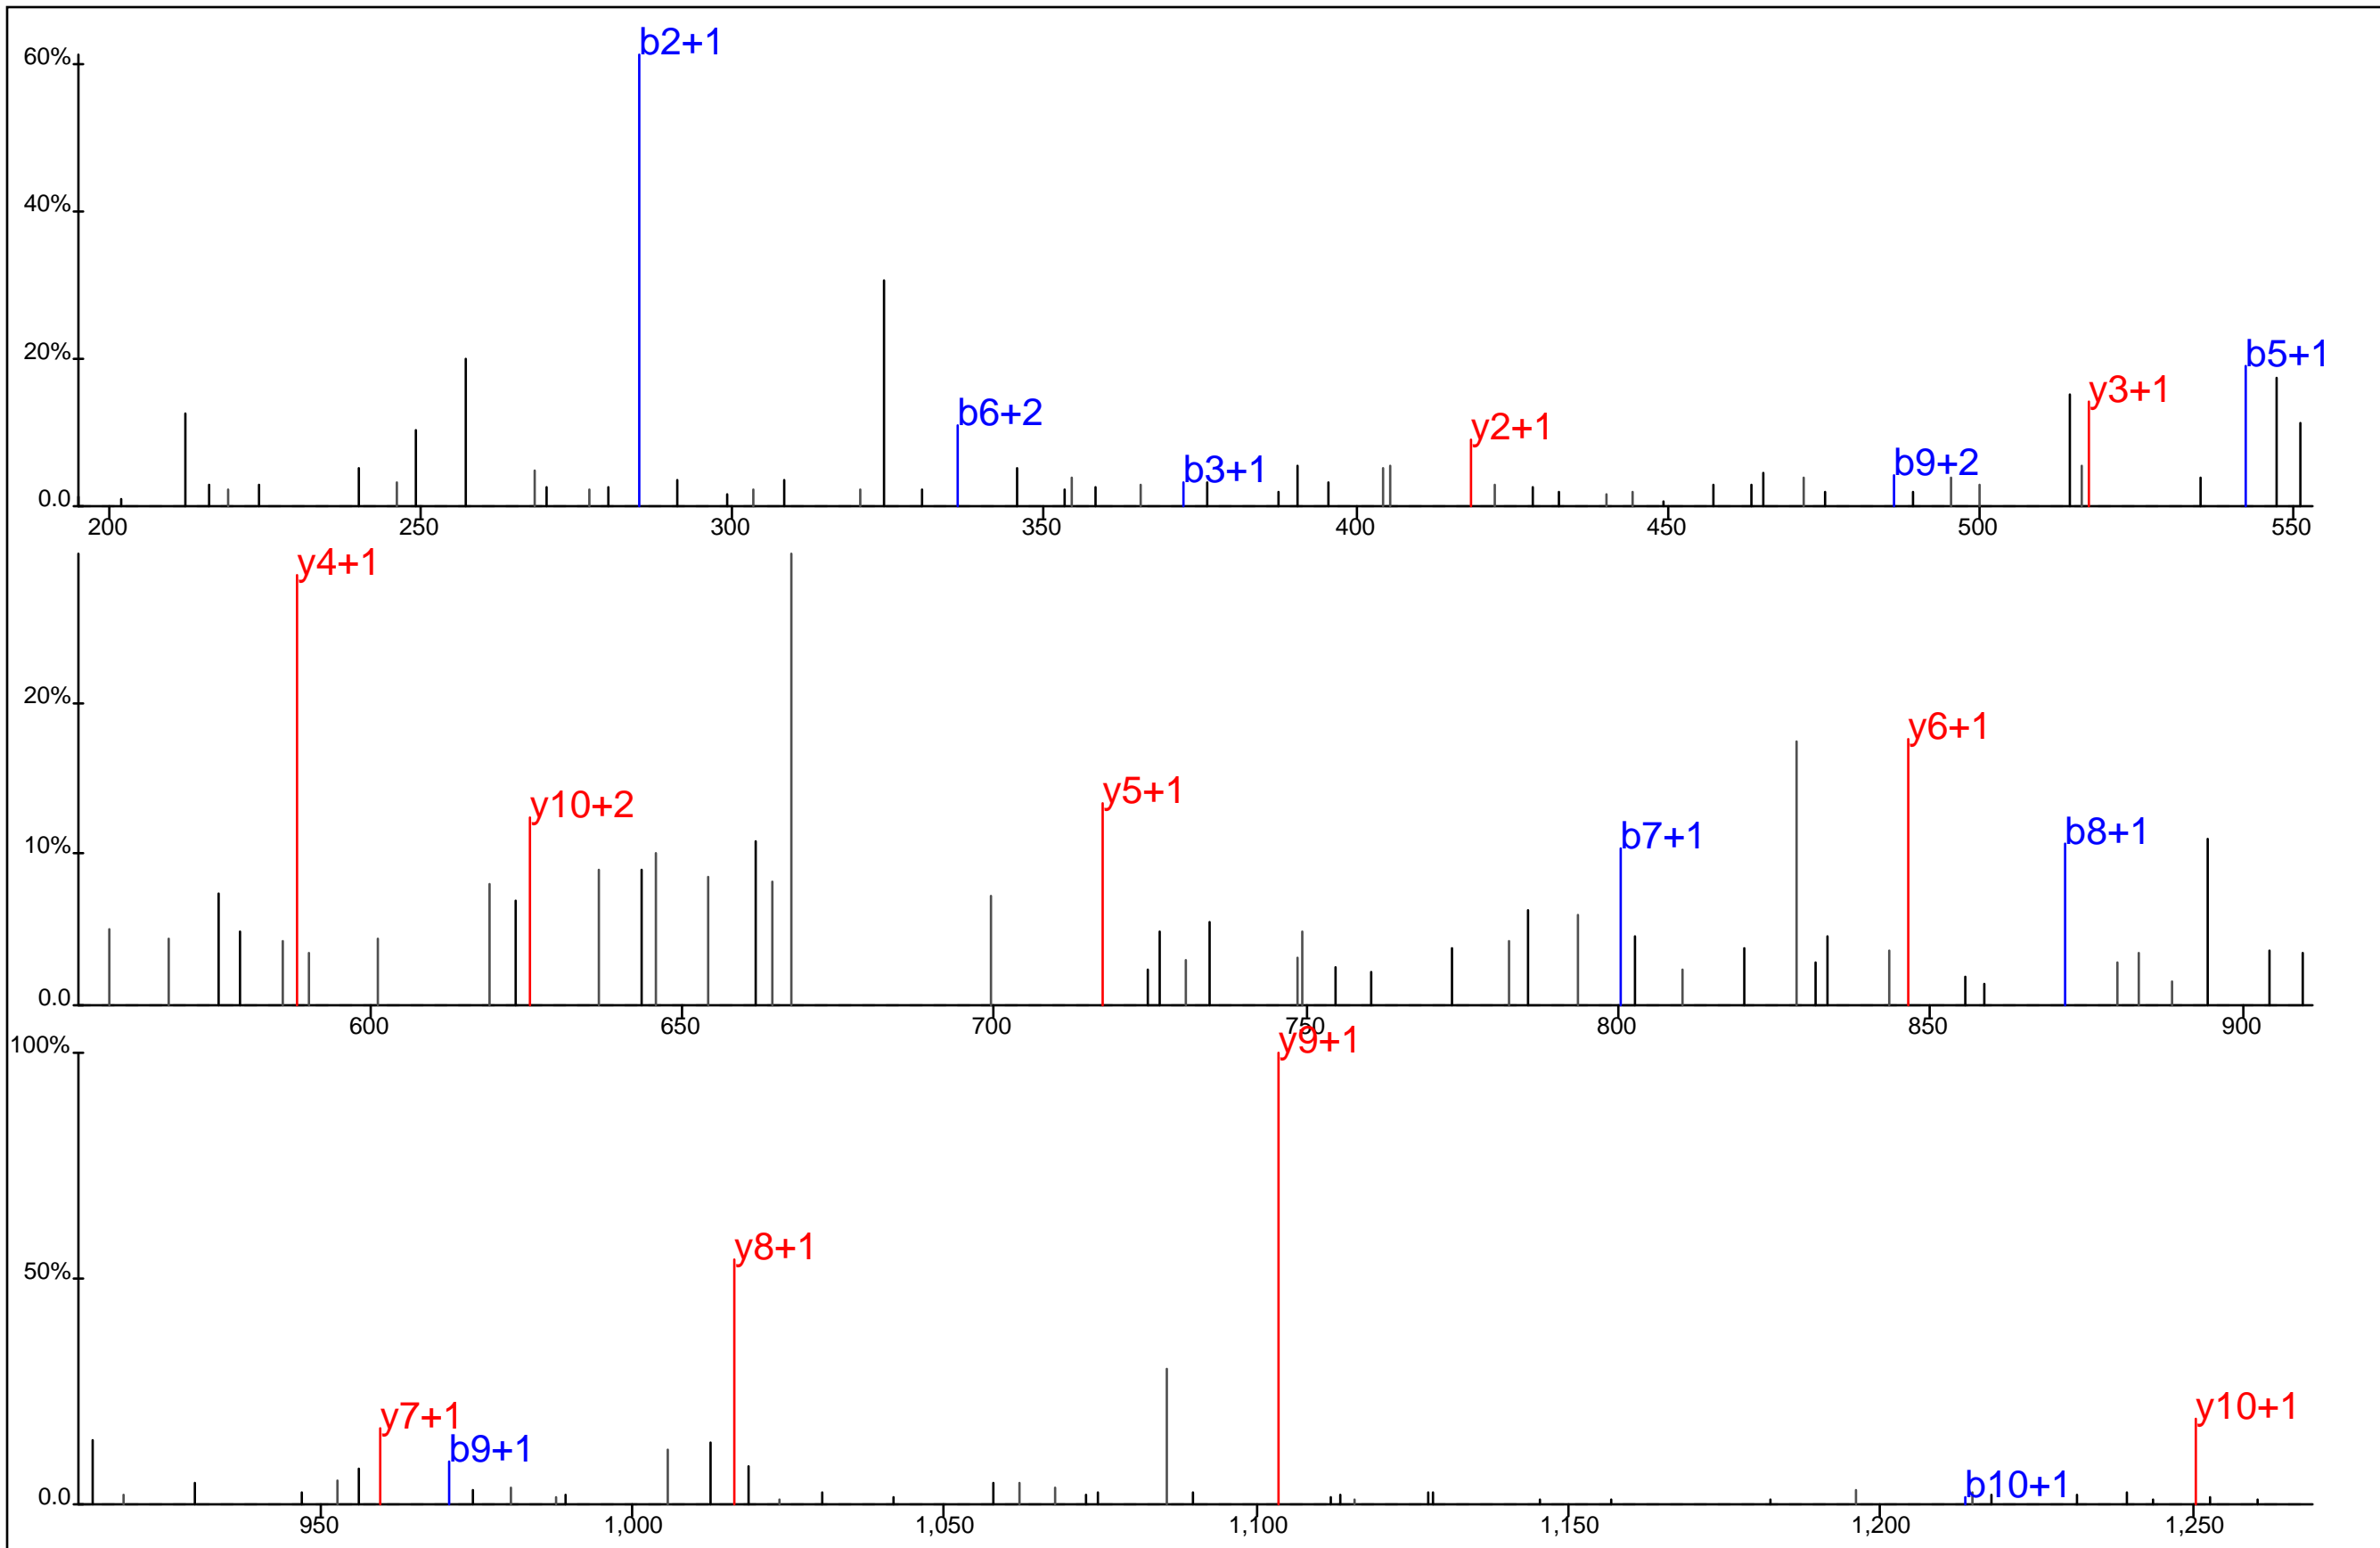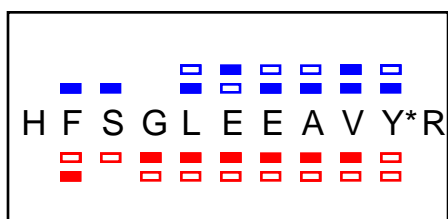

Protein Name: CCT8  
 gi Accession: 0  
 Precursor Mass: 694.3057+2  
 Delta Mass: 0.094 ppm  
 XCorr: 67.64

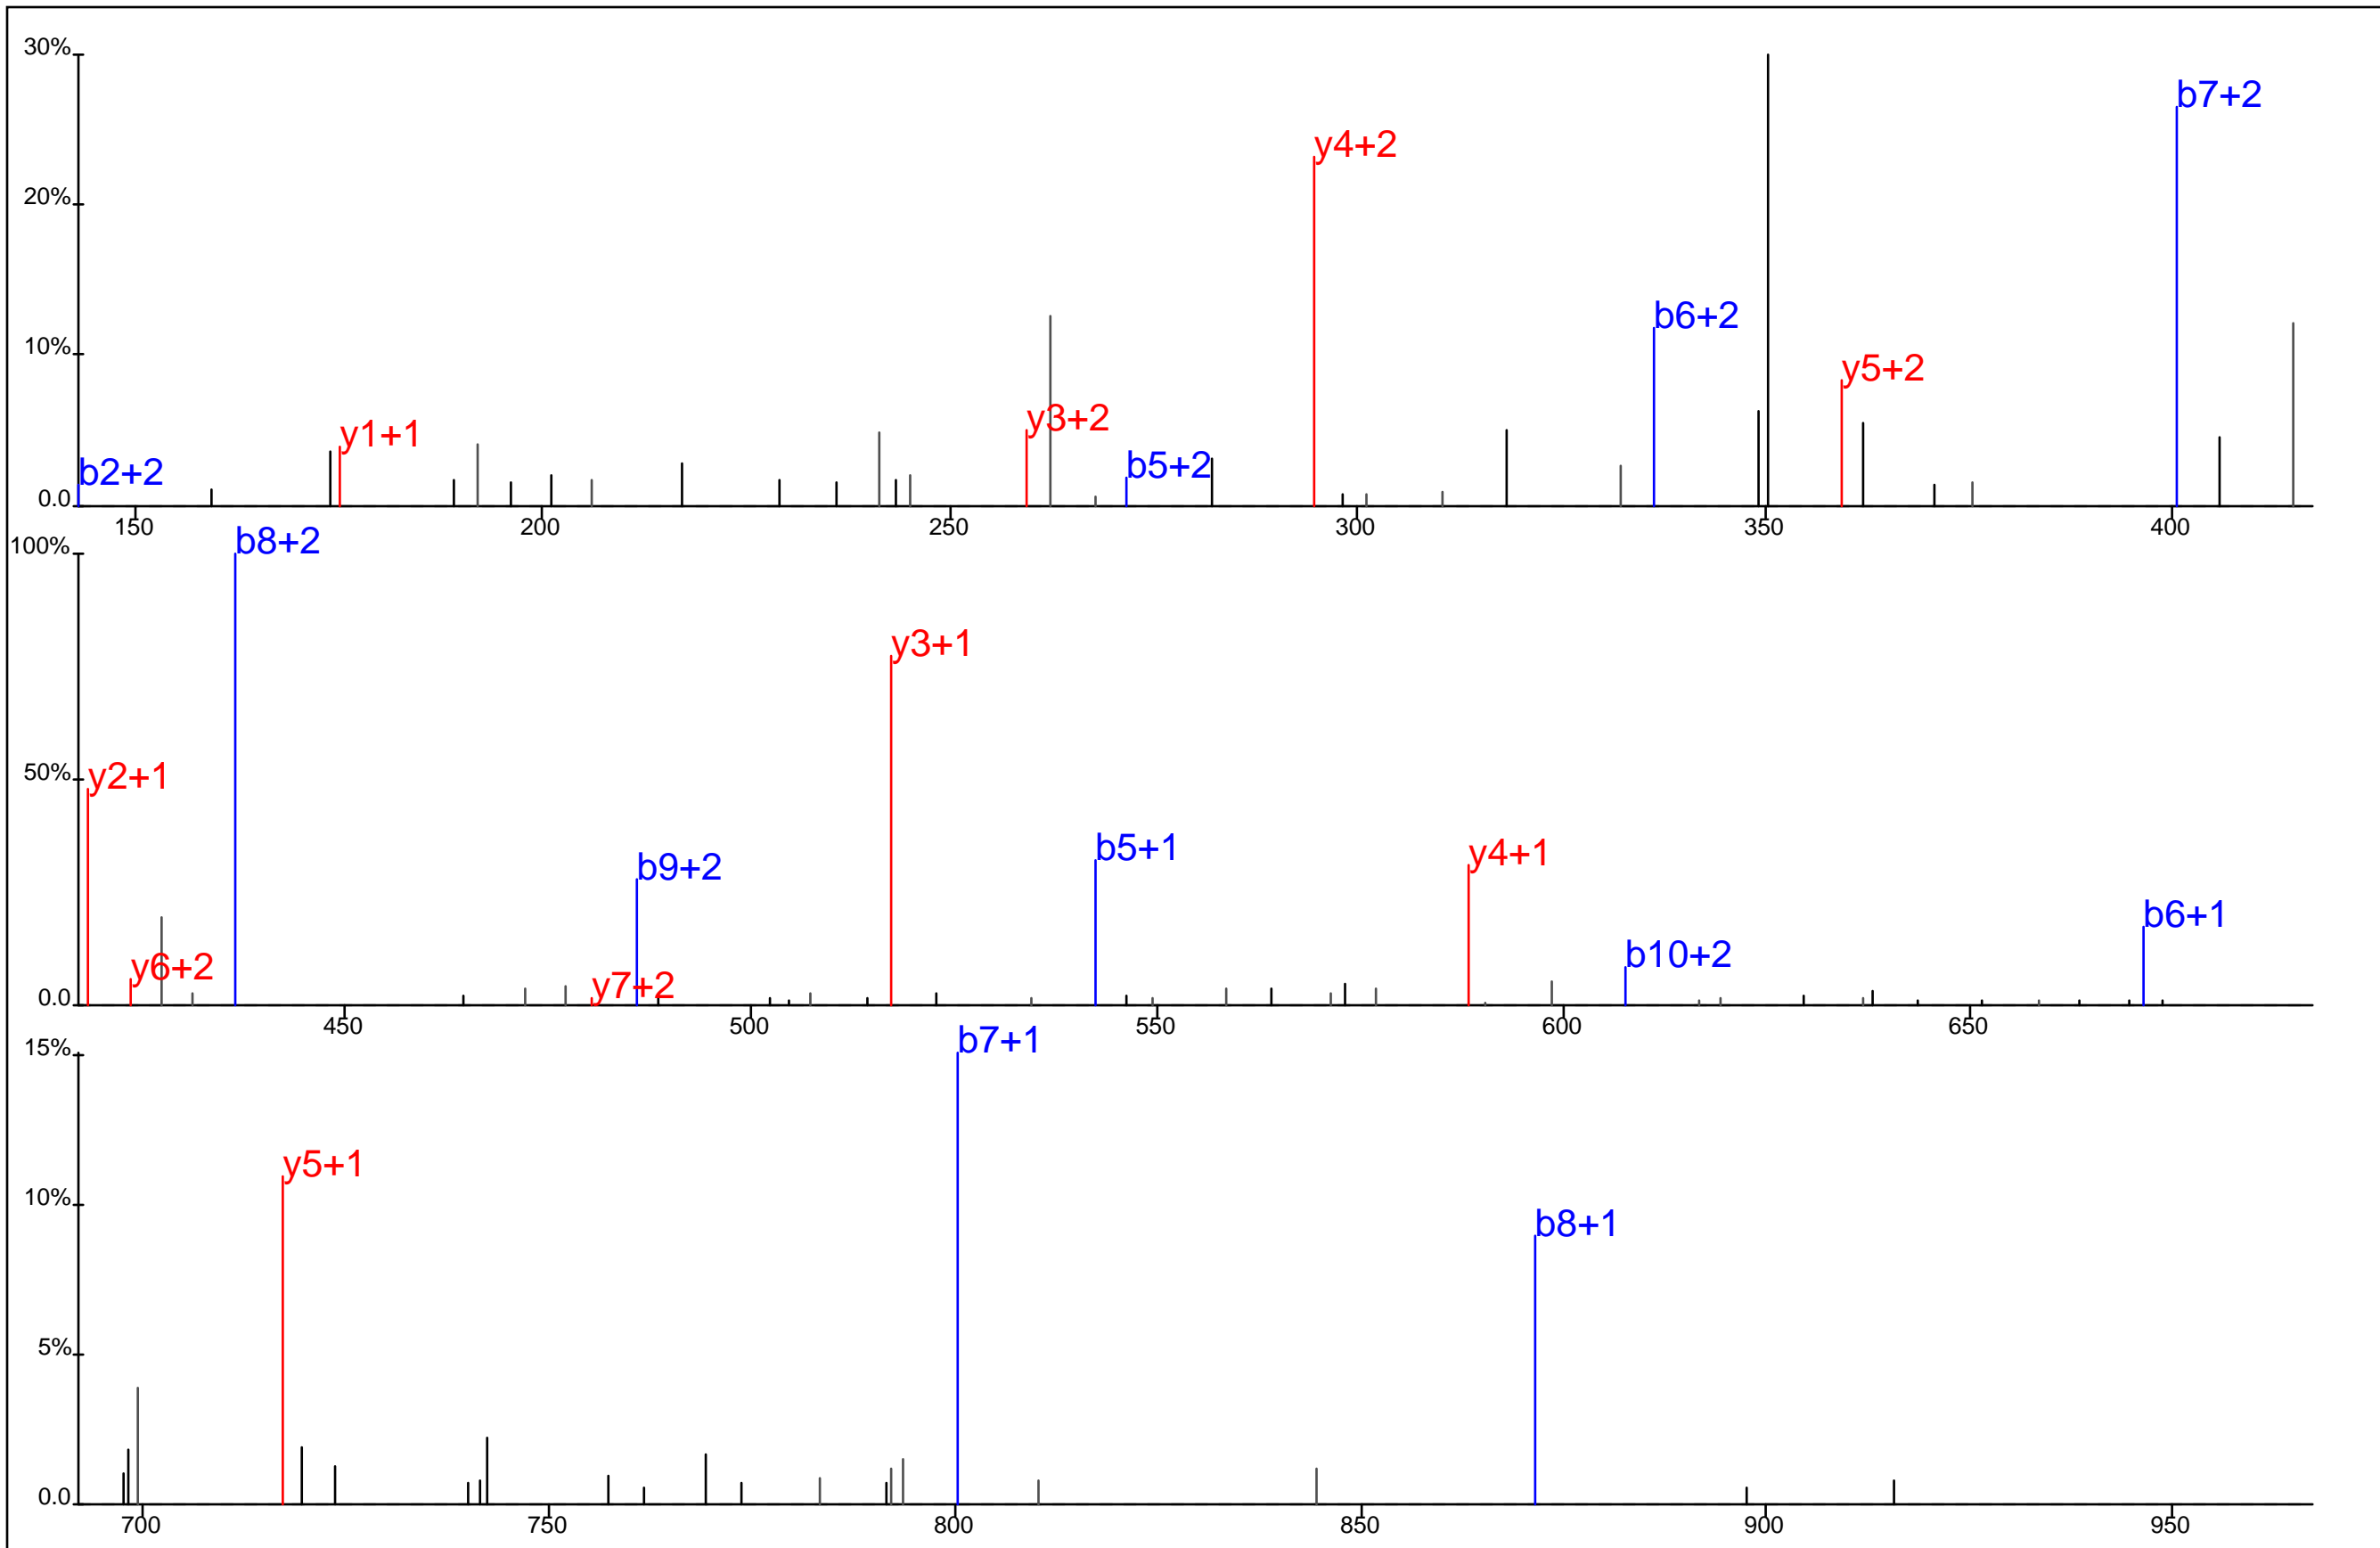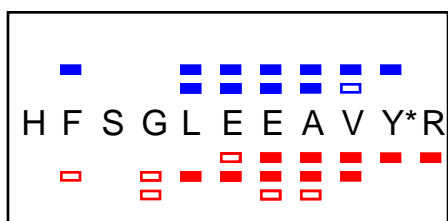

Protein Name: CCT8  
 gi Accession: 0  
 Precursor Mass: 463.2064+3  
 Delta Mass: 0.314 ppm  
 XCorr: 31.74

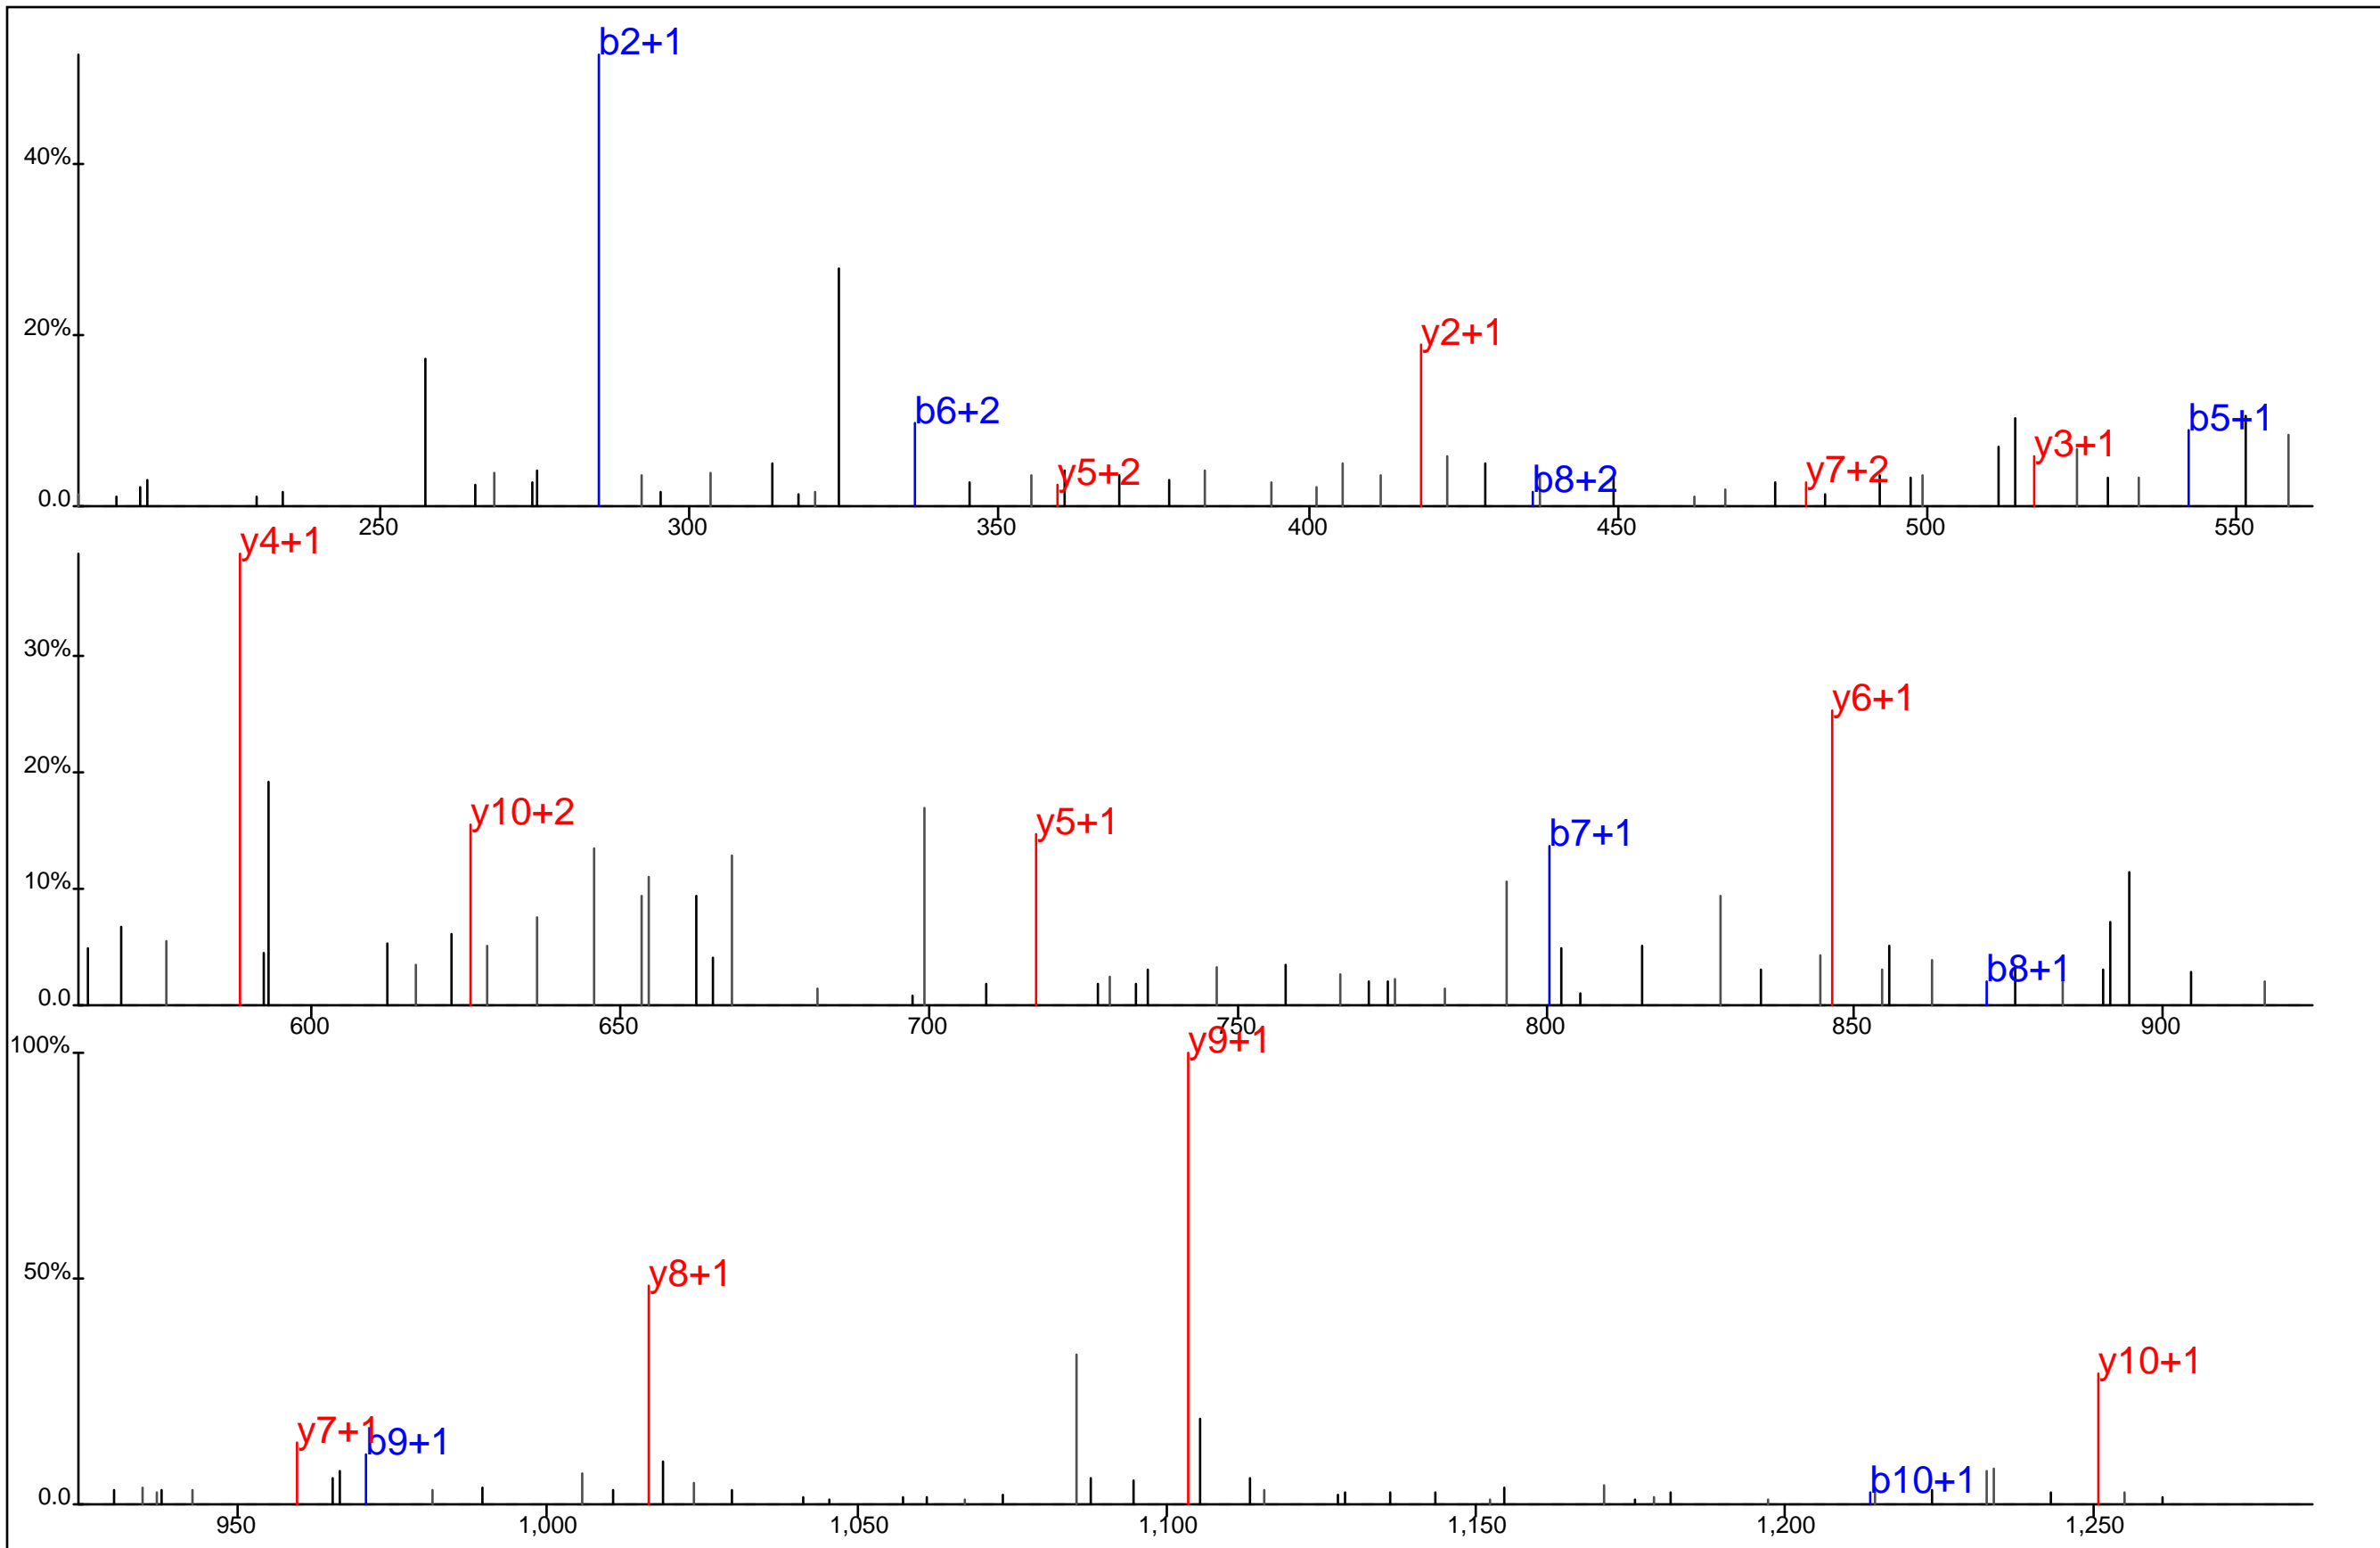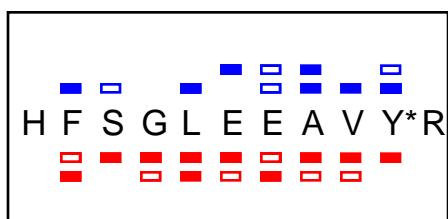

Protein Name: CCT8  
 gi Accession: 0  
 Precursor Mass: 694.3055+2  
 Delta Mass: 0.357 ppm  
 XCorr: 72.89



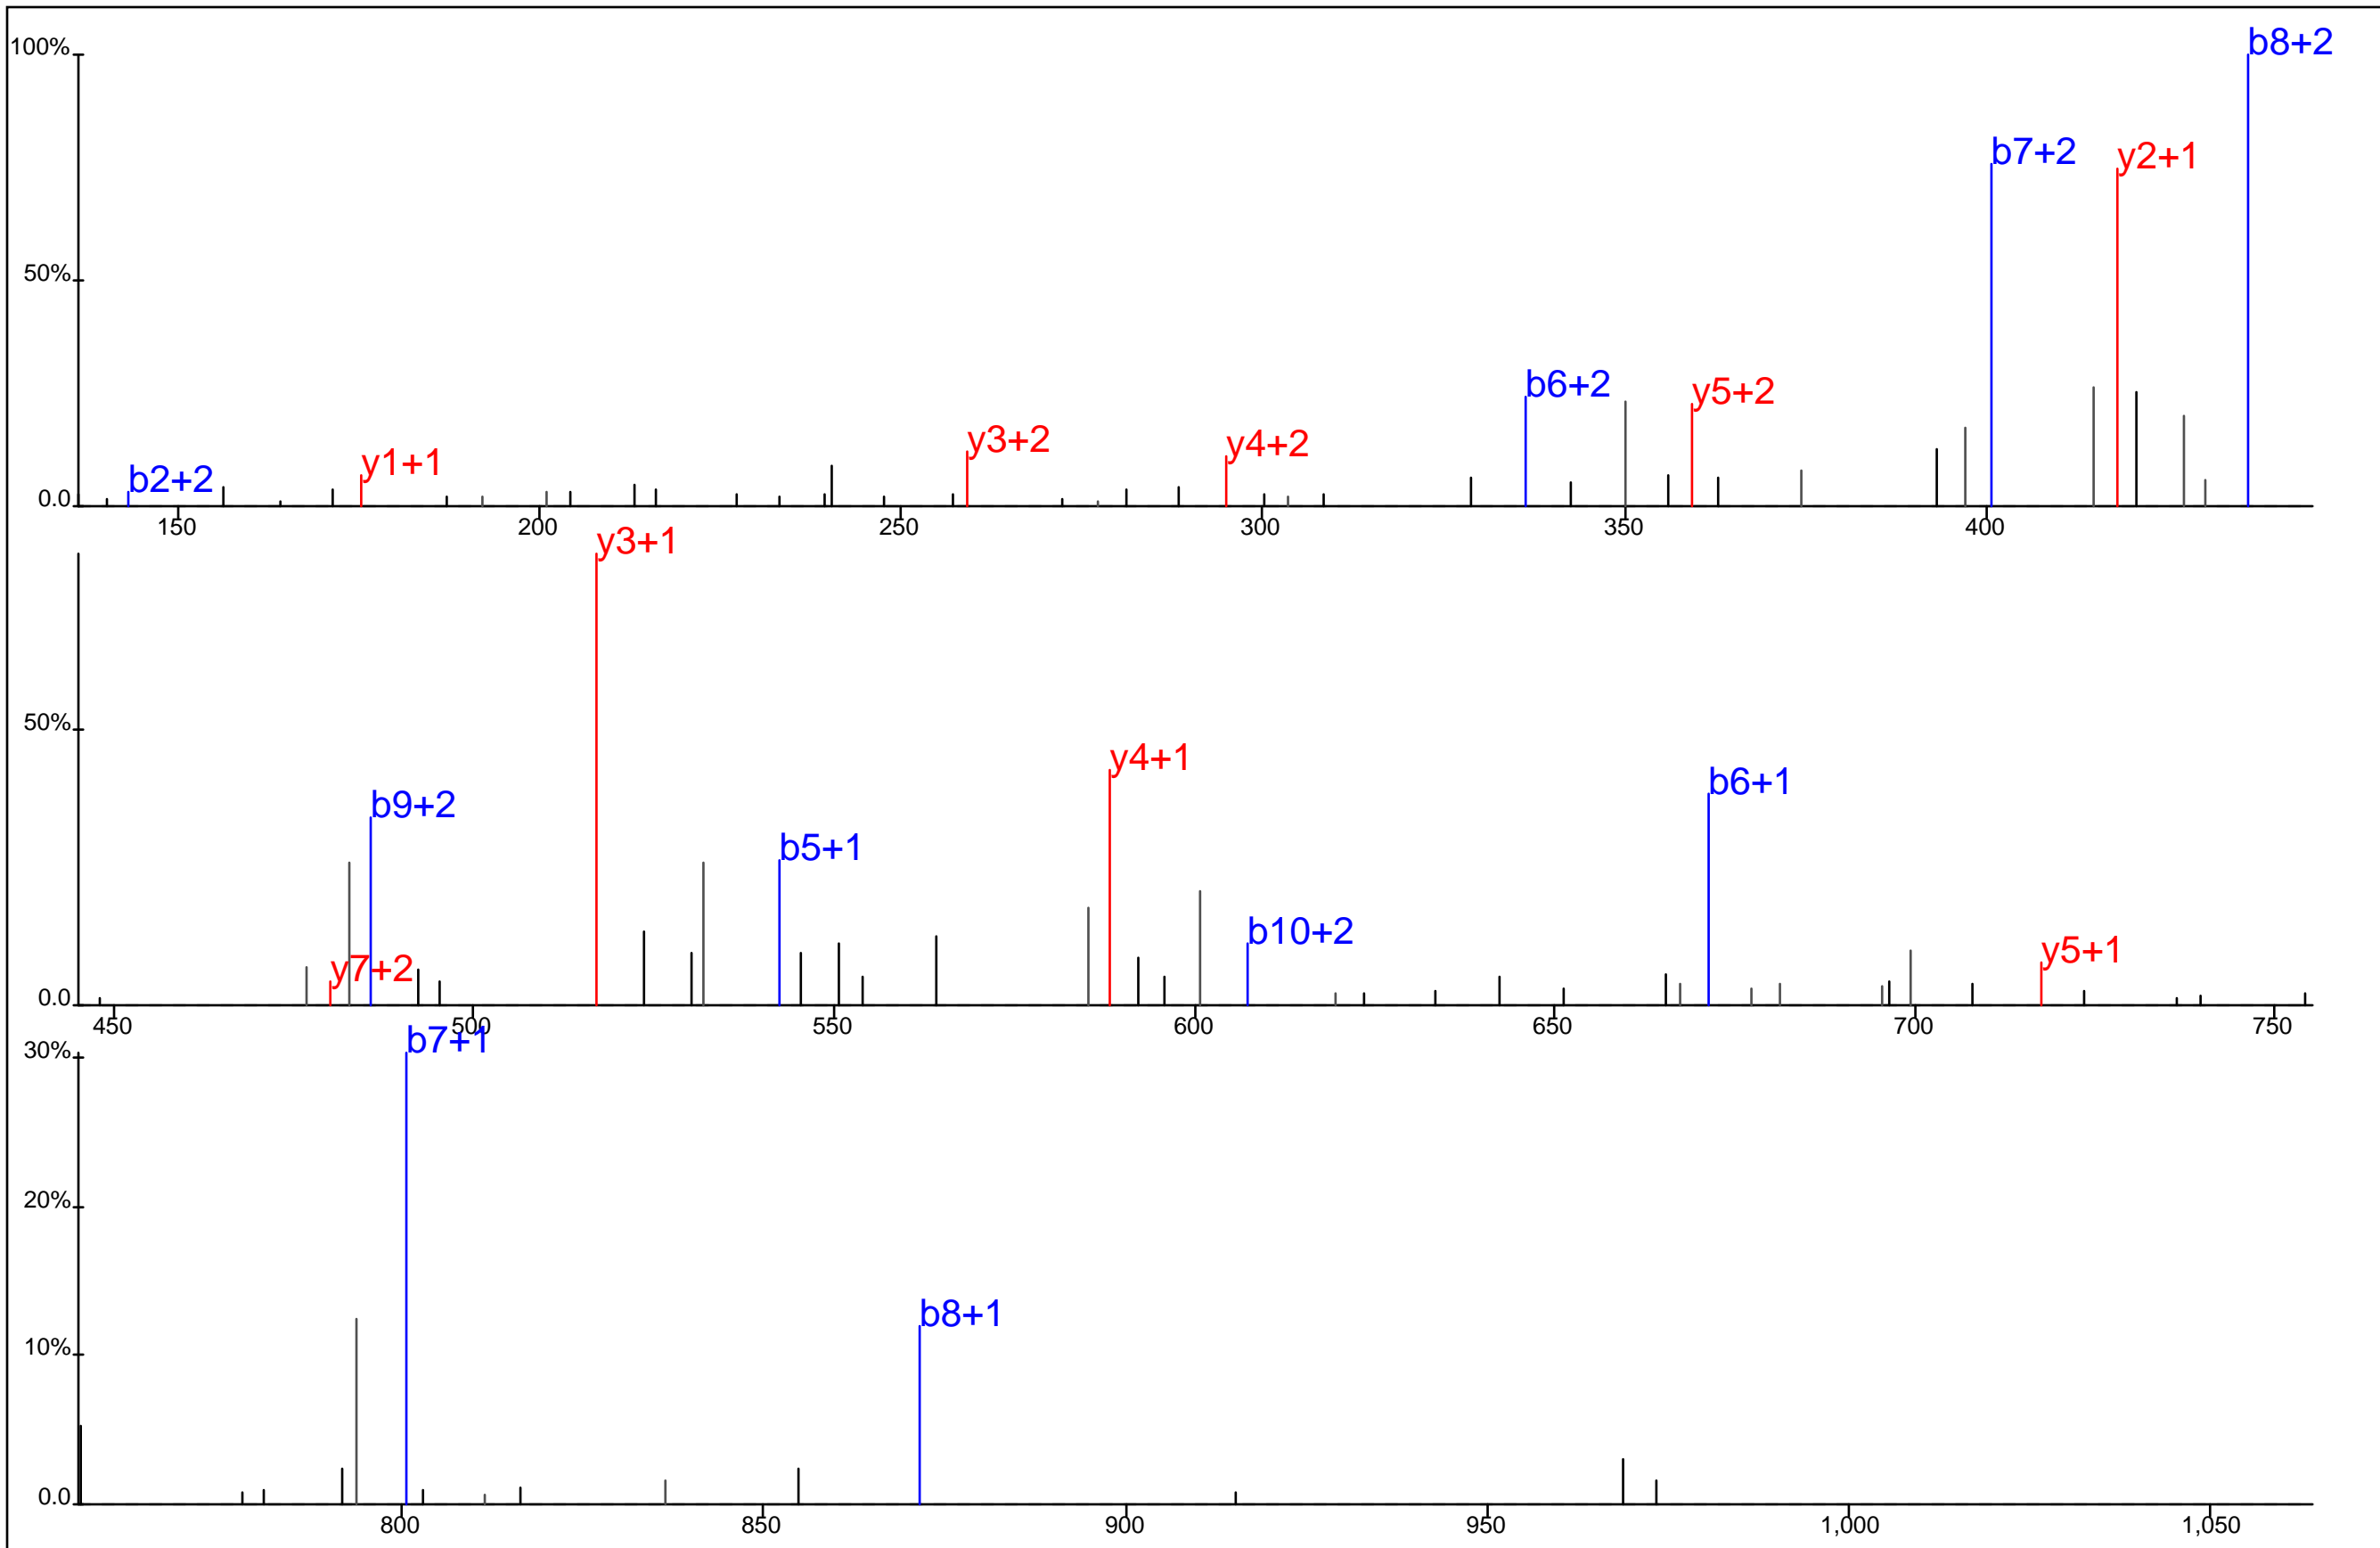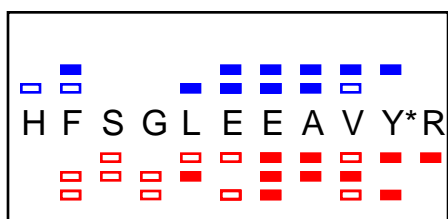

Protein Name: CCT8  
 gi Accession: 0  
 Precursor Mass: 463.2072+3  
 Delta Mass: 1.964 ppm  
 XCorr: 29.5

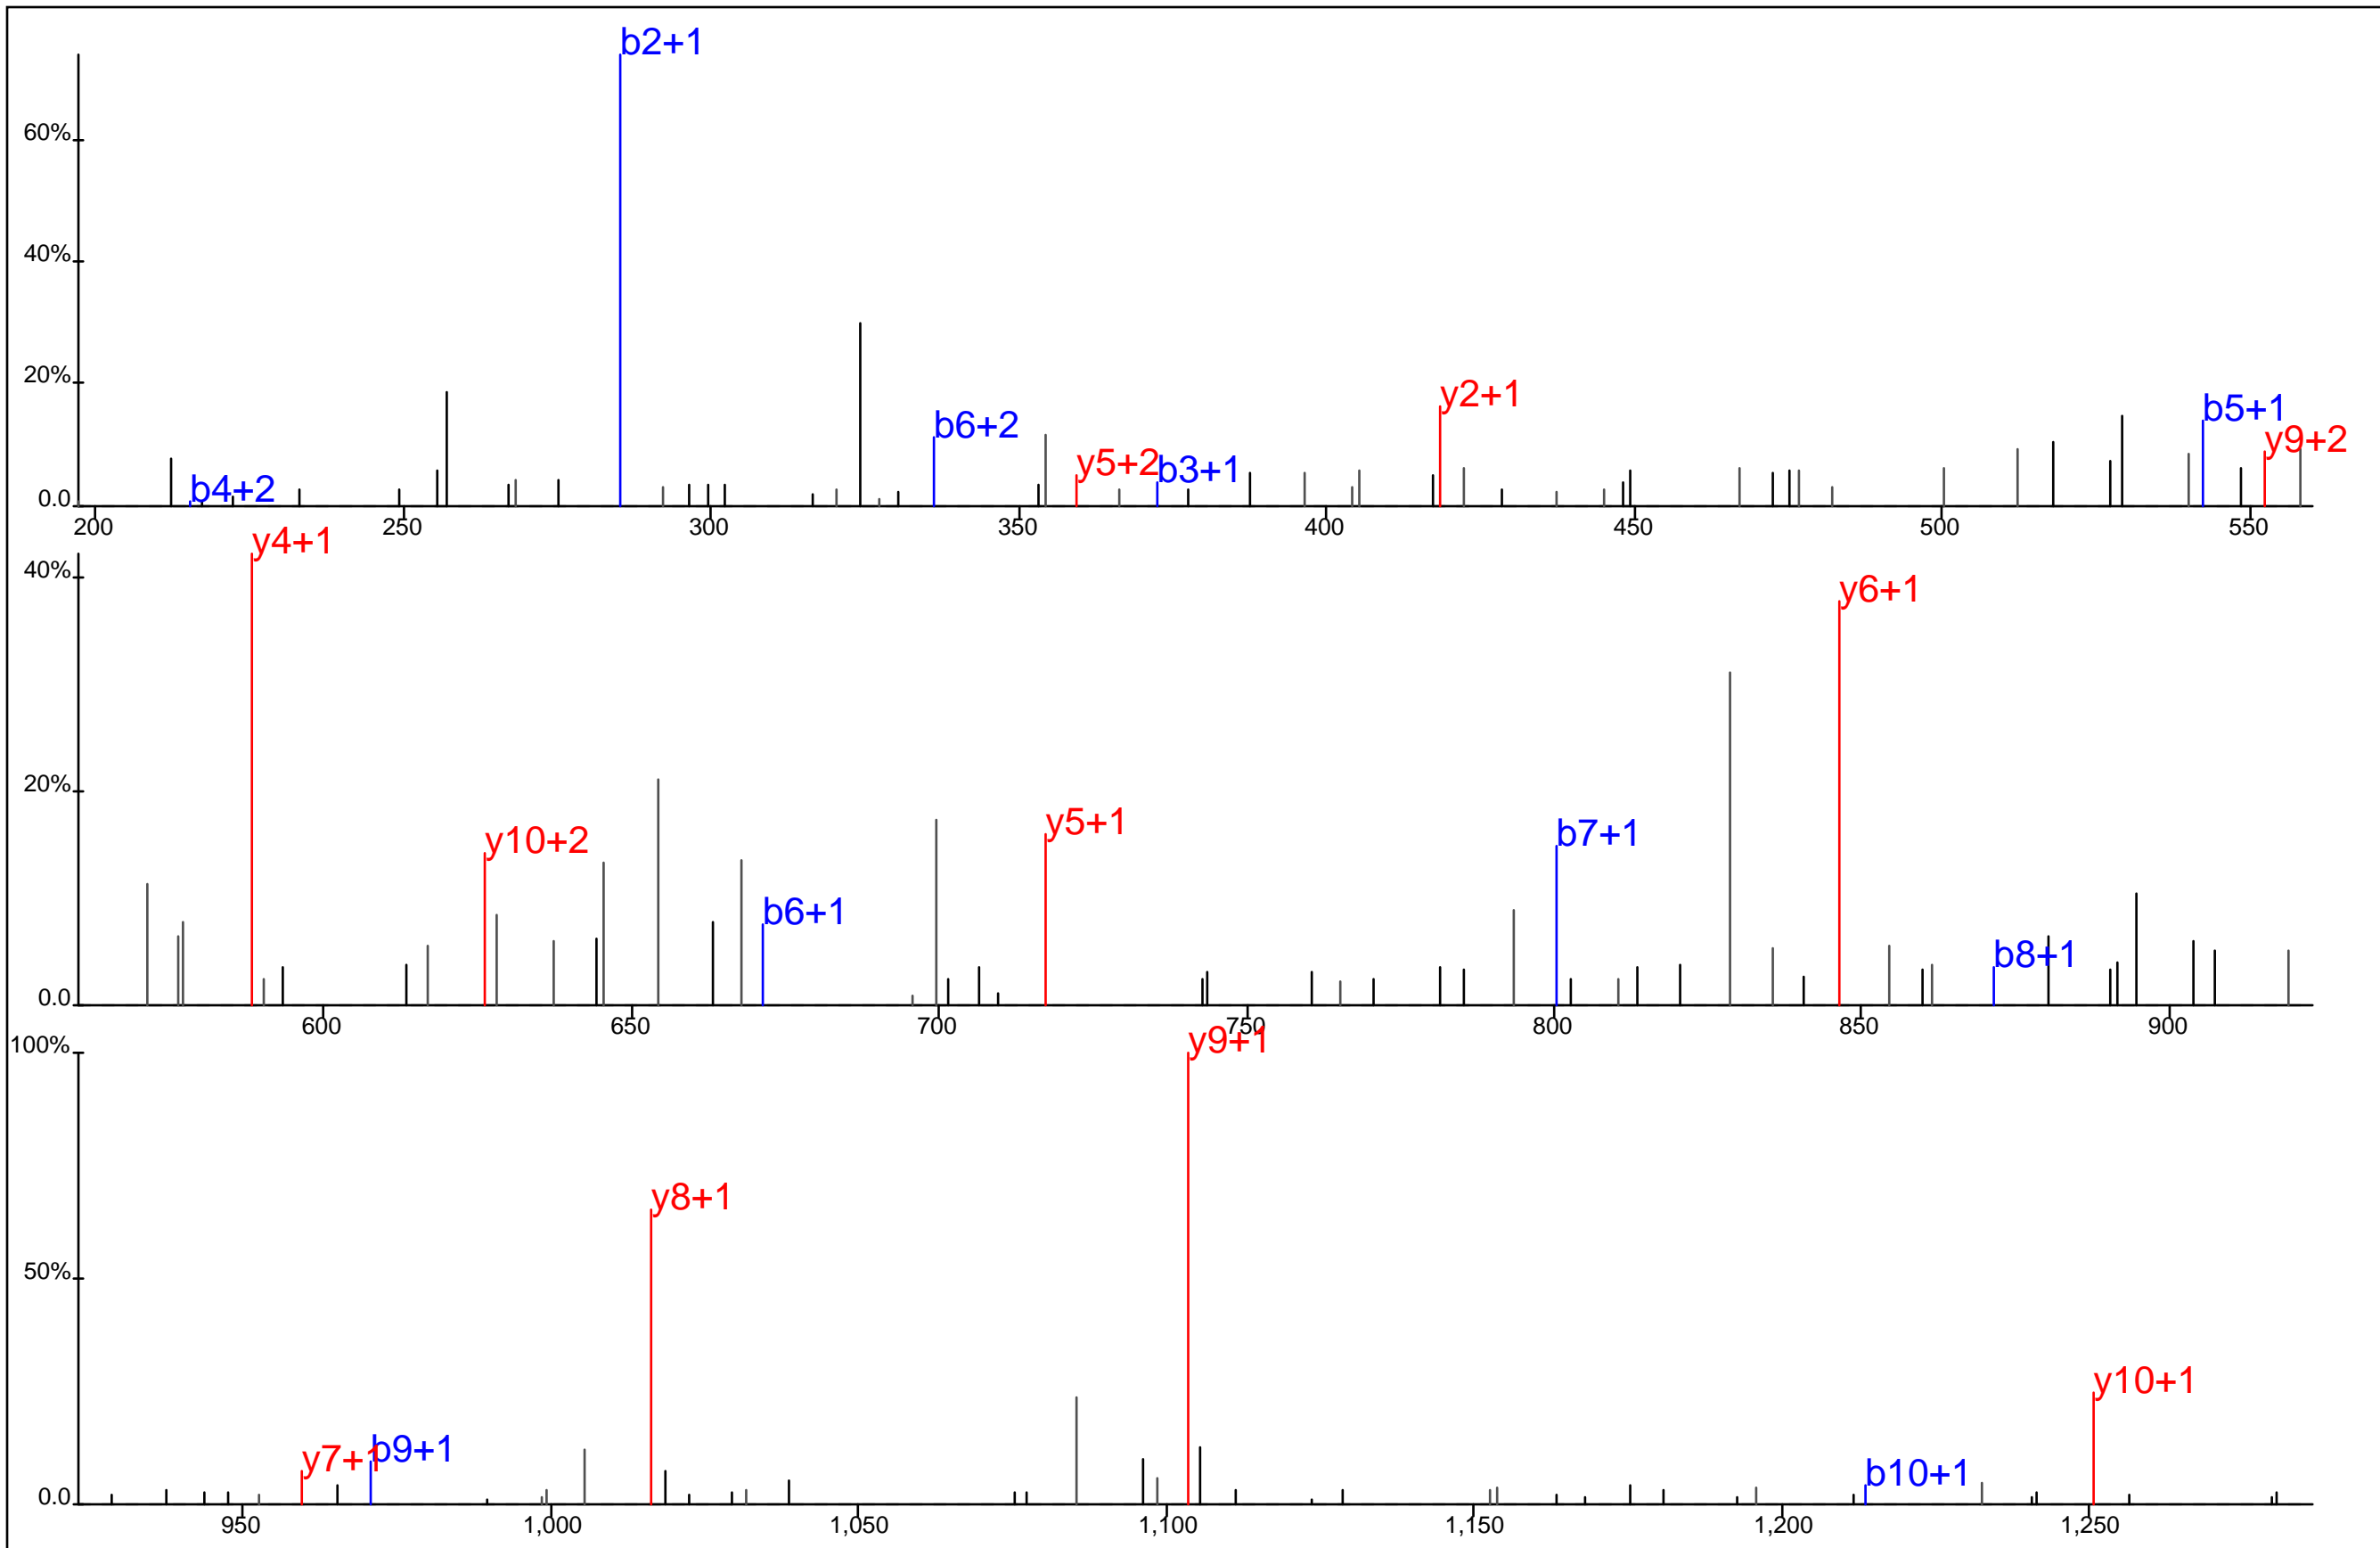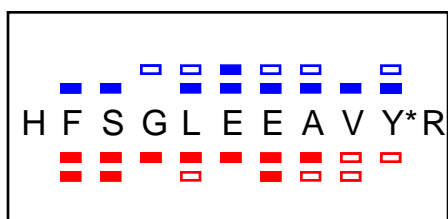

Protein Name: CCT8  
 gi Accession: 0  
 Precursor Mass: 694.3080+2  
 Delta Mass: 3.337 ppm  
 XCorr: 60.6

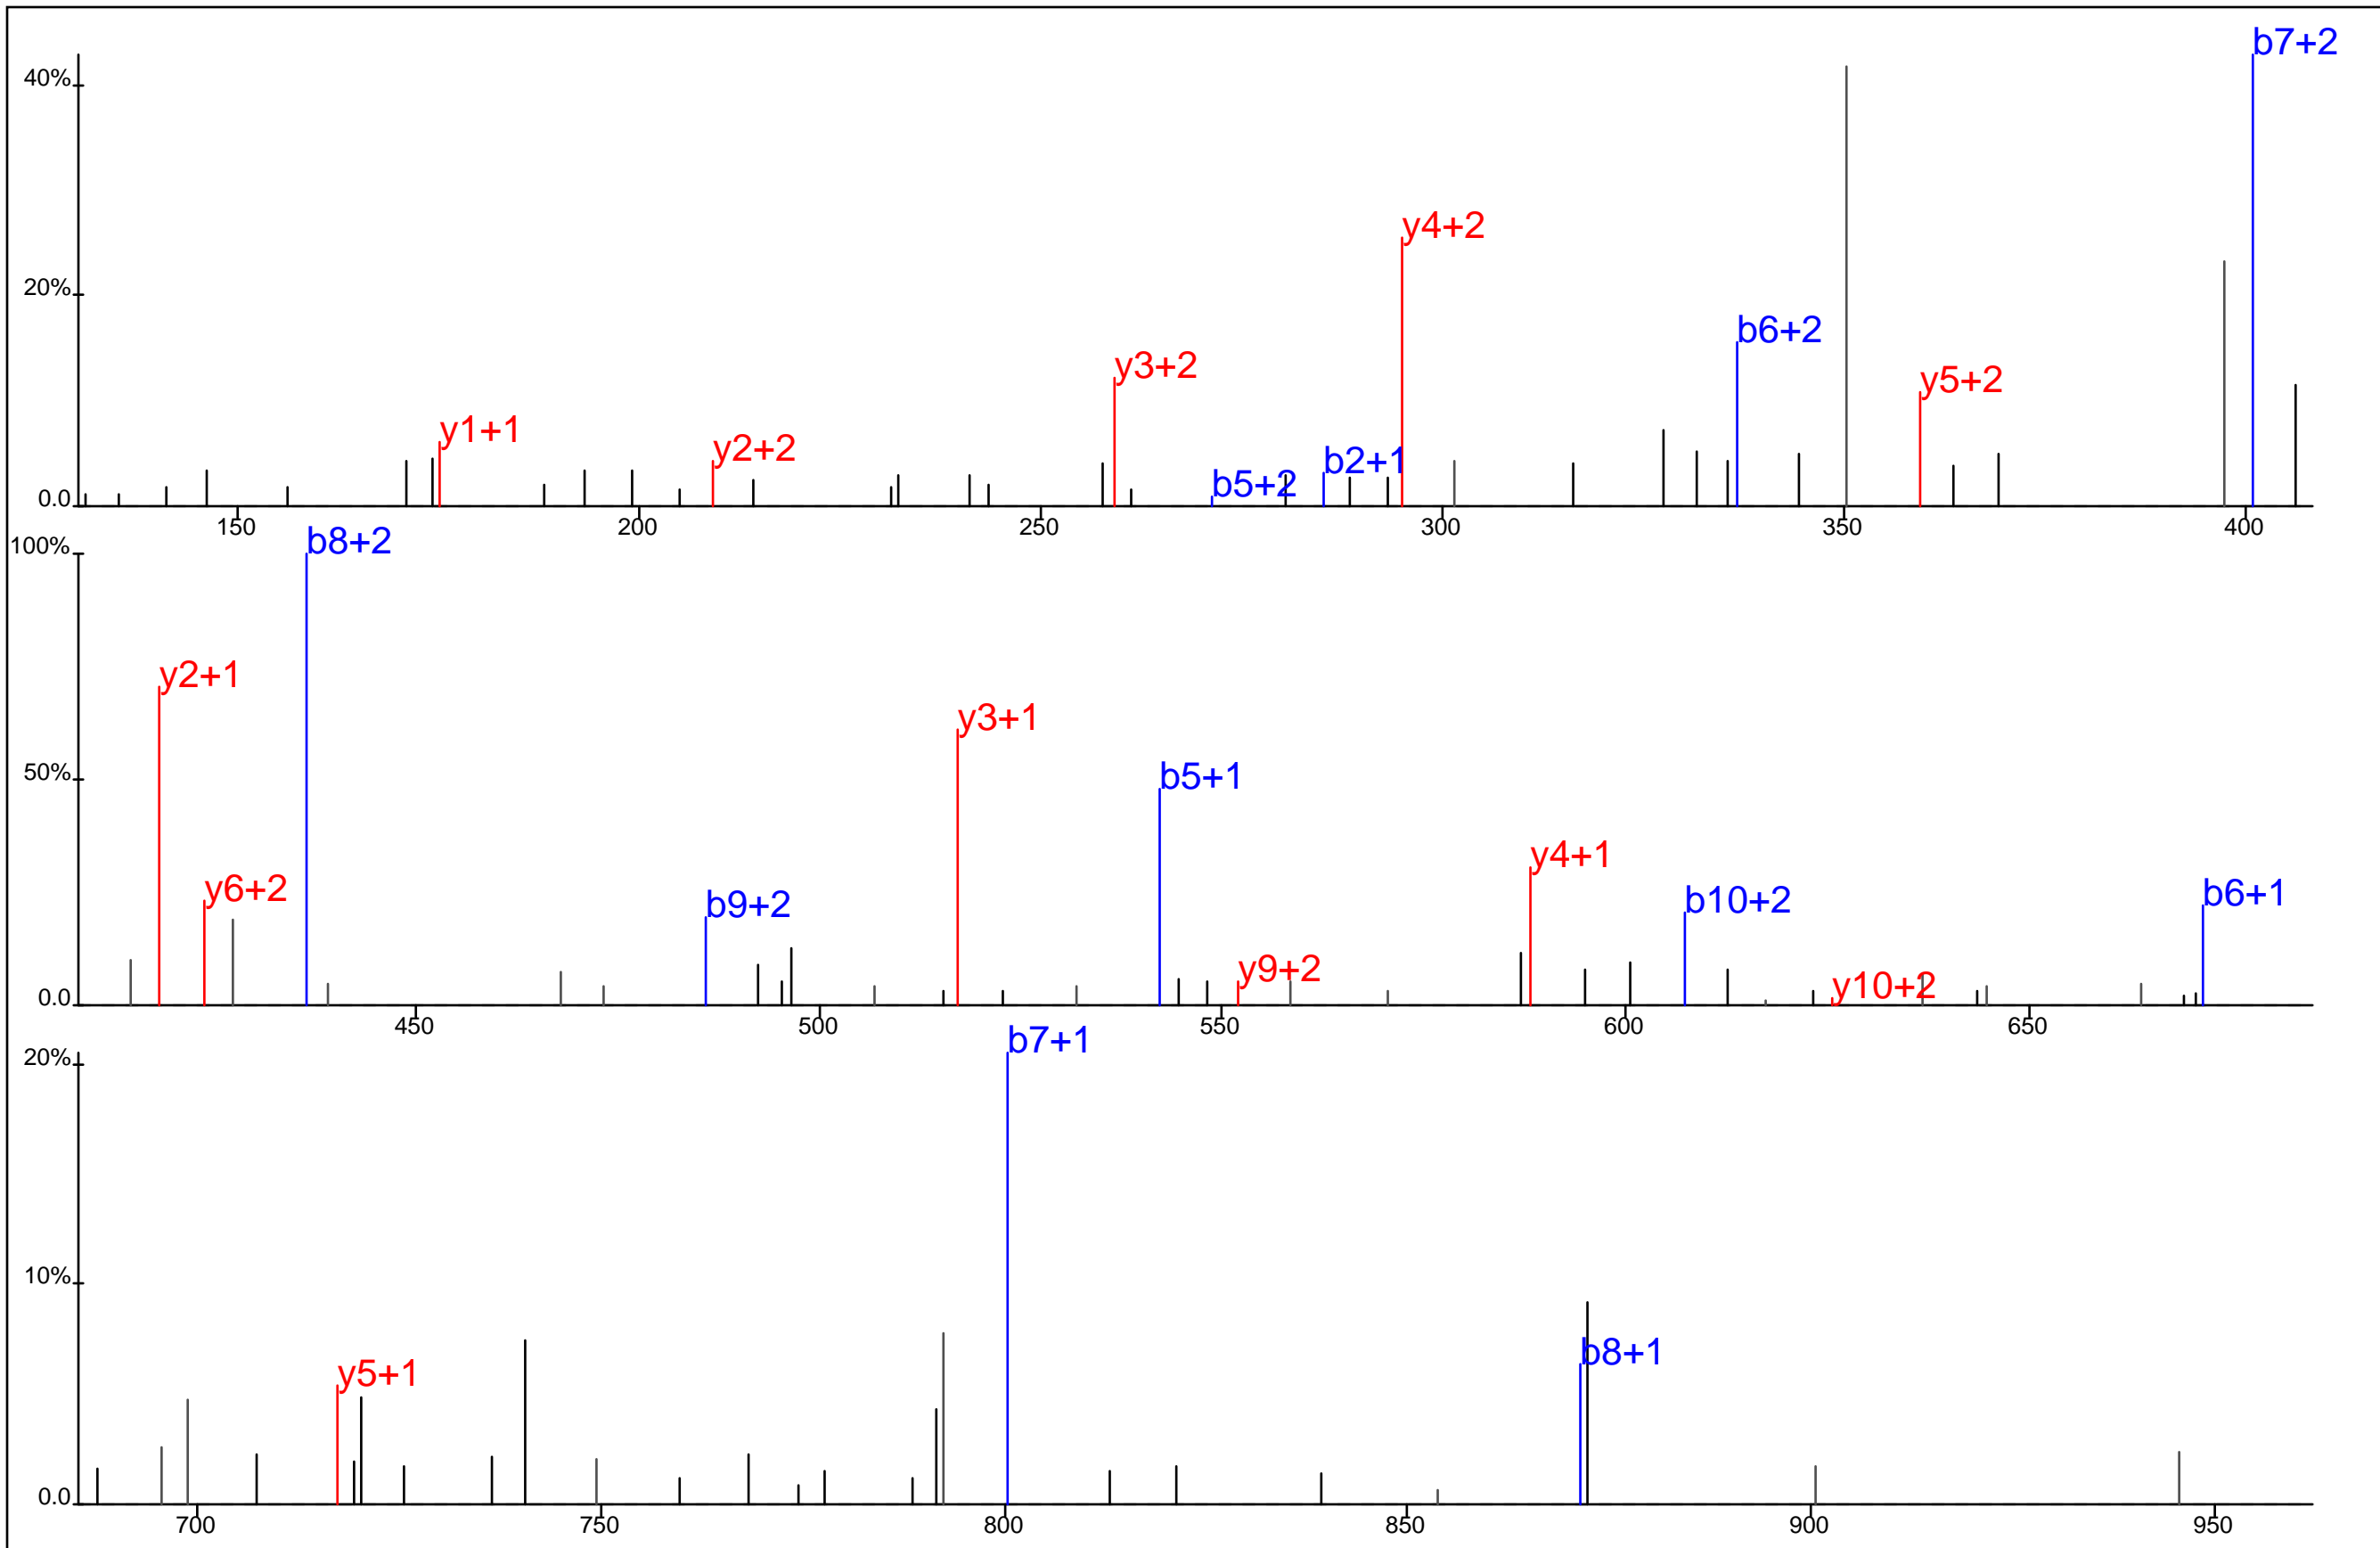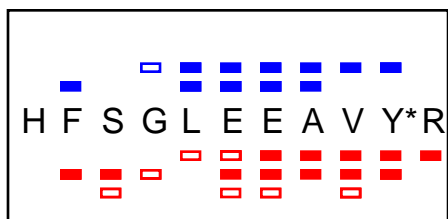

Protein Name: CCT8  
 gi Accession: 0  
 Precursor Mass: 463.2065+3  
 Delta Mass: 0.578 ppm  
 XCorr: 29.76



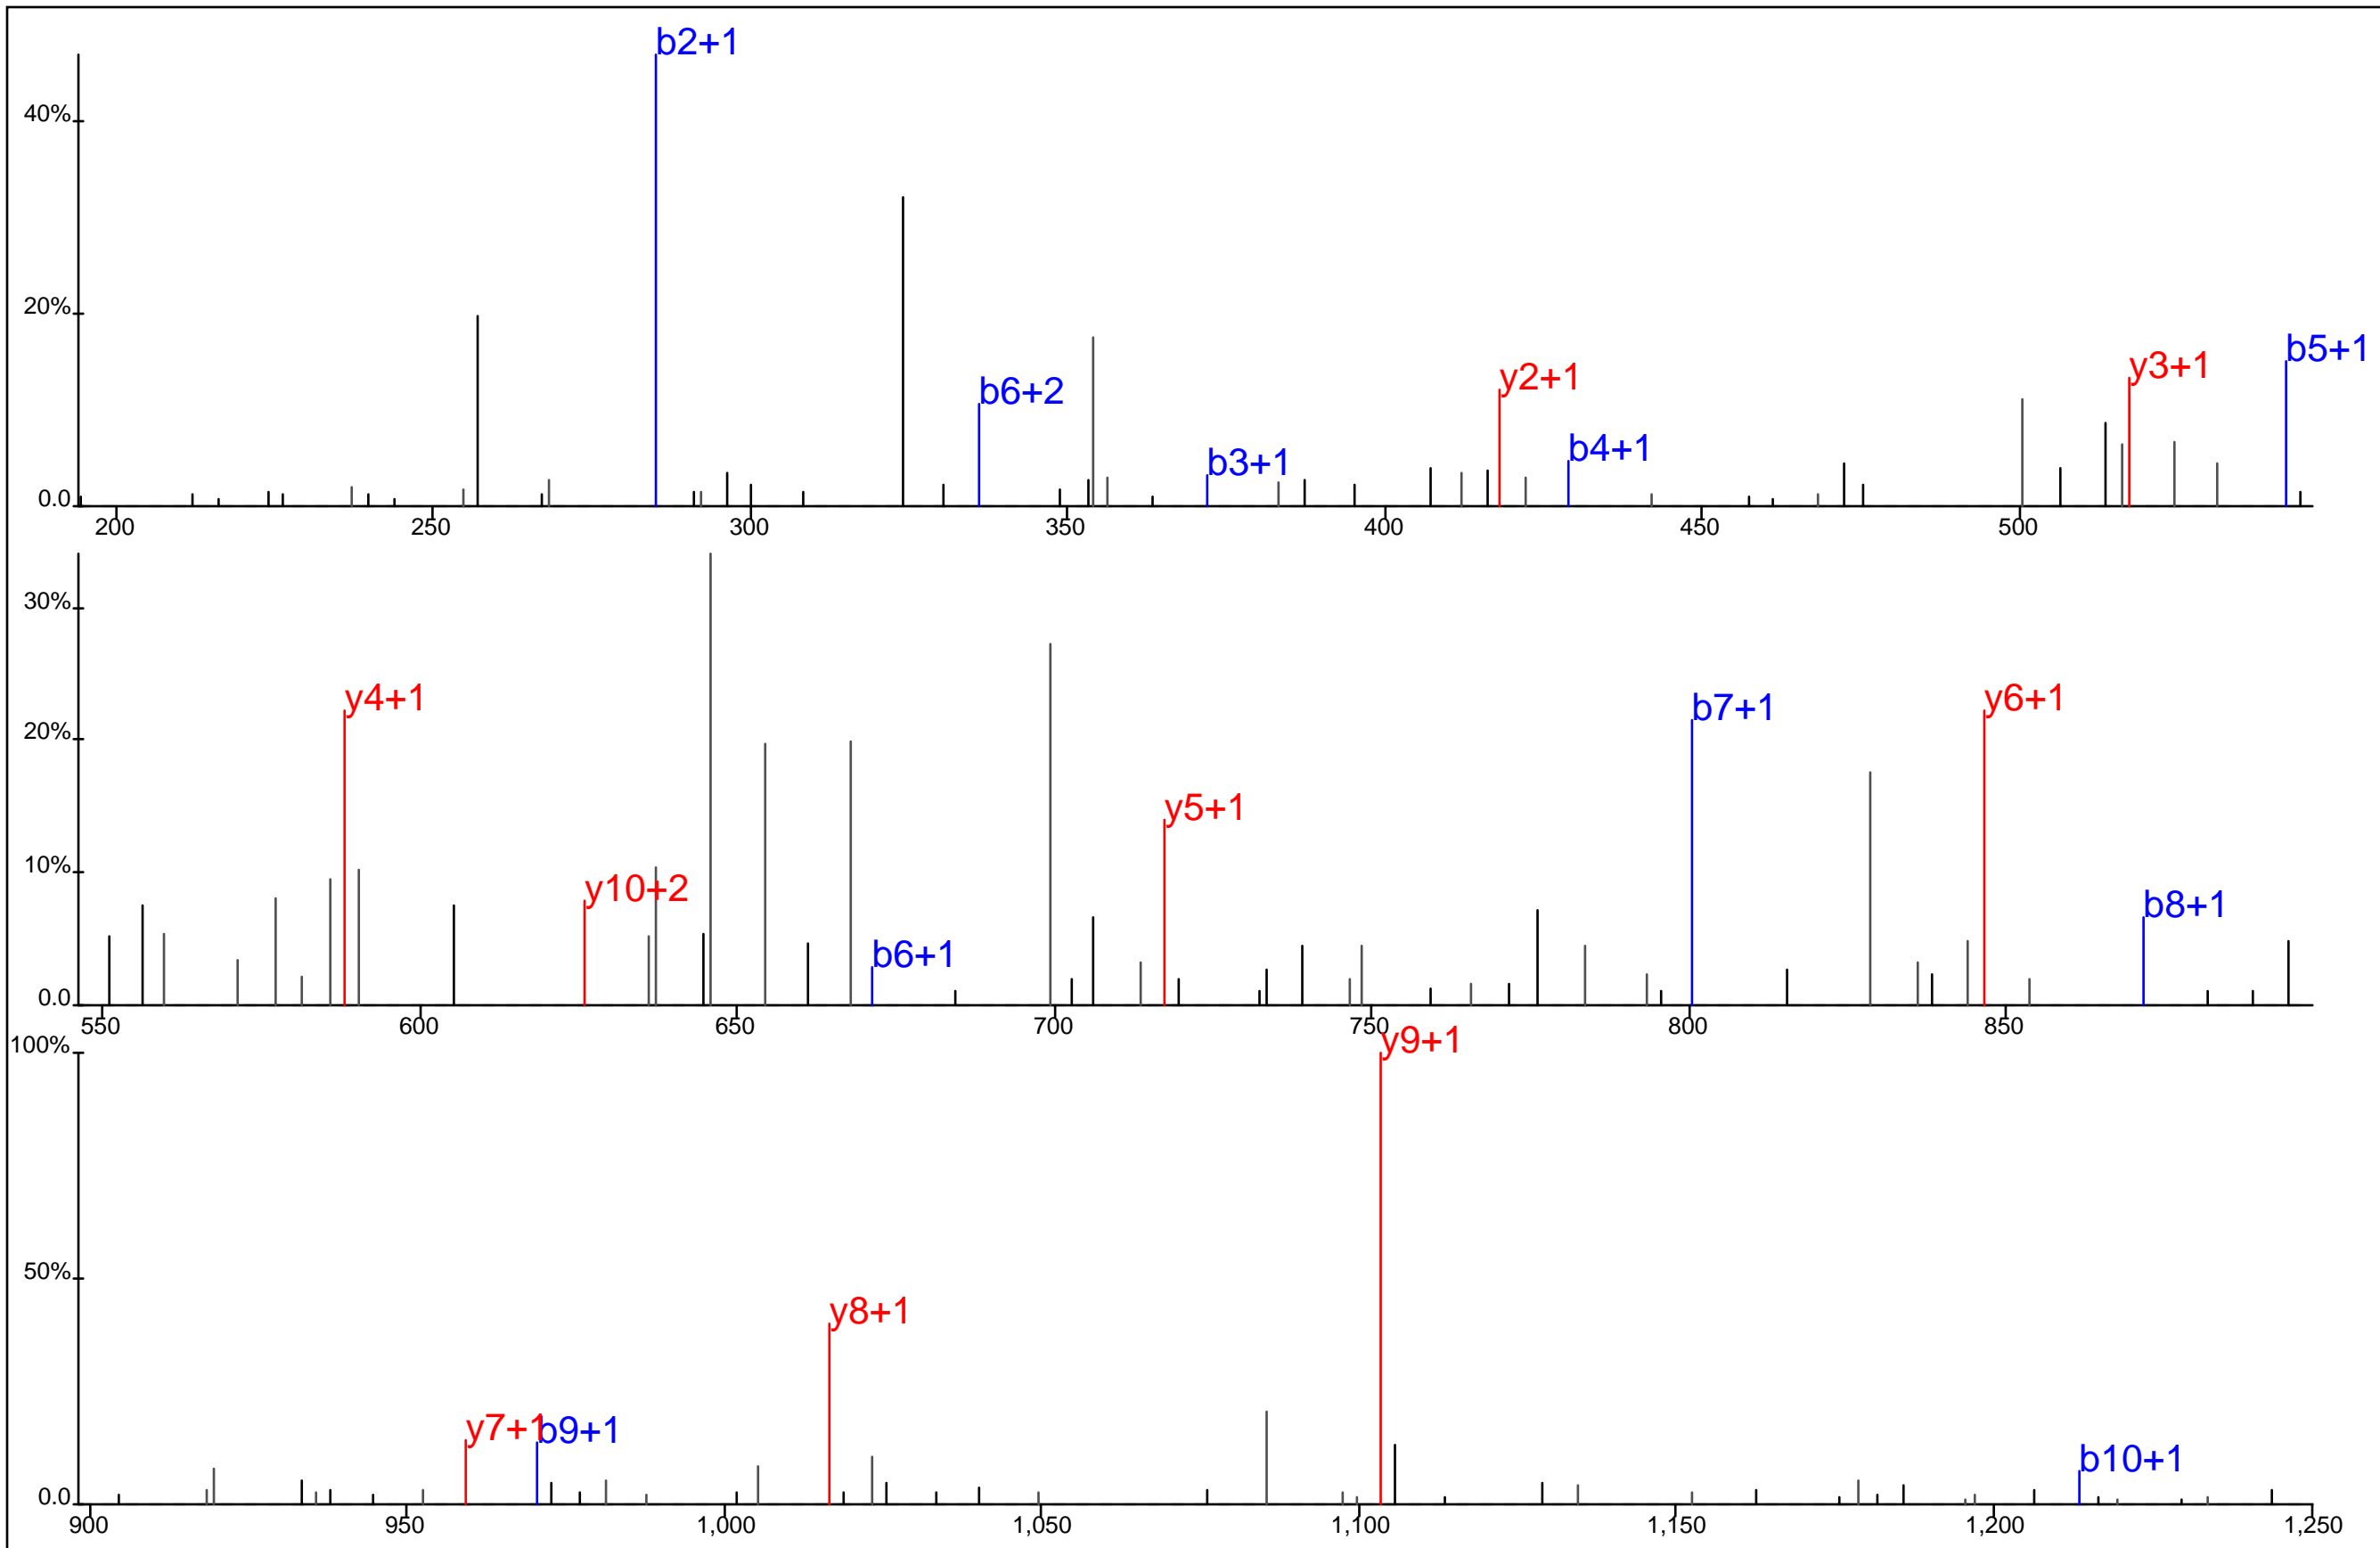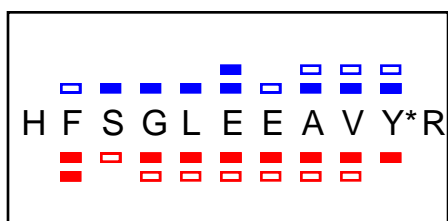

Protein Name: CCT8  
 gi Accession: 0  
 Precursor Mass: 694.3063+2  
 Delta Mass: 0.786 ppm  
 XCorr: 65.83

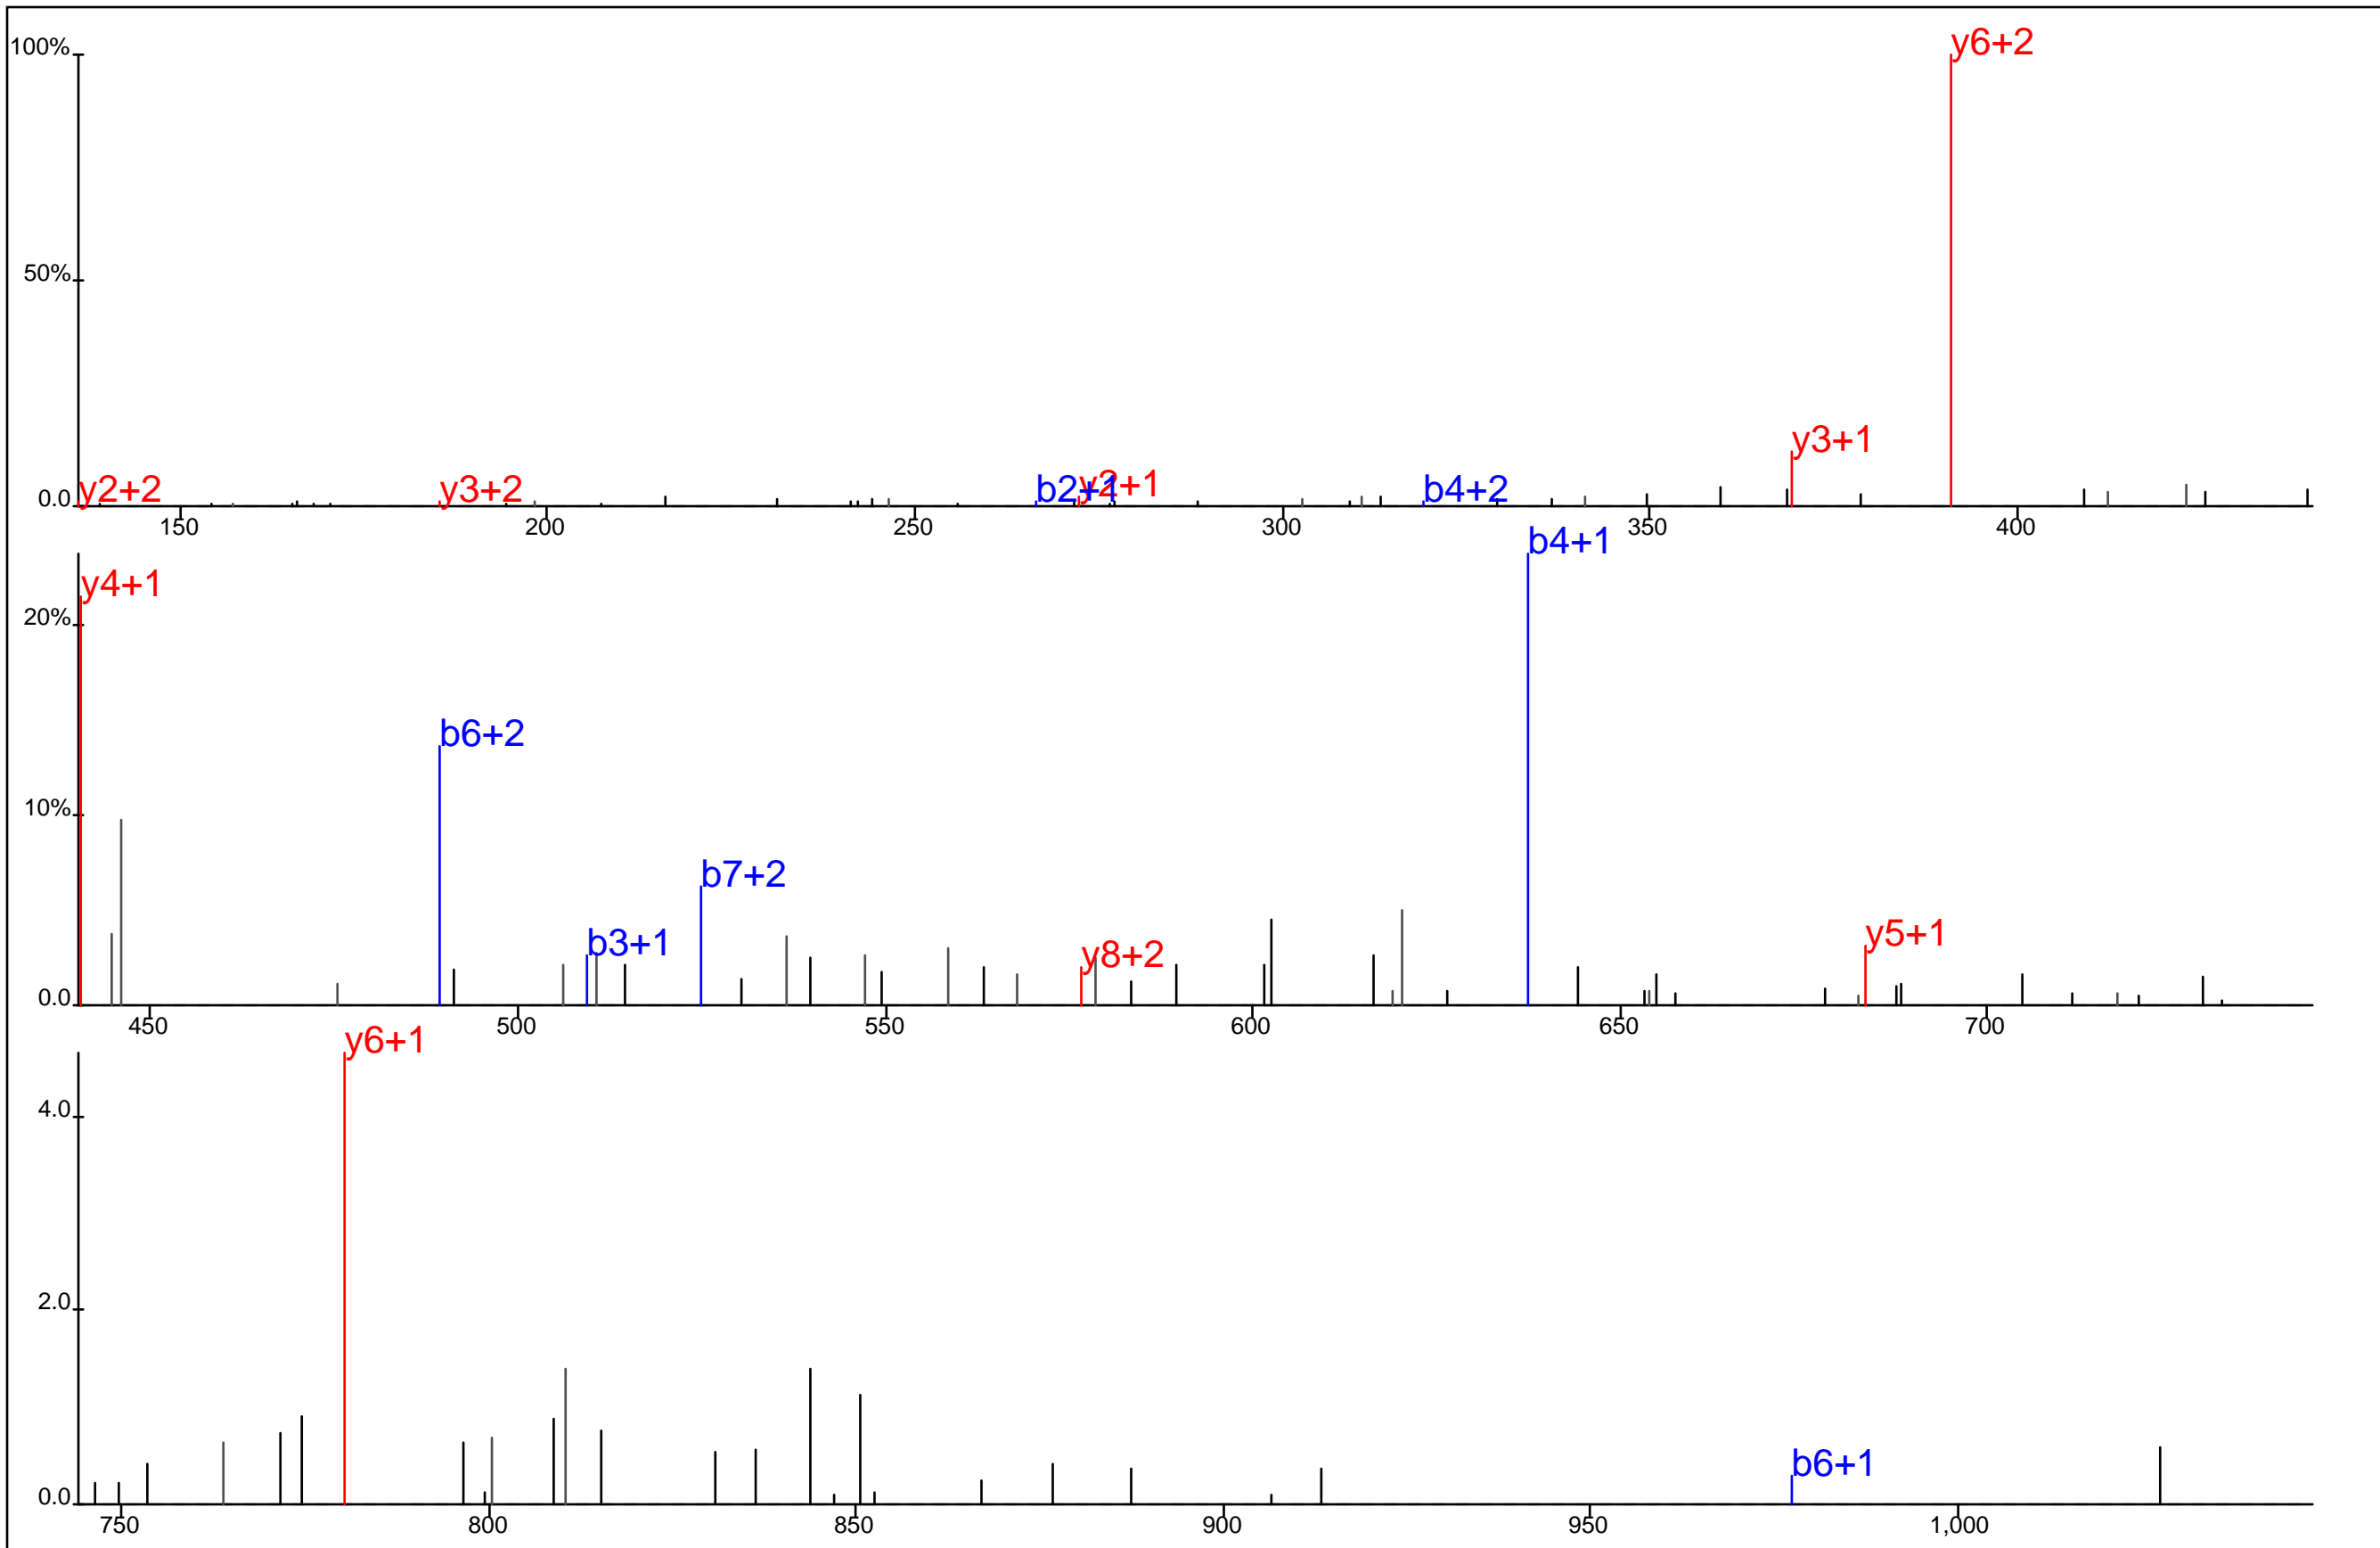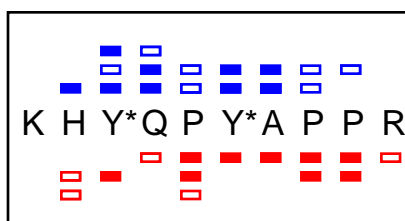

Protein Name: CD28  
 gi Accession: 0  
 Precursor Mass: 472.8664+3  
 Delta Mass: 1.096 ppm  
 XCorr: 23.77

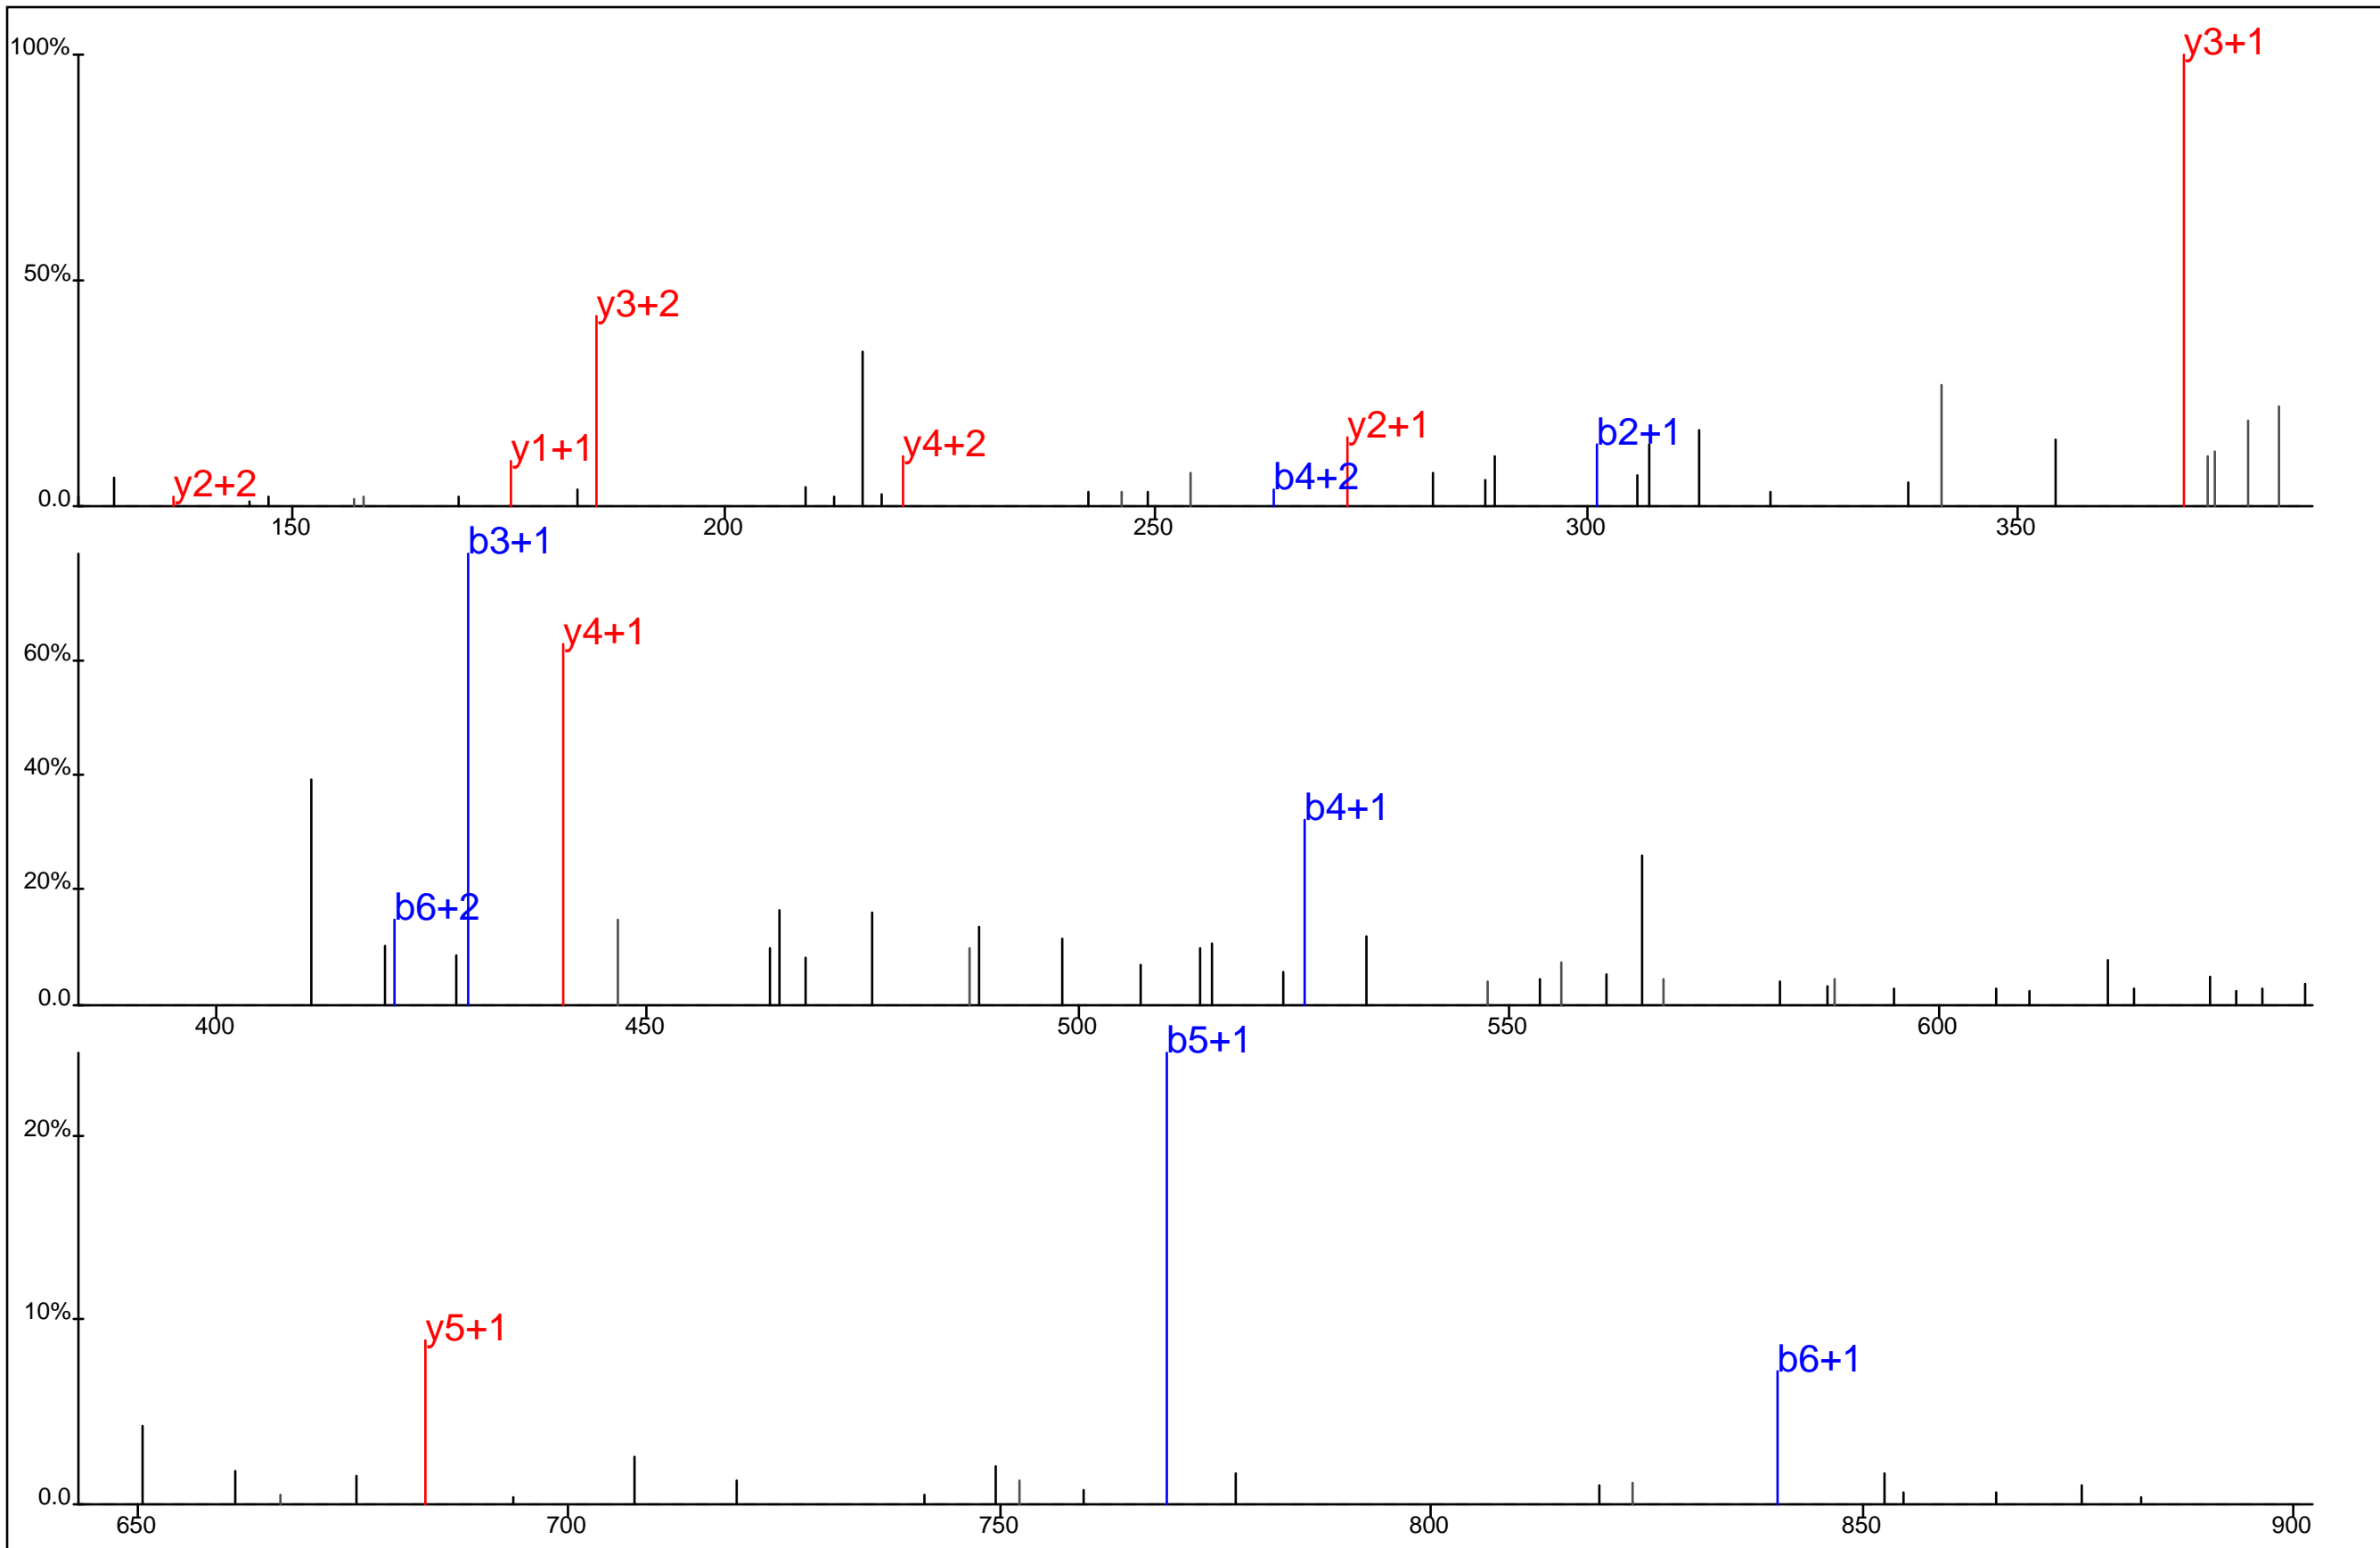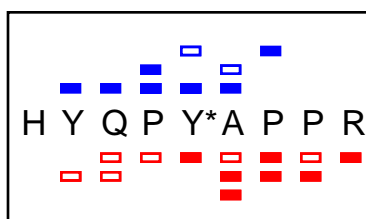

Protein Name: CD28  
 gi Accession: 0  
 Precursor Mass: 403.5130+3  
 Delta Mass: 0.301 ppm  
 XCorr: 27.16

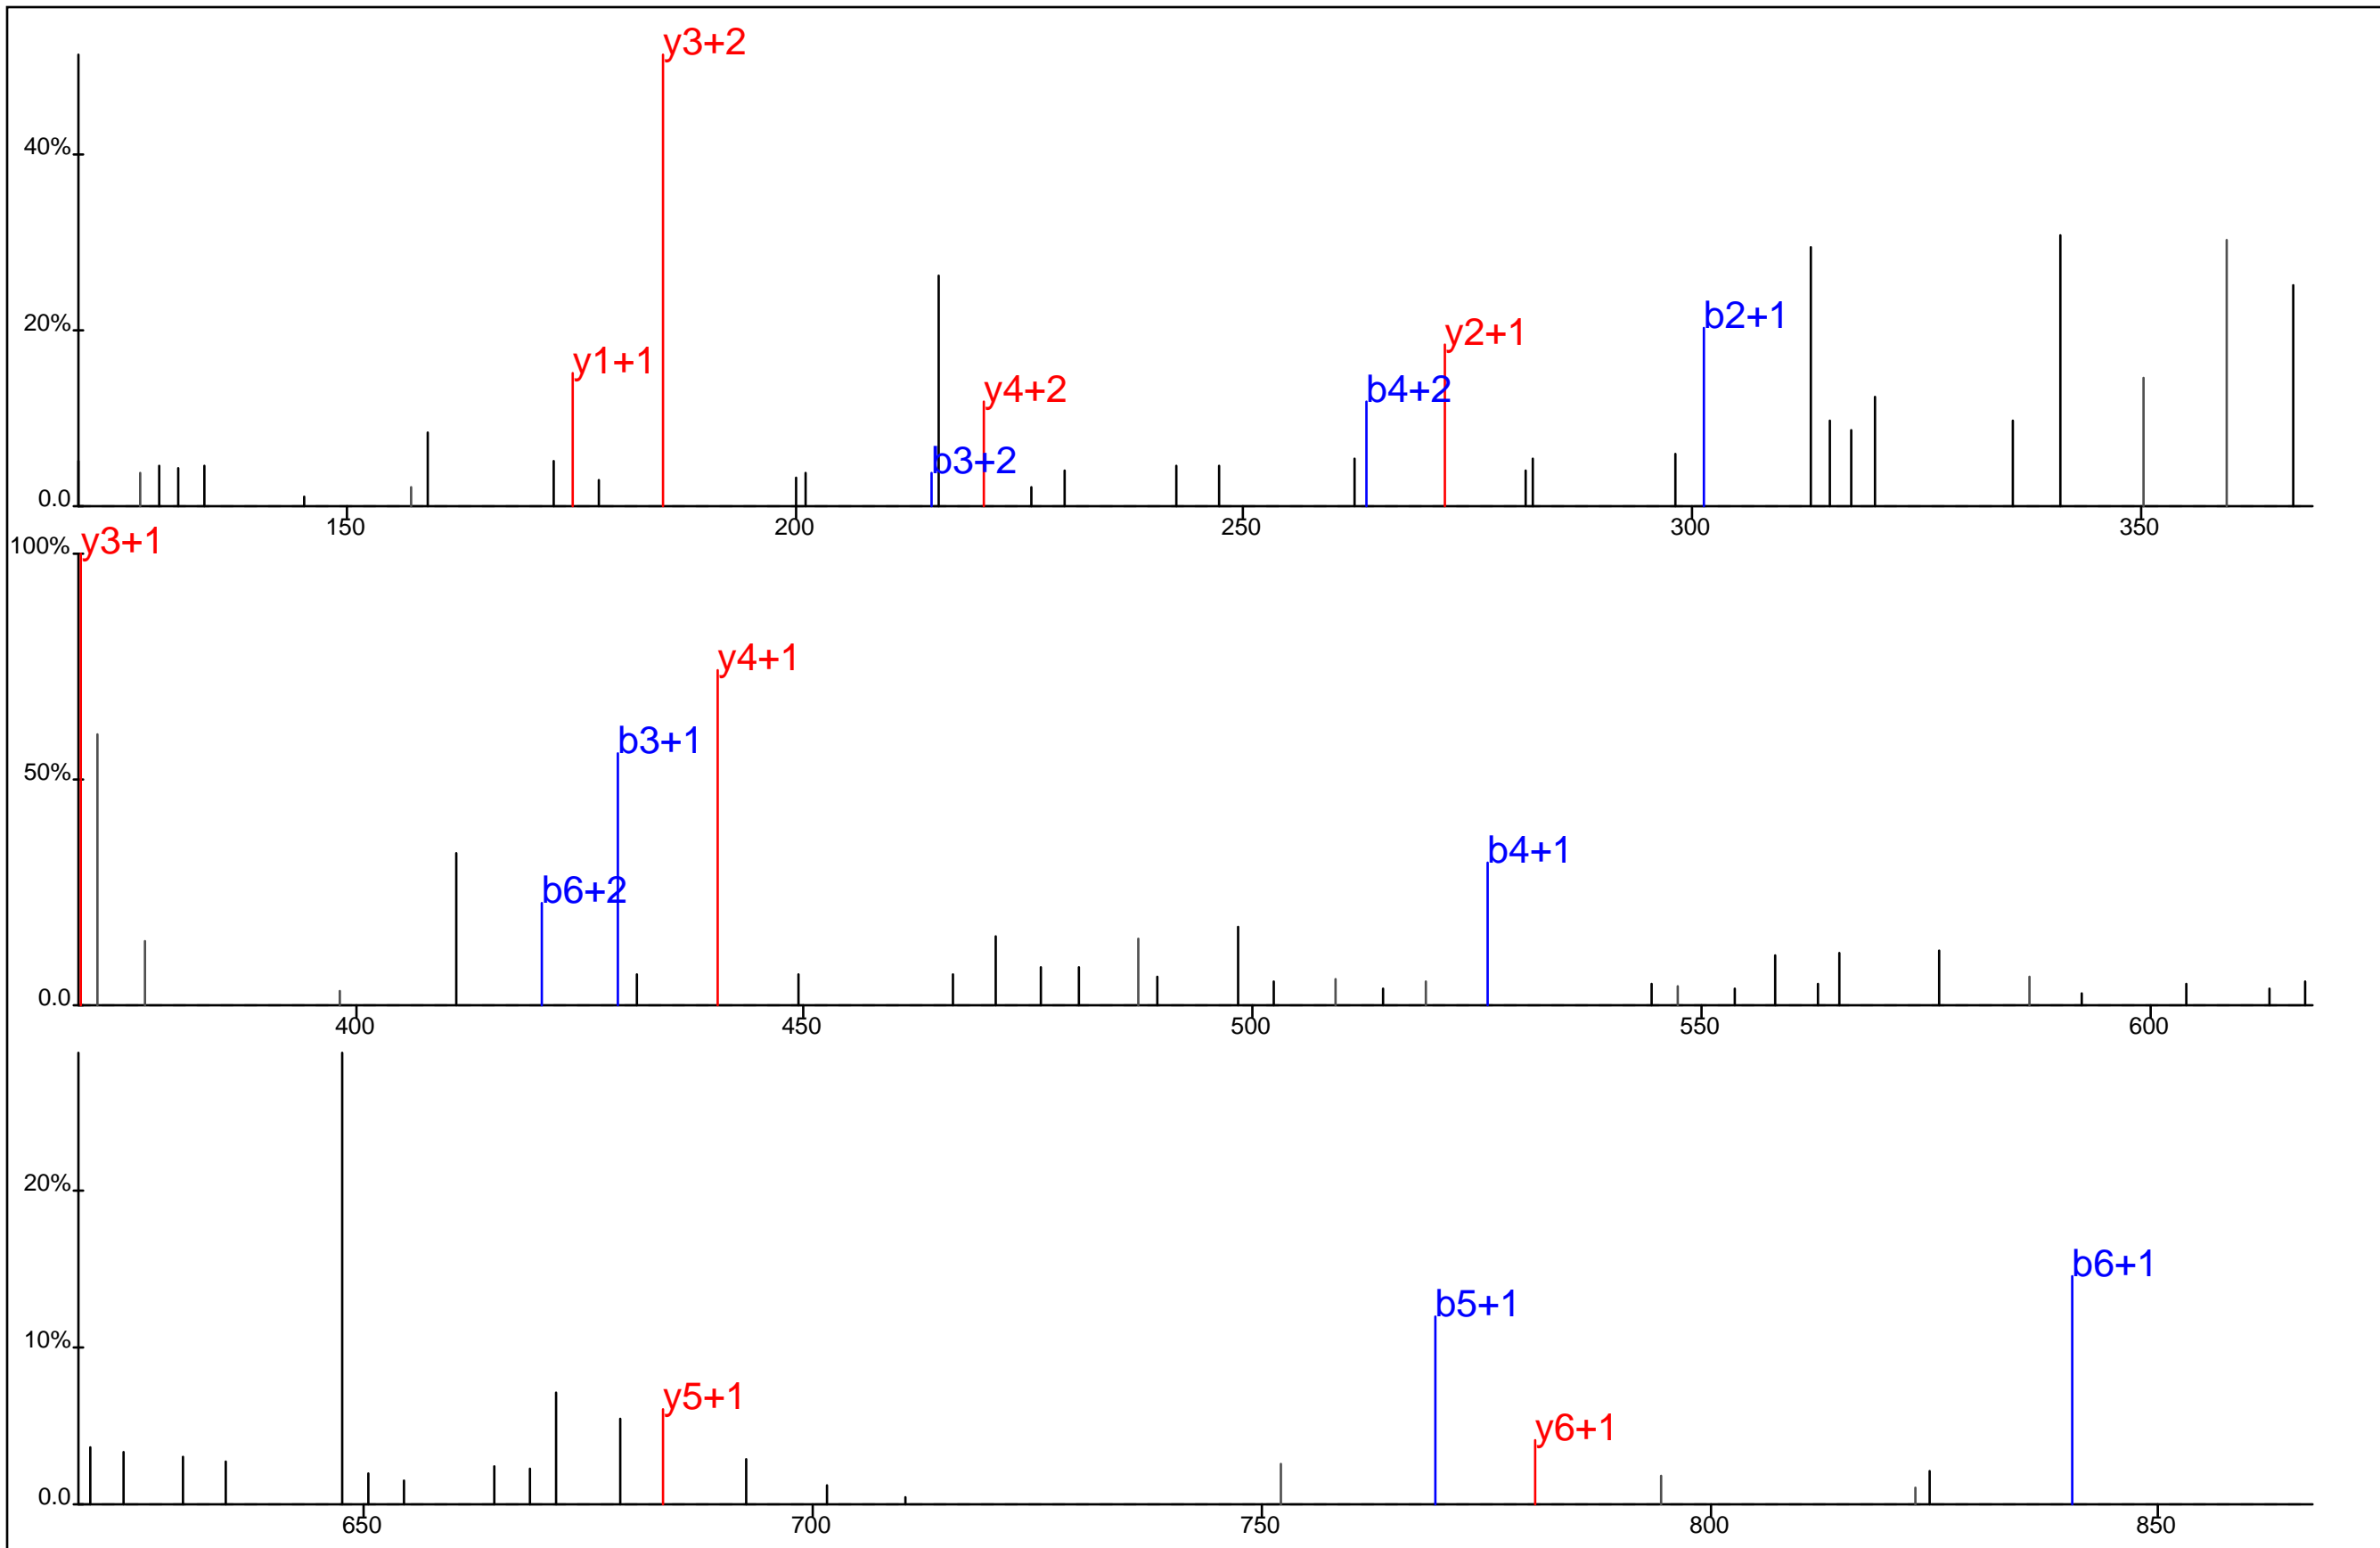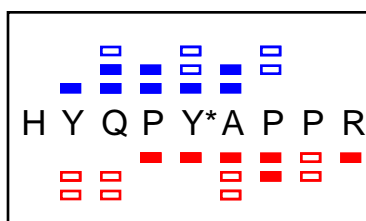

Protein Name: CD28  
 gi Accession: 0  
 Precursor Mass: 403.5135+3  
 Delta Mass: 0.987 ppm  
 XCorr: 35.78



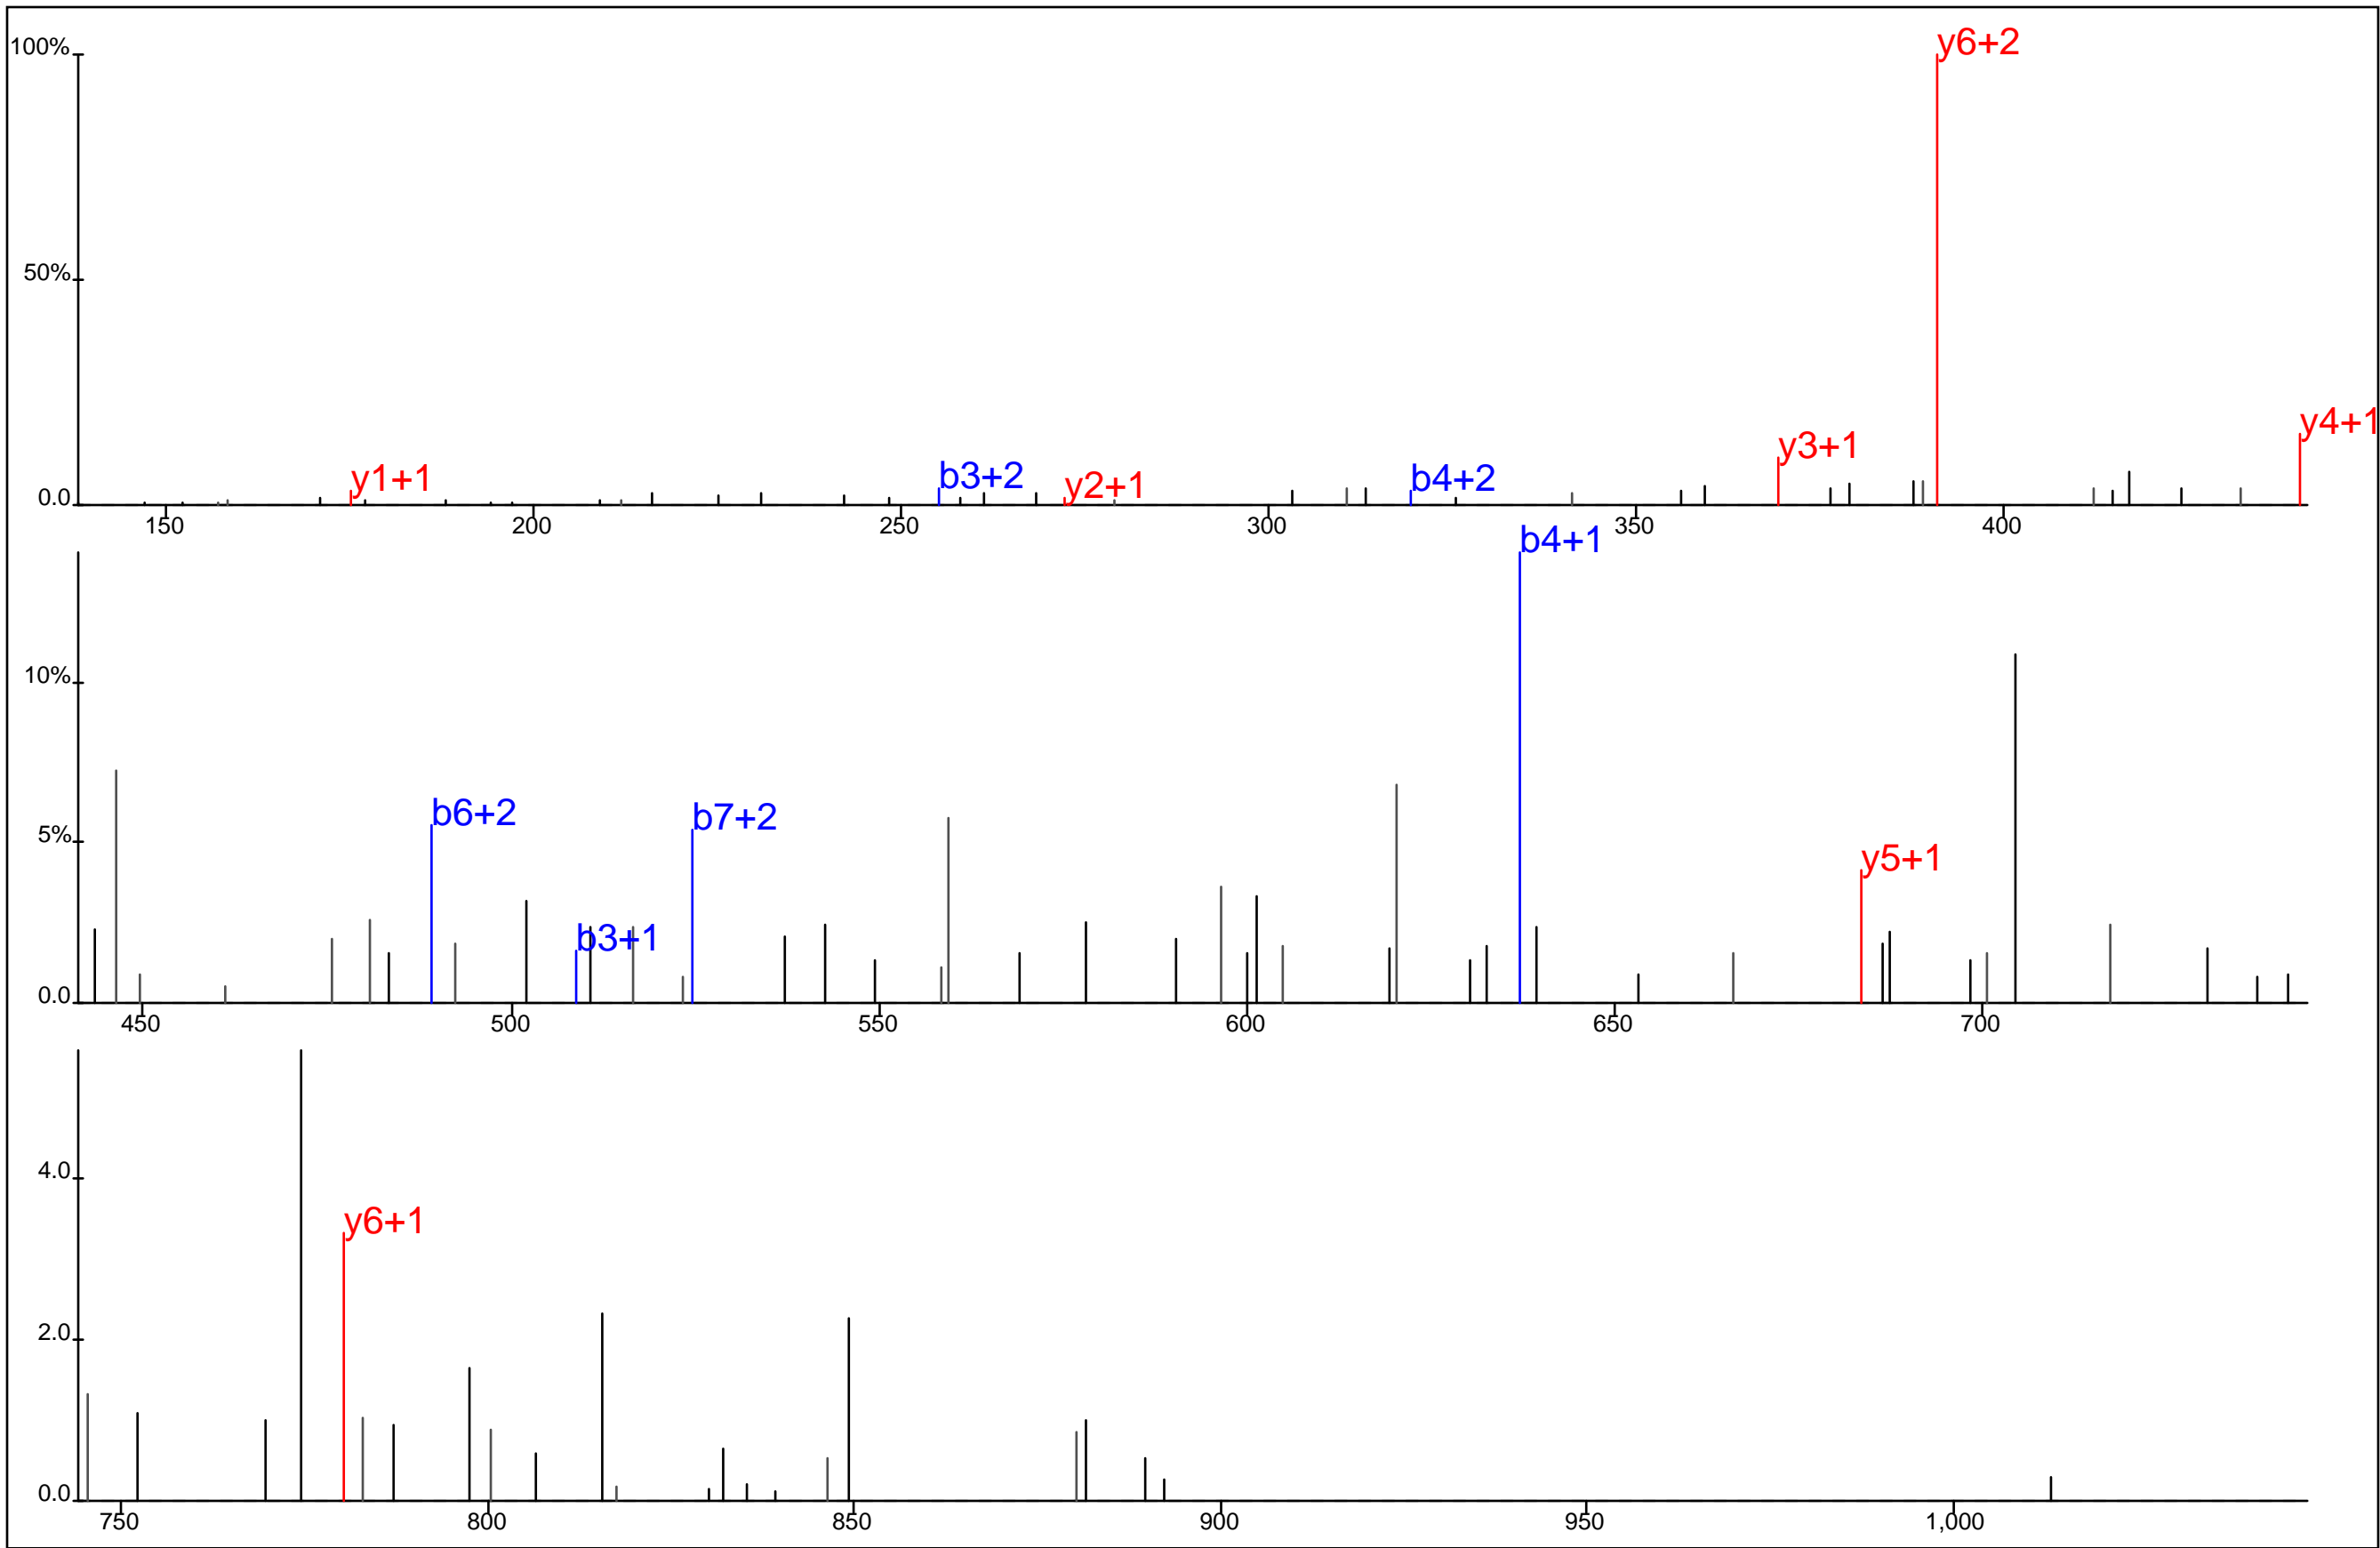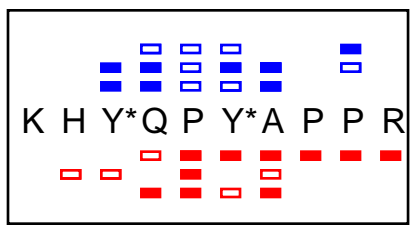

Protein Name: CD28  
 gi Accession: 0  
 Precursor Mass: 472.8663+3  
 Delta Mass: 1.290 ppm  
 XCorr: 26.83

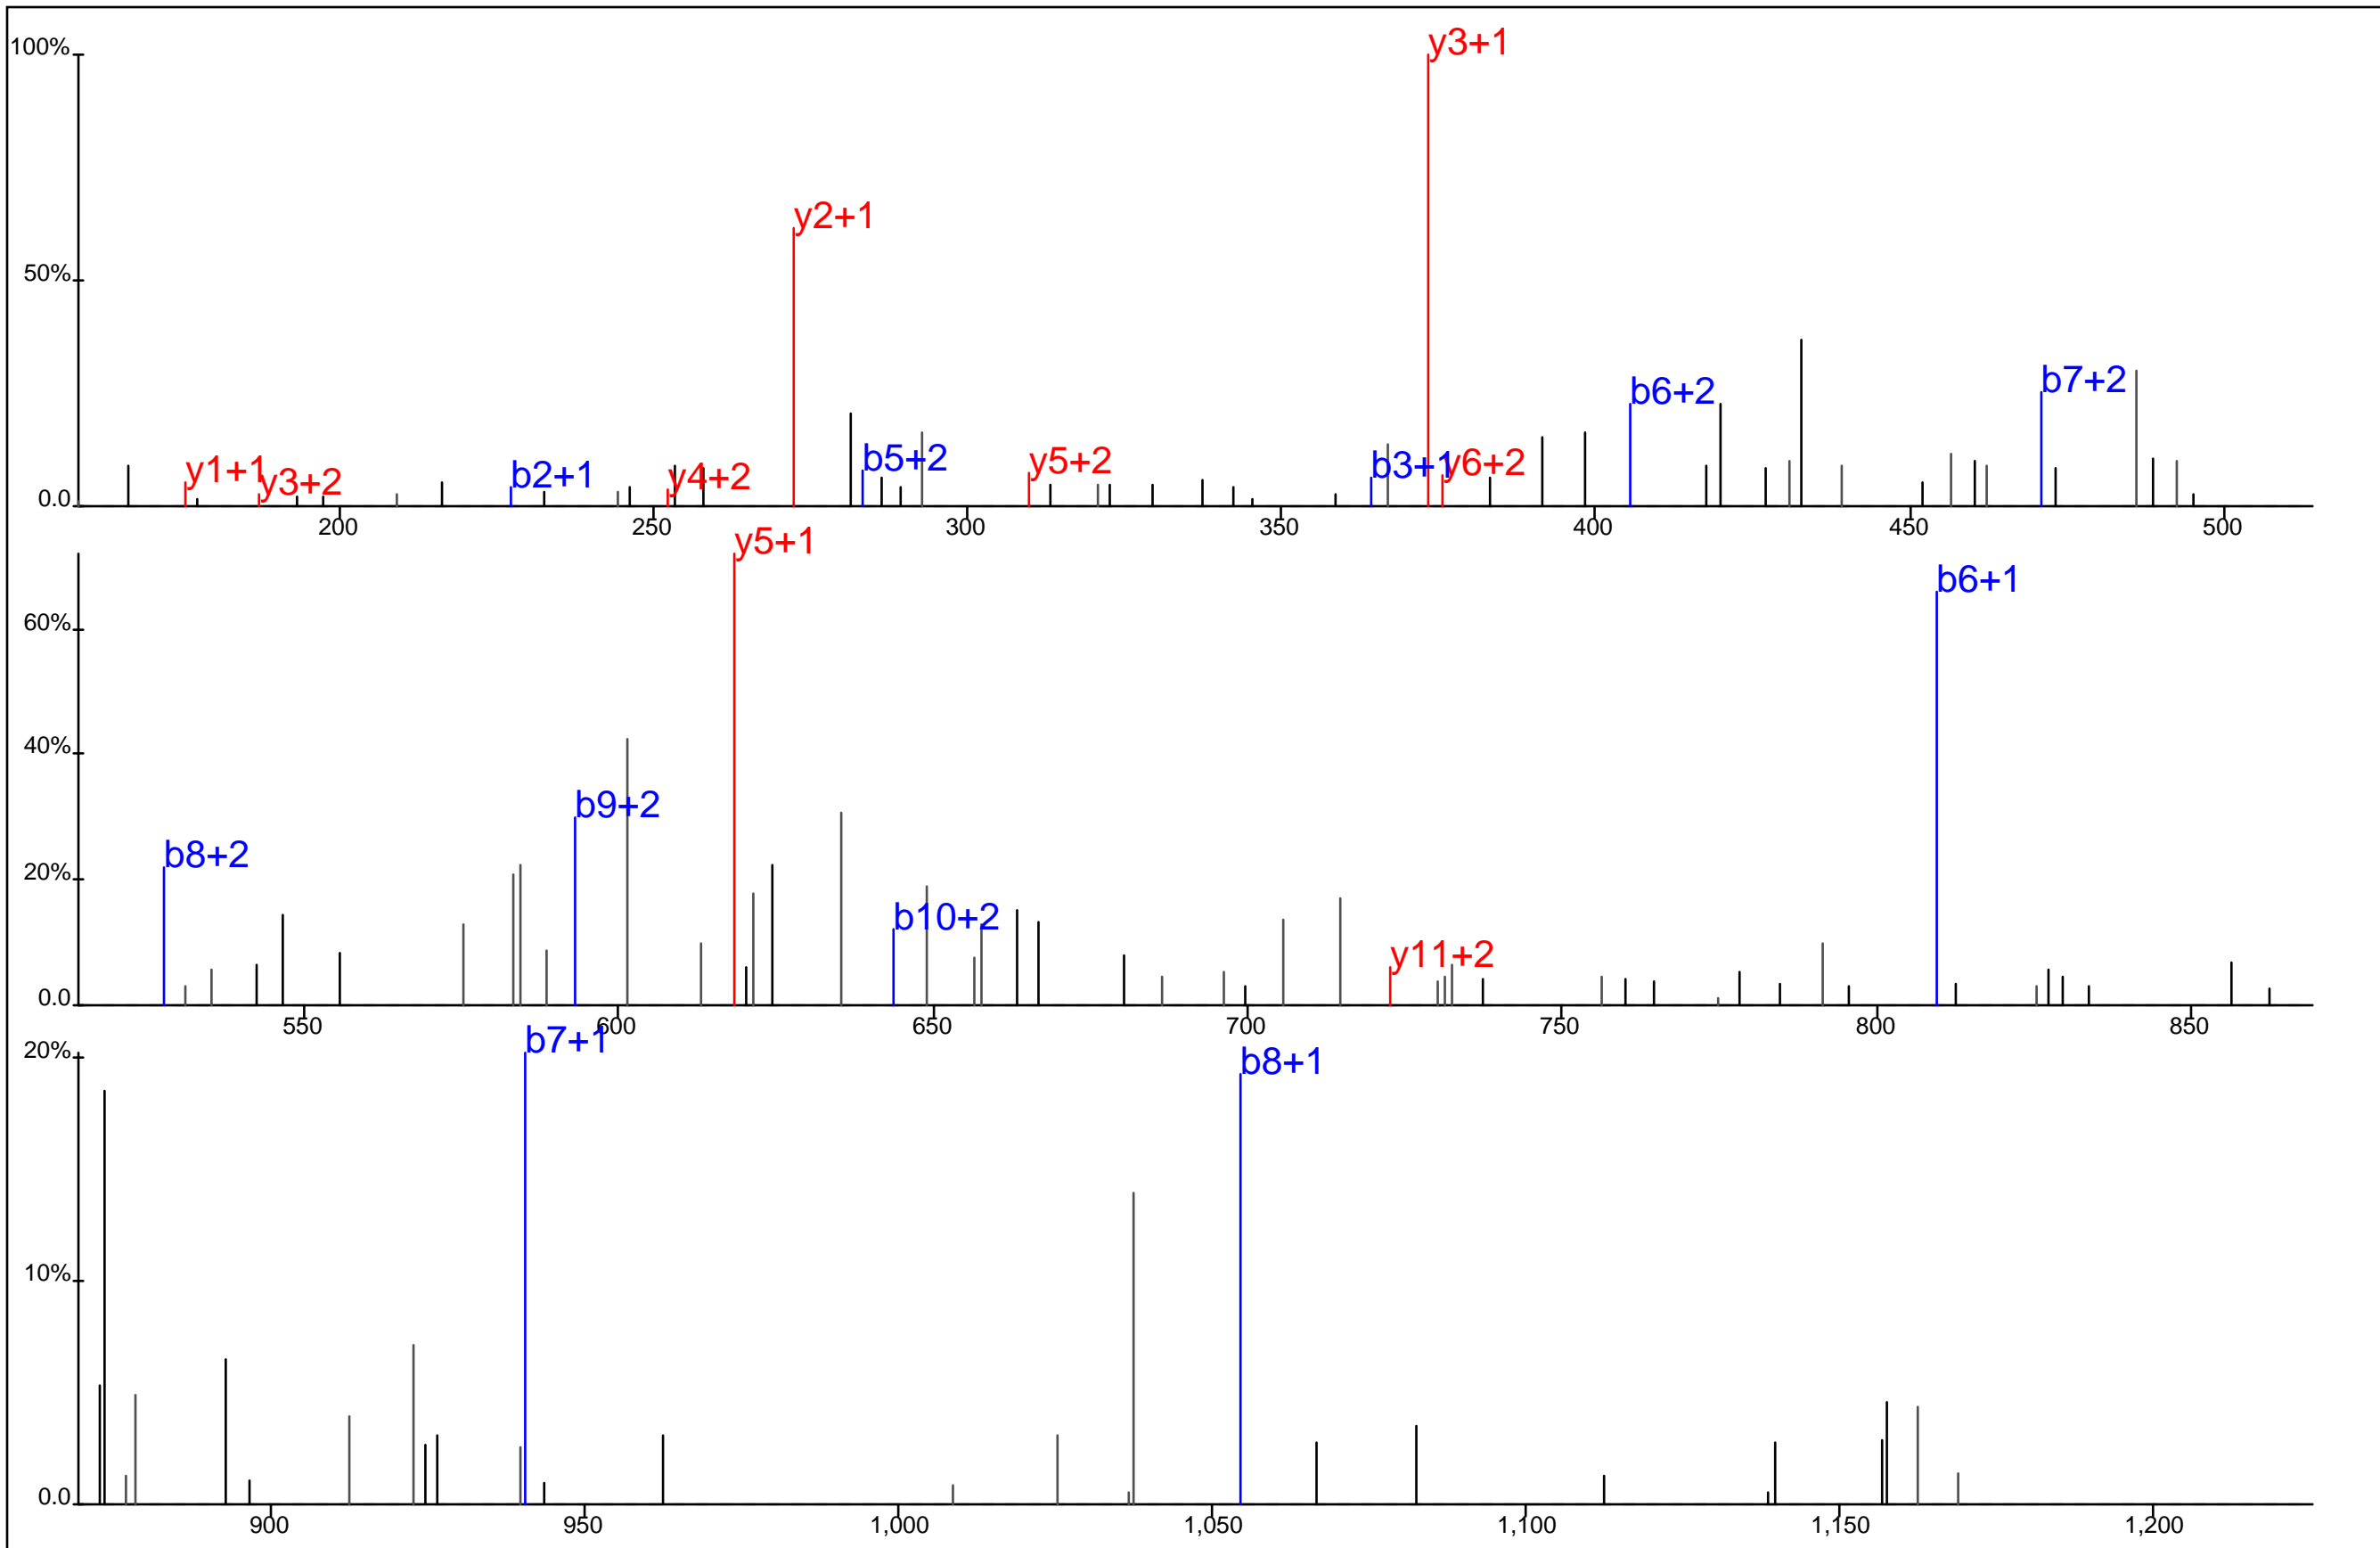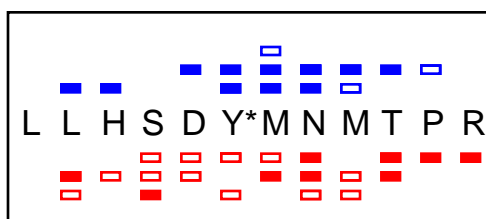

Protein Name: CD28  
 gi Accession: 0  
 Precursor Mass: 519.8904+3  
 Delta Mass: 1.385 ppm  
 XCorr: 21.36

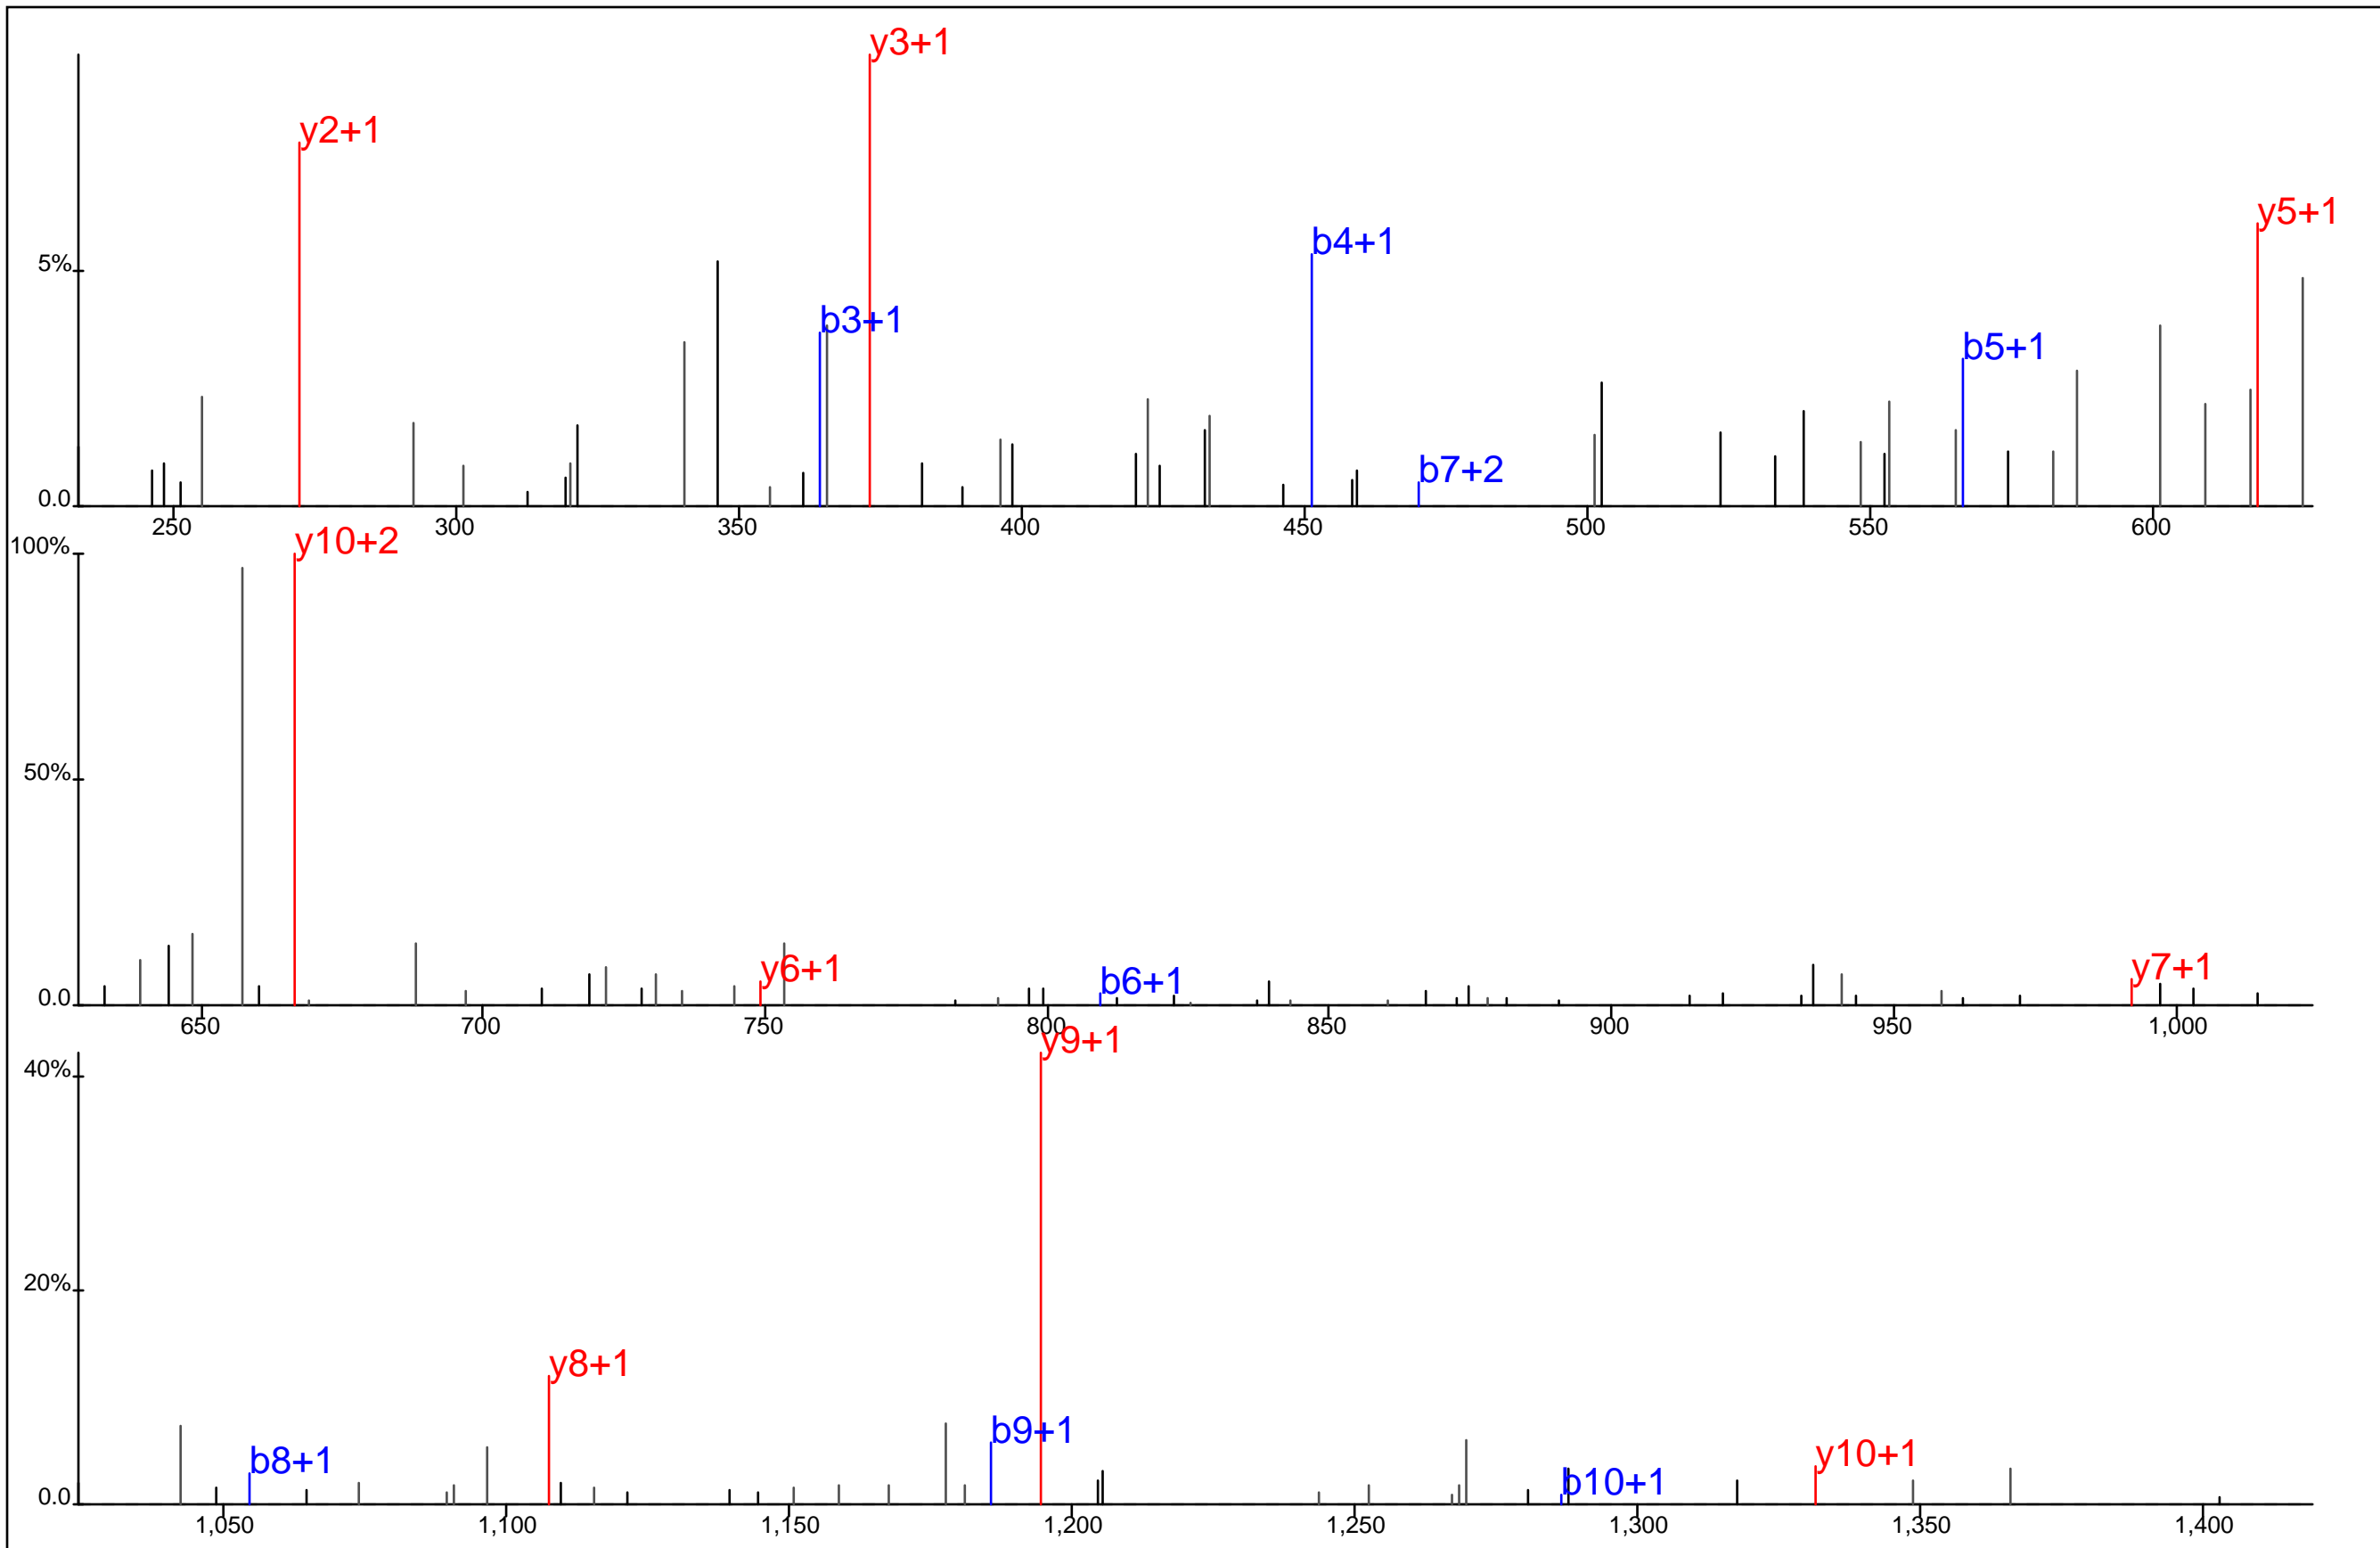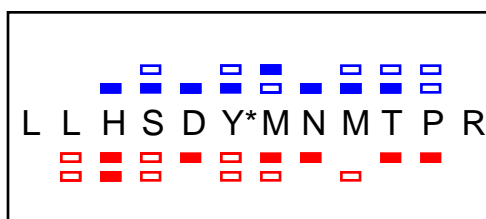

Protein Name: CD28  
 gi Accession: 0  
 Precursor Mass: 779.3312+2  
 Delta Mass: 2.474 ppm  
 XCorr: 40.86

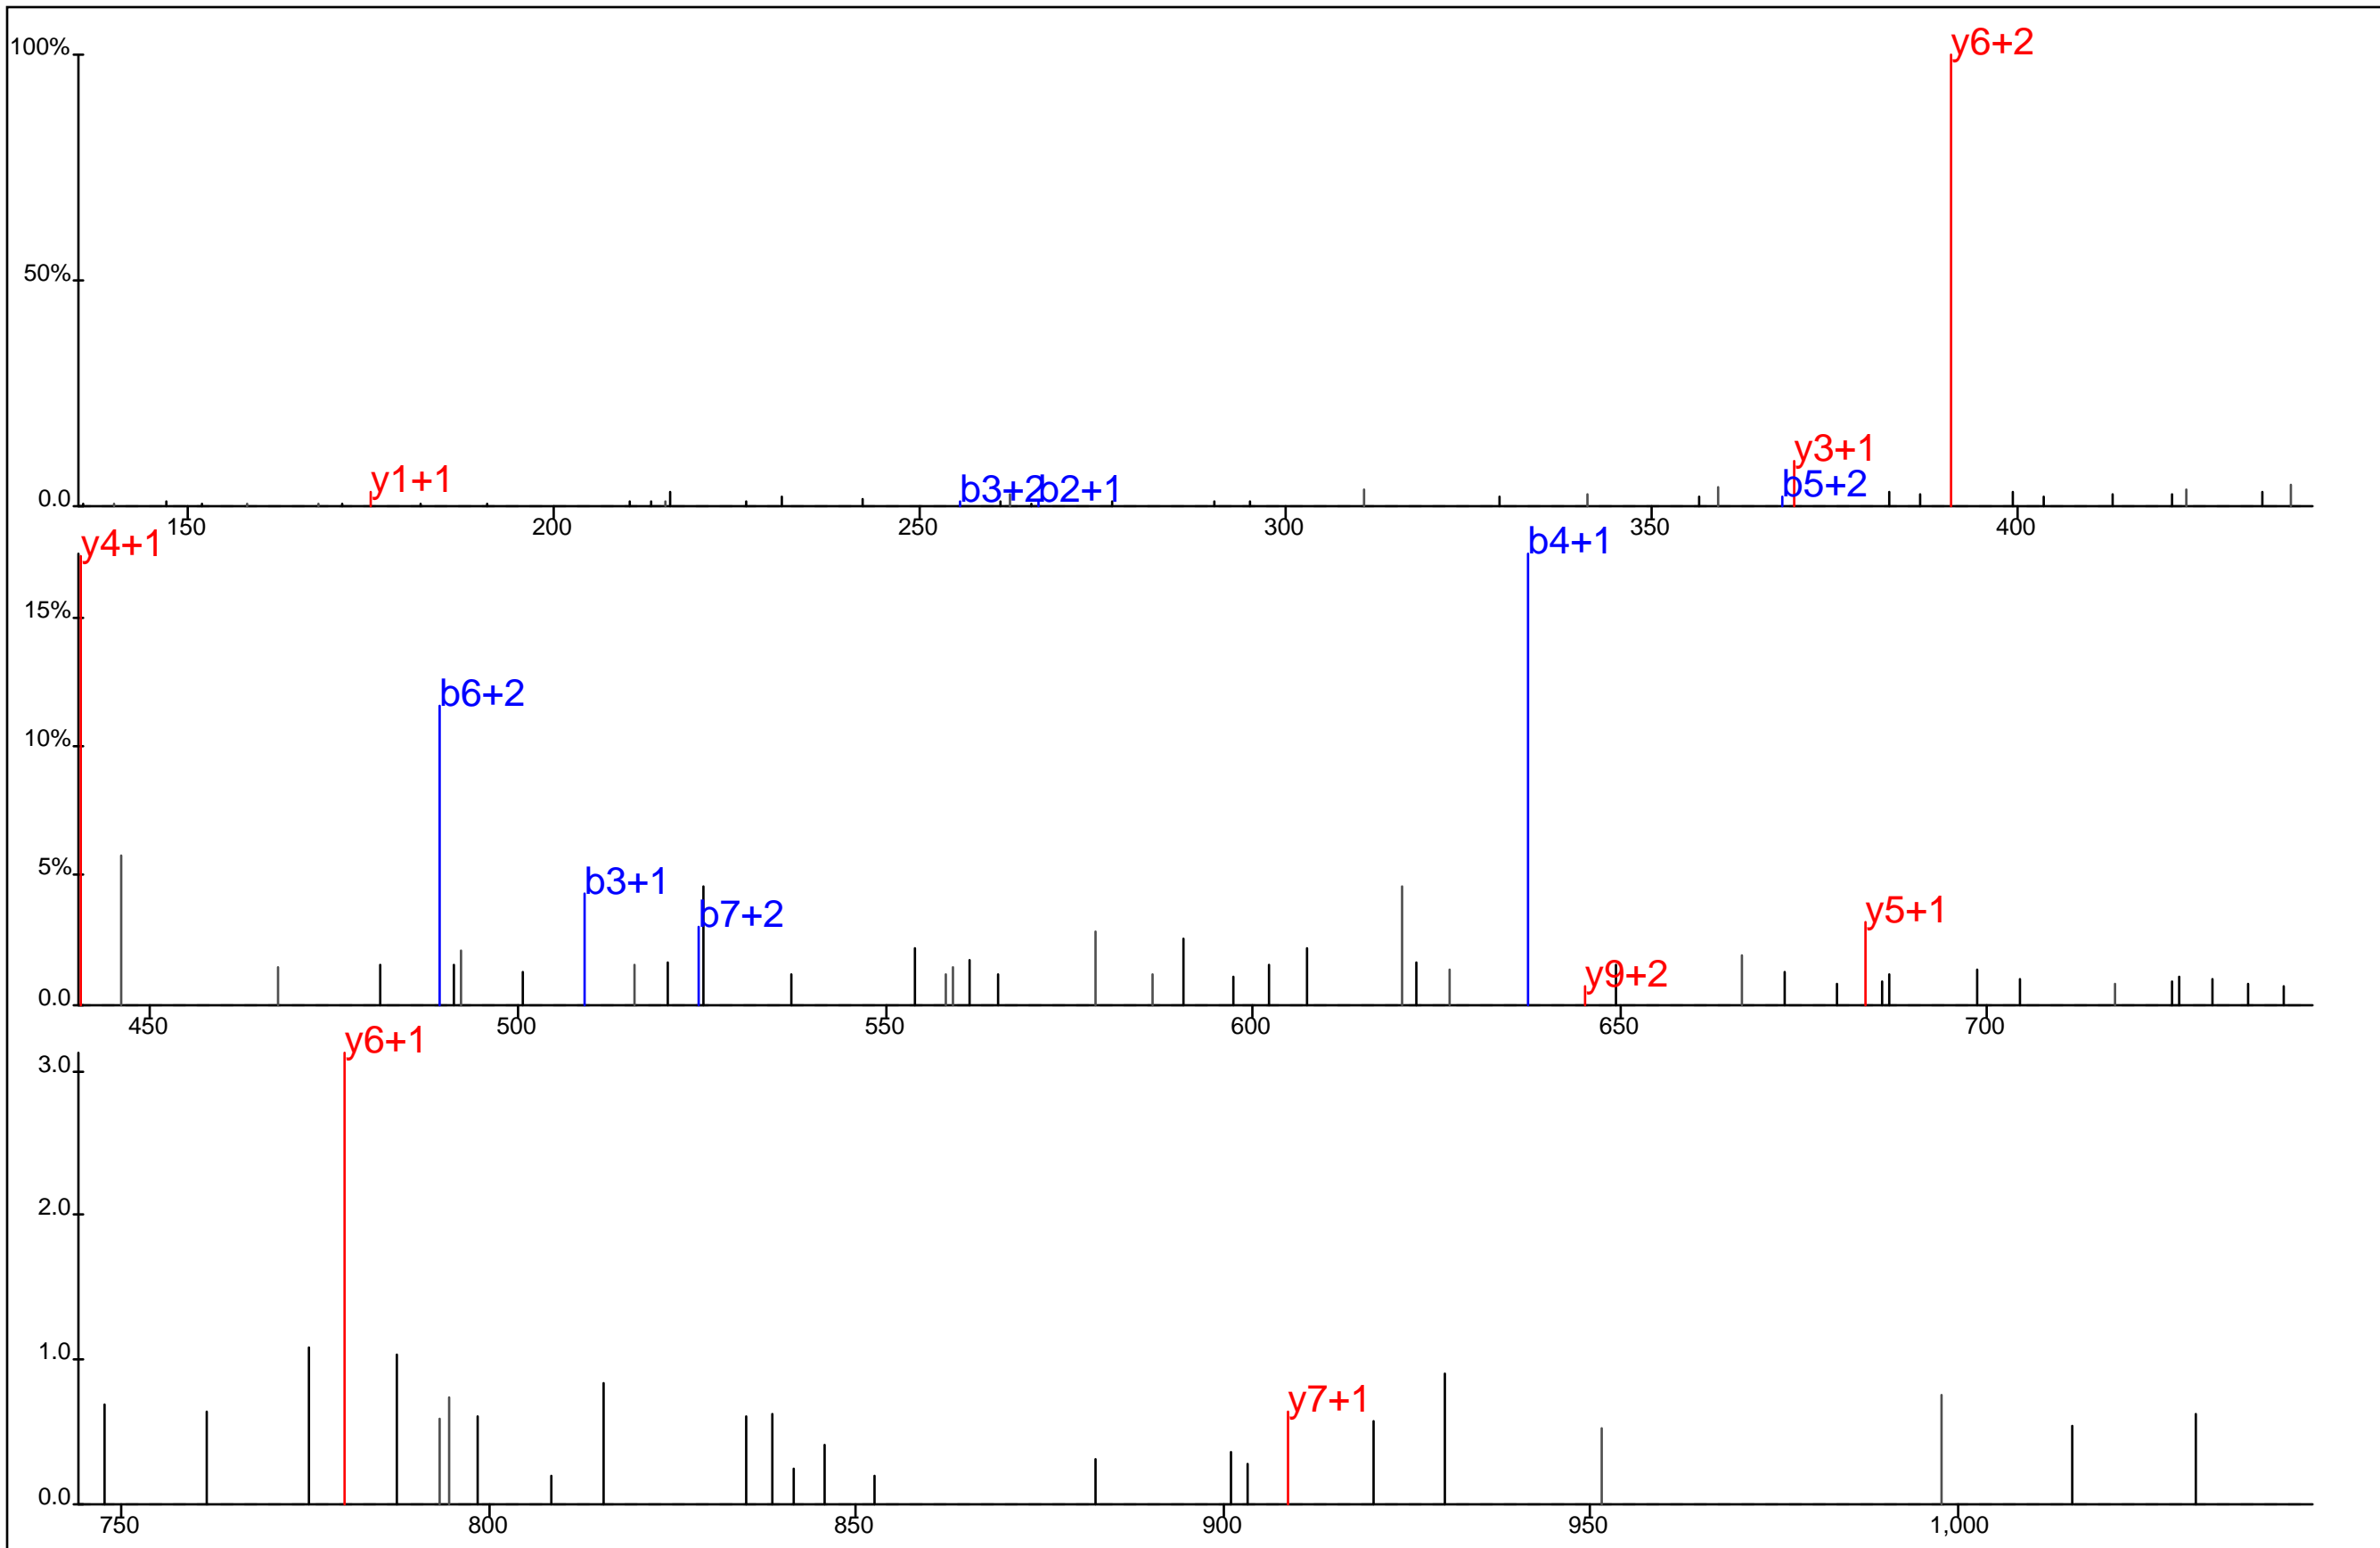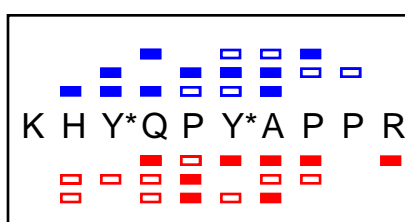

Protein Name: CD28  
 gi Accession: 0  
 Precursor Mass: 472.8667+3  
 Delta Mass: 0.450 ppm  
 XCorr: 35.05

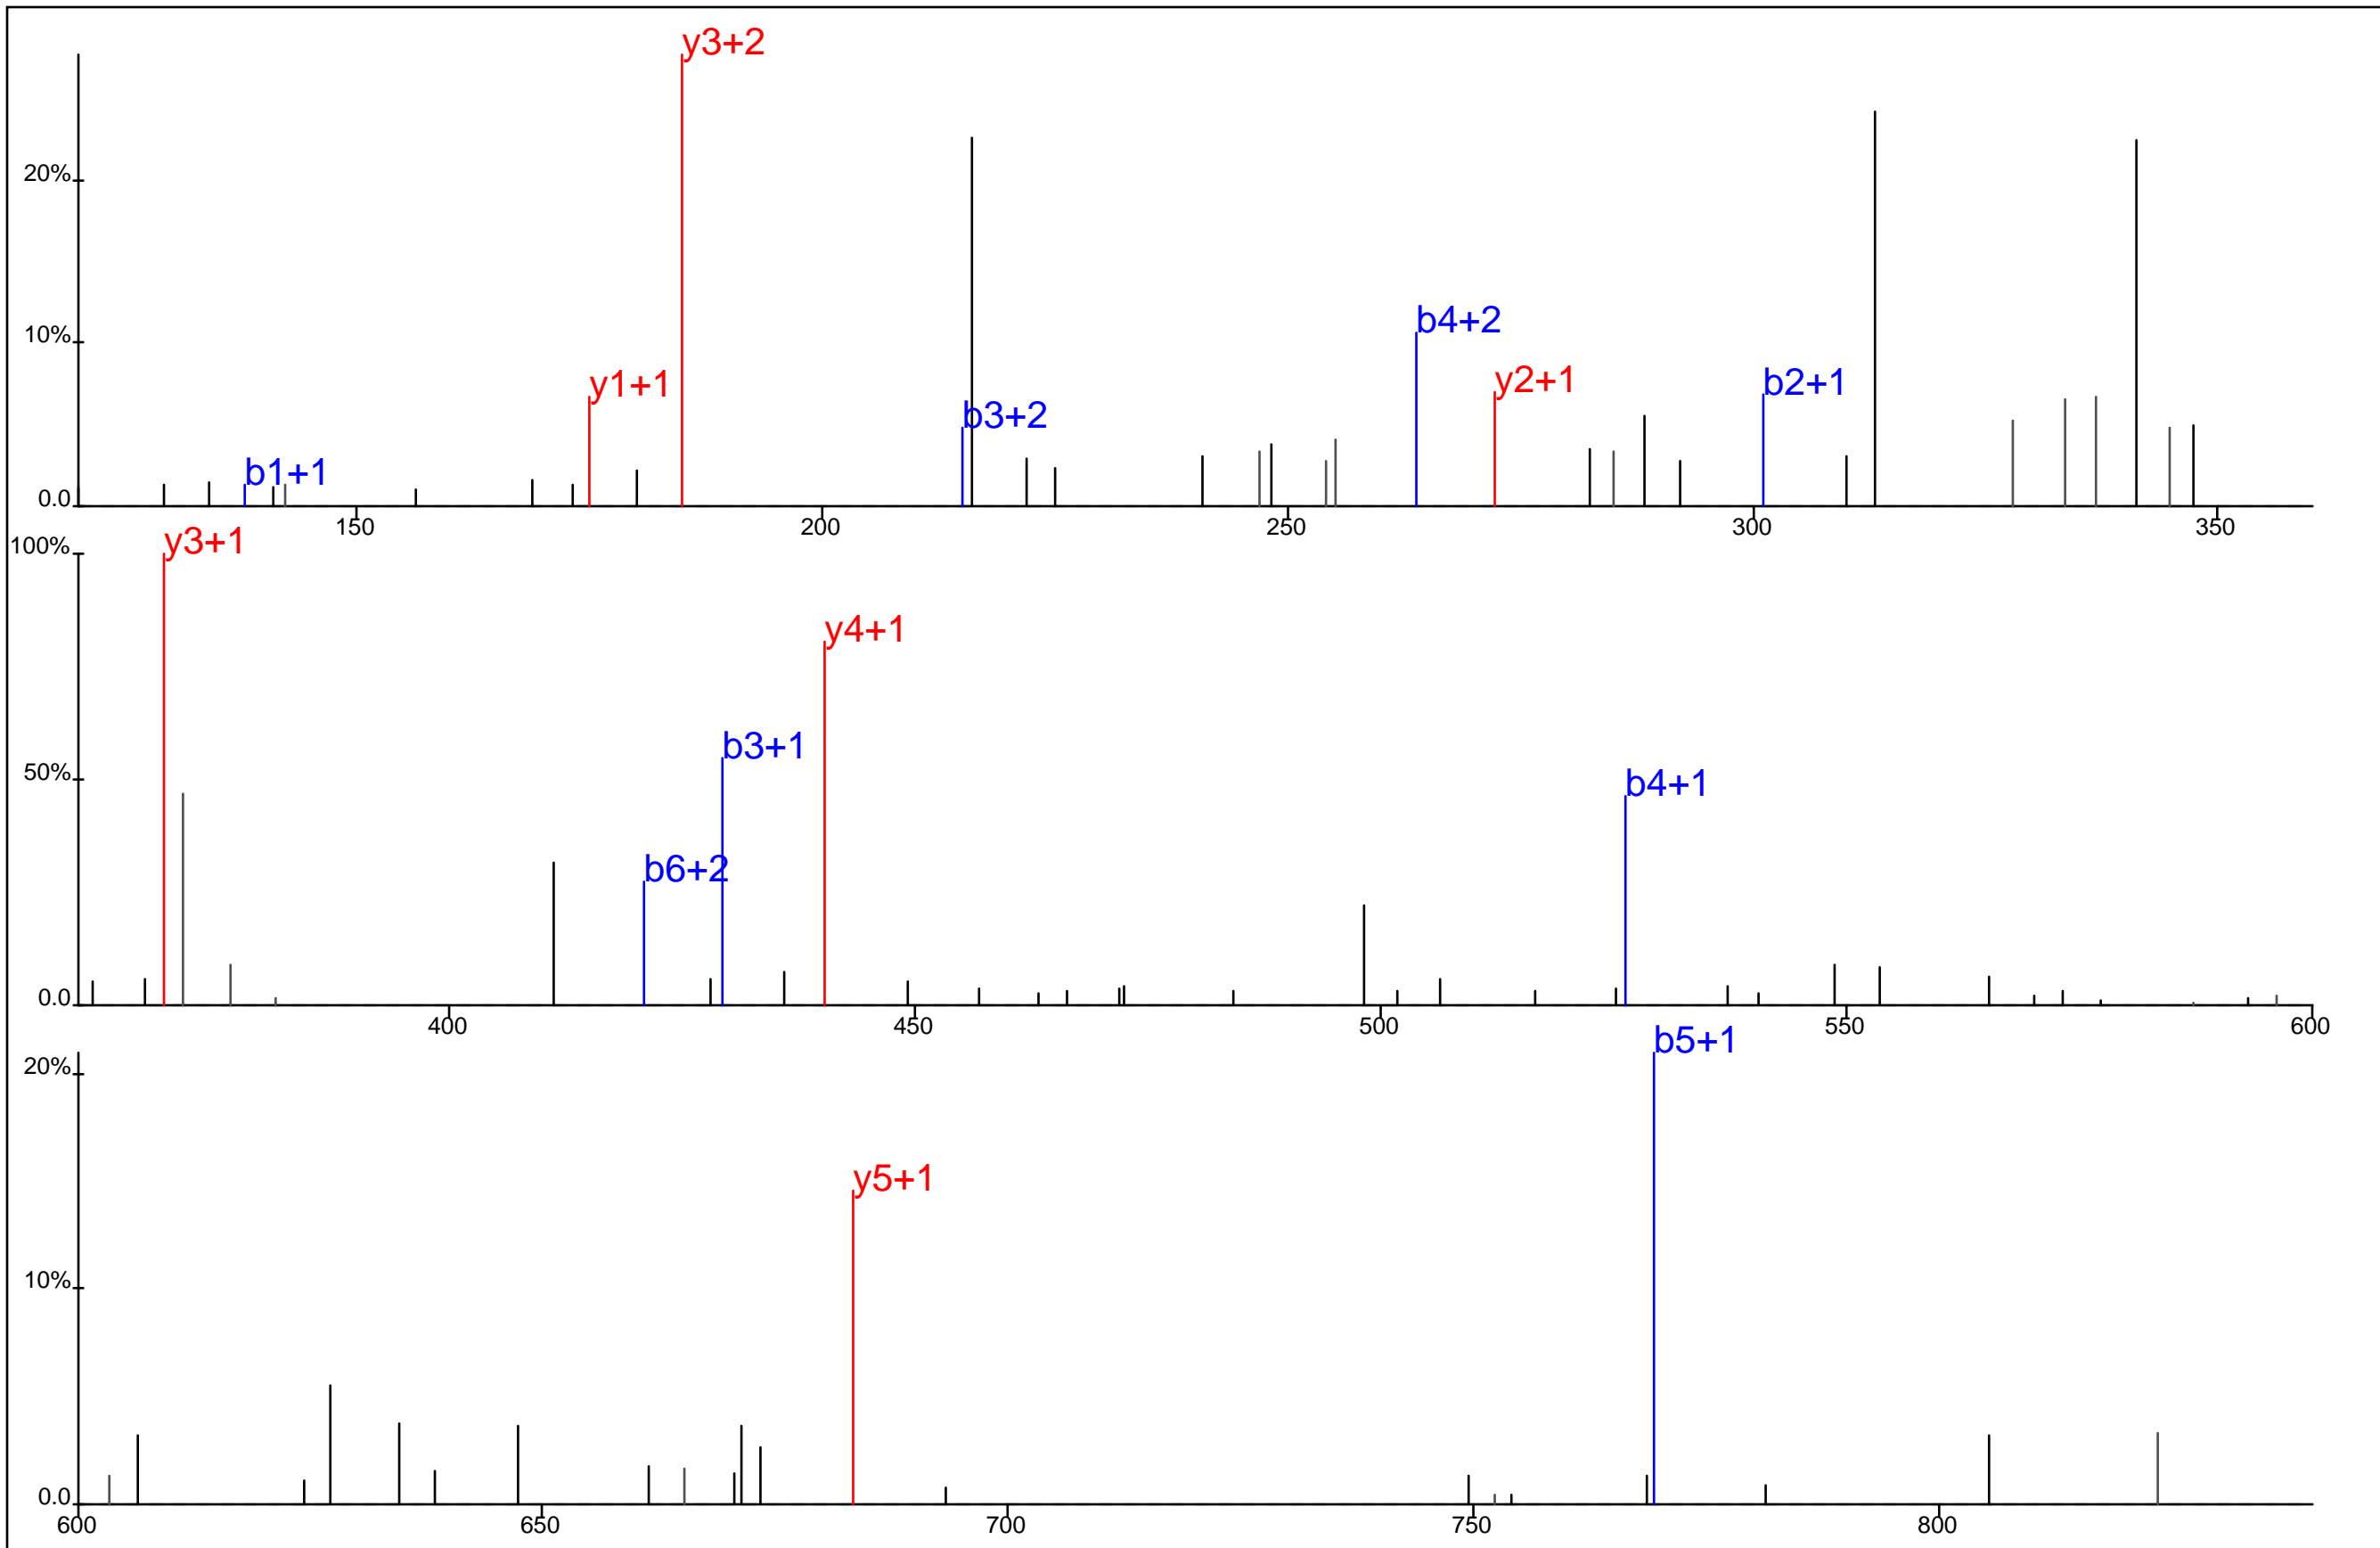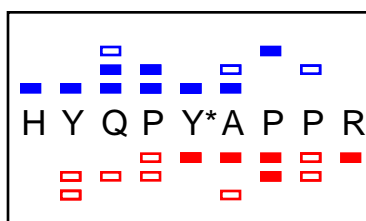

Protein Name: CD28  
 gi Accession: 0  
 Precursor Mass: 403.5133+3  
 Delta Mass: 0.381 ppm  
 XCorr: 28.98

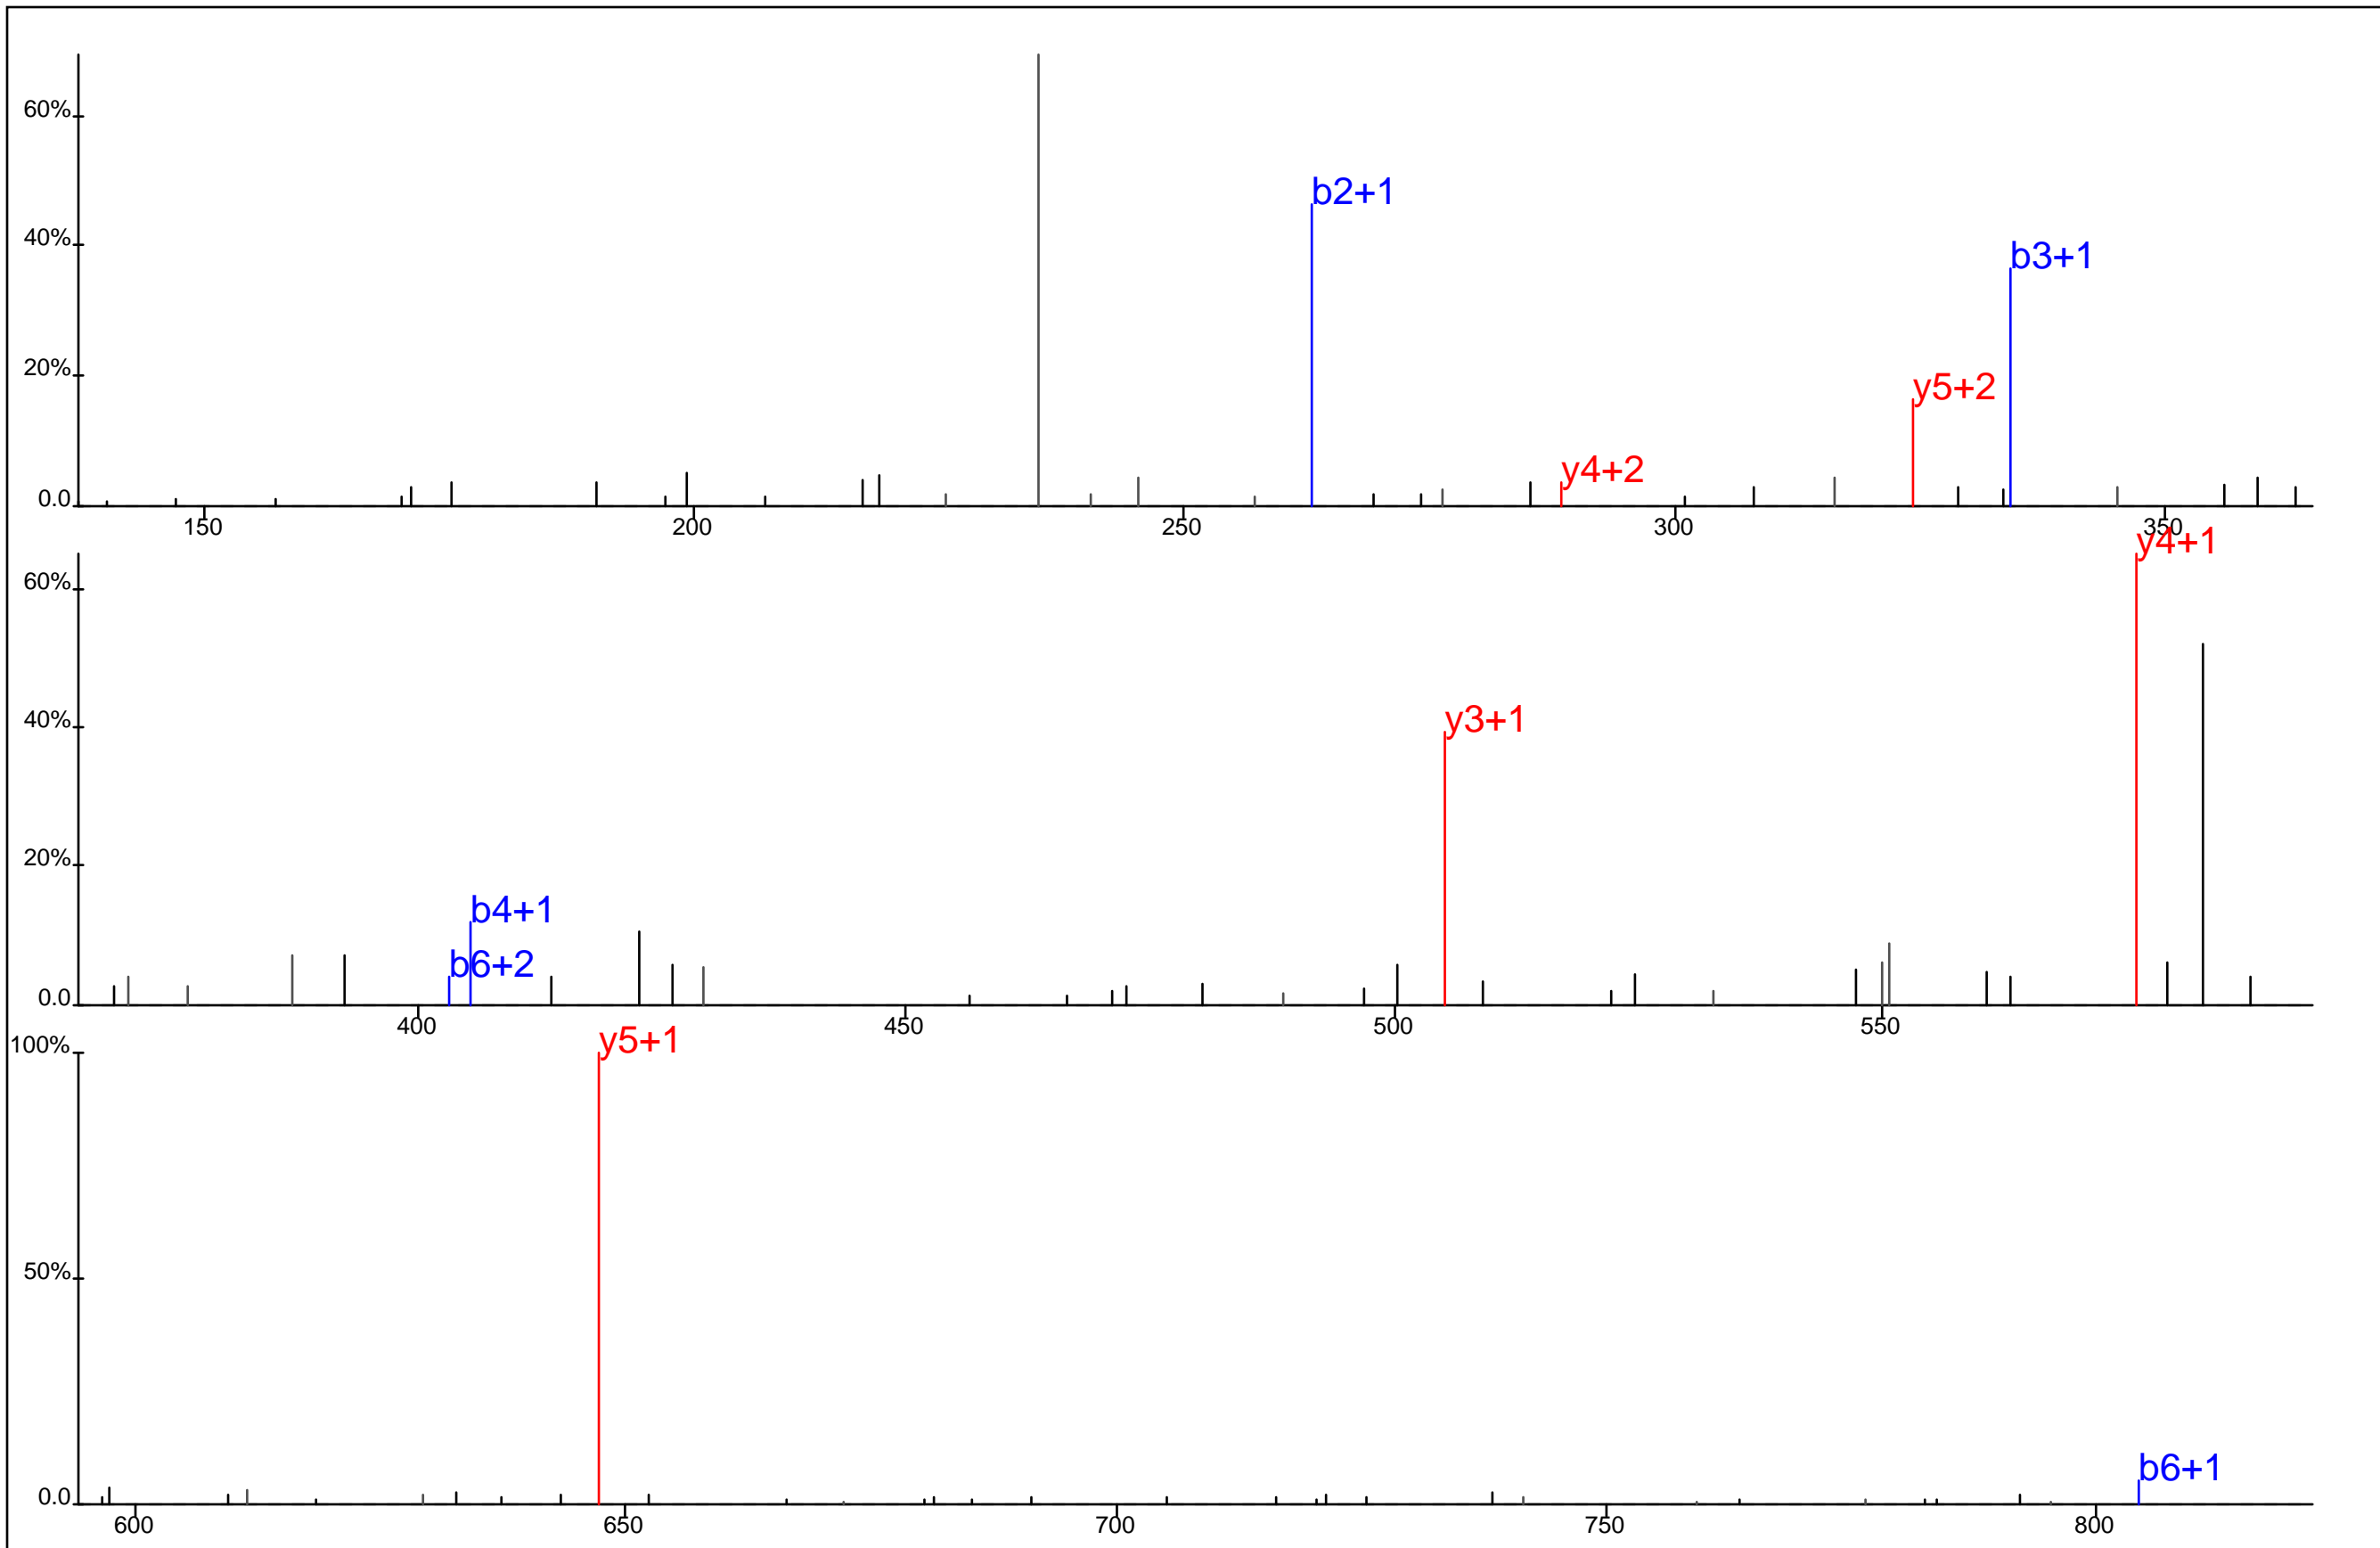

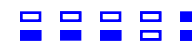
  
**D F A A Y\* R S**
  


Protein Name: CD28  
 gi Accession: 0  
 Precursor Mass: 455.1786+2  
 Delta Mass: 0.264 ppm  
 XCorr: 28.07

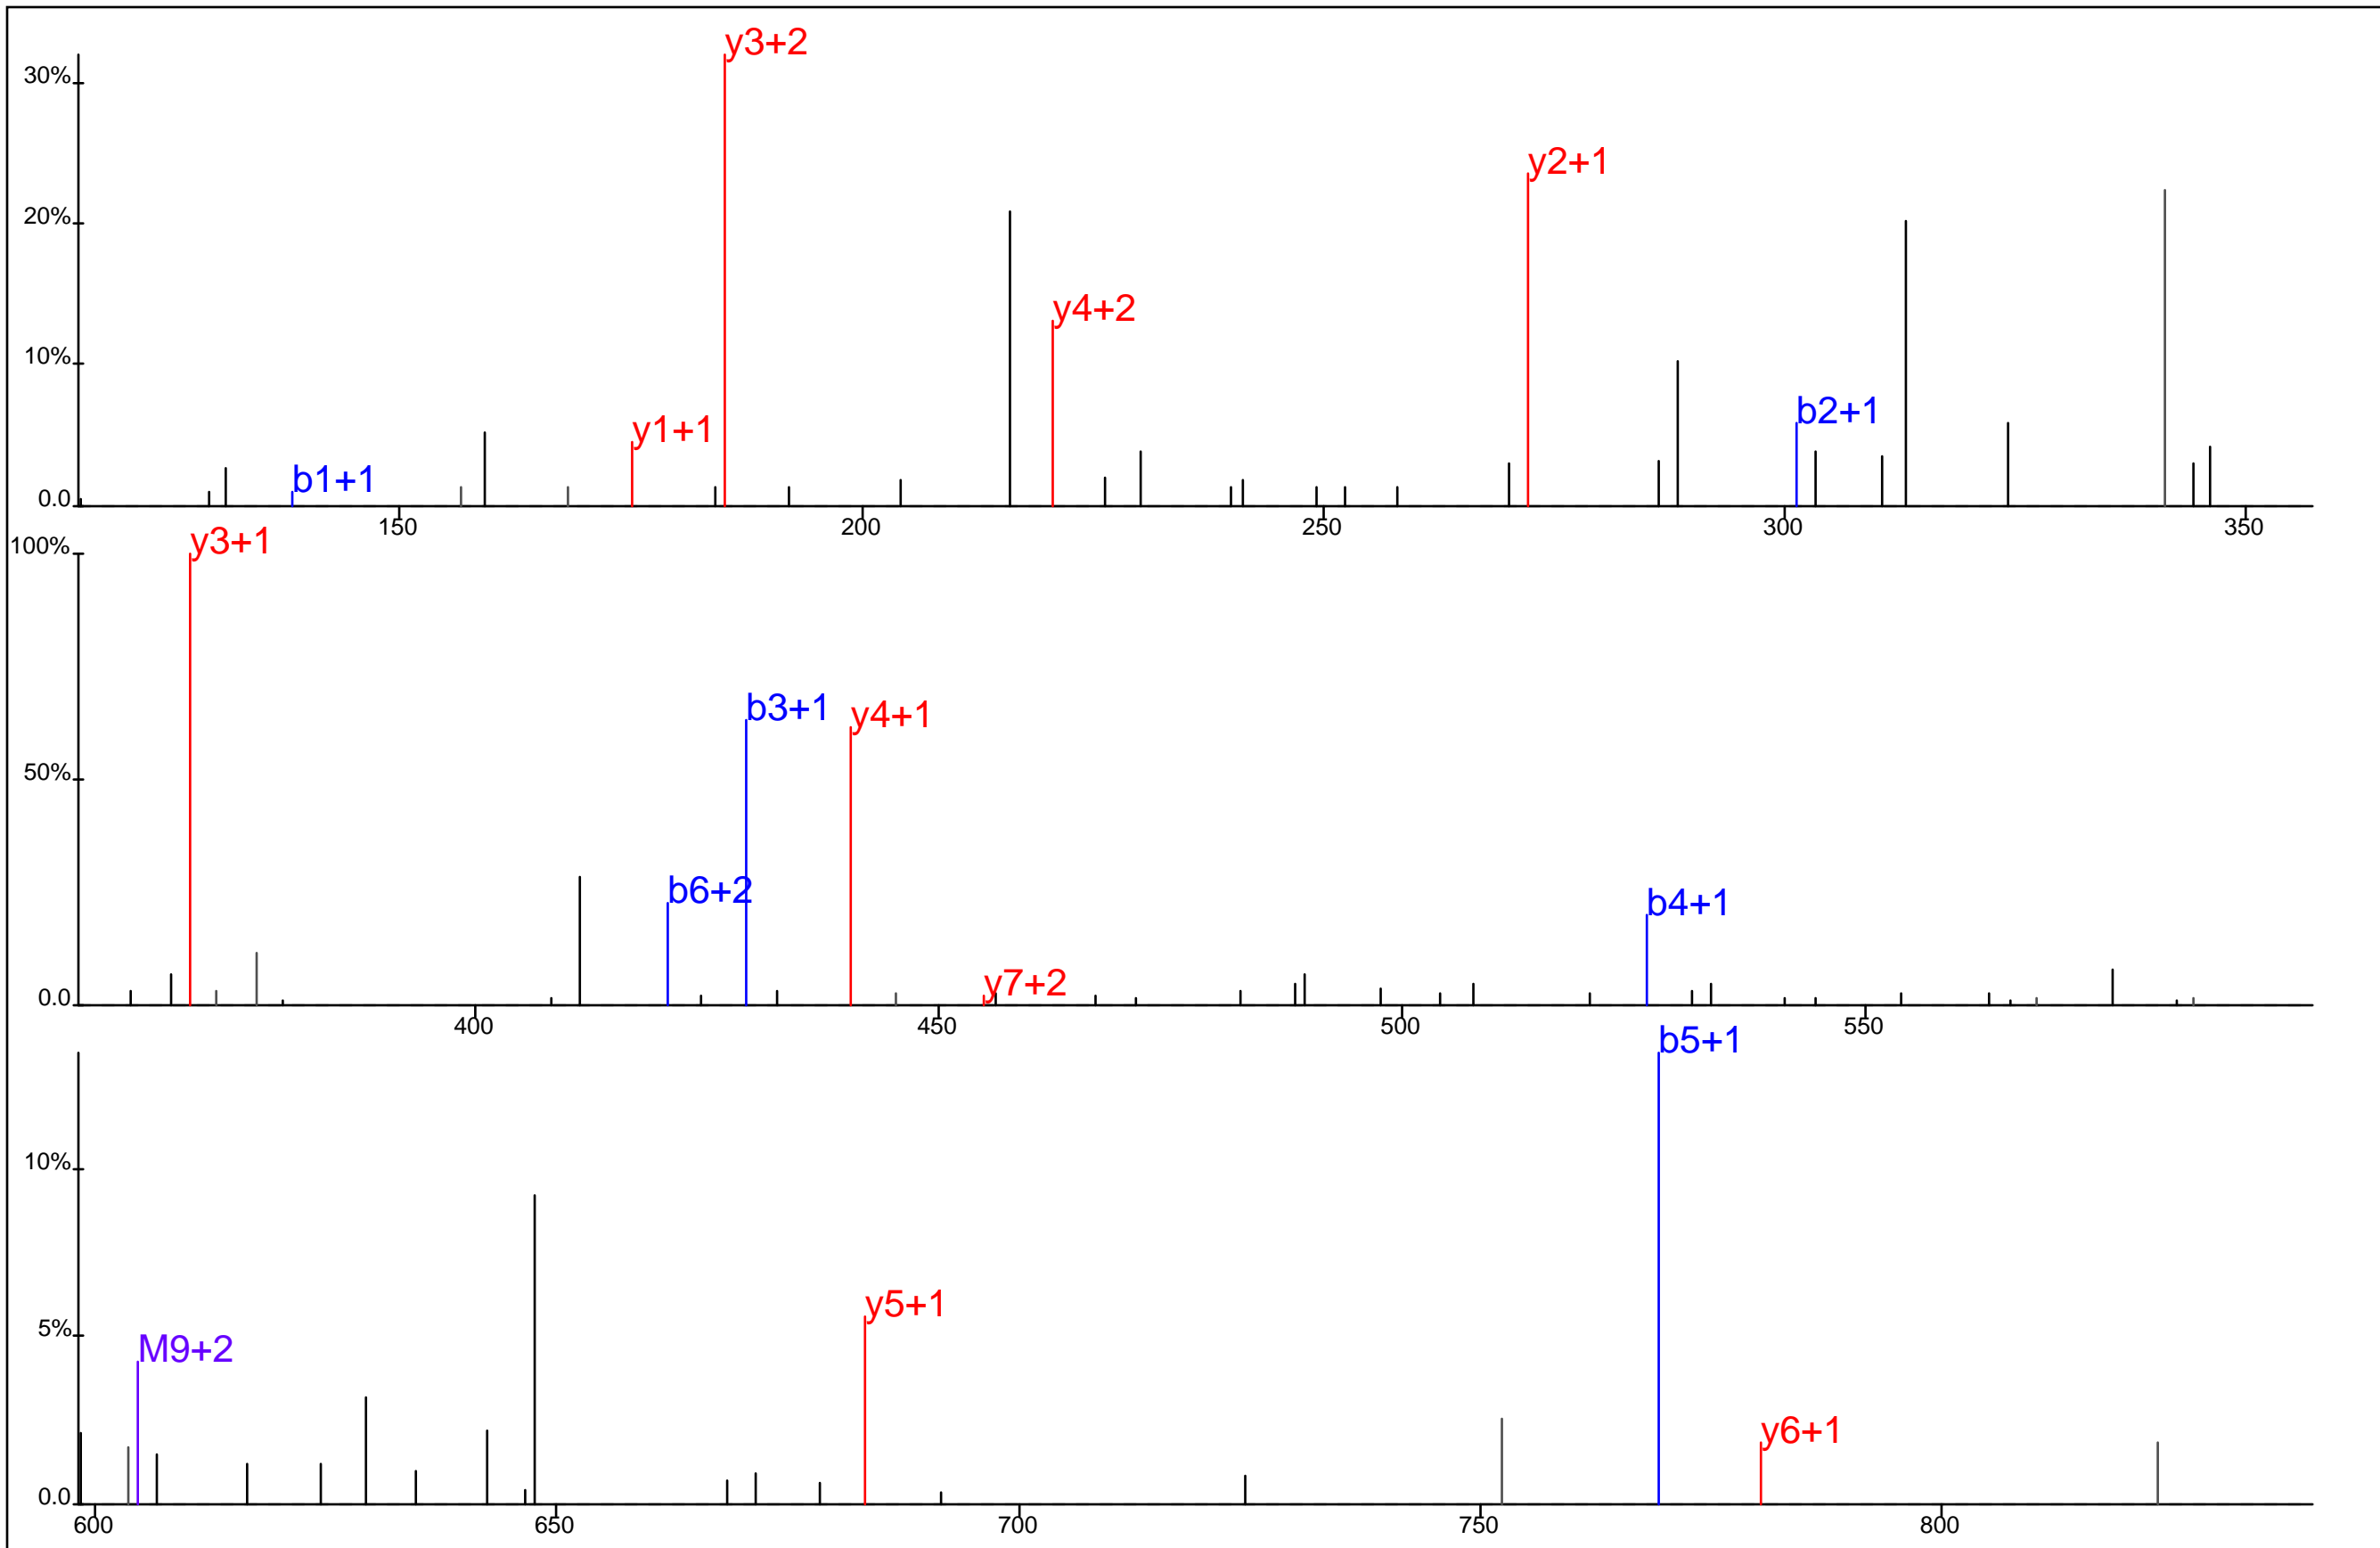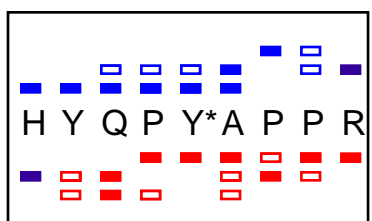

Protein Name: CD28  
 gi Accession: 0  
 Precursor Mass: 403.5133+3  
 Delta Mass: 0.458 ppm  
 XCorr: 35.37

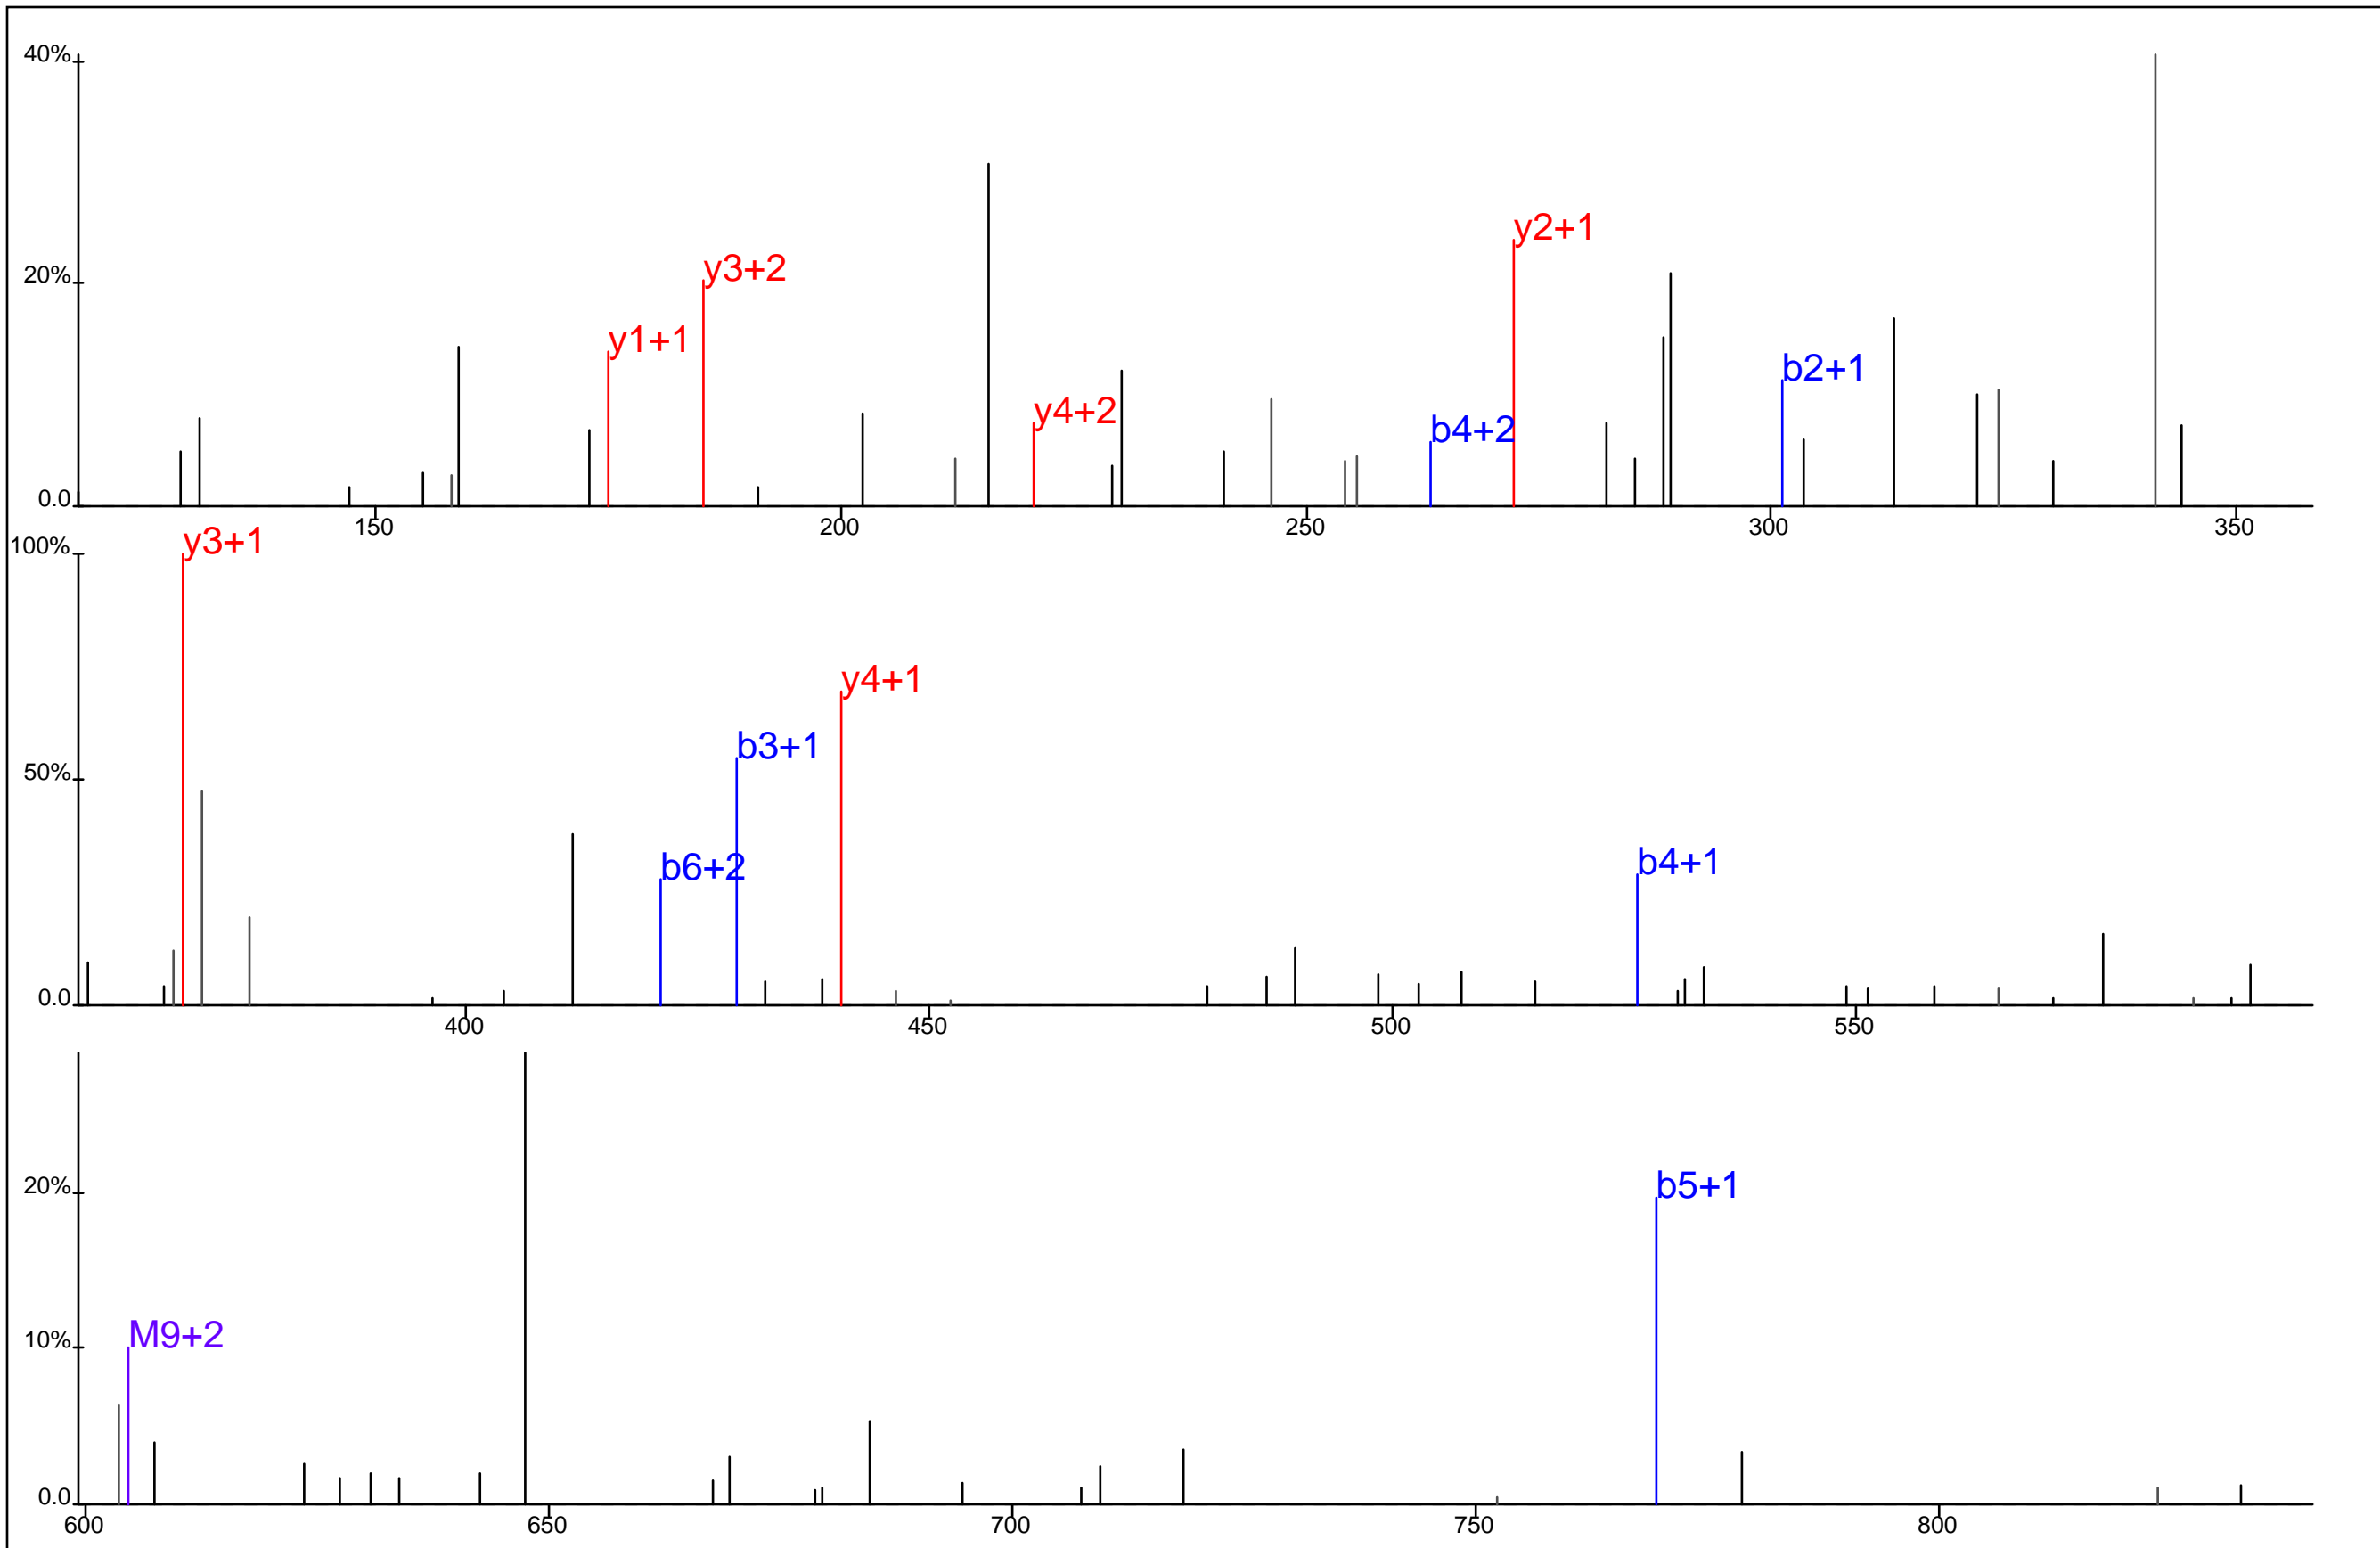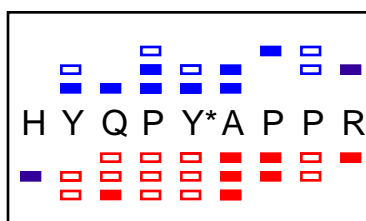

Protein Name: CD28  
 gi Accession: 0  
 Precursor Mass: 403.5135+3  
 Delta Mass: 0.836 ppm  
 XCorr: 21.78



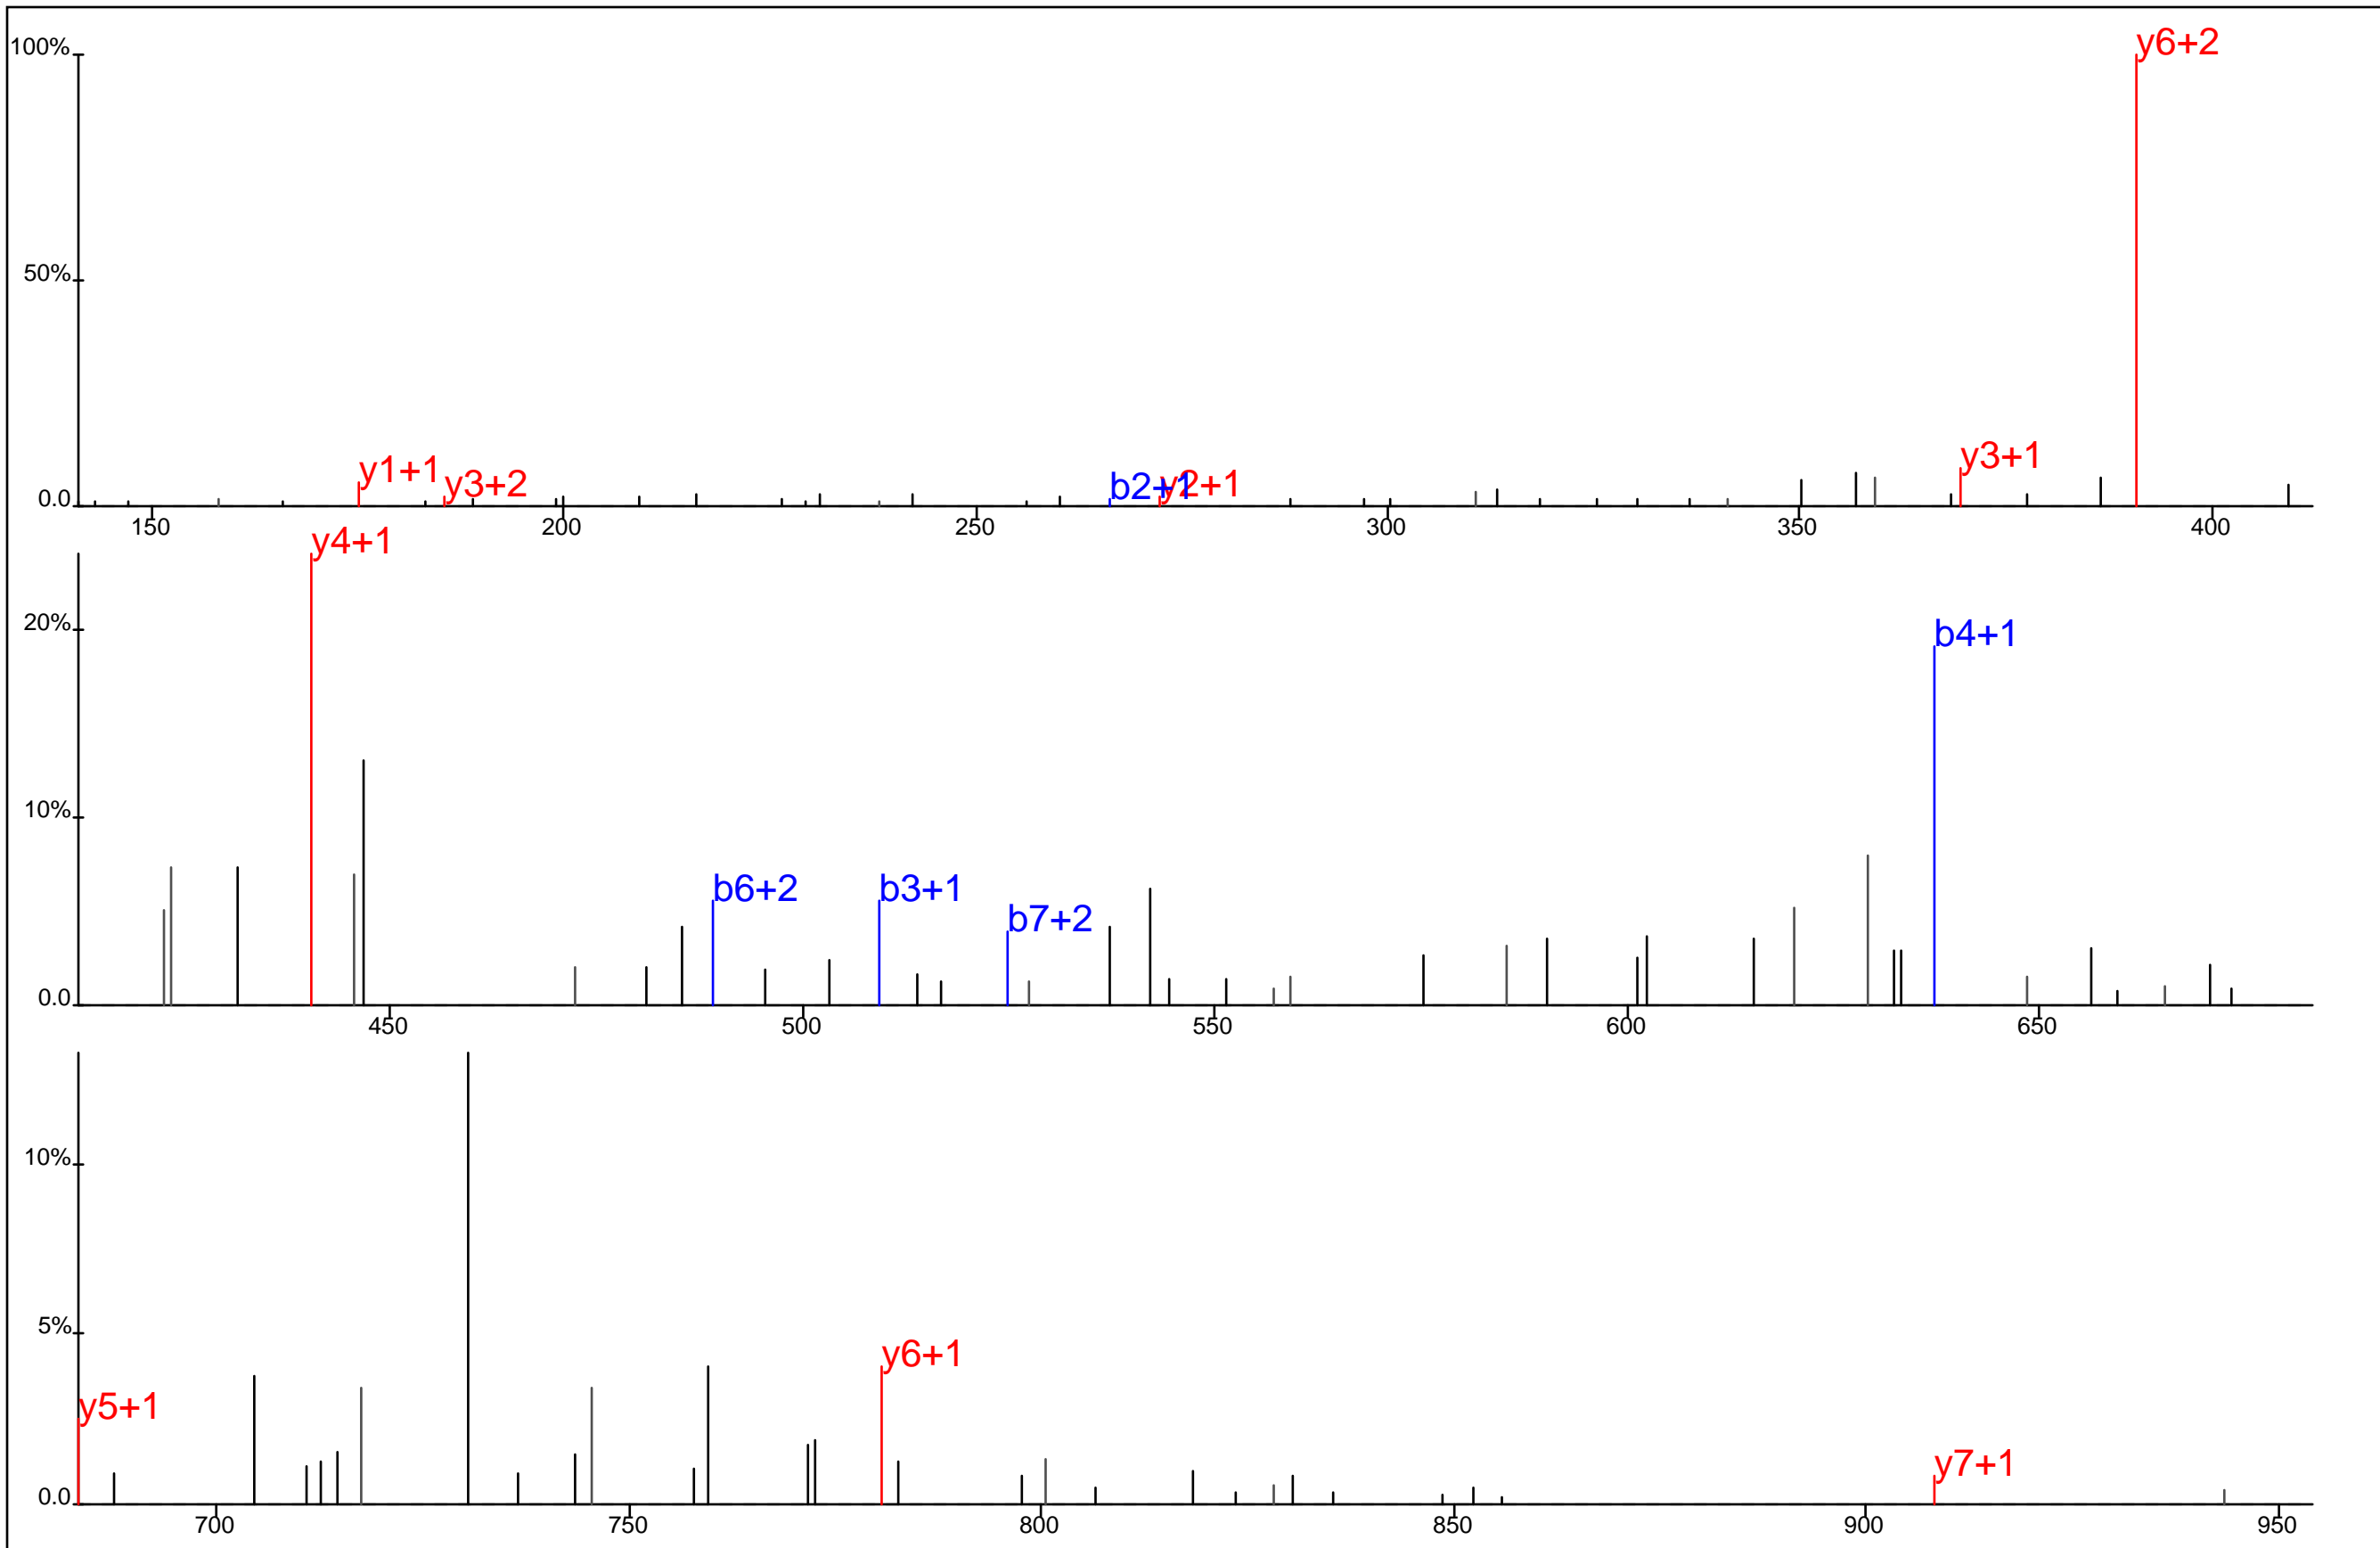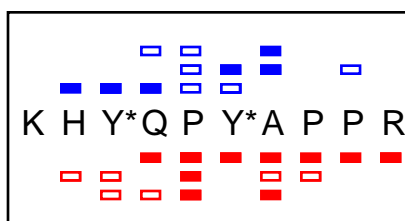

Protein Name: CD28  
 gi Accession: 0  
 Precursor Mass: 472.8650+3  
 Delta Mass: 4.005 ppm  
 XCorr: 23.84

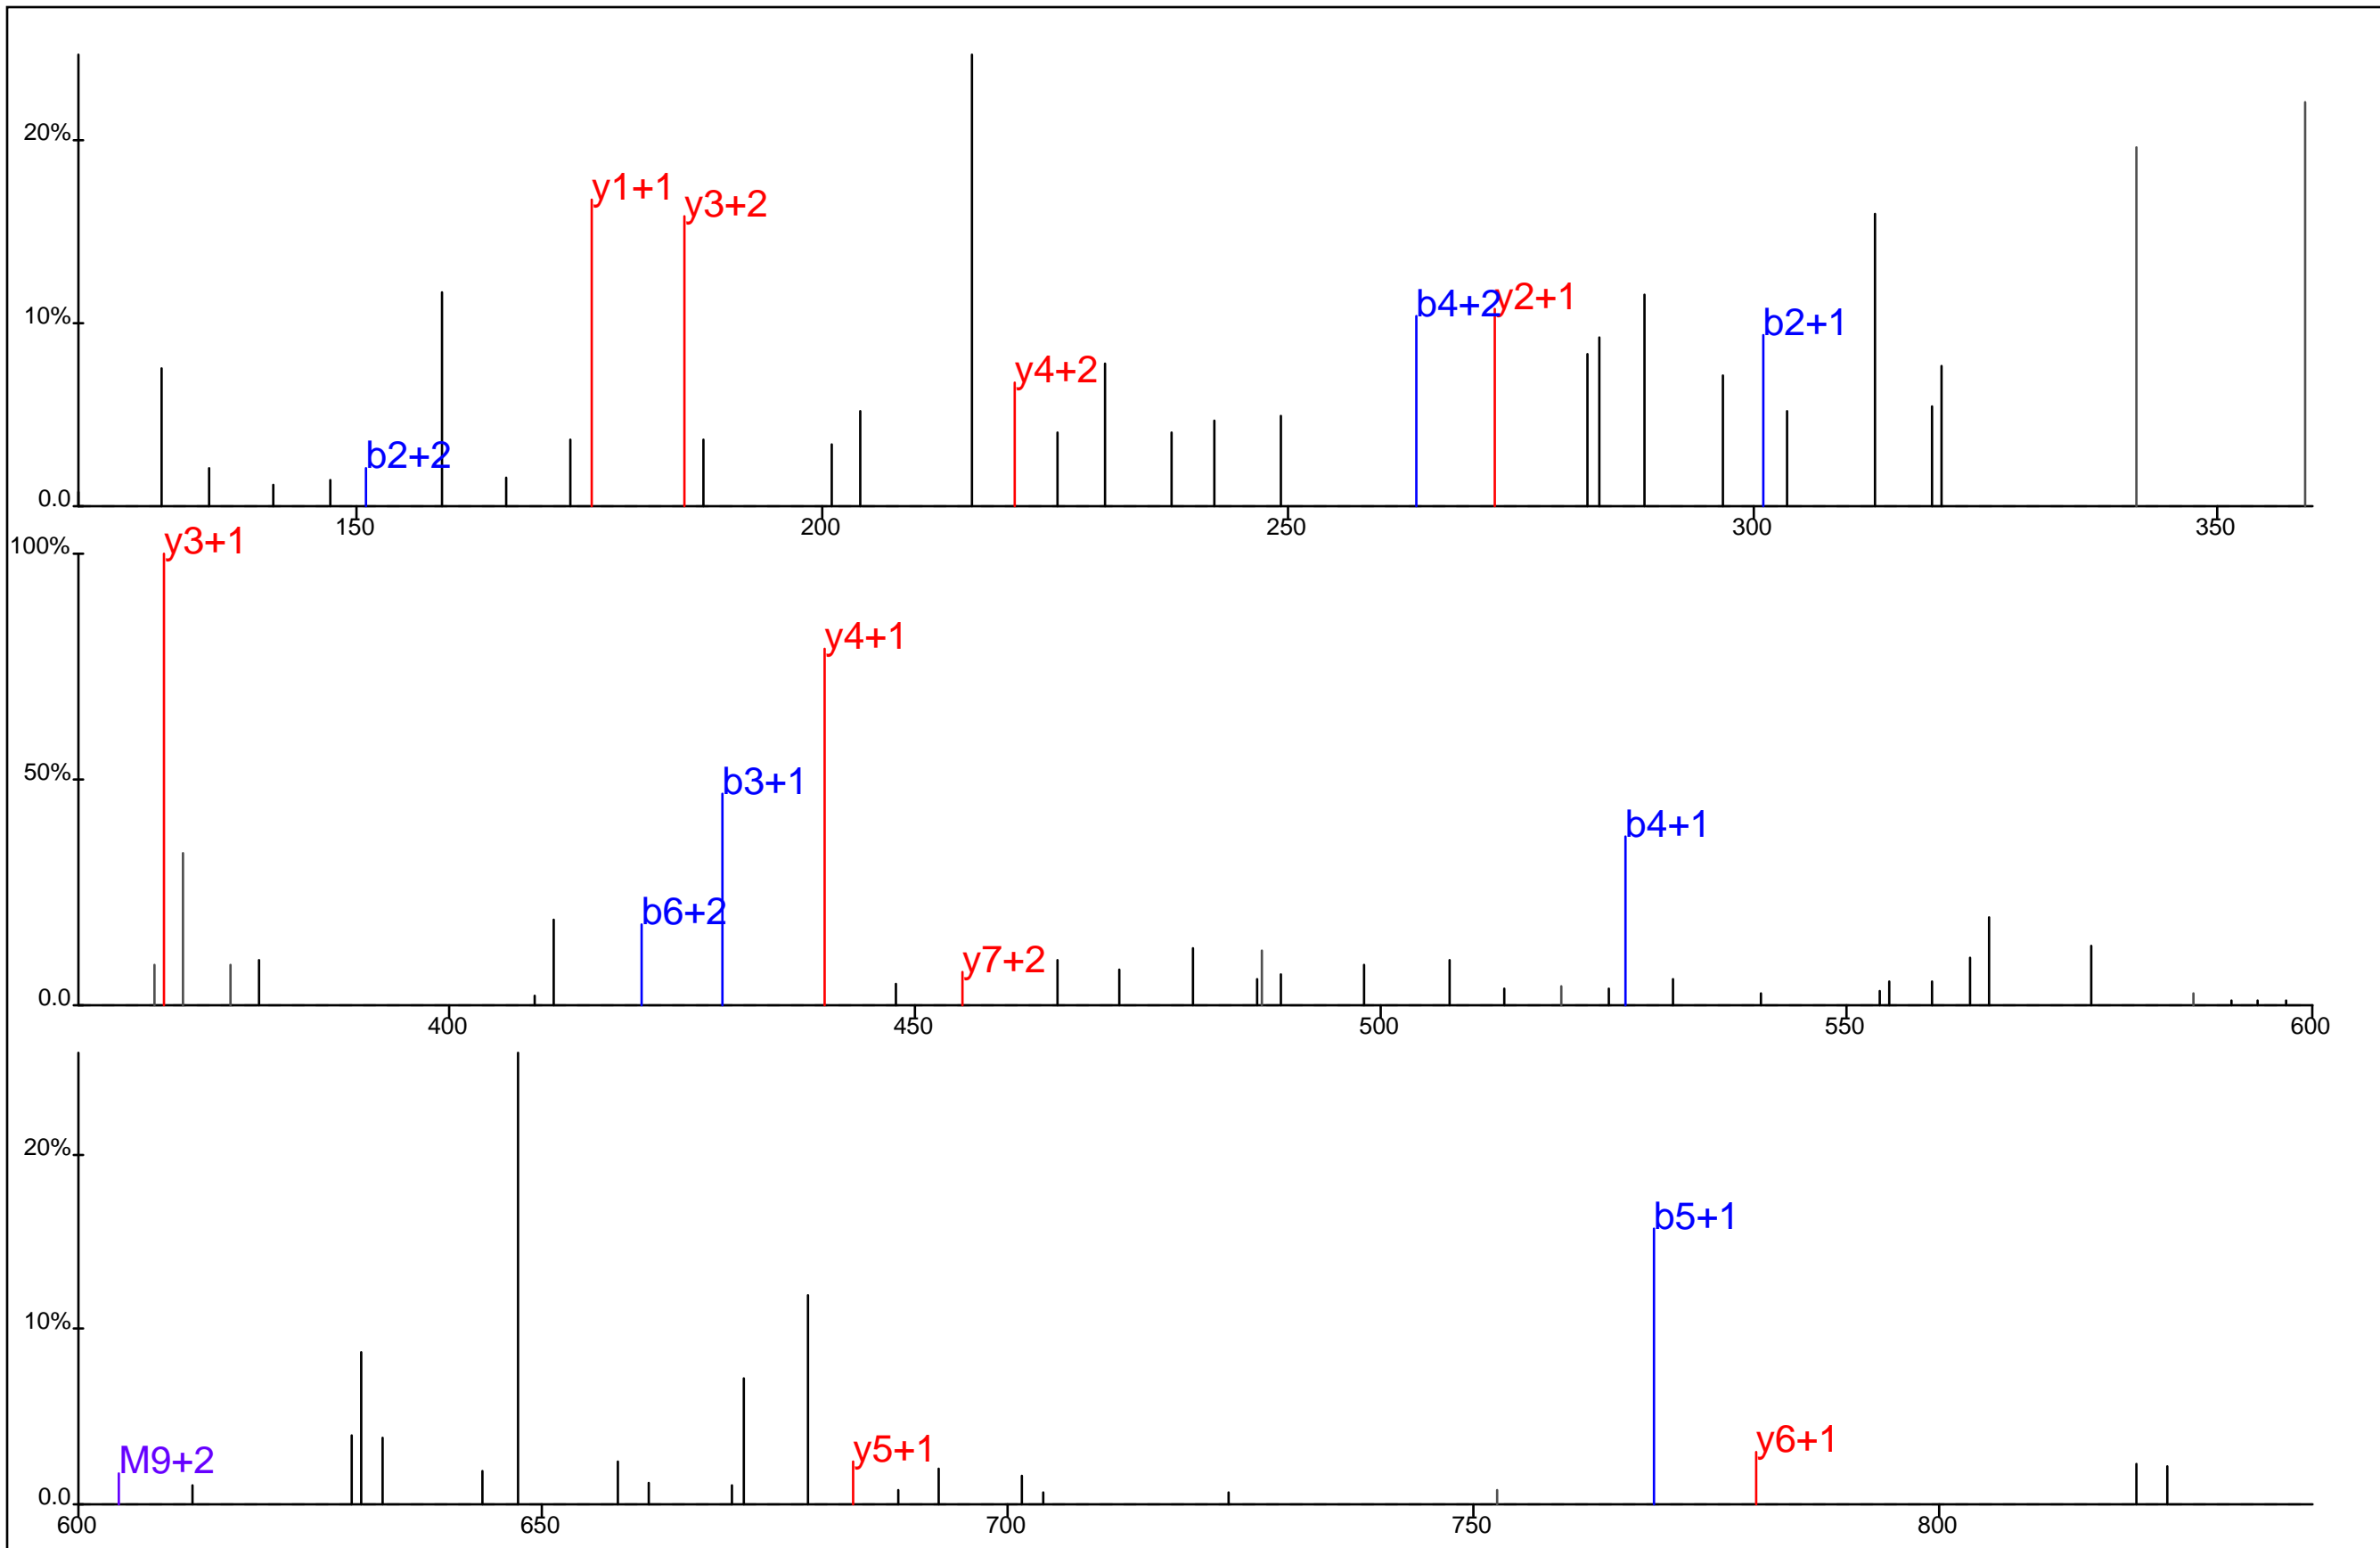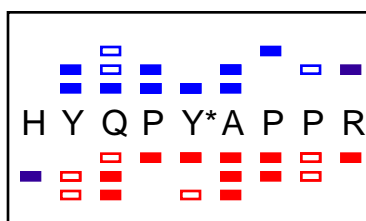

Protein Name: CD28  
 gi Accession: 0  
 Precursor Mass: 403.5131+3  
 Delta Mass: 0.004 ppm  
 XCorr: 22.33

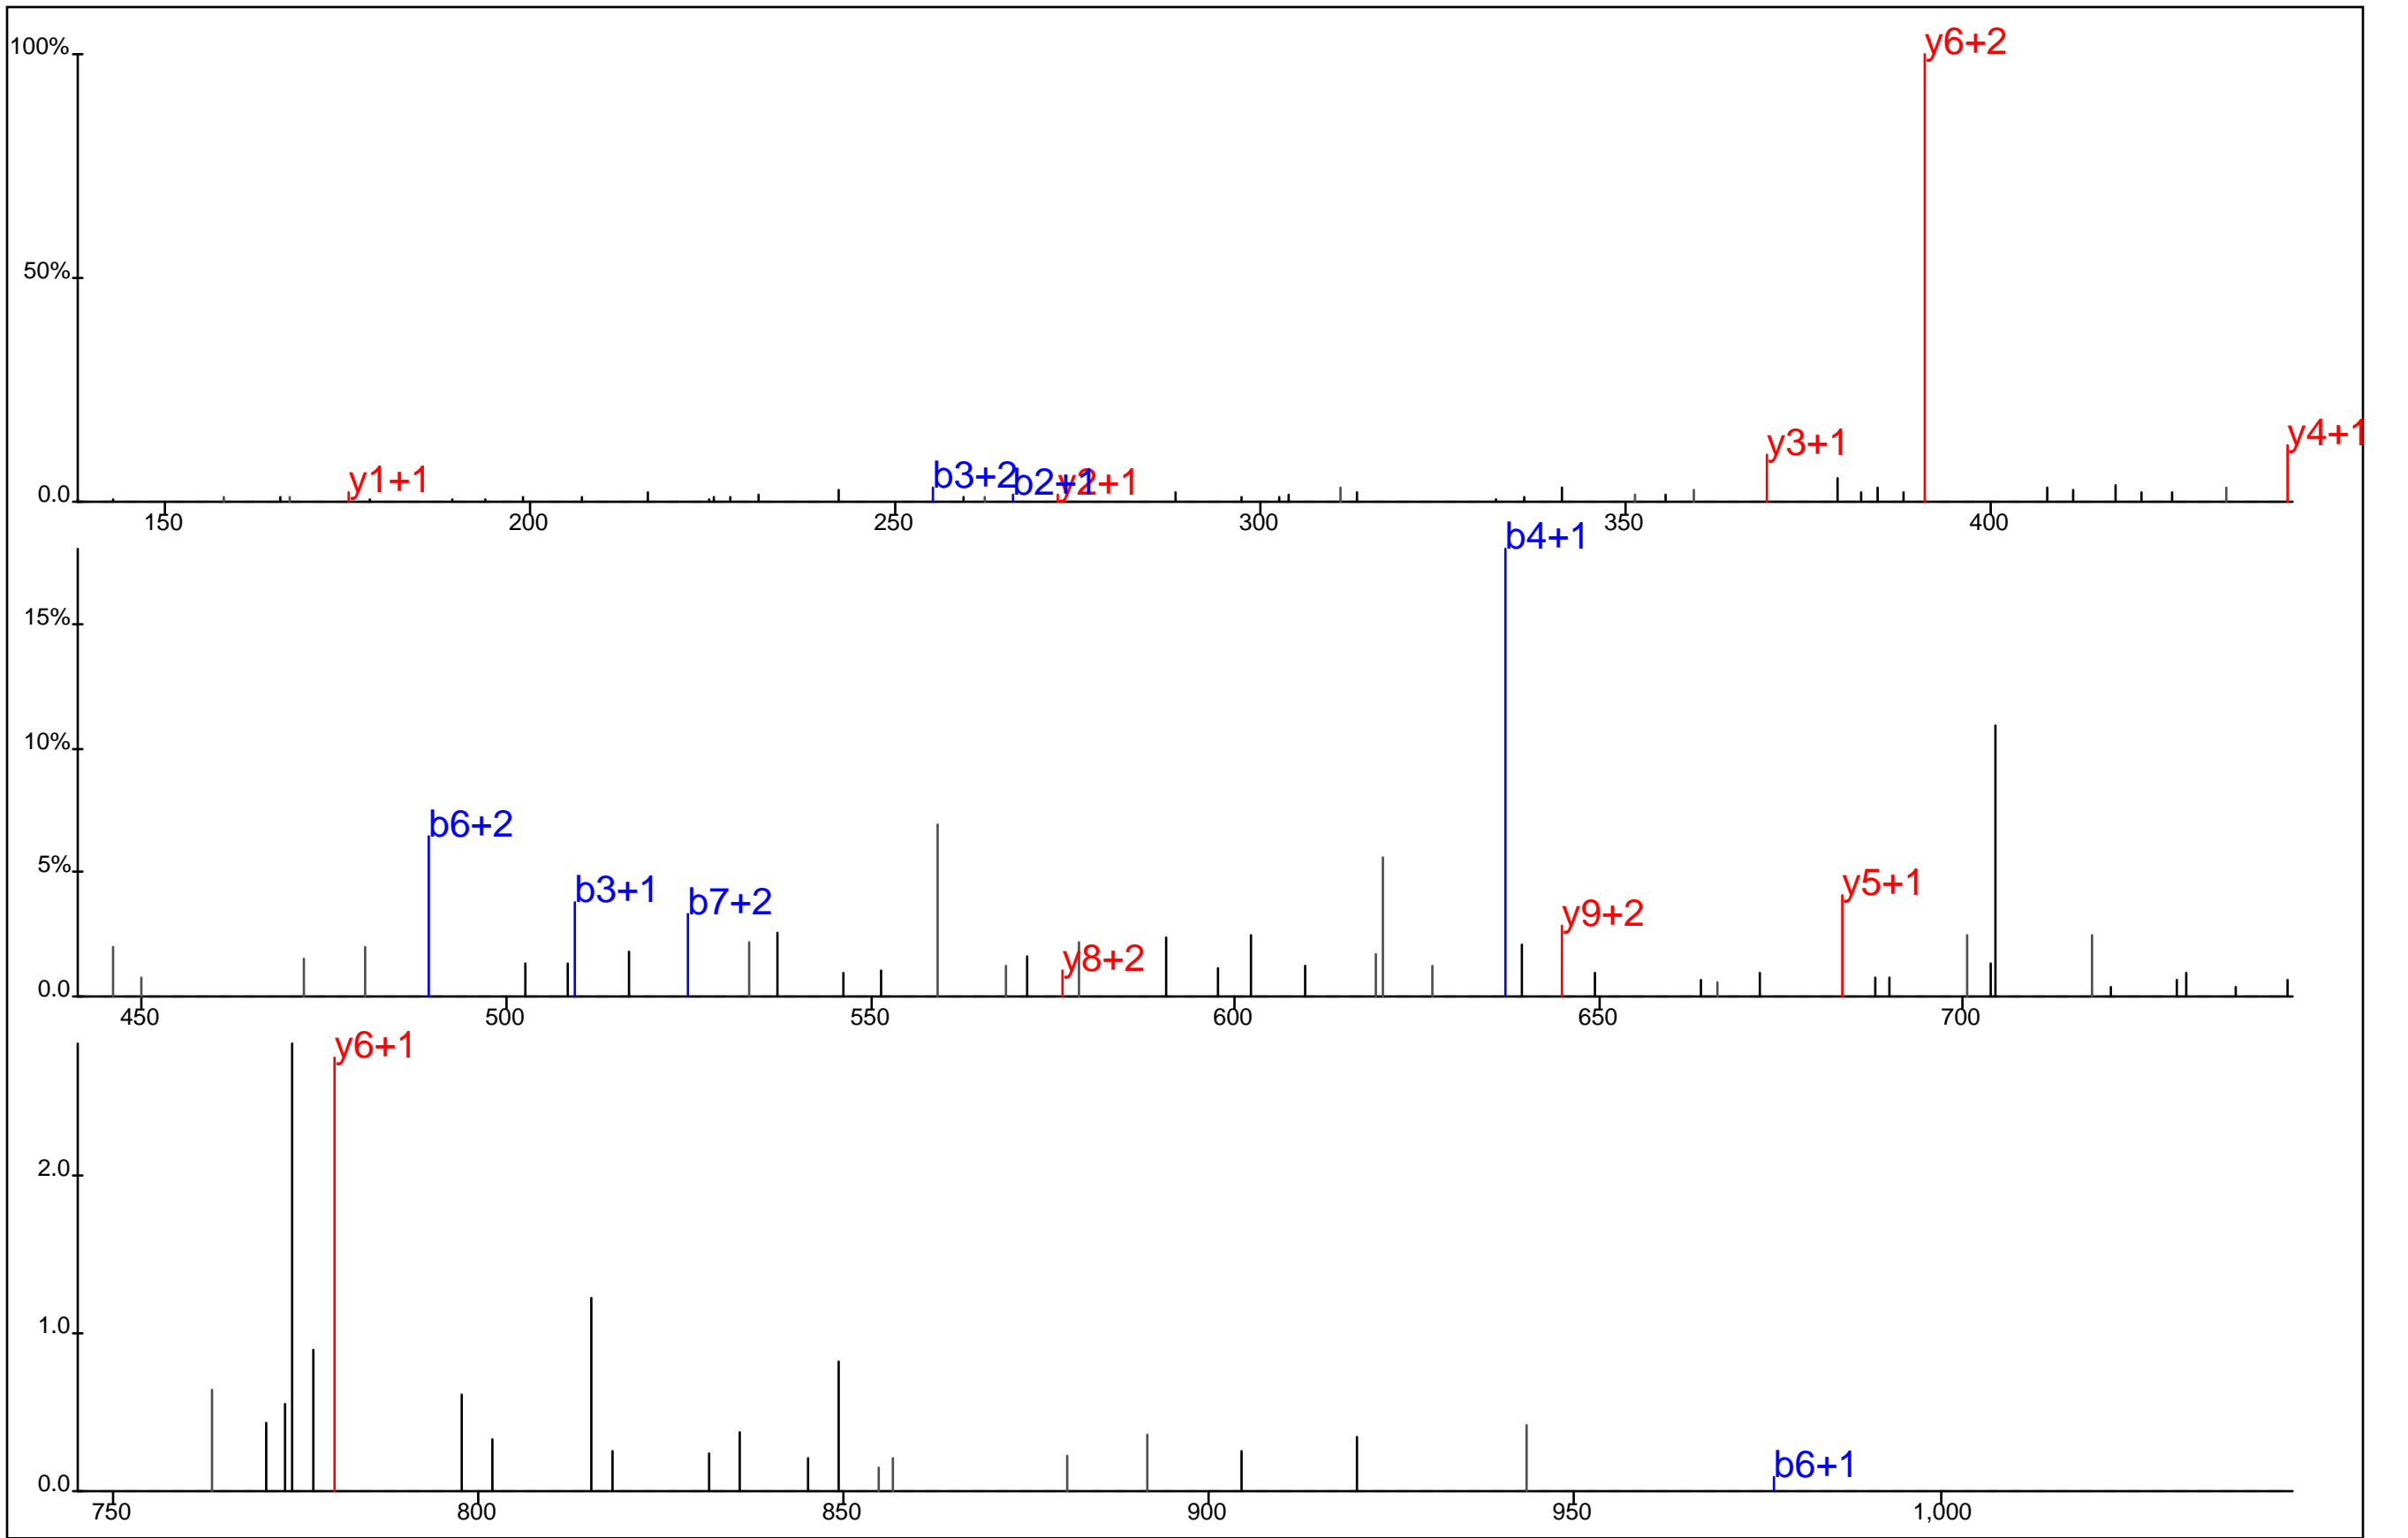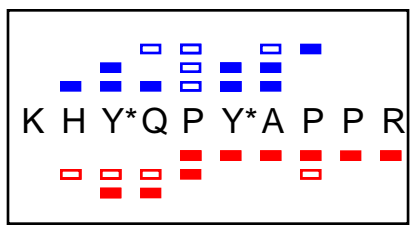

Protein Name: CD28  
 gi Accession: 0  
 Precursor Mass: 472.8659+3  
 Delta Mass: 2.002 ppm  
 XCorr: 29.48

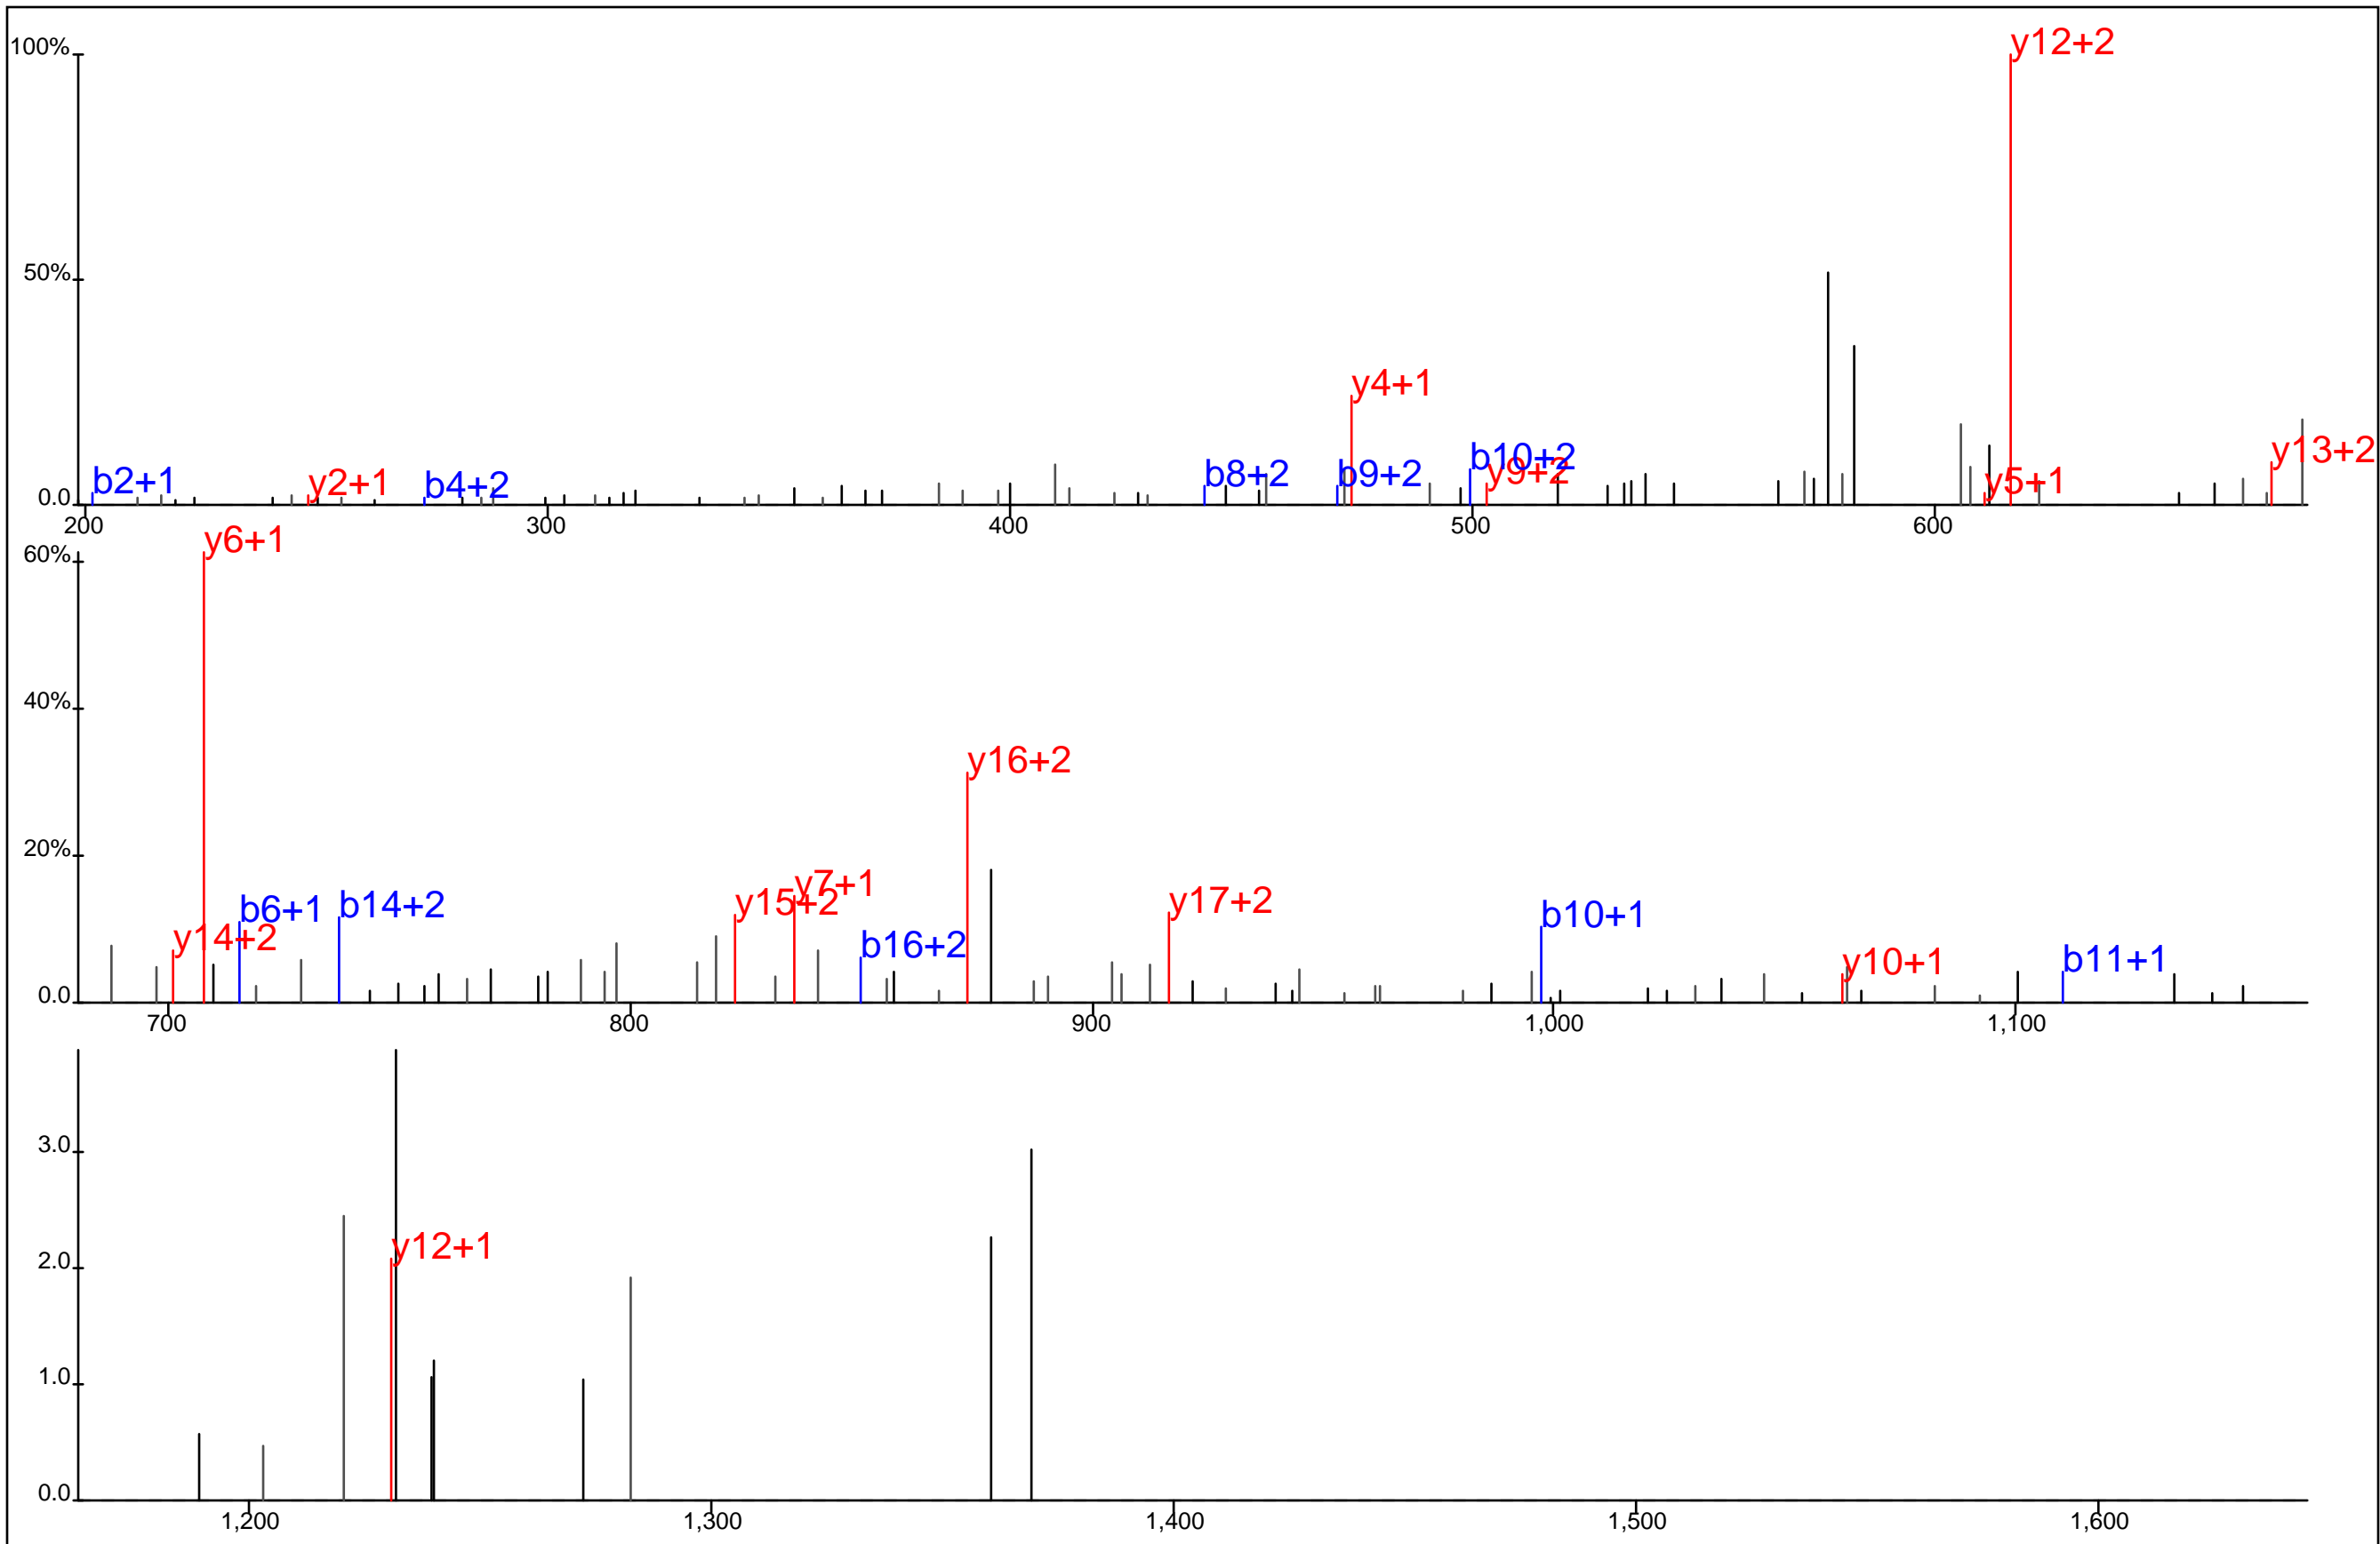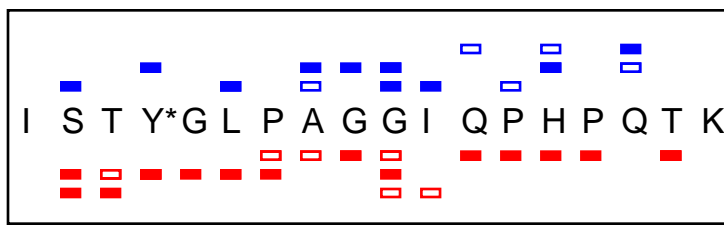

Protein Name: CD2 associated protein  
 gi Accession: 0  
 Precursor Mass: 648.9916+3  
 Delta Mass: 1.171 ppm  
 XCorr: 29.46

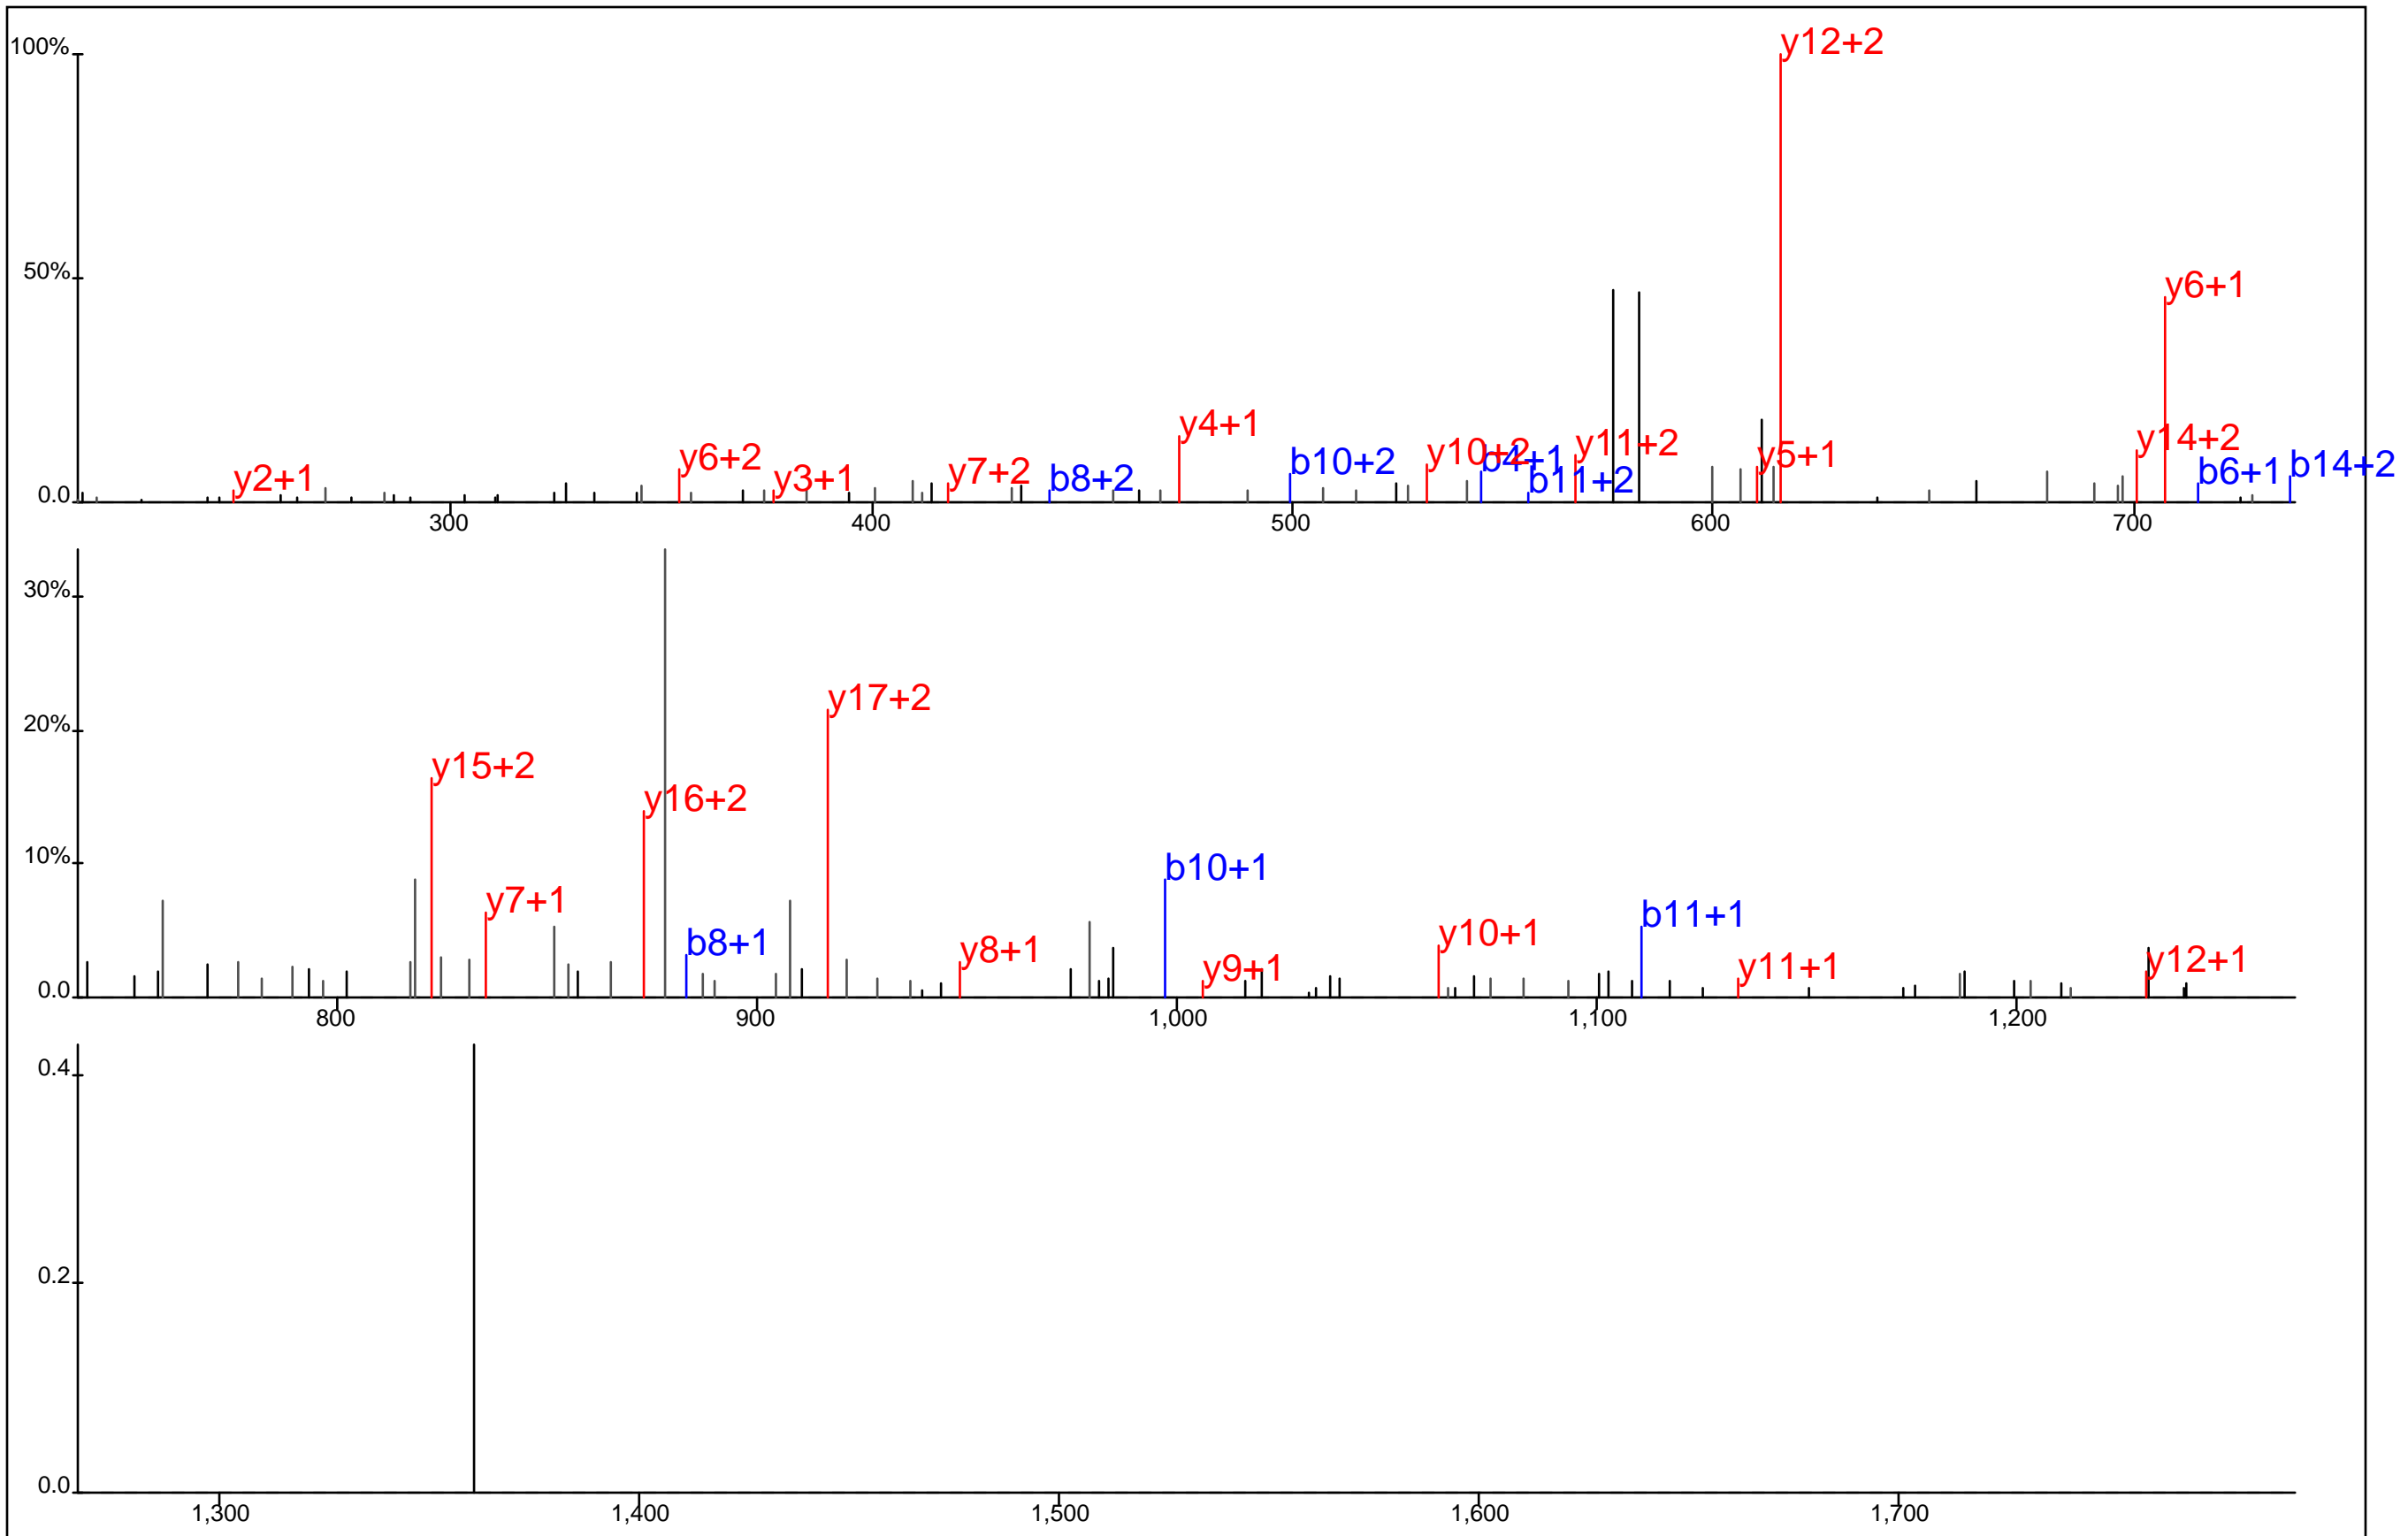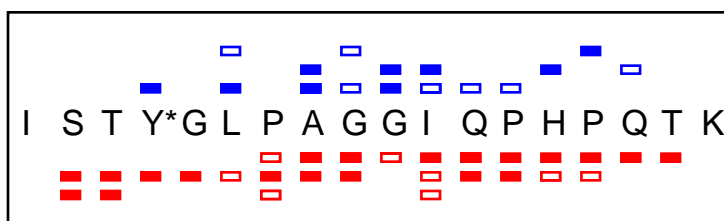

Protein Name: CD2 associated protein  
 gi Accession: 0  
 Precursor Mass: 648.9910+3  
 Delta Mass: 0.230 ppm  
 XCorr: 50.05

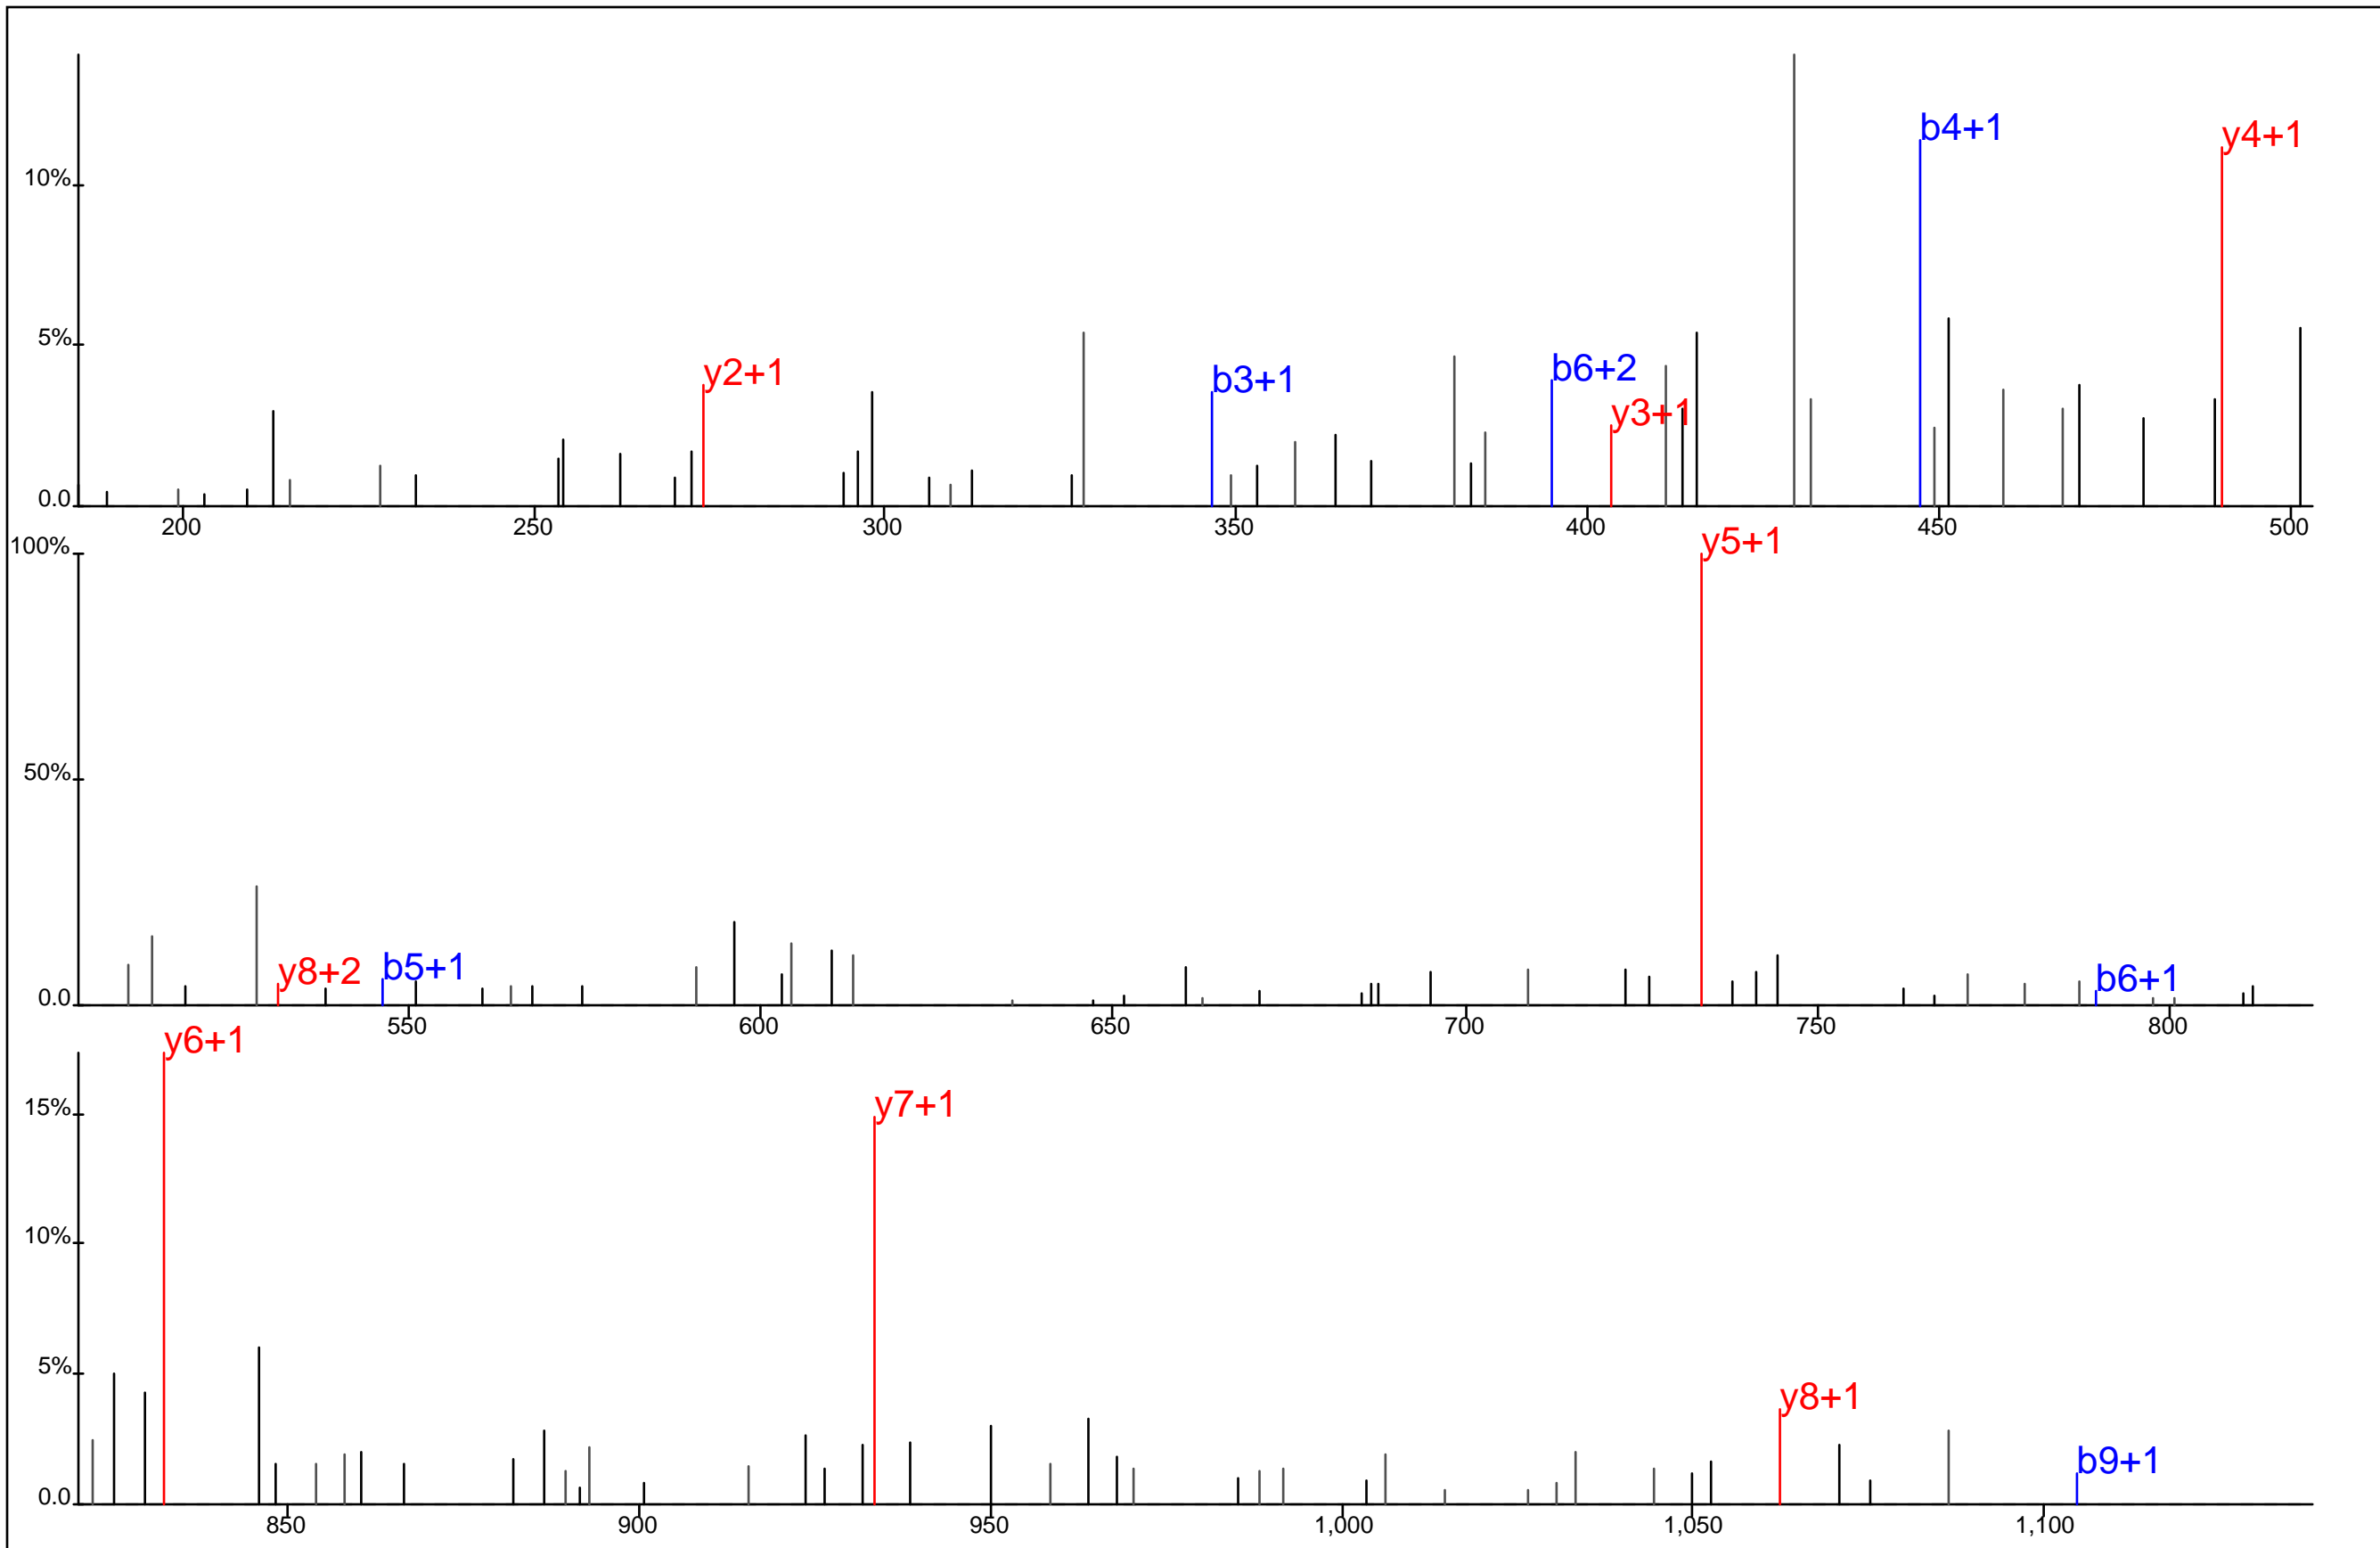

DTETVYSEVR

Protein Name: CD31  
 gi Accession: 0  
 Precursor Mass: 639.7649+2  
 Delta Mass: 1.902 ppm  
 XCorr: 28.22

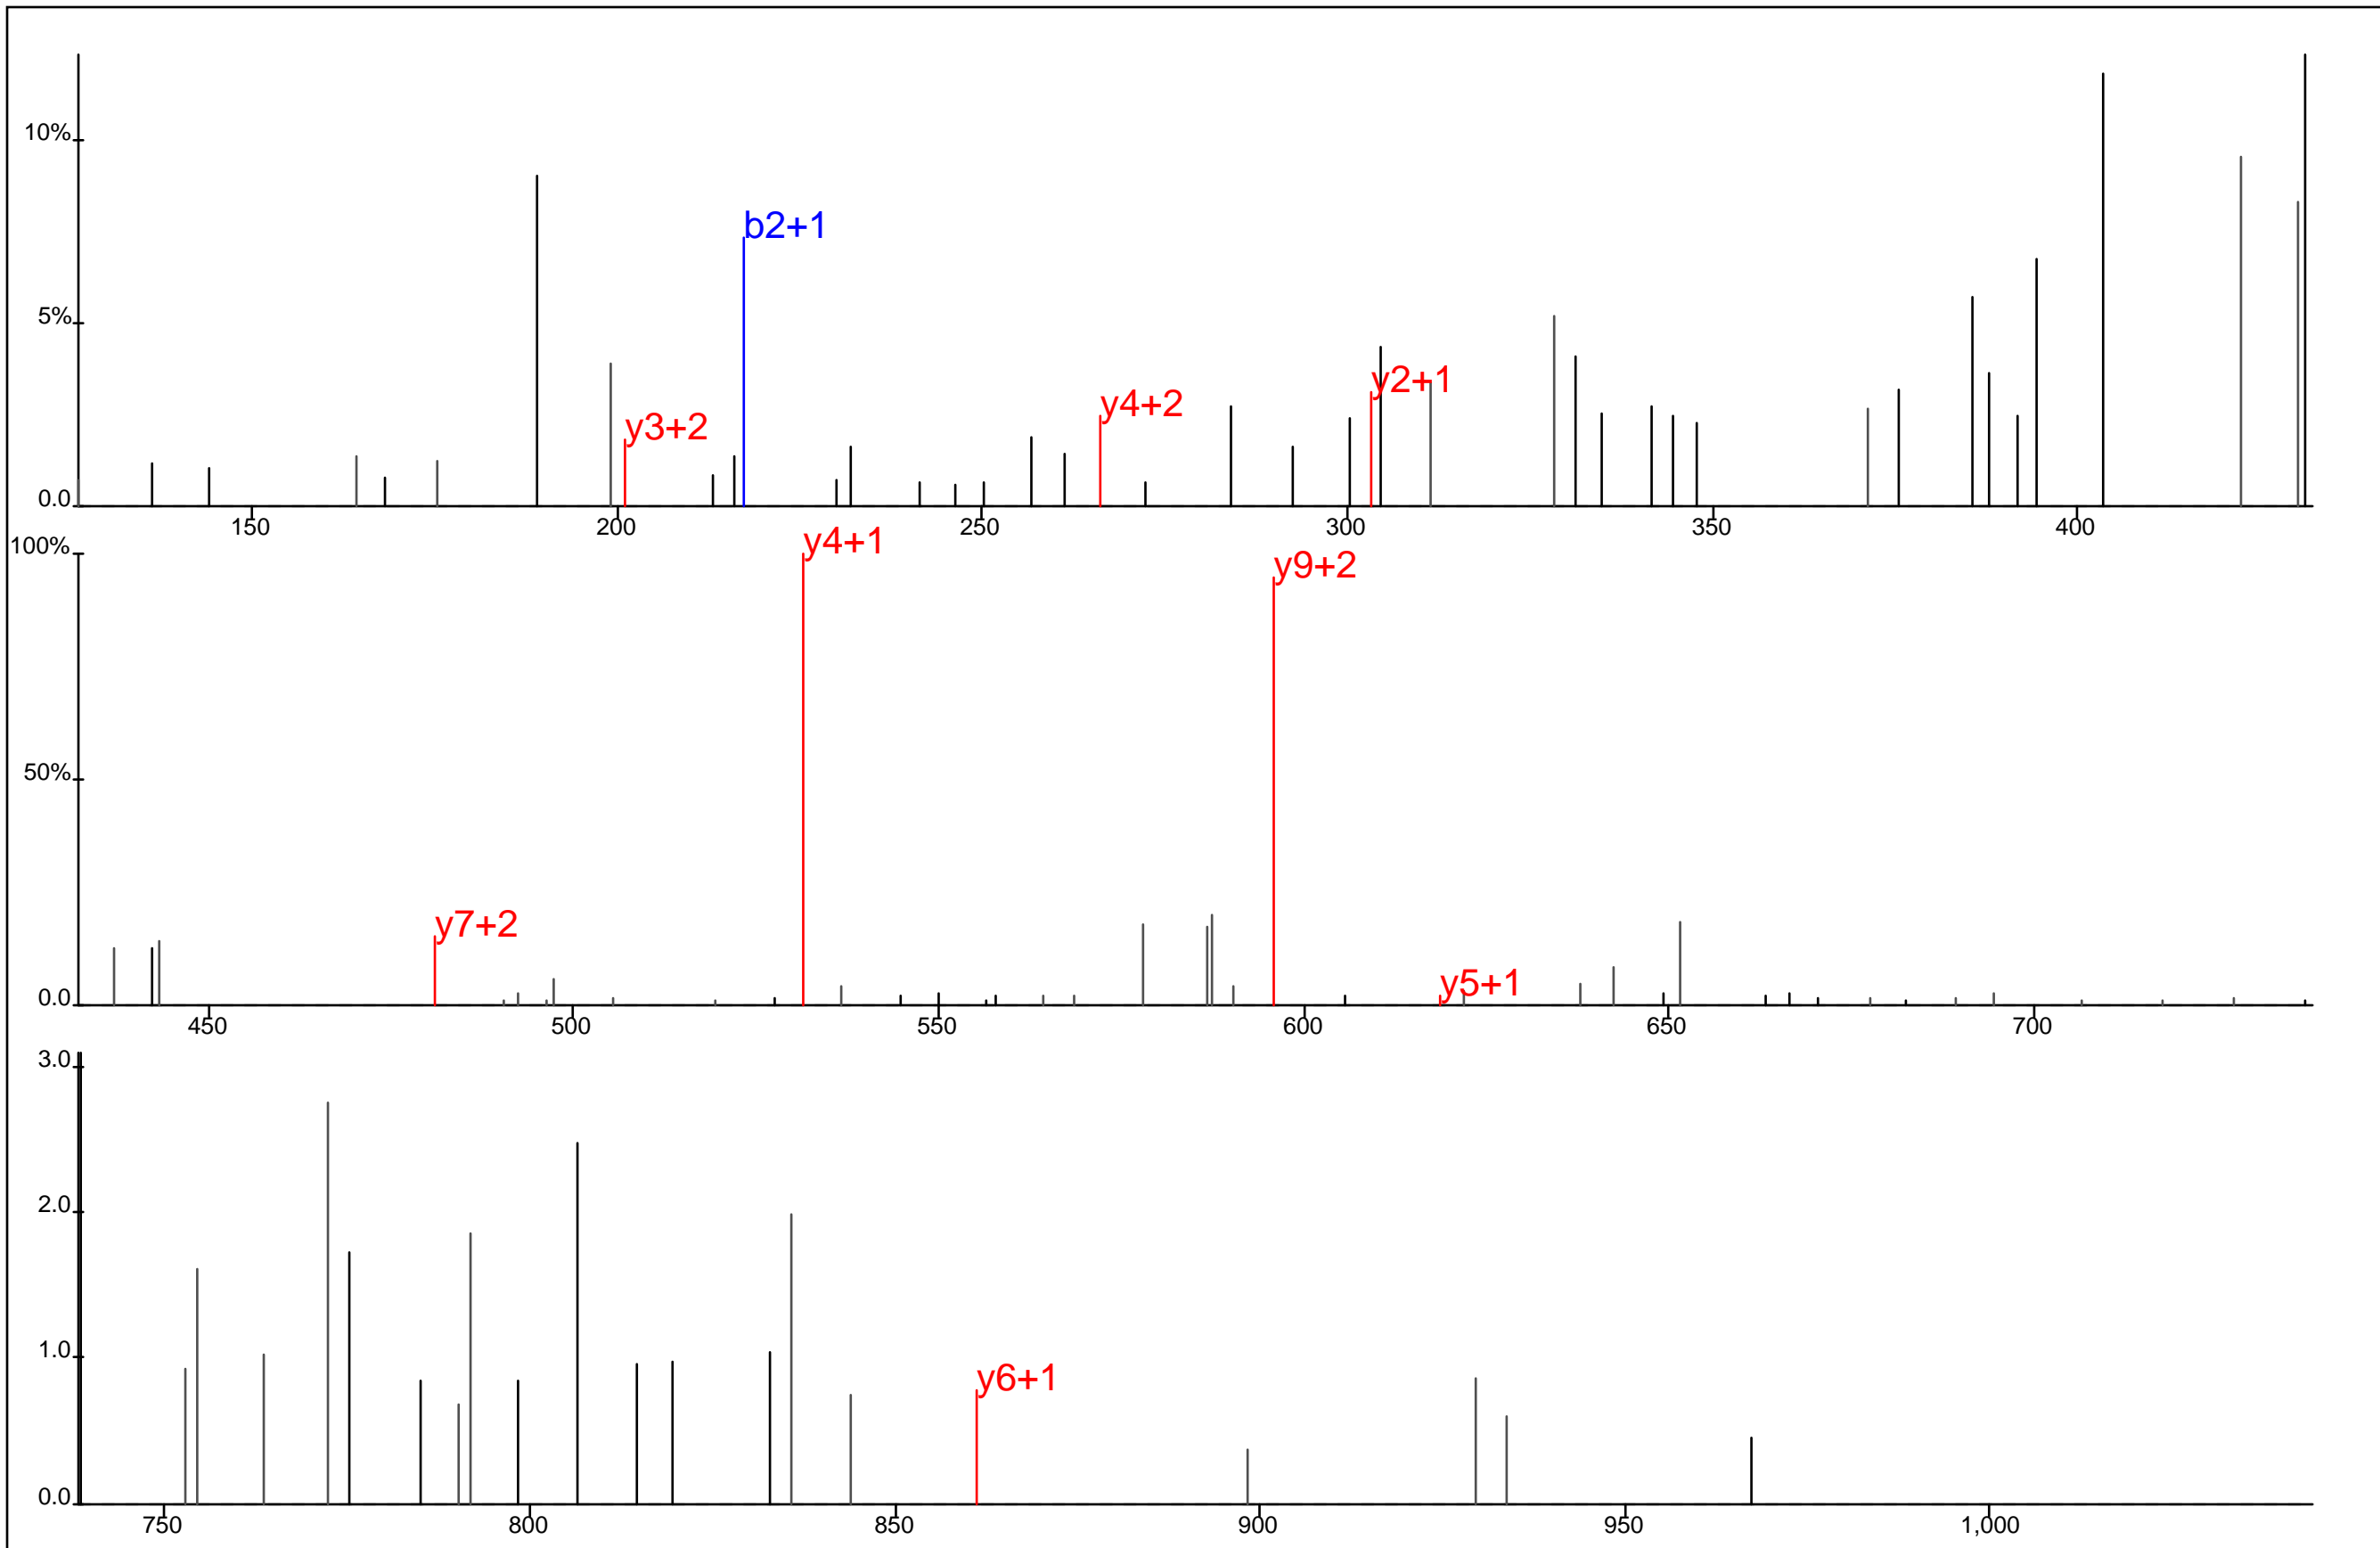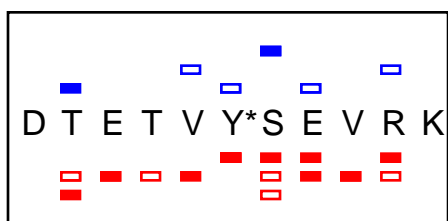

Protein Name: CD31  
 gi Accession: 0  
 Precursor Mass: 469.5447+3  
 Delta Mass: 0.299 ppm  
 XCorr: 20.63

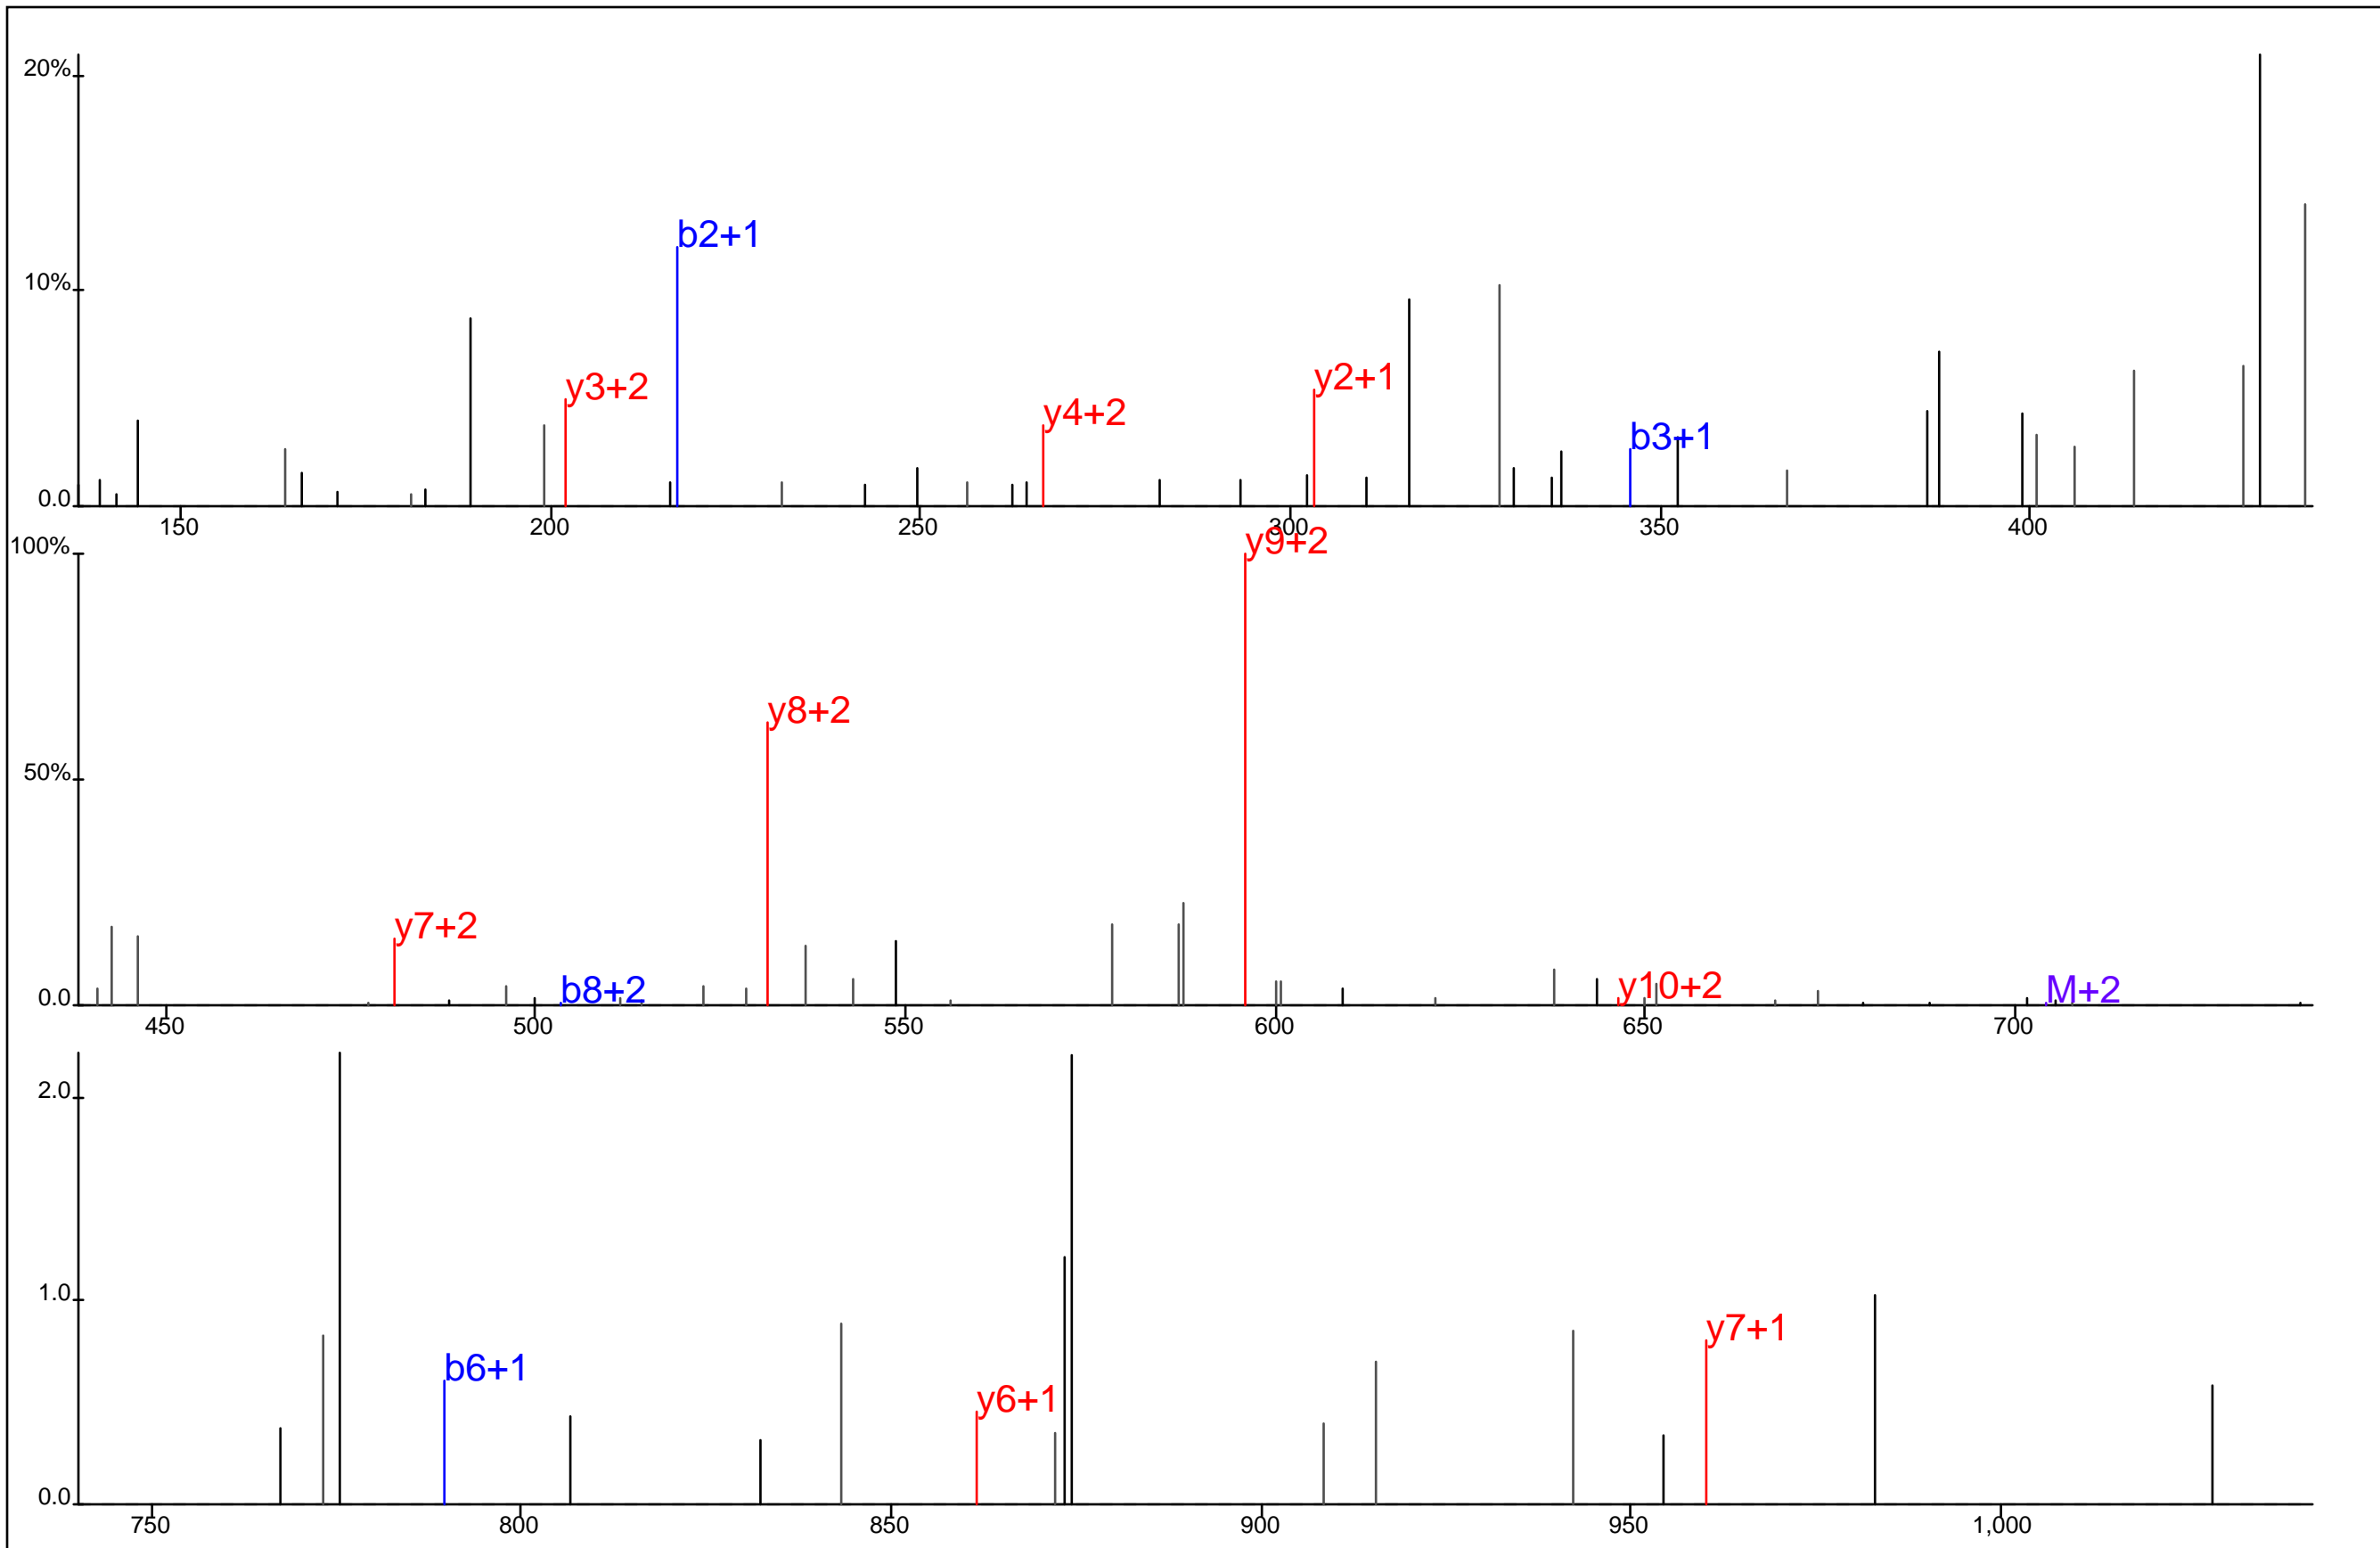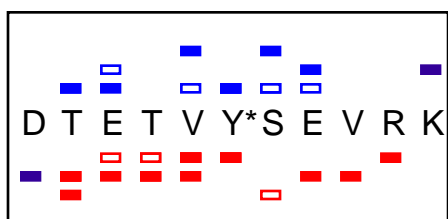

Protein Name: CD31  
 gi Accession: 0  
 Precursor Mass: 469.5441+3  
 Delta Mass: 1.536 ppm  
 XCorr: 26.03



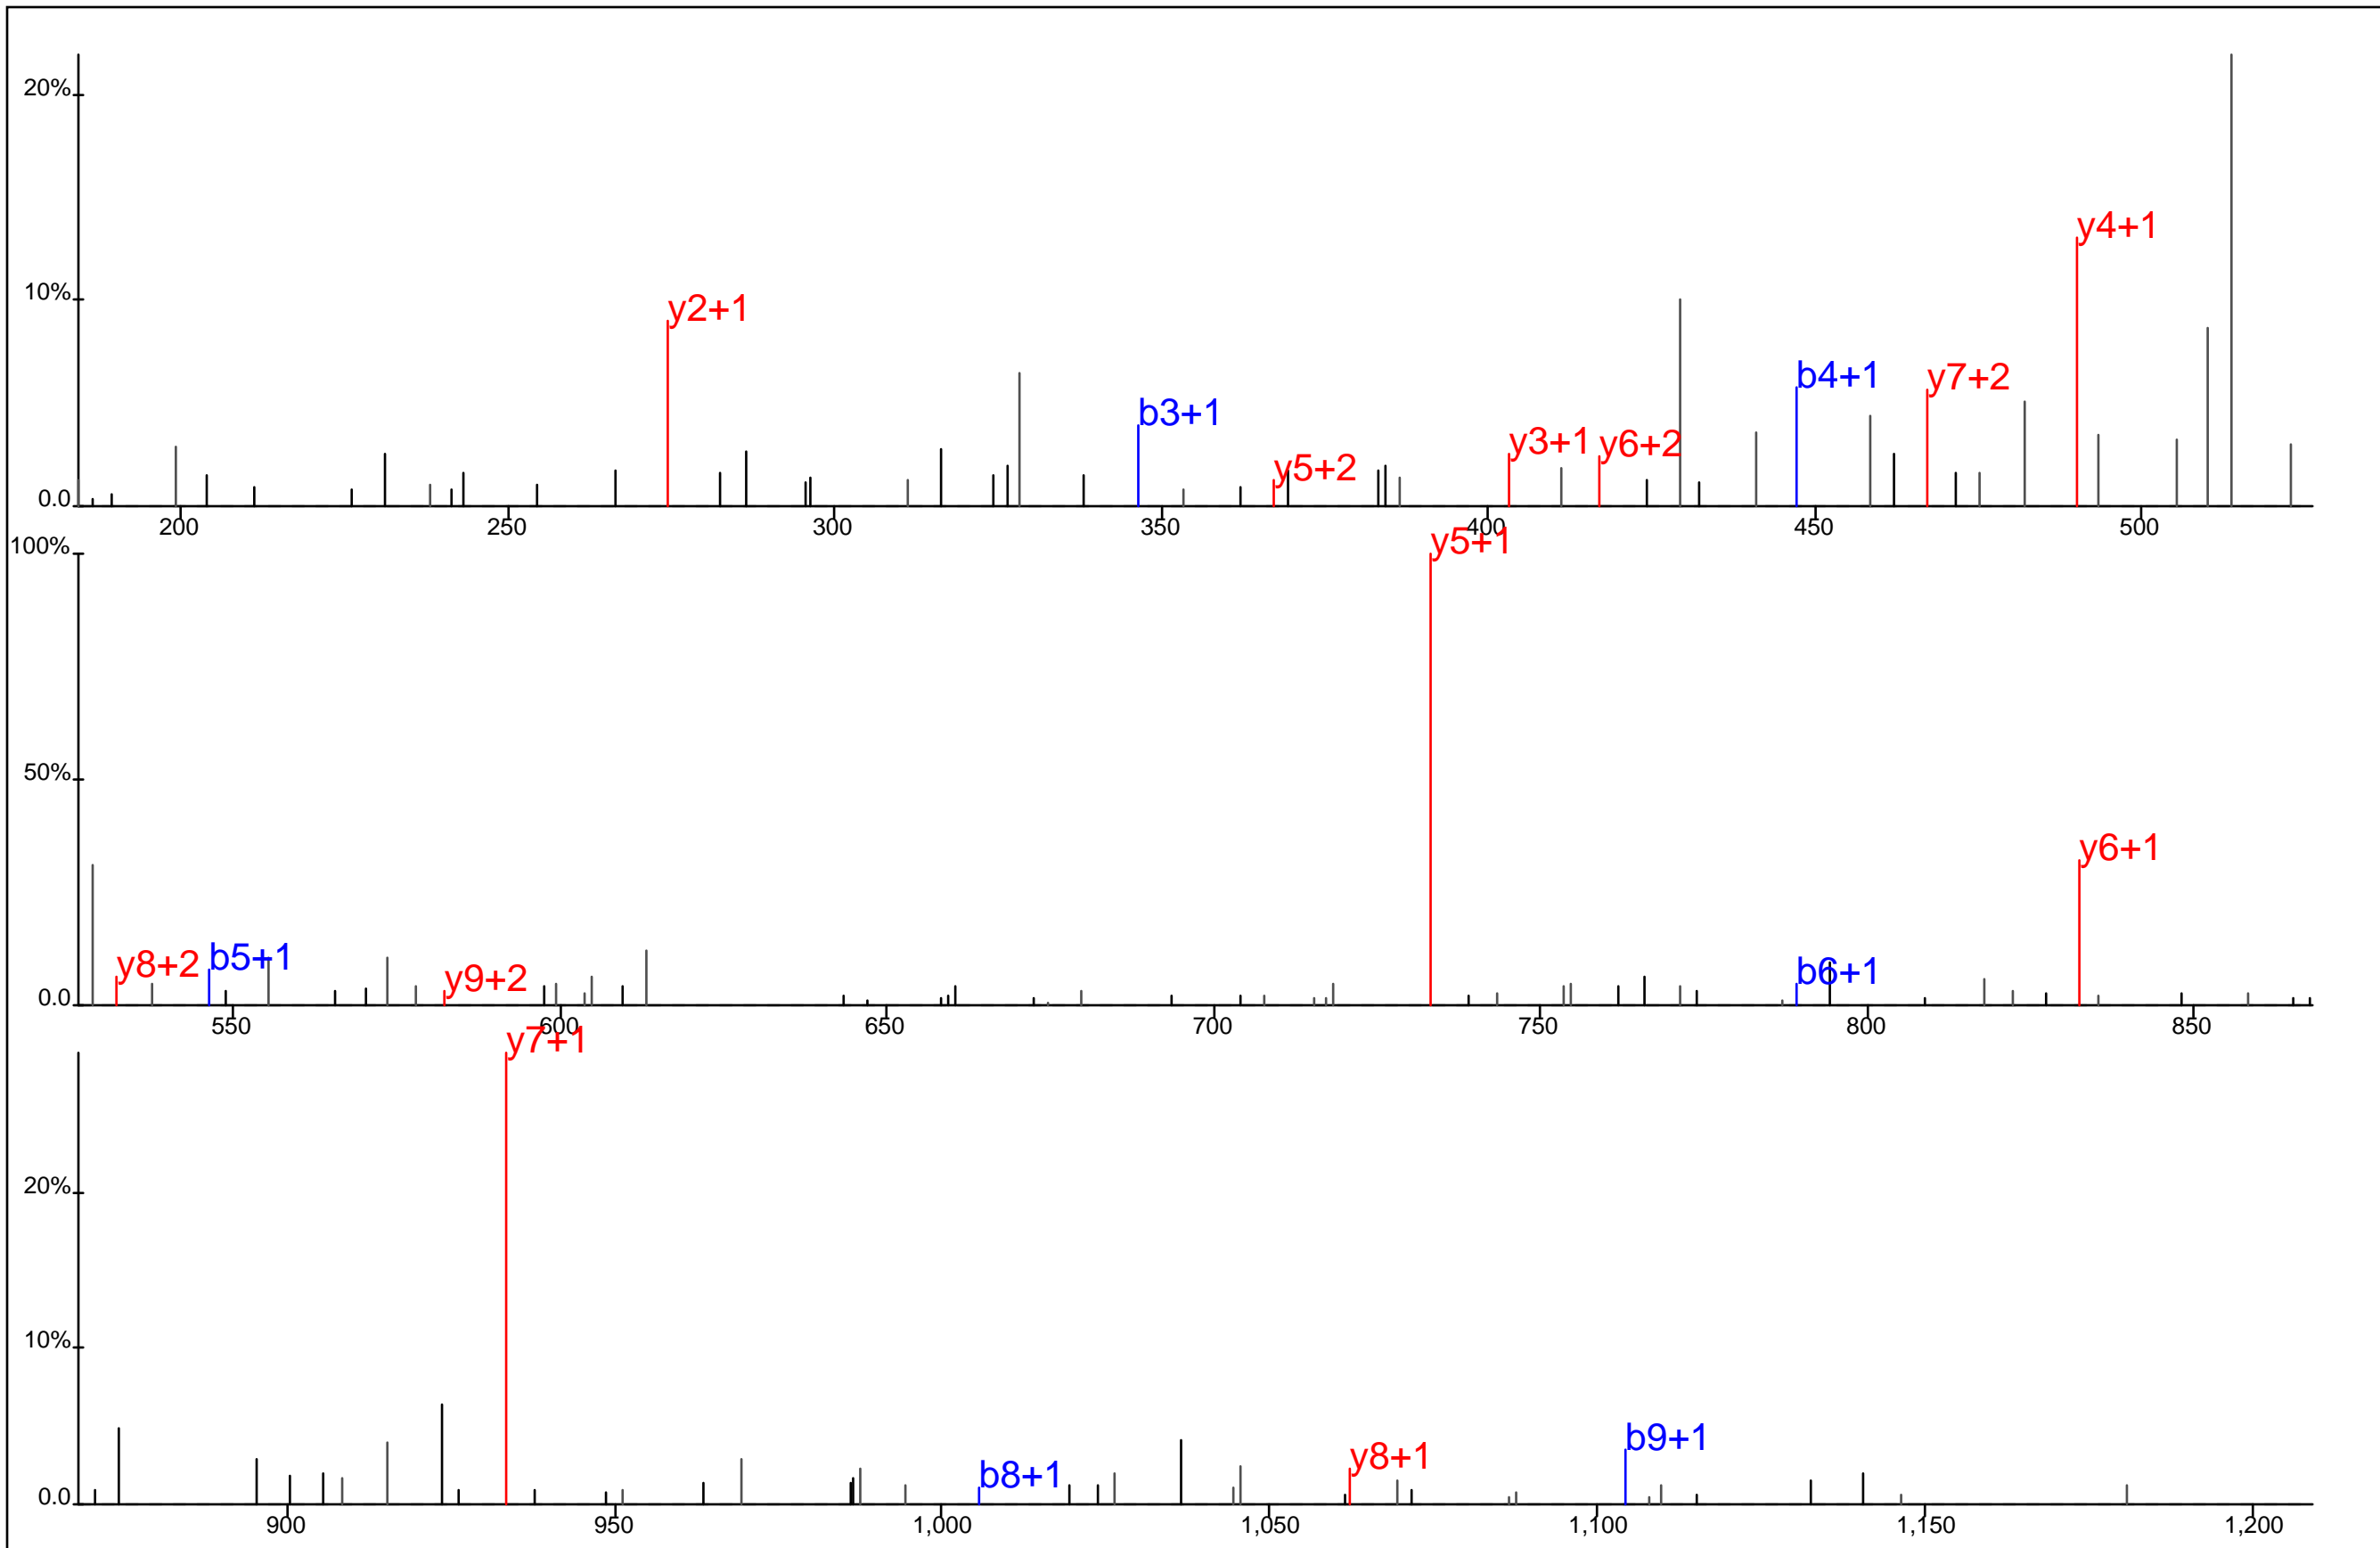

D T E T V Y\* S E V R

Protein Name: CD31  
 gi Accession: 0  
 Precursor Mass: 639.7672+2  
 Delta Mass: 1.725 ppm  
 XCorr: 29.09

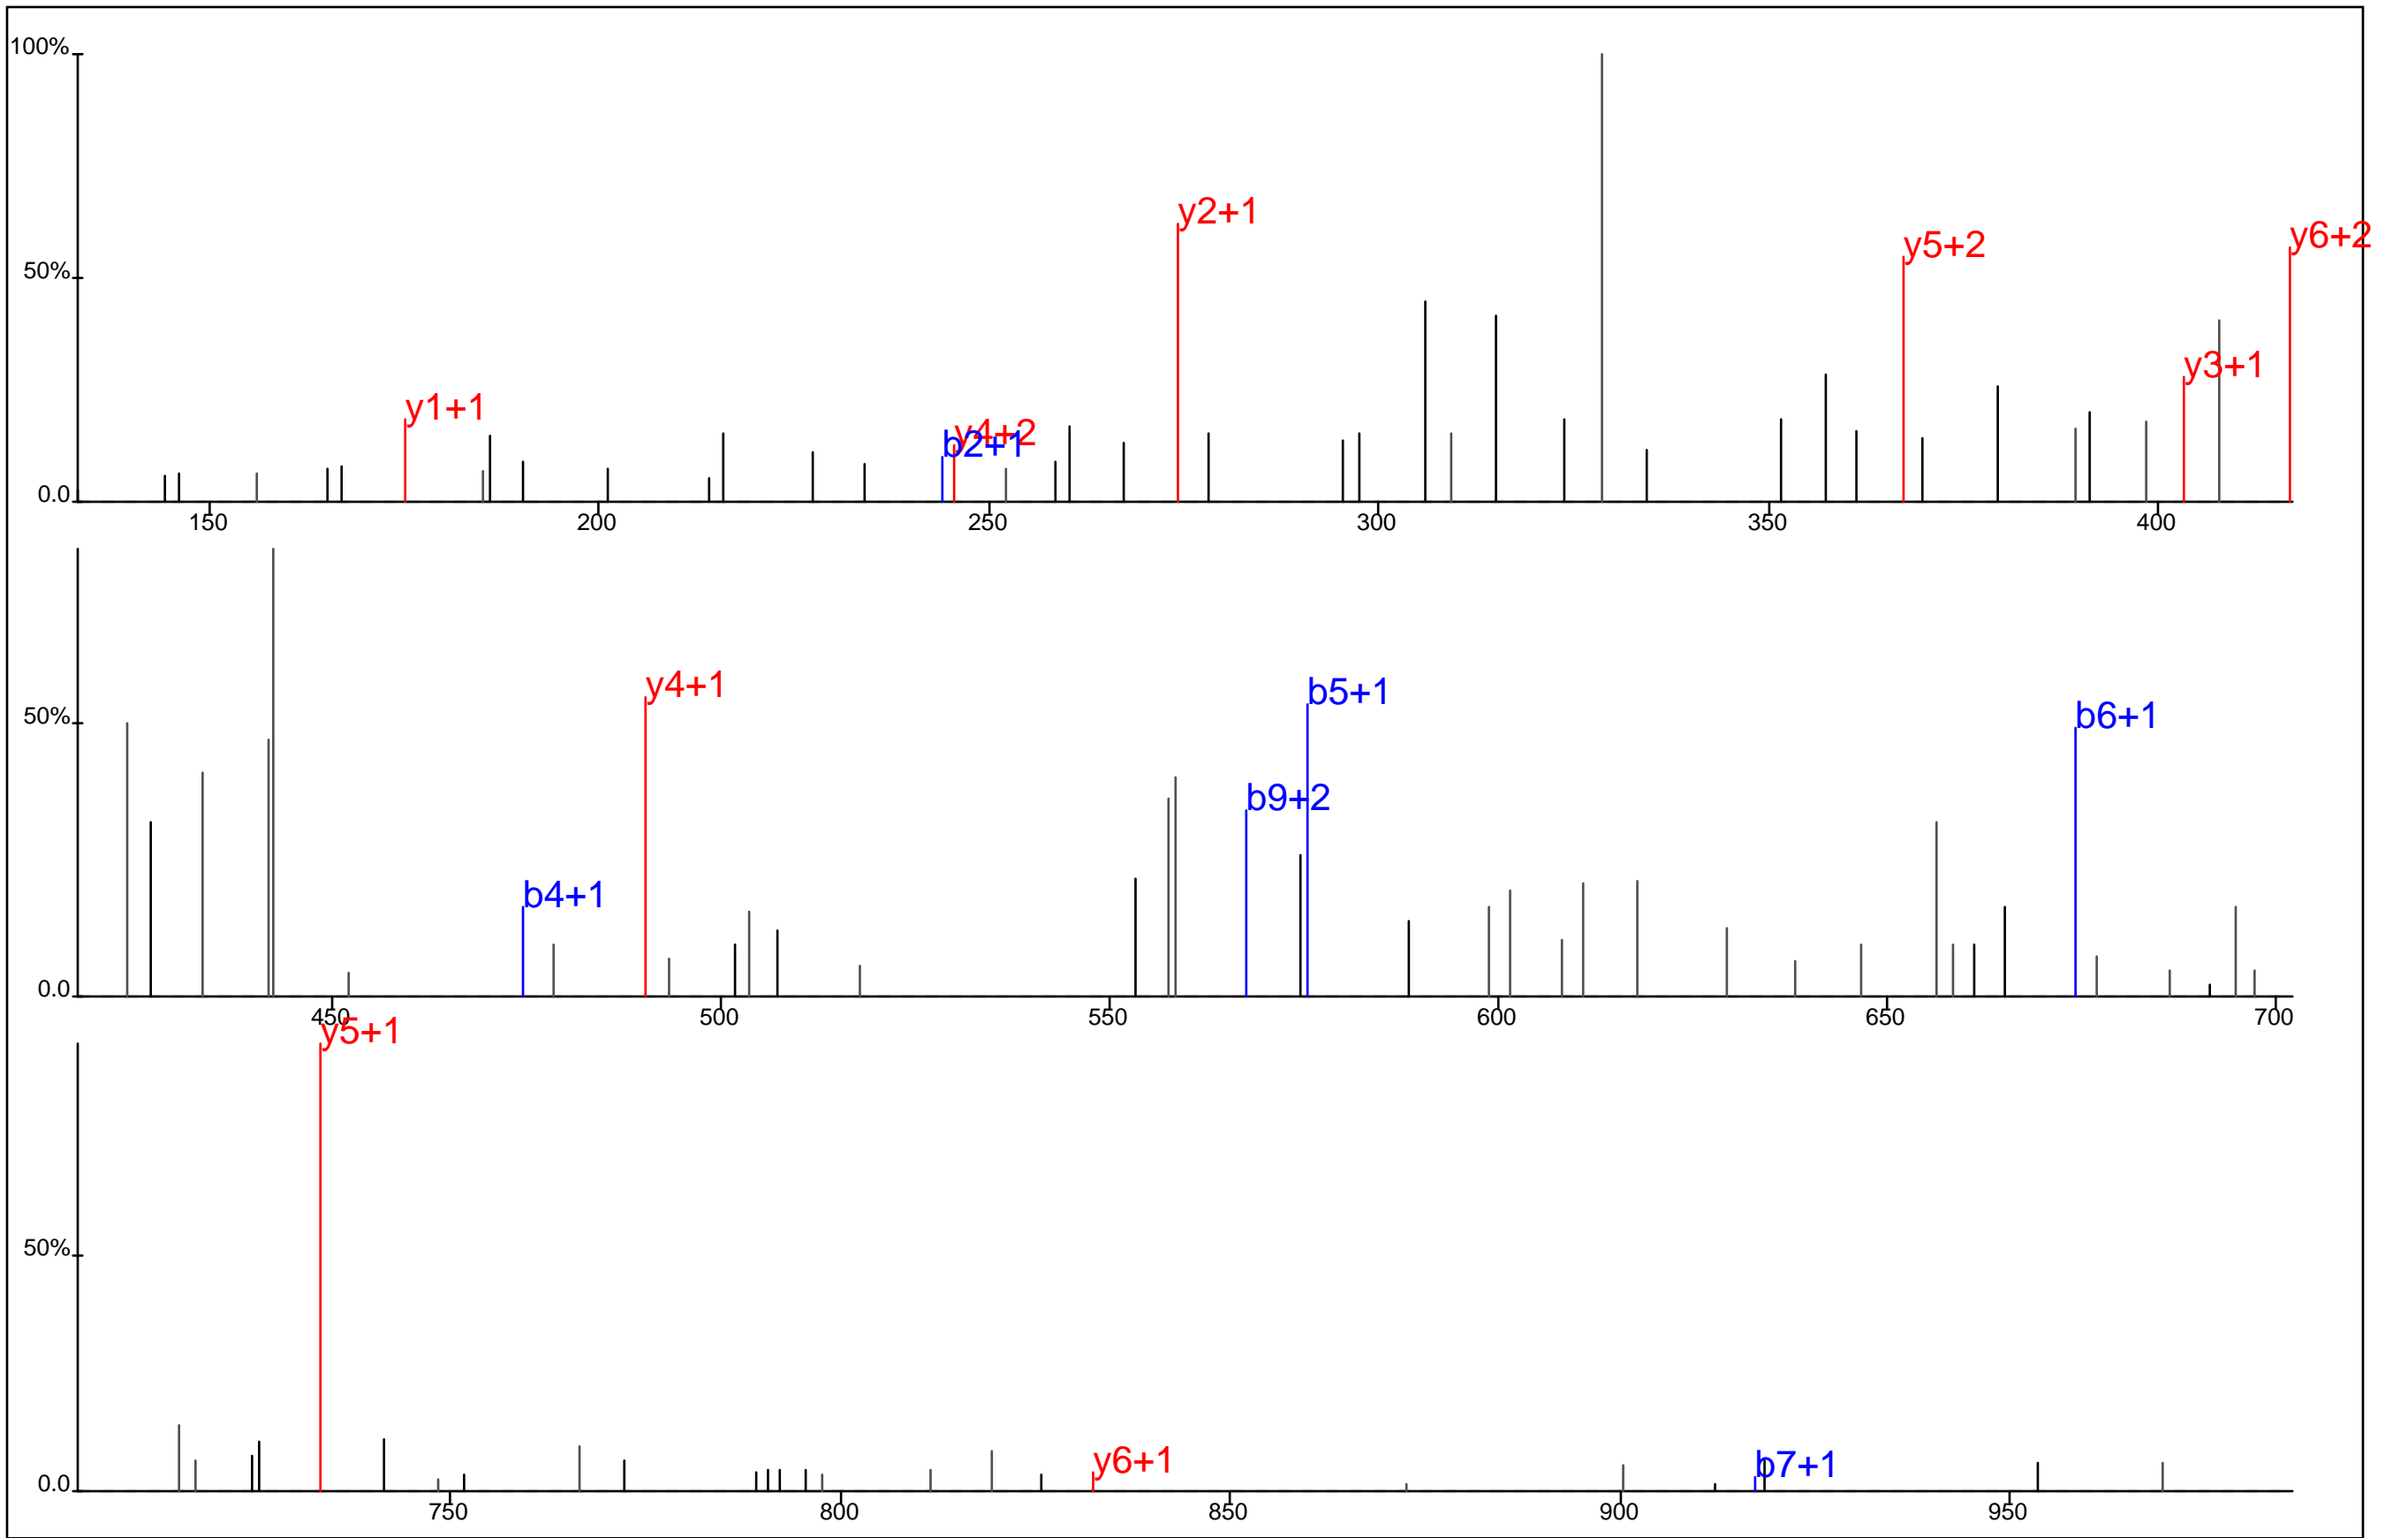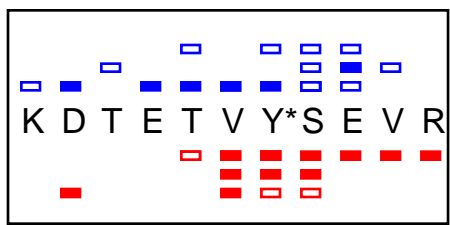

Protein Name: CD31  
 gi Accession: 0  
 Precursor Mass: 469.5454+3  
 Delta Mass: 1.199 ppm  
 XCorr: 20.13

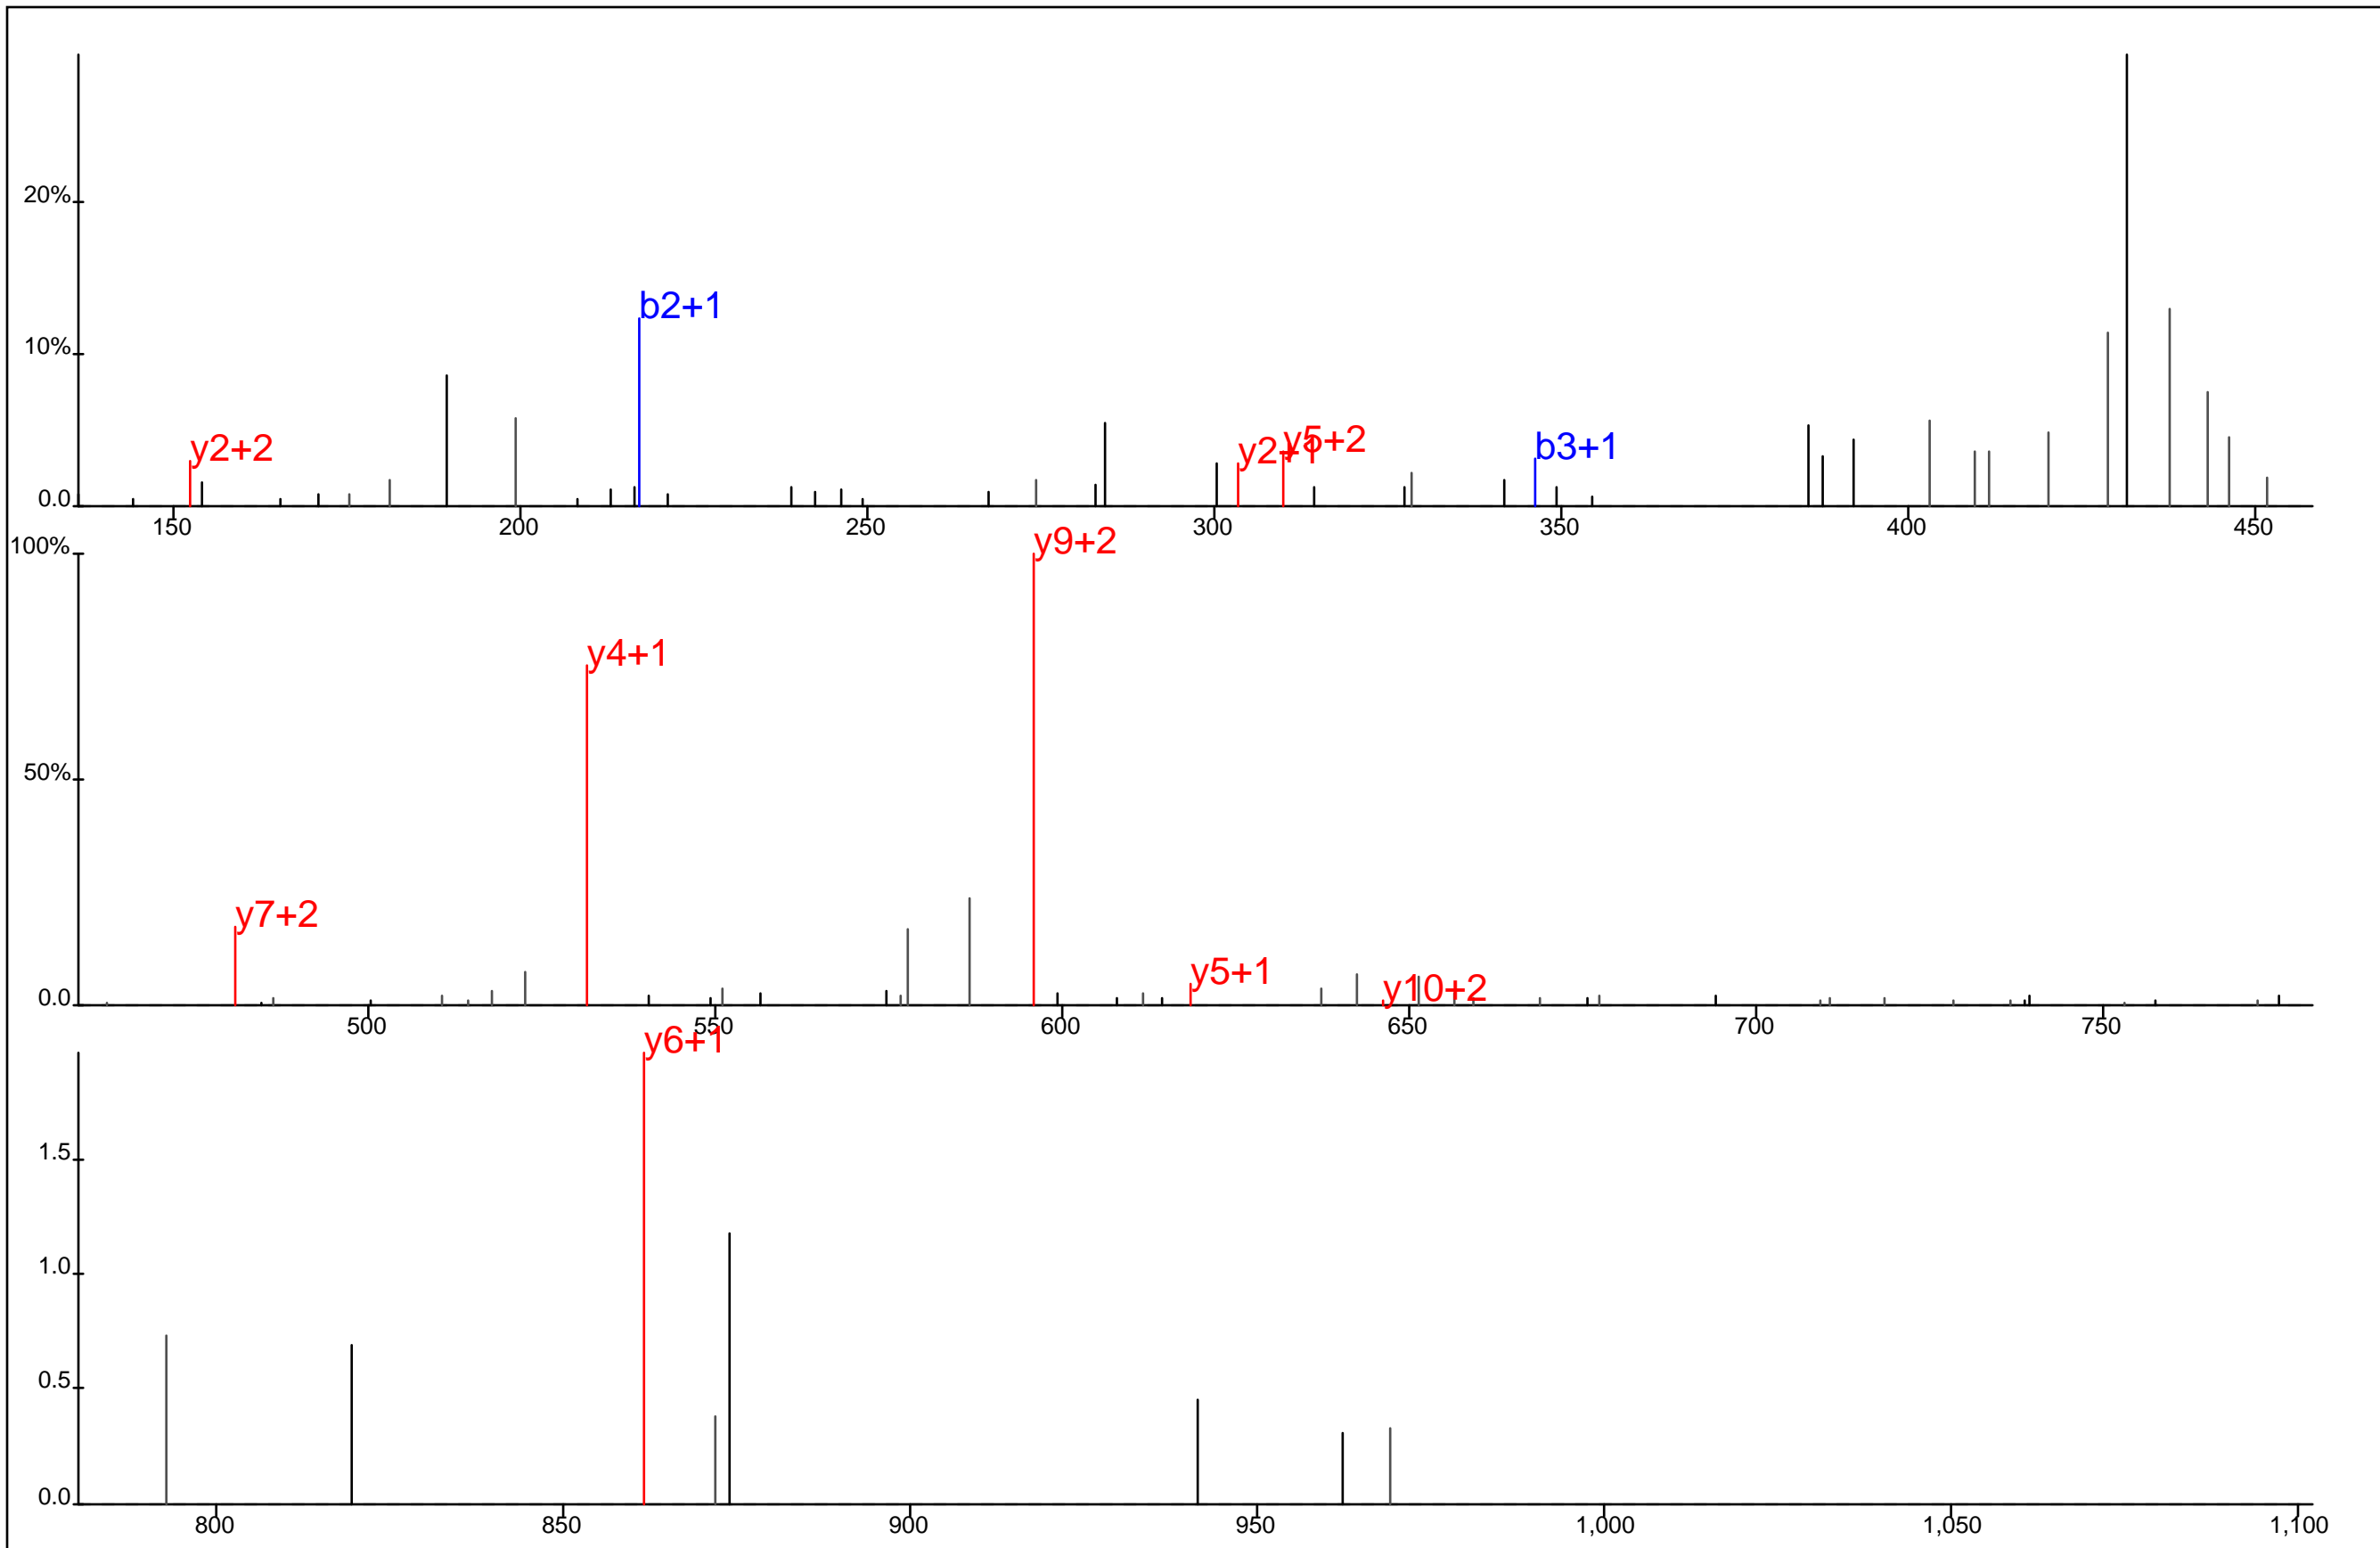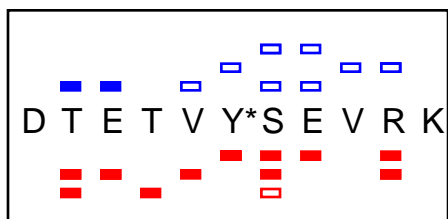

Protein Name: CD31  
 gi Accession: 0  
 Precursor Mass: 469.5443+3  
 Delta Mass: 1.145 ppm  
 XCorr: 21.99

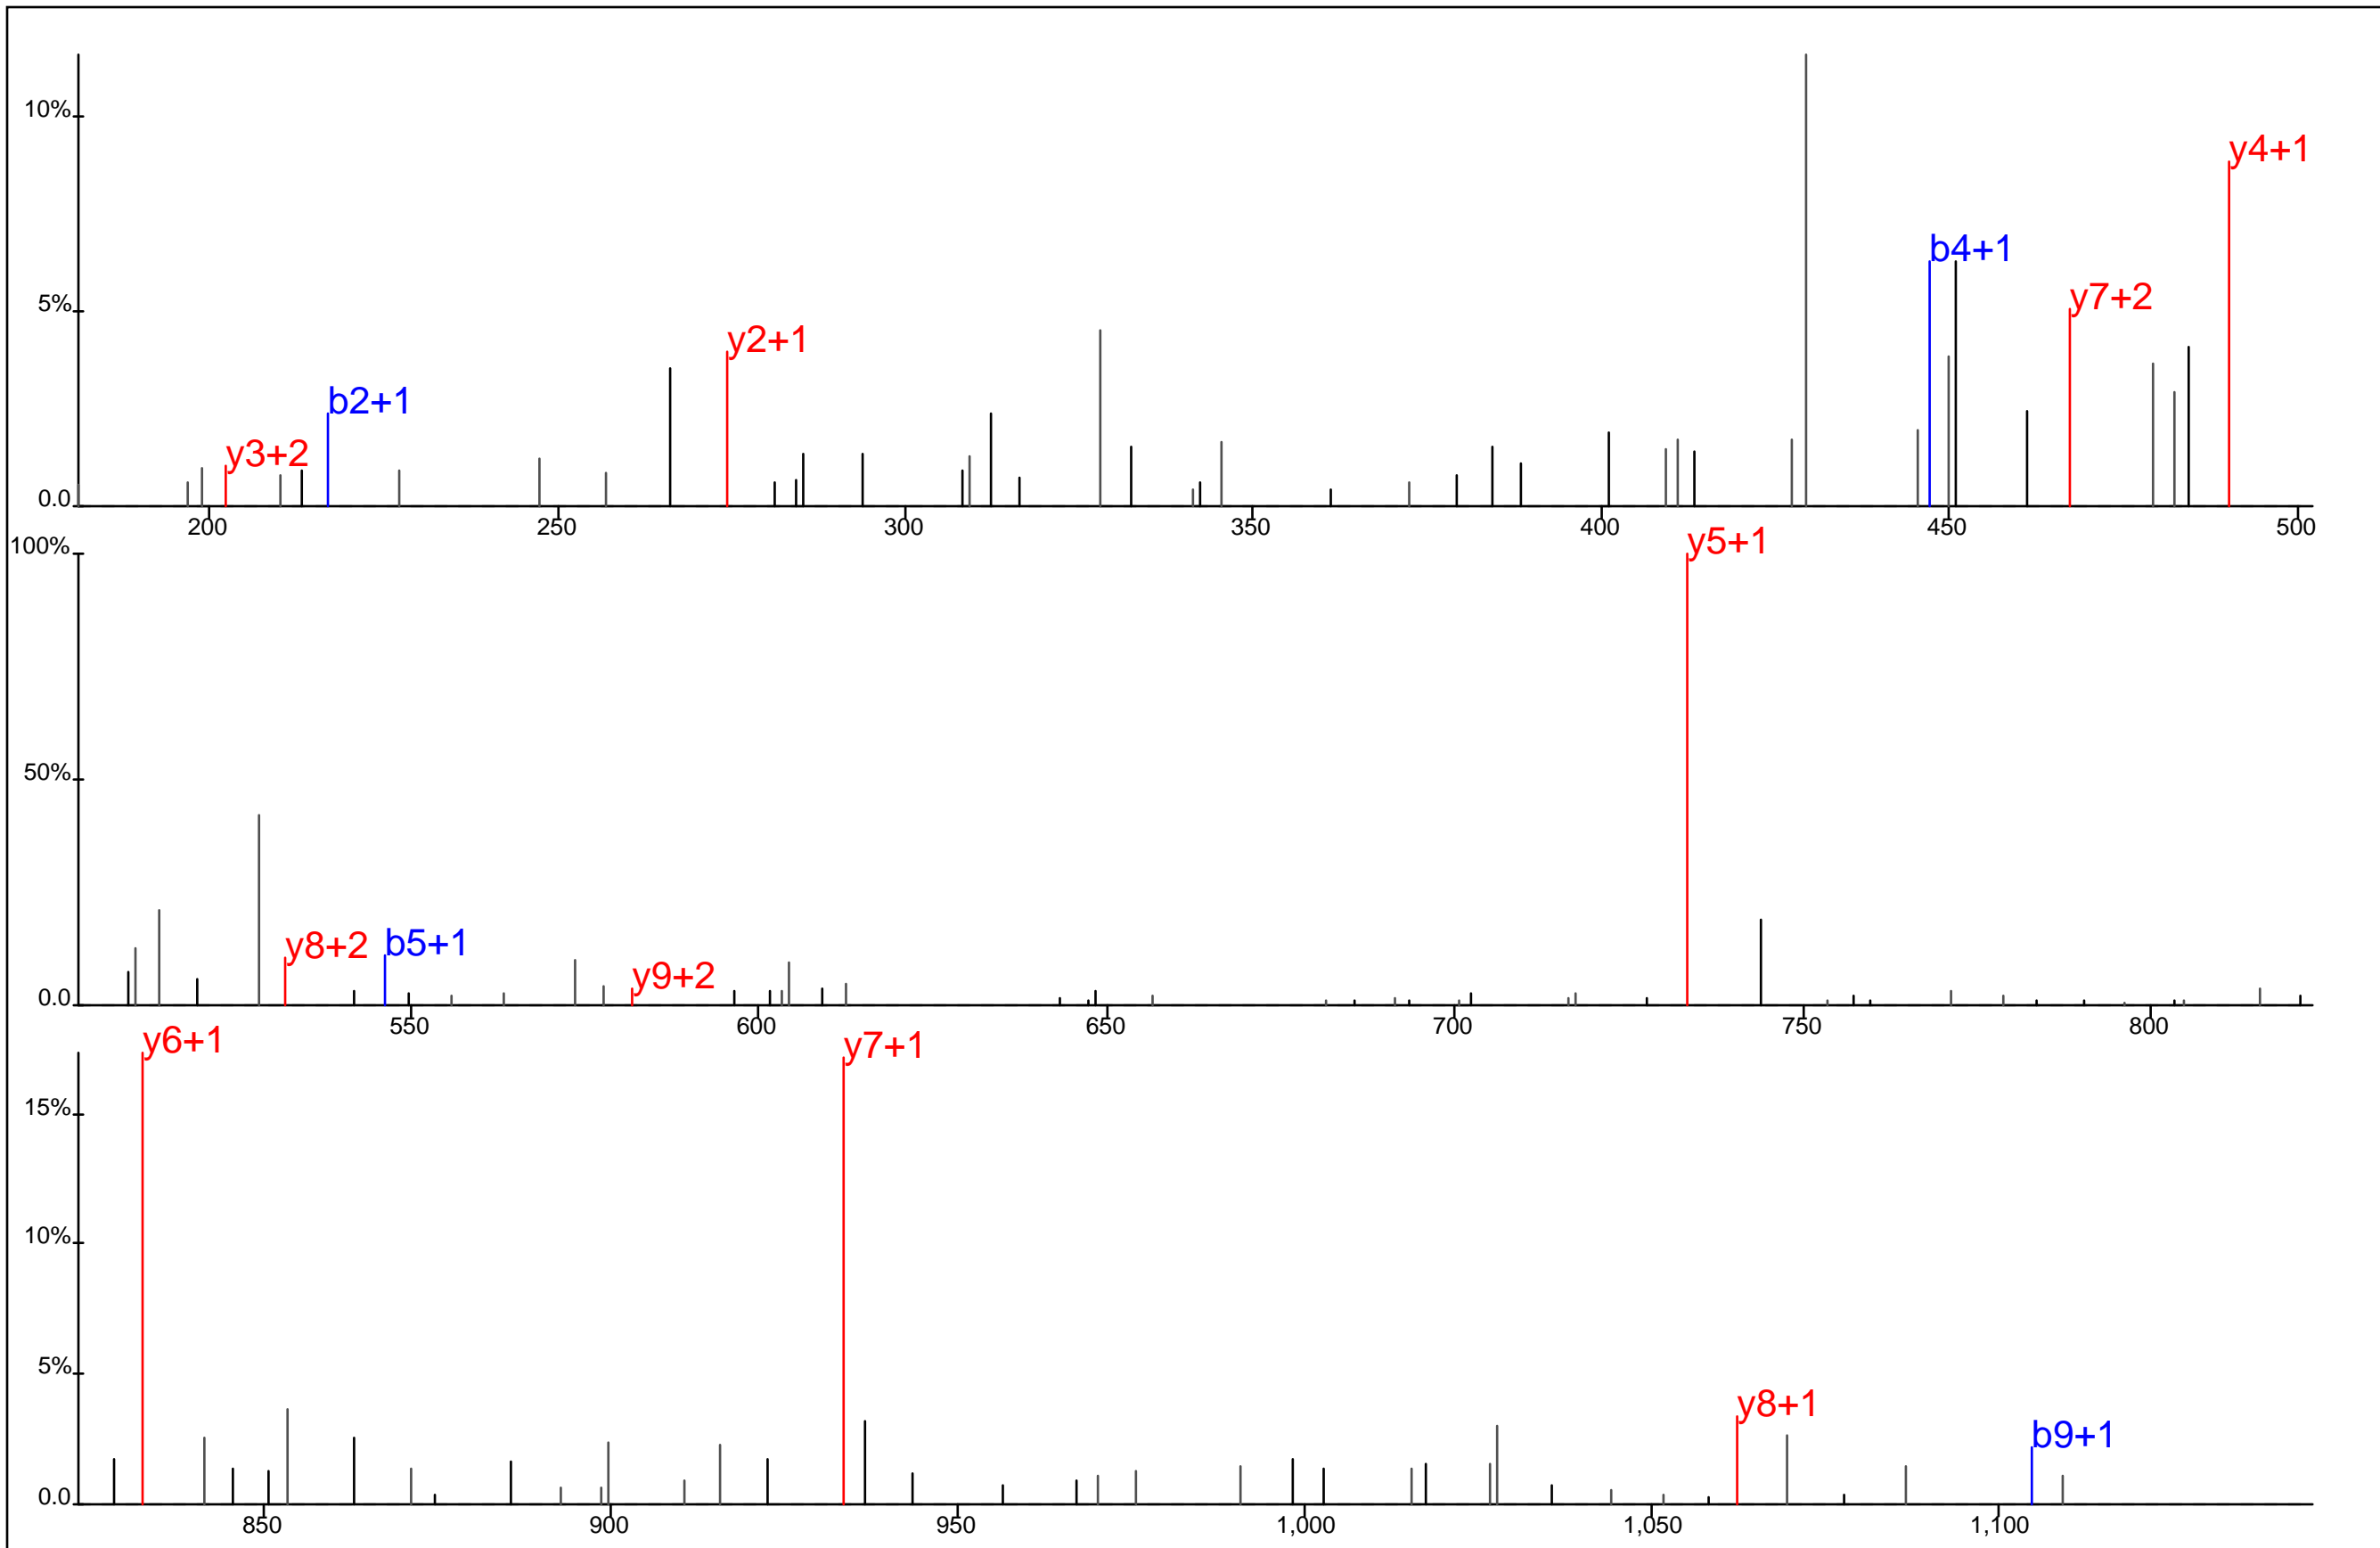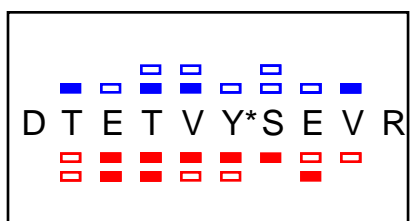

Protein Name: CD31  
 gi Accession: 0  
 Precursor Mass: 639.7670+2  
 Delta Mass: 1.439 ppm  
 XCorr: 29.2

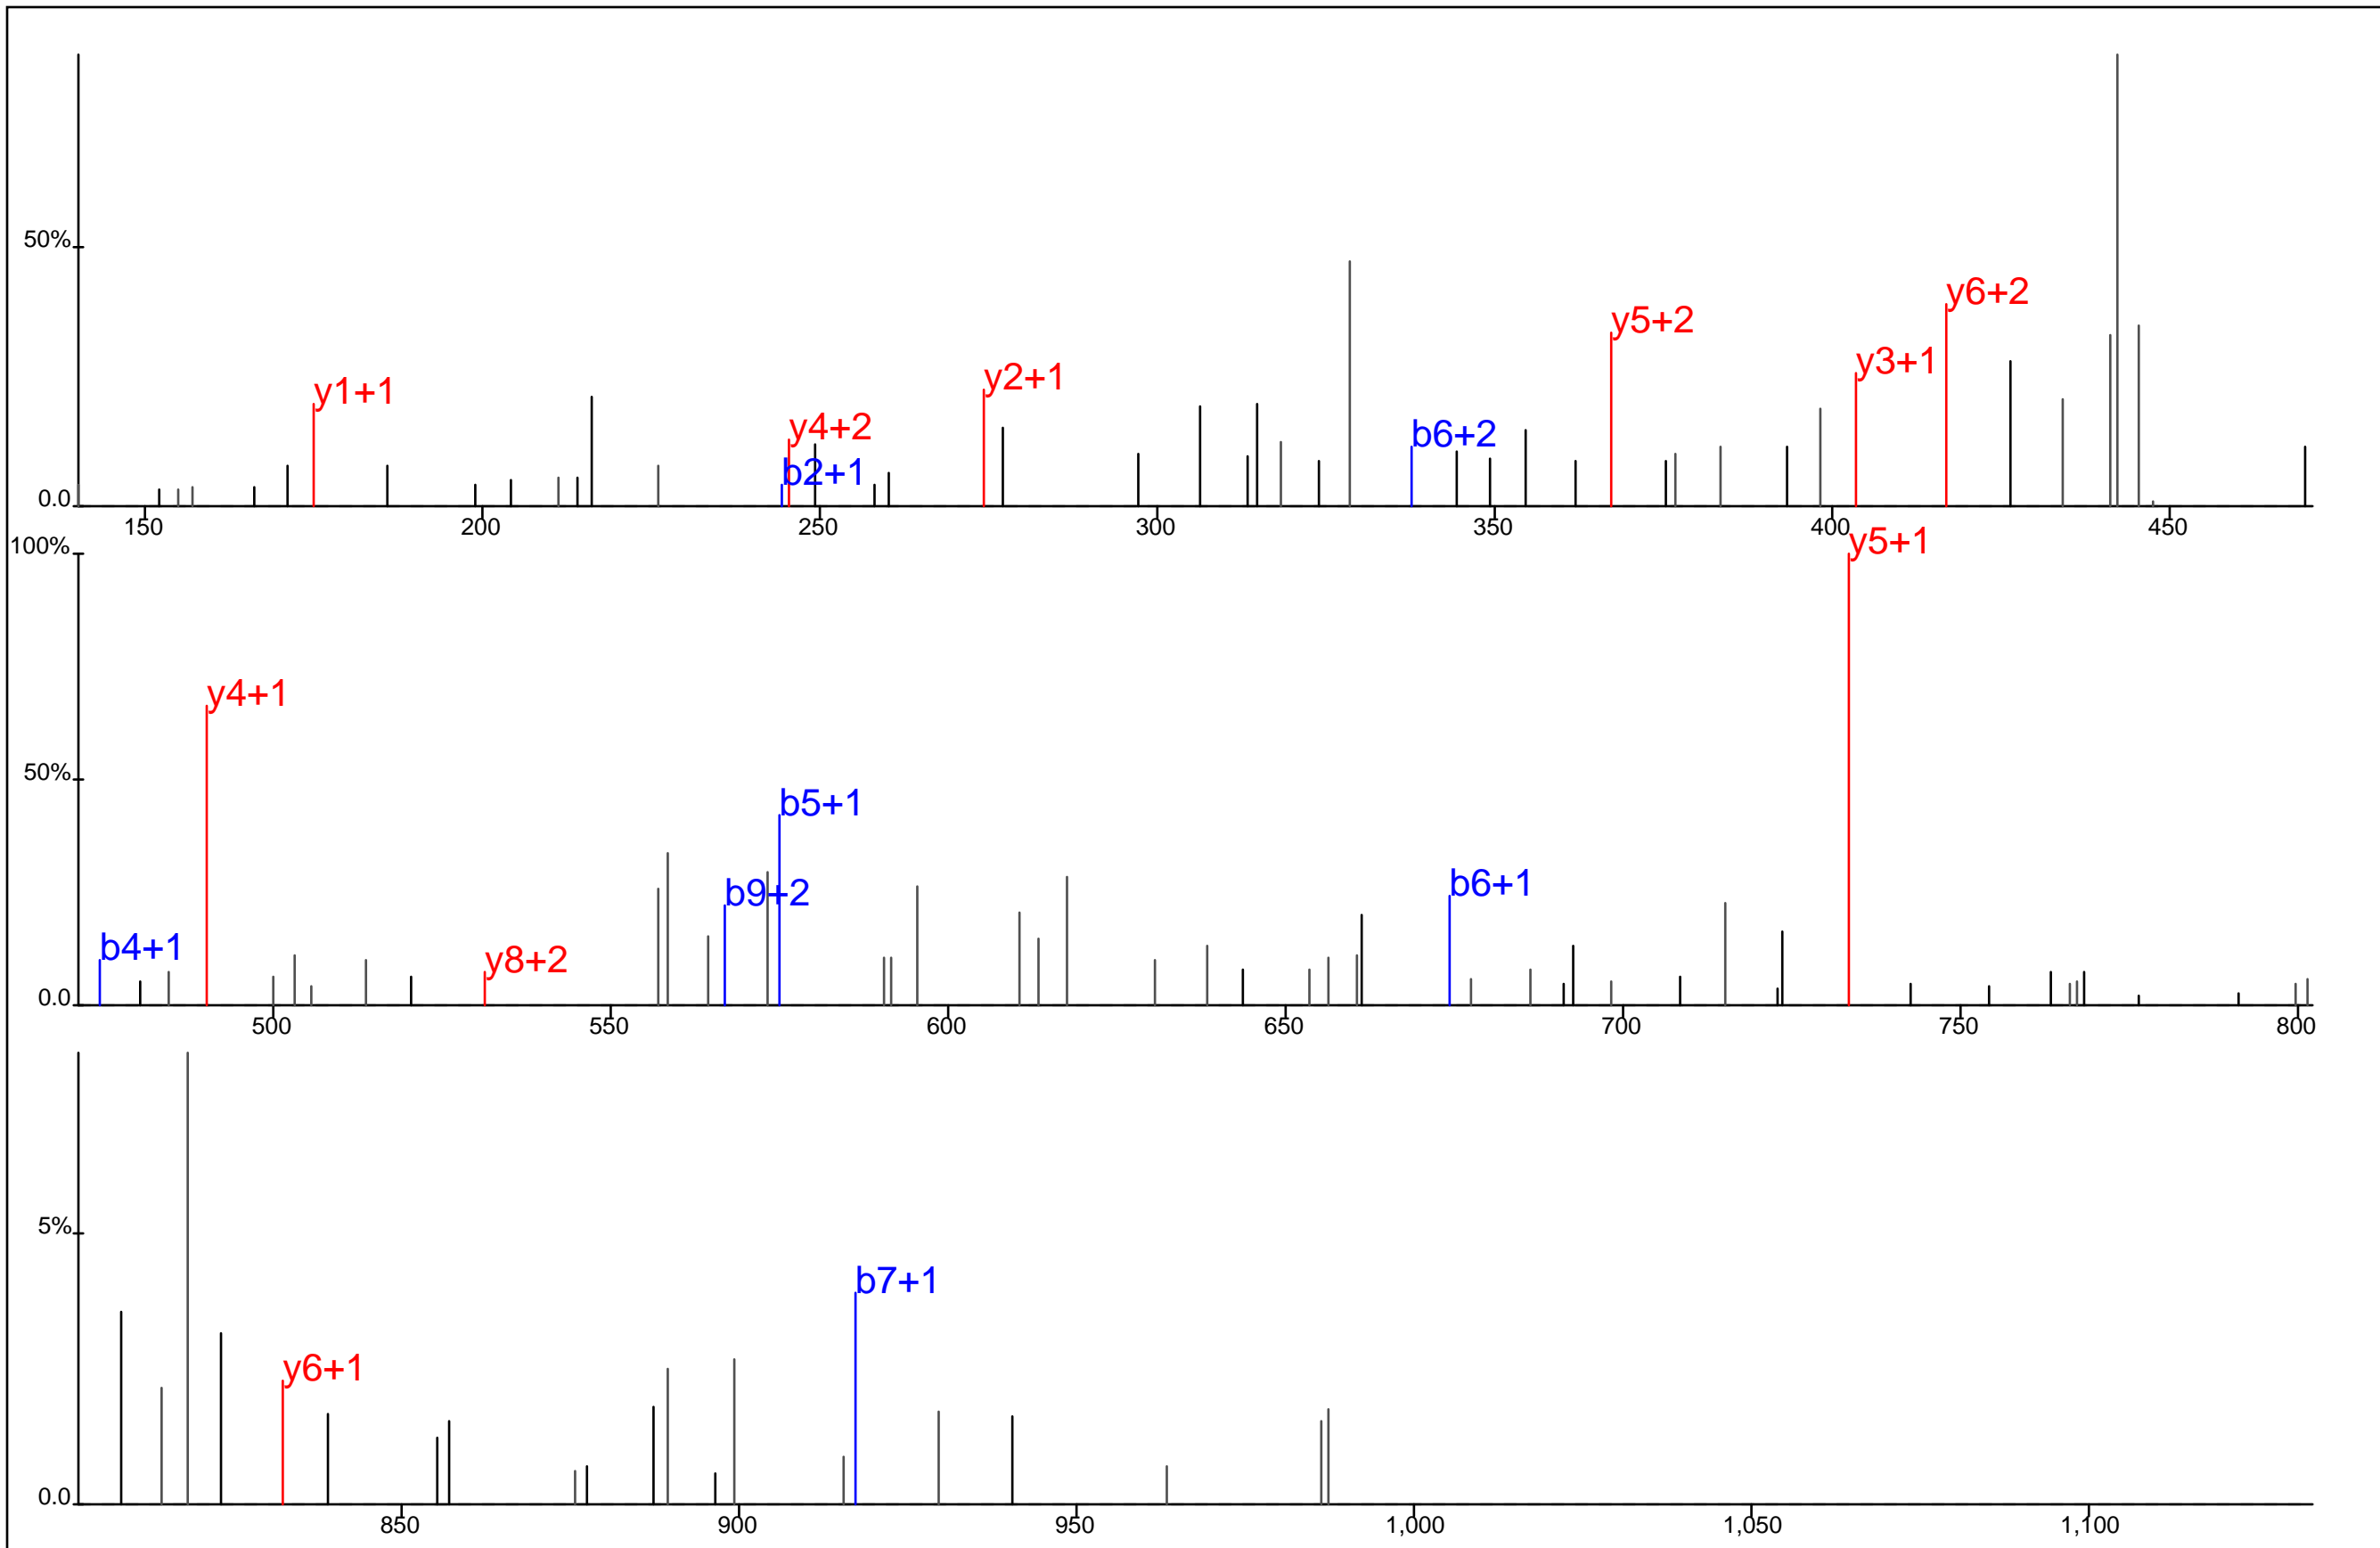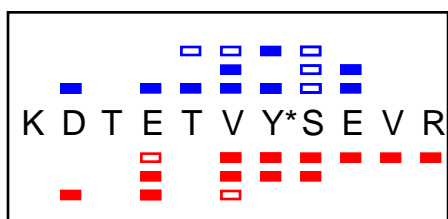

Protein Name: CD31  
 gi Accession: 0  
 Precursor Mass: 469.5461+3  
 Delta Mass: 2.826 ppm  
 XCorr: 26.27

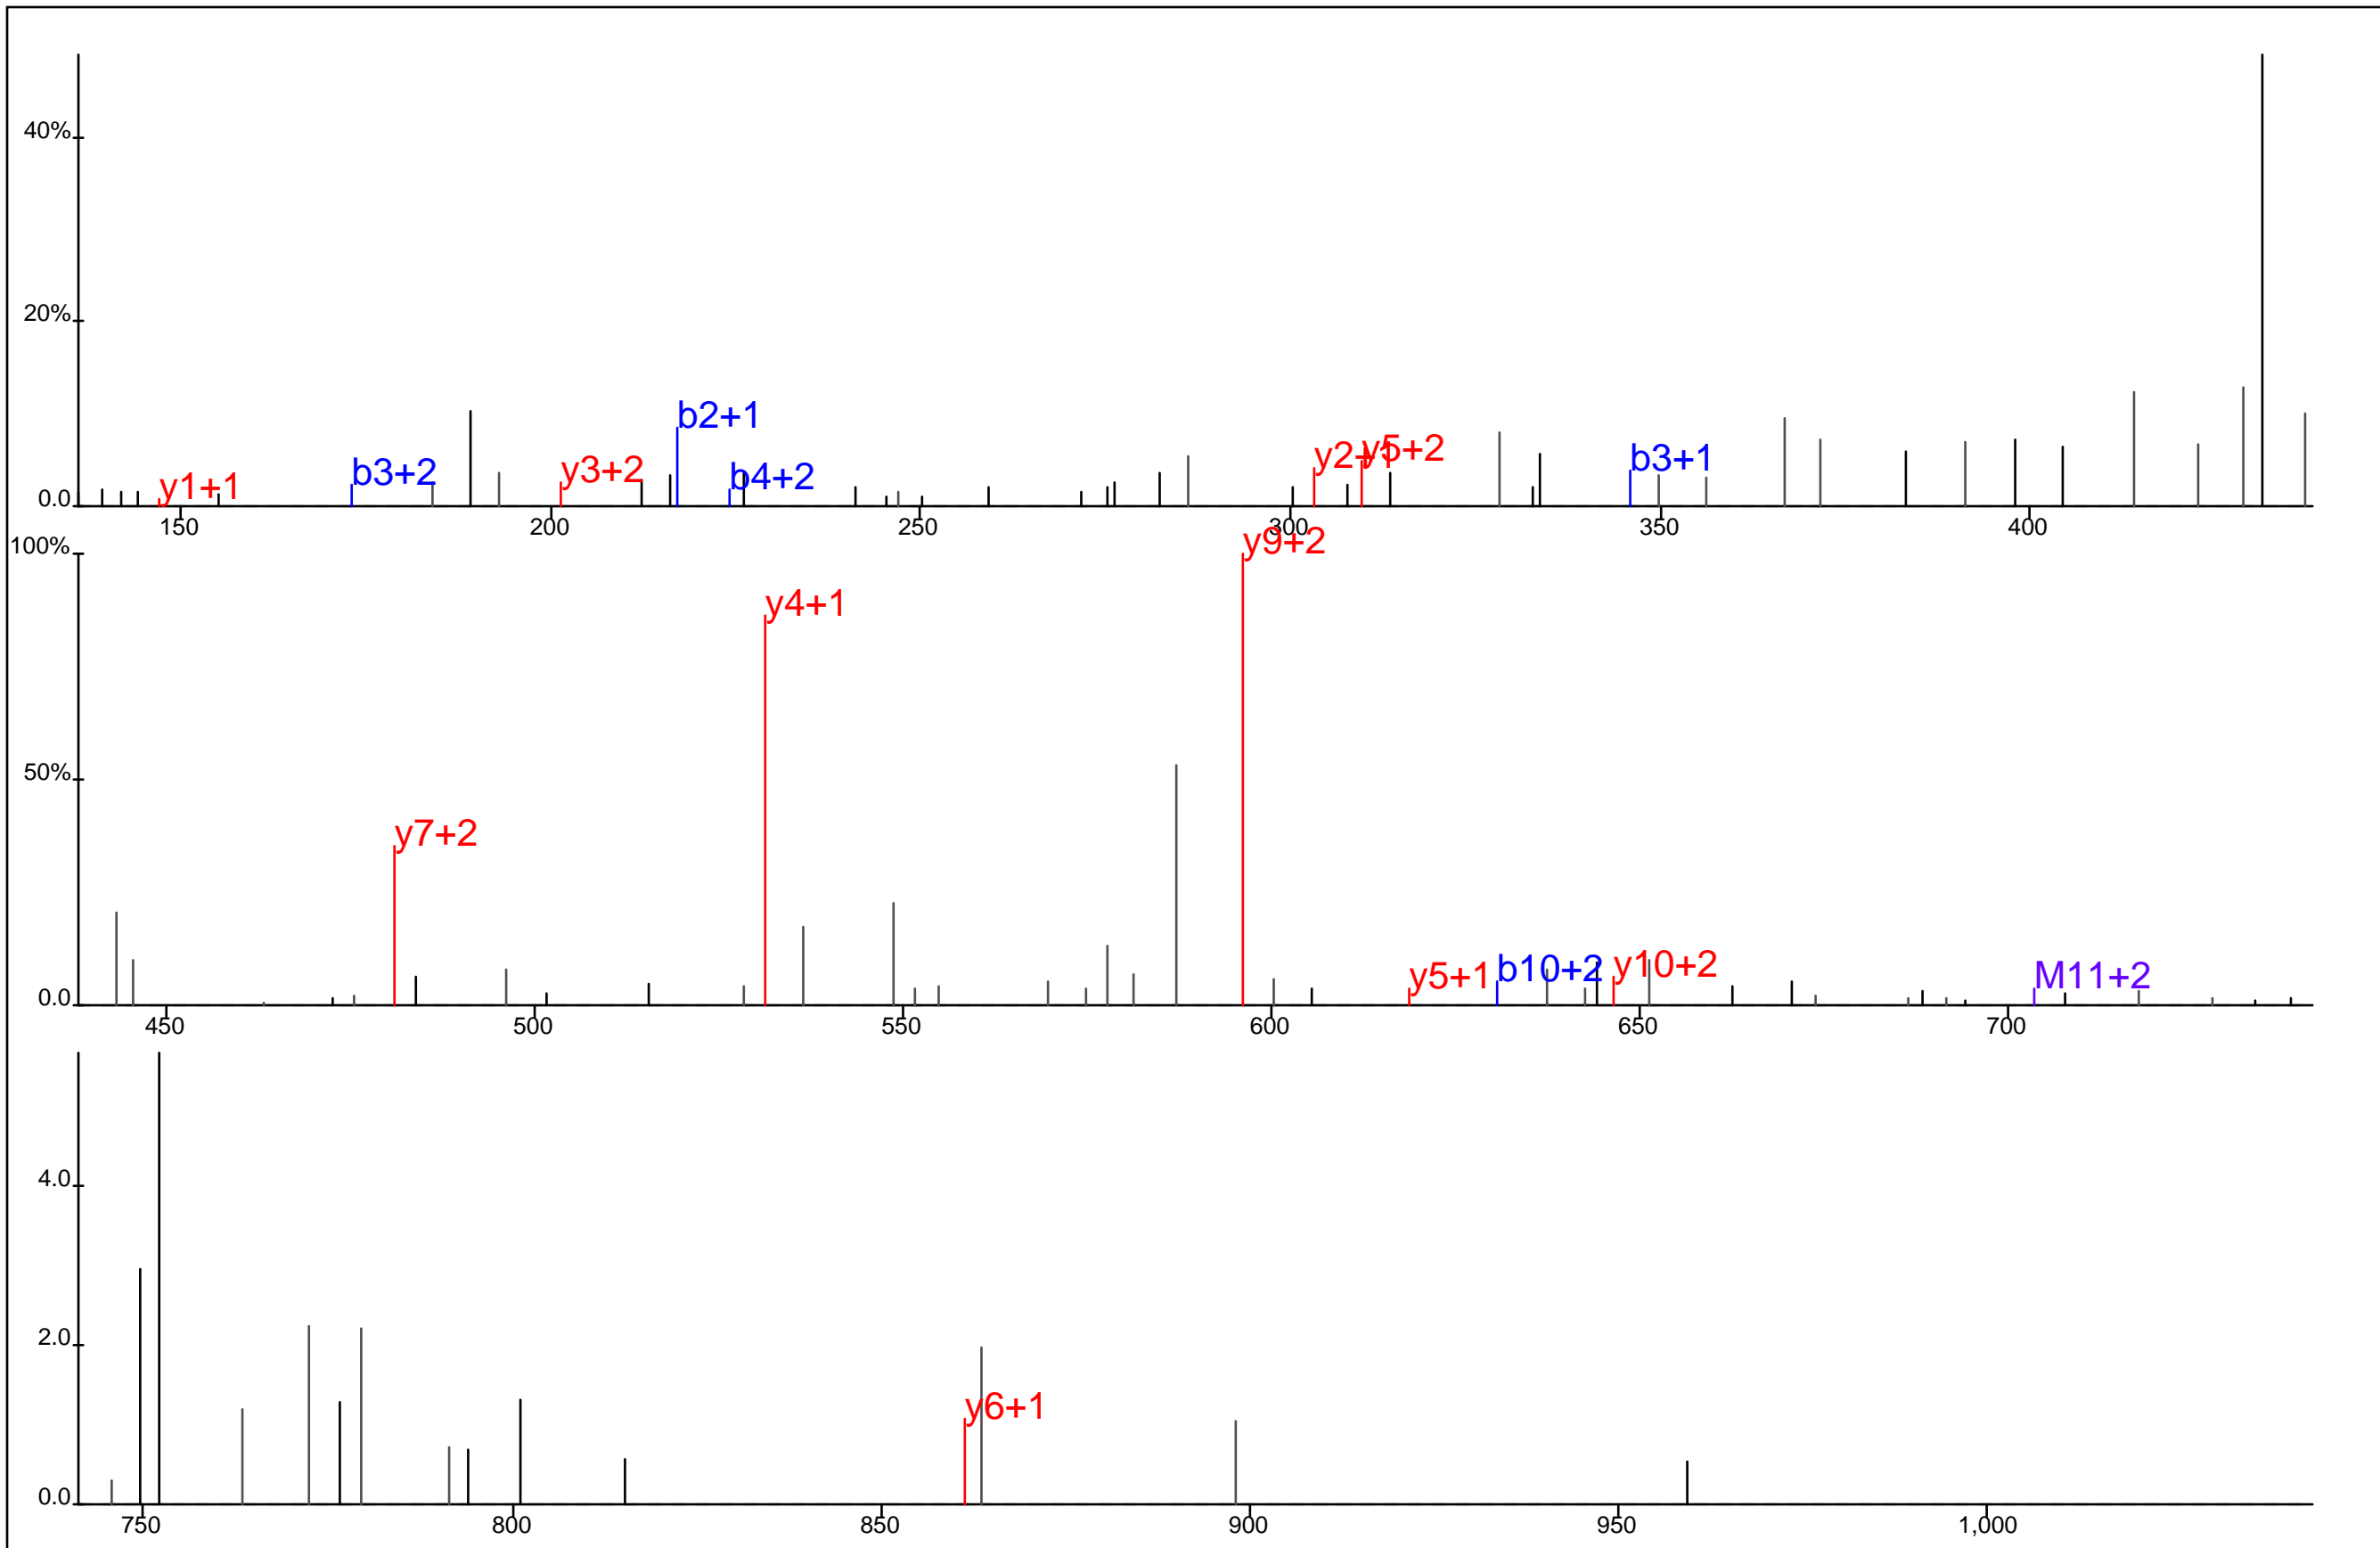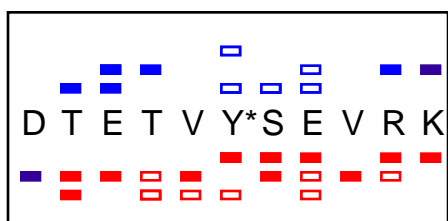

Protein Name: CD31  
 gi Accession: 0  
 Precursor Mass: 469.5443+3  
 Delta Mass: 1.211 ppm  
 XCorr: 22.71

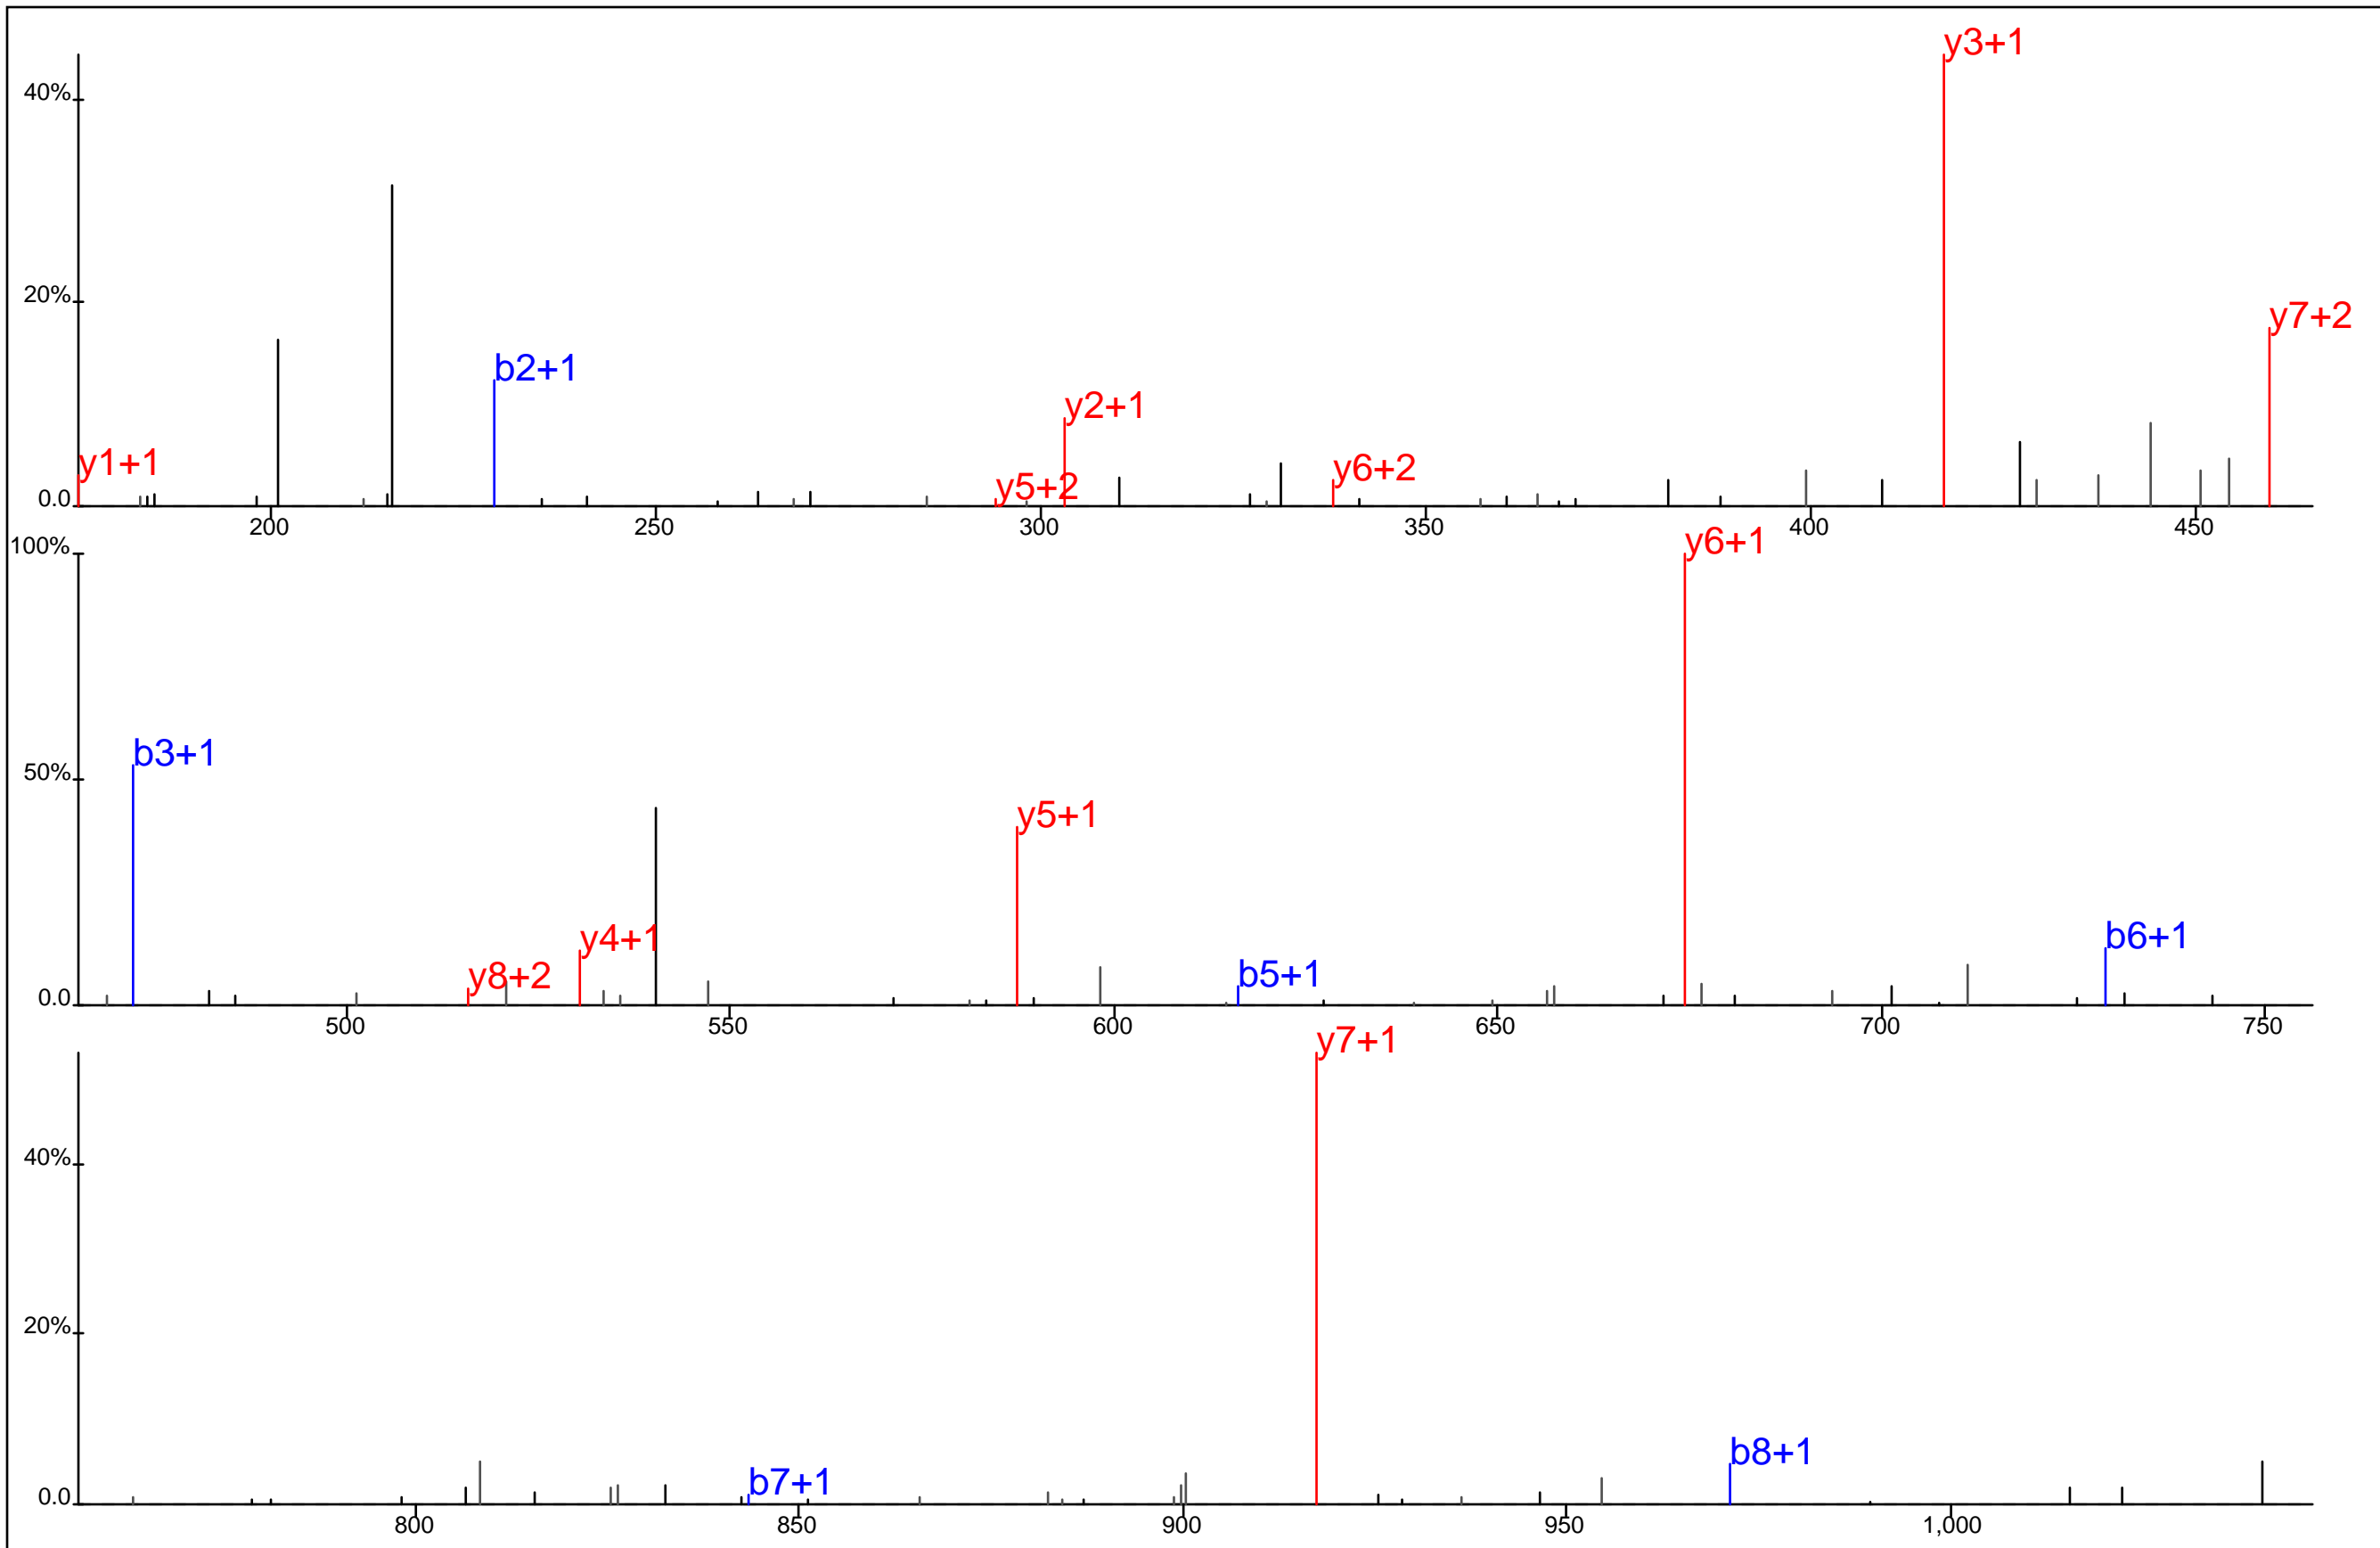

**D L Y\* S G L N Q R**

Protein Name: CD3E  
 gi Accession: 0  
 Precursor Mass: 573.2526+2  
 Delta Mass: 0.592 ppm  
 XCorr: 42.78

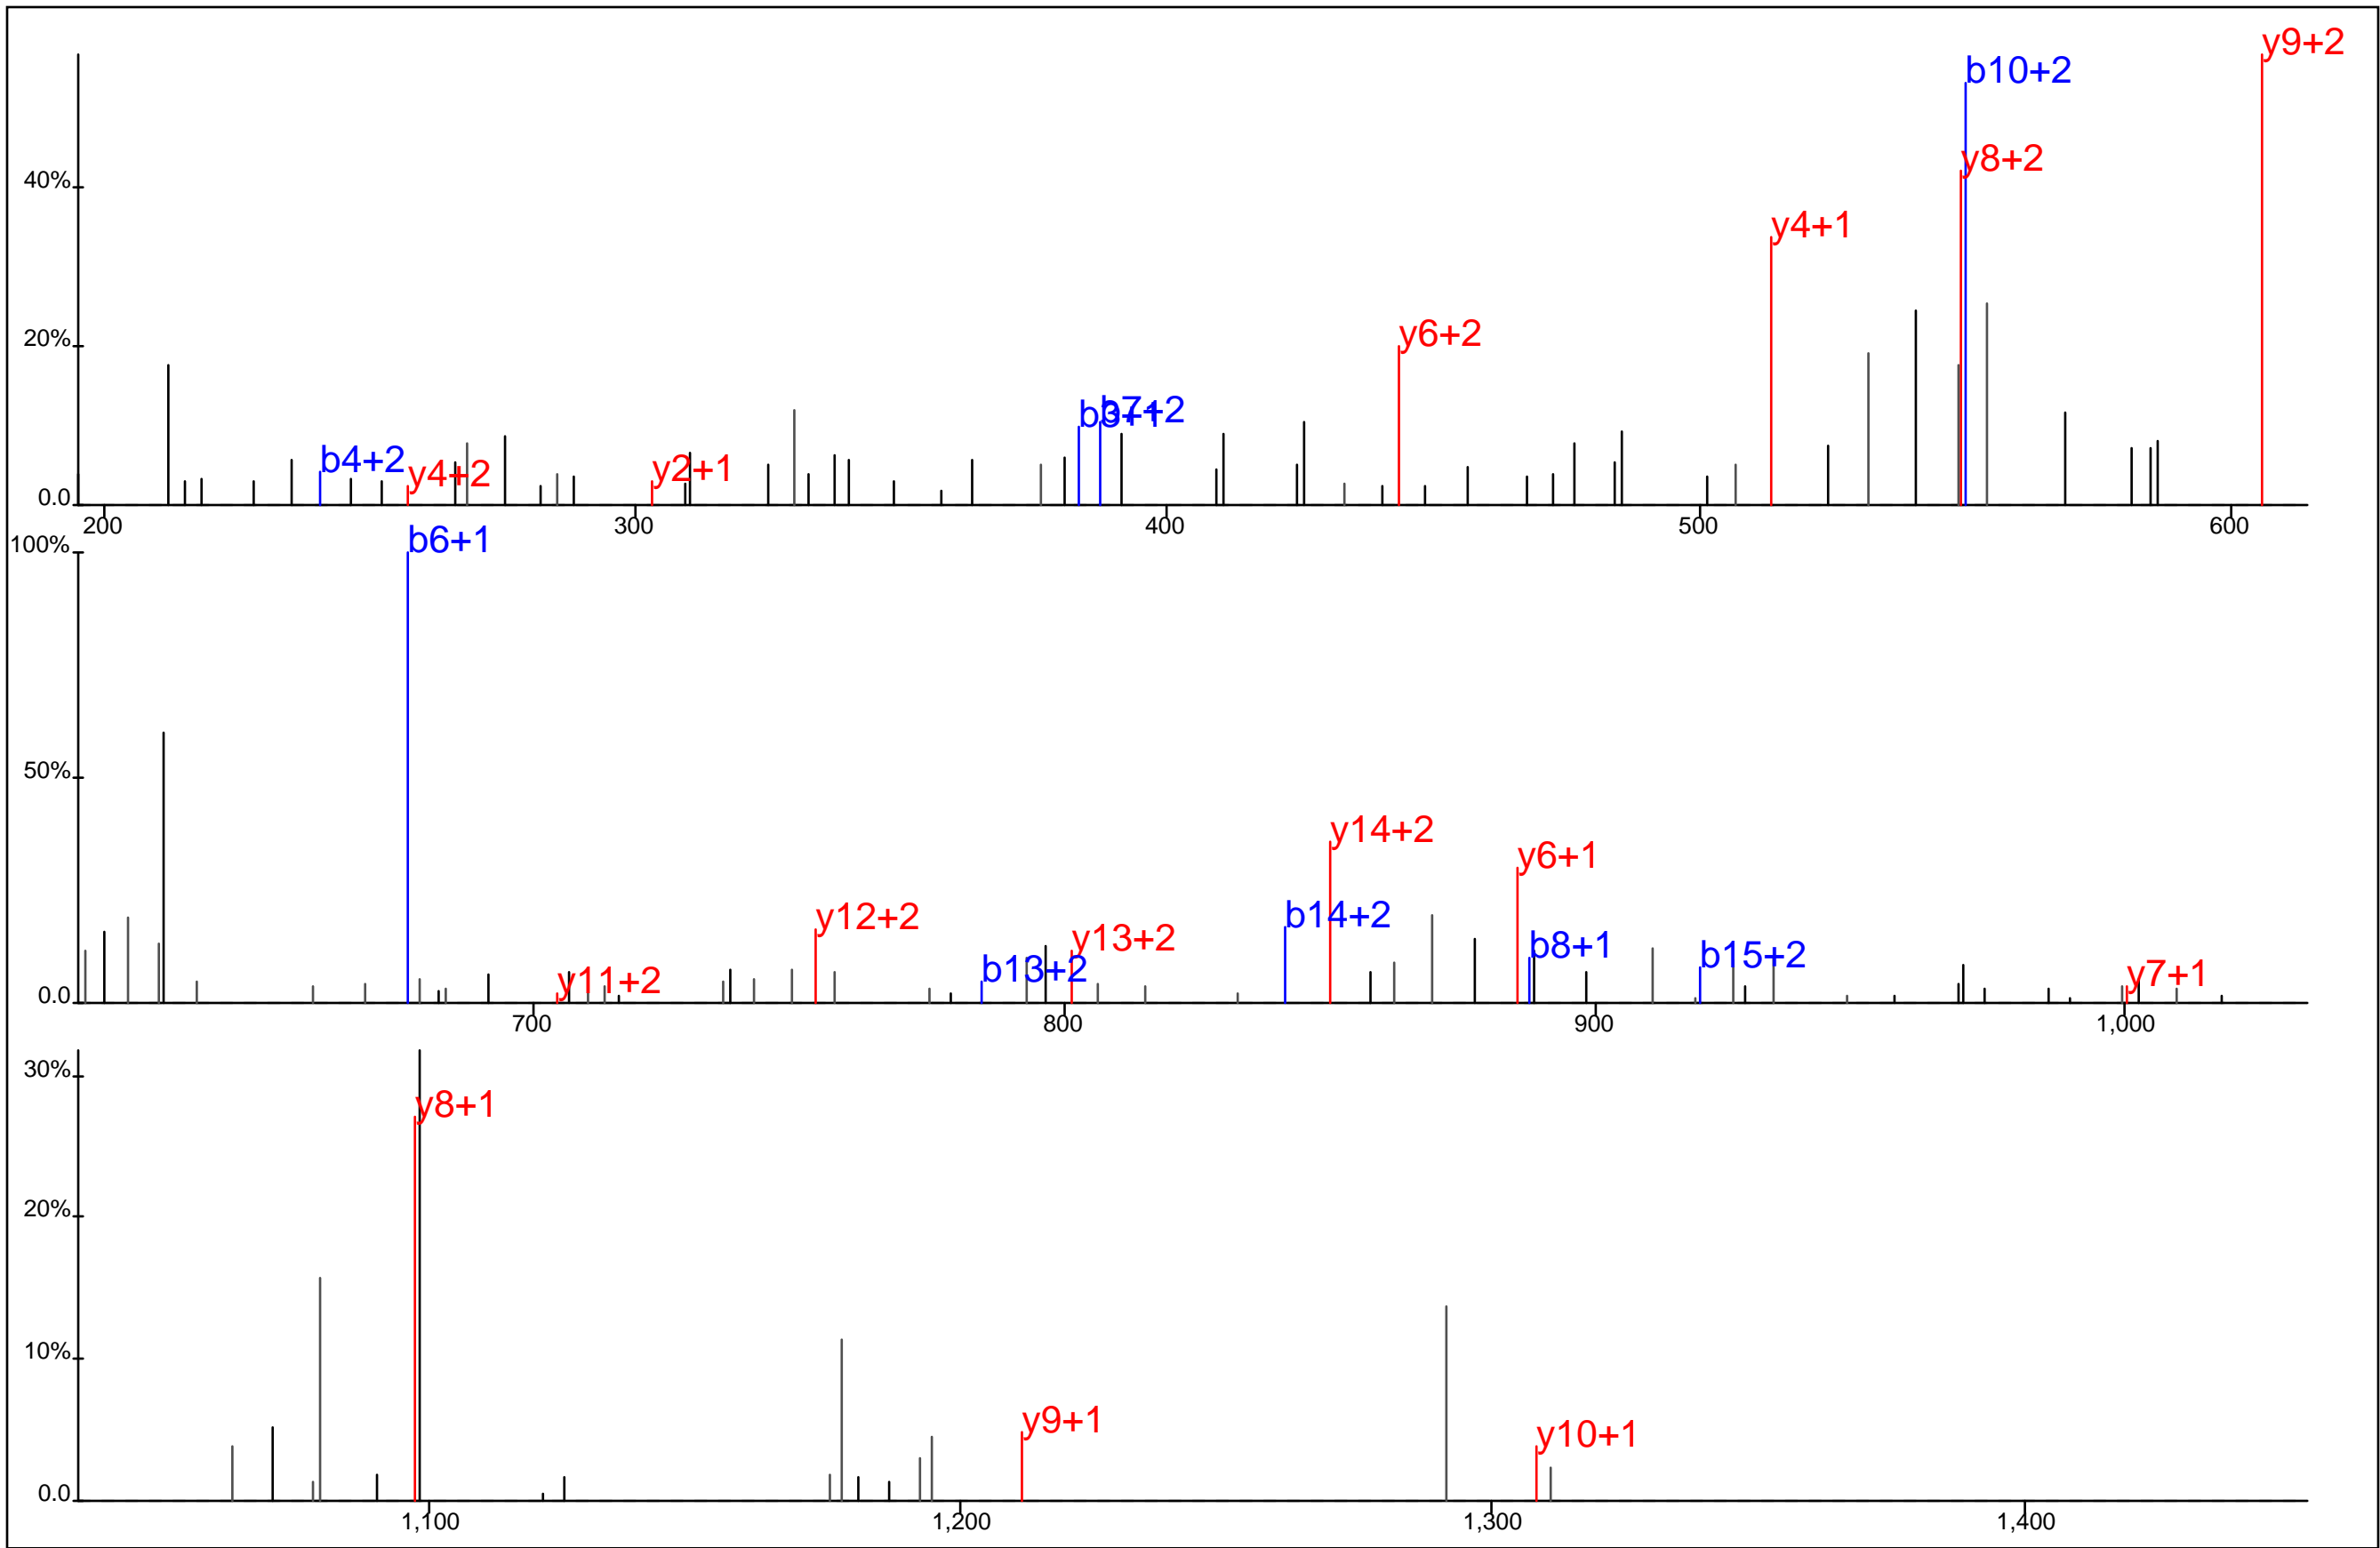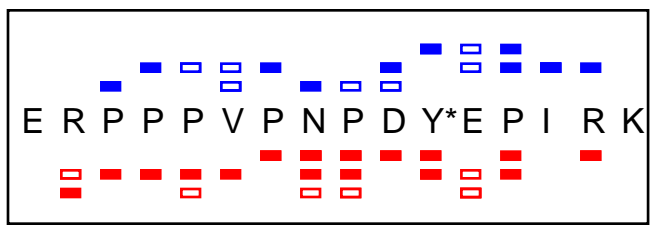

Protein Name: CD3E  
 gi Accession: 0  
 Precursor Mass: 661.9952+3  
 Delta Mass: 1.211 ppm  
 XCorr: 27.16



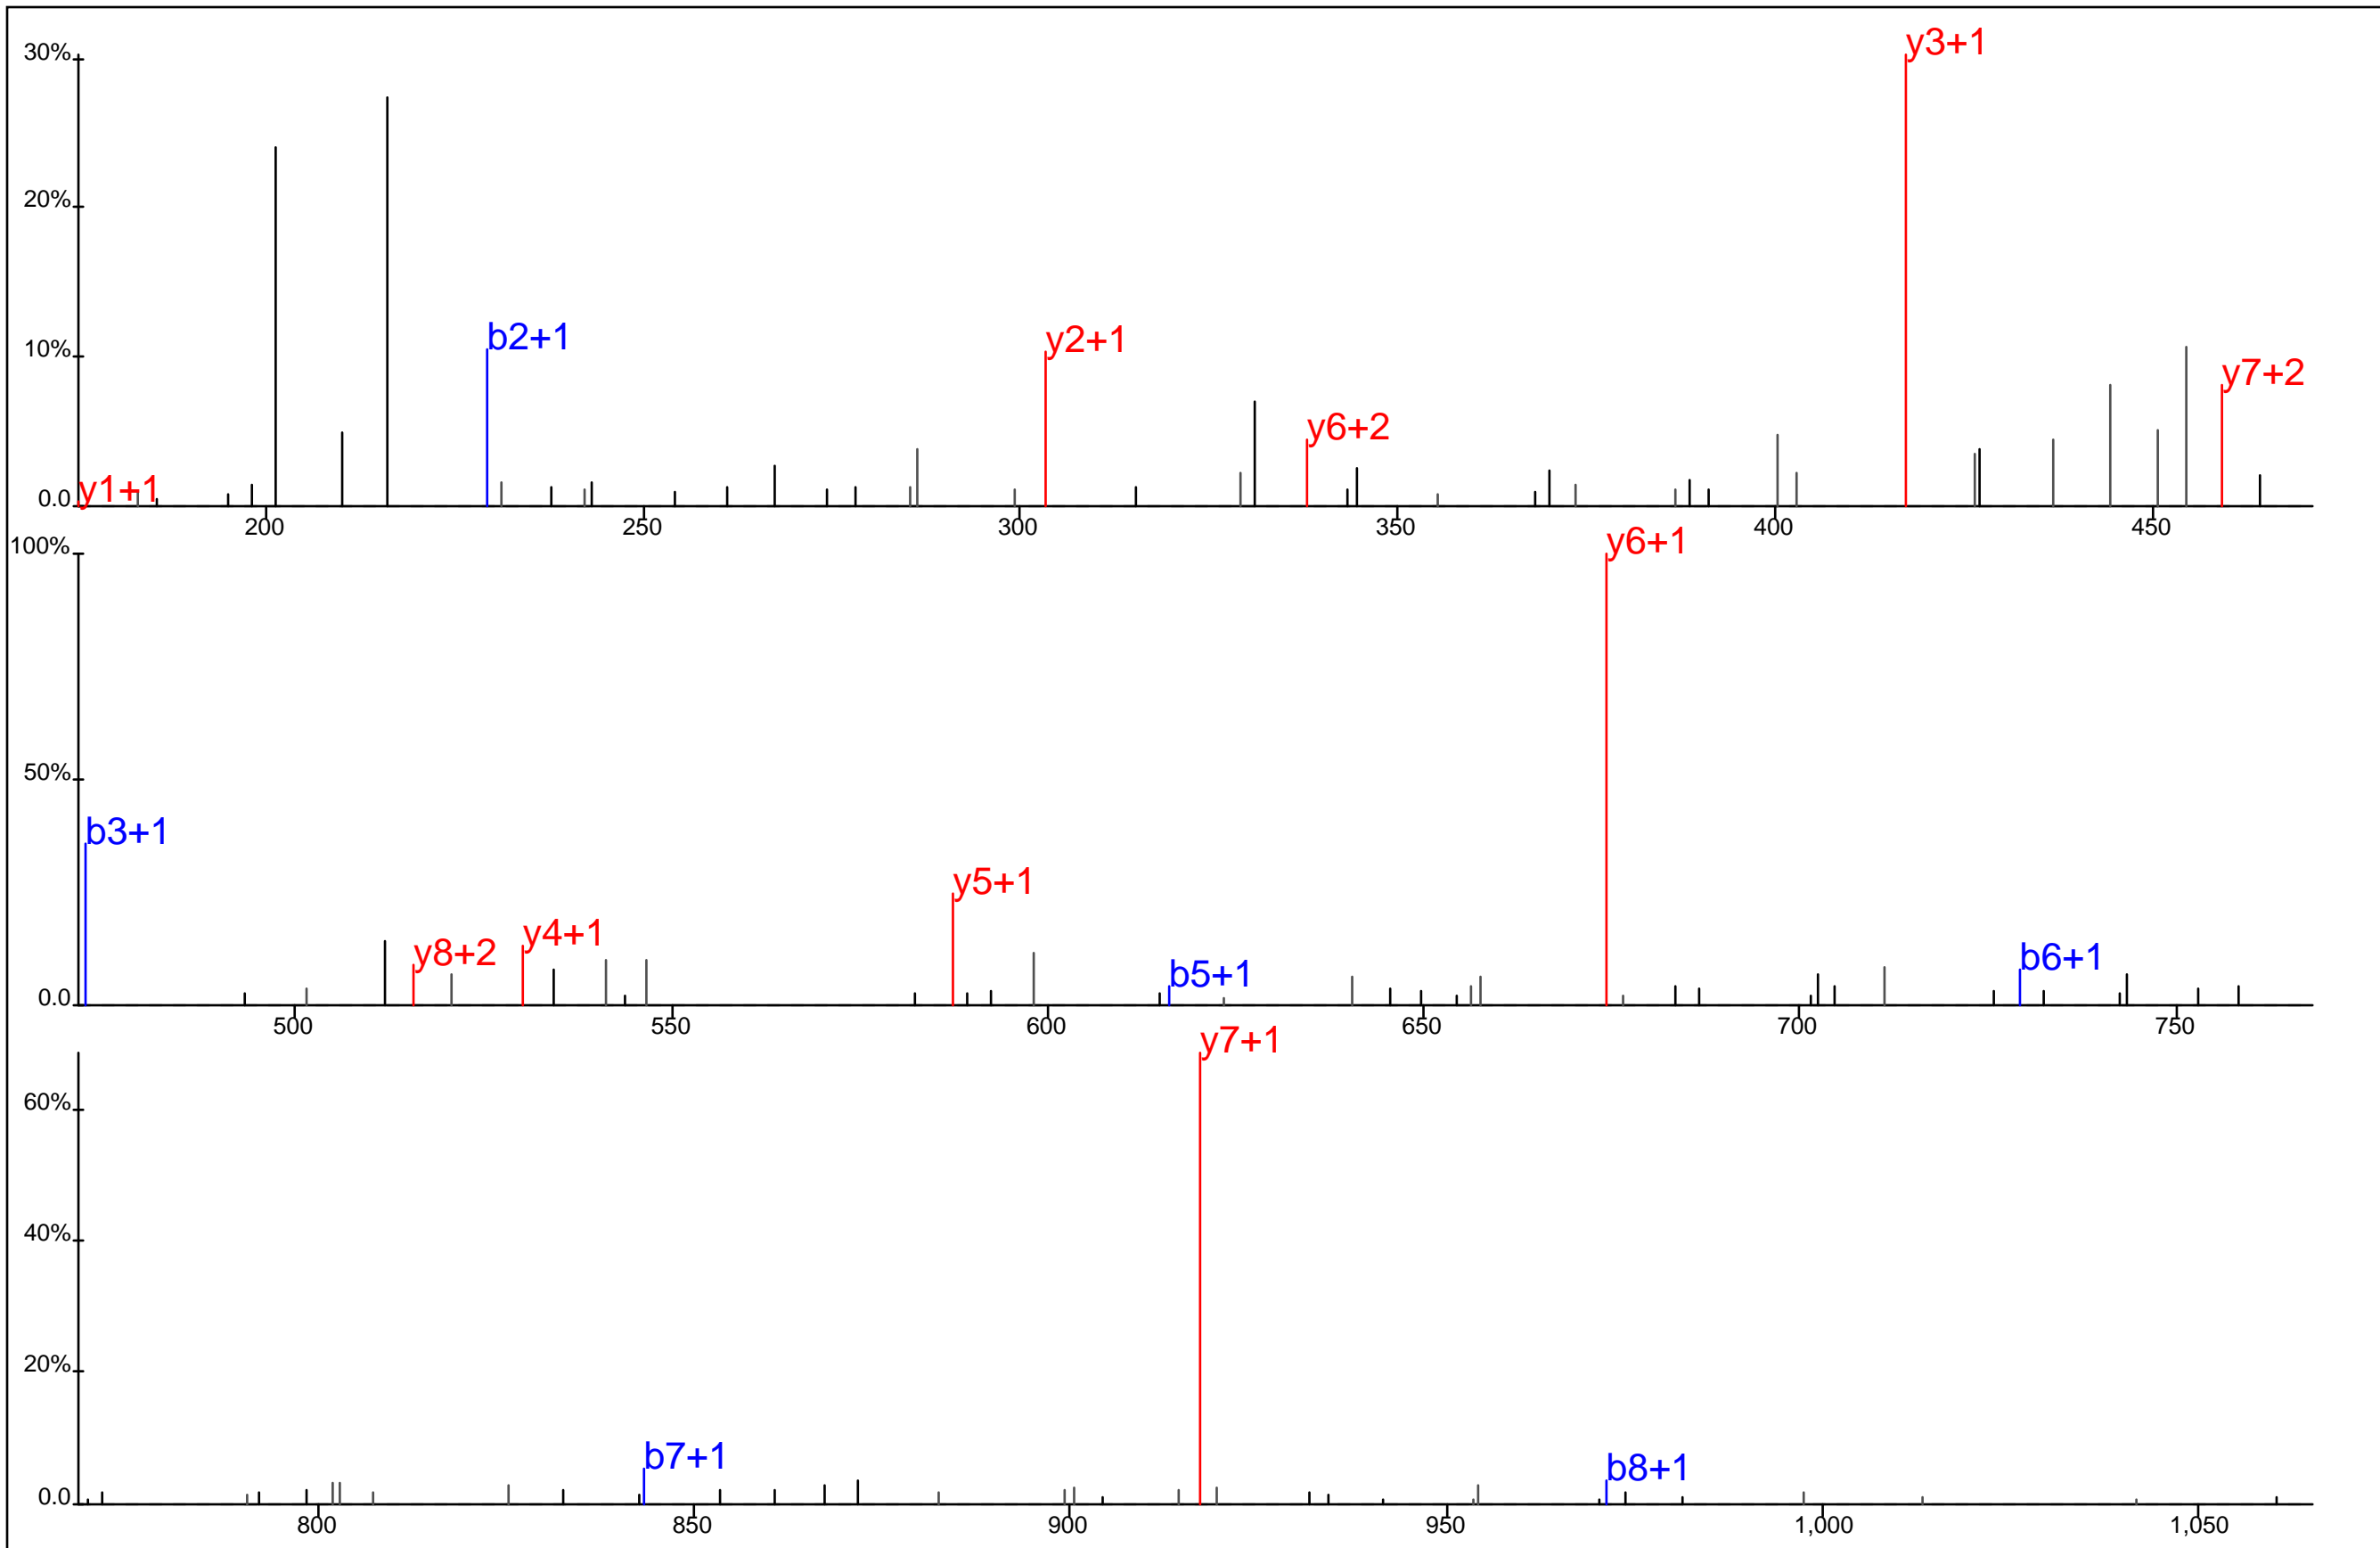

■ □ ■ □ ■ □  
 D L Y\* S G L N Q R  
■ □ ■ □ ■ □ ■ □

Protein Name: CD3E  
 gi Accession: 0  
 Precursor Mass: 573.2535+2  
 Delta Mass: 0.899 ppm  
 XCorr: 40.28

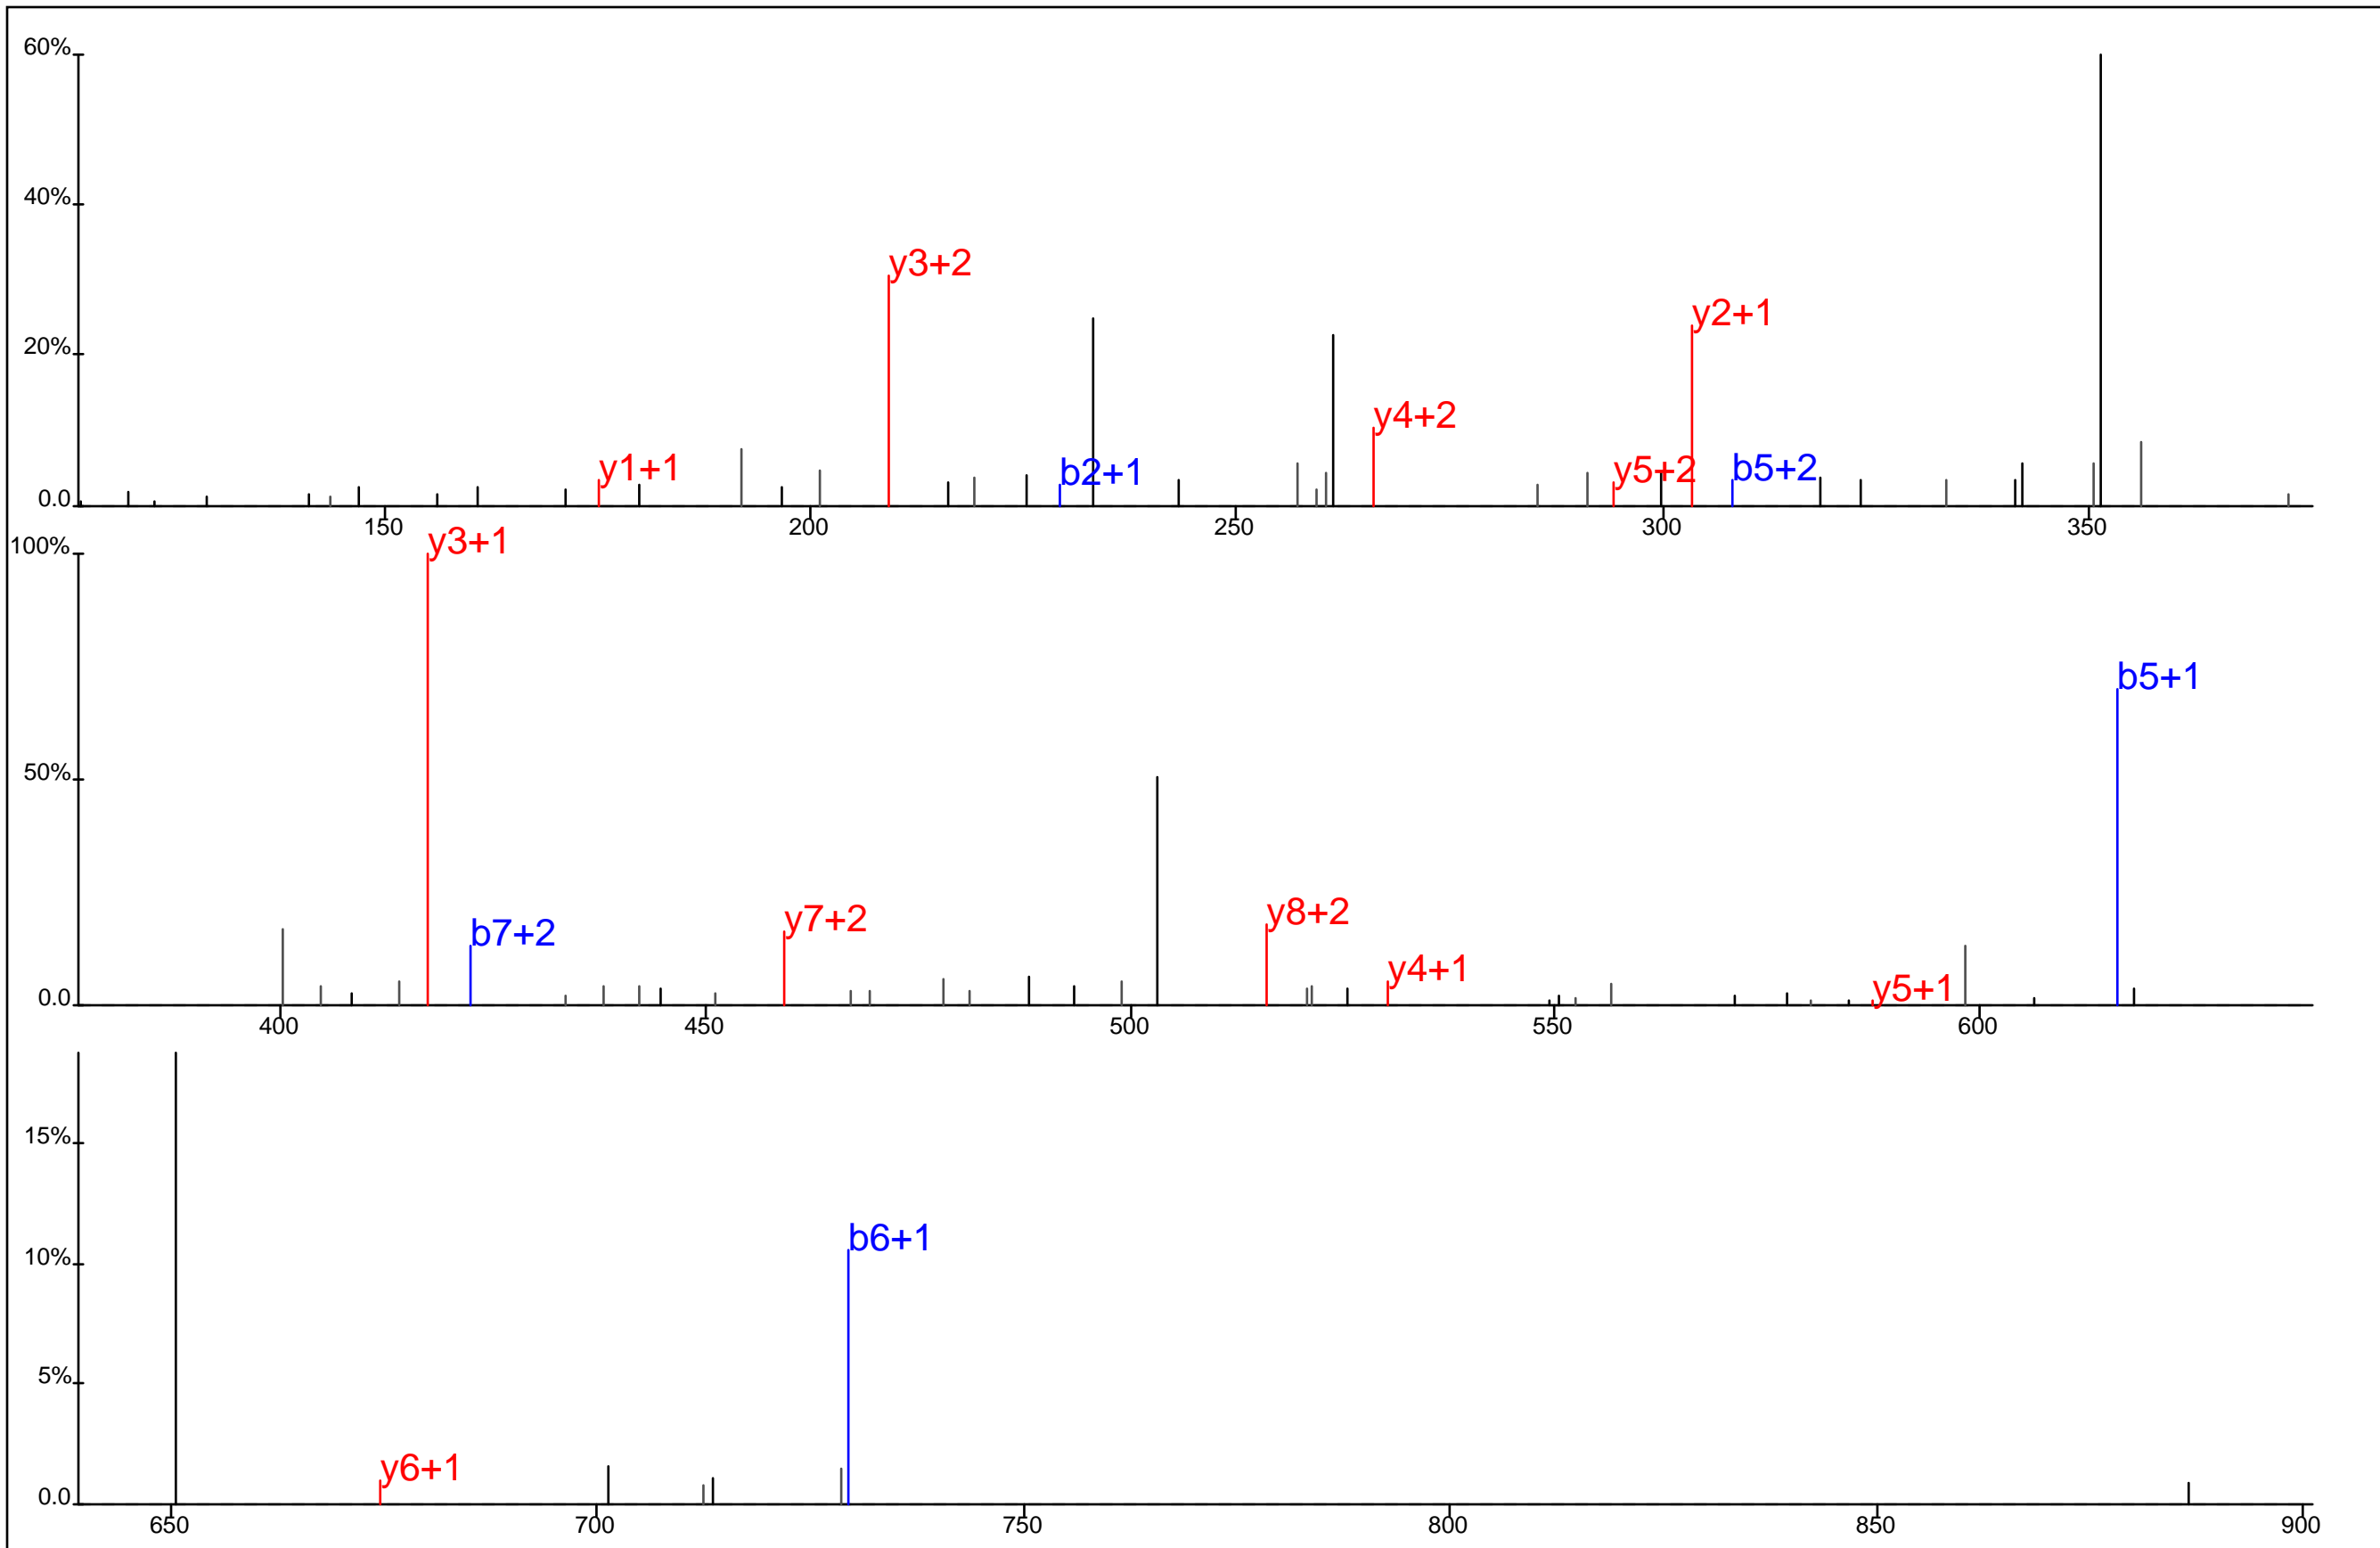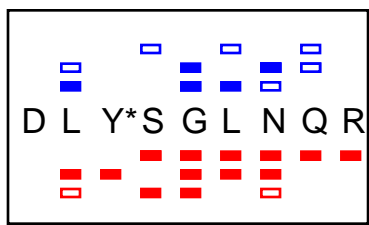

Protein Name: CD3E  
 gi Accession: 0  
 Precursor Mass: 382.5048+3  
 Delta Mass: 1.102 ppm  
 XCorr: 24.6





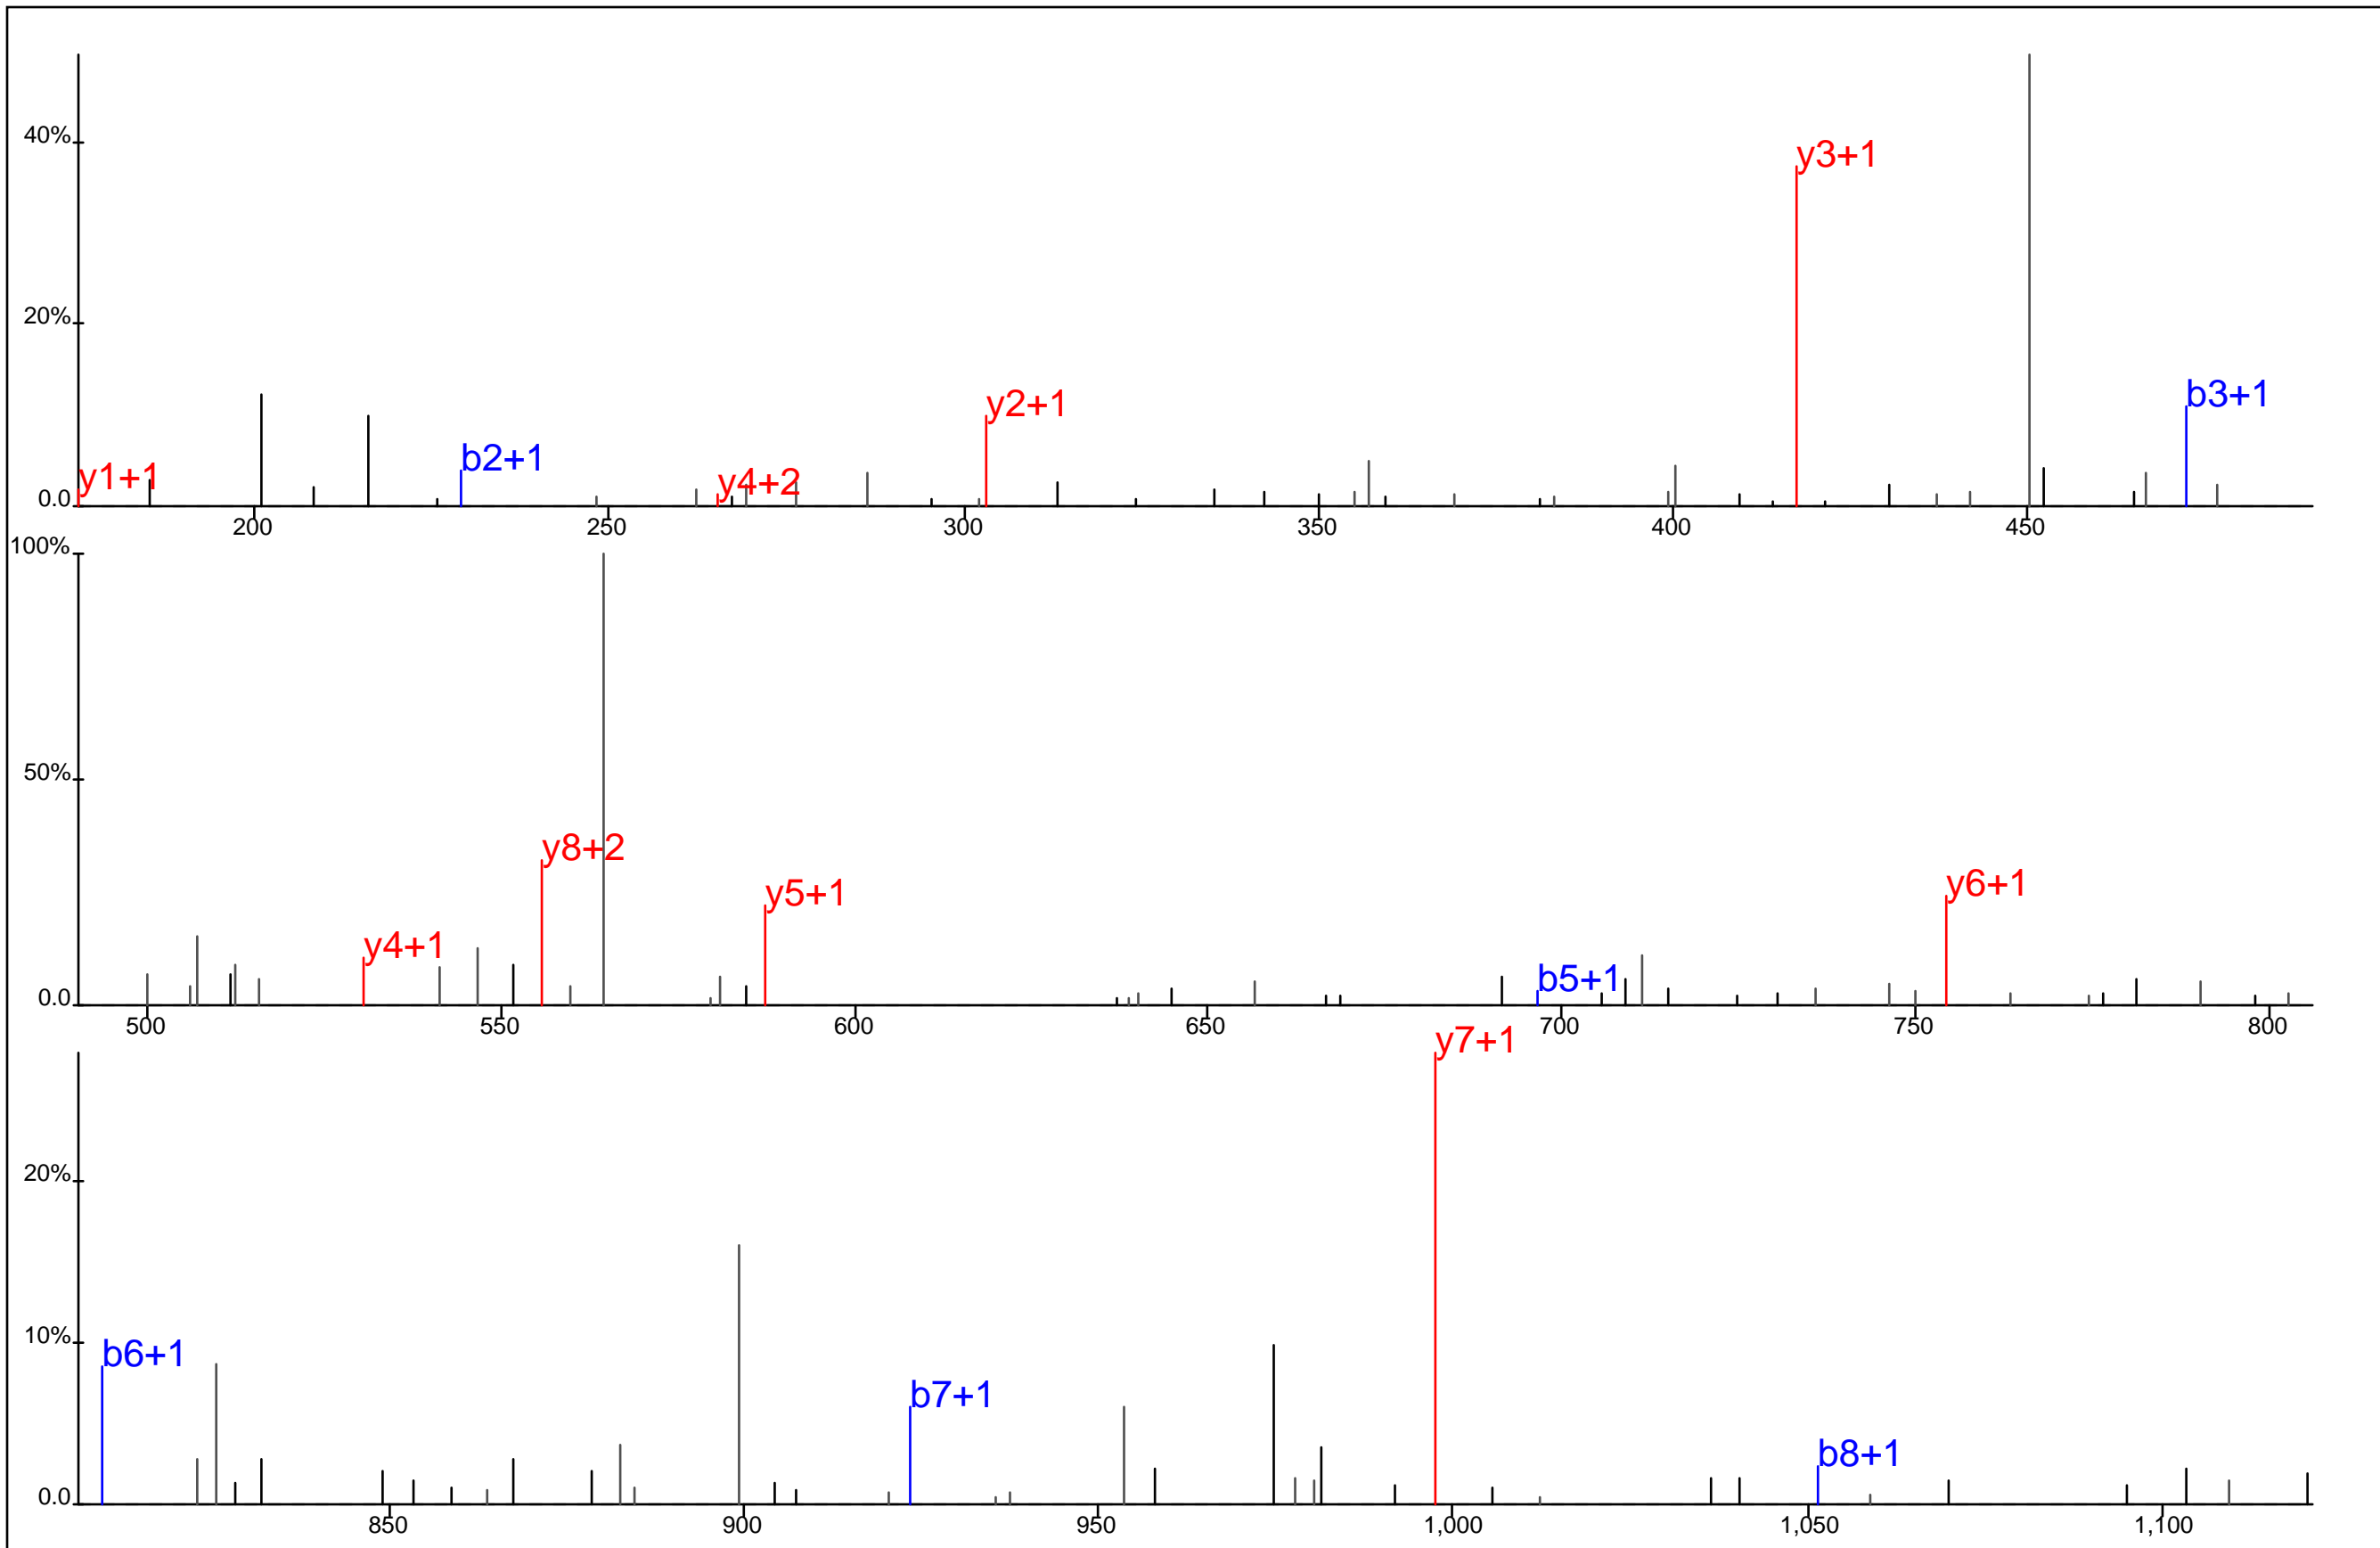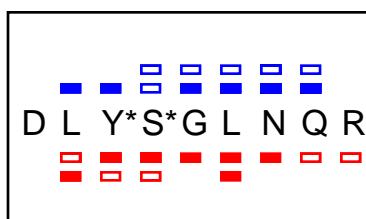

Protein Name: CD3E  
 gi Accession: 0  
 Precursor Mass: 613.2360+2  
 Delta Mass: 0.173 ppm  
 XCorr: 28.45

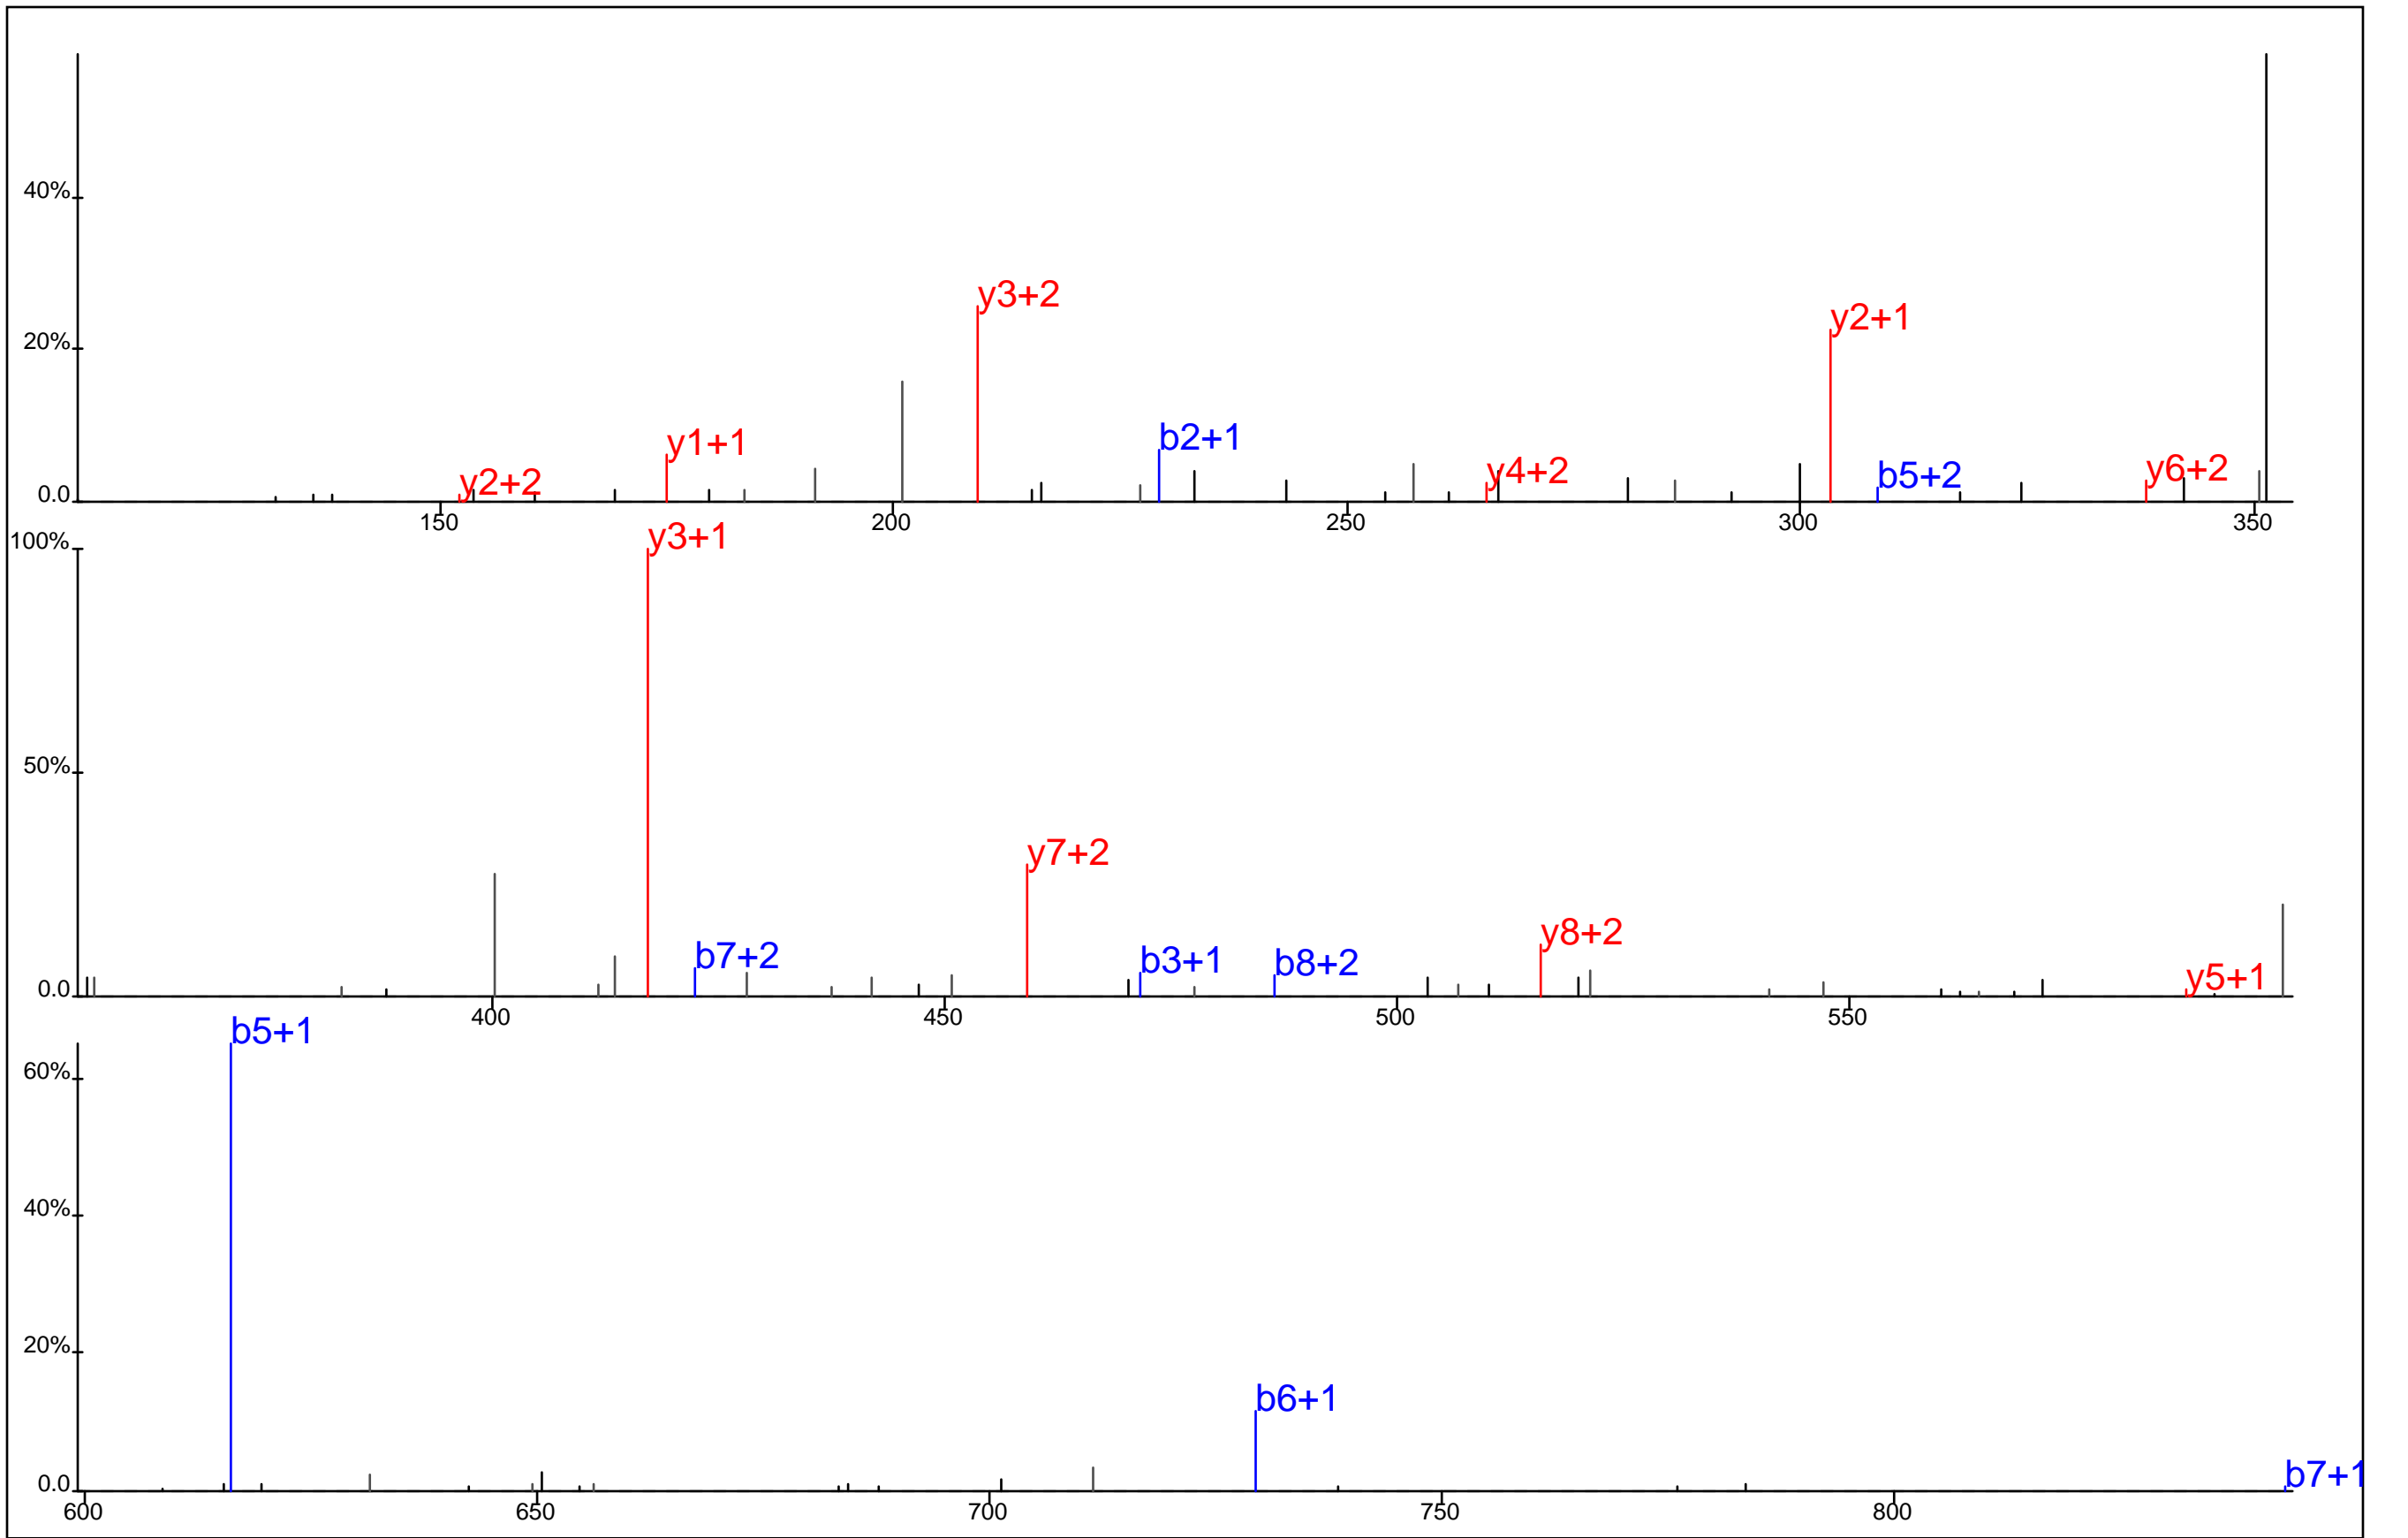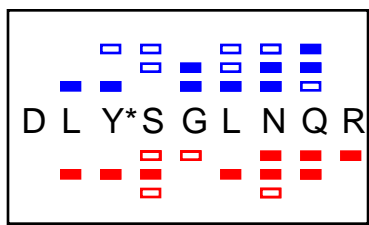

Protein Name: CD3E  
 gi Accession: 0  
 Precursor Mass: 382.5043+3  
 Delta Mass: 0.179 ppm  
 XCorr: 30.86

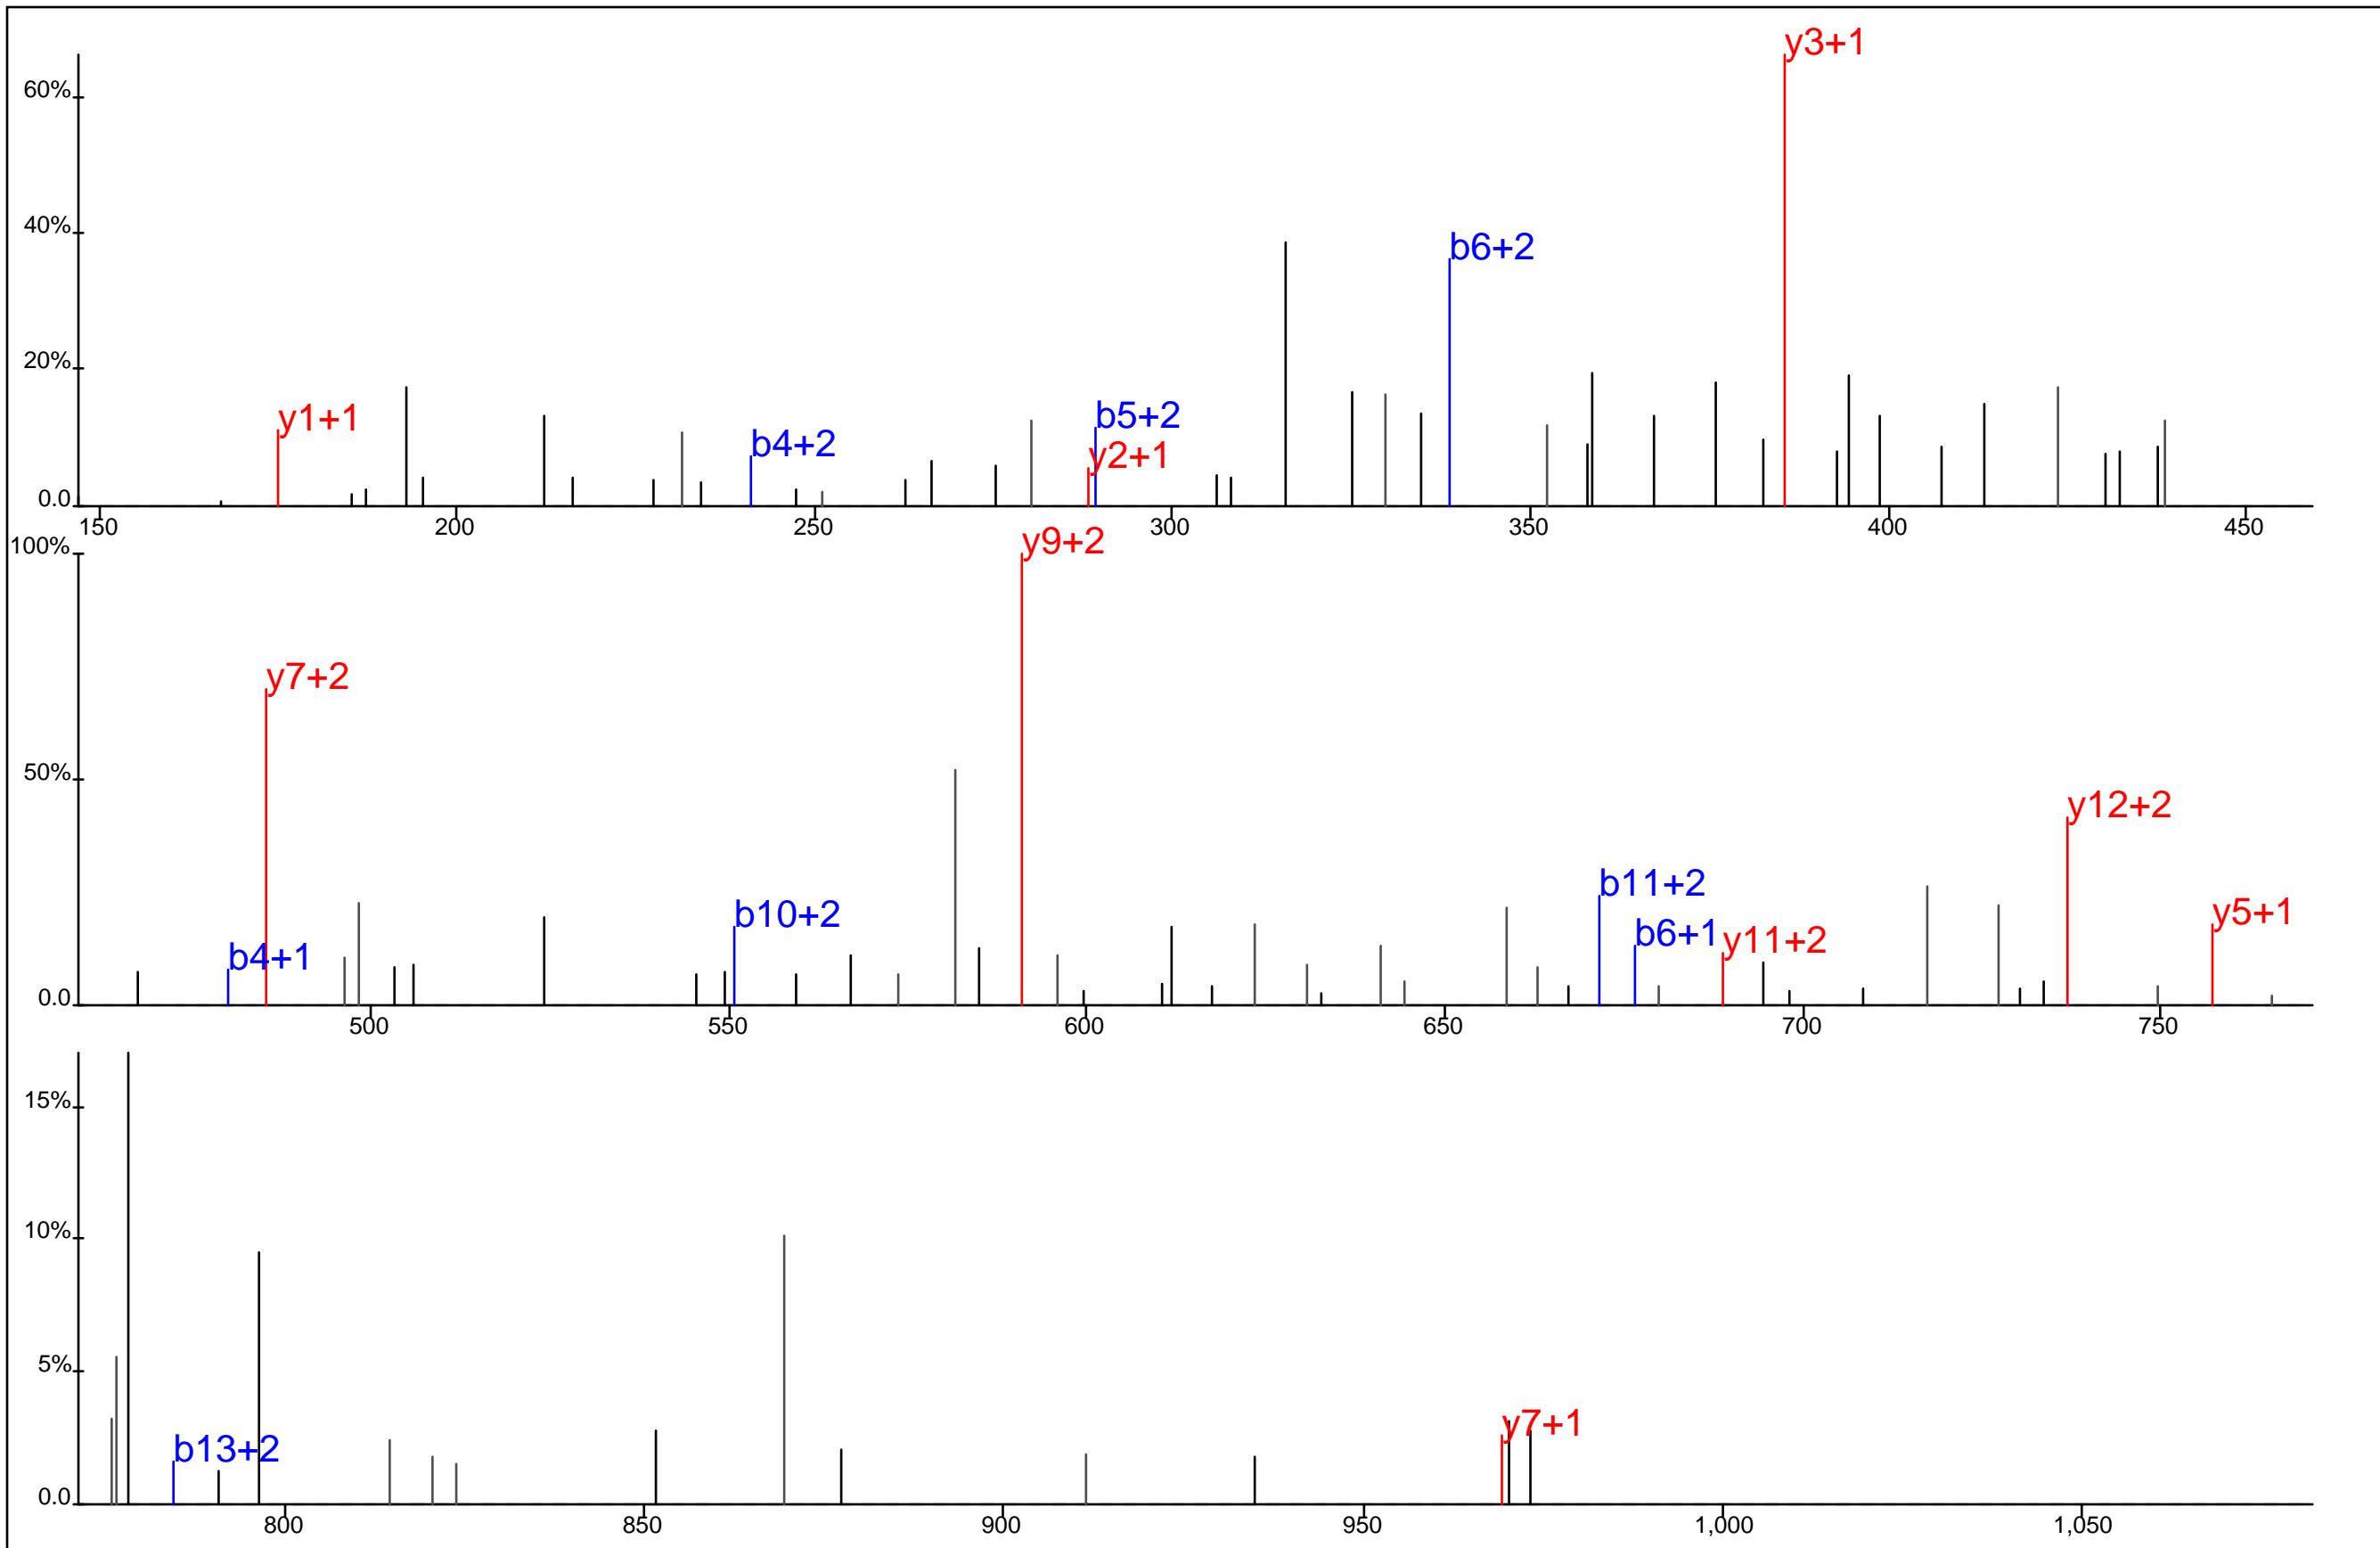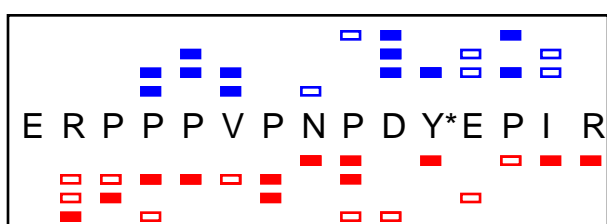

Protein Name: CD3E  
 gi Accession: 0  
 Precursor Mass: 464.7246+4  
 Delta Mass: 1.447 ppm  
 XCorr: 25.98

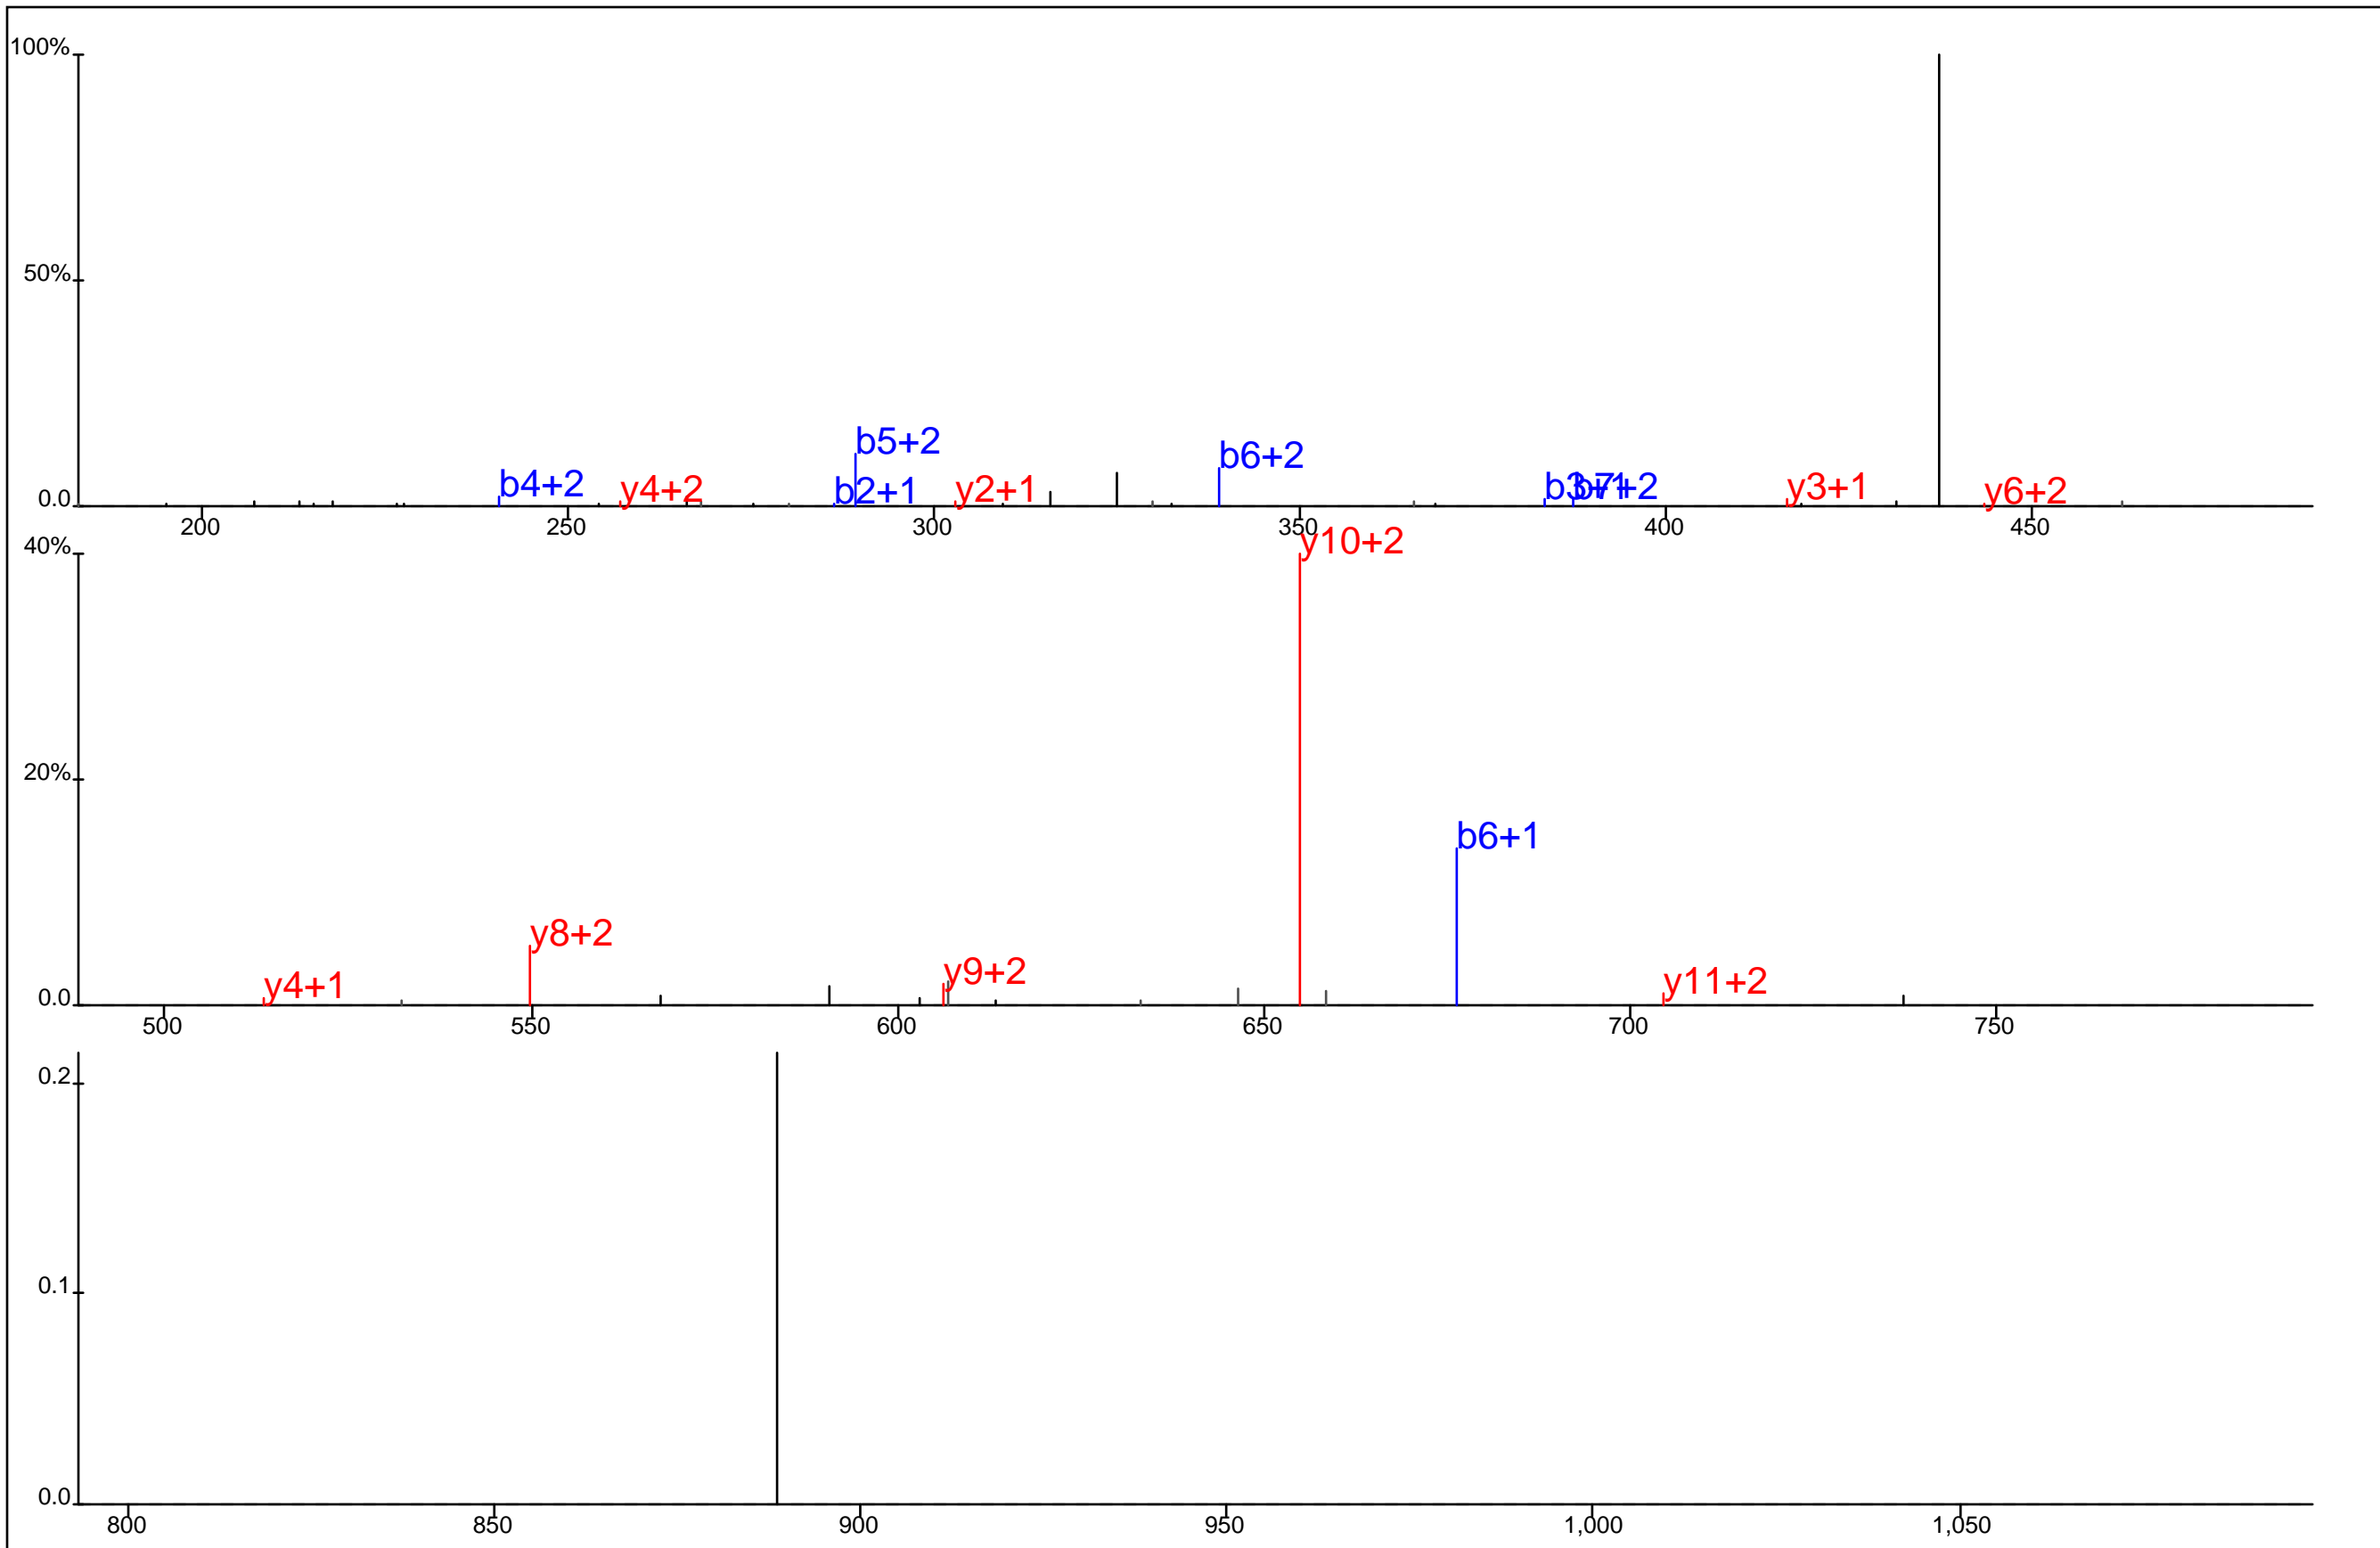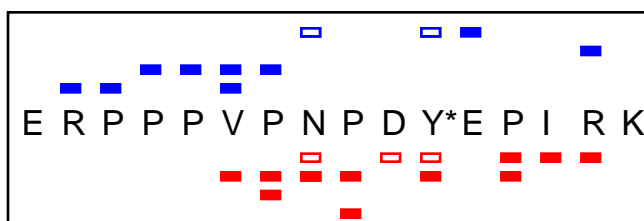

Protein Name: CD3E  
 gi Accession: 0  
 Precursor Mass: 496.7481+4  
 Delta Mass: 0.989 ppm  
 XCorr: 26.09



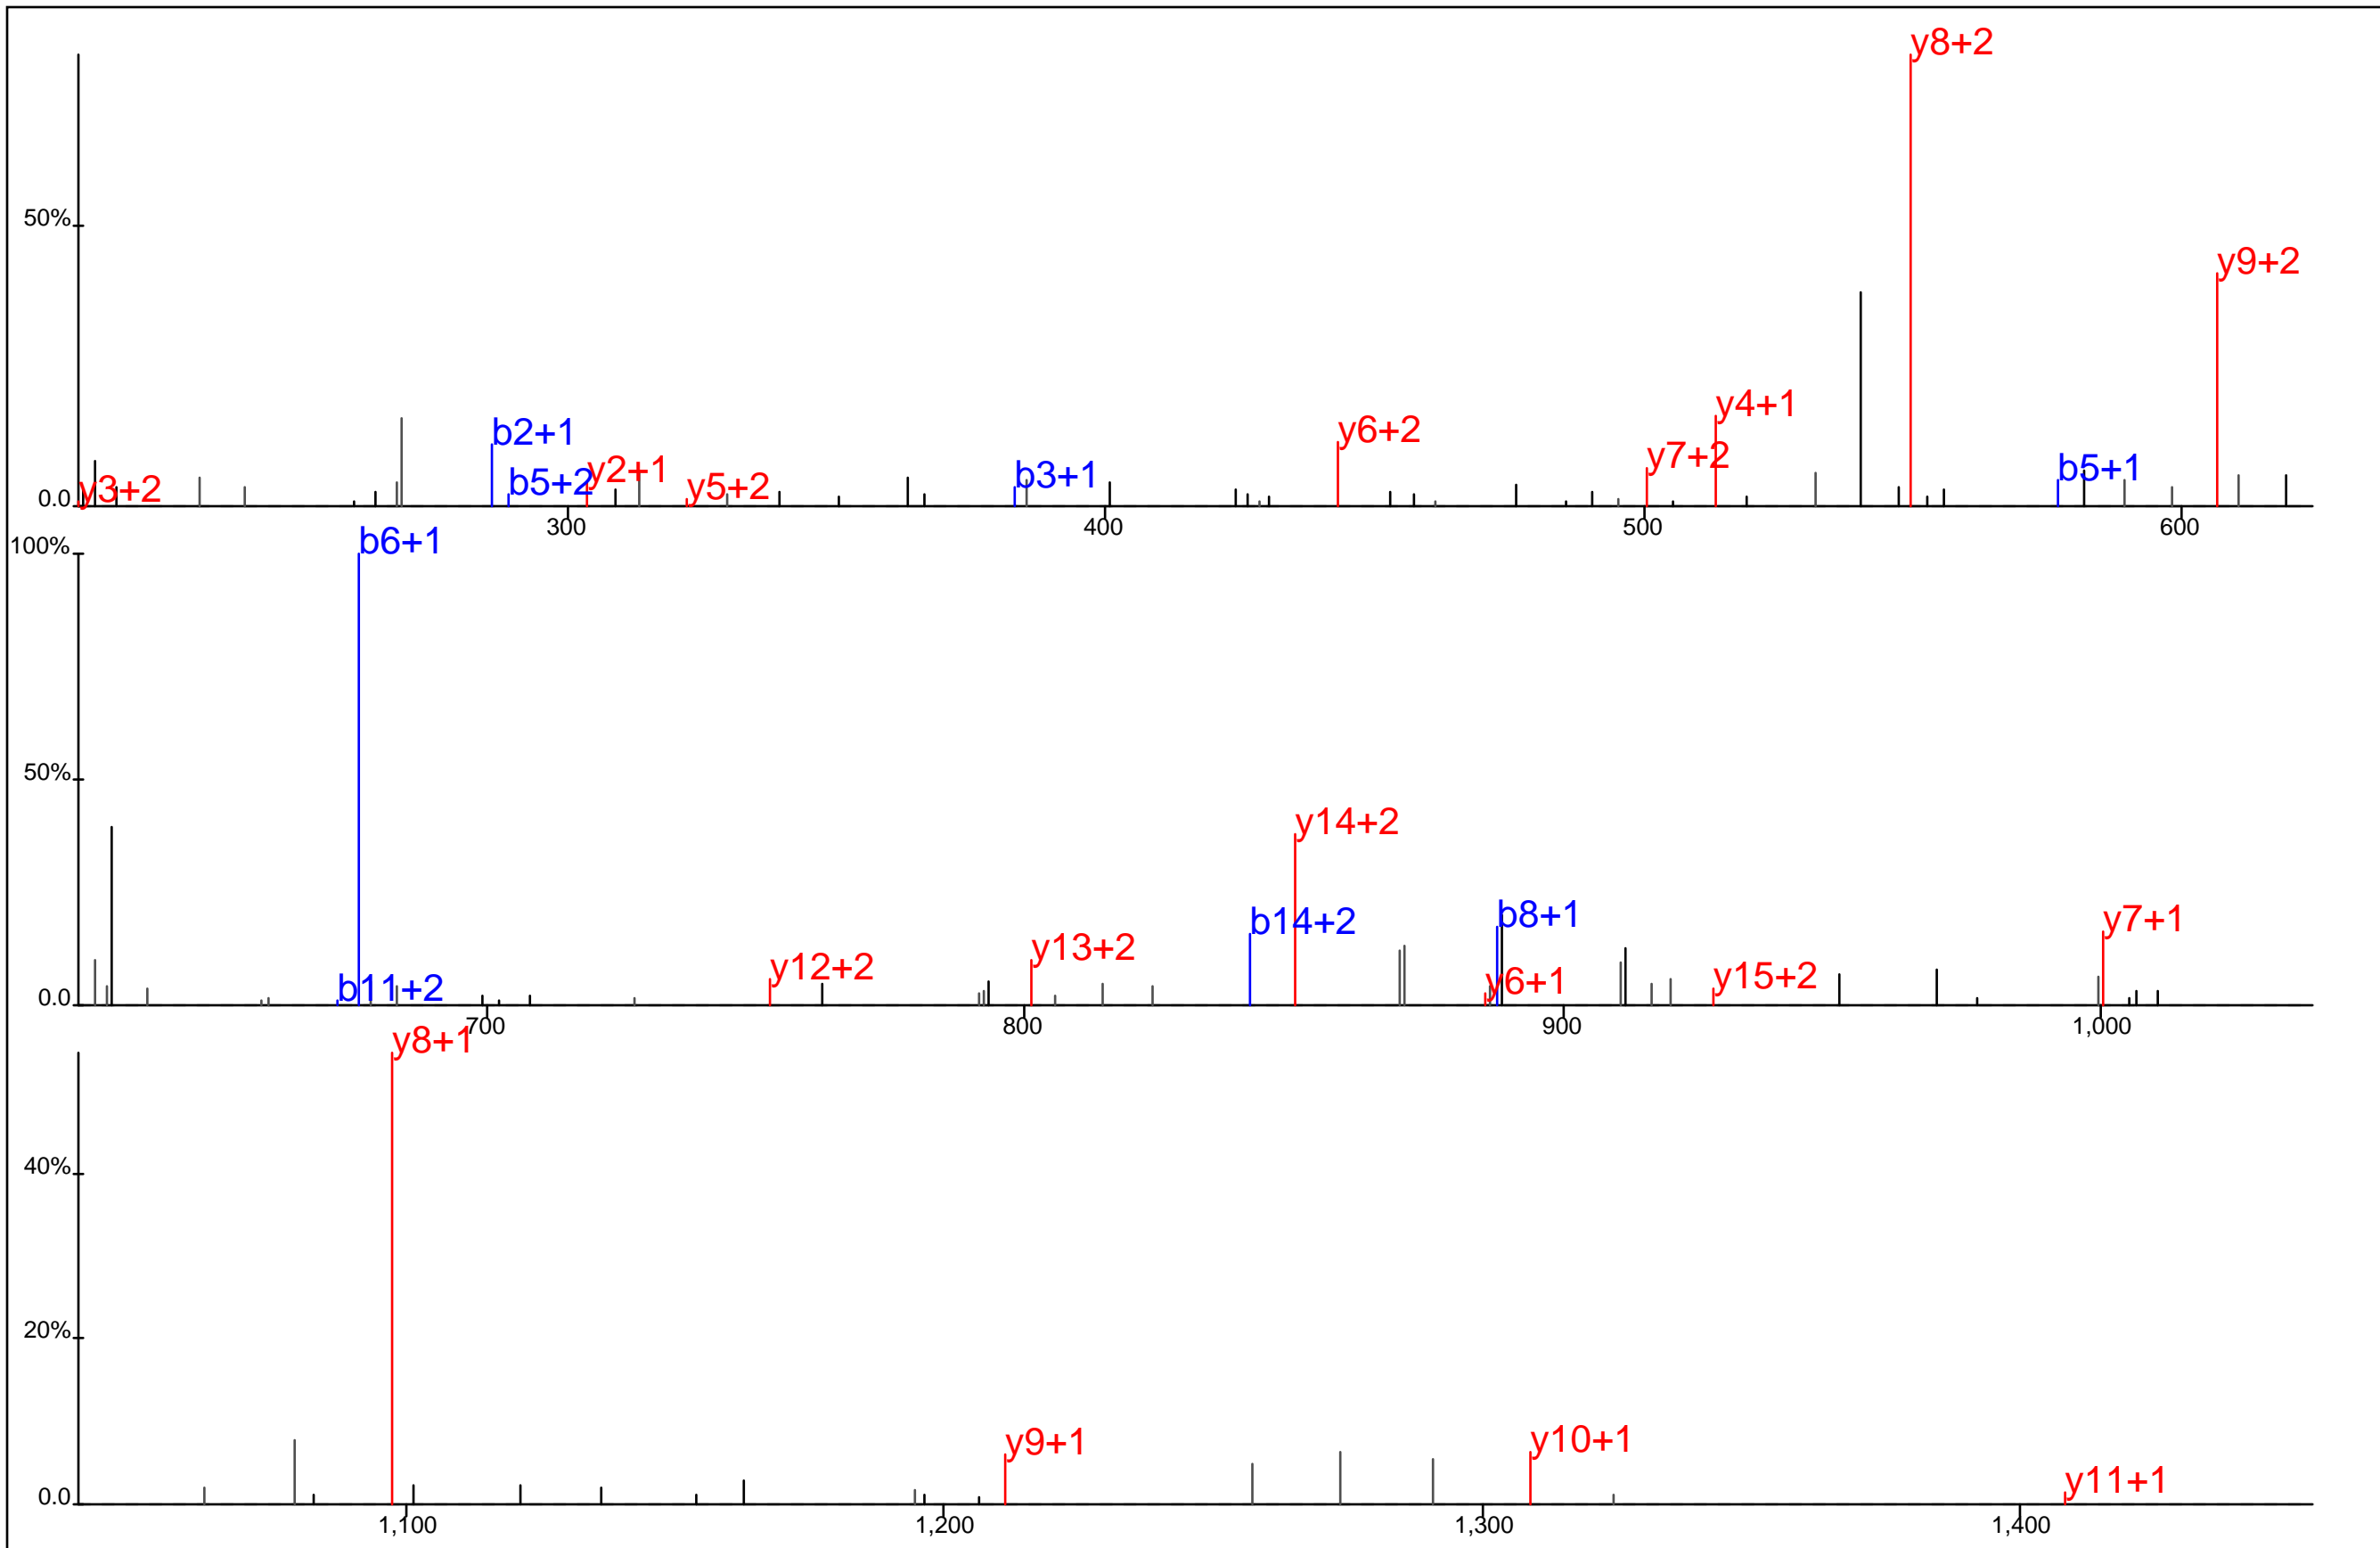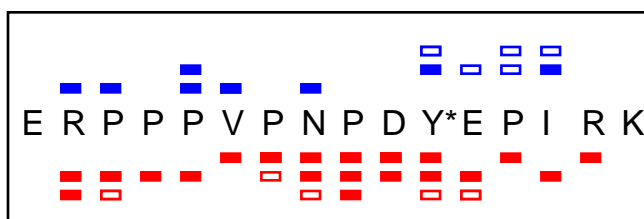

Protein Name: CD3E  
 gi Accession: 0  
 Precursor Mass: 661.9948+3  
 Delta Mass: 0.566 ppm  
 XCorr: 45.02

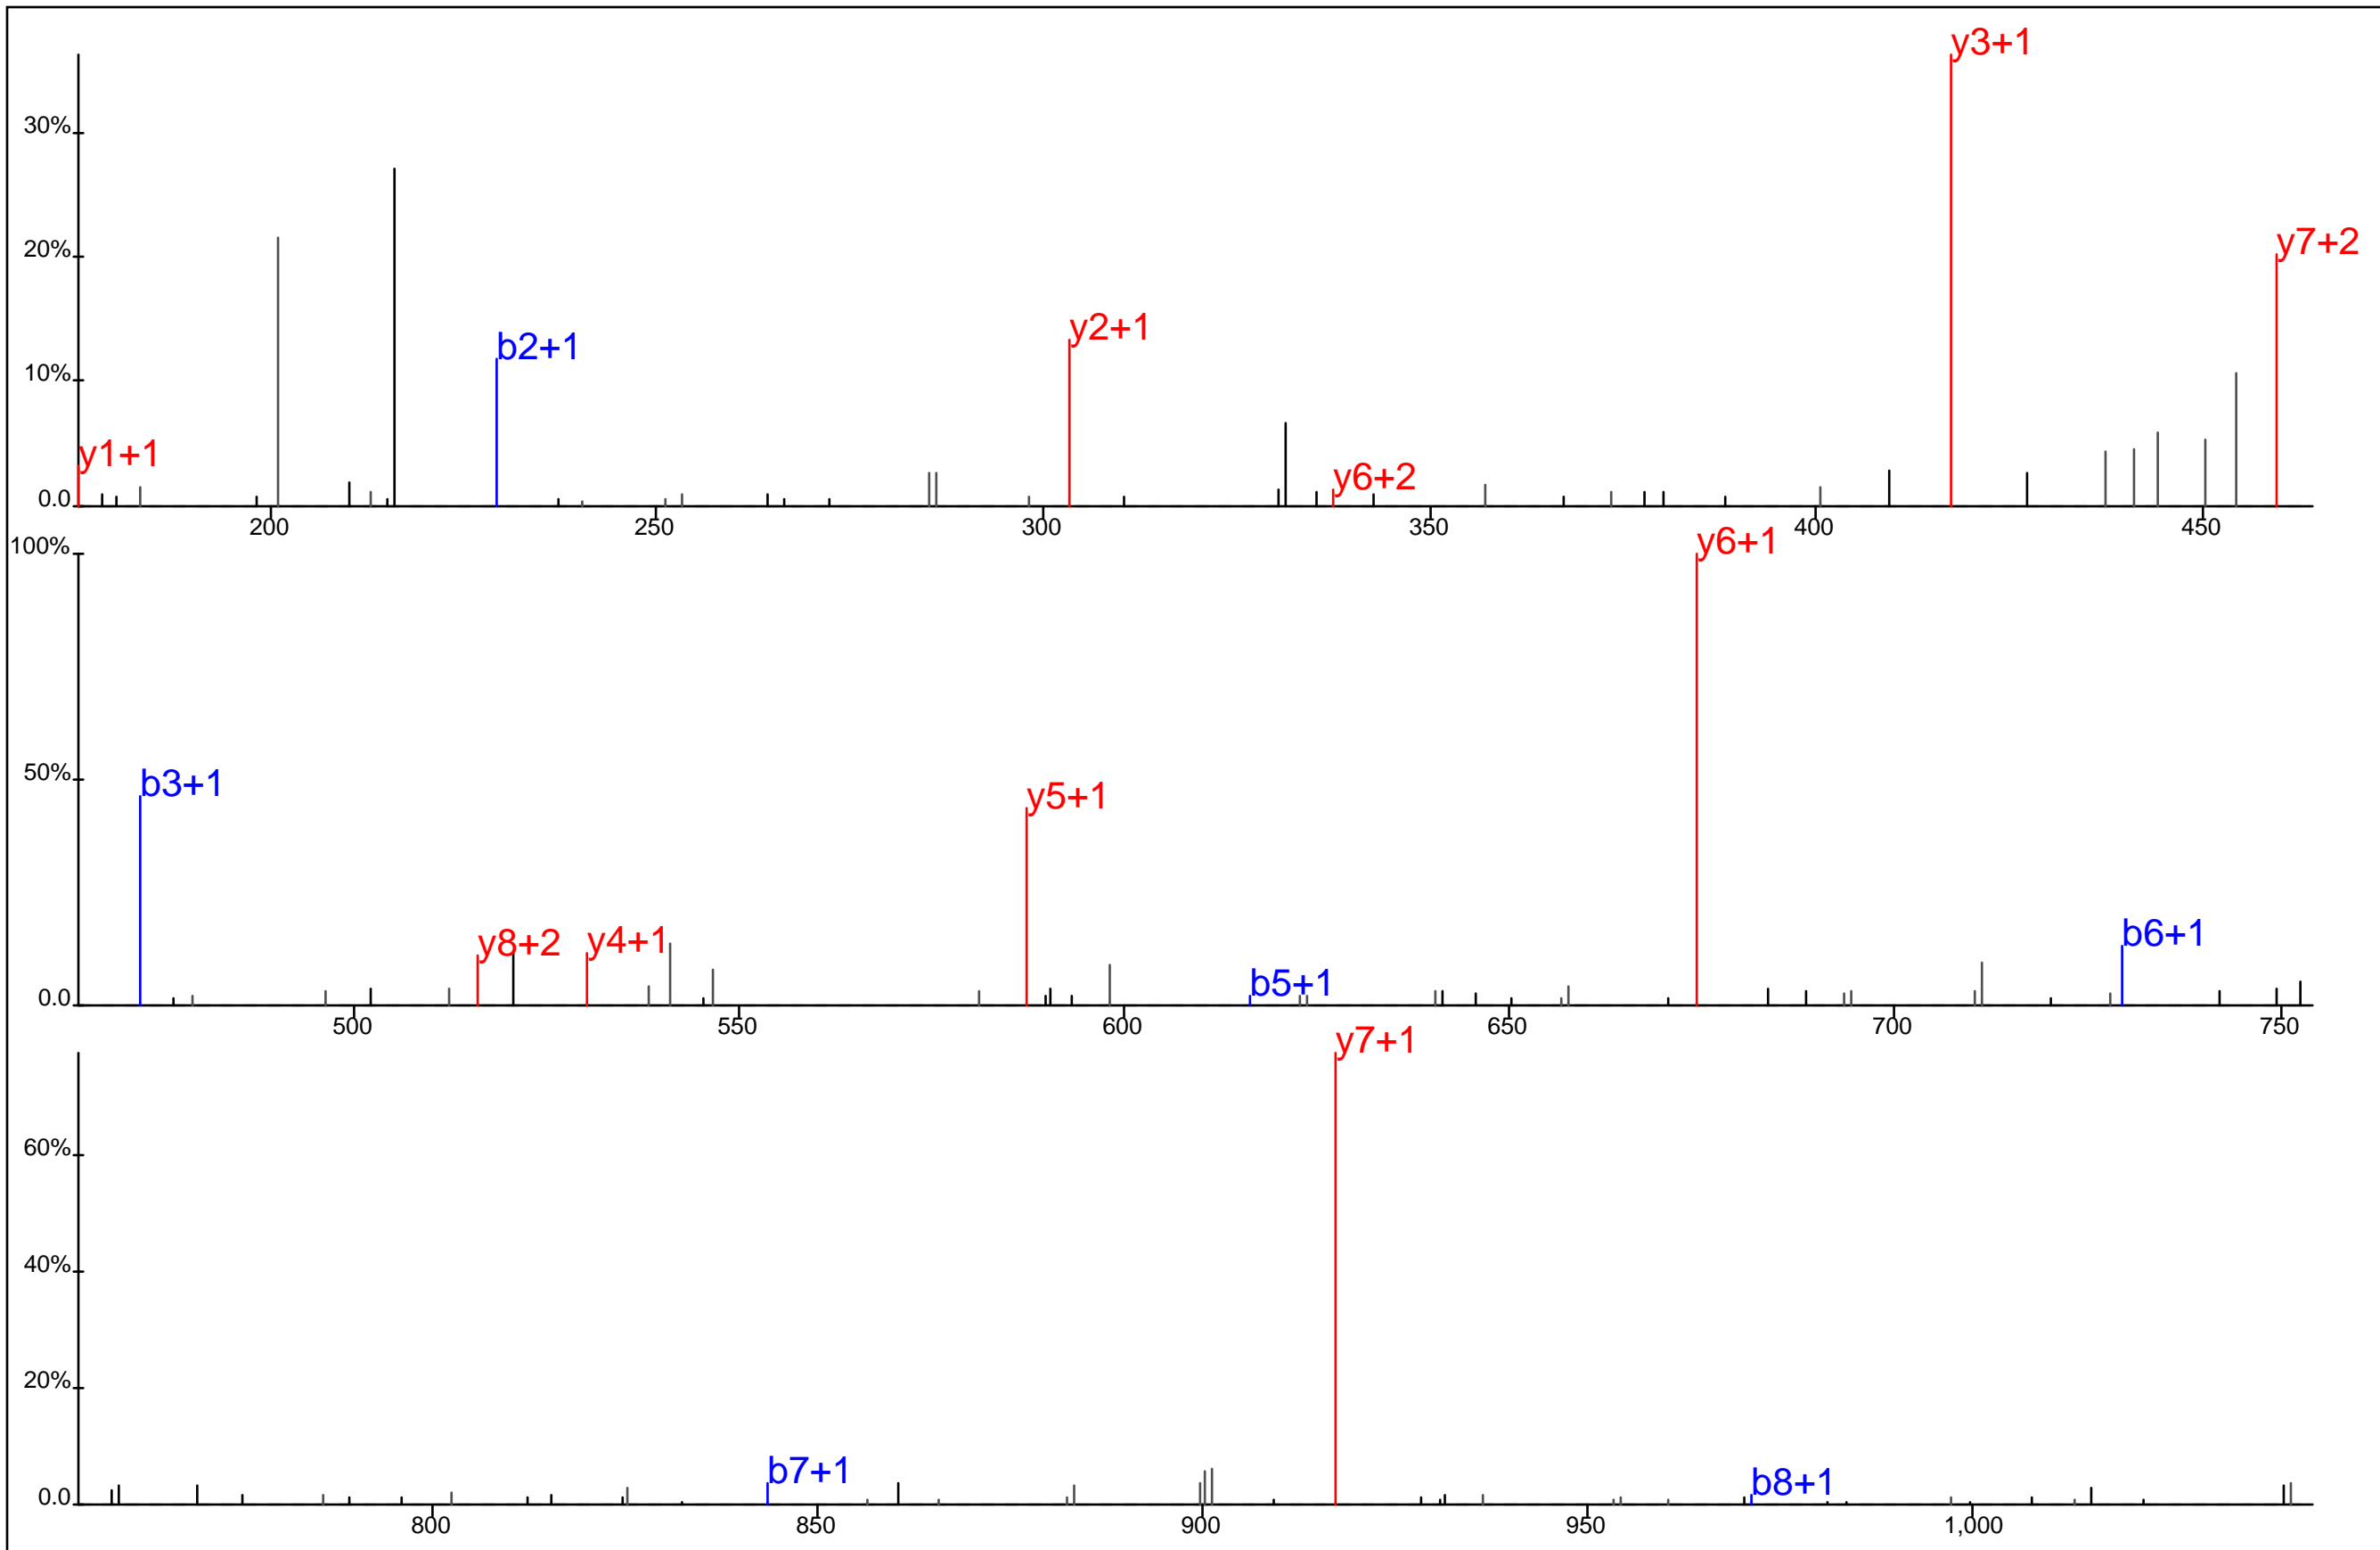

■ ■ ■ ■ ■ ■  
 D L Y\* S G L N Q R  
■ ■ ■ ■ ■ ■ ■

Protein Name: CD3E  
 gi Accession: 0  
 Precursor Mass: 573.2502+2  
 Delta Mass: 4.749 ppm  
 XCorr: 48.9

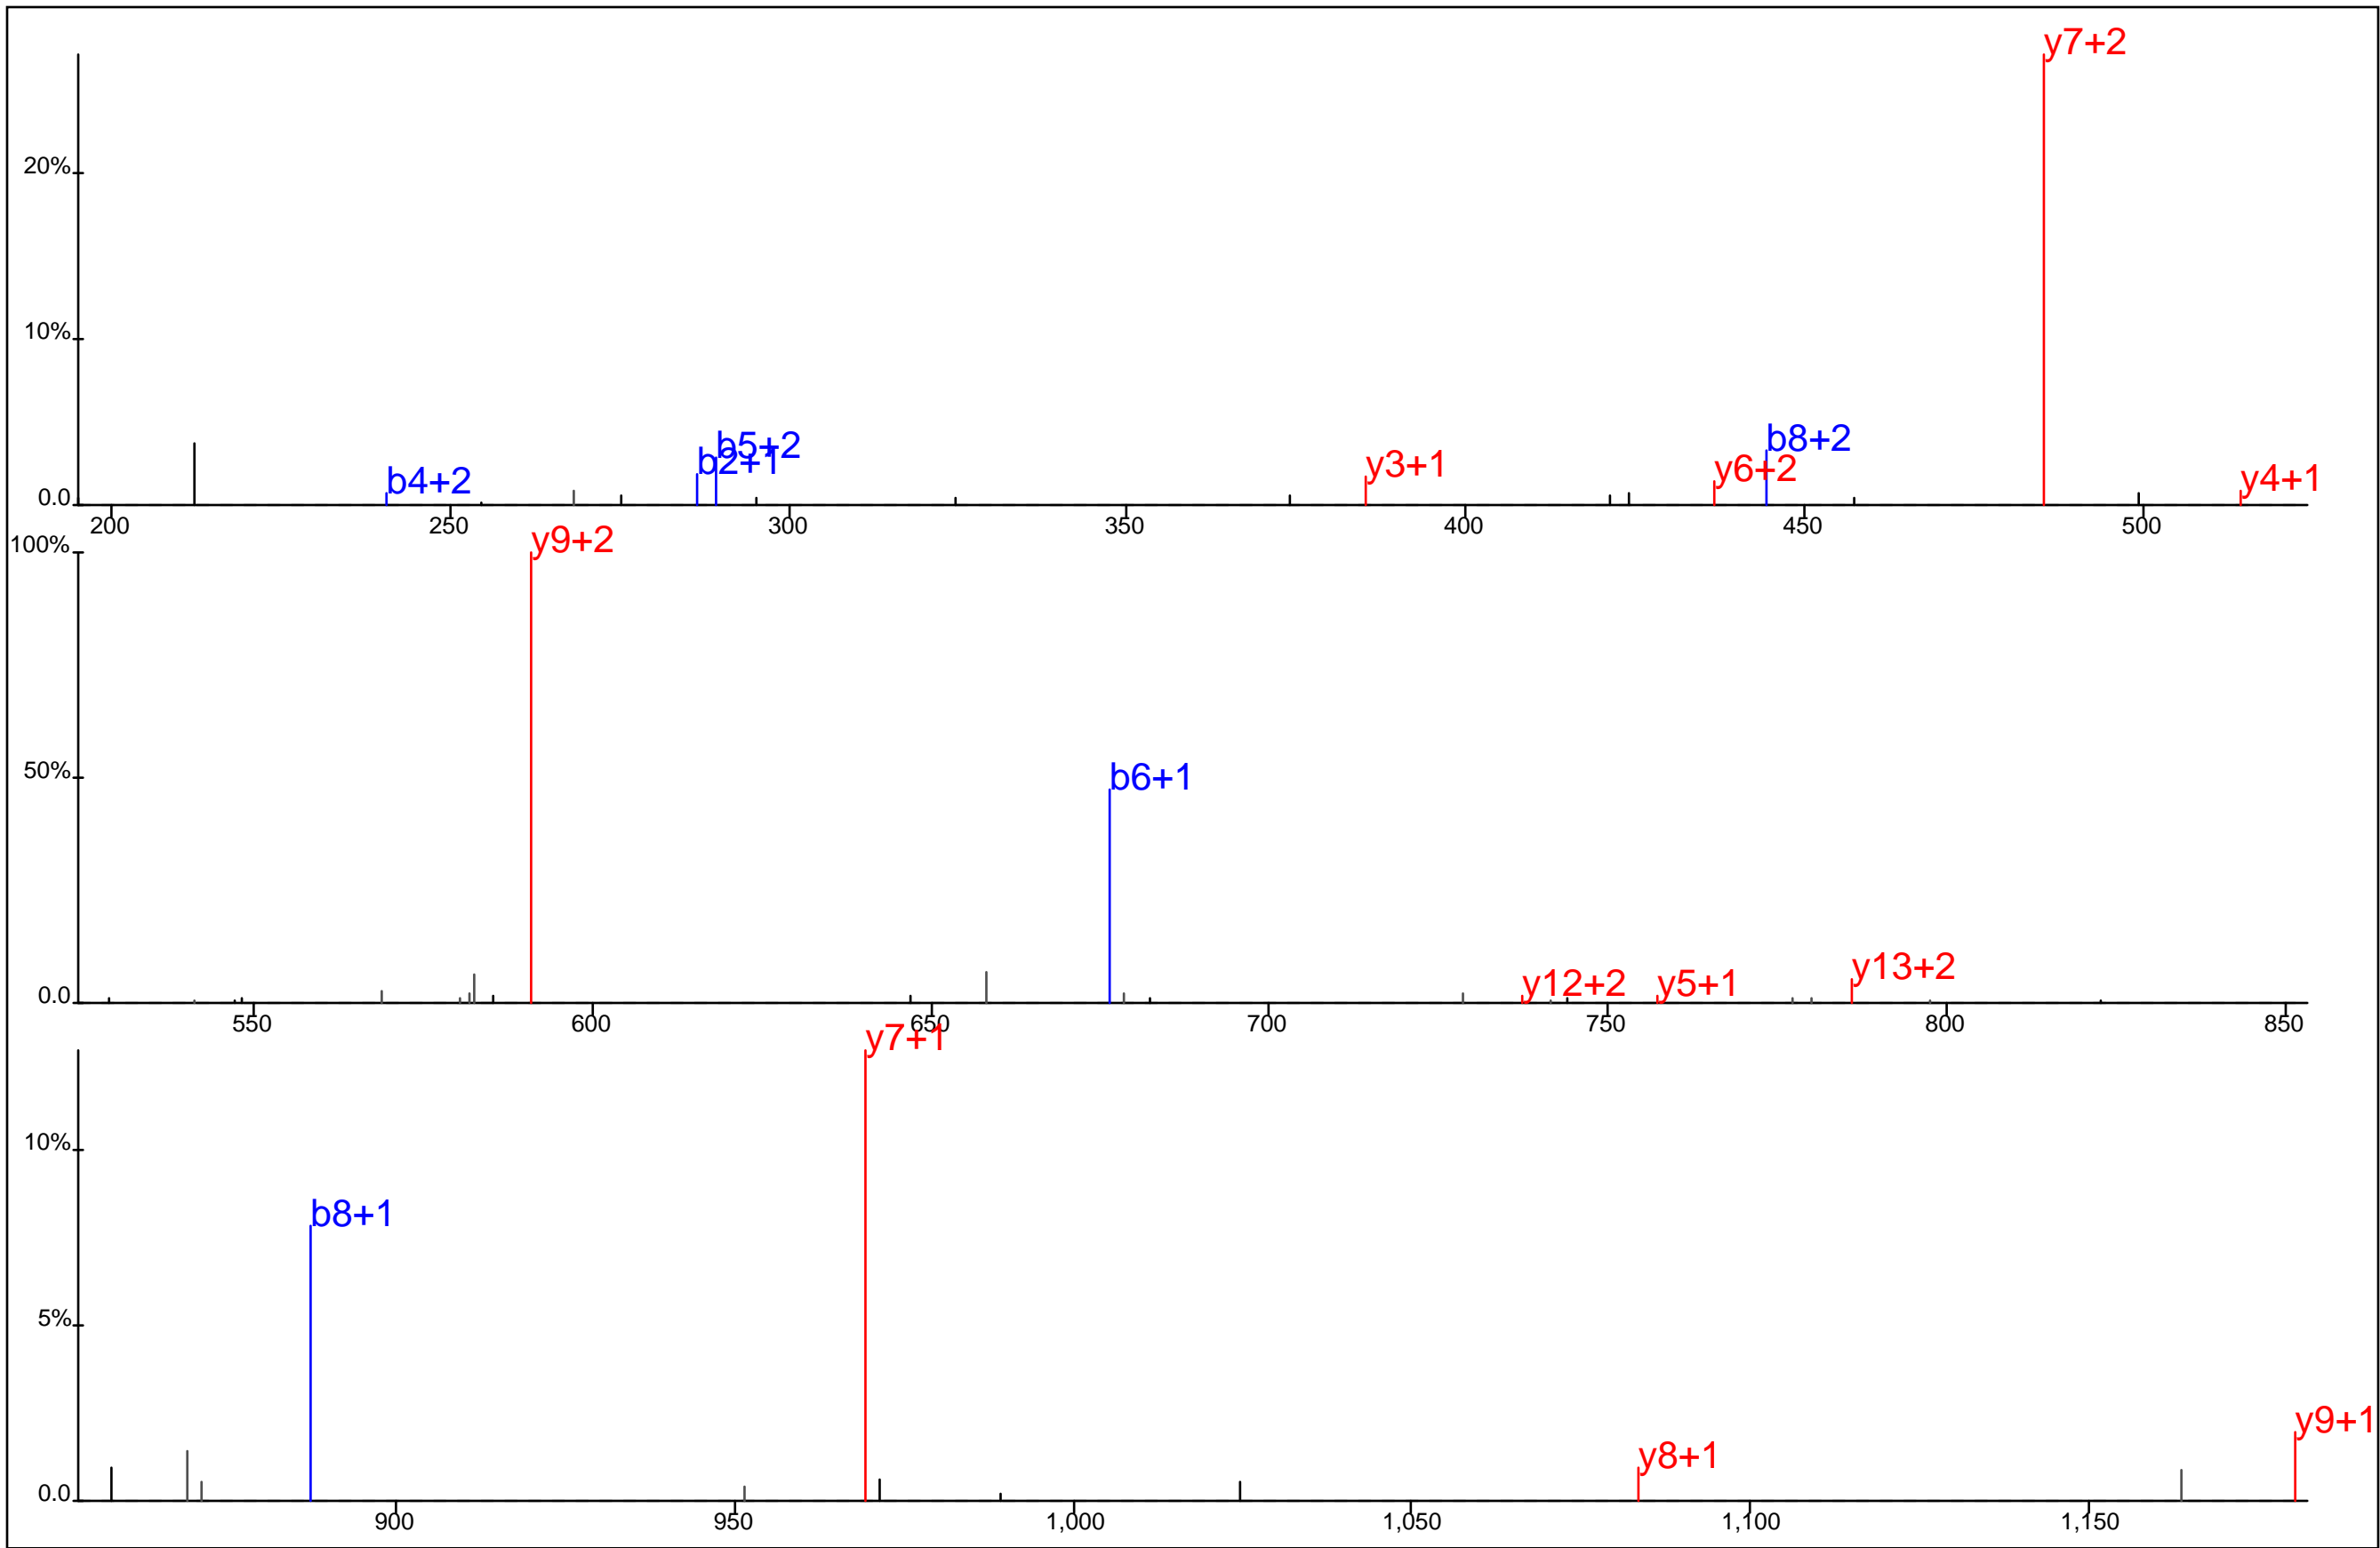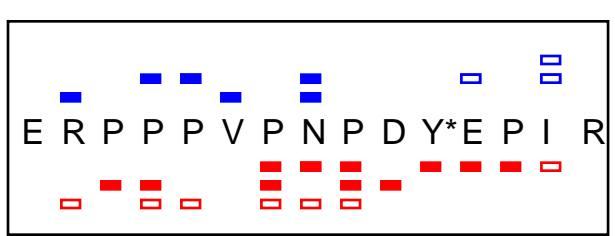

Protein Name: CD3E  
 gi Accession: 0  
 Precursor Mass: 619.2966+3  
 Delta Mass: 0.731 ppm  
 XCorr: 34.11

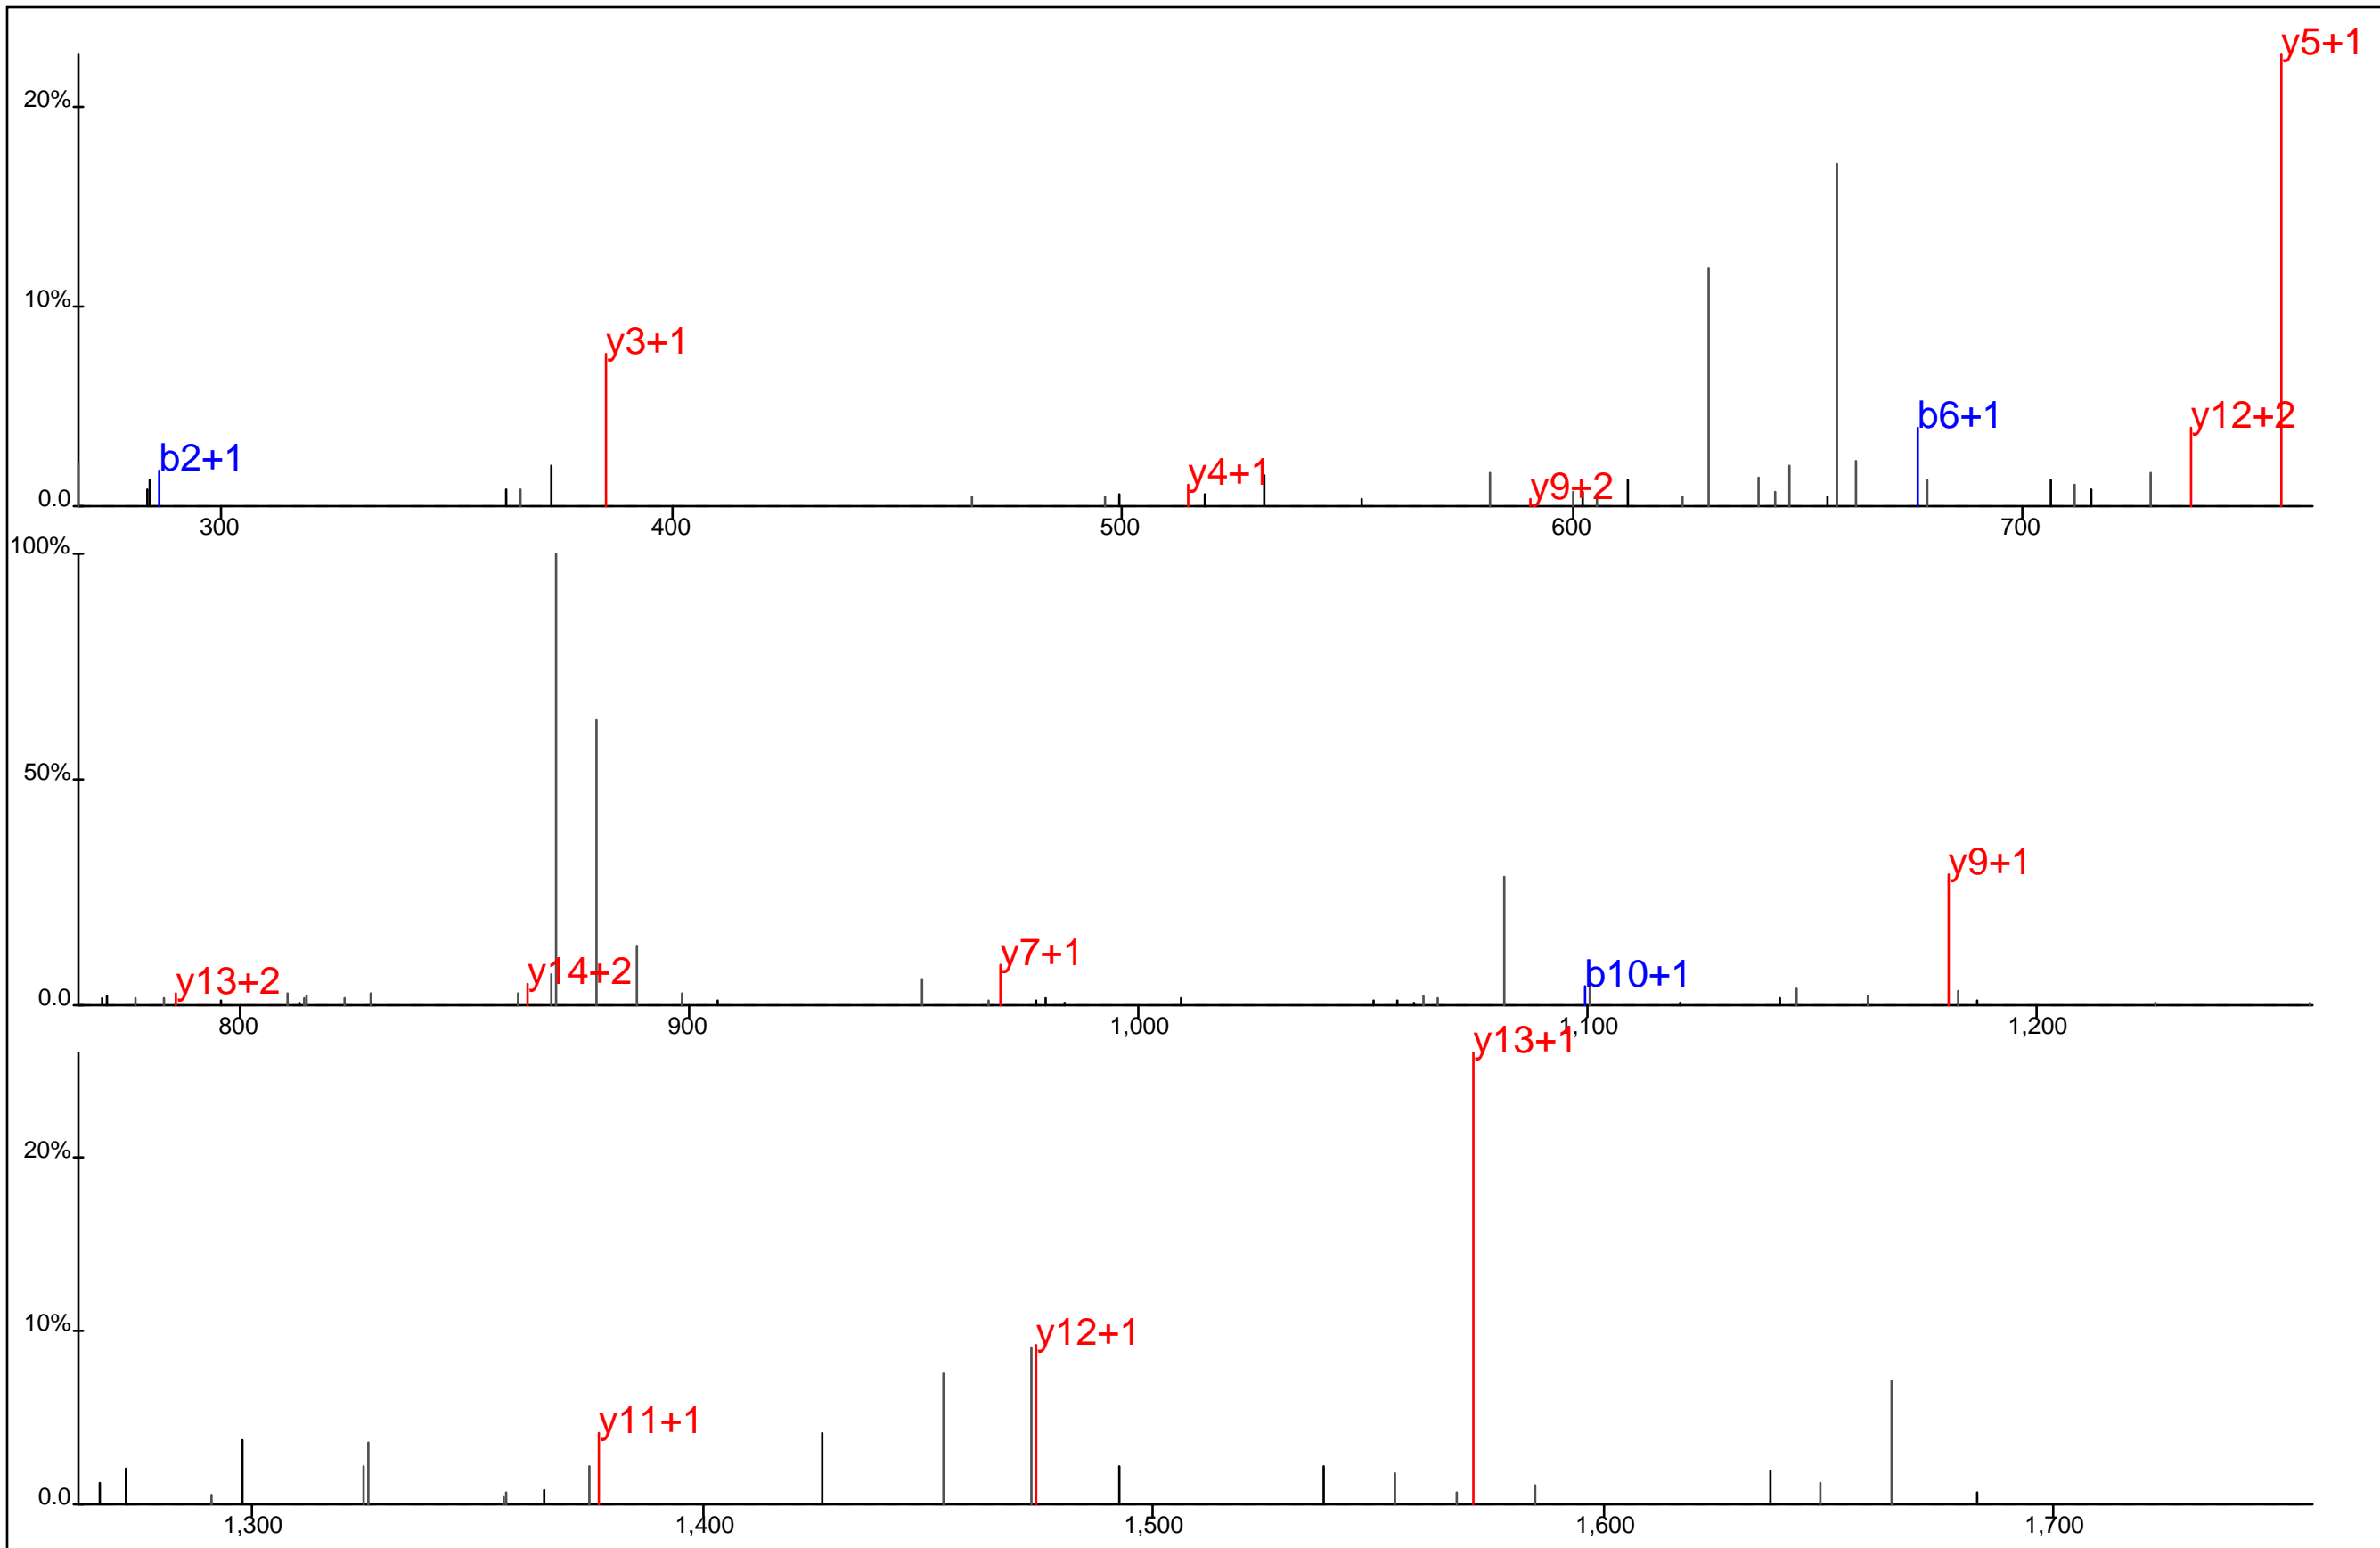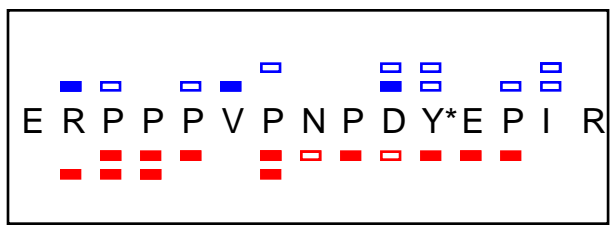

Protein Name: CD3E  
 gi Accession: 0  
 Precursor Mass: 928.4448+2  
 Delta Mass: 4.618 ppm  
 XCorr: 45.99

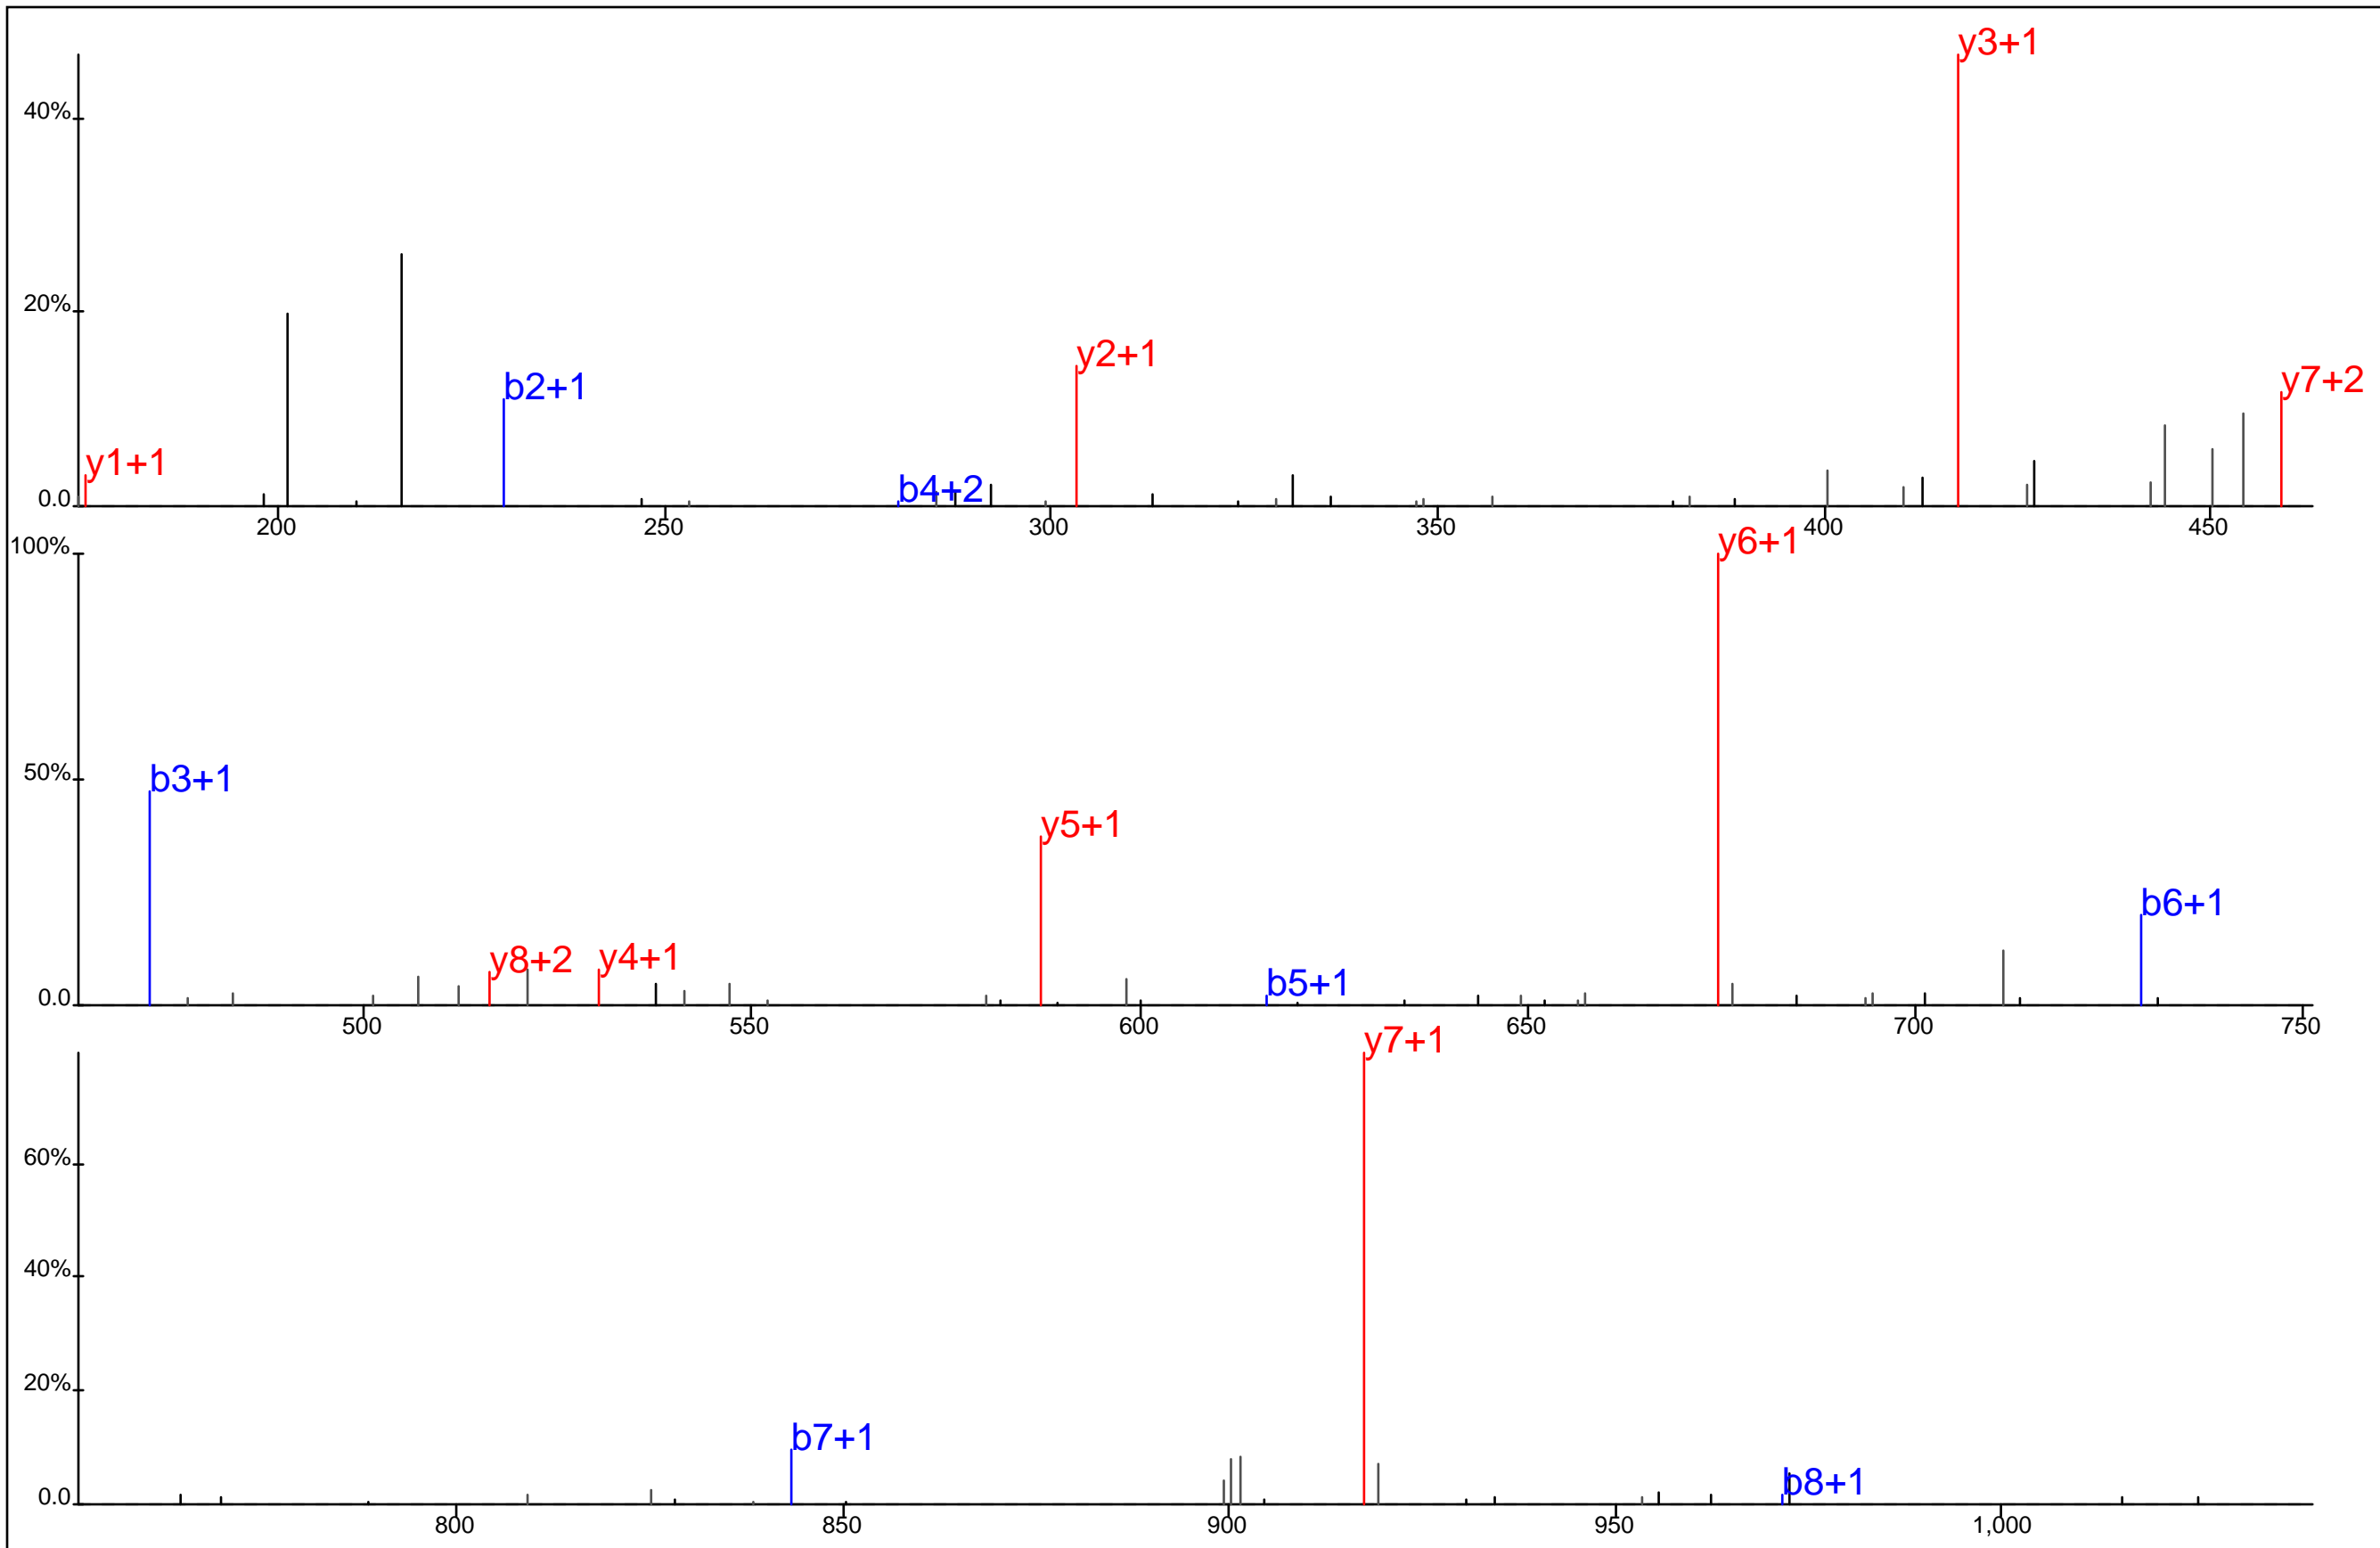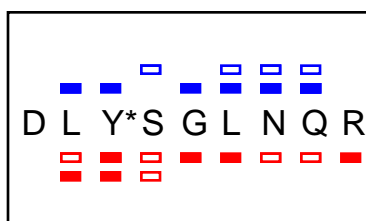

Protein Name: CD3E  
 gi Accession: 0  
 Precursor Mass: 573.2535+2  
 Delta Mass: 1.006 ppm  
 XCorr: 45.78

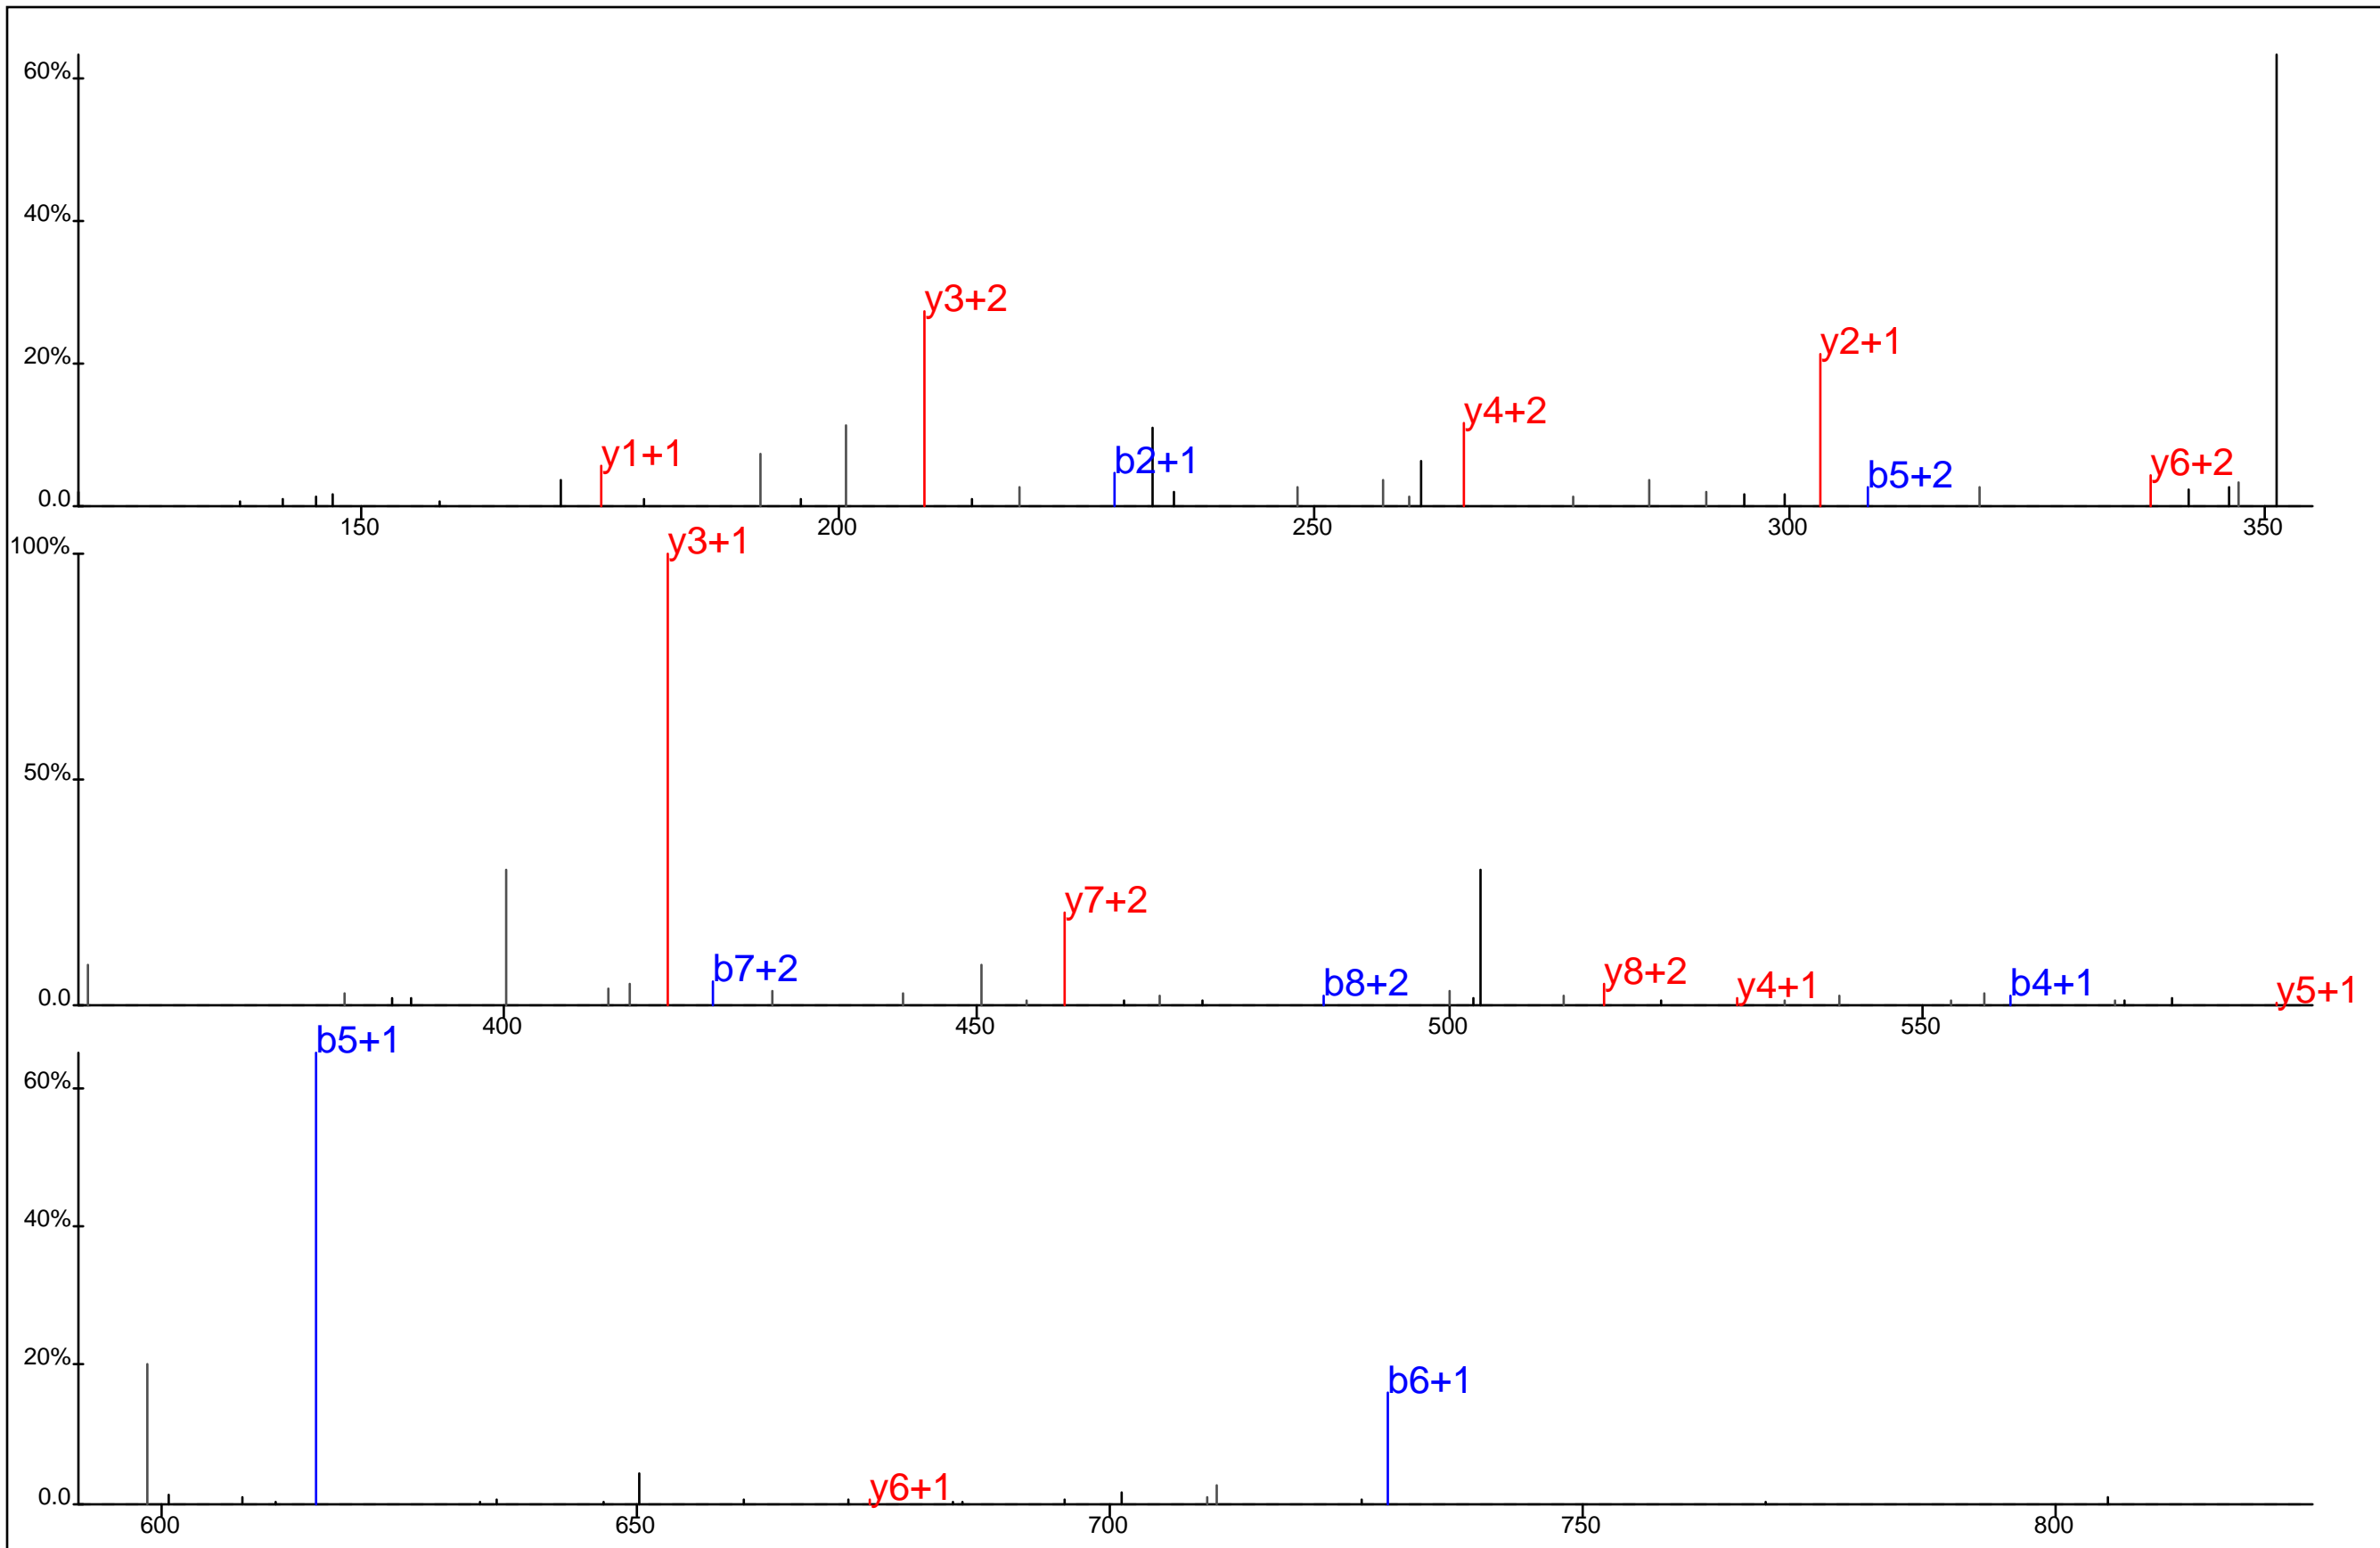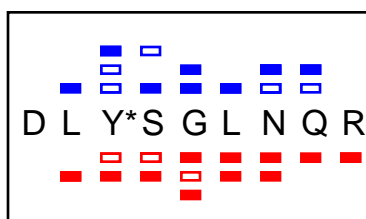

Protein Name: CD3E  
 gi Accession: 0  
 Precursor Mass: 382.5045+3  
 Delta Mass: 0.381 ppm  
 XCorr: 28.43

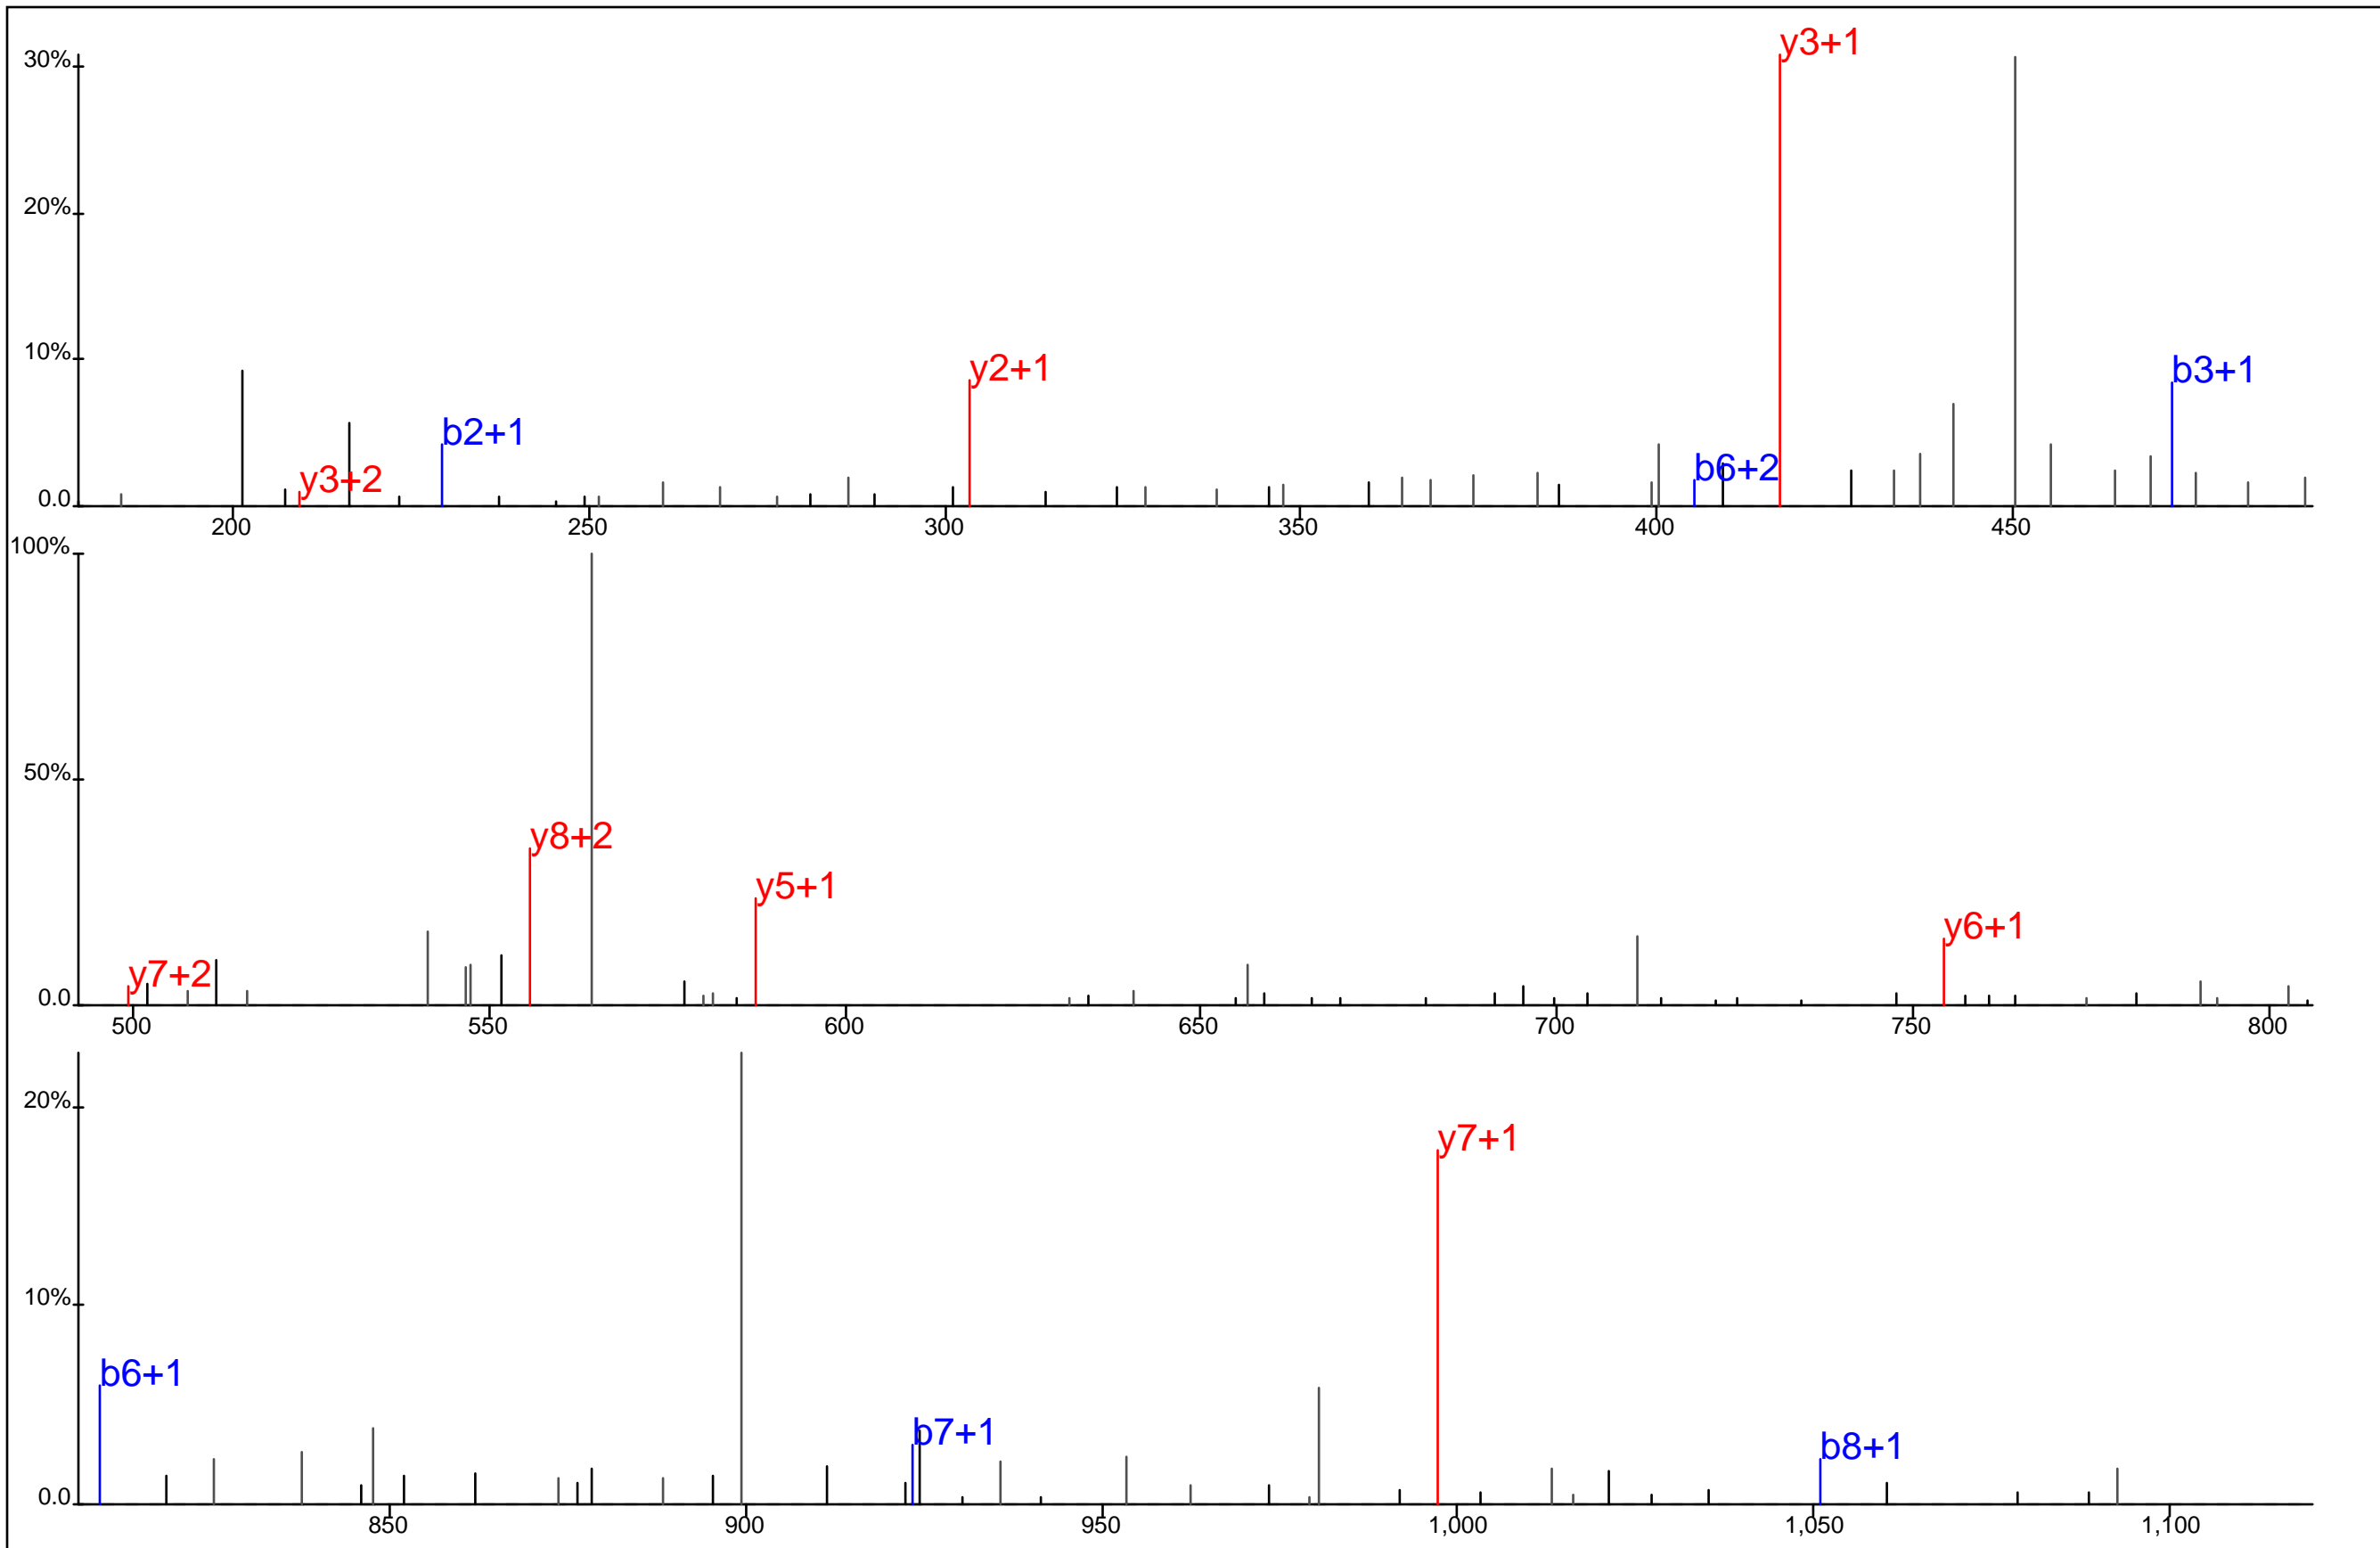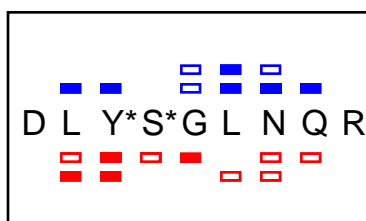

Protein Name: CD3E  
 gi Accession: 0  
 Precursor Mass: 613.2364+2  
 Delta Mass: 0.424 ppm  
 XCorr: 31.38

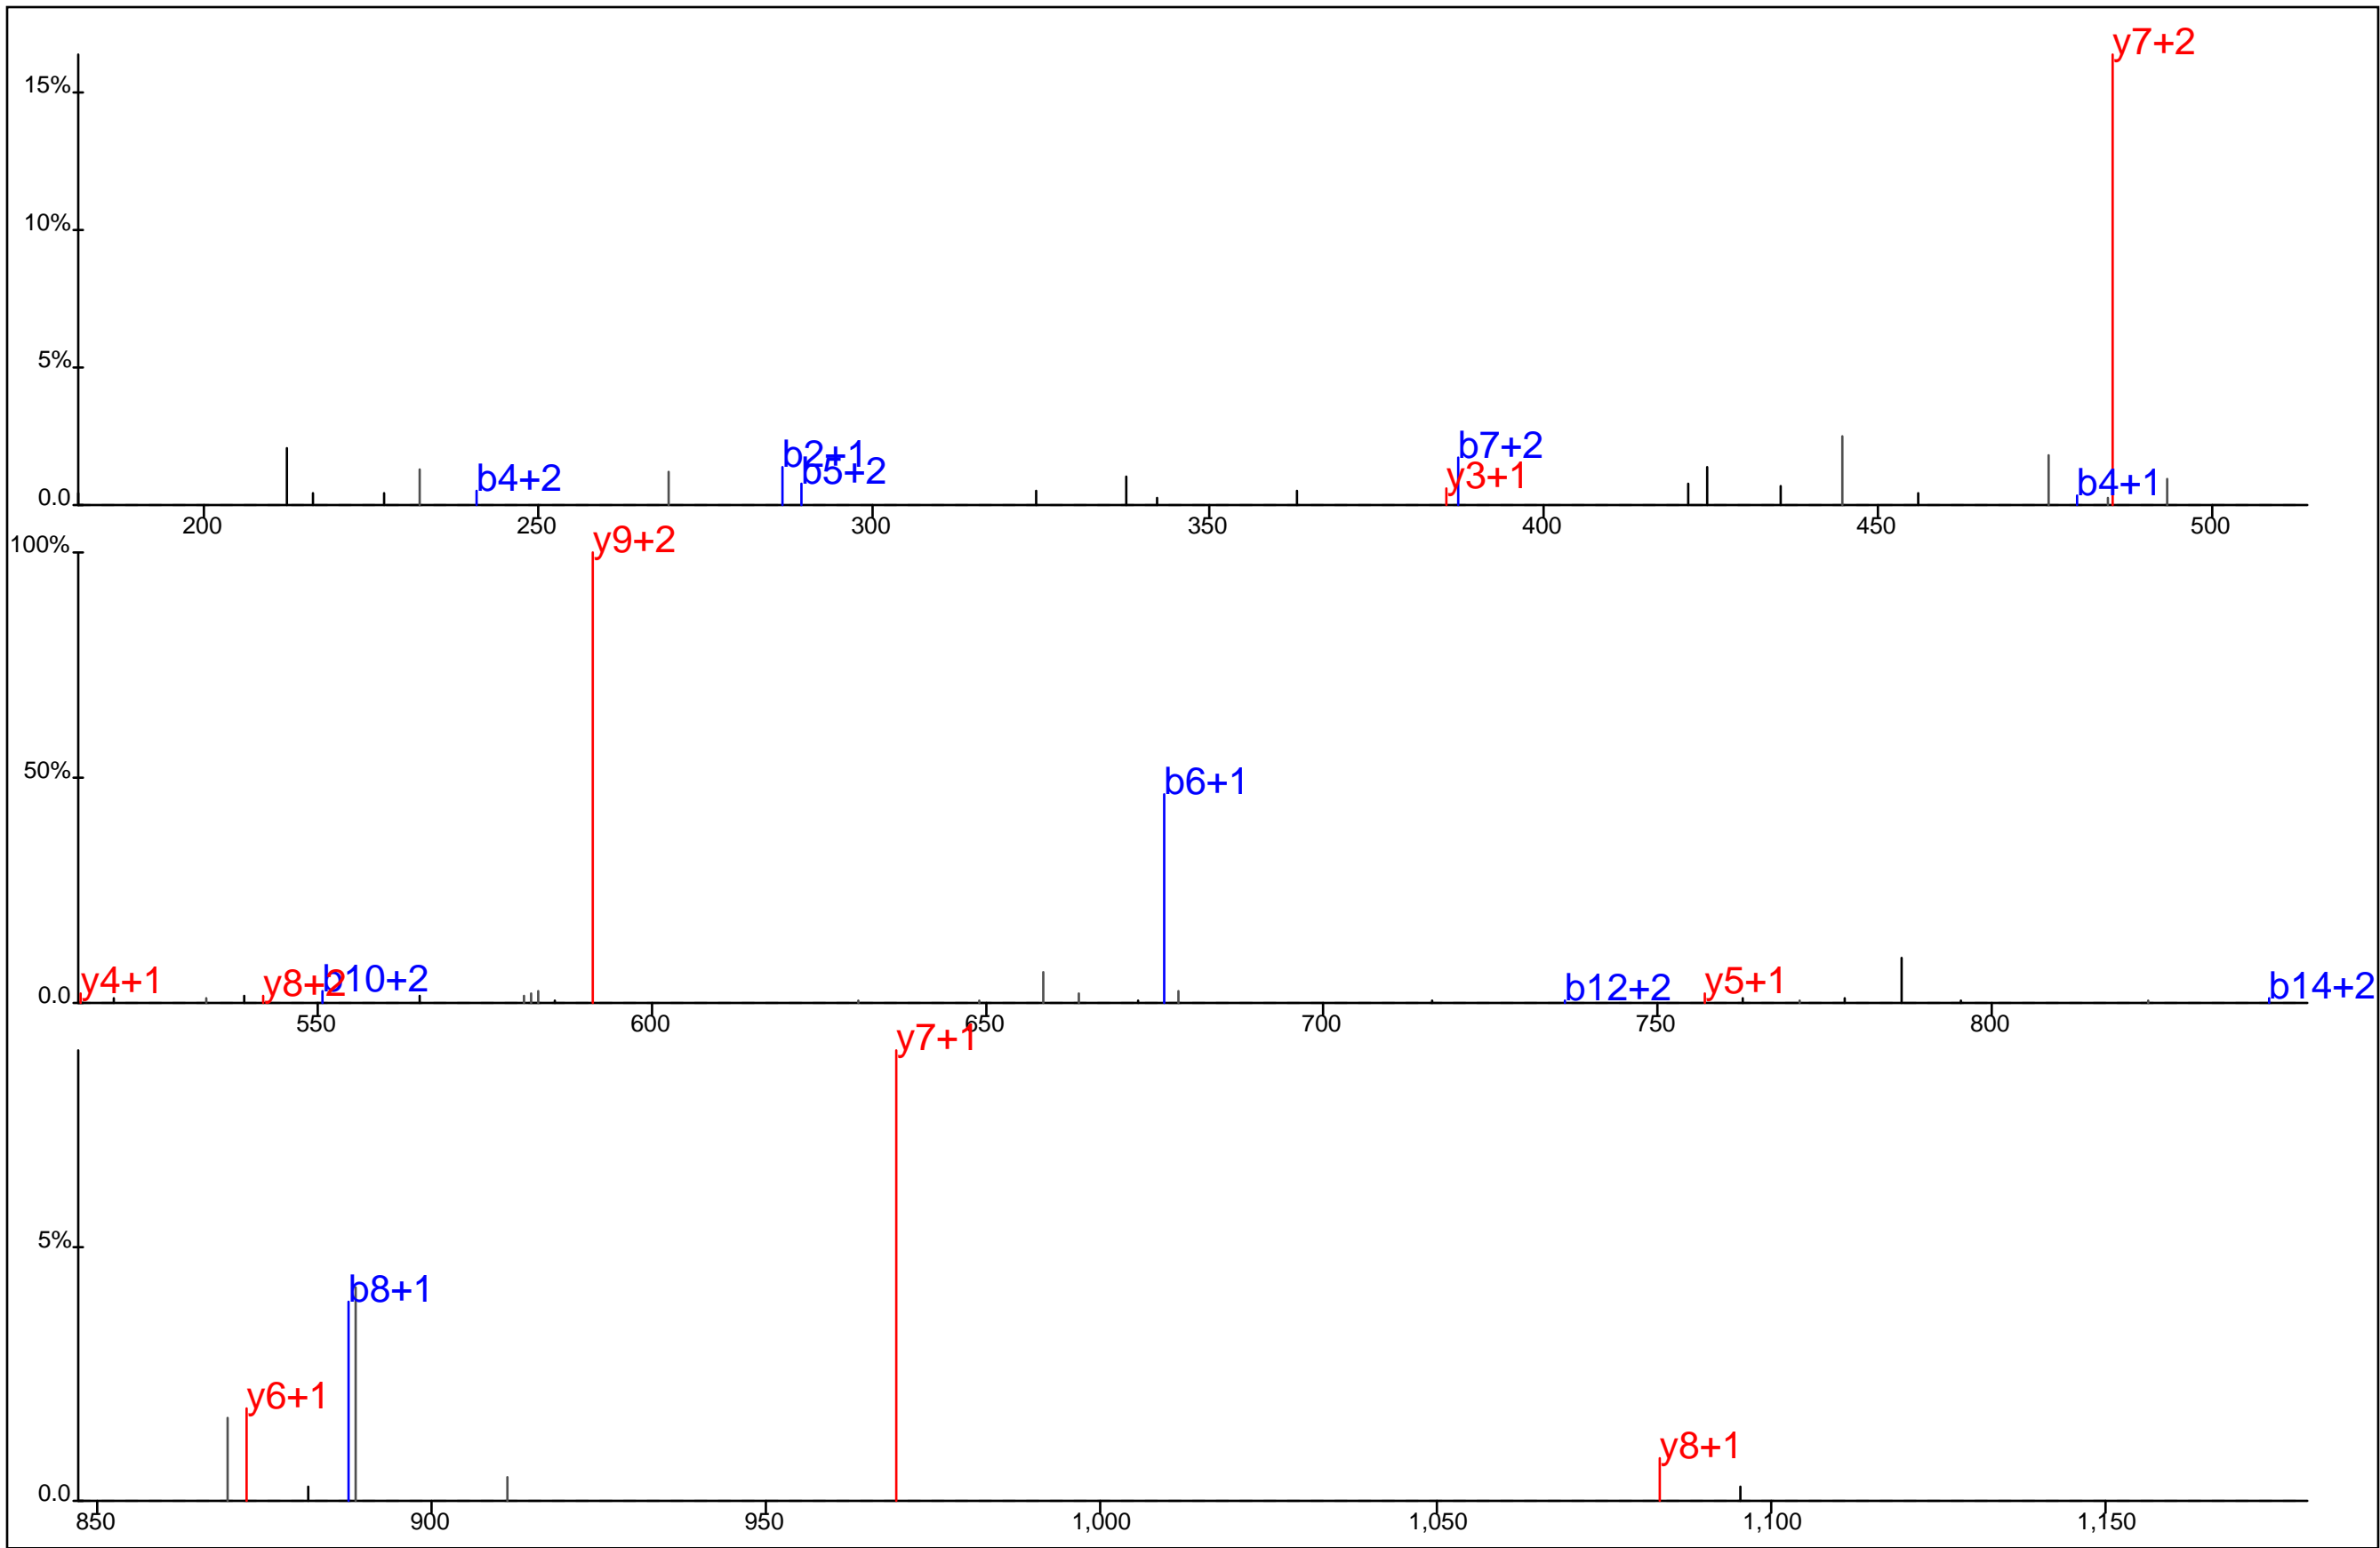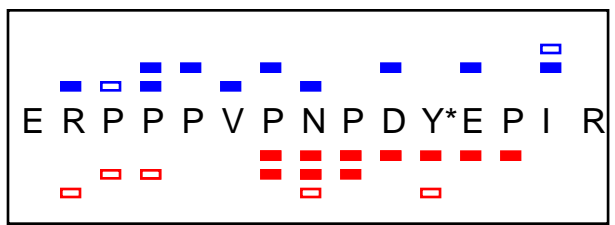

Protein Name: CD3E  
 gi Accession: 0  
 Precursor Mass: 619.2968+3  
 Delta Mass: 1.125 ppm  
 XCorr: 46.22



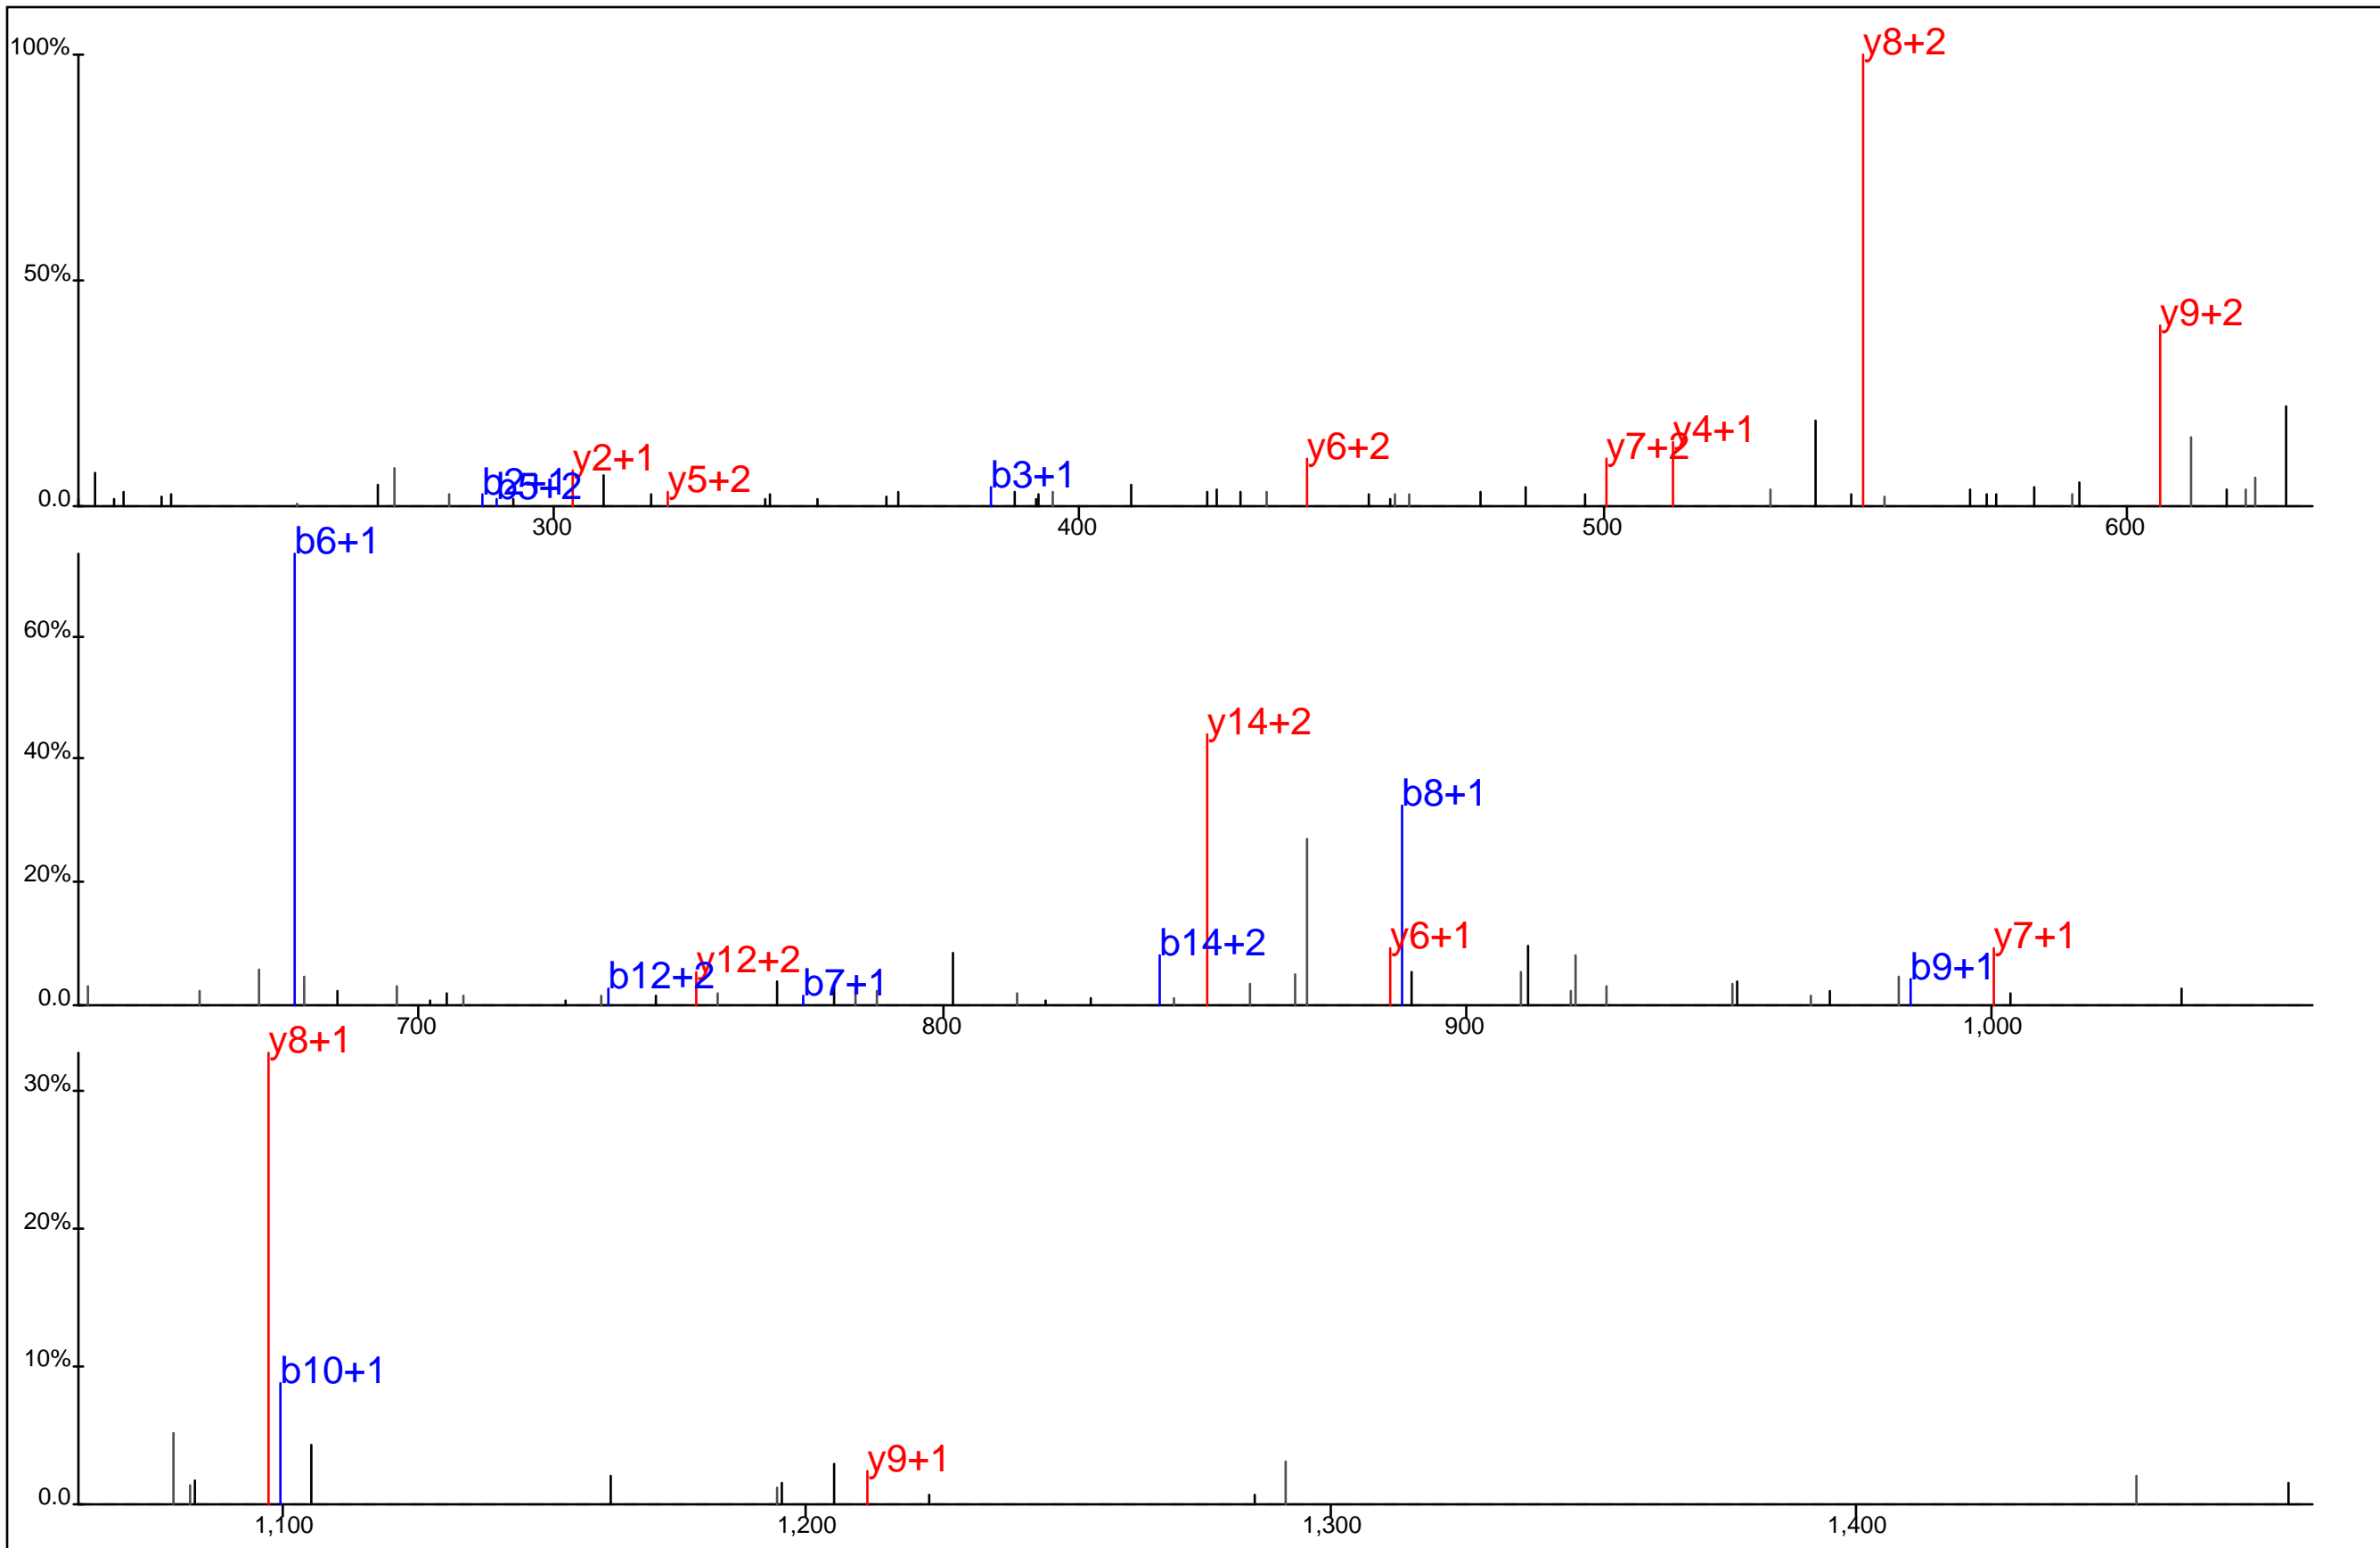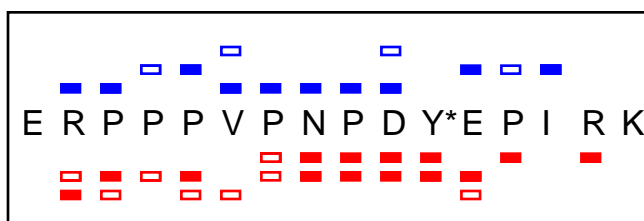

Protein Name: CD3E  
 gi Accession: 0  
 Precursor Mass: 661.9949+3  
 Delta Mass: 0.750 ppm  
 XCorr: 40.4

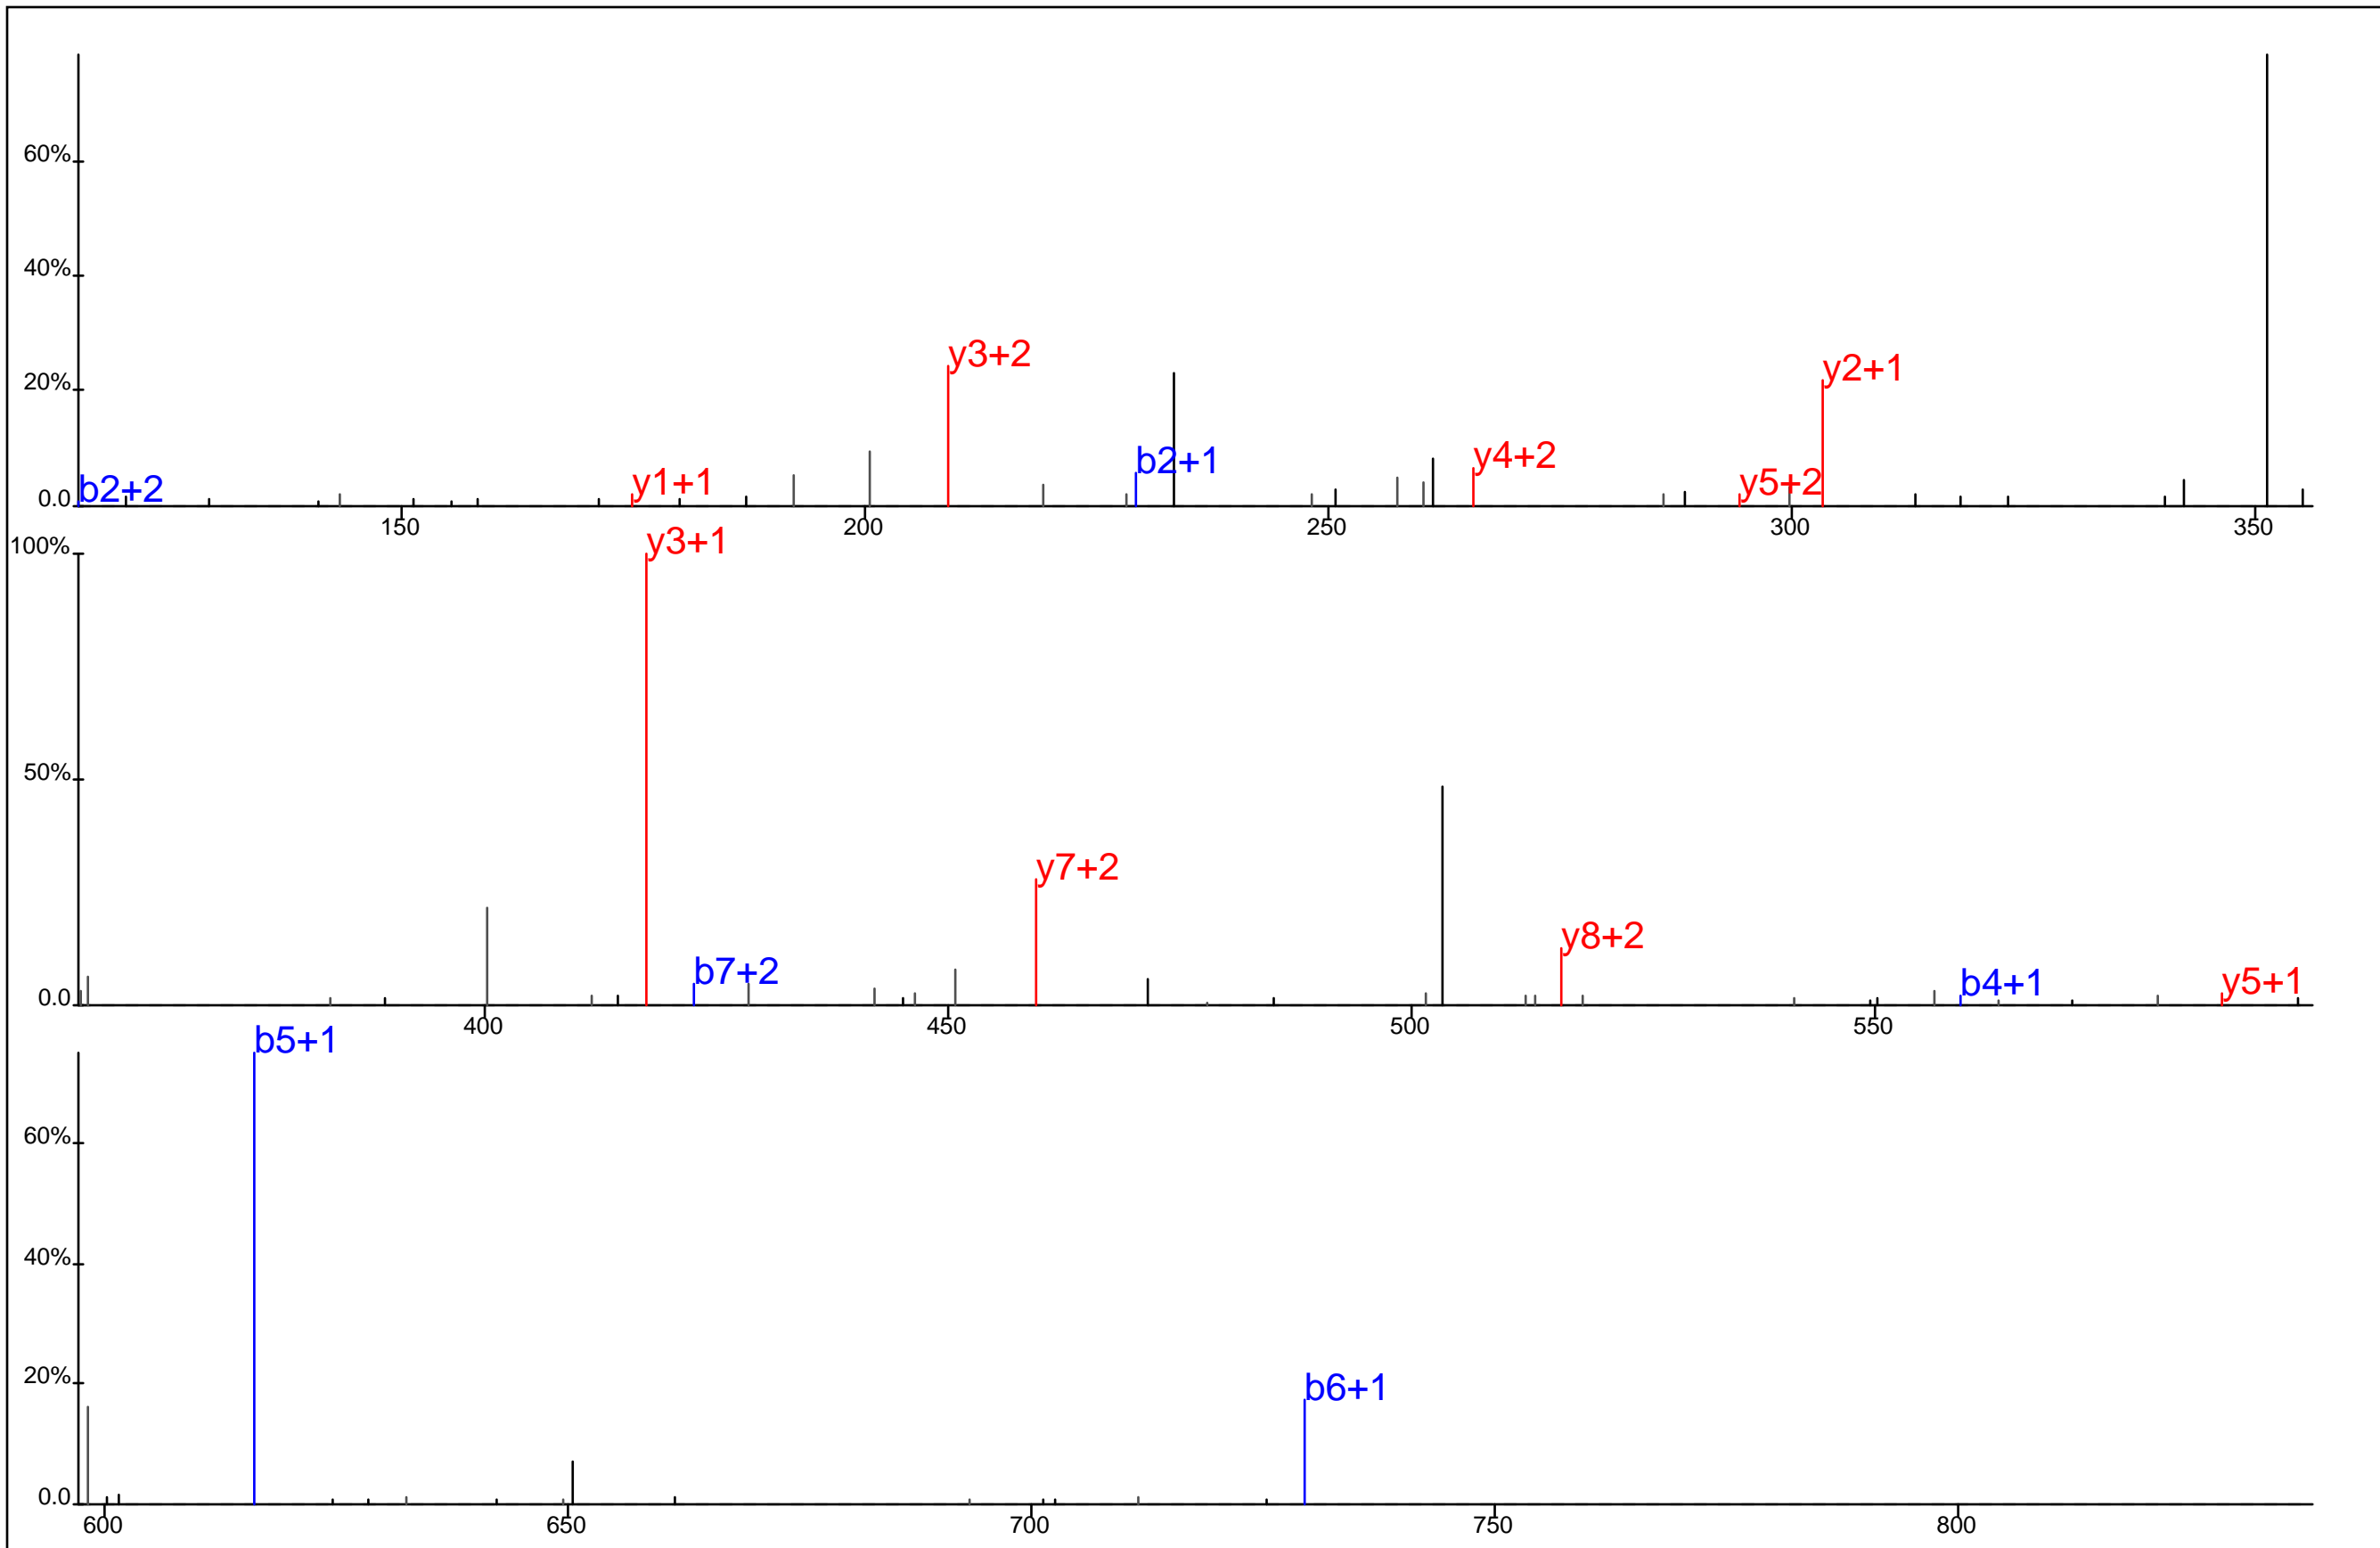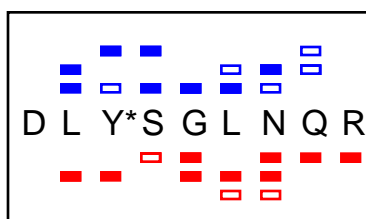

Protein Name: CD3E  
 gi Accession: 0  
 Precursor Mass: 382.5048+3  
 Delta Mass: 0.942 ppm  
 XCorr: 27.79

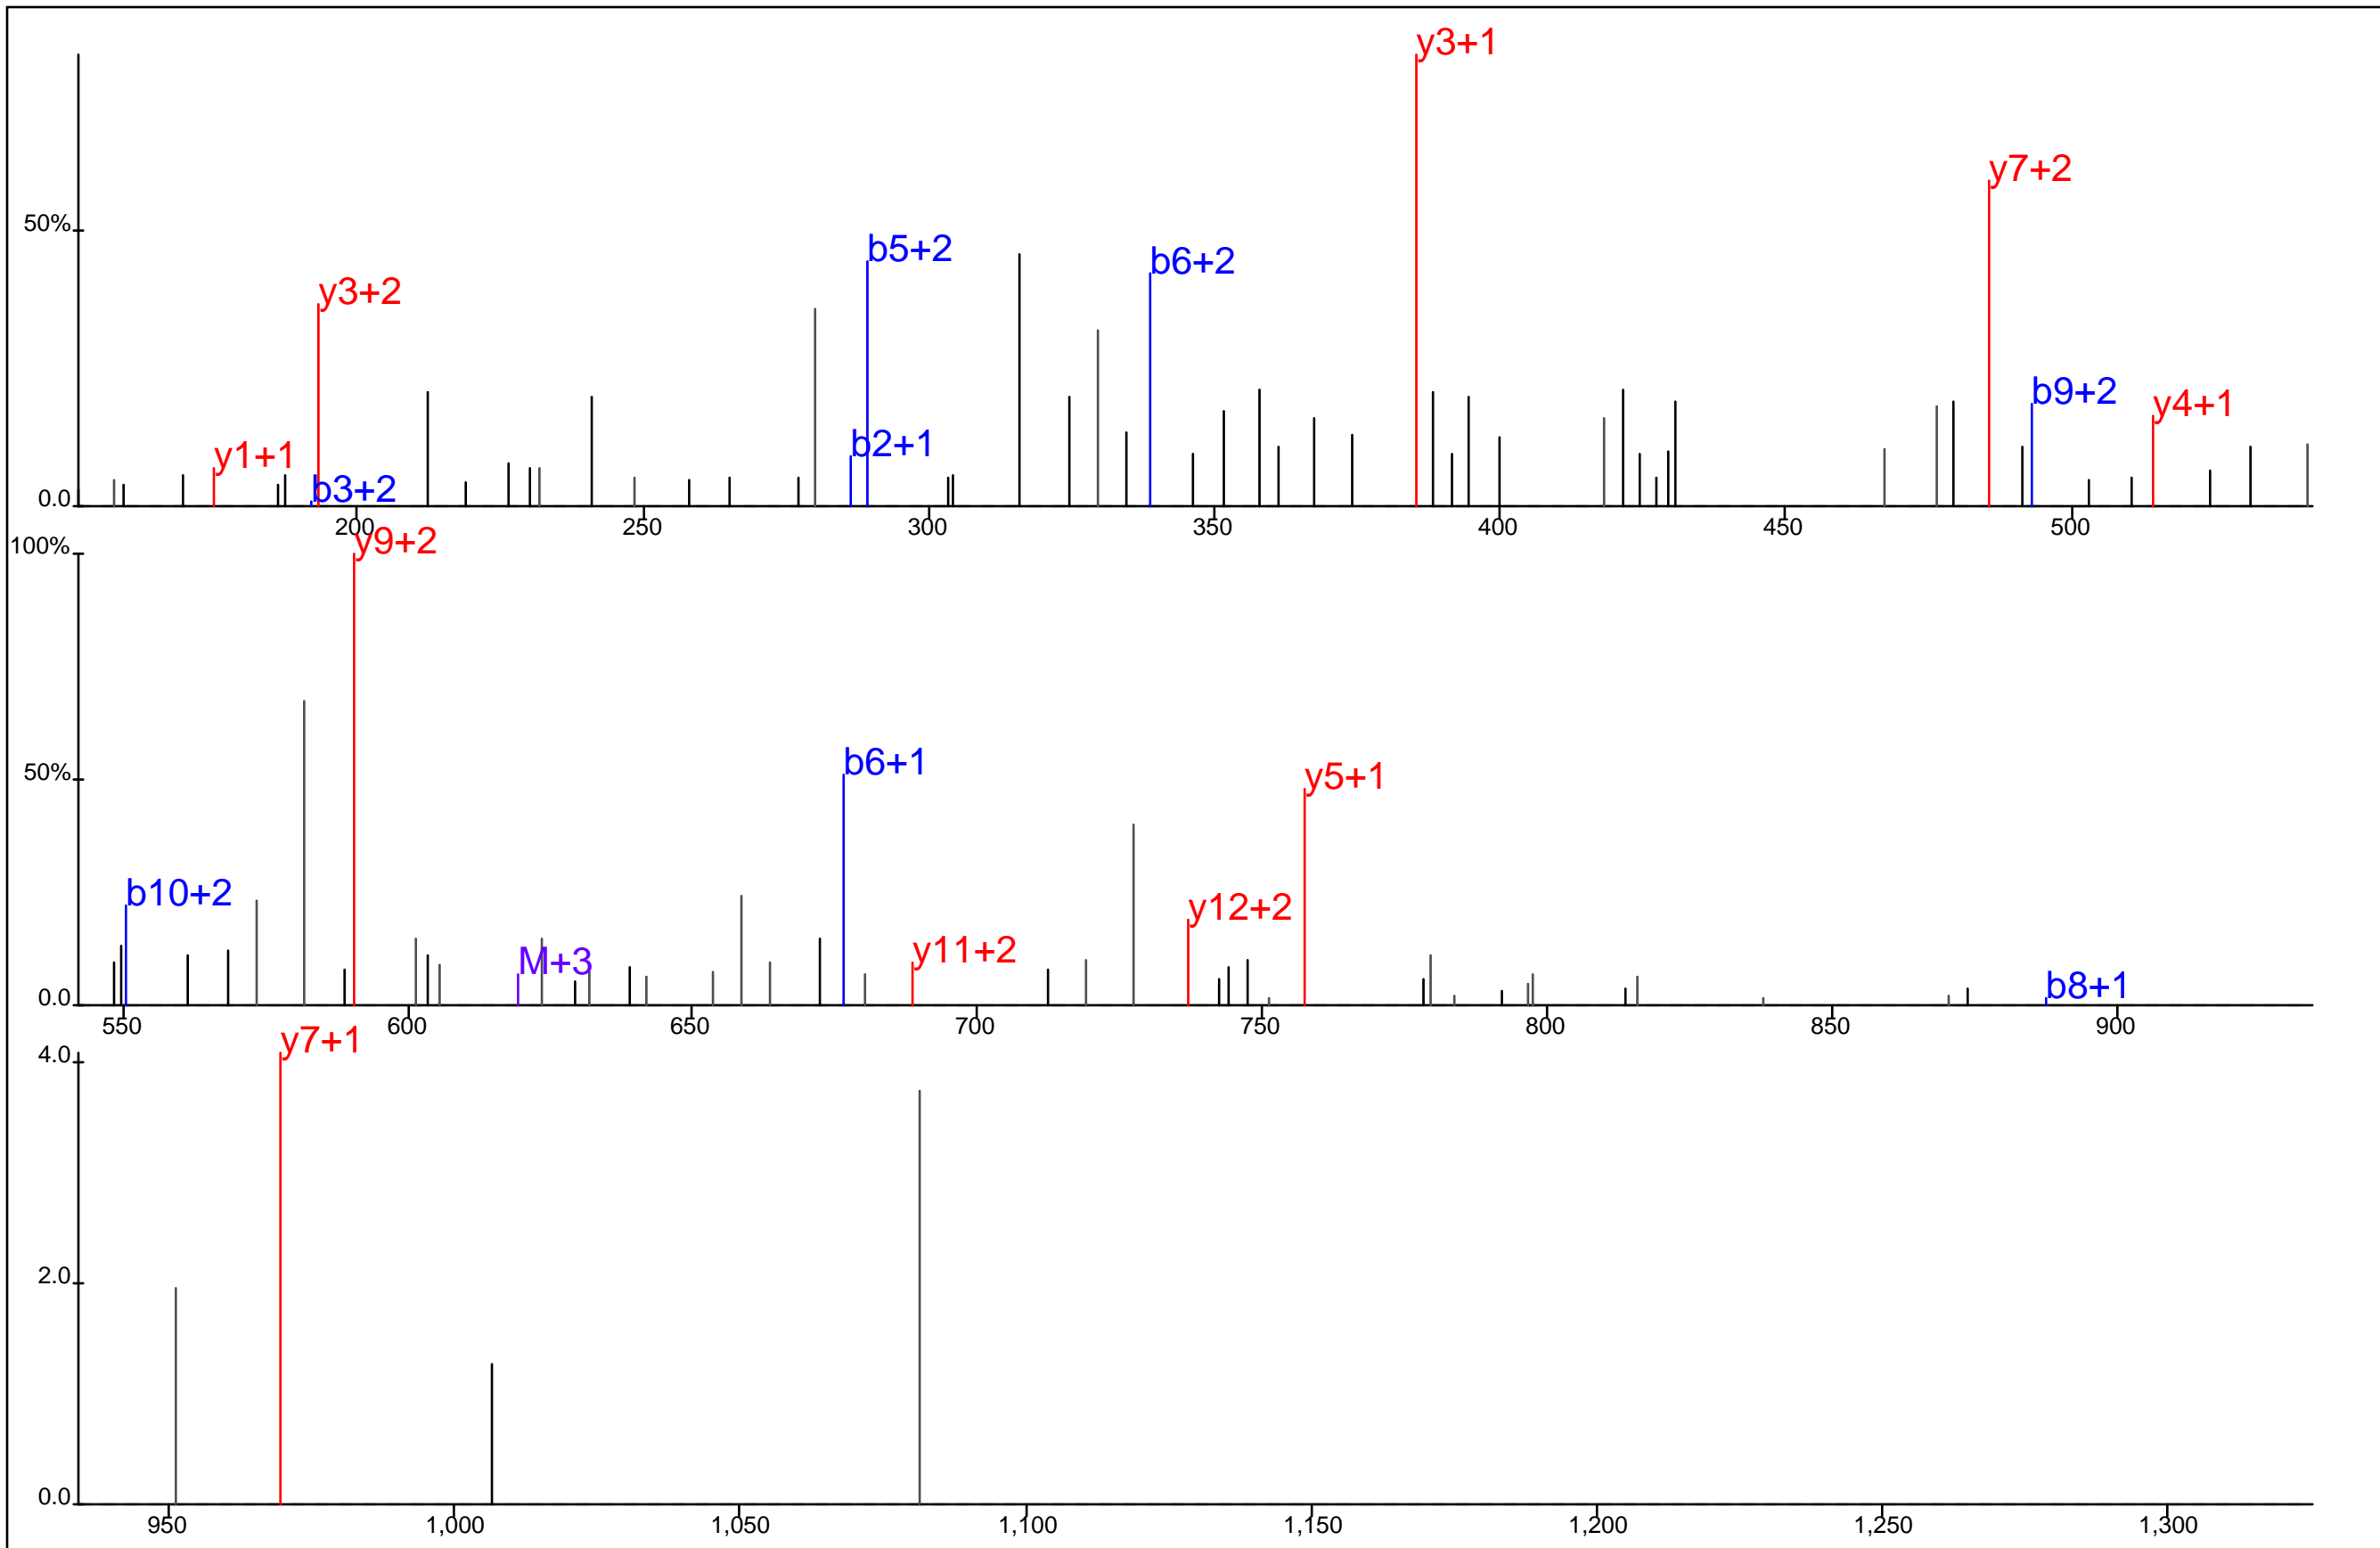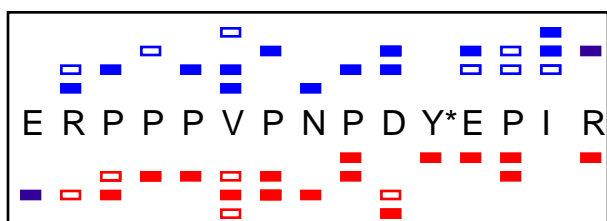

Protein Name: CD3E  
 gi Accession: 0  
 Precursor Mass: 464.7243+4  
 Delta Mass: 0.855 ppm  
 XCorr: 21.65

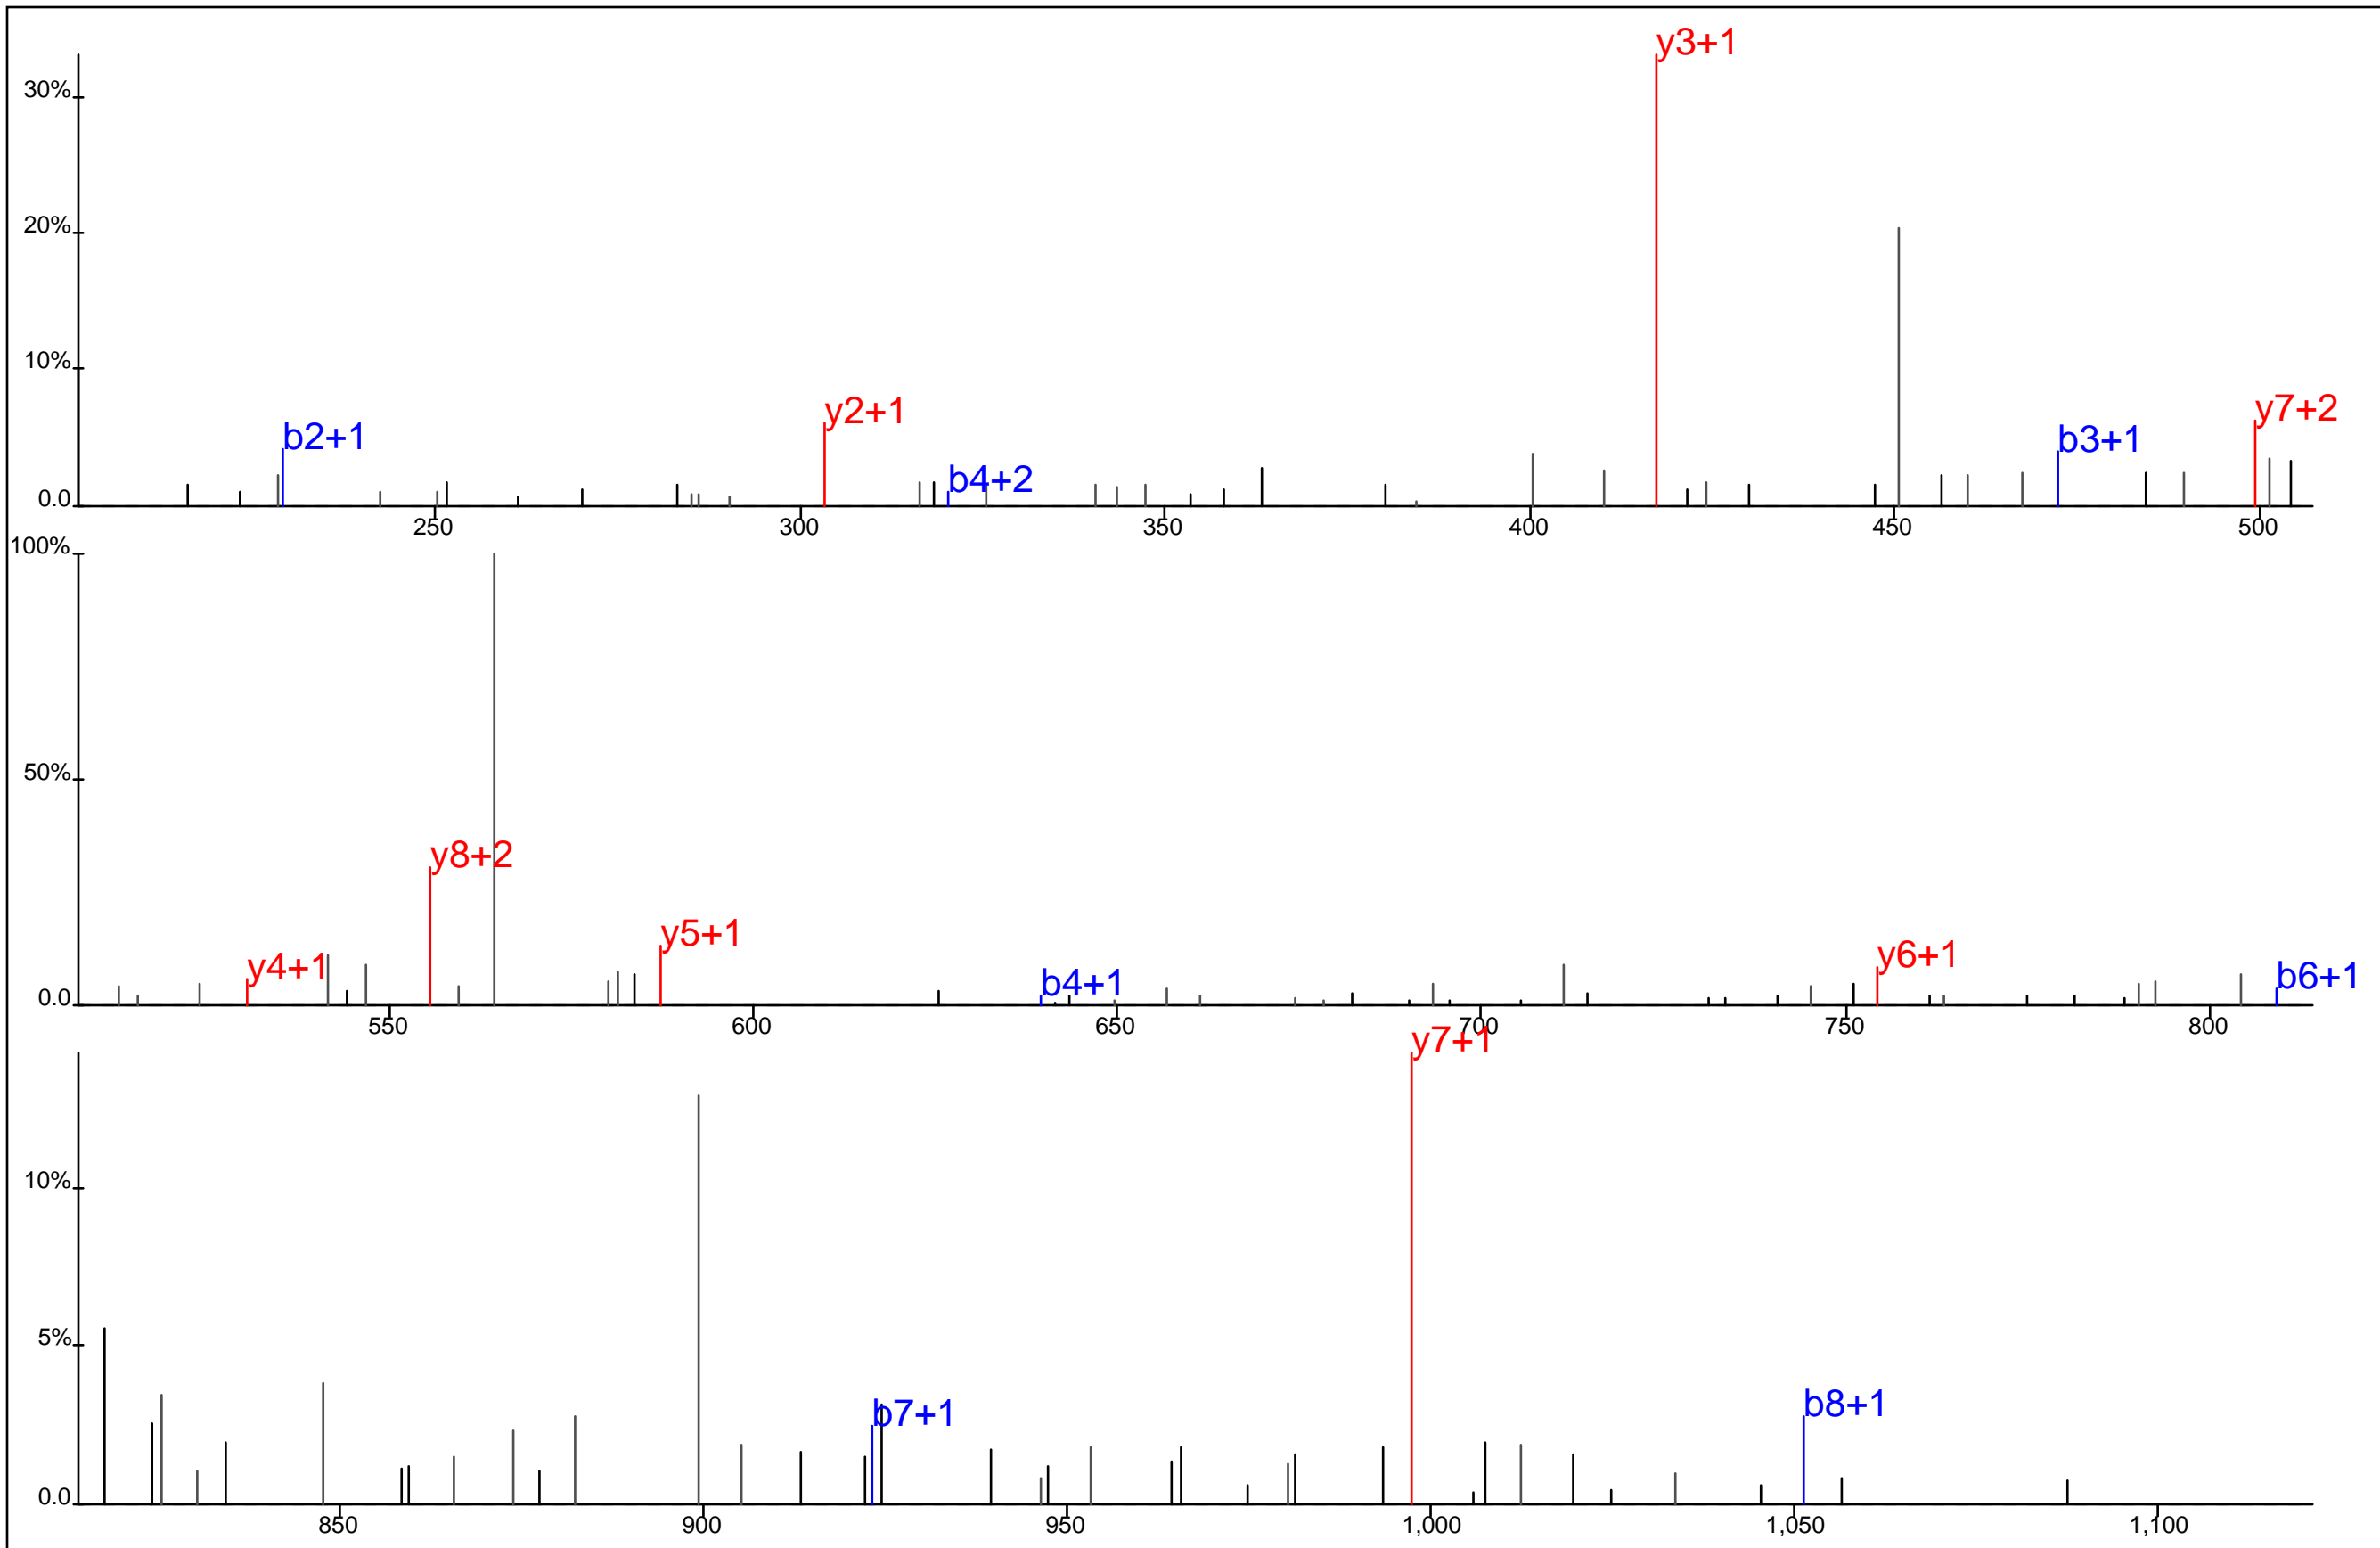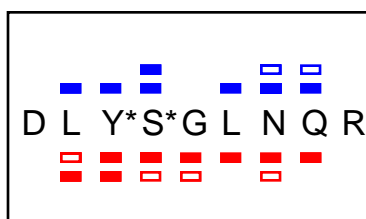

Protein Name: CD3E  
 gi Accession: 0  
 Precursor Mass: 613.2360+2  
 Delta Mass: 0.173 ppm  
 XCorr: 29.45

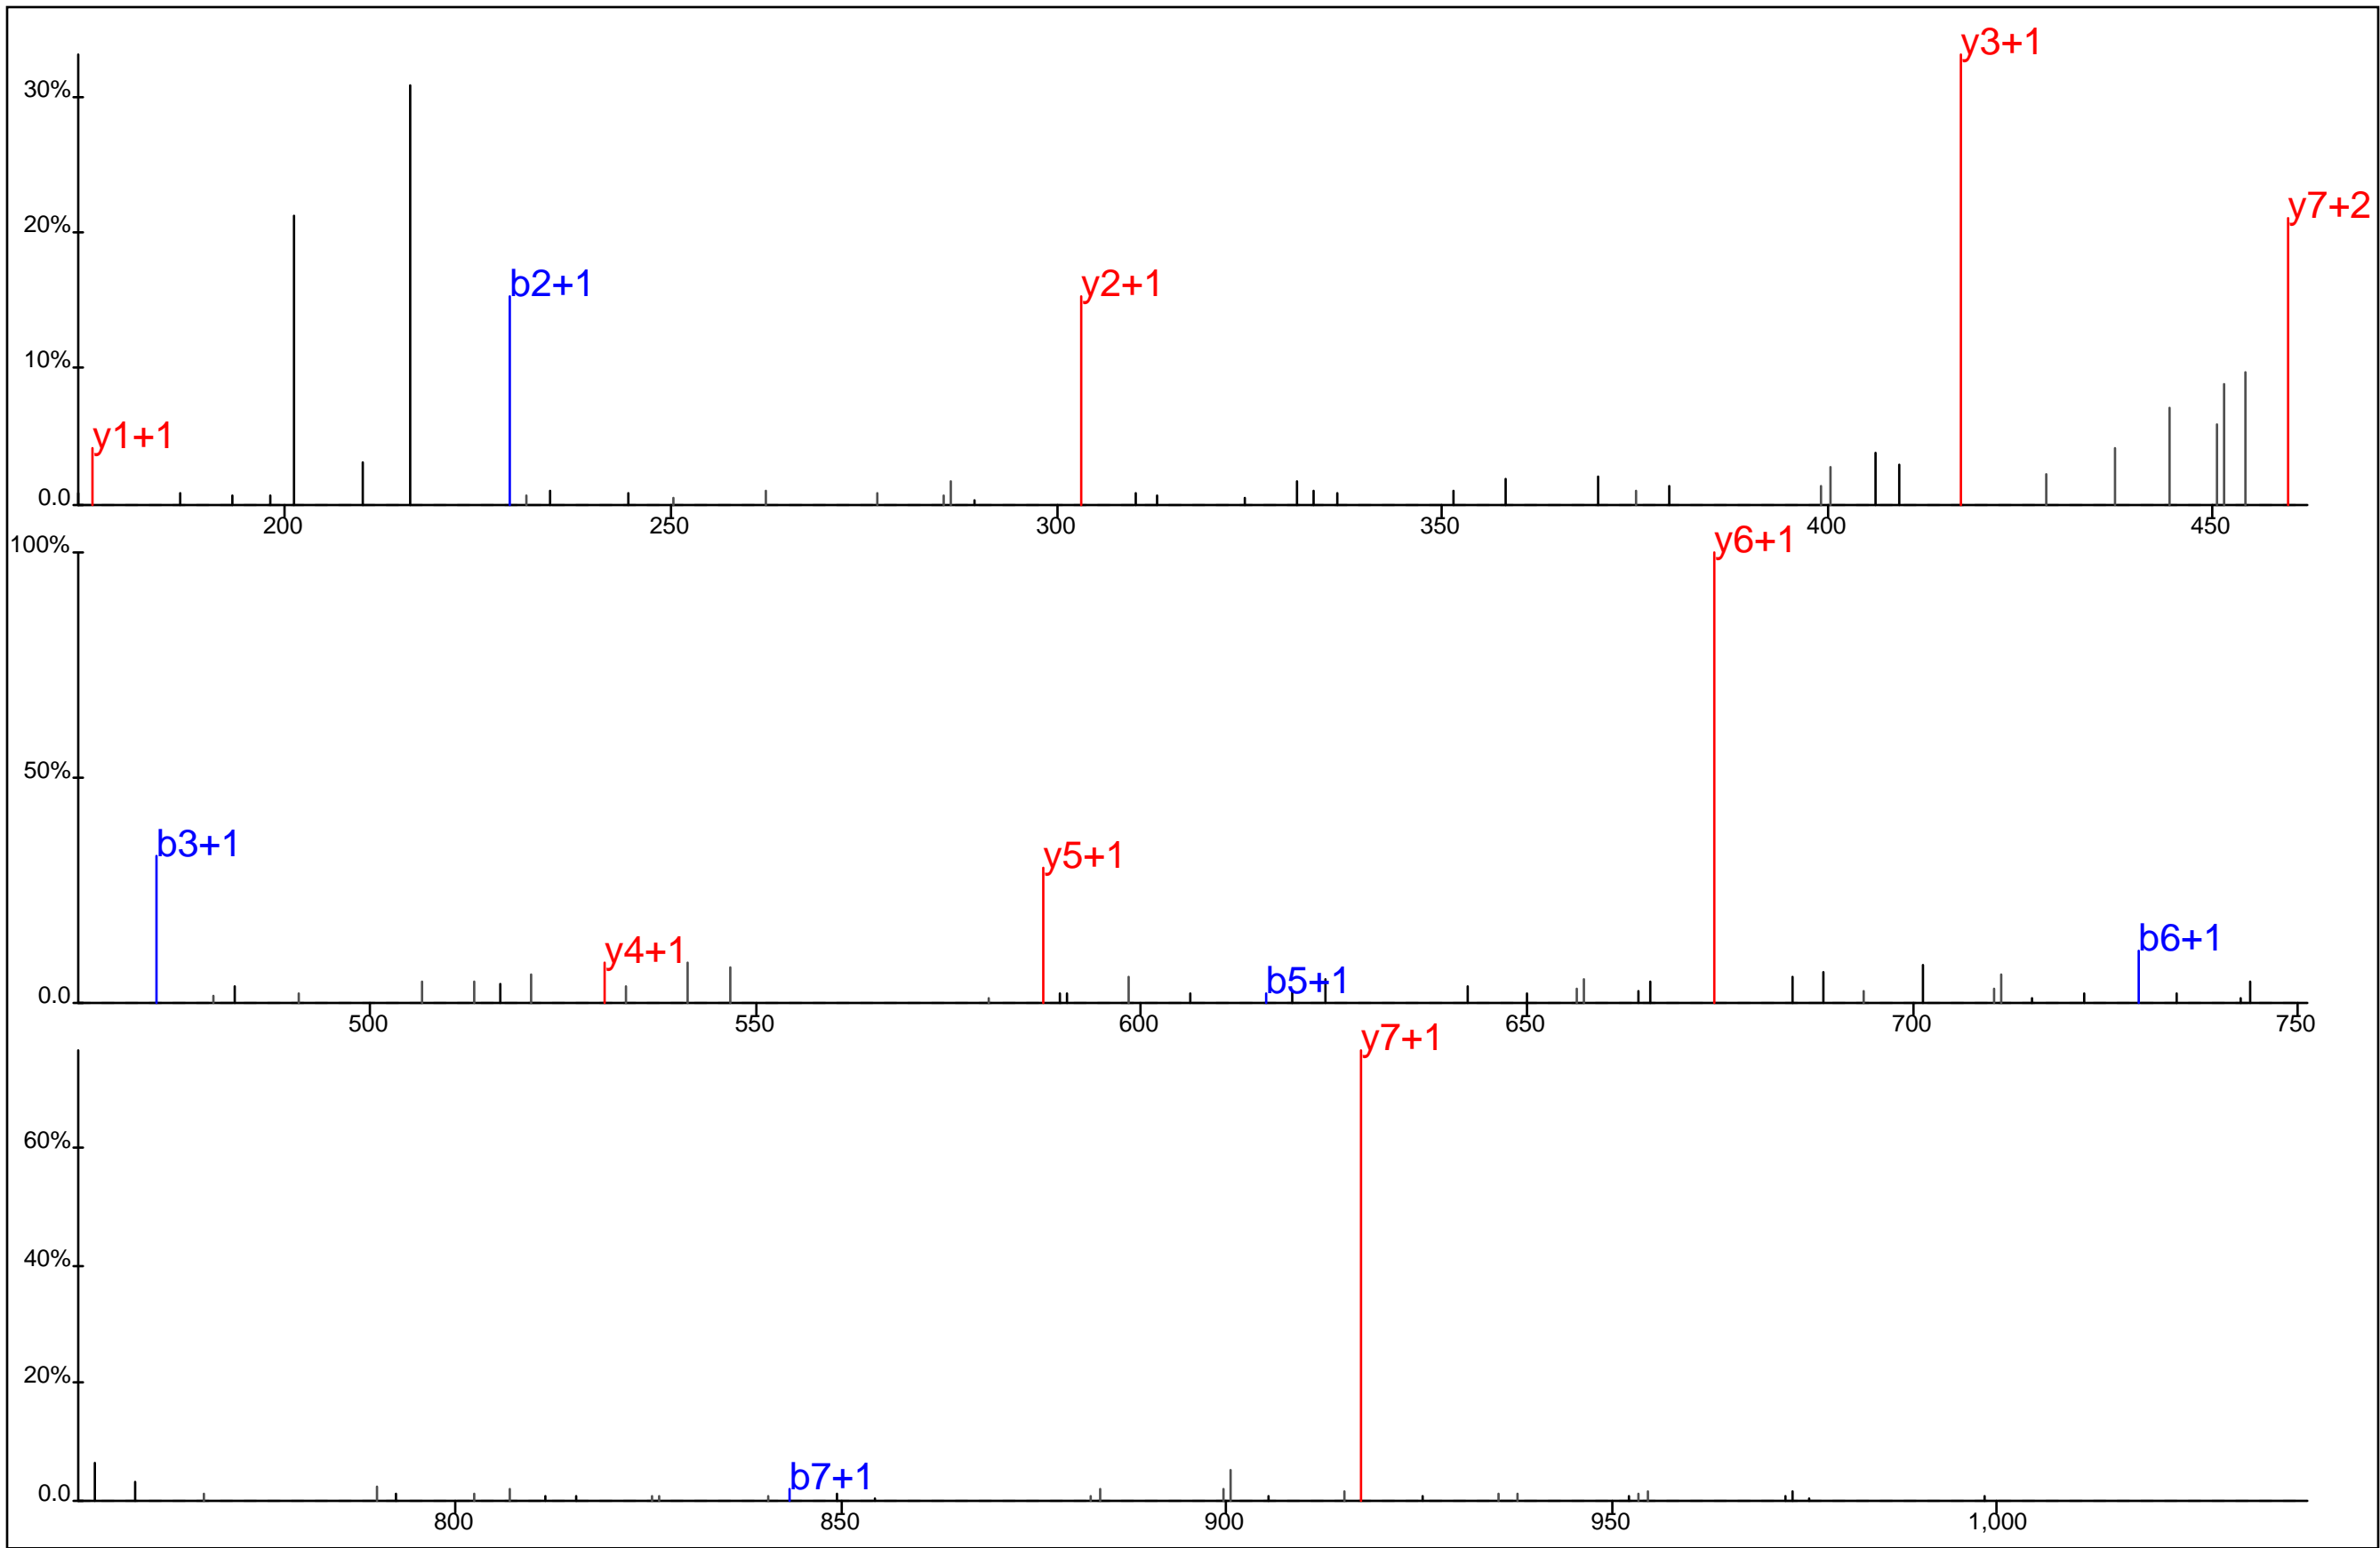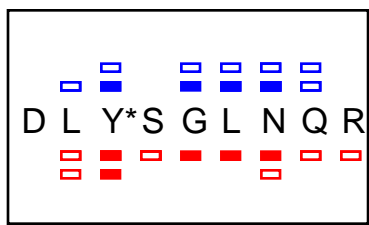

Protein Name: CD3E  
 gi Accession: 0  
 Precursor Mass: 573.2531+2  
 Delta Mass: 0.260 ppm  
 XCorr: 46.97

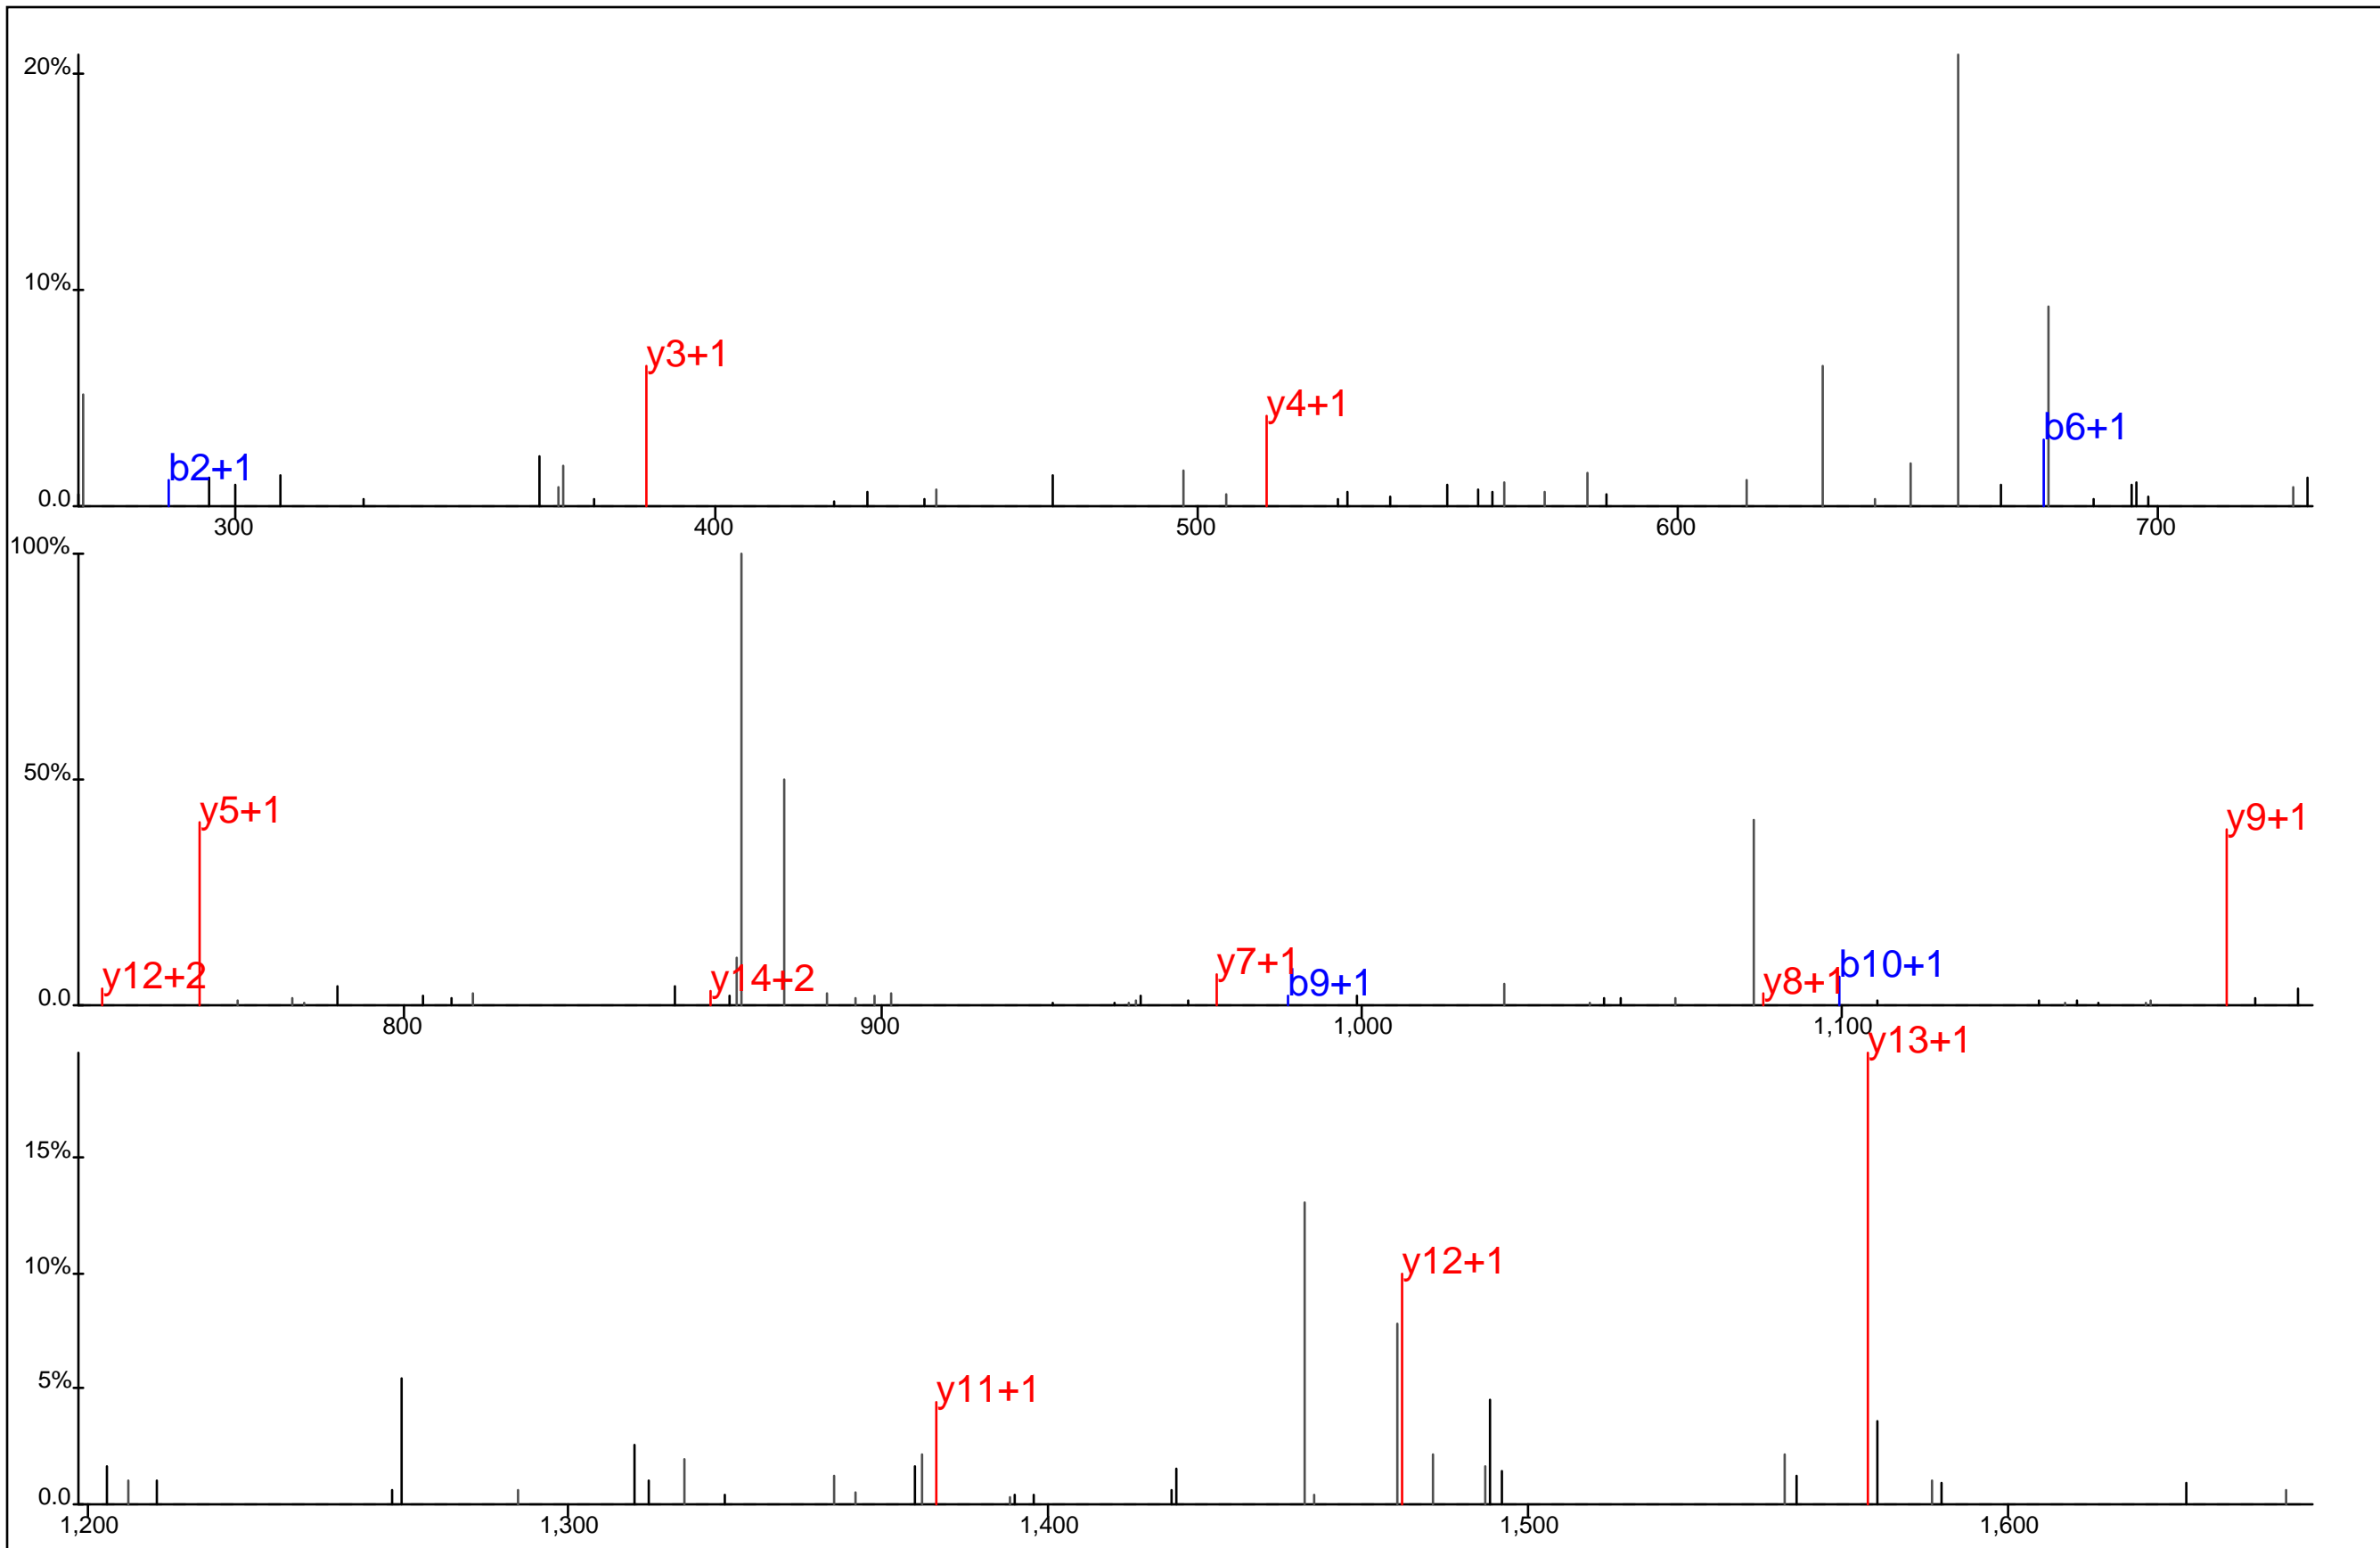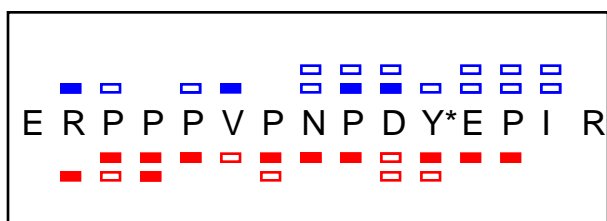

Protein Name: CD3E  
 gi Accession: 0  
 Precursor Mass: 928.4411+2  
 Delta Mass: 0.606 ppm  
 XCorr: 50.5

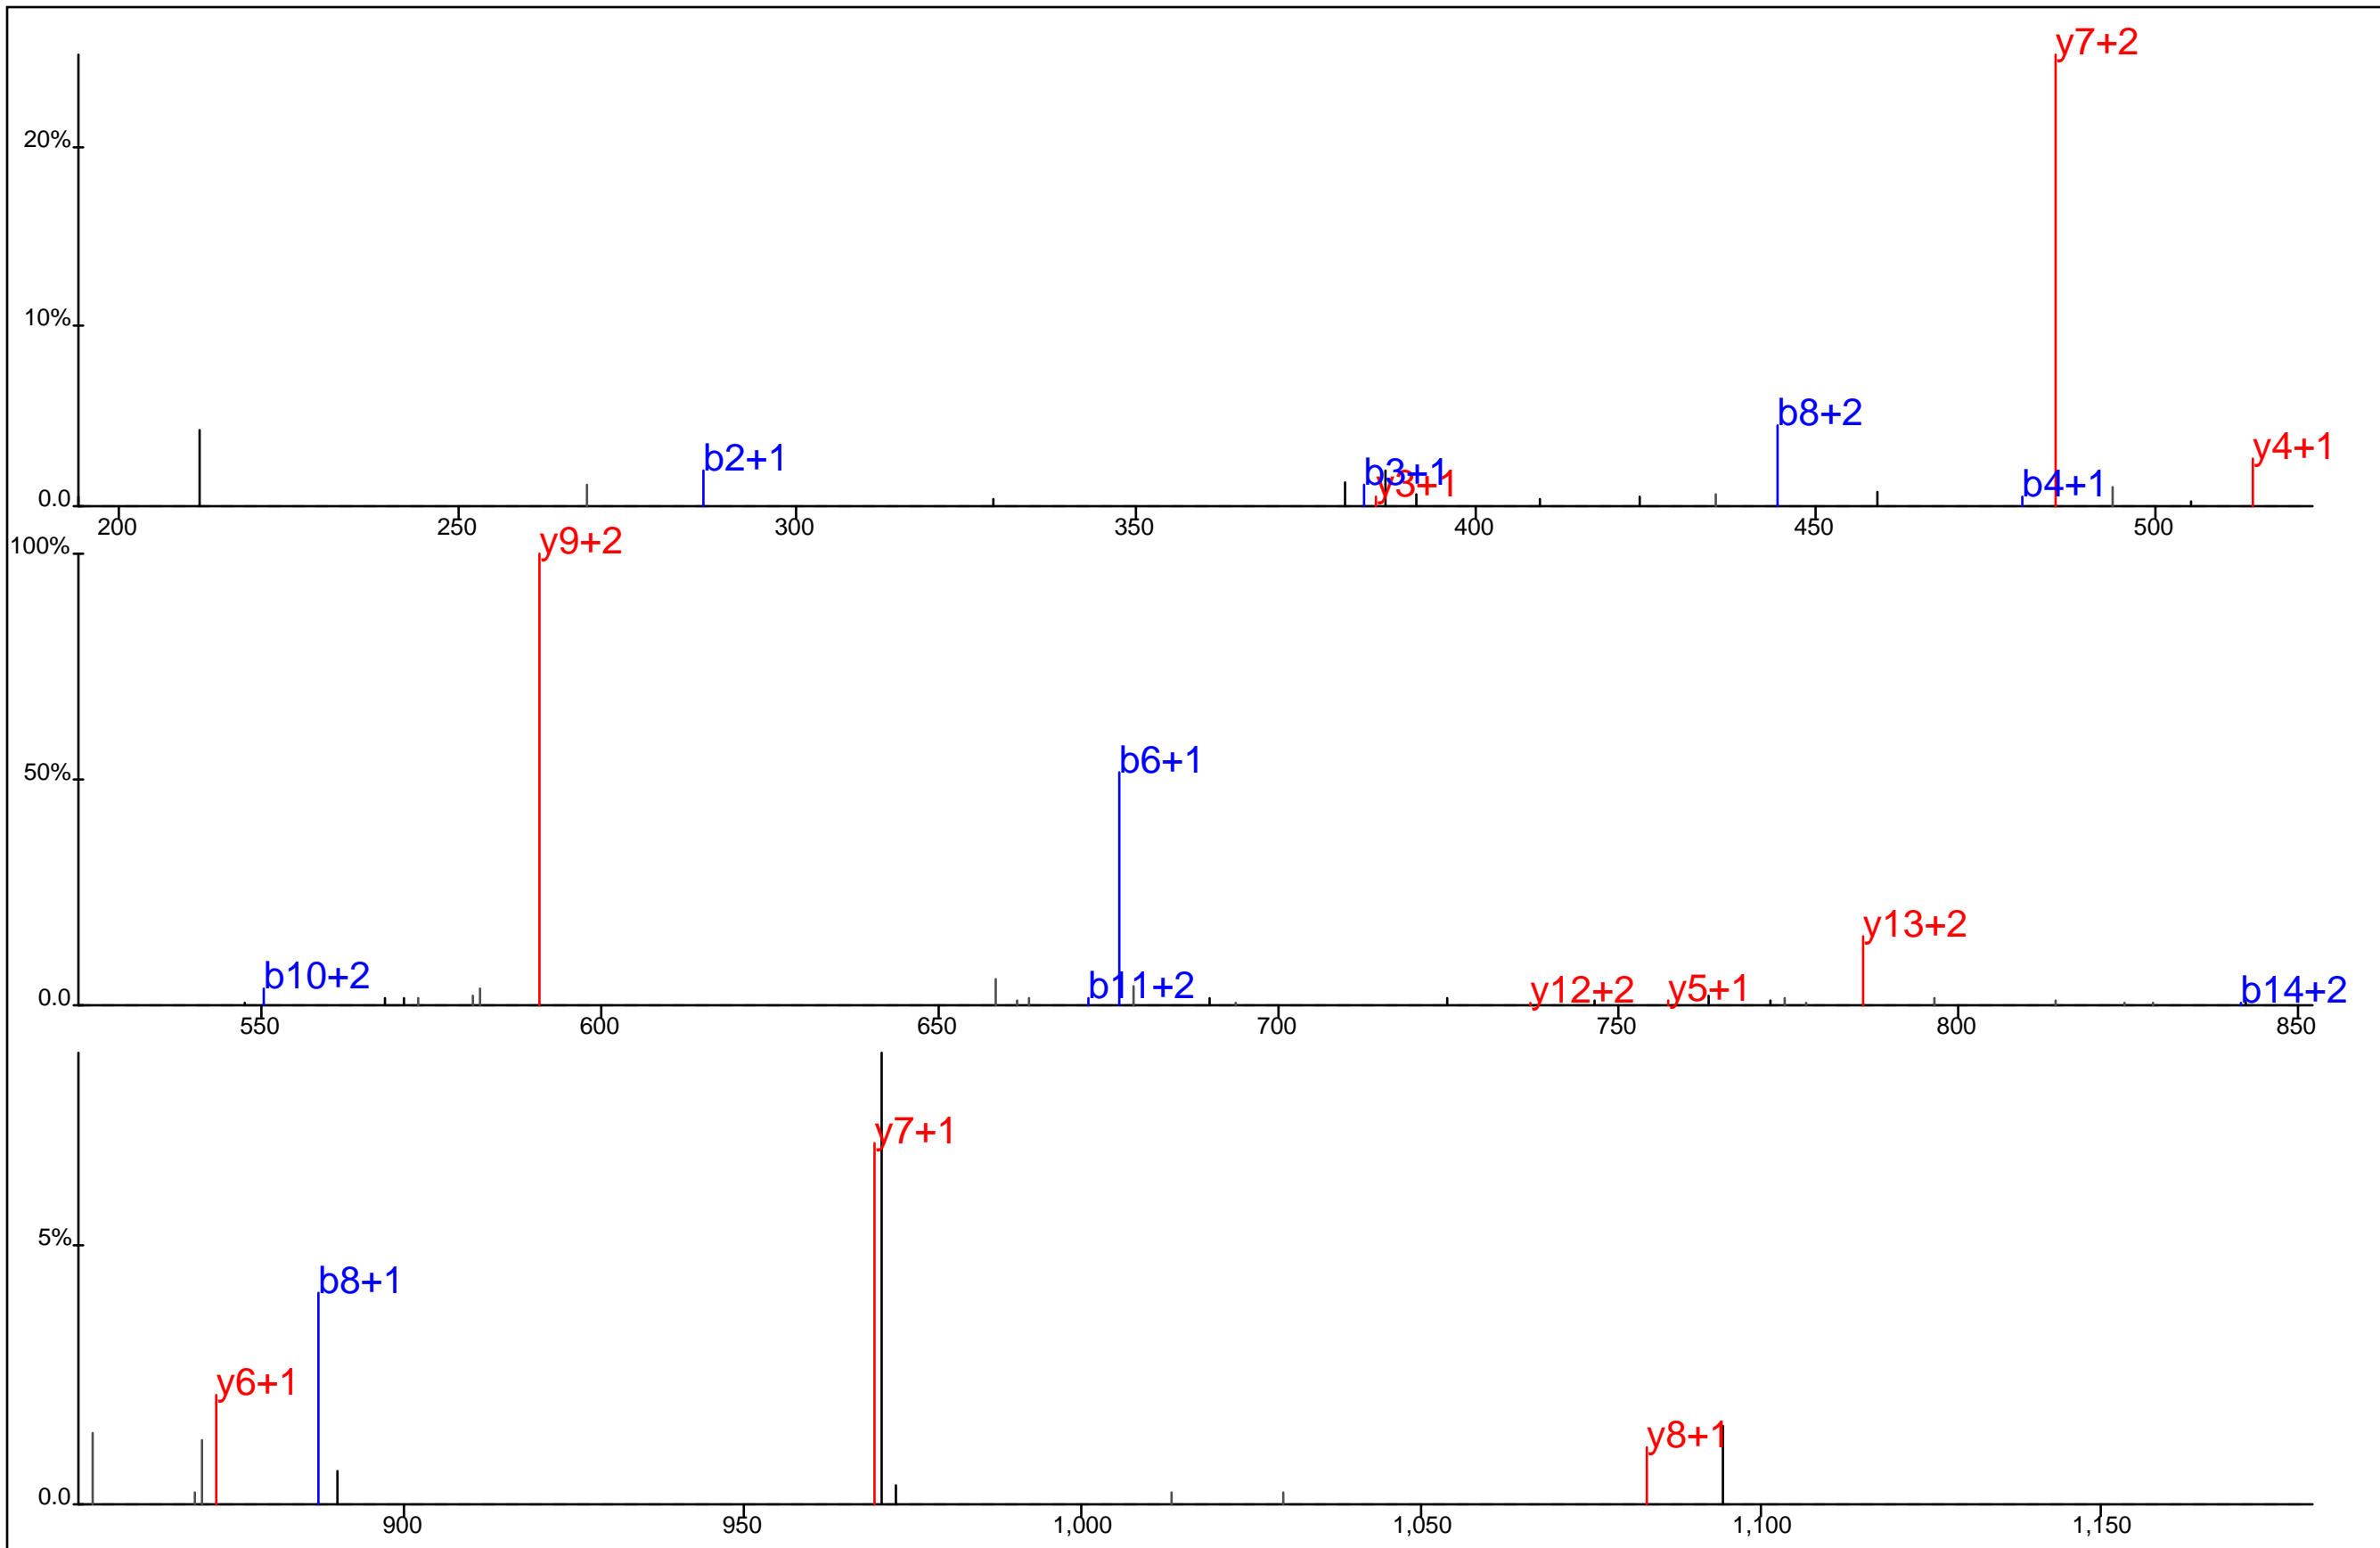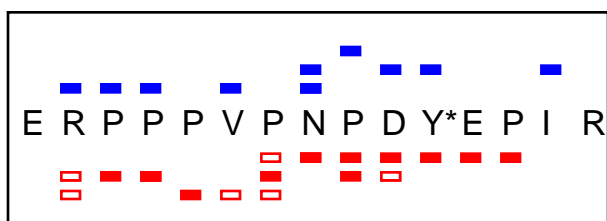

Protein Name: CD3E  
 gi Accession: 0  
 Precursor Mass: 619.2963+3  
 Delta Mass: 0.336 ppm  
 XCorr: 31.69

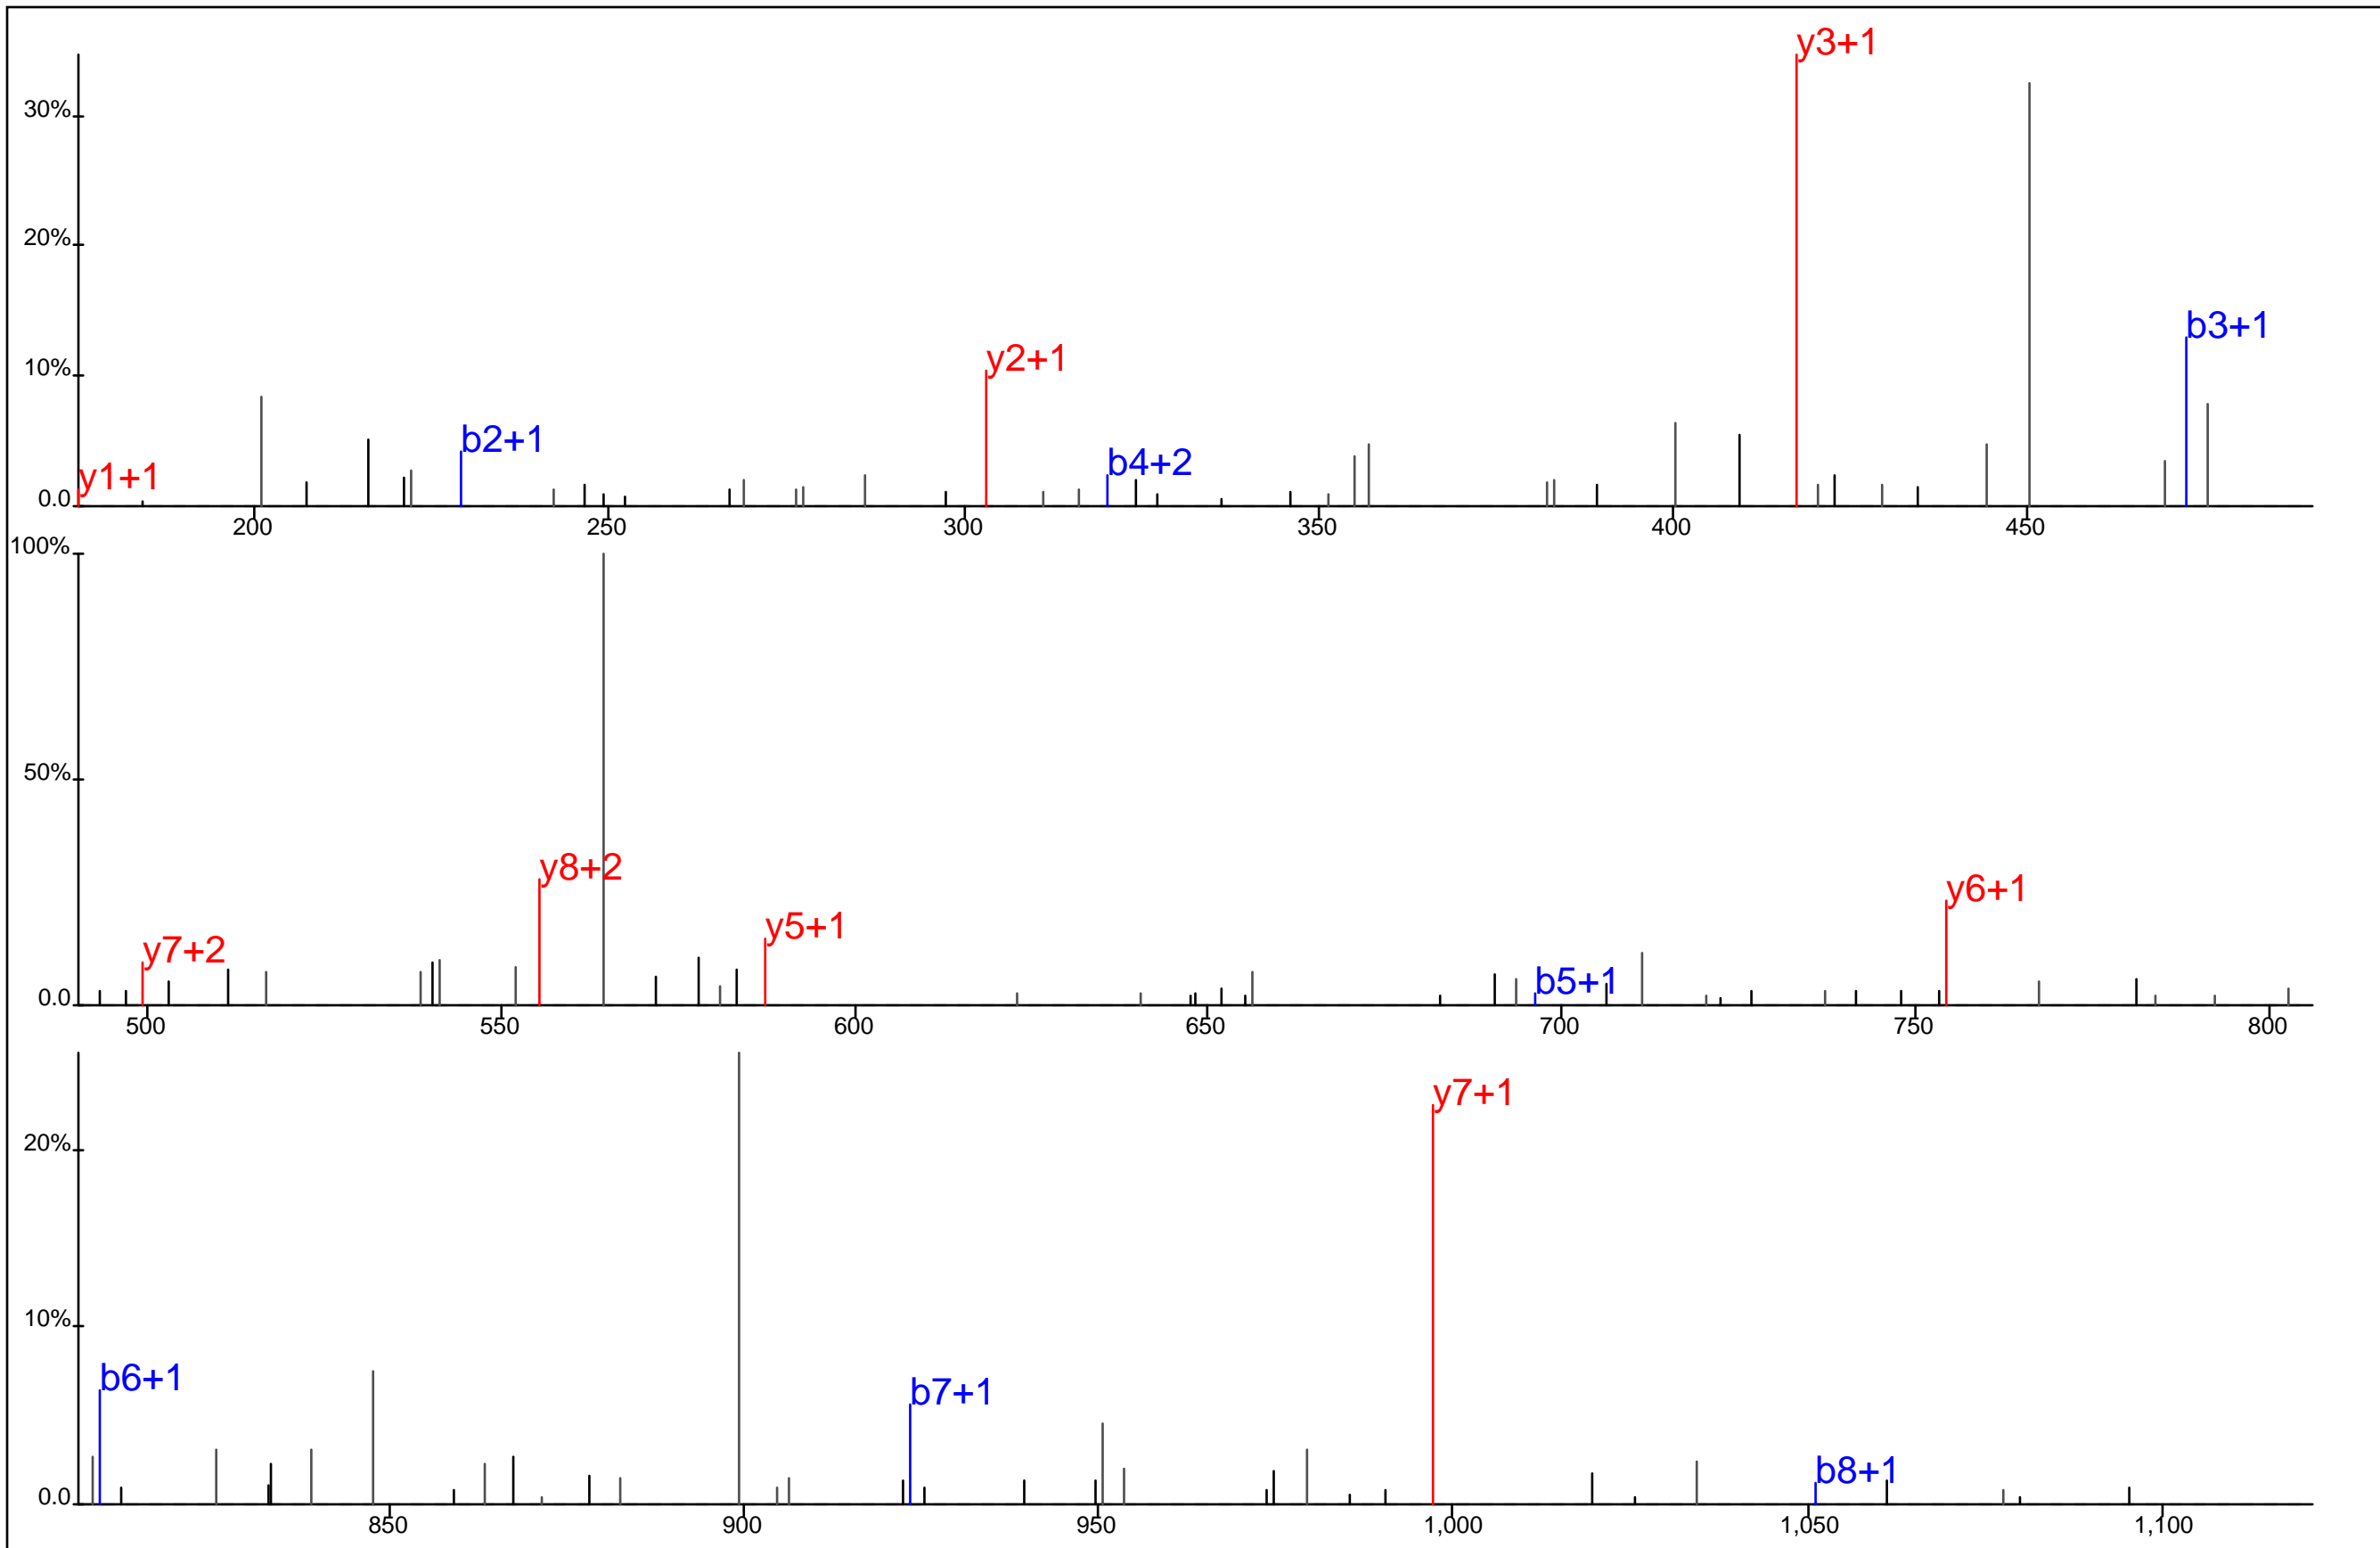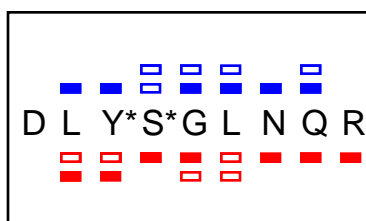

Protein Name: CD3E  
 gi Accession: 0  
 Precursor Mass: 613.2358+2  
 Delta Mass: 0.472 ppm  
 XCorr: 38.36



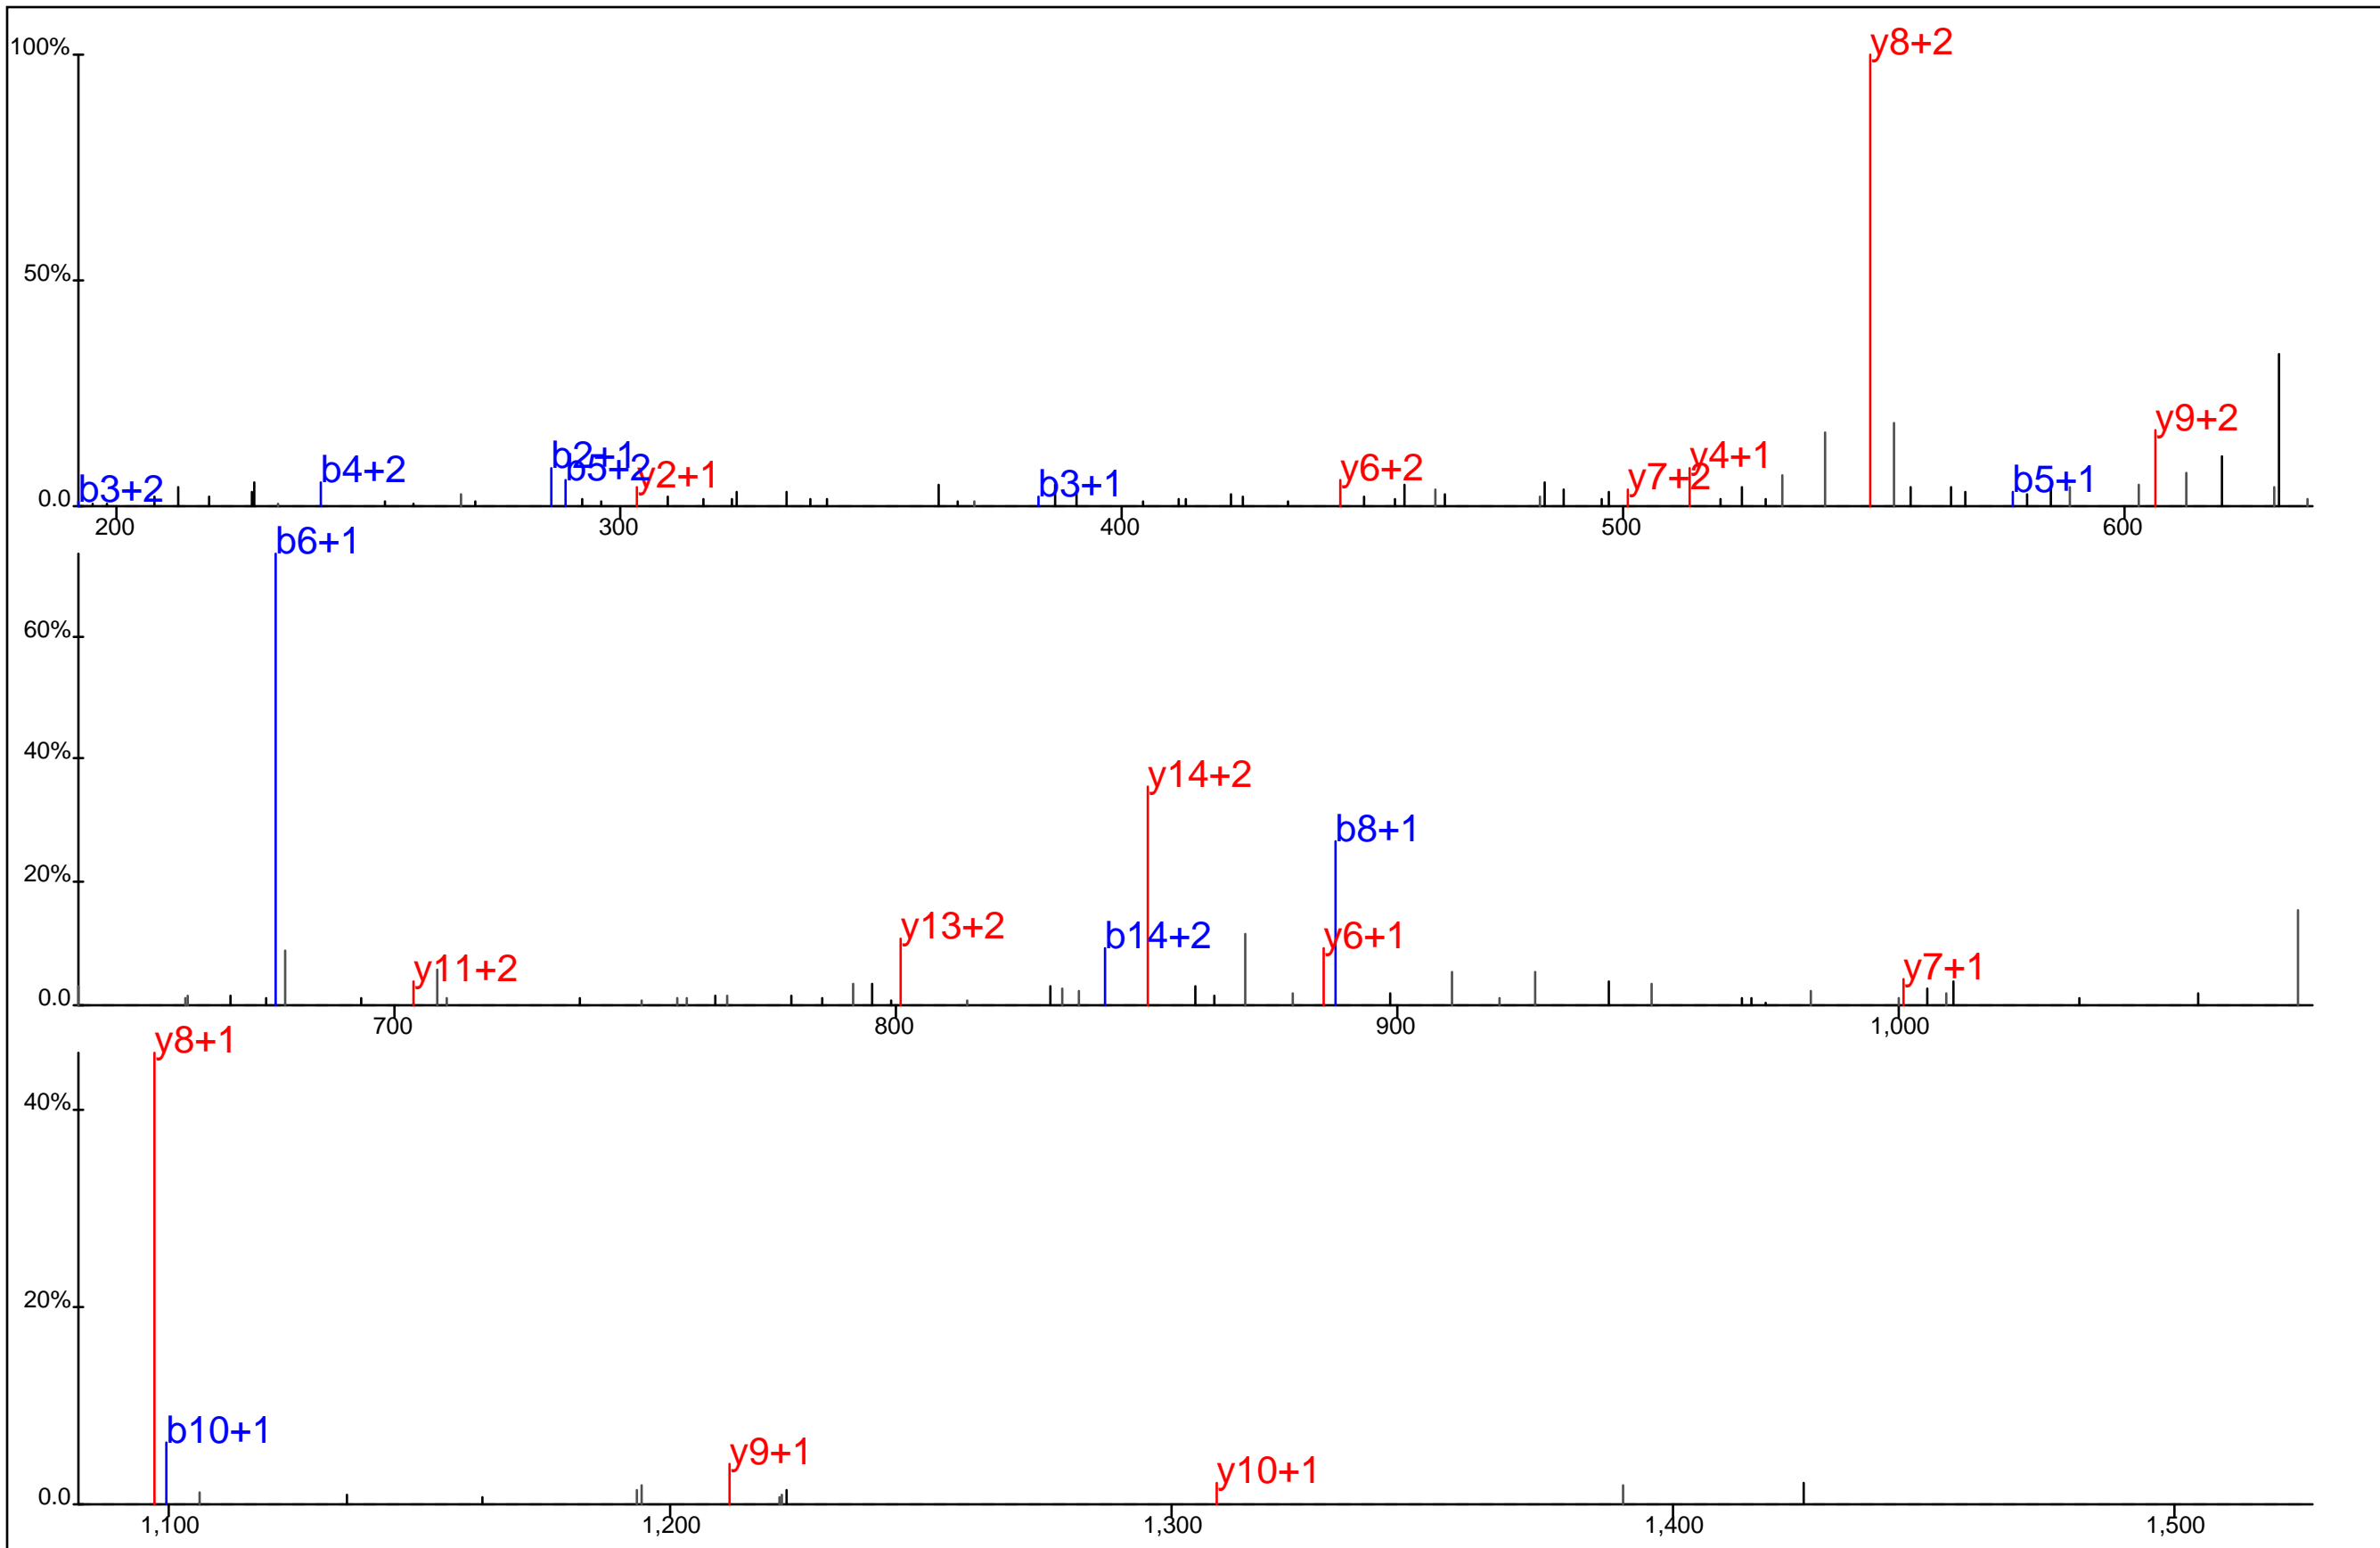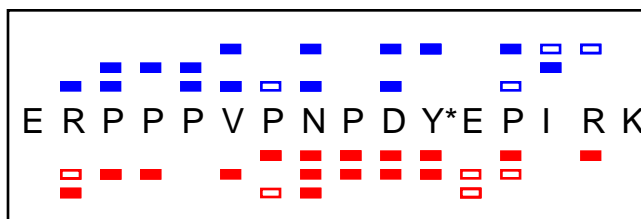

Protein Name: CD3E  
 gi Accession: 0  
 Precursor Mass: 661.9943+3  
 Delta Mass: 0.172 ppm  
 XCorr: 34.72

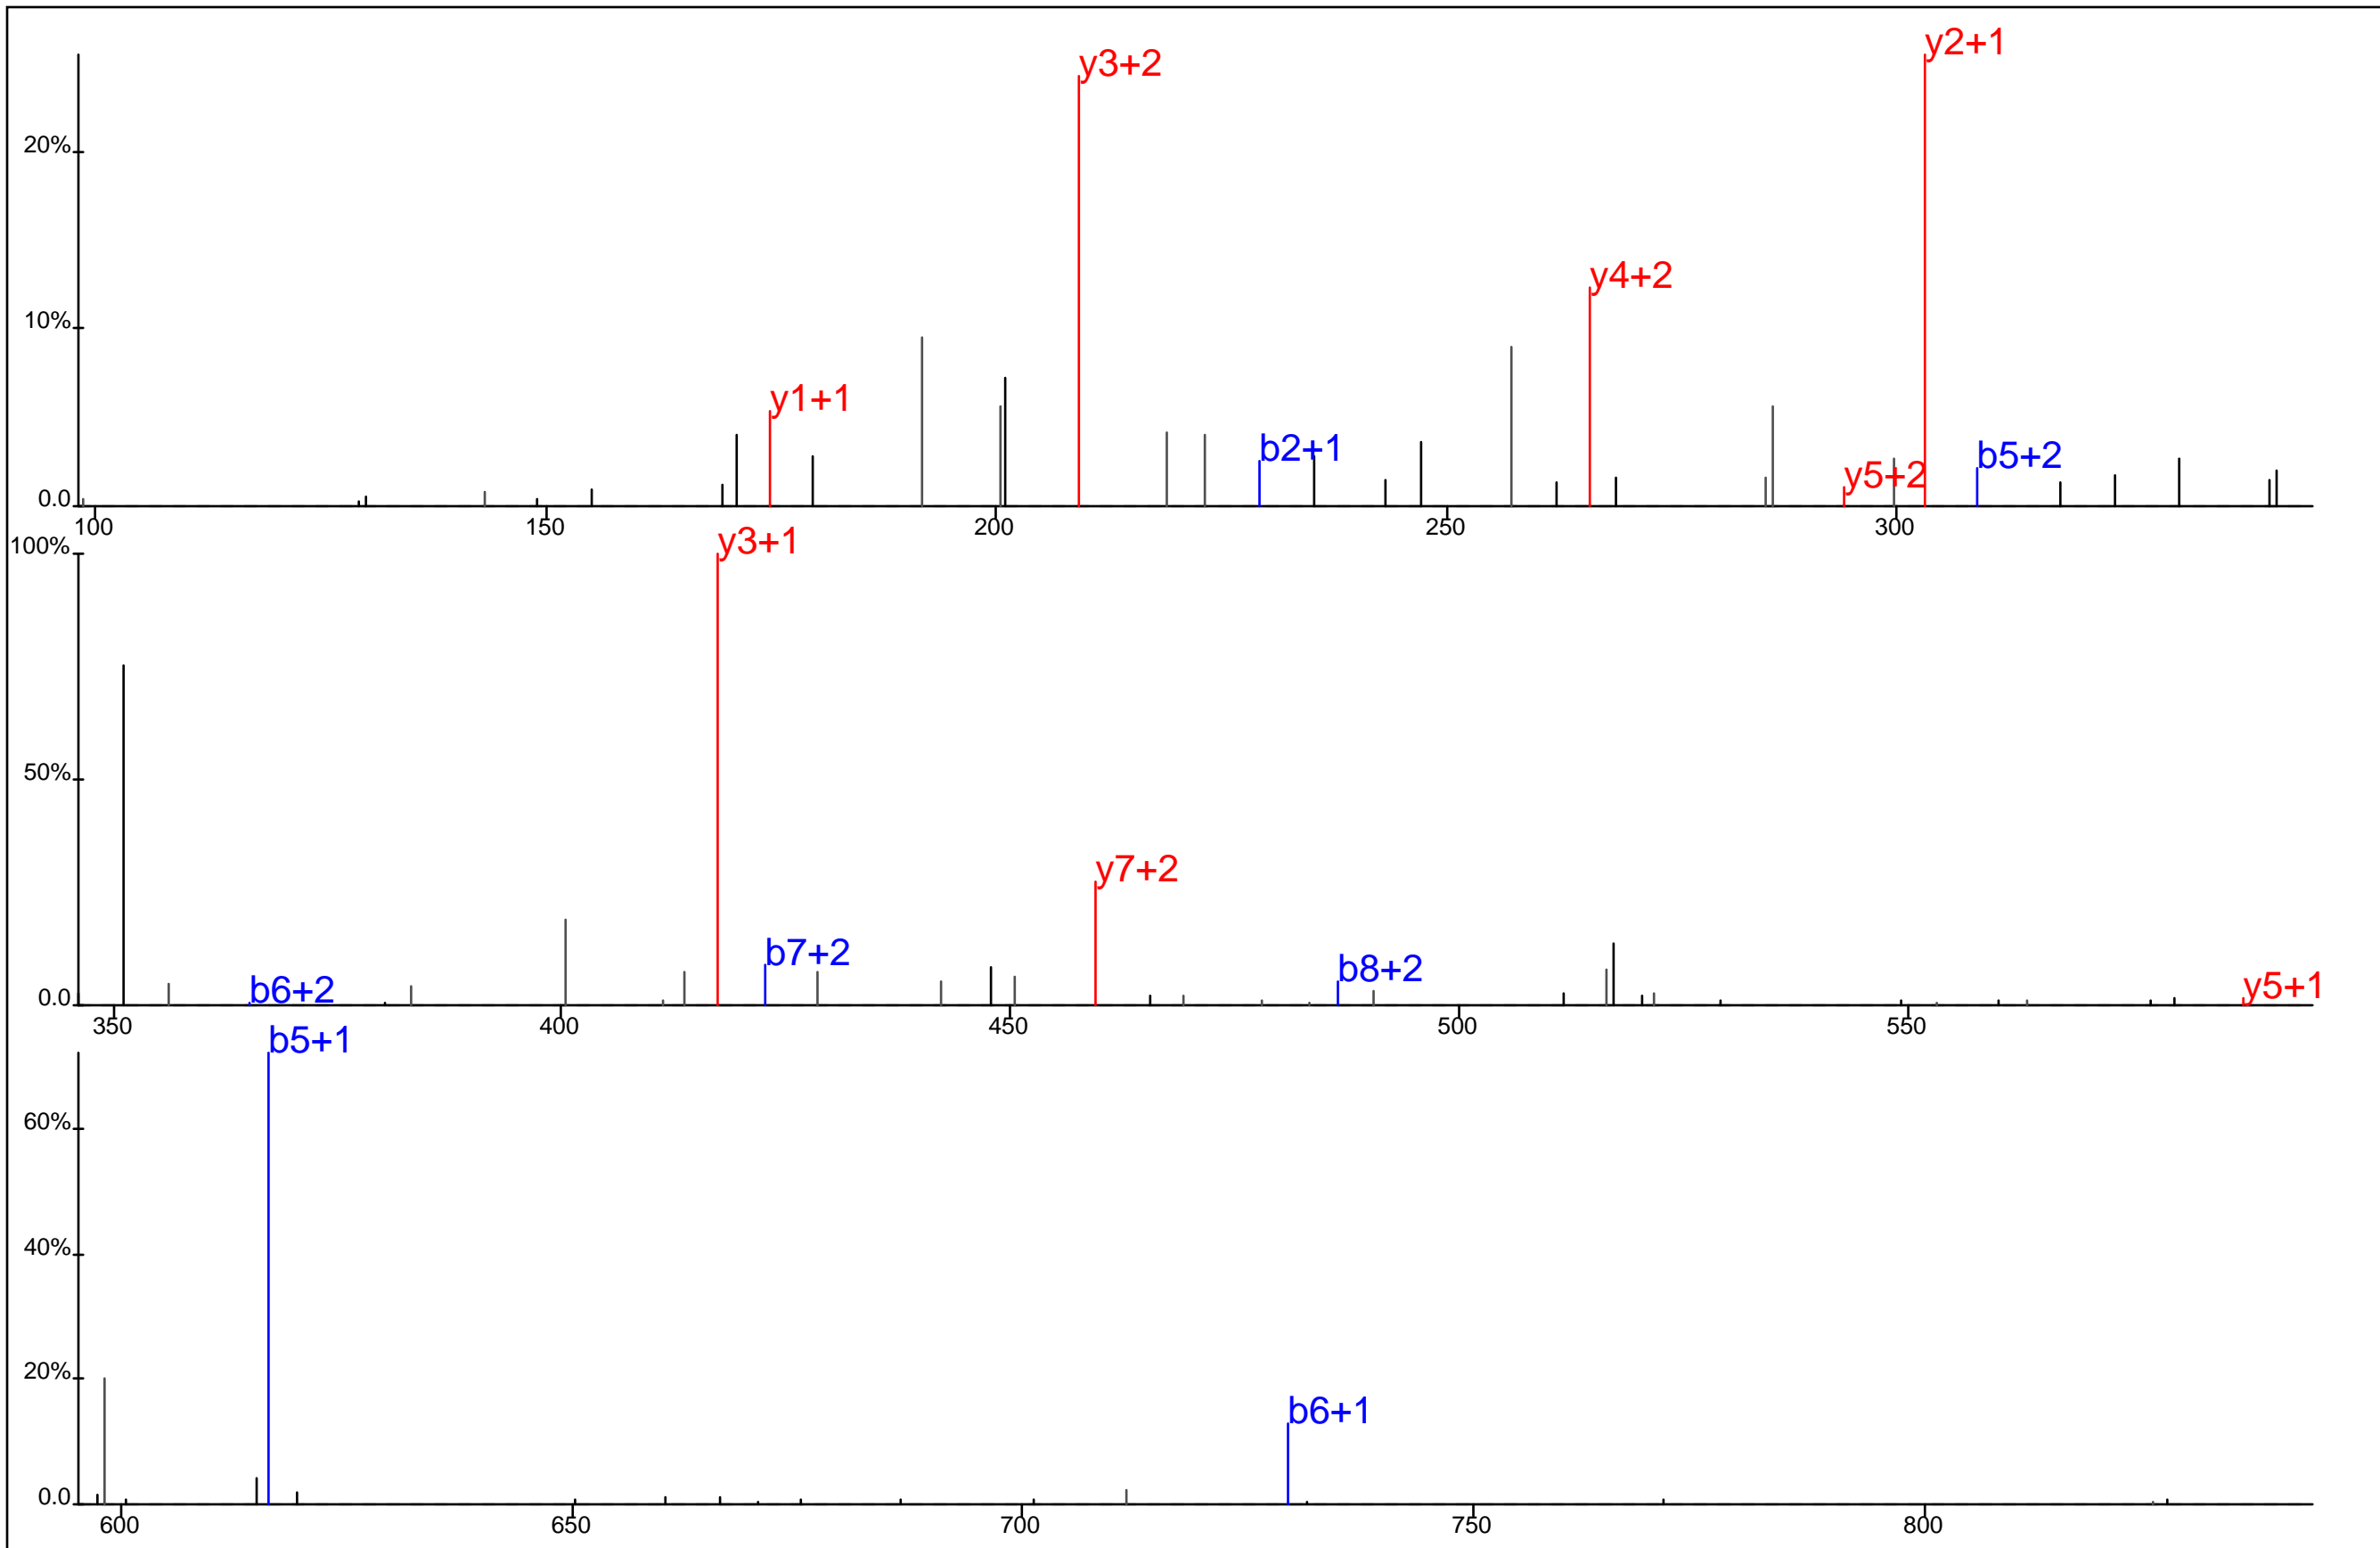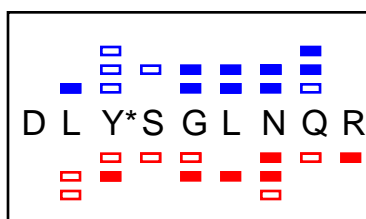

Protein Name: CD3E  
 gi Accession: 0  
 Precursor Mass: 382.5043+3  
 Delta Mass: 0.339 ppm  
 XCorr: 22.87

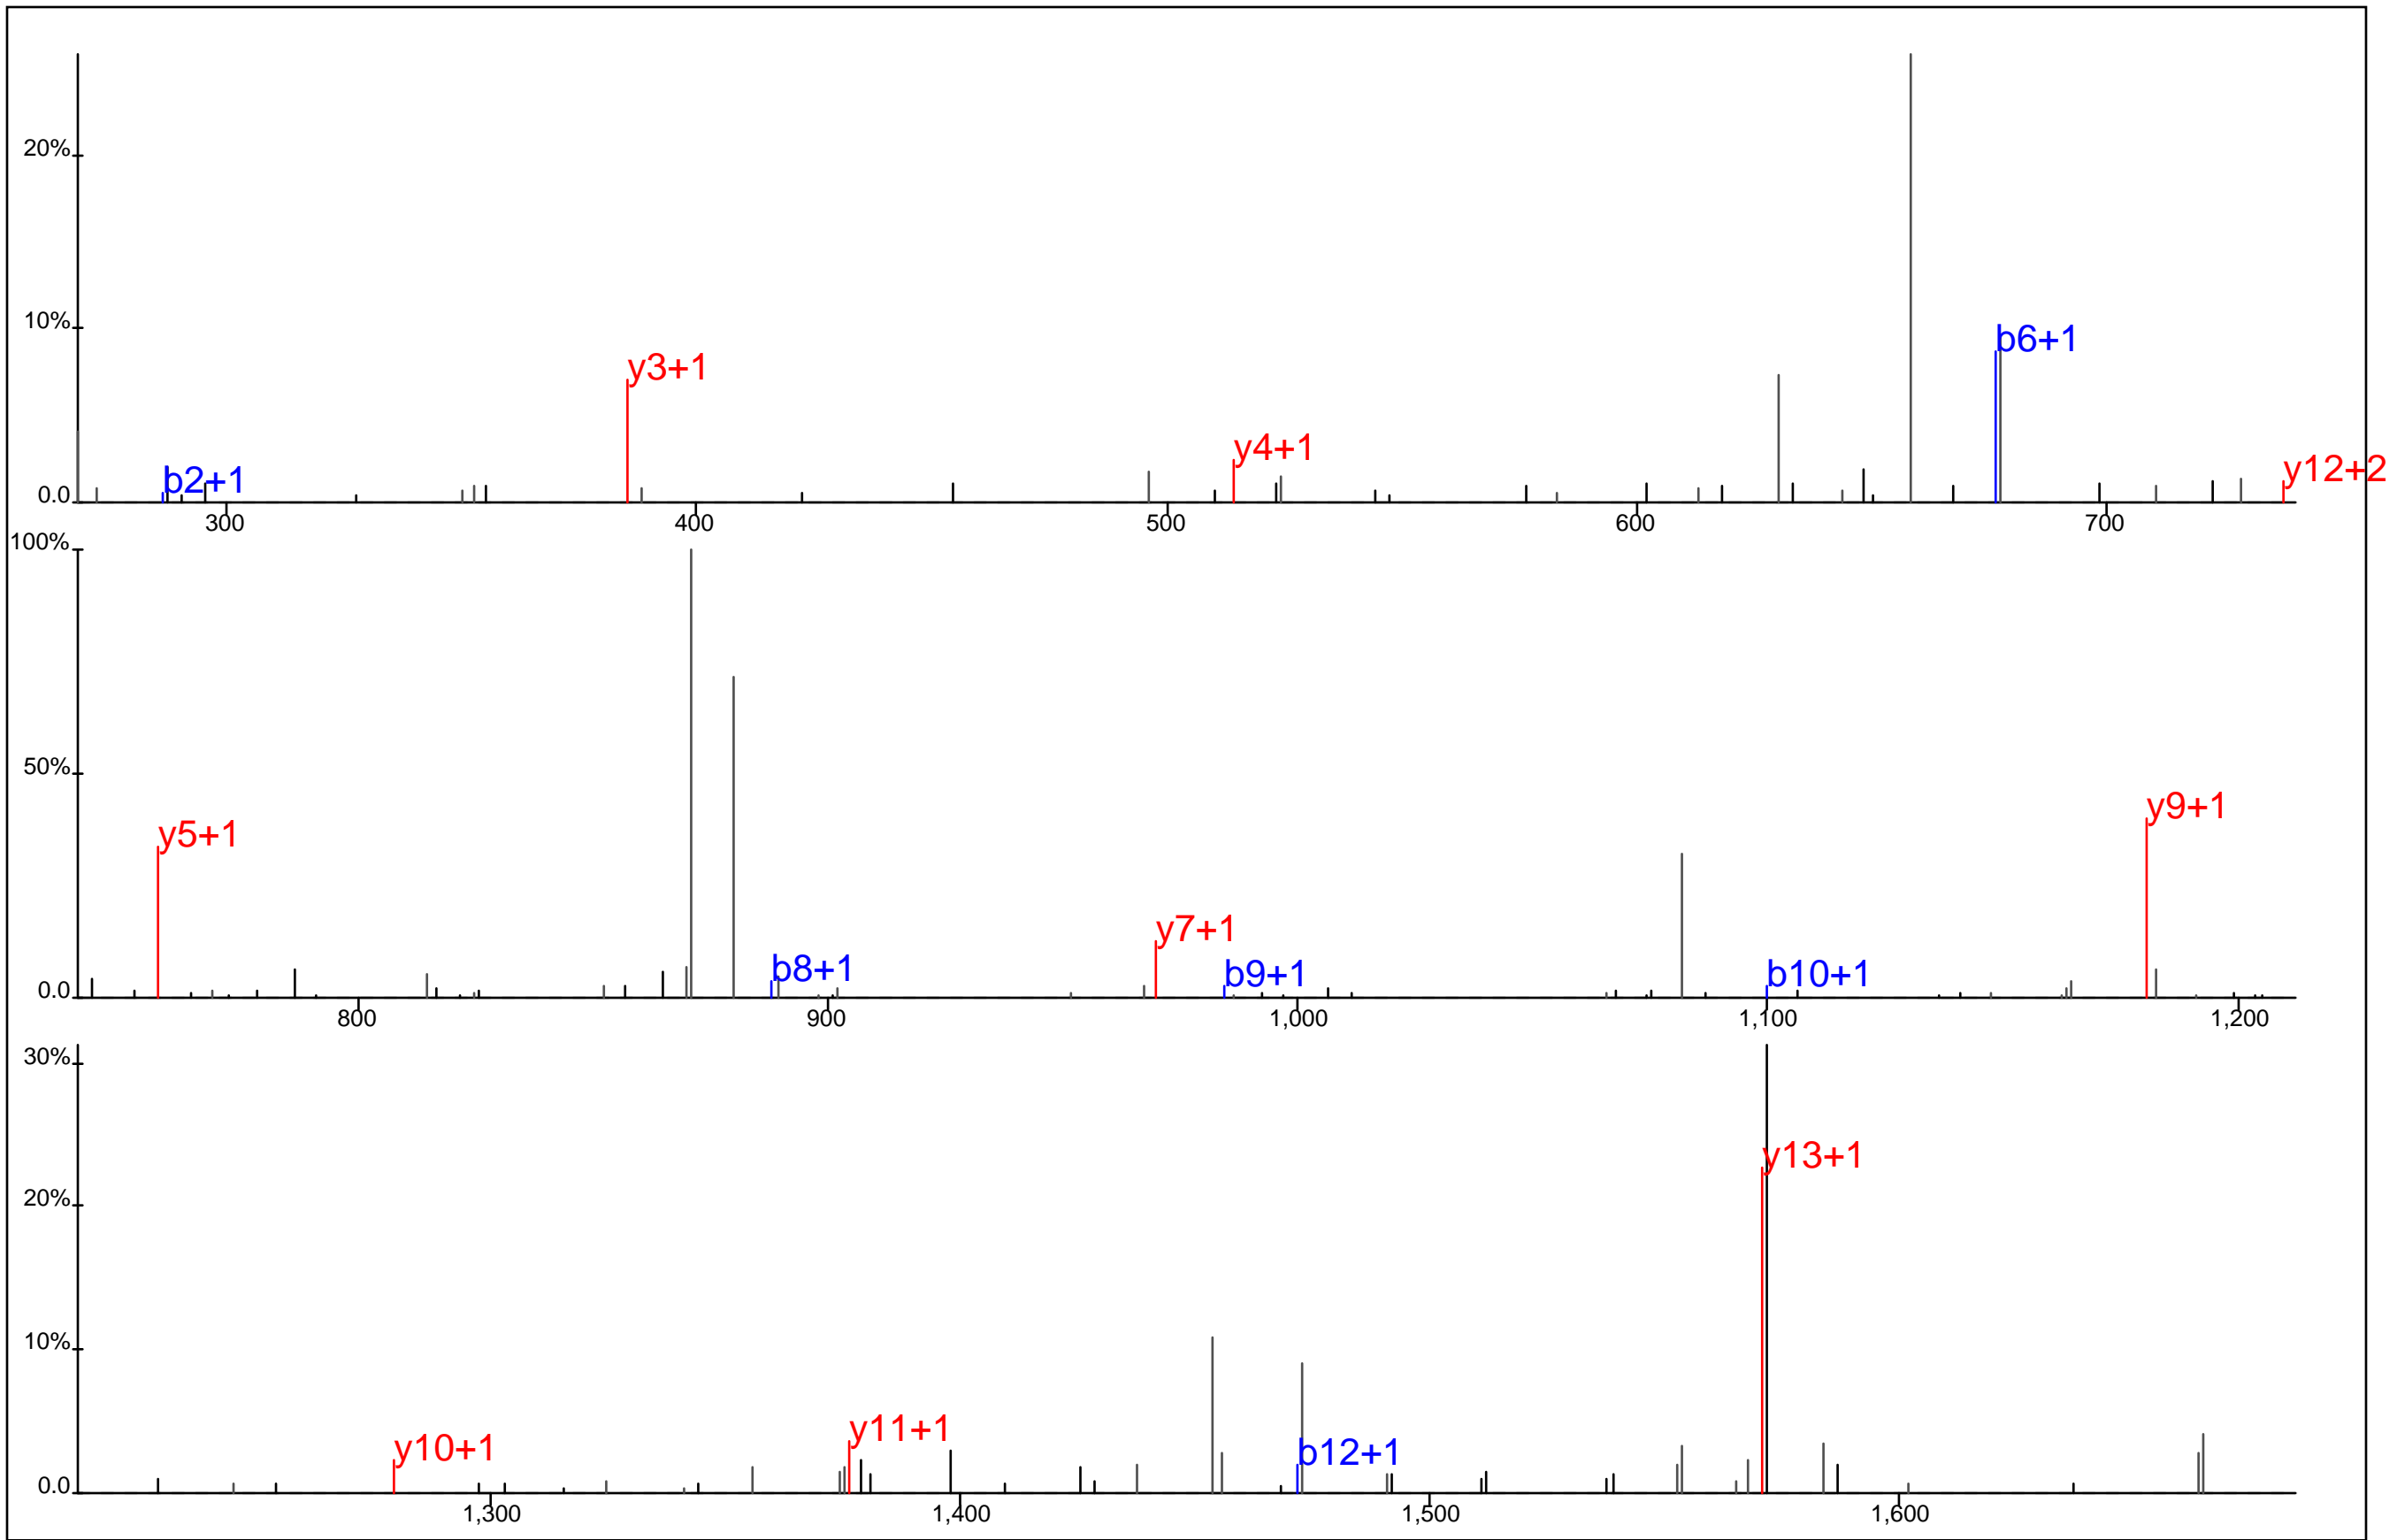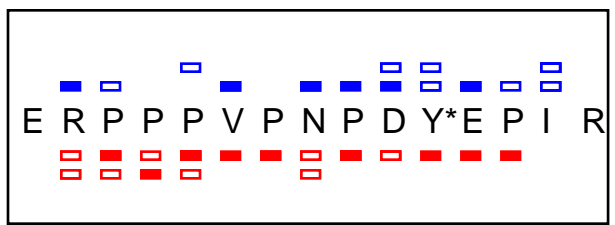

Protein Name: CD3E  
 gi Accession: 0  
 Precursor Mass: 928.4399+2  
 Delta Mass: 0.644 ppm  
 XCorr: 37.32

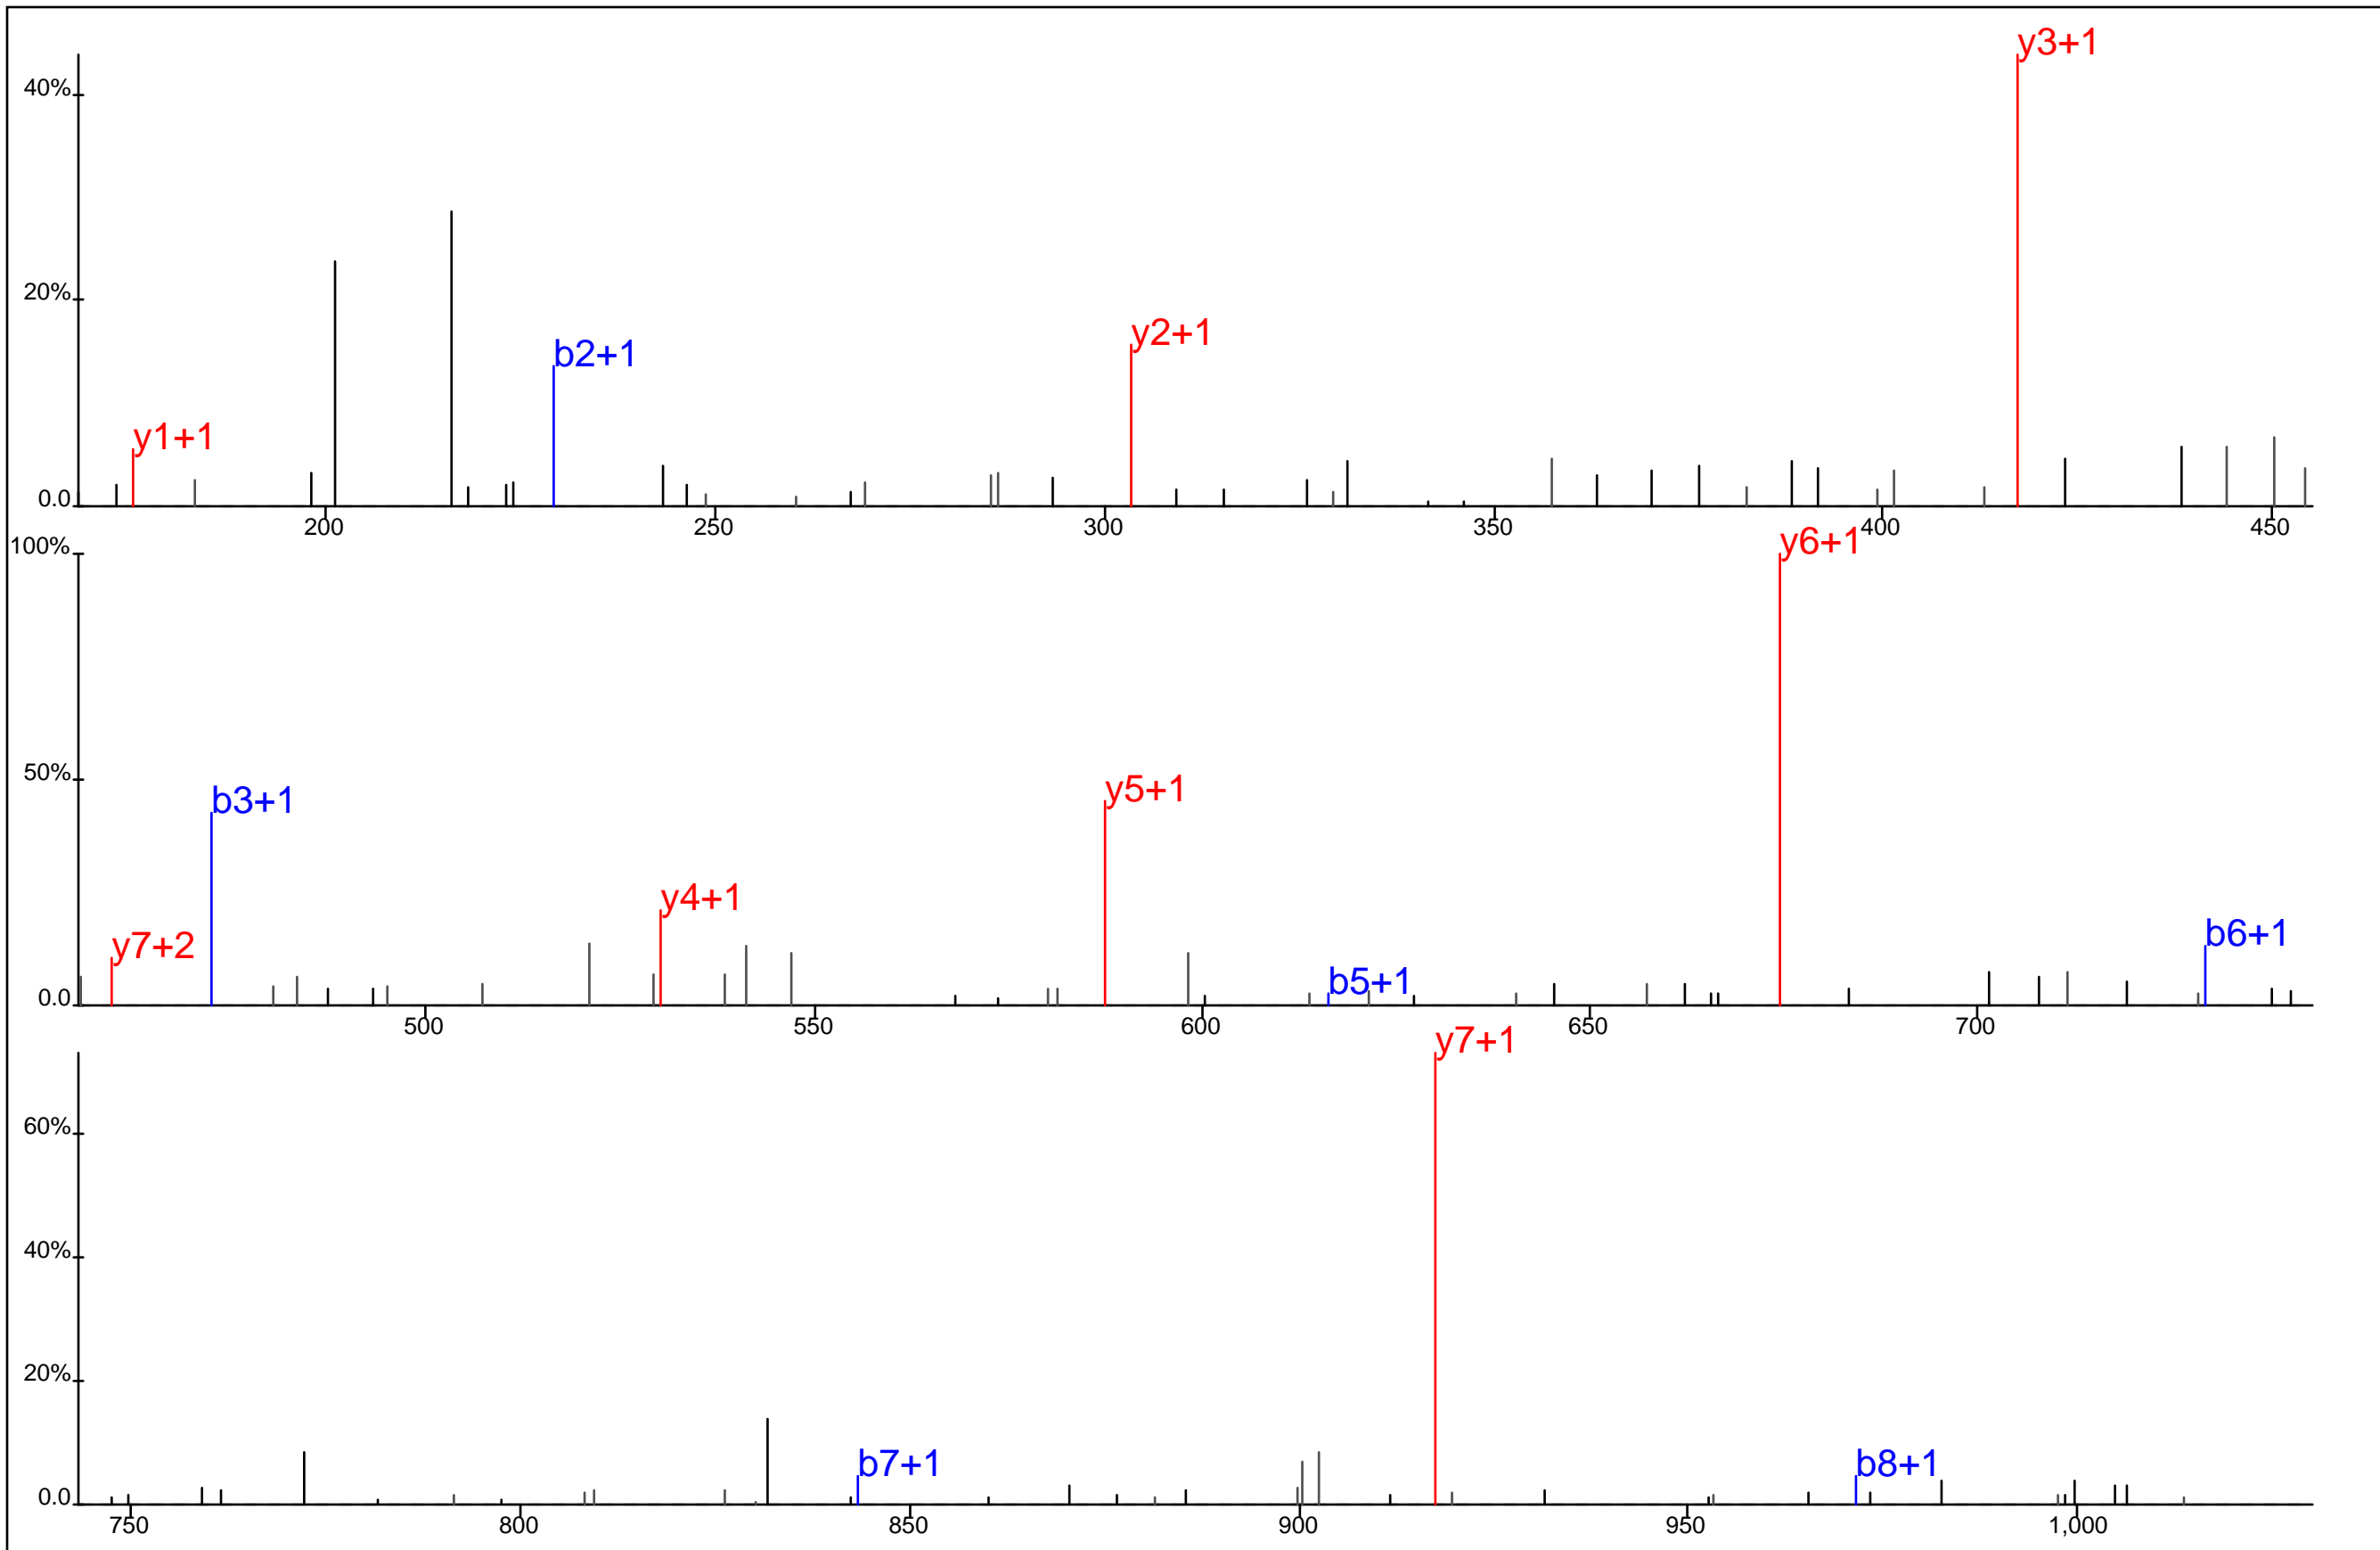

■ ■  
□ □  
**D L Y\* S G L N Q R**  
■ ■ ■ ■ ■ ■ ■

Protein Name: CD3E  
 gi Accession: 0  
 Precursor Mass: 573.2539+2  
 Delta Mass: 1.645 ppm  
 XCorr: 41.09

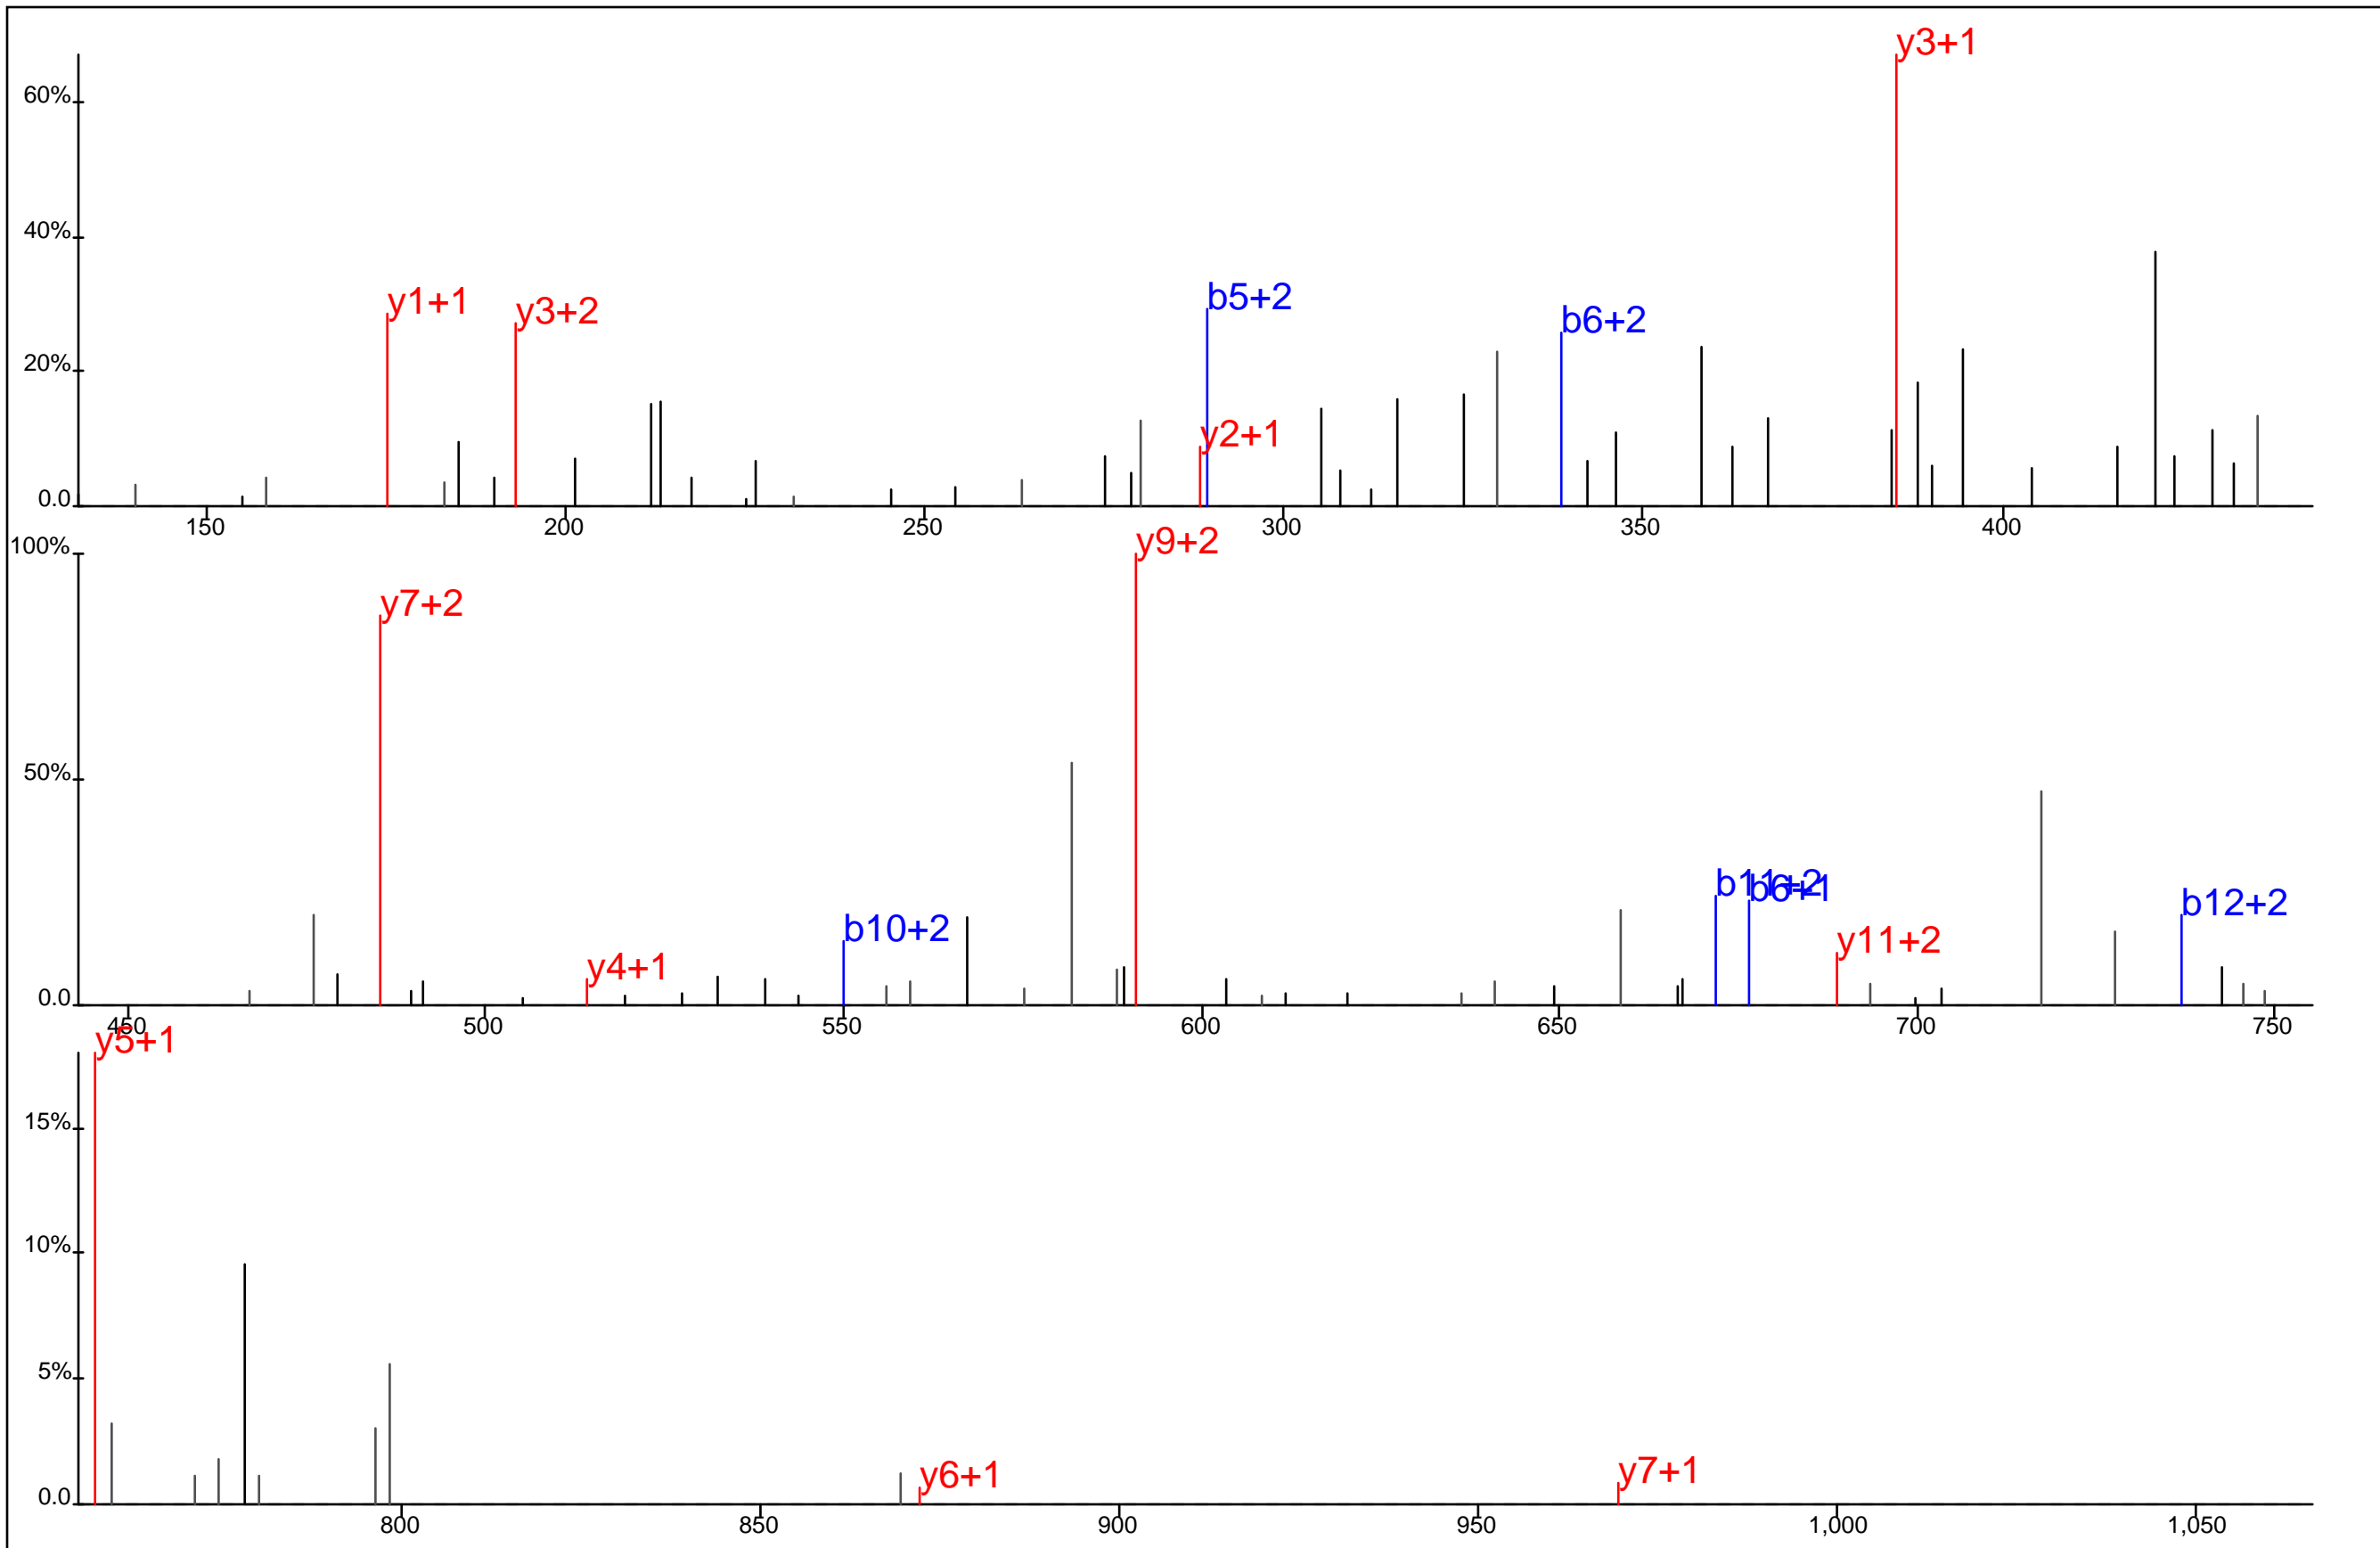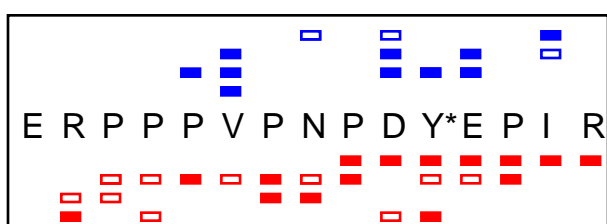

Protein Name: CD3E  
 gi Accession: 0  
 Precursor Mass: 464.7242+4  
 Delta Mass: 0.527 ppm  
 XCorr: 33.59

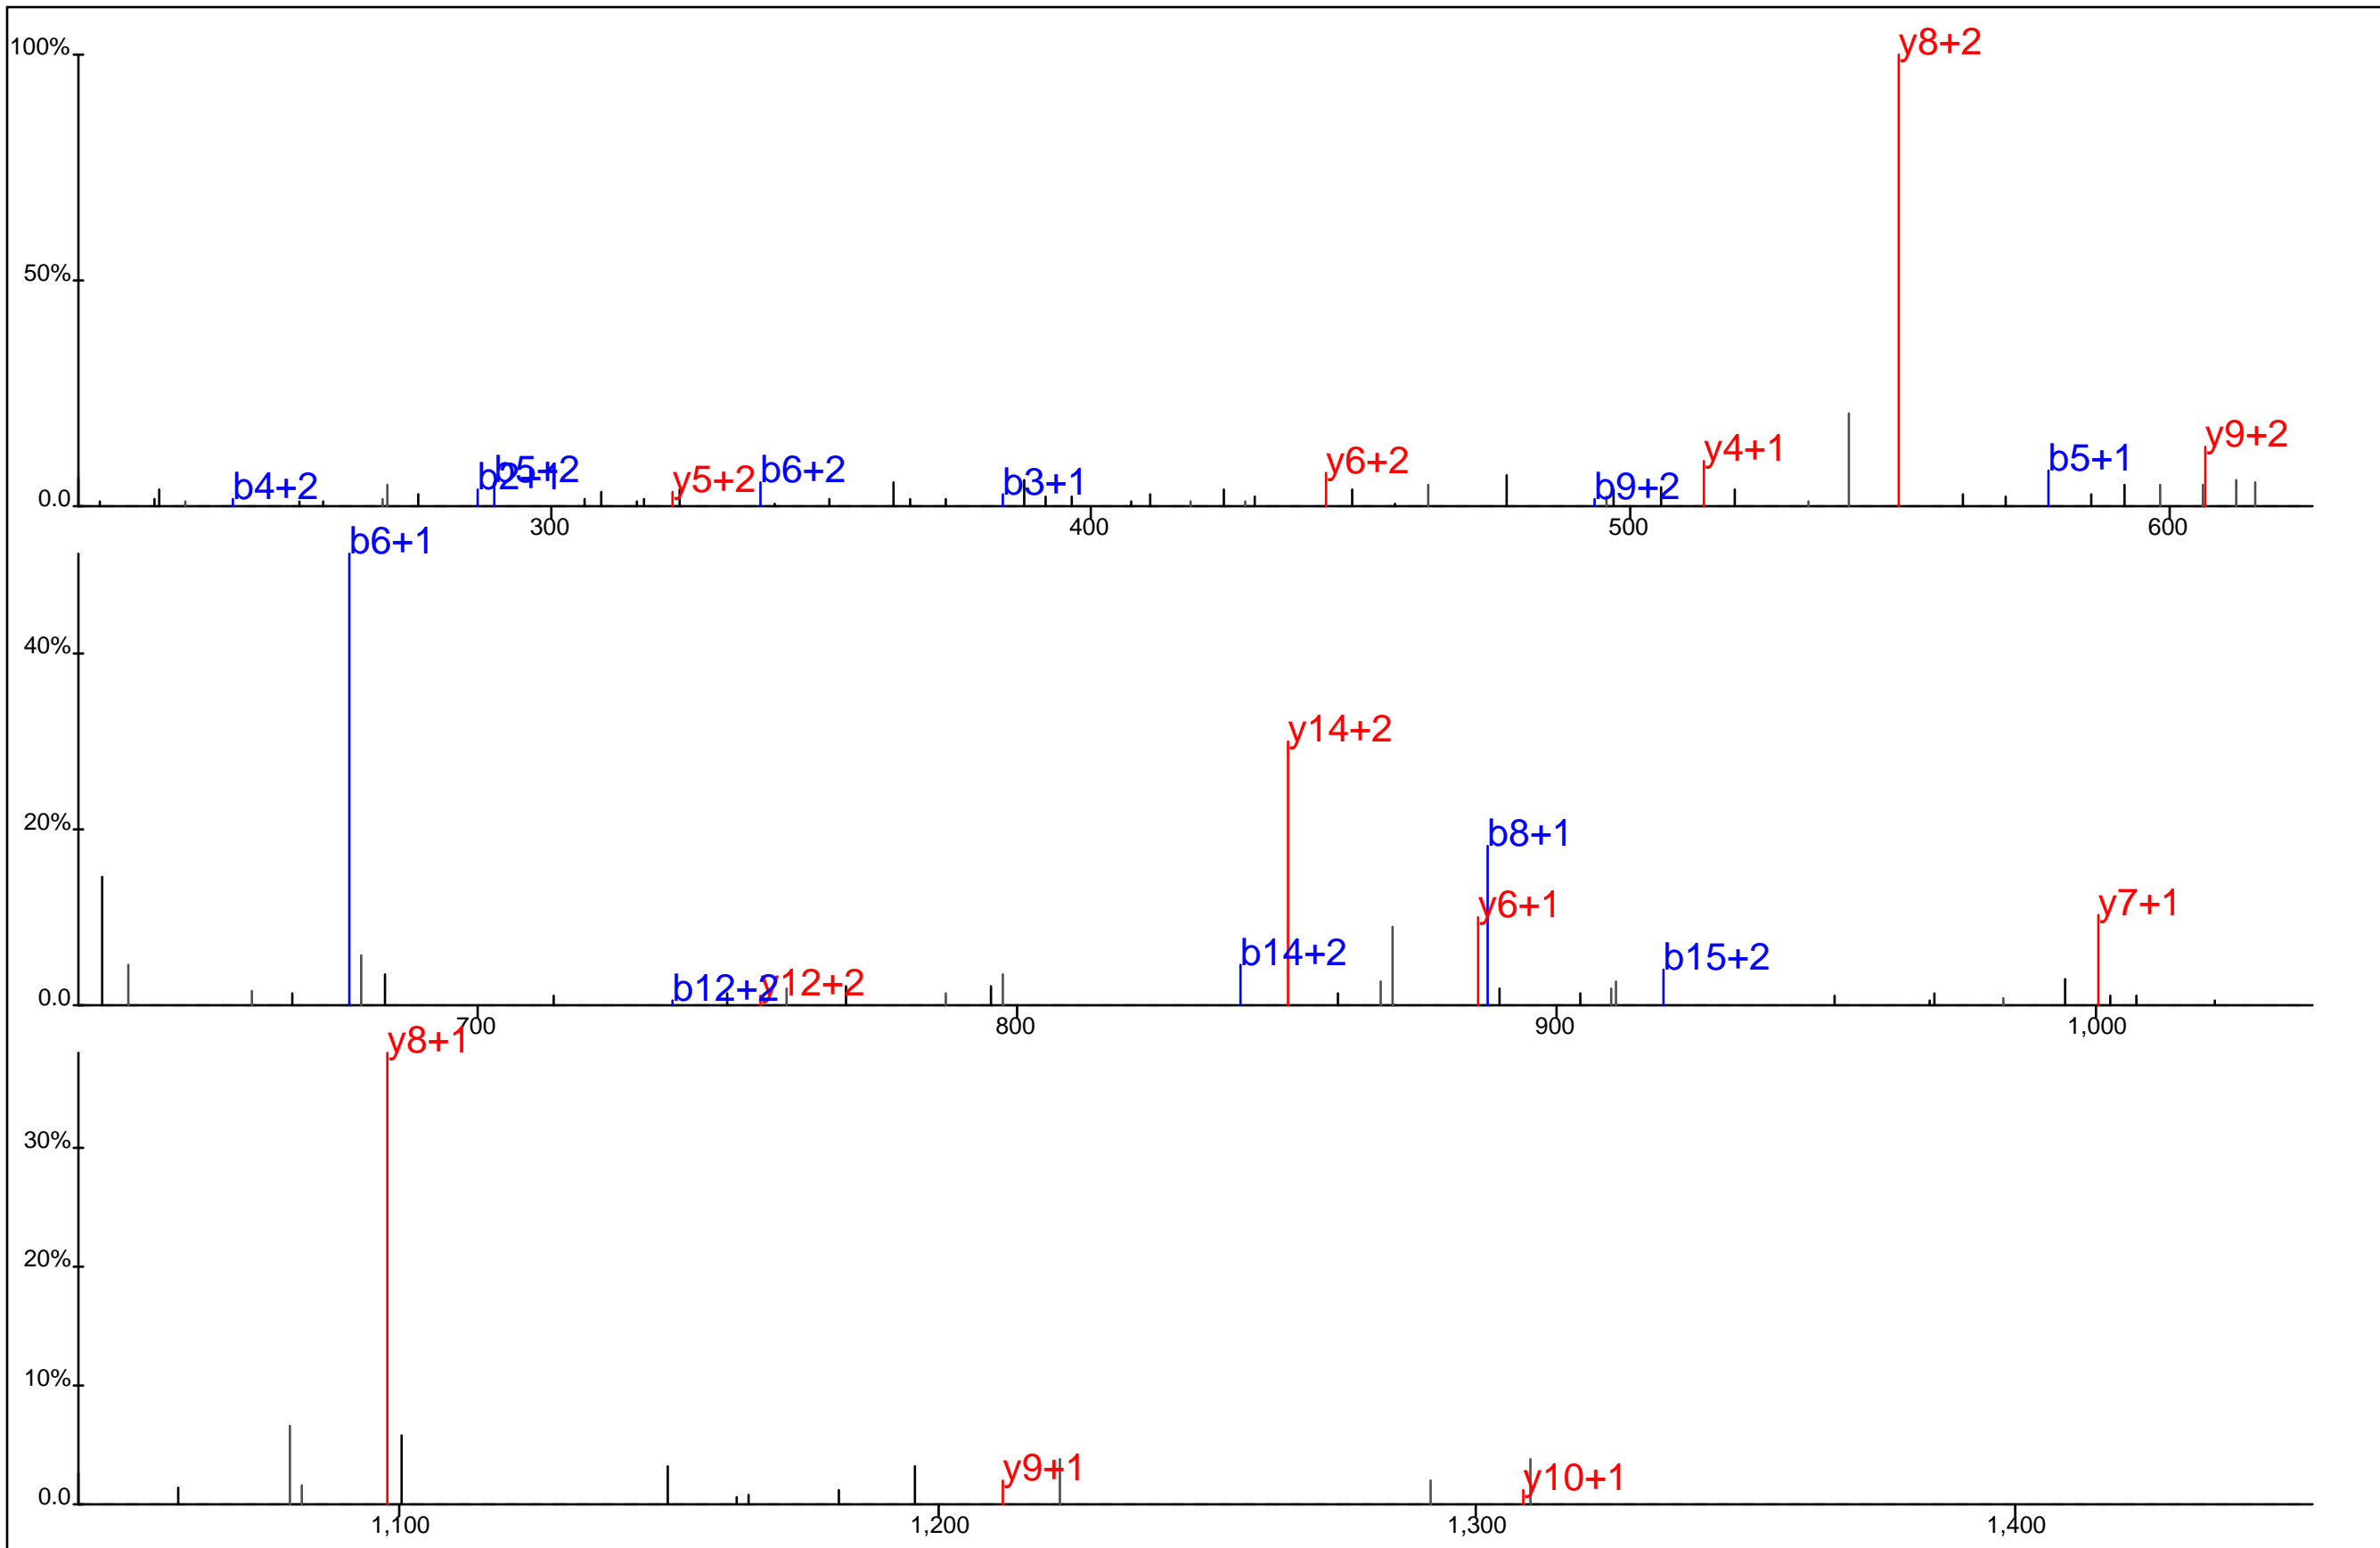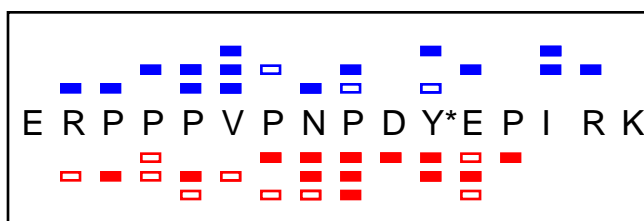

Protein Name: CD3E  
 gi Accession: 0  
 Precursor Mass: 661.9945+3  
 Delta Mass: 0.104 ppm  
 XCorr: 31.51

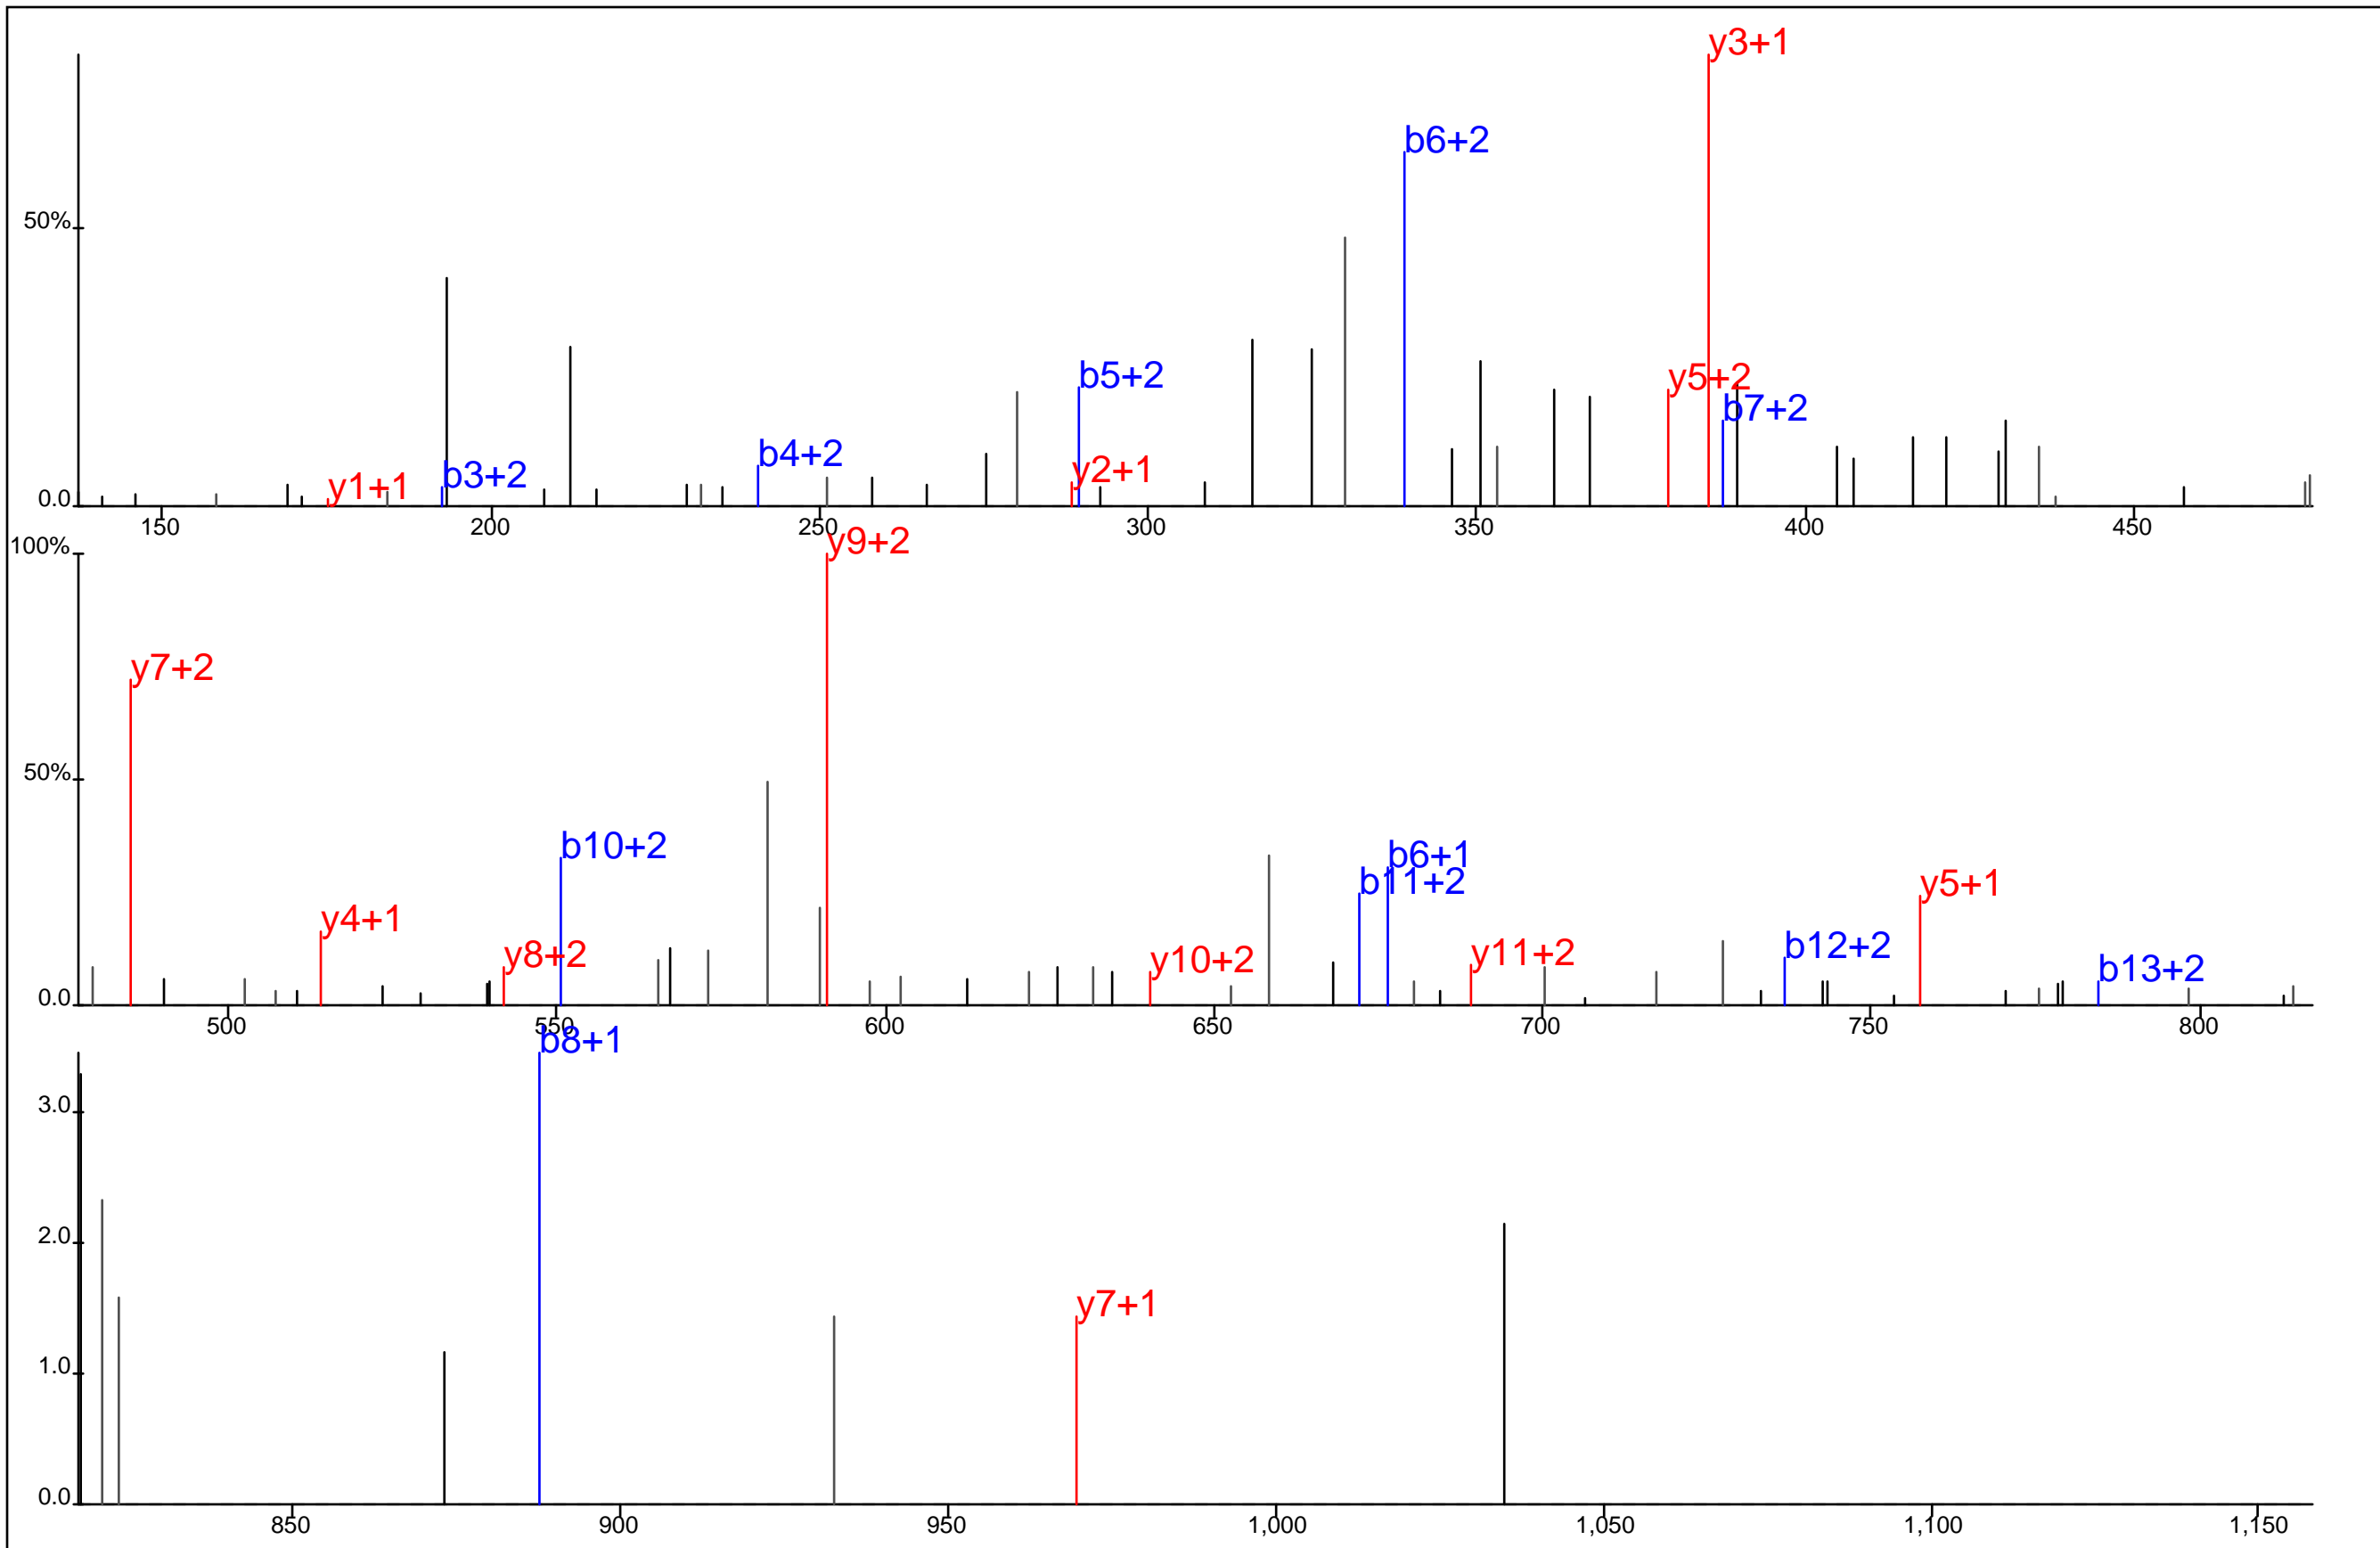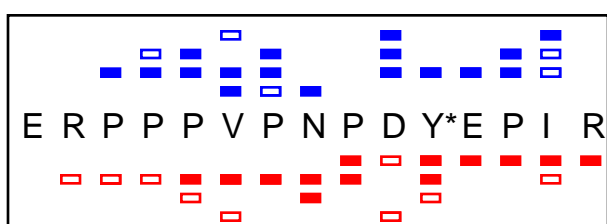

Protein Name: CD3E  
 gi Accession: 0  
 Precursor Mass: 464.7231+4  
 Delta Mass: 1.777 ppm  
 XCorr: 30.28

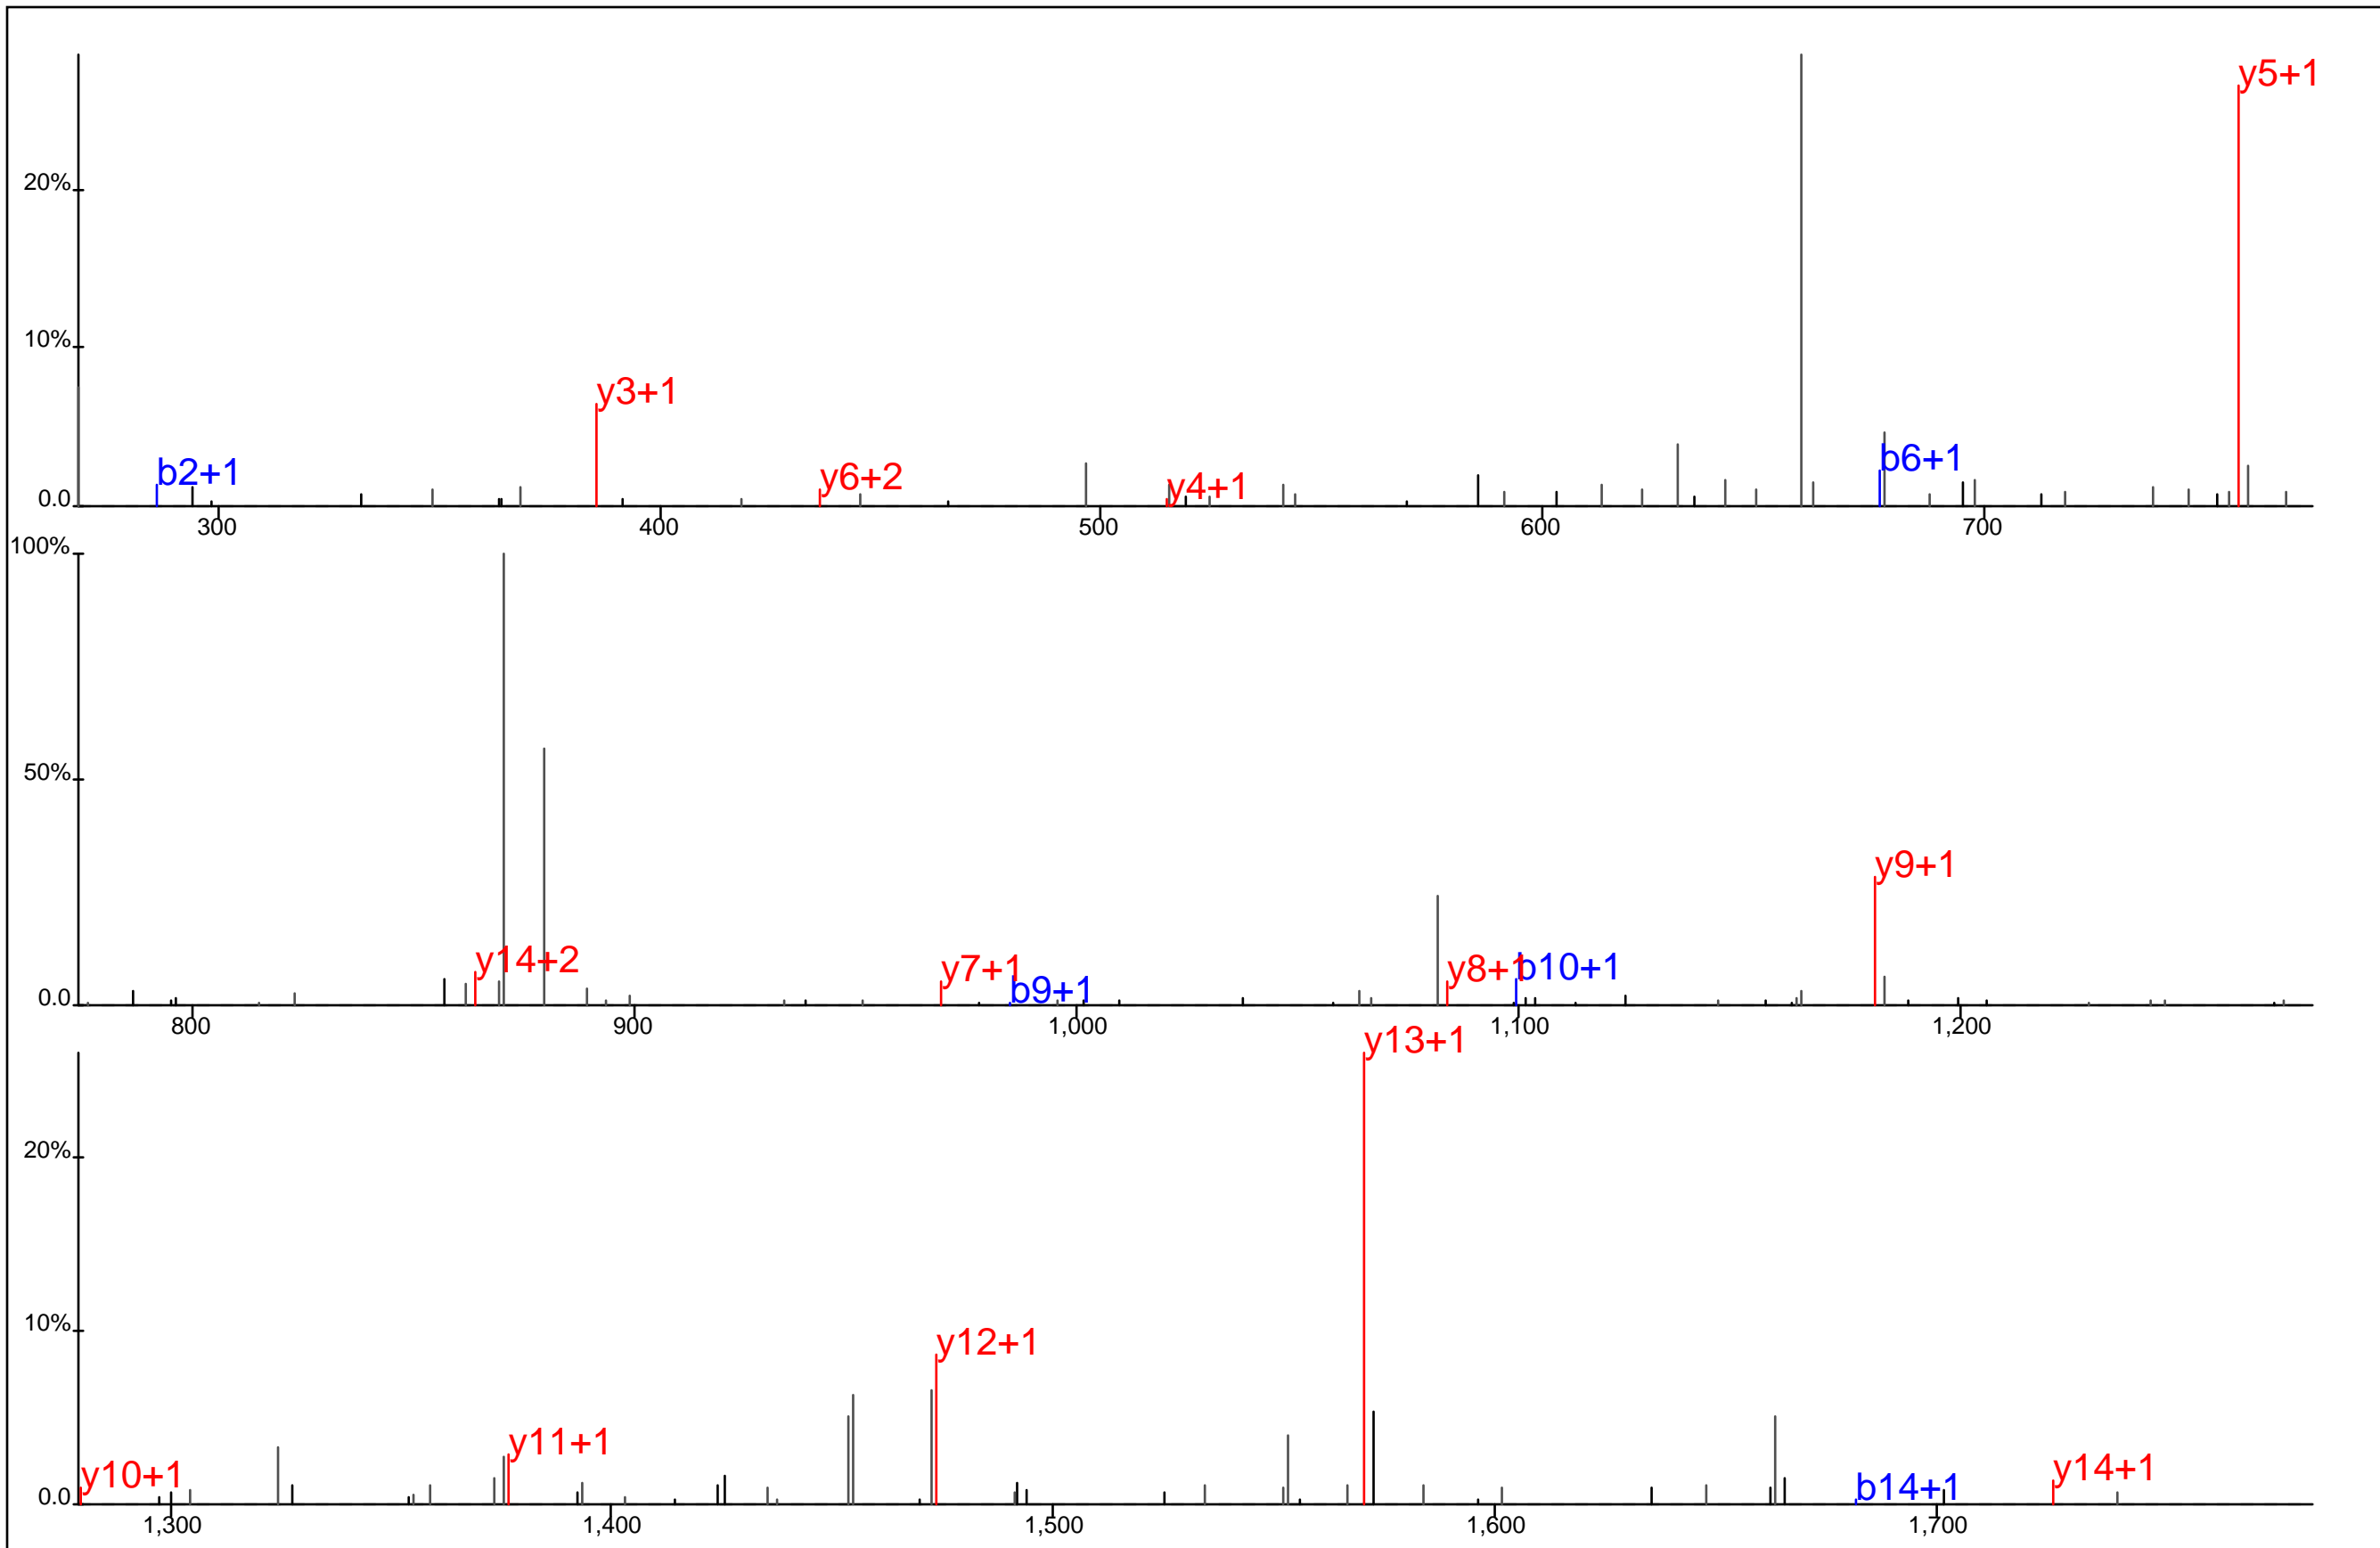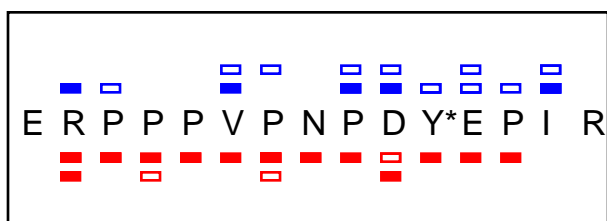

Protein Name: CD3E  
 gi Accession: 0  
 Precursor Mass: 928.4370+2  
 Delta Mass: 3.801 ppm  
 XCorr: 50.53



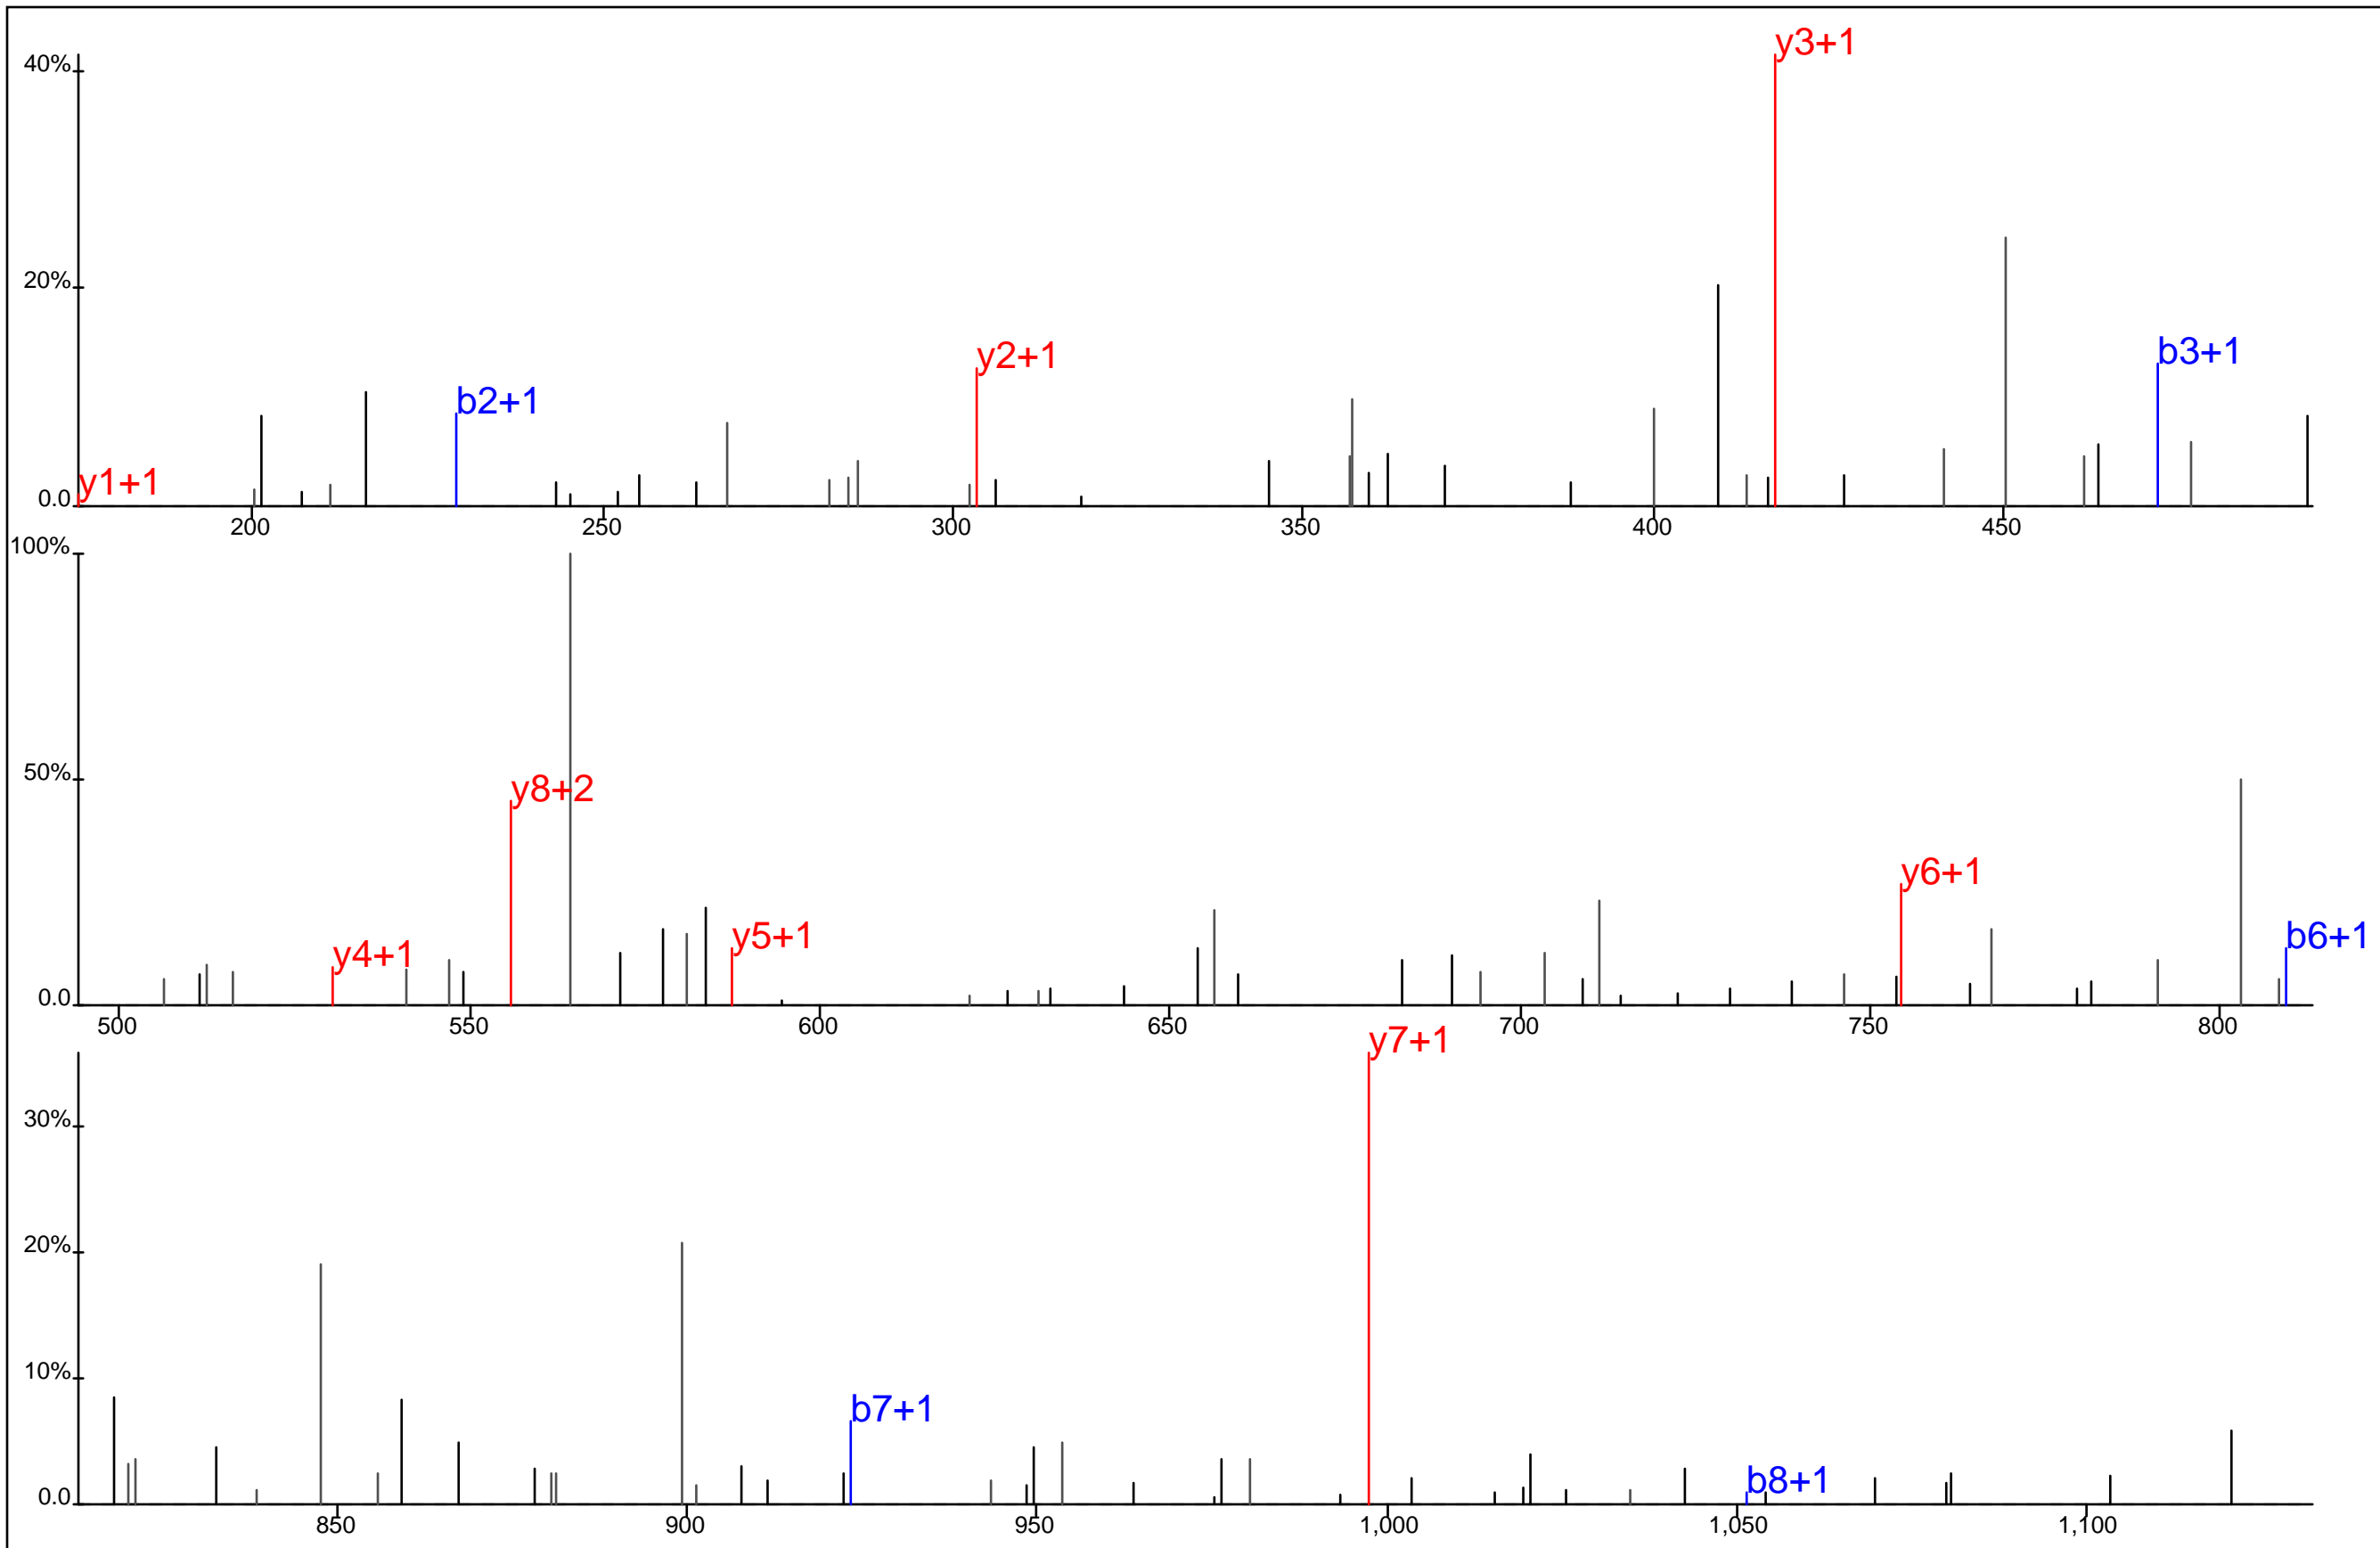

■ ■ ■ ■ ■ ■ ■  
 D L Y\* S\* G L N Q R  
□ □ □ □ □ □ □

Protein Name: CD3E  
 gi Accession: 0  
 Precursor Mass: 613.2370+2  
 Delta Mass: 1.422 ppm  
 XCorr: 20.71

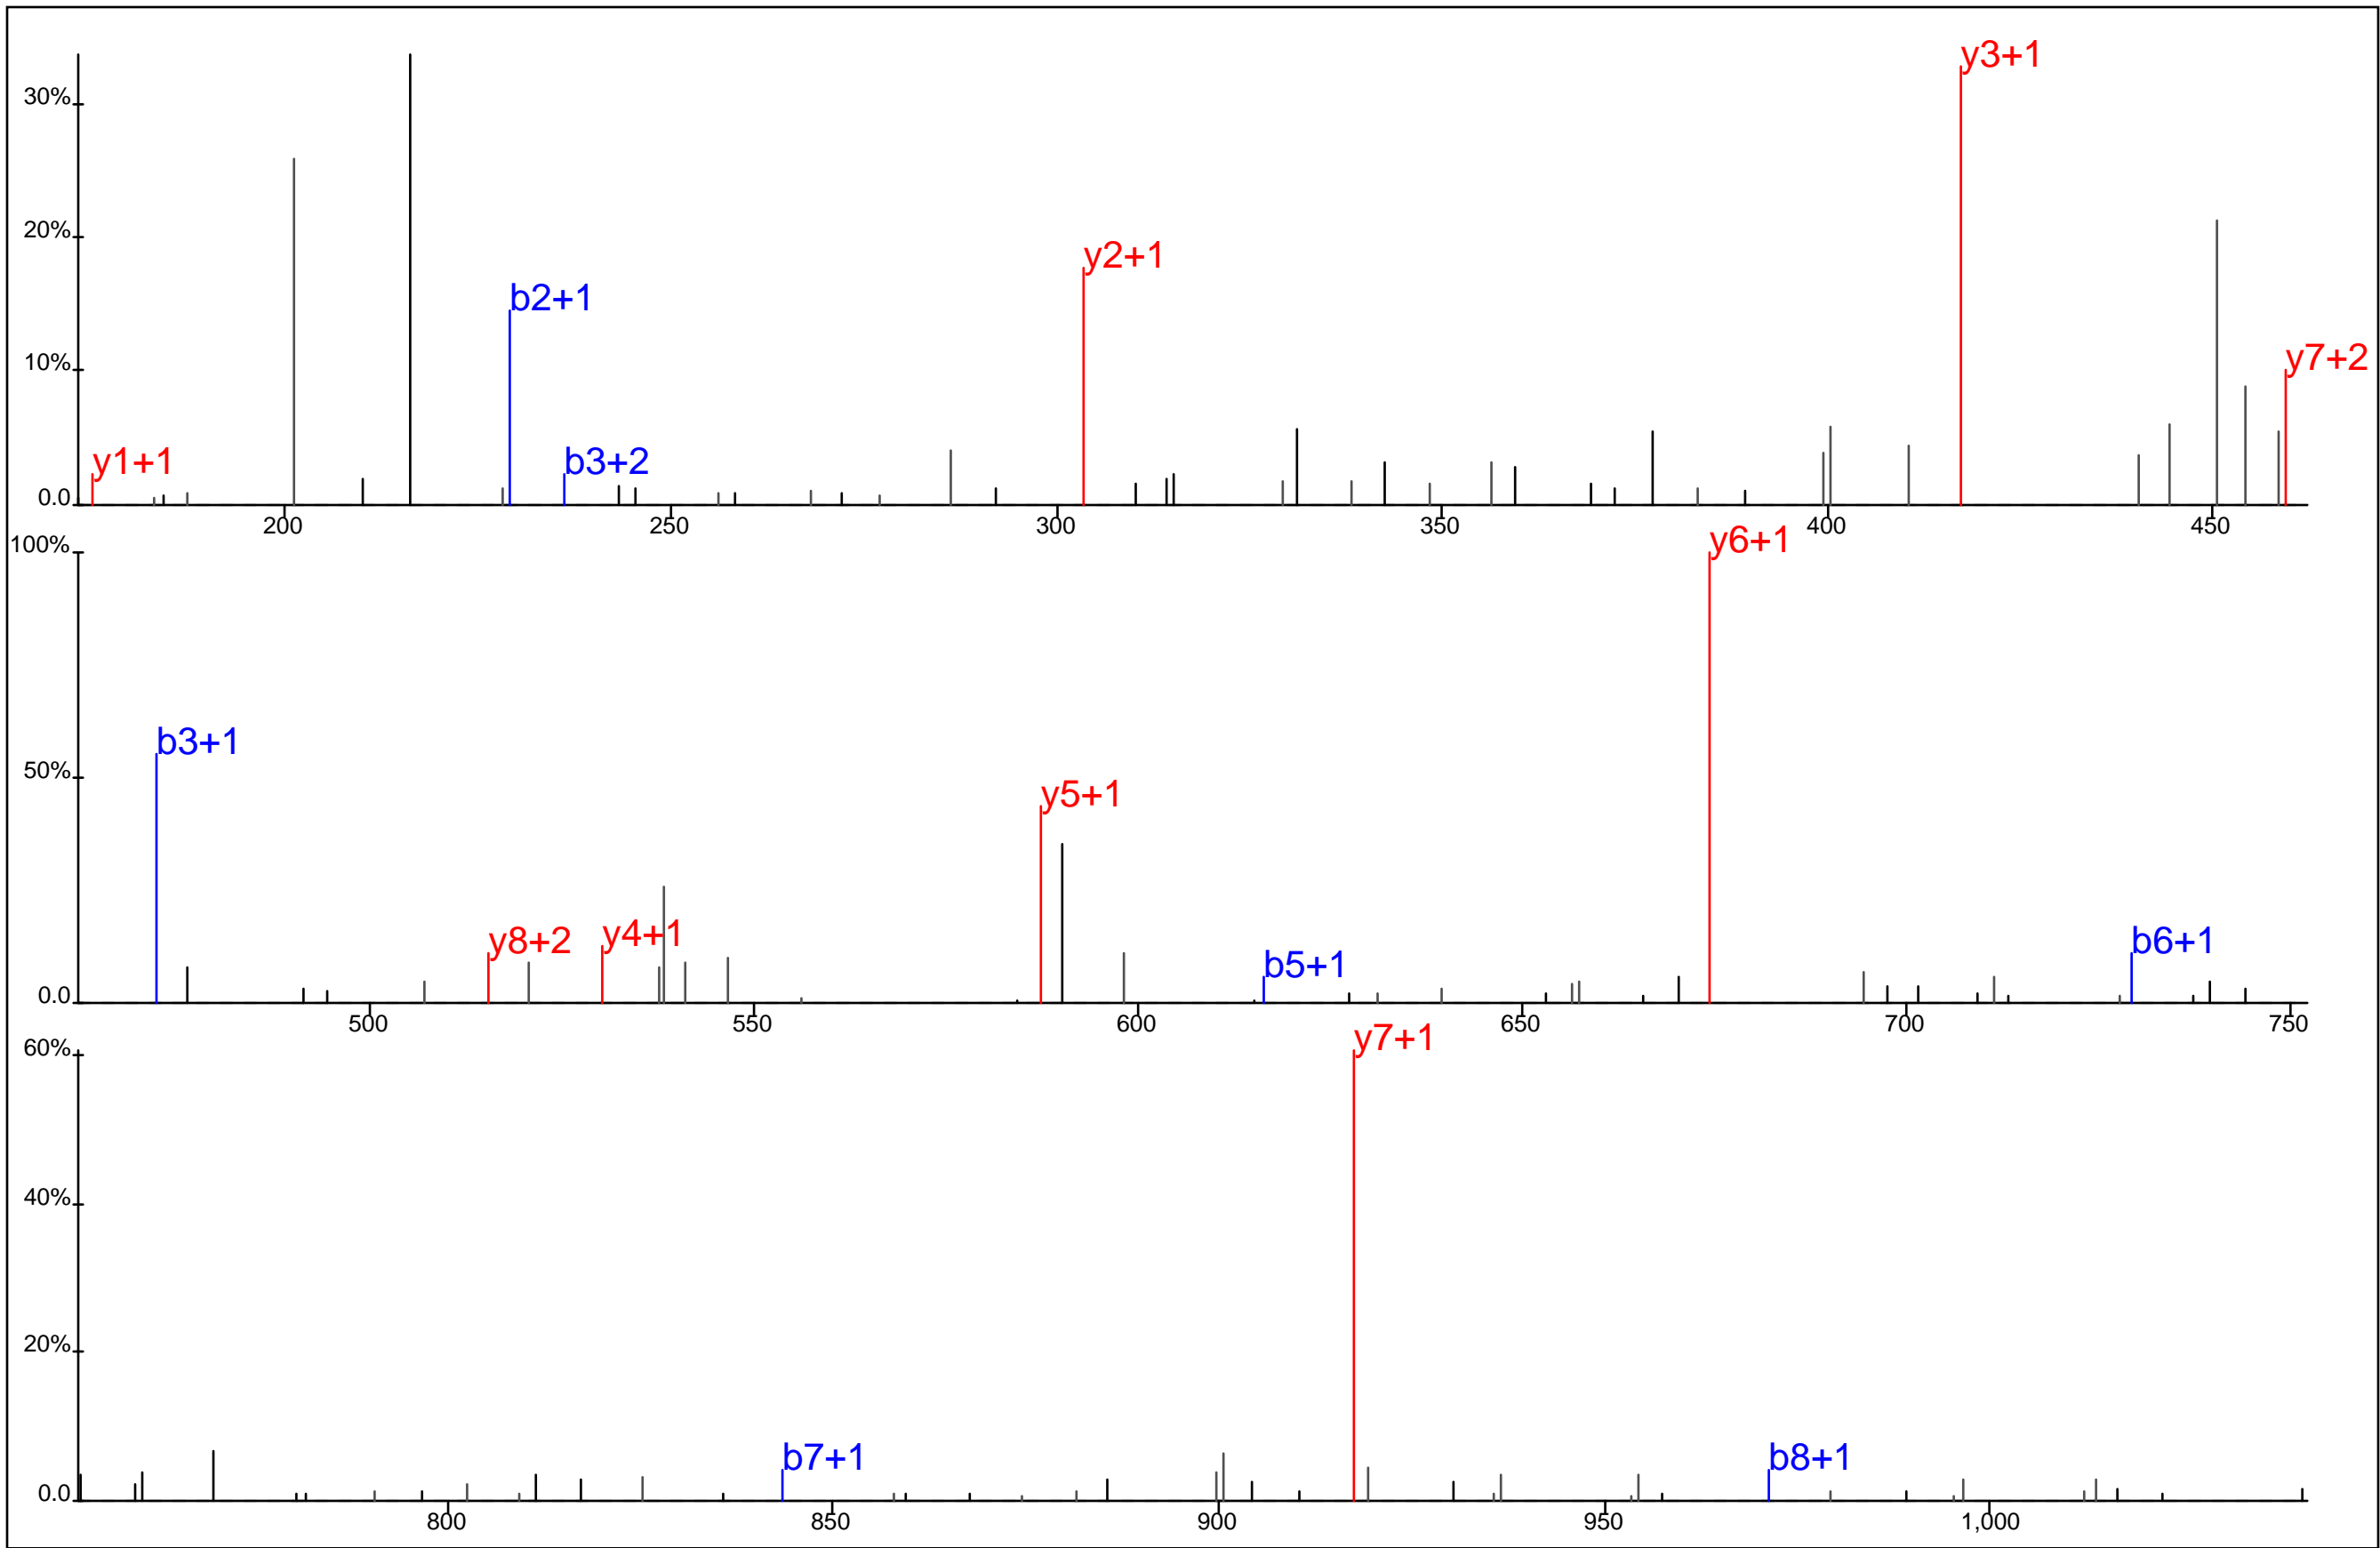

|                          |                                                                                                                             |
|--------------------------|-----------------------------------------------------------------------------------------------------------------------------|
| <p>DL Y* S G L N Q R</p> | <p>Protein Name: CD3E<br/> gi Accession: 0<br/> Precursor Mass: 573.2502+2<br/> Delta Mass: 4.749 ppm<br/> XCorr: 46.67</p> |
|--------------------------|-----------------------------------------------------------------------------------------------------------------------------|

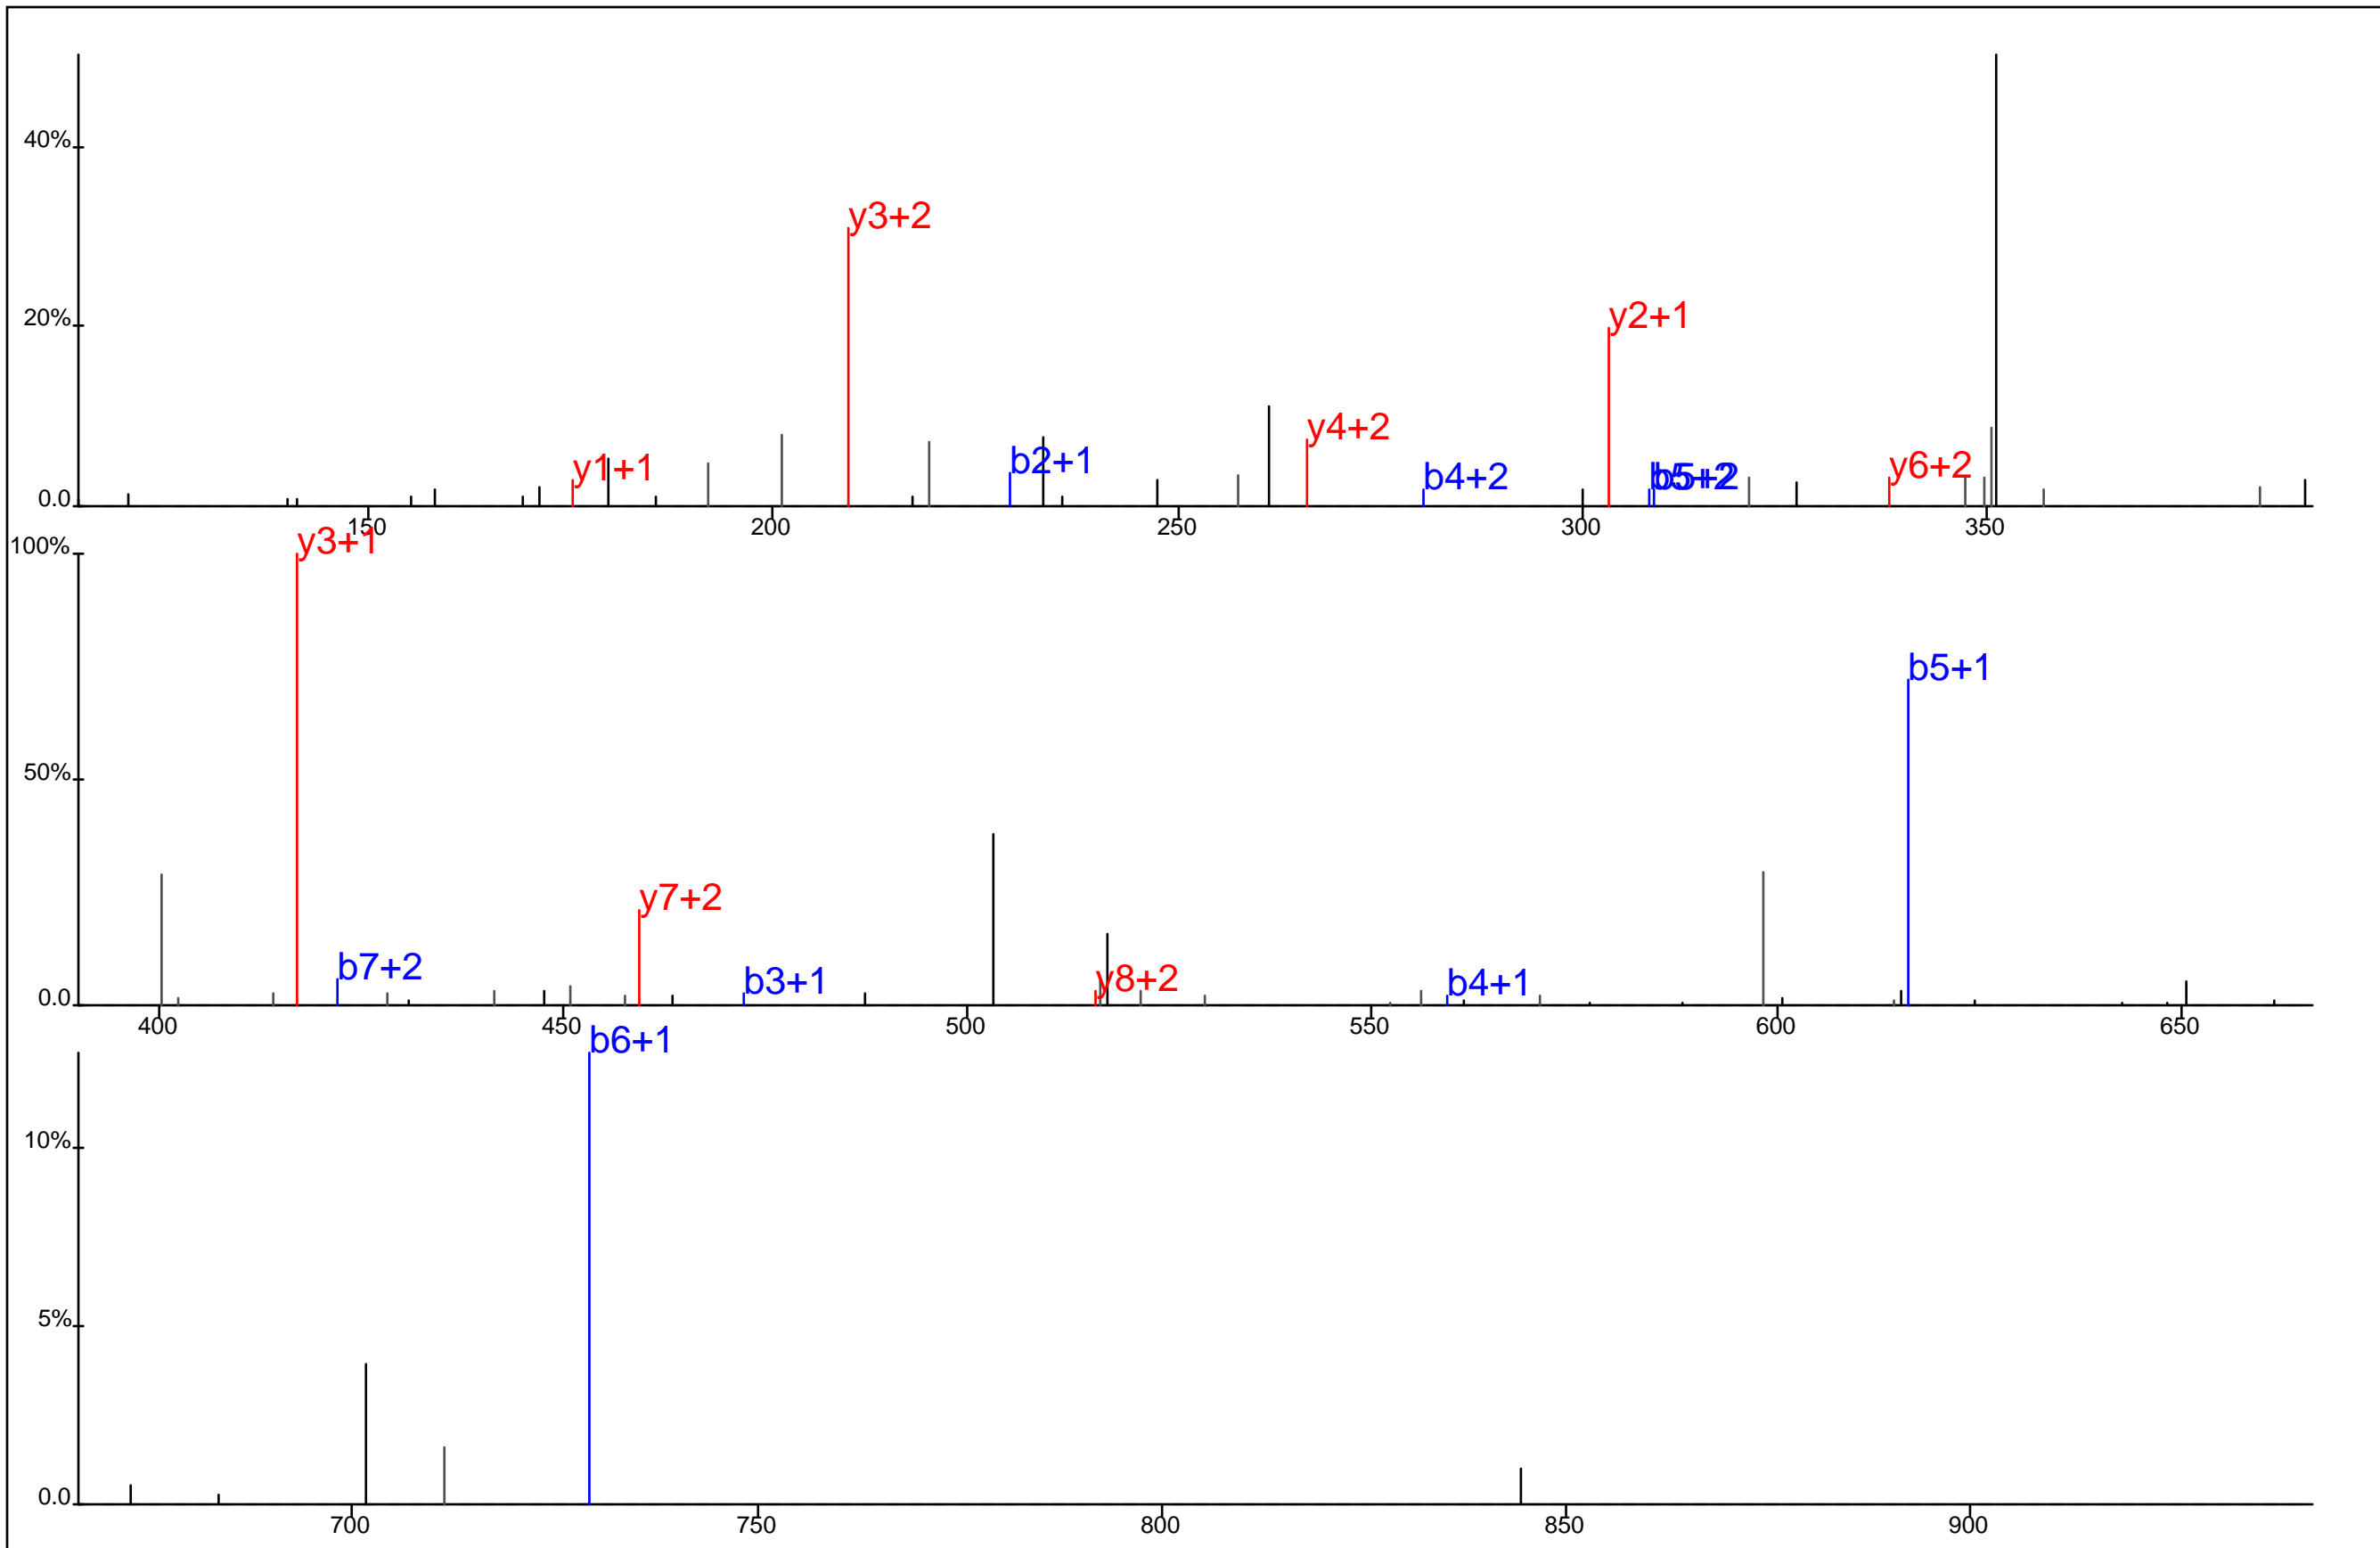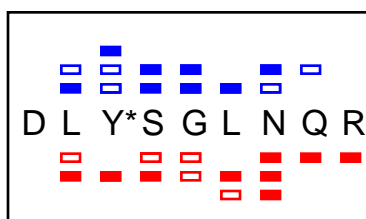

Protein Name: CD3E  
 gi Accession: 0  
 Precursor Mass: 382.5045+3  
 Delta Mass: 0.222 ppm  
 XCorr: 20.85

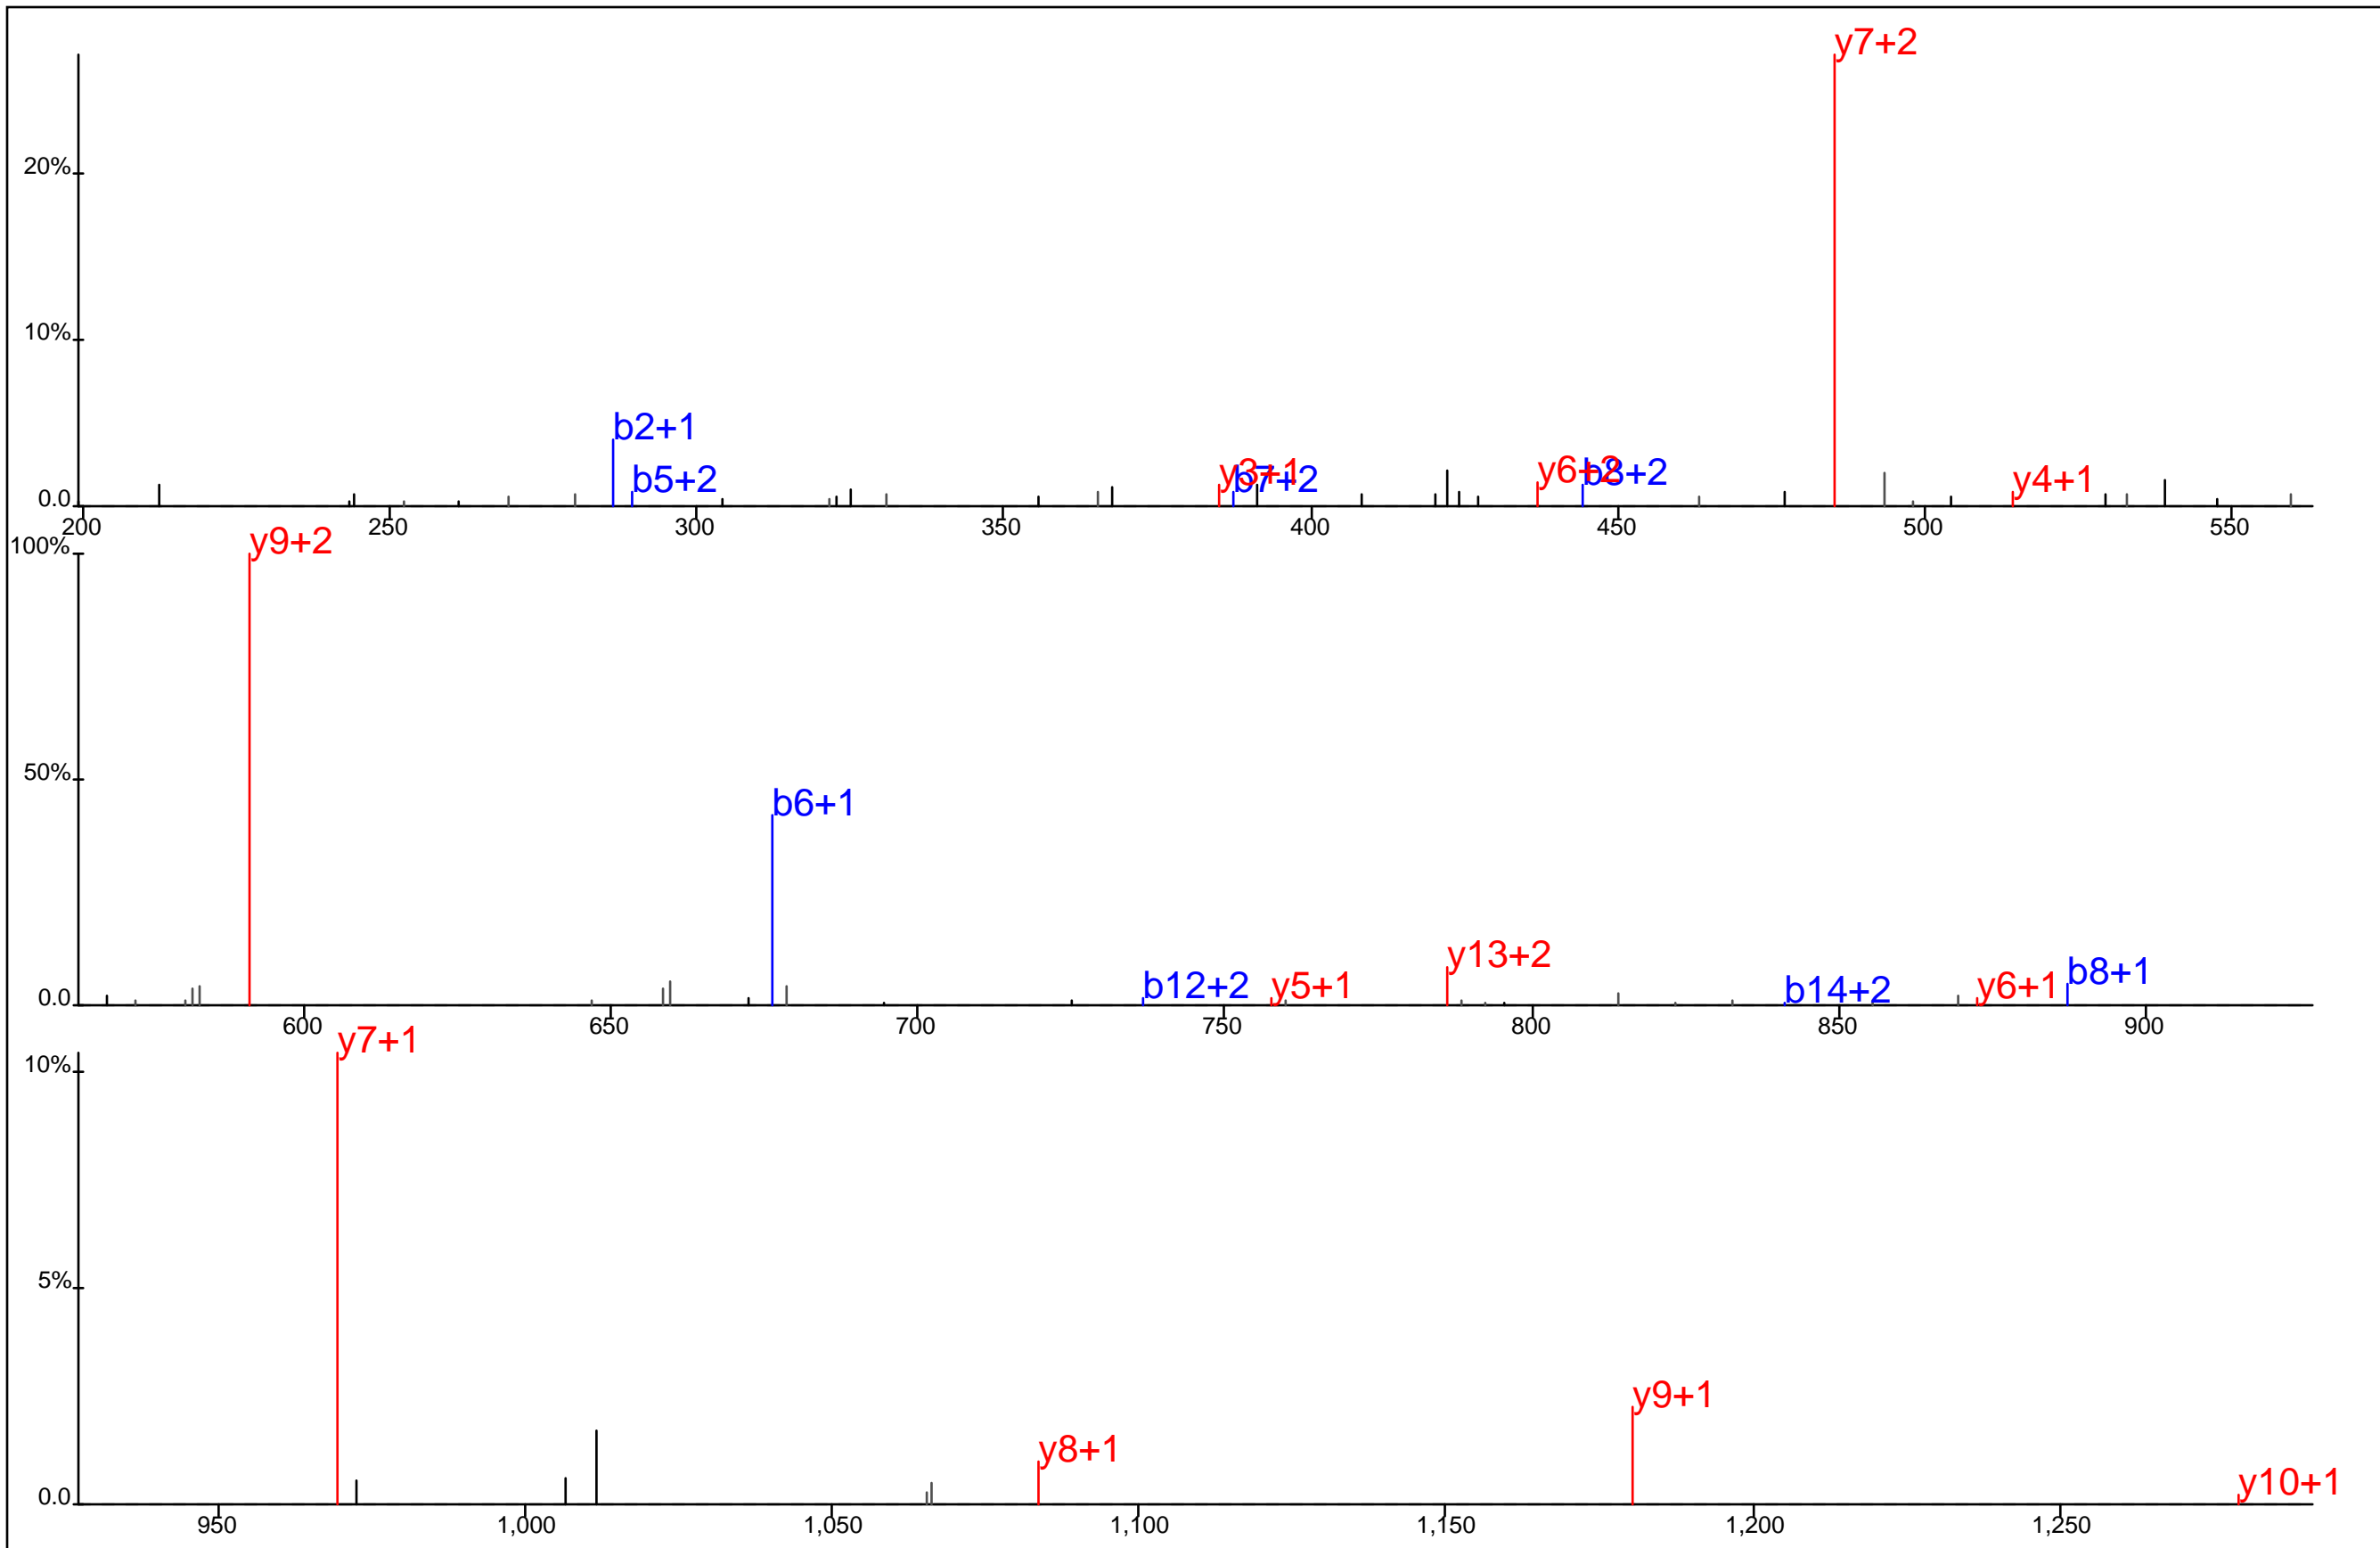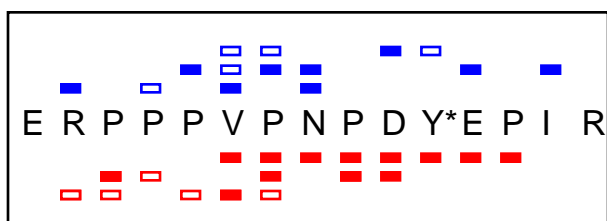

Protein Name: CD3E  
 gi Accession: 0  
 Precursor Mass: 619.2957+3  
 Delta Mass: 0.651 ppm  
 XCorr: 41.79

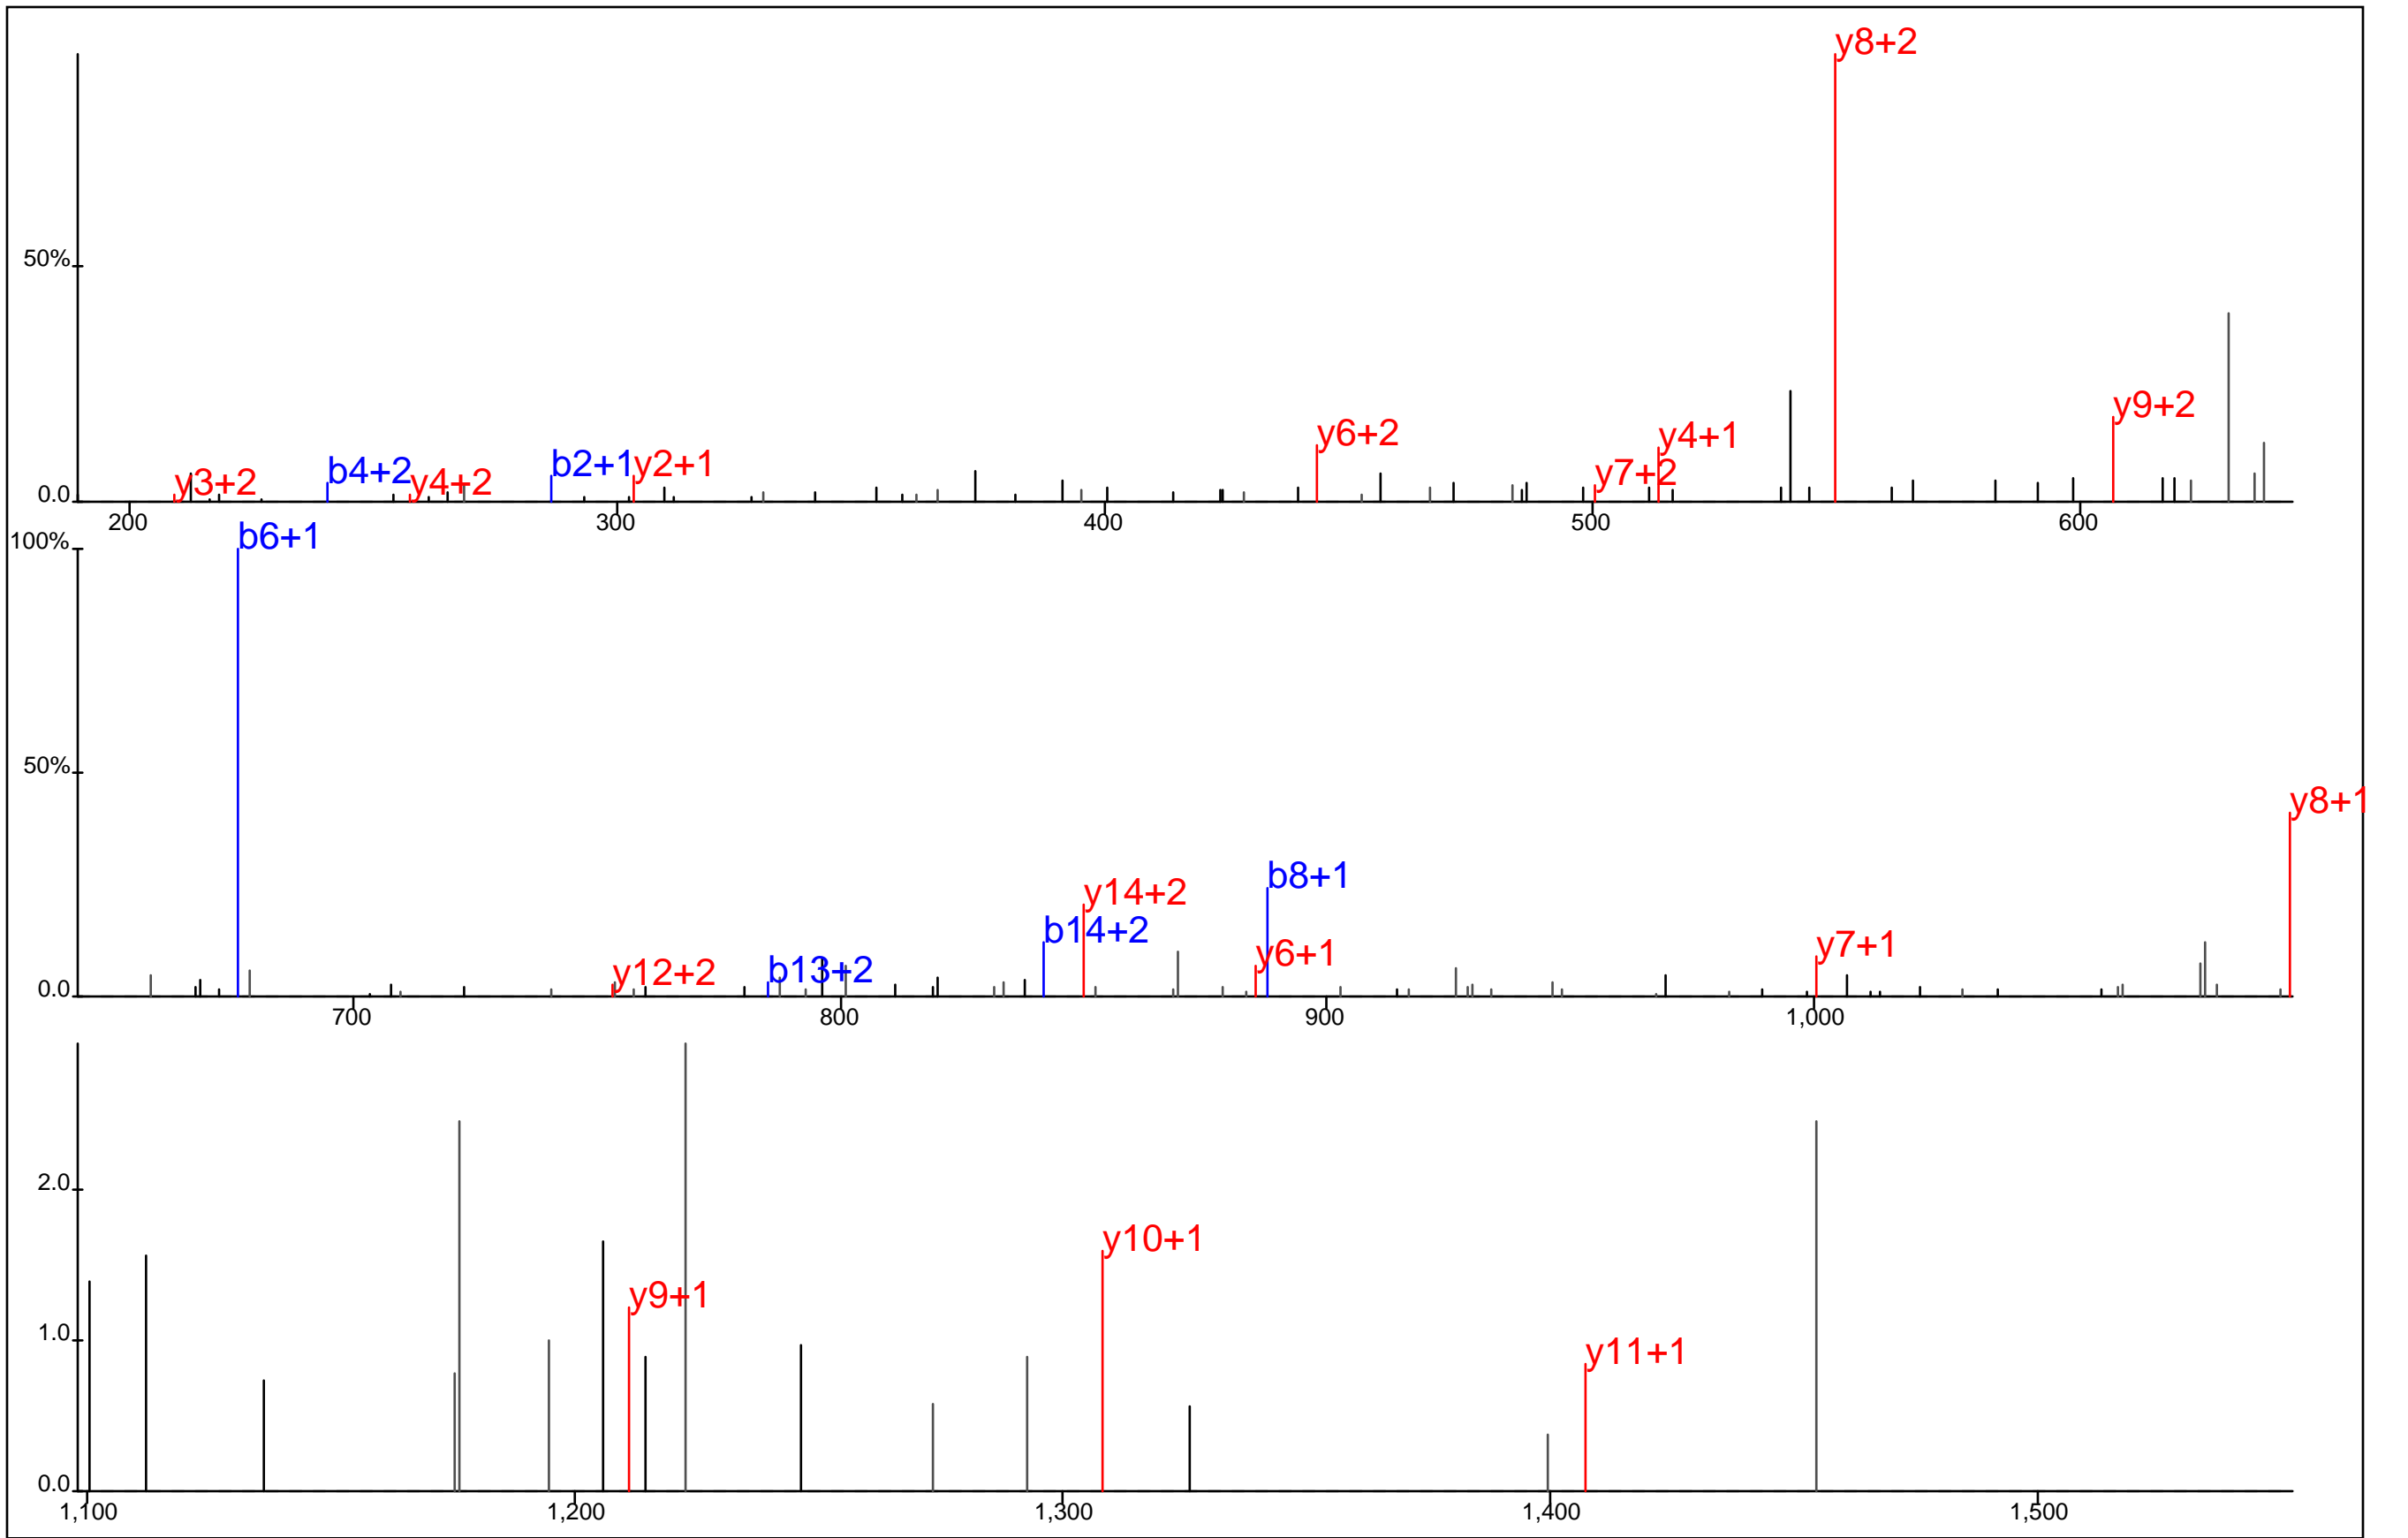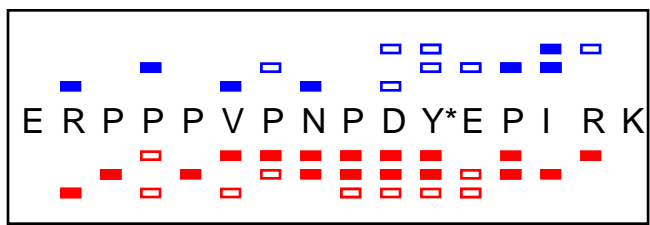

Protein Name: CD3E  
 gi Accession: 0  
 Precursor Mass: 661.9964+3  
 Delta Mass: 2.965 ppm  
 XCorr: 31.52

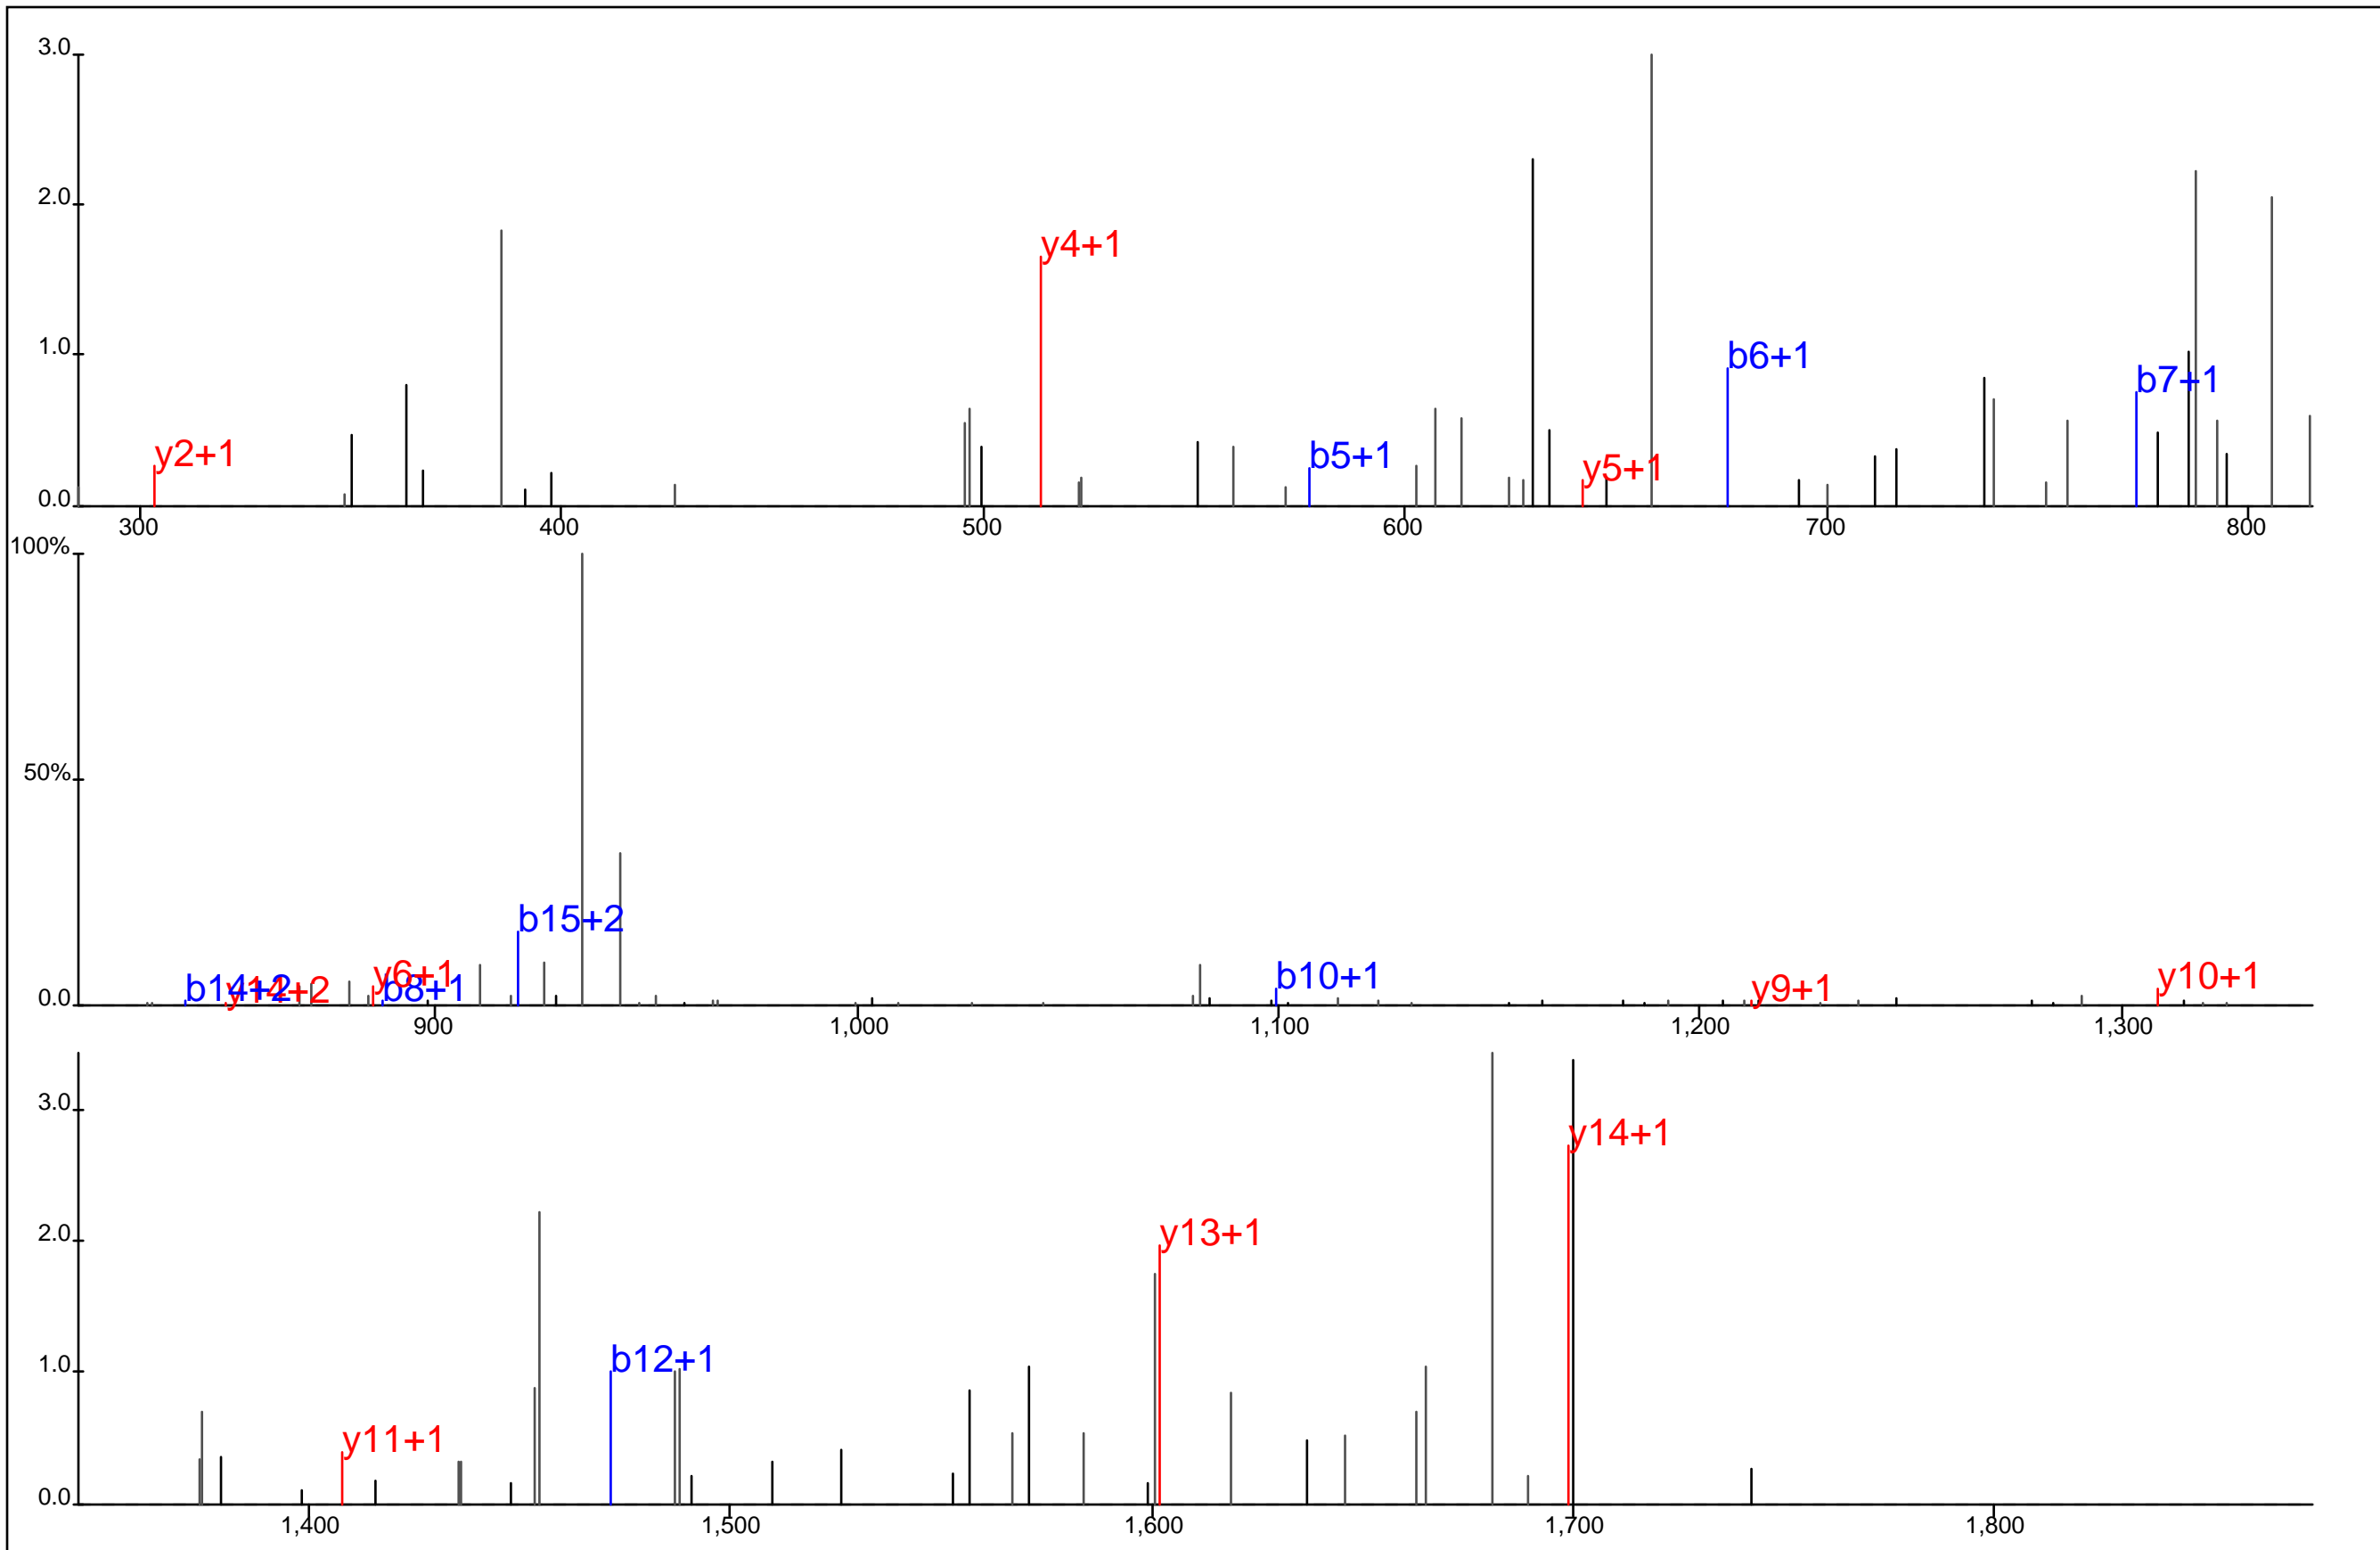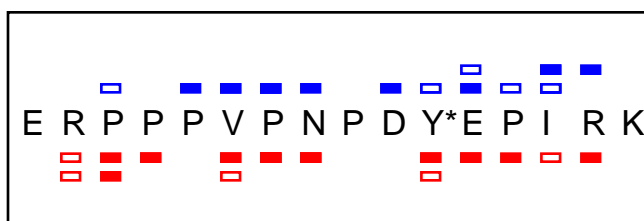

Protein Name: CD3E  
 gi Accession: 0  
 Precursor Mass: 992.4908+2  
 Delta Mass: 2.787 ppm  
 XCorr: 25.92

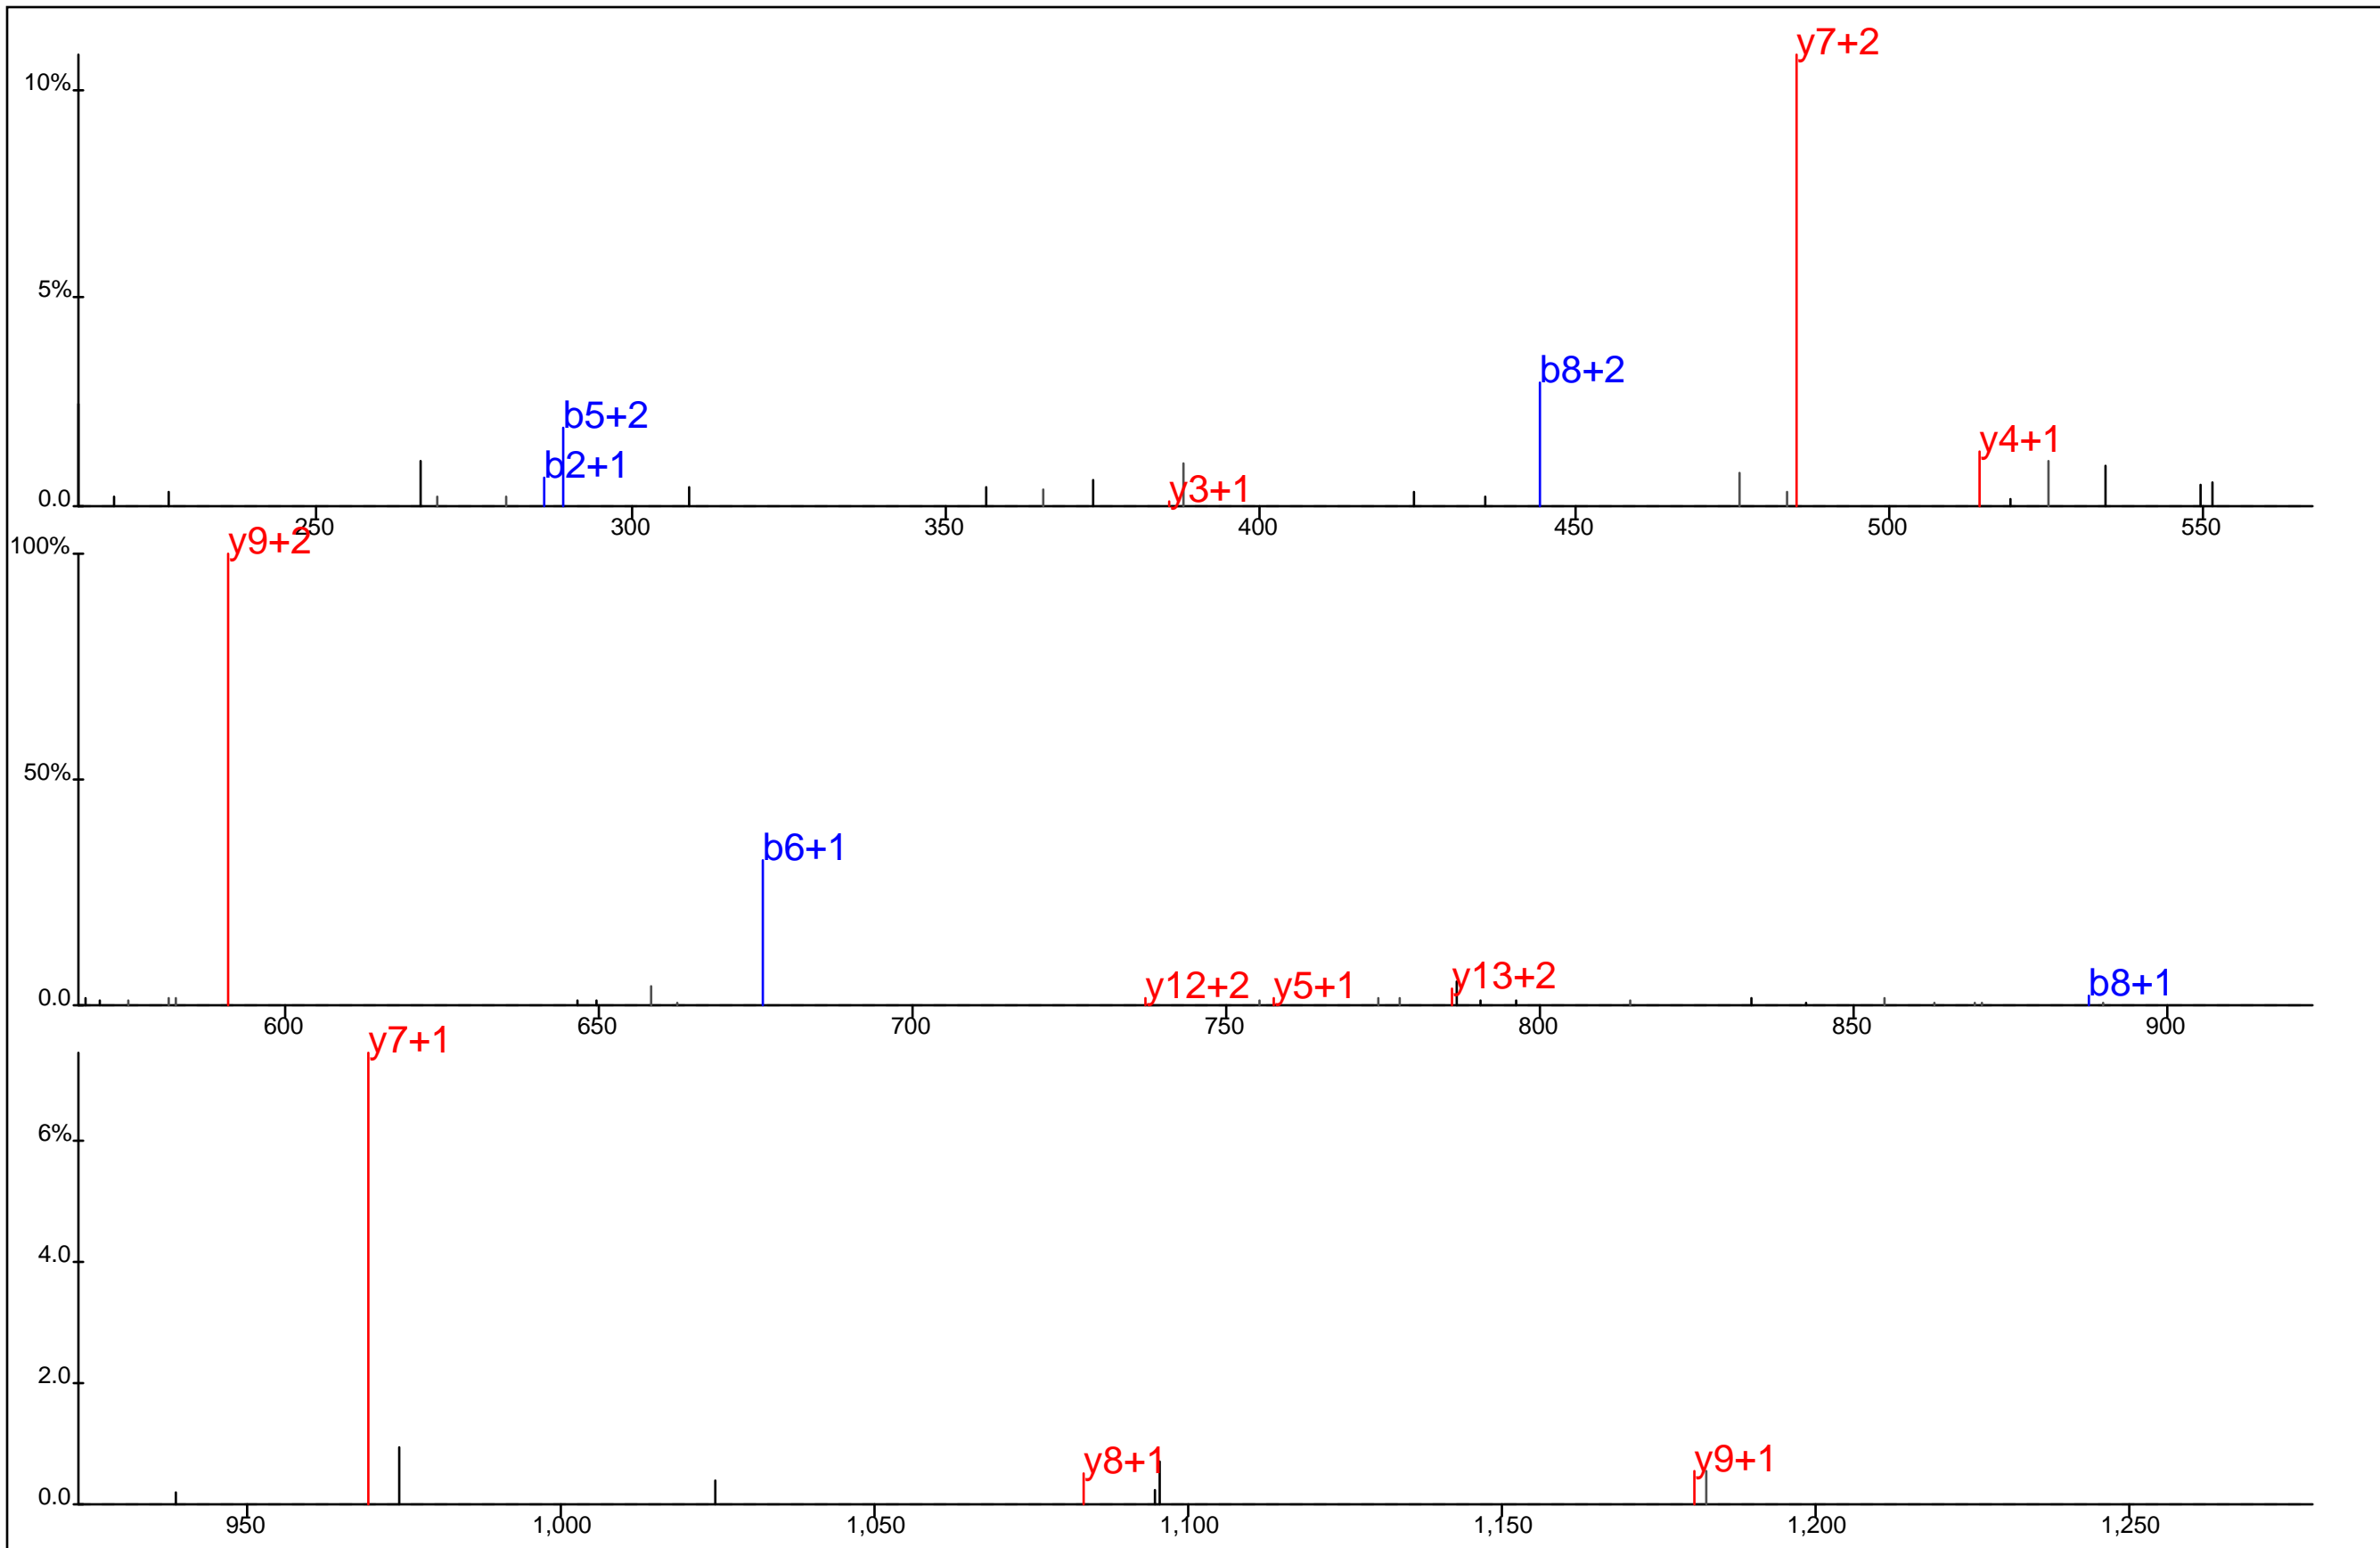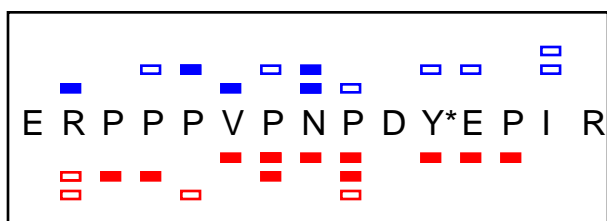

Protein Name: CD3E  
 gi Accession: 0  
 Precursor Mass: 619.2973+3  
 Delta Mass: 1.914 ppm  
 XCorr: 29.88

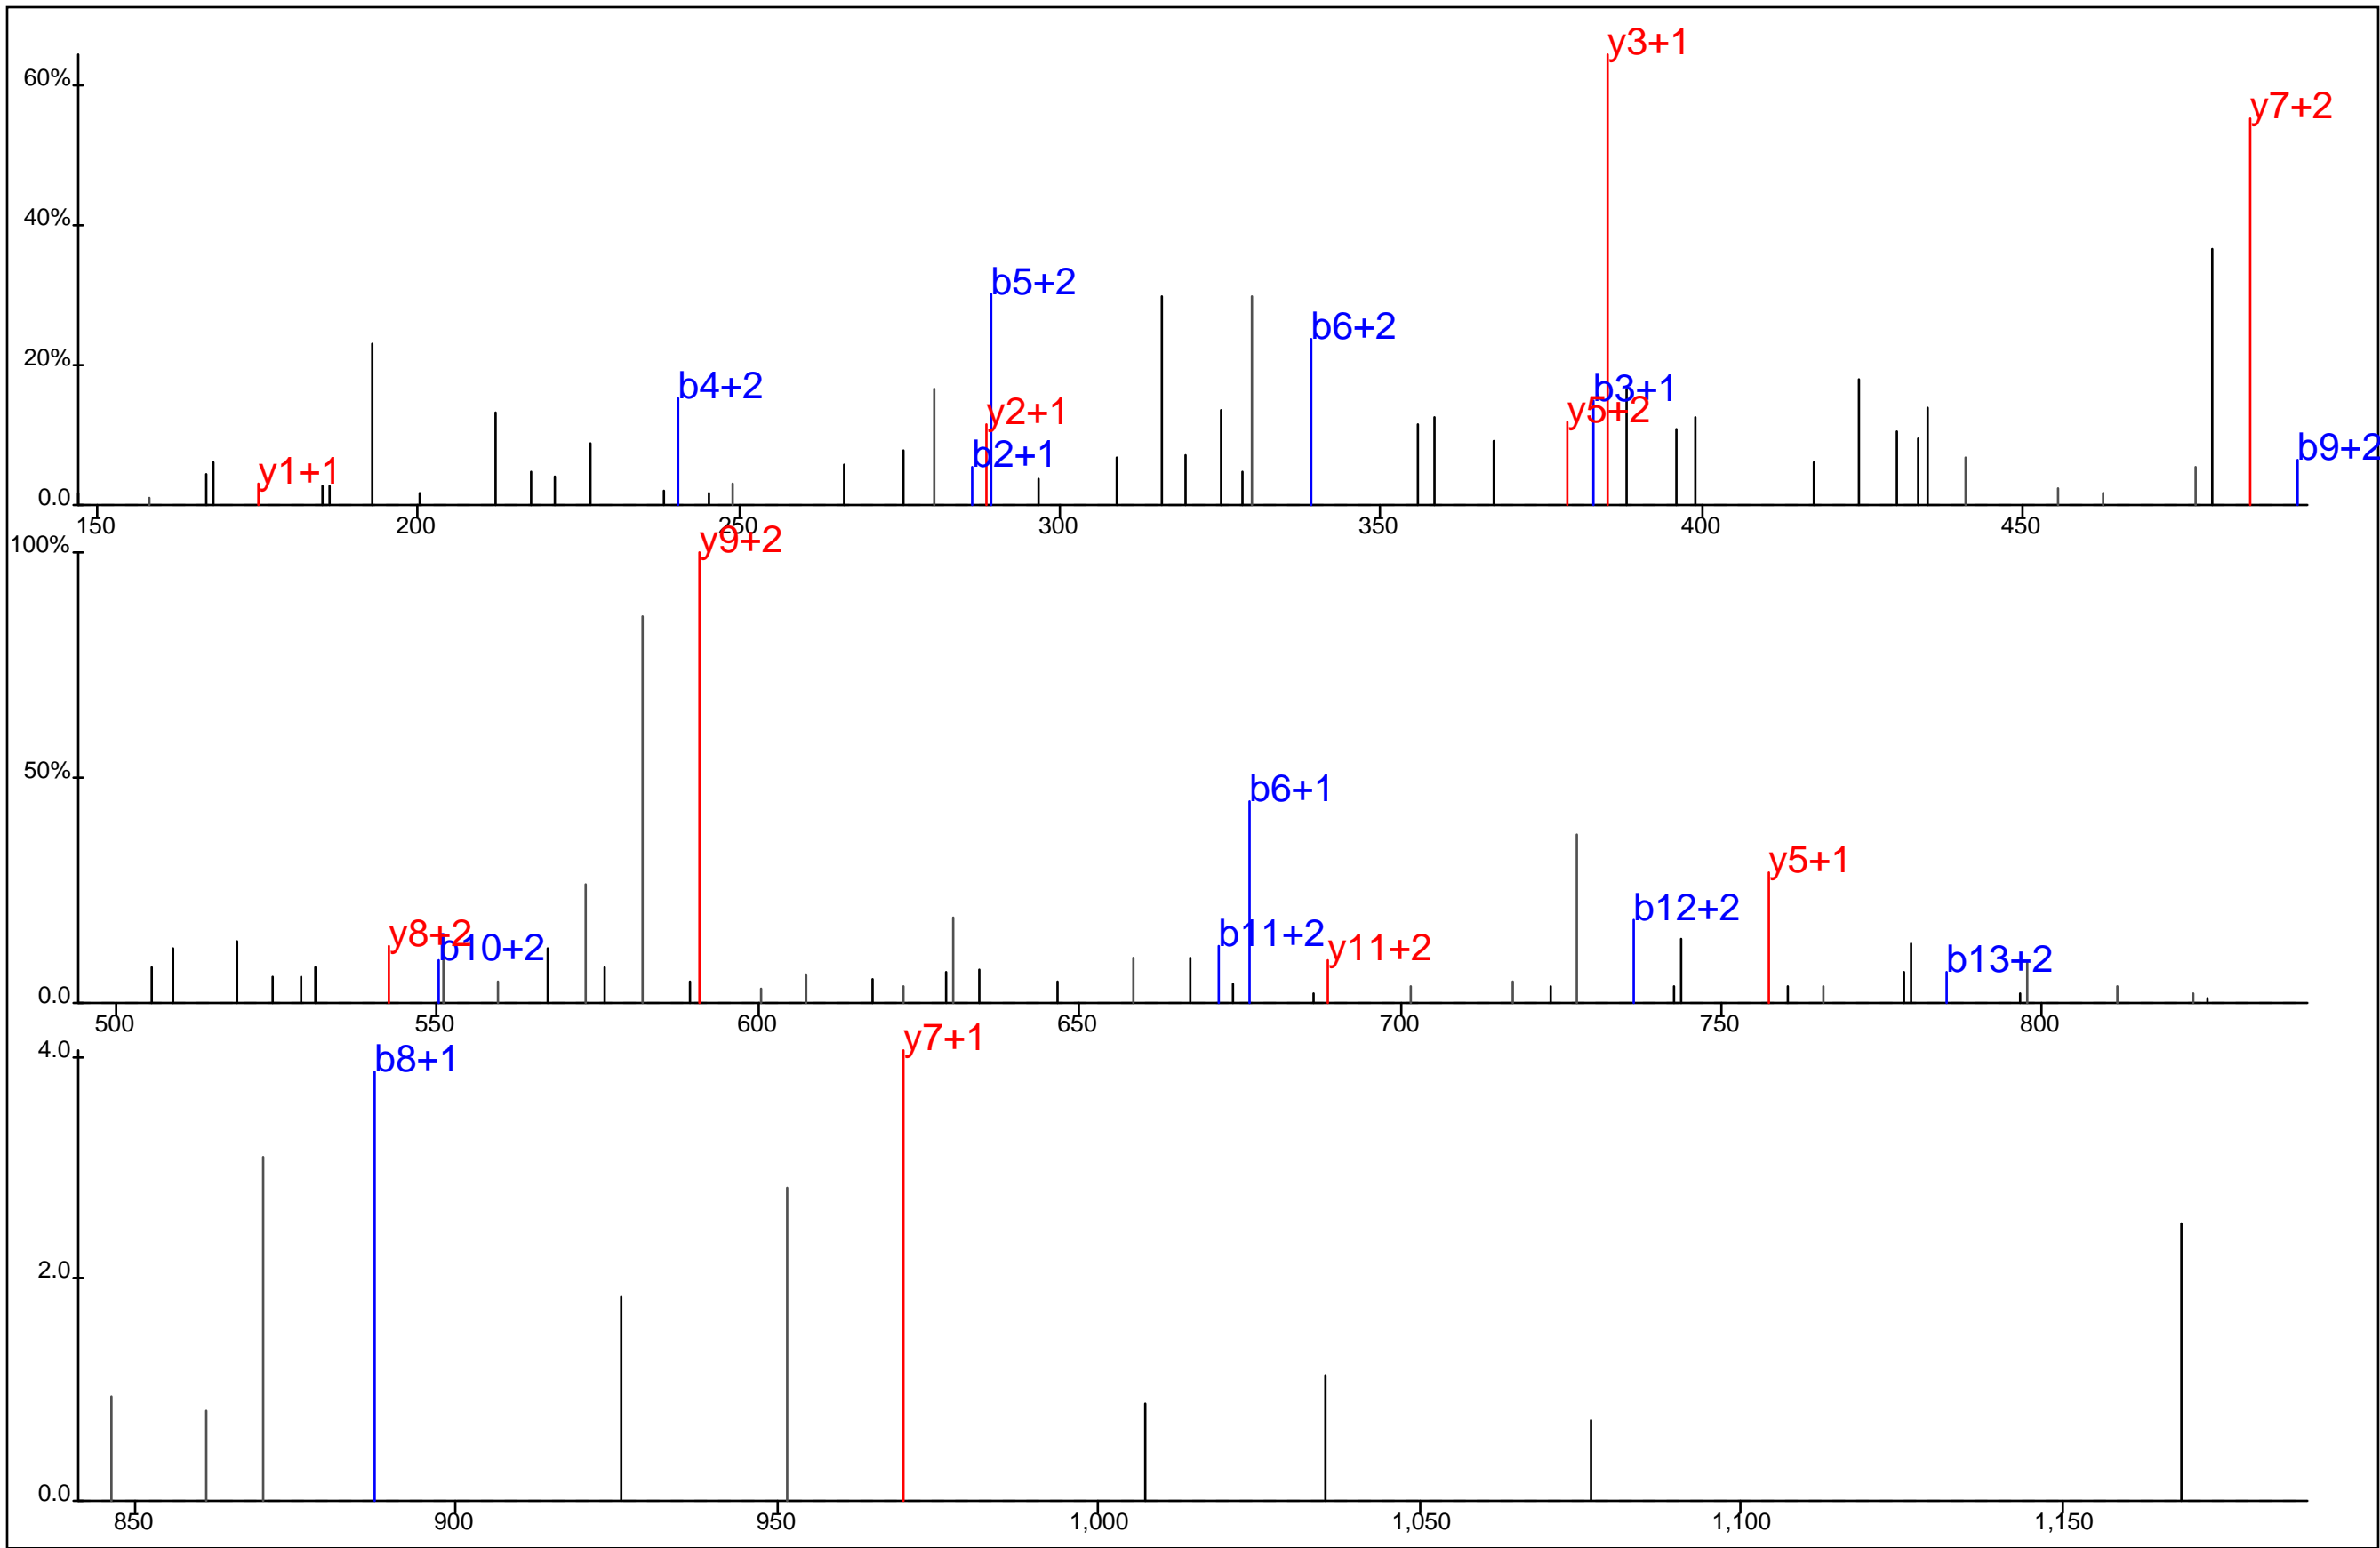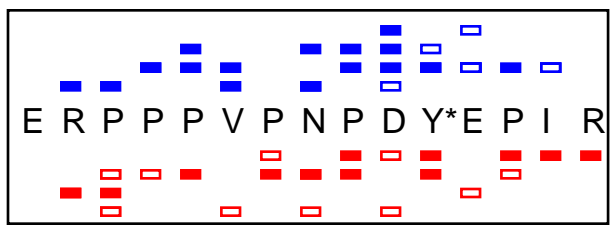

Protein Name: CD3E  
 gi Accession: 0  
 Precursor Mass: 464.7241+4  
 Delta Mass: 0.329 ppm  
 XCorr: 31.05



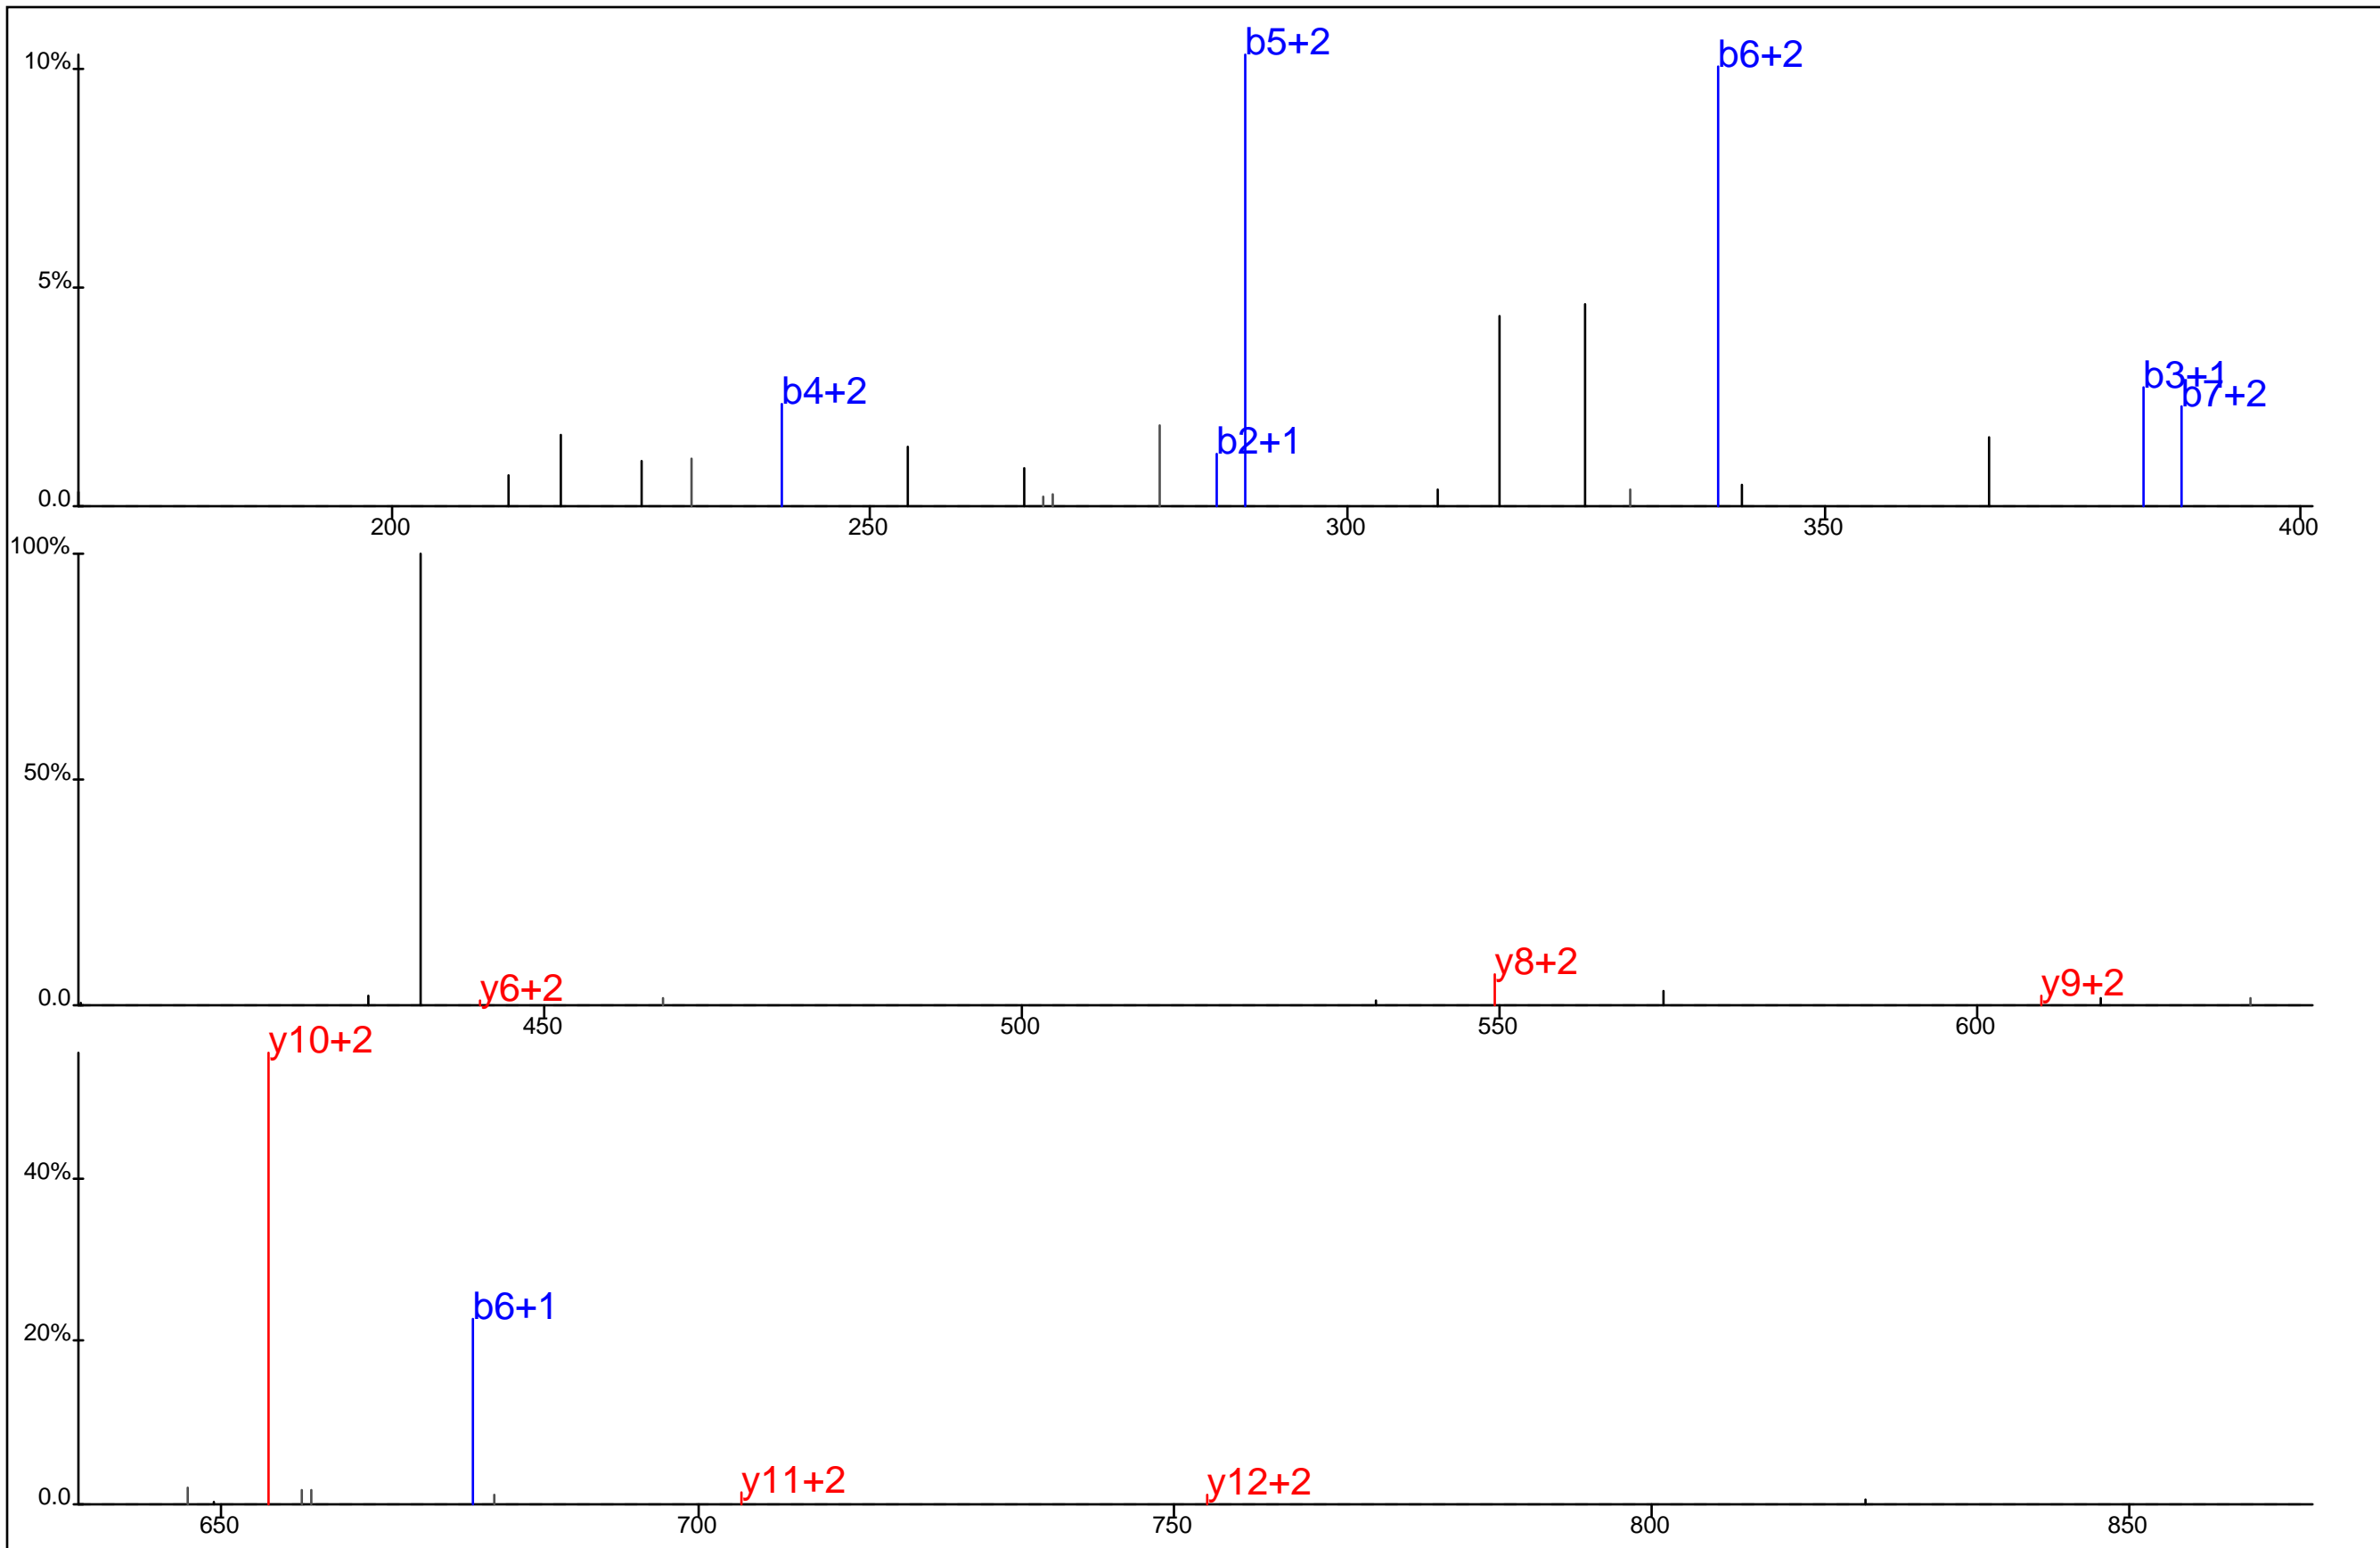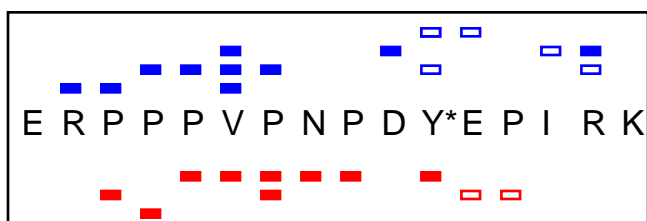

Protein Name: CD3E  
 gi Accession: 0  
 Precursor Mass: 496.7492+4  
 Delta Mass: 3.144 ppm  
 XCorr: 23.96

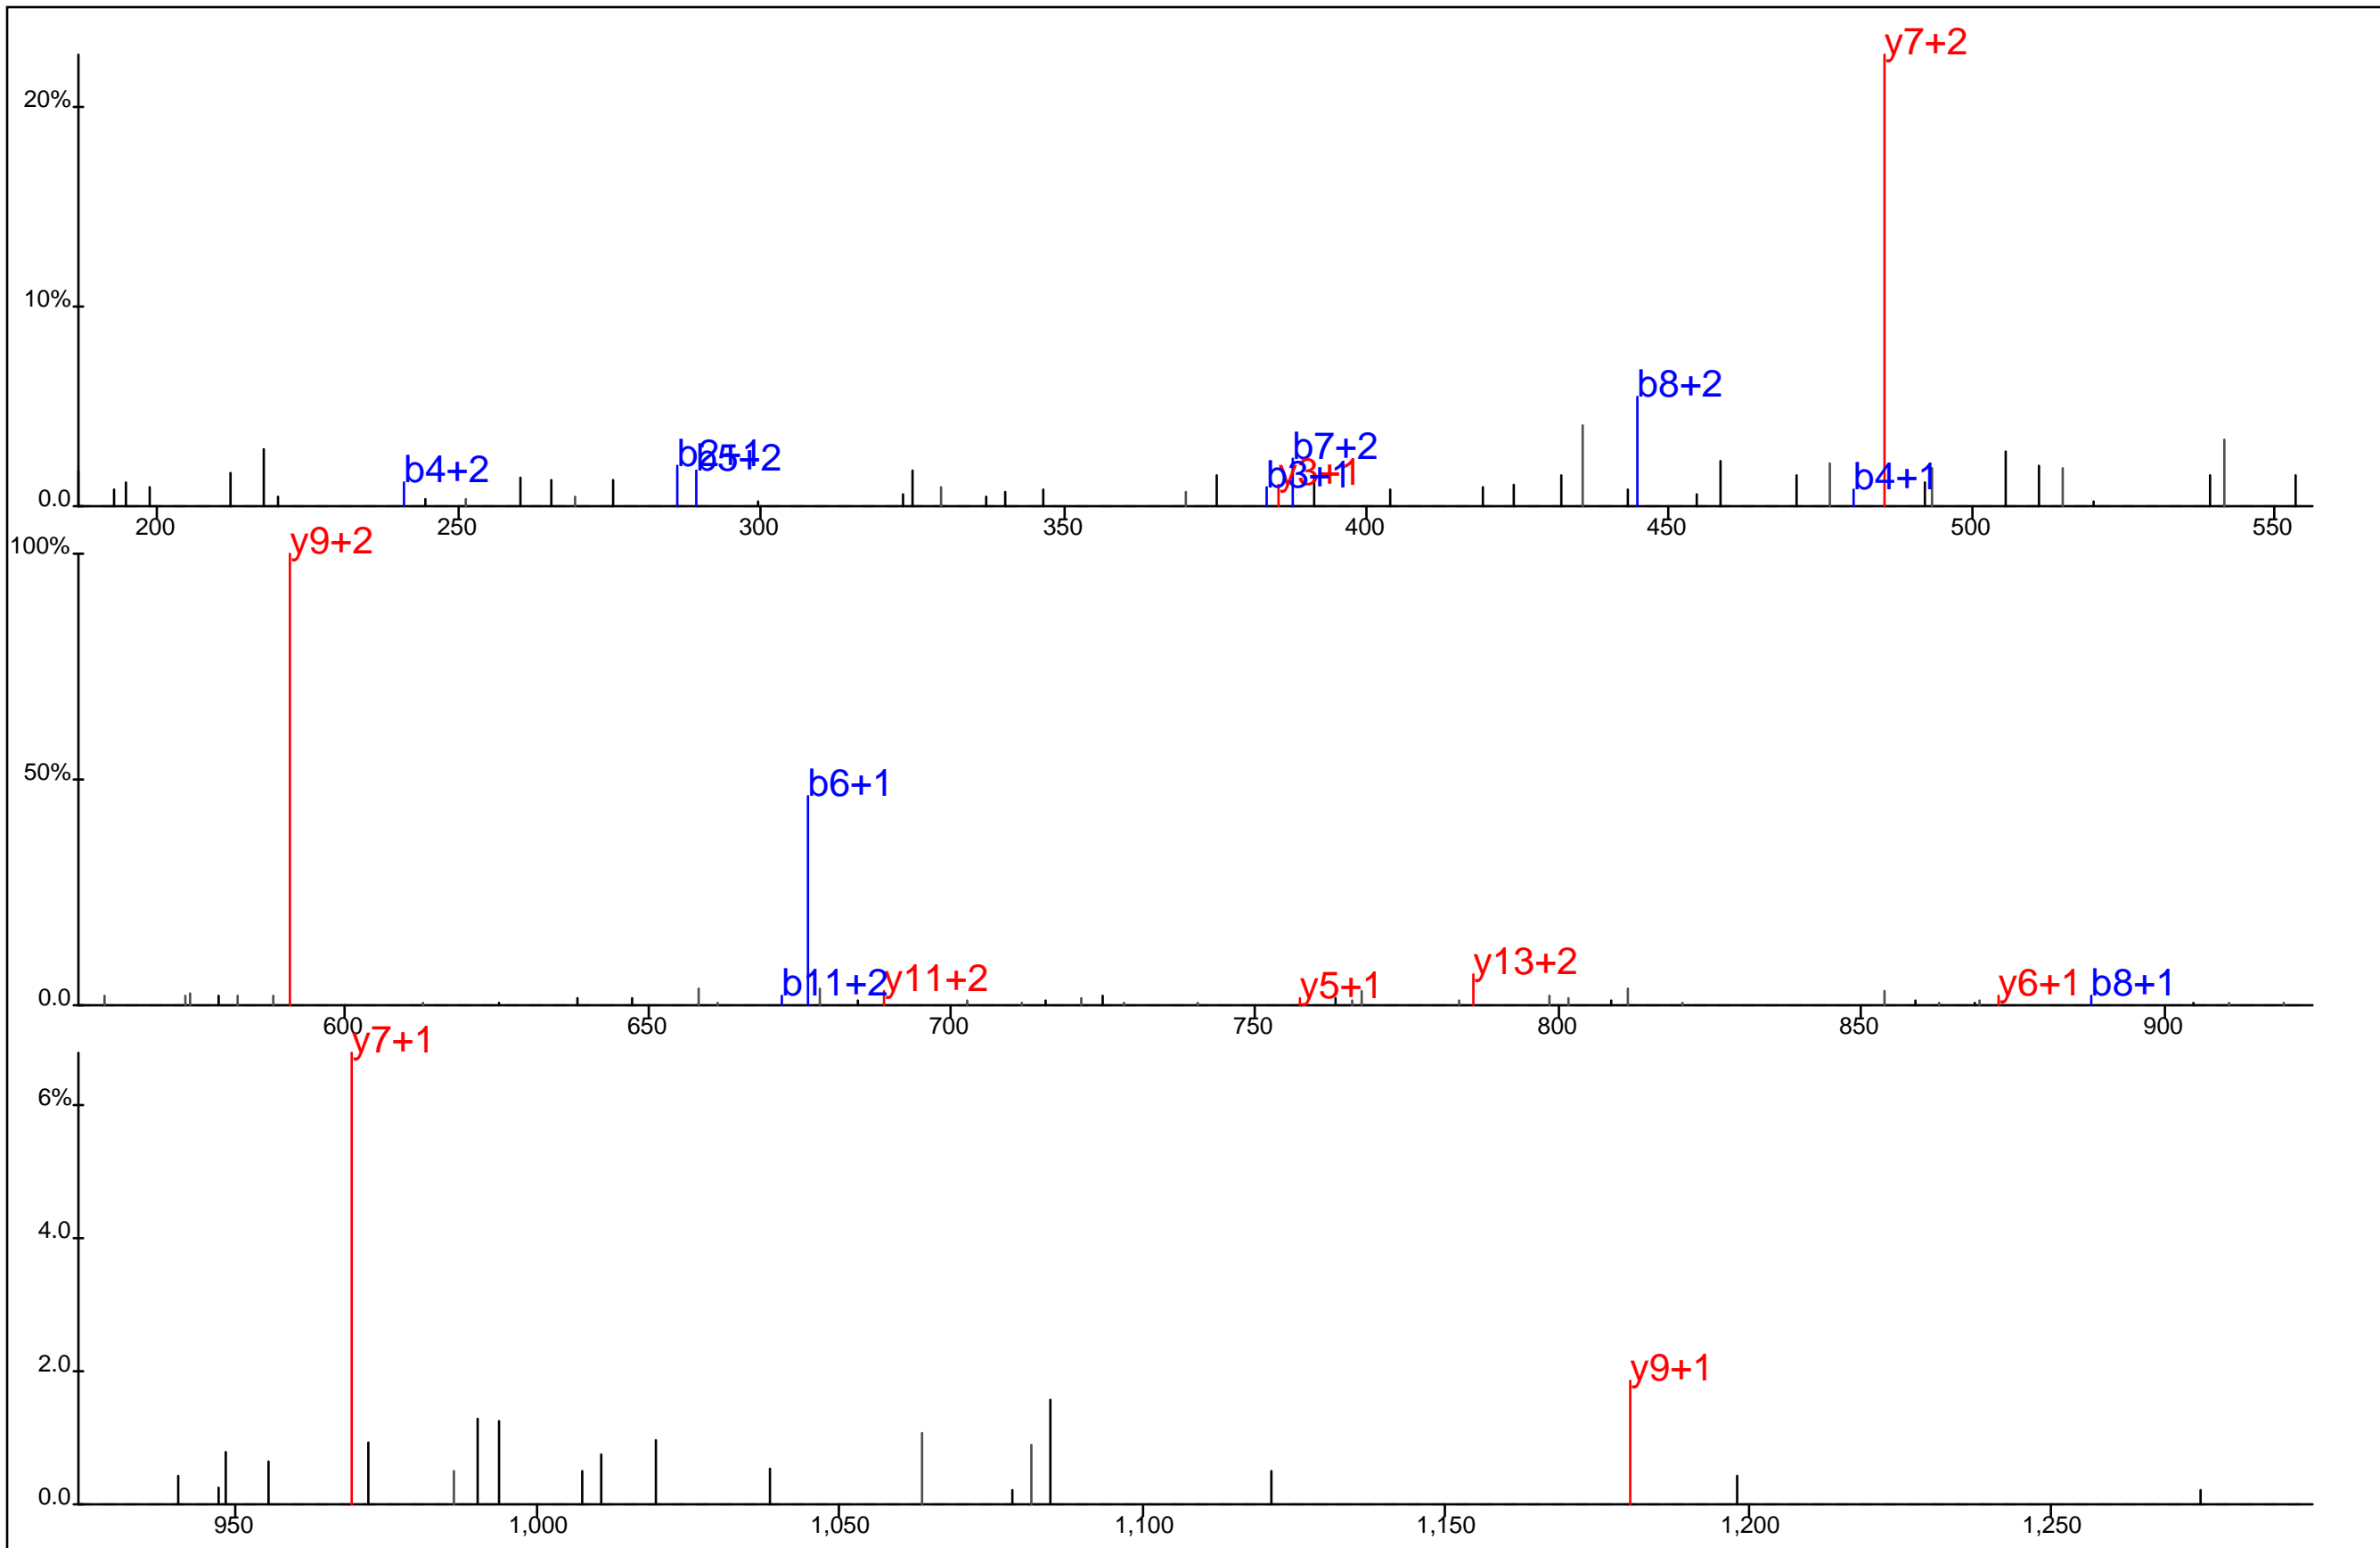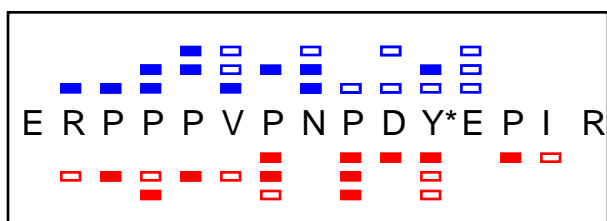

Protein Name: CD3E  
 gi Accession: 0  
 Precursor Mass: 619.2952+3  
 Delta Mass: 1.539 ppm  
 XCorr: 21.99

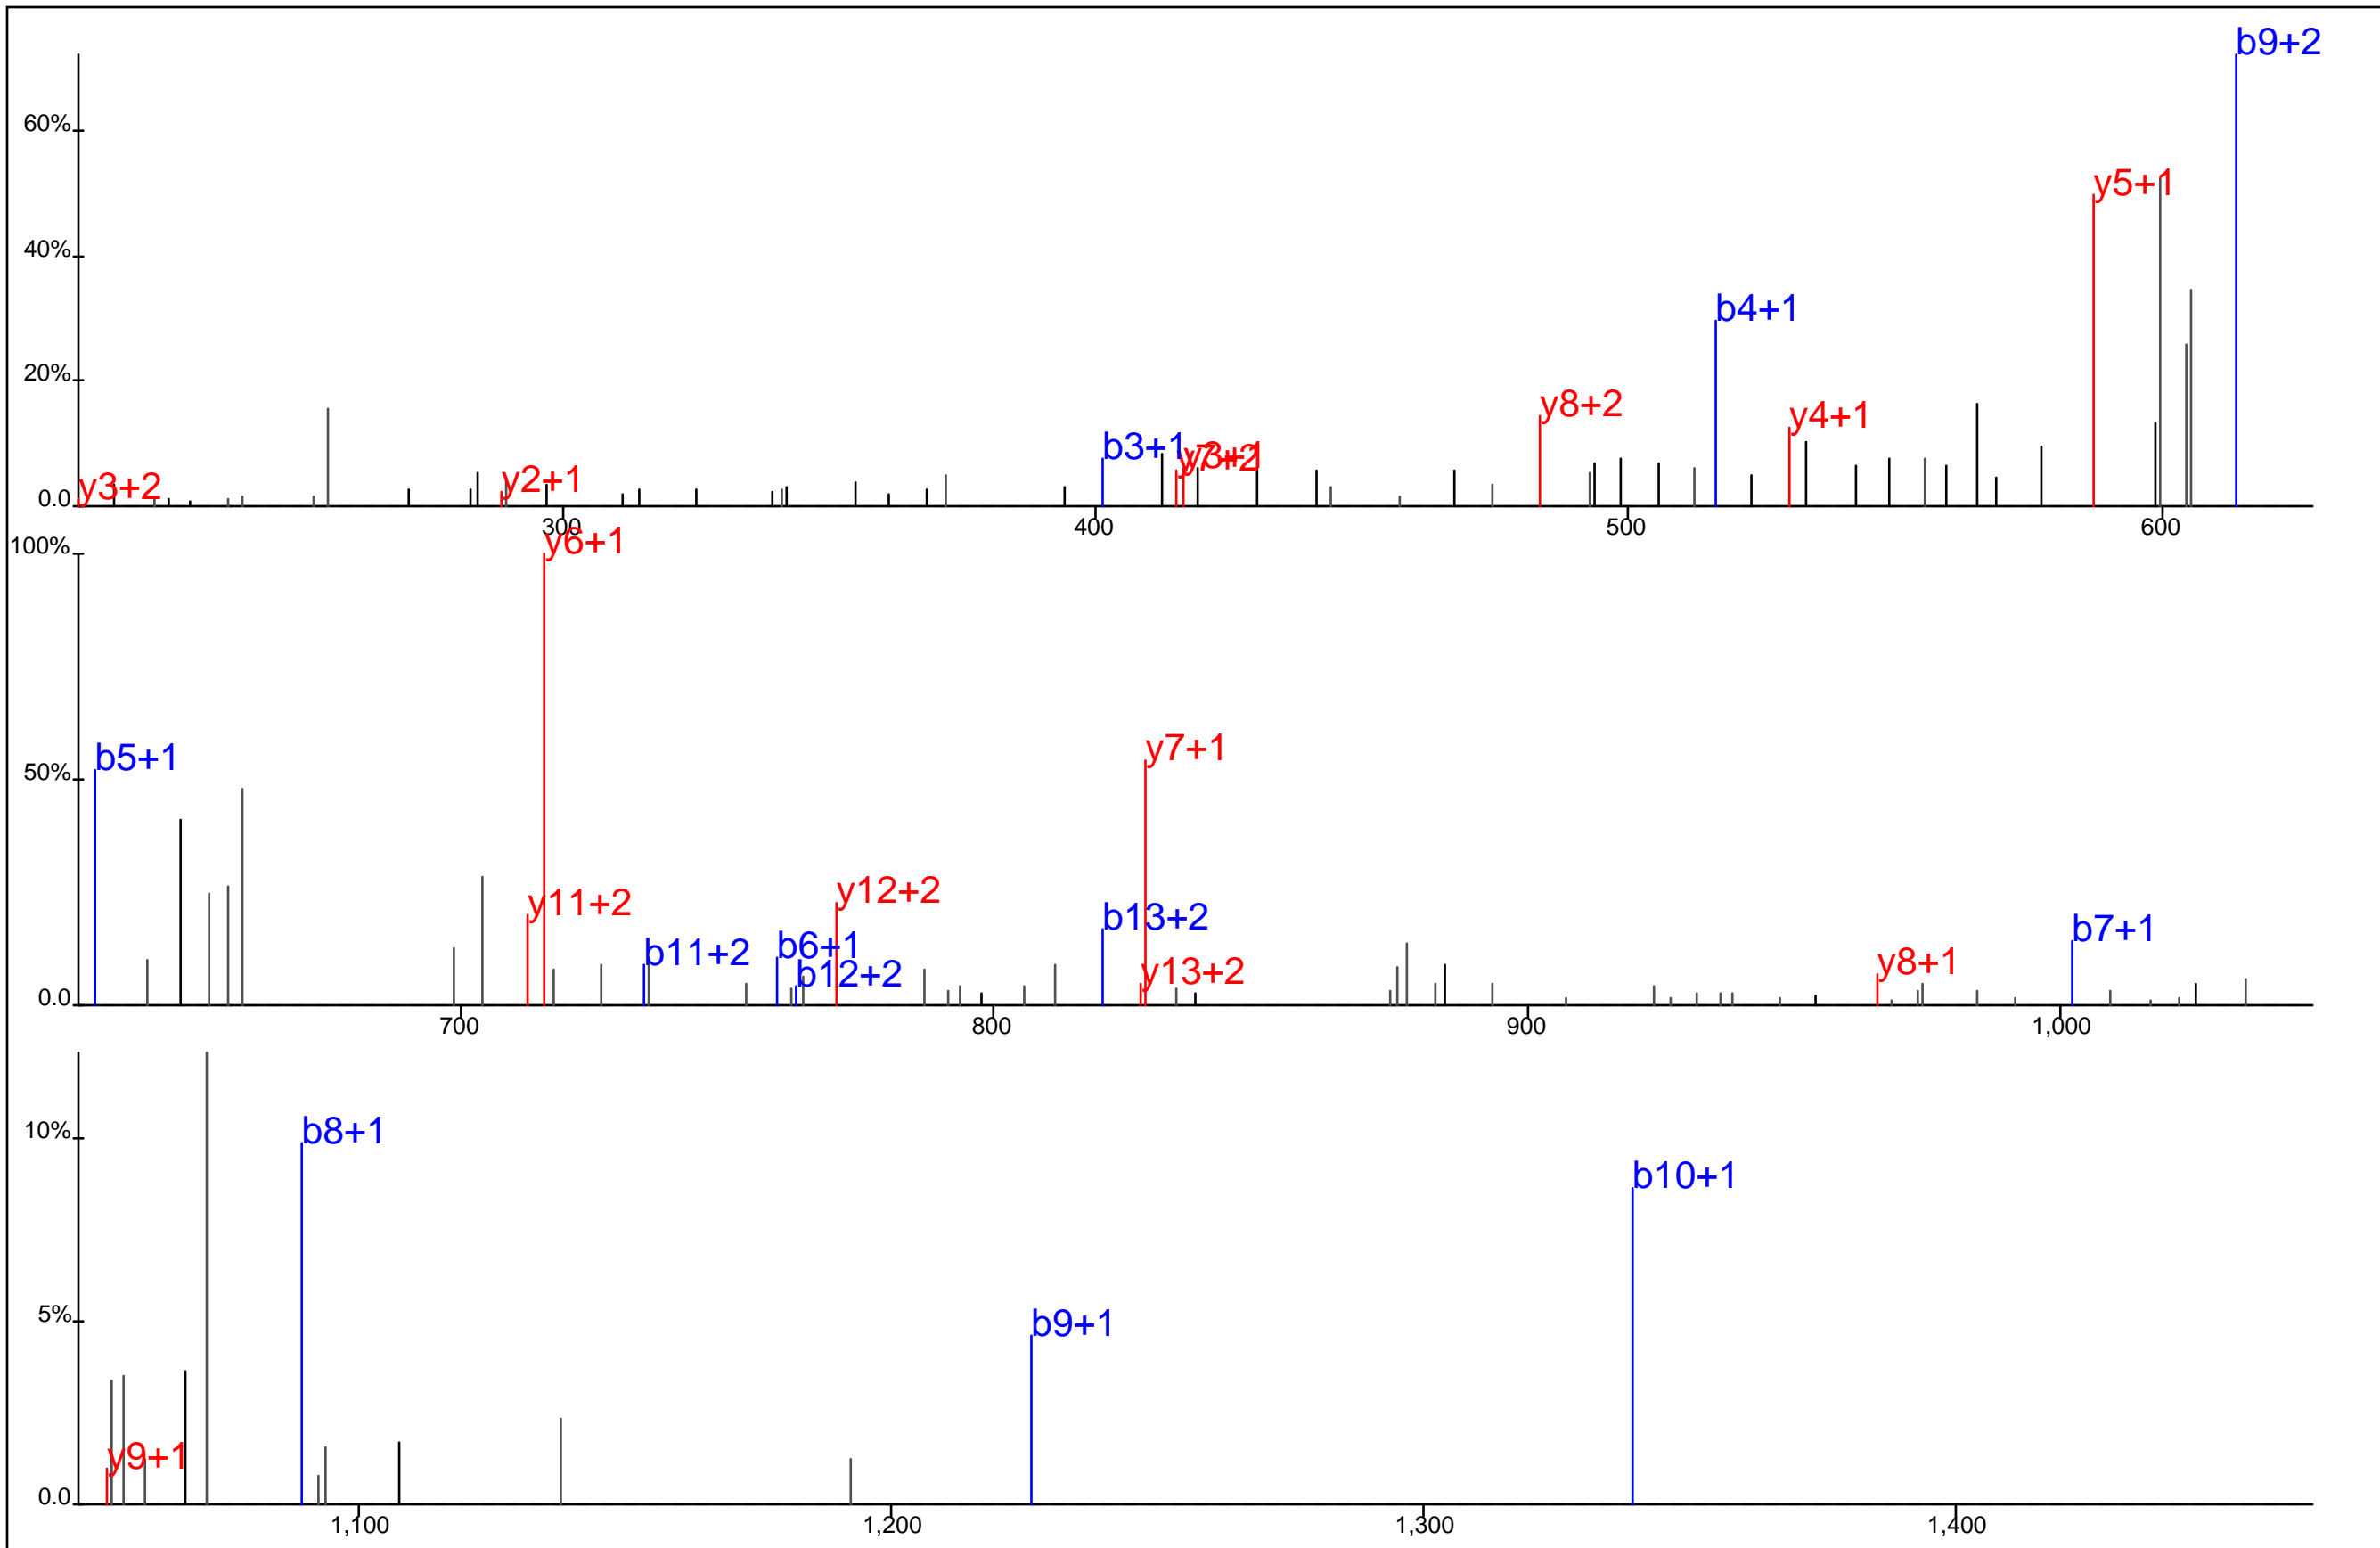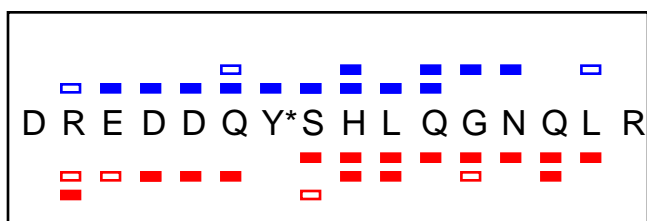

Protein Name: CD3 gamma  
 gi Accession: 0  
 Precursor Mass: 685.2950+3  
 Delta Mass: 0.932 ppm  
 XCorr: 44.77

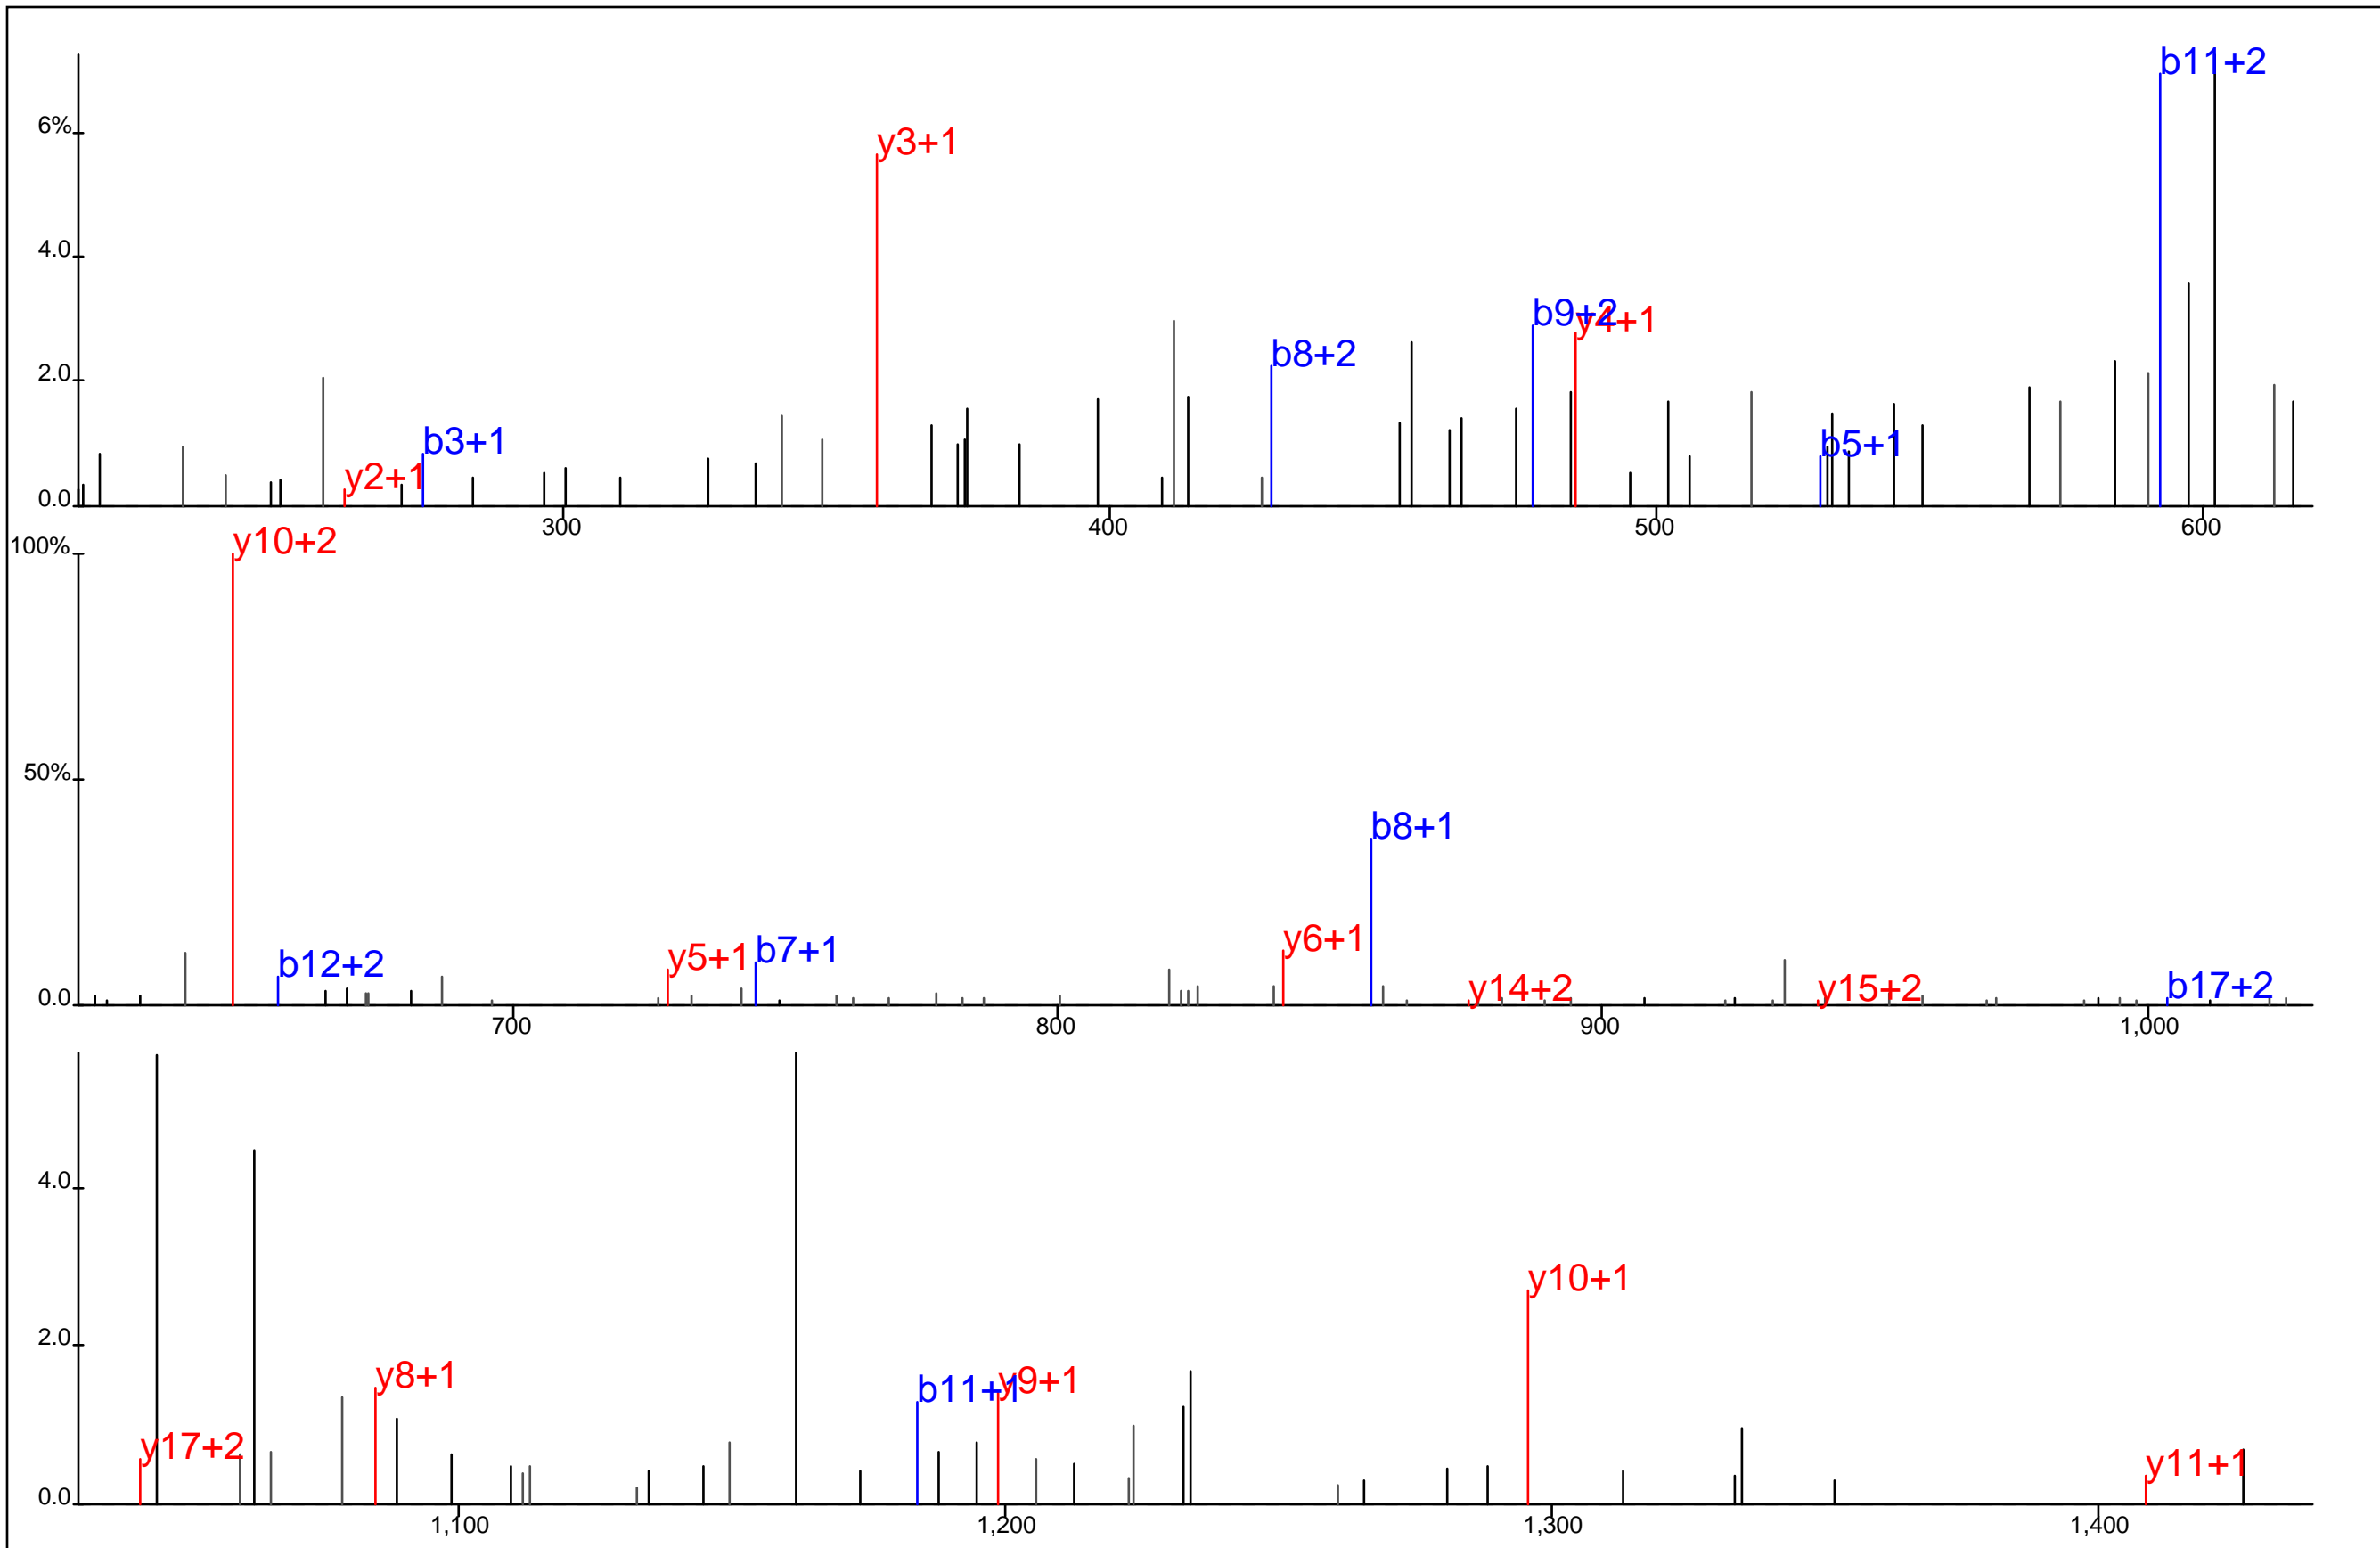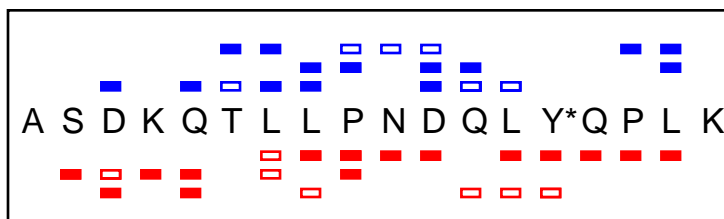

Protein Name: CD3 gamma  
 gi Accession: 0  
 Precursor Mass: 718.0291+3  
 Delta Mass: 1.974 ppm  
 XCorr: 29.18

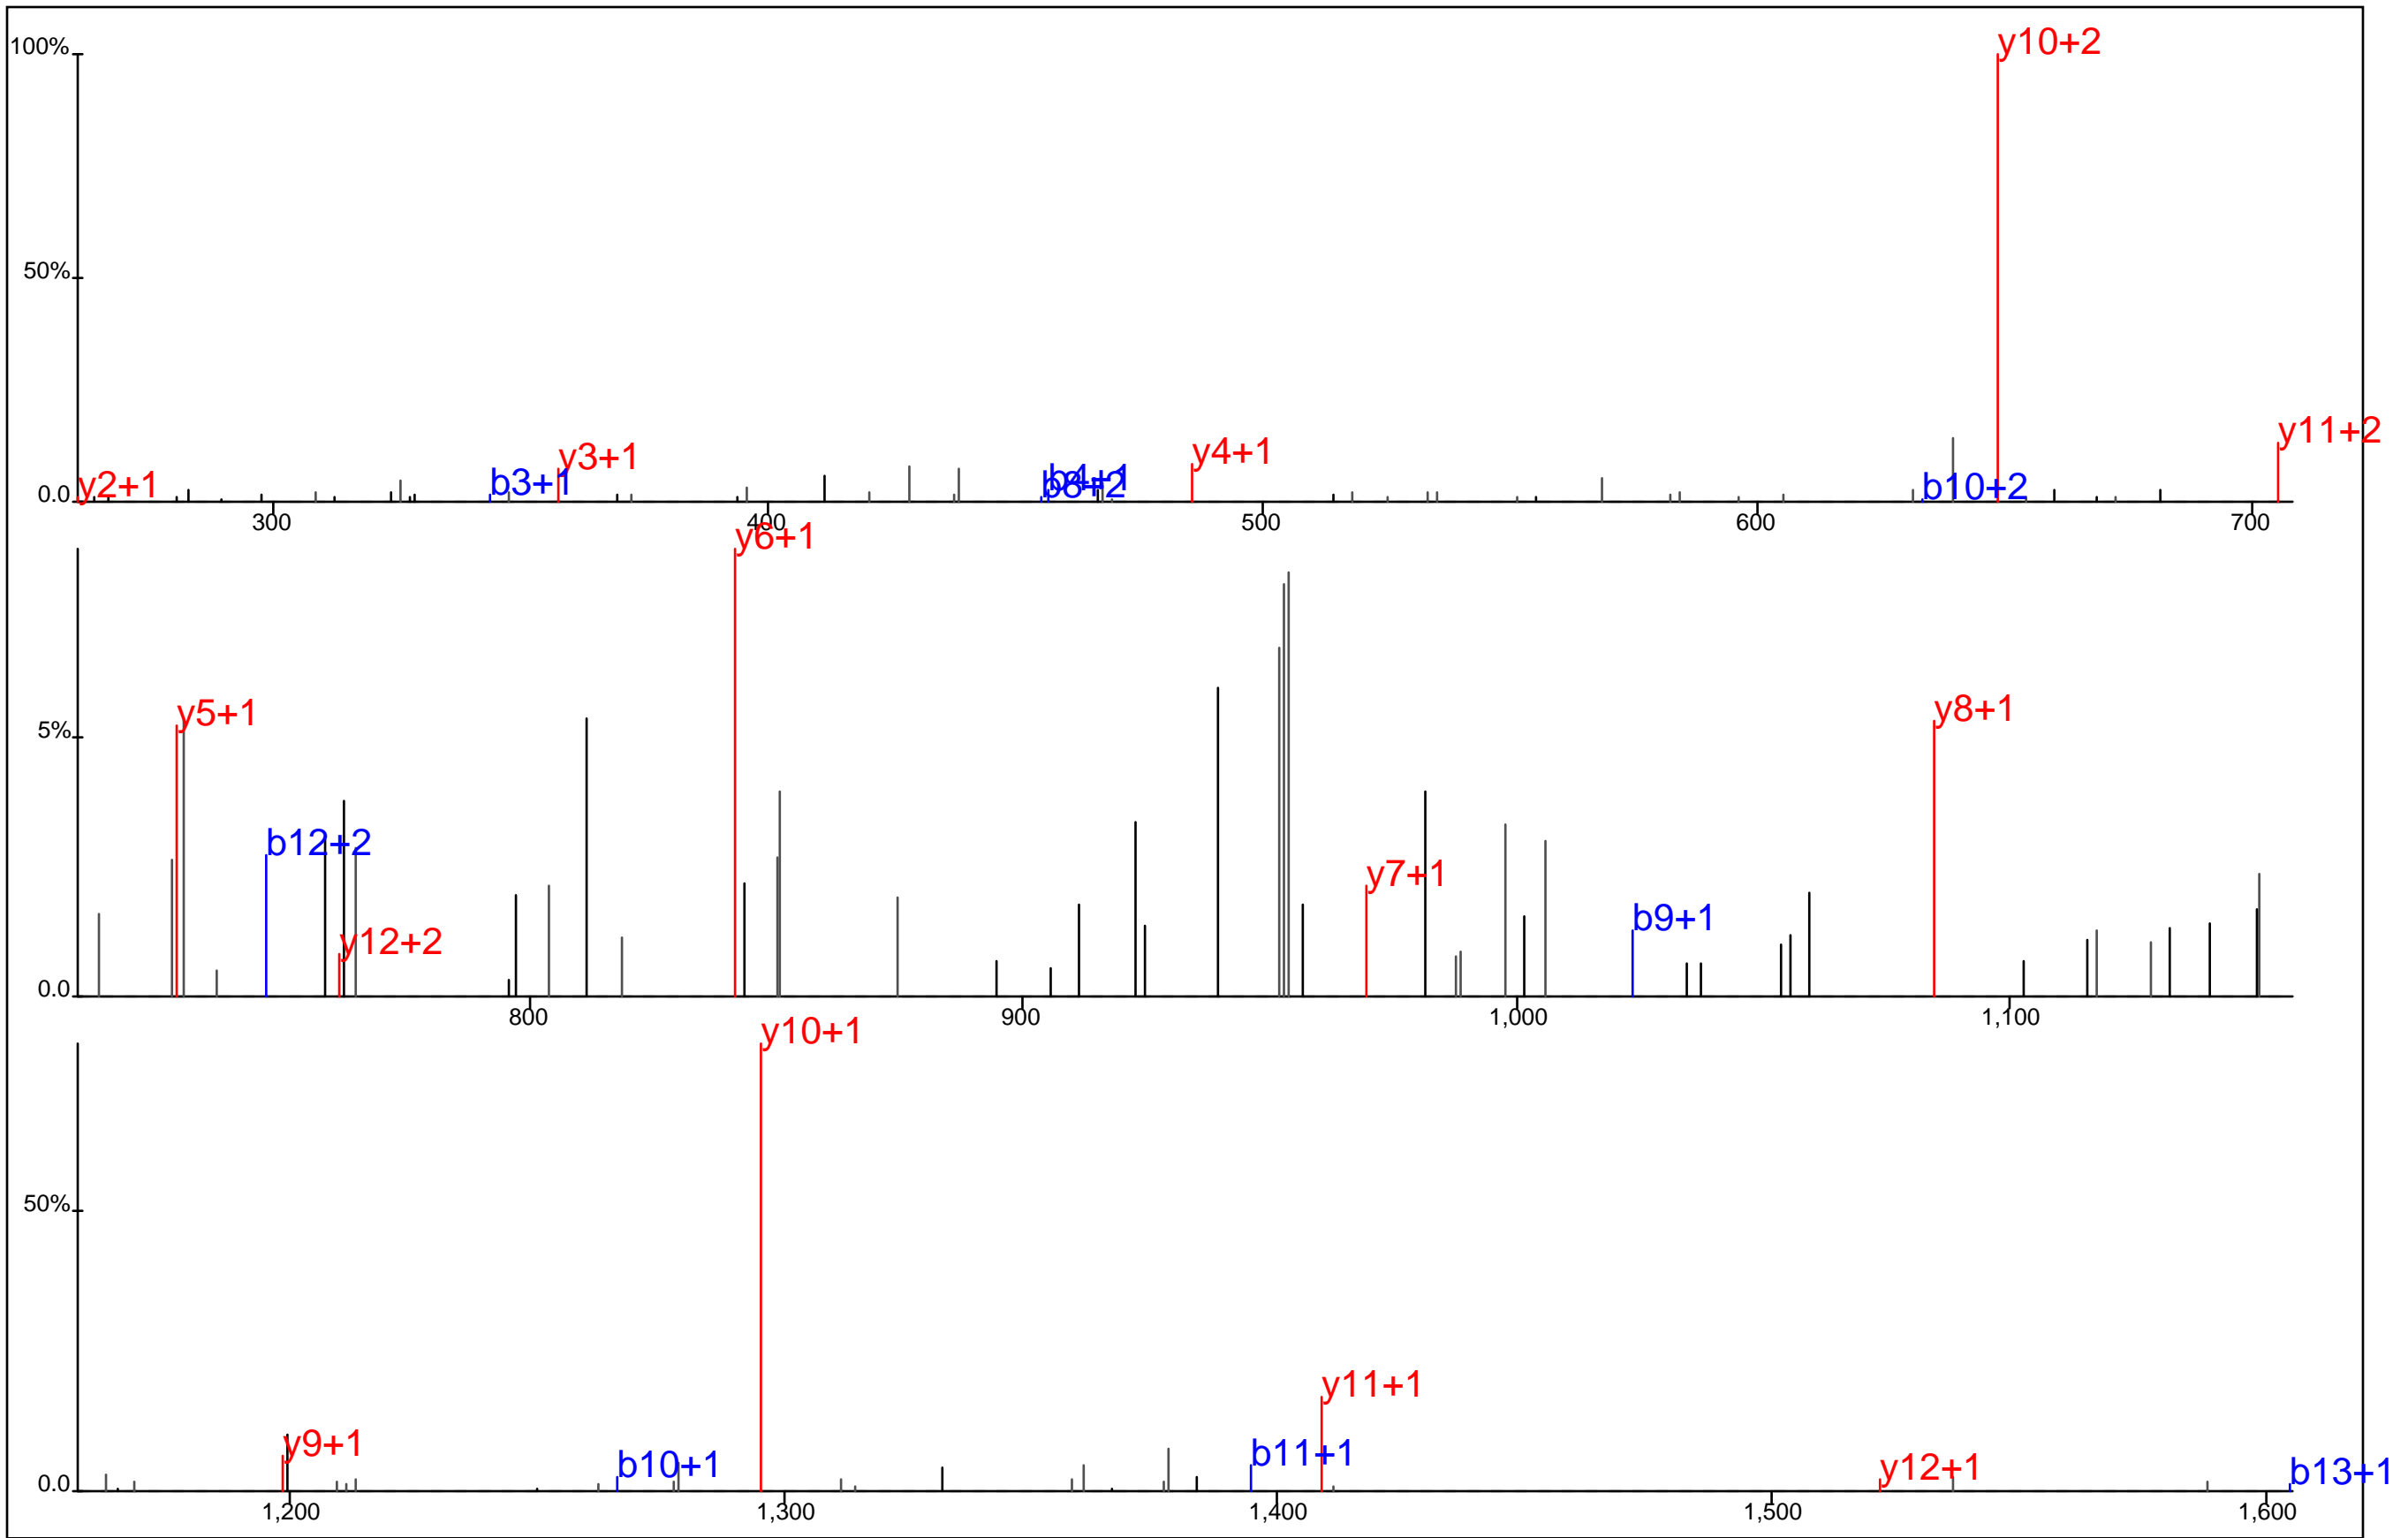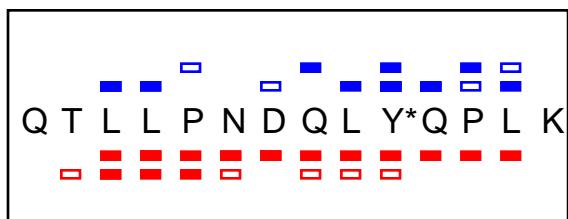

Protein Name: CD3 gamma  
 gi Accession: 0  
 Precursor Mass: 875.9444+2  
 Delta Mass: 2.294 ppm  
 XCorr: 52.62

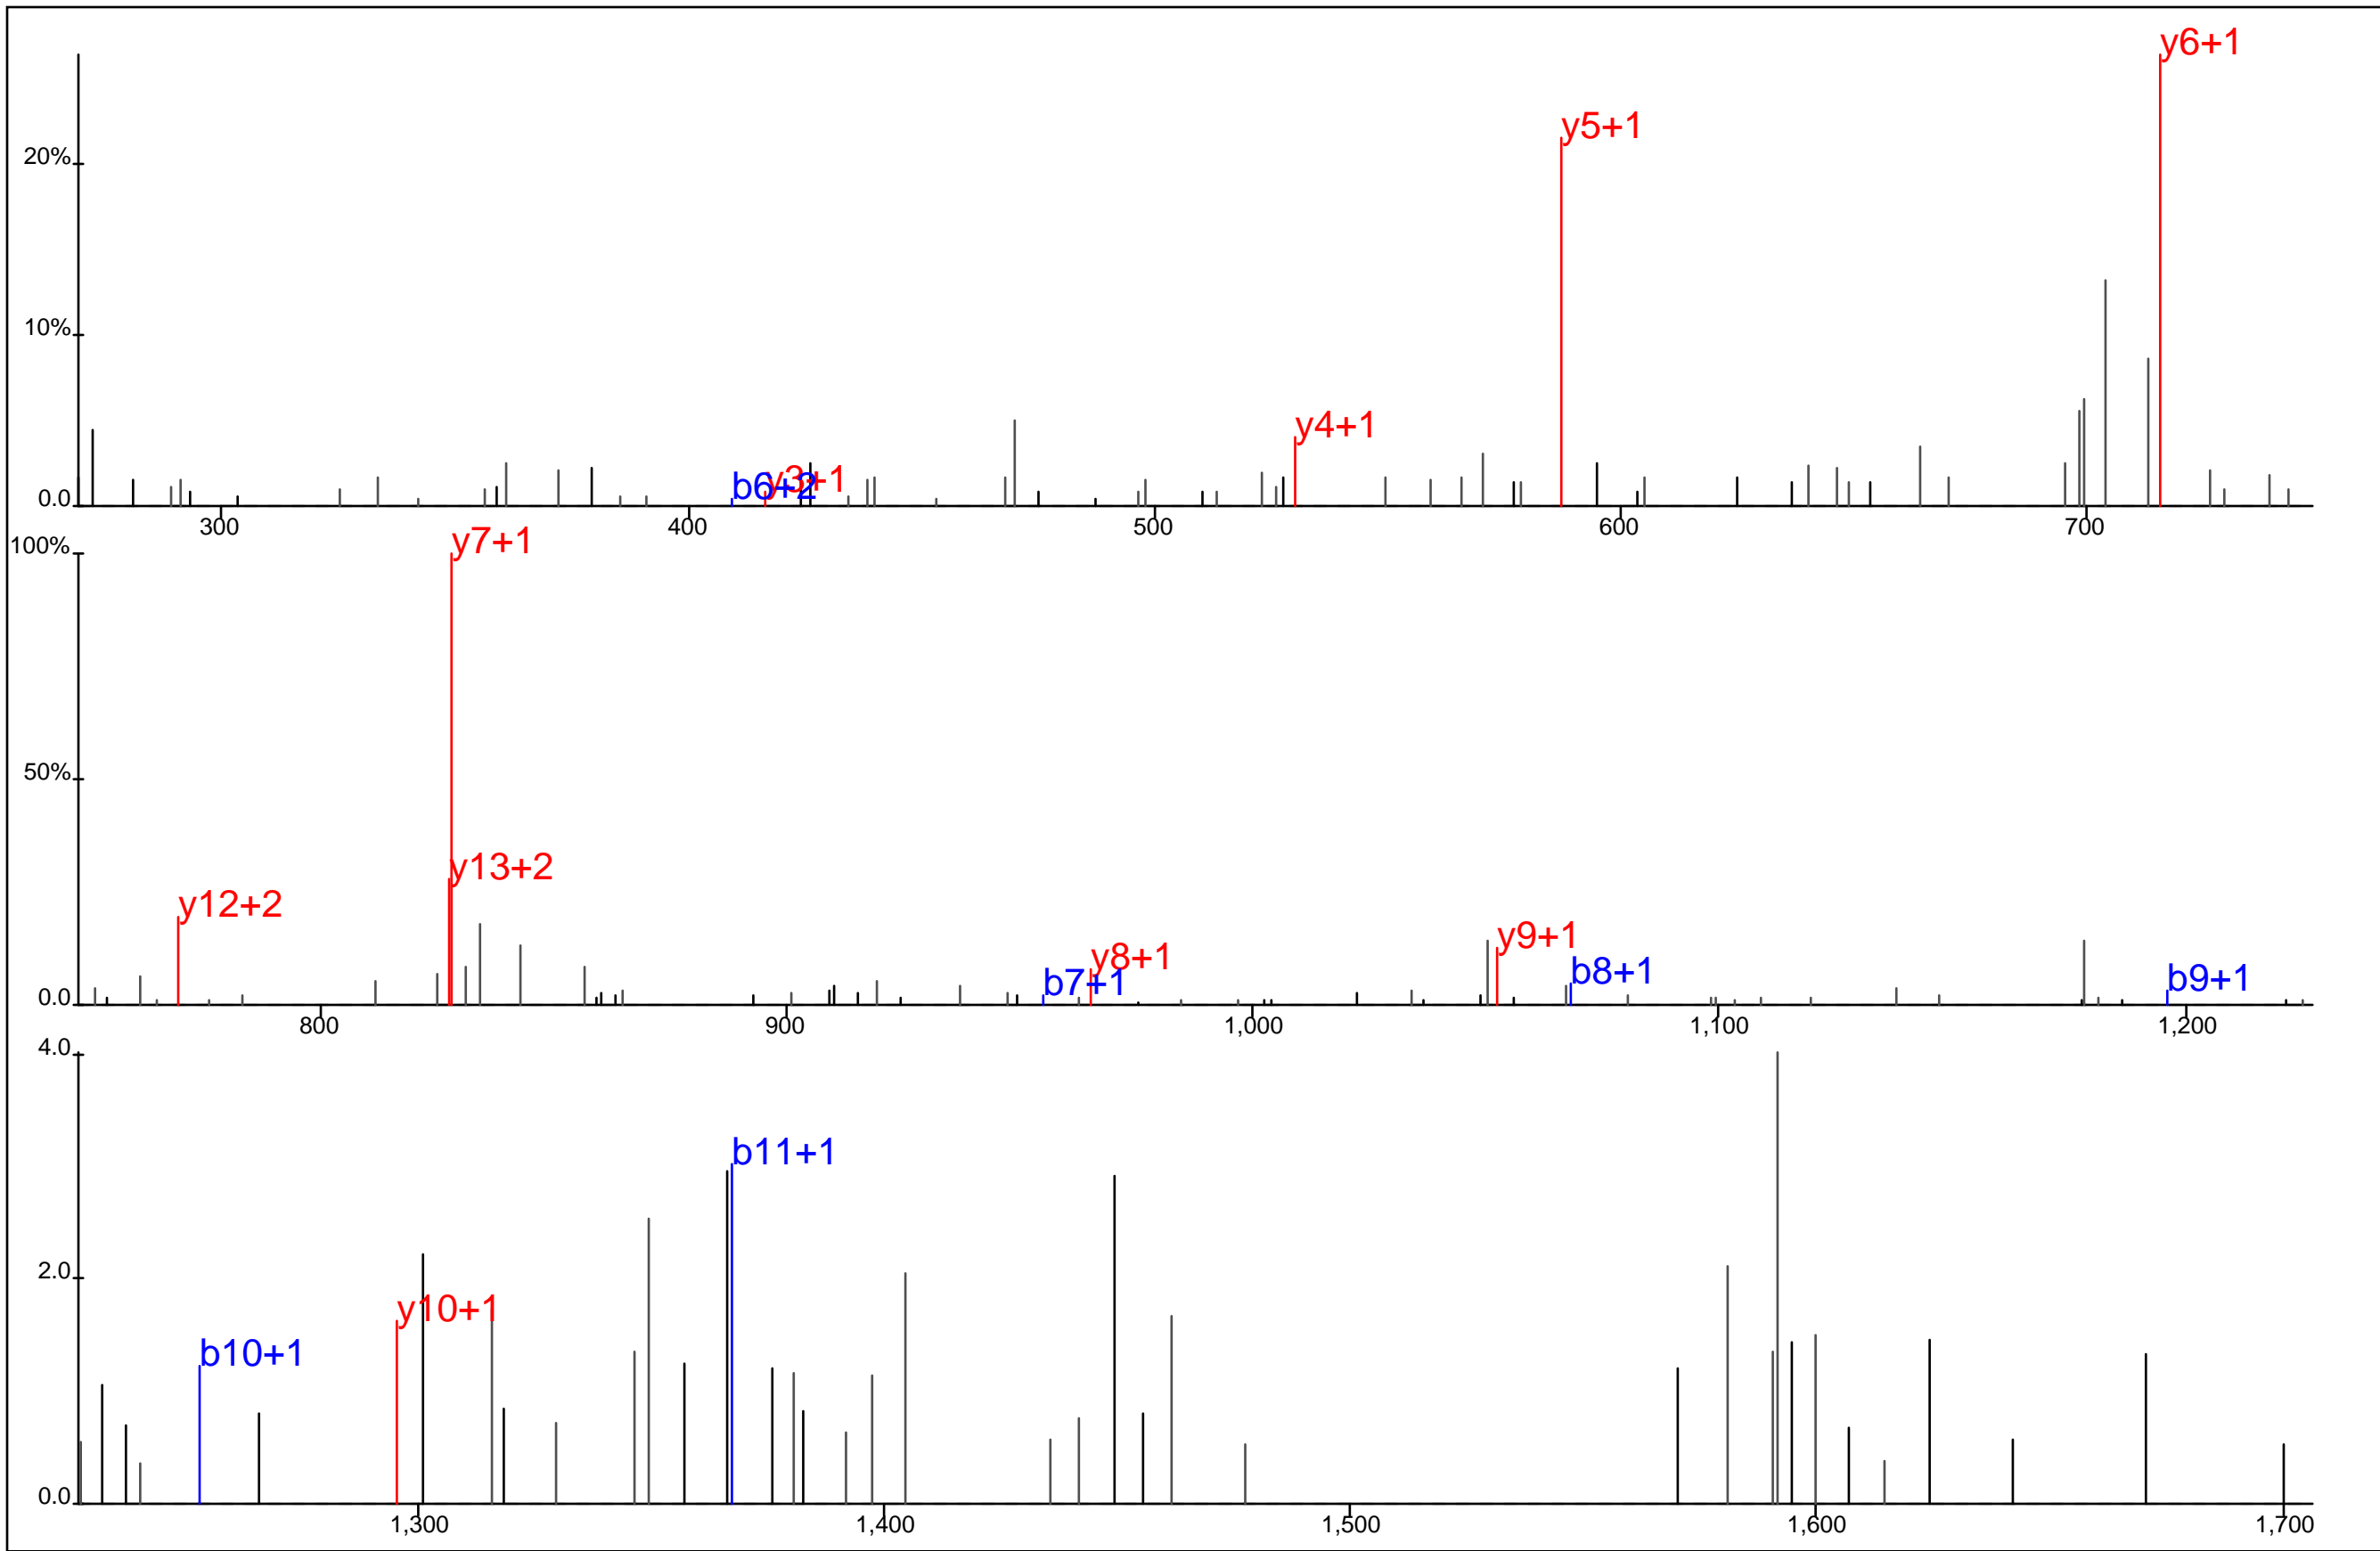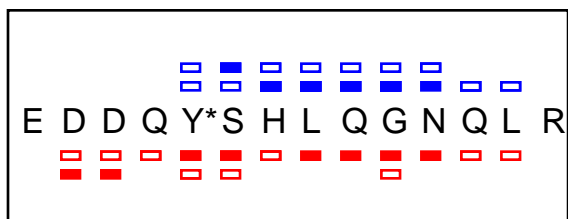

Protein Name: CD3 gamma  
 gi Accession: 0  
 Precursor Mass: 891.8781+2  
 Delta Mass: 2.630 ppm  
 XCorr: 25.11

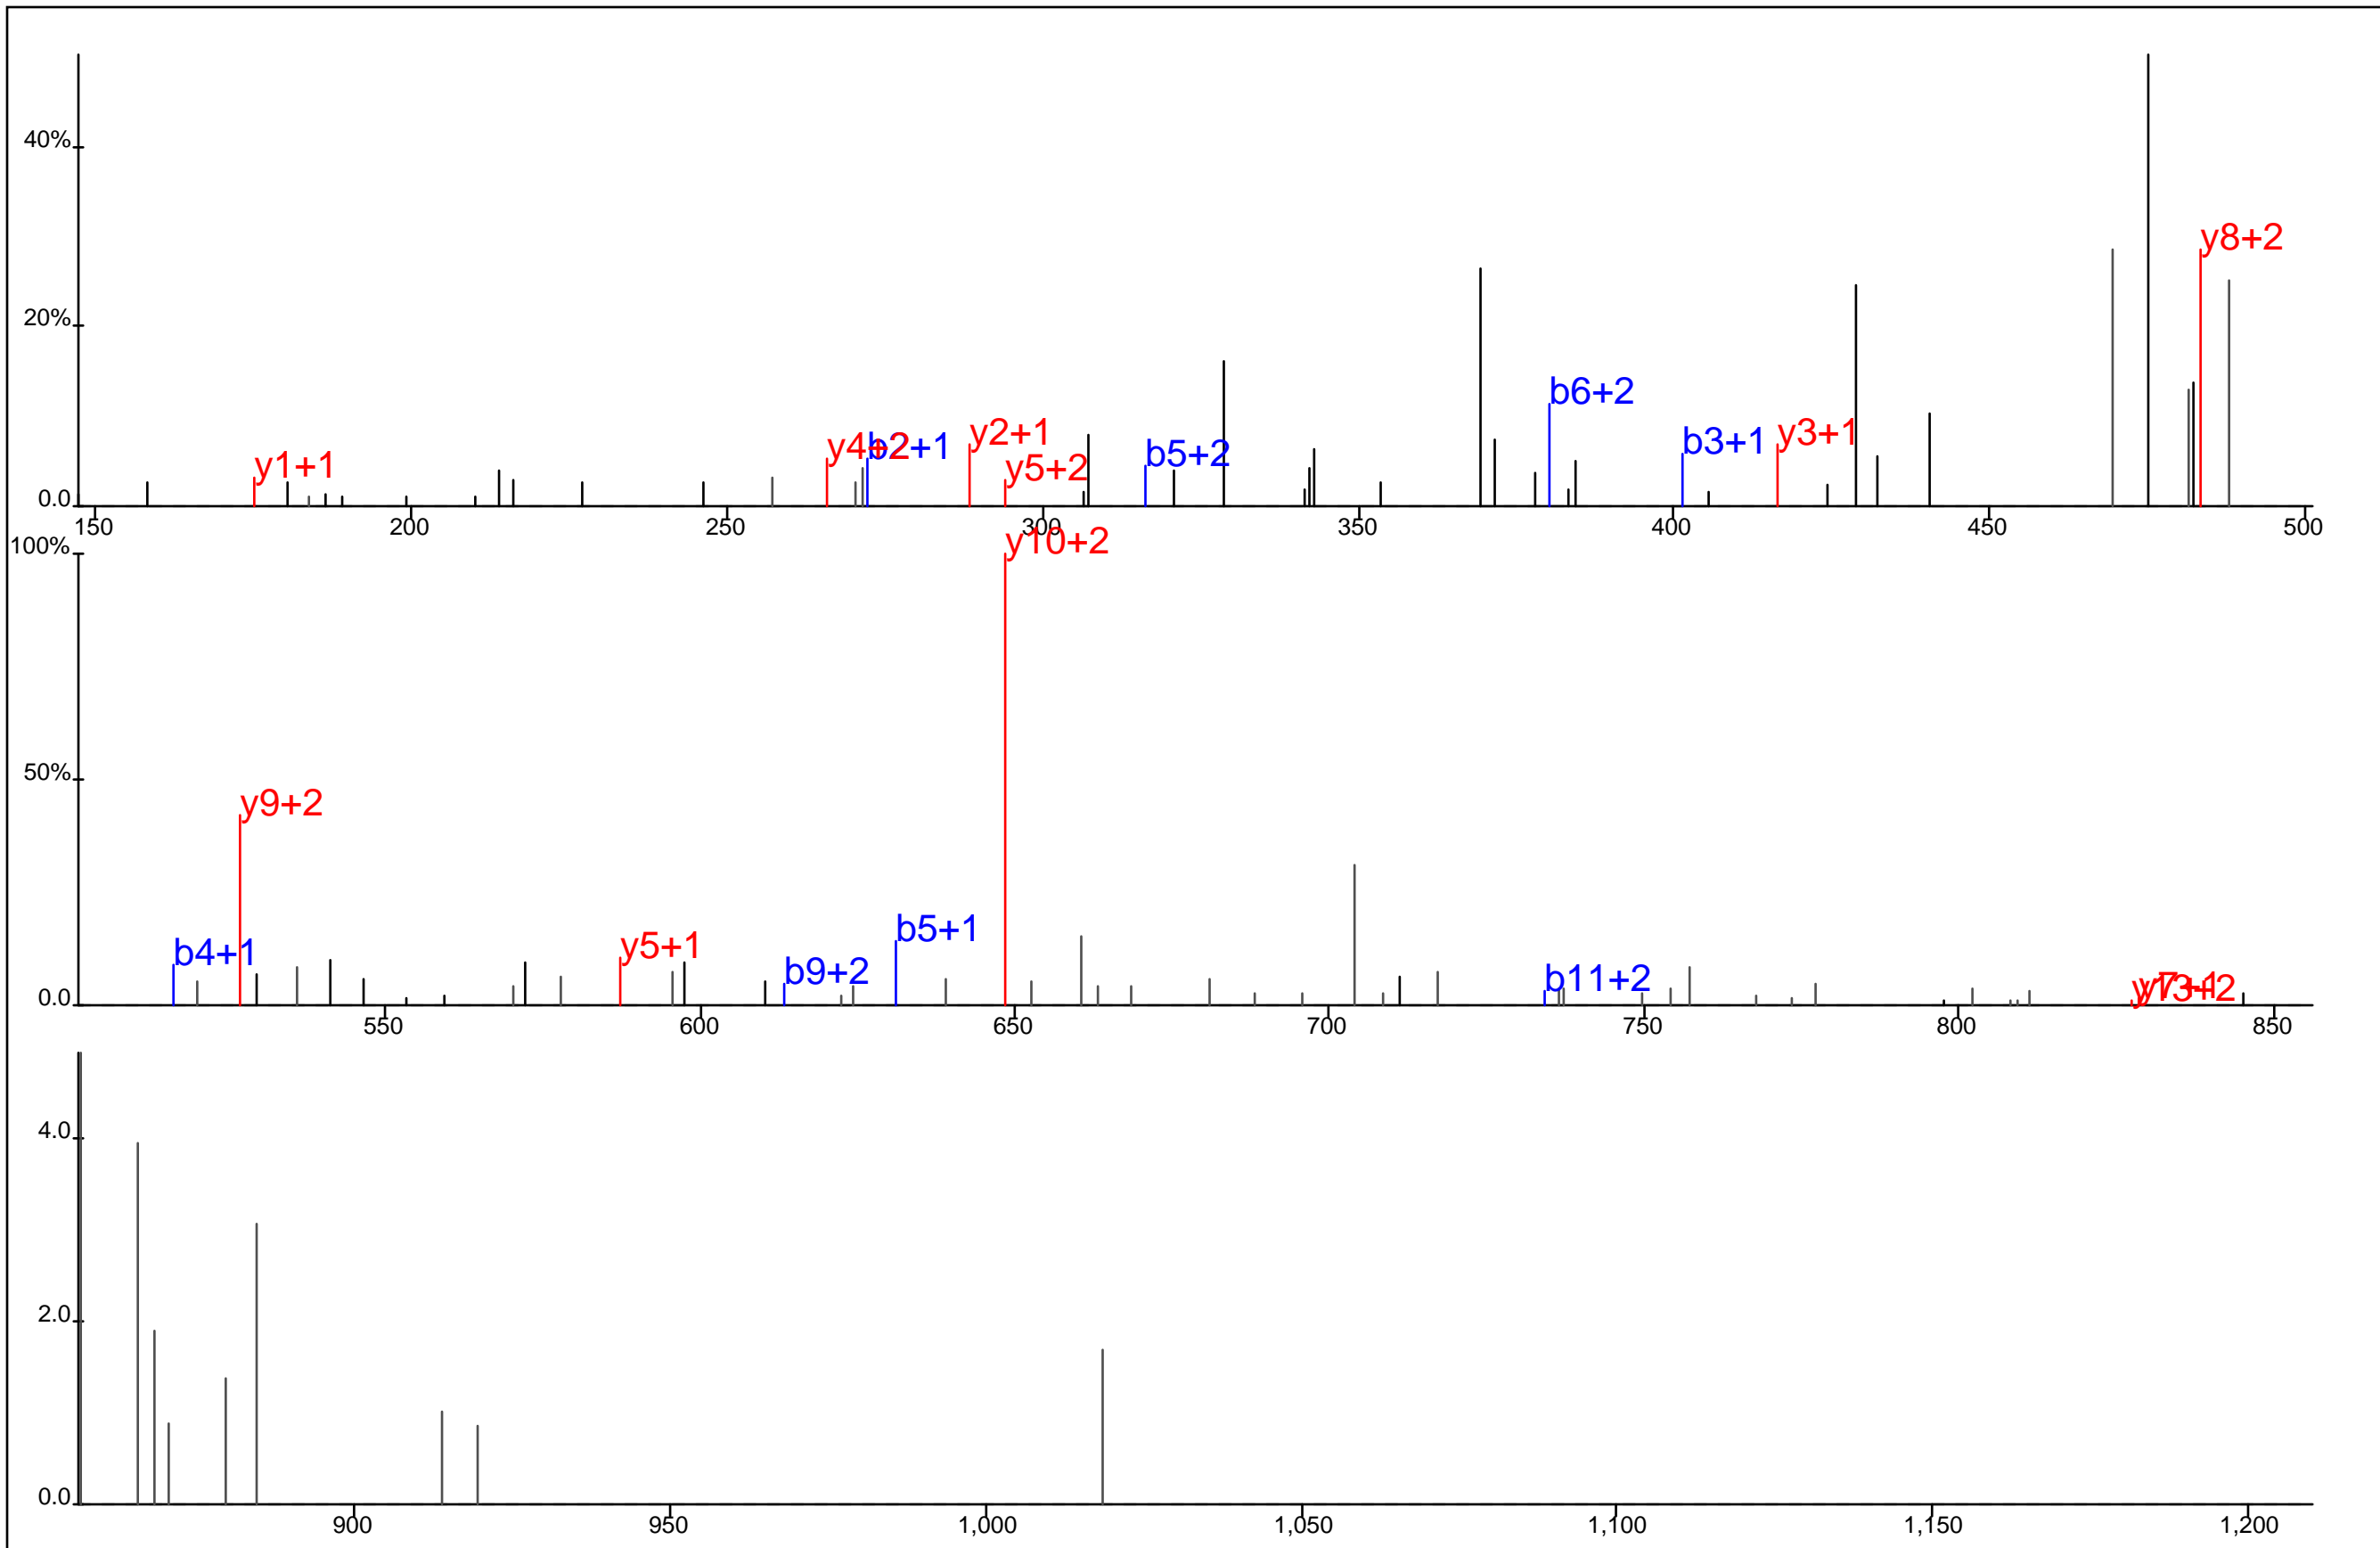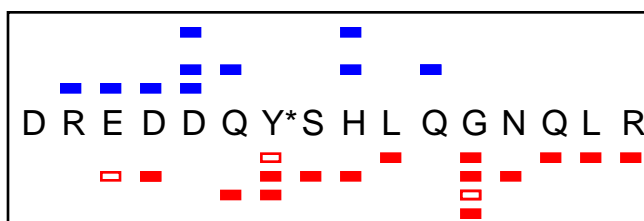

Protein Name: CD3 gamma  
 gi Accession: 0  
 Precursor Mass: 514.2208+4  
 Delta Mass: 5.397 ppm  
 XCorr: 20.97

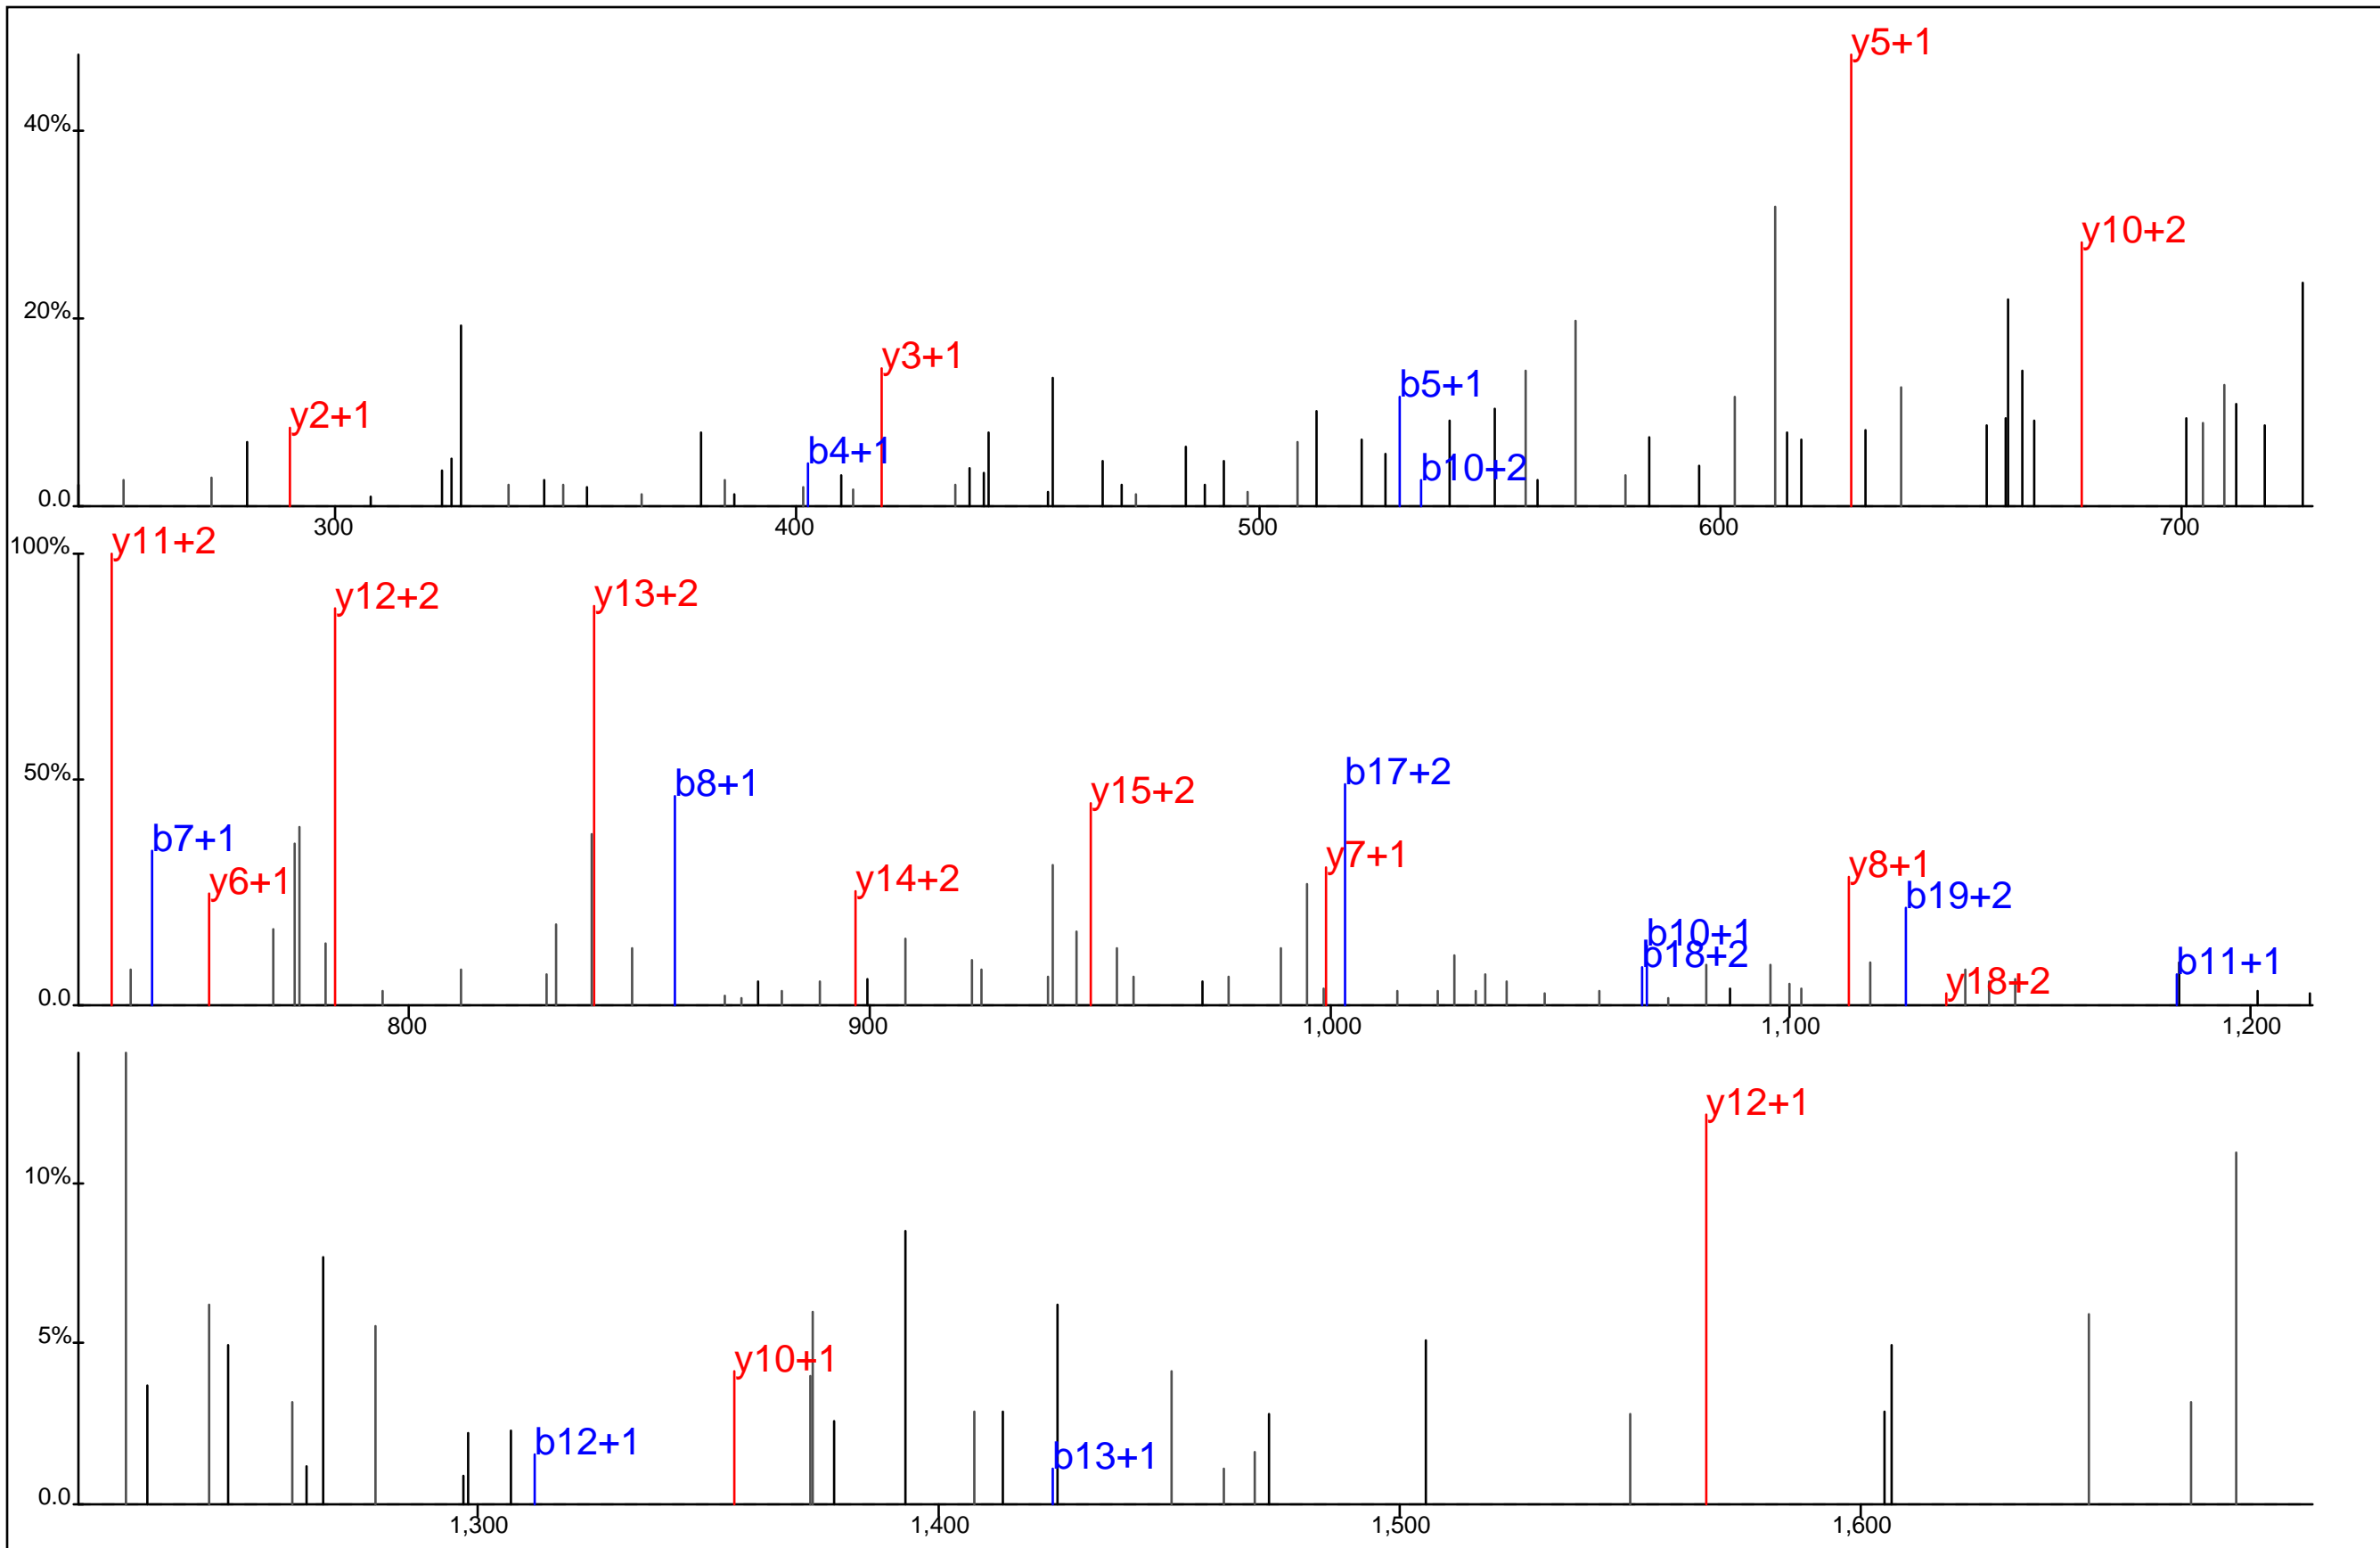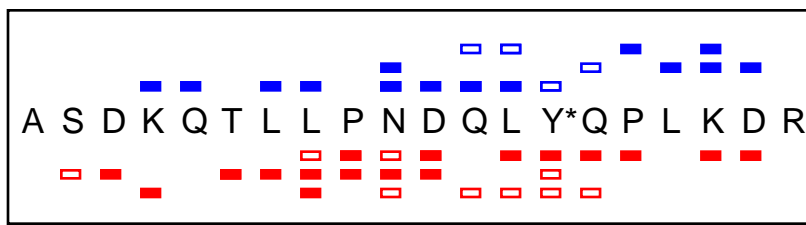

Protein Name: CD3 gamma  
 gi Accession: 0  
 Precursor Mass: 808.4047+3  
 Delta Mass: 1.250 ppm  
 XCorr: 32.24



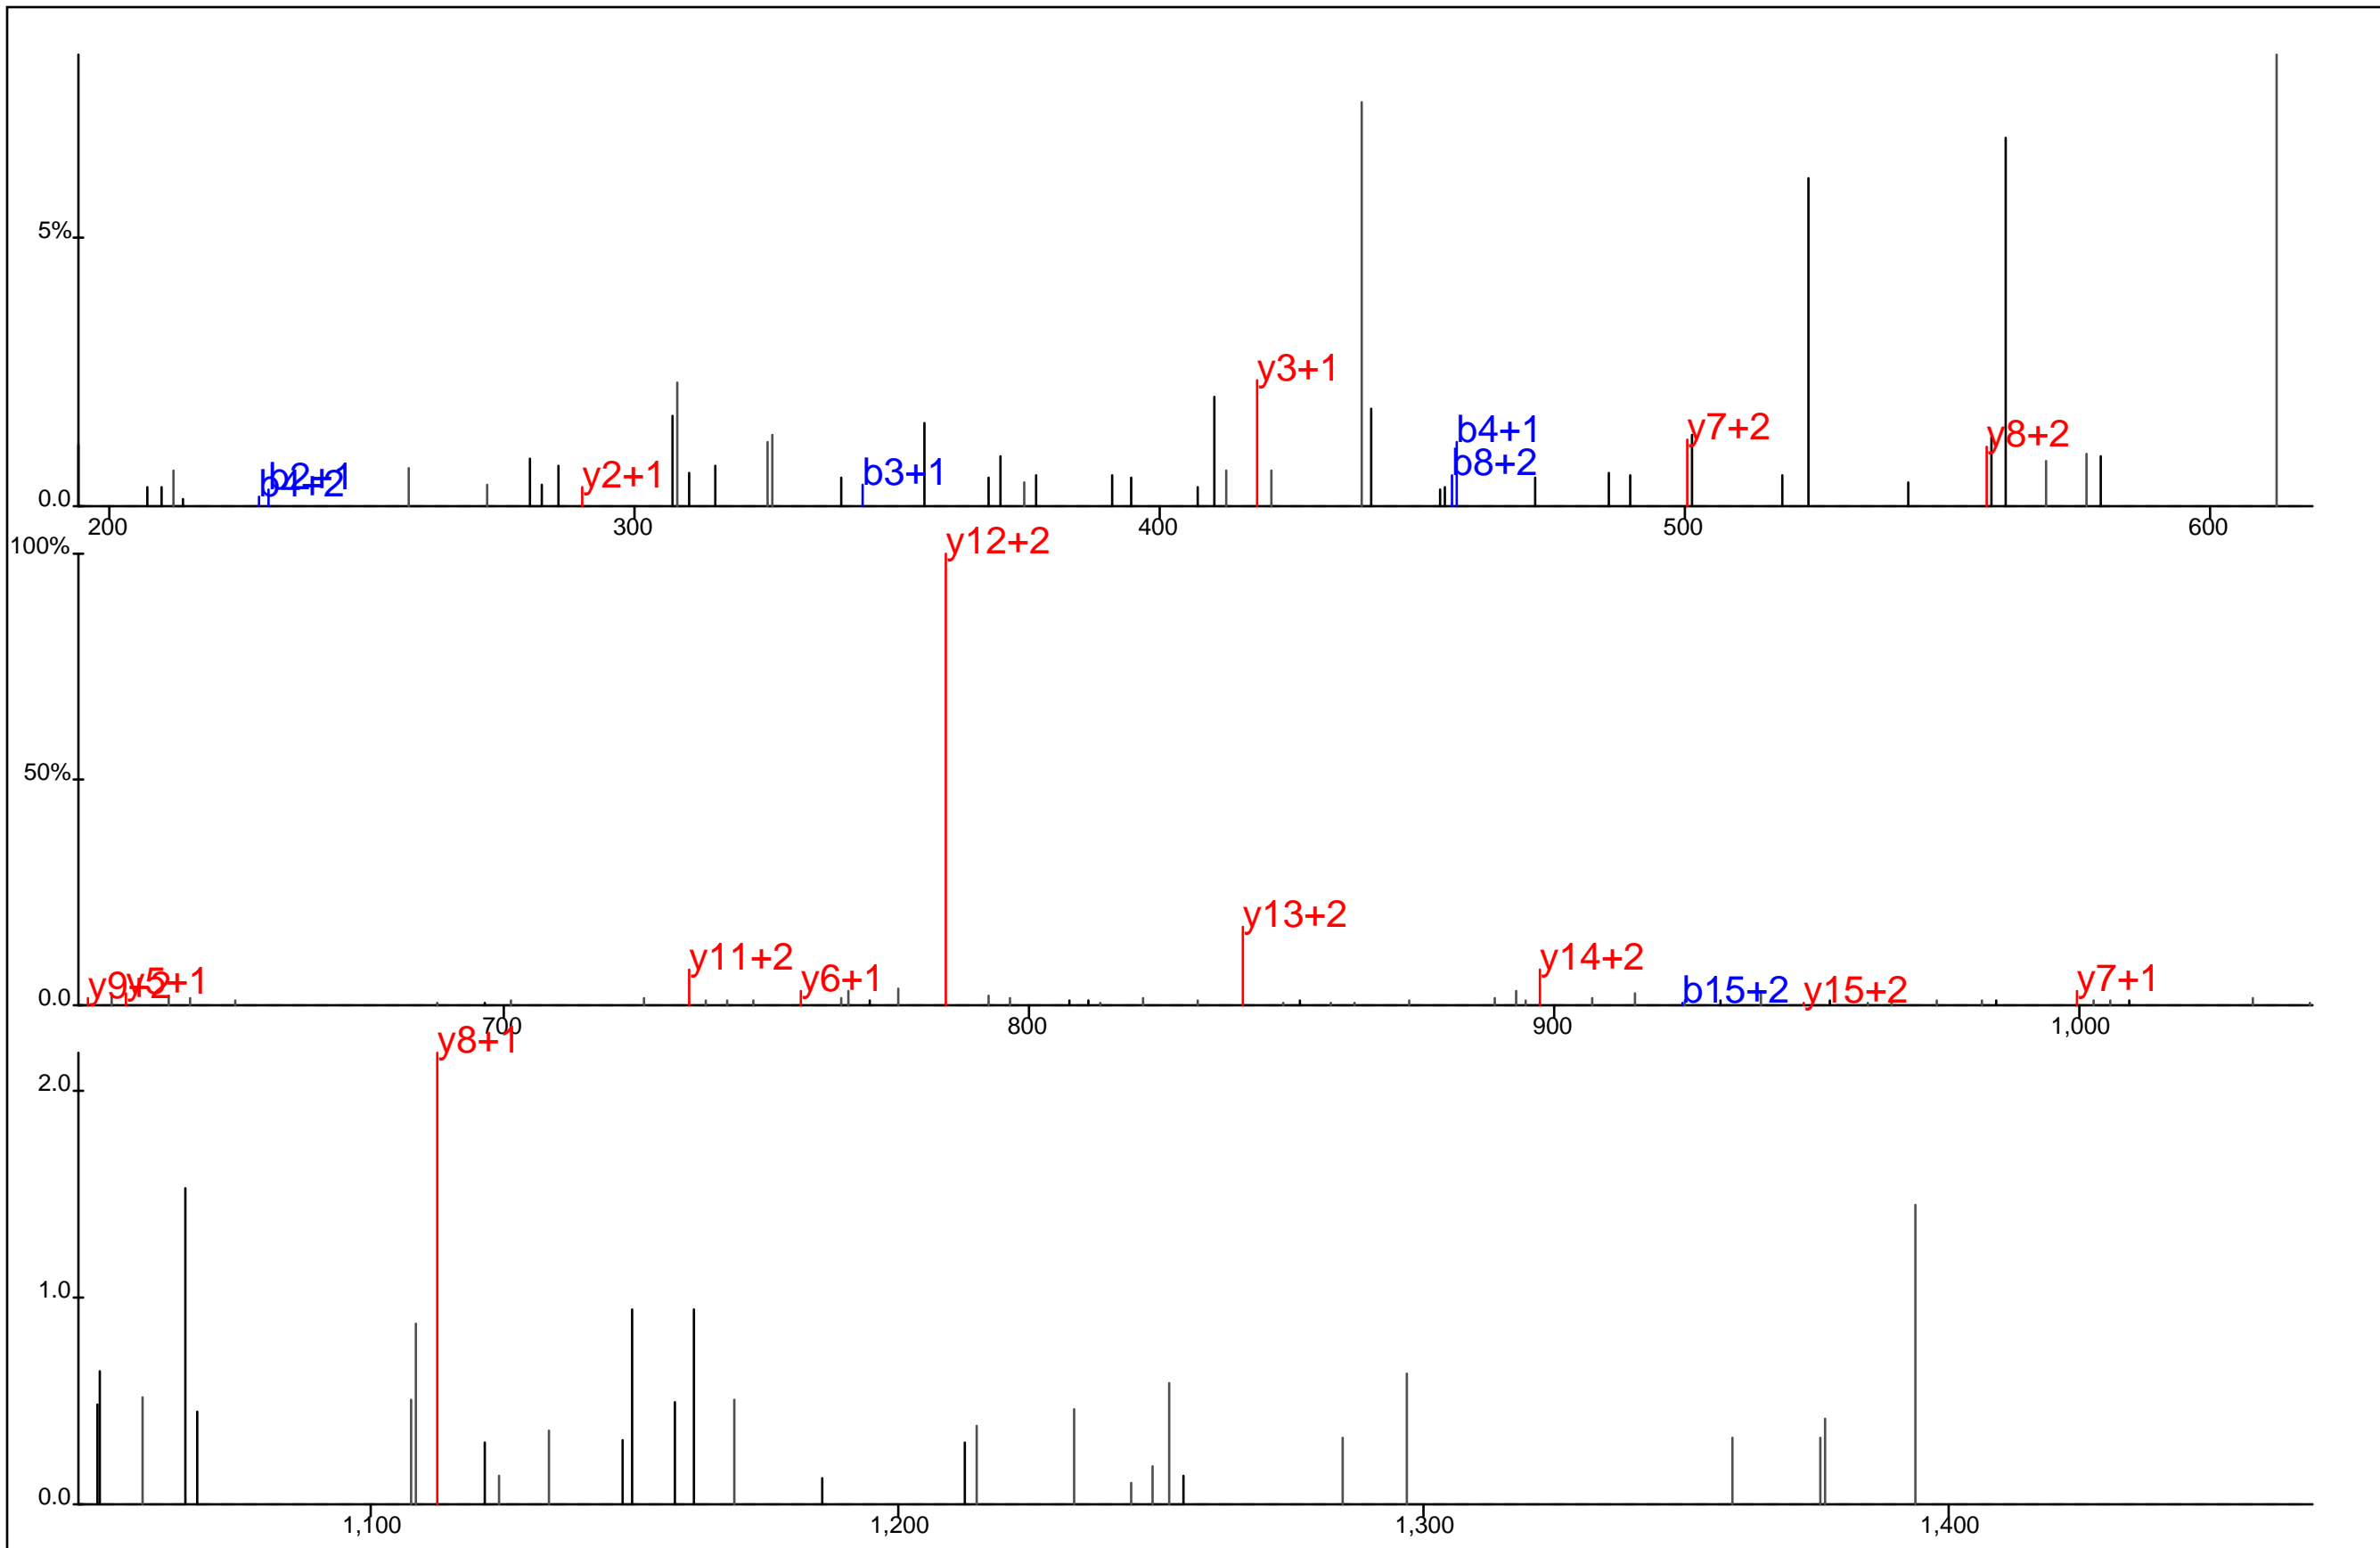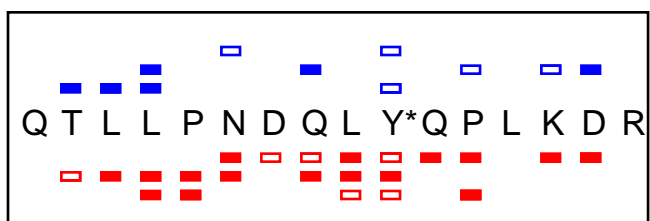

Protein Name: CD3 gamma  
 gi Accession: 0  
 Precursor Mass: 674.6755+3  
 Delta Mass: 3.128 ppm  
 XCorr: 26.68

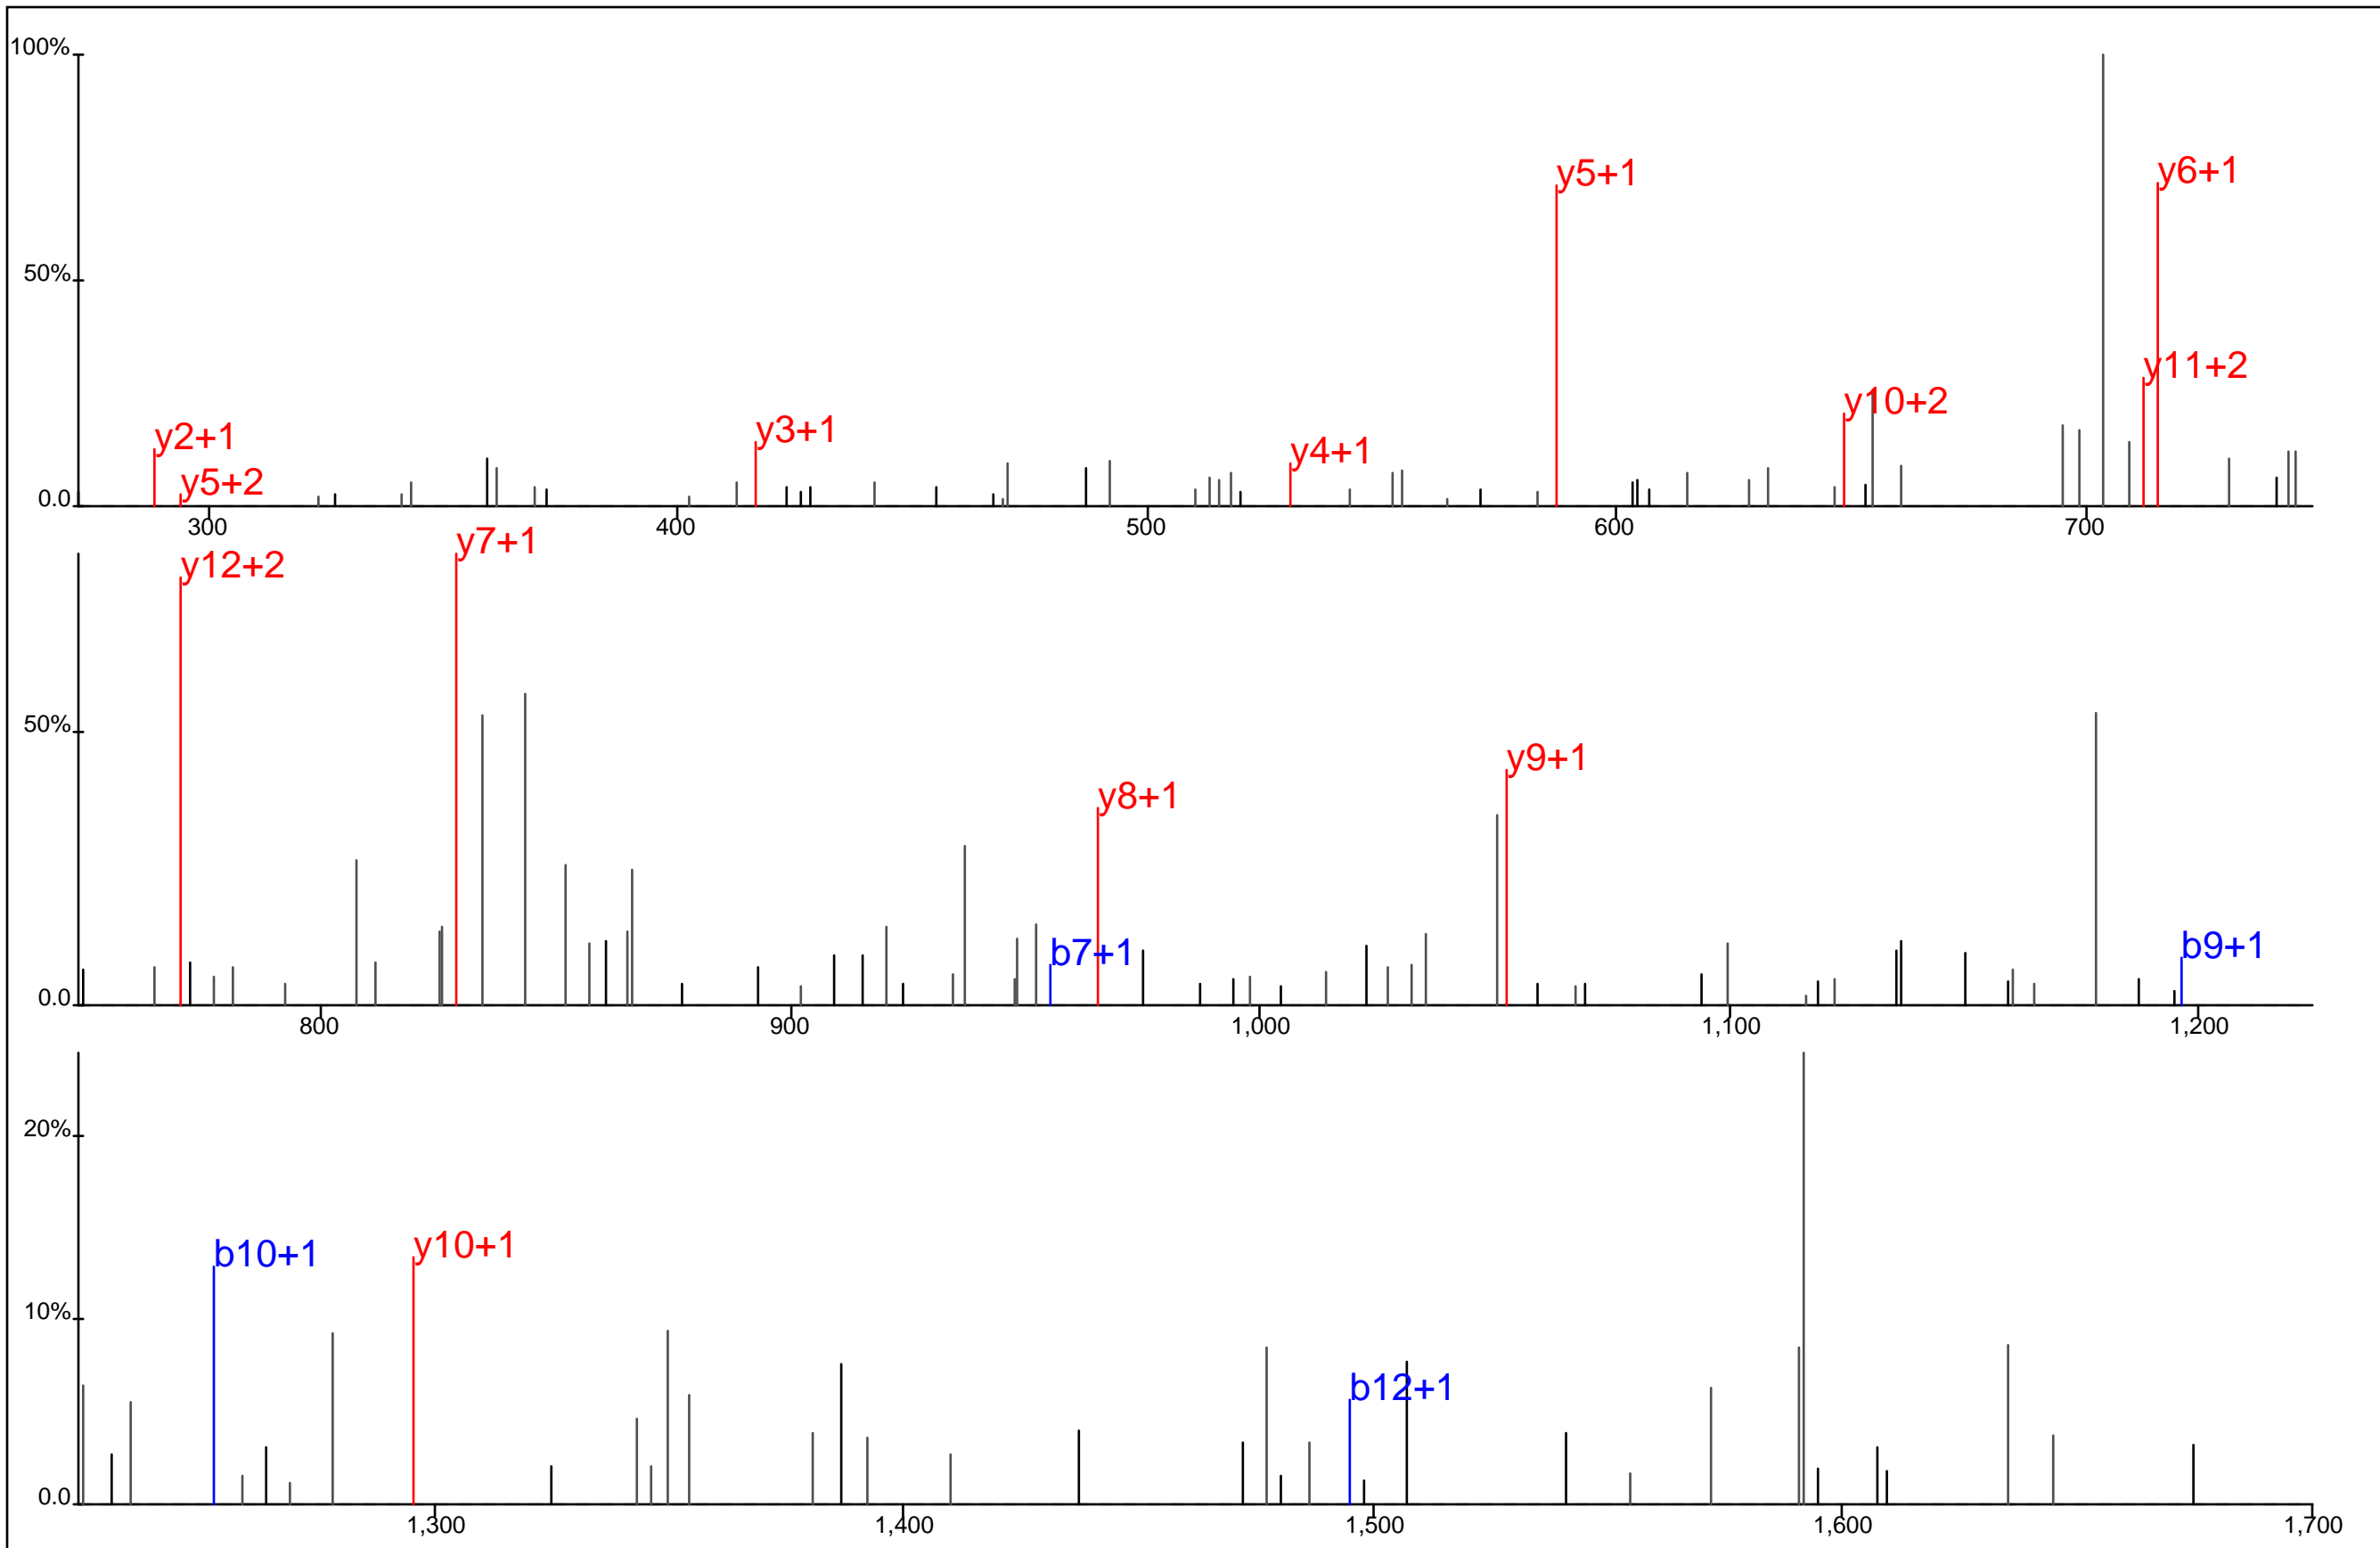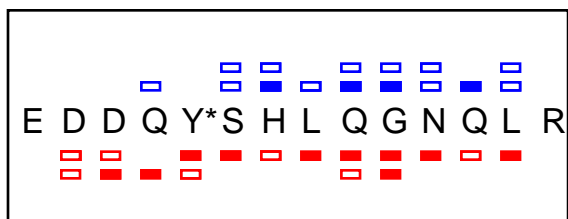

Protein Name: CD3 gamma  
 gi Accession: 0  
 Precursor Mass: 891.8751+2  
 Delta Mass: 0.794 ppm  
 XCorr: 48.47

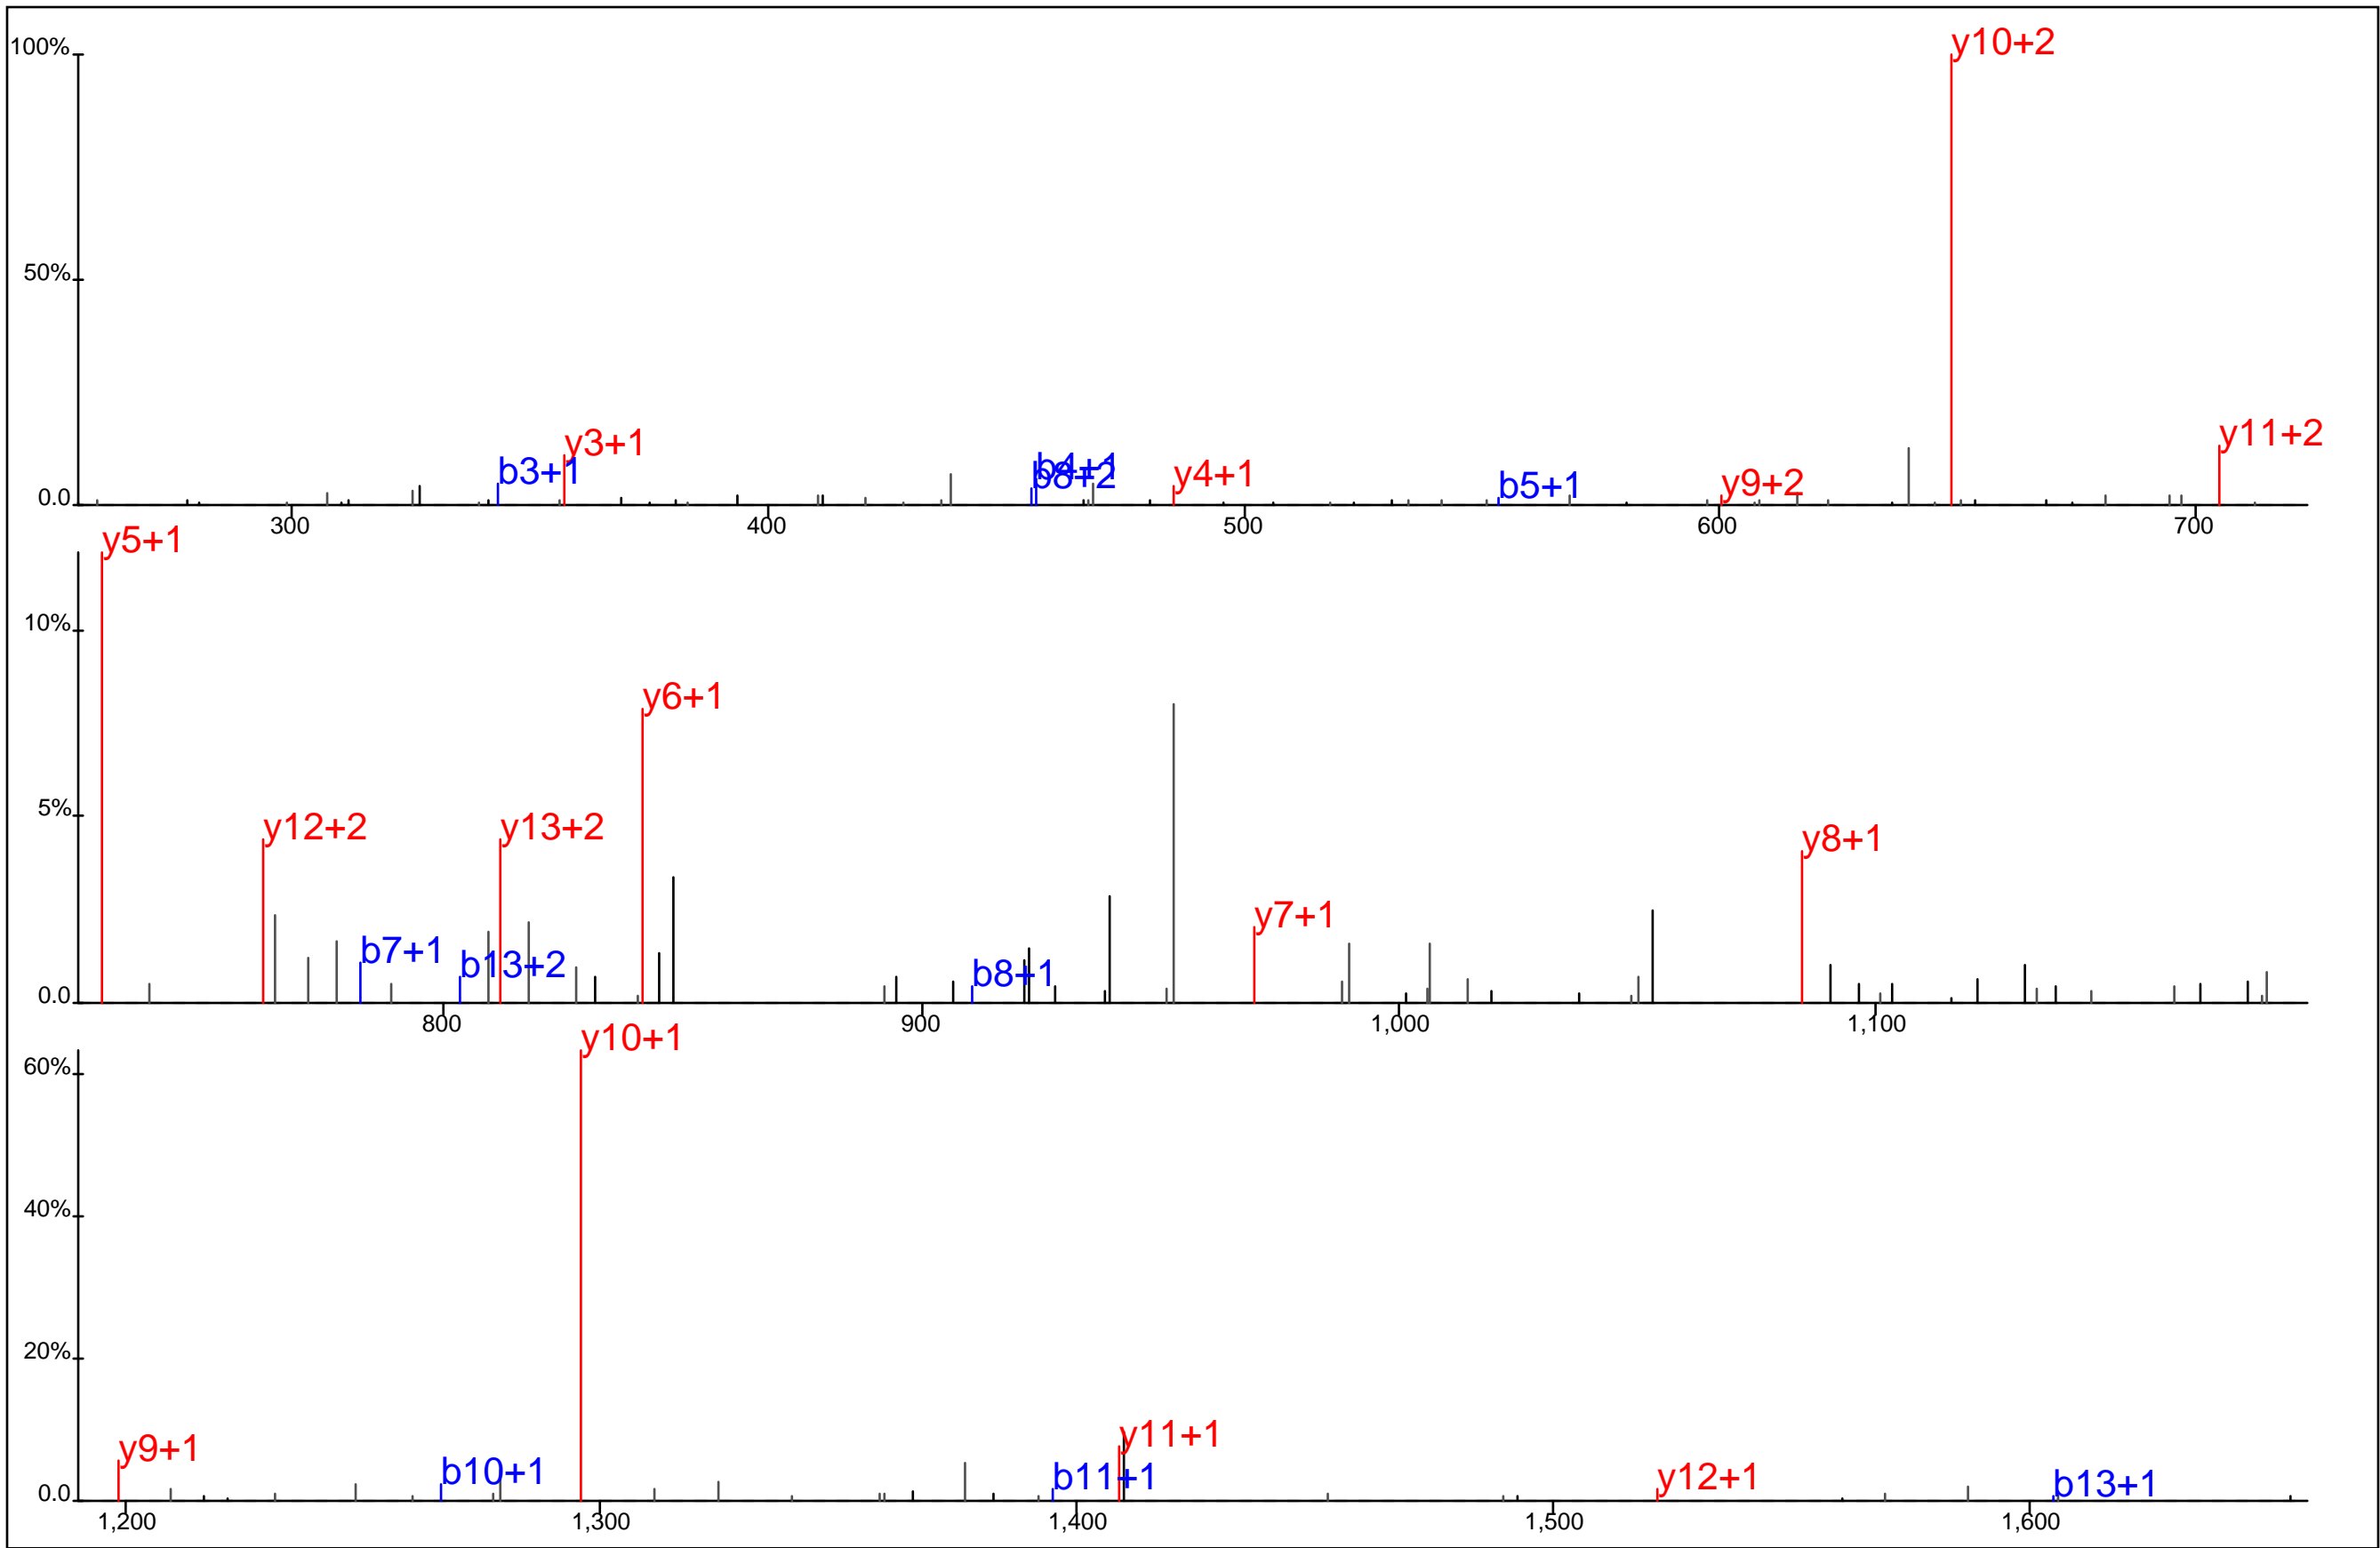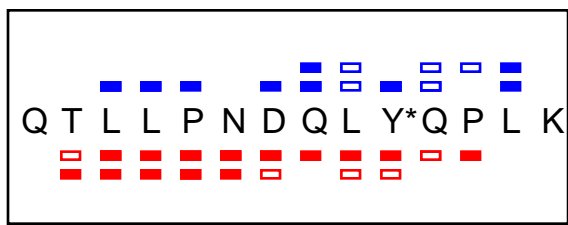

Protein Name: CD3 gamma  
 gi Accession: 0  
 Precursor Mass: 875.9434+2  
 Delta Mass: 1.178 ppm  
 XCorr: 70.69

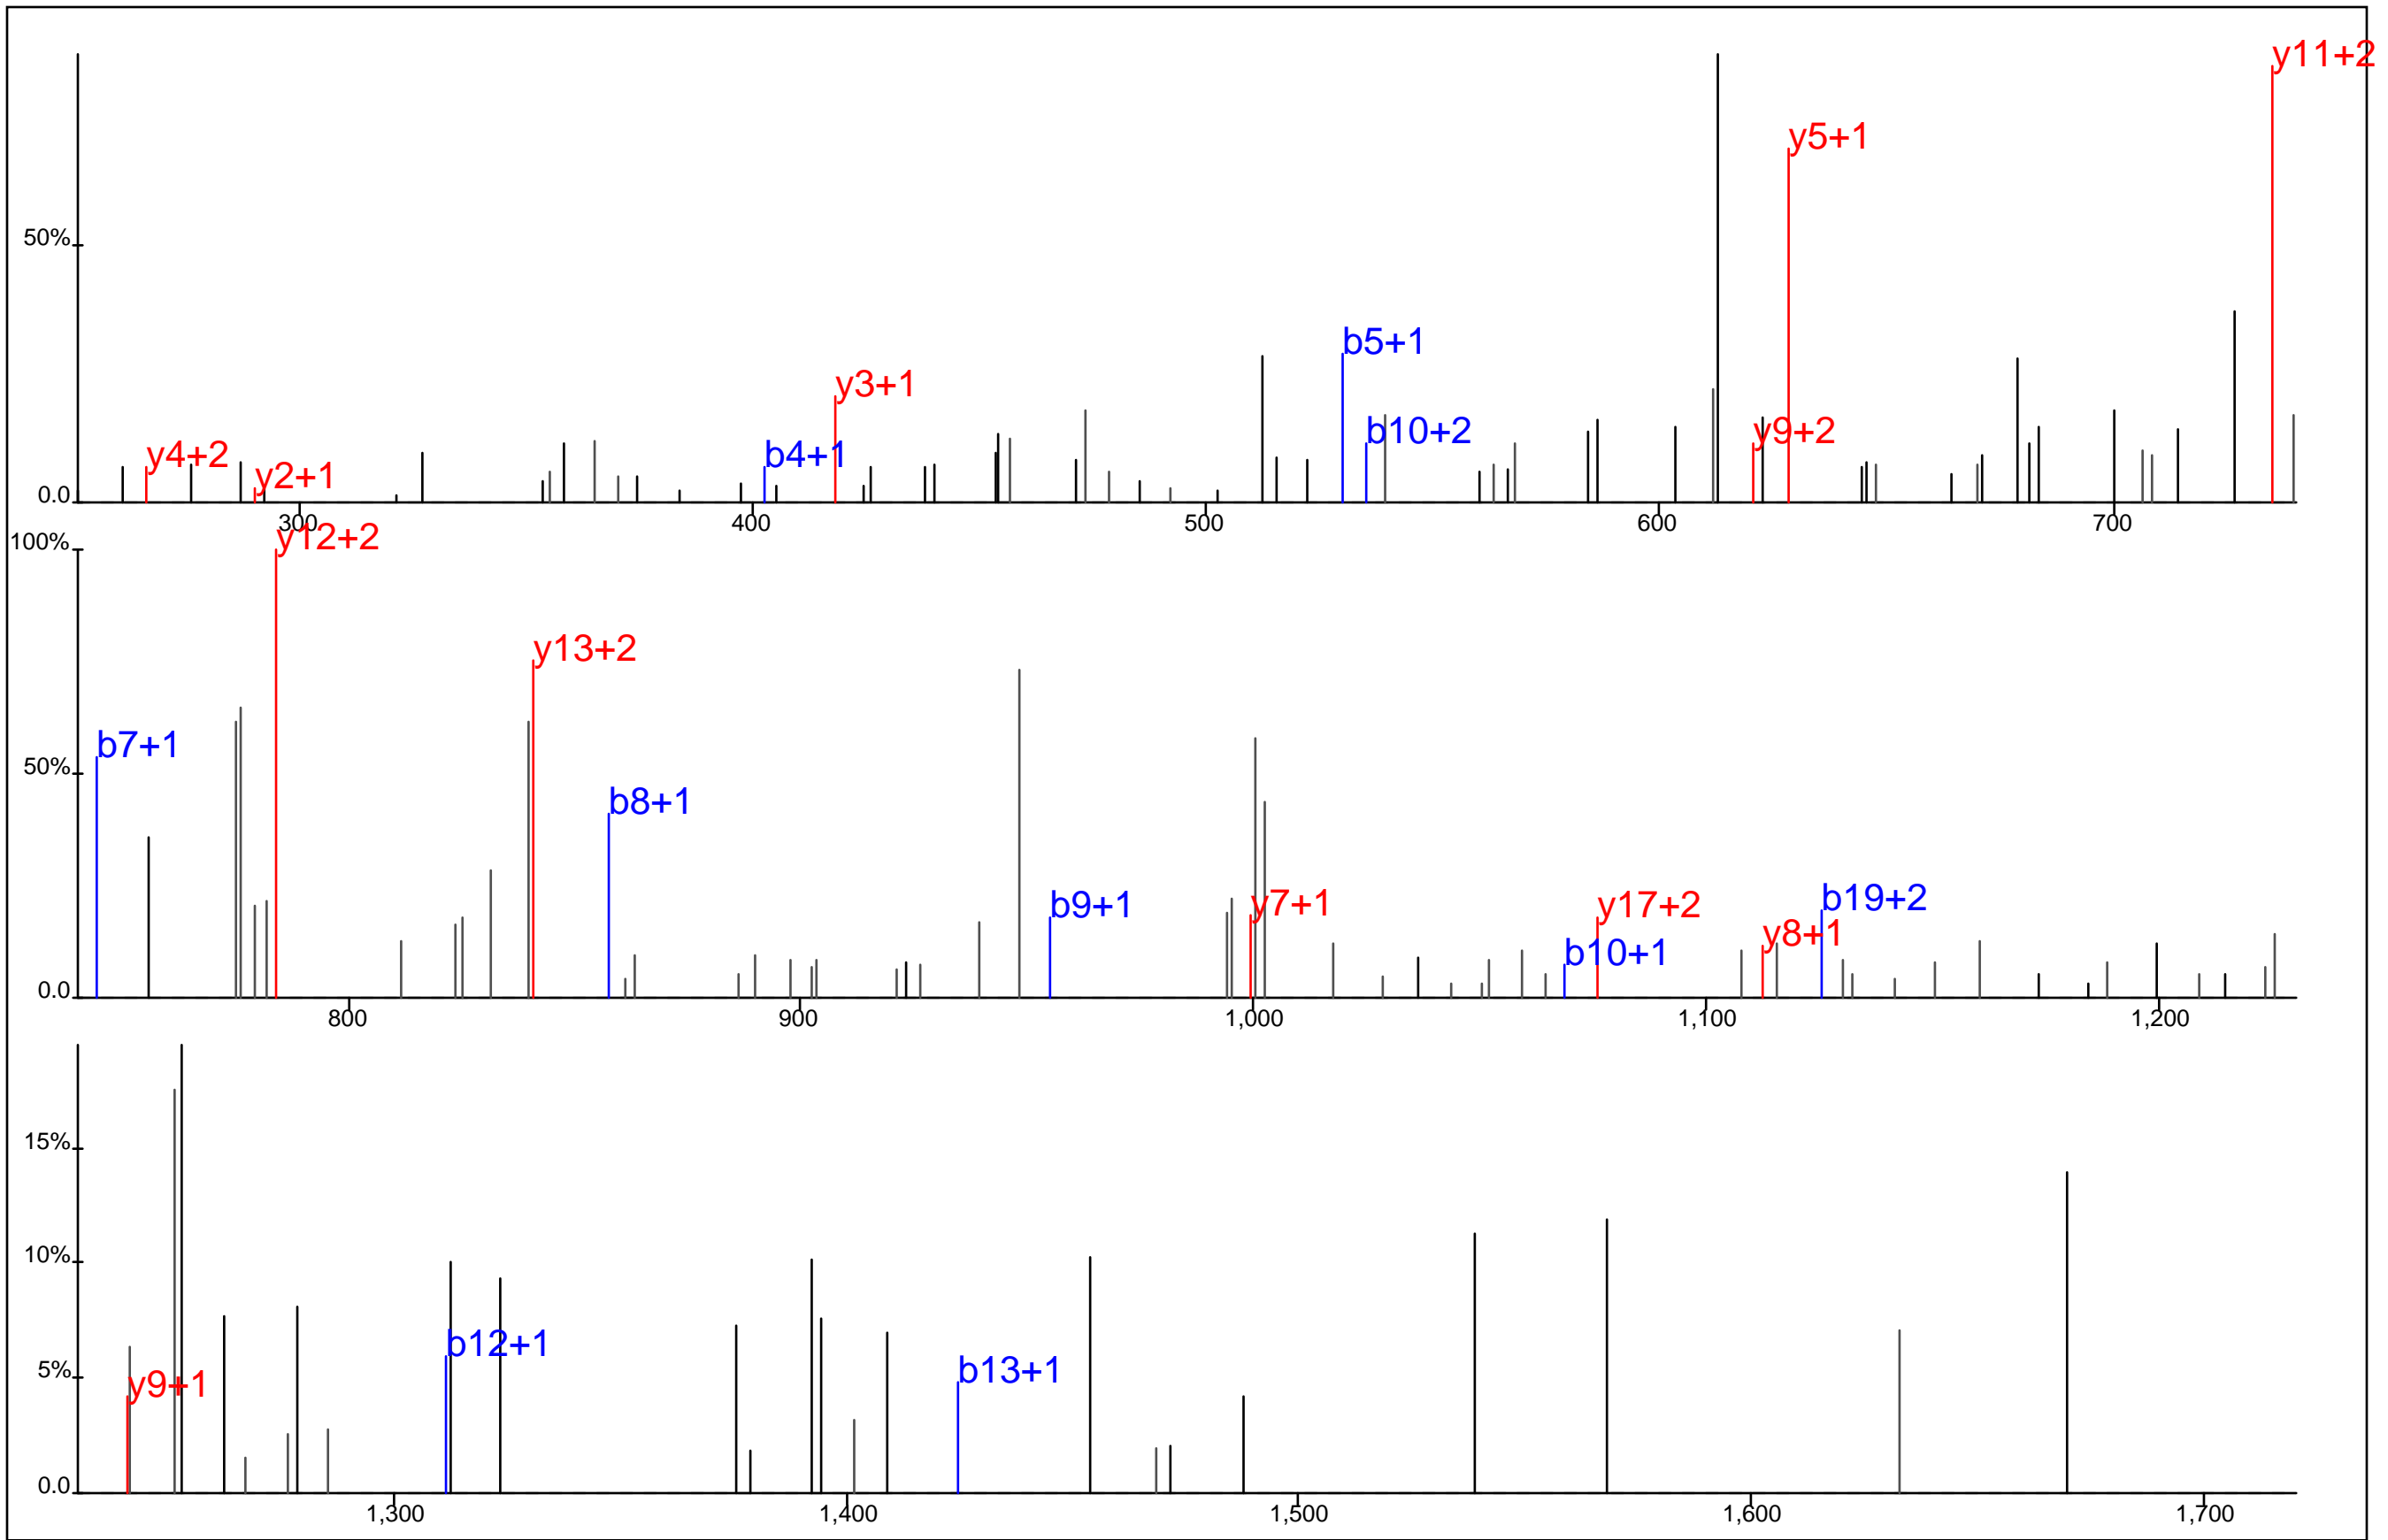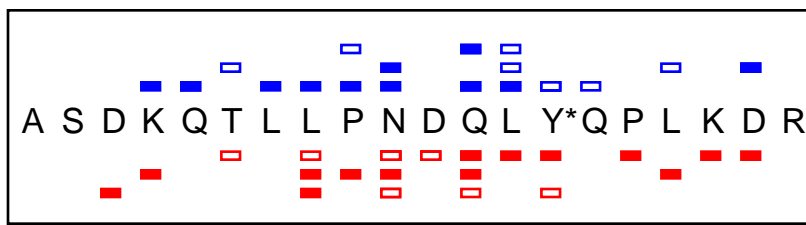

Protein Name: CD3 gamma  
 gi Accession: 0  
 Precursor Mass: 808.4058+3  
 Delta Mass: 2.535 ppm  
 XCorr: 23.08

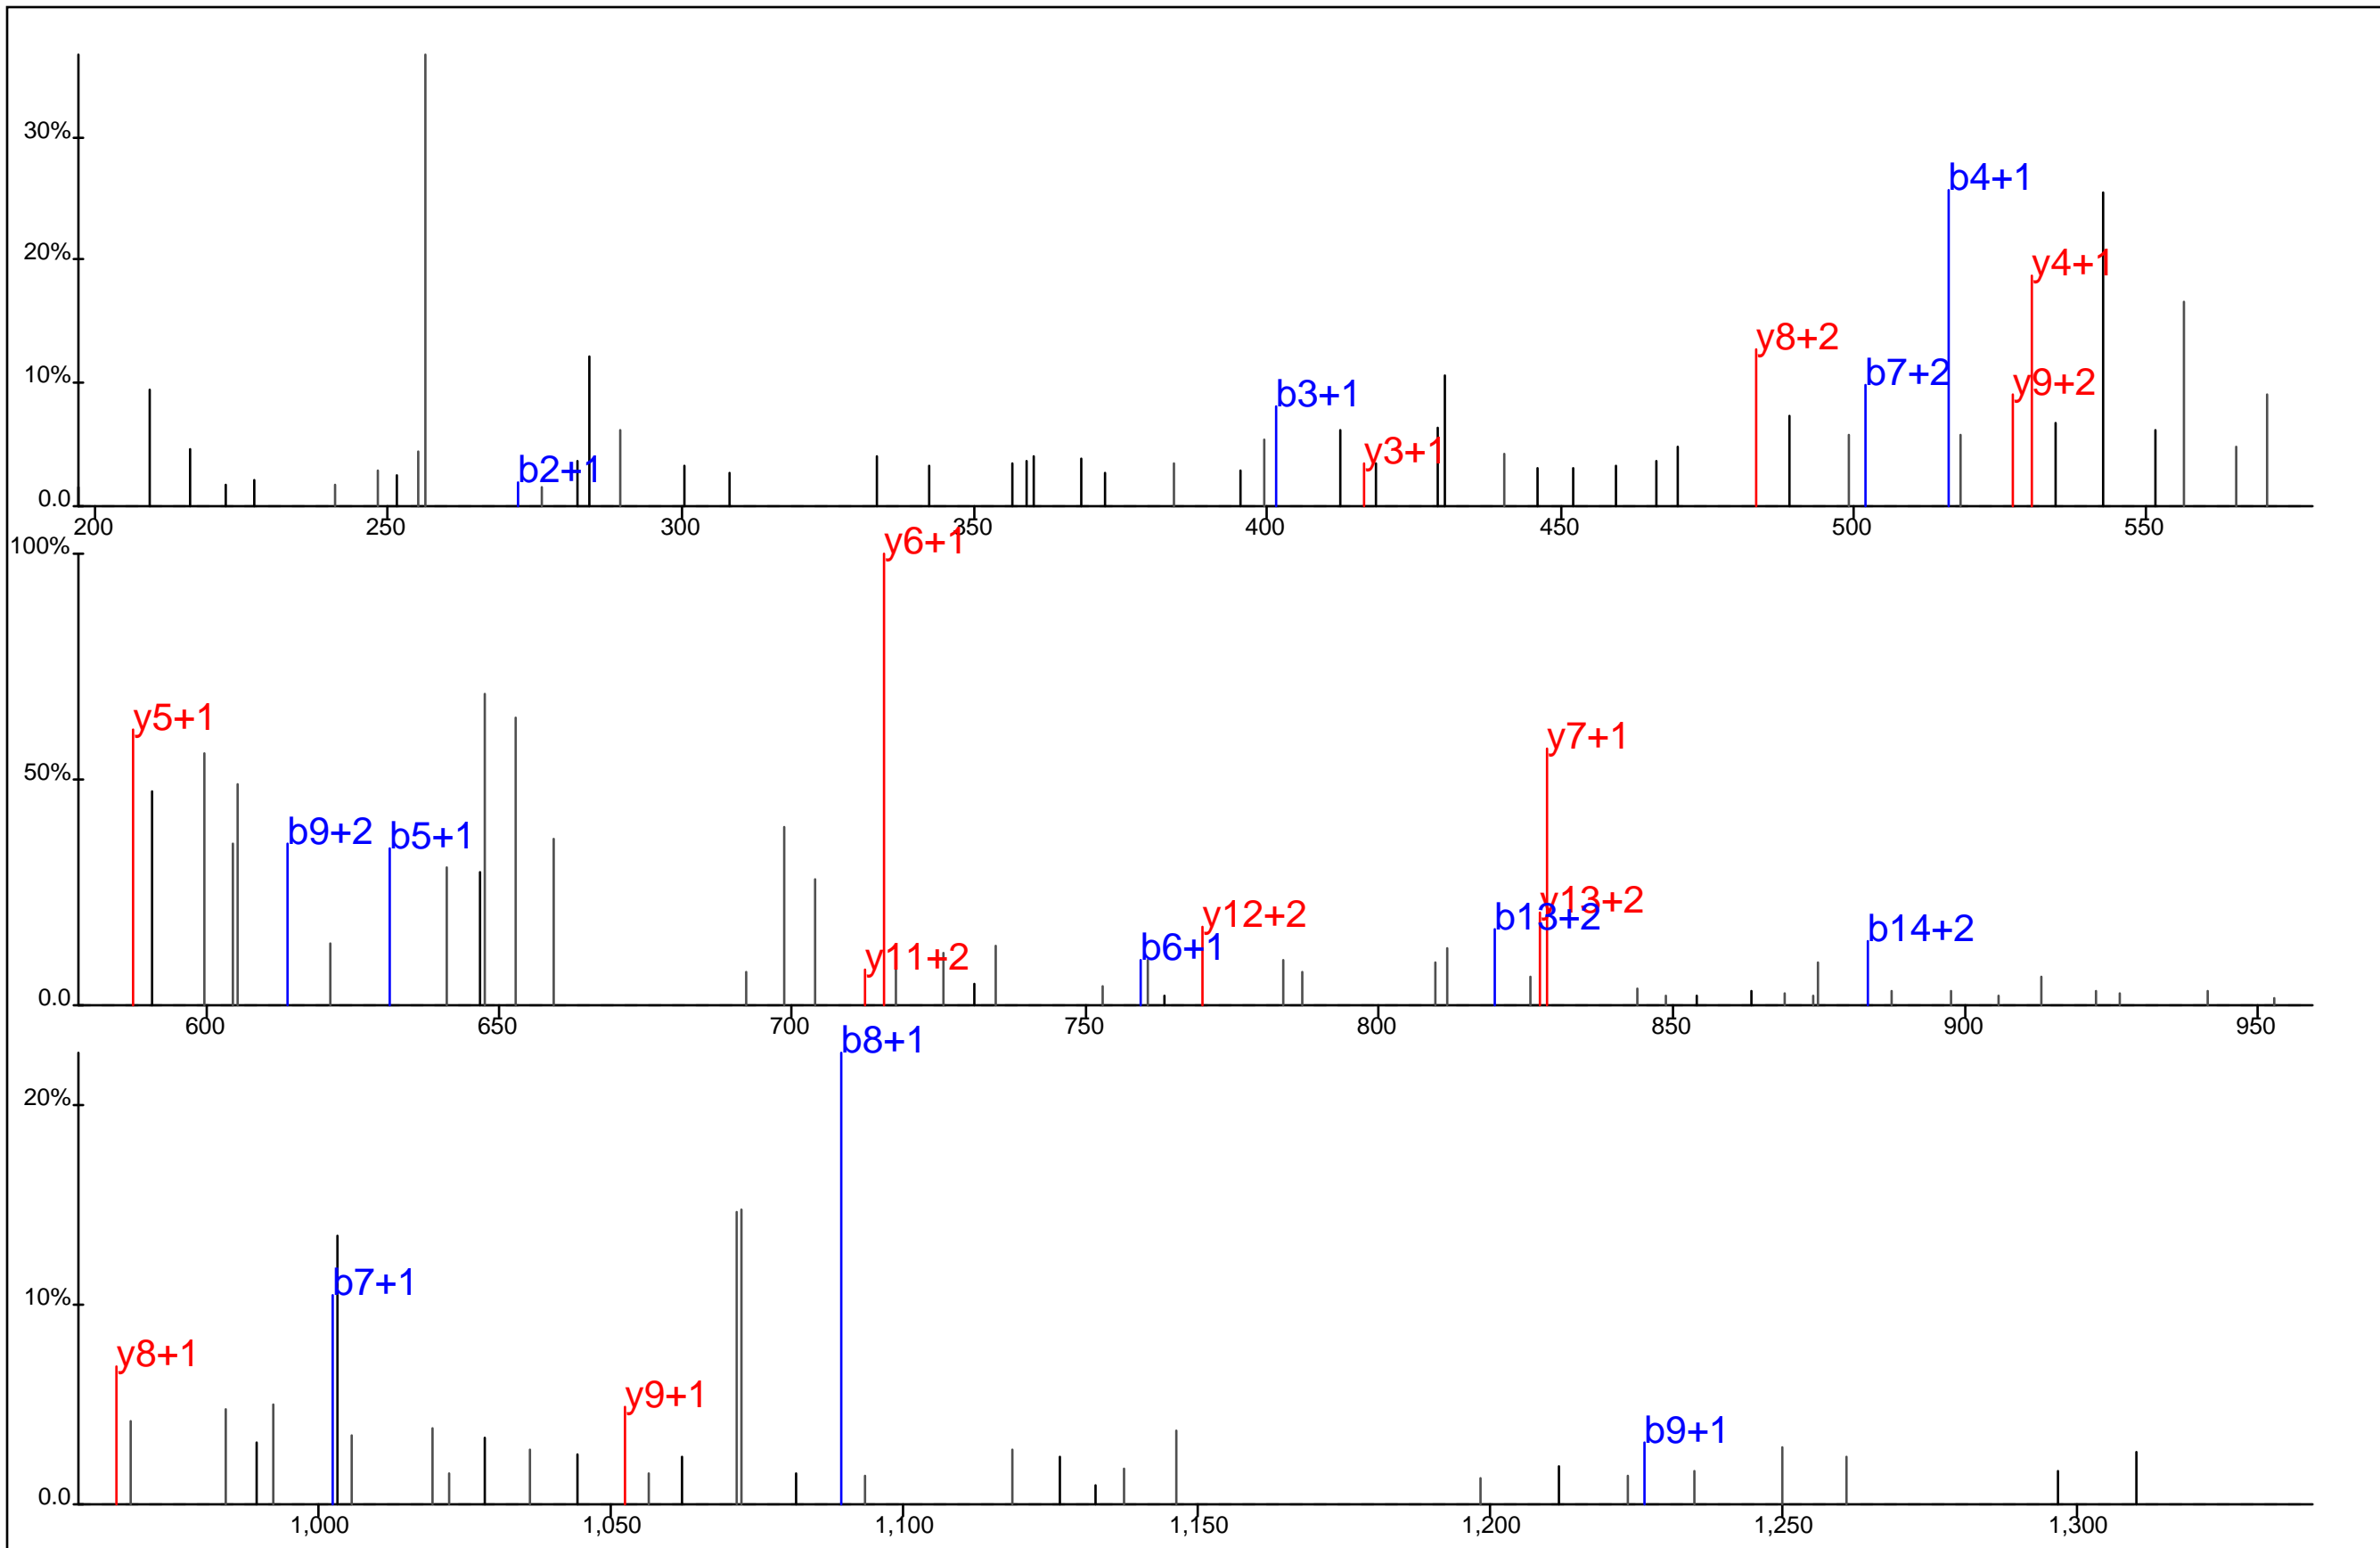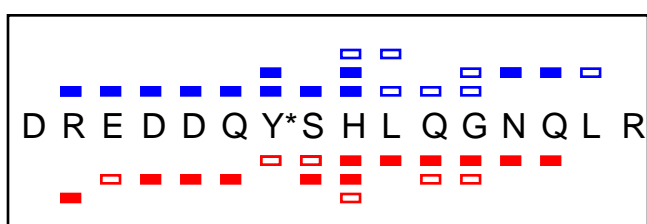

Protein Name: CD3 gamma  
 gi Accession: 0  
 Precursor Mass: 685.2958+3  
 Delta Mass: 0.226 ppm  
 XCorr: 20.3

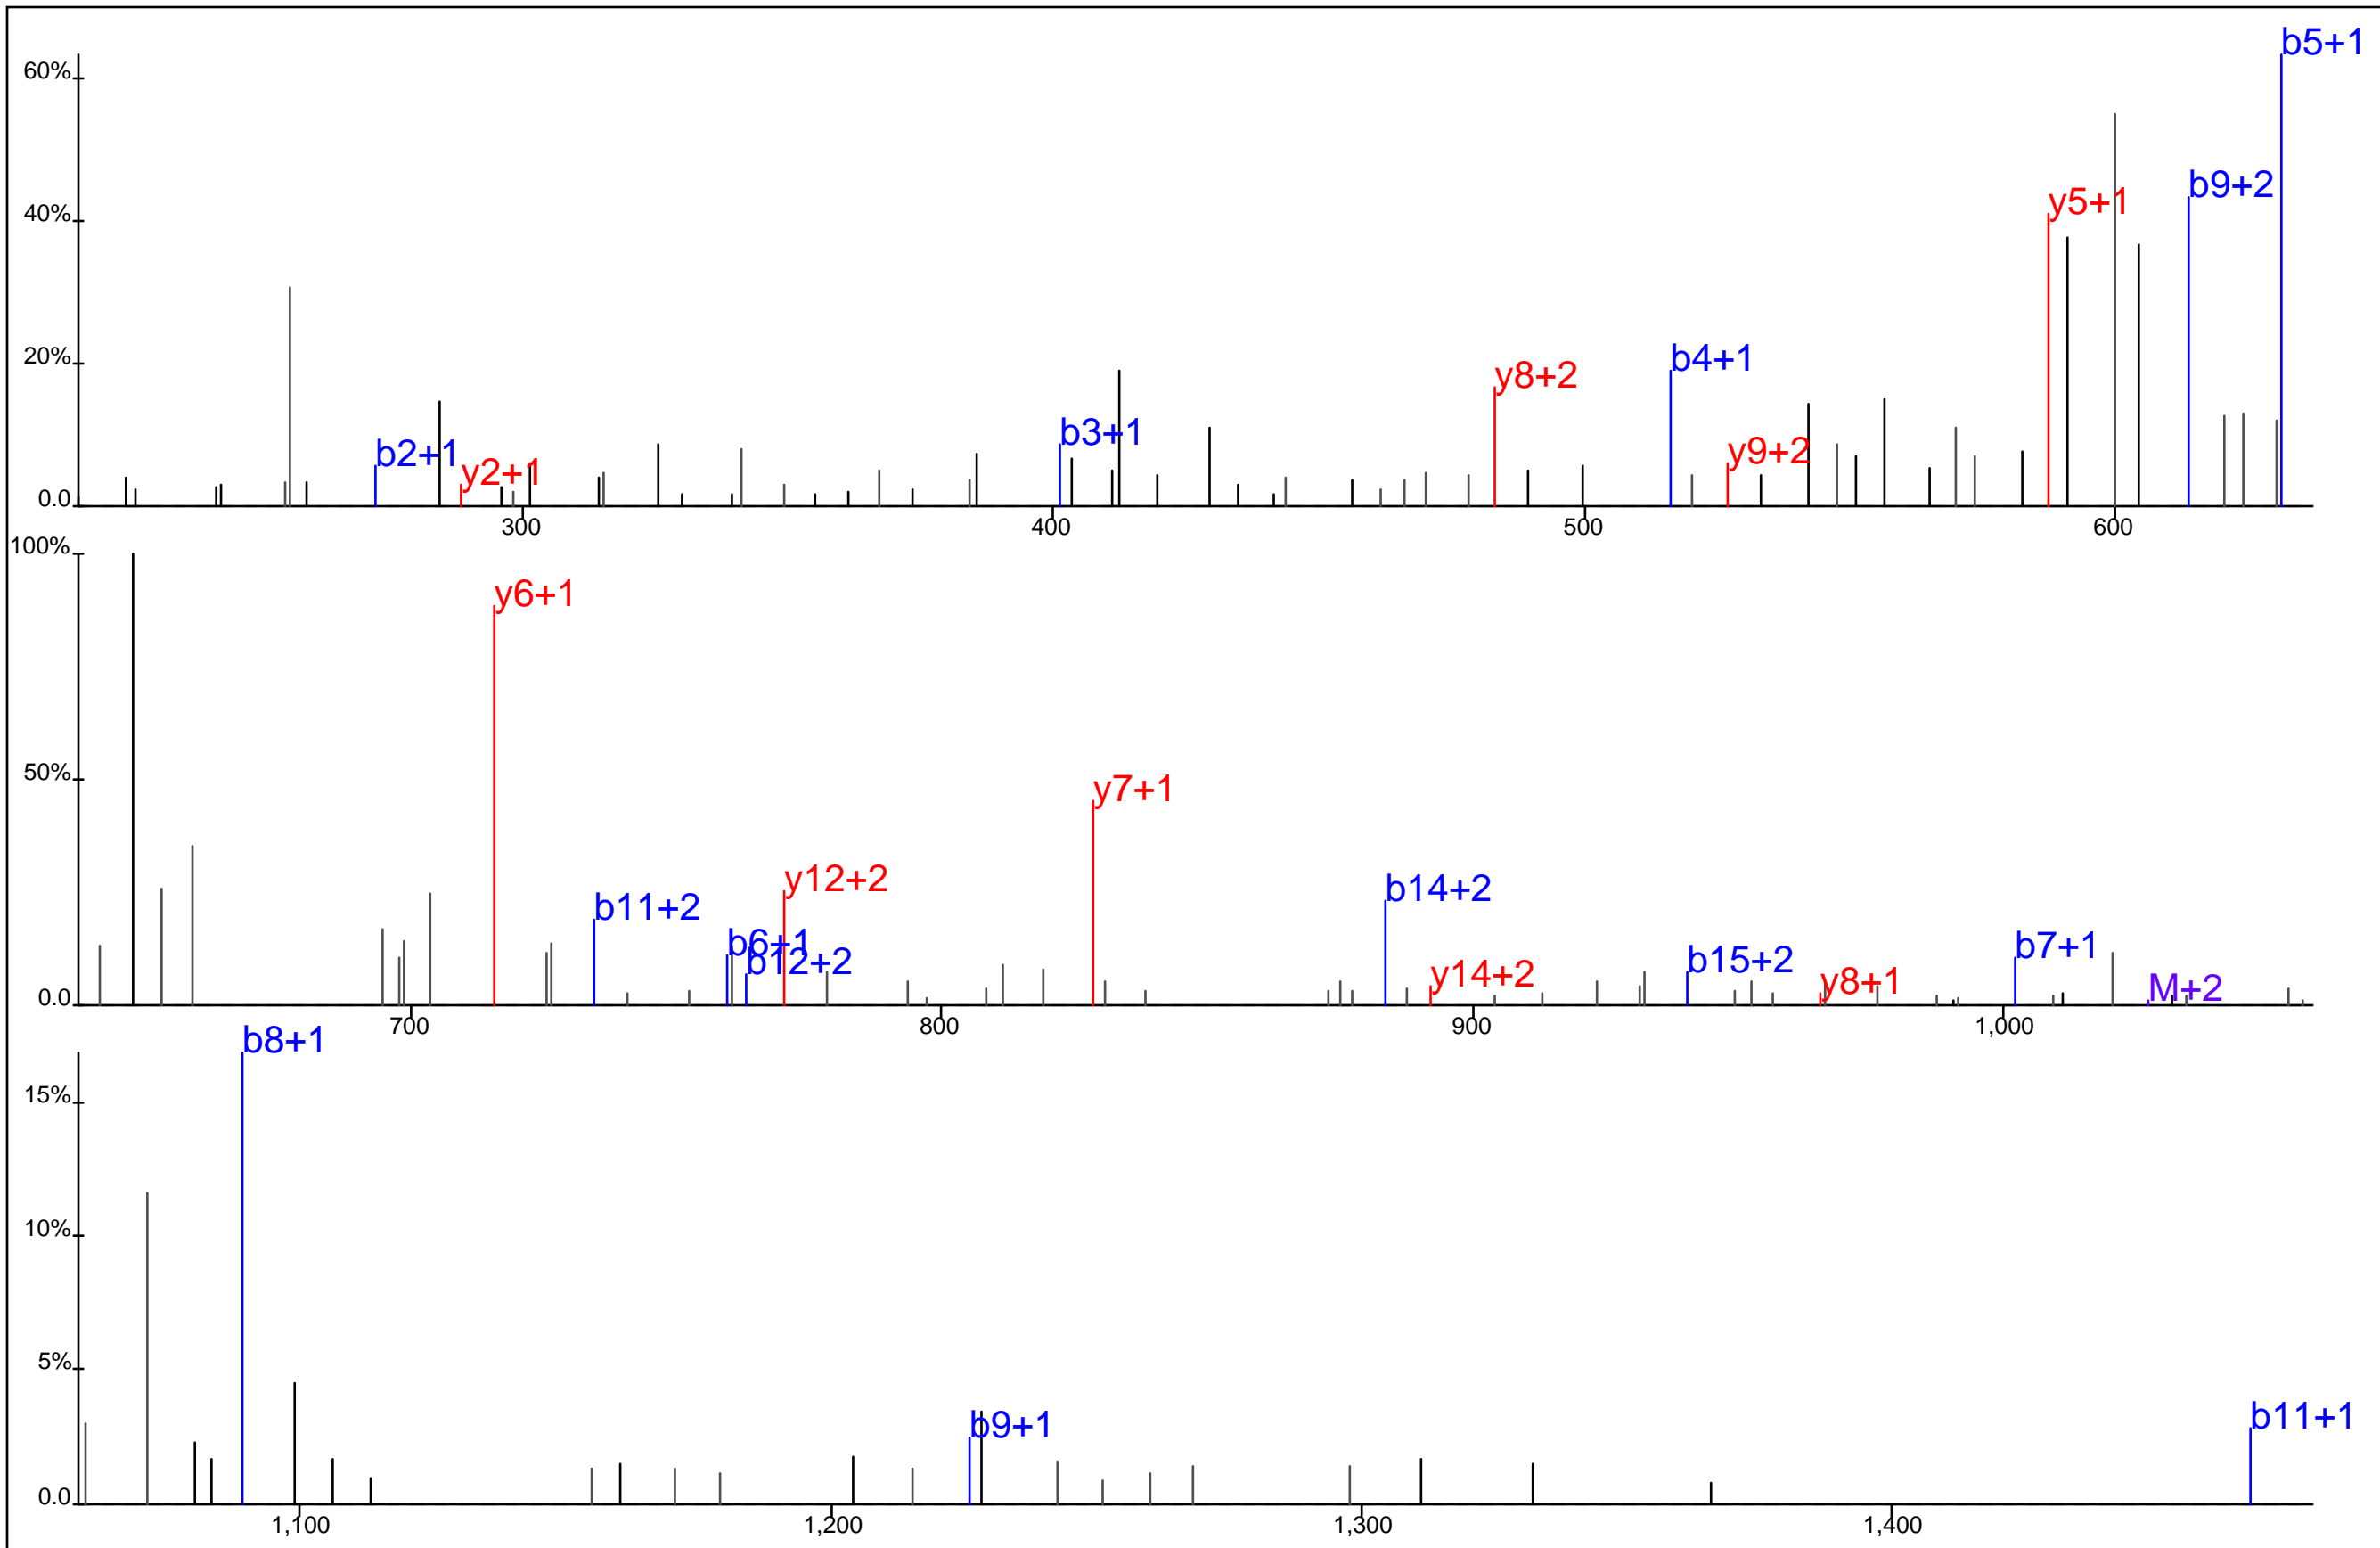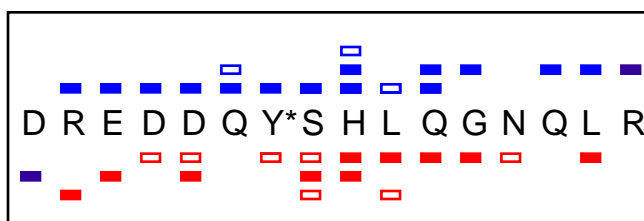

Protein Name: CD3 gamma  
 gi Accession: 0  
 Precursor Mass: 685.2949+3  
 Delta Mass: 1.021 ppm  
 XCorr: 29.71

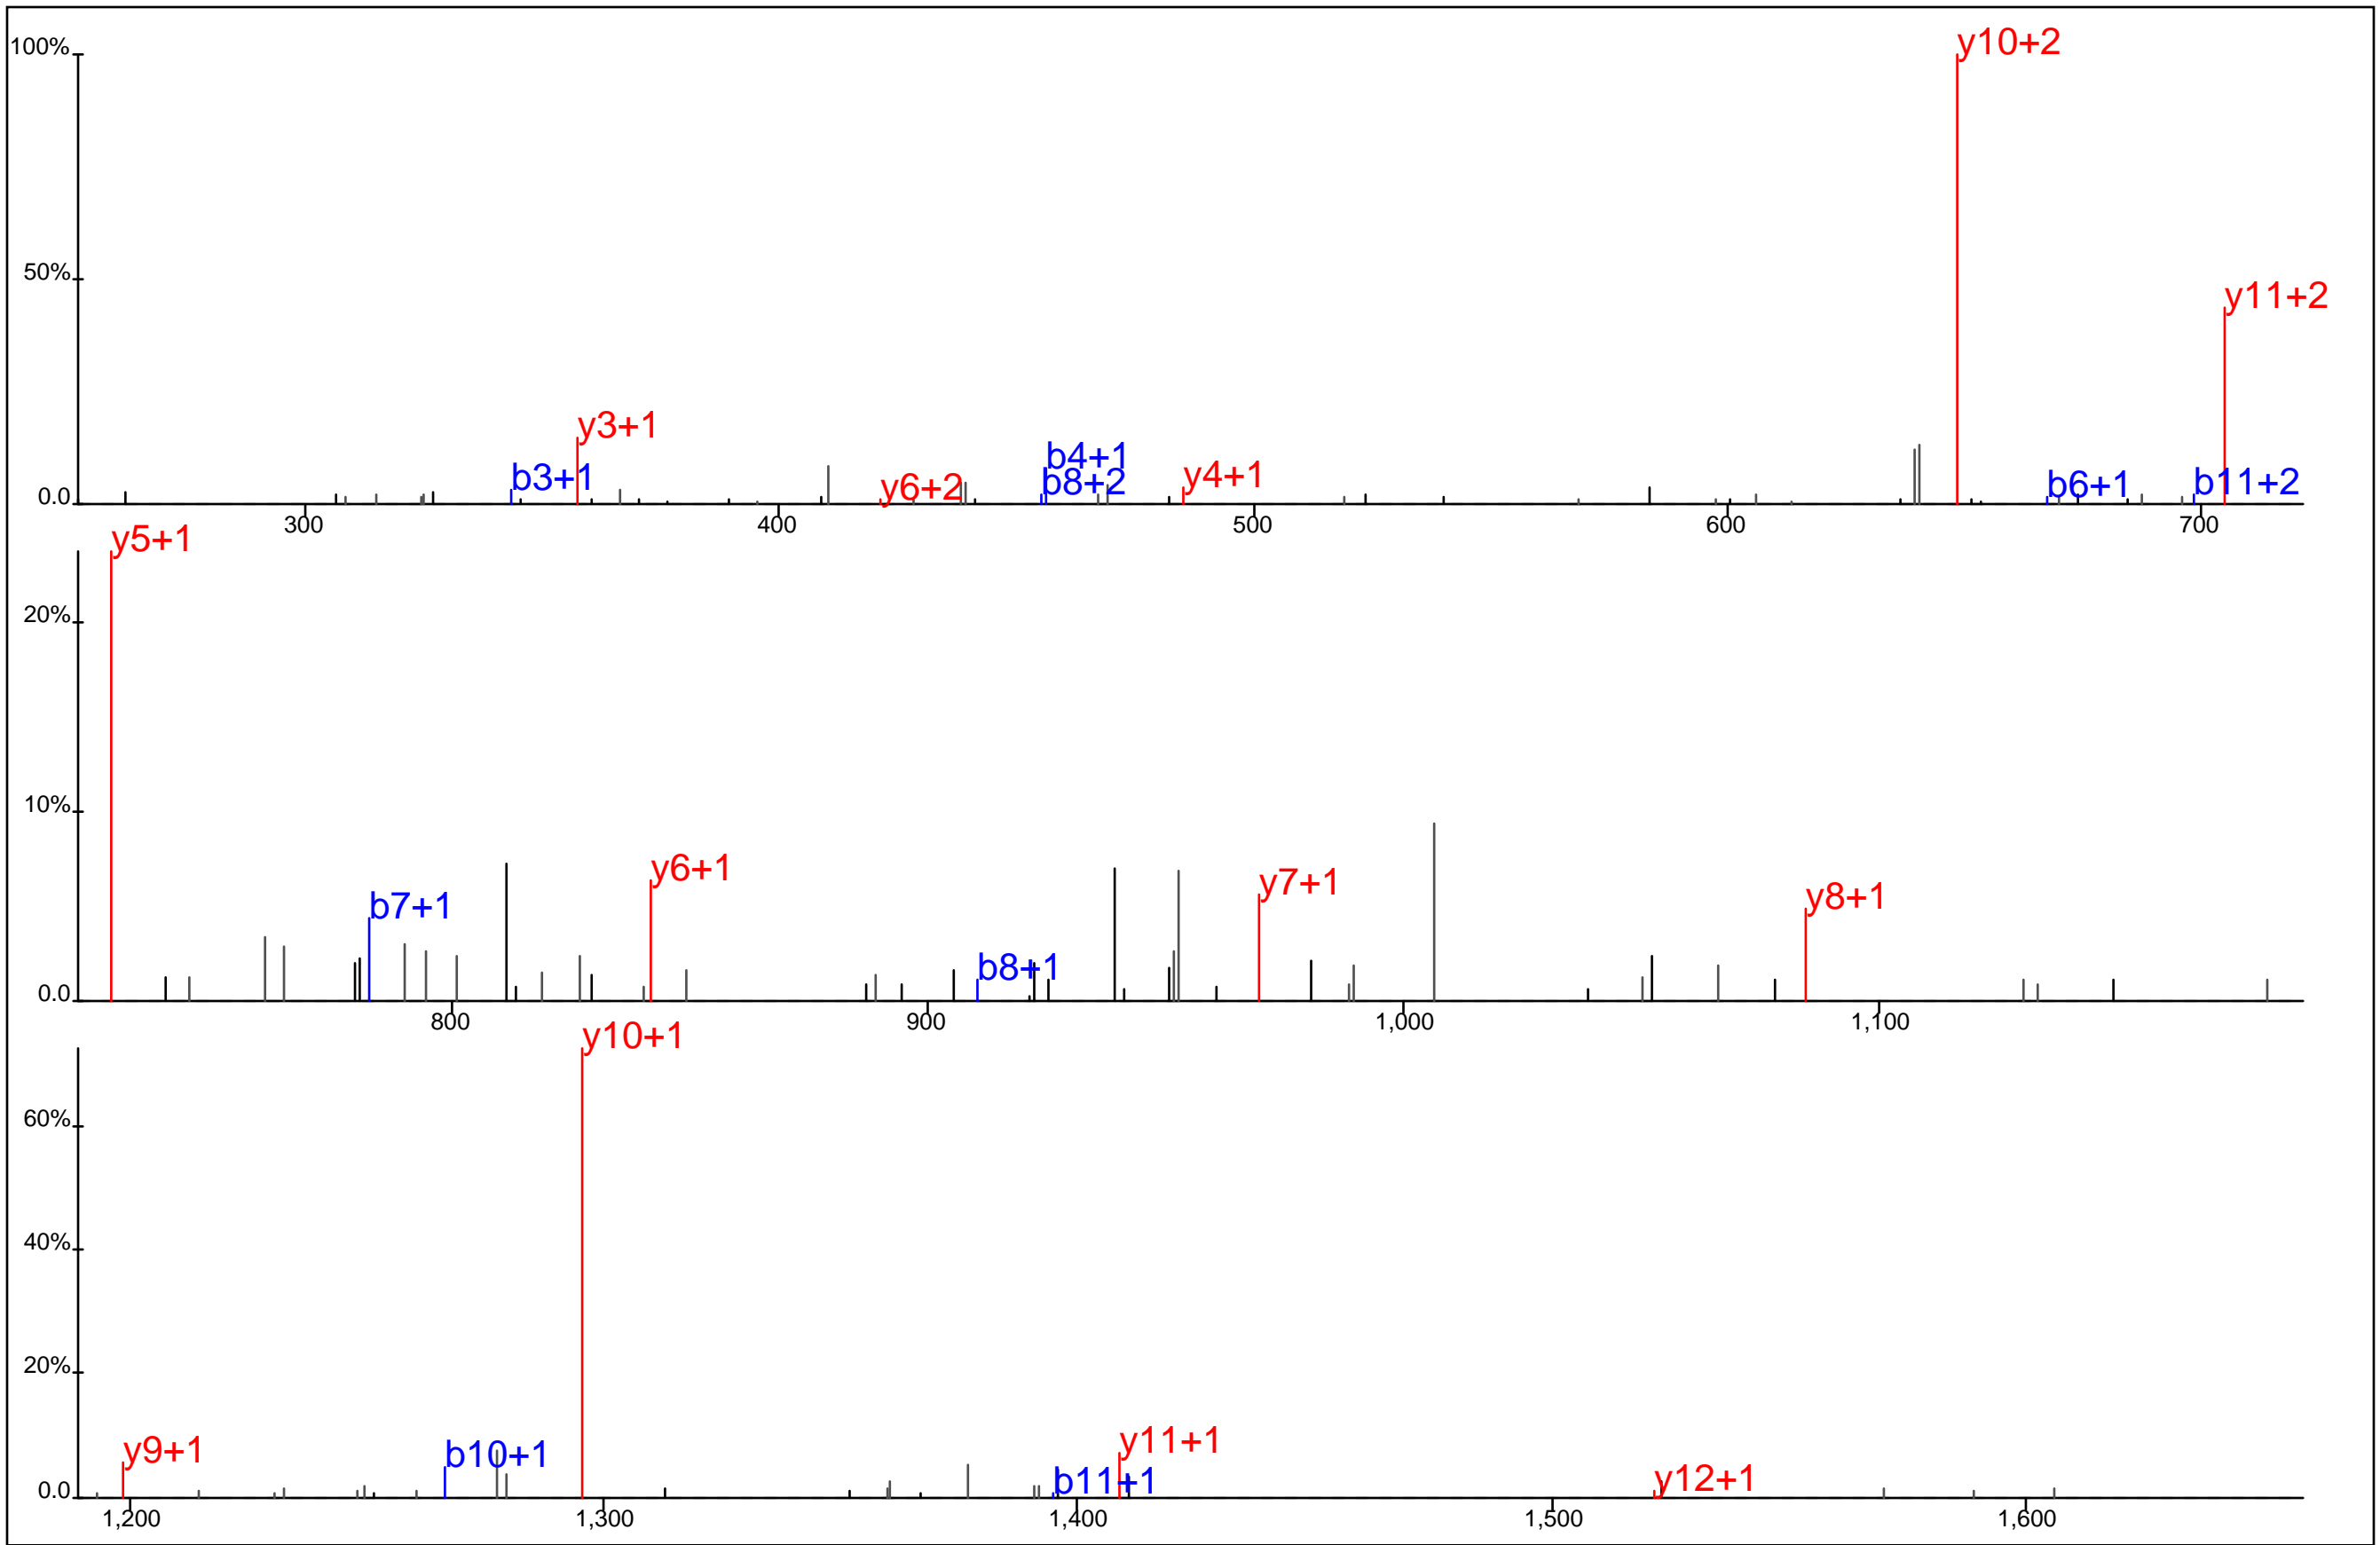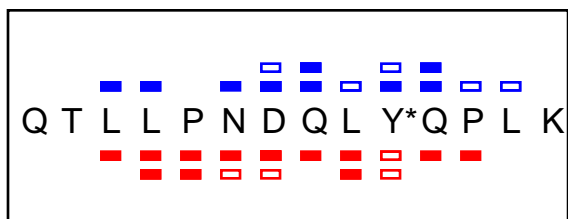

Protein Name: CD3 gamma  
 gi Accession: 0  
 Precursor Mass: 875.9438+2  
 Delta Mass: 1.667 ppm  
 XCorr: 67.2

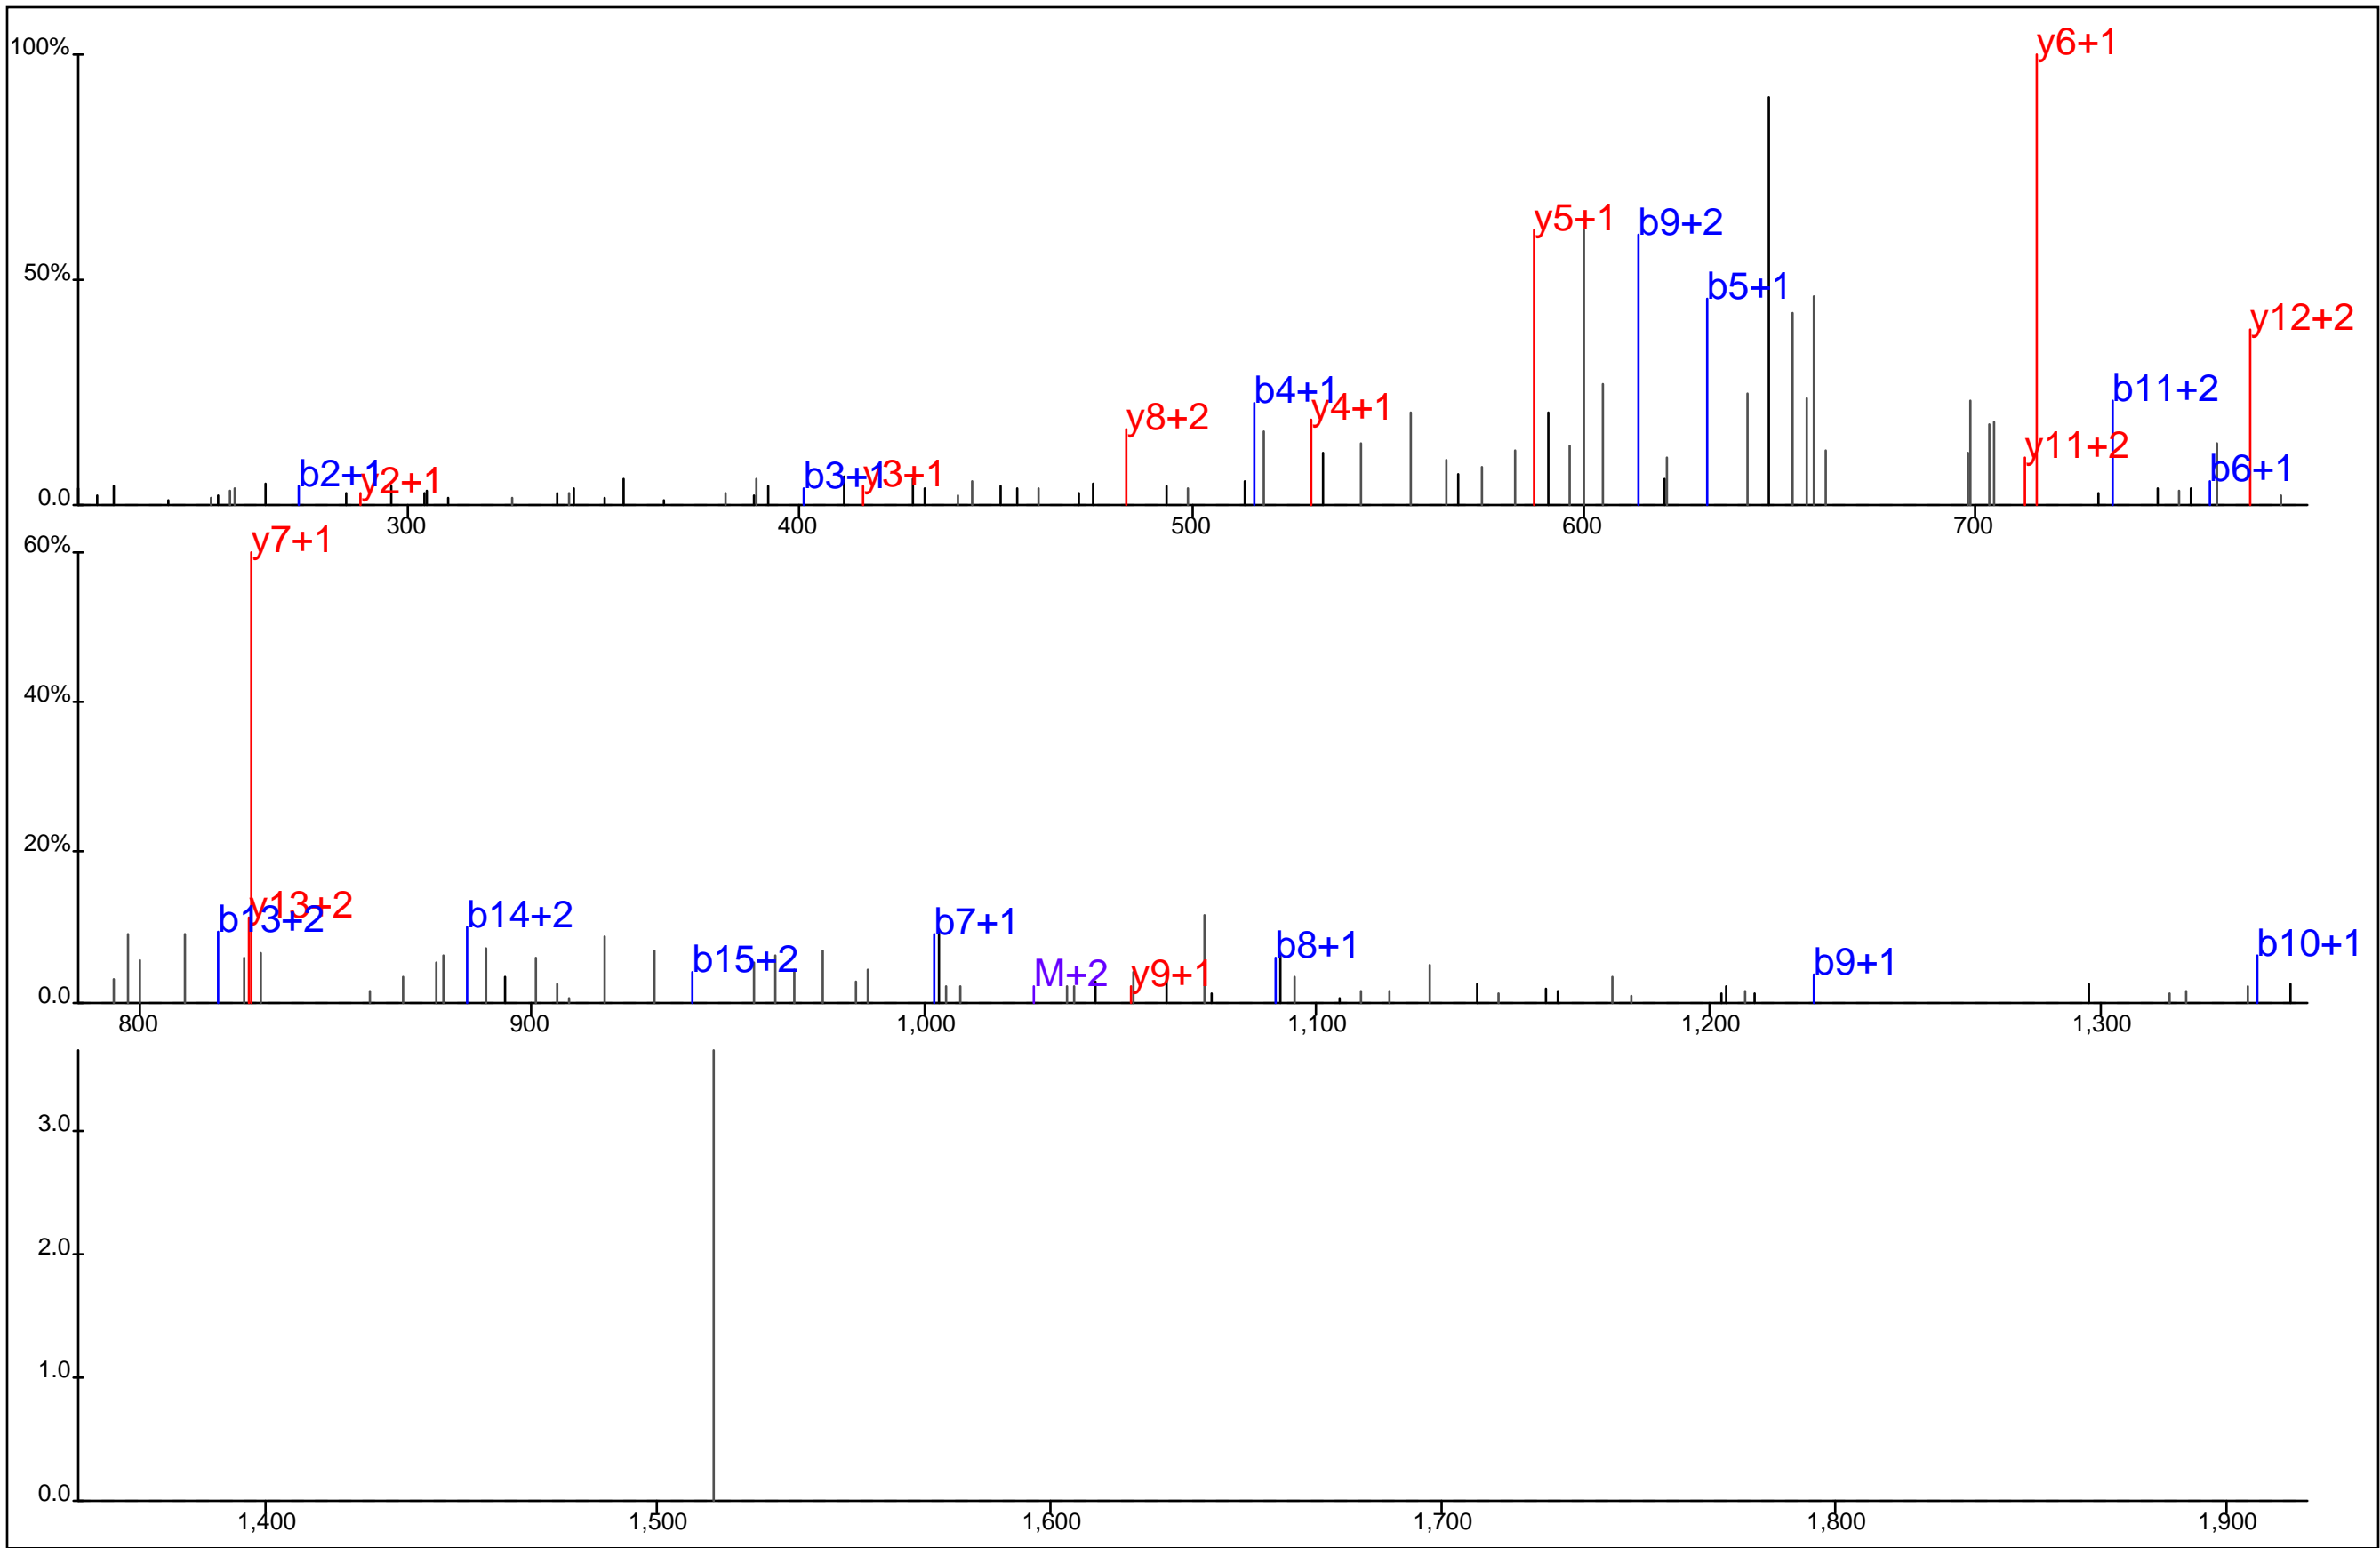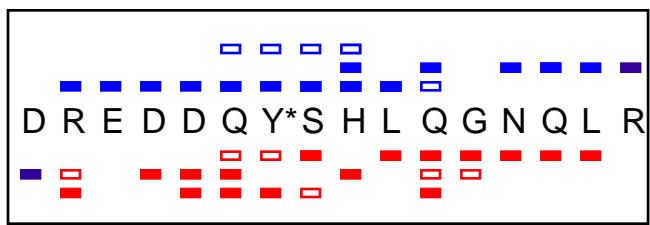

Protein Name: CD3 gamma  
 gi Accession: 0  
 Precursor Mass: 685.2914+3  
 Delta Mass: 6.192 ppm  
 XCorr: 30.79





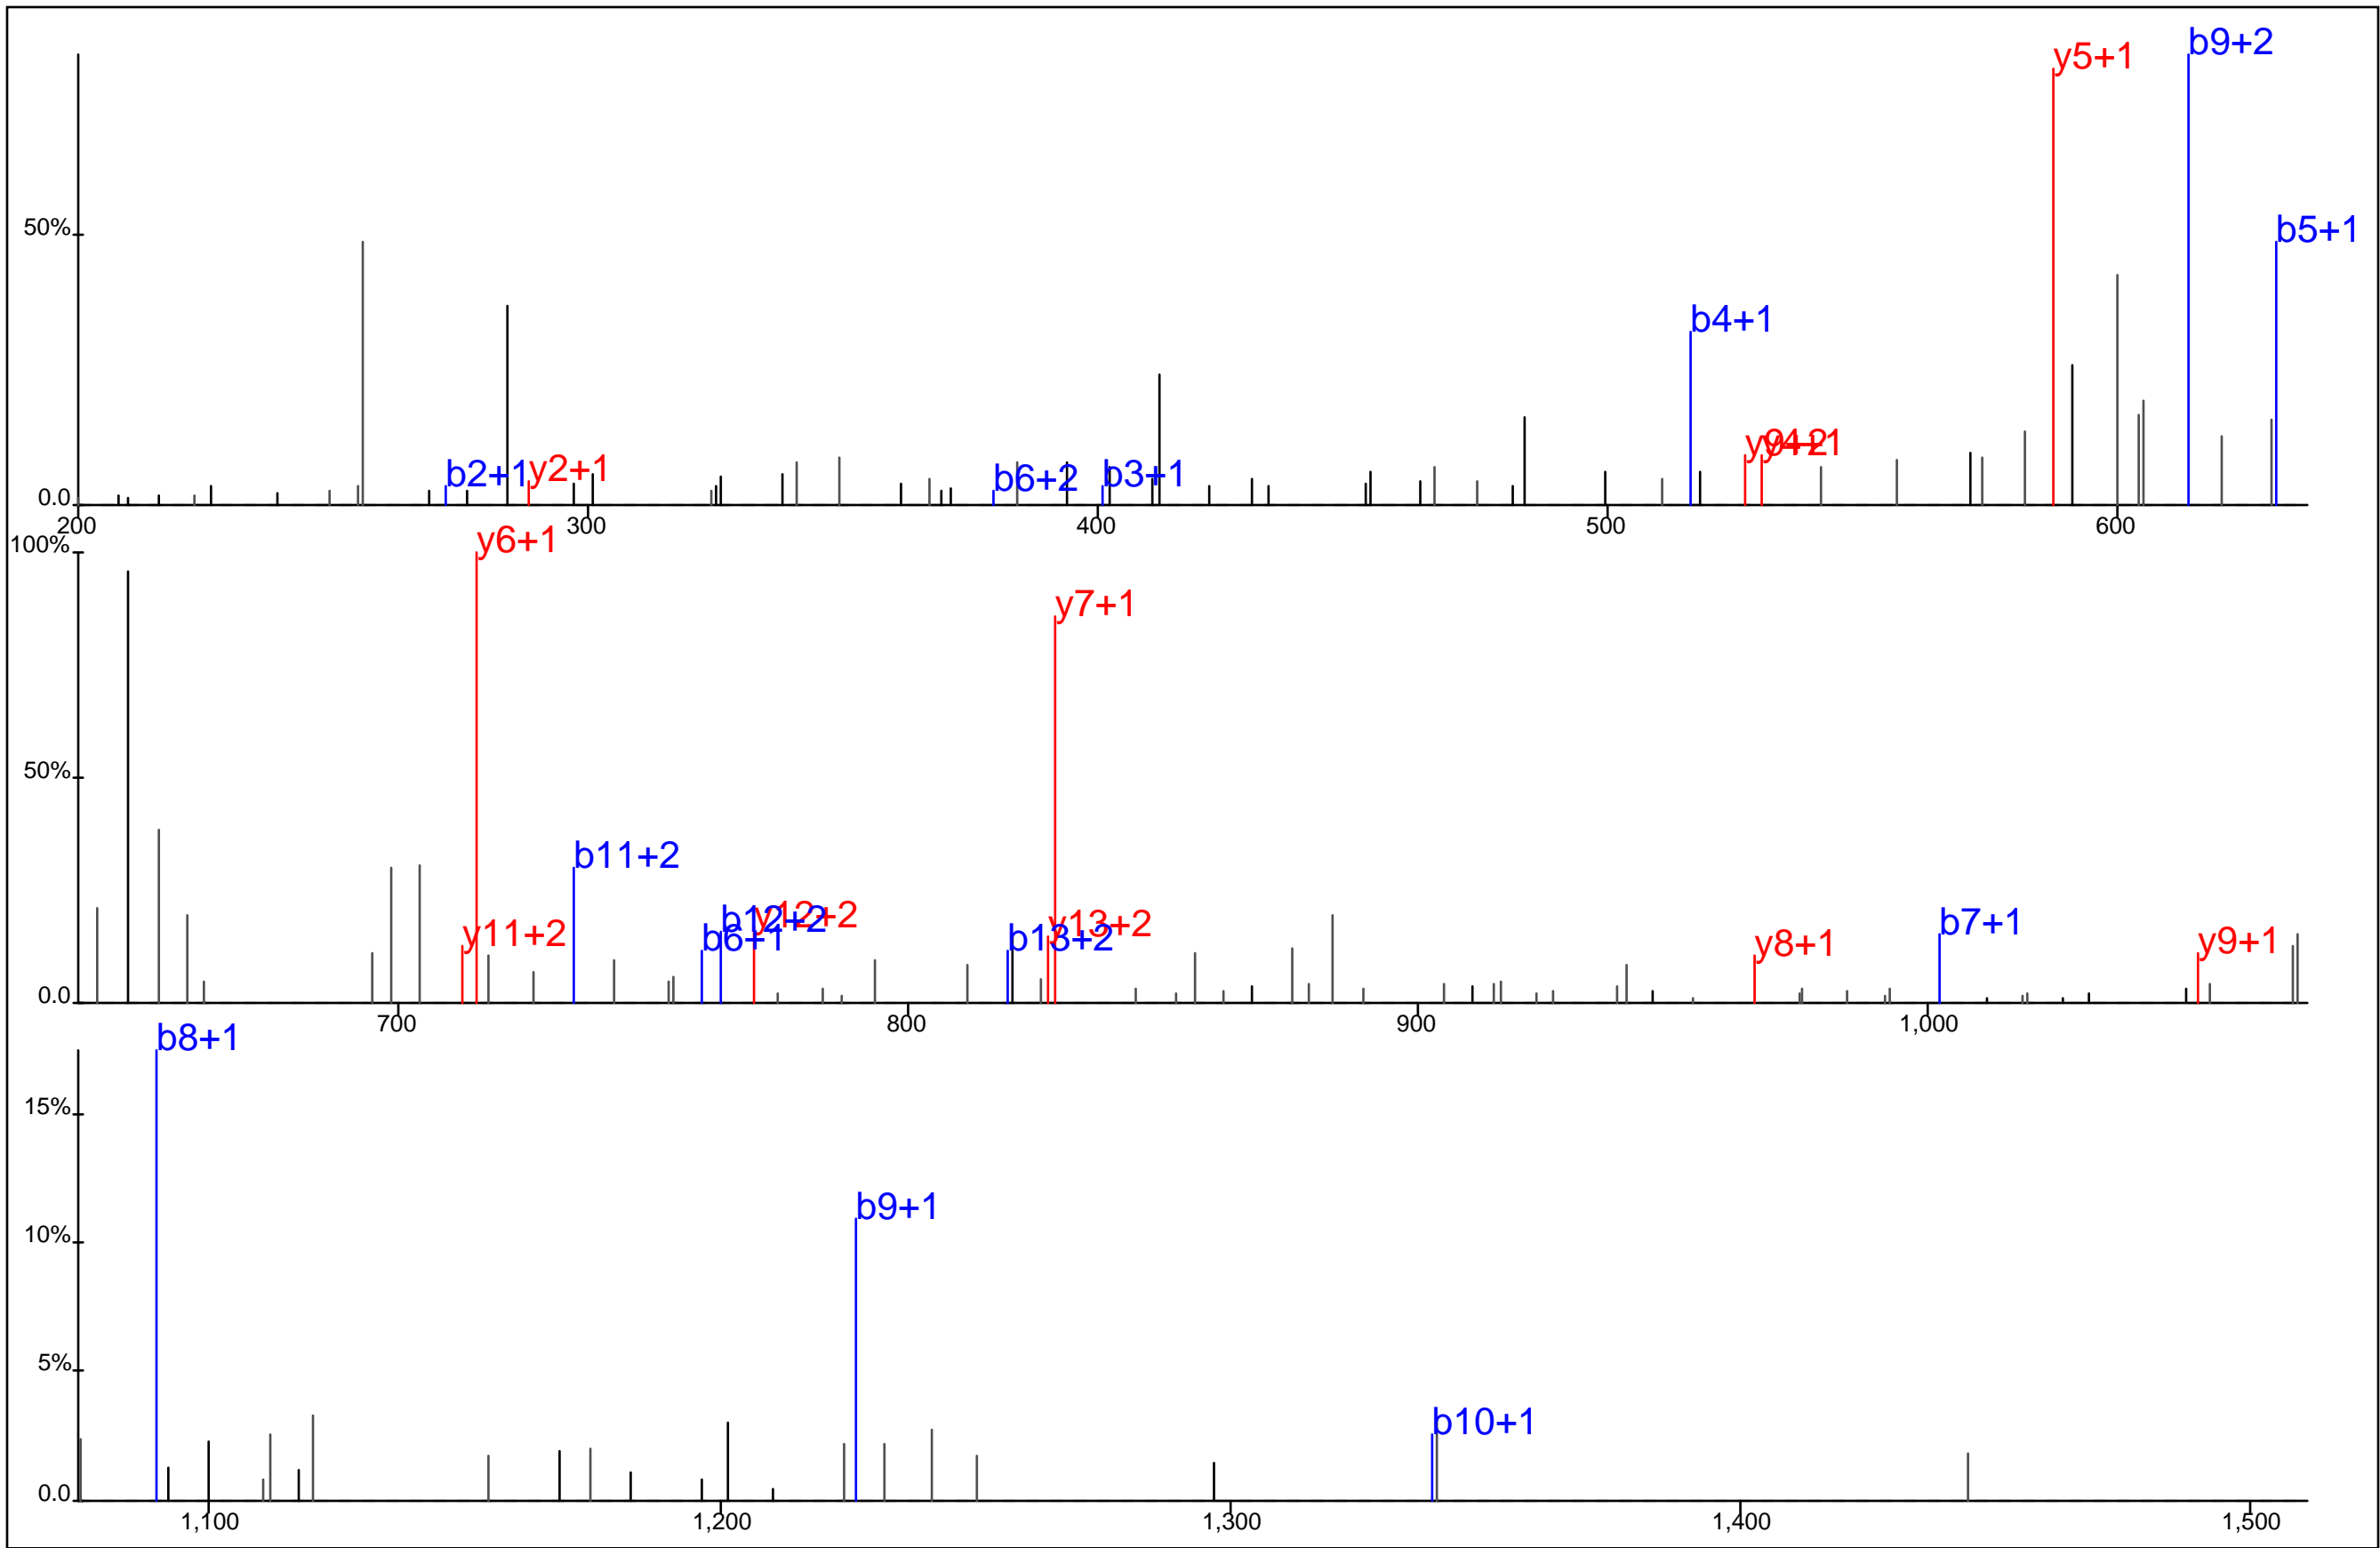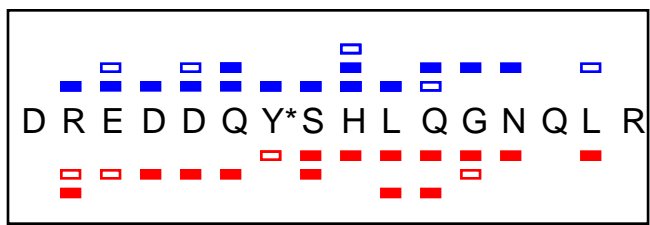

Protein Name: CD3 gamma  
 gi Accession: 0  
 Precursor Mass: 685.2990+3  
 Delta Mass: 4.862 ppm  
 XCorr: 29.44

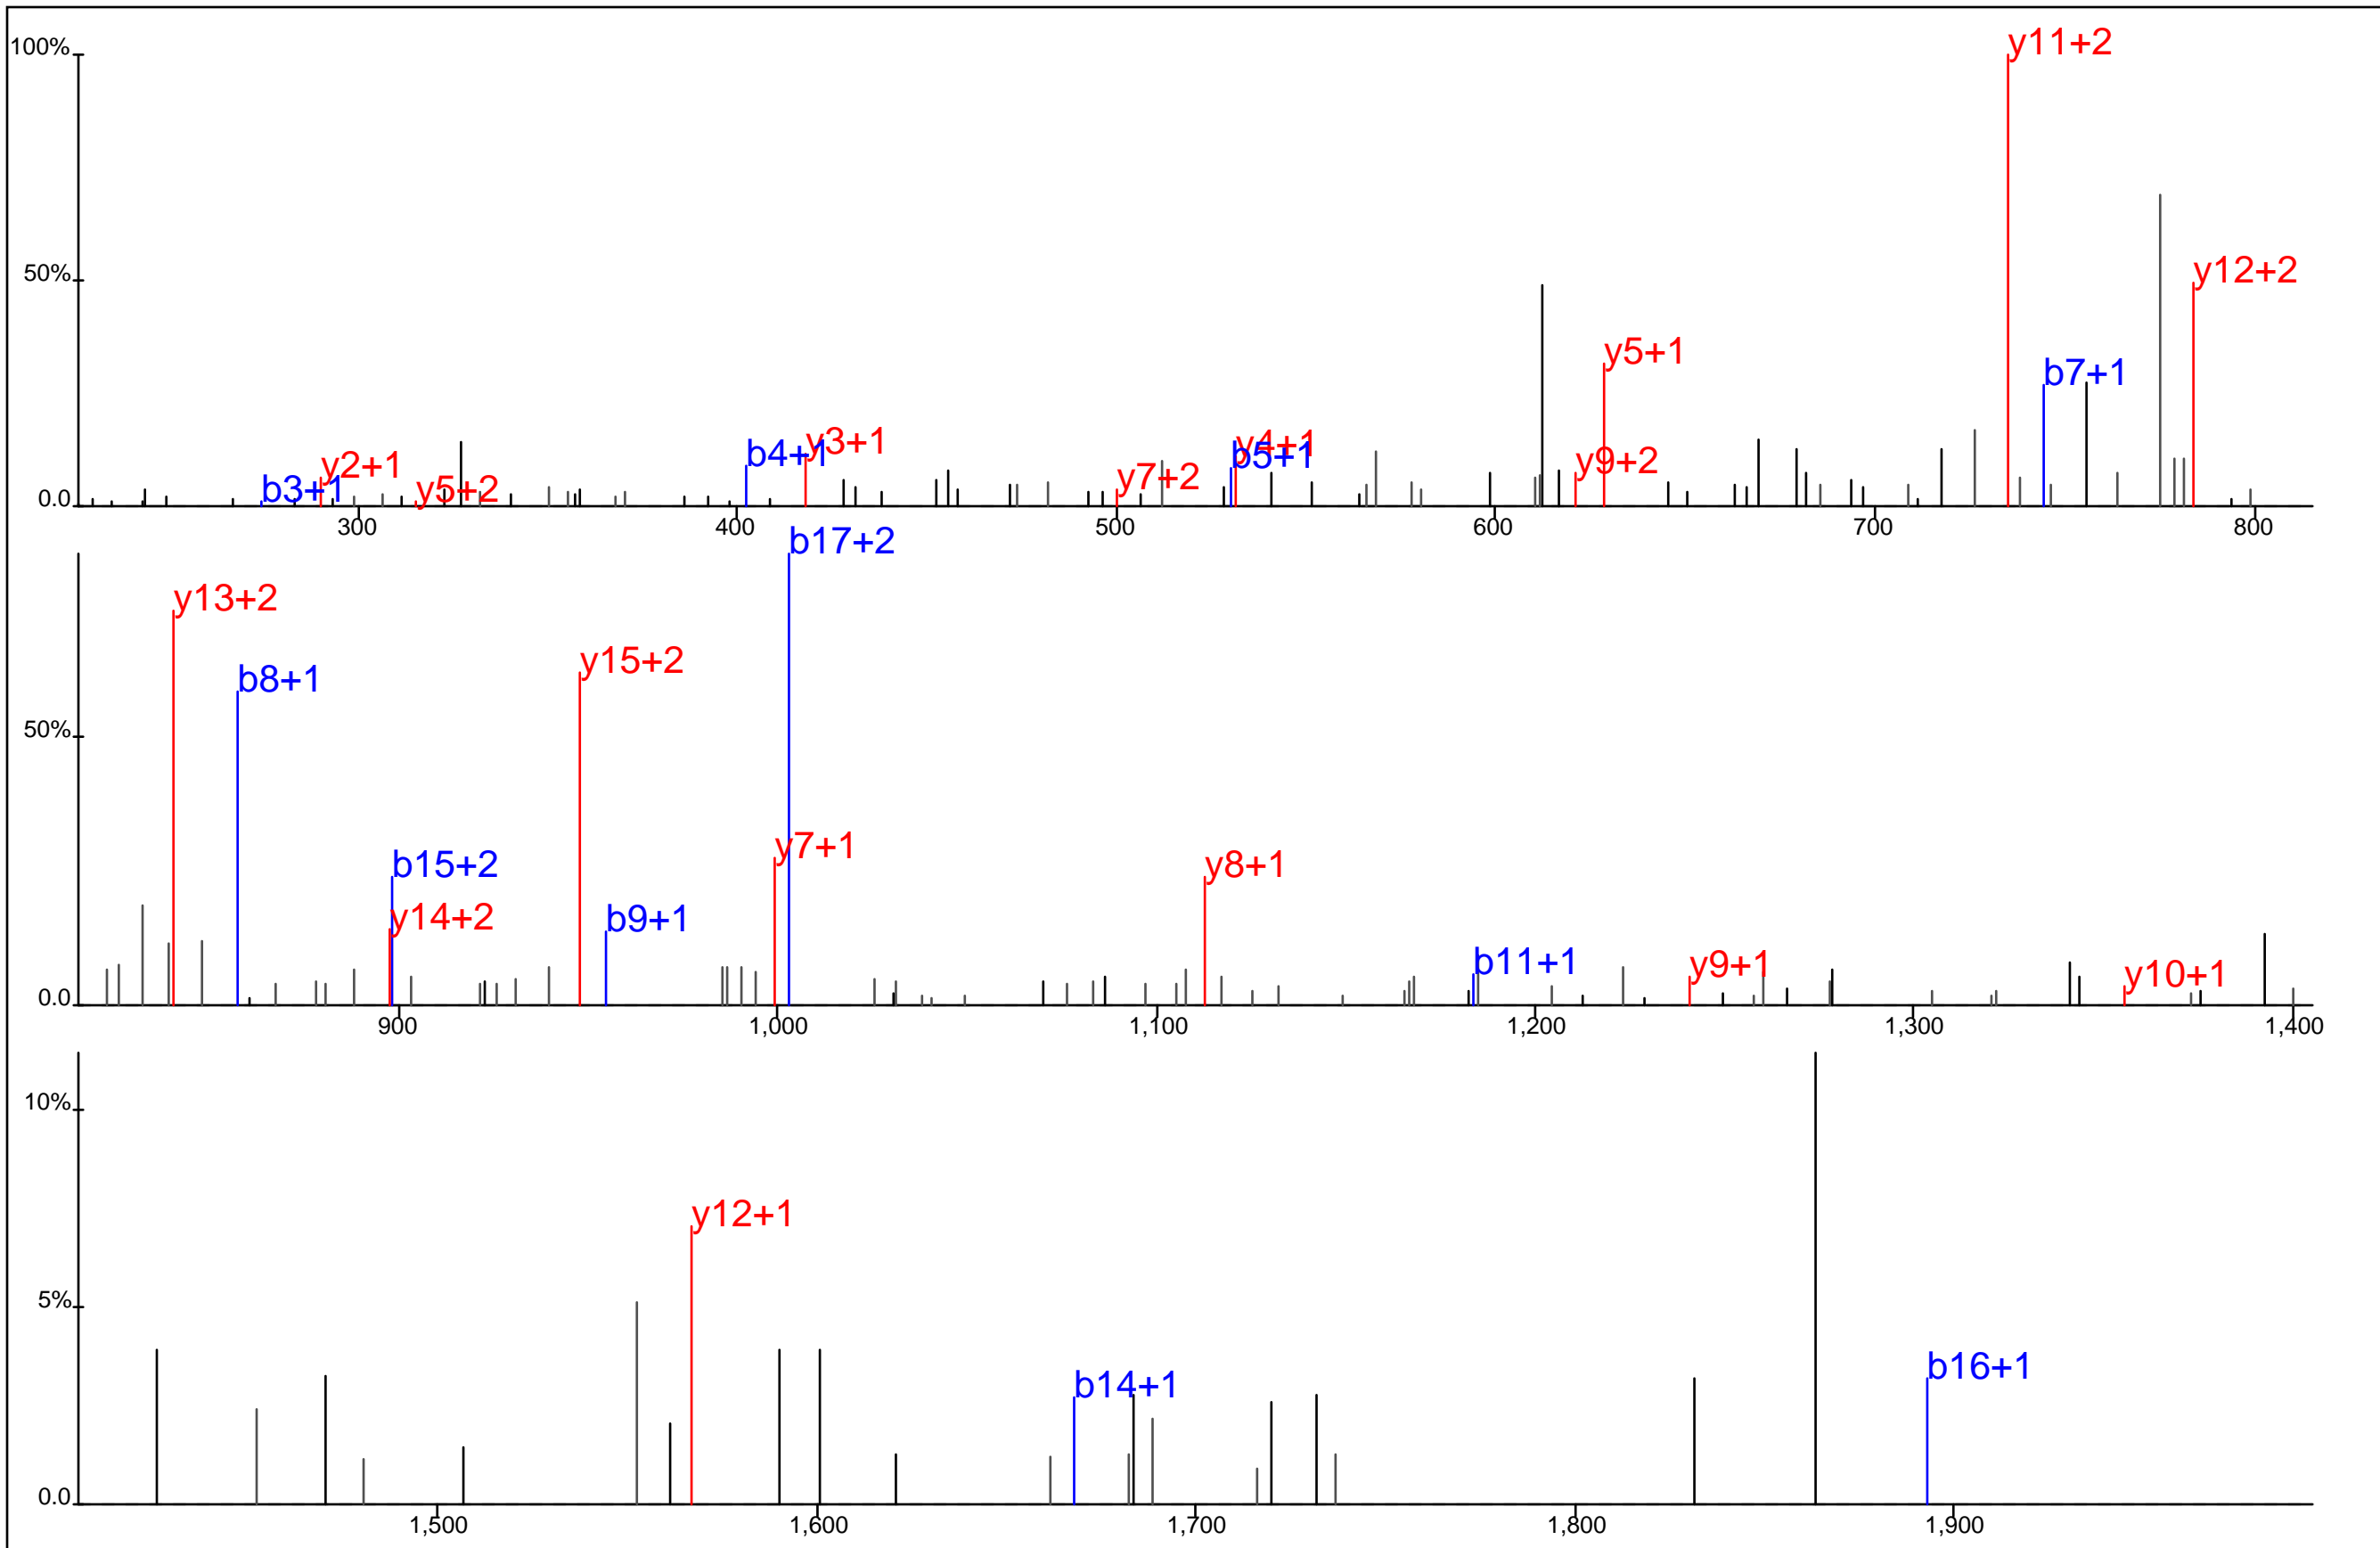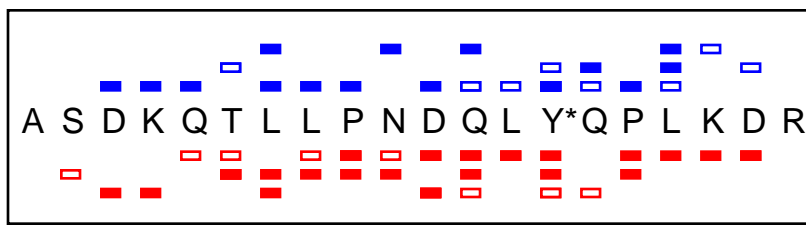

Protein Name: CD3 gamma  
 gi Accession: 0  
 Precursor Mass: 808.4045+3  
 Delta Mass: 1.023 ppm  
 XCorr: 41.58

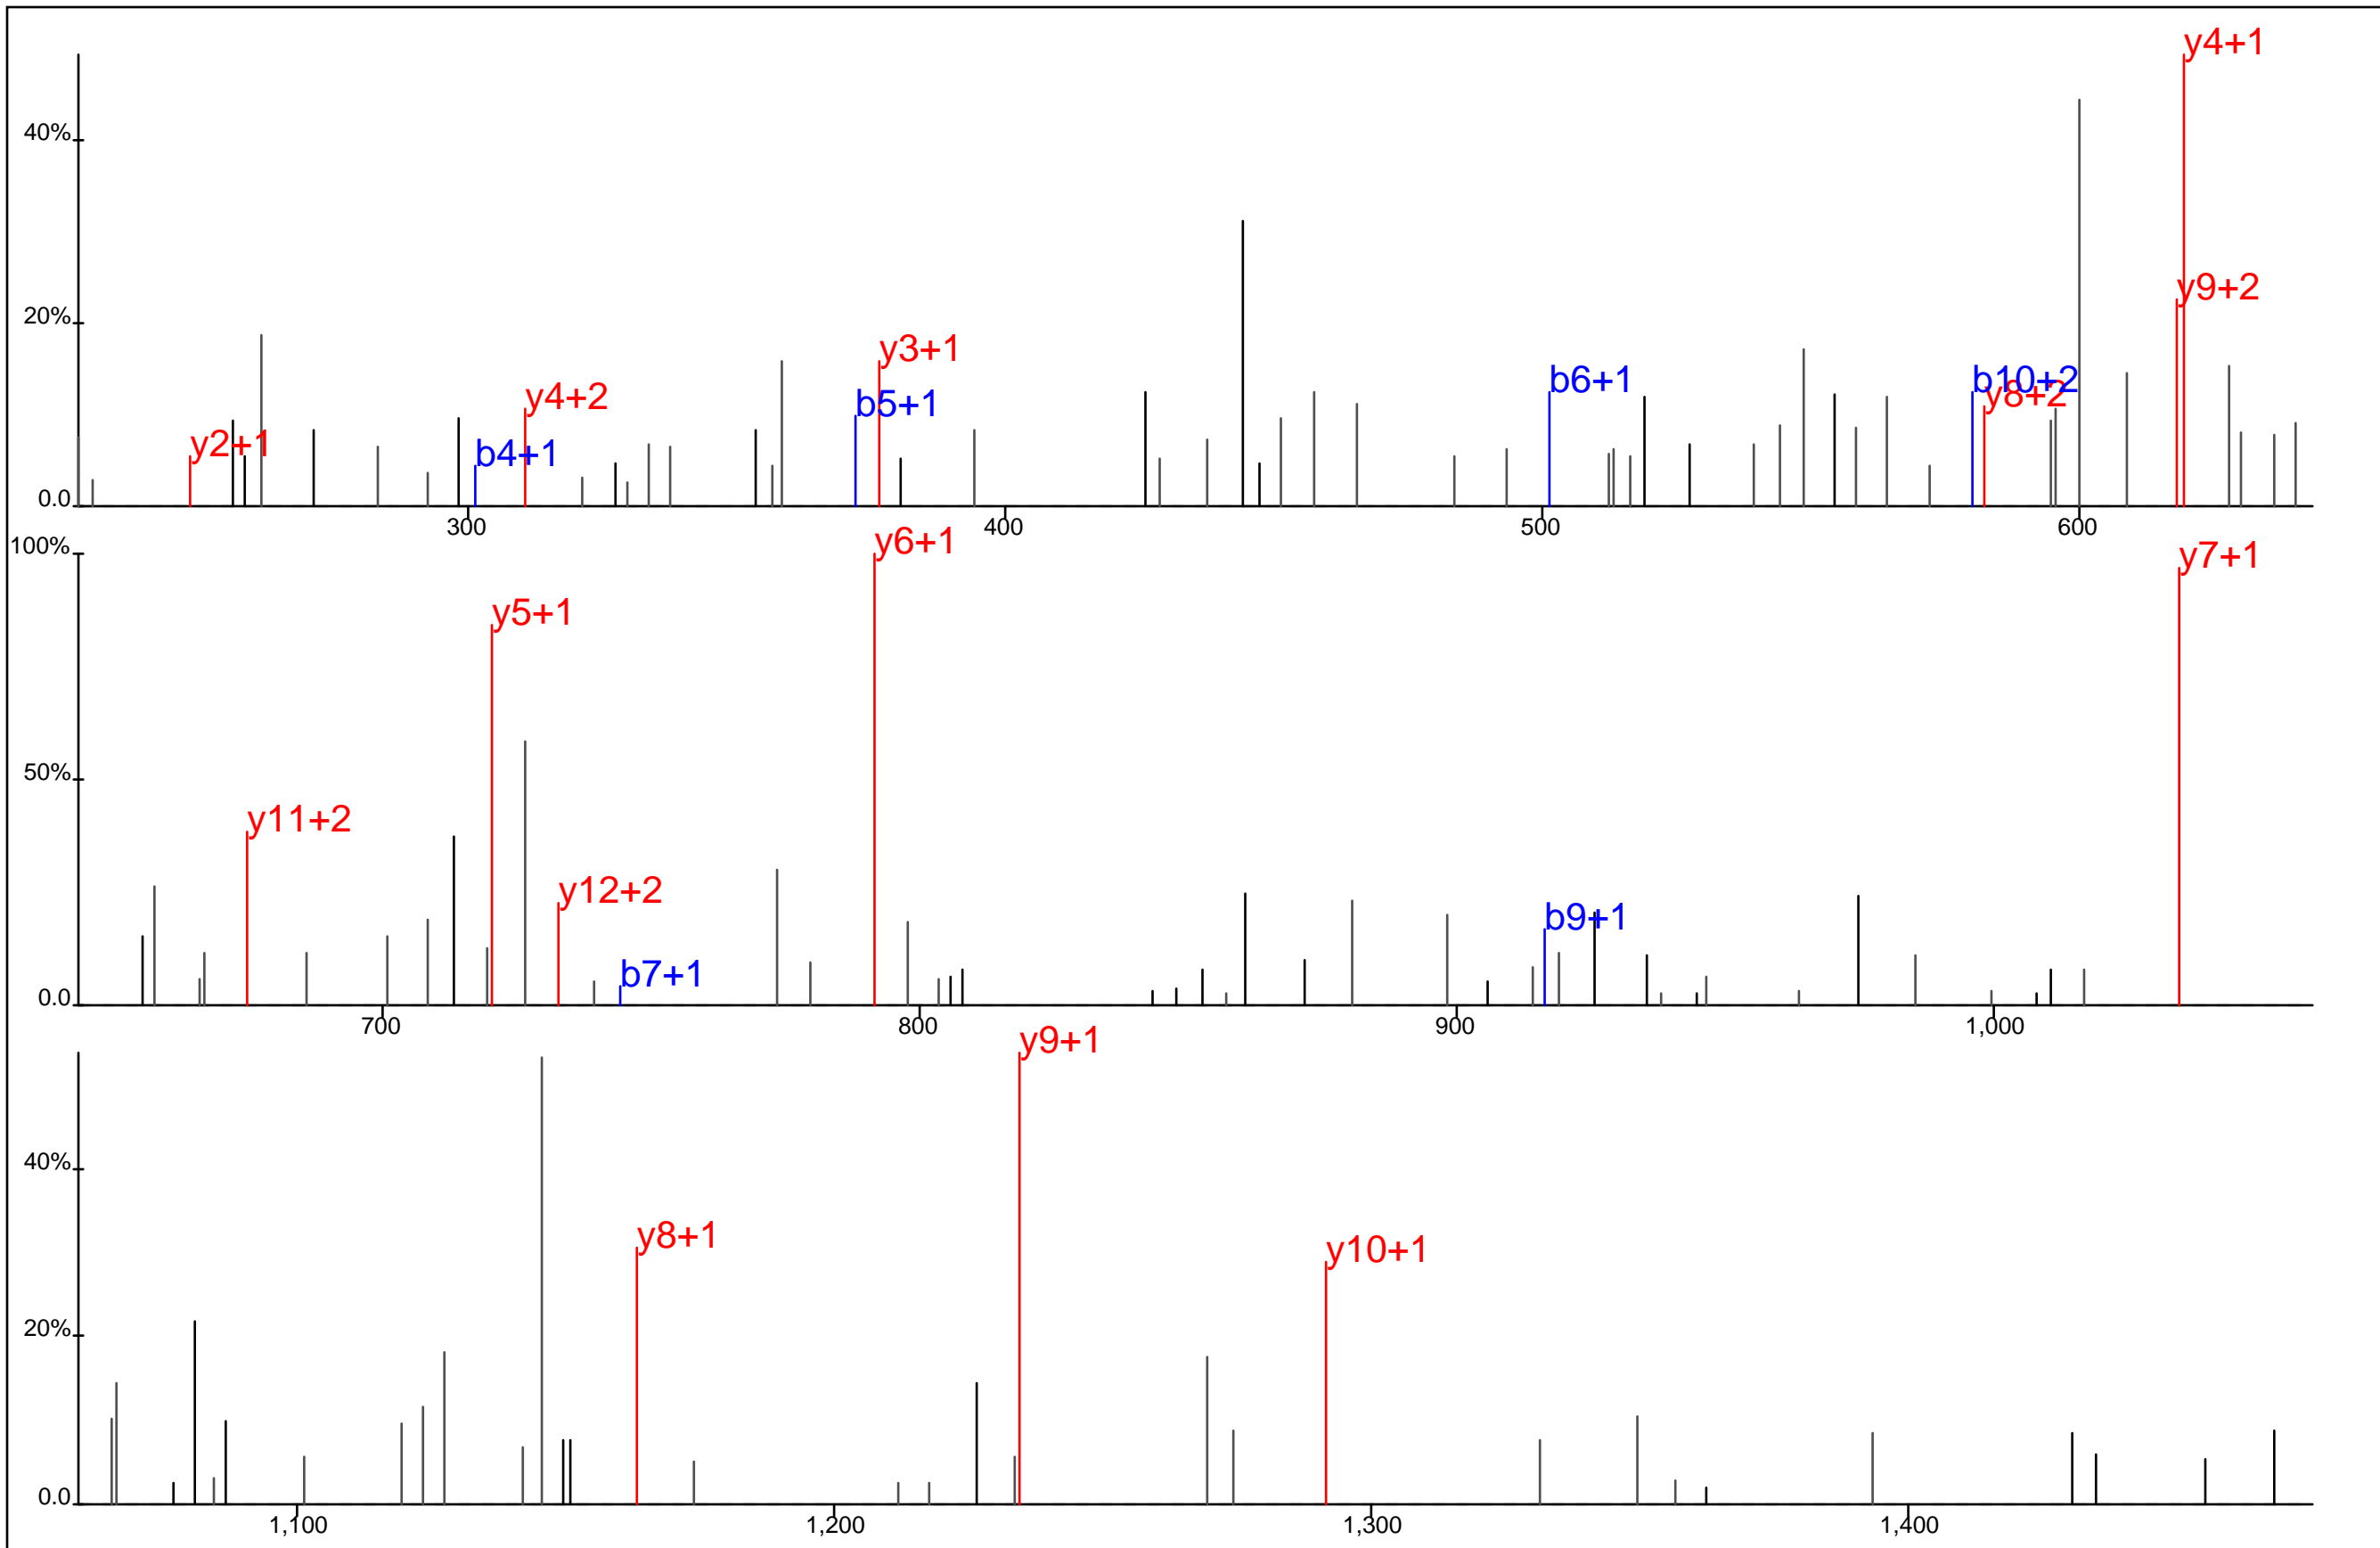

■ ■  
 A D G G A E Y\* A T Y\* Q T K  
■ ■ ■ ■ ■ ■ ■ ■ ■ ■

Protein Name: CD46  
 gi Accession: 0  
 Precursor Mass: 767.7813+2  
 Delta Mass: 3.593 ppm  
 XCorr: 41.71

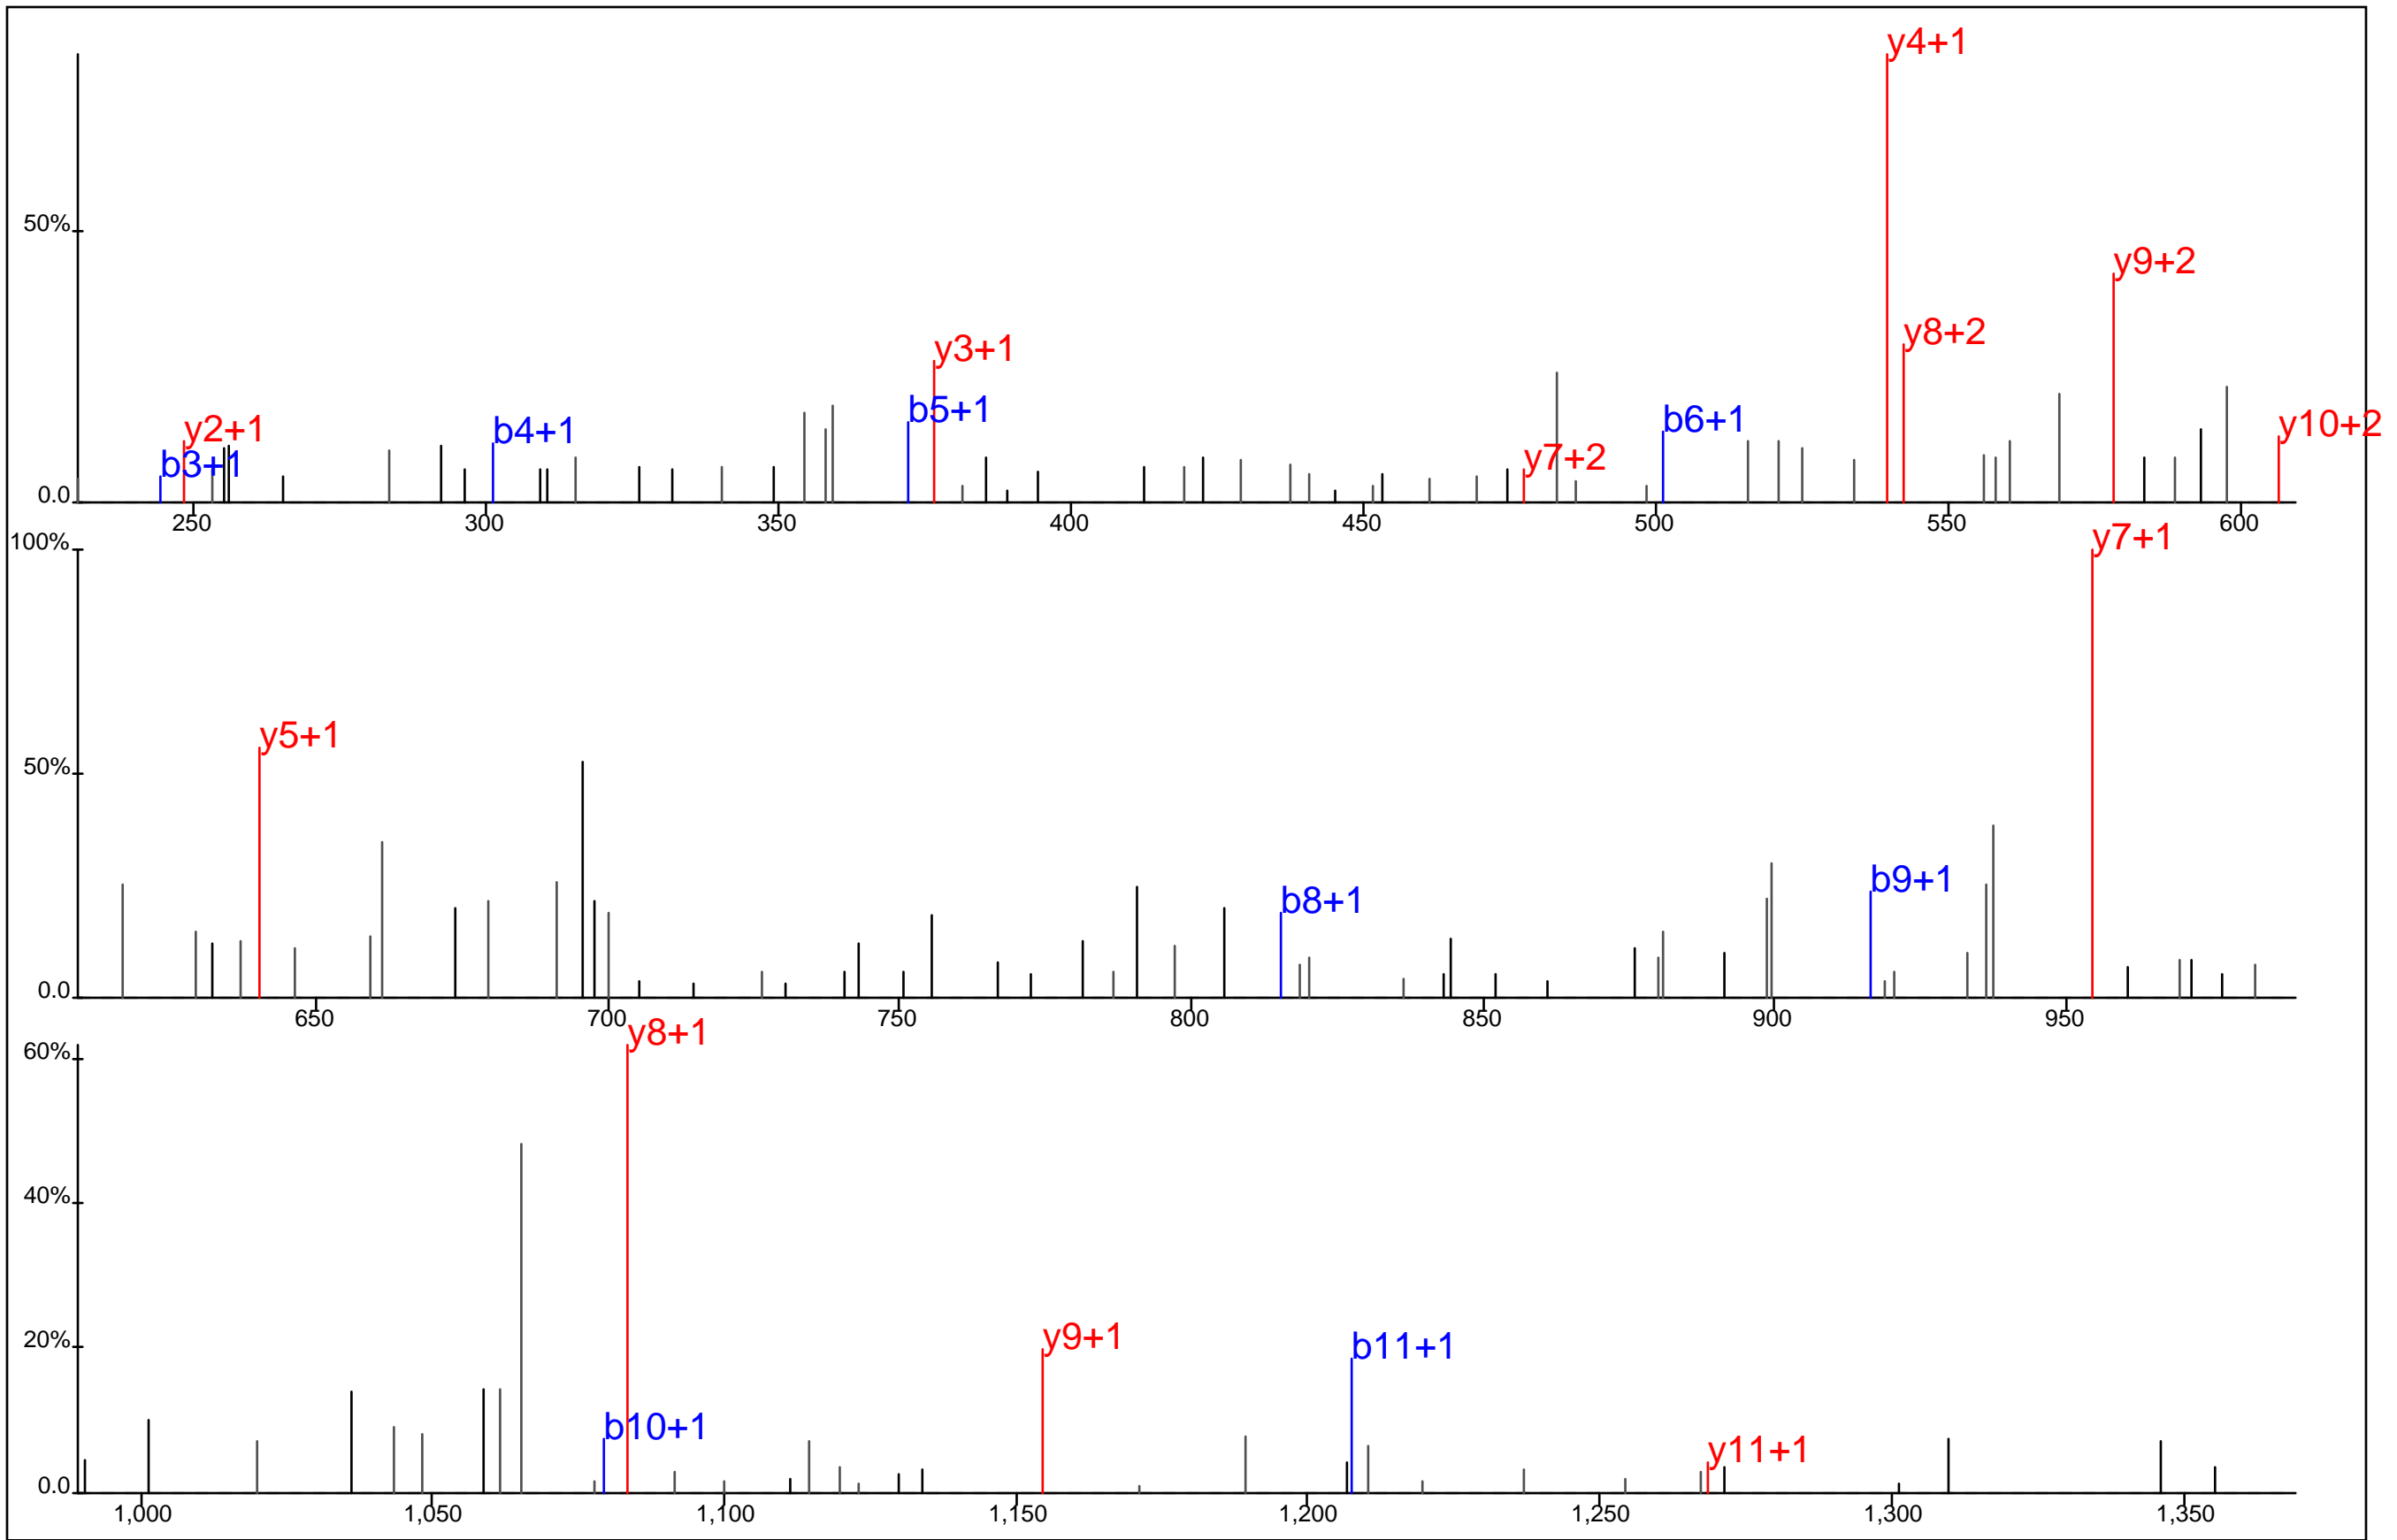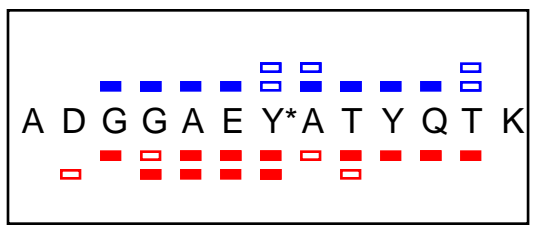

Protein Name: CD46  
 gi Accession: 0  
 Precursor Mass: 727.7935+2  
 Delta Mass: 2.579 ppm  
 XCorr: 56.09

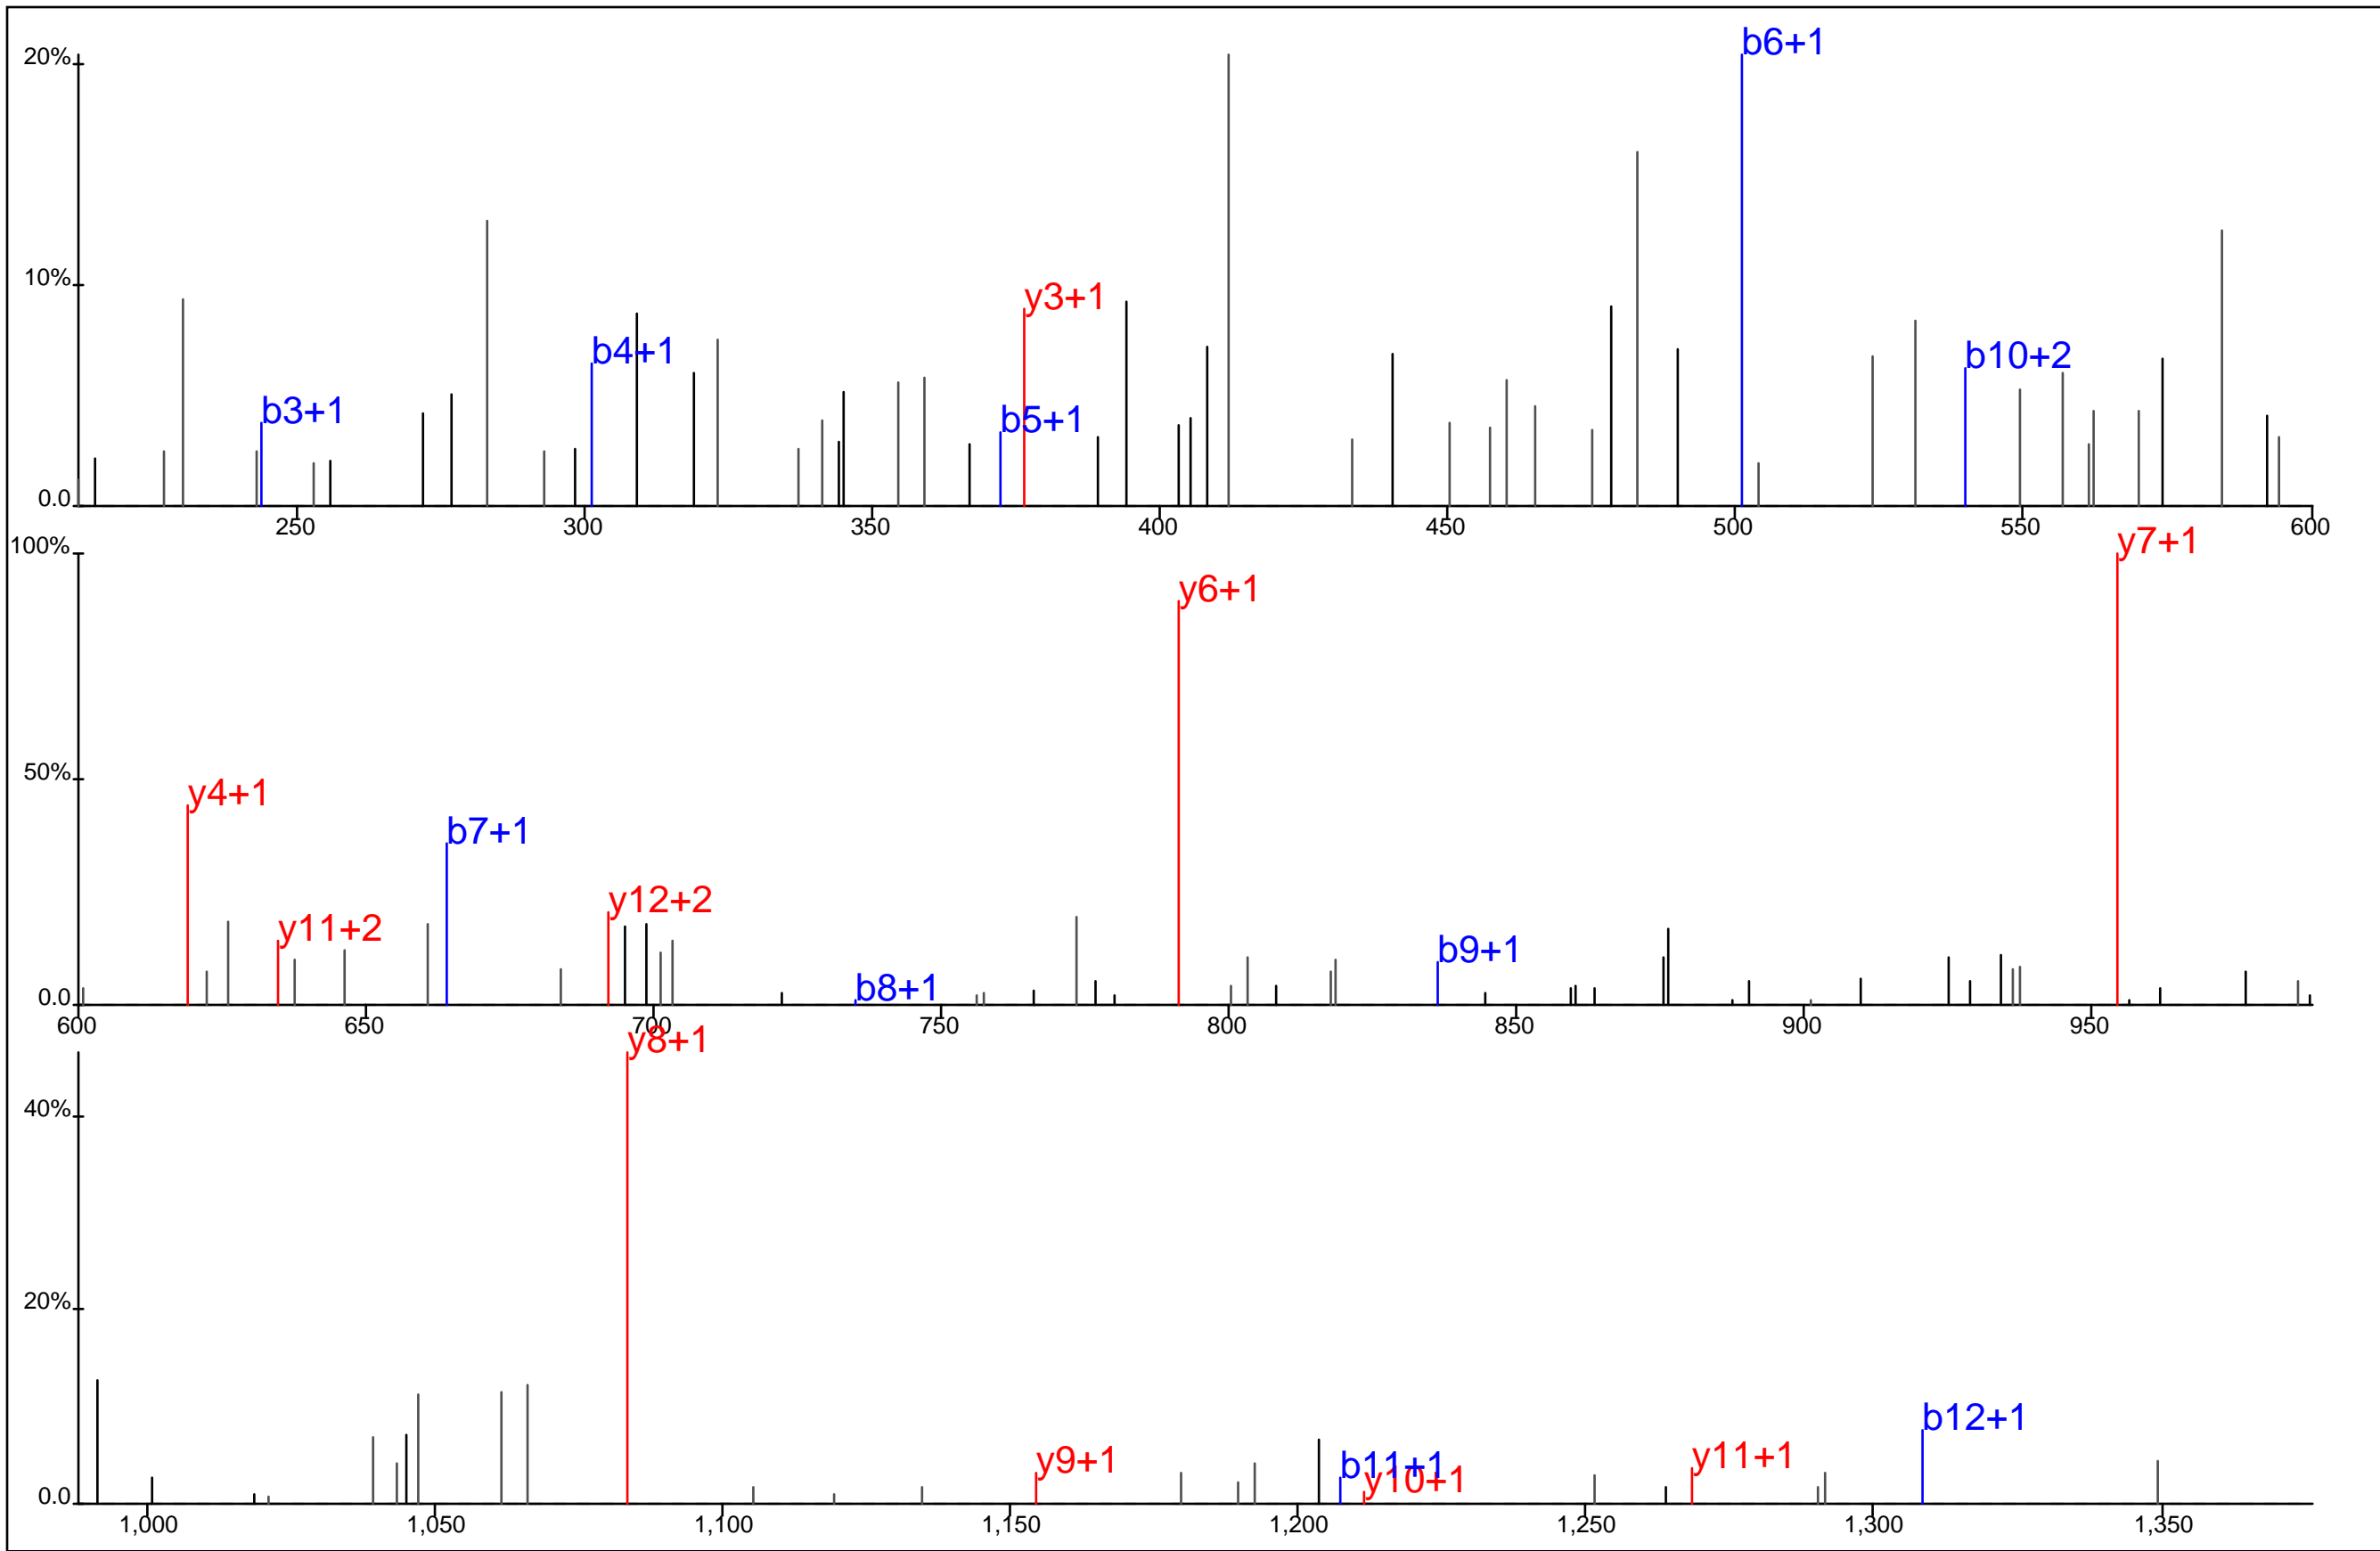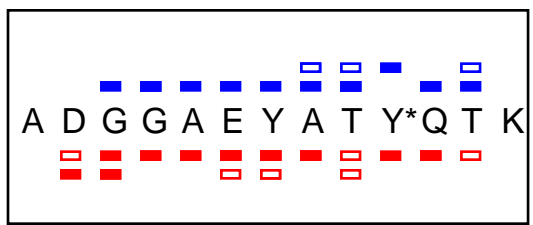

Protein Name: CD46  
 gi Accession: 0  
 Precursor Mass: 727.7949+2  
 Delta Mass: 0.649 ppm  
 XCorr: 33.18

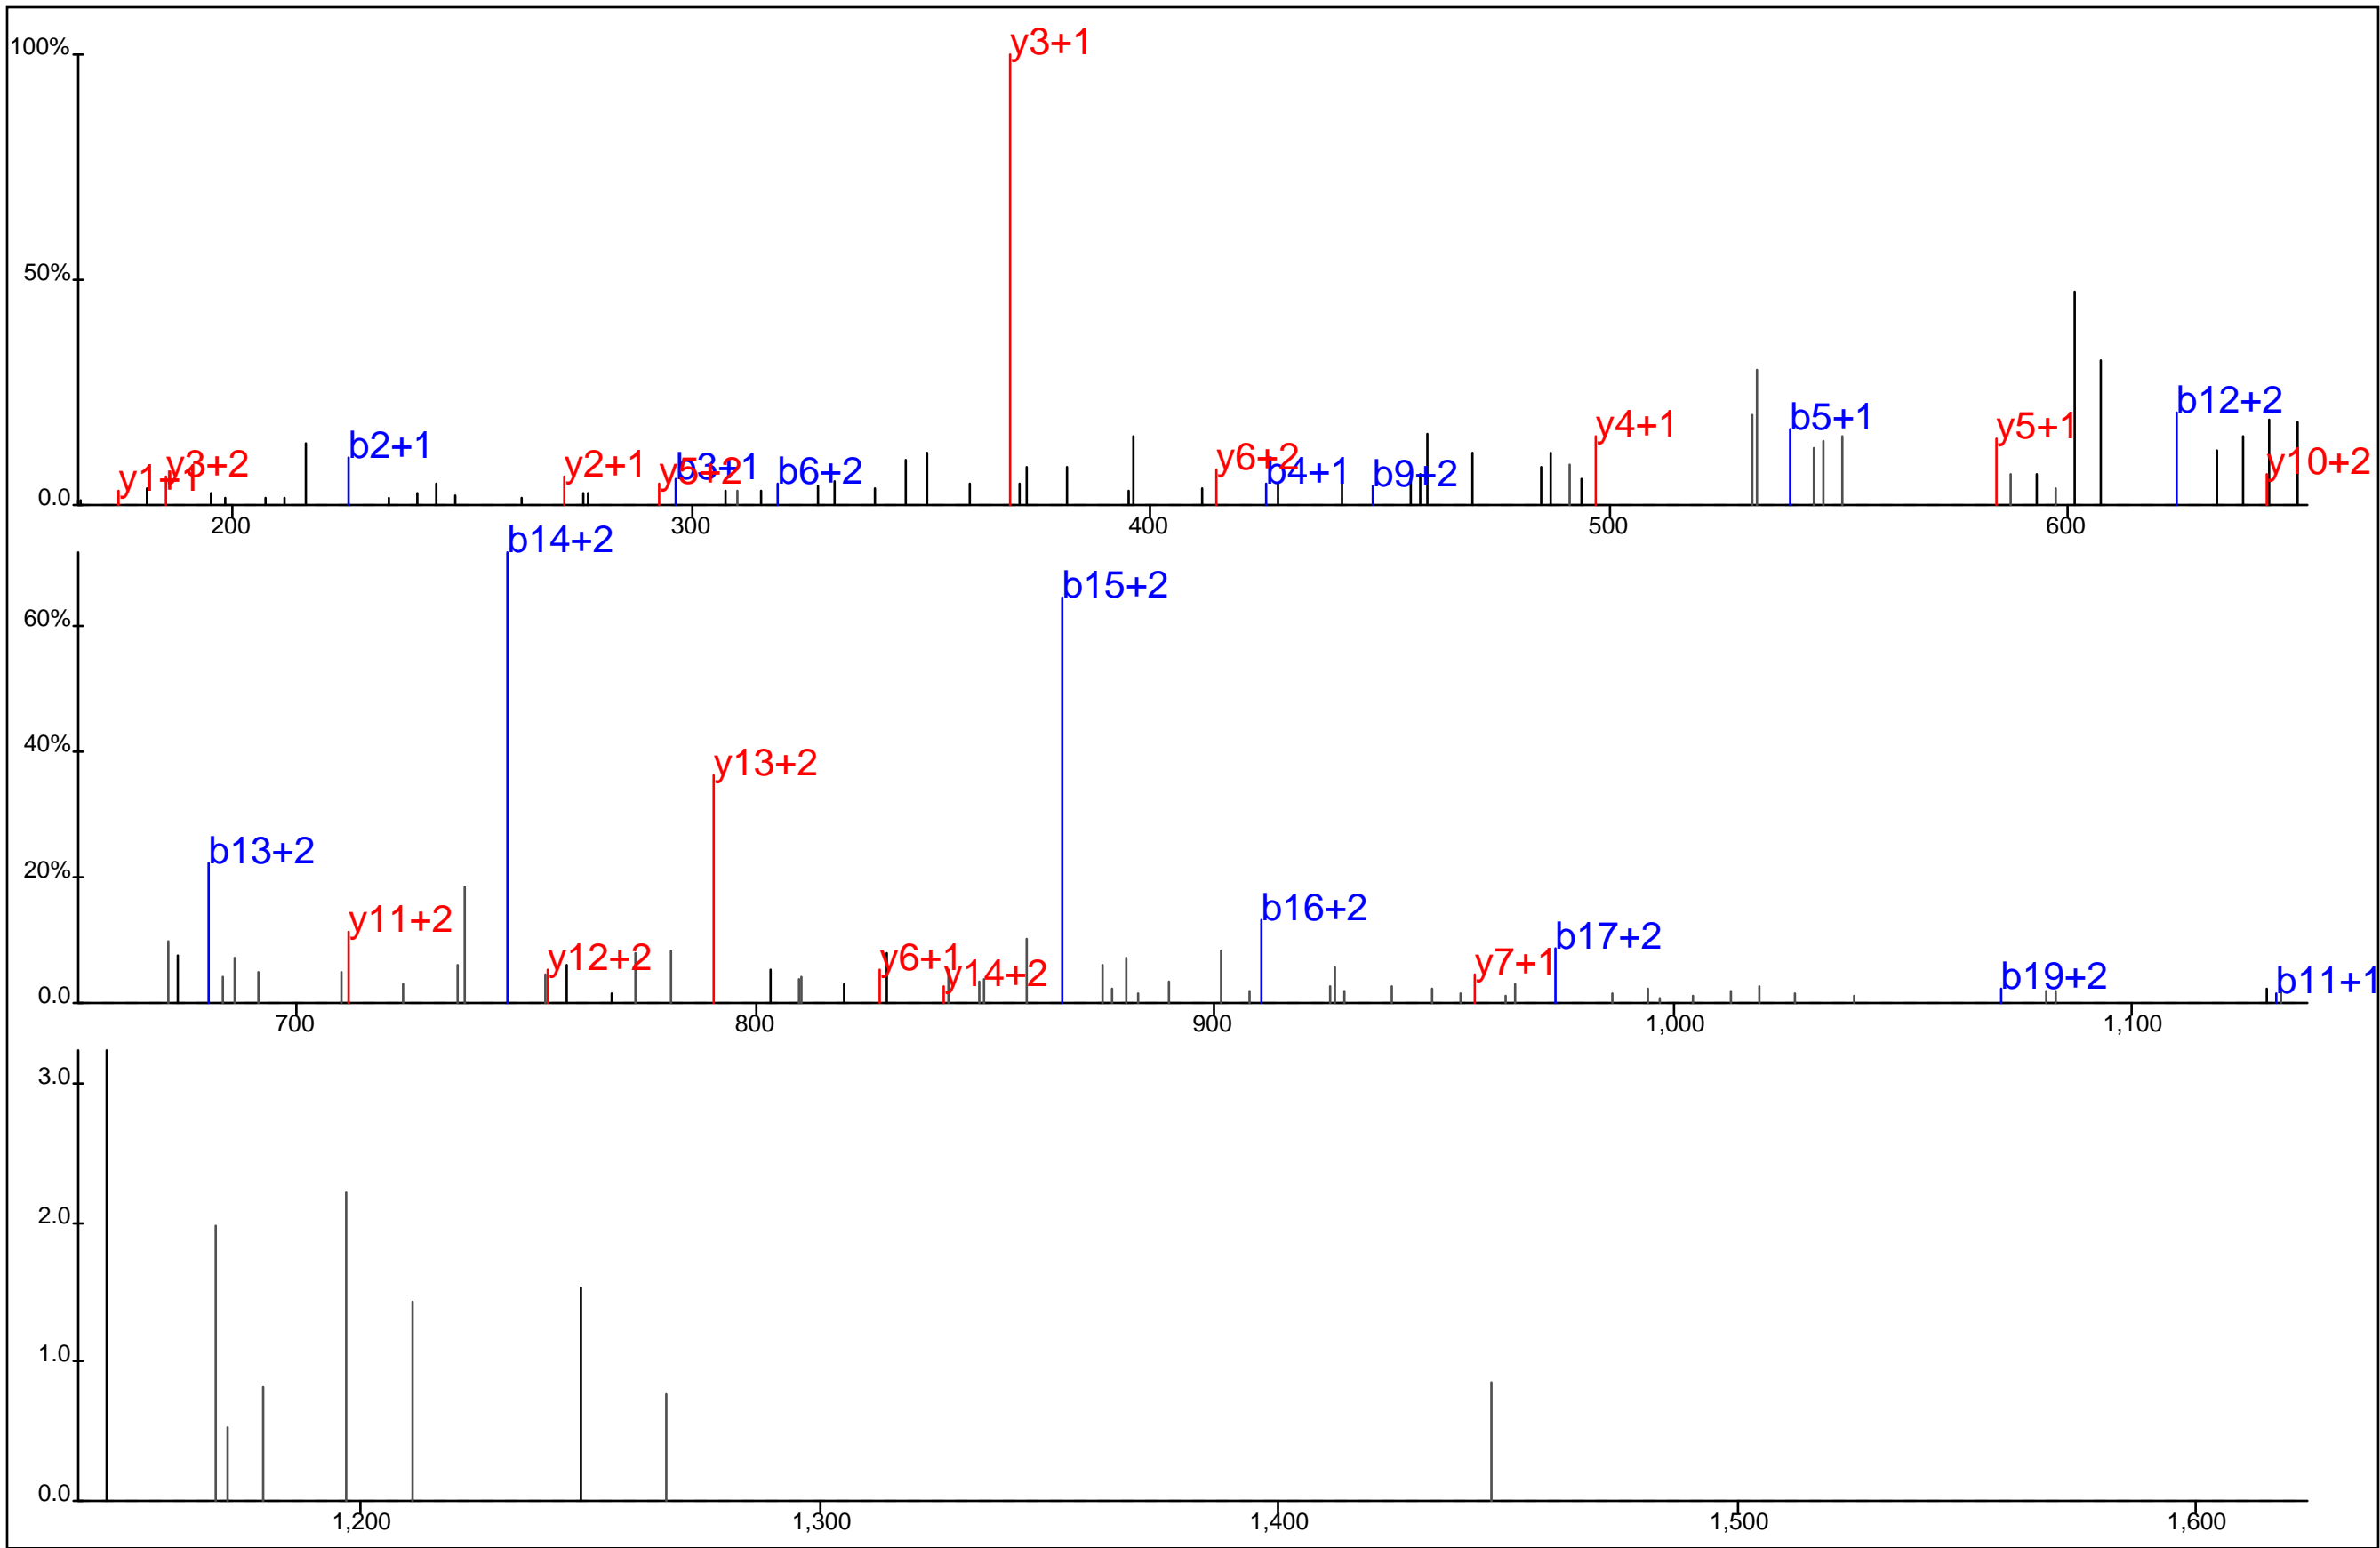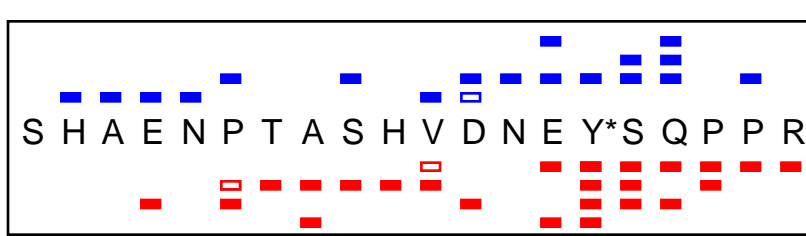

Protein Name: CD5  
 gi Accession: 0  
 Precursor Mass: 579.7489+4  
 Delta Mass: 2.640 ppm  
 XCorr: 40.45

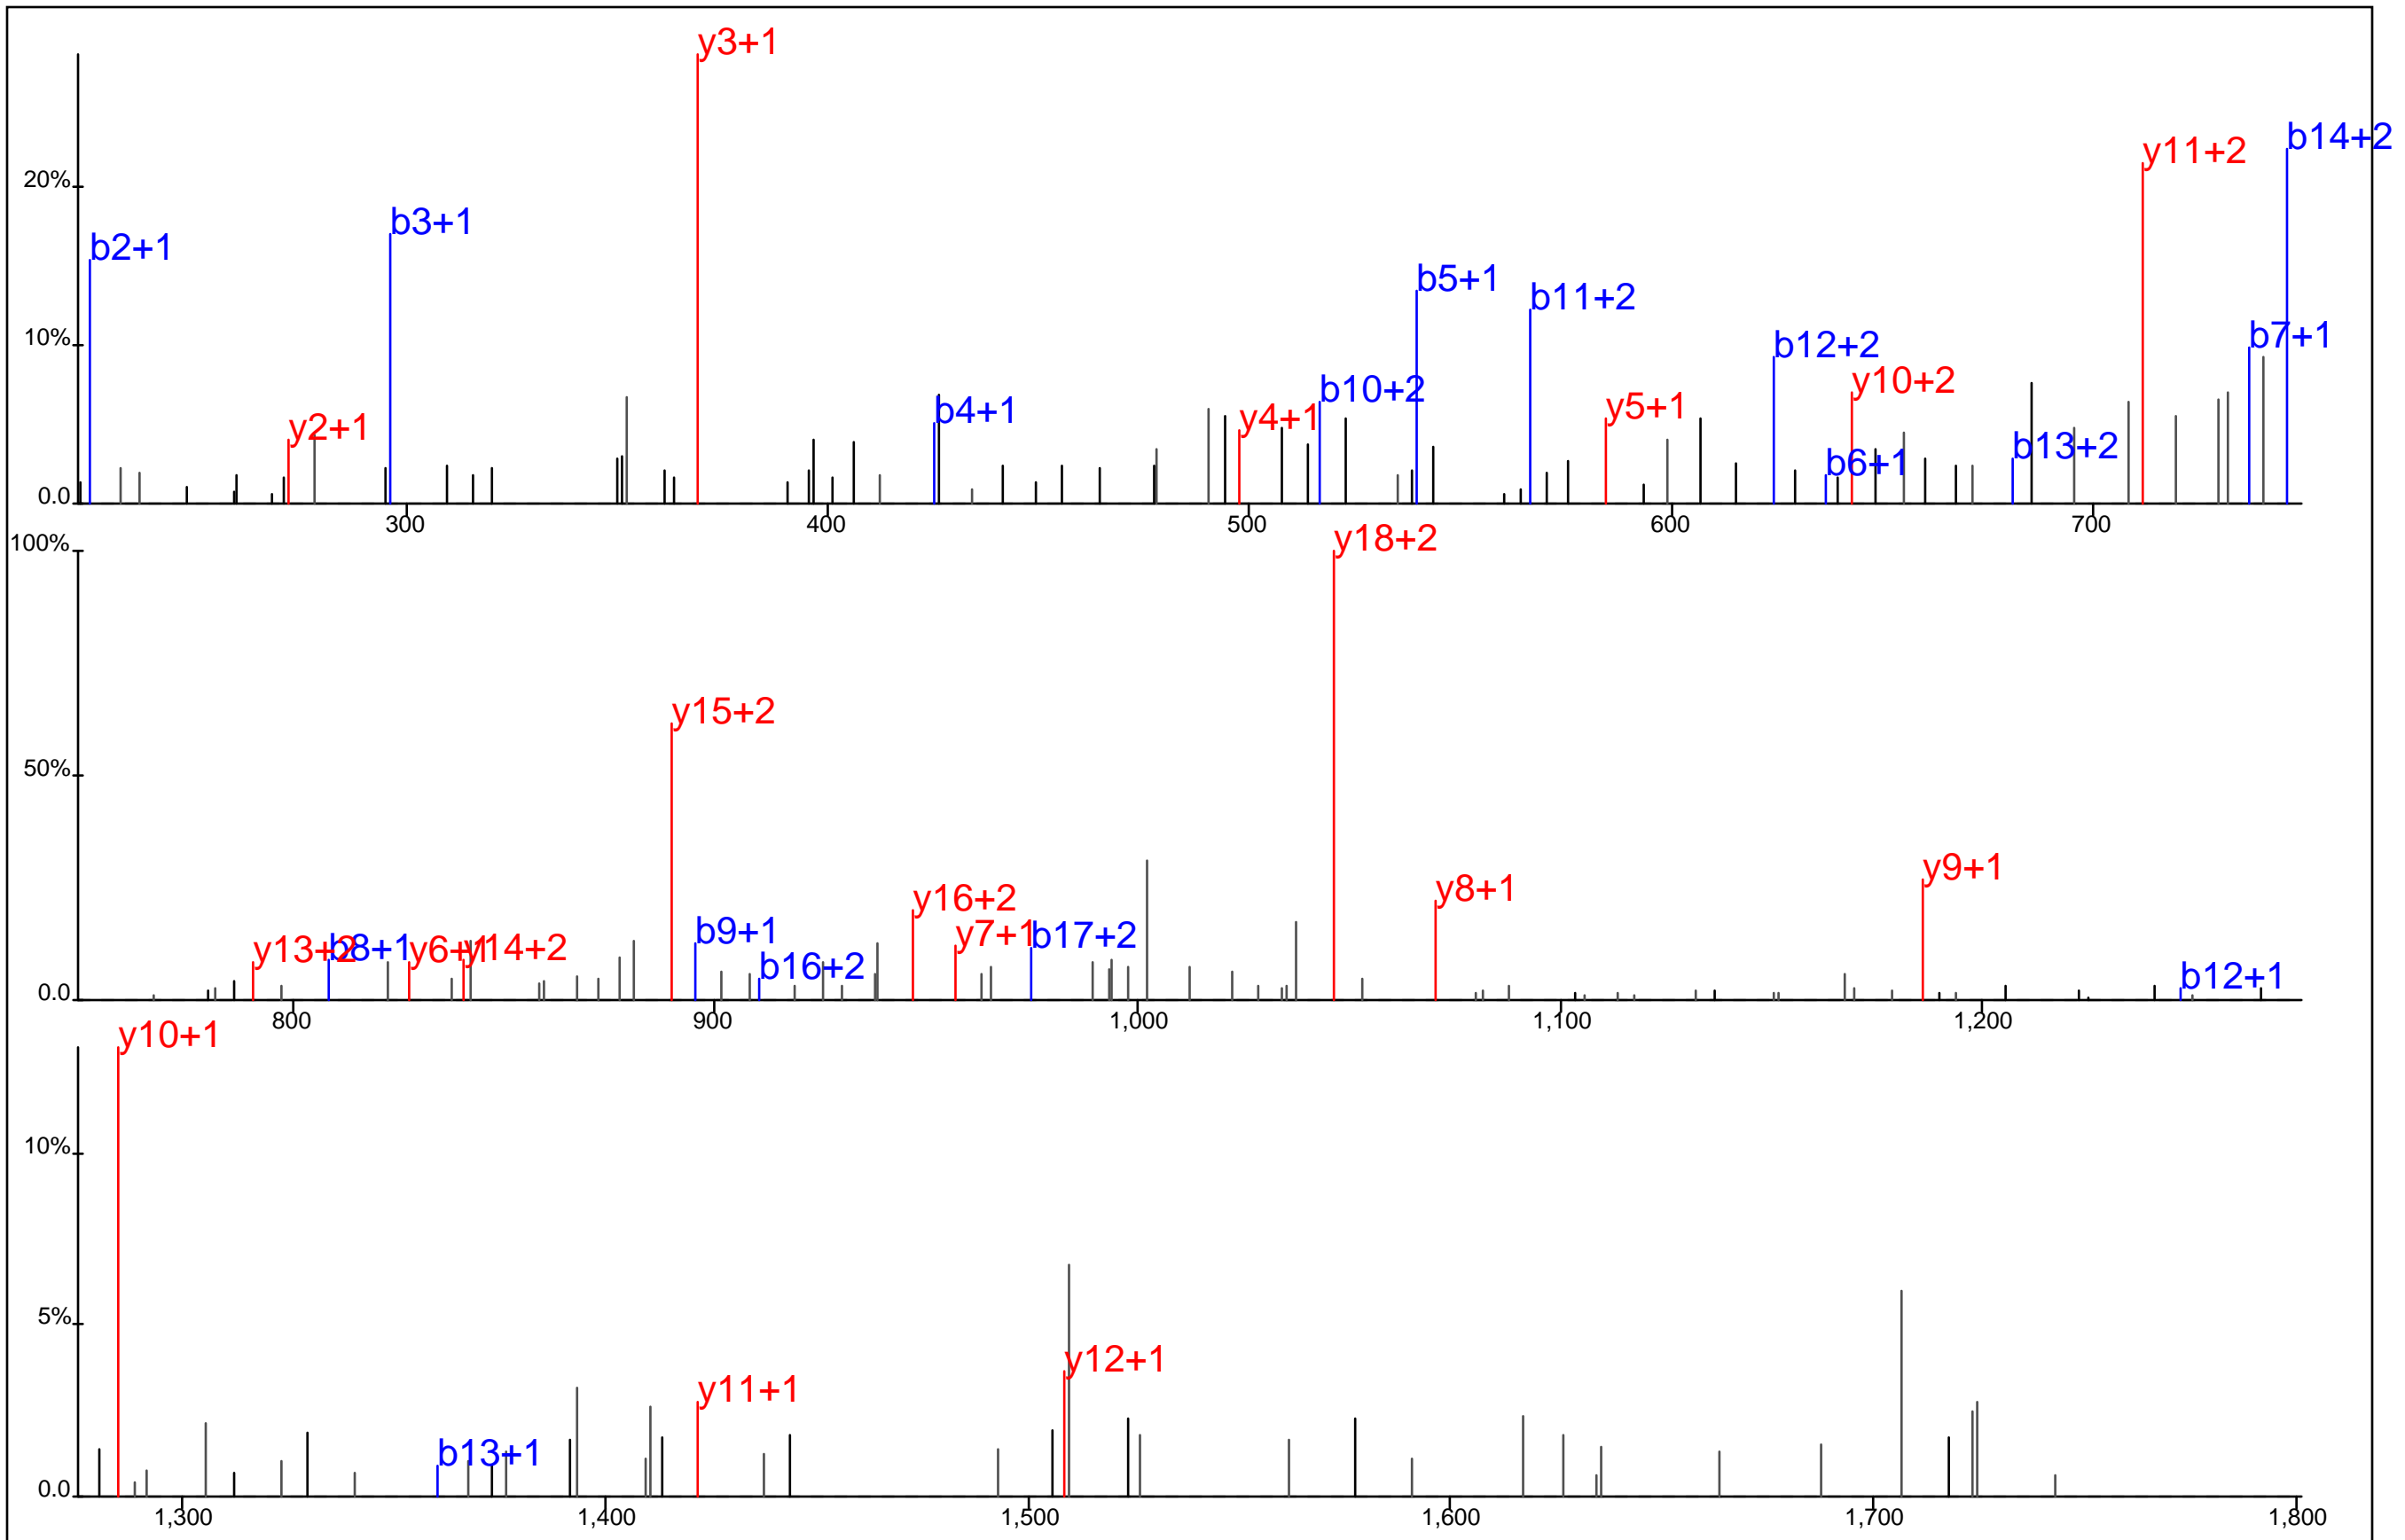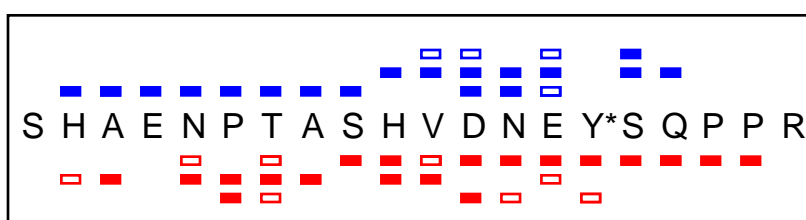

Protein Name: CD5  
 gi Accession: 0  
 Precursor Mass: 772.6620+3  
 Delta Mass: 1.697 ppm  
 XCorr: 47.86



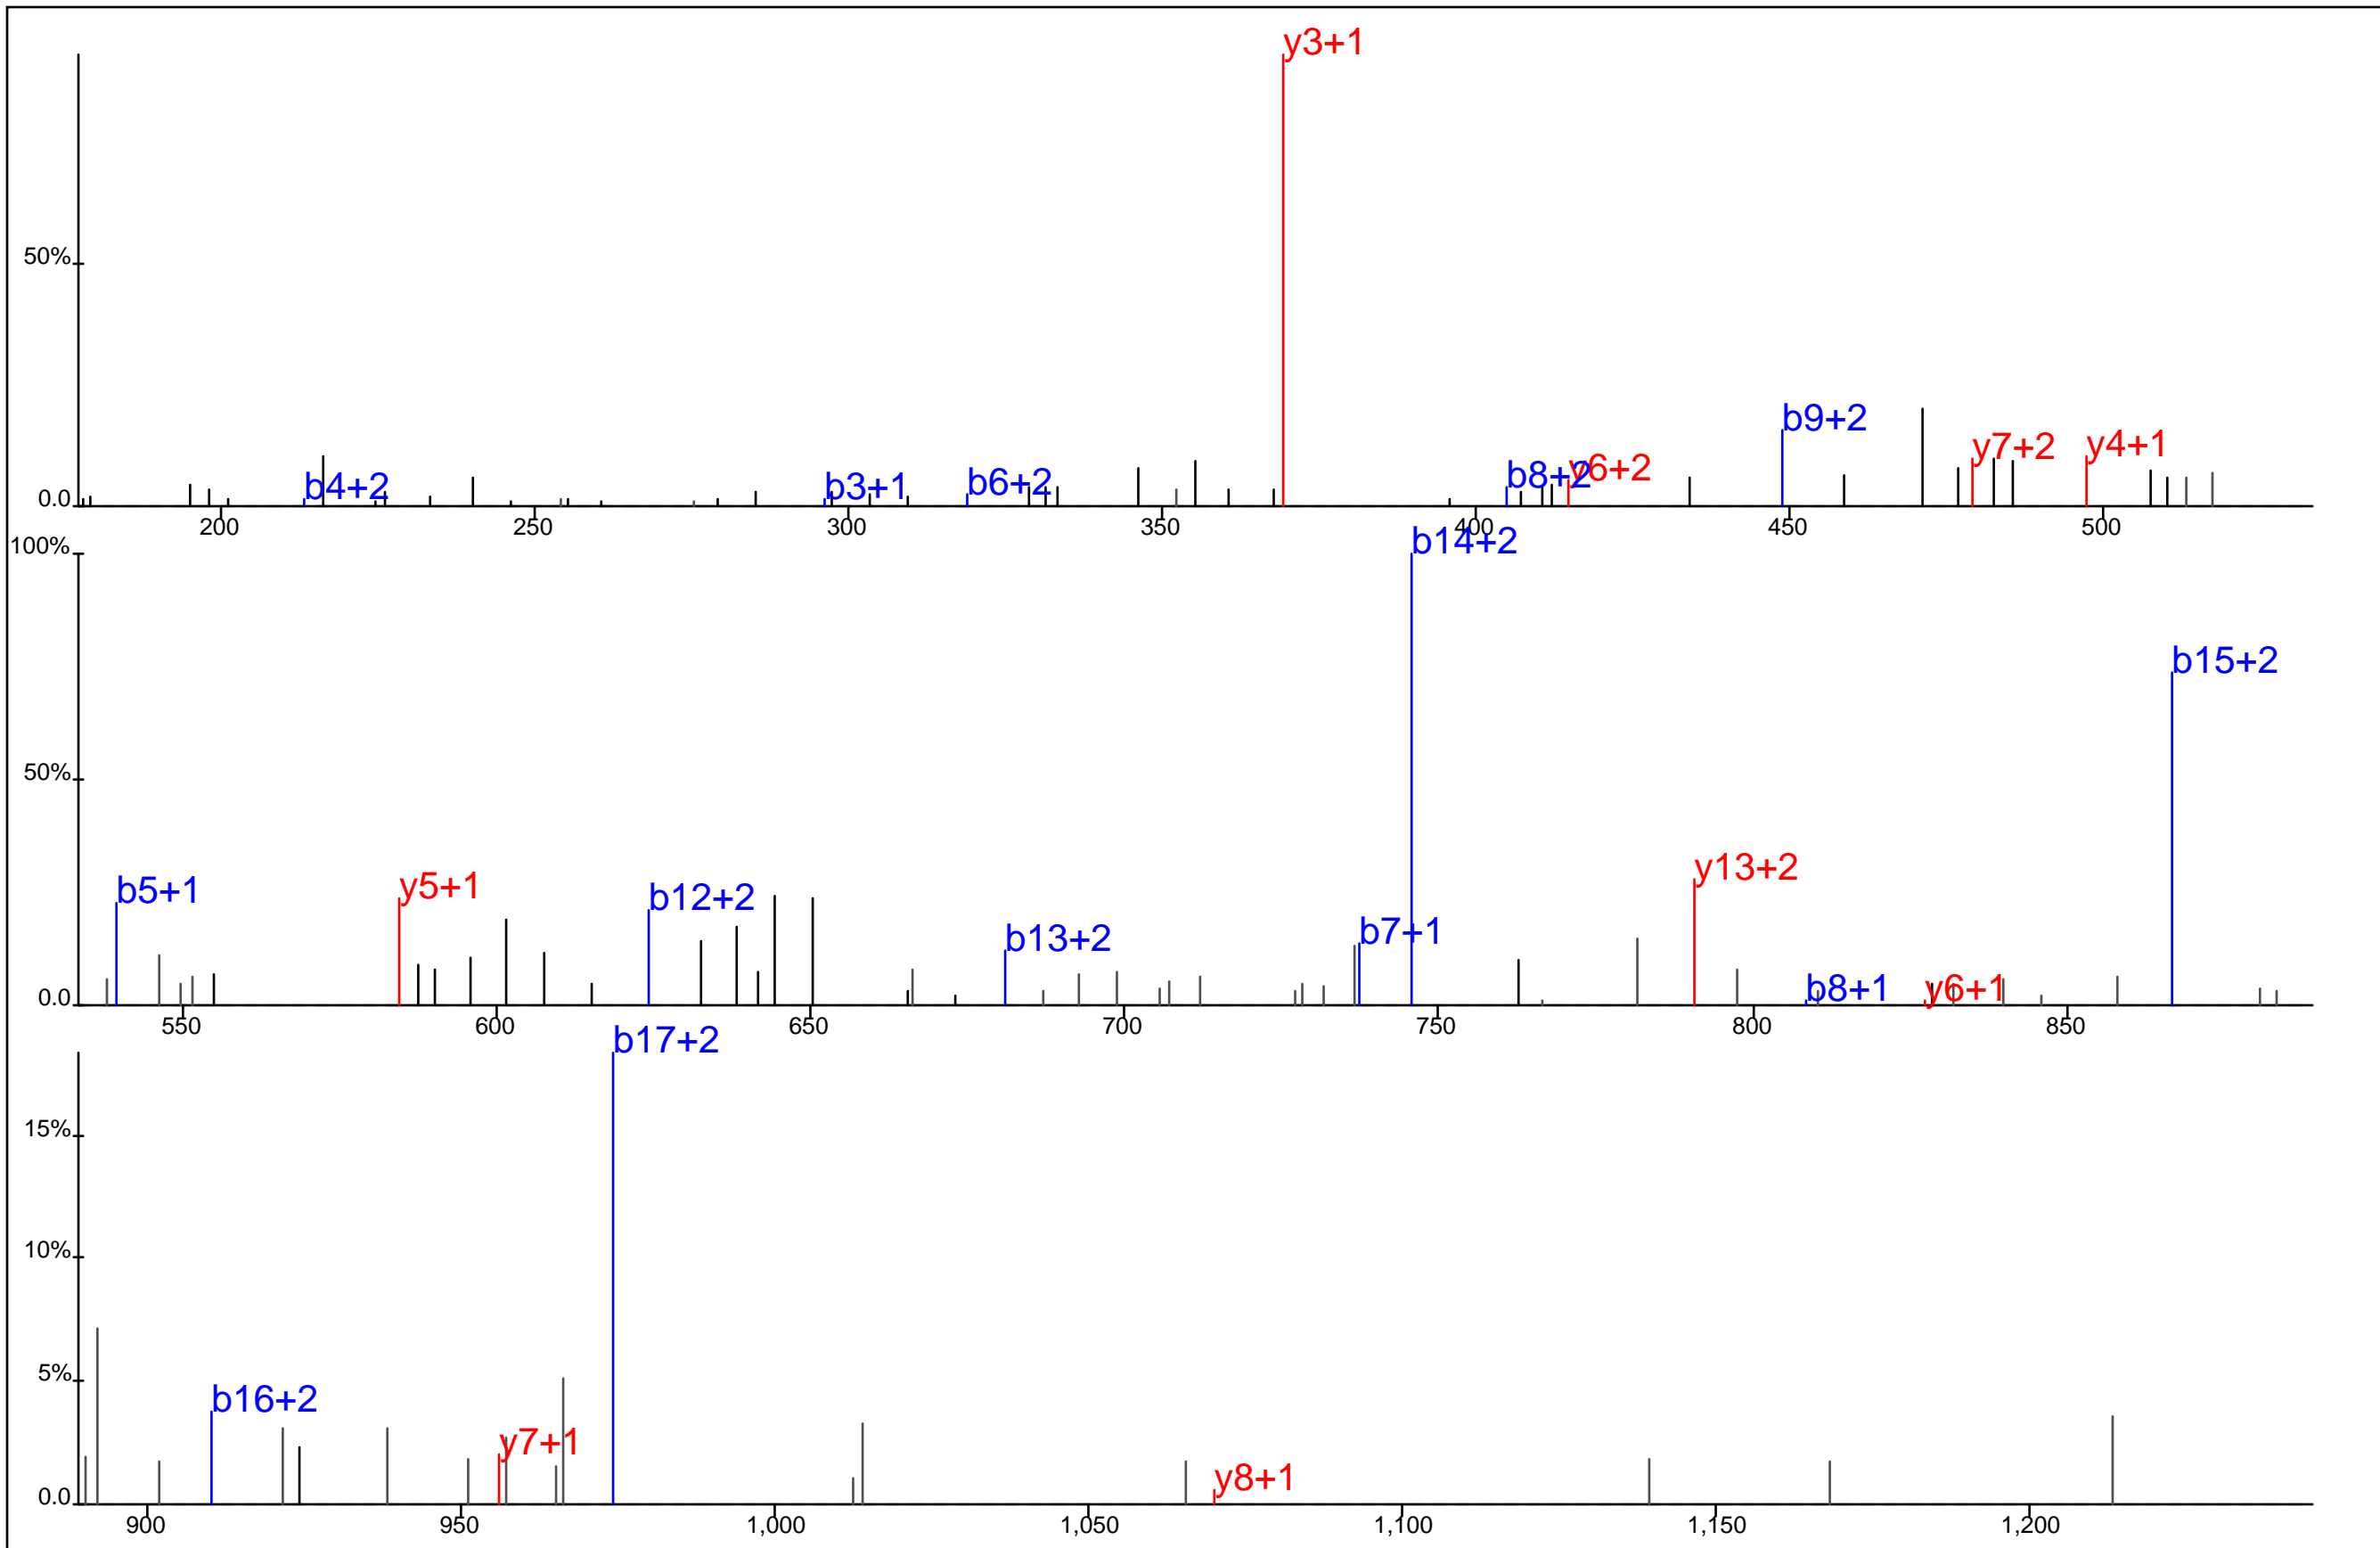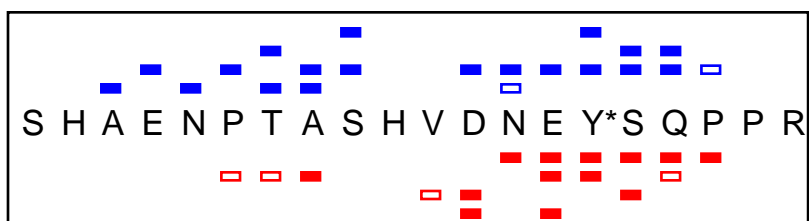

Protein Name: CD5  
 gi Accession: 0  
 Precursor Mass: 579.7481+4  
 Delta Mass: 1.270 ppm  
 XCorr: 33.63

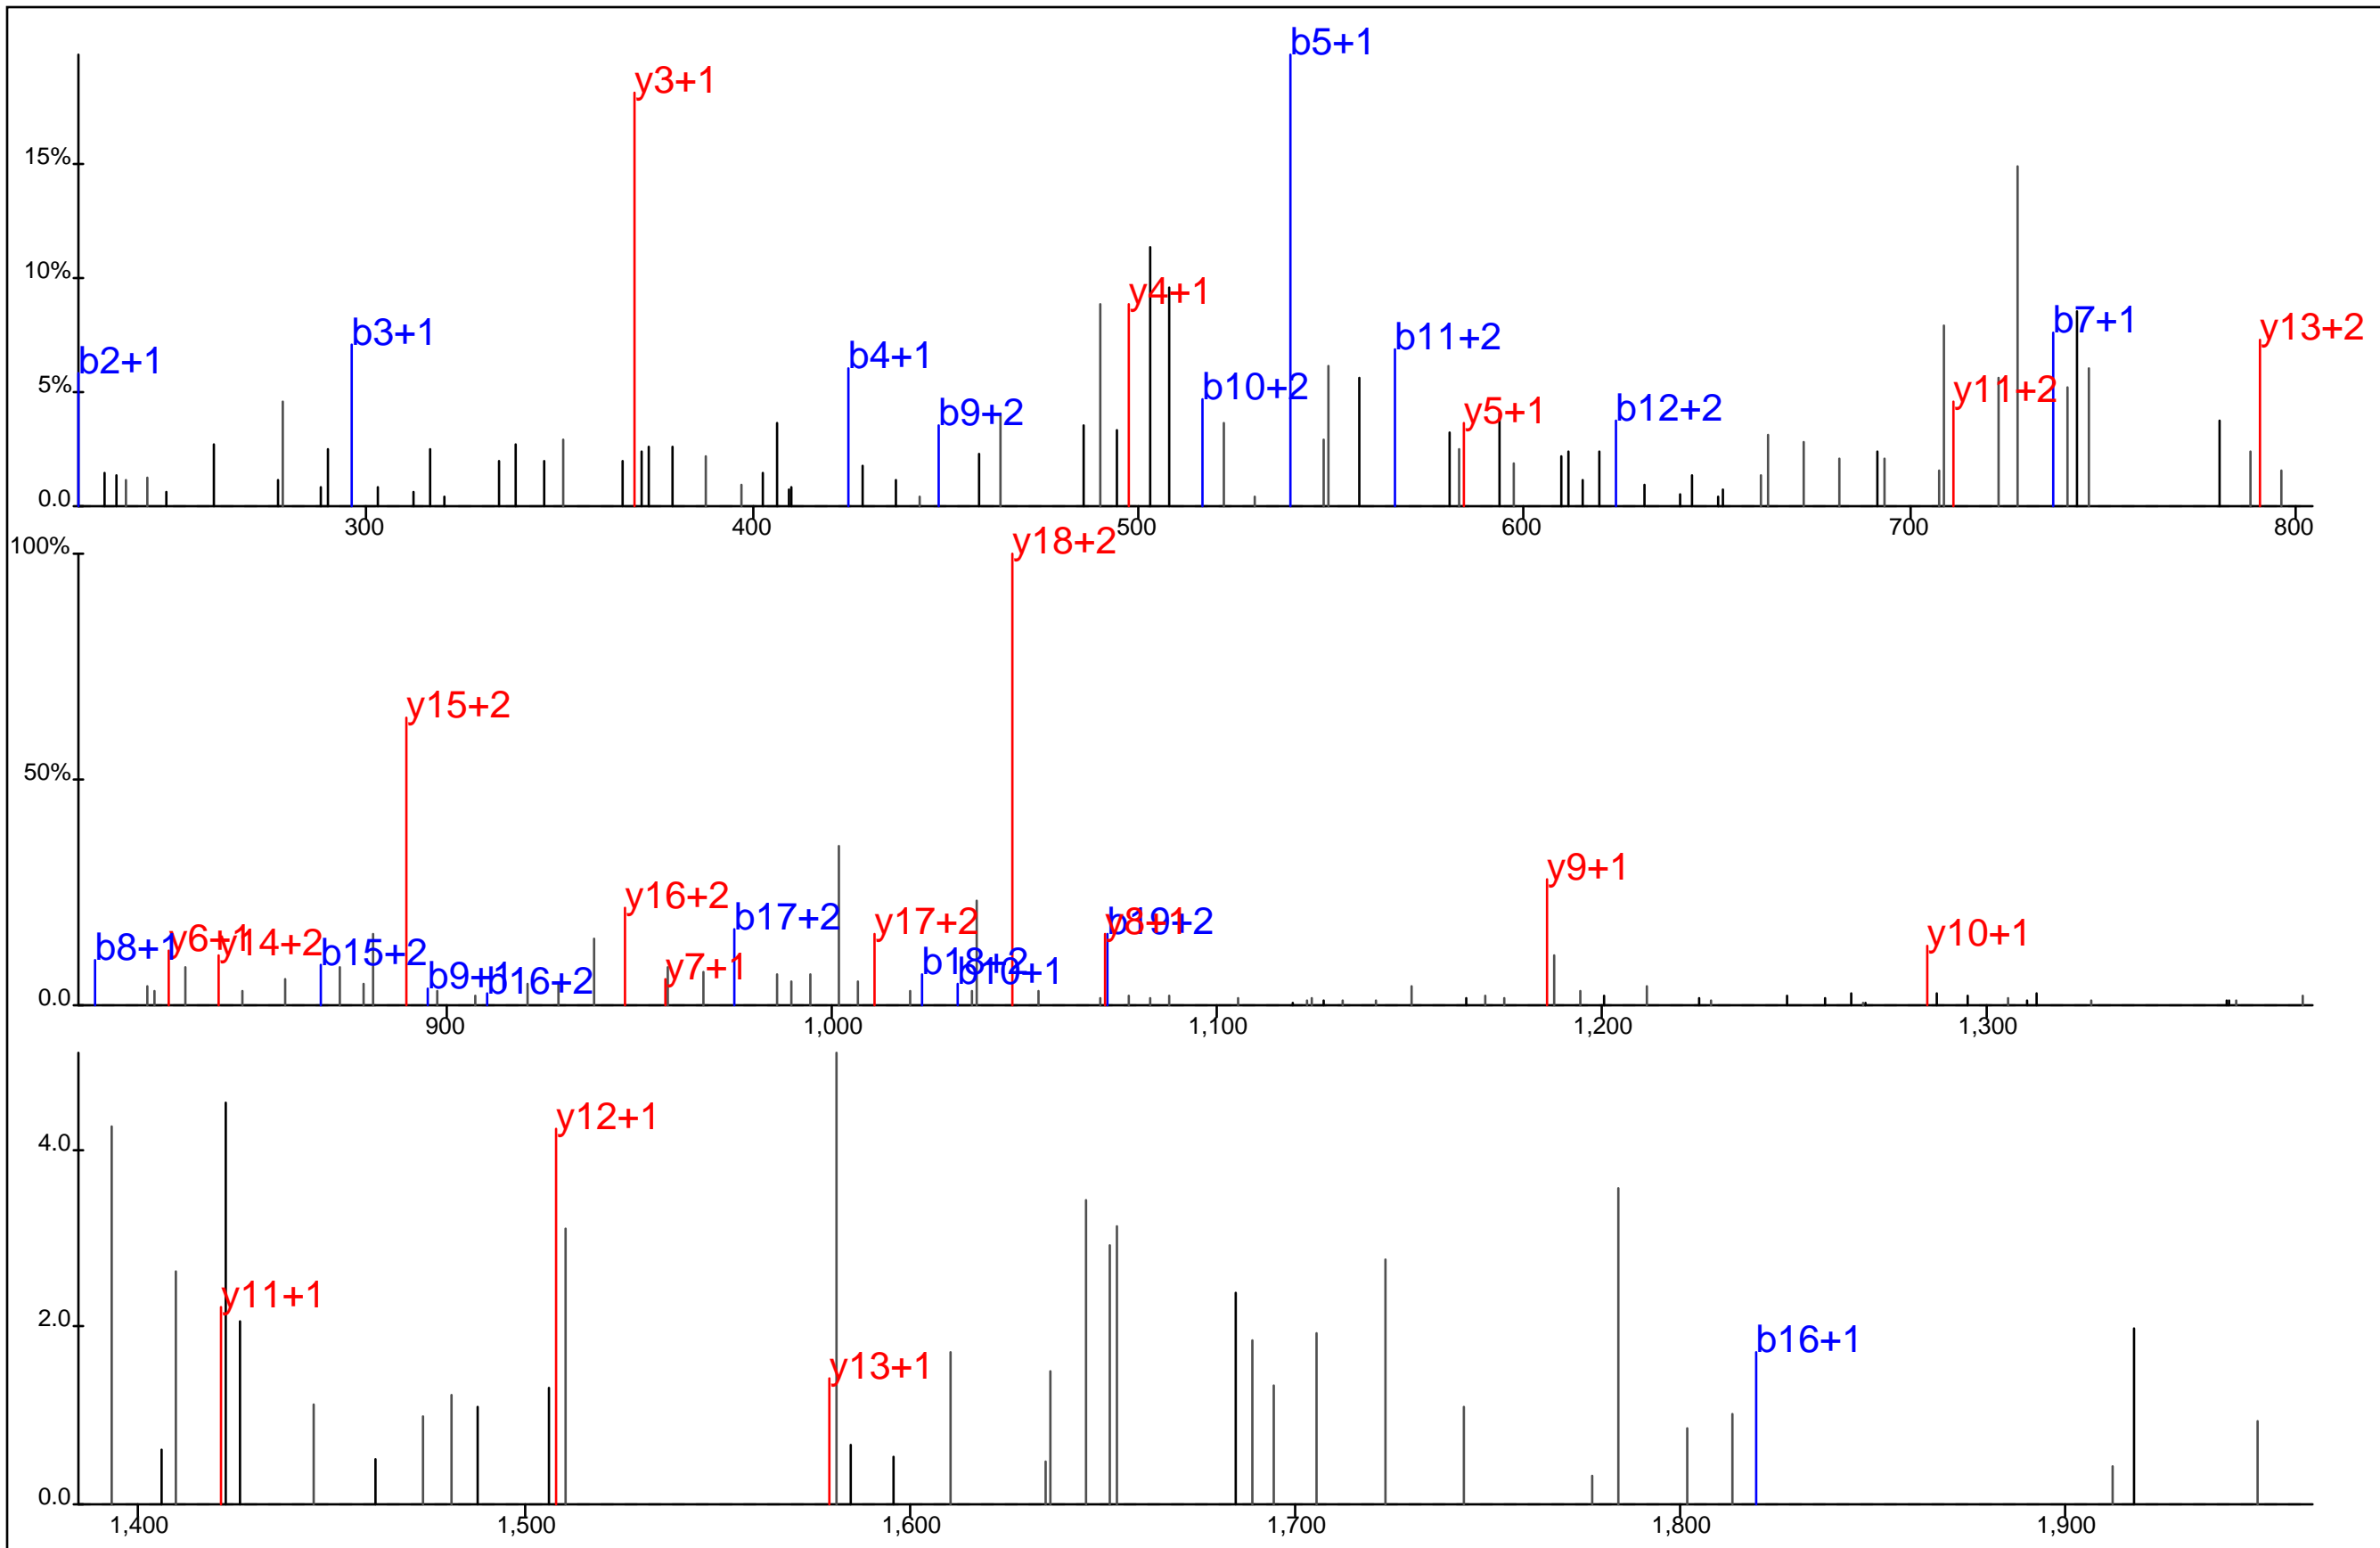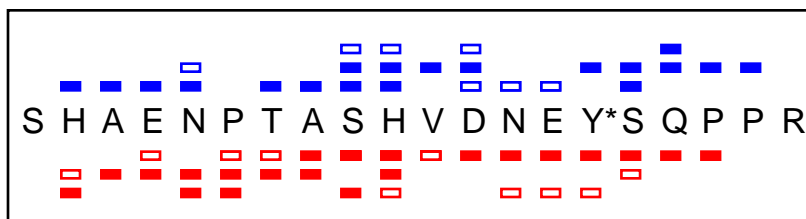

Protein Name: CD5  
 gi Accession: 0  
 Precursor Mass: 772.6595+3  
 Delta Mass: 1.544 ppm  
 XCorr: 43.38

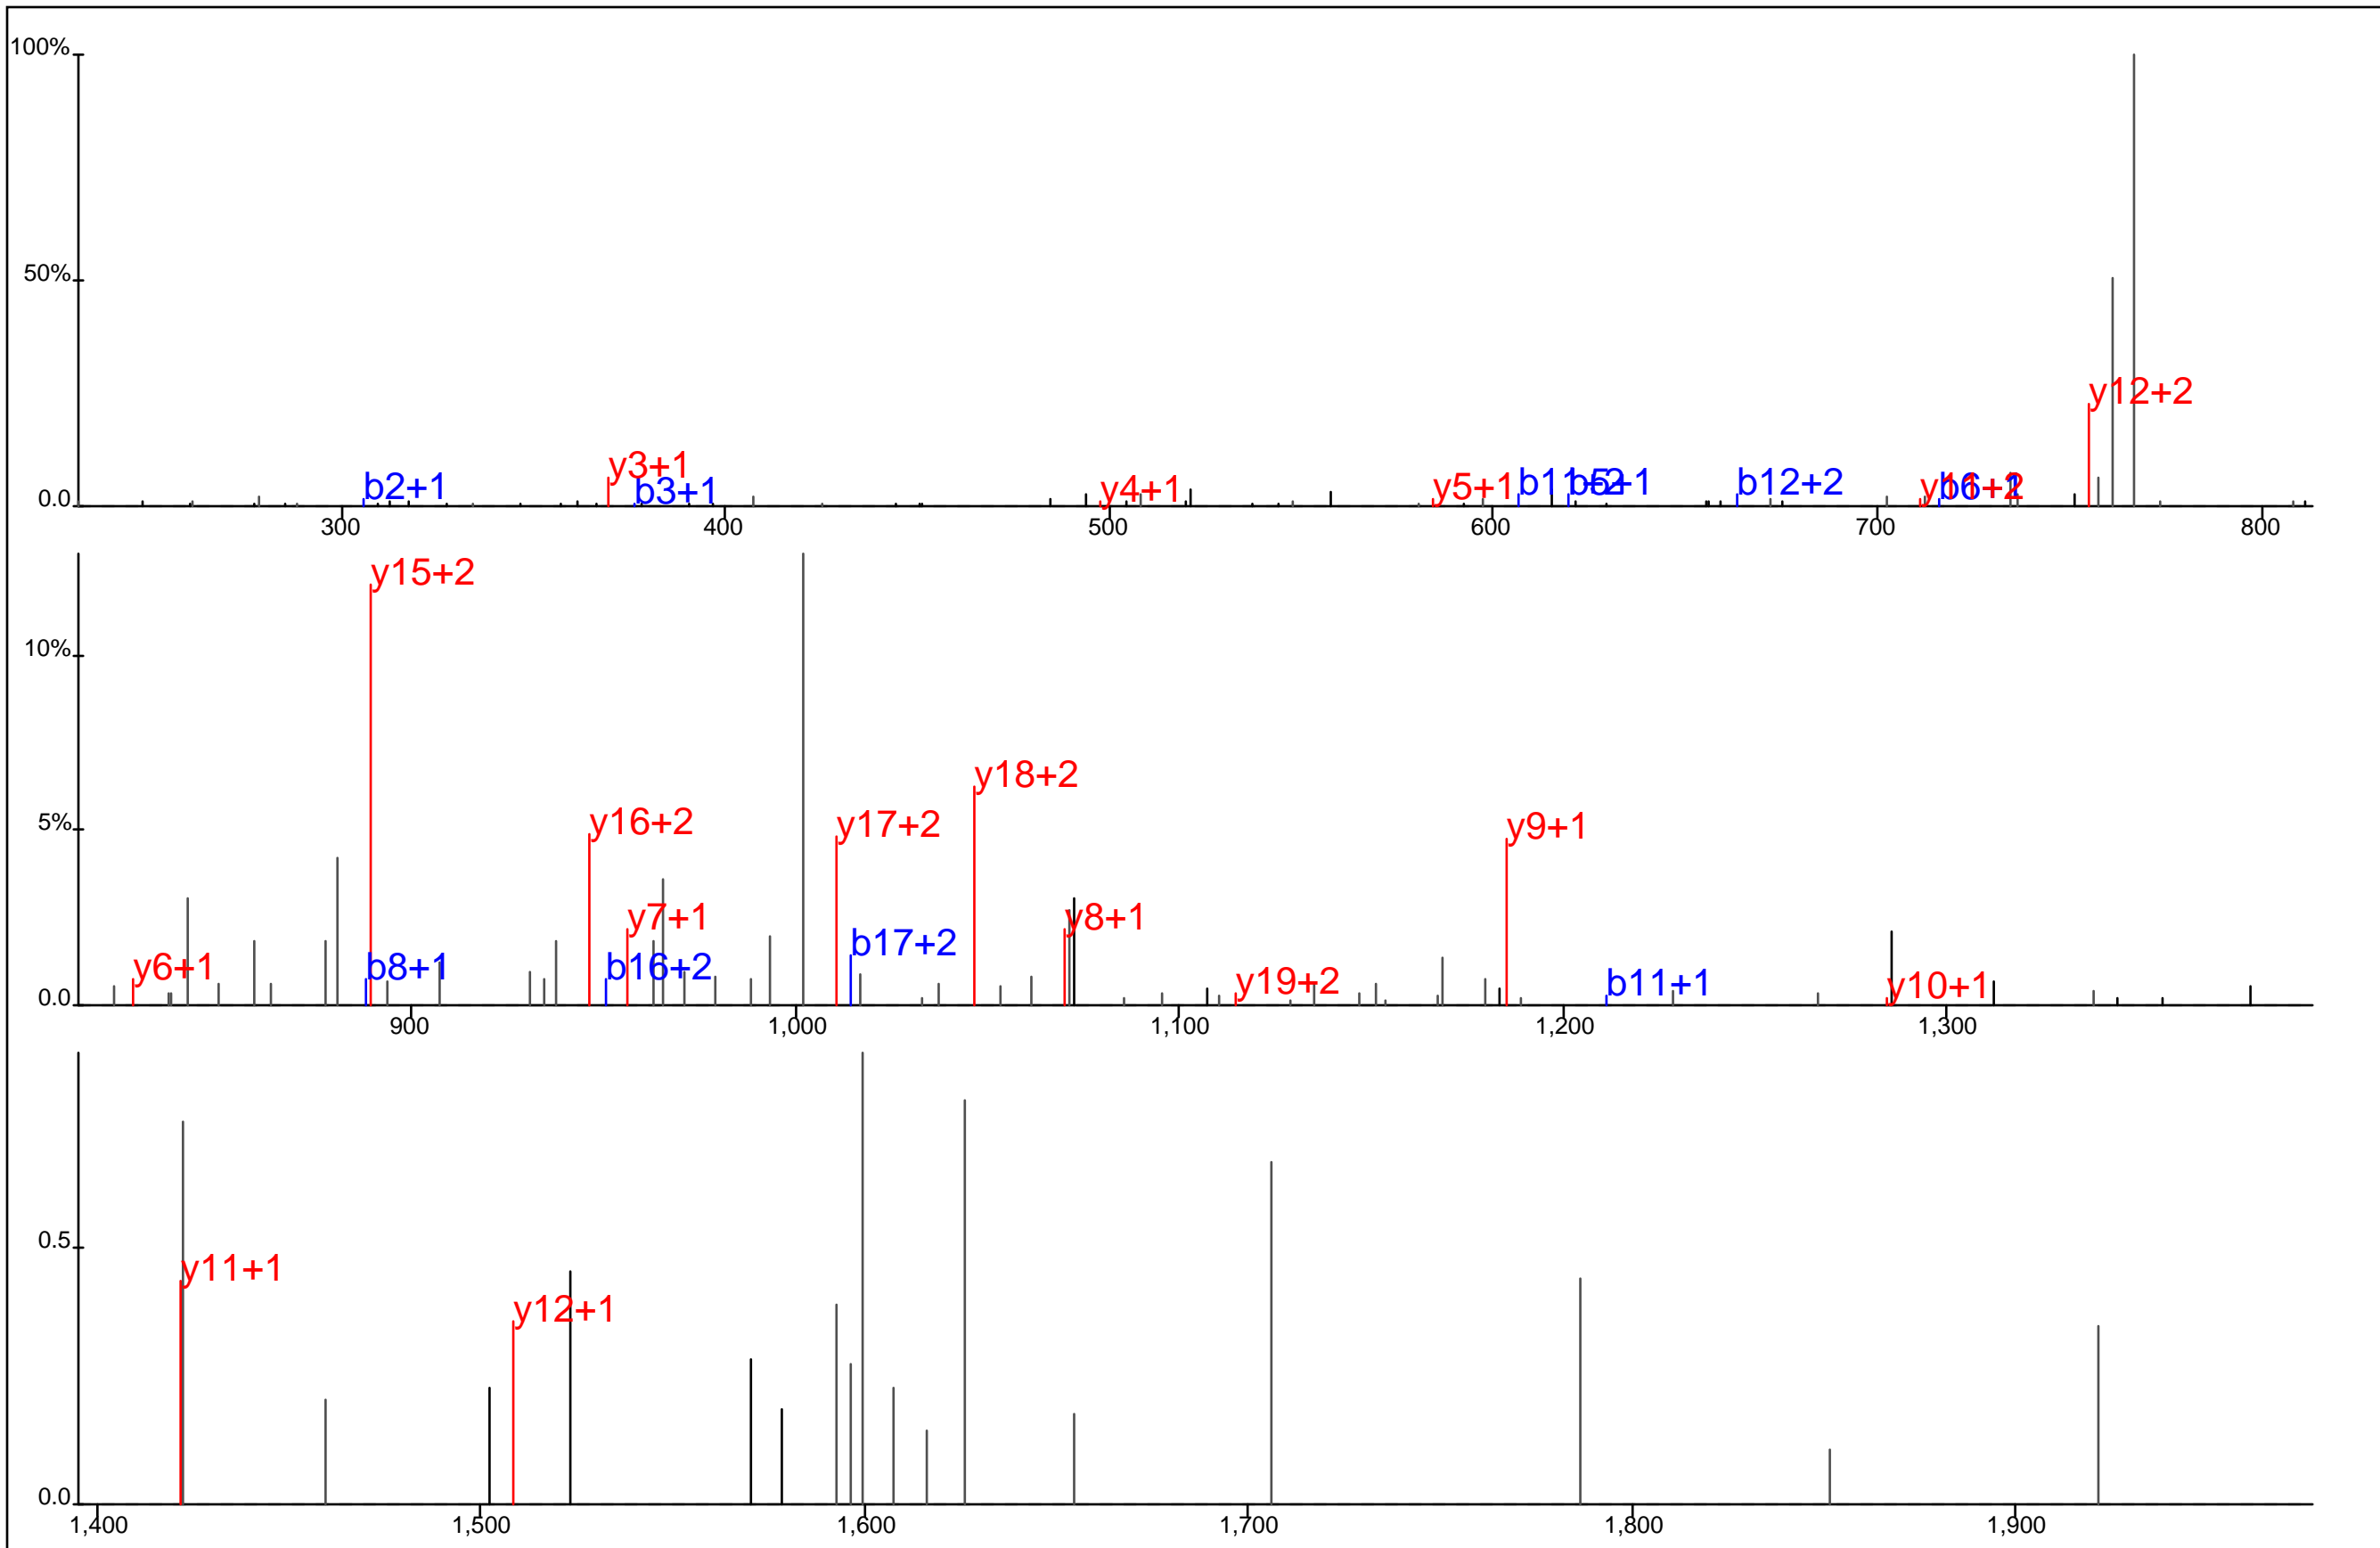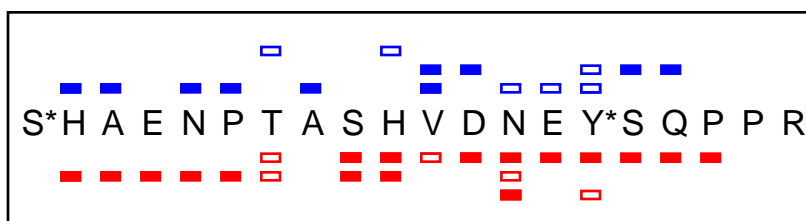

Protein Name: CD5  
 gi Accession: 0  
 Precursor Mass: 799.3159+3  
 Delta Mass: 0.406 ppm  
 XCorr: 35.87

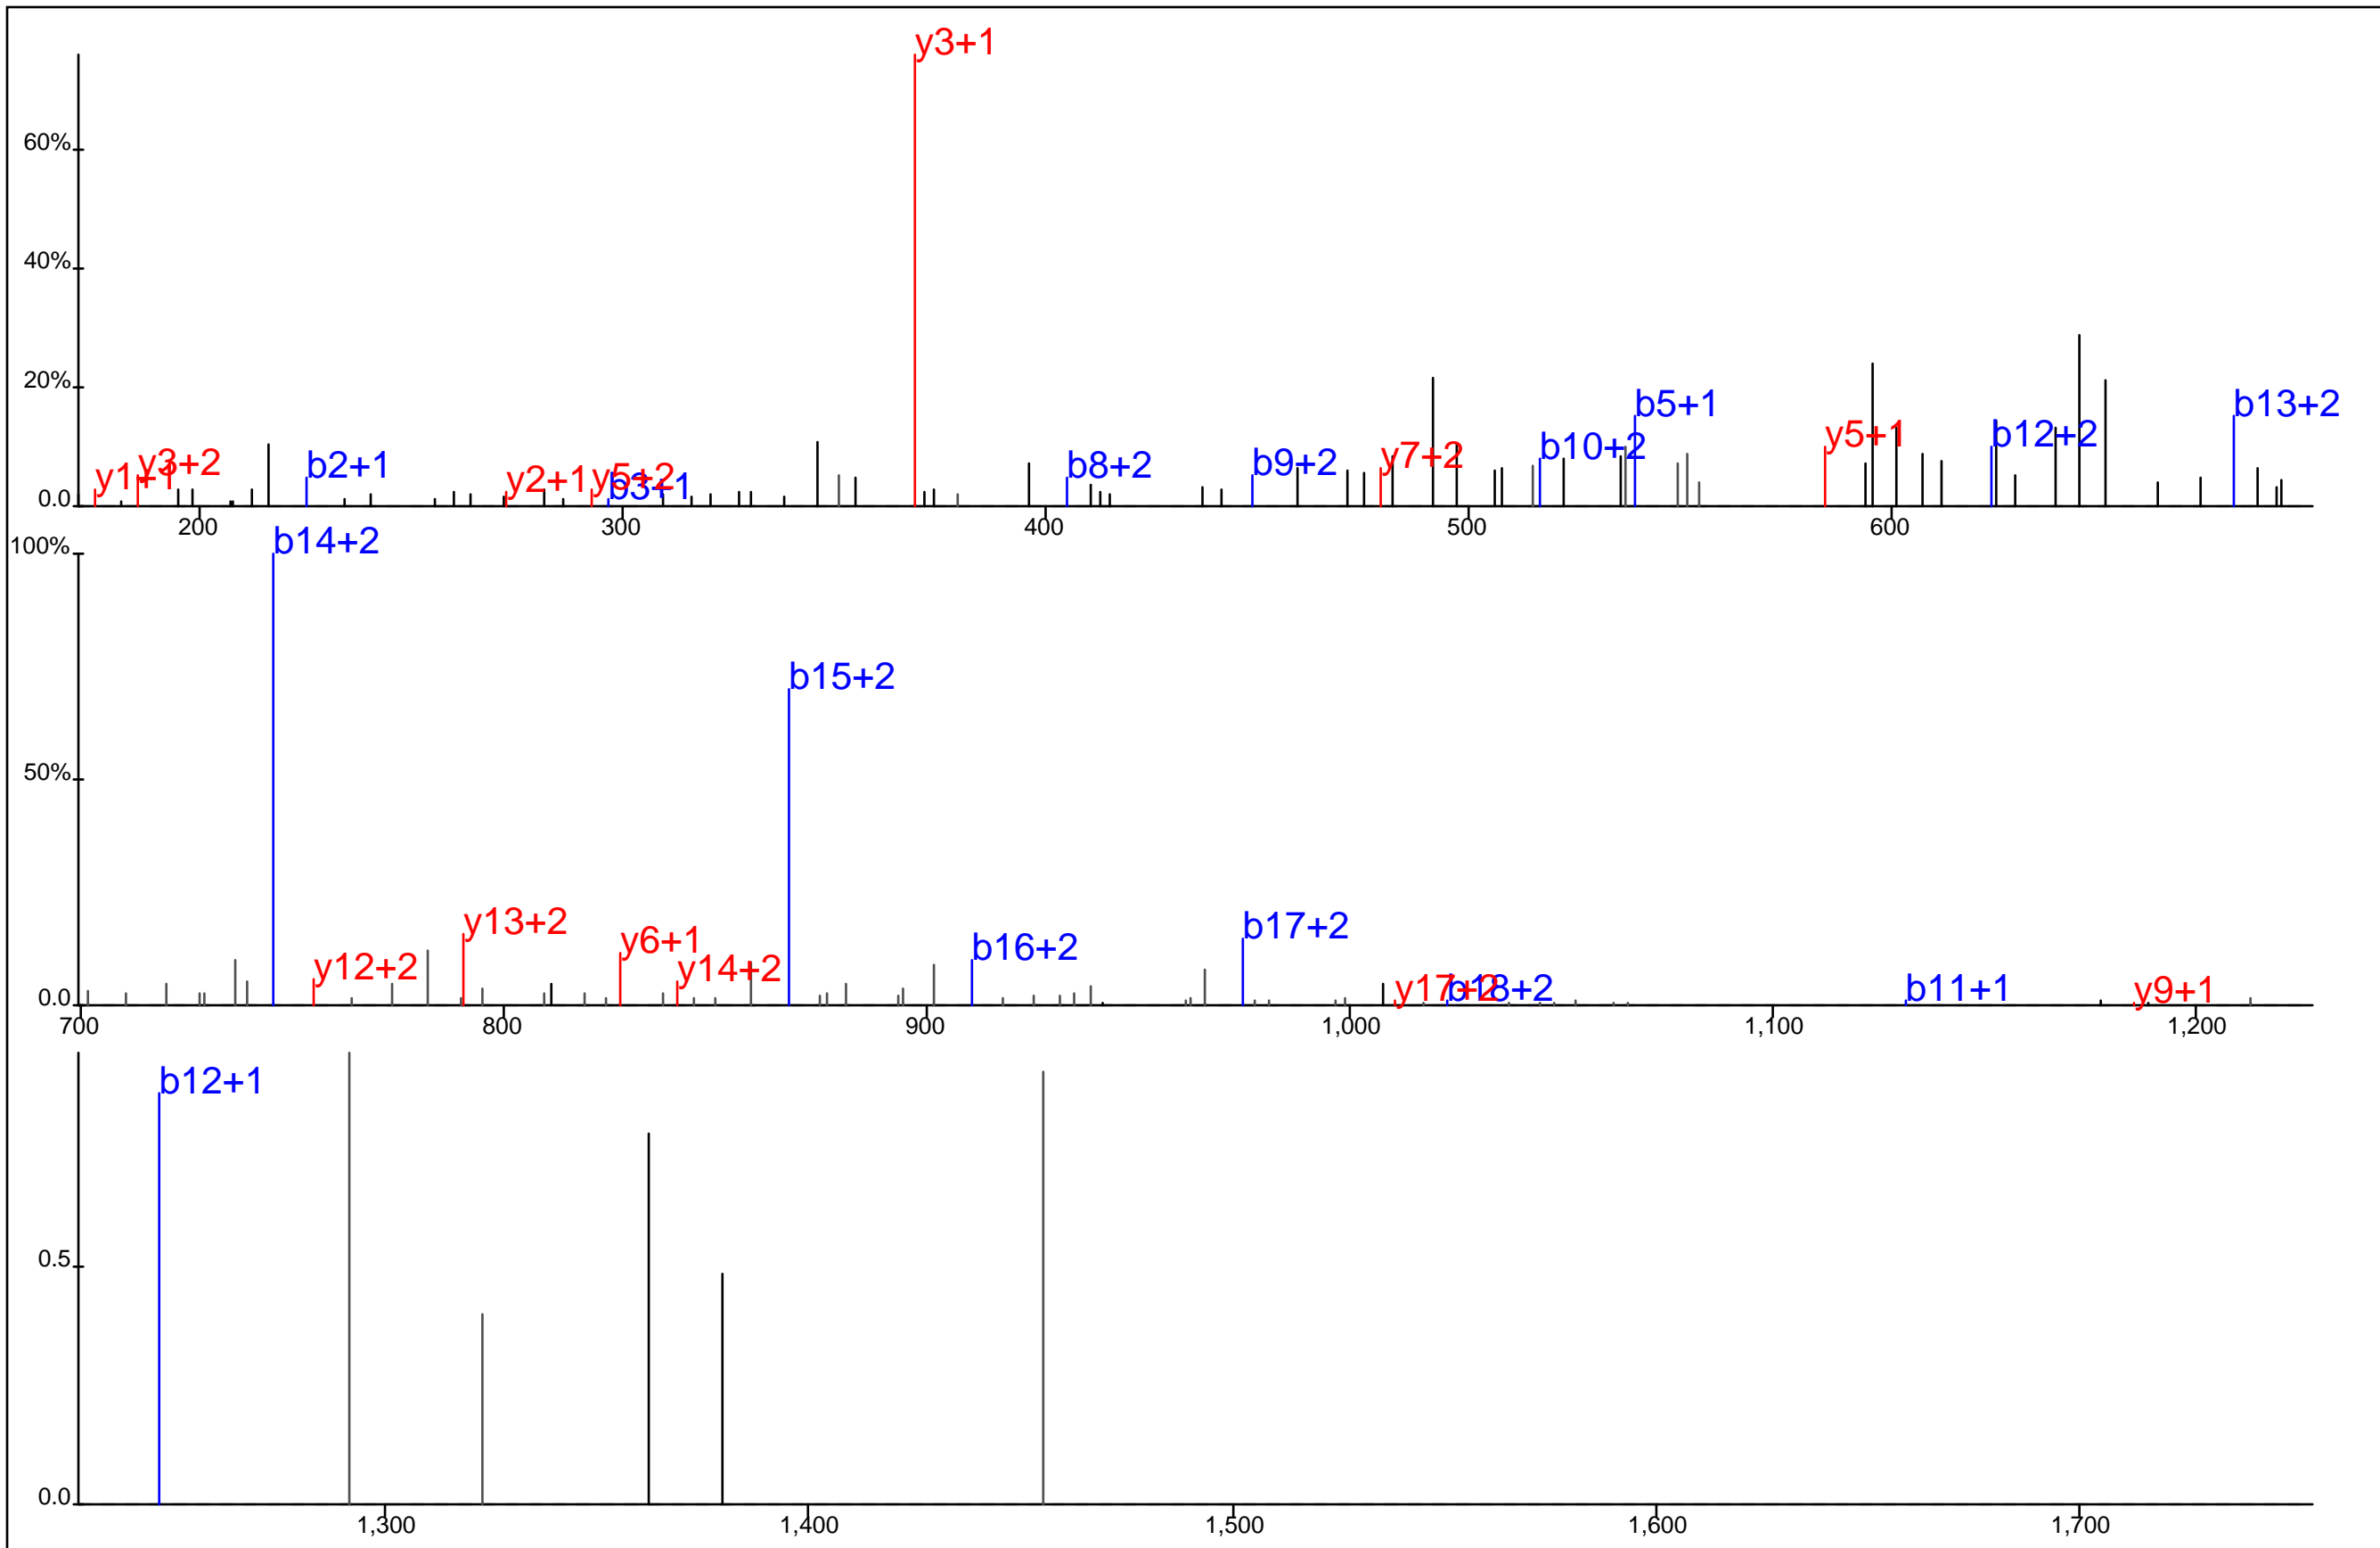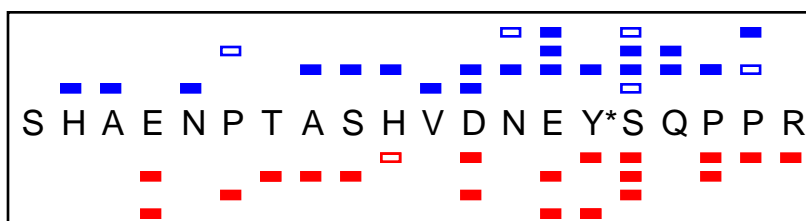

Protein Name: CD5  
 gi Accession: 0  
 Precursor Mass: 579.7480+4  
 Delta Mass: 1.165 ppm  
 XCorr: 42.49

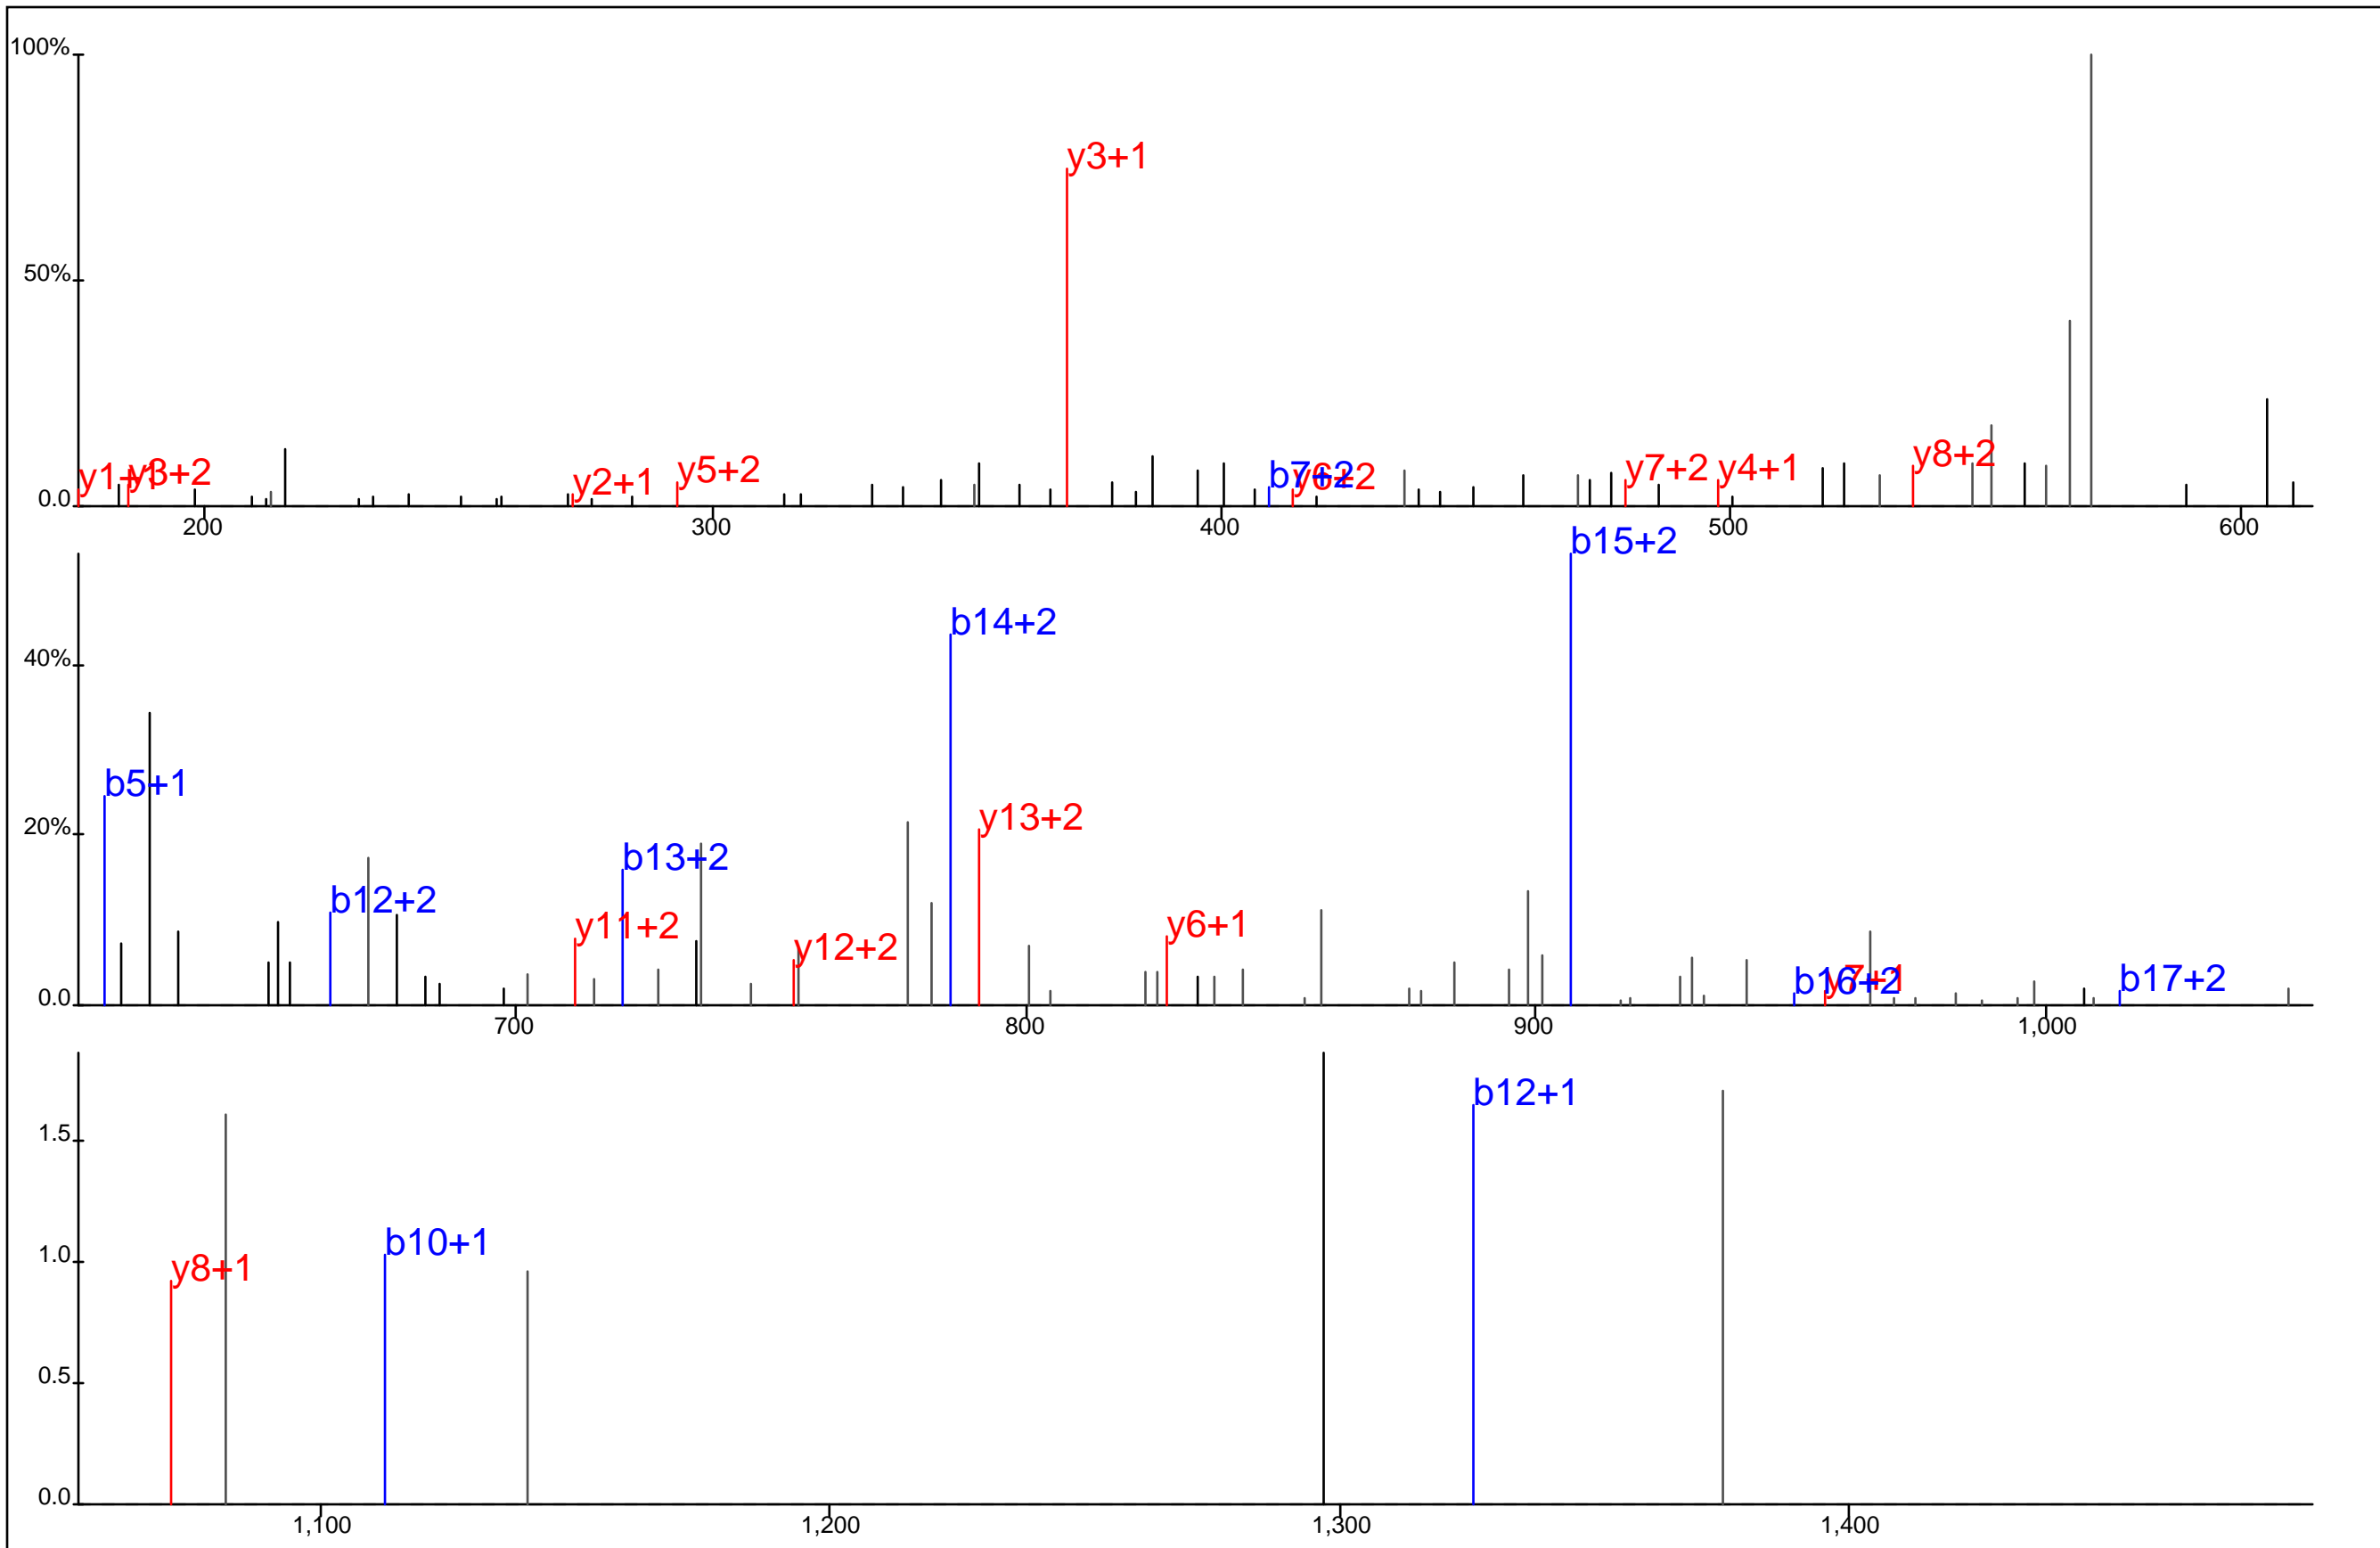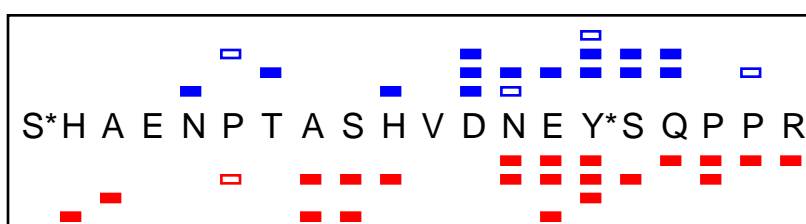

Protein Name: CD5  
 gi Accession: 0  
 Precursor Mass: 599.7380+4  
 Delta Mass: 1.634 ppm  
 XCorr: 24.33

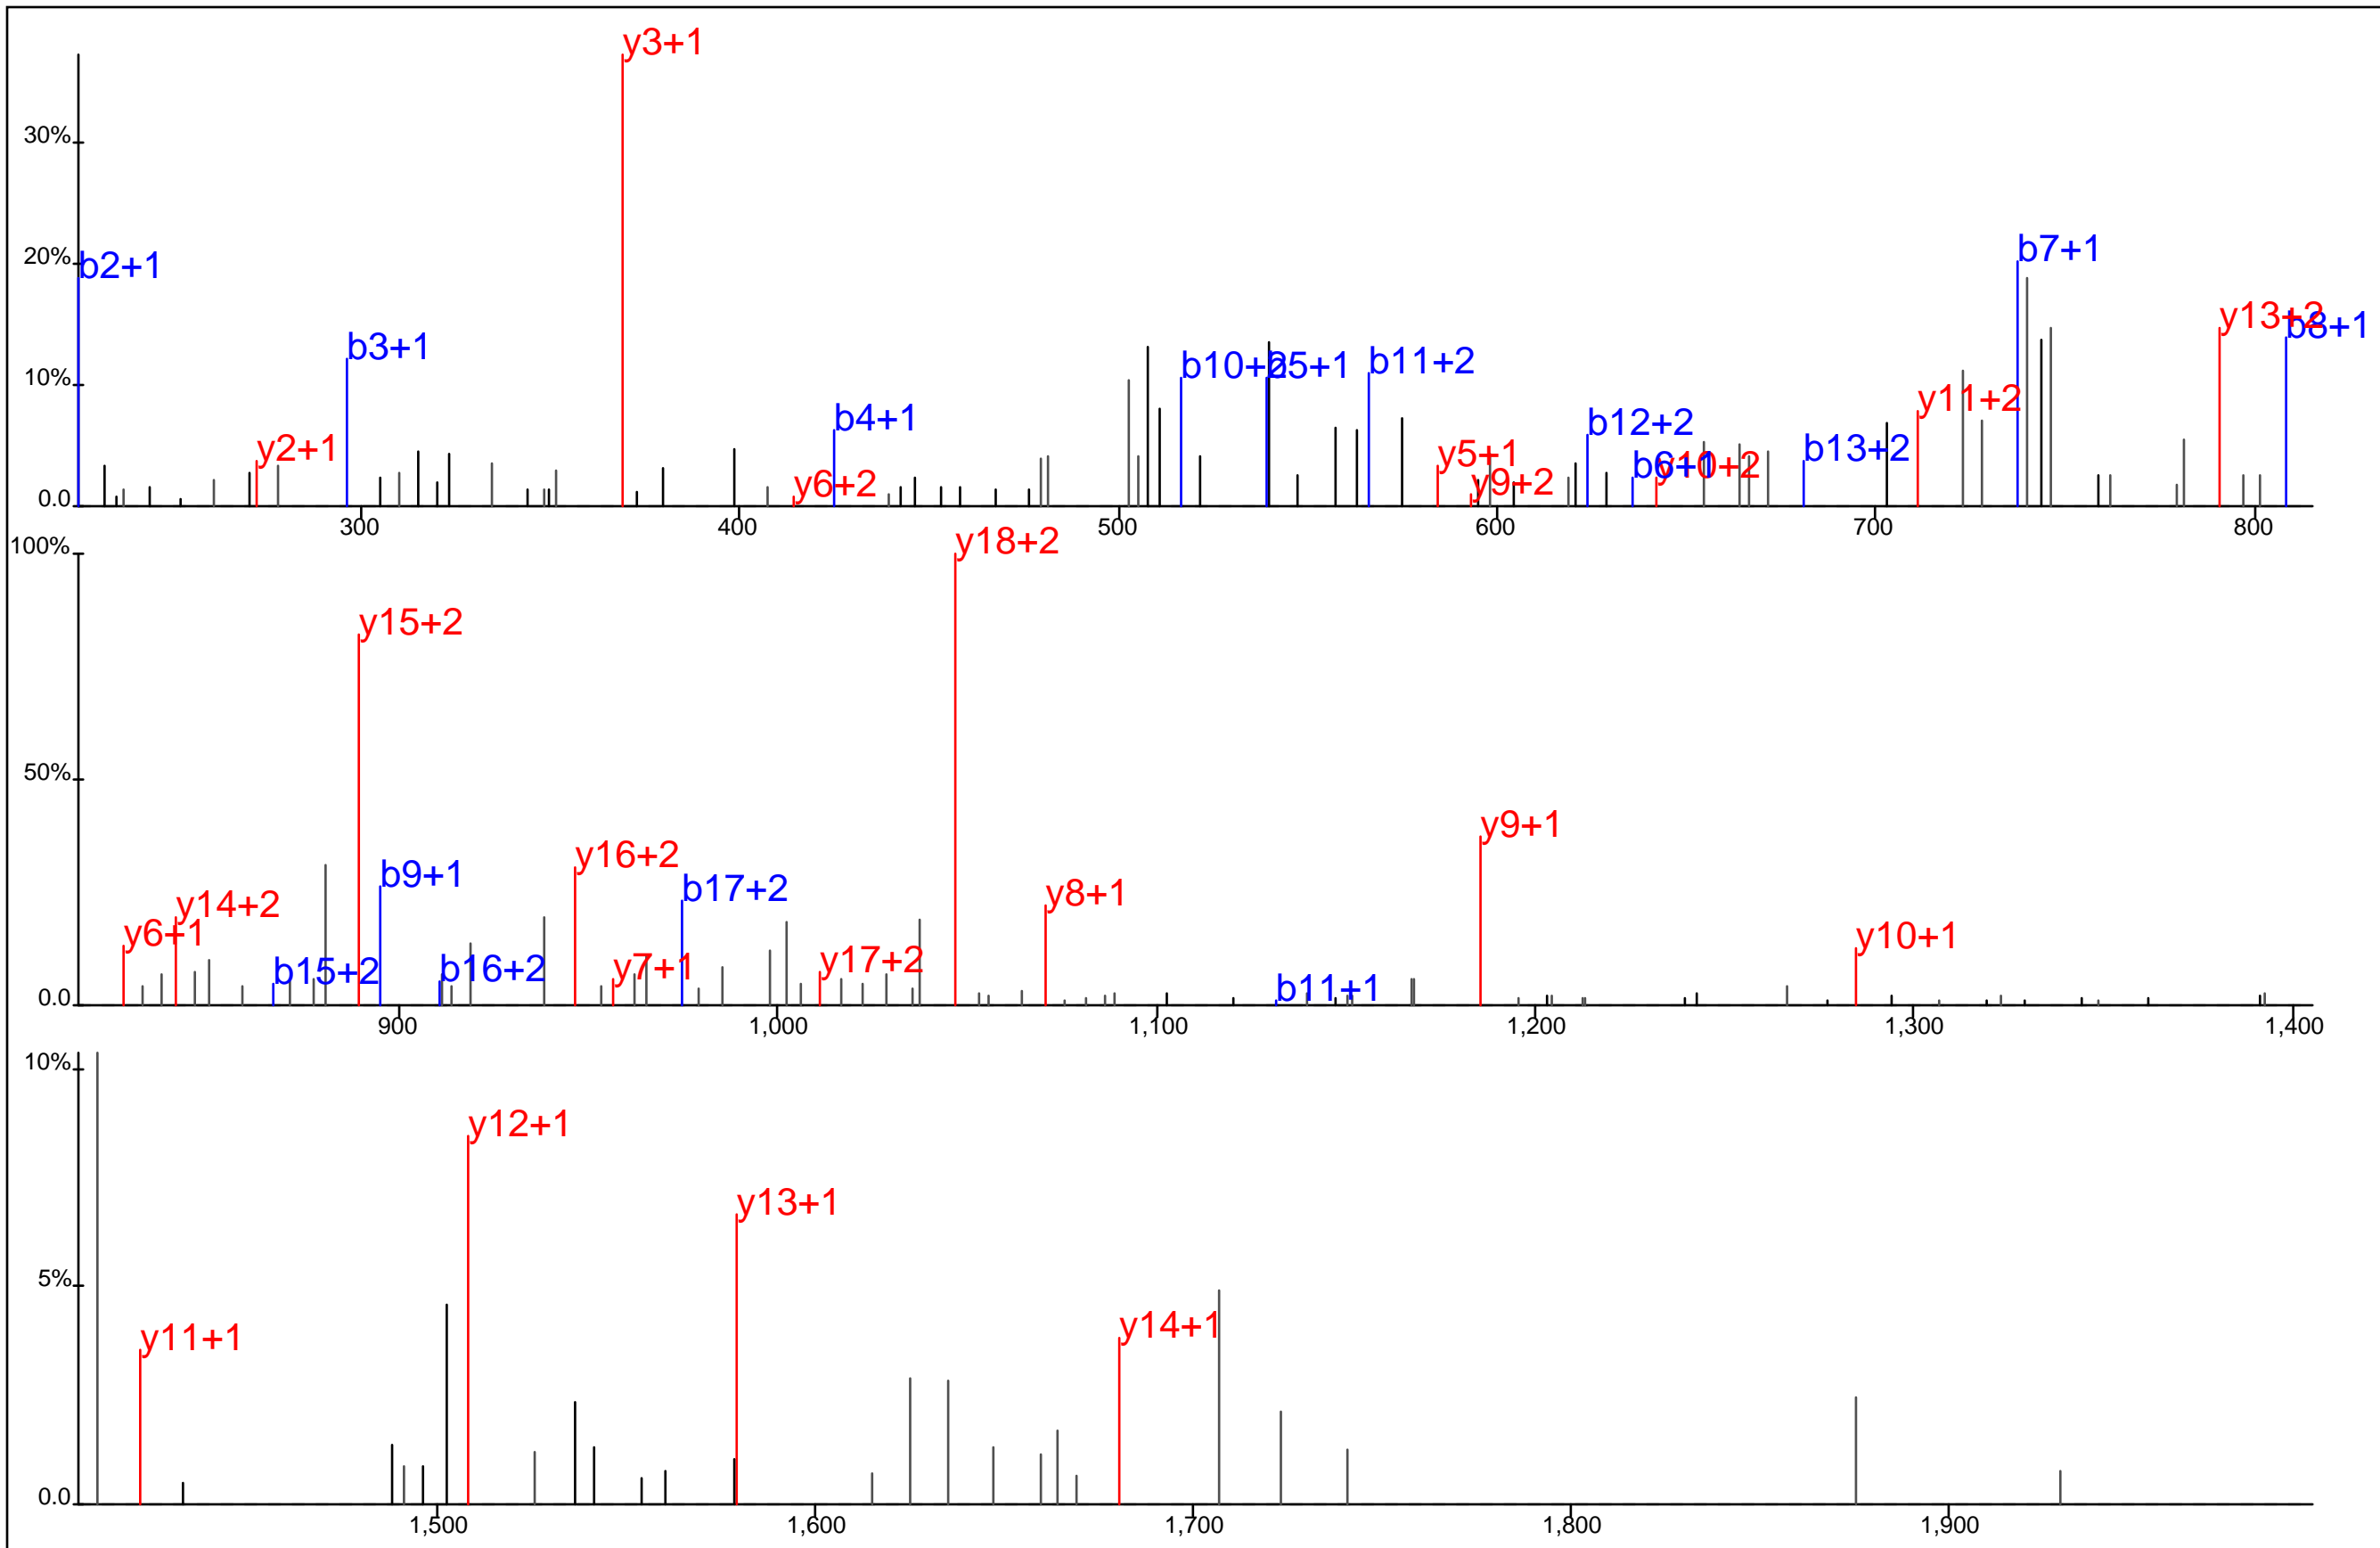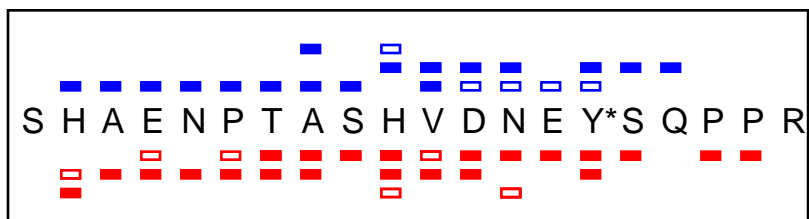

Protein Name: CD5  
 gi Accession: 0  
 Precursor Mass: 772.6609+3  
 Delta Mass: 0.275 ppm  
 XCorr: 49.47

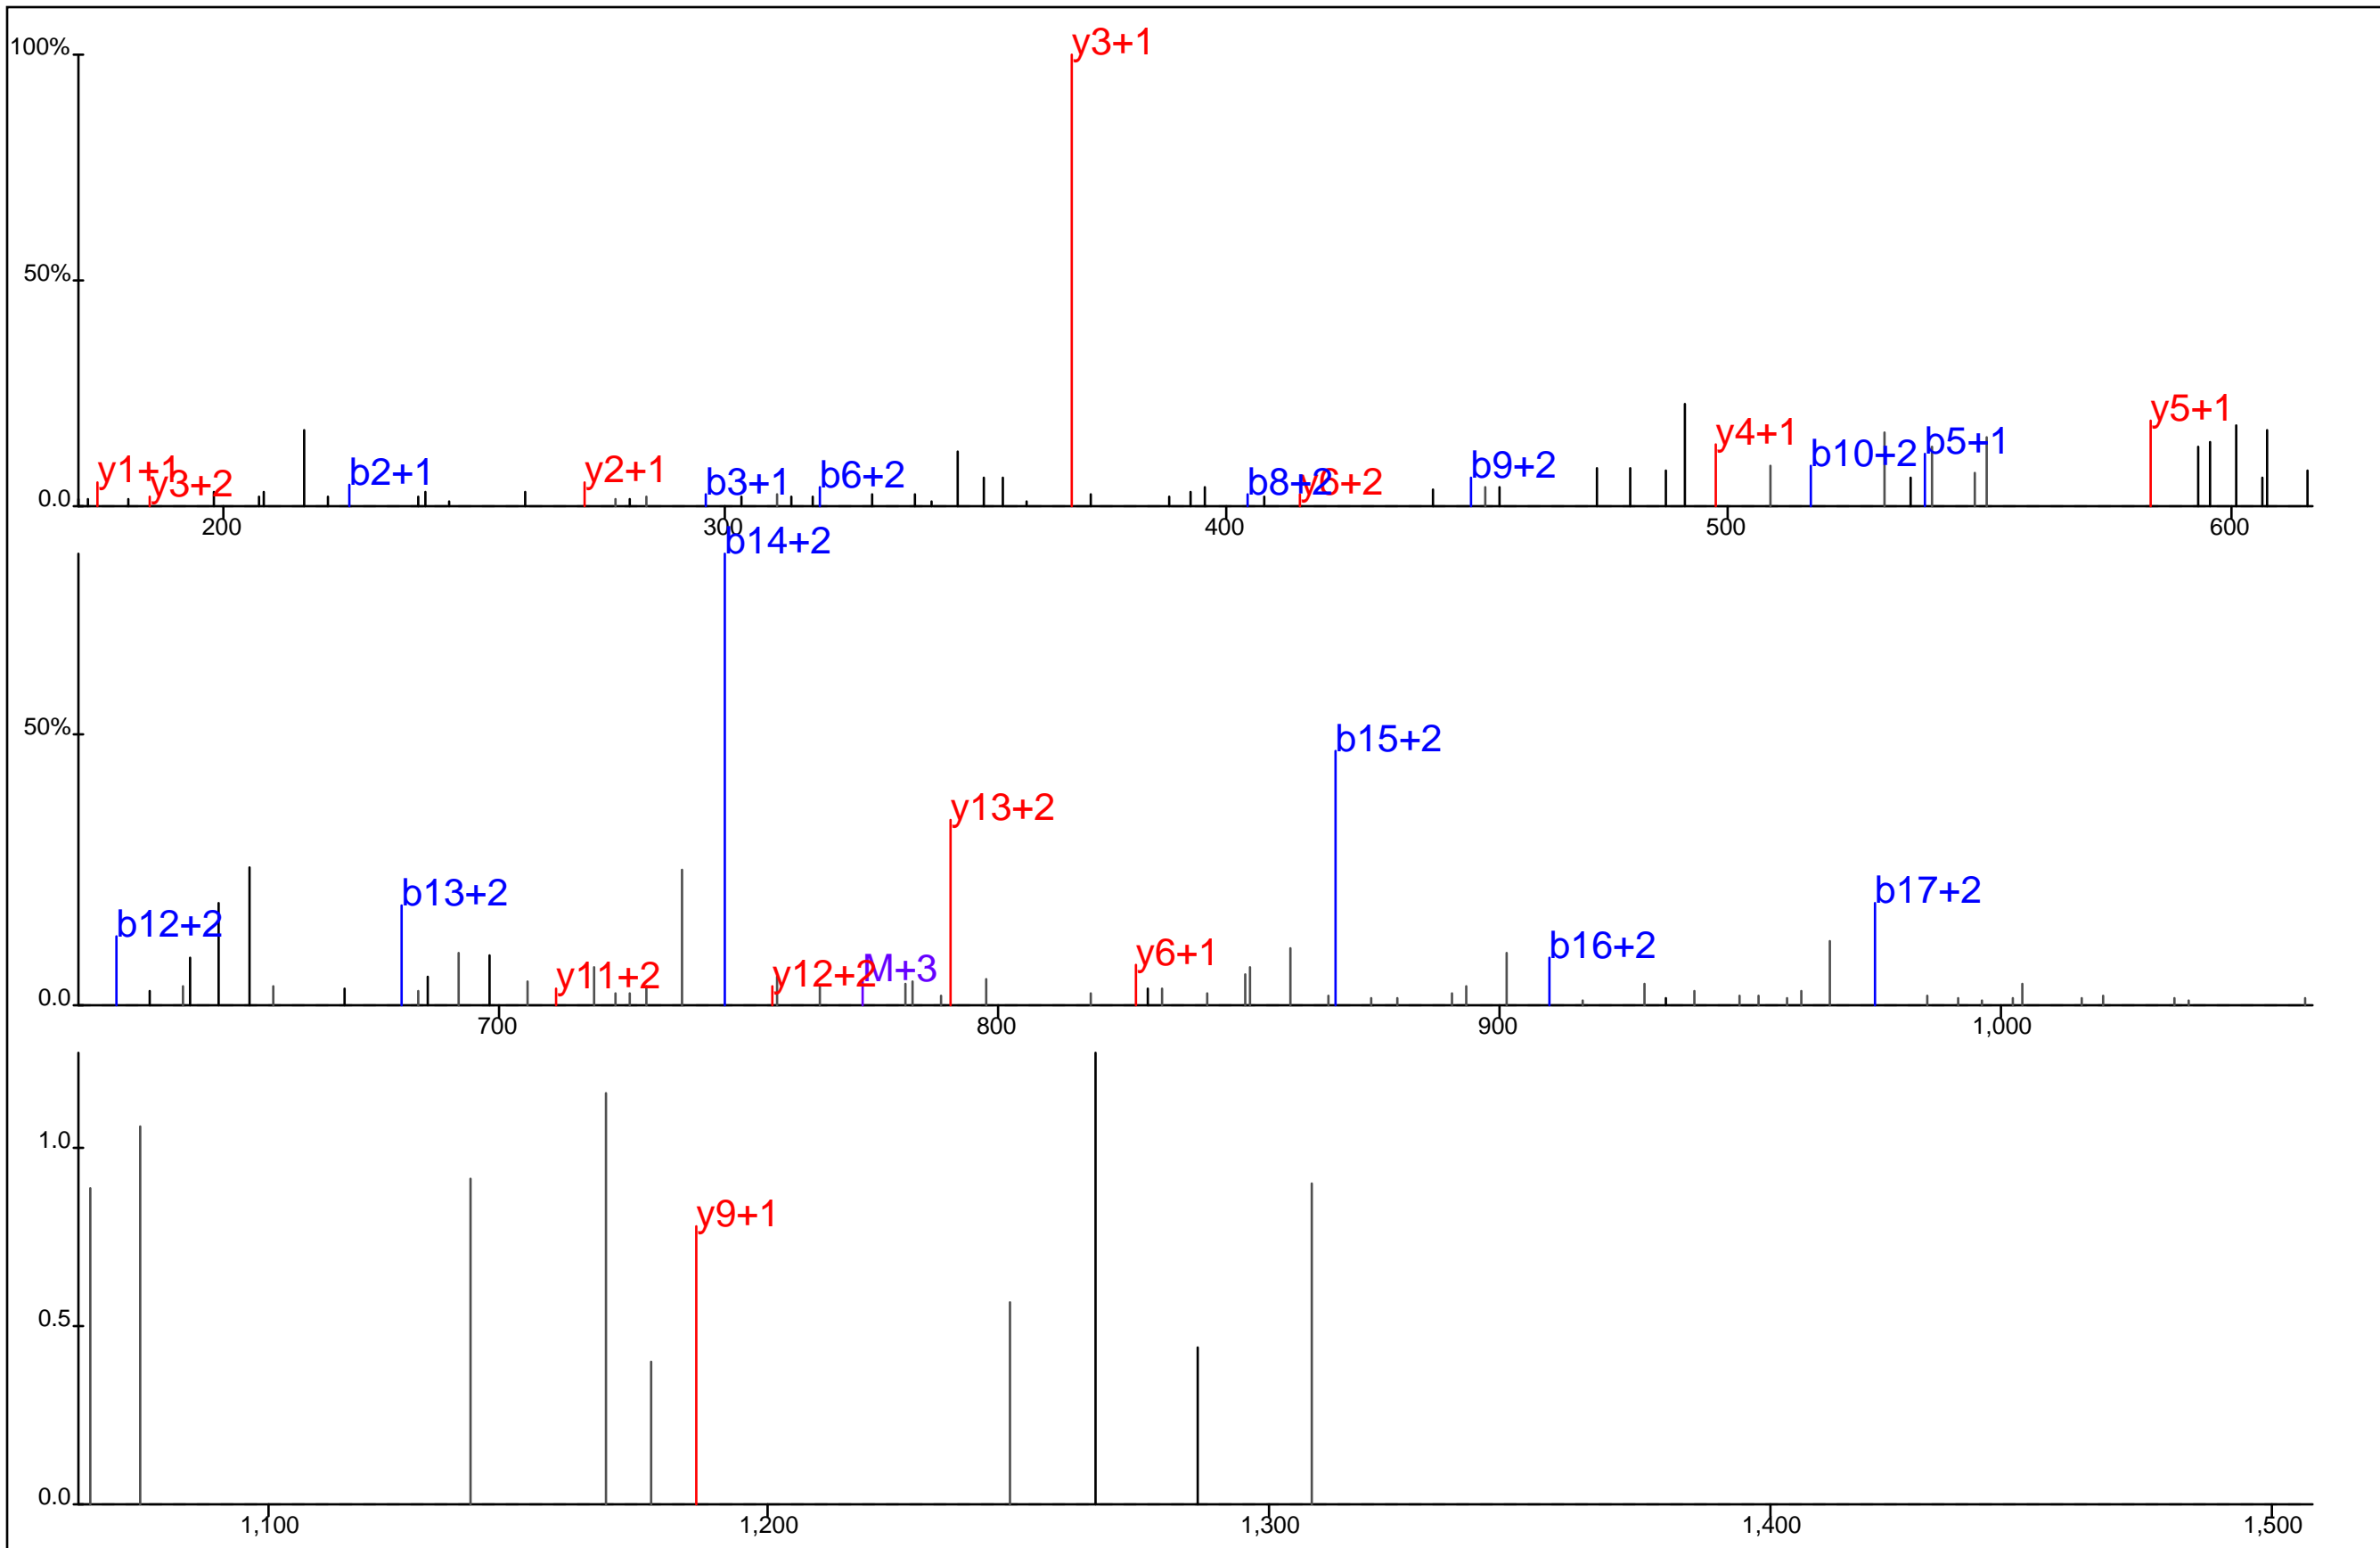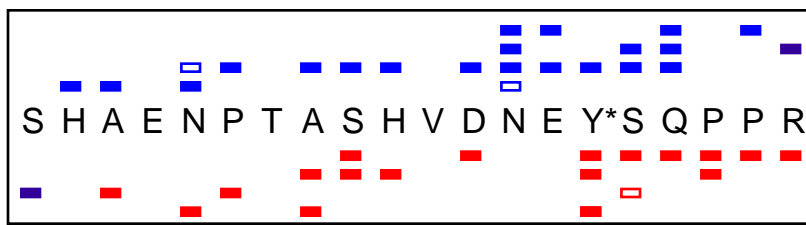

Protein Name: CD5  
 gi Accession: 0  
 Precursor Mass: 579.7439+4  
 Delta Mass: 6.004 ppm  
 XCorr: 43.91

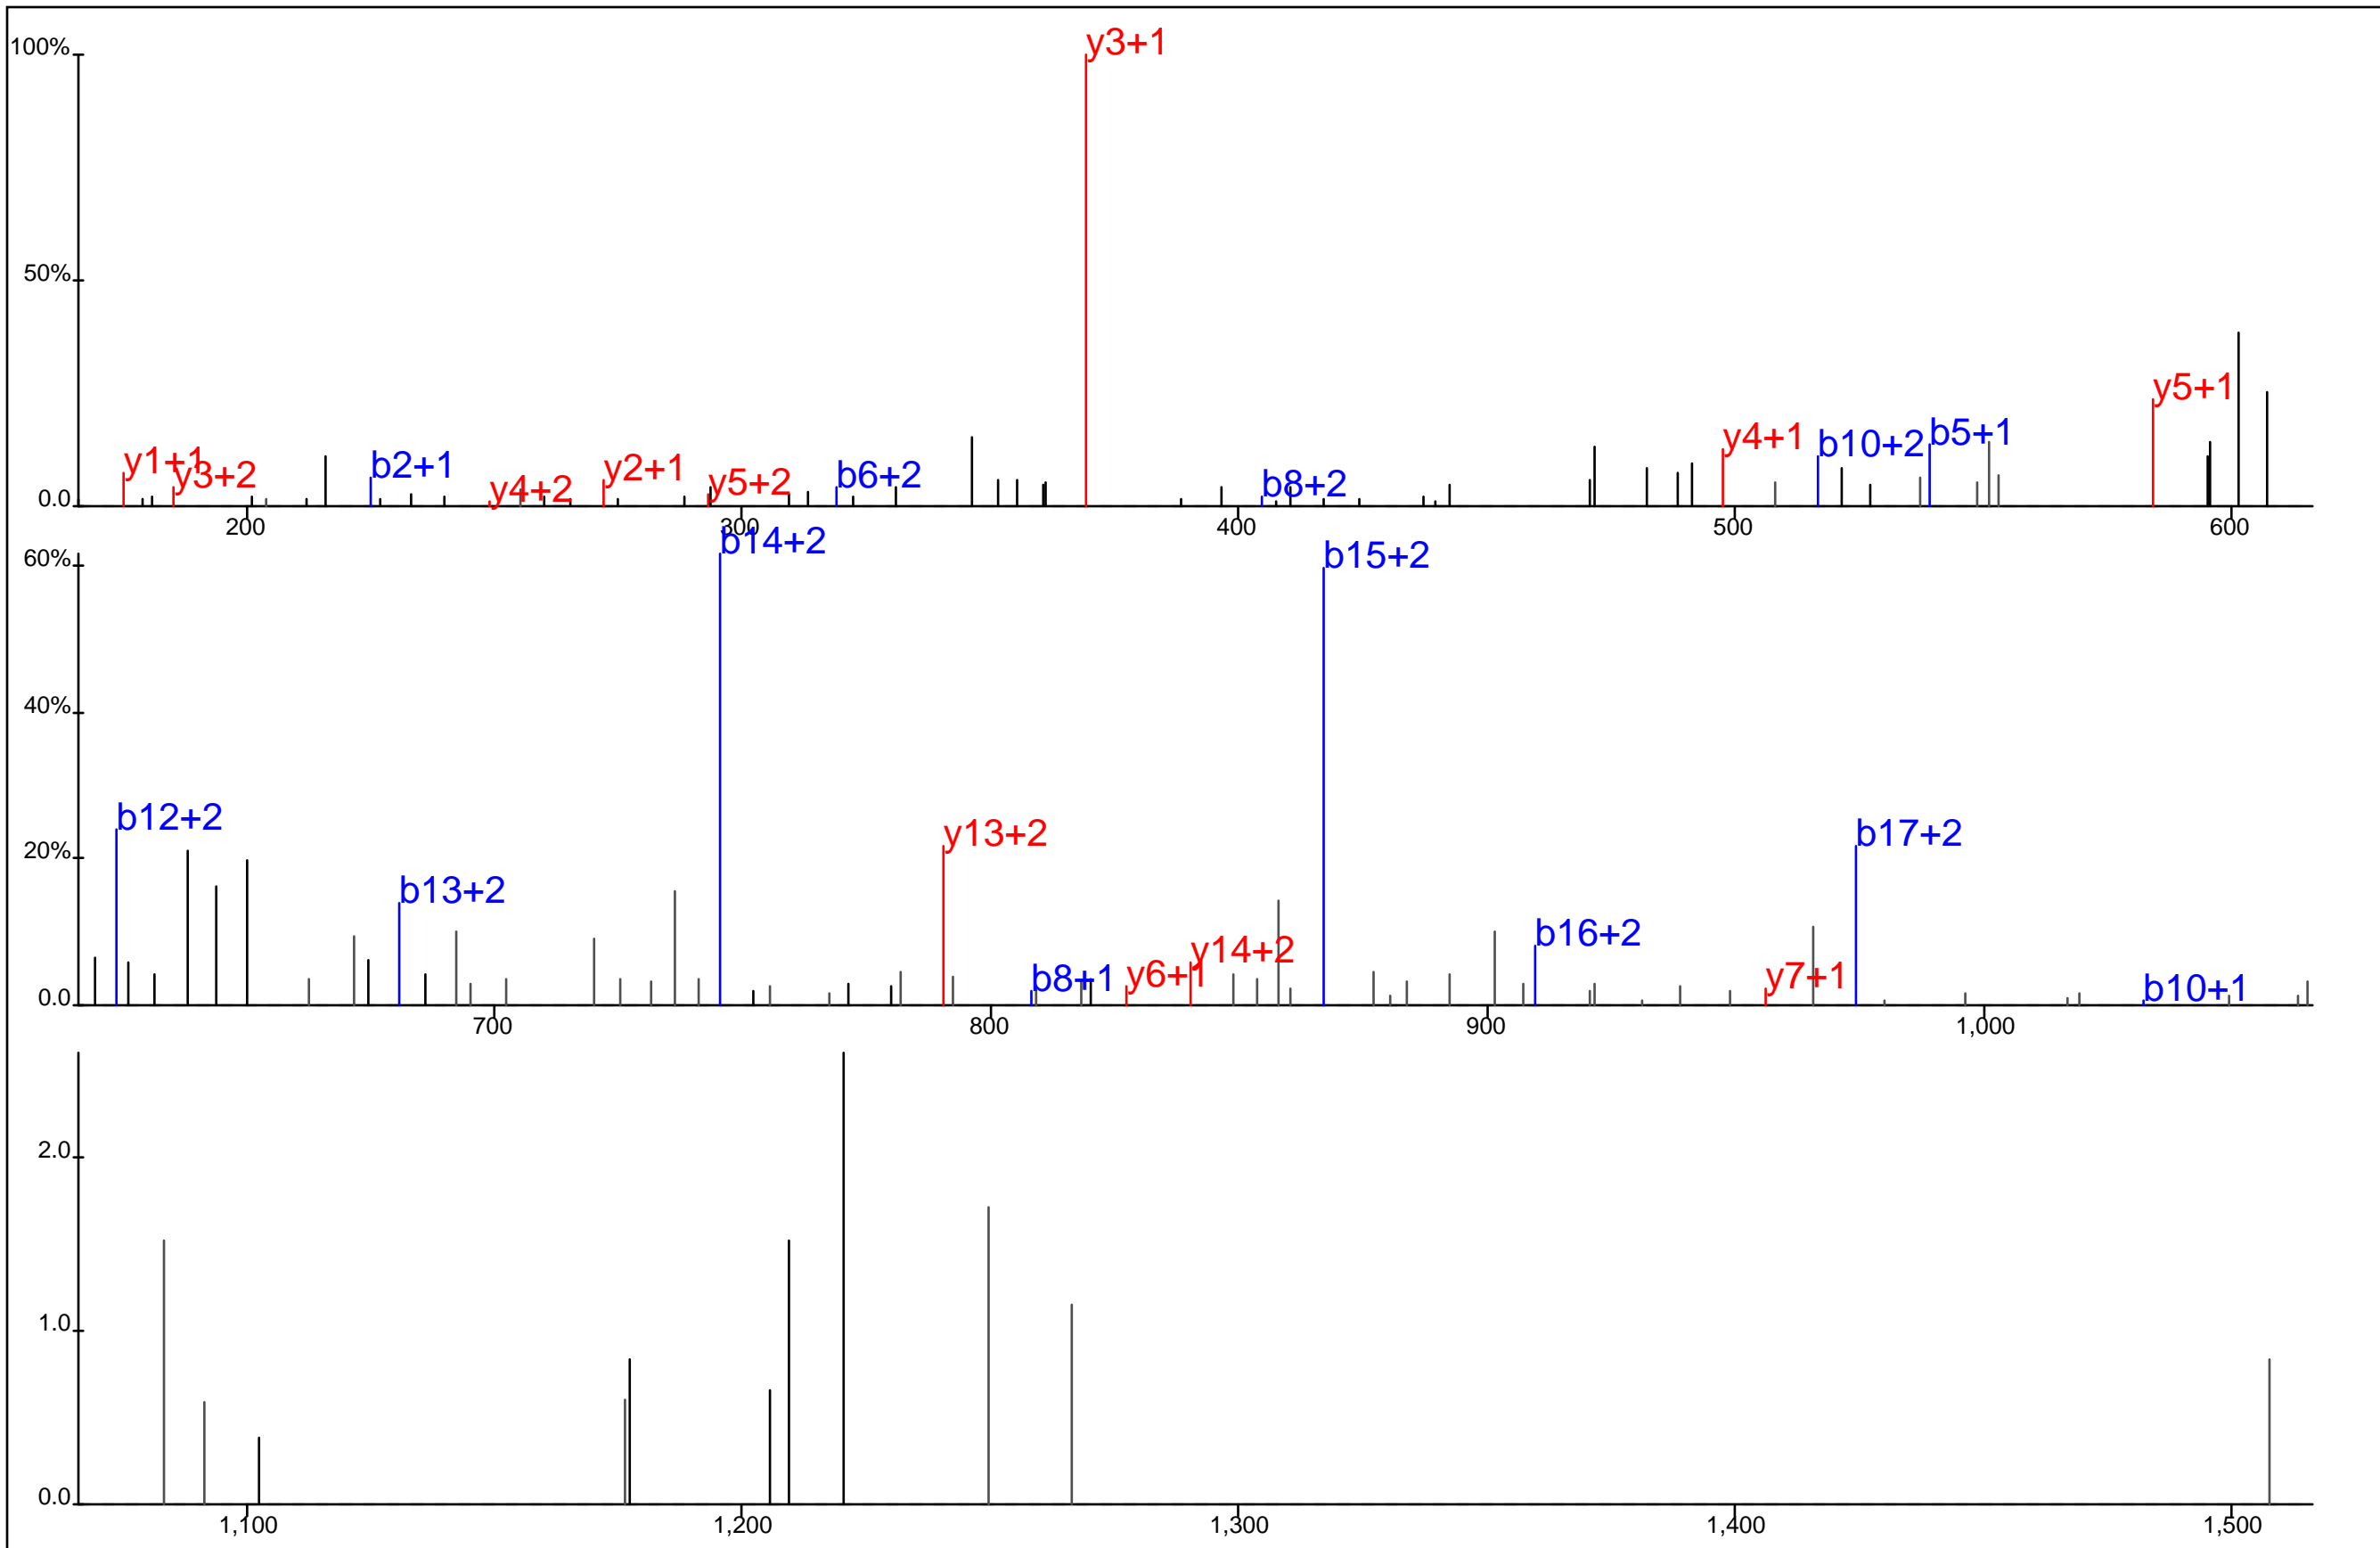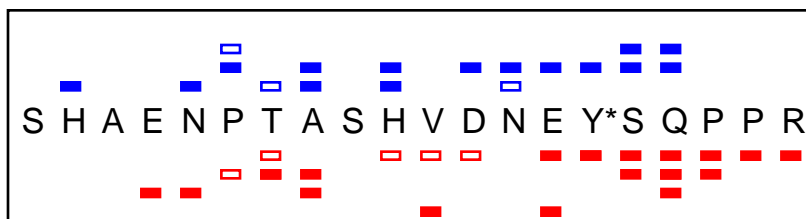

Protein Name: CD5  
 gi Accession: 0  
 Precursor Mass: 579.7453+4  
 Delta Mass: 3.579 ppm  
 XCorr: 30.01



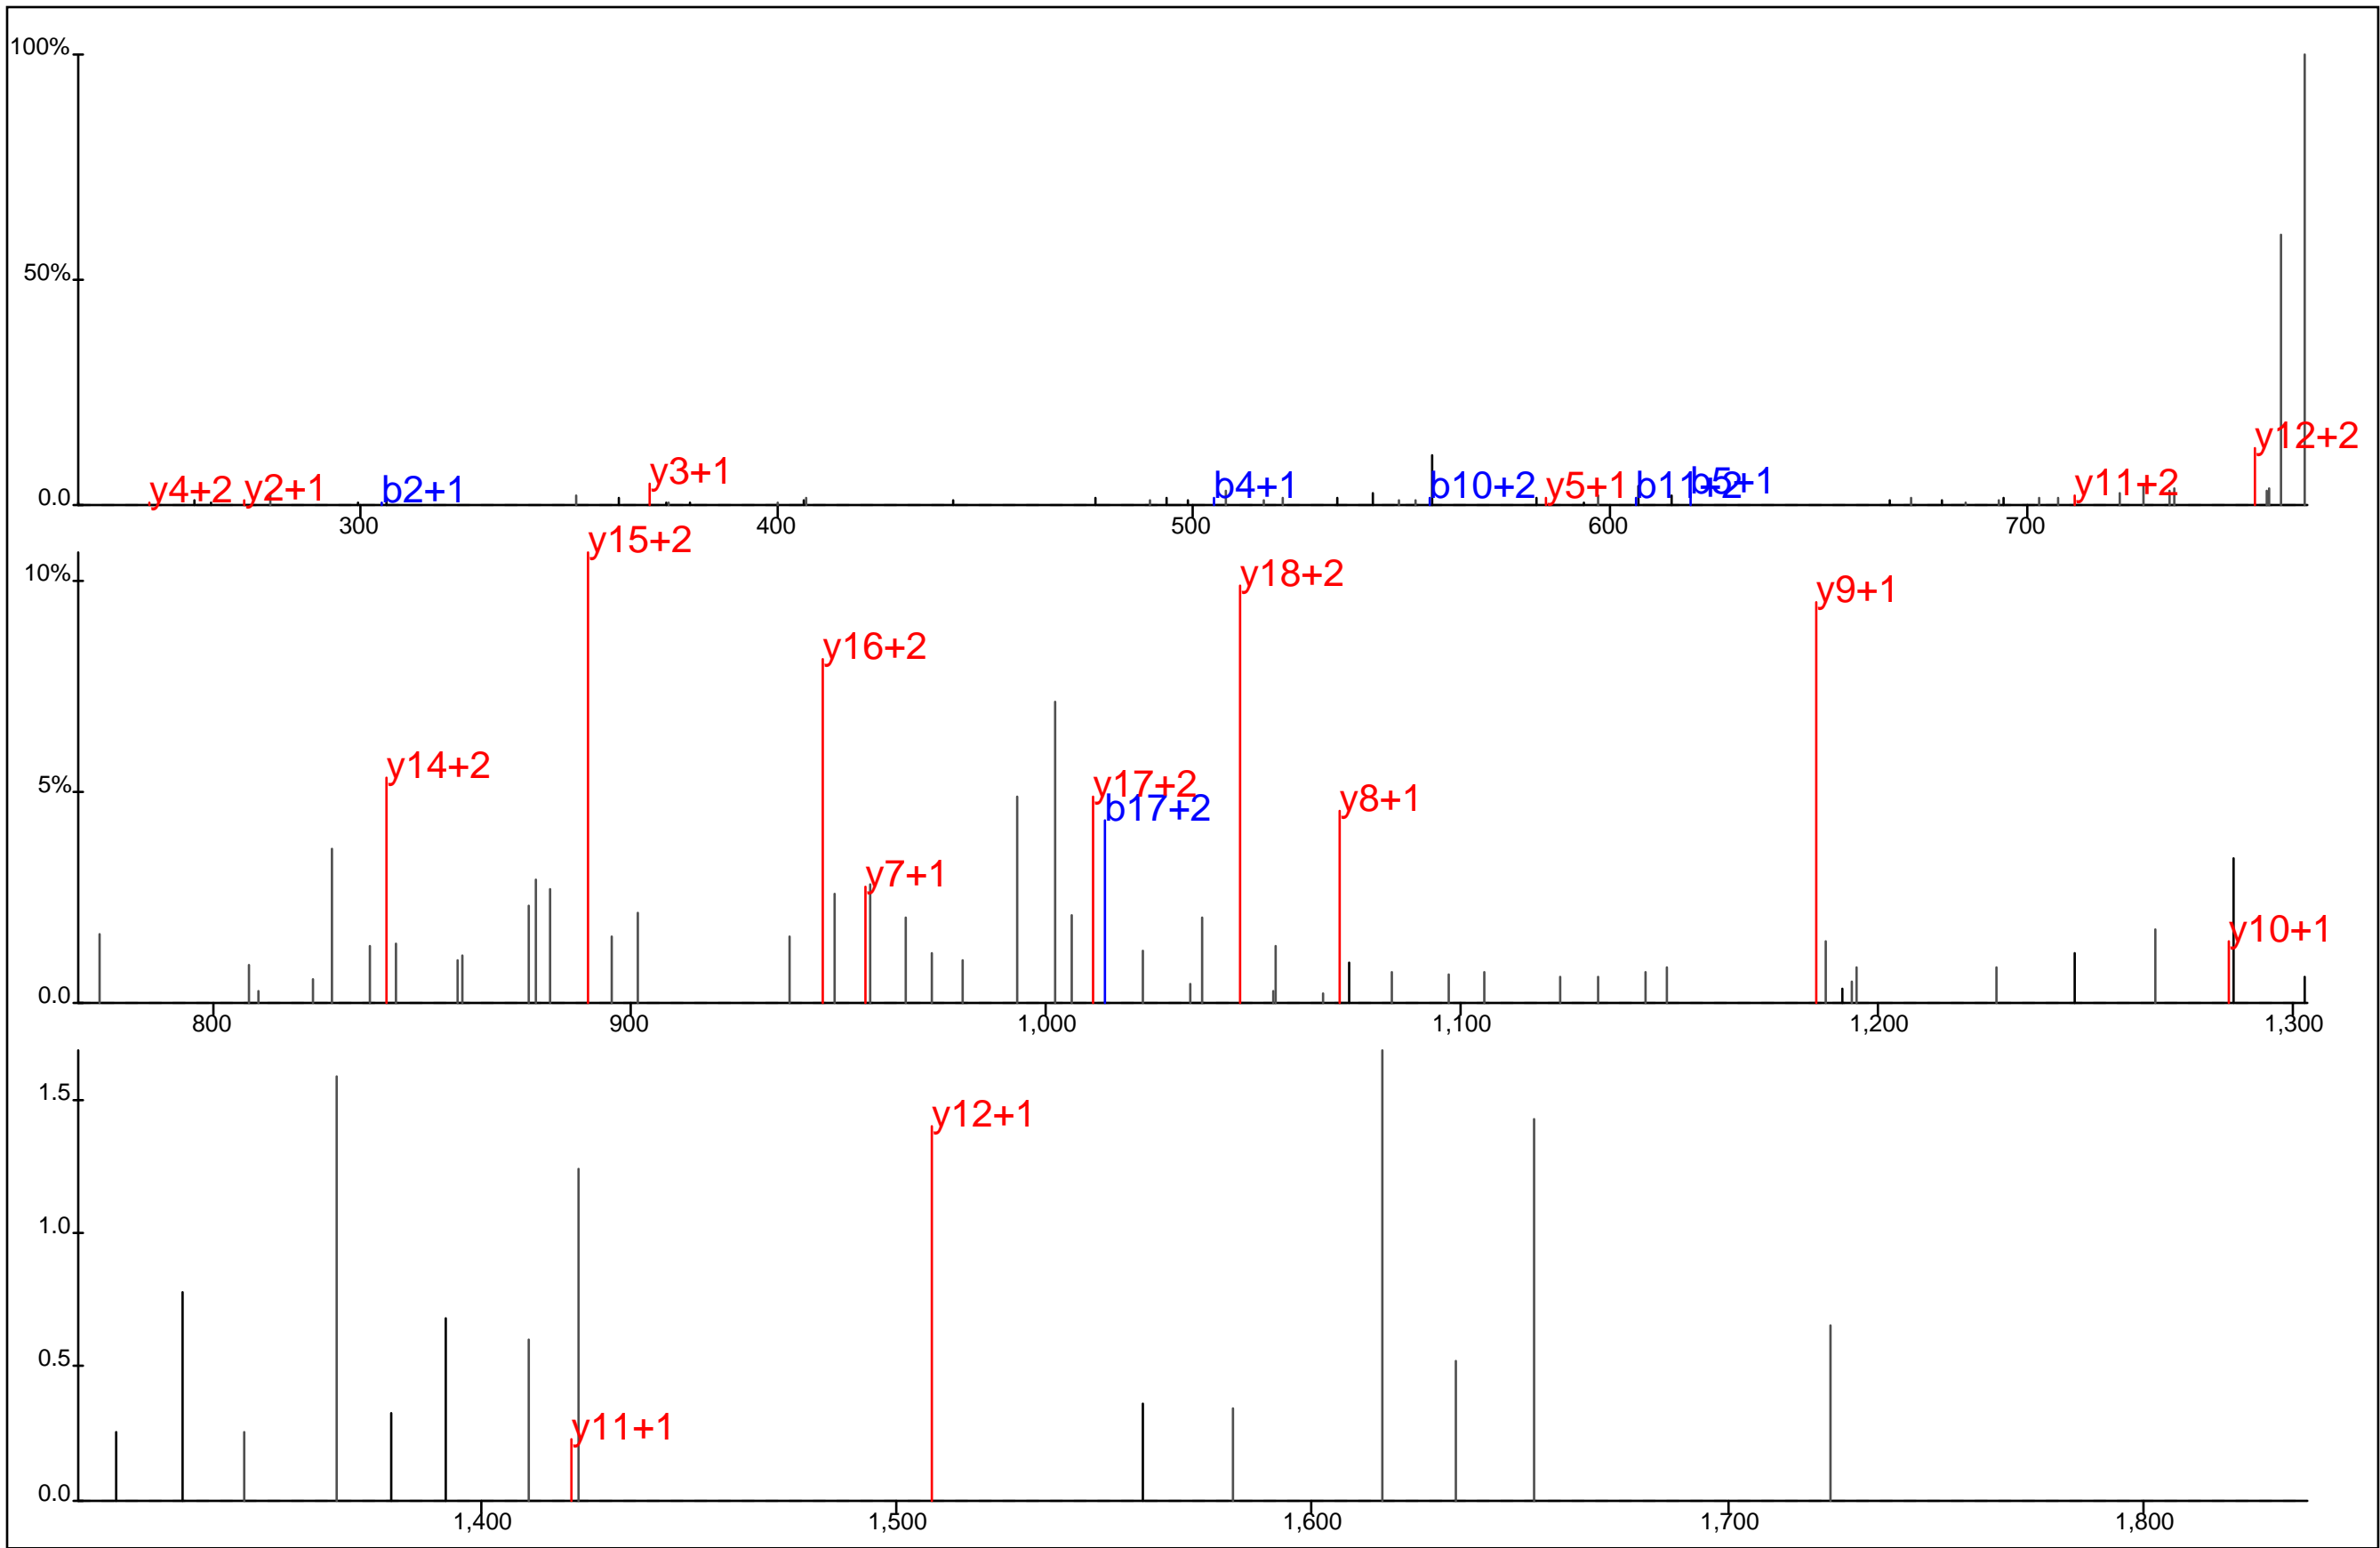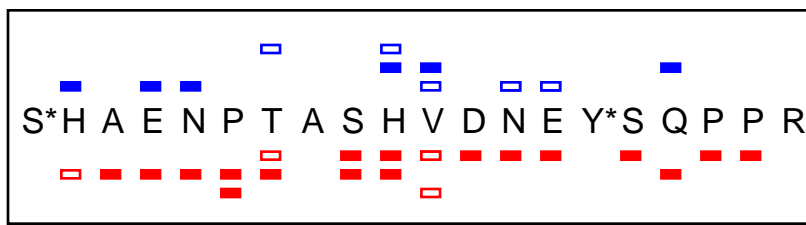

Protein Name: CD5  
 gi Accession: 0  
 Precursor Mass: 799.3151+3  
 Delta Mass: 1.400 ppm  
 XCorr: 40.58

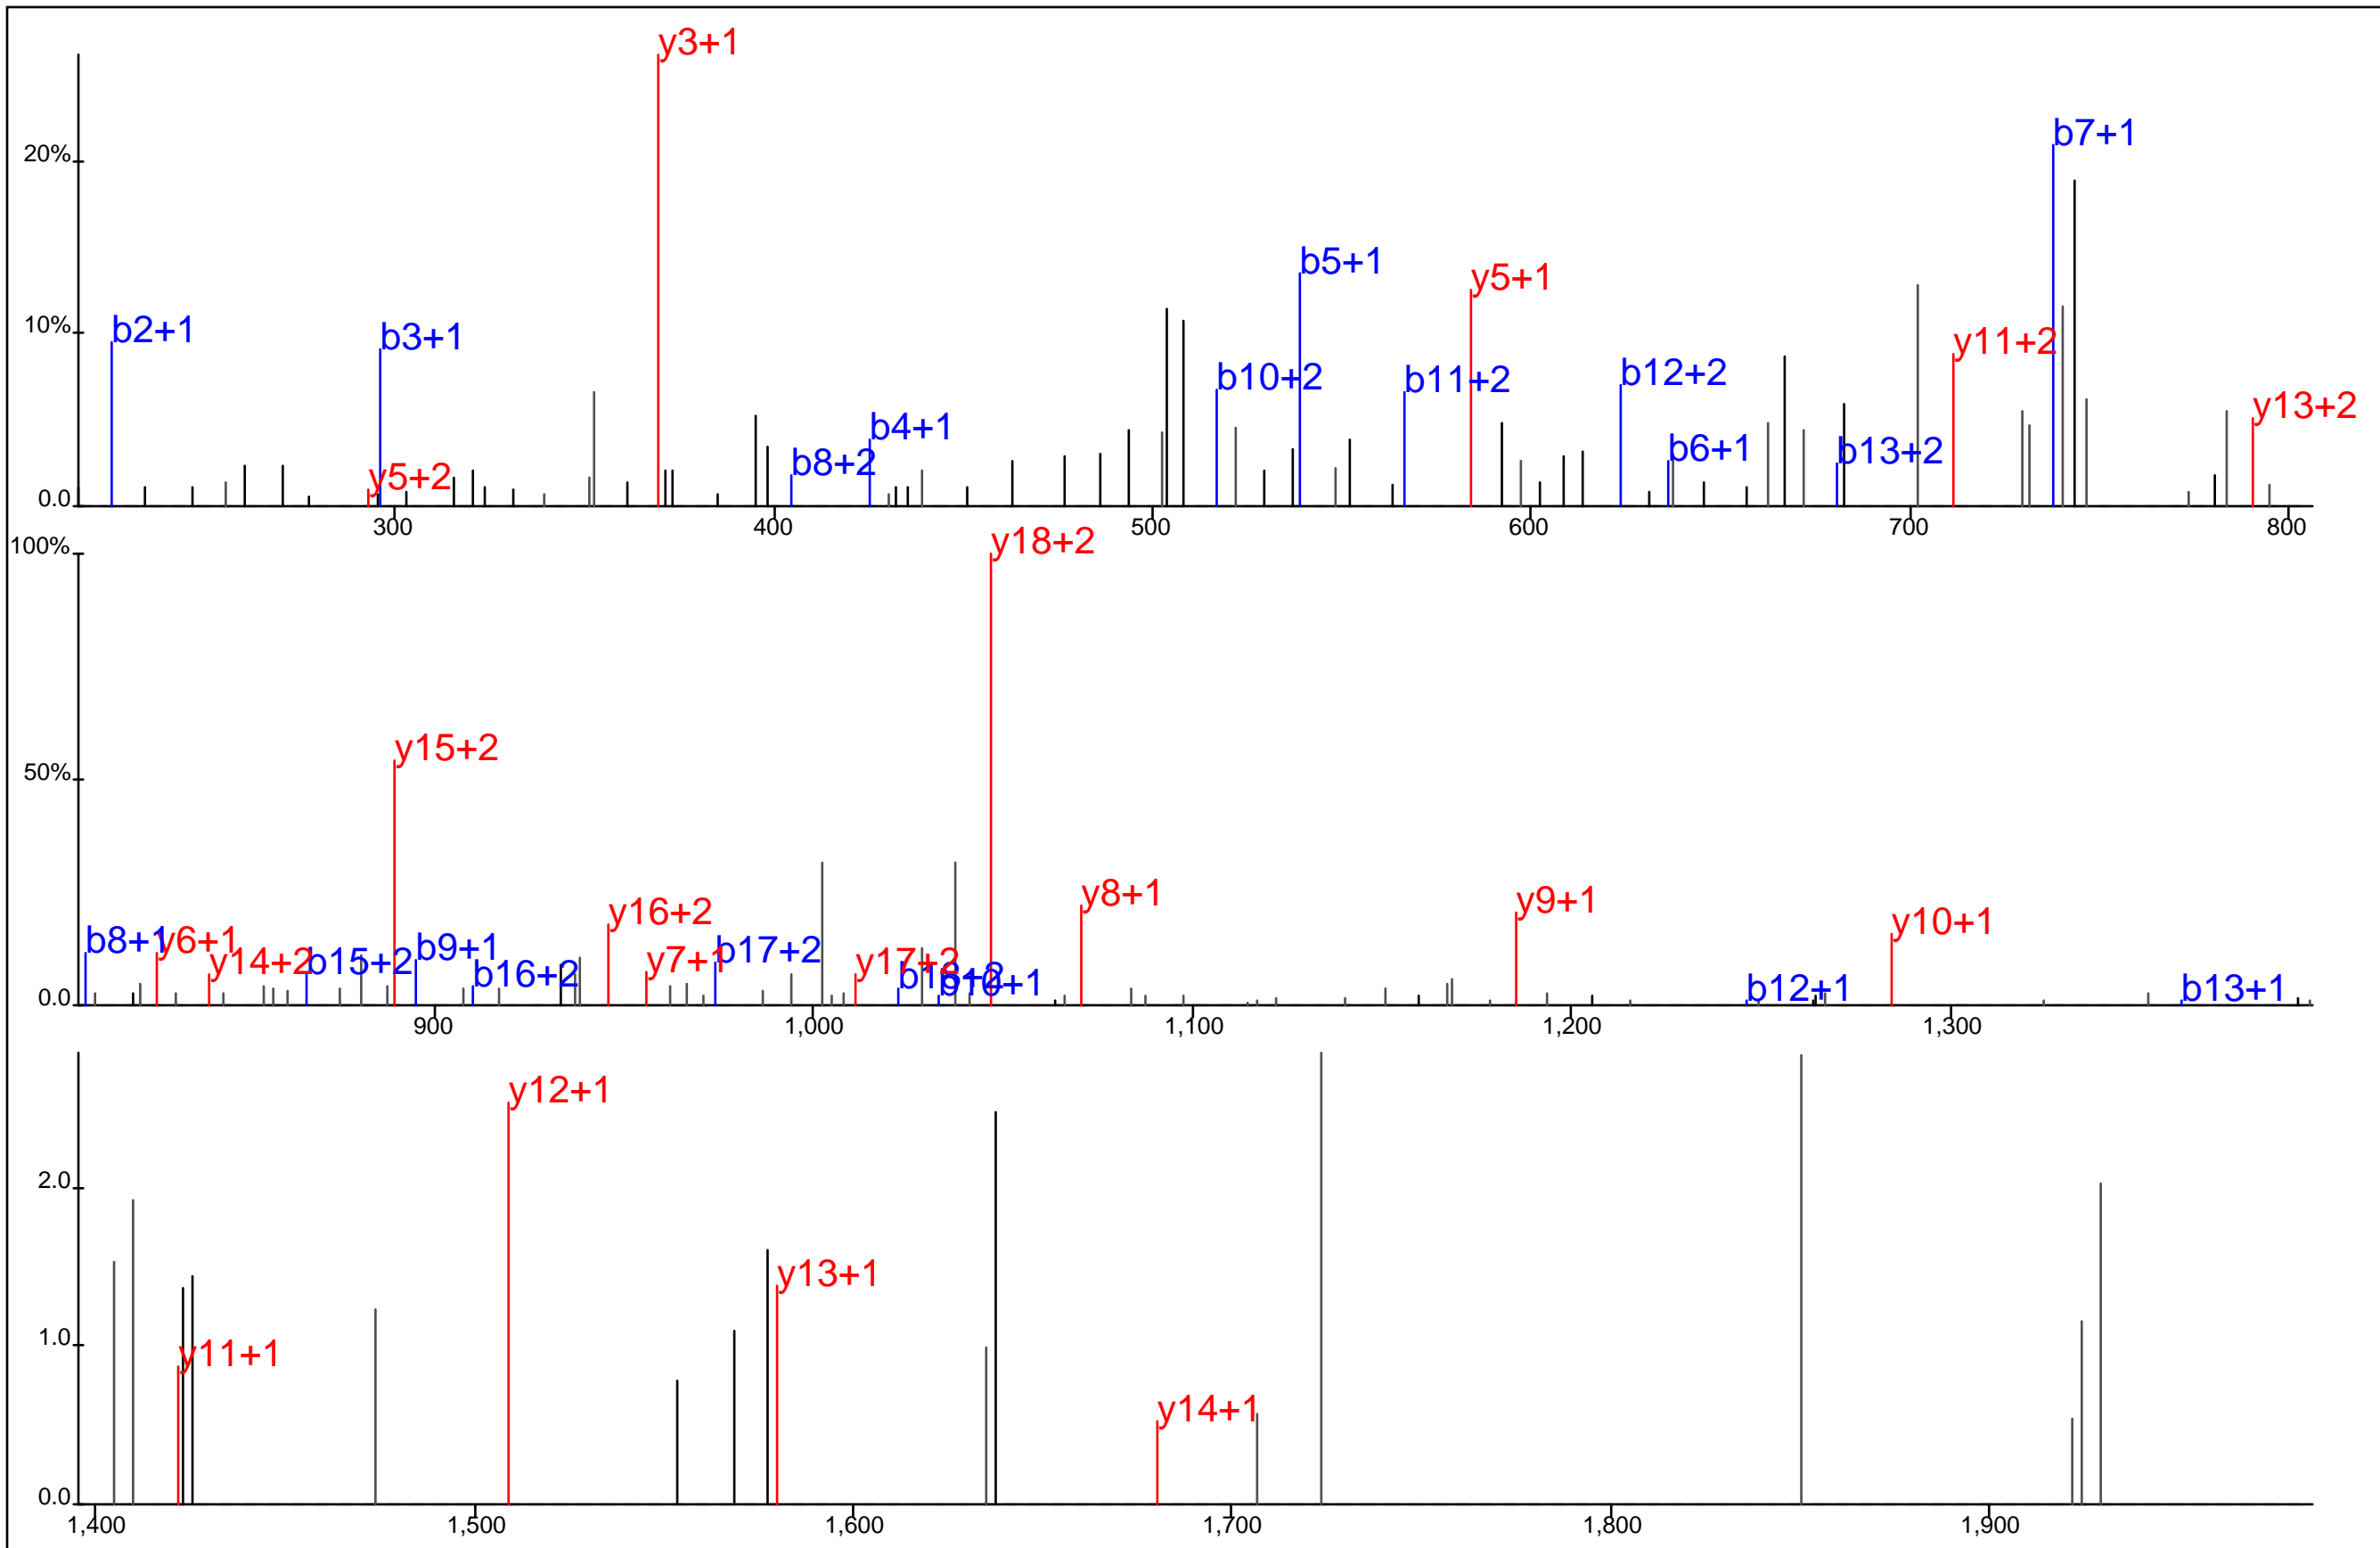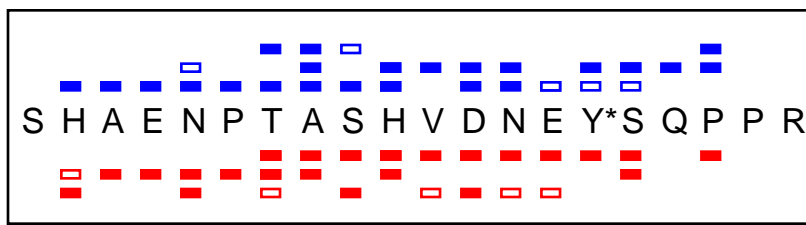

Protein Name: CD5  
 gi Accession: 0  
 Precursor Mass: 772.6620+3  
 Delta Mass: 1.618 ppm  
 XCorr: 54.83

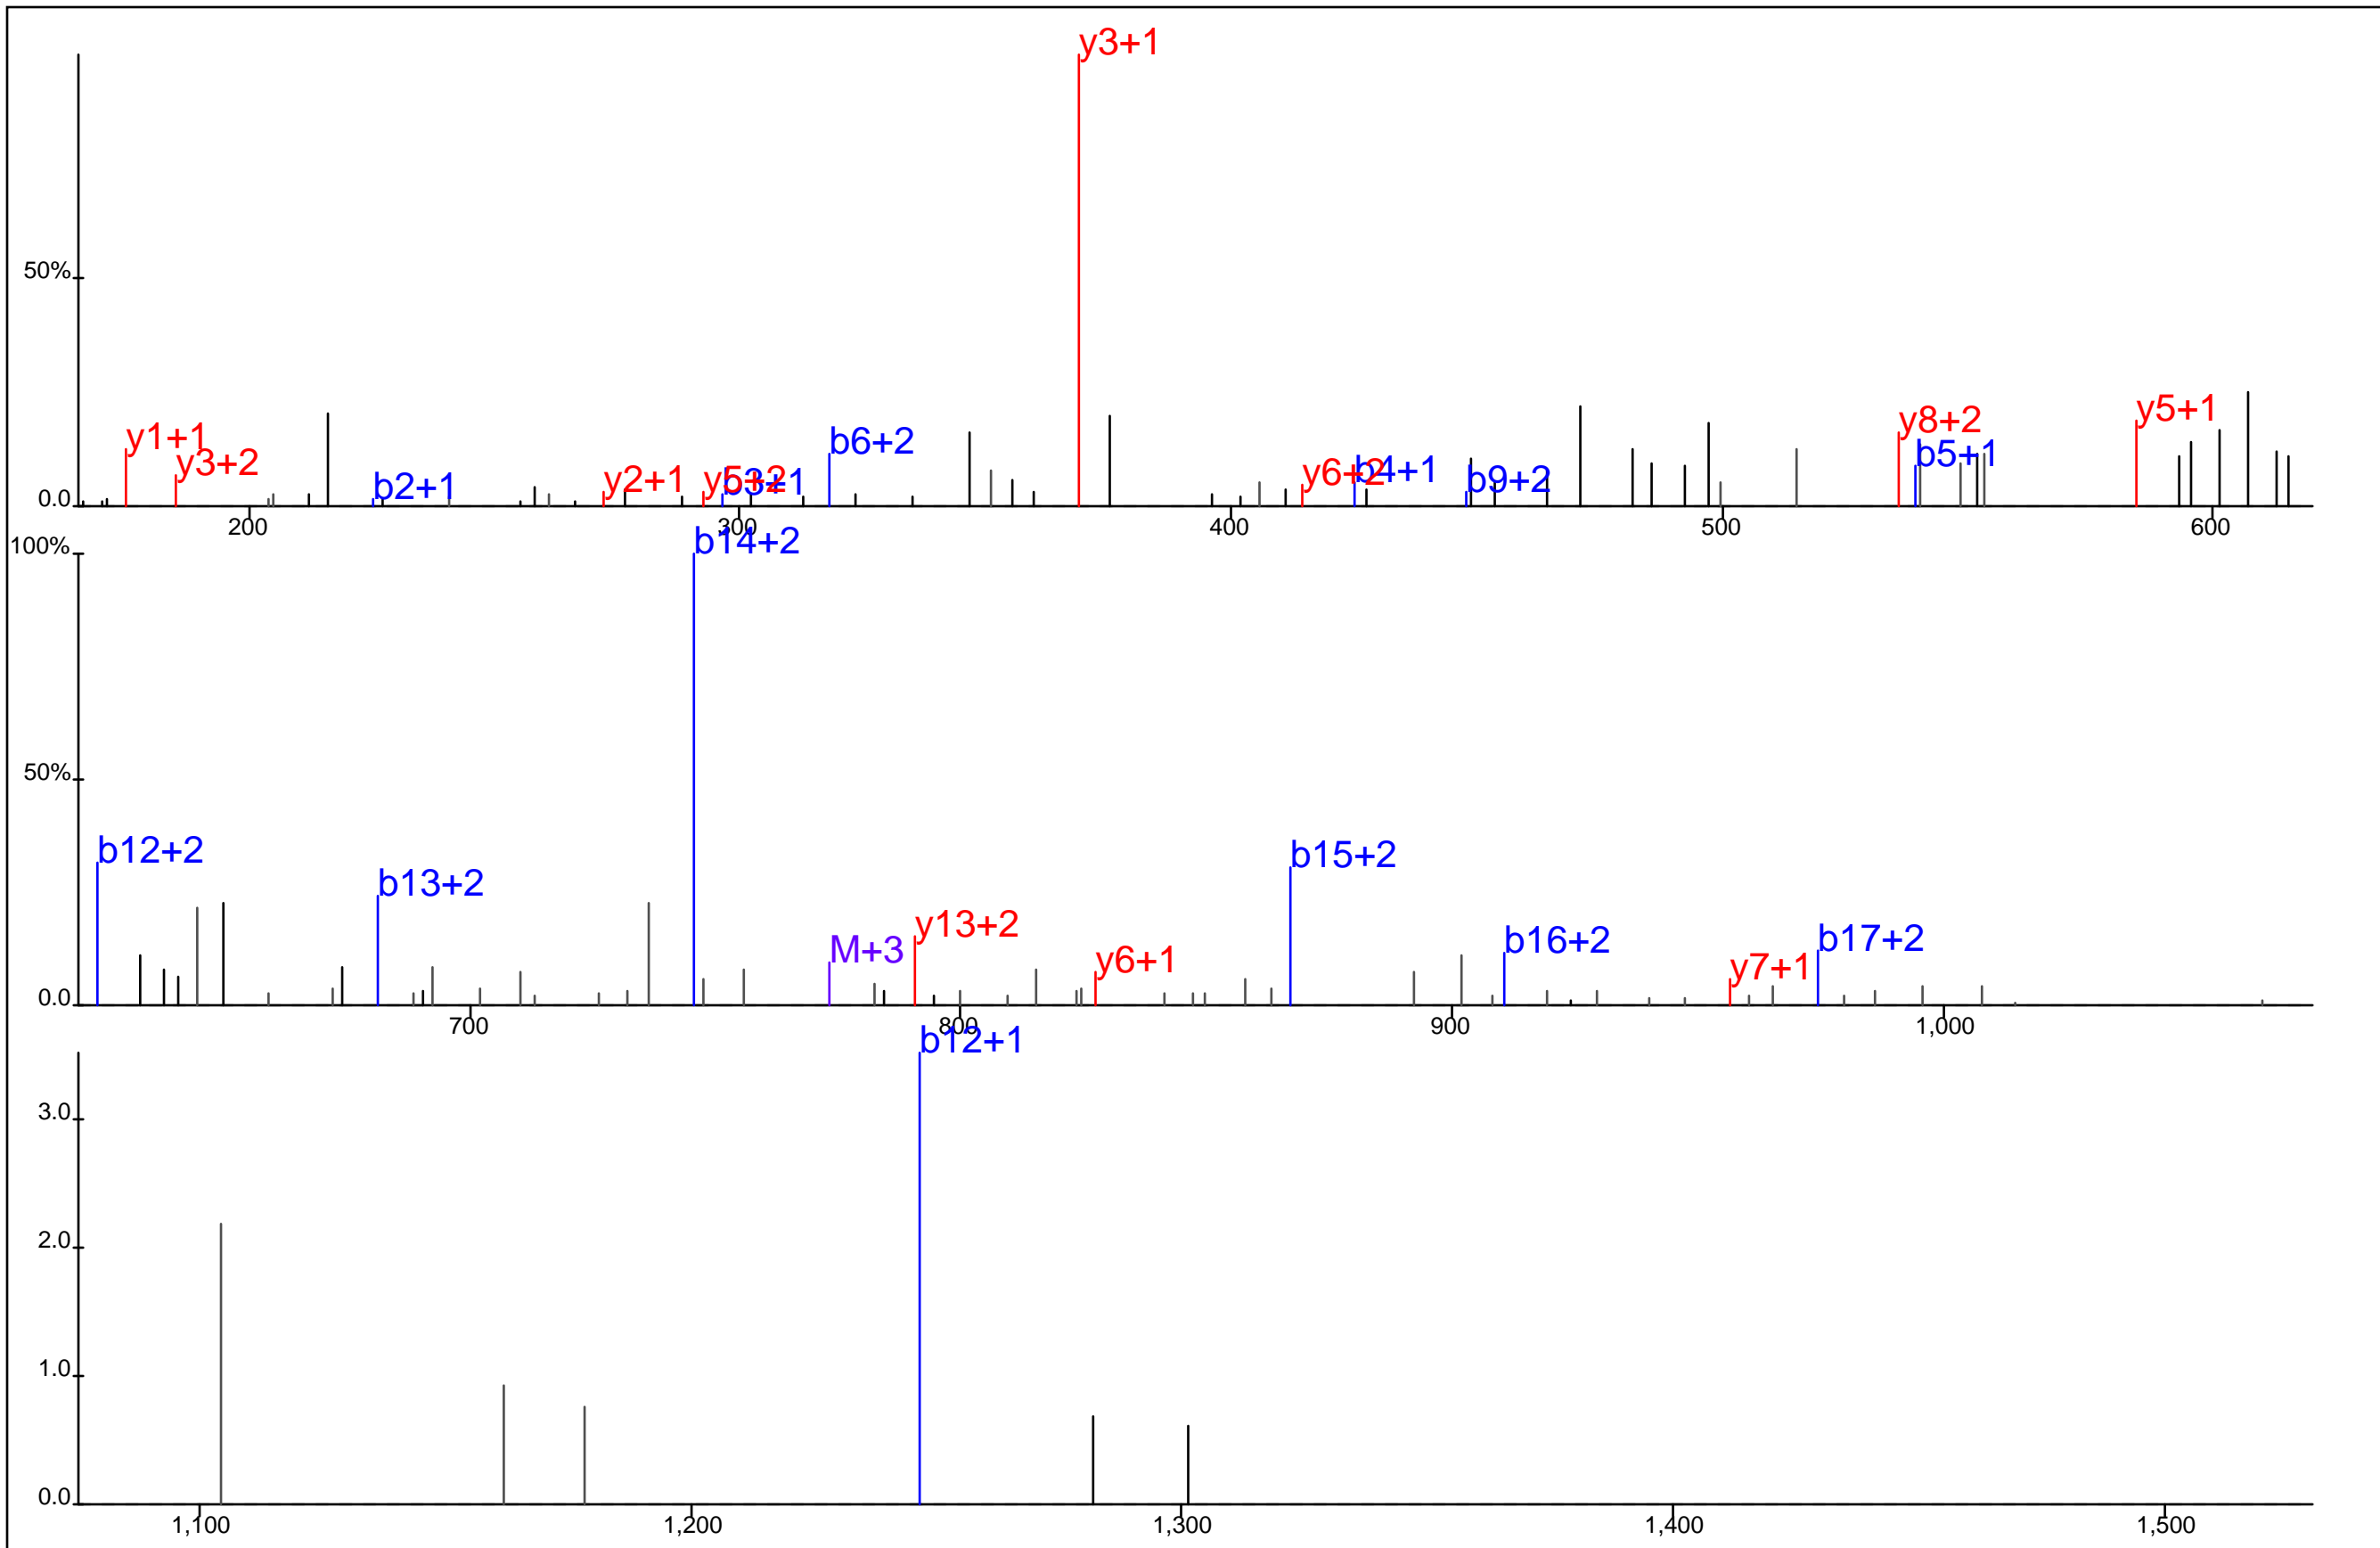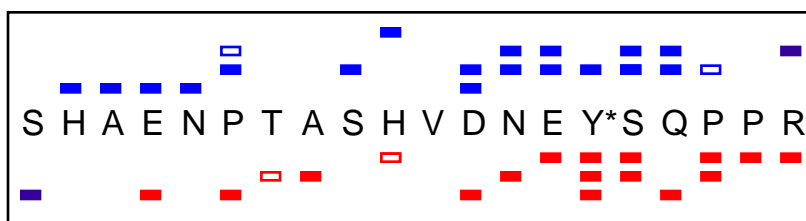

Protein Name: CD5  
 gi Accession: 0  
 Precursor Mass: 579.7463+4  
 Delta Mass: 1.787 ppm  
 XCorr: 34.02

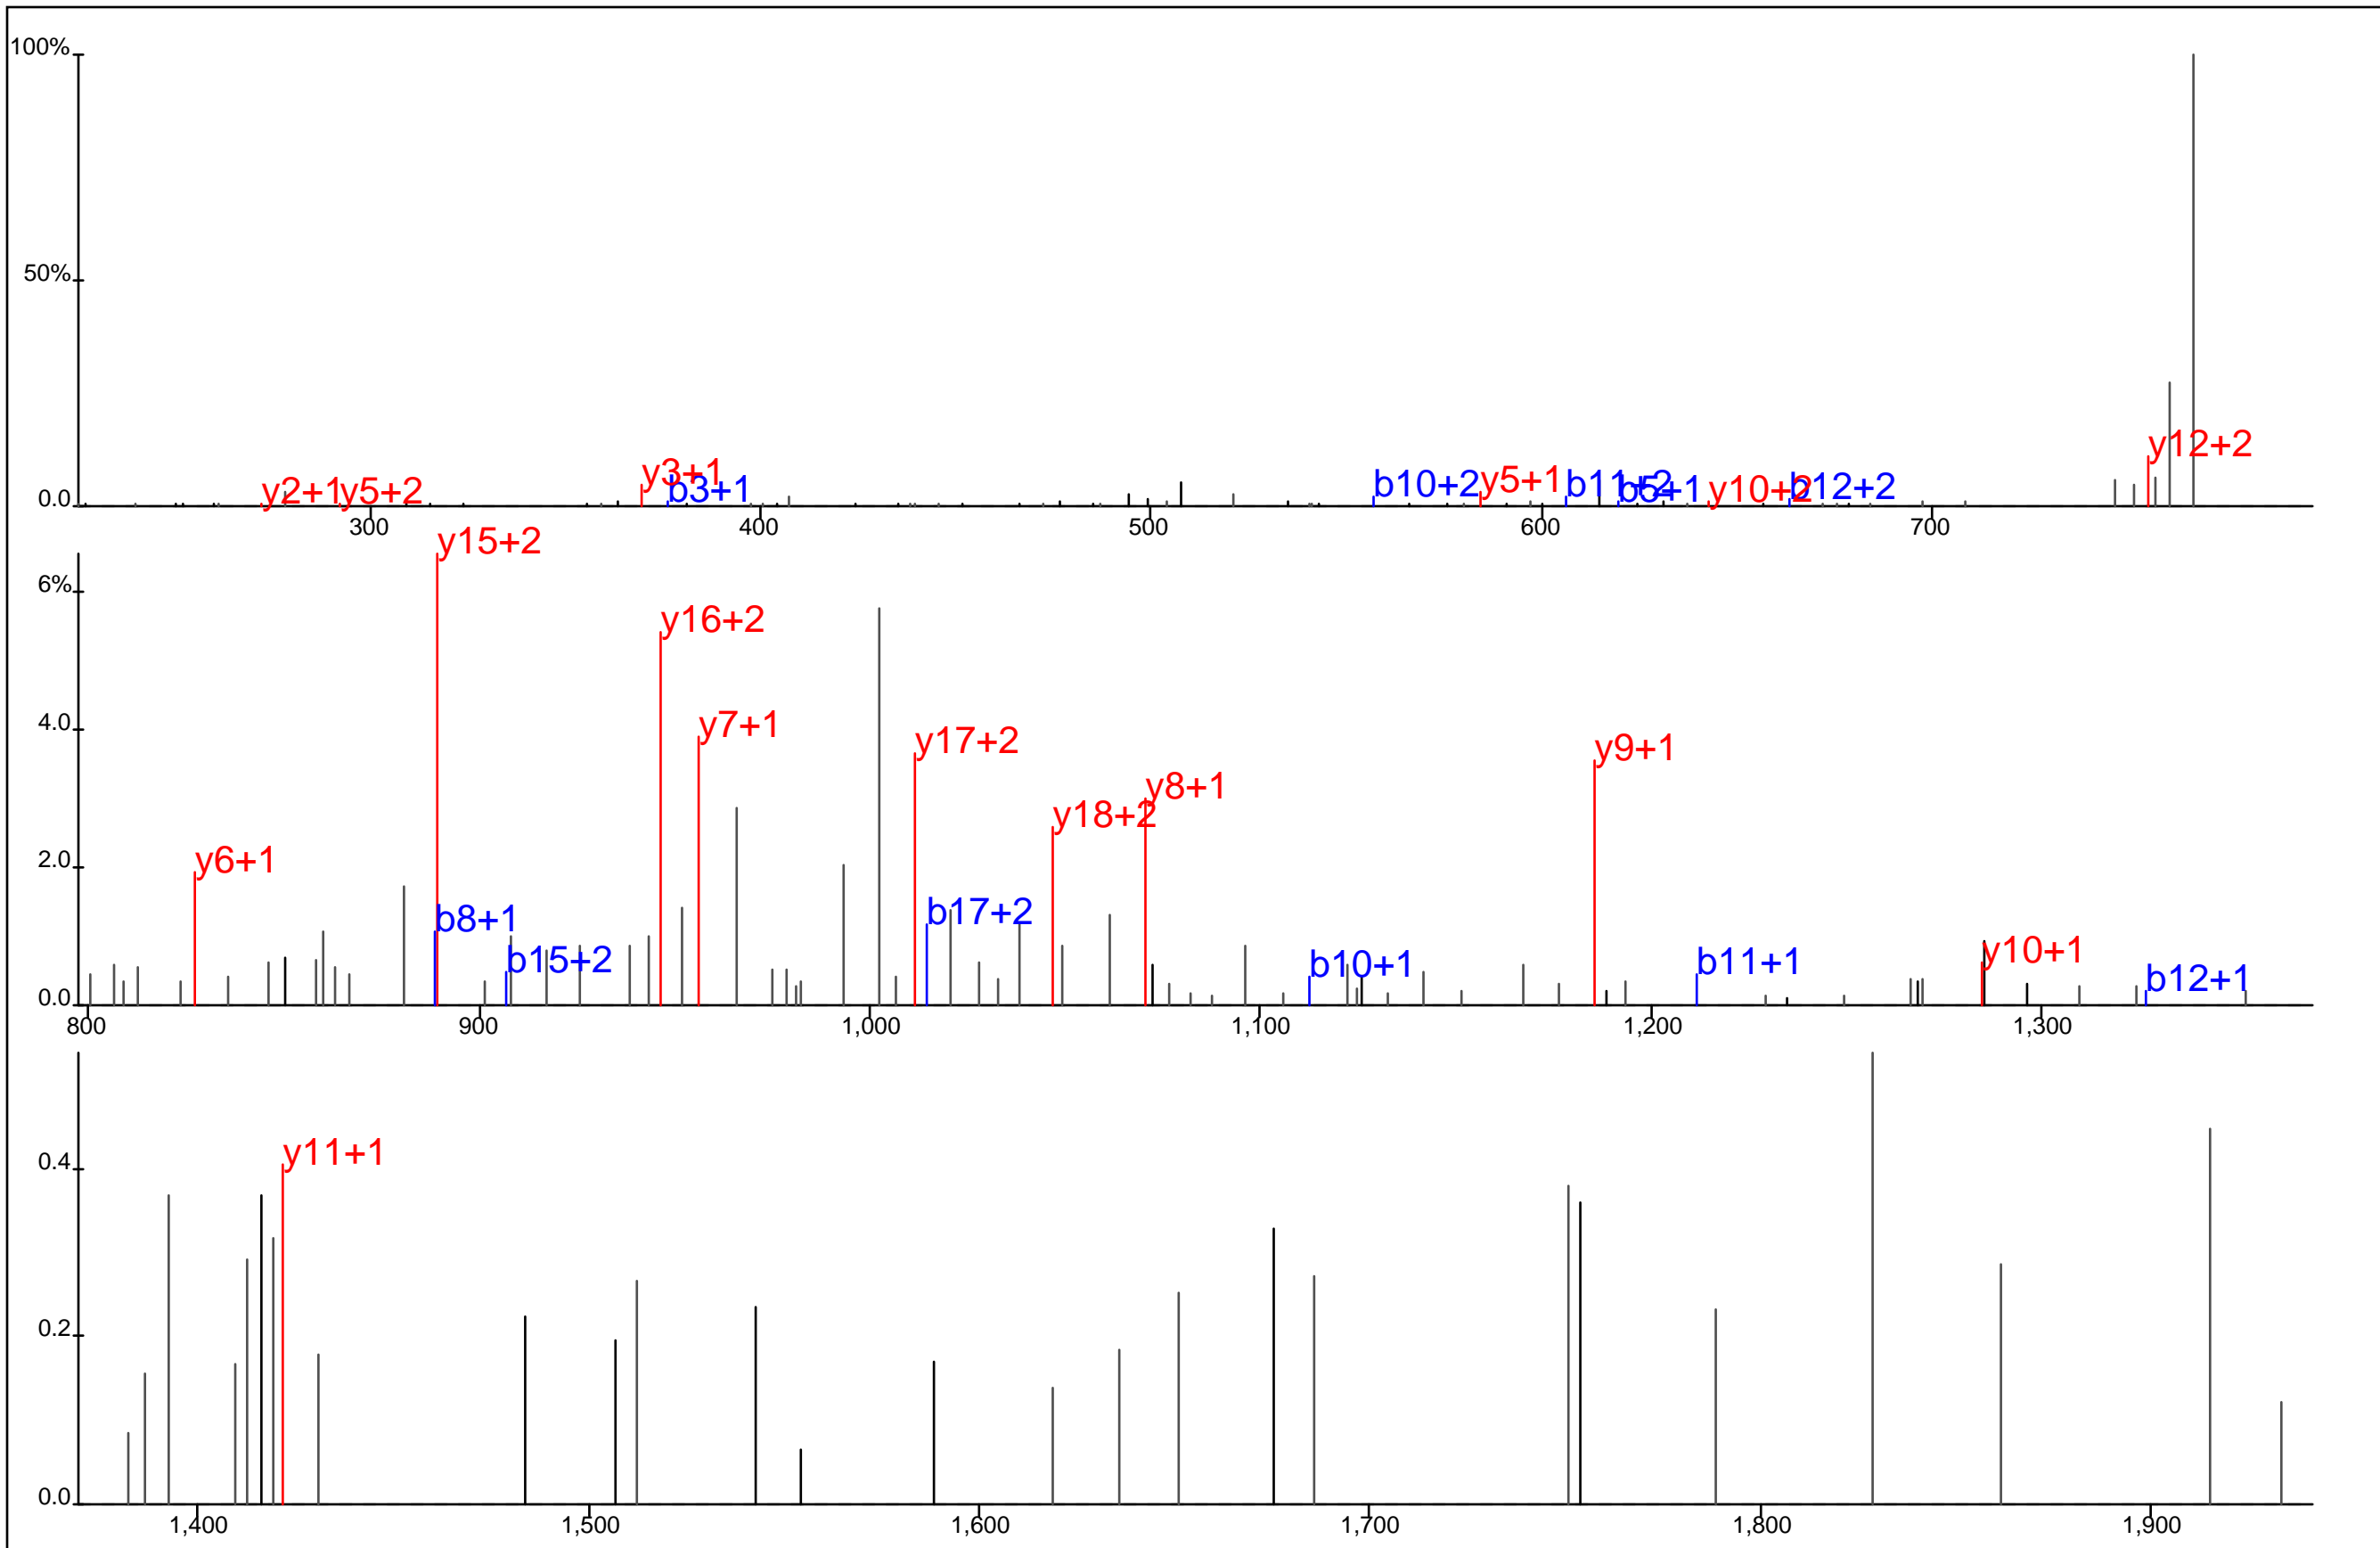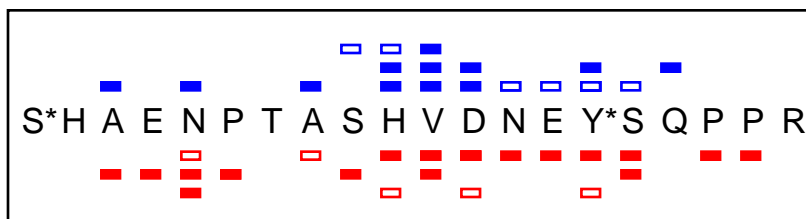

Protein Name: CD5  
 gi Accession: 0  
 Precursor Mass: 799.3138+3  
 Delta Mass: 3.004 ppm  
 XCorr: 34.23

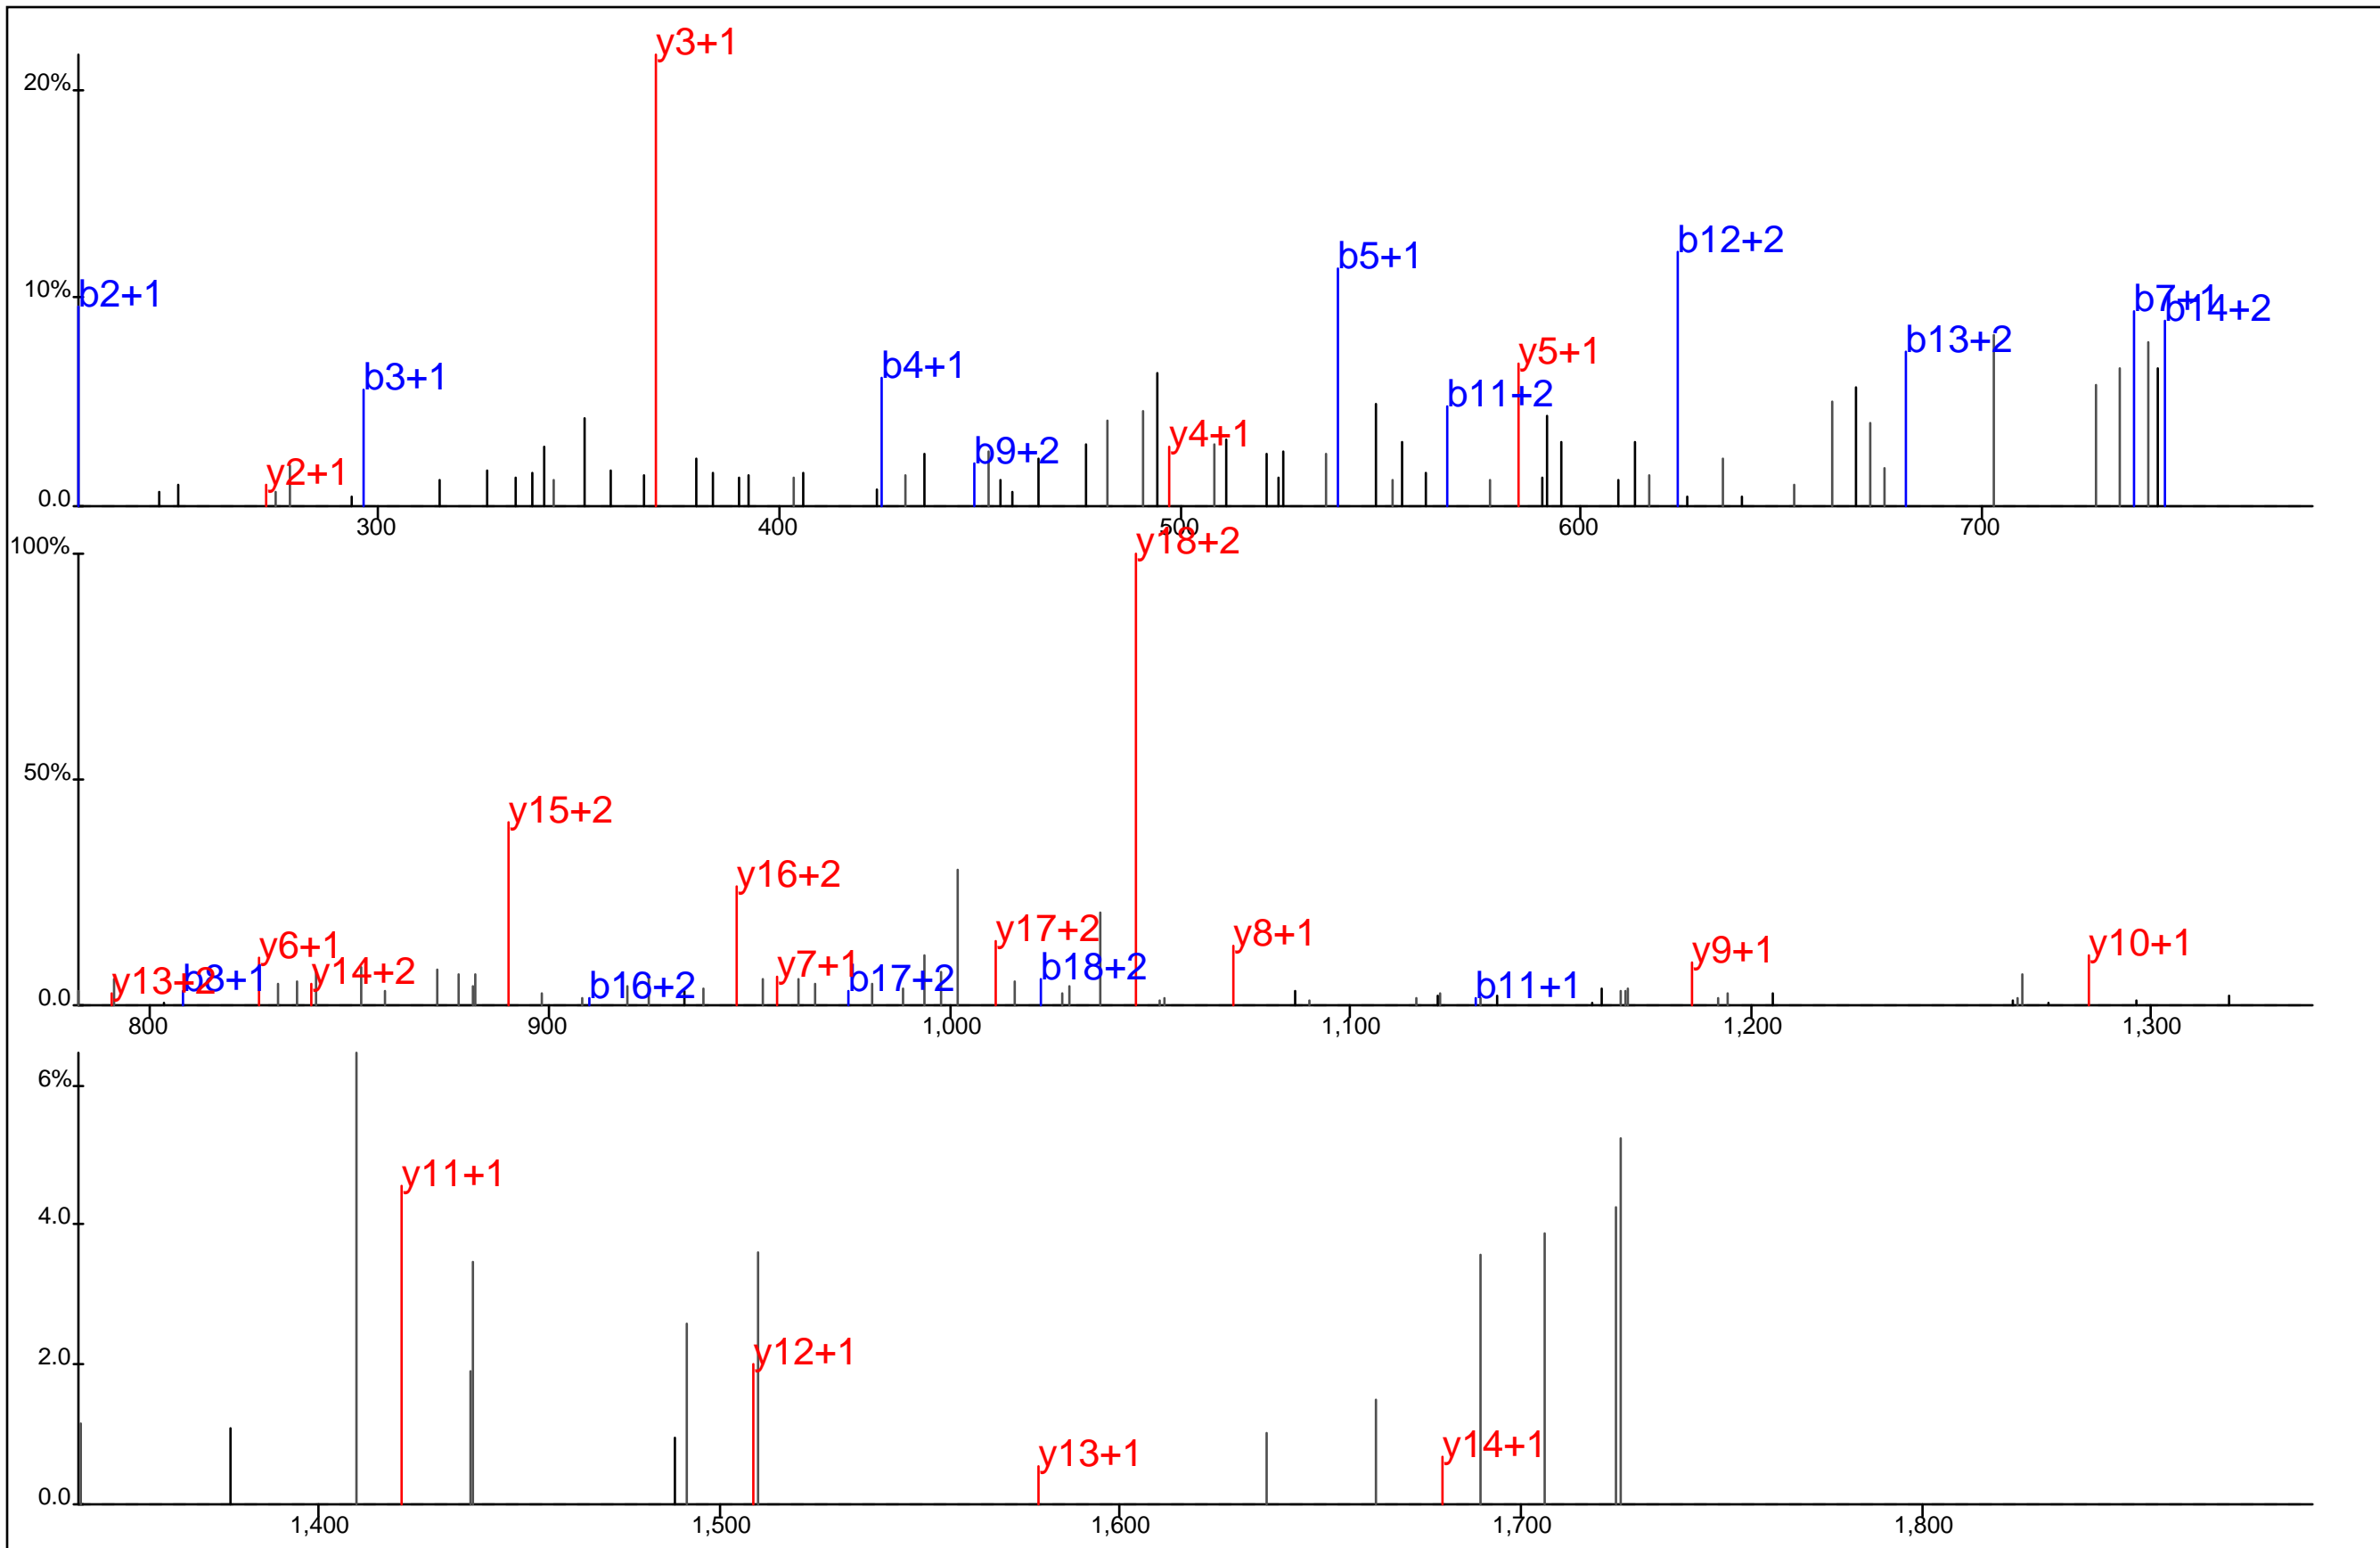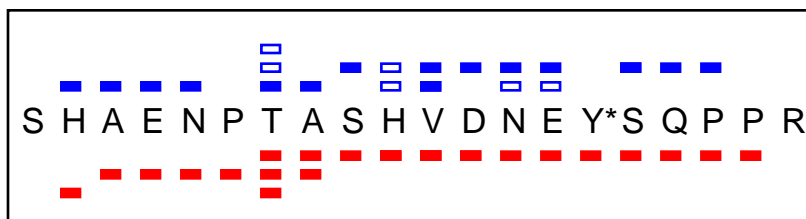

Protein Name: CD5  
 gi Accession: 0  
 Precursor Mass: 772.6625+3  
 Delta Mass: 2.330 ppm  
 XCorr: 51.82

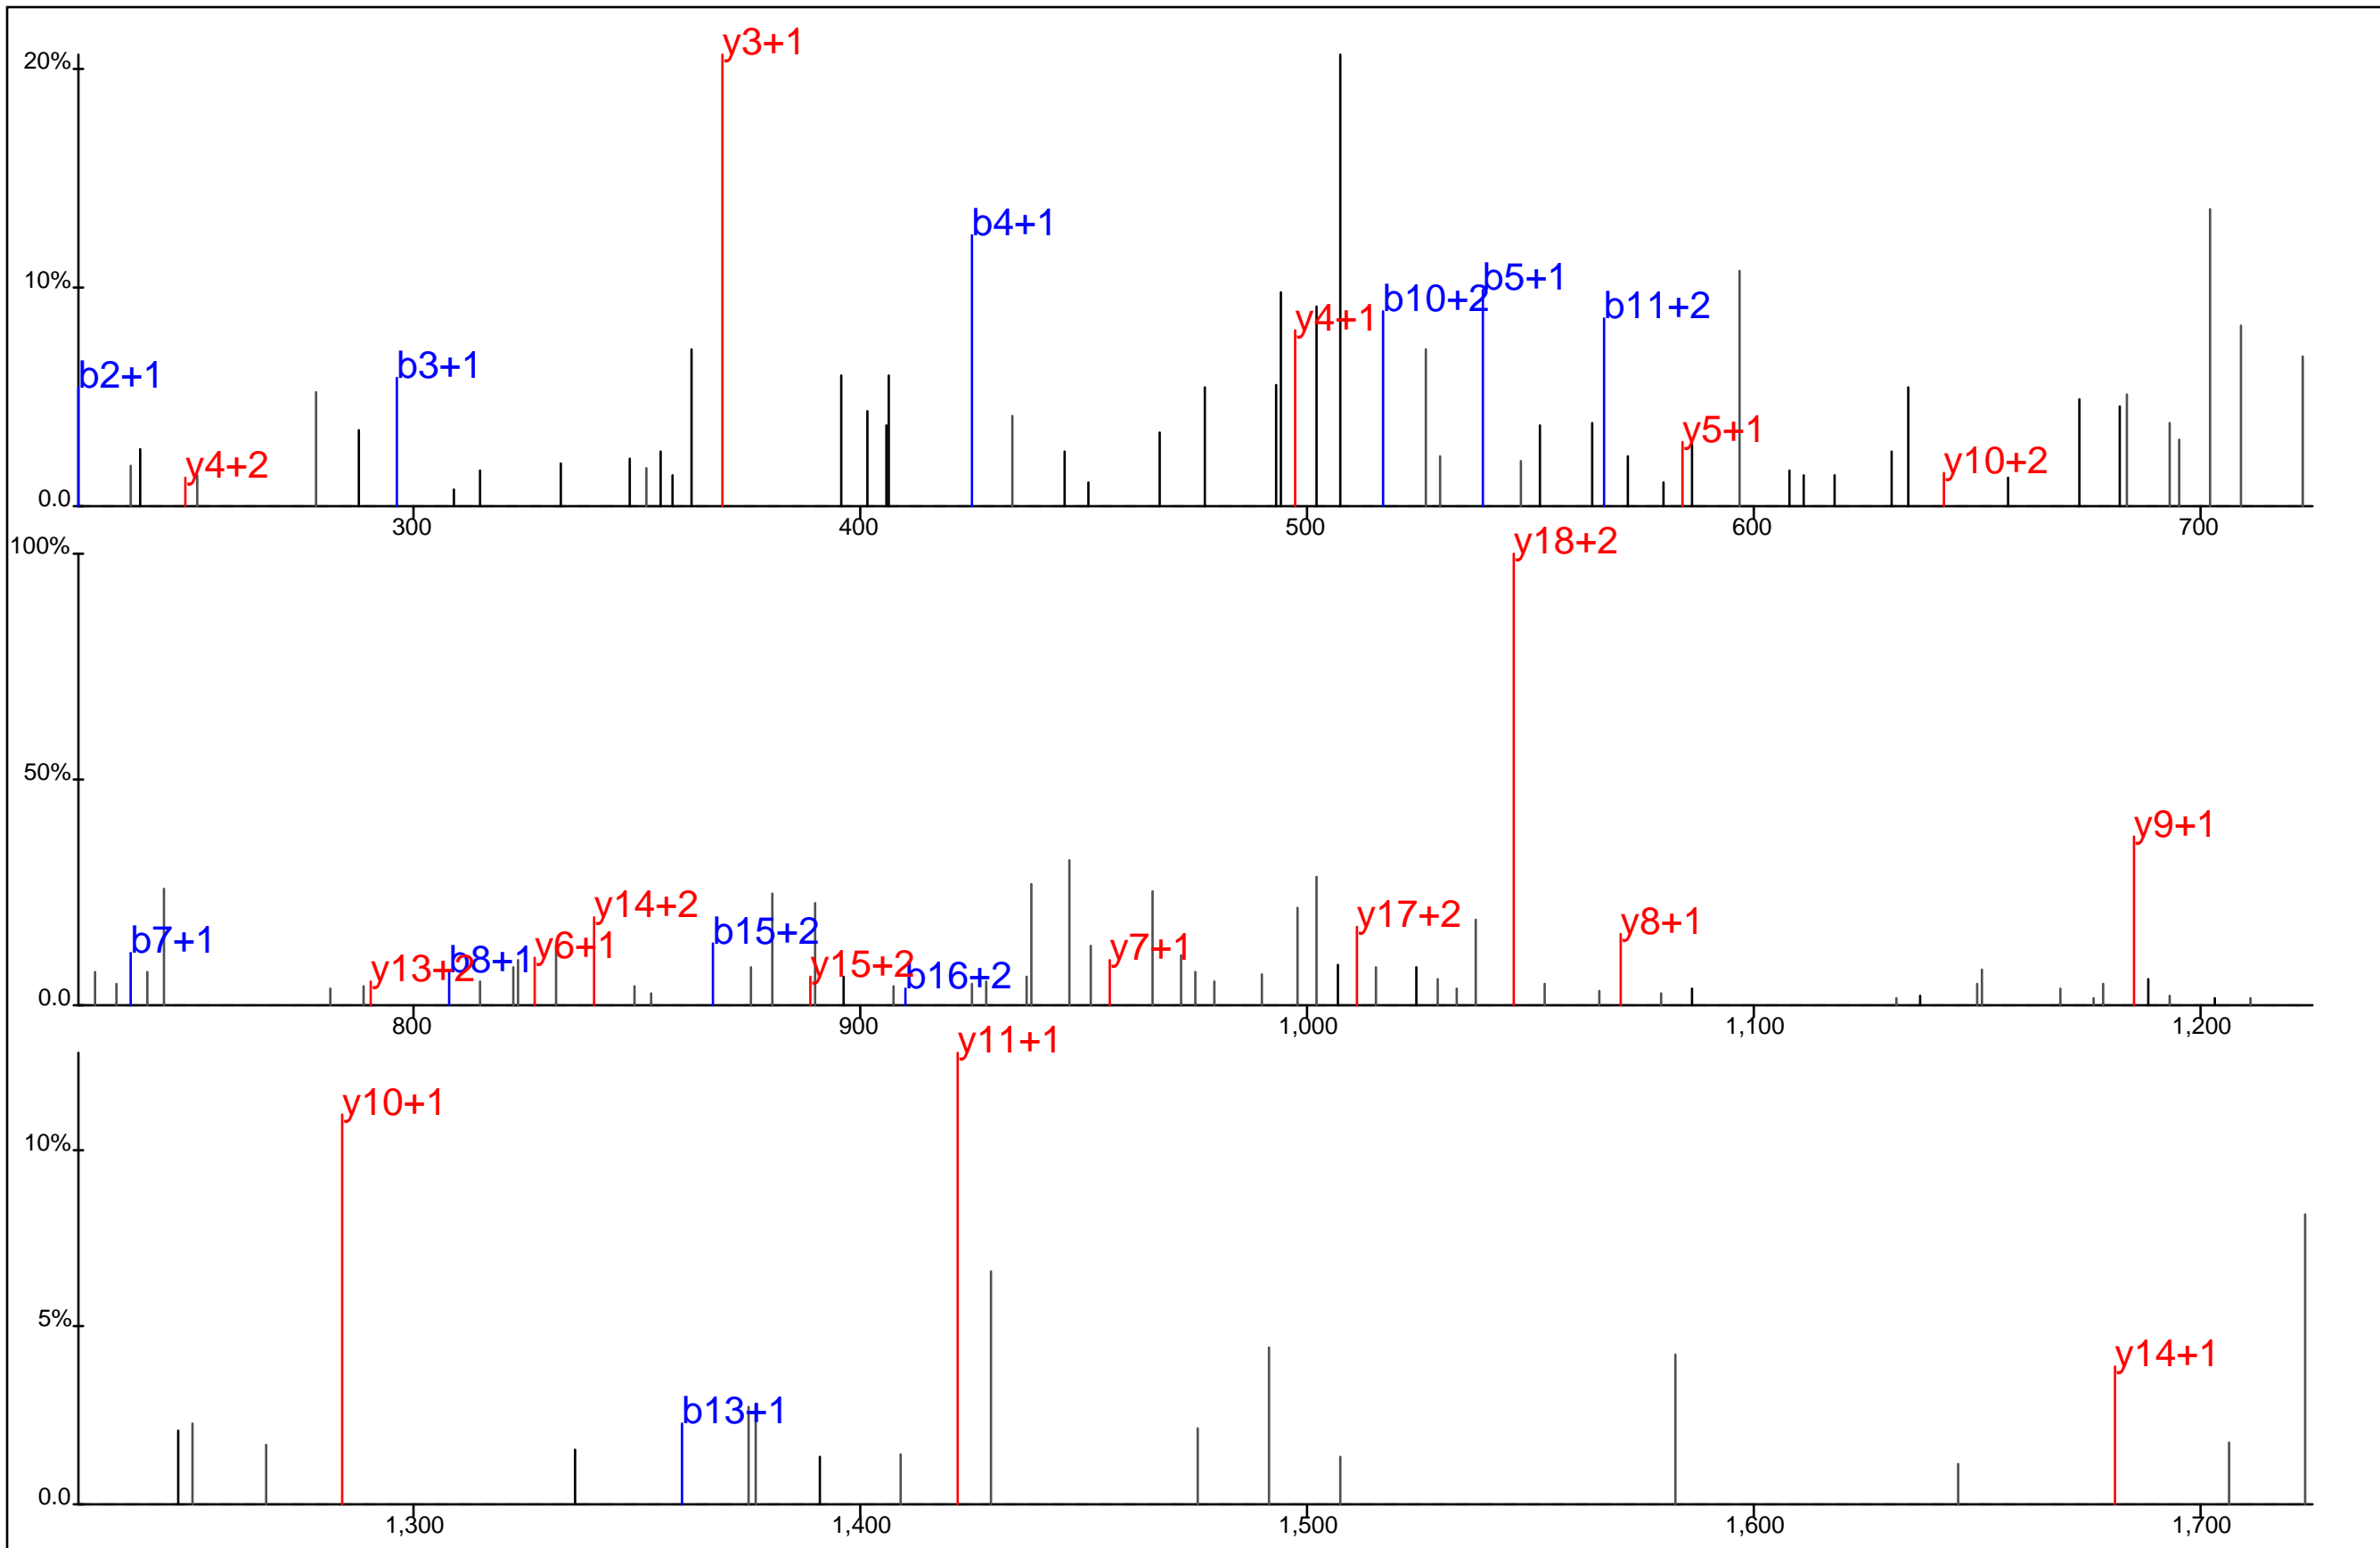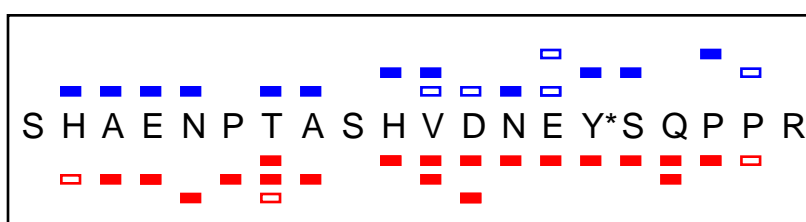

Protein Name: CD5  
 gi Accession: 0  
 Precursor Mass: 772.6615+3  
 Delta Mass: 0.986 ppm  
 XCorr: 43.4

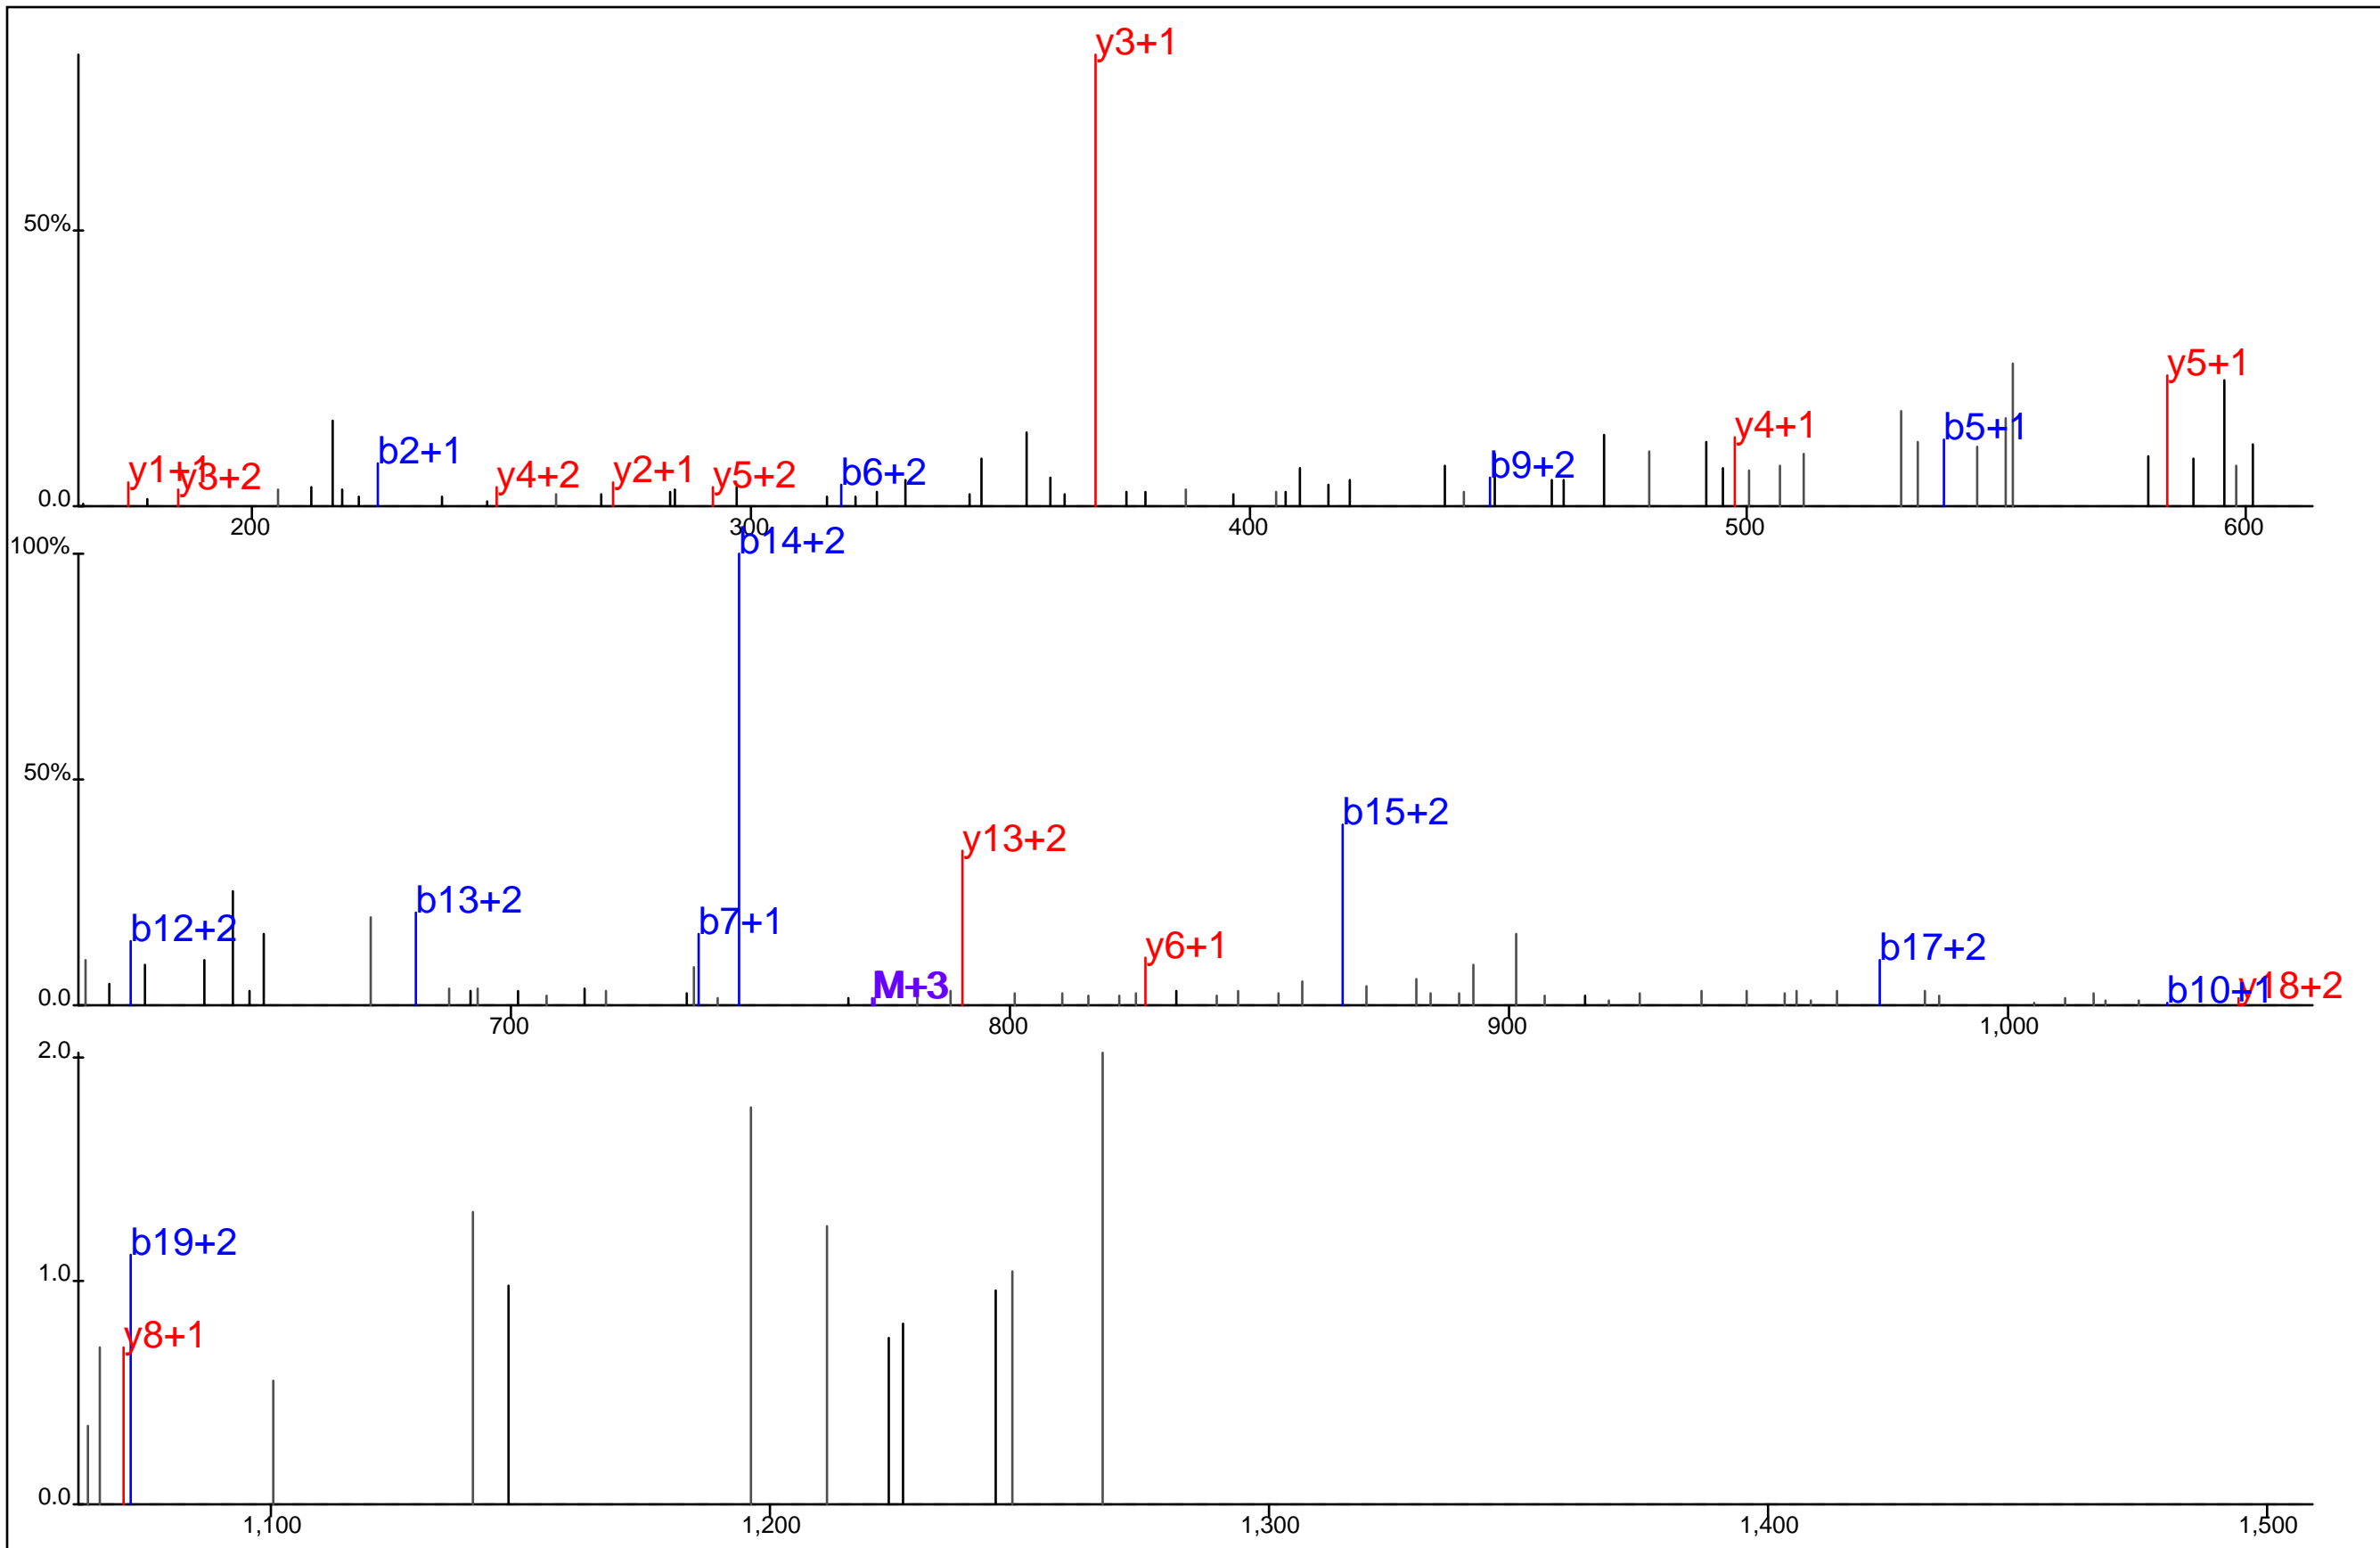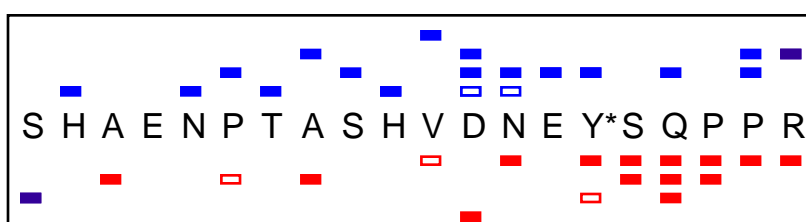

Protein Name: CD5  
 gi Accession: 0  
 Precursor Mass: 579.7480+4  
 Delta Mass: 1.060 ppm  
 XCorr: 35.25

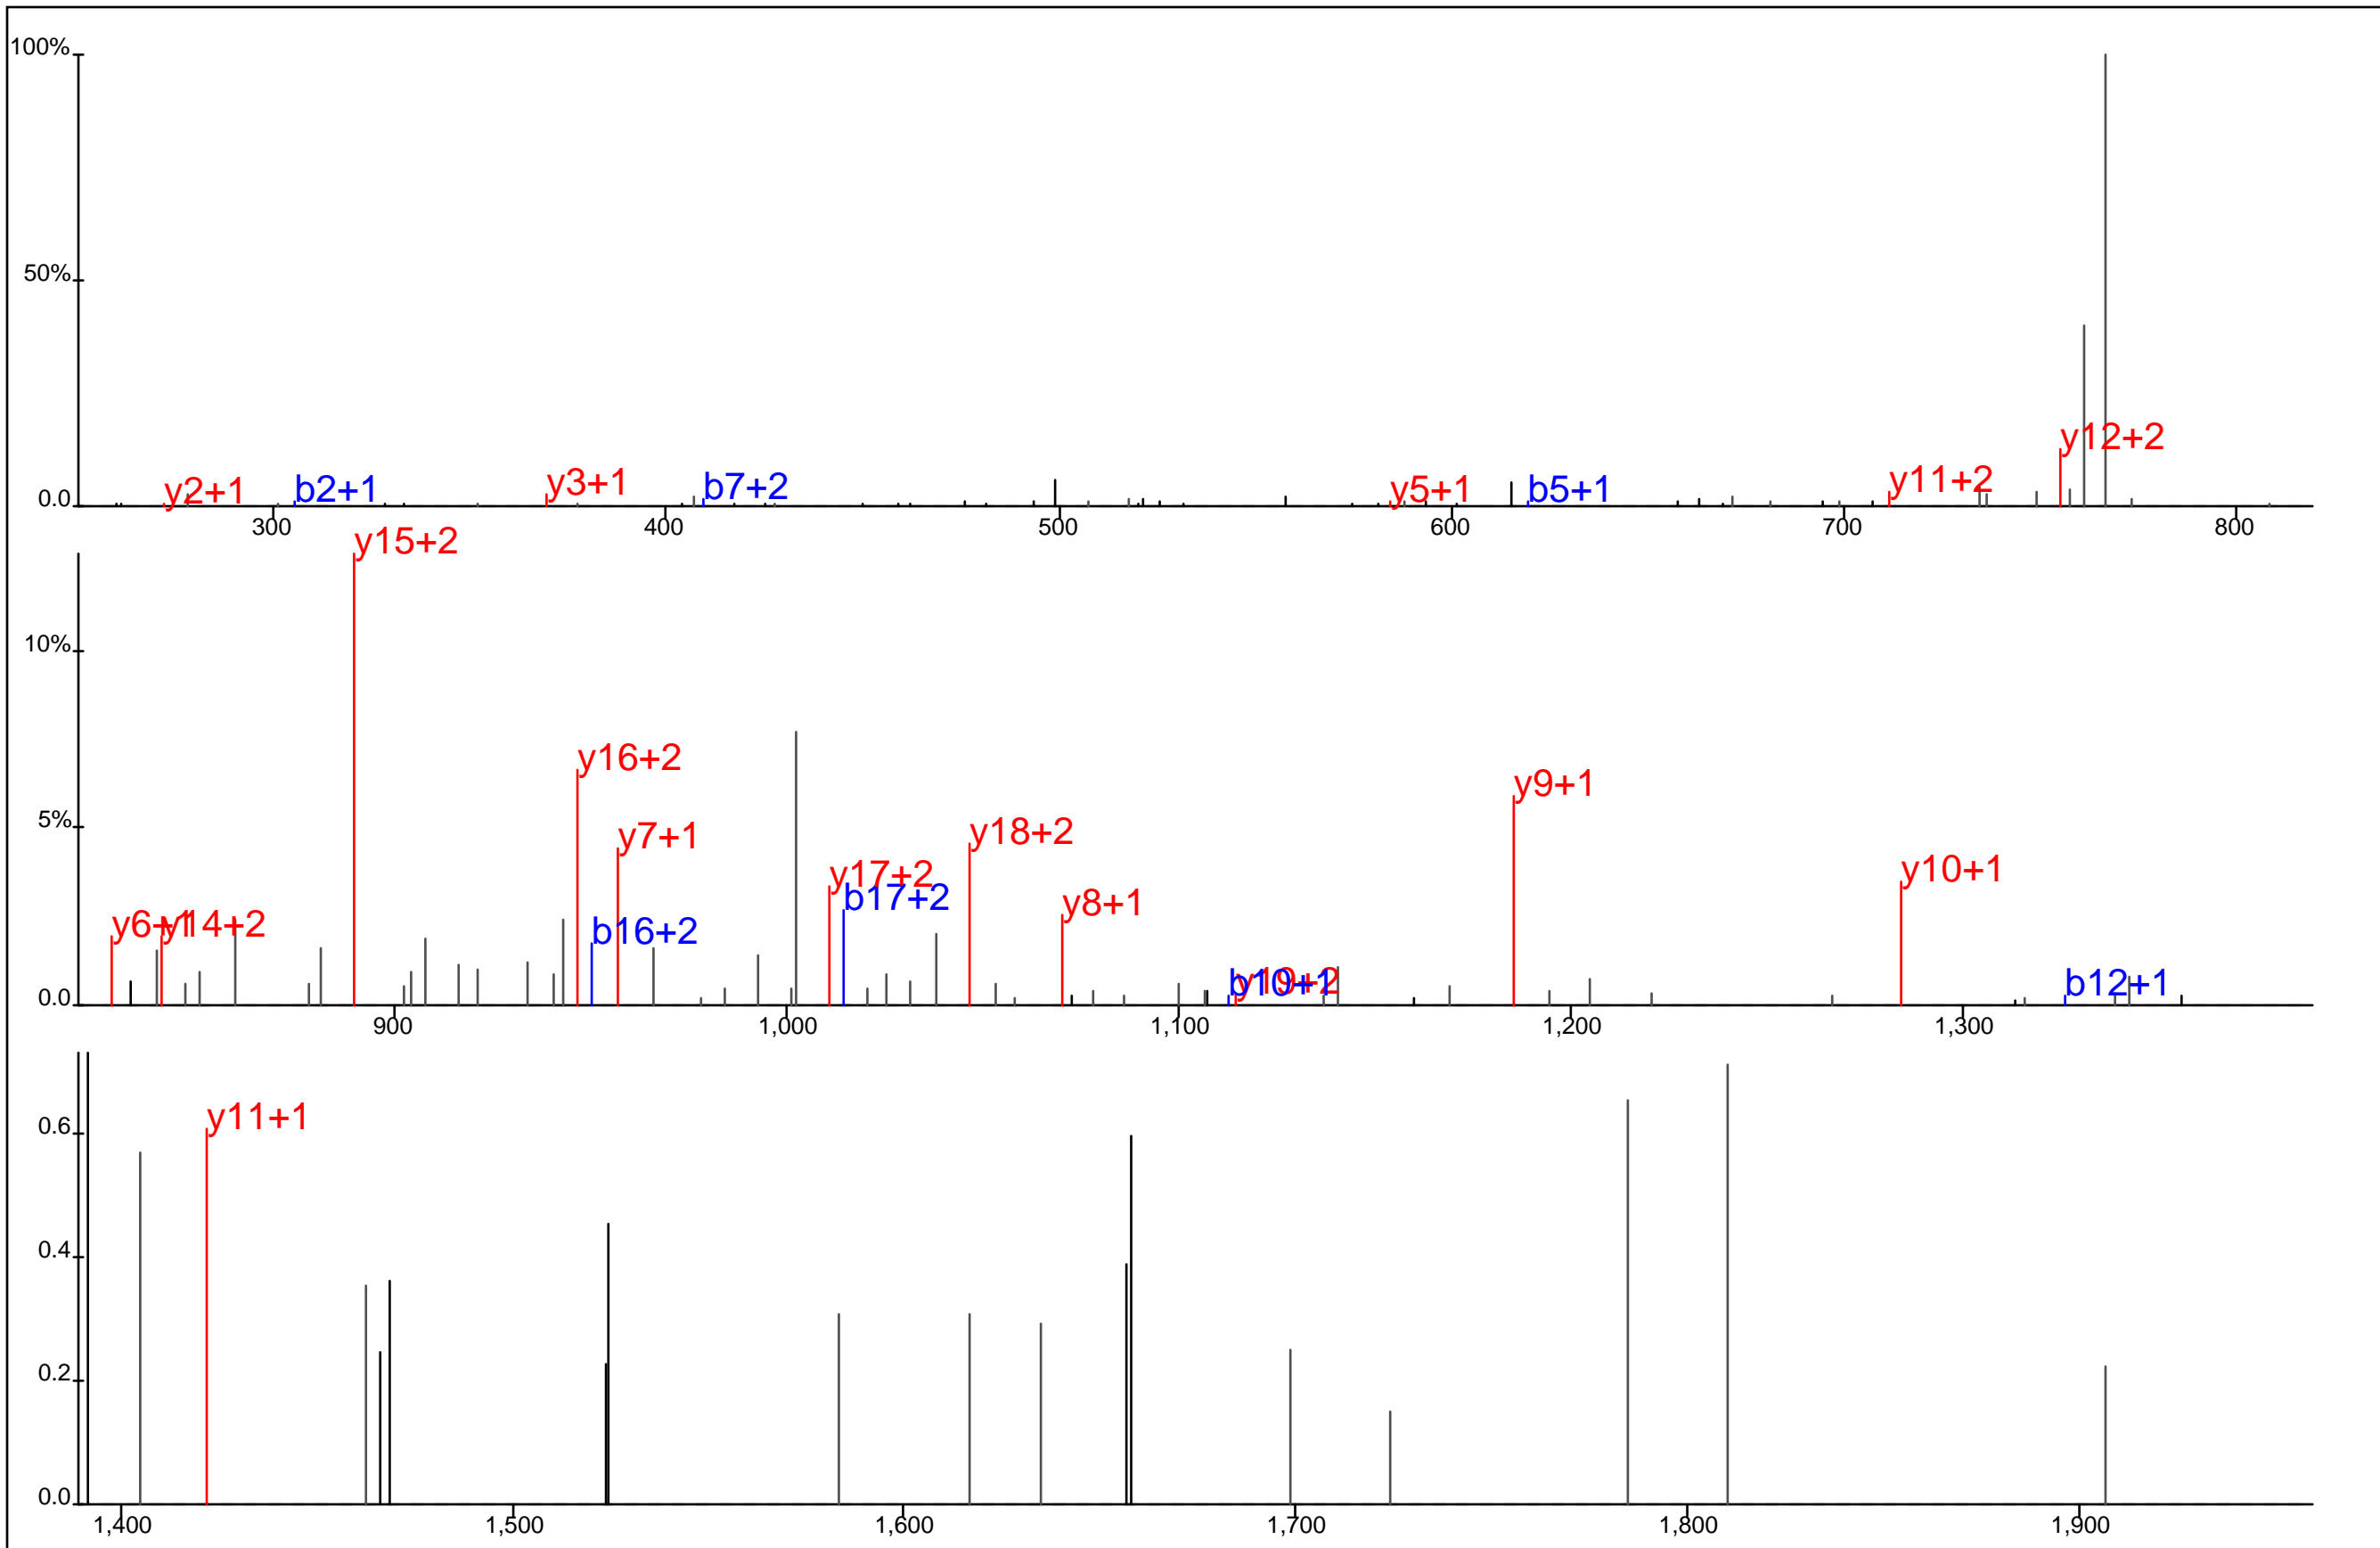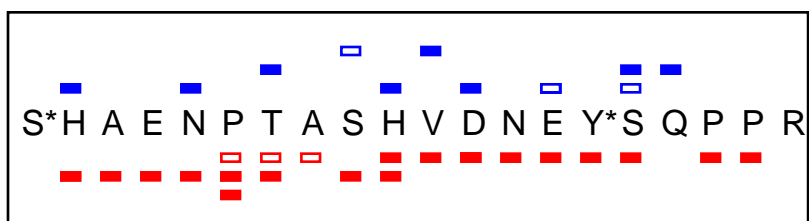

Protein Name: CD5  
 gi Accession: 0  
 Precursor Mass: 799.3190+3  
 Delta Mass: 3.492 ppm  
 XCorr: 44.21



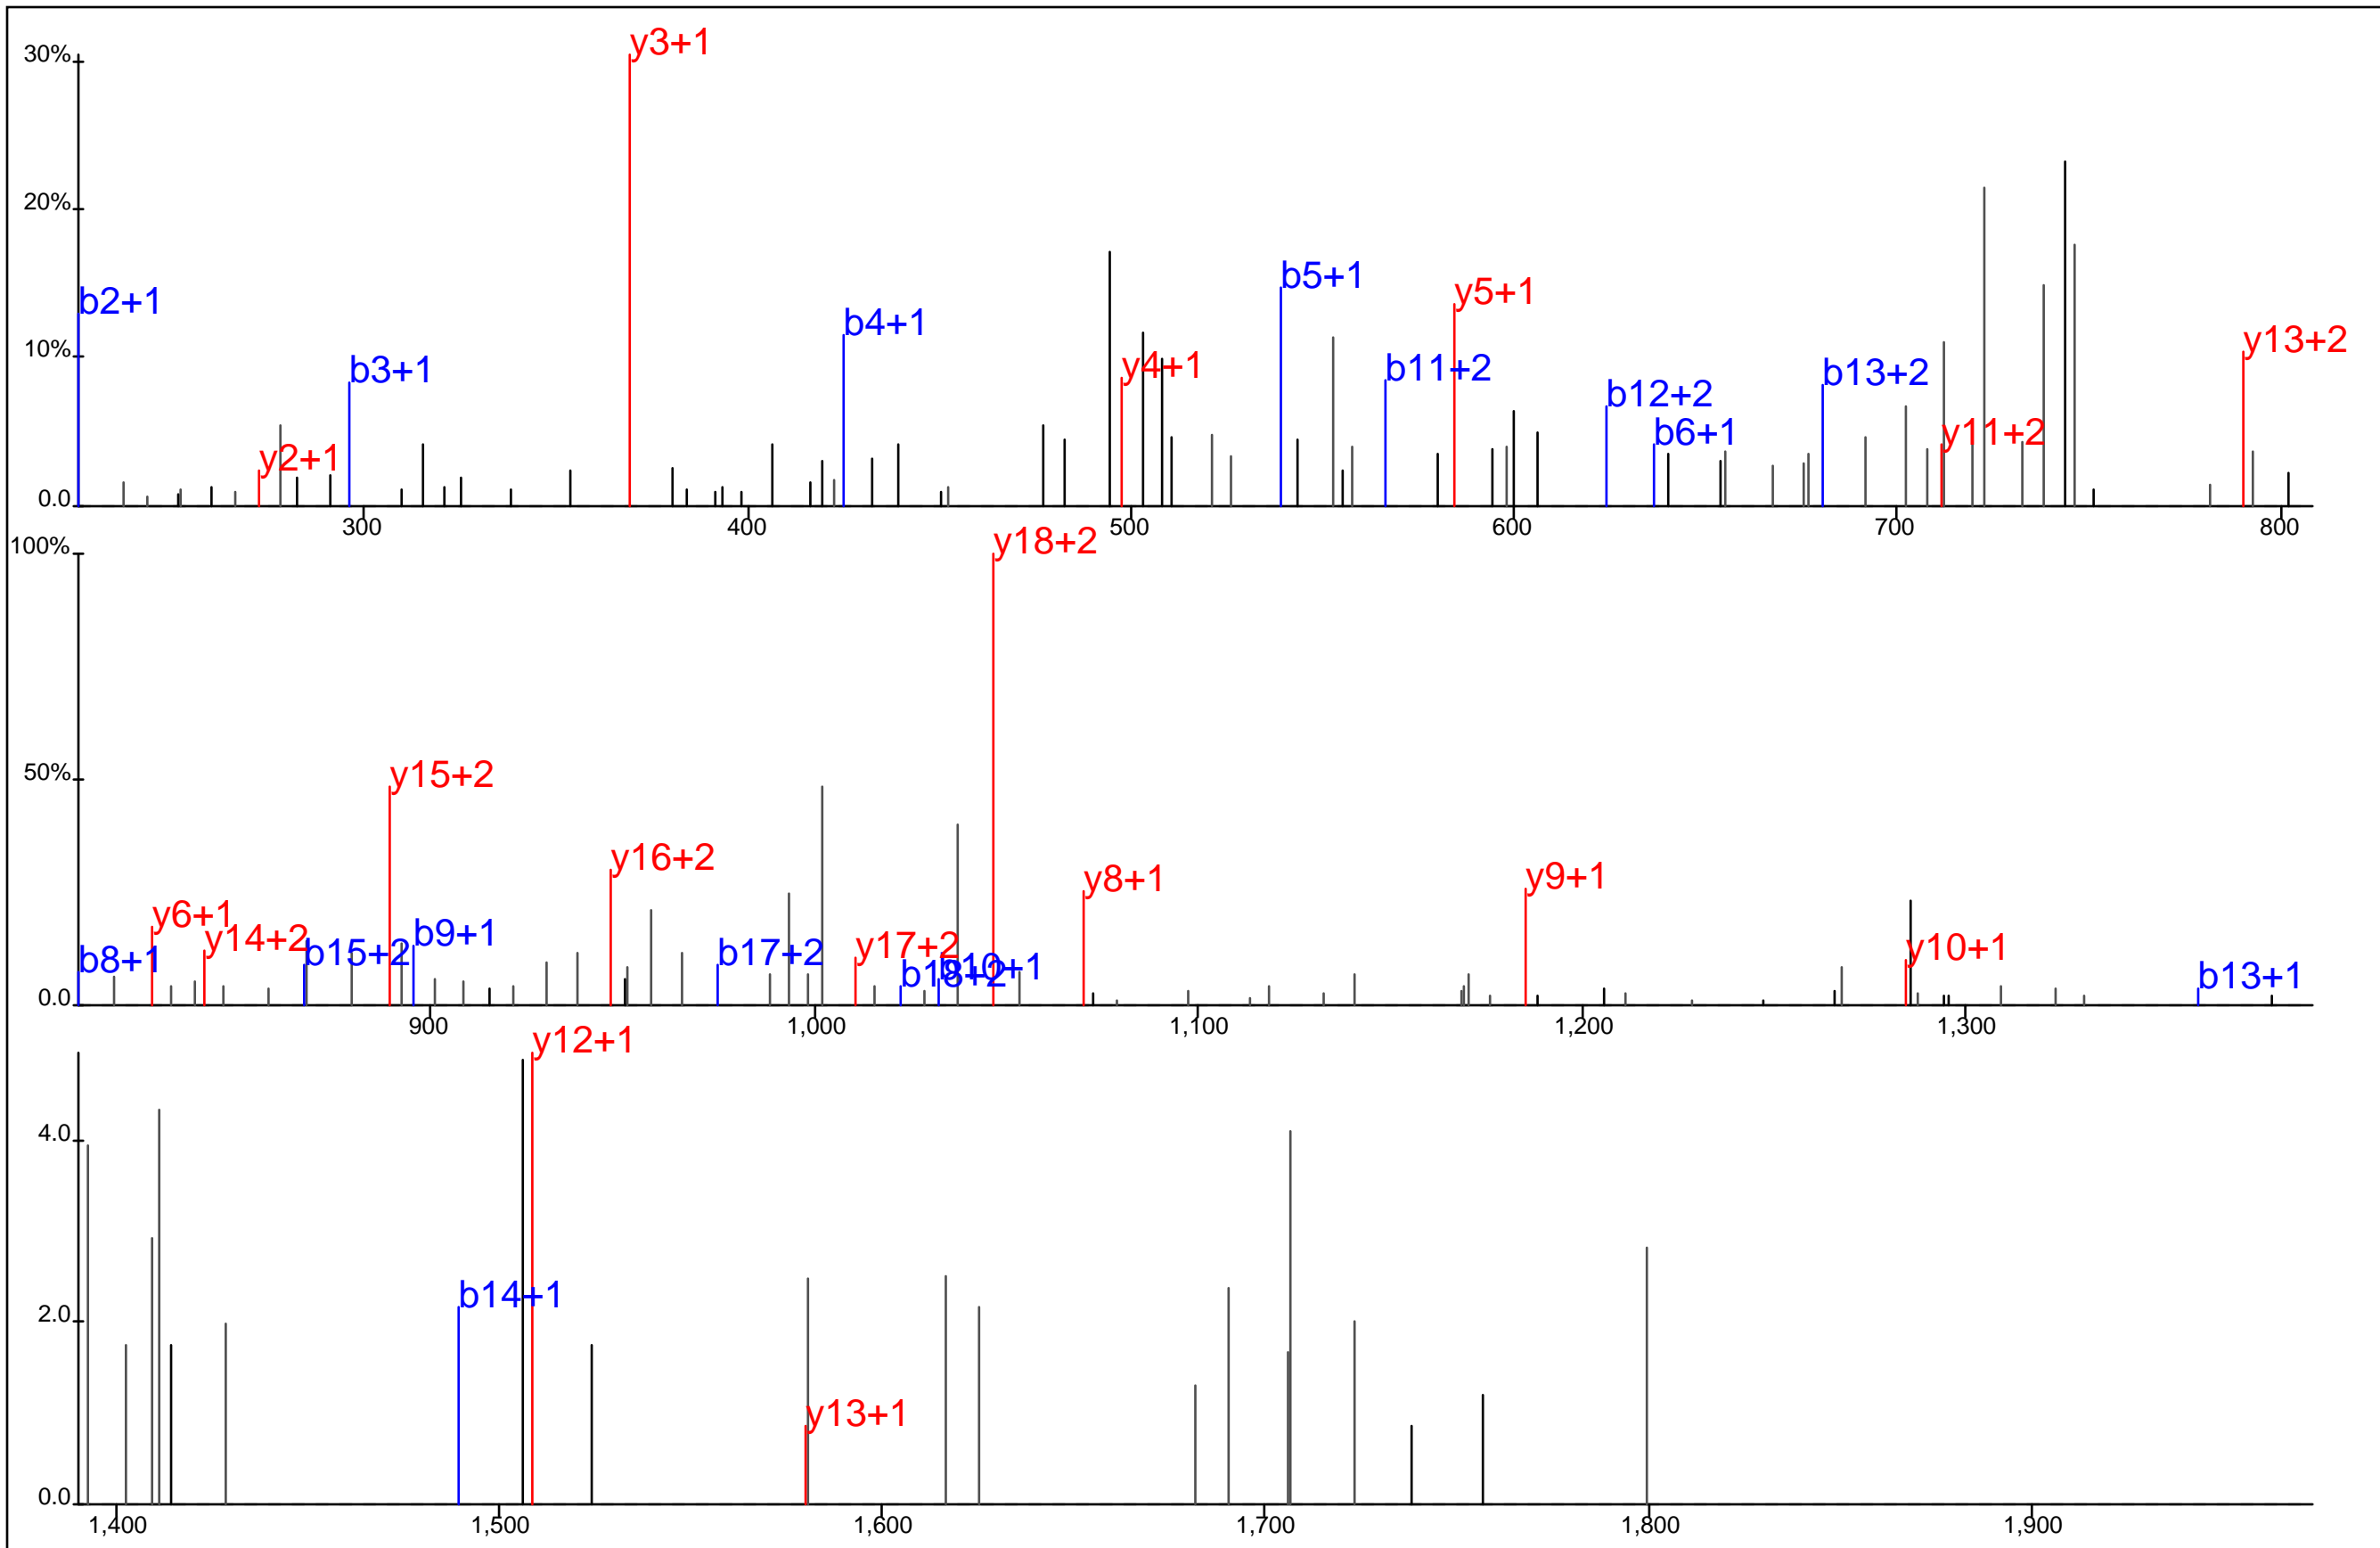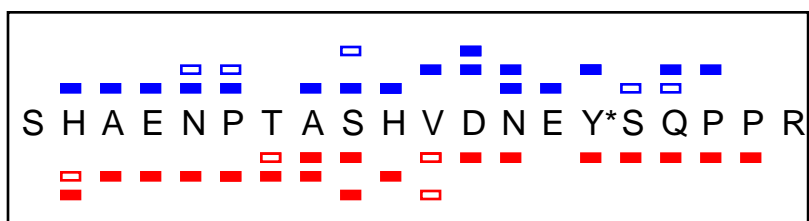

Protein Name: CD5  
 gi Accession: 0  
 Precursor Mass: 772.6611+3  
 Delta Mass: 0.433 ppm  
 XCorr: 53.77

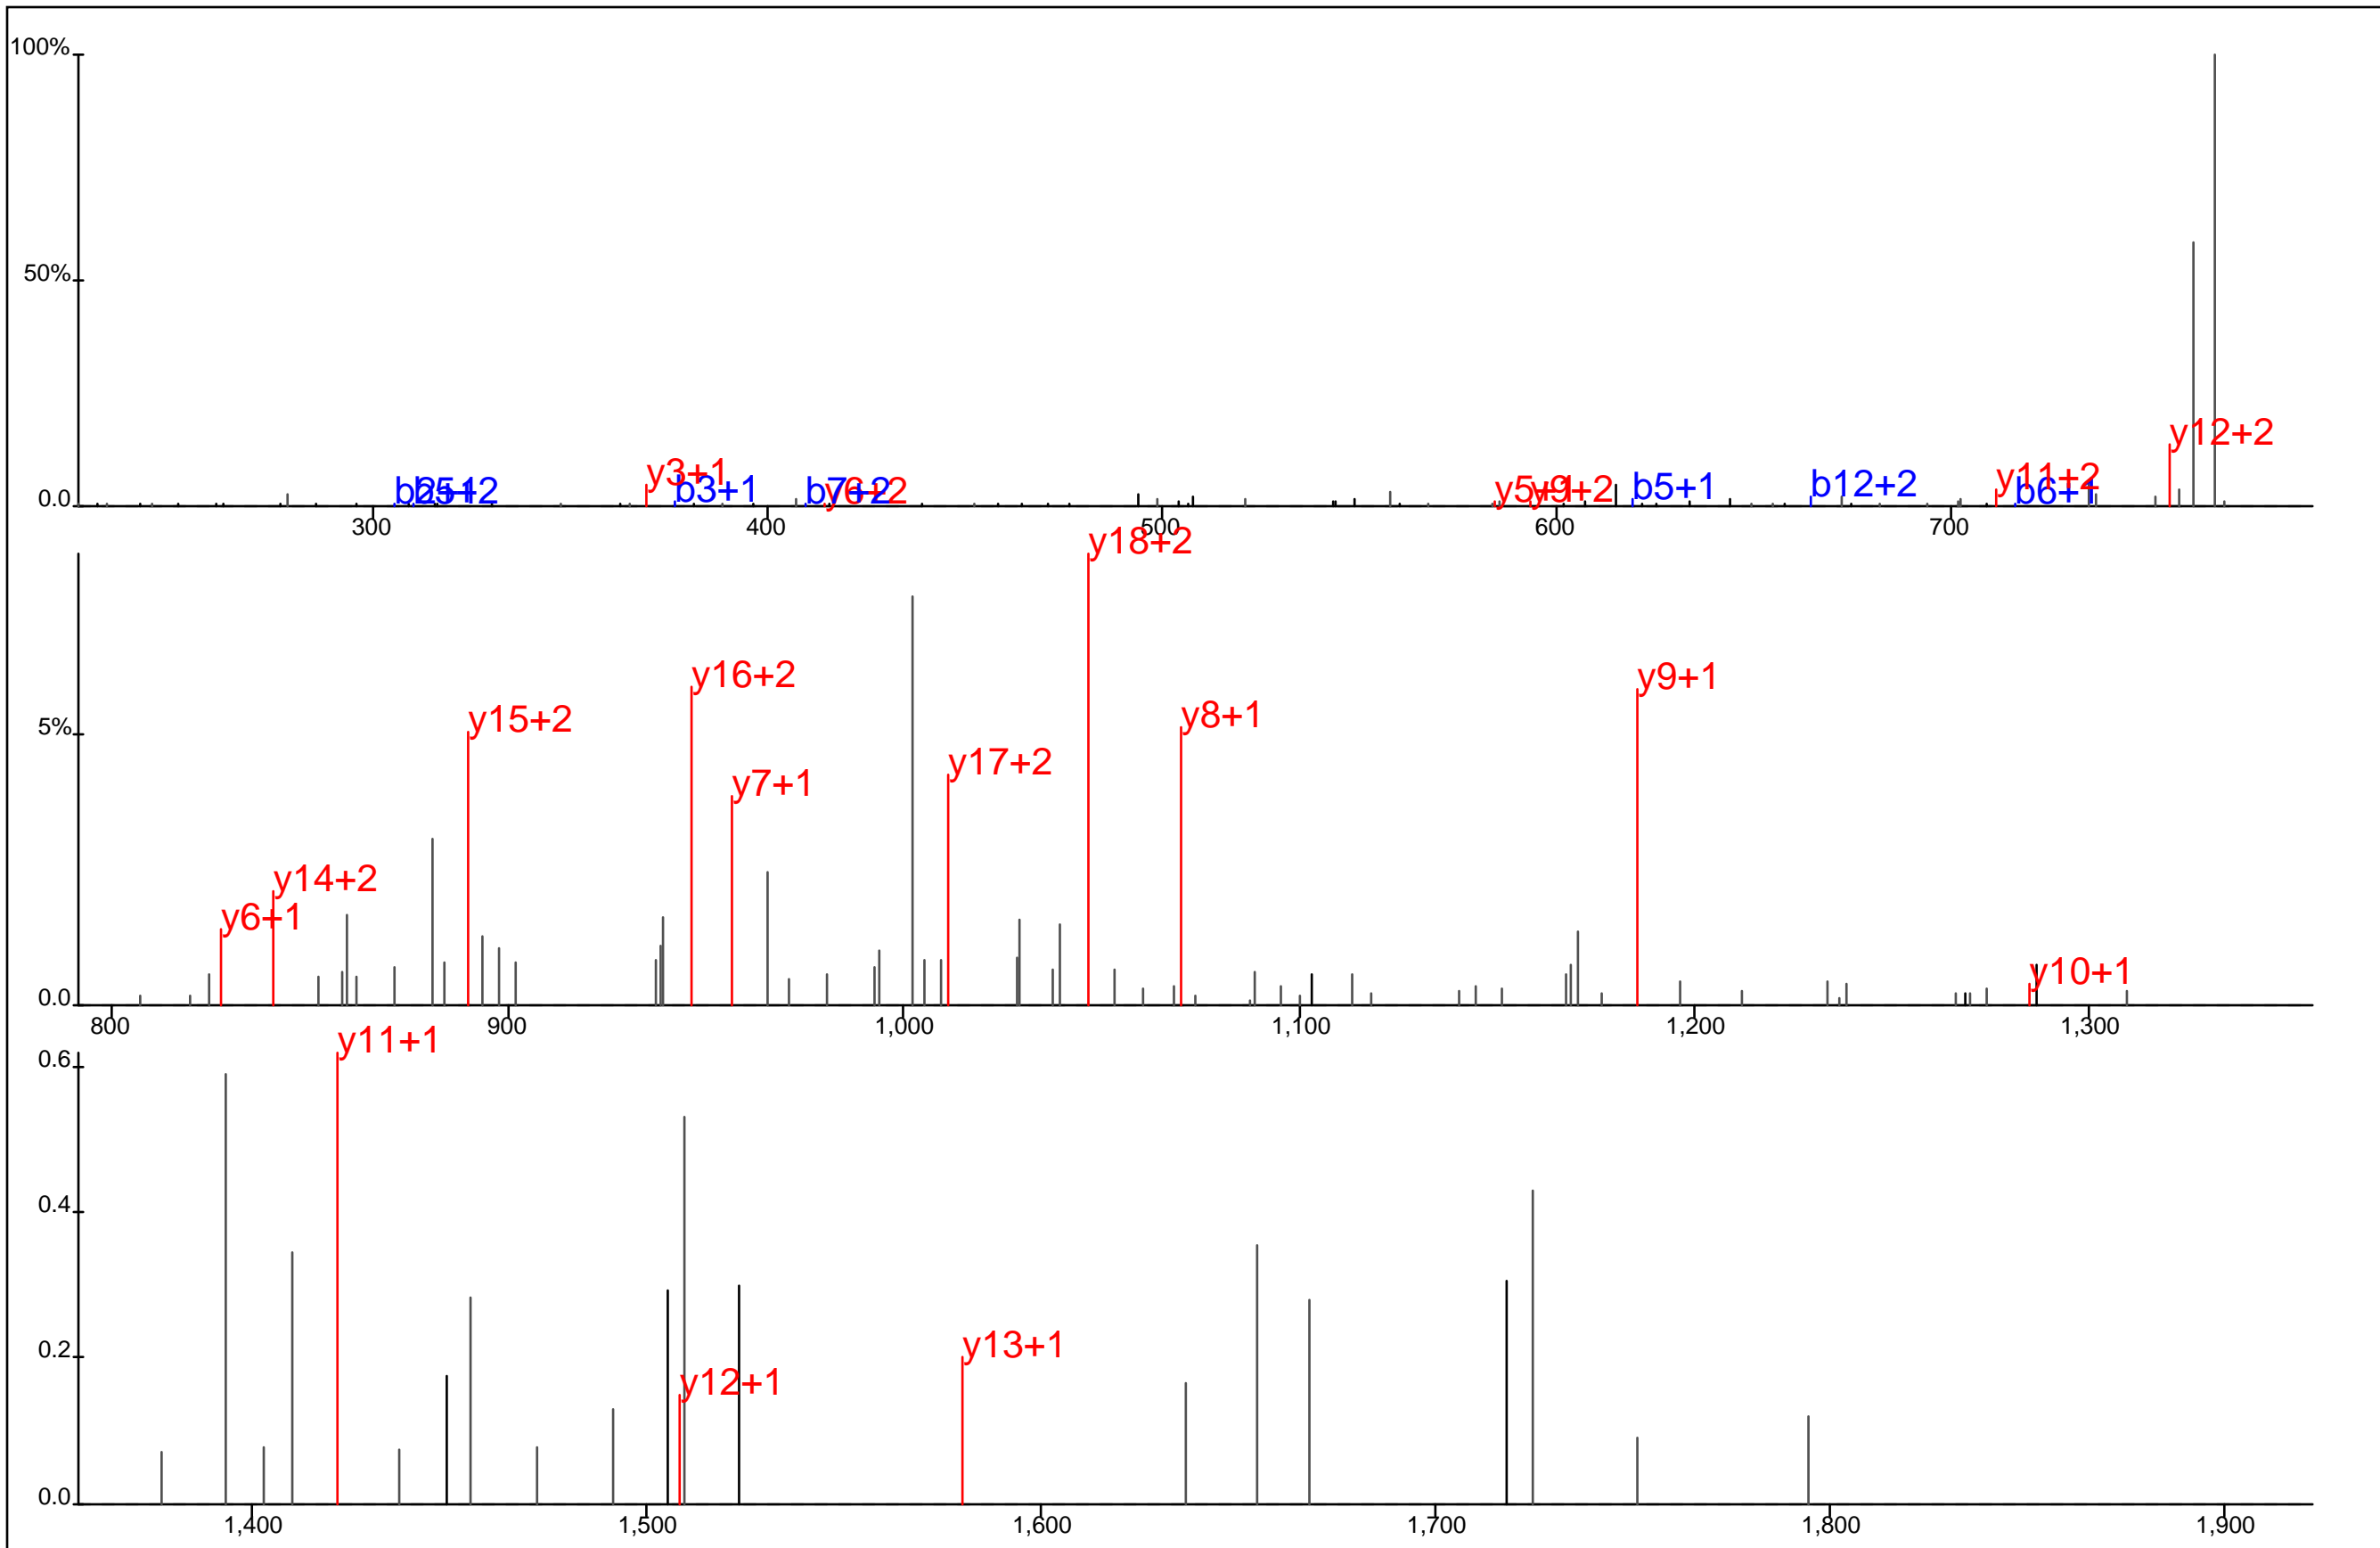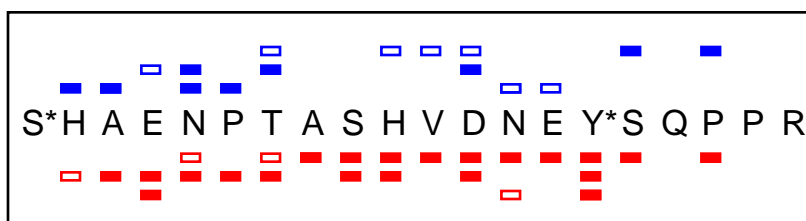

Protein Name: CD5  
 gi Accession: 0  
 Precursor Mass: 799.3158+3  
 Delta Mass: 0.482 ppm  
 XCorr: 47.42

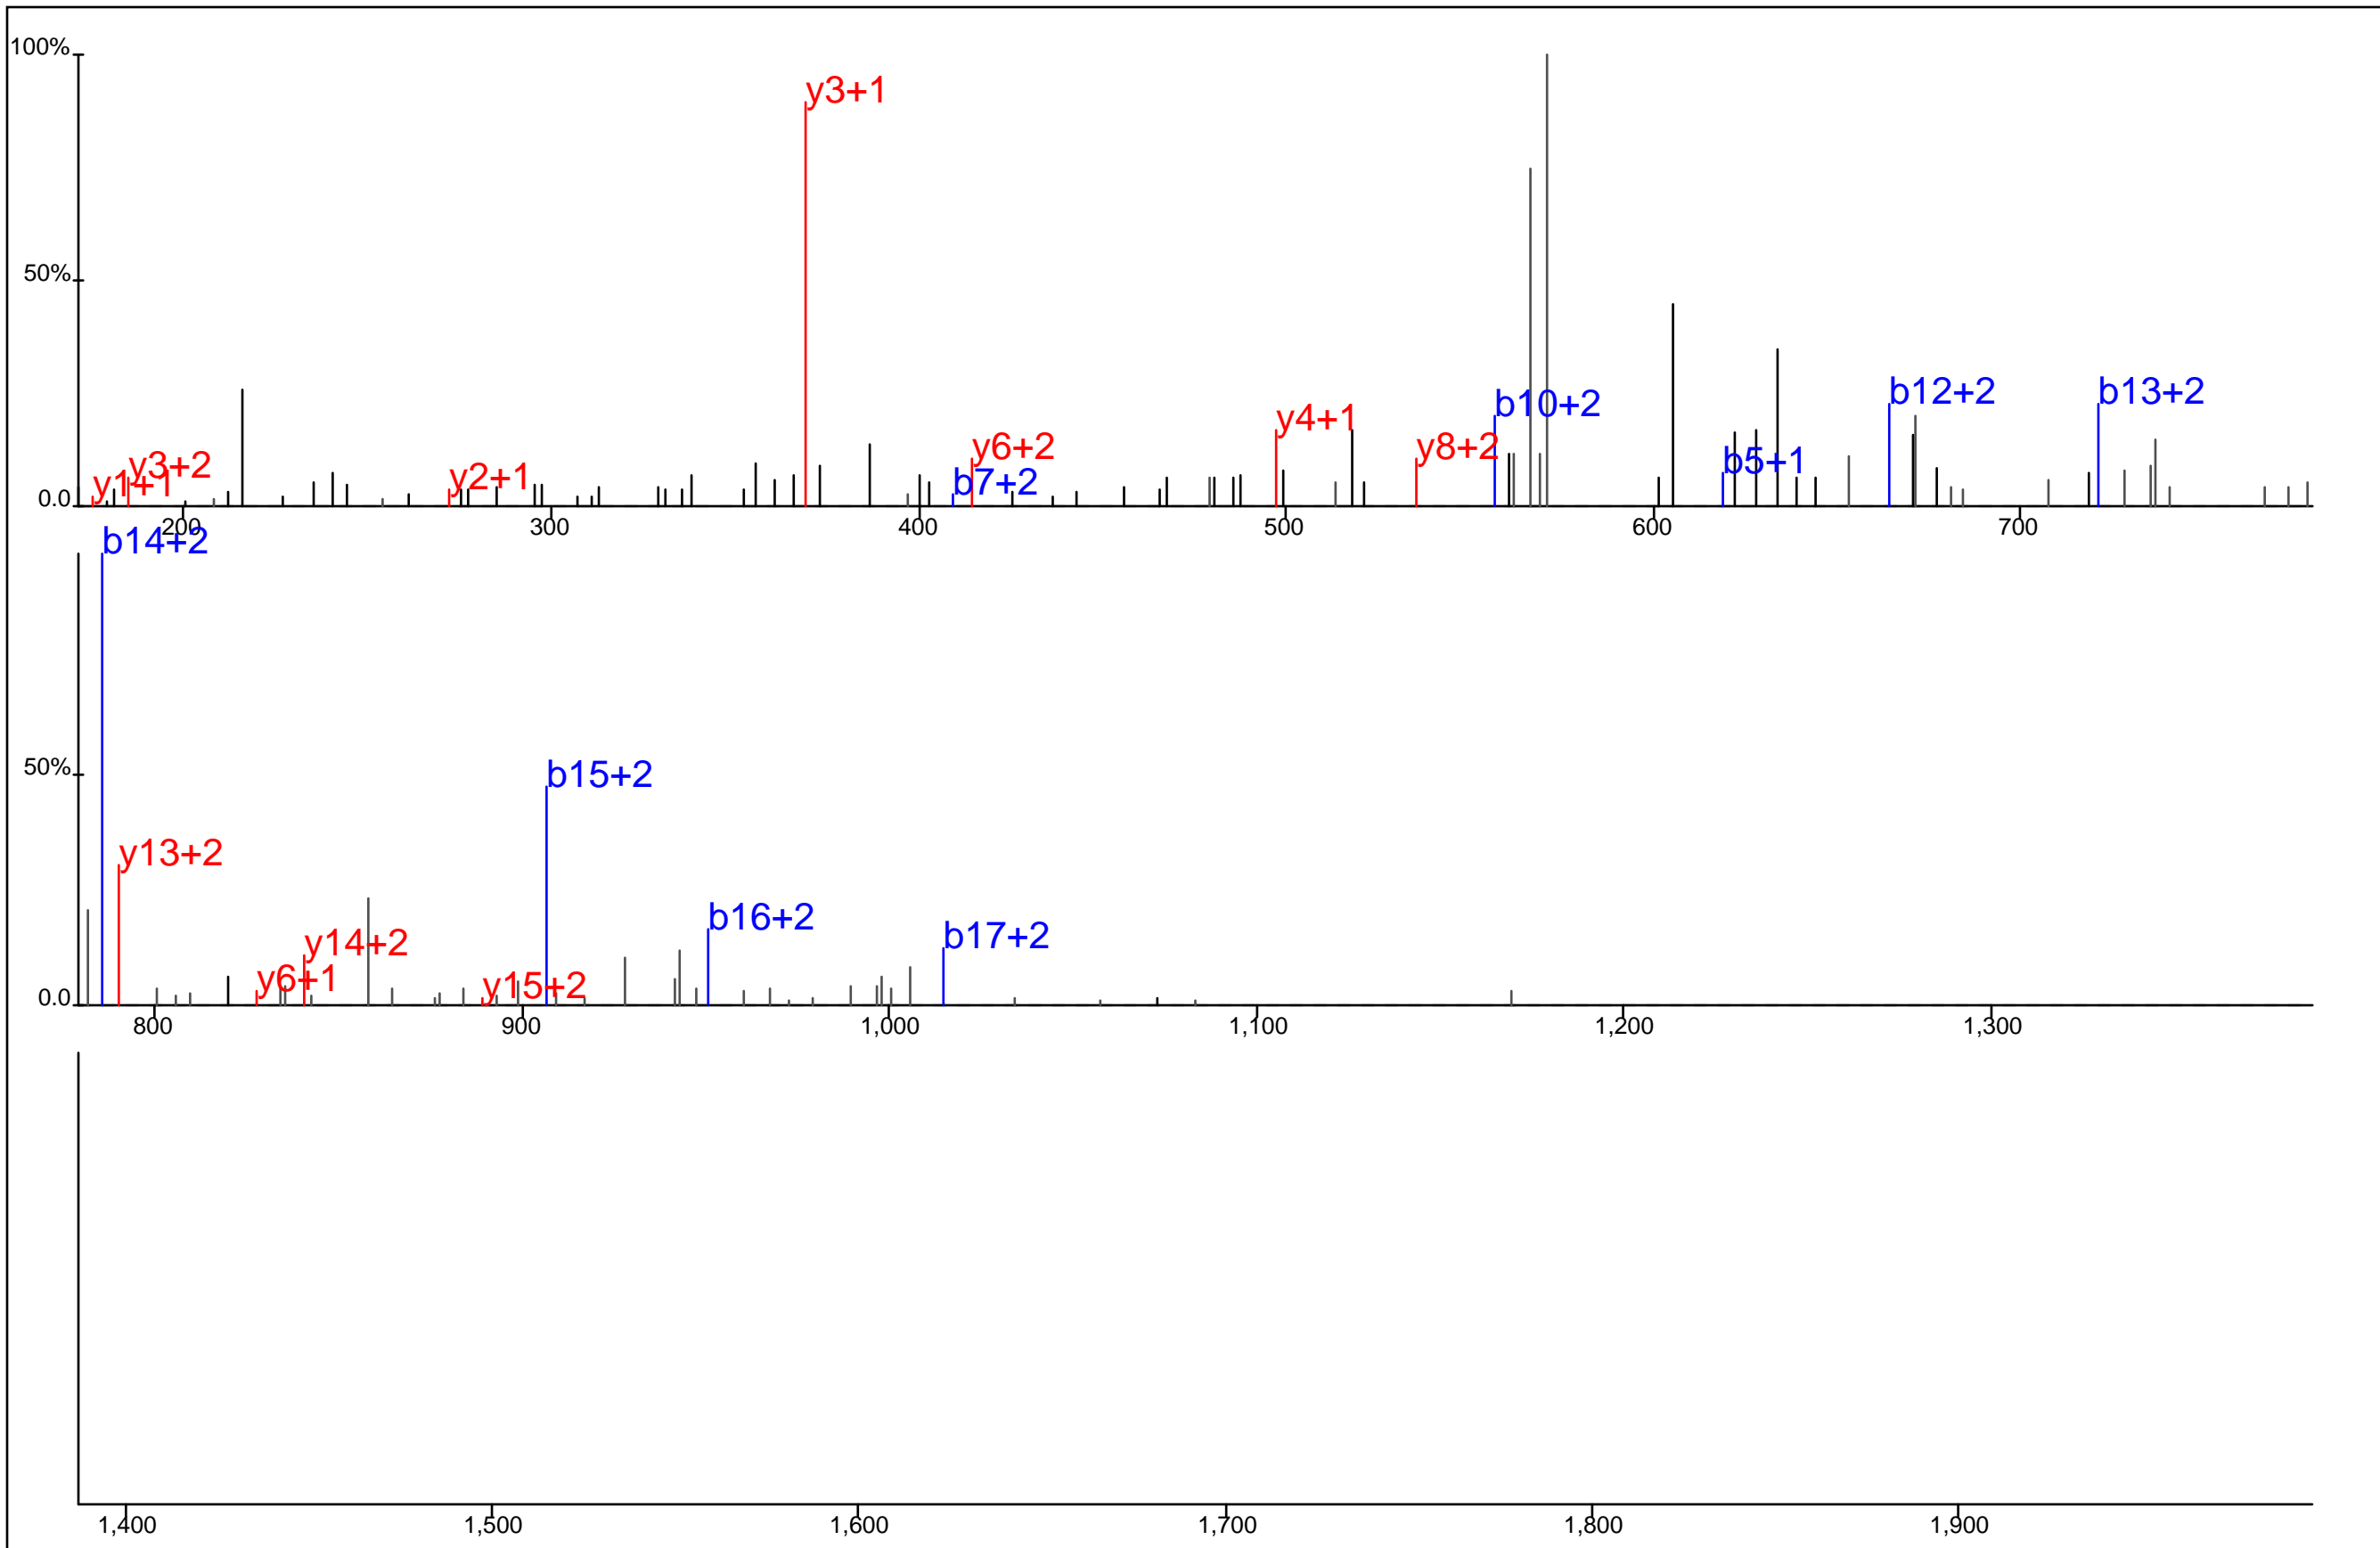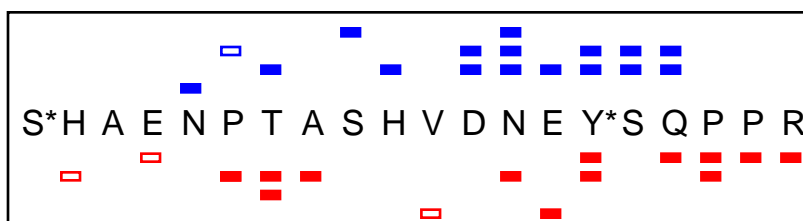

Protein Name: CD5  
 gi Accession: 0  
 Precursor Mass: 599.7397+4  
 Delta Mass: 1.321 ppm  
 XCorr: 26.74

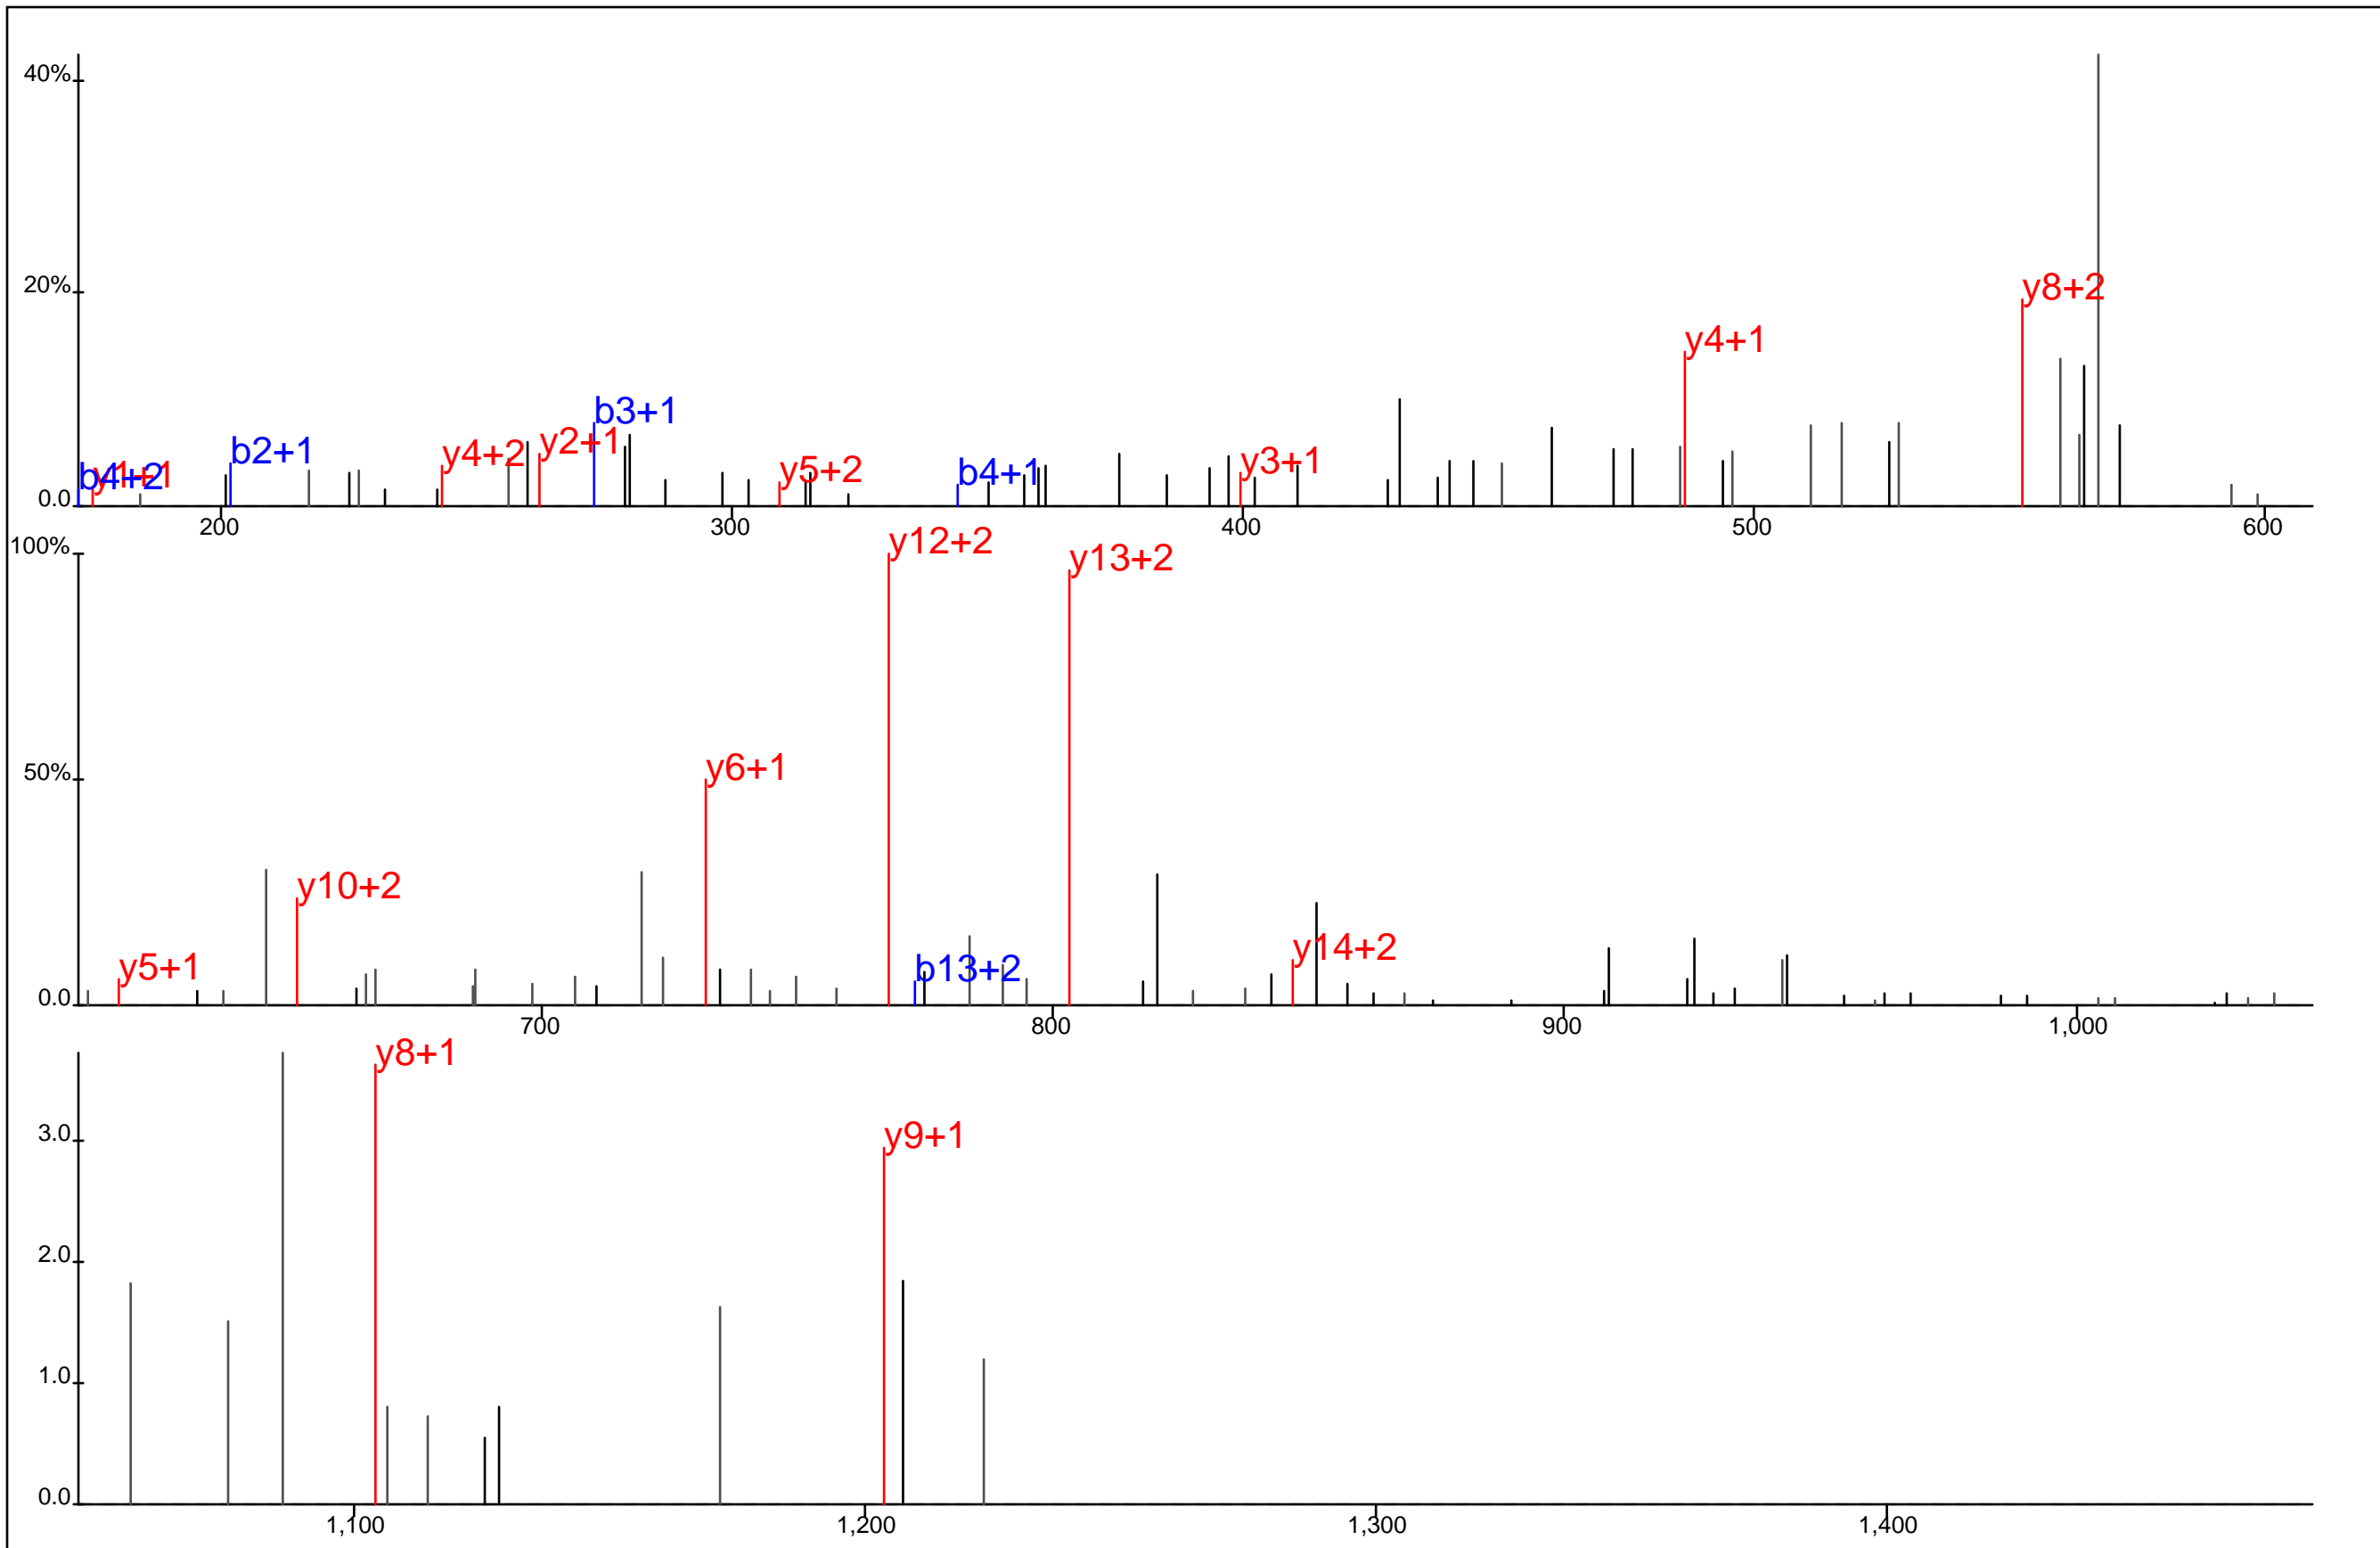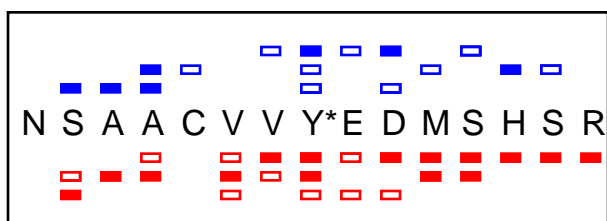

Protein Name: CD7  
 gi Accession: 0  
 Precursor Mass: 602.5728+3  
 Delta Mass: 3.130 ppm  
 XCorr: 20.46

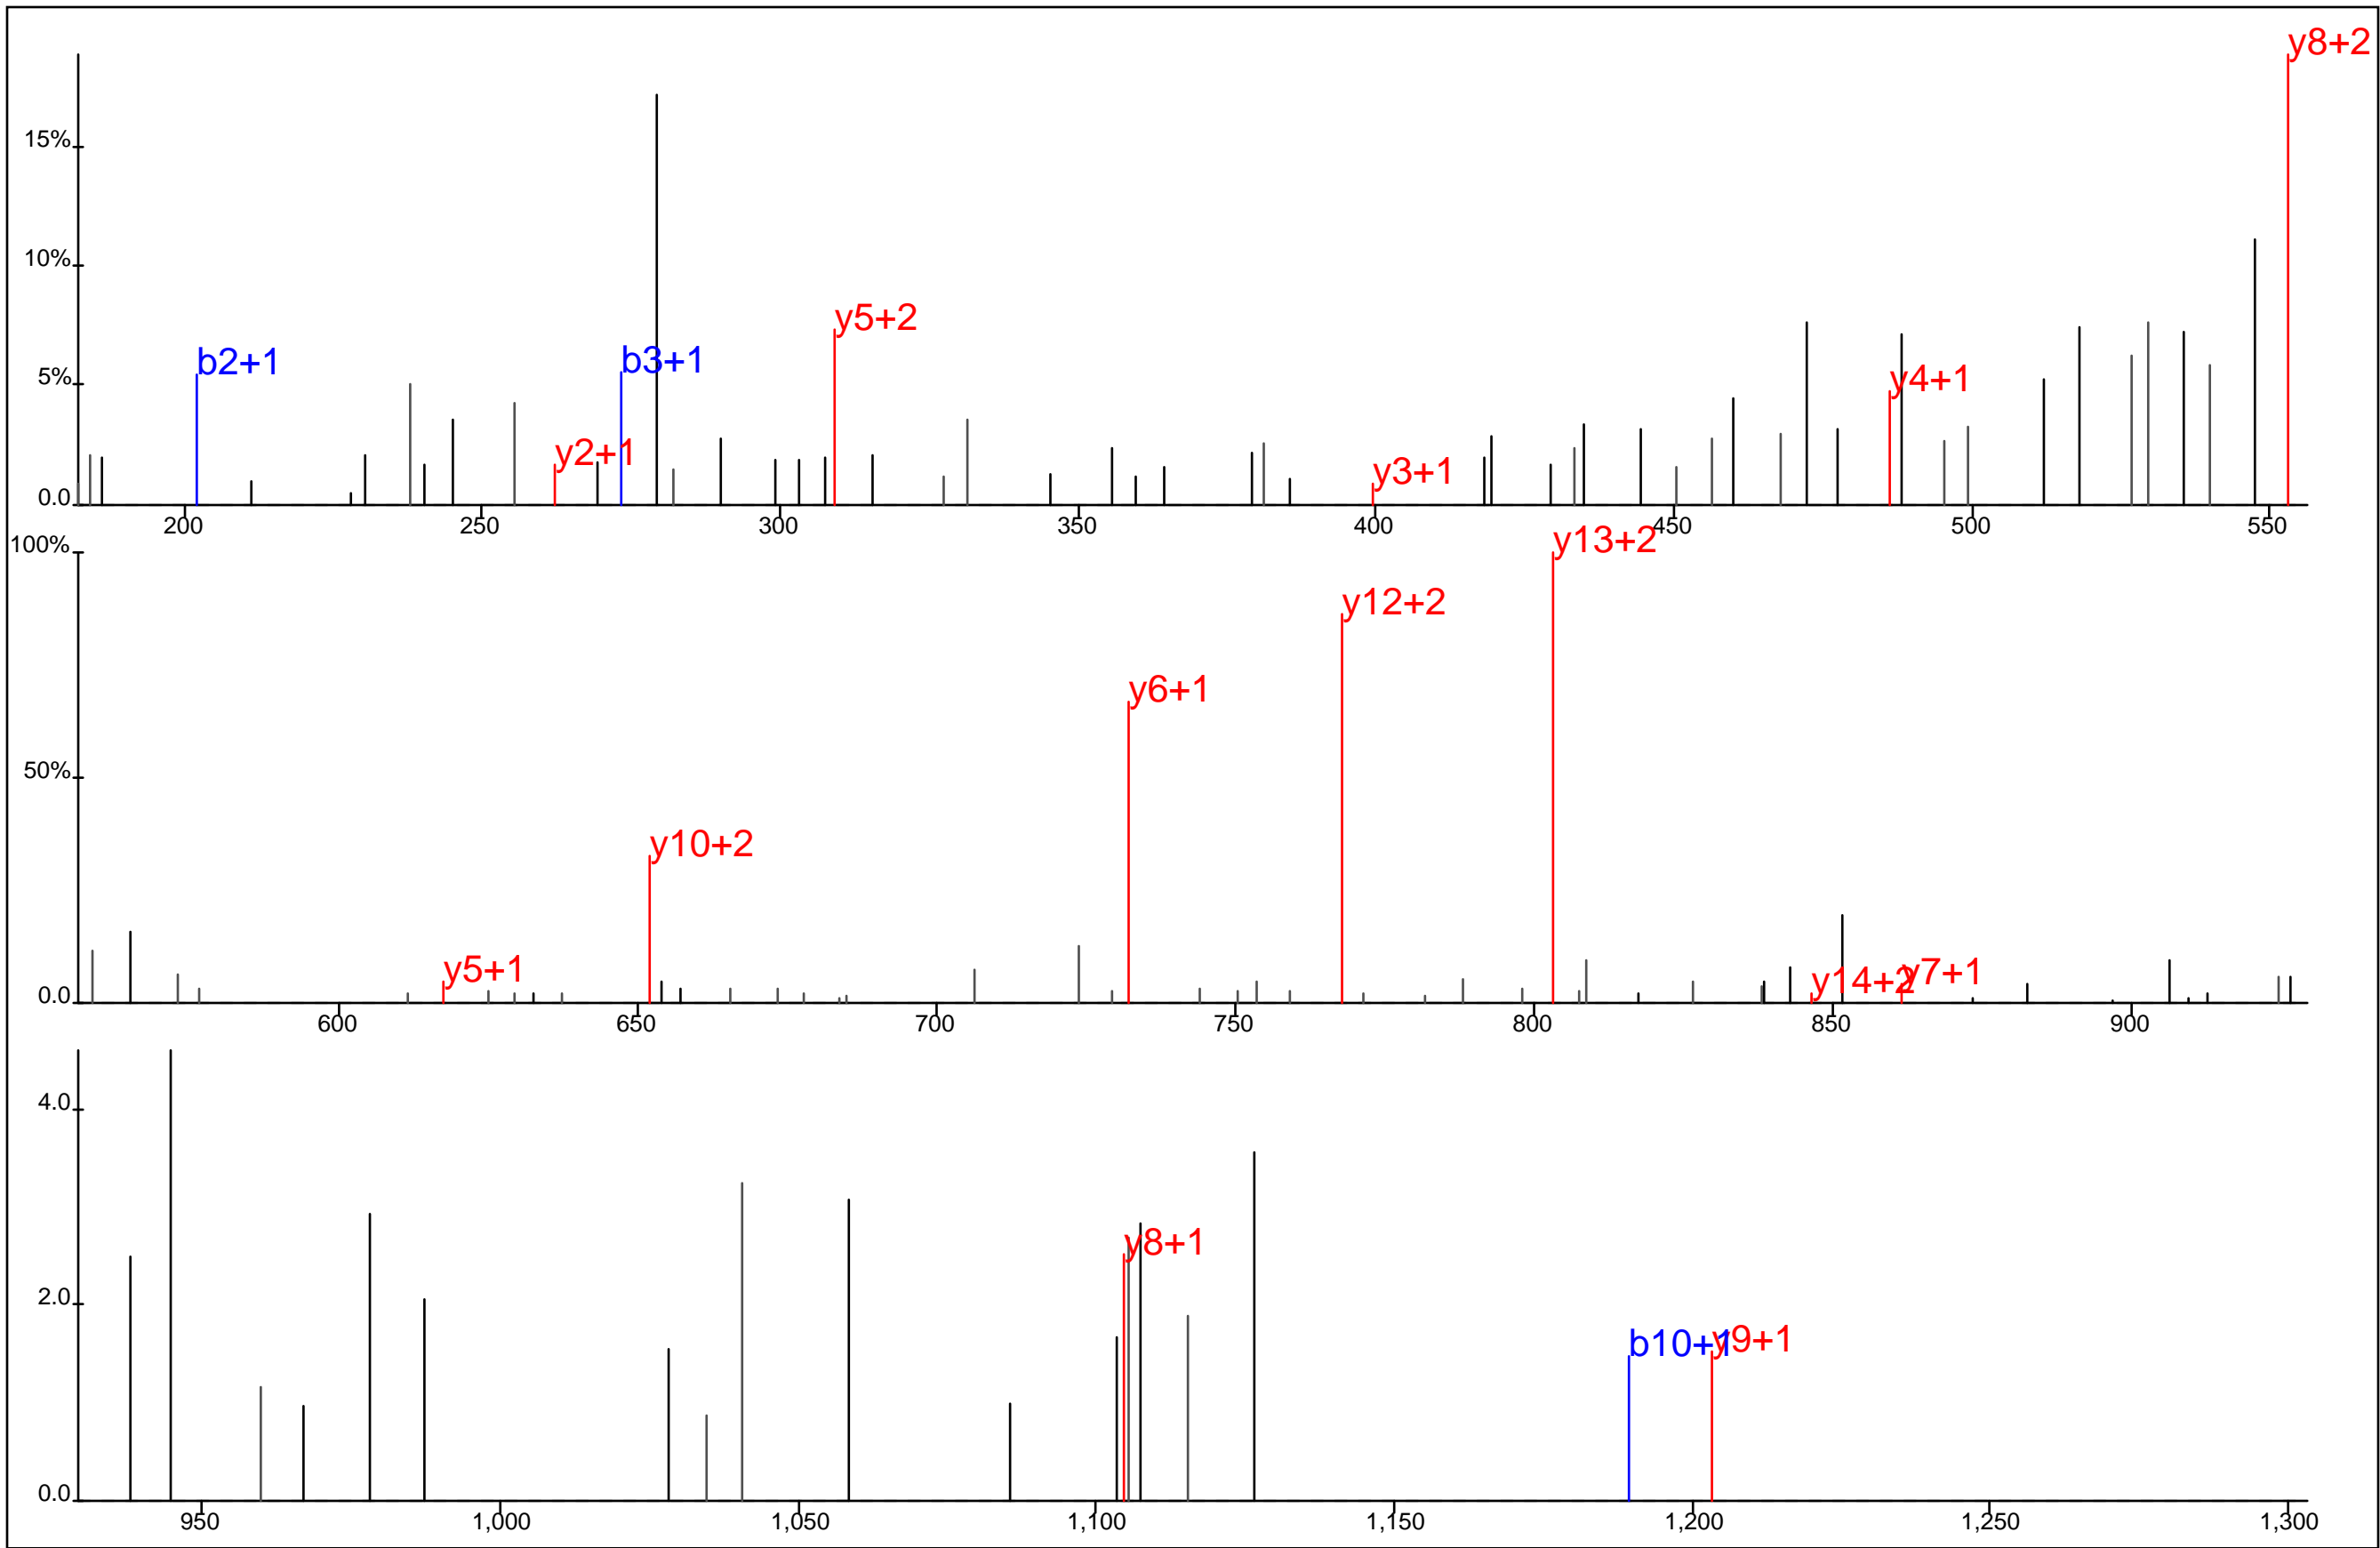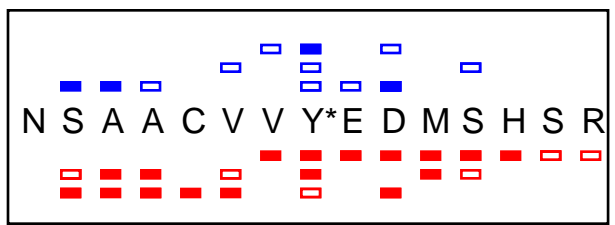

Protein Name: CD7  
 gi Accession: 0  
 Precursor Mass: 602.5717+3  
 Delta Mass: 1.202 ppm  
 XCorr: 27.07

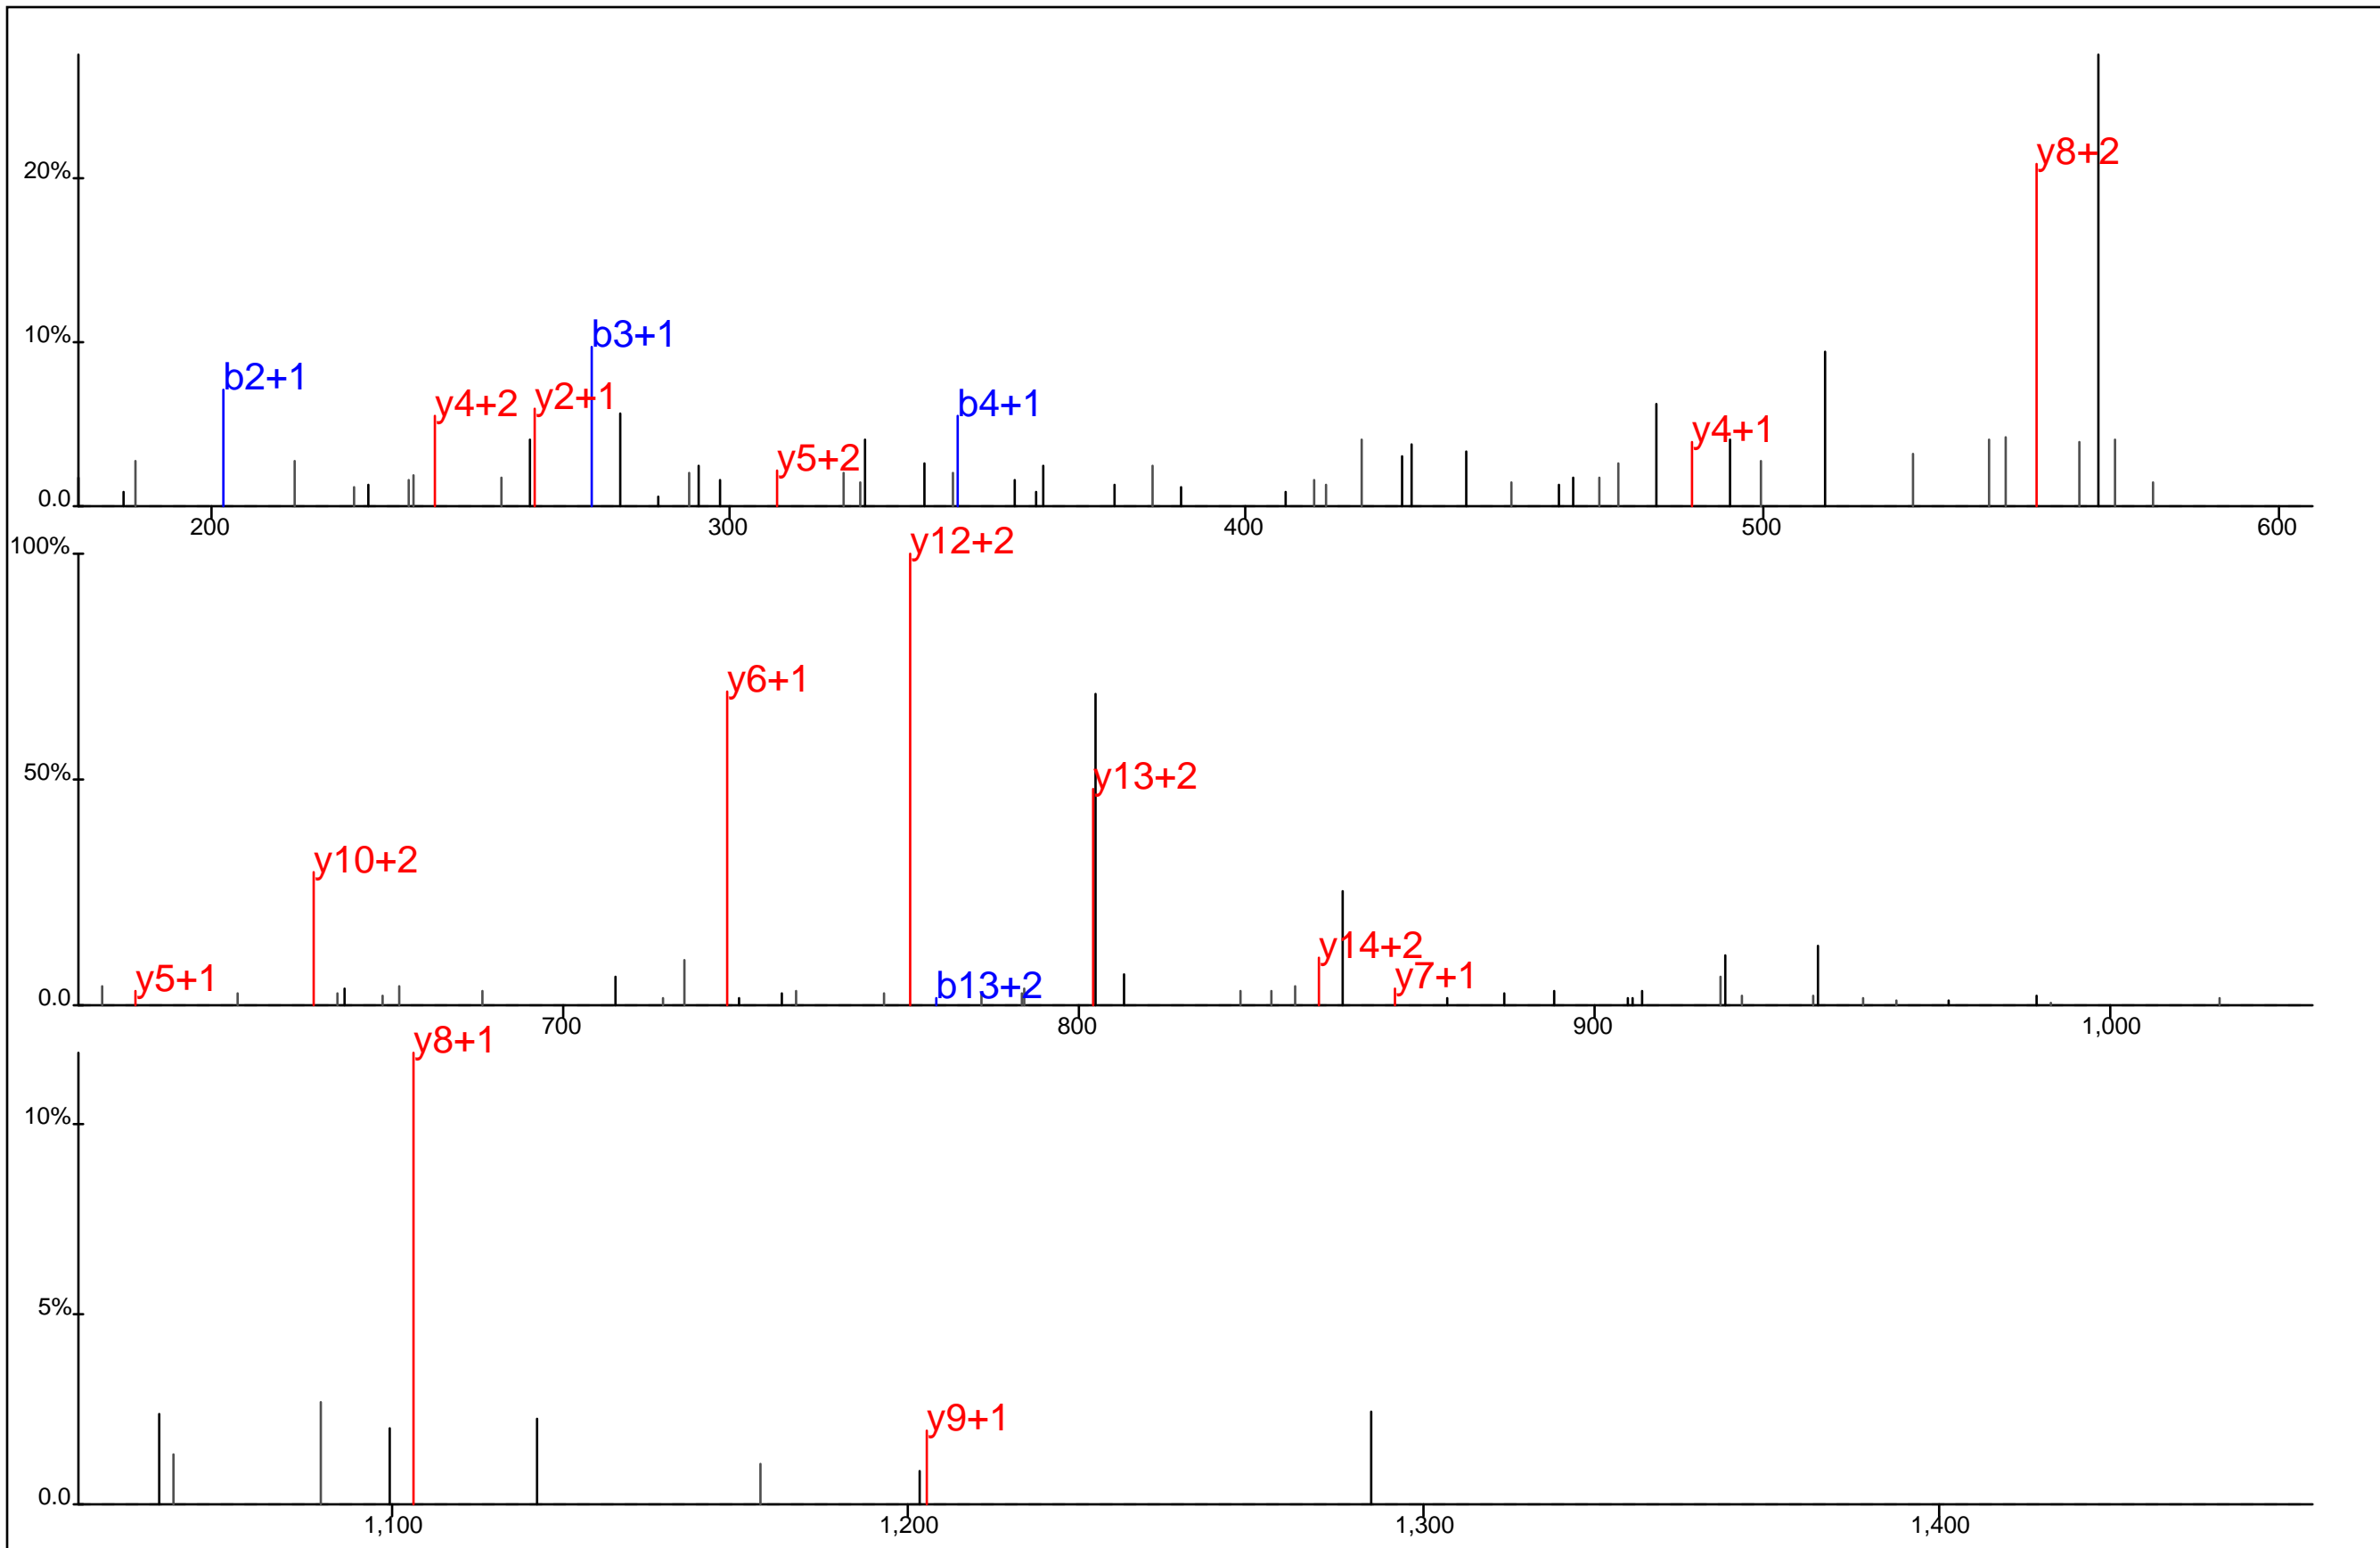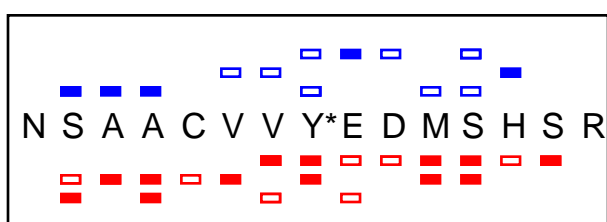

Protein Name: CD7  
 gi Accession: 0  
 Precursor Mass: 602.5708+3  
 Delta Mass: 0.217 ppm  
 XCorr: 28.09

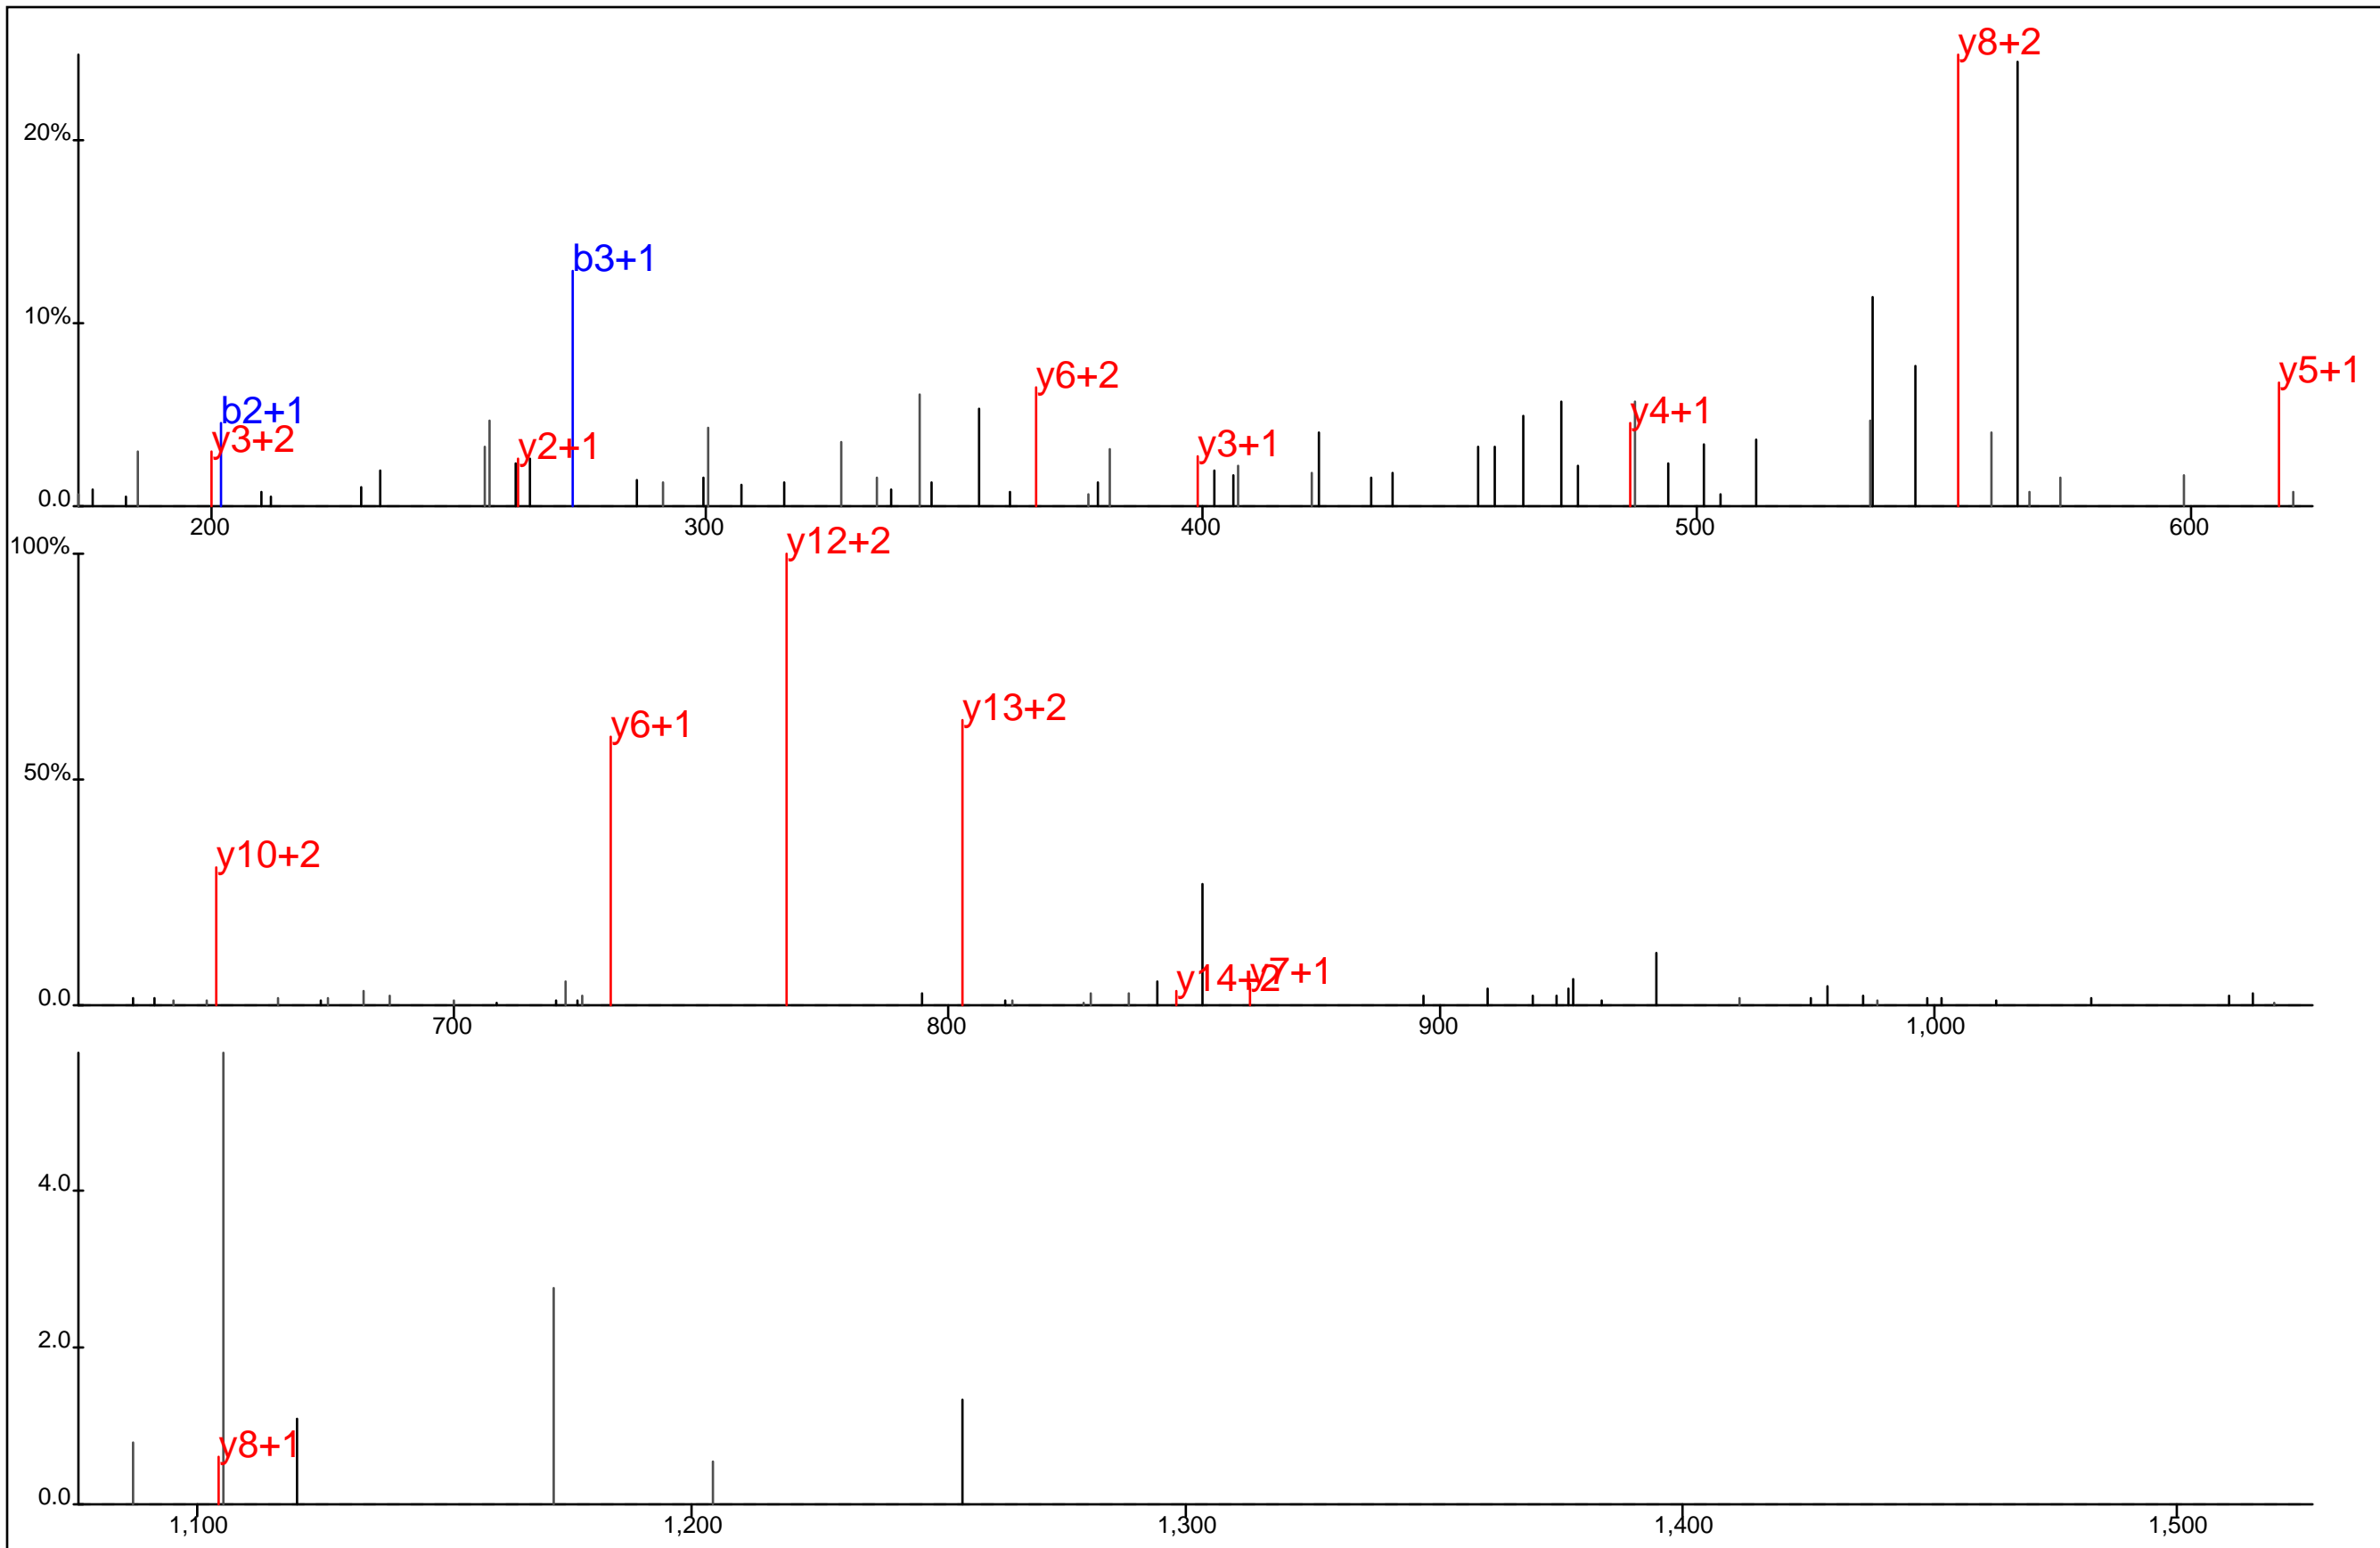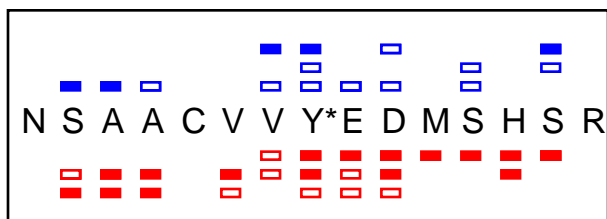

Protein Name: CD7  
 gi Accession: 0  
 Precursor Mass: 602.5709+3  
 Delta Mass: 0.014 ppm  
 XCorr: 25.88

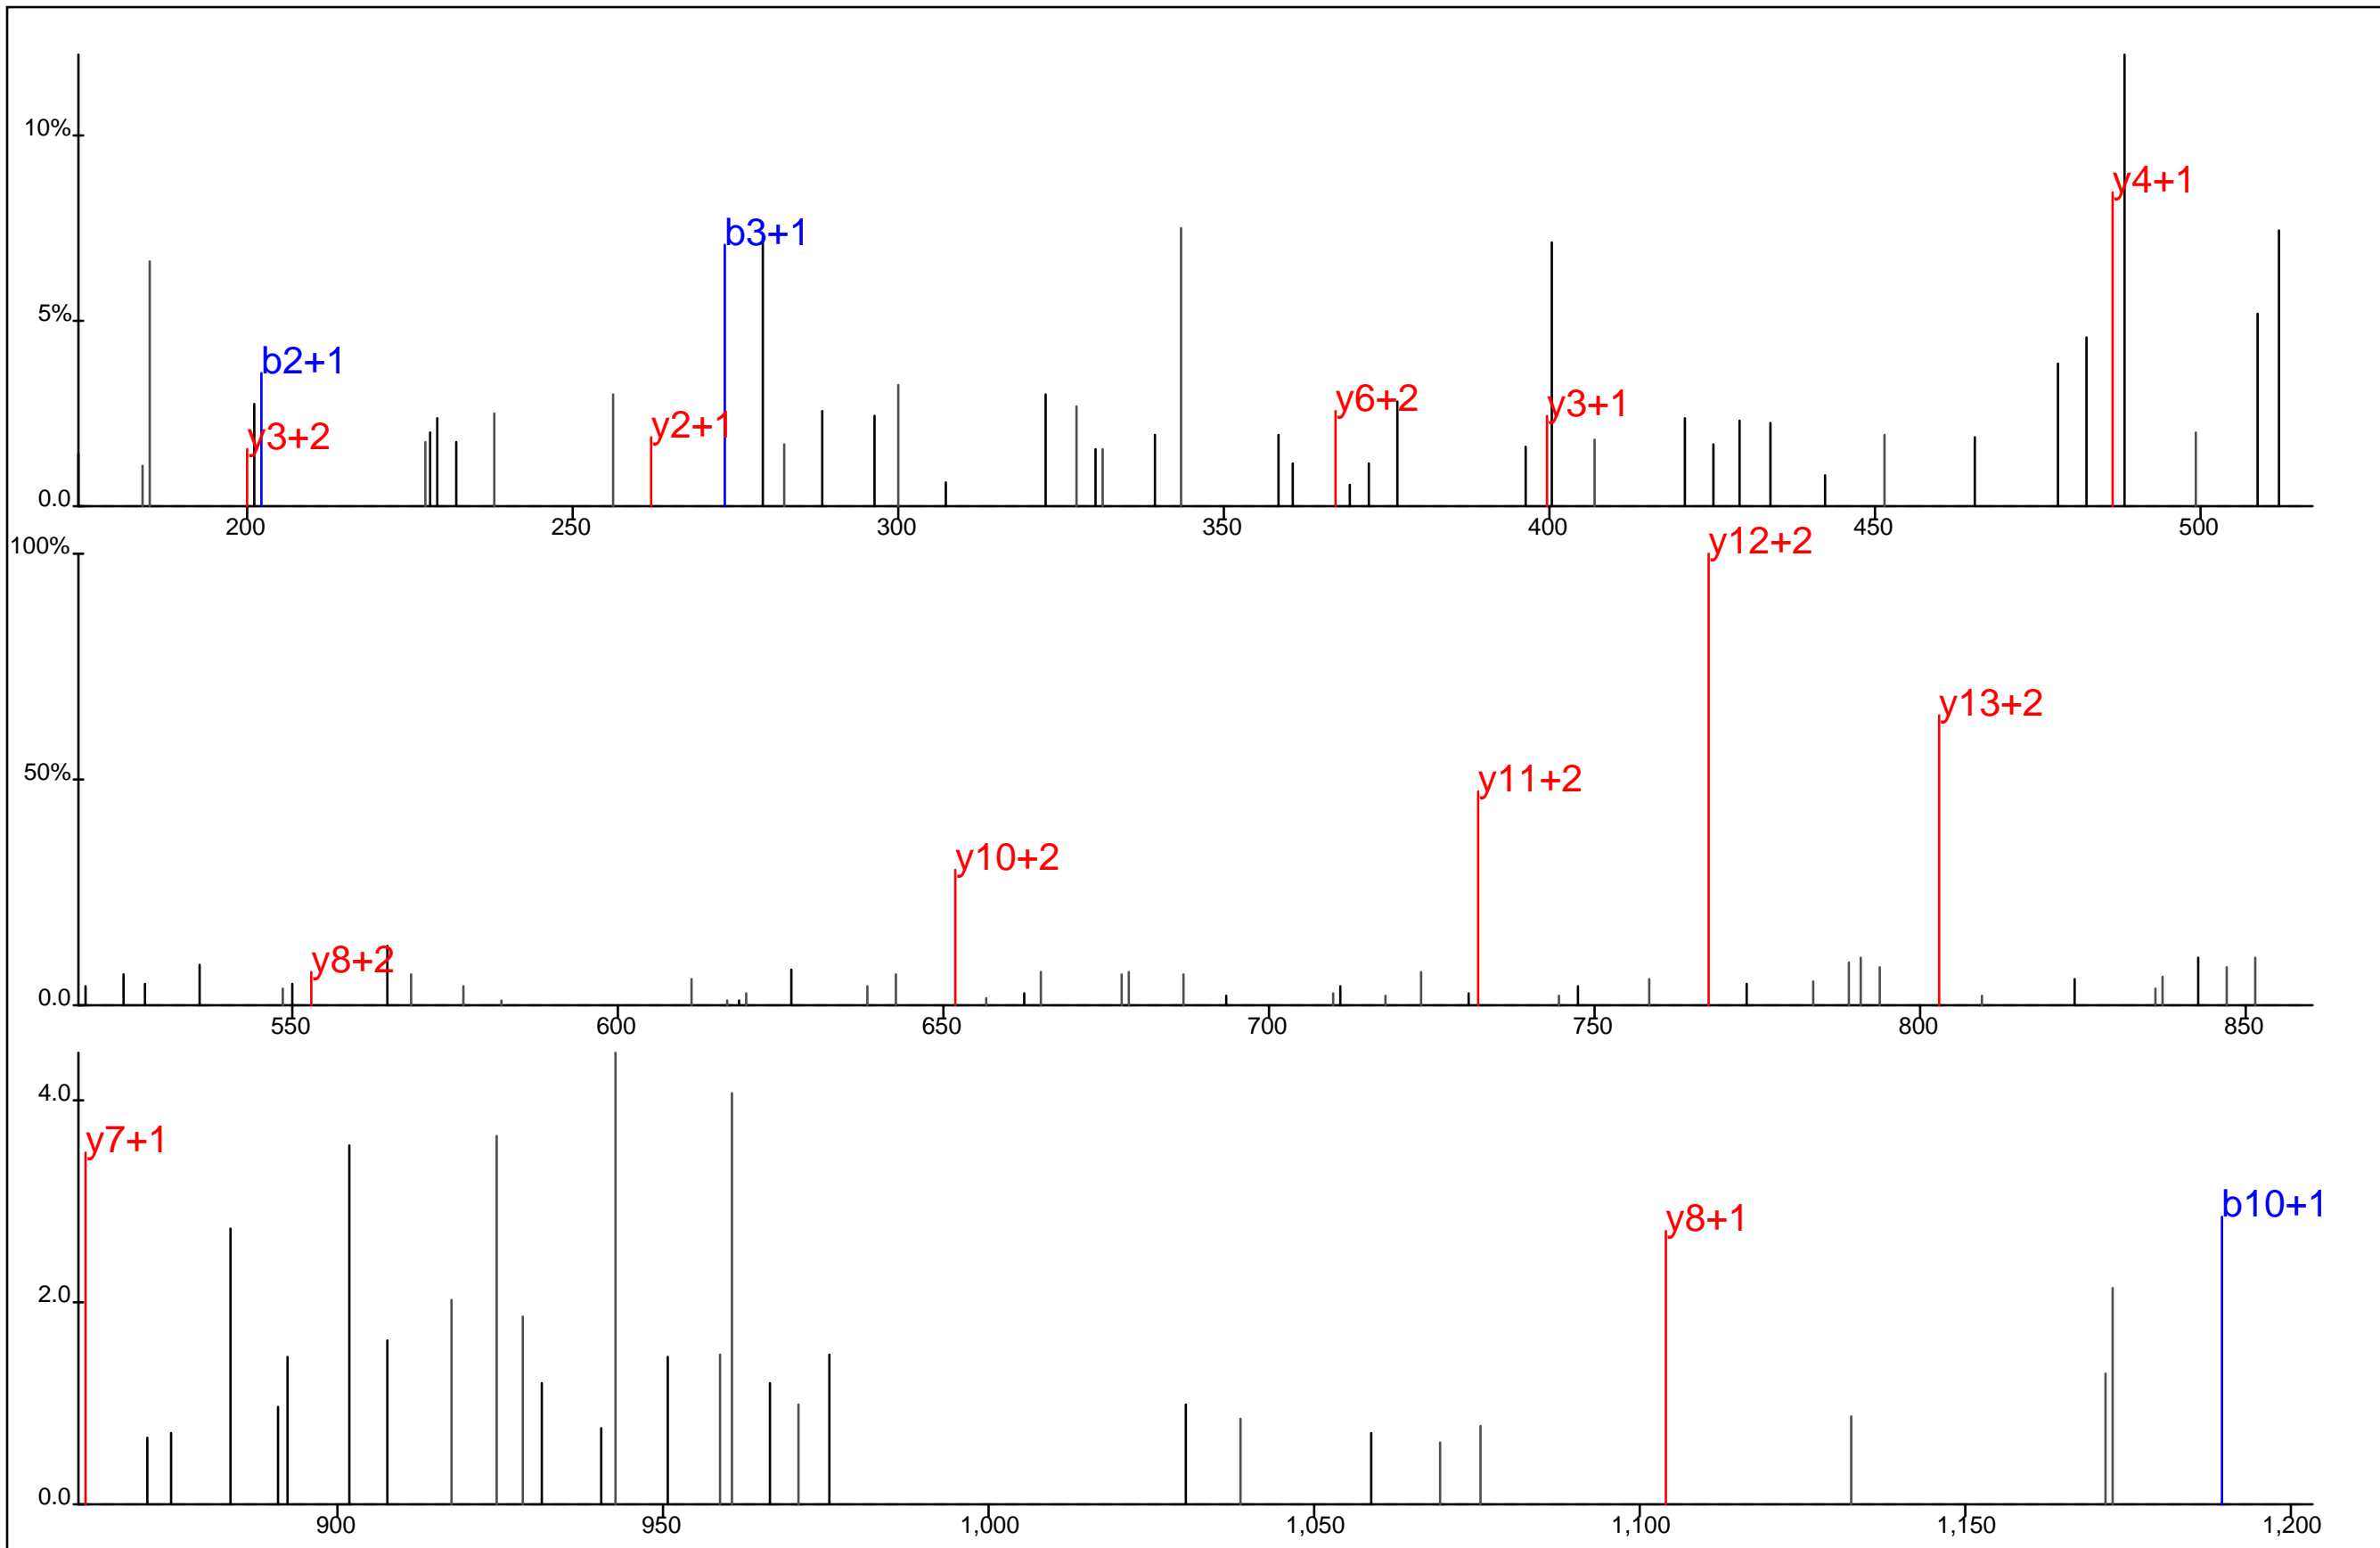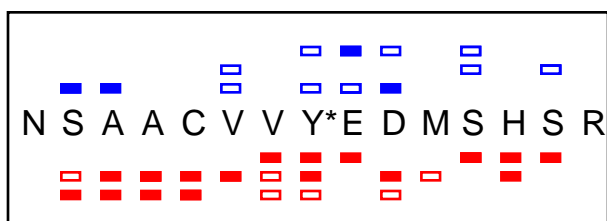

Protein Name: CD7  
 gi Accession: 0  
 Precursor Mass: 602.5715+3  
 Delta Mass: 0.898 ppm  
 XCorr: 20.72



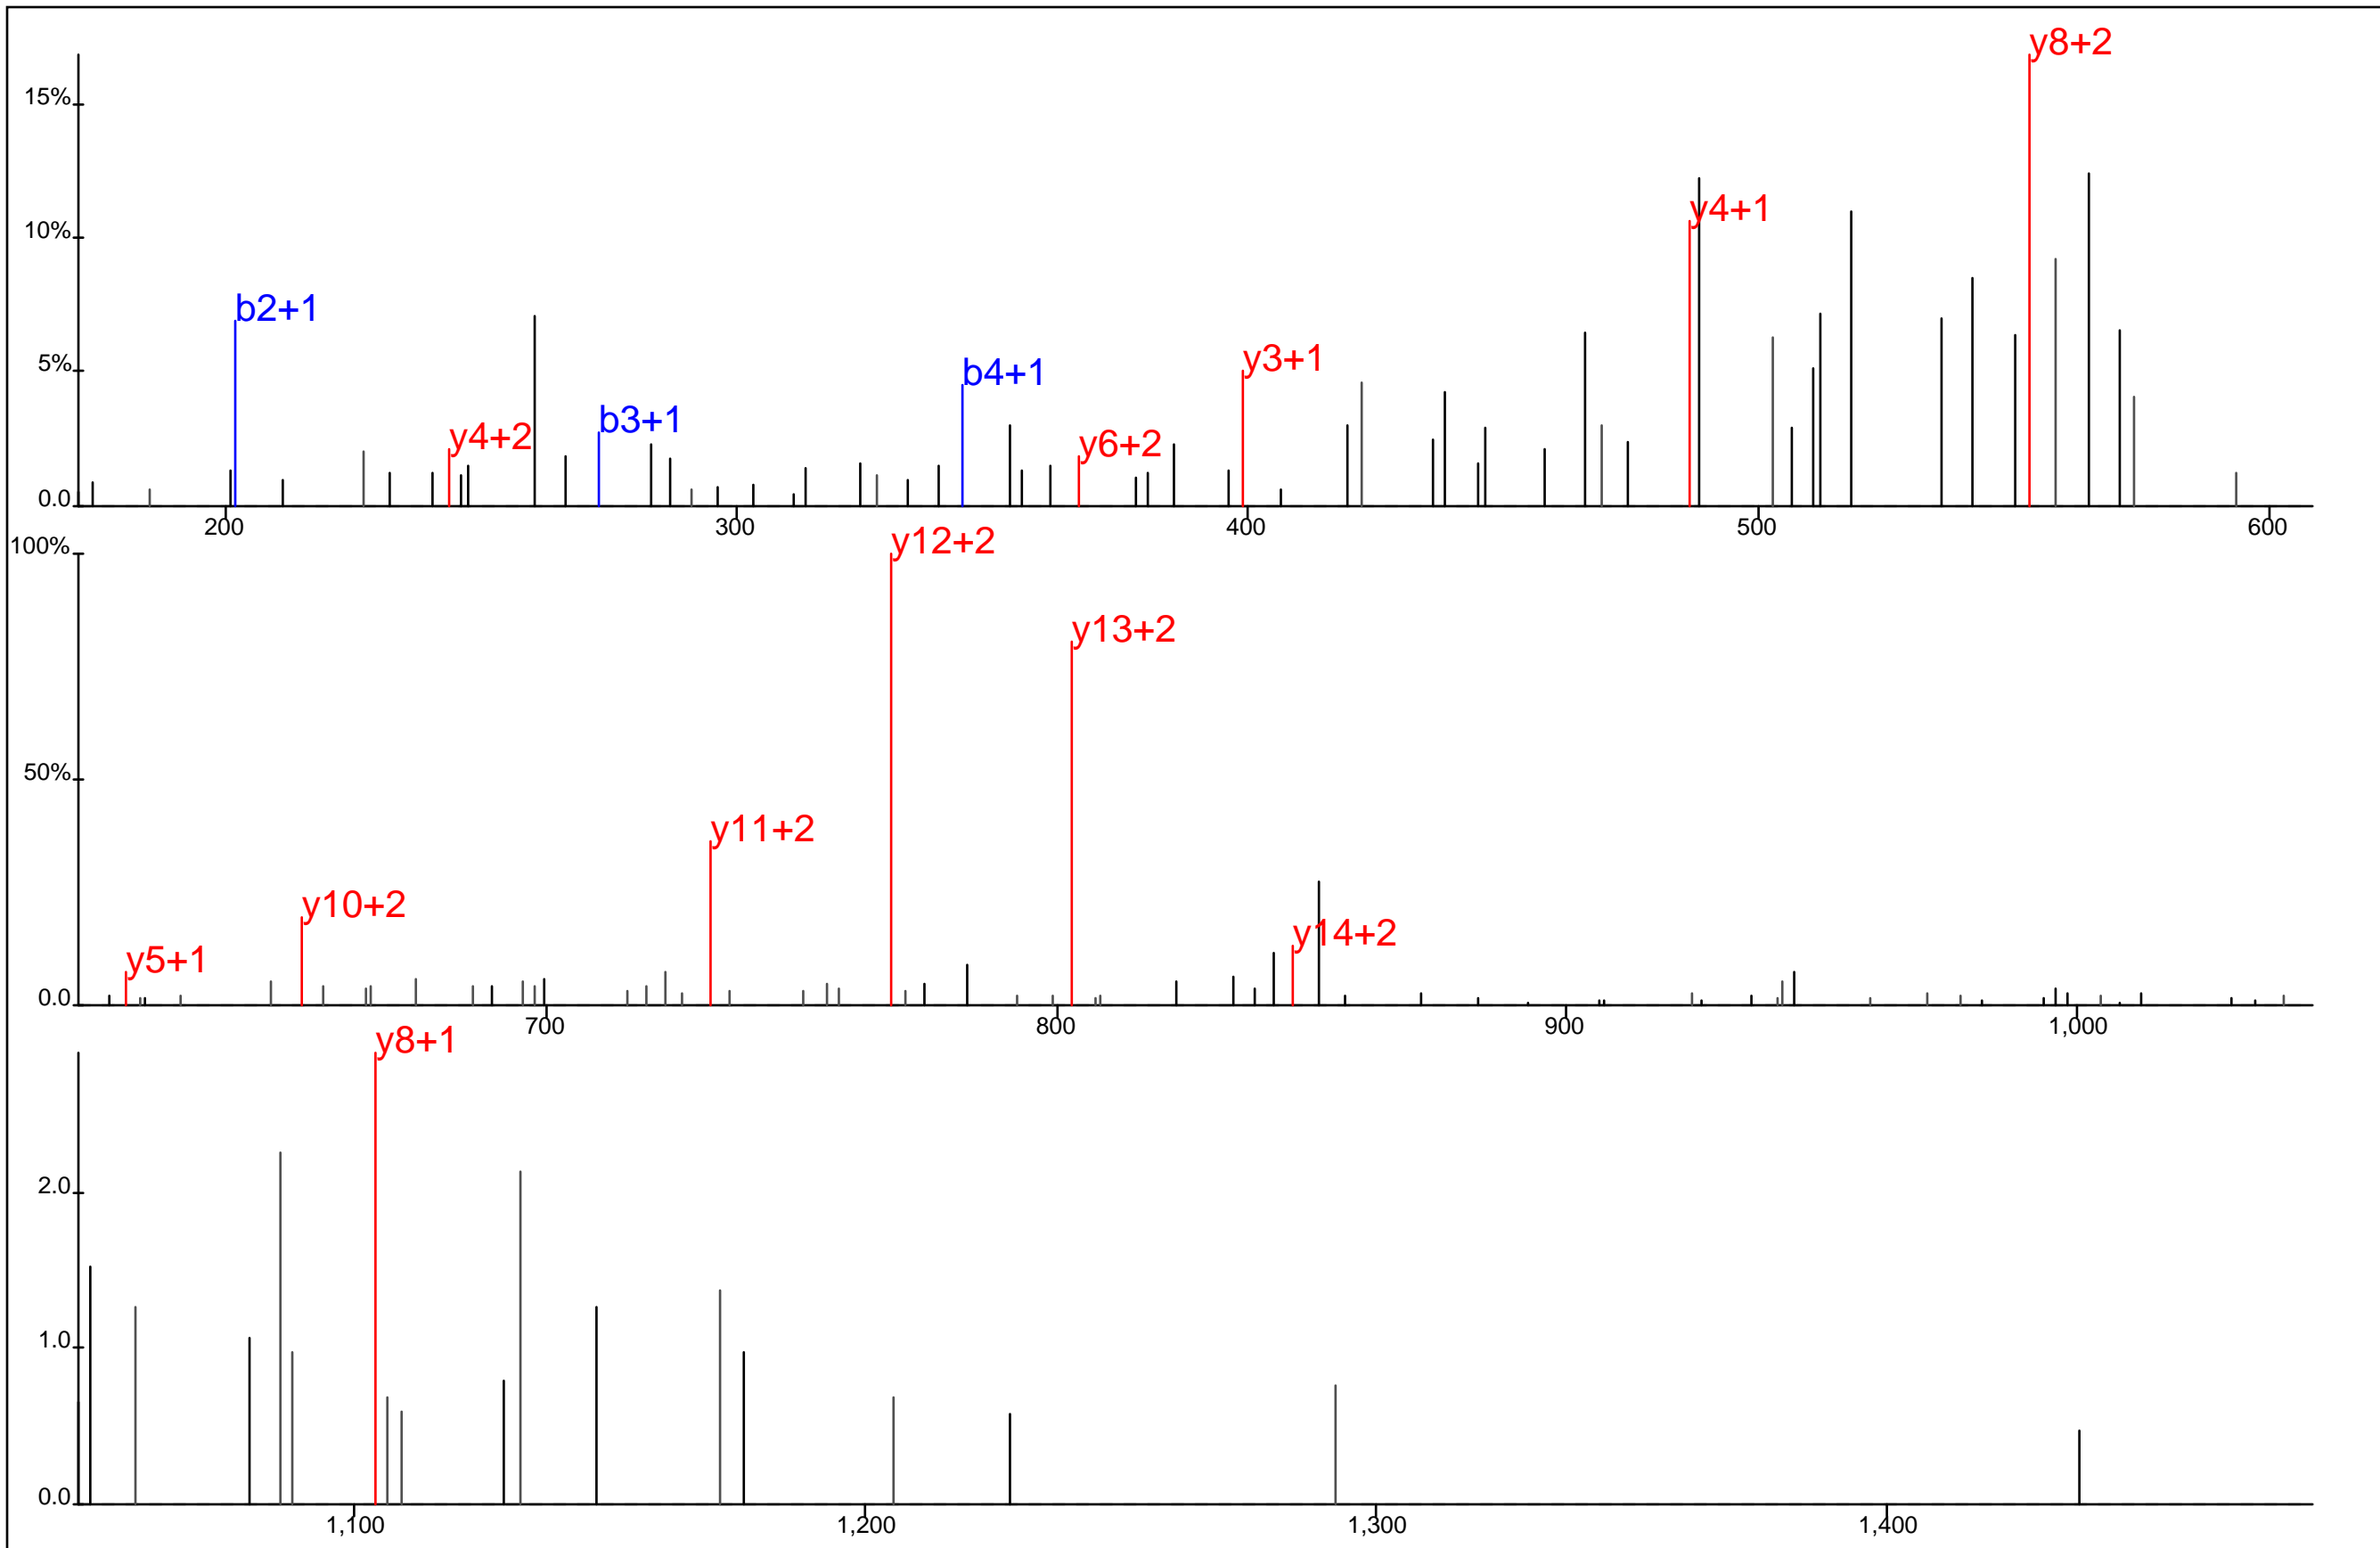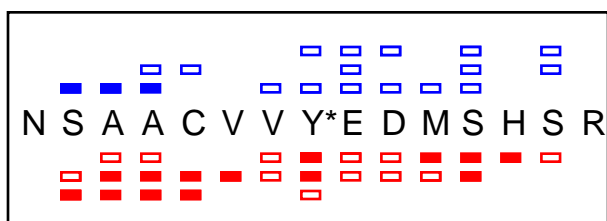

Protein Name: CD7  
 gi Accession: 0  
 Precursor Mass: 602.5706+3  
 Delta Mass: 0.622 ppm  
 XCorr: 30.4

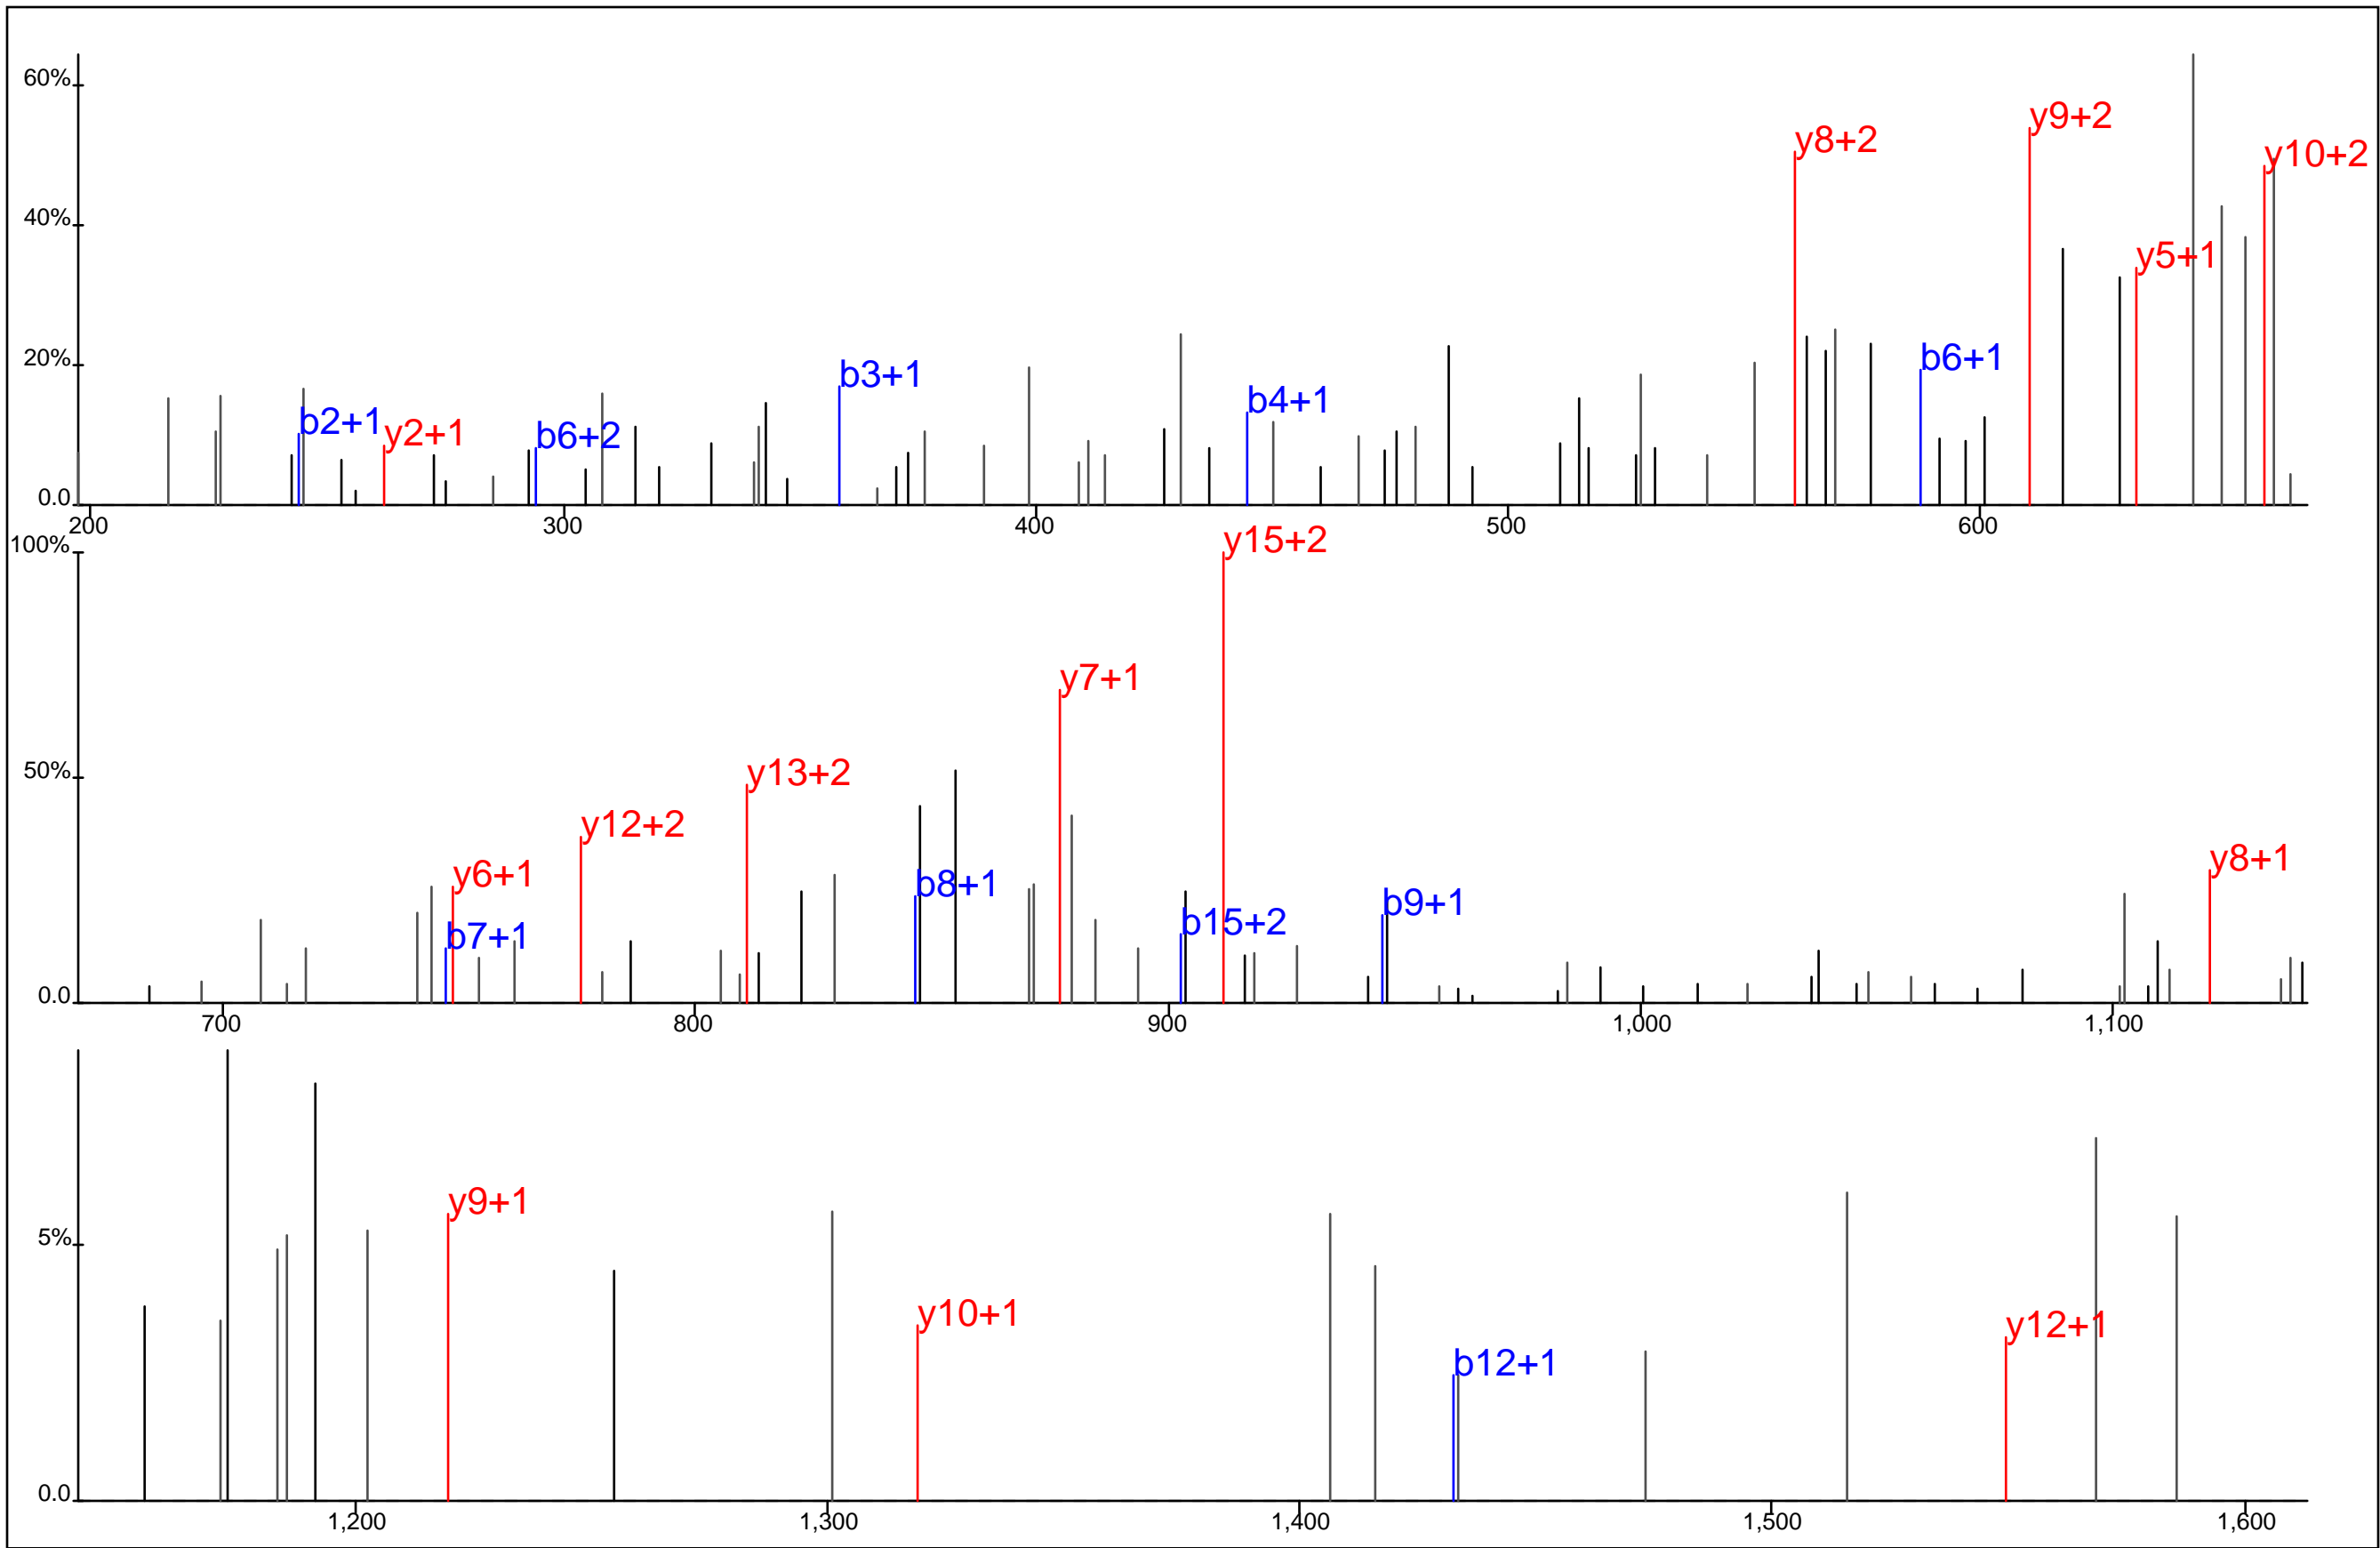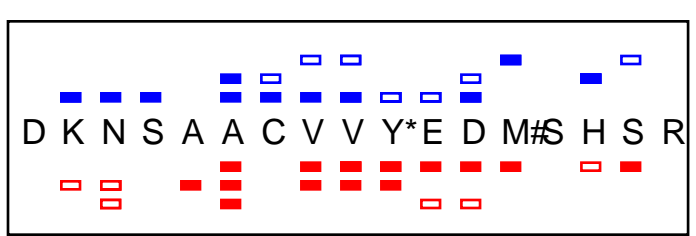

Protein Name: CD7  
 gi Accession: 0  
 Precursor Mass: 688.9438+3  
 Delta Mass: 0.935 ppm  
 XCorr: 35.15

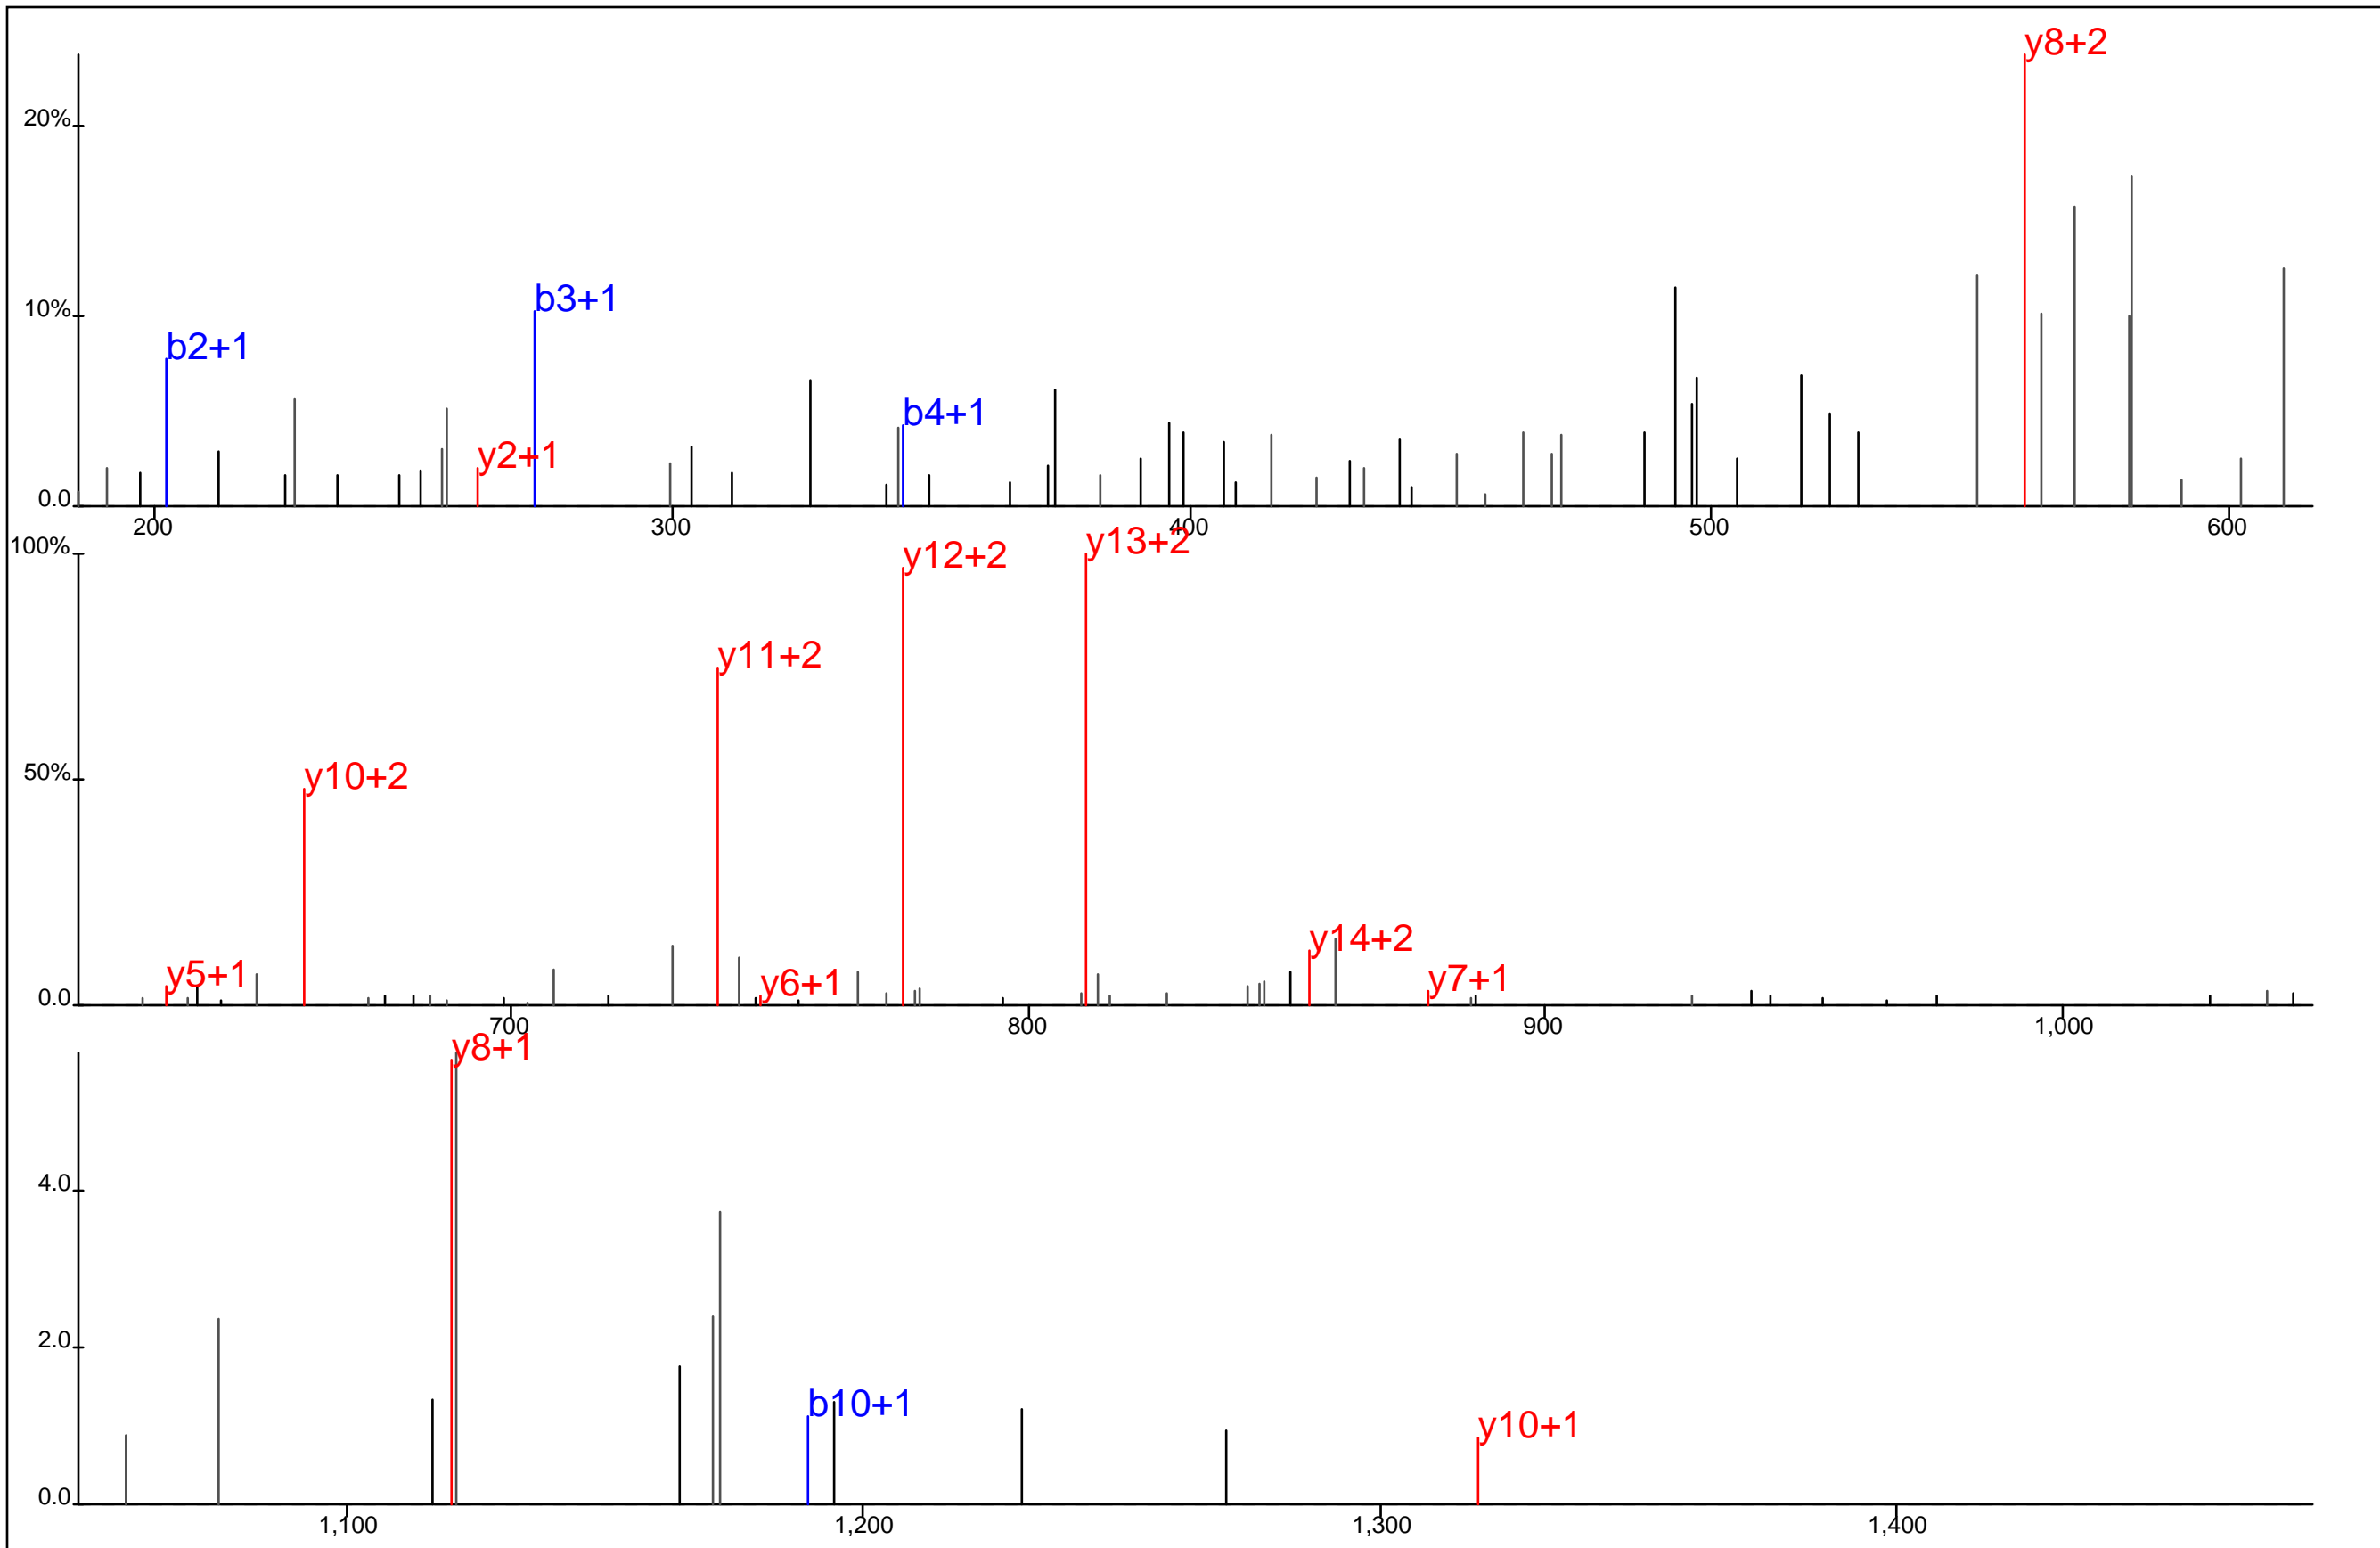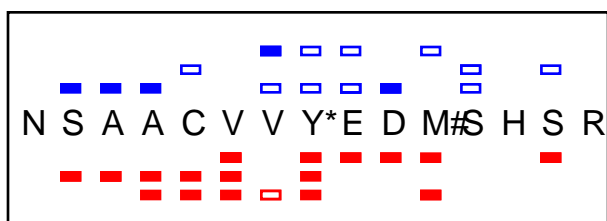

Protein Name: CD7  
 gi Accession: 0  
 Precursor Mass: 607.9045+3  
 Delta Mass: 3.143 ppm  
 XCorr: 26.7

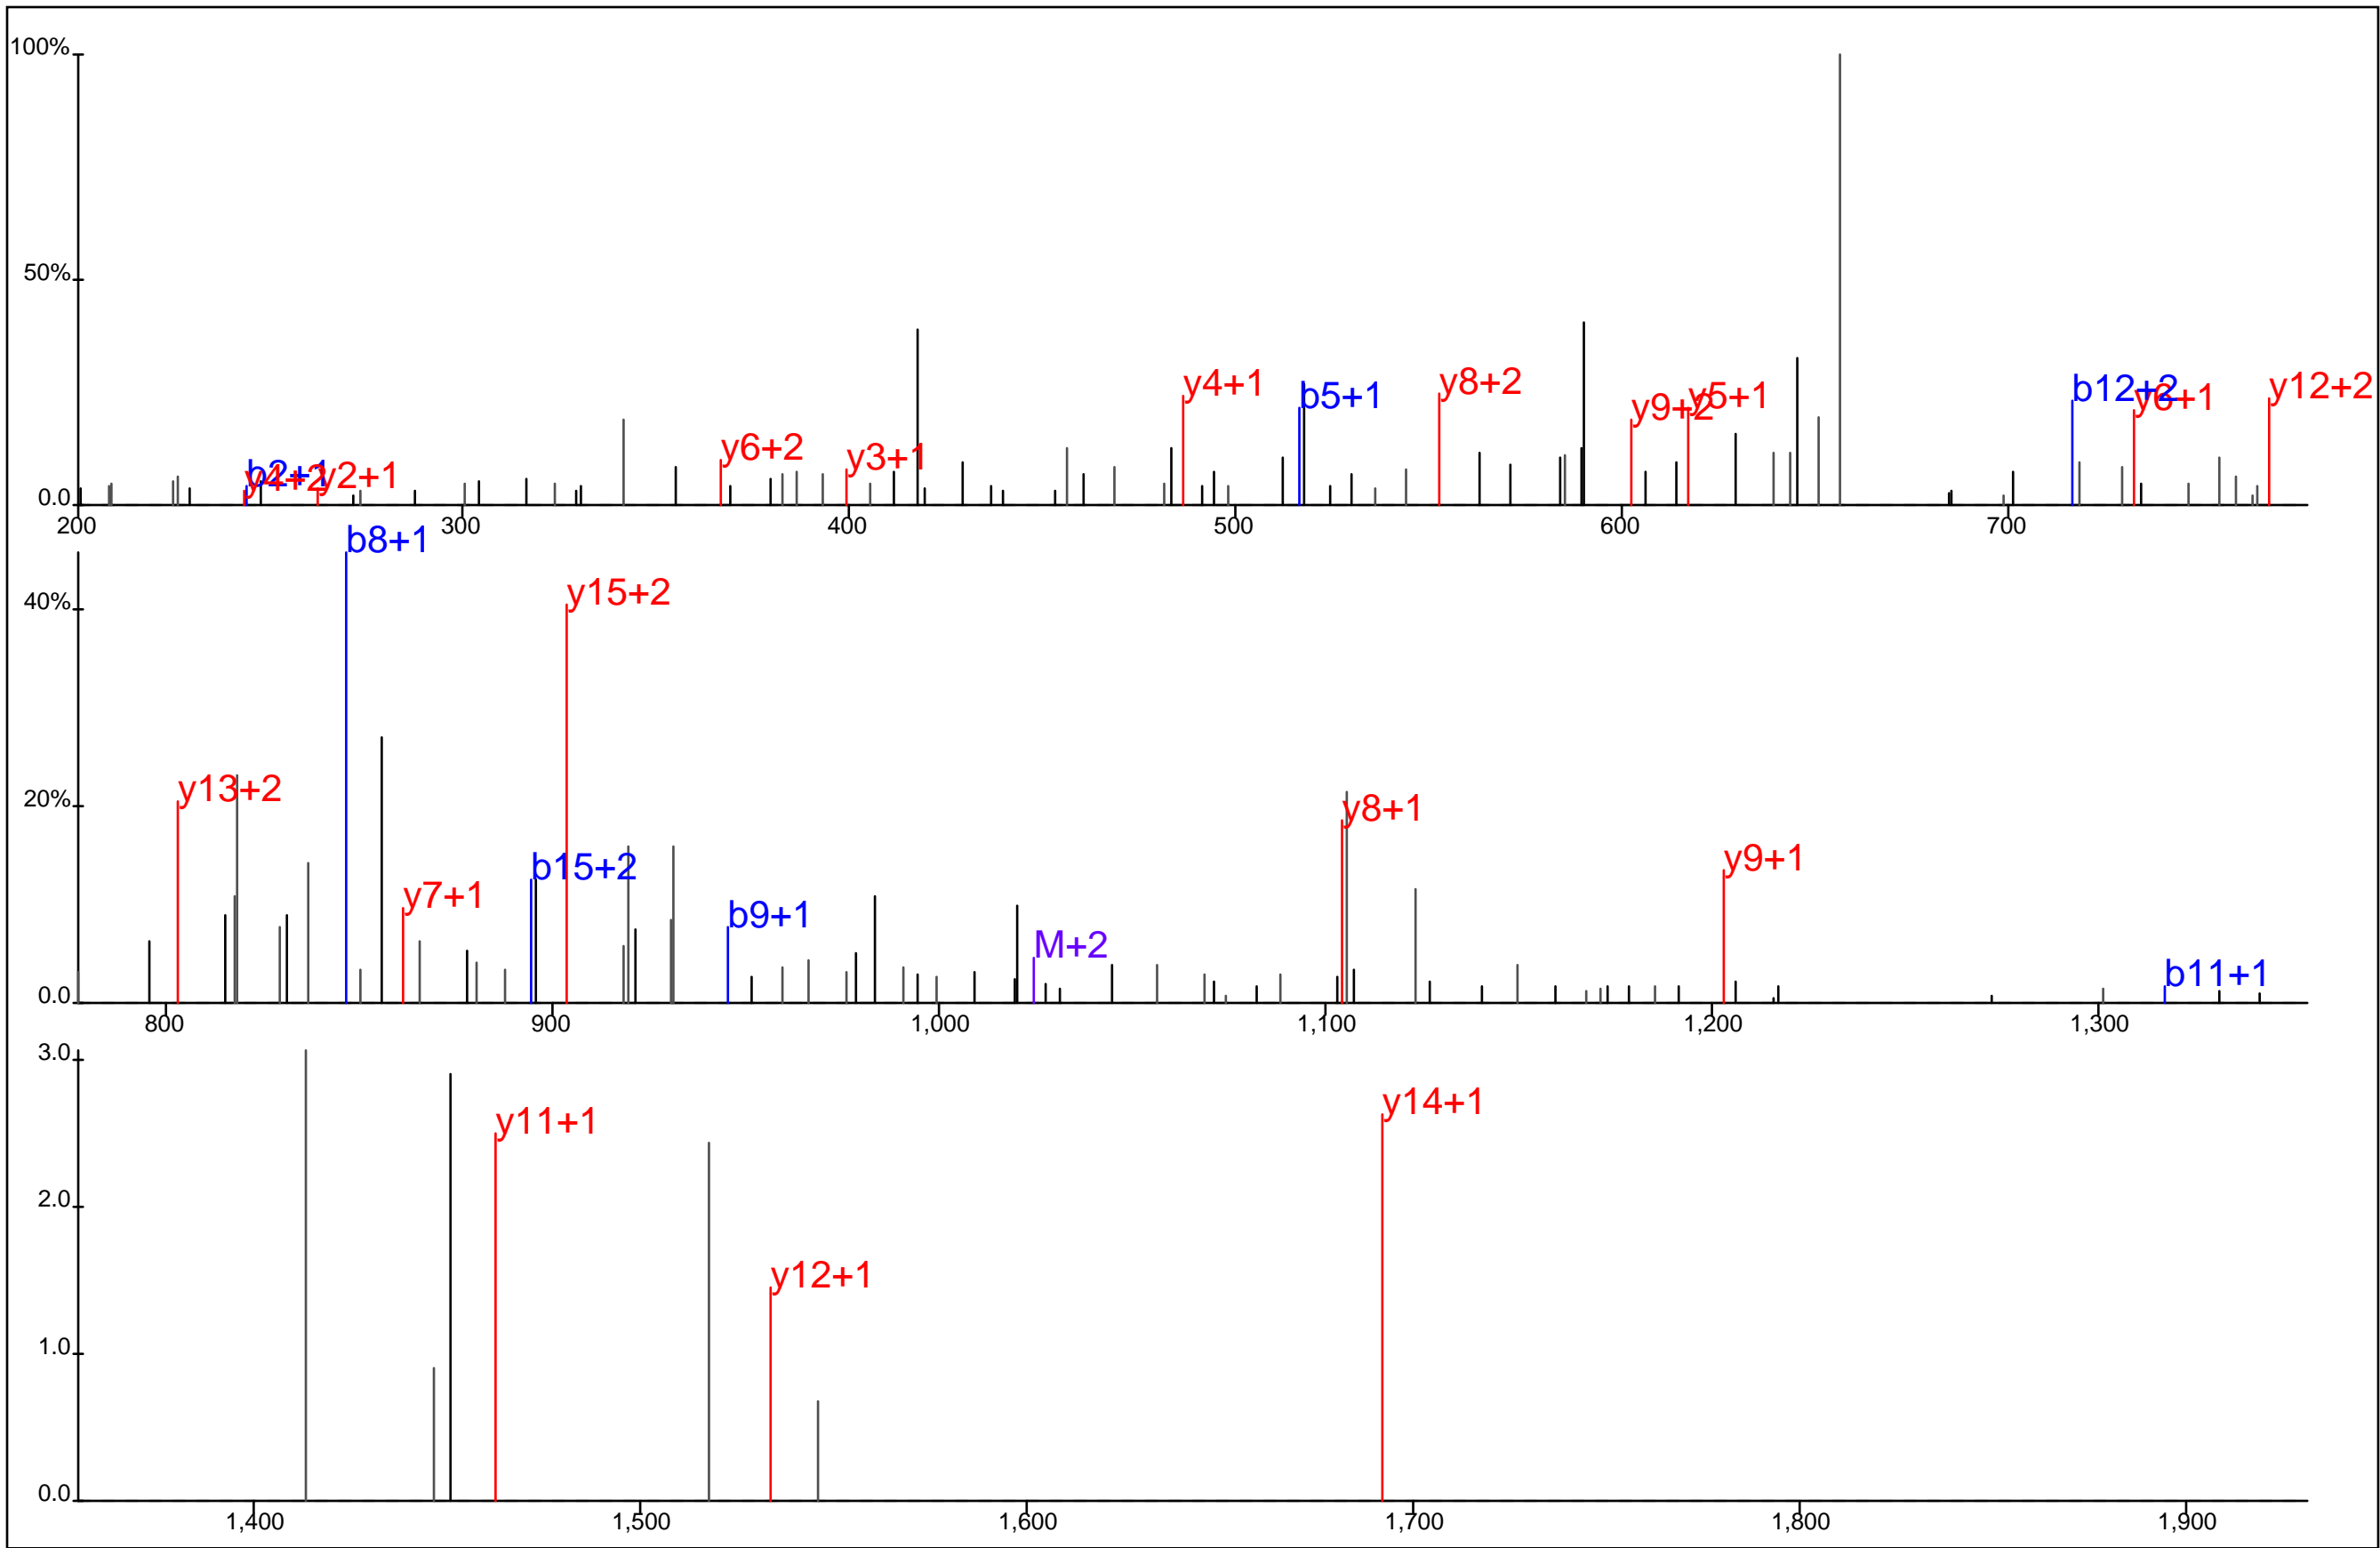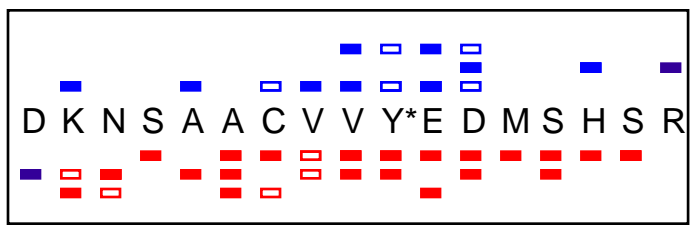

Protein Name: CD7  
 gi Accession: 0  
 Precursor Mass: 683.6118+3  
 Delta Mass: 0.368 ppm  
 XCorr: 32.44

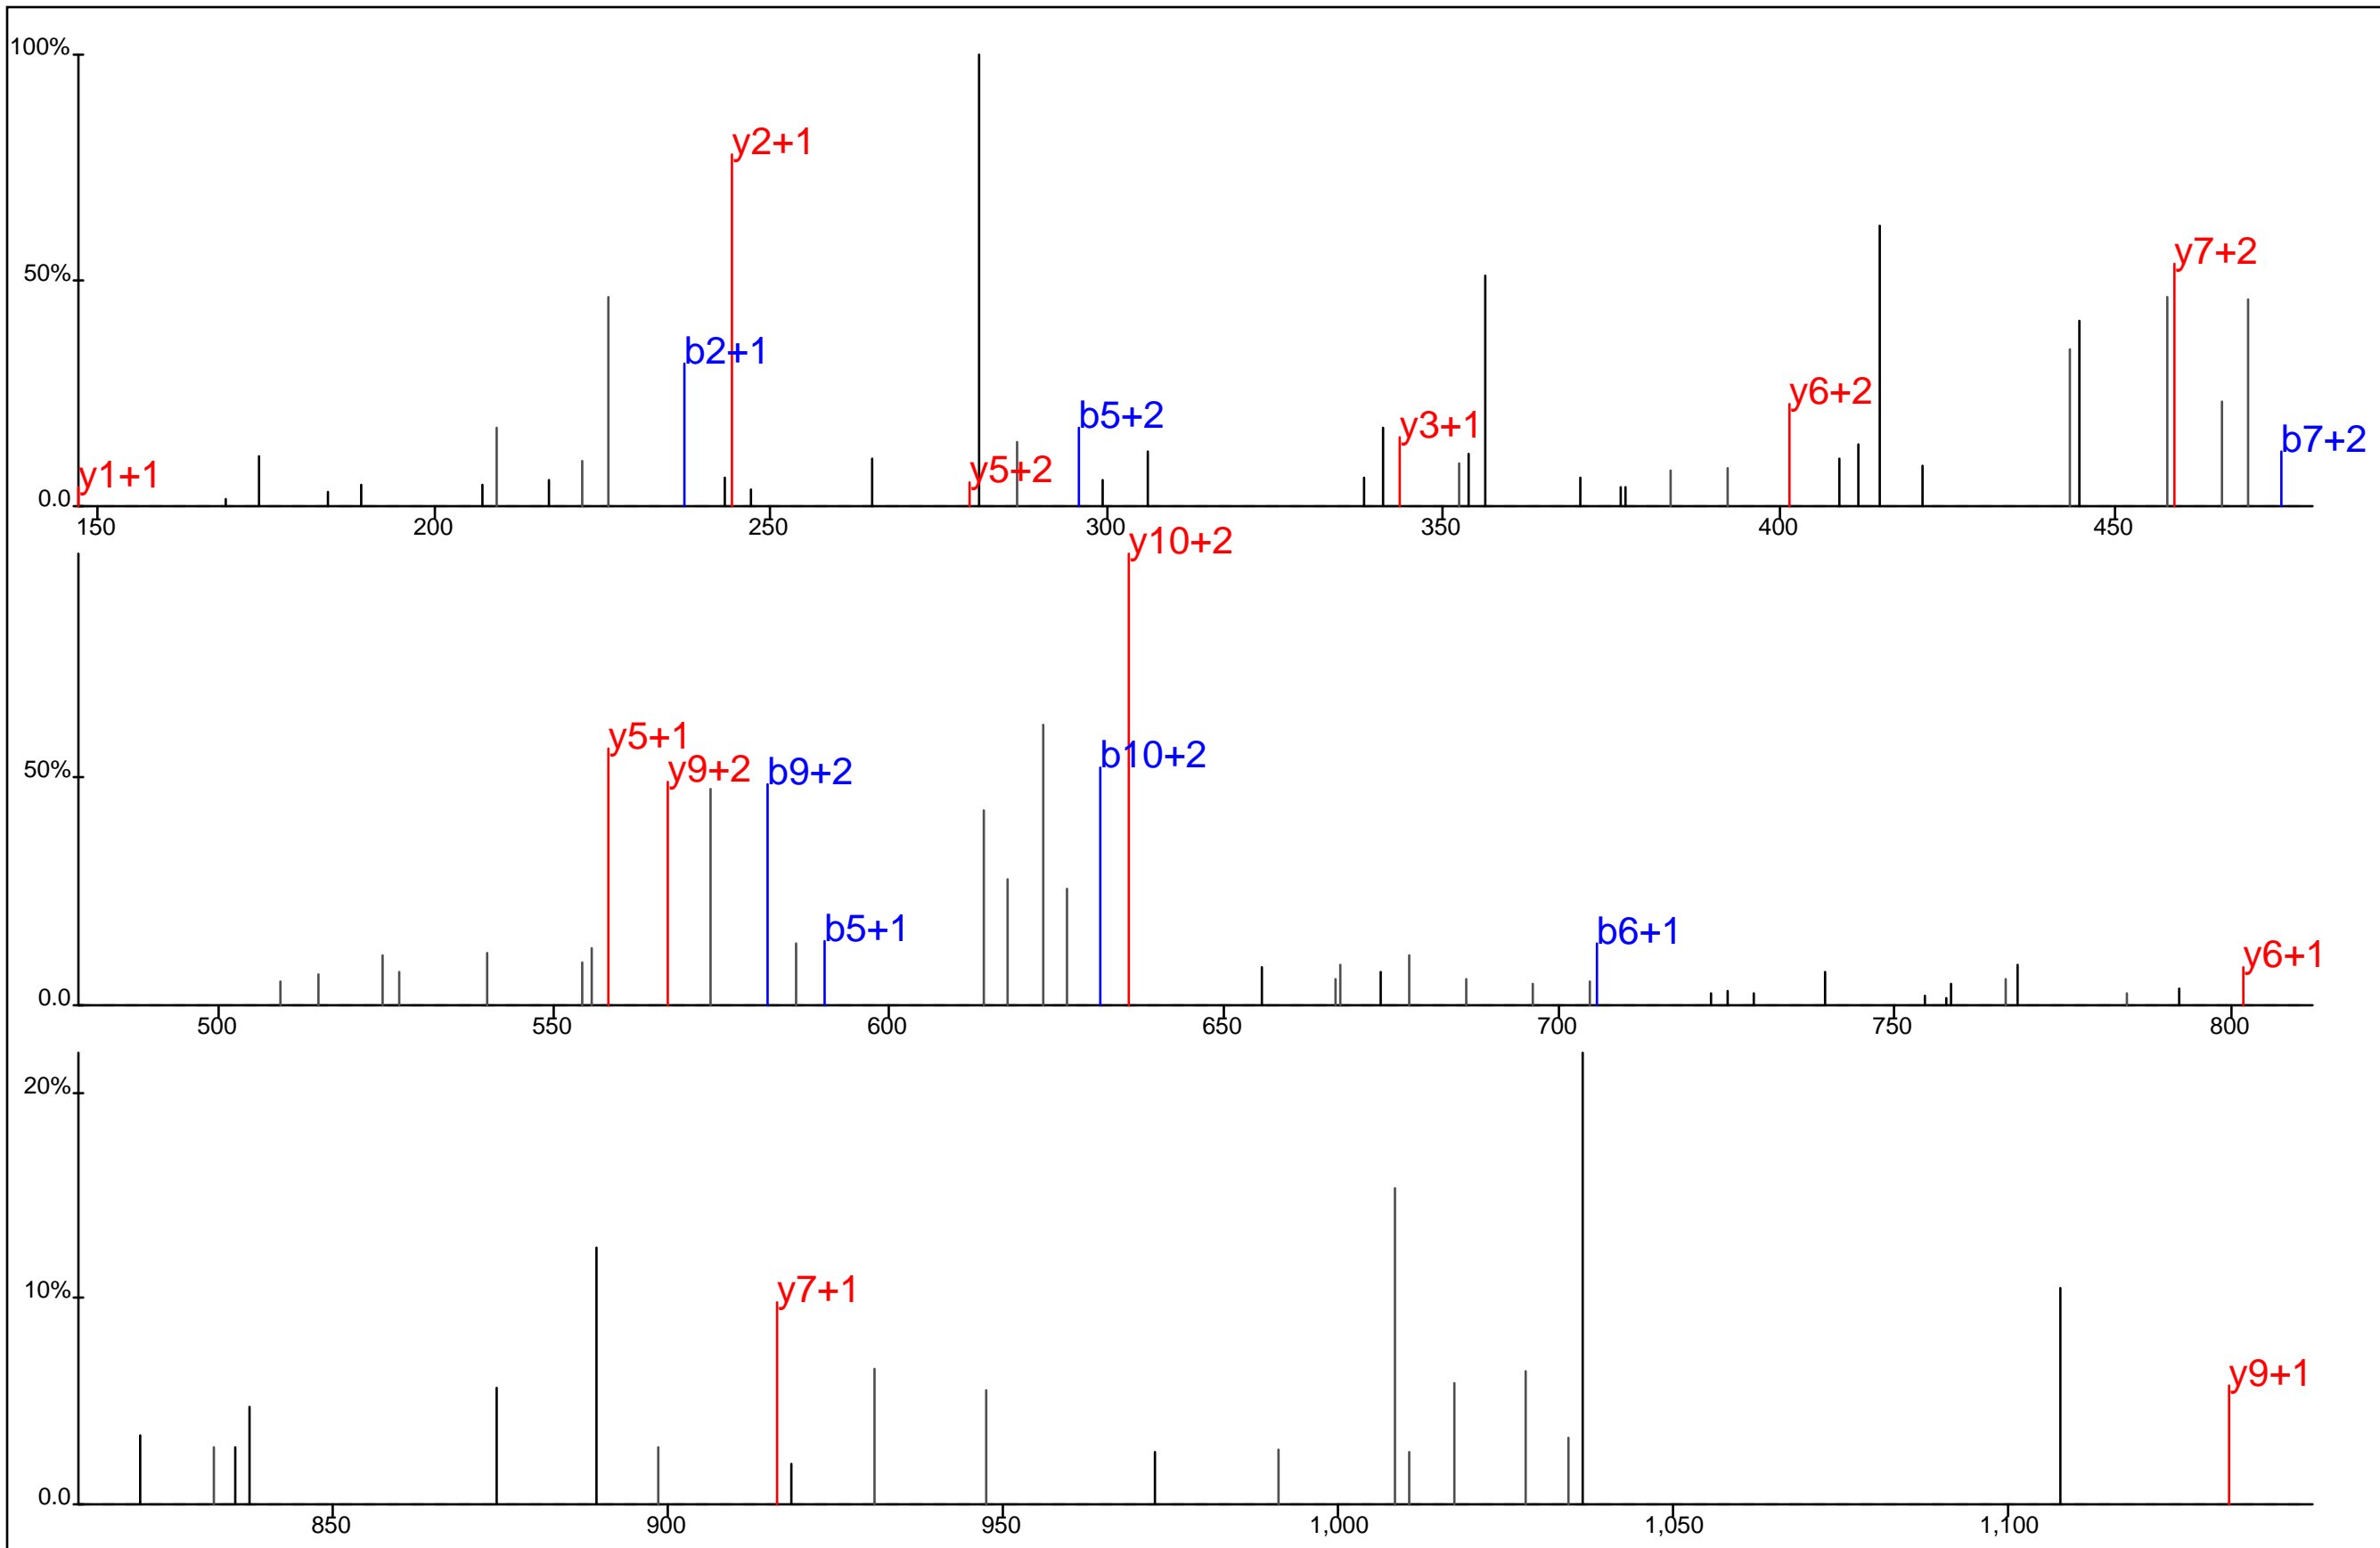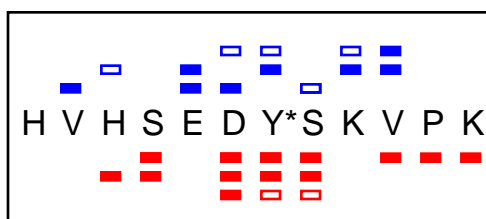

Protein Name: CD82 antigen  
 gi Accession: 0  
 Precursor Mass: 502.5639+3  
 Delta Mass: 0.900 ppm  
 XCorr: 22.66

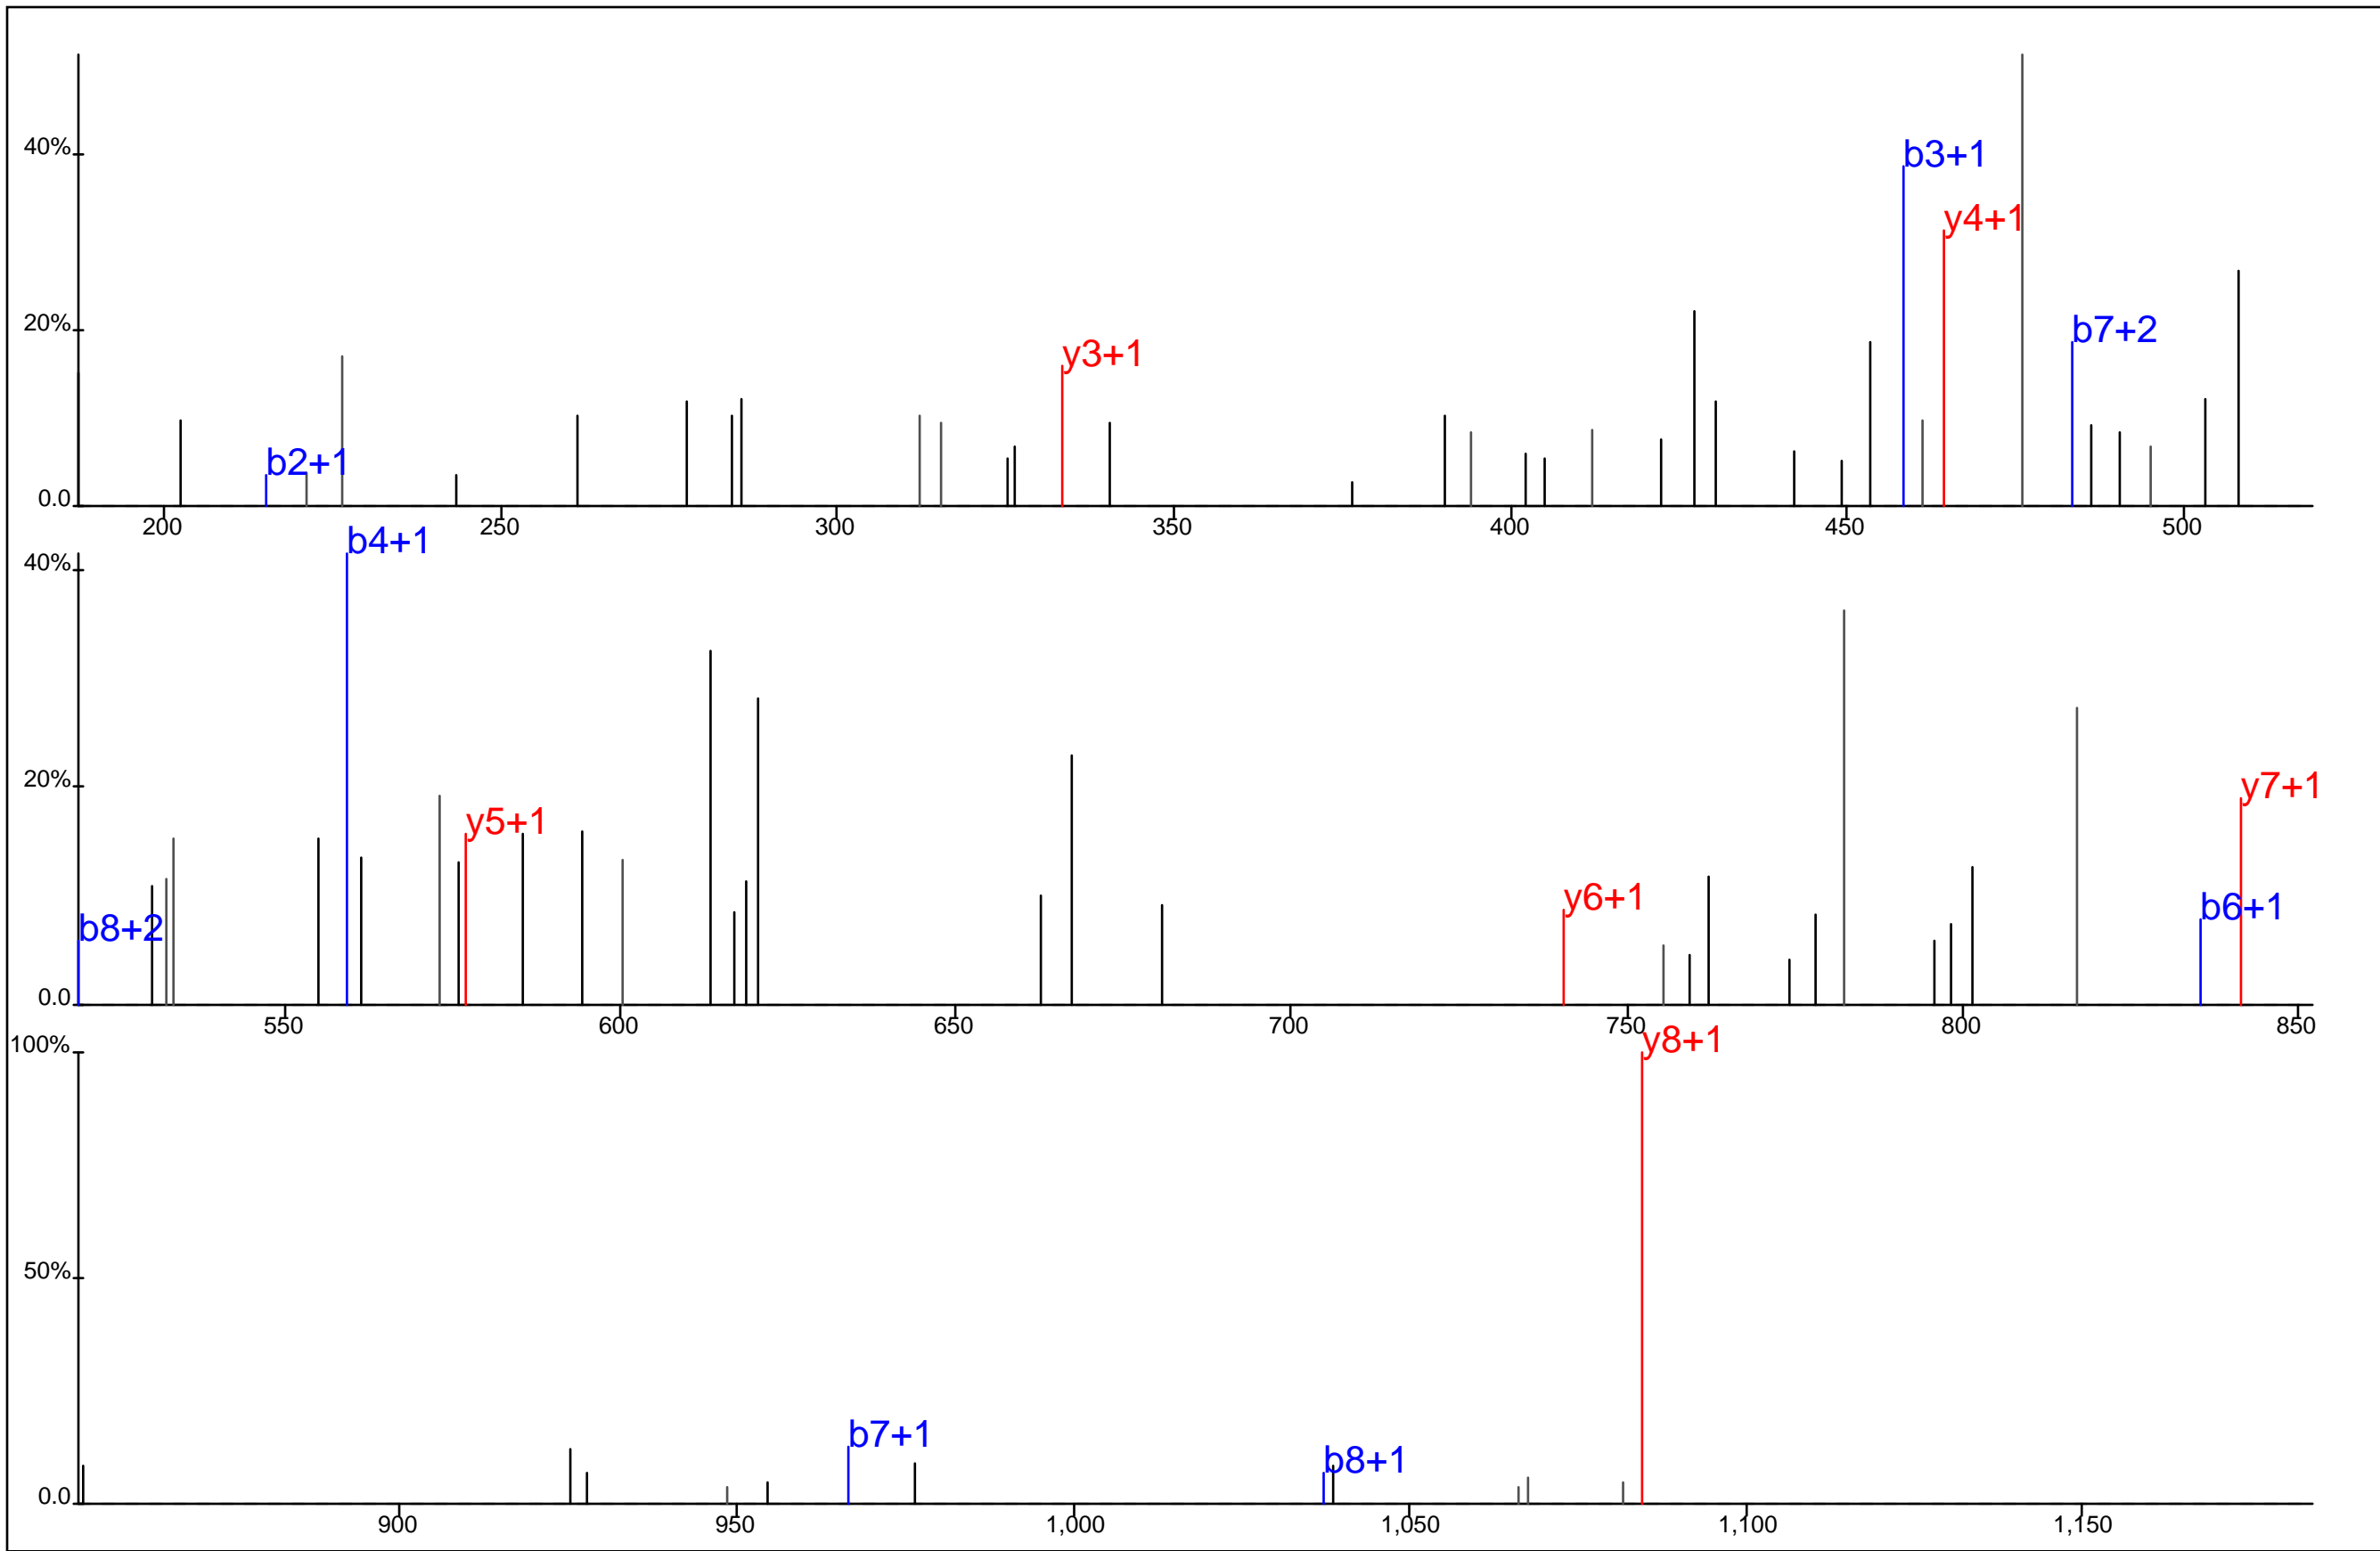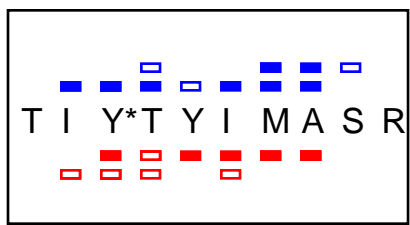

Protein Name: CD84  
 gi Accession: 0  
 Precursor Mass: 649.7968+2  
 Delta Mass: 0.930 ppm  
 XCorr: 20.01

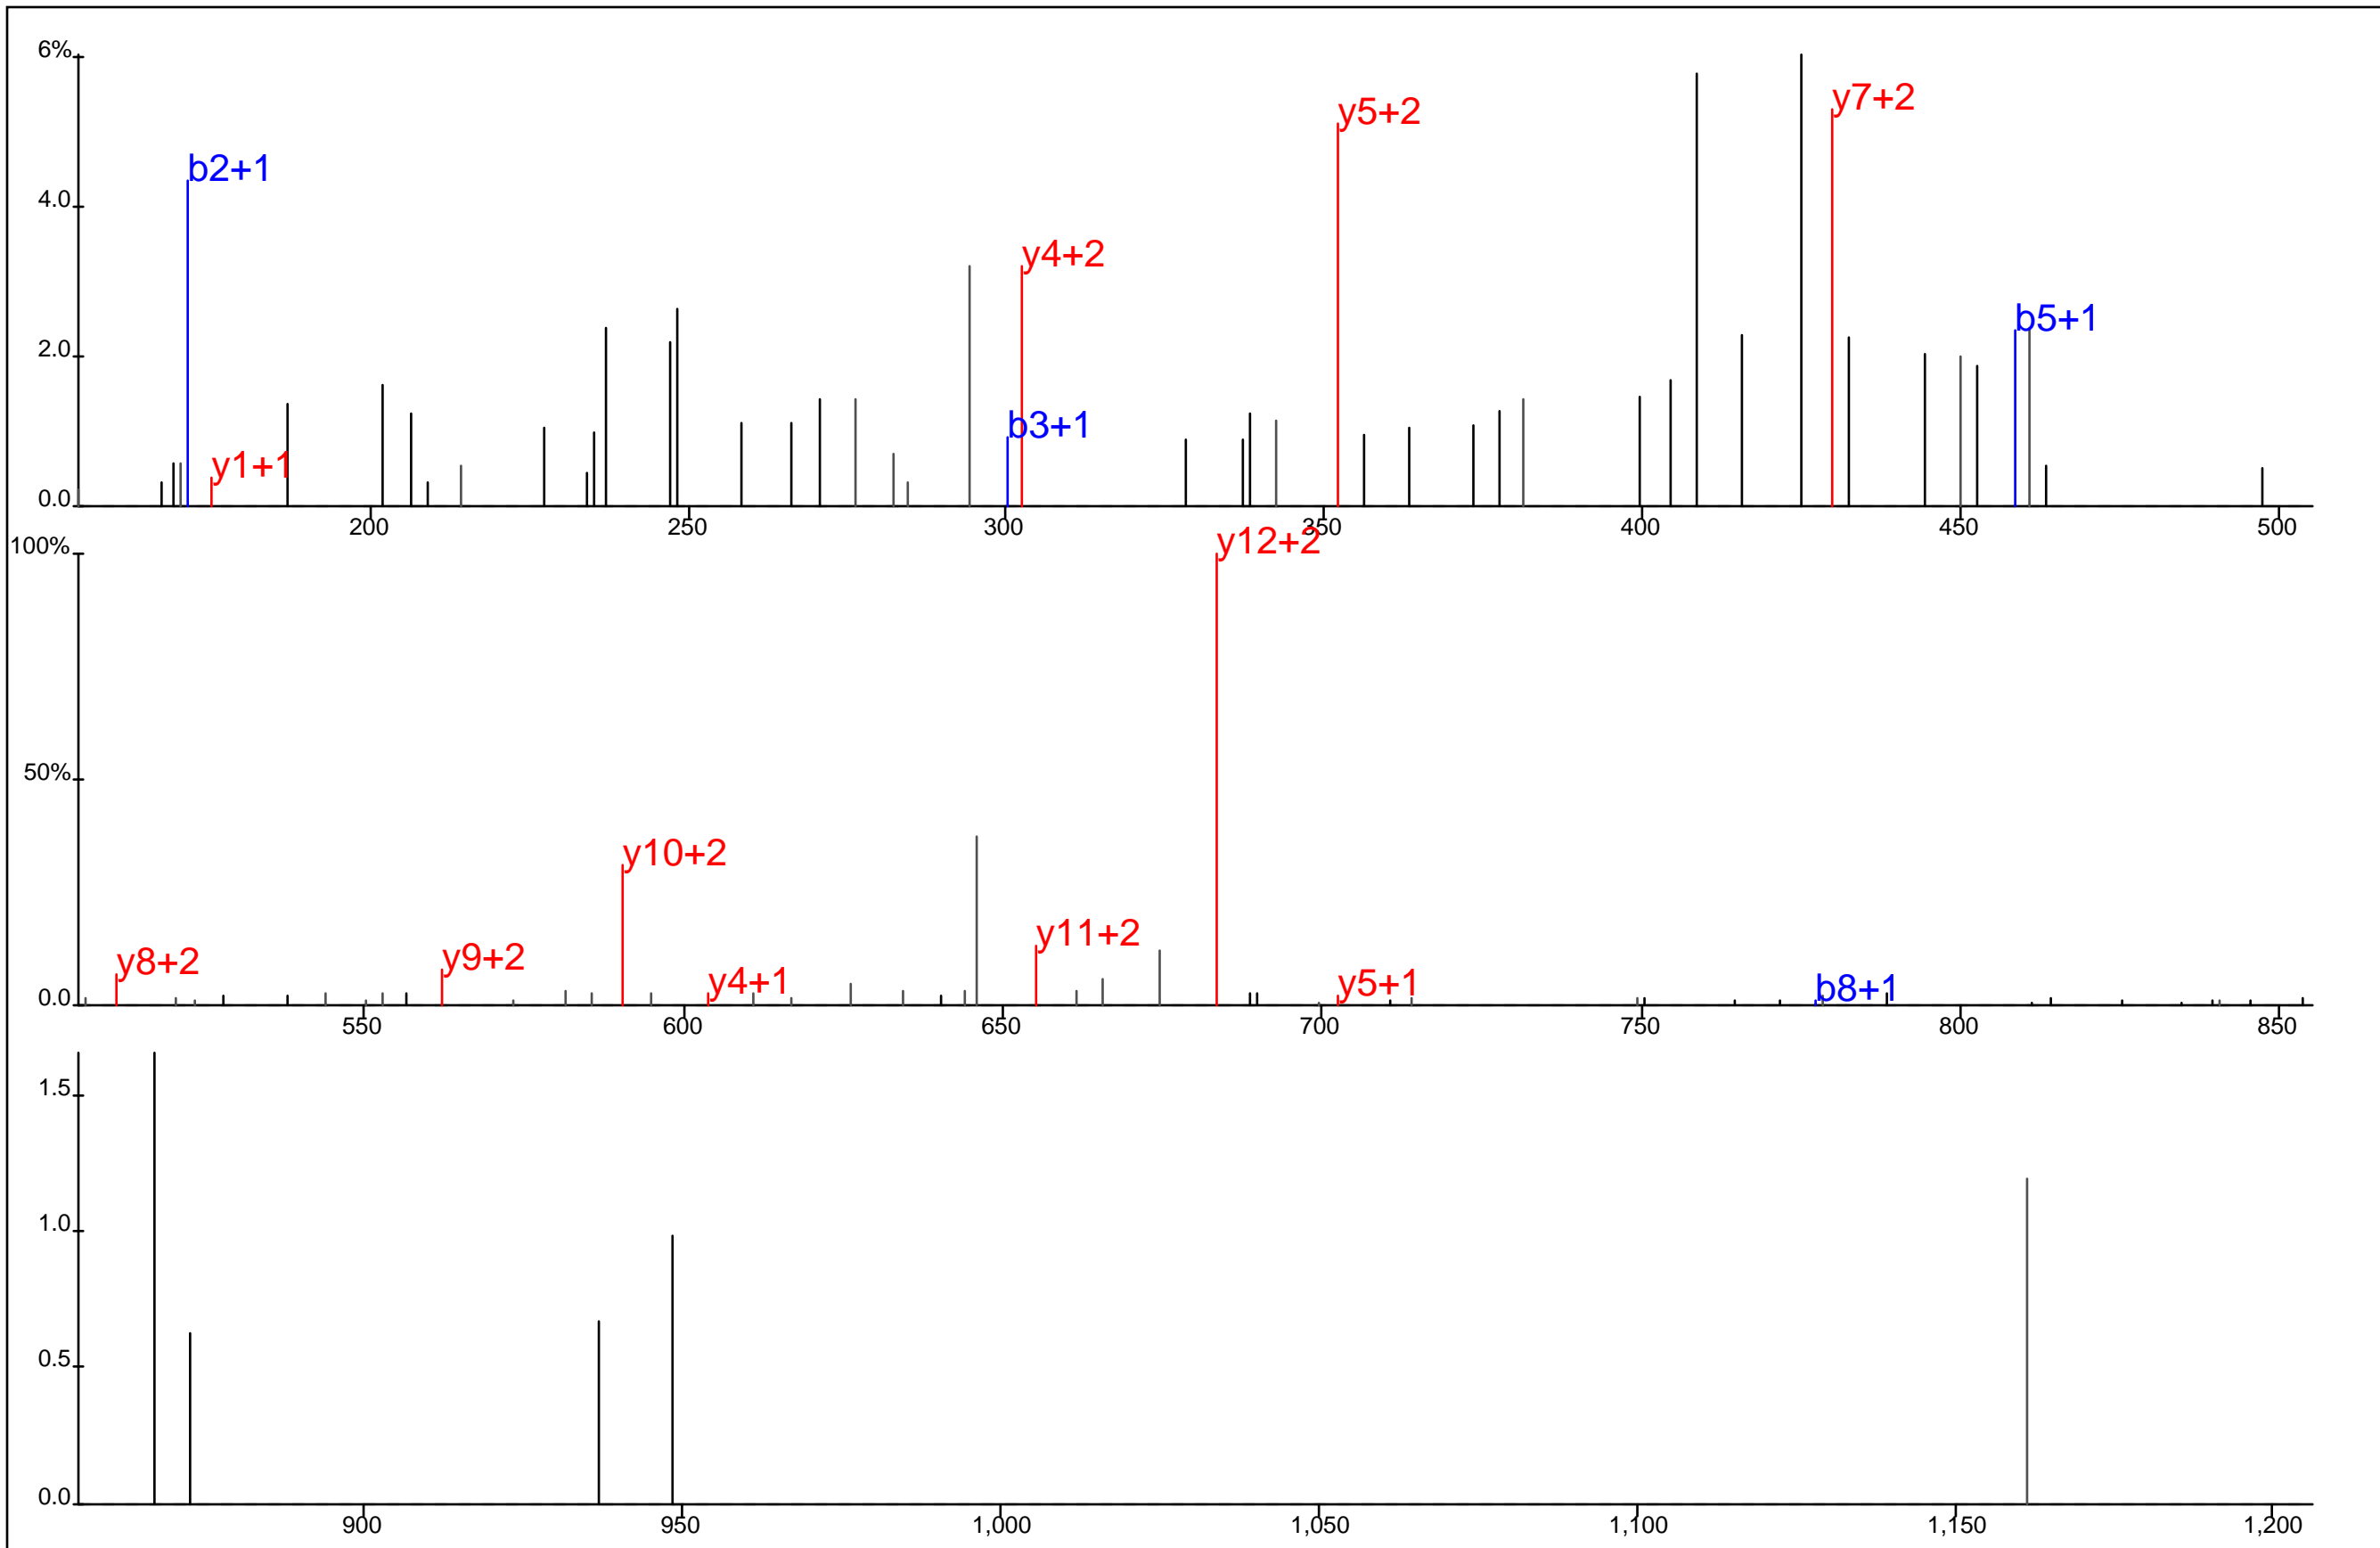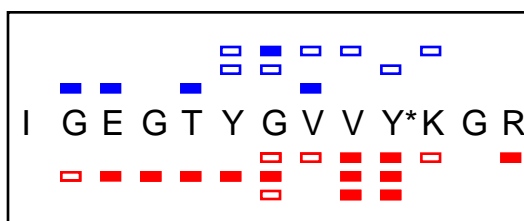

Protein Name: CDC2  
 gi Accession: 0  
 Precursor Mass: 493.5728+3  
 Delta Mass: 0.076 ppm  
 XCorr: 36.13

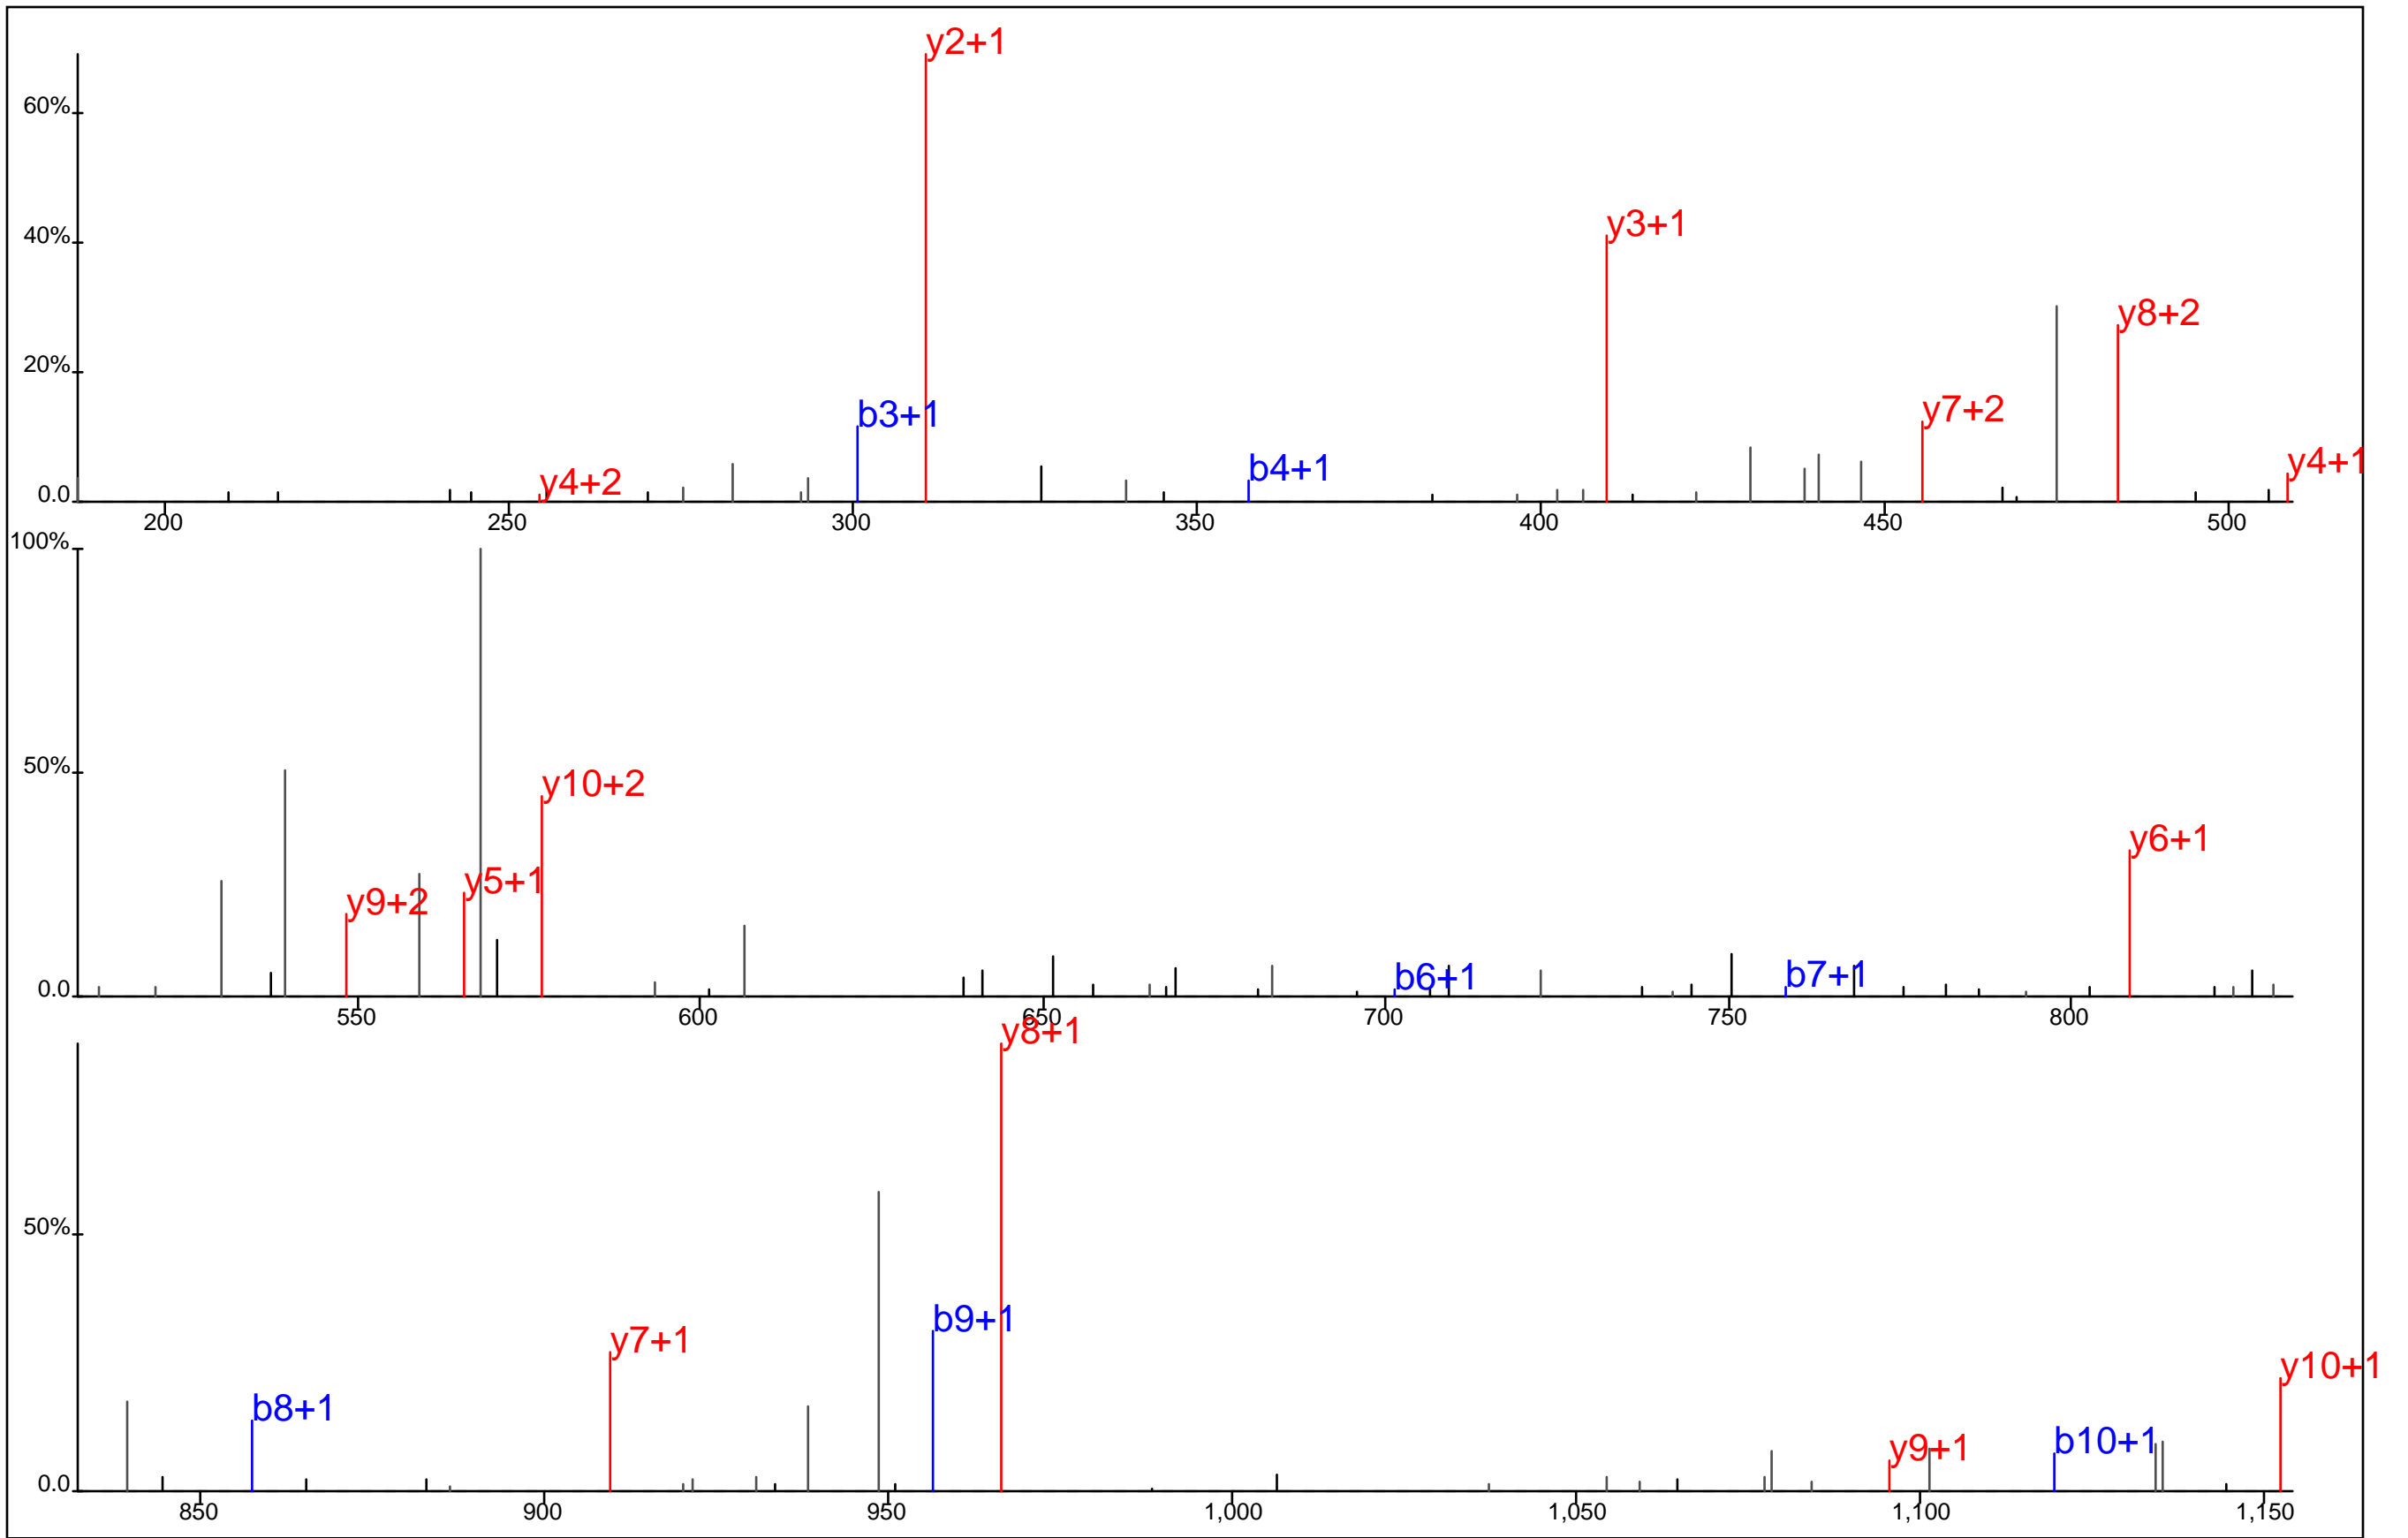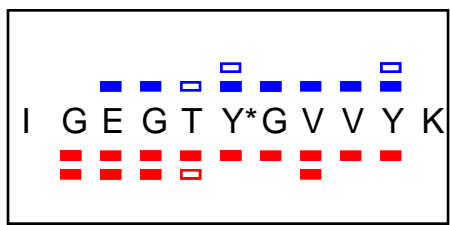

Protein Name: CDC2  
 gi Accession: 0  
 Precursor Mass: 633.2954+2  
 Delta Mass: 1.740 ppm  
 XCorr: 44.49



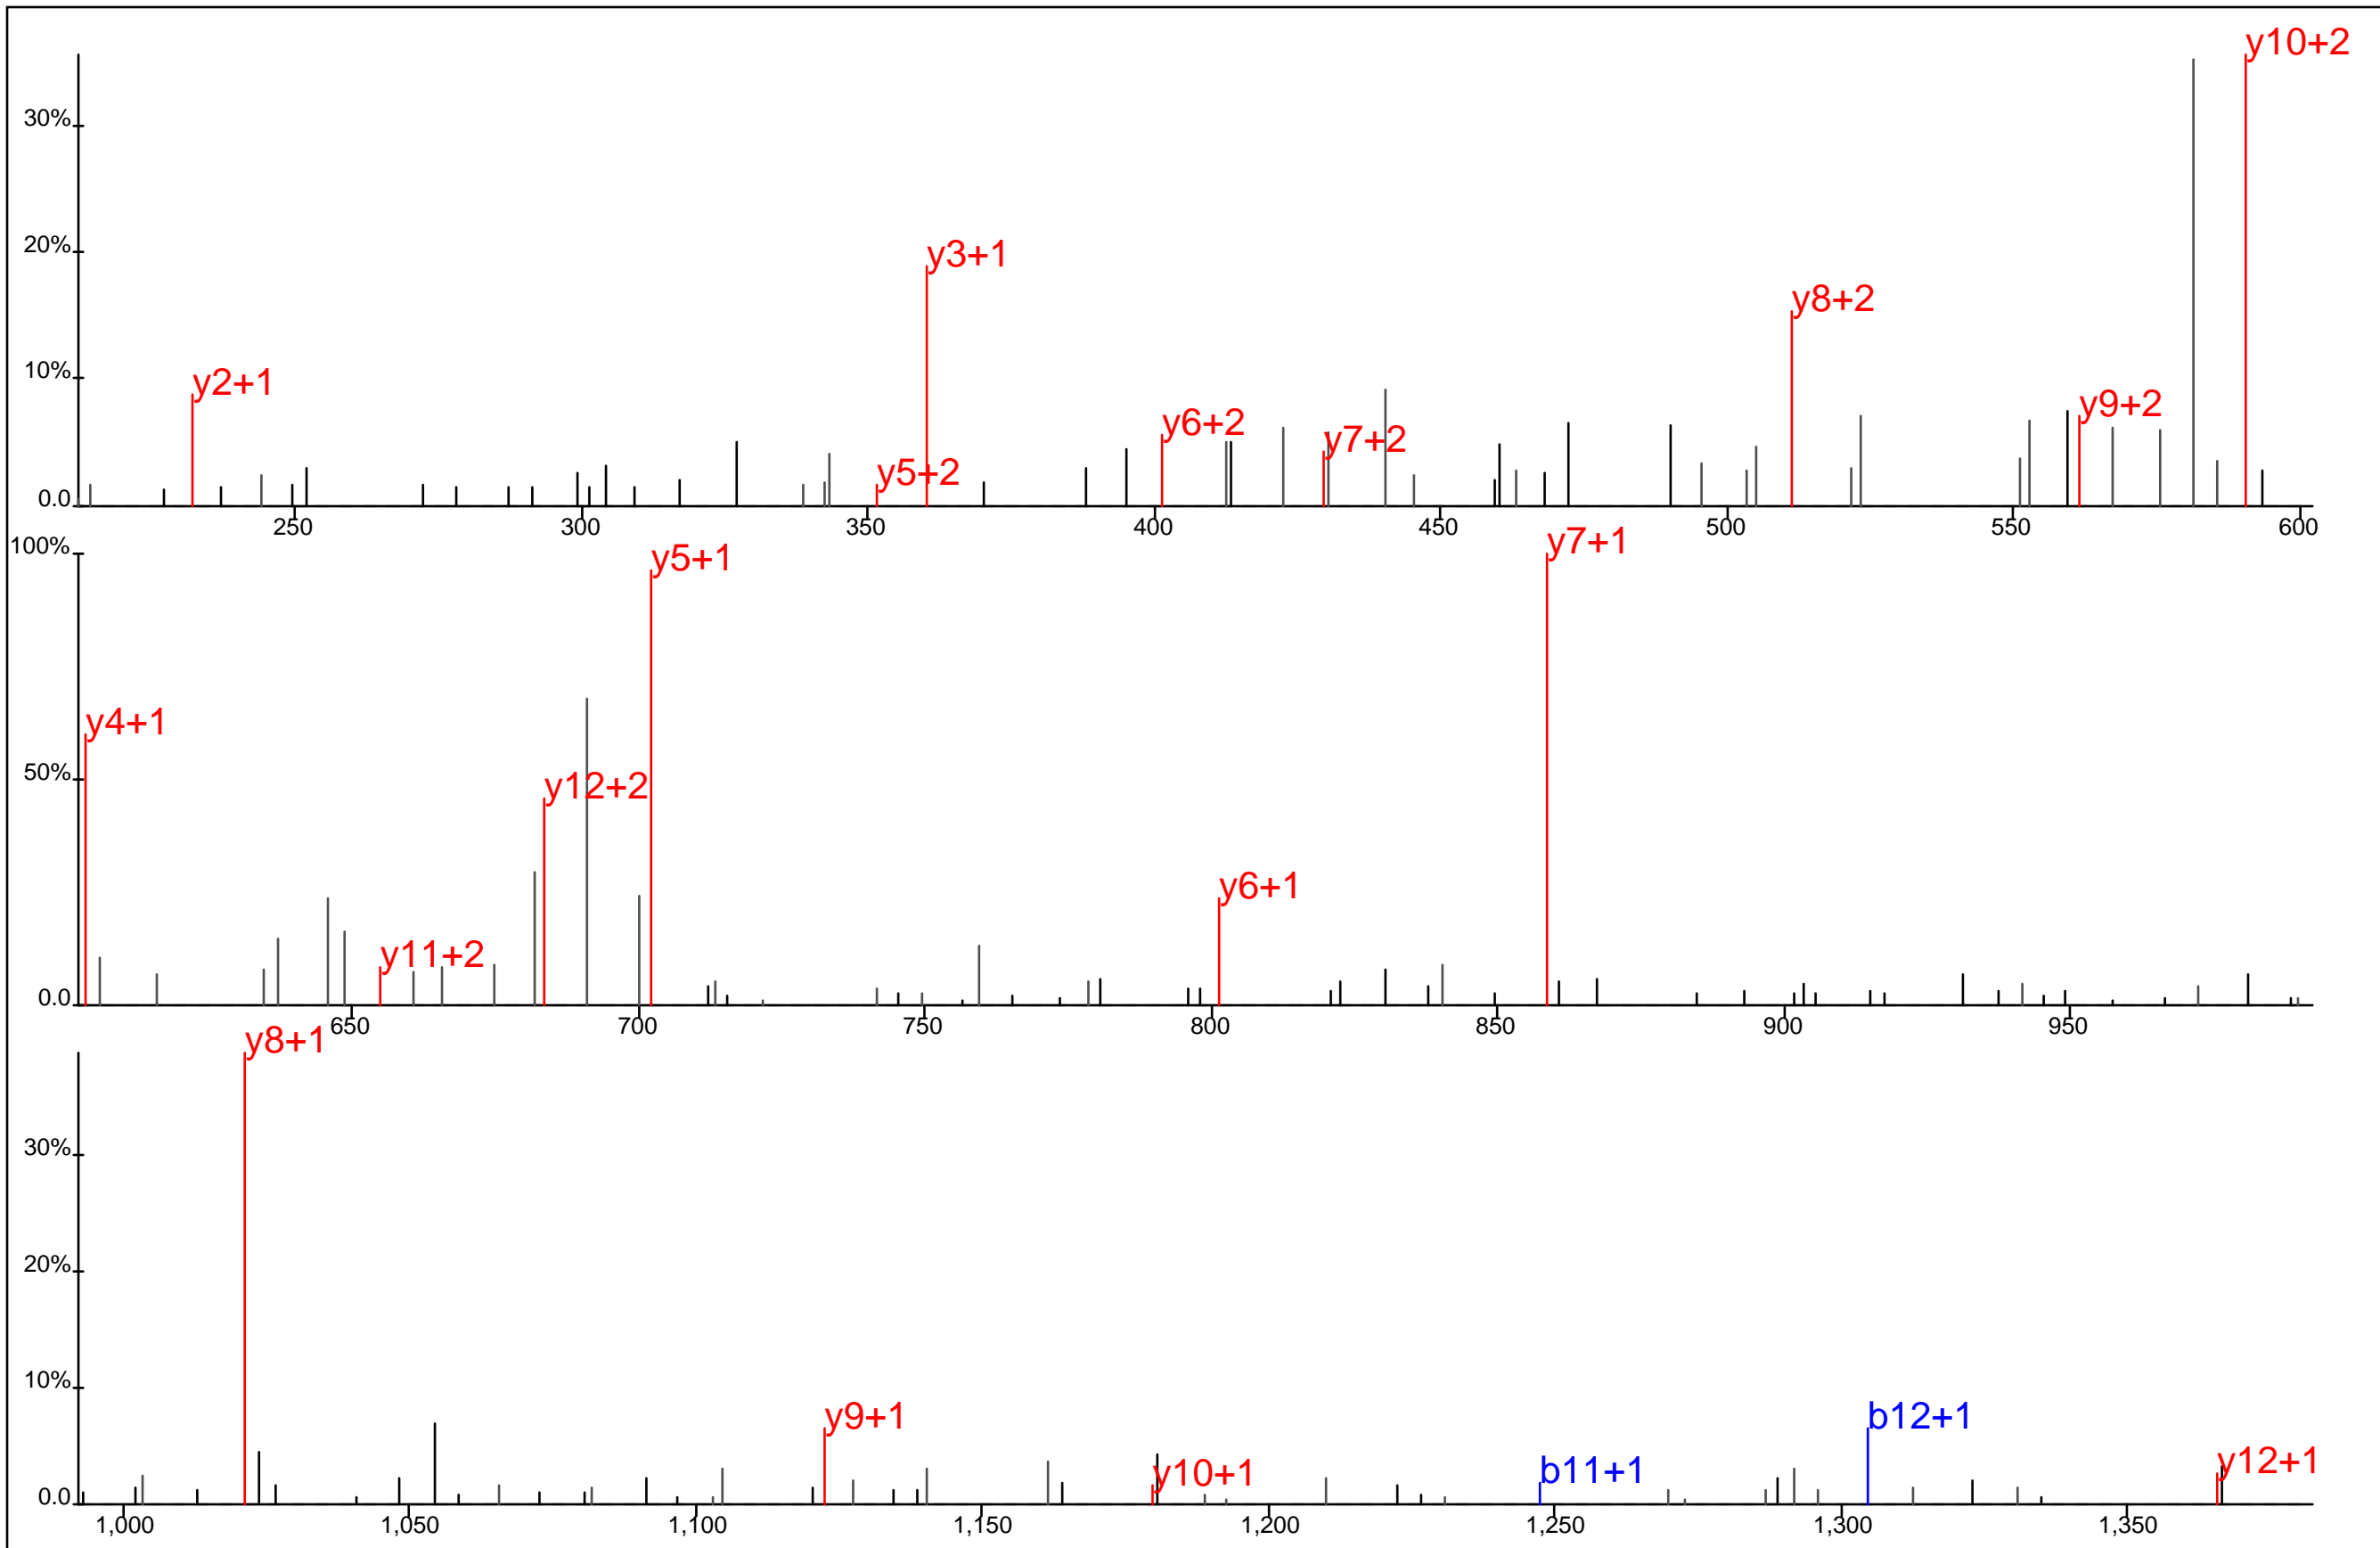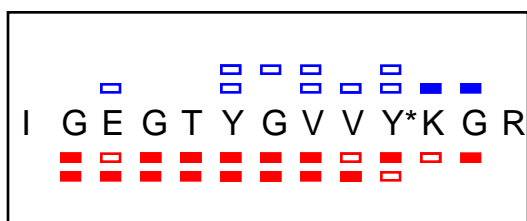

Protein Name: CDC2  
 gi Accession: 0  
 Precursor Mass: 739.8555+2  
 Delta Mass: 0.169 ppm  
 XCorr: 62.72

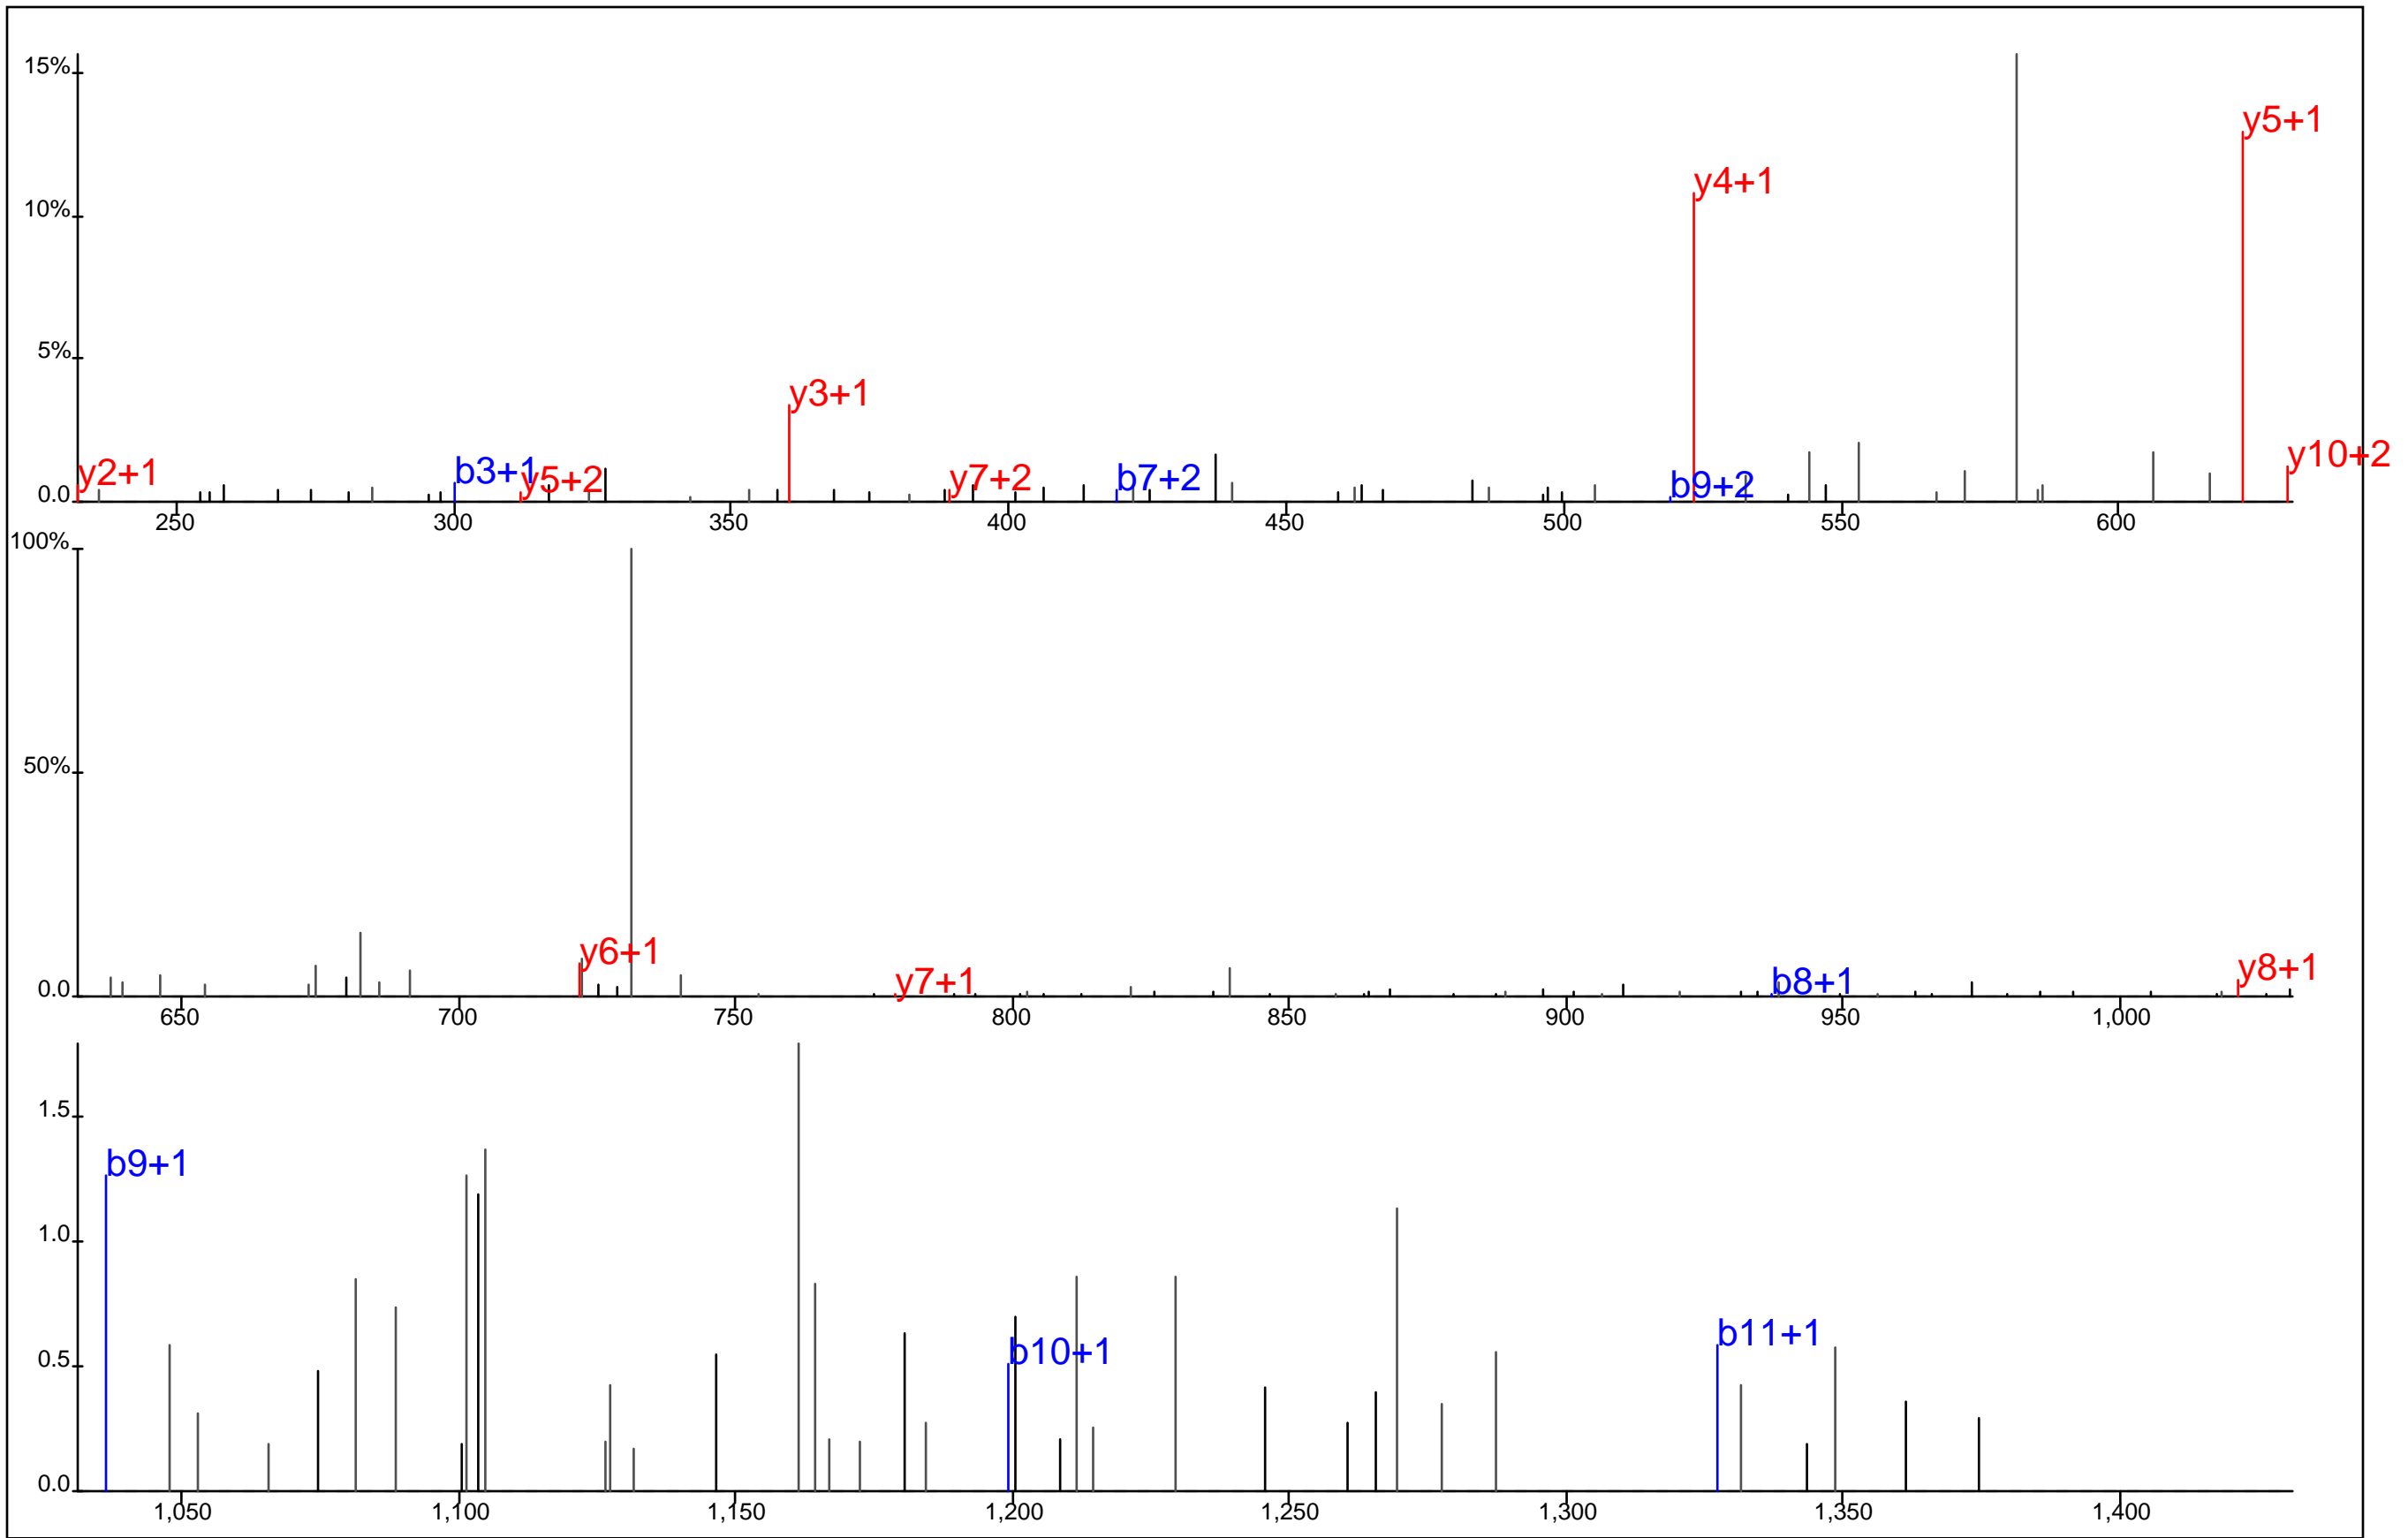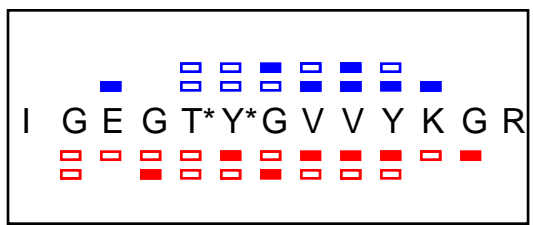

Protein Name: CDC2  
 gi Accession: 0  
 Precursor Mass: 779.8407+2  
 Delta Mass: 2.488 ppm  
 XCorr: 38.72

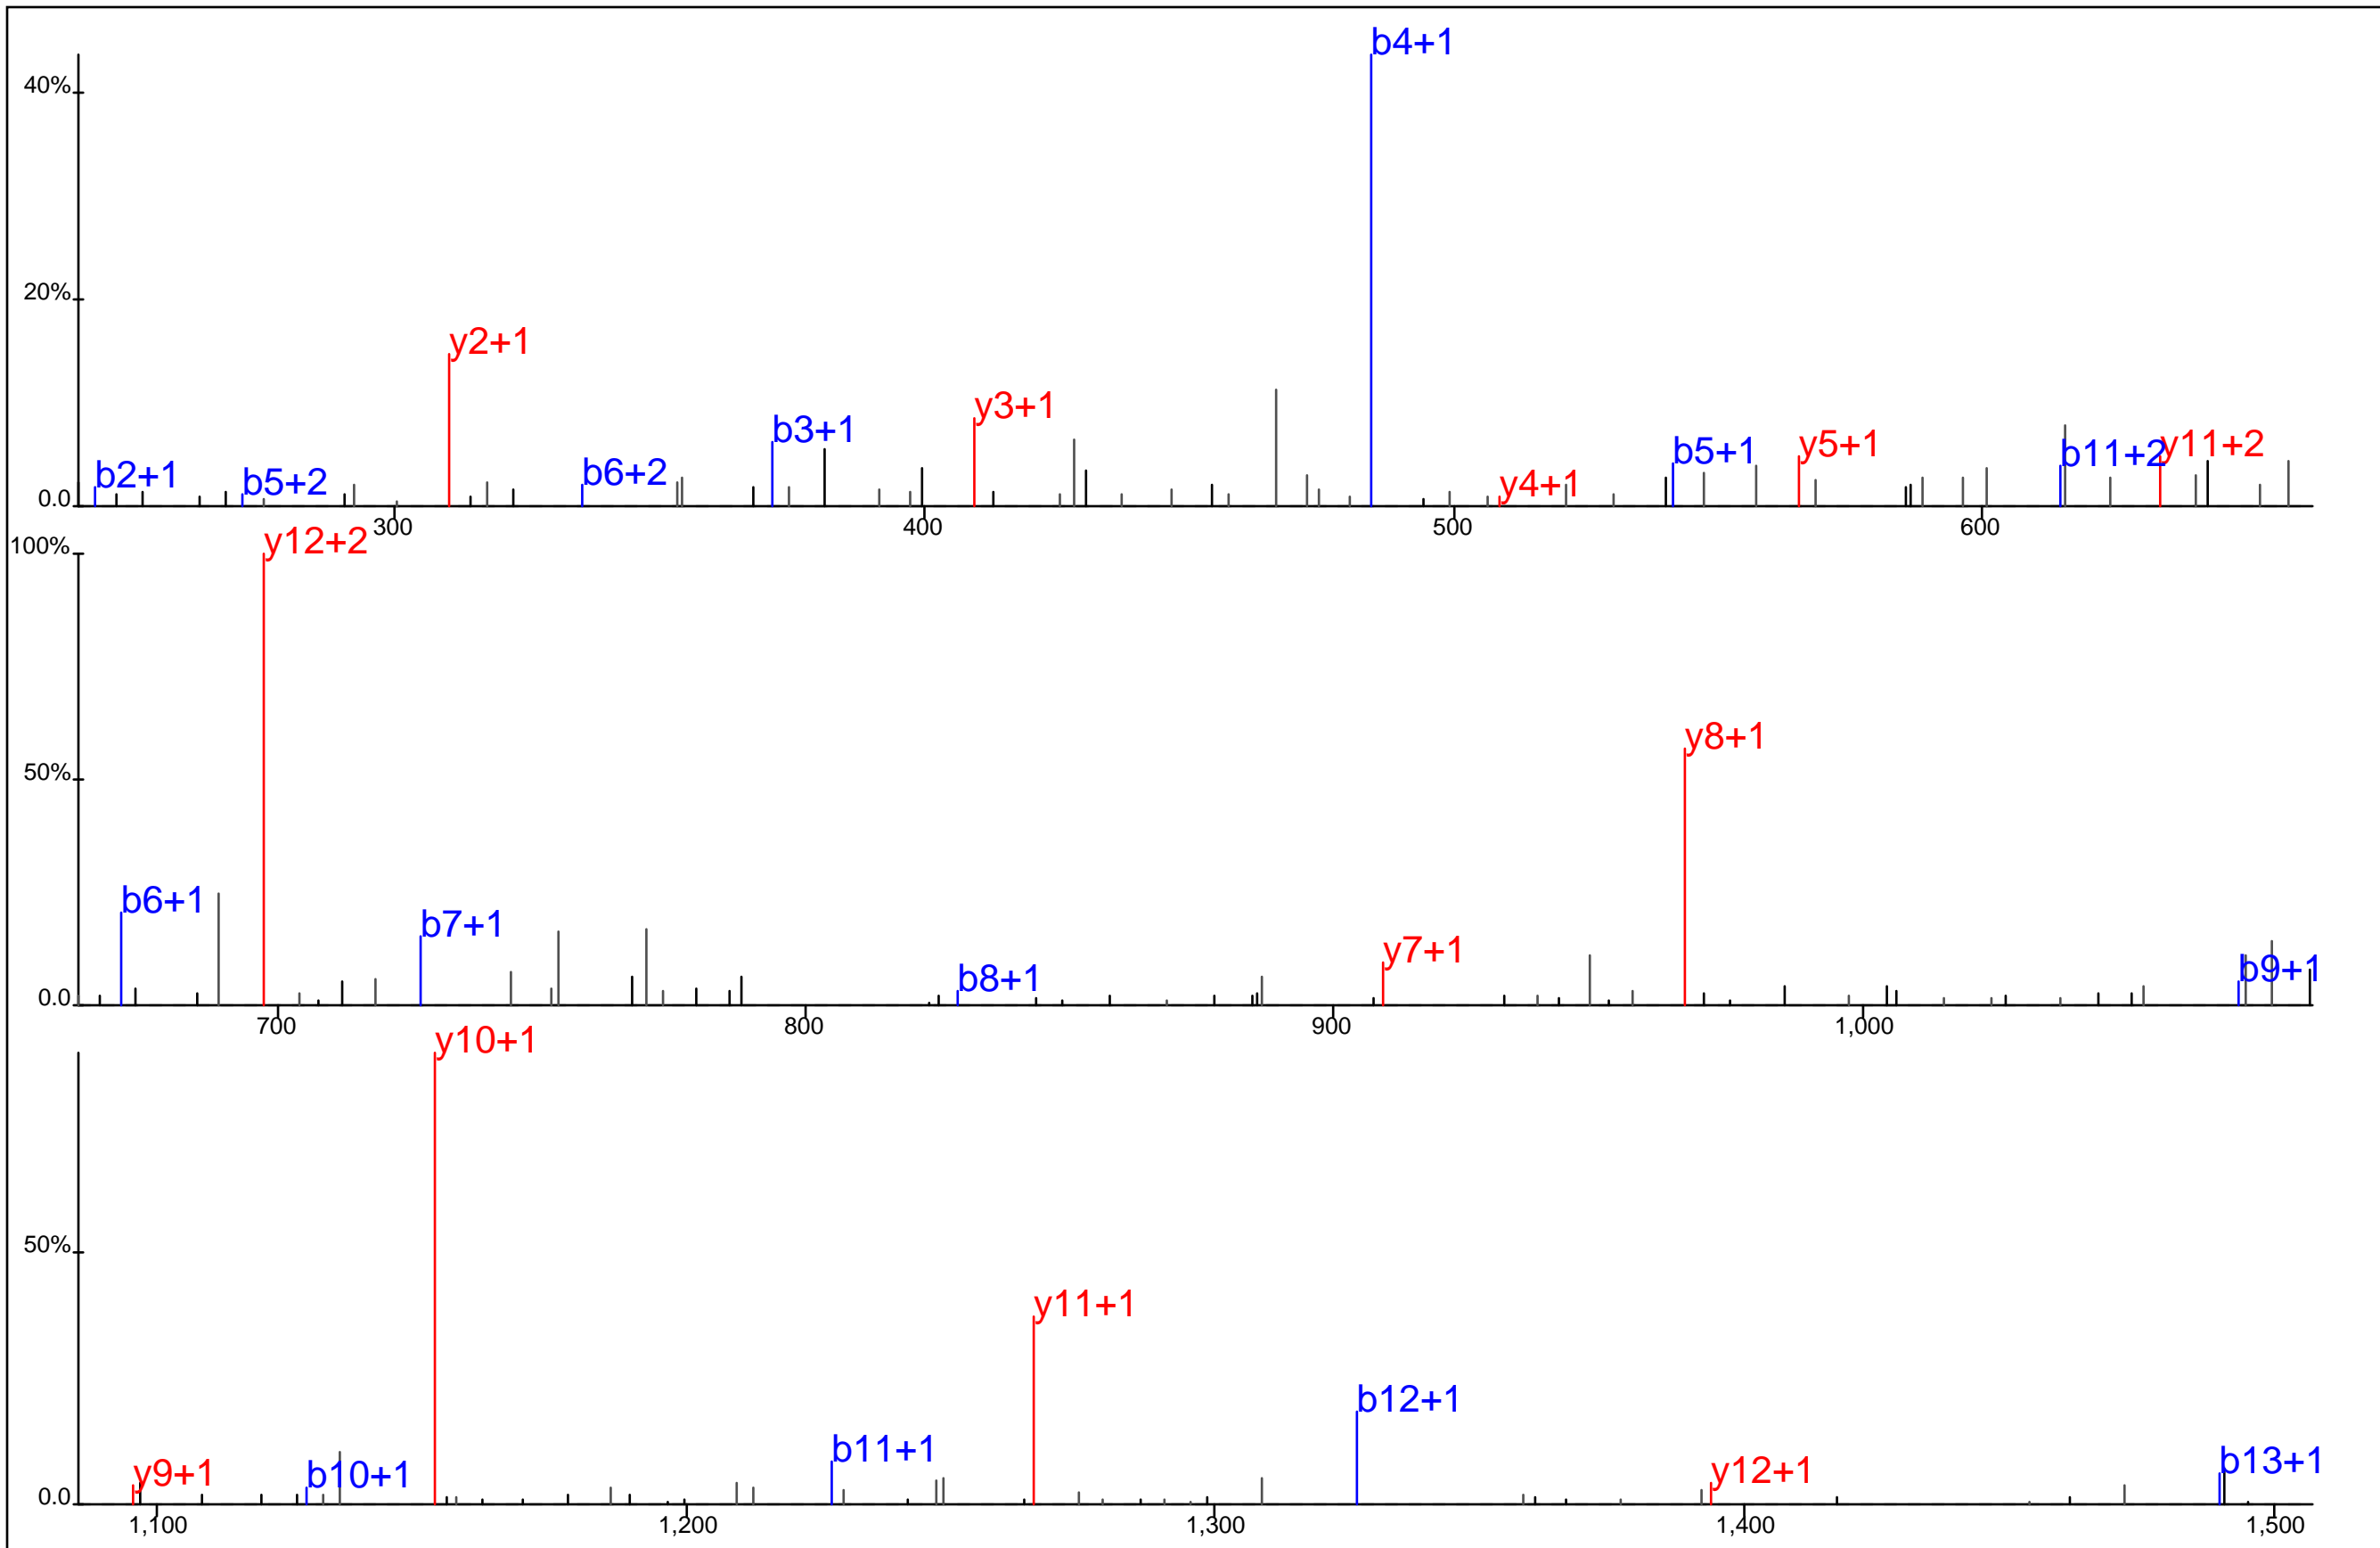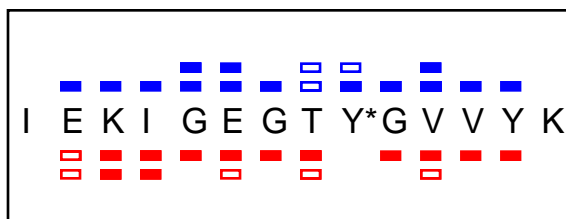

Protein Name: CDC2  
 gi Accession: 0  
 Precursor Mass: 818.4055+2  
 Delta Mass: 0.500 ppm  
 XCorr: 53.26

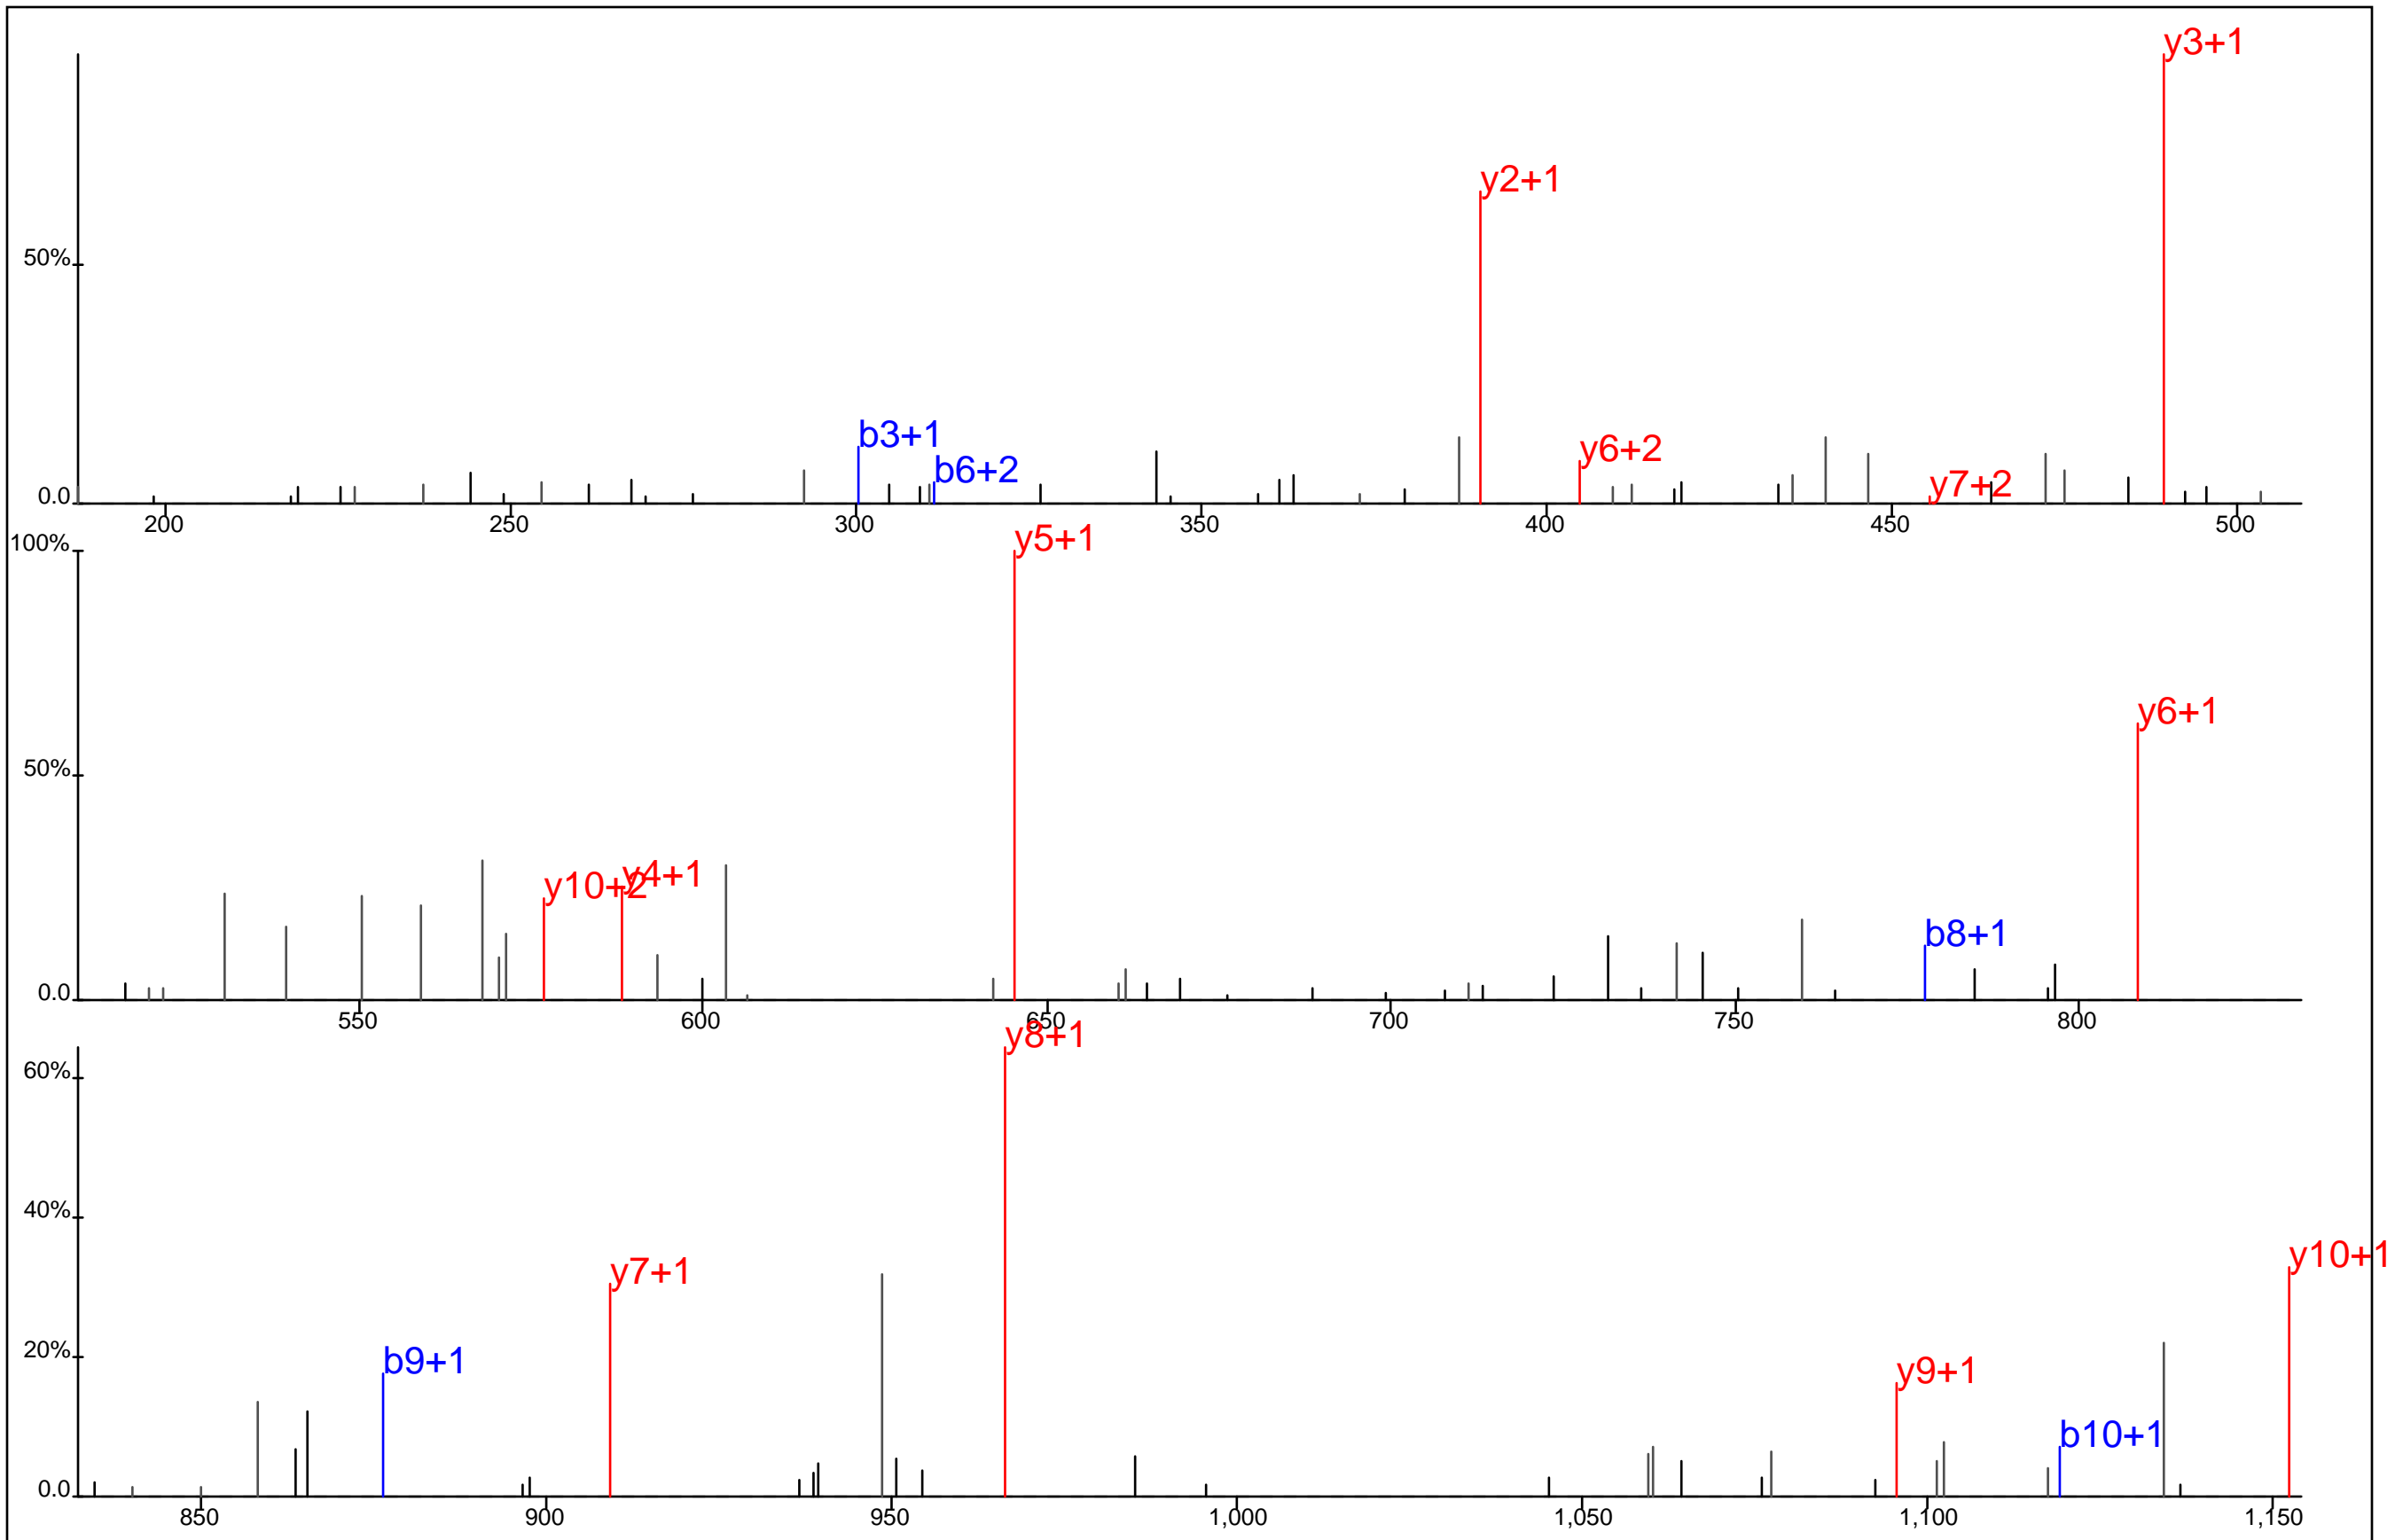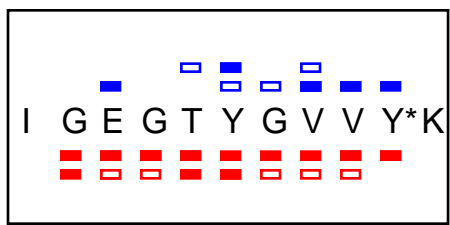

Protein Name: CDC2  
 gi Accession: 0  
 Precursor Mass: 633.2947+2  
 Delta Mass: 0.680 ppm  
 XCorr: 69.11

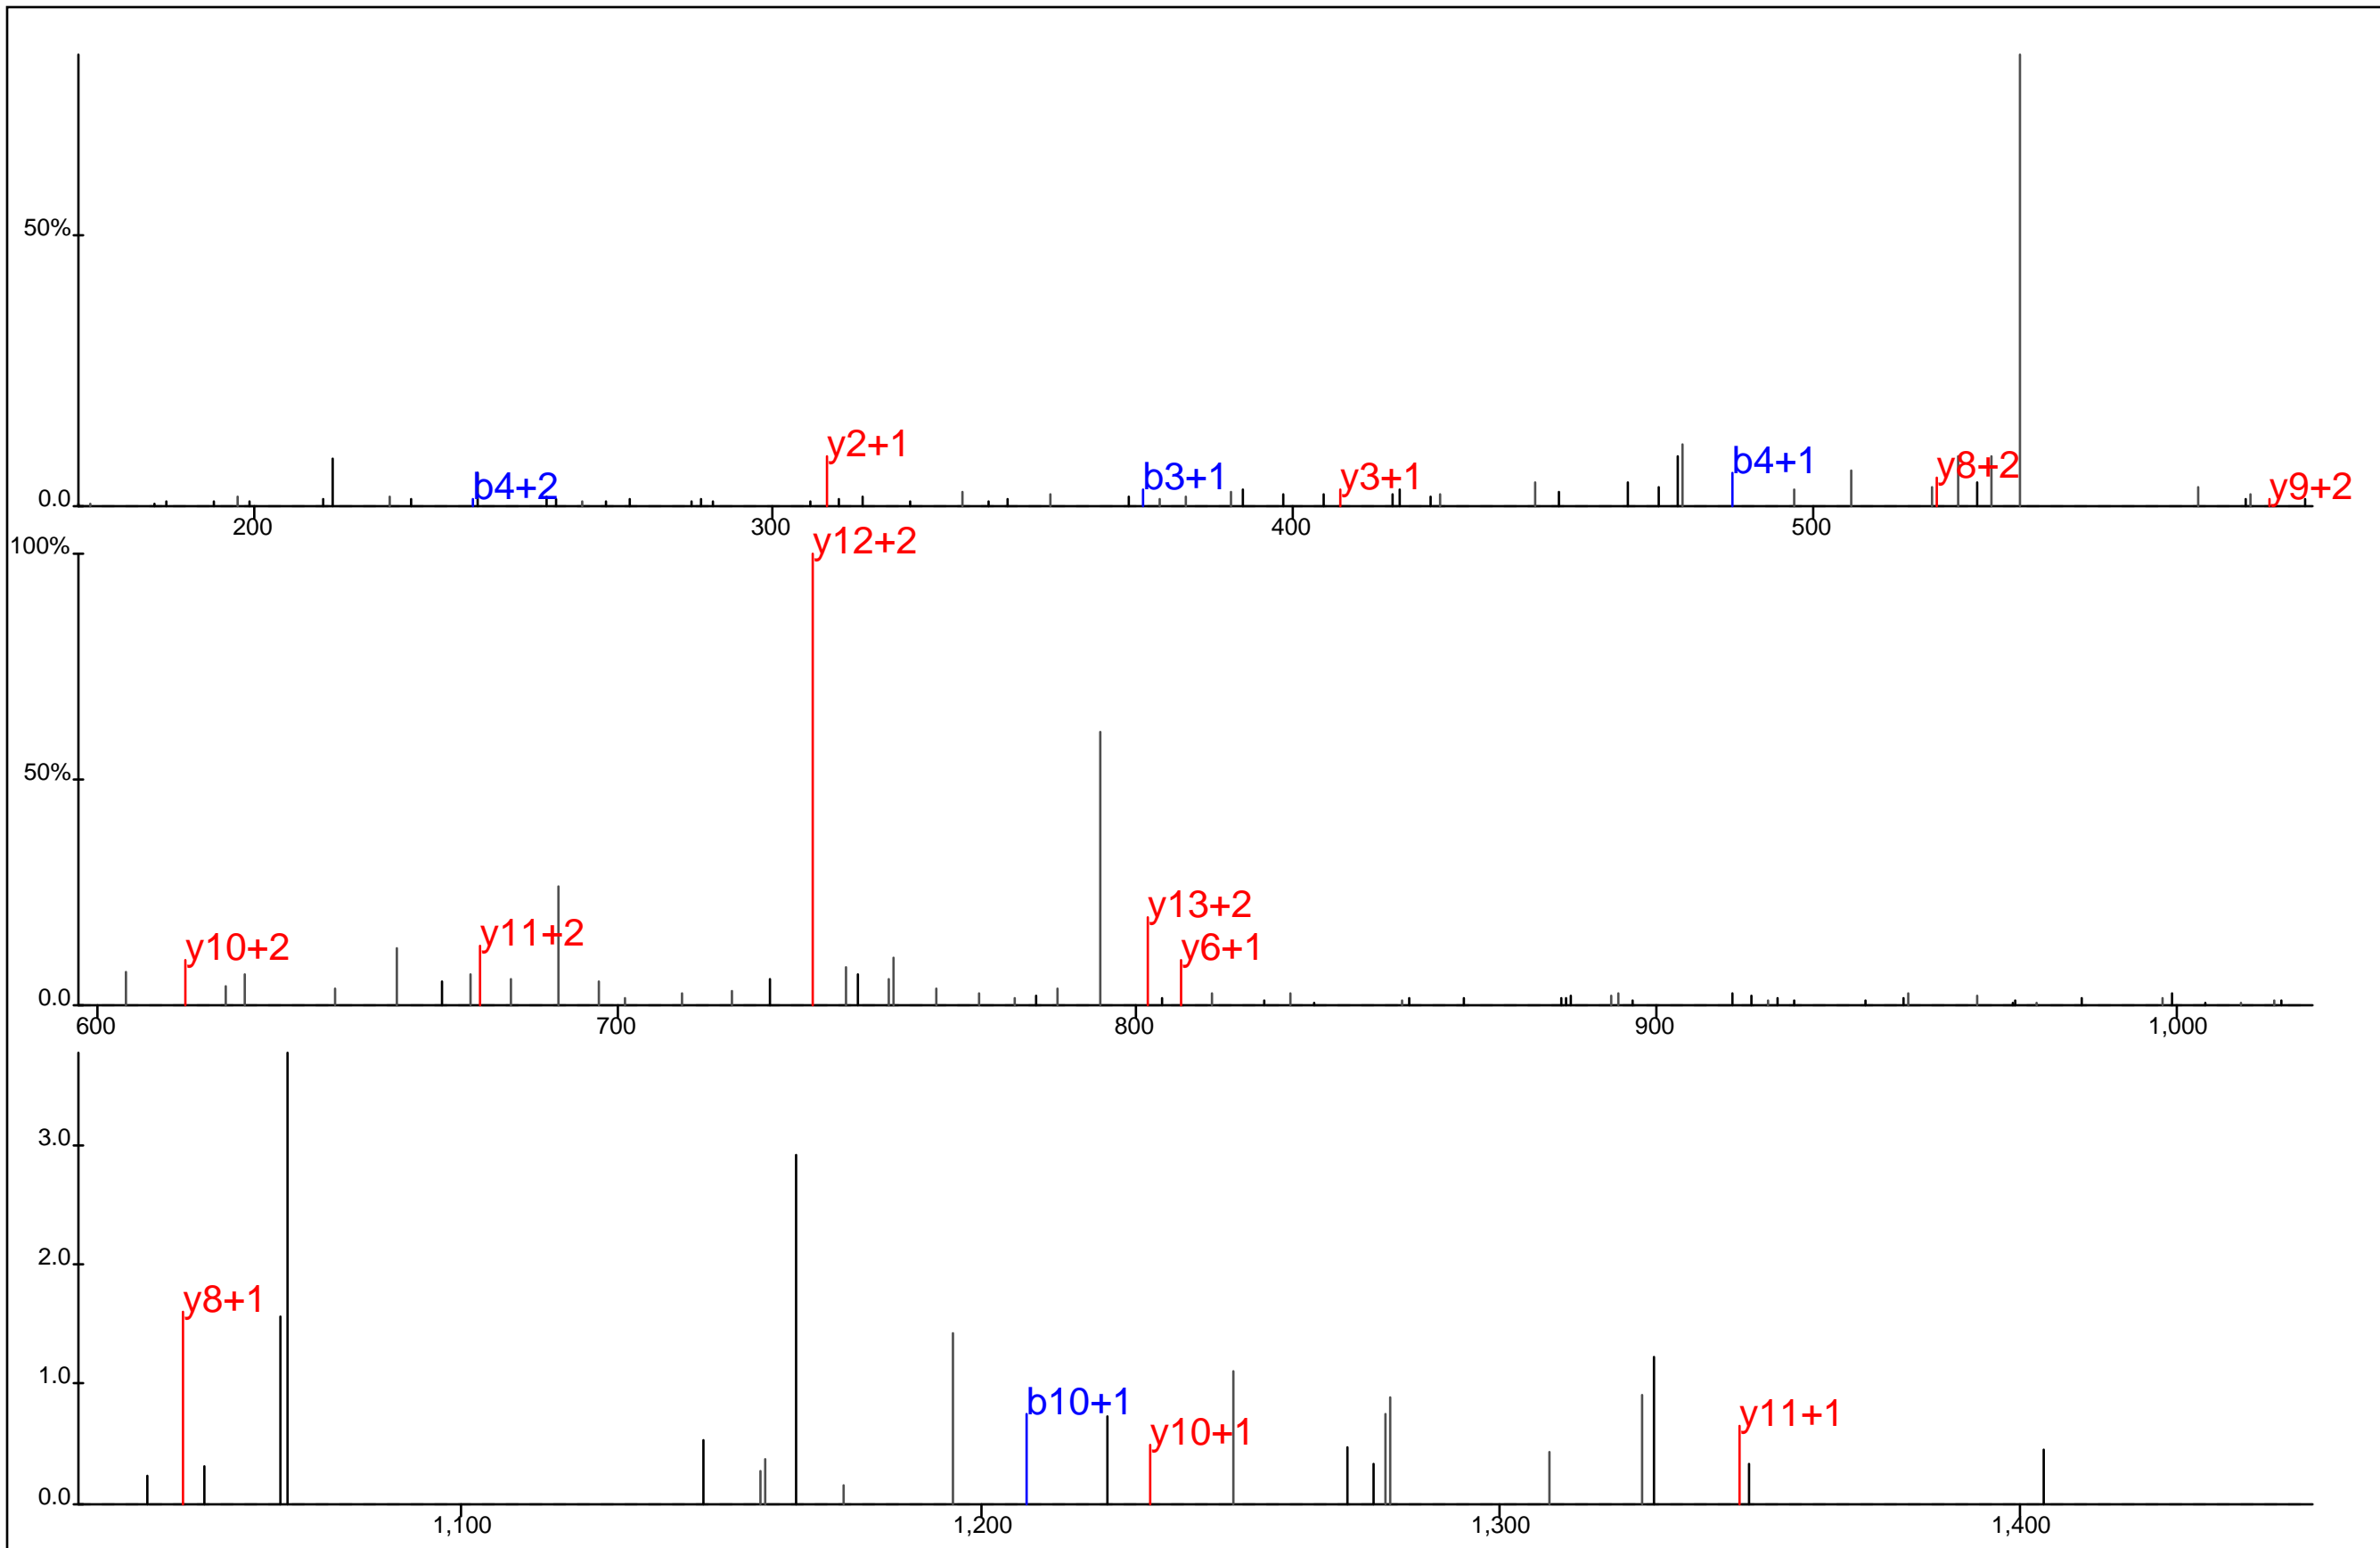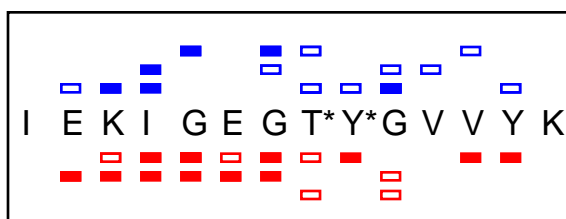

Protein Name: CDC2  
 gi Accession: 0  
 Precursor Mass: 572.5944+3  
 Delta Mass: 0.327 ppm  
 XCorr: 21.79

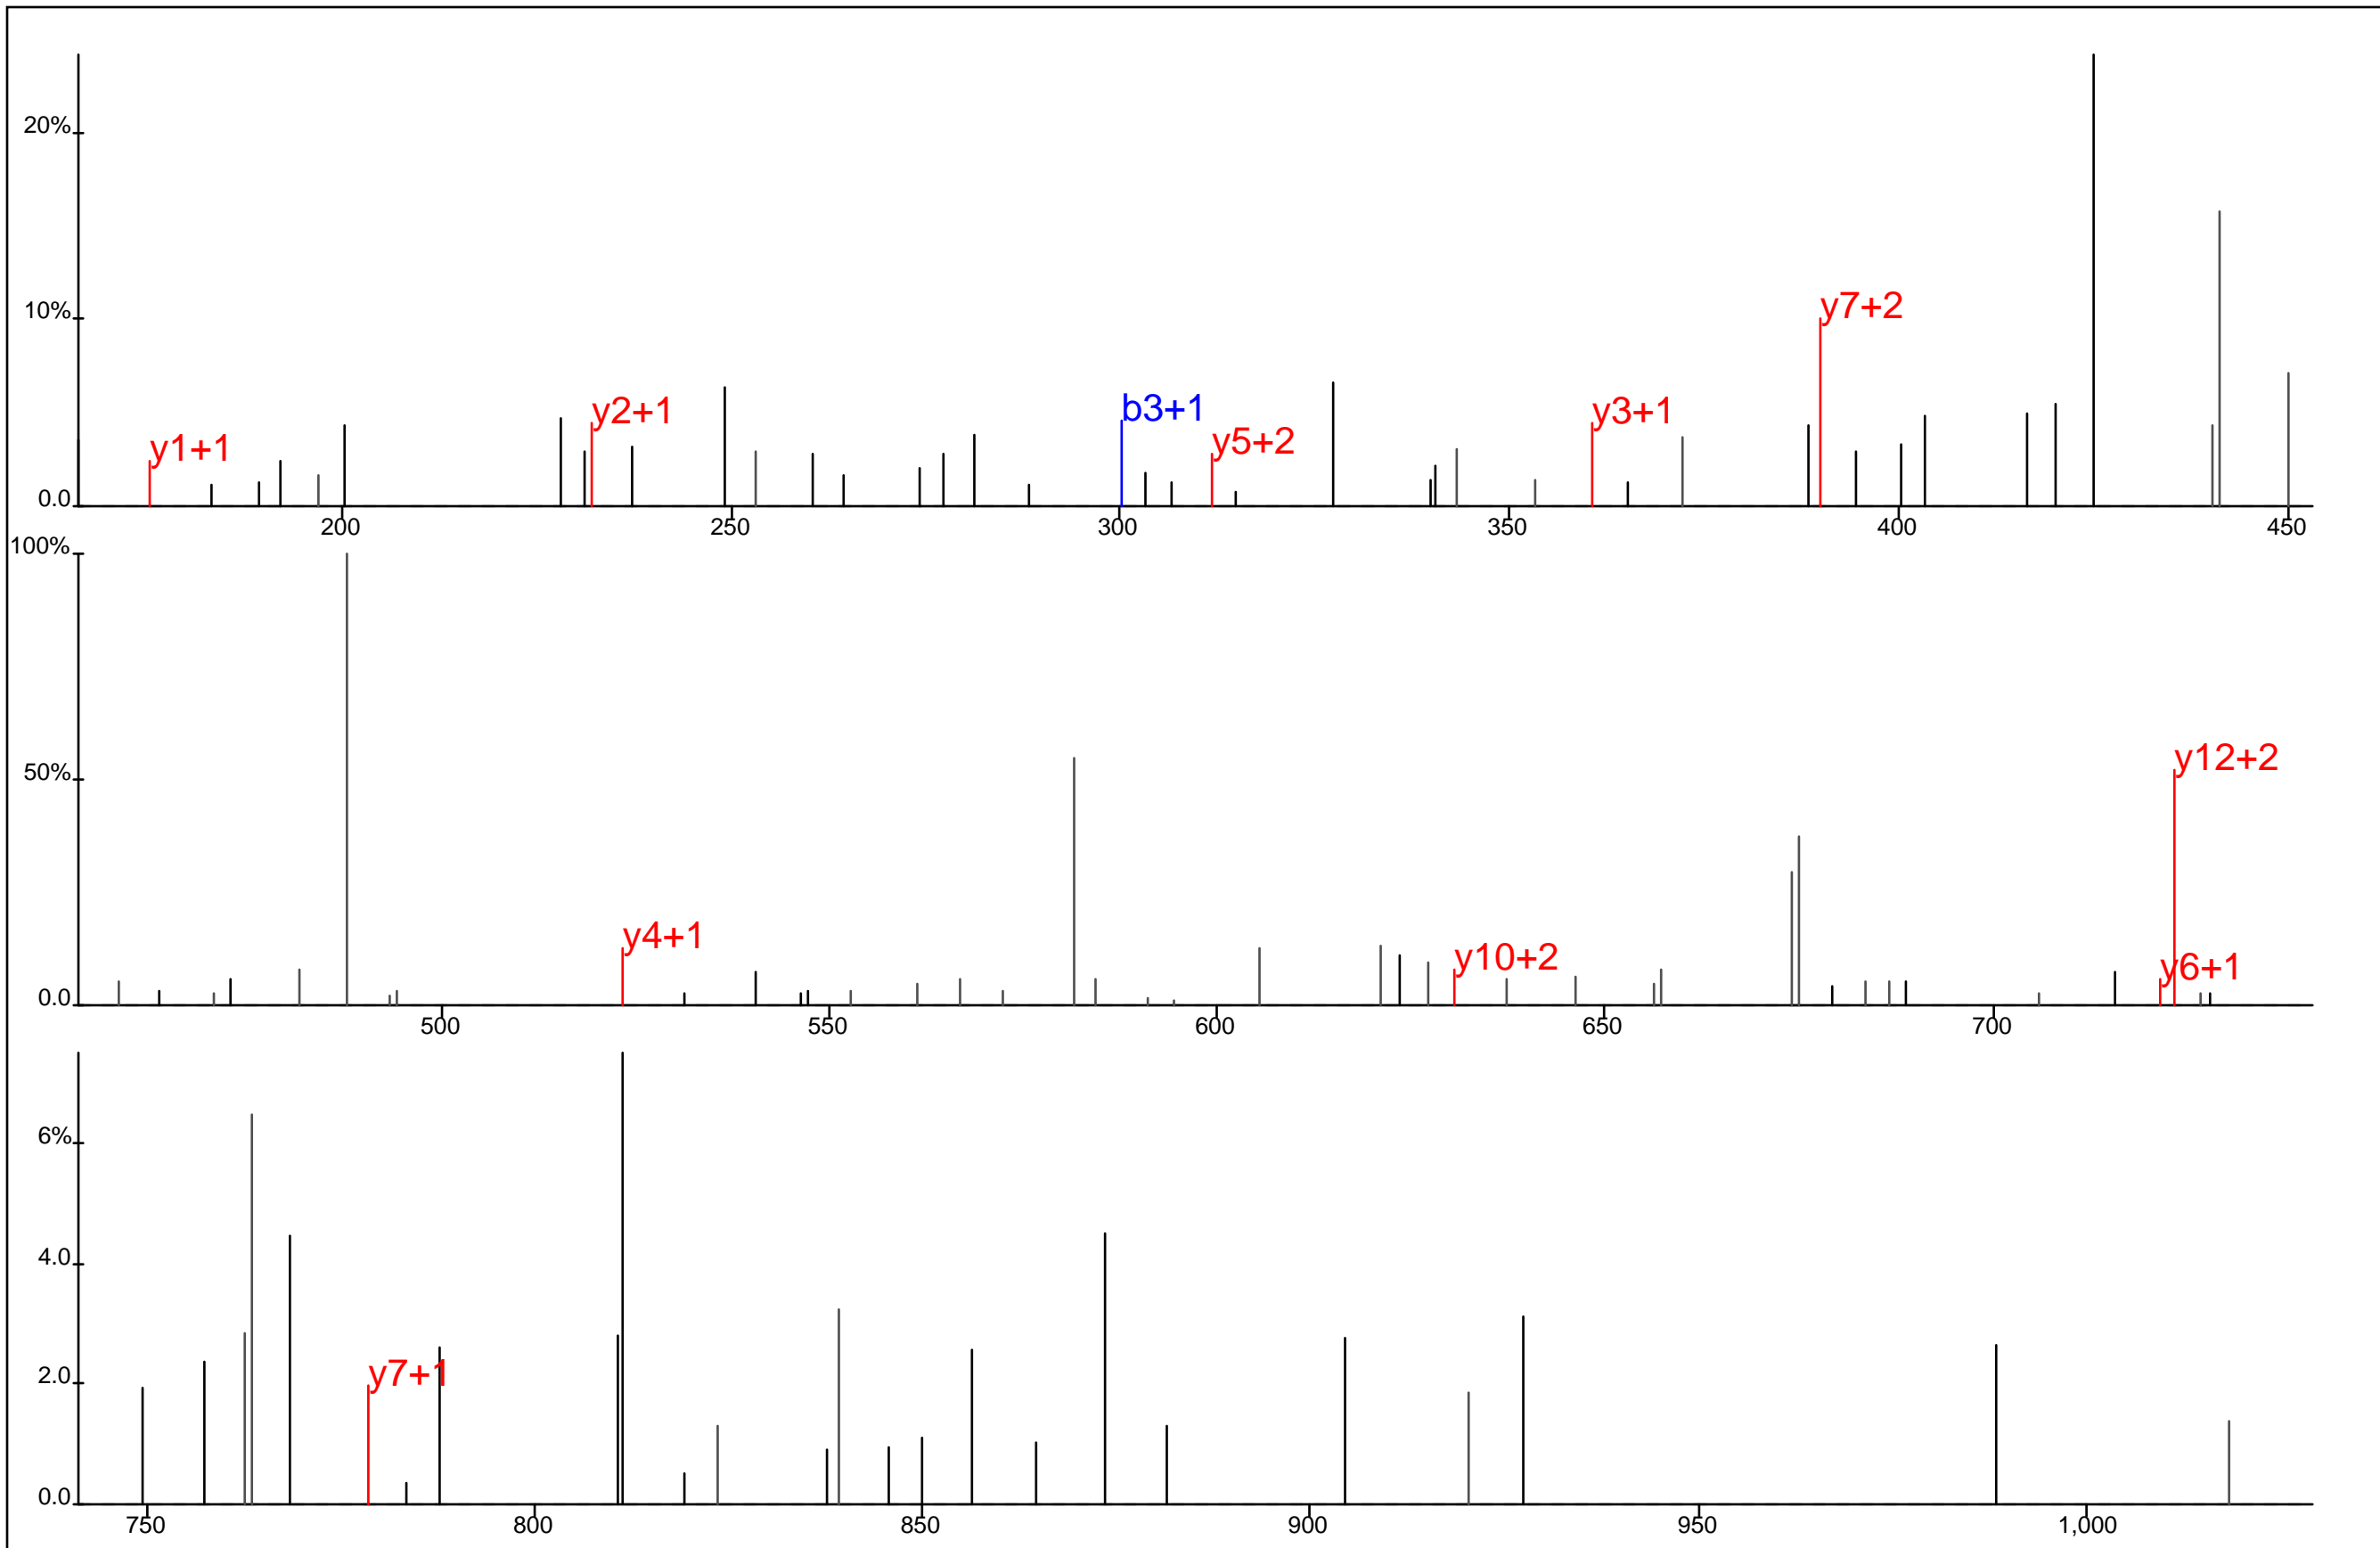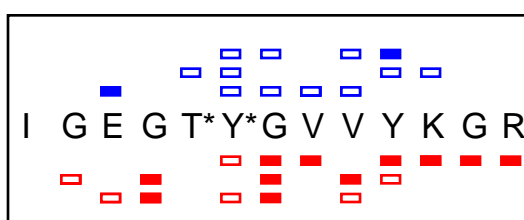

Protein Name: CDC2  
 gi Accession: 0  
 Precursor Mass: 520.2296+3  
 Delta Mass: 2.597 ppm  
 XCorr: 21.72

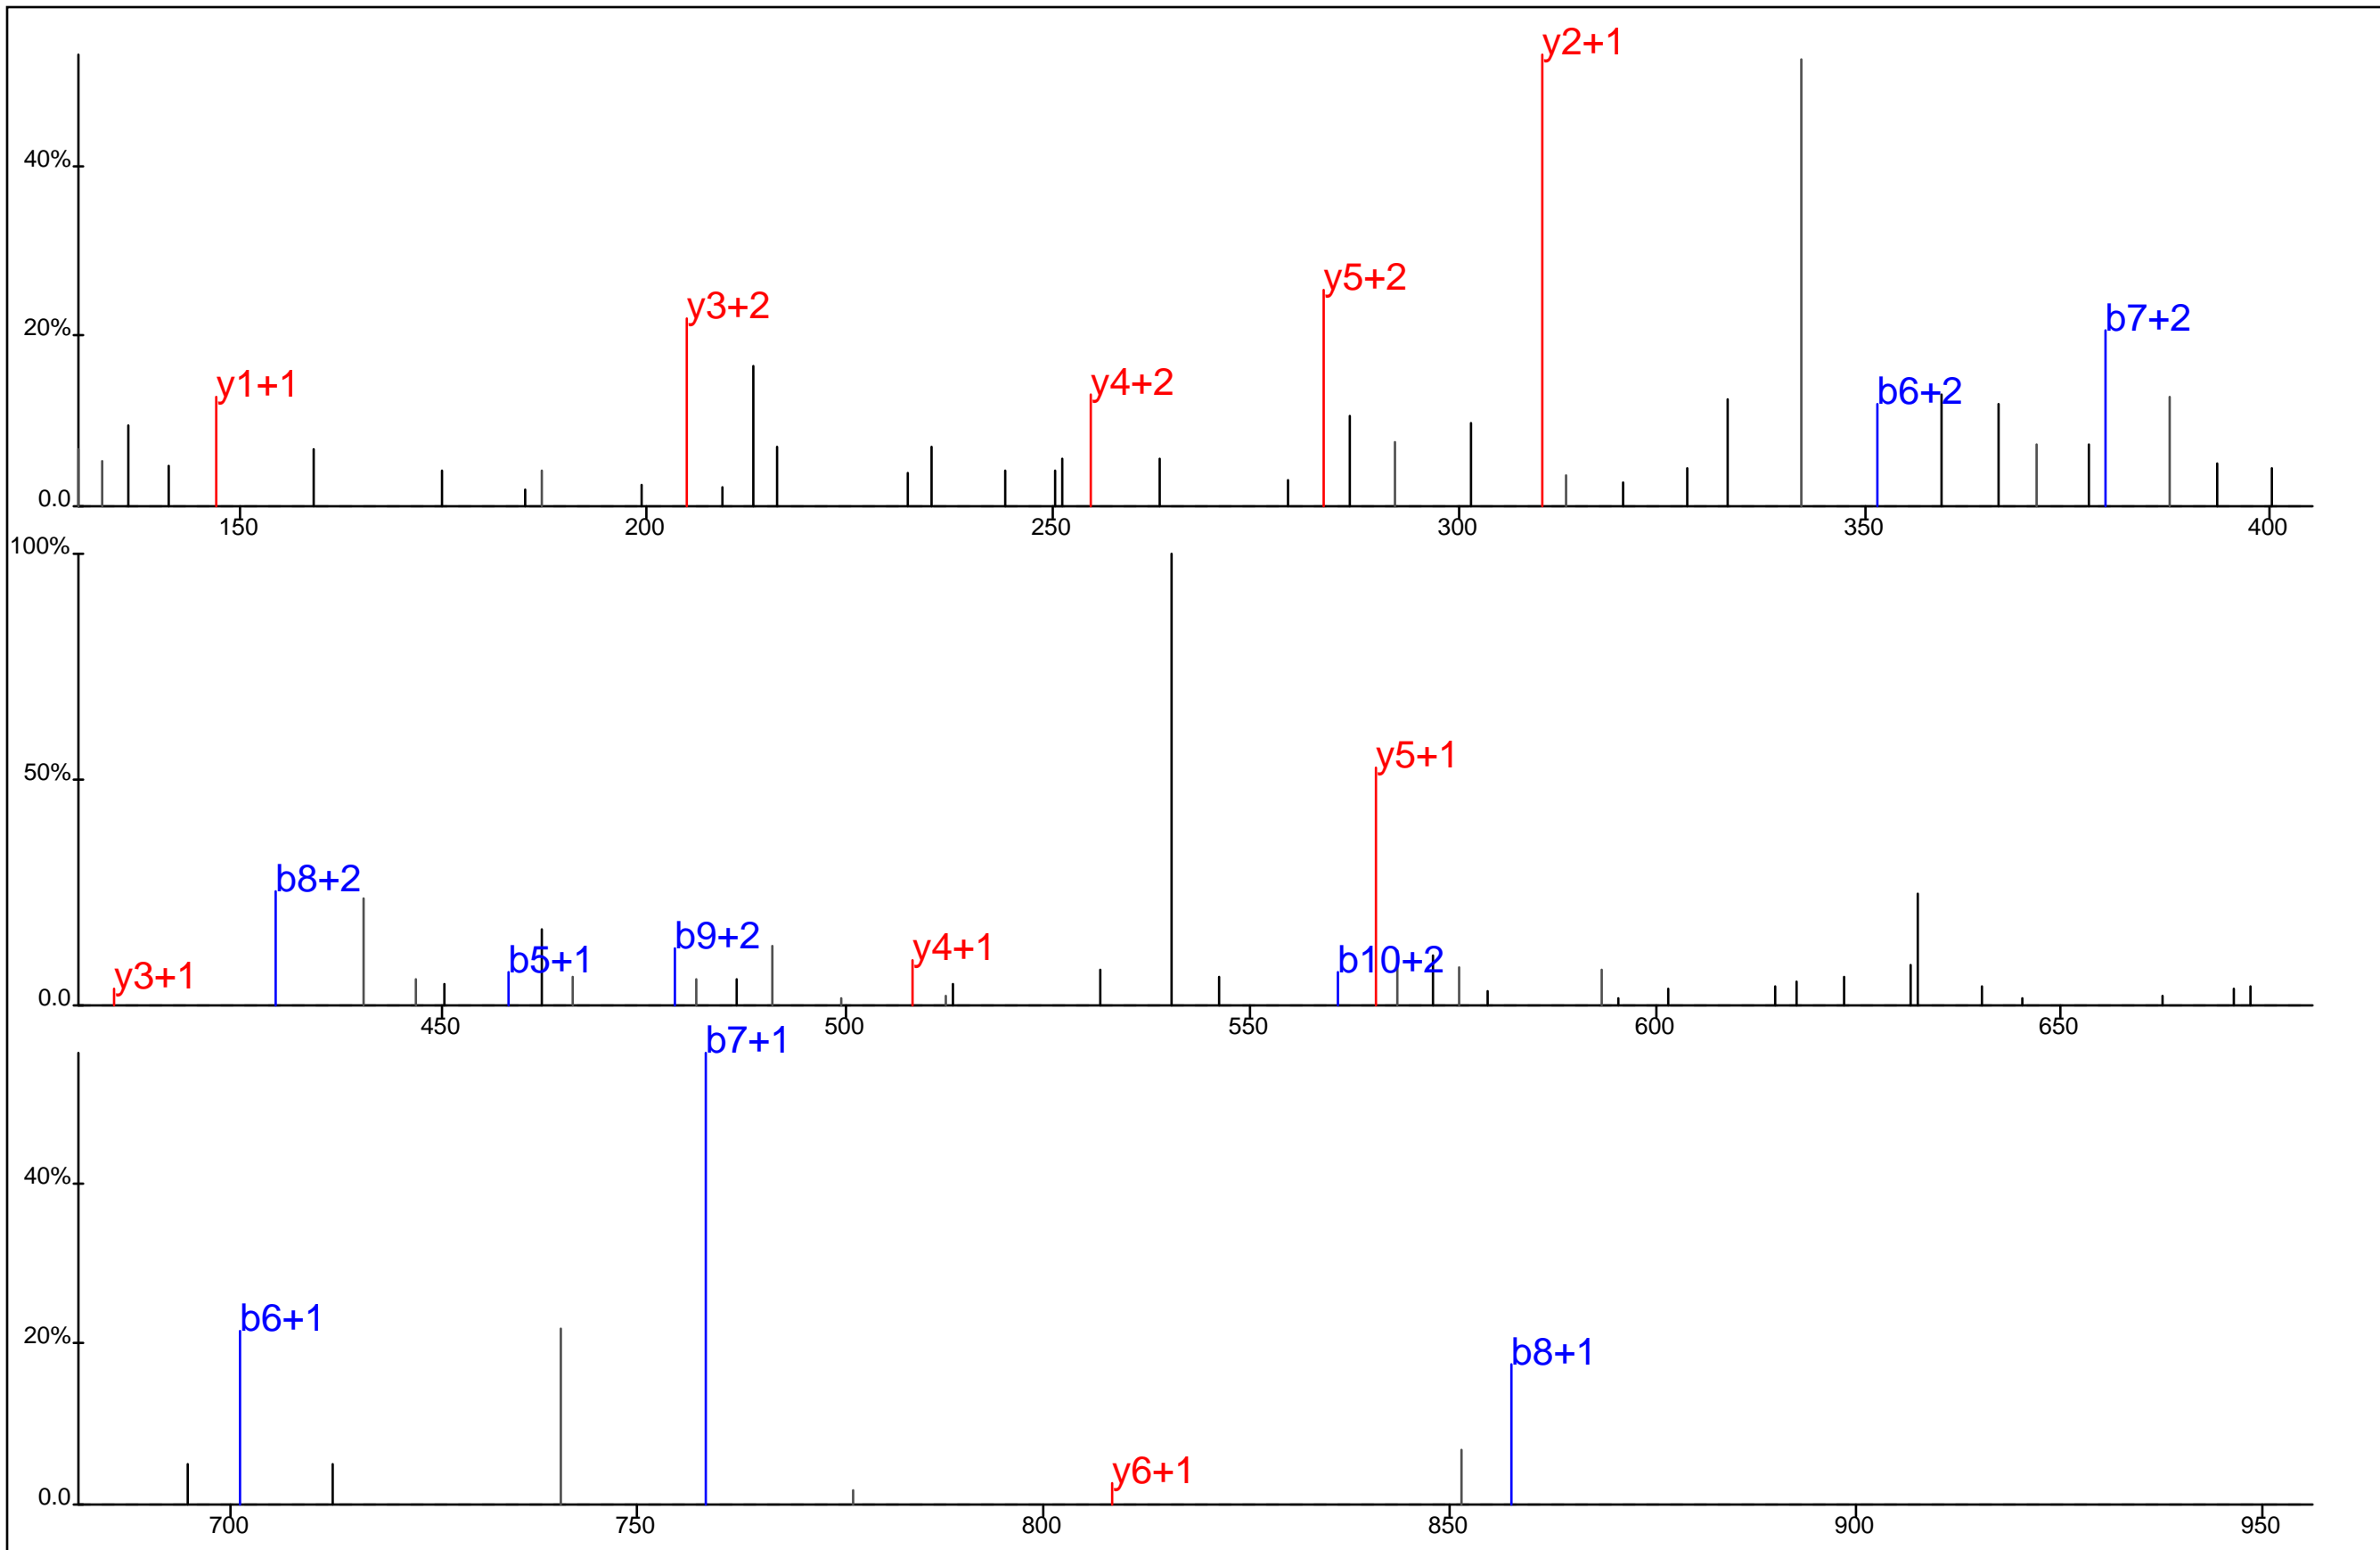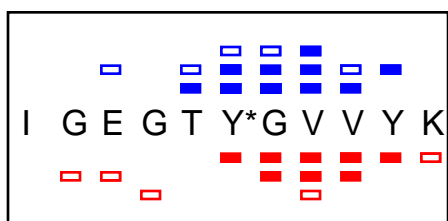

Protein Name: CDC2  
 gi Accession: 0  
 Precursor Mass: 422.5323+3  
 Delta Mass: 0.766 ppm  
 XCorr: 30.92

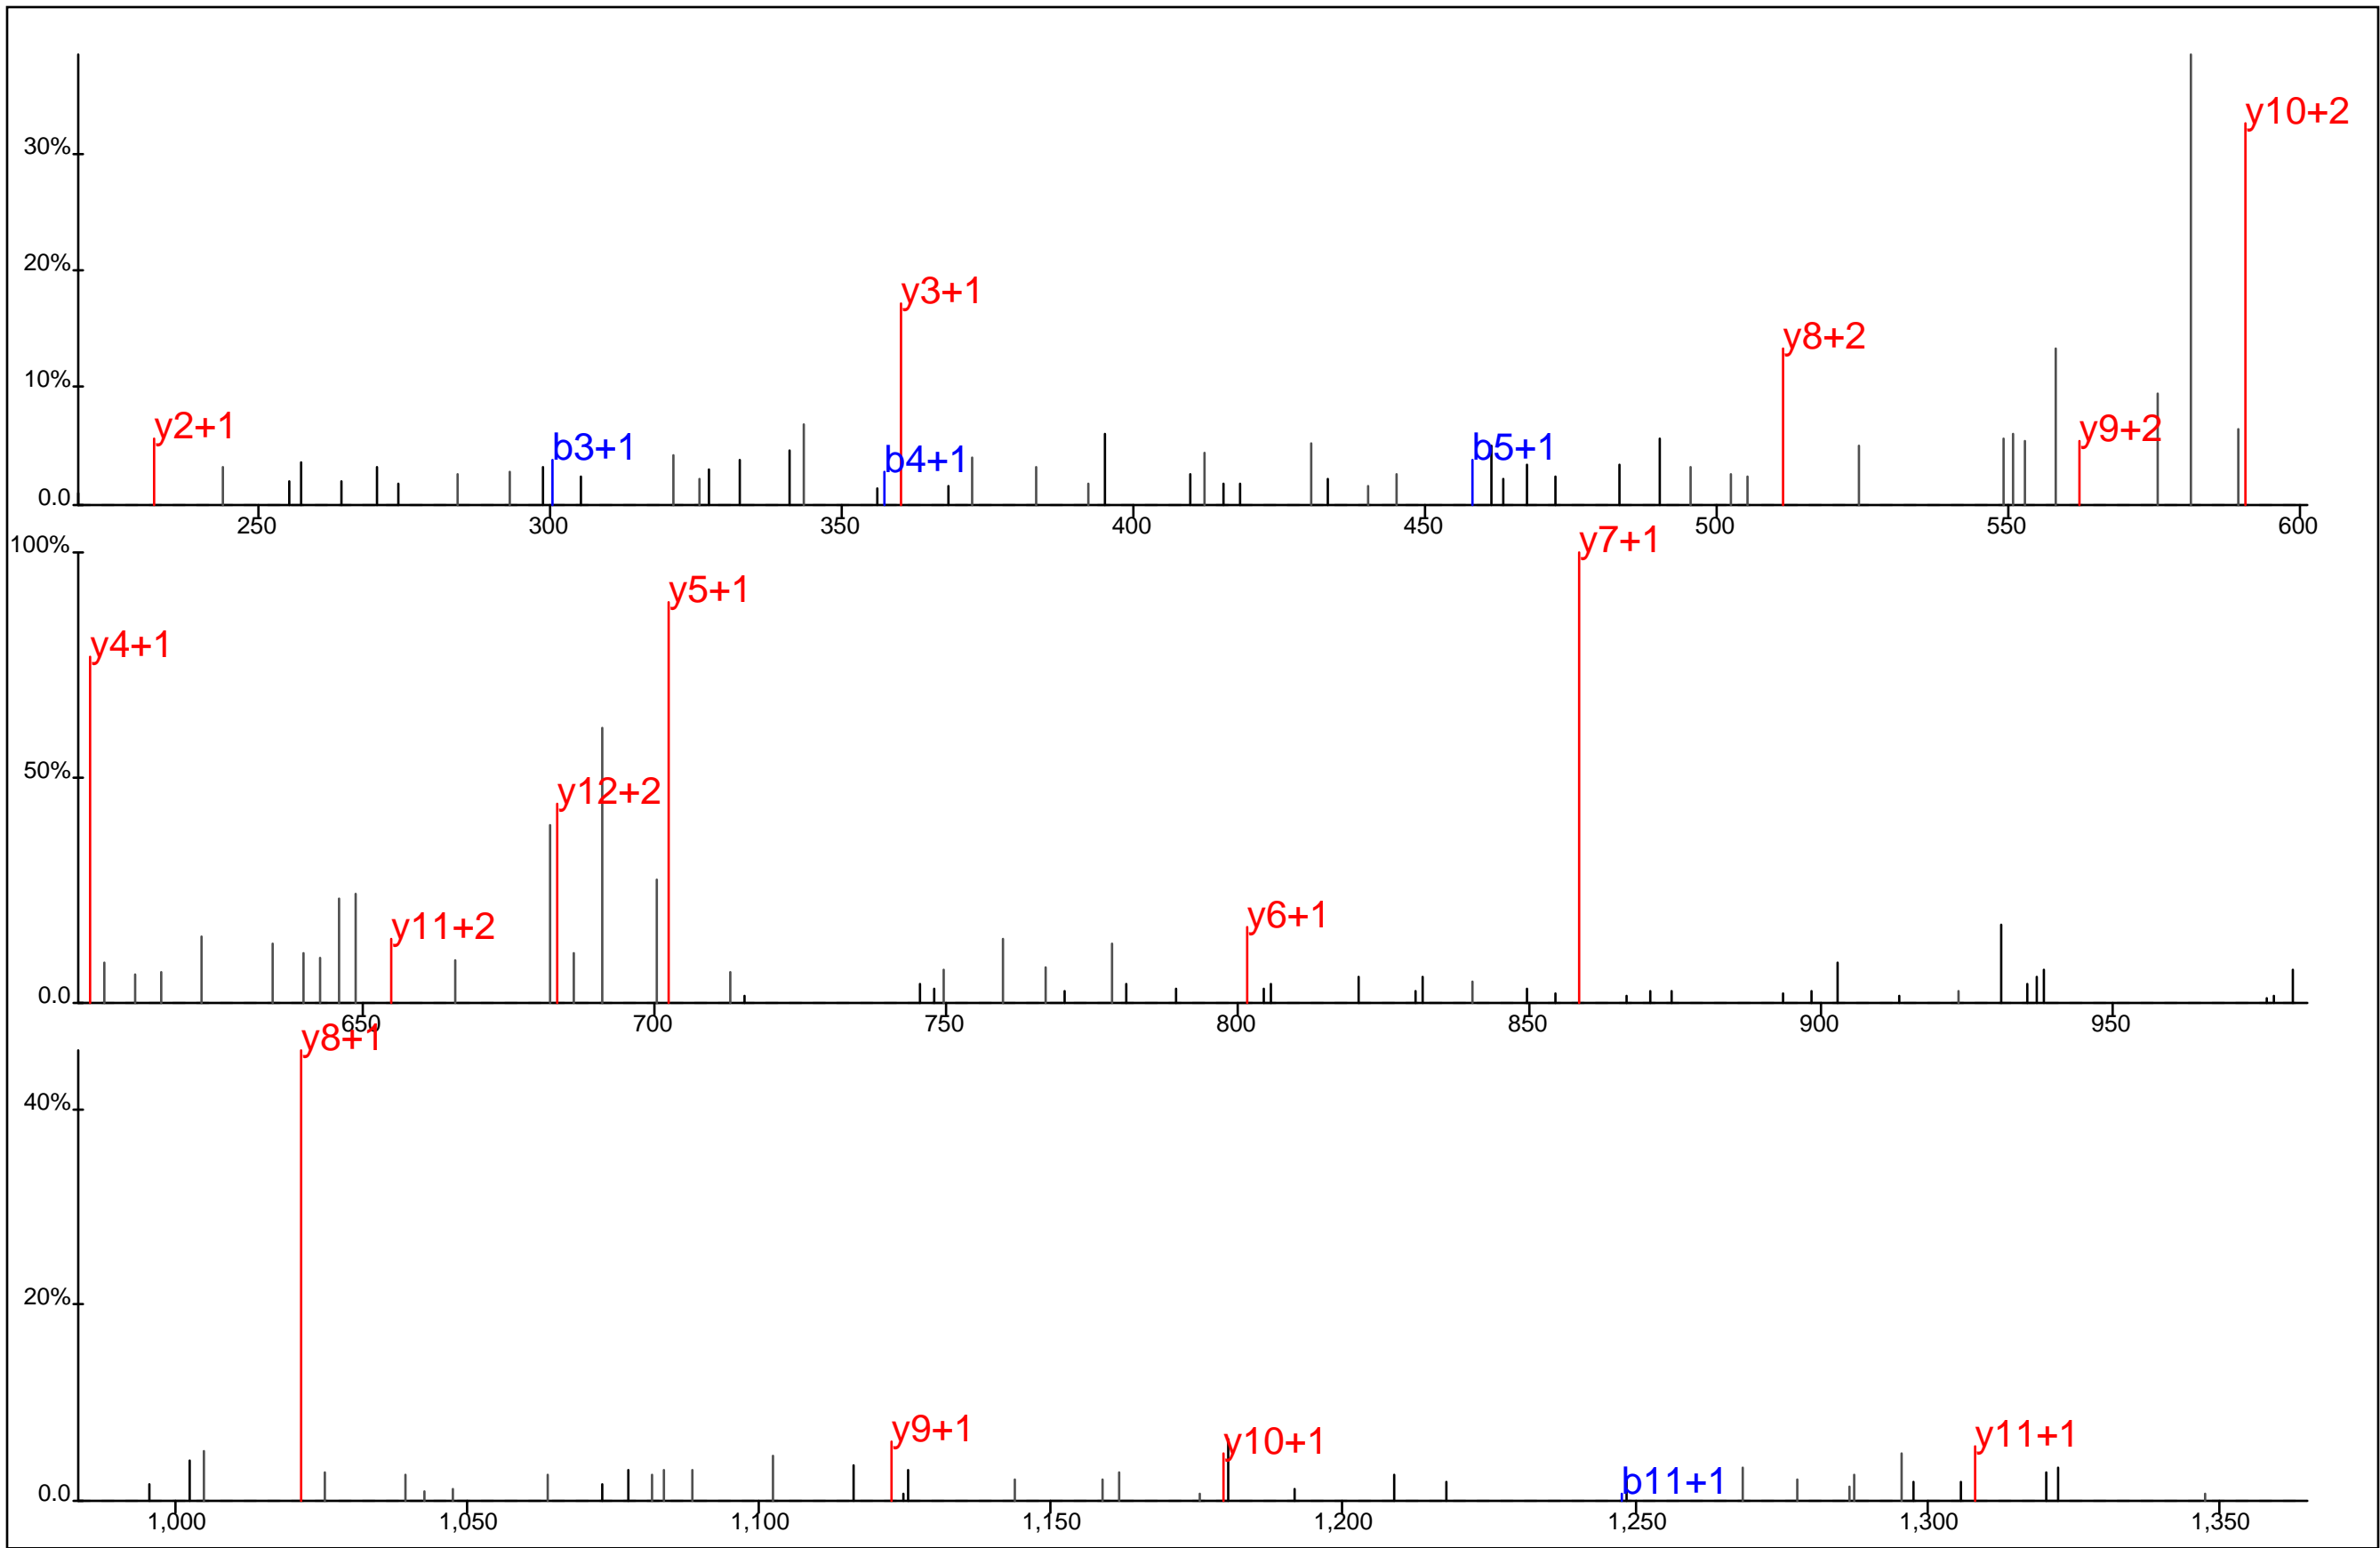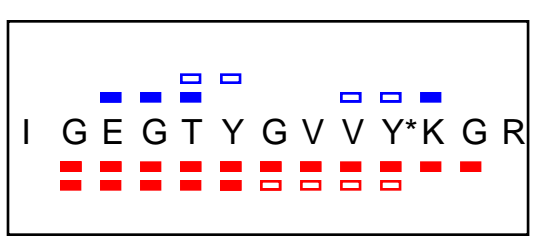

Protein Name: CDC2  
 gi Accession: 0  
 Precursor Mass: 739.8569+2  
 Delta Mass: 1.730 ppm  
 XCorr: 70.24





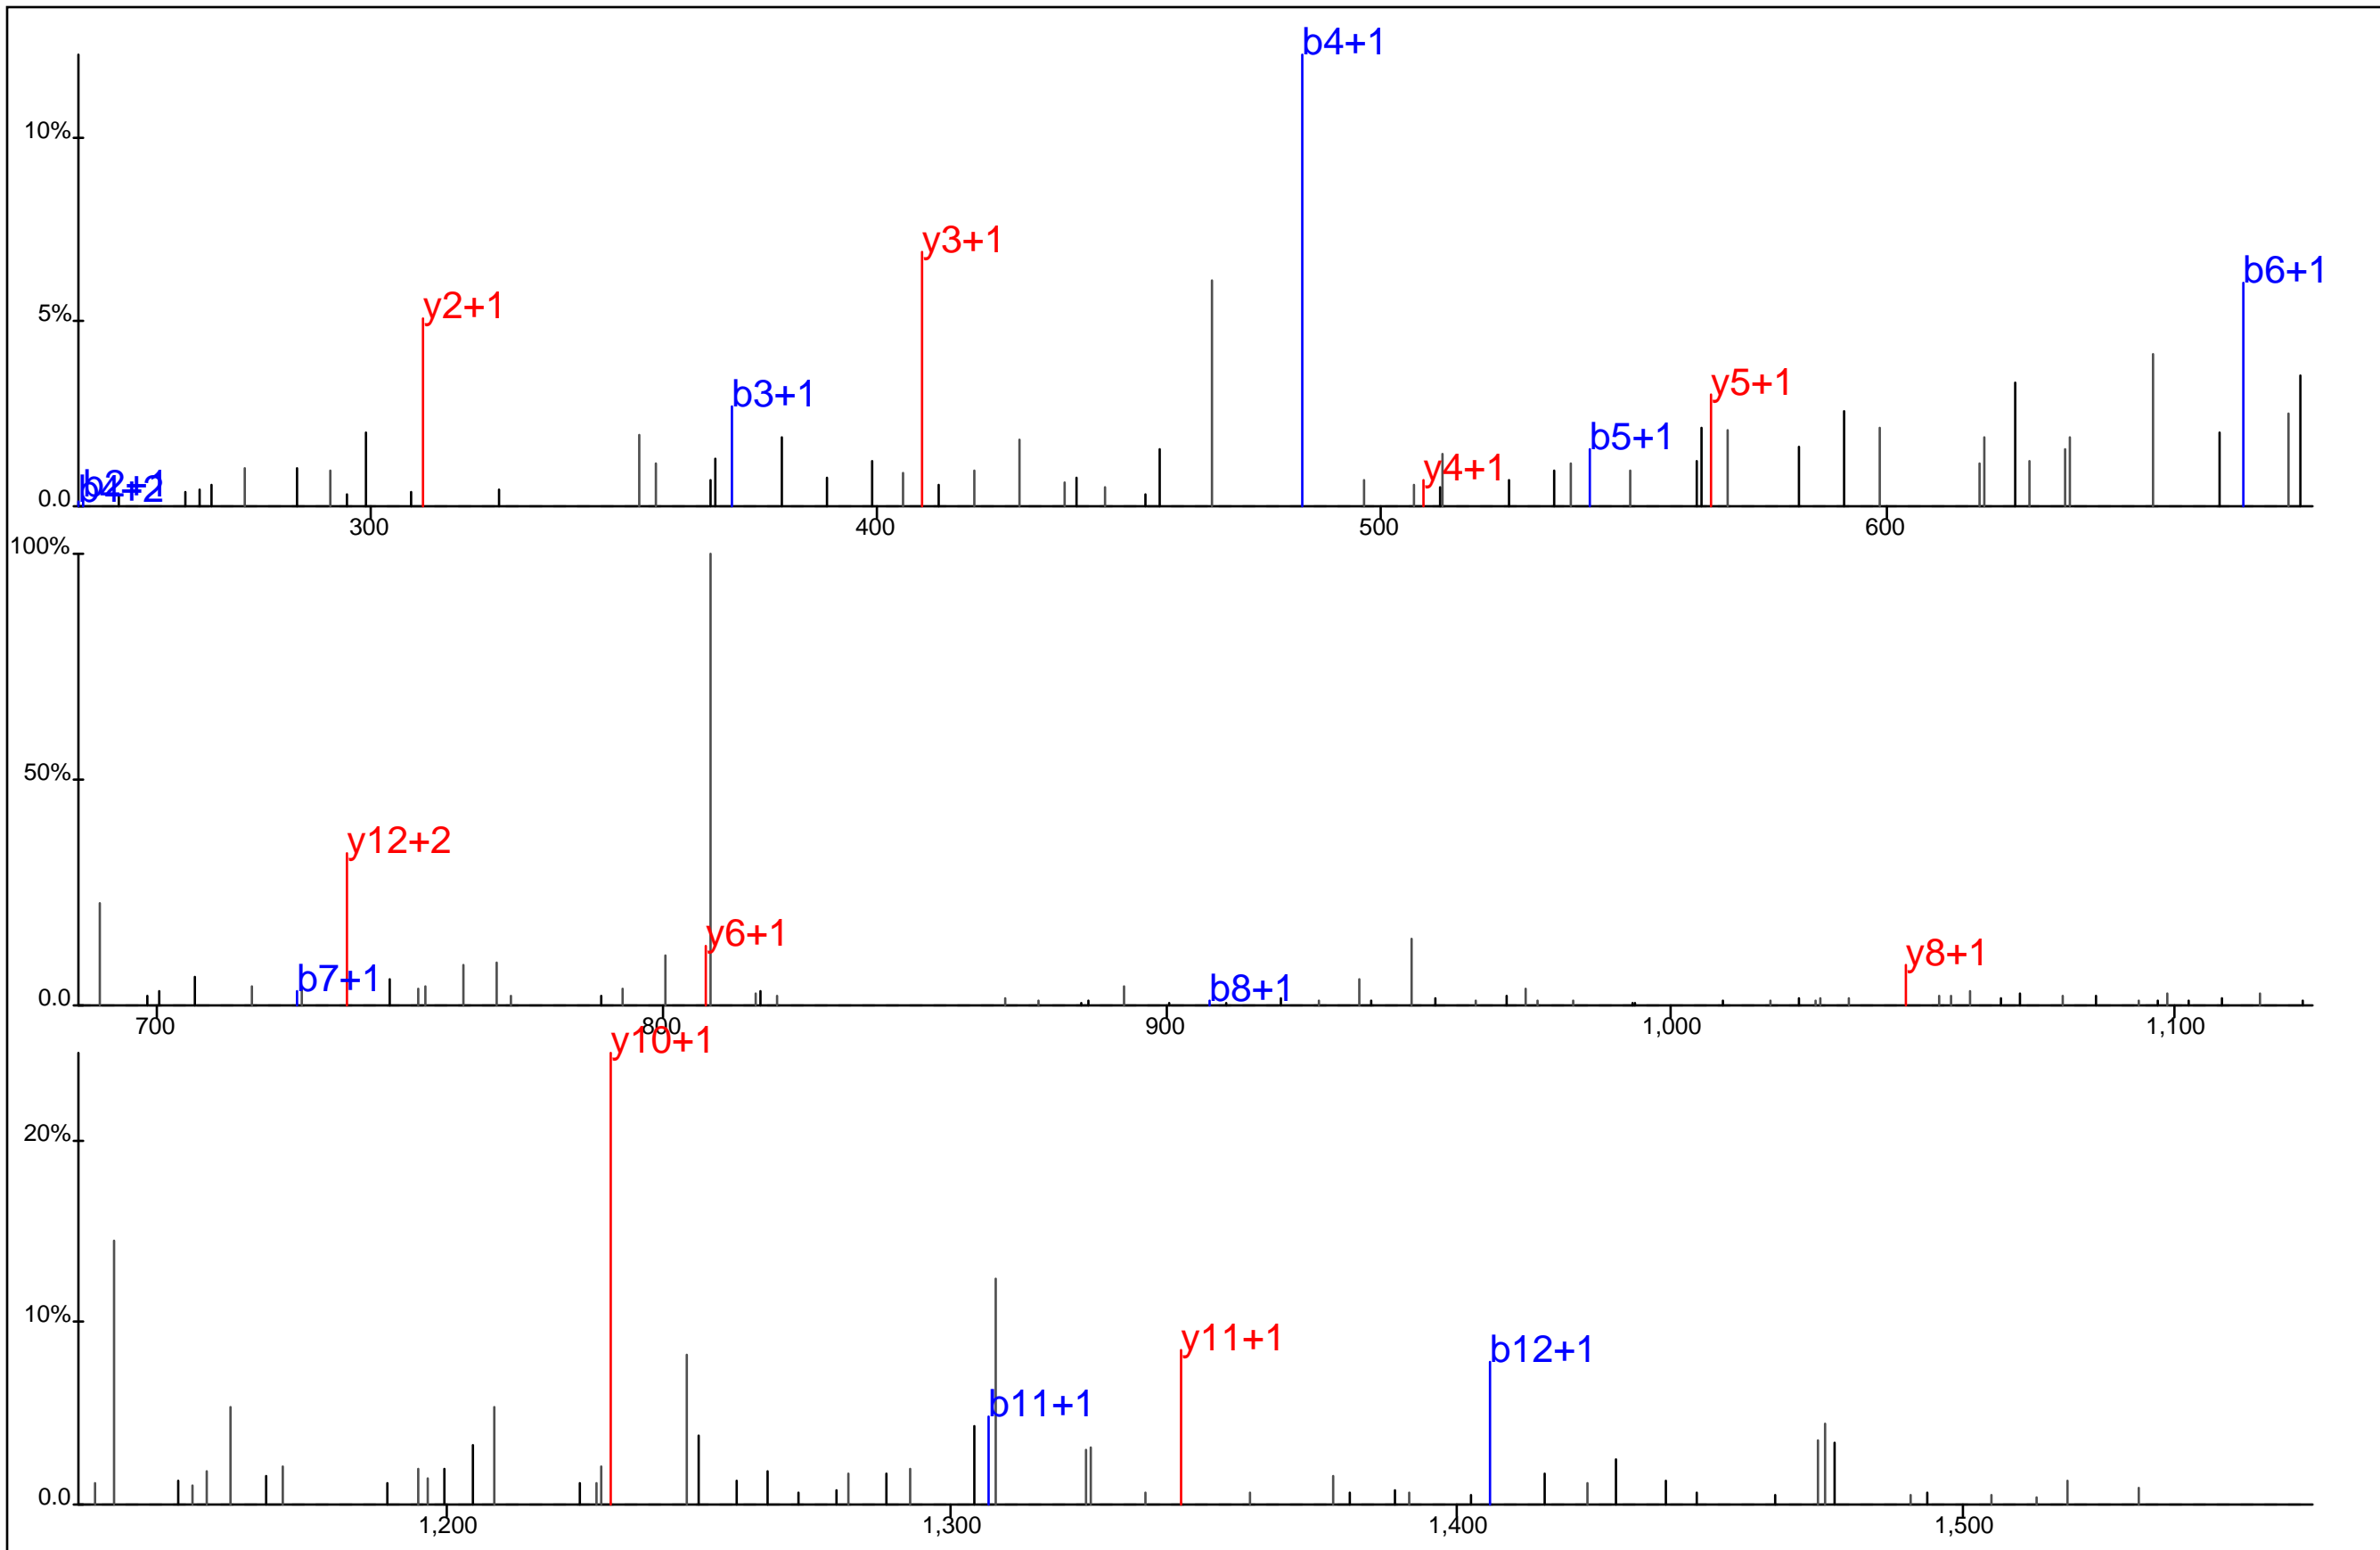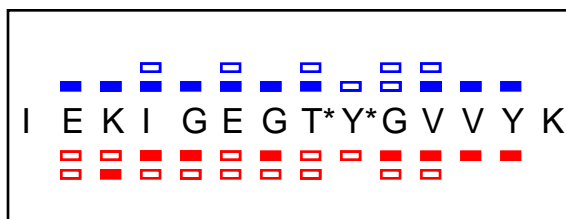

Protein Name: CDC2  
 gi Accession: 0  
 Precursor Mass: 858.3856+2  
 Delta Mass: 3.165 ppm  
 XCorr: 52.17



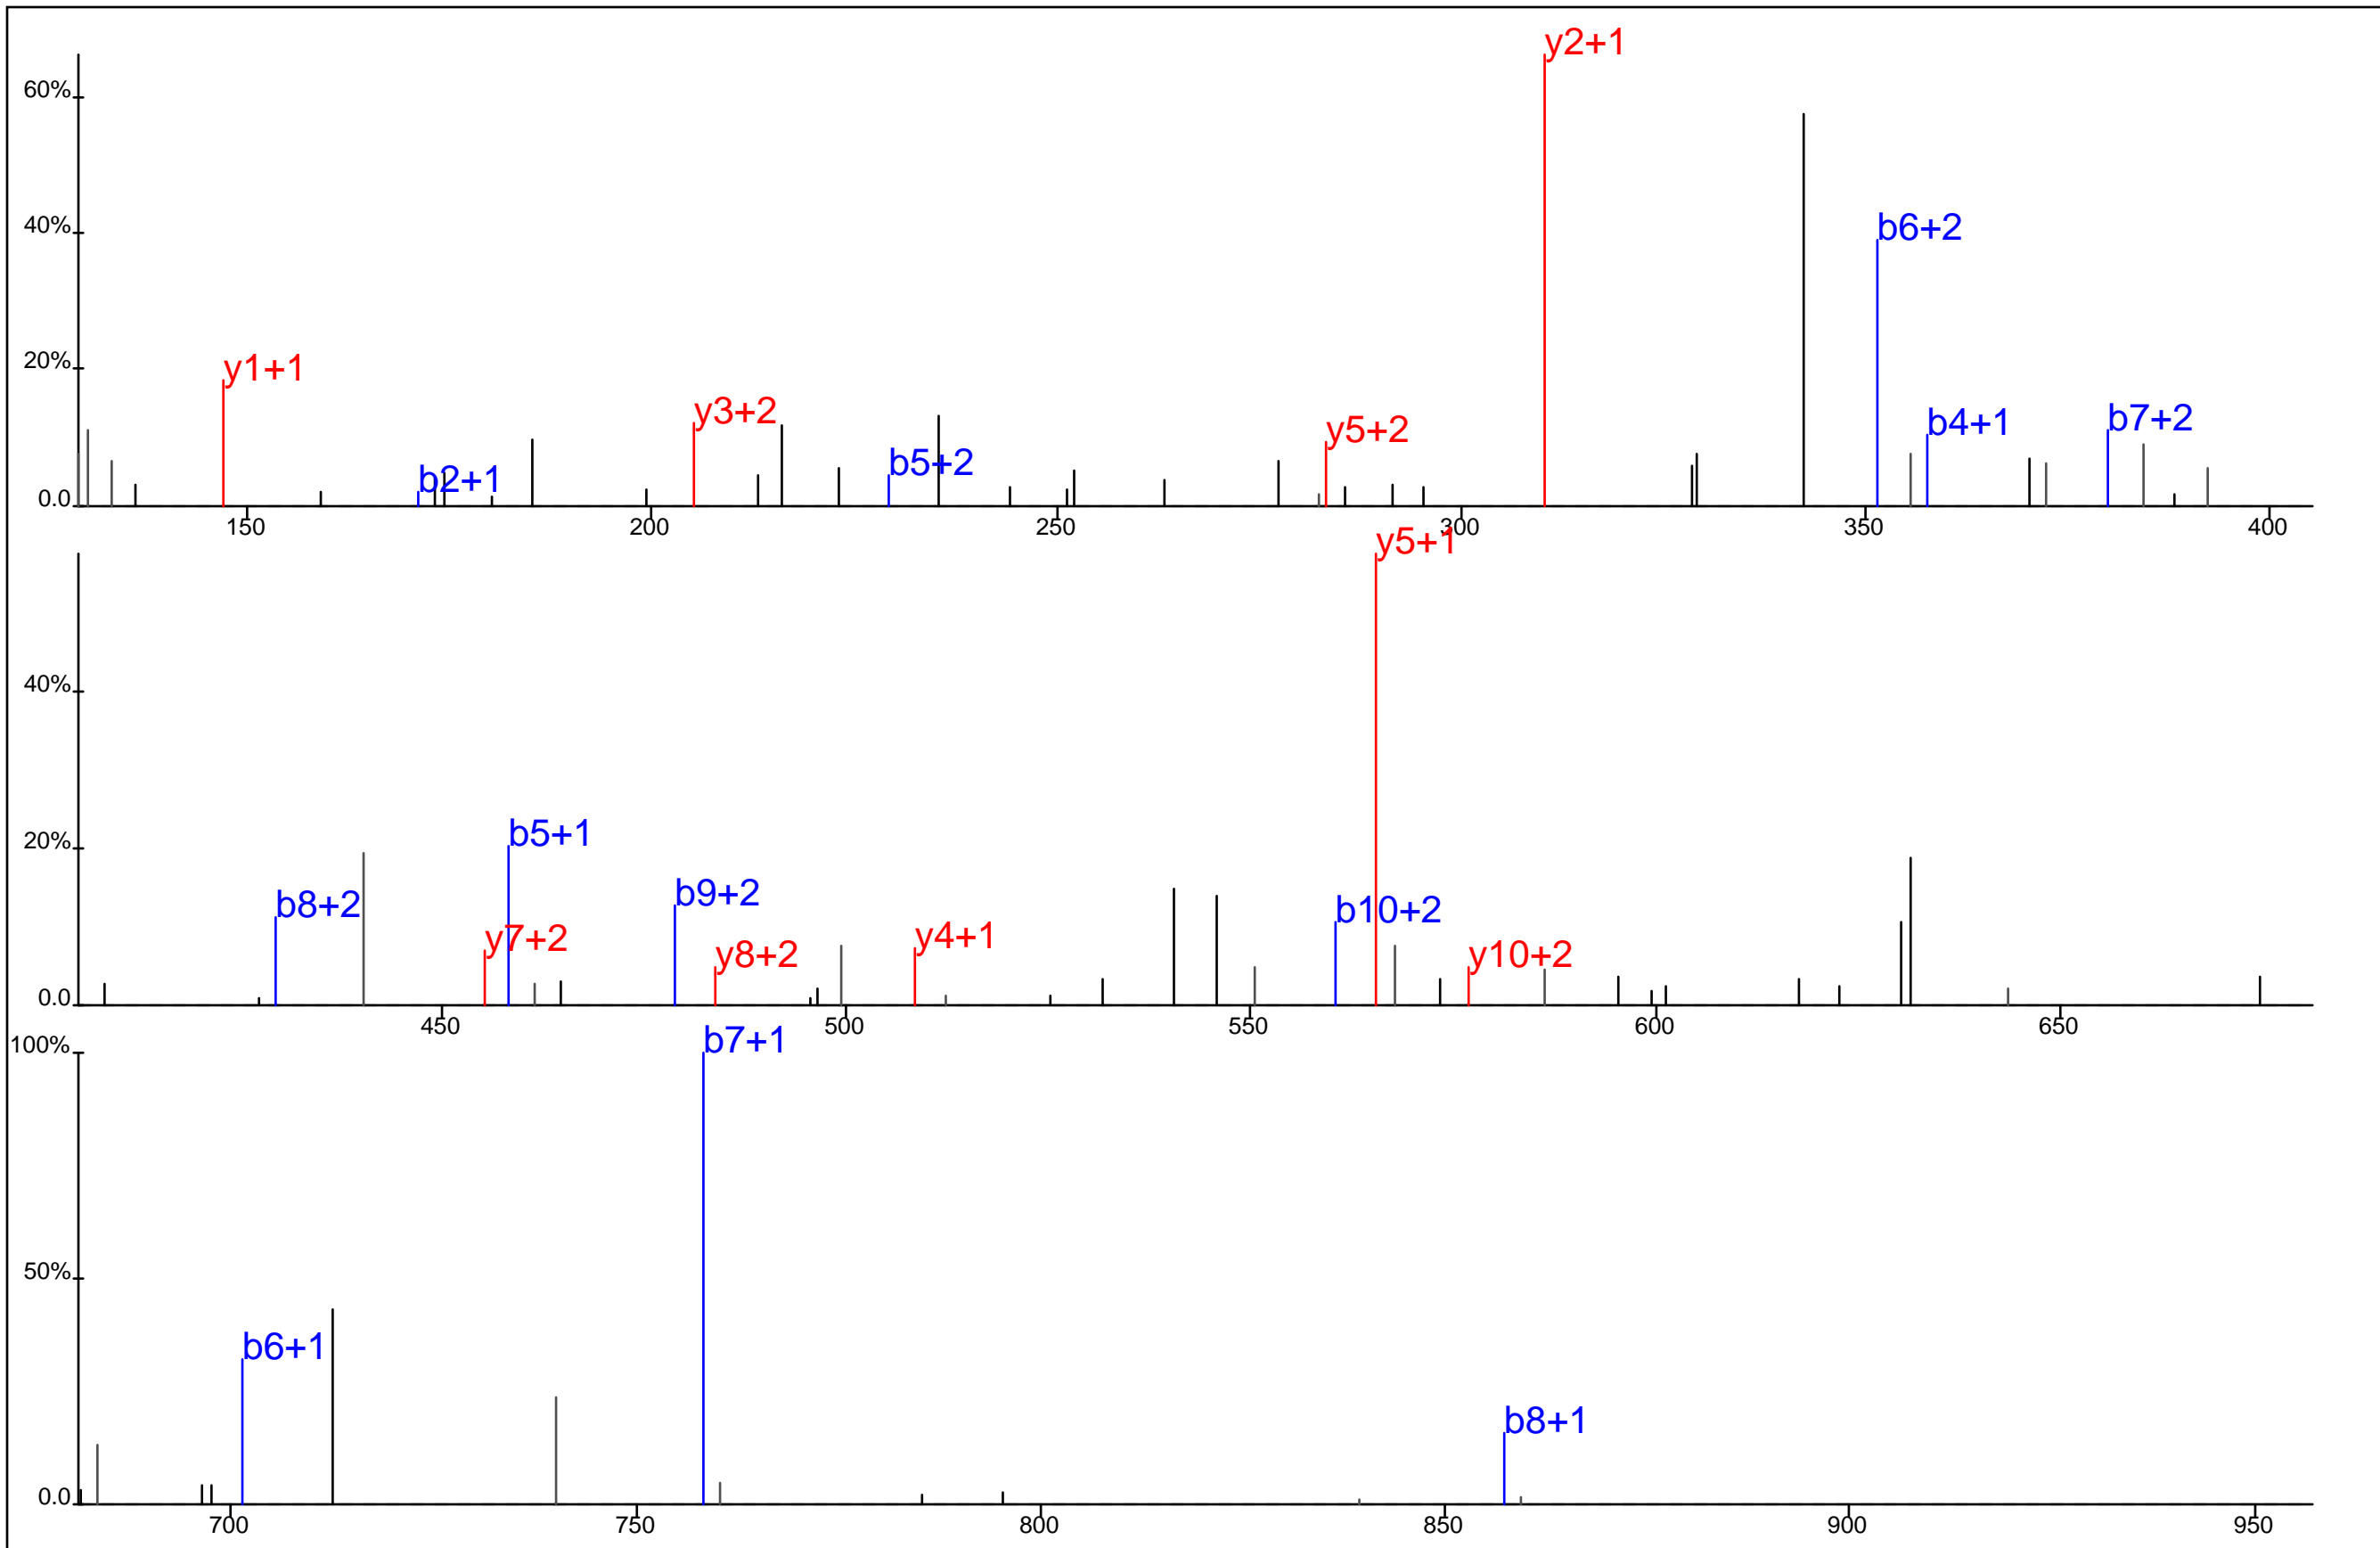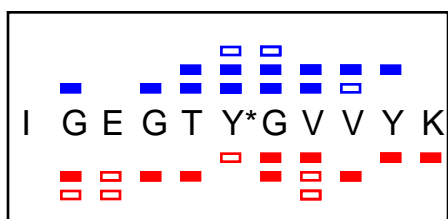

Protein Name: CDC2  
 gi Accession: 0  
 Precursor Mass: 422.5324+3  
 Delta Mass: 0.982 ppm  
 XCorr: 35.37

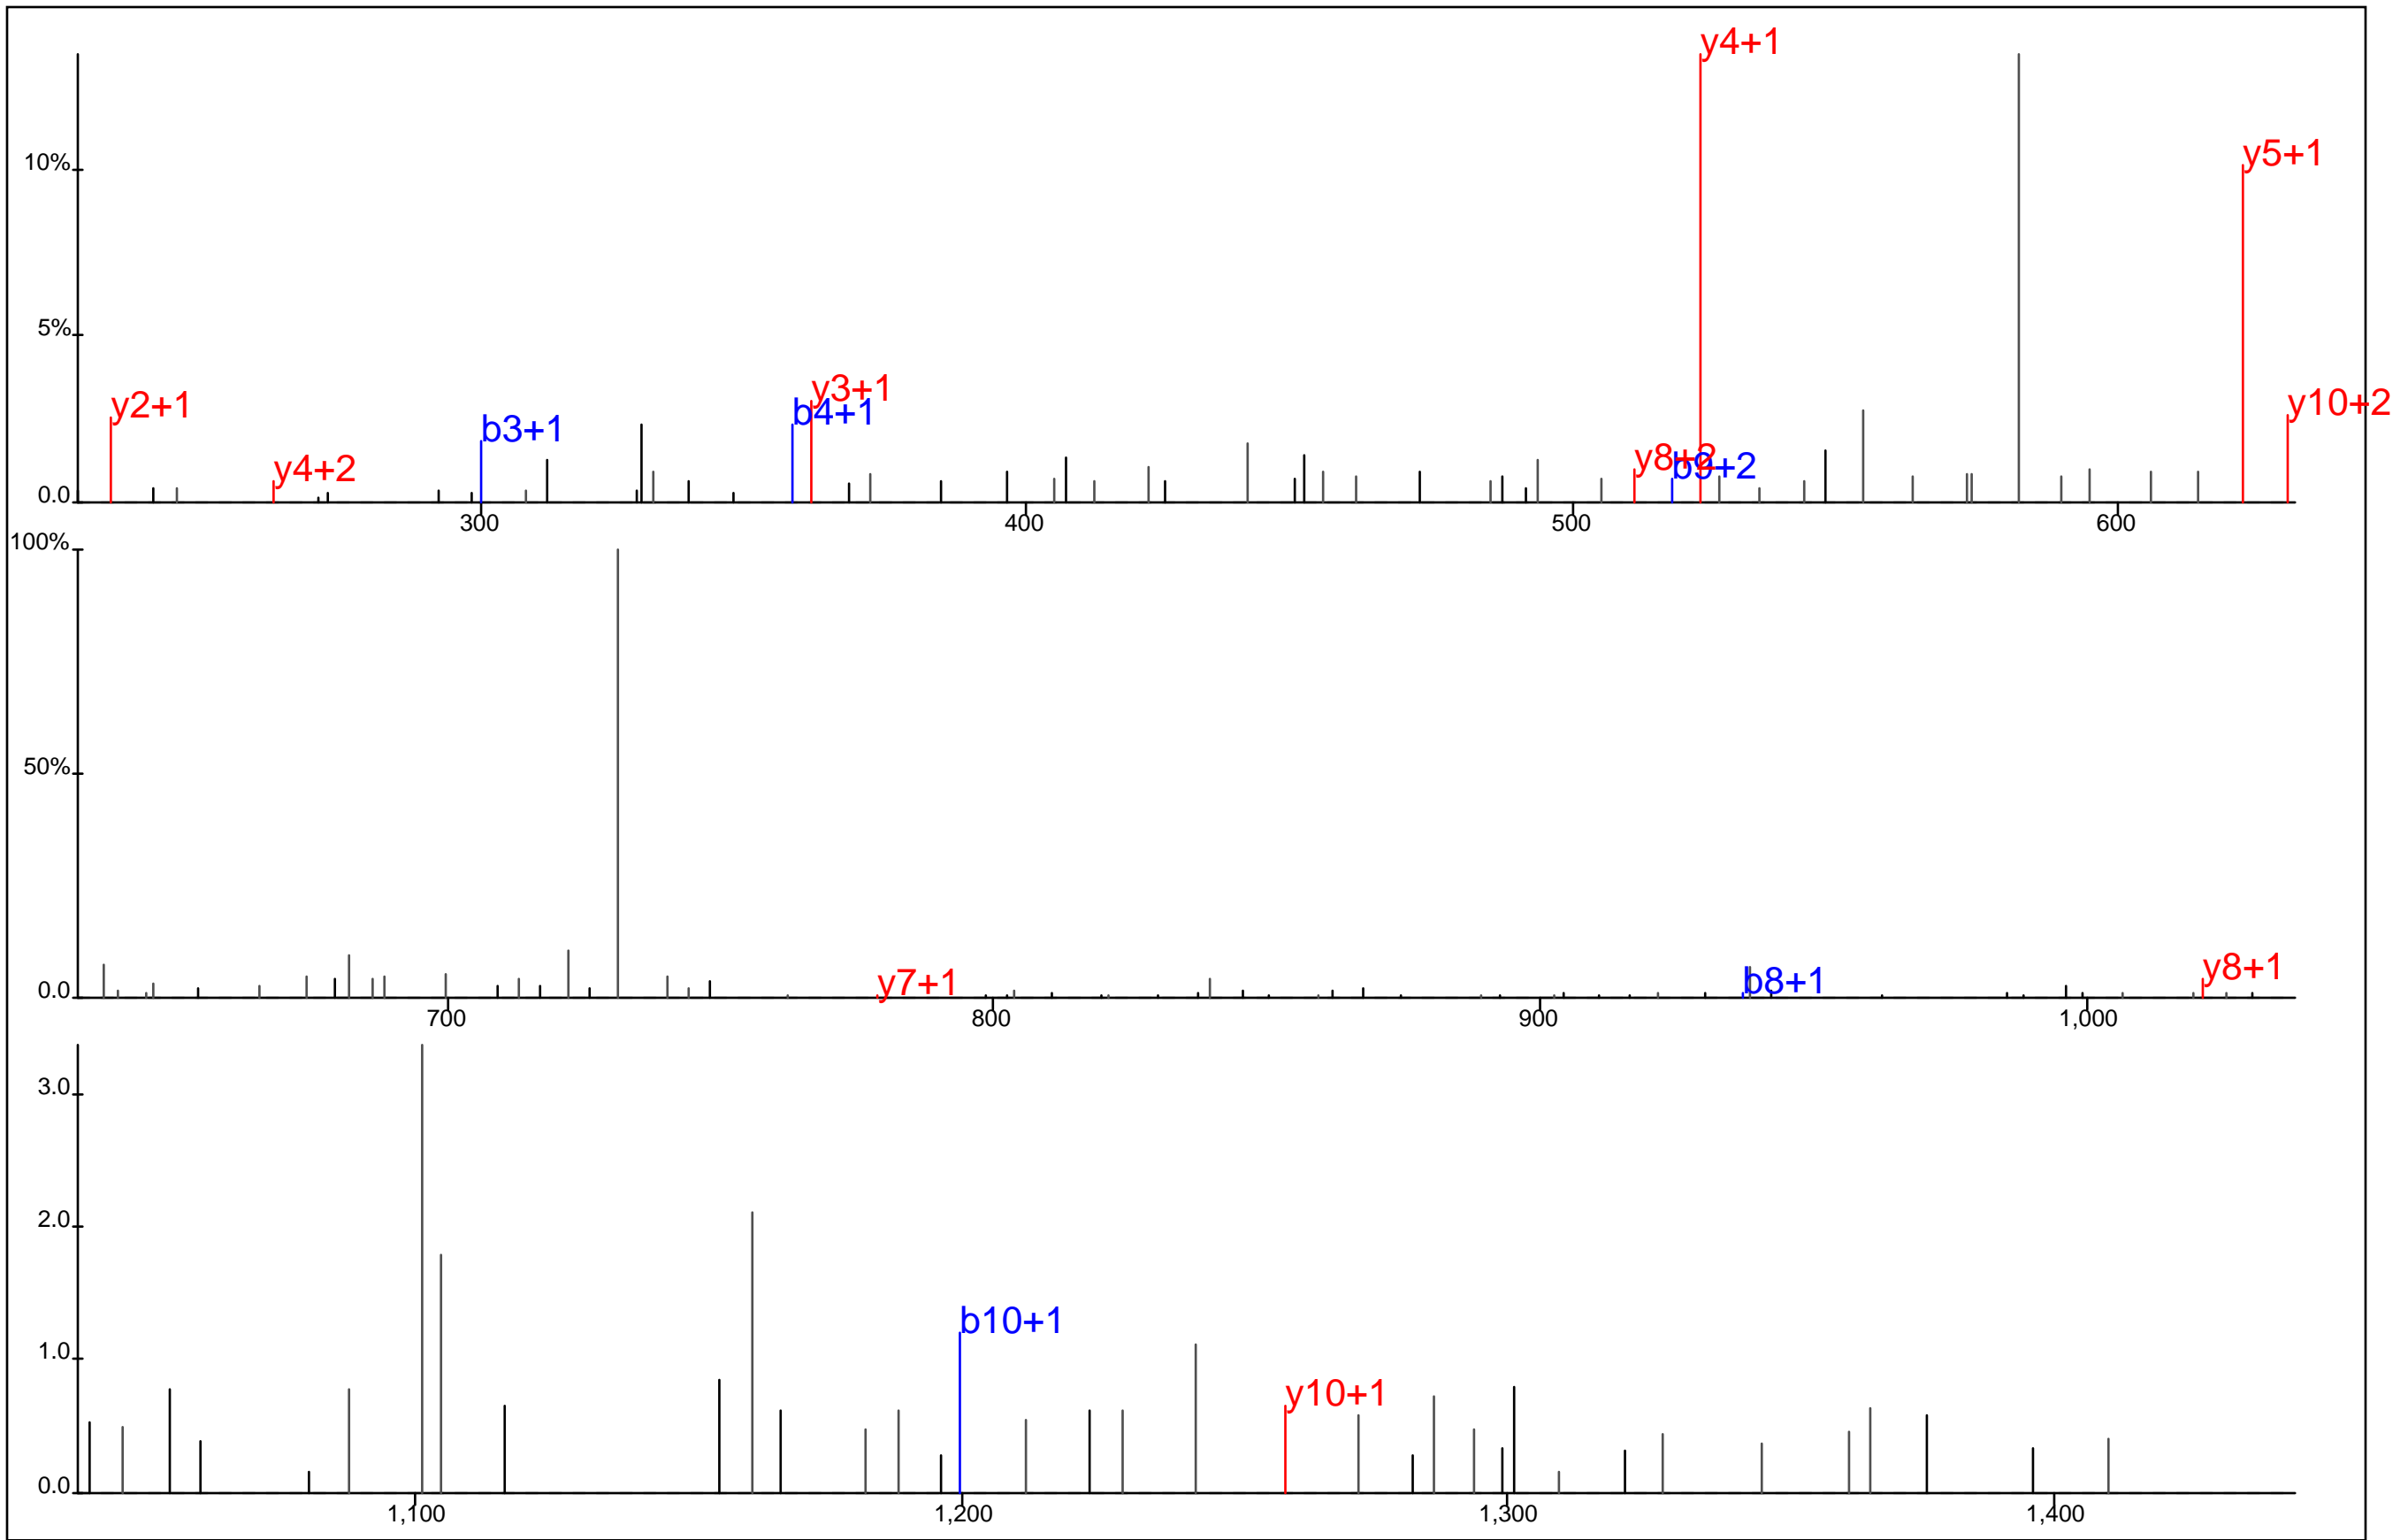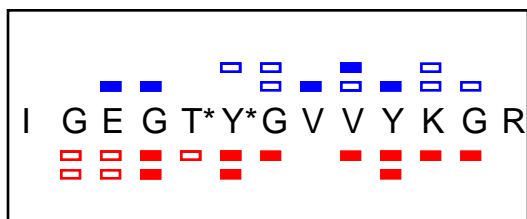

Protein Name: CDC2  
 gi Accession: 0  
 Precursor Mass: 779.8384+2  
 Delta Mass: 0.488 ppm  
 XCorr: 52.2

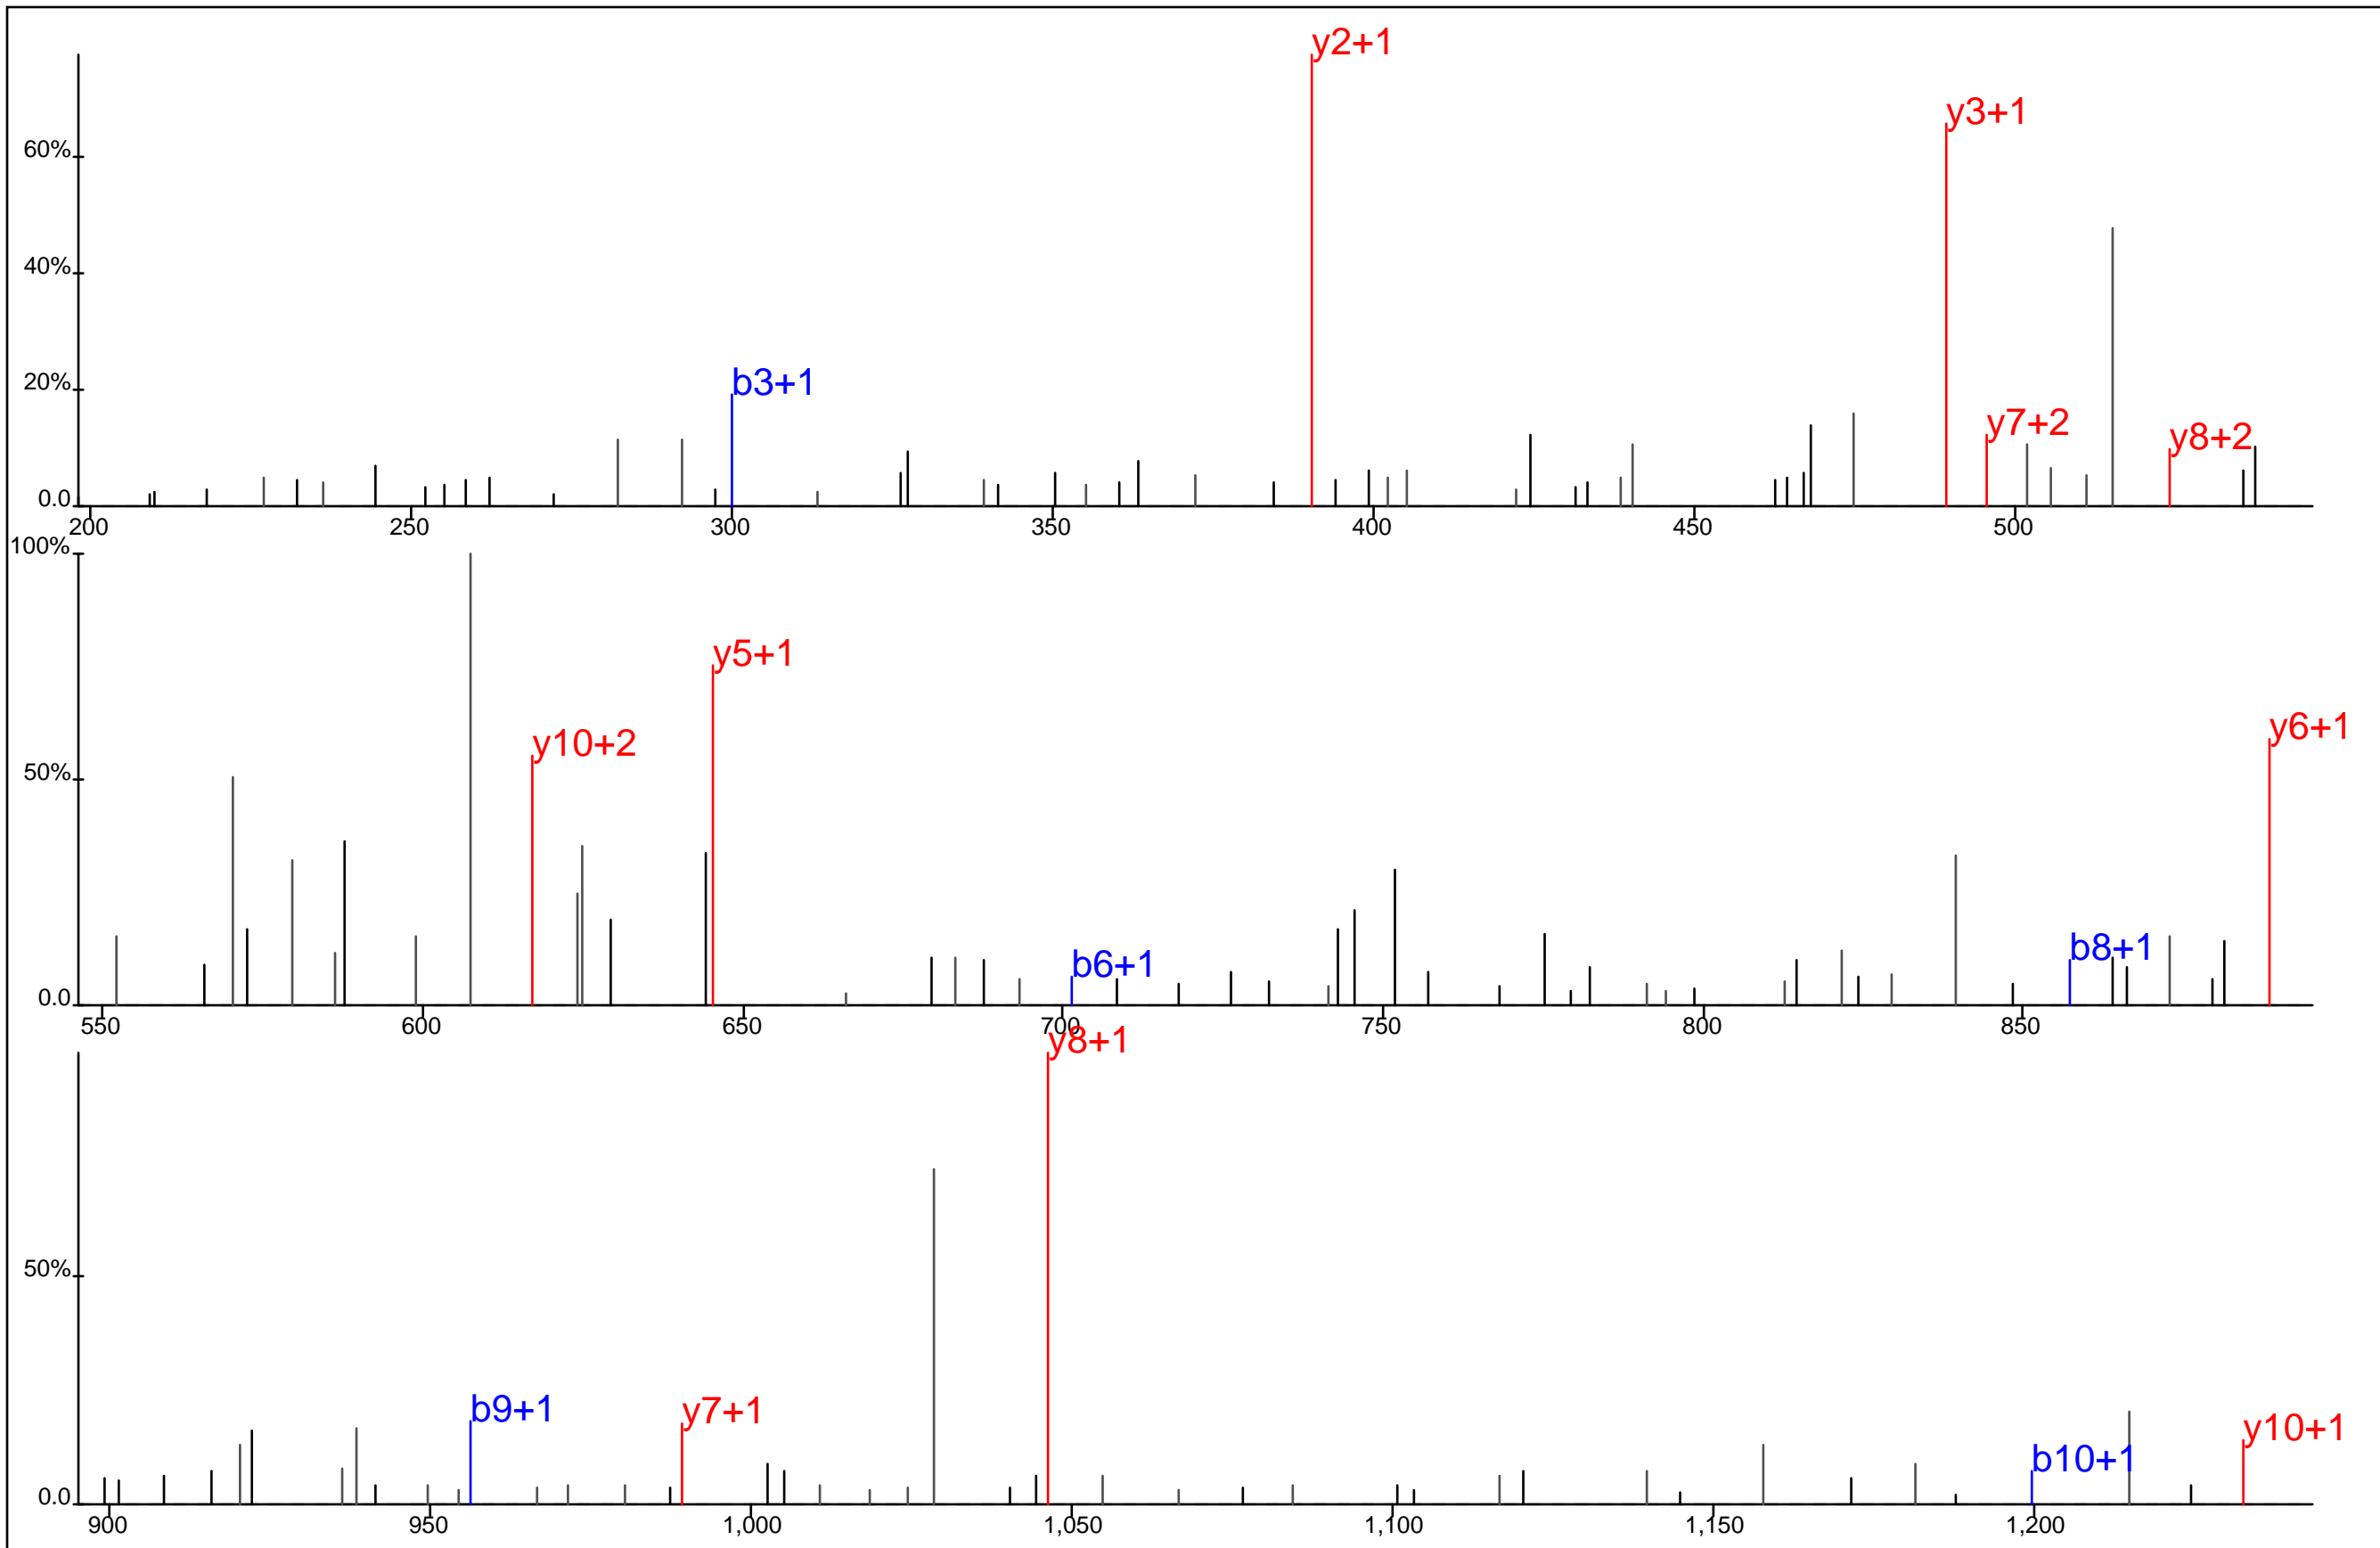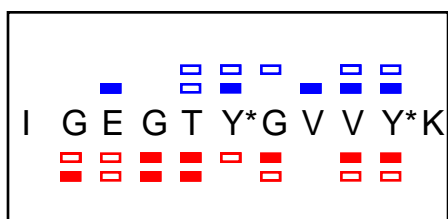

Protein Name: CDC2  
 gi Accession: 0  
 Precursor Mass: 673.2770+2  
 Delta Mass: 0.730 ppm  
 XCorr: 53.91

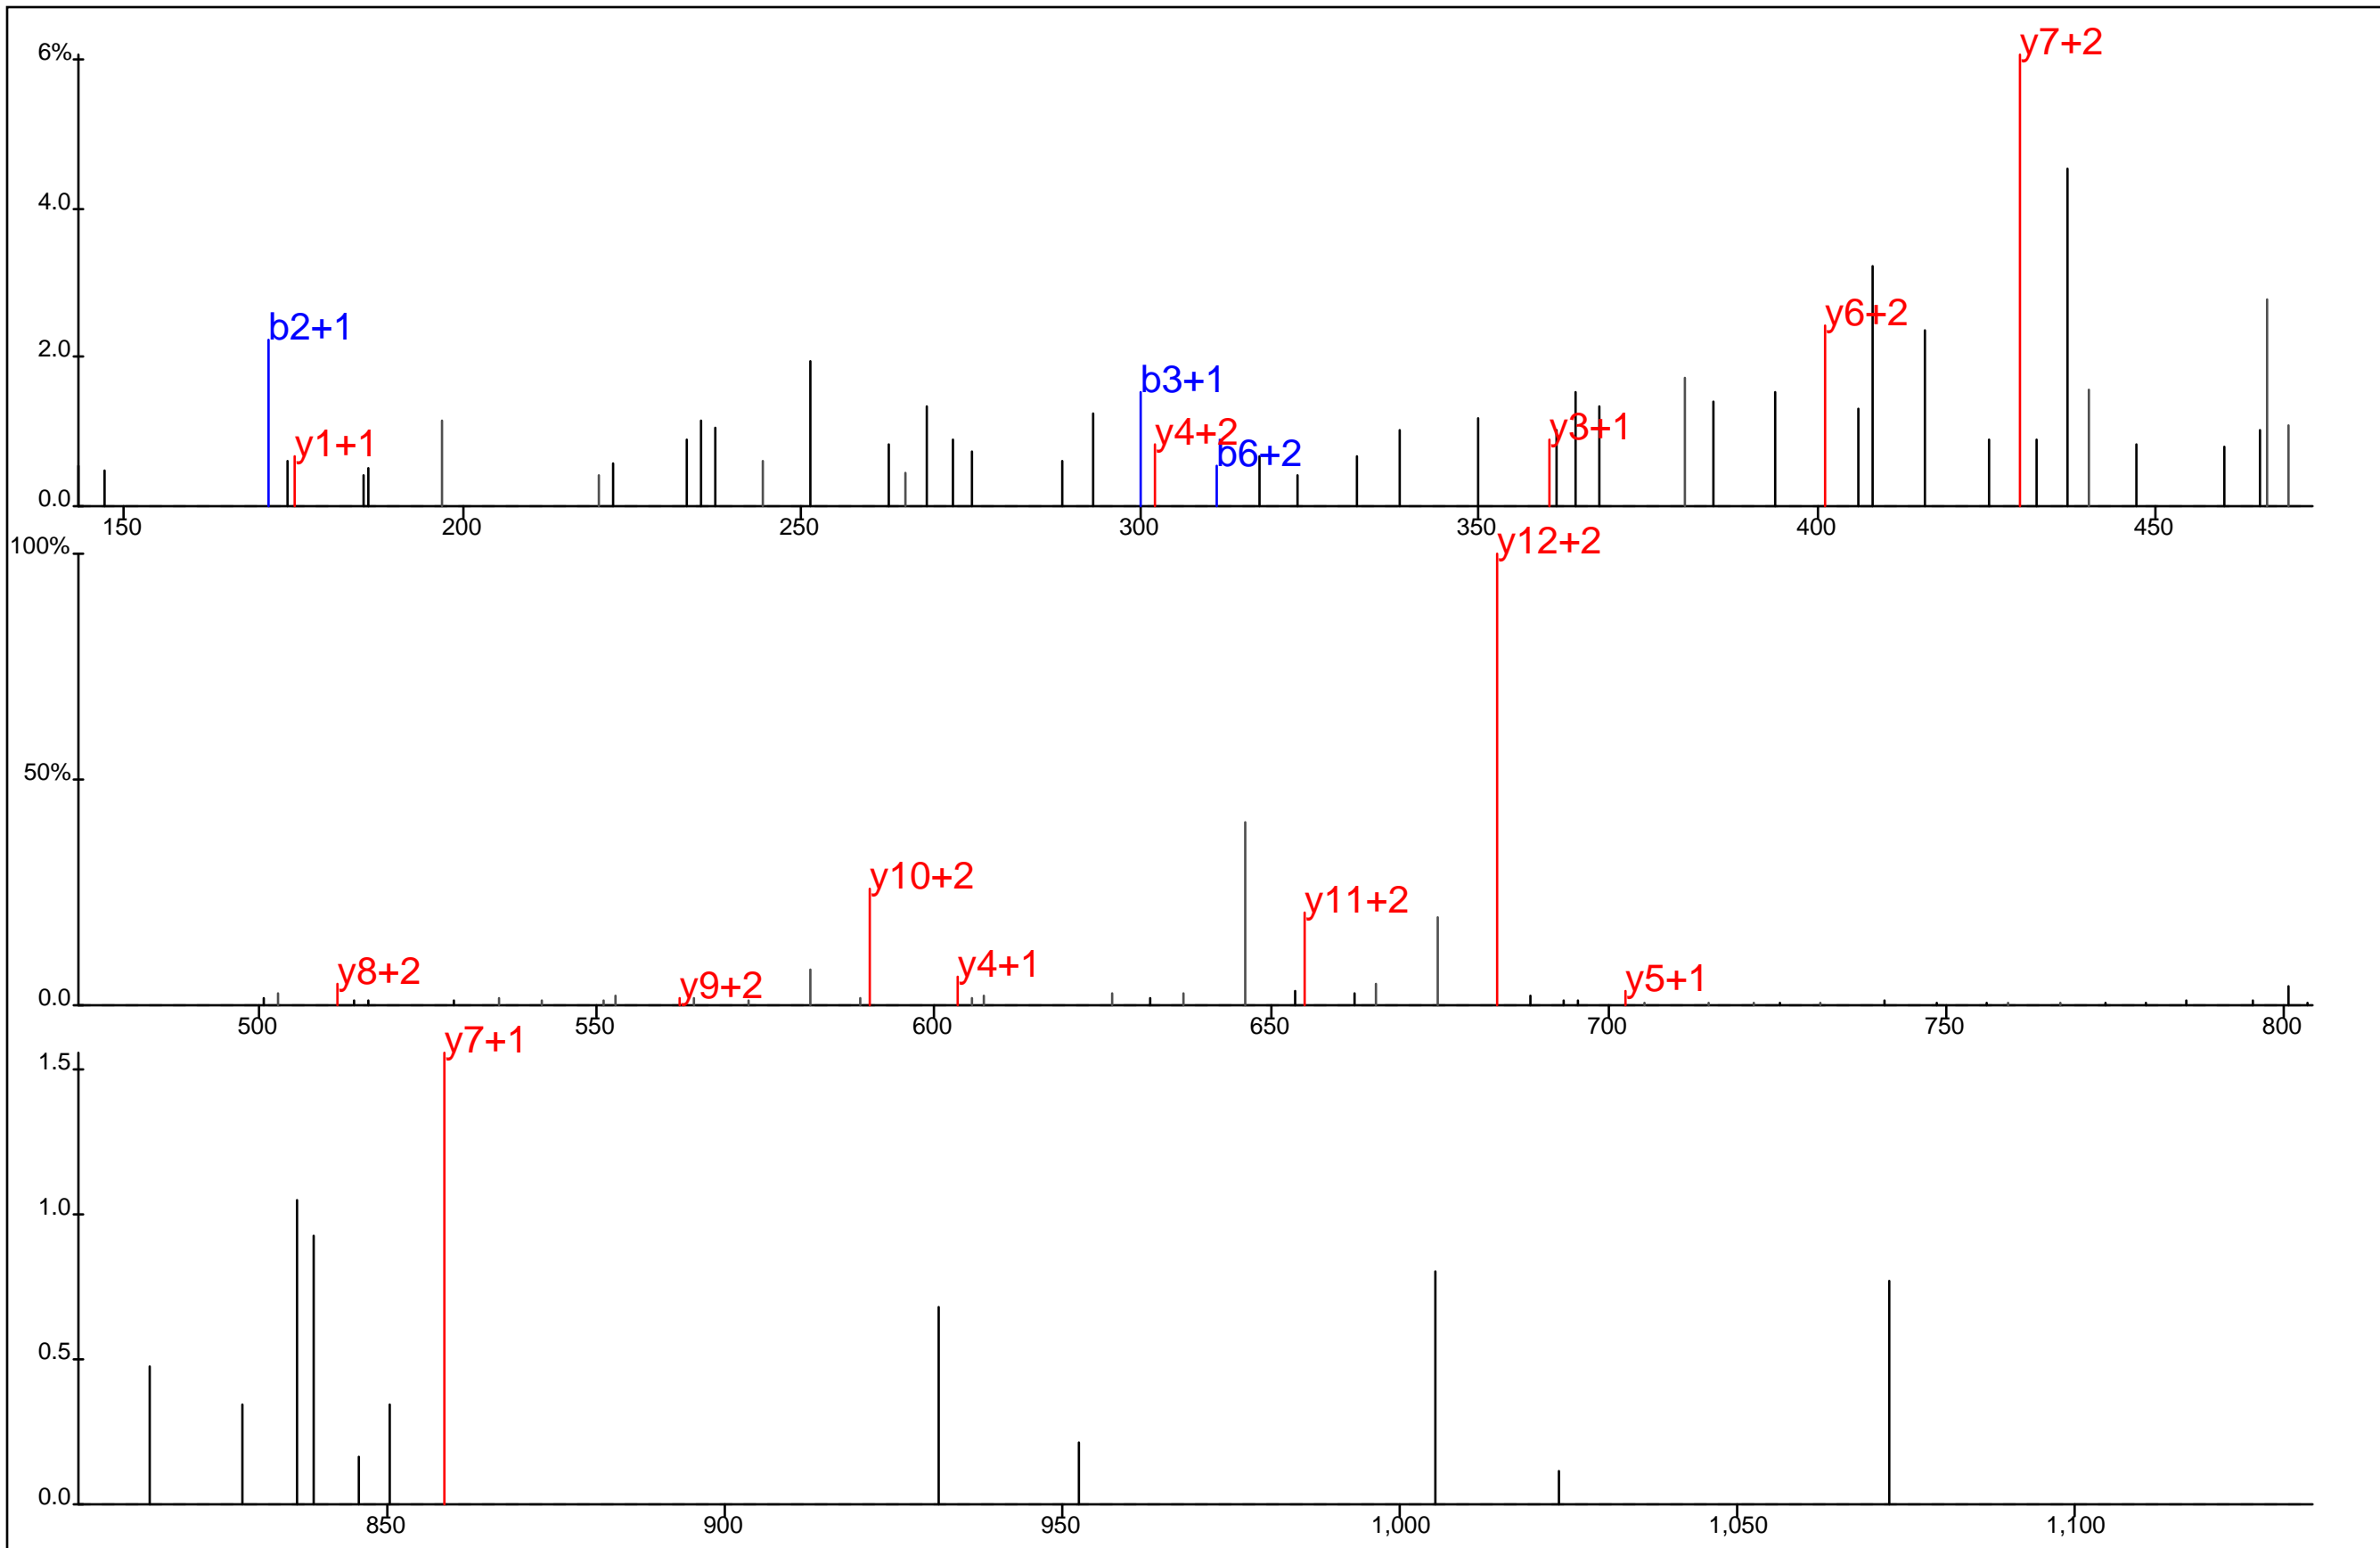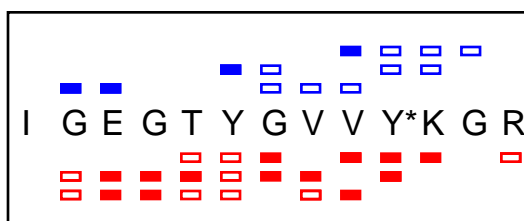

Protein Name: CDC2  
 gi Accession: 0  
 Precursor Mass: 493.5718+3  
 Delta Mass: 2.119 ppm  
 XCorr: 24.14

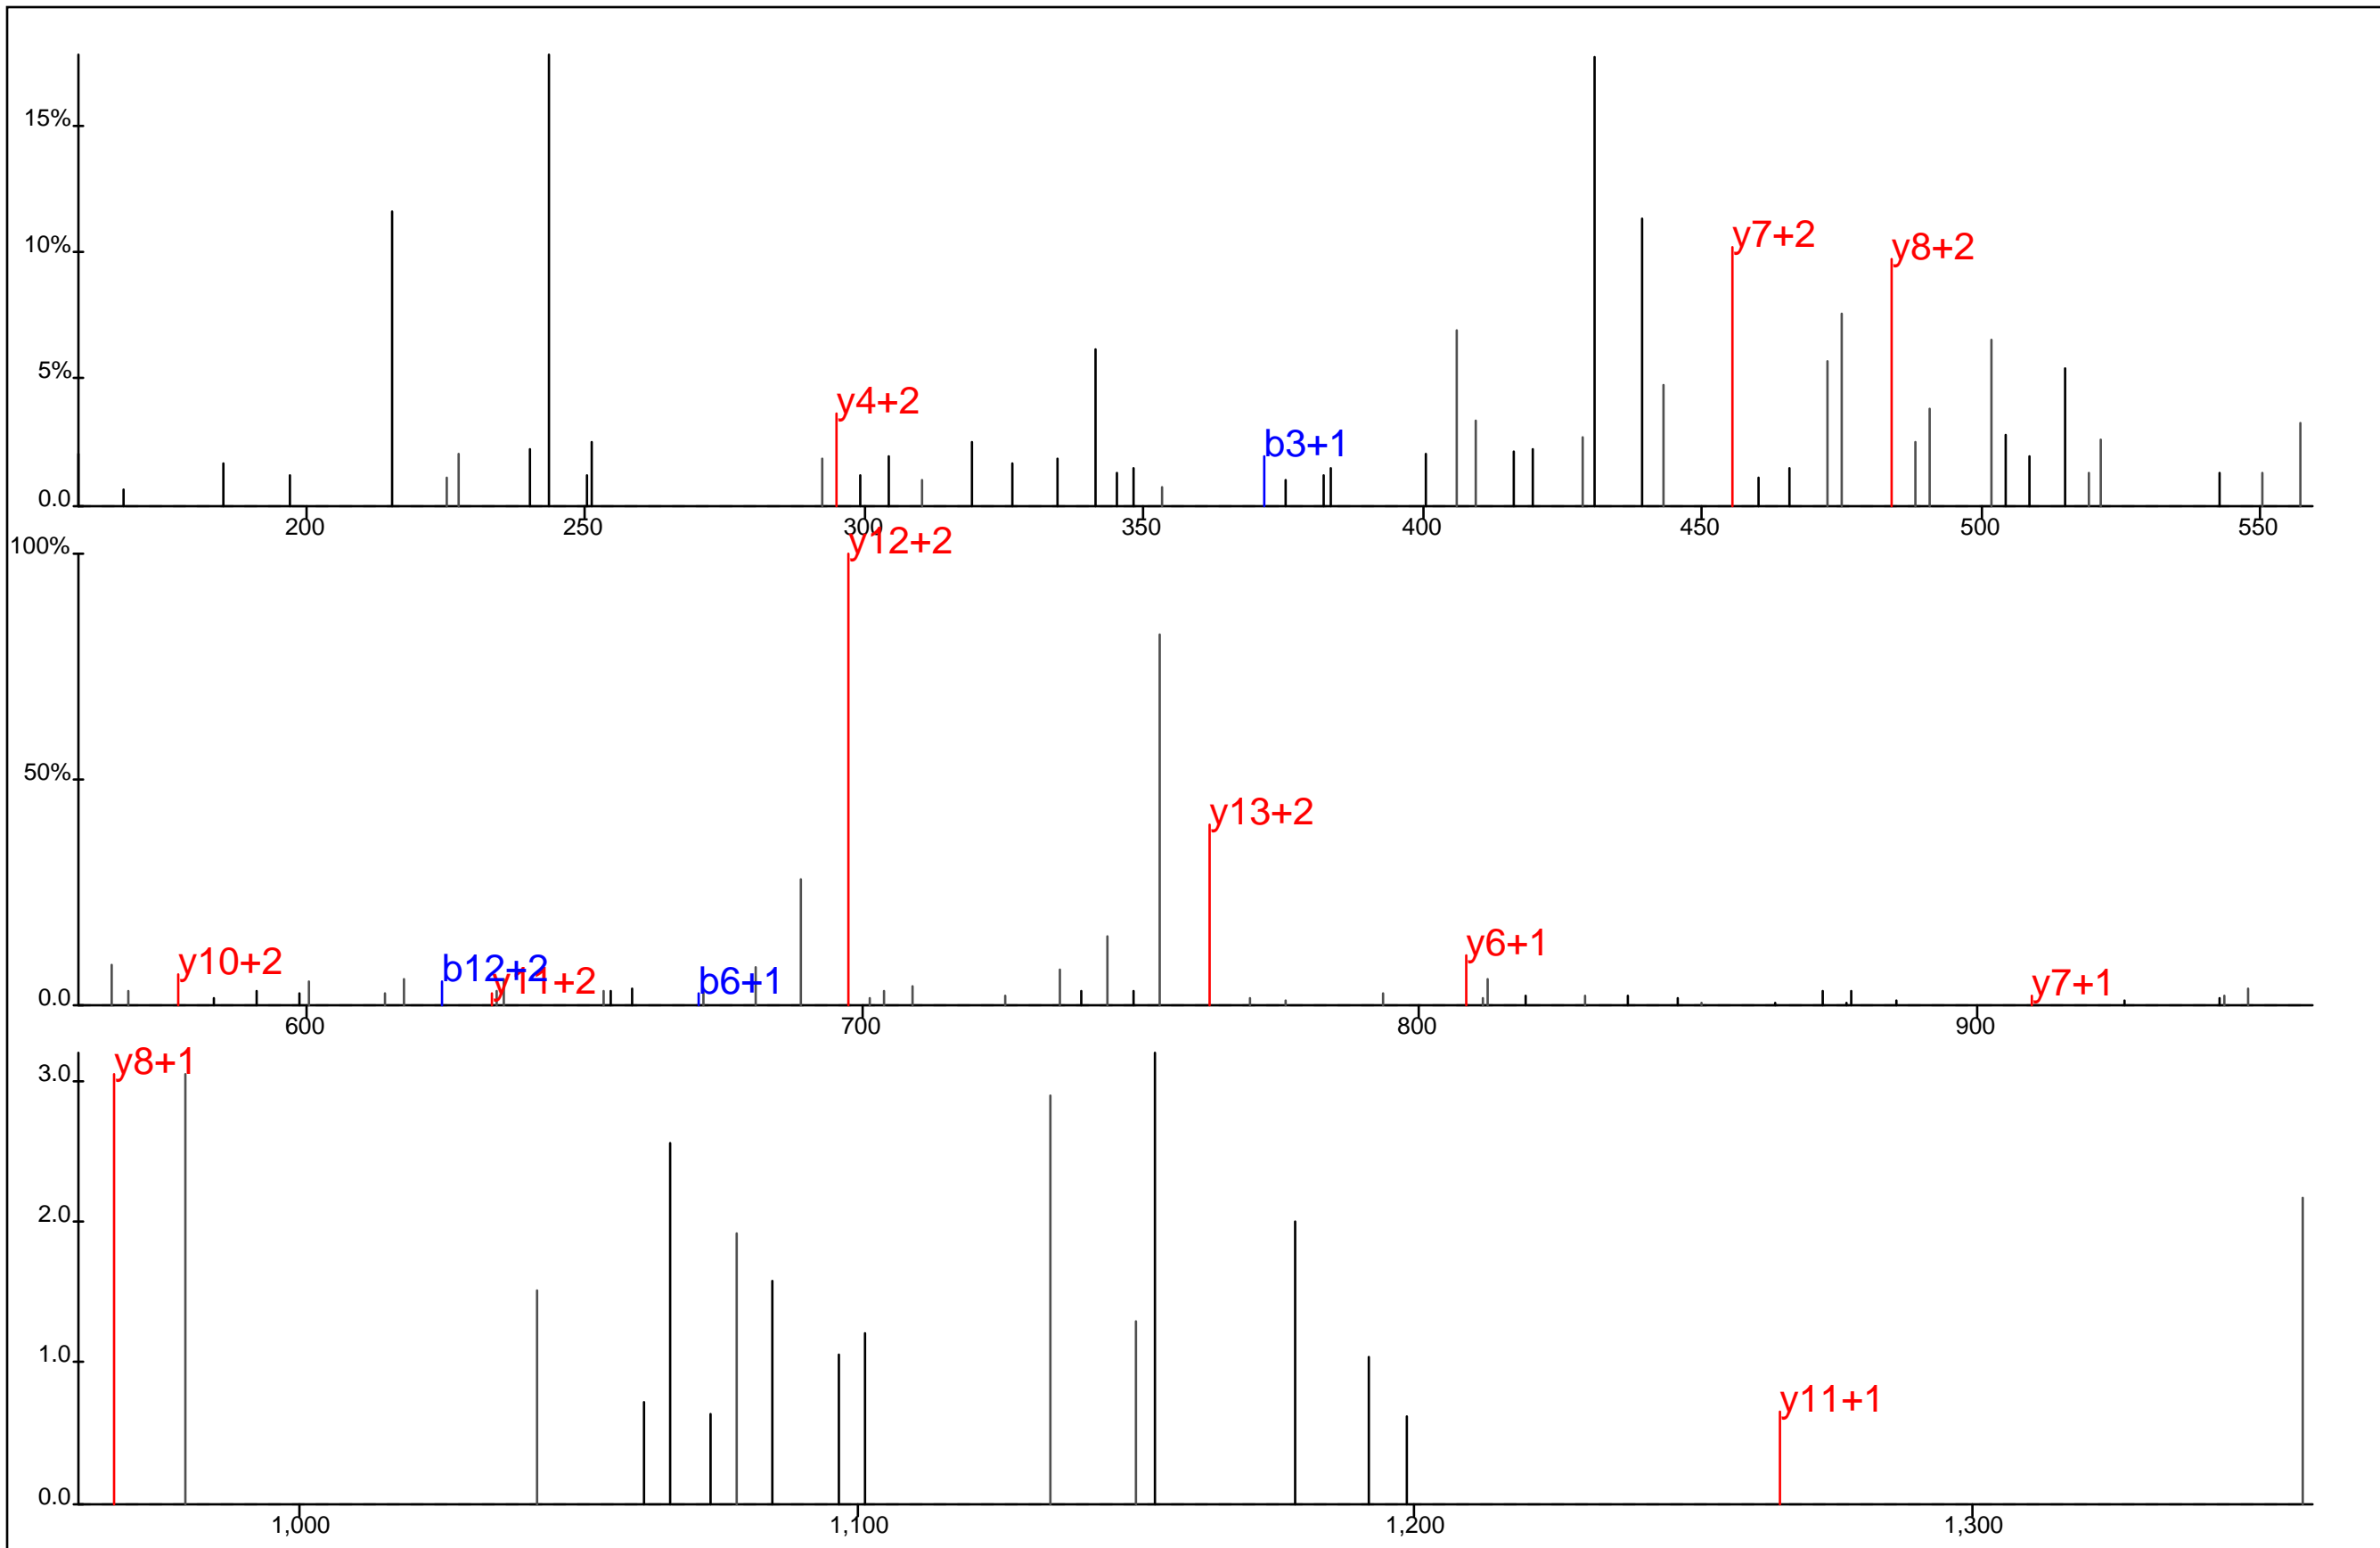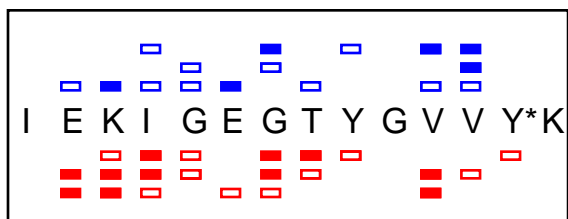

Protein Name: CDC2  
 gi Accession: 0  
 Precursor Mass: 545.9400+3  
 Delta Mass: 1.536 ppm  
 XCorr: 25.16



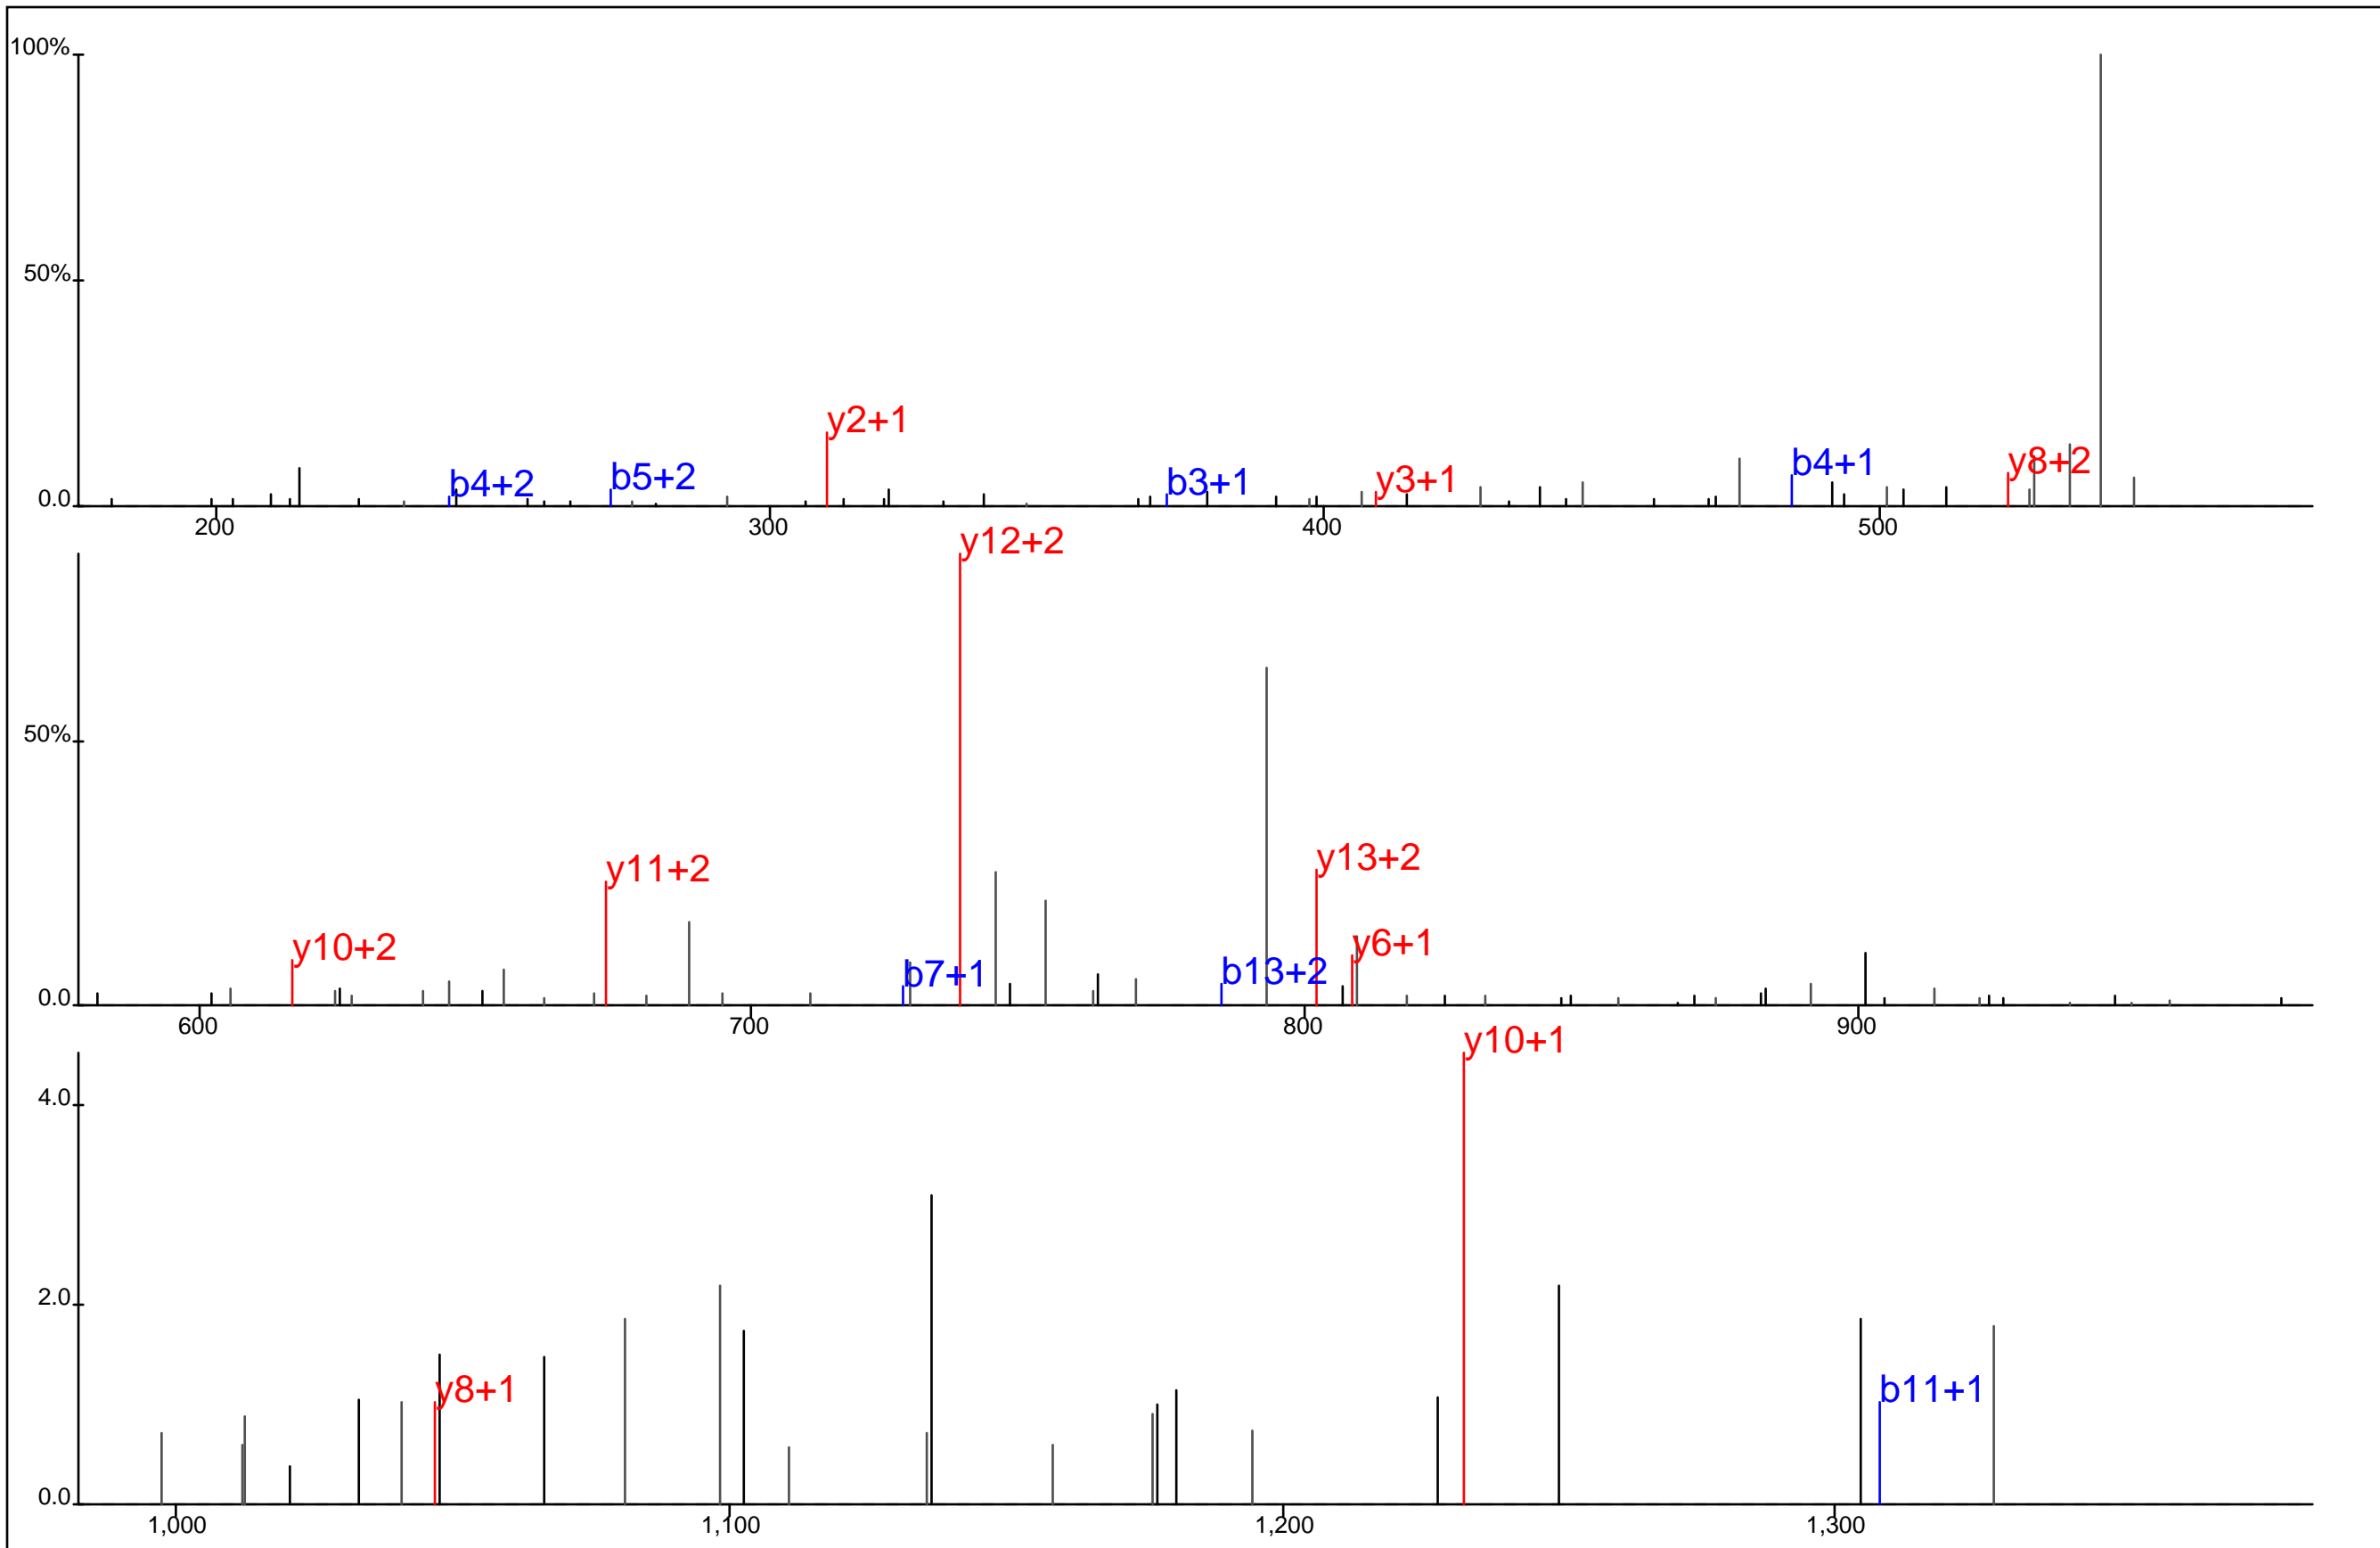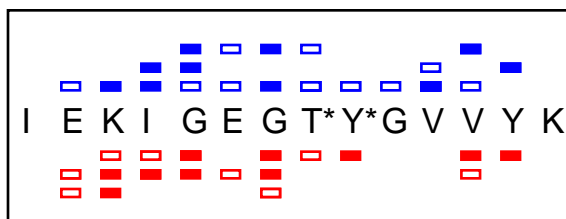

Protein Name: CDC2  
 gi Accession: 0  
 Precursor Mass: 572.5952+3  
 Delta Mass: 1.061 ppm  
 XCorr: 23.11

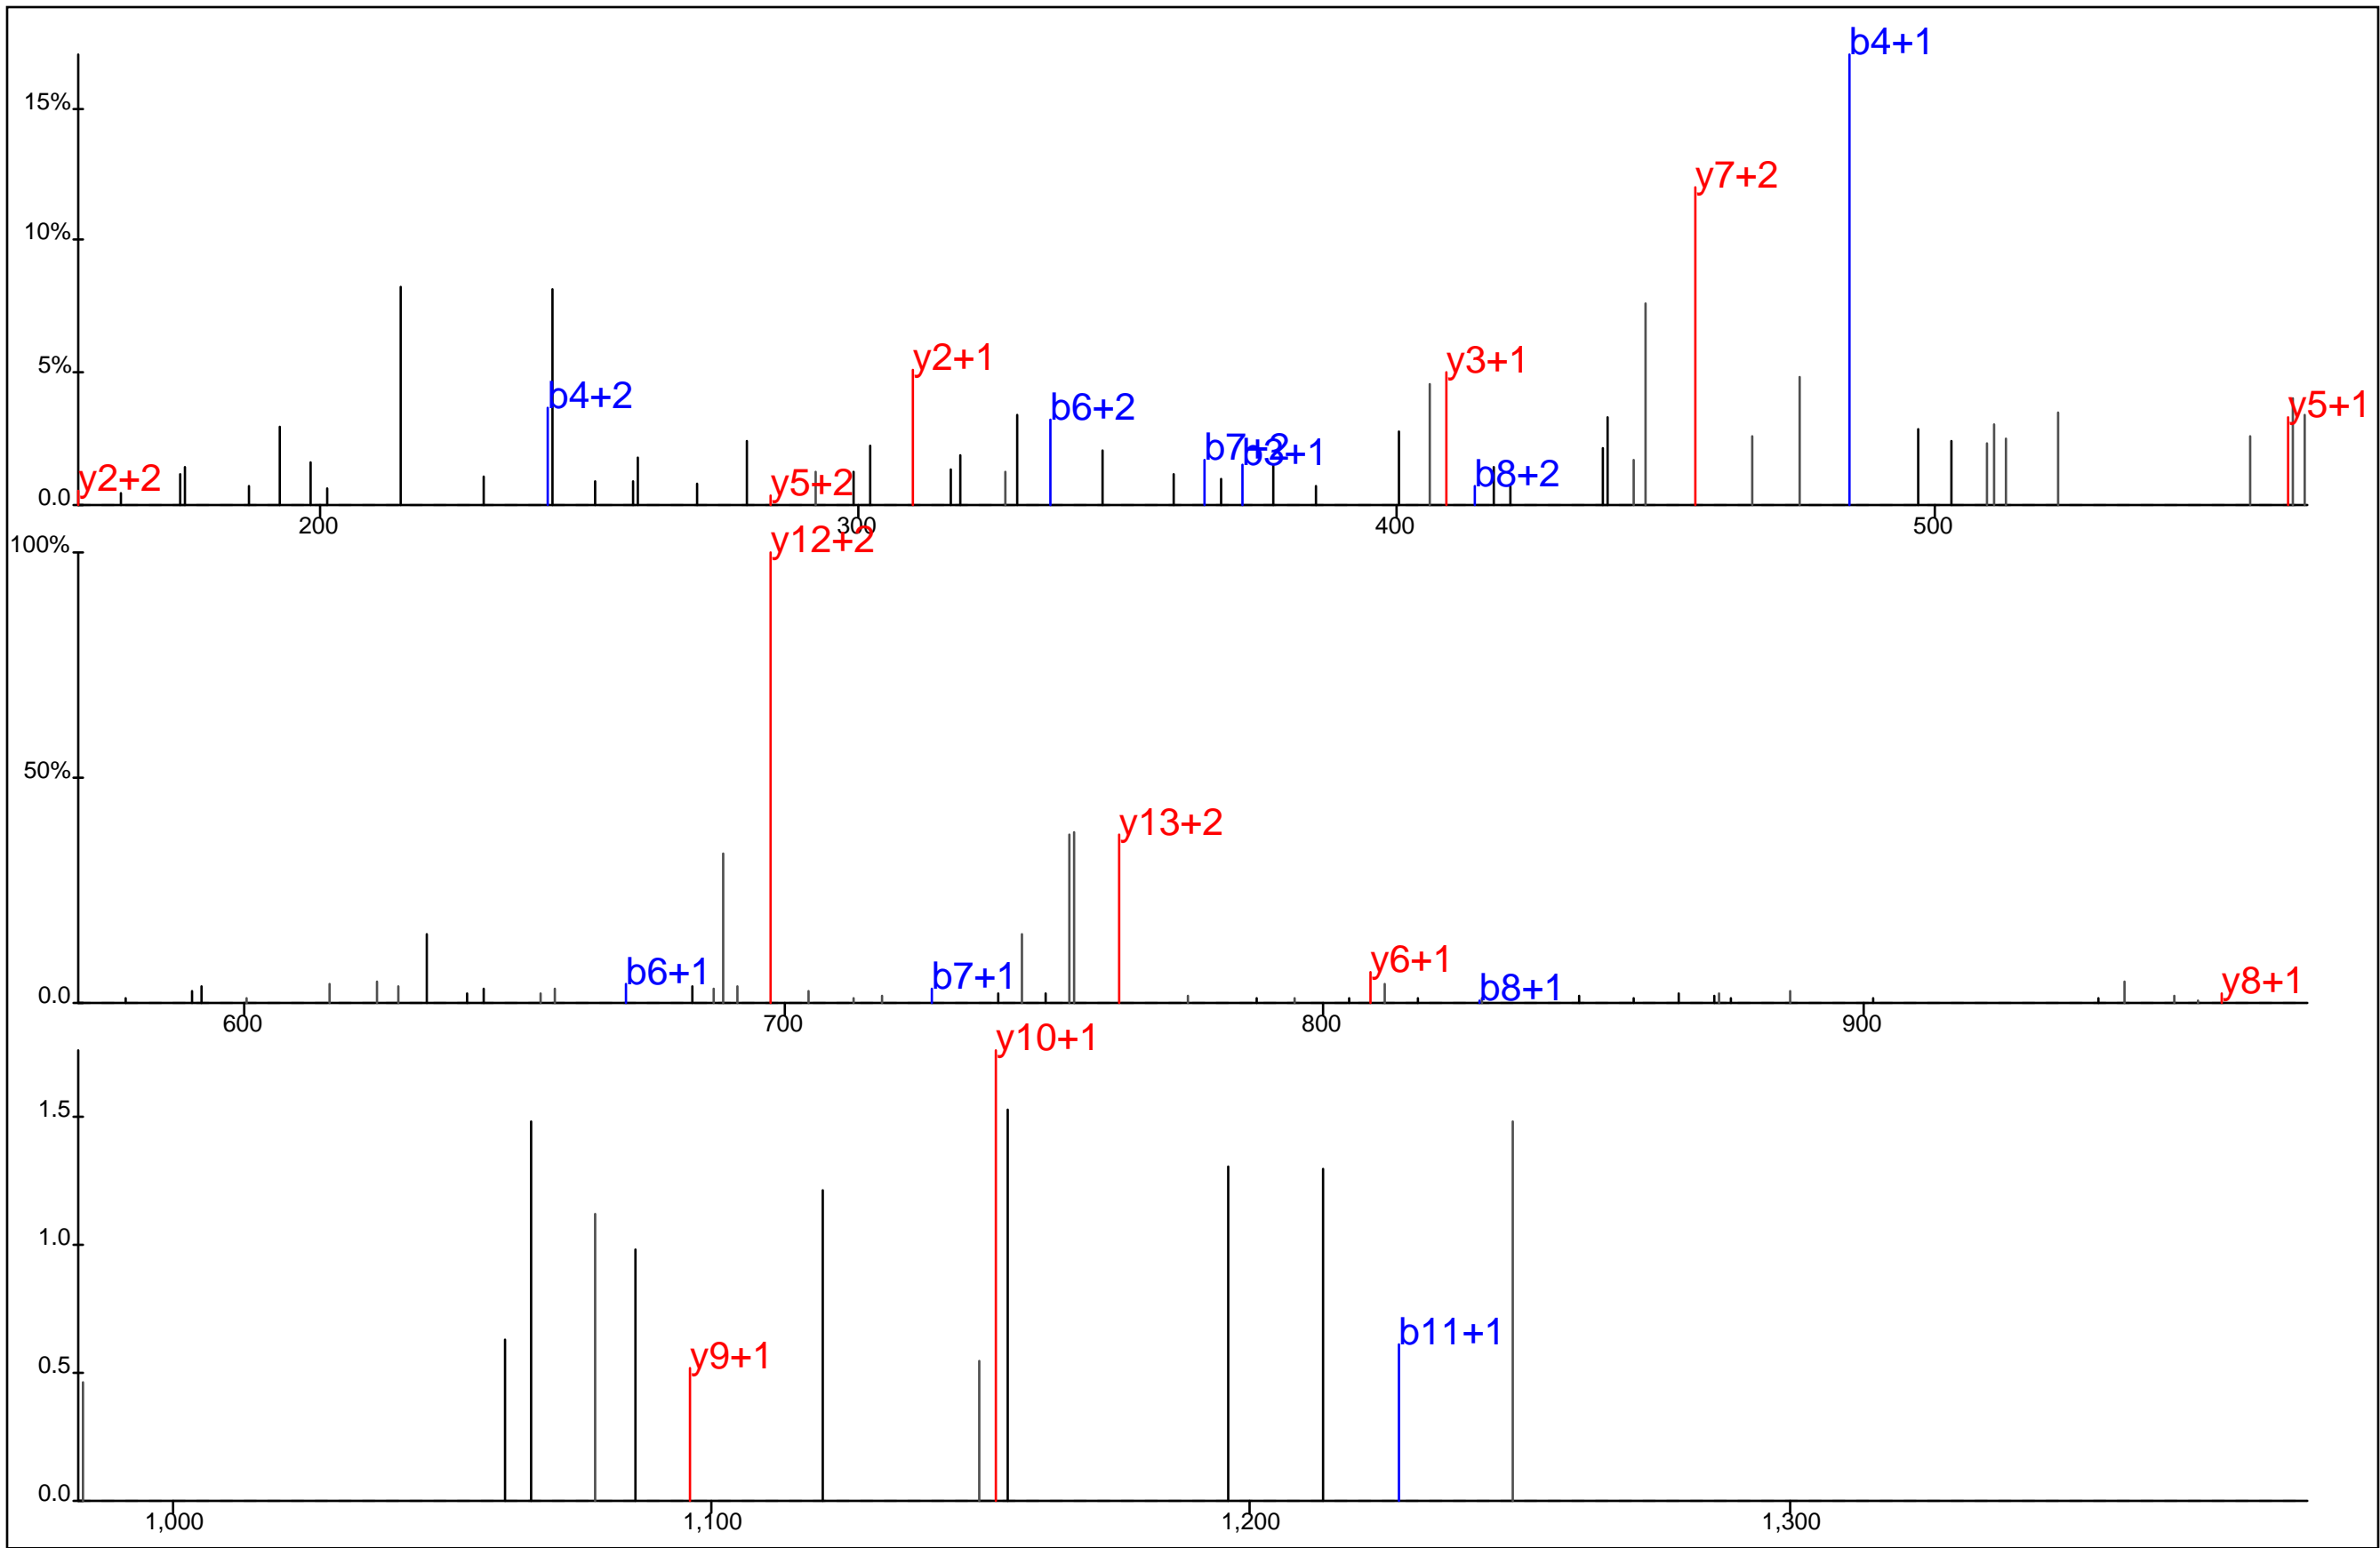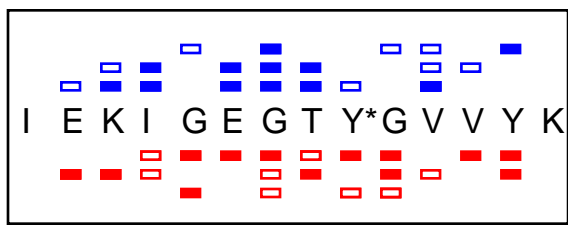

Protein Name: CDC2  
 gi Accession: 0  
 Precursor Mass: 545.9391+3  
 Delta Mass: 0.142 ppm  
 XCorr: 35.25



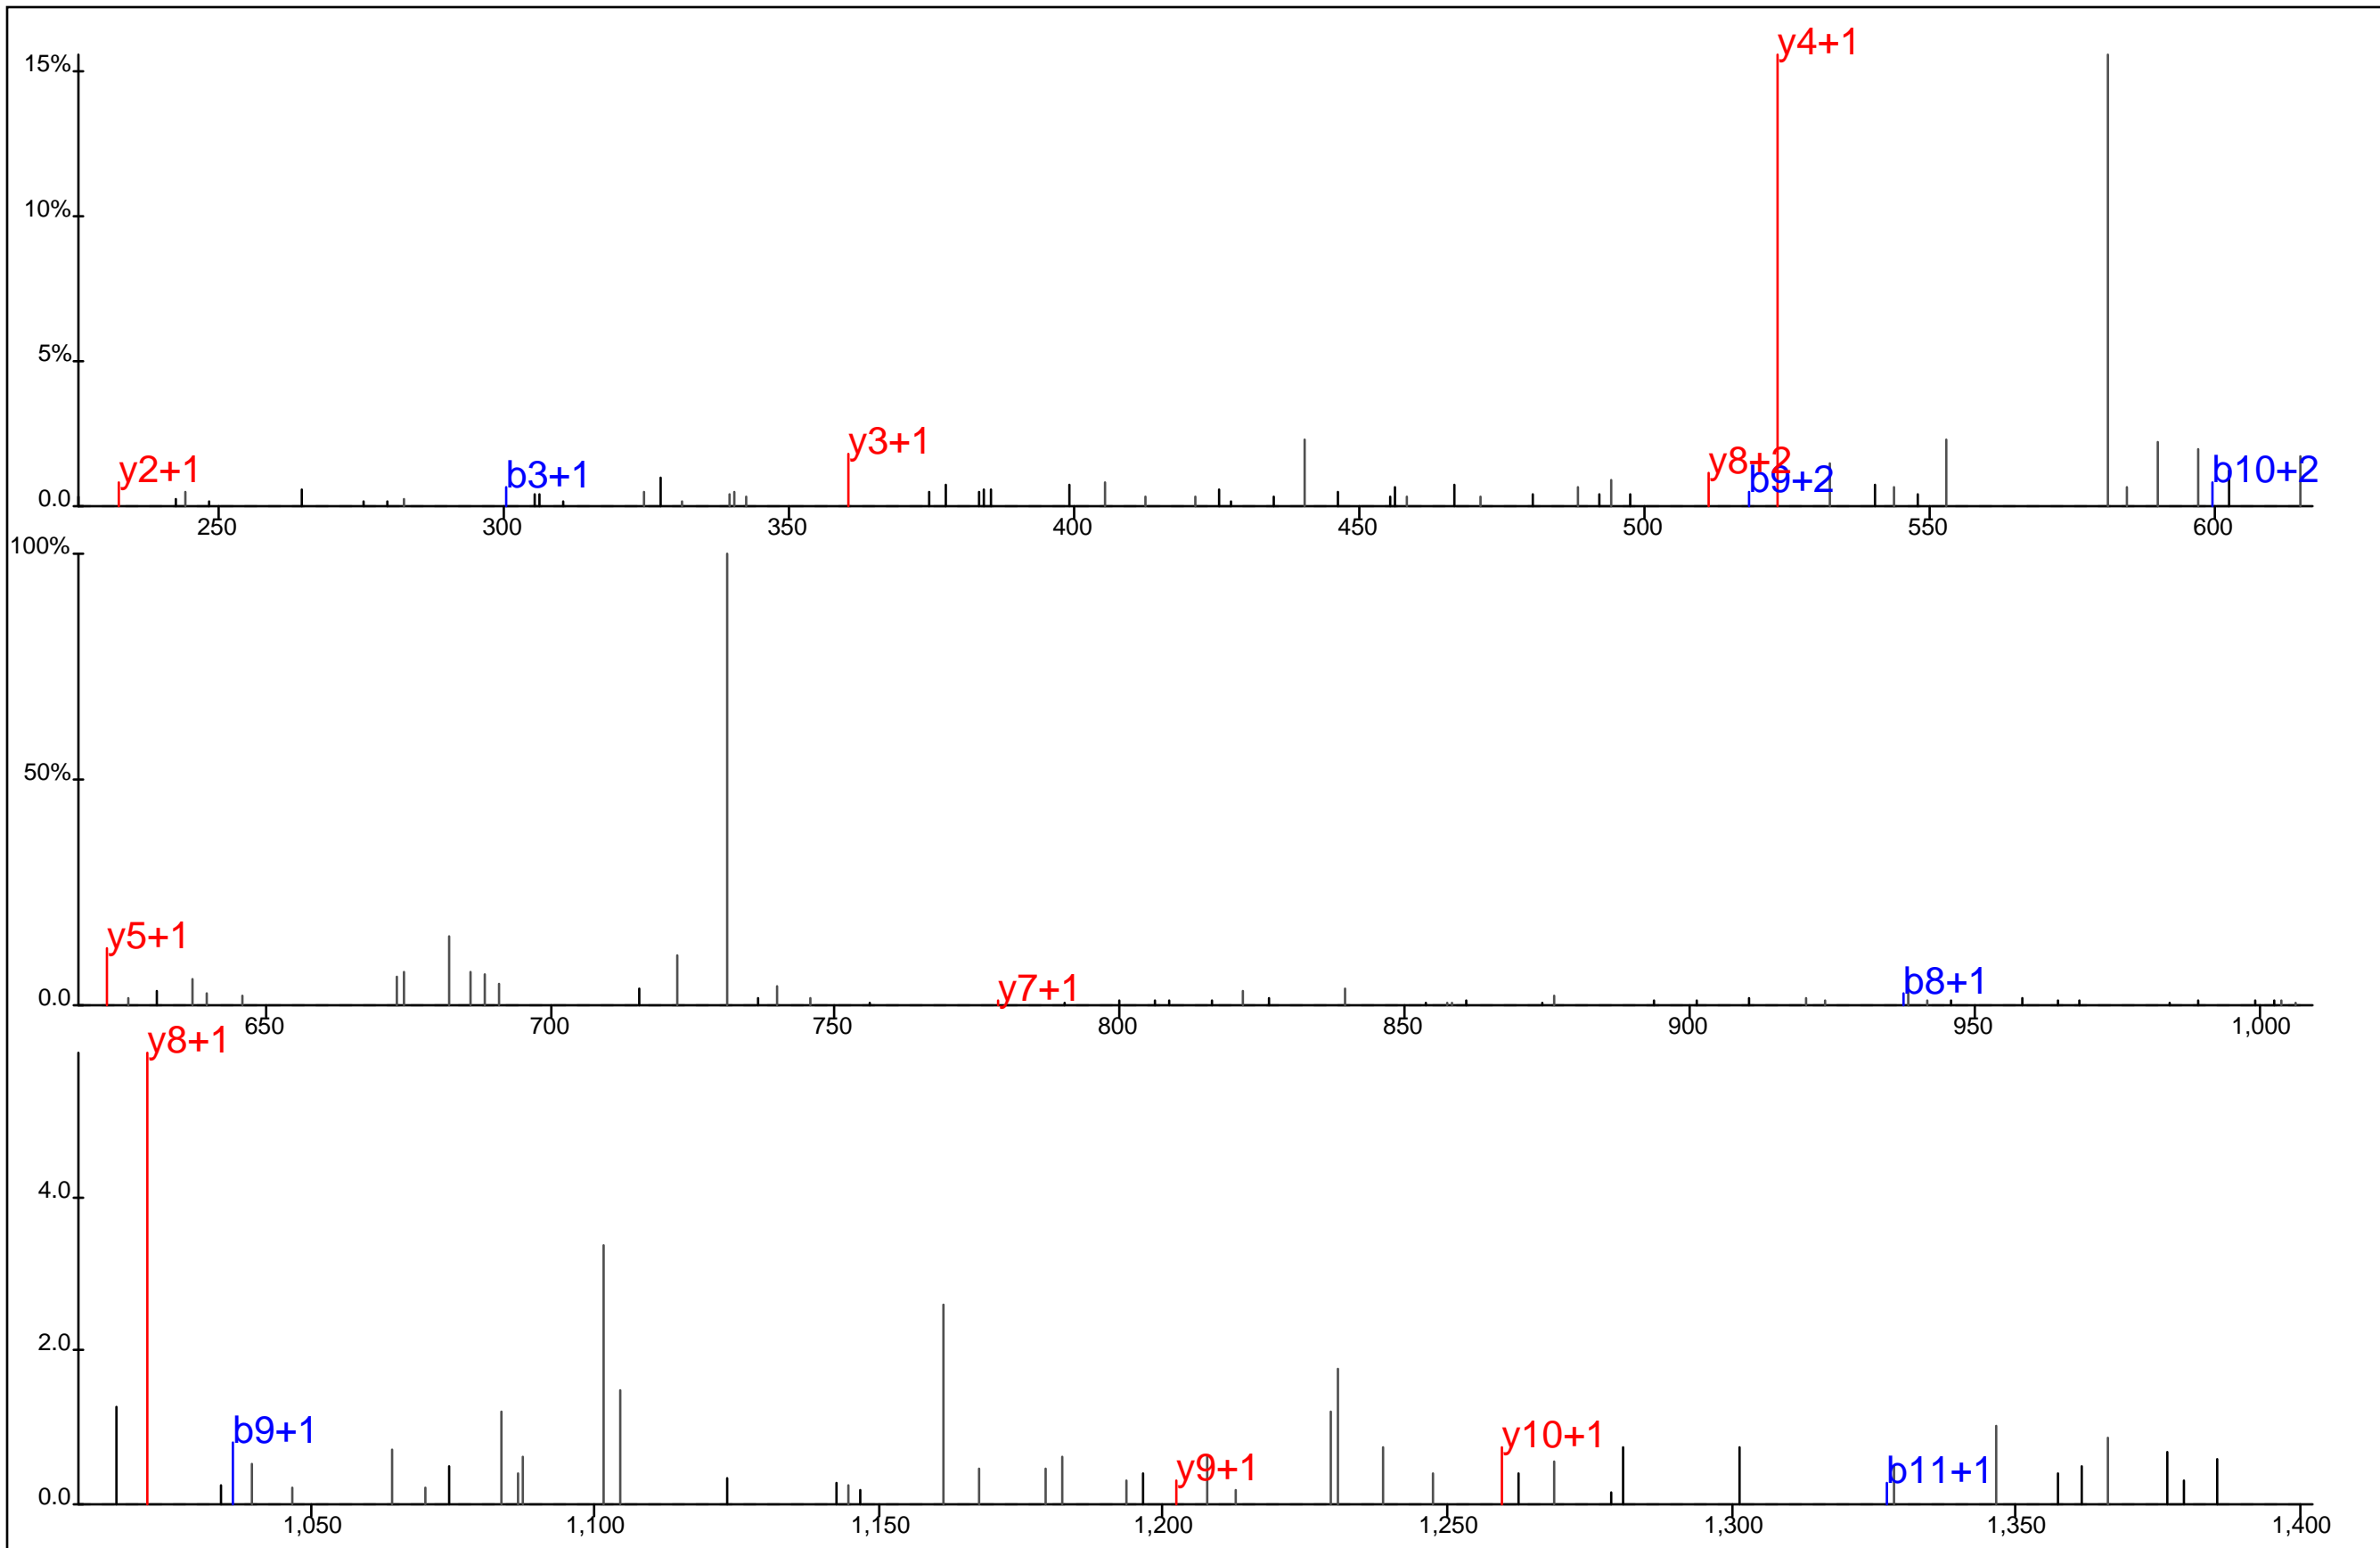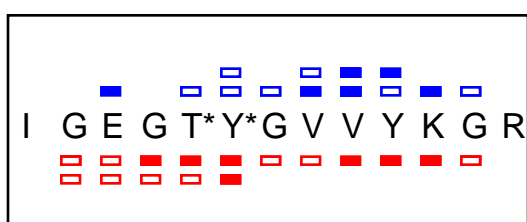

Protein Name: CDC2  
 gi Accession: 0  
 Precursor Mass: 779.8381+2  
 Delta Mass: 0.801 ppm  
 XCorr: 54.15

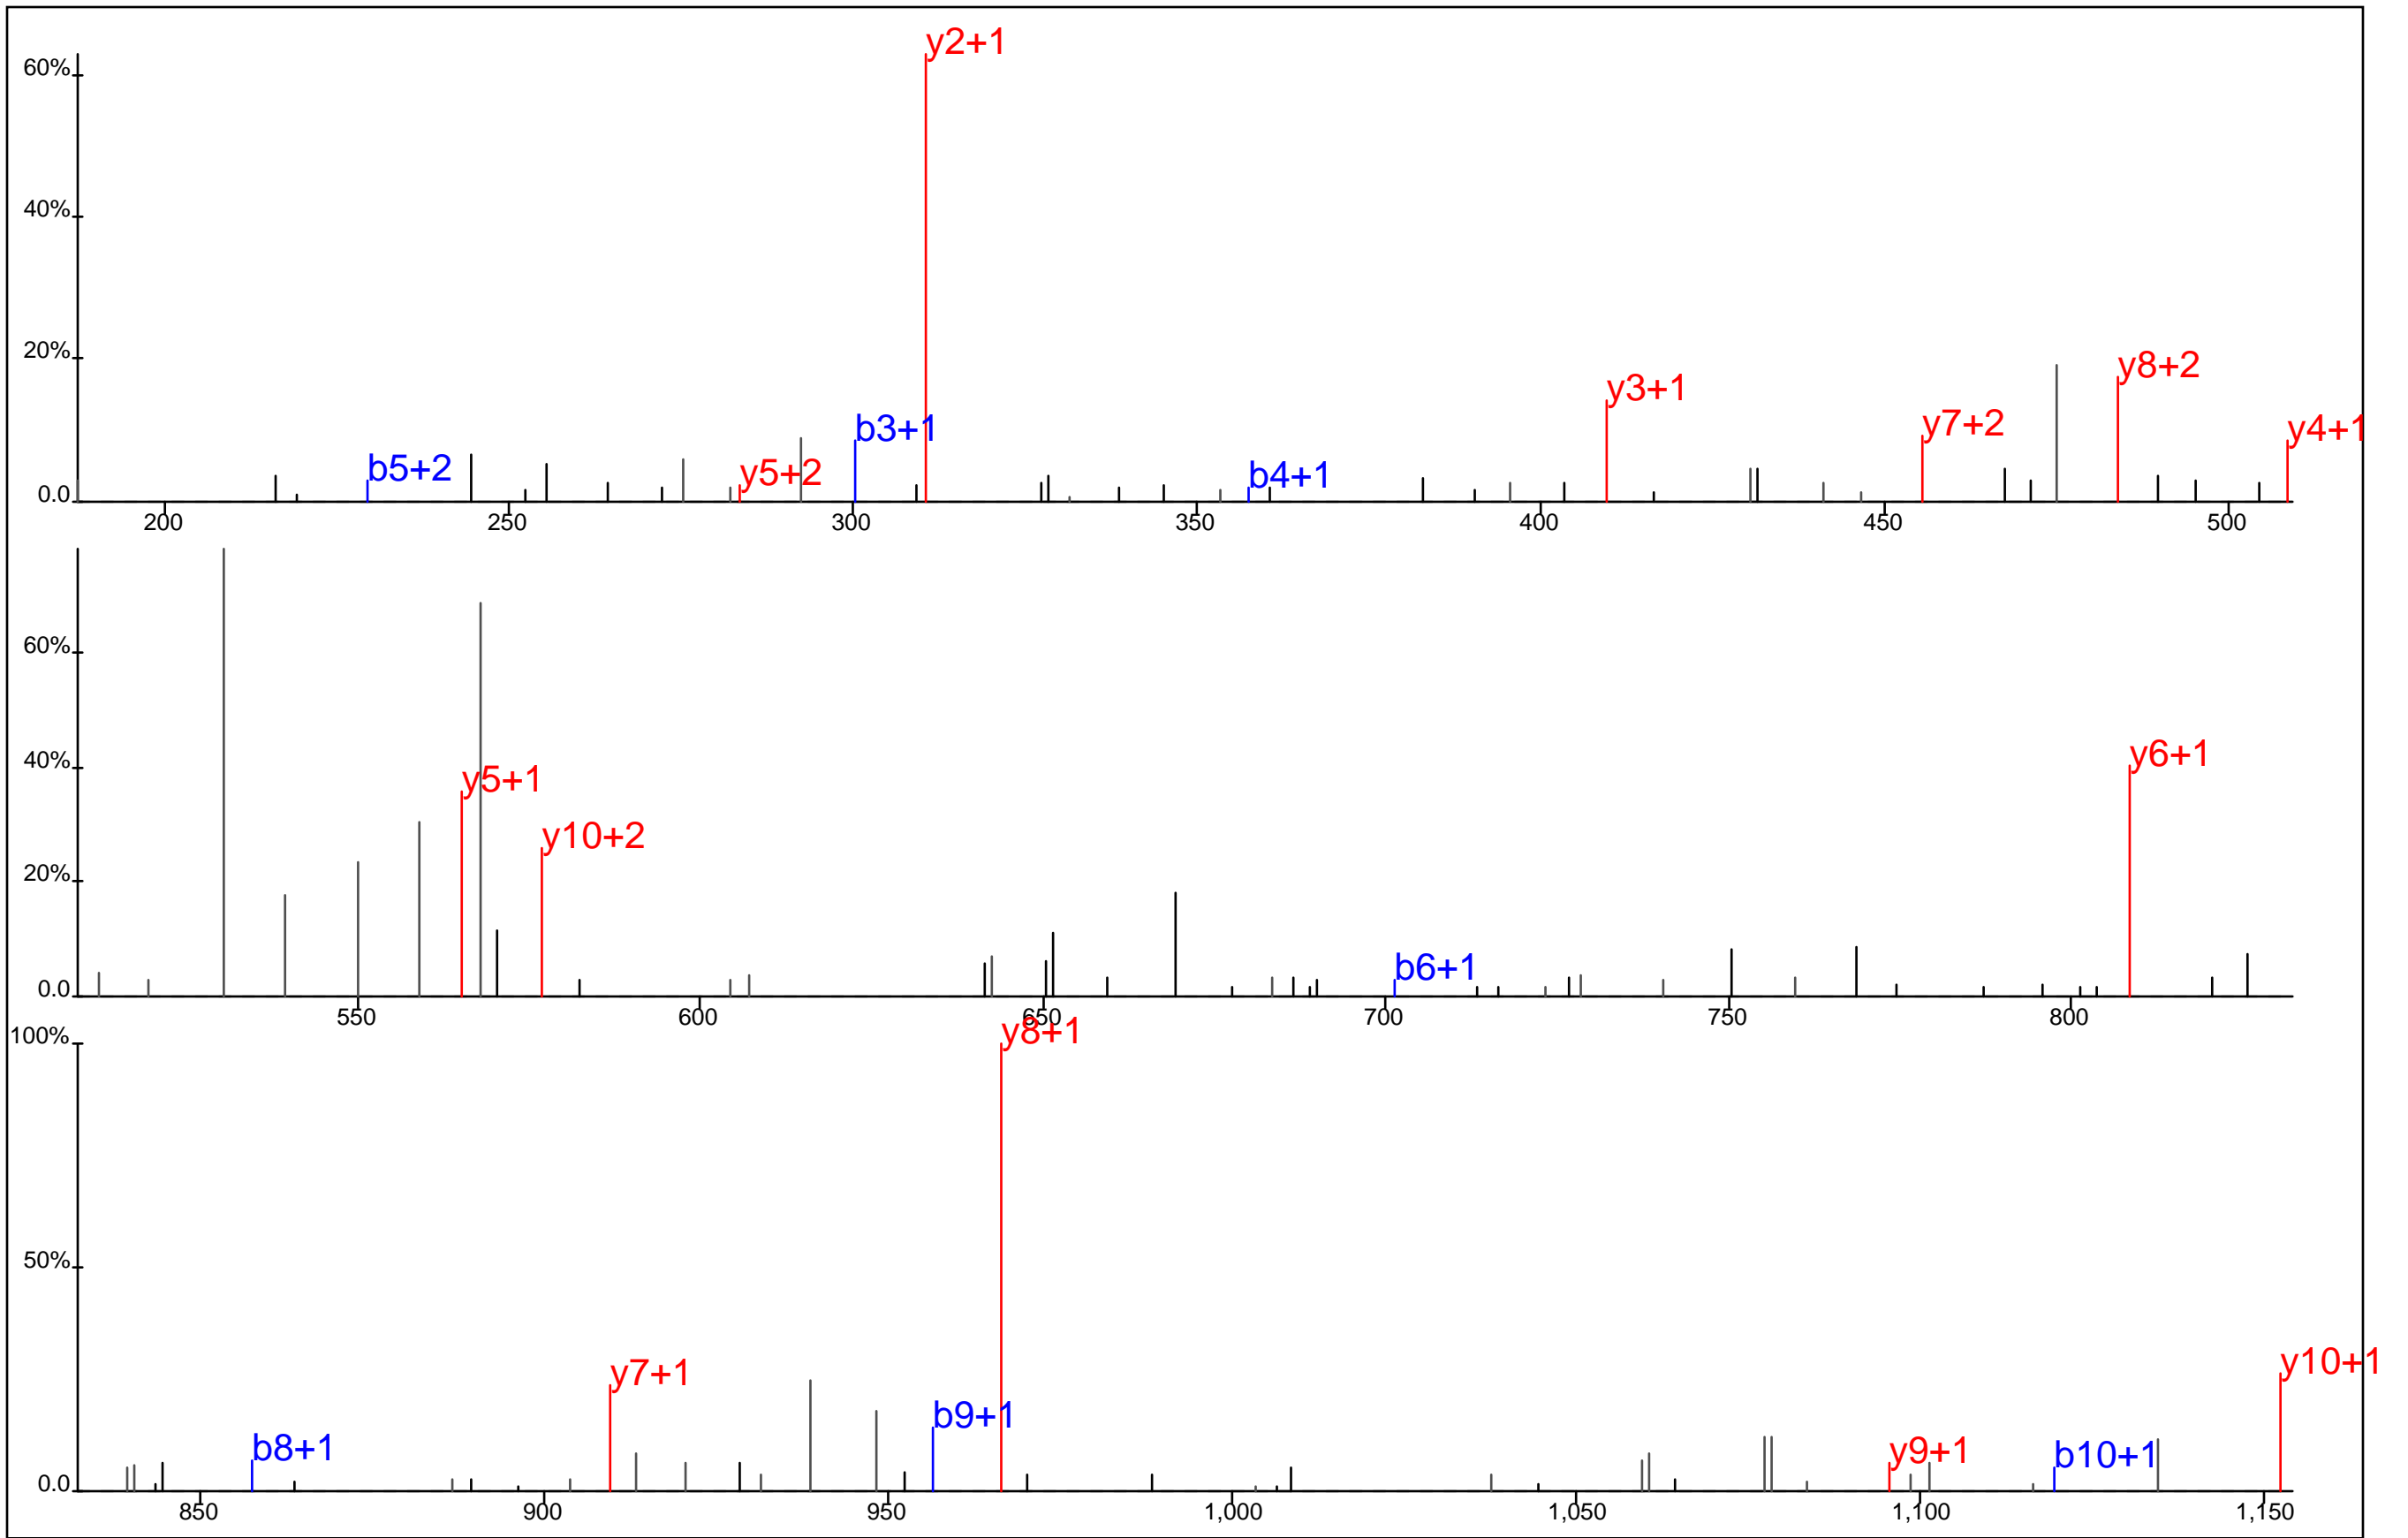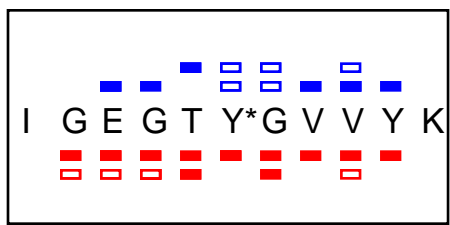

Protein Name: CDC2  
 gi Accession: 0  
 Precursor Mass: 633.2943+2  
 Delta Mass: 0.005 ppm  
 XCorr: 48.42

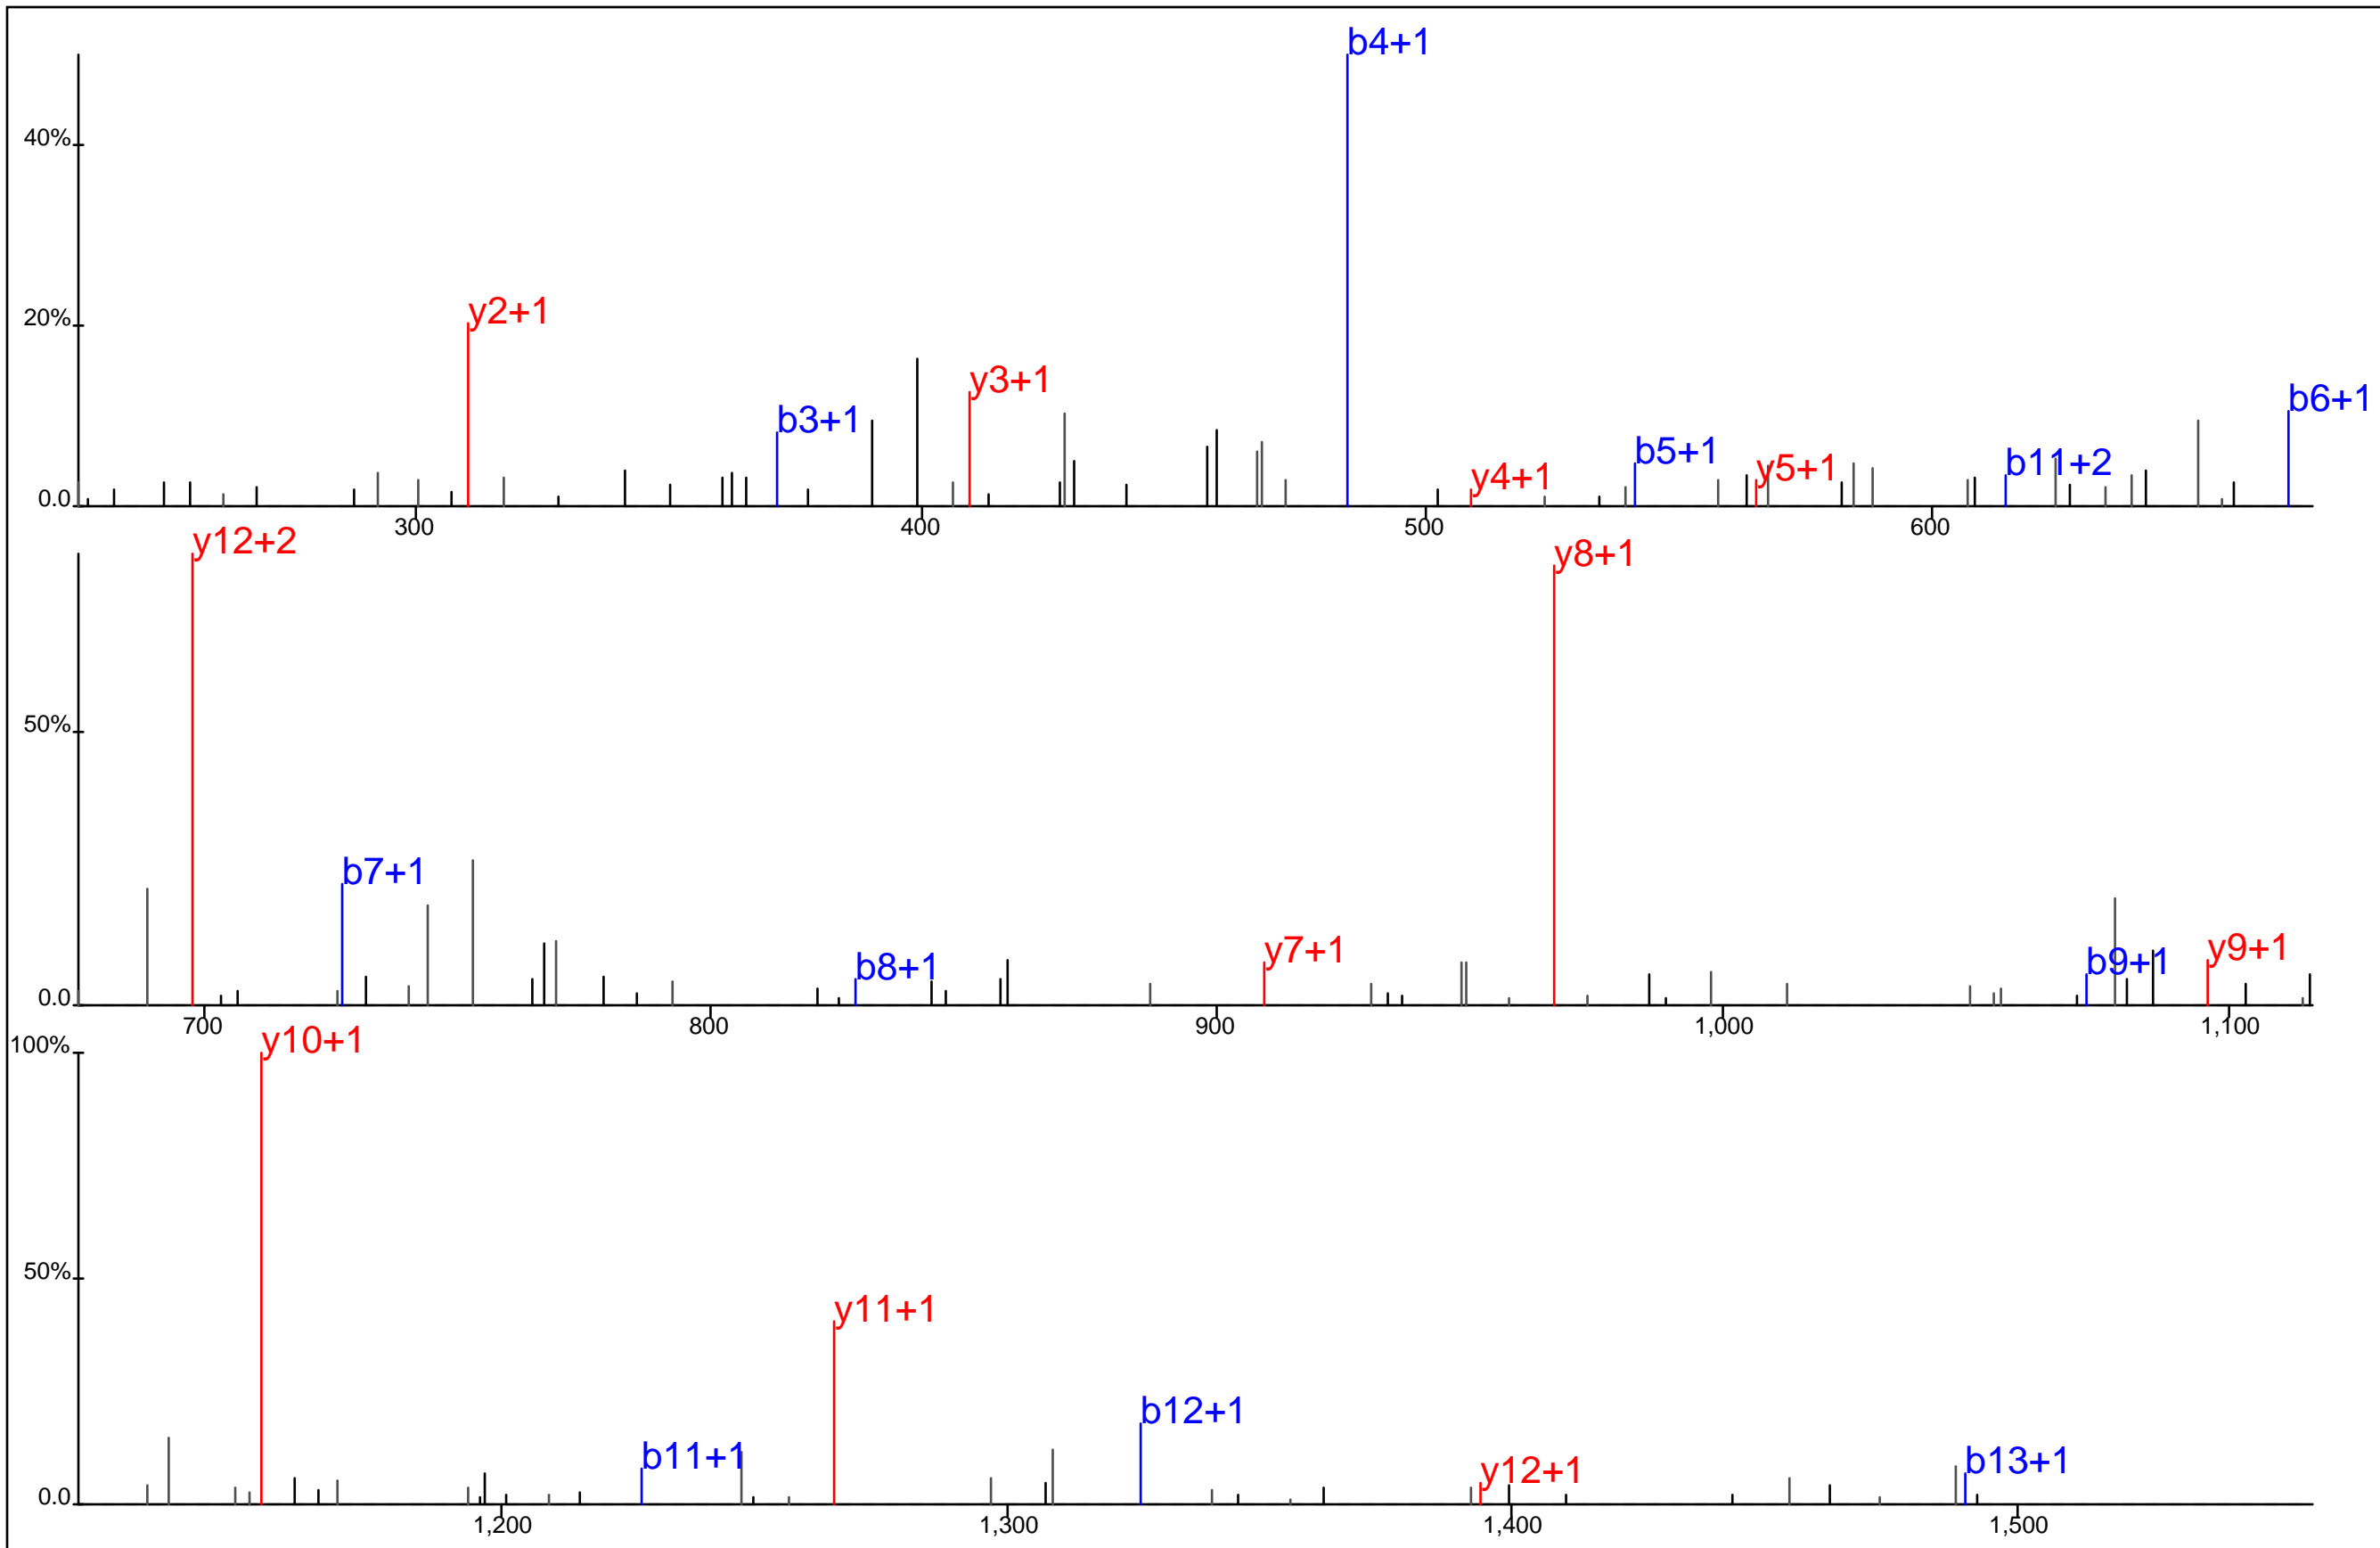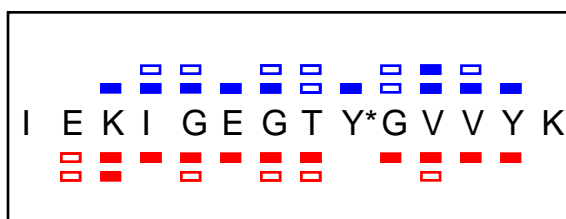

Protein Name: CDC2  
 gi Accession: 0  
 Precursor Mass: 818.4061+2  
 Delta Mass: 1.246 ppm  
 XCorr: 49.69

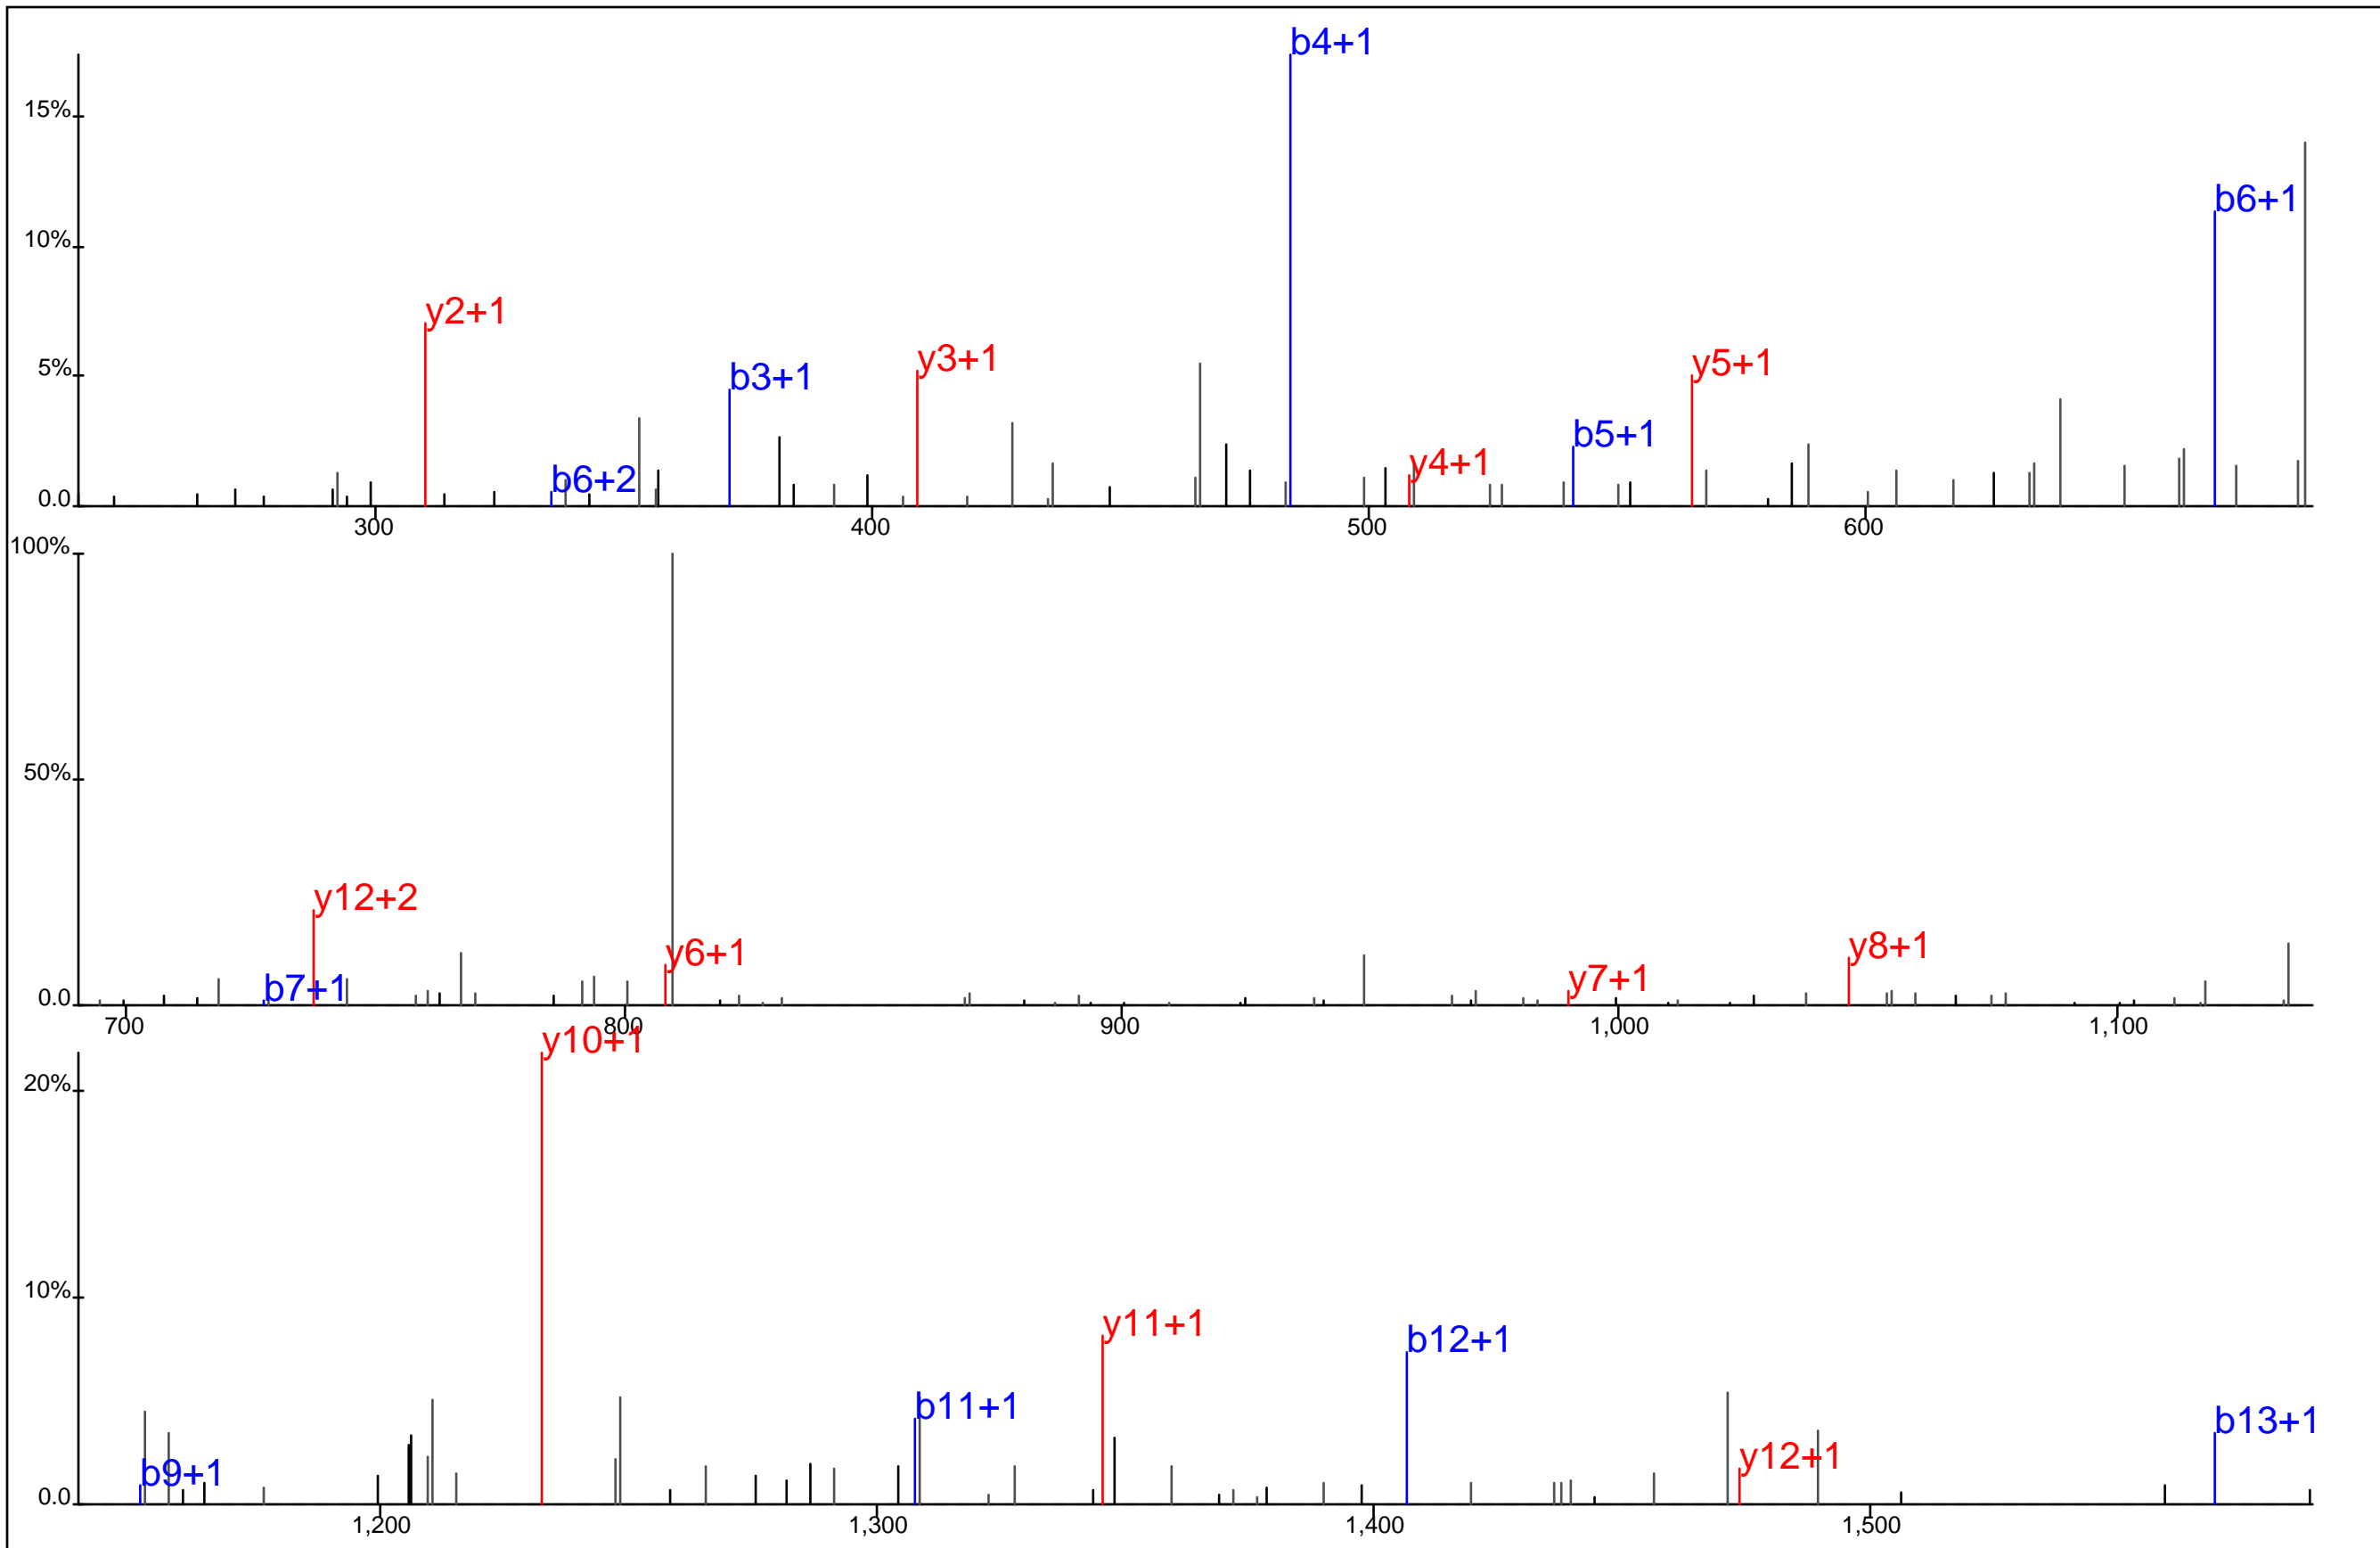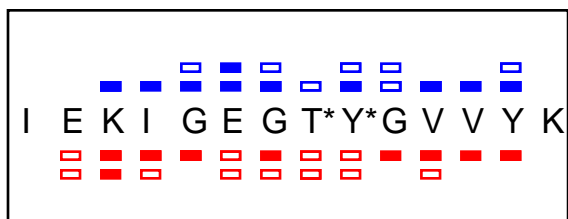

Protein Name: CDC2  
 gi Accession: 0  
 Precursor Mass: 858.3879+2  
 Delta Mass: 0.462 ppm  
 XCorr: 54.59

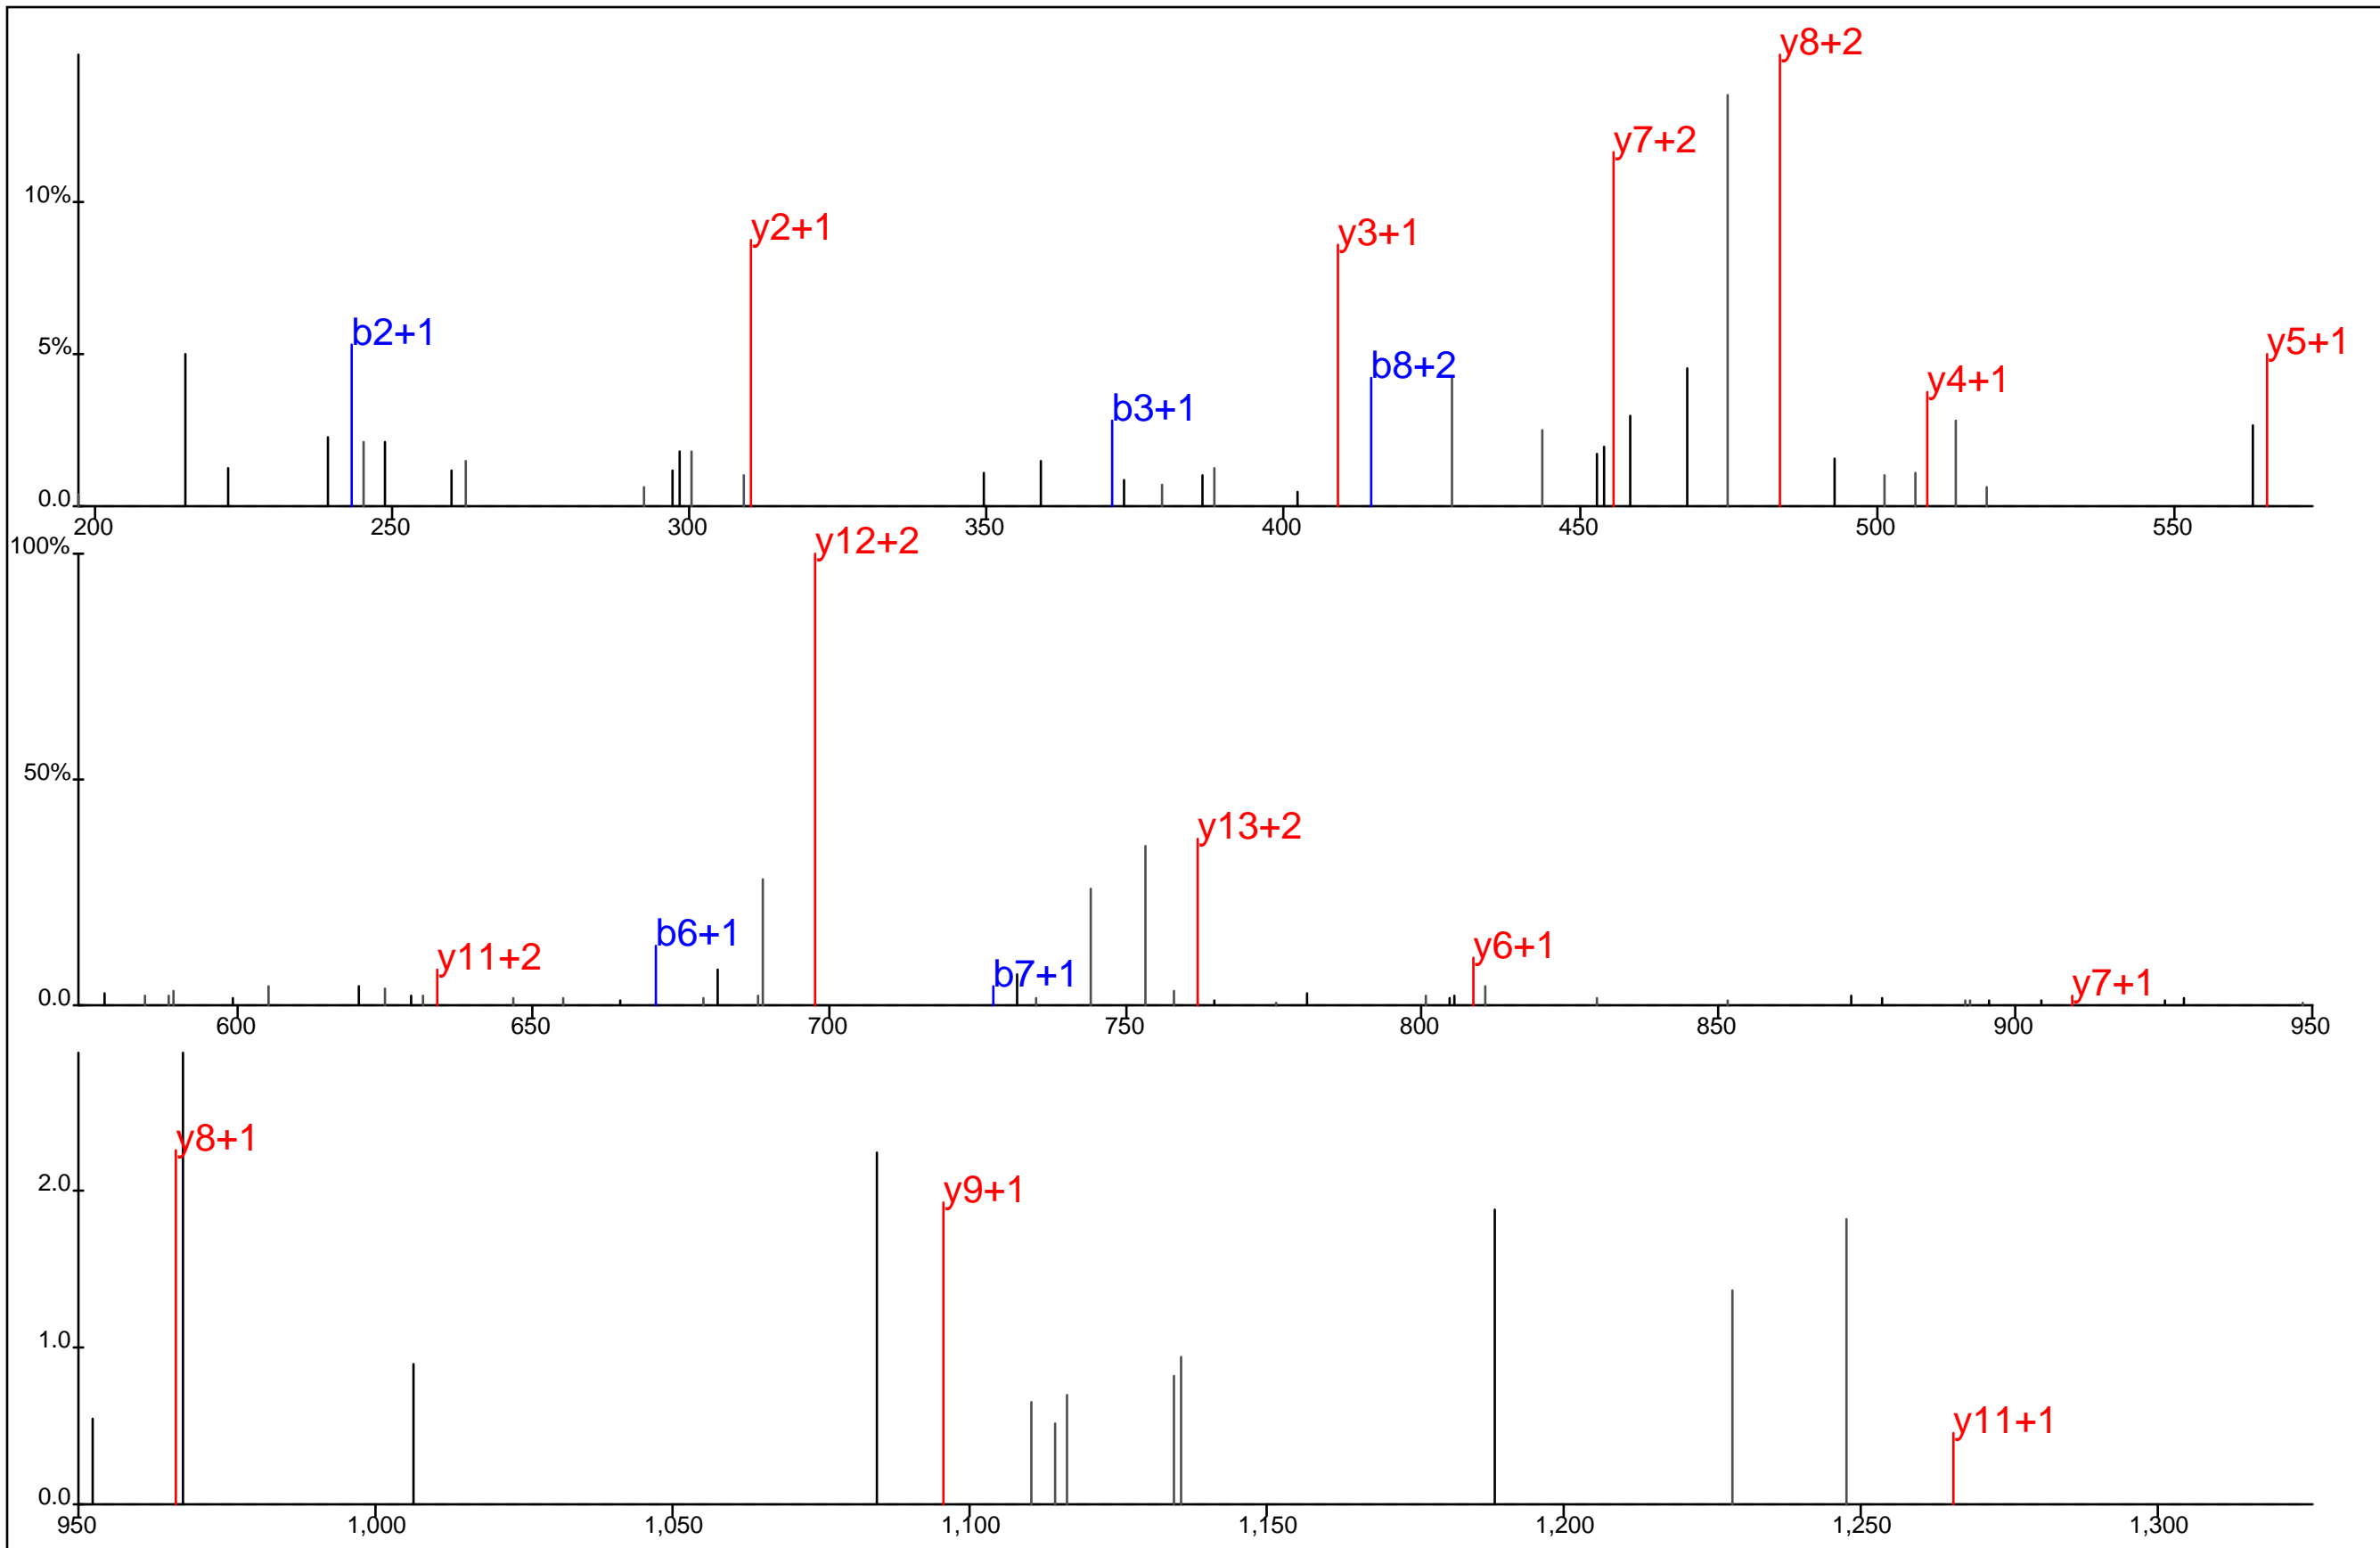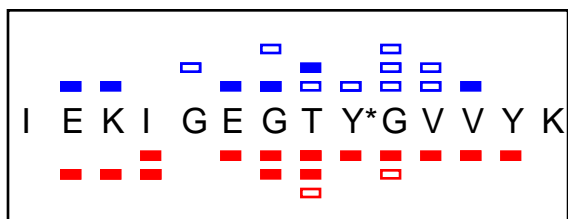

Protein Name: CDC2  
 gi Accession: 0  
 Precursor Mass: 545.9397+3  
 Delta Mass: 0.976 ppm  
 XCorr: 55.51



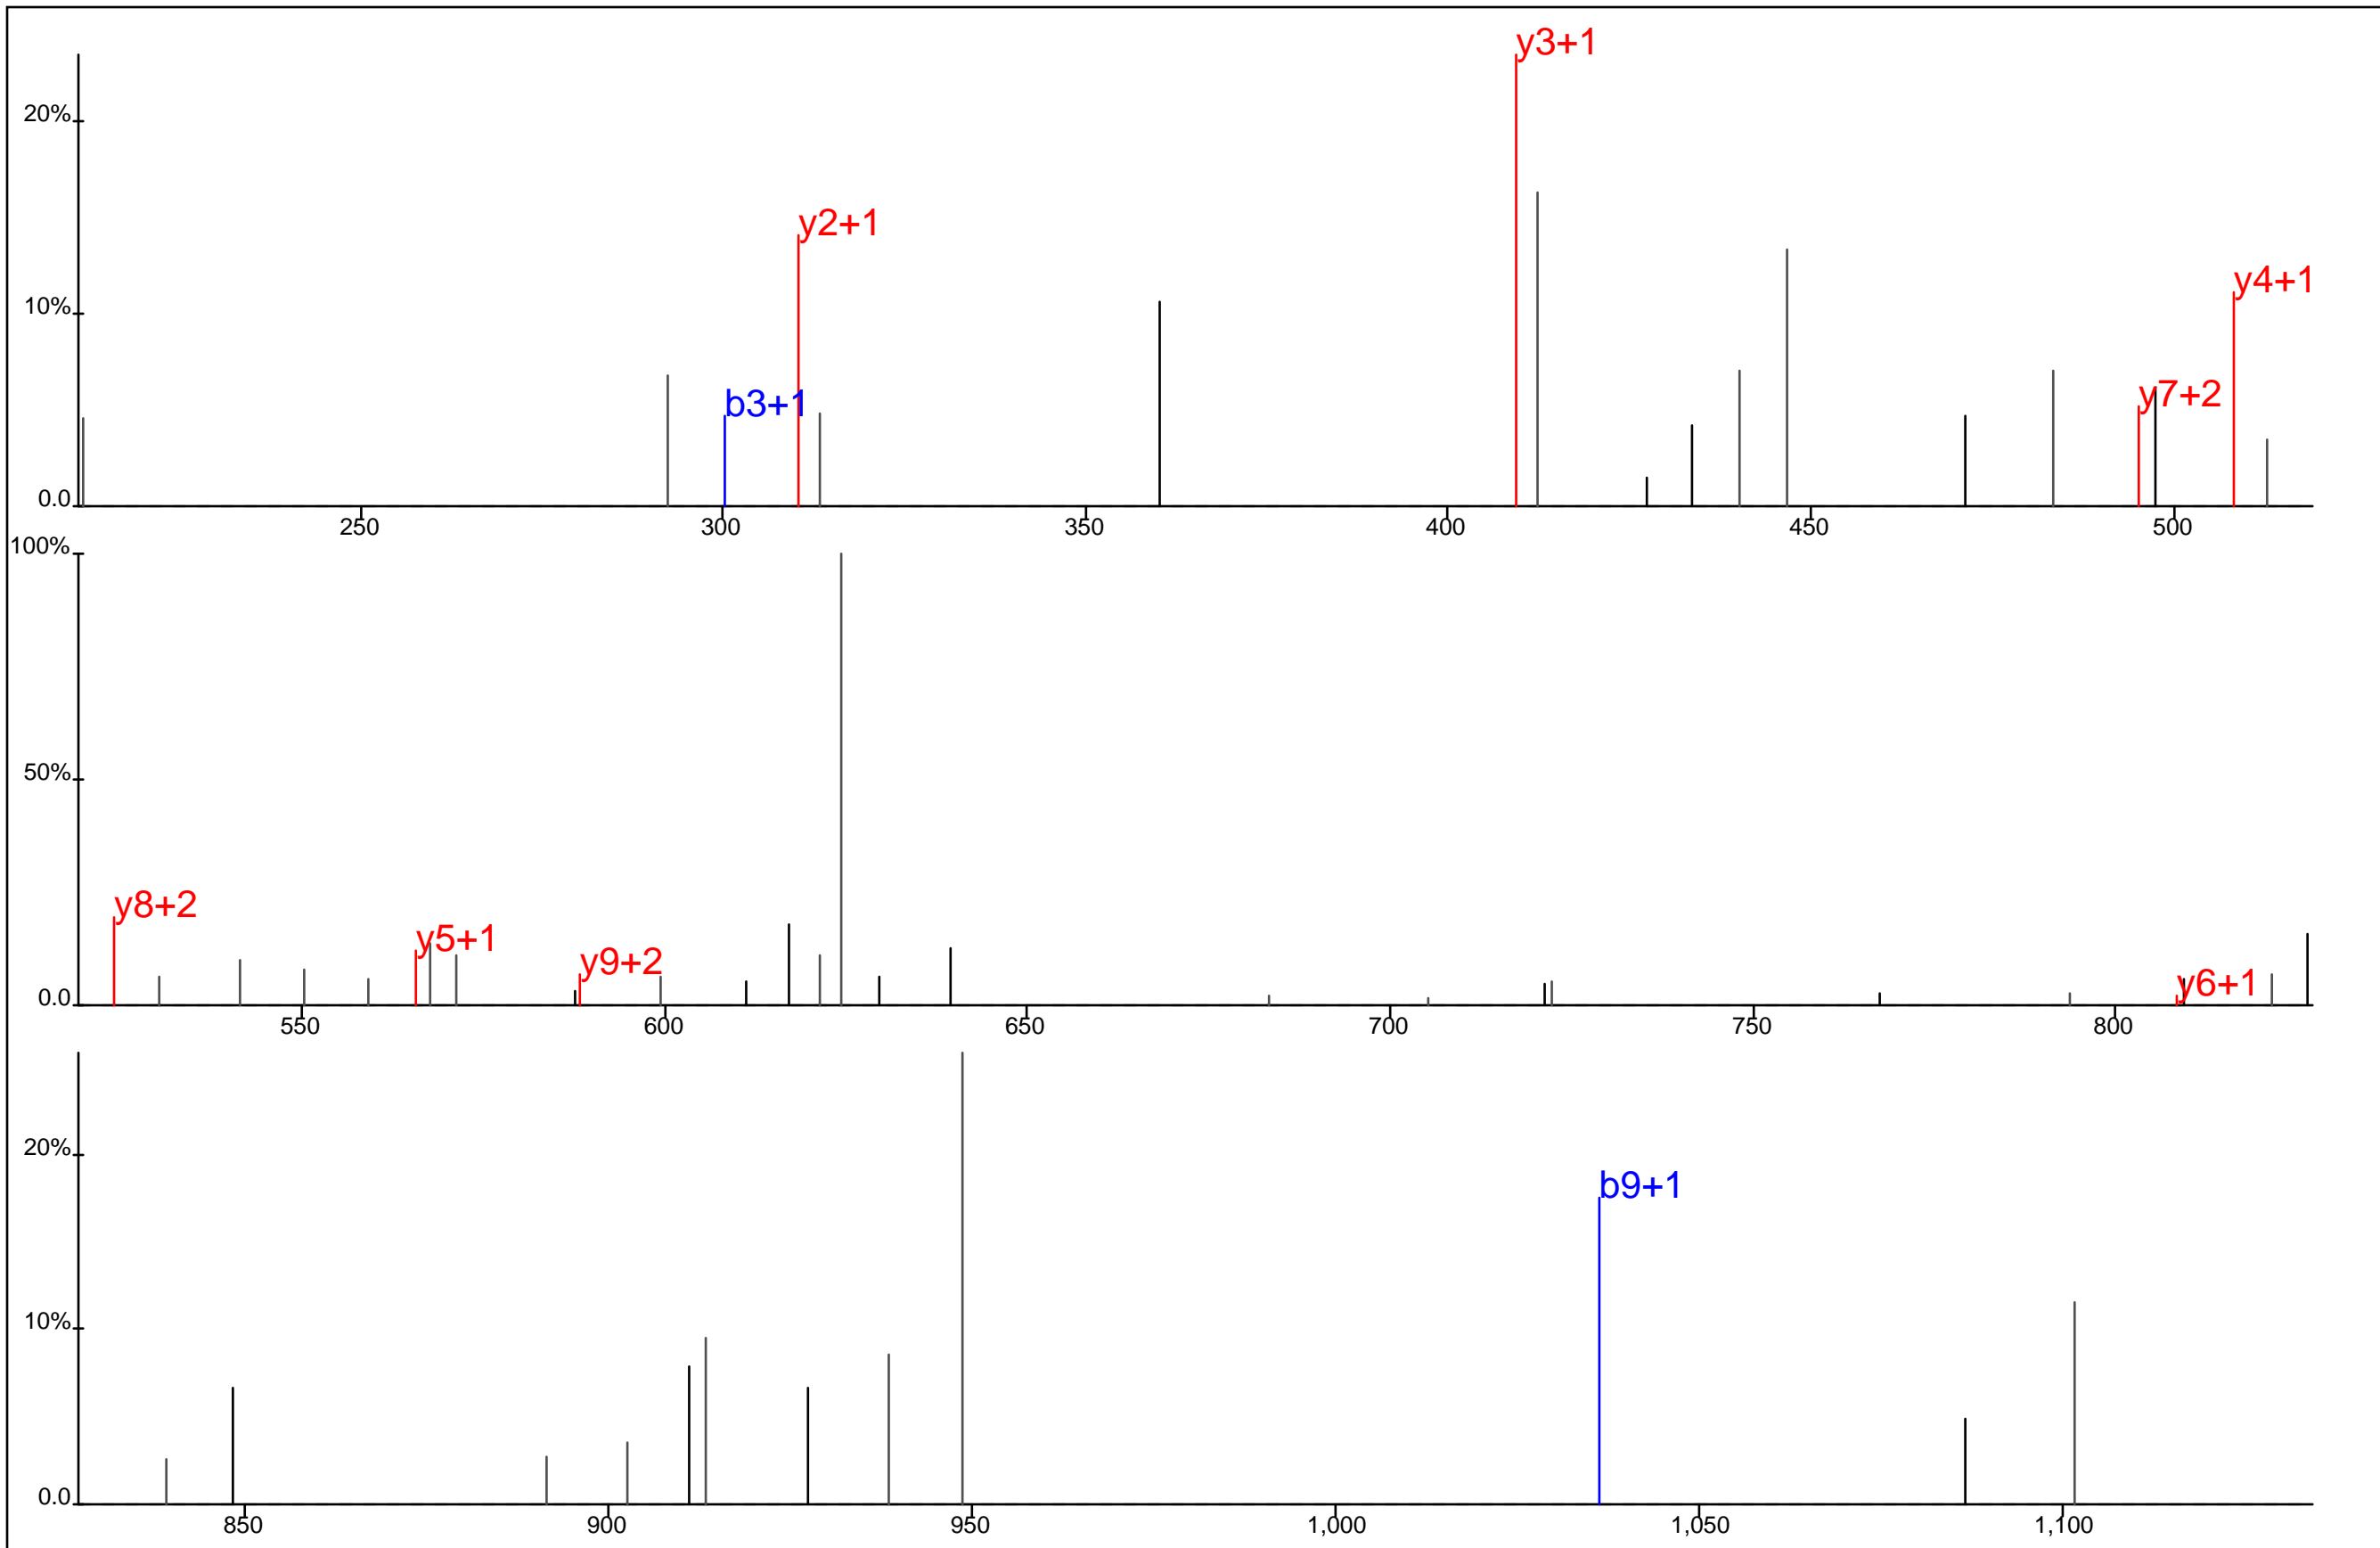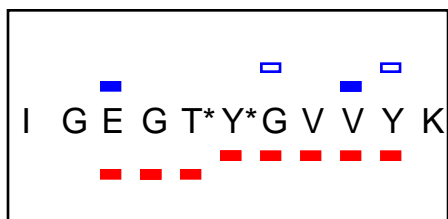

Protein Name: CDC2  
 gi Accession: 0  
 Precursor Mass: 673.2820+2  
 Delta Mass: 6.708 ppm  
 XCorr: 38.03

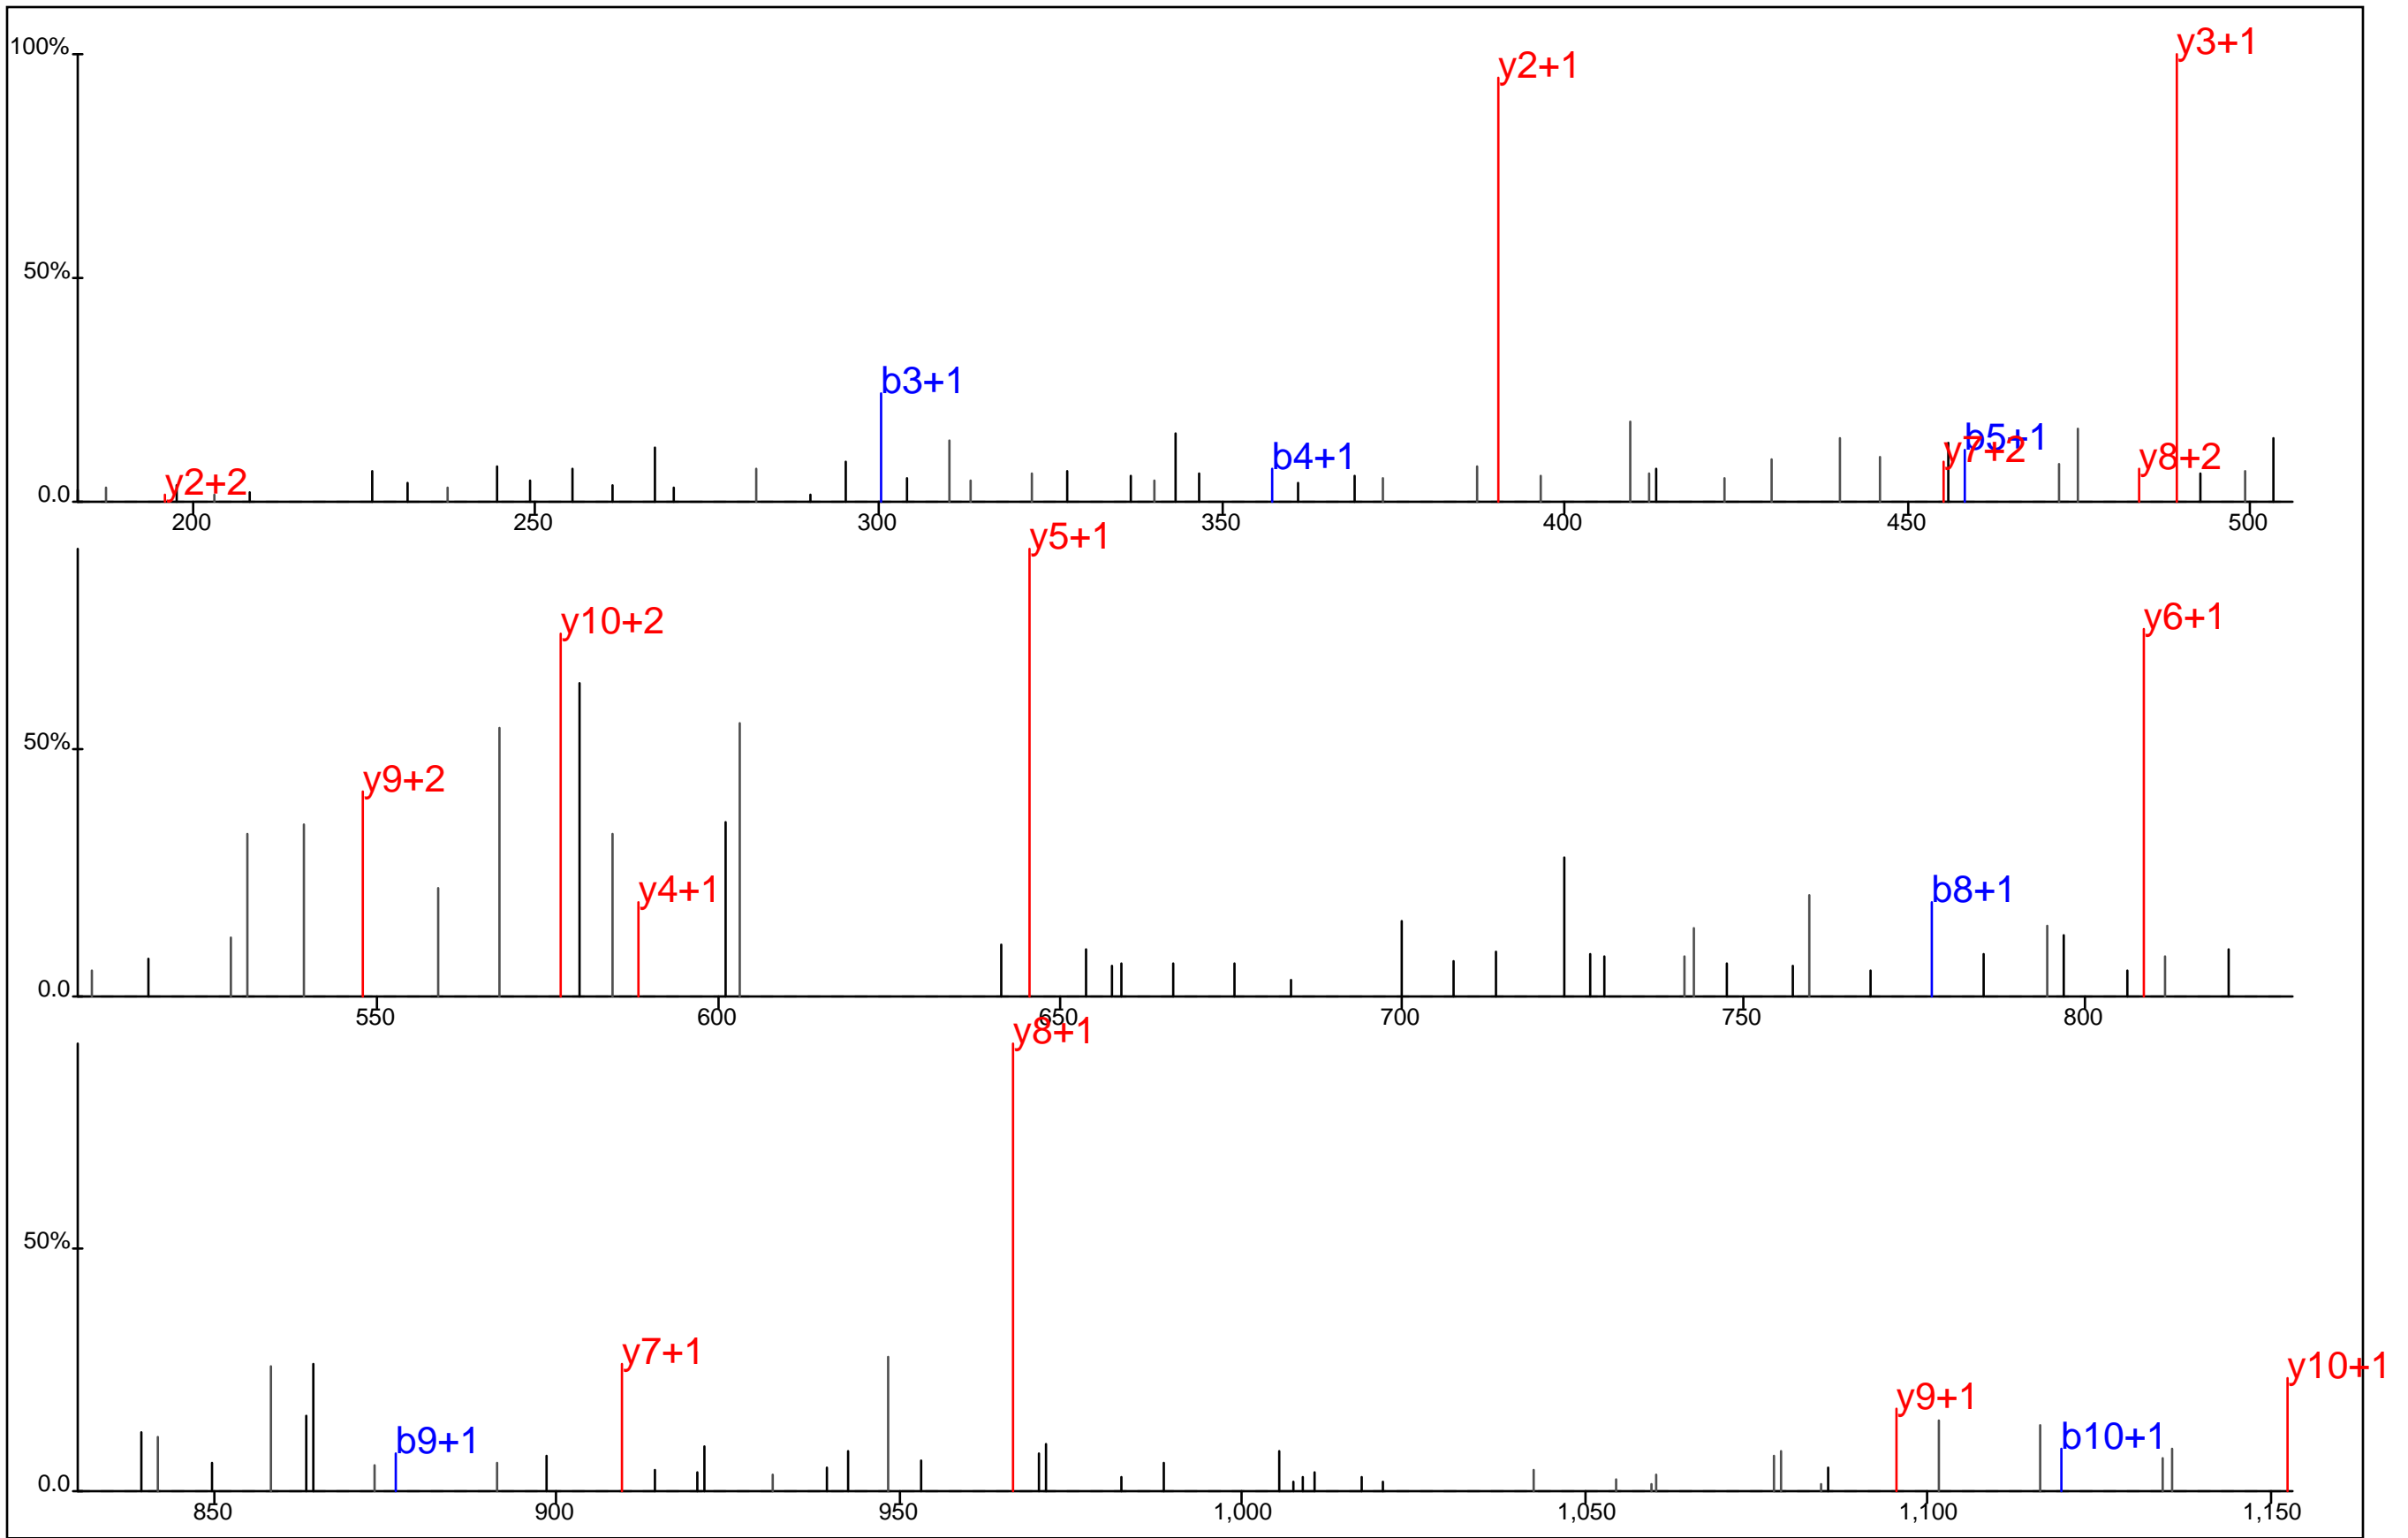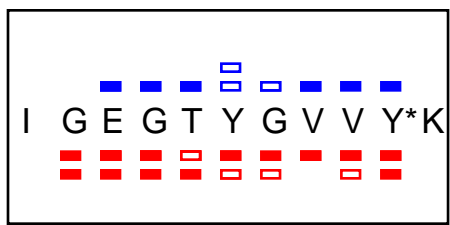

Protein Name: CDC2  
 gi Accession: 0  
 Precursor Mass: 633.2952+2  
 Delta Mass: 1.354 ppm  
 XCorr: 52.38

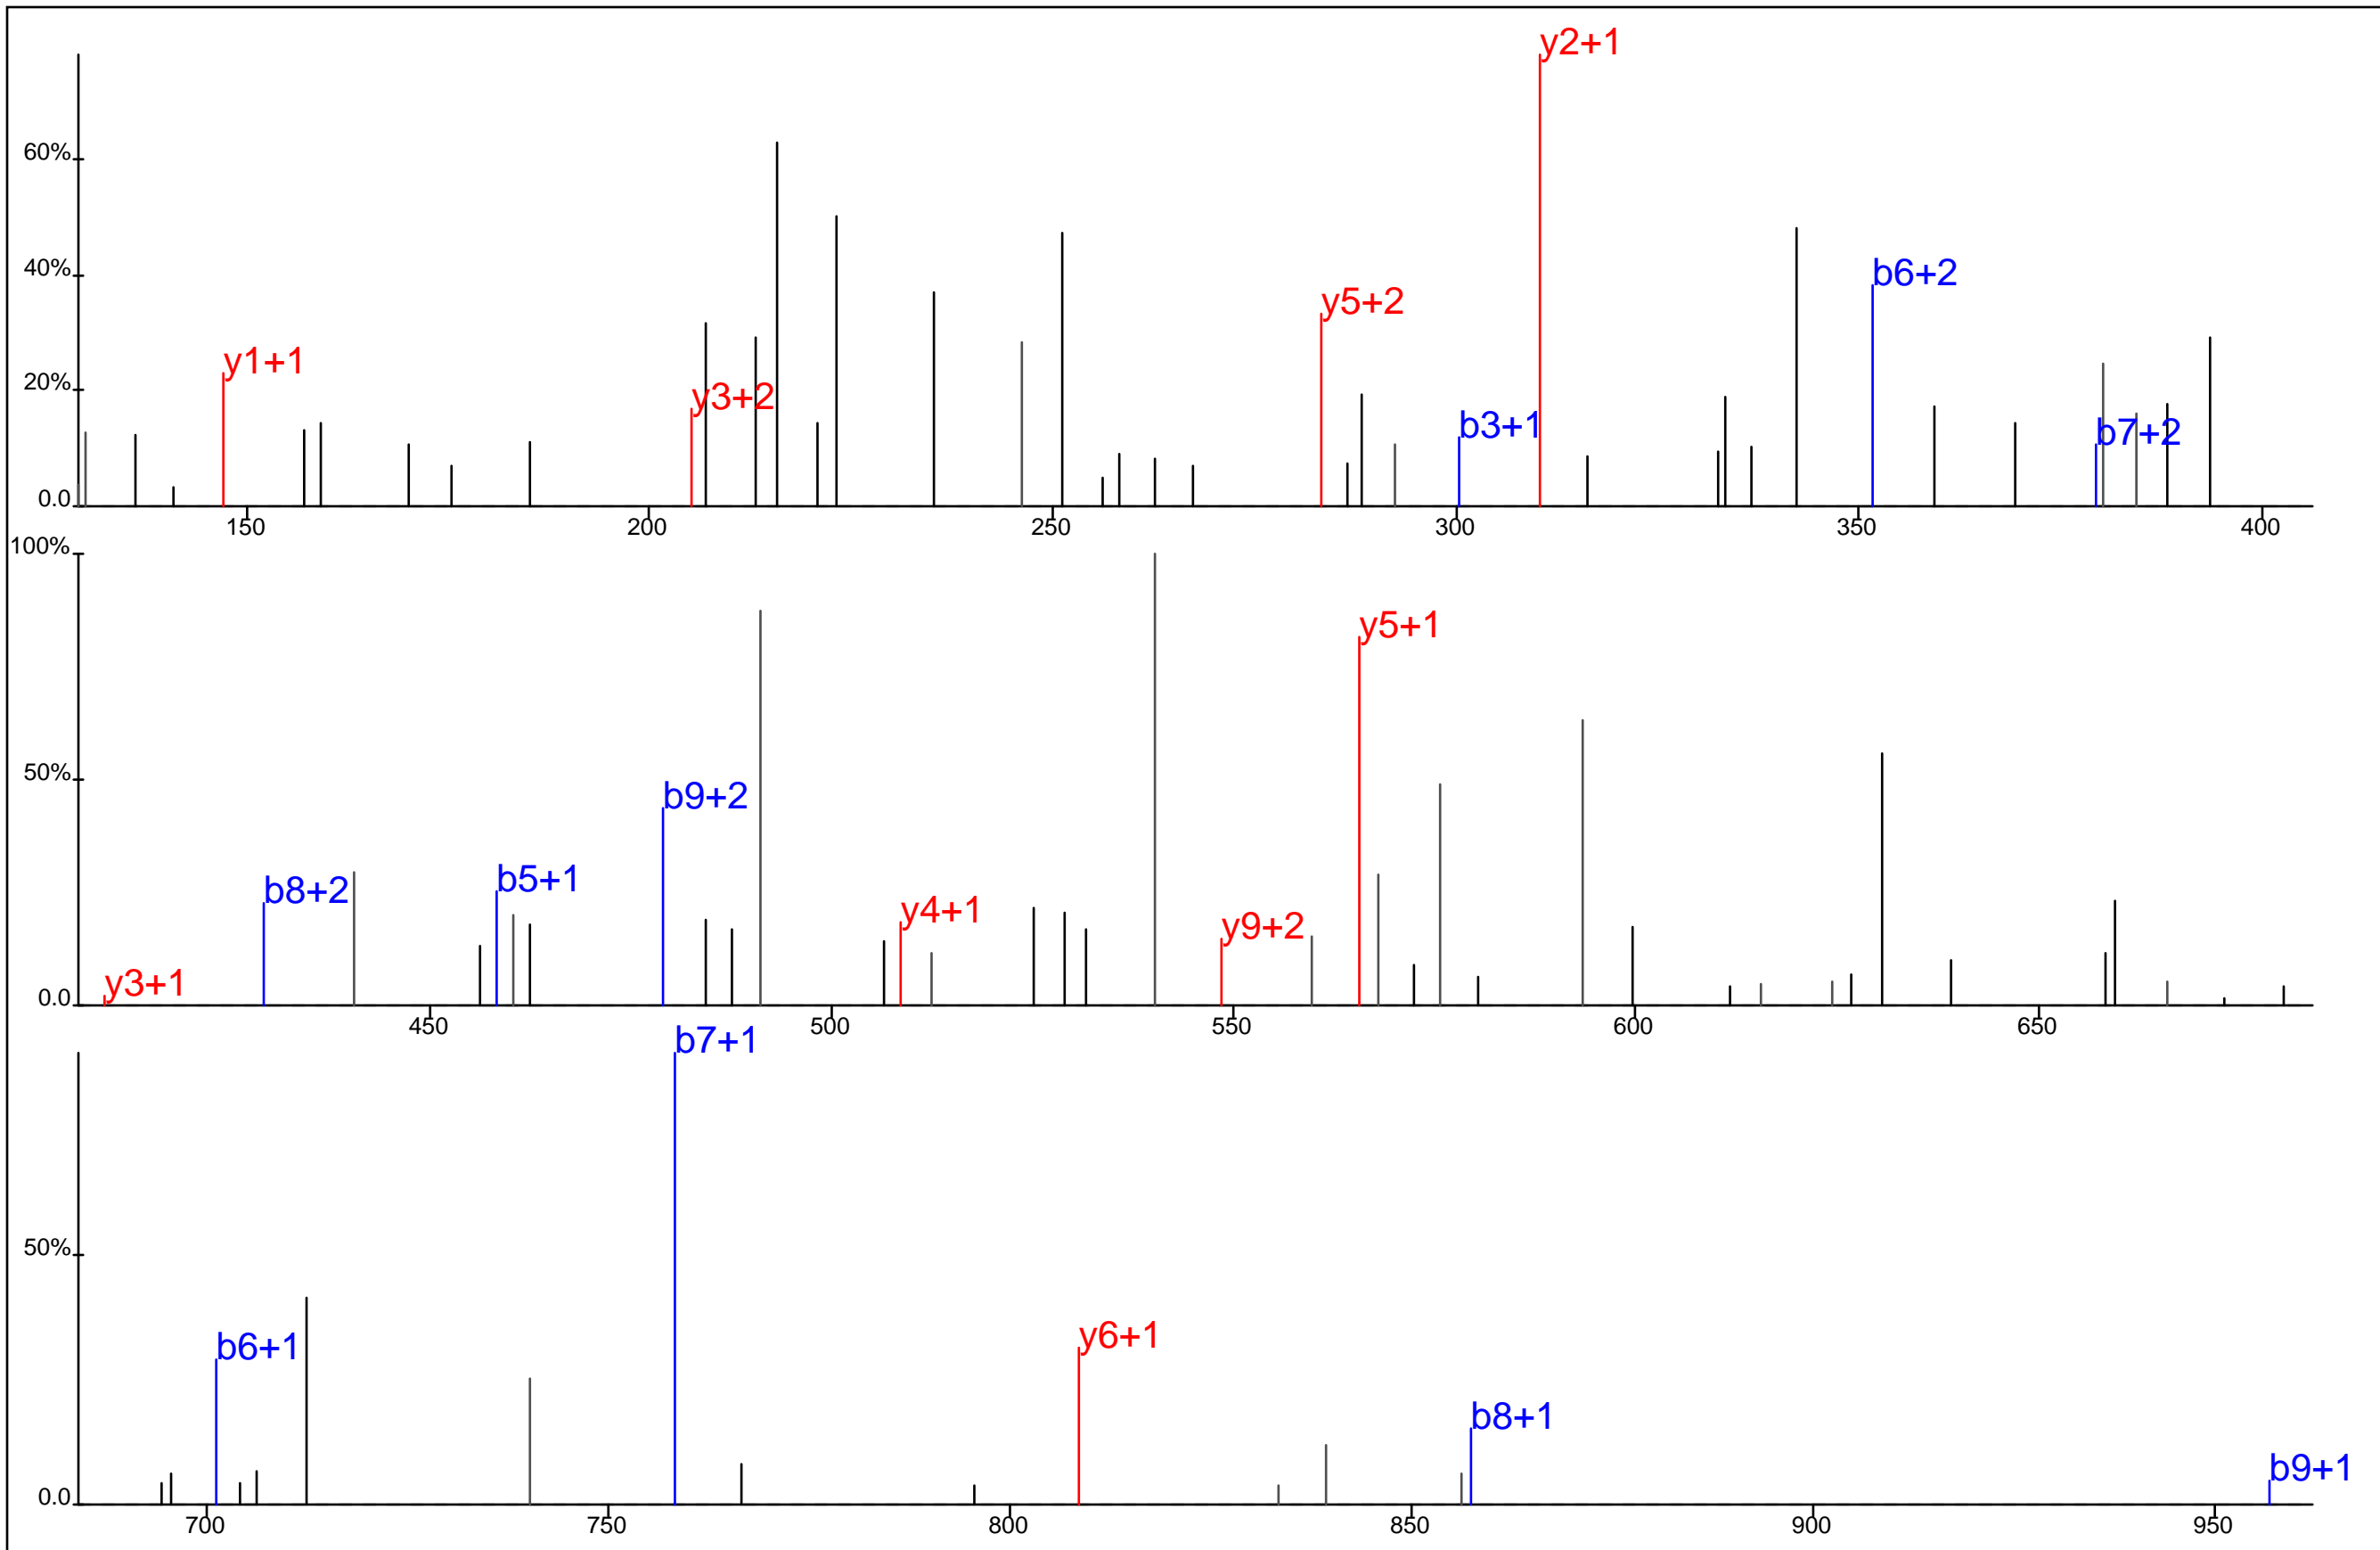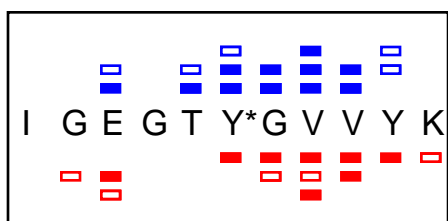

Protein Name: CDC2  
 gi Accession: 0  
 Precursor Mass: 422.5319+3  
 Delta Mass: 0.104 ppm  
 XCorr: 20.77

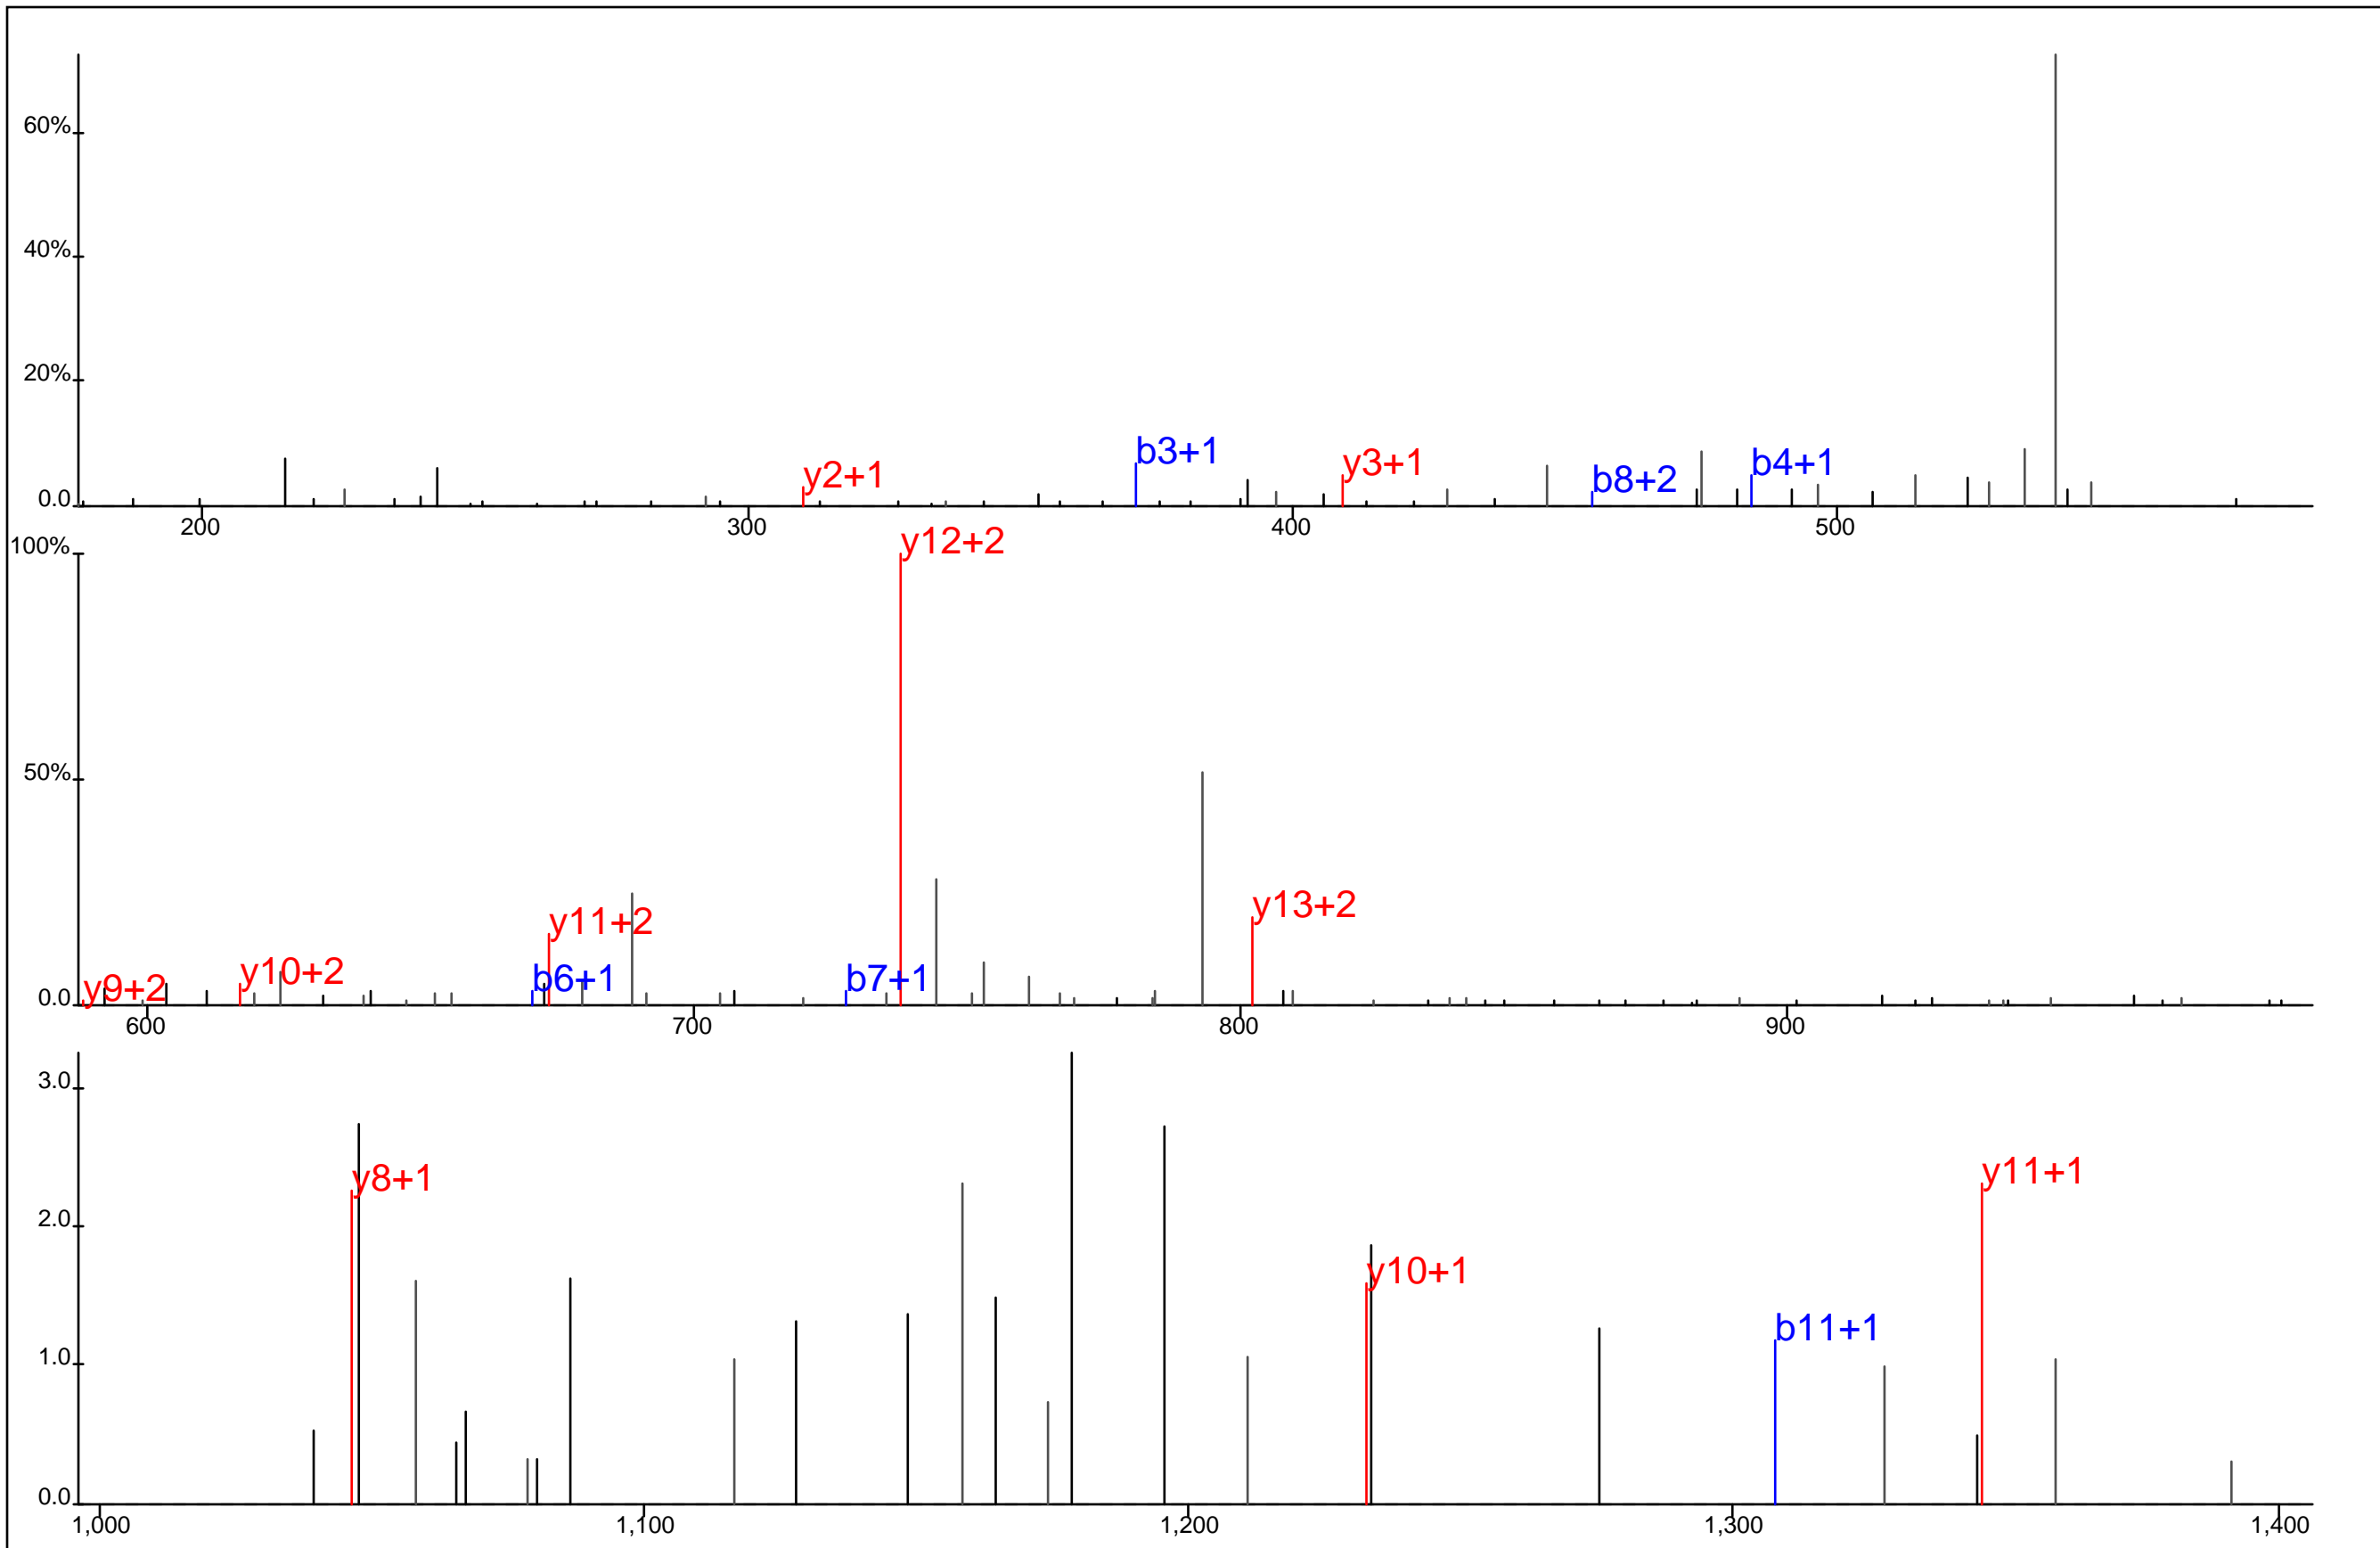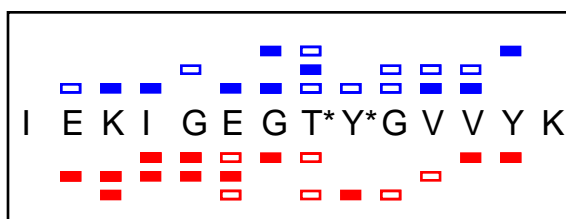

Protein Name: CDC2  
 gi Accession: 0  
 Precursor Mass: 572.5946+3  
 Delta Mass: 0.007 ppm  
 XCorr: 20.49

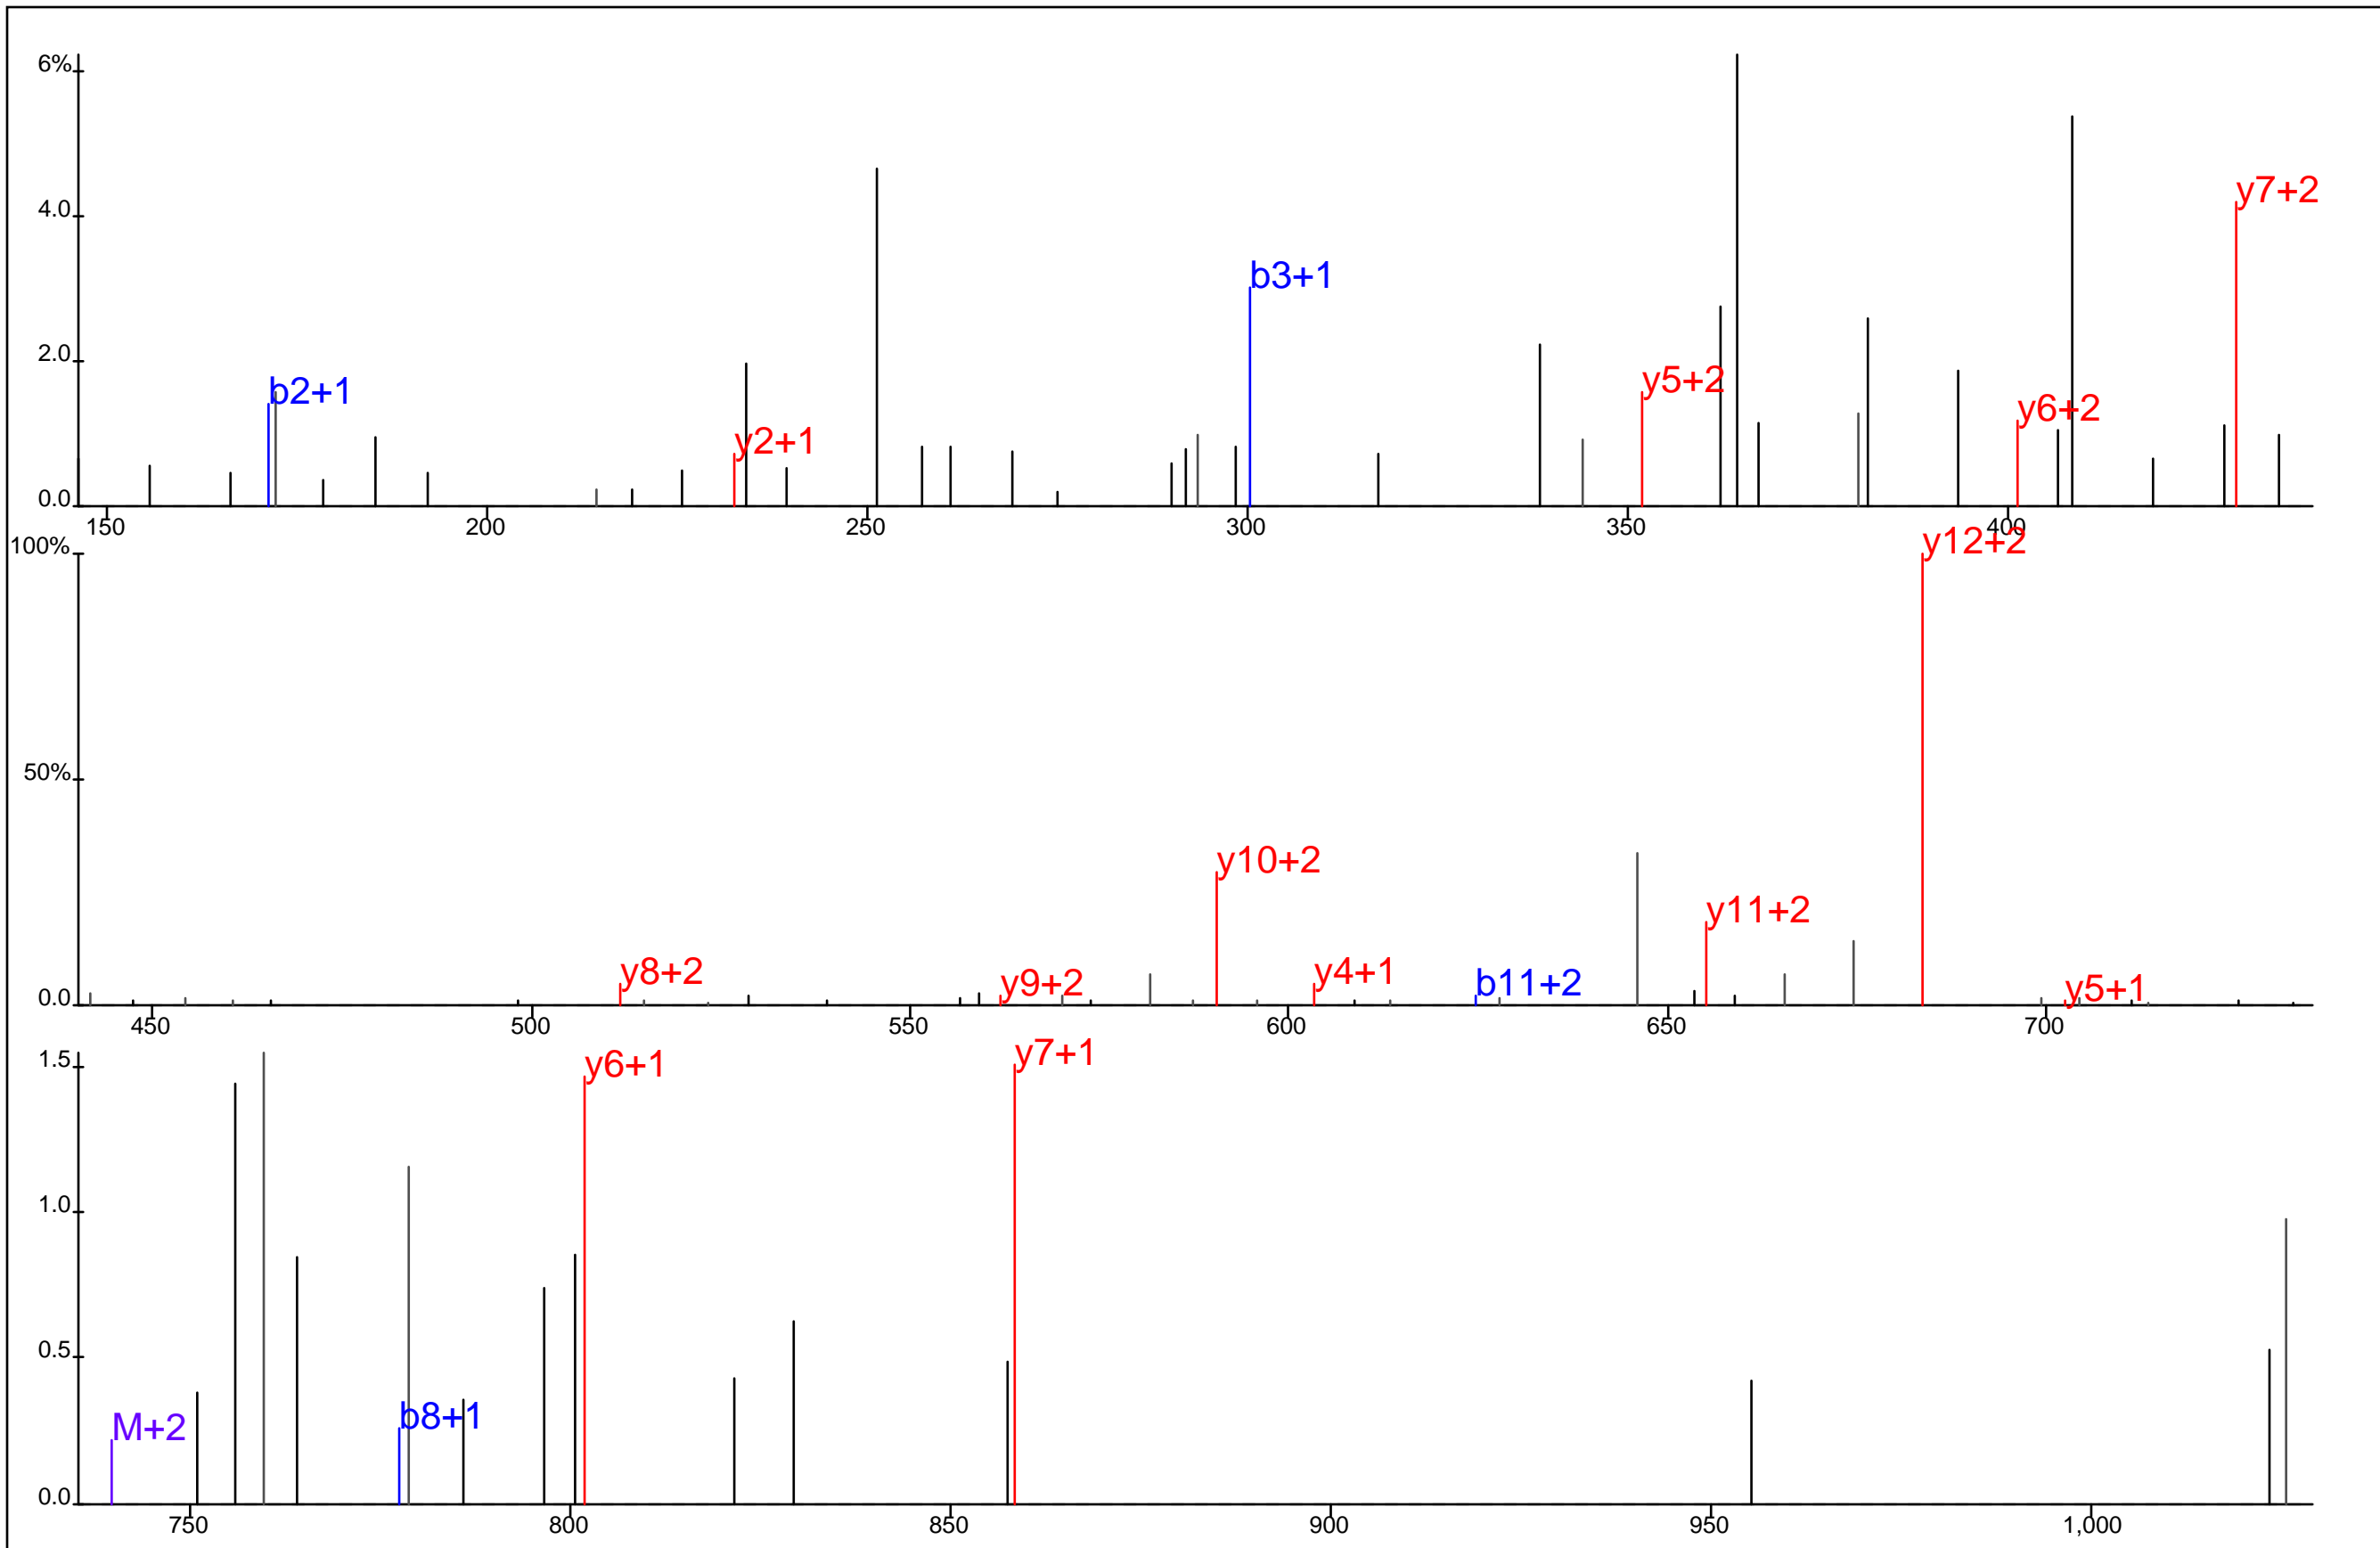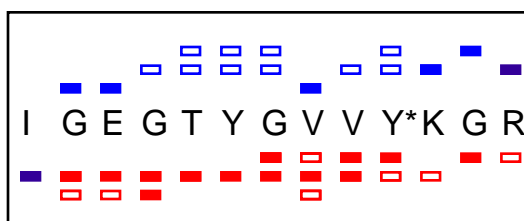

Protein Name: CDC2  
 gi Accession: 0  
 Precursor Mass: 493.5732+3  
 Delta Mass: 0.853 ppm  
 XCorr: 26.26

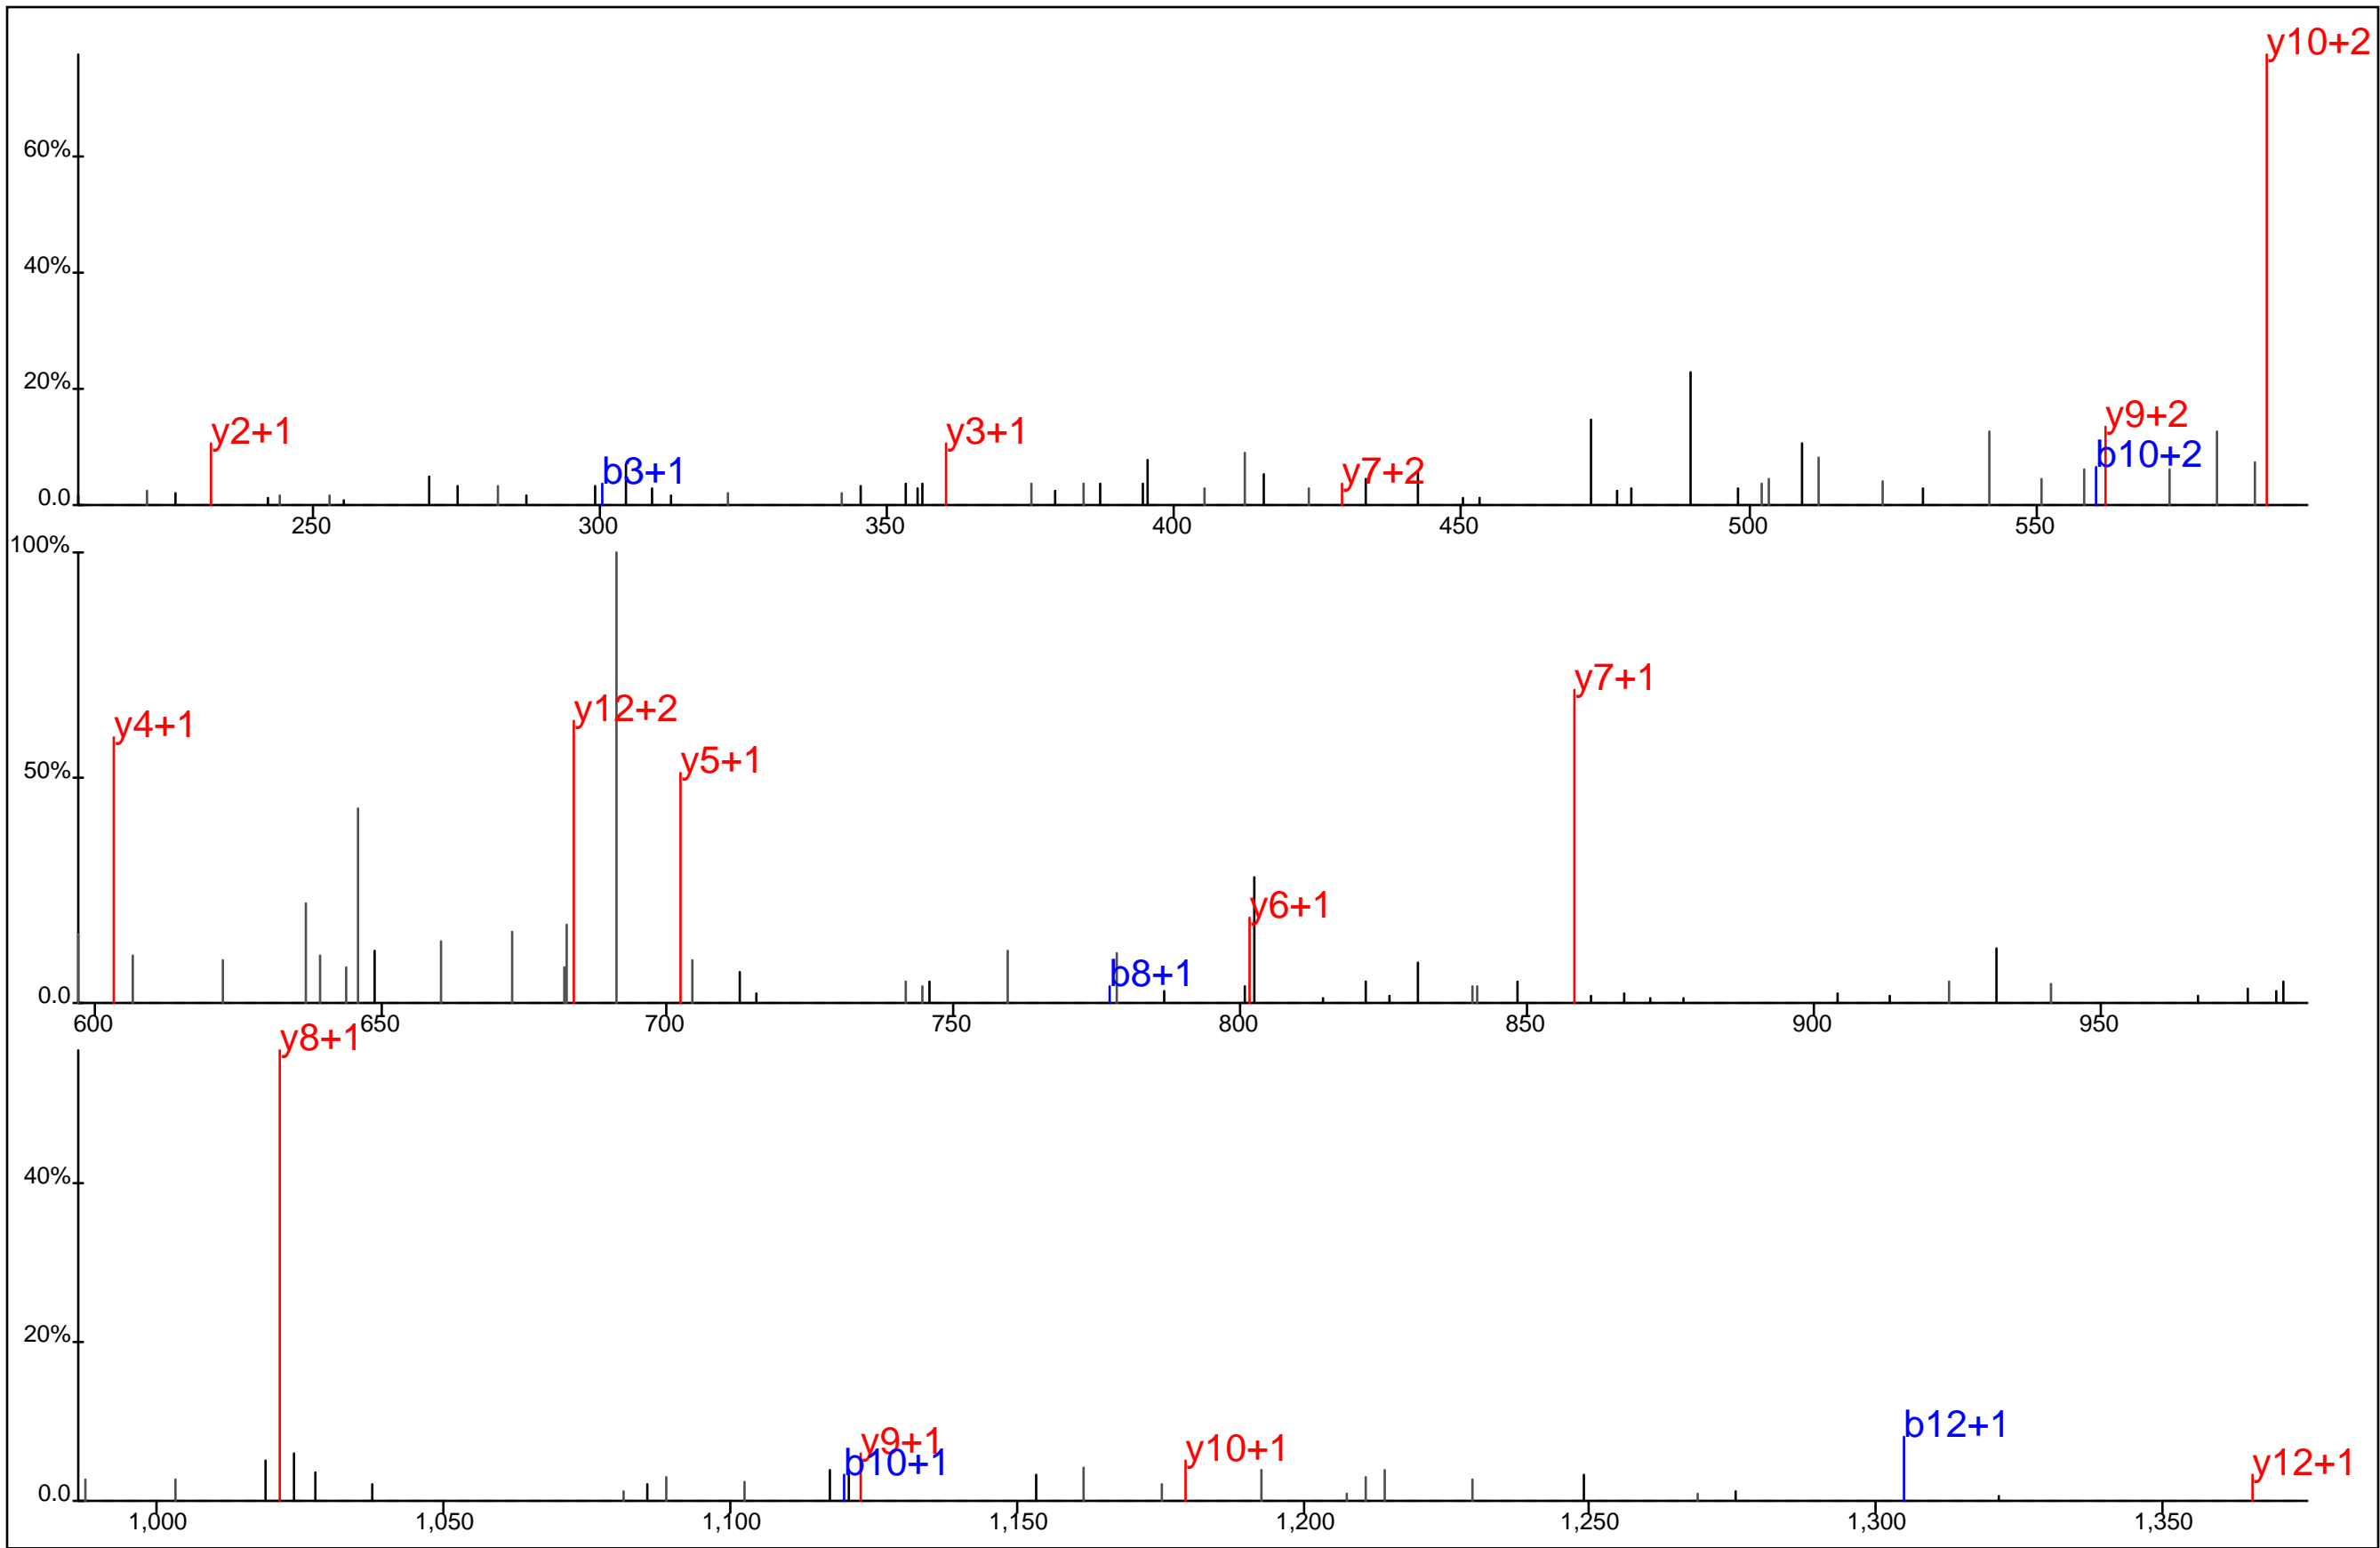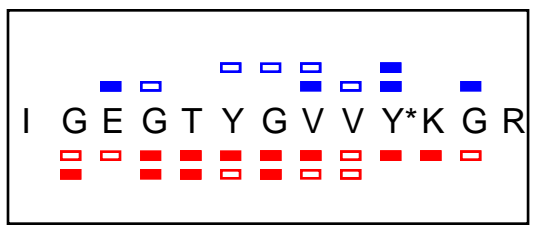

Protein Name: CDC2  
 gi Accession: 0  
 Precursor Mass: 739.8568+2  
 Delta Mass: 1.564 ppm  
 XCorr: 54.42

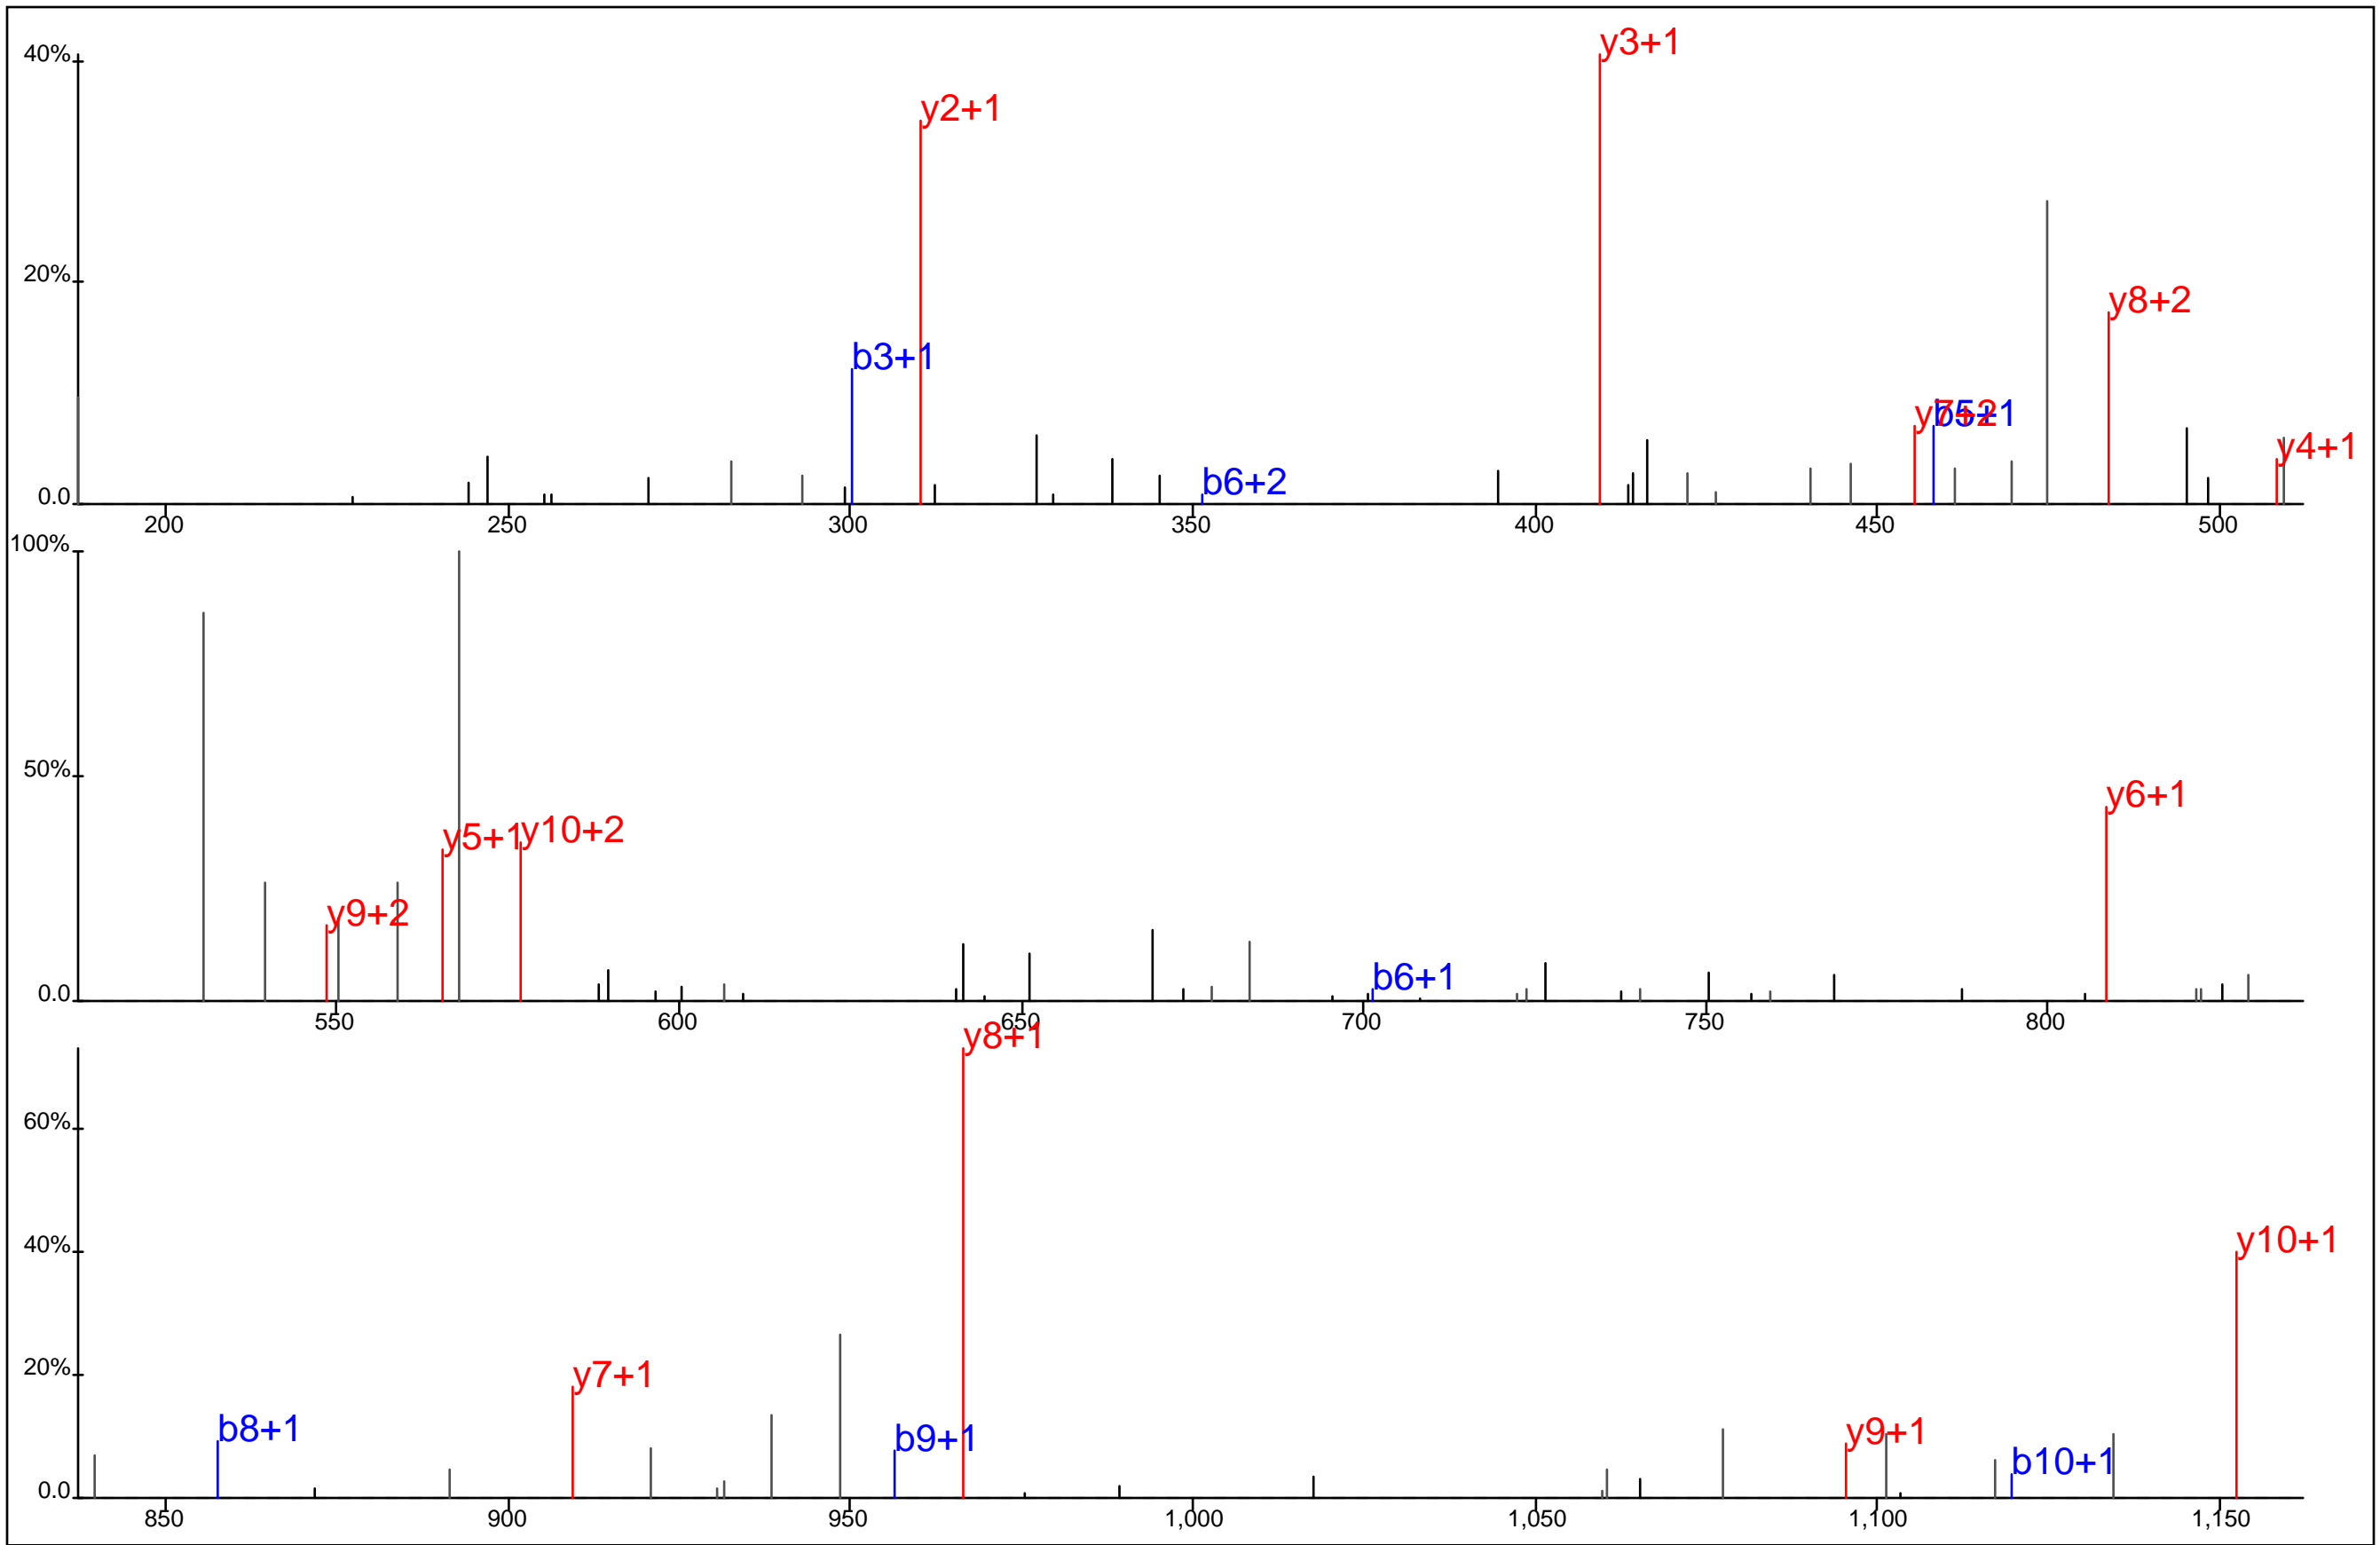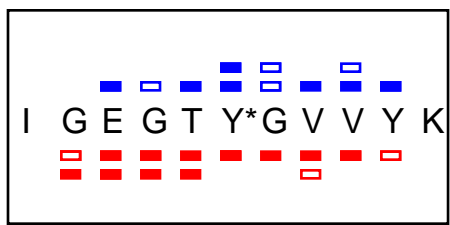

Protein Name: CDC2  
 gi Accession: 0  
 Precursor Mass: 633.2946+2  
 Delta Mass: 0.390 ppm  
 XCorr: 52.15

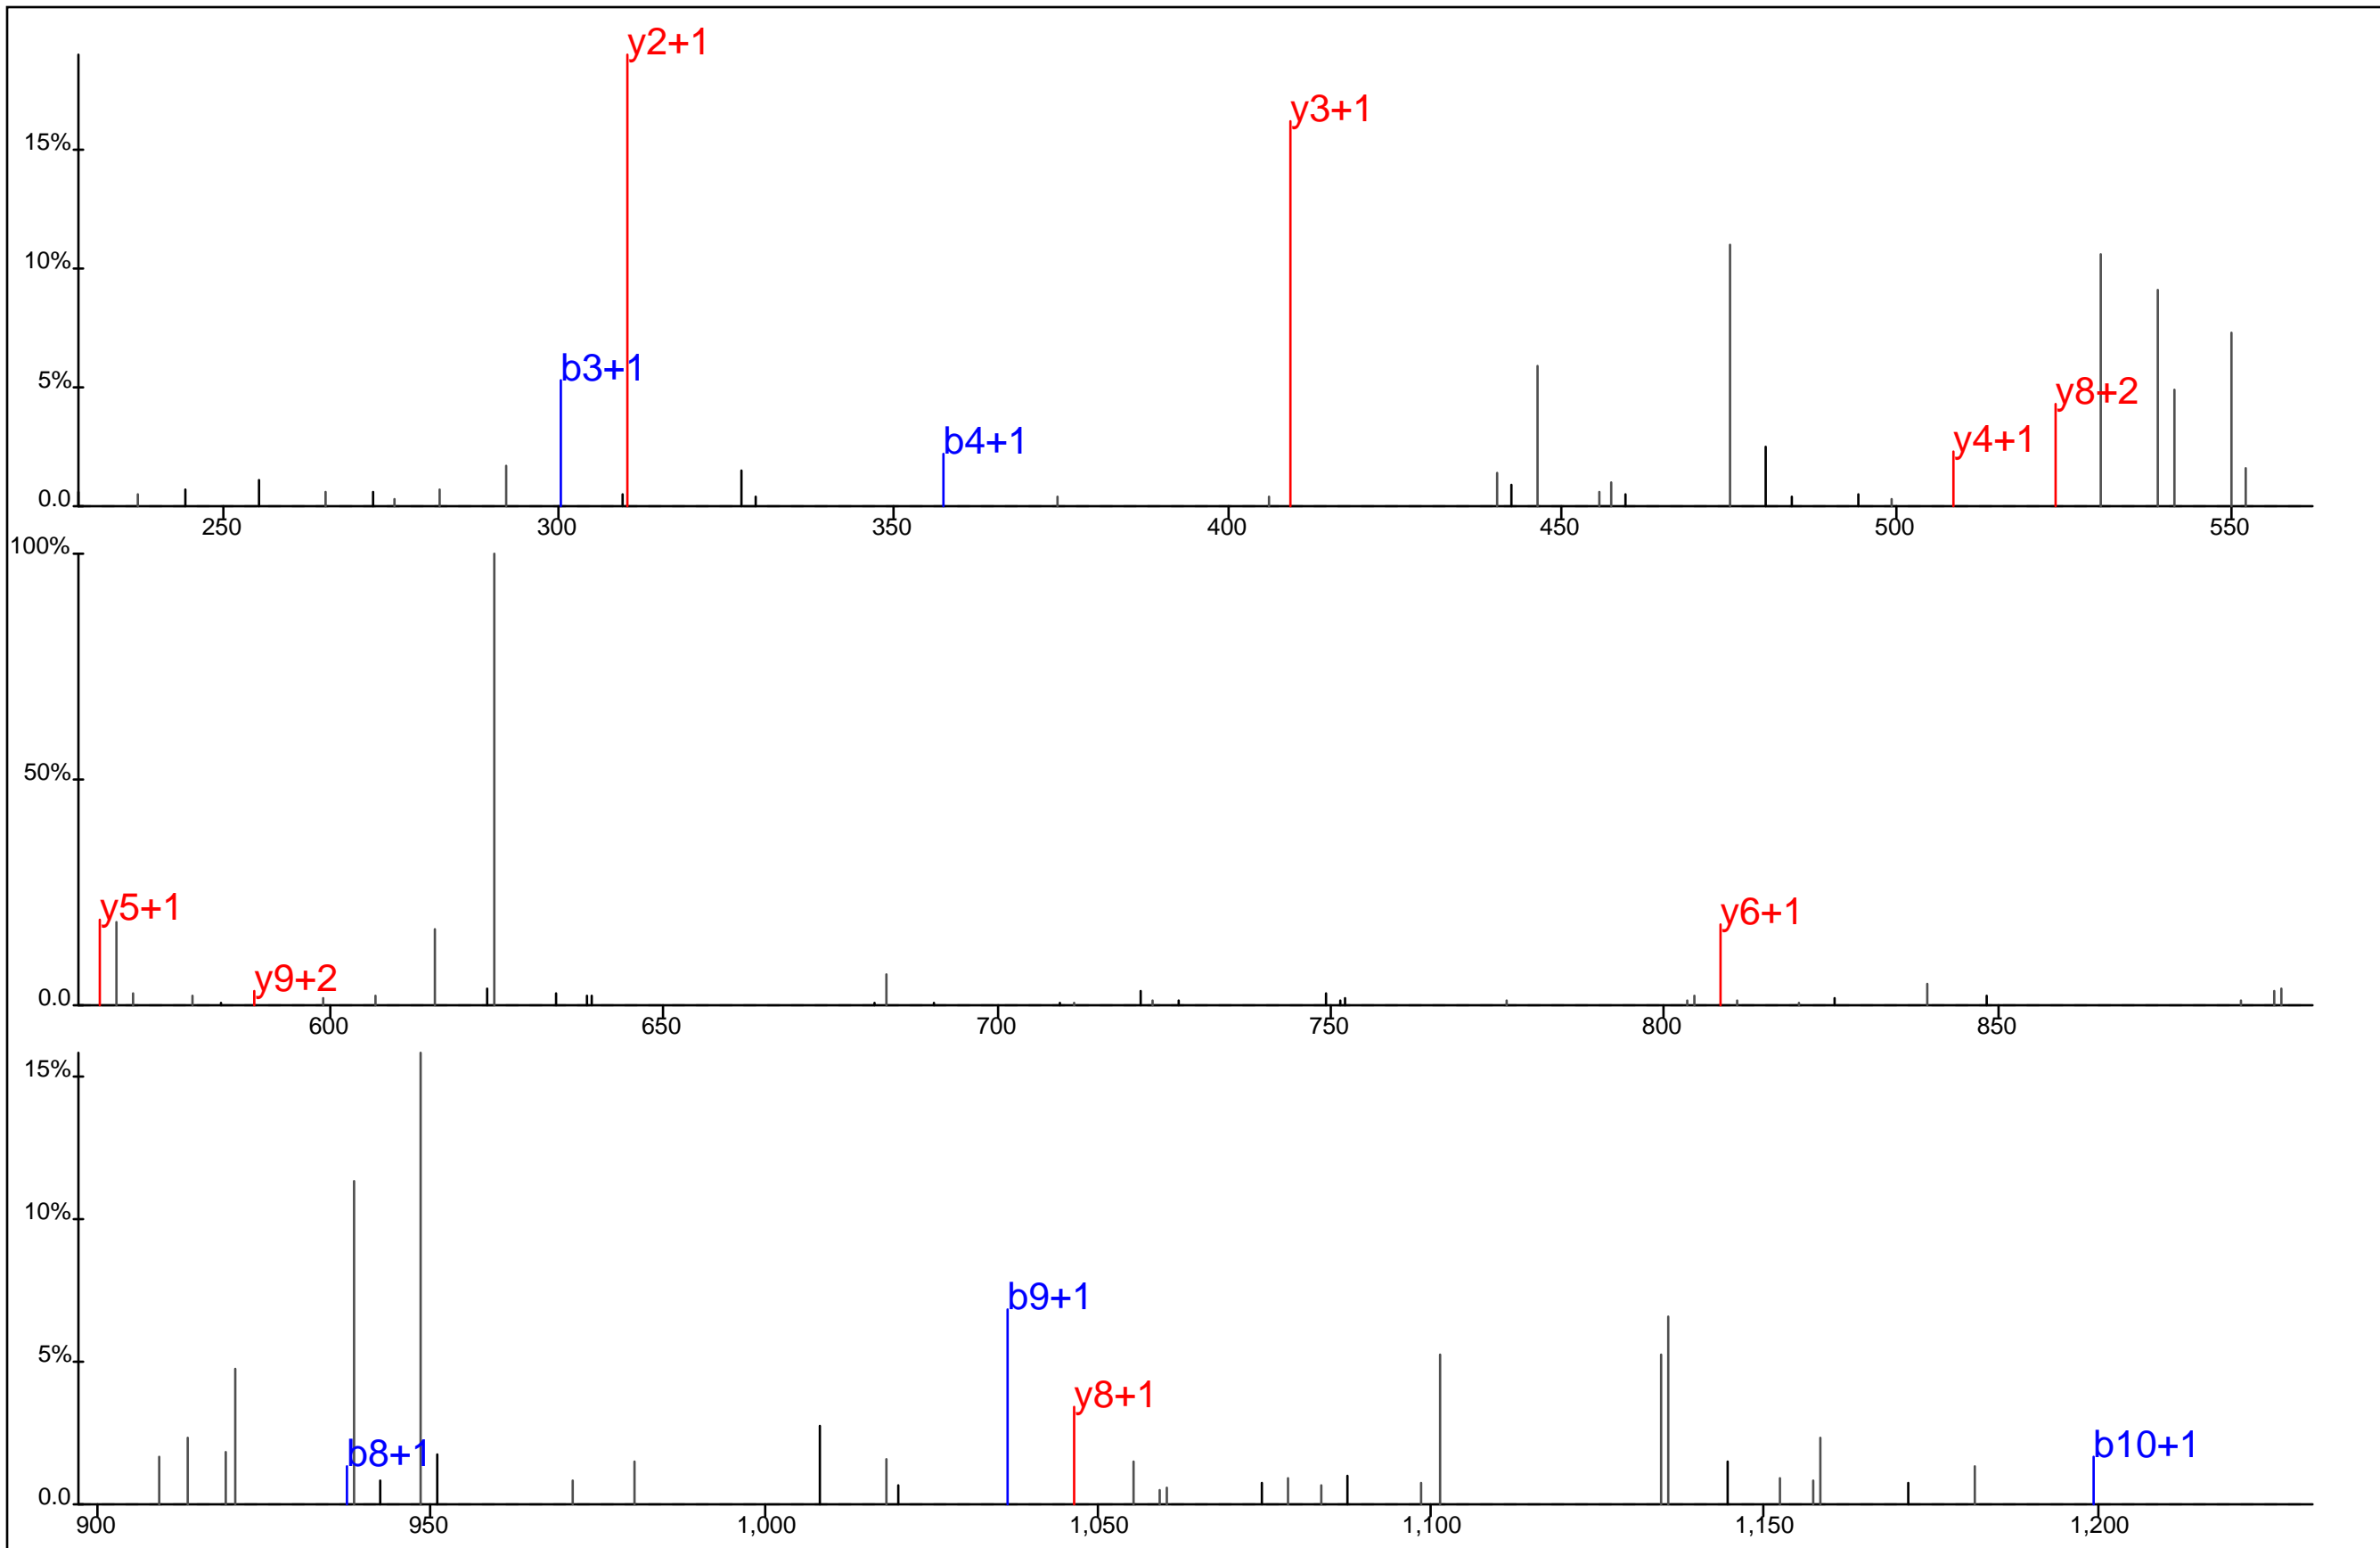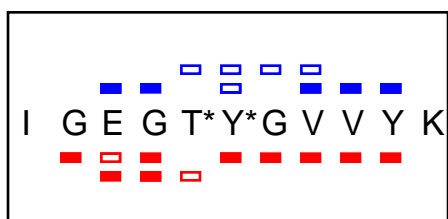

Protein Name: CDC2  
 gi Accession: 0  
 Precursor Mass: 673.2782+2  
 Delta Mass: 1.084 ppm  
 XCorr: 51.13



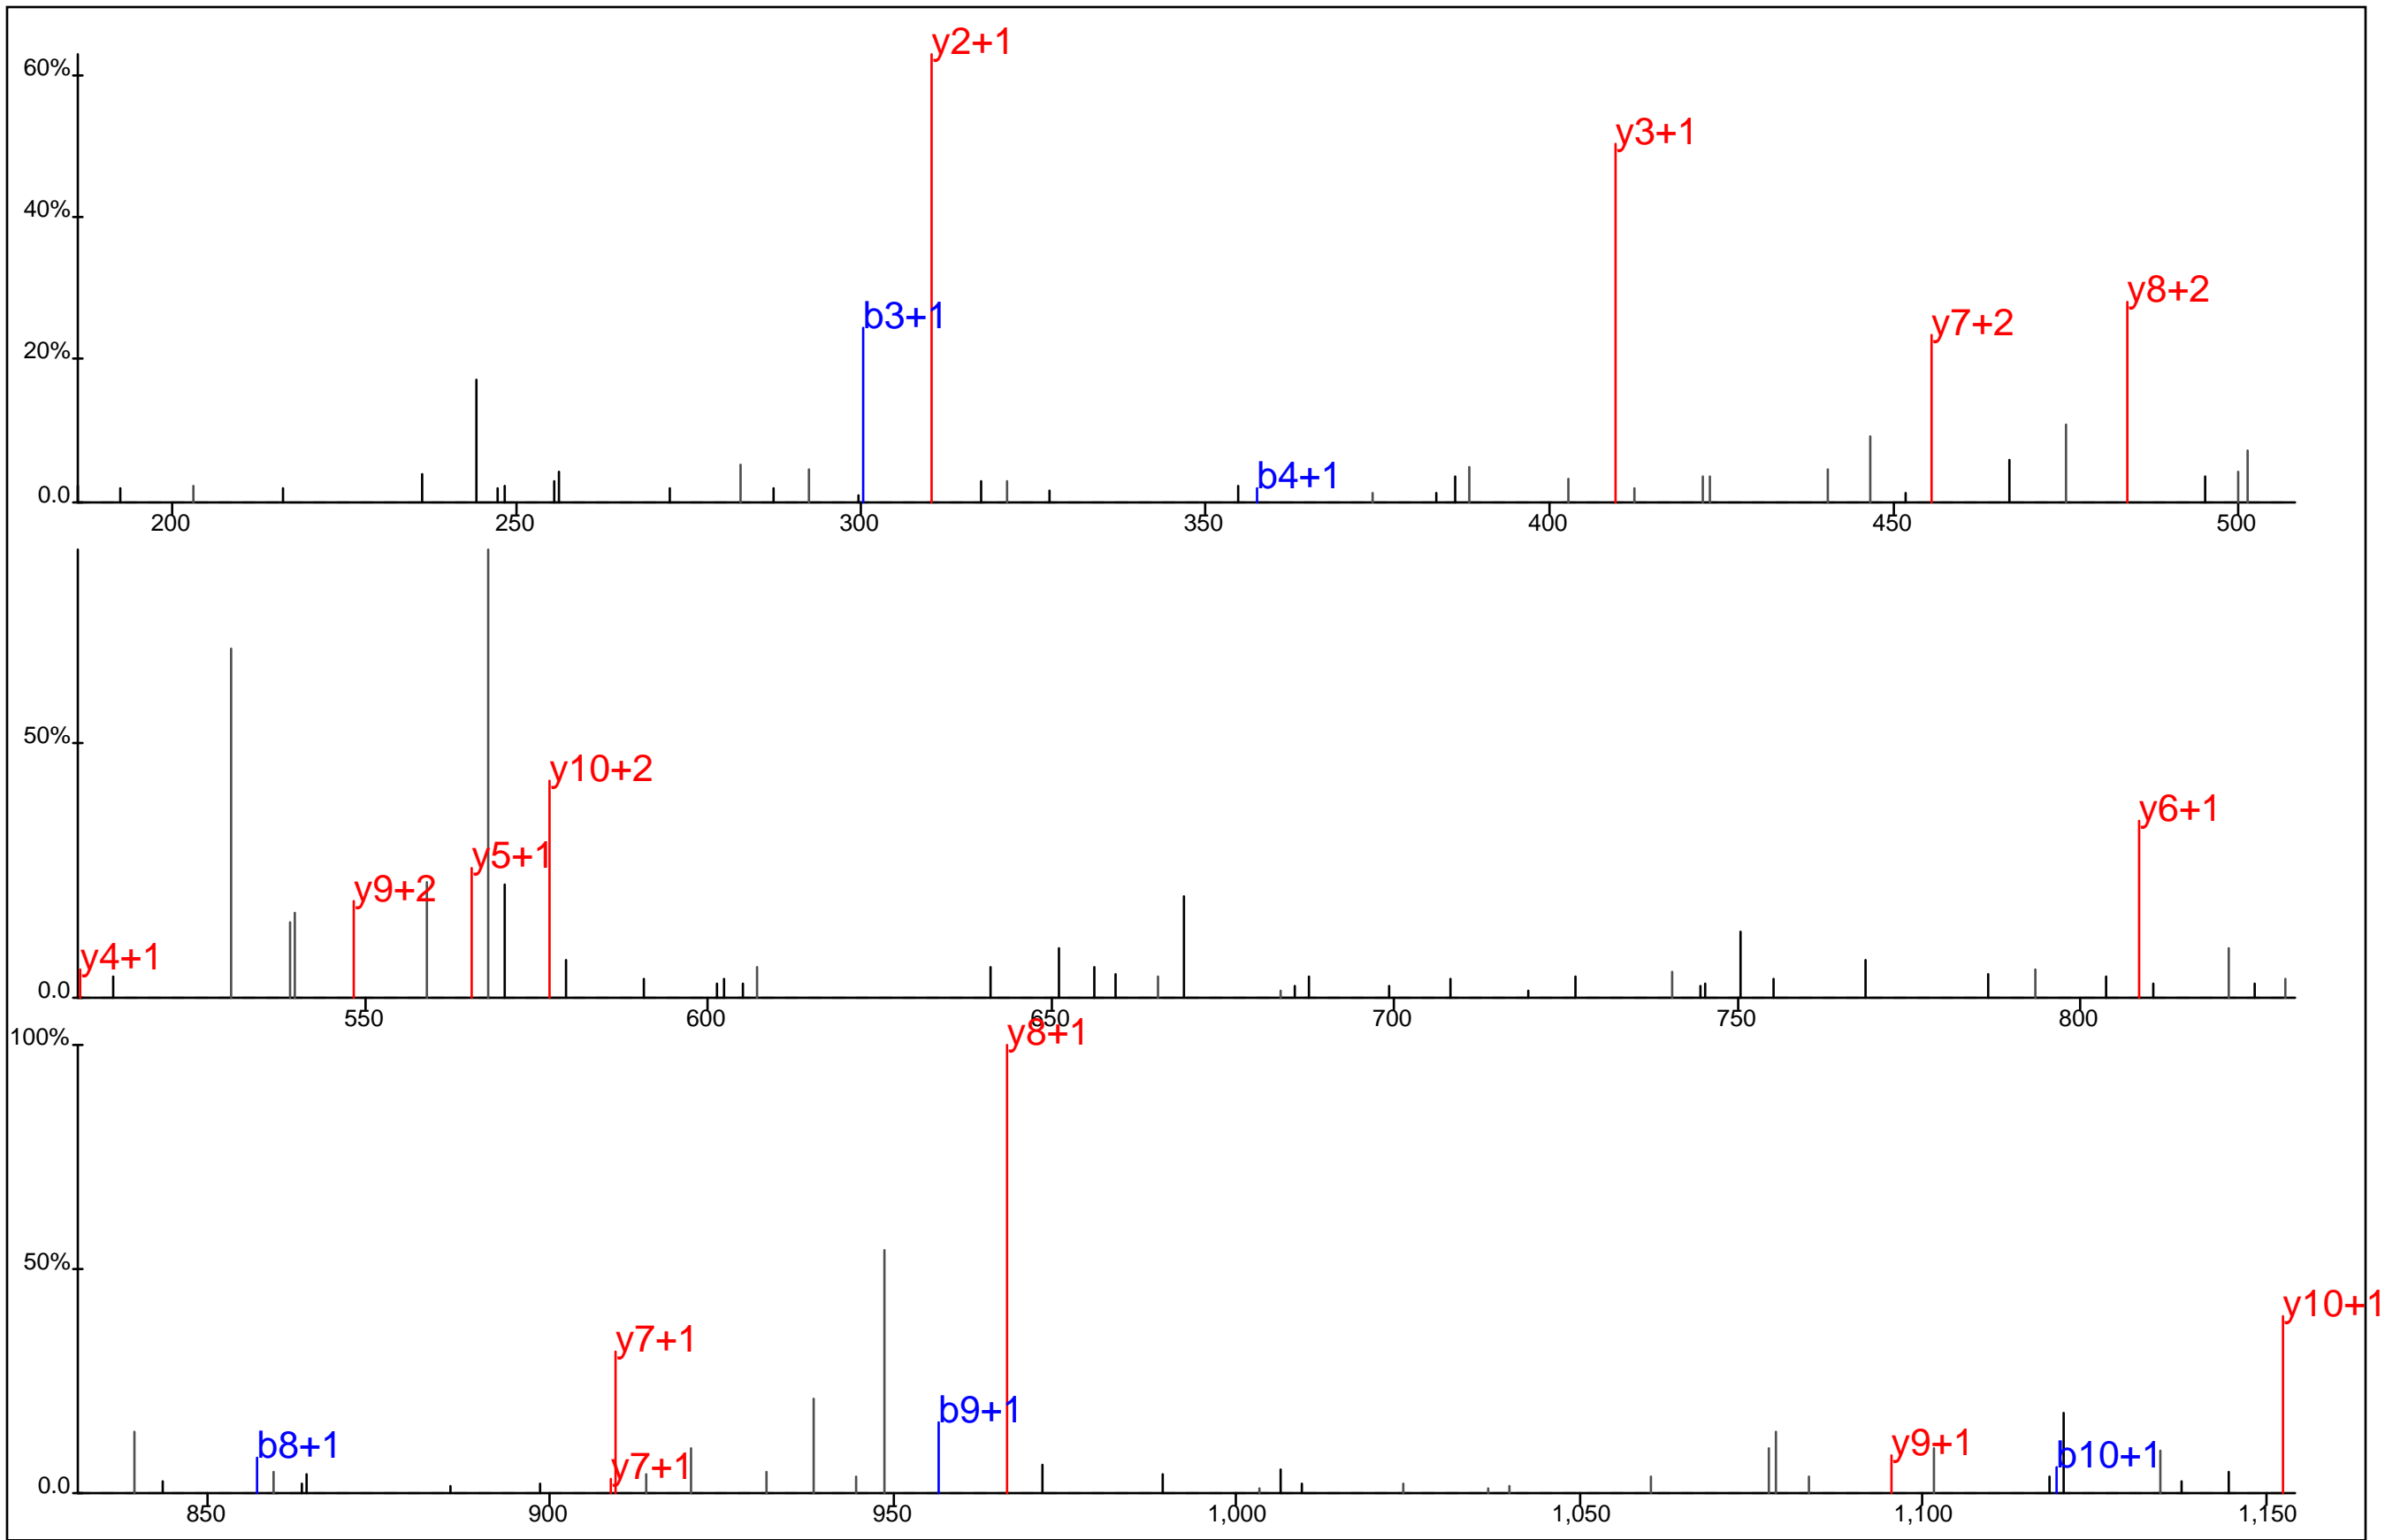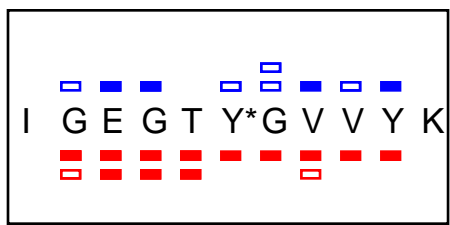

Protein Name: CDC2  
 gi Accession: 0  
 Precursor Mass: 633.2937+2  
 Delta Mass: 0.961 ppm  
 XCorr: 45.04

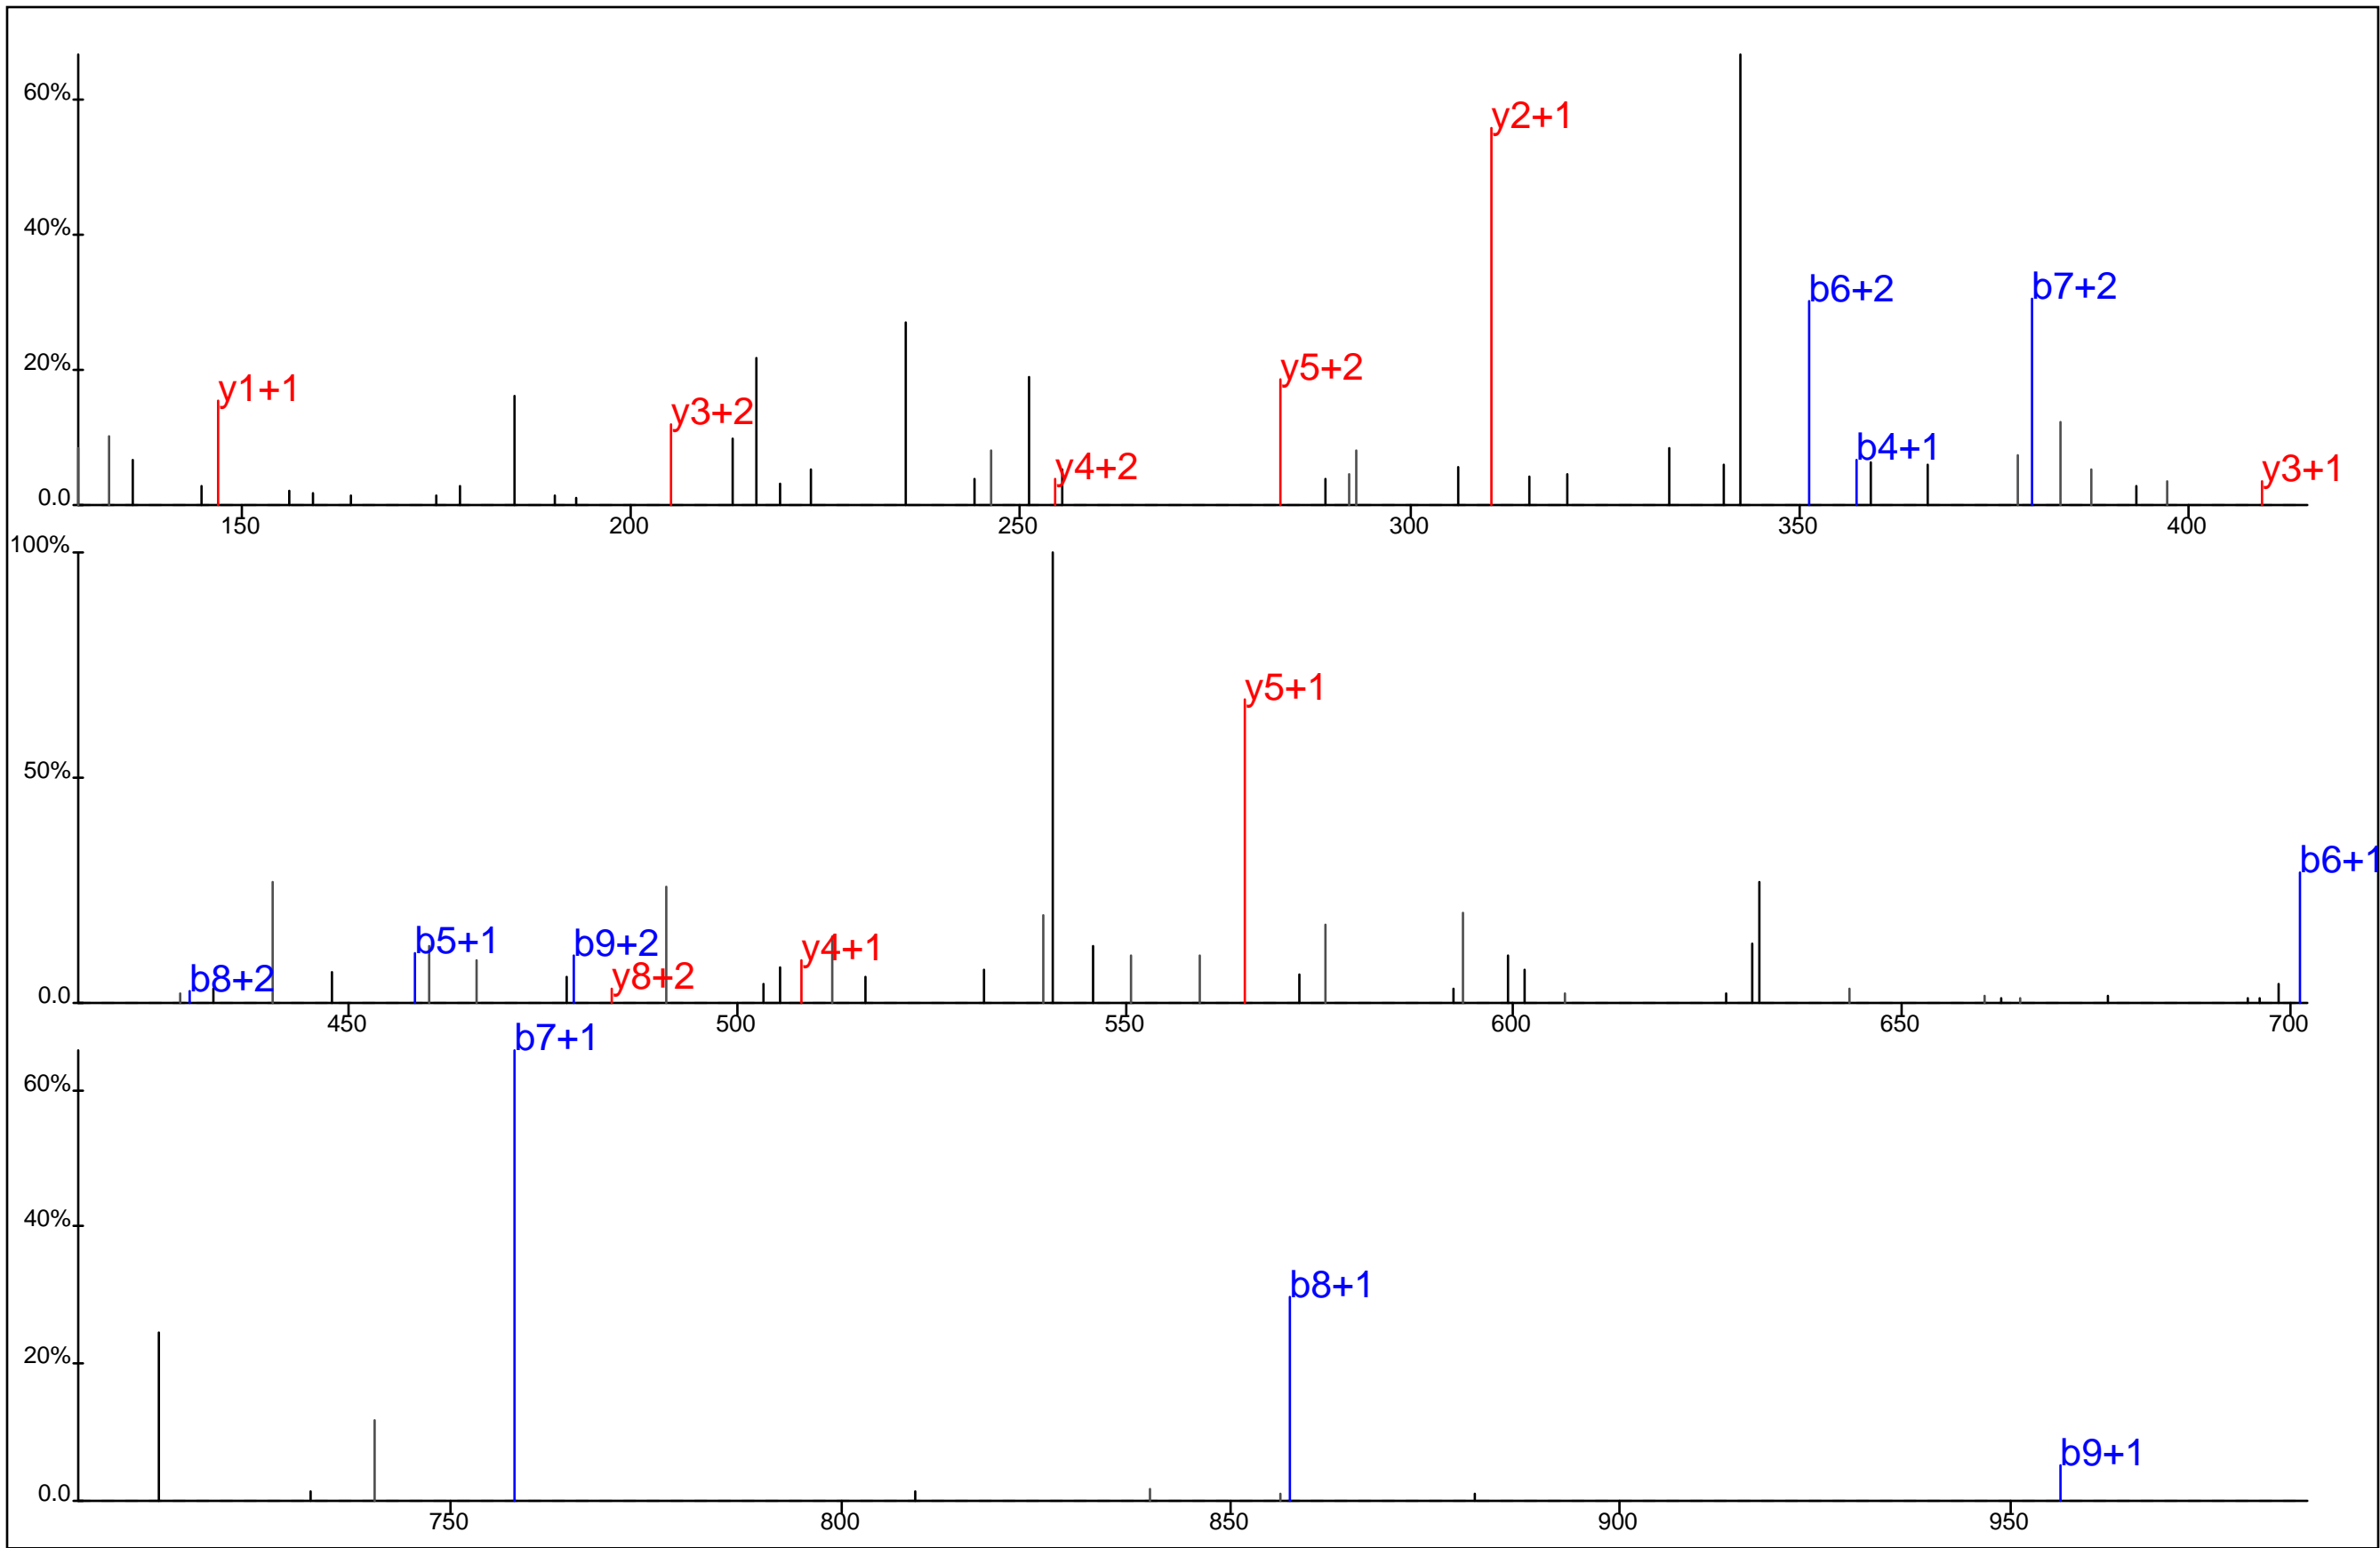

|  |                                                                                                                                                             |
|--|-------------------------------------------------------------------------------------------------------------------------------------------------------------|
|  | <p>Protein Name: CDC2<br/>         gi Accession: 0<br/>         Precursor Mass: 422.5318+3<br/>         Delta Mass: 0.393 ppm<br/>         XCorr: 22.91</p> |
|--|-------------------------------------------------------------------------------------------------------------------------------------------------------------|

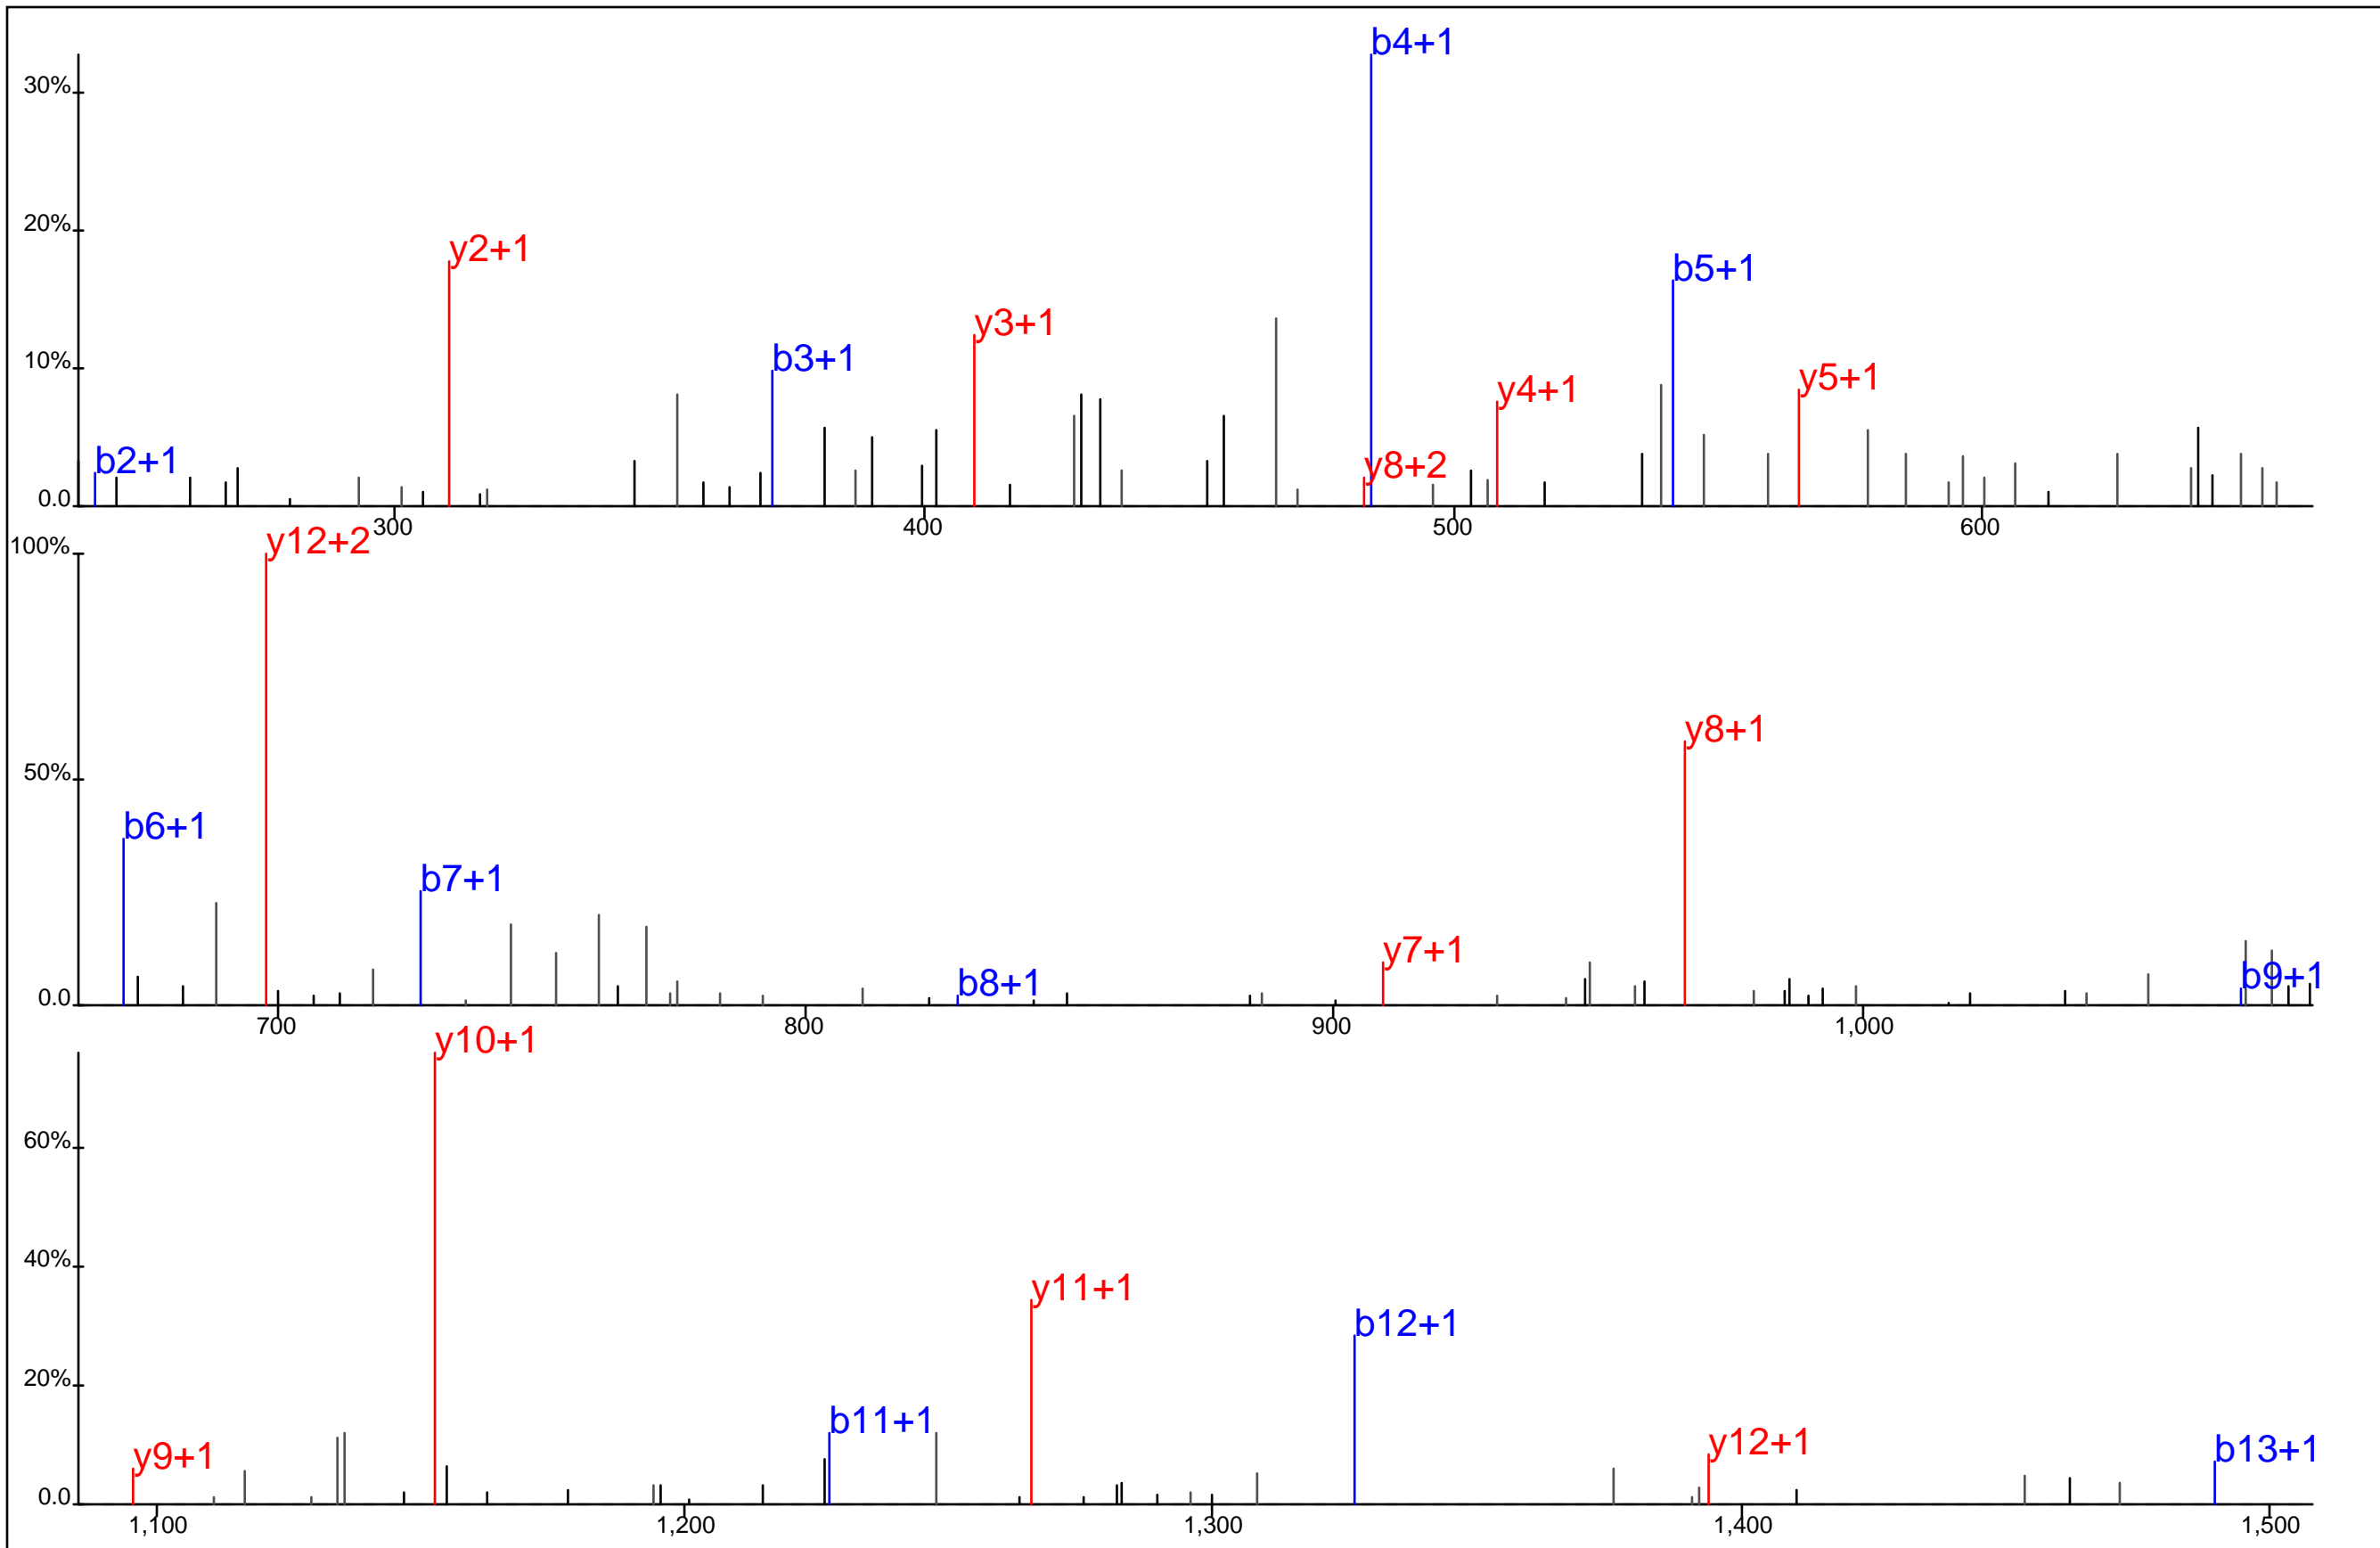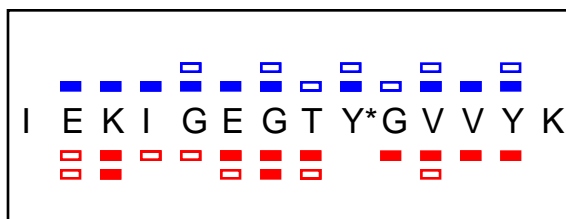

Protein Name: CDC2  
 gi Accession: 0  
 Precursor Mass: 818.4050+2  
 Delta Mass: 0.098 ppm  
 XCorr: 68.71

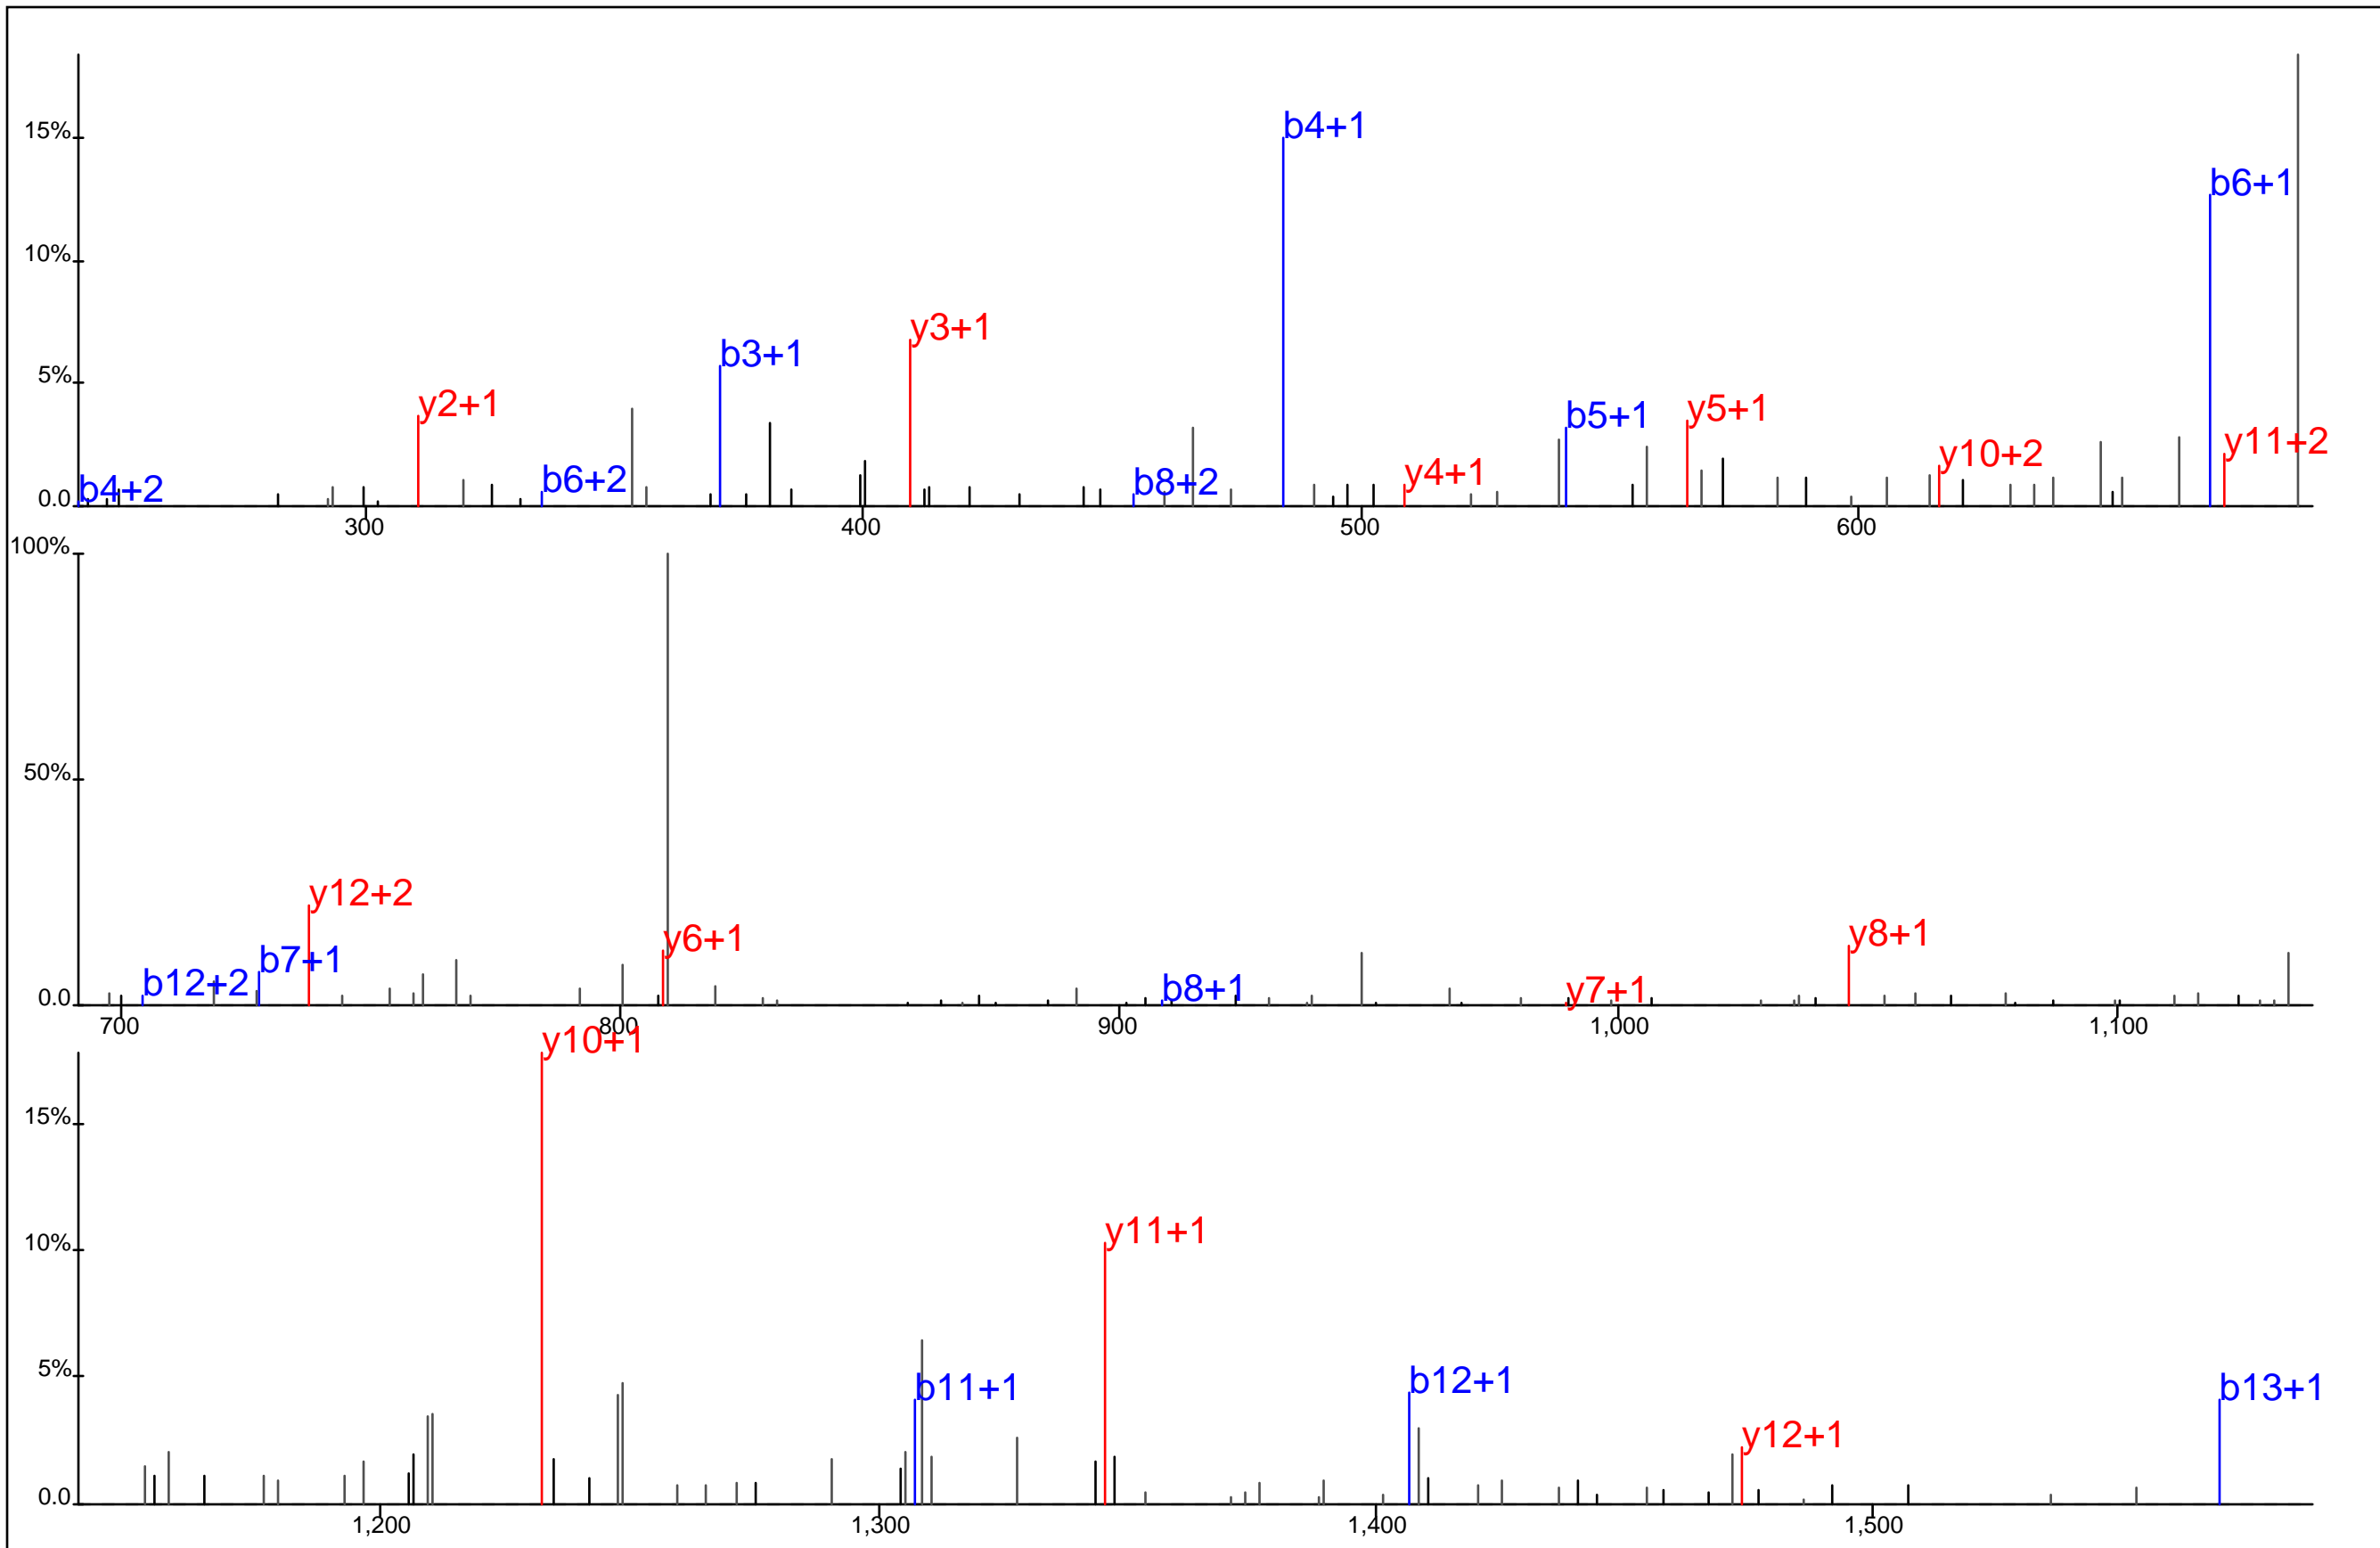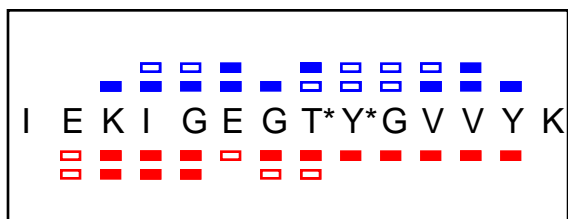

Protein Name: CDC2  
 gi Accession: 0  
 Precursor Mass: 858.3885+2  
 Delta Mass: 0.322 ppm  
 XCorr: 62.35

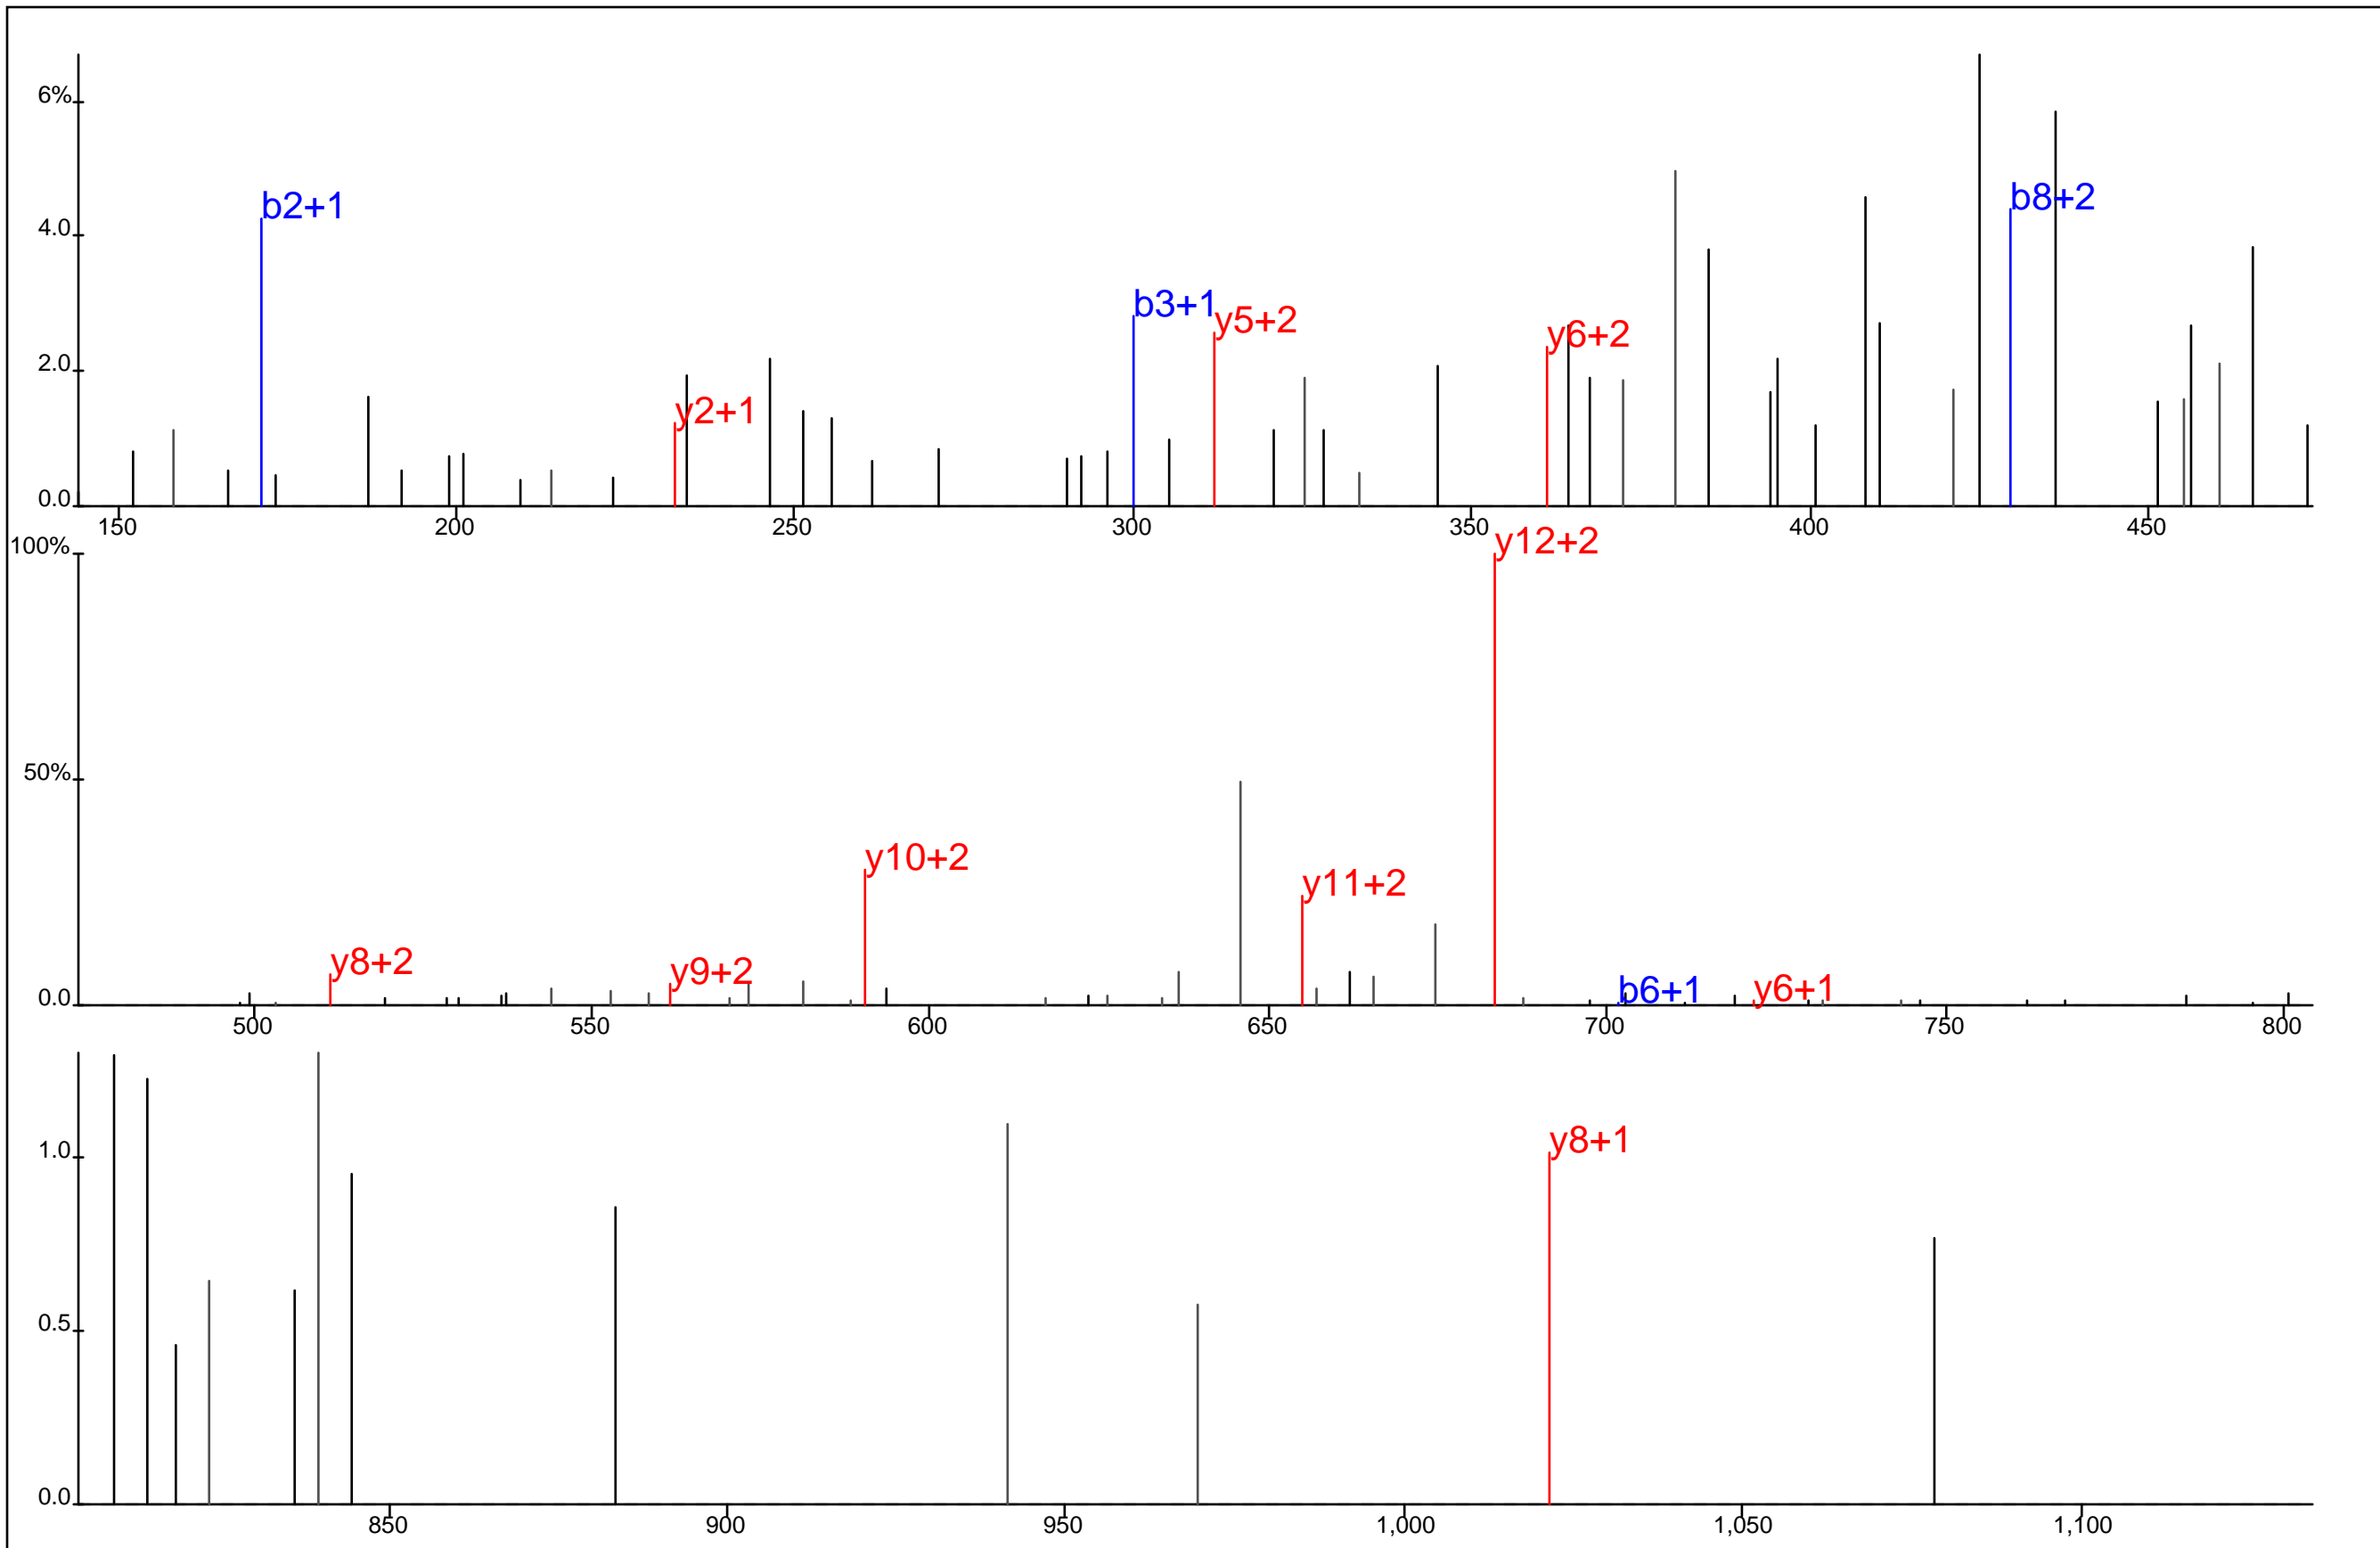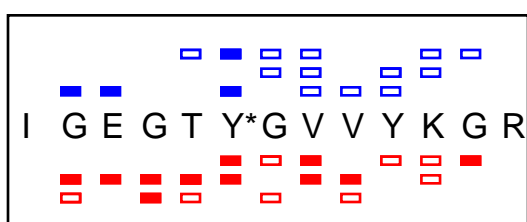

Protein Name: CDC2  
 gi Accession: 0  
 Precursor Mass: 493.5736+3  
 Delta Mass: 1.596 ppm  
 XCorr: 20.5

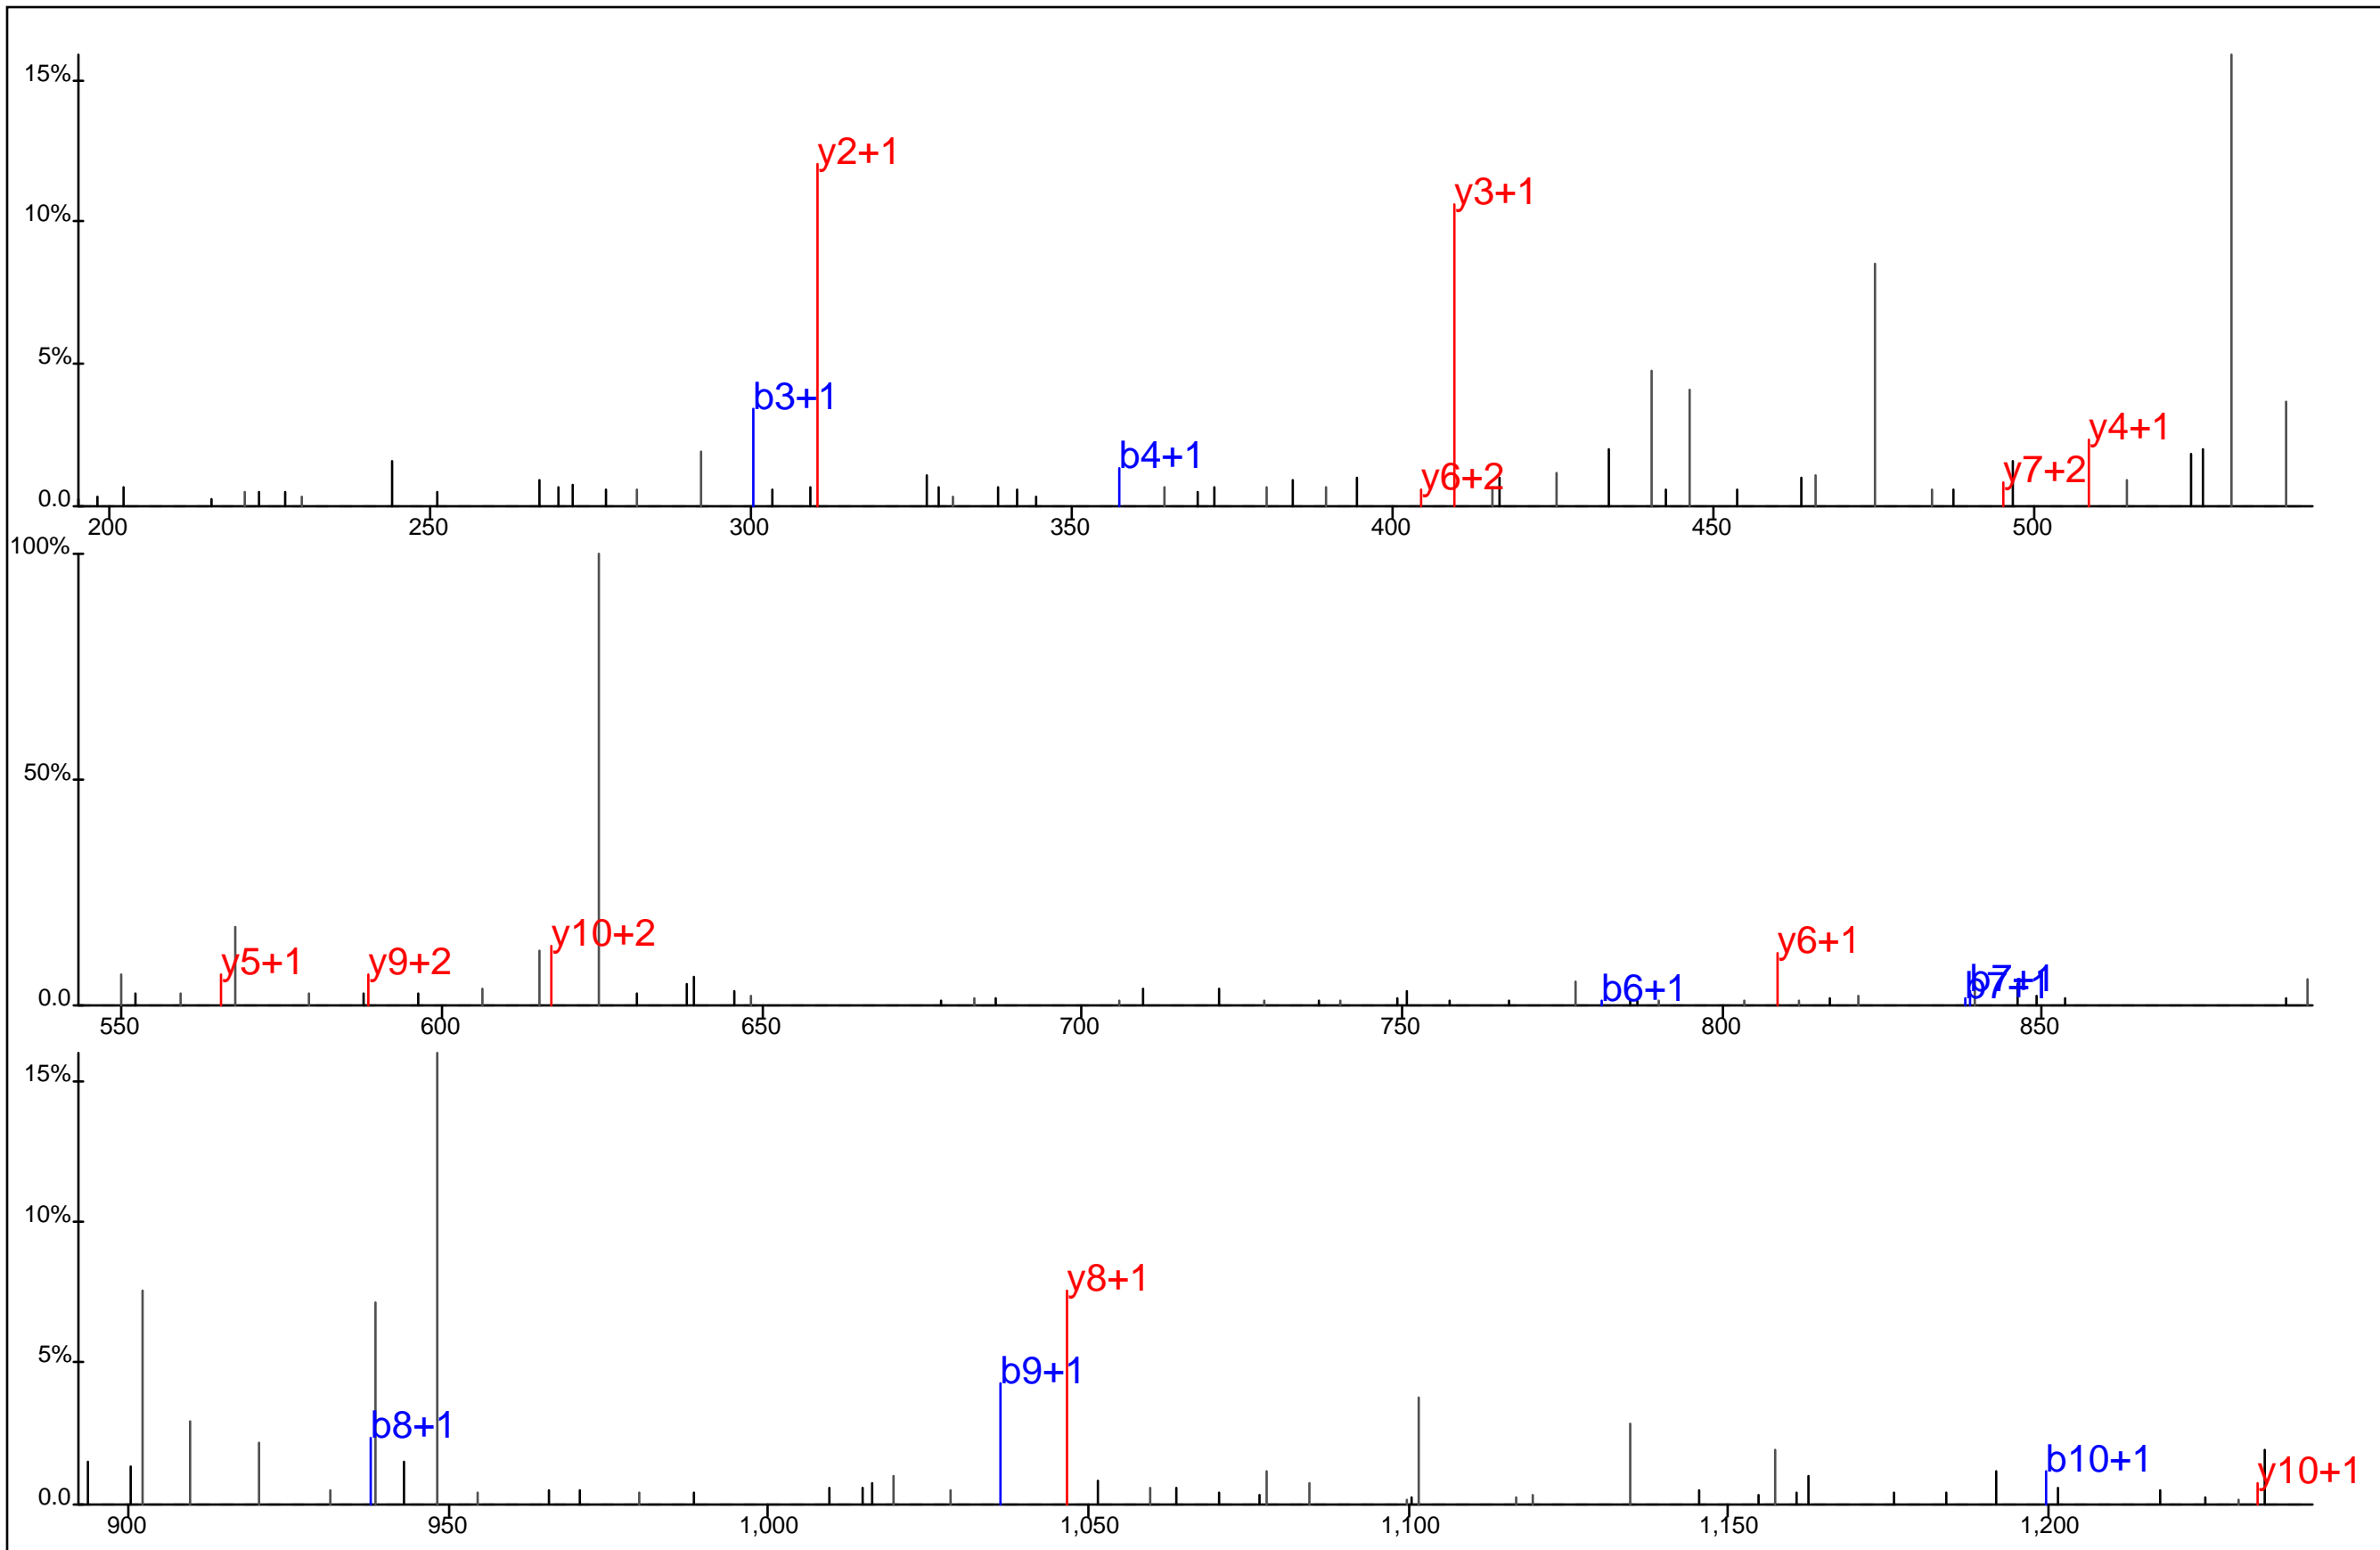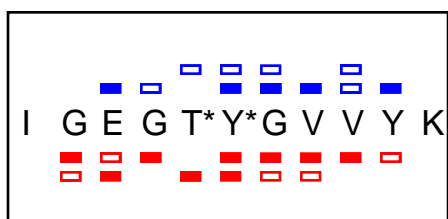

Protein Name: CDC2  
 gi Accession: 0  
 Precursor Mass: 673.2770+2  
 Delta Mass: 0.639 ppm  
 XCorr: 51.18



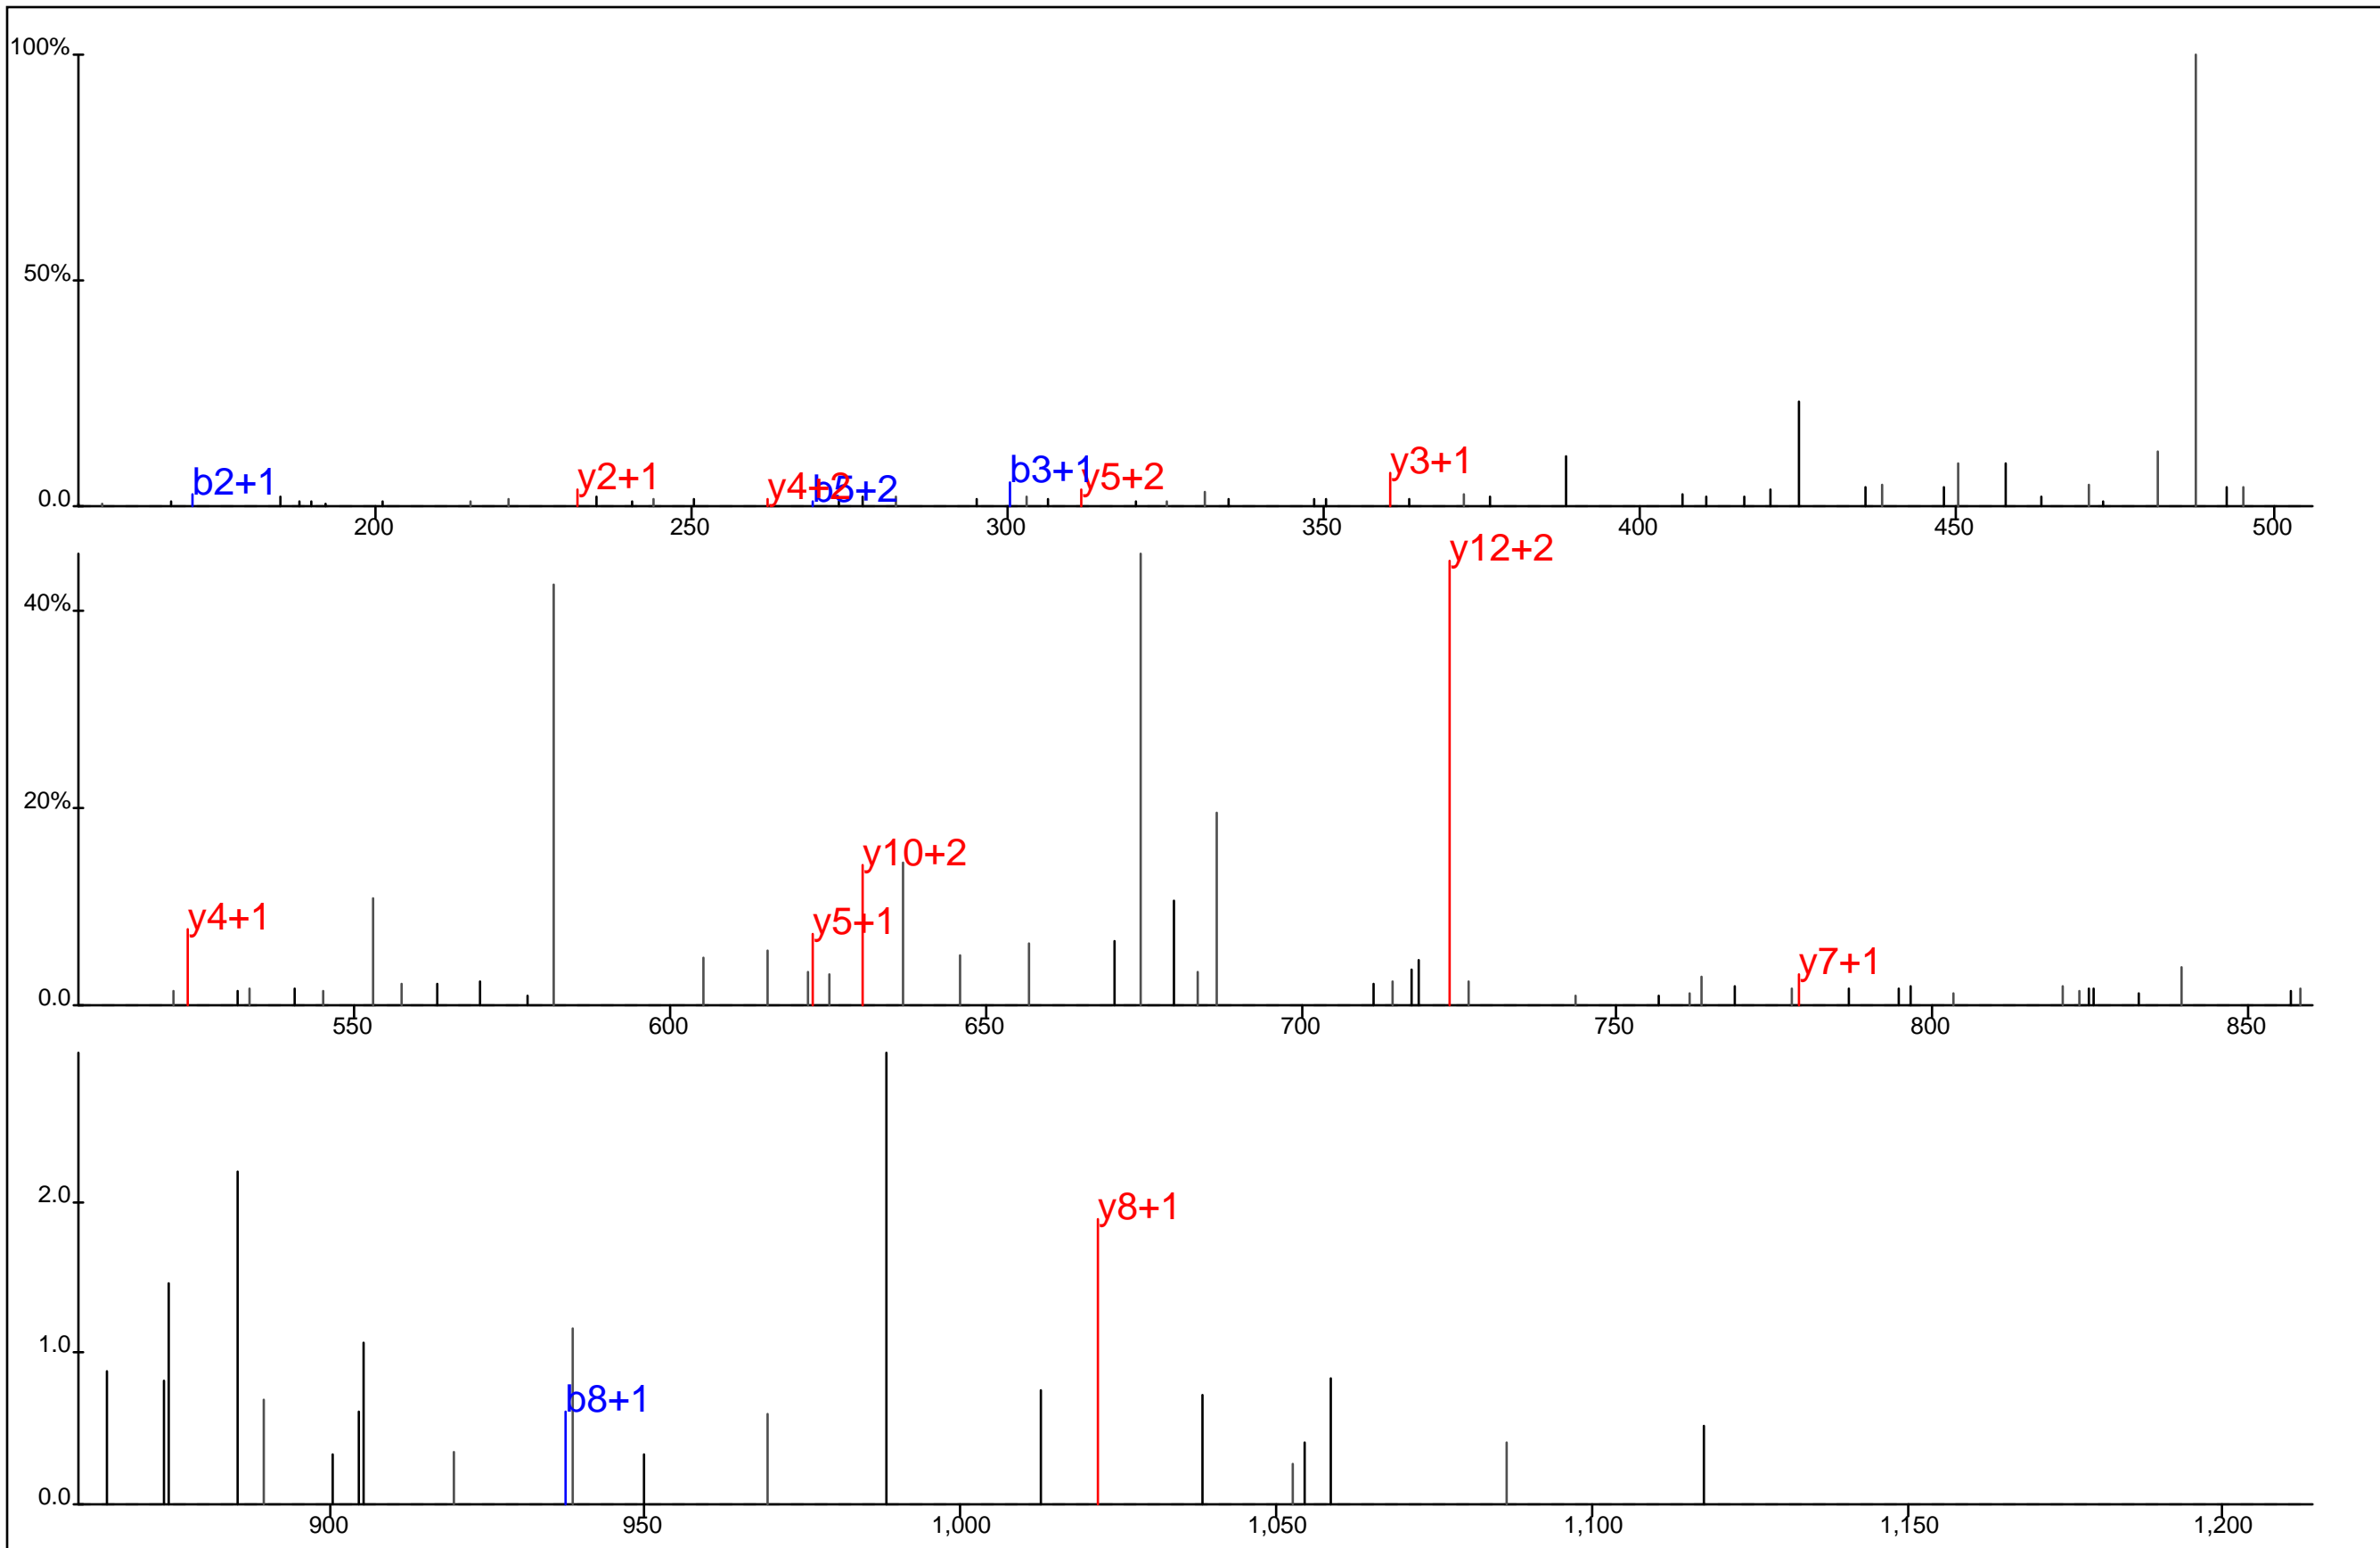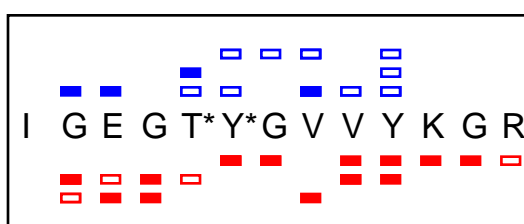

Protein Name: CDC2  
 gi Accession: 0  
 Precursor Mass: 520.2311+3  
 Delta Mass: 5.534 ppm  
 XCorr: 22.21



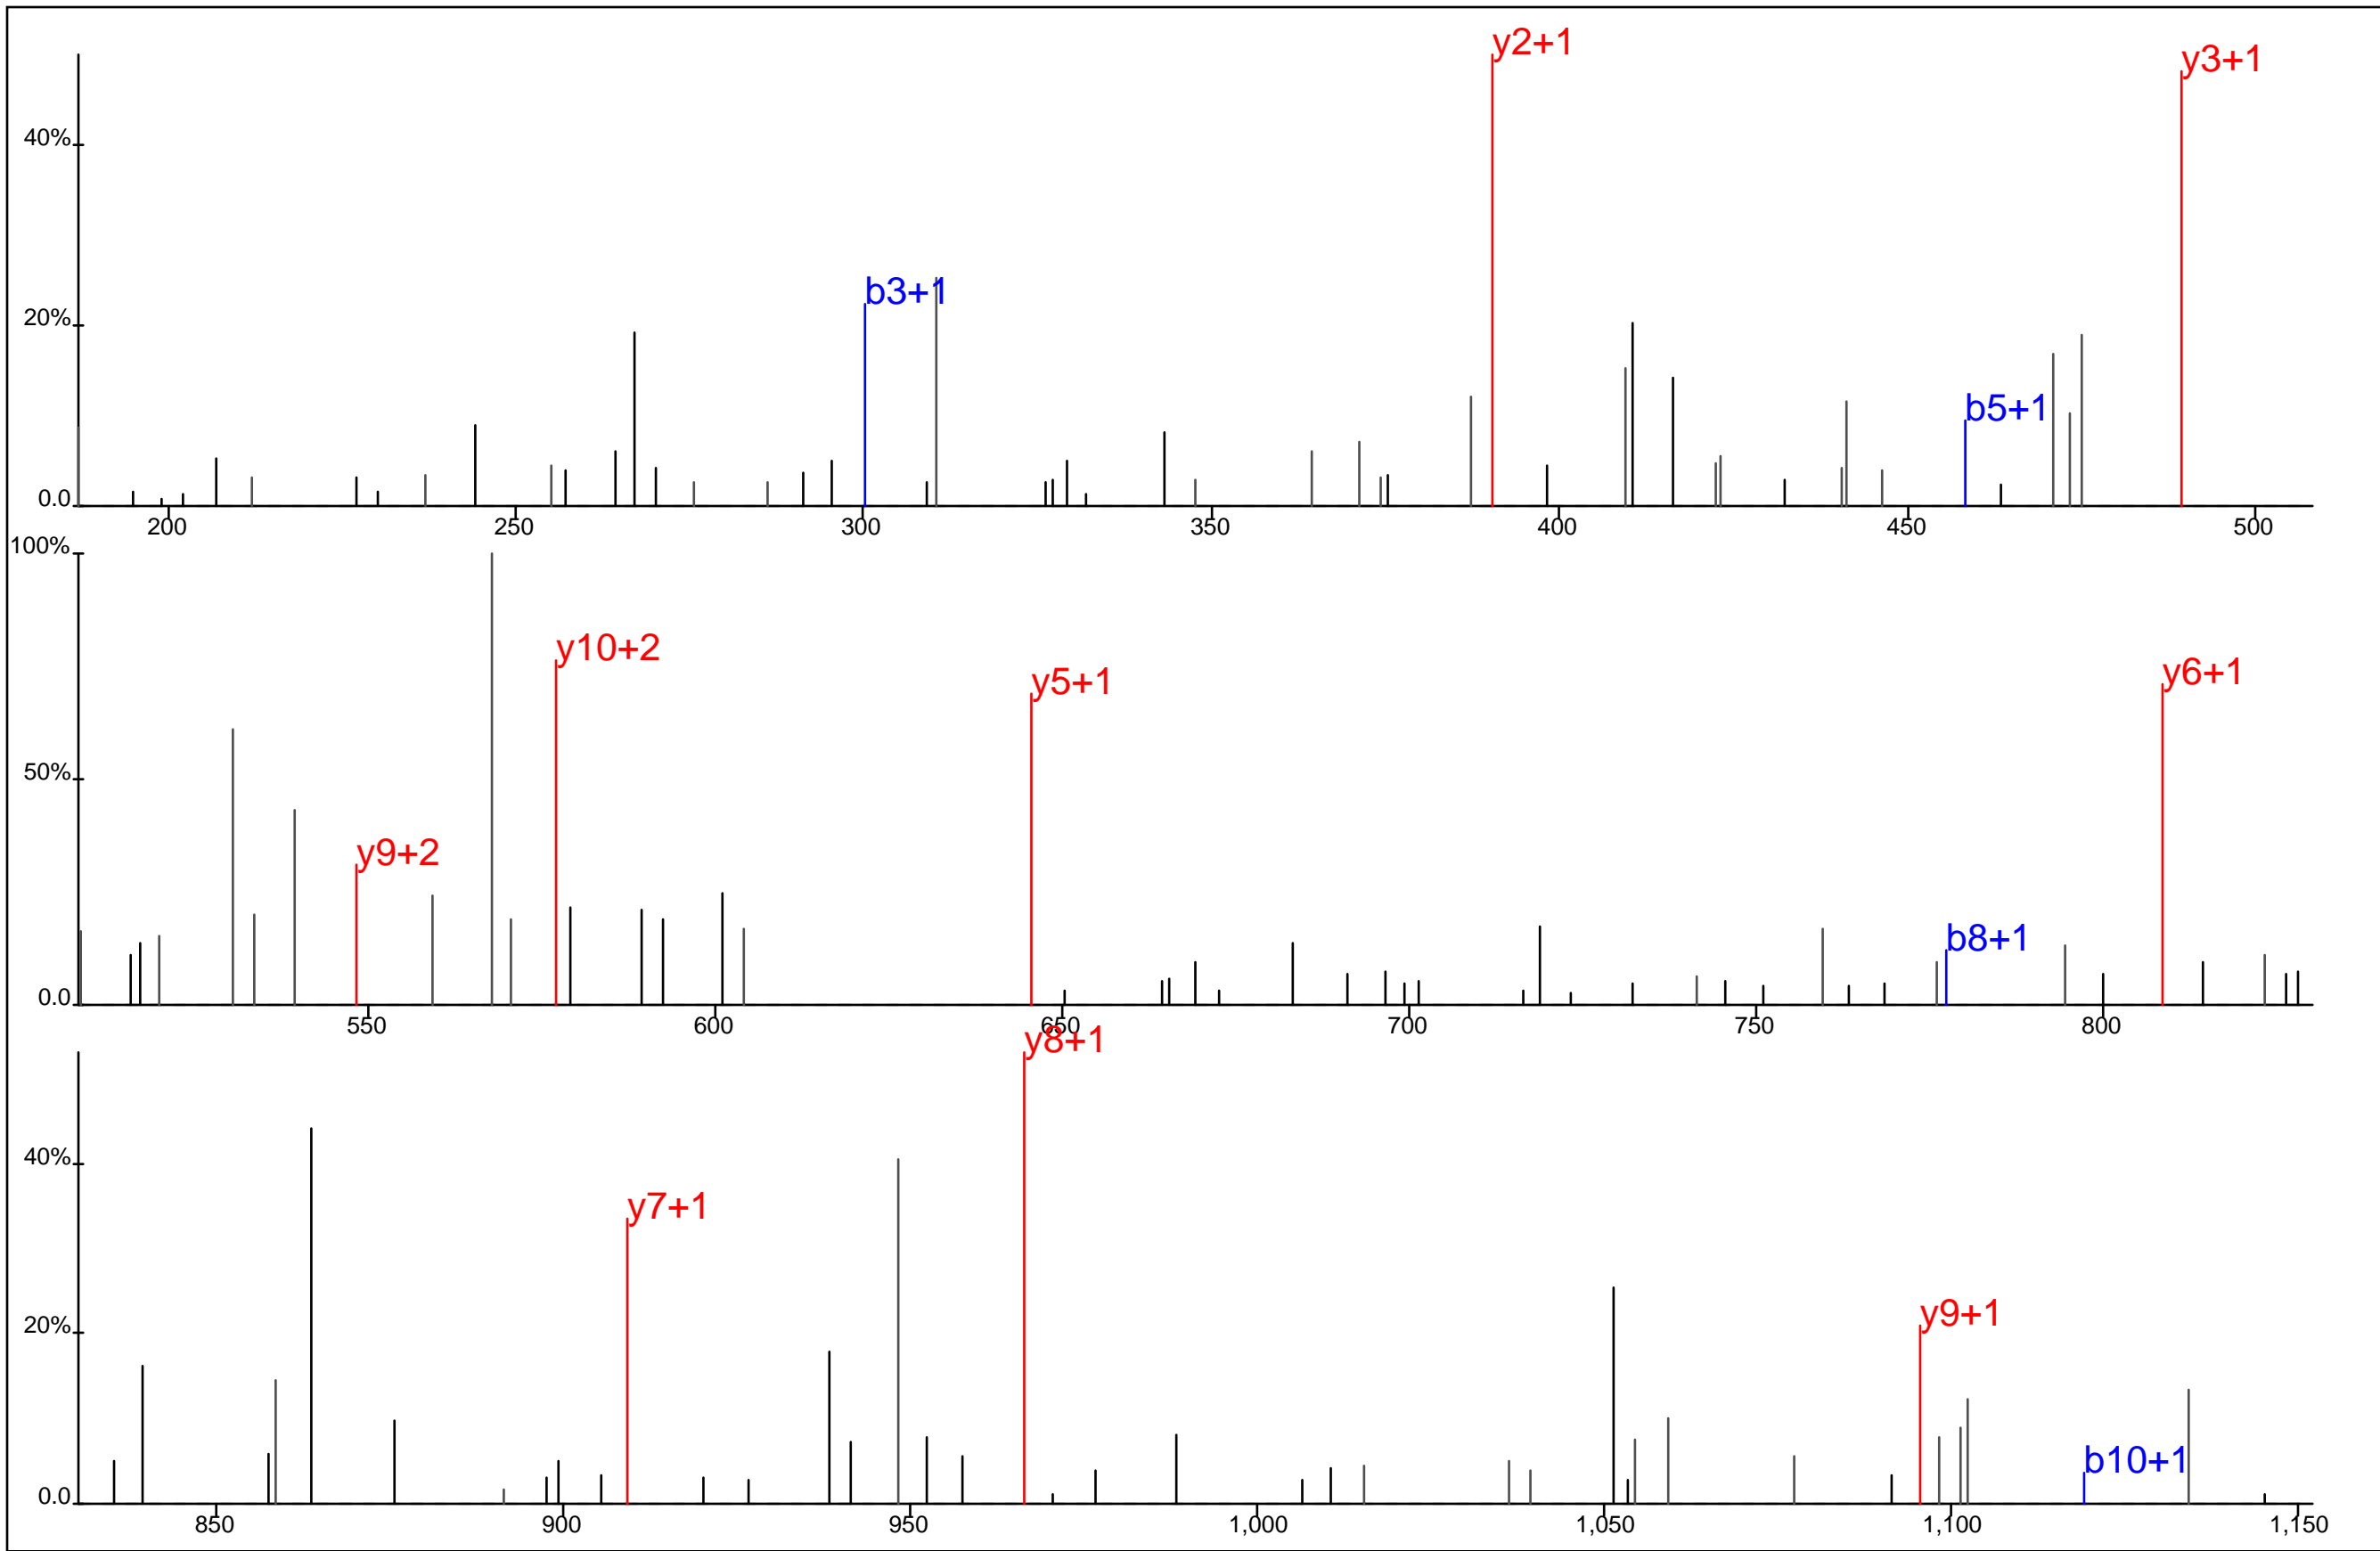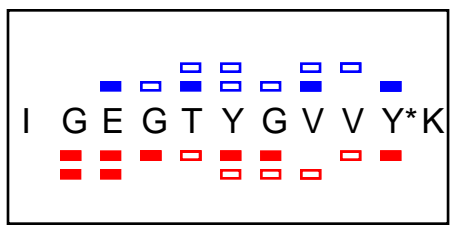

Protein Name: CDC2  
 gi Accession: 0  
 Precursor Mass: 633.2952+2  
 Delta Mass: 1.354 ppm  
 XCorr: 40.89

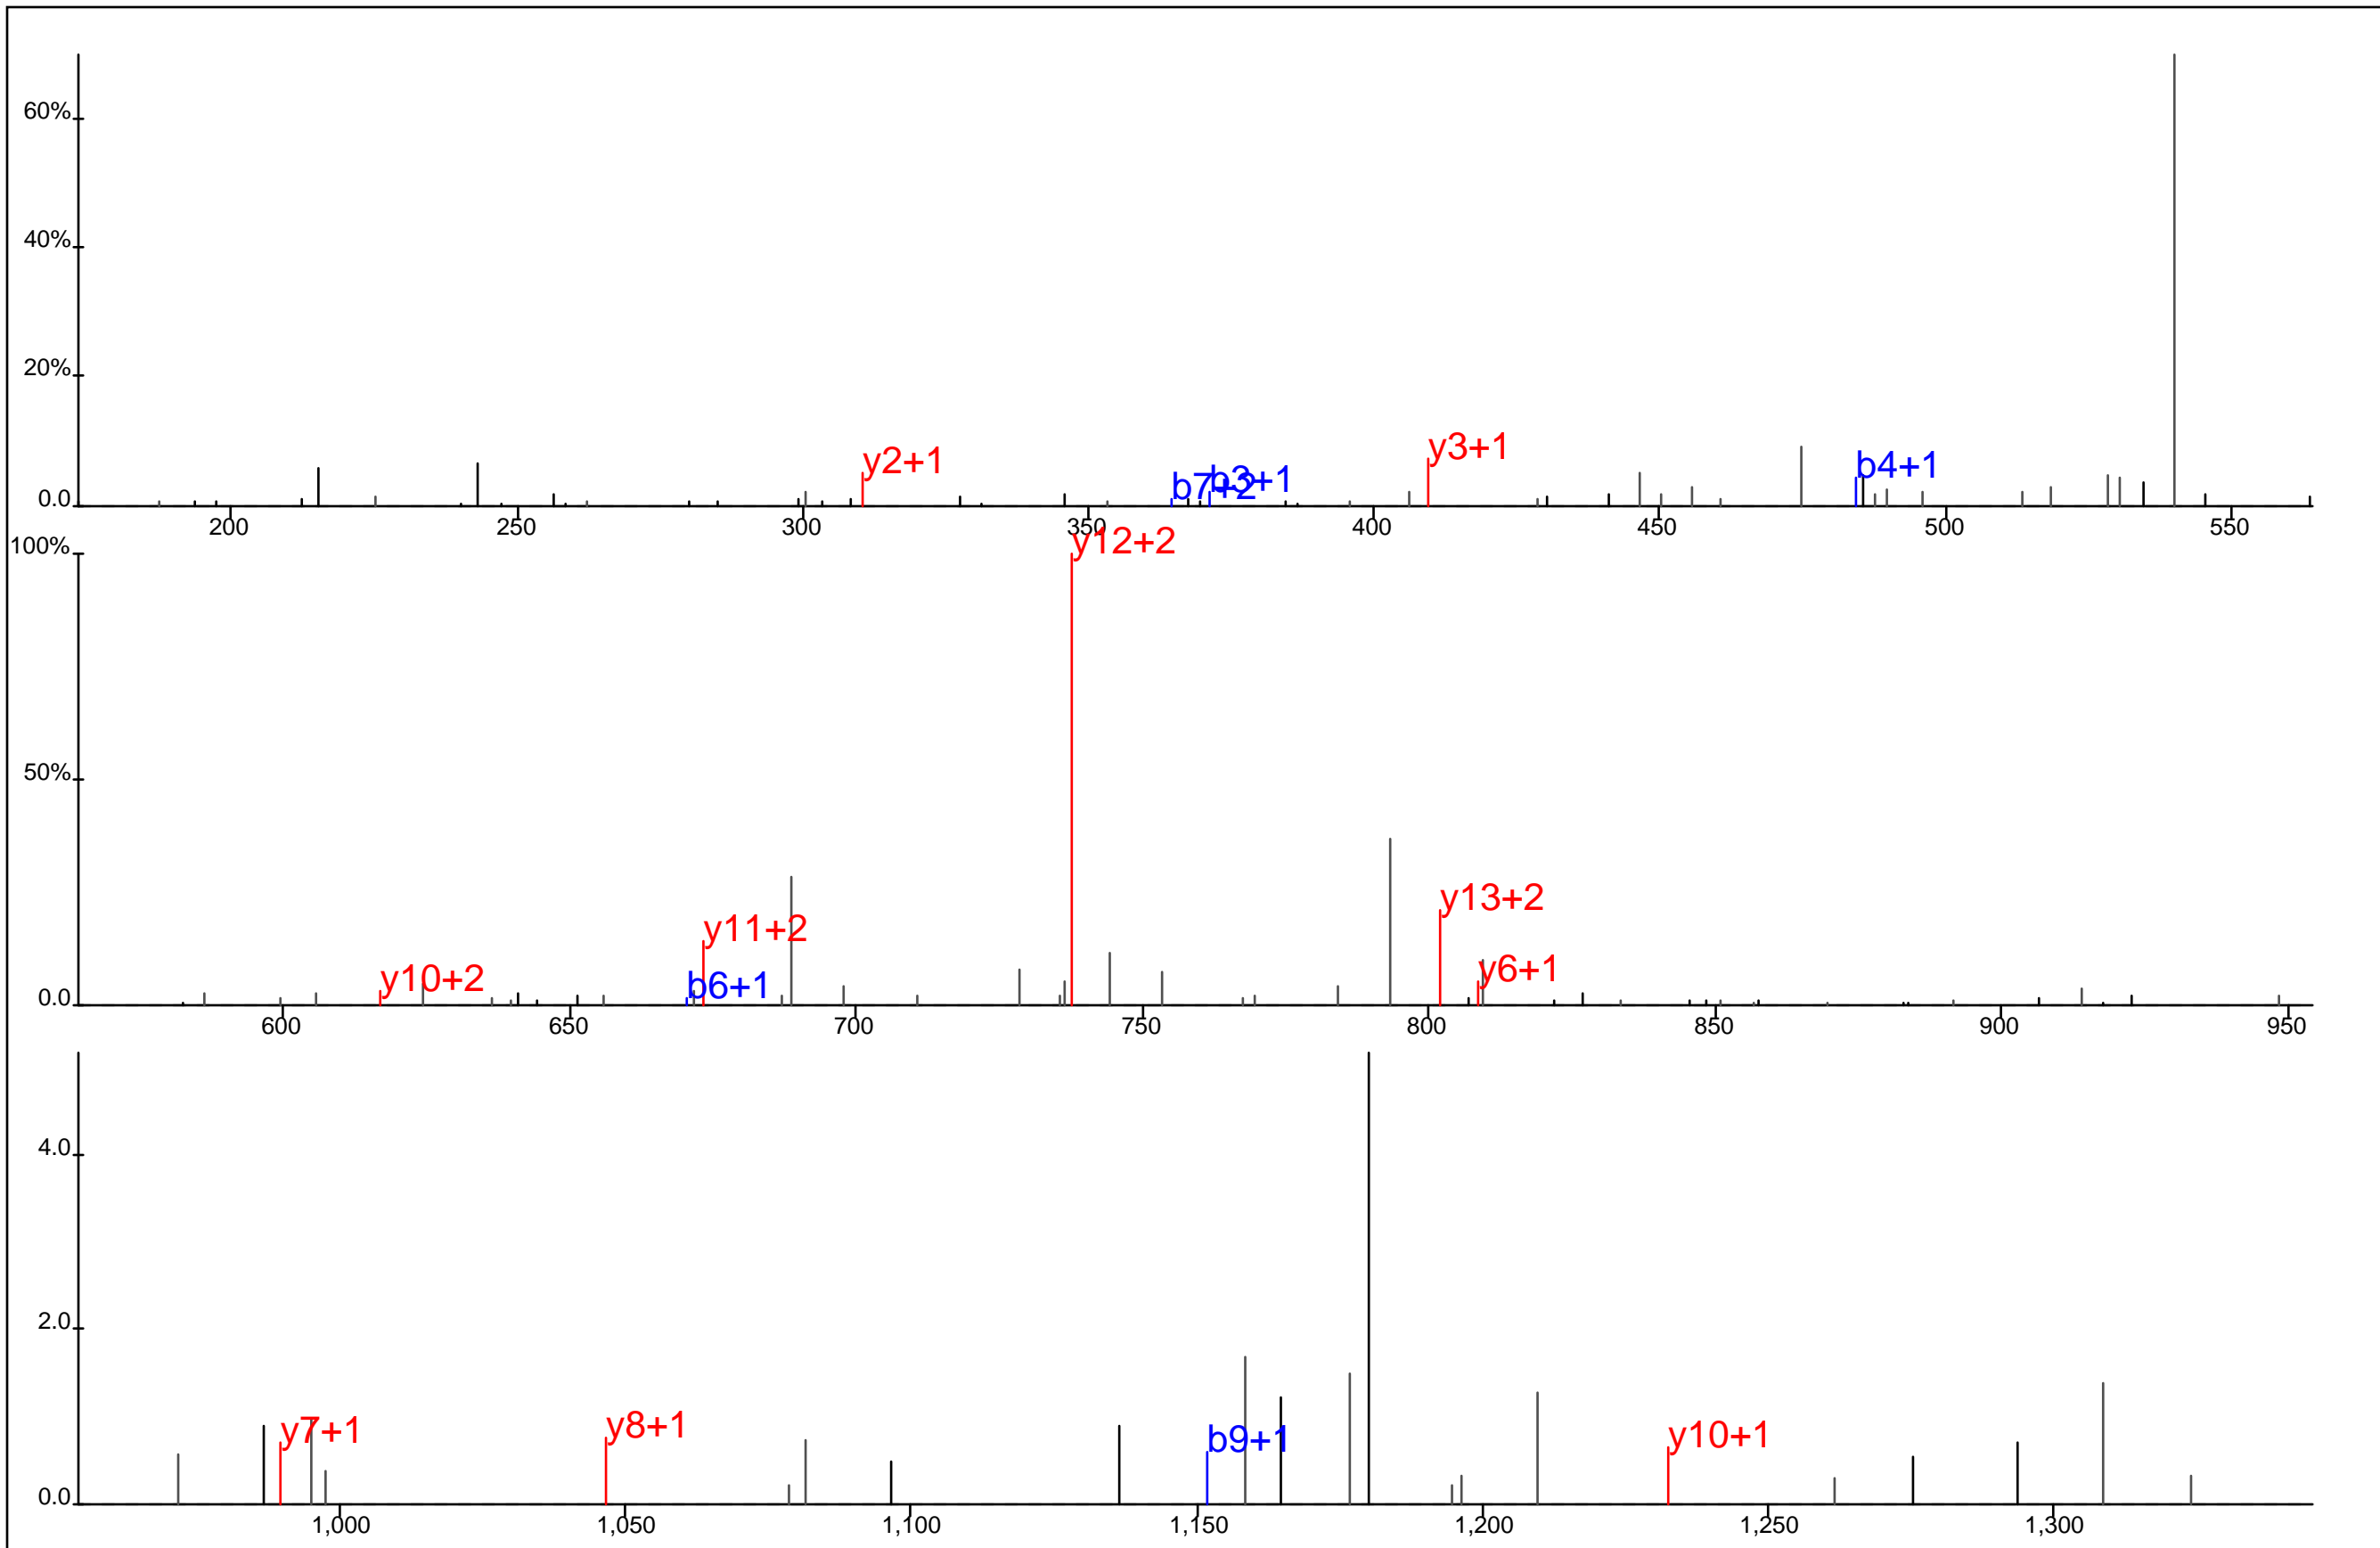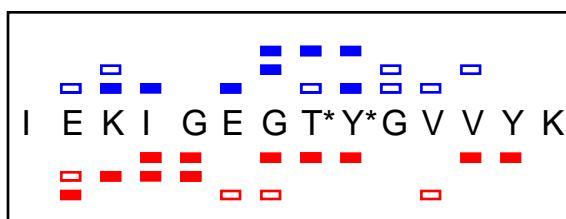

Protein Name: CDC2  
 gi Accession: 0  
 Precursor Mass: 572.5948+3  
 Delta Mass: 0.421 ppm  
 XCorr: 26.49

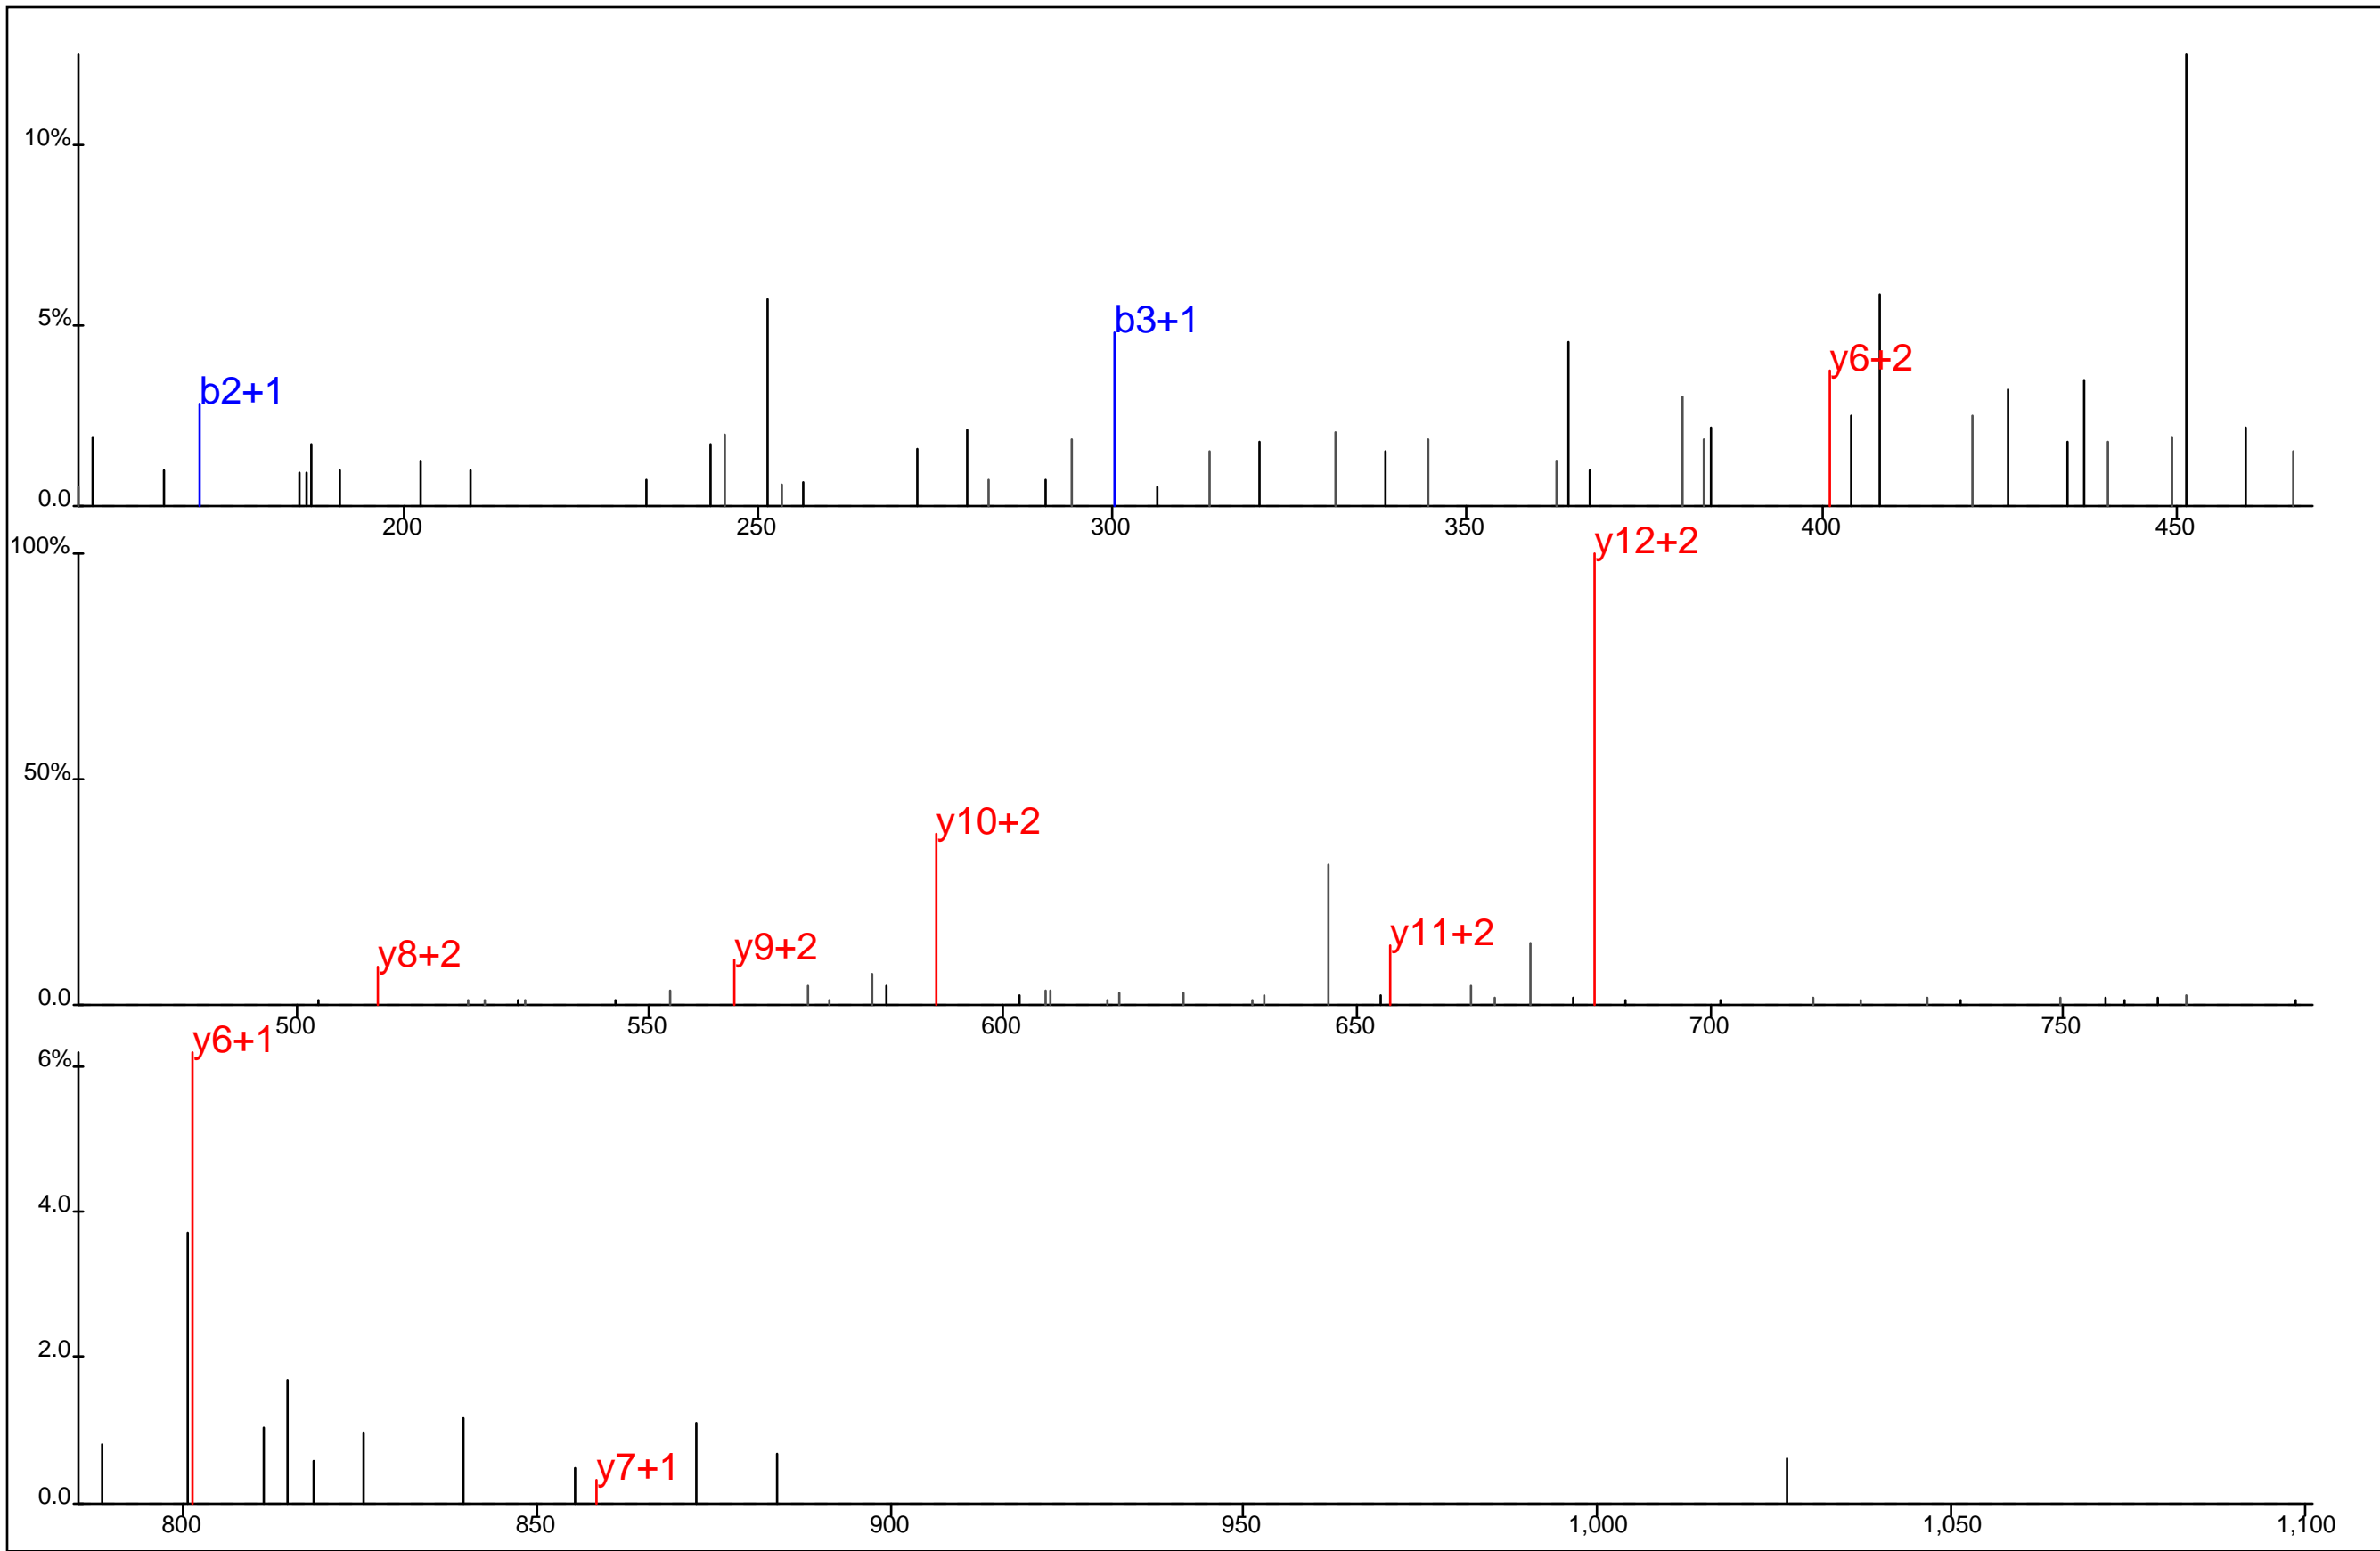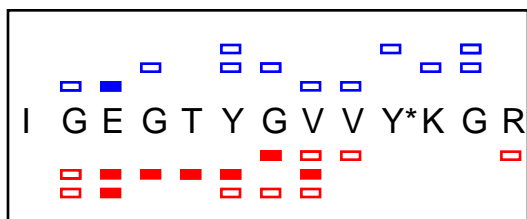

Protein Name: CDC2  
 gi Accession: 0  
 Precursor Mass: 493.5740+3  
 Delta Mass: 2.401 ppm  
 XCorr: 25.83

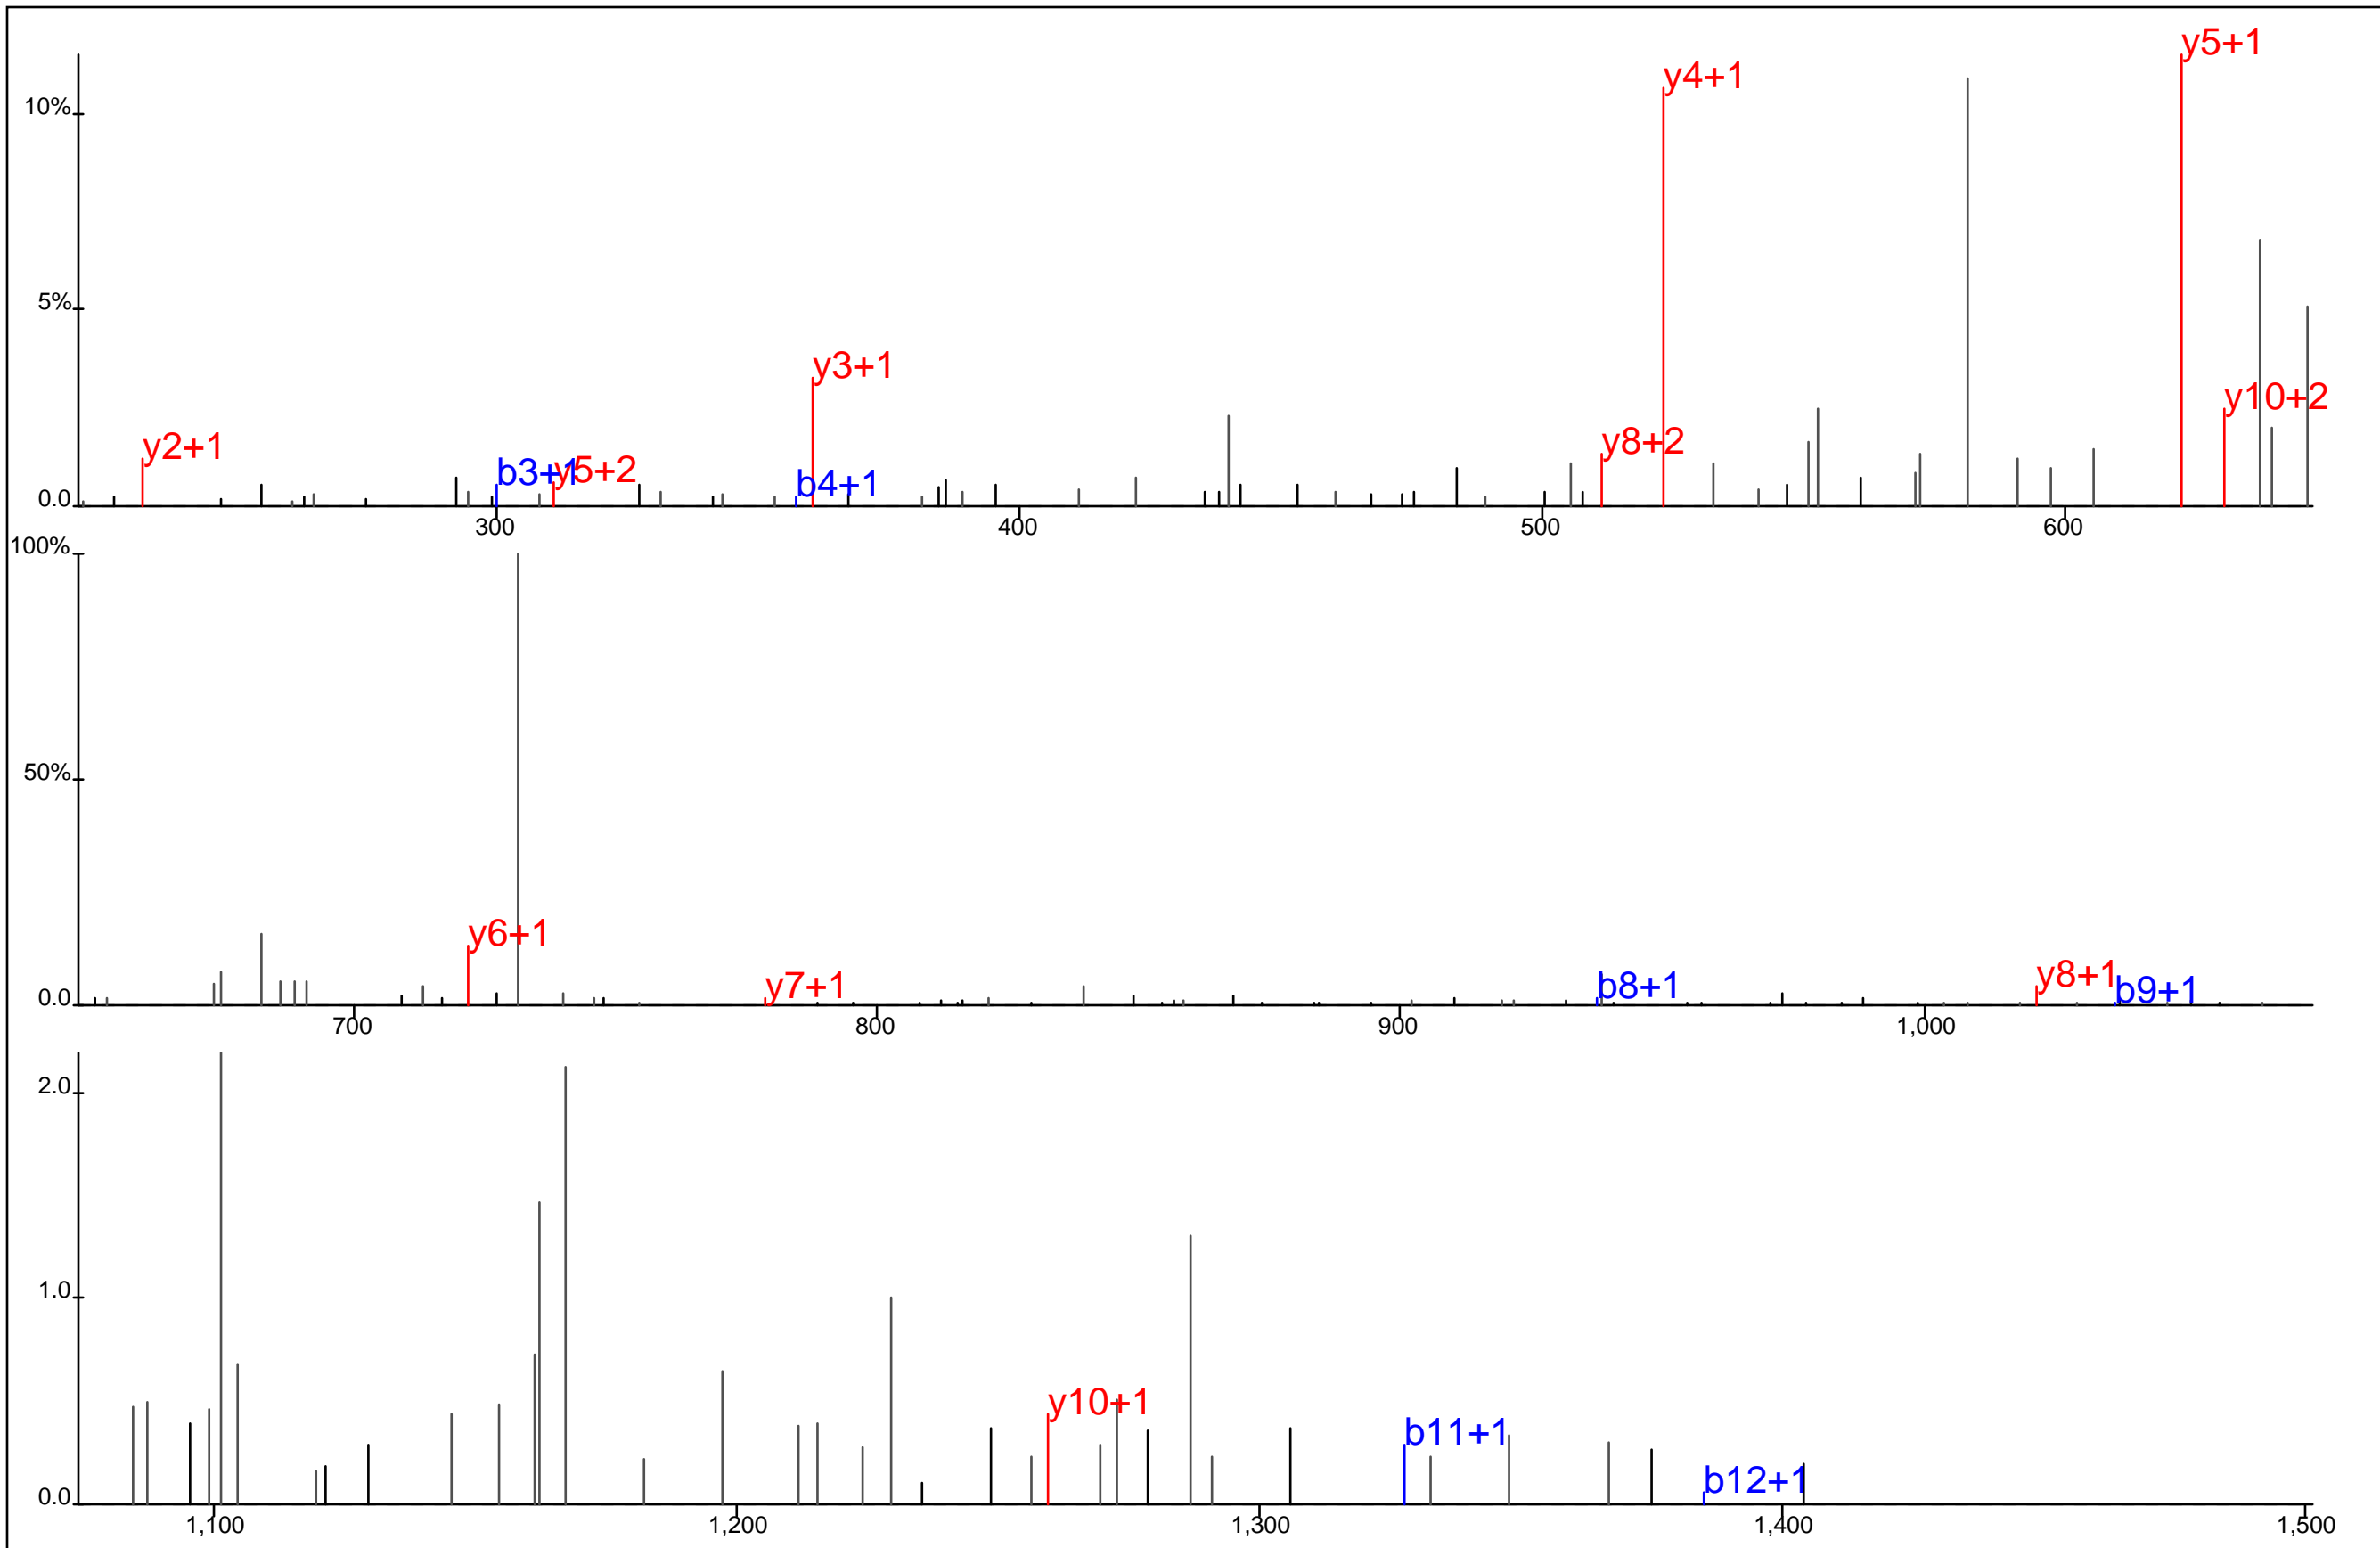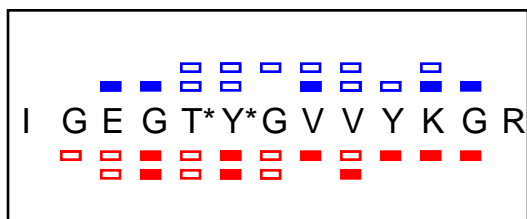

Protein Name: CDC2  
 gi Accession: 0  
 Precursor Mass: 779.8401+2  
 Delta Mass: 1.784 ppm  
 XCorr: 59.82

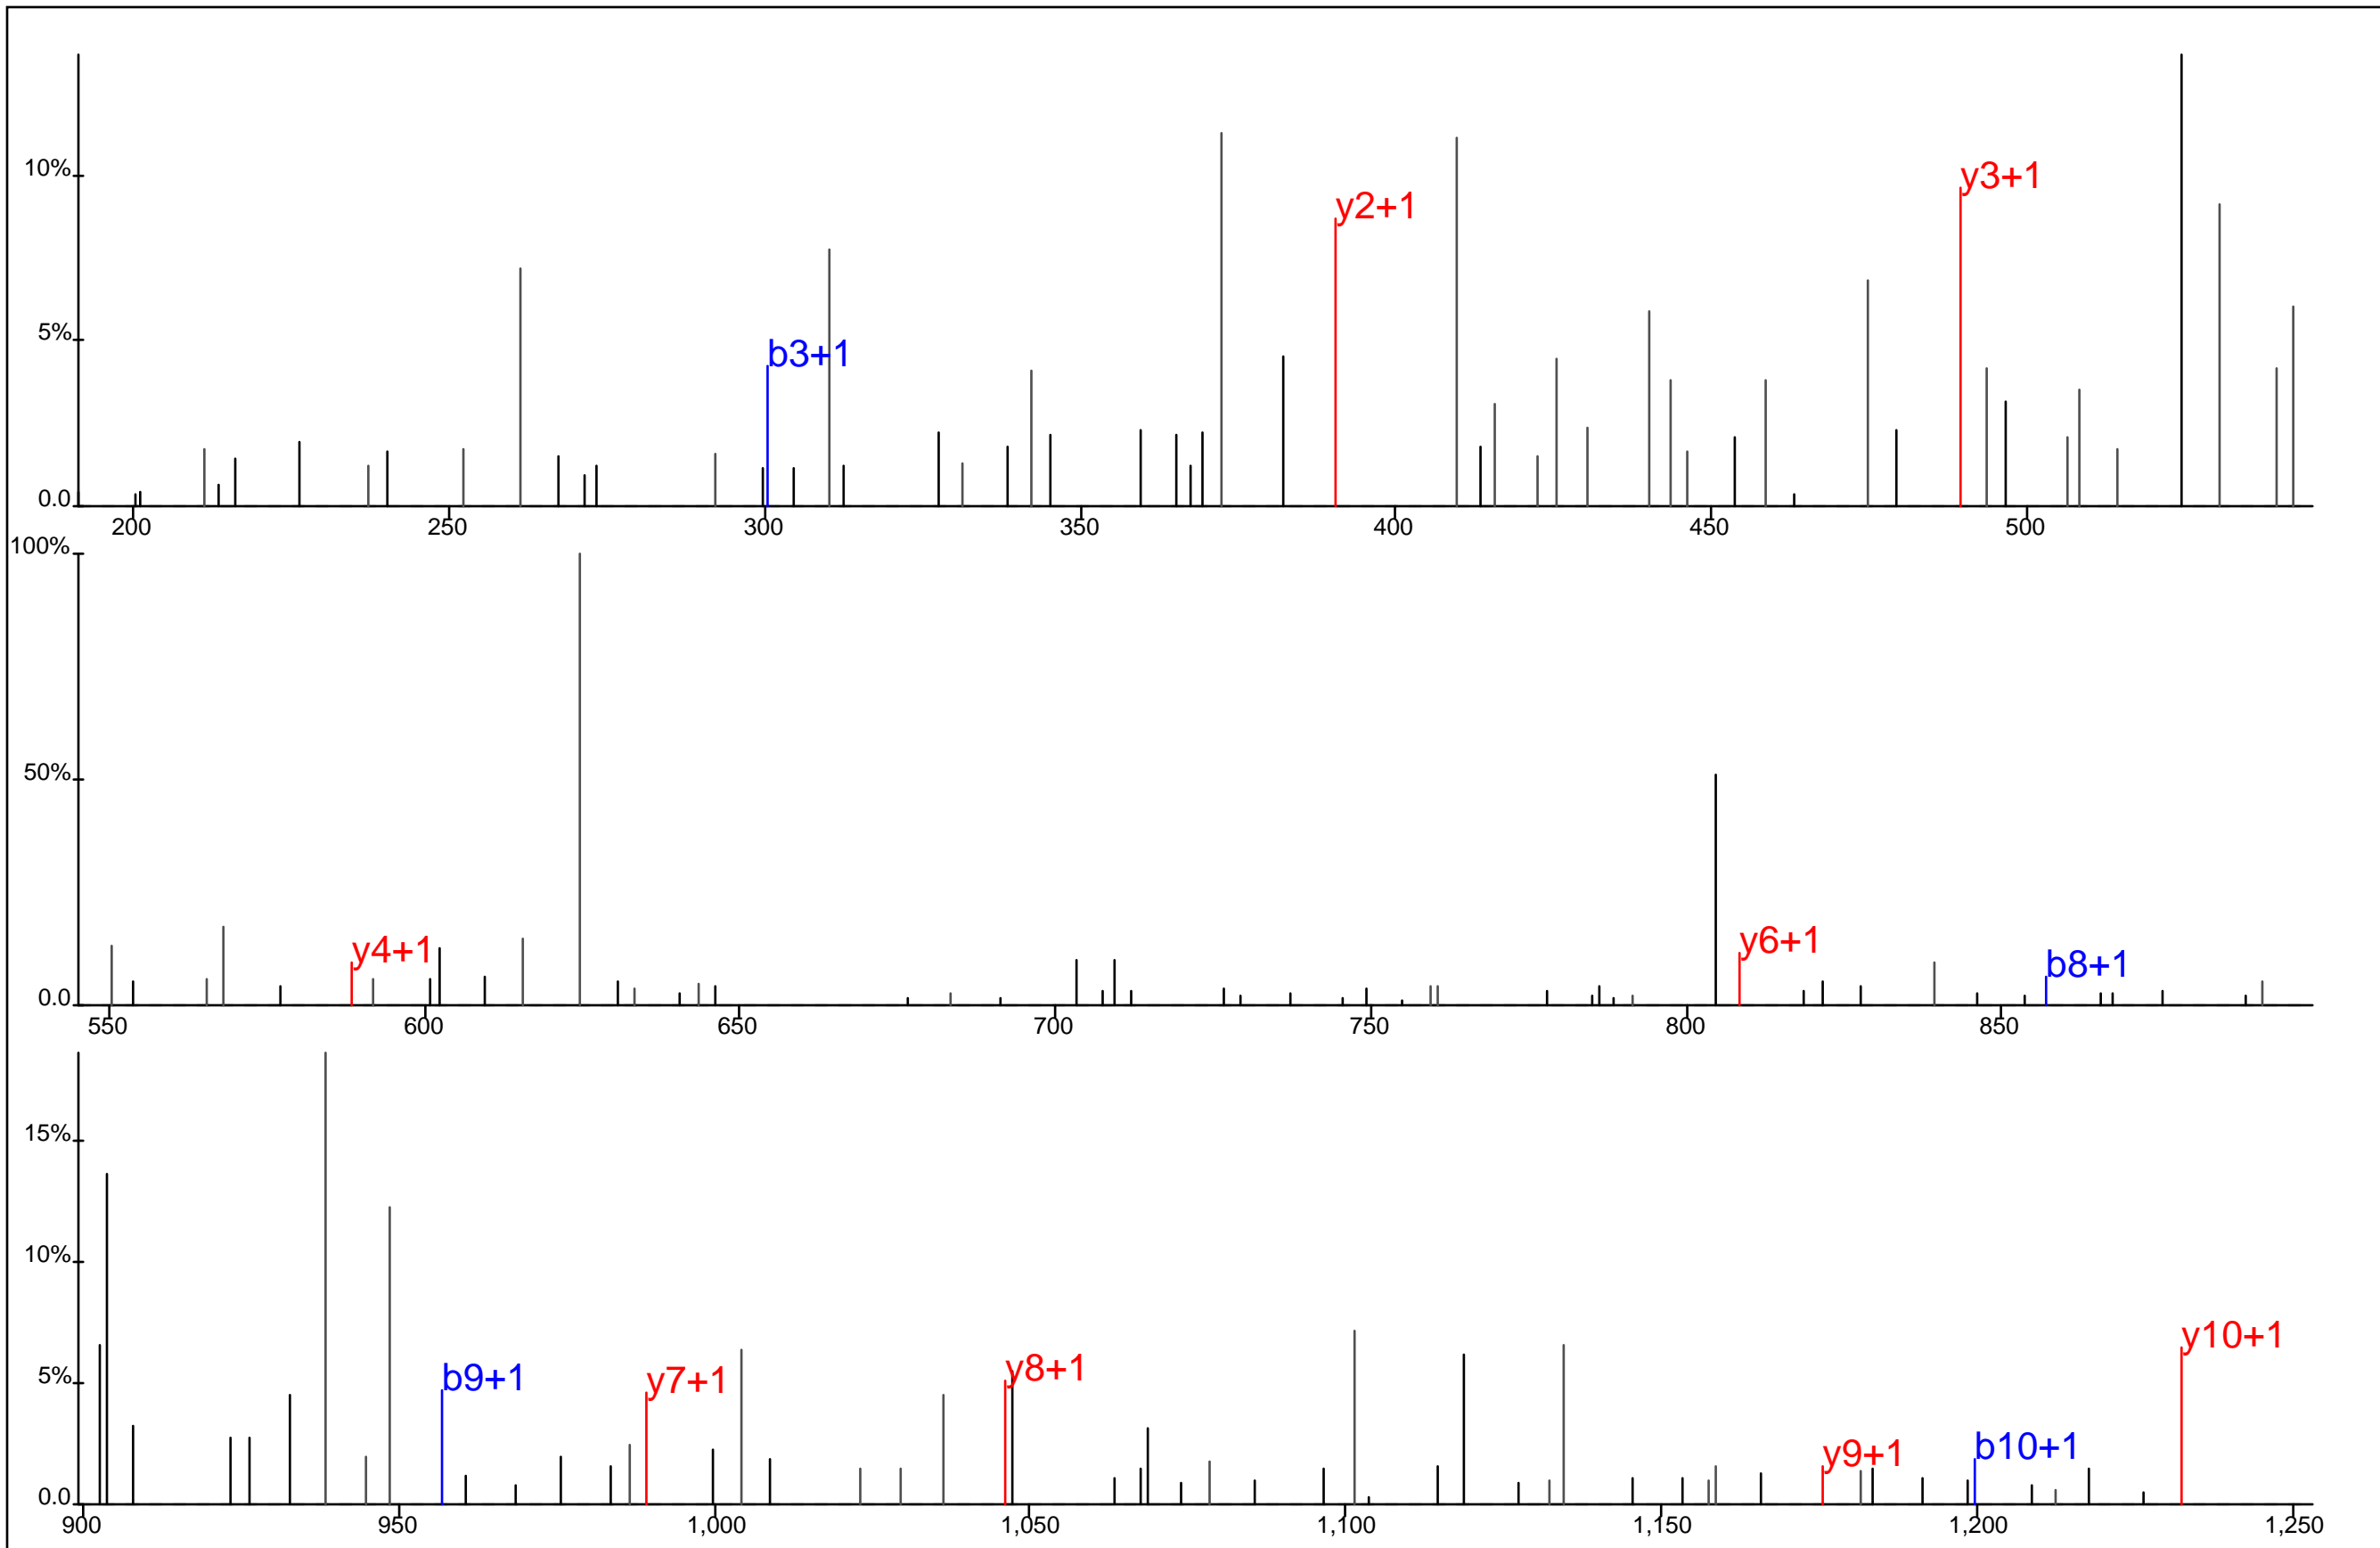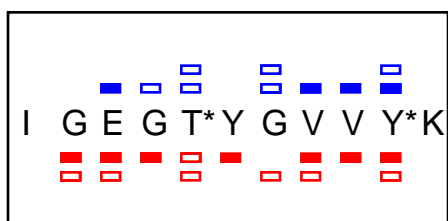

Protein Name: CDC2  
 gi Accession: 0  
 Precursor Mass: 673.2782+2  
 Delta Mass: 1.084 ppm  
 XCorr: 26.65

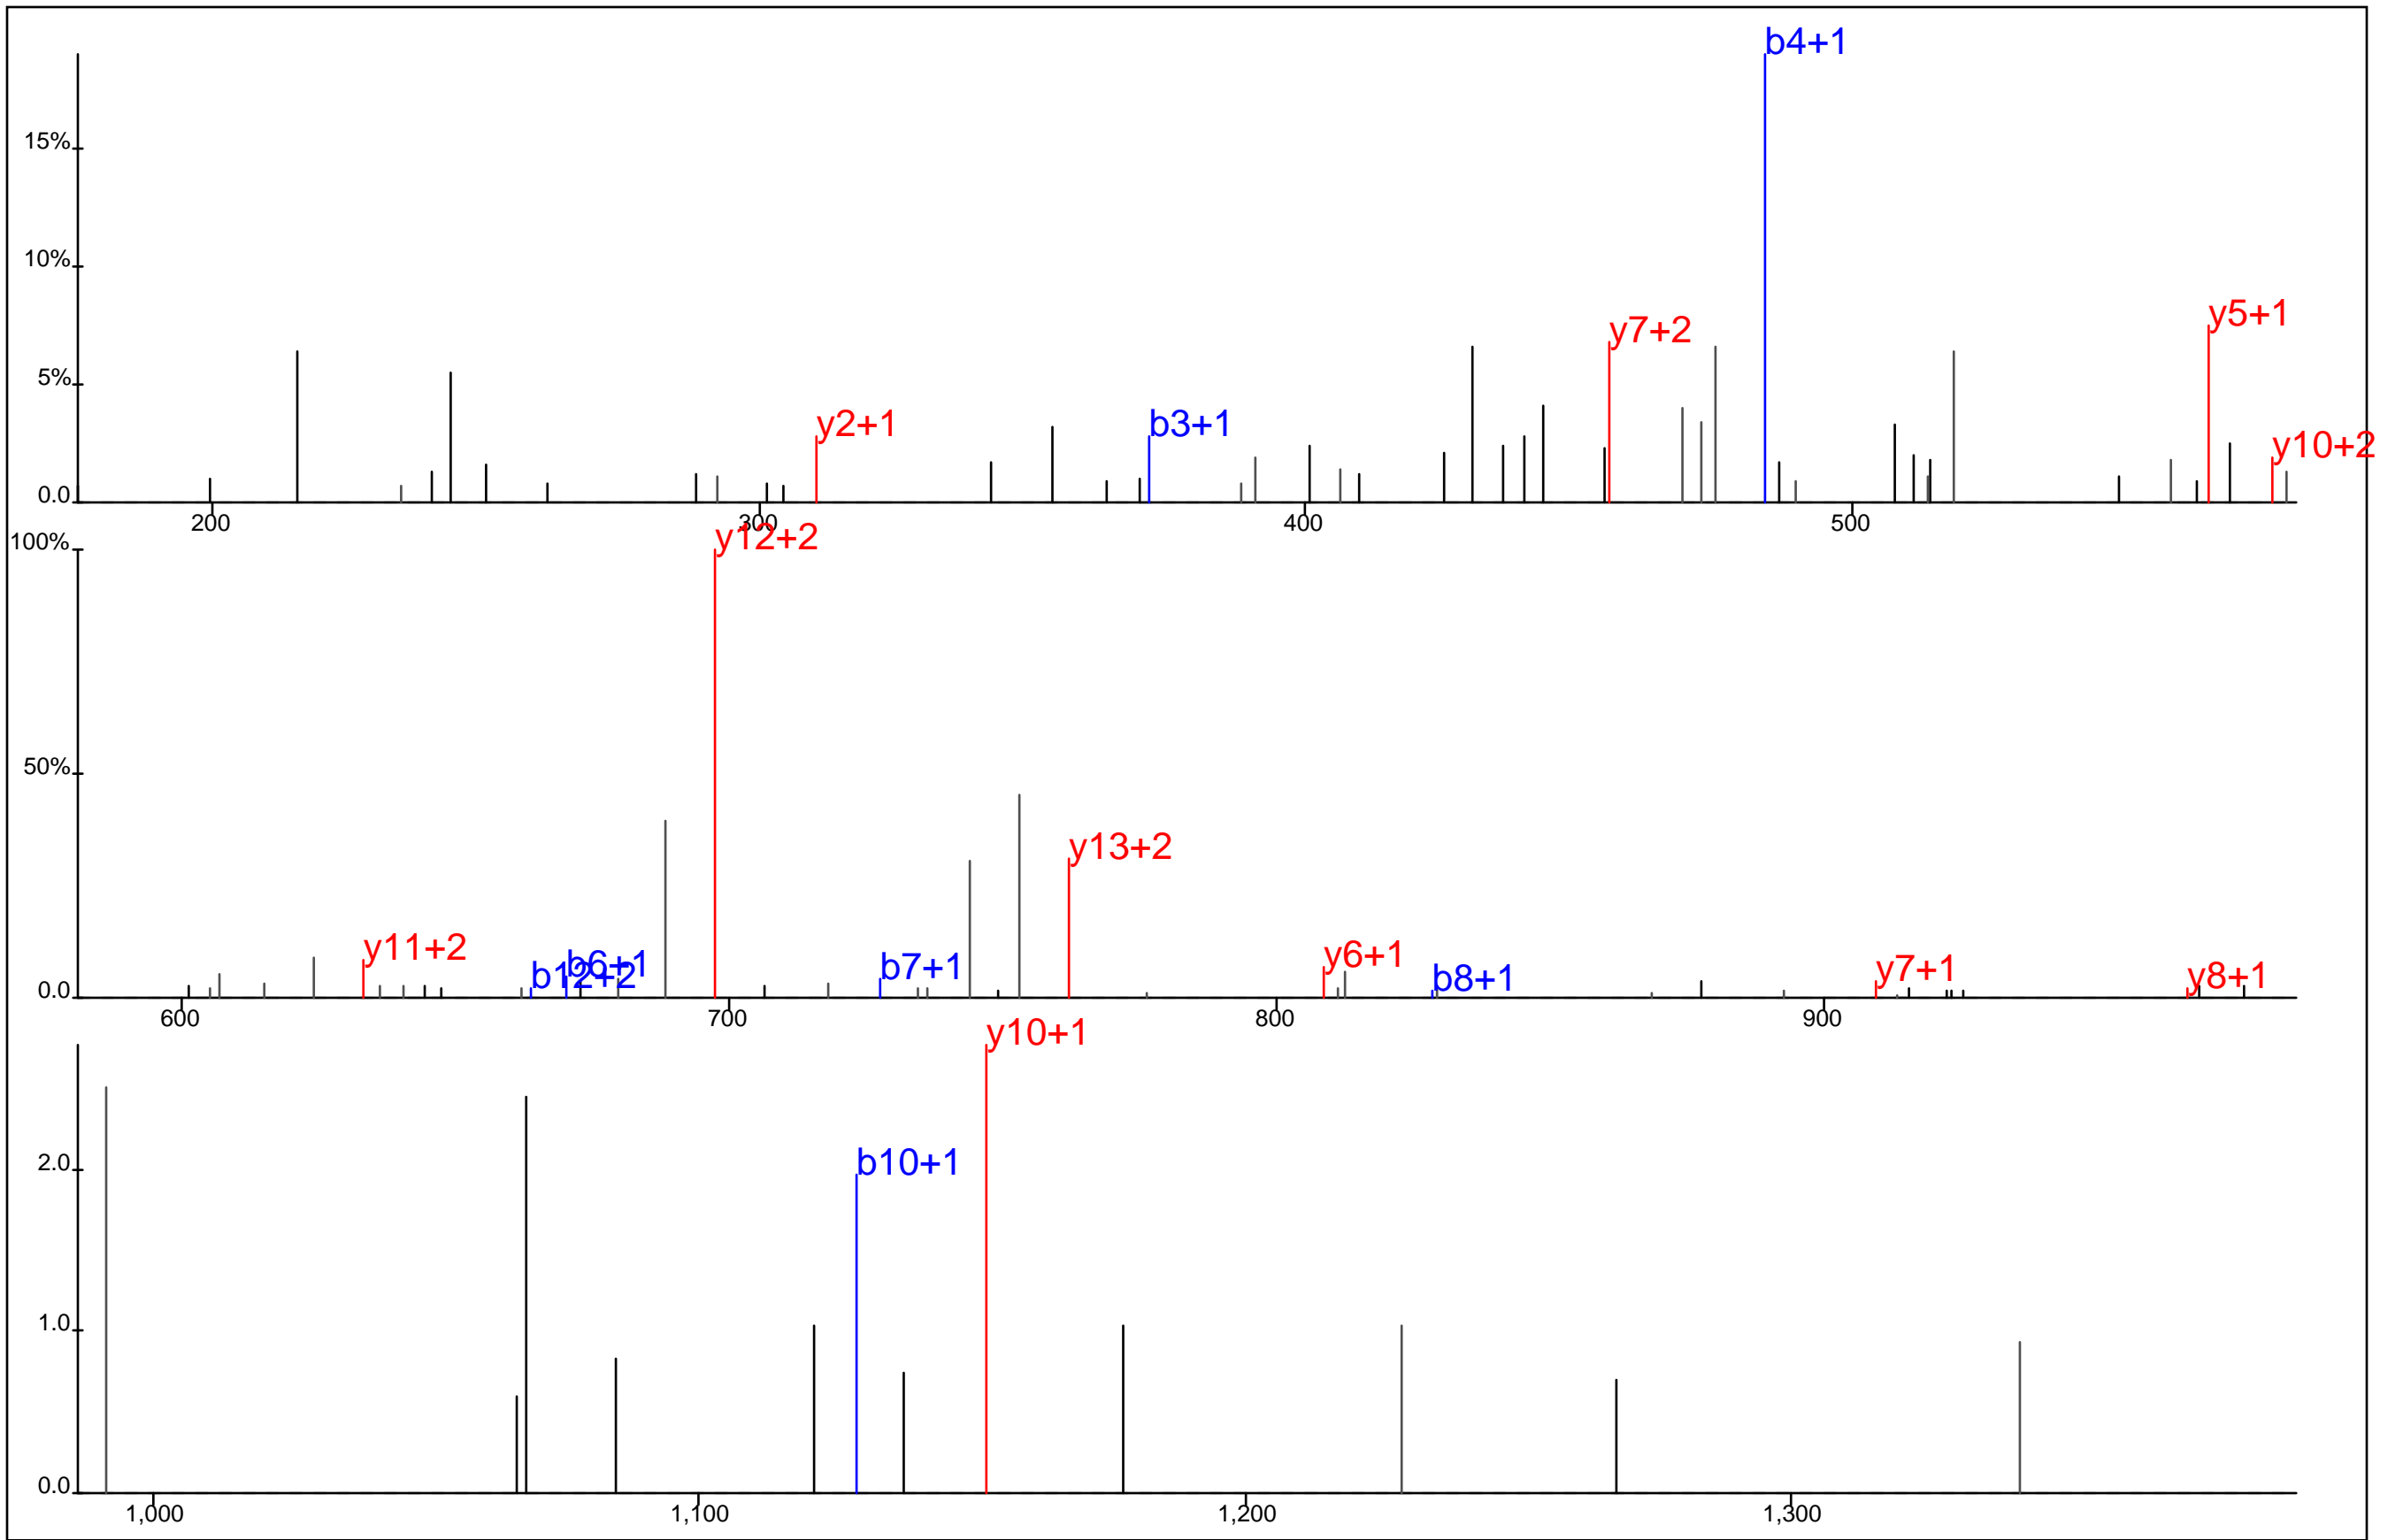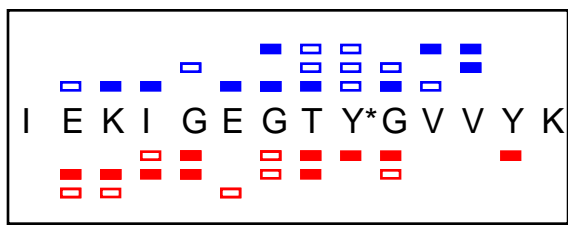

Protein Name: CDC2  
 gi Accession: 0  
 Precursor Mass: 545.9396+3  
 Delta Mass: 0.753 ppm  
 XCorr: 37.65

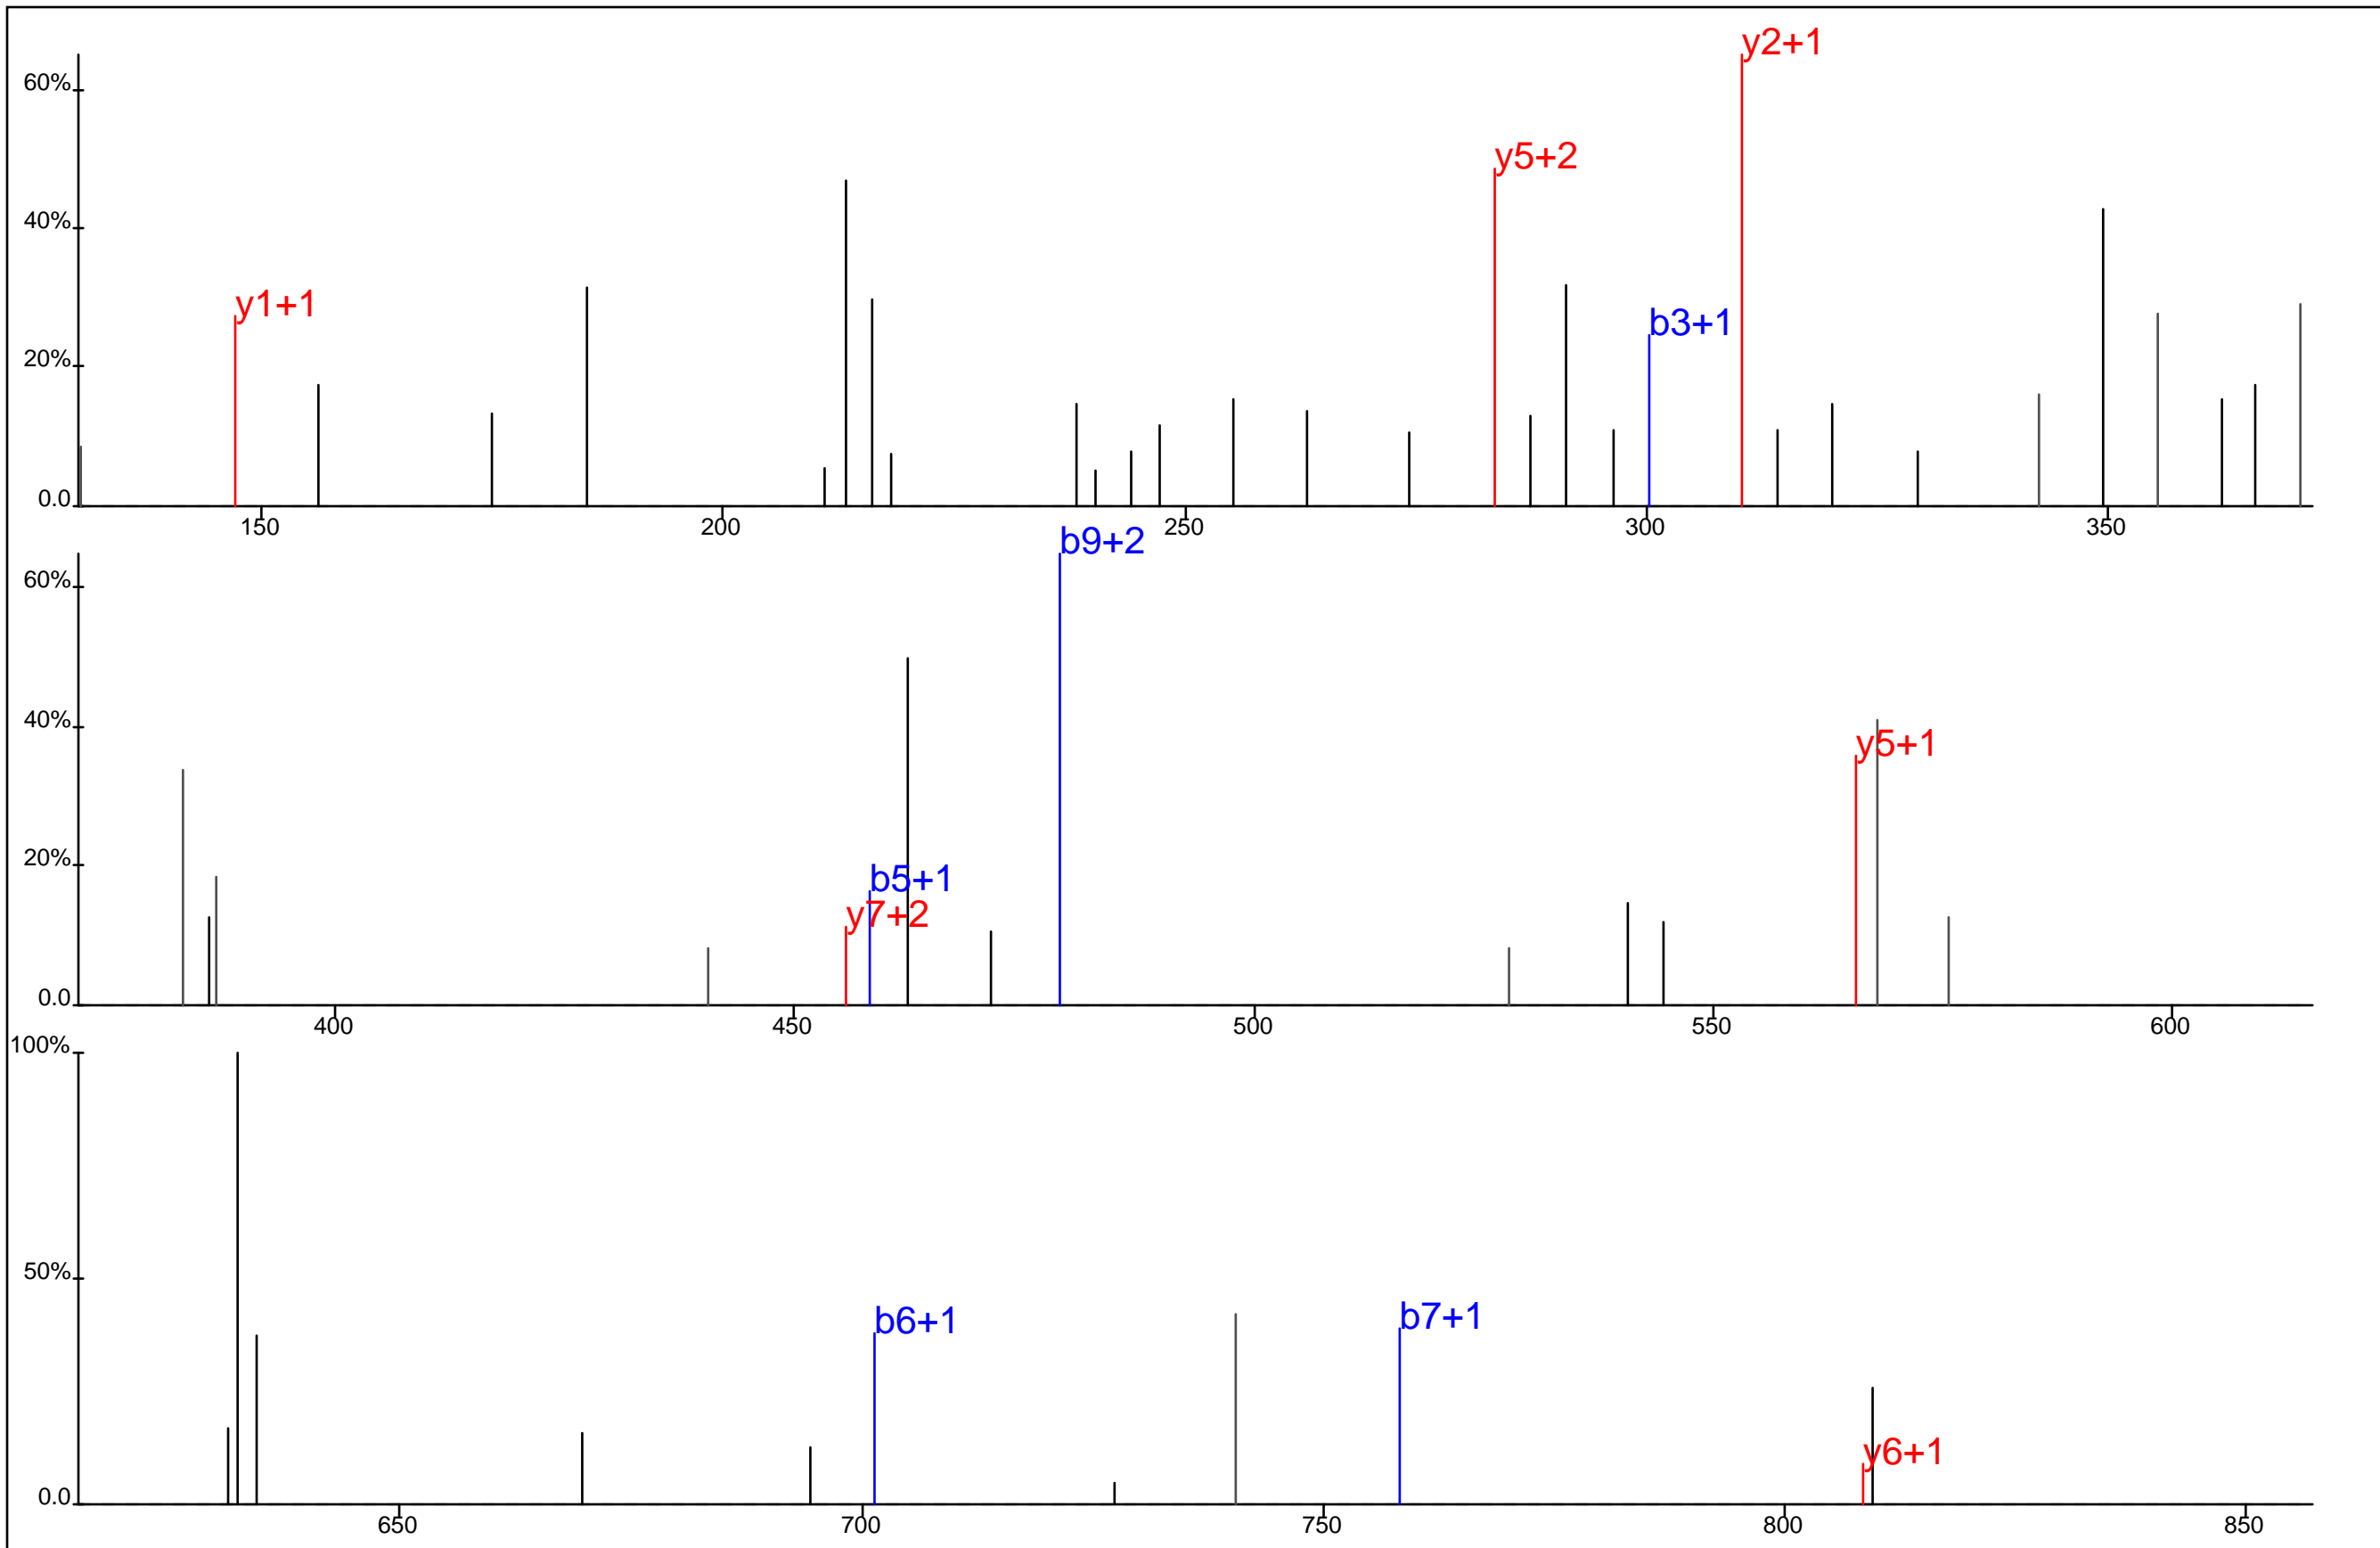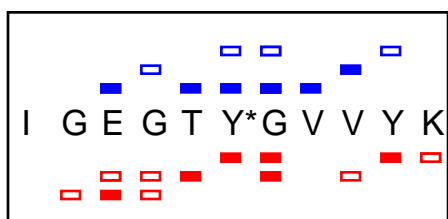

Protein Name: CDC2  
 gi Accession: 0  
 Precursor Mass: 422.5318+3  
 Delta Mass: 0.319 ppm  
 XCorr: 25.08

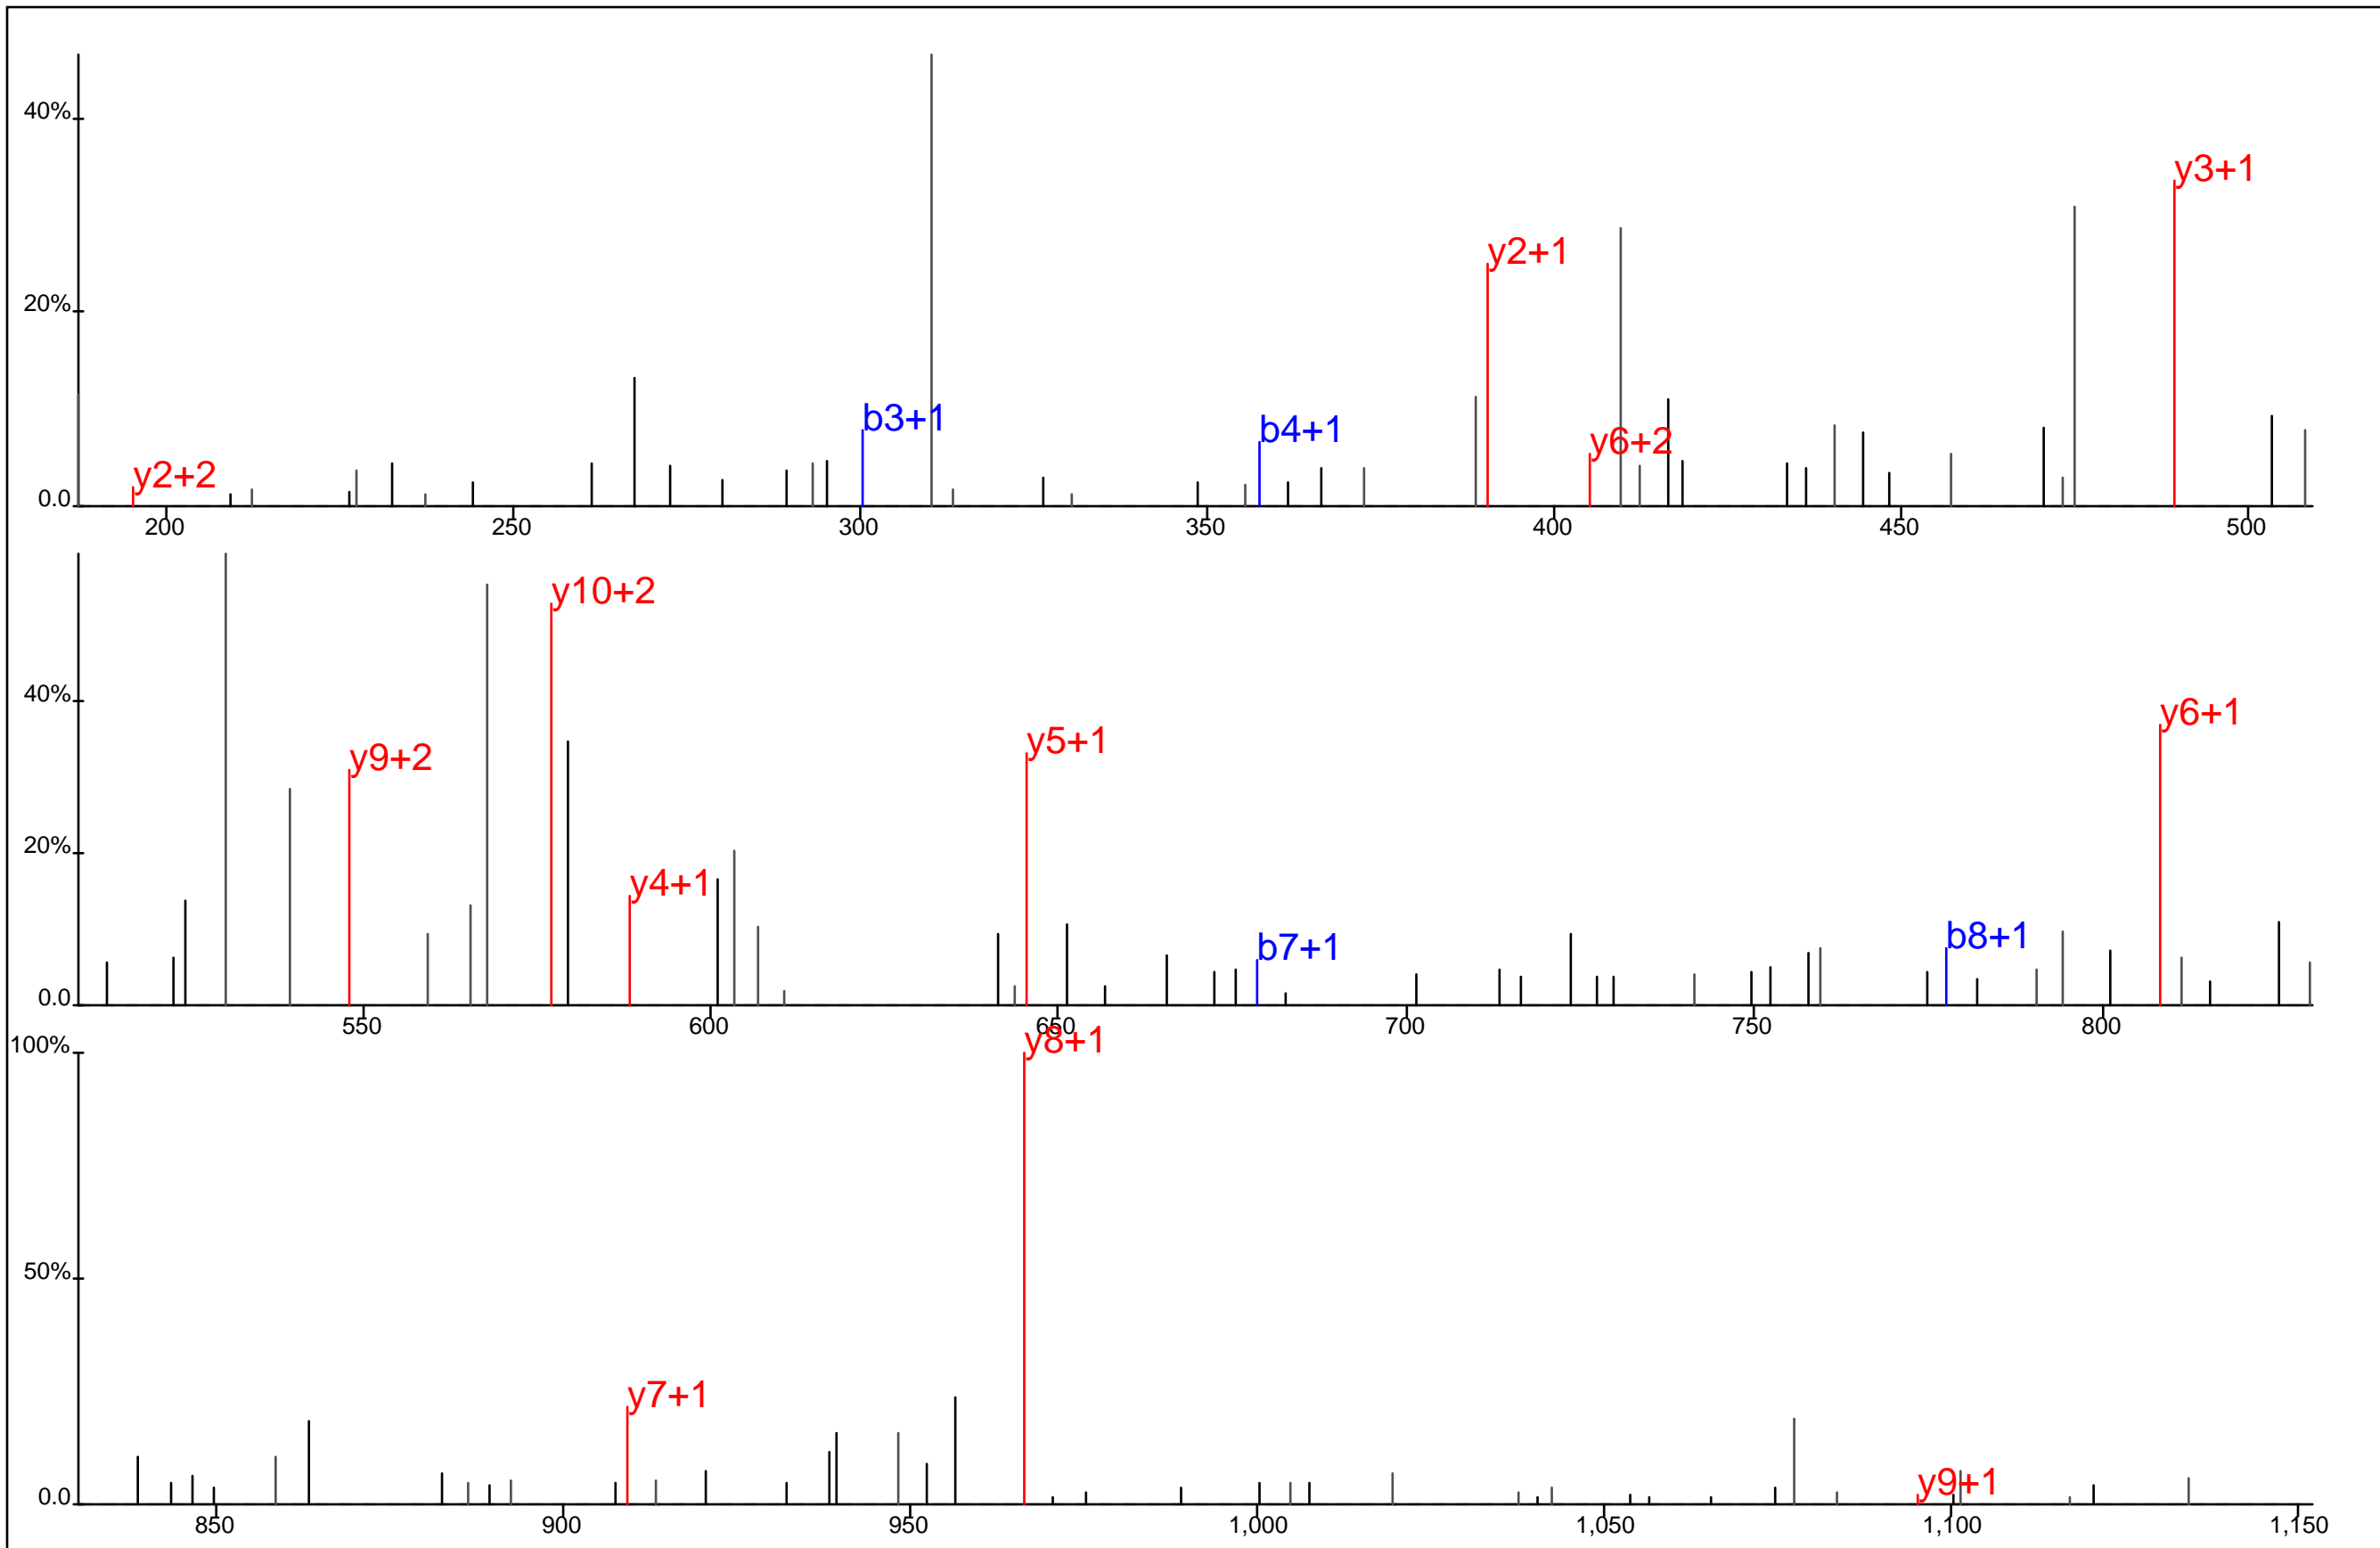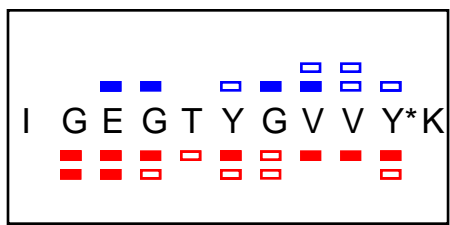

Protein Name: CDC2  
 gi Accession: 0  
 Precursor Mass: 633.2950+2  
 Delta Mass: 1.162 ppm  
 XCorr: 48.72



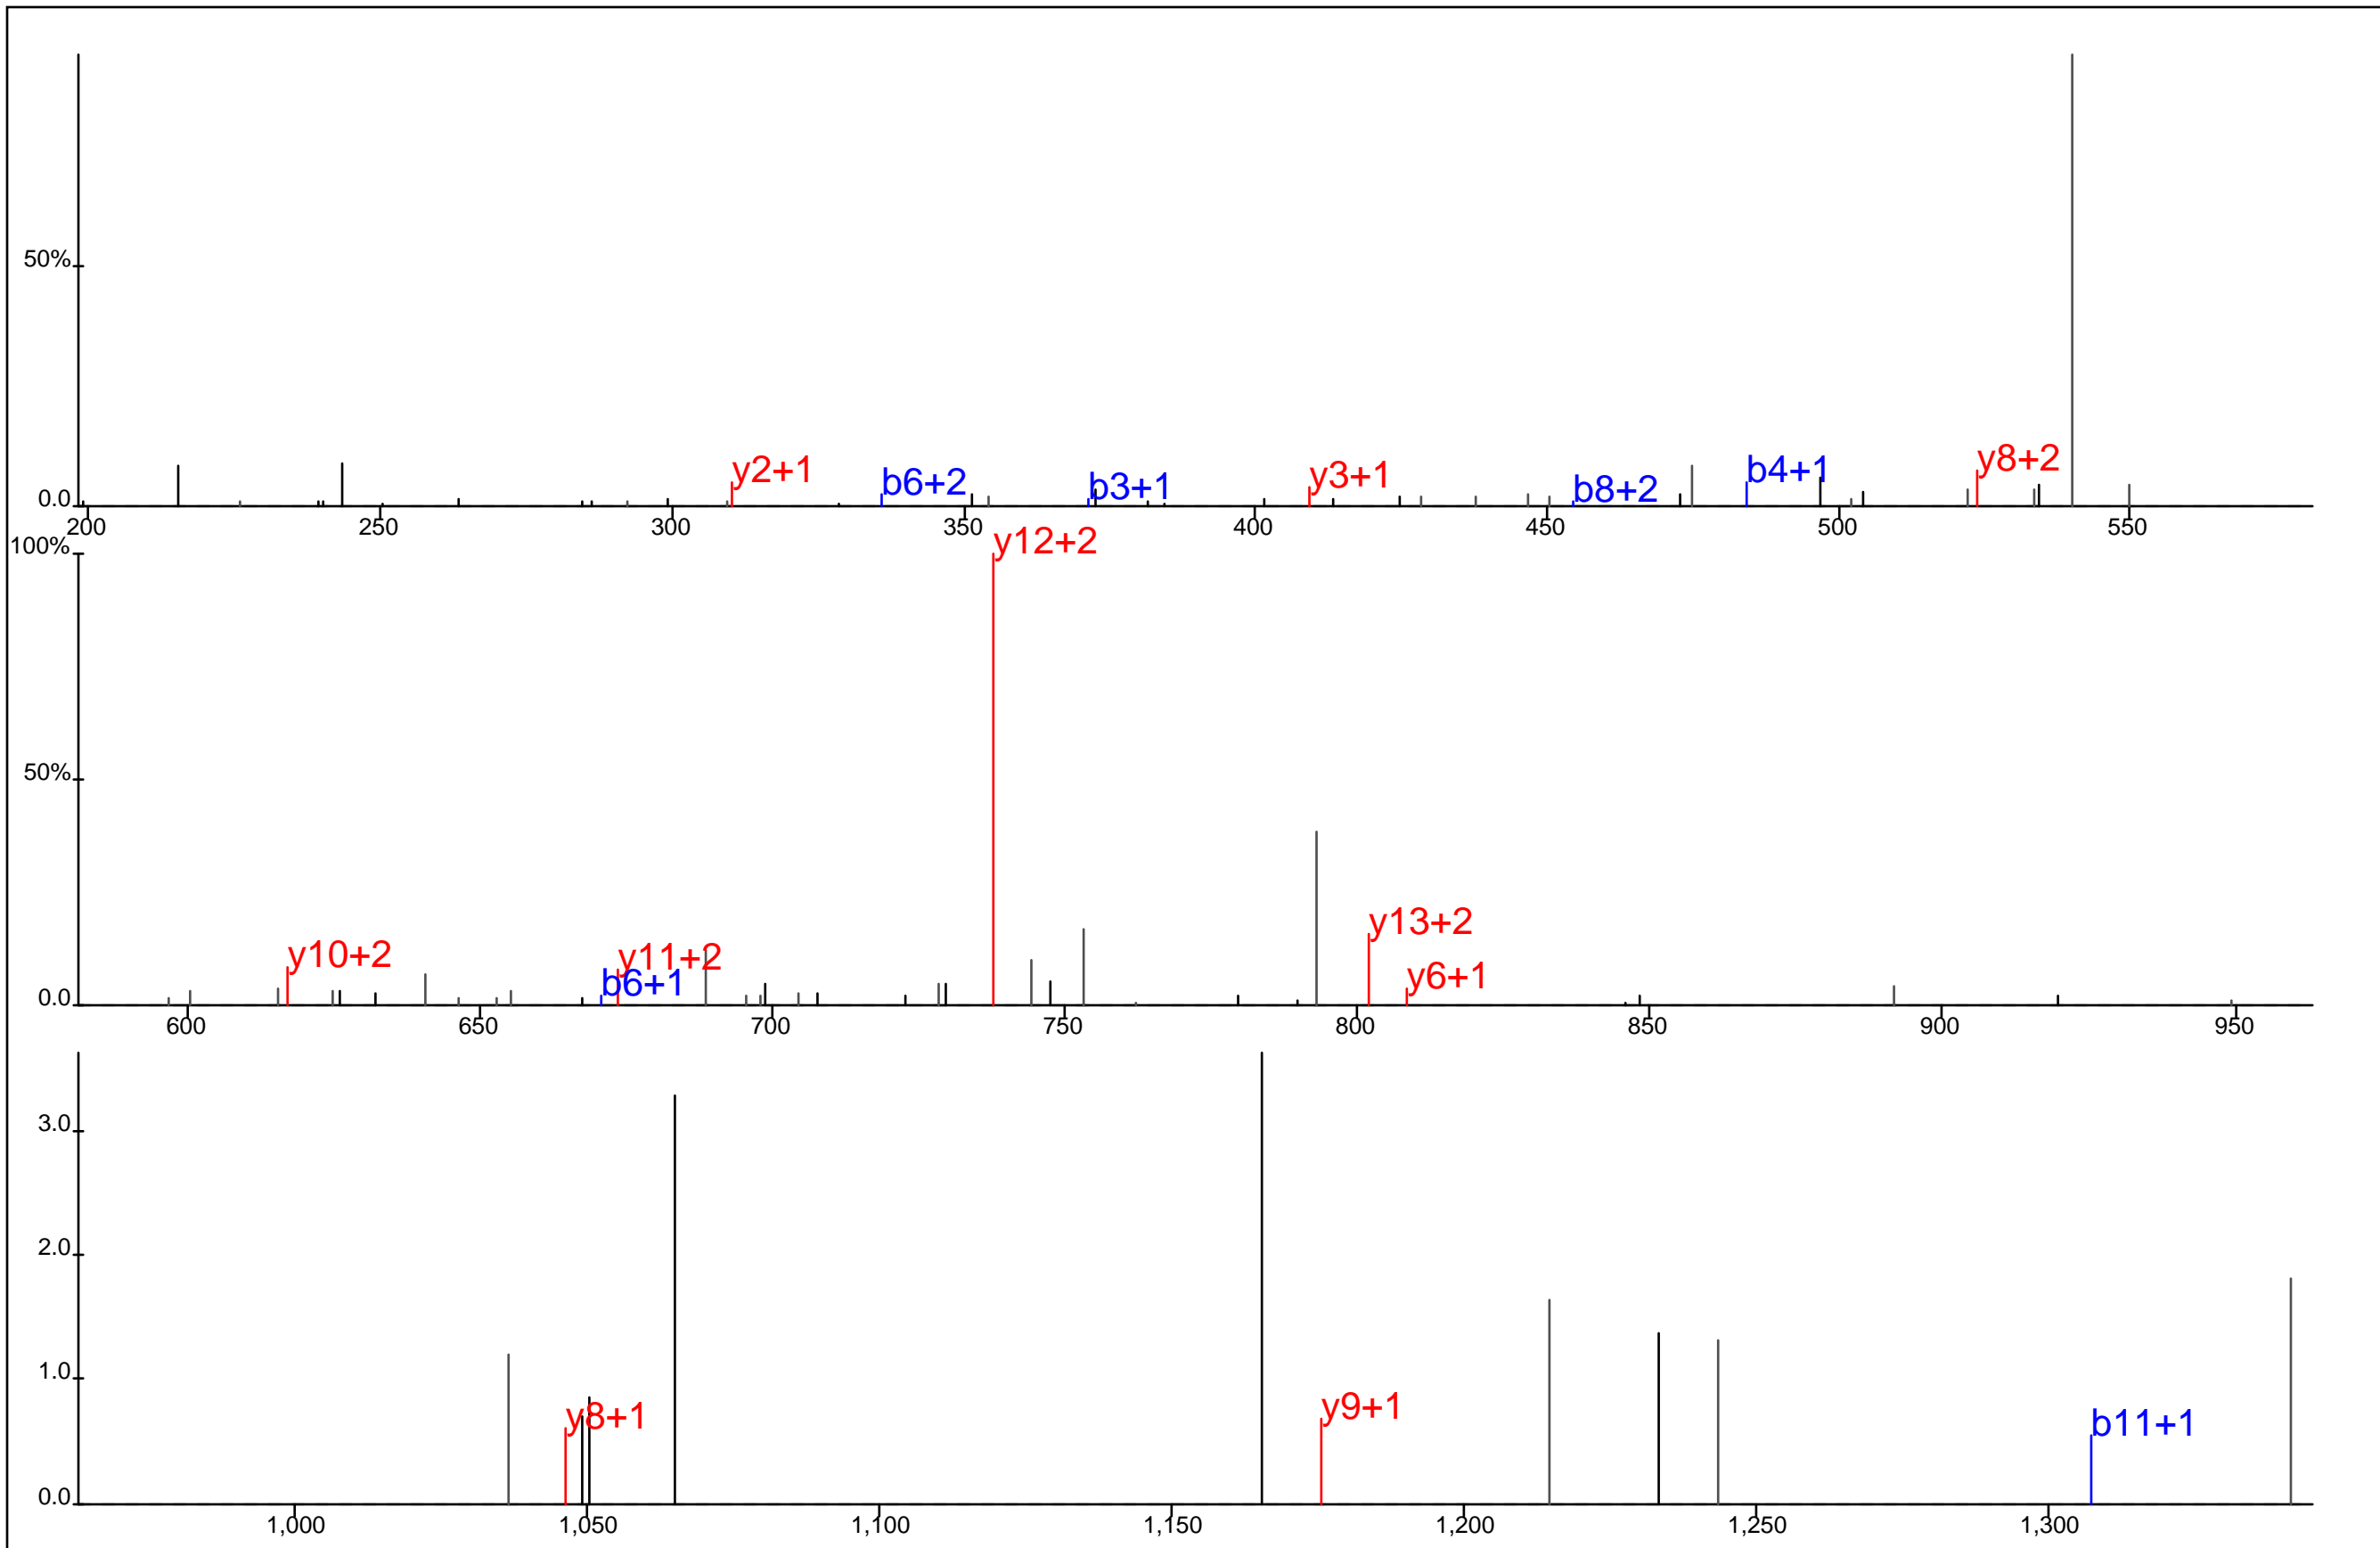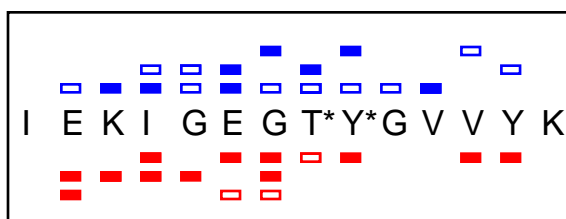

Protein Name: CDC2  
 gi Accession: 0  
 Precursor Mass: 572.5944+3  
 Delta Mass: 0.327 ppm  
 XCorr: 26.62

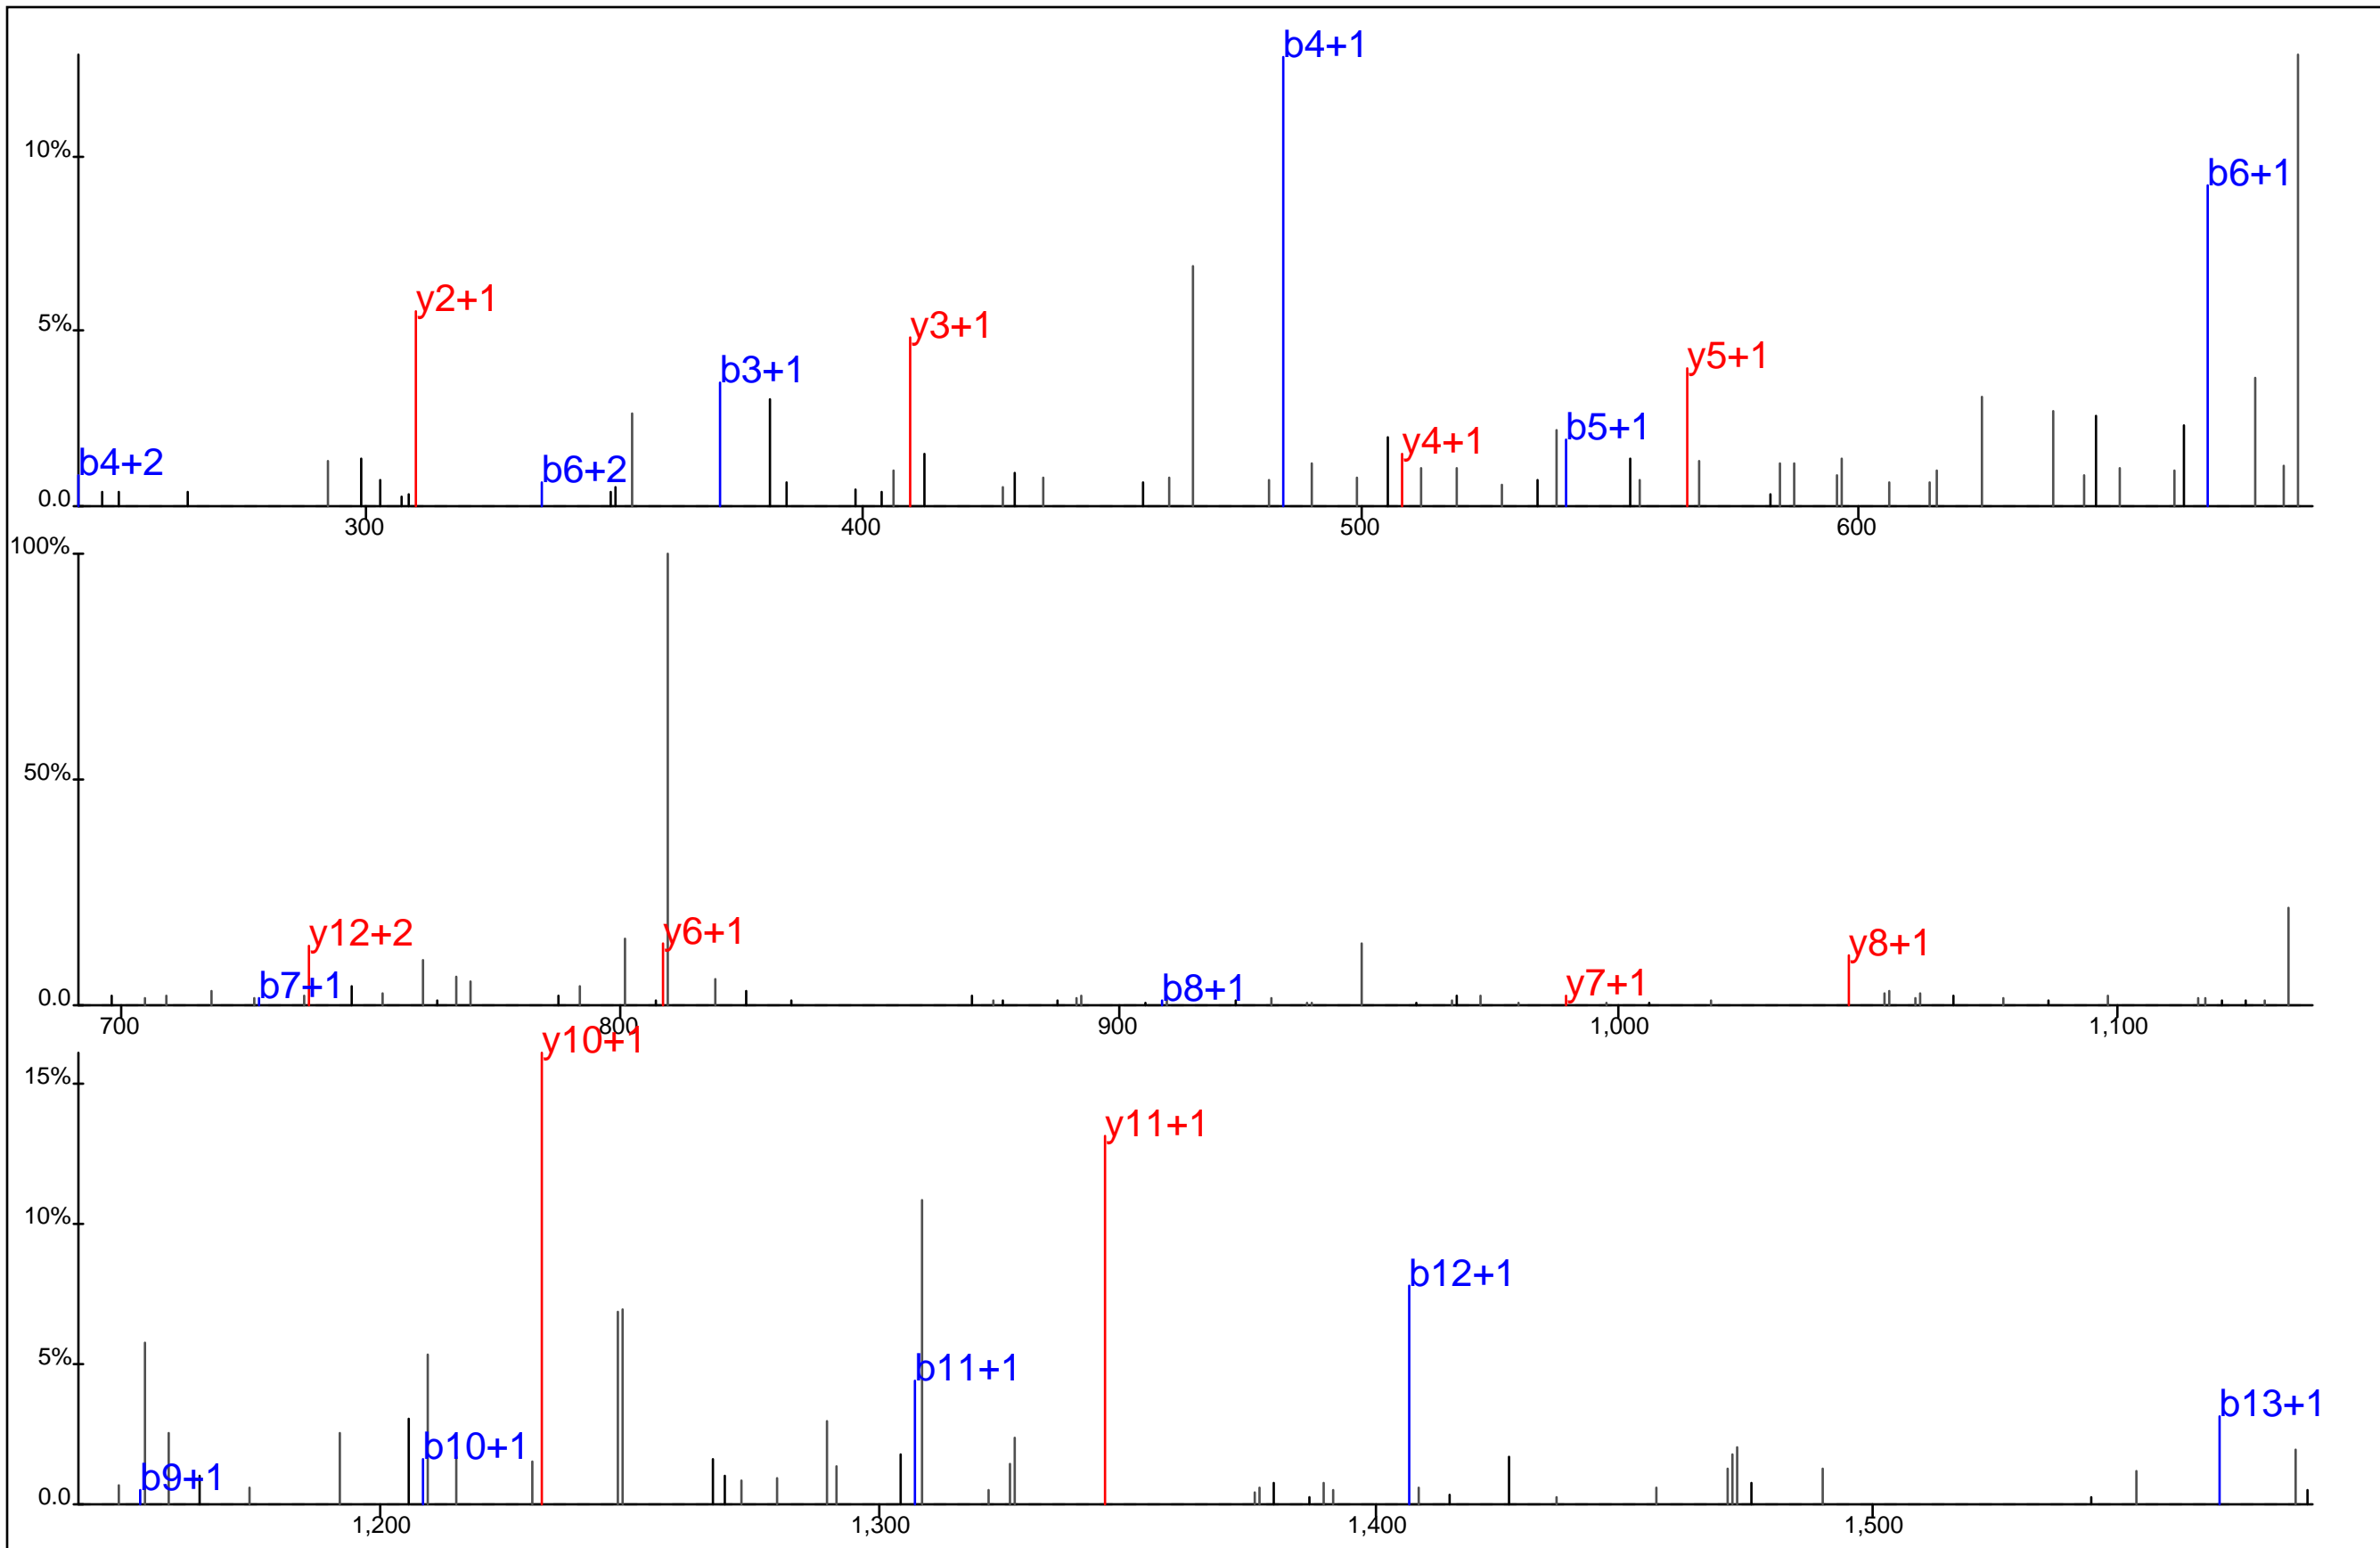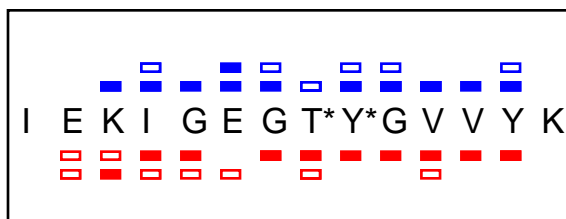

Protein Name: CDC2  
 gi Accession: 0  
 Precursor Mass: 858.3876+2  
 Delta Mass: 0.817 ppm  
 XCorr: 50.91

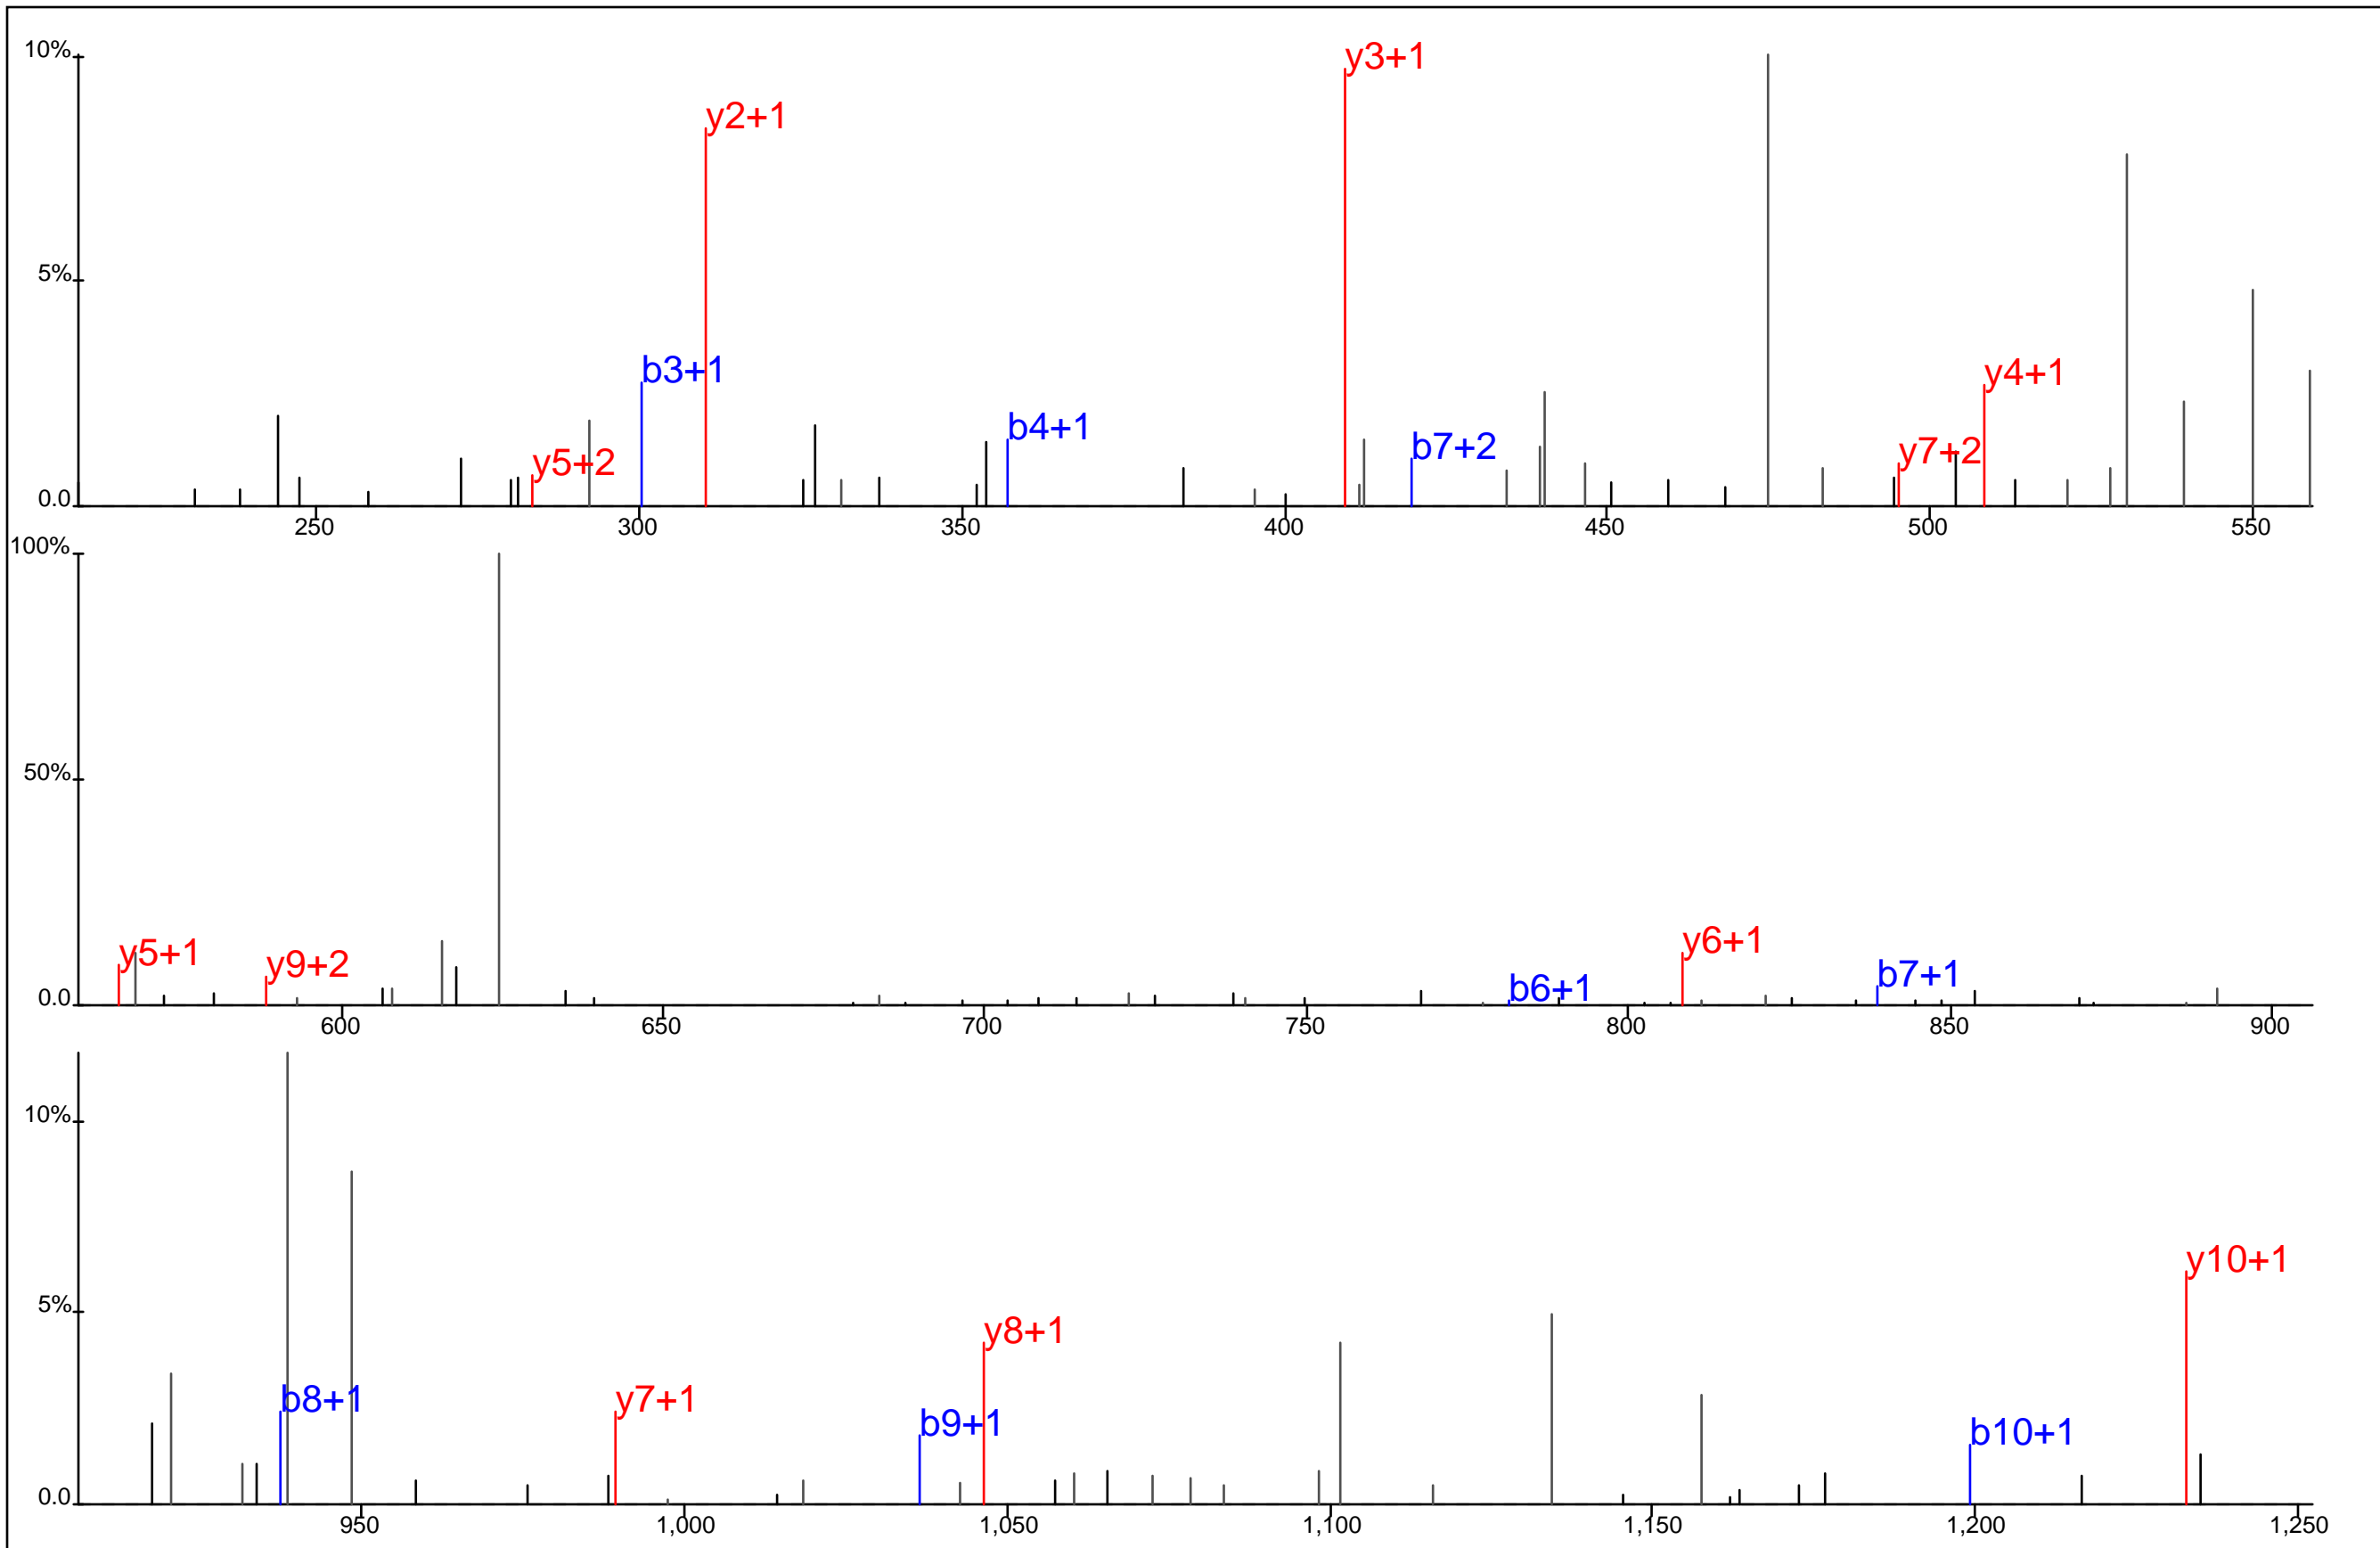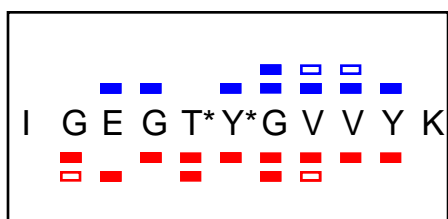

Protein Name: CDC2  
 gi Accession: 0  
 Precursor Mass: 673.2773+2  
 Delta Mass: 0.276 ppm  
 XCorr: 61.62

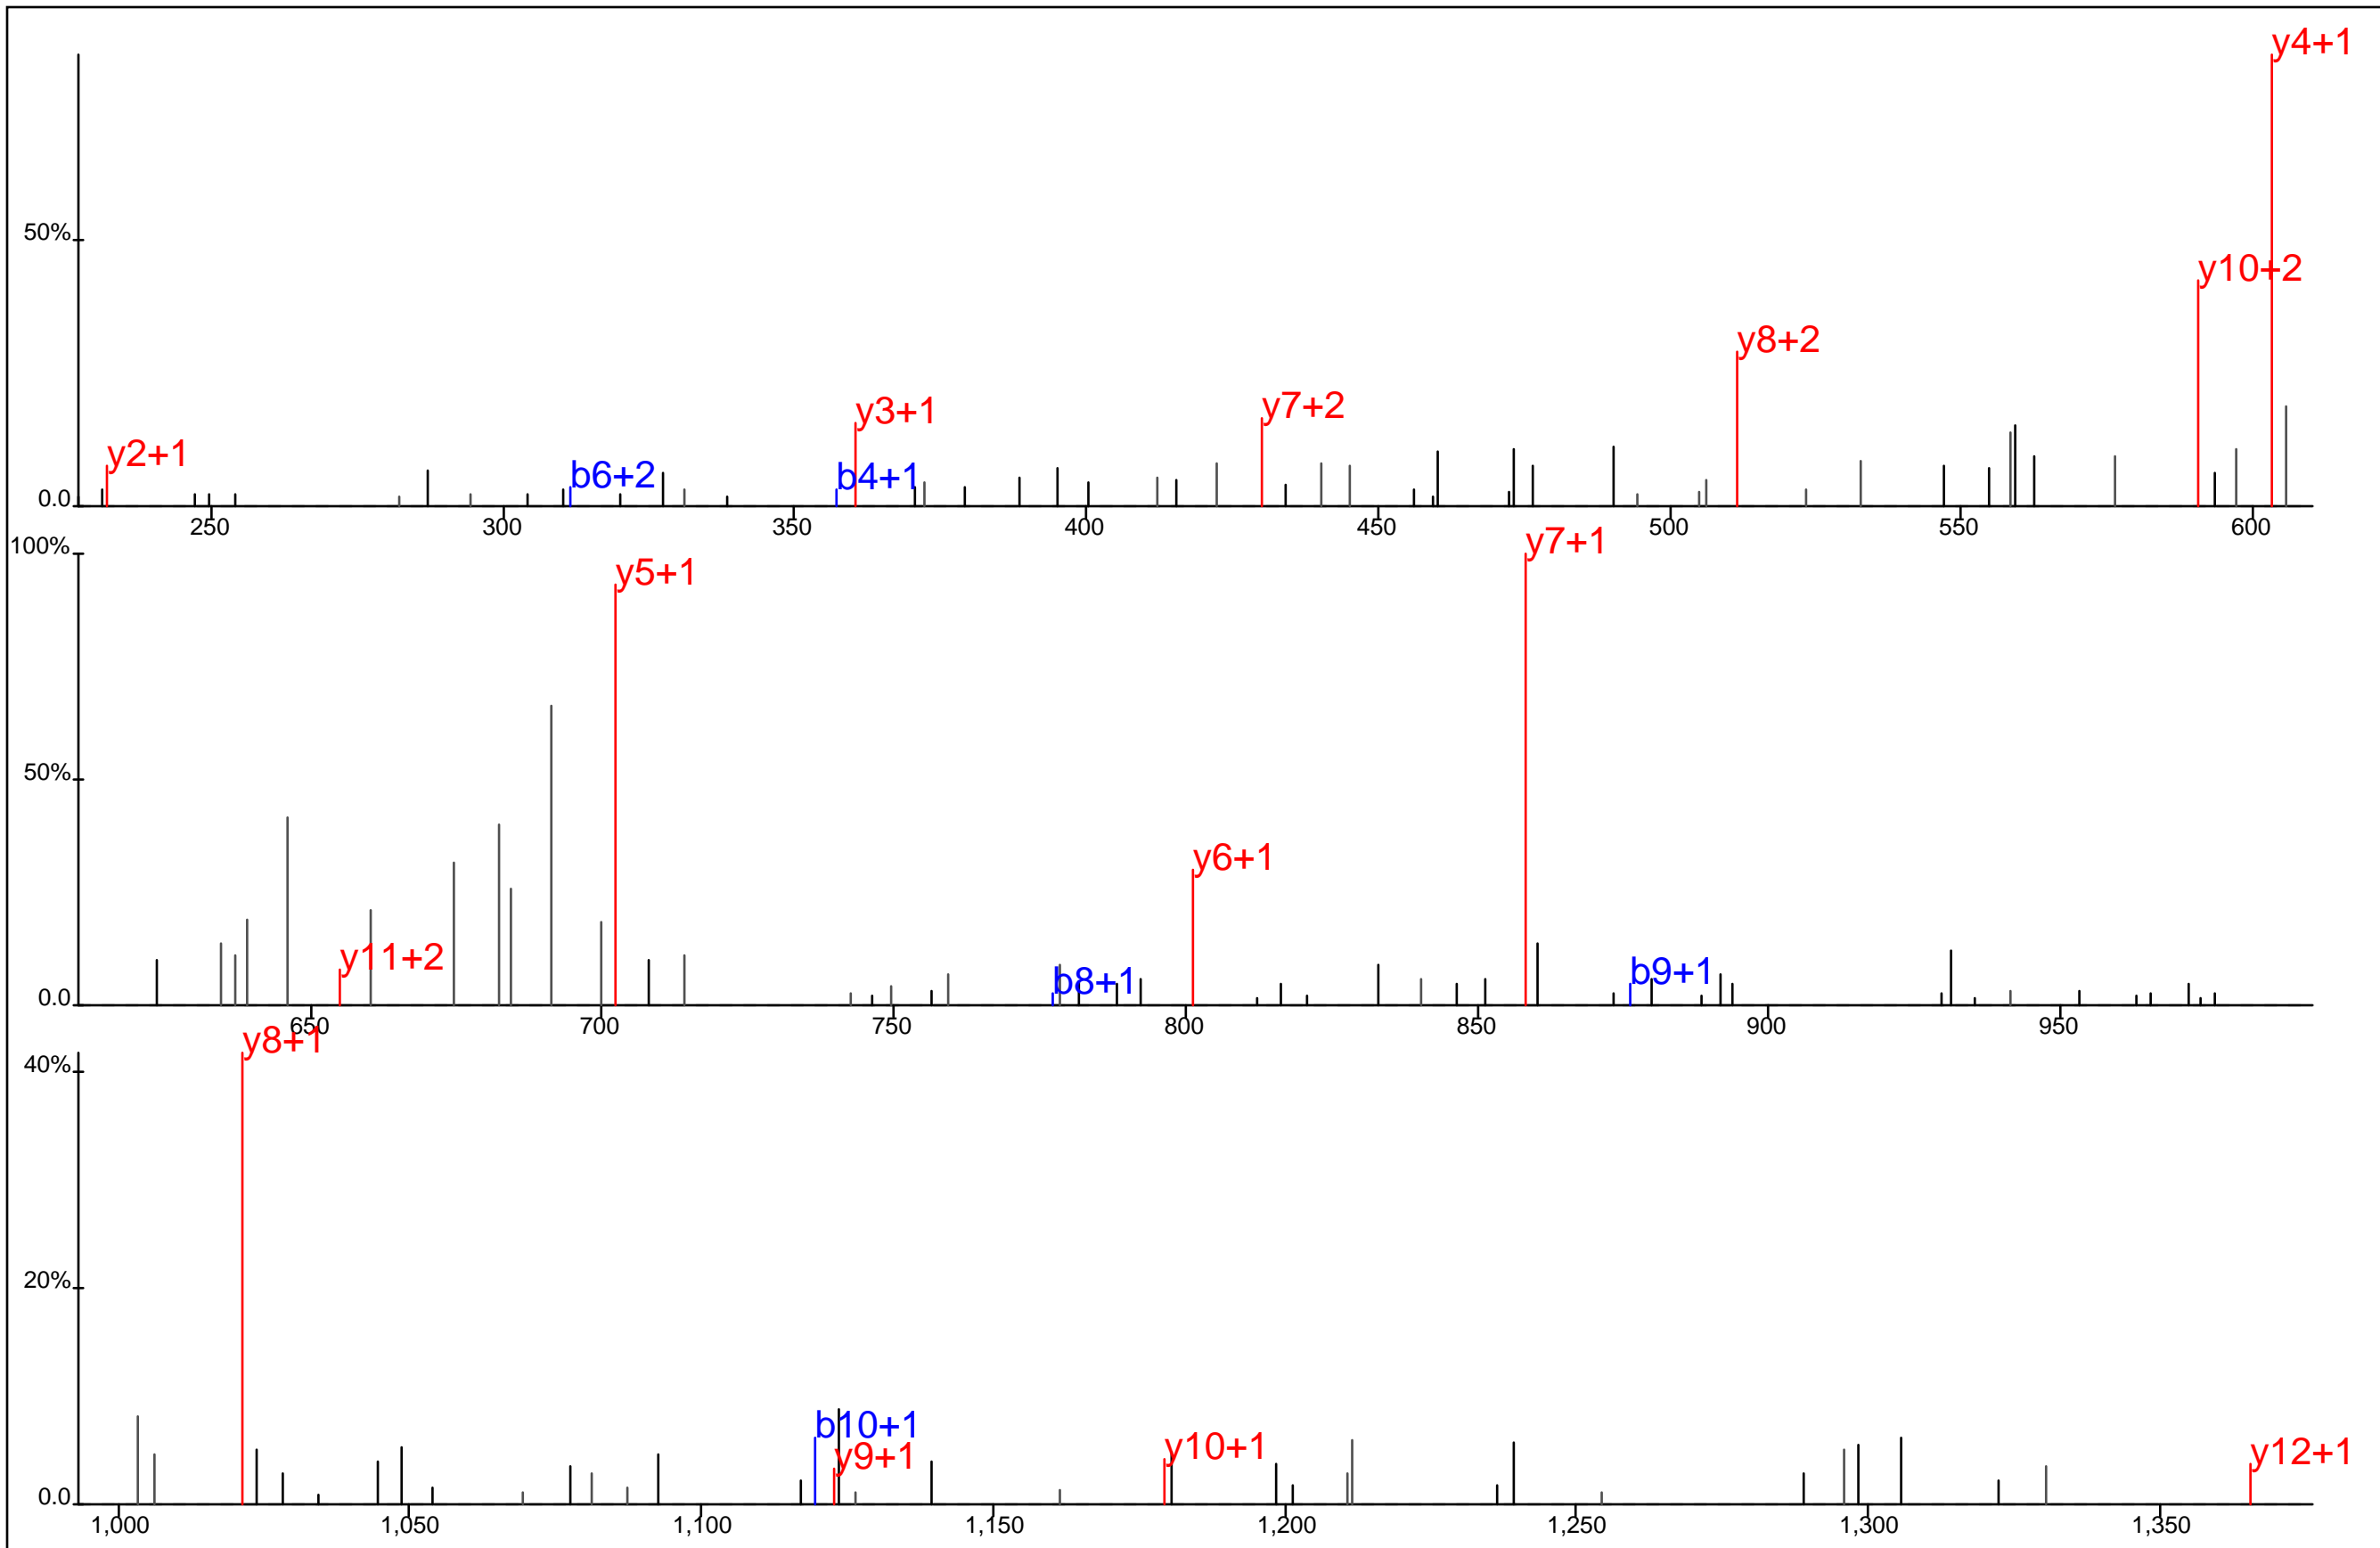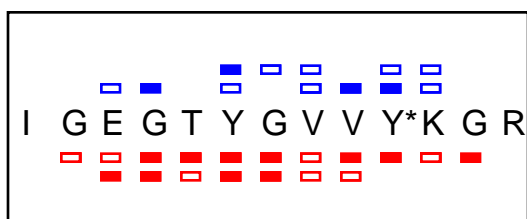

Protein Name: CDC2  
 gi Accession: 0  
 Precursor Mass: 739.8571+2  
 Delta Mass: 2.060 ppm  
 XCorr: 47.33



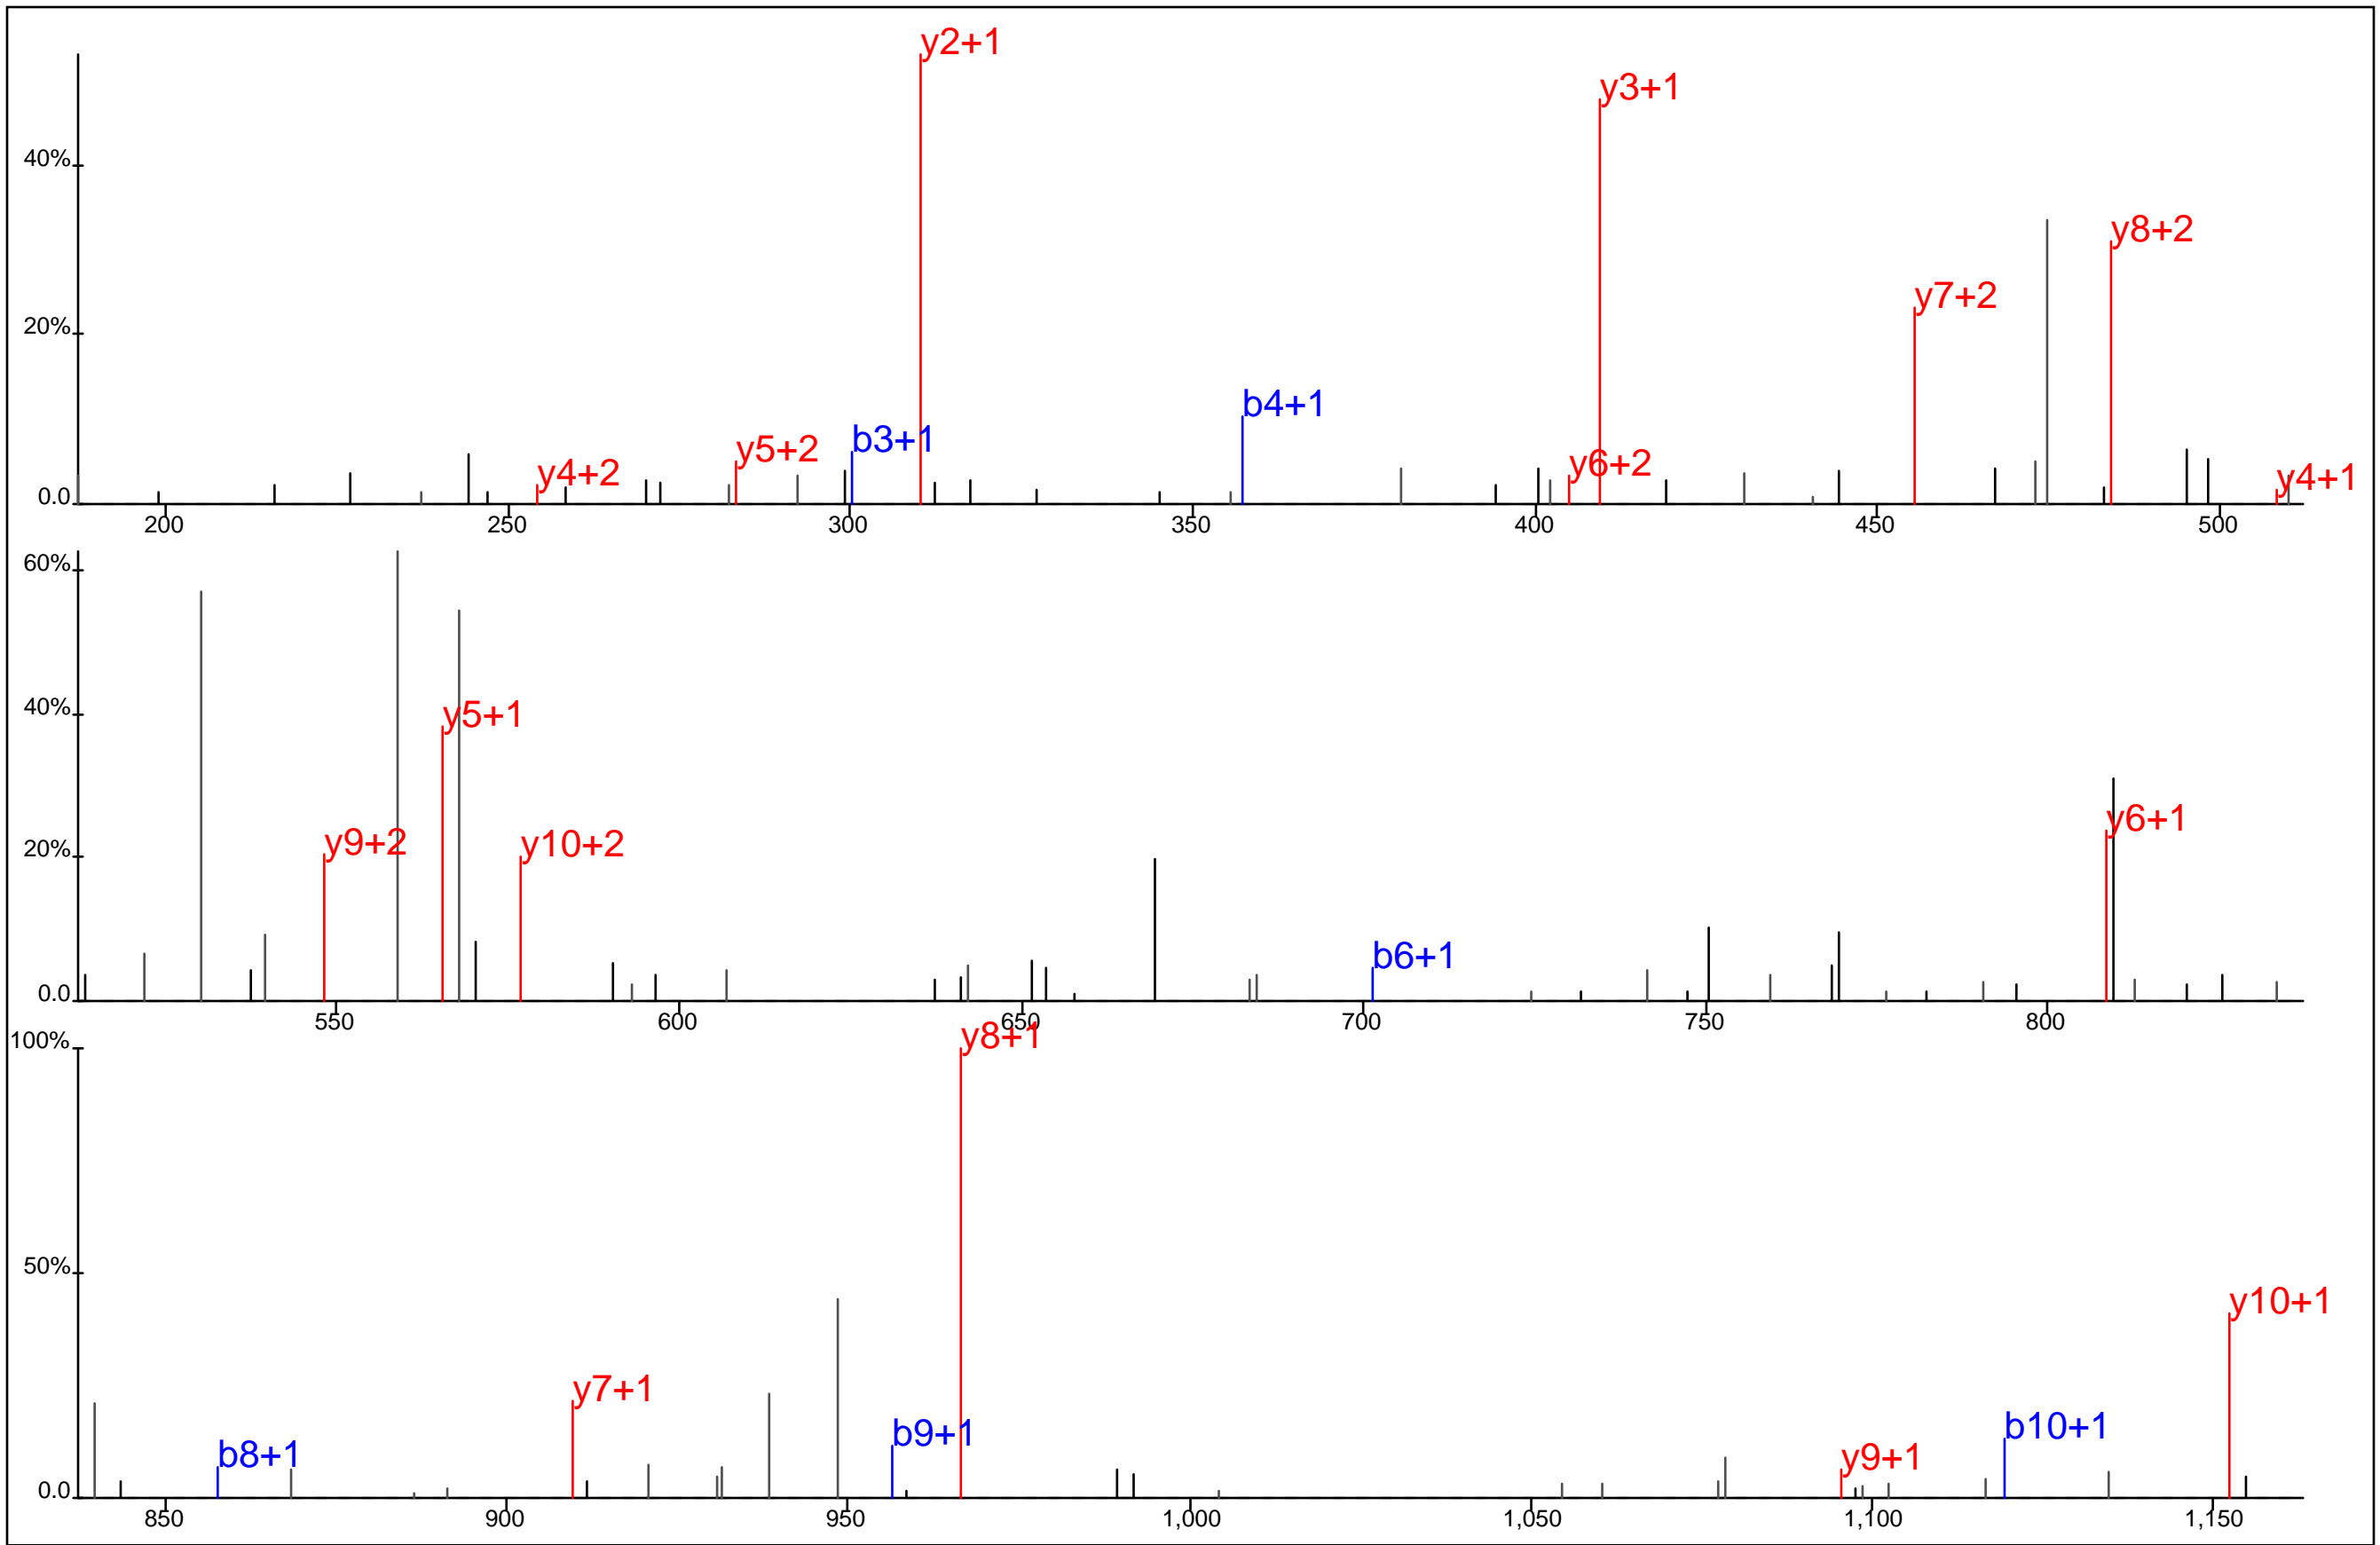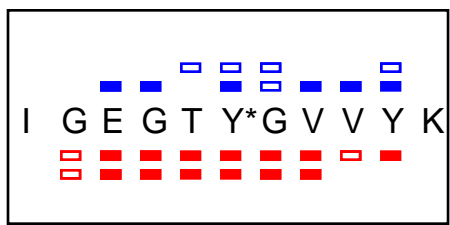

Protein Name: CDC2  
 gi Accession: 0  
 Precursor Mass: 633.2941+2  
 Delta Mass: 0.286 ppm  
 XCorr: 51.97

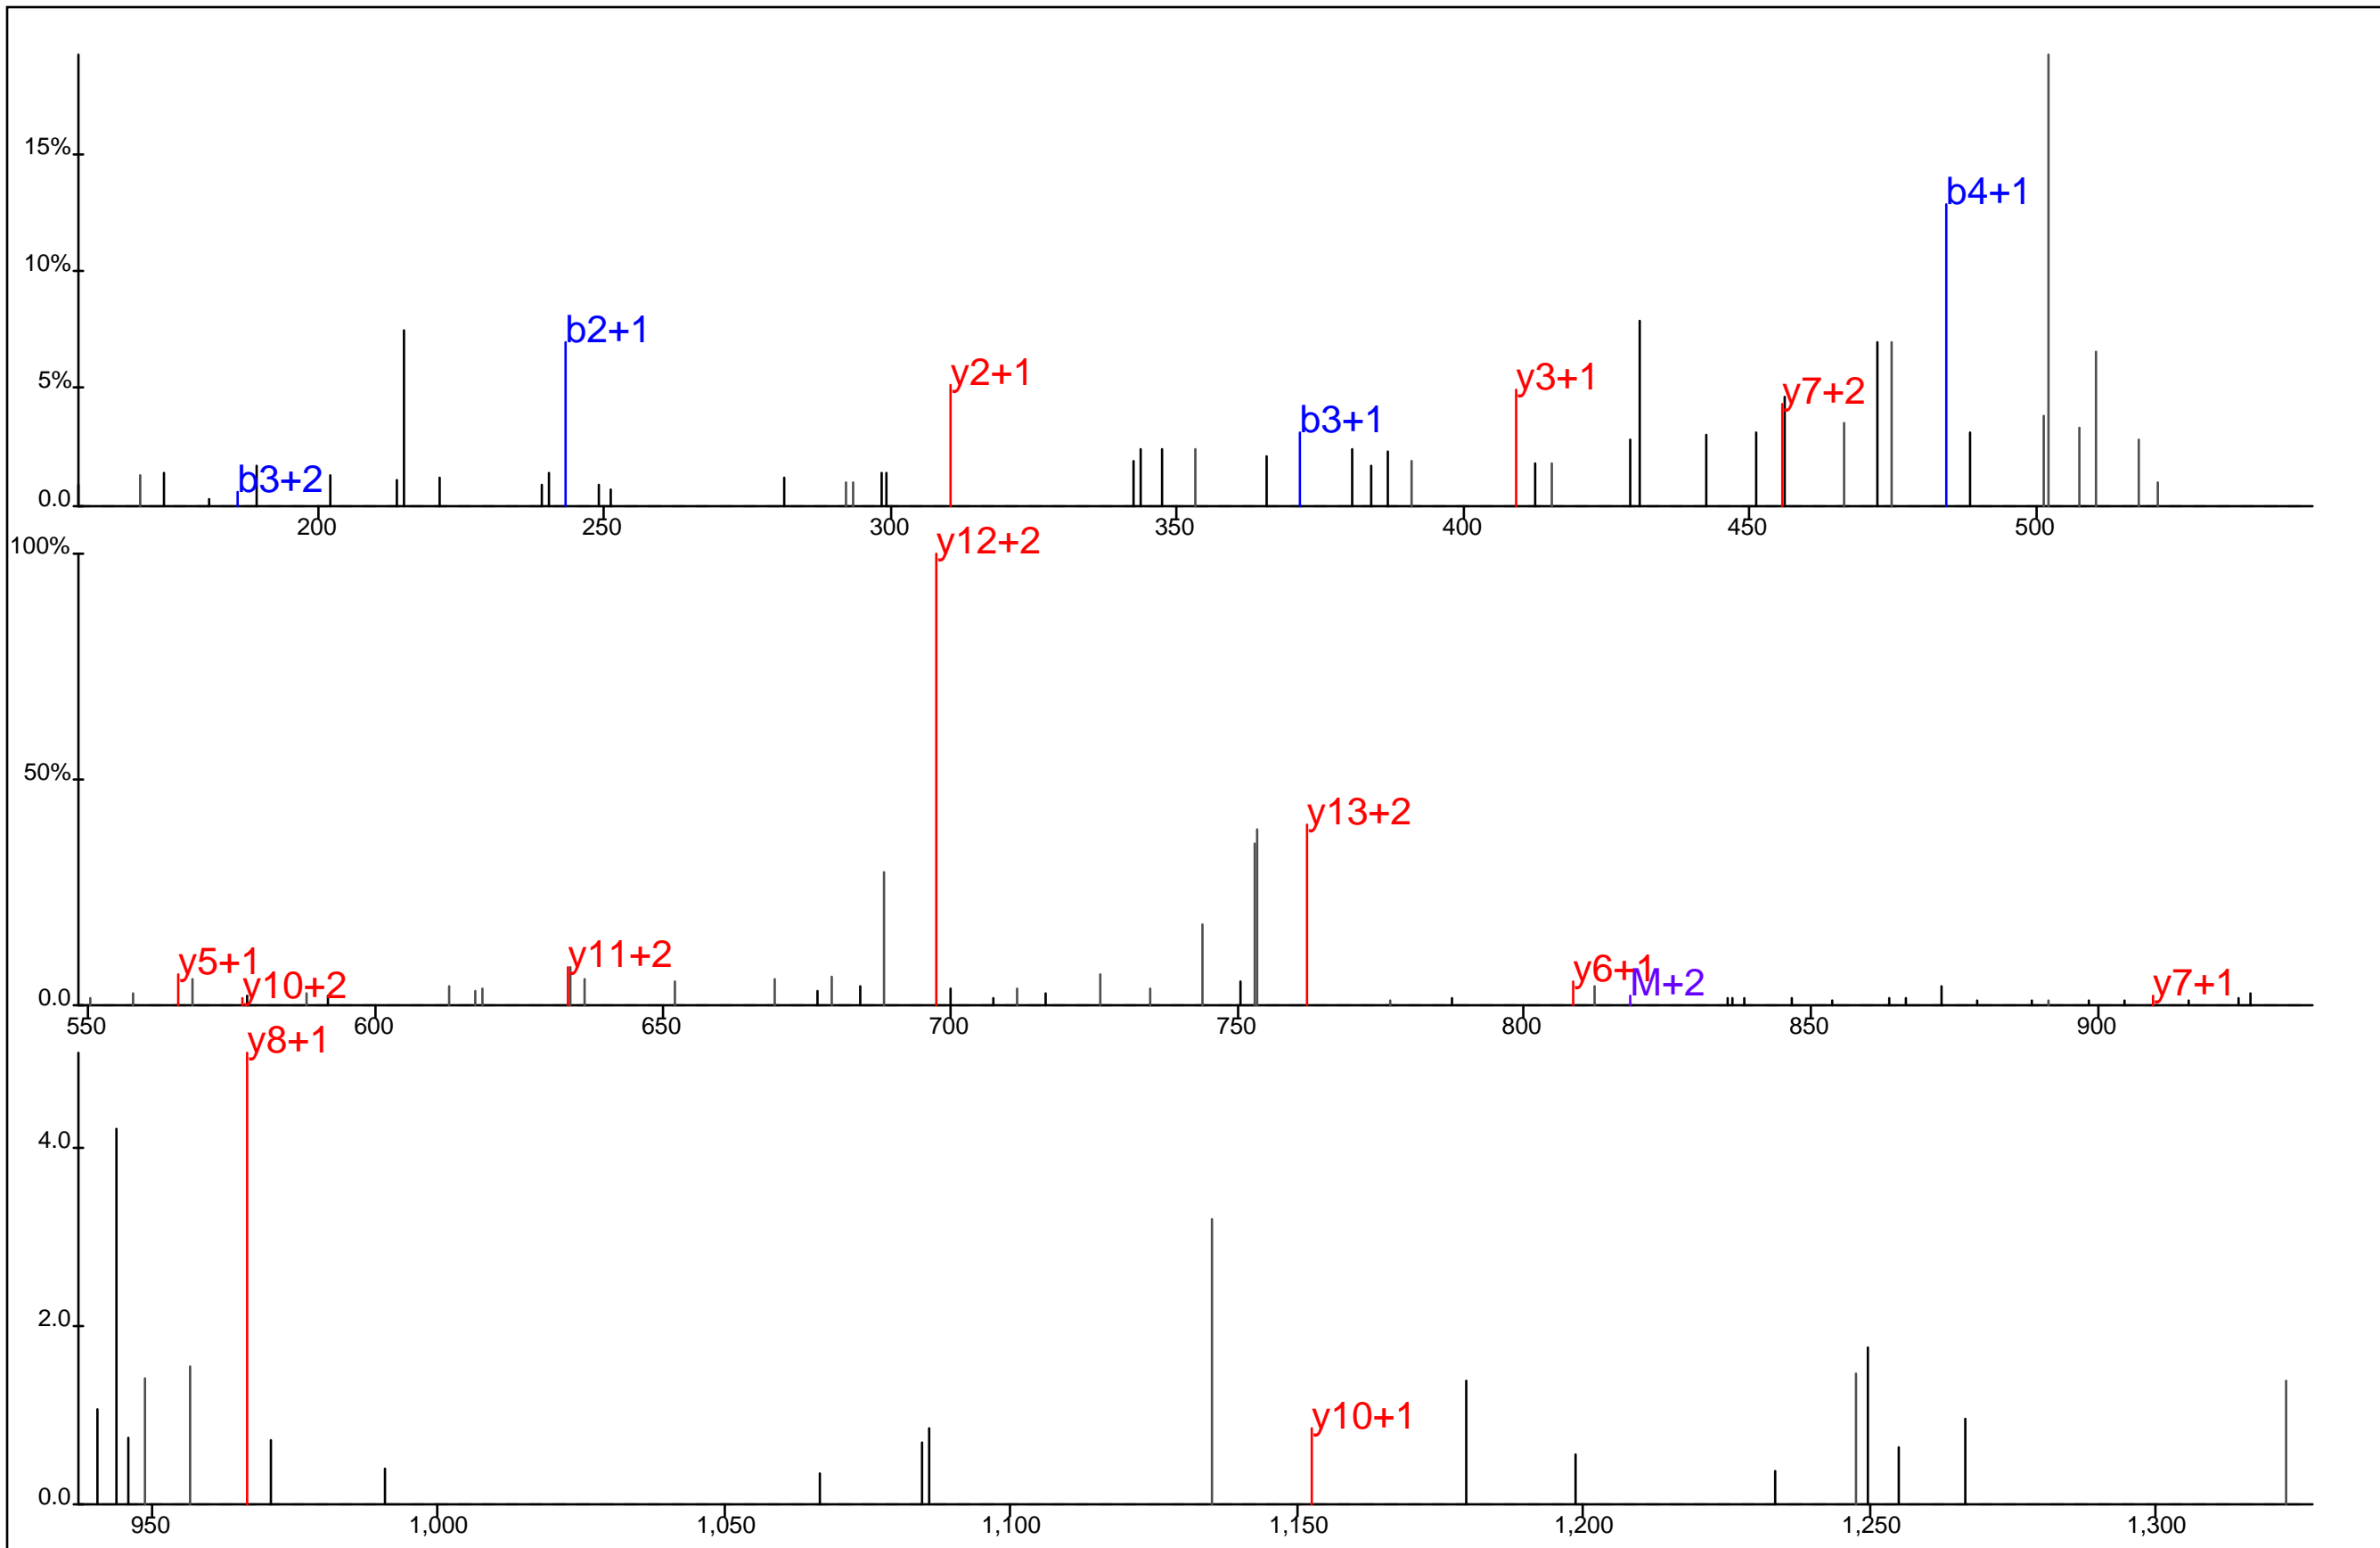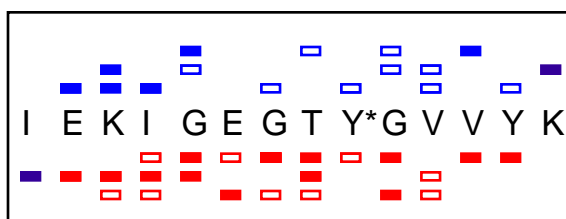

Protein Name: CDC2  
 gi Accession: 0  
 Precursor Mass: 545.9382+3  
 Delta Mass: 1.710 ppm  
 XCorr: 30.34

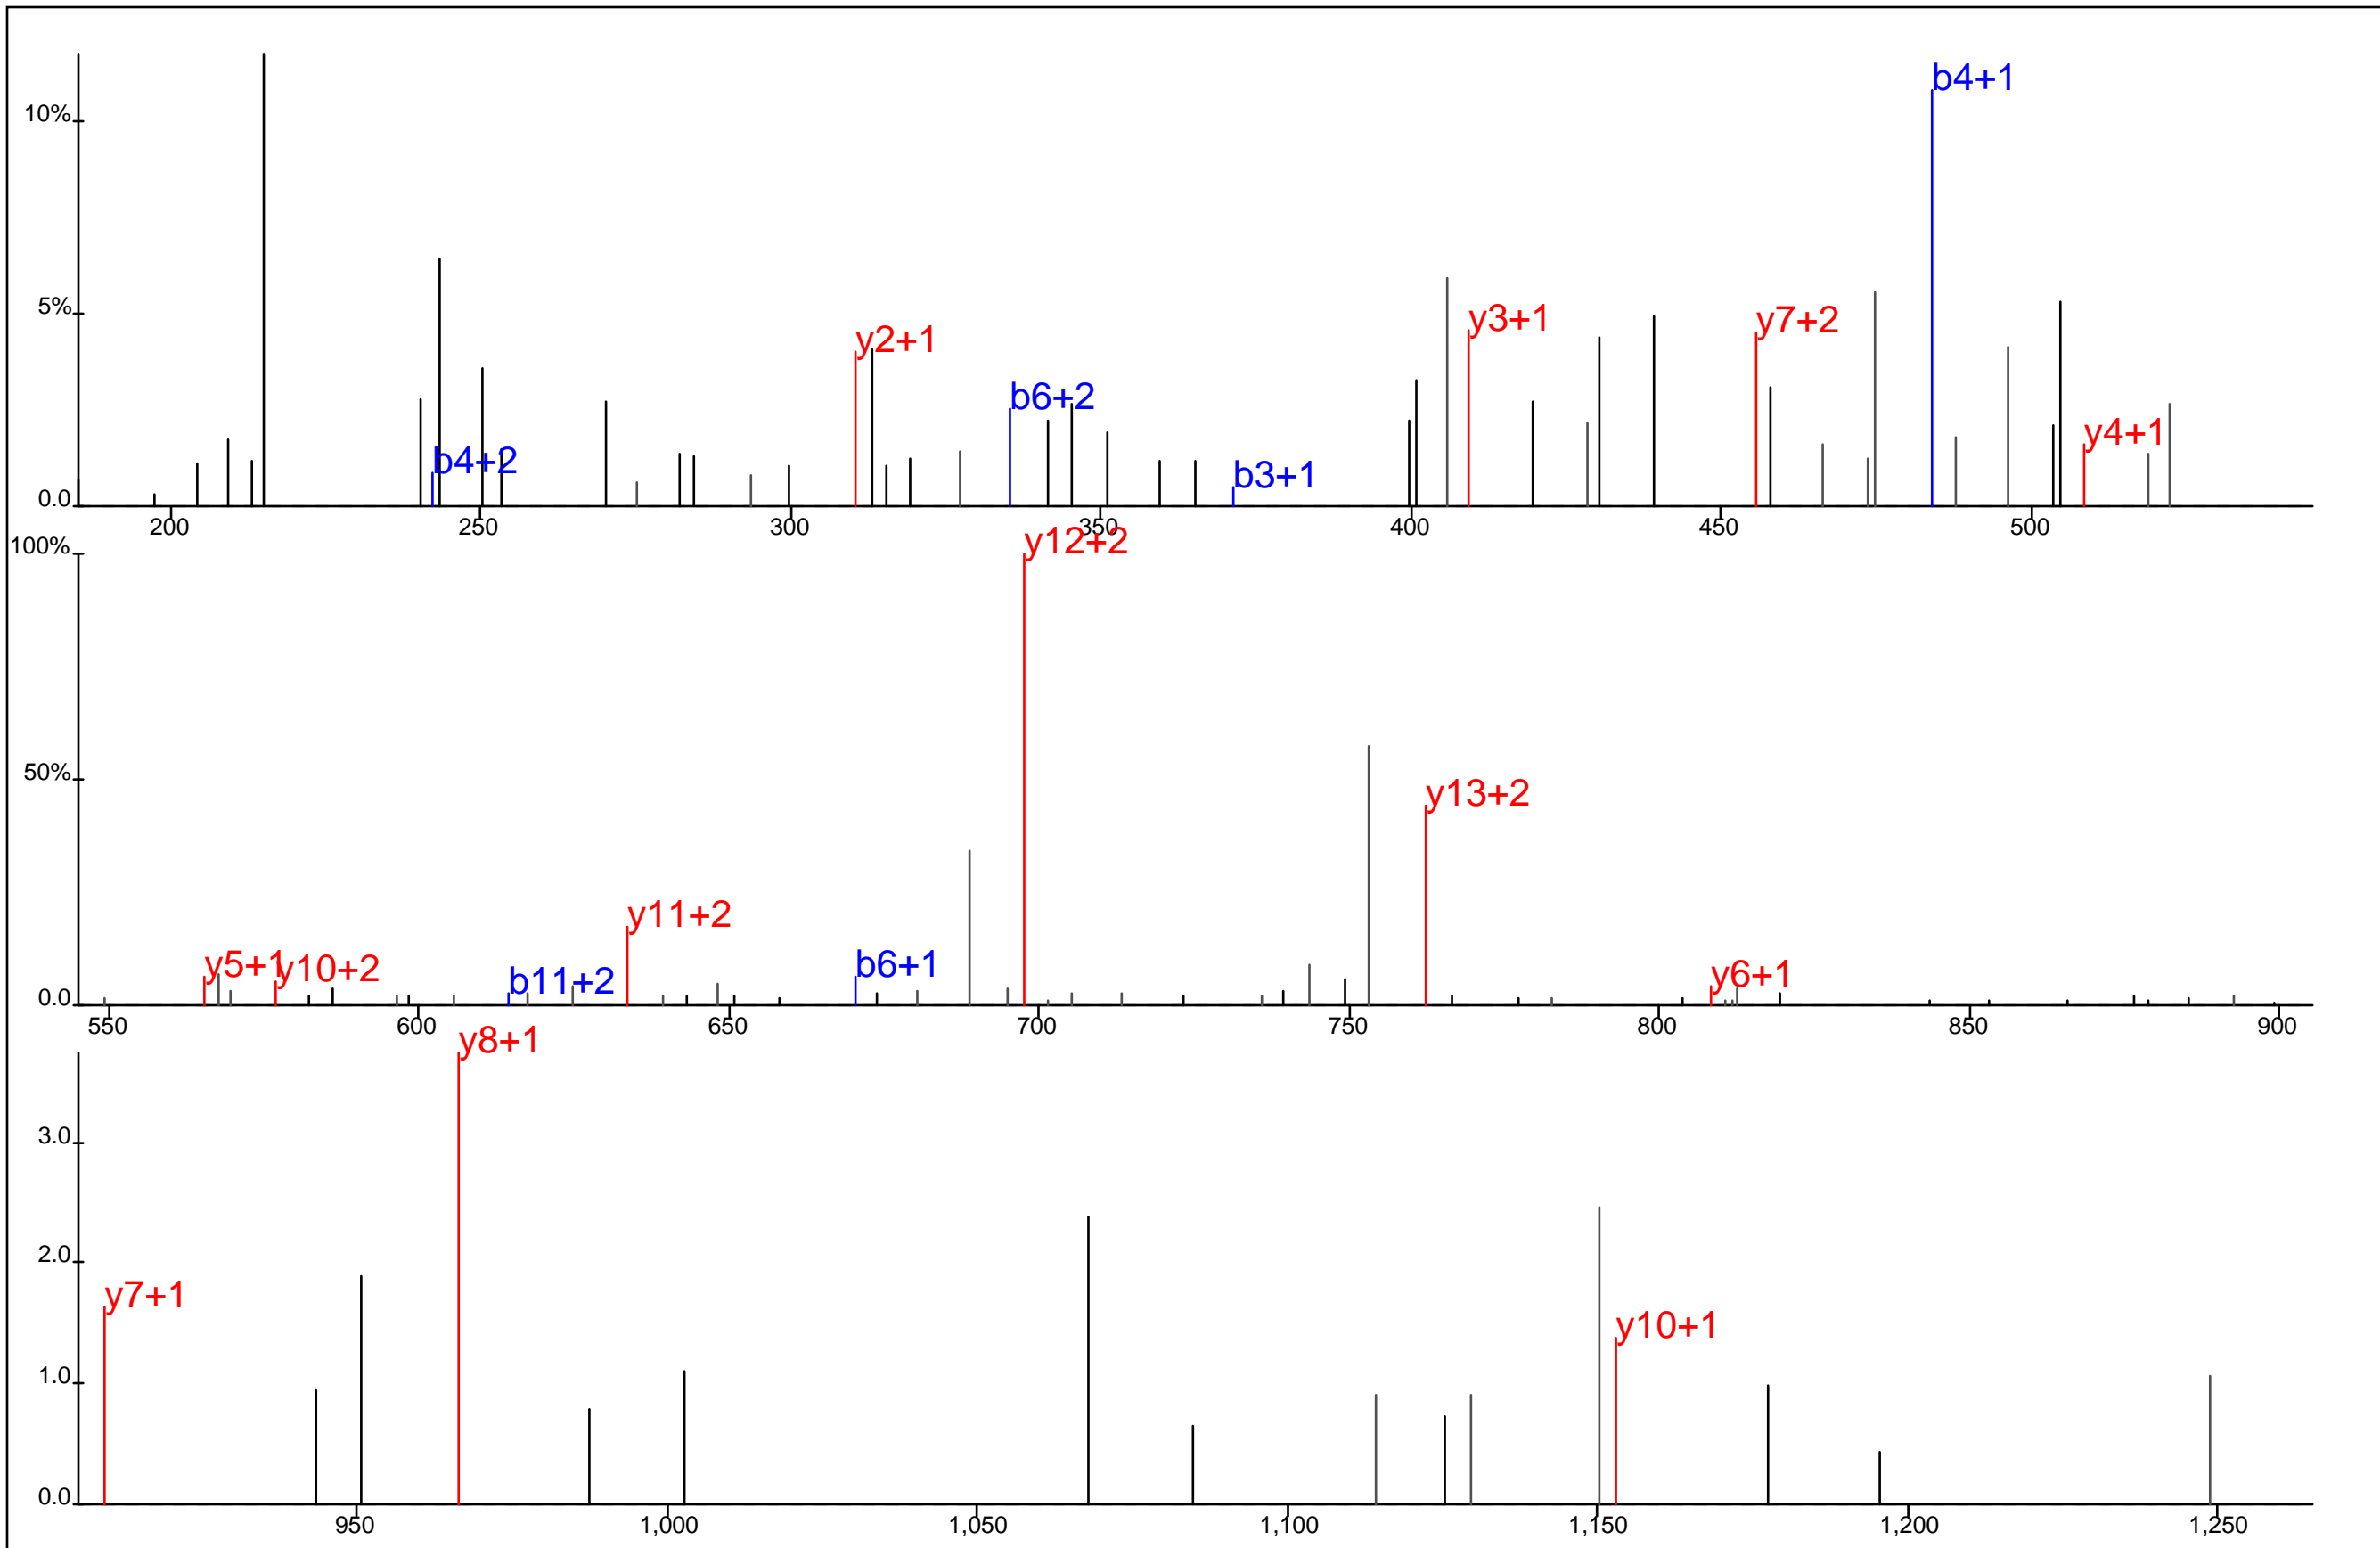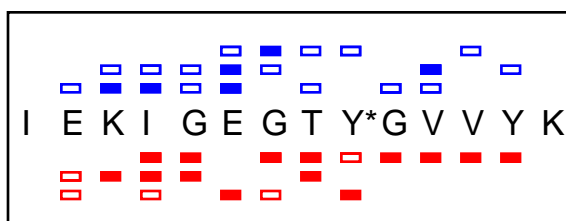

Protein Name: CDC2  
 gi Accession: 0  
 Precursor Mass: 545.9388+3  
 Delta Mass: 0.590 ppm  
 XCorr: 37.34



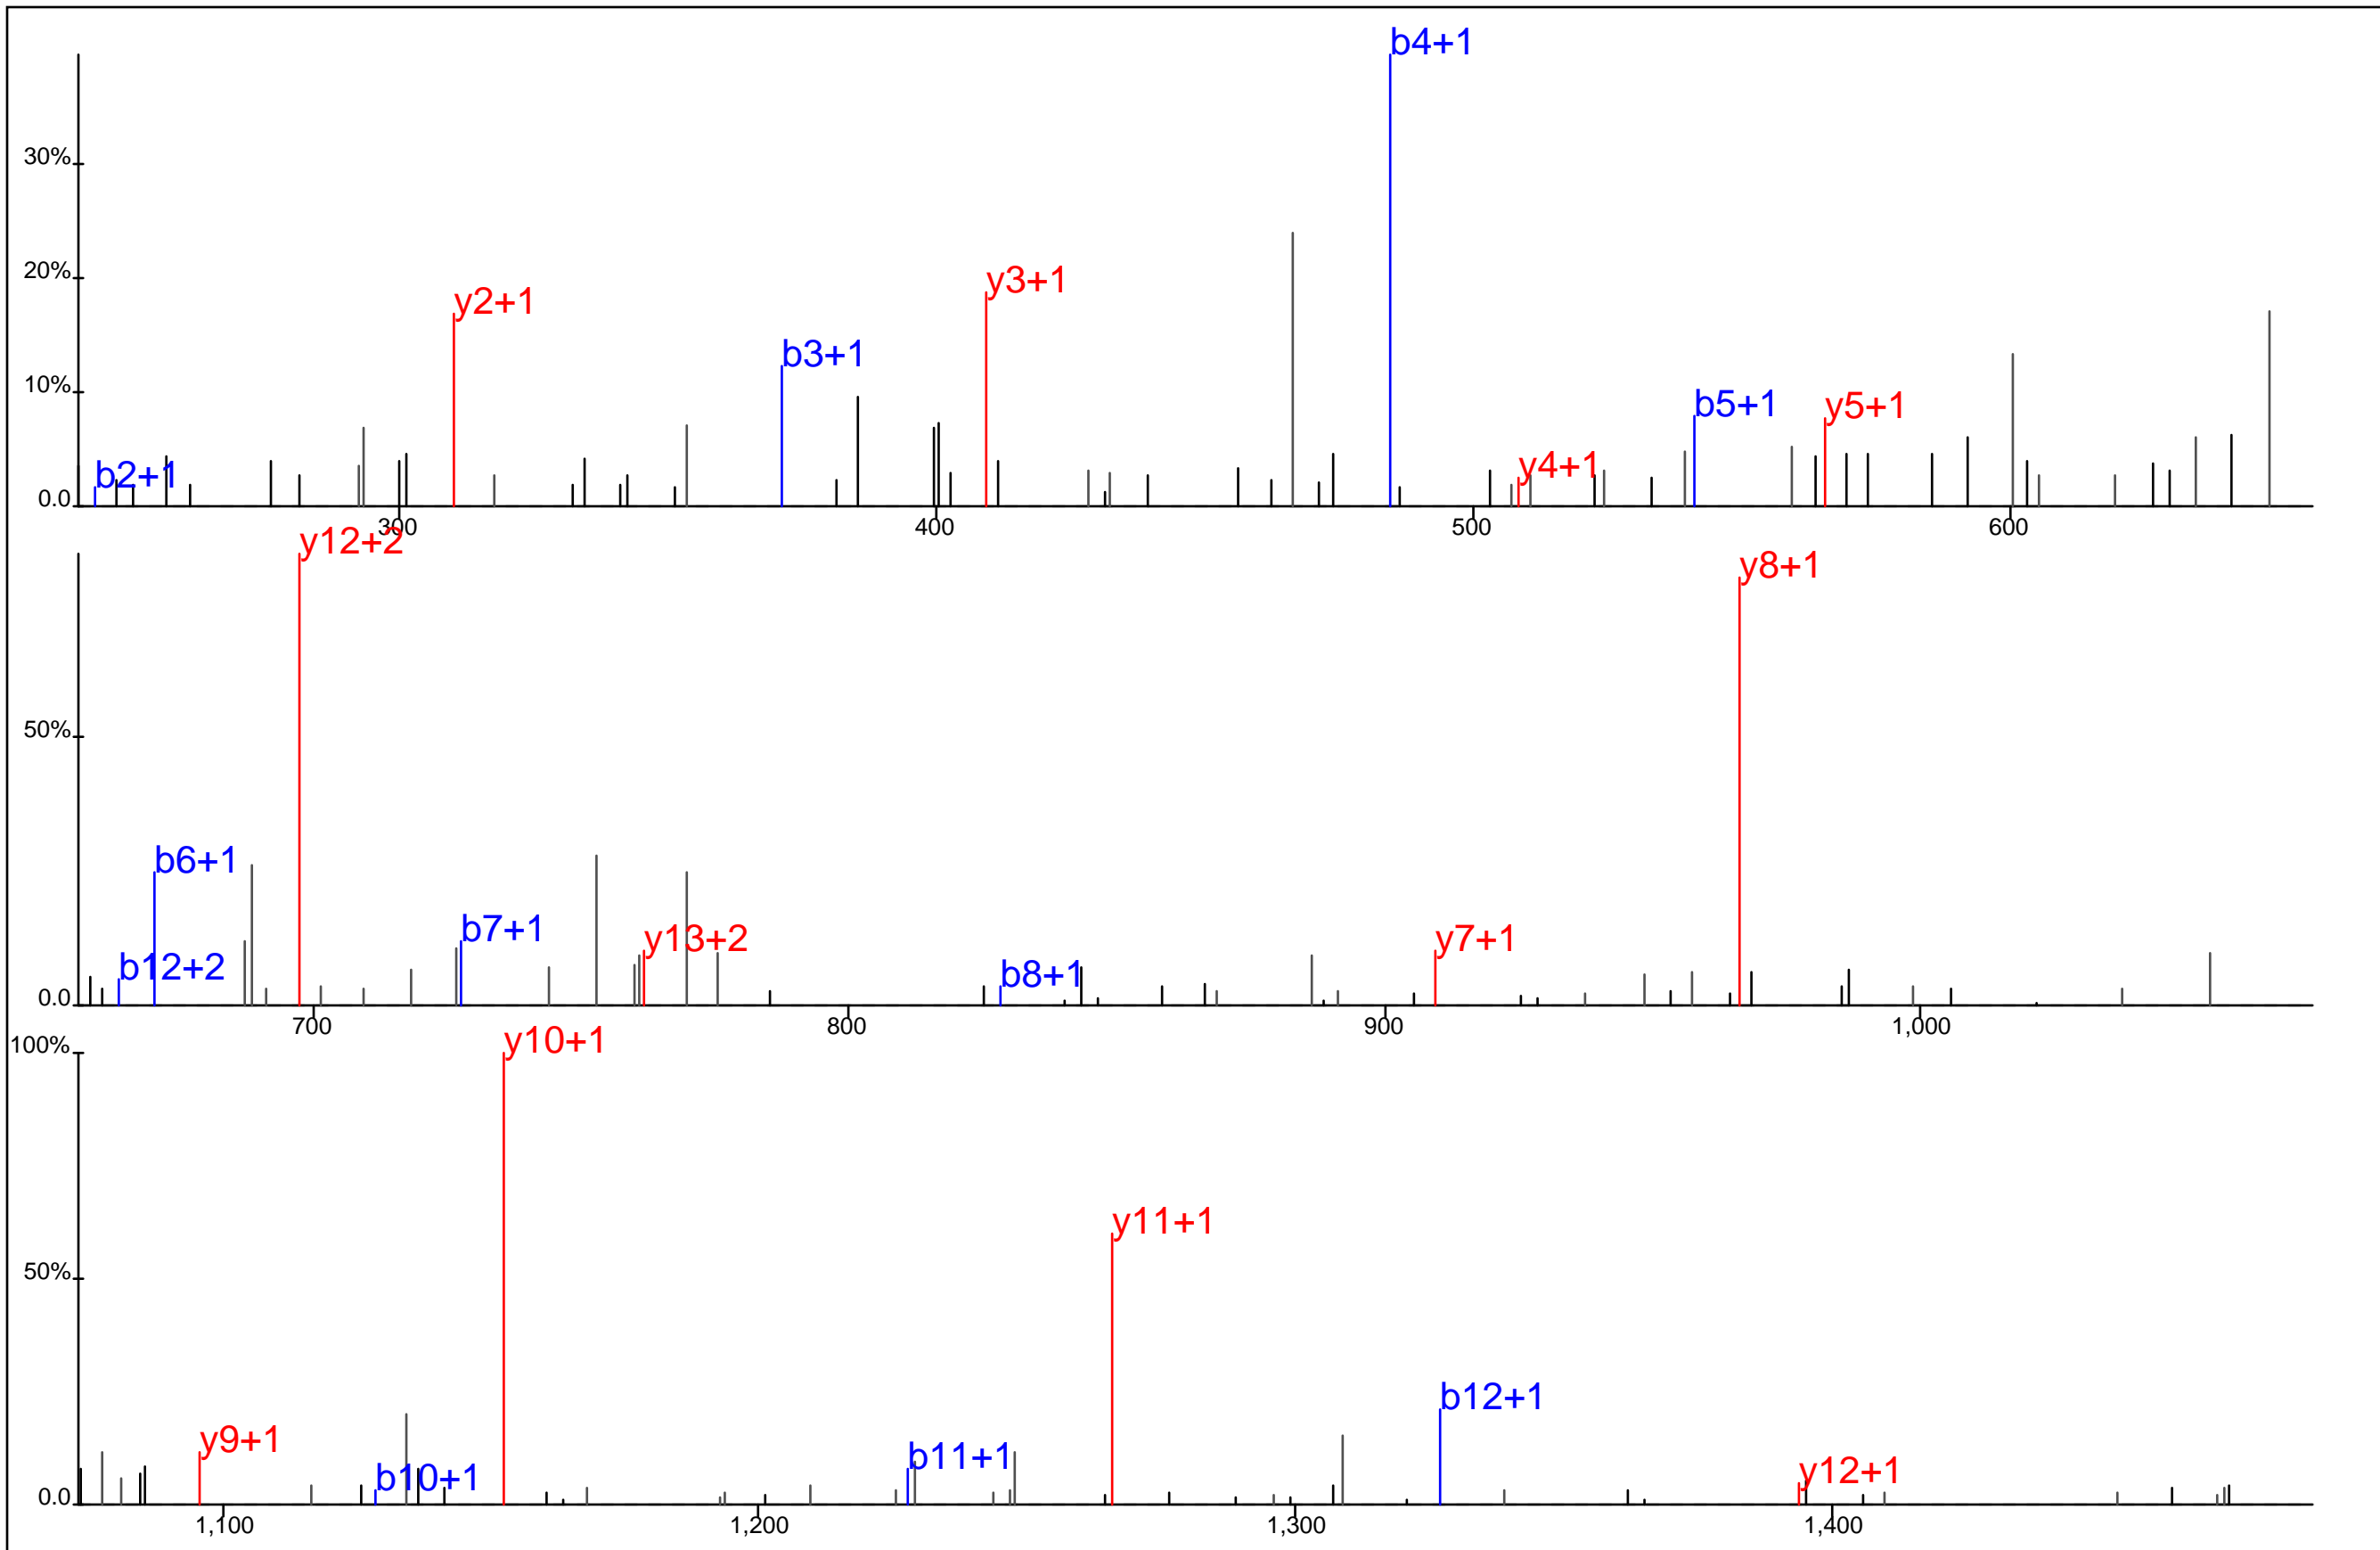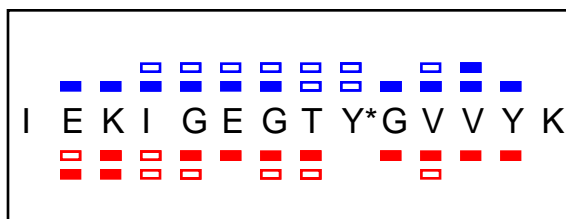

Protein Name: CDC2  
 gi Accession: 0  
 Precursor Mass: 818.4051+2  
 Delta Mass: 0.023 ppm  
 XCorr: 65.41

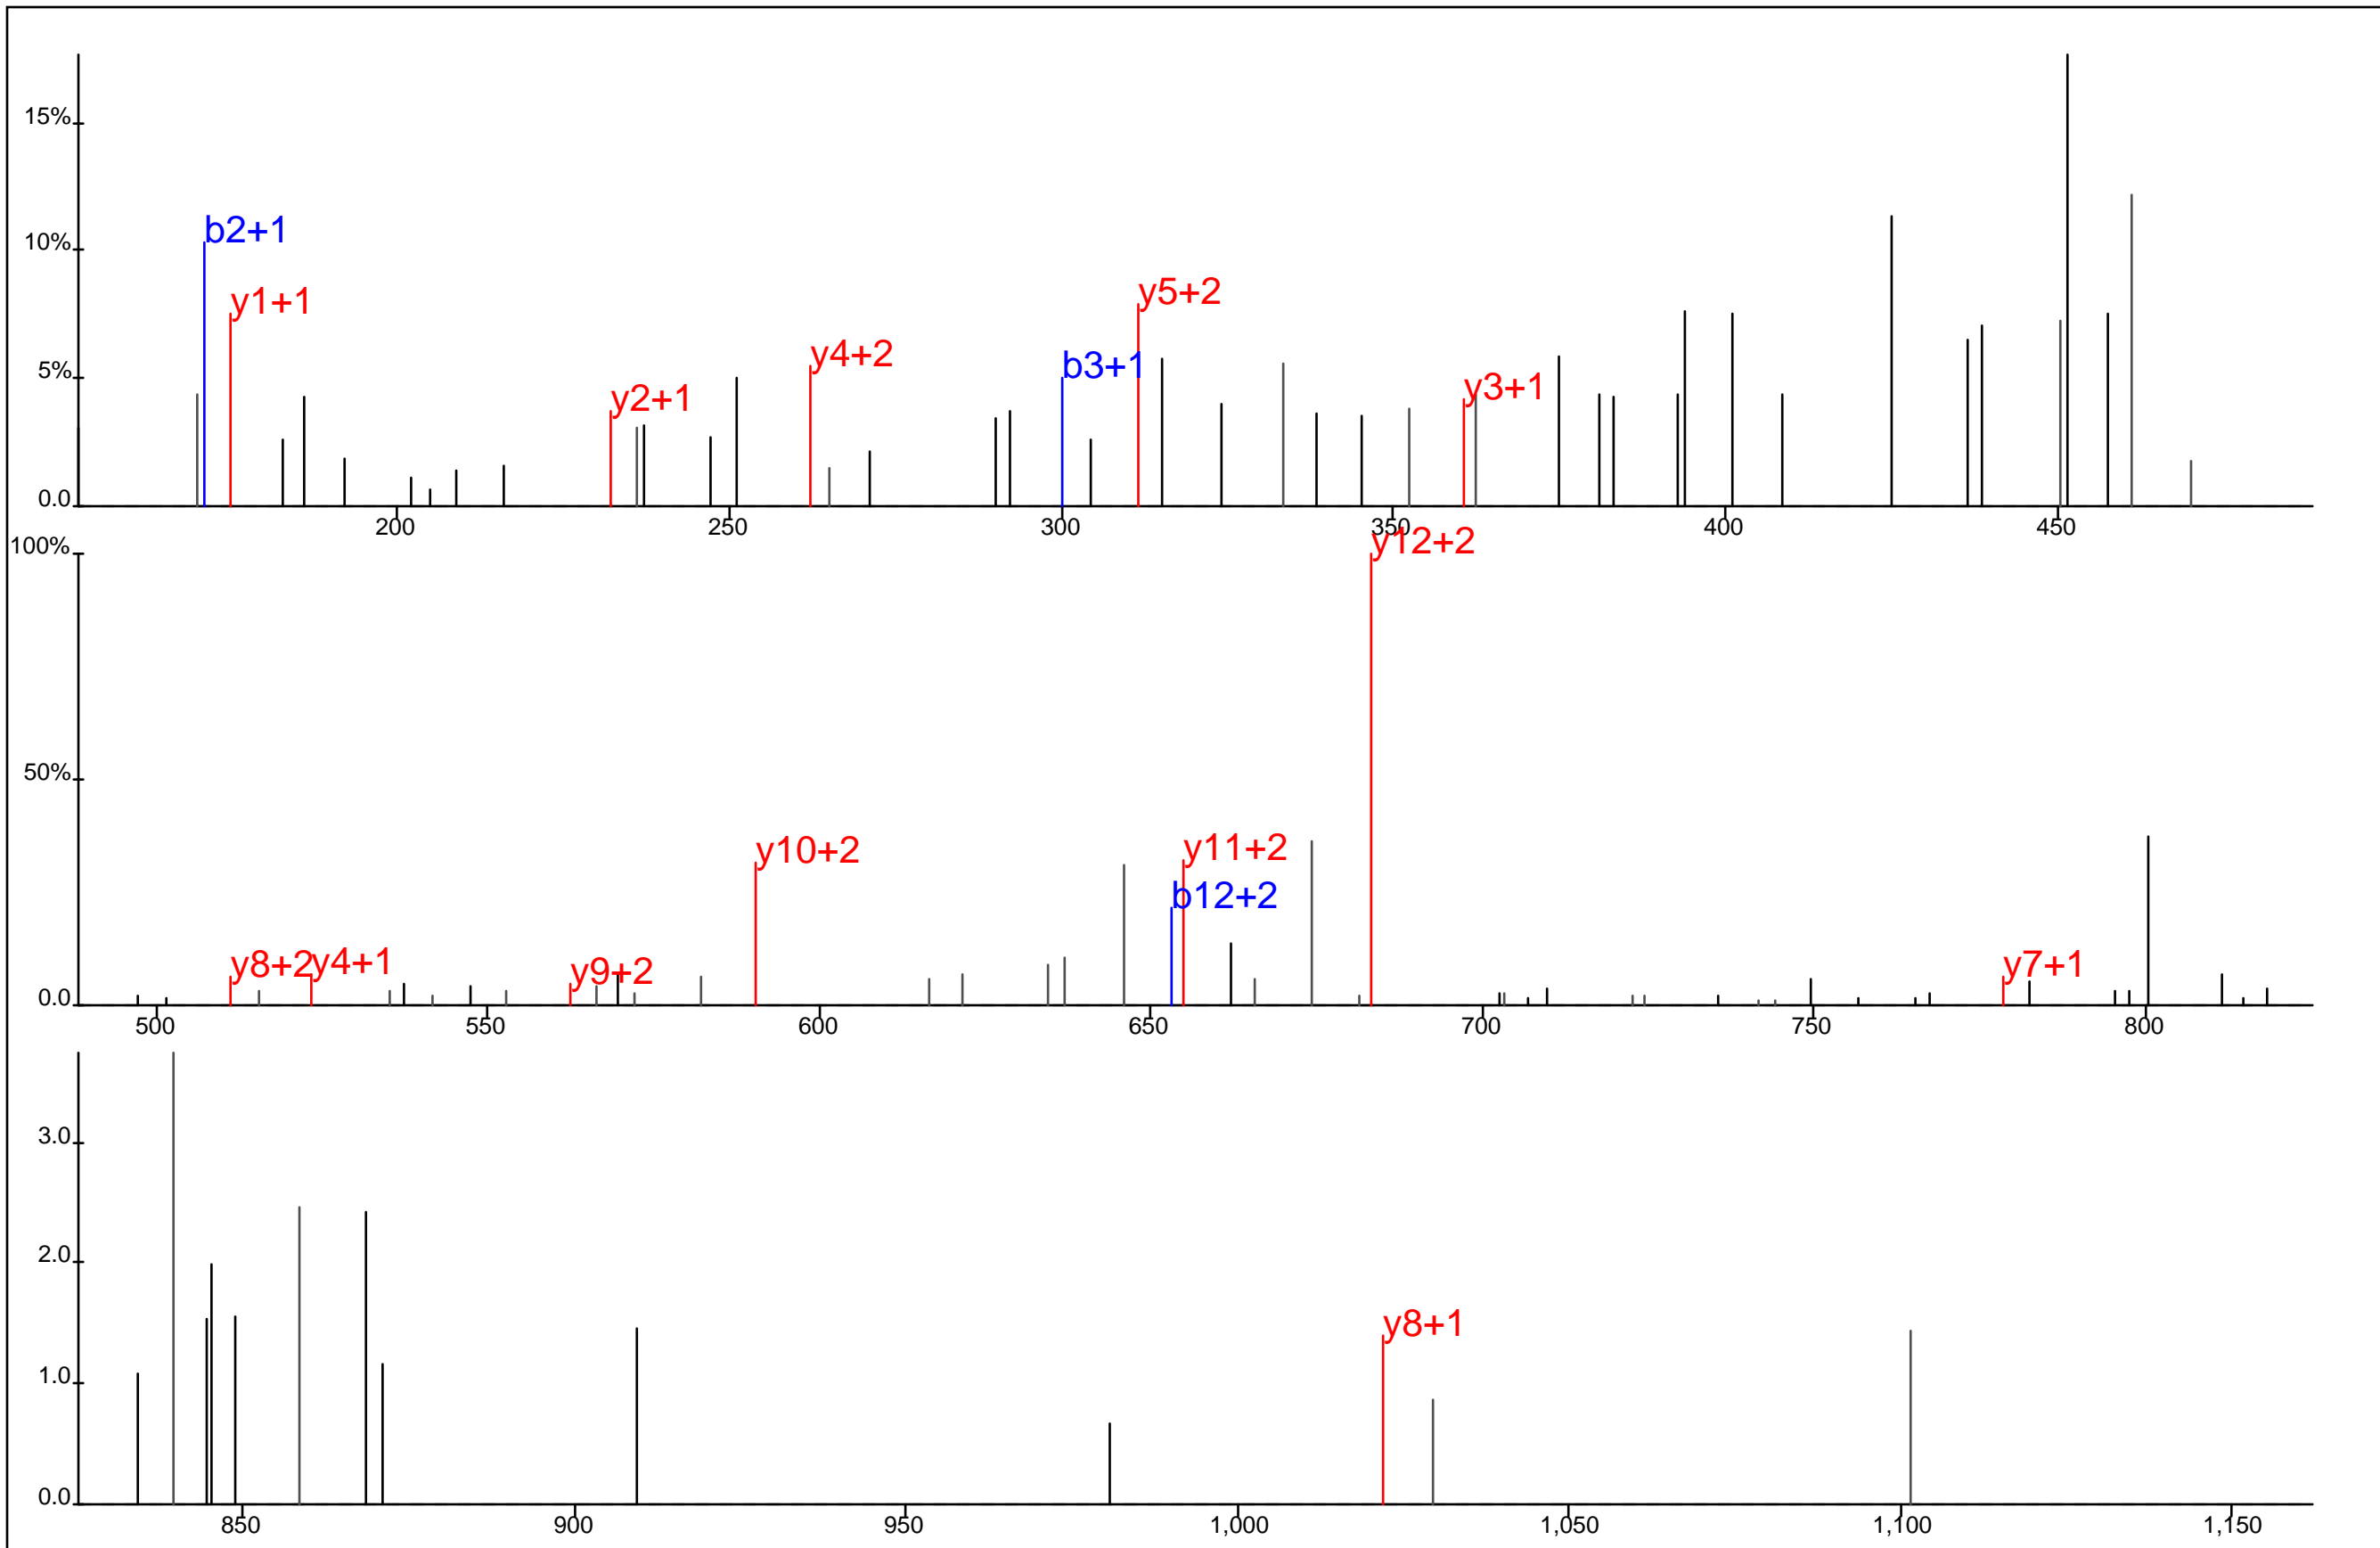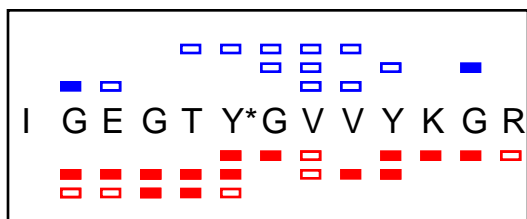

Protein Name: CDC2  
 gi Accession: 0  
 Precursor Mass: 493.5729+3  
 Delta Mass: 0.172 ppm  
 XCorr: 22.03



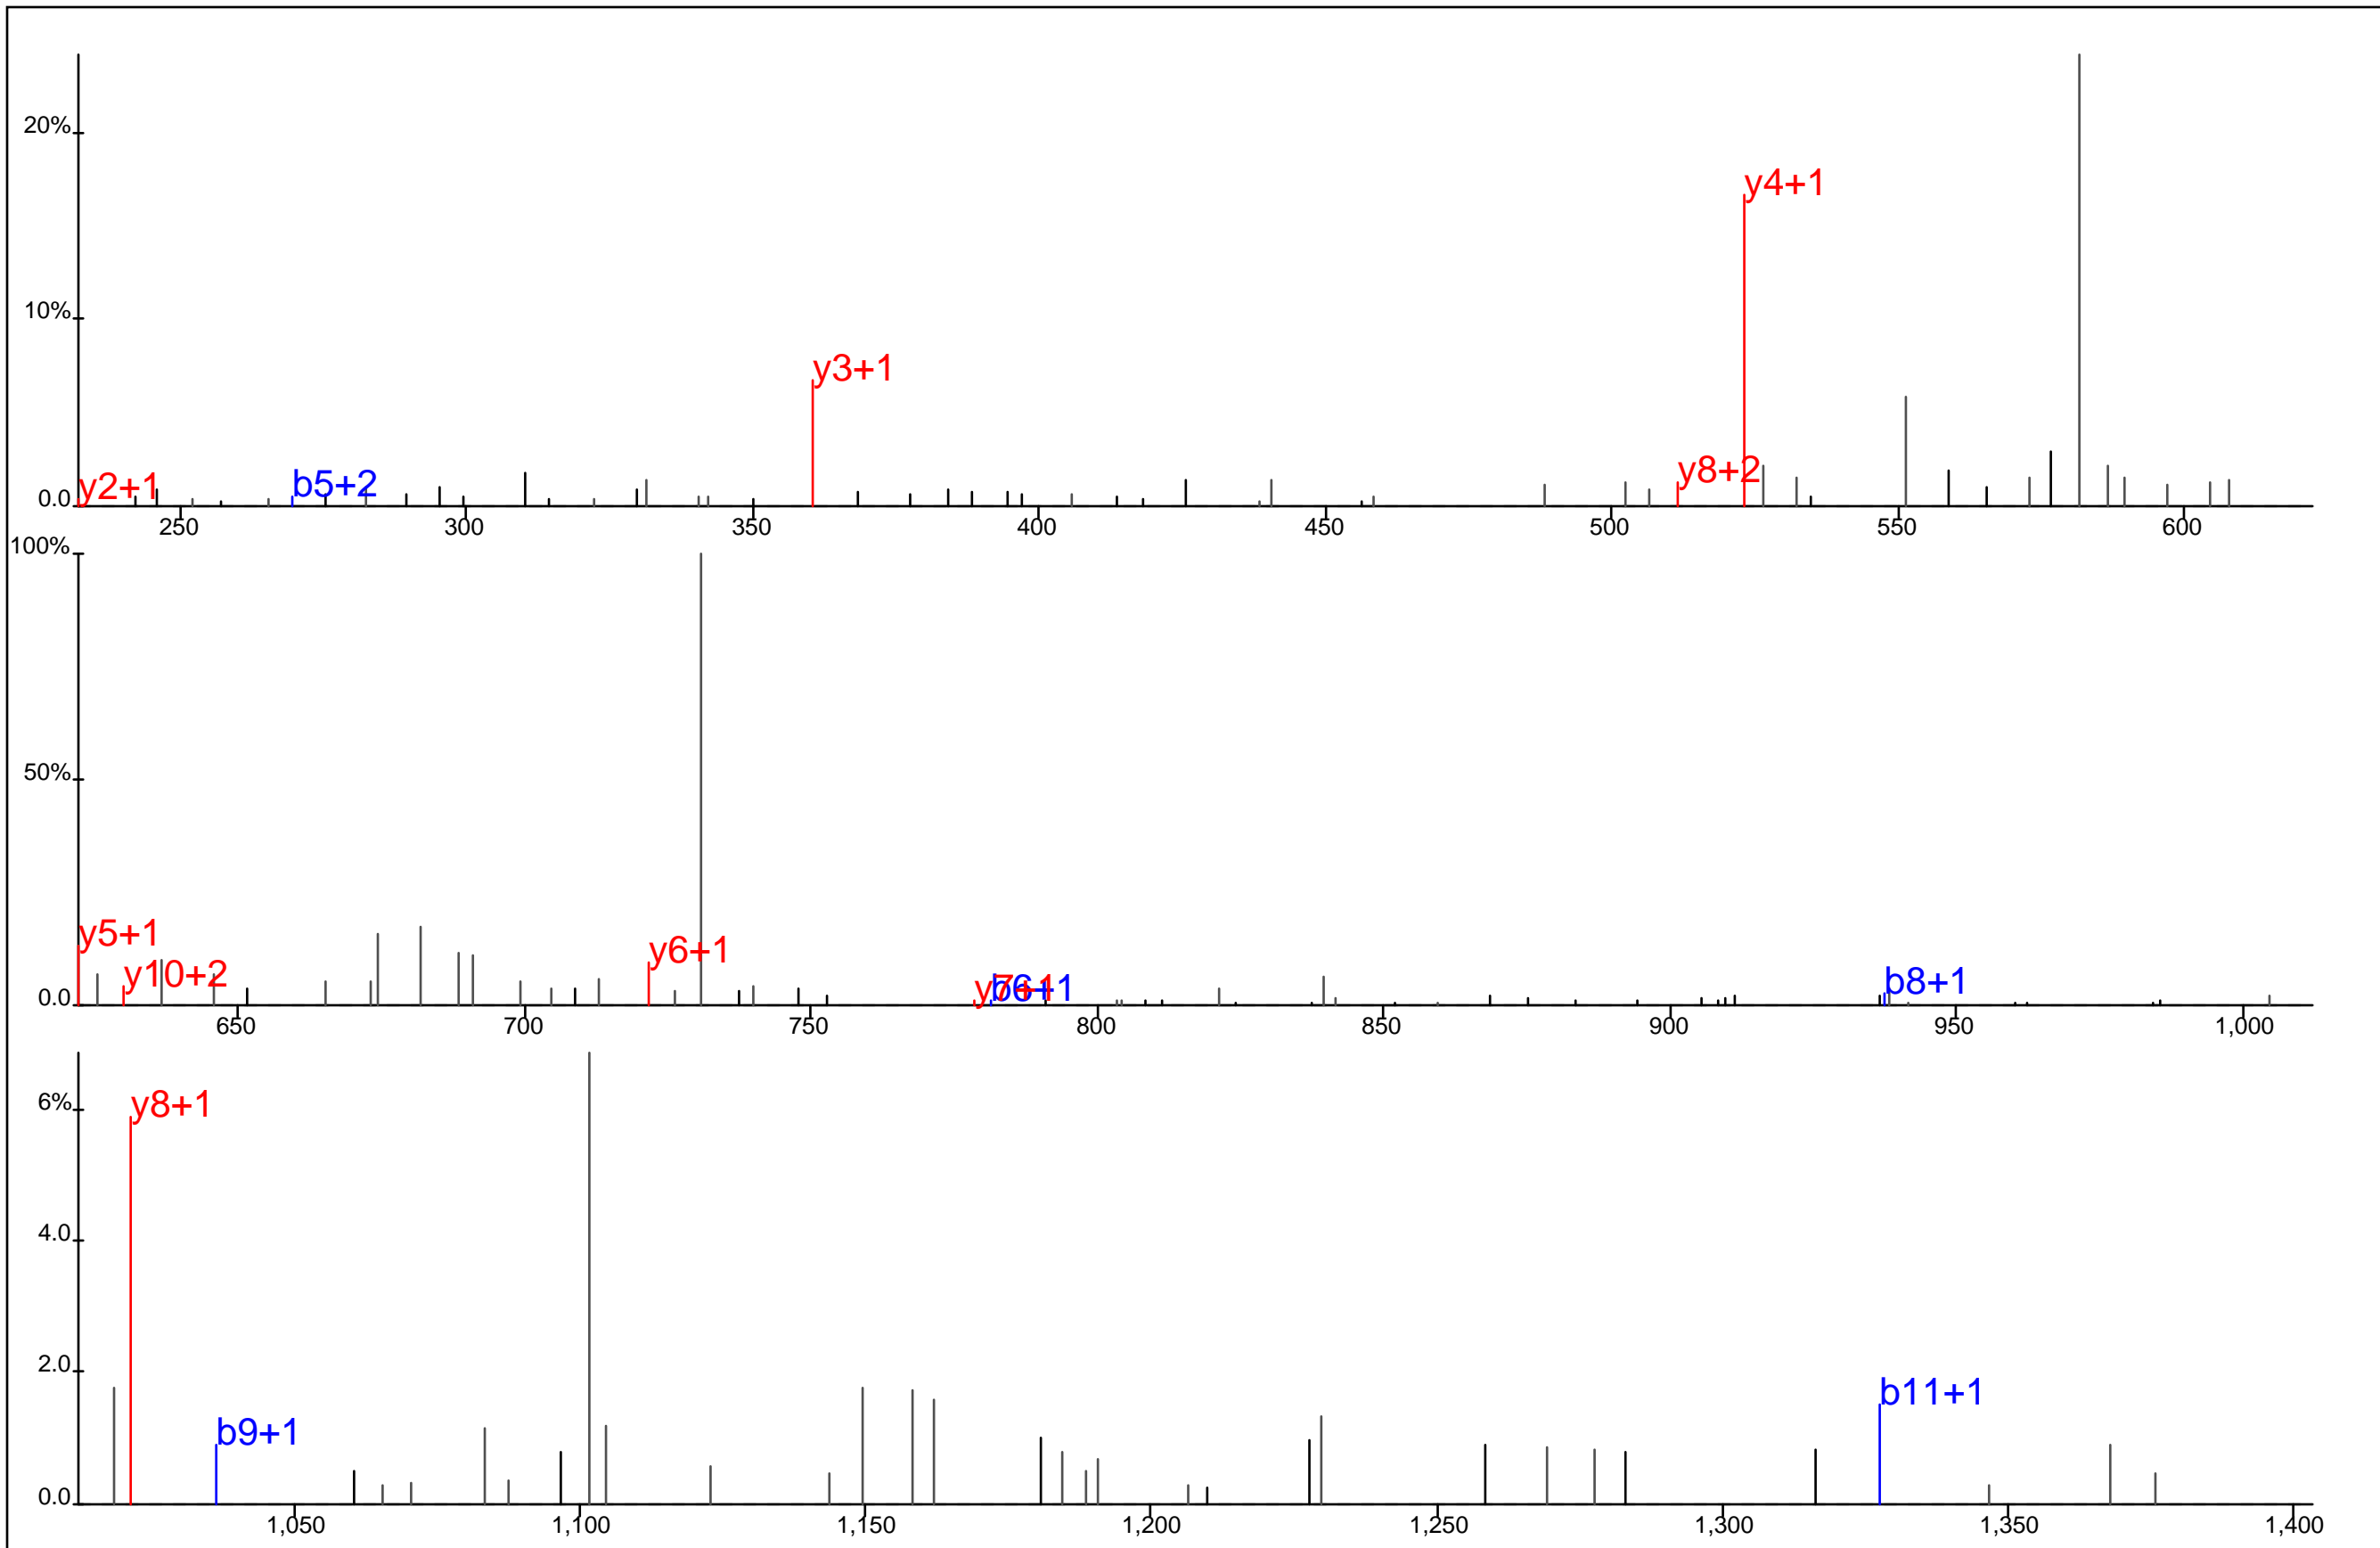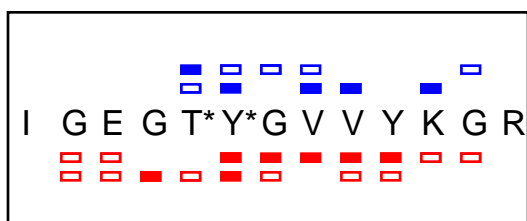

Protein Name: CDC2  
 gi Accession: 0  
 Precursor Mass: 779.8388+2  
 Delta Mass: 0.060 ppm  
 XCorr: 26.57

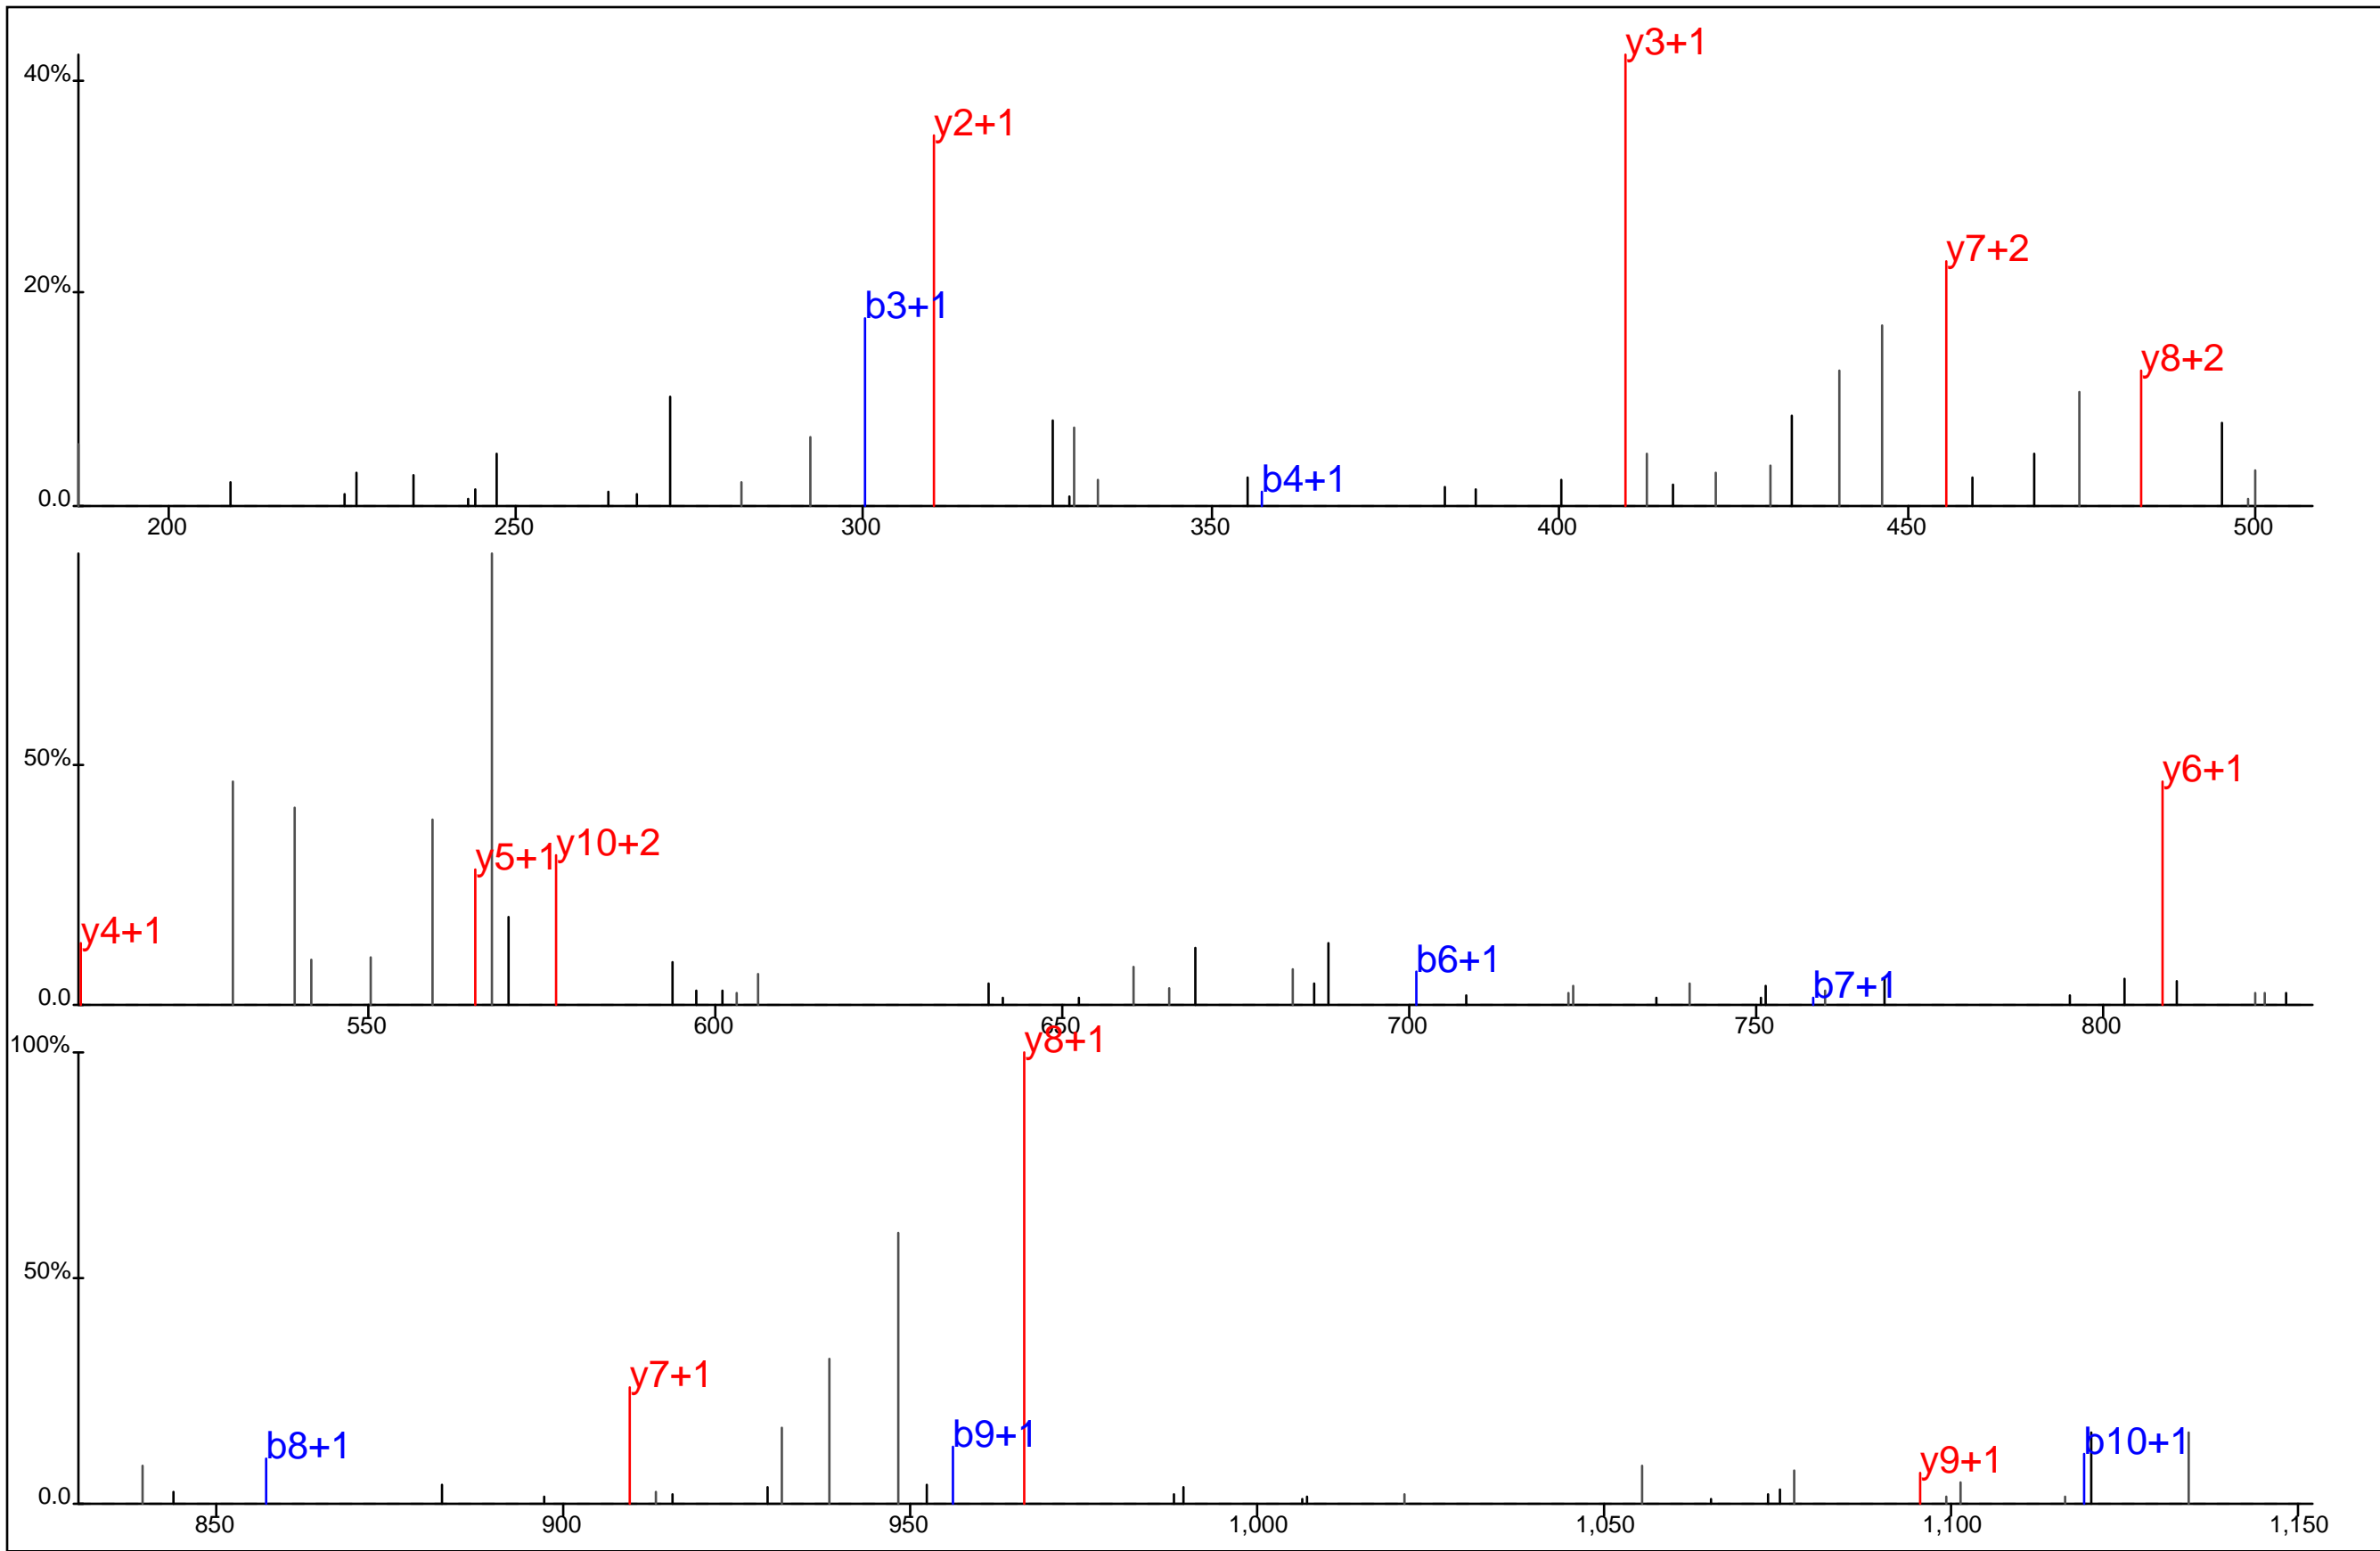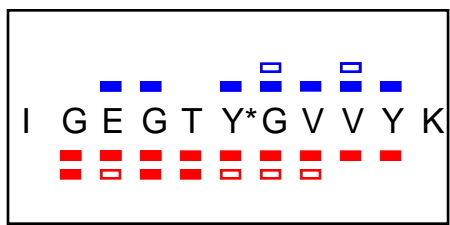

Protein Name: CDC2  
 gi Accession: 0  
 Precursor Mass: 633.2938+2  
 Delta Mass: 0.864 ppm  
 XCorr: 41.13

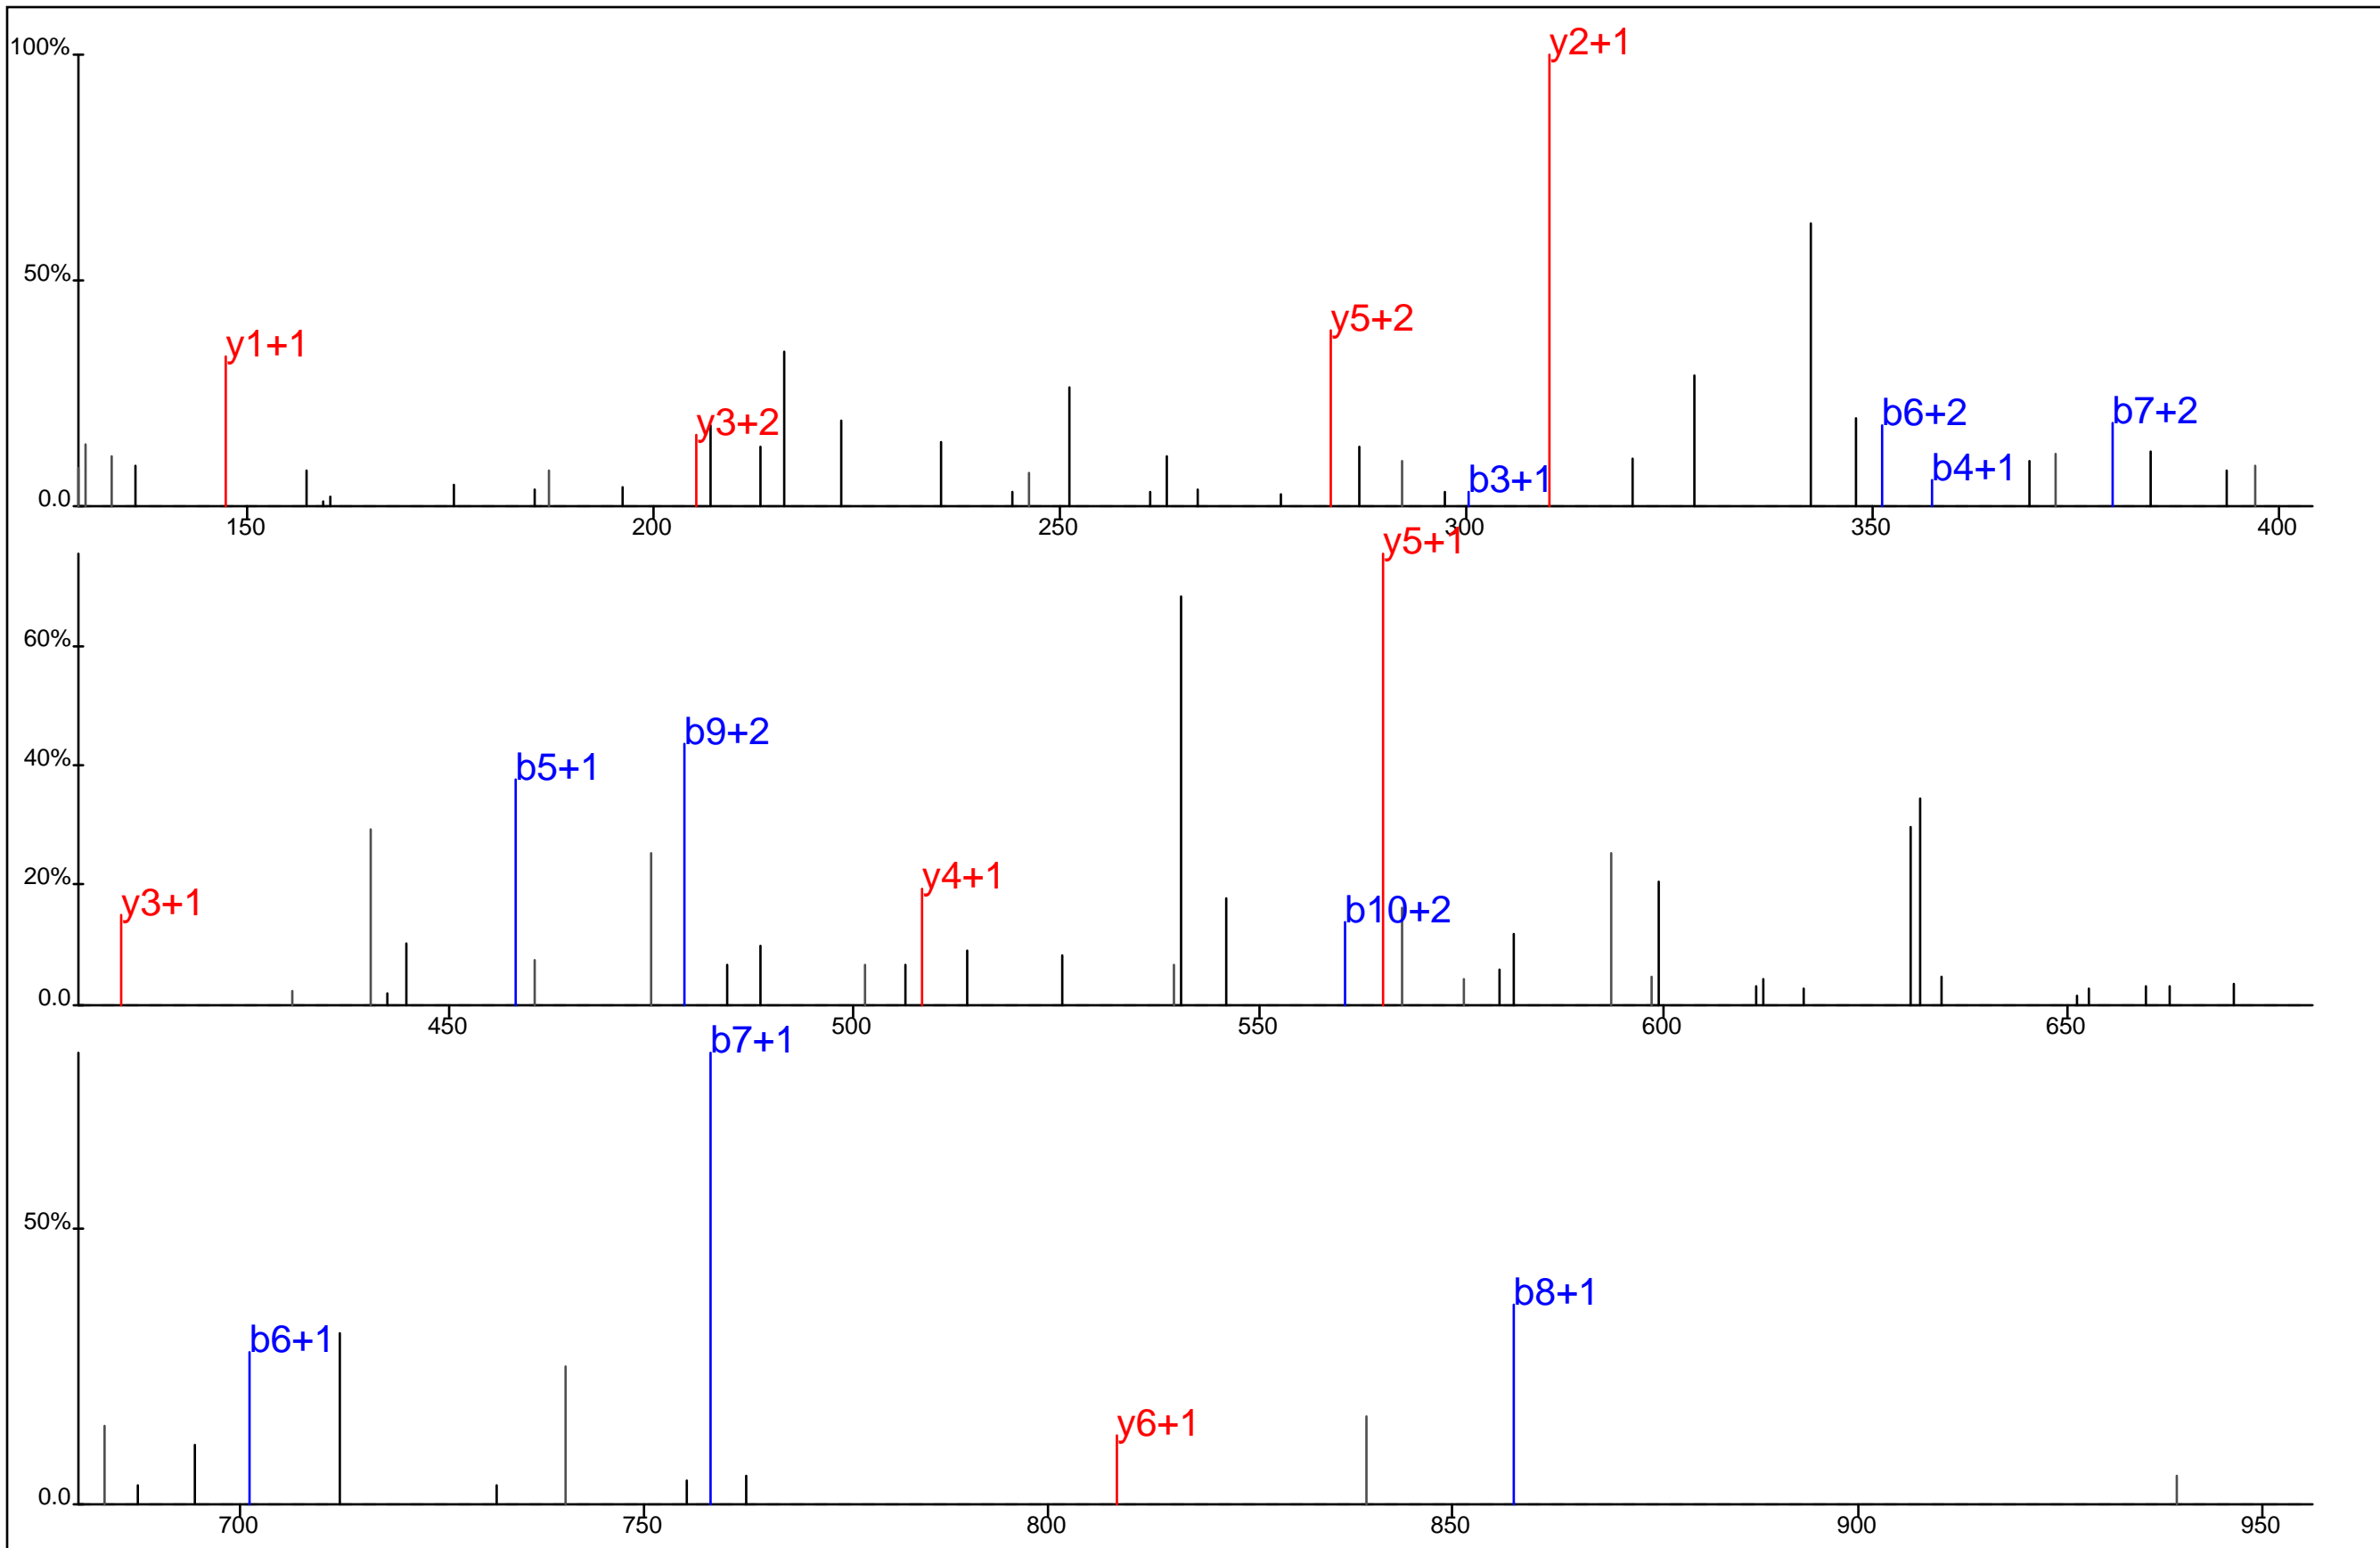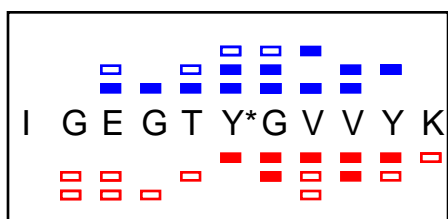

Protein Name: CDC2  
 gi Accession: 0  
 Precursor Mass: 422.5316+3  
 Delta Mass: 0.826 ppm  
 XCorr: 30.7

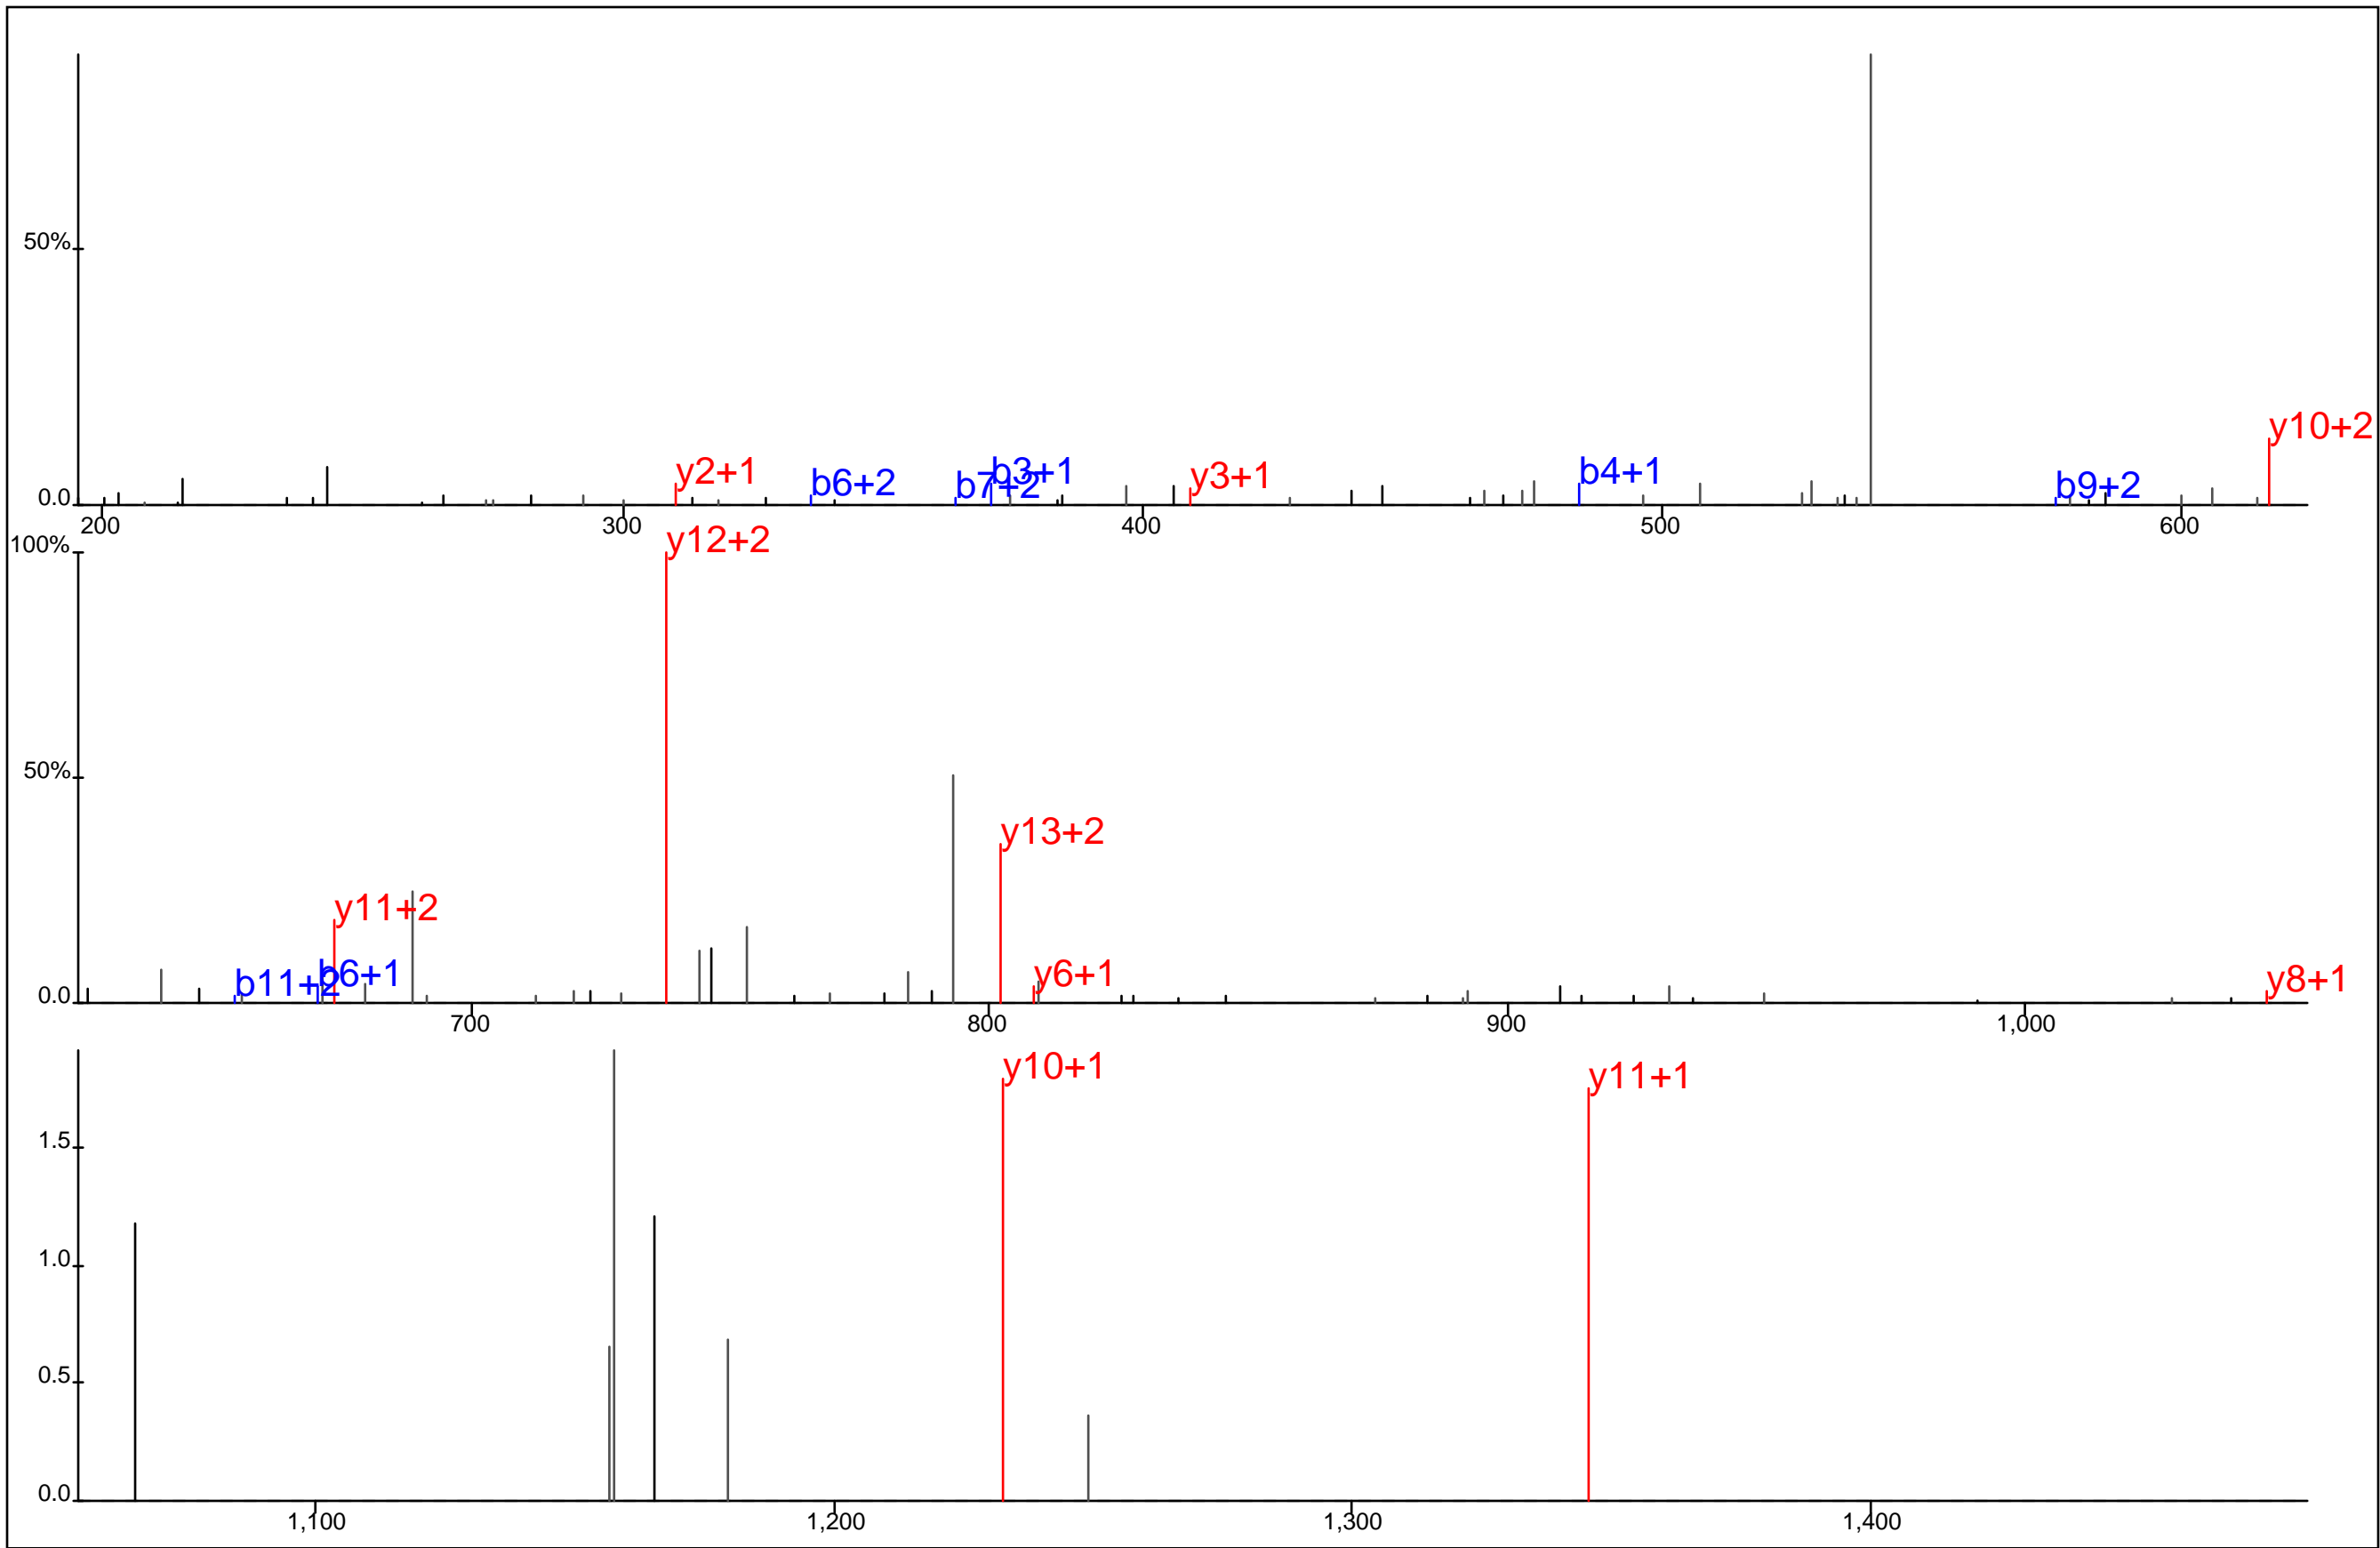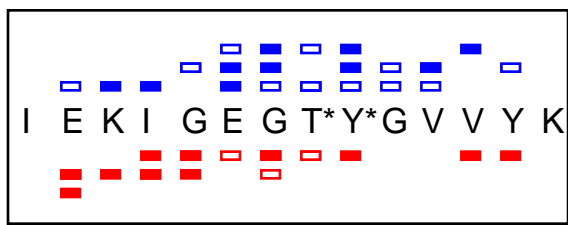

Protein Name: CDC2  
 gi Accession: 0  
 Precursor Mass: 572.5941+3  
 Delta Mass: 0.860 ppm  
 XCorr: 22.35

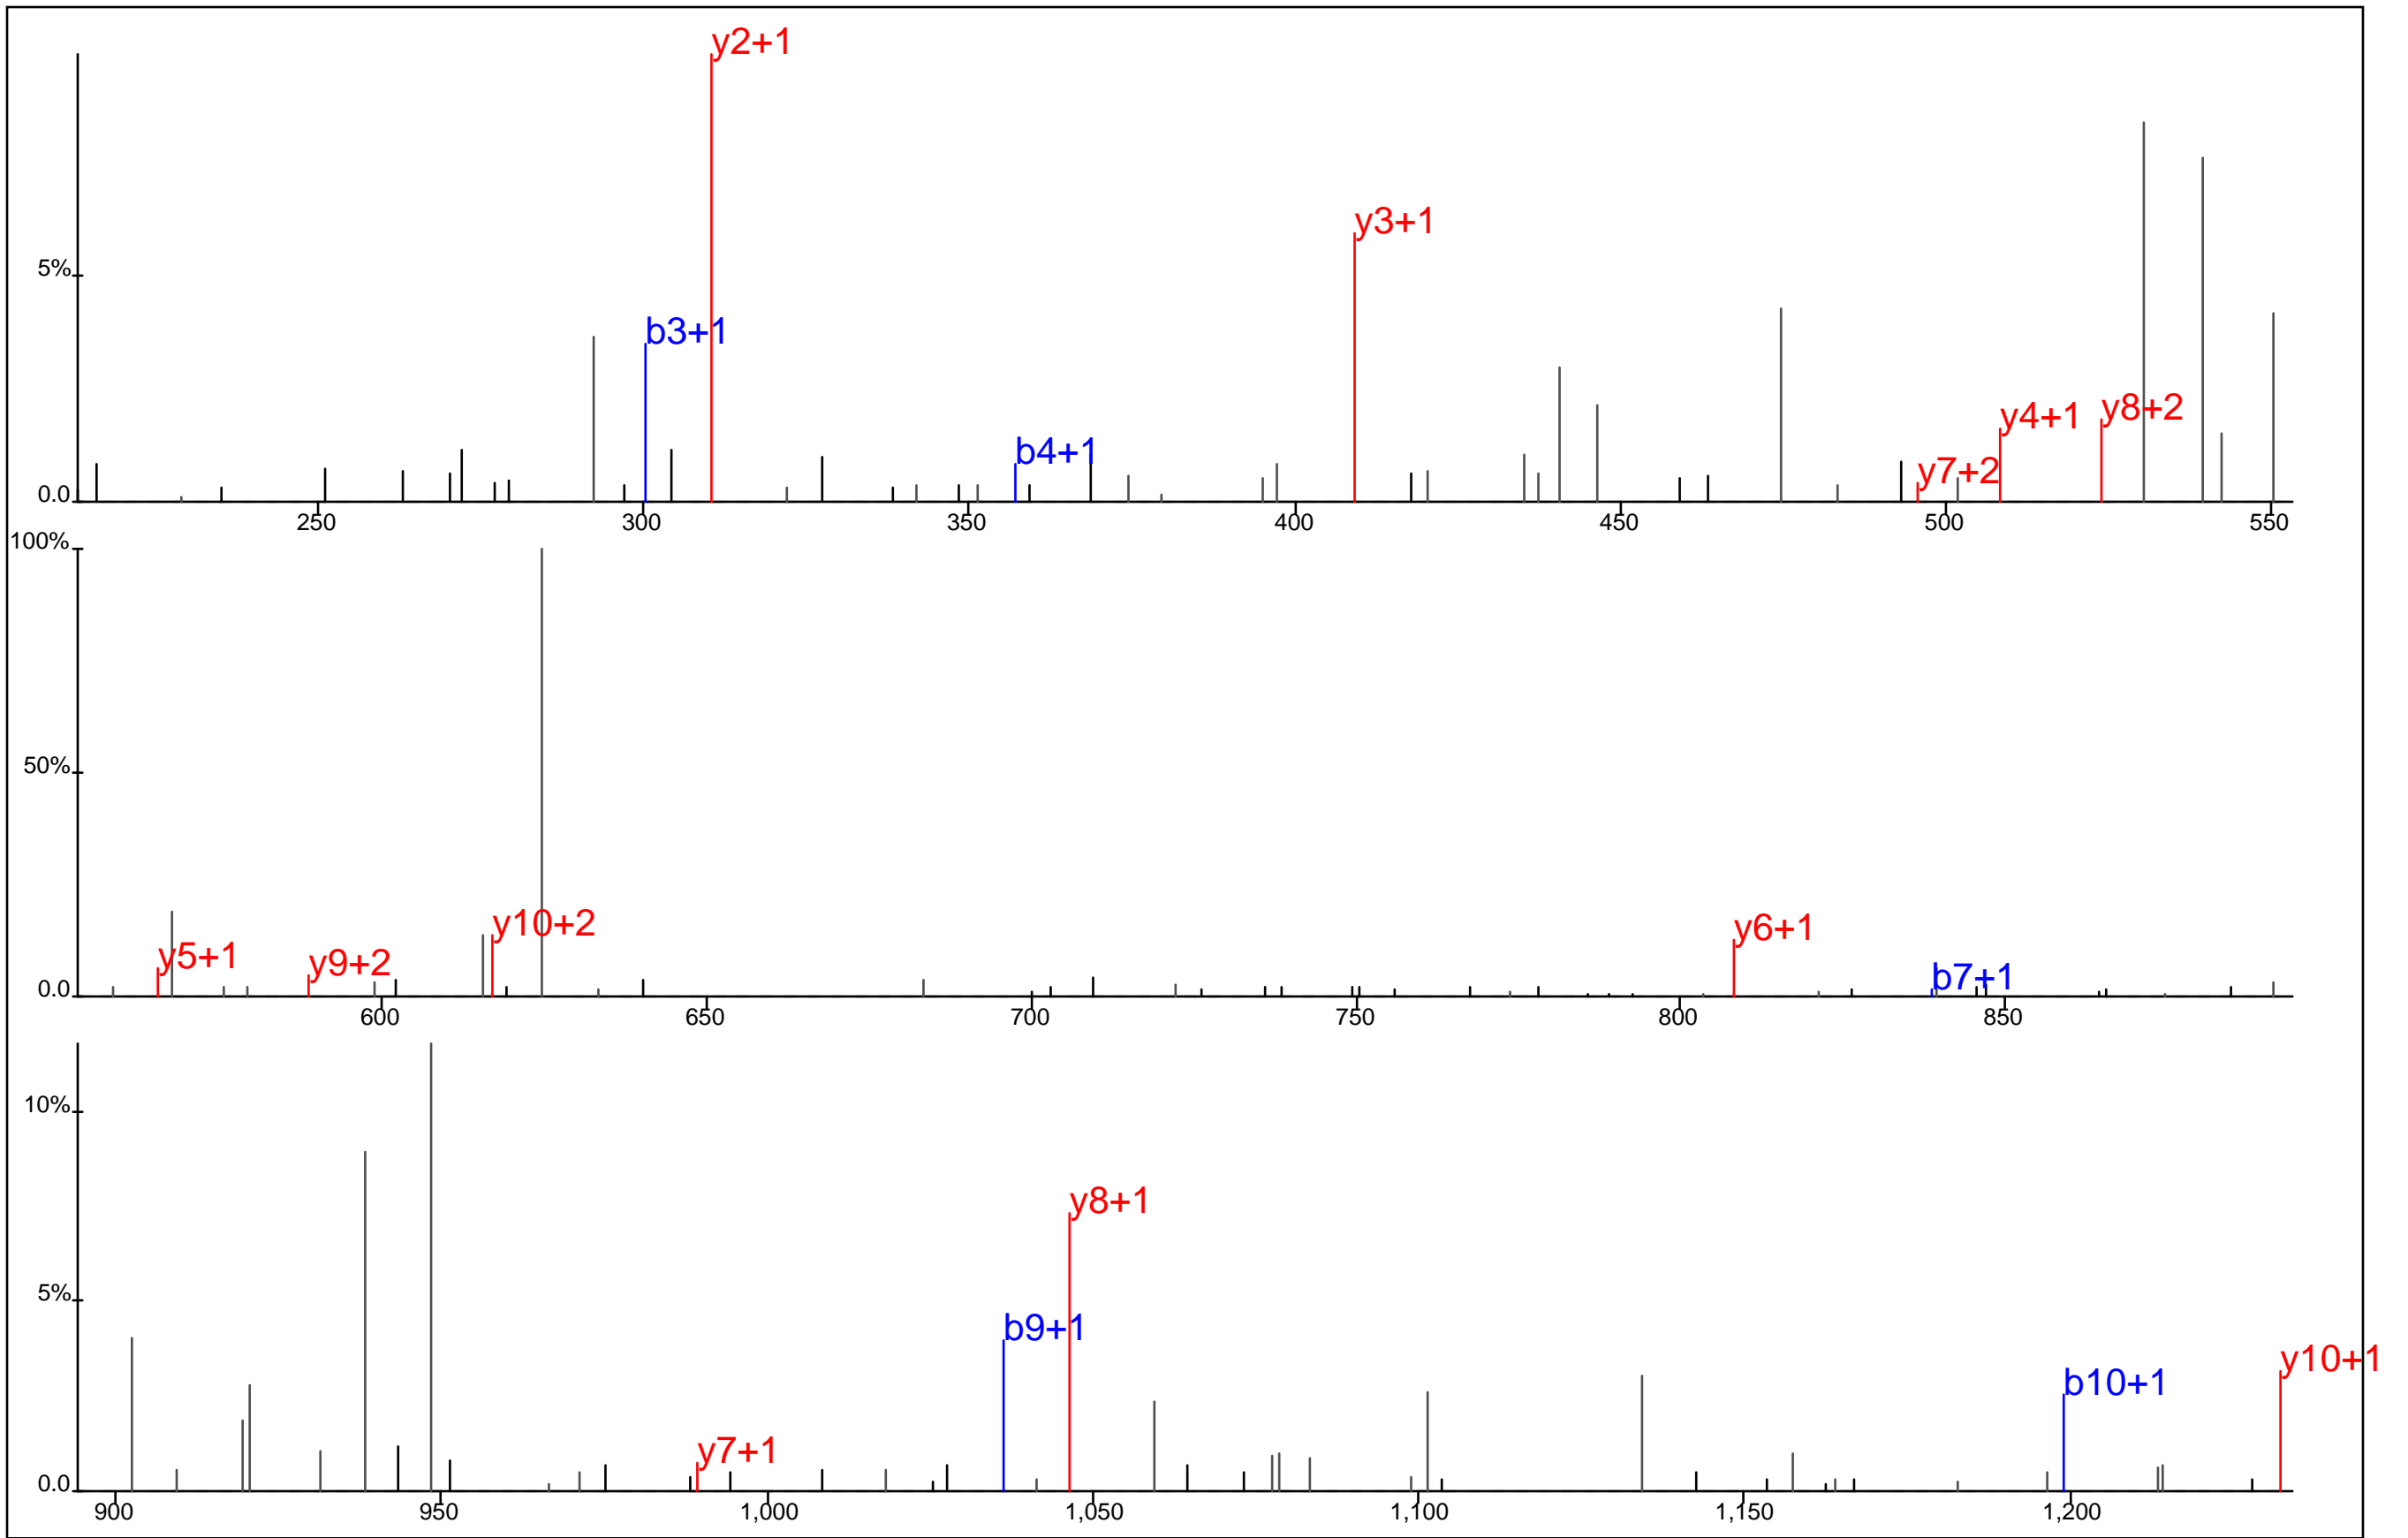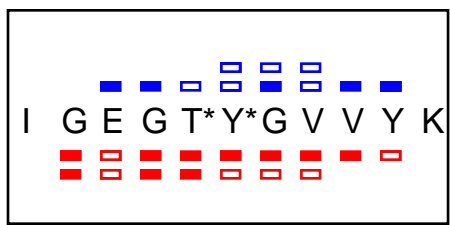

Protein Name: CDC2  
 gi Accession: 0  
 Precursor Mass: 673.2773+2  
 Delta Mass: 0.186 ppm  
 XCorr: 46.44



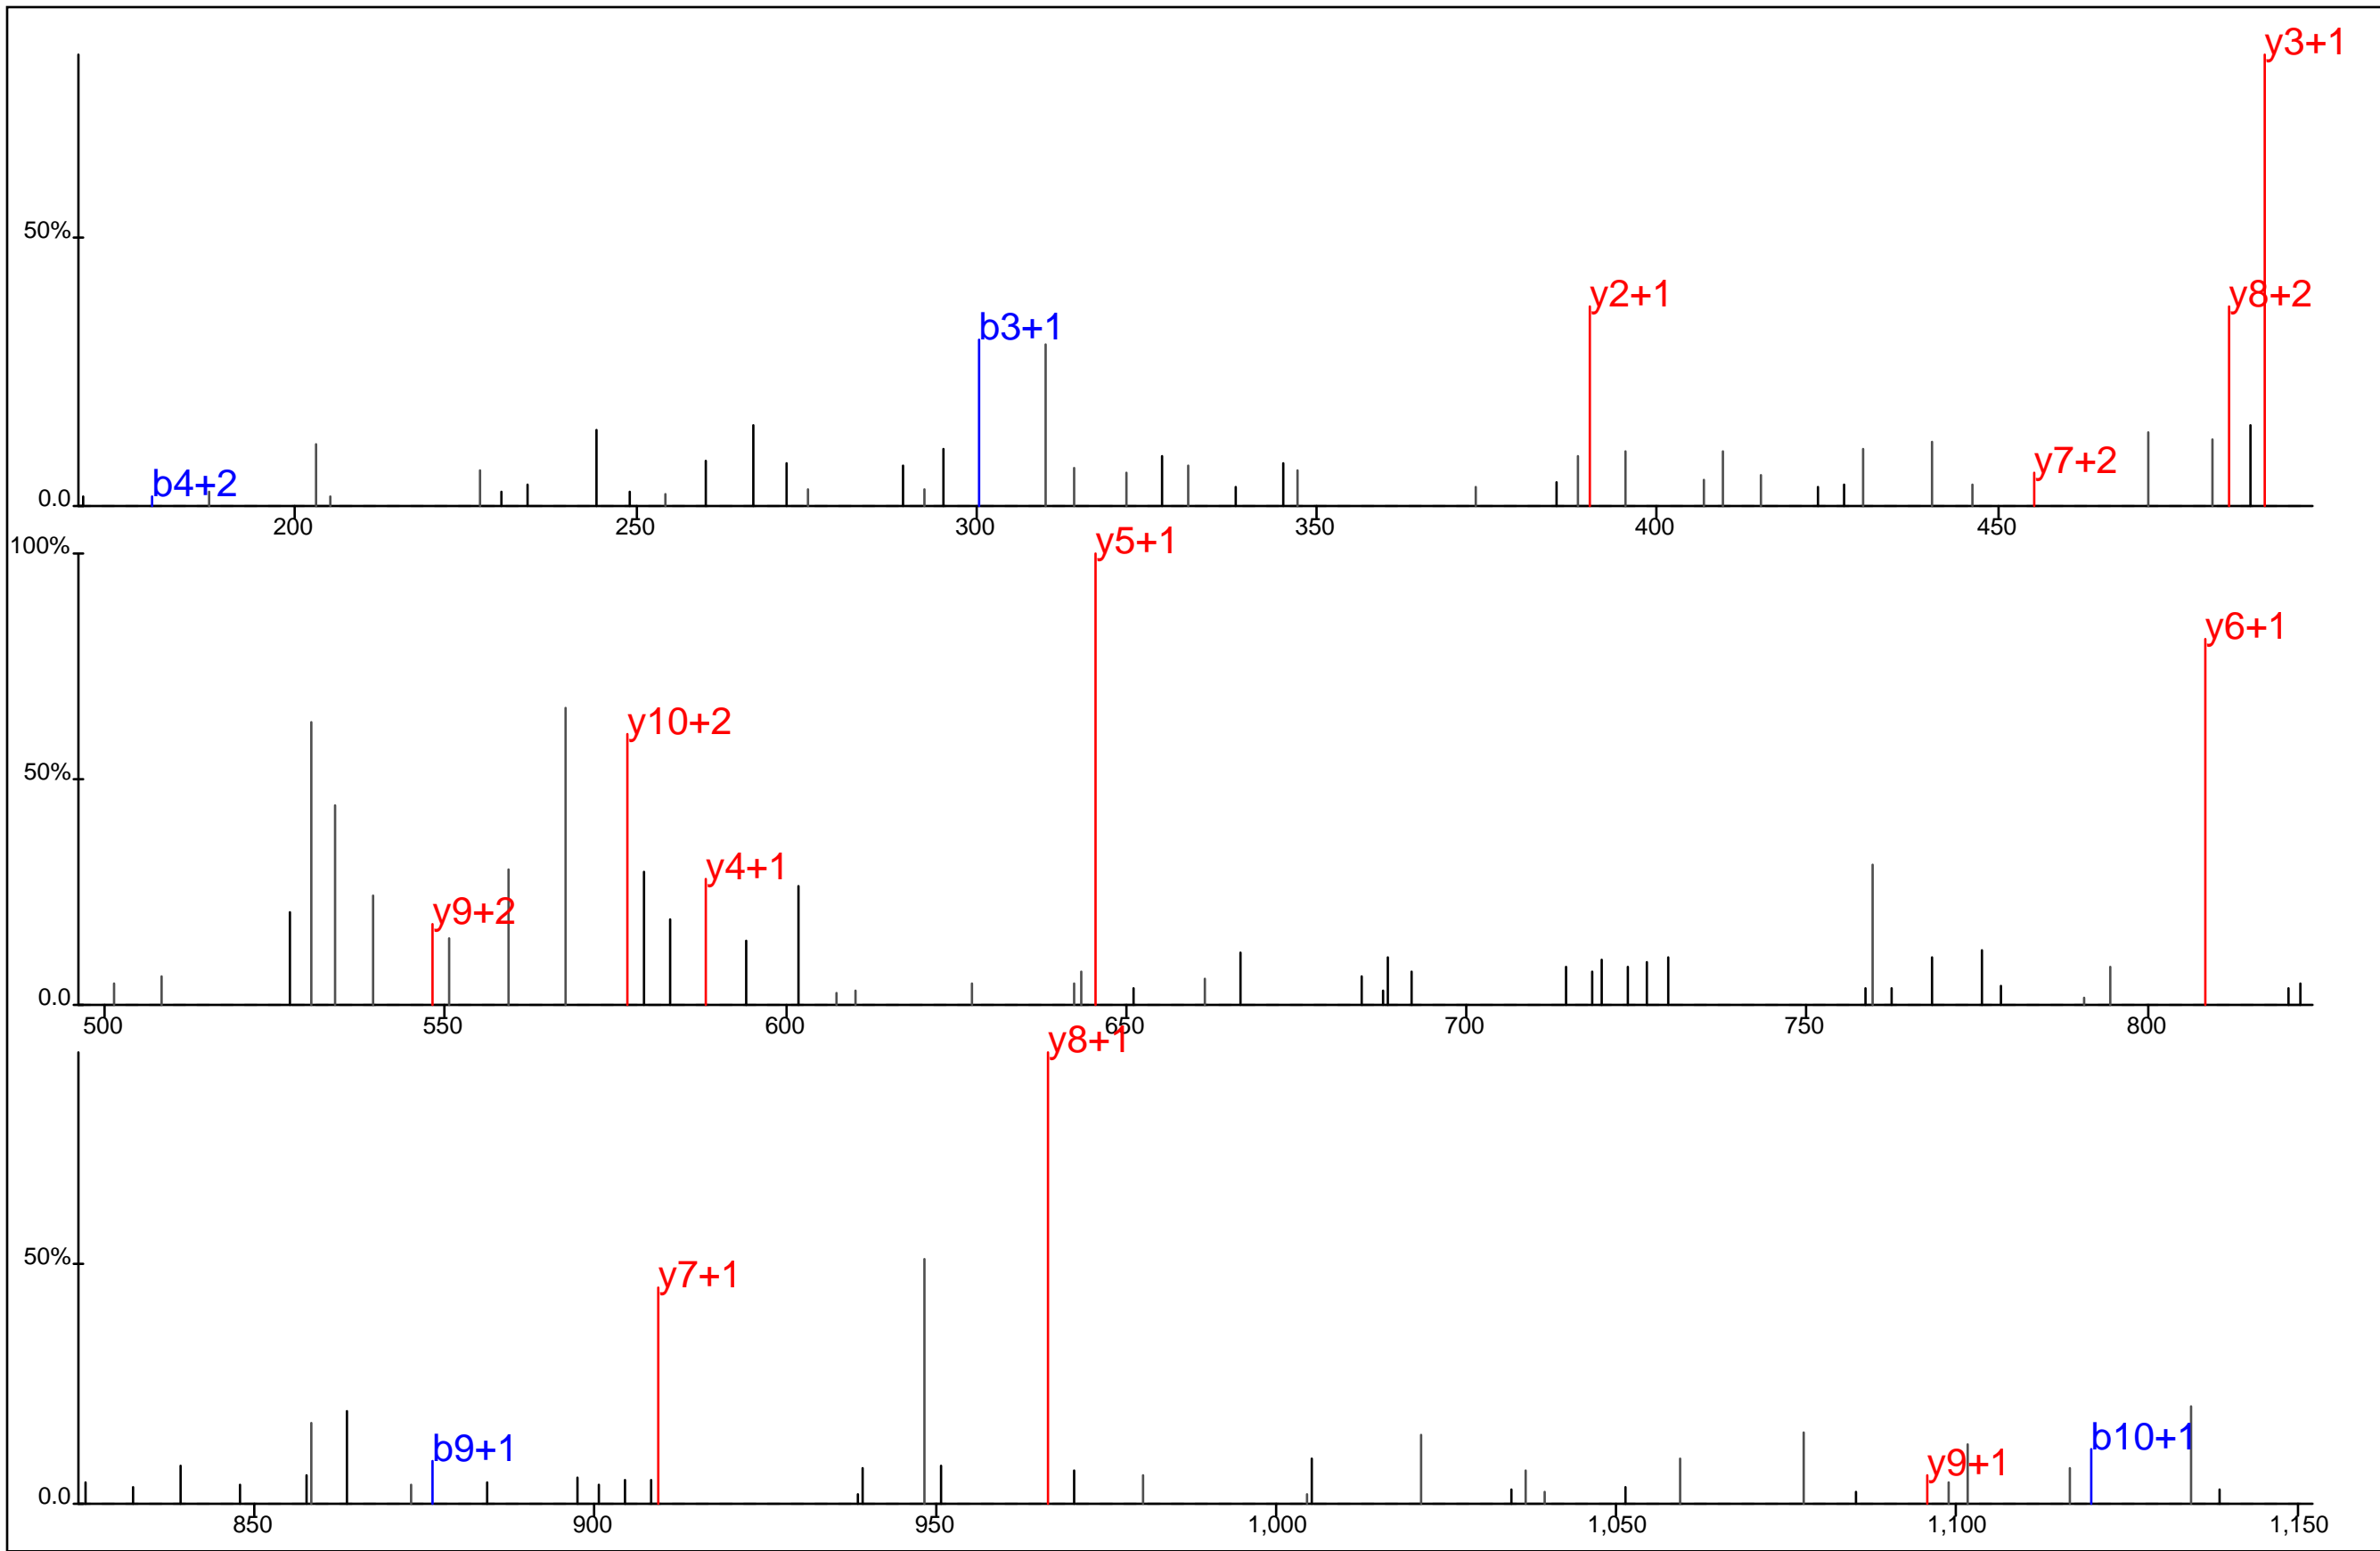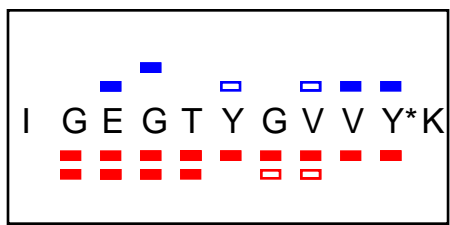

Protein Name: CDC2  
 gi Accession: 0  
 Precursor Mass: 633.2946+2  
 Delta Mass: 0.390 ppm  
 XCorr: 44.31



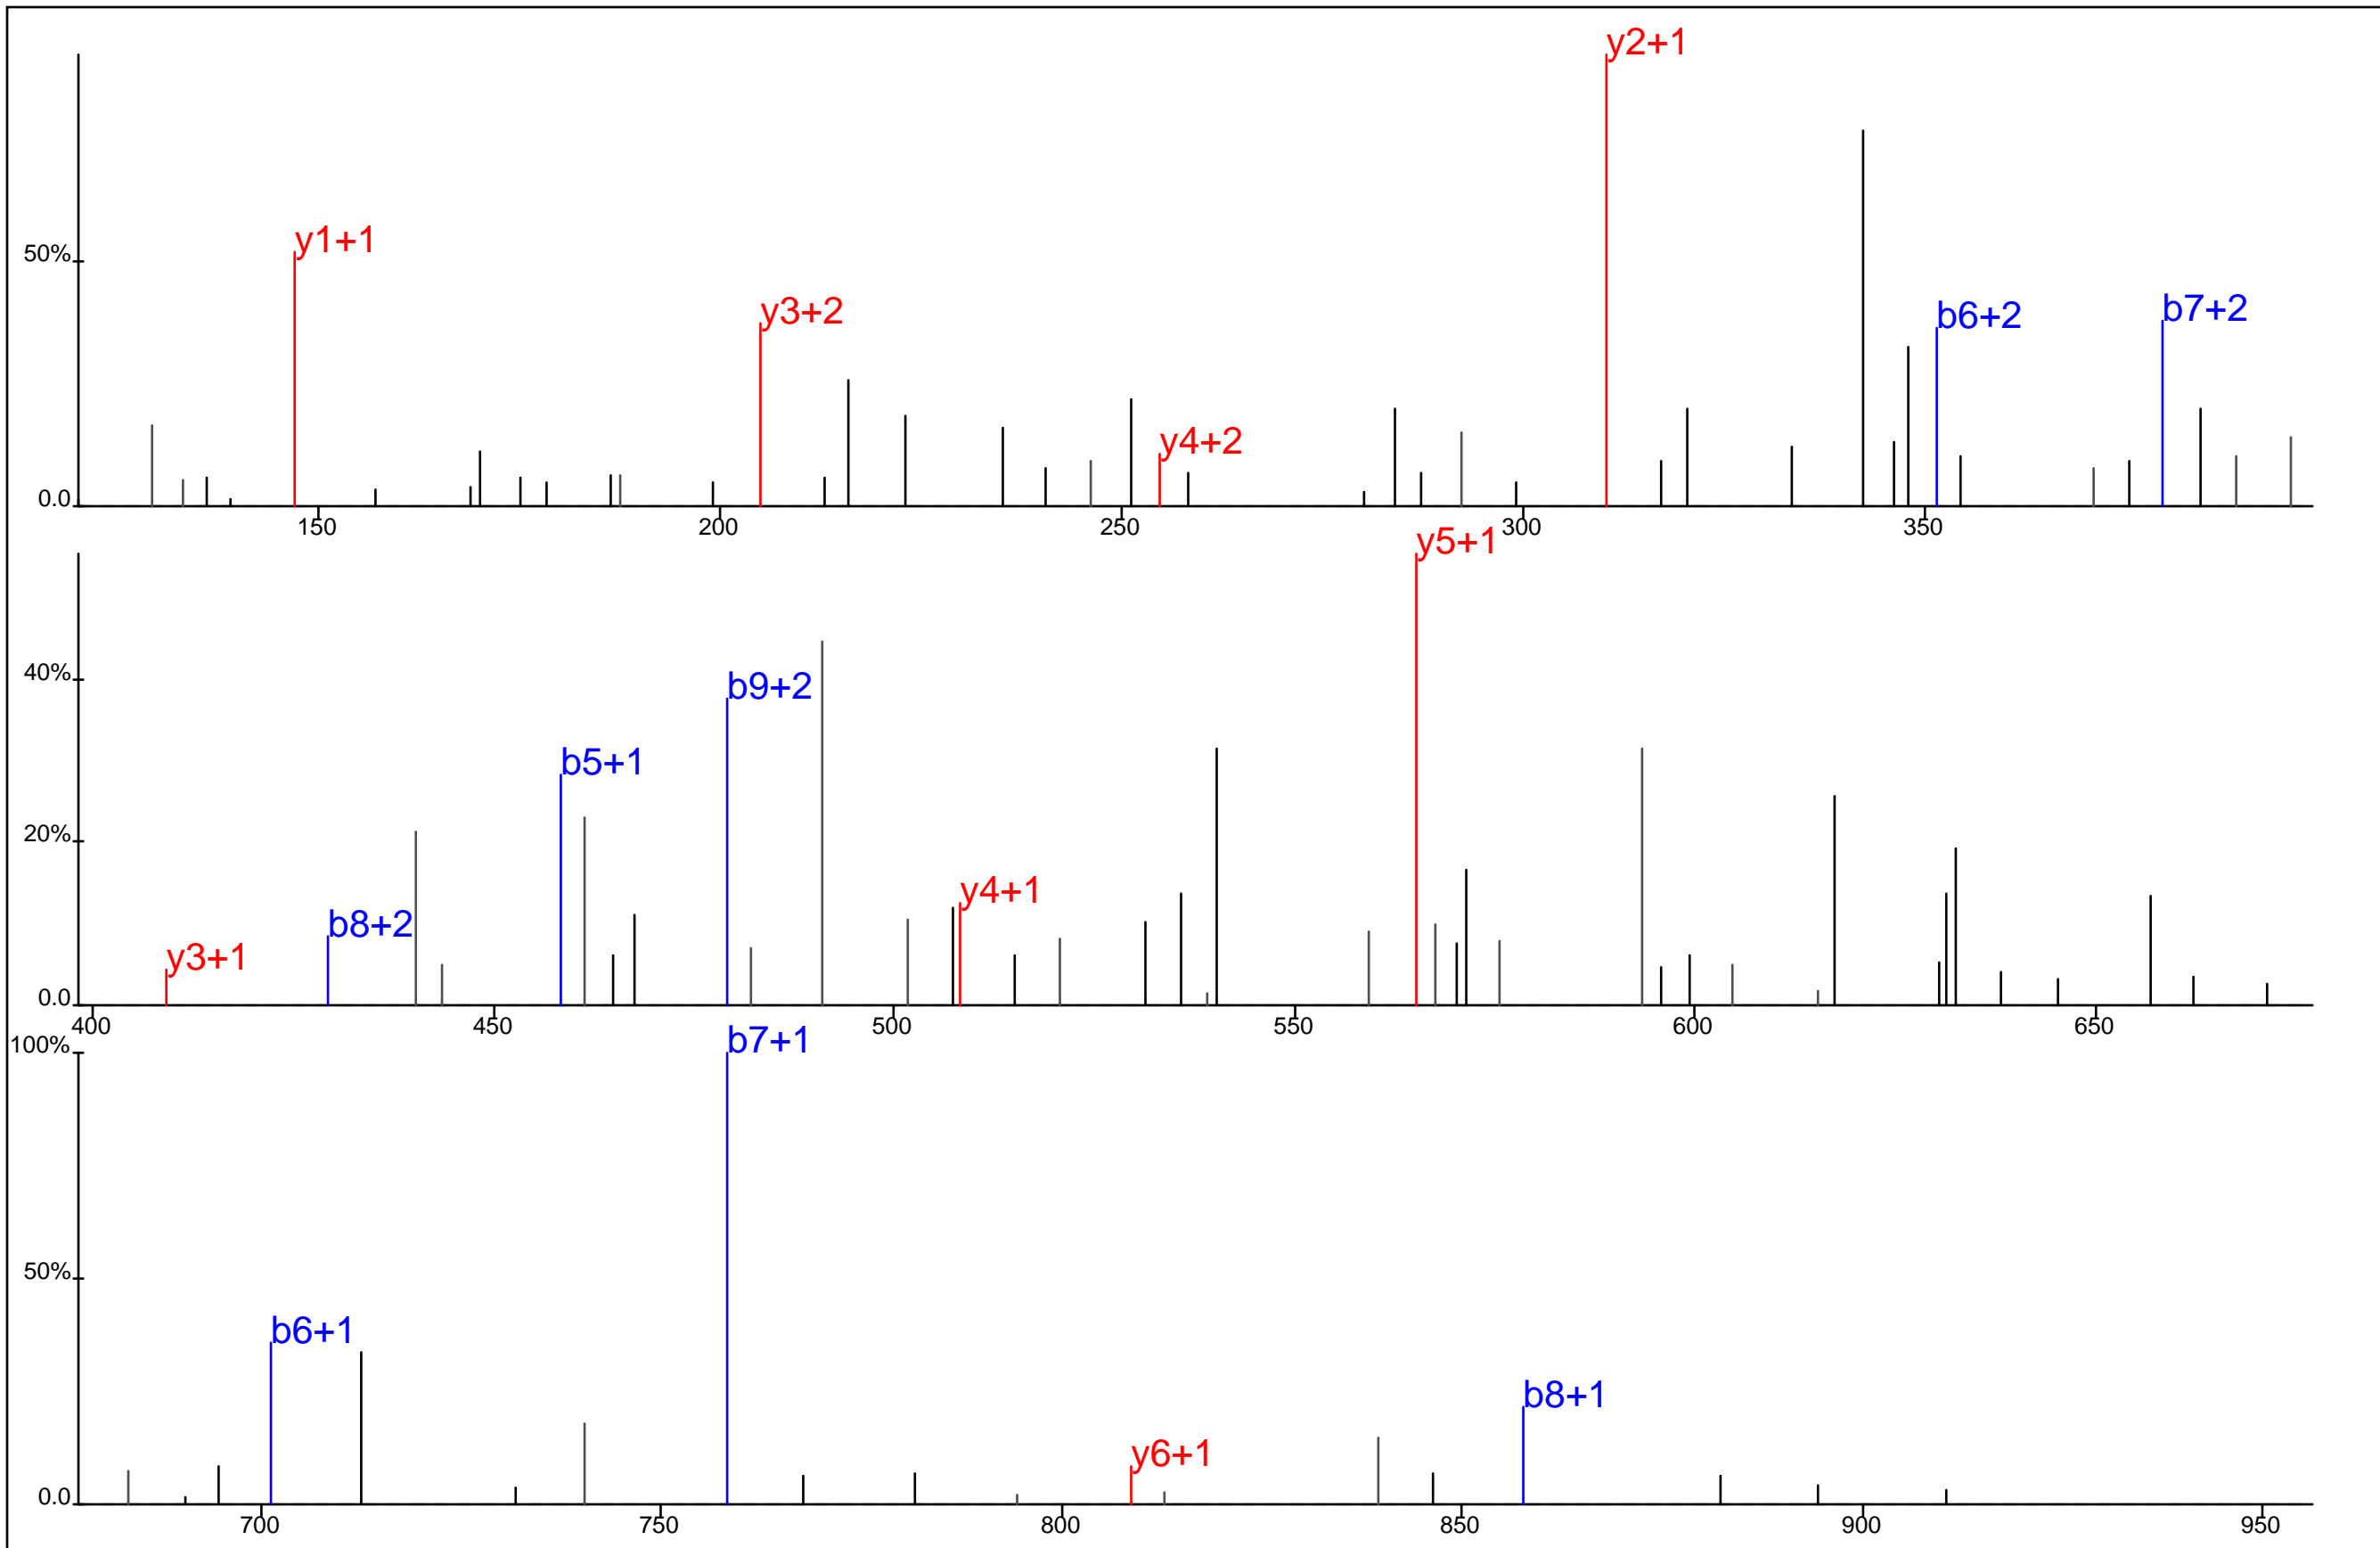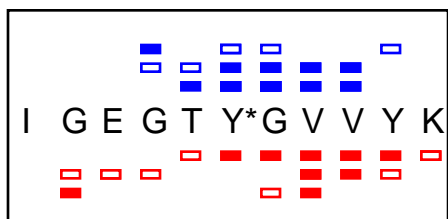

Protein Name: CDC2  
 gi Accession: 0  
 Precursor Mass: 422.5321+3  
 Delta Mass: 0.330 ppm  
 XCorr: 37.91

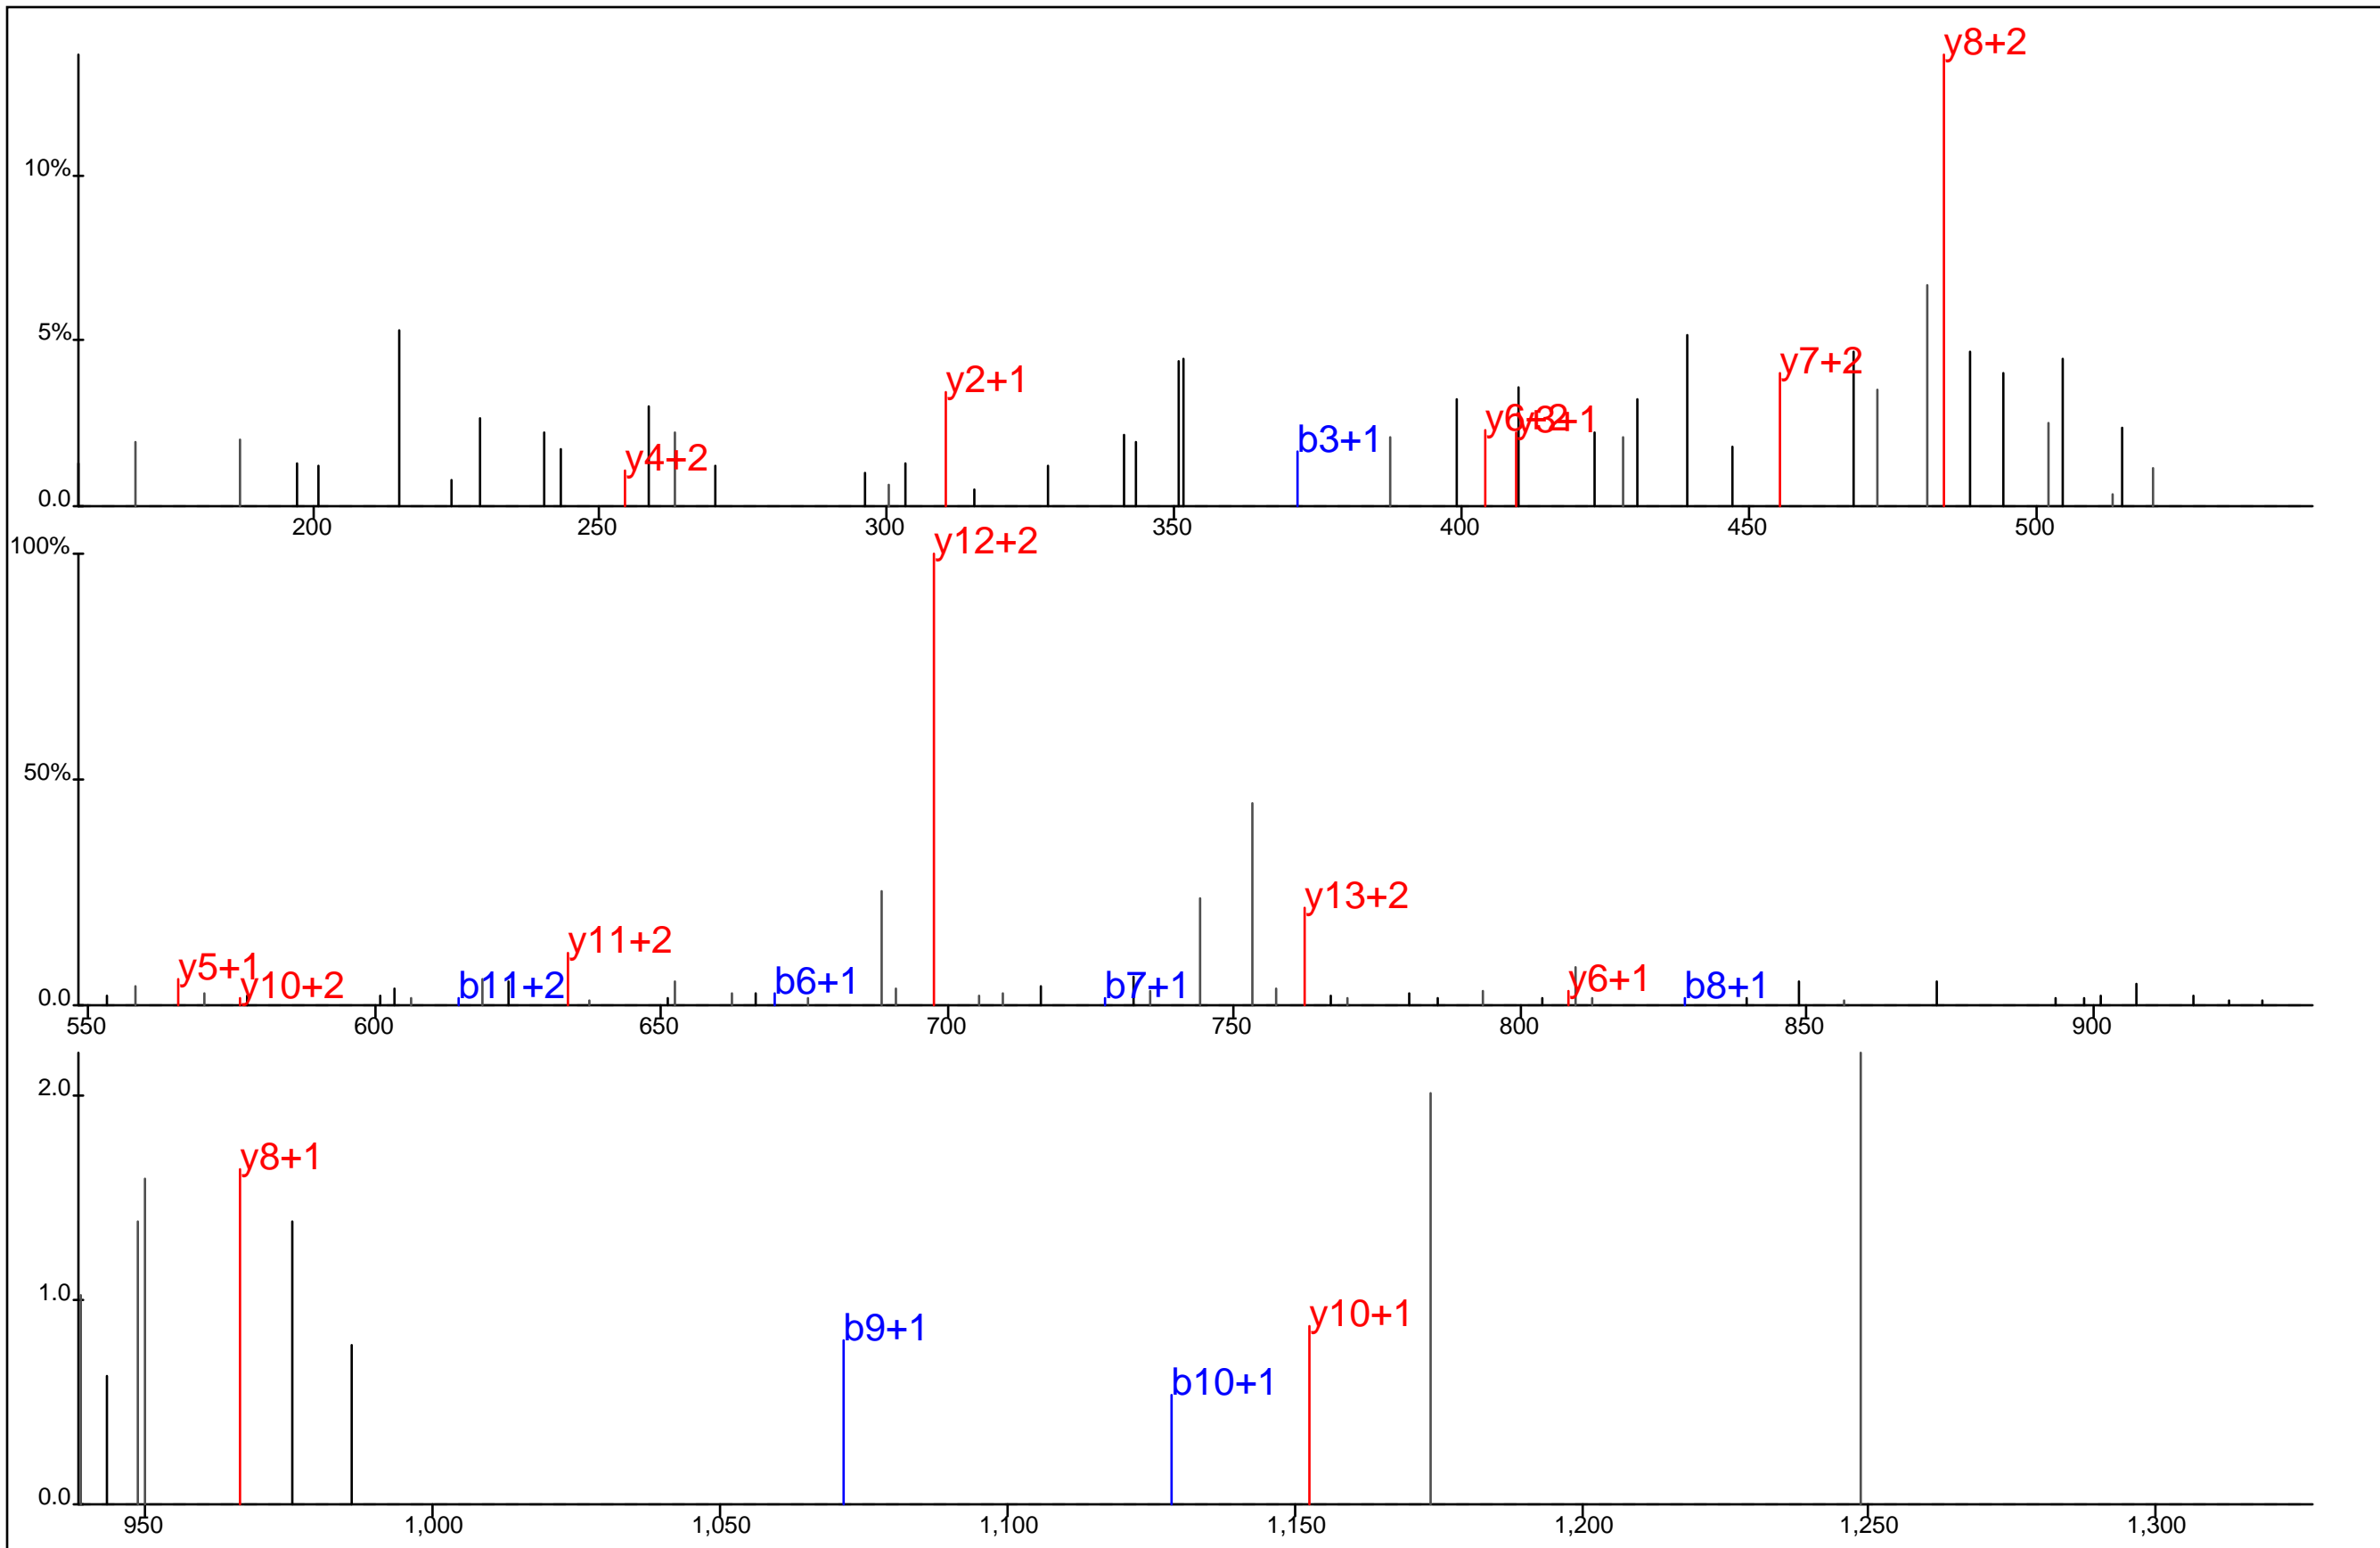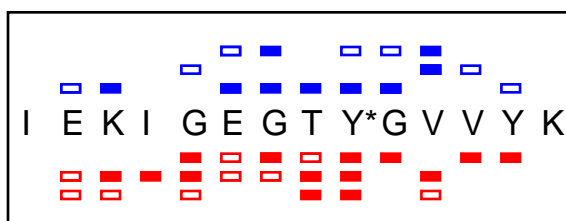

Protein Name: CDC2  
 gi Accession: 0  
 Precursor Mass: 545.9394+3  
 Delta Mass: 0.417 ppm  
 XCorr: 27.52





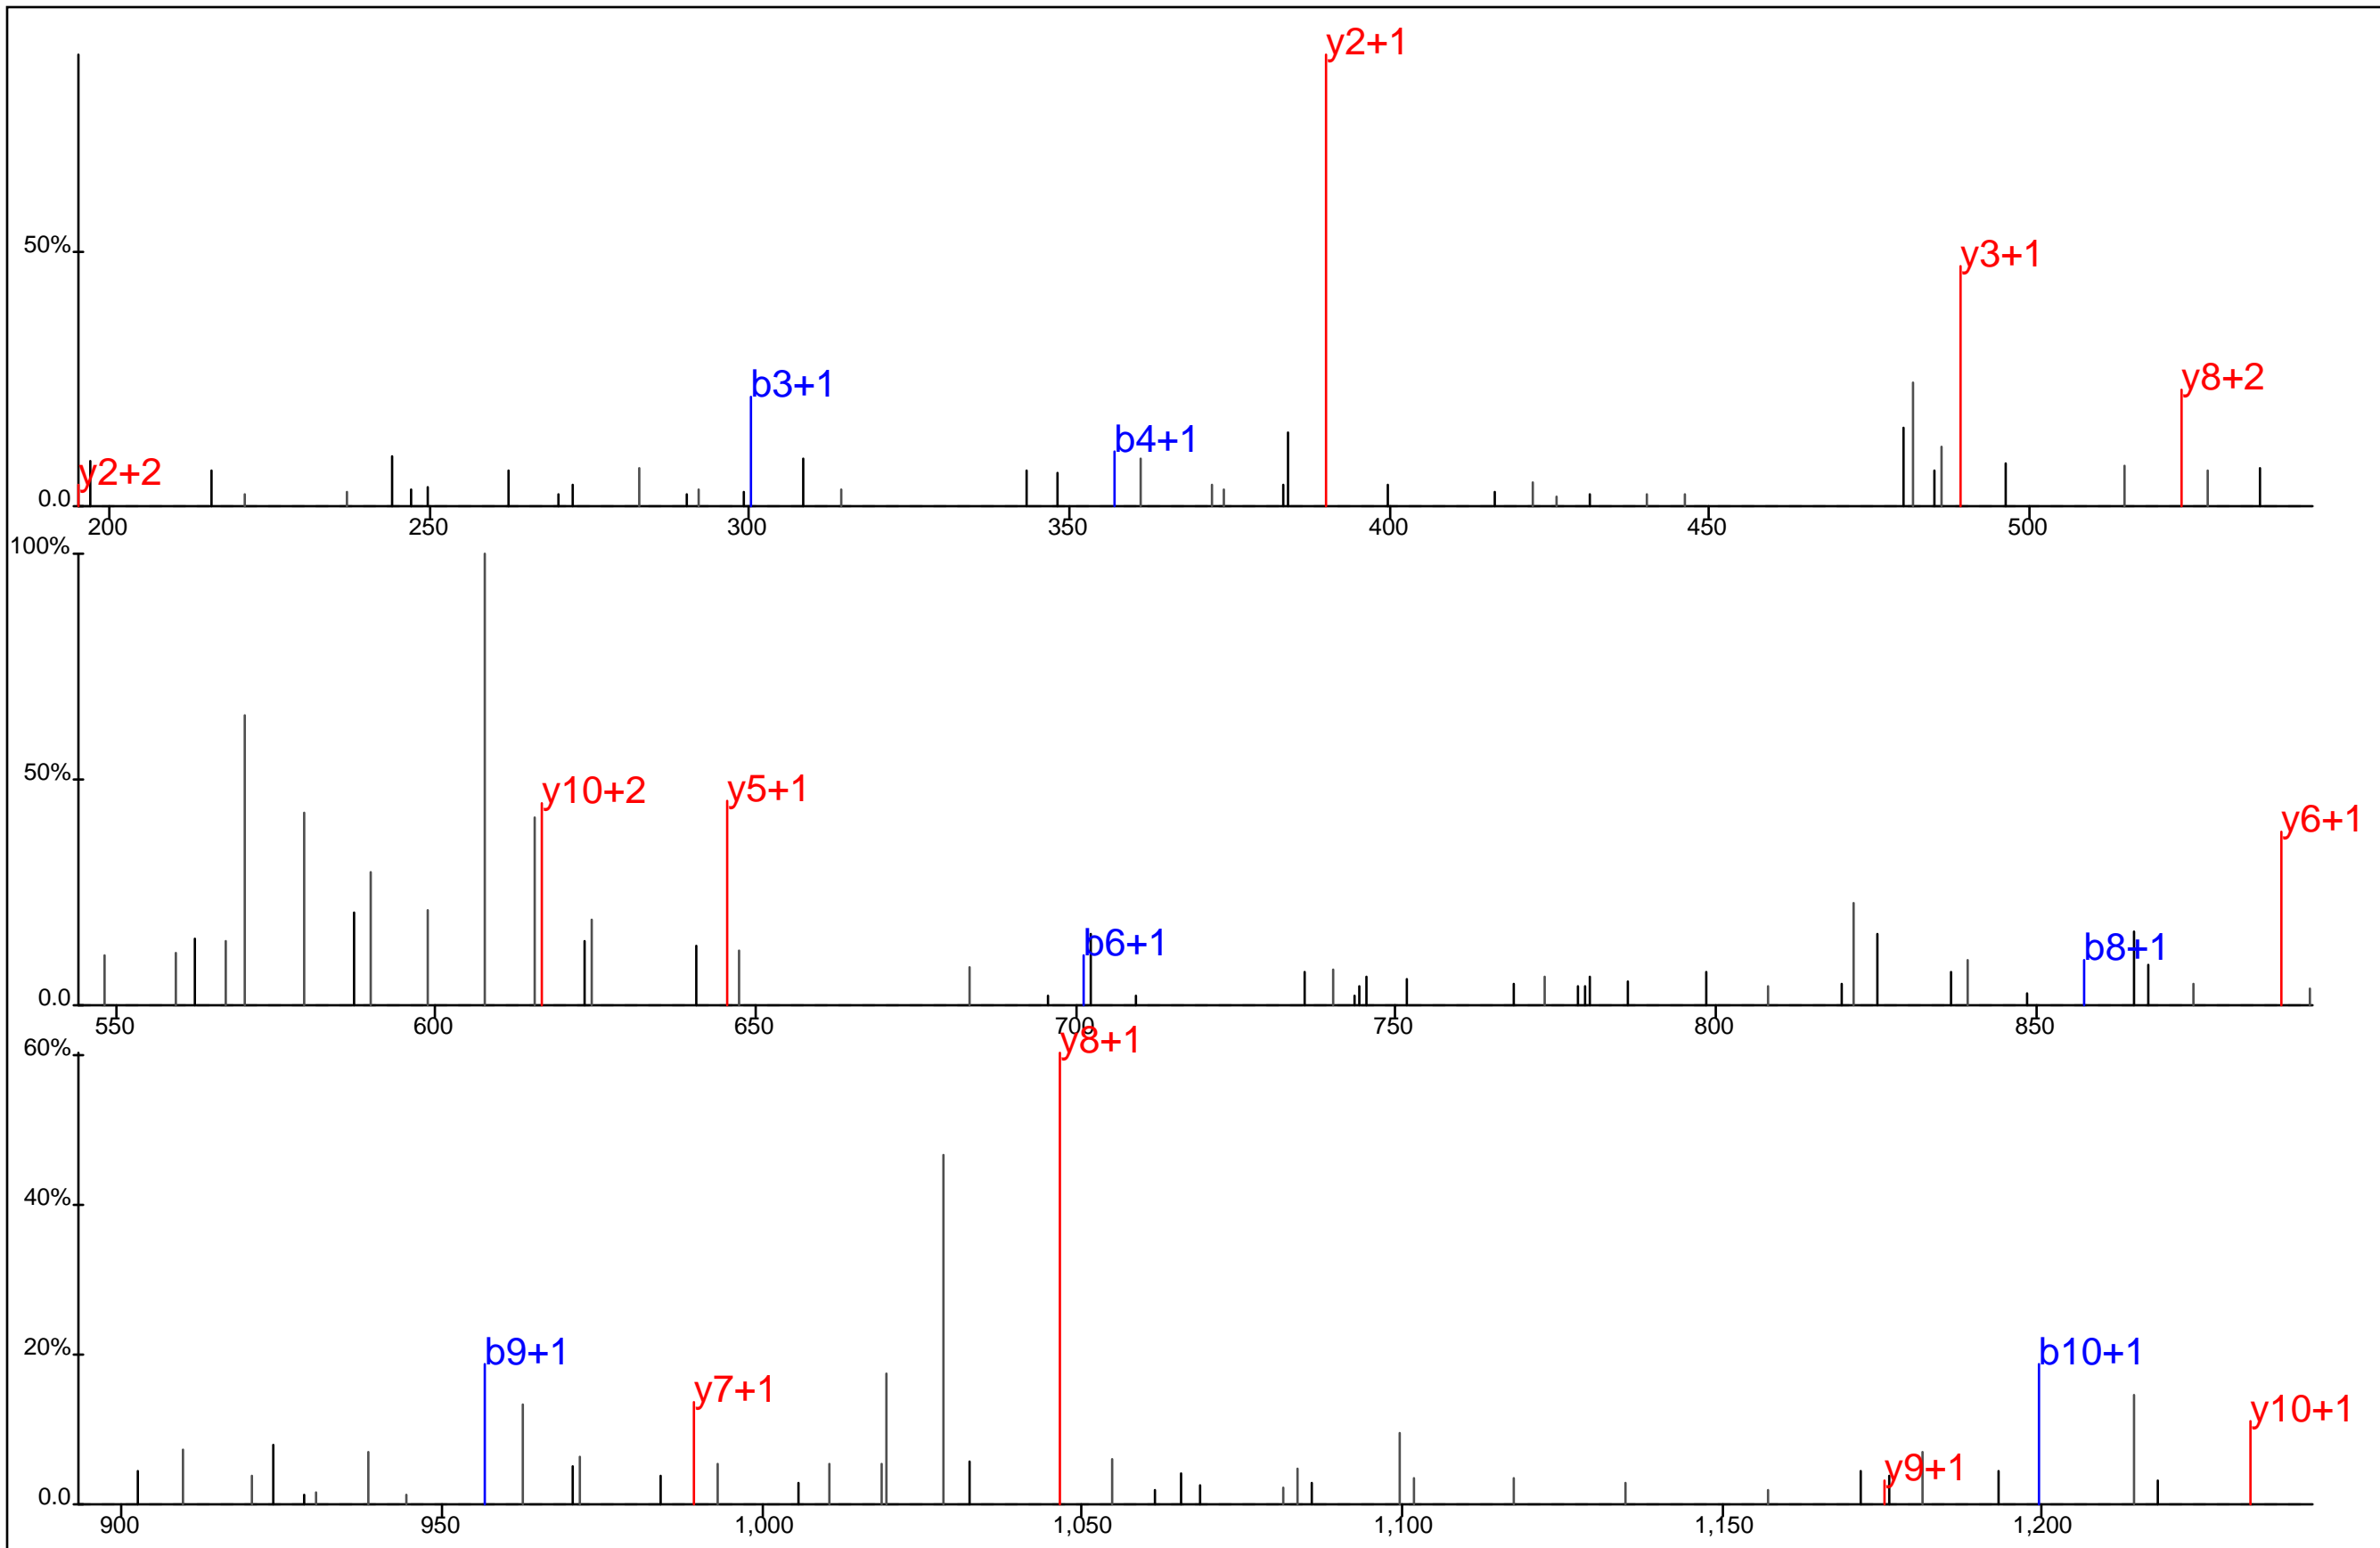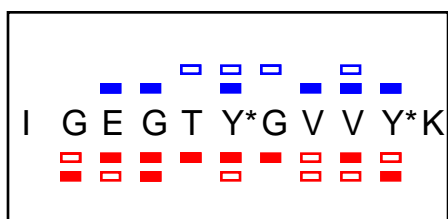

Protein Name: CDC2  
 gi Accession: 0  
 Precursor Mass: 673.2787+2  
 Delta Mass: 1.810 ppm  
 XCorr: 38.23

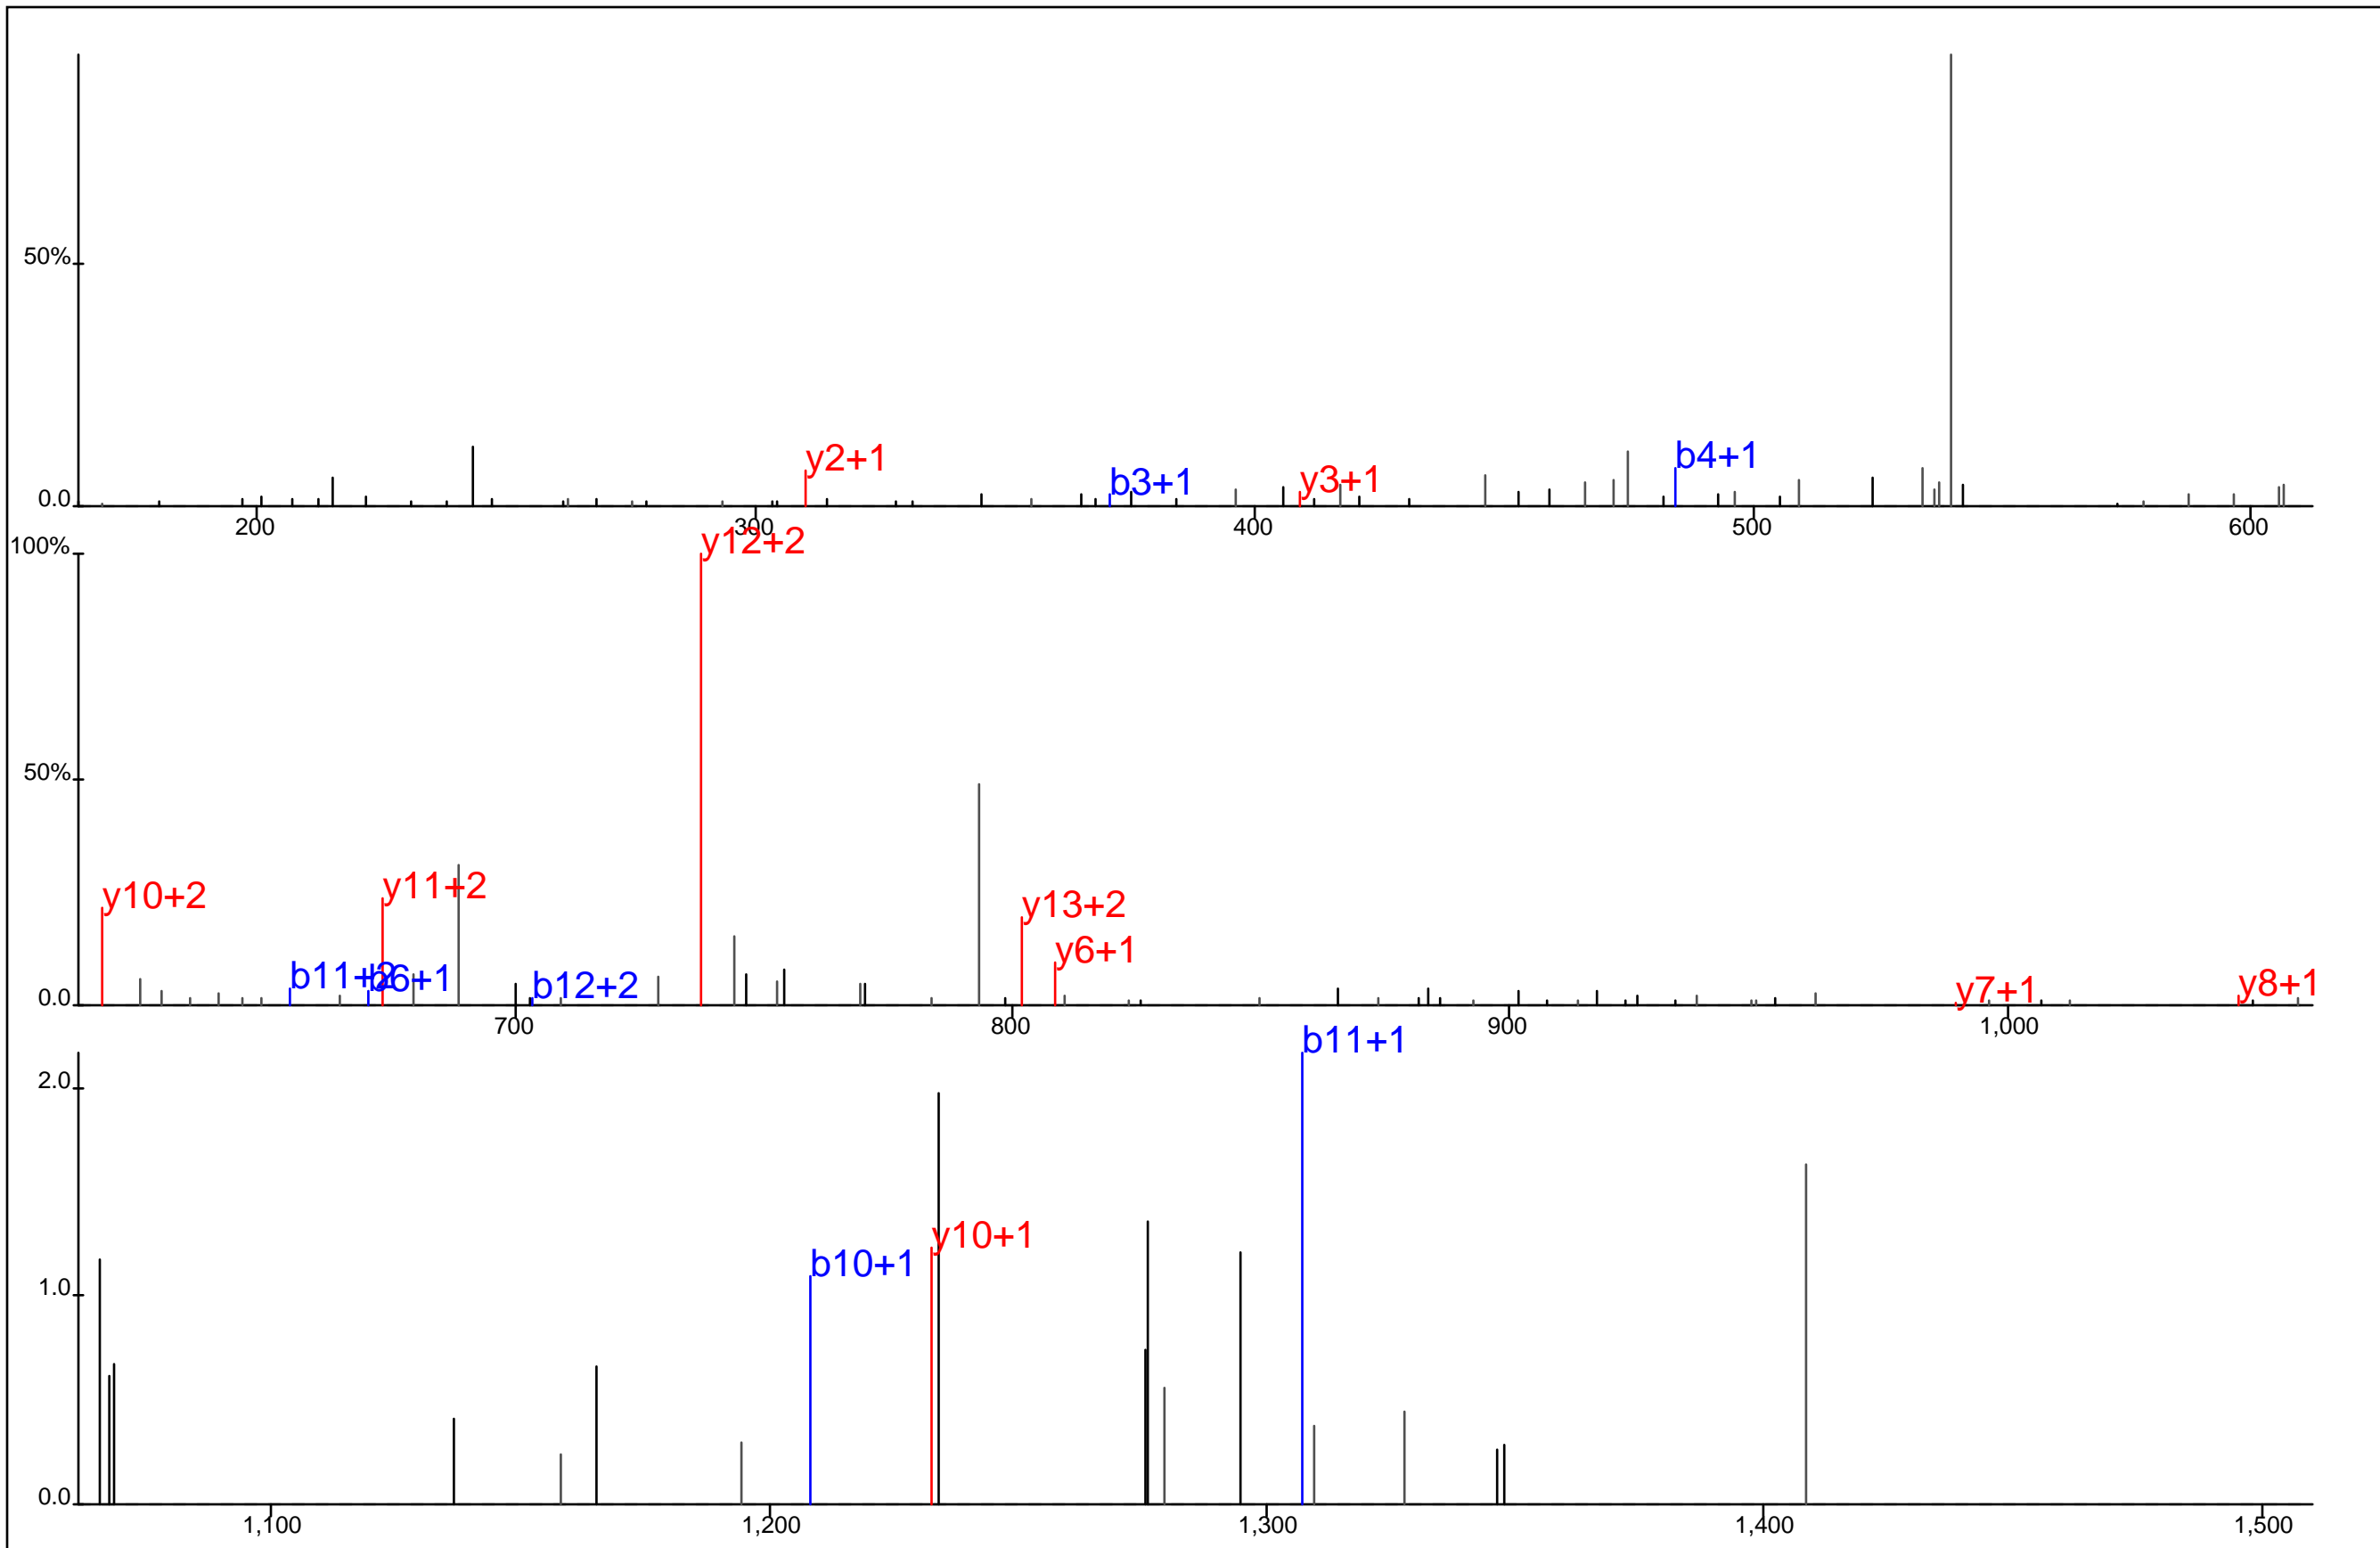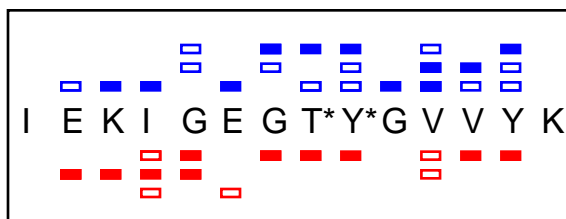

Protein Name: CDC2  
 gi Accession: 0  
 Precursor Mass: 572.5939+3  
 Delta Mass: 1.180 ppm  
 XCorr: 20.19



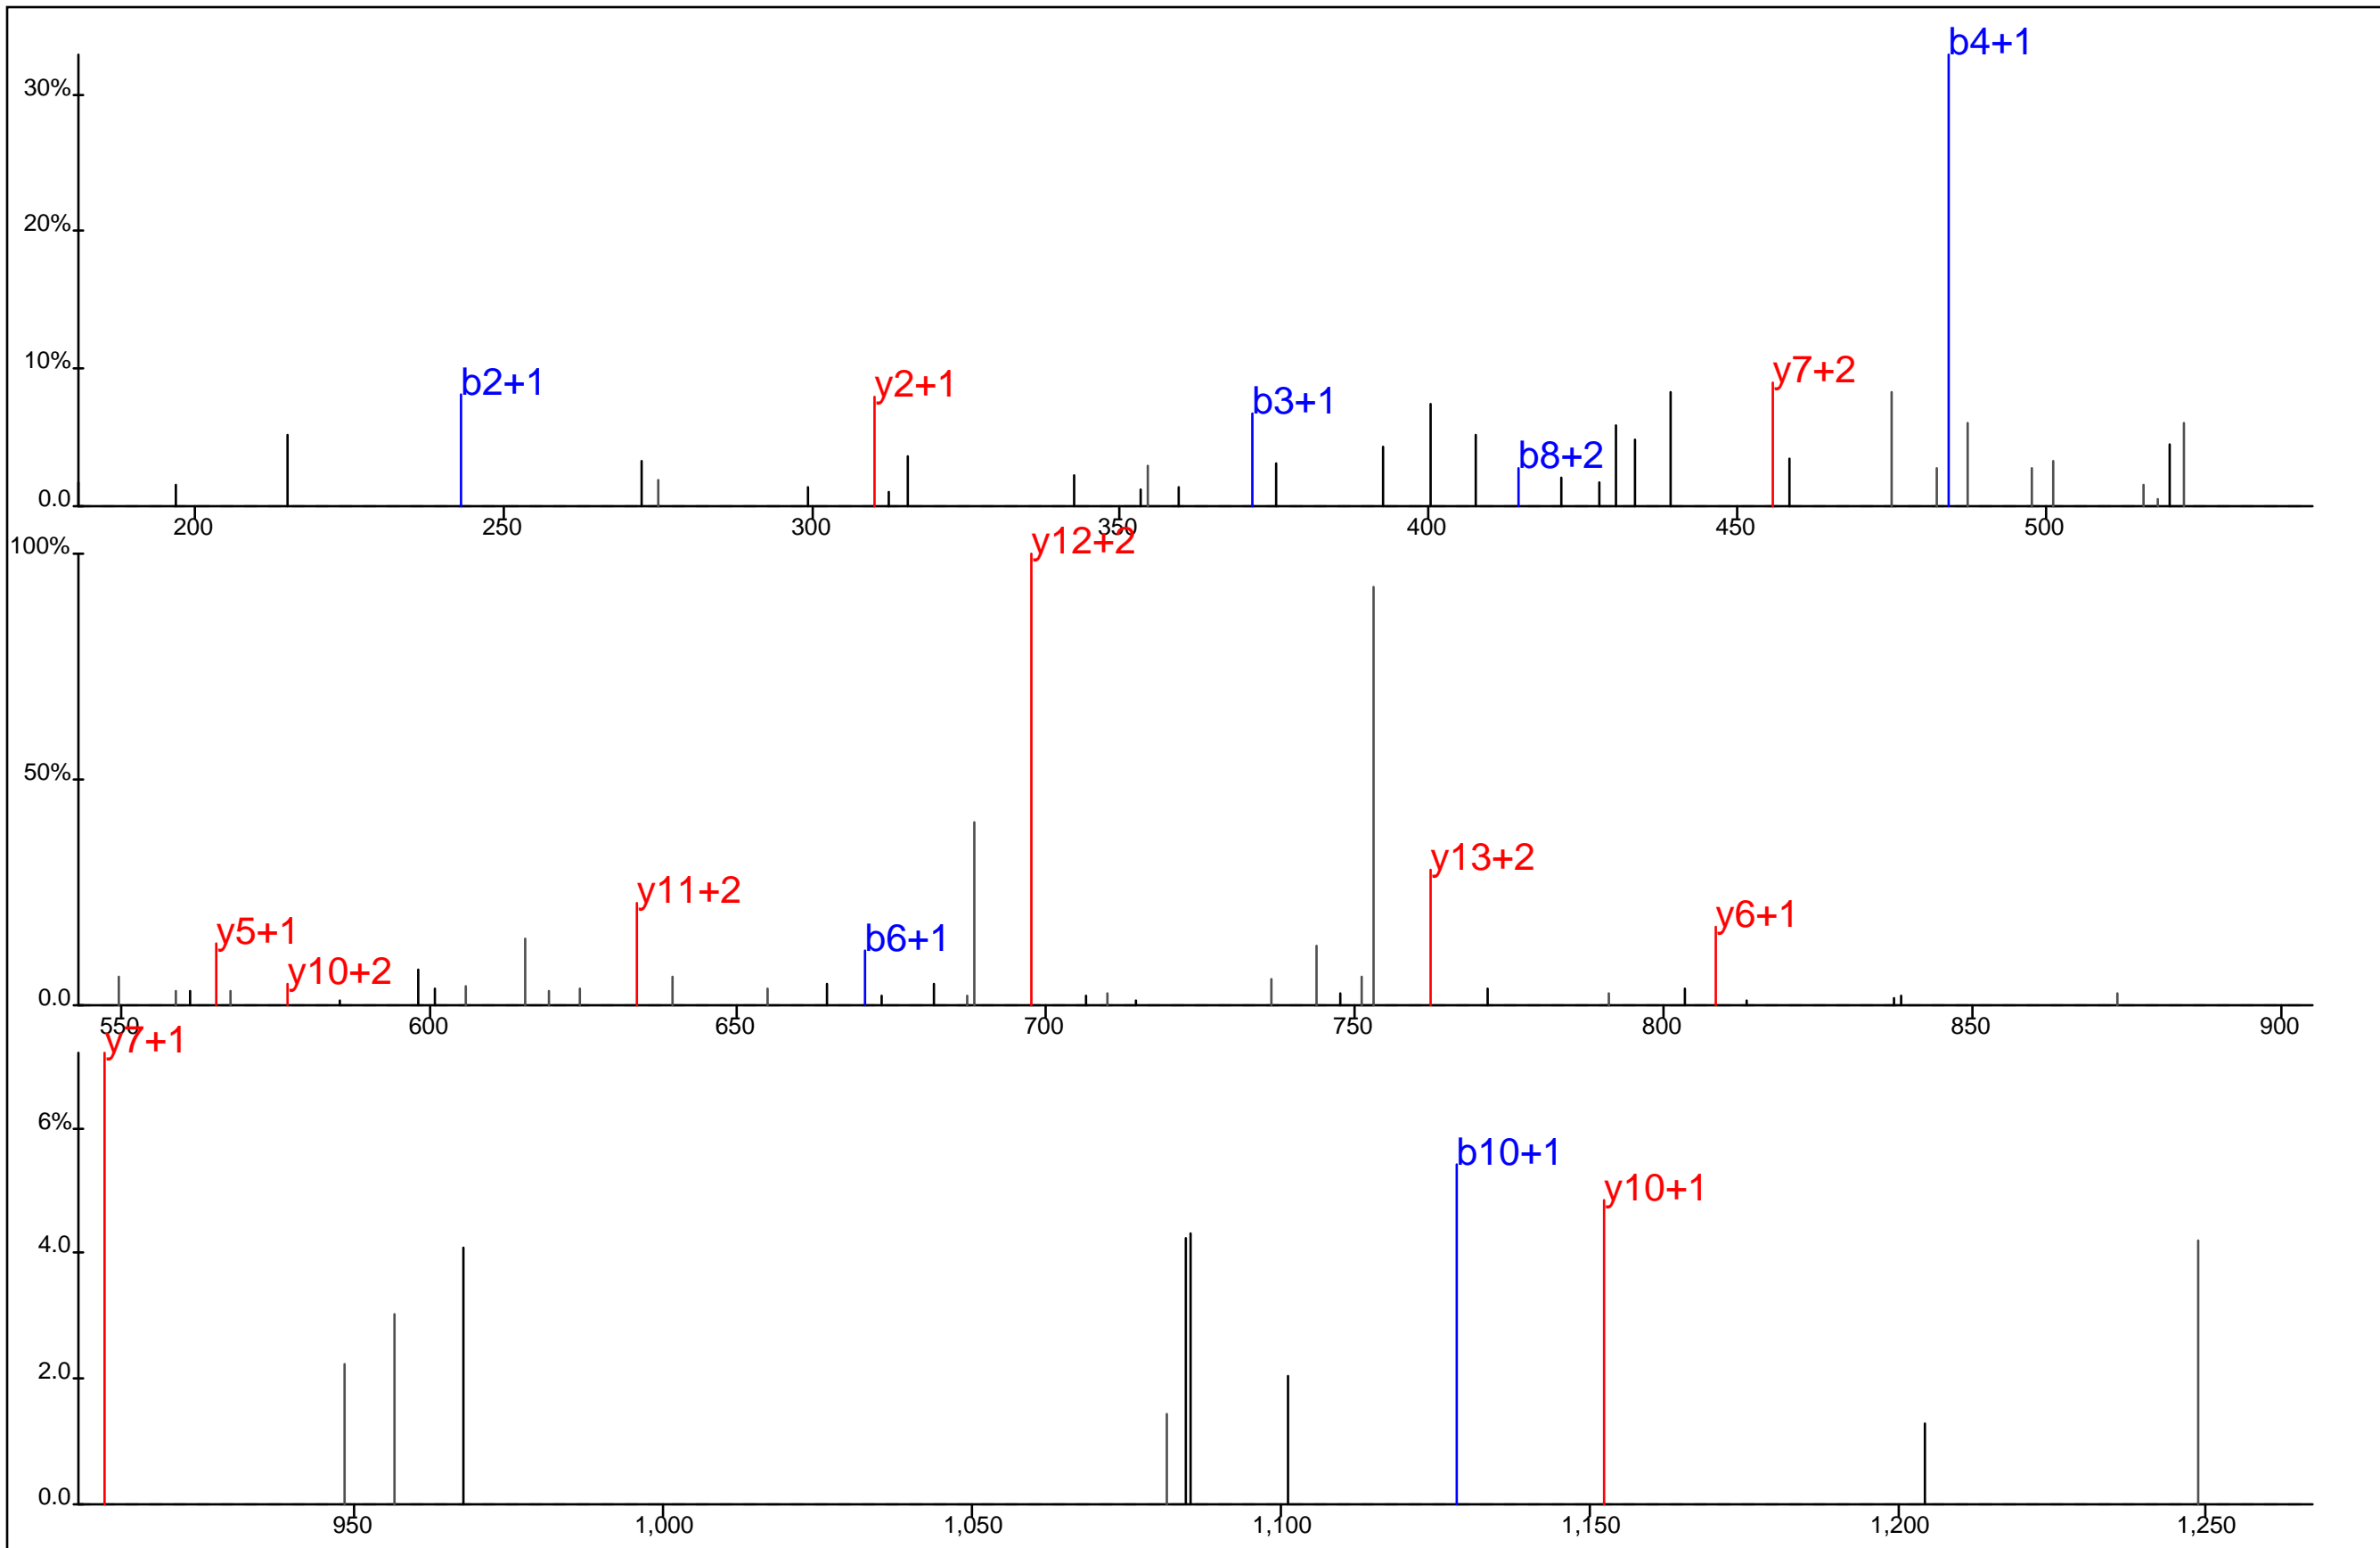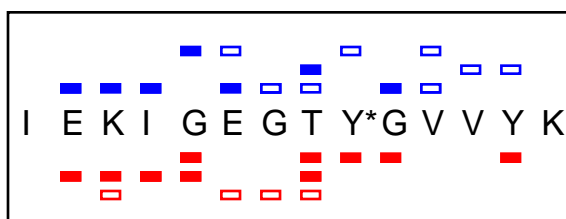

Protein Name: CDC2  
 gi Accession: 0  
 Precursor Mass: 545.9393+3  
 Delta Mass: 0.305 ppm  
 XCorr: 41.12

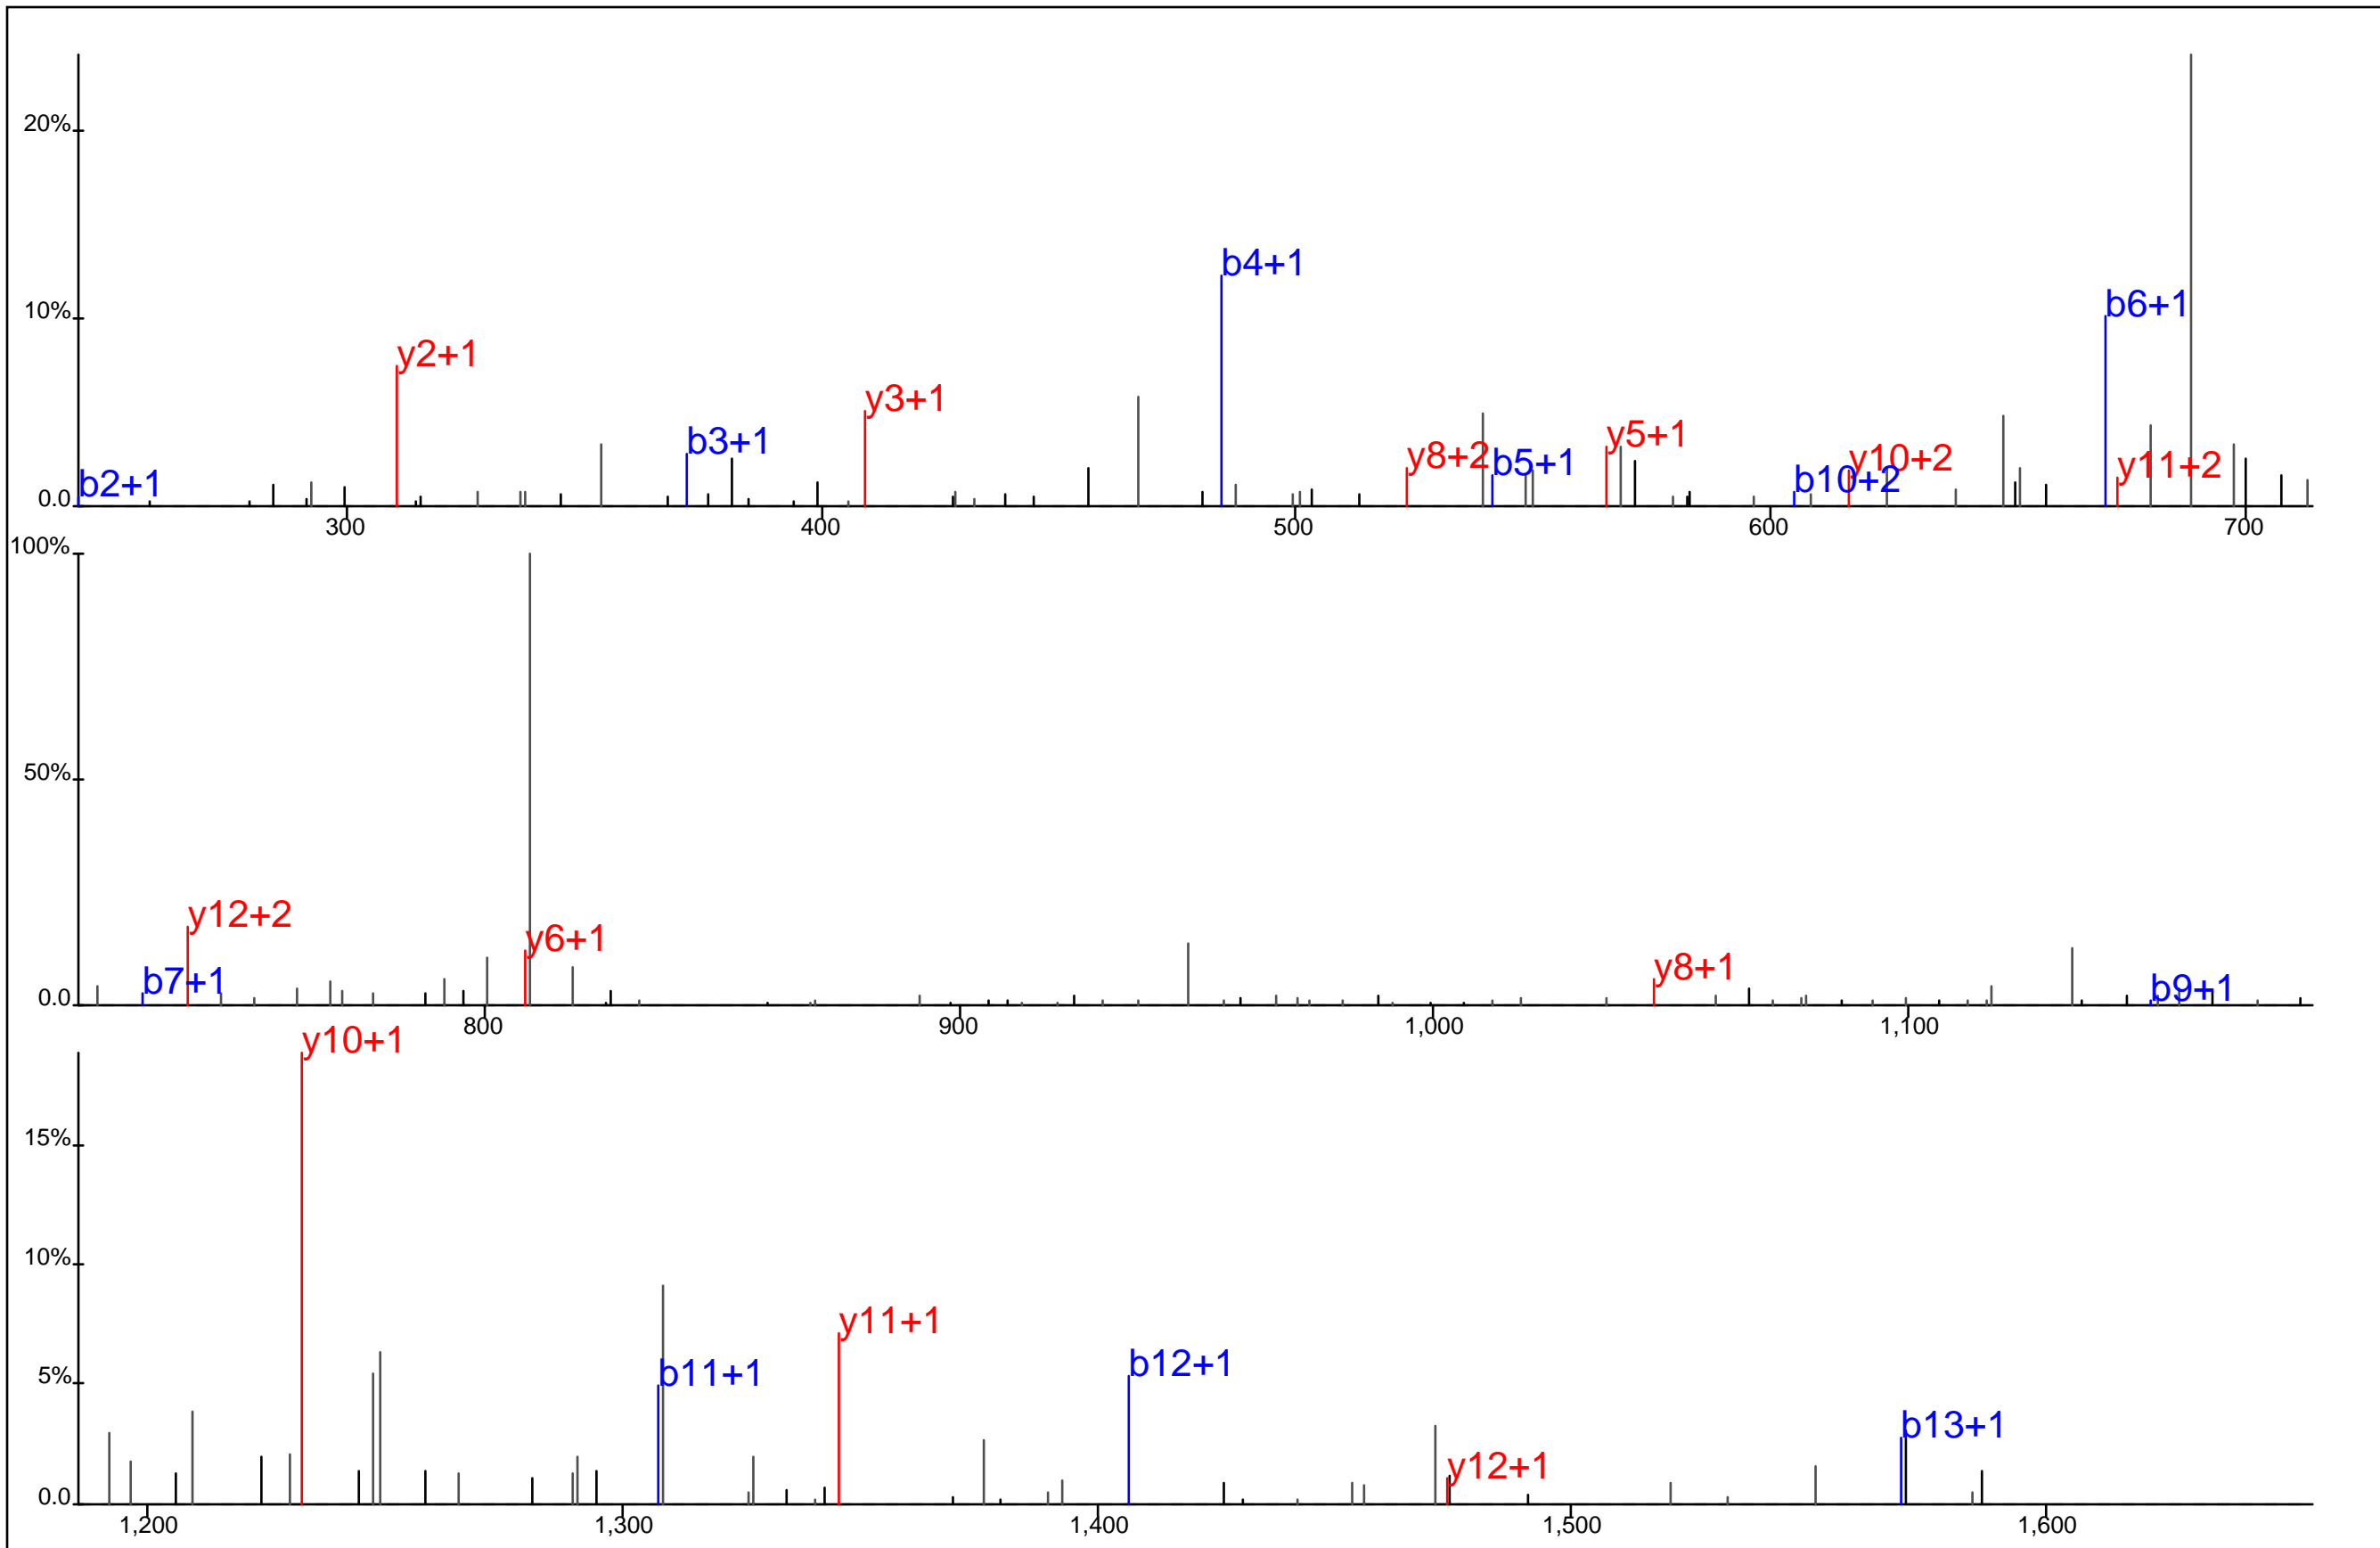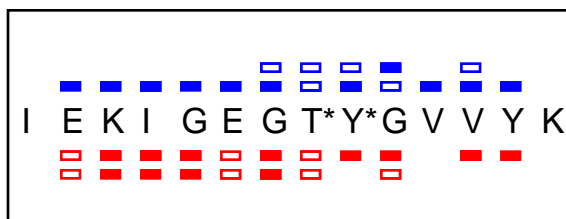

Protein Name: CDC2  
 gi Accession: 0  
 Precursor Mass: 858.3865+2  
 Delta Mass: 2.097 ppm  
 XCorr: 49.66



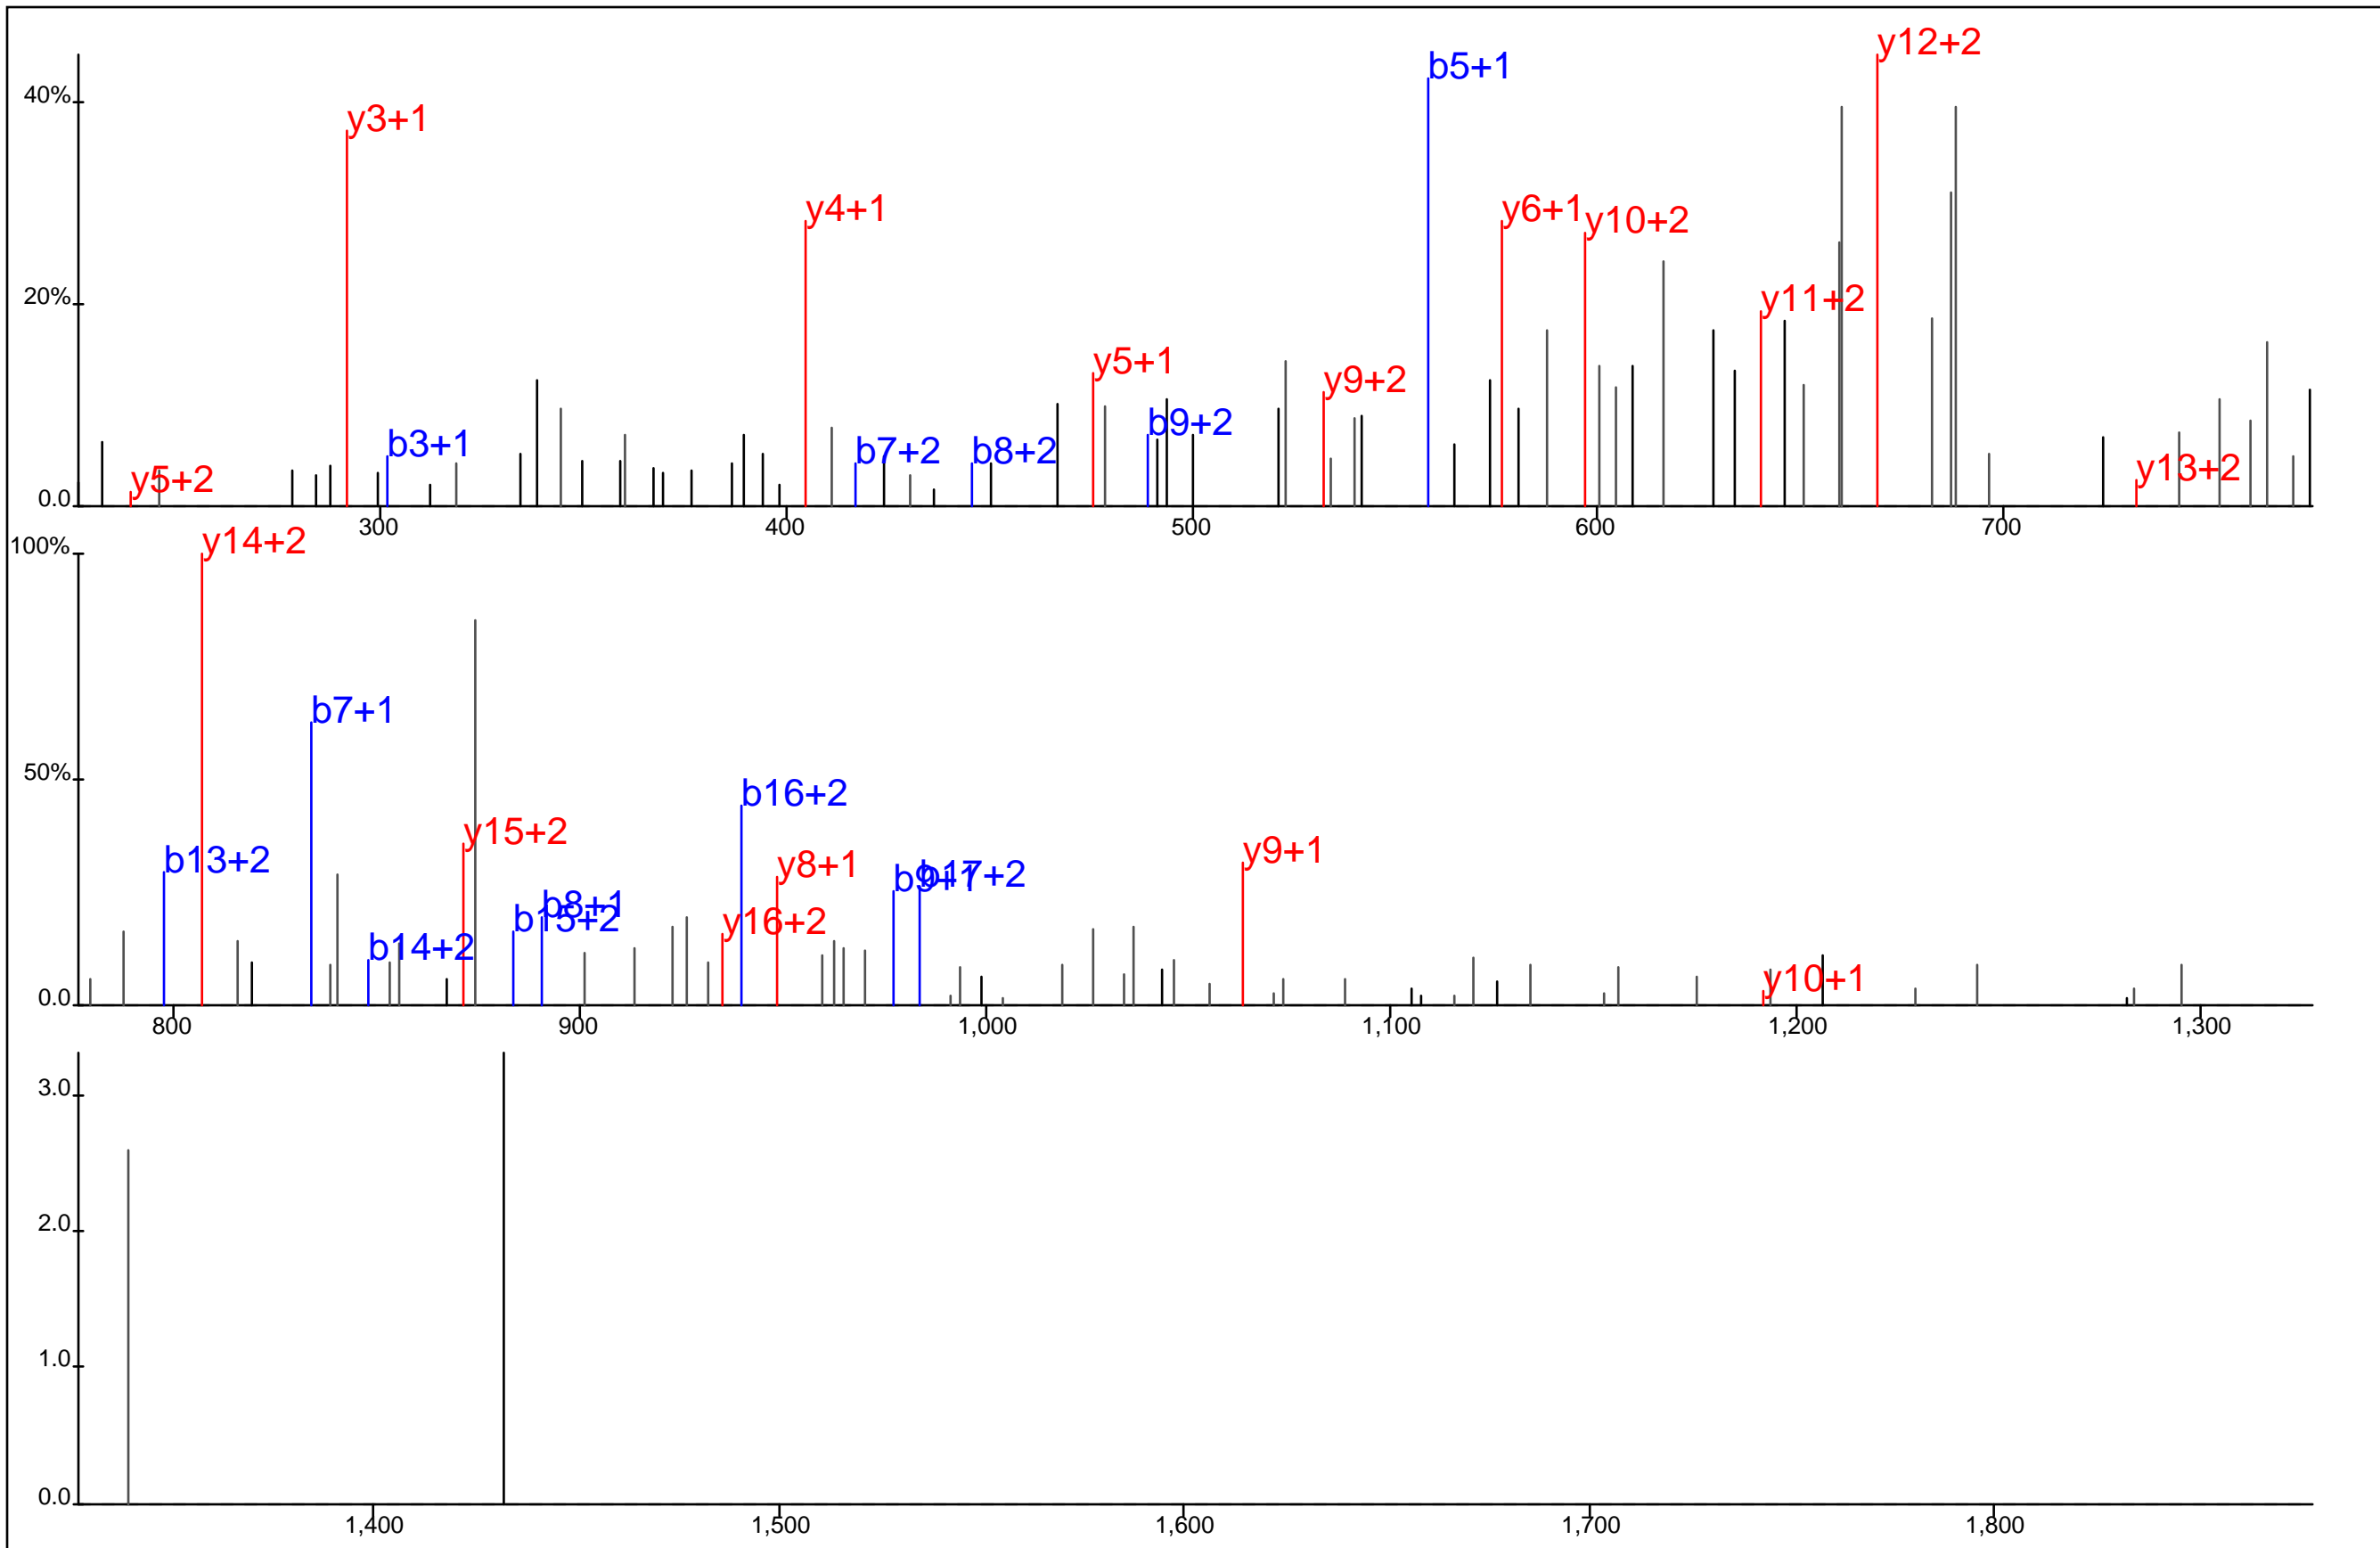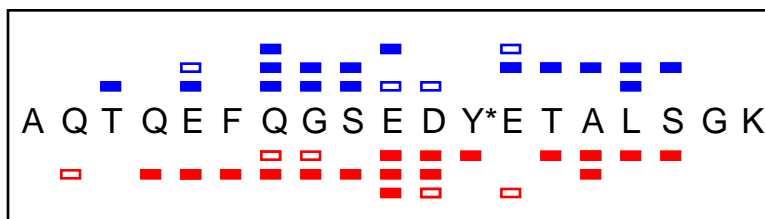

Protein Name: CDK5 regulatory subunit associated protein 2  
 gi Accession: 0  
 Precursor Mass: 723.6404+3  
 Delta Mass: 2.143 ppm  
 XCorr: 35.38

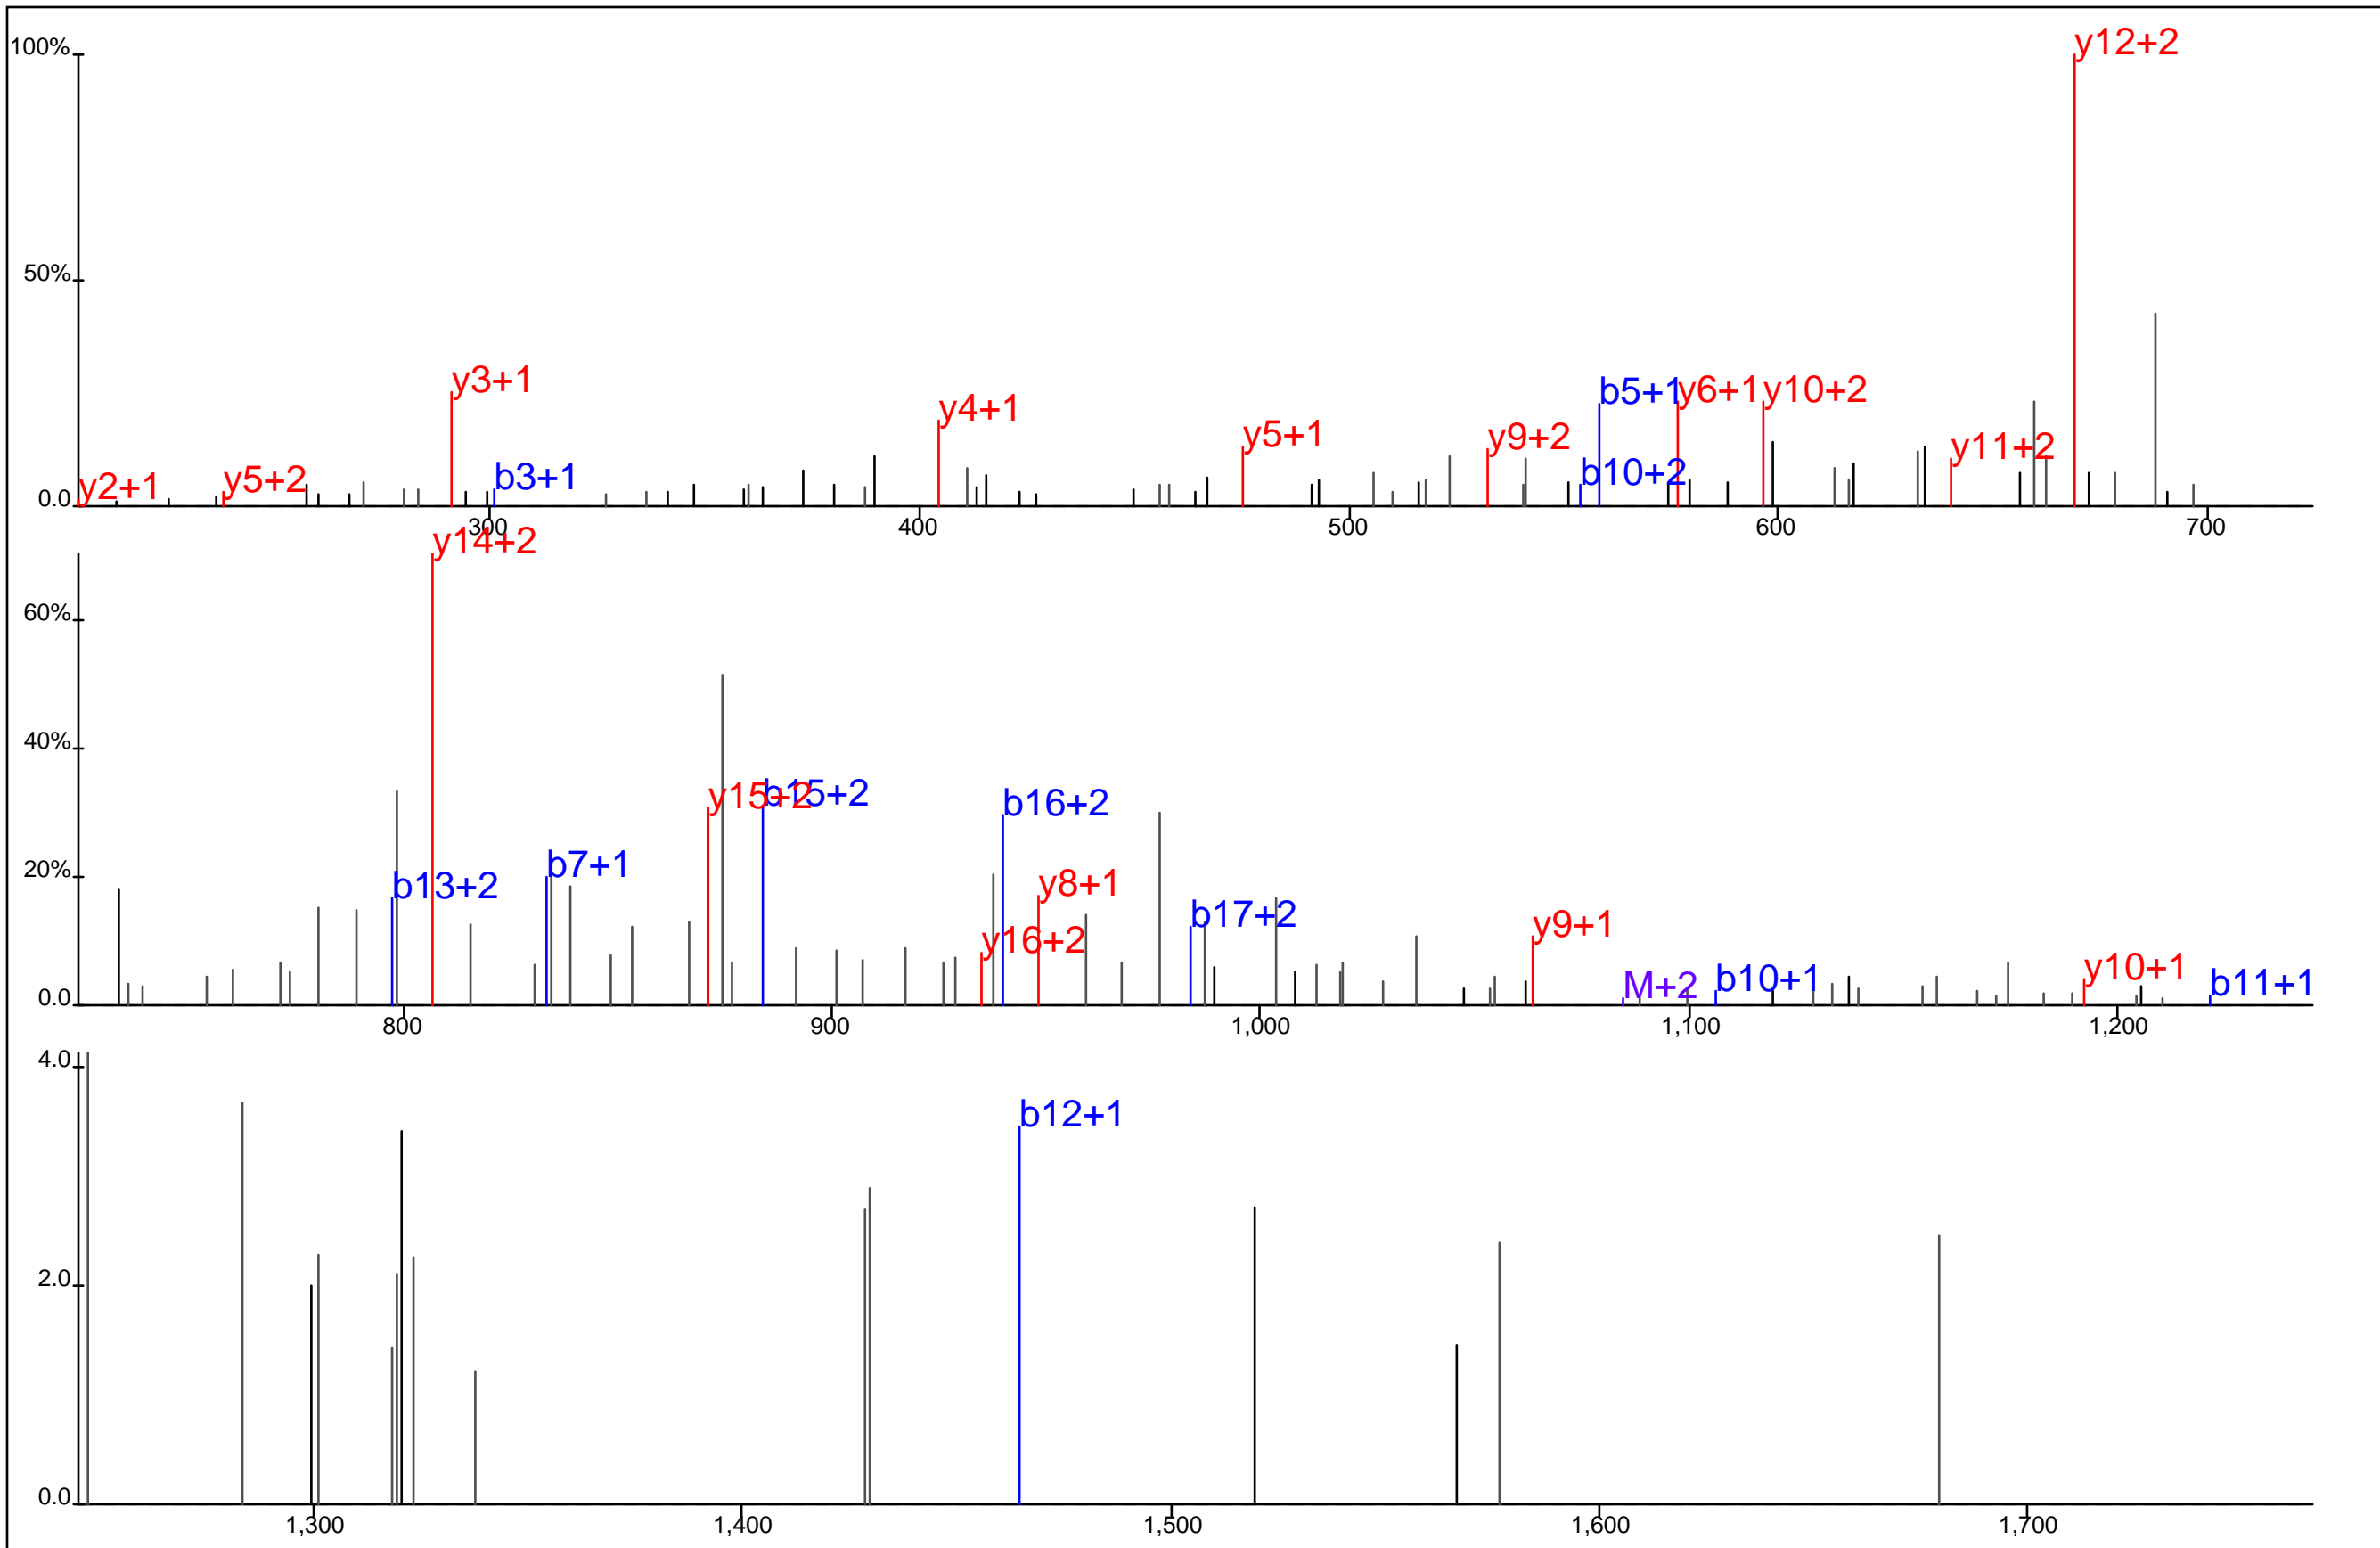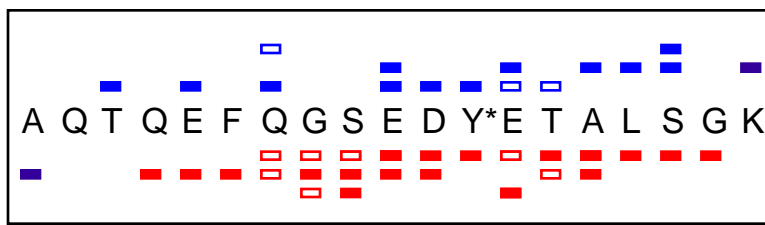

Protein Name: CDK5 regulatory subunit associated protein 2  
 gi Accession: 0  
 Precursor Mass: 723.6408+3  
 Delta Mass: 2.734 ppm  
 XCorr: 29.26

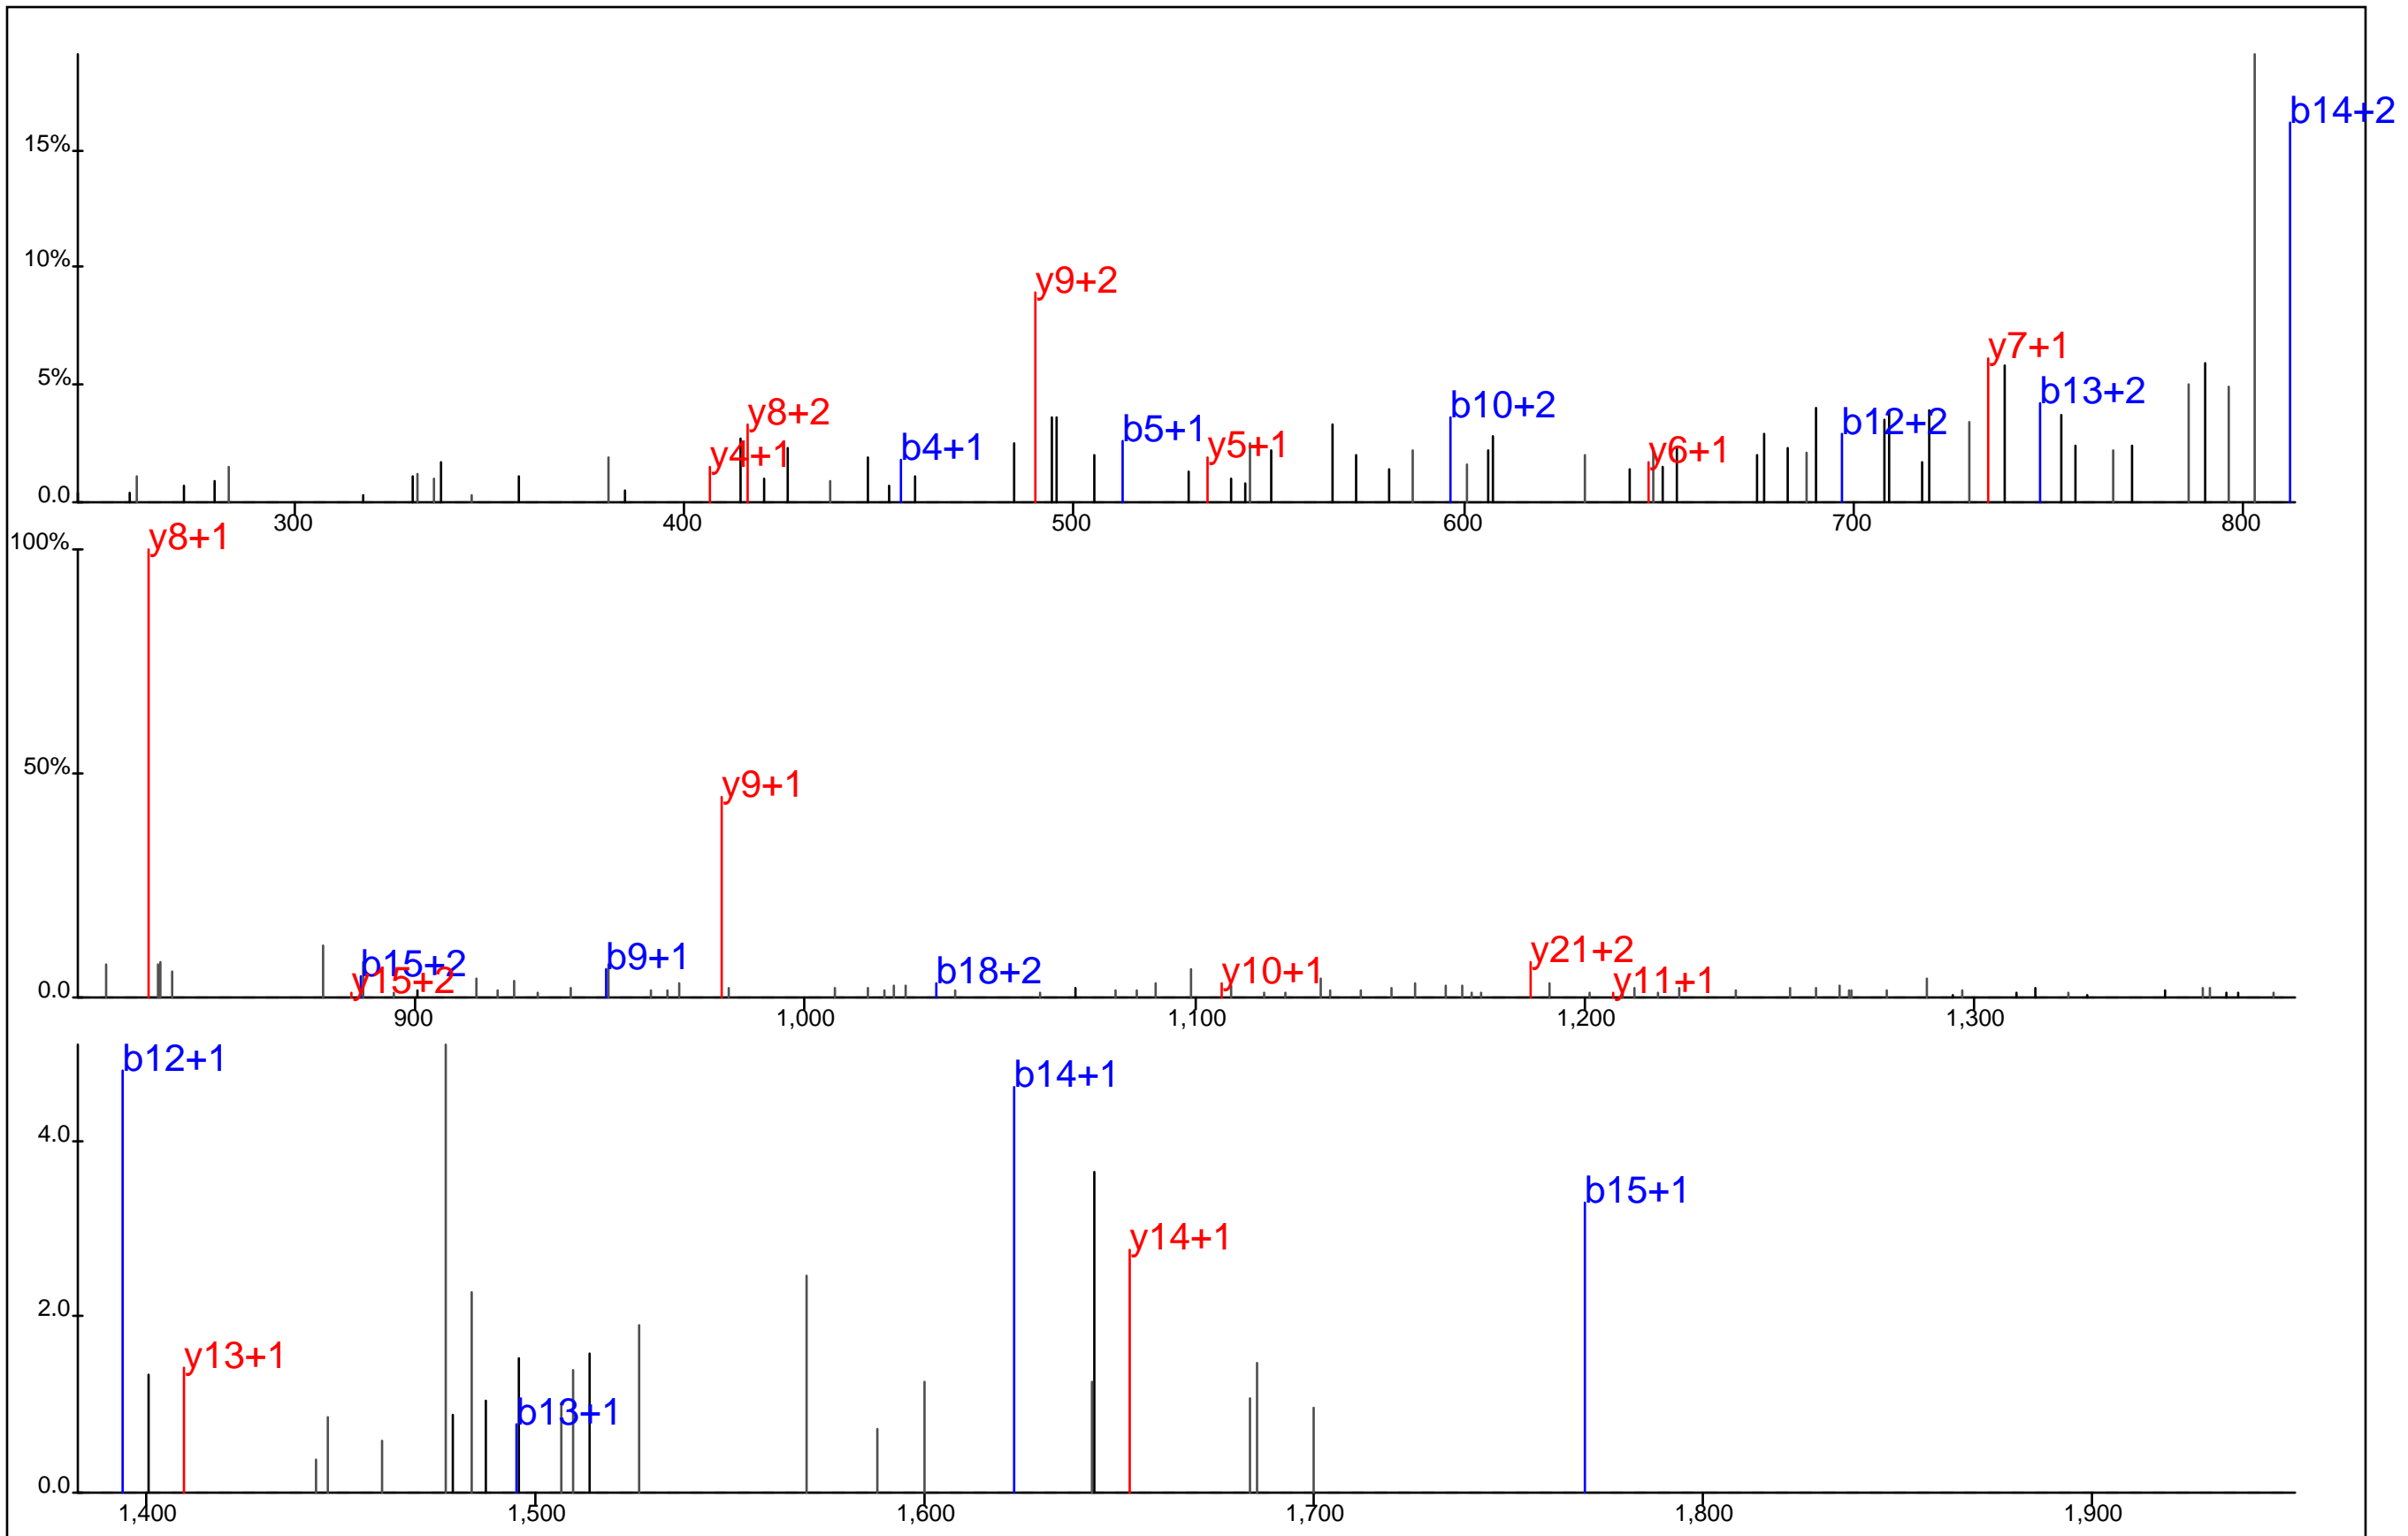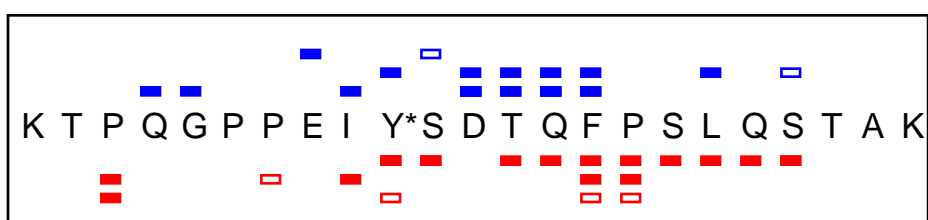

Protein Name: CDV3 homolog  
 gi Accession: 0  
 Precursor Mass: 867.4136+3  
 Delta Mass: 0.697 ppm  
 XCorr: 25.19

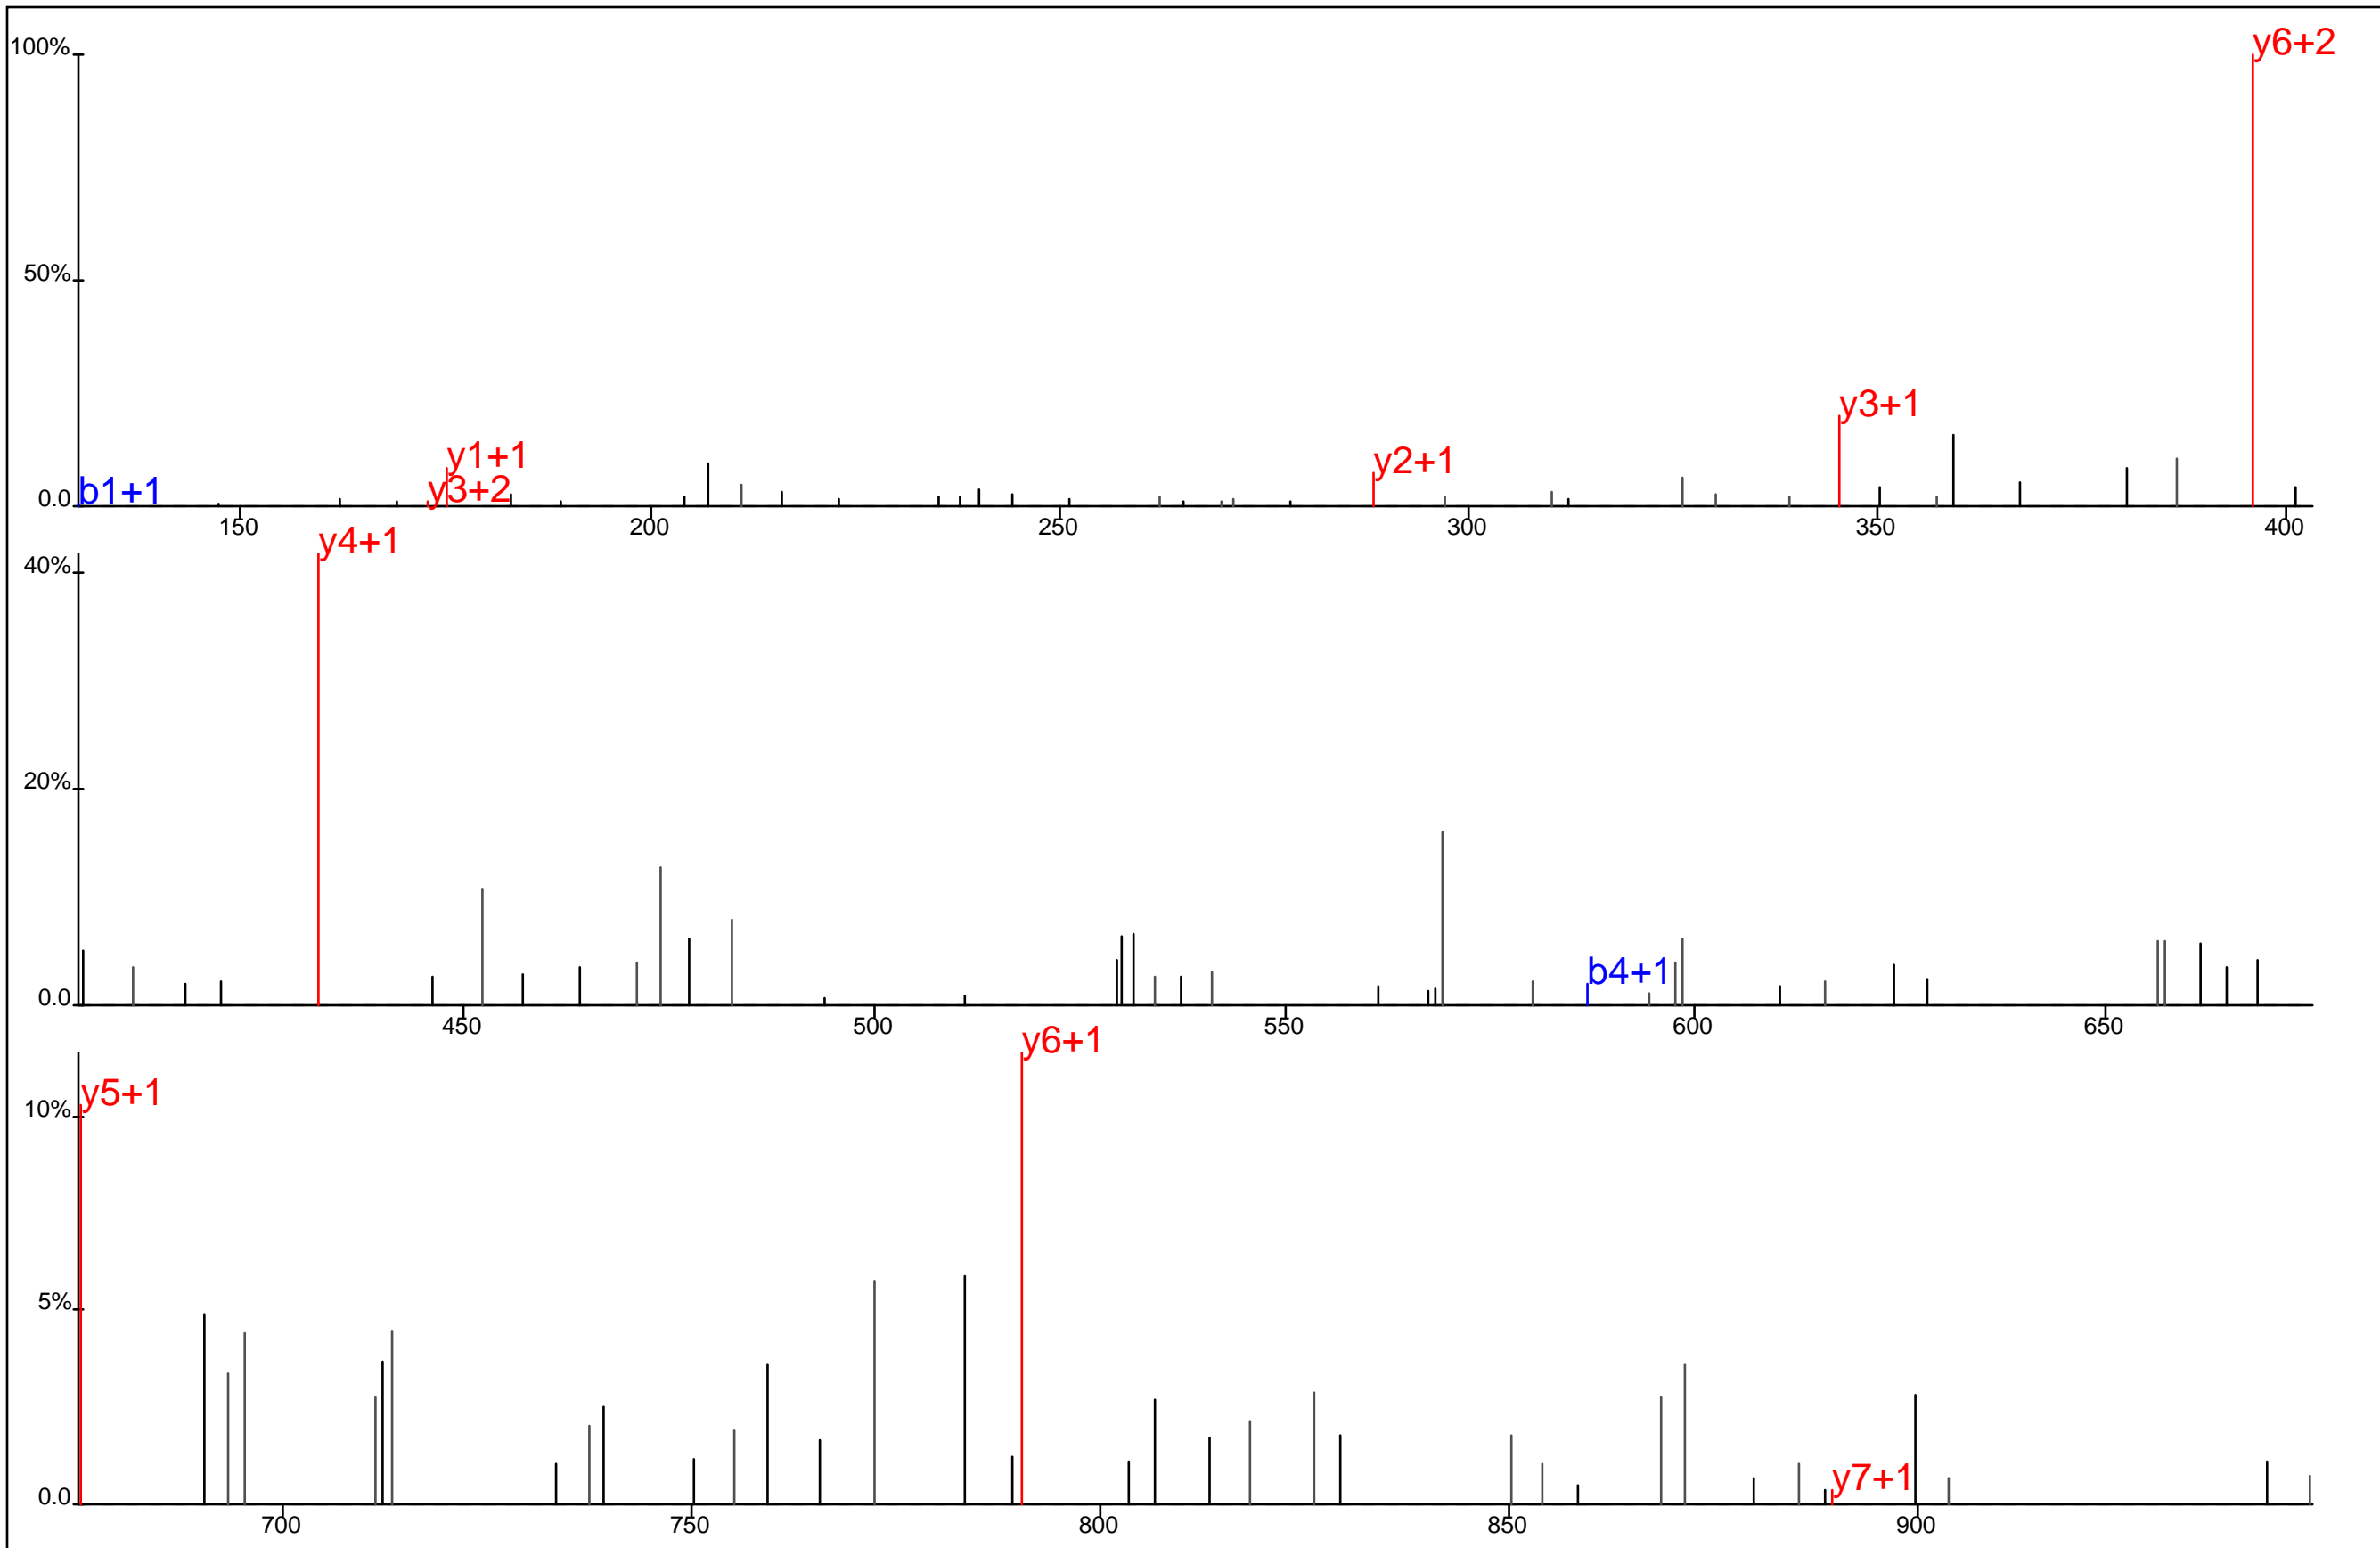

■ ■ ■ ■ ■ ■ ■ ■  
 E V D Y\* S G L R  
 ■ ■ ■ ■ ■ ■ ■ ■  
 ■ ■ ■ ■ ■ ■ ■ ■

Protein Name: CDV3 homolog  
 gi Accession: 0  
 Precursor Mass: 509.7175+2  
 Delta Mass: 3.613 ppm  
 XCorr: 34.34

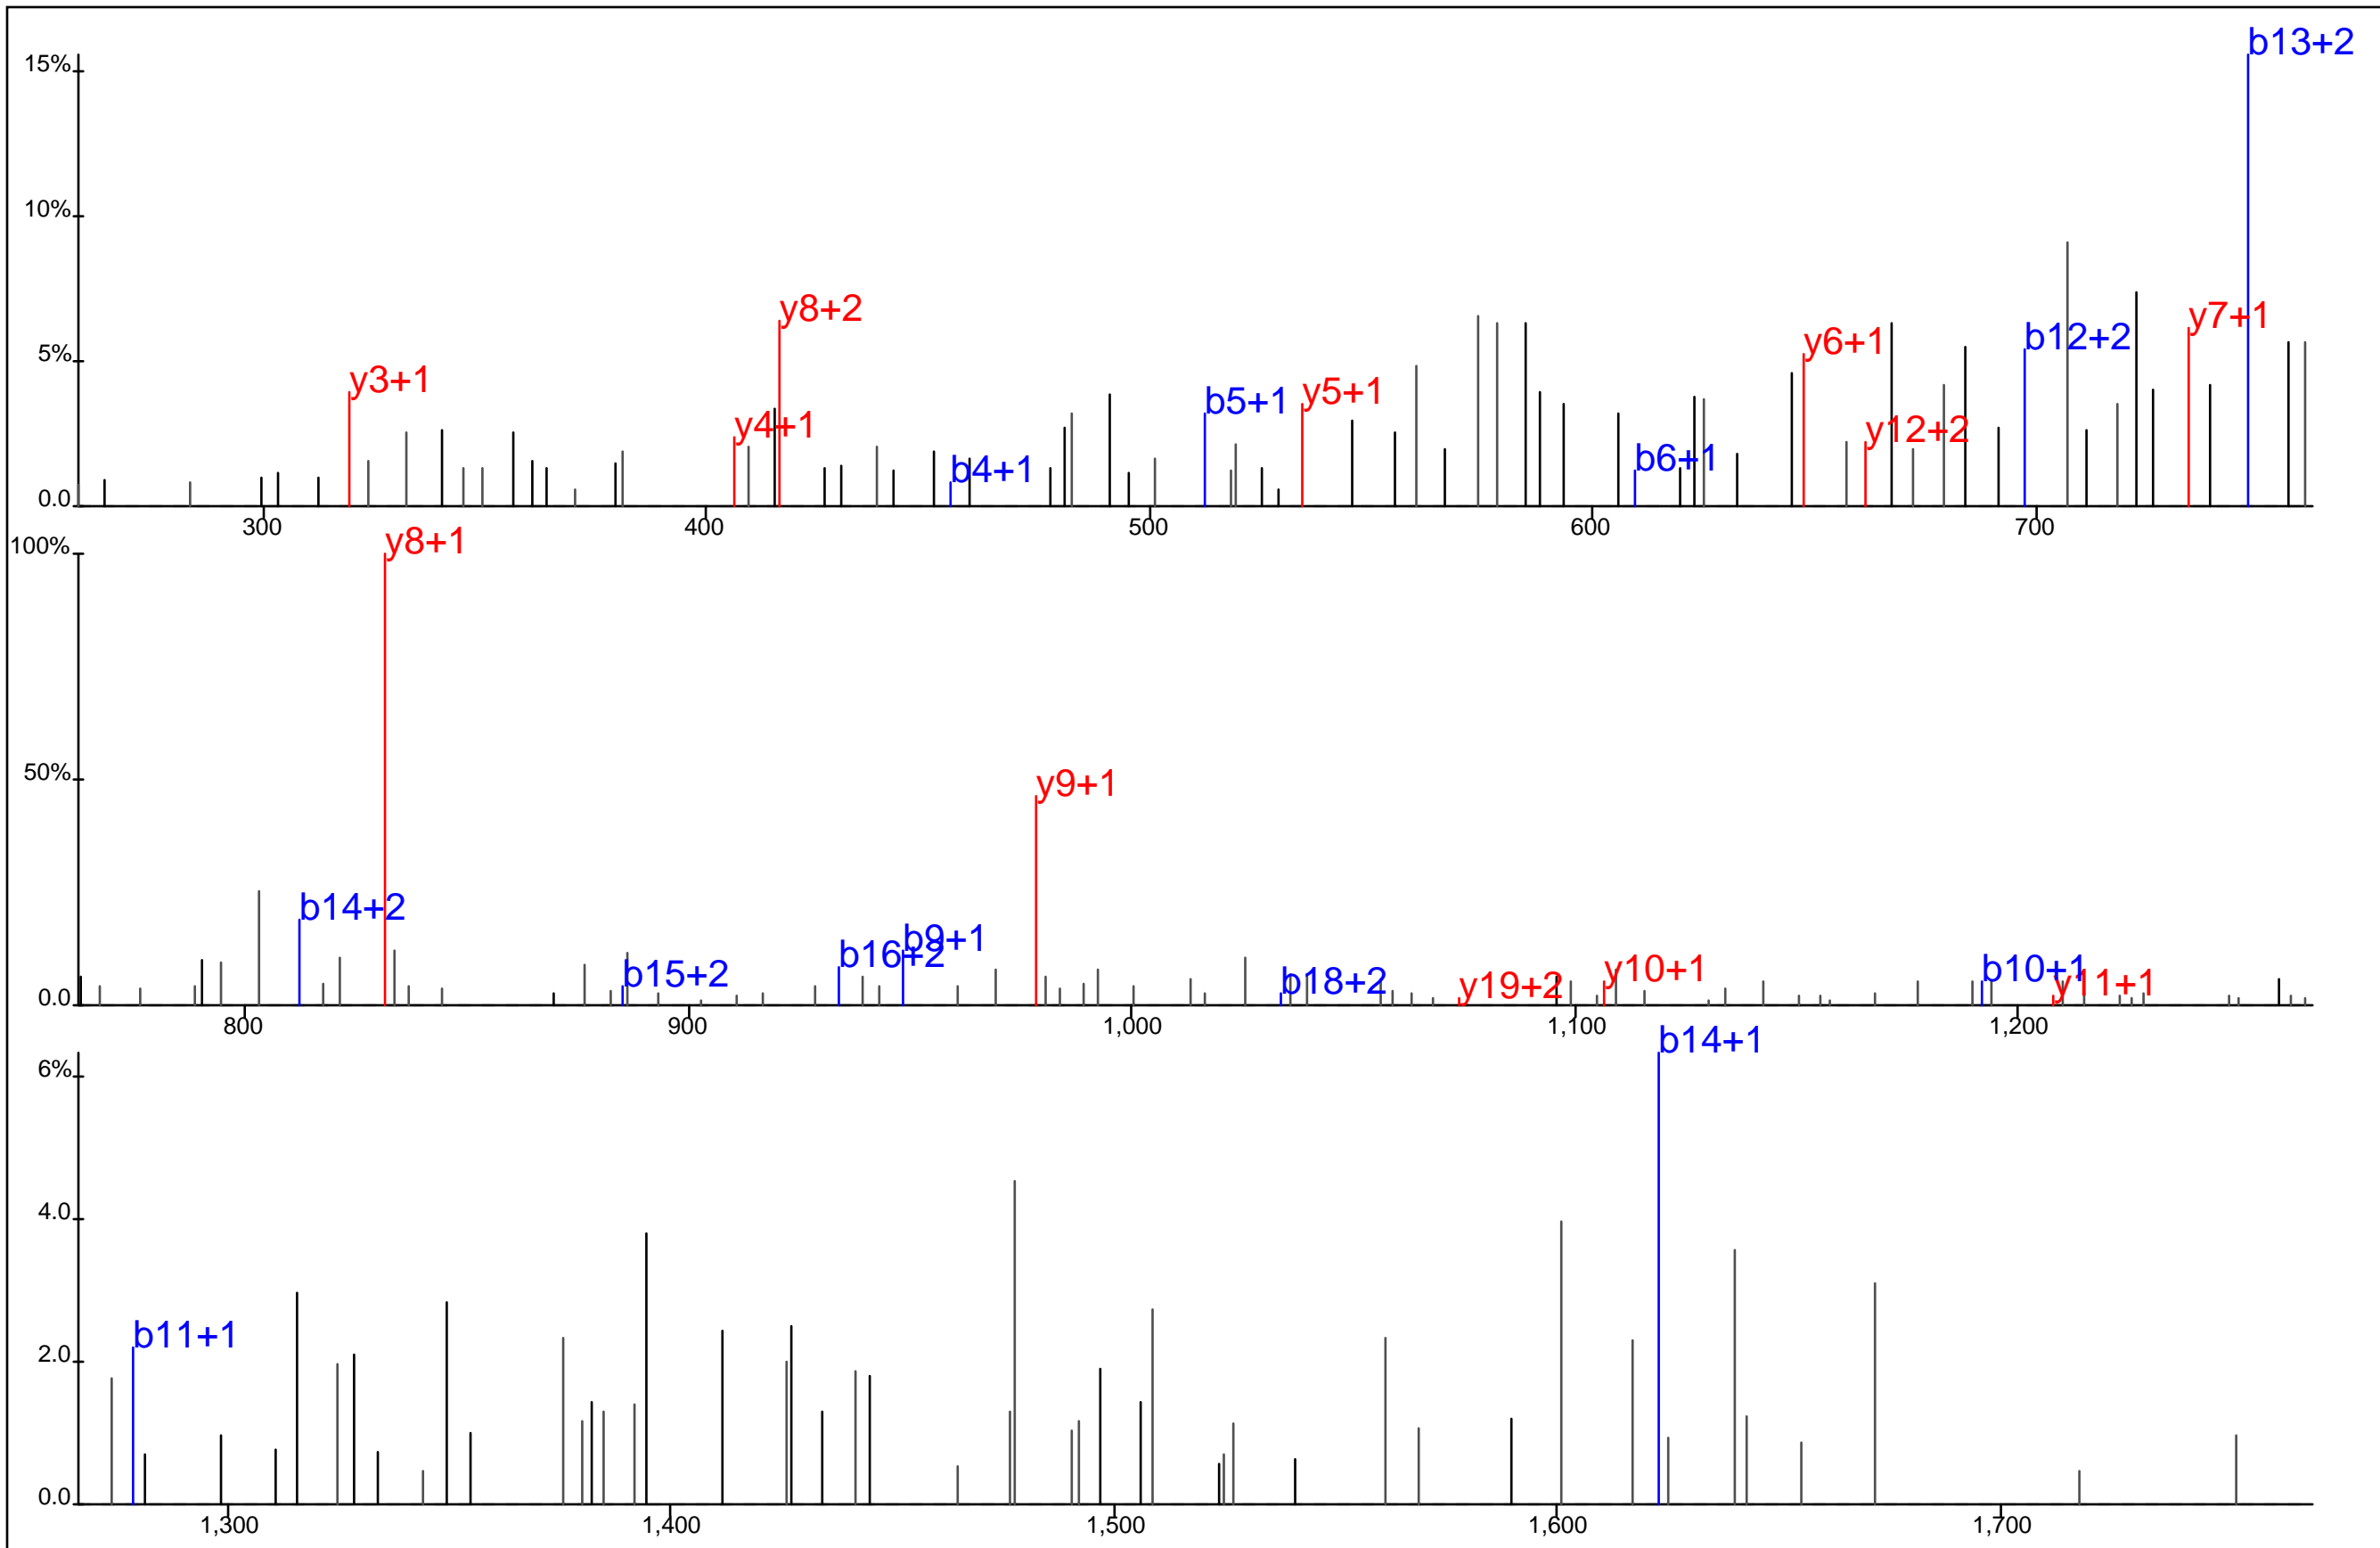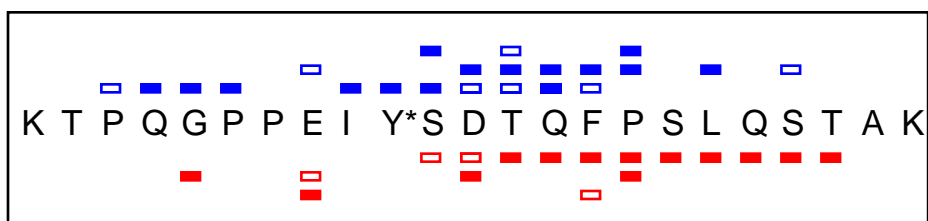

Protein Name: CDV3 homolog  
 gi Accession: 0  
 Precursor Mass: 867.4158+3  
 Delta Mass: 1.838 ppm  
 XCorr: 24.94



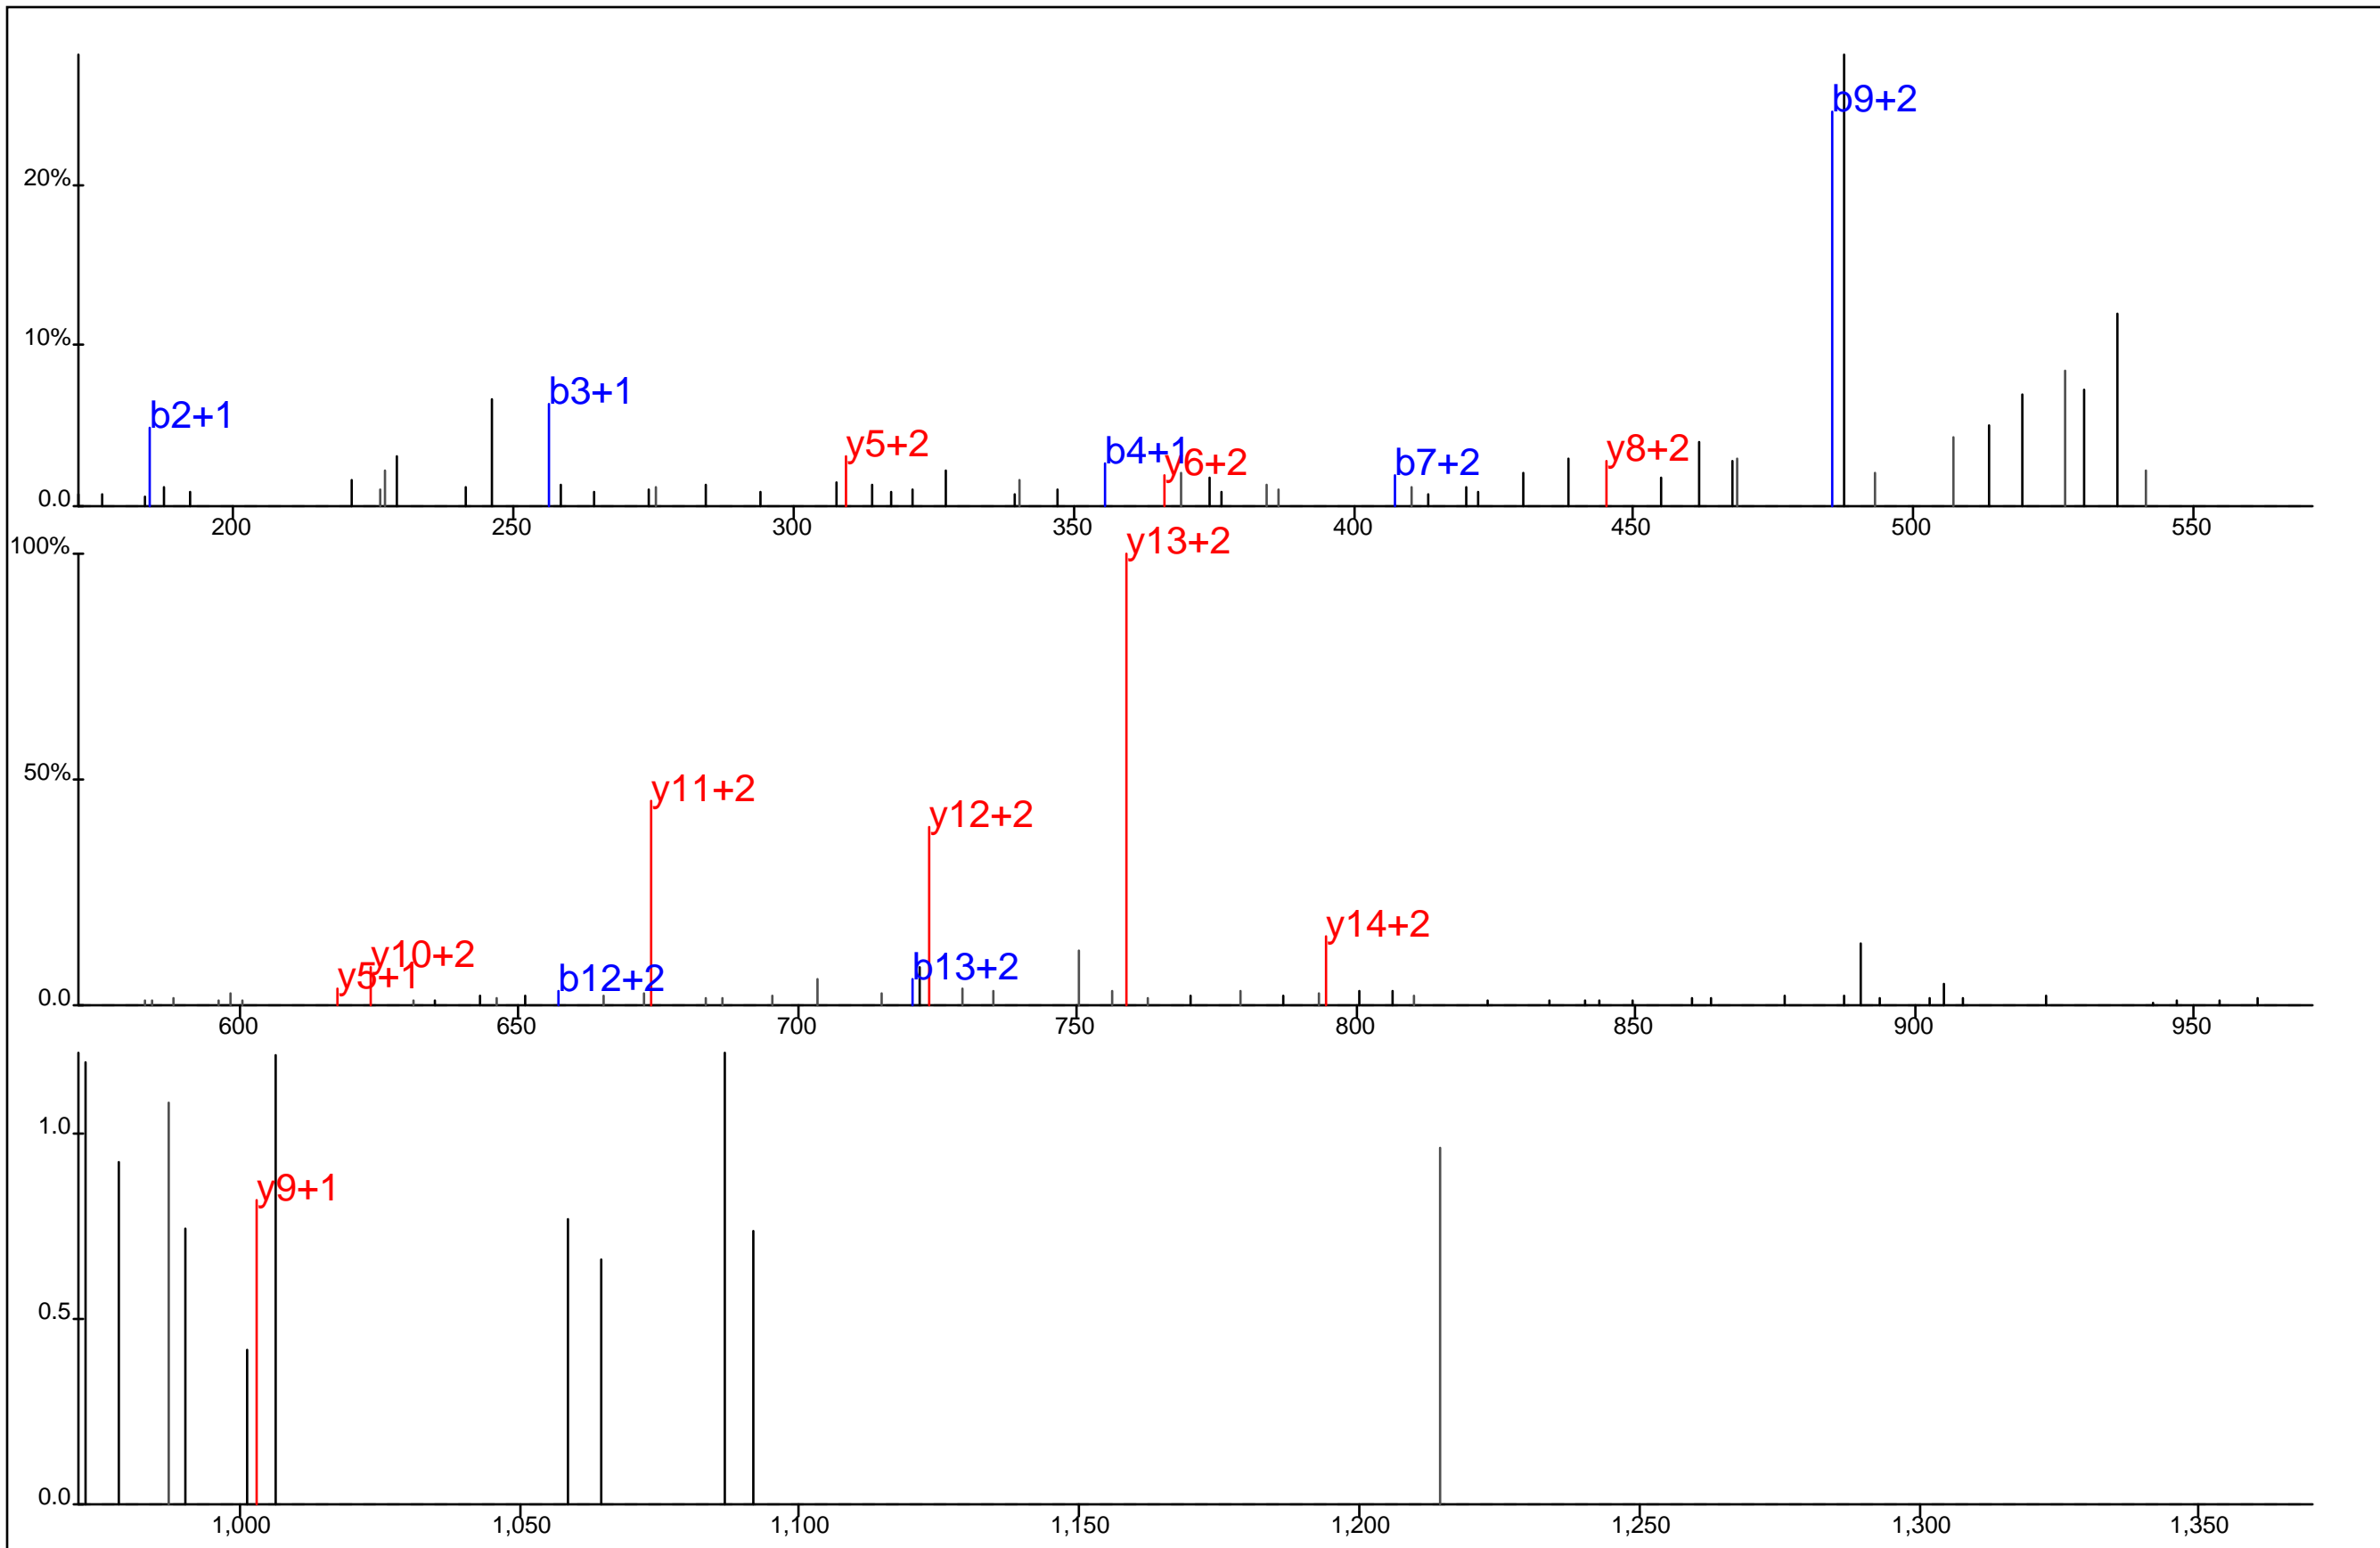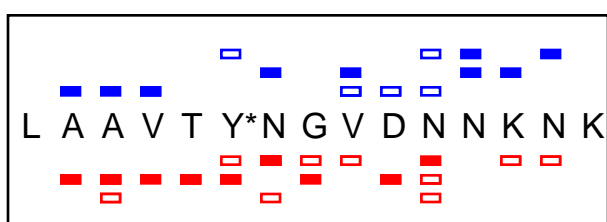

Protein Name: Cell division cycle 10  
 gi Accession: 0  
 Precursor Mass: 567.6057+3  
 Delta Mass: 1.343 ppm  
 XCorr: 22.34



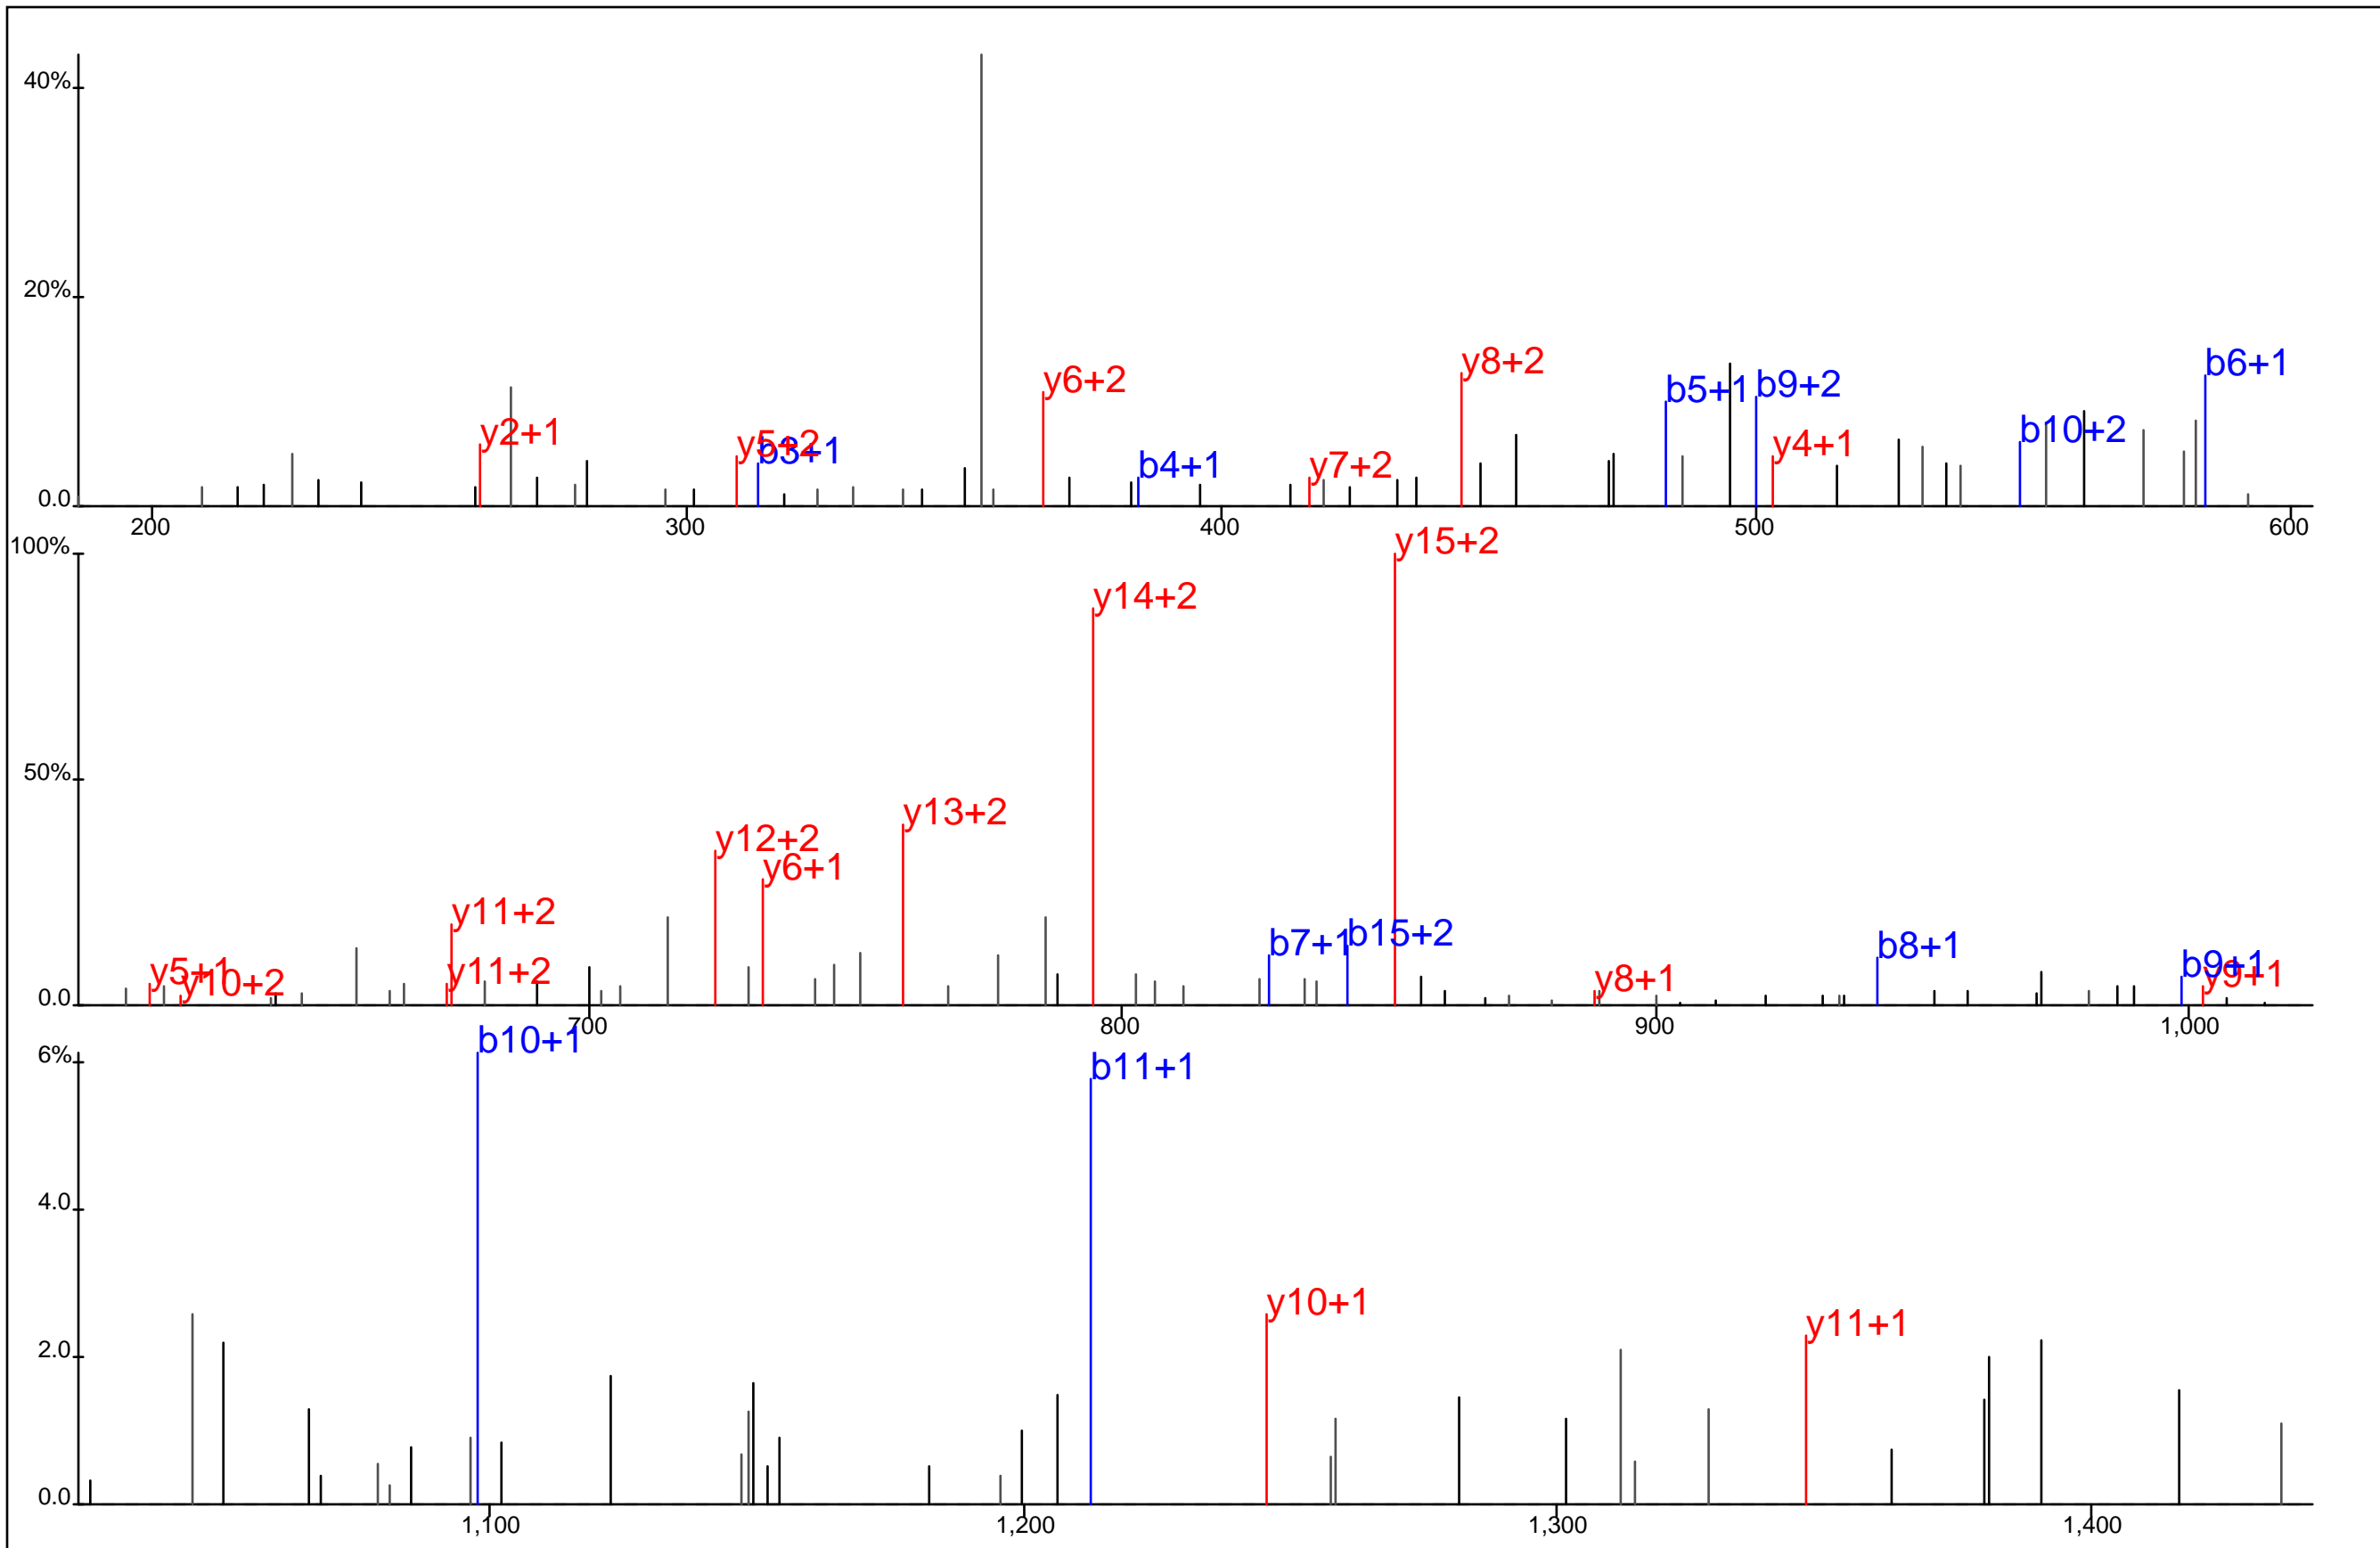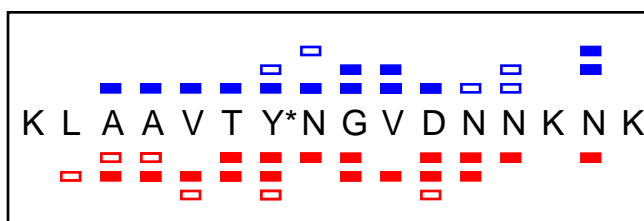

Protein Name: Cell division cycle 10  
 gi Accession: 0  
 Precursor Mass: 610.3008+3  
 Delta Mass: 3.985 ppm  
 XCorr: 49.22

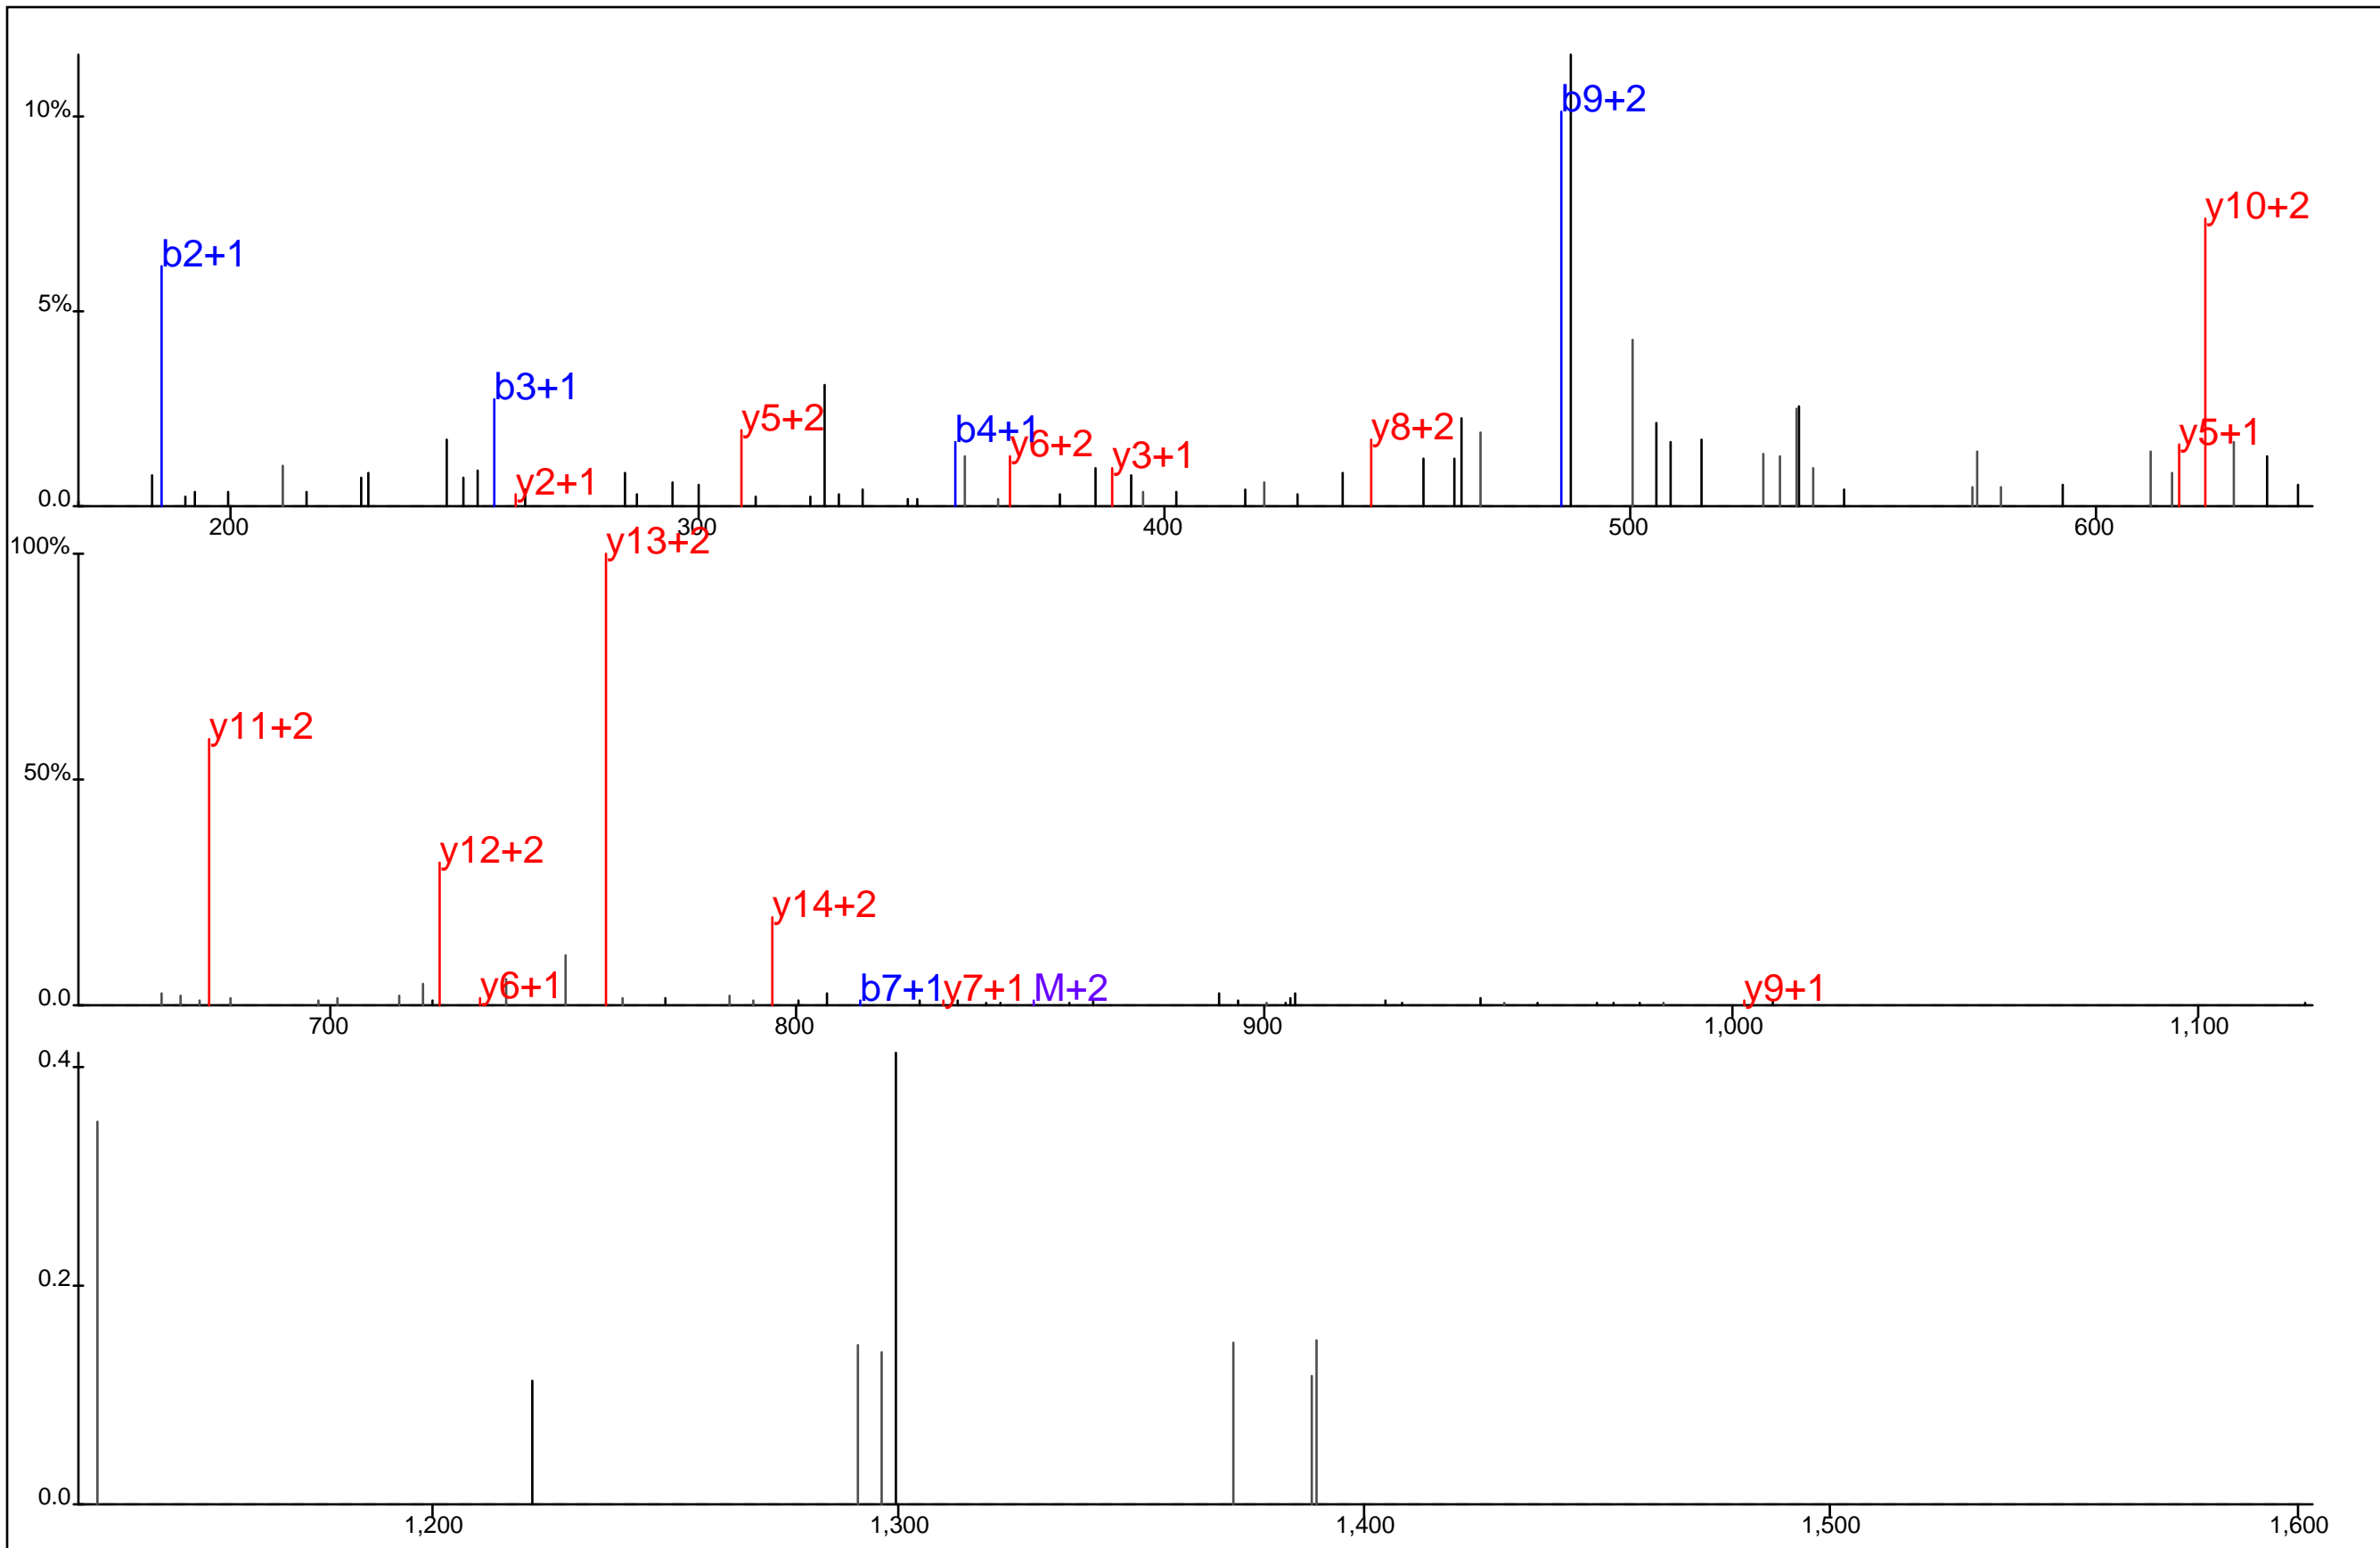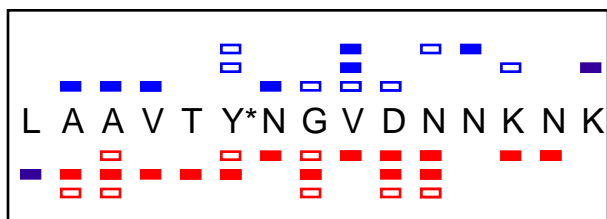

Protein Name: Cell division cycle 10  
 gi Accession: 0  
 Precursor Mass: 567.6044+3  
 Delta Mass: 1.025 ppm  
 XCorr: 28.73

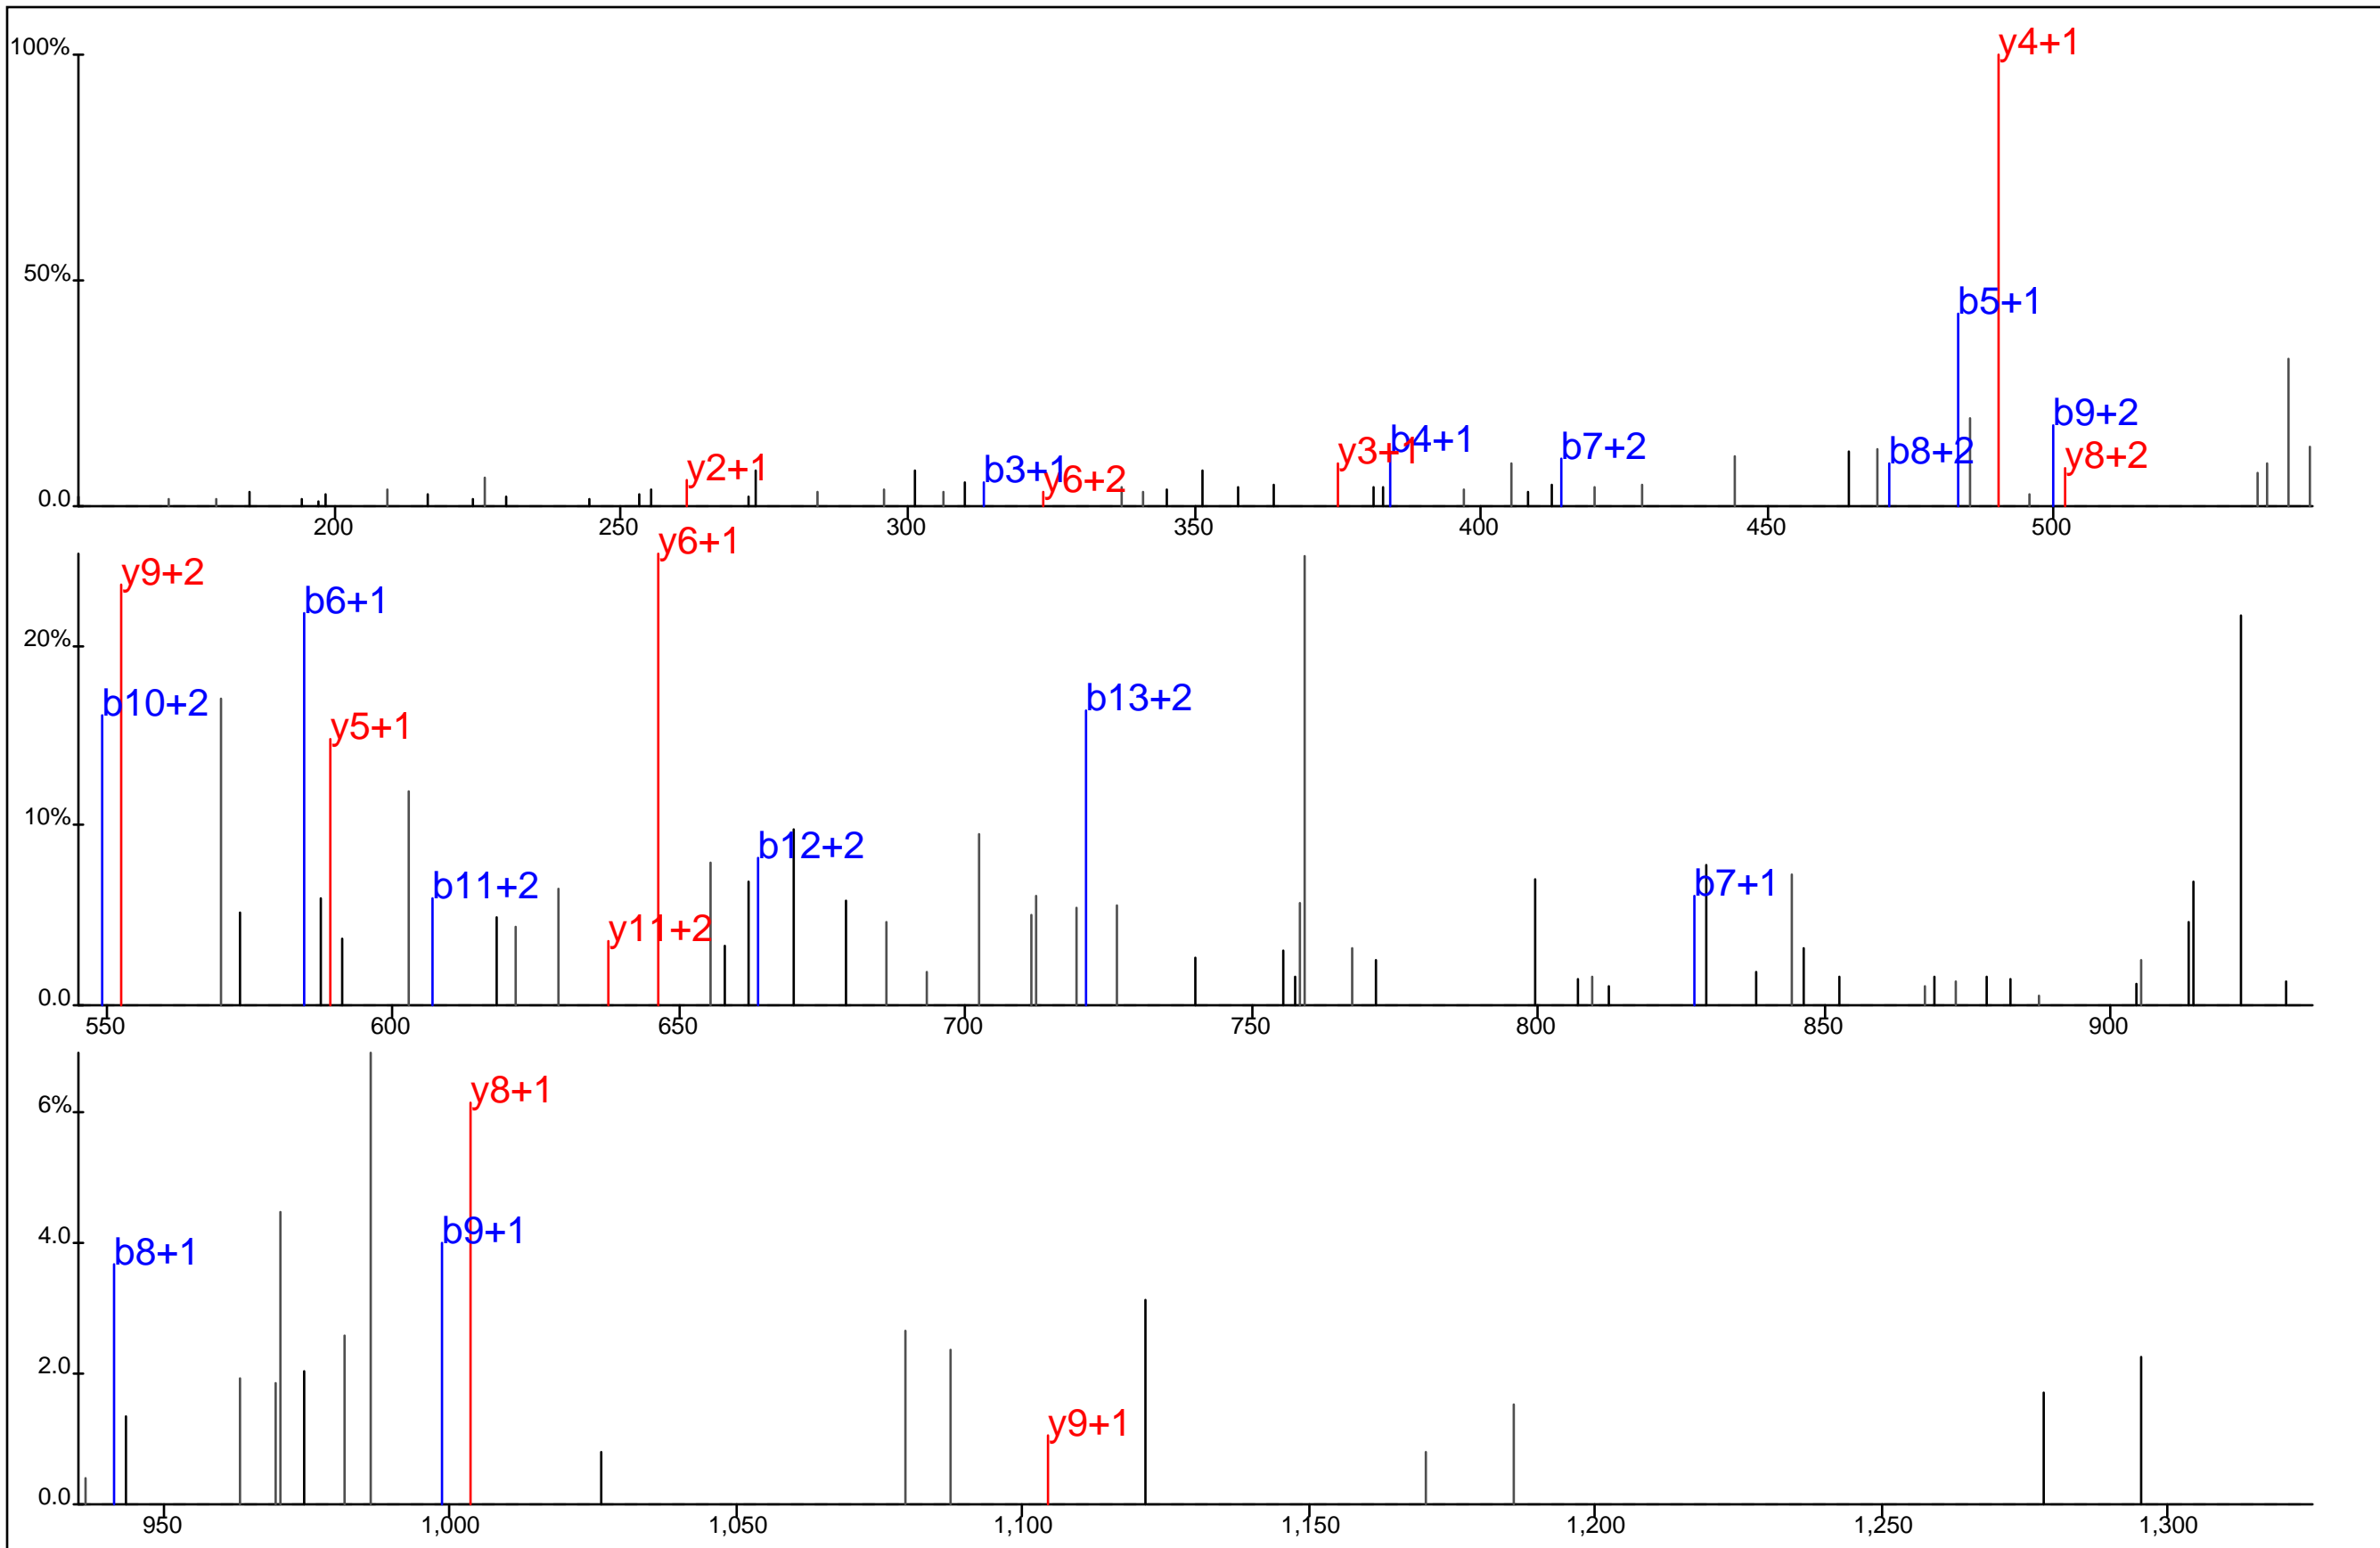

K L A A V T Y\* N G V D N N K  
■ □

Protein Name: Cell division cycle 10  
 gi Accession: 0  
 Precursor Mass: 529.5909+3  
 Delta Mass: 0.447 ppm  
 XCorr: 36.61

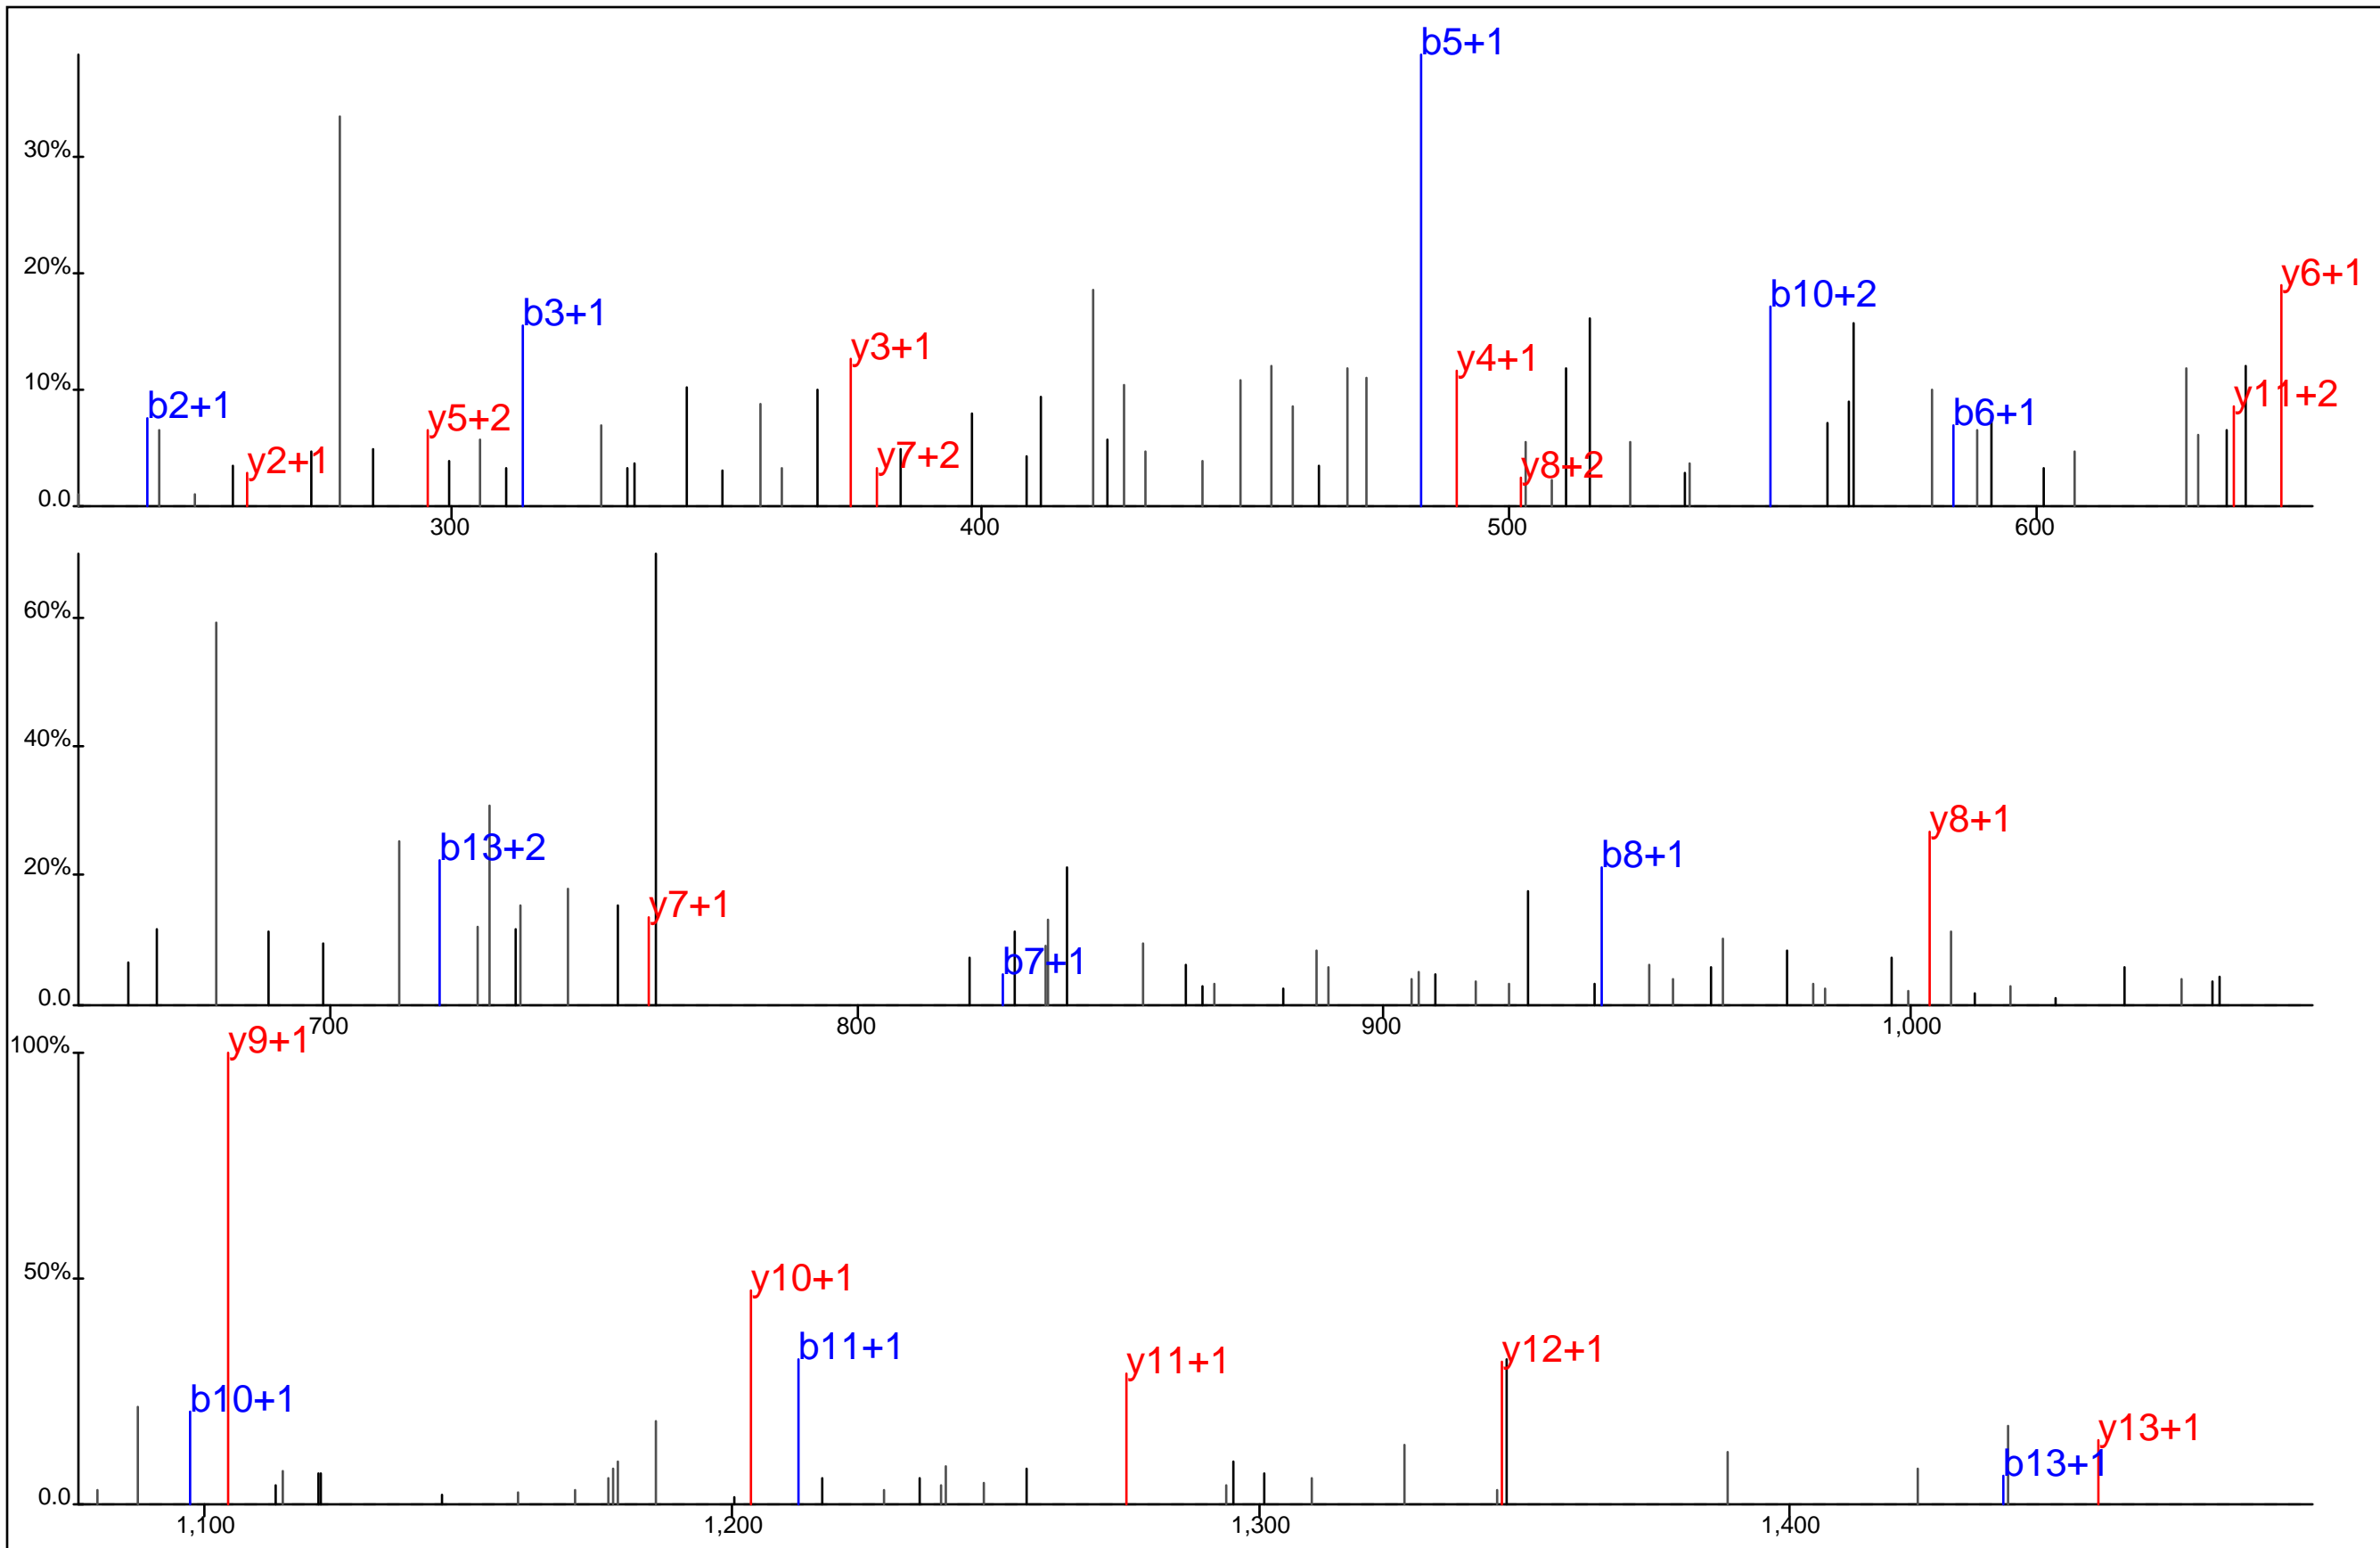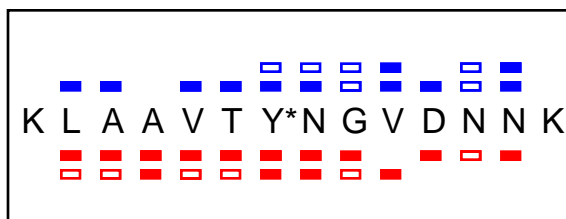

Protein Name: Cell division cycle 10  
 gi Accession: 0  
 Precursor Mass: 793.8822+2  
 Delta Mass: 0.160 ppm  
 XCorr: 36.97

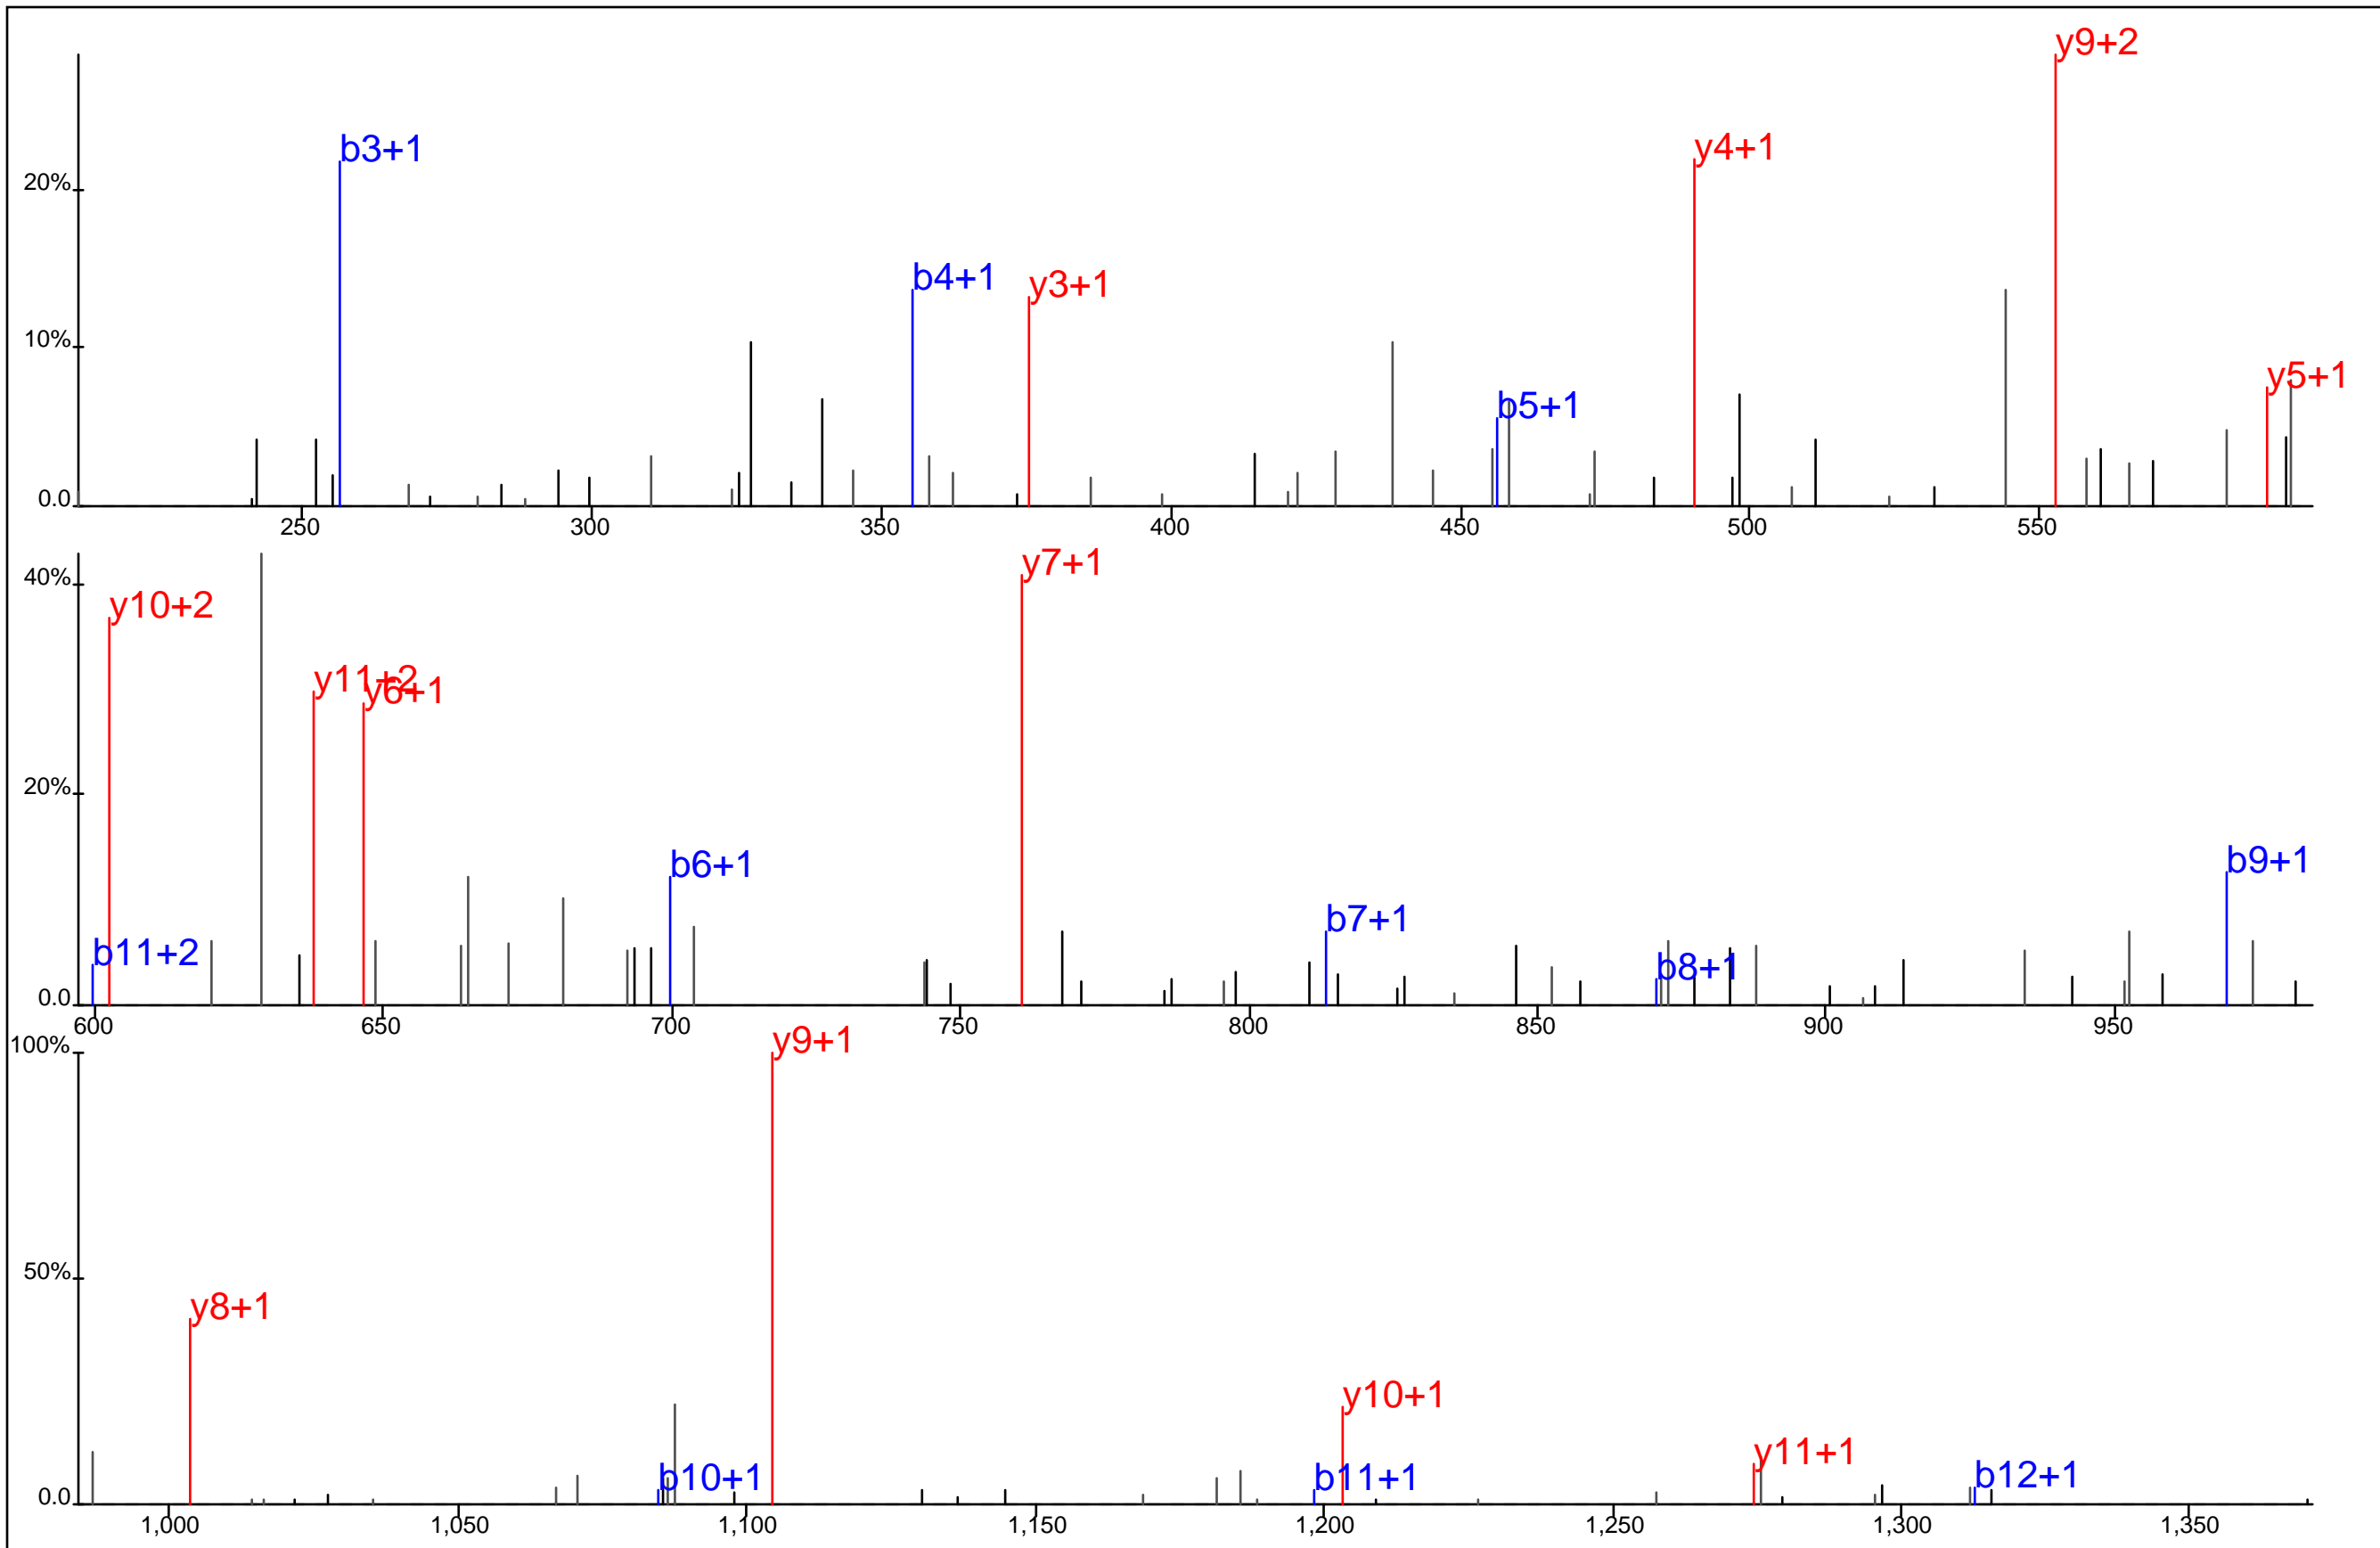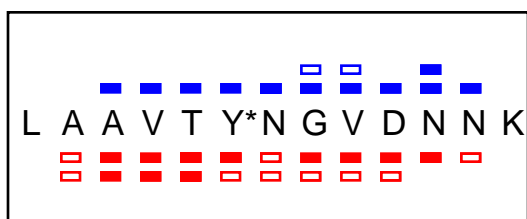

Protein Name: Cell division cycle 10  
 gi Accession: 0  
 Precursor Mass: 729.8341+2  
 Delta Mass: 1.019 ppm  
 XCorr: 57.44

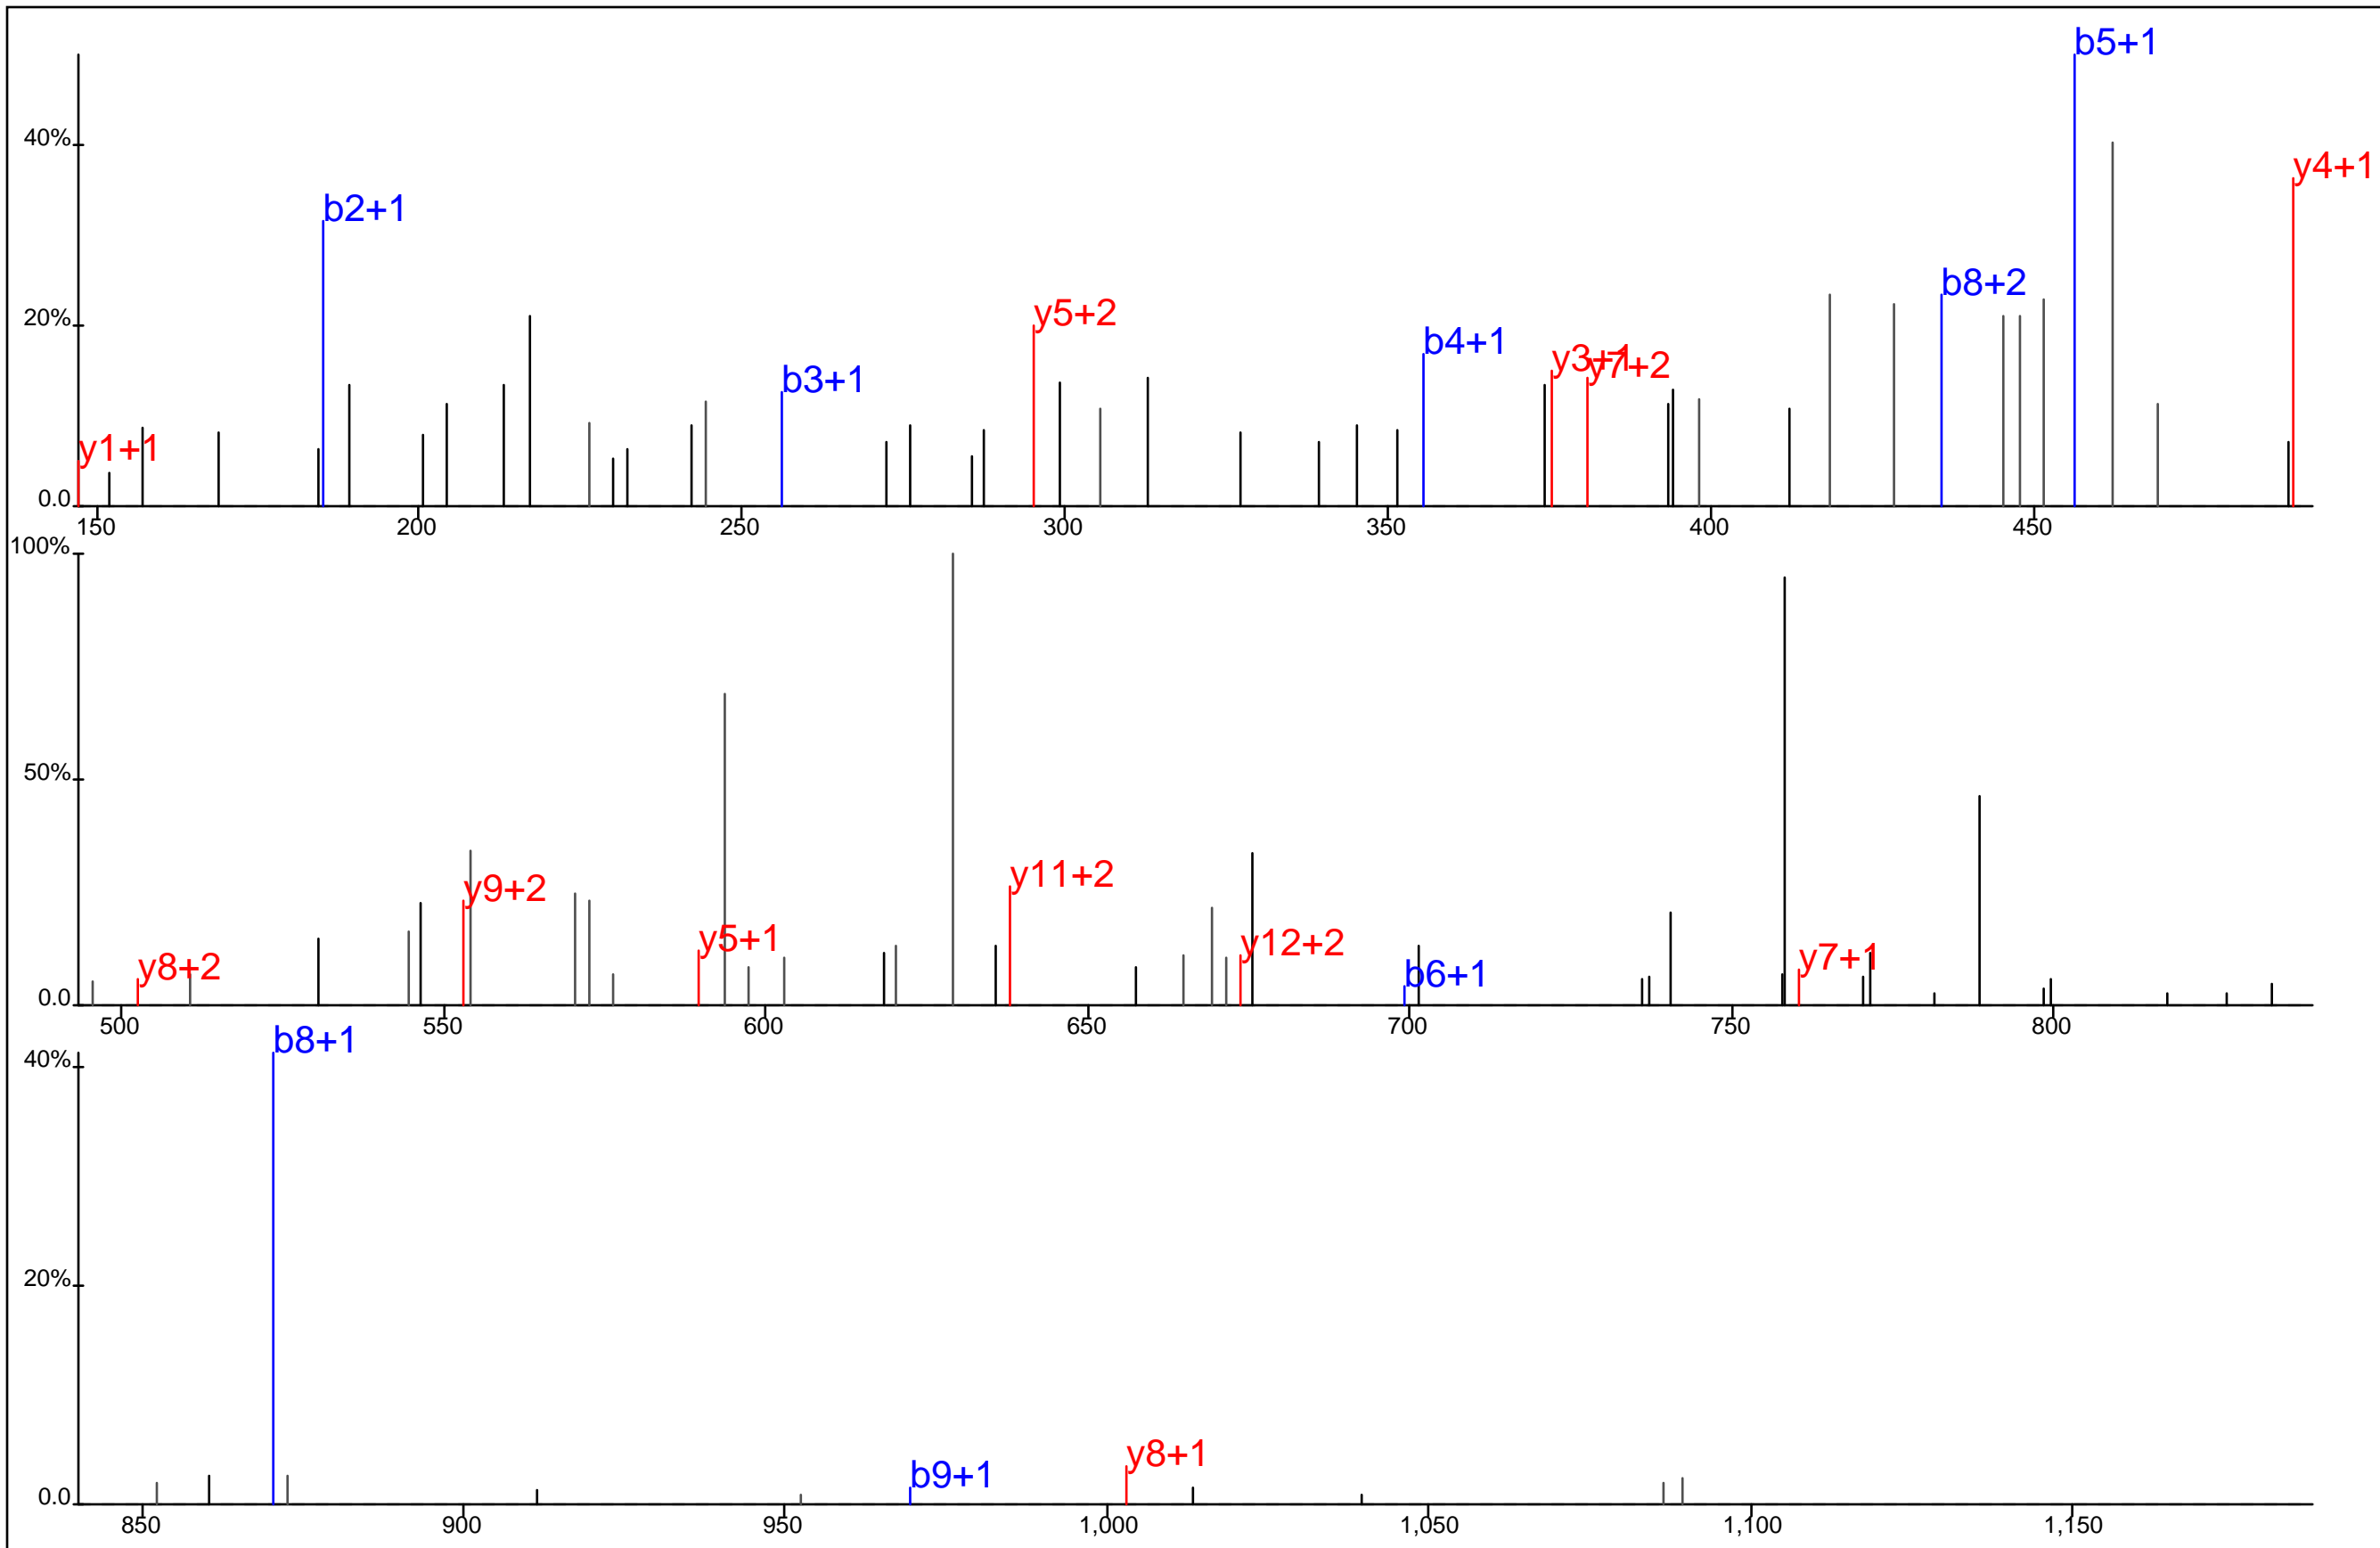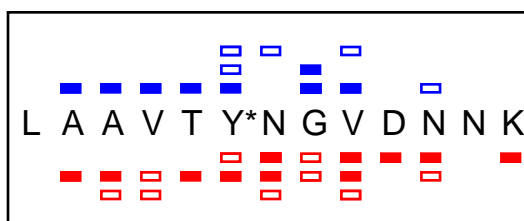

Protein Name: Cell division cycle 10  
 gi Accession: 0  
 Precursor Mass: 486.8932+3  
 Delta Mass: 1.776 ppm  
 XCorr: 20.31



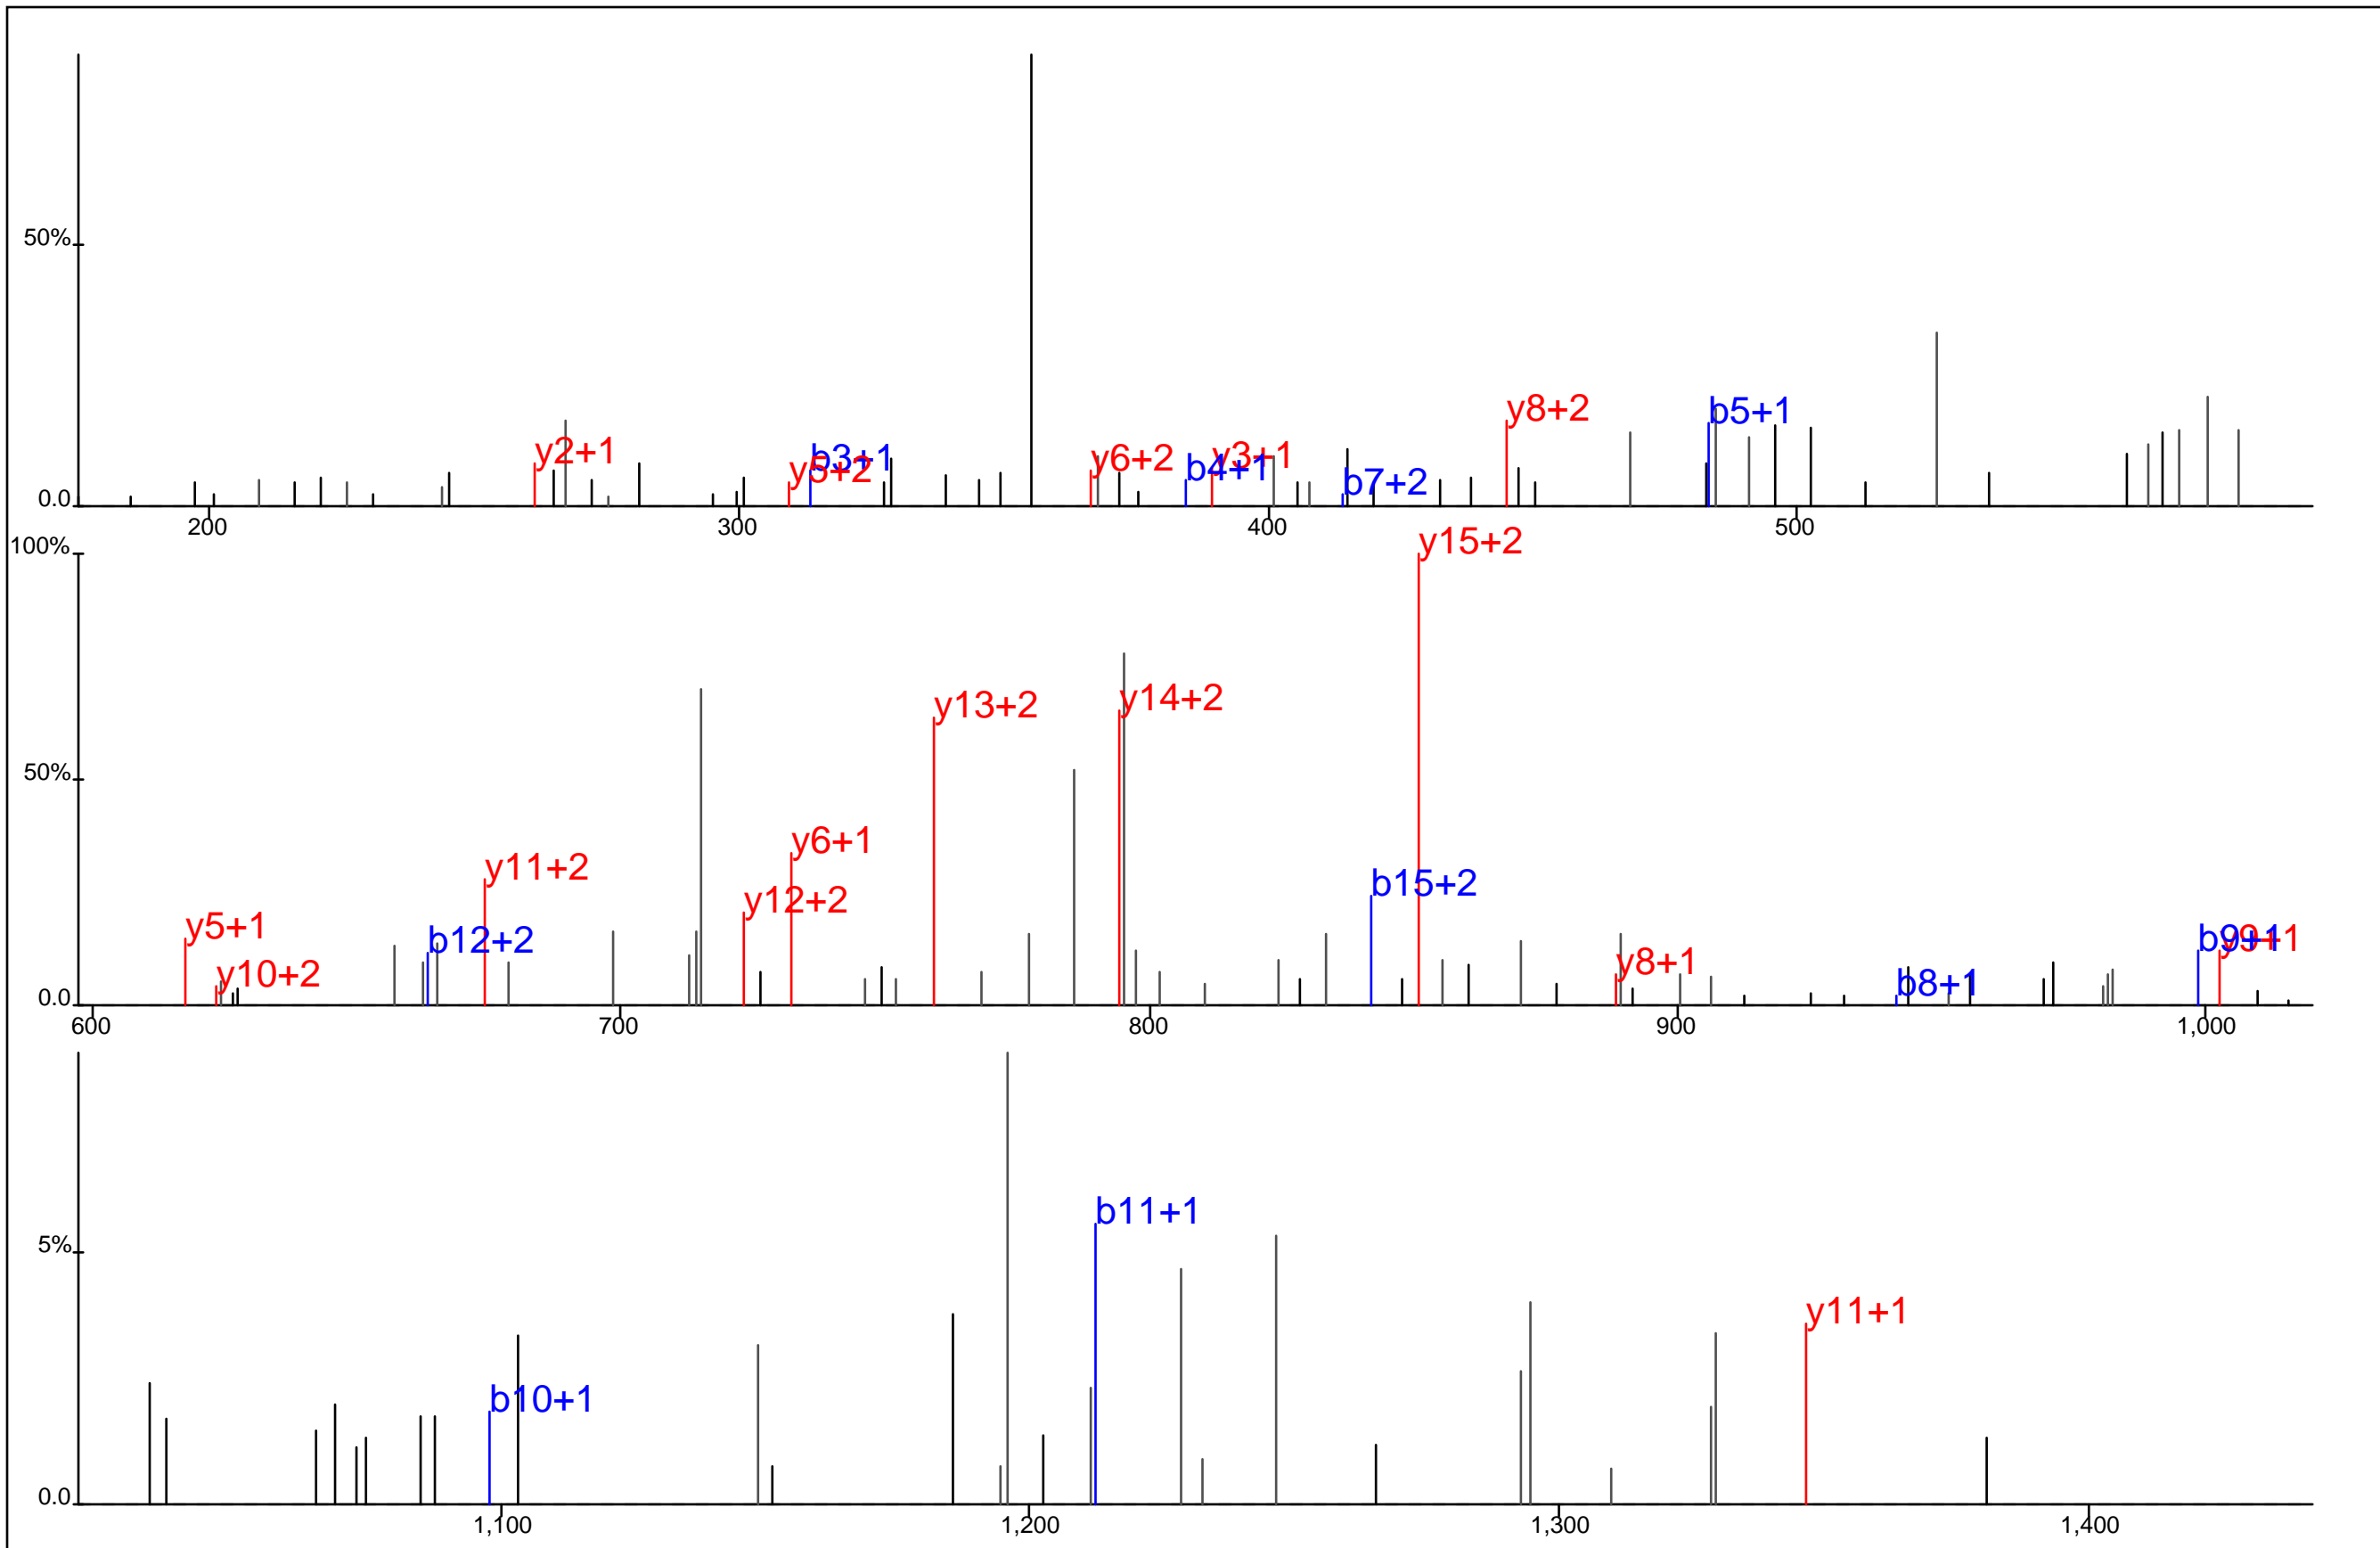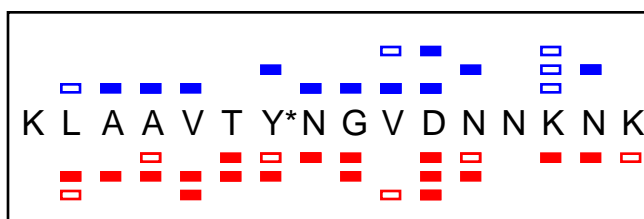

Protein Name: Cell division cycle 10  
 gi Accession: 0  
 Precursor Mass: 610.3018+3  
 Delta Mass: 2.382 ppm  
 XCorr: 43.17

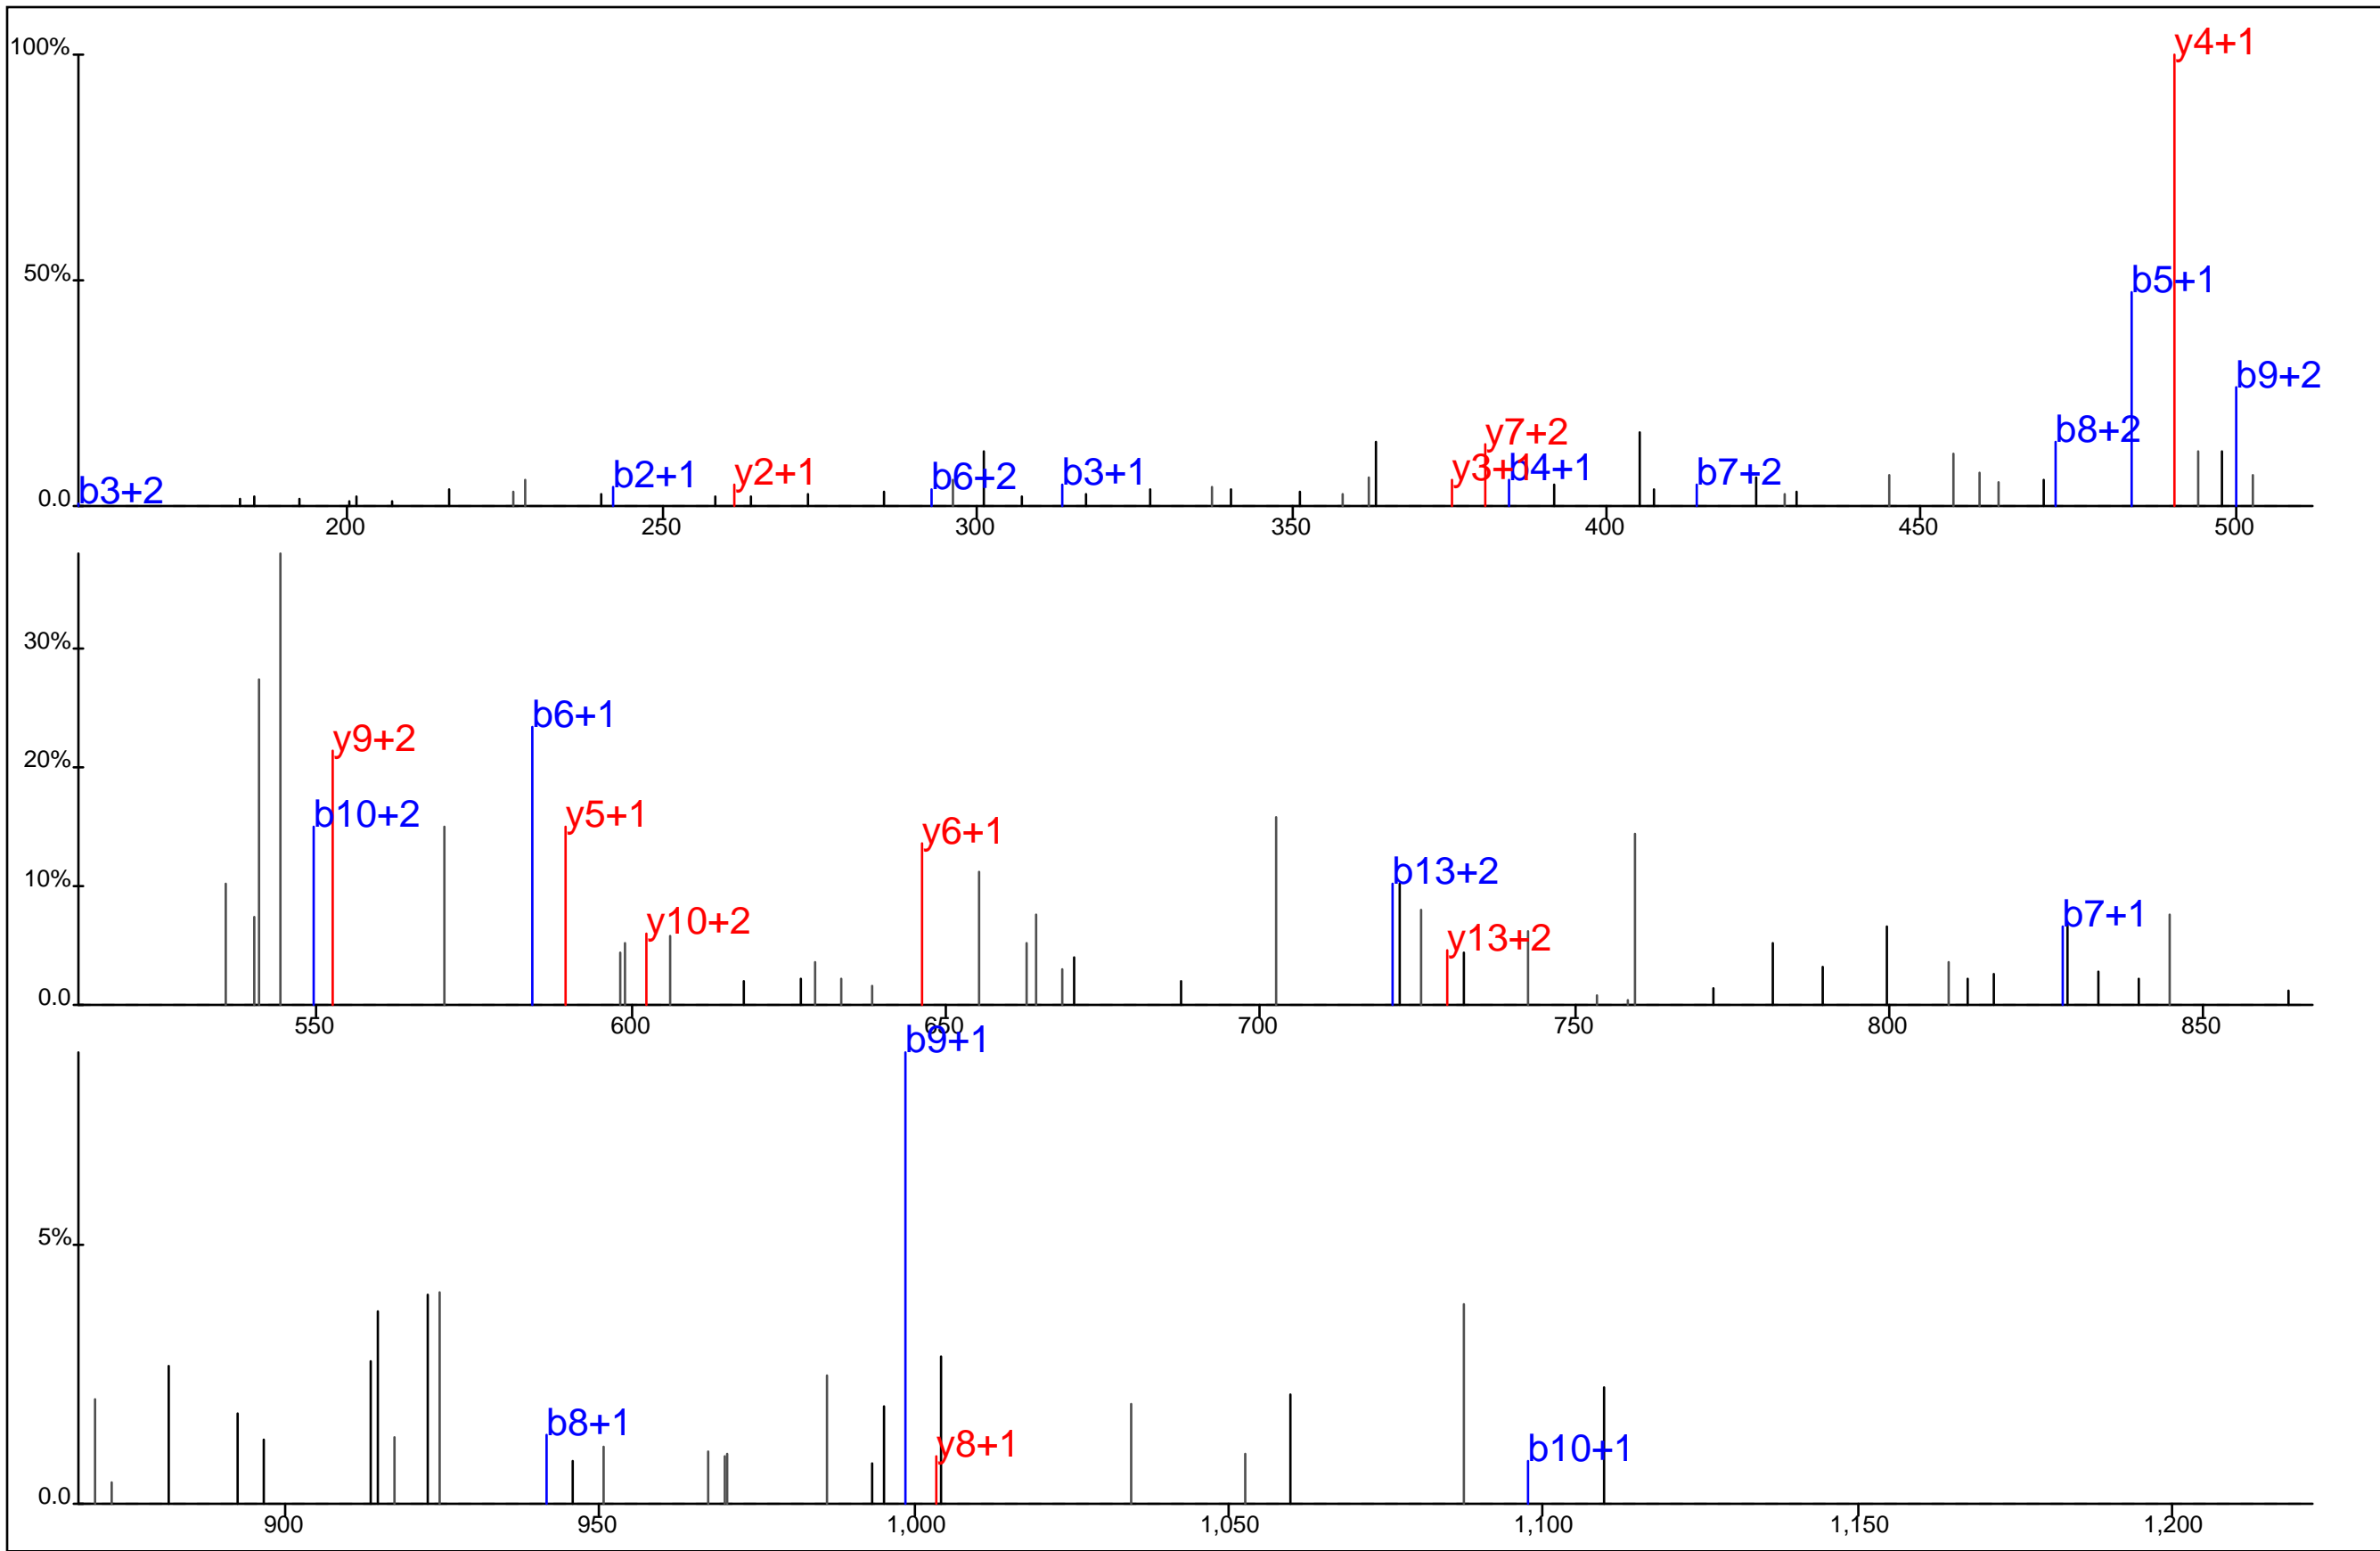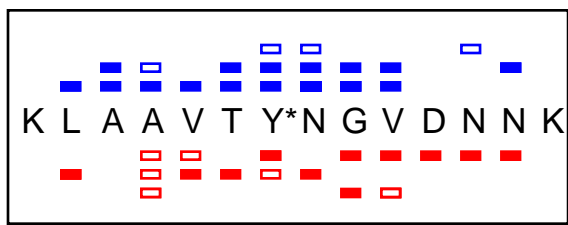

Protein Name: Cell division cycle 10  
 gi Accession: 0  
 Precursor Mass: 529.5908+3  
 Delta Mass: 0.331 ppm  
 XCorr: 37.73

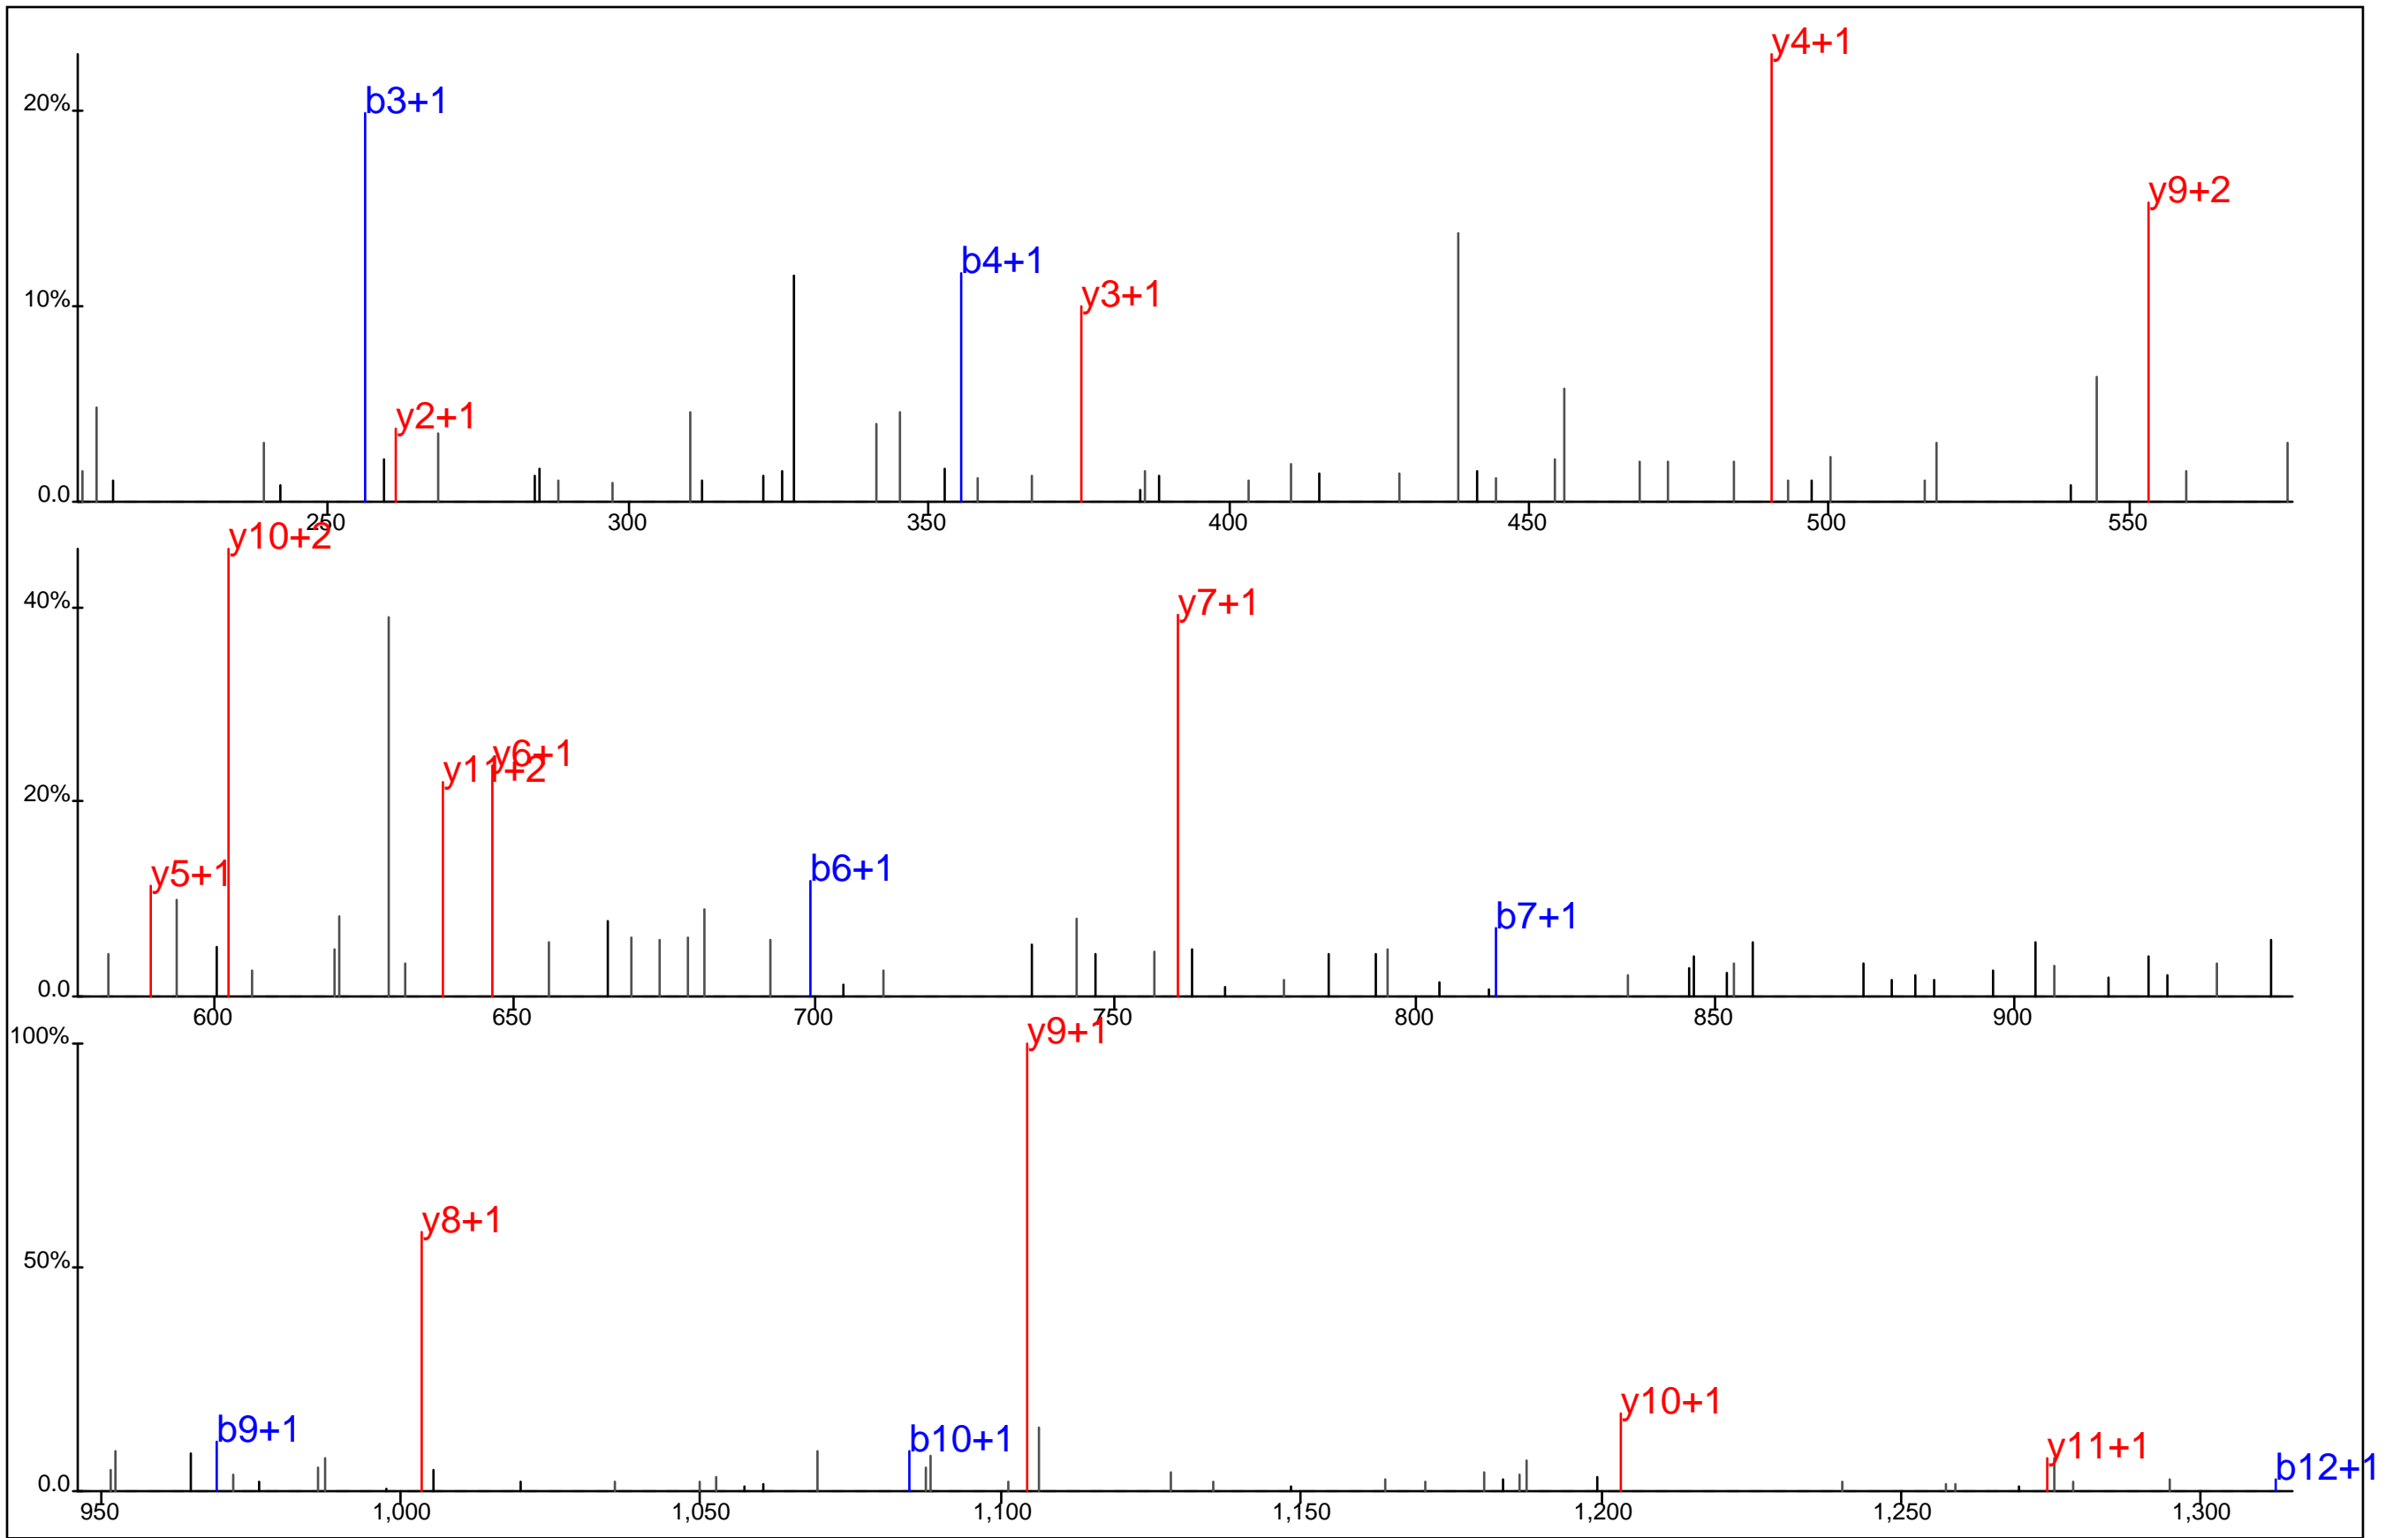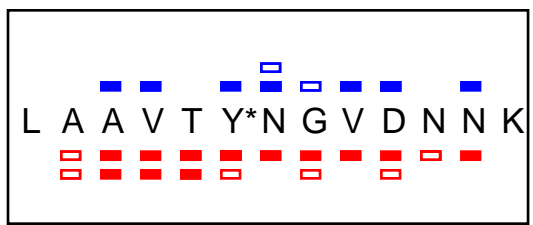

Protein Name: Cell division cycle 10  
 gi Accession: 0  
 Precursor Mass: 729.8345+2  
 Delta Mass: 0.516 ppm  
 XCorr: 80.29

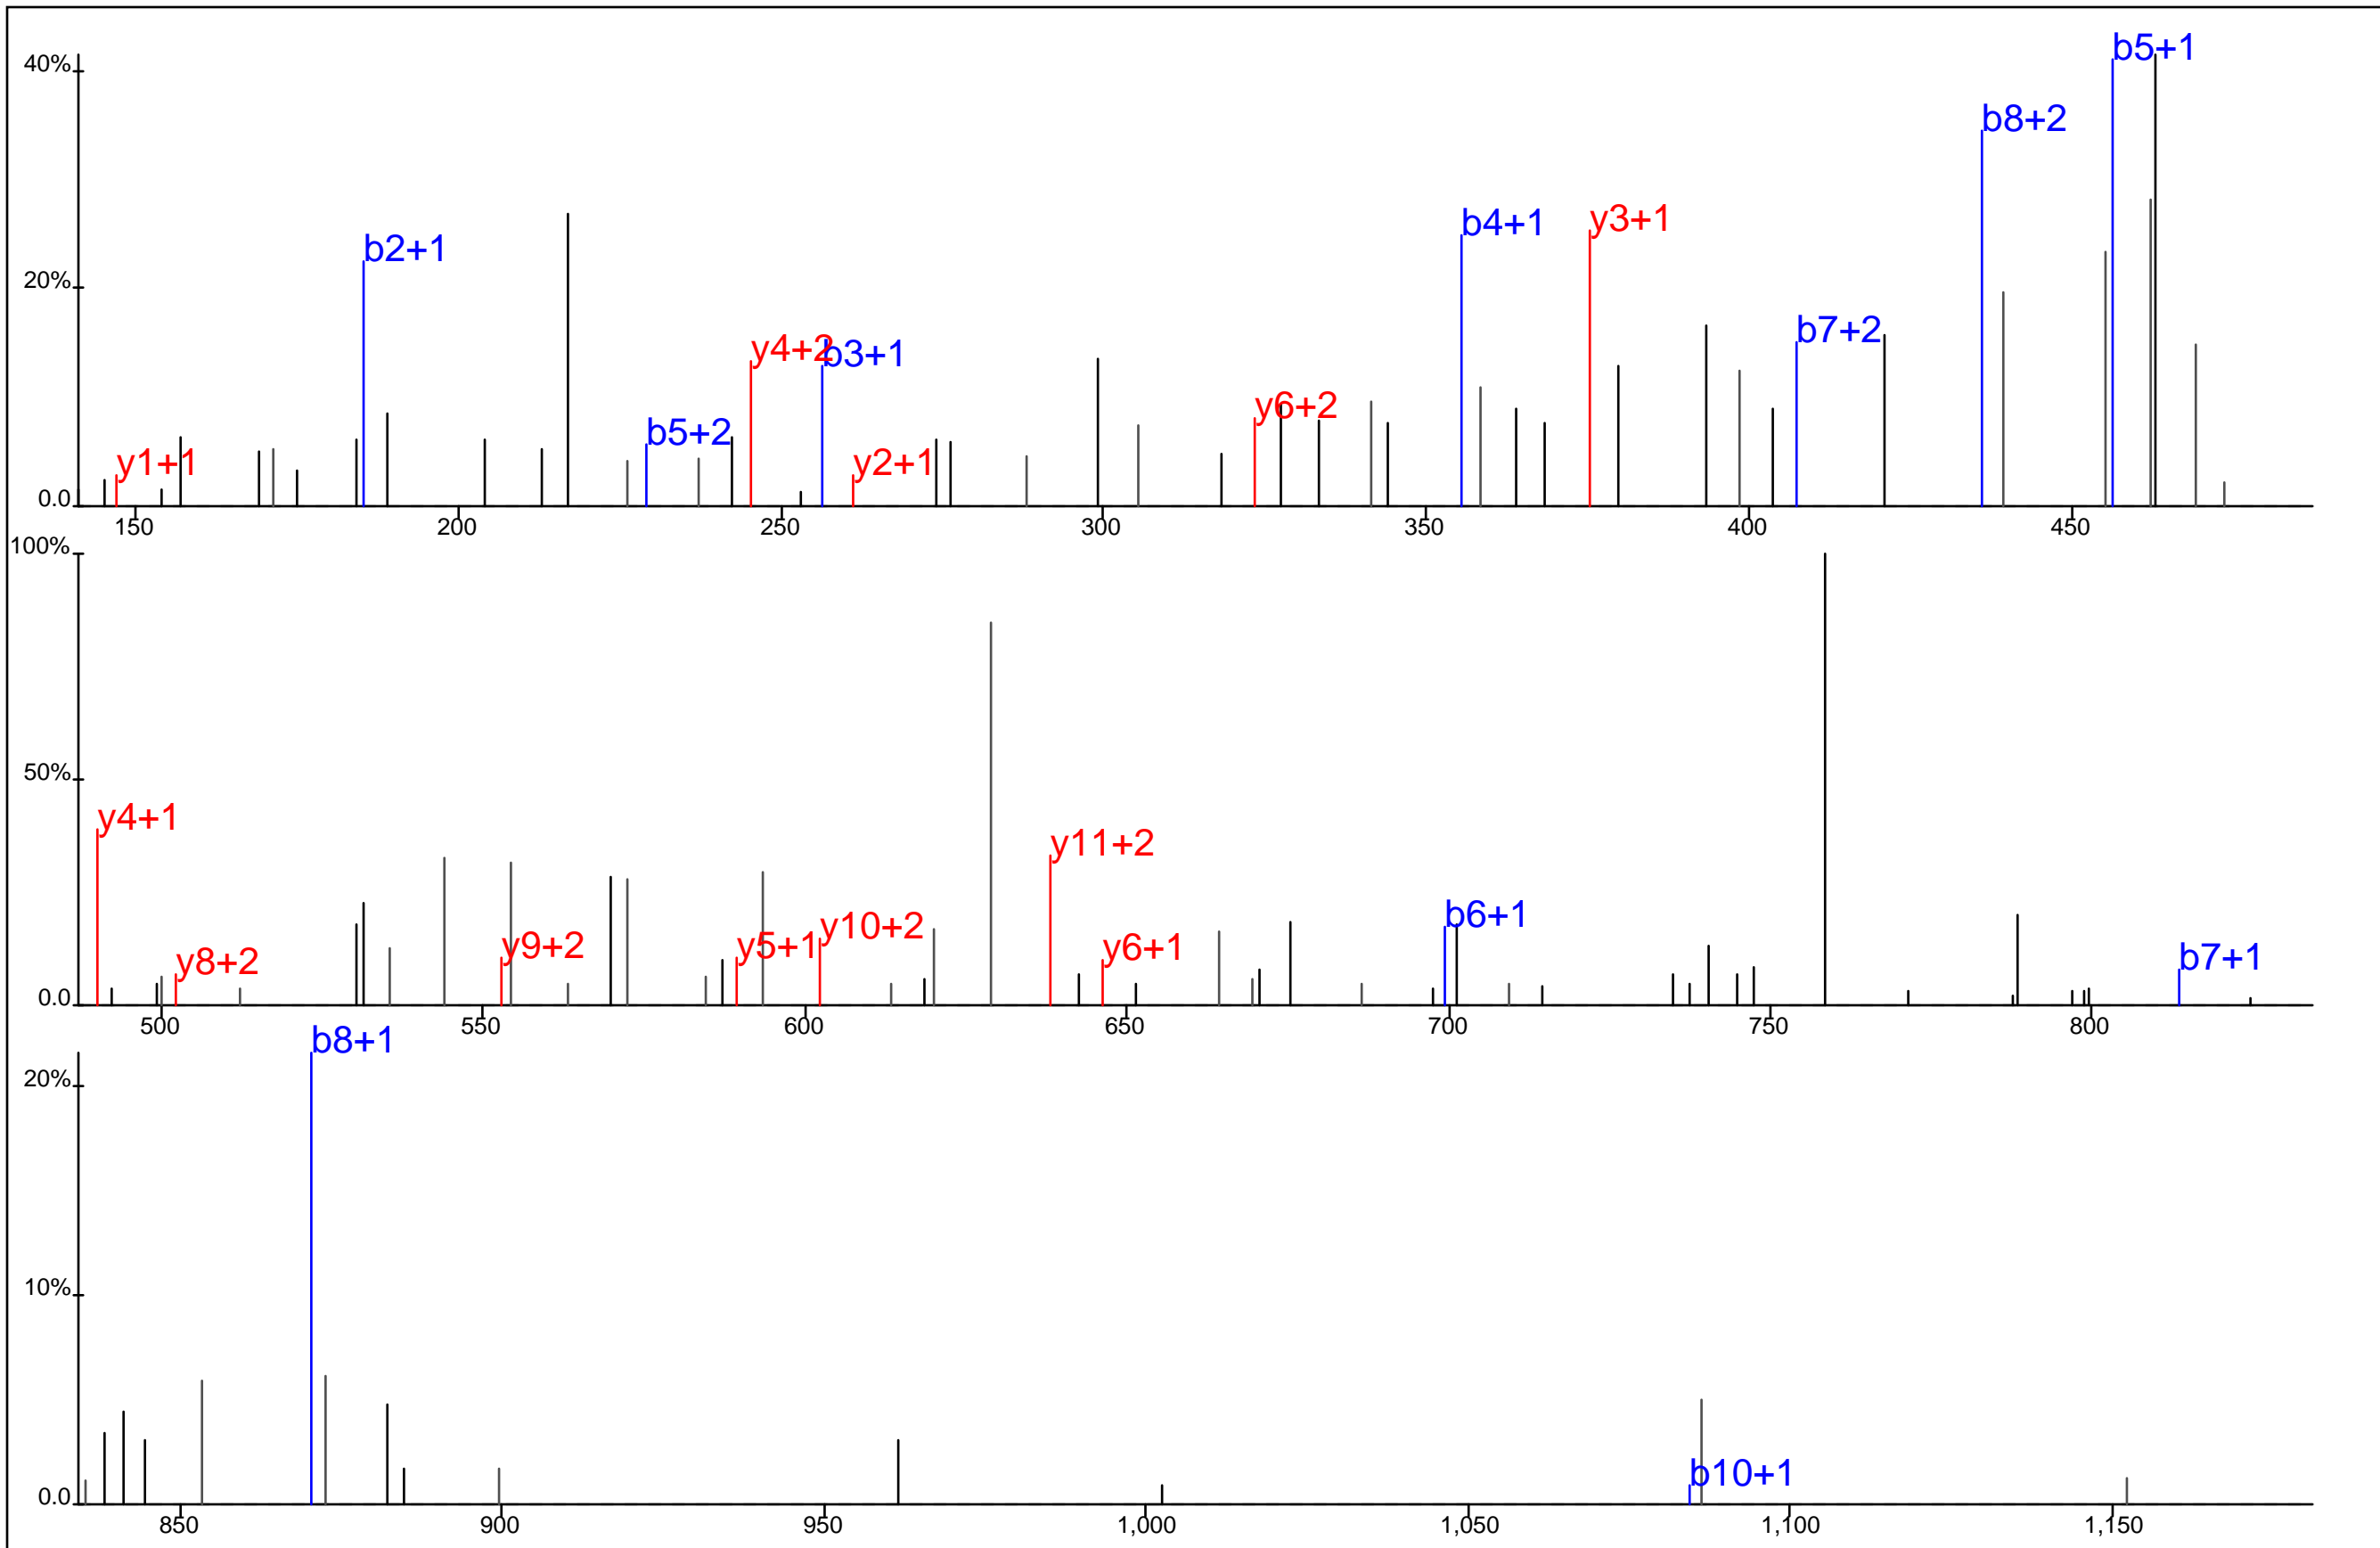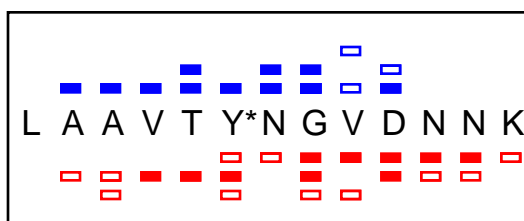

Protein Name: Cell division cycle 10  
 gi Accession: 0  
 Precursor Mass: 486.8924+3  
 Delta Mass: 0.083 ppm  
 XCorr: 39.84

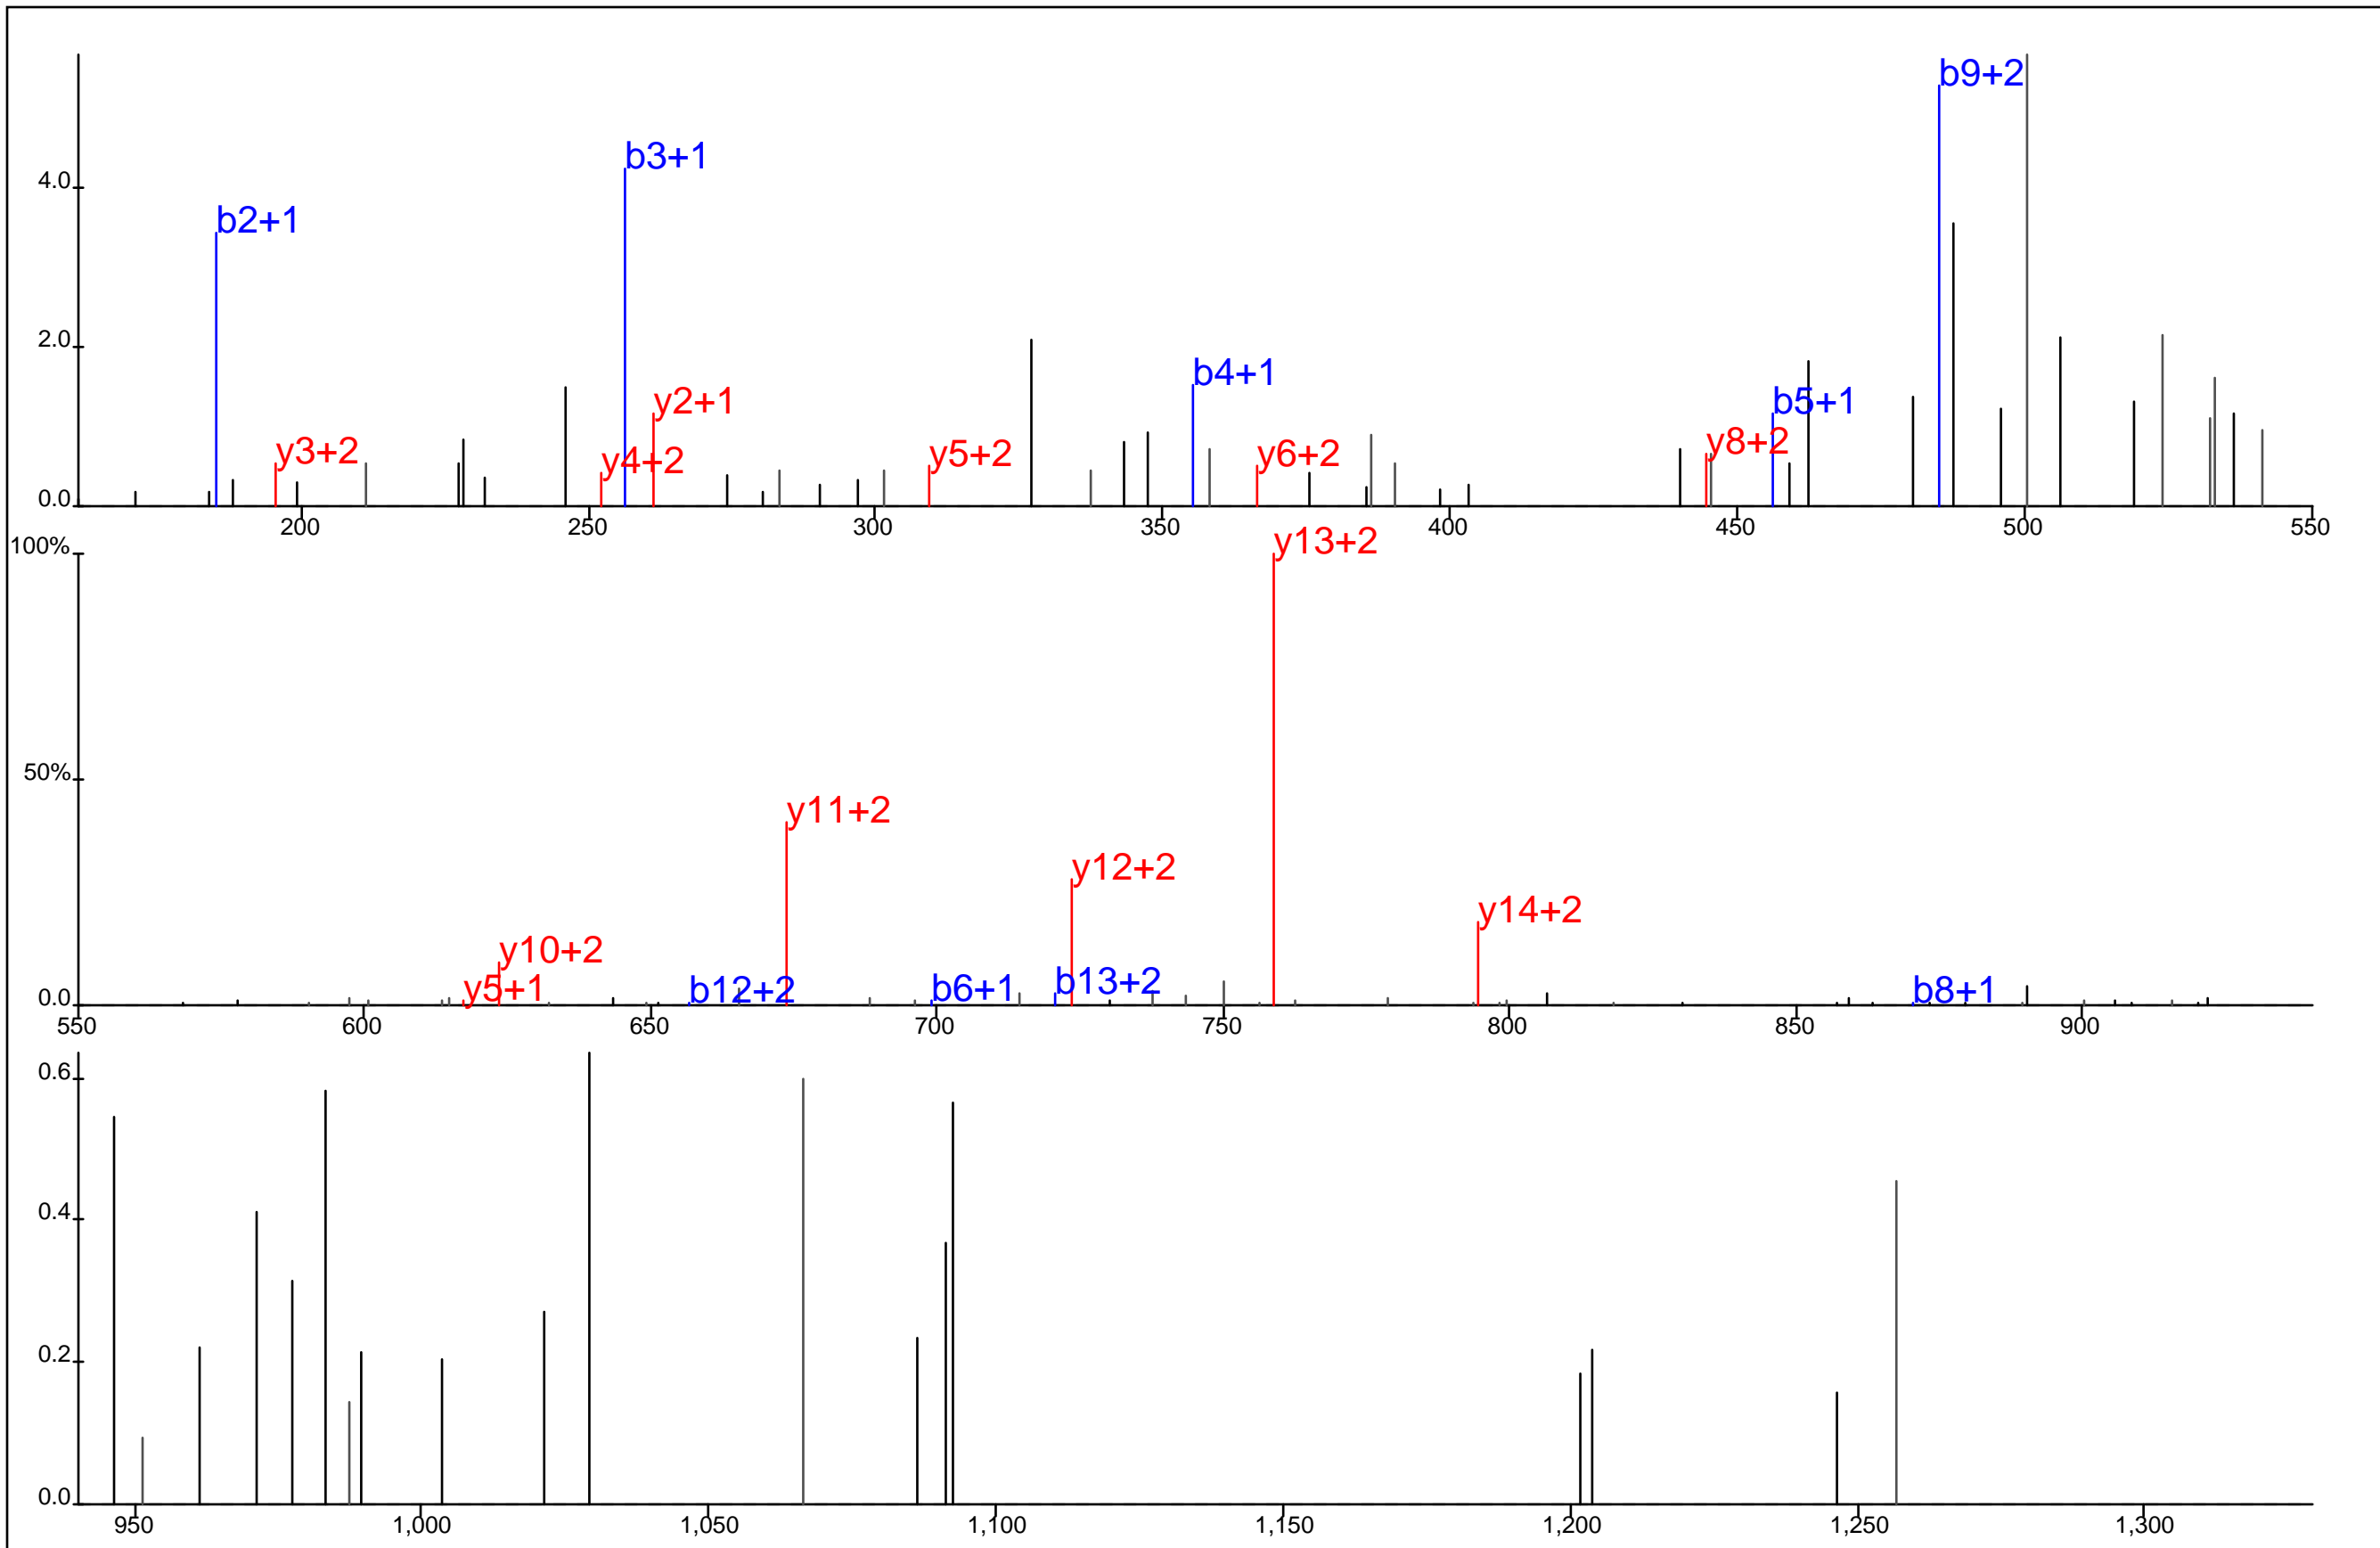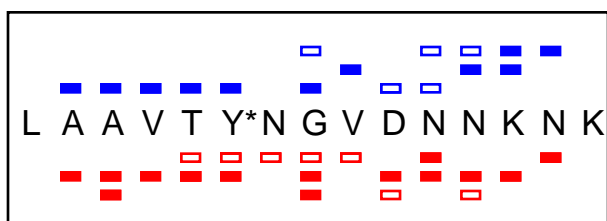

Protein Name: Cell division cycle 10  
 gi Accession: 0  
 Precursor Mass: 567.6042+3  
 Delta Mass: 1.241 ppm  
 XCorr: 23.66



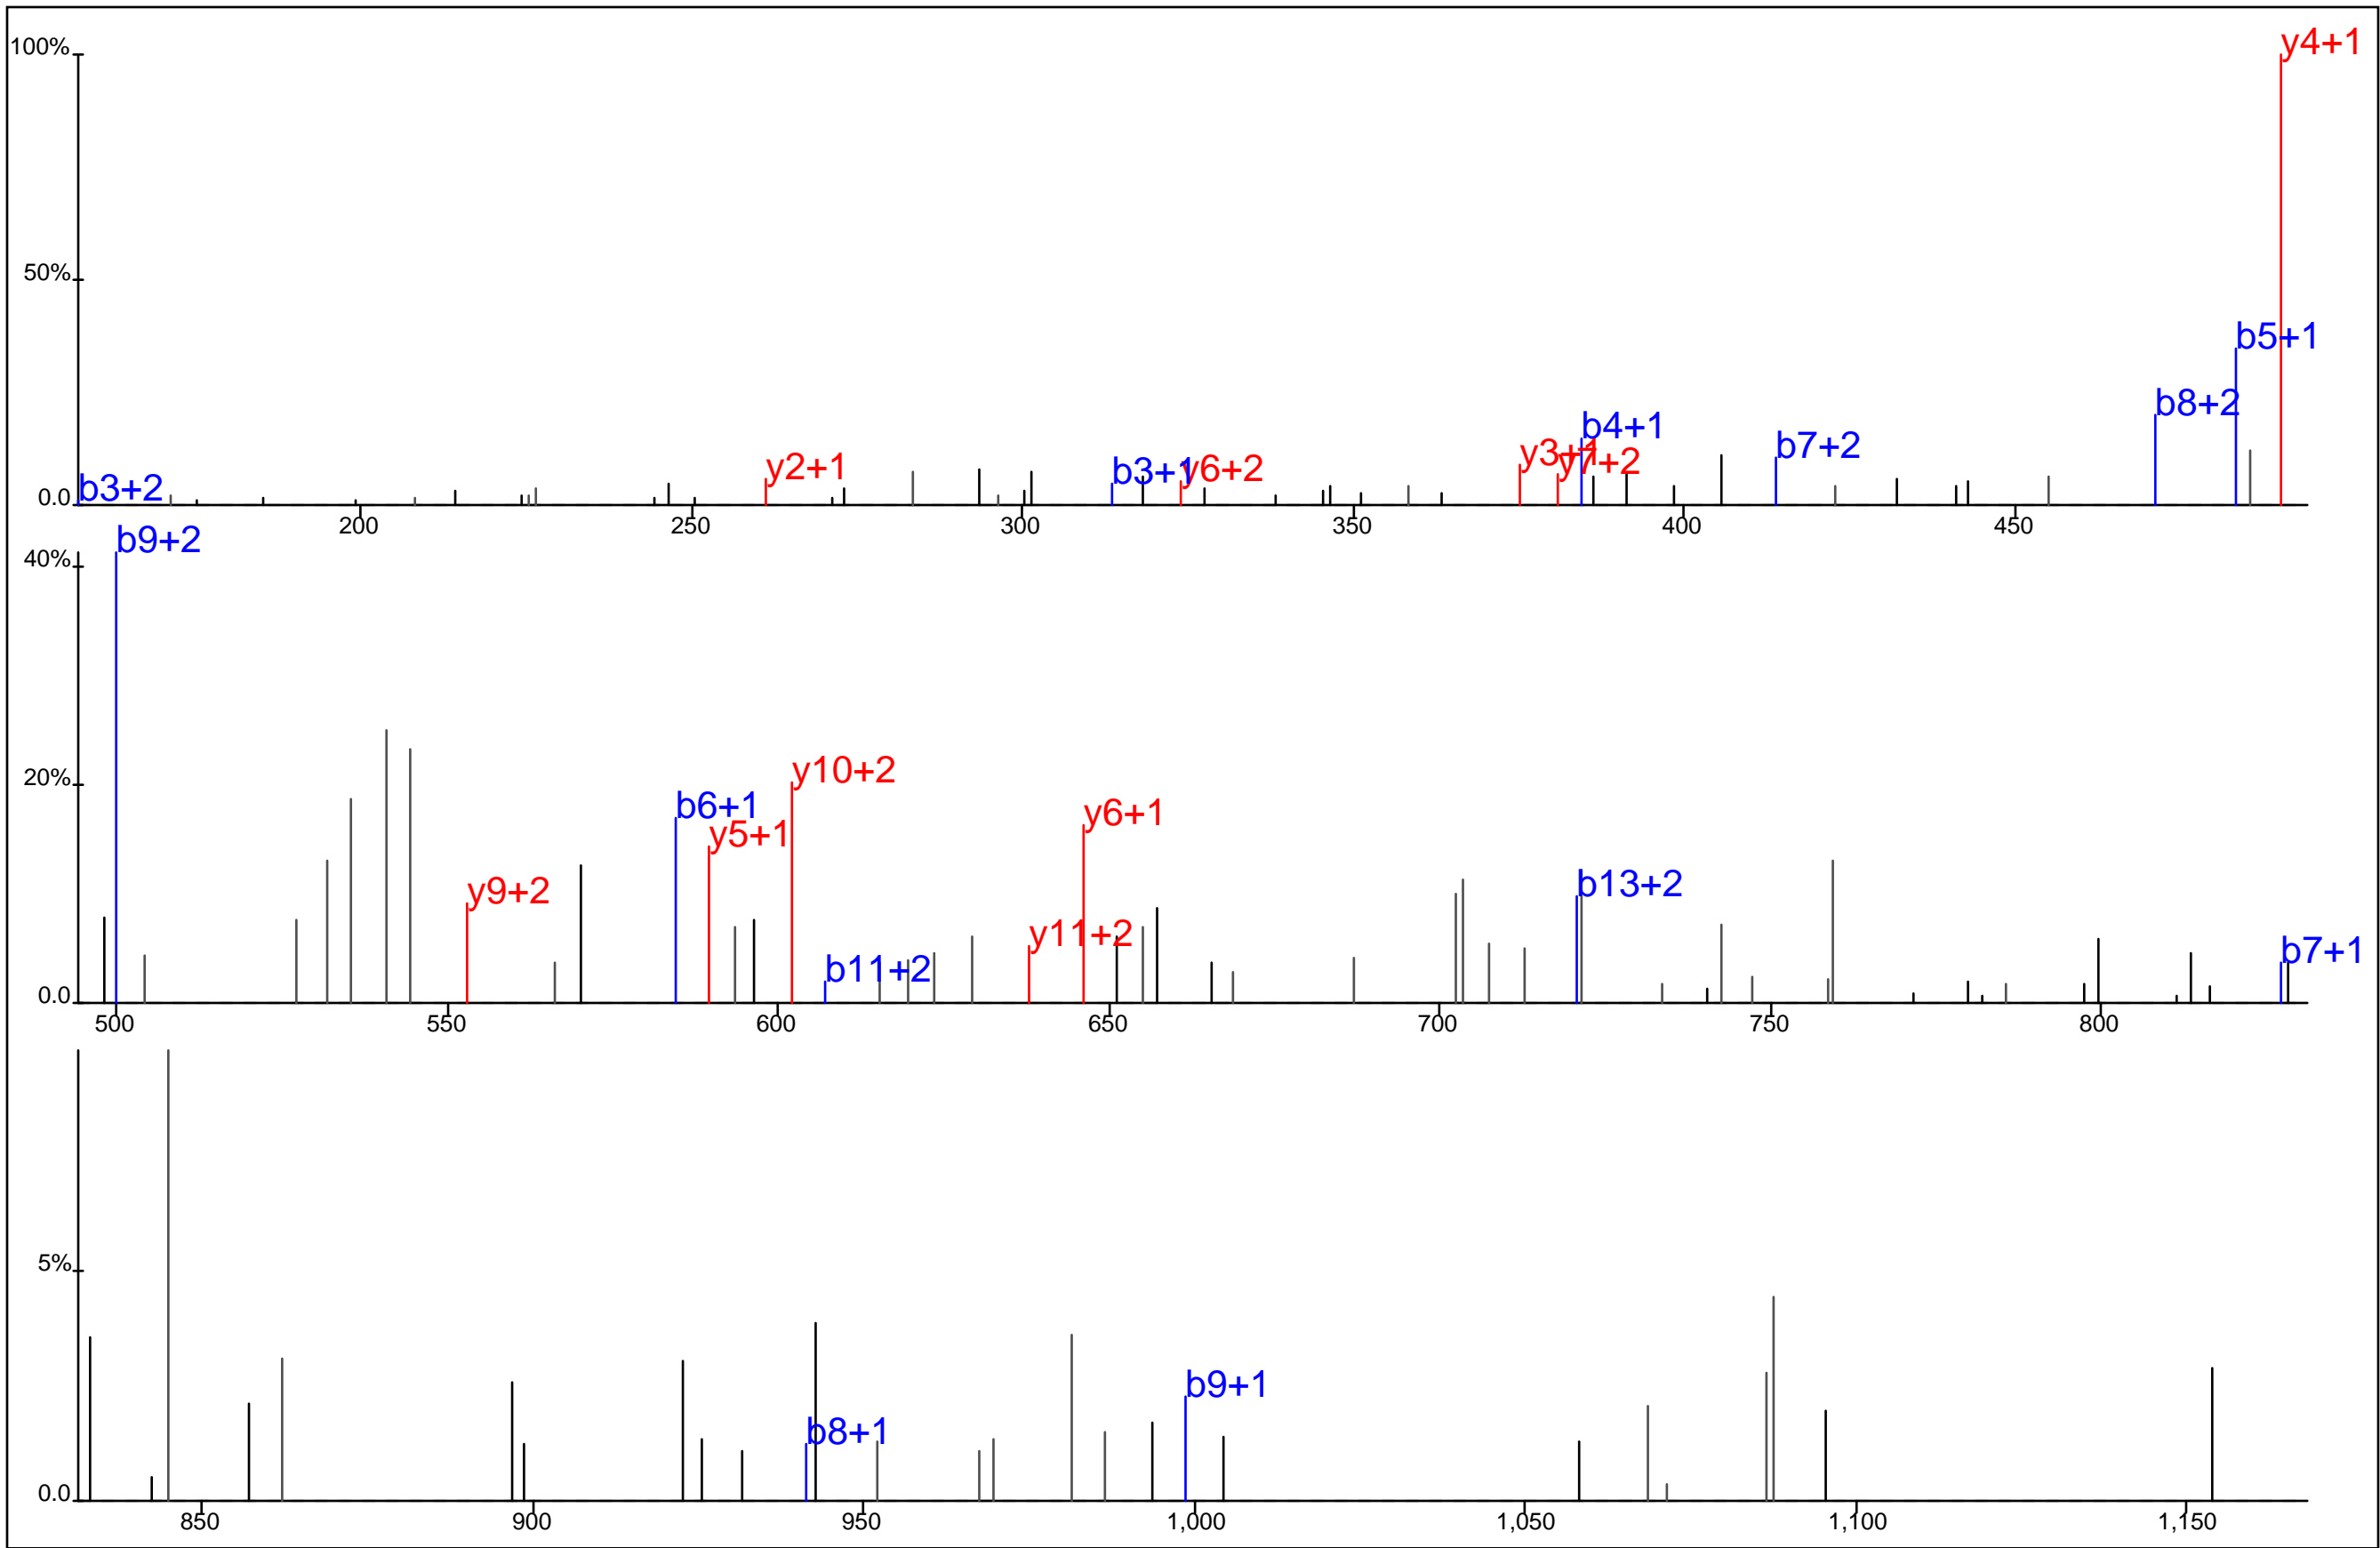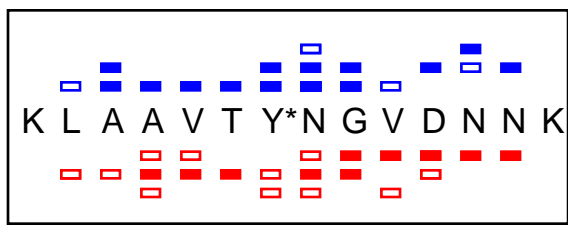

Protein Name: Cell division cycle 10  
 gi Accession: 0  
 Precursor Mass: 529.5906+3  
 Delta Mass: 0.014 ppm  
 XCorr: 30.42

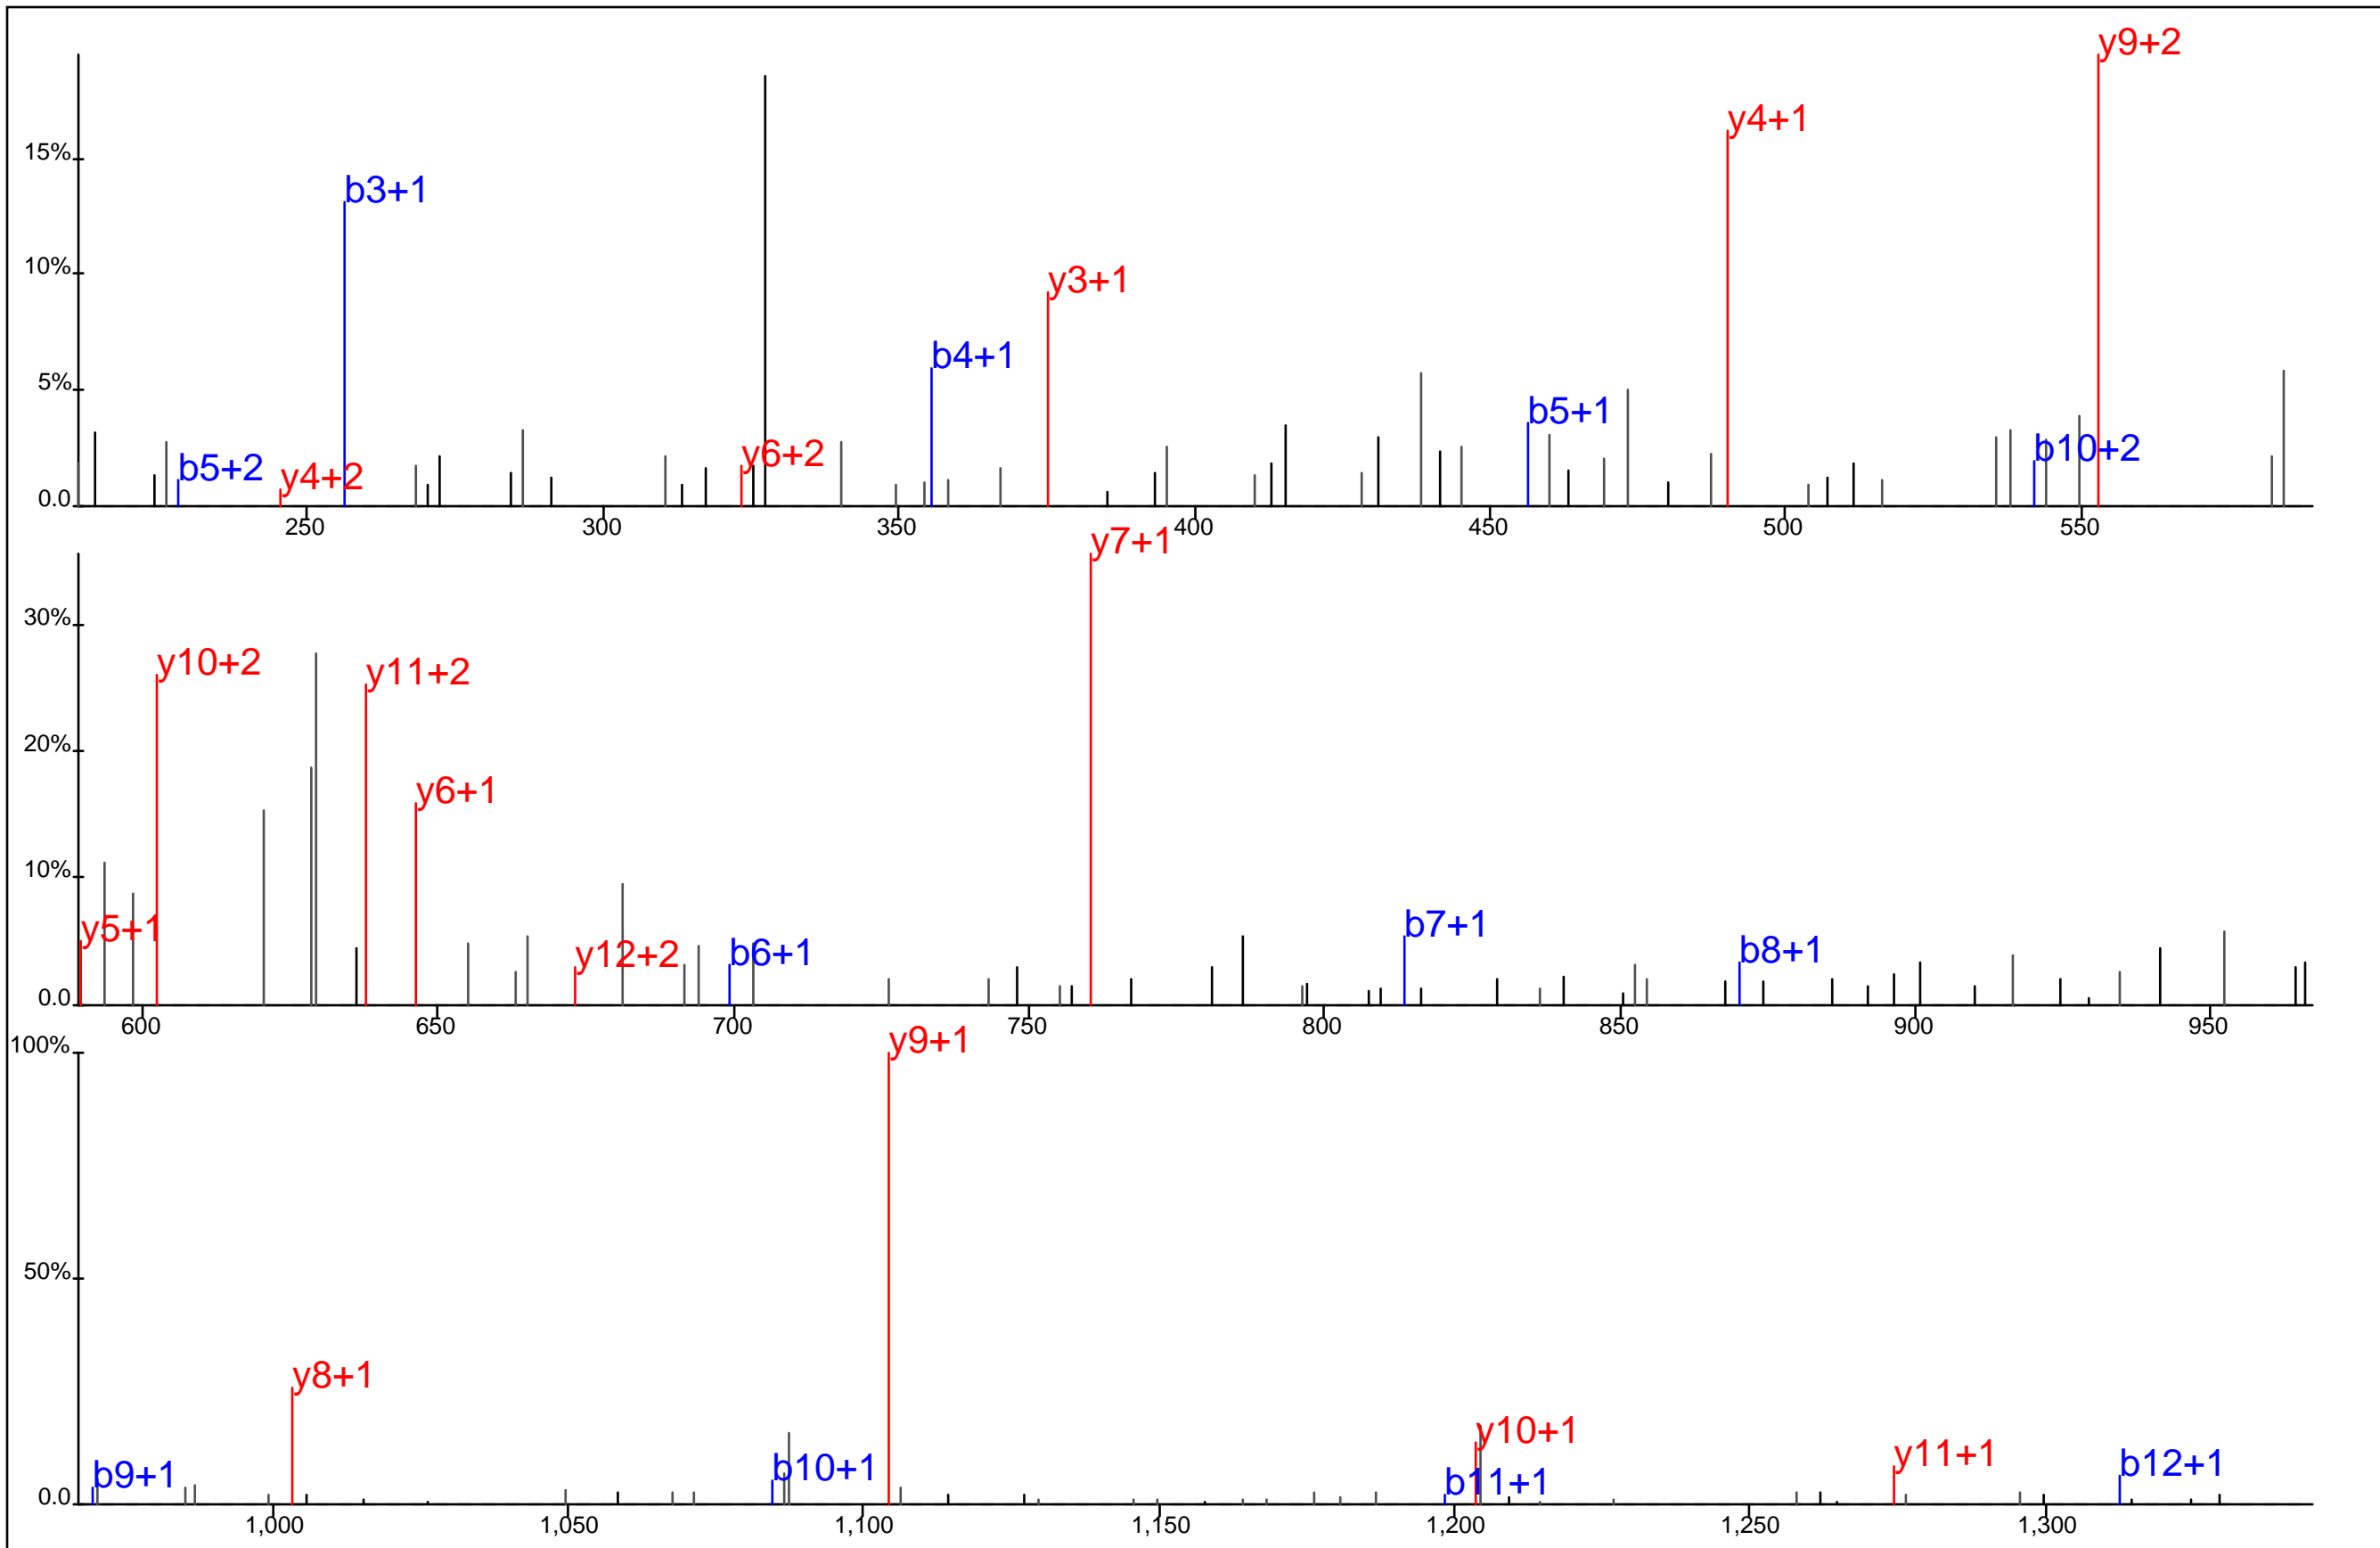

■ ■ ■ ■ ■ ■ ■ ■ ■ ■  
 L A A V T Y\* N G V D N N K  
■ ■ ■ ■ ■ ■ ■ ■ ■ ■

Protein Name: Cell division cycle 10  
 gi Accession: 0  
 Precursor Mass: 729.8351+2  
 Delta Mass: 0.321 ppm  
 XCorr: 62.24



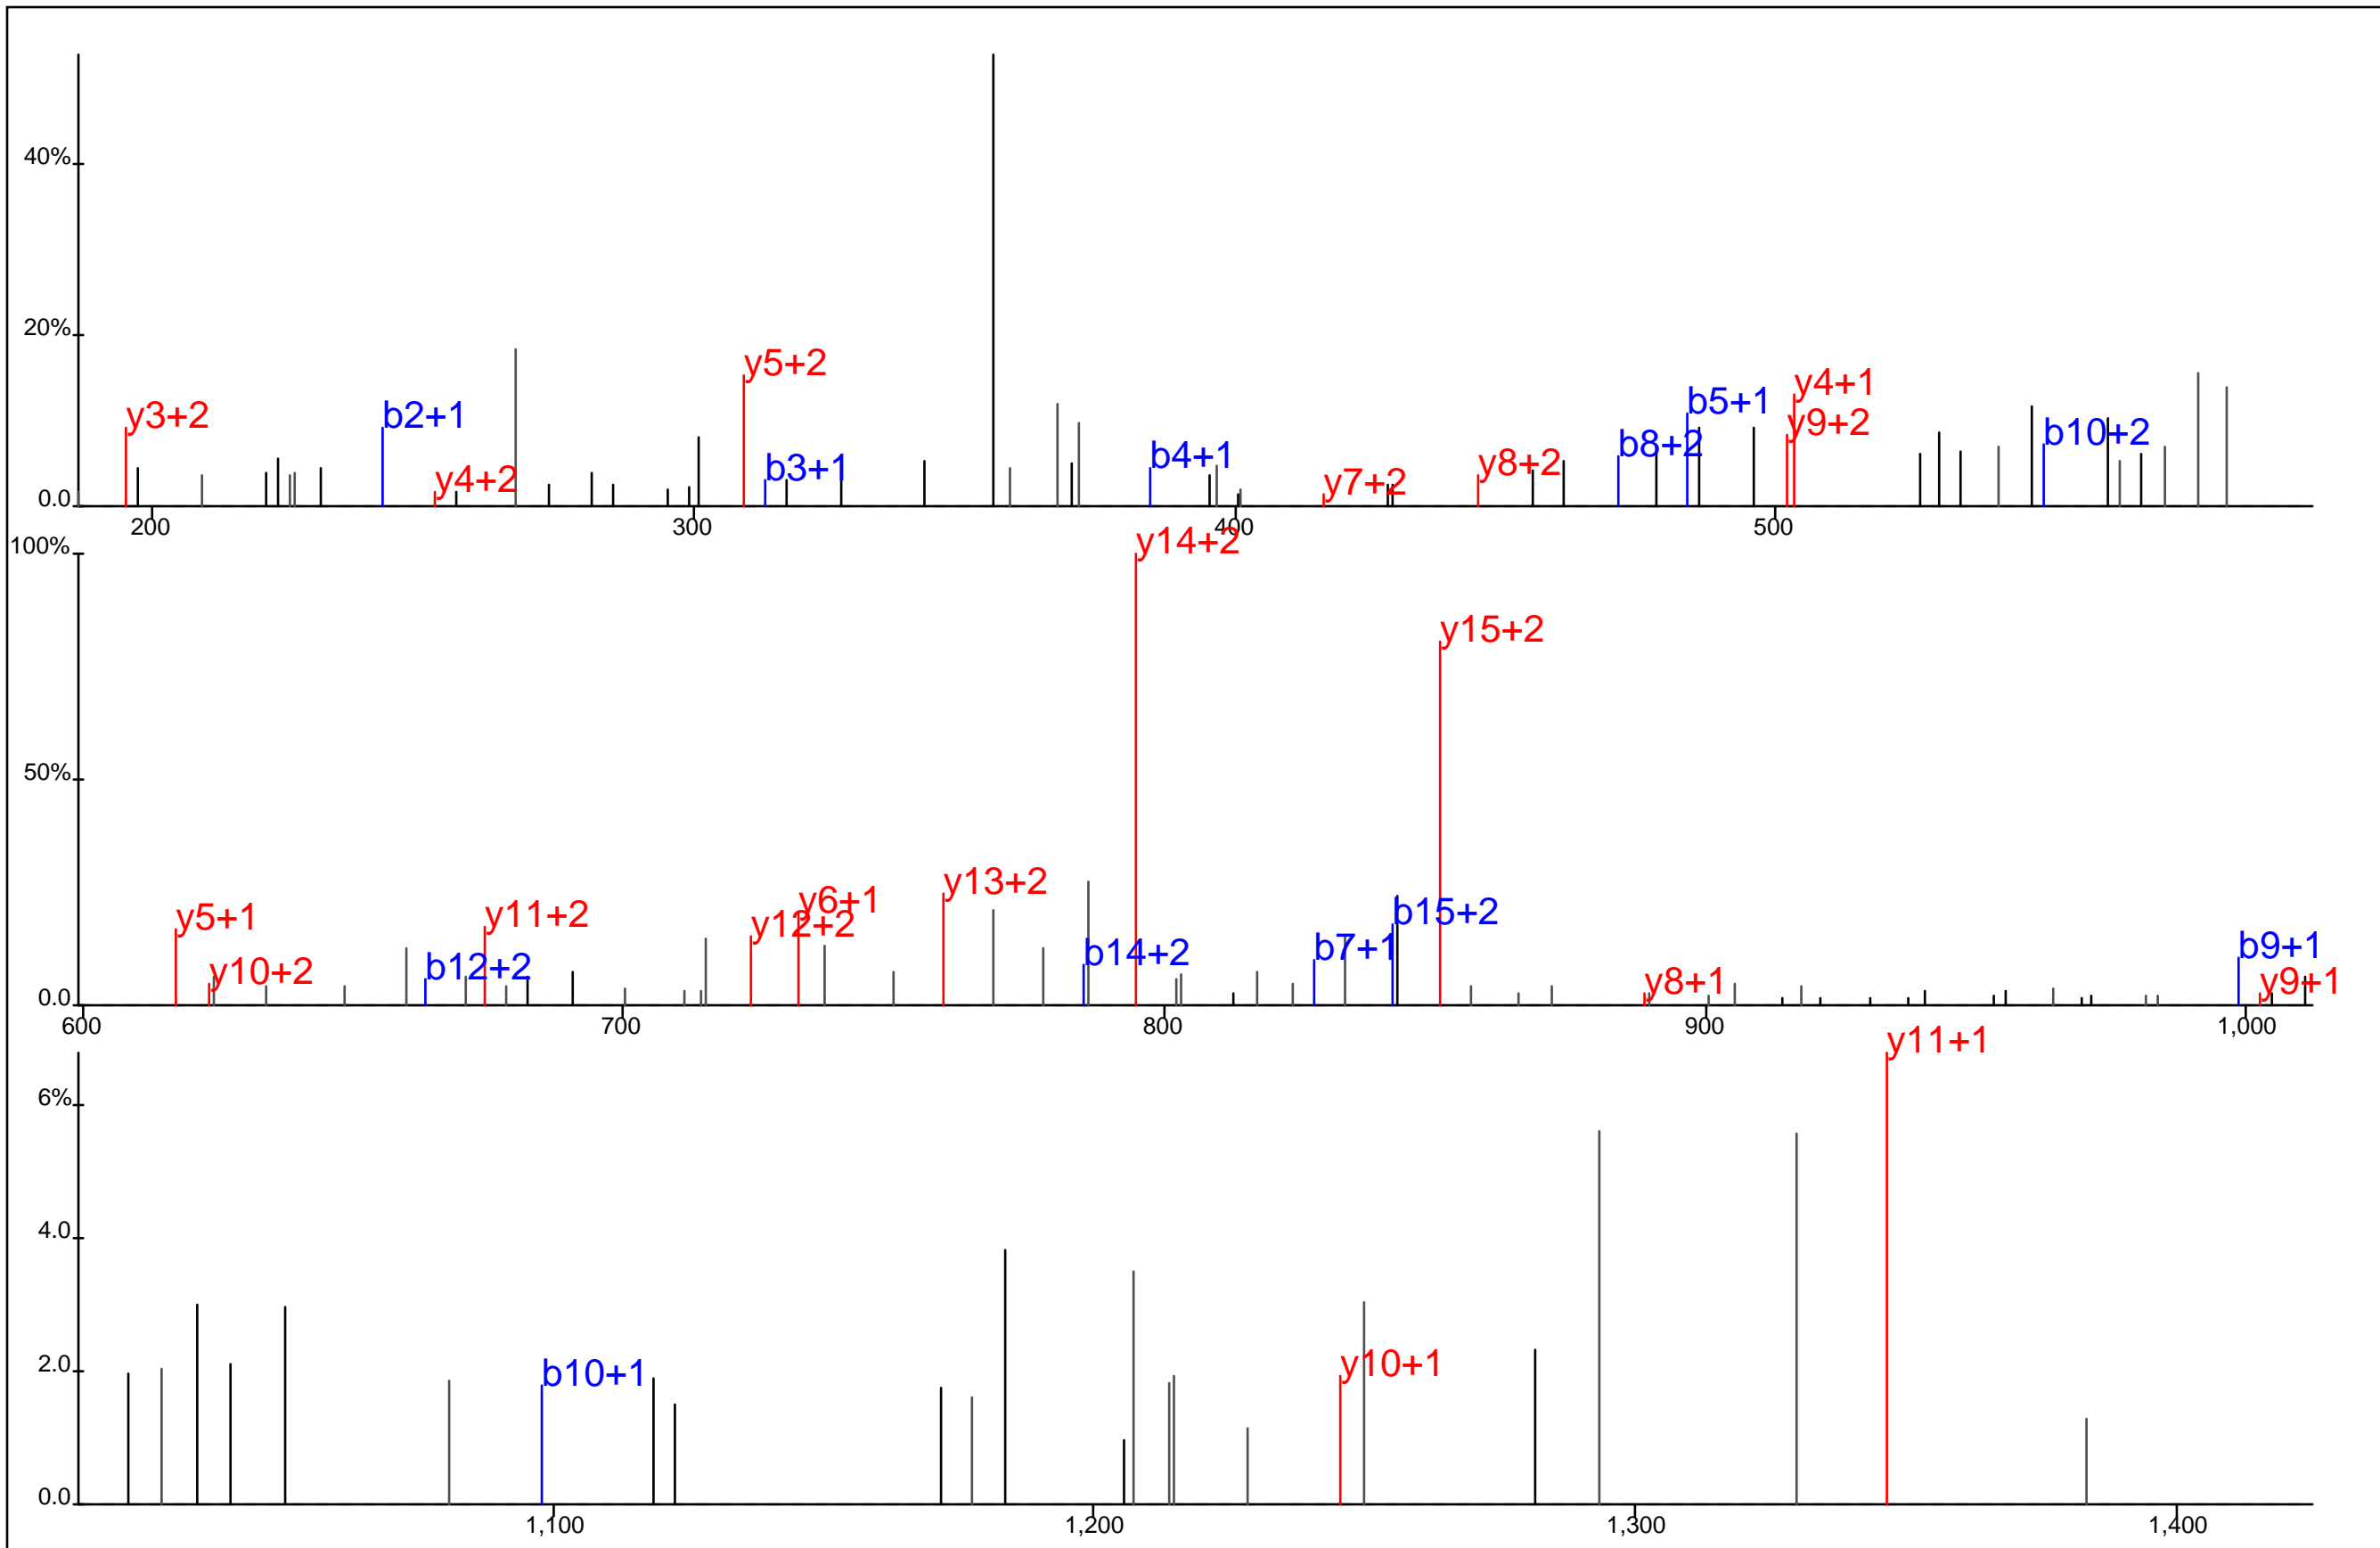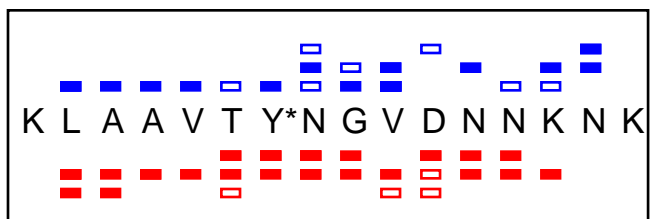

Protein Name: Cell division cycle 10  
 gi Accession: 0  
 Precursor Mass: 610.3030+3  
 Delta Mass: 0.480 ppm  
 XCorr: 42.56

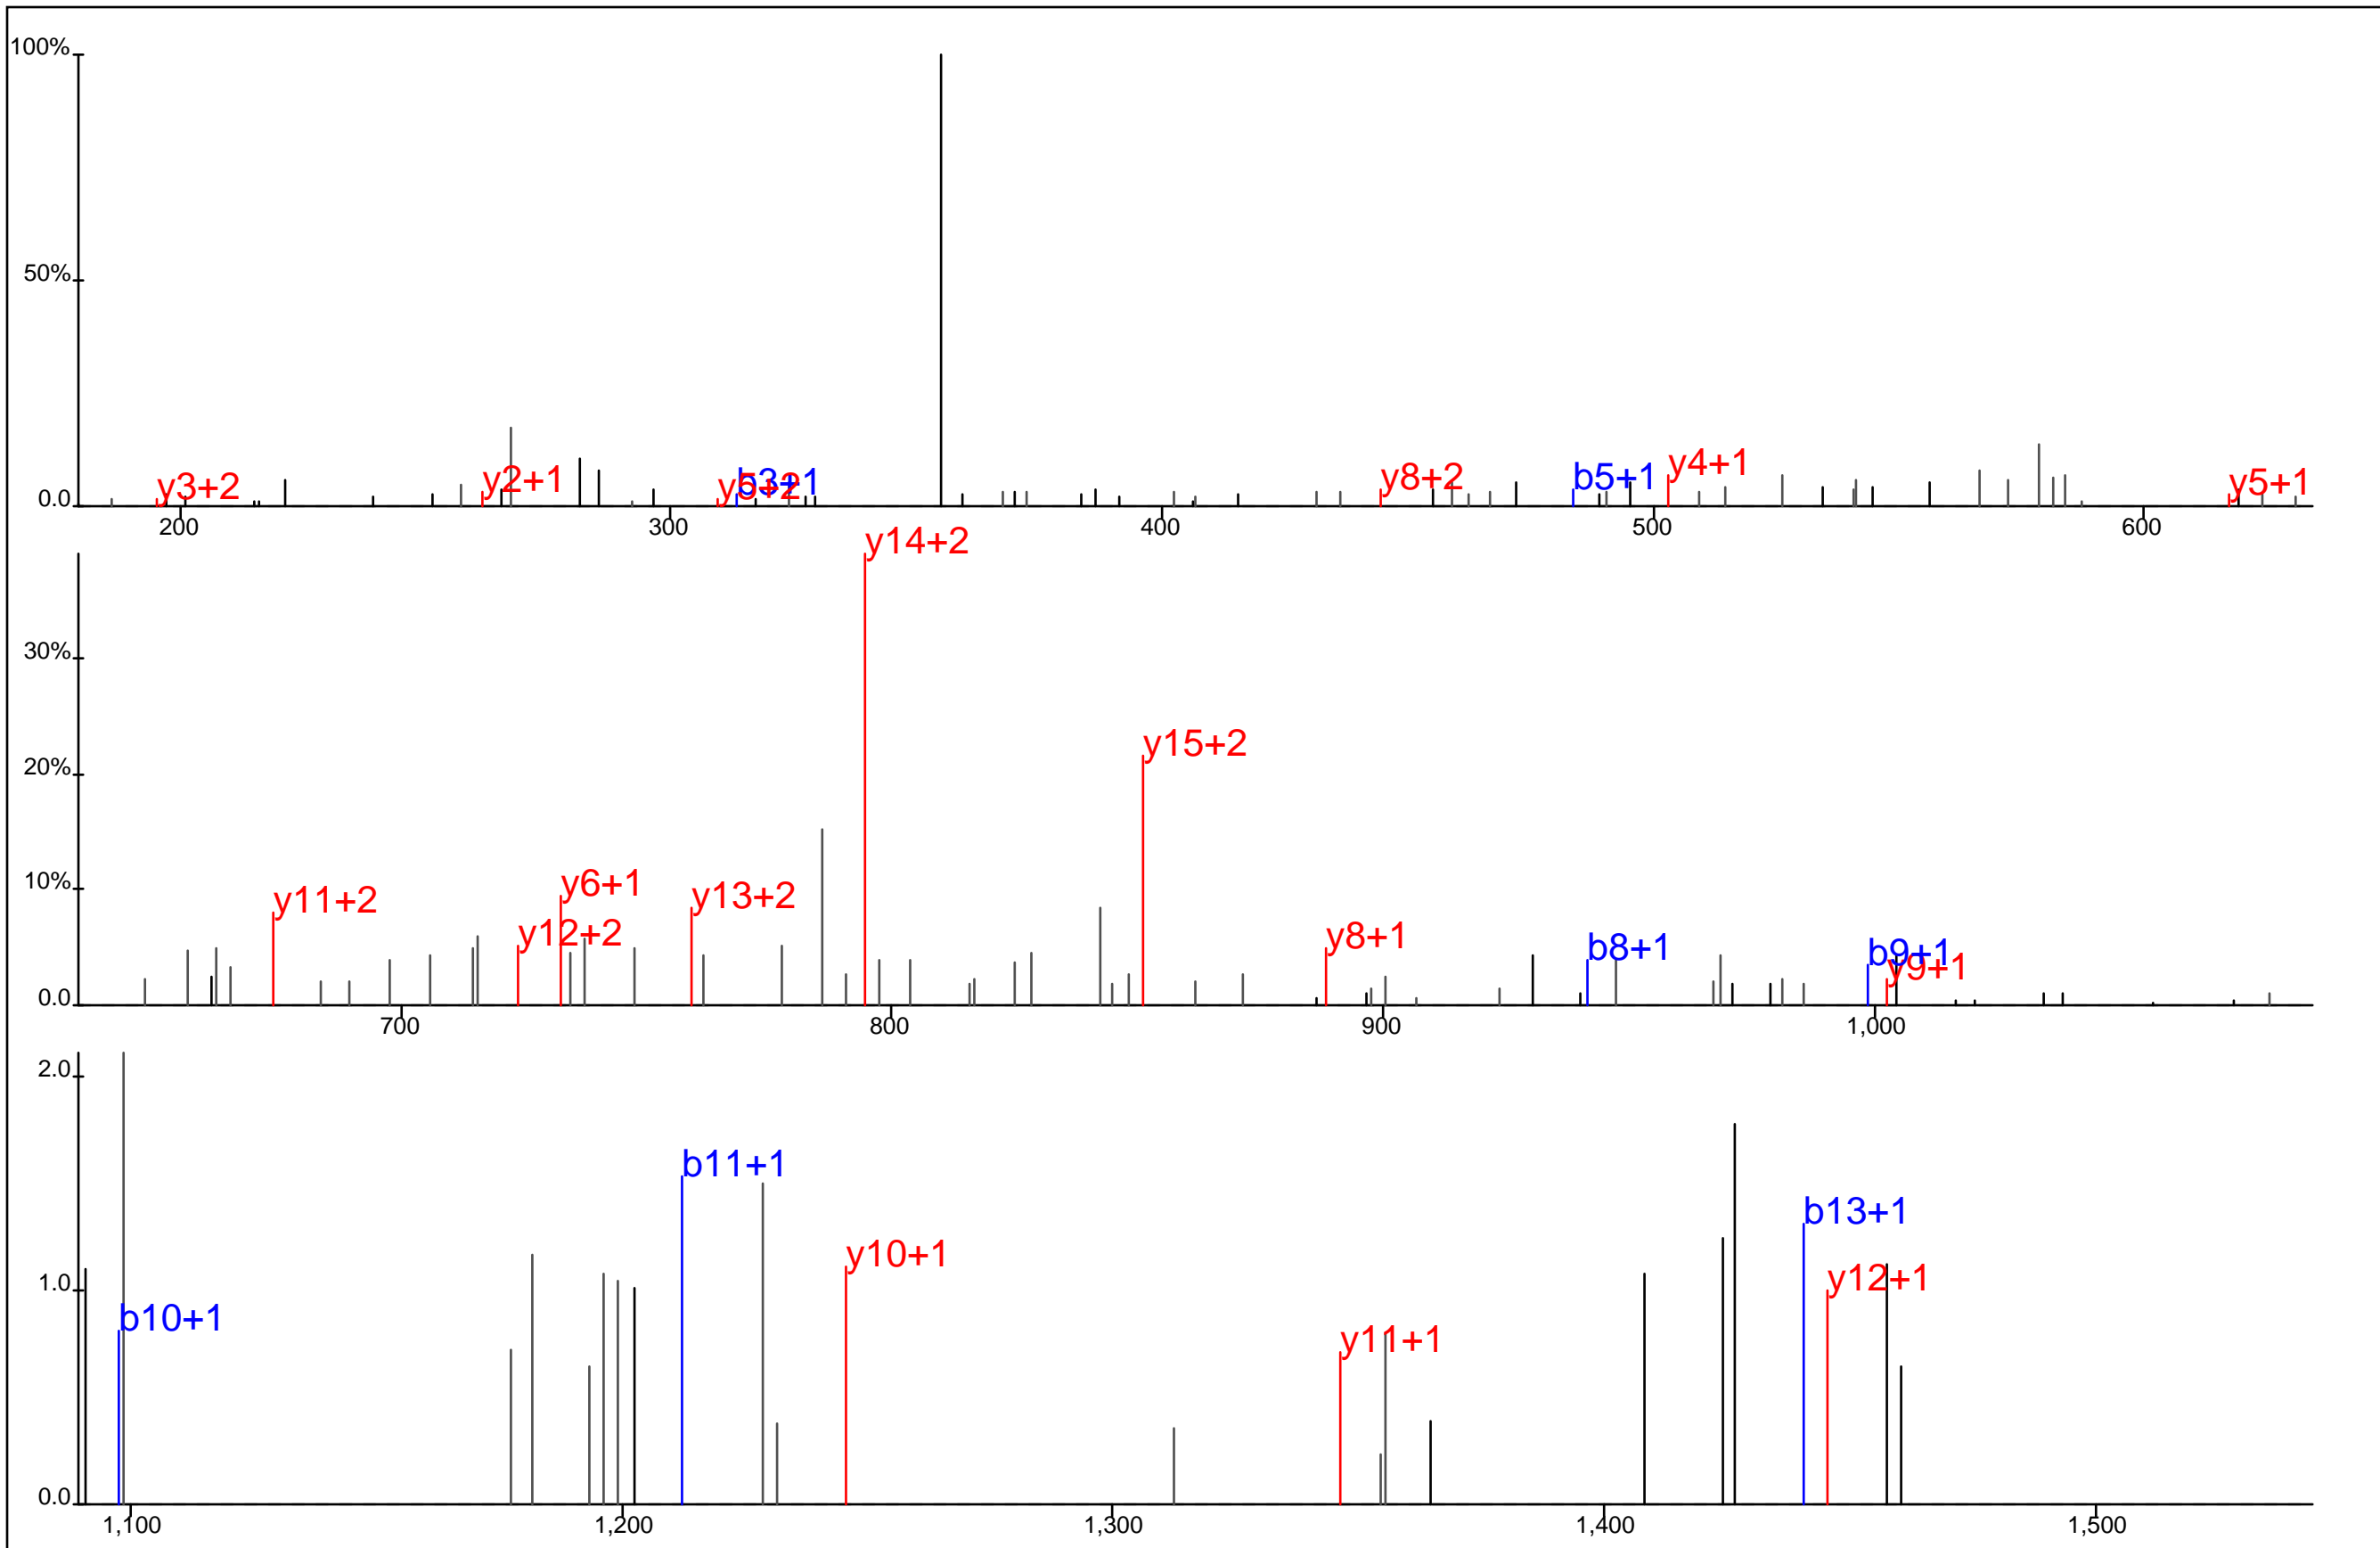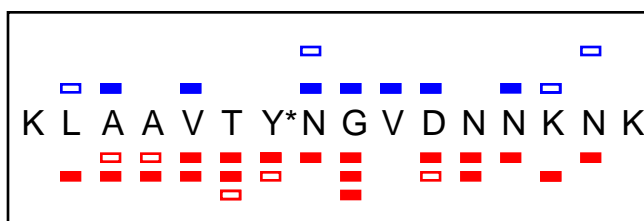

Protein Name: Cell division cycle 10  
 gi Accession: 0  
 Precursor Mass: 610.3032+3  
 Delta Mass: 0.179 ppm  
 XCorr: 30.03

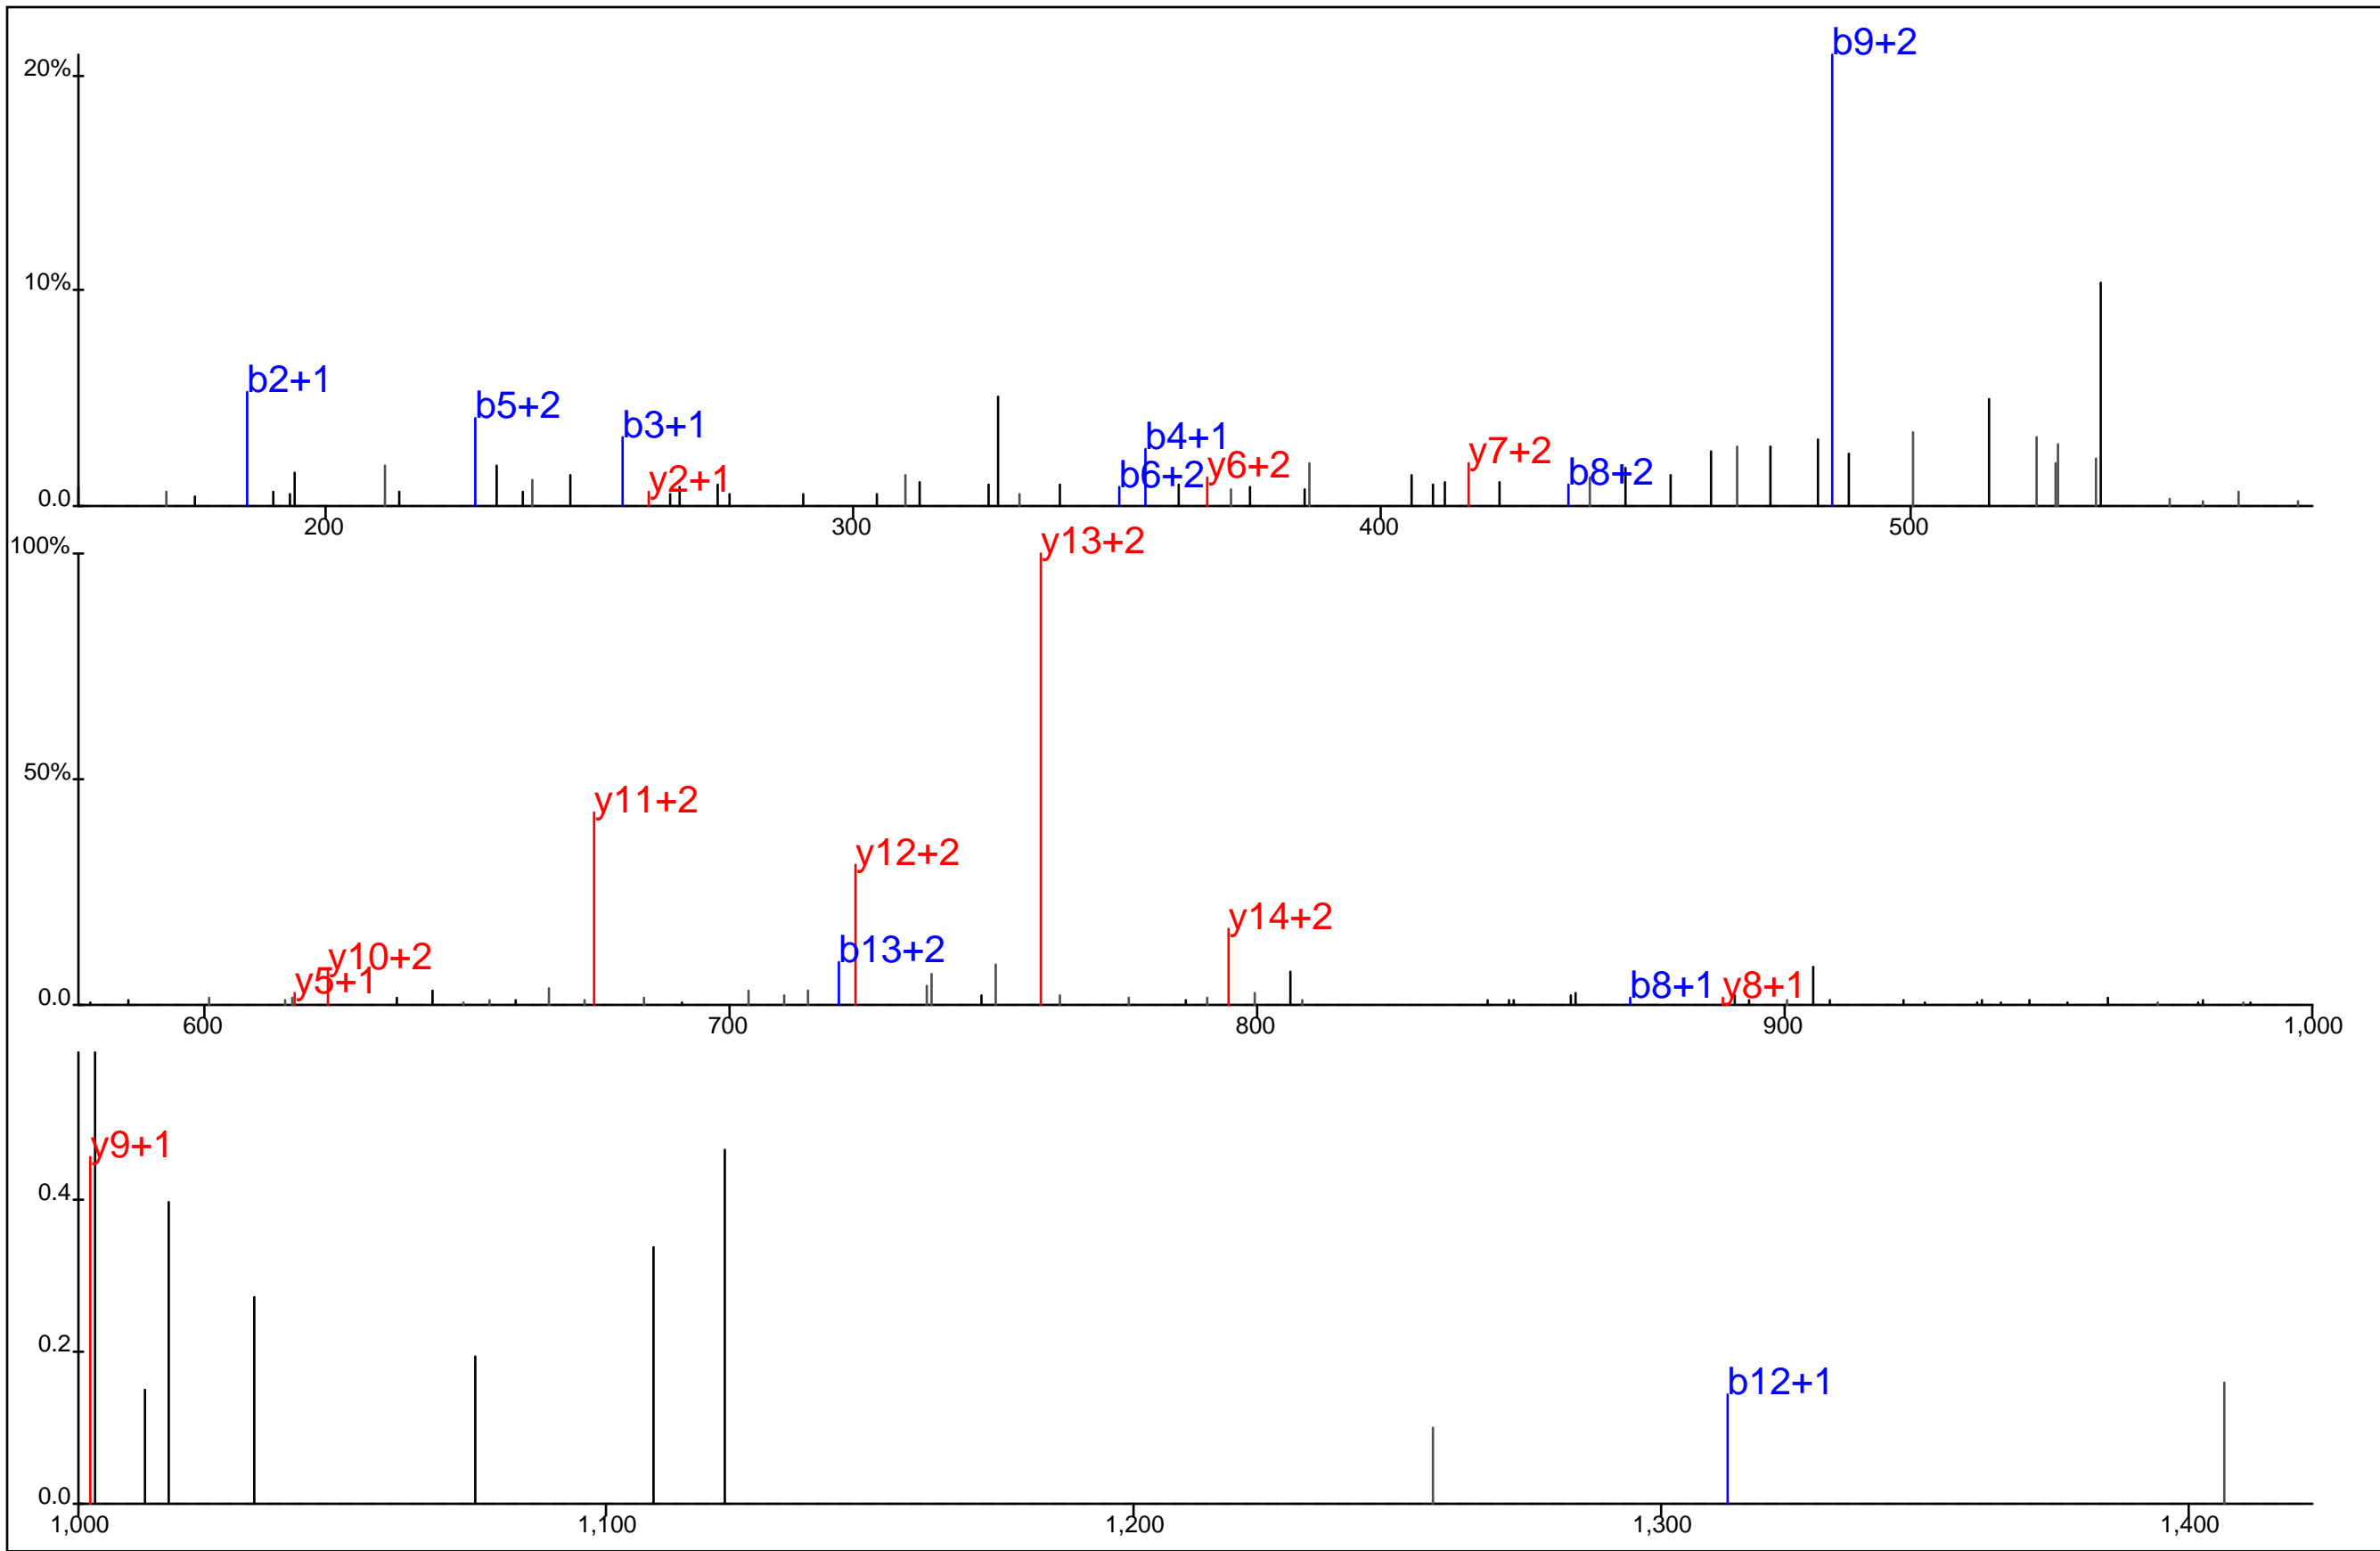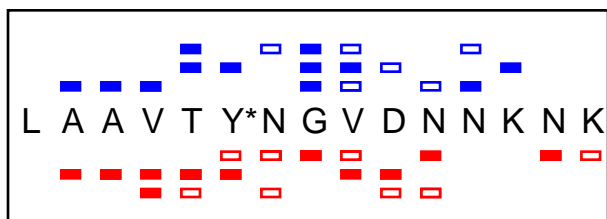

Protein Name: Cell division cycle 10  
 gi Accession: 0  
 Precursor Mass: 567.6039+3  
 Delta Mass: 1.886 ppm  
 XCorr: 23.21

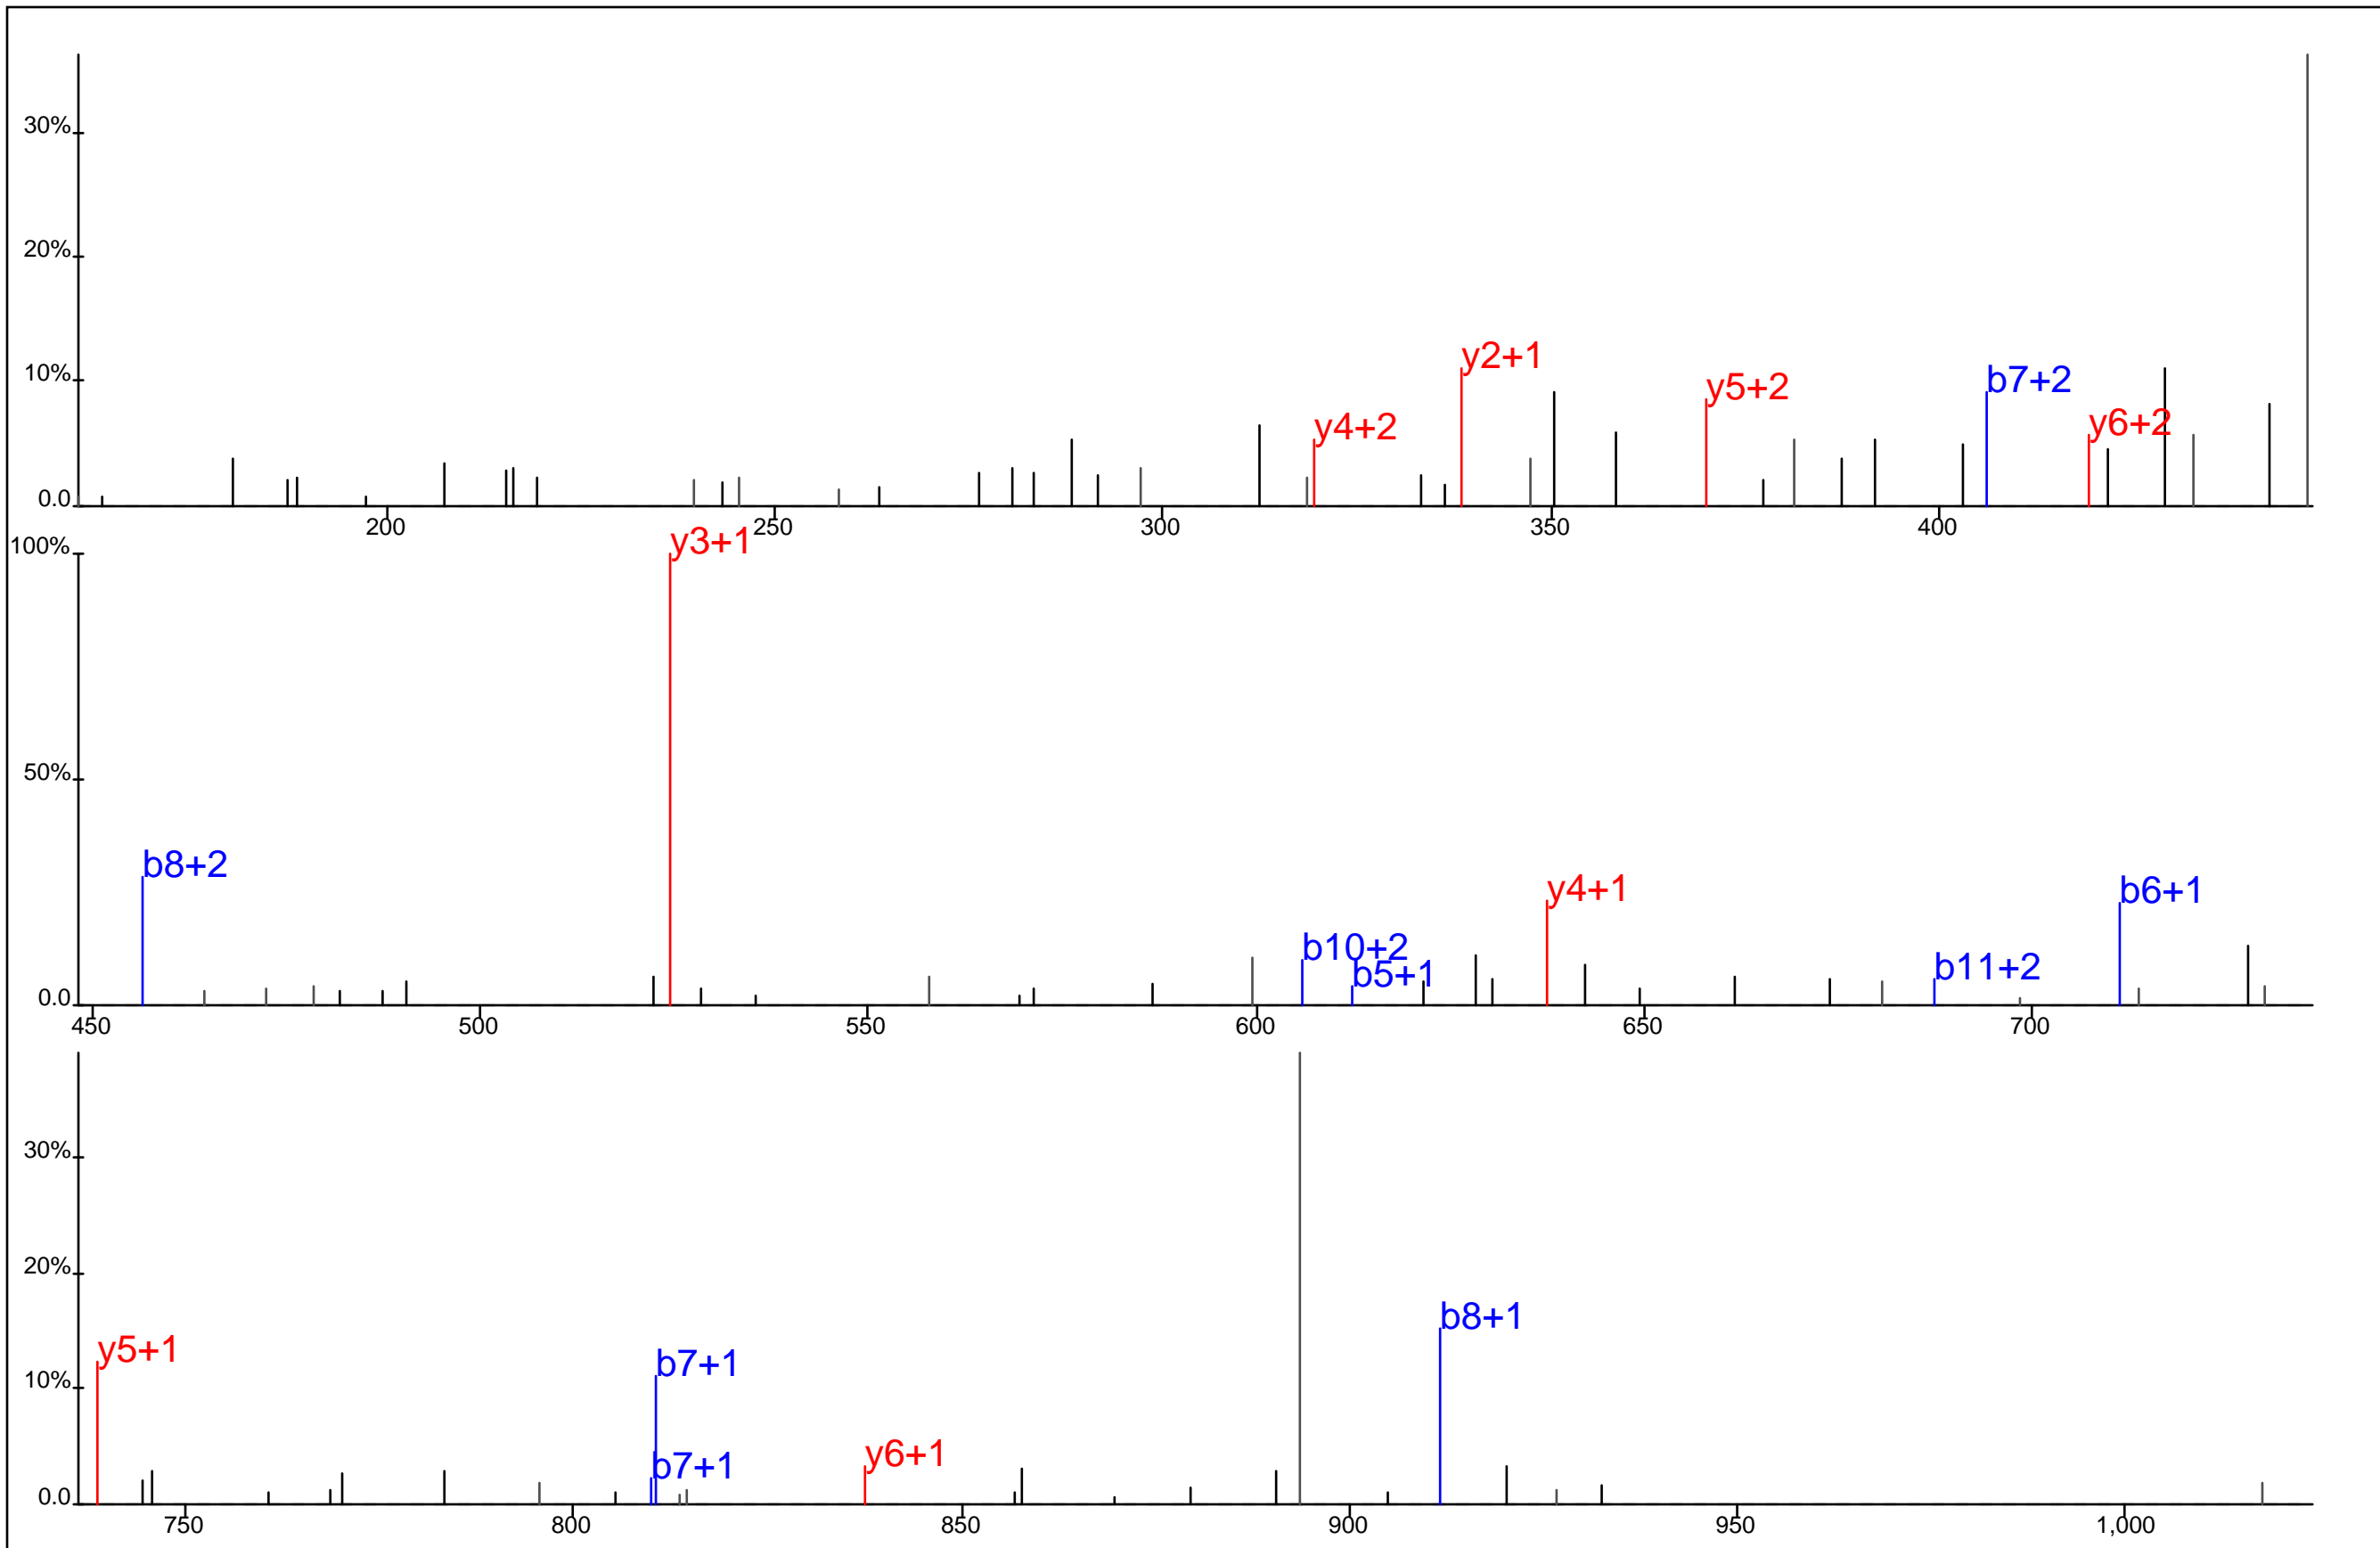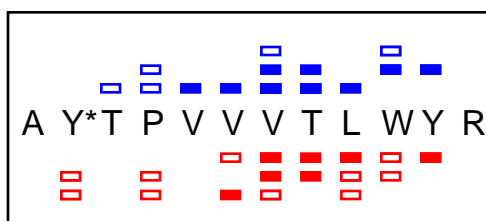

Protein Name: Cell division cycle 2 like 1  
 gi Accession: 0  
 Precursor Mass: 516.5932+3  
 Delta Mass: 0.479 ppm  
 XCorr: 28.58

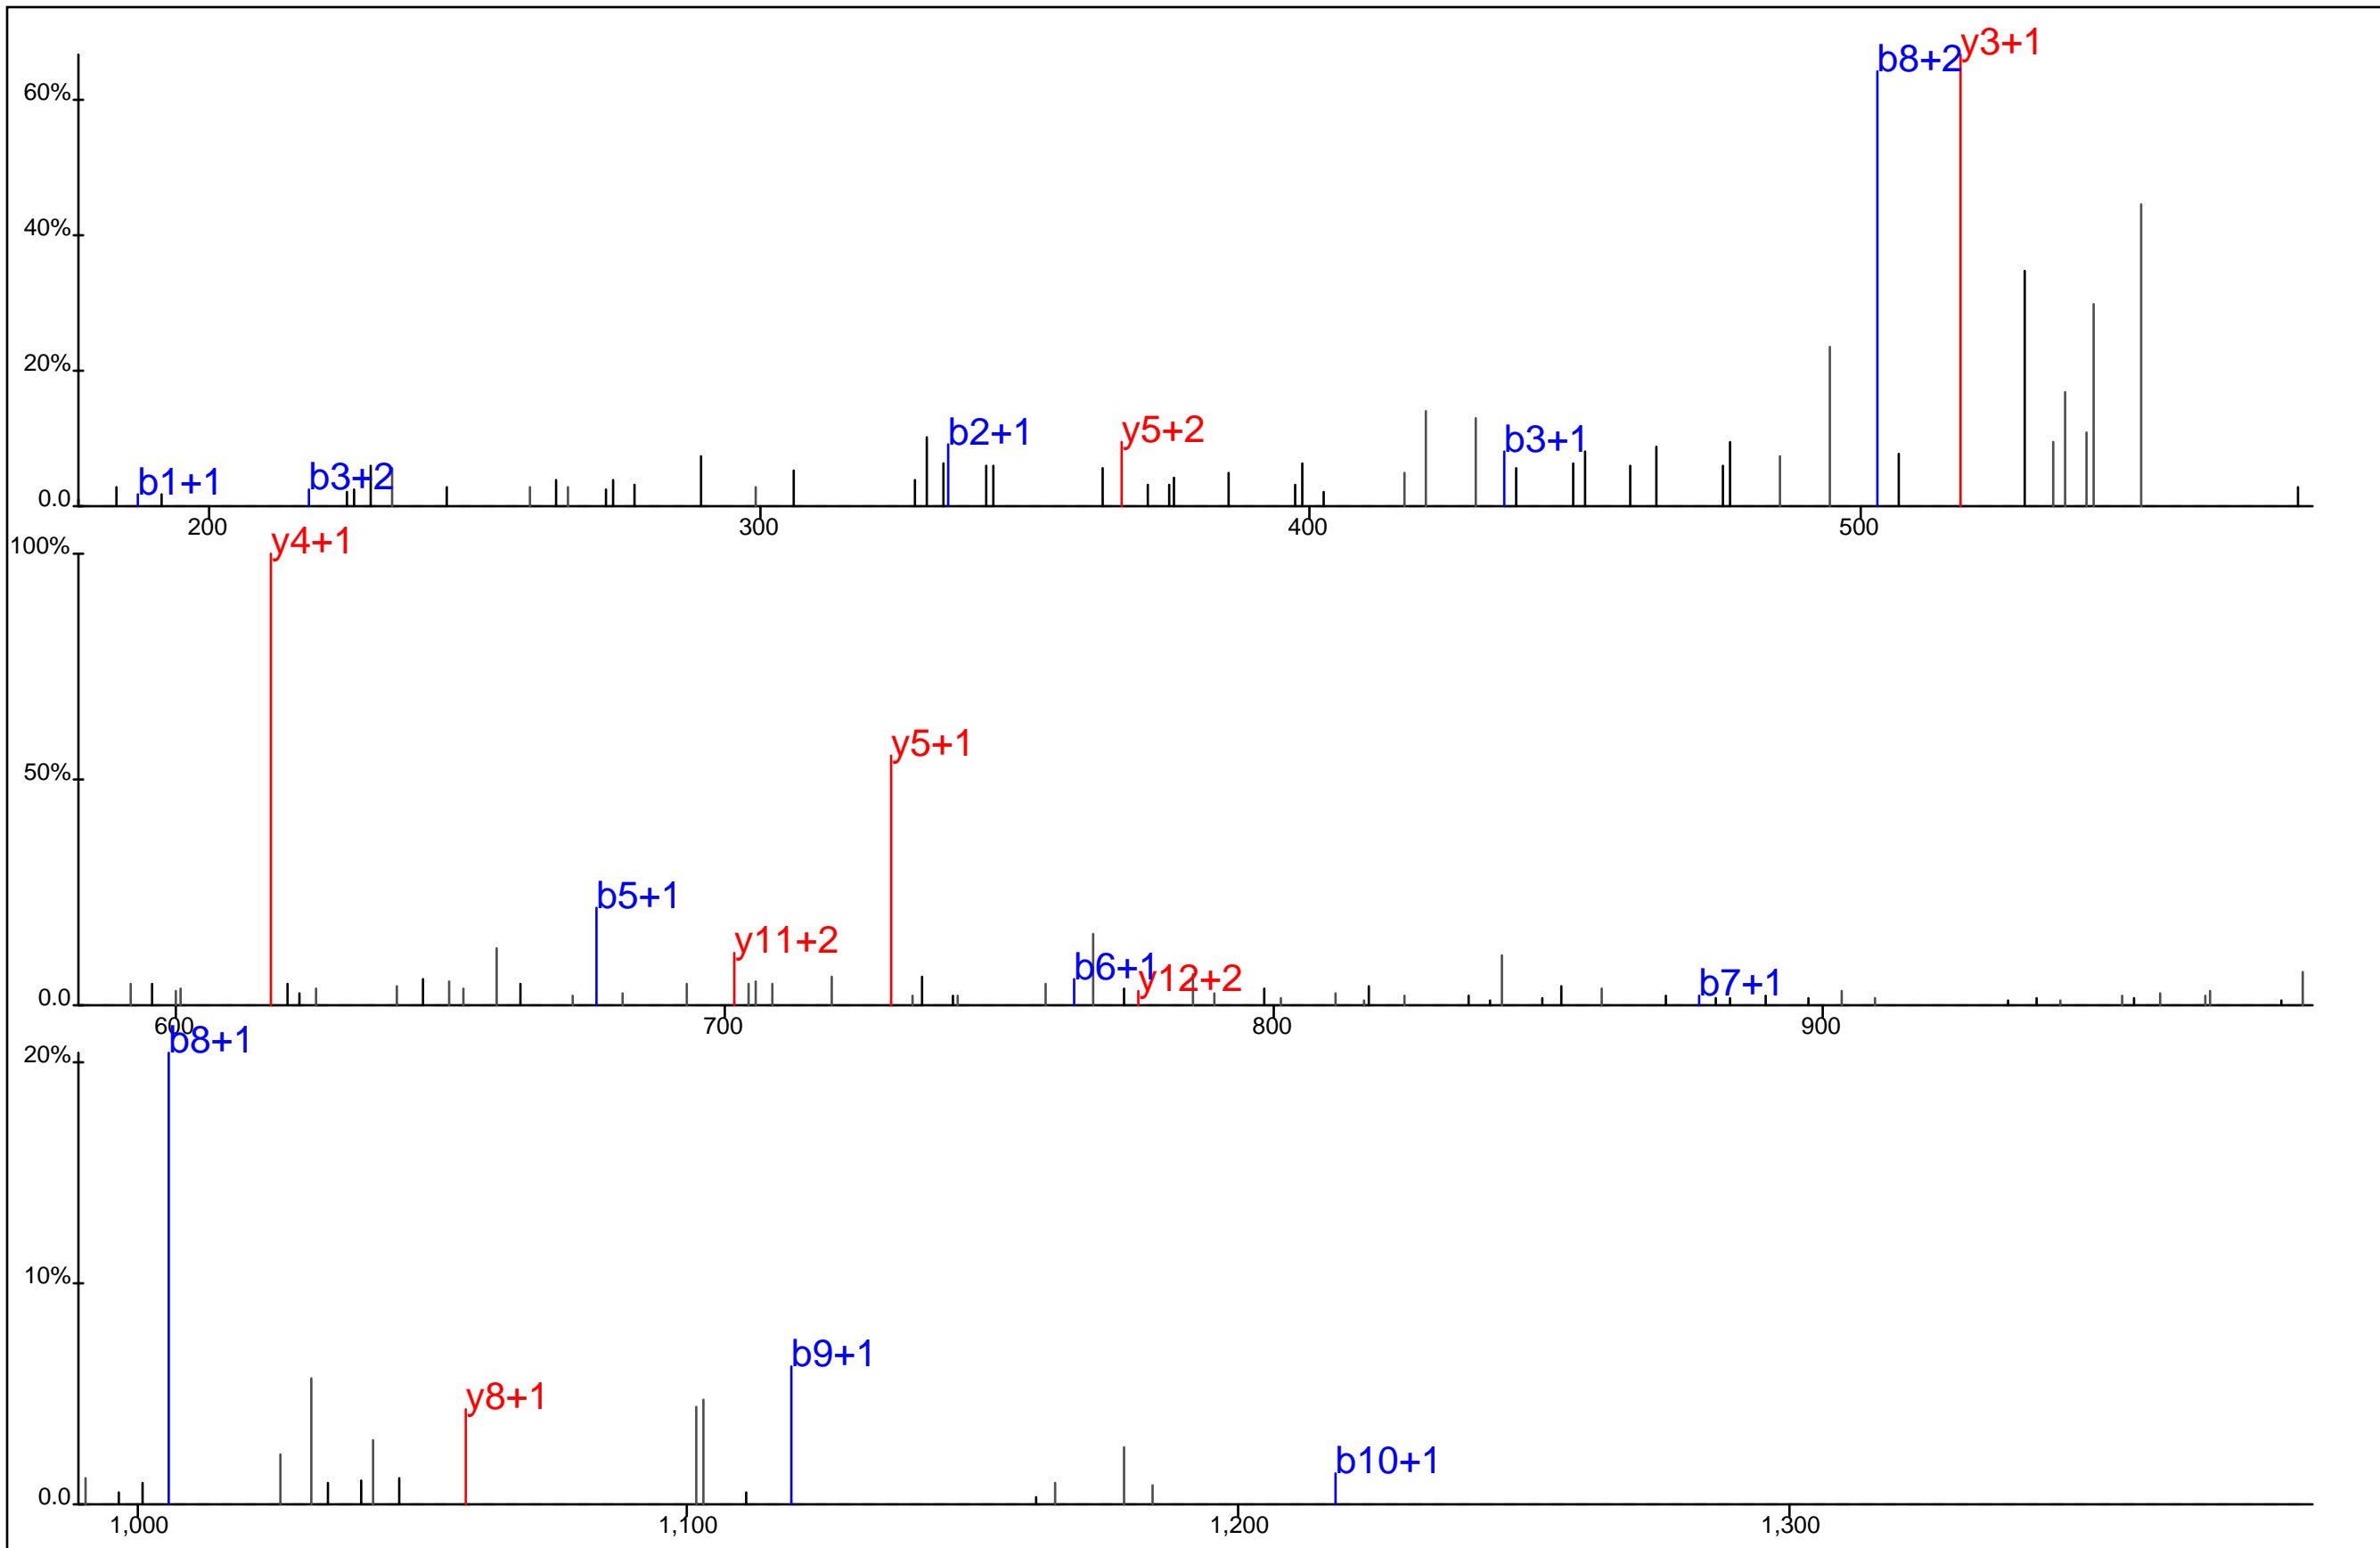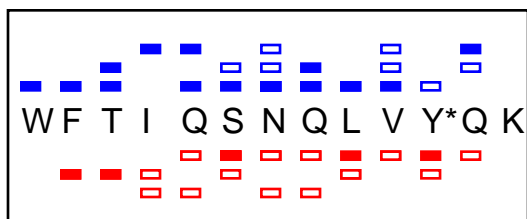

Protein Name: Centaurin beta 1  
 gi Accession: 0  
 Precursor Mass: 578.9467+3  
 Delta Mass: 0.191 ppm  
 XCorr: 27.19

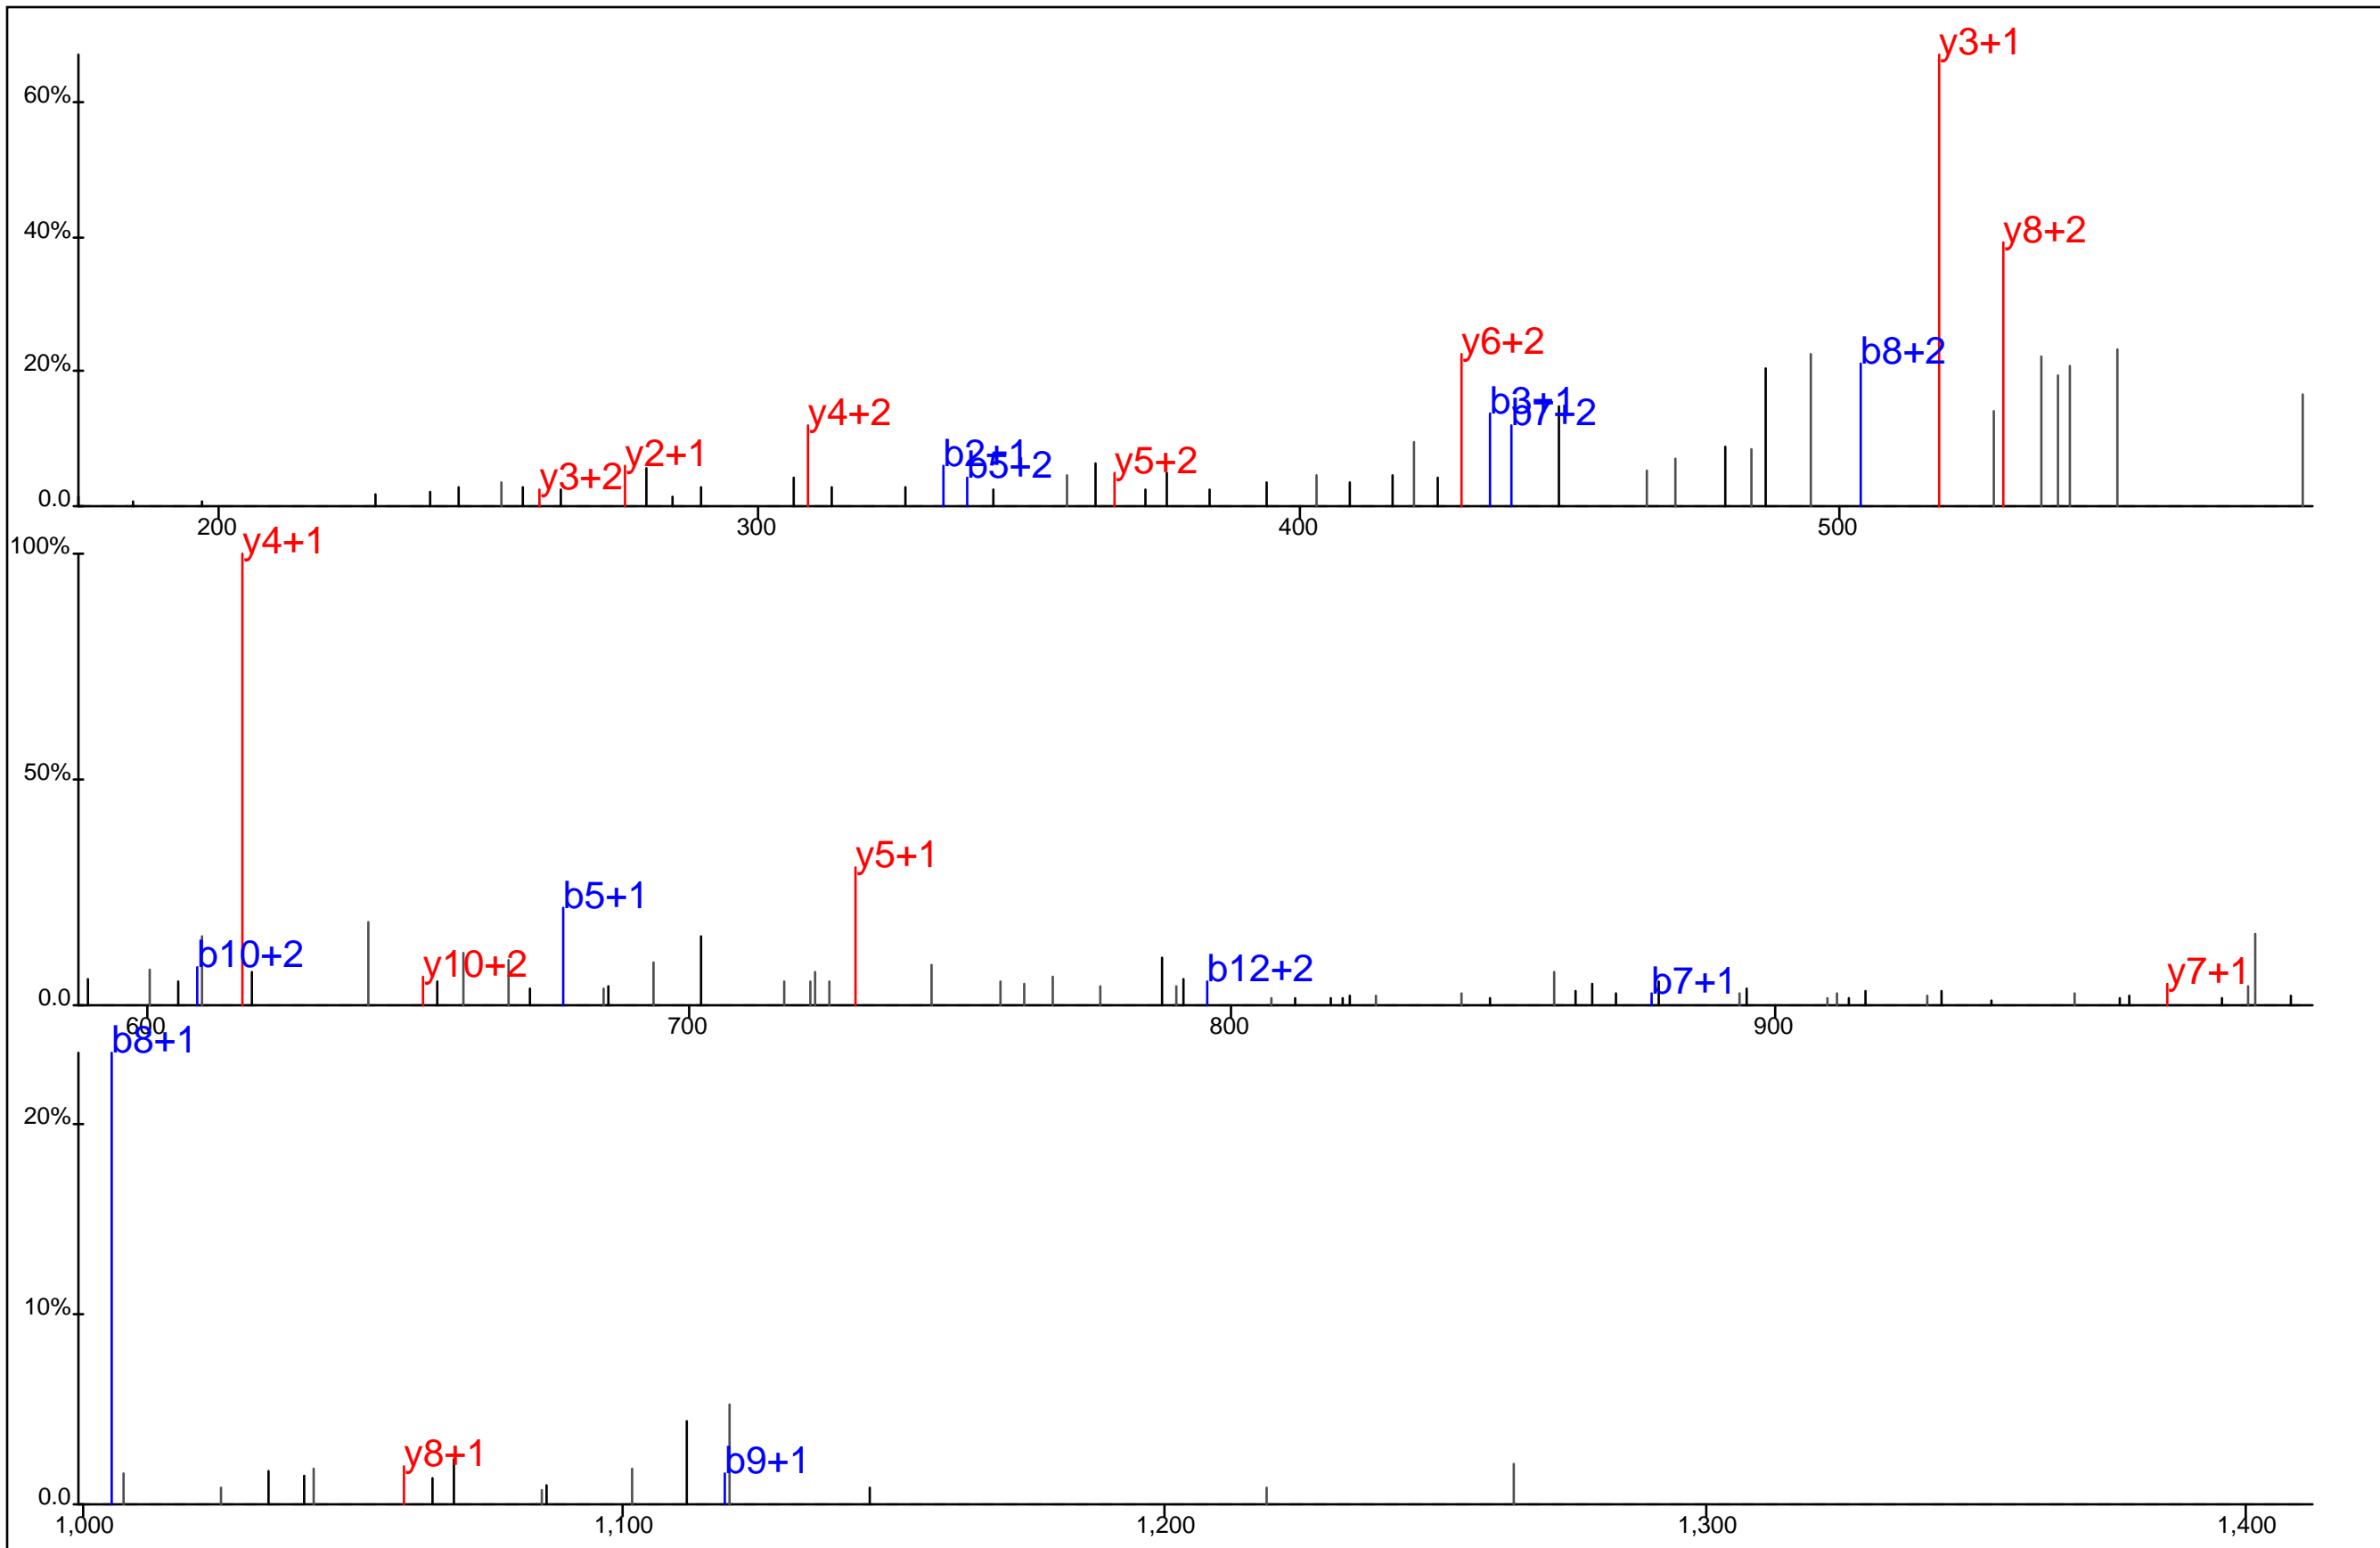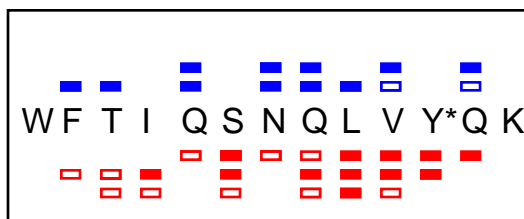

Protein Name: Centaurin beta 1  
 gi Accession: 0  
 Precursor Mass: 578.9461+3  
 Delta Mass: 0.759 ppm  
 XCorr: 27.24

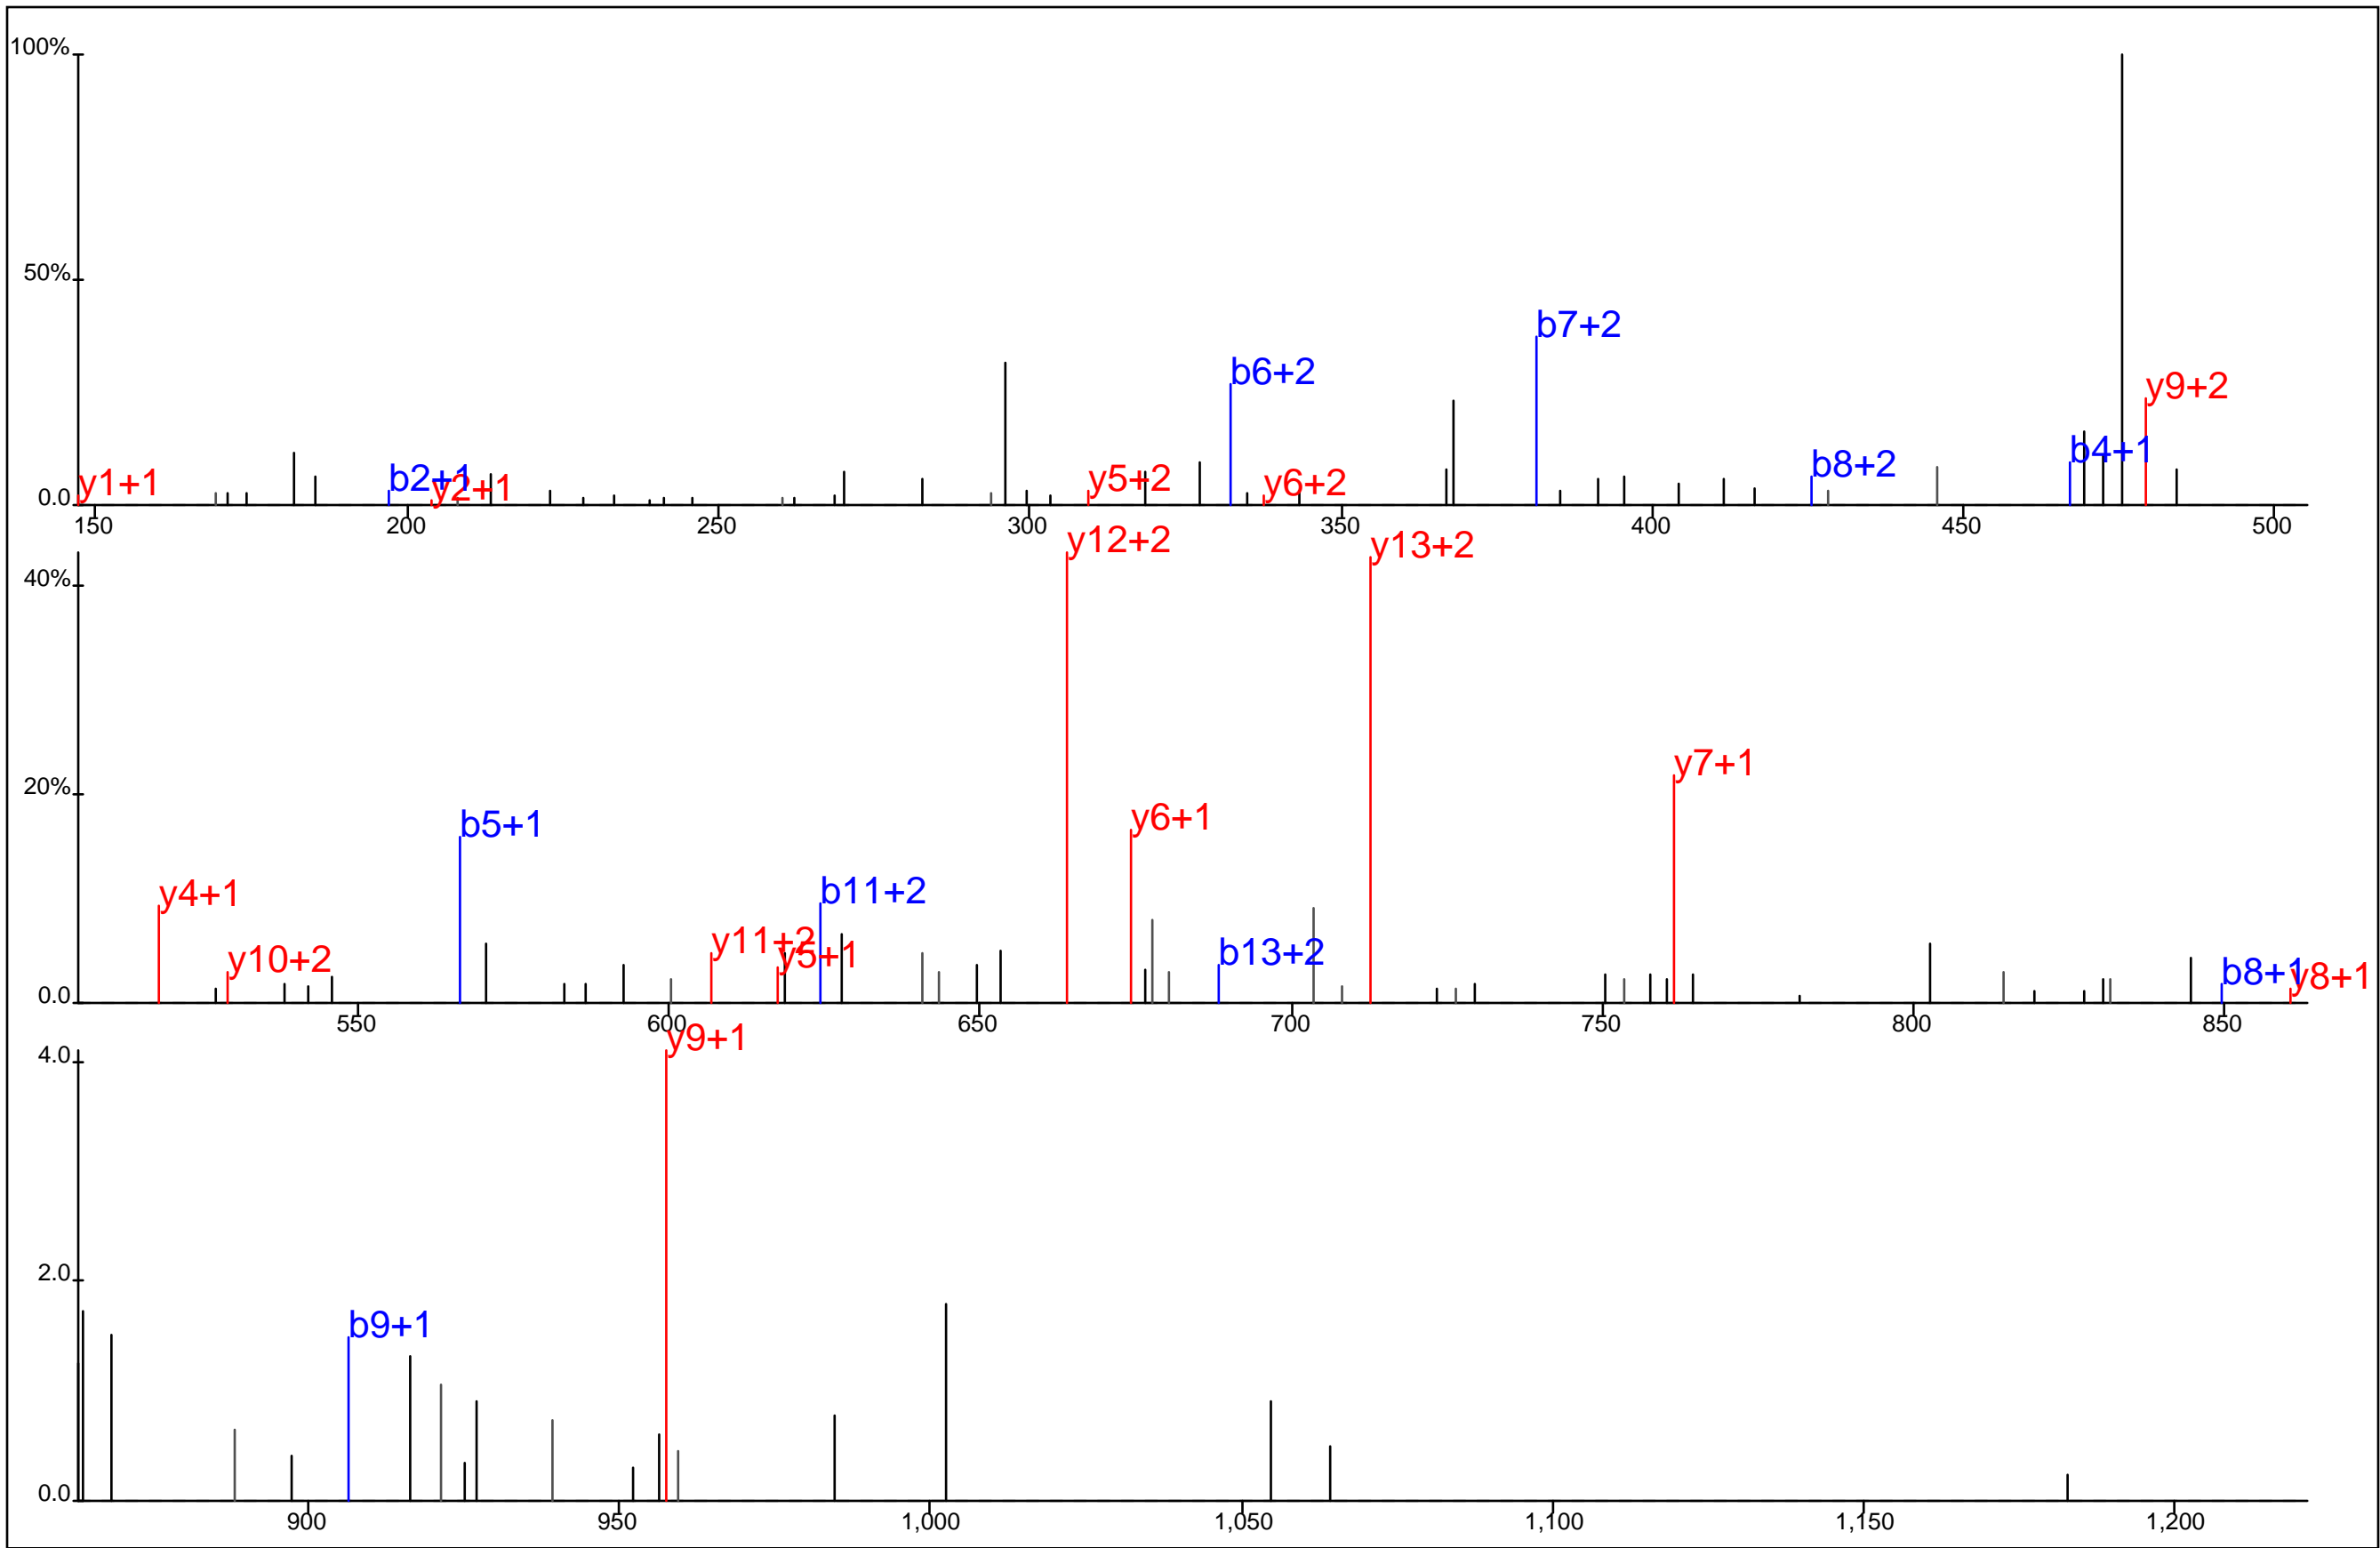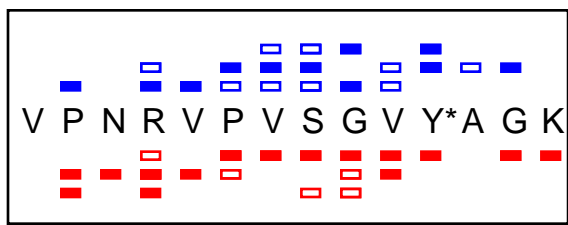

Protein Name: Centriolar coiled-coil protein of 110 kDa  
 gi Accession: 0  
 Precursor Mass: 508.2618+3  
 Delta Mass: 4.573 ppm  
 XCorr: 29.28

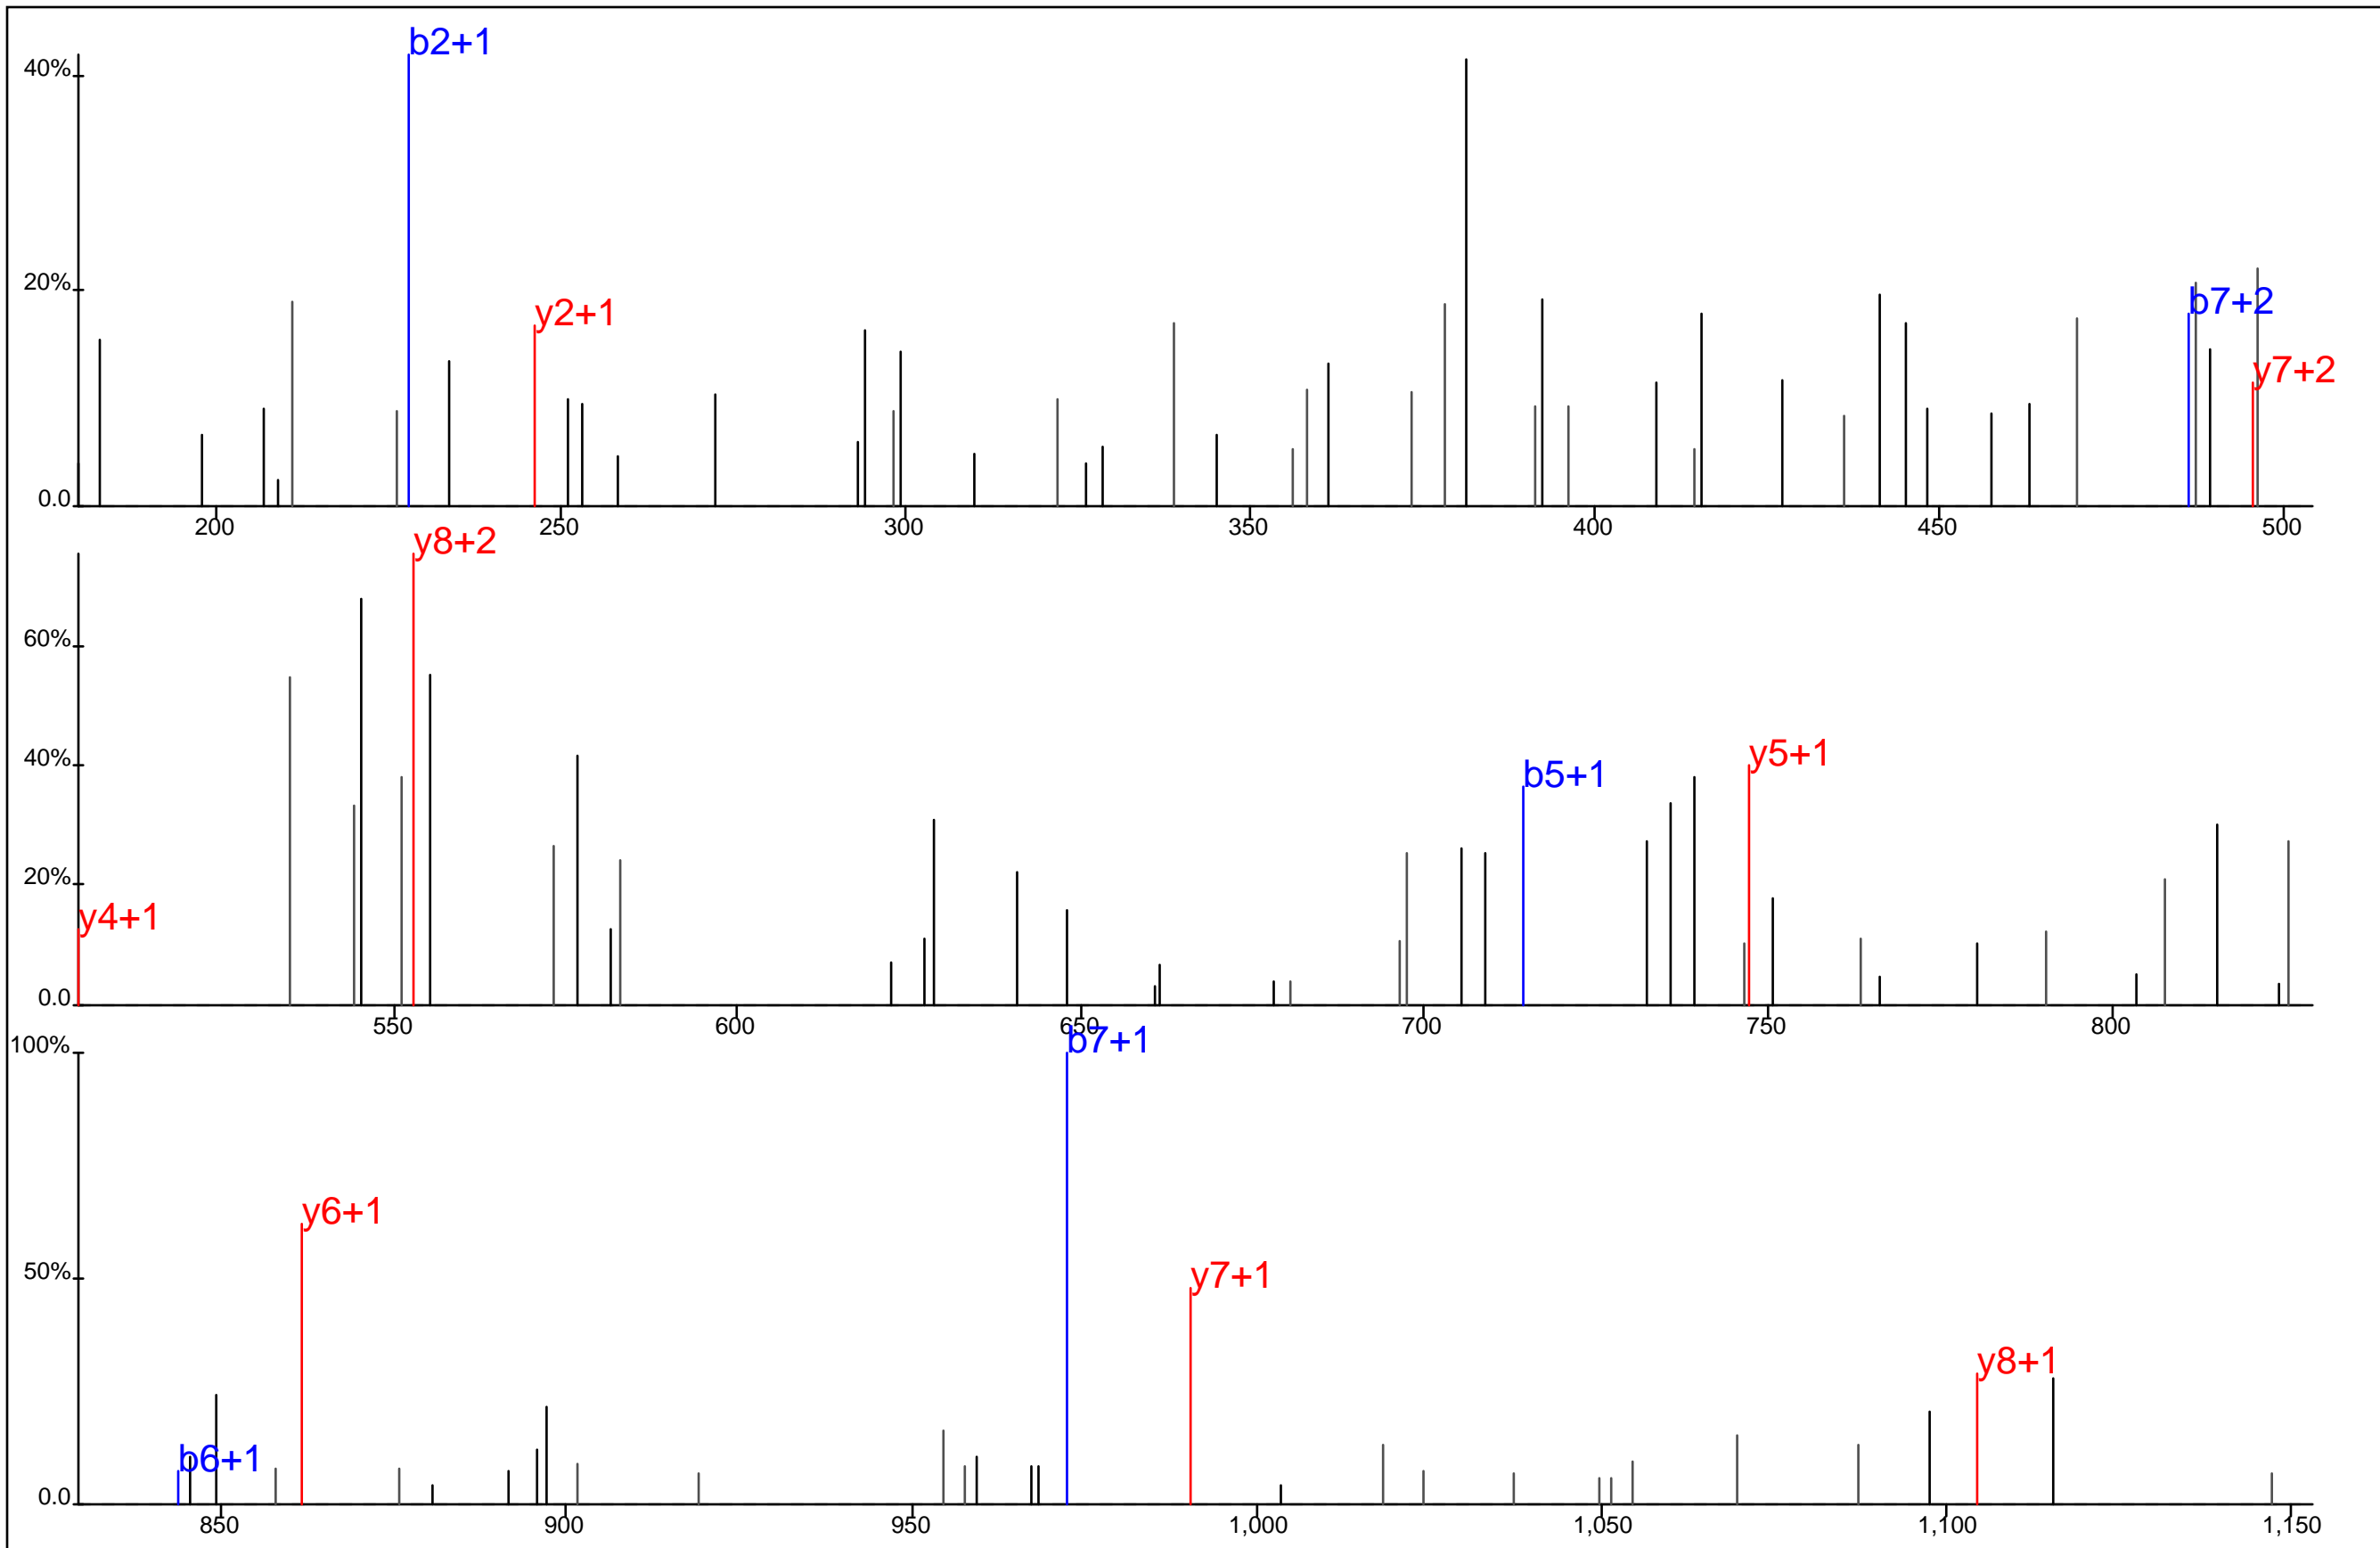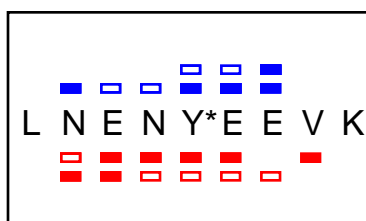

Protein Name: Centromeric protein E  
 gi Accession: 0  
 Precursor Mass: 609.2577+2  
 Delta Mass: 0.343 ppm  
 XCorr: 20.41



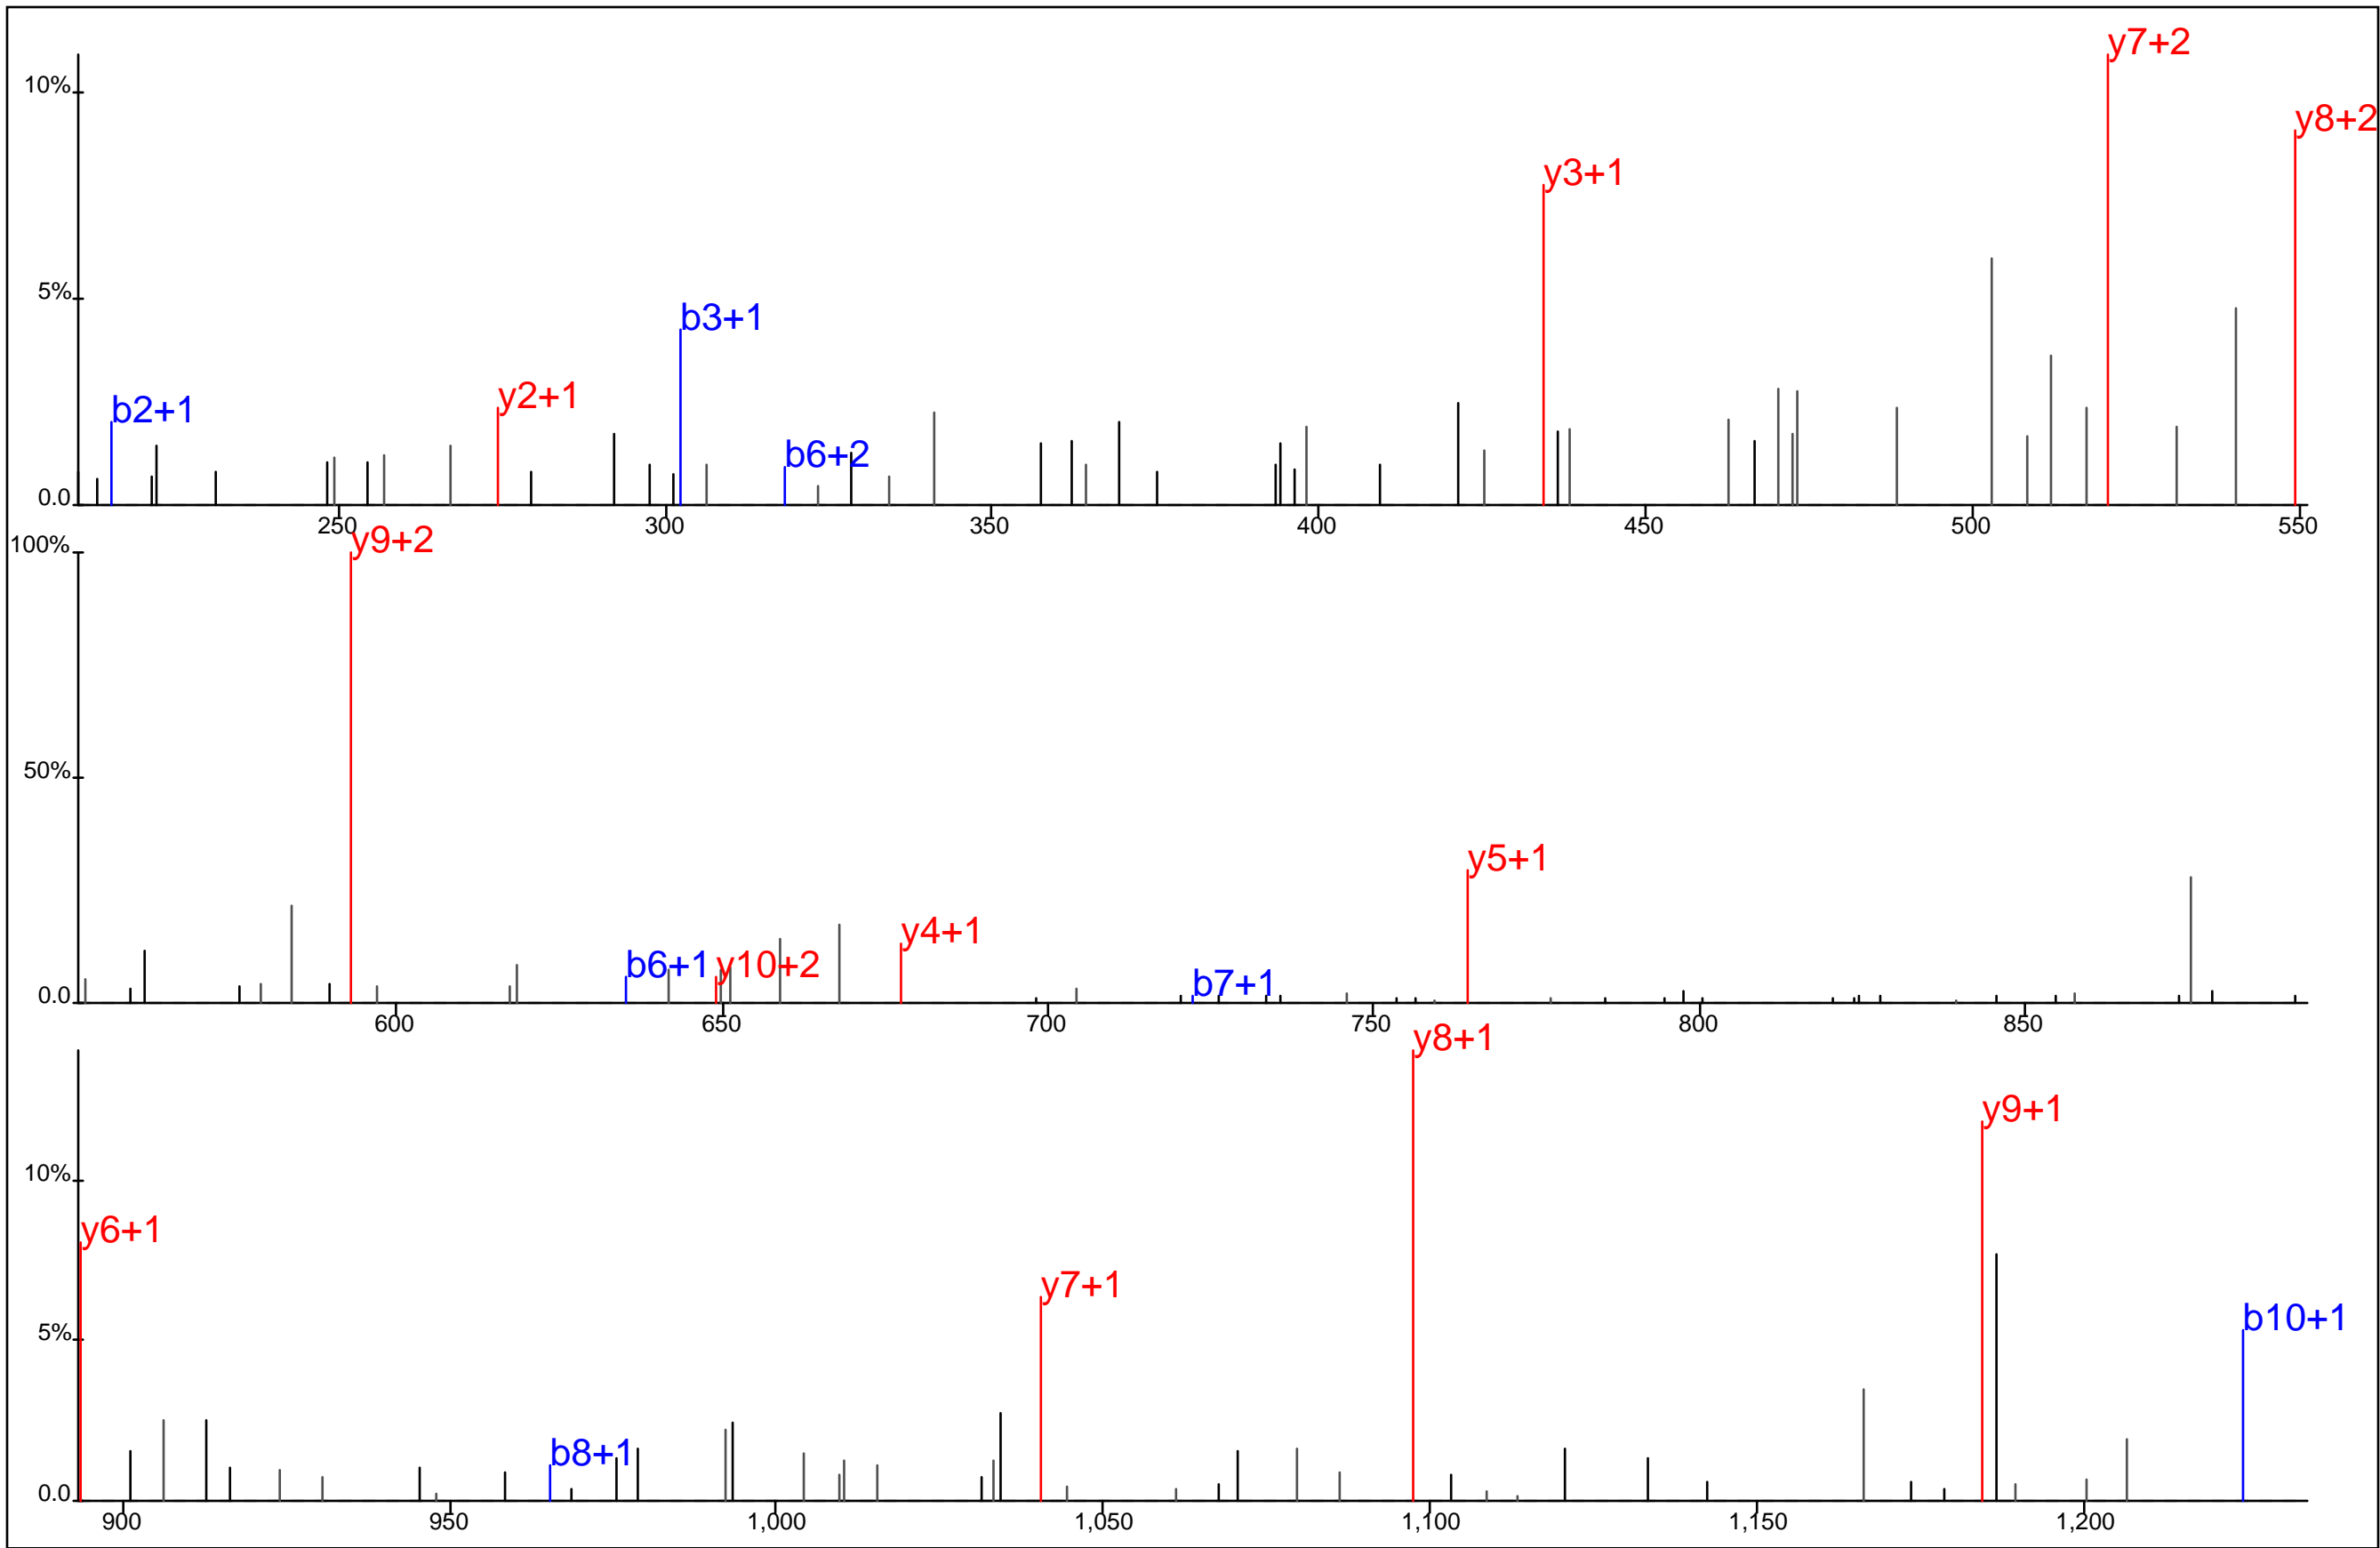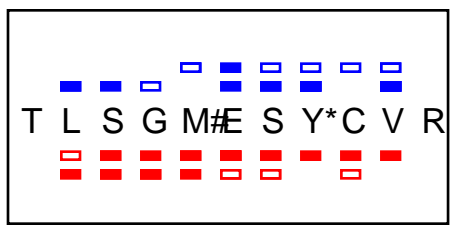

Protein Name: Chaperonin containing T complex polypeptide 1 subunit 4  
 gi Accession: 0  
 Precursor Mass: 699.7748+2  
 Delta Mass: 0.369 ppm  
 XCorr: 50.74

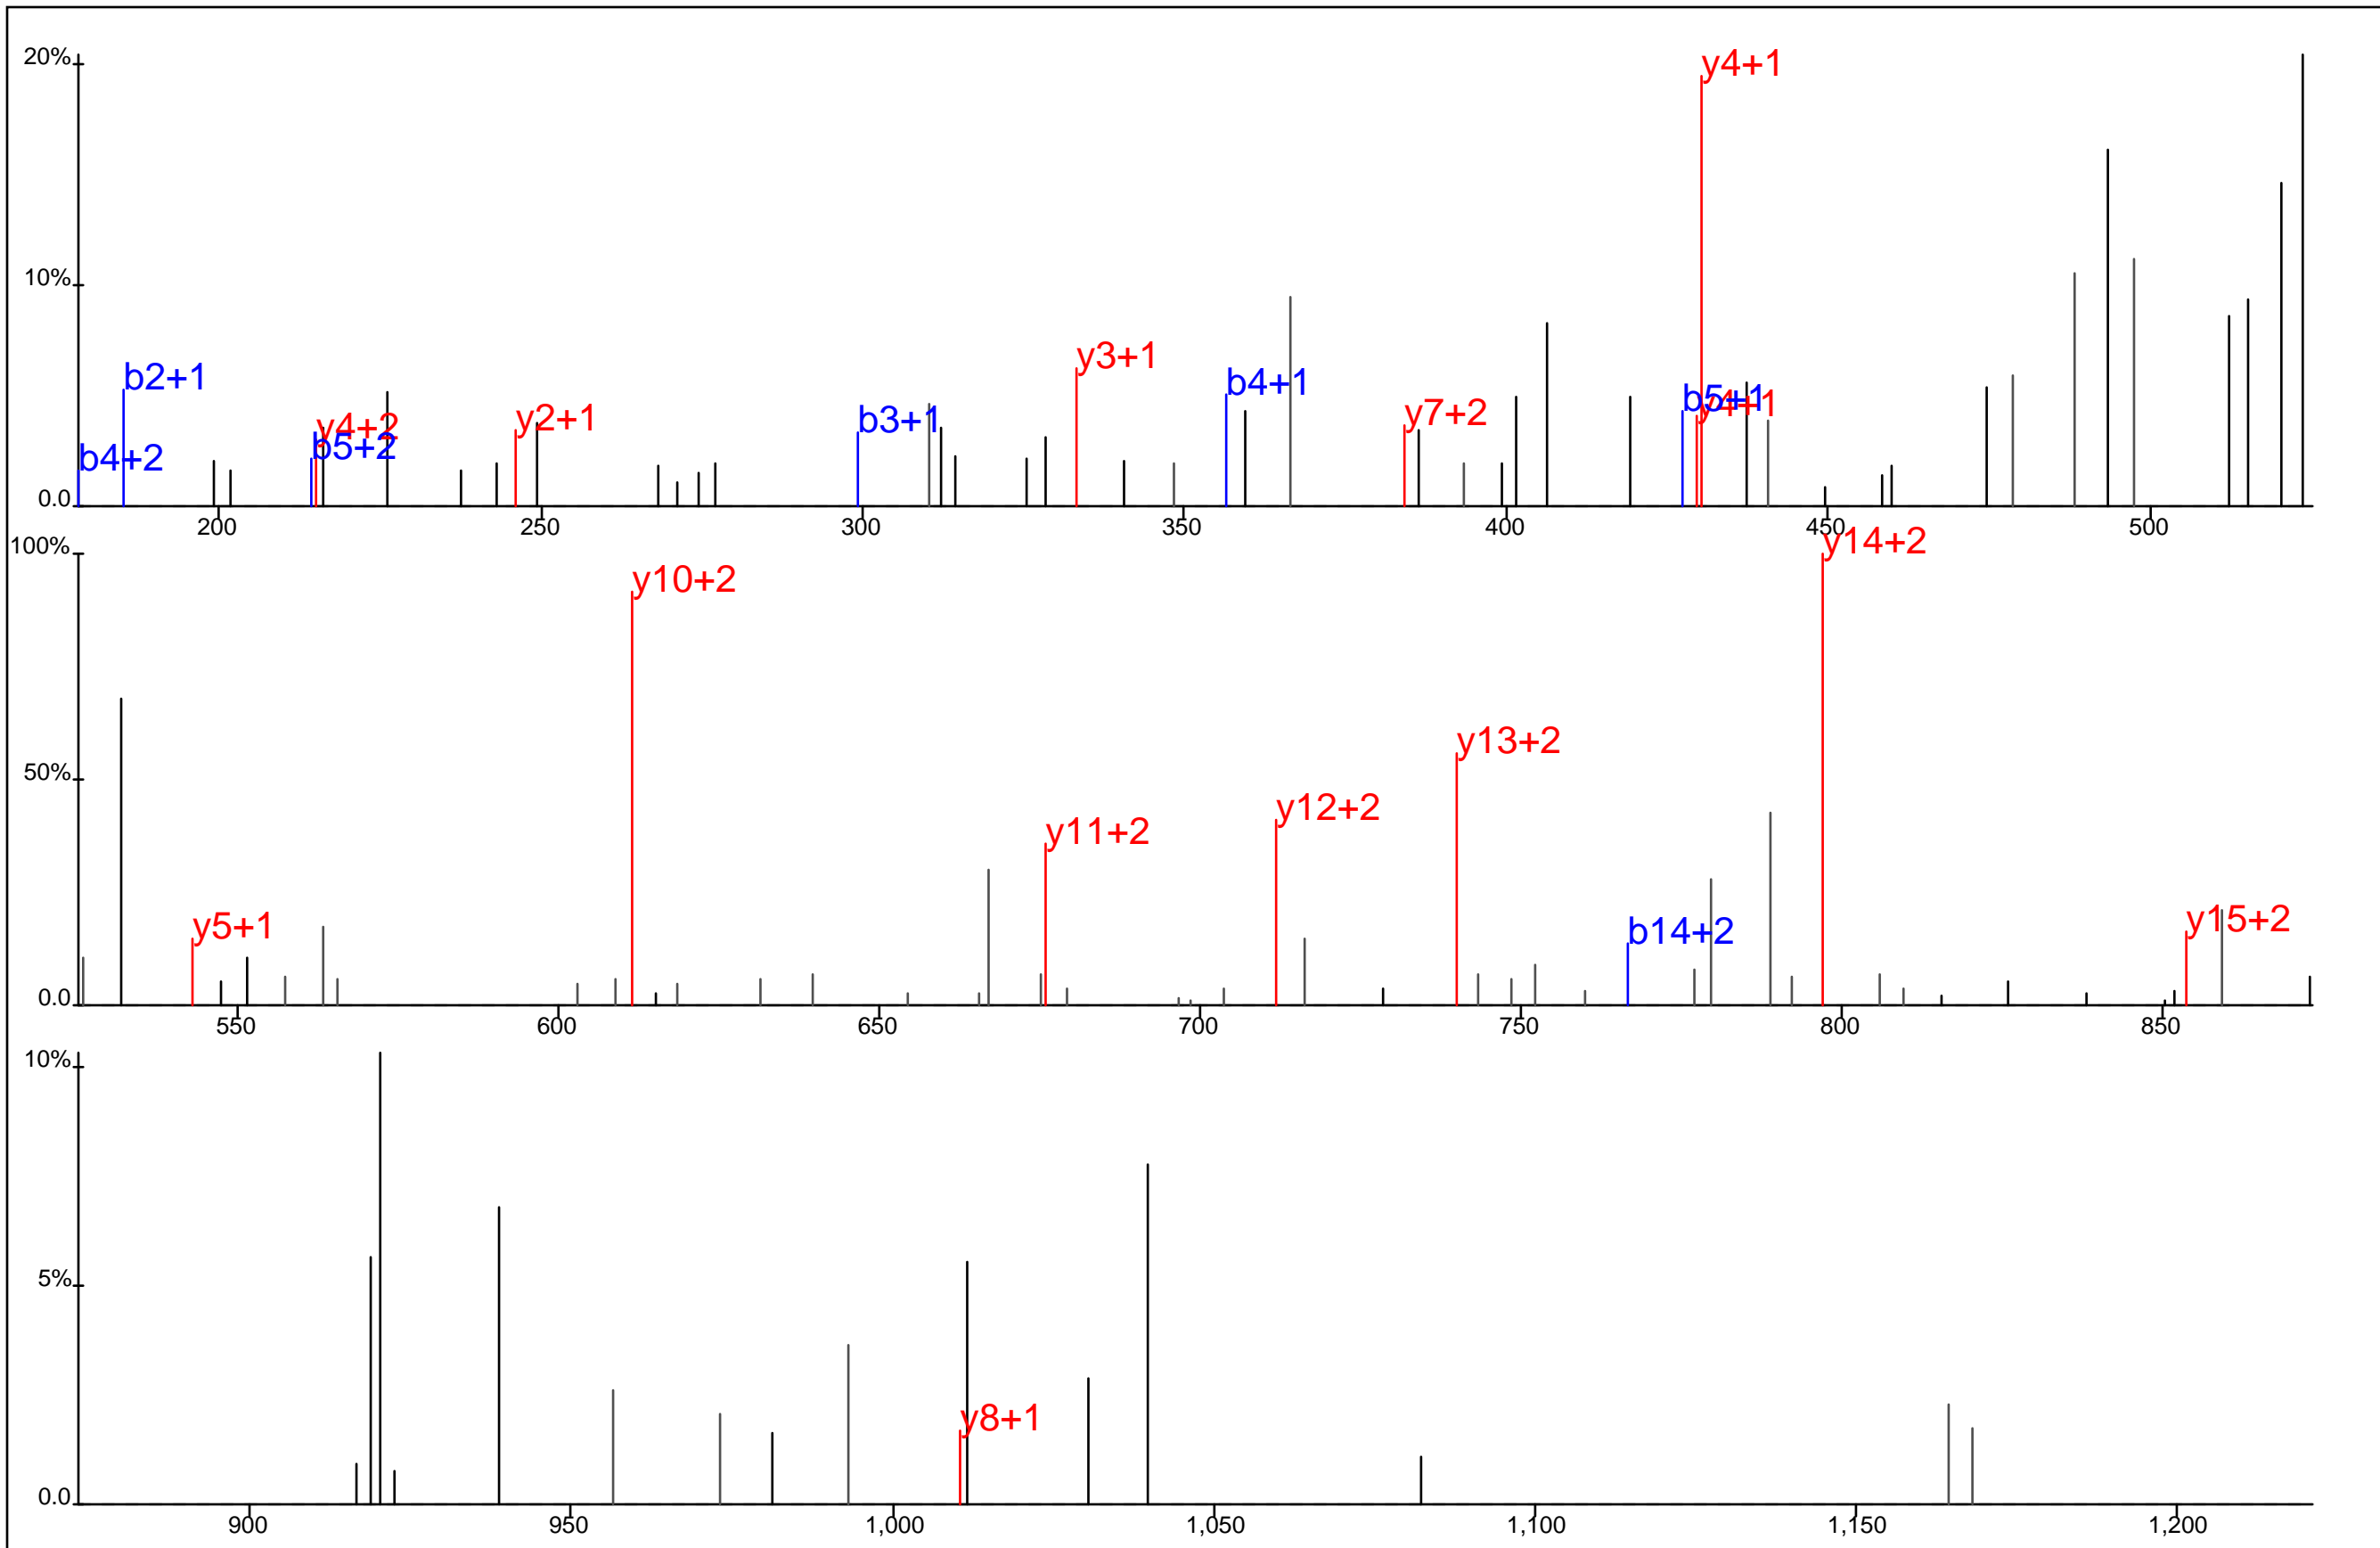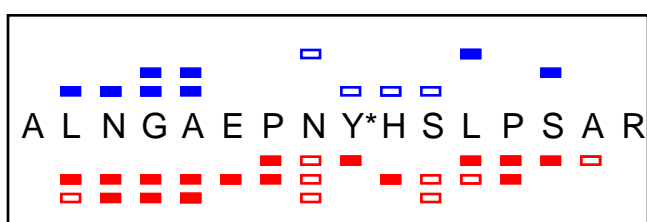

Protein Name: Chromosome 11 open reading frame 59  
 gi Accession: 0  
 Precursor Mass: 592.9404+3  
 Delta Mass: 0.064 ppm  
 XCorr: 28.08

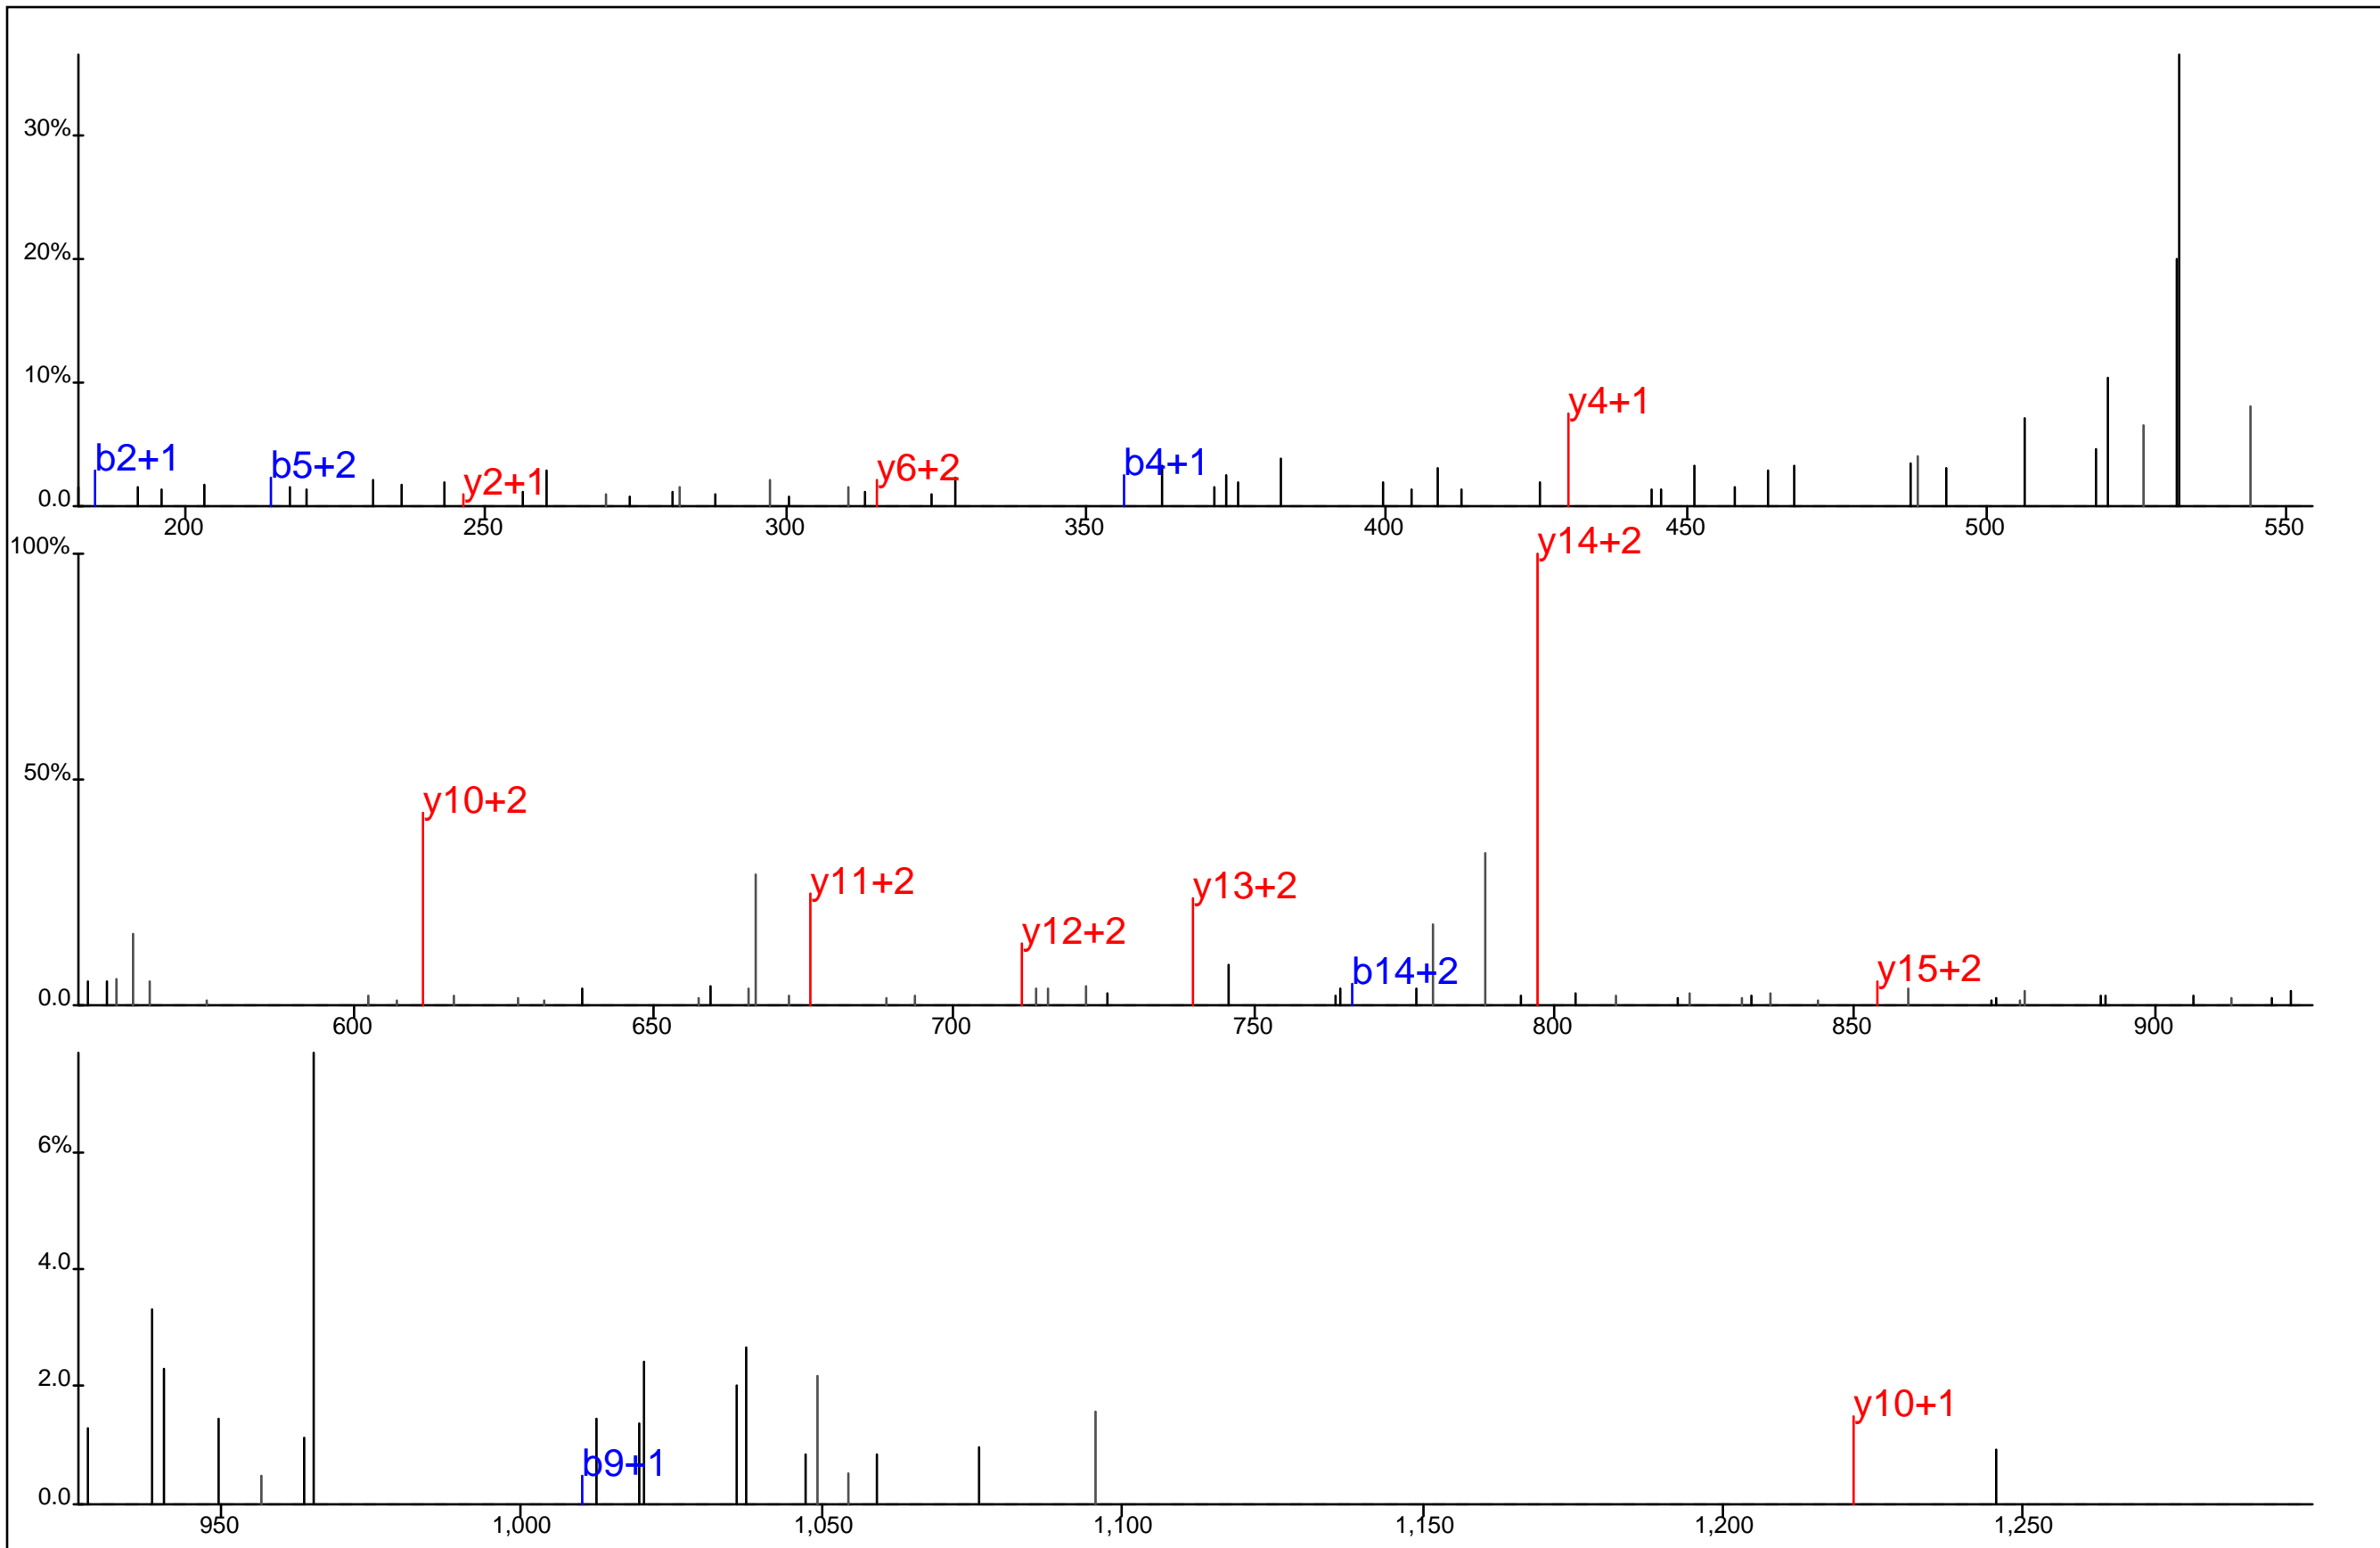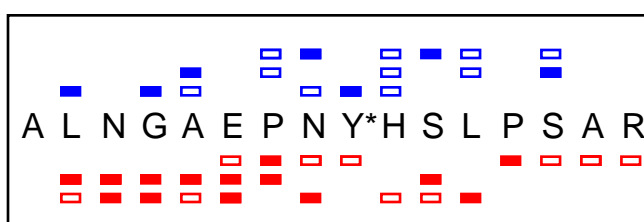

Protein Name: Chromosome 11 open reading frame 59  
 gi Accession: 0  
 Precursor Mass: 592.9407+3  
 Delta Mass: 0.682 ppm  
 XCorr: 22.92

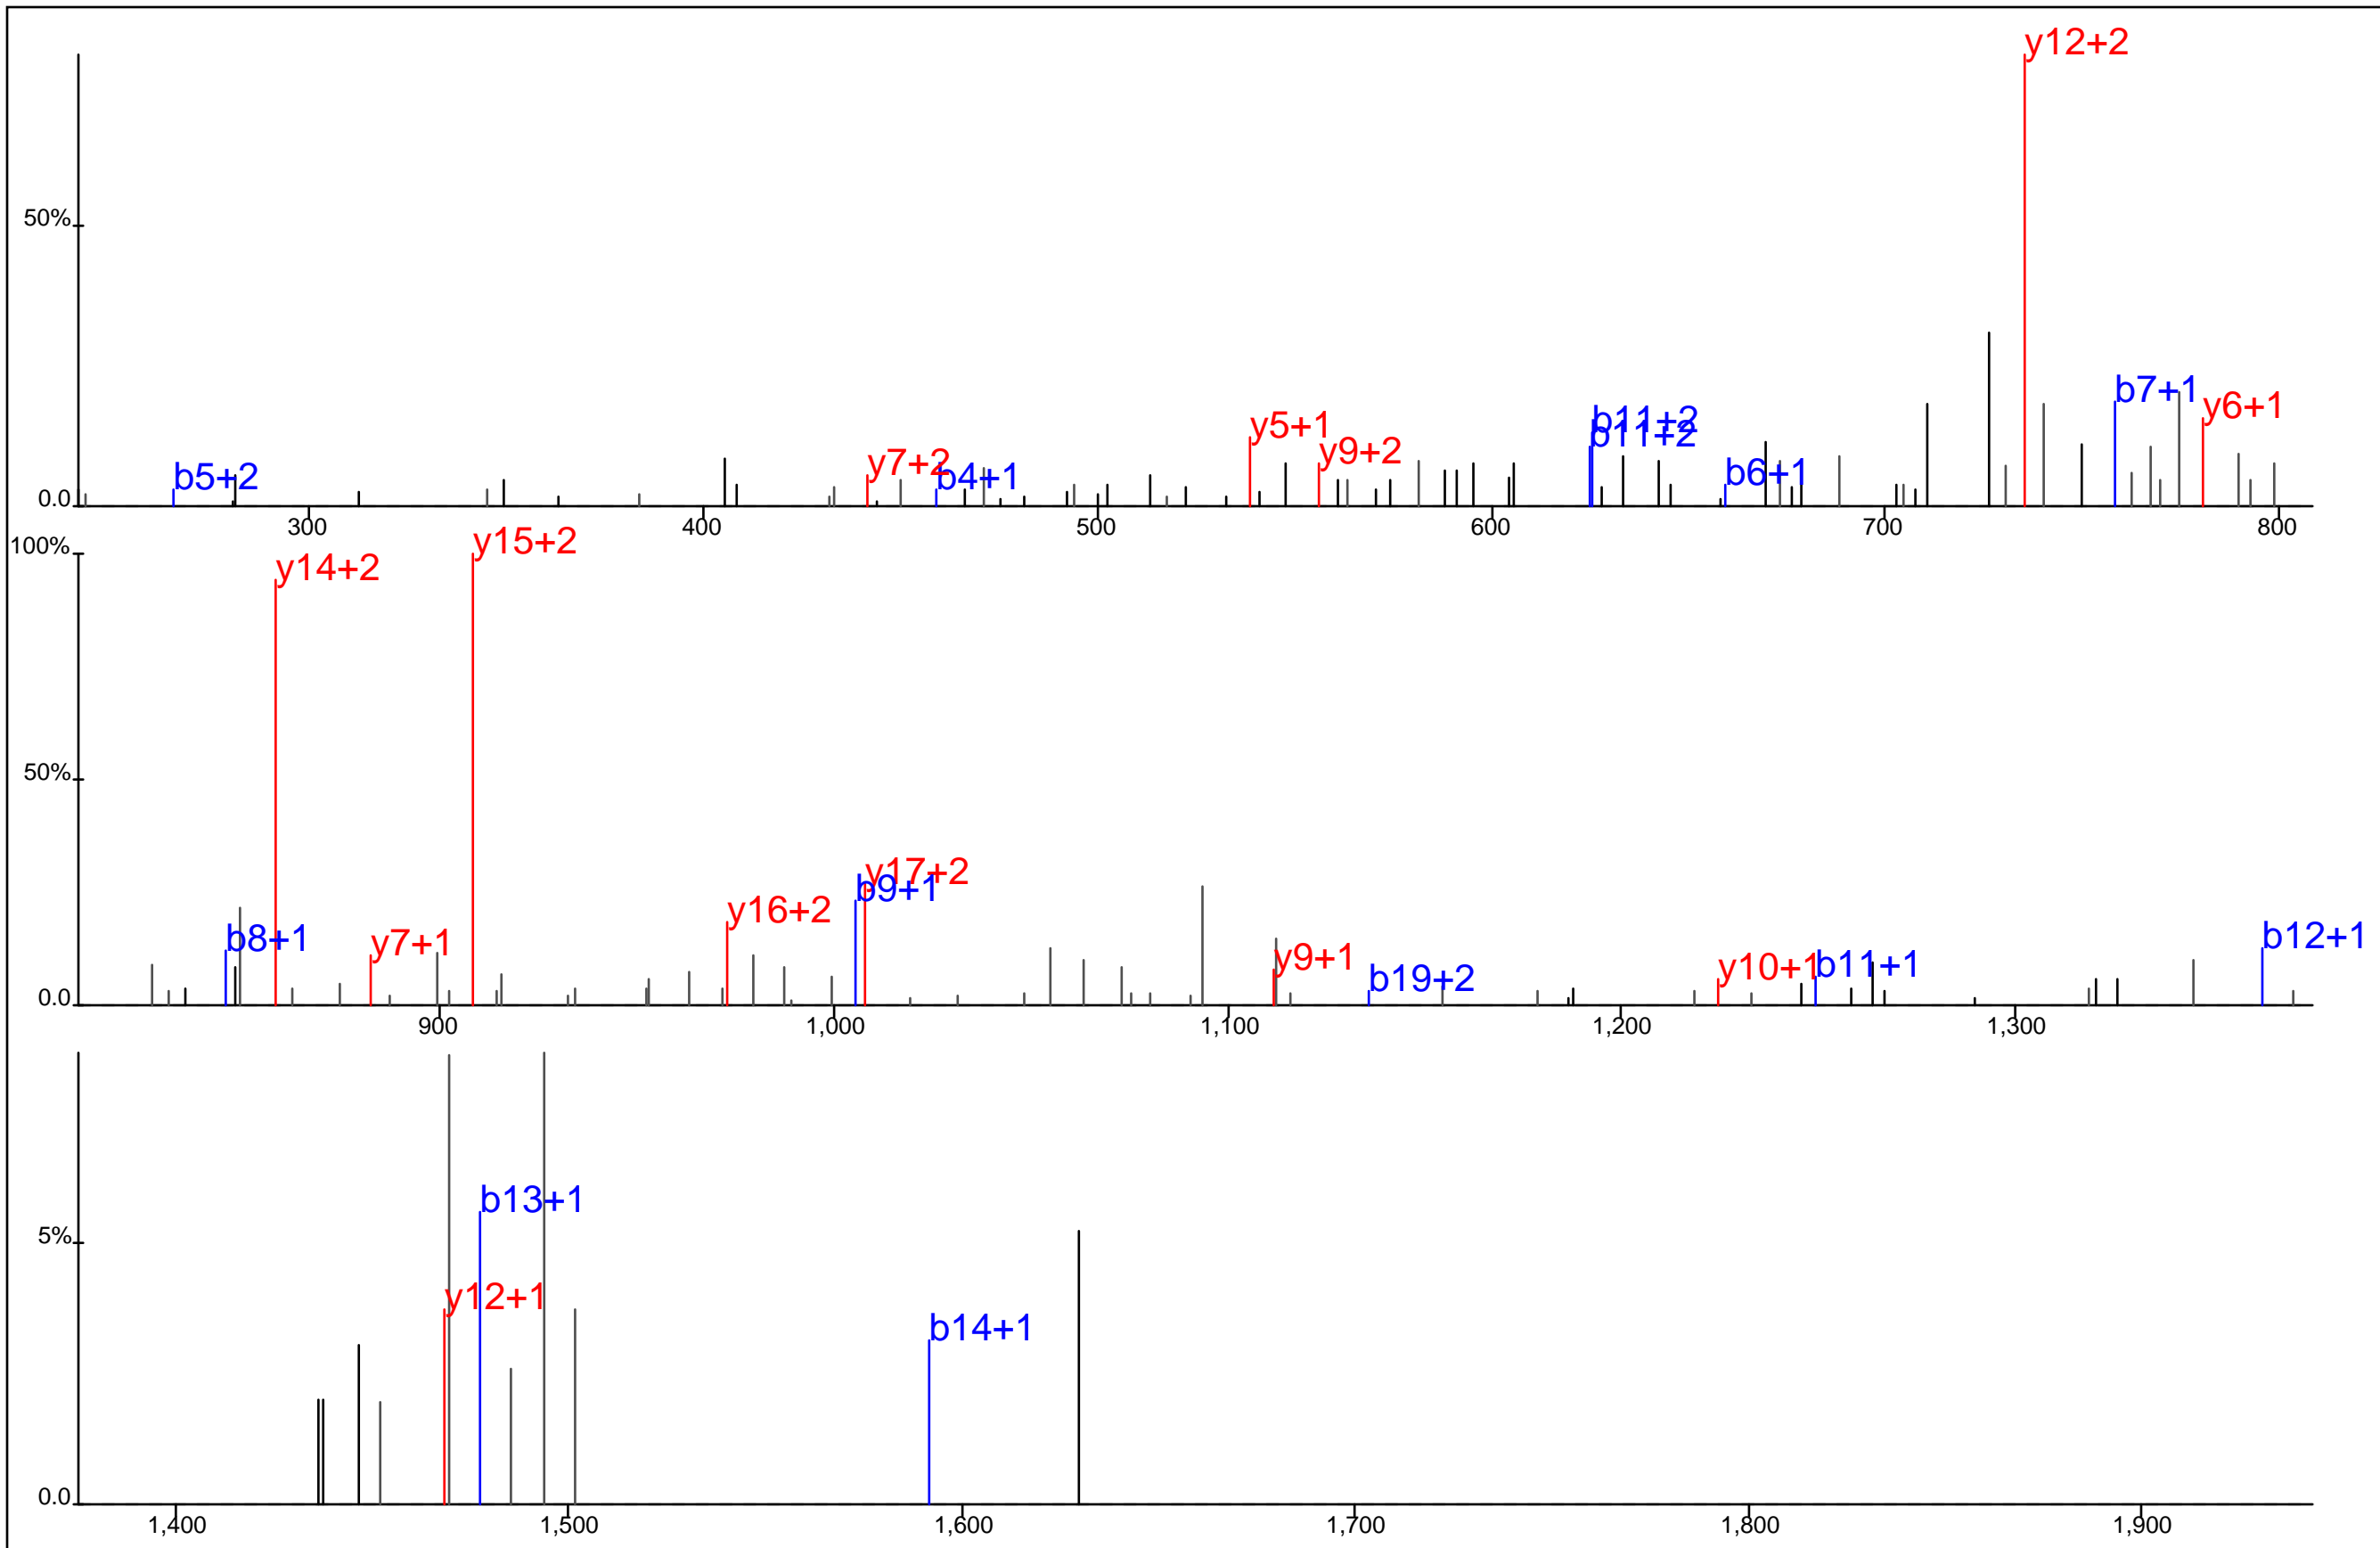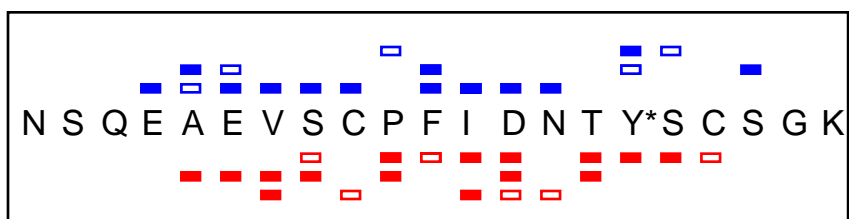

Protein Name: Chromosome 20 open reading frame 18  
 gi Accession: 0  
 Precursor Mass: 824.9970+3  
 Delta Mass: 3.293 ppm  
 XCorr: 37.66

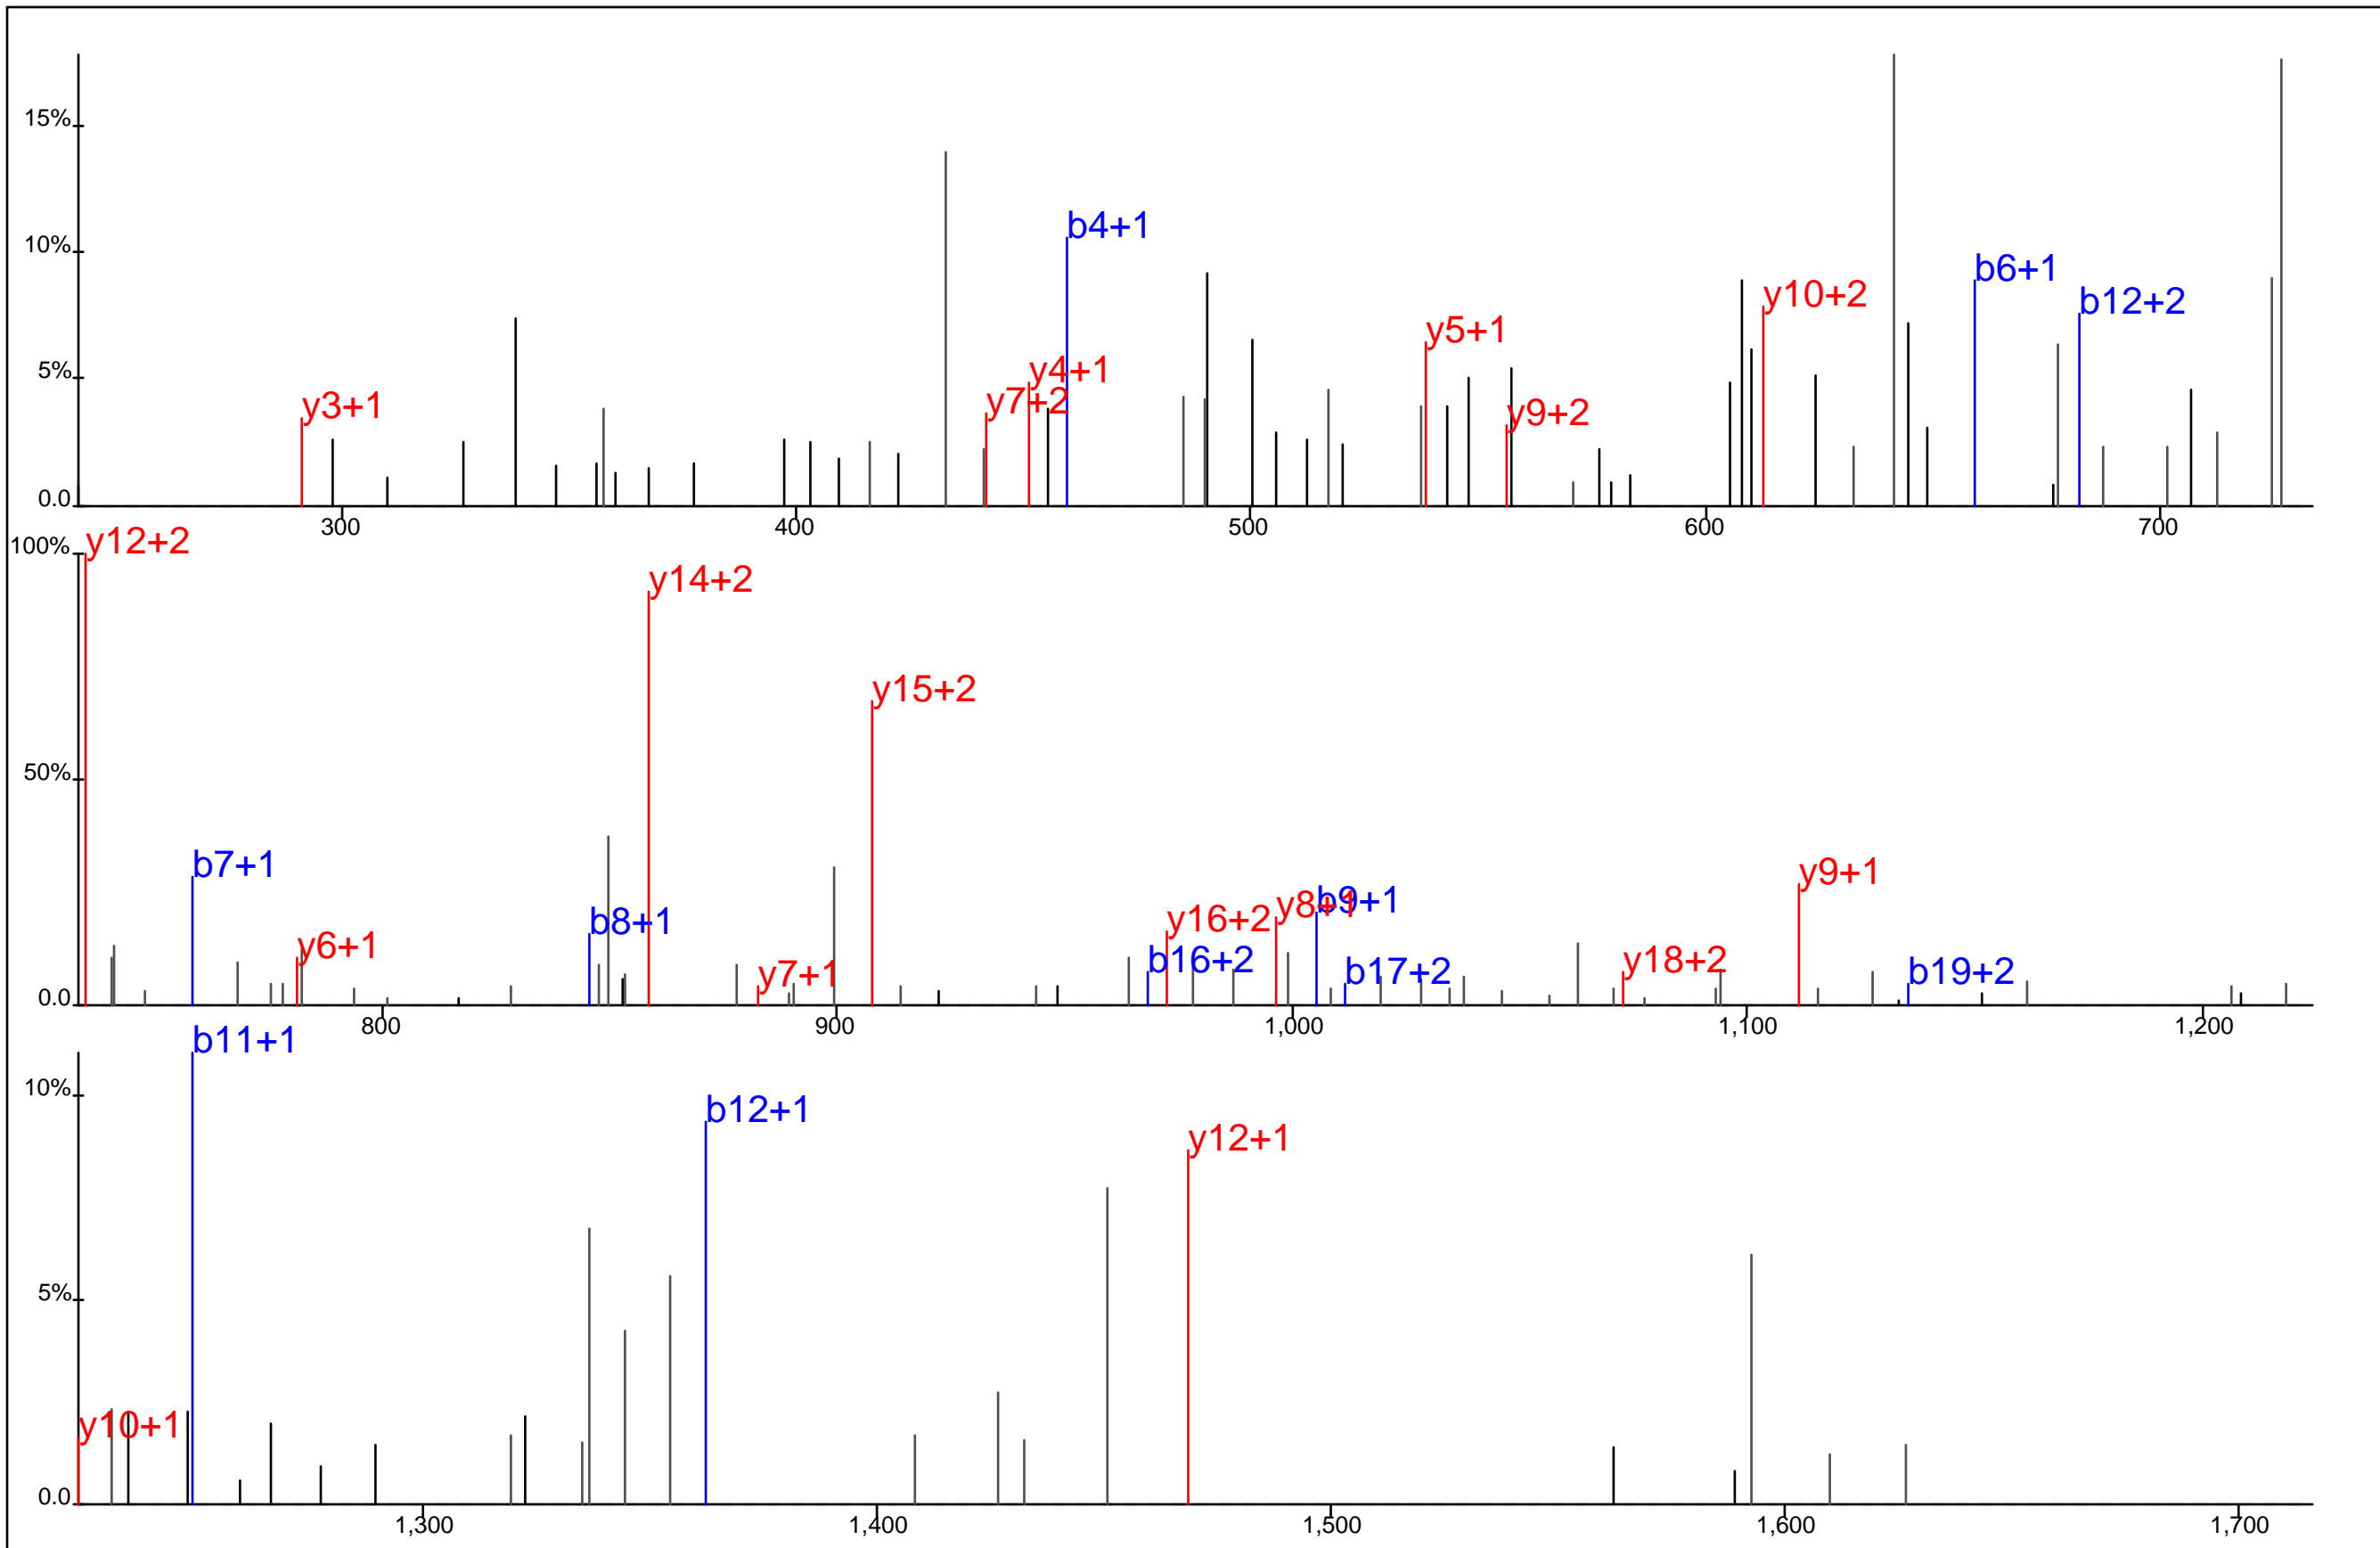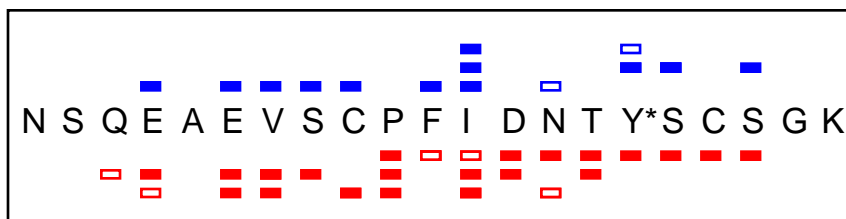

Protein Name: Chromosome 20 open reading frame 18  
 gi Accession: 0  
 Precursor Mass: 824.9936+3  
 Delta Mass: 0.854 ppm  
 XCorr: 43.16

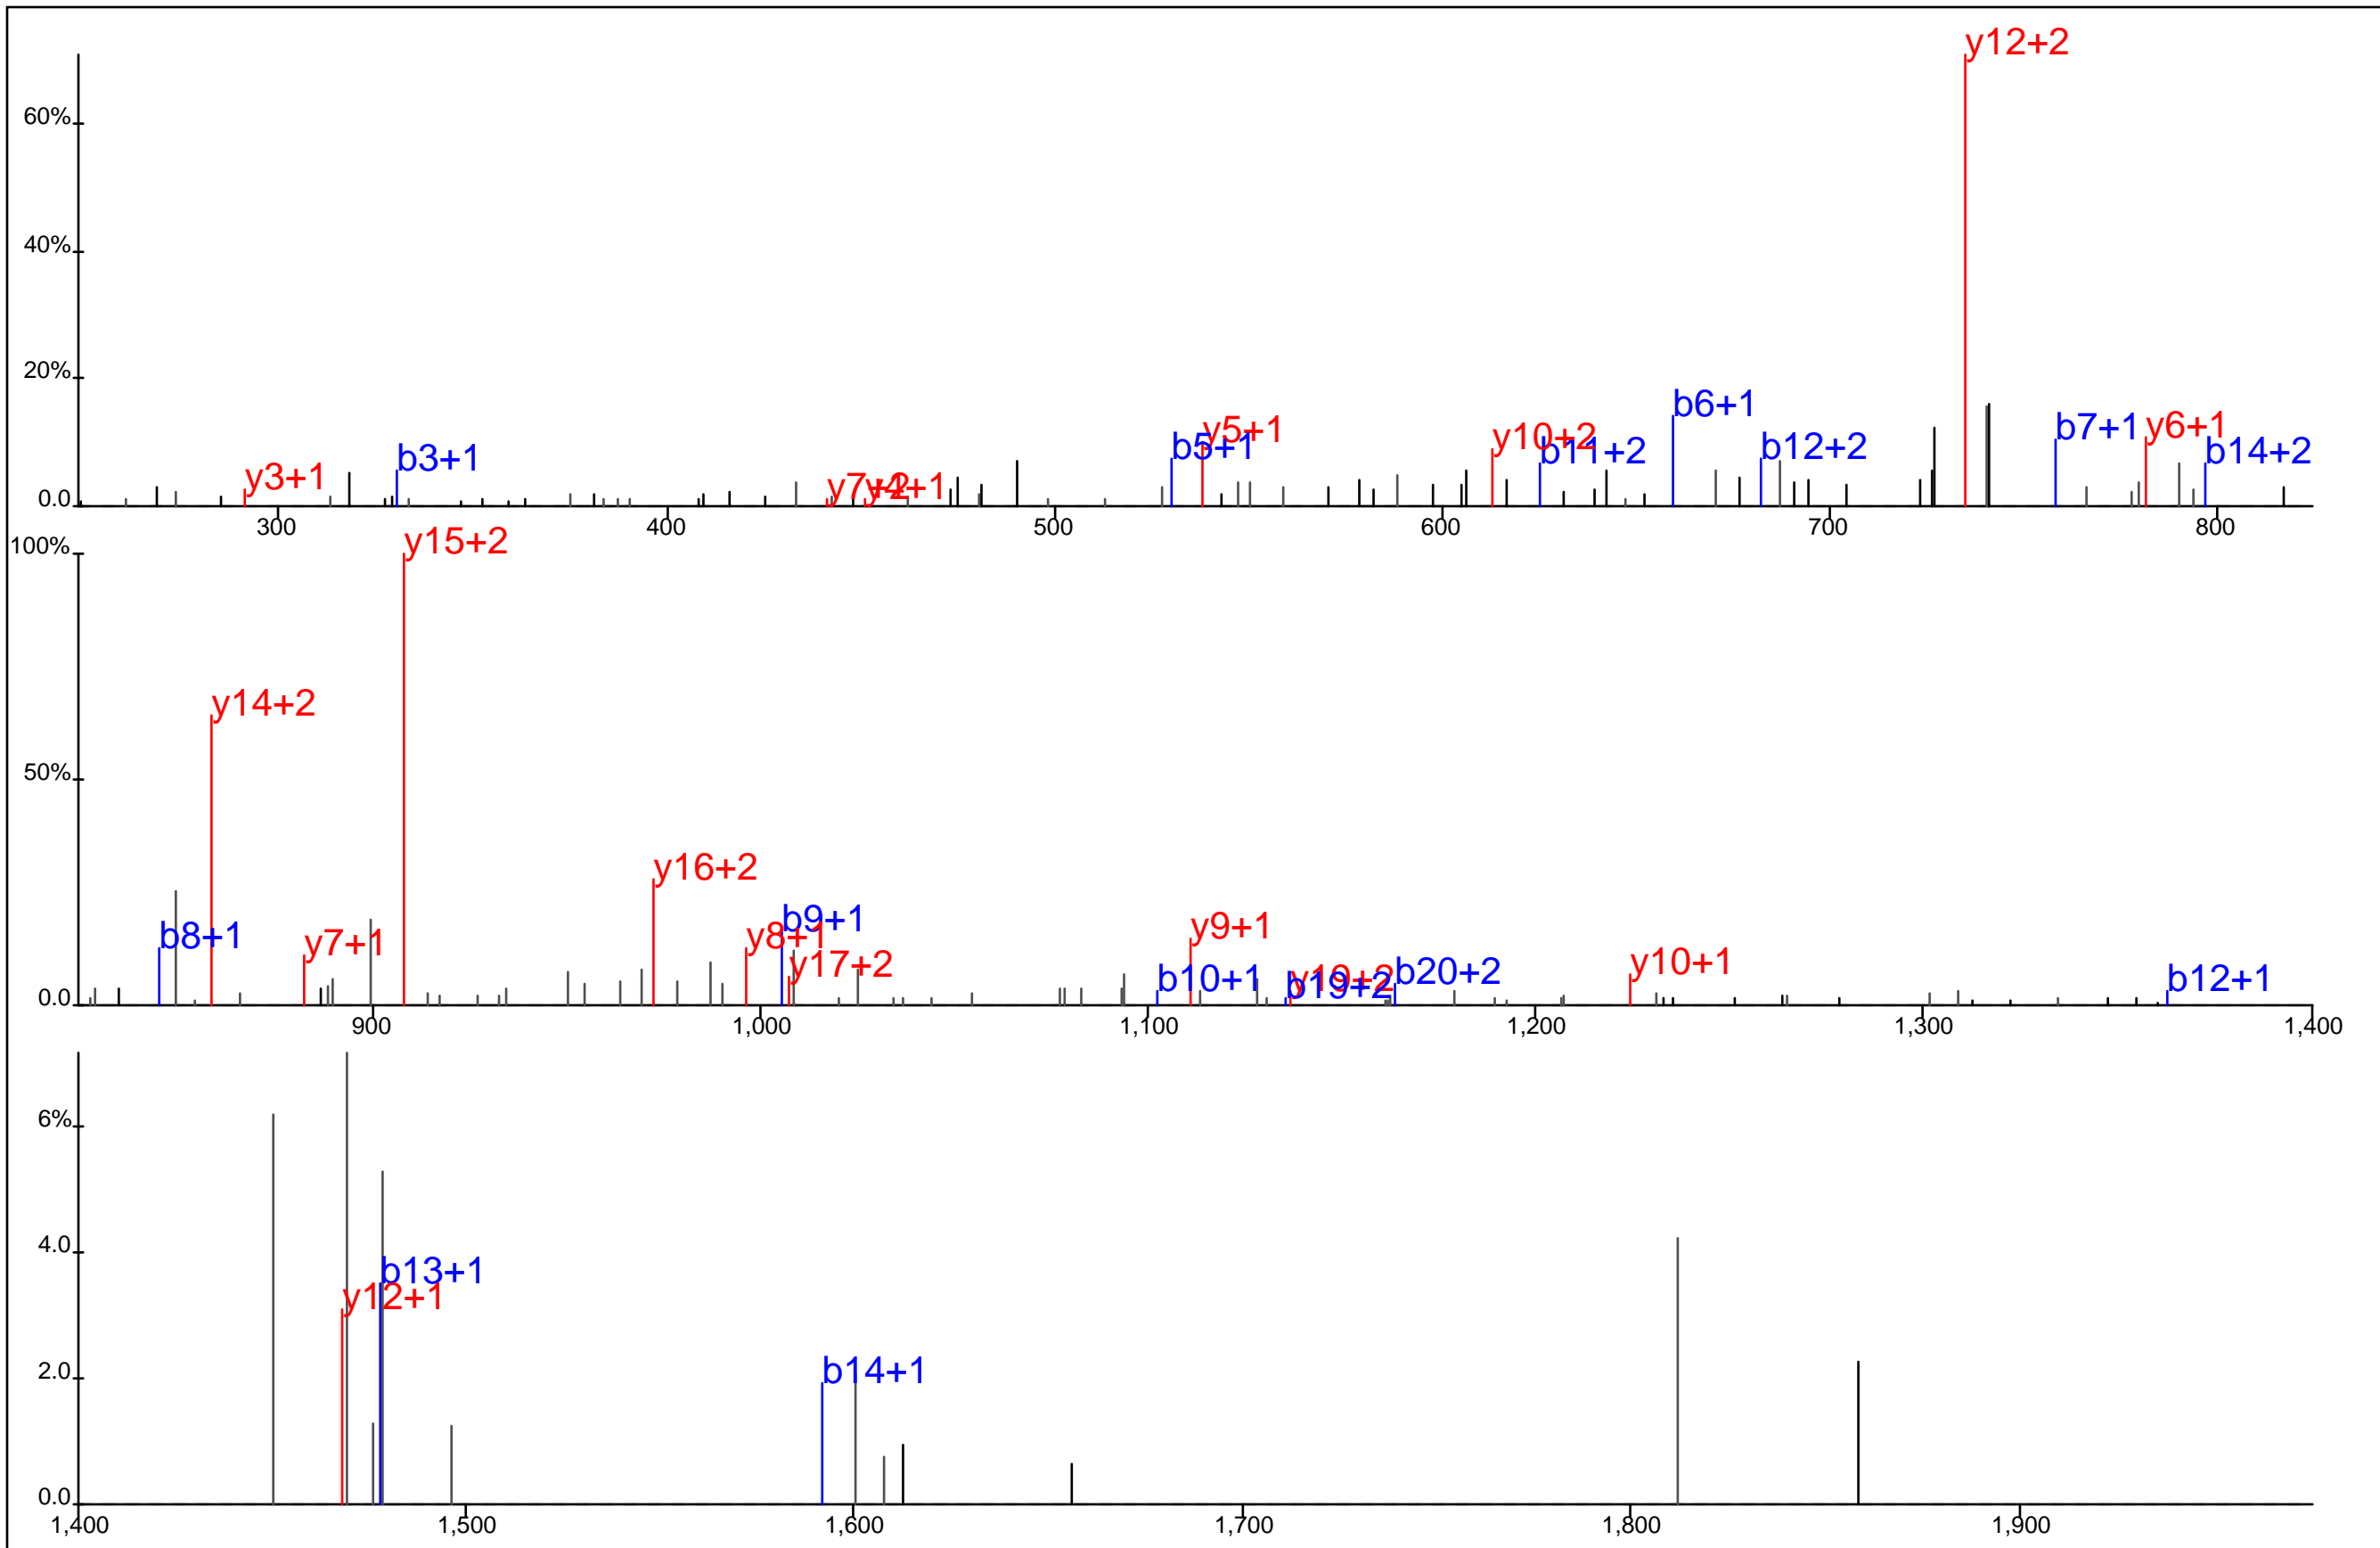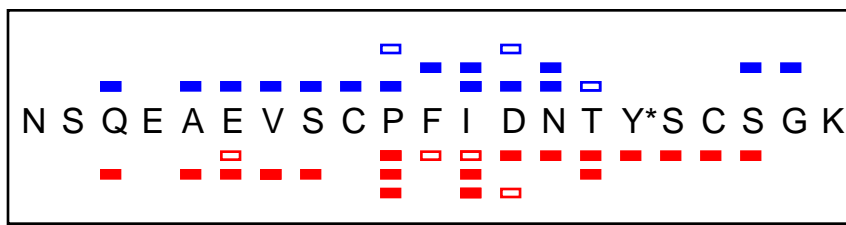

Protein Name: Chromosome 20 open reading frame 18  
 gi Accession: 0  
 Precursor Mass: 824.9951+3  
 Delta Mass: 0.998 ppm  
 XCorr: 45.07

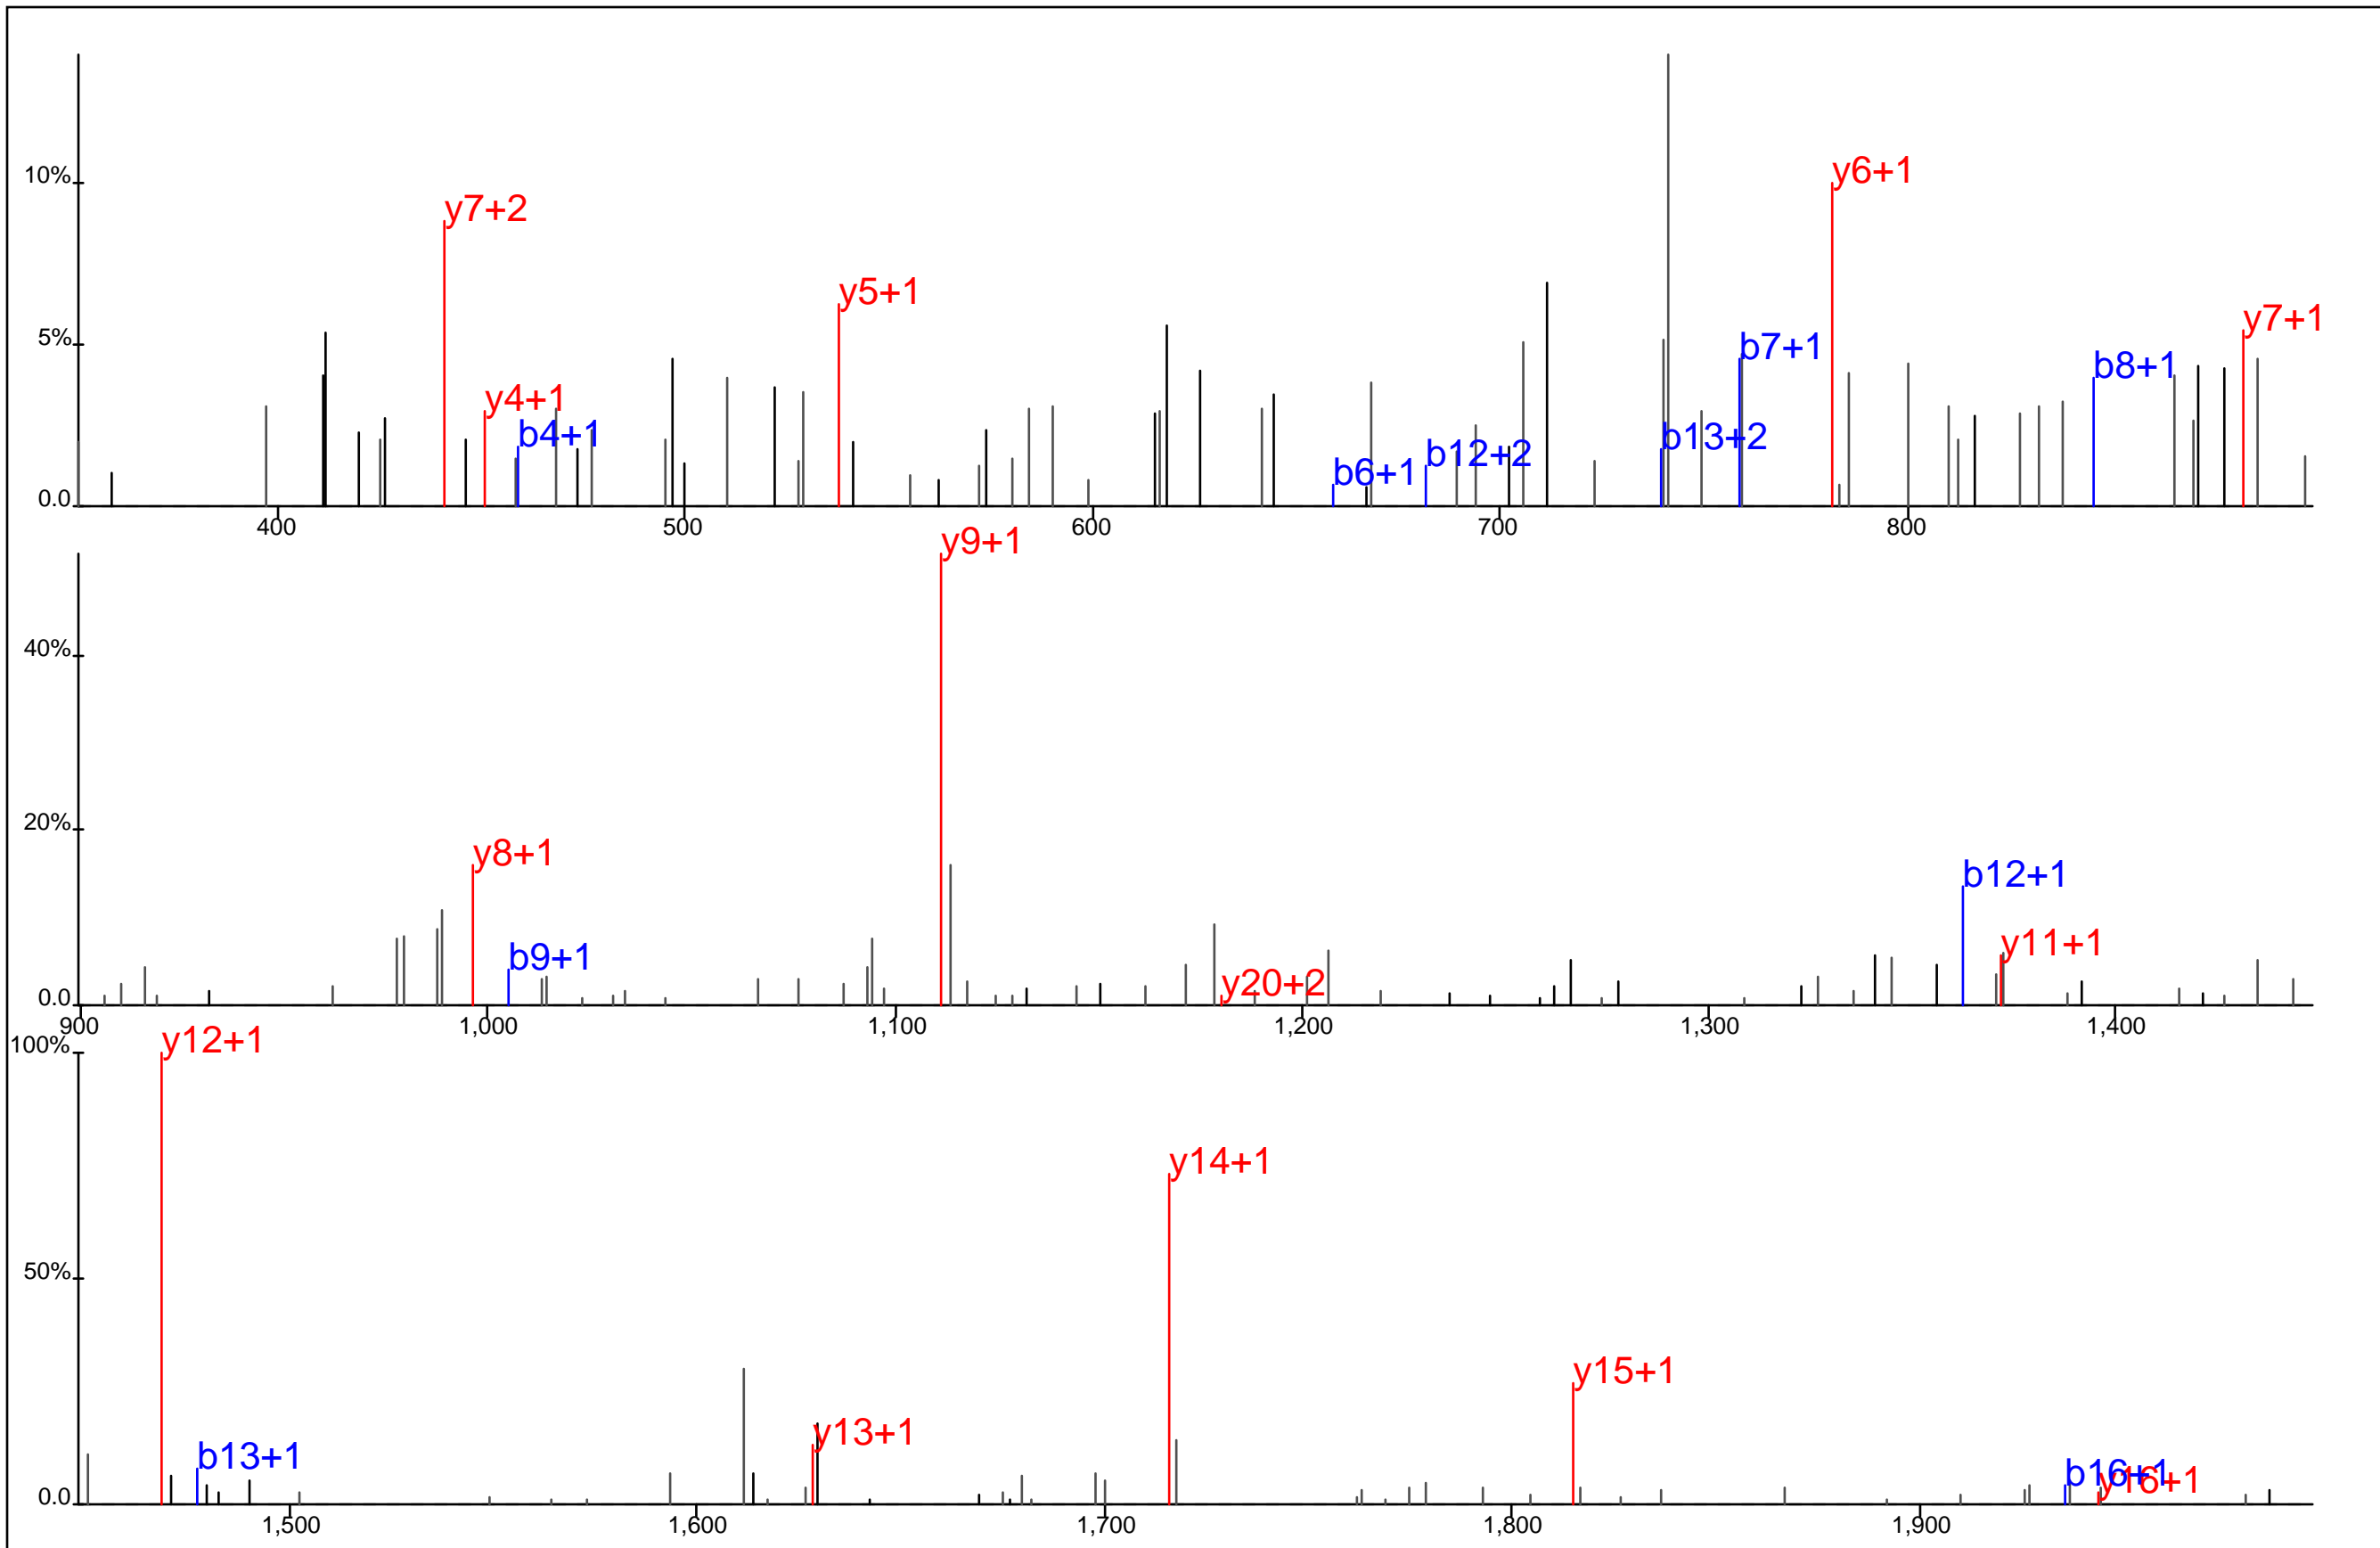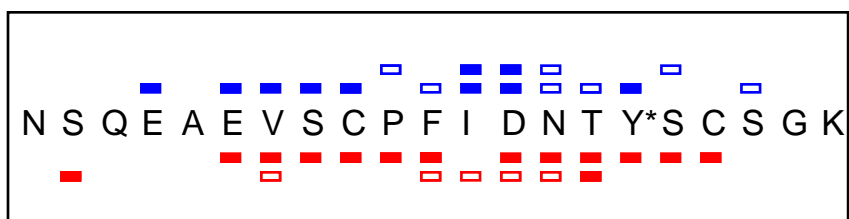

Protein Name: Chromosome 20 open reading frame 18  
 gi Accession: 0  
 Precursor Mass: 1,236.9937+2  
 Delta Mass: 4.730 ppm  
 XCorr: 43.62

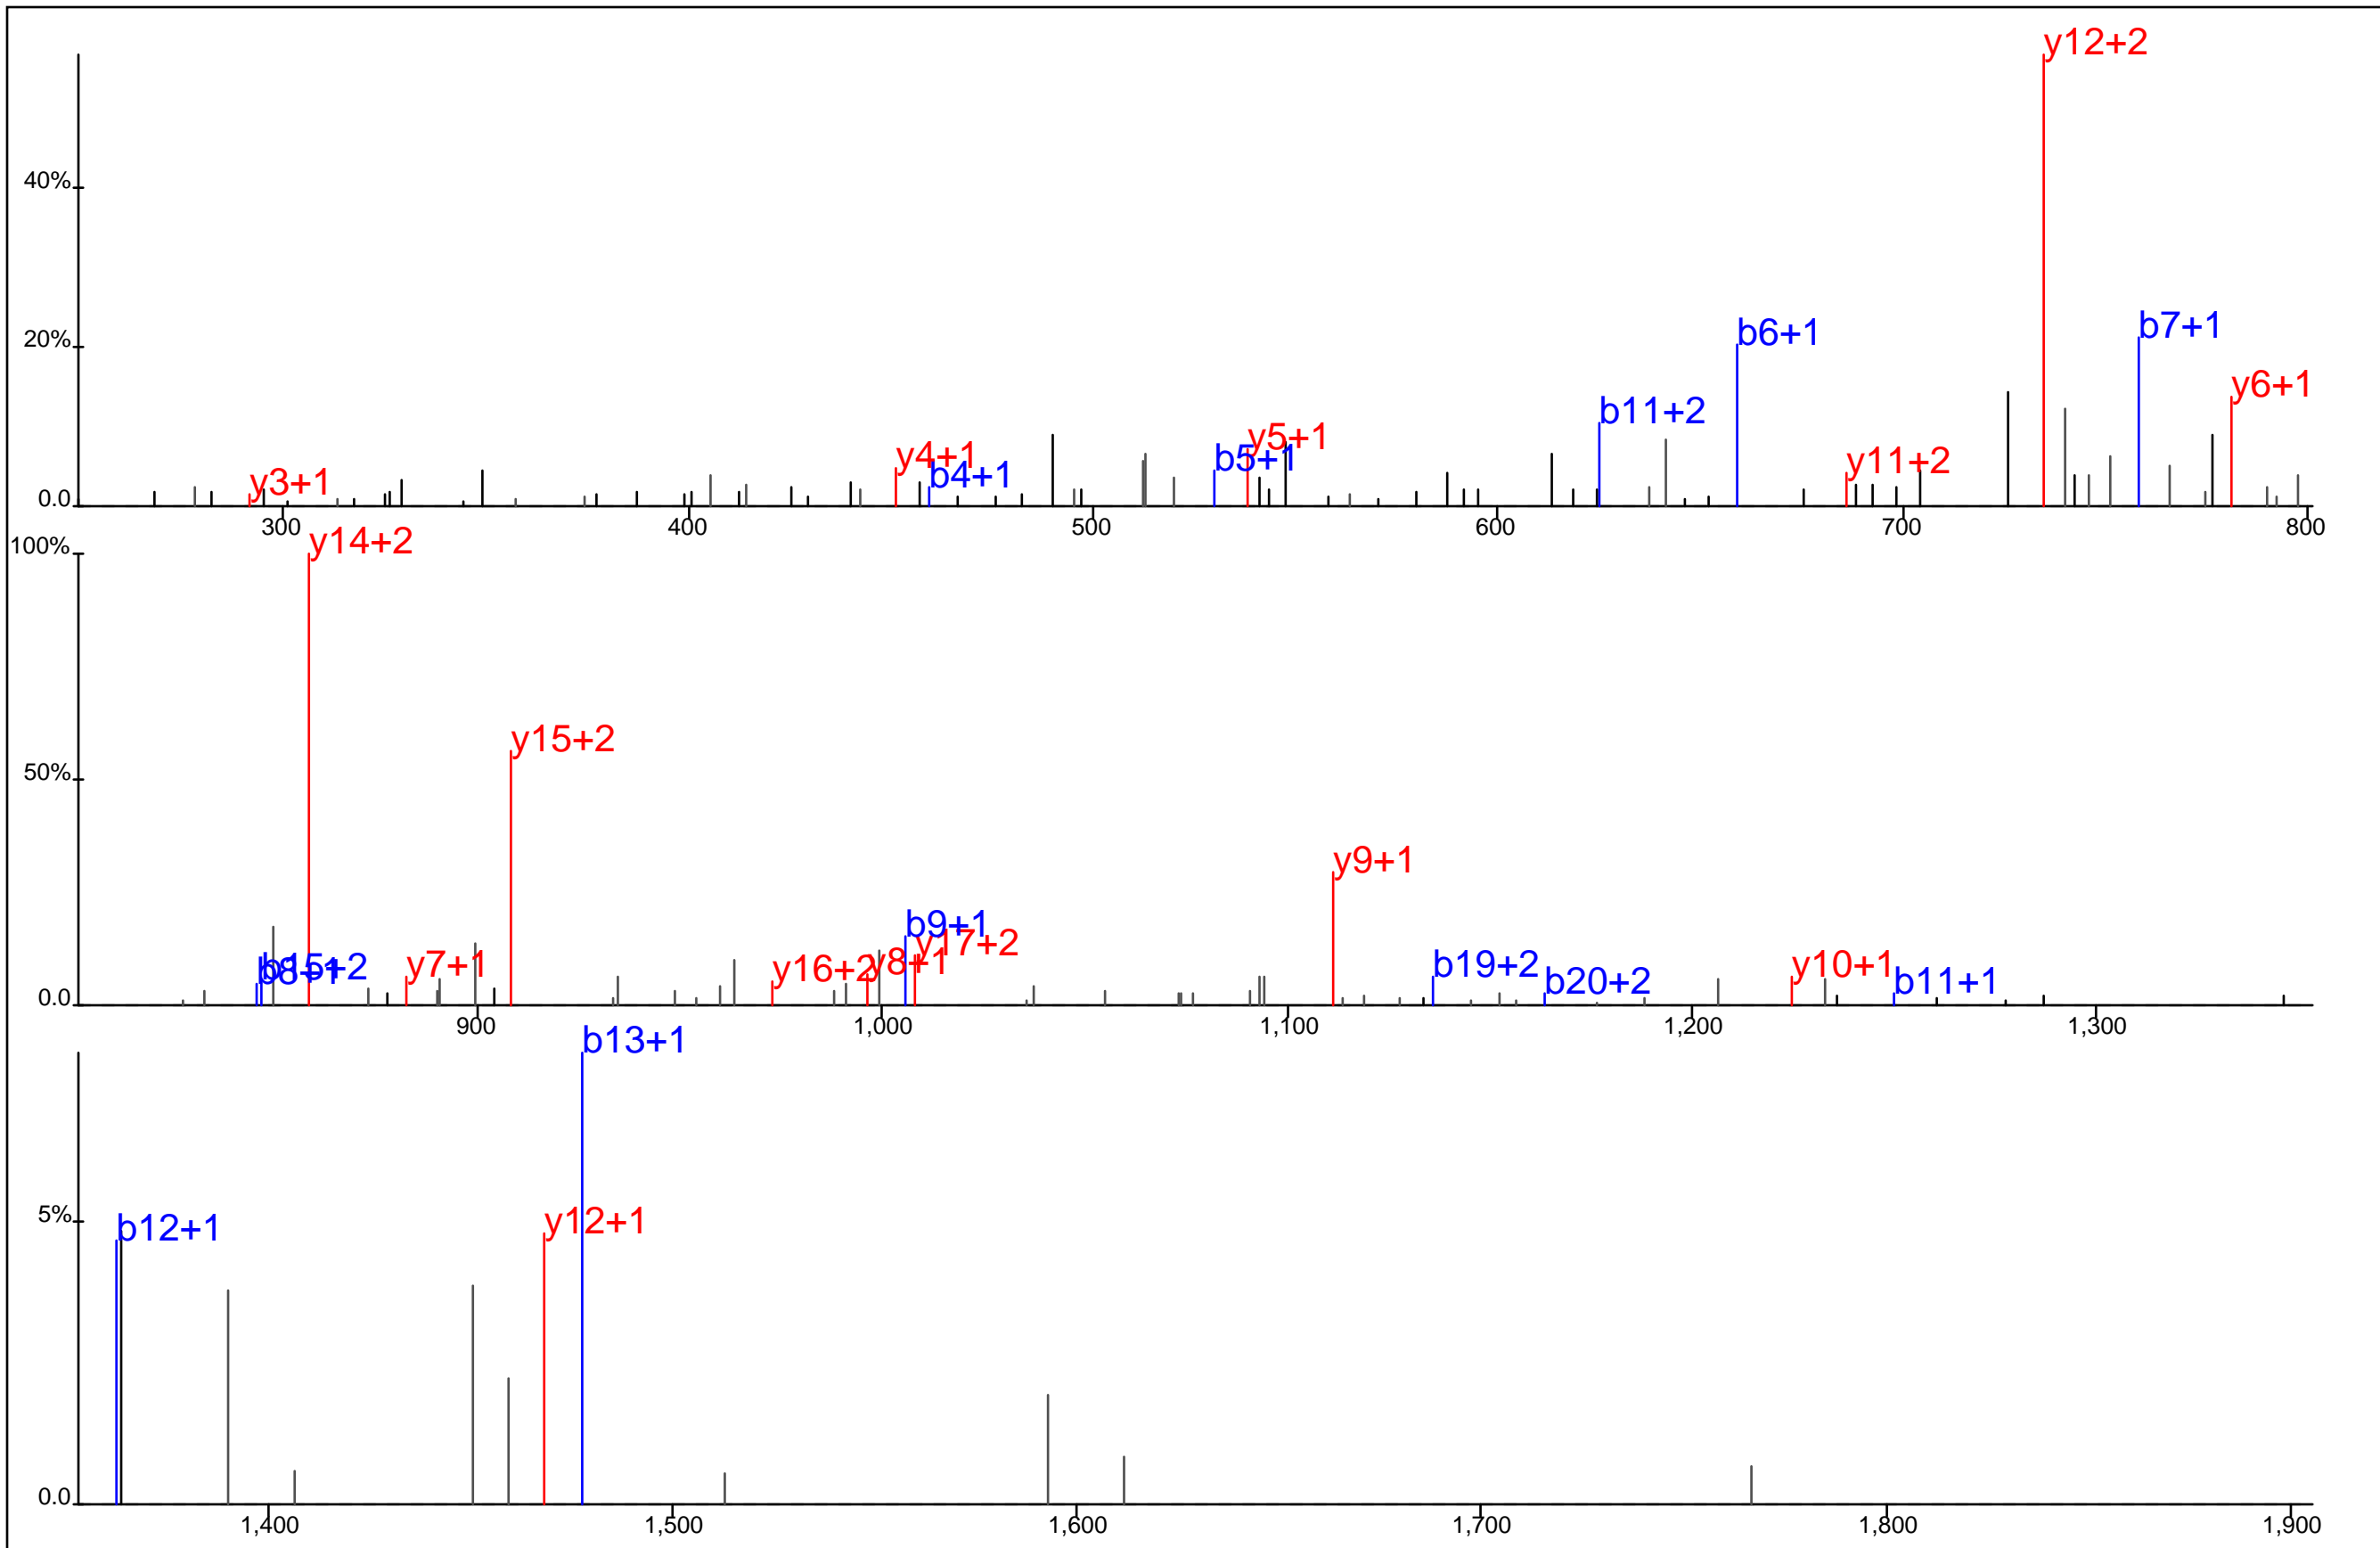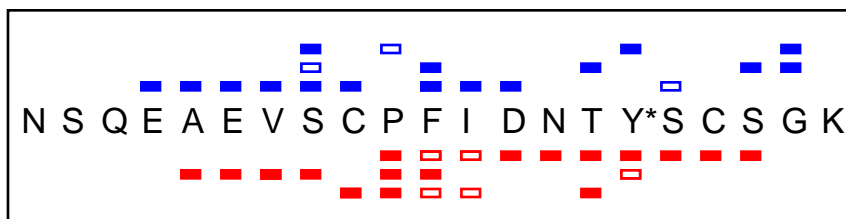

Protein Name: Chromosome 20 open reading frame 18  
 gi Accession: 0  
 Precursor Mass: 824.9929+3  
 Delta Mass: 1.668 ppm  
 XCorr: 41.81



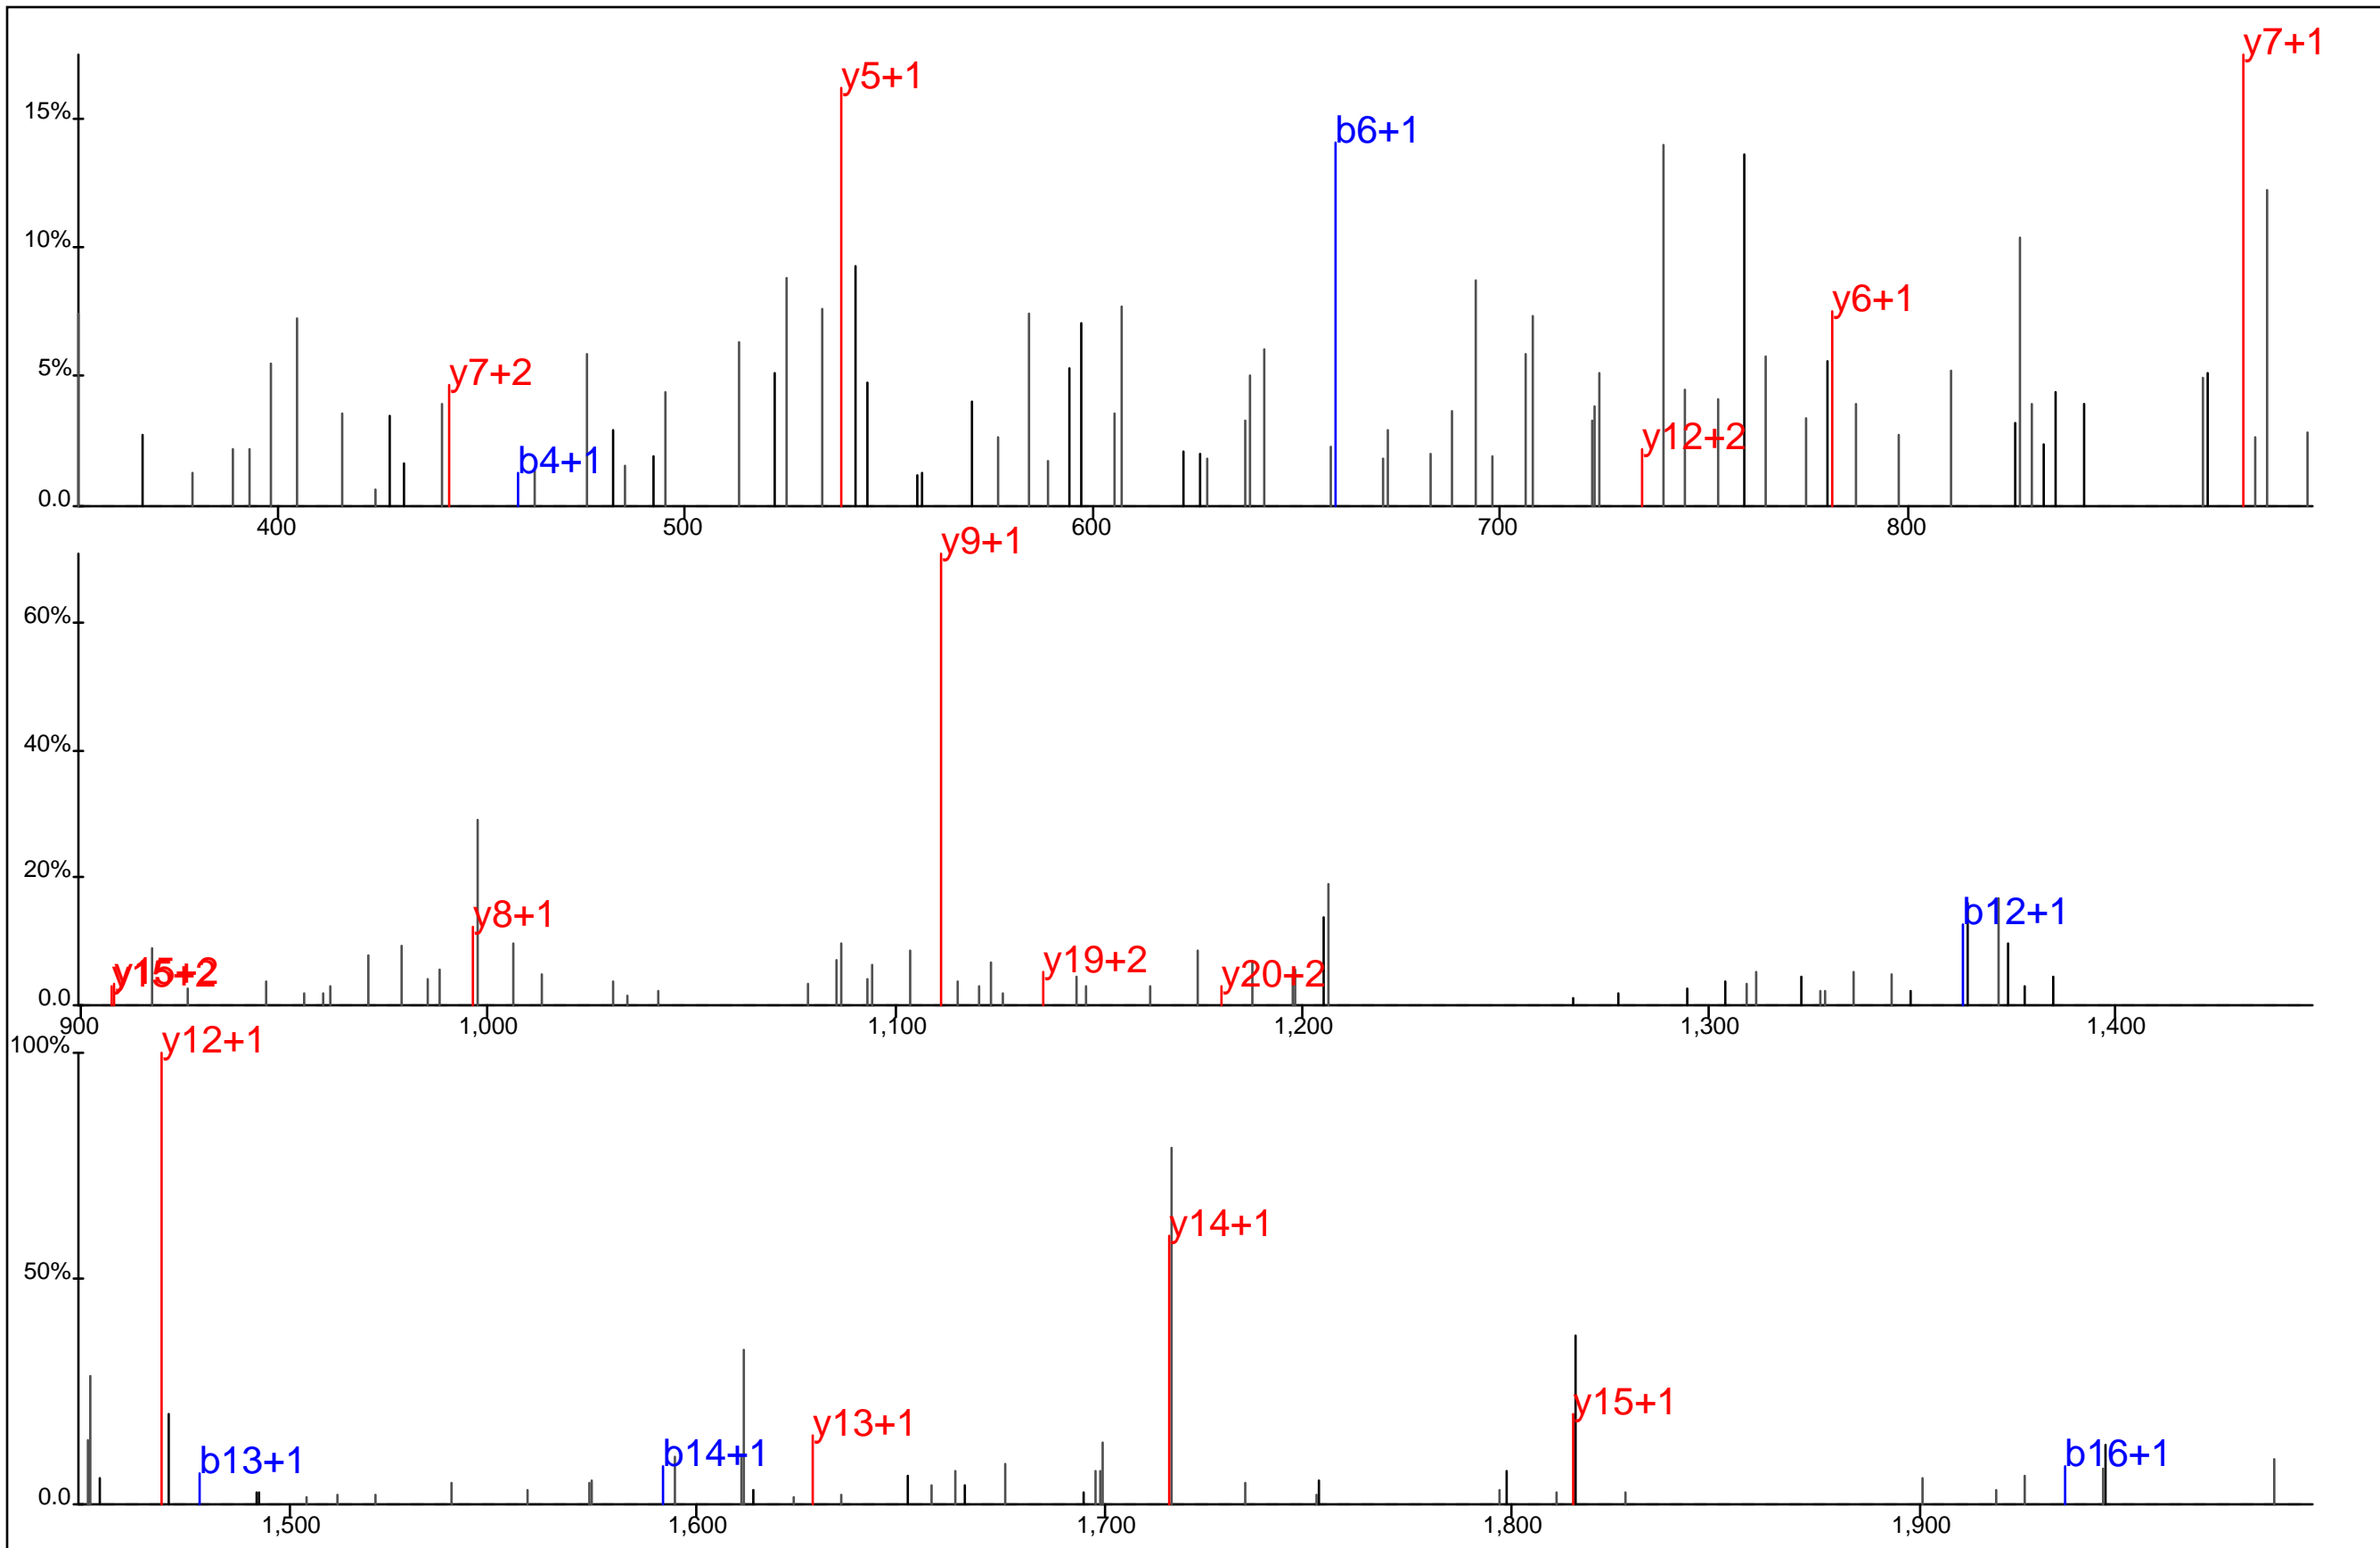

N S Q E A E V S C P F I D N T Y\* S C S G K  
 - -      -      - - - - - - - - - - - - - - -

Protein Name: Chromosome 20 open reading frame 18  
 gi Accession: 0  
 Precursor Mass: 1,236.9917+2  
 Delta Mass: 3.150 ppm  
 XCorr: 37.45

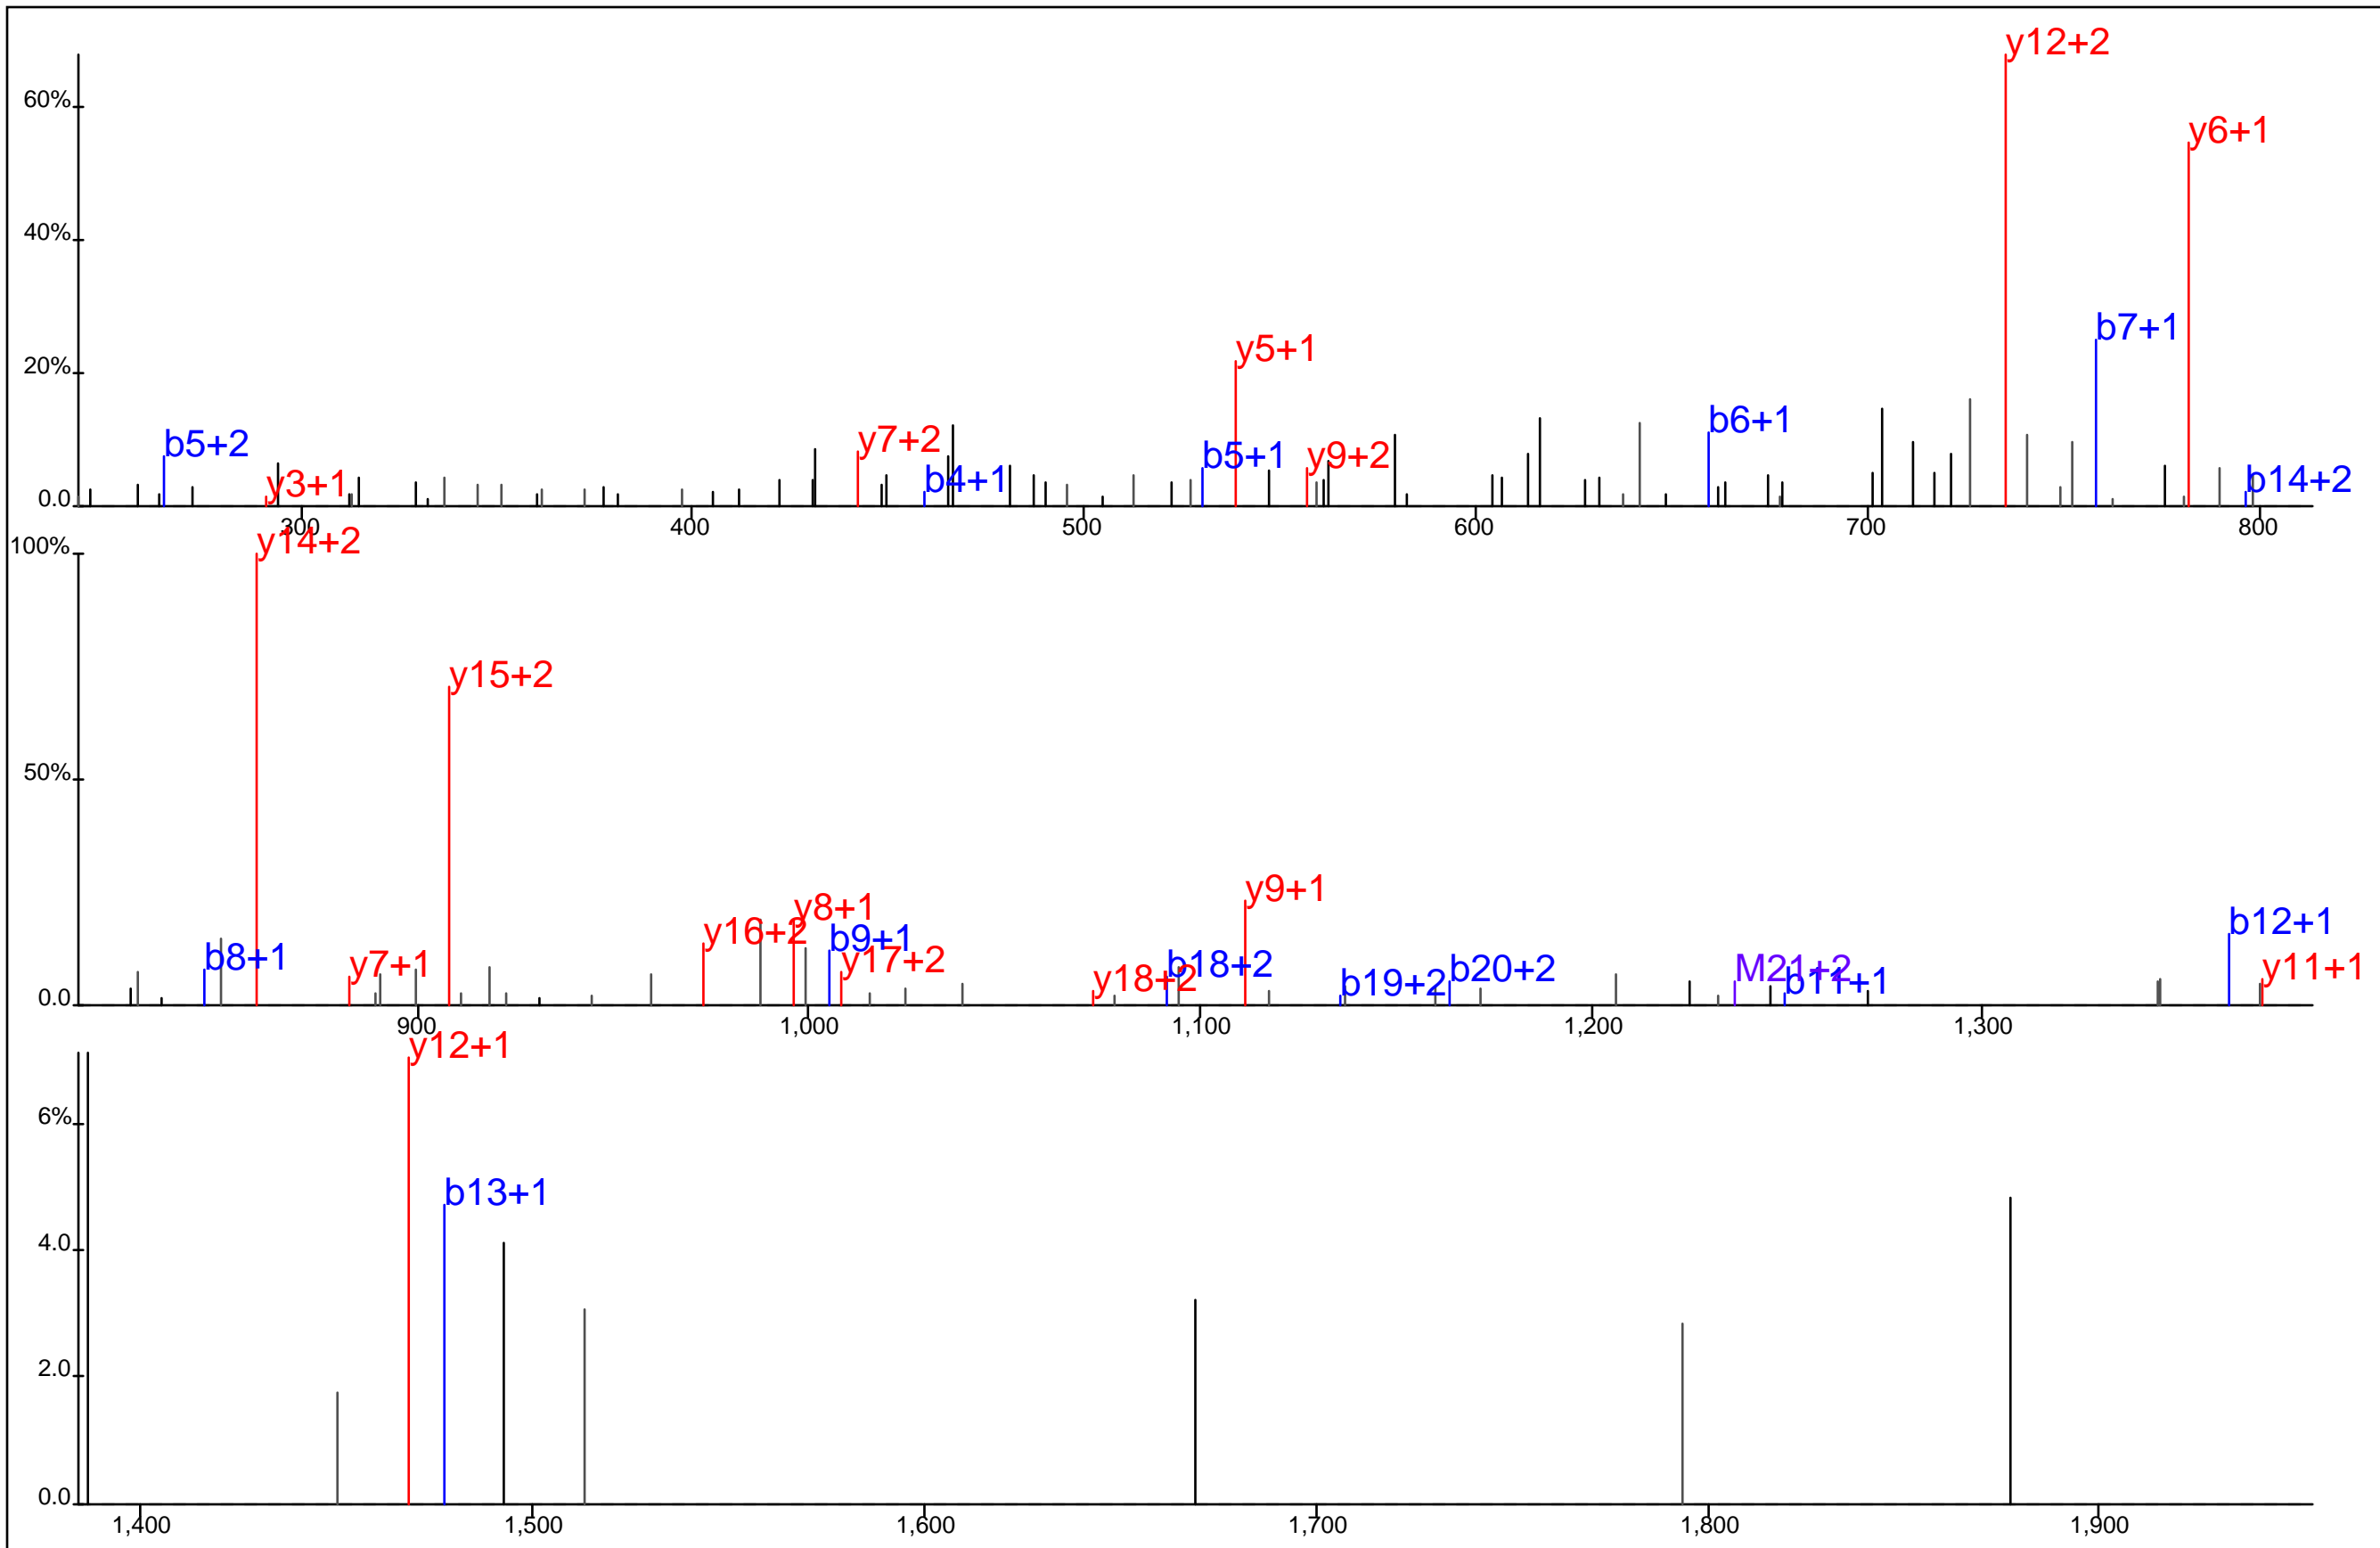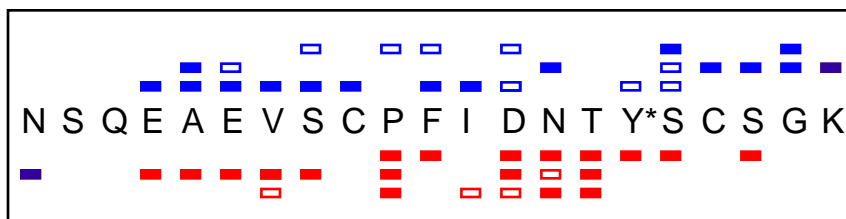

Protein Name: Chromosome 20 open reading frame 18  
 gi Accession: 0  
 Precursor Mass: 824.9934+3  
 Delta Mass: 1.076 ppm  
 XCorr: 42.38

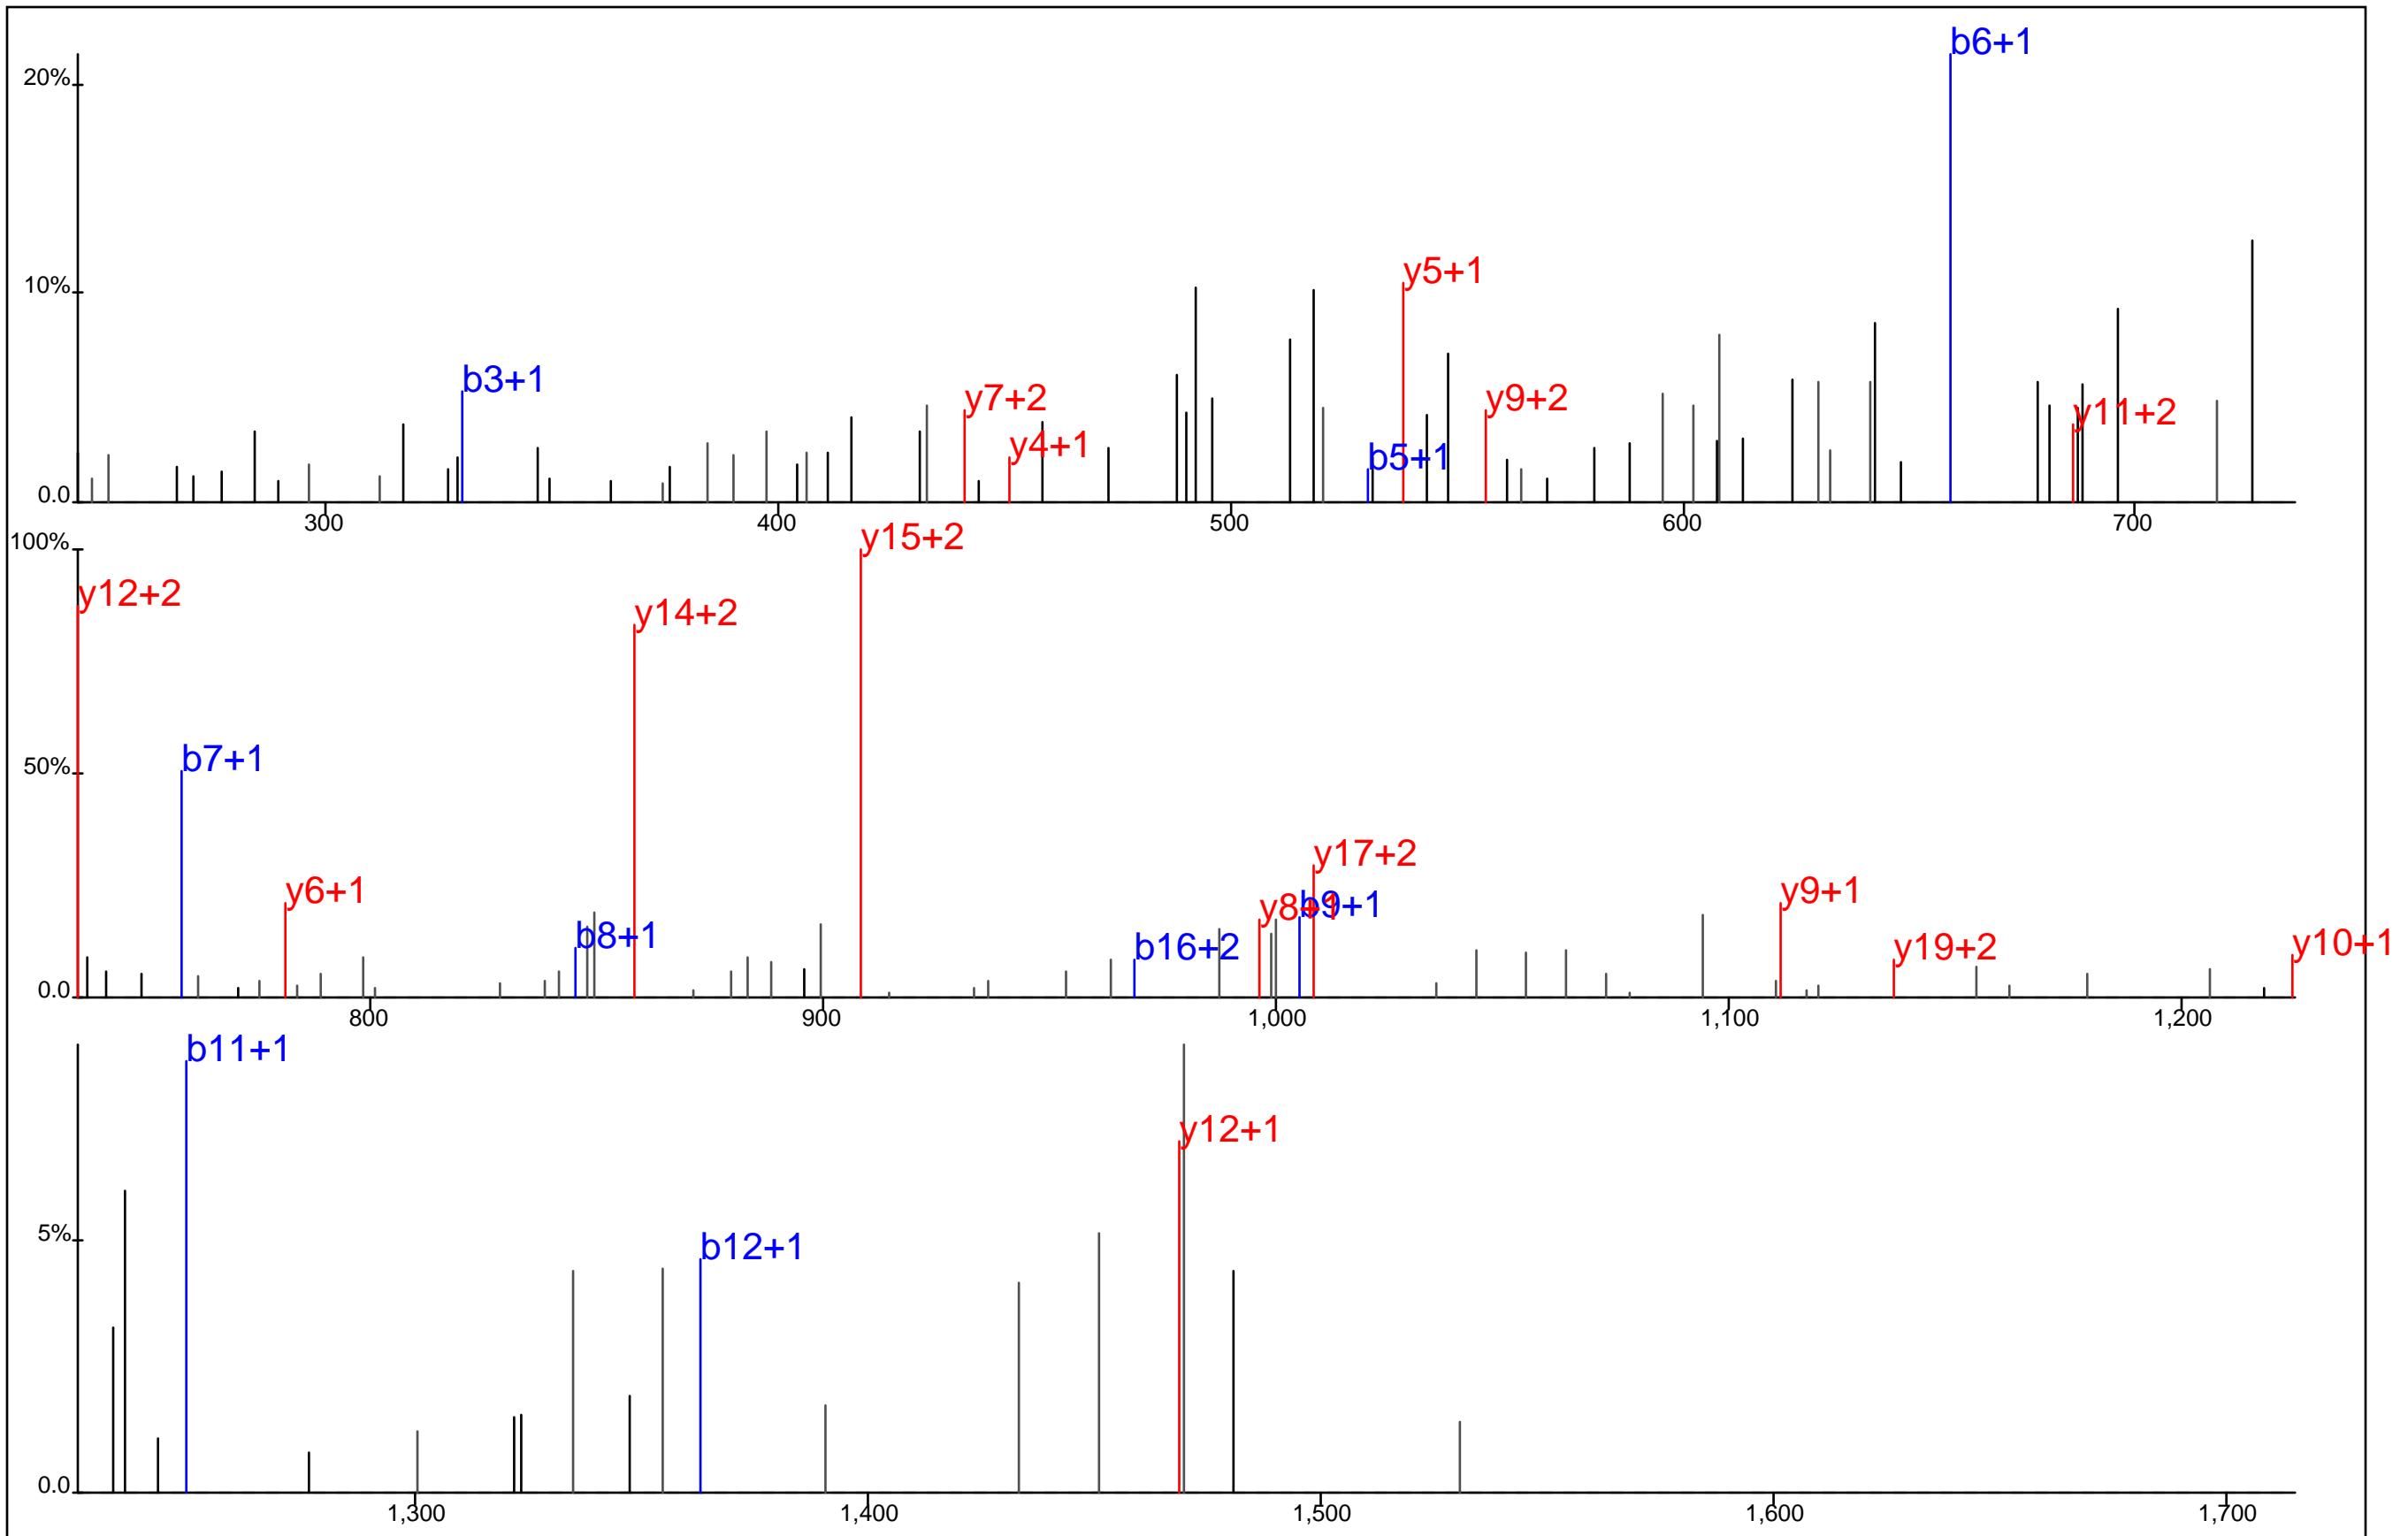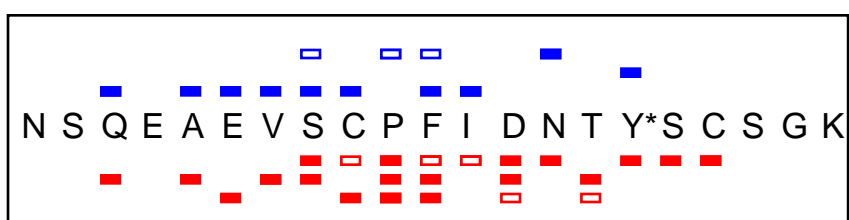

Protein Name: Chromosome 20 open reading frame 18  
 gi Accession: 0  
 Precursor Mass: 824.9938+3  
 Delta Mass: 0.558 ppm  
 XCorr: 46.8

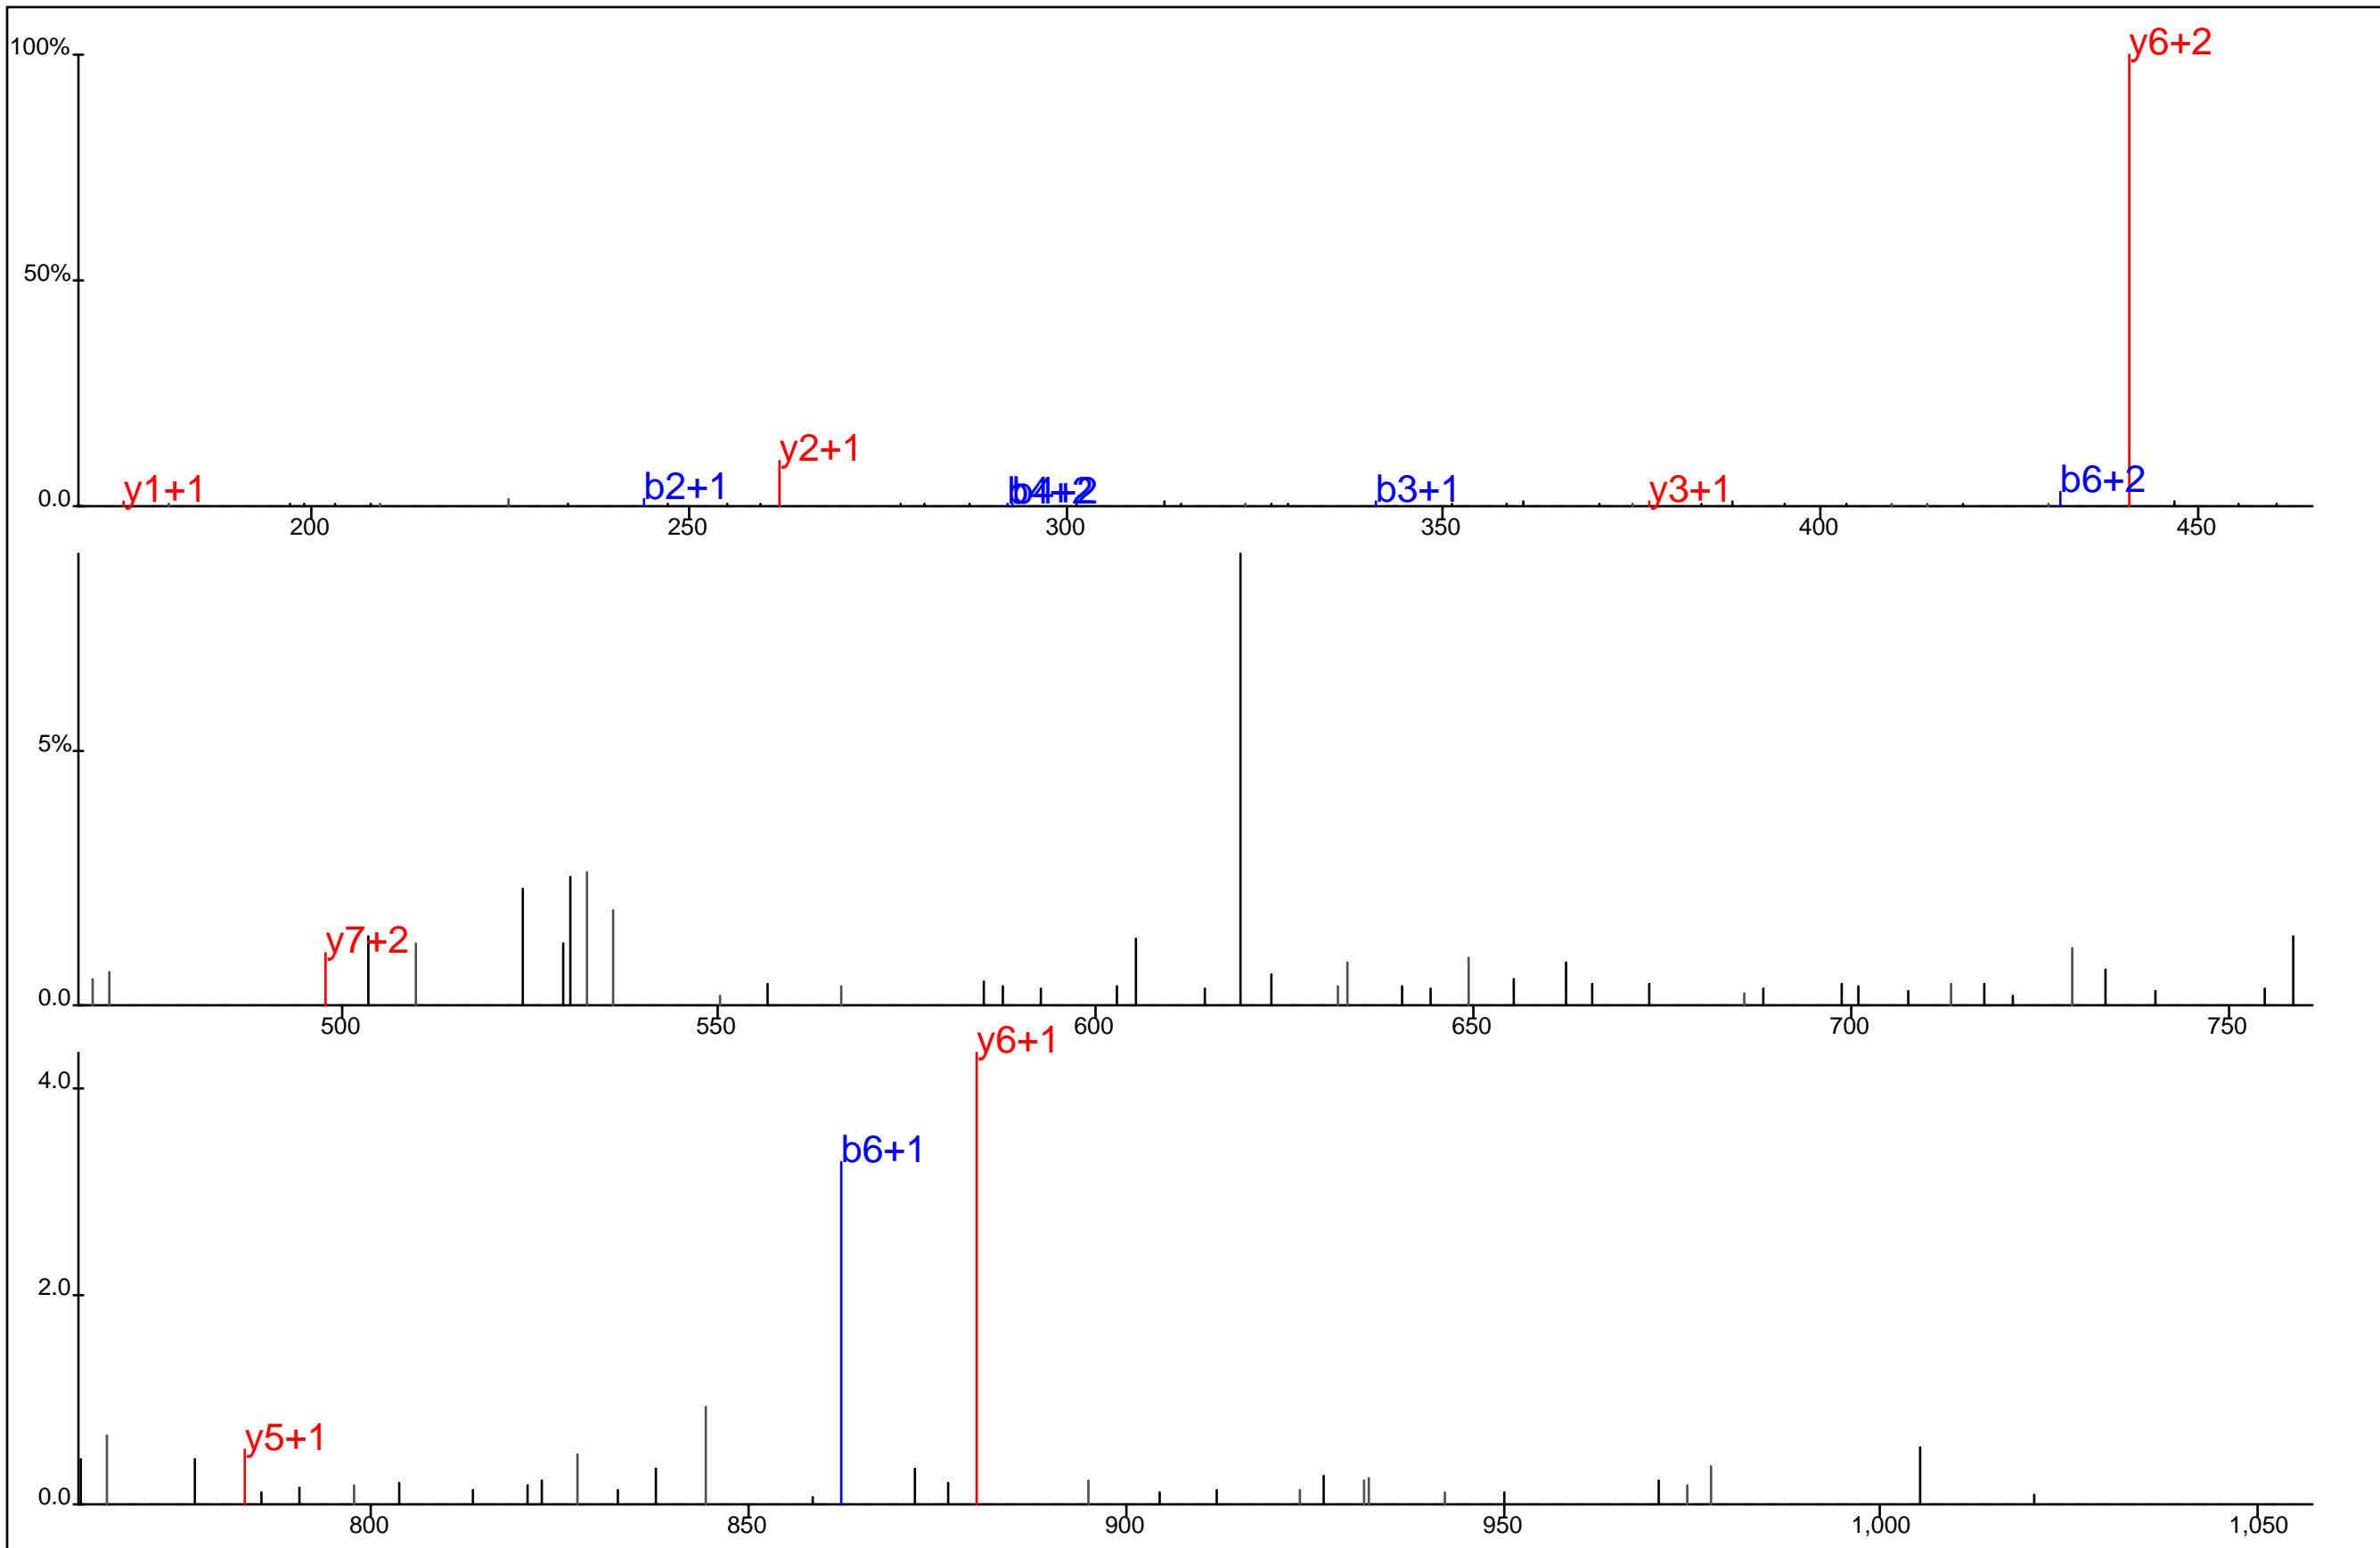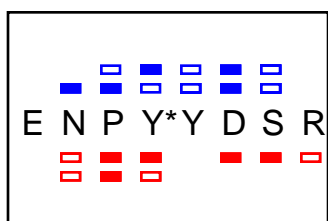

Protein Name: Clathrin, heavy polypeptide  
 gi Accession: 0  
 Precursor Mass: 562.2095+2  
 Delta Mass: 2.232 ppm  
 XCorr: 20.5

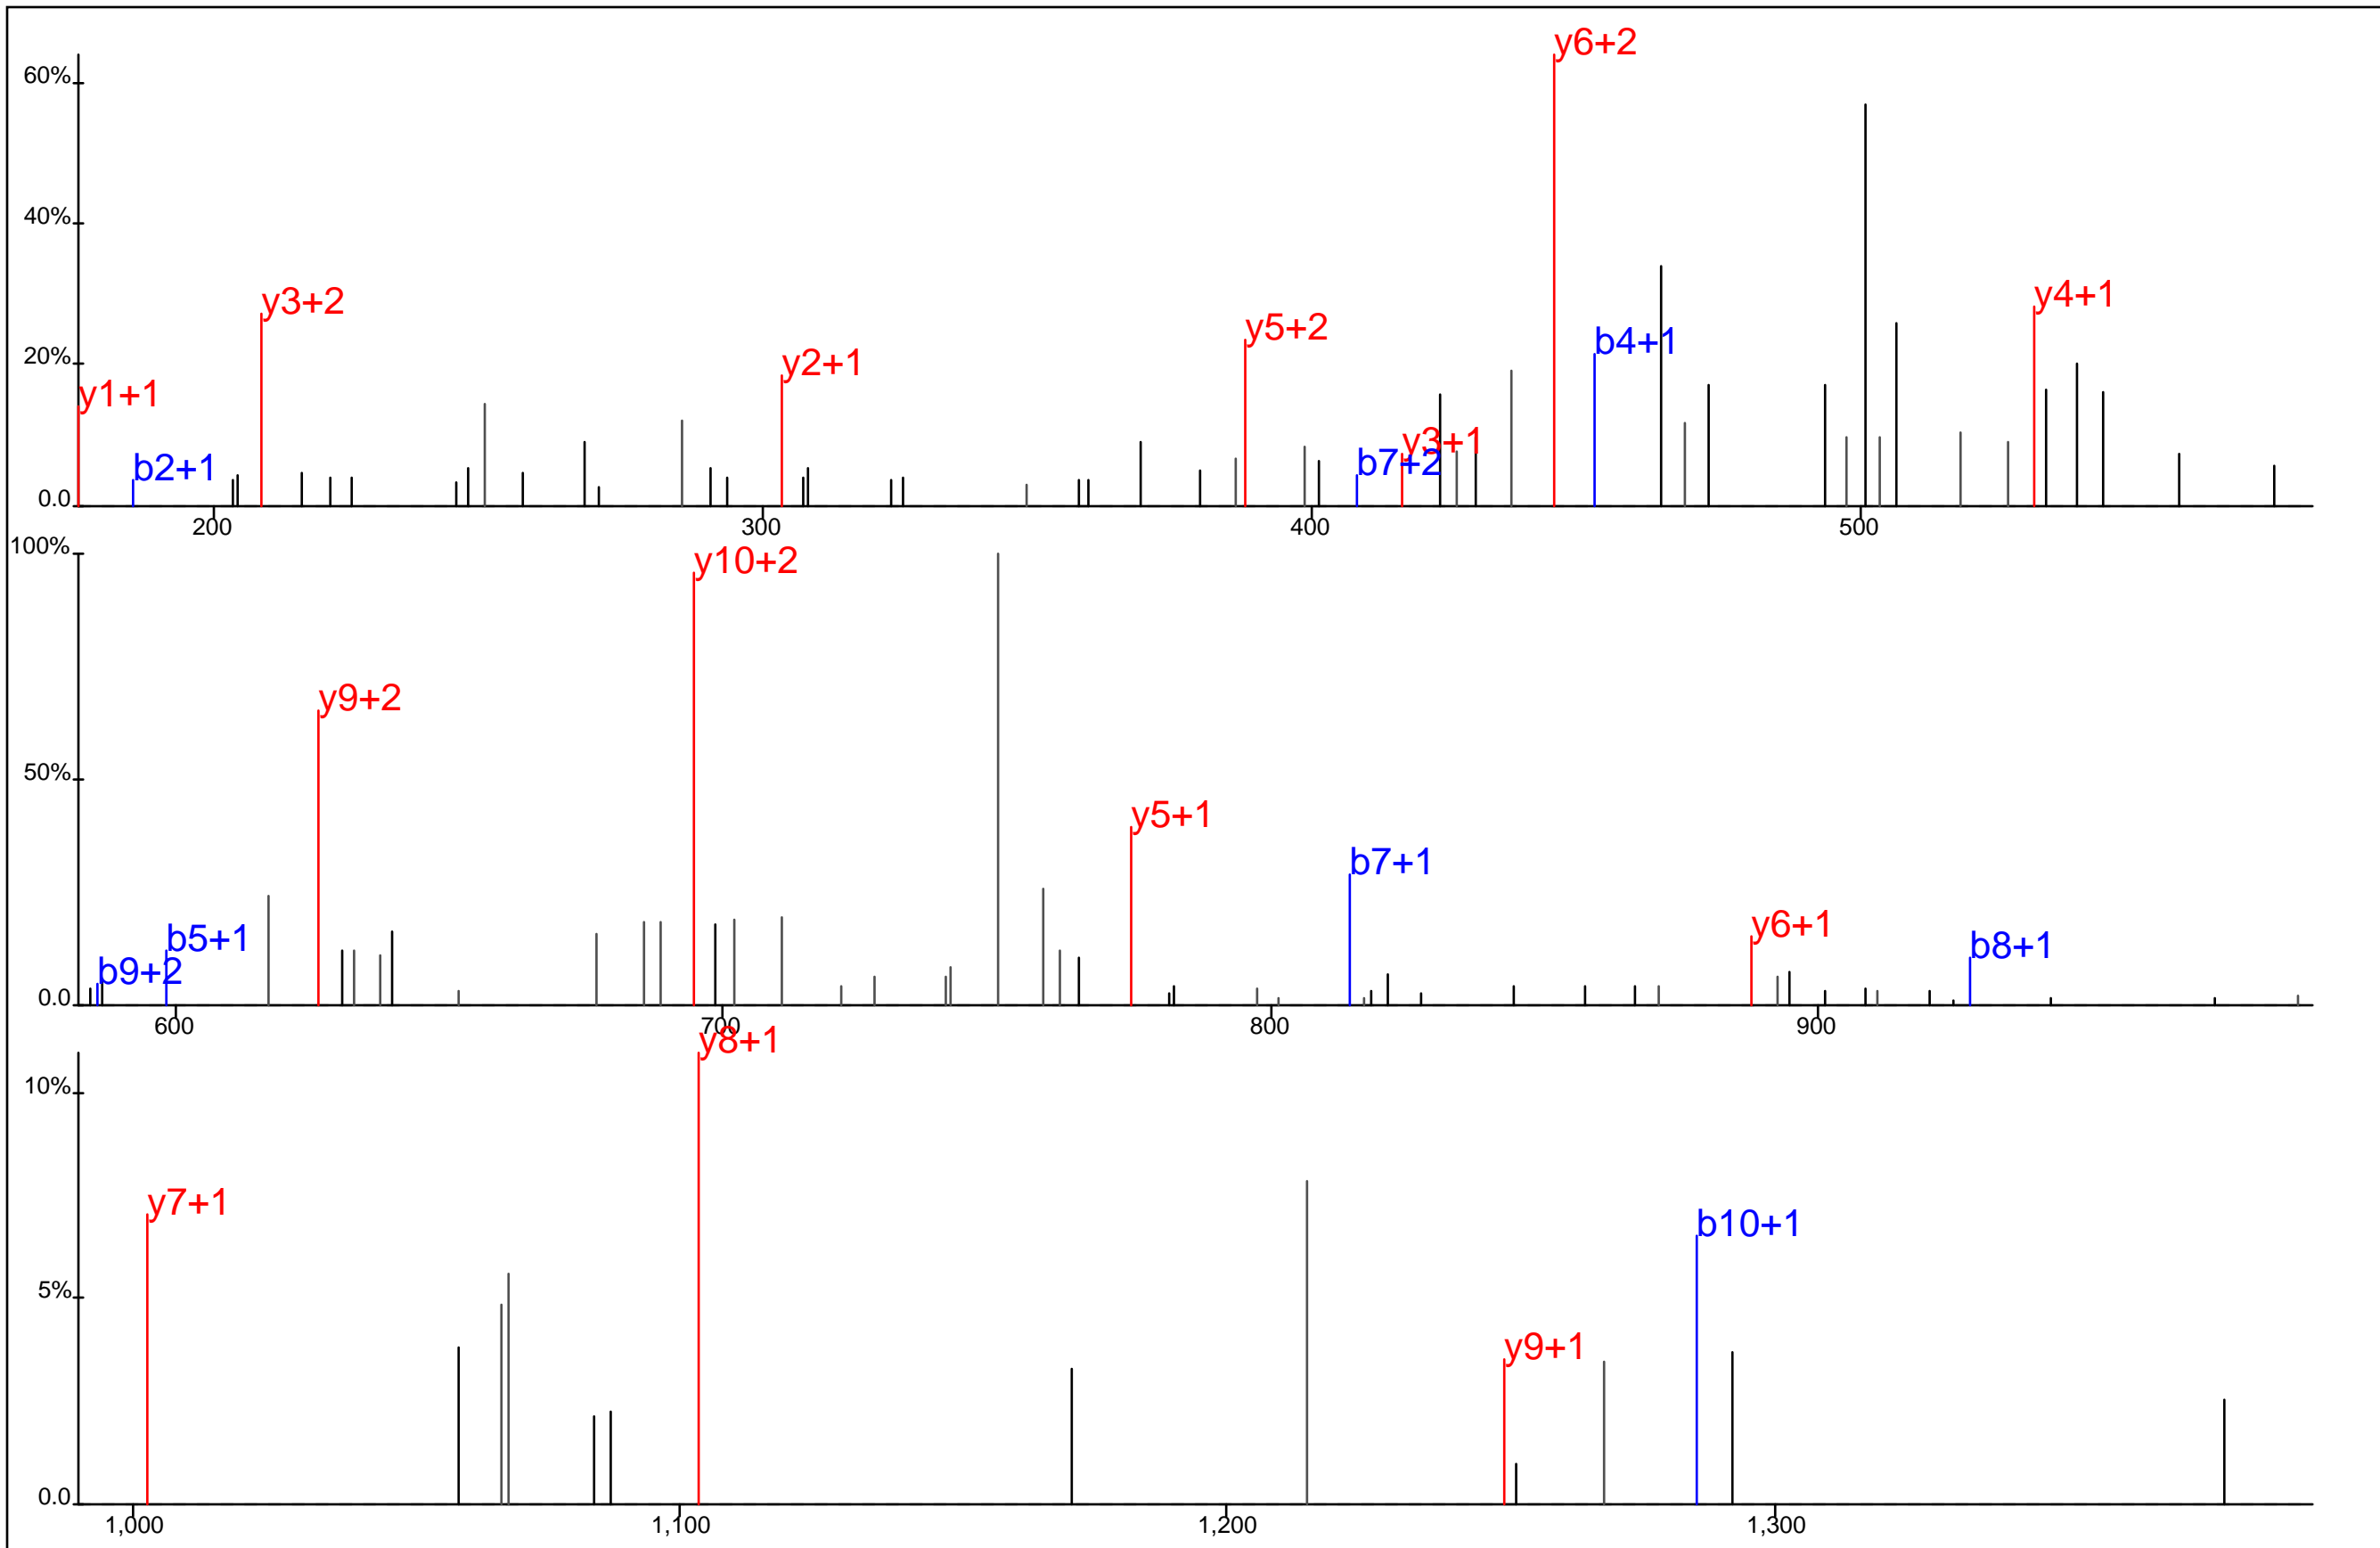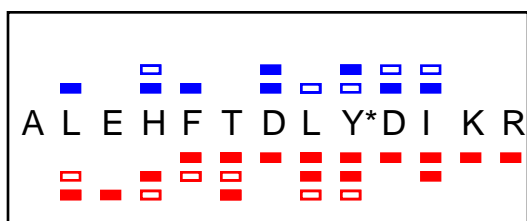

Protein Name: Clathrin, heavy polypeptide  
 gi Accession: 0  
 Precursor Mass: 567.6086+3  
 Delta Mass: 4.142 ppm  
 XCorr: 42.37

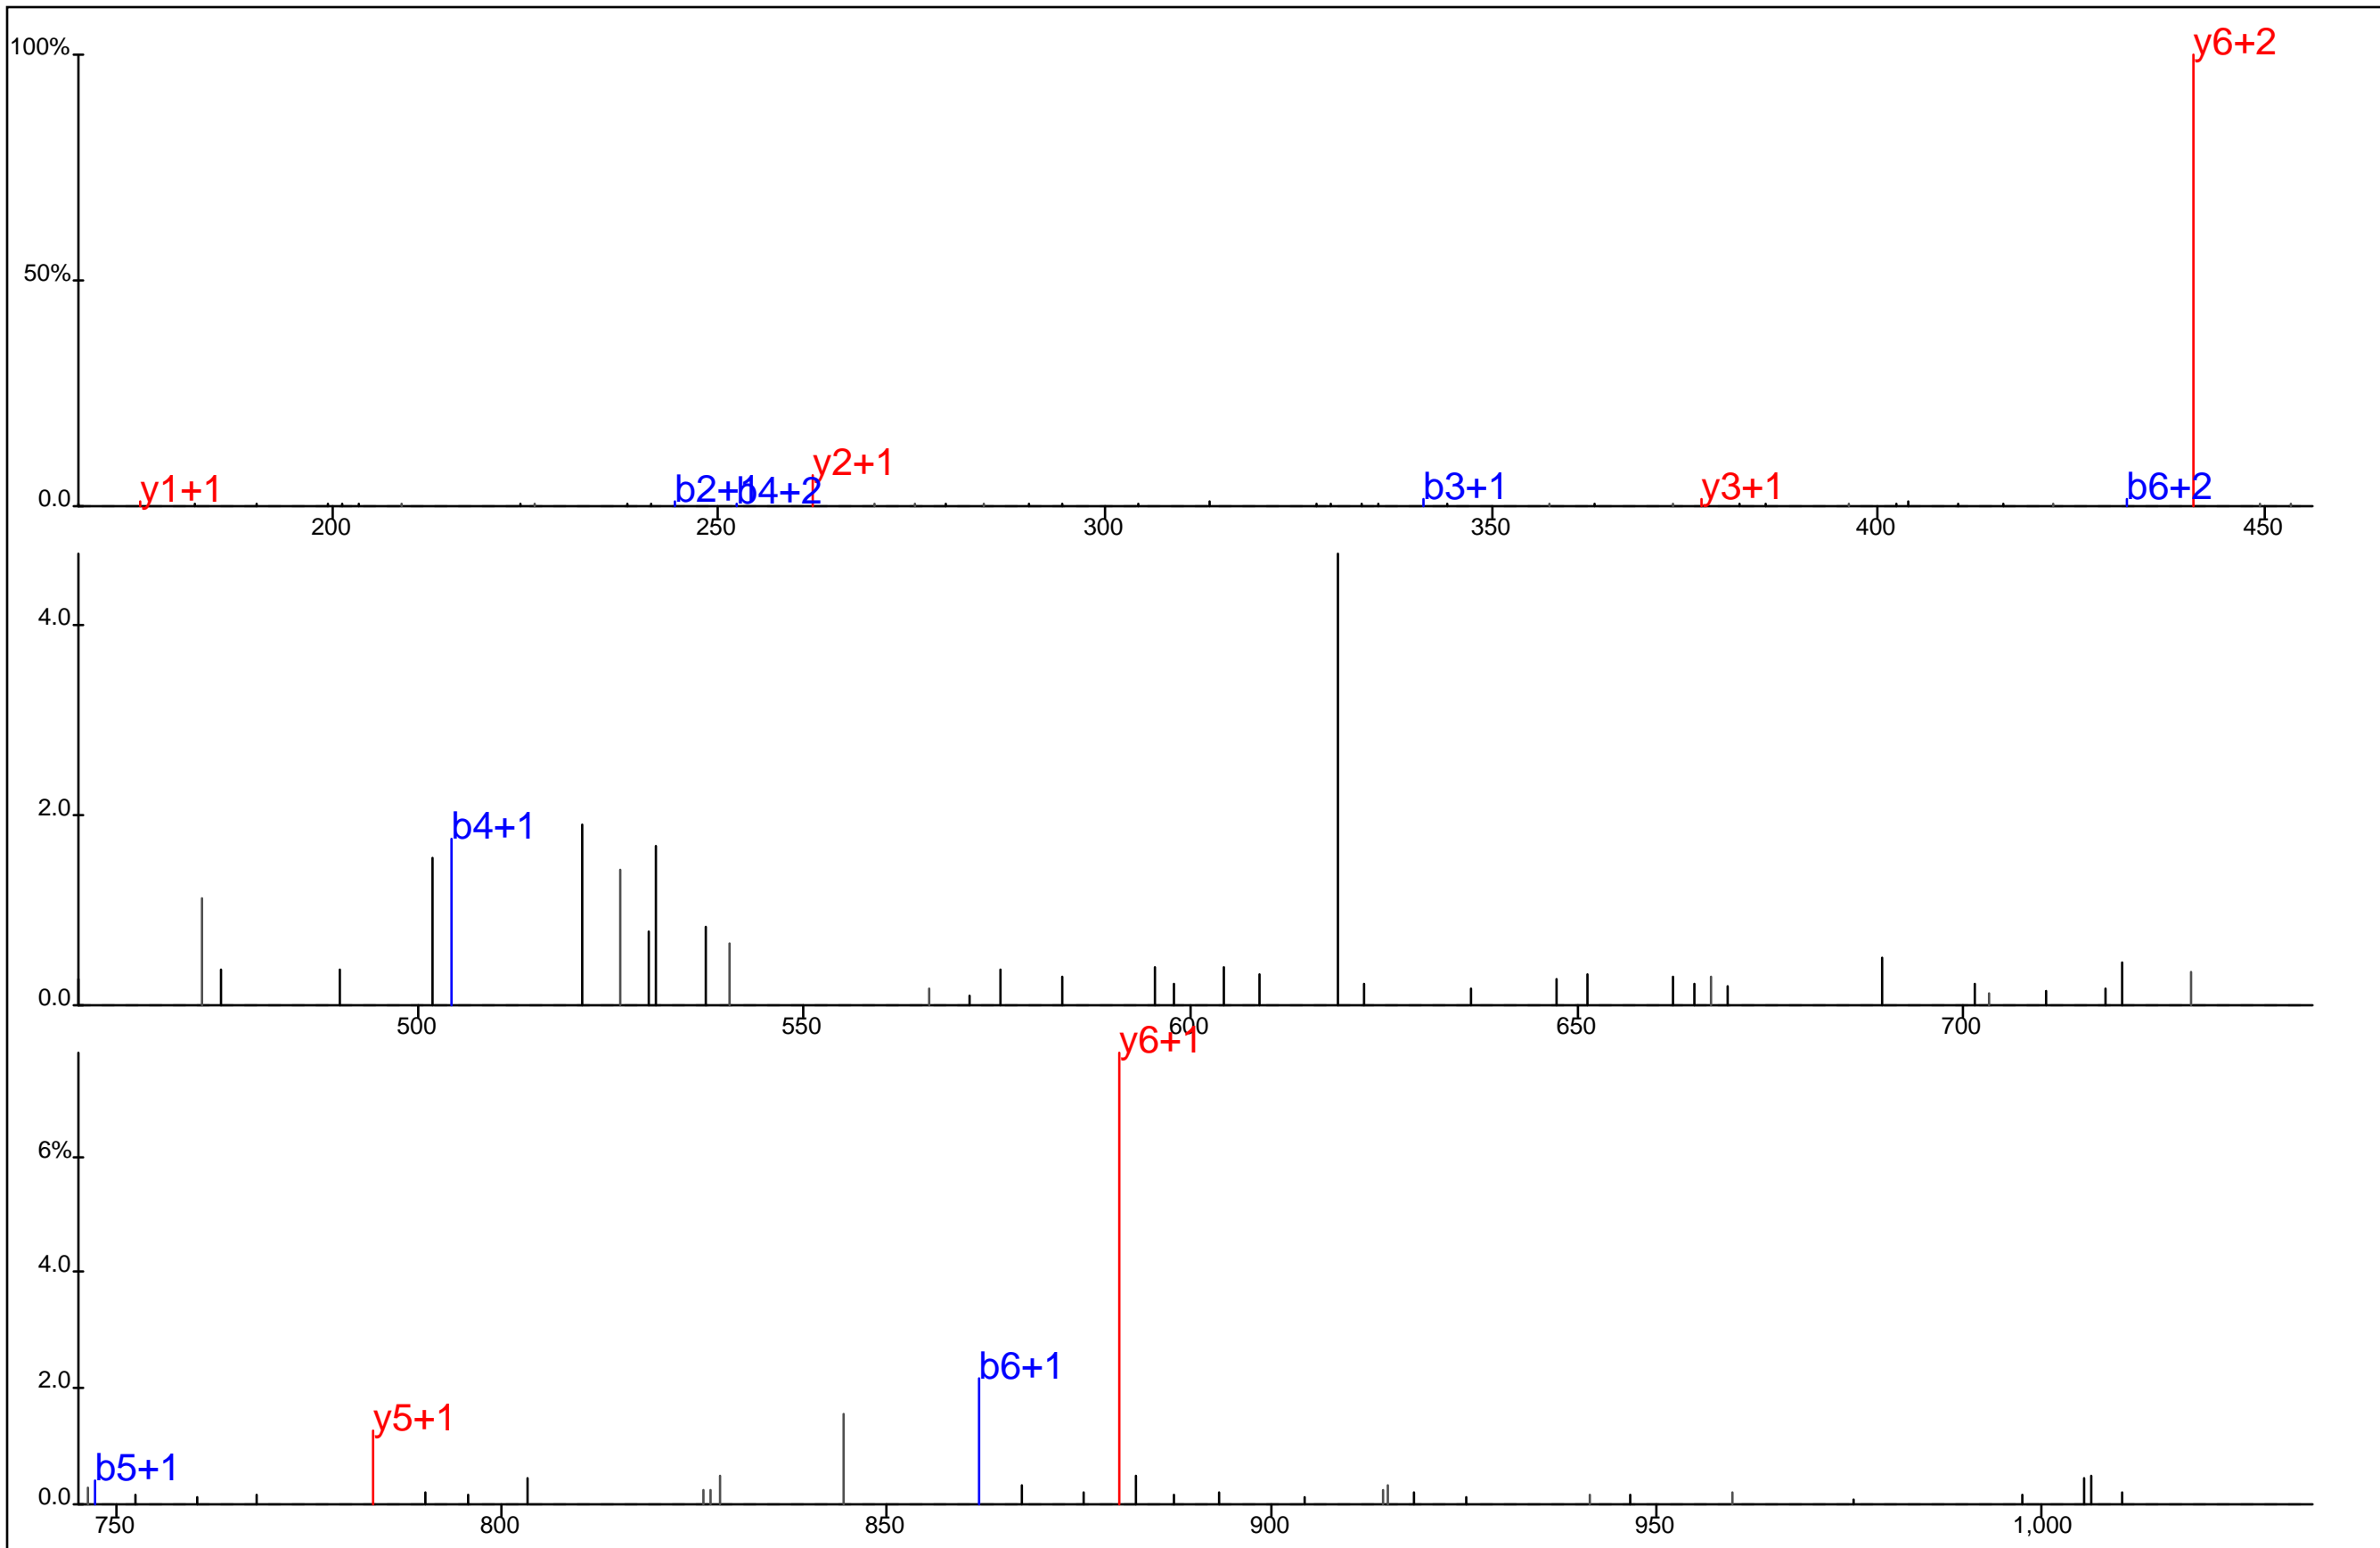

**E N P Y Y\* D S R**

Protein Name: Clathrin, heavy polypeptide  
 gi Accession: 0  
 Precursor Mass: 562.2086+2  
 Delta Mass: 0.602 ppm  
 XCorr: 27.26

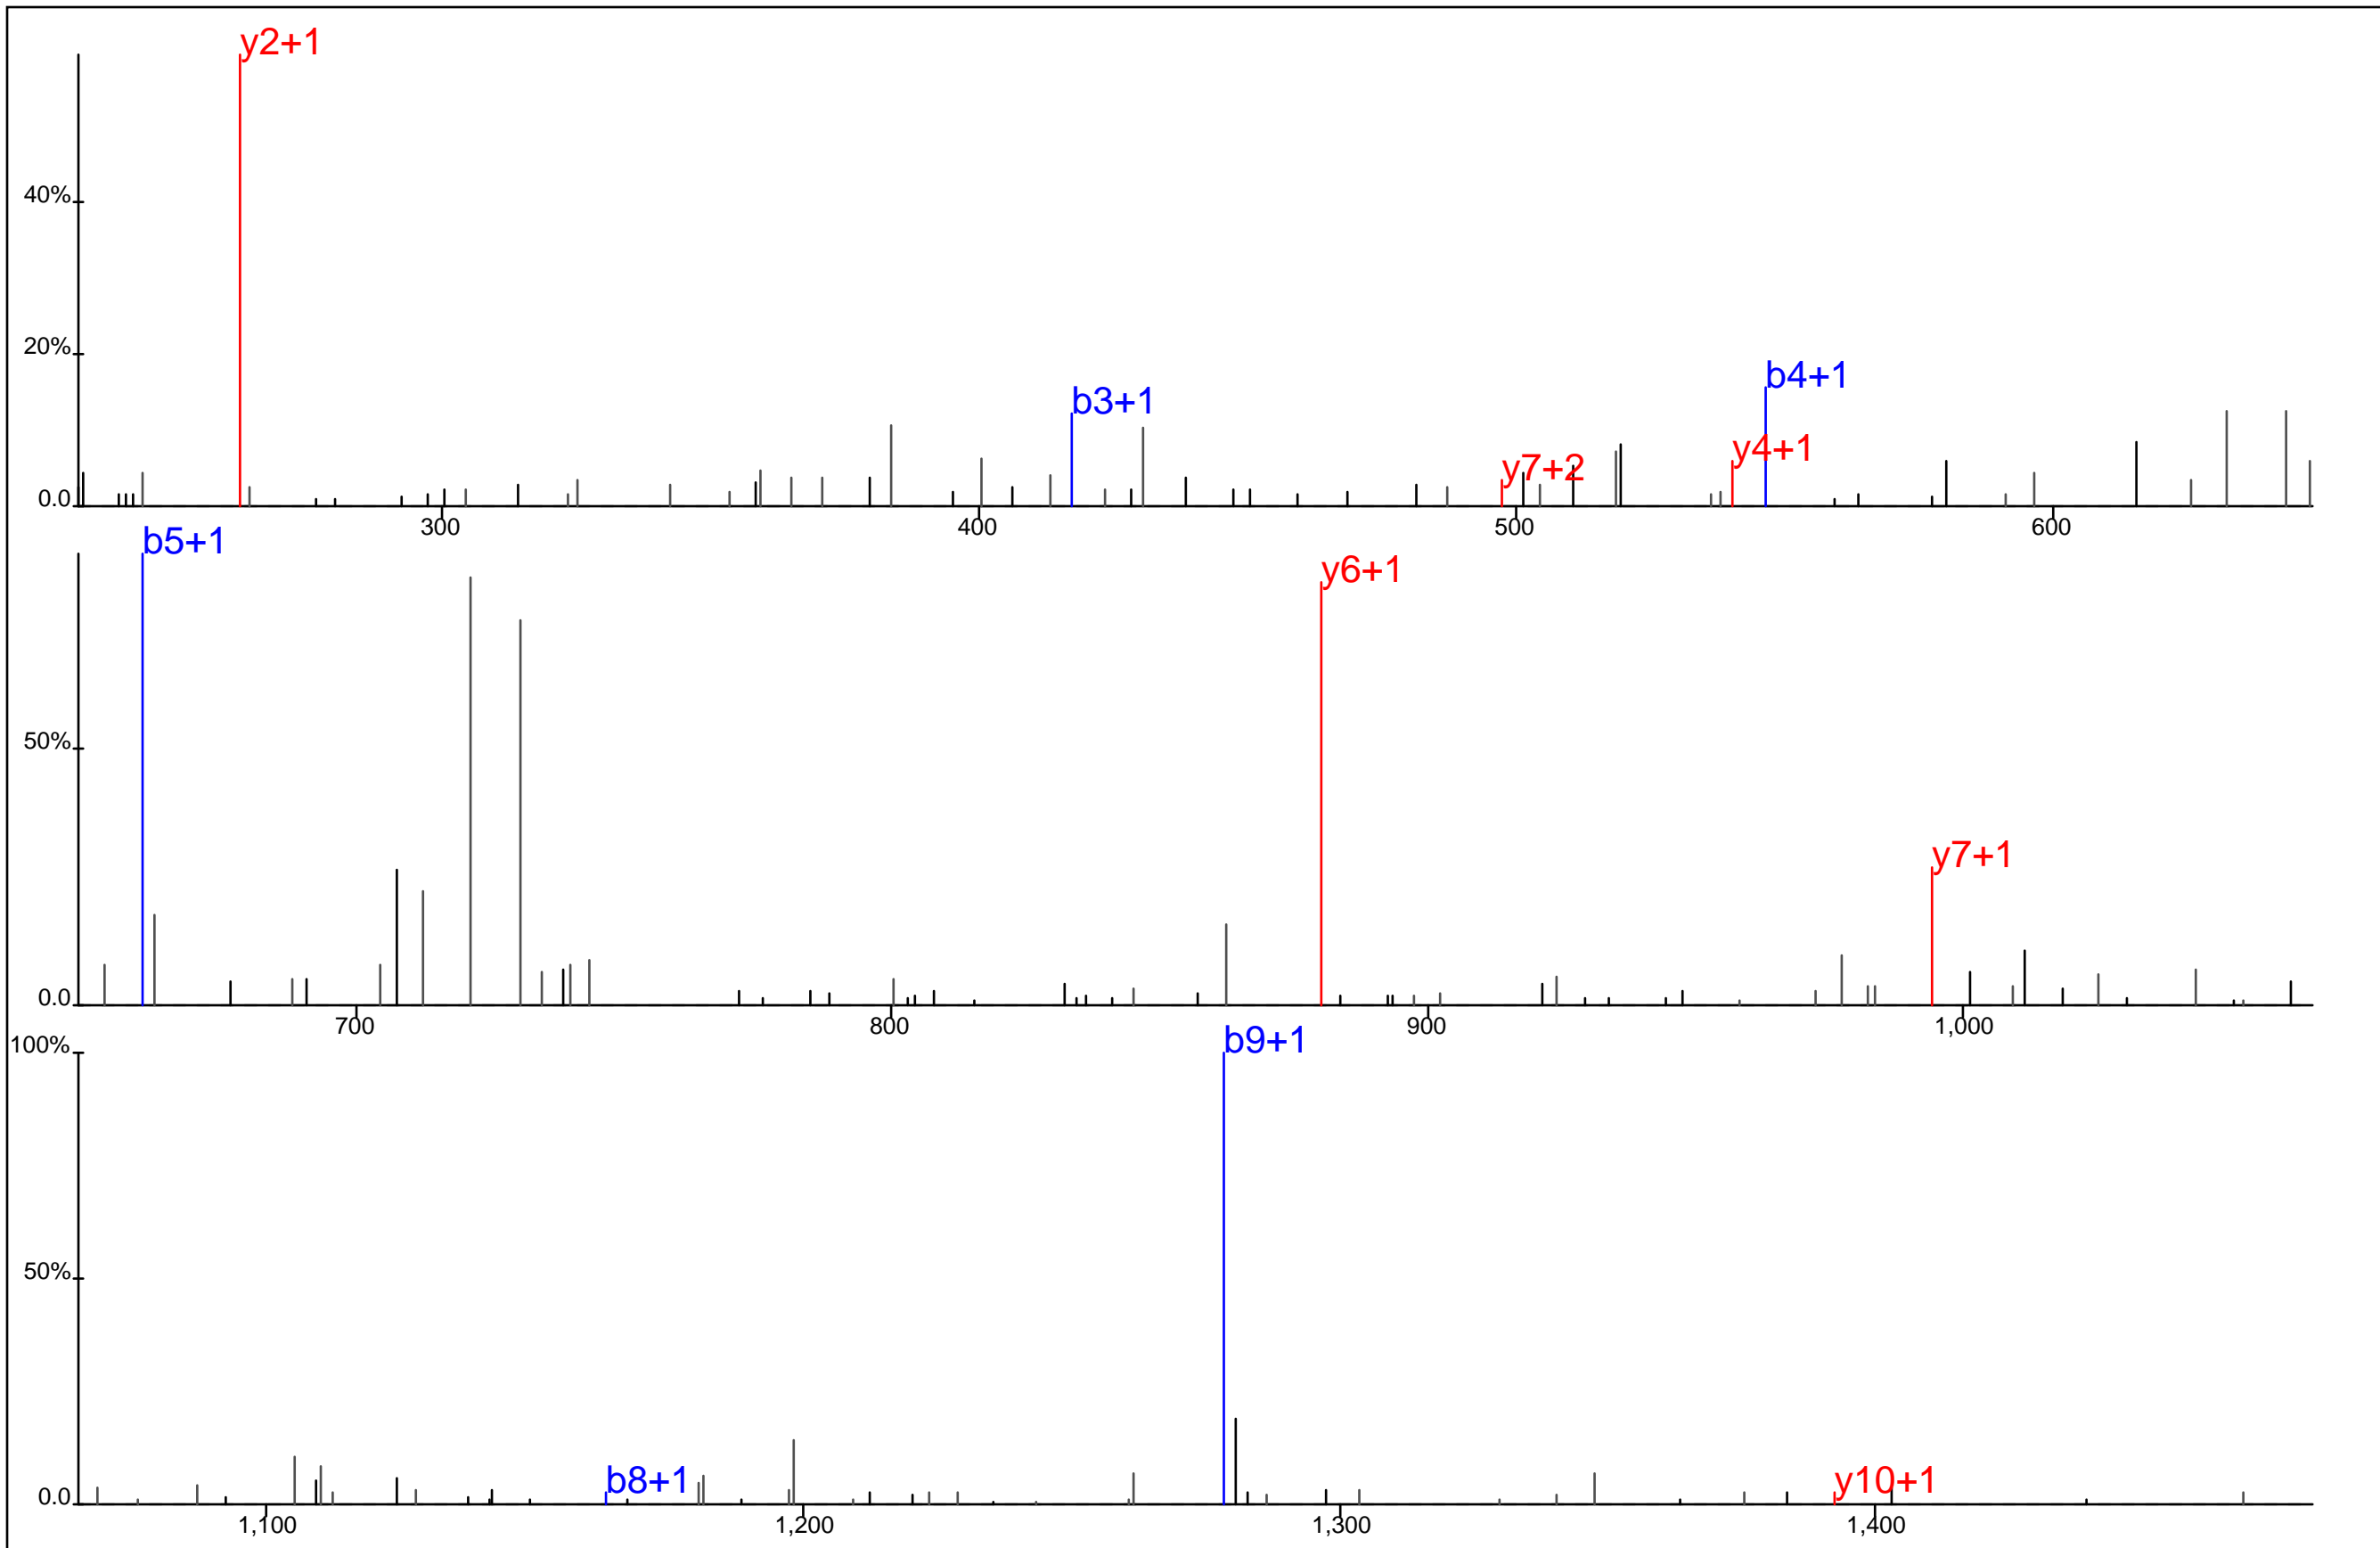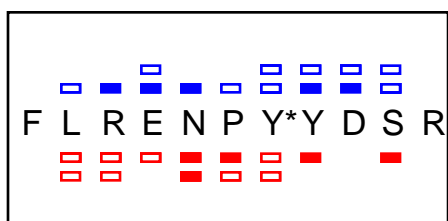

Protein Name: Clathrin, heavy polypeptide  
 gi Accession: 0  
 Precursor Mass: 770.3327+2  
 Delta Mass: 3.002 ppm  
 XCorr: 22.14

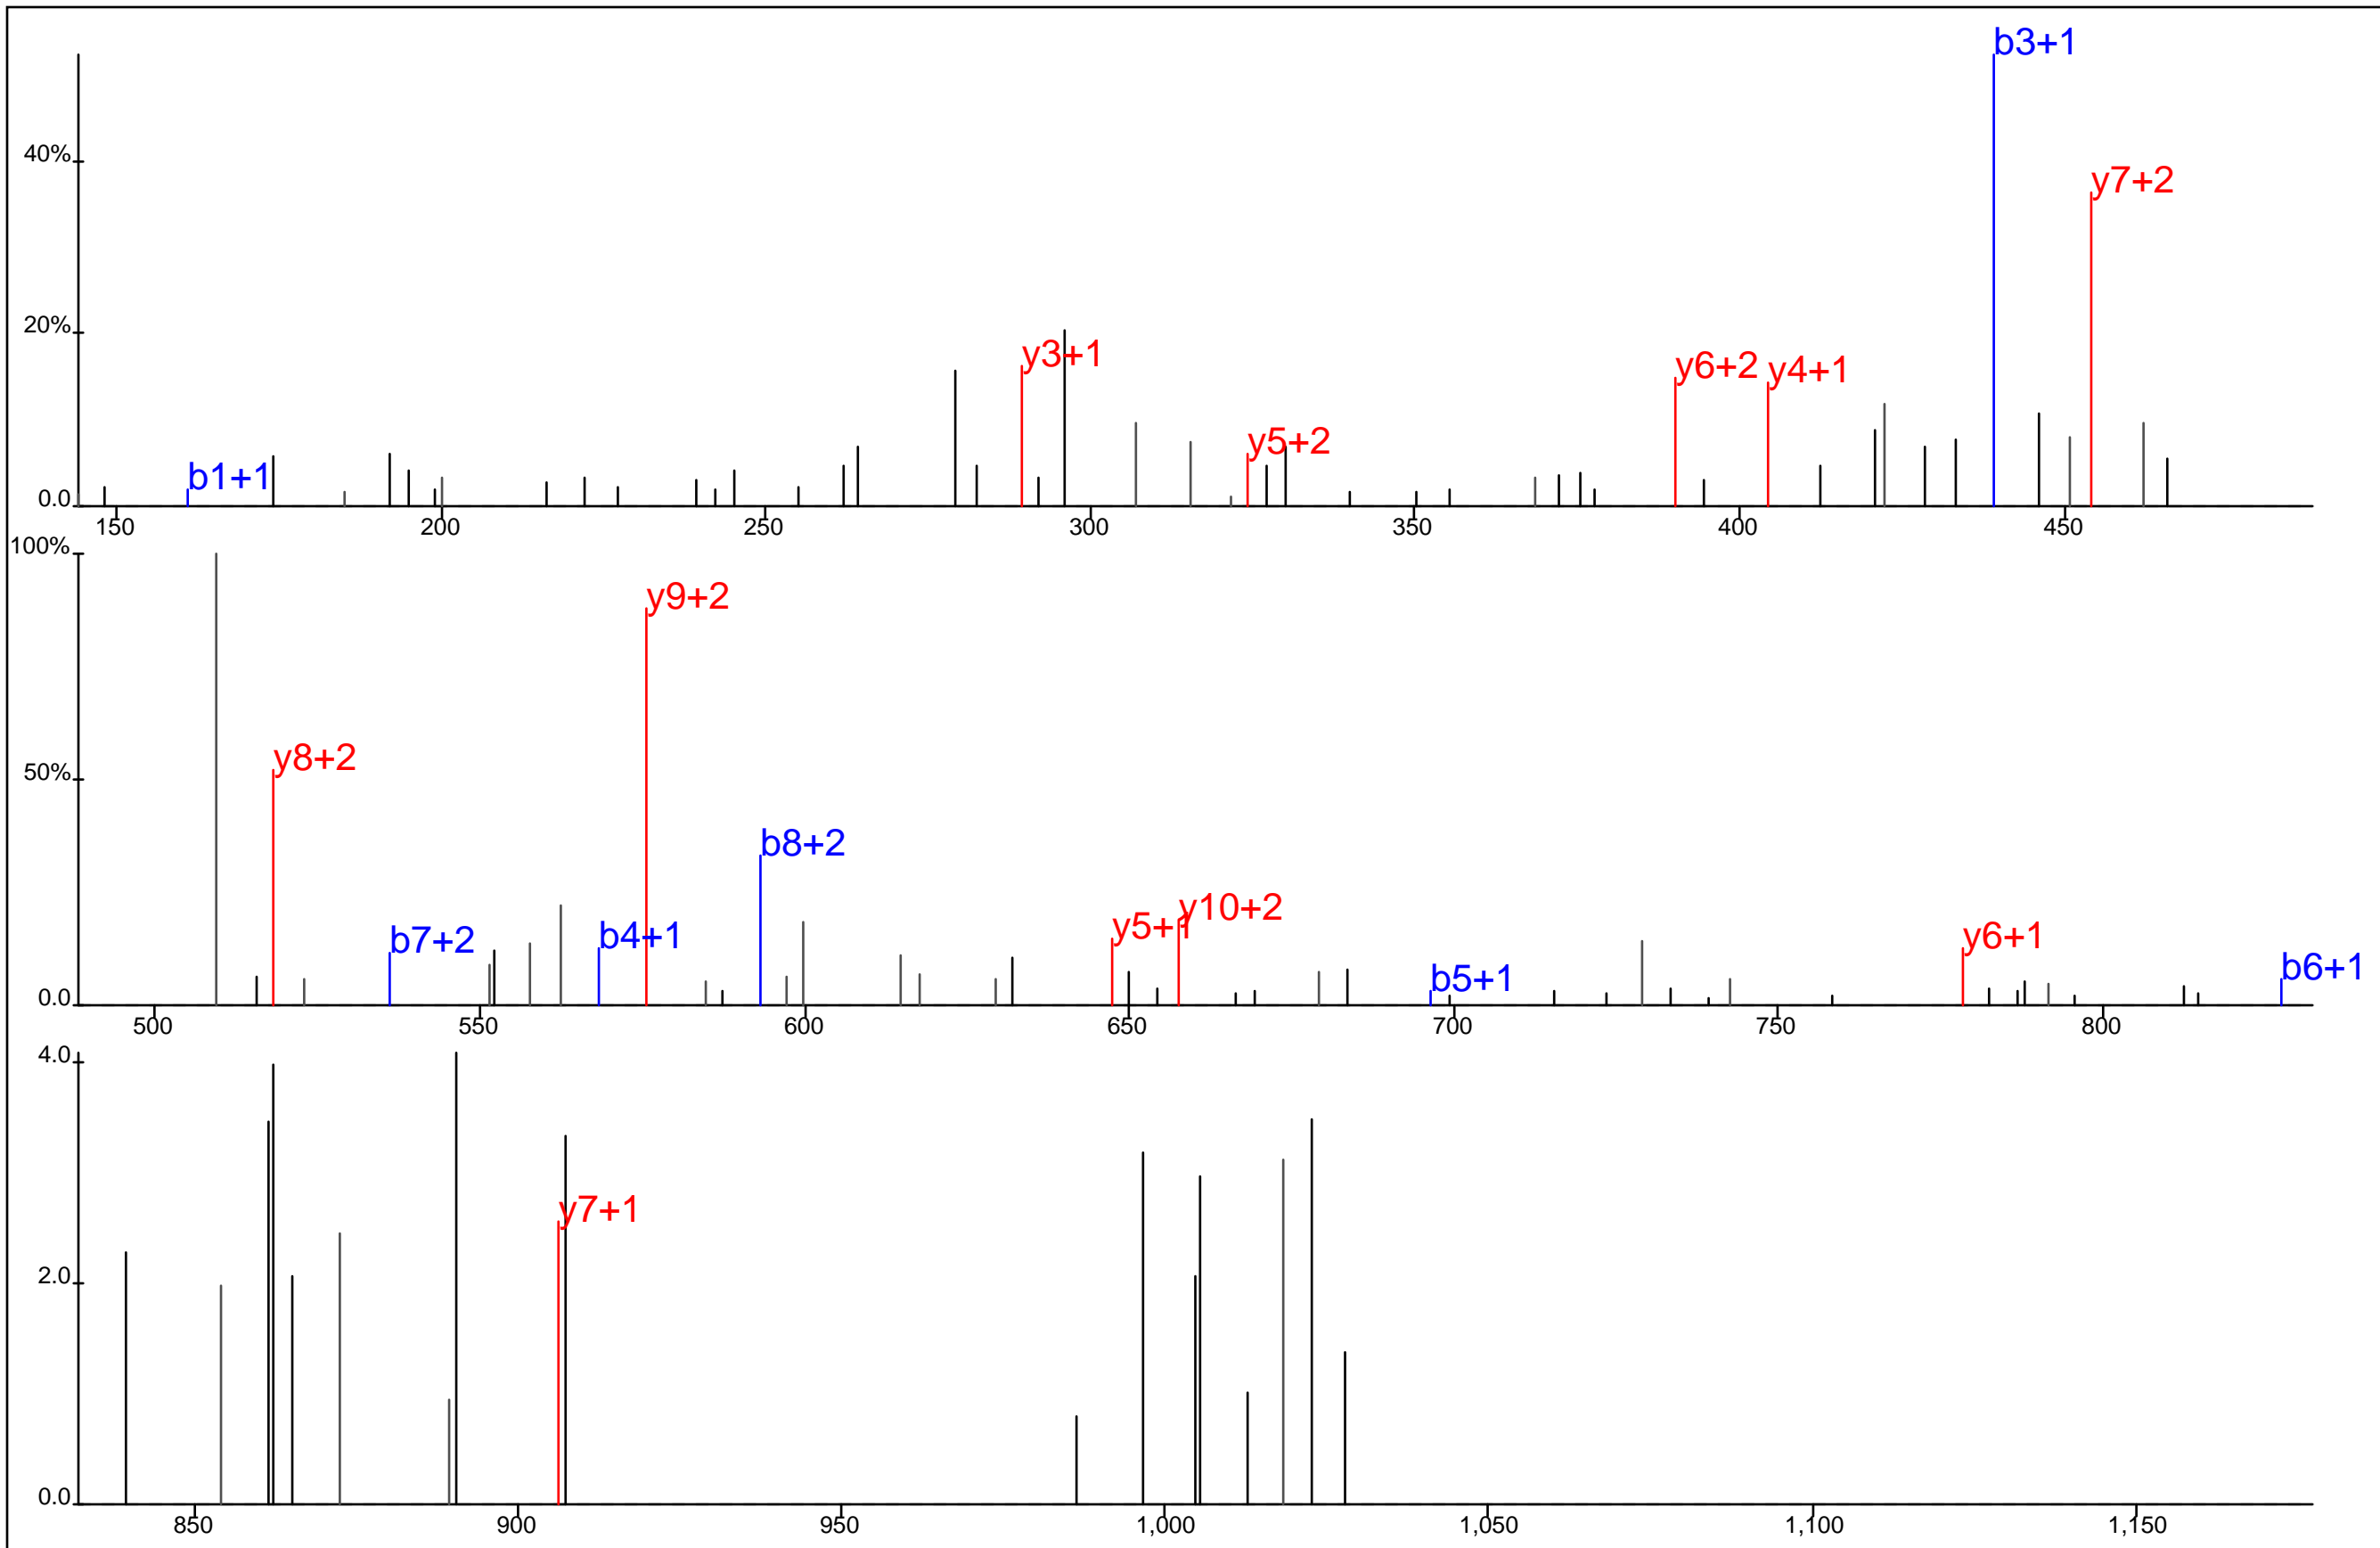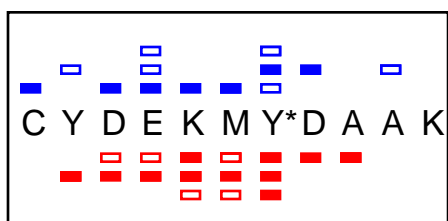

Protein Name: Clathrin, heavy polypeptide  
 gi Accession: 0  
 Precursor Mass: 491.8526+3  
 Delta Mass: 0.535 ppm  
 XCorr: 28.79



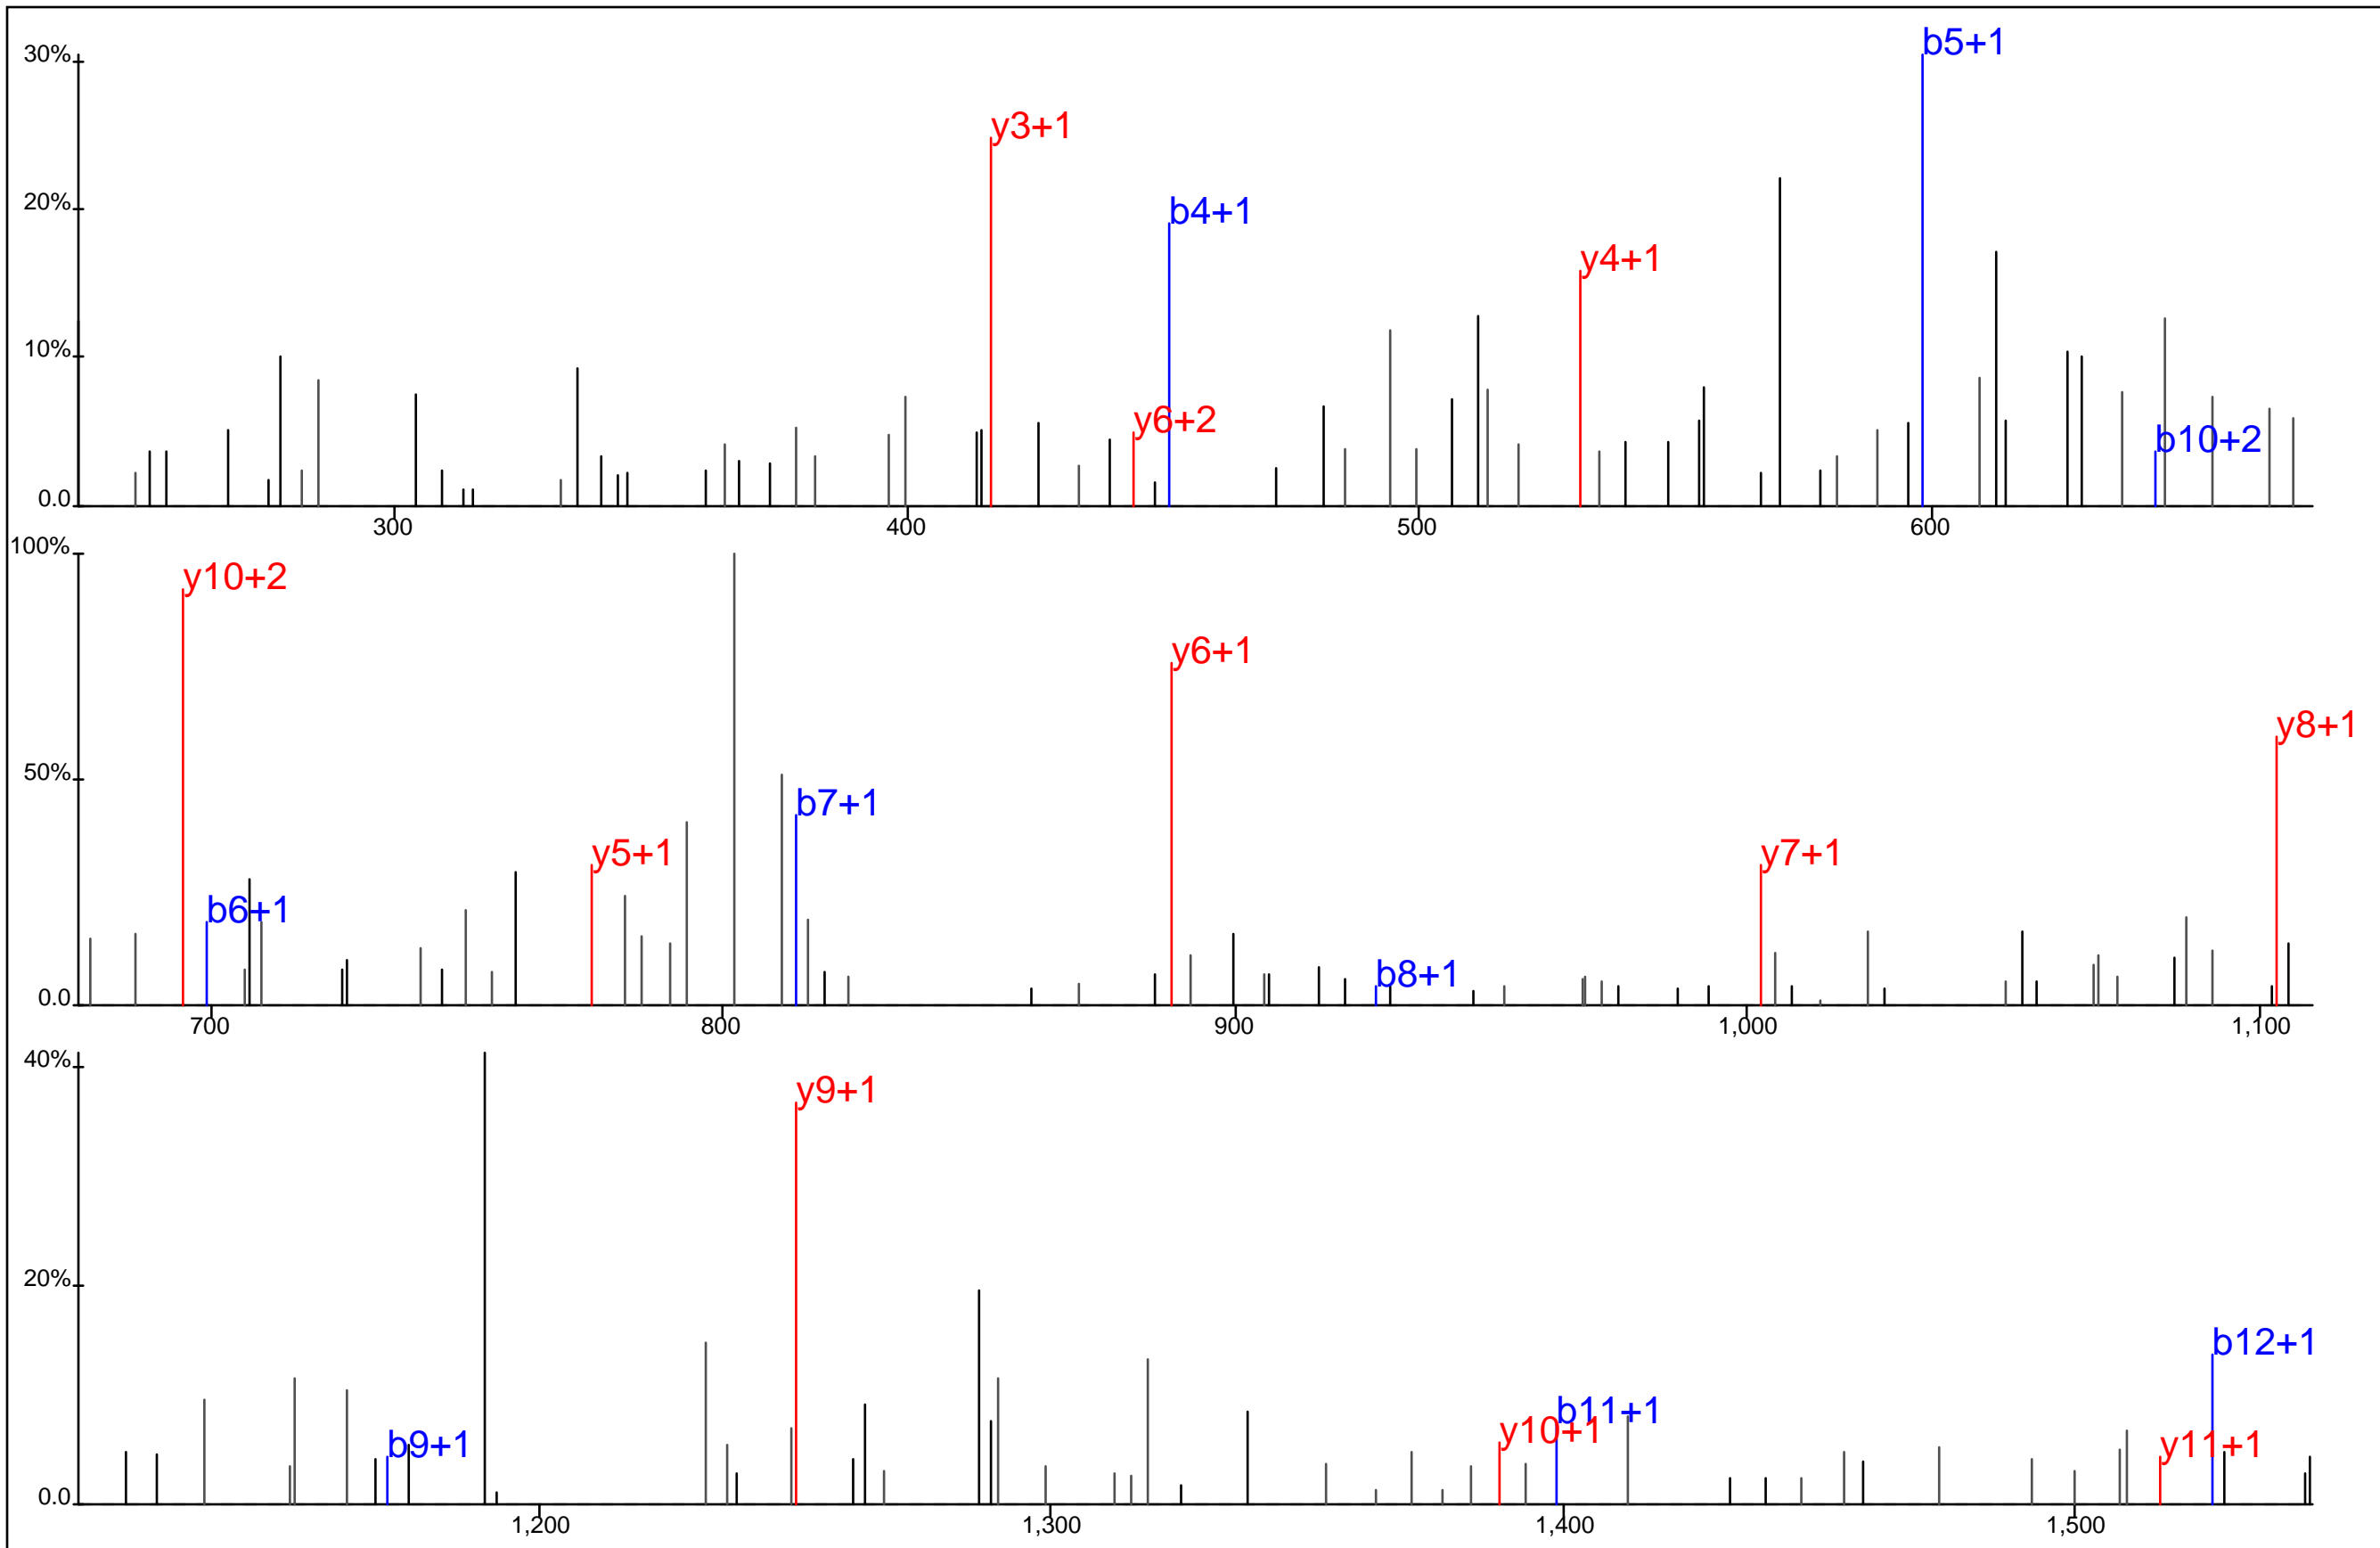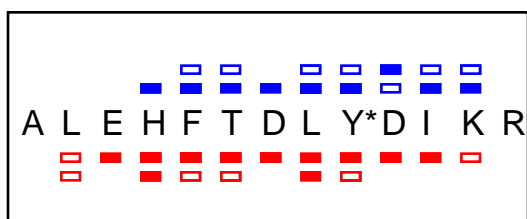

Protein Name: Clathrin, heavy polypeptide  
 gi Accession: 0  
 Precursor Mass: 850.9086+2  
 Delta Mass: 3.323 ppm  
 XCorr: 25.36

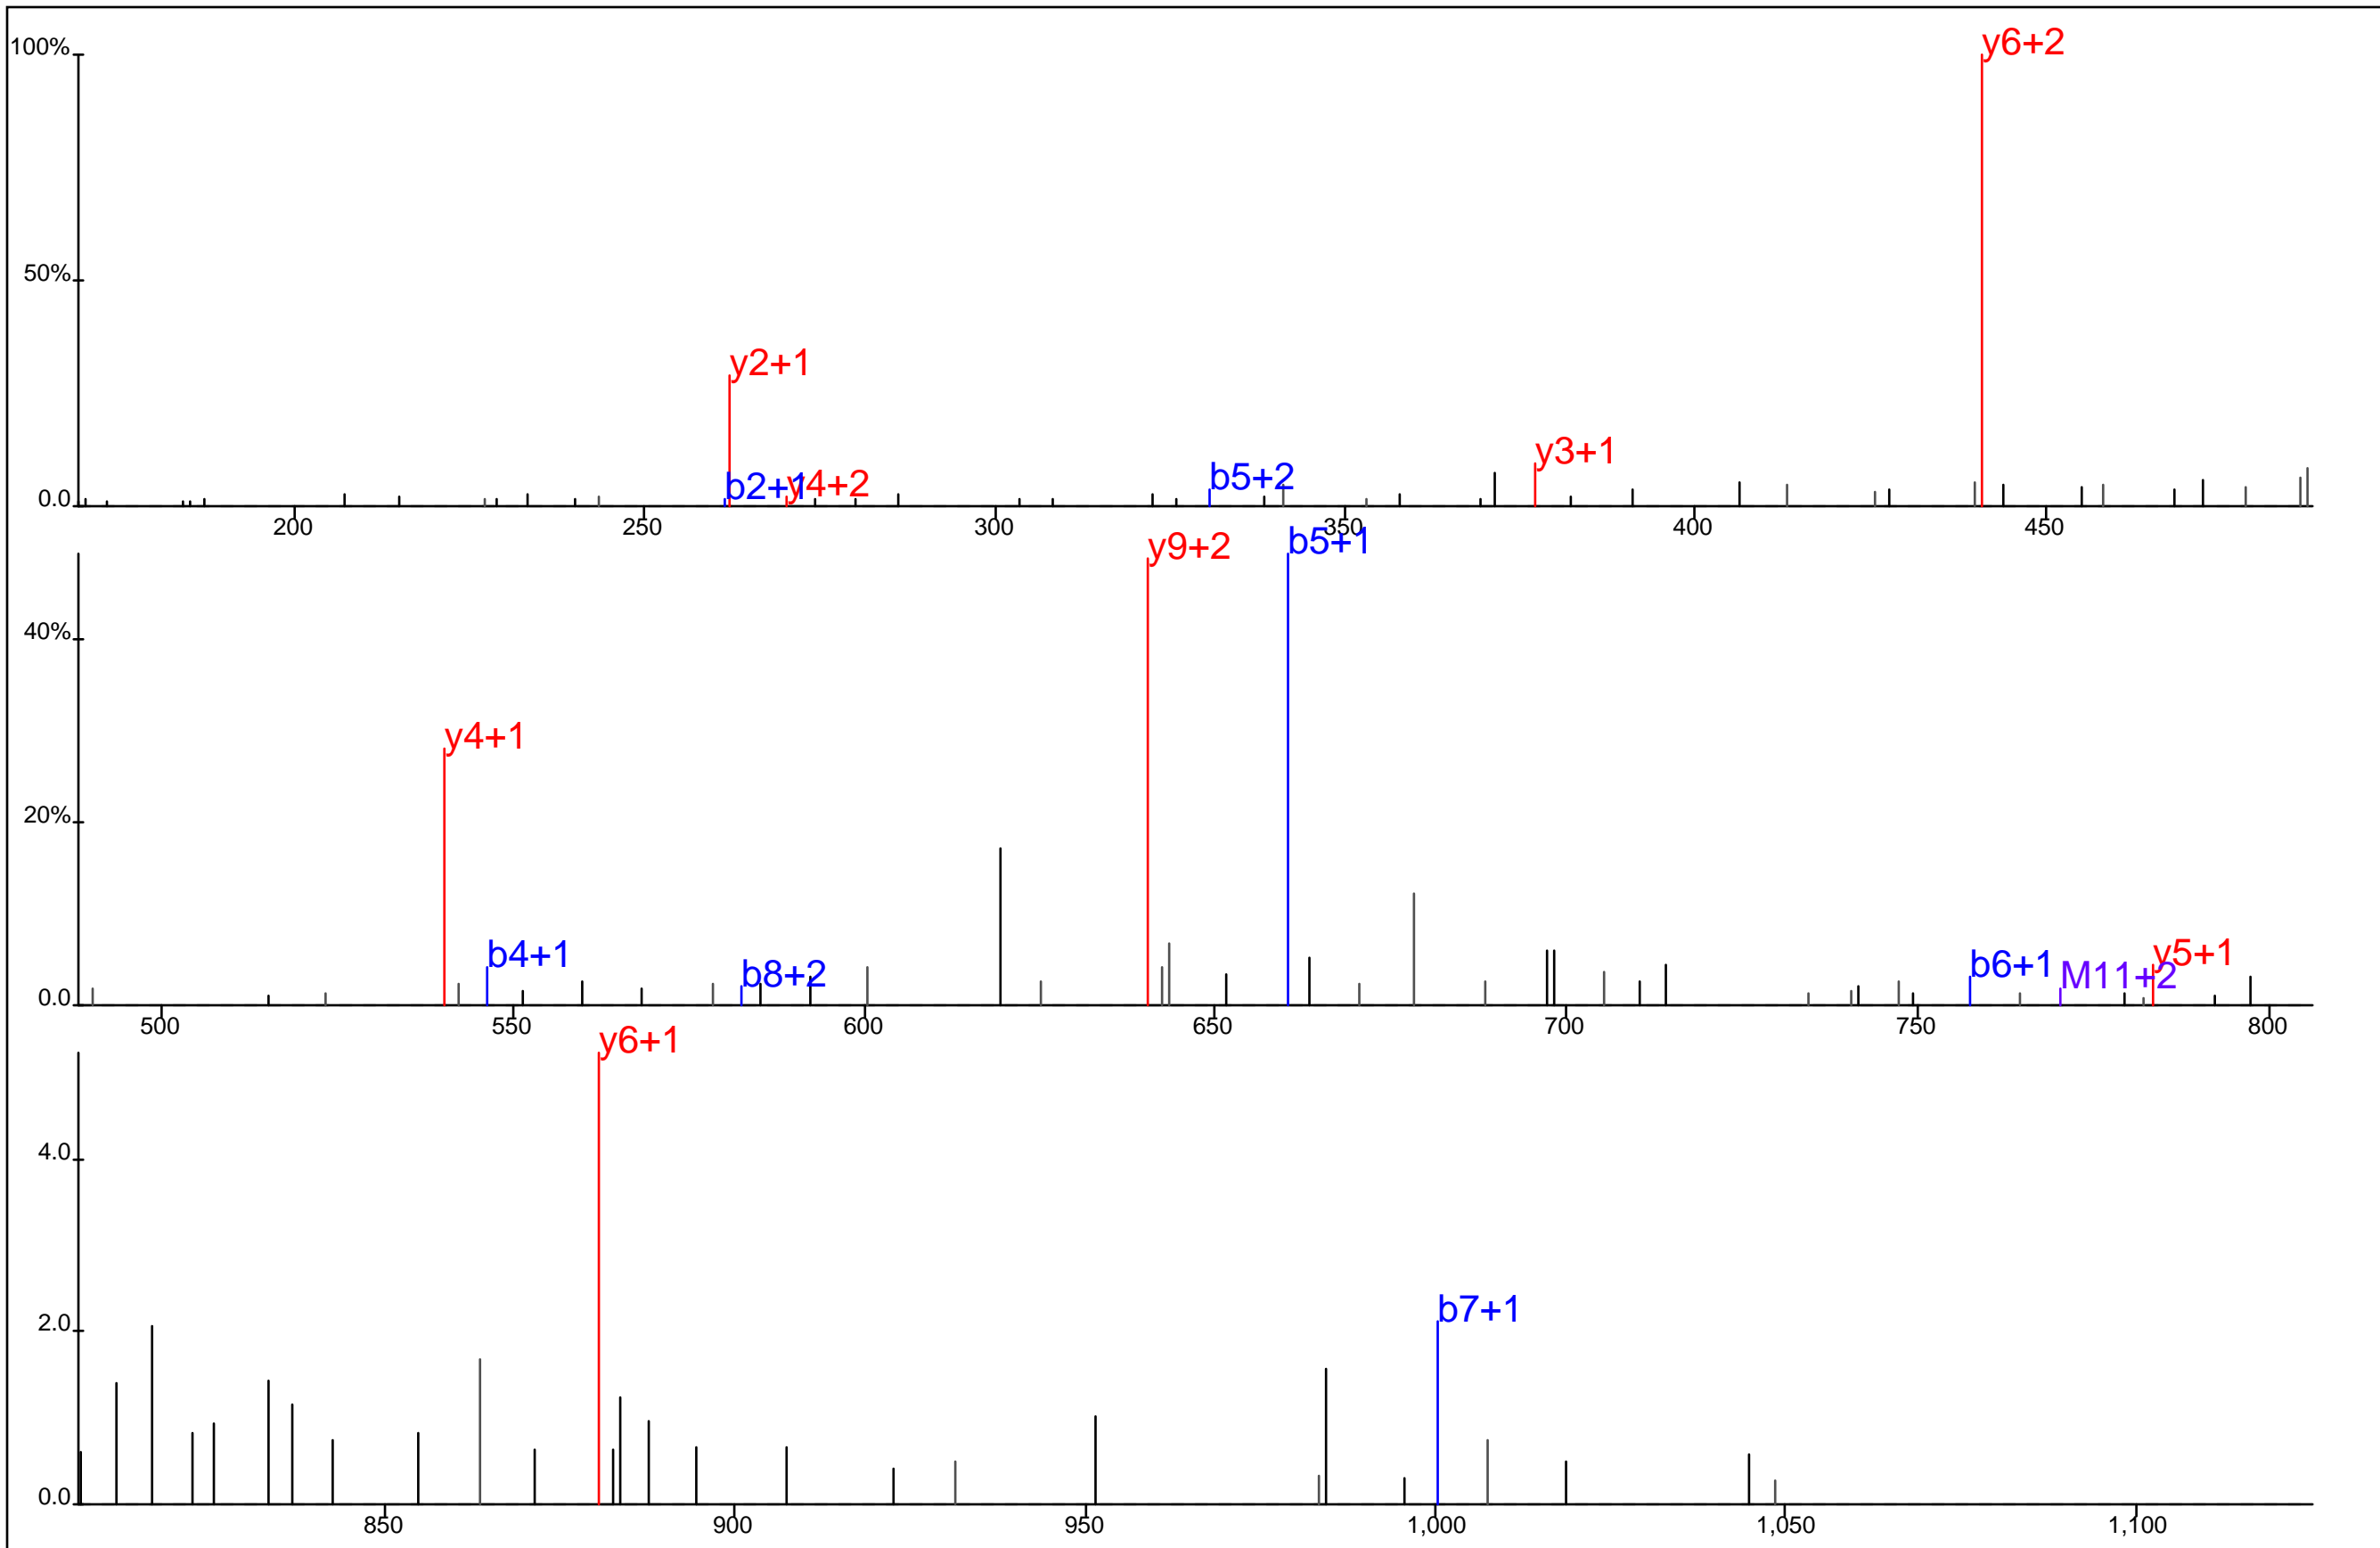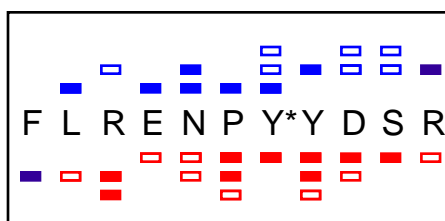

Protein Name: Clathrin, heavy polypeptide  
 gi Accession: 0  
 Precursor Mass: 513.8928+3  
 Delta Mass: 0.636 ppm  
 XCorr: 23.49

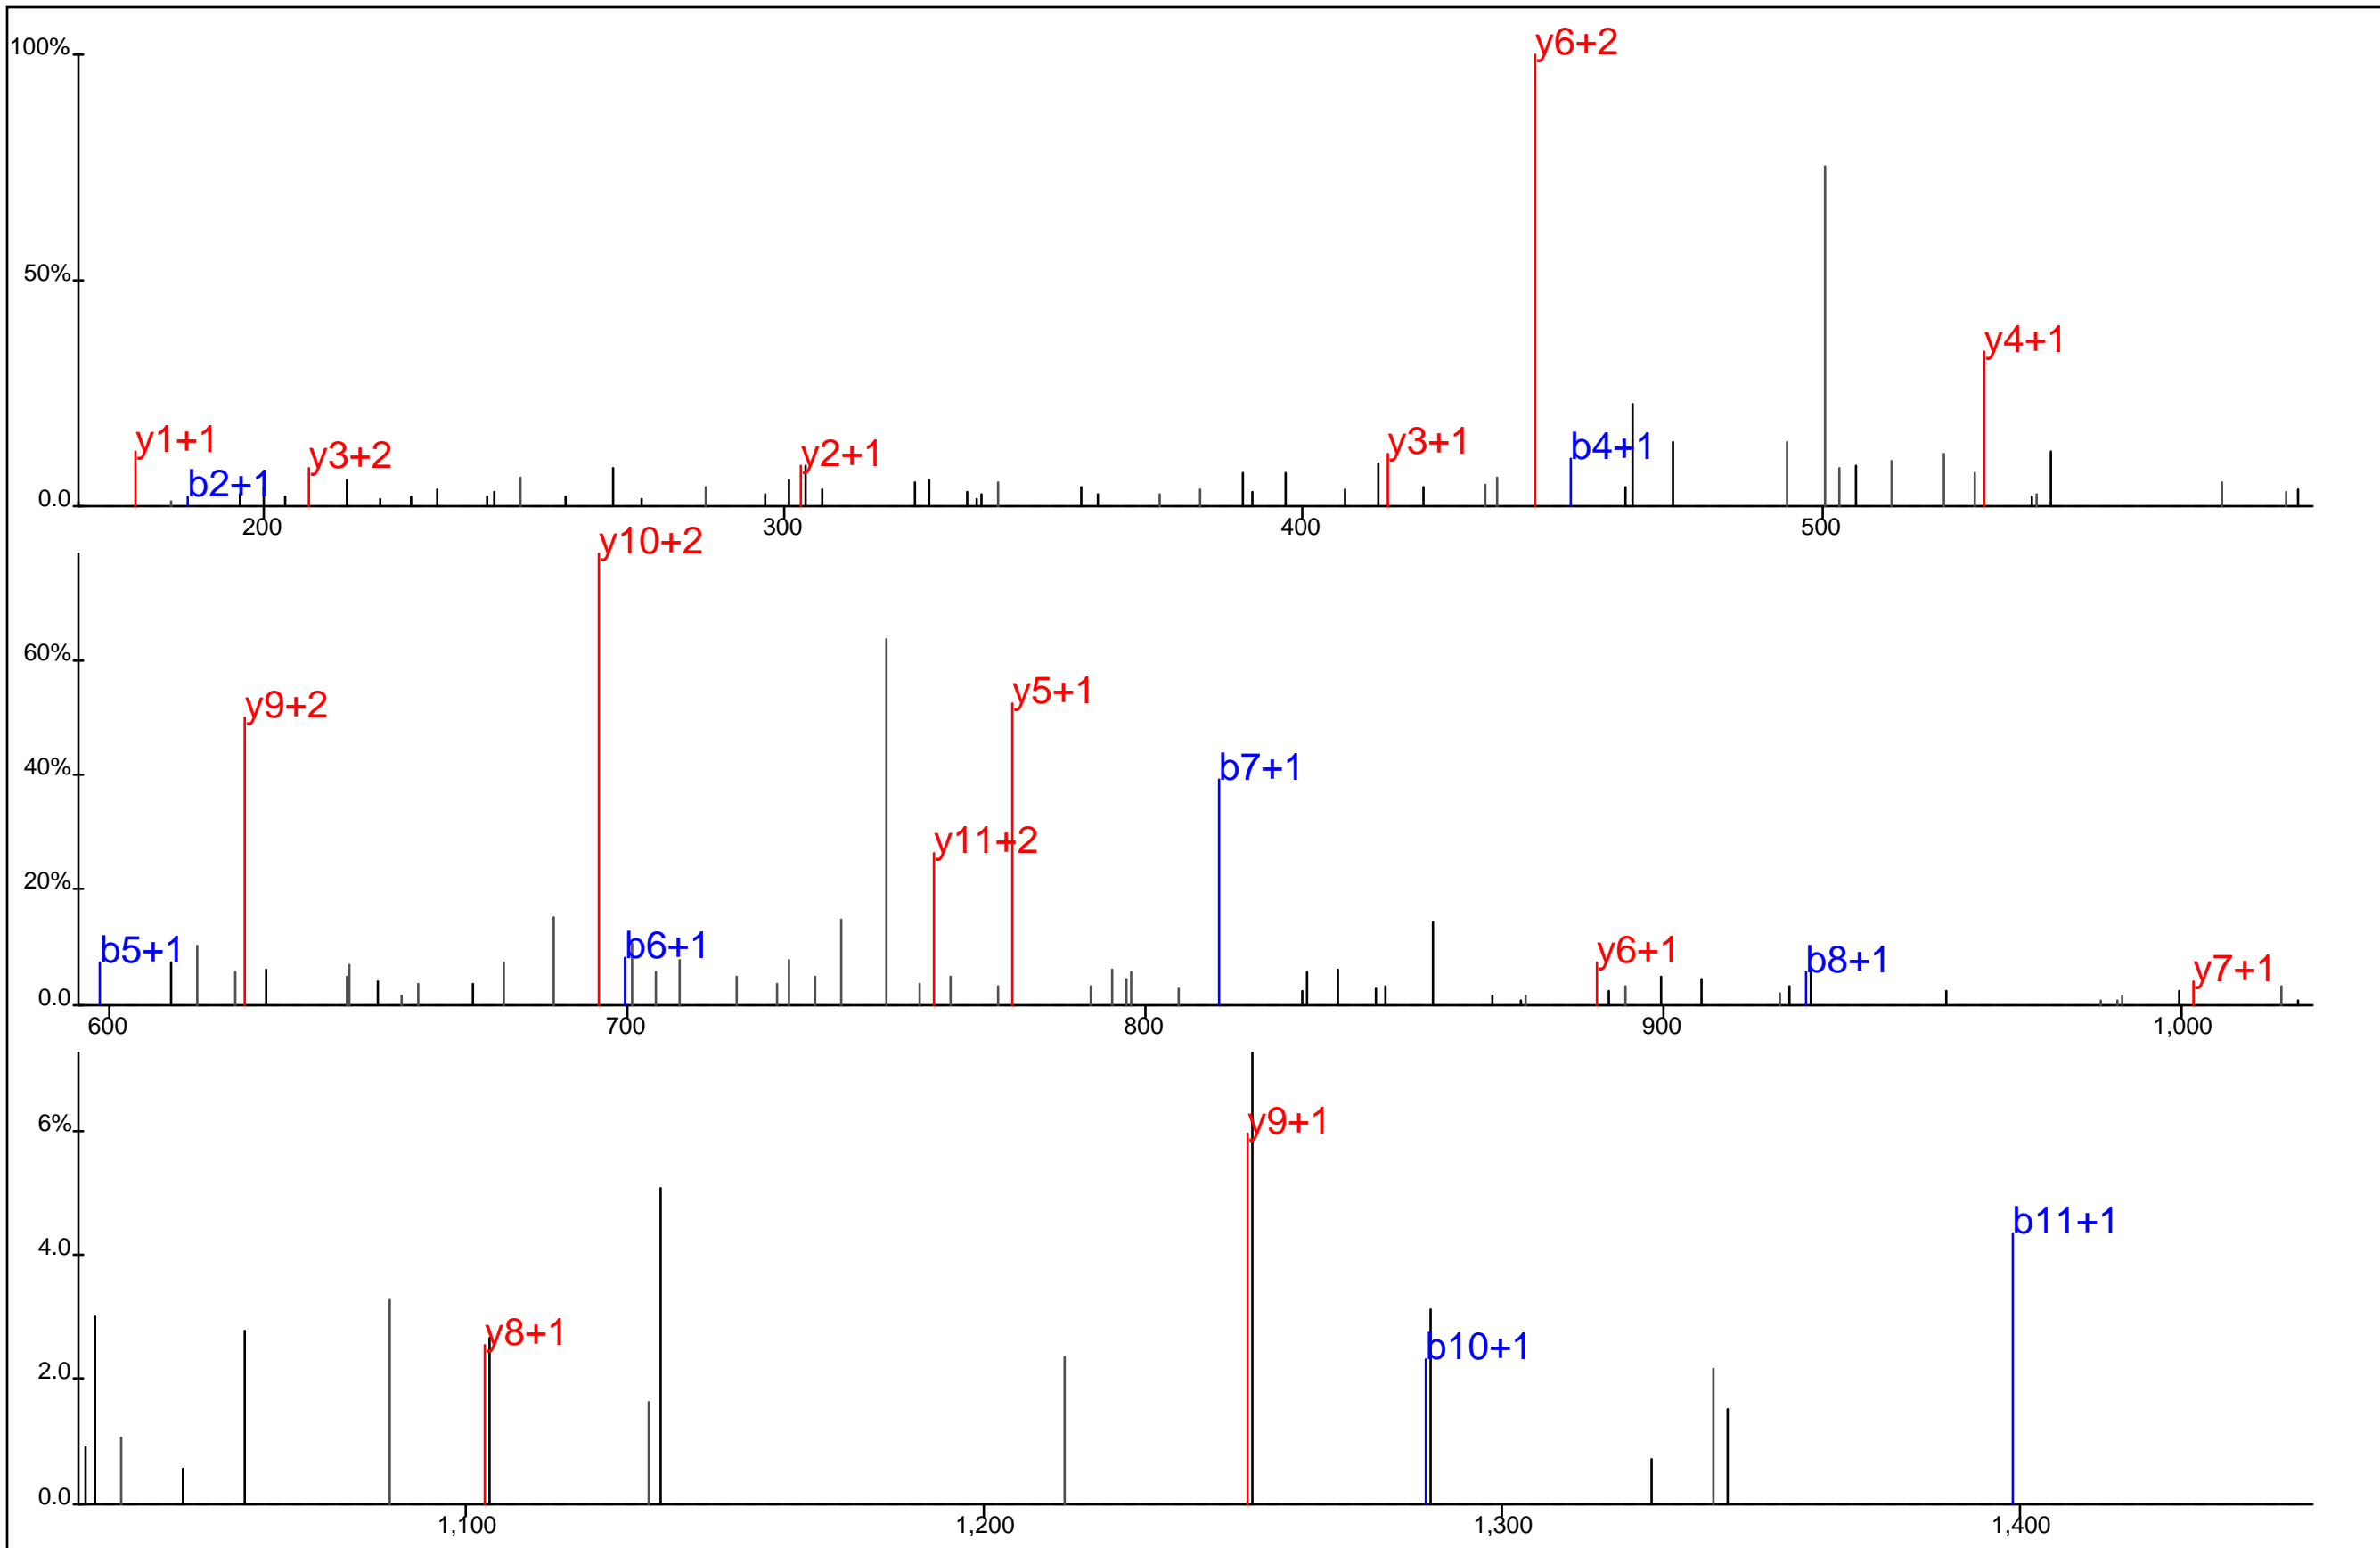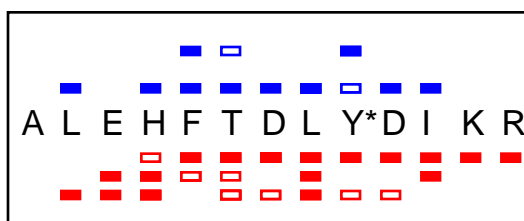

Protein Name: Clathrin, heavy polypeptide  
 gi Accession: 0  
 Precursor Mass: 567.6081+3  
 Delta Mass: 3.172 ppm  
 XCorr: 46.69

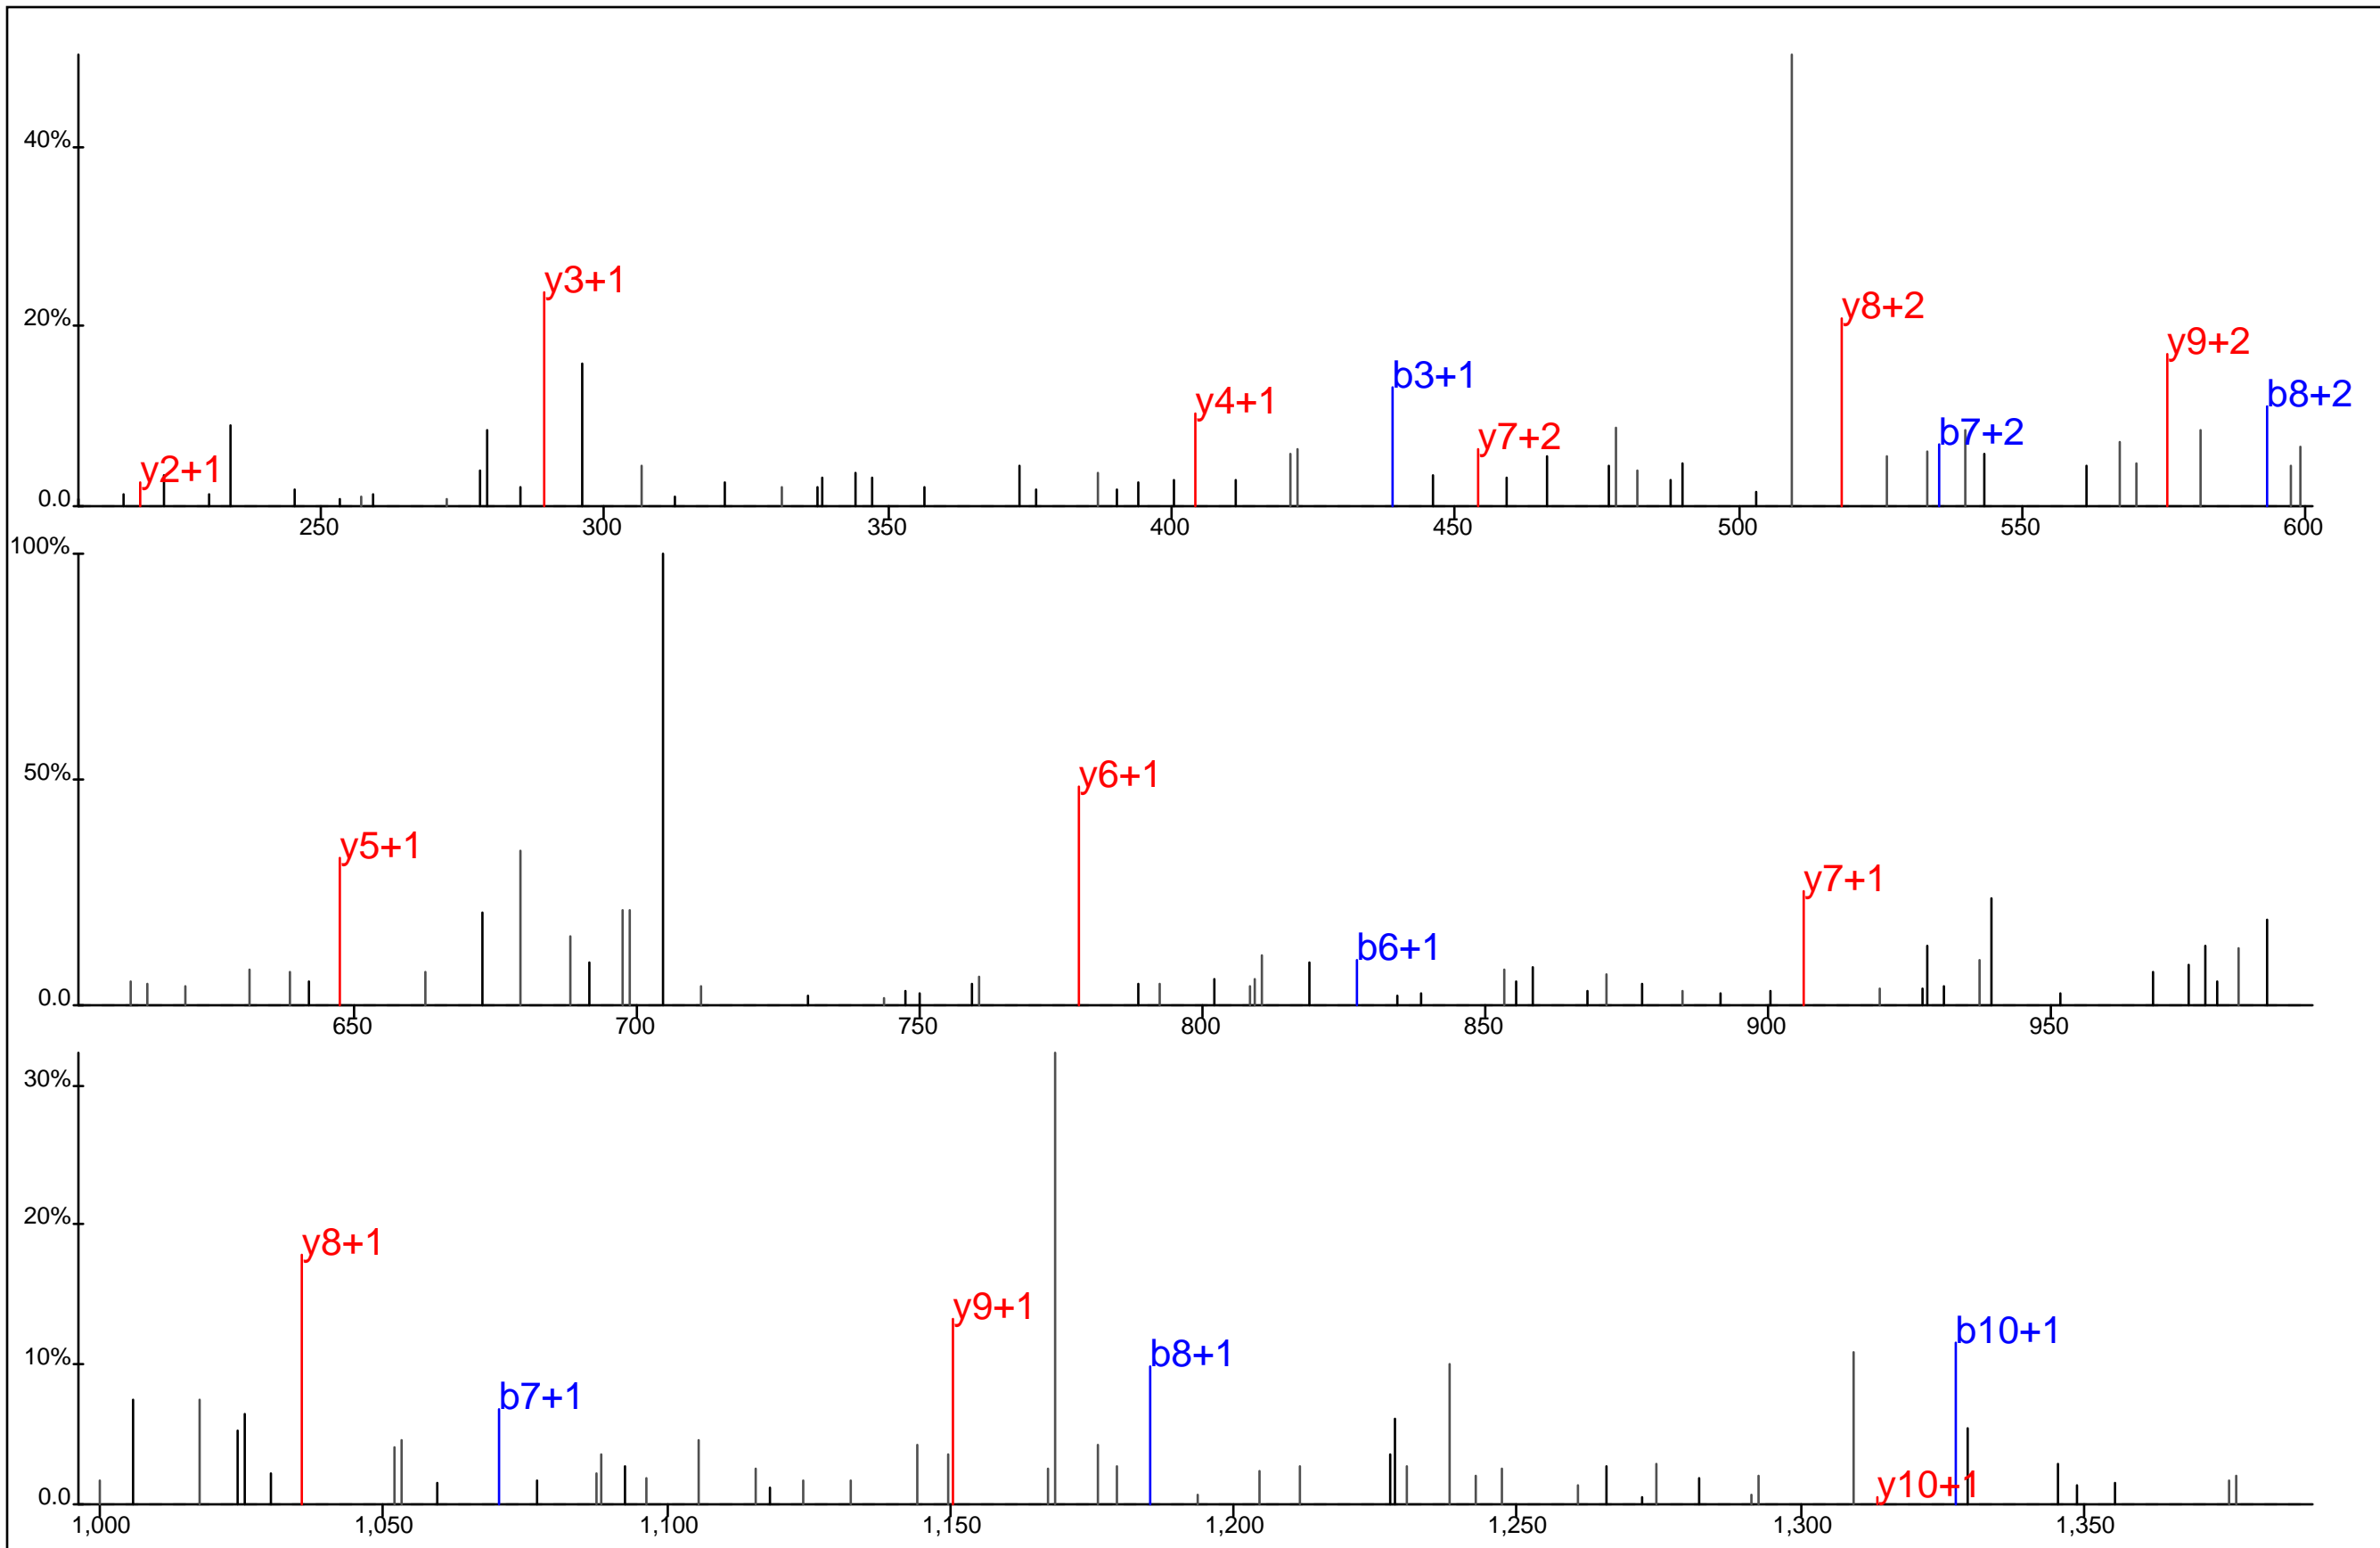

C Y D E K M Y\* D A A K

Protein Name: Clathrin, heavy polypeptide  
 gi Accession: 0  
 Precursor Mass: 737.2729+2  
 Delta Mass: 2.750 ppm  
 XCorr: 40.27

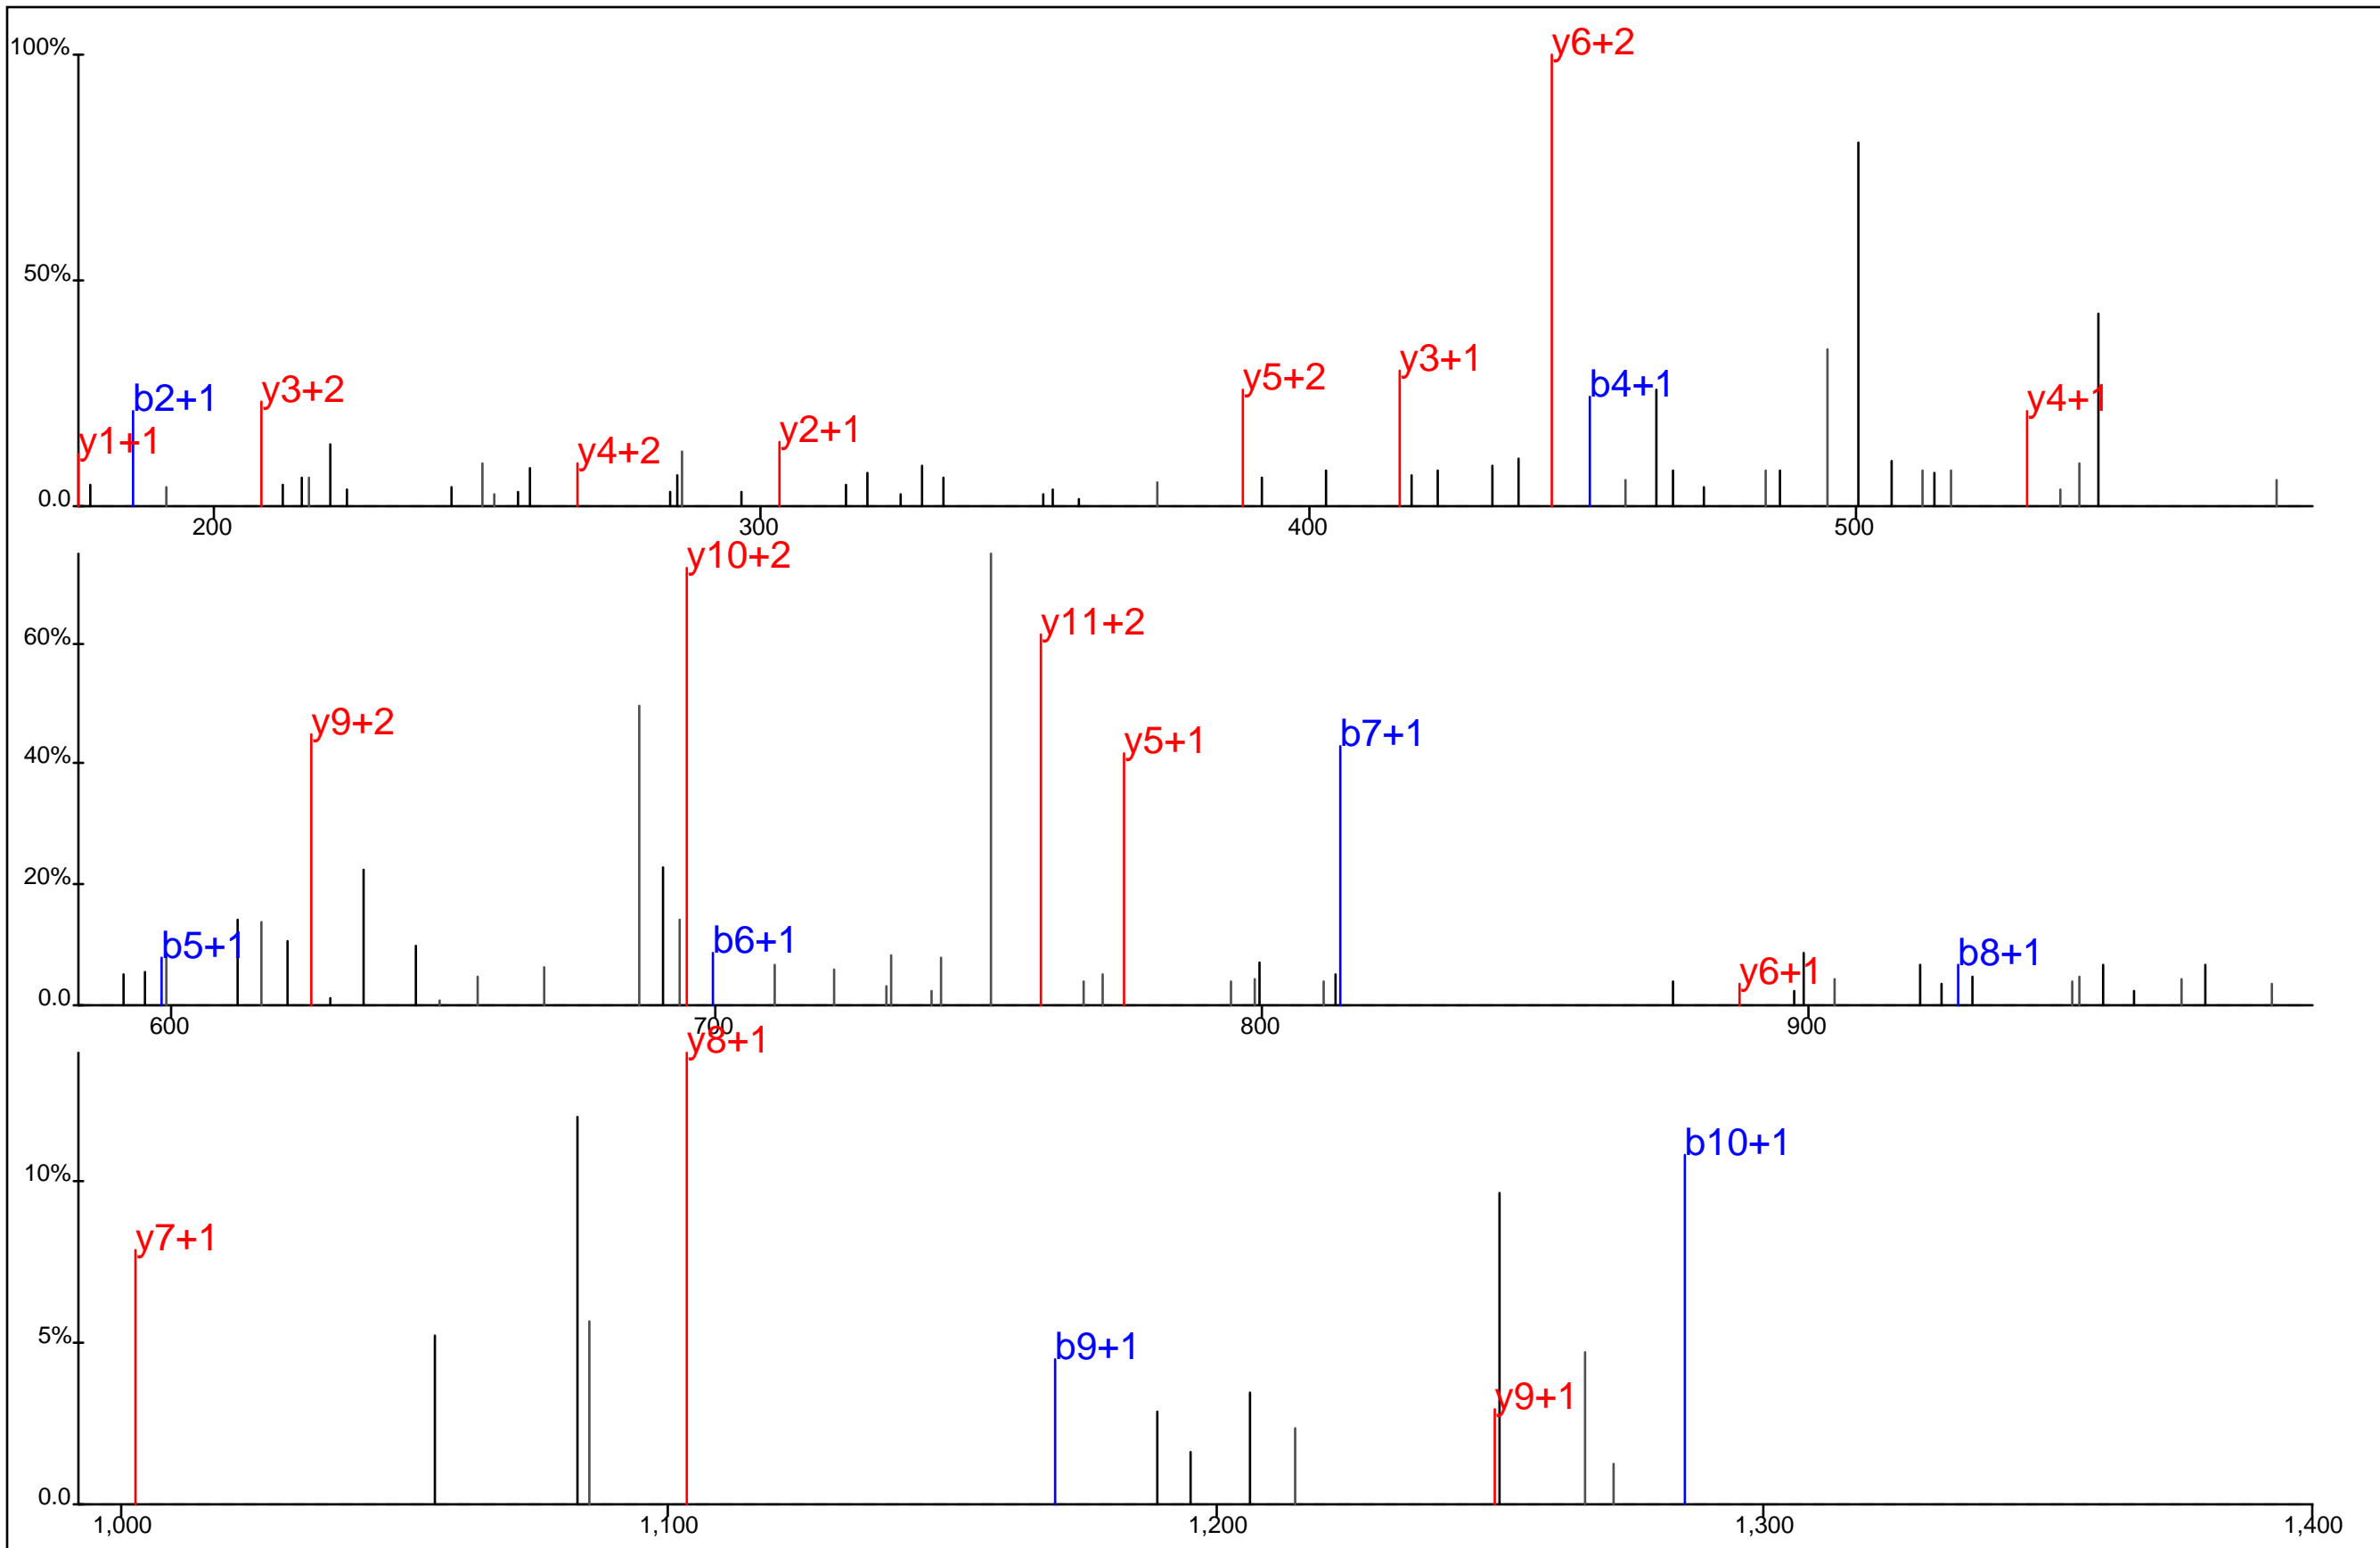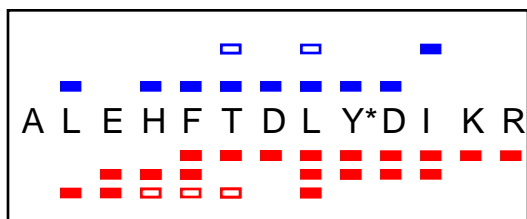

Protein Name: Clathrin, heavy polypeptide  
 gi Accession: 0  
 Precursor Mass: 567.6097+3  
 Delta Mass: 5.971 ppm  
 XCorr: 45.16

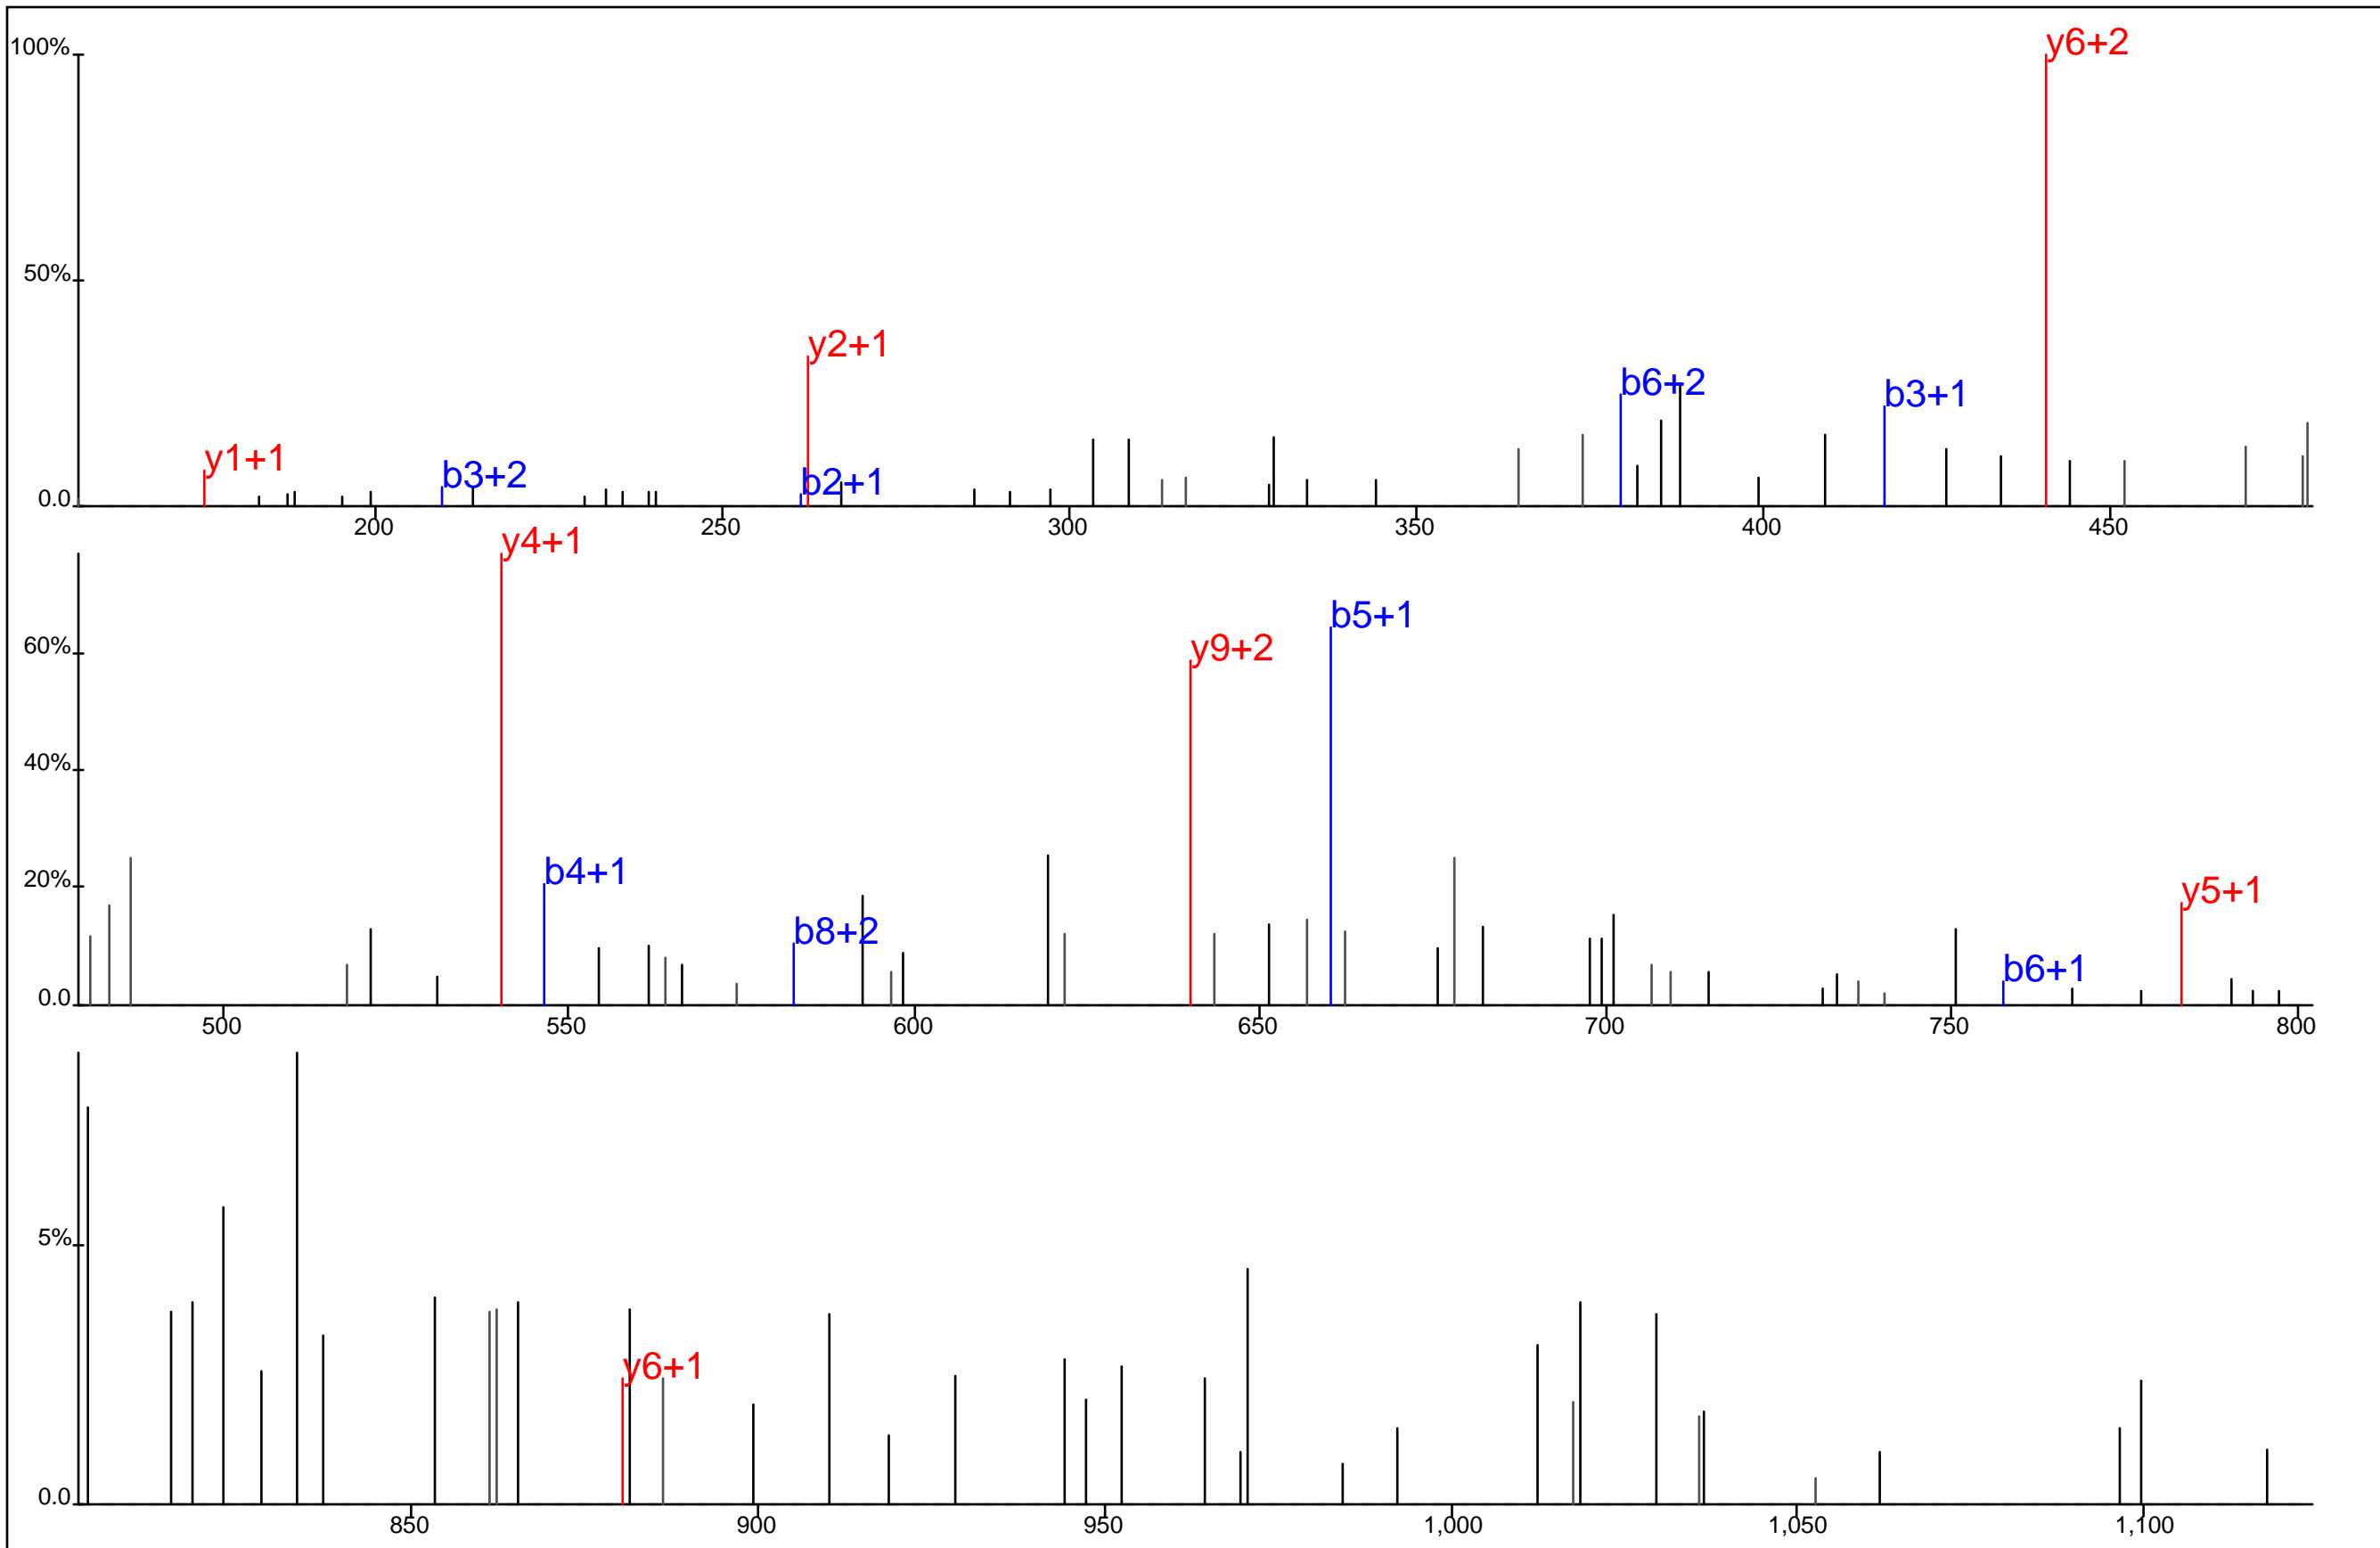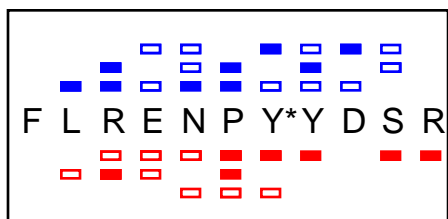

Protein Name: Clathrin, heavy polypeptide  
 gi Accession: 0  
 Precursor Mass: 513.8914+3  
 Delta Mass: 1.981 ppm  
 XCorr: 20.57



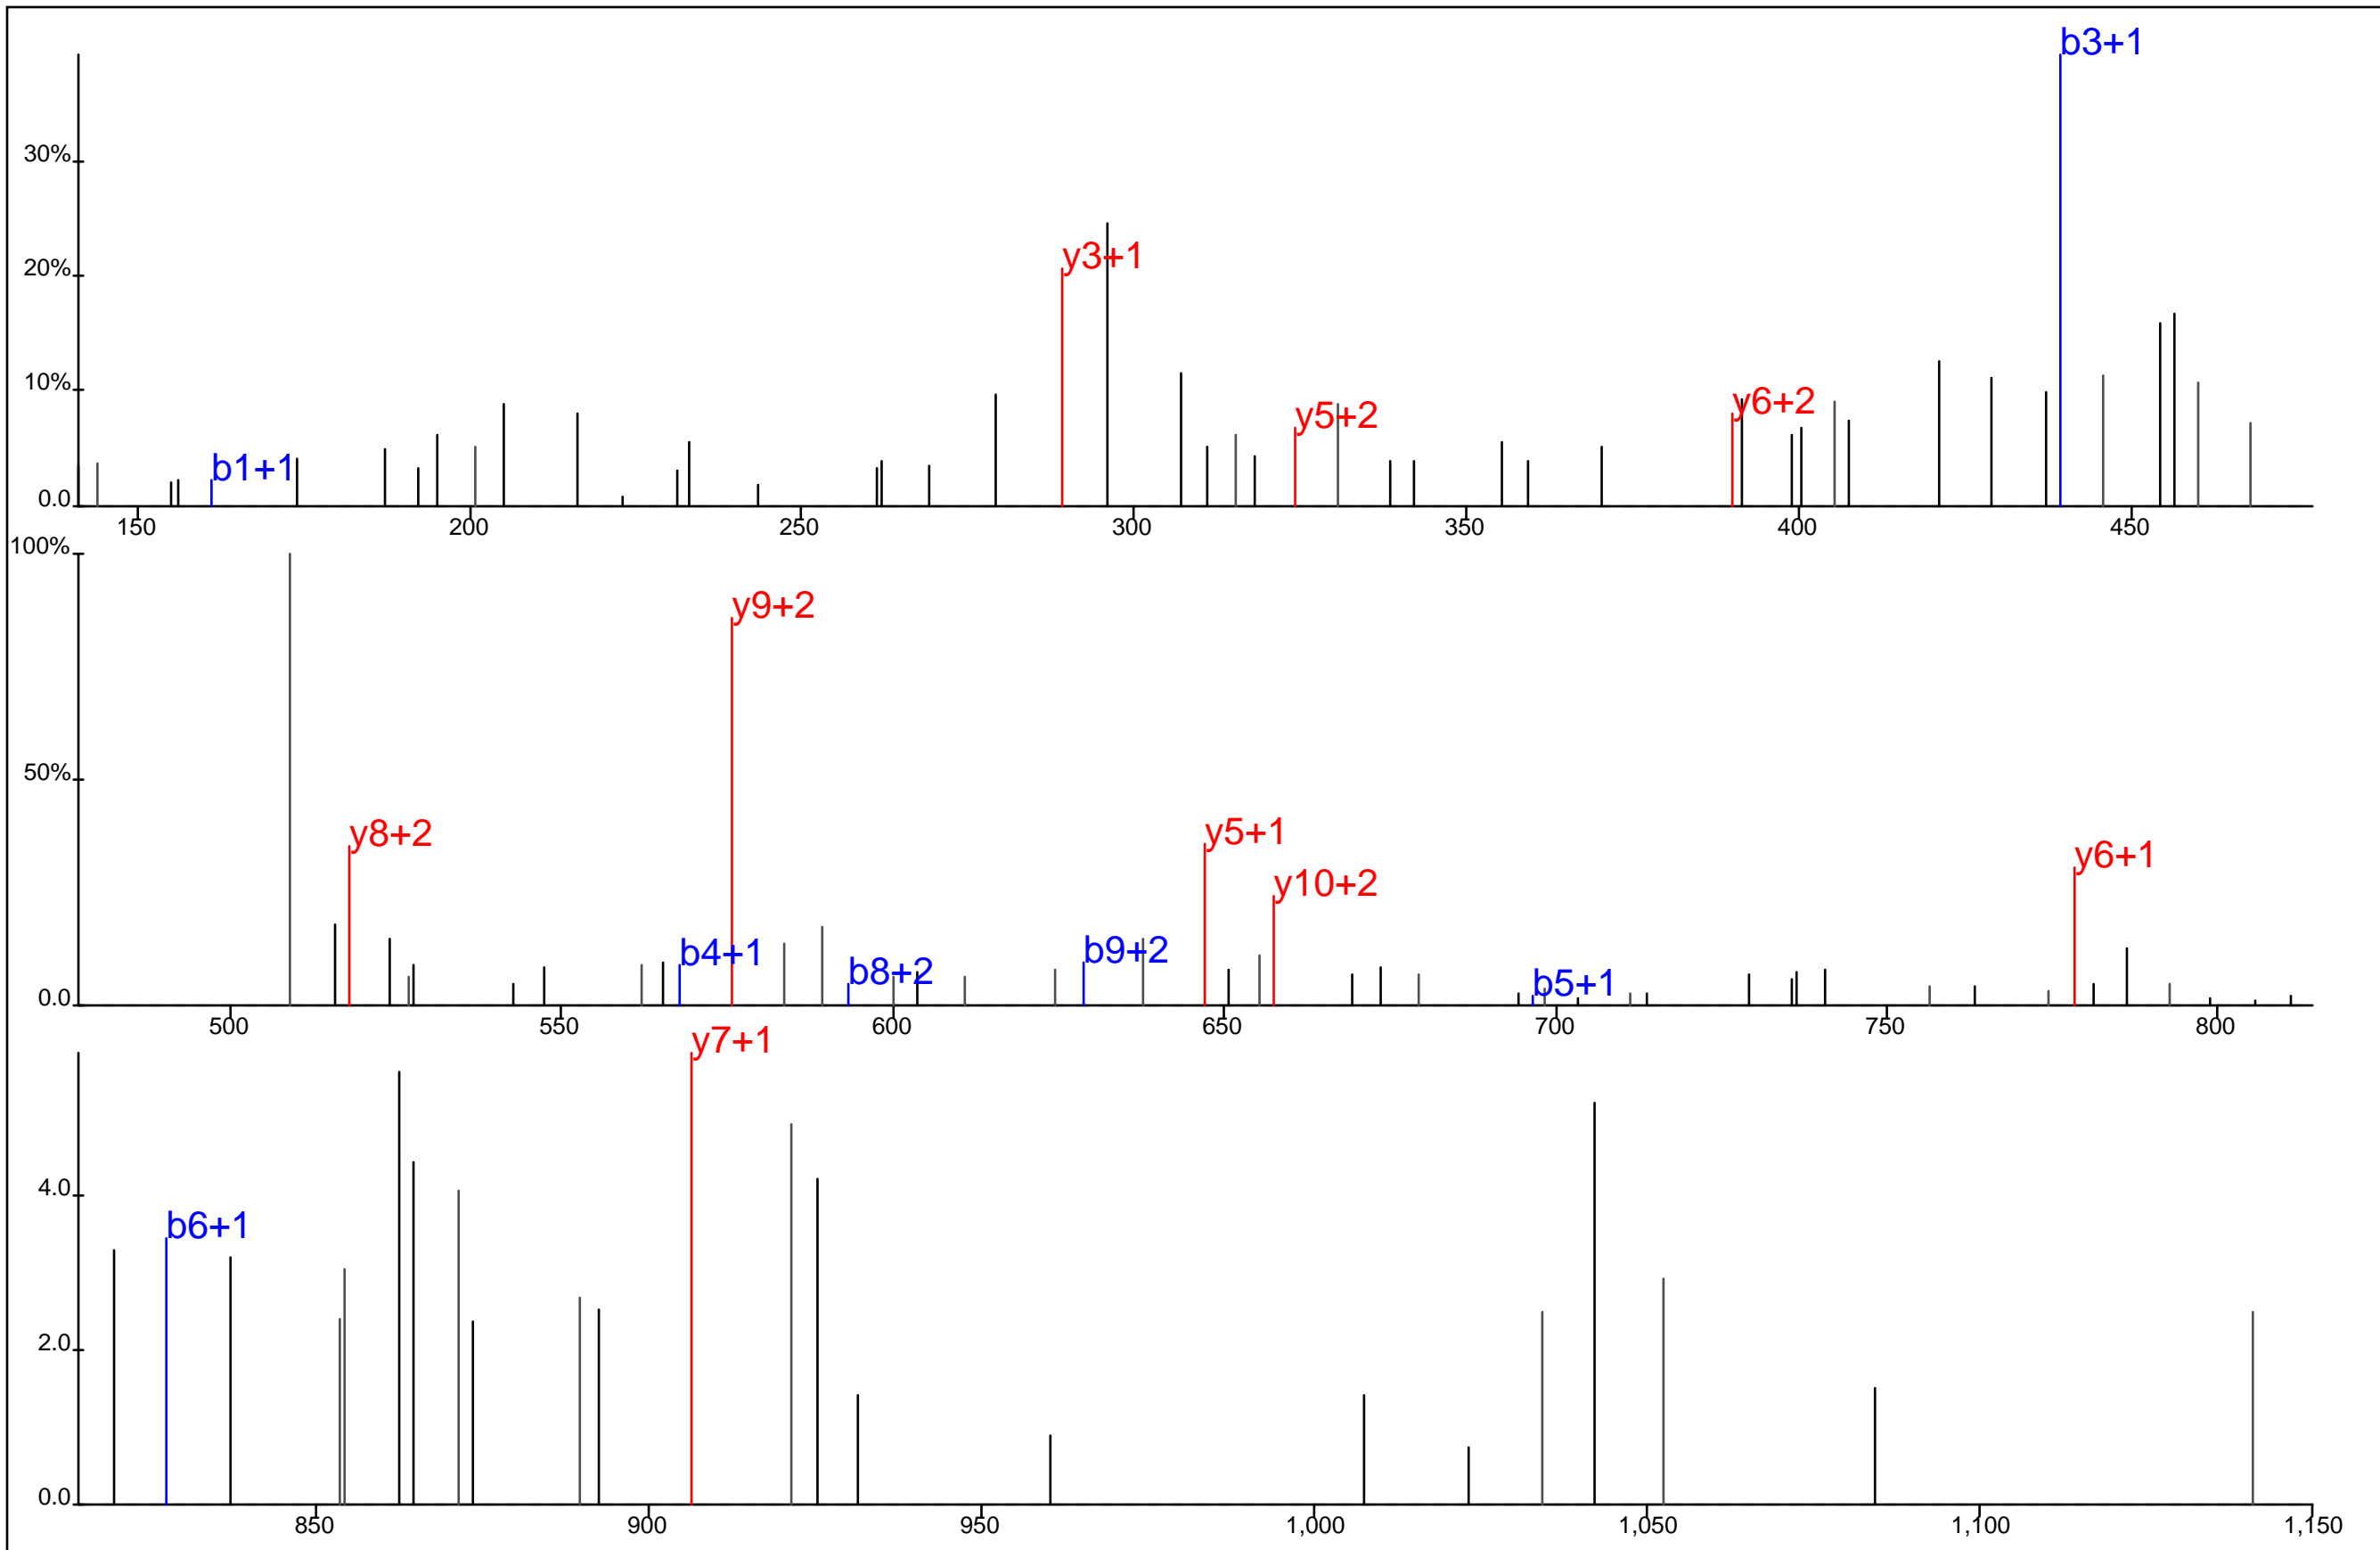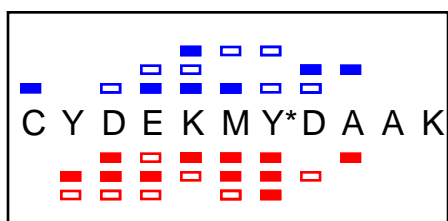

Protein Name: Clathrin, heavy polypeptide  
 gi Accession: 0  
 Precursor Mass: 491.8522+3  
 Delta Mass: 0.336 ppm  
 XCorr: 21.09



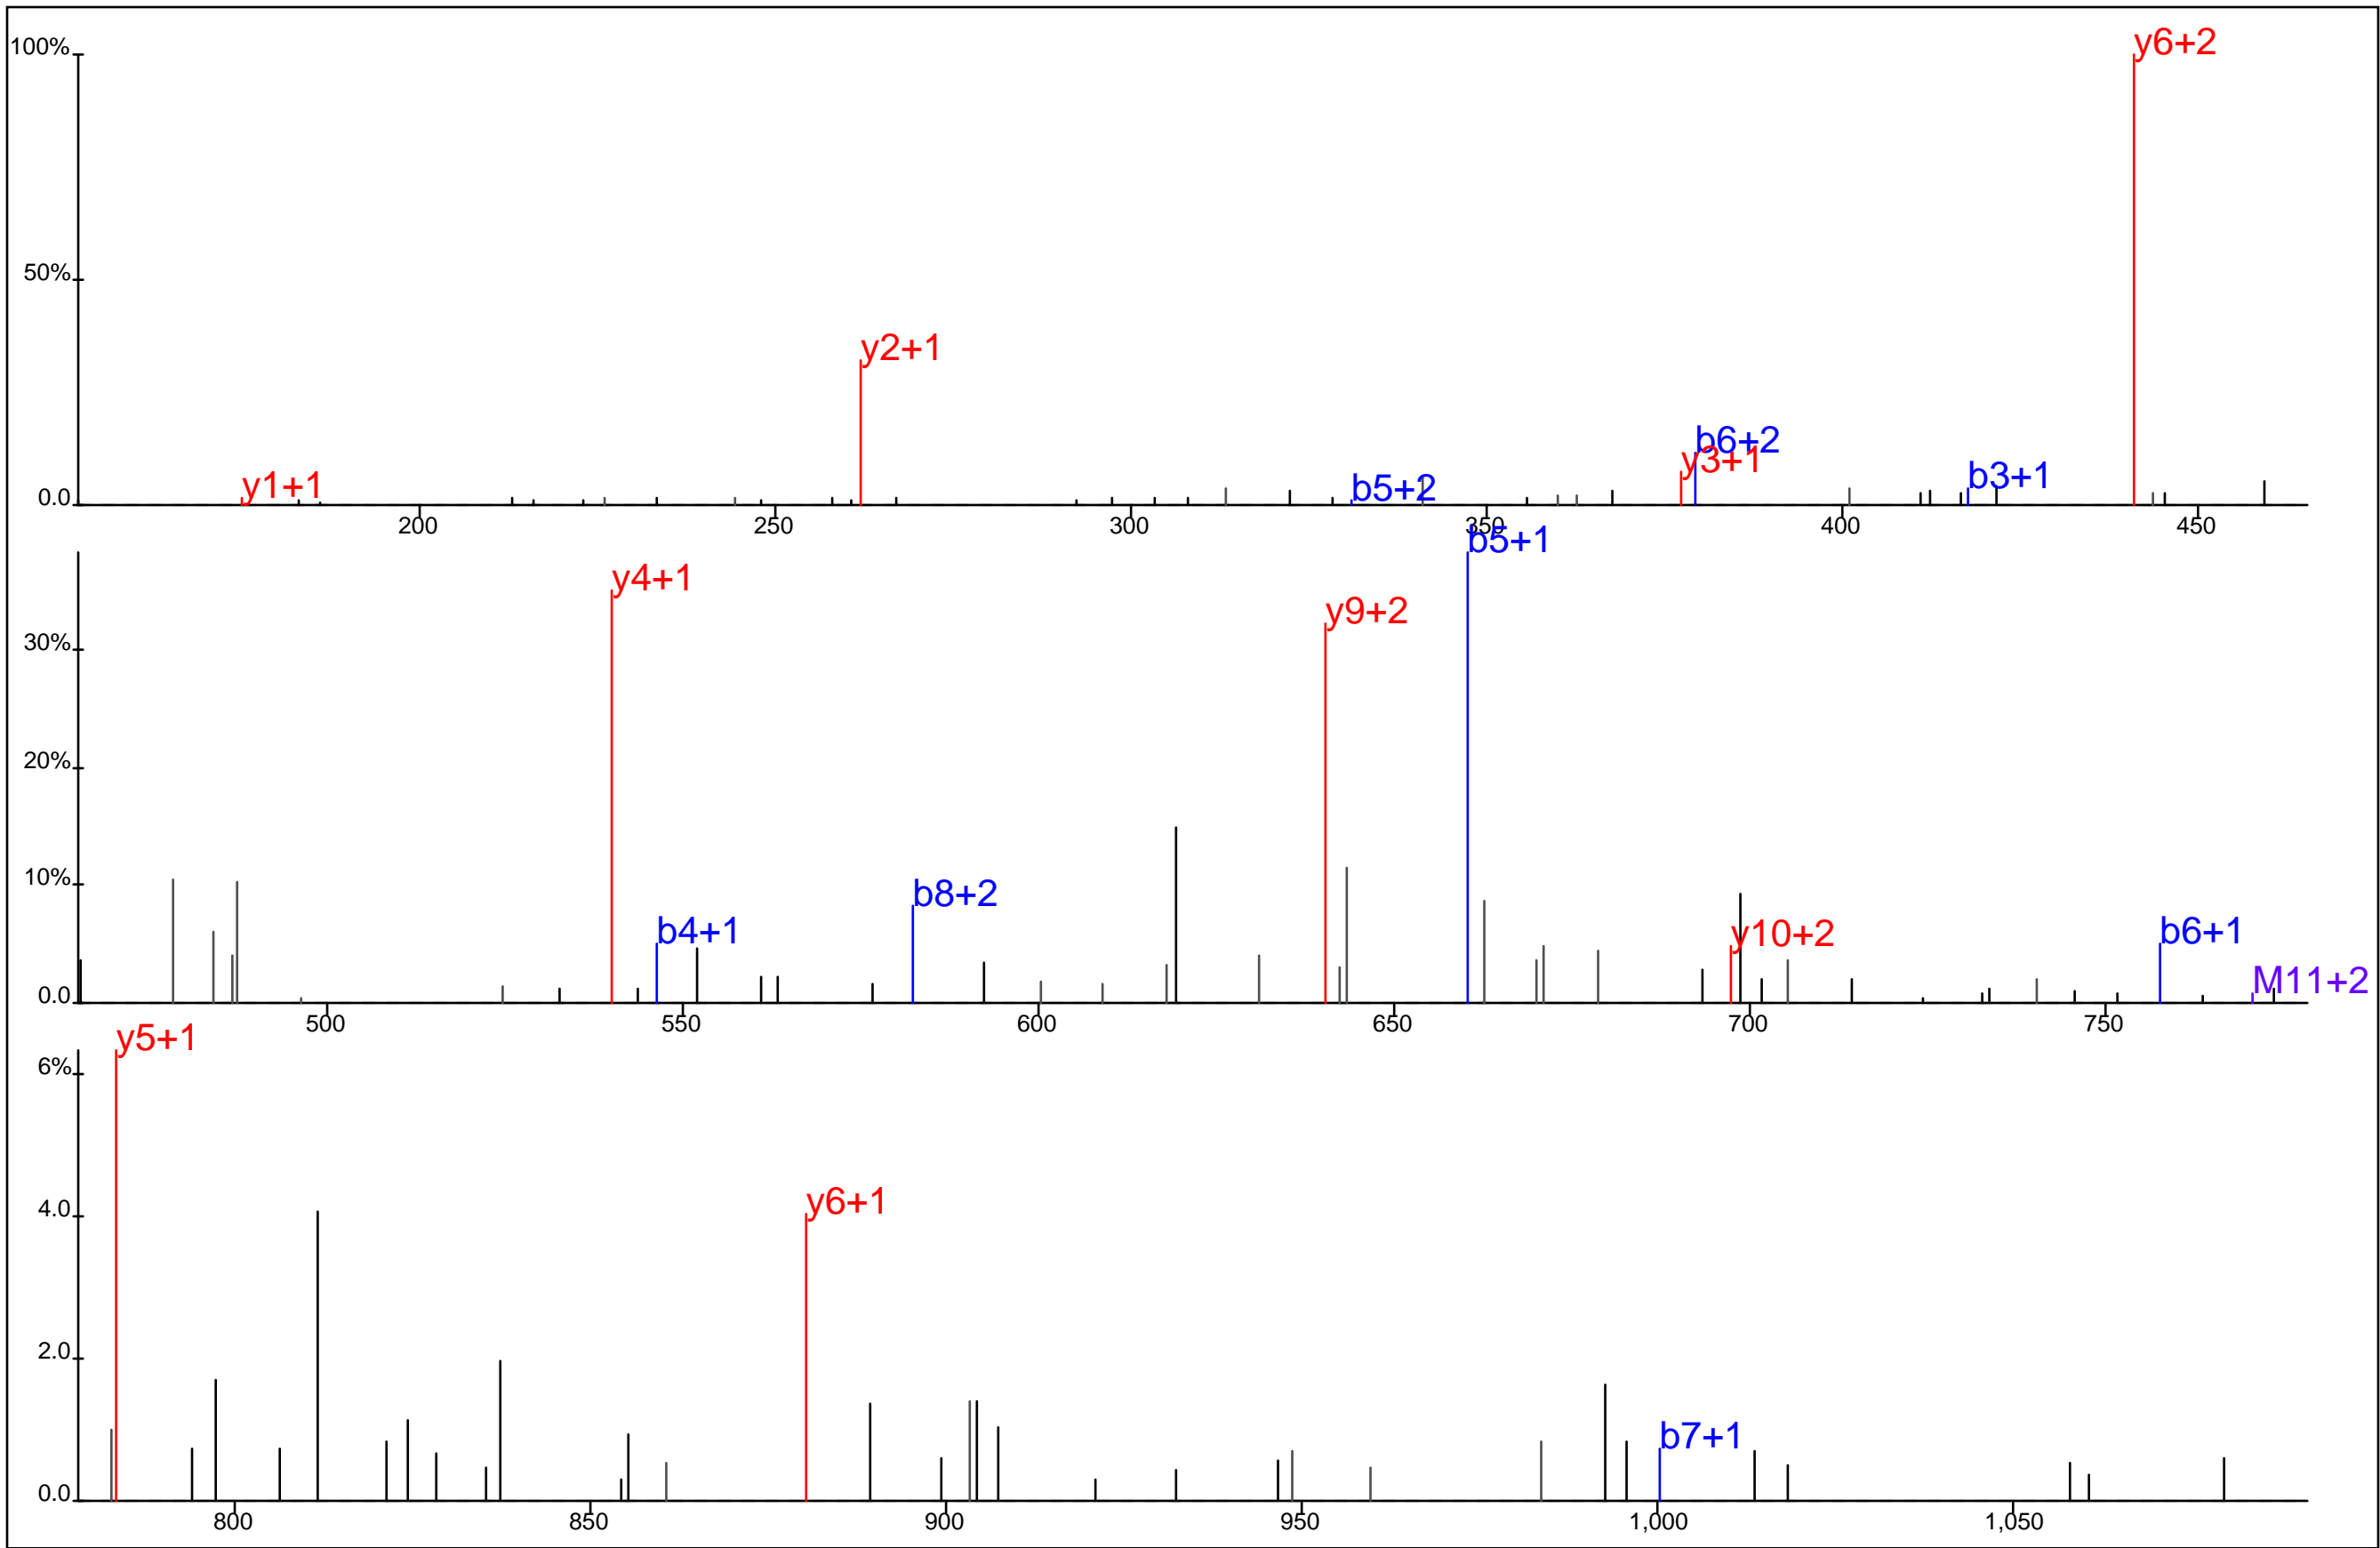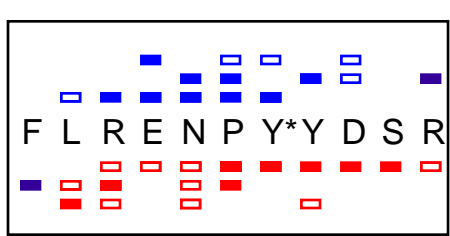

Protein Name: Clathrin, heavy polypeptide  
 gi Accession: 0  
 Precursor Mass: 513.8920+3  
 Delta Mass: 0.790 ppm  
 XCorr: 27.39

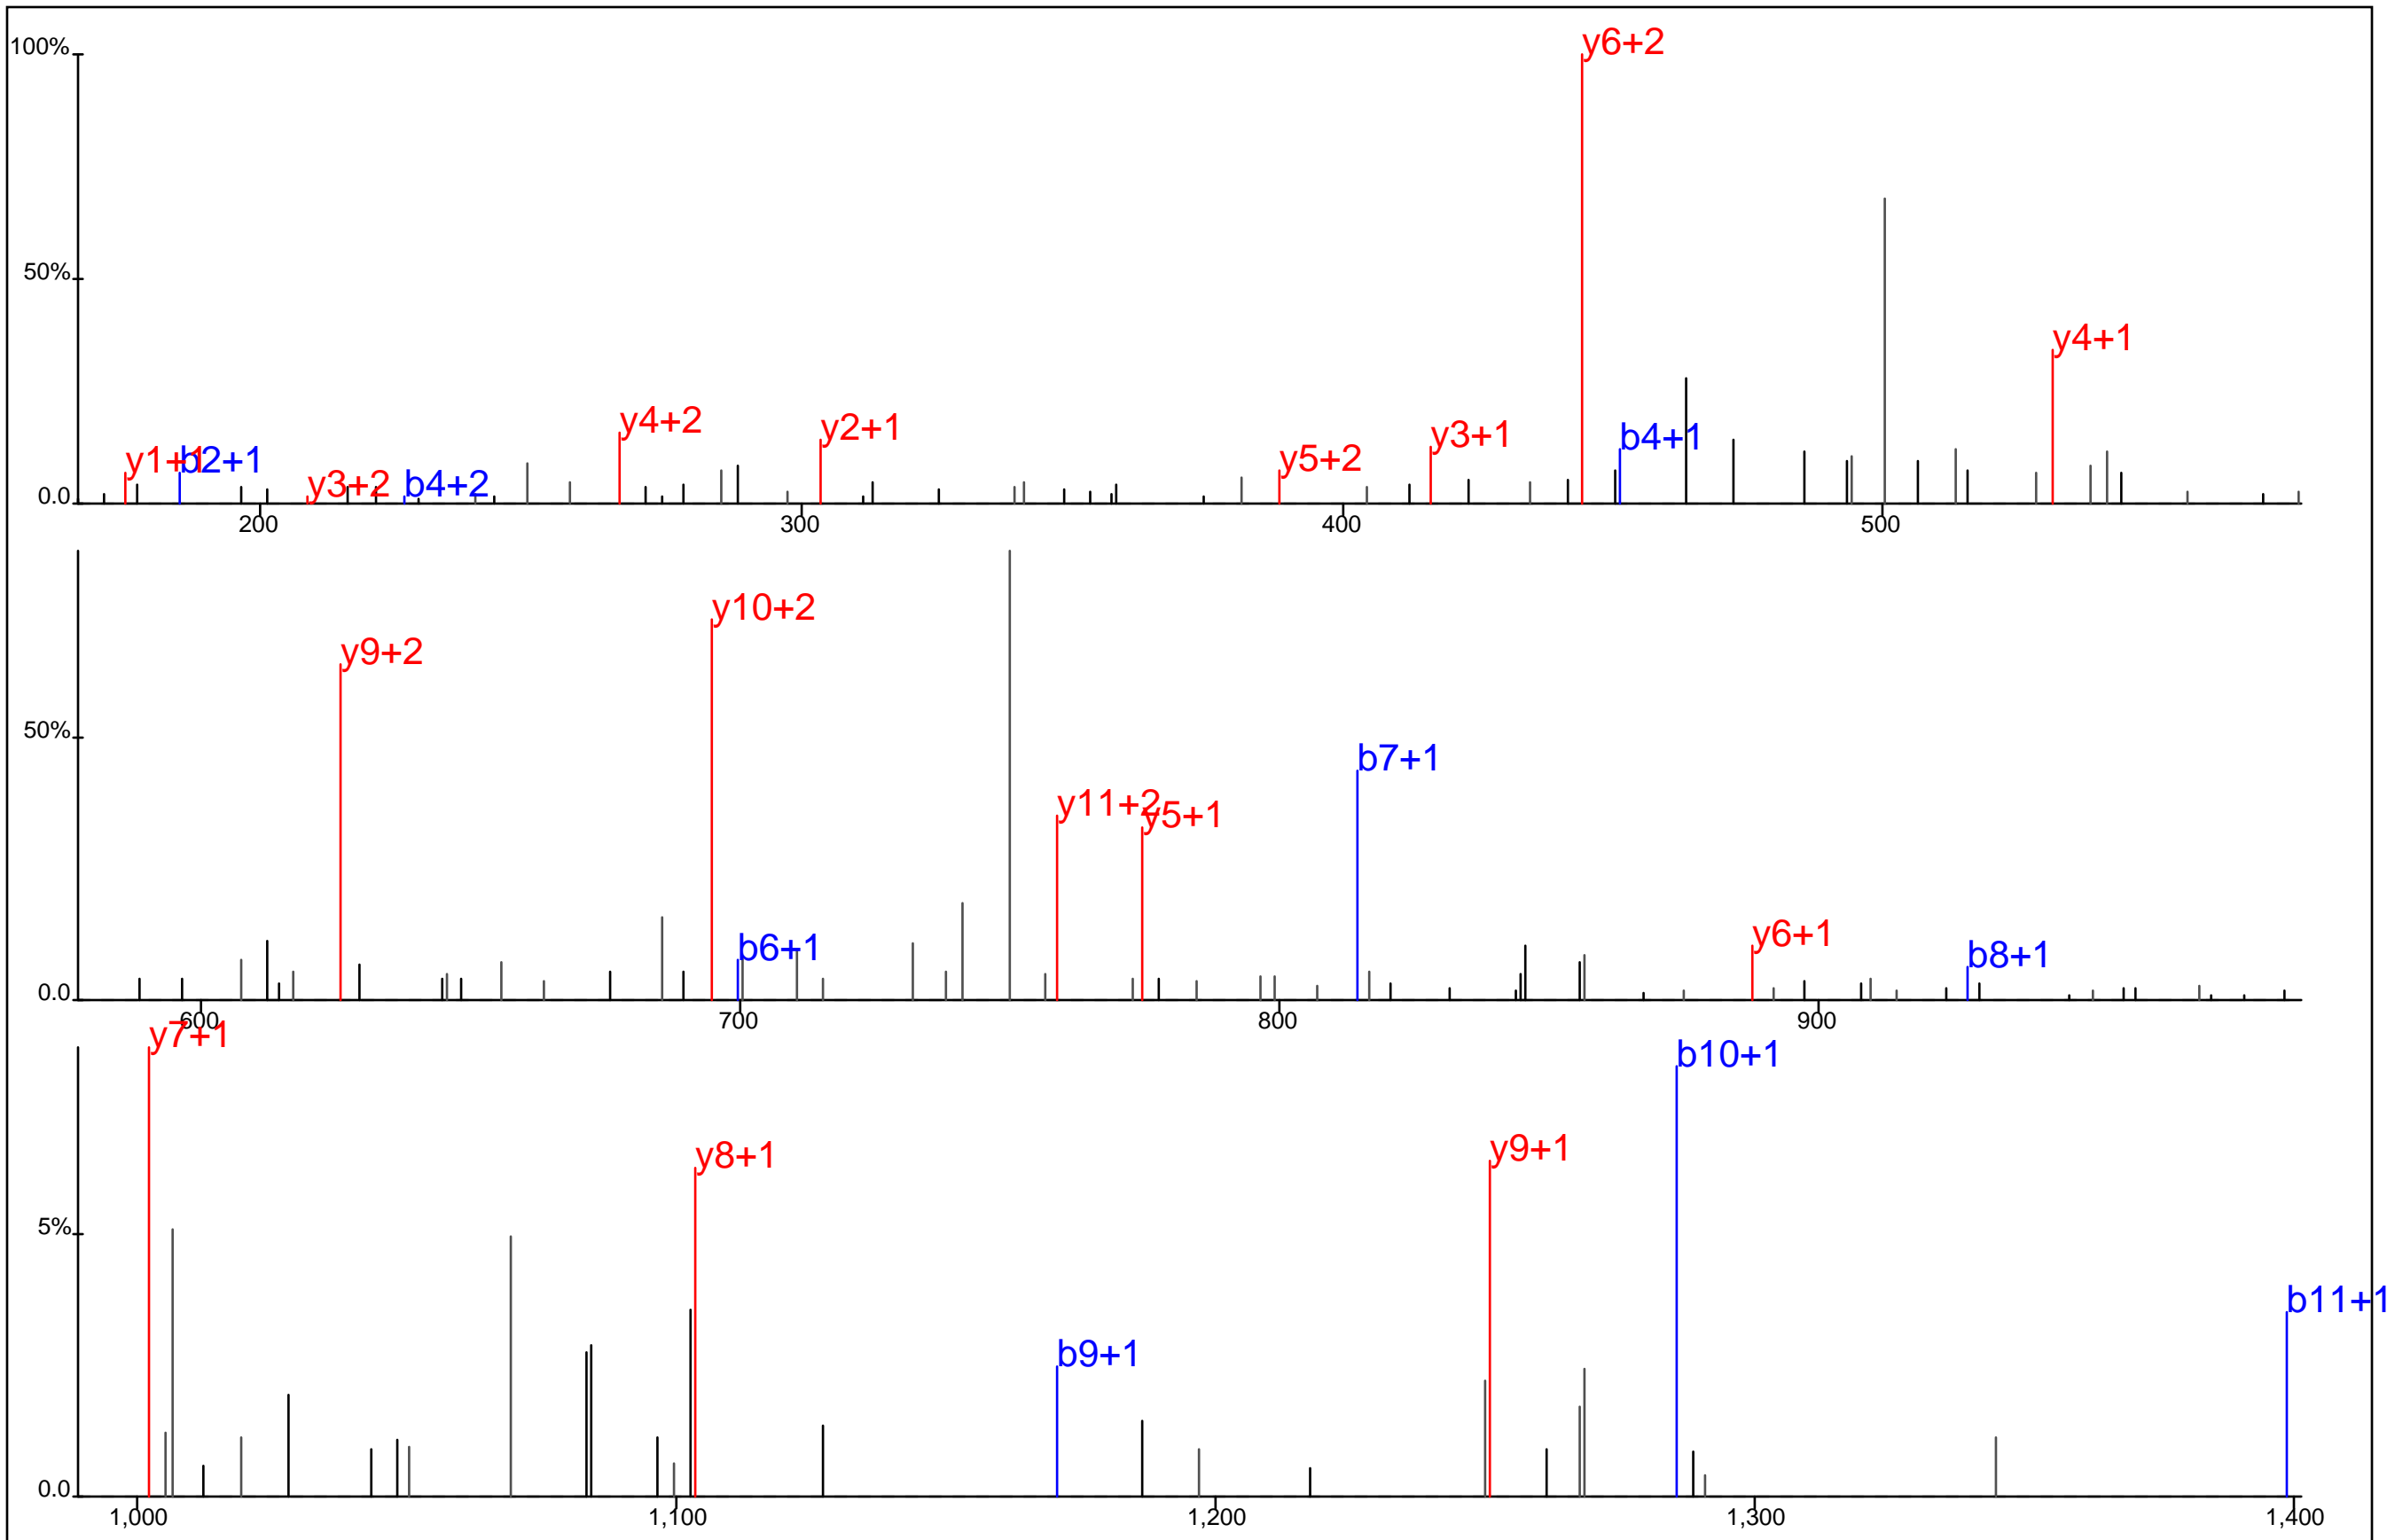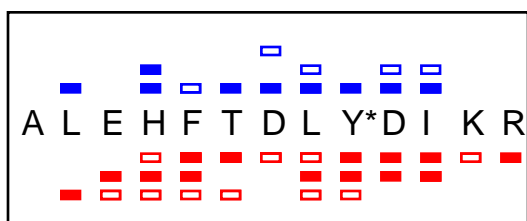

Protein Name: Clathrin, heavy polypeptide  
 gi Accession: 0  
 Precursor Mass: 567.6049+3  
 Delta Mass: 2.426 ppm  
 XCorr: 55.98

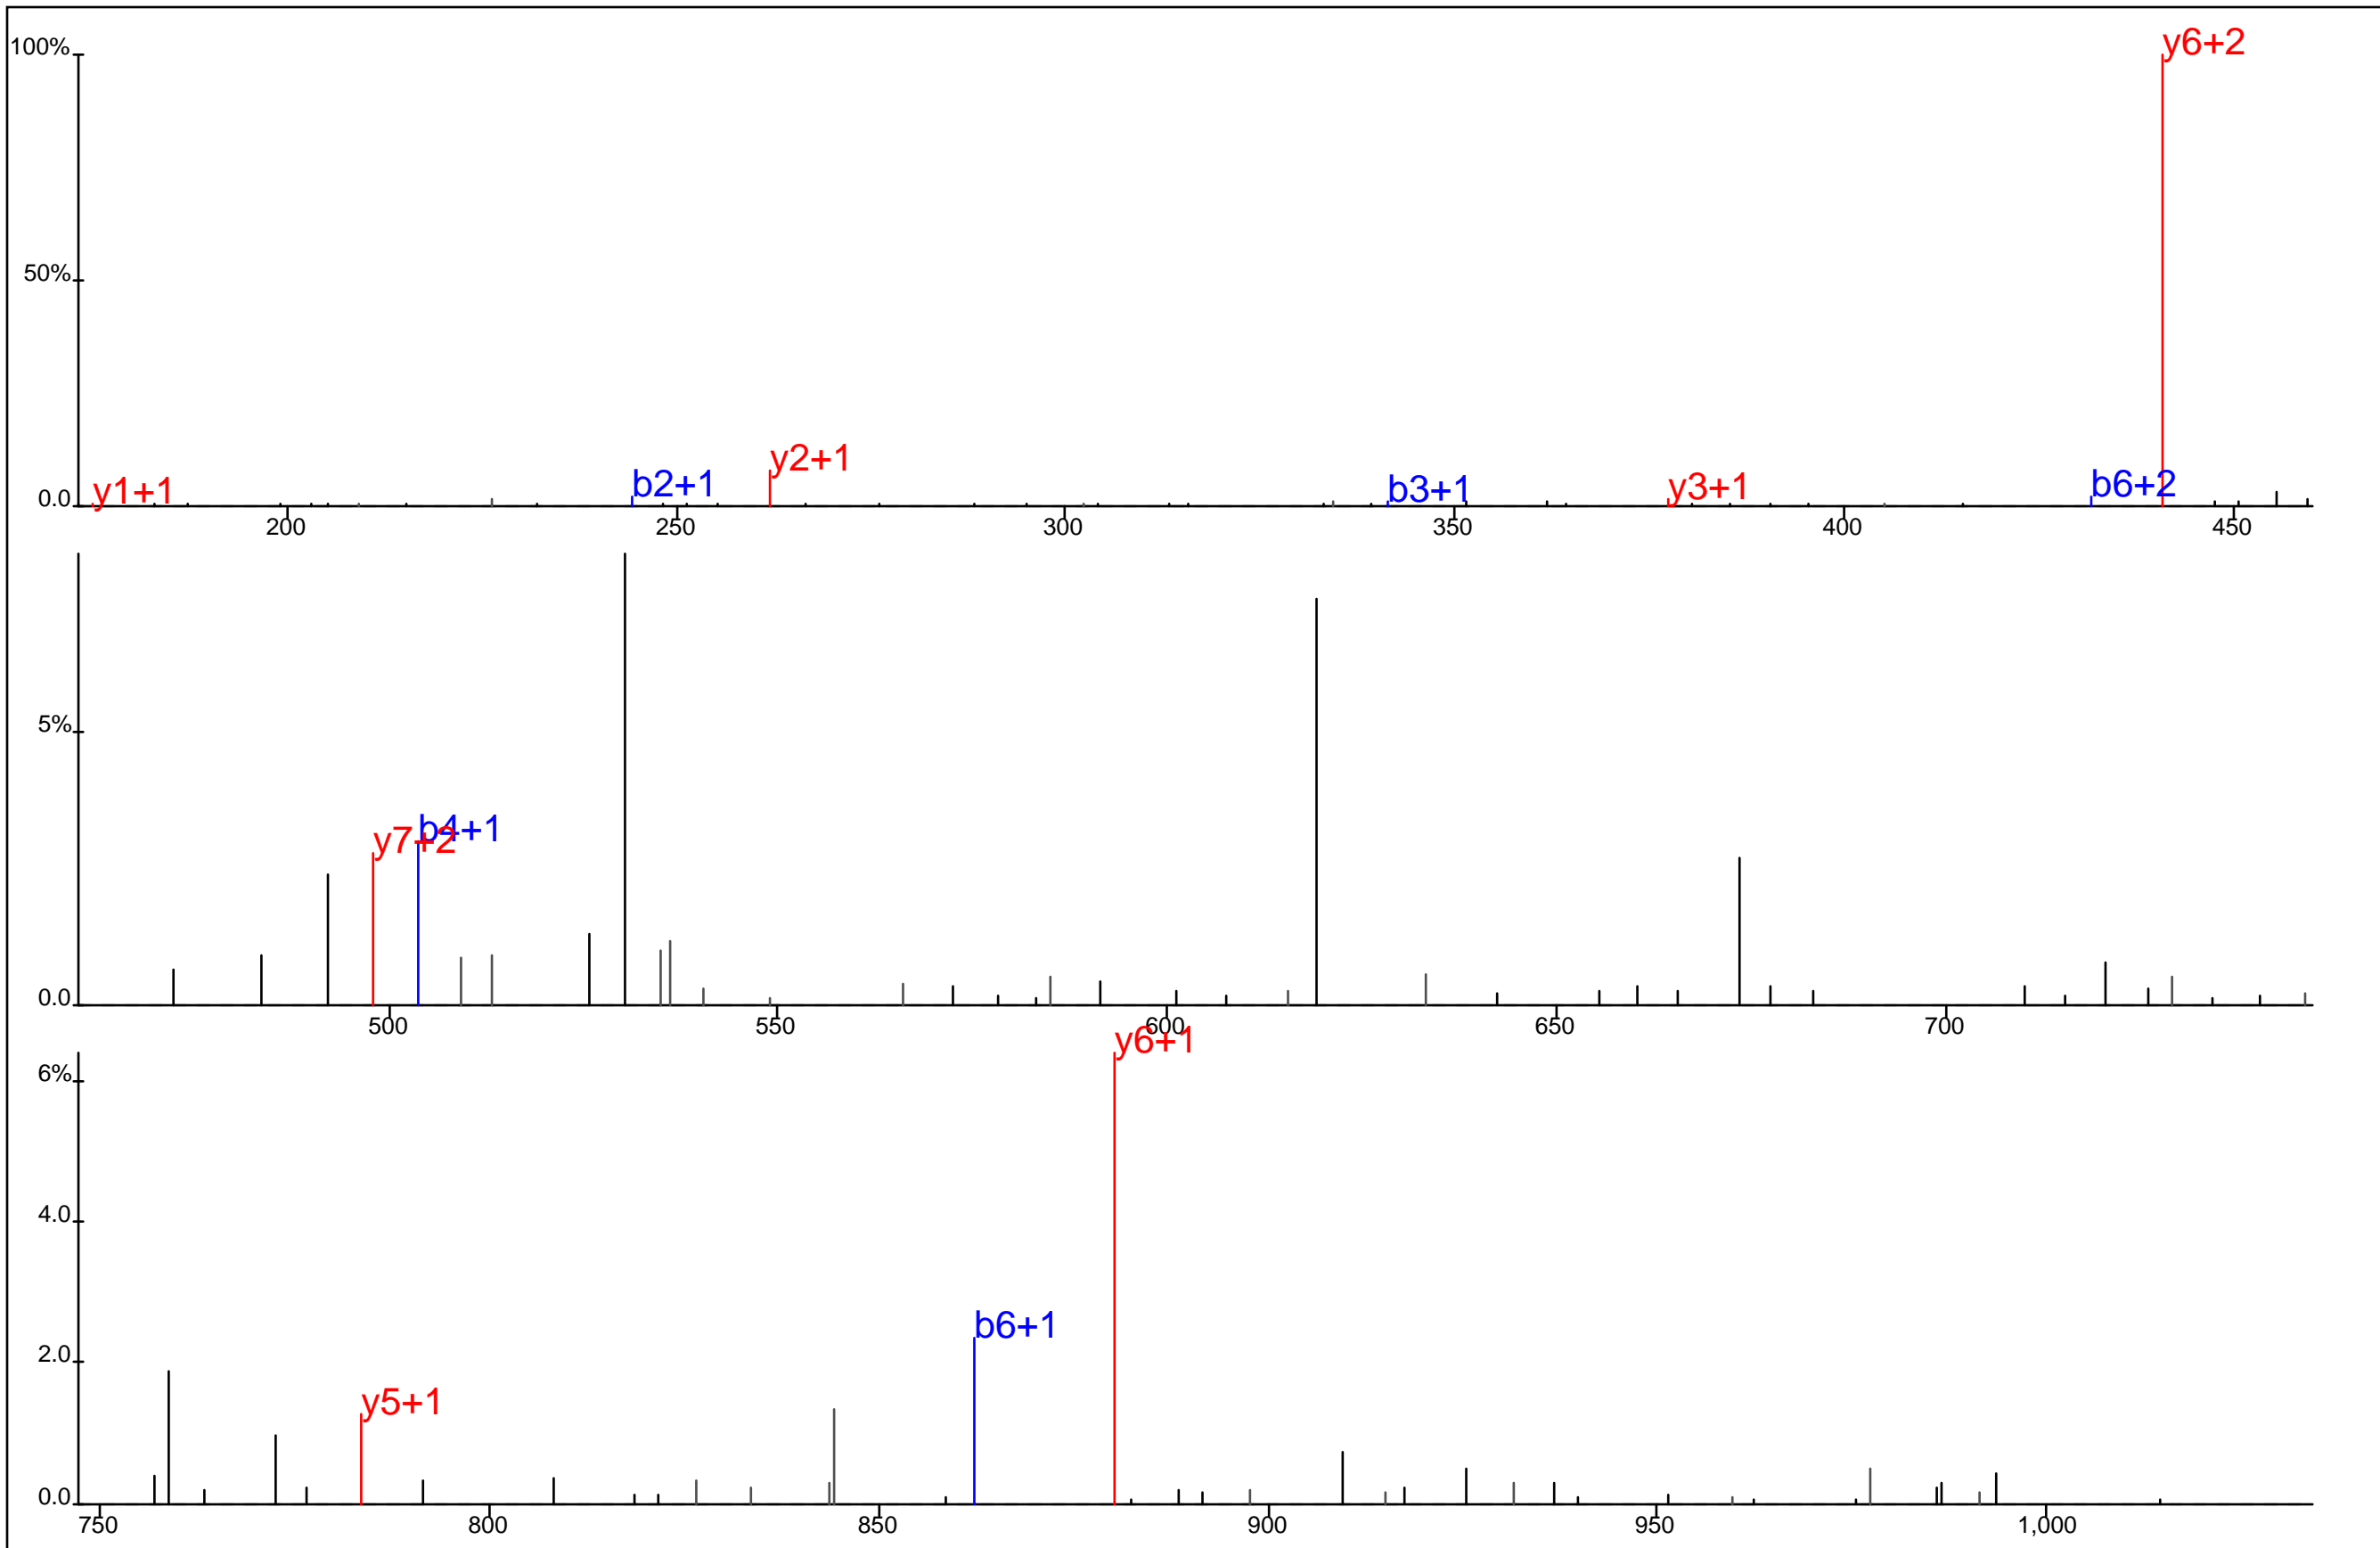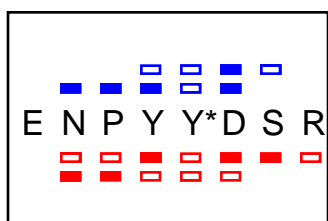

Protein Name: Clathrin, heavy polypeptide  
 gi Accession: 0  
 Precursor Mass: 562.2083+2  
 Delta Mass: 0.167 ppm  
 XCorr: 21.12

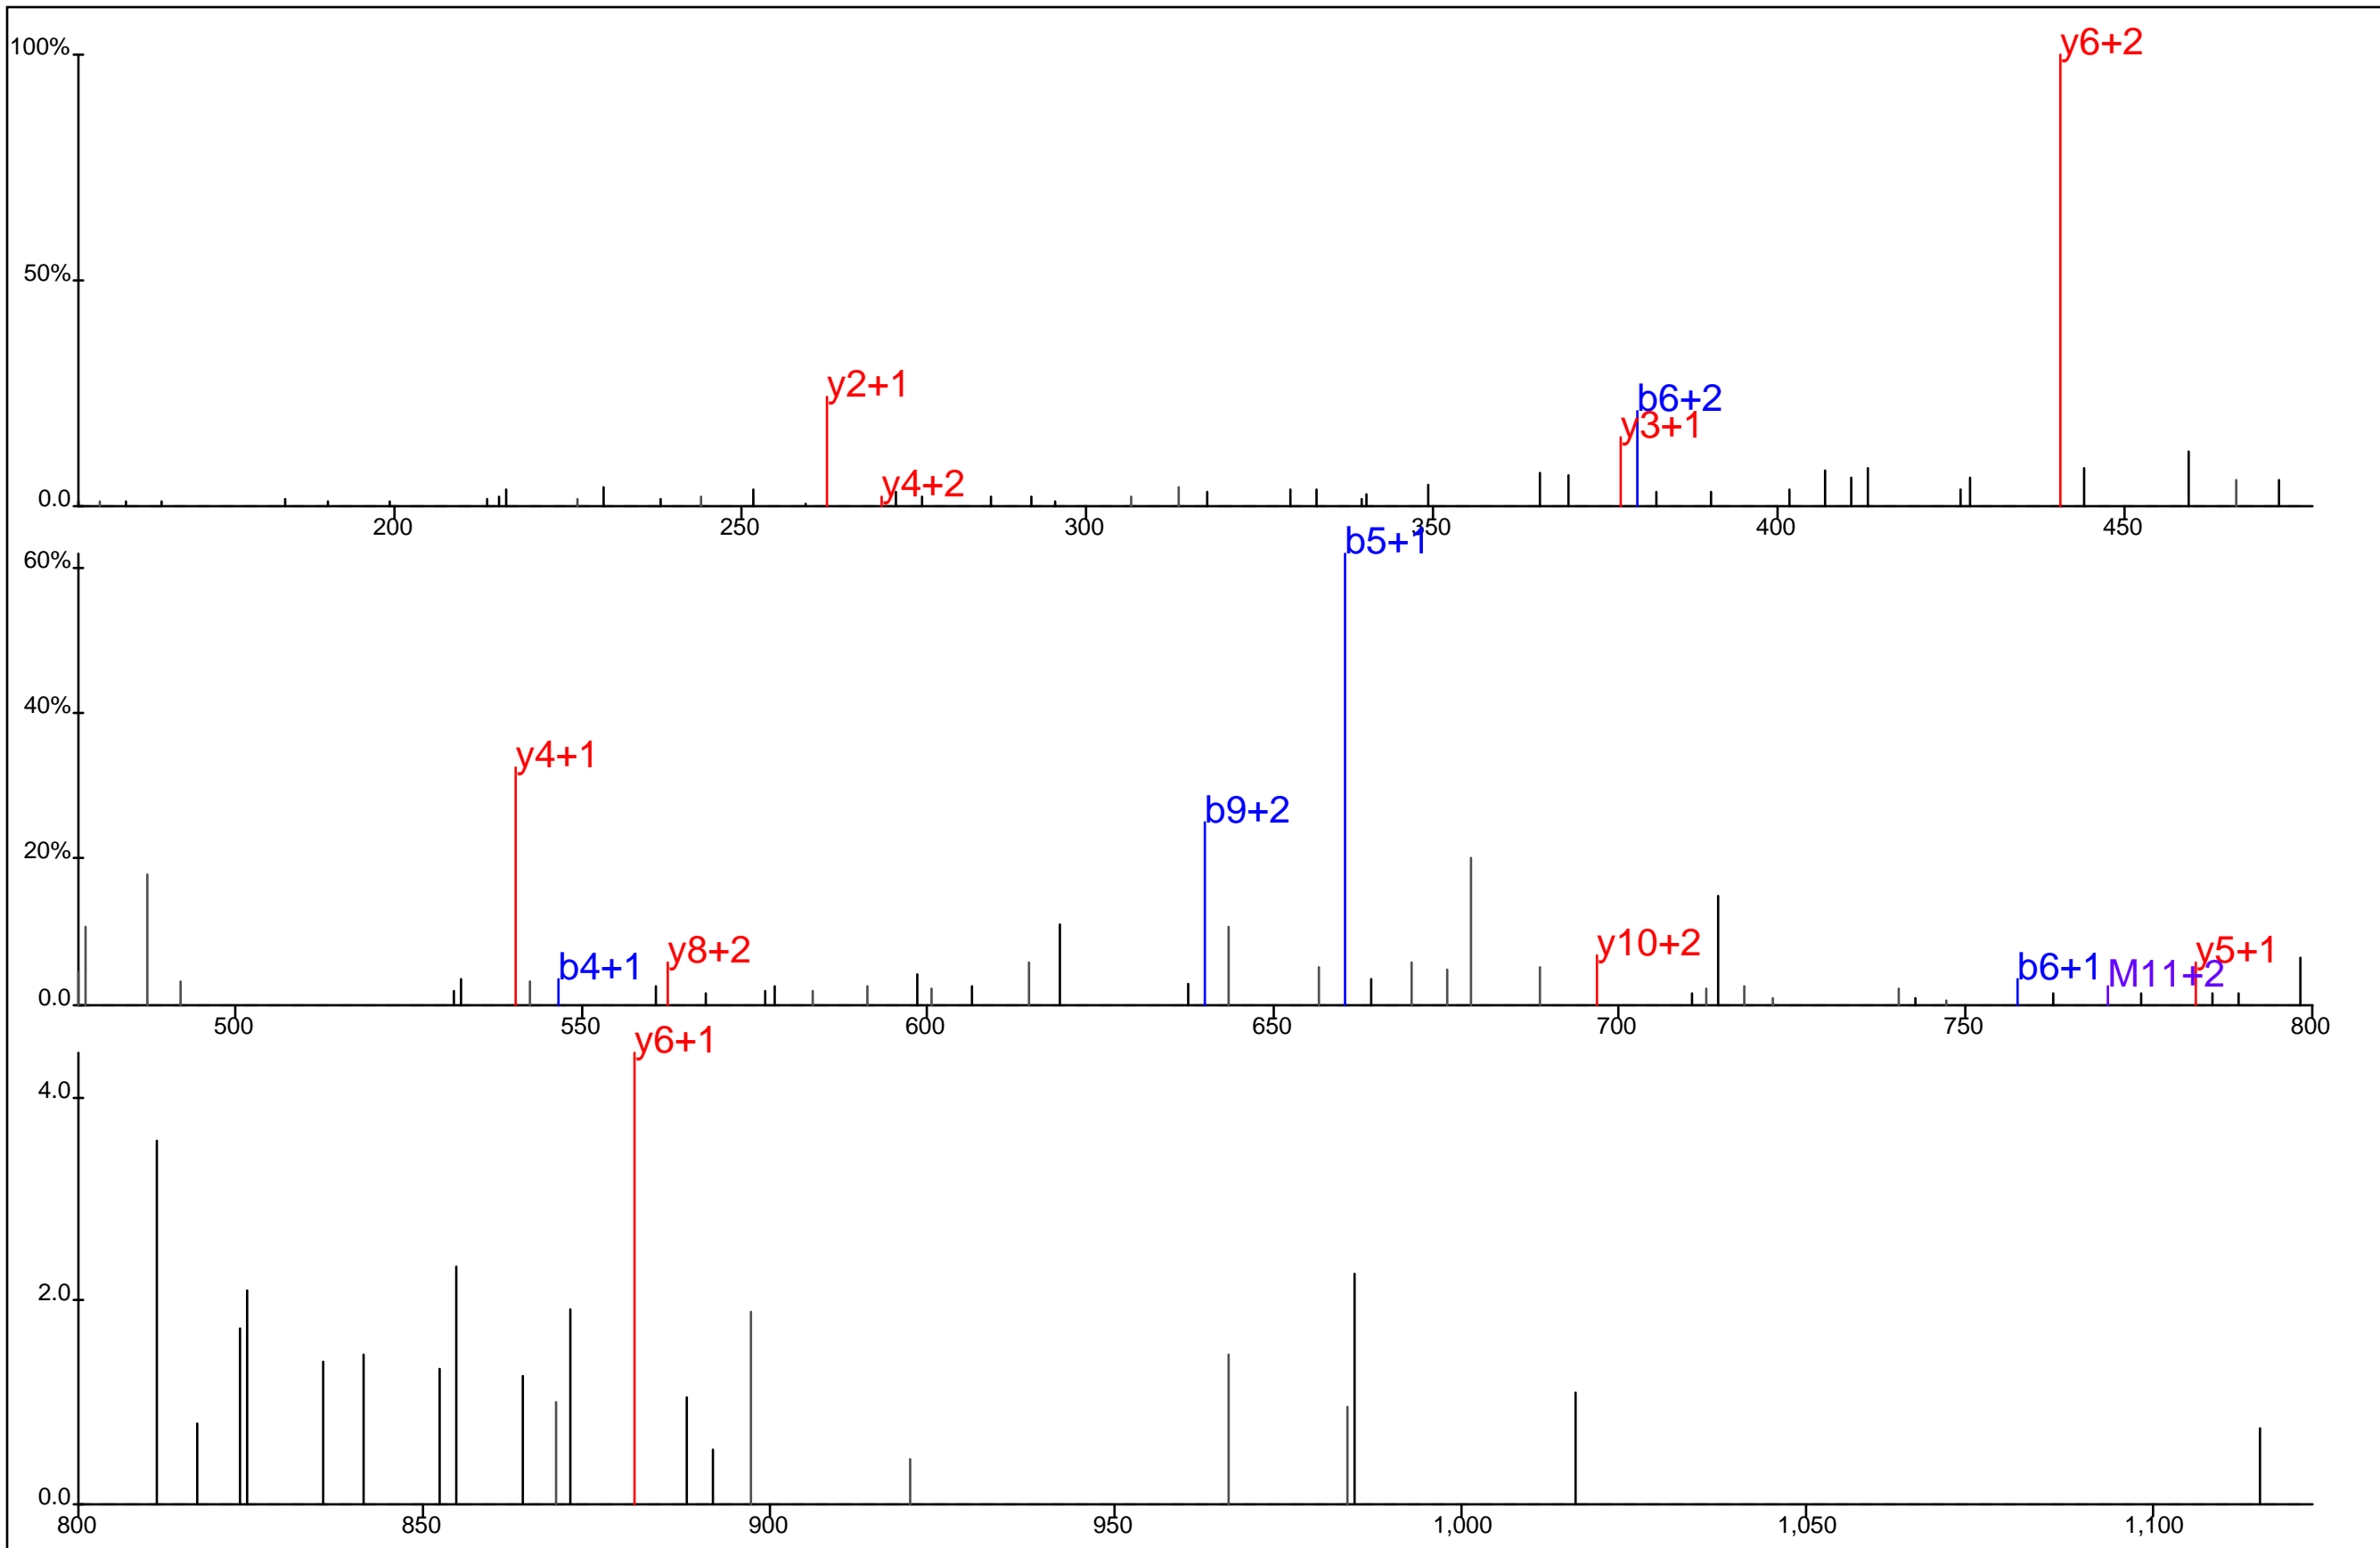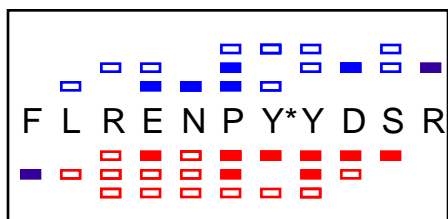

Protein Name: Clathrin, heavy polypeptide  
 gi Accession: 0  
 Precursor Mass: 513.8920+3  
 Delta Mass: 0.790 ppm  
 XCorr: 21.87

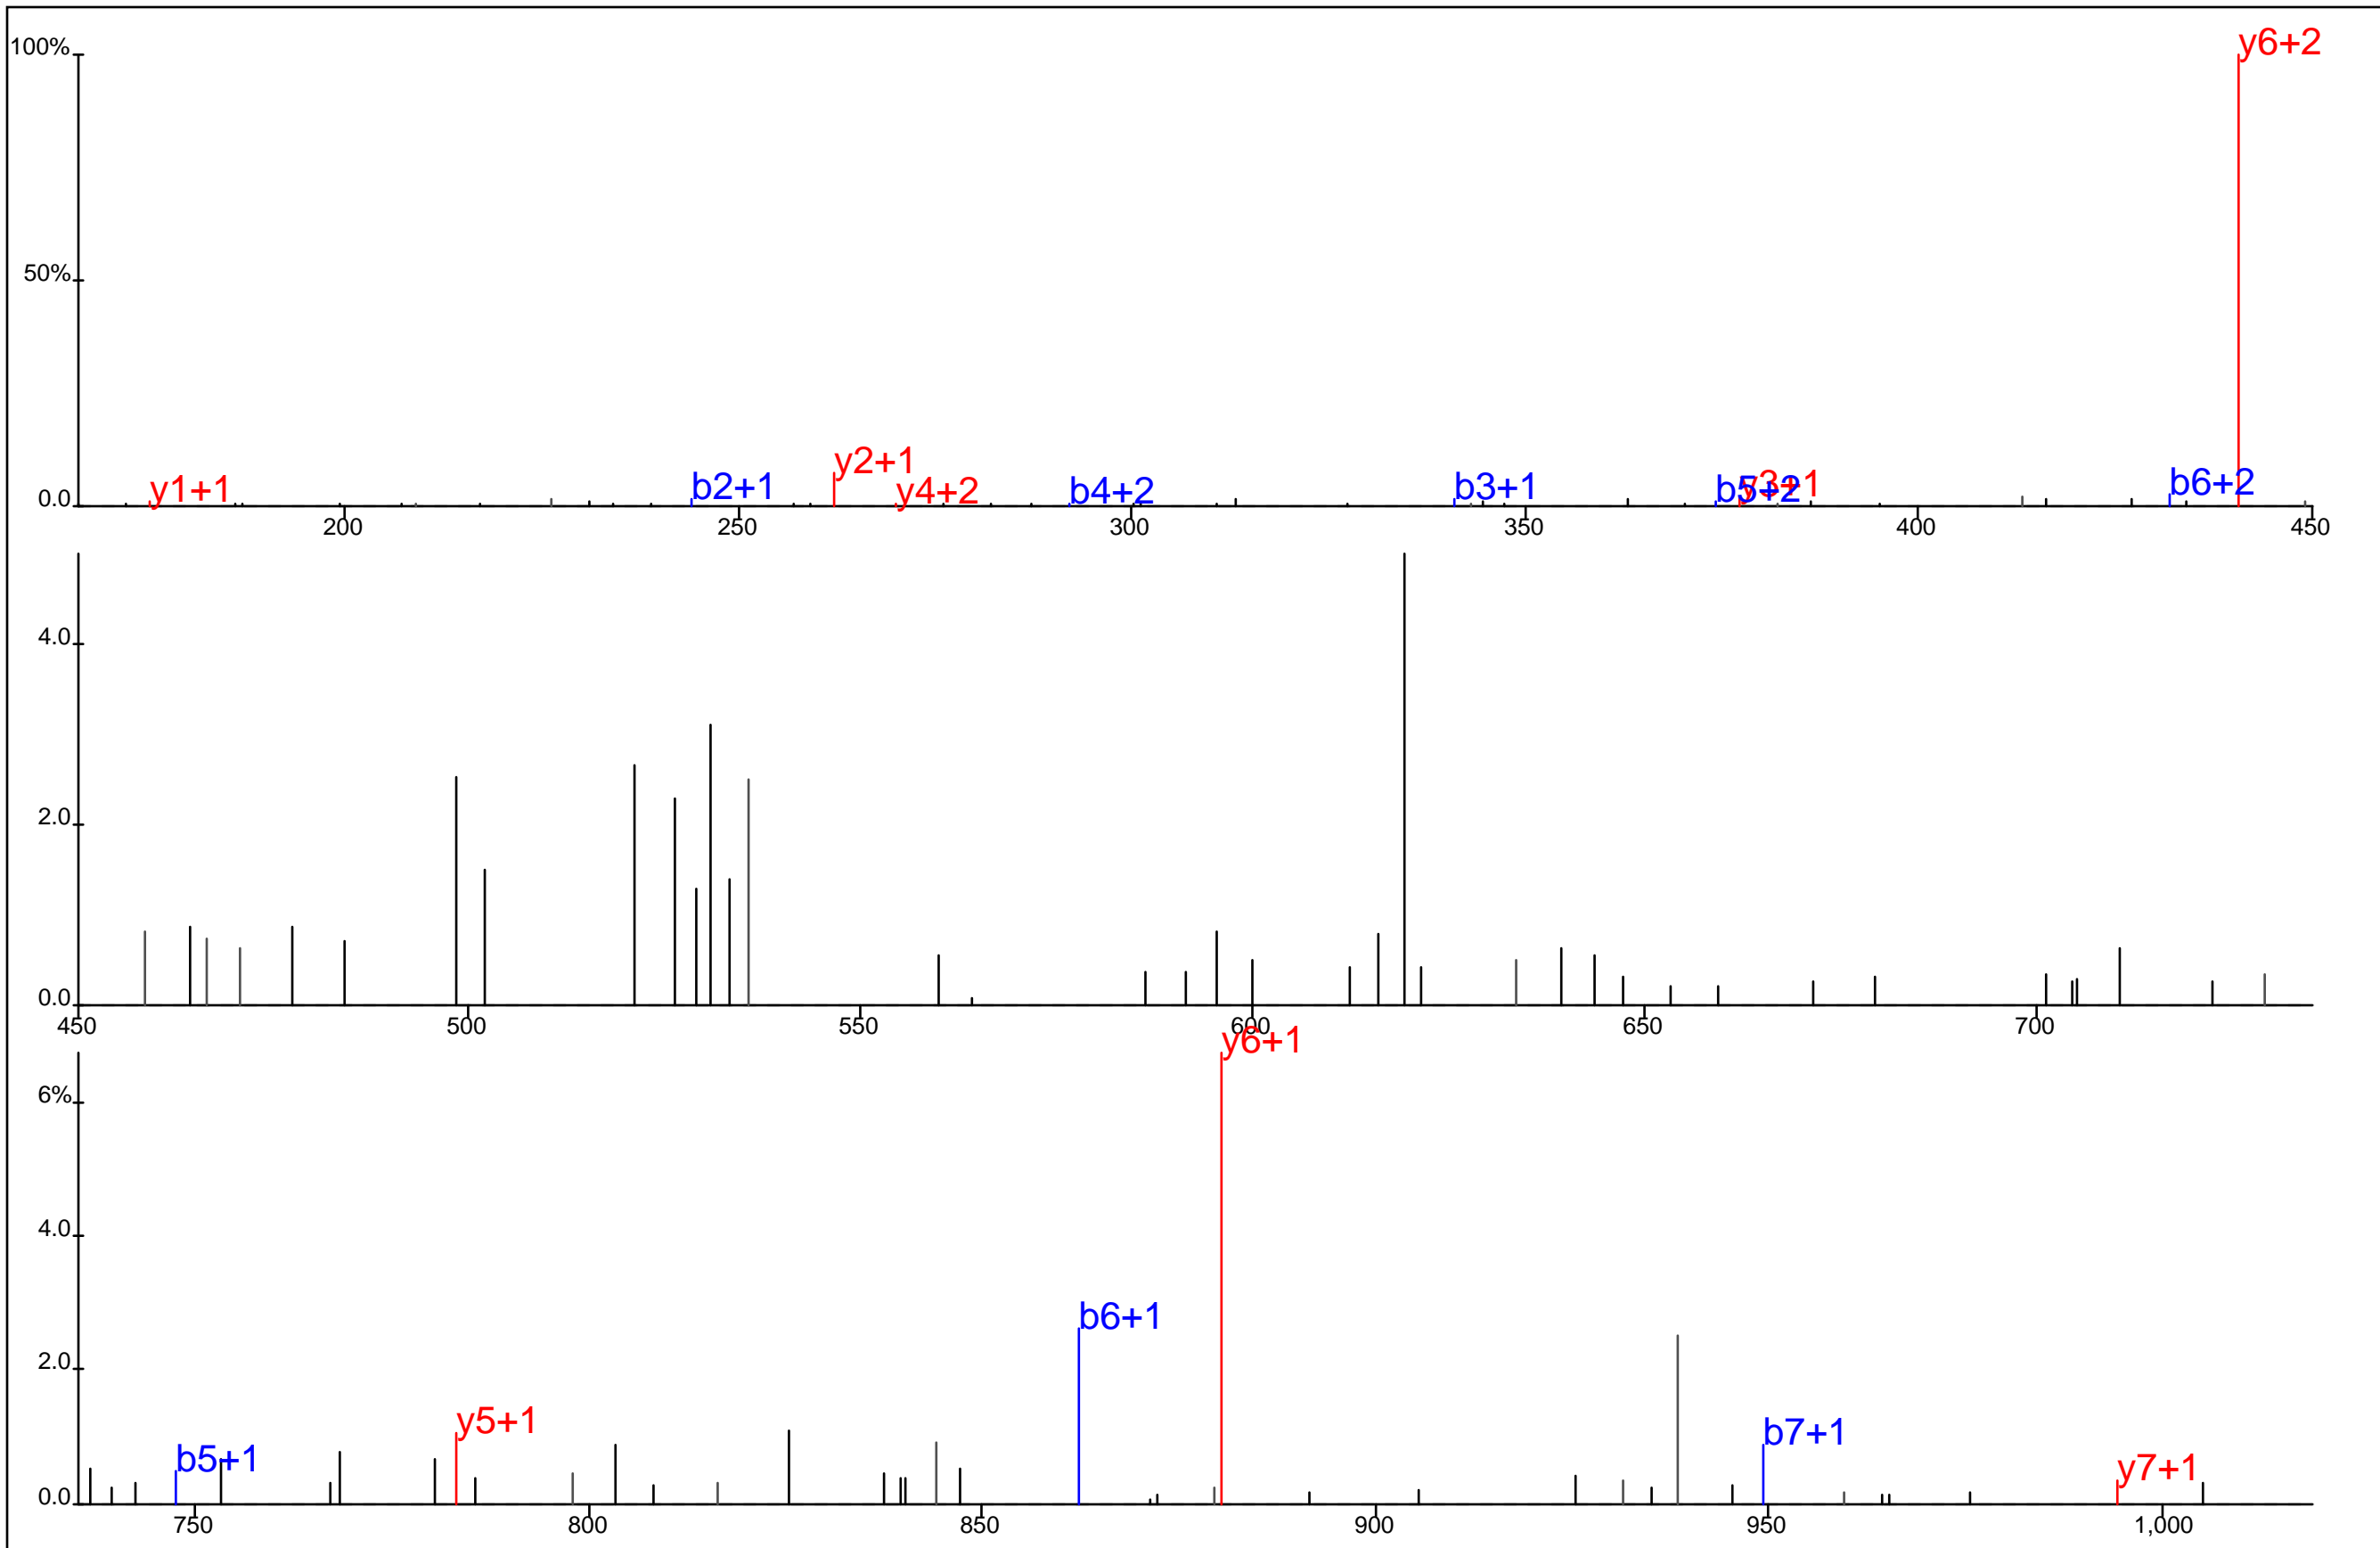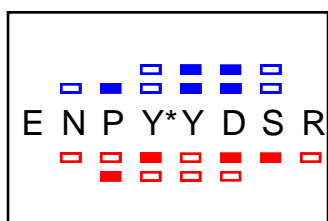

Protein Name: Clathrin, heavy polypeptide  
 gi Accession: 0  
 Precursor Mass: 562.2069+2  
 Delta Mass: 2.332 ppm  
 XCorr: 26.56



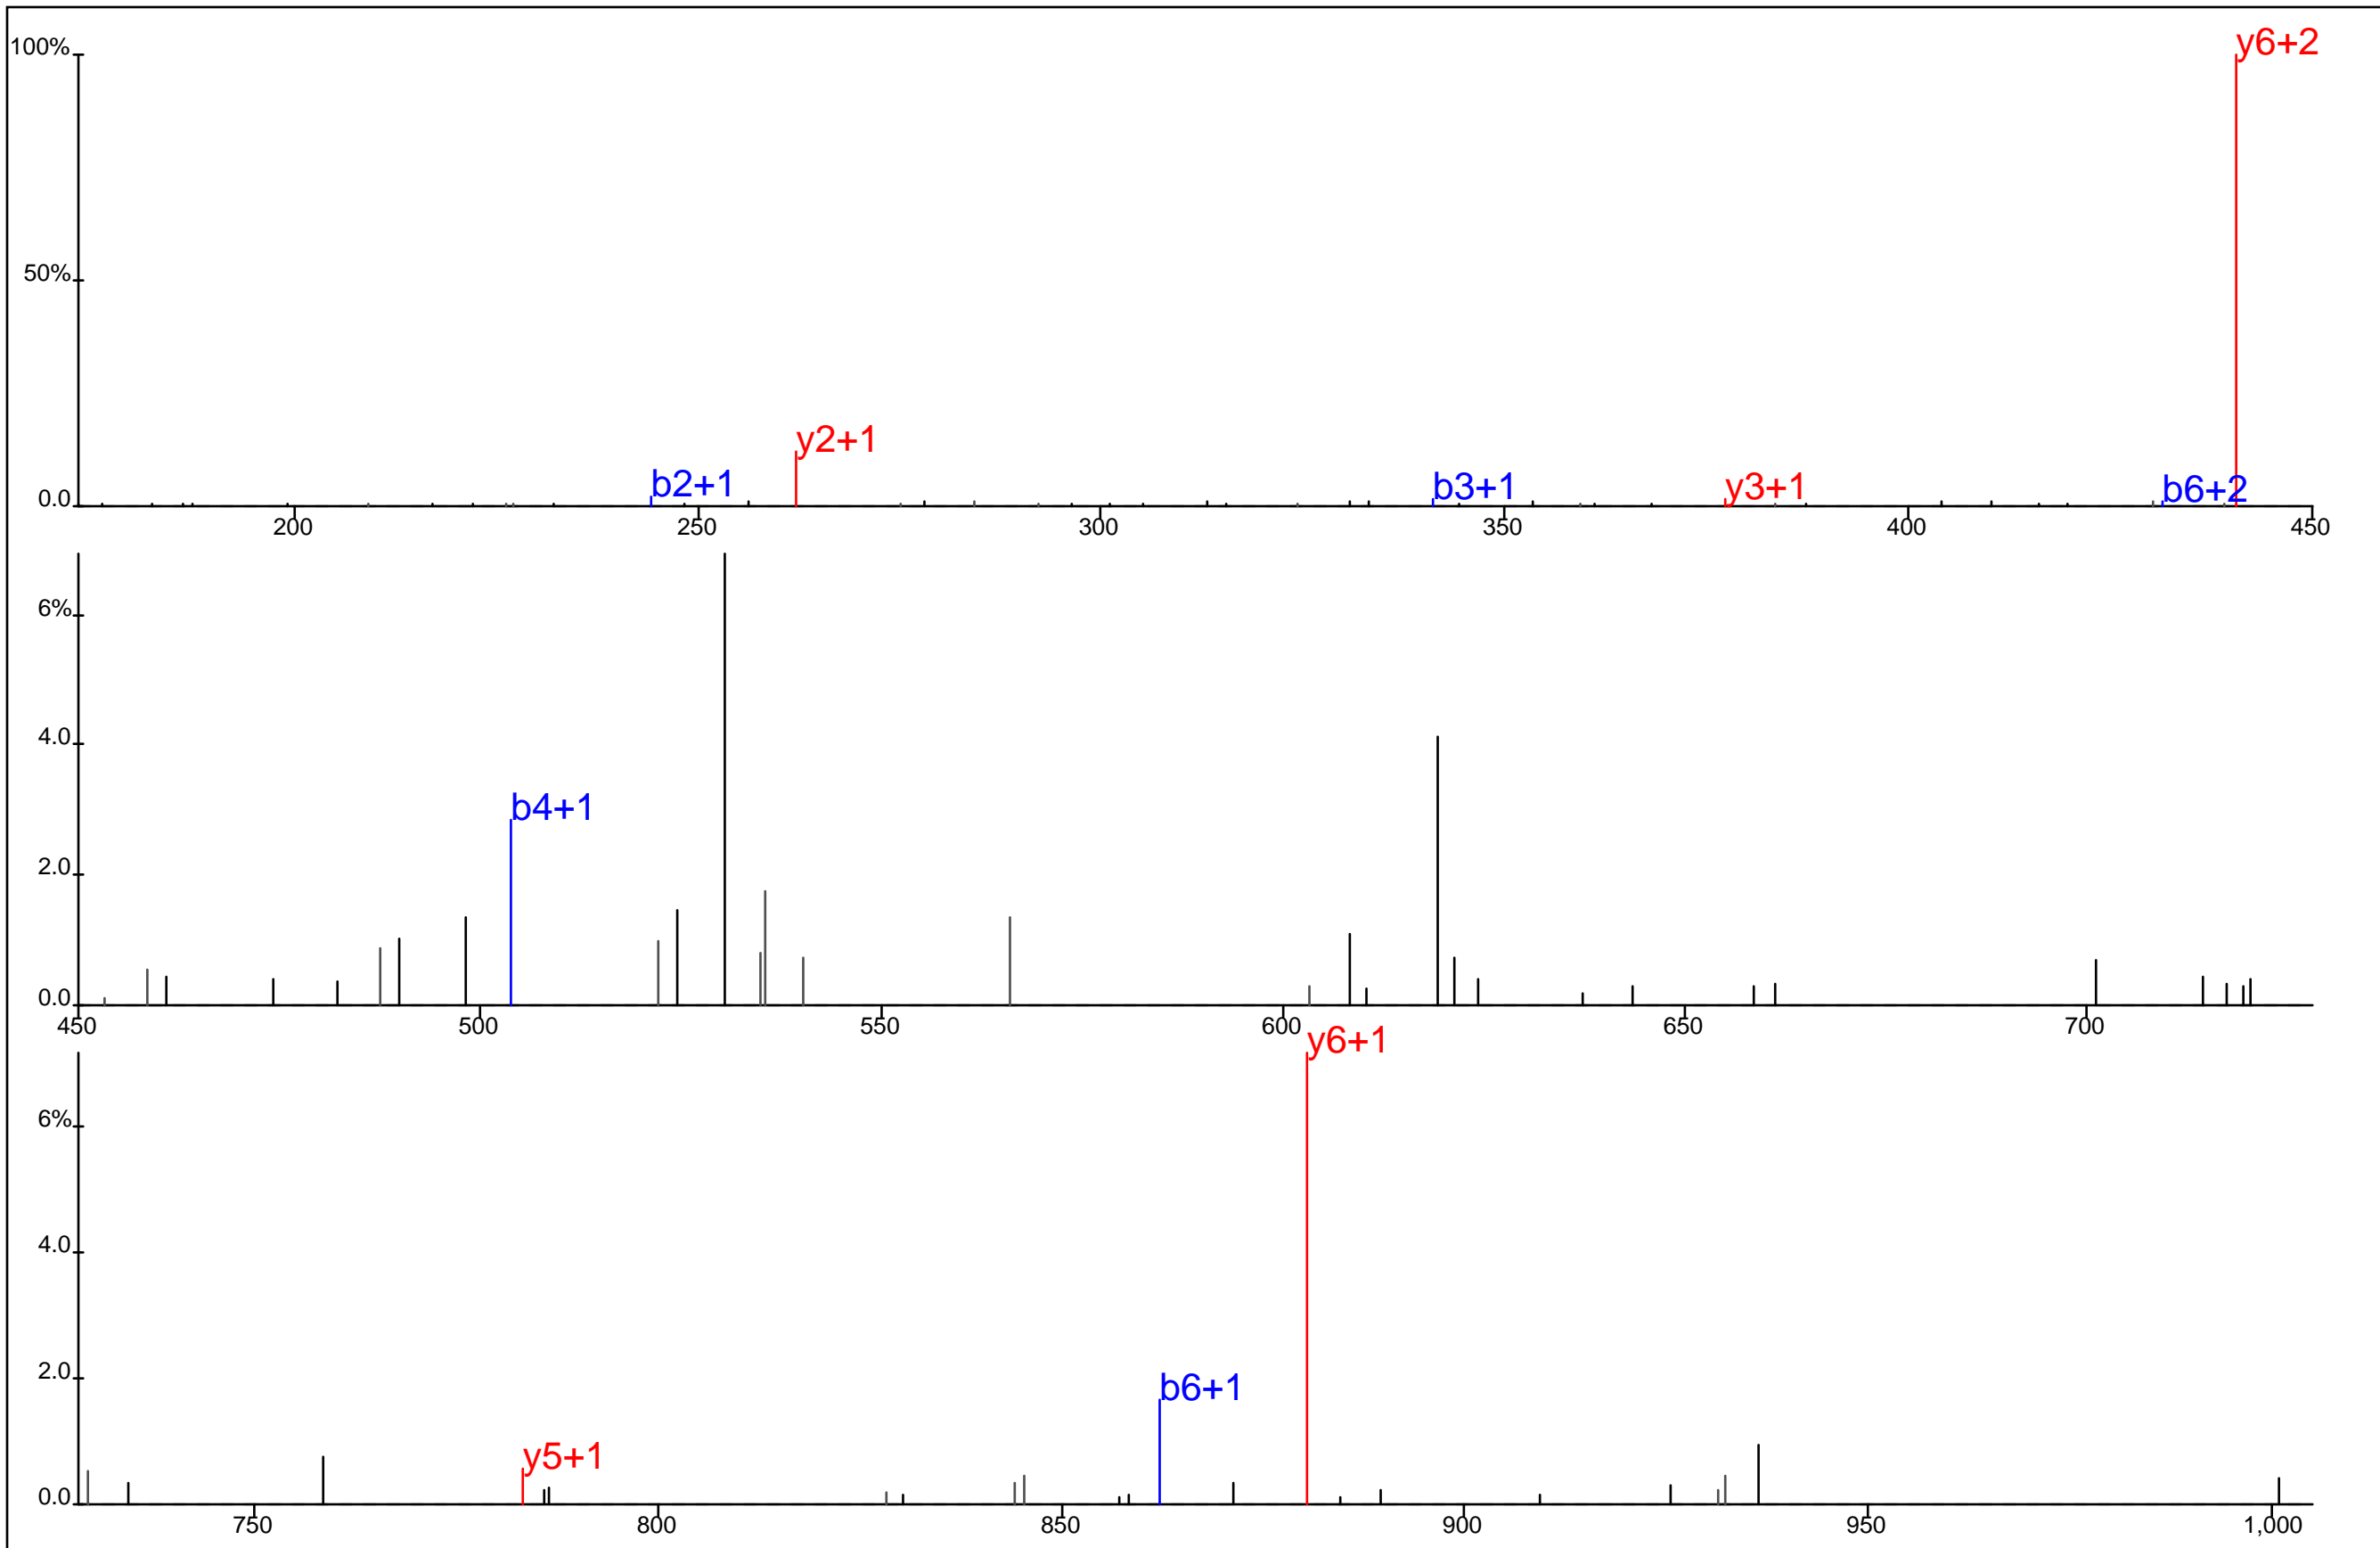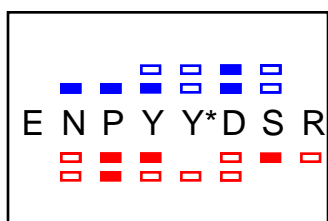

Protein Name: Clathrin, heavy polypeptide  
 gi Accession: 0  
 Precursor Mass: 562.2071+2  
 Delta Mass: 2.006 ppm  
 XCorr: 22.56

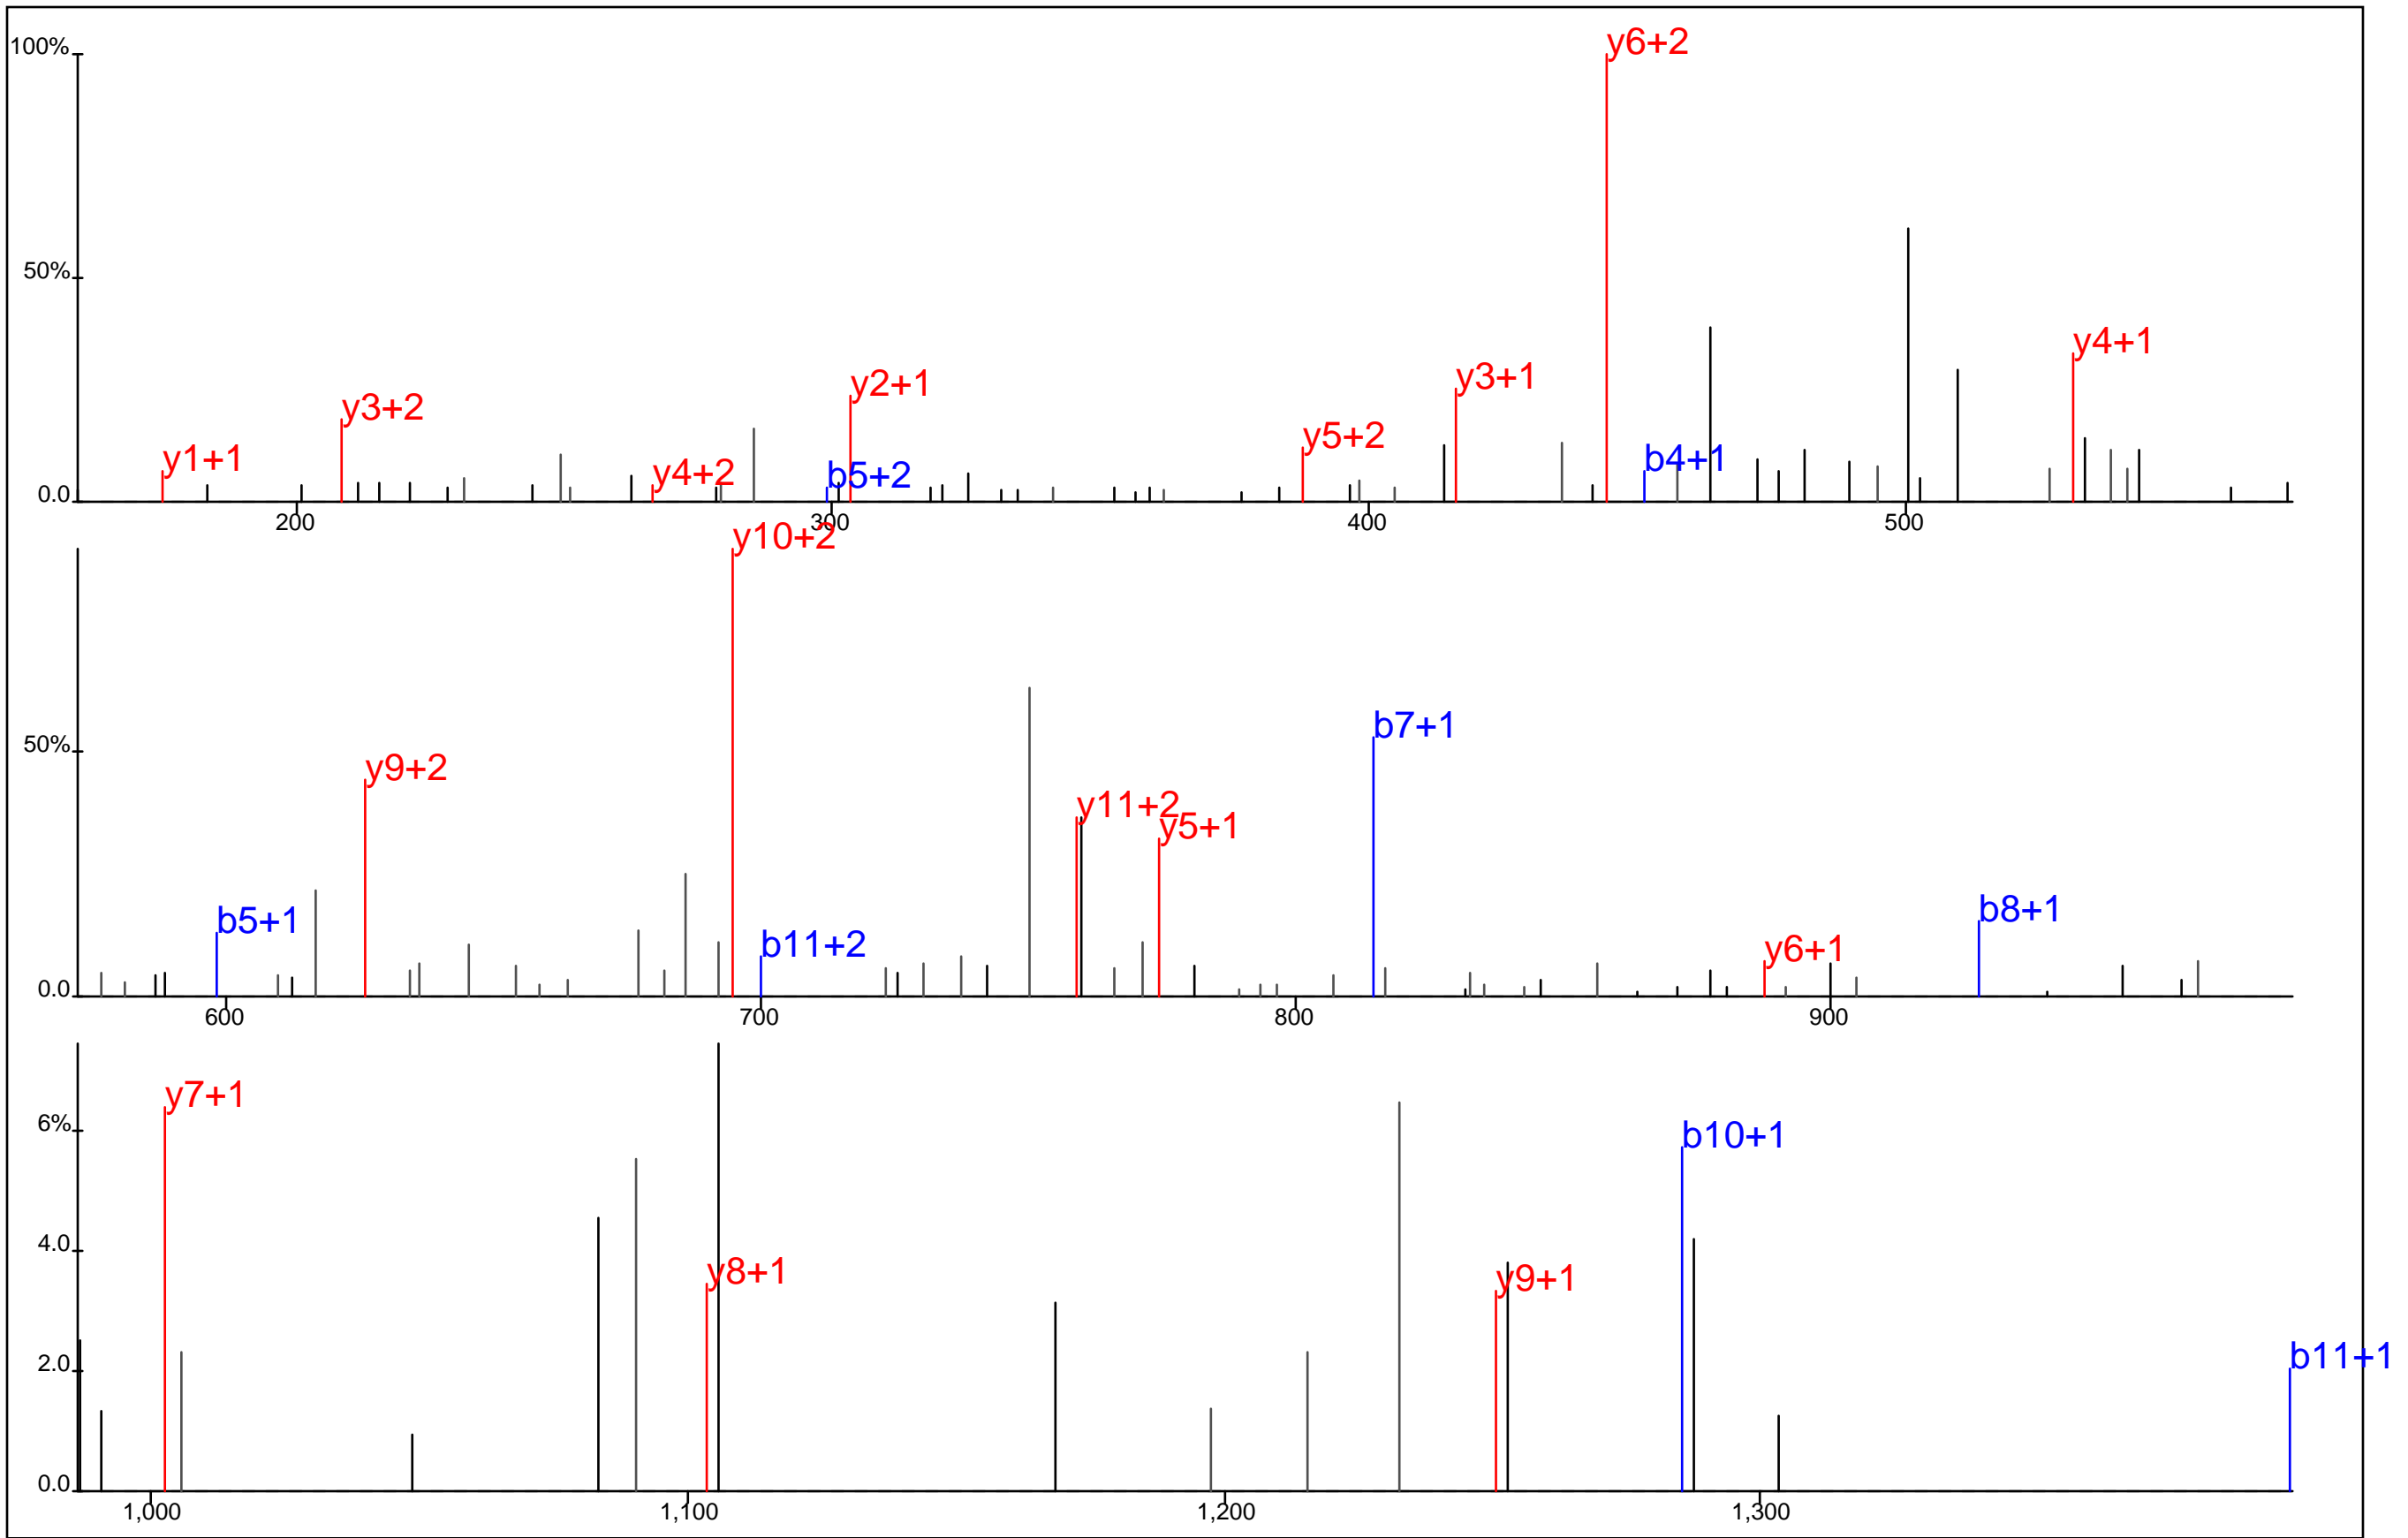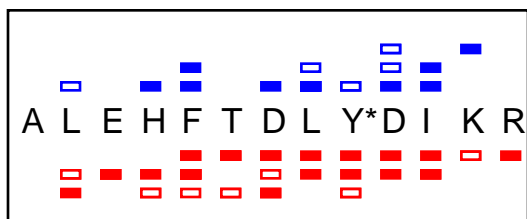

Protein Name: Clathrin, heavy polypeptide  
 gi Accession: 0  
 Precursor Mass: 567.6077+3  
 Delta Mass: 2.526 ppm  
 XCorr: 45.3



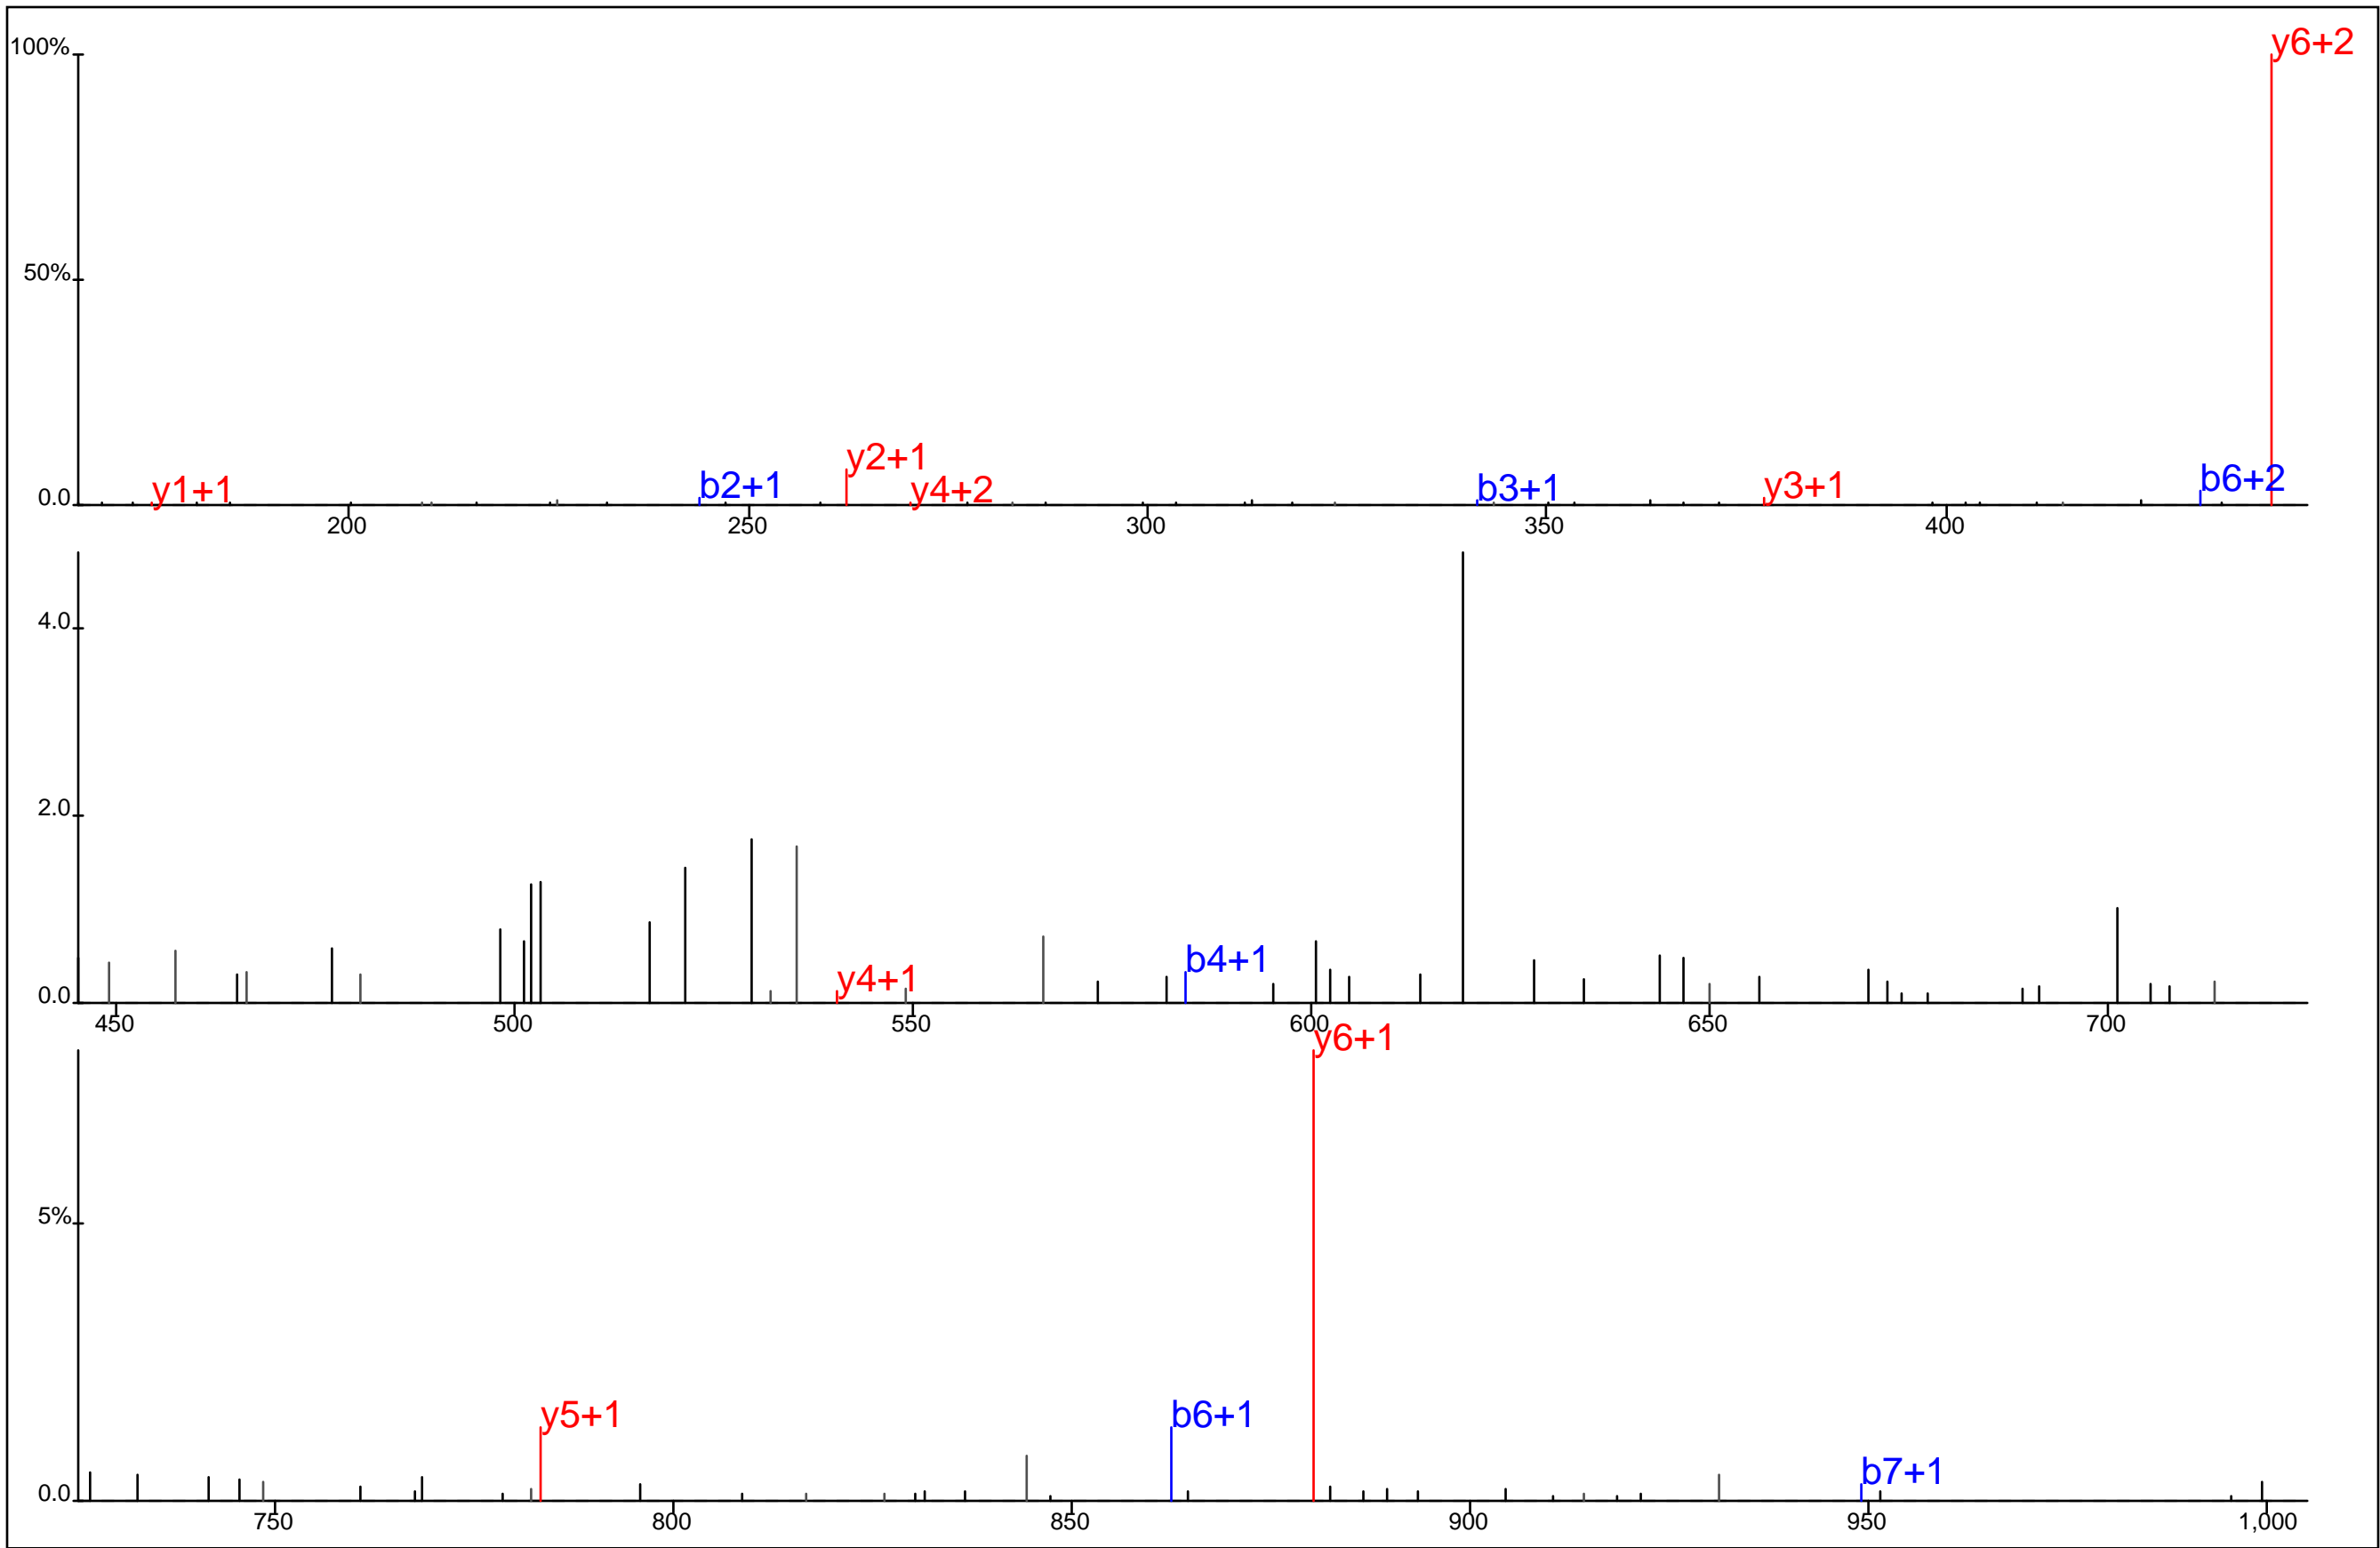

▢ ▢ ▢ ▢ ▢ ▢  
 E N P Y\*Y D S R  
▢ ▢ ▢ ▢ ▢ ▢

Protein Name: Clathrin, heavy polypeptide  
 gi Accession: 0  
 Precursor Mass: 562.2076+2  
 Delta Mass: 1.136 ppm  
 XCorr: 20.7

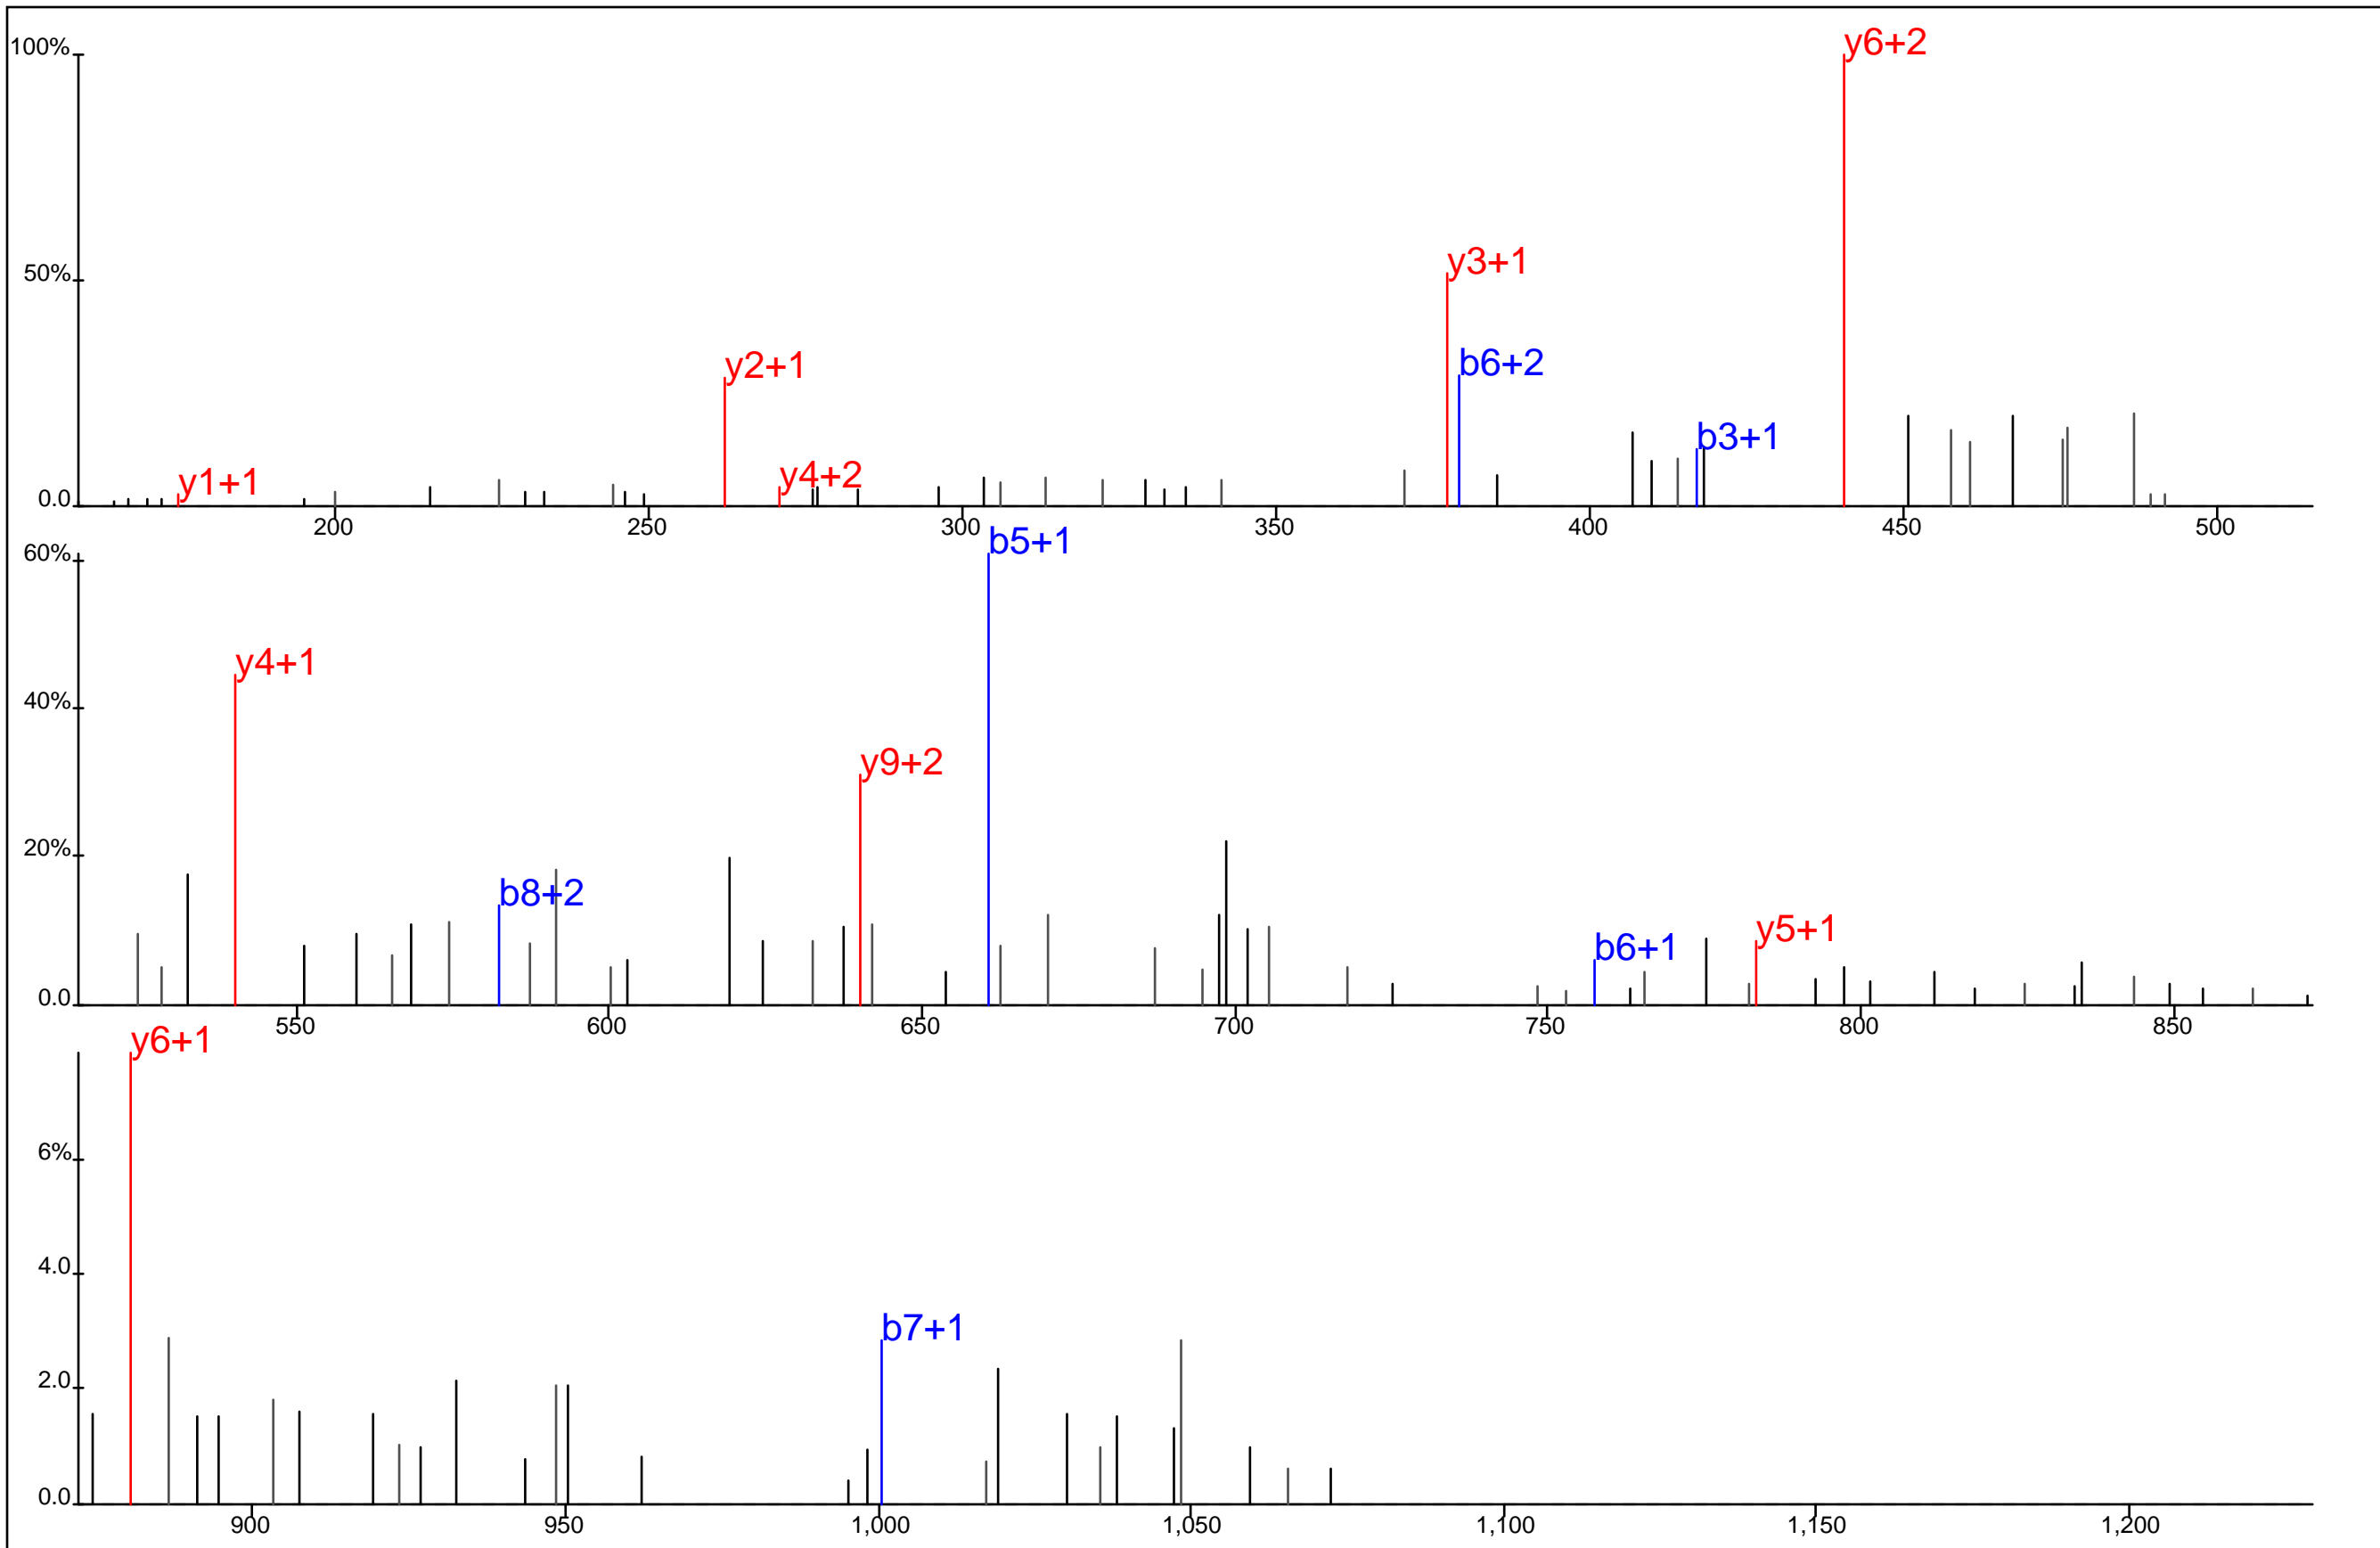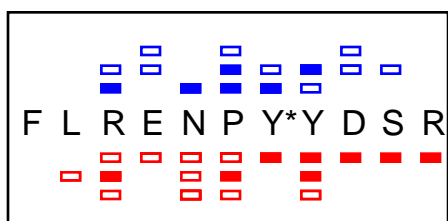

Protein Name: Clathrin, heavy polypeptide  
 gi Accession: 0  
 Precursor Mass: 513.8931+3  
 Delta Mass: 1.349 ppm  
 XCorr: 20.95

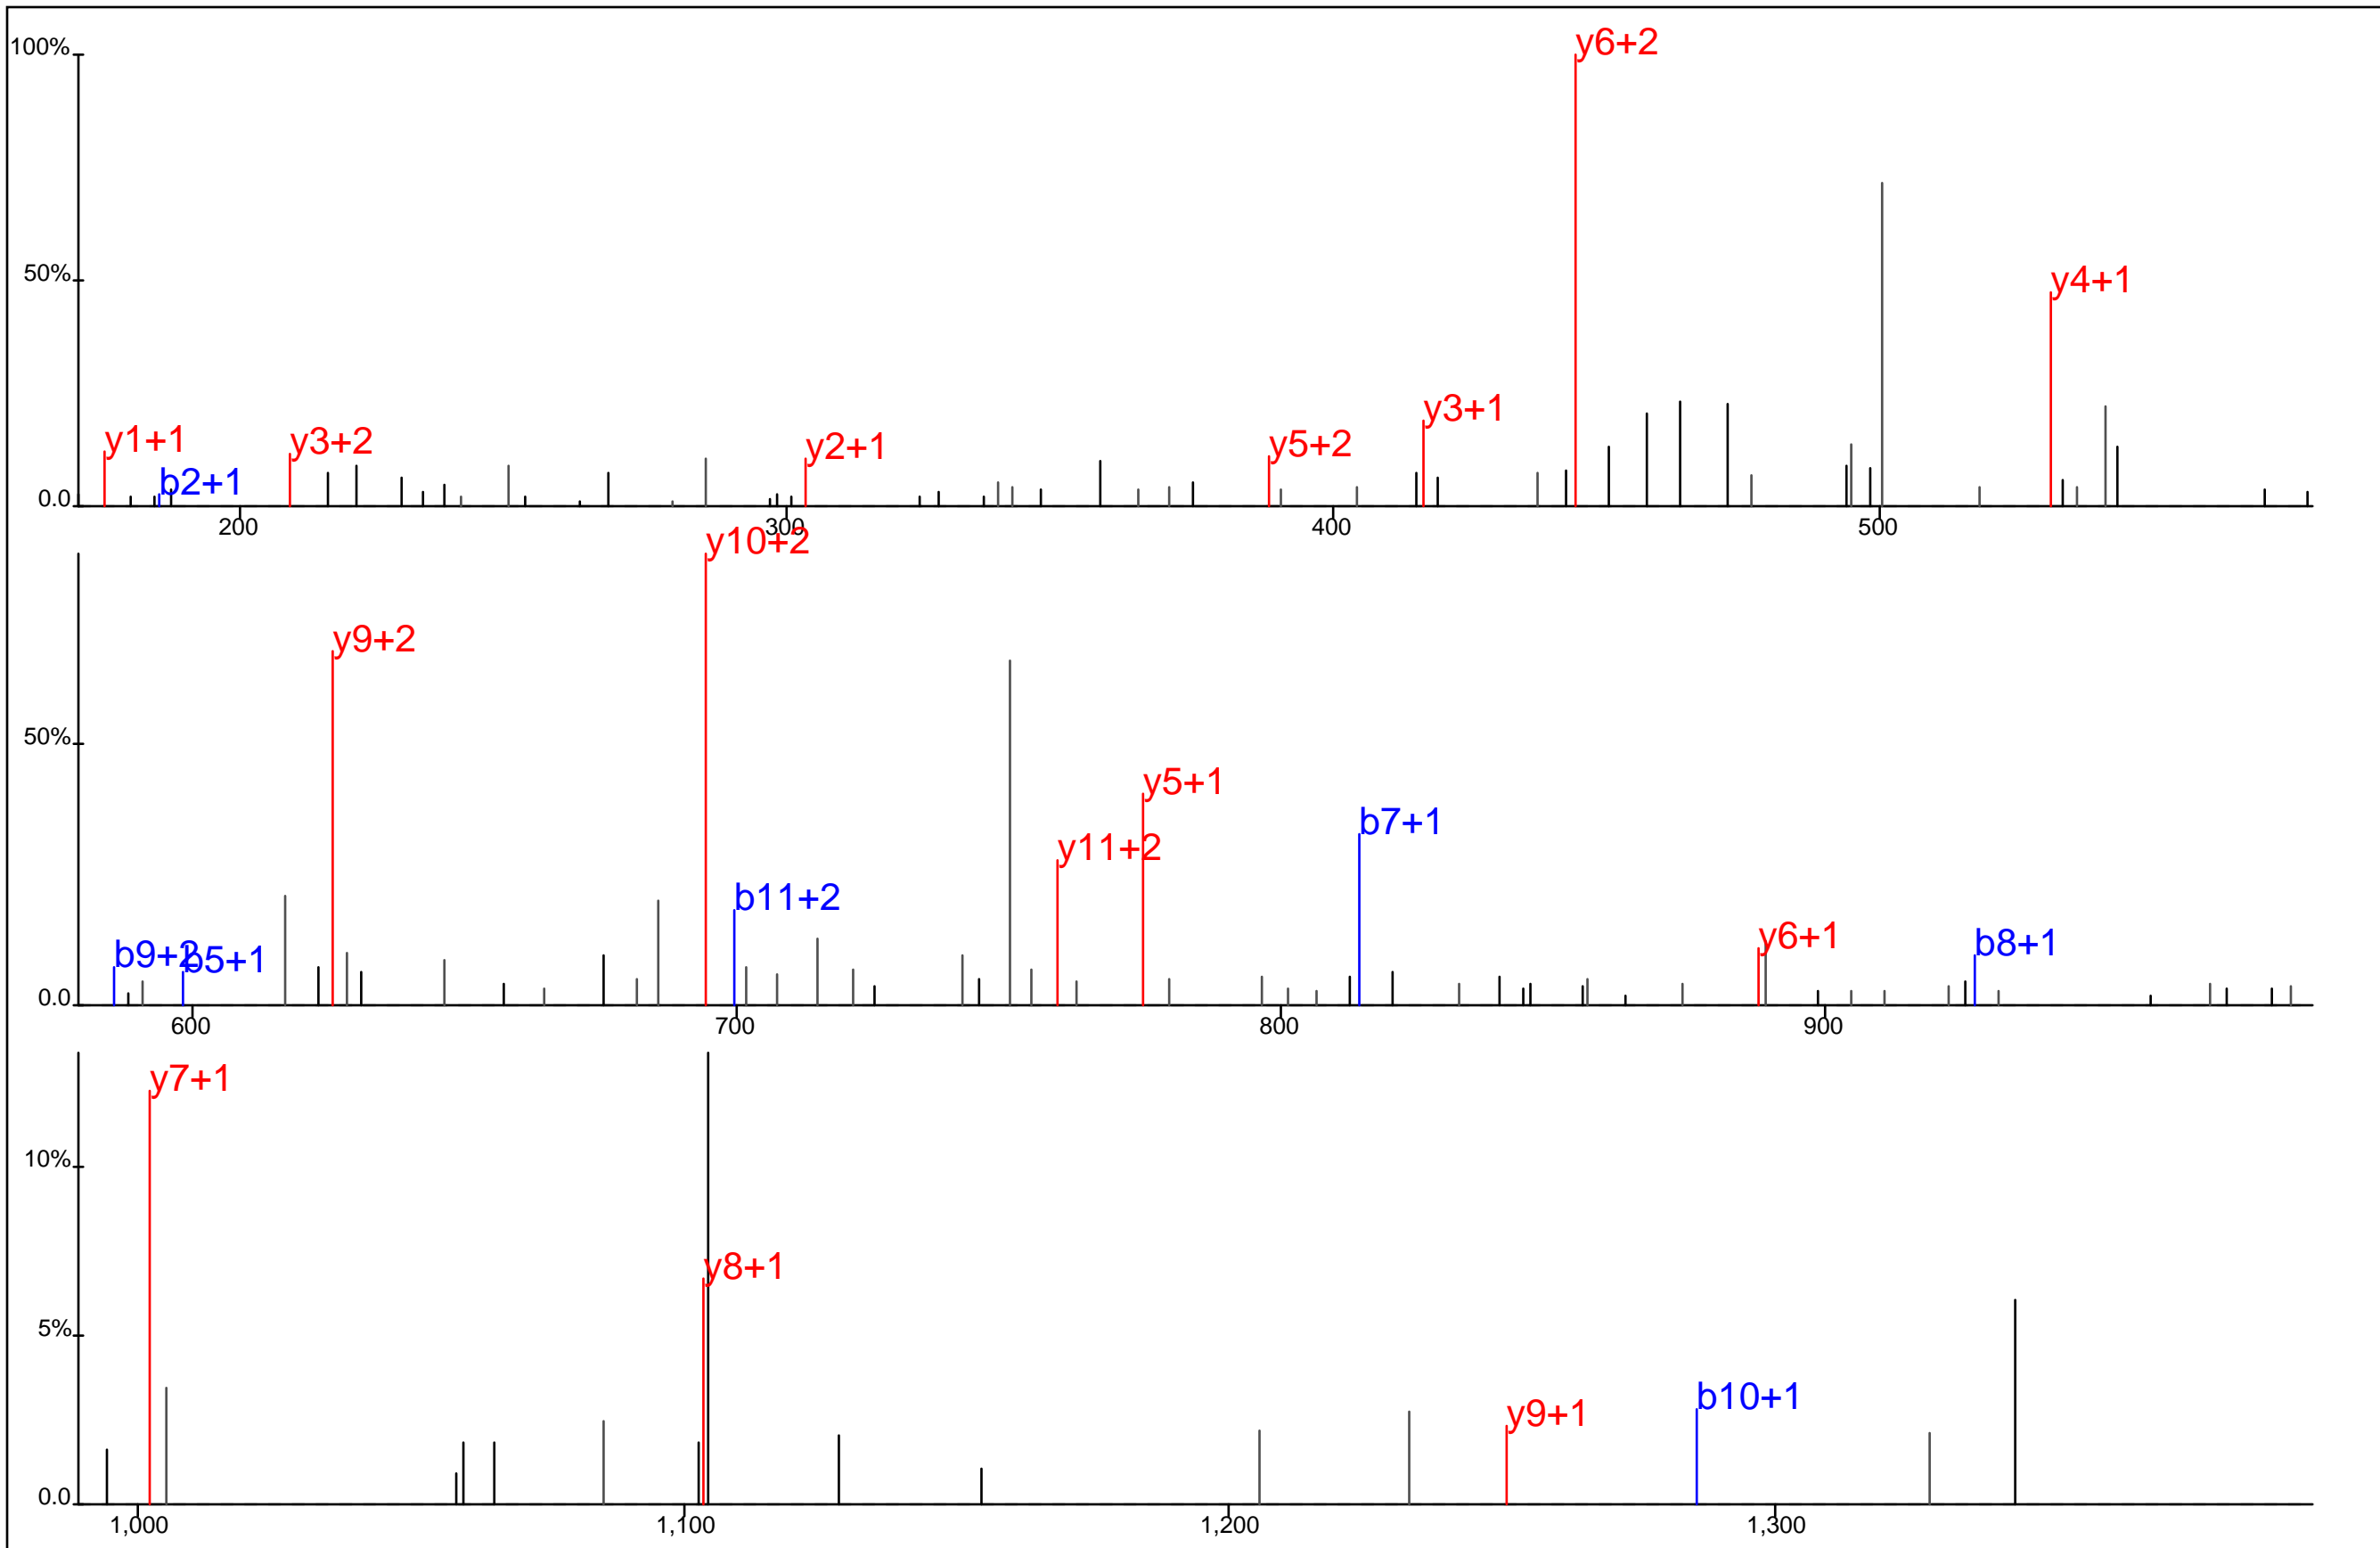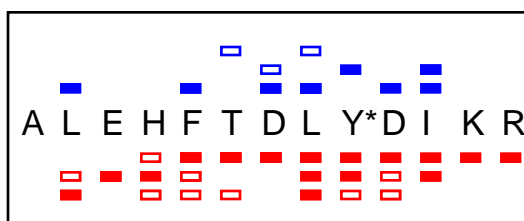

Protein Name: Clathrin, heavy polypeptide  
 gi Accession: 0  
 Precursor Mass: 567.6066+3  
 Delta Mass: 0.588 ppm  
 XCorr: 56.74

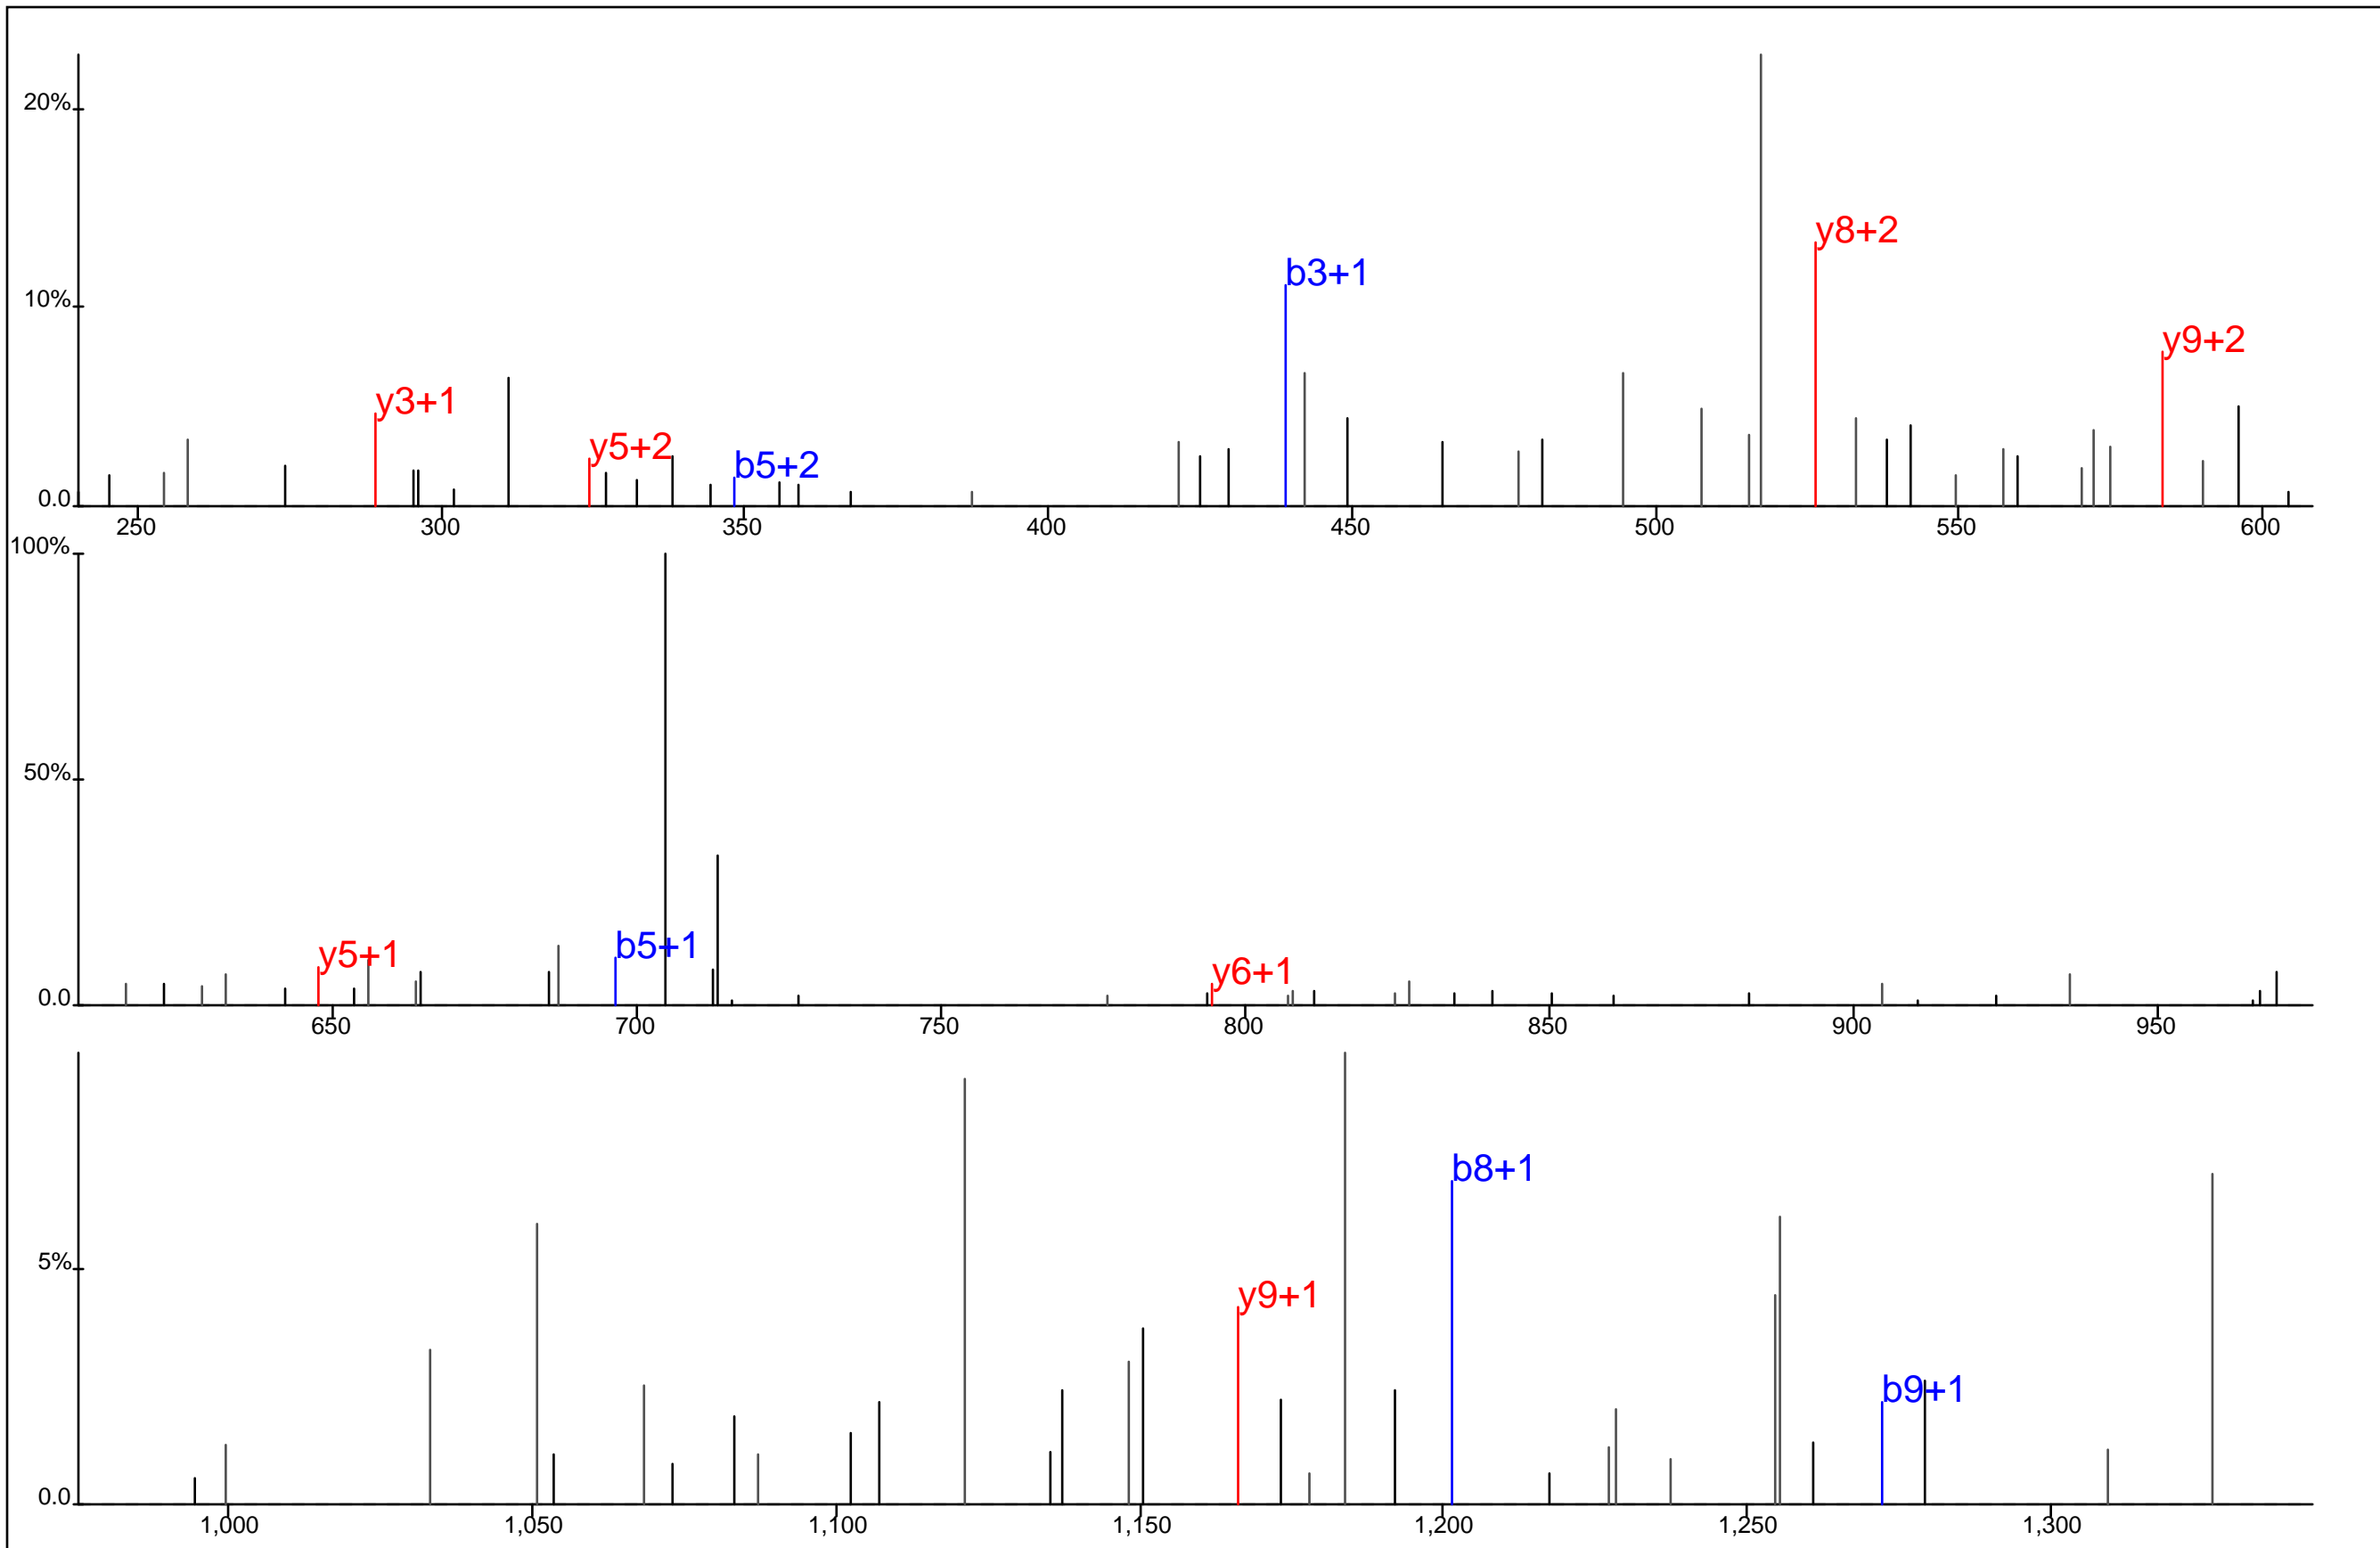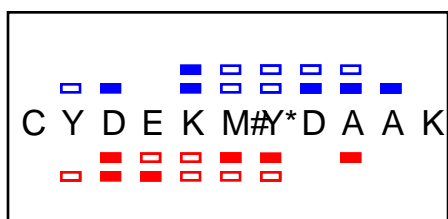

Protein Name: Clathrin, heavy polypeptide  
 gi Accession: 0  
 Precursor Mass: 745.2711+2  
 Delta Mass: 1.686 ppm  
 XCorr: 22.2

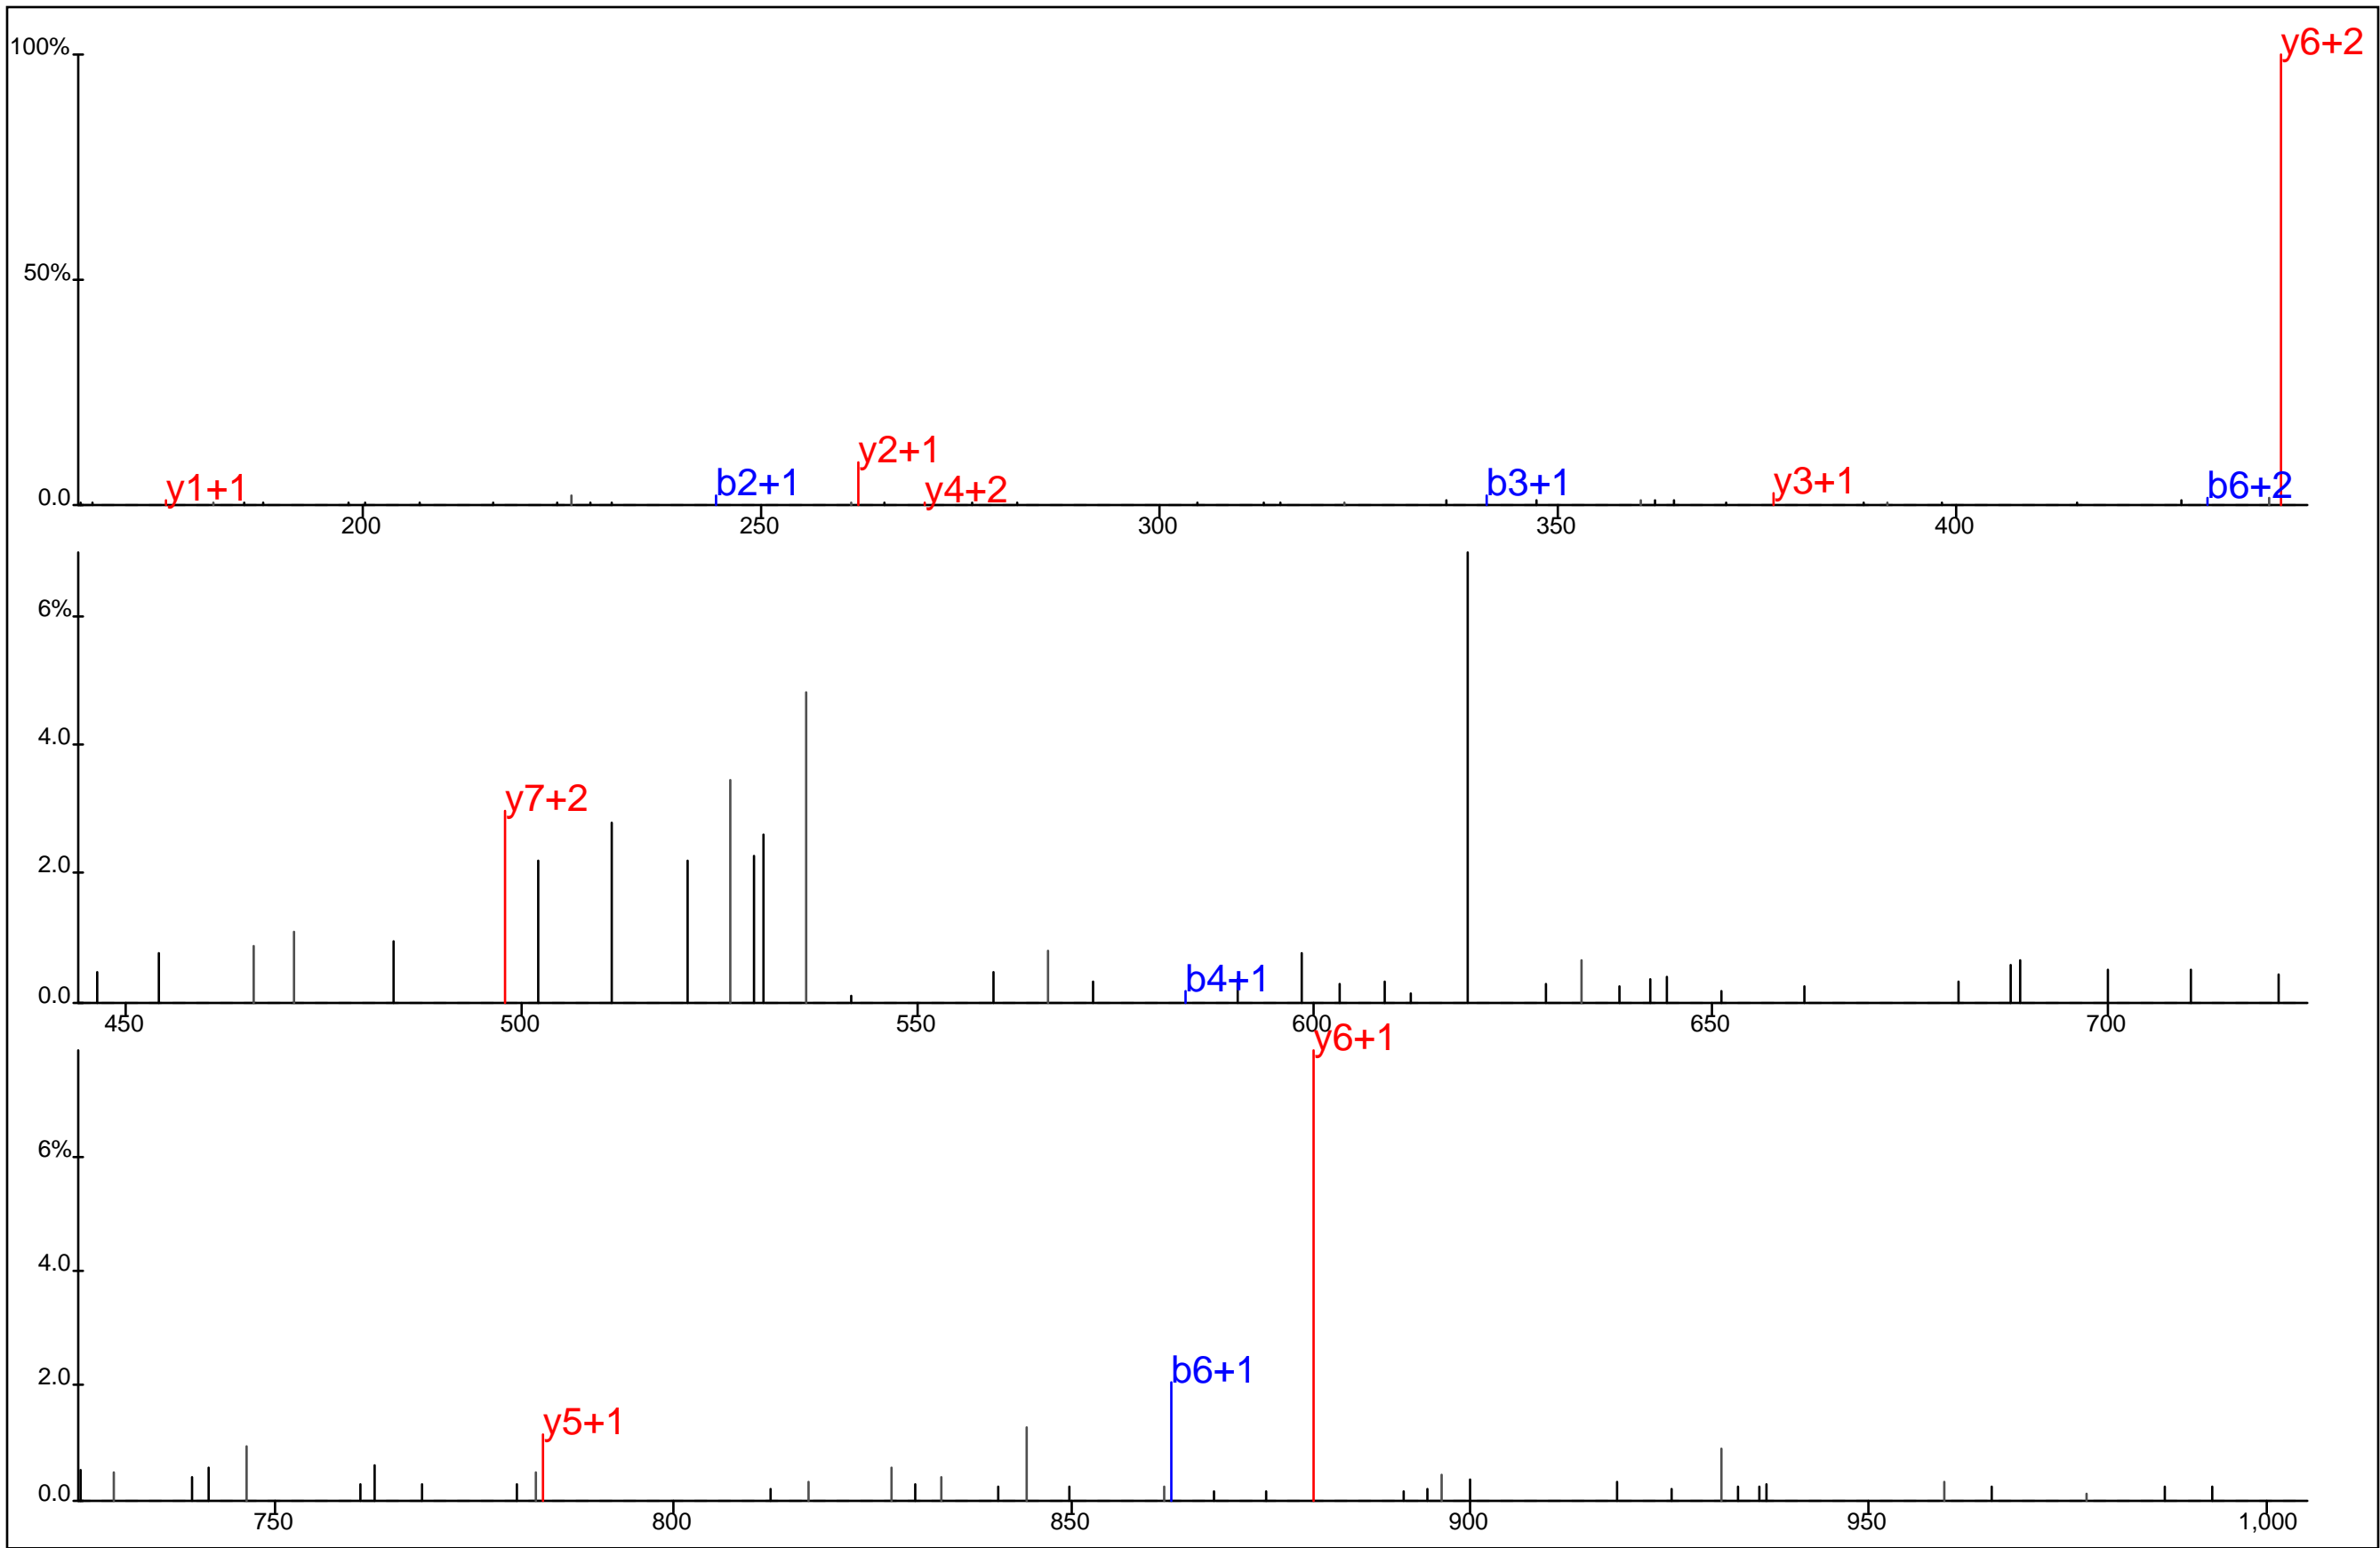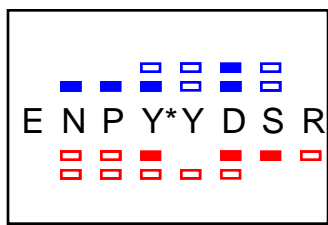

Protein Name: Clathrin, heavy polypeptide  
 gi Accession: 0  
 Precursor Mass: 562.2073+2  
 Delta Mass: 1.572 ppm  
 XCorr: 21.33



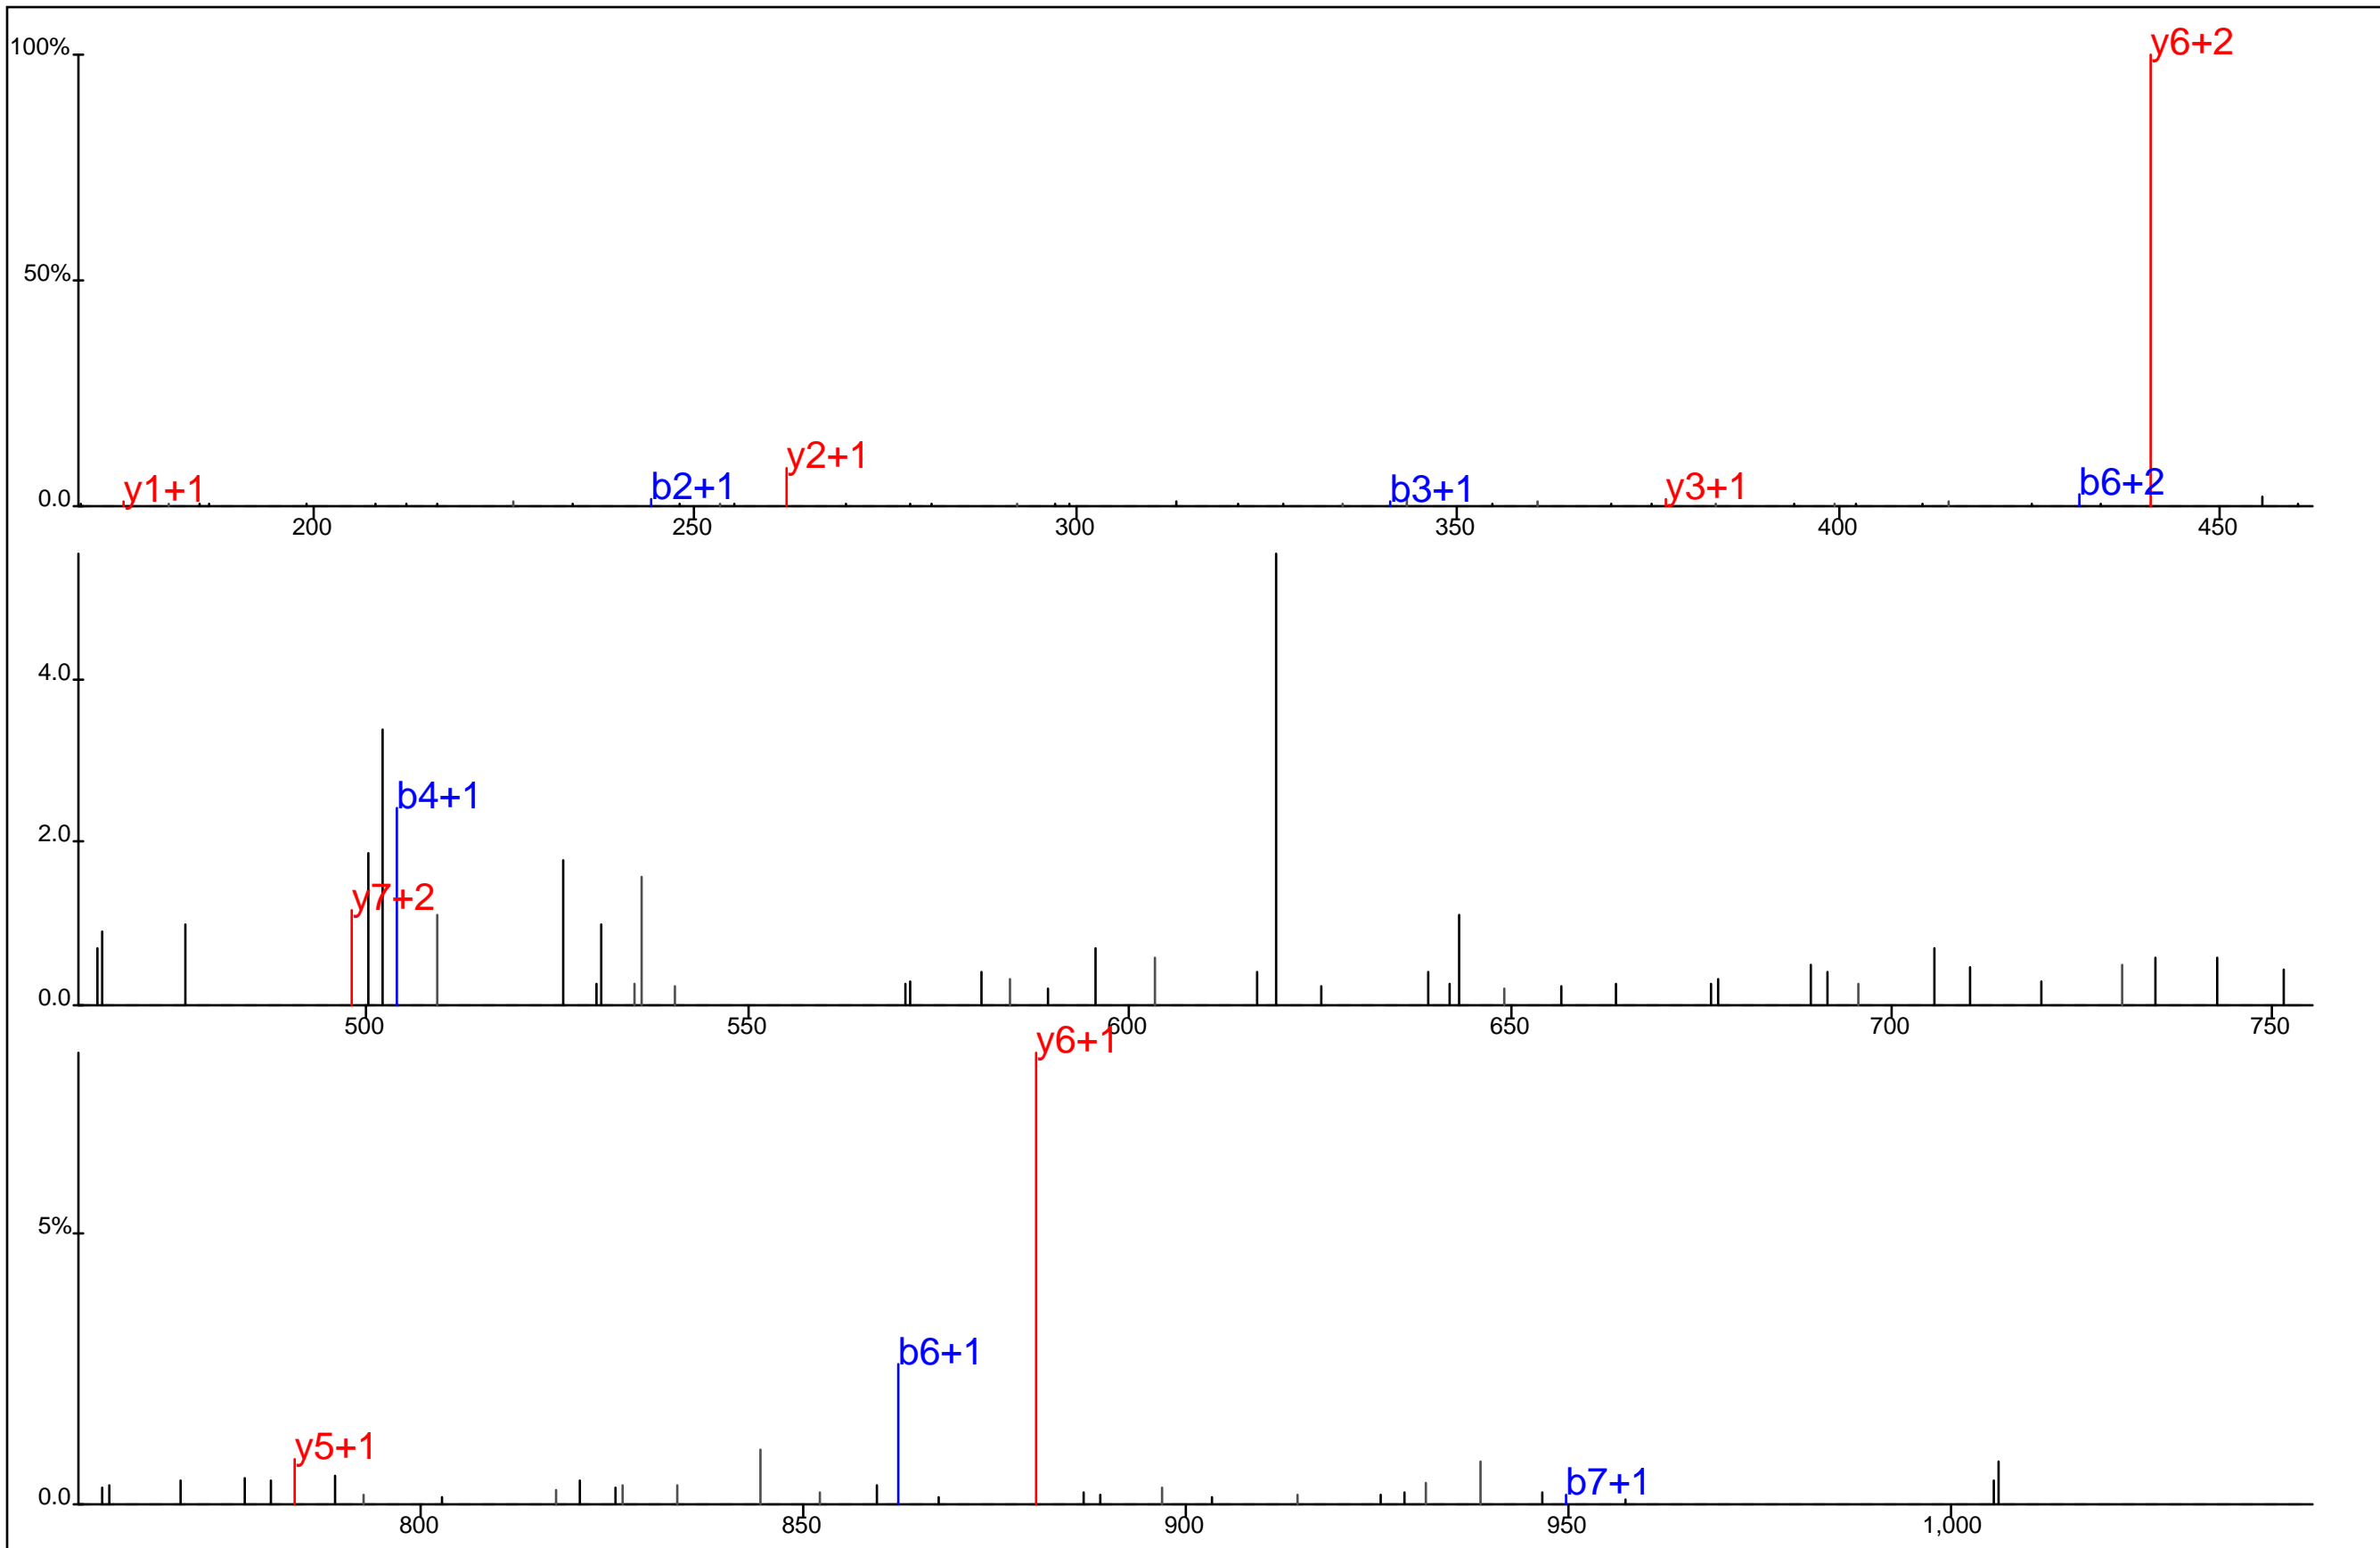

E N P Y Y\* D S R

Protein Name: Clathrin, heavy polypeptide  
 gi Accession: 0  
 Precursor Mass: 562.2090+2  
 Delta Mass: 1.471 ppm  
 XCorr: 21.98

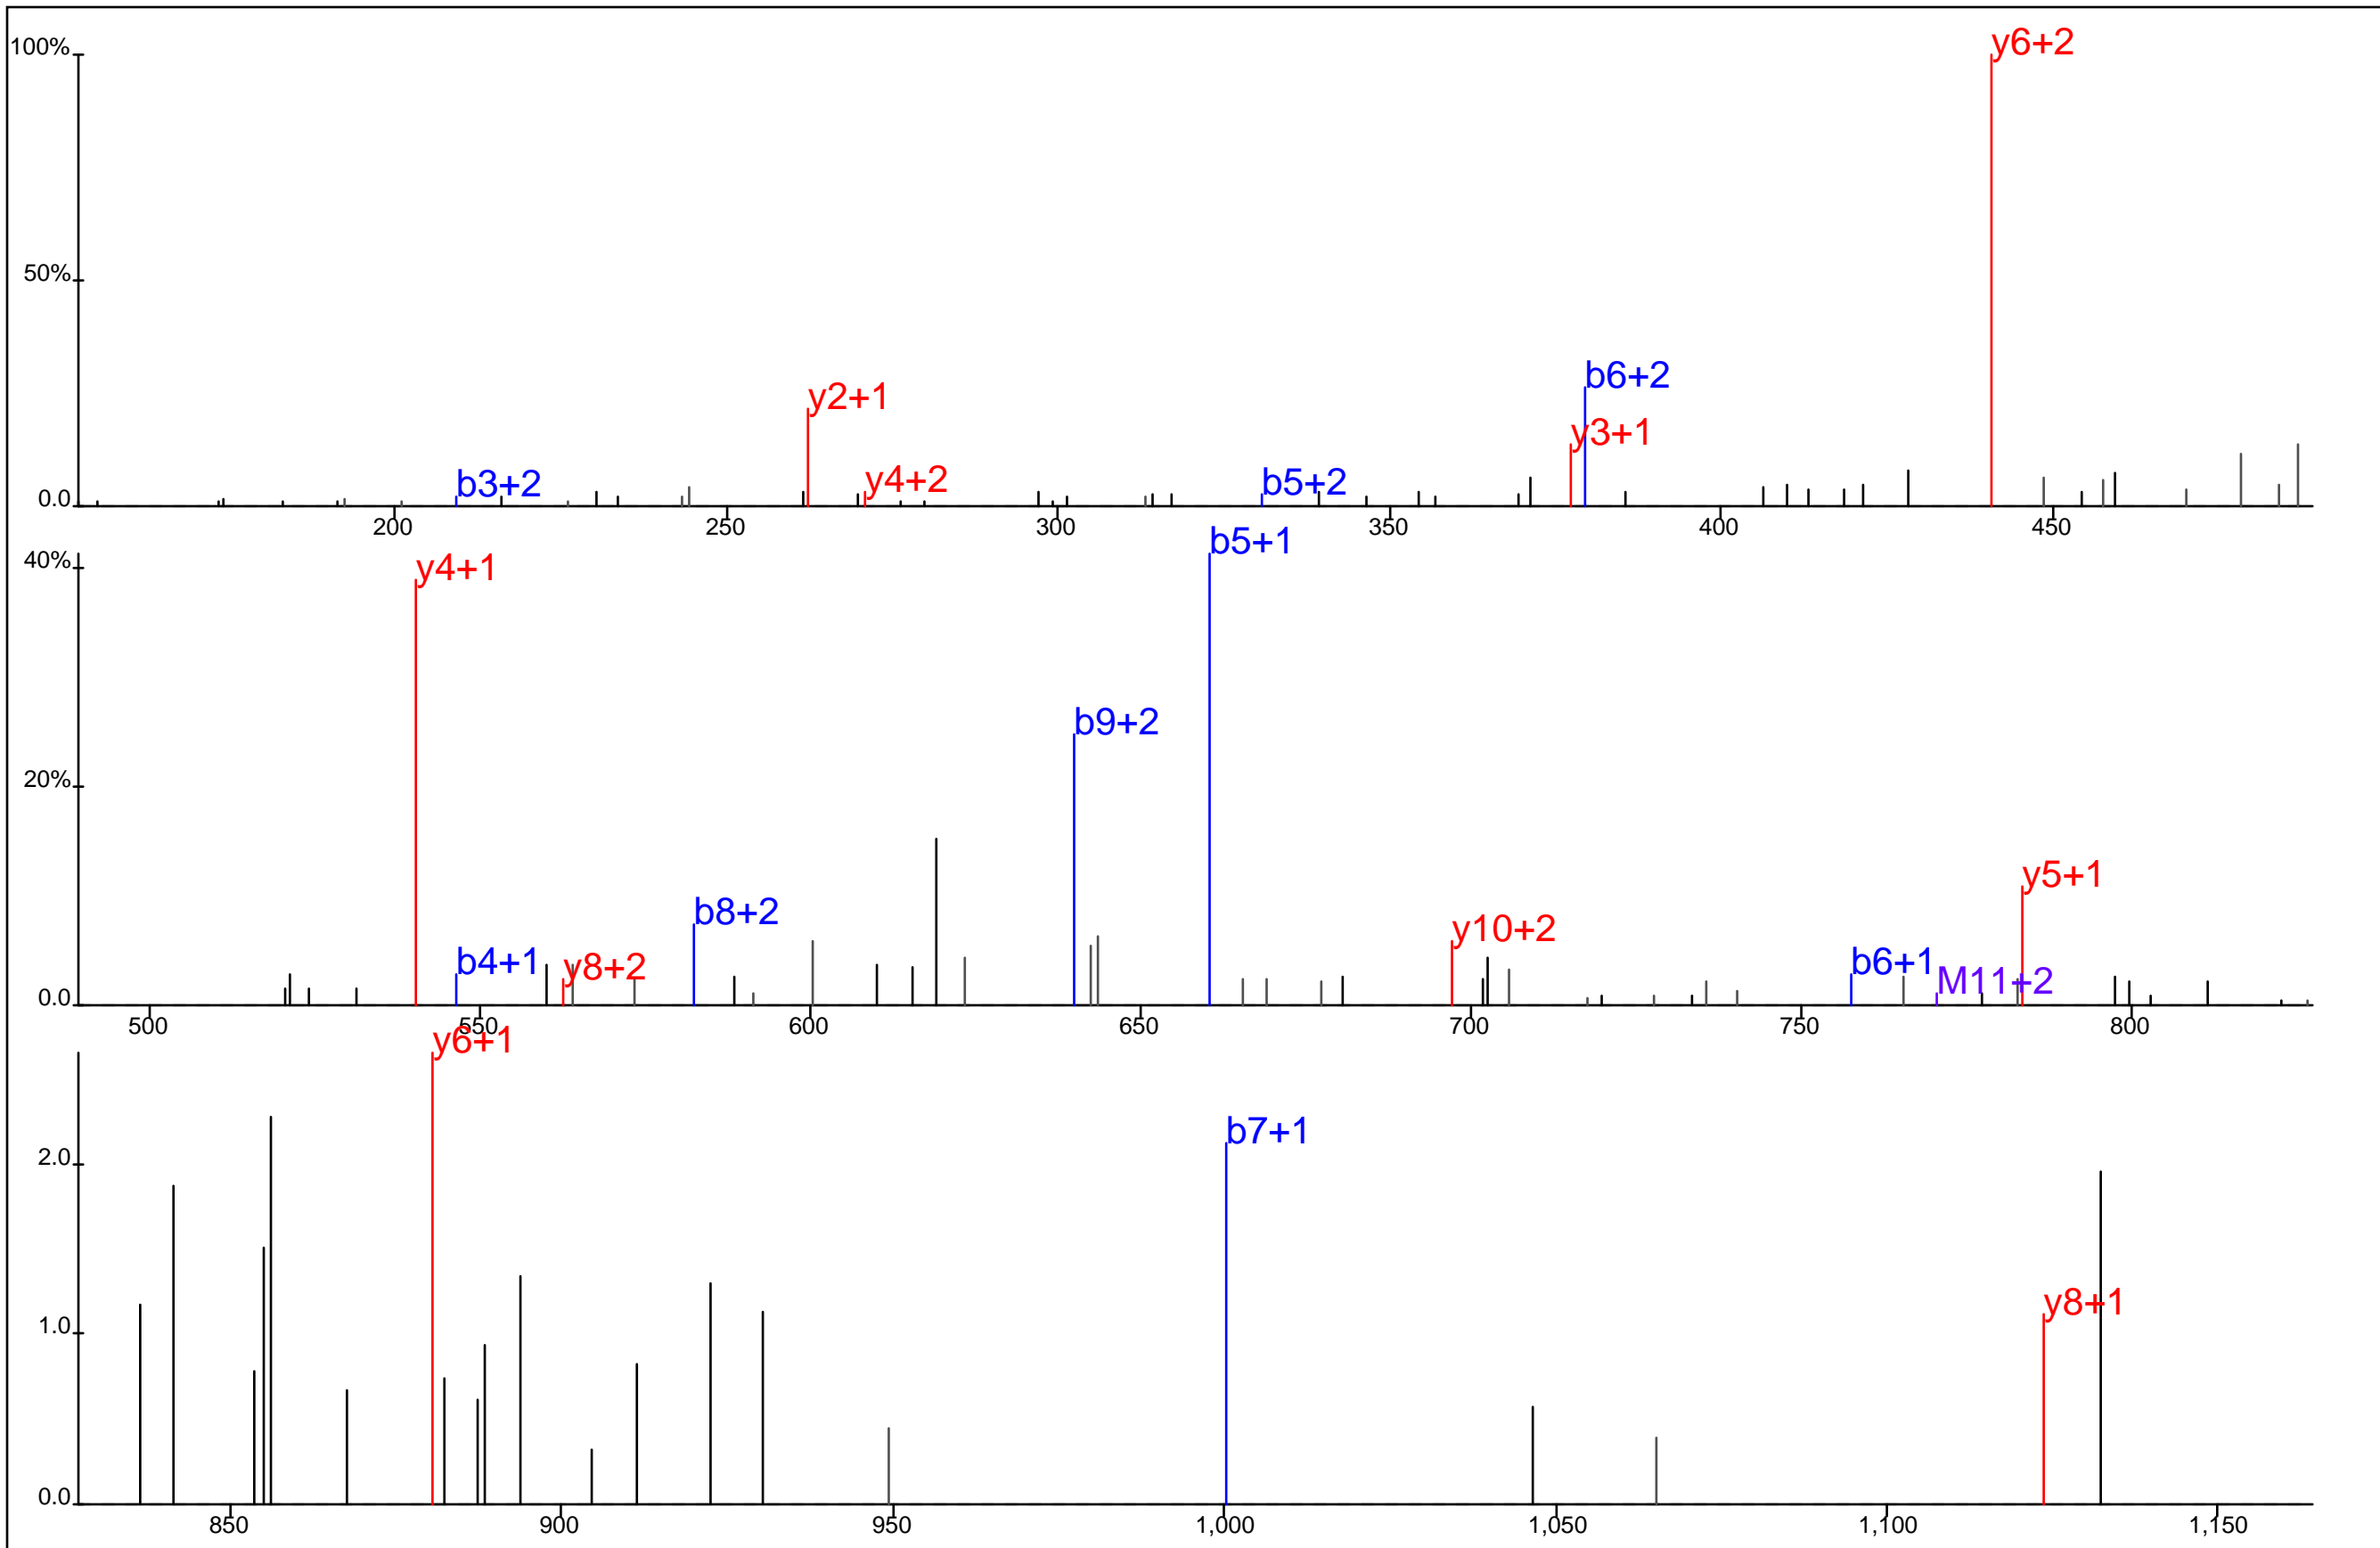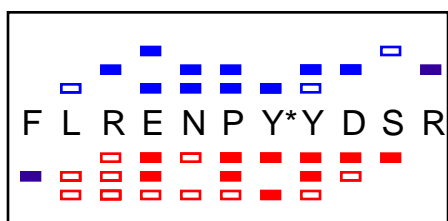

Protein Name: Clathrin, heavy polypeptide  
 gi Accession: 0  
 Precursor Mass: 513.8928+3  
 Delta Mass: 0.755 ppm  
 XCorr: 30.83



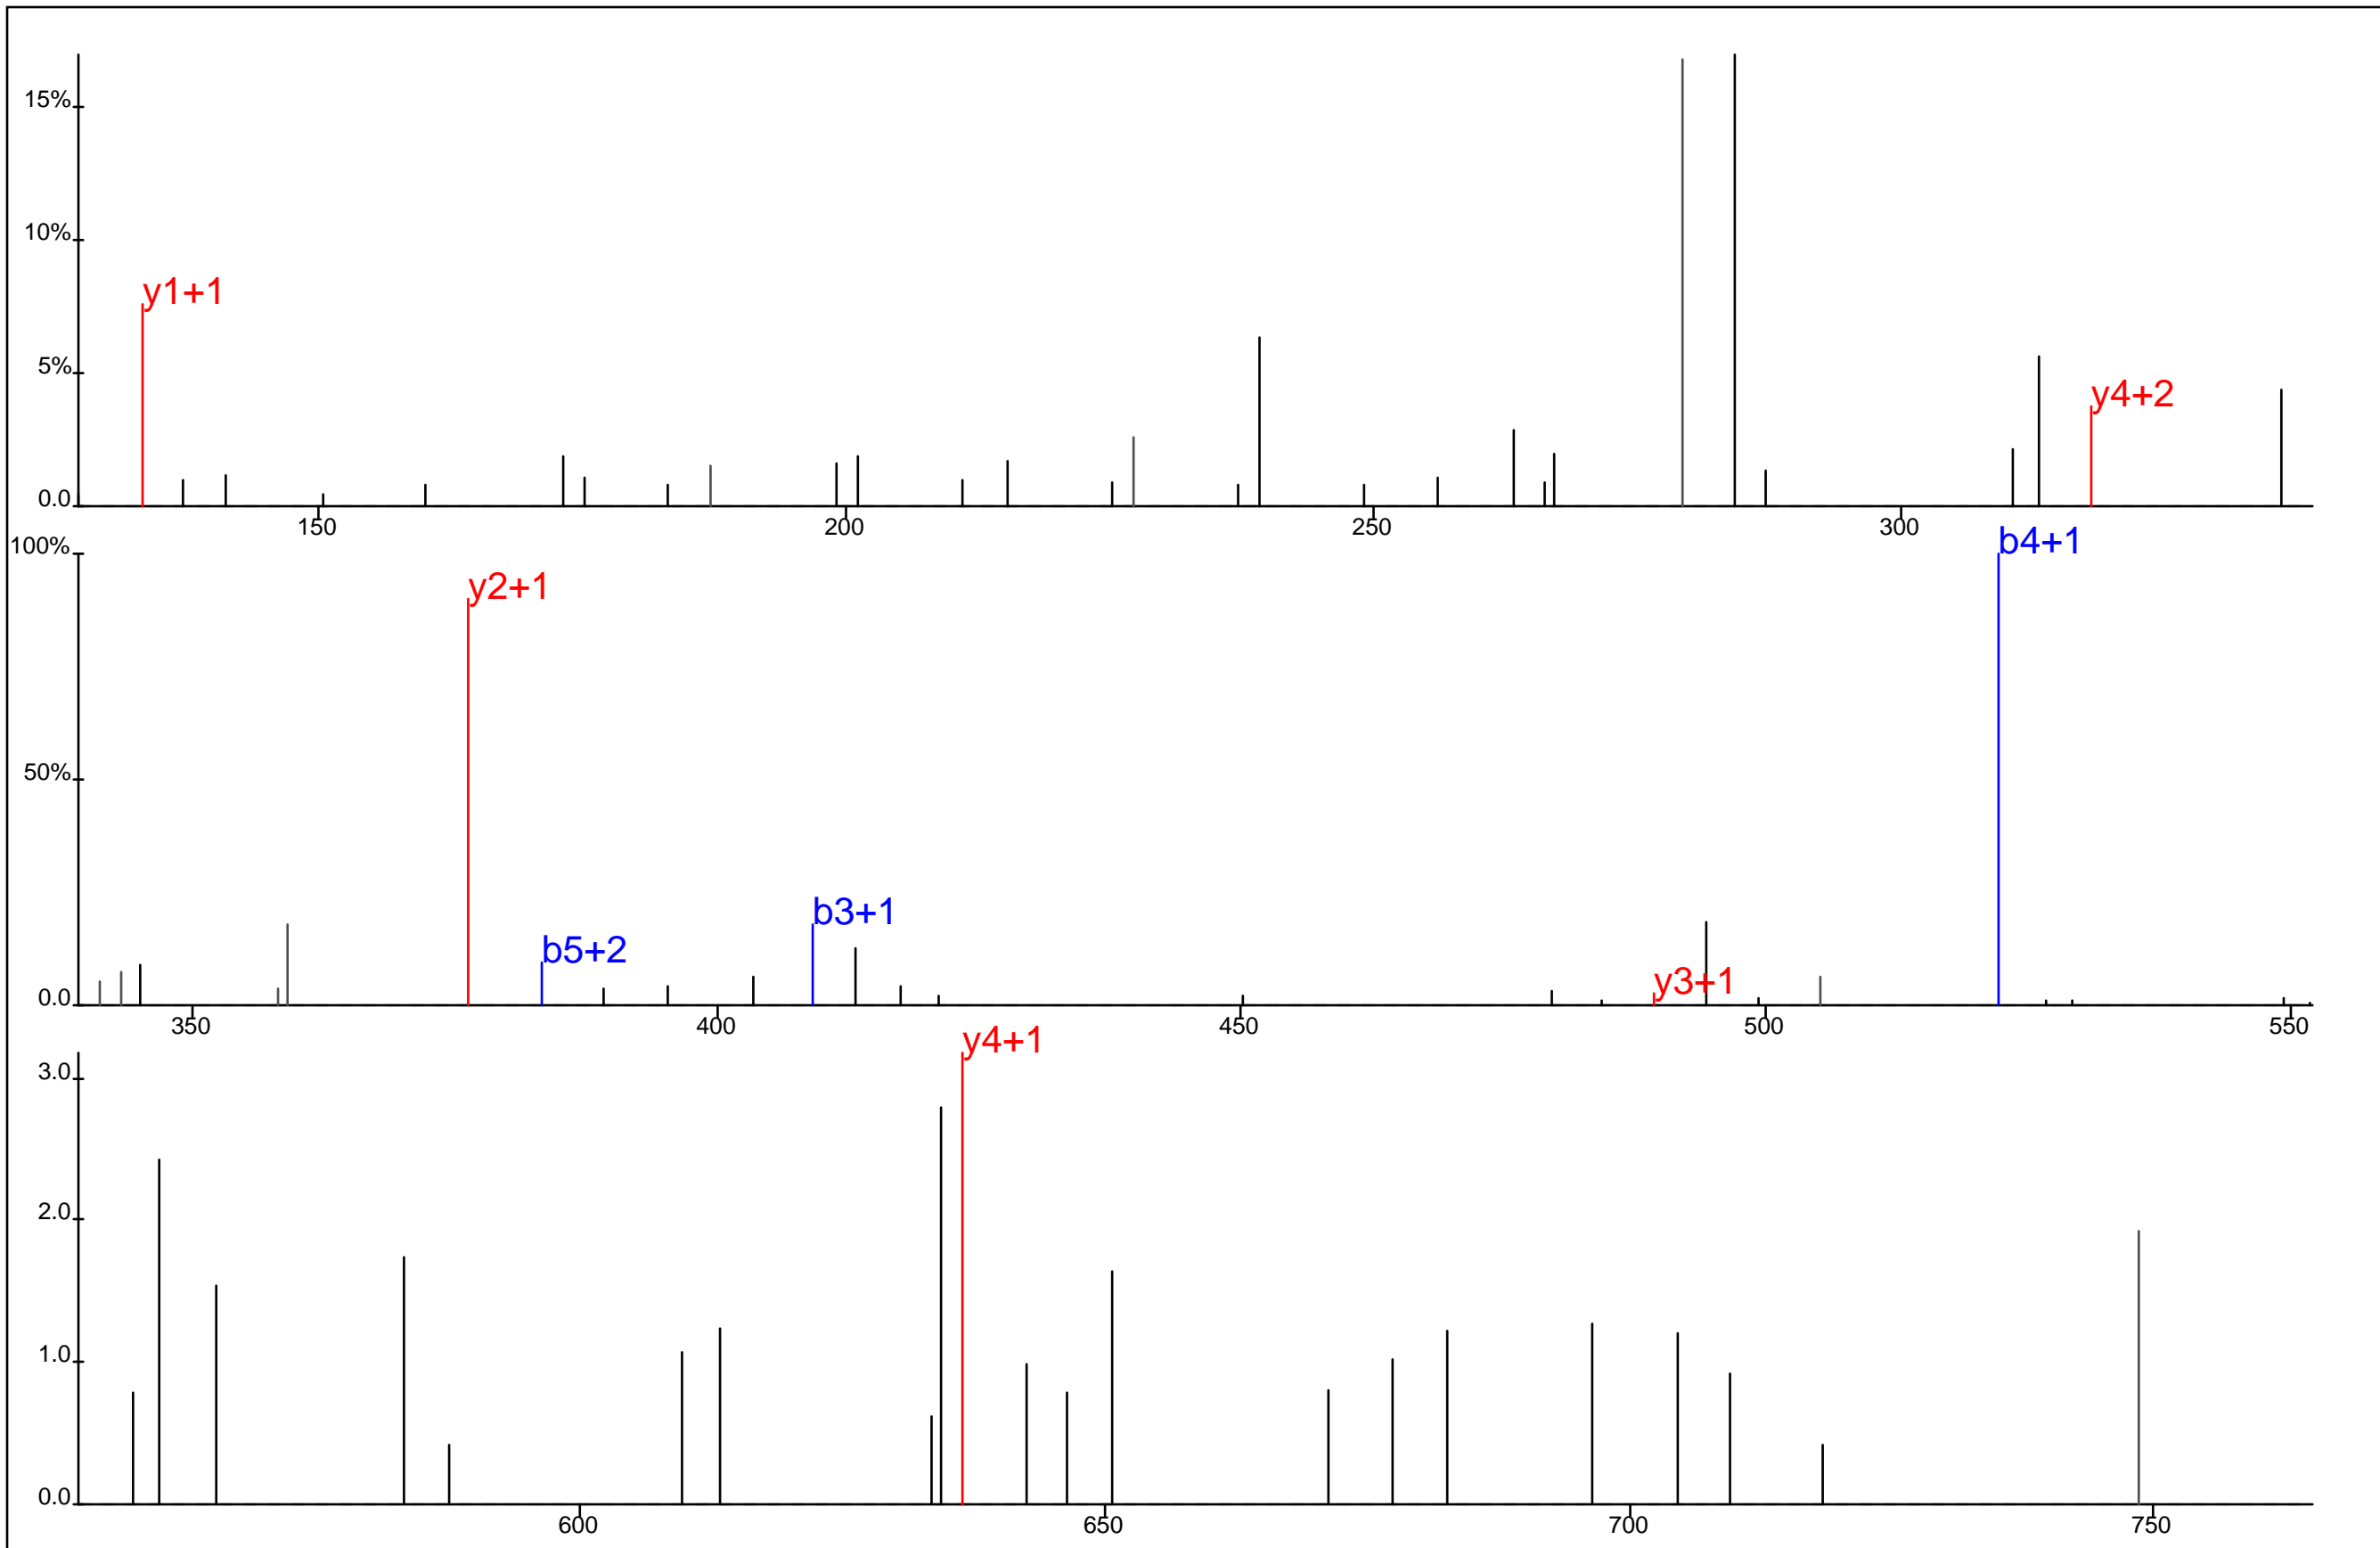

▢ ▢ ▢  
 F N F I Y\* N  
▢ ▢ ▢ ▢

Protein Name: Cleavage and polyadenylation specificity factor 5  
 gi Accession: 0  
 Precursor Mass: 449.1807+2  
 Delta Mass: 0.065 ppm  
 XCorr: 20.45

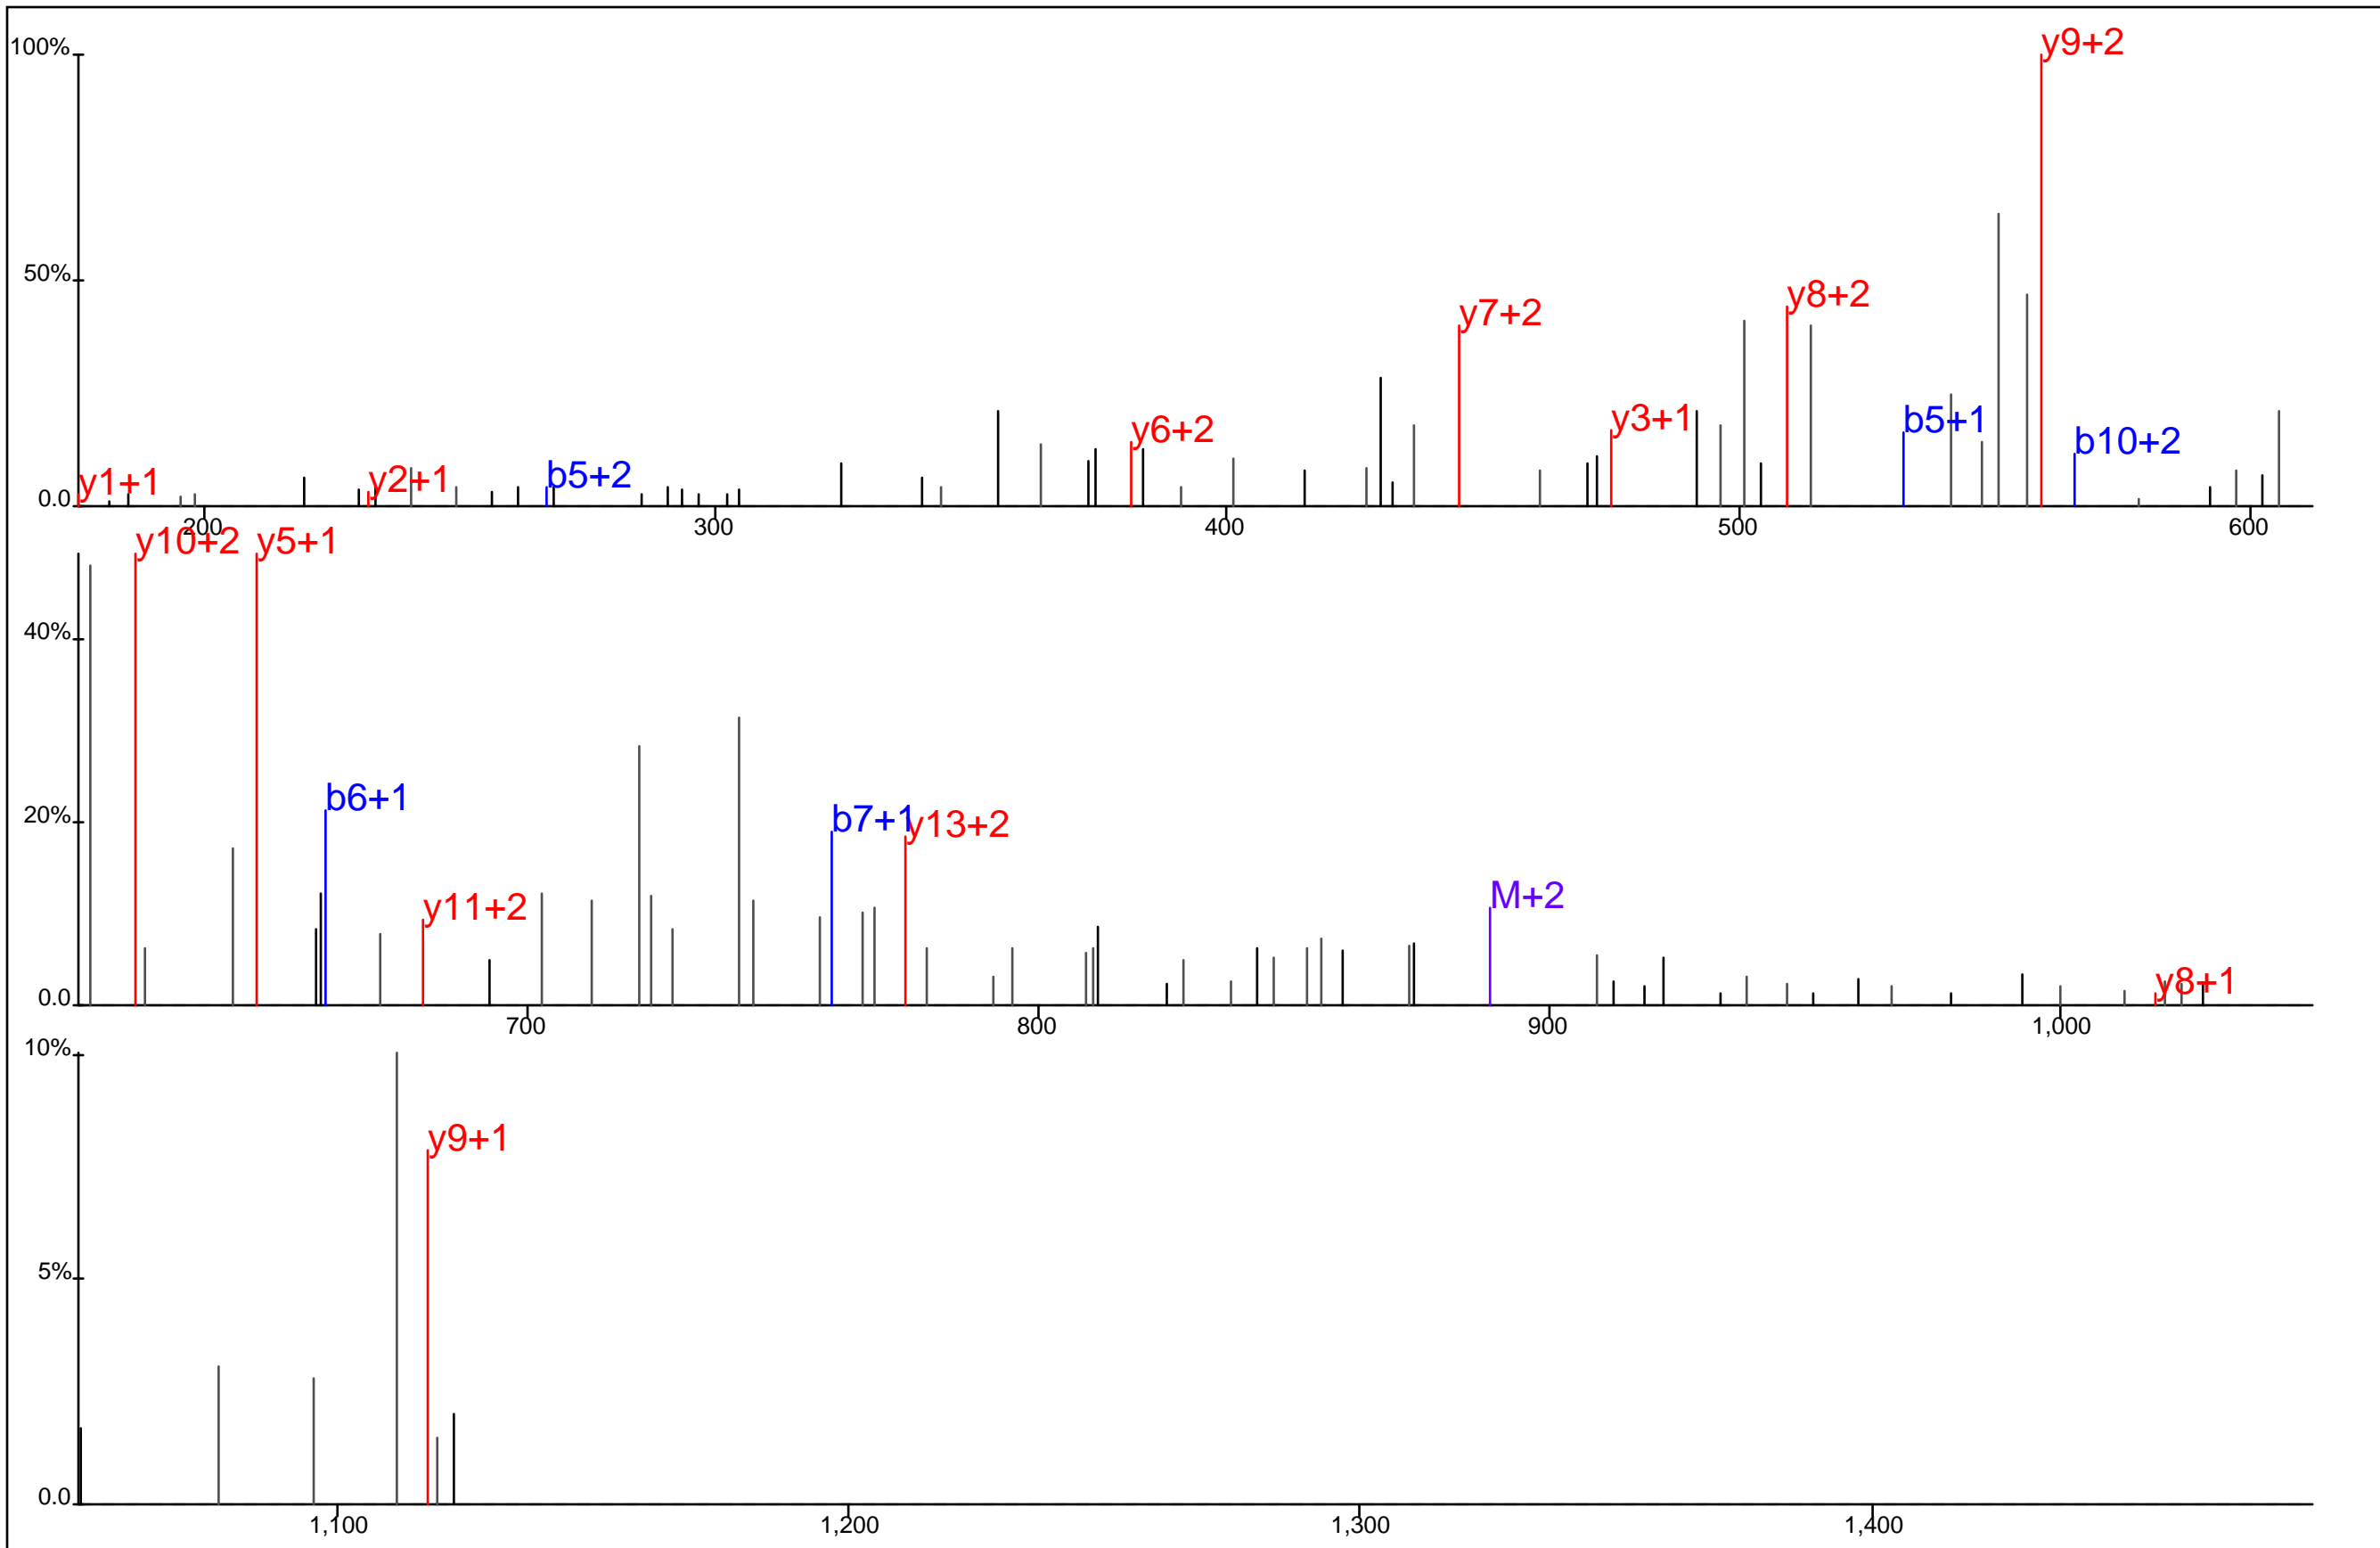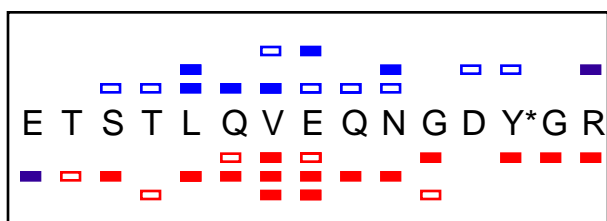

Protein Name: c-Mpl binding protein  
 gi Accession: 0  
 Precursor Mass: 592.9193+3  
 Delta Mass: 0.123 ppm  
 XCorr: 20.06

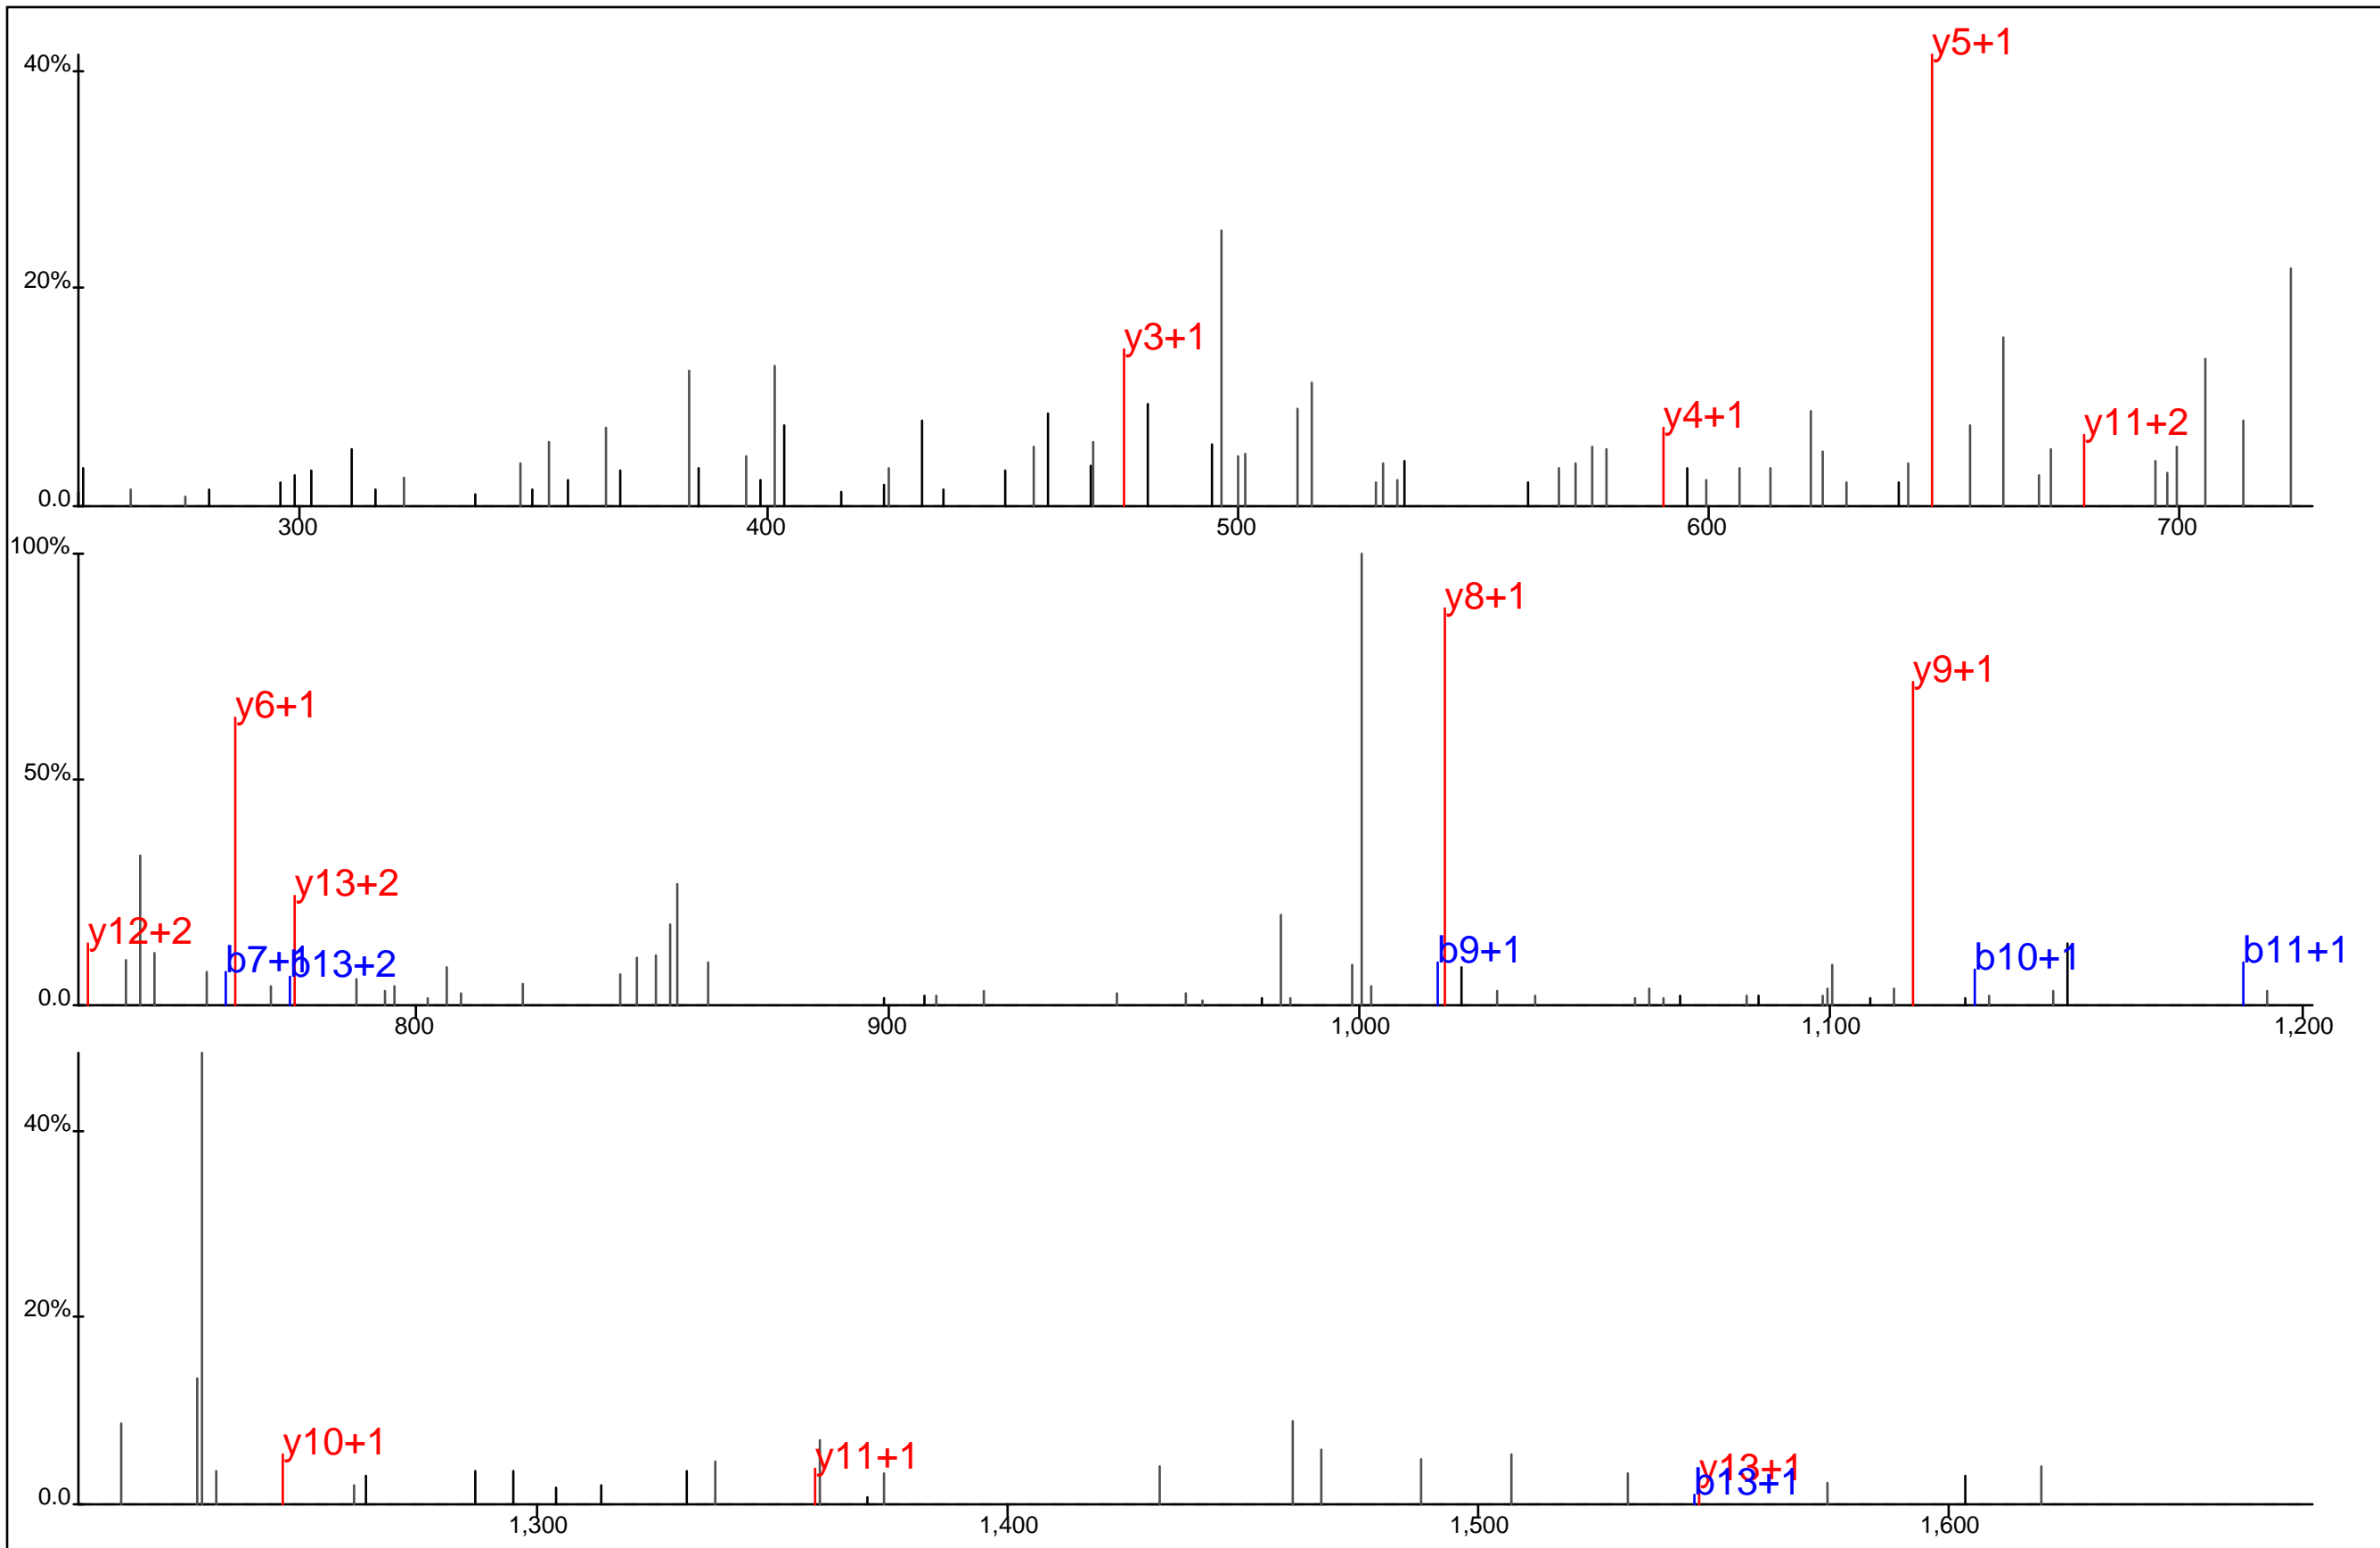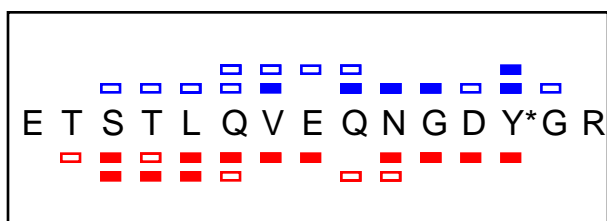

Protein Name: c-Mpl binding protein  
 gi Accession: 0  
 Precursor Mass: 888.8766+2  
 Delta Mass: 1.361 ppm  
 XCorr: 24.22

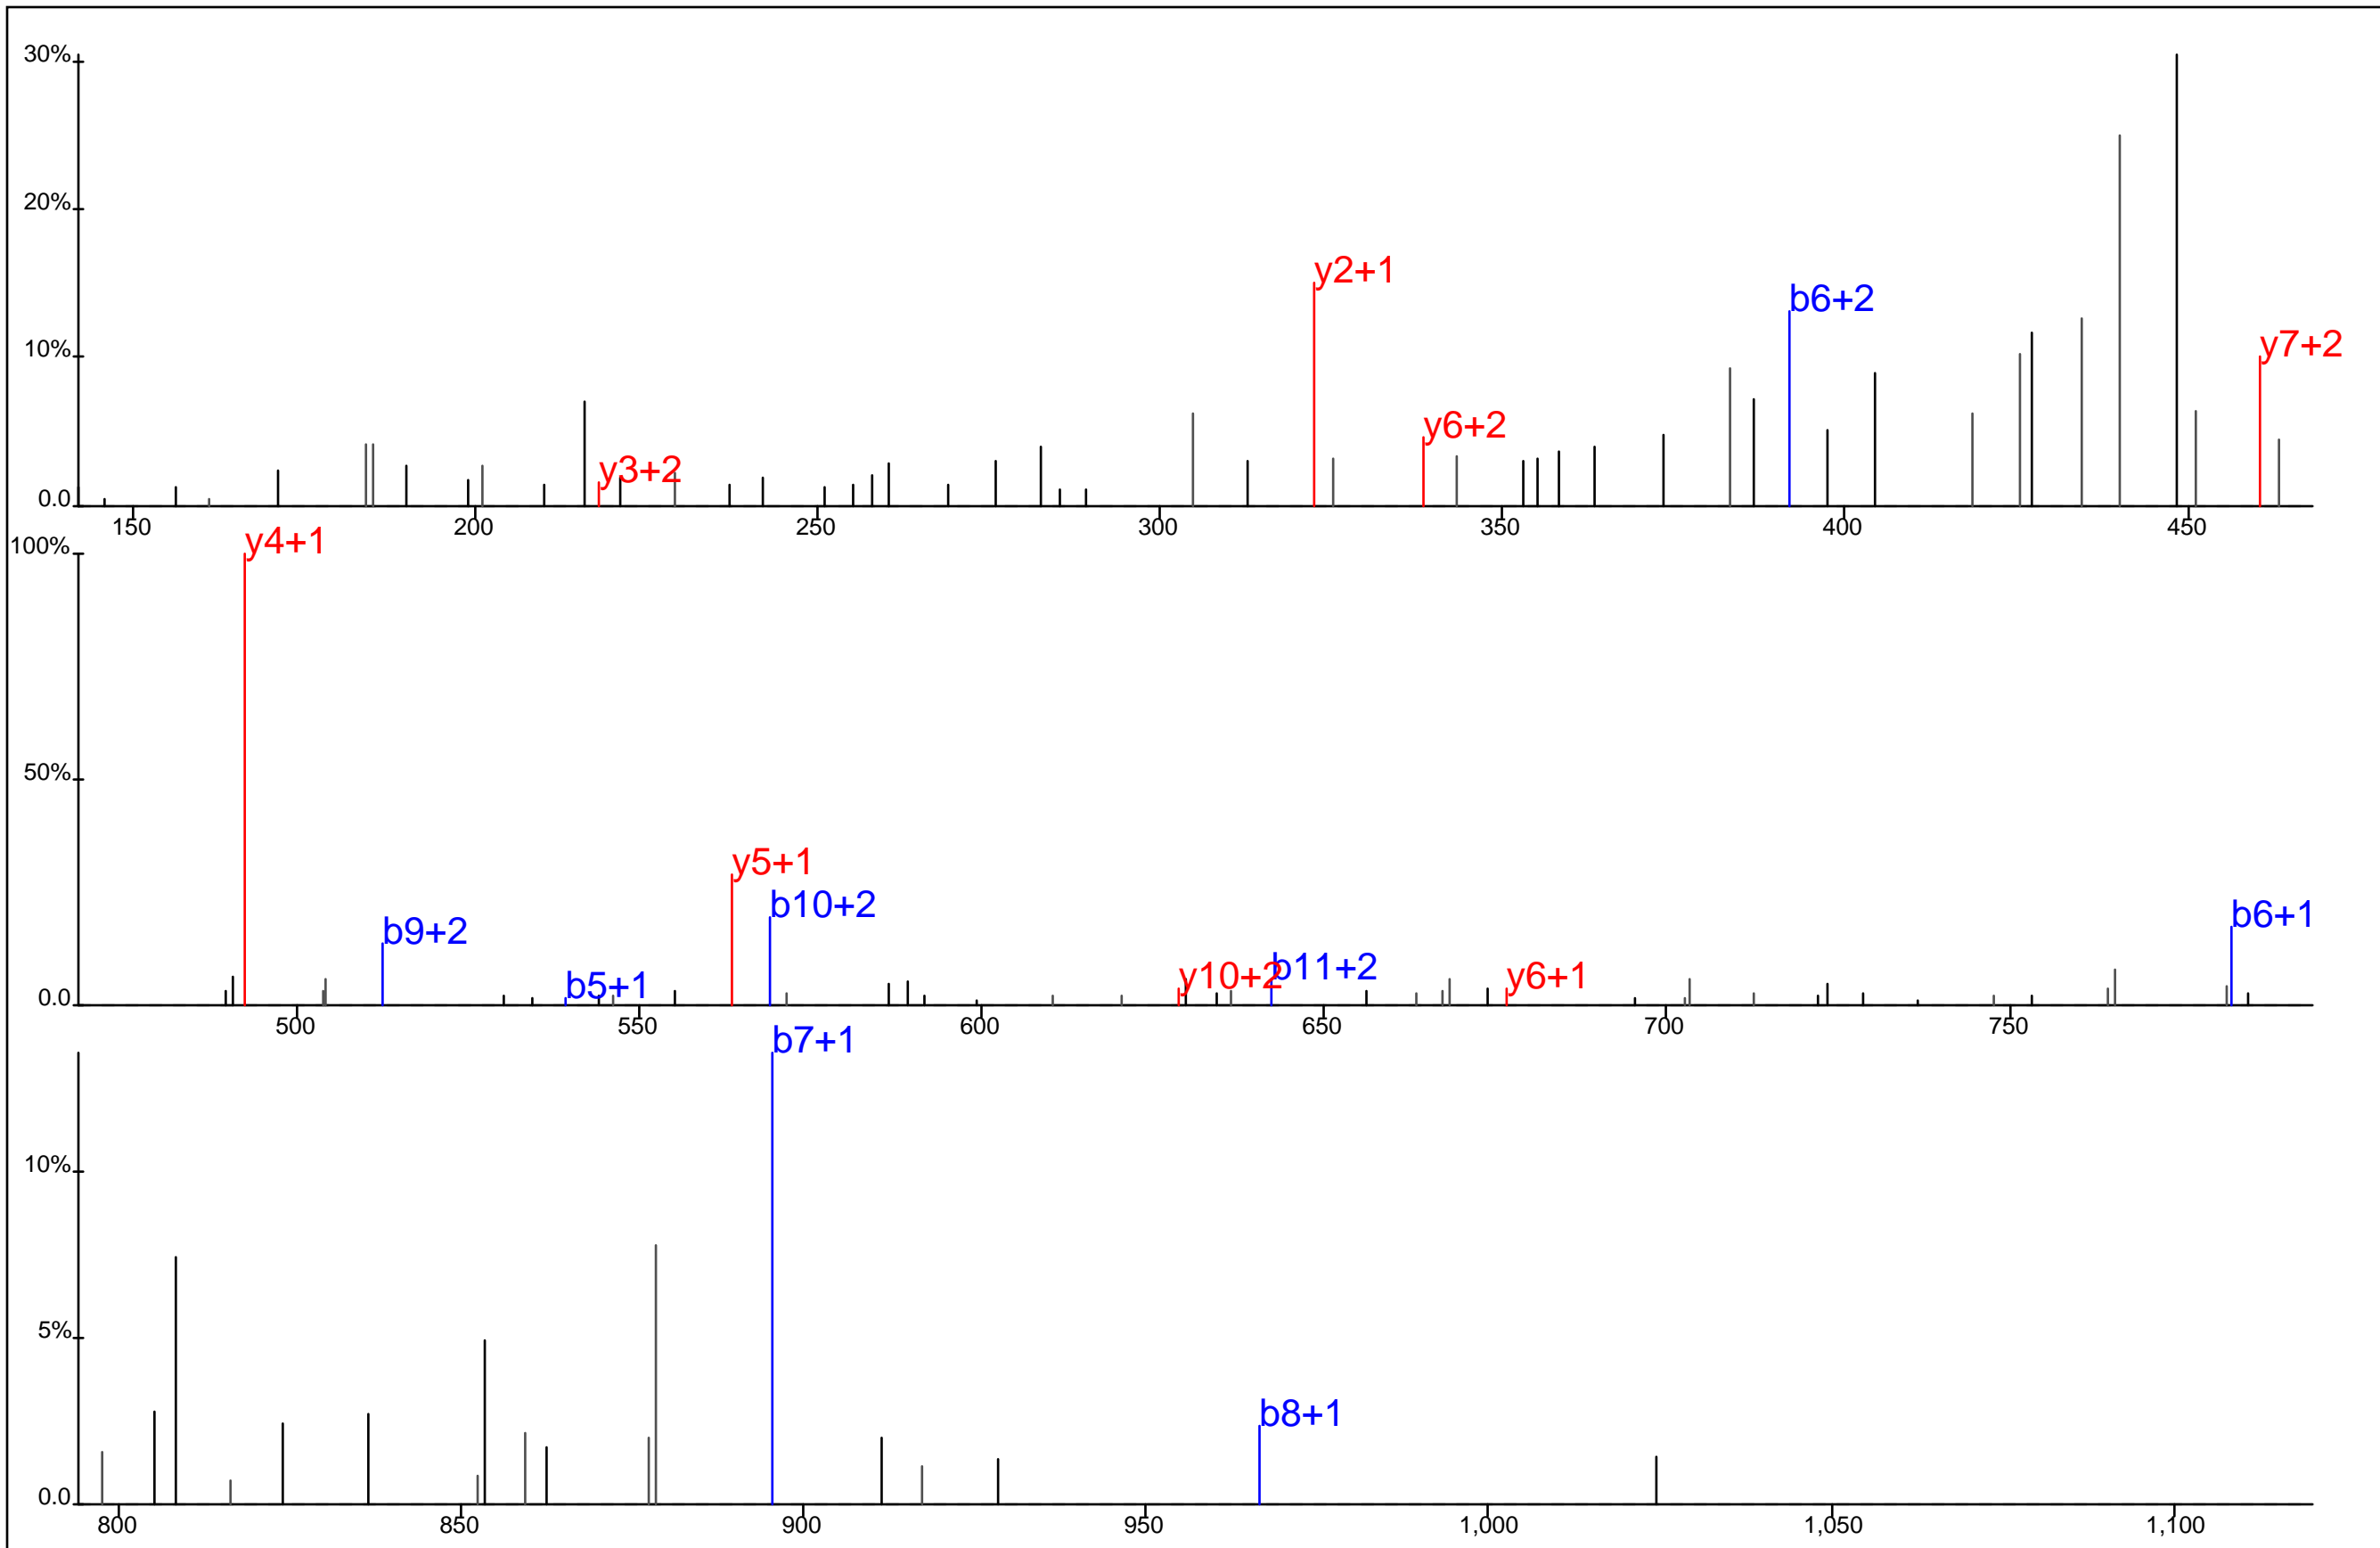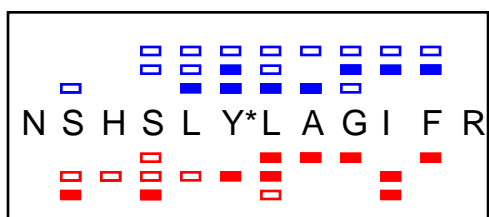

Protein Name: Coatomer protein complex, subunit gamma 2  
 gi Accession: 0  
 Precursor Mass: 486.5694+3  
 Delta Mass: 0.046 ppm  
 XCorr: 27.45

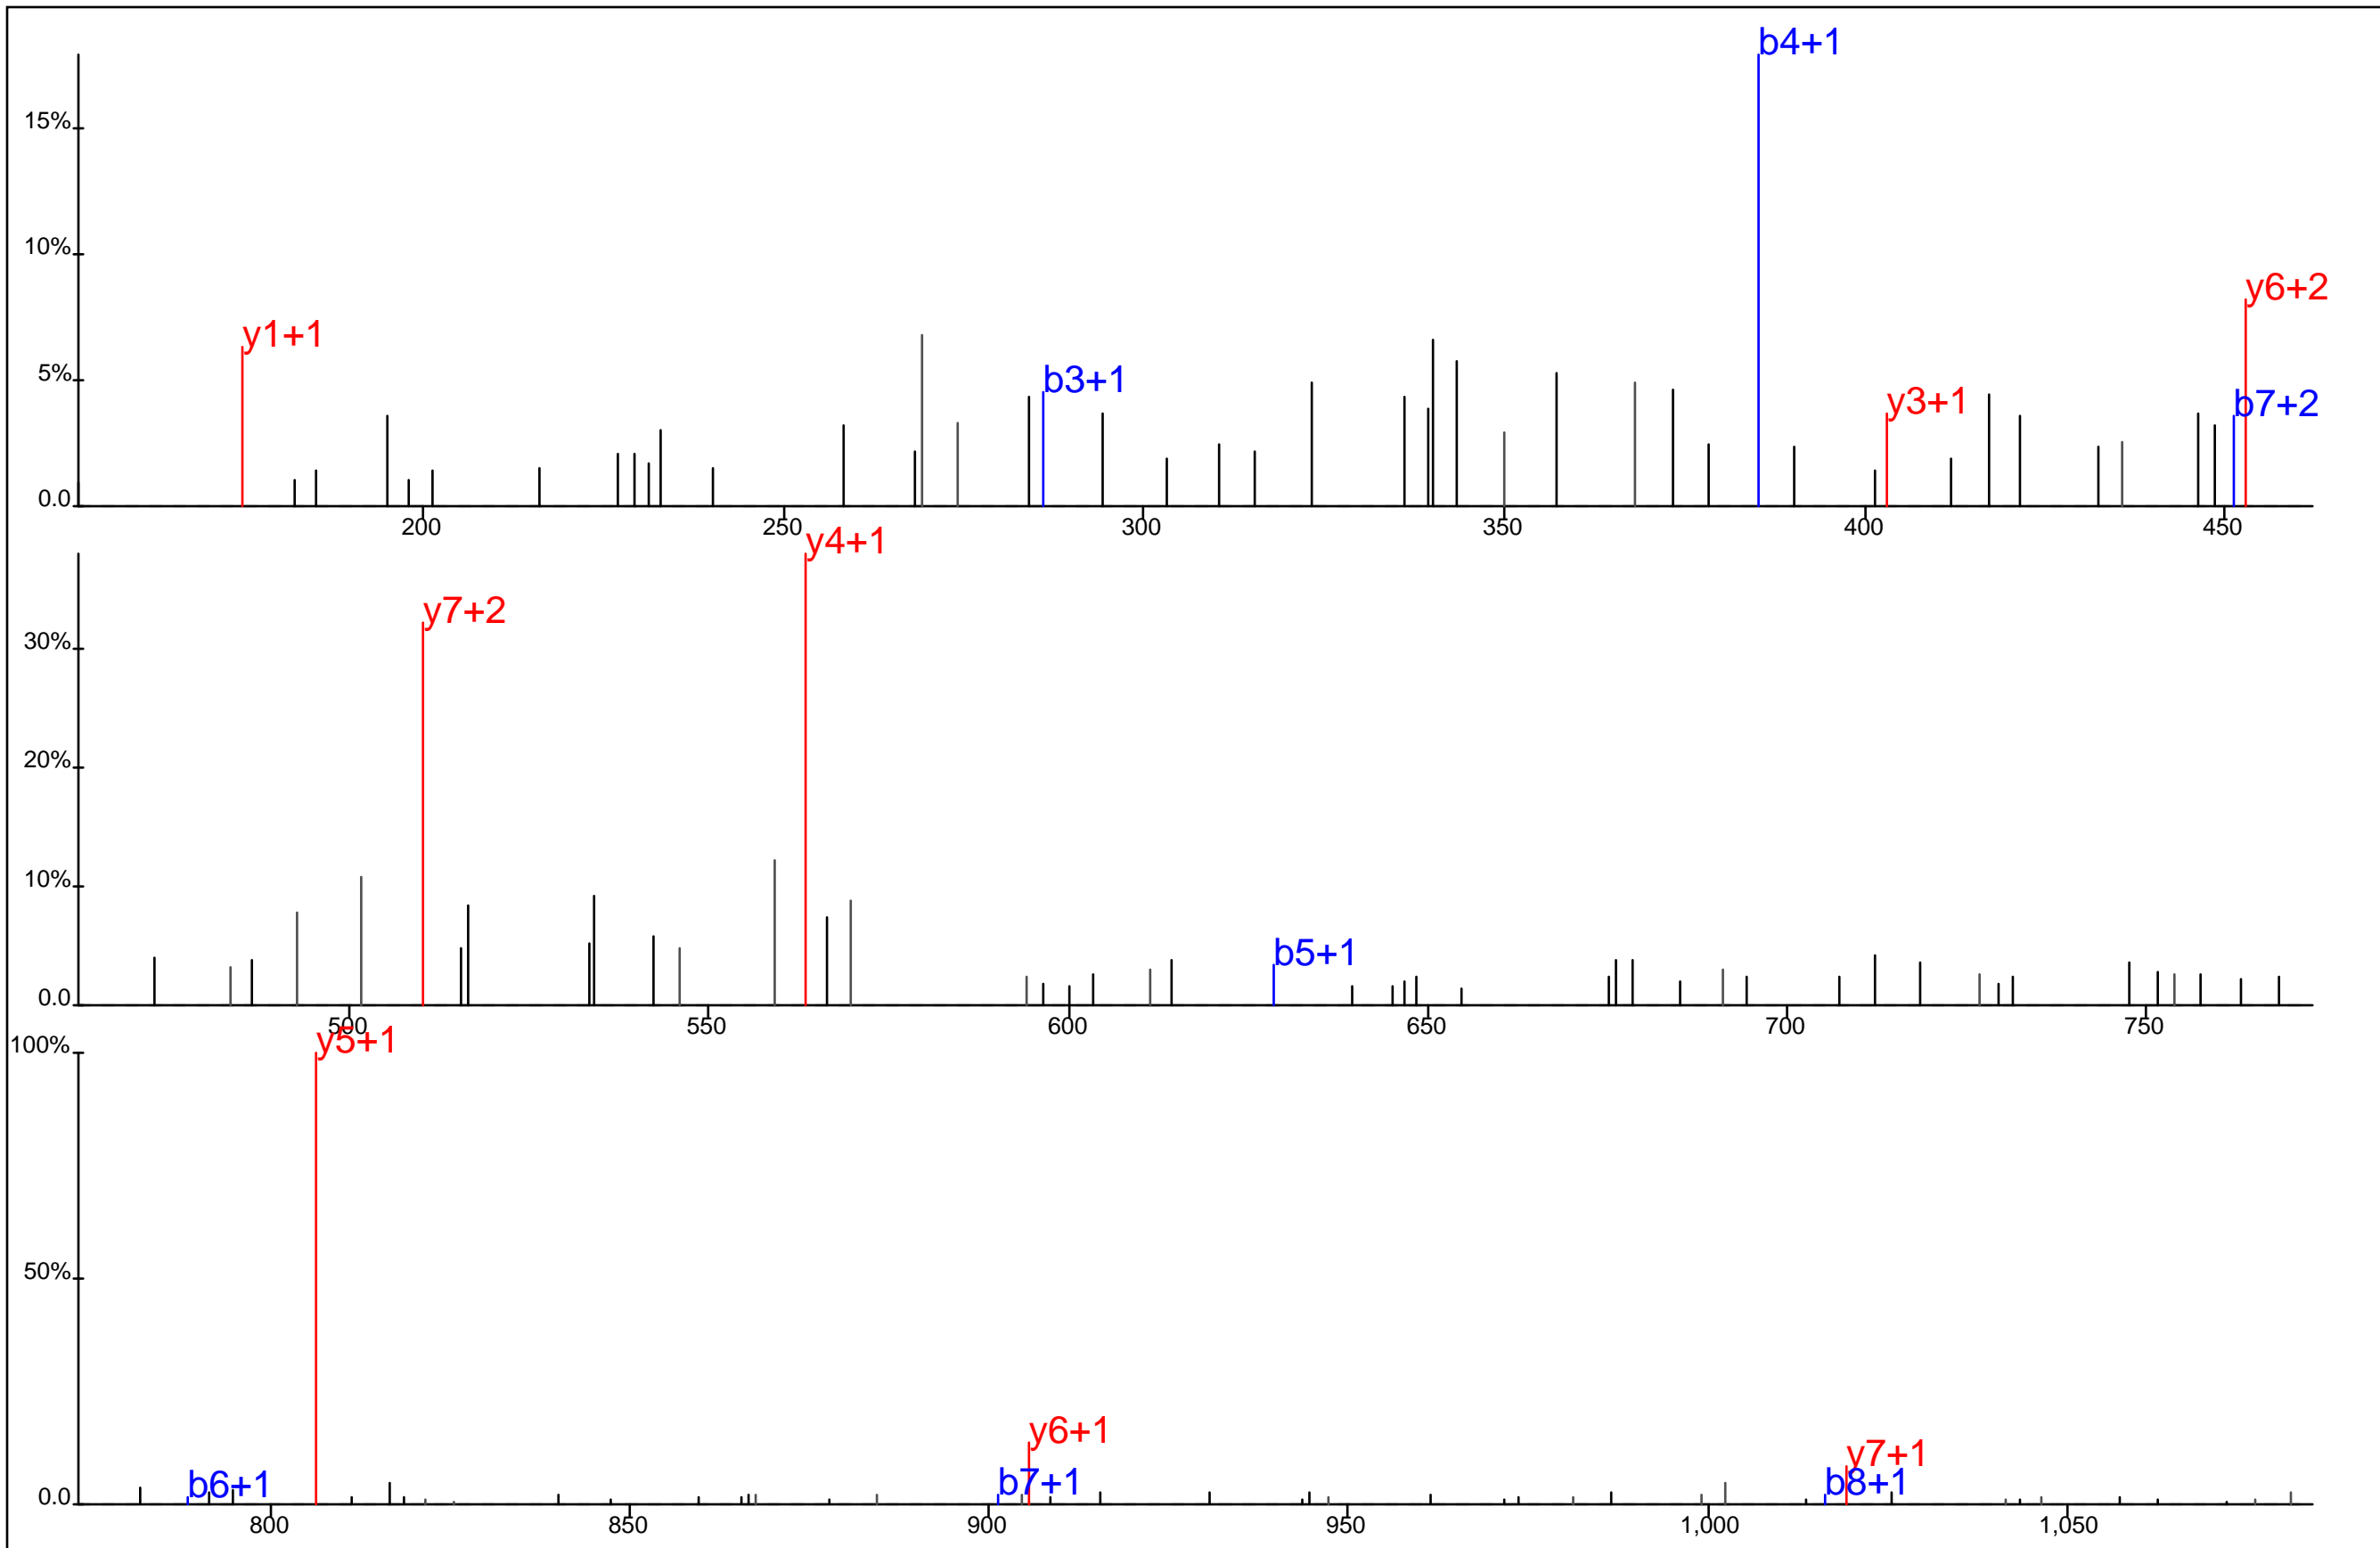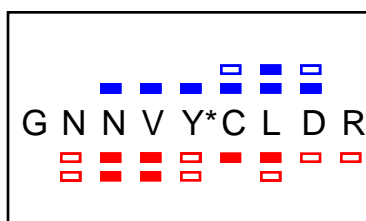

Protein Name: Coatomer protein complex, subunit alpha  
 gi Accession: 0  
 Precursor Mass: 595.7369+2  
 Delta Mass: 0.519 ppm  
 XCorr: 33.21

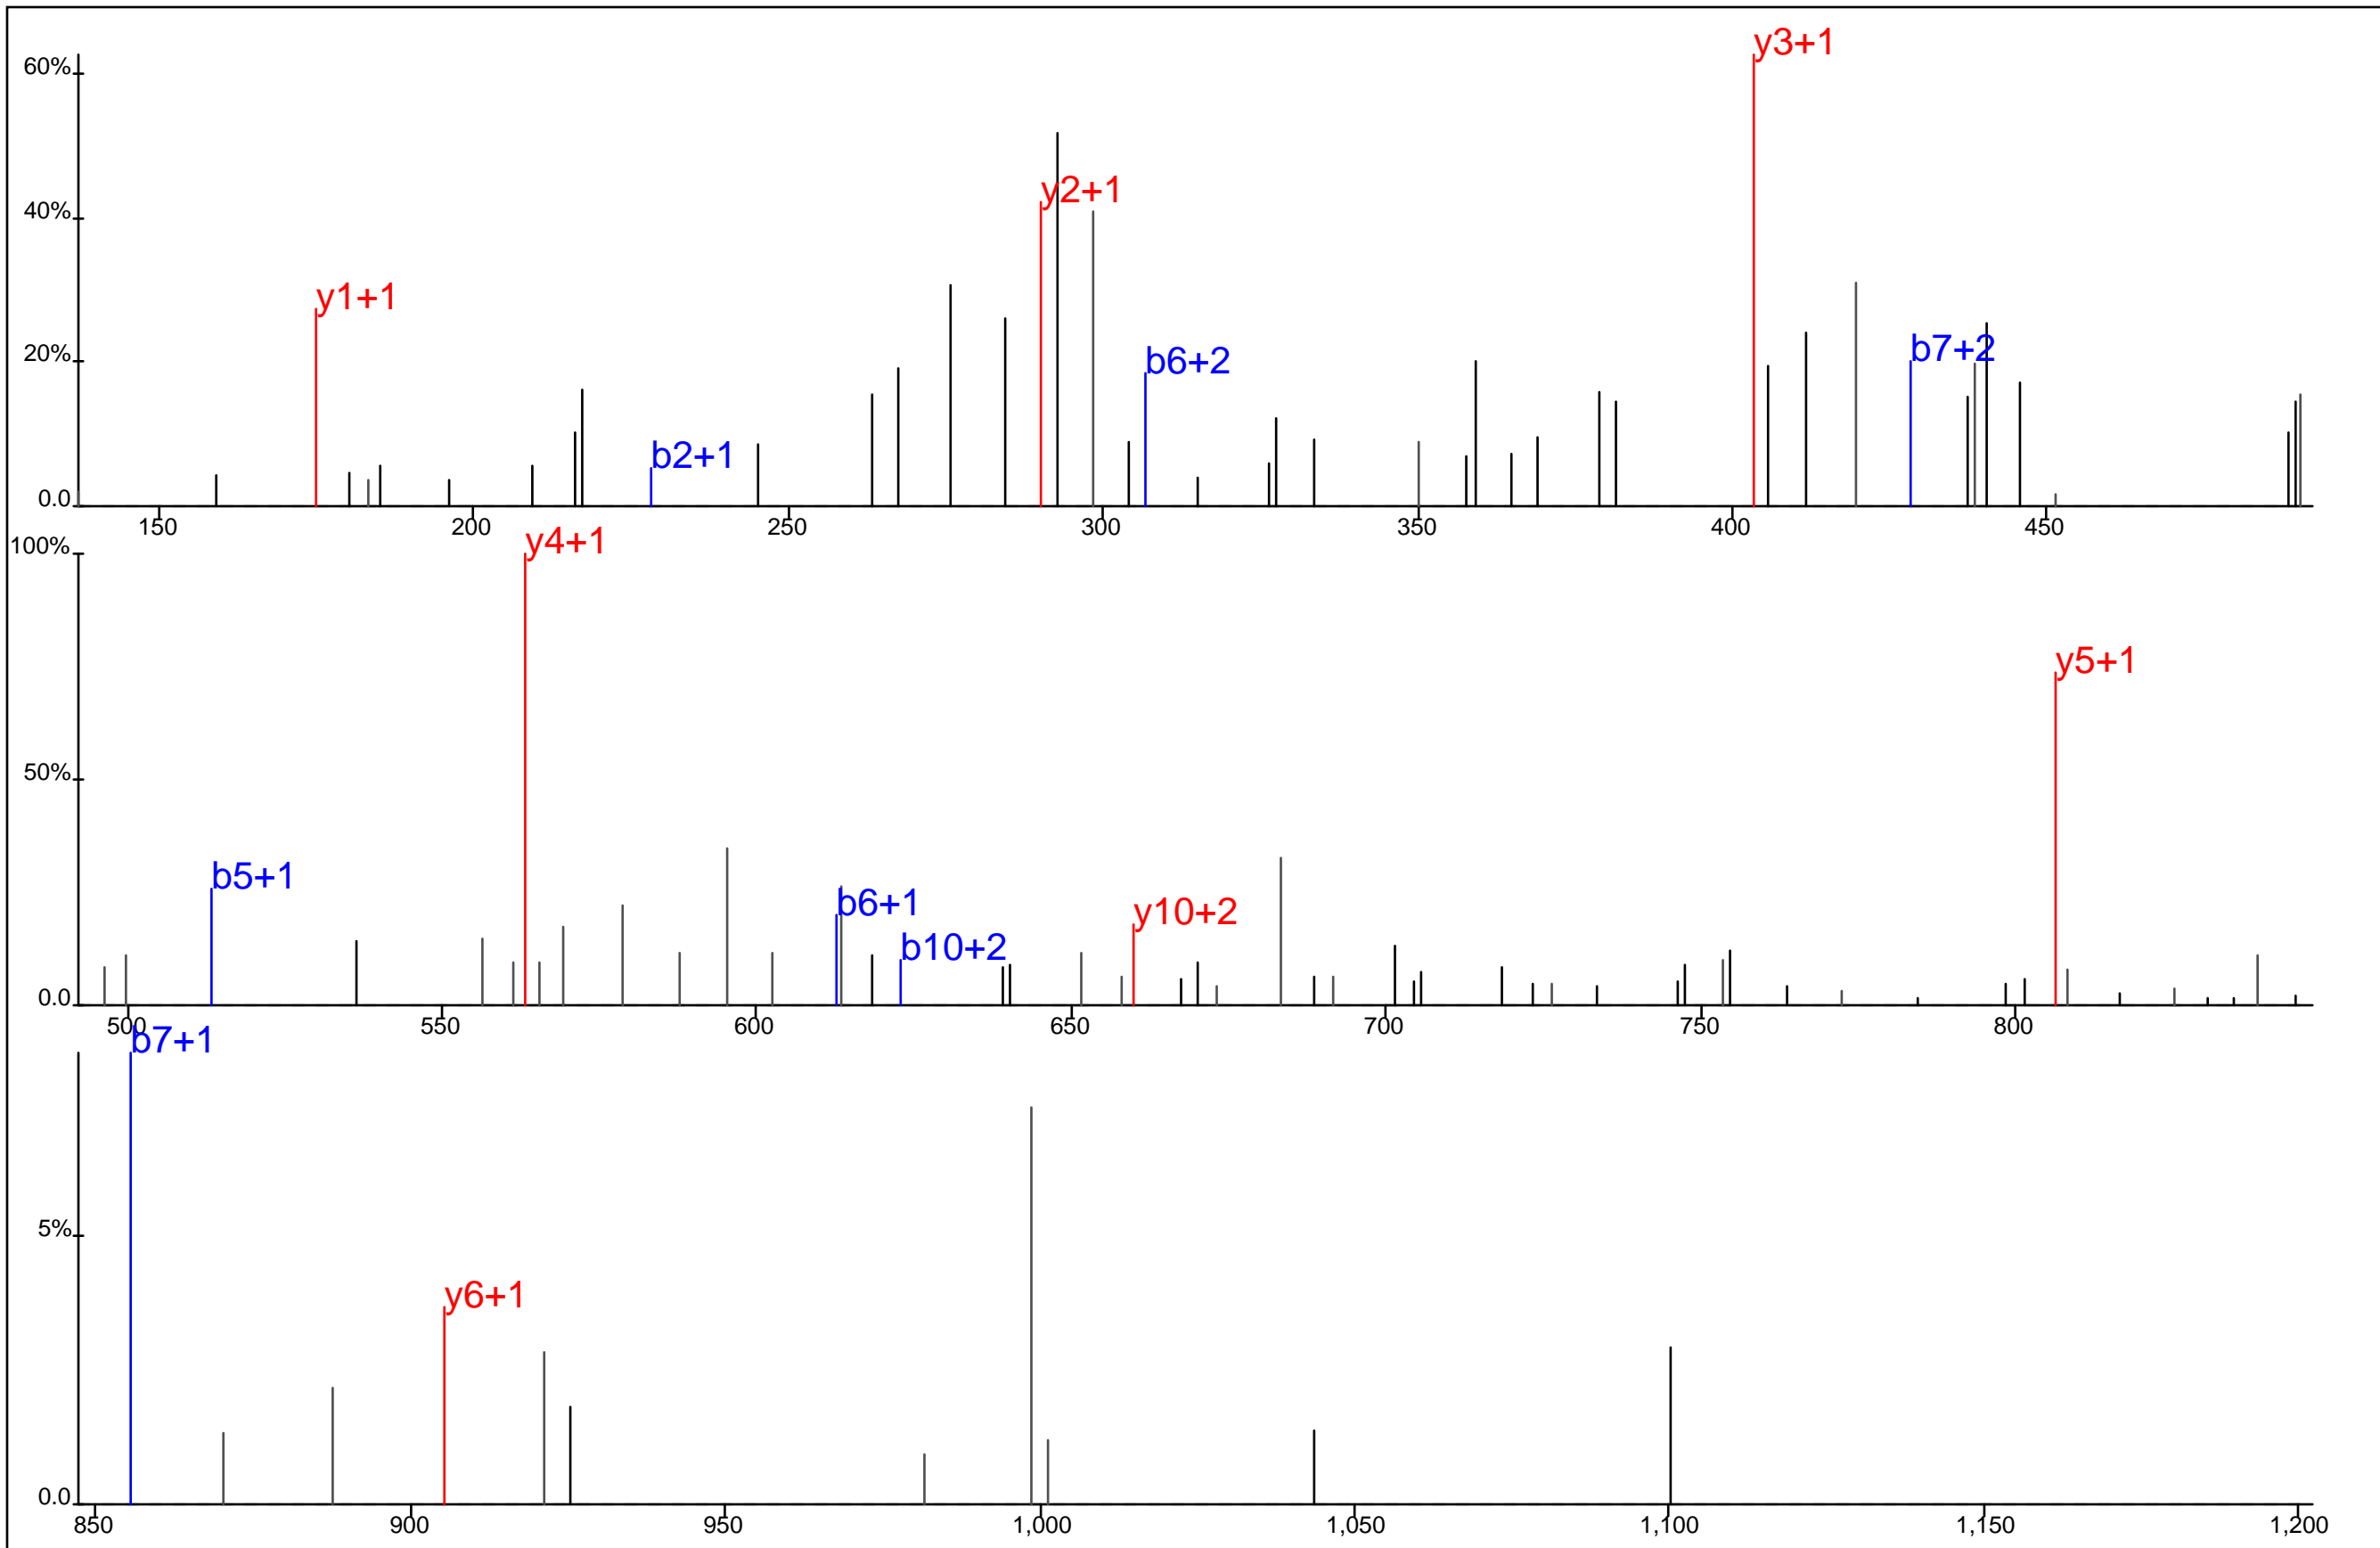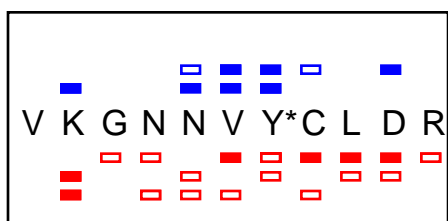

Protein Name: Coatomer protein complex, subunit alpha  
 gi Accession: 0  
 Precursor Mass: 473.2163+3  
 Delta Mass: 3.471 ppm  
 XCorr: 29.36

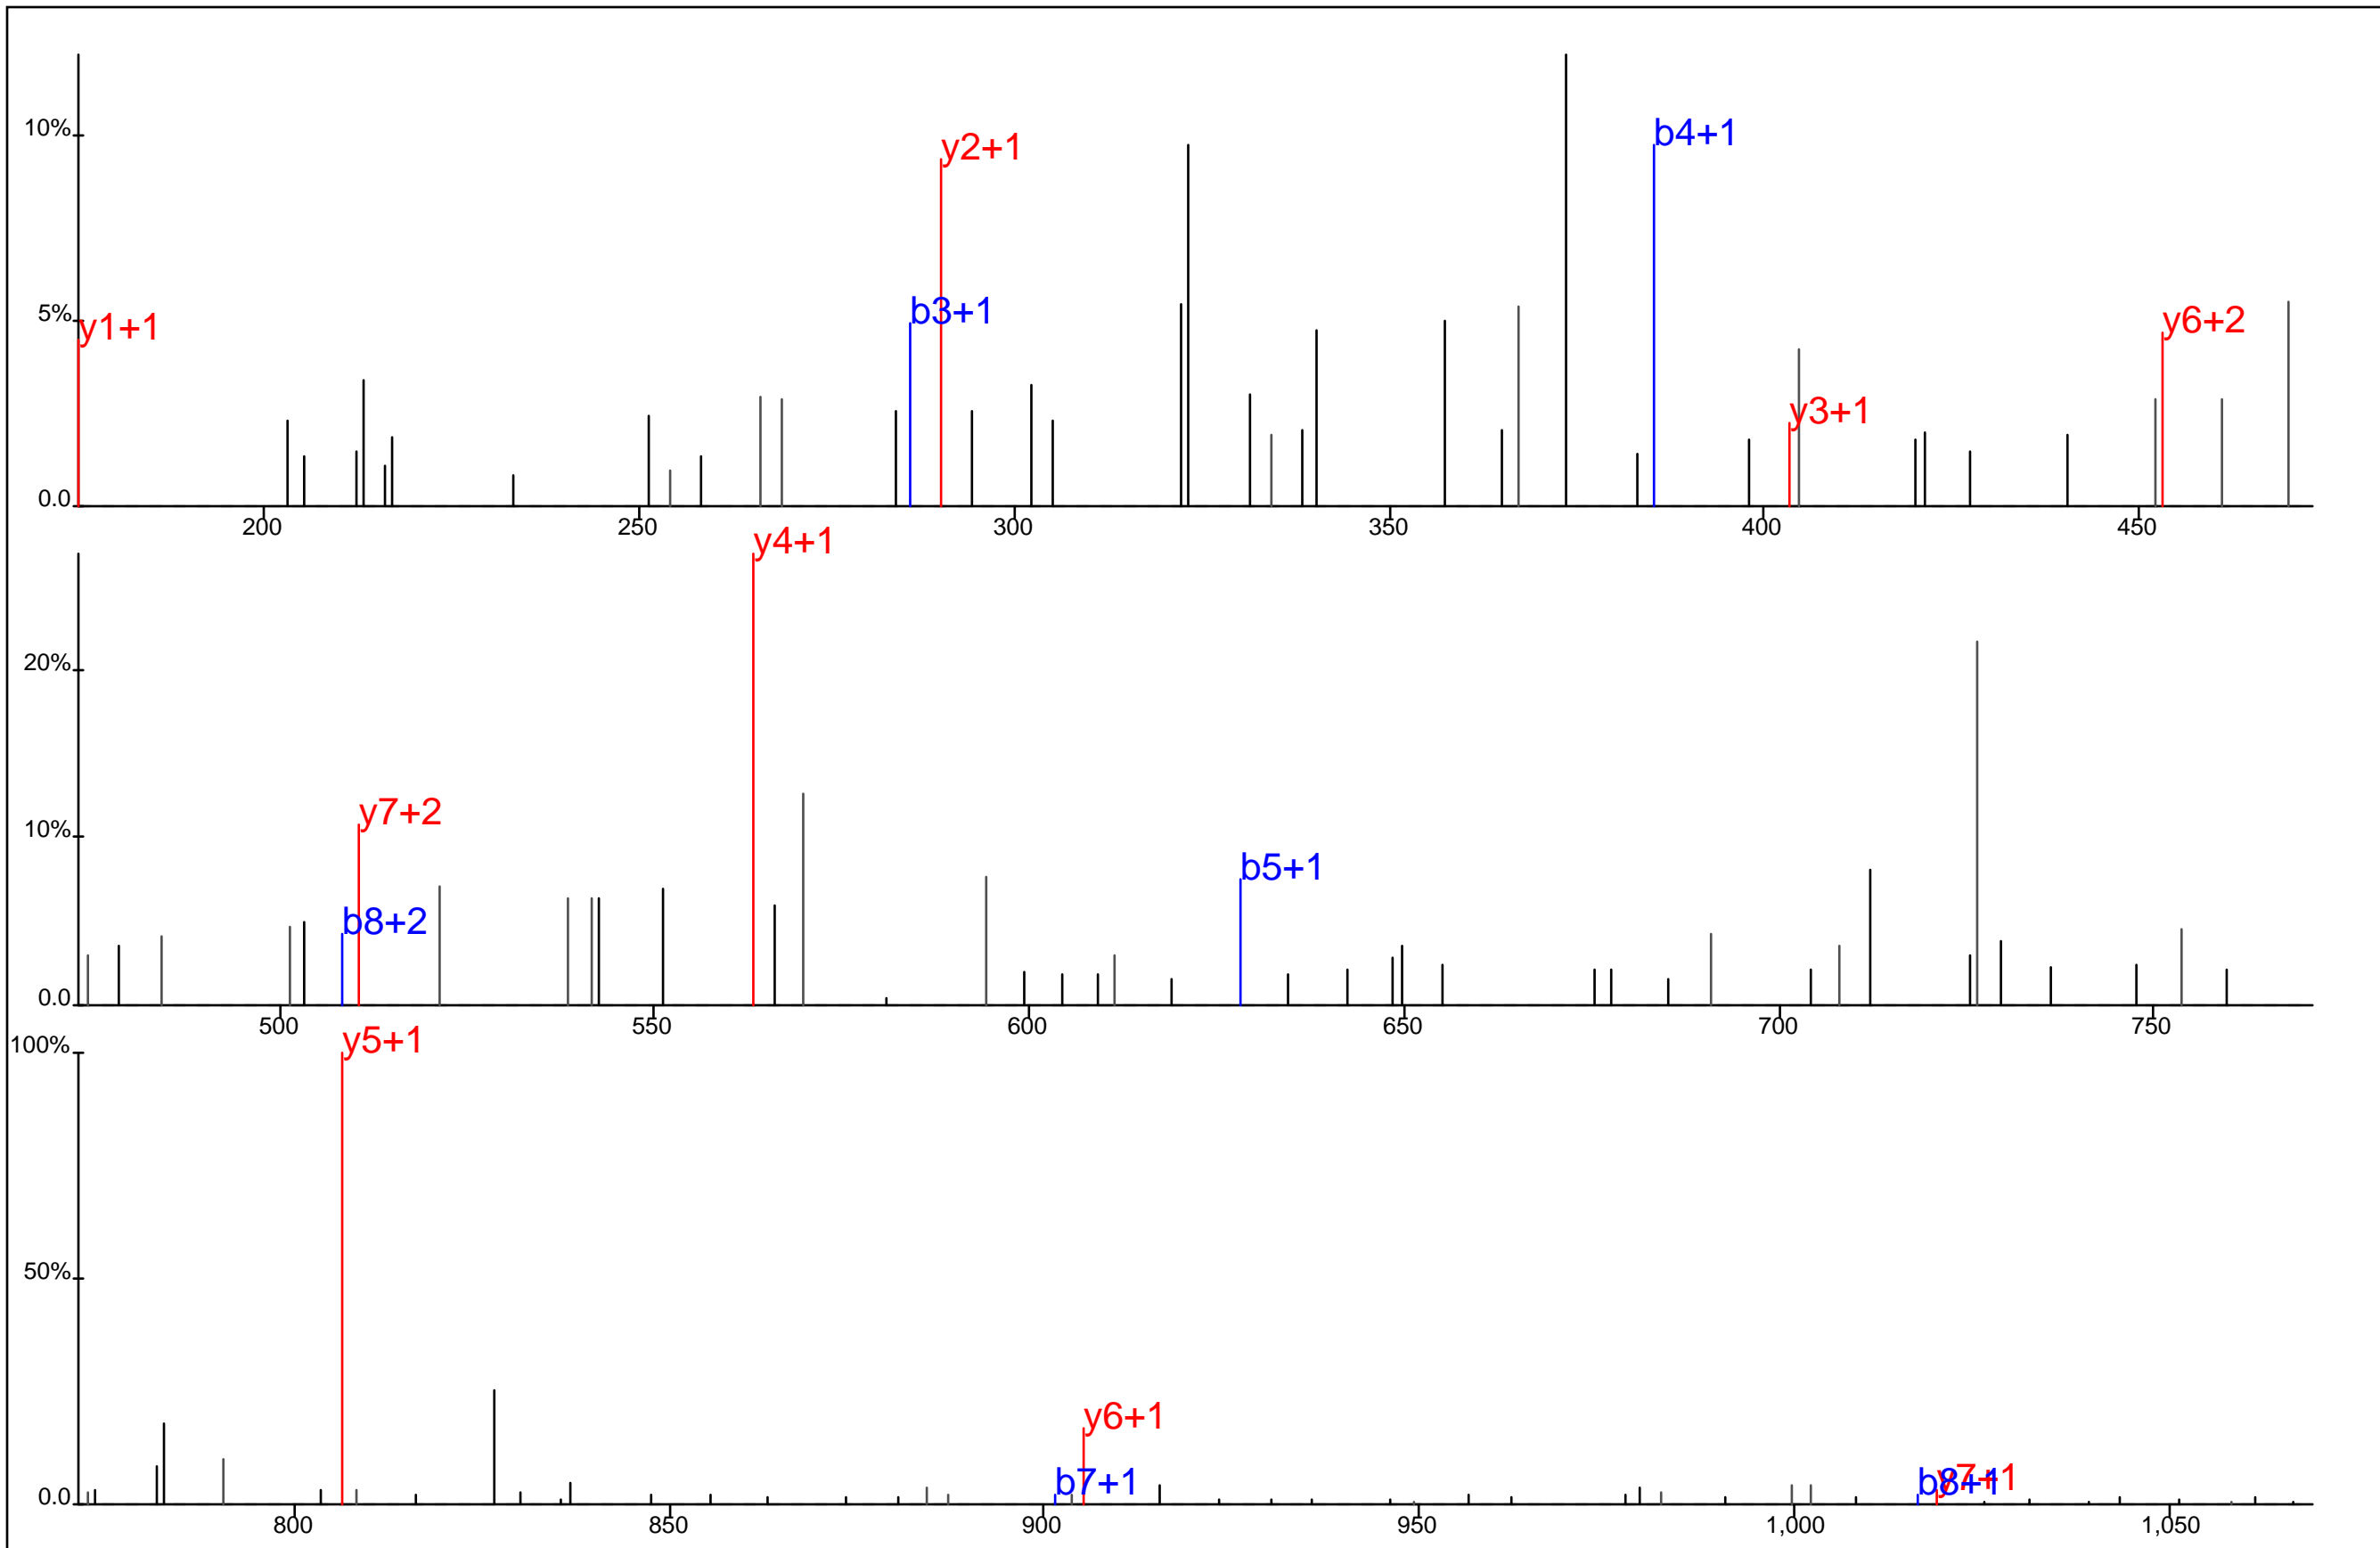

■ ■ ■ ■ ■ ■ ■ ■  
 G N N V Y\* C L D R  
□ □ □ □ □ □ □ □

Protein Name: Coatomer protein complex, subunit alpha  
 gi Accession: 0  
 Precursor Mass: 595.7371+2  
 Delta Mass: 0.828 ppm  
 XCorr: 25.21

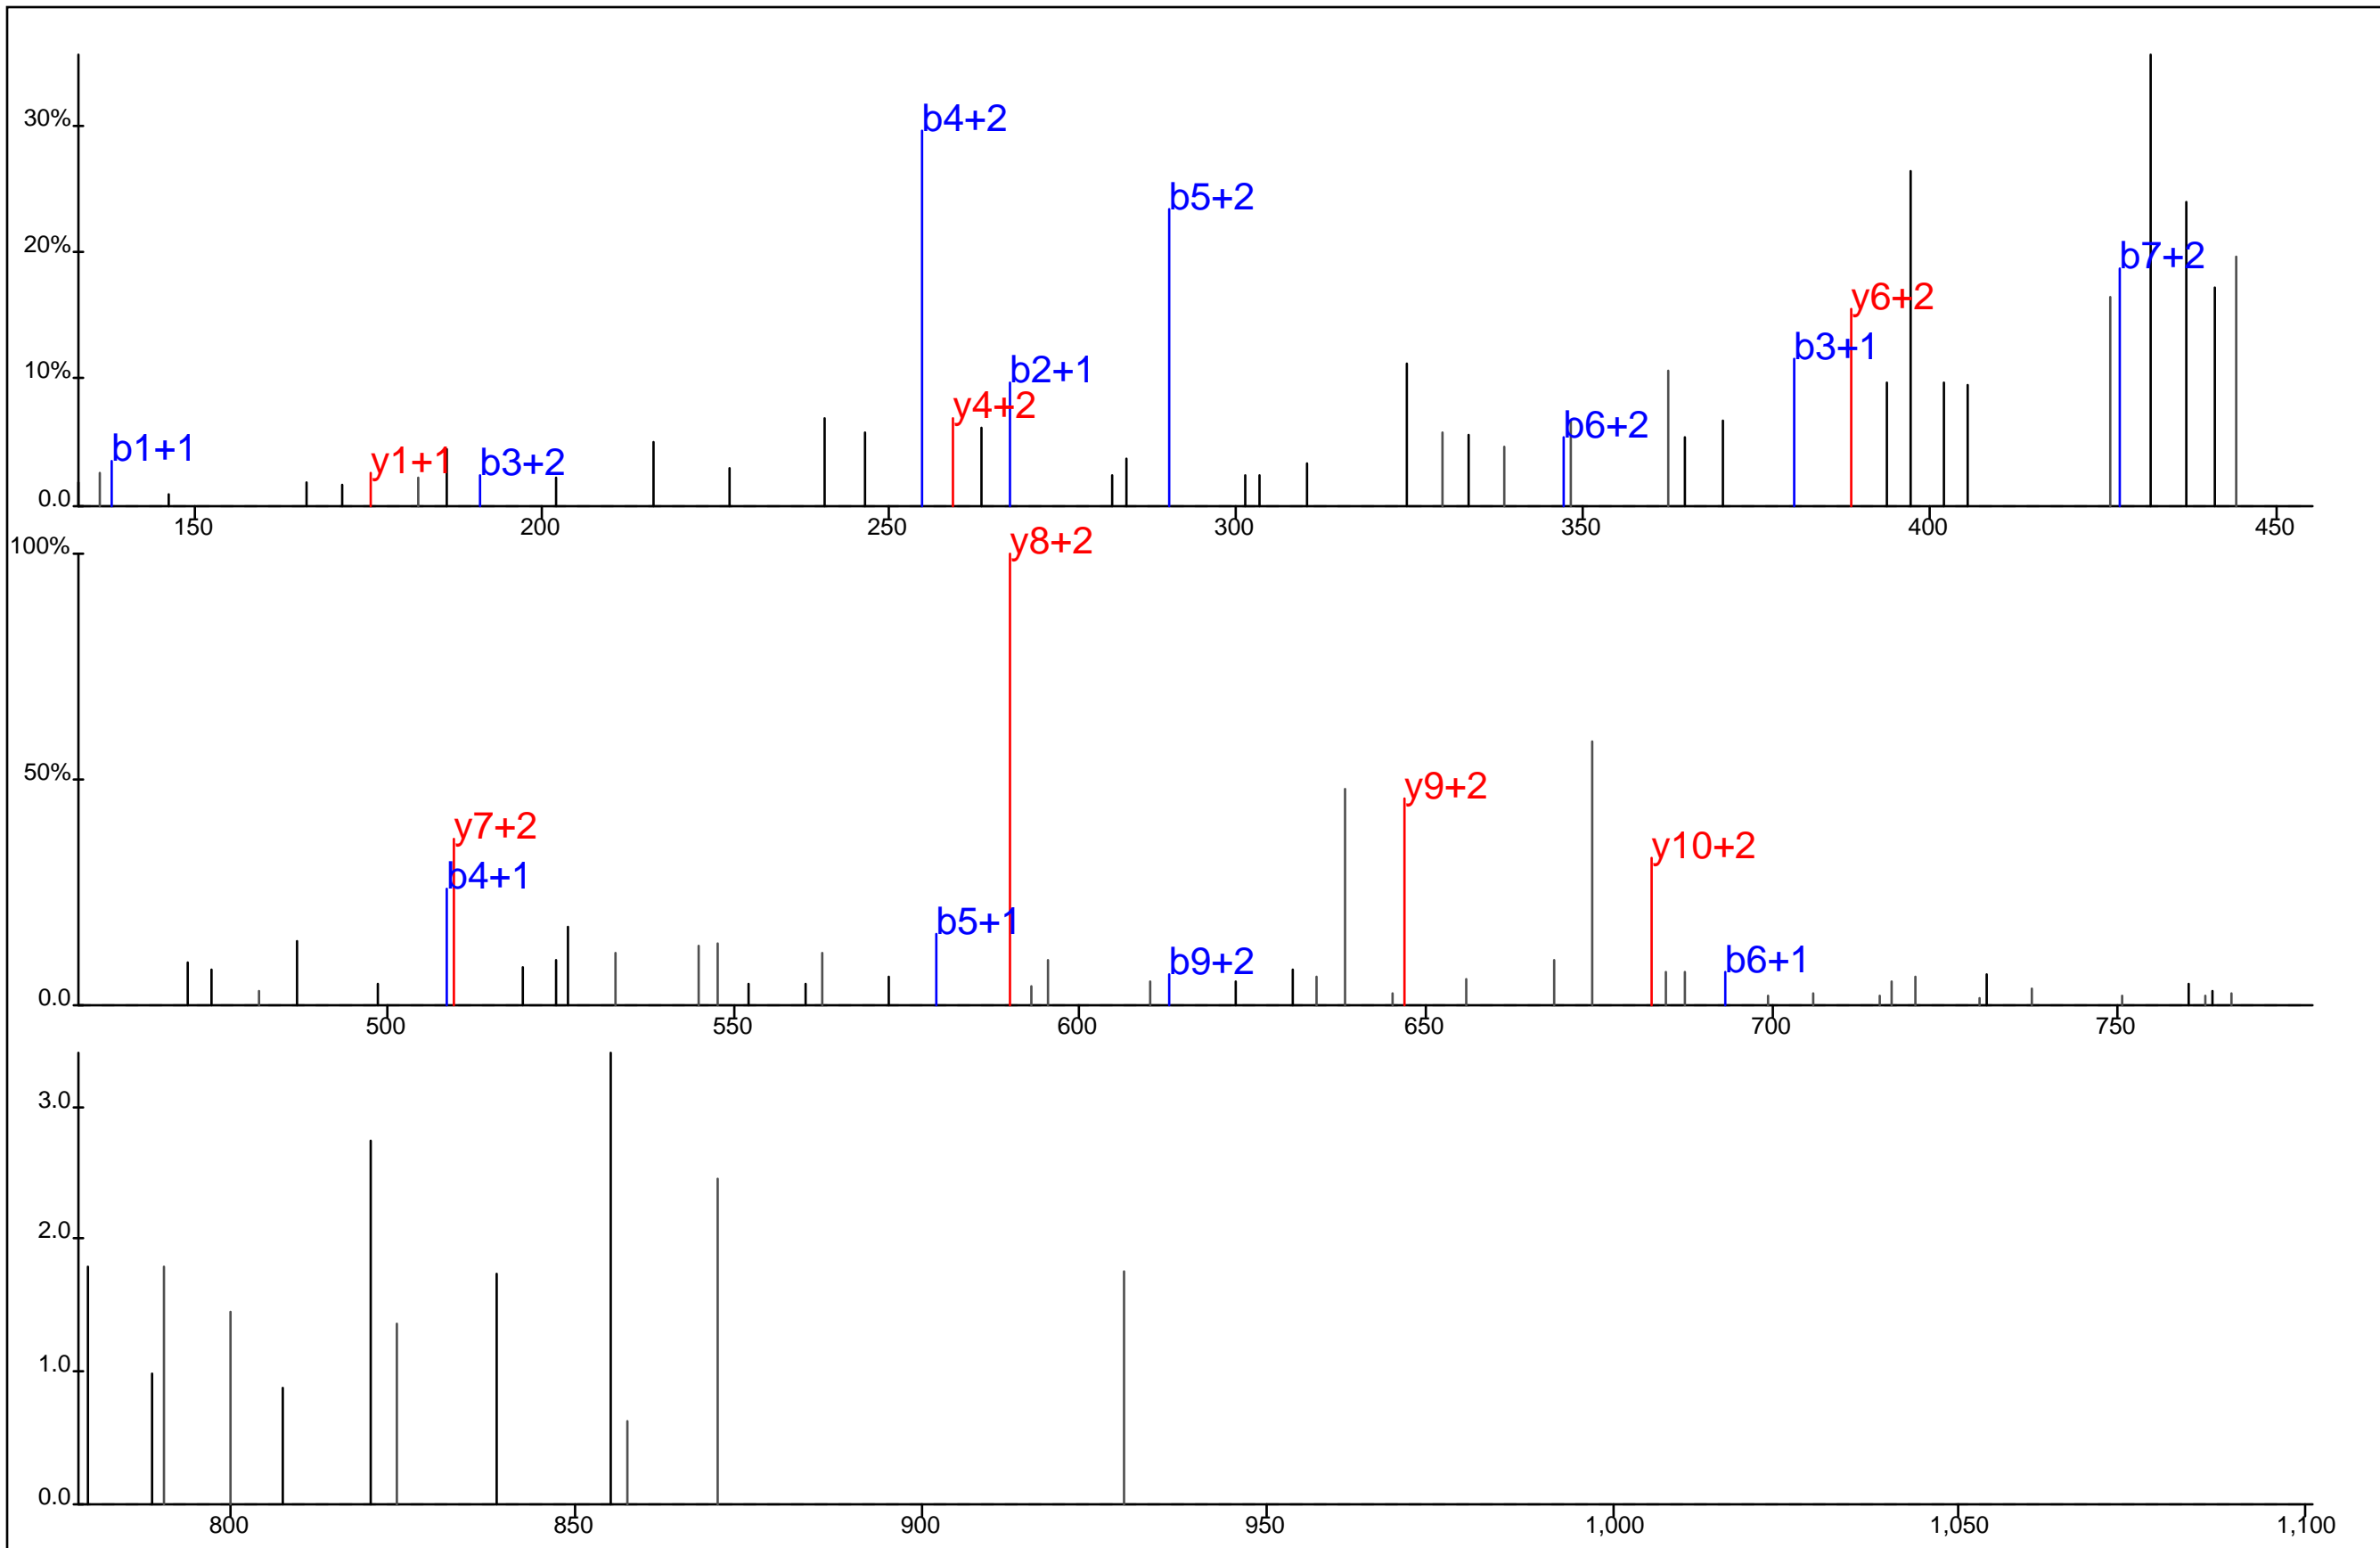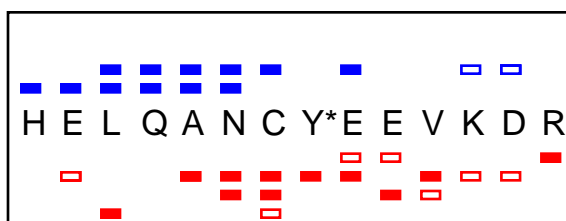

Protein Name: Cofilin 1  
 gi Accession: 0  
 Precursor Mass: 468.4506+4  
 Delta Mass: 0.870 ppm  
 XCorr: 21.17



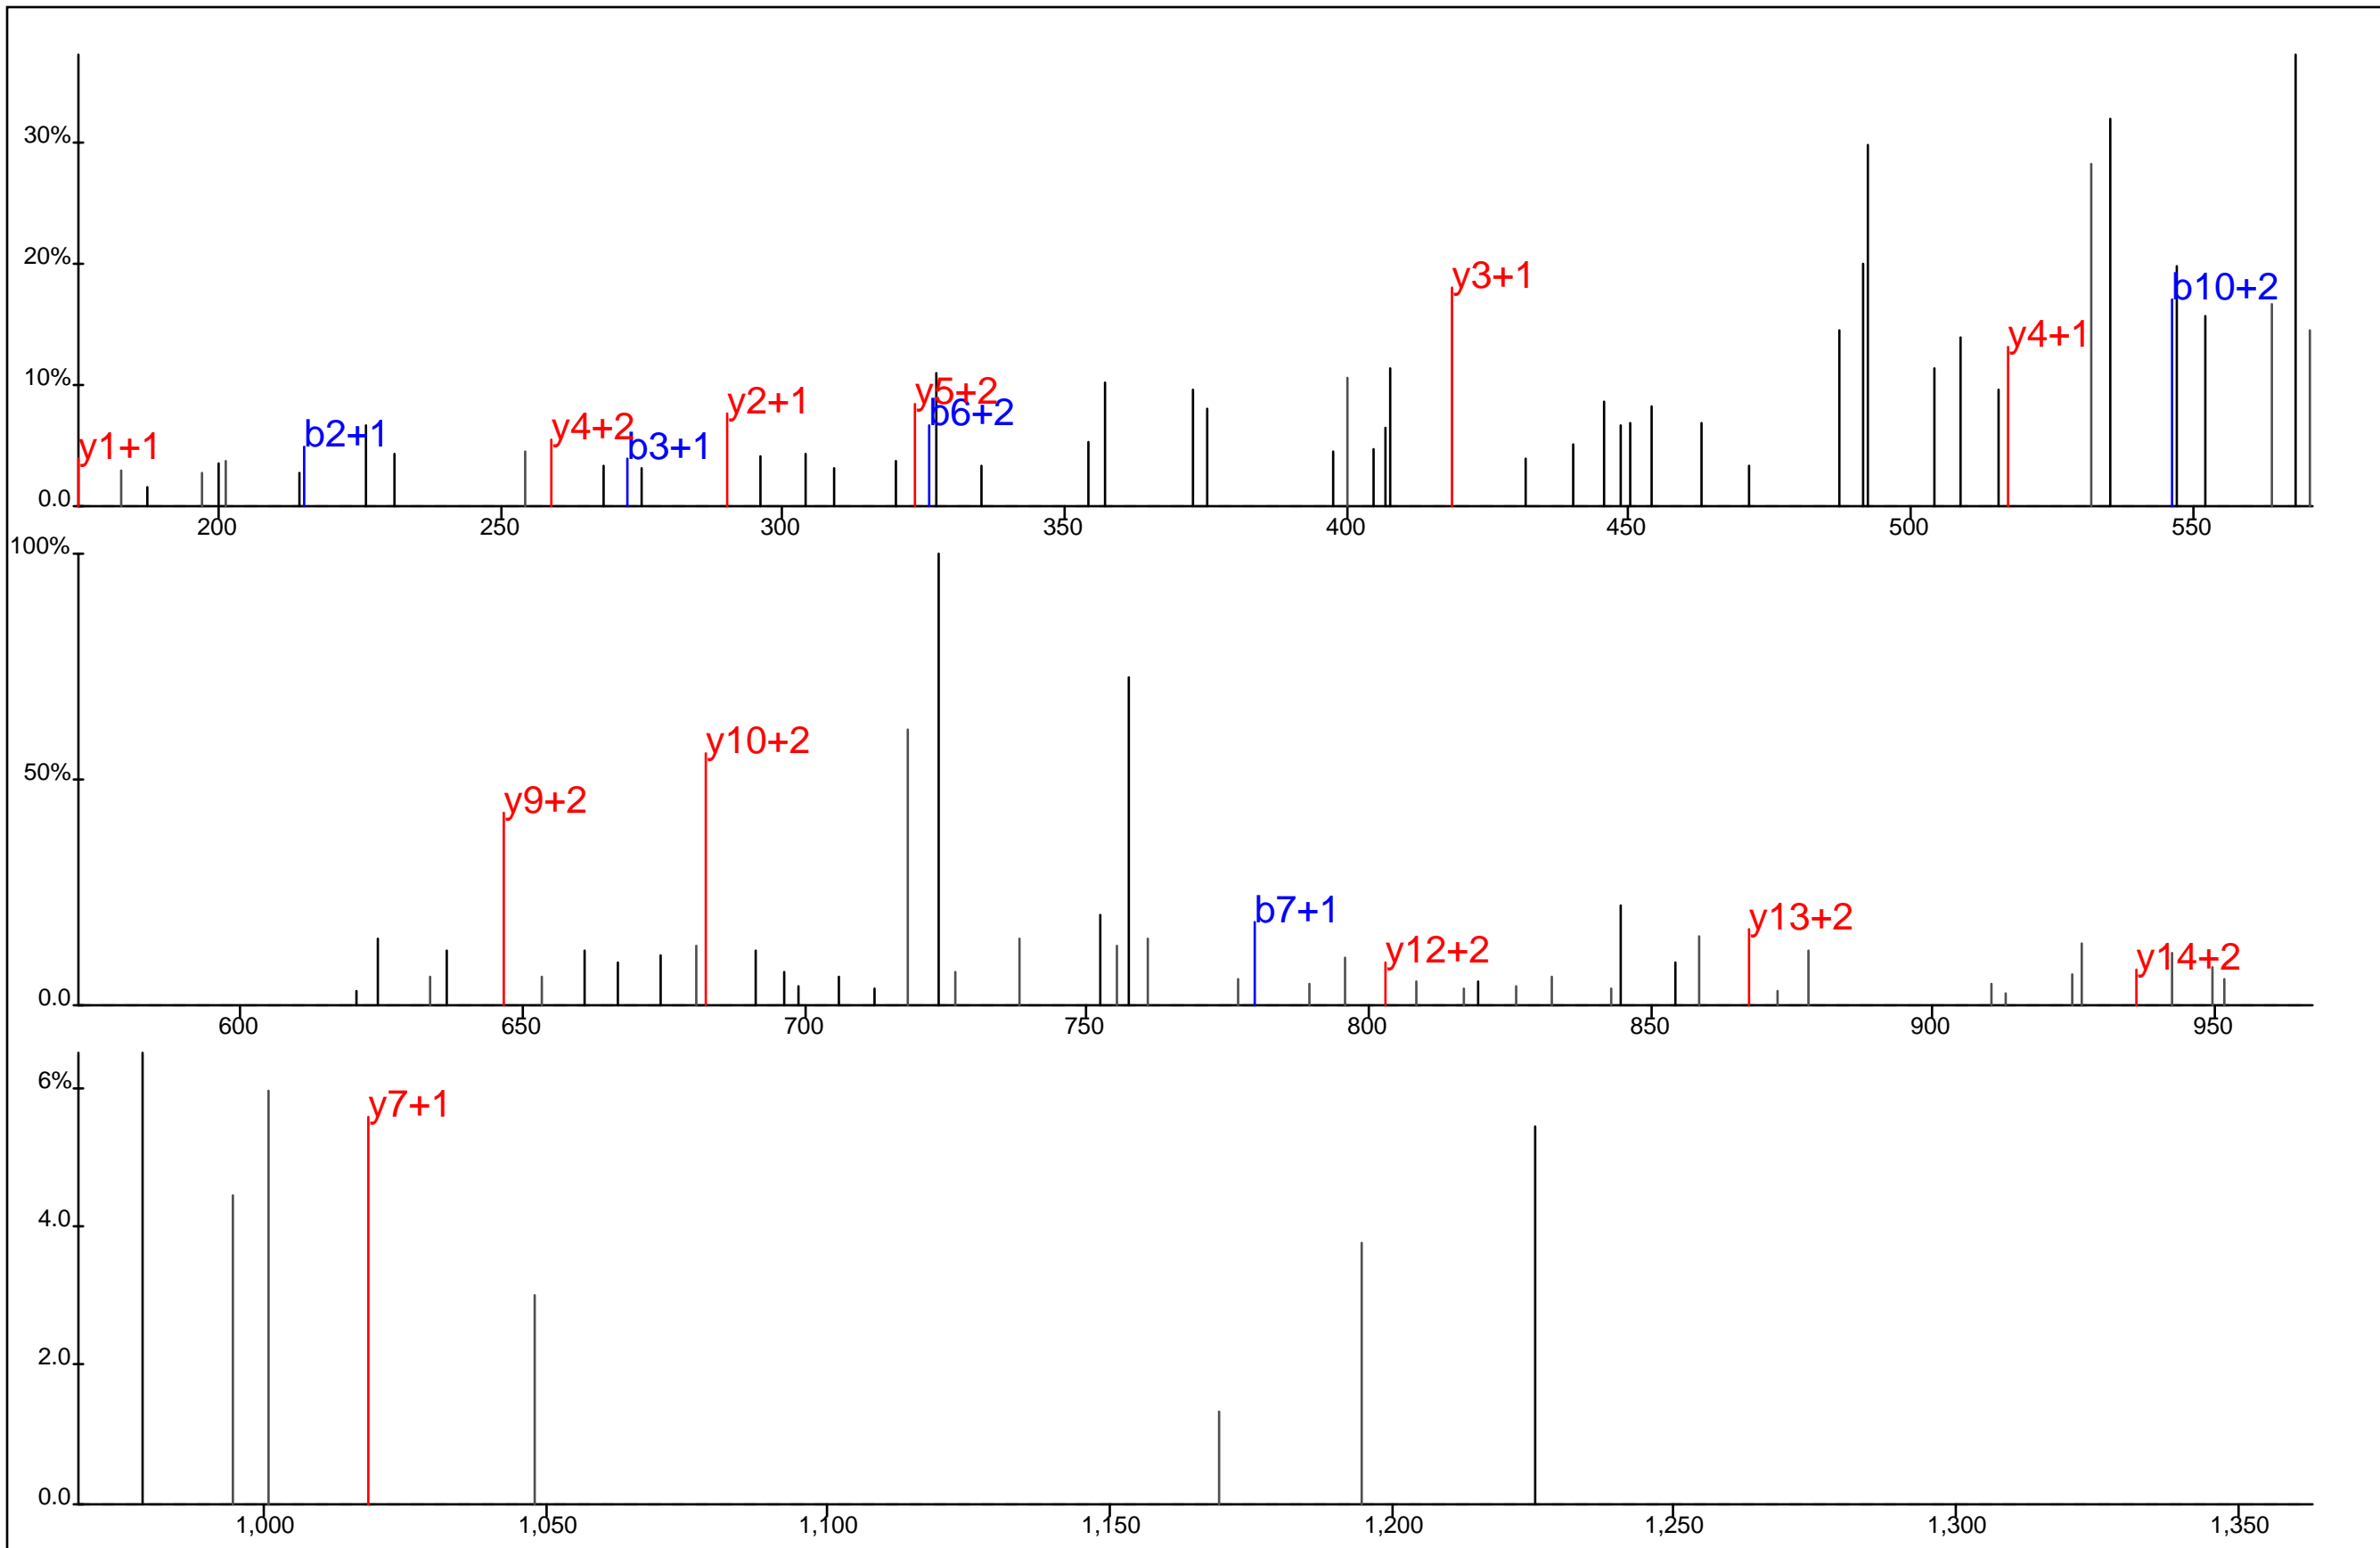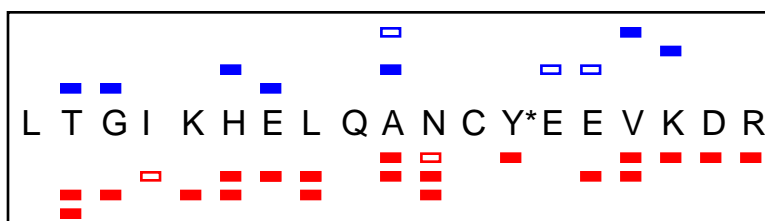

Protein Name: Cofilin 1  
 gi Accession: 0  
 Precursor Mass: 596.5320+4  
 Delta Mass: 2.116 ppm  
 XCorr: 21.38

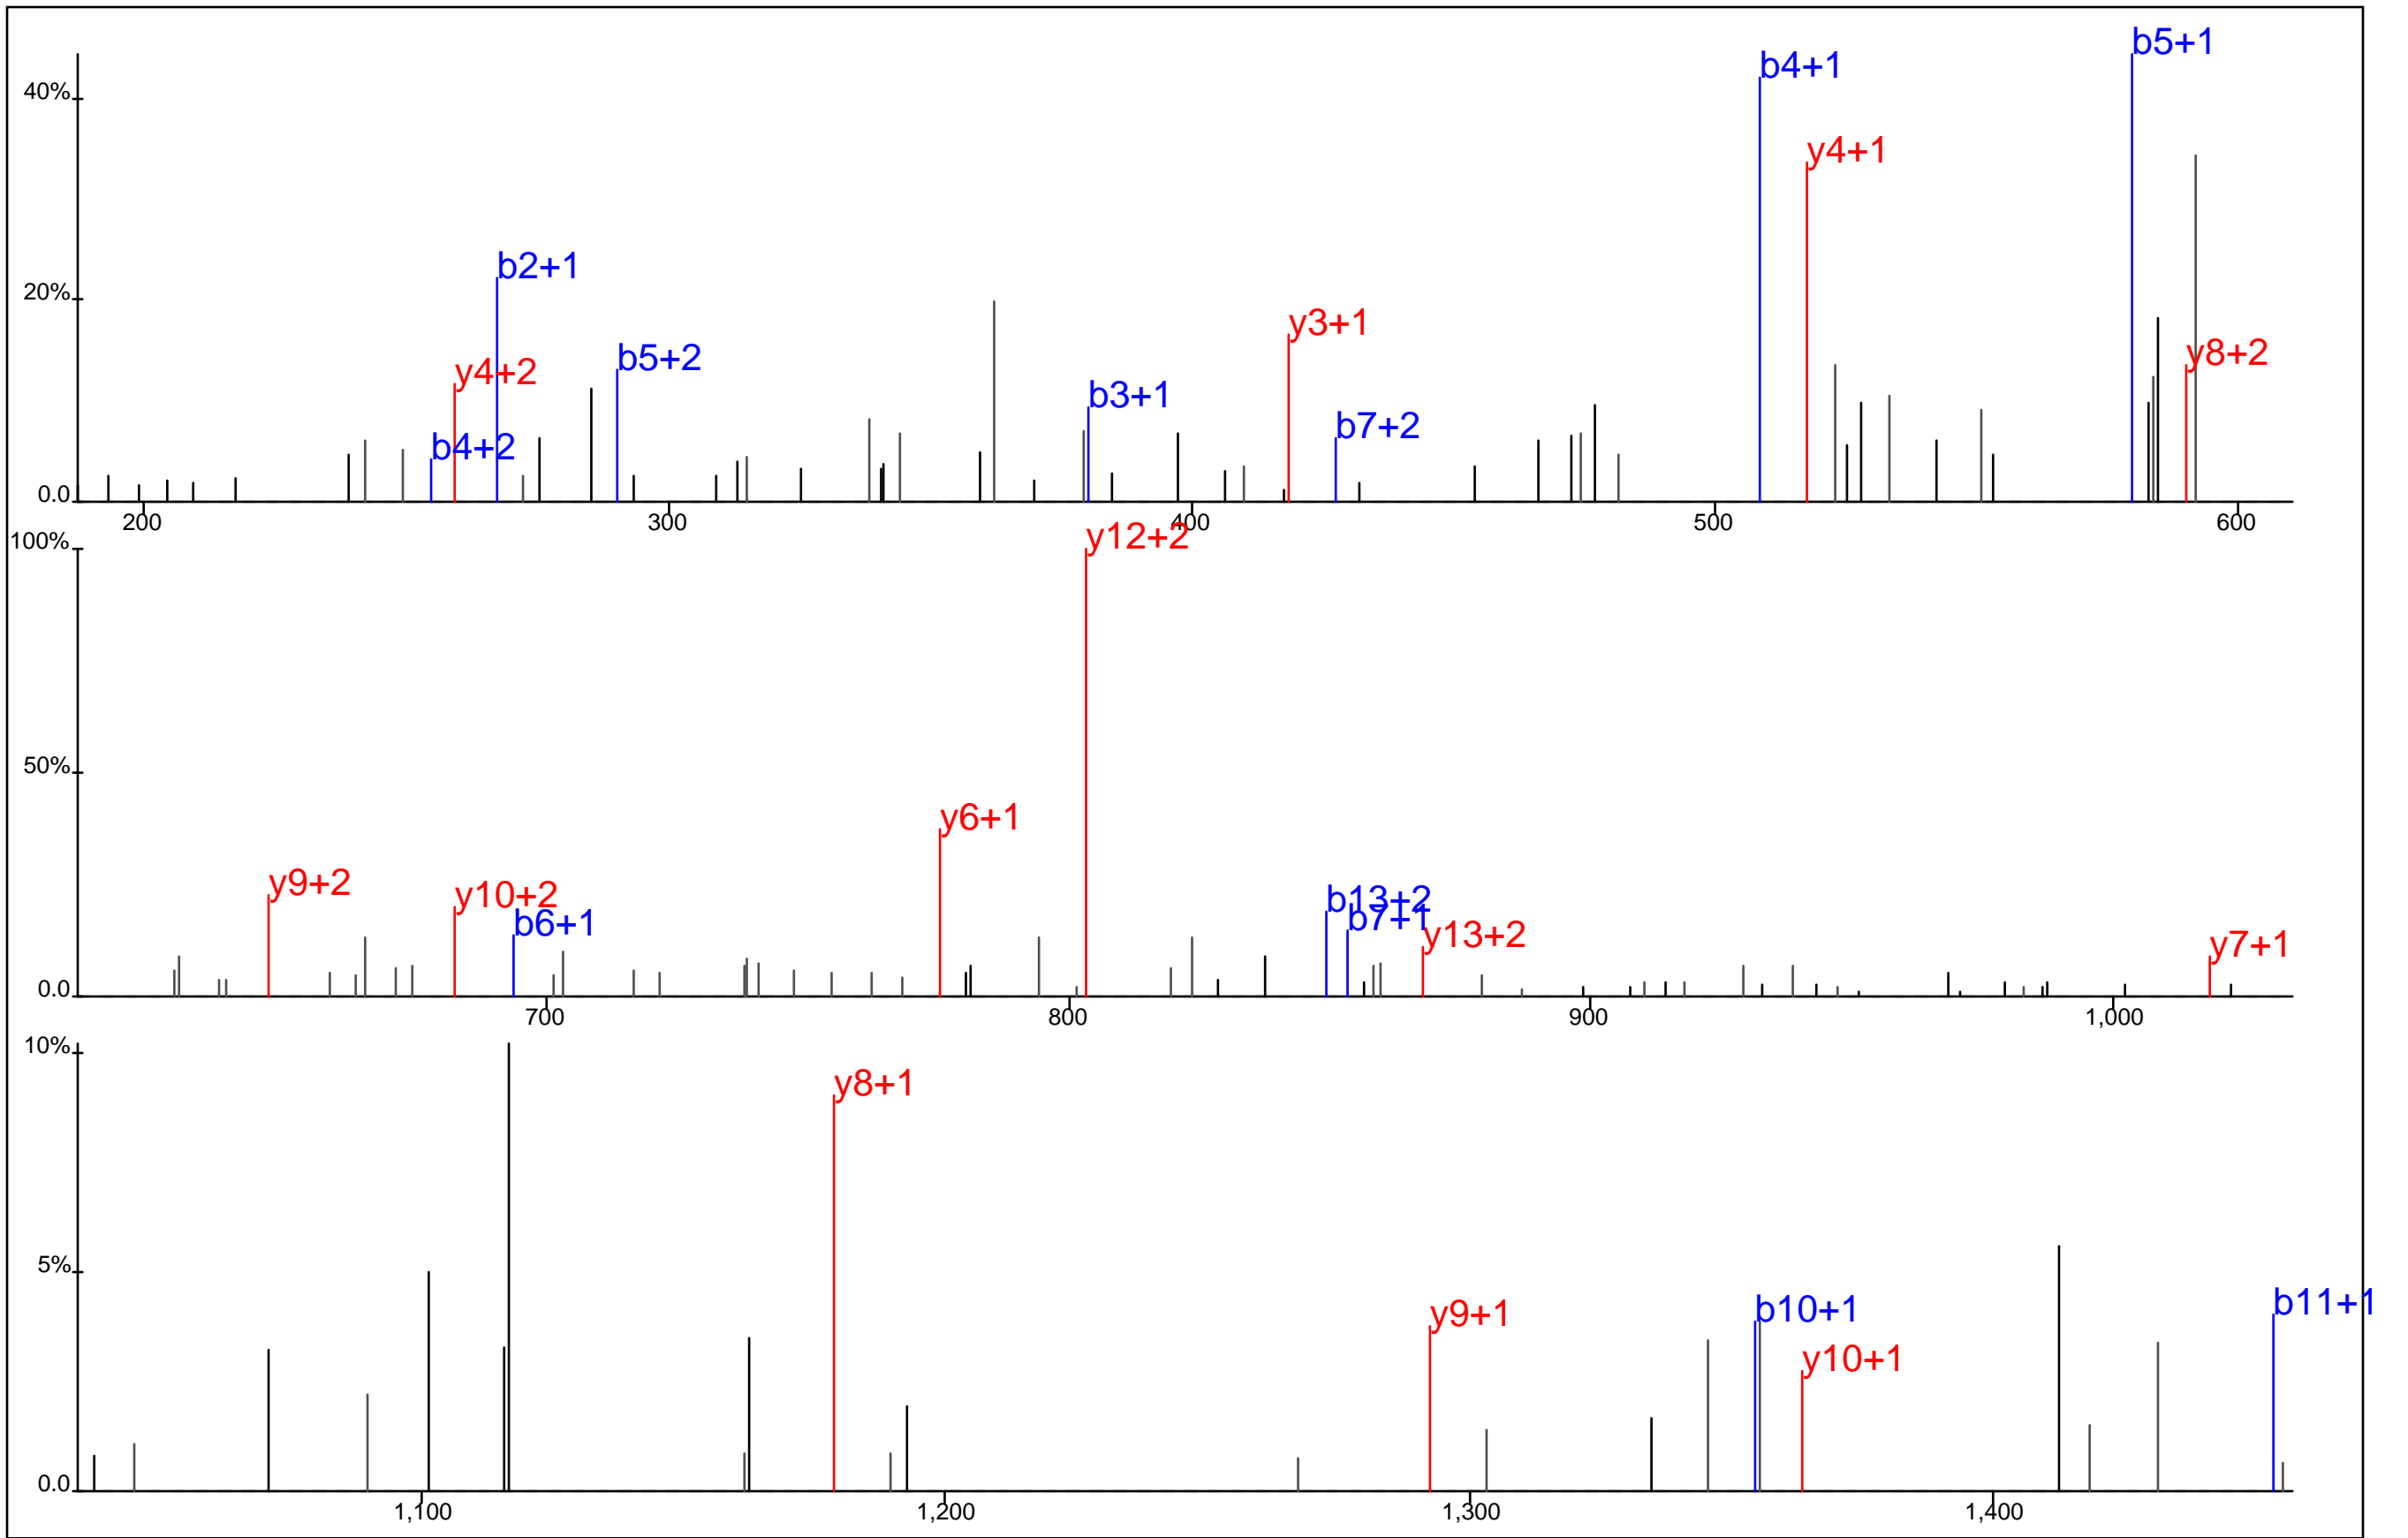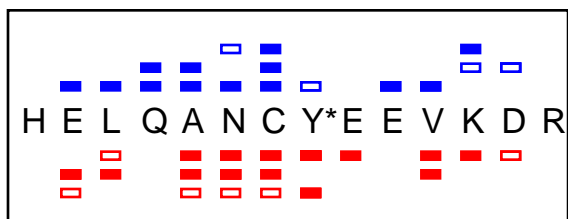

Protein Name: Cofilin 1  
 gi Accession: 0  
 Precursor Mass: 624.2656+3  
 Delta Mass: 1.725 ppm  
 XCorr: 51.96

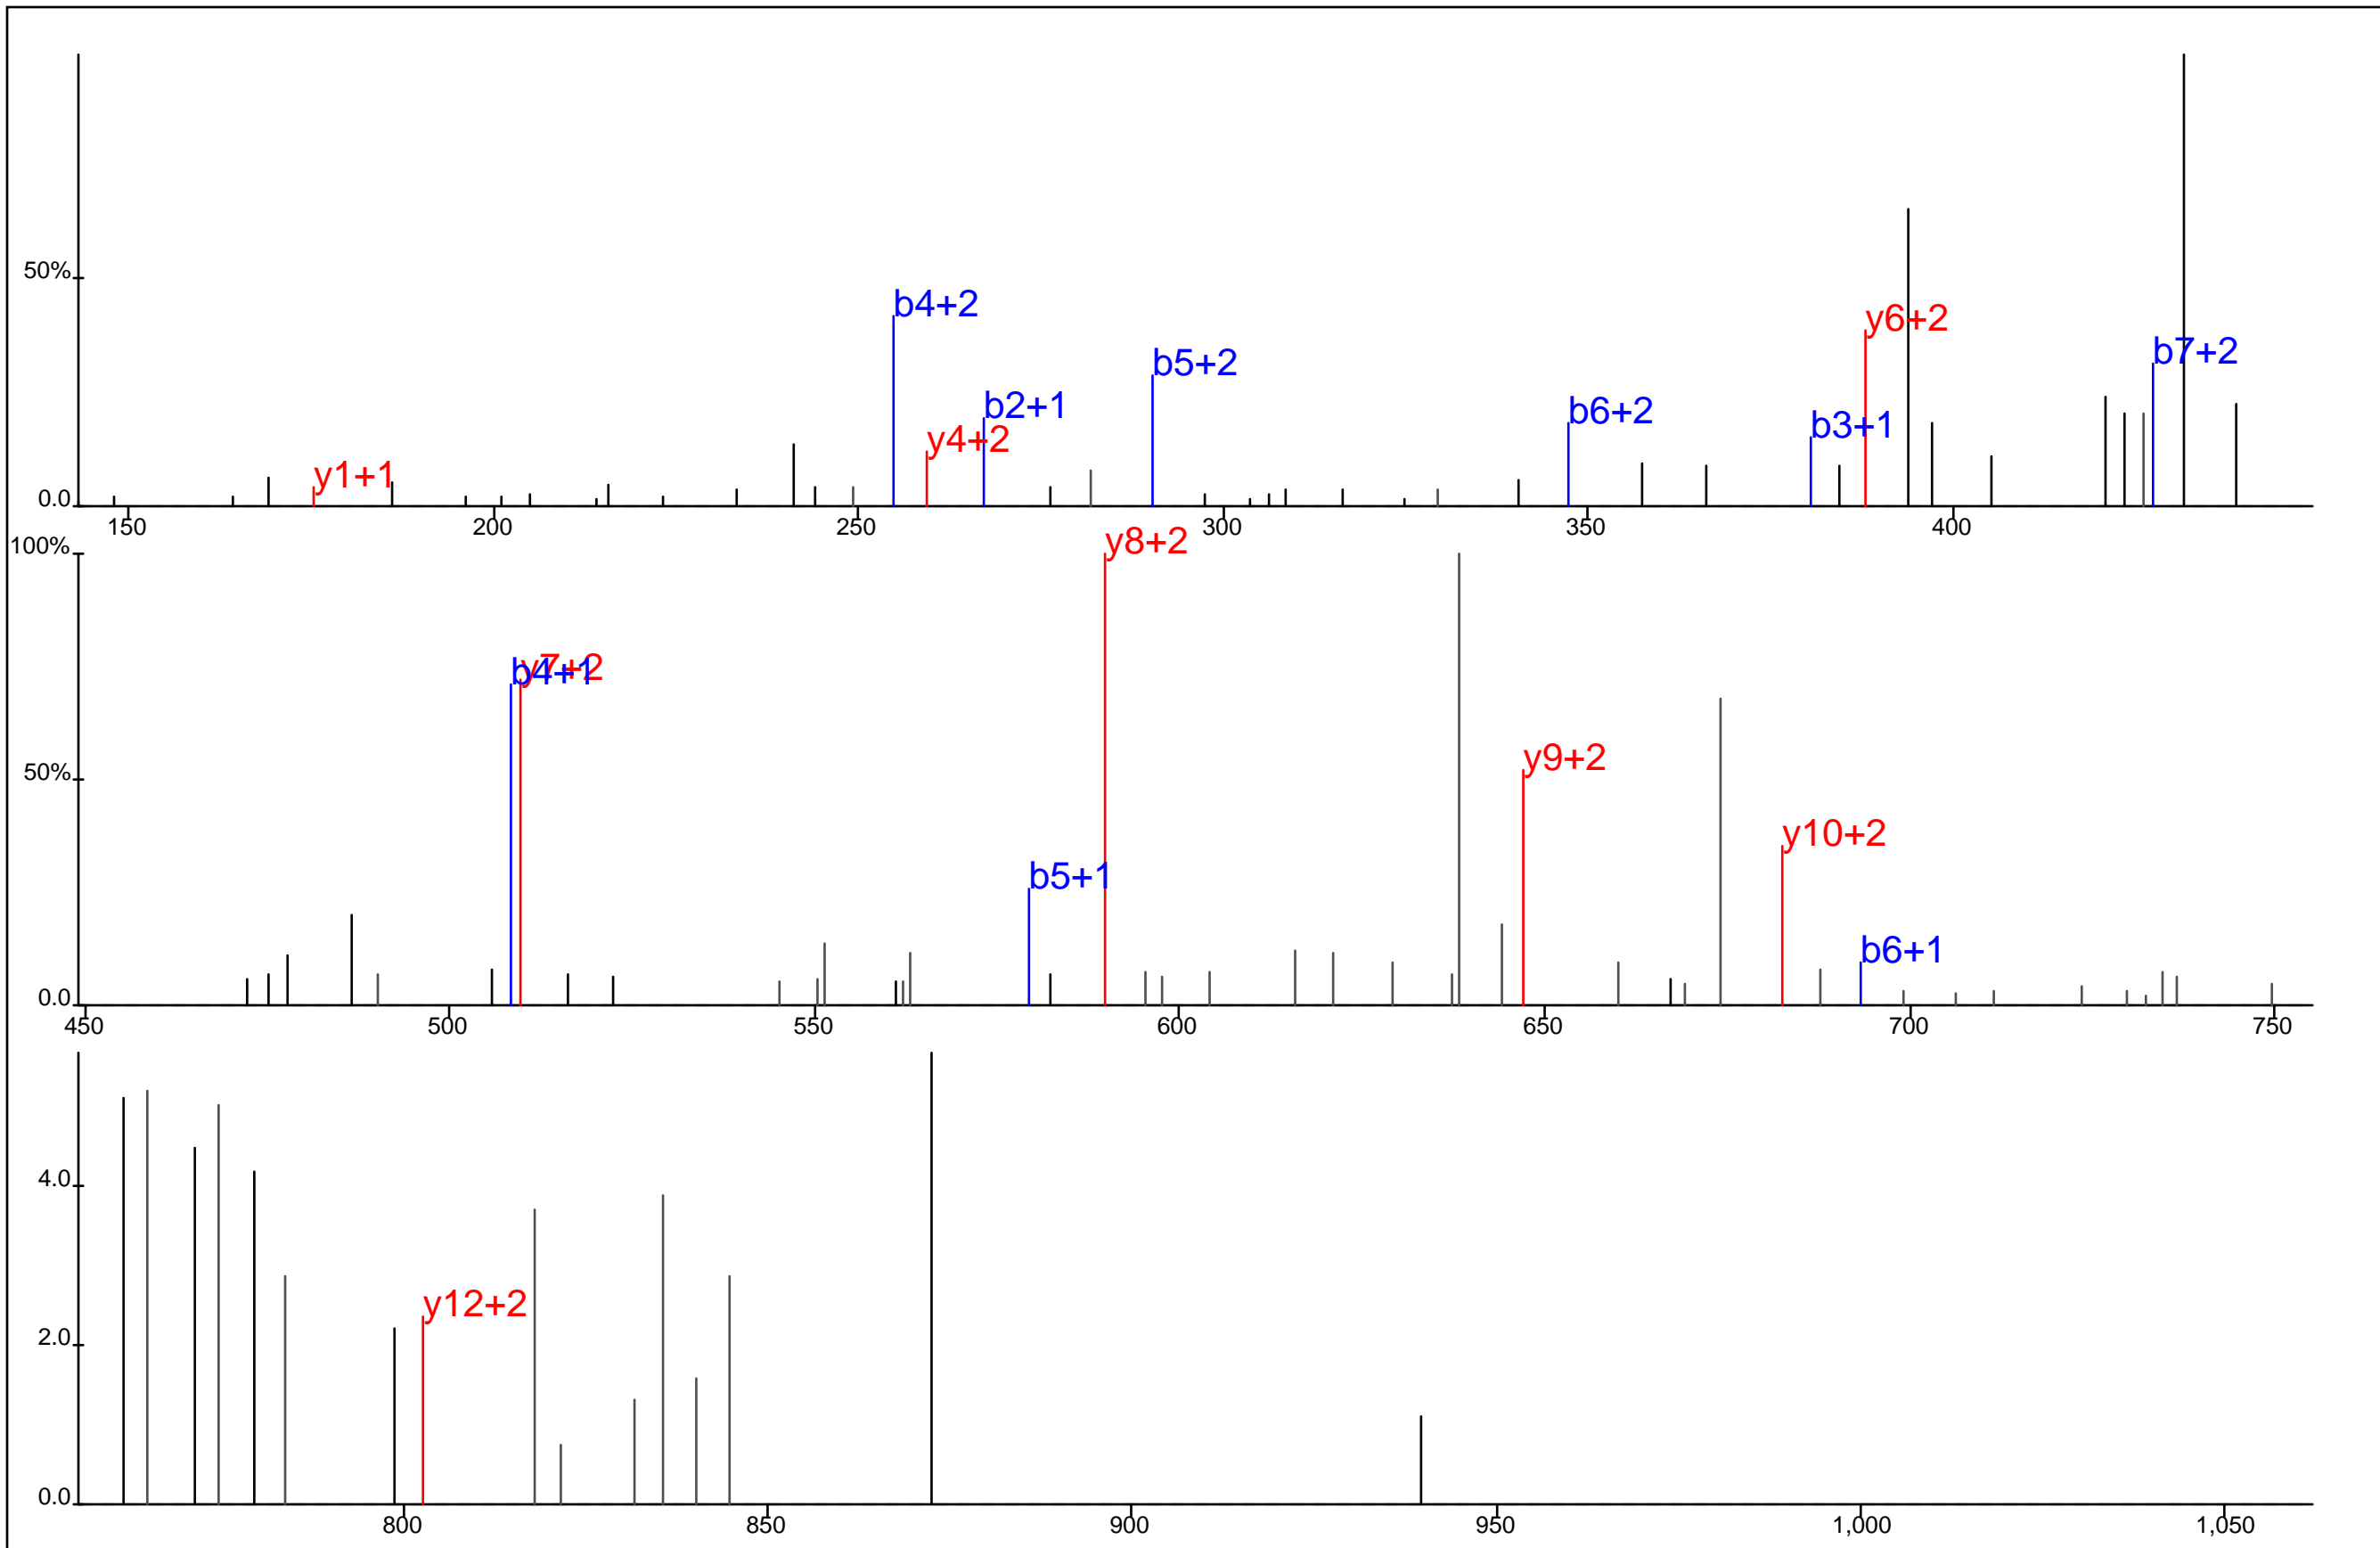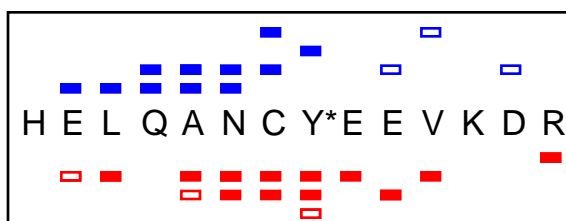

Protein Name: Cofilin 1  
 gi Accession: 0  
 Precursor Mass: 468.4503+4  
 Delta Mass: 0.282 ppm  
 XCorr: 20.57

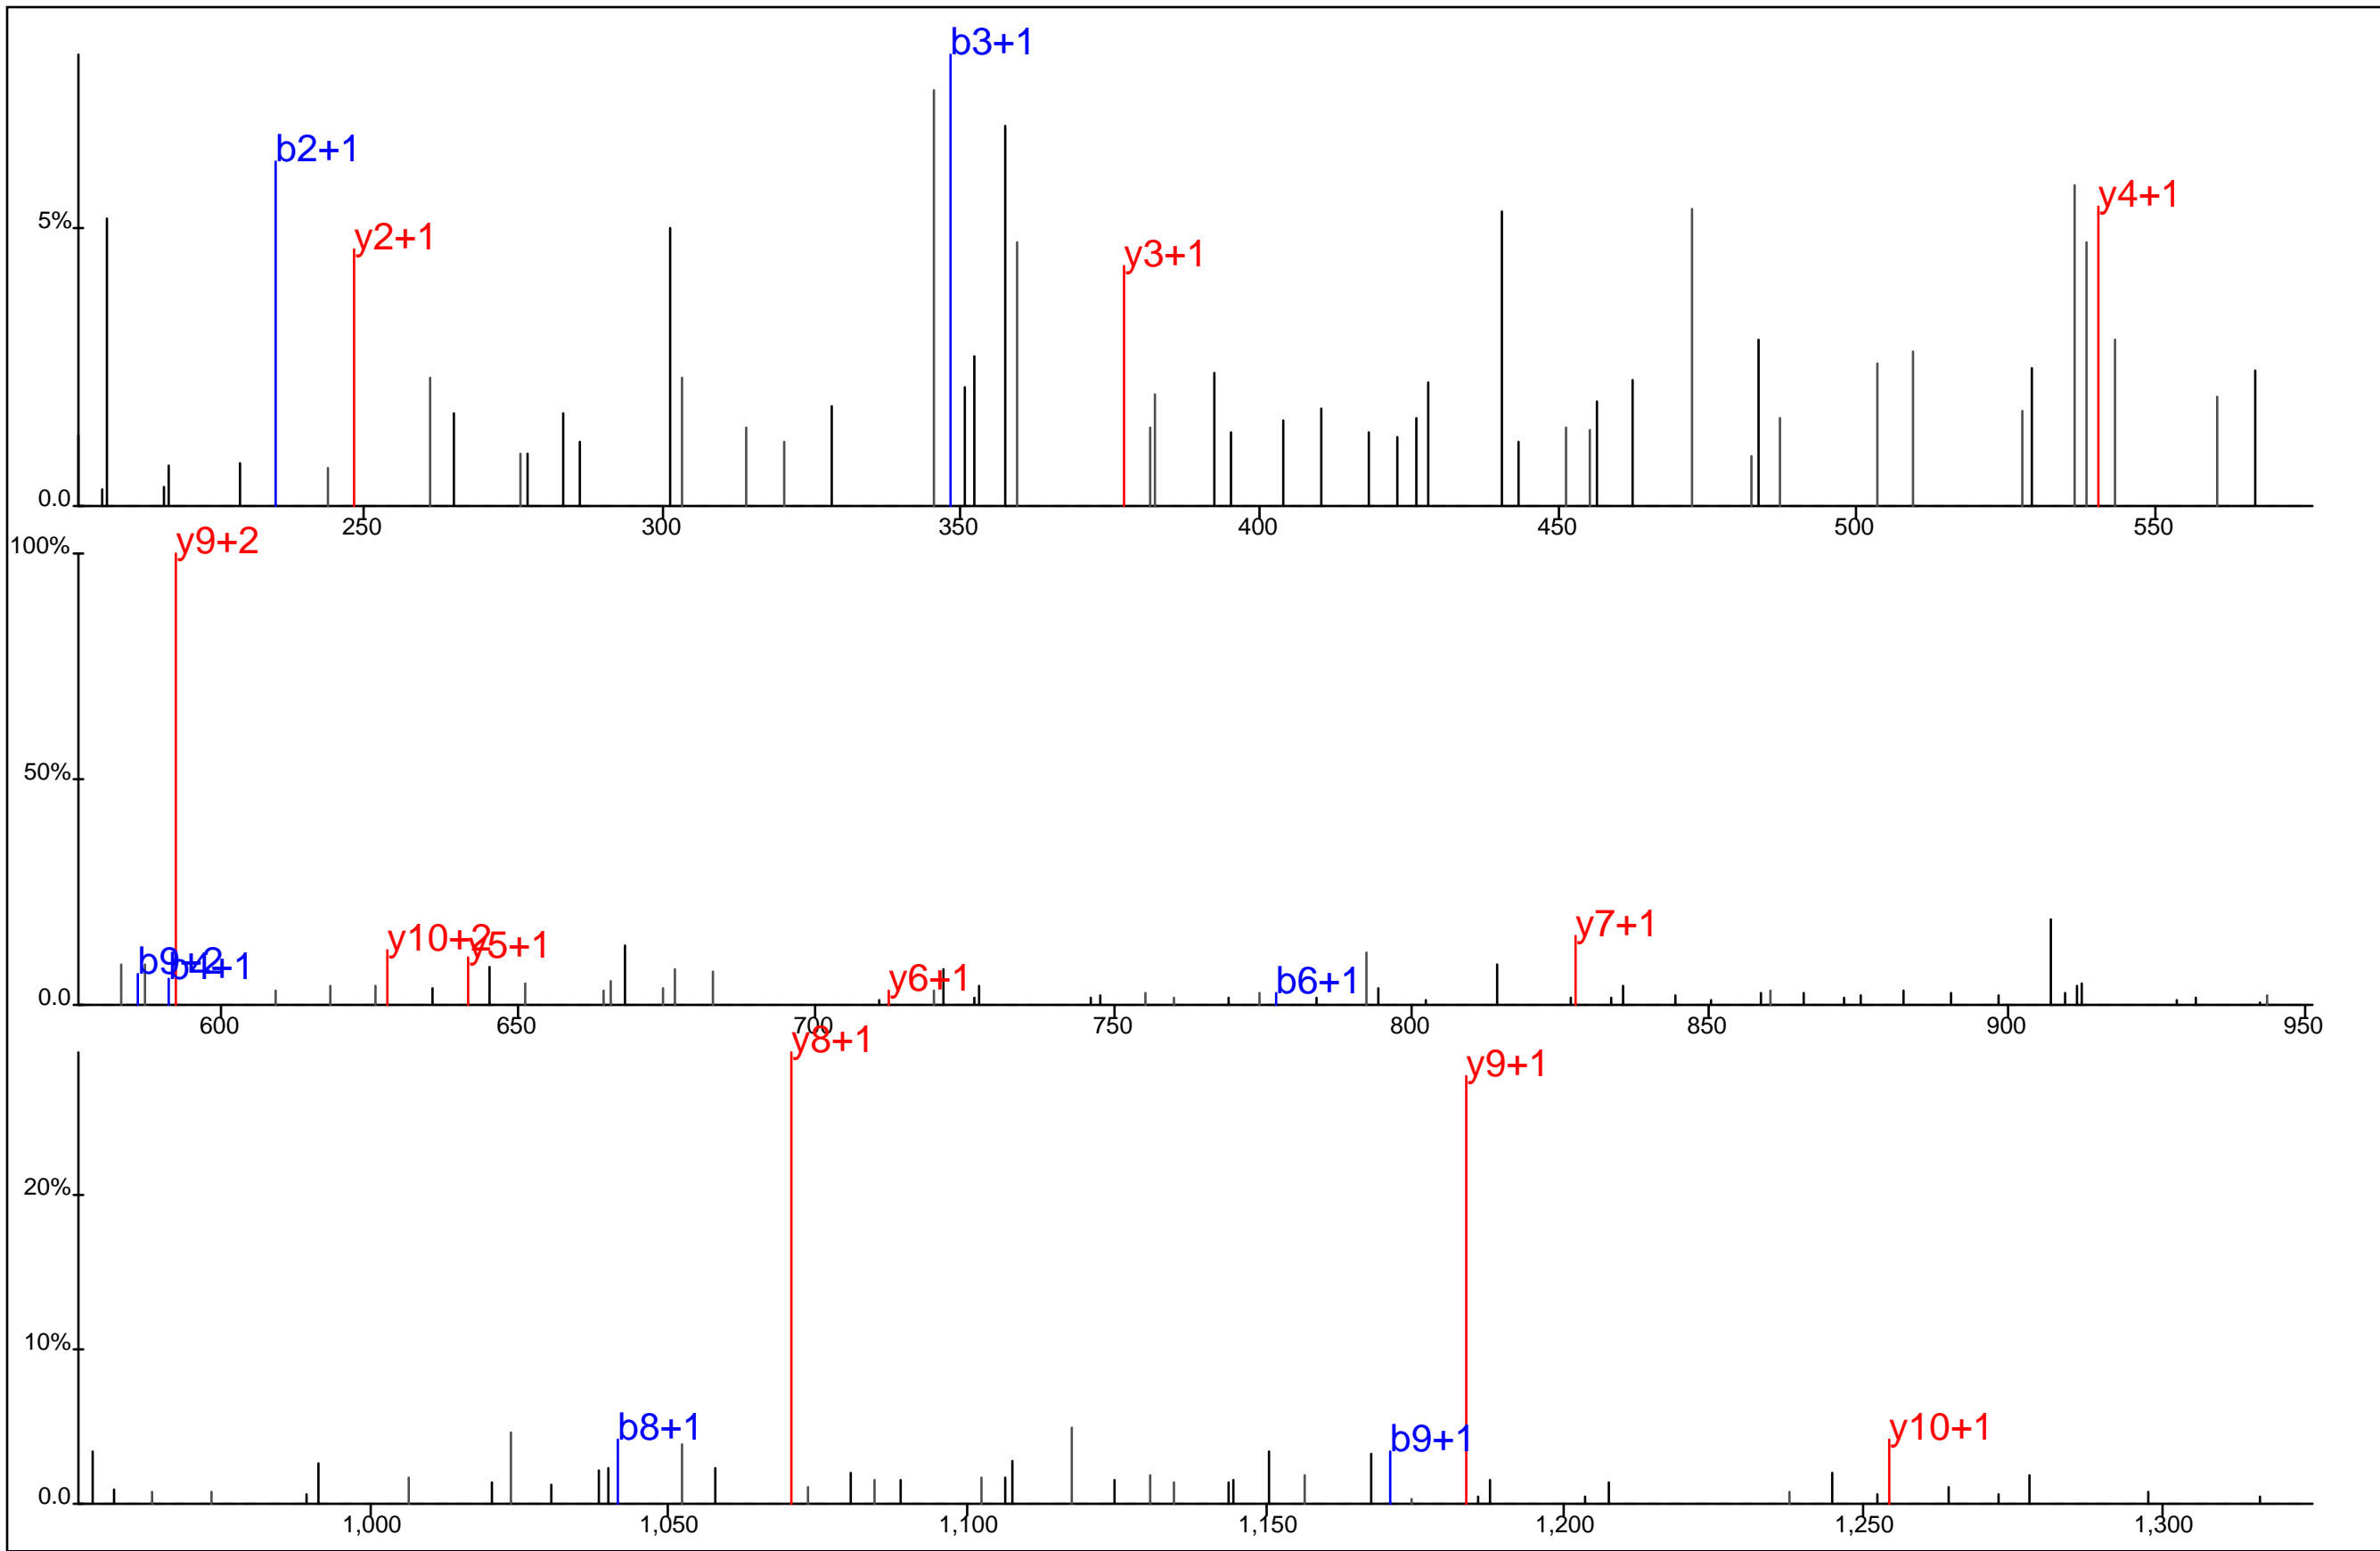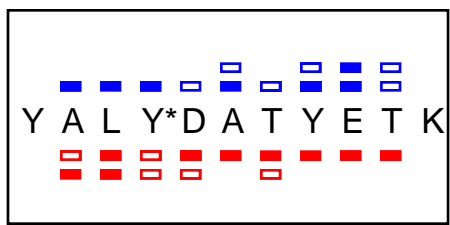

Protein Name: Cofilin 1  
 gi Accession: 0  
 Precursor Mass: 709.3008+2  
 Delta Mass: 1.514 ppm  
 XCorr: 32.75

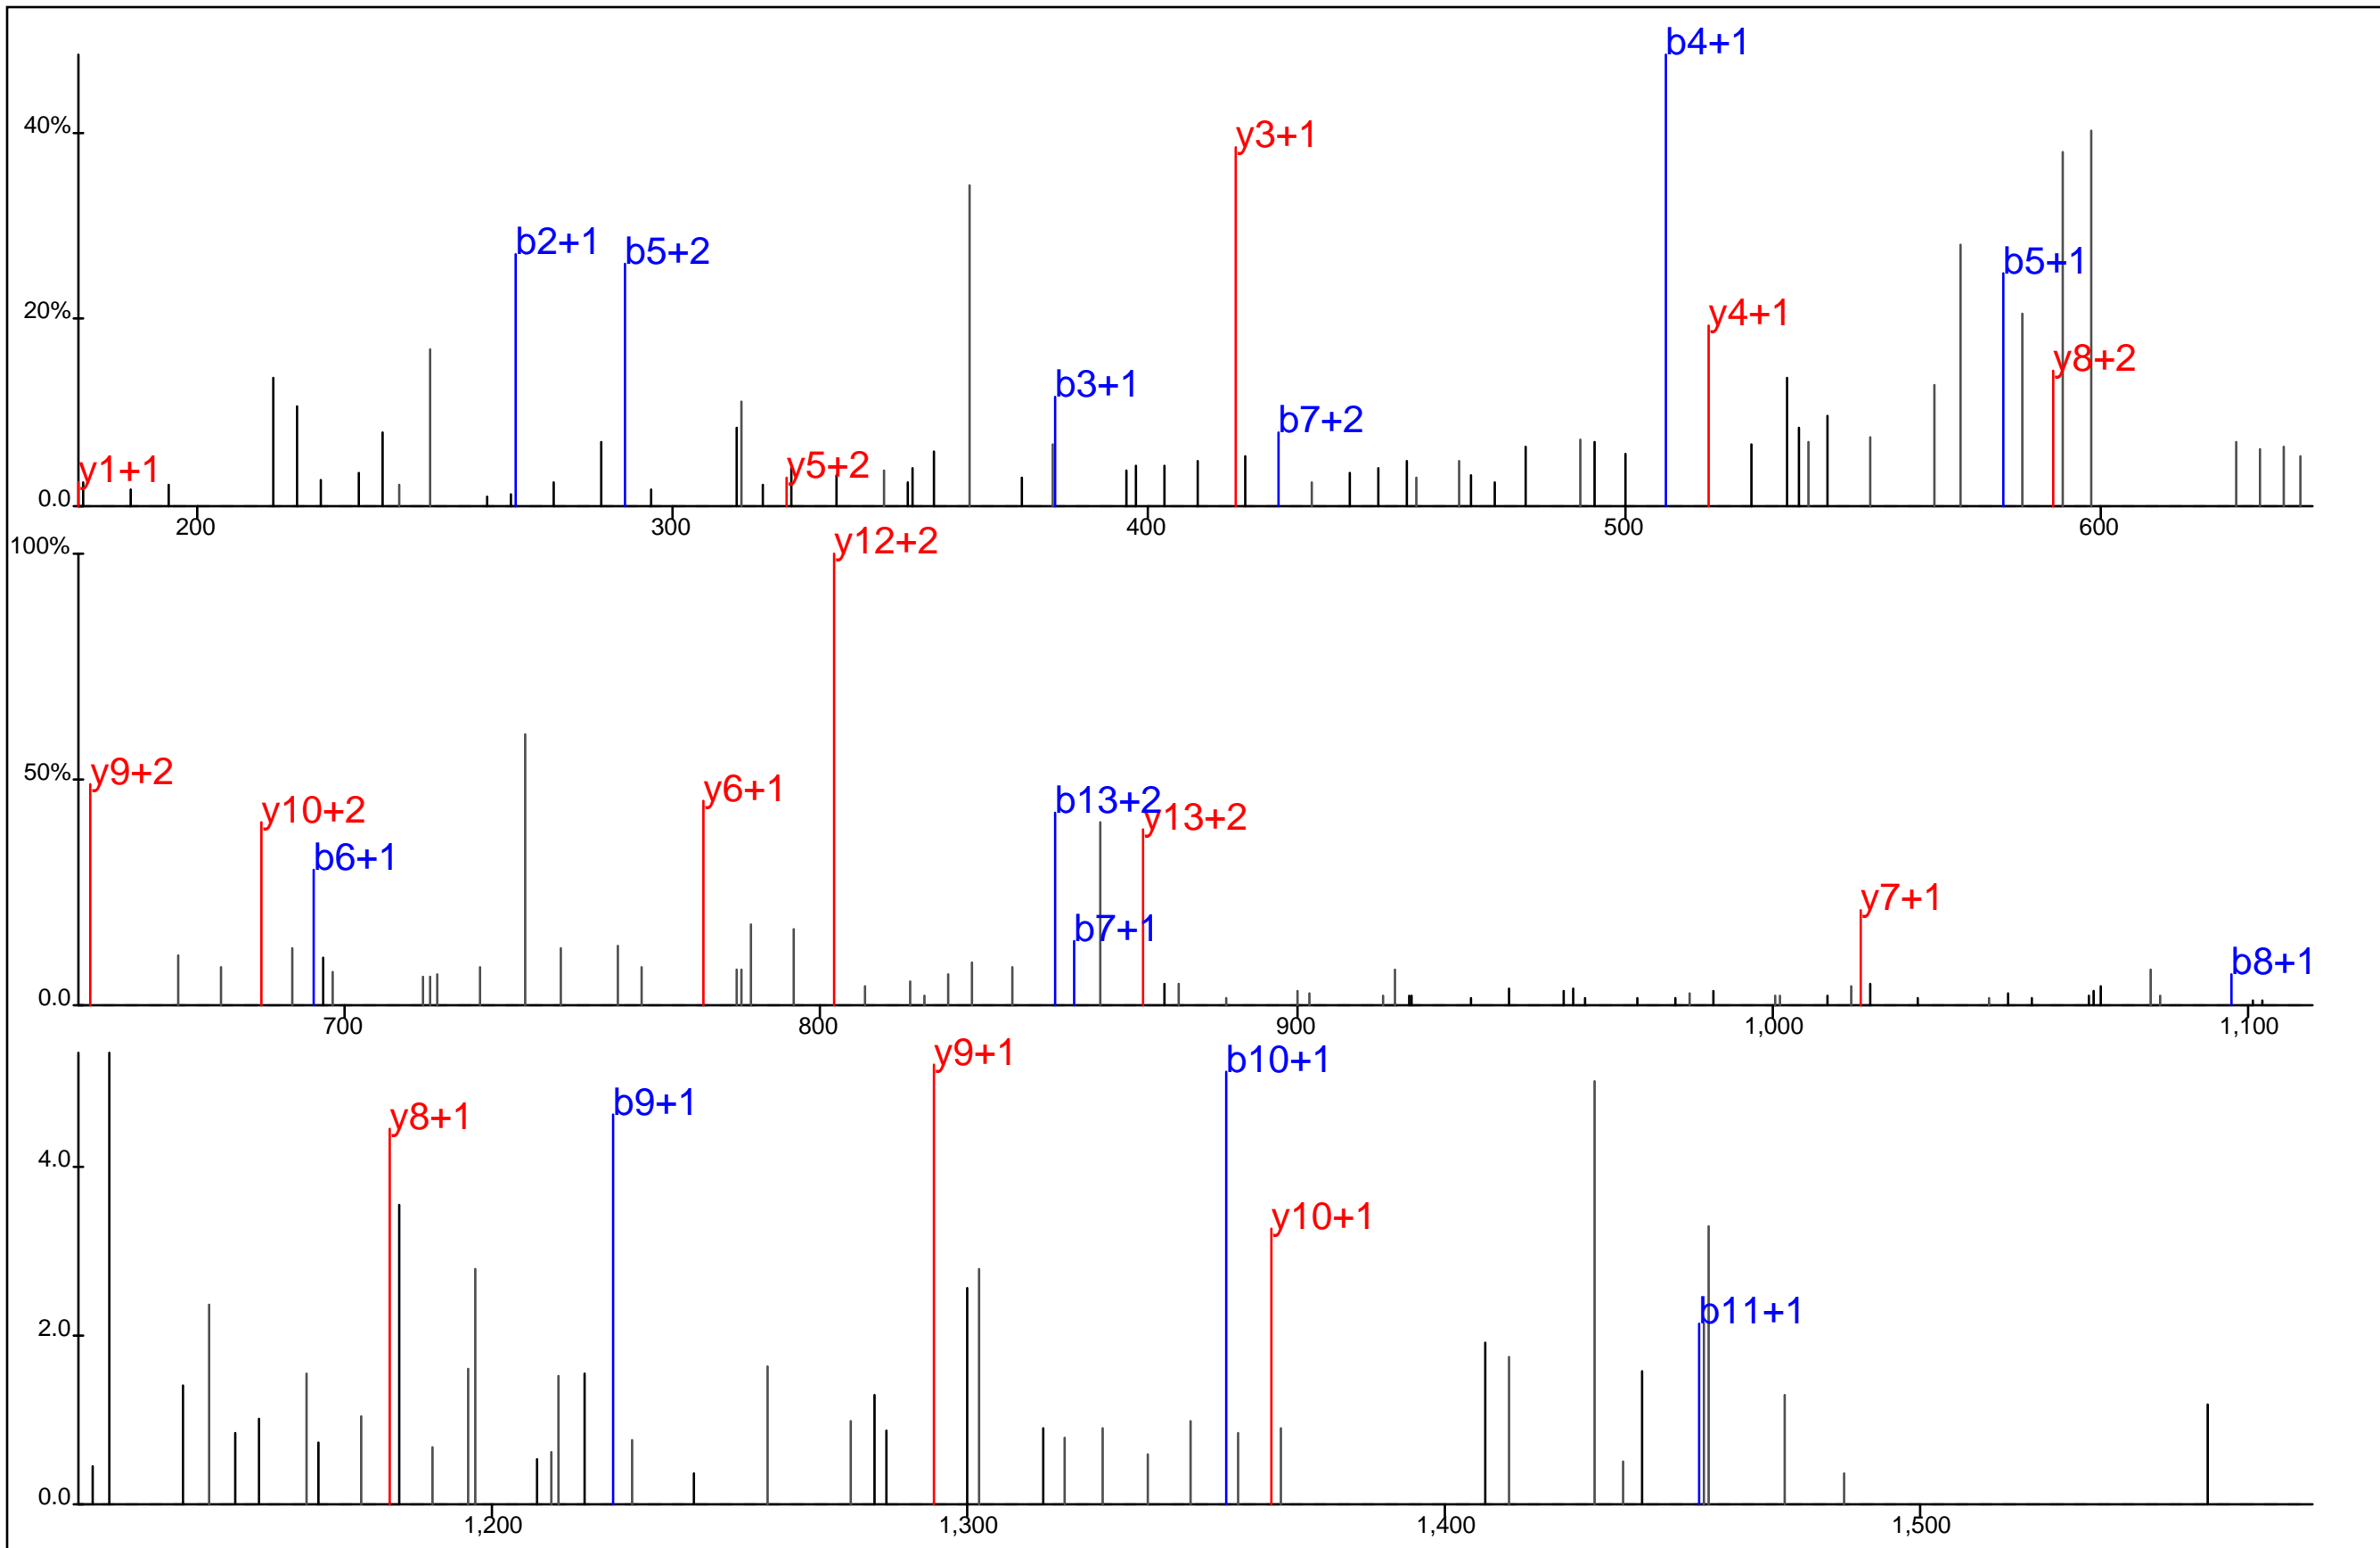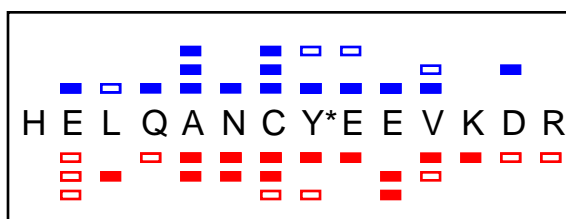

Protein Name: Cofilin 1  
 gi Accession: 0  
 Precursor Mass: 624.2607+3  
 Delta Mass: 6.007 ppm  
 XCorr: 54.62

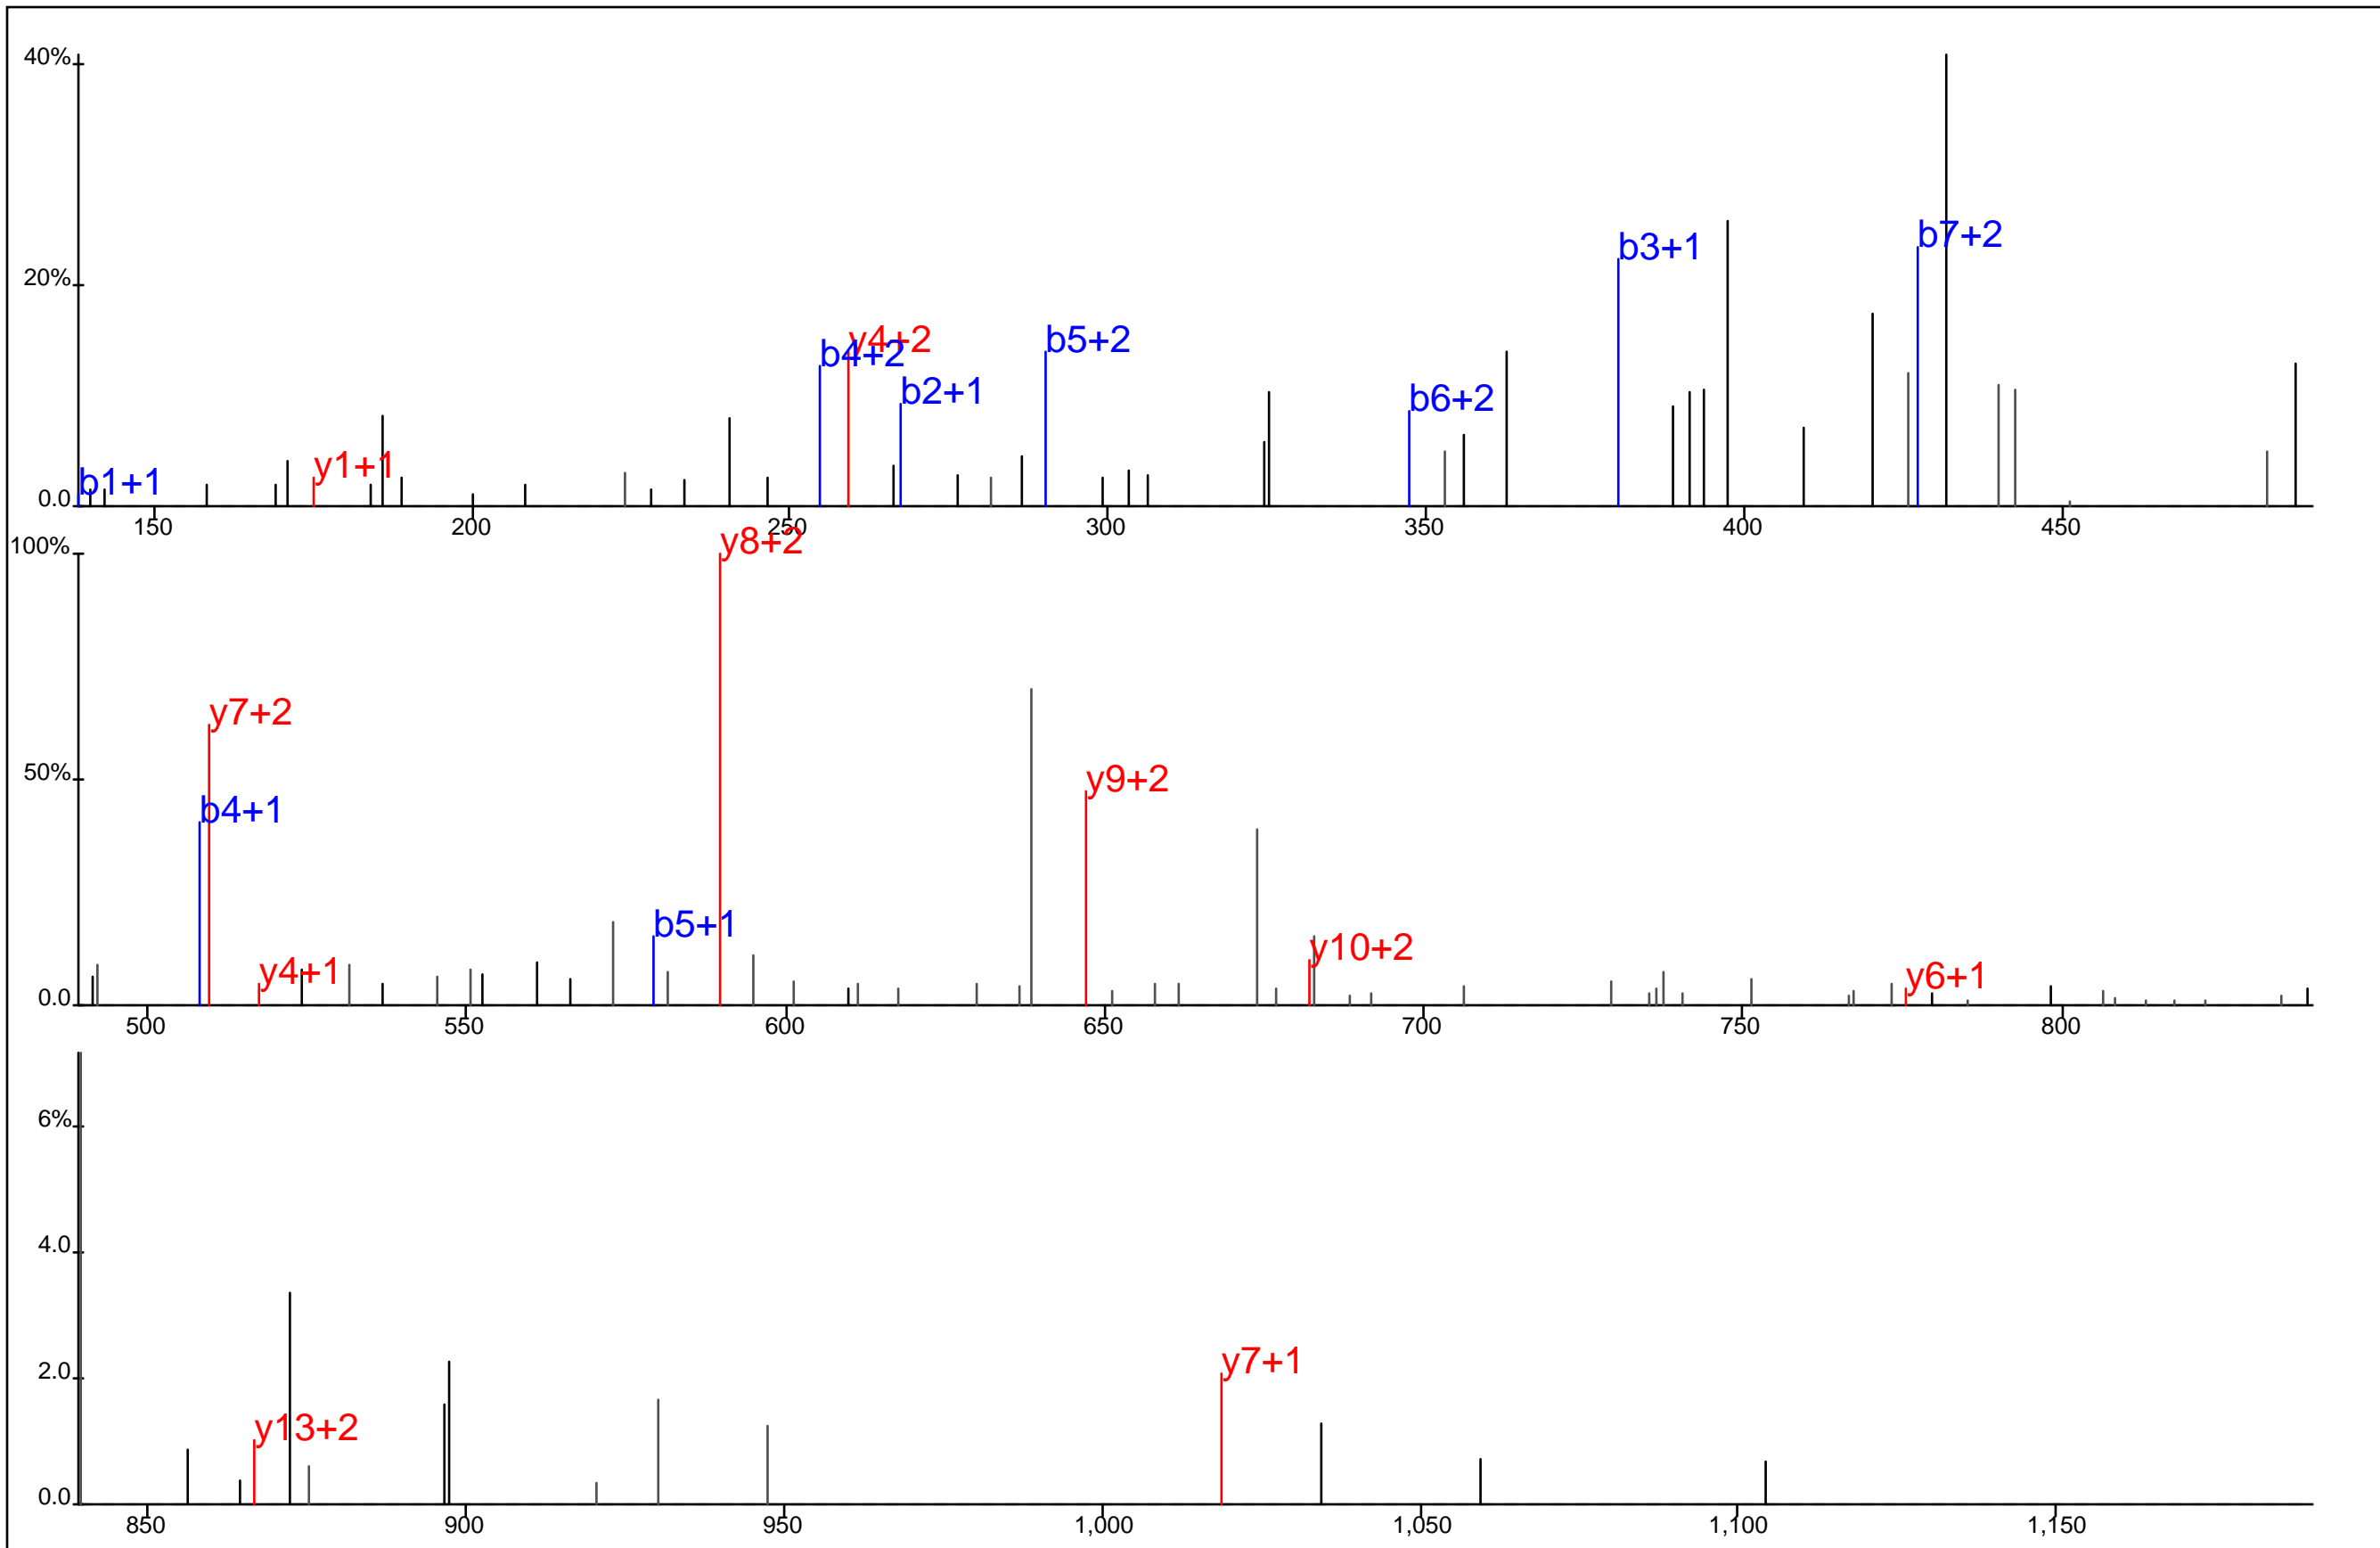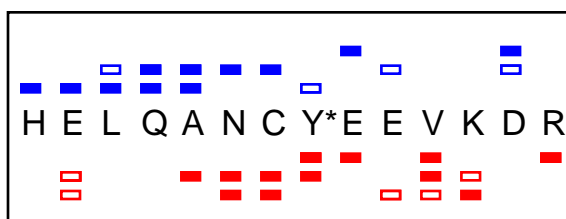

Protein Name: Cofilin 1  
 gi Accession: 0  
 Precursor Mass: 468.4504+4  
 Delta Mass: 0.543 ppm  
 XCorr: 21.27

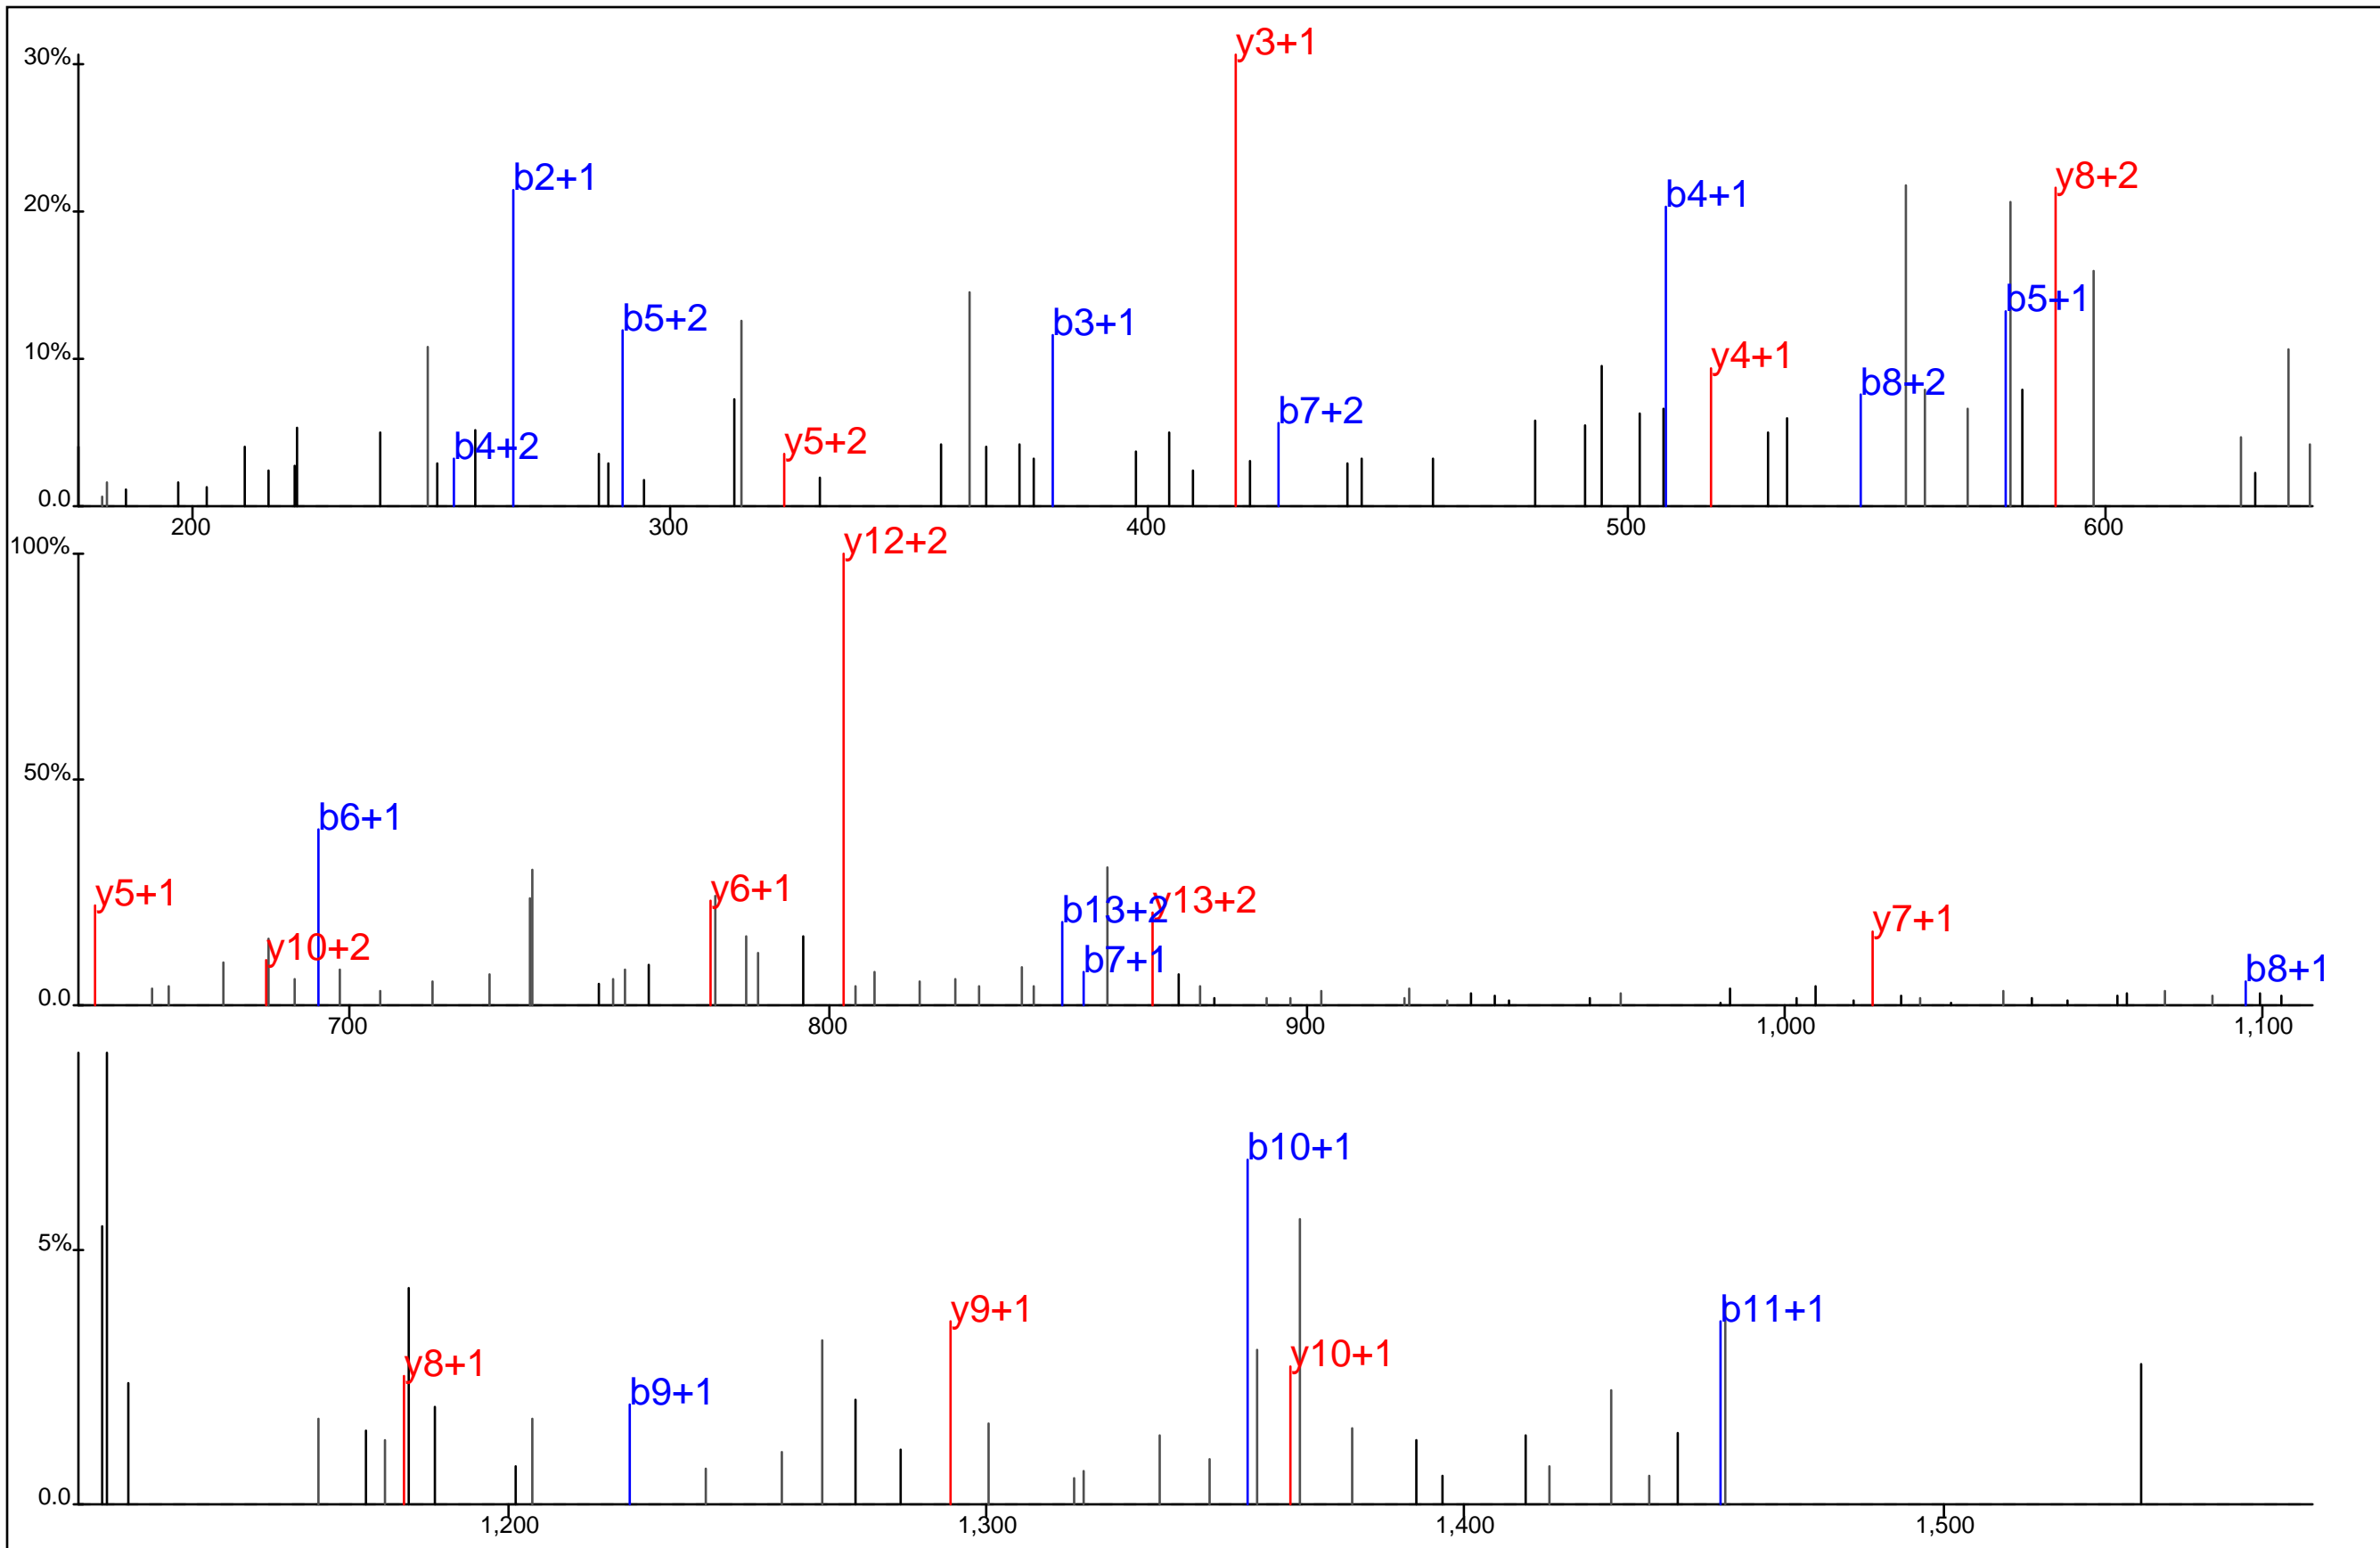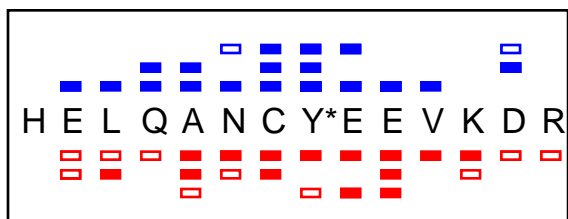

Protein Name: Cofilin 1  
 gi Accession: 0  
 Precursor Mass: 624.2629+3  
 Delta Mass: 2.582 ppm  
 XCorr: 45.38

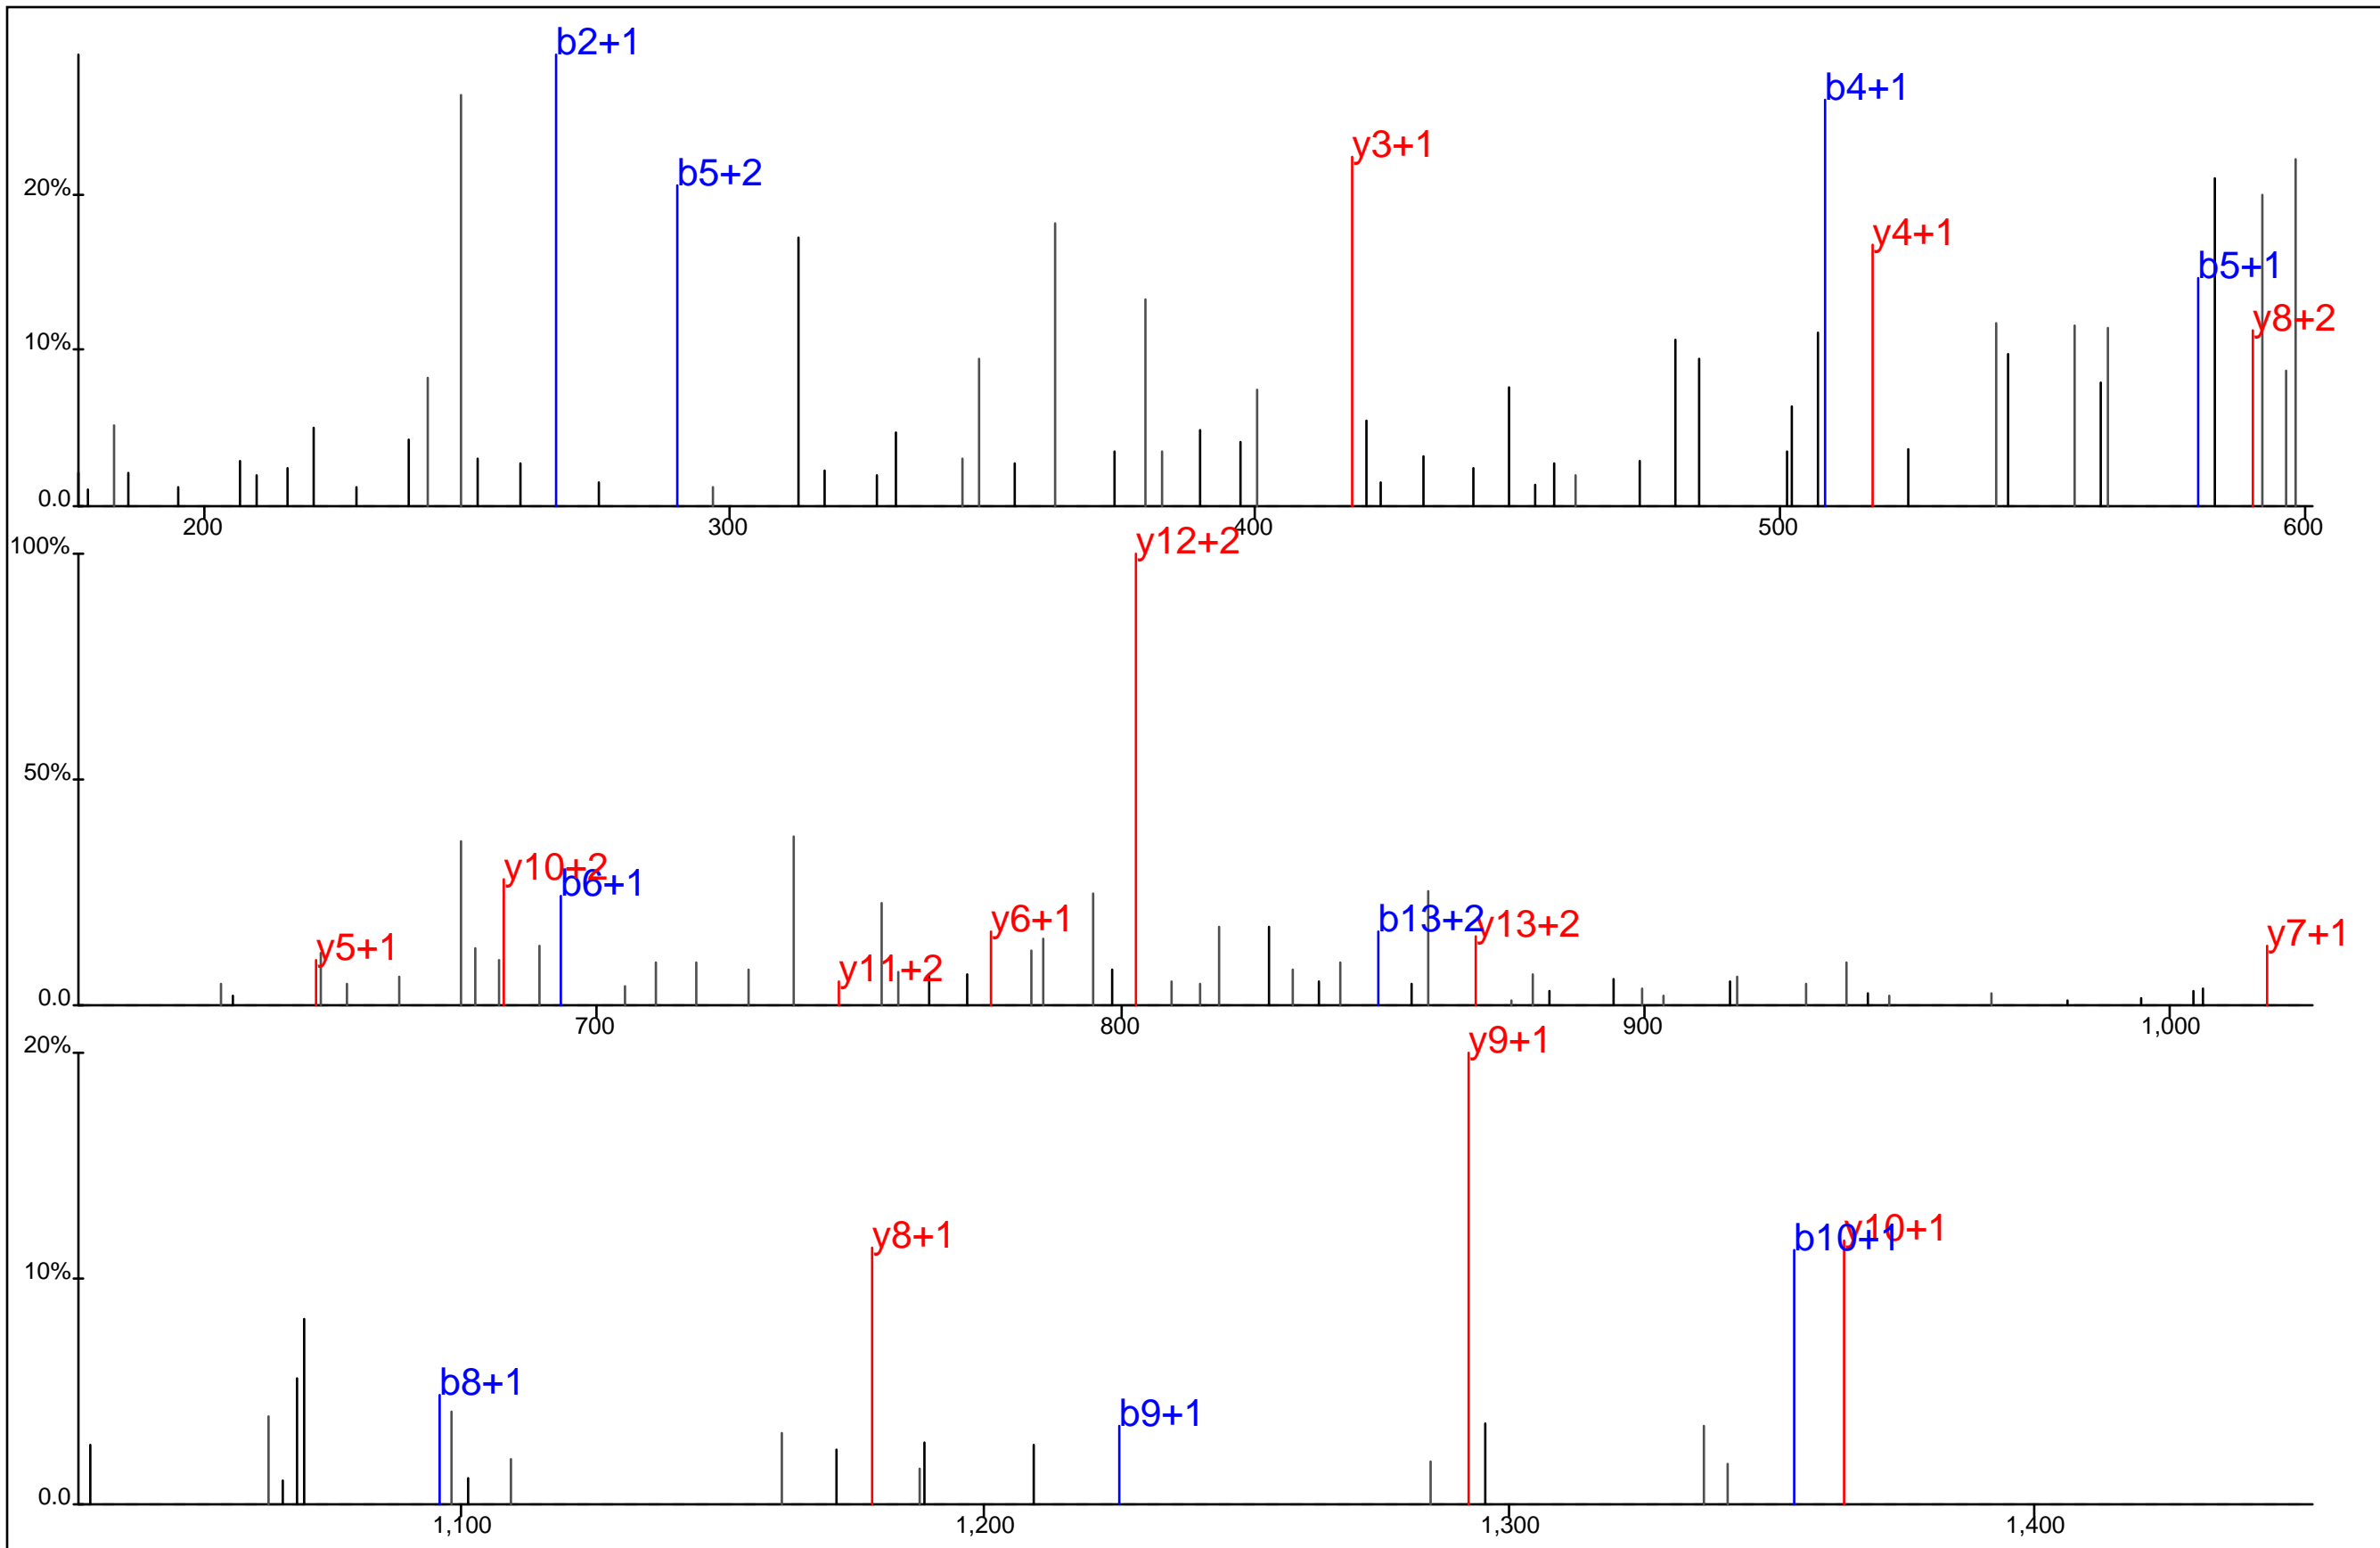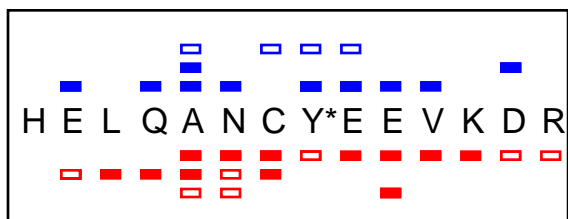

Protein Name: Cofilin 1  
 gi Accession: 0  
 Precursor Mass: 624.2639+3  
 Delta Mass: 1.015 ppm  
 XCorr: 57.18



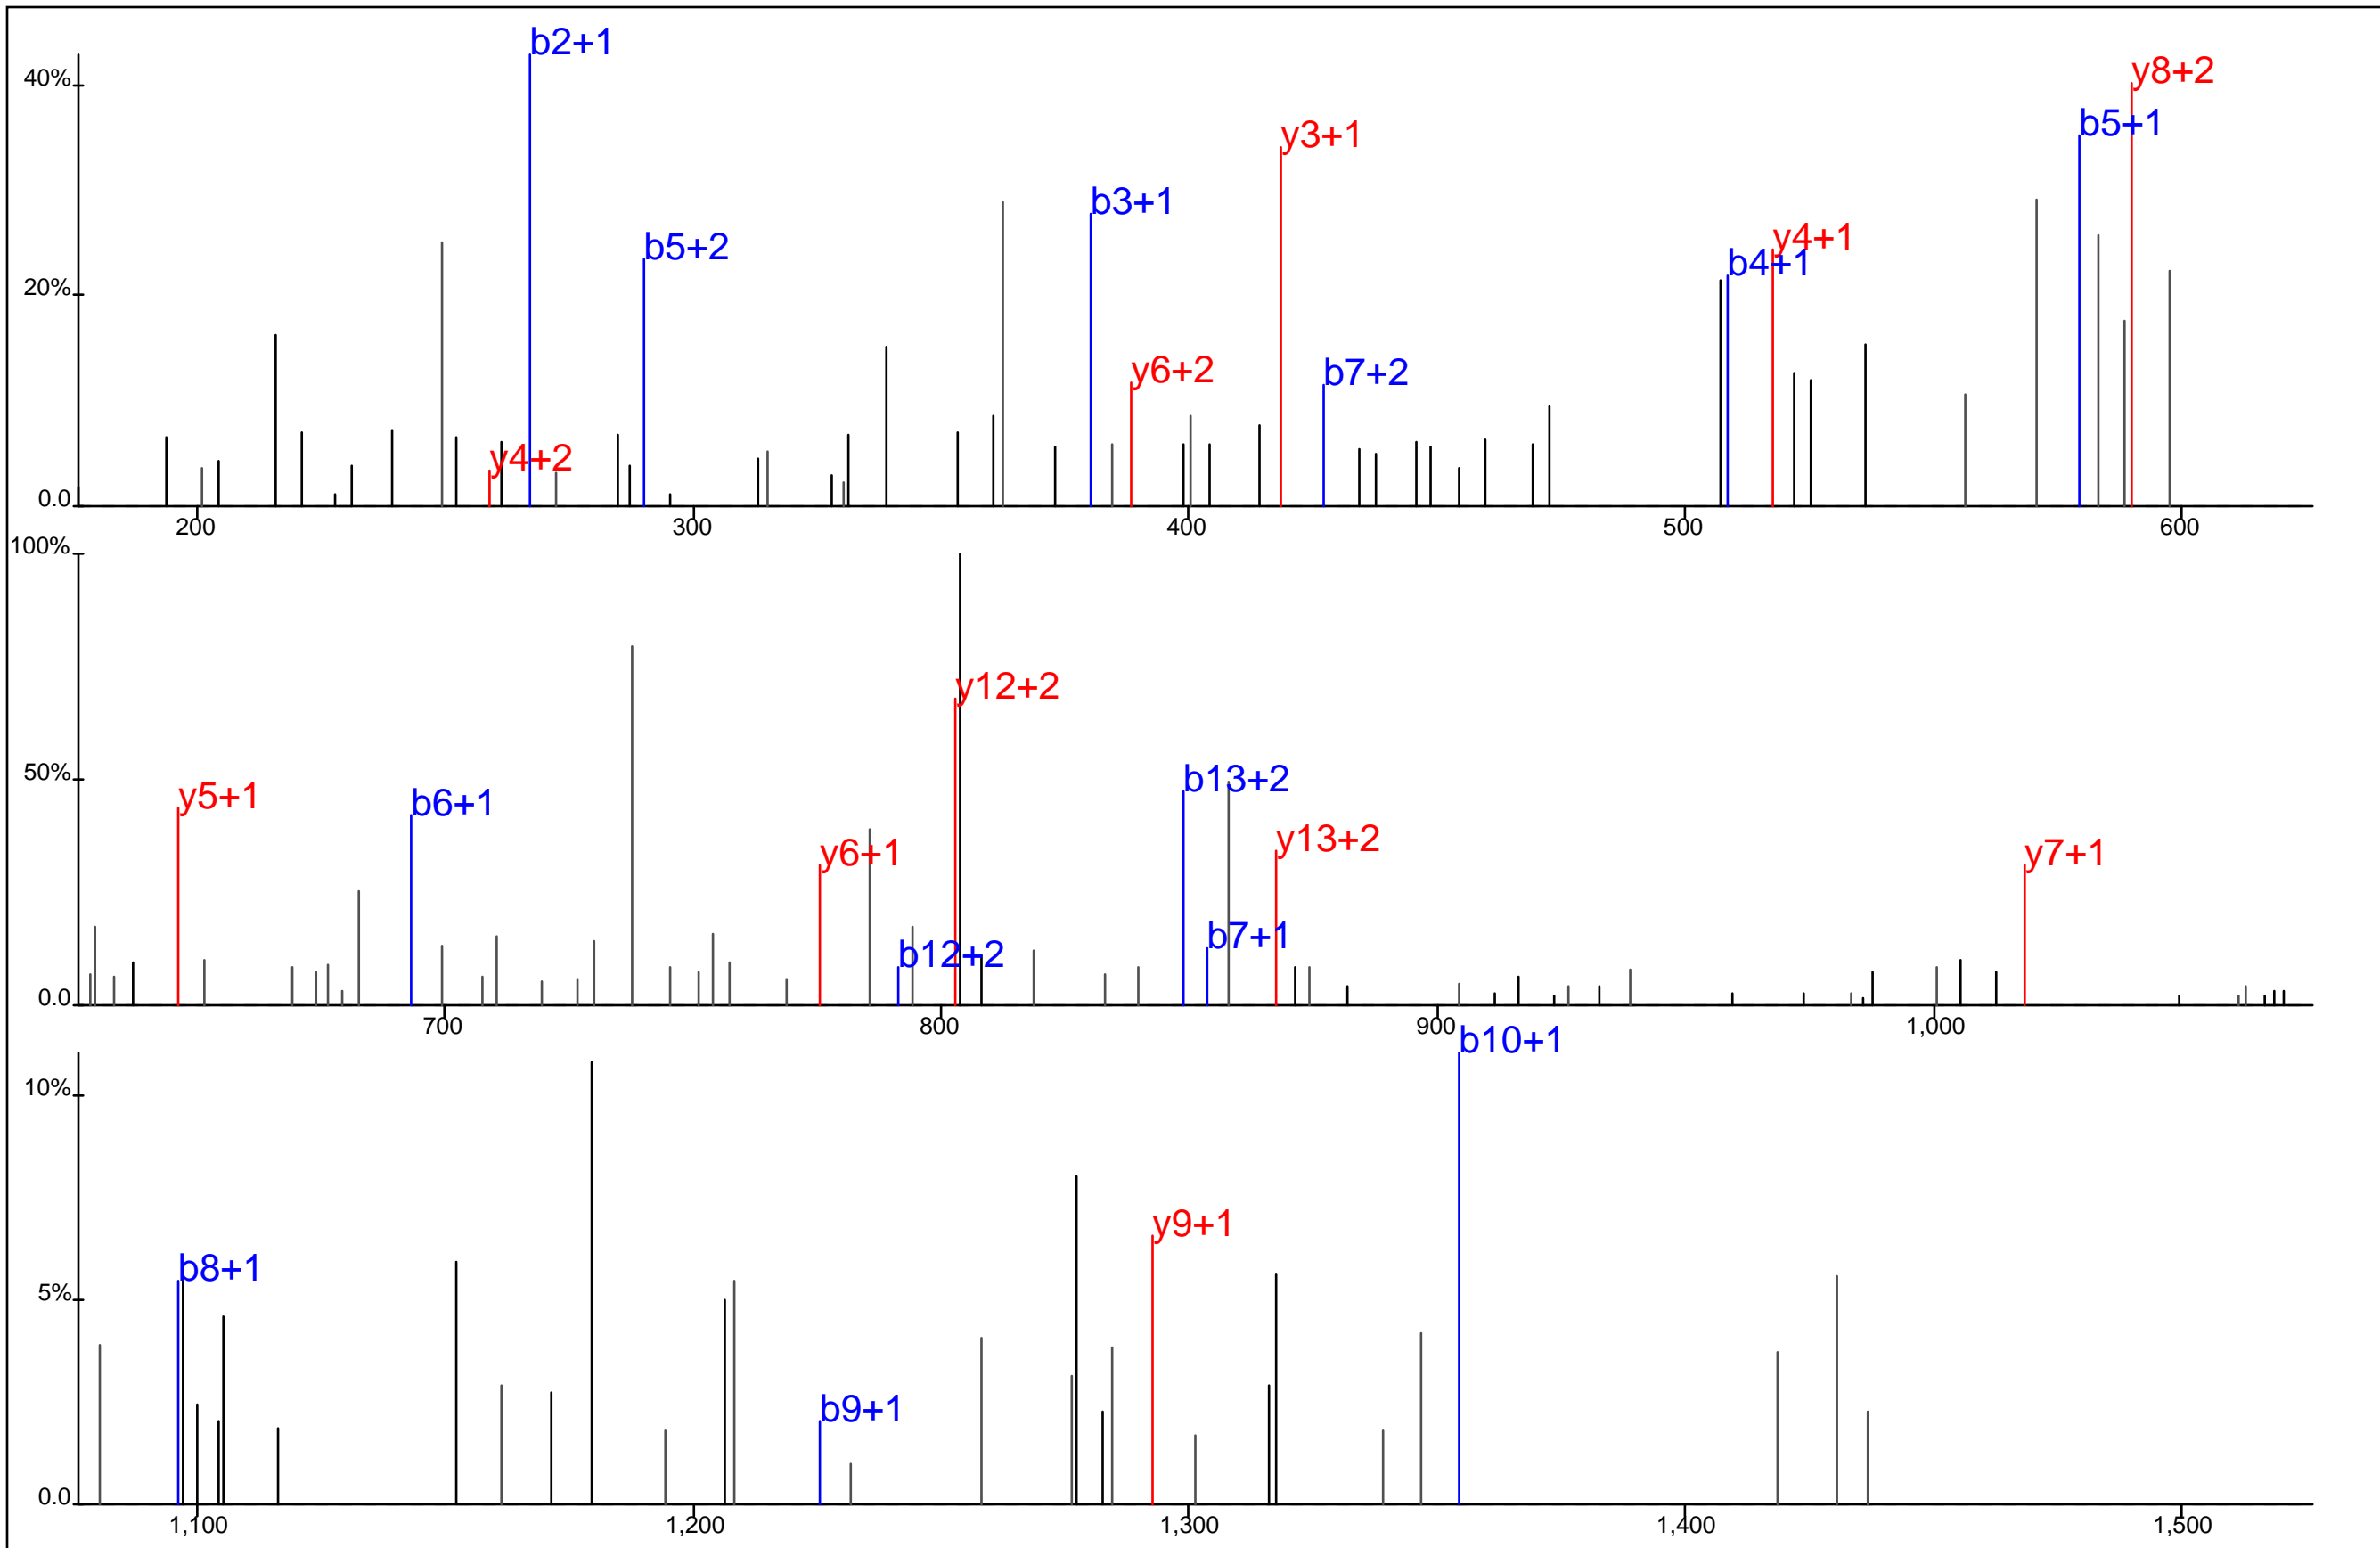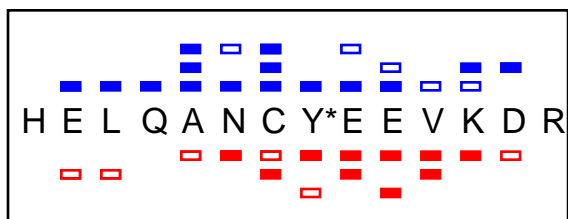

Protein Name: Cofilin 1  
 gi Accession: 0  
 Precursor Mass: 624.2632+3  
 Delta Mass: 2.091 ppm  
 XCorr: 51.24

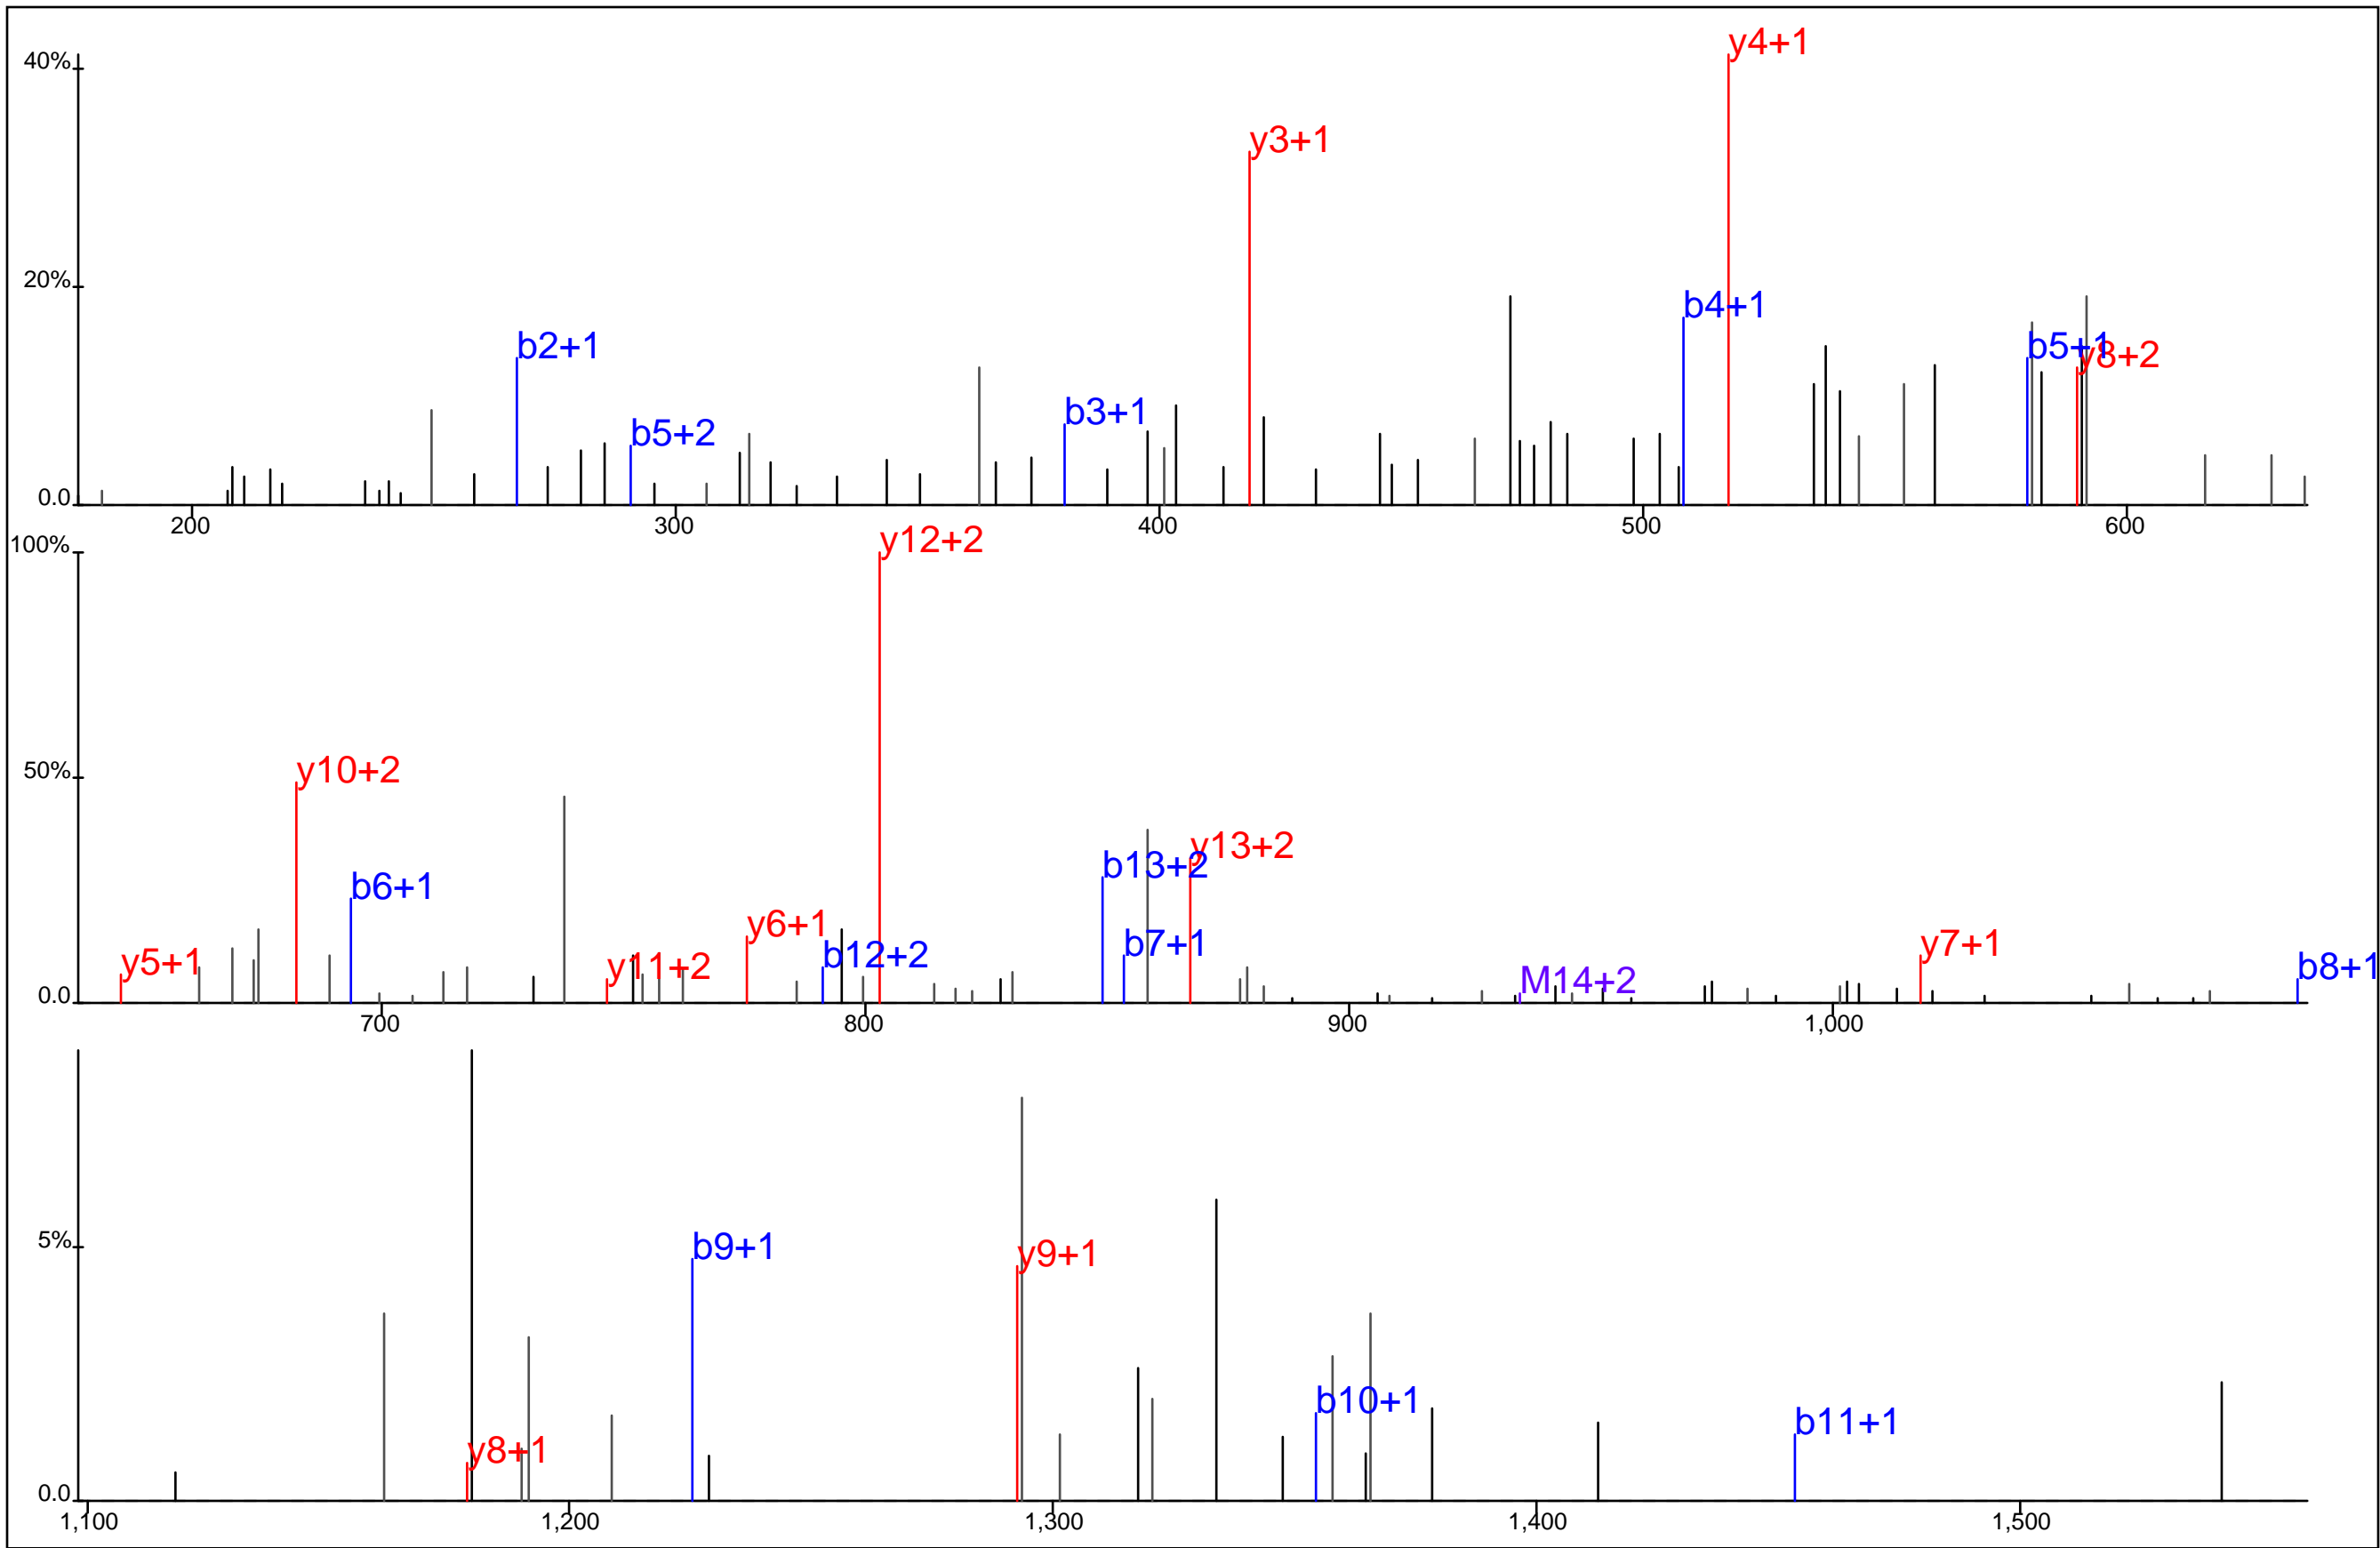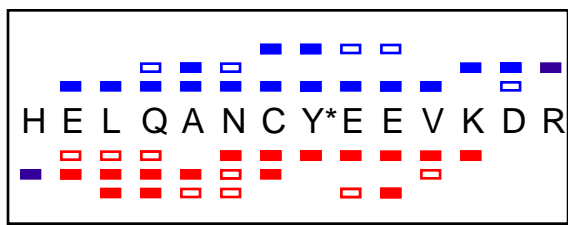

Protein Name: Cofilin 1  
 gi Accession: 0  
 Precursor Mass: 624.2613+3  
 Delta Mass: 5.125 ppm  
 XCorr: 36.8

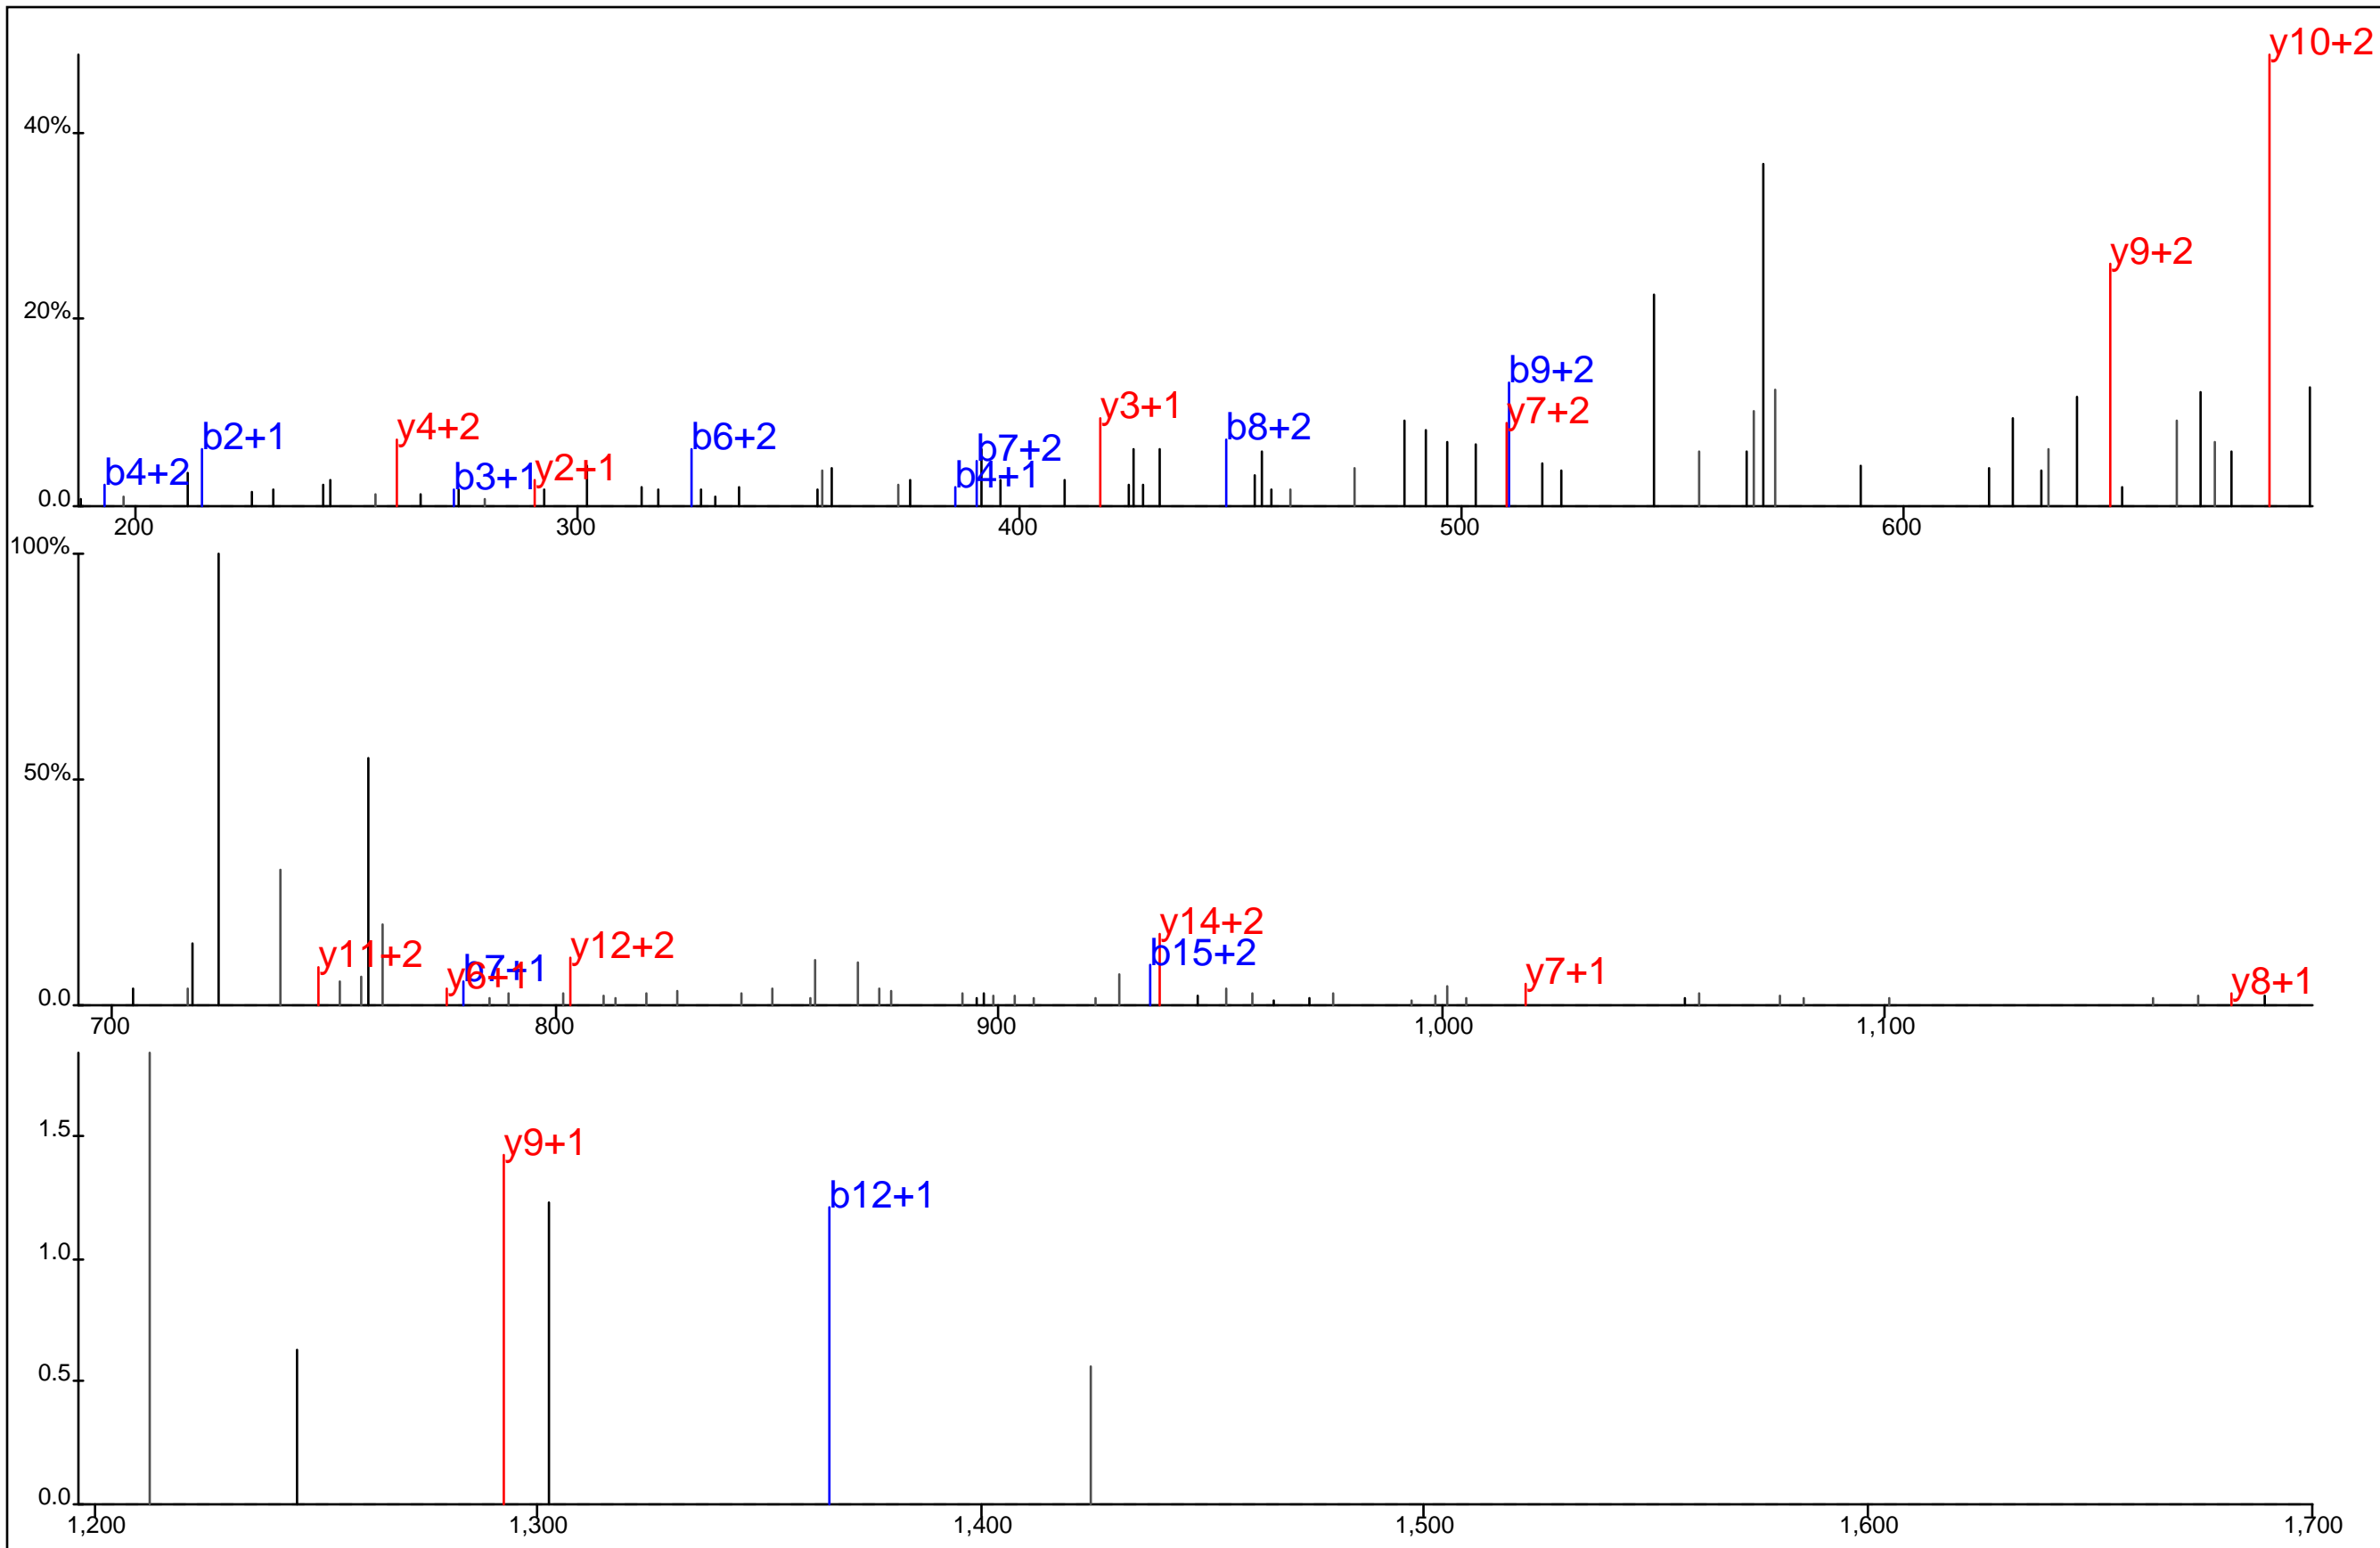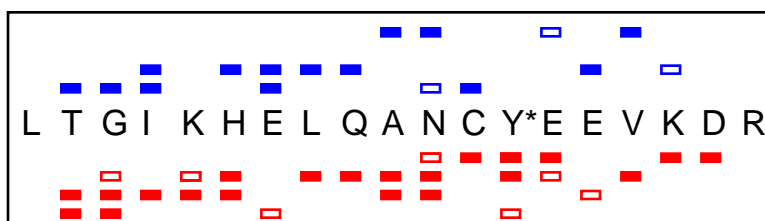

Protein Name: Cofilin 1  
 gi Accession: 0  
 Precursor Mass: 596.5335+4  
 Delta Mass: 0.446 ppm  
 XCorr: 27.7

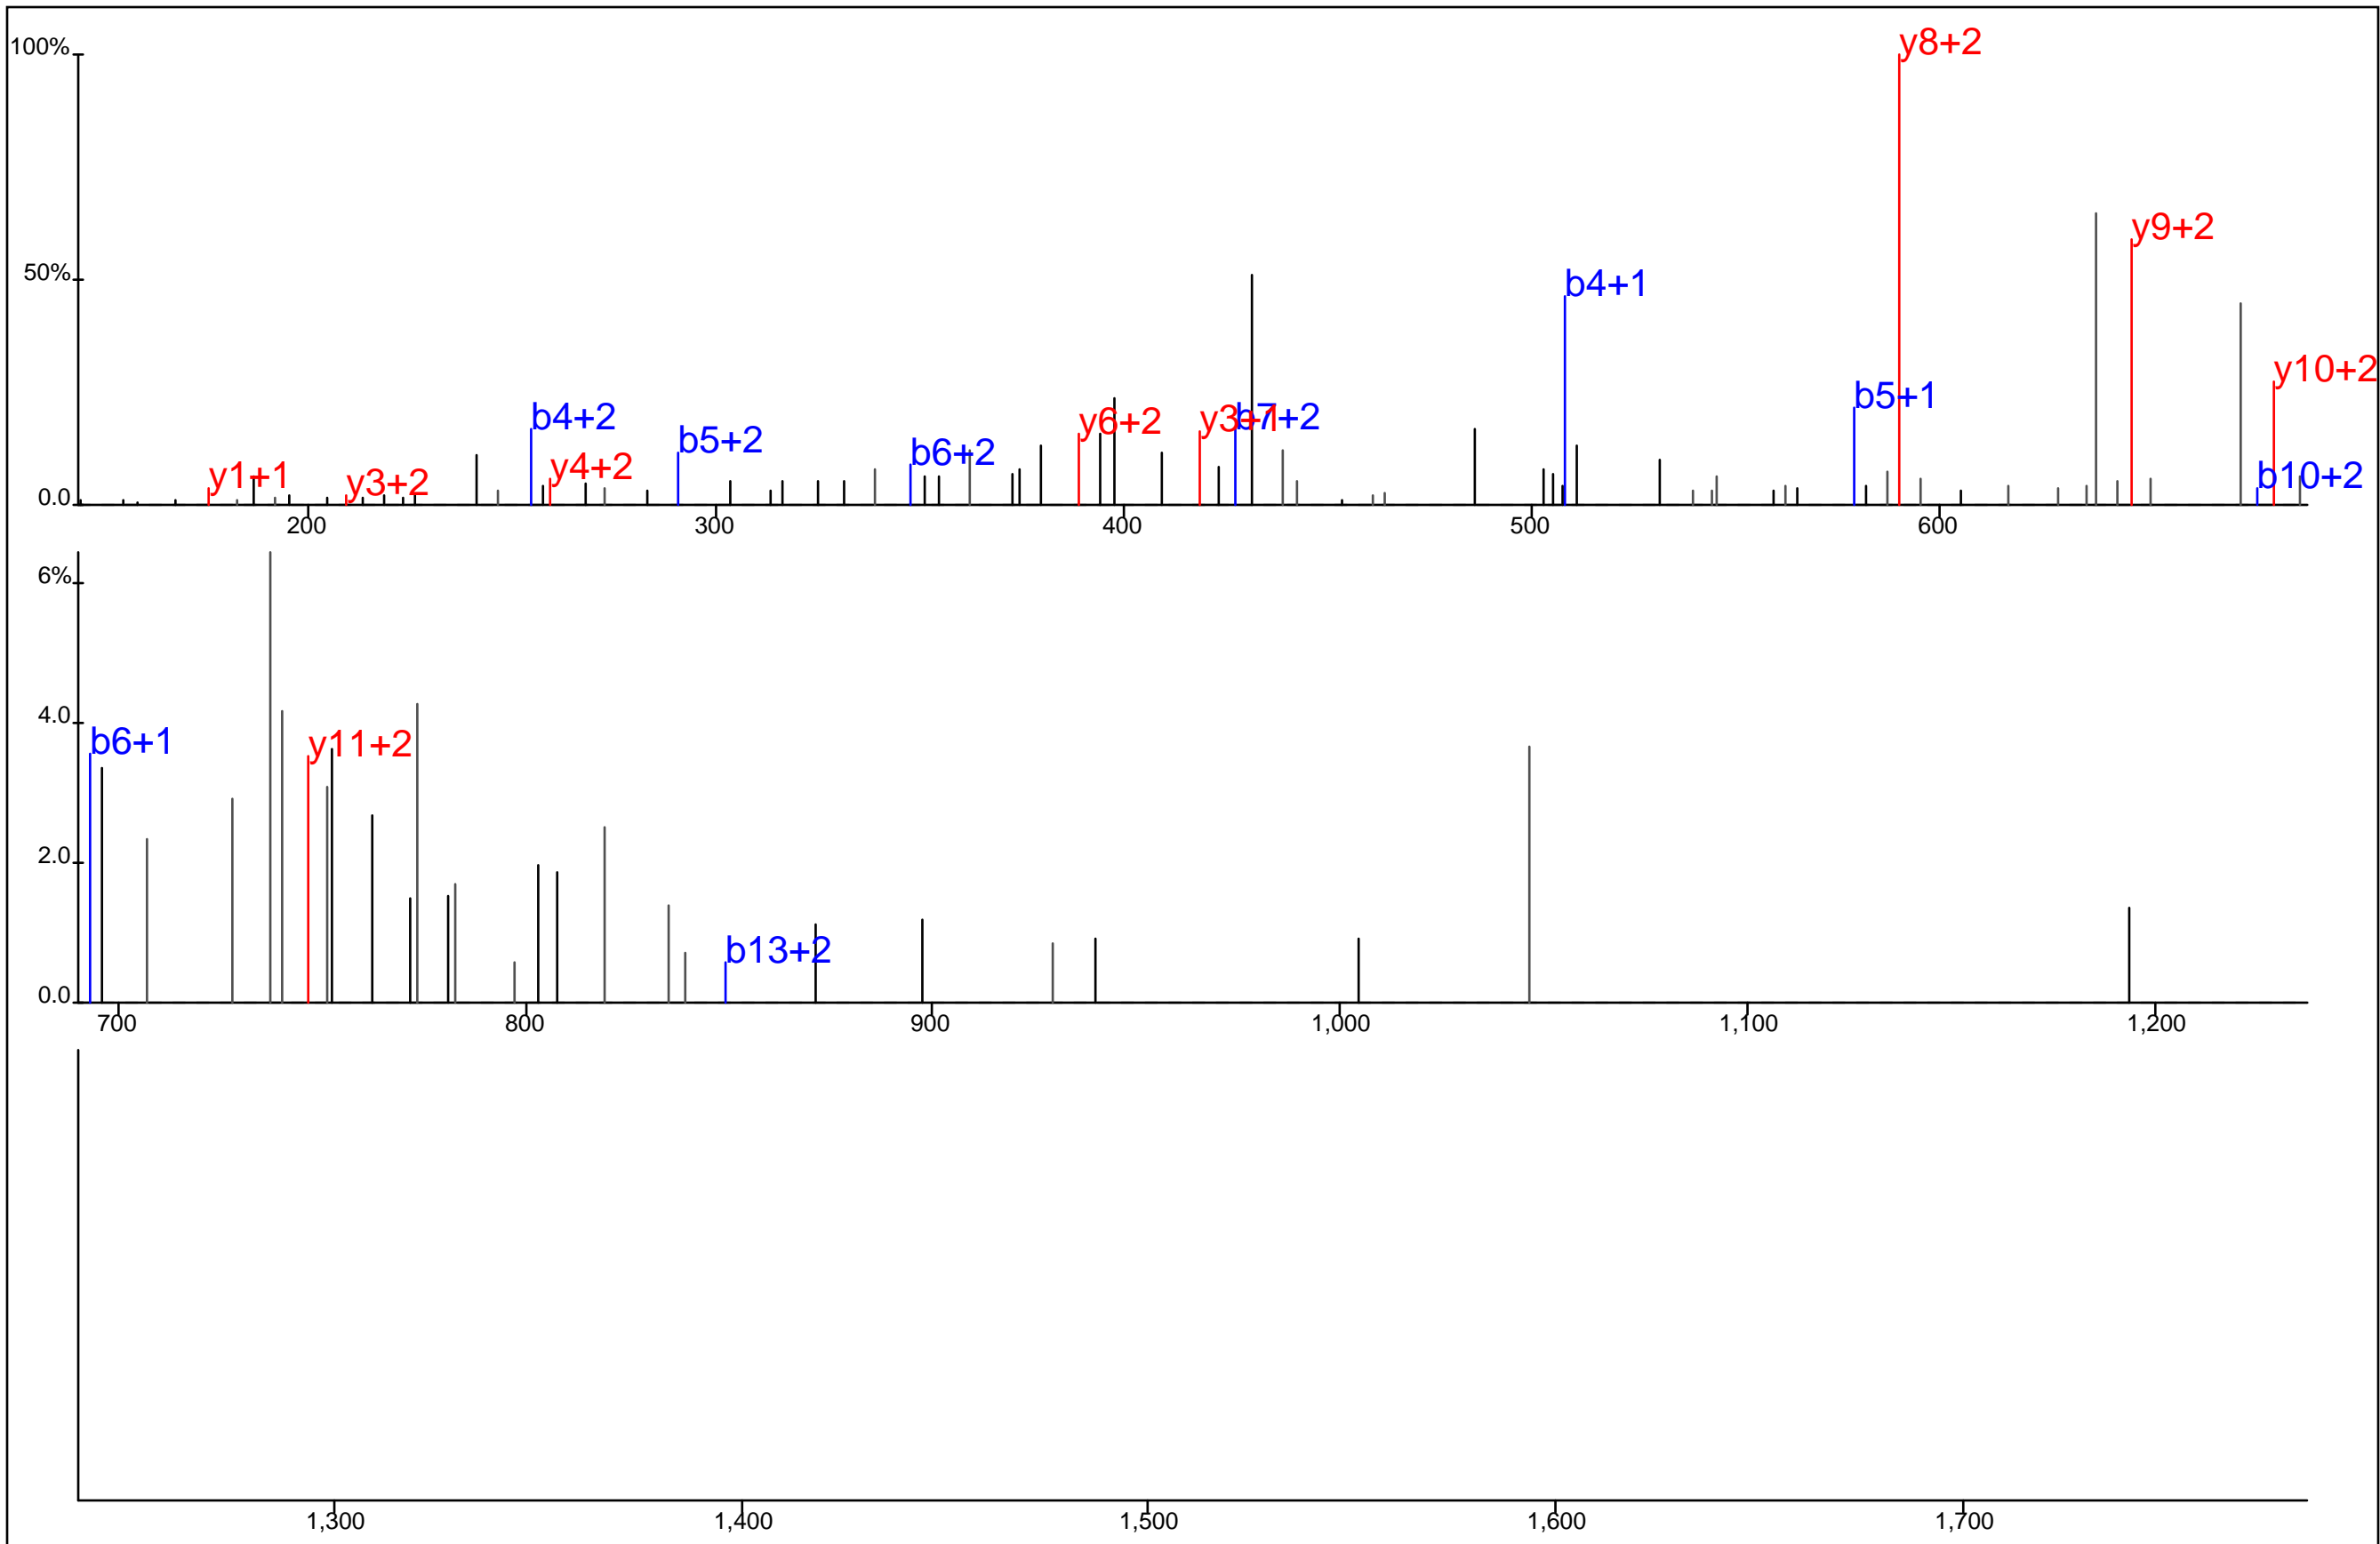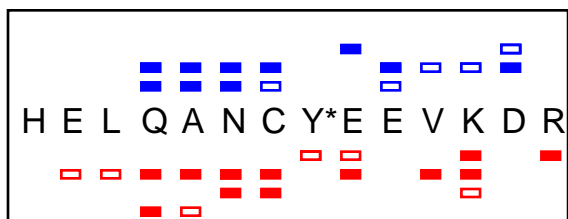

Protein Name: Cofilin 1  
 gi Accession: 0  
 Precursor Mass: 468.4505+4  
 Delta Mass: 0.740 ppm  
 XCorr: 20.42

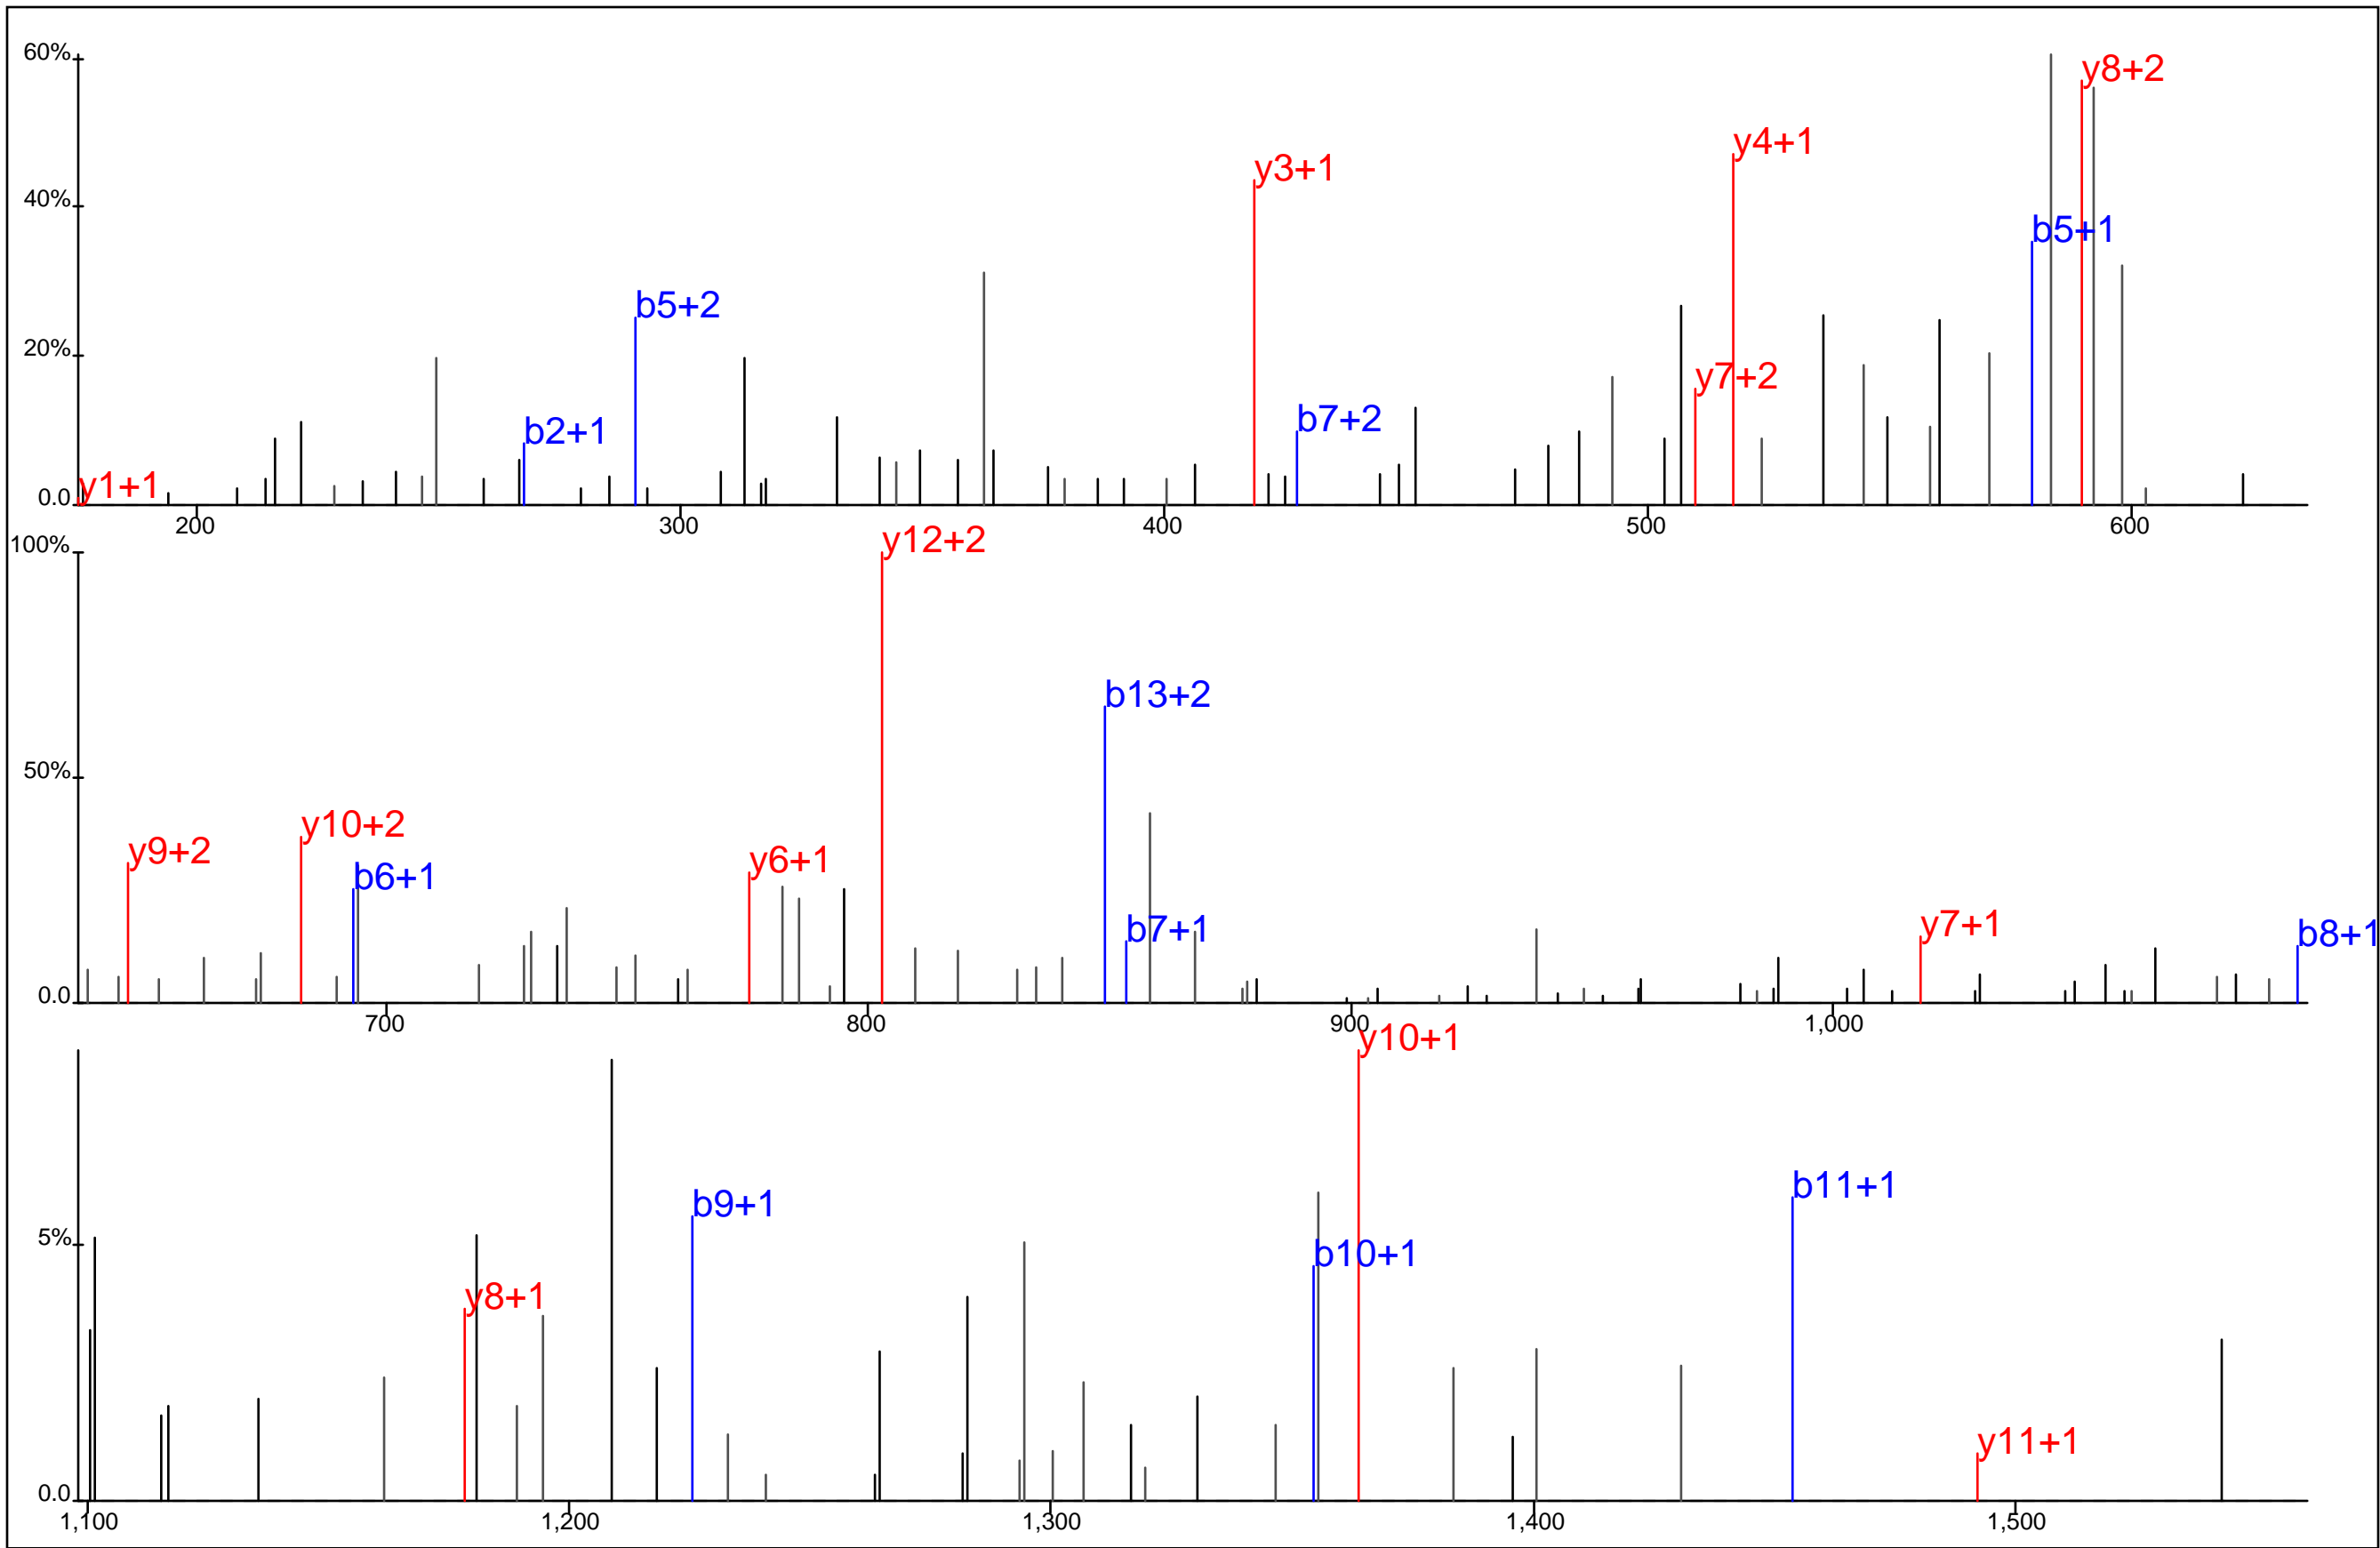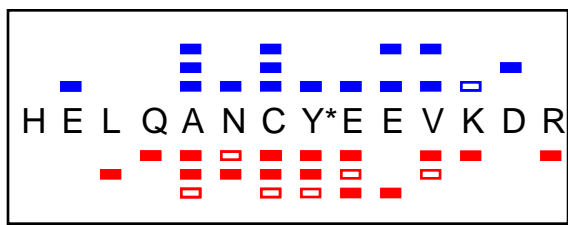

Protein Name: Cofilin 1  
 gi Accession: 0  
 Precursor Mass: 624.2652+3  
 Delta Mass: 1.139 ppm  
 XCorr: 38.63

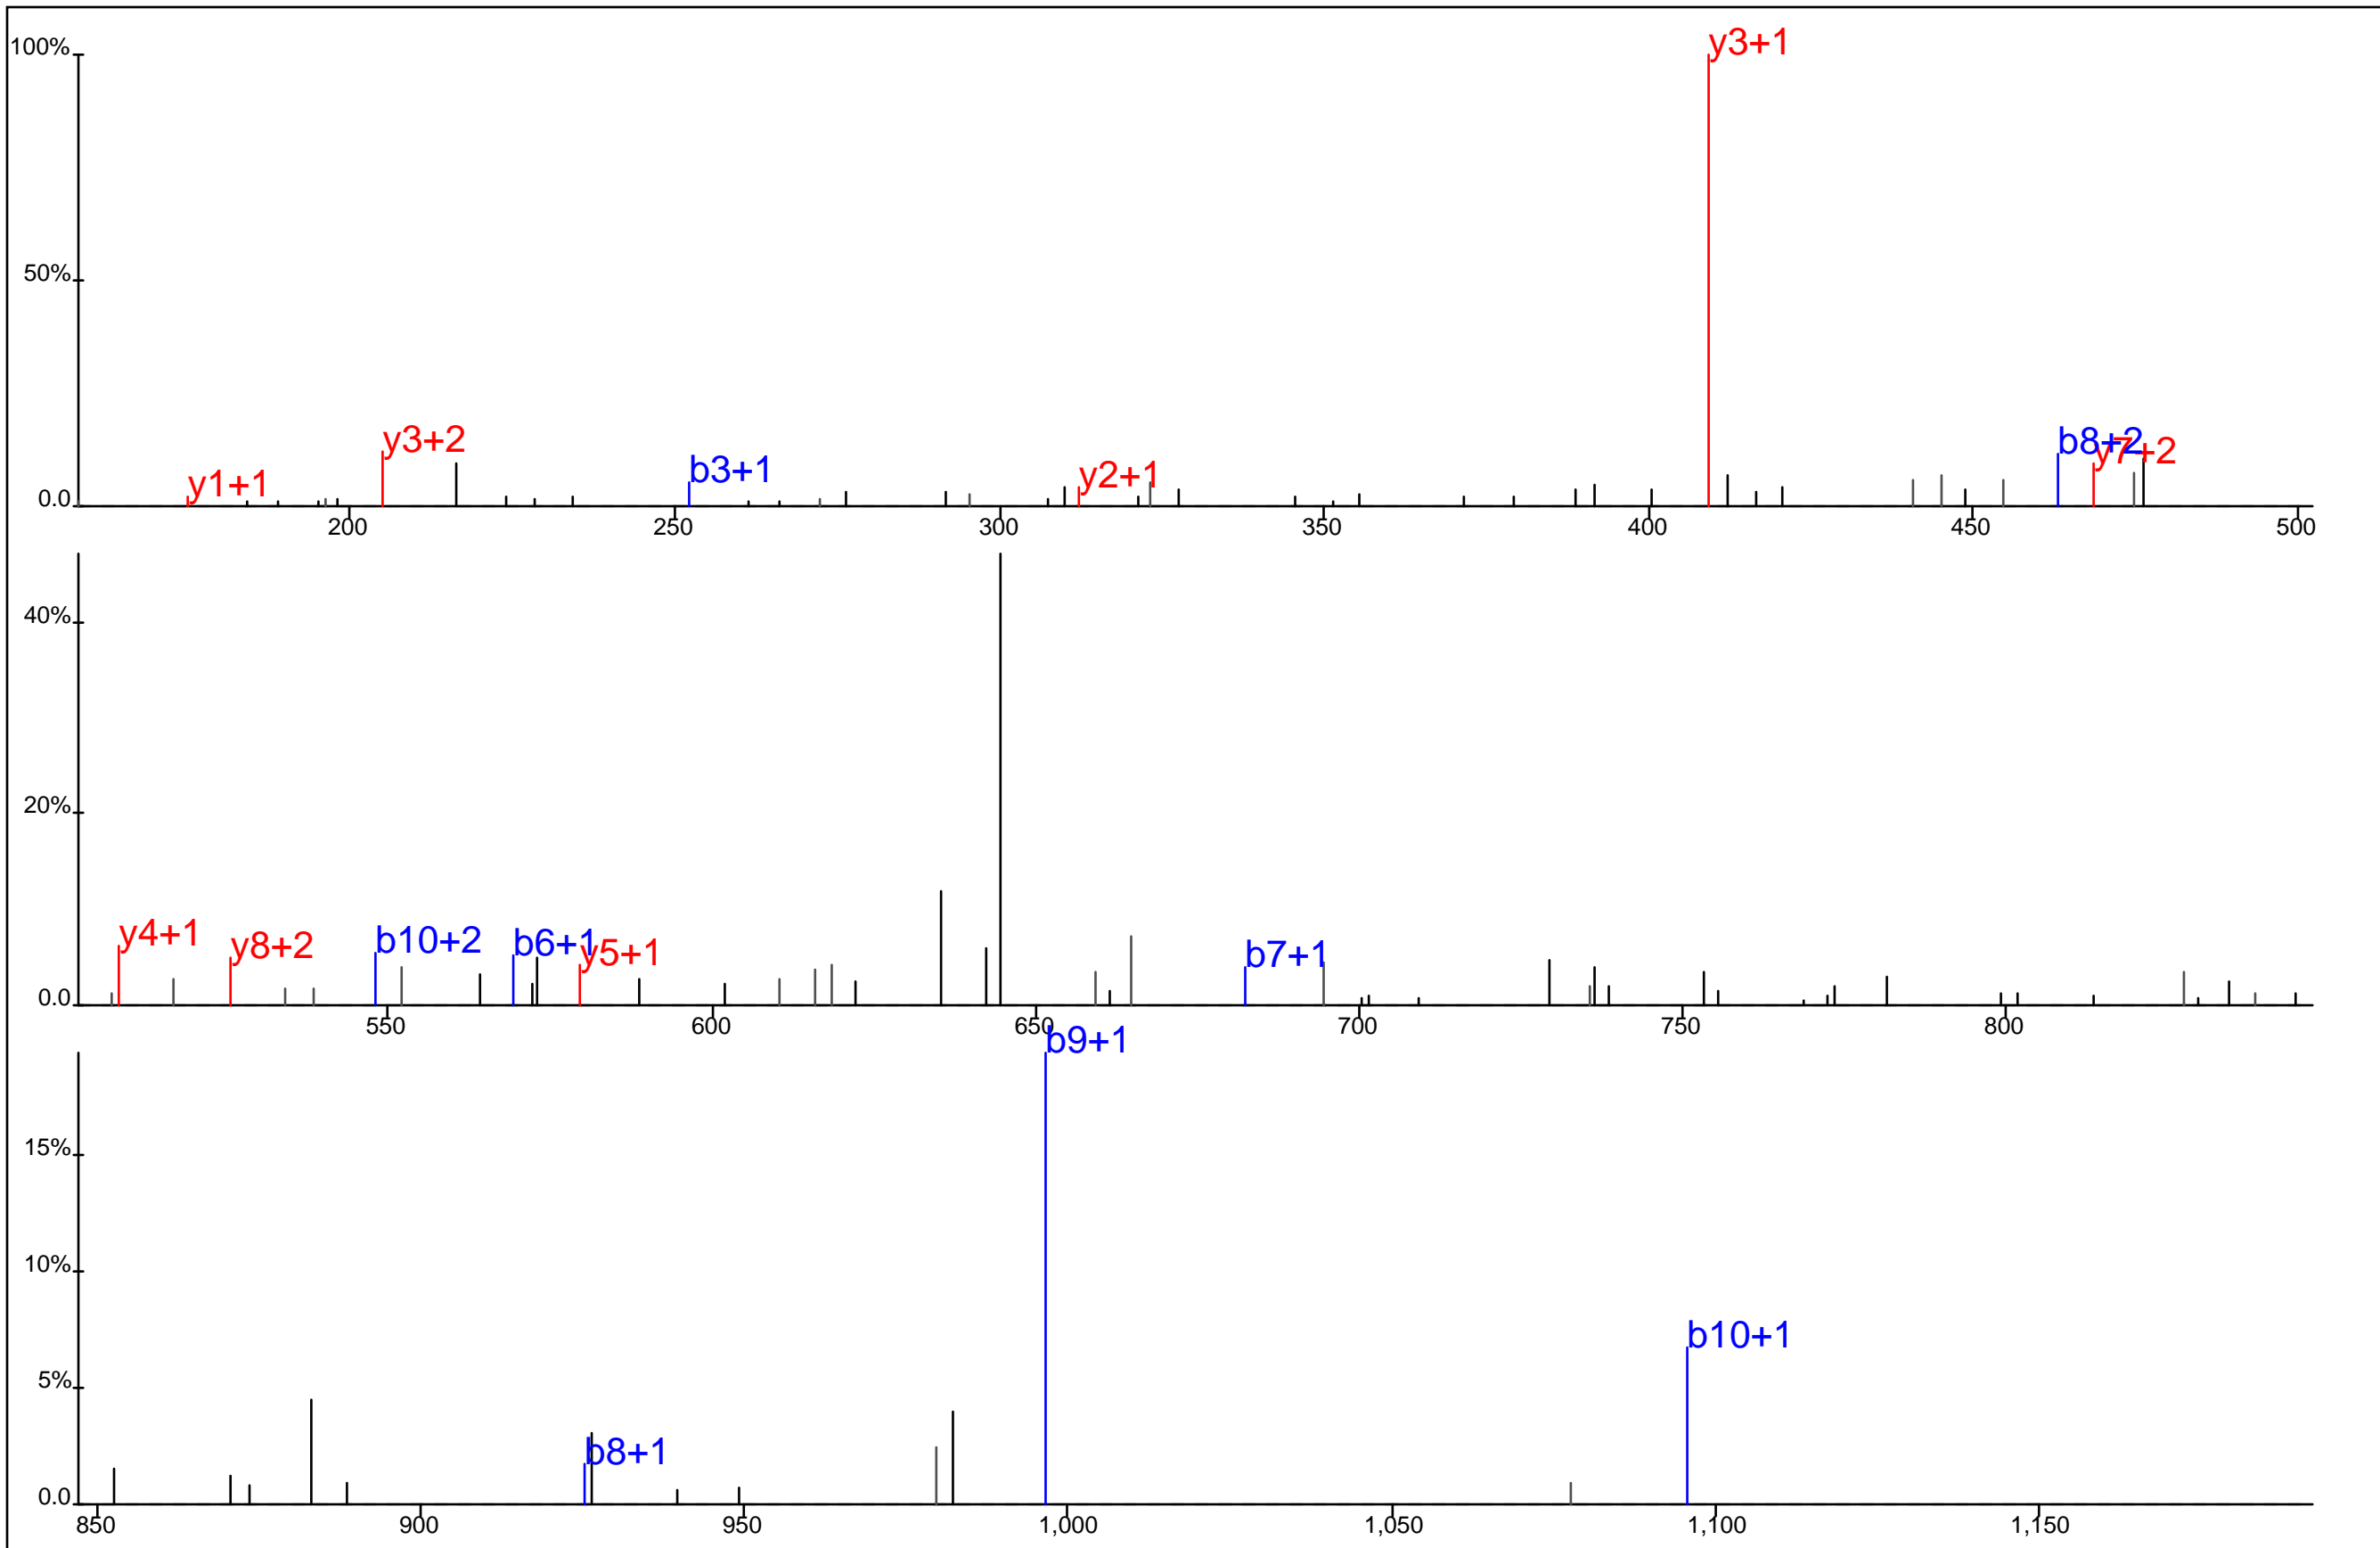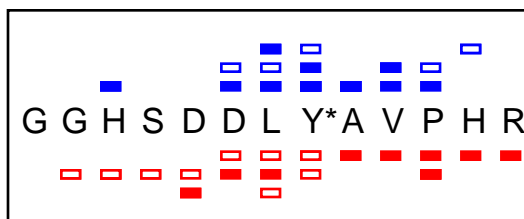

Protein Name: Coiled-coil domain containing 123  
 gi Accession: 0  
 Precursor Mass: 501.8845+3  
 Delta Mass: 0.917 ppm  
 XCorr: 26.71

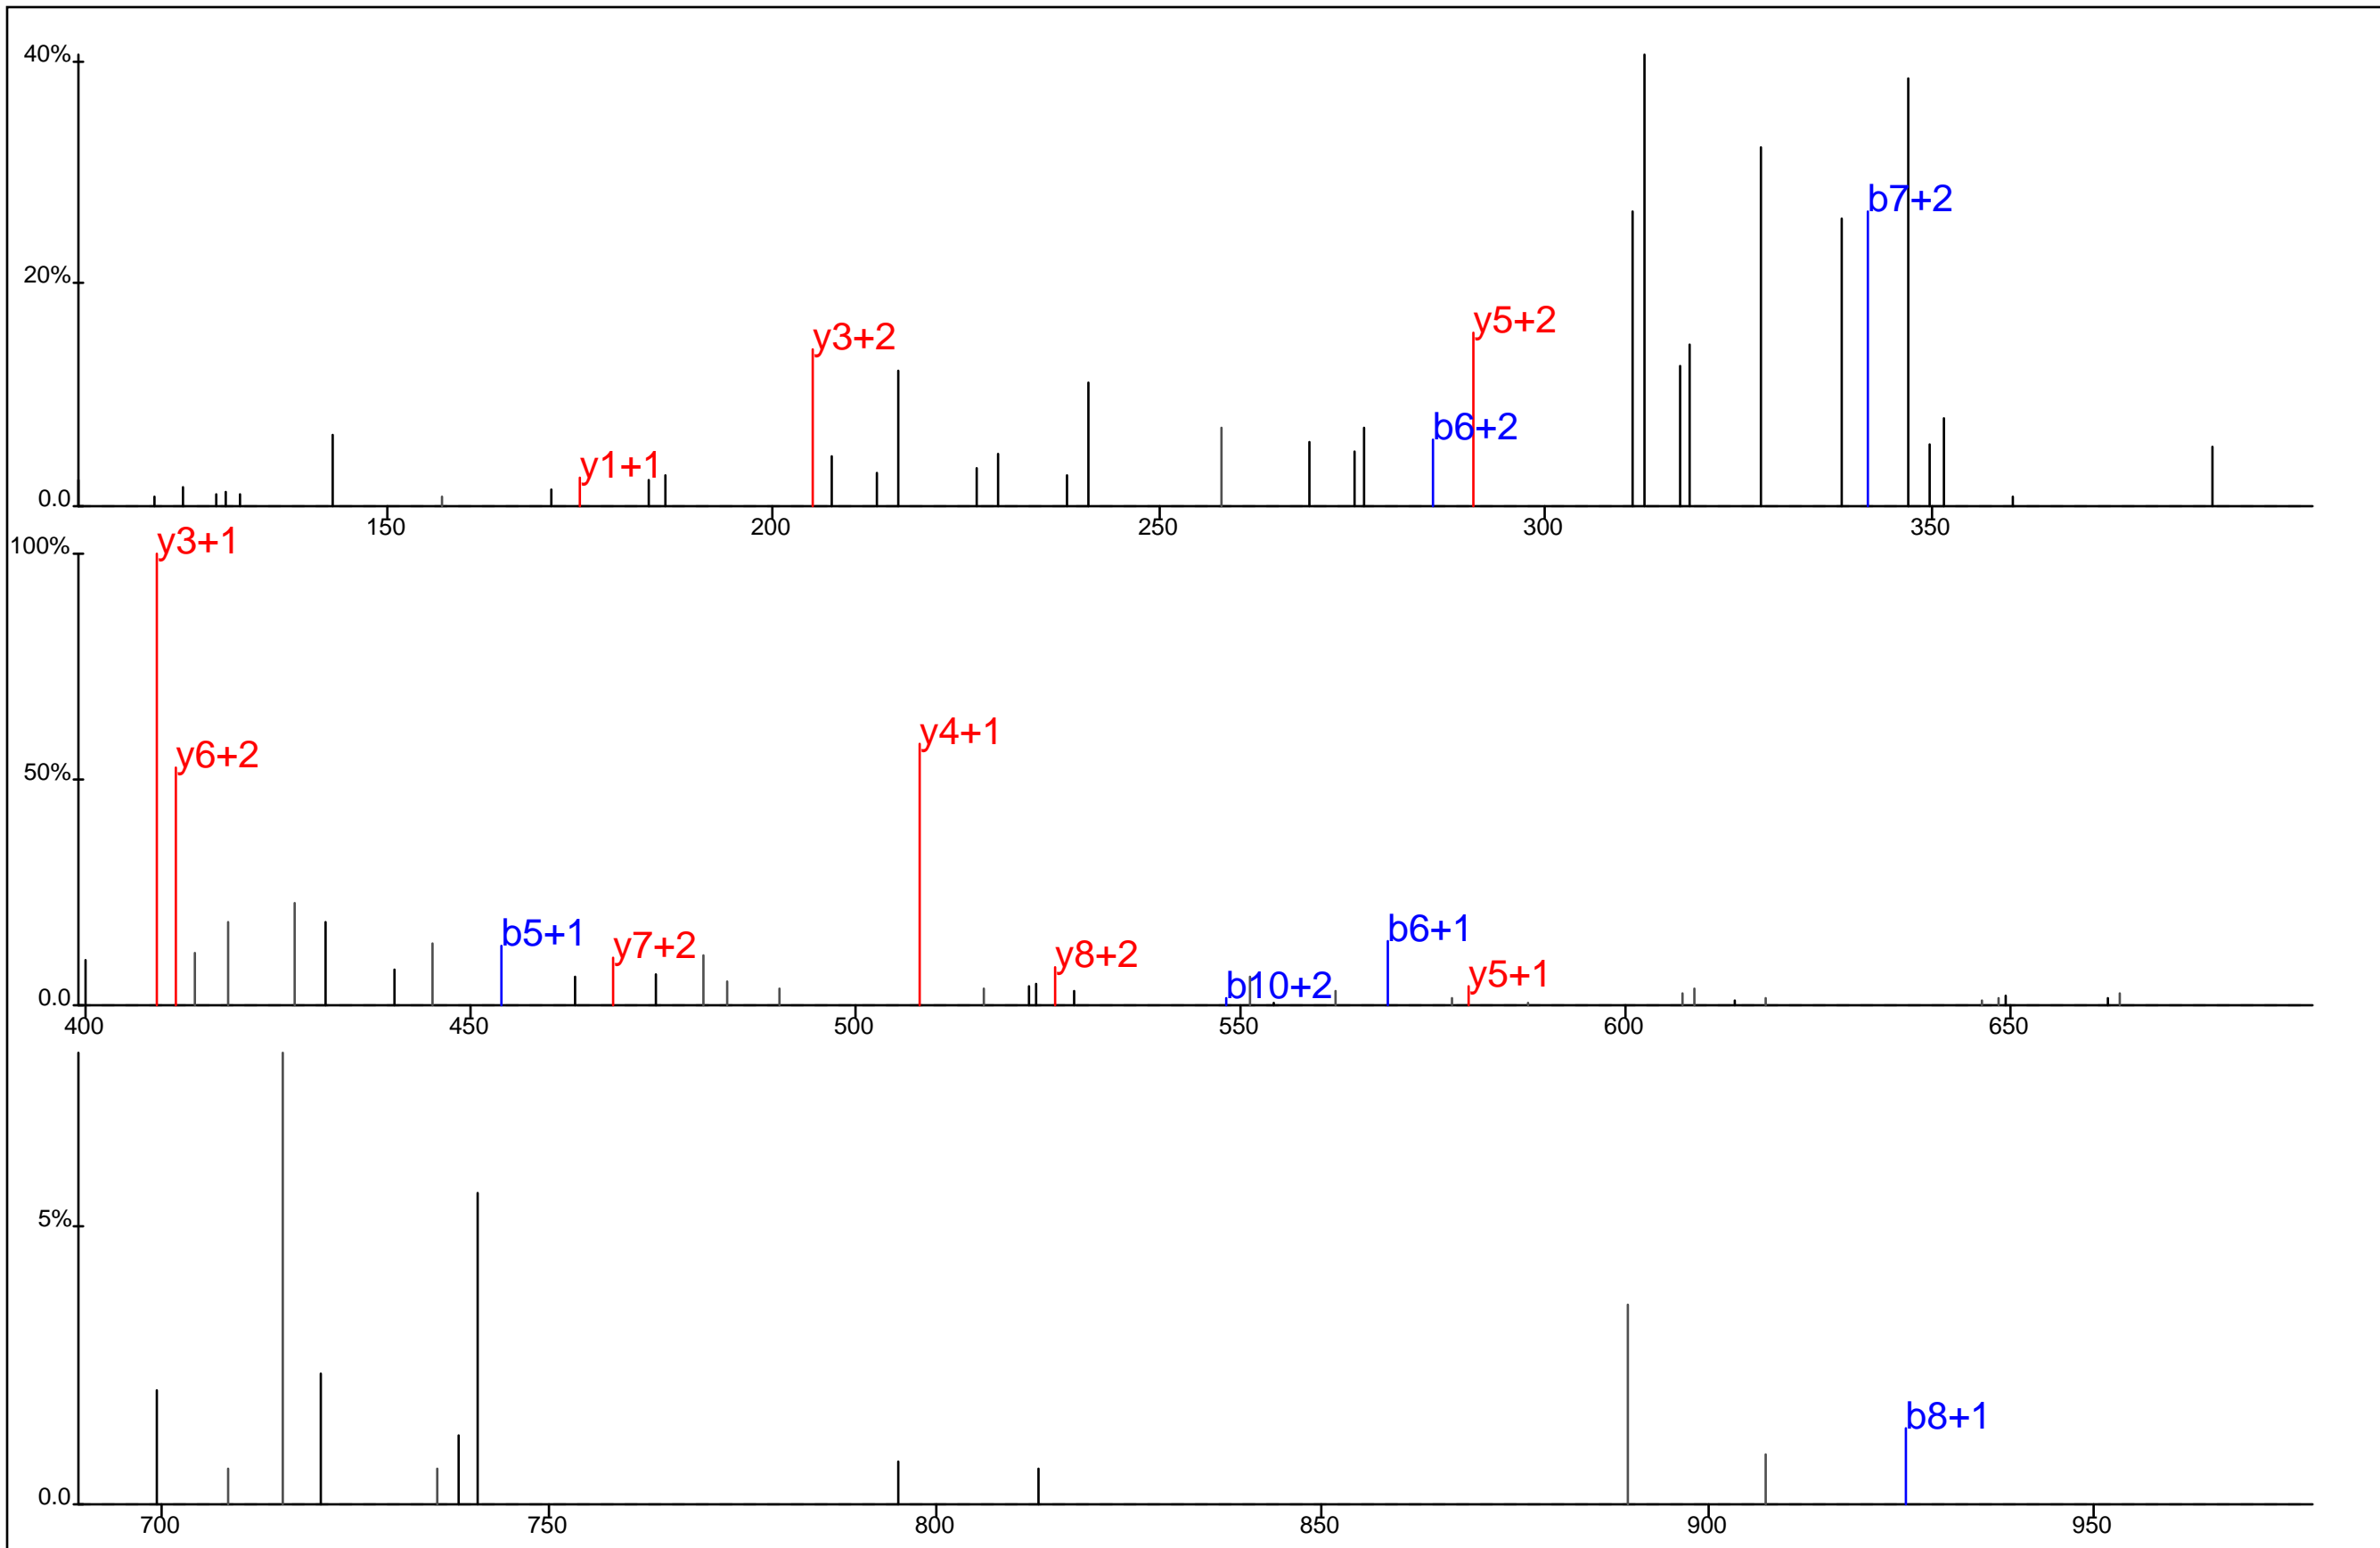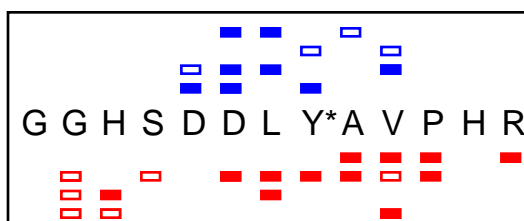

Protein Name: Coiled-coil domain containing 123  
 gi Accession: 0  
 Precursor Mass: 376.6650+4  
 Delta Mass: 0.463 ppm  
 XCorr: 26.62

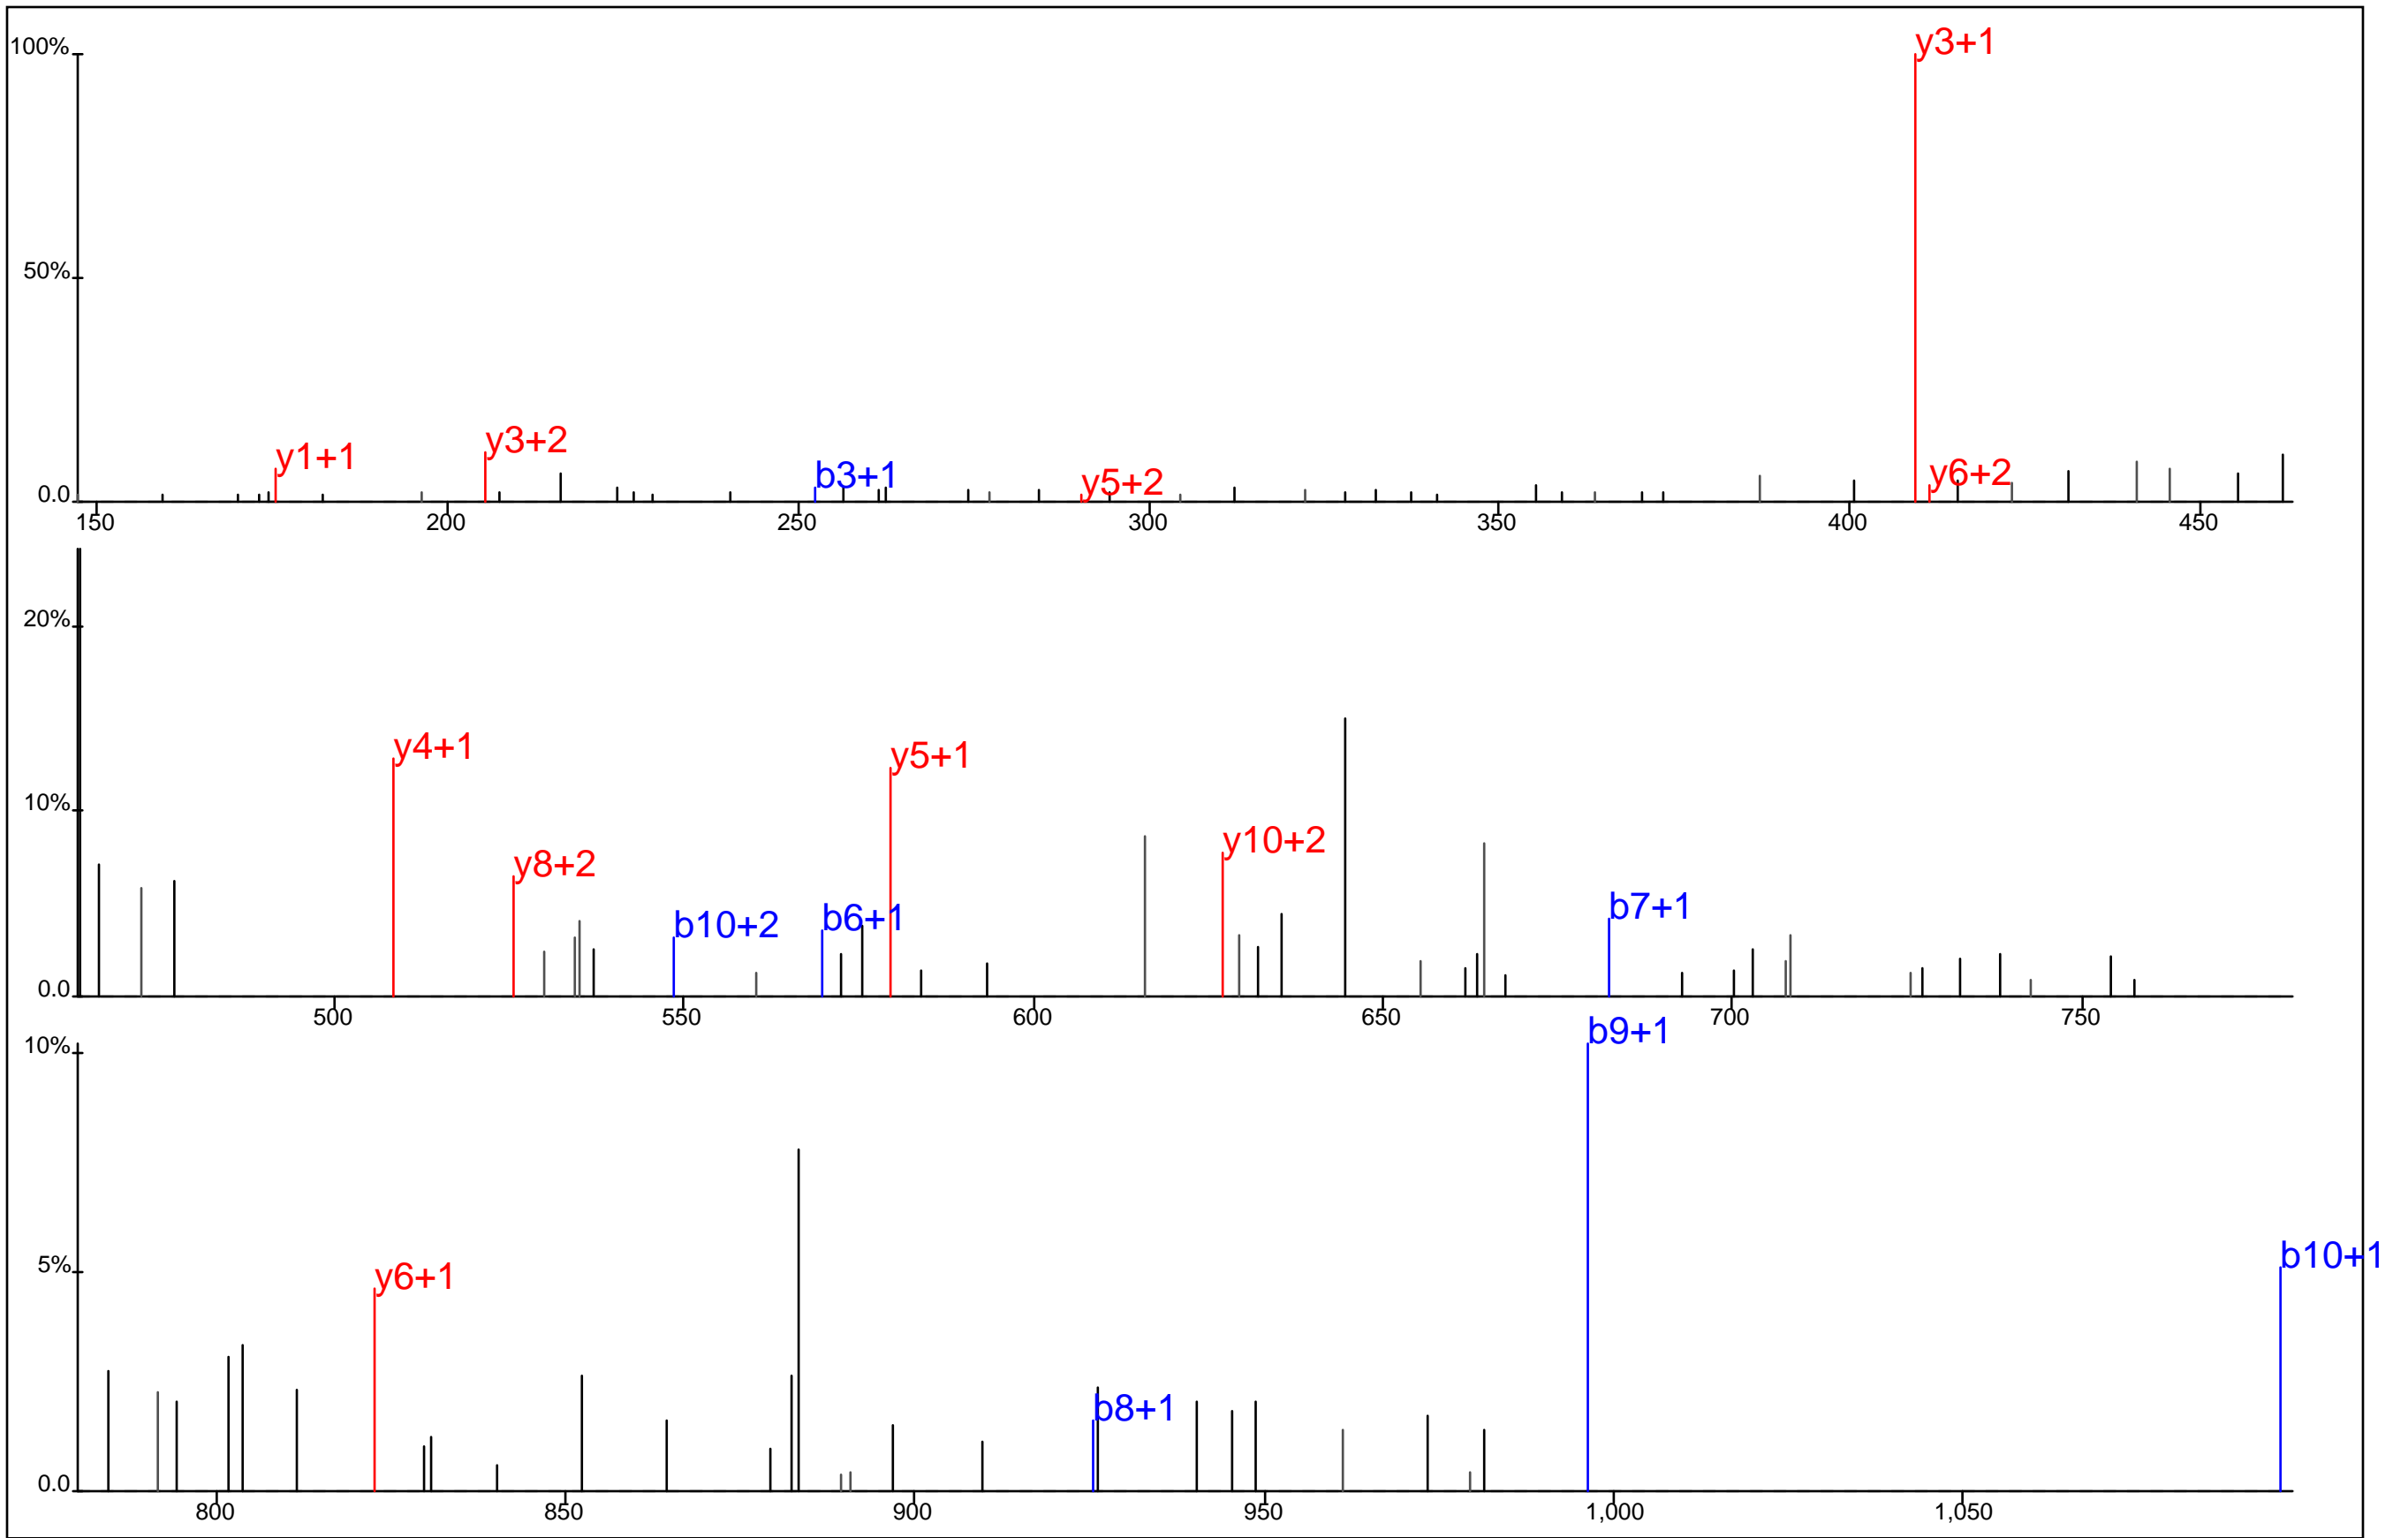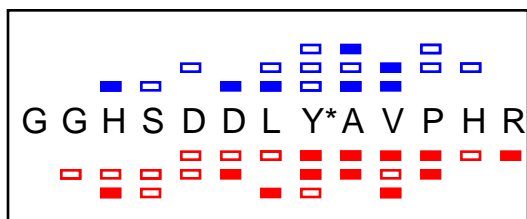

Protein Name: Coiled-coil domain containing 123  
 gi Accession: 0  
 Precursor Mass: 501.8848+3  
 Delta Mass: 1.528 ppm  
 XCorr: 31.1



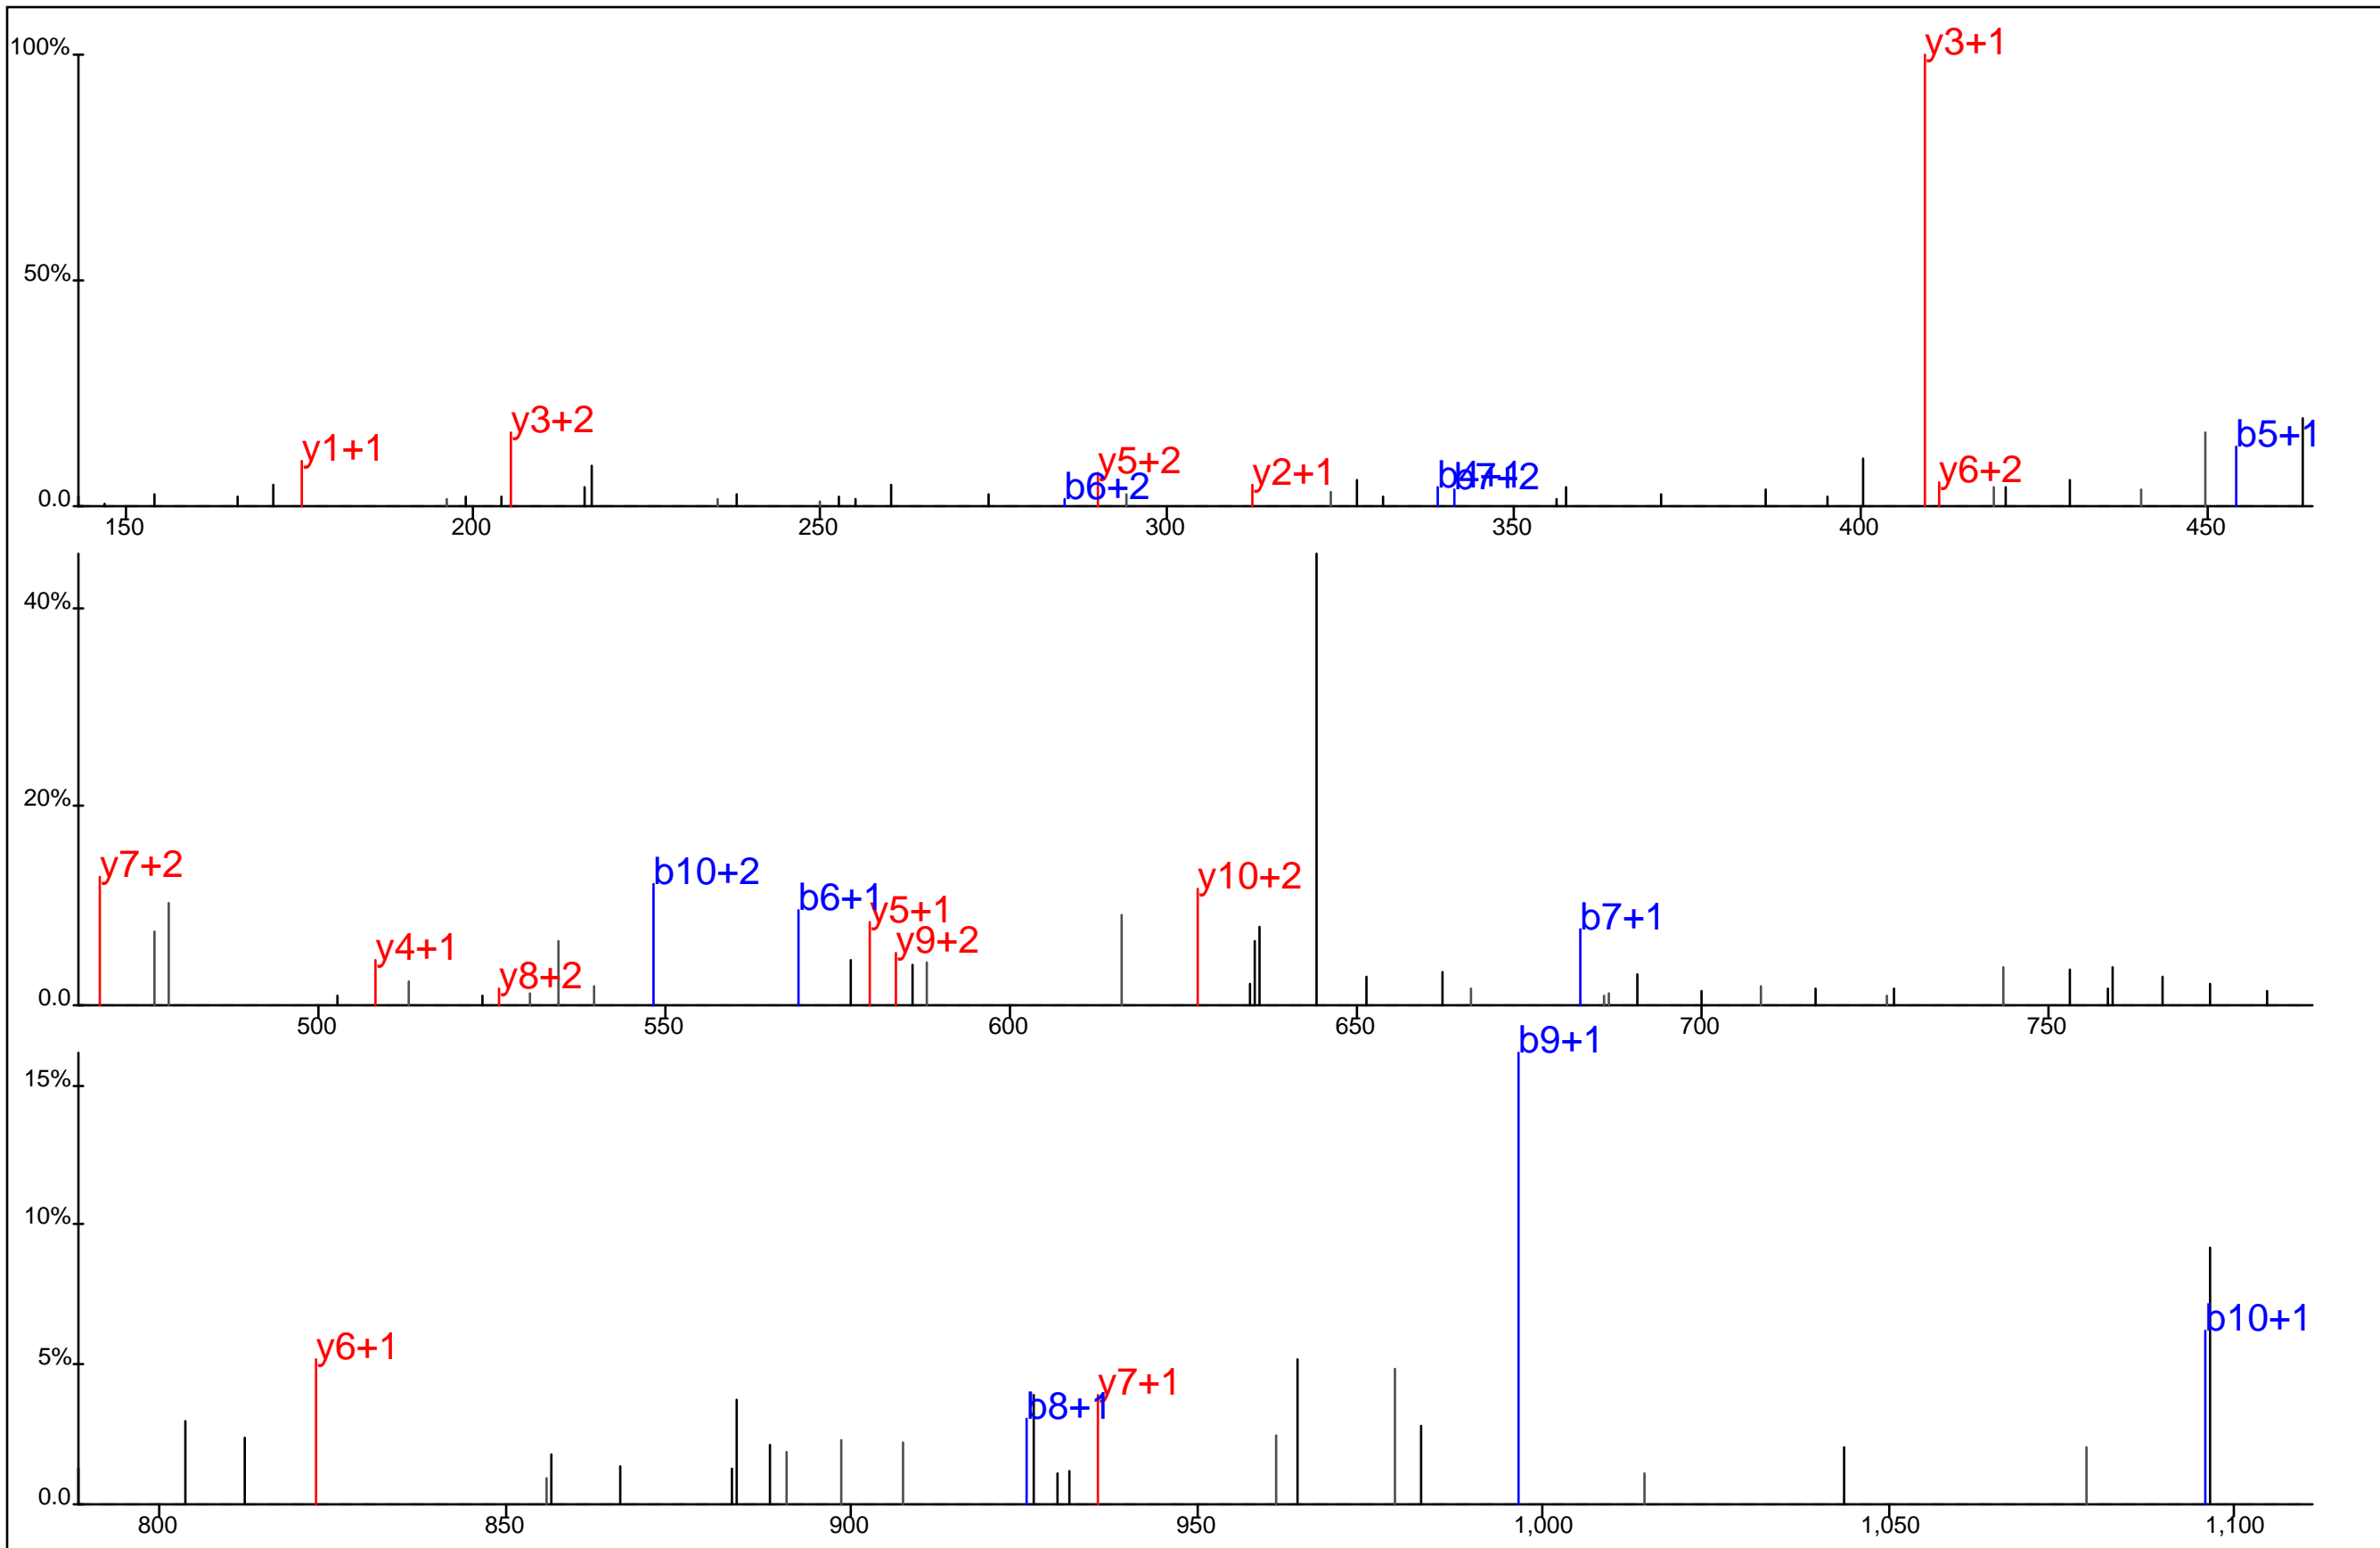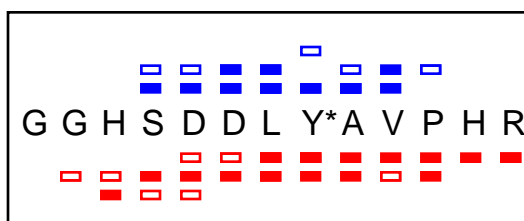

Protein Name: Coiled-coil domain containing 123  
 gi Accession: 0  
 Precursor Mass: 501.8837+3  
 Delta Mass: 0.725 ppm  
 XCorr: 29.67



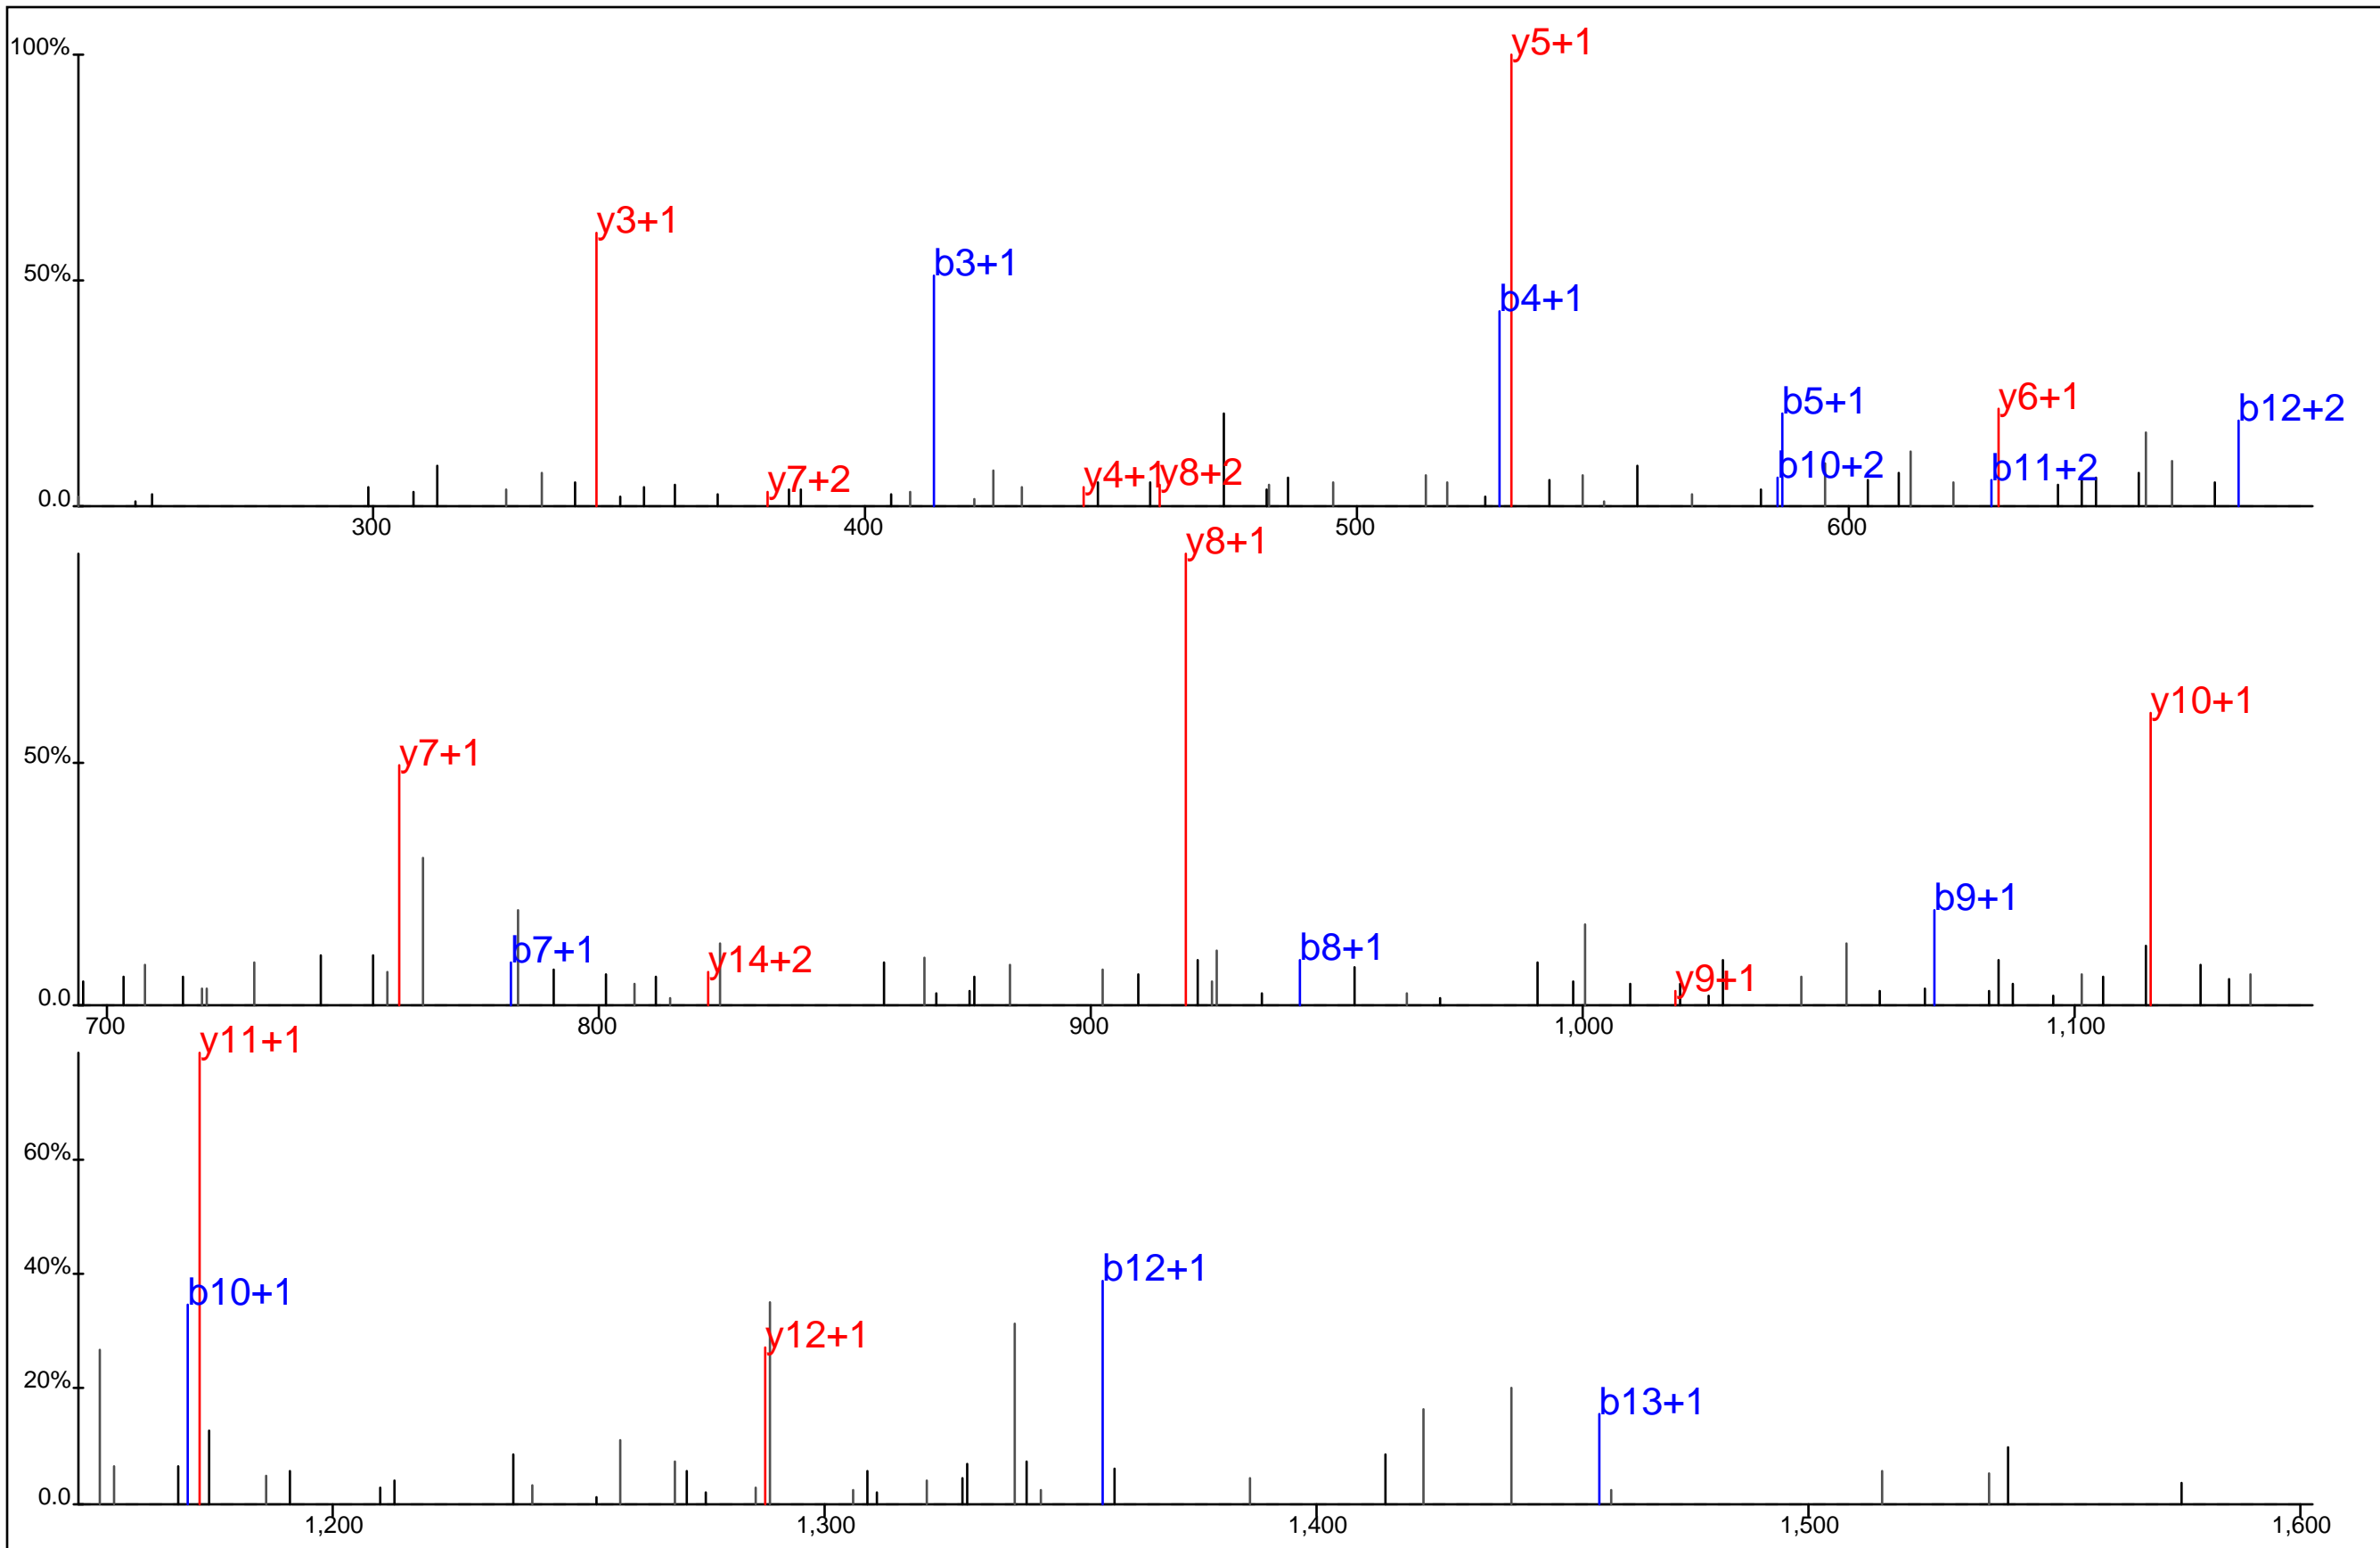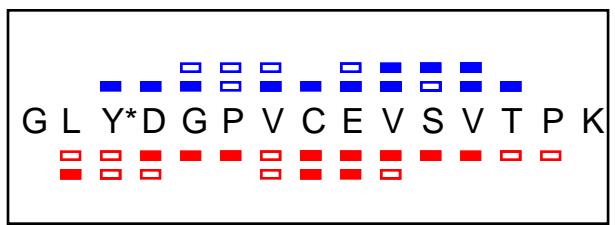

Protein Name: Collapsin response mediator protein 2  
 gi Accession: 0  
 Precursor Mass: 850.8845+2  
 Delta Mass: 0.889 ppm  
 XCorr: 50.73



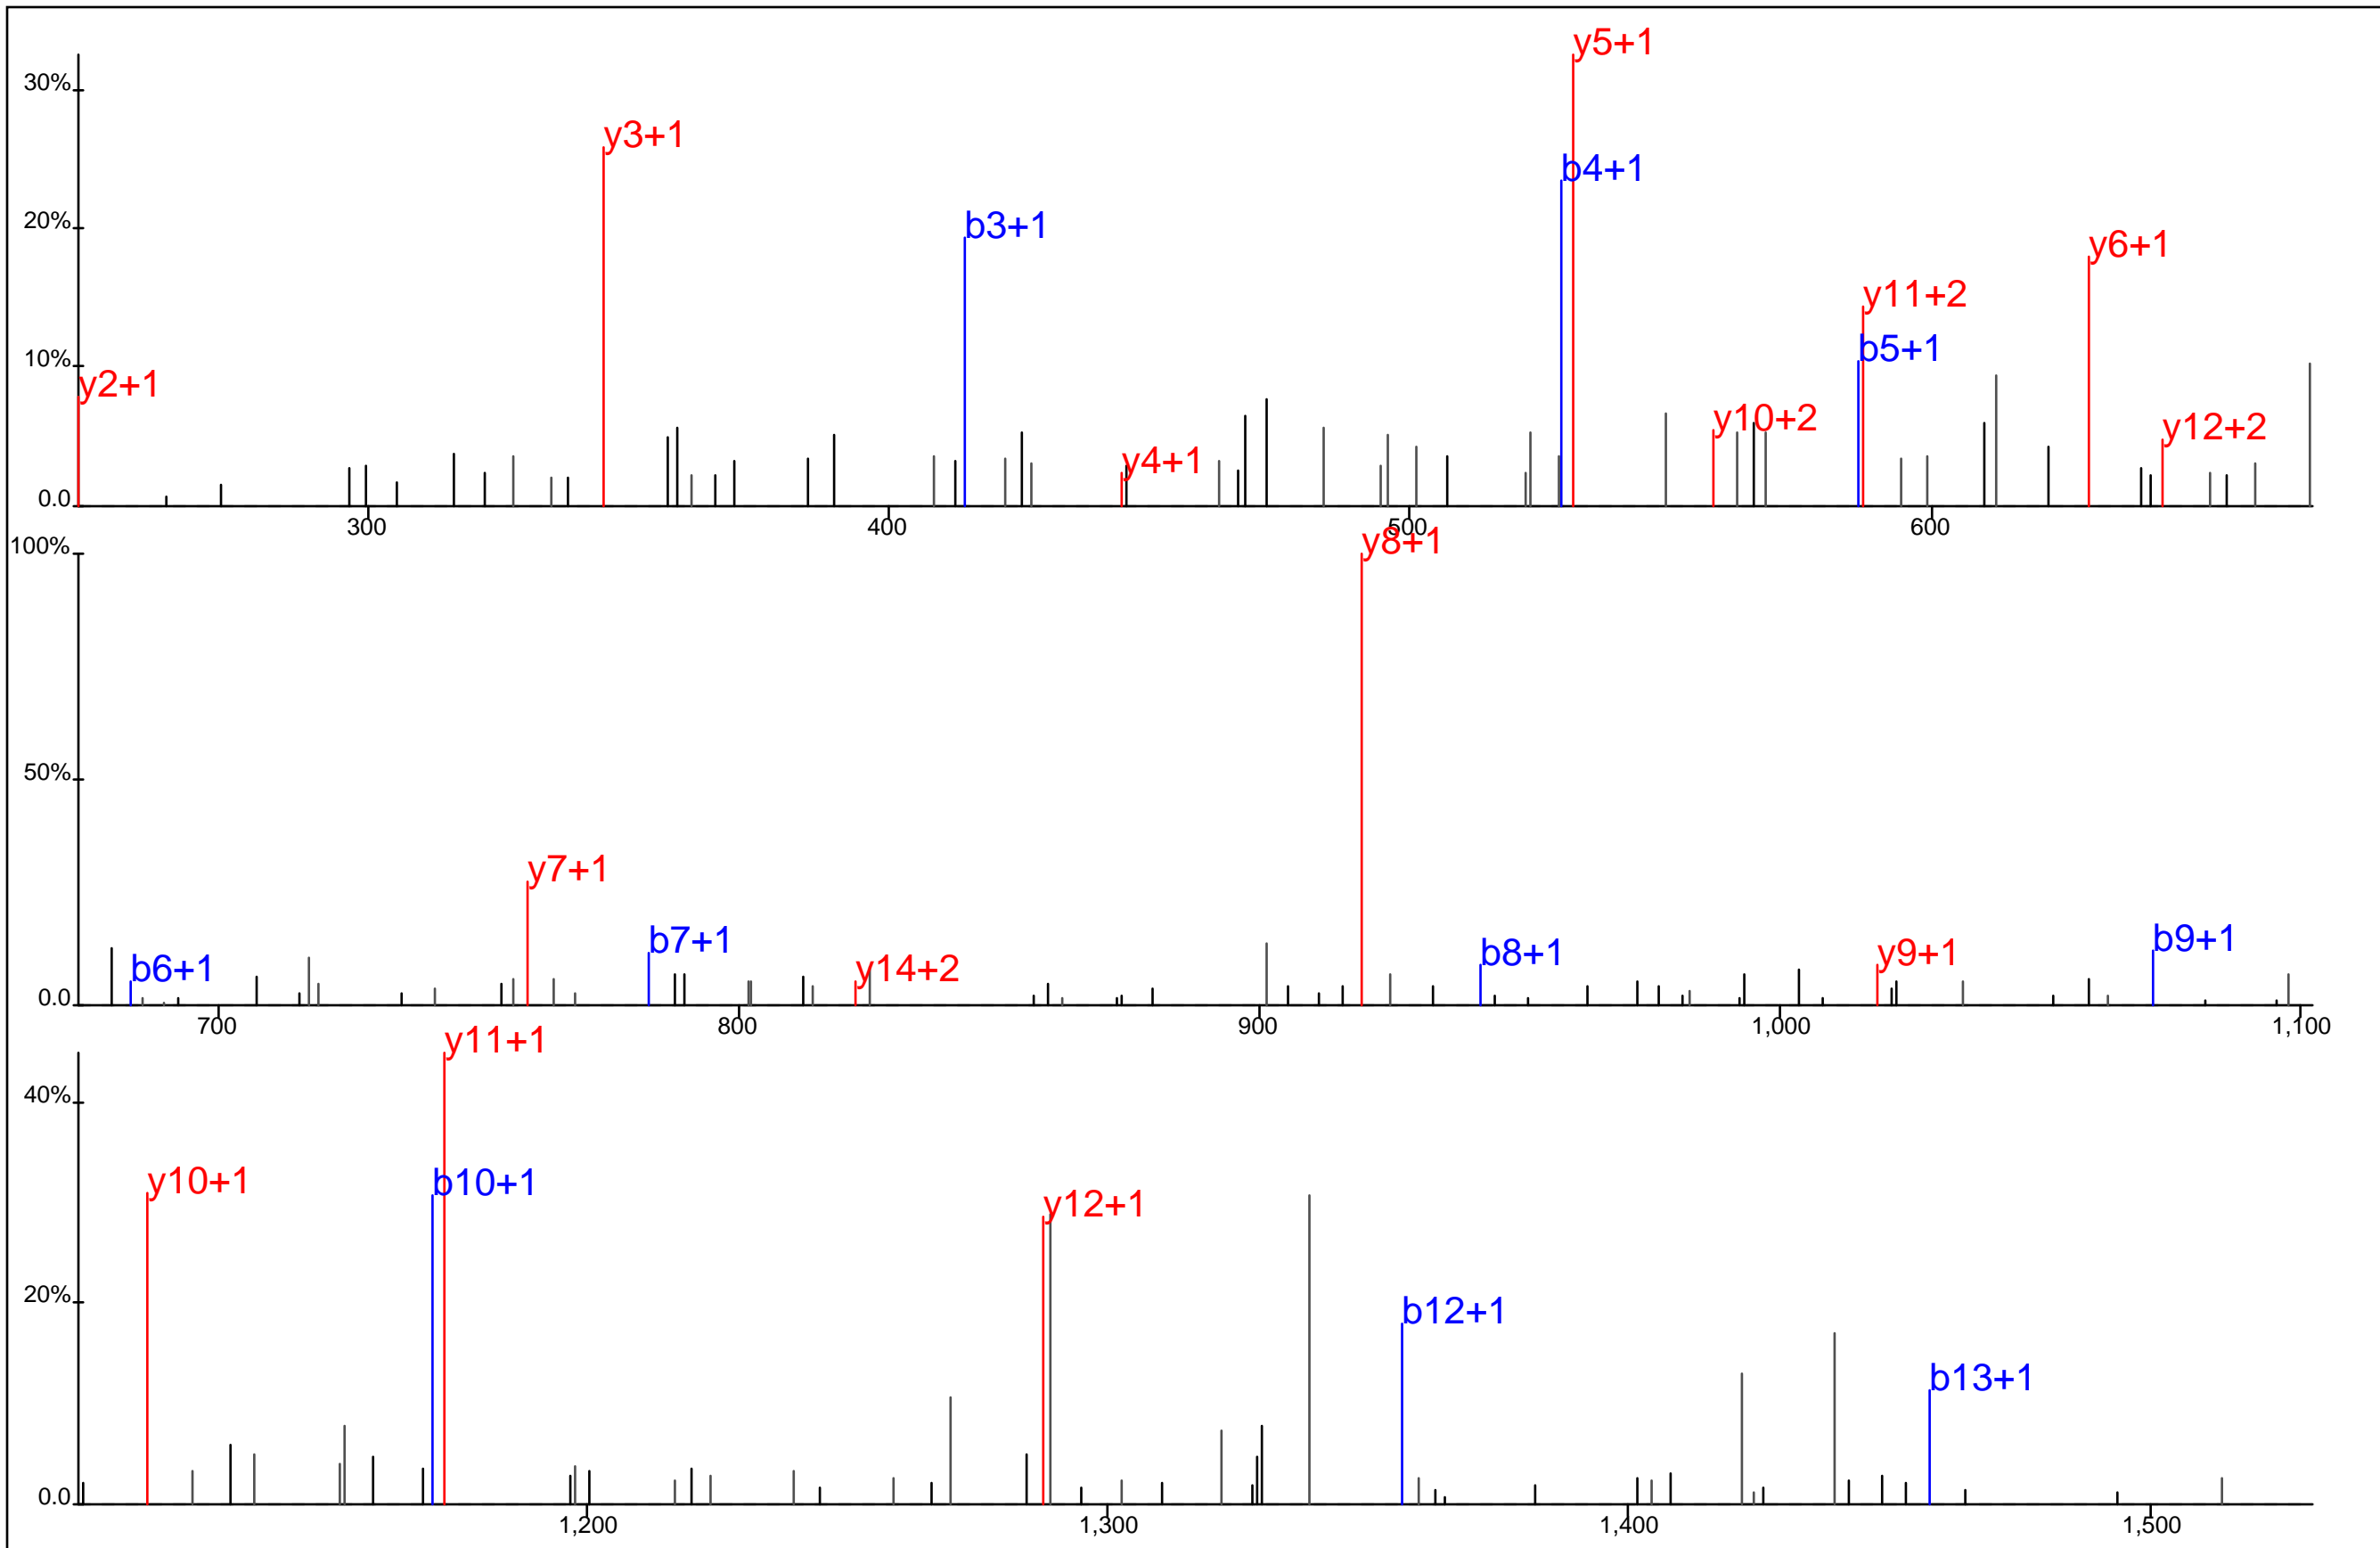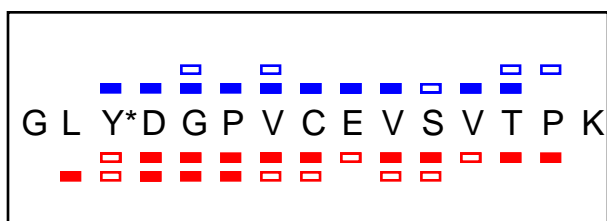

Protein Name: Collapsin response mediator protein 2  
 gi Accession: 0  
 Precursor Mass: 850.8842+2  
 Delta Mass: 0.530 ppm  
 XCorr: 85.9

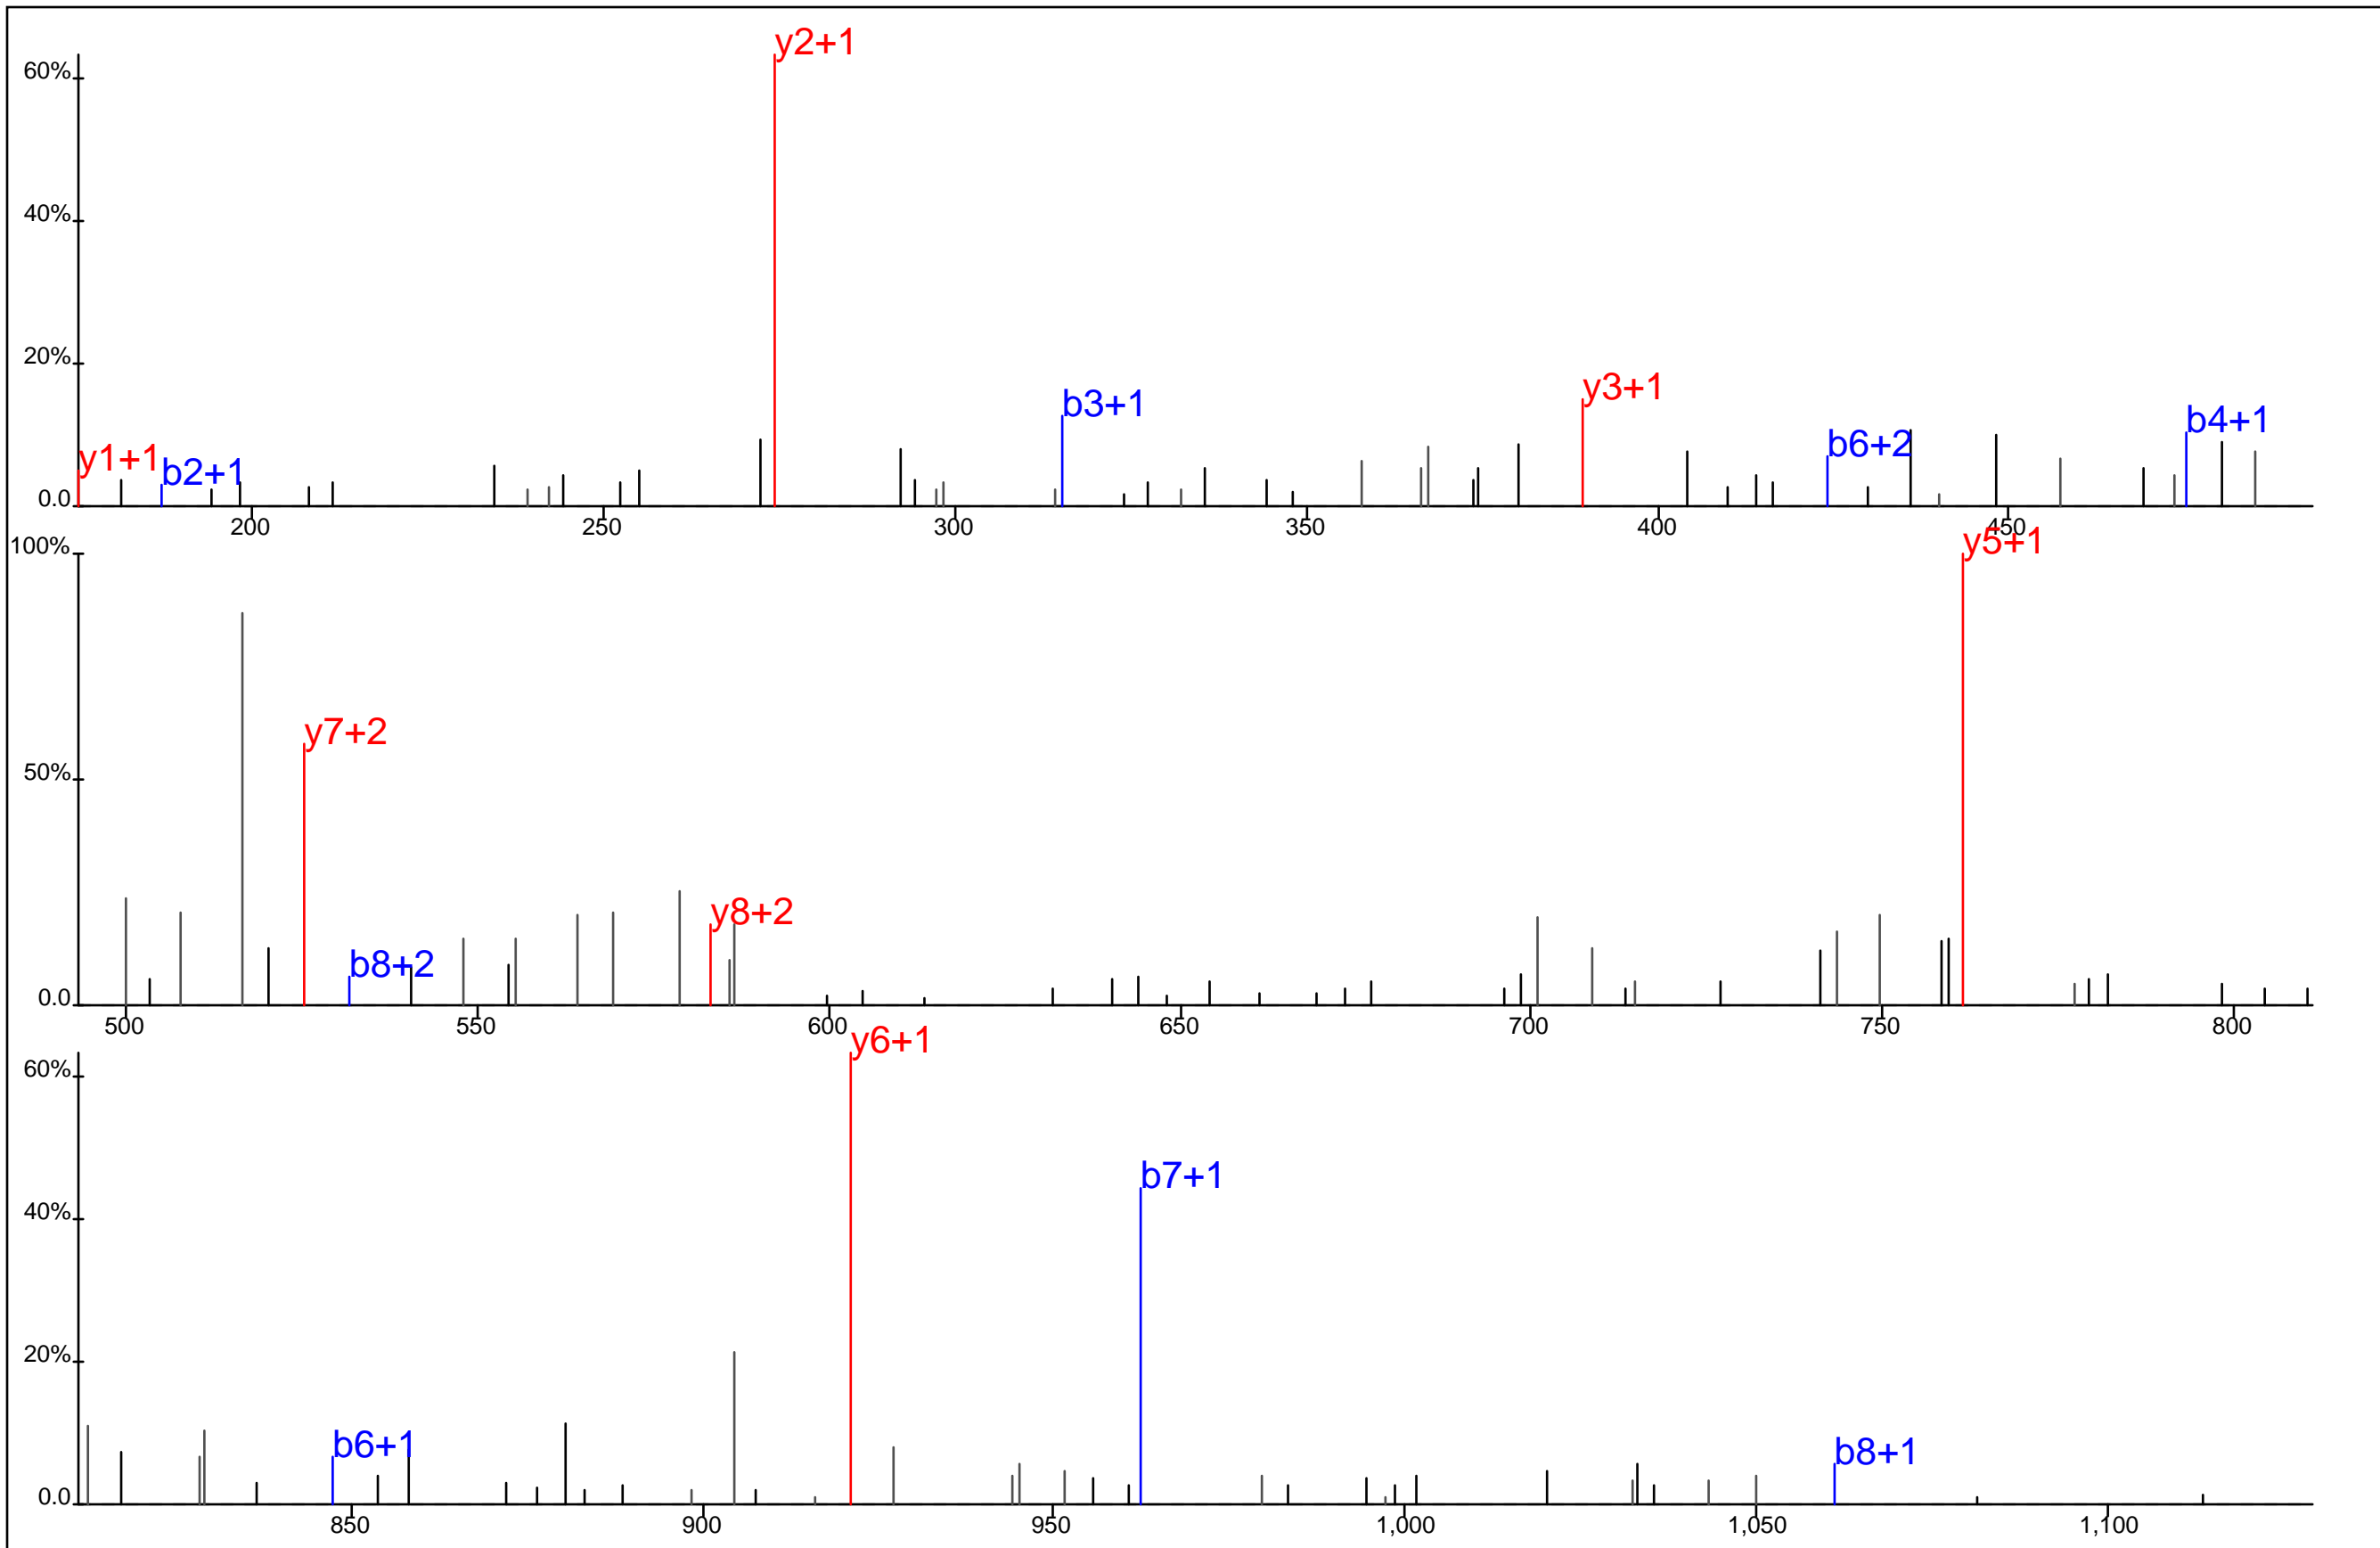

■ ■ ■ ■ ■ ■ ■  
■ ■ ■ ■ ■ ■ ■

A D Q C Y\* E D V R

Protein Name: Coronin 1A  
 gi Accession: 0  
 Precursor Mass: 618.2228+2  
 Delta Mass: 1.157 ppm  
 XCorr: 24.03

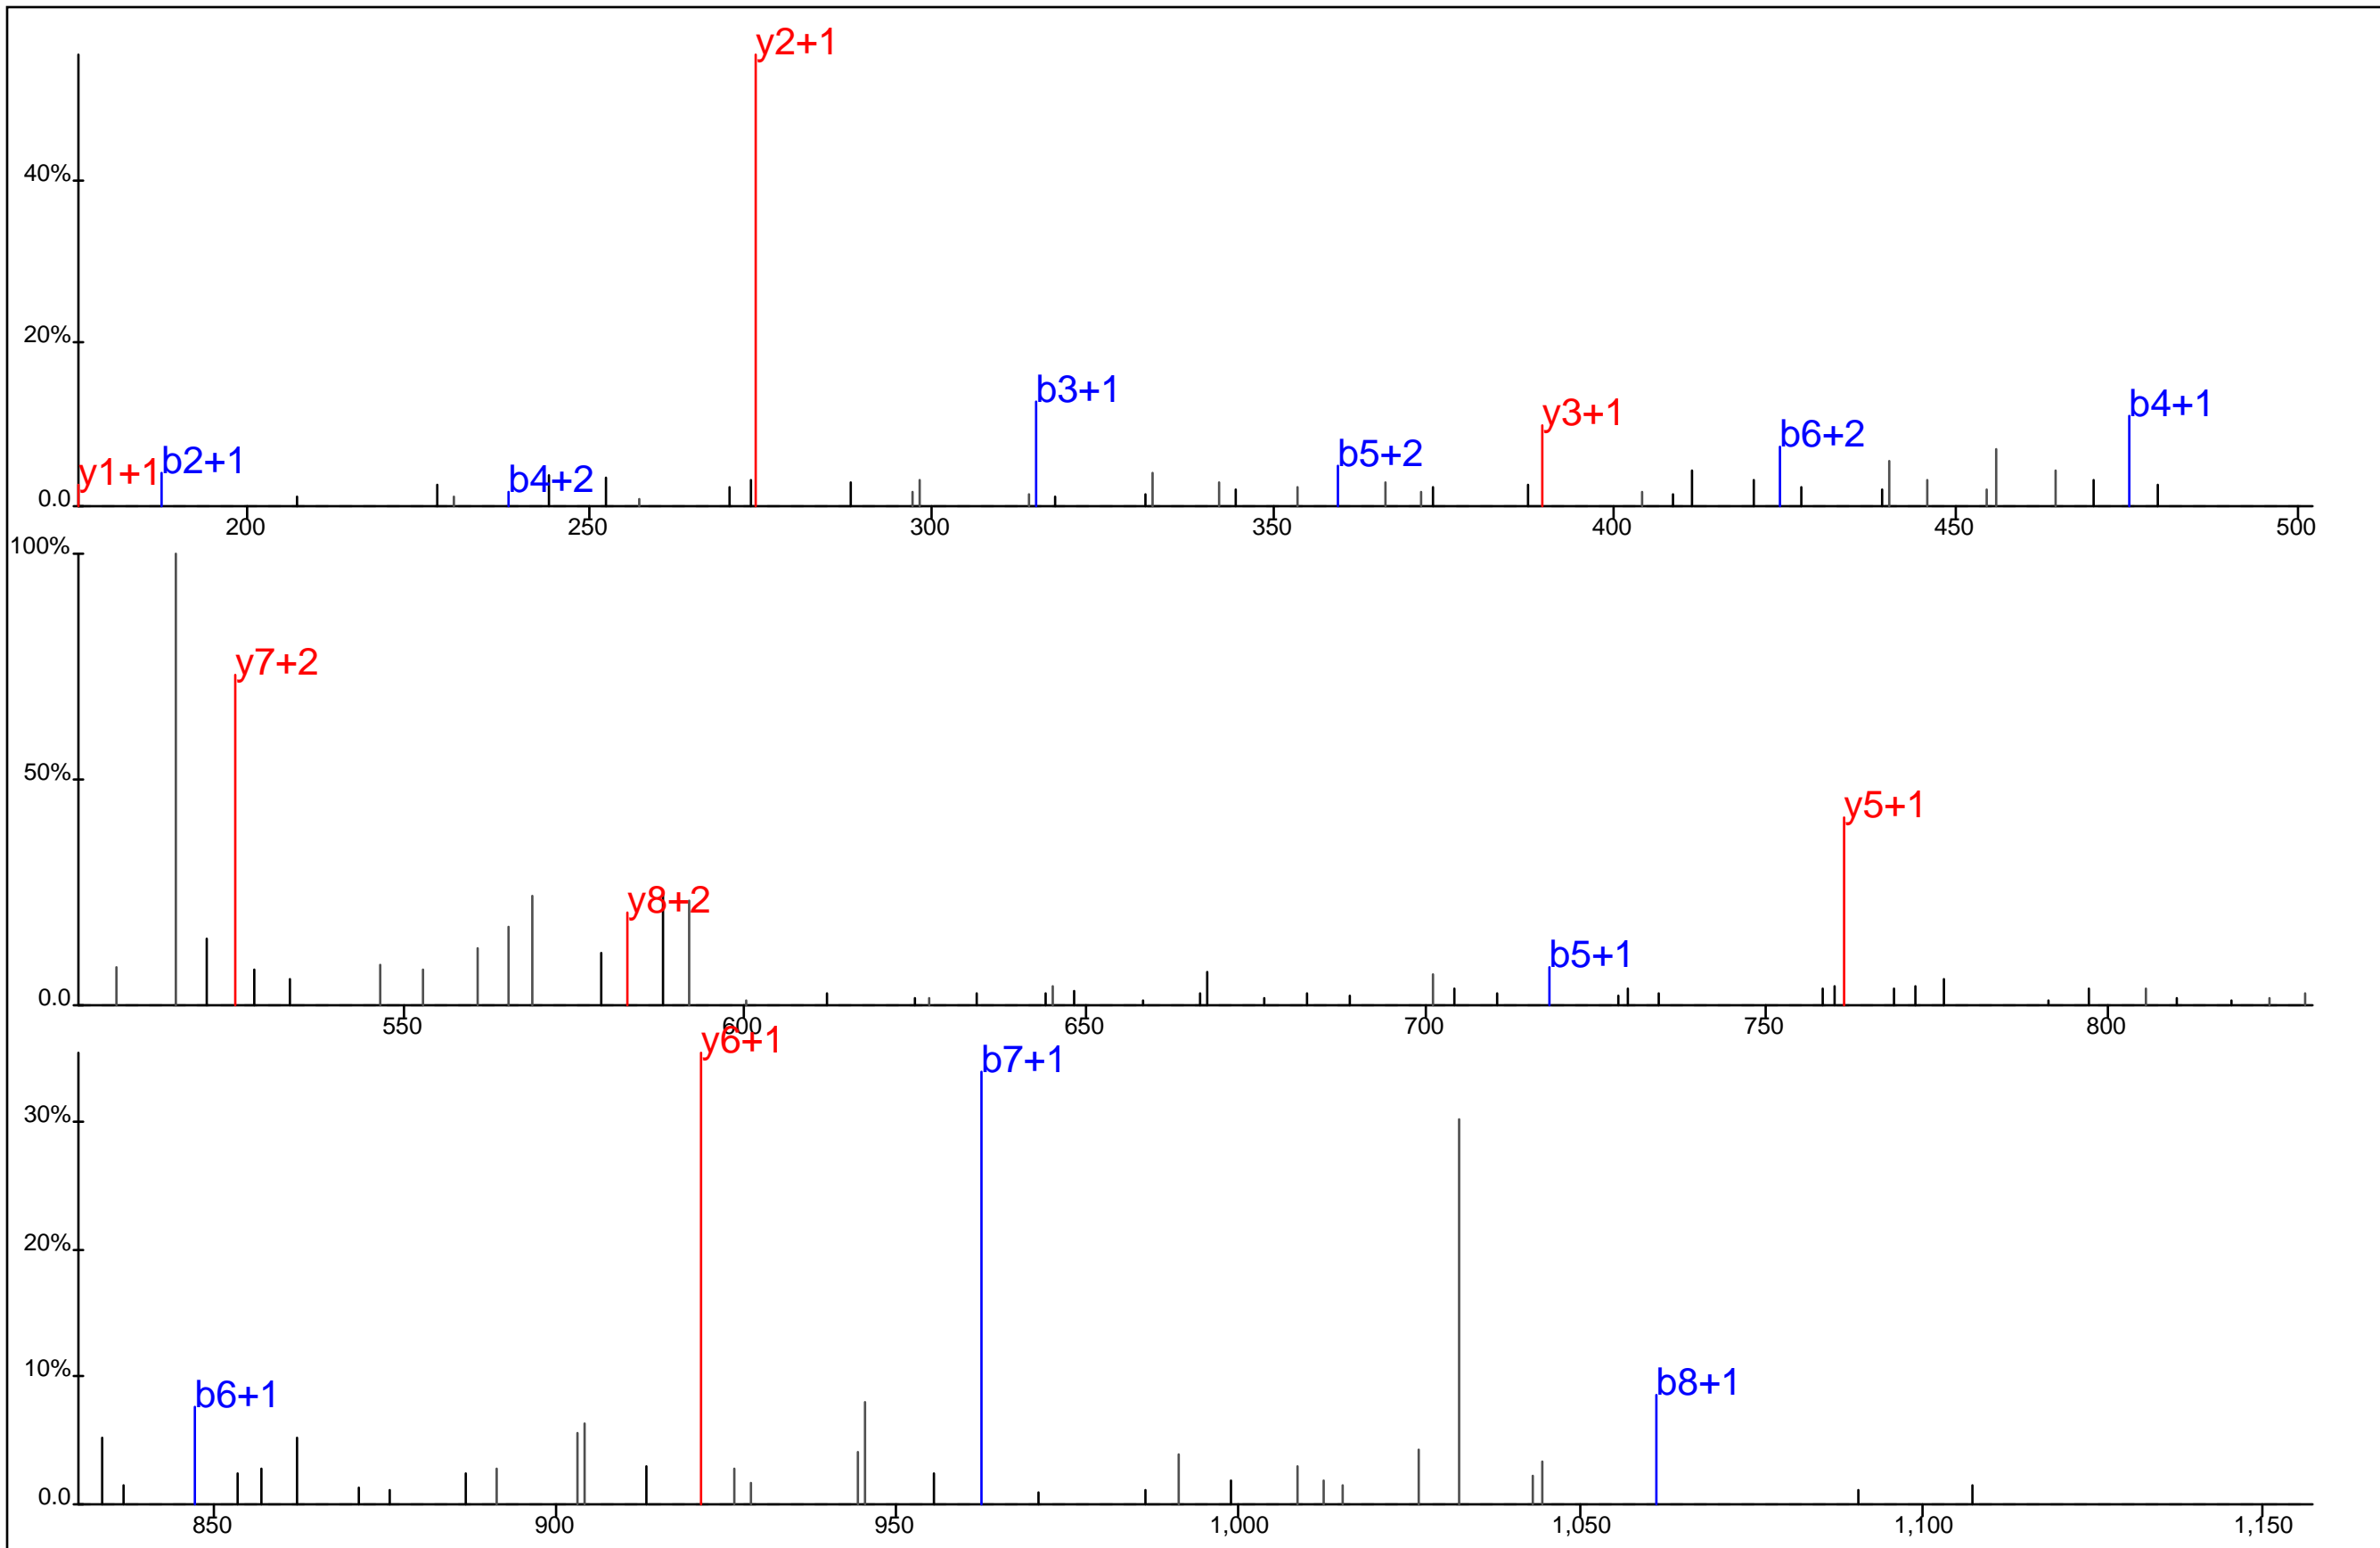

■ ■ ■ ■ ■ ■  
□ □ □ □ □ □  
**A D Q C Y\* E D V R**

Protein Name: Coronin 1A  
 gi Accession: 0  
 Precursor Mass: 618.2241+2  
 Delta Mass: 0.819 ppm  
 XCorr: 42.16

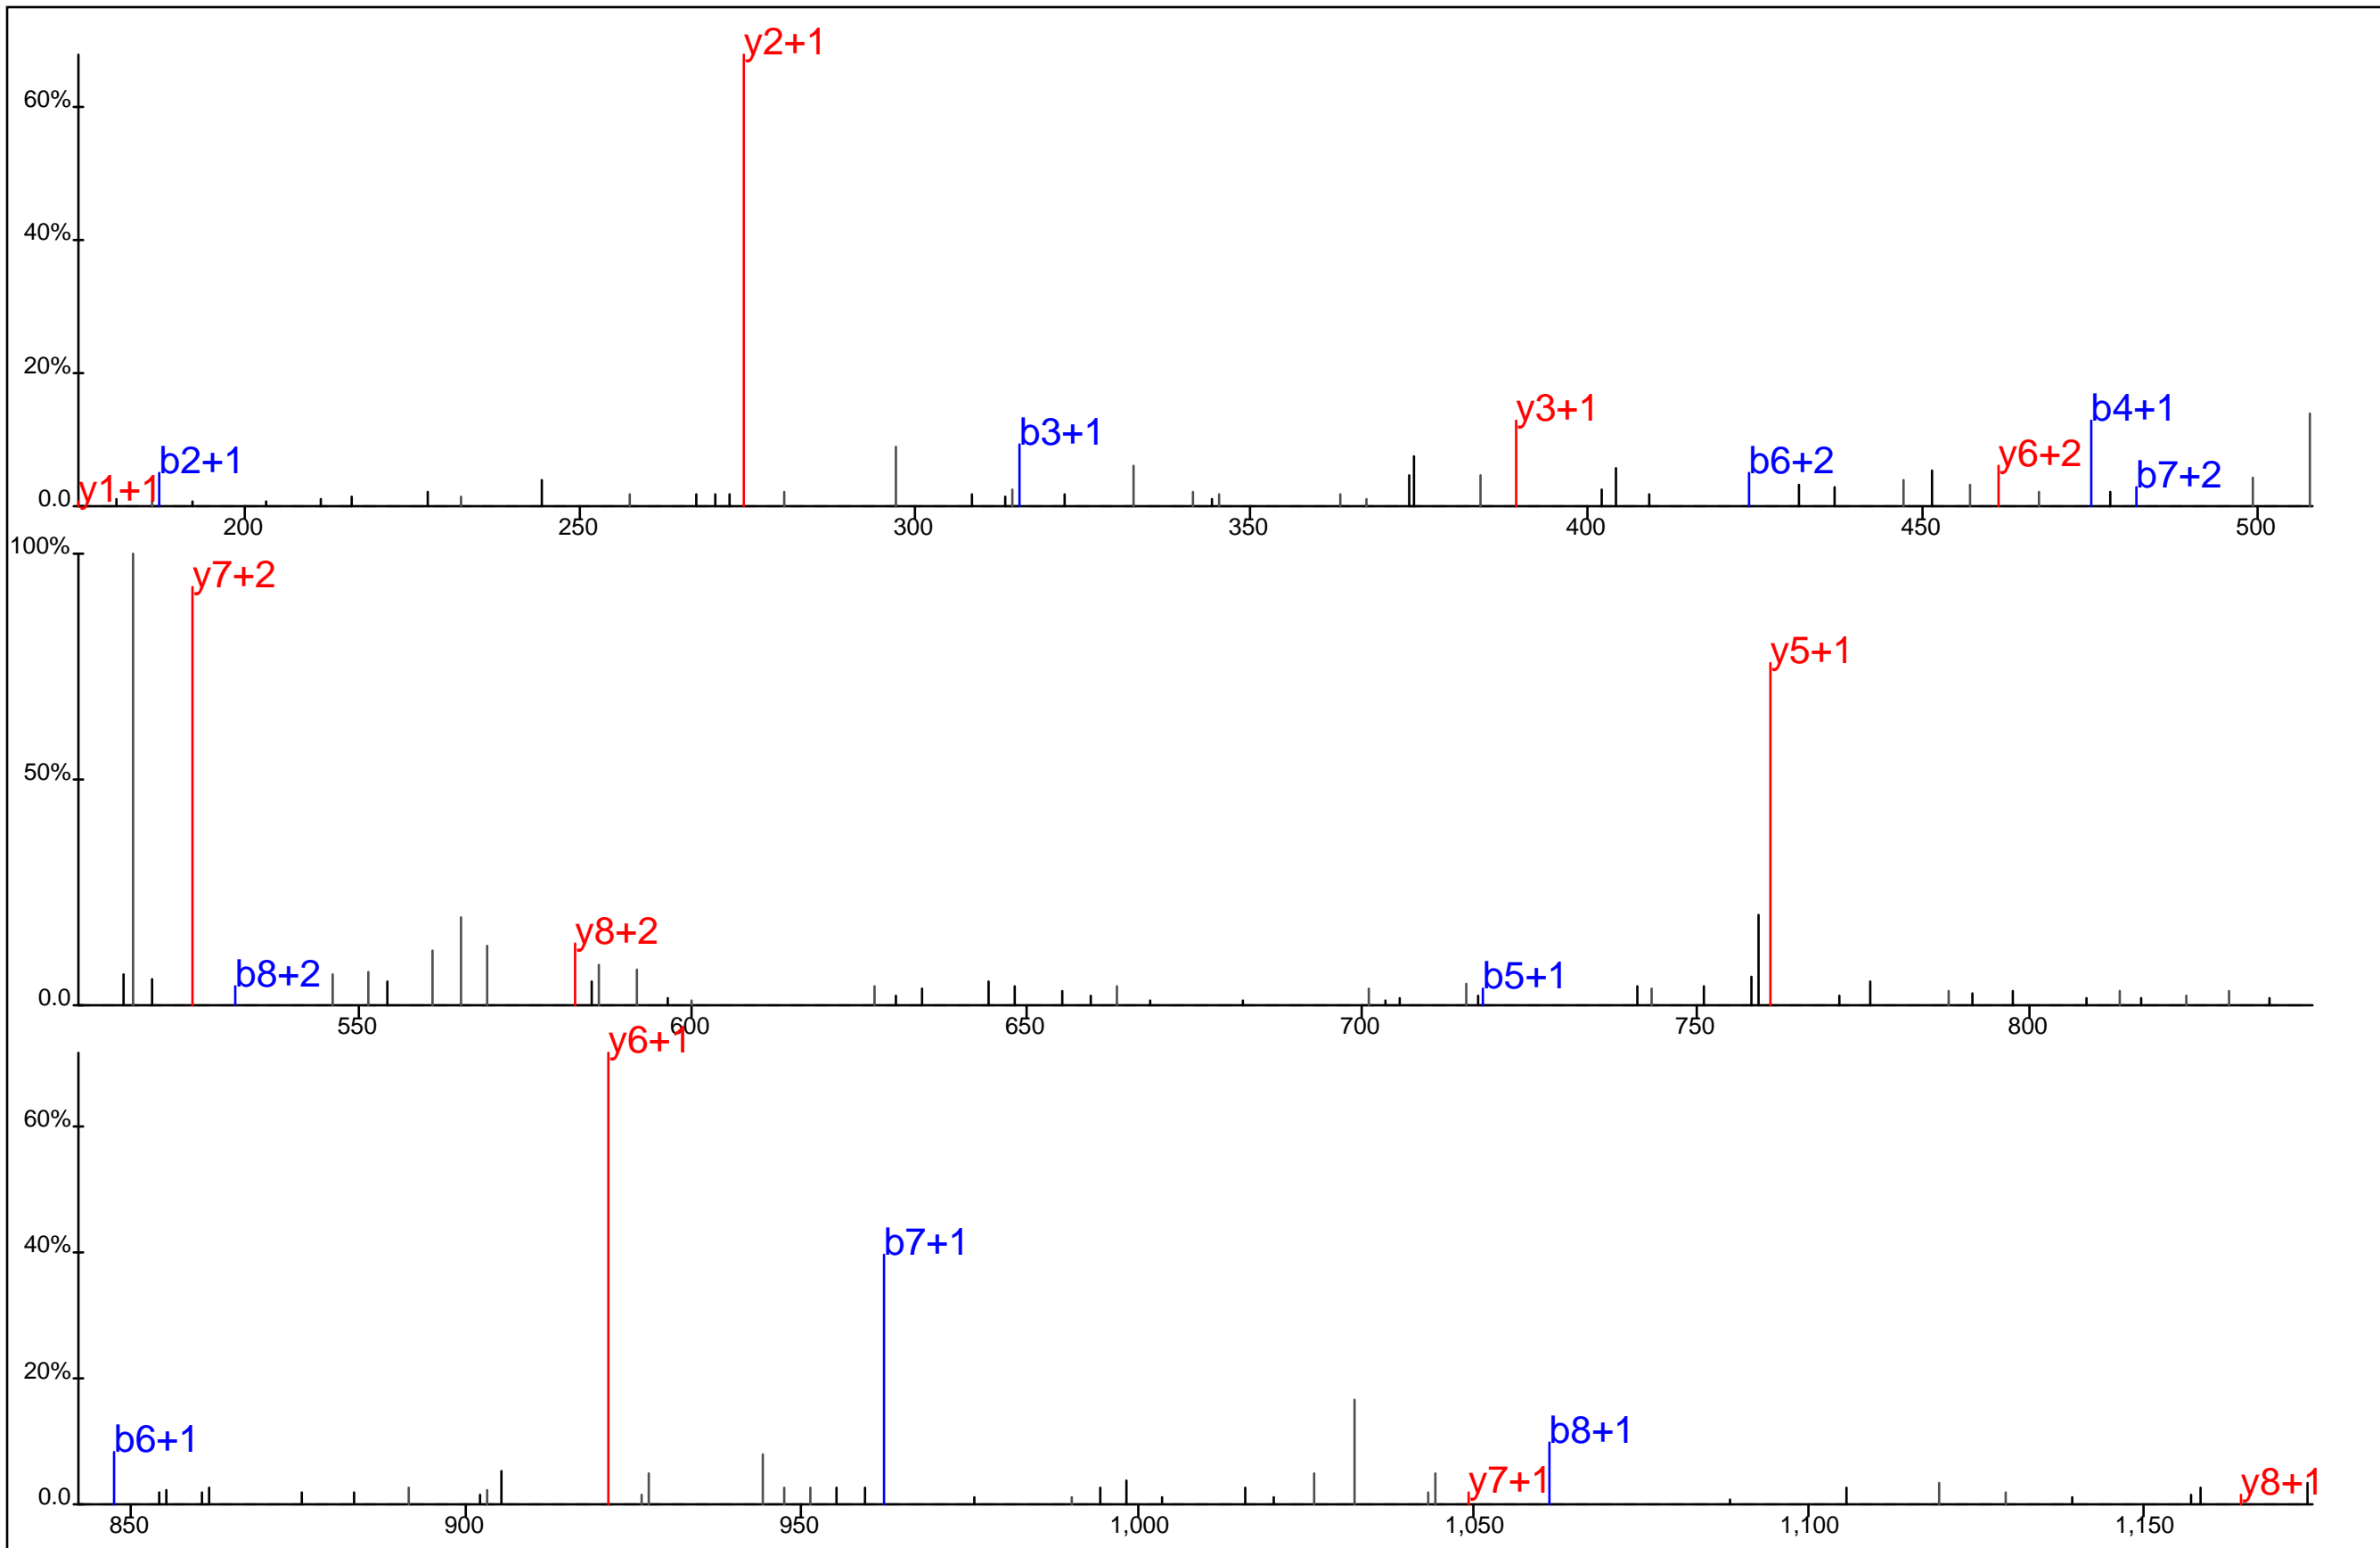

A D Q C Y\* E D V R

Protein Name: Coronin 1A  
 gi Accession: 0  
 Precursor Mass: 618.2227+2  
 Delta Mass: 1.454 ppm  
 XCorr: 43.07



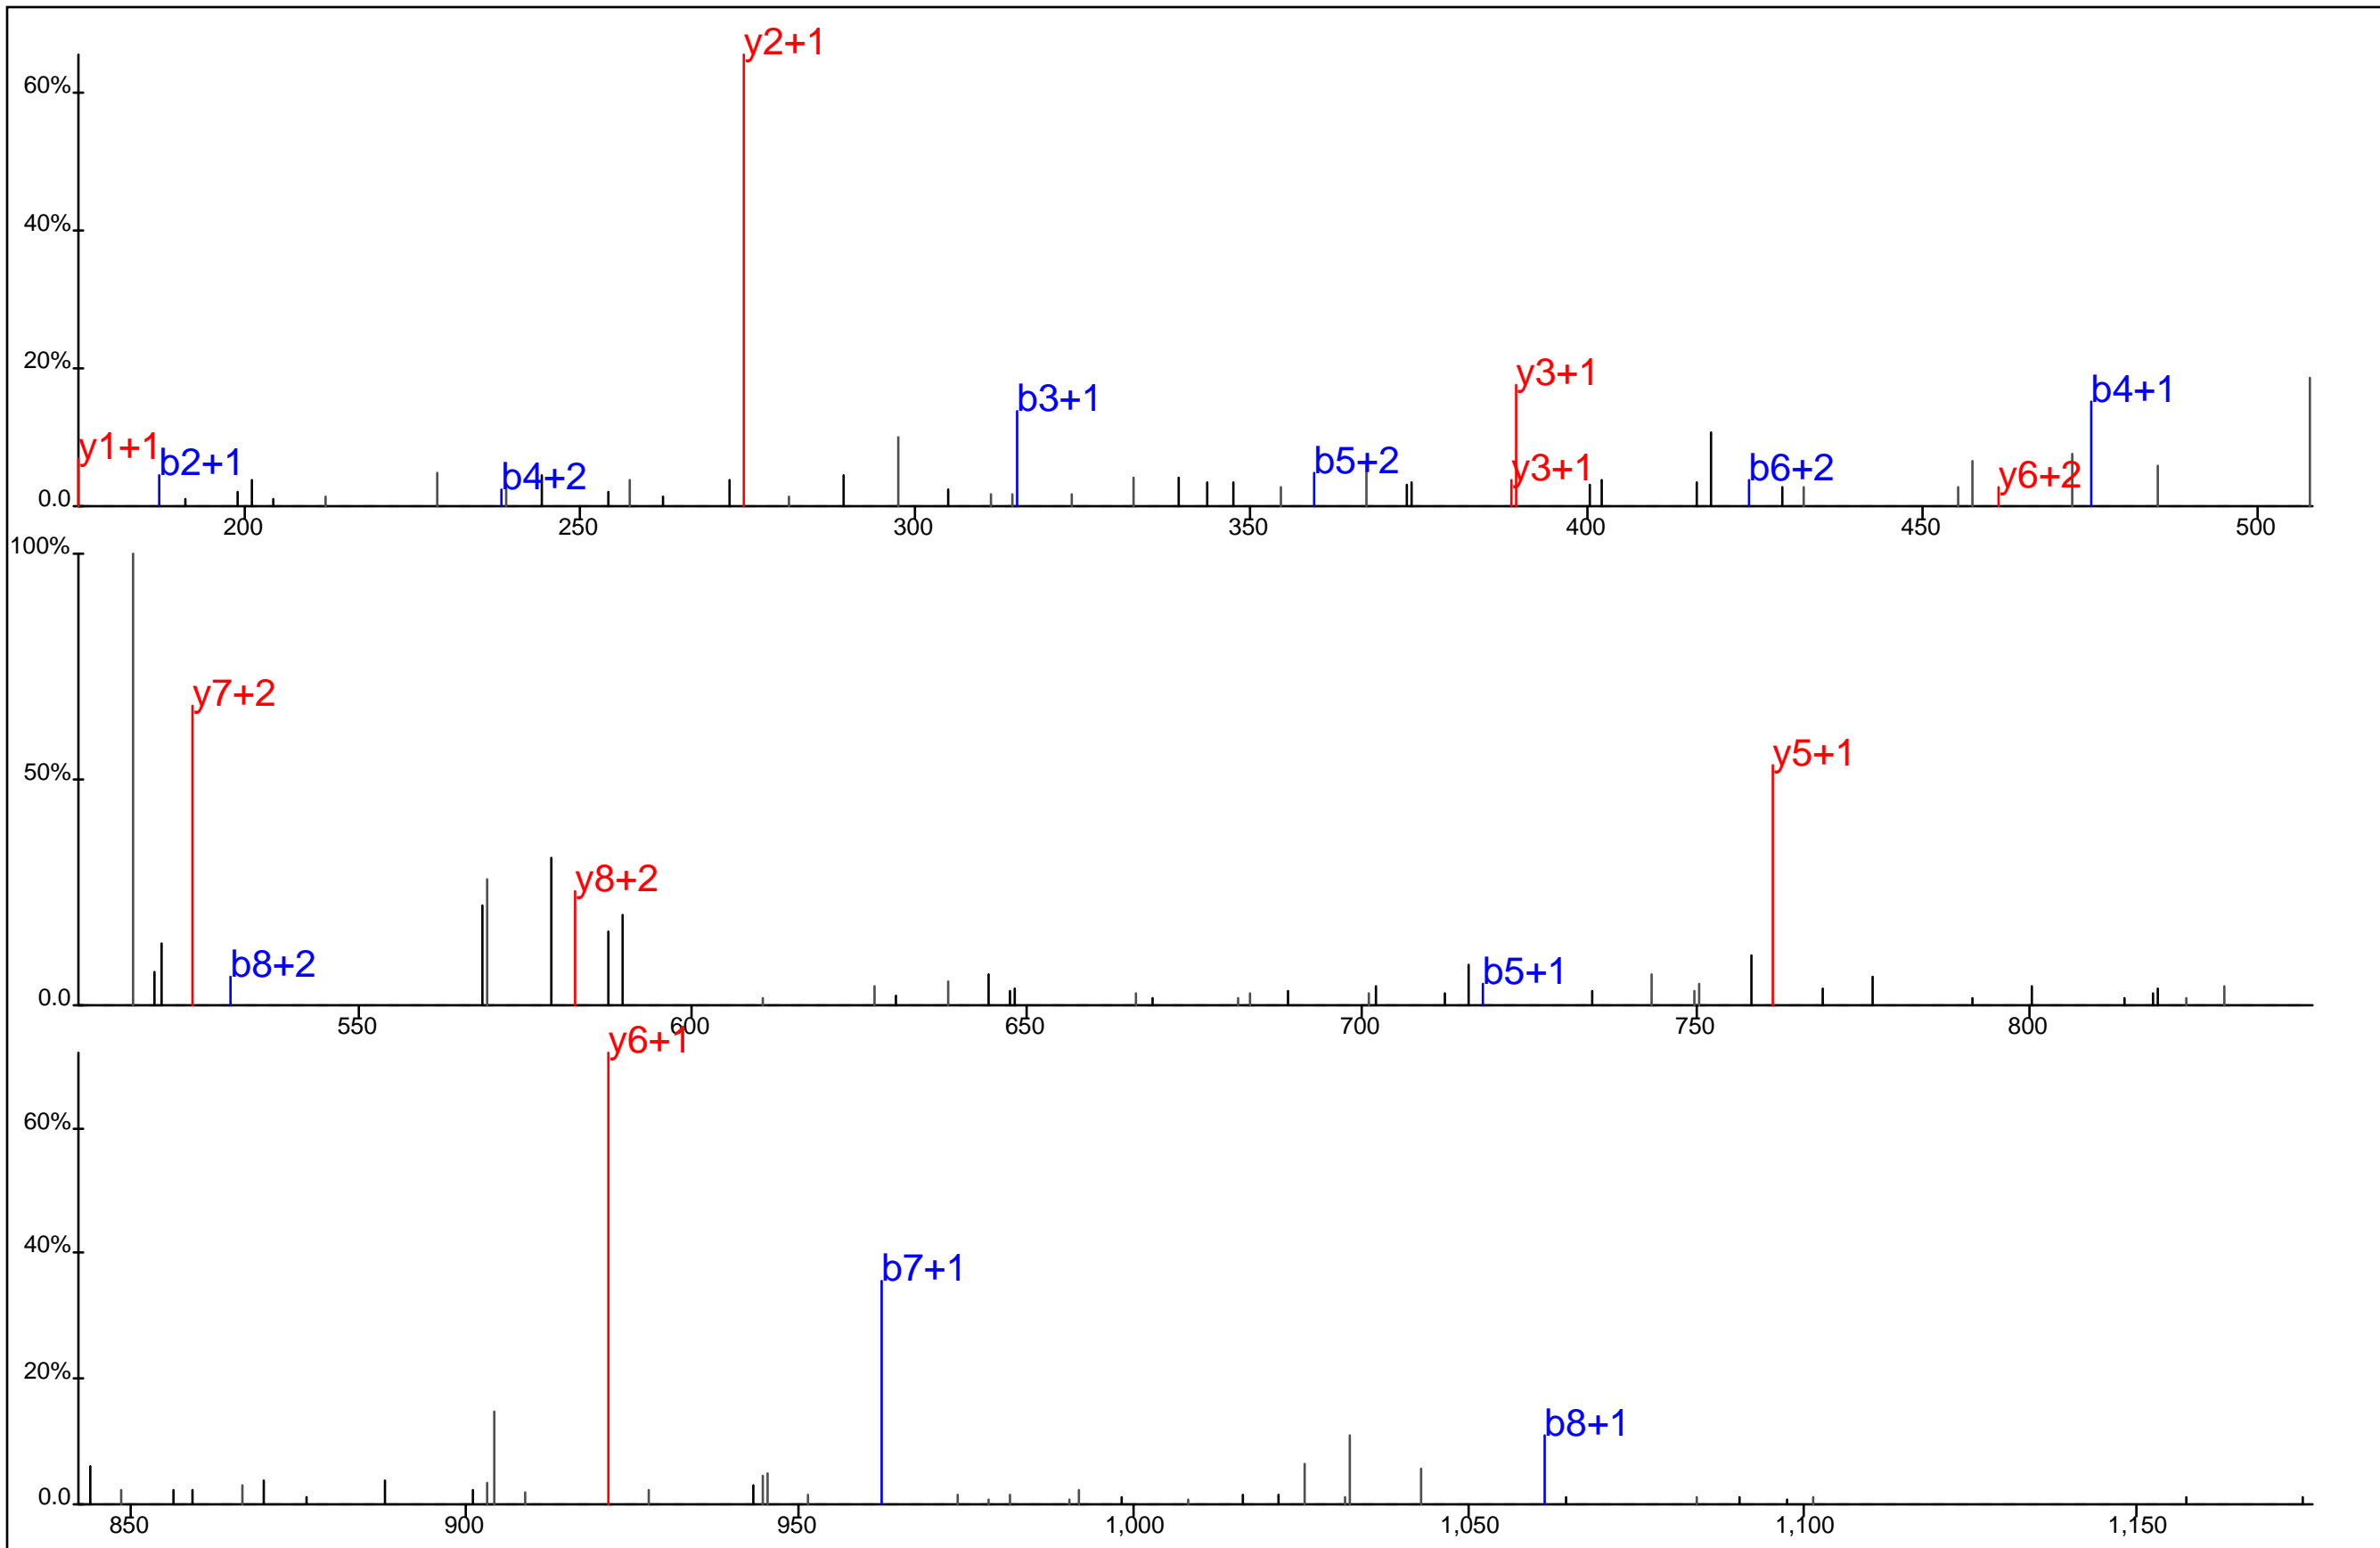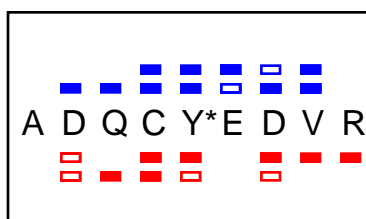

Protein Name: Coronin 1A  
 gi Accession: 0  
 Precursor Mass: 618.2222+2  
 Delta Mass: 2.244 ppm  
 XCorr: 30.66

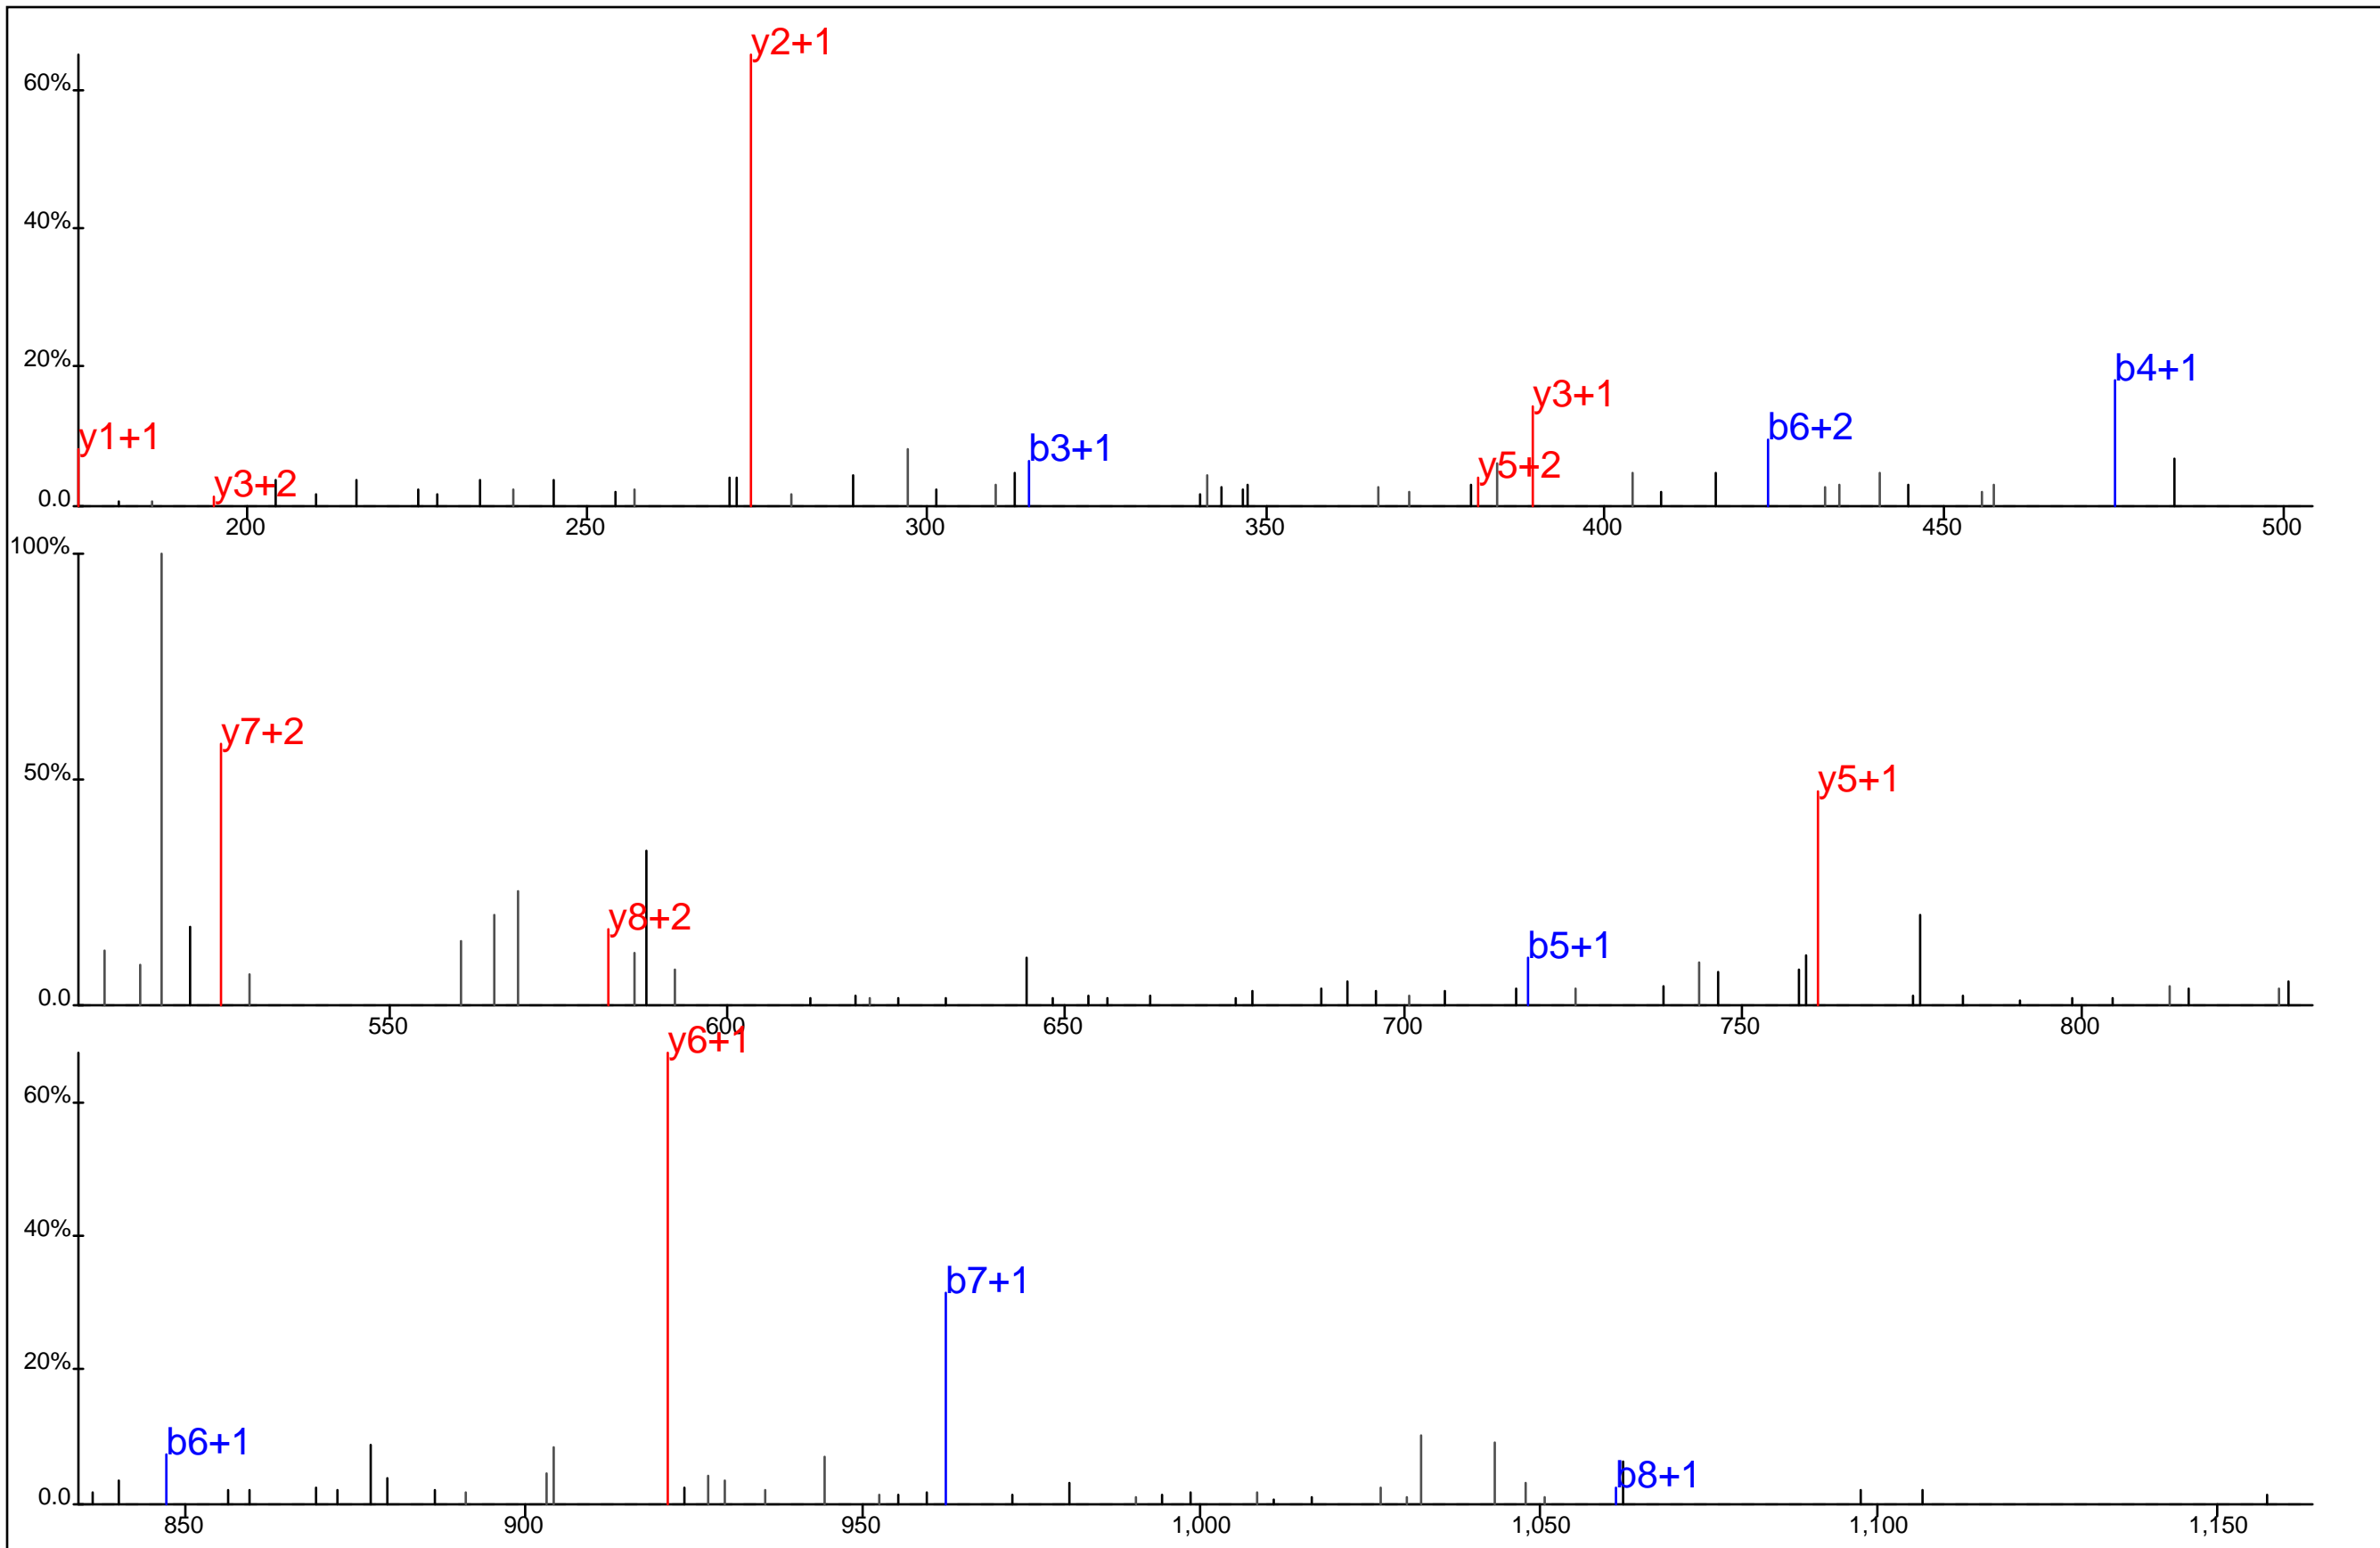

■ ■ ■ ■ ■ ■ ■  
 A D Q C Y\* E D V R  
■ ■ ■ ■ ■ ■ ■

Protein Name: Coronin 1A  
 gi Accession: 0  
 Precursor Mass: 618.2245+2  
 Delta Mass: 1.609 ppm  
 XCorr: 31.87

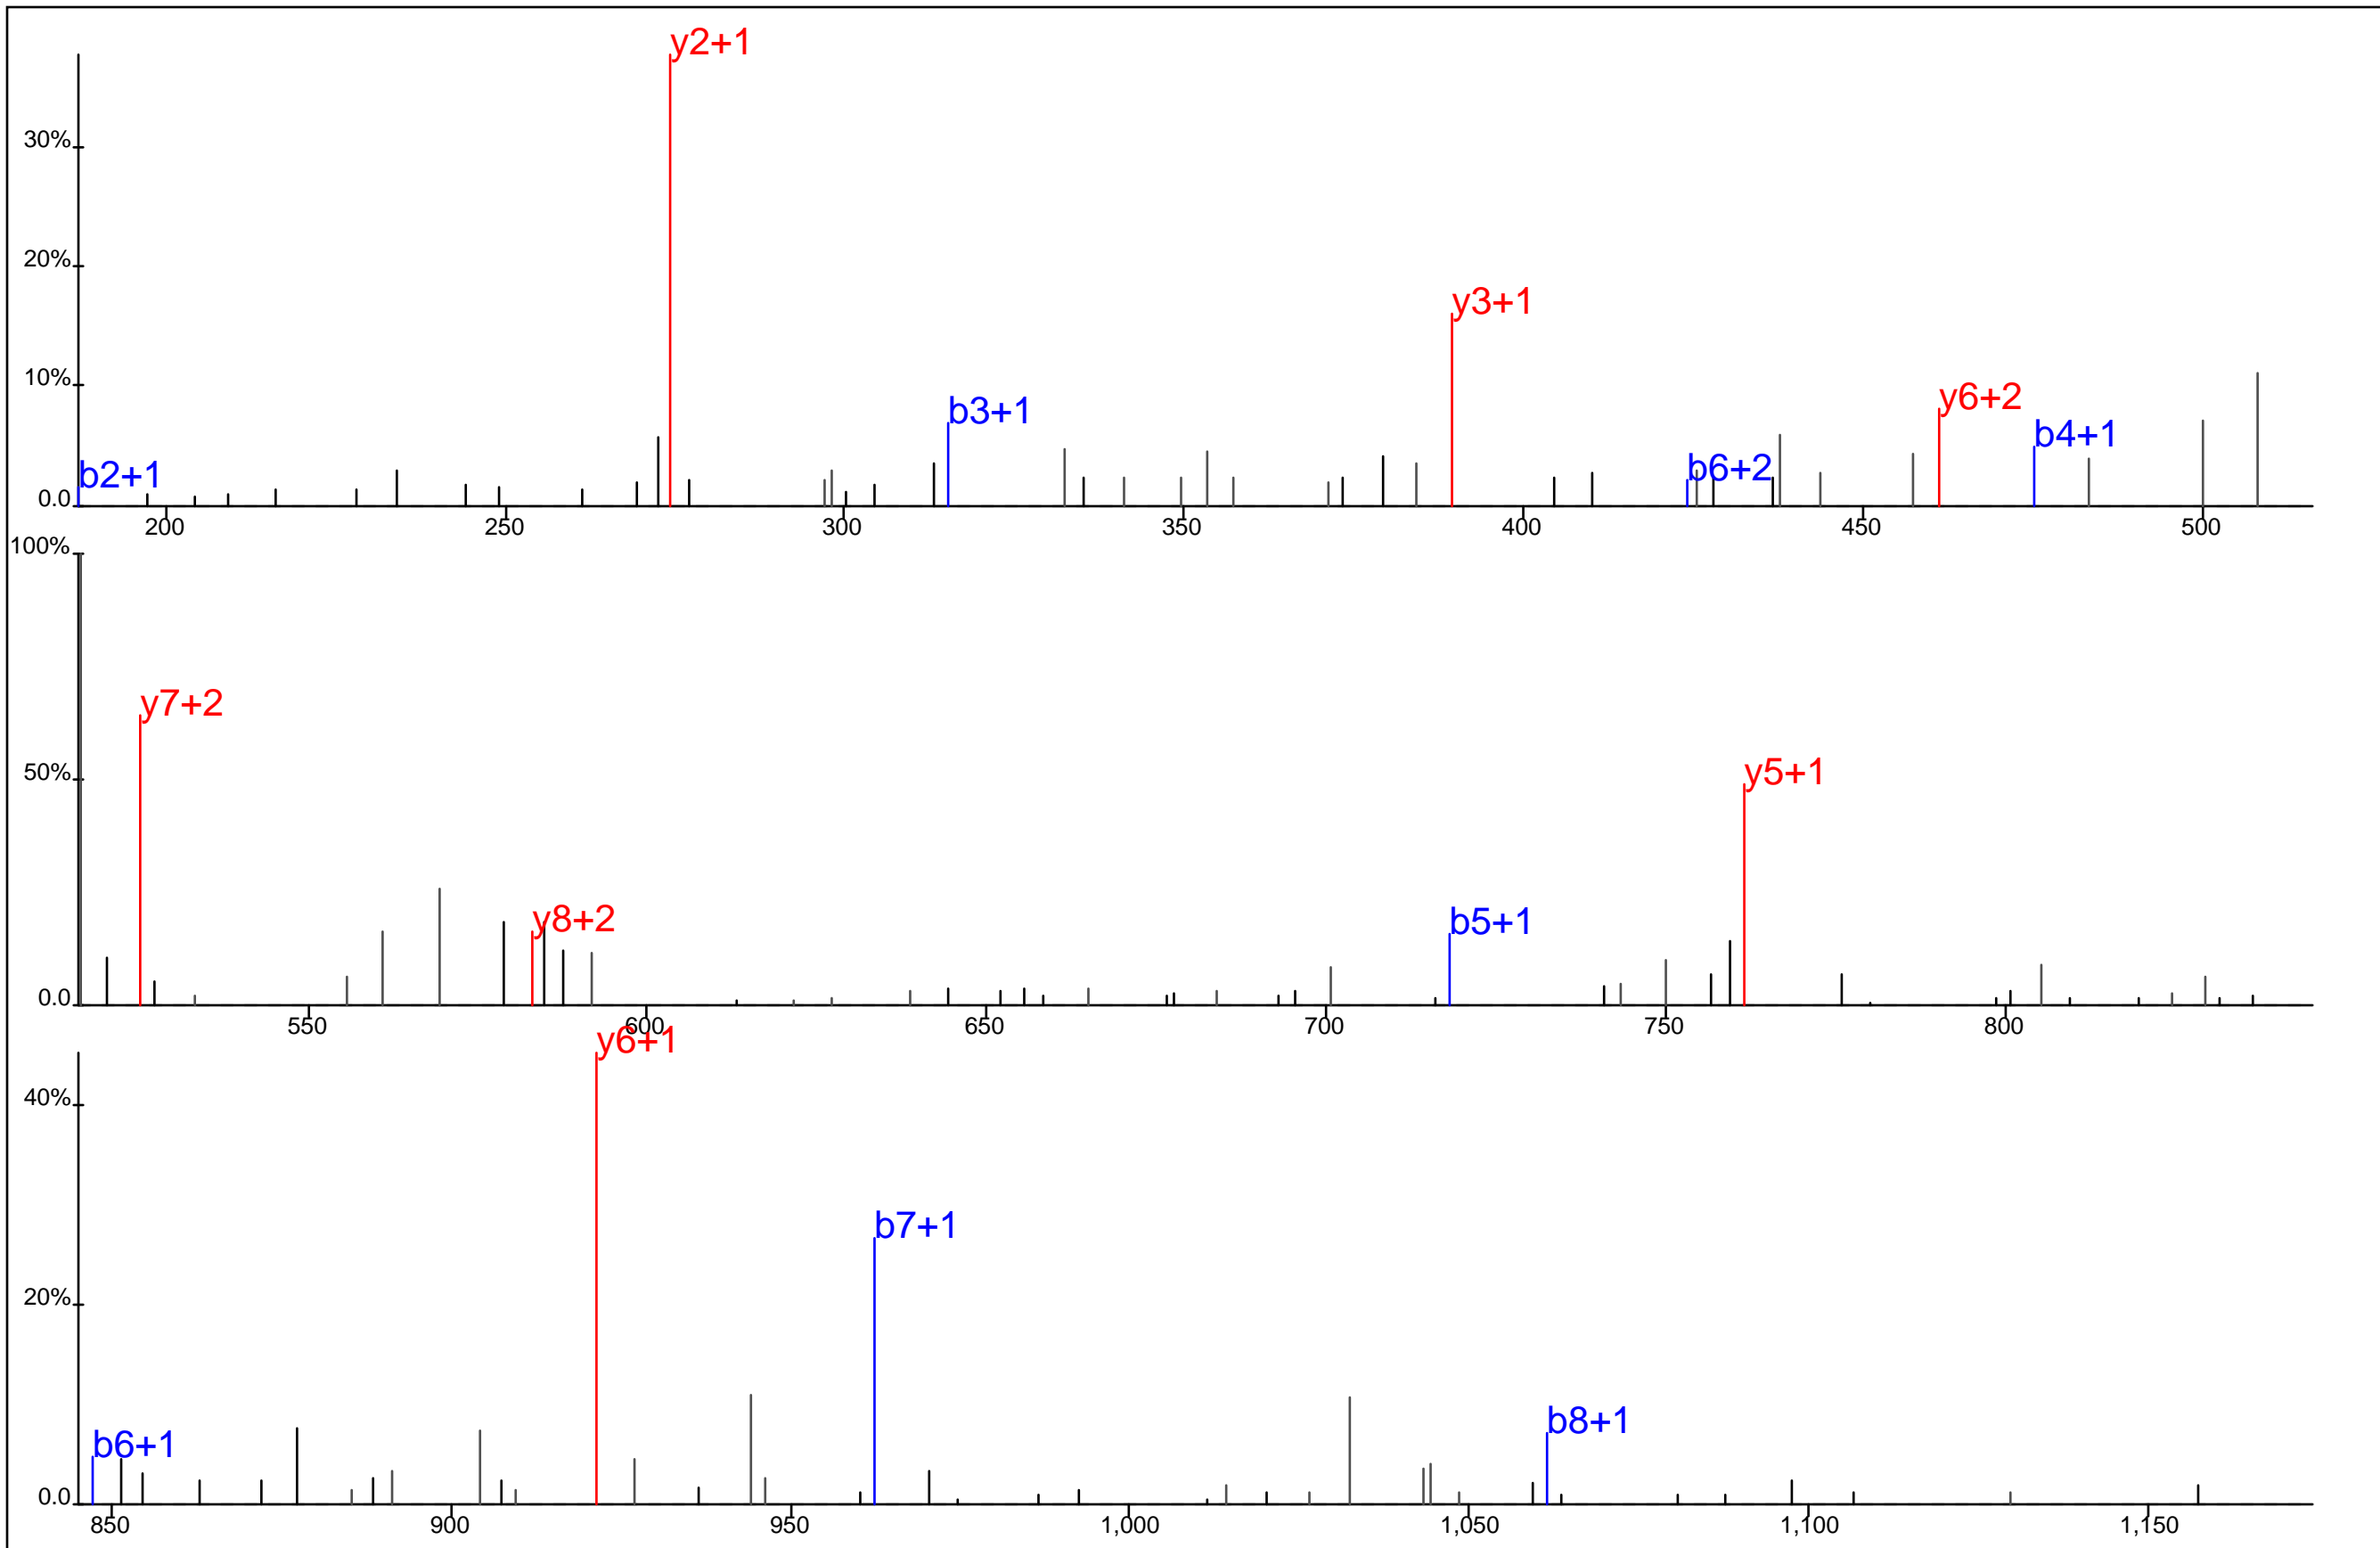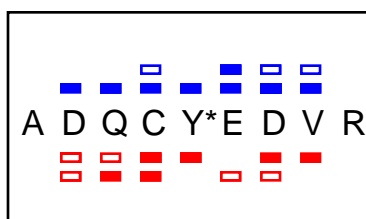

Protein Name: Coronin 1A  
 gi Accession: 0  
 Precursor Mass: 618.2225+2  
 Delta Mass: 1.750 ppm  
 XCorr: 26.94

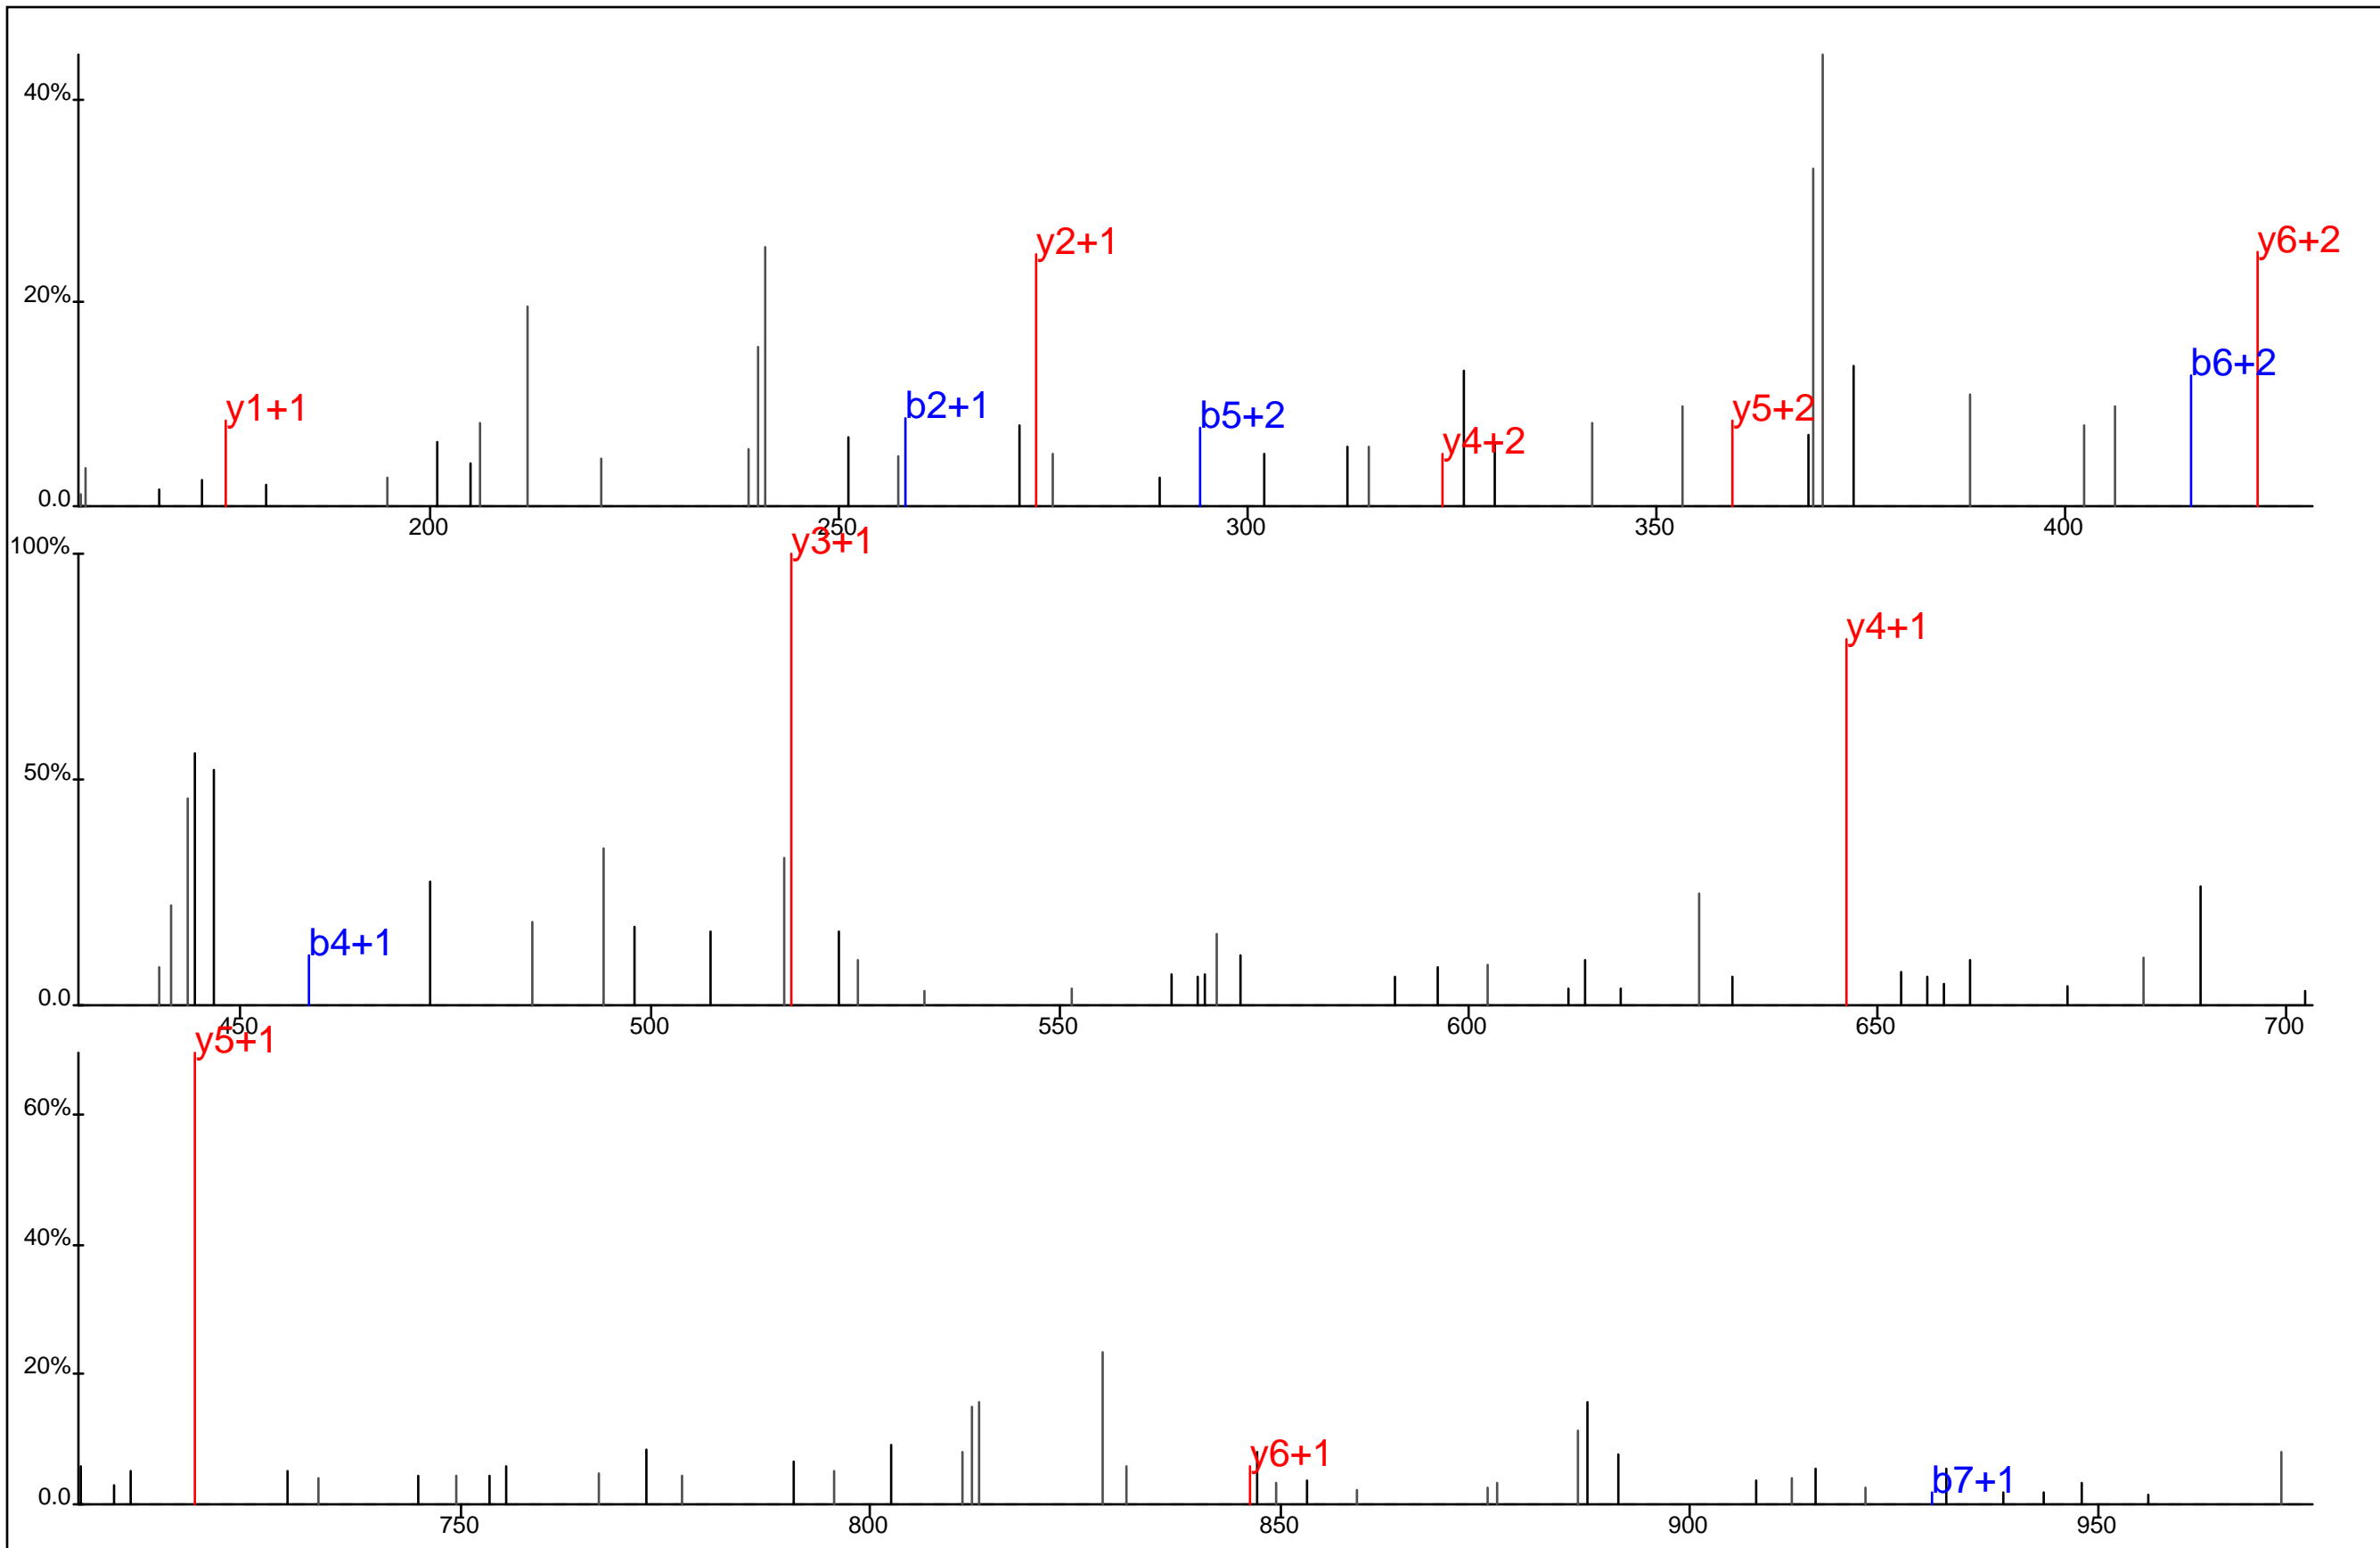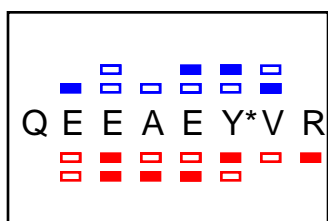

Protein Name: CRK  
 gi Accession: 0  
 Precursor Mass: 552.2205+2  
 Delta Mass: 6.181 ppm  
 XCorr: 21.14

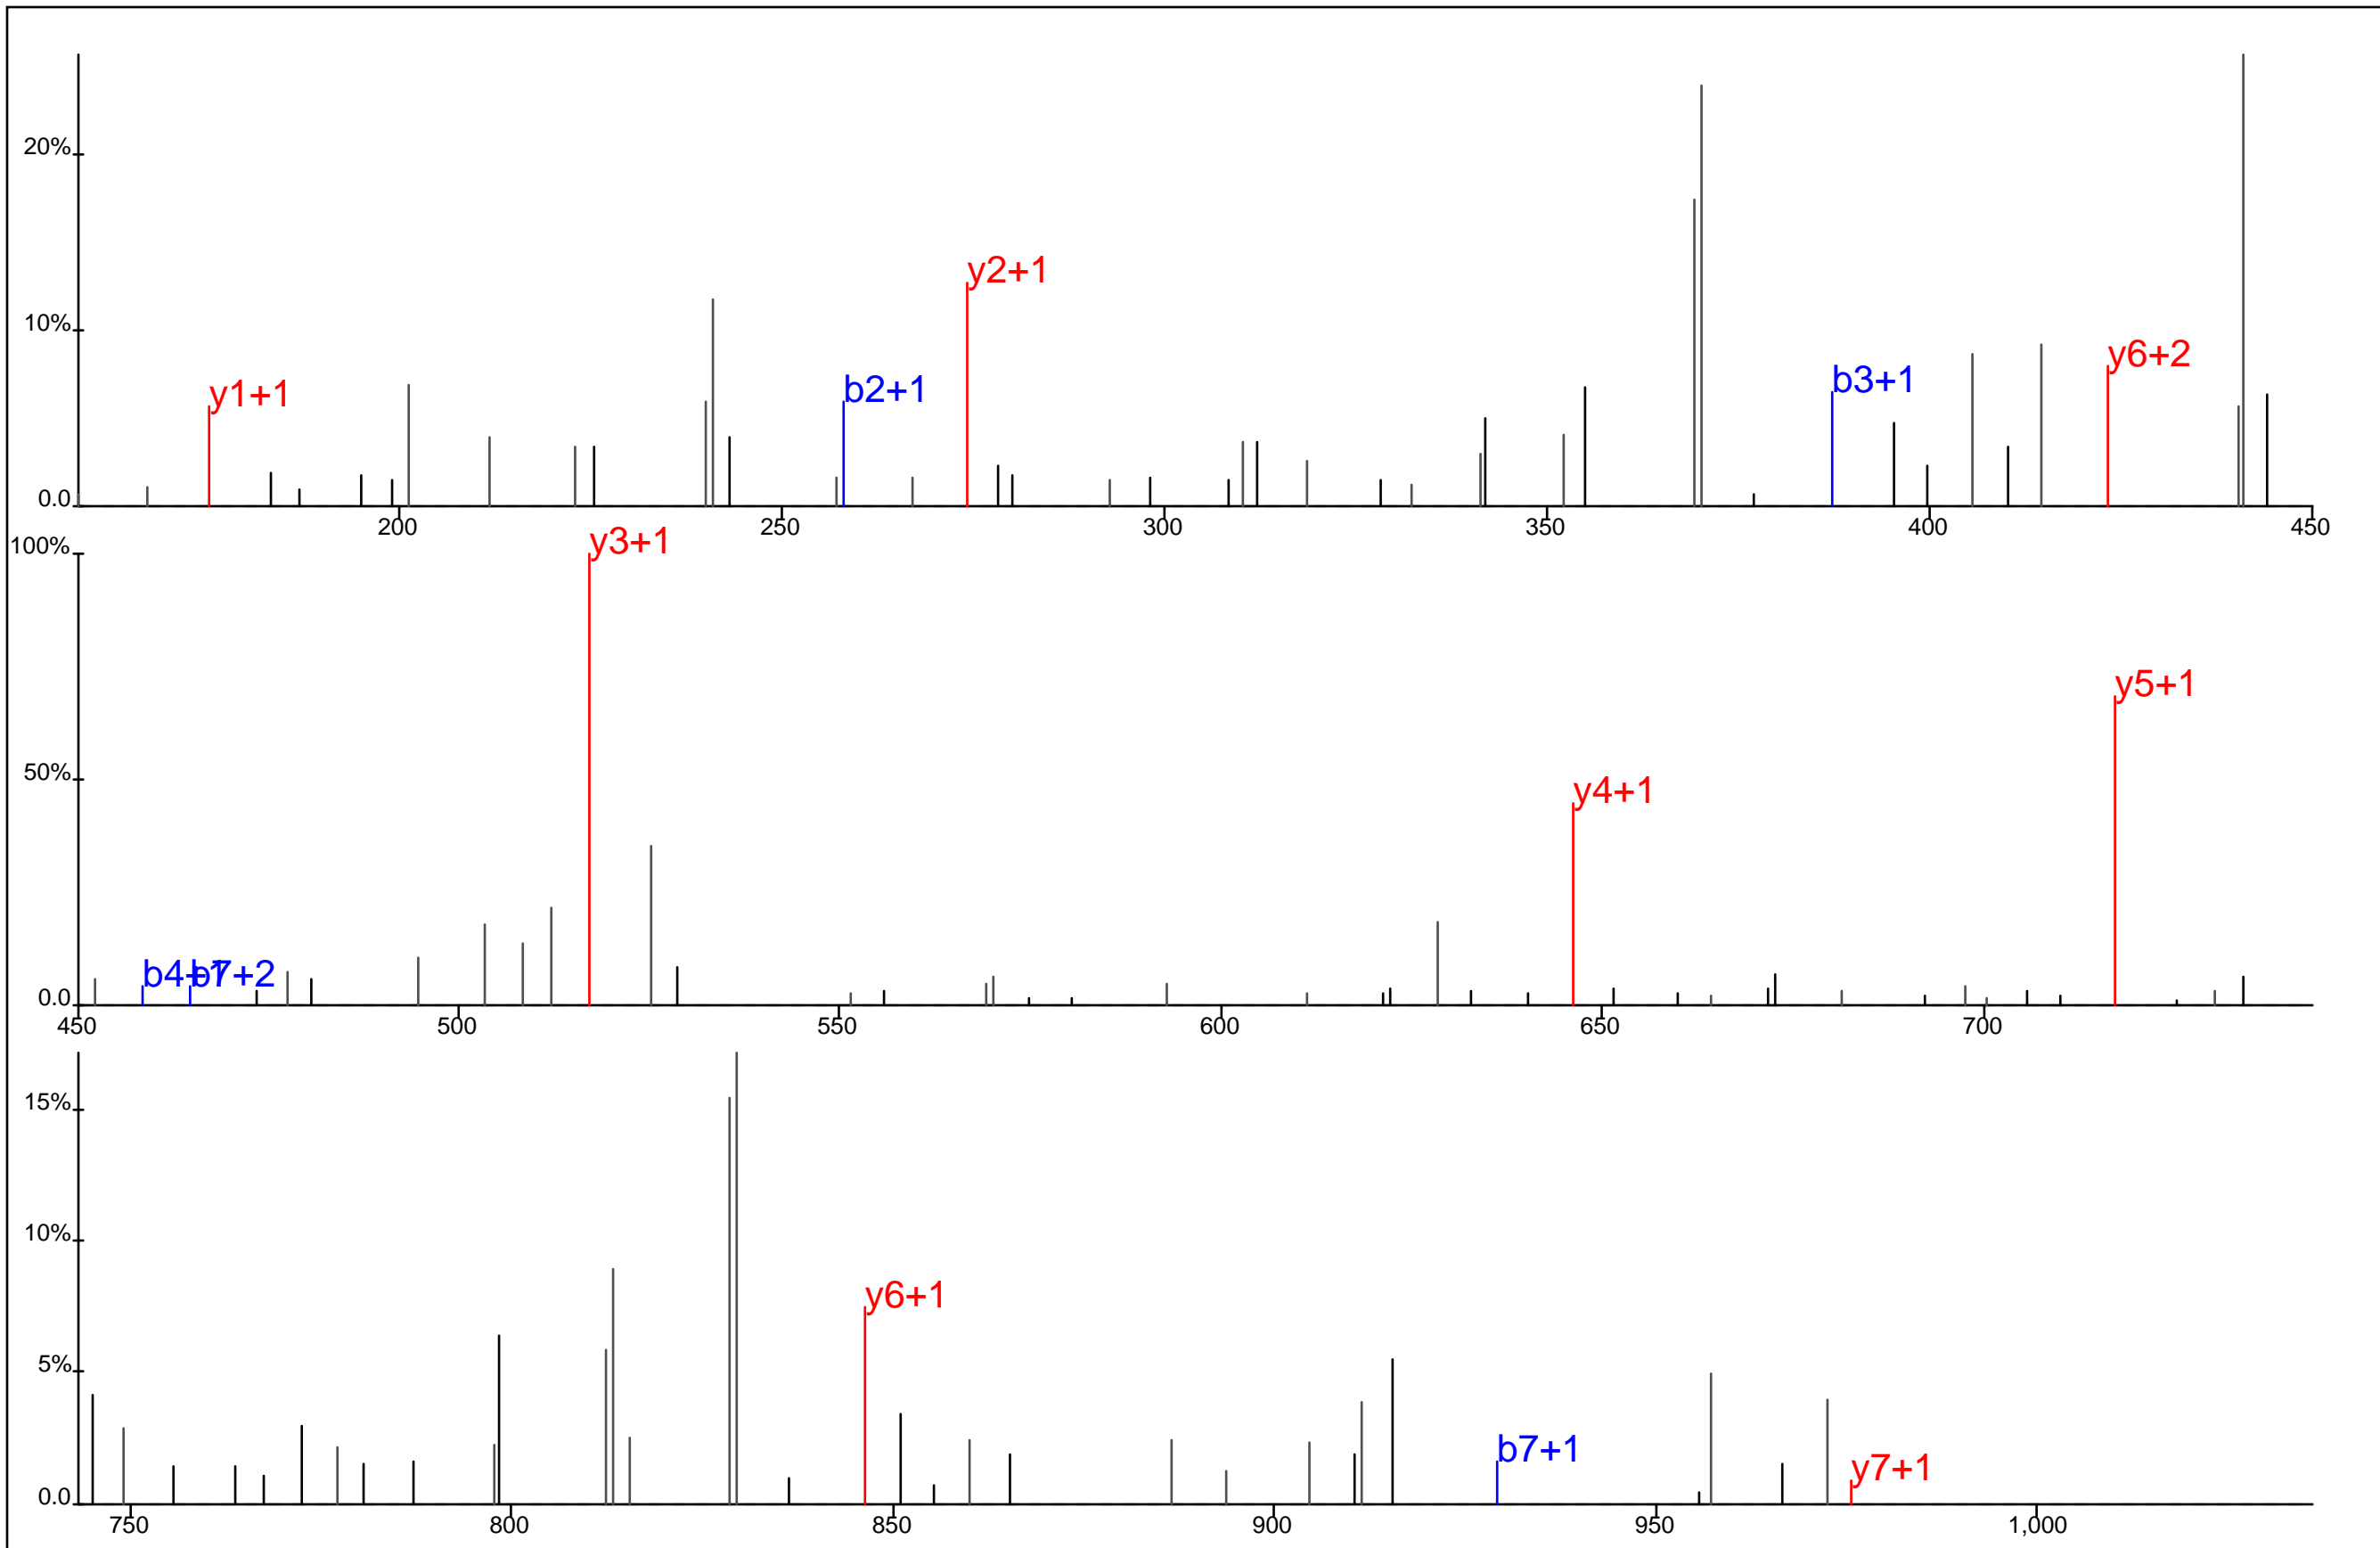

■ ■ ■ ■ ■ ■ ■  
 Q E E A E Y\*V R  
■ ■ ■ ■ ■ ■ ■

Protein Name: CRK  
 gi Accession: 0  
 Precursor Mass: 552.2239+2  
 Delta Mass: 0.015 ppm  
 XCorr: 26.99

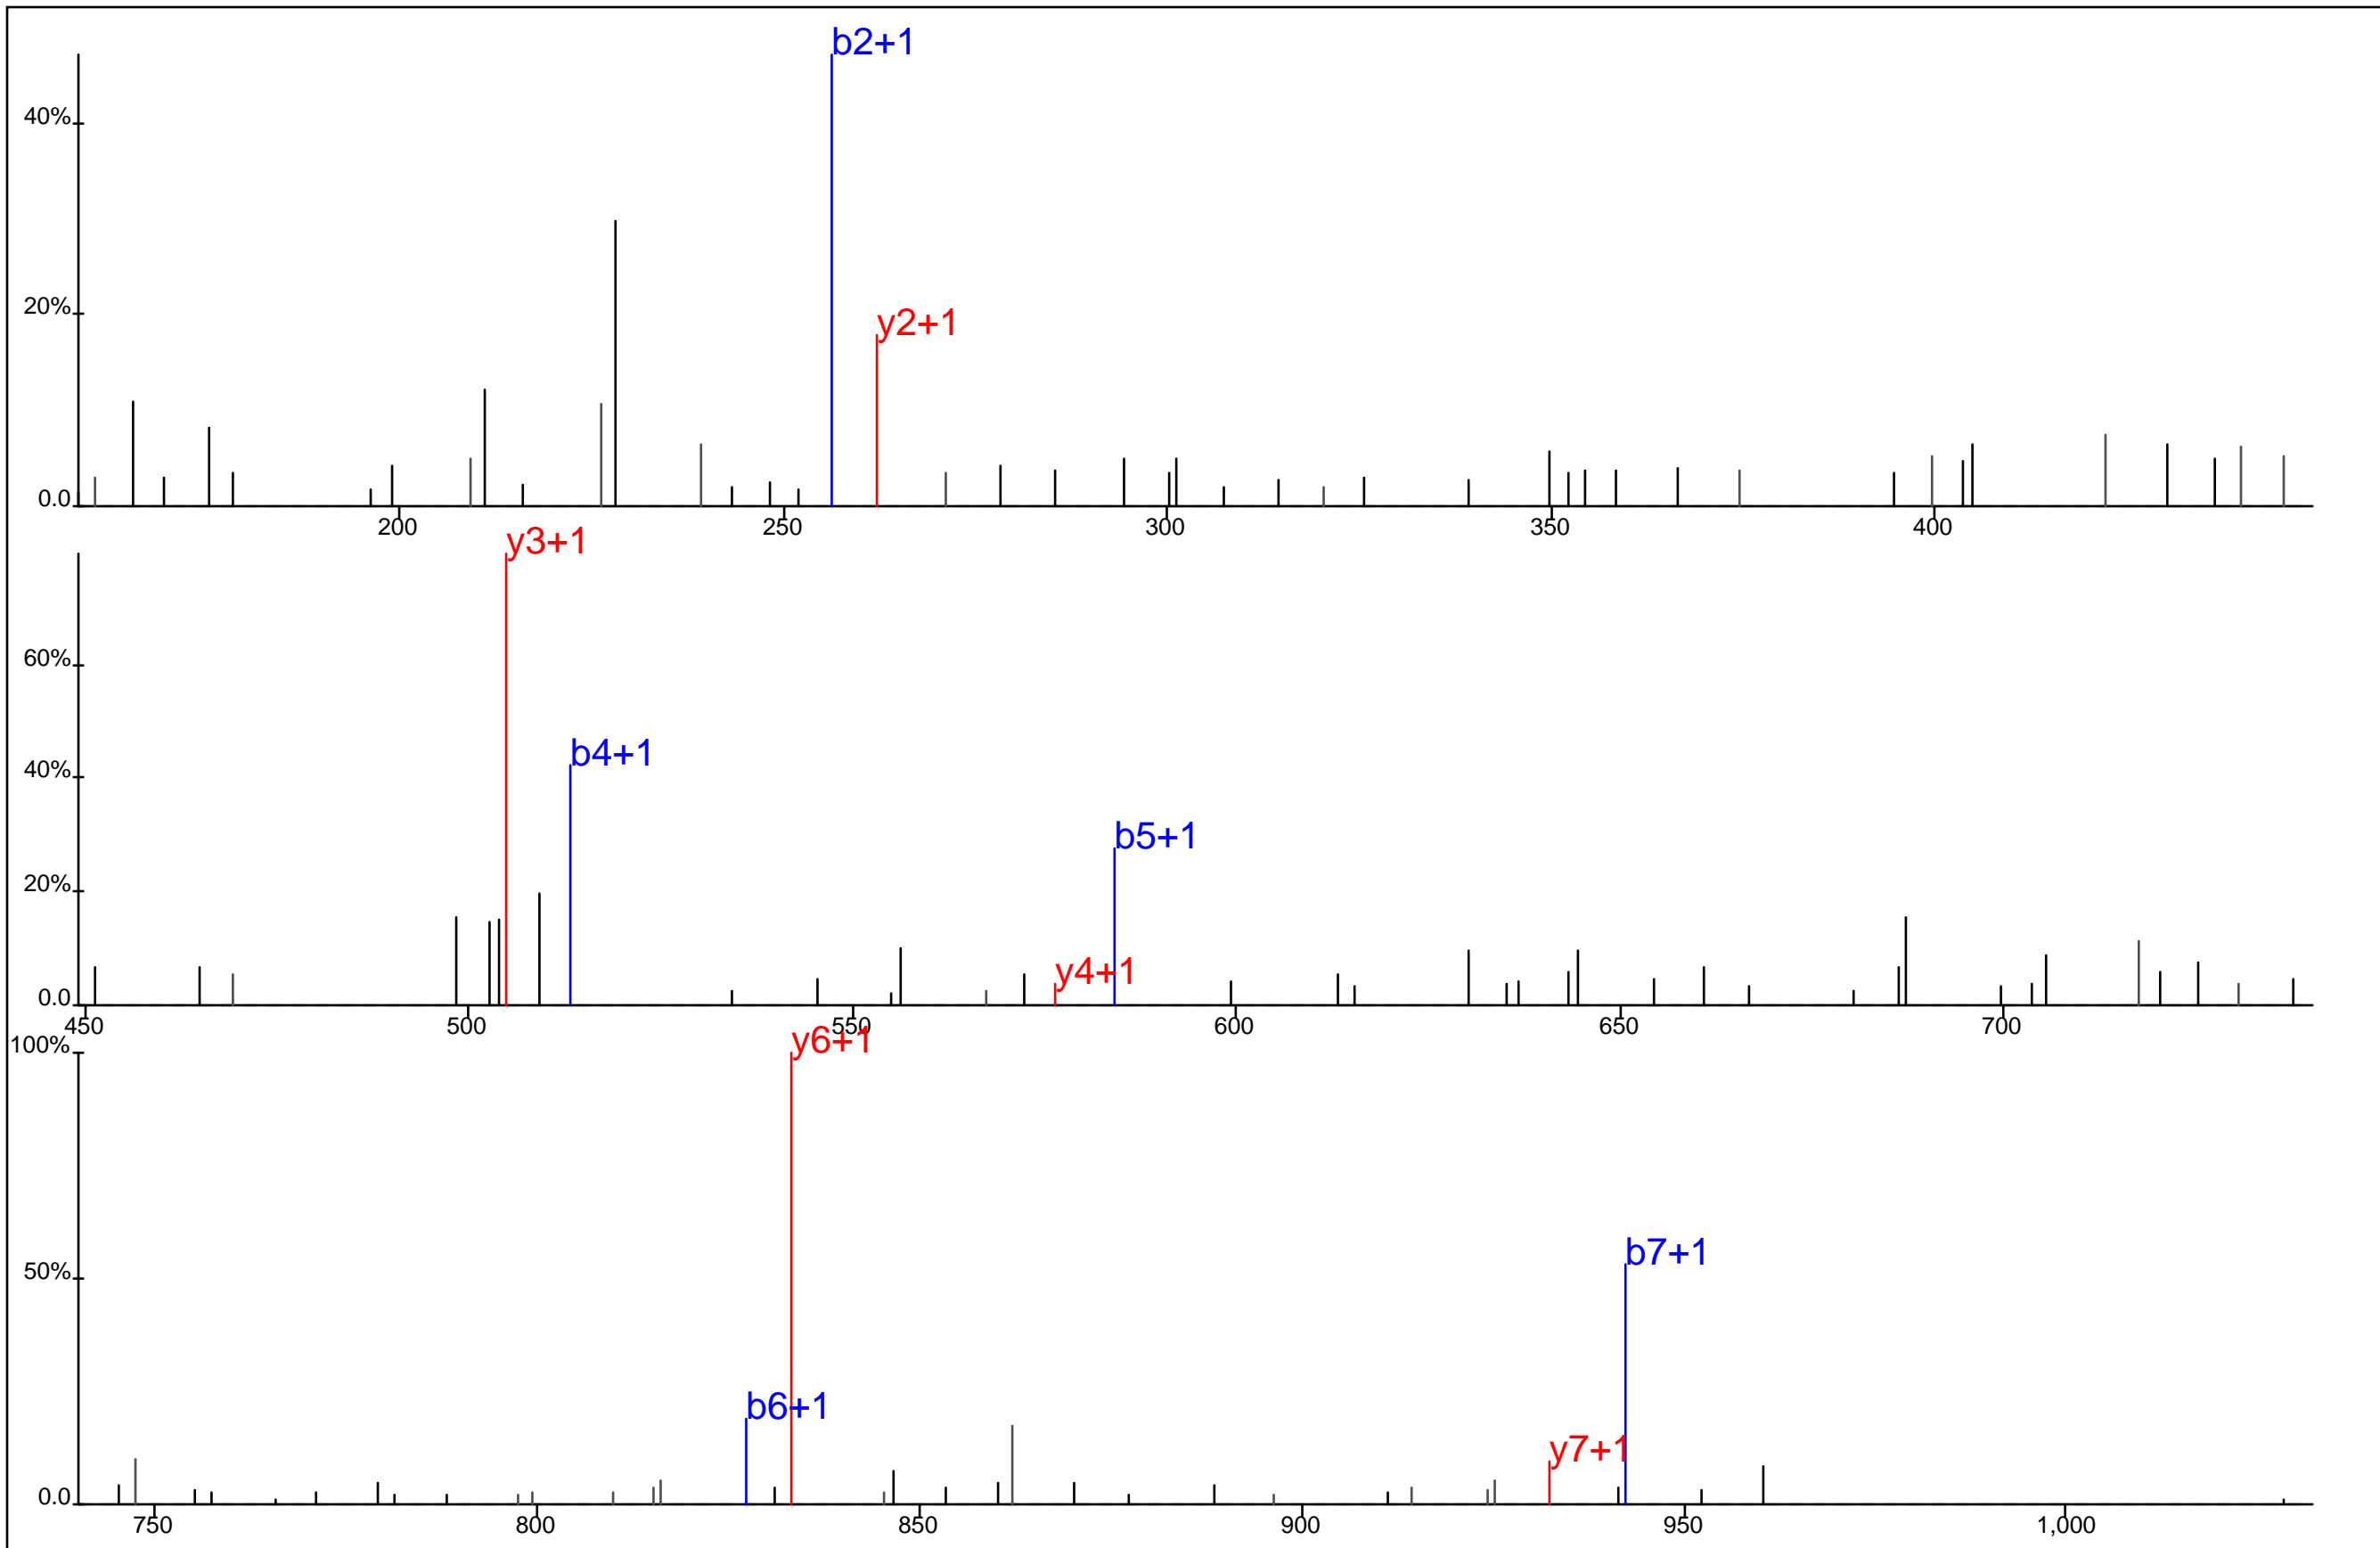

■ ▢ ▣ ▤ ▥ ▦  
 R V P C A Y\* D K  
▨ ▩ ▪ ▫ ▬ ▭

Protein Name: CRKL  
 gi Accession: 0  
 Precursor Mass: 544.7332+2  
 Delta Mass: 0.265 ppm  
 XCorr: 25.36

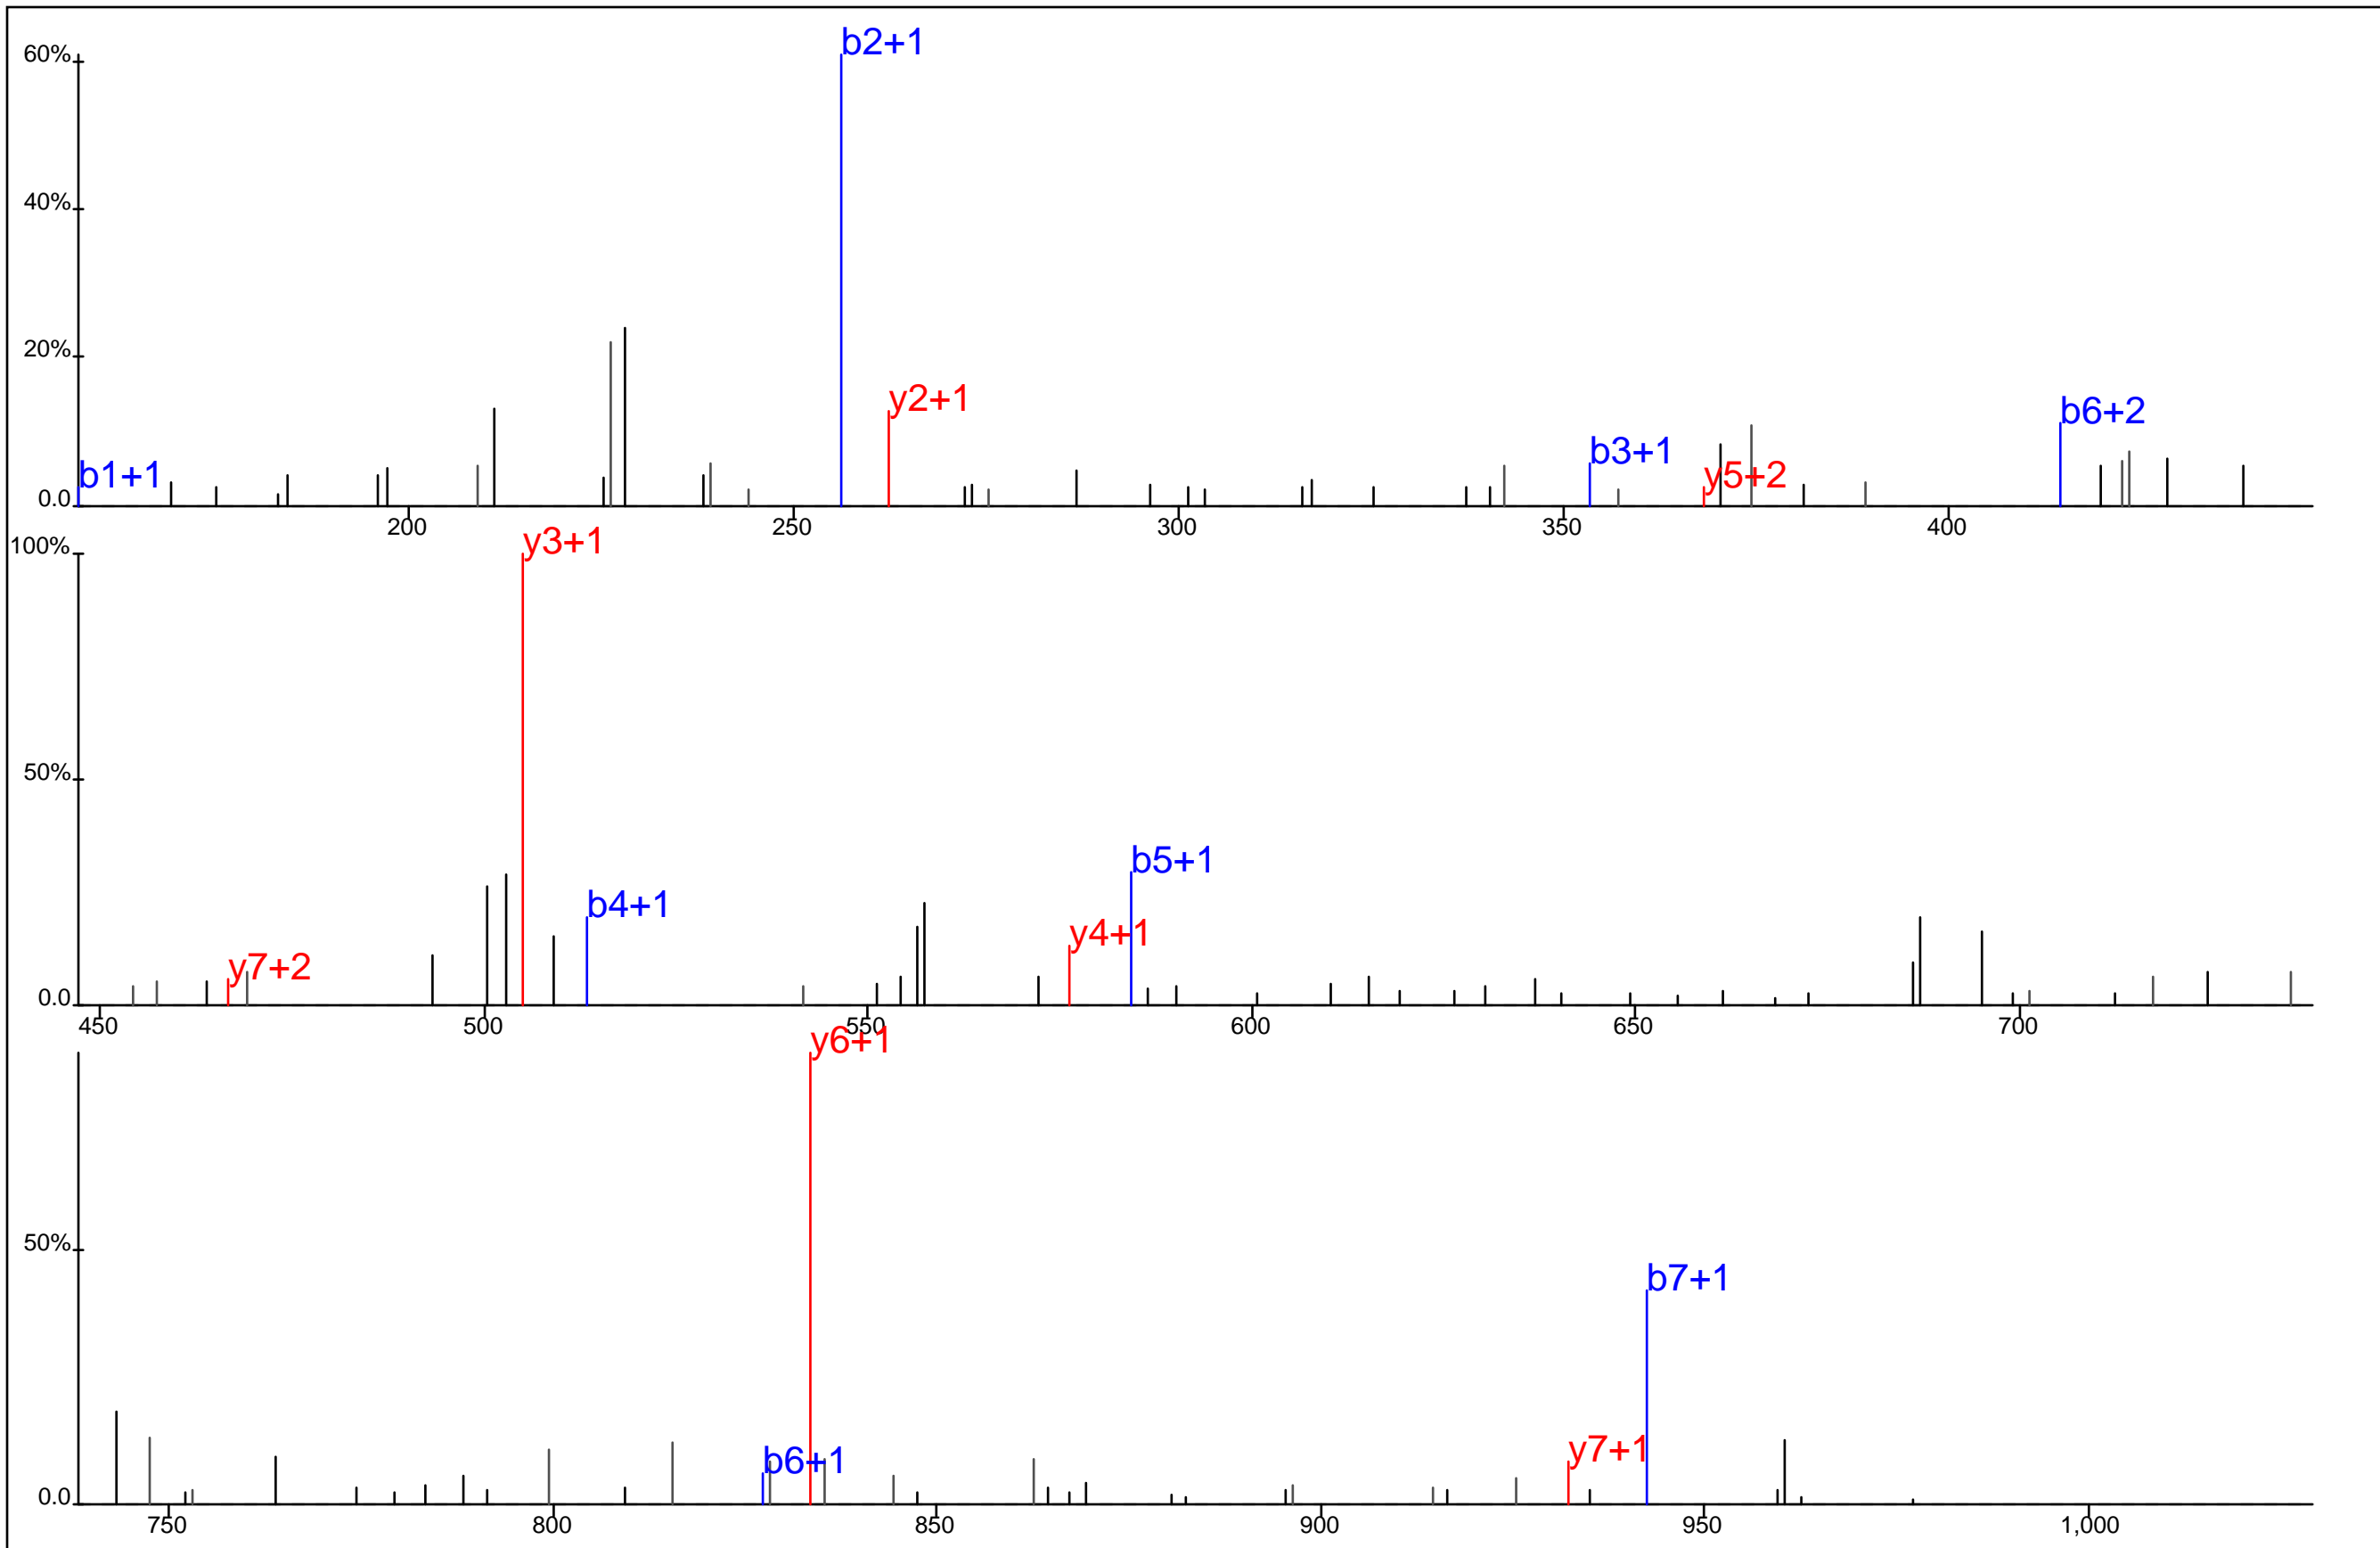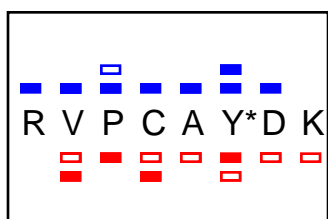

Protein Name: CRKL  
 gi Accession: 0  
 Precursor Mass: 544.7327+2  
 Delta Mass: 1.273 ppm  
 XCorr: 23.96

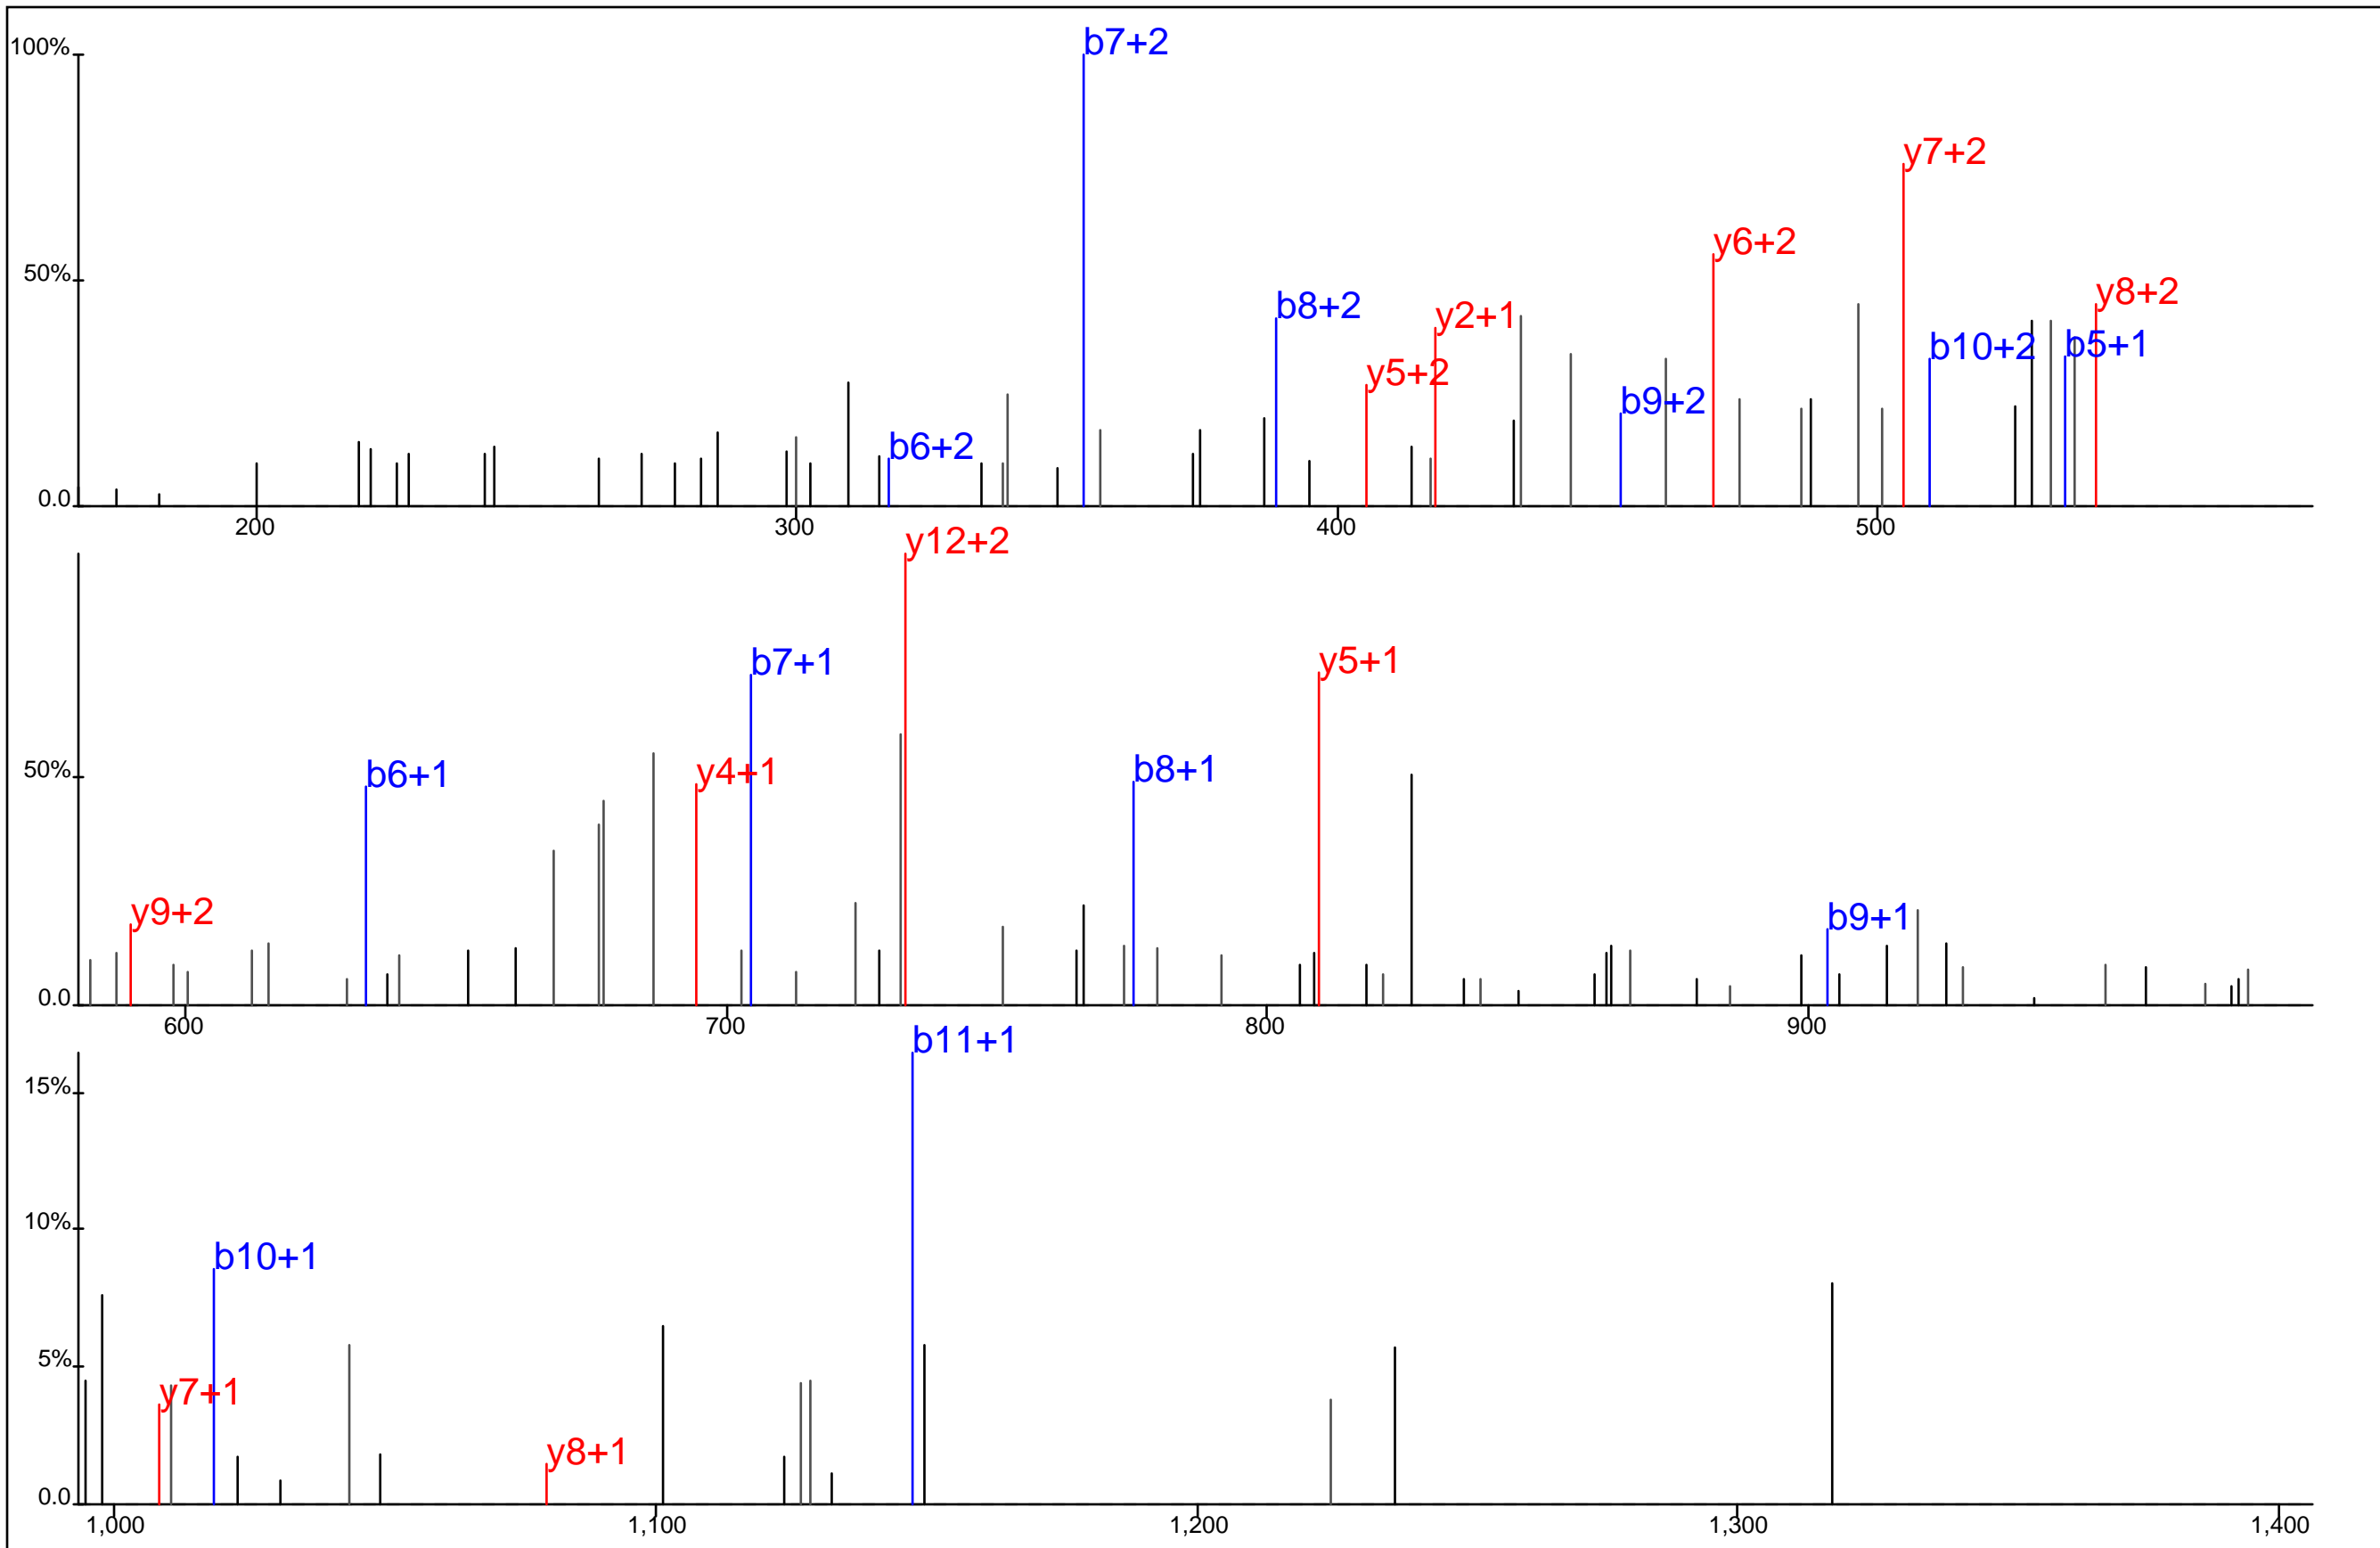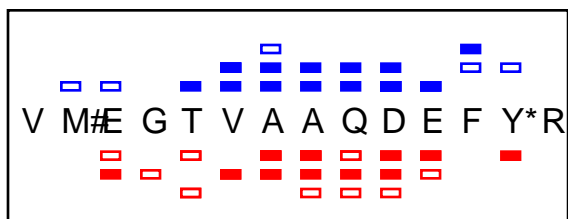

Protein Name: Csk  
 gi Accession: 0  
 Precursor Mass: 571.2406+3  
 Delta Mass: 2.295 ppm  
 XCorr: 29.57



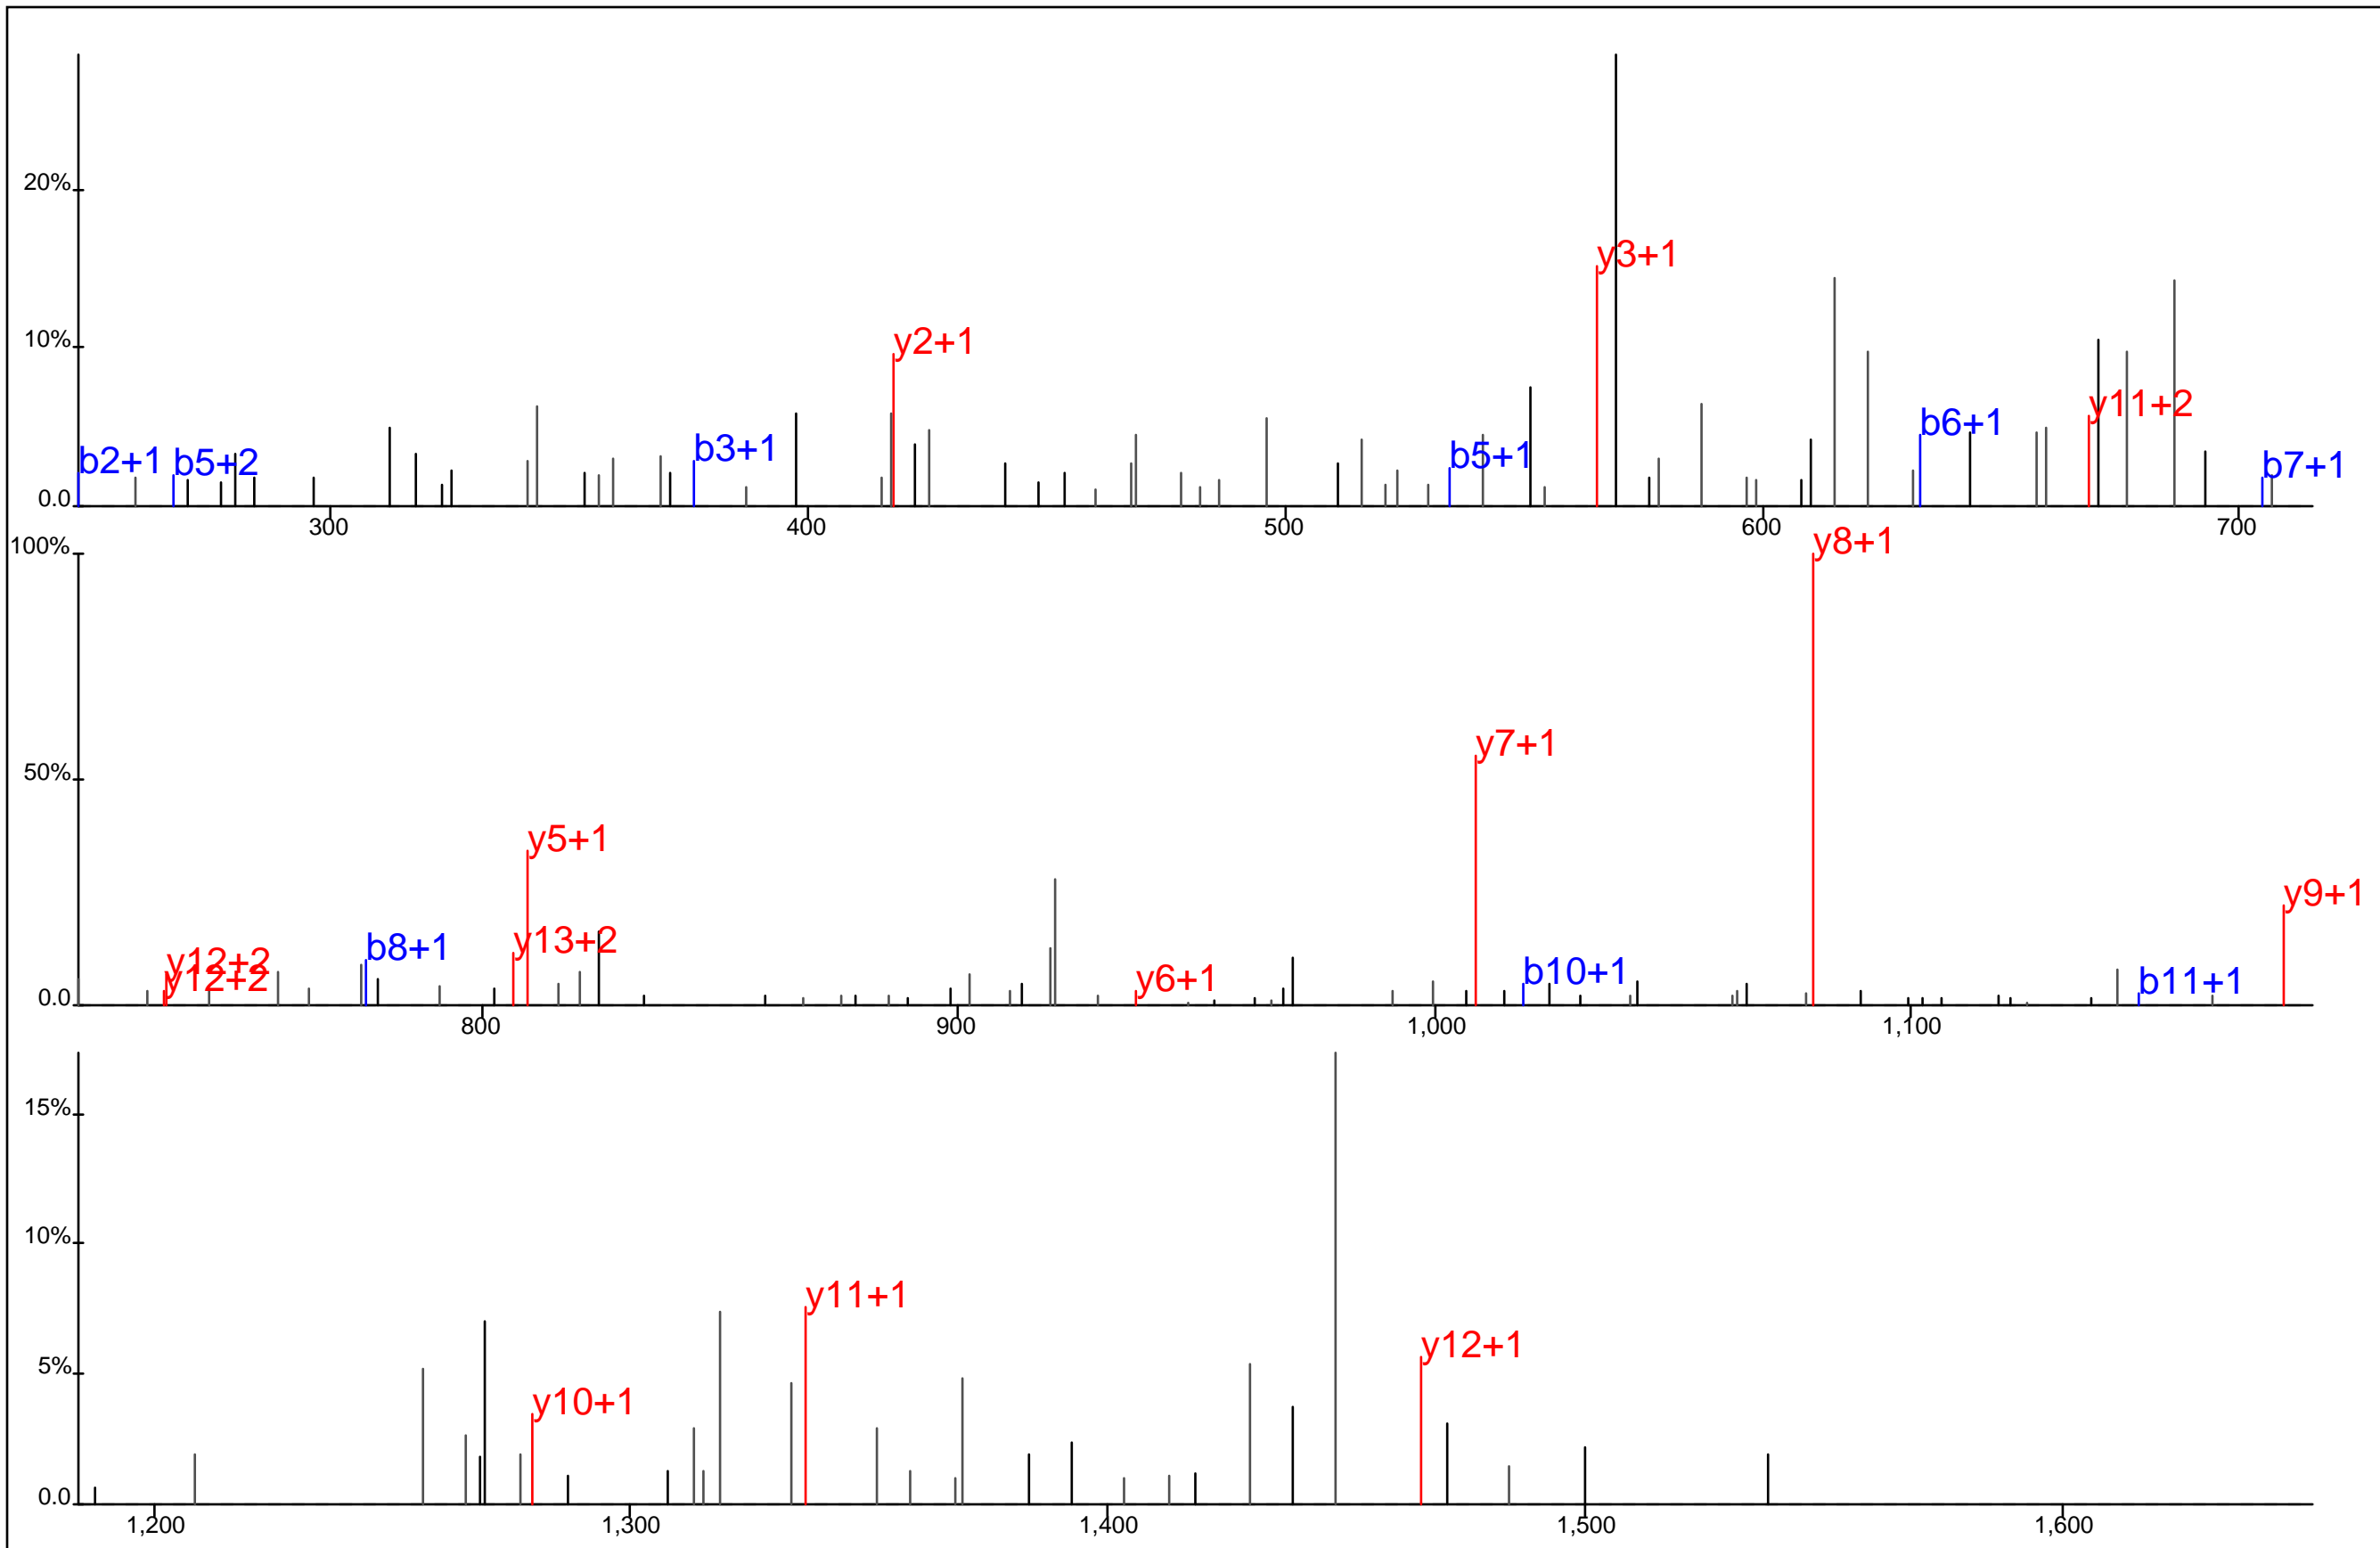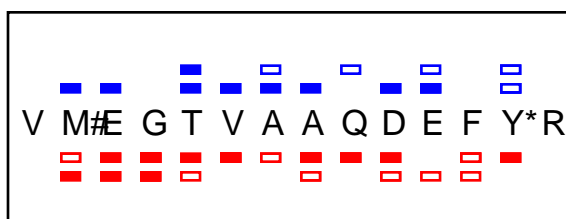

Protein Name: Csk  
 gi Accession: 0  
 Precursor Mass: 856.3538+2  
 Delta Mass: 1.727 ppm  
 XCorr: 51.02

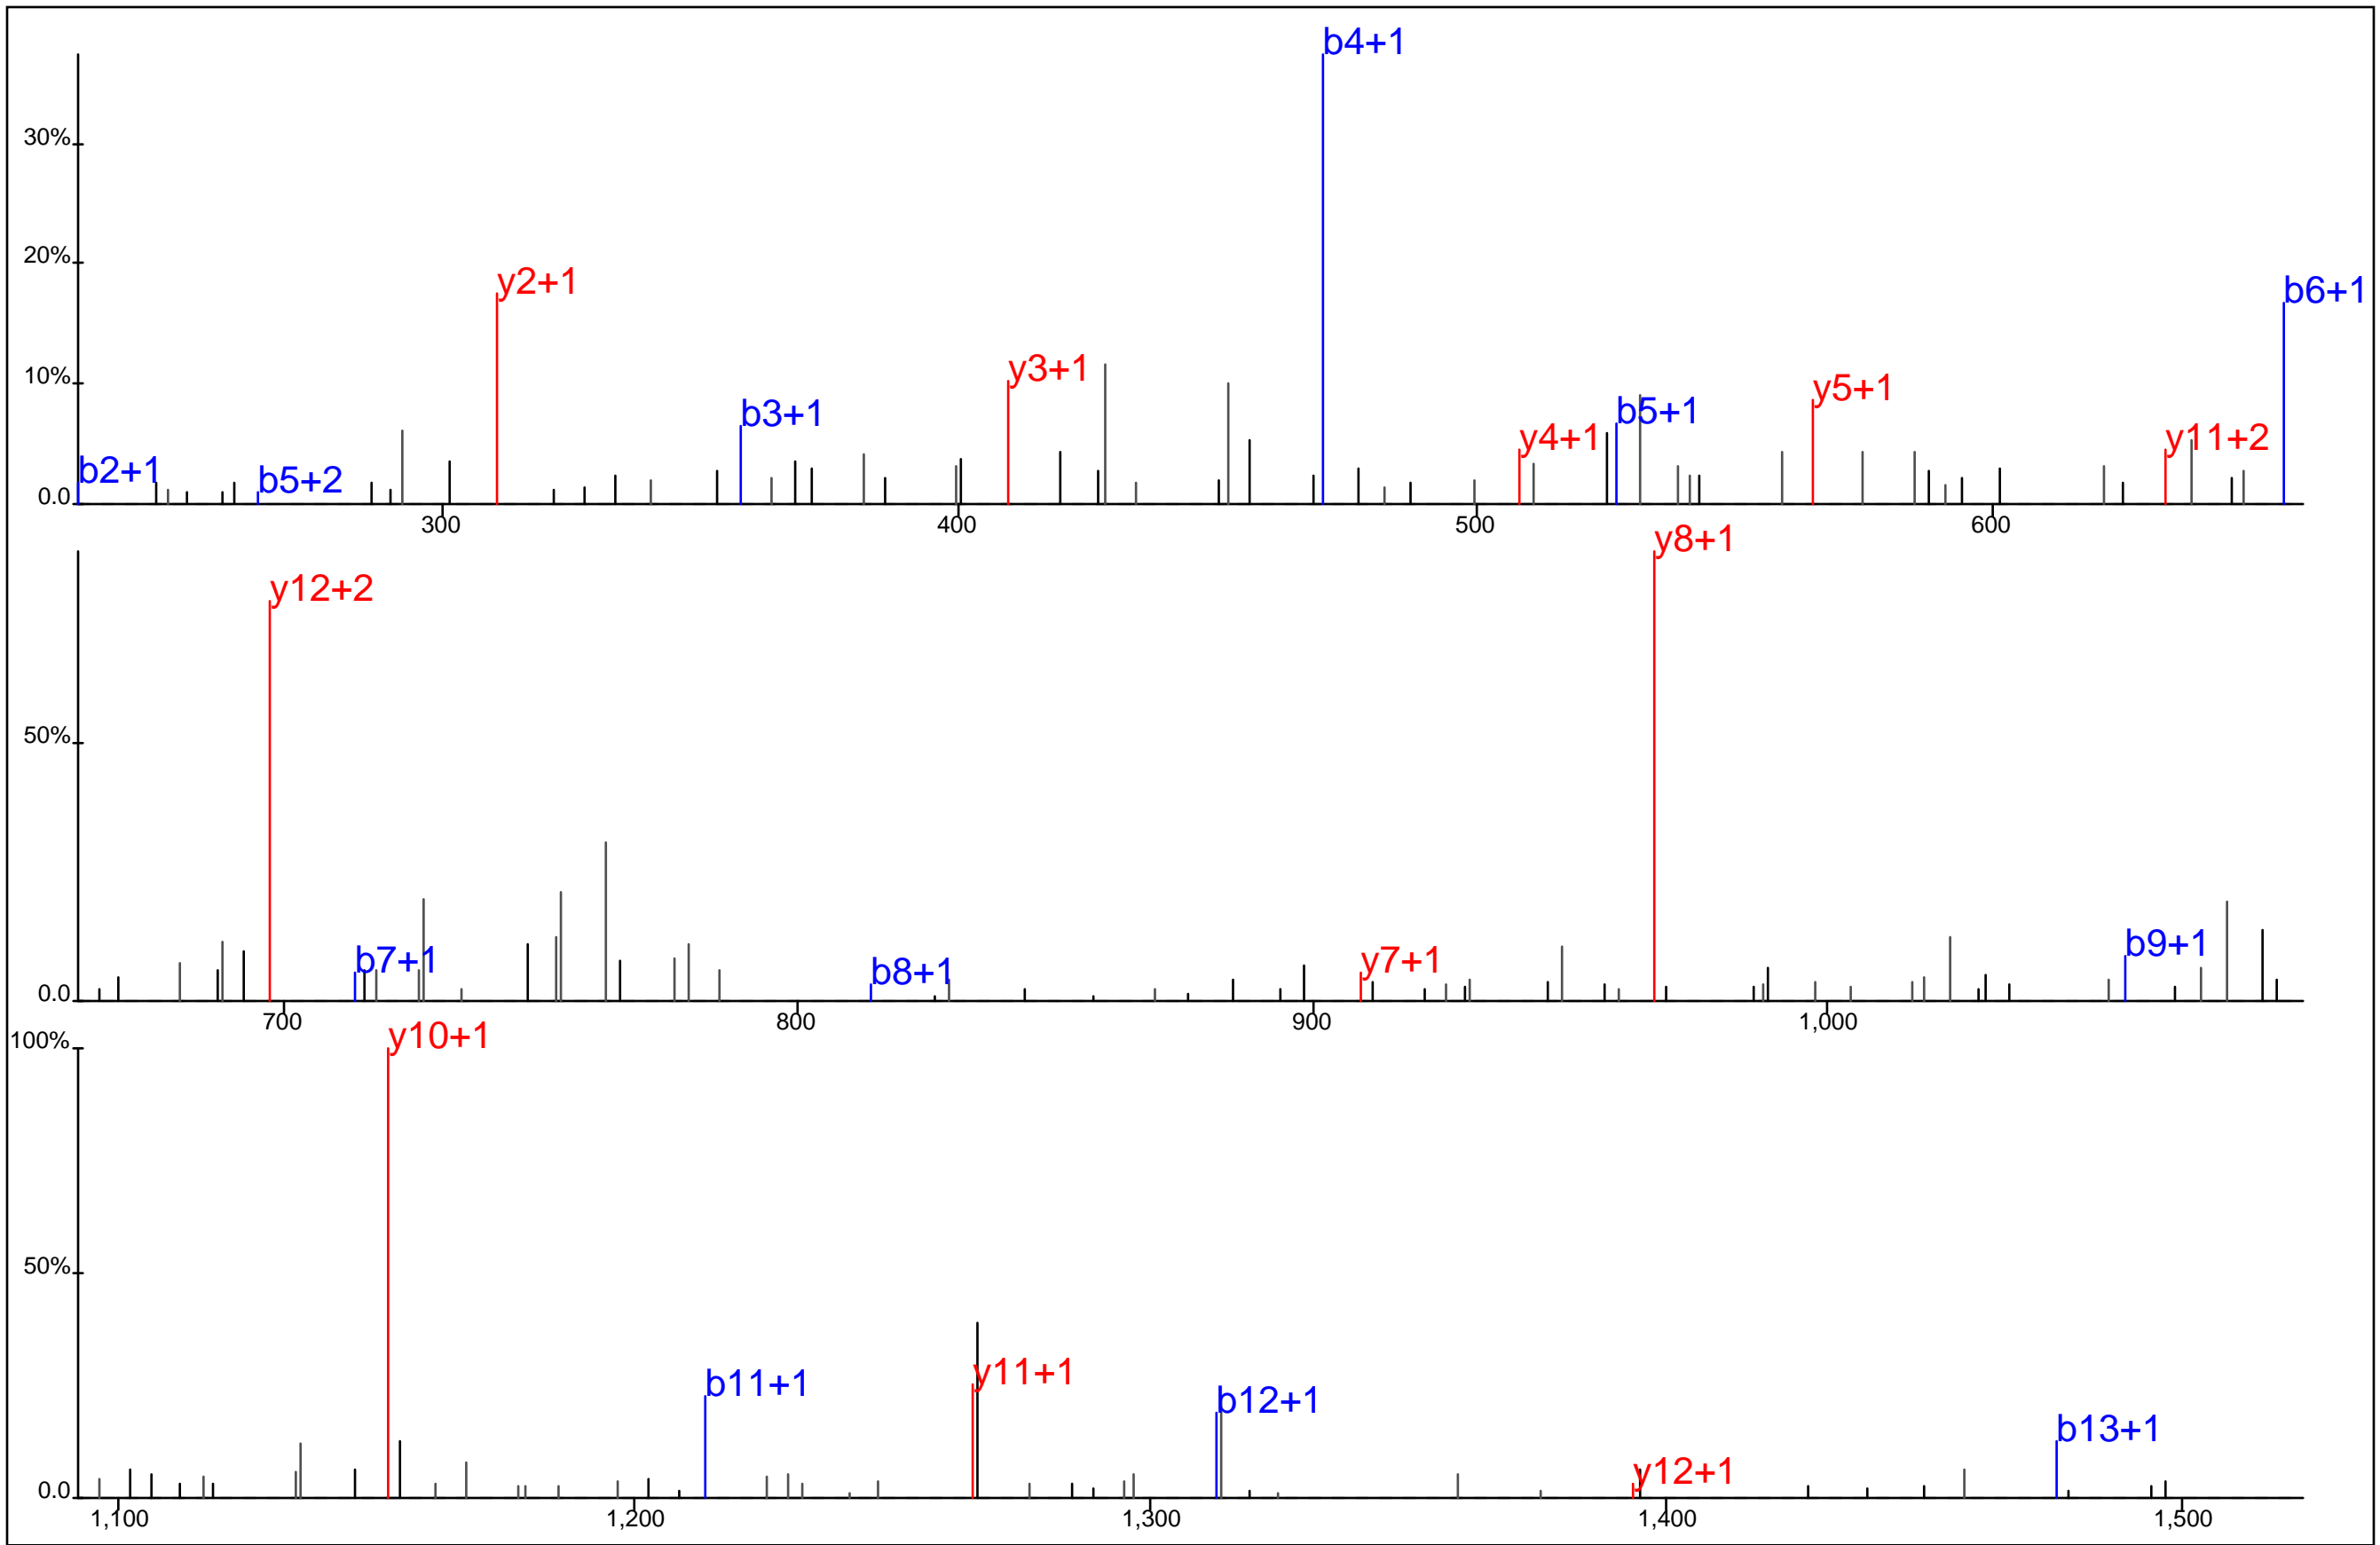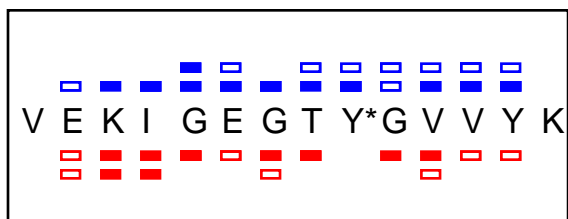

Protein Name: Cyclin dependent kinase 2  
 gi Accession: 0  
 Precursor Mass: 811.3967+2  
 Delta Mass: 0.767 ppm  
 XCorr: 48.04

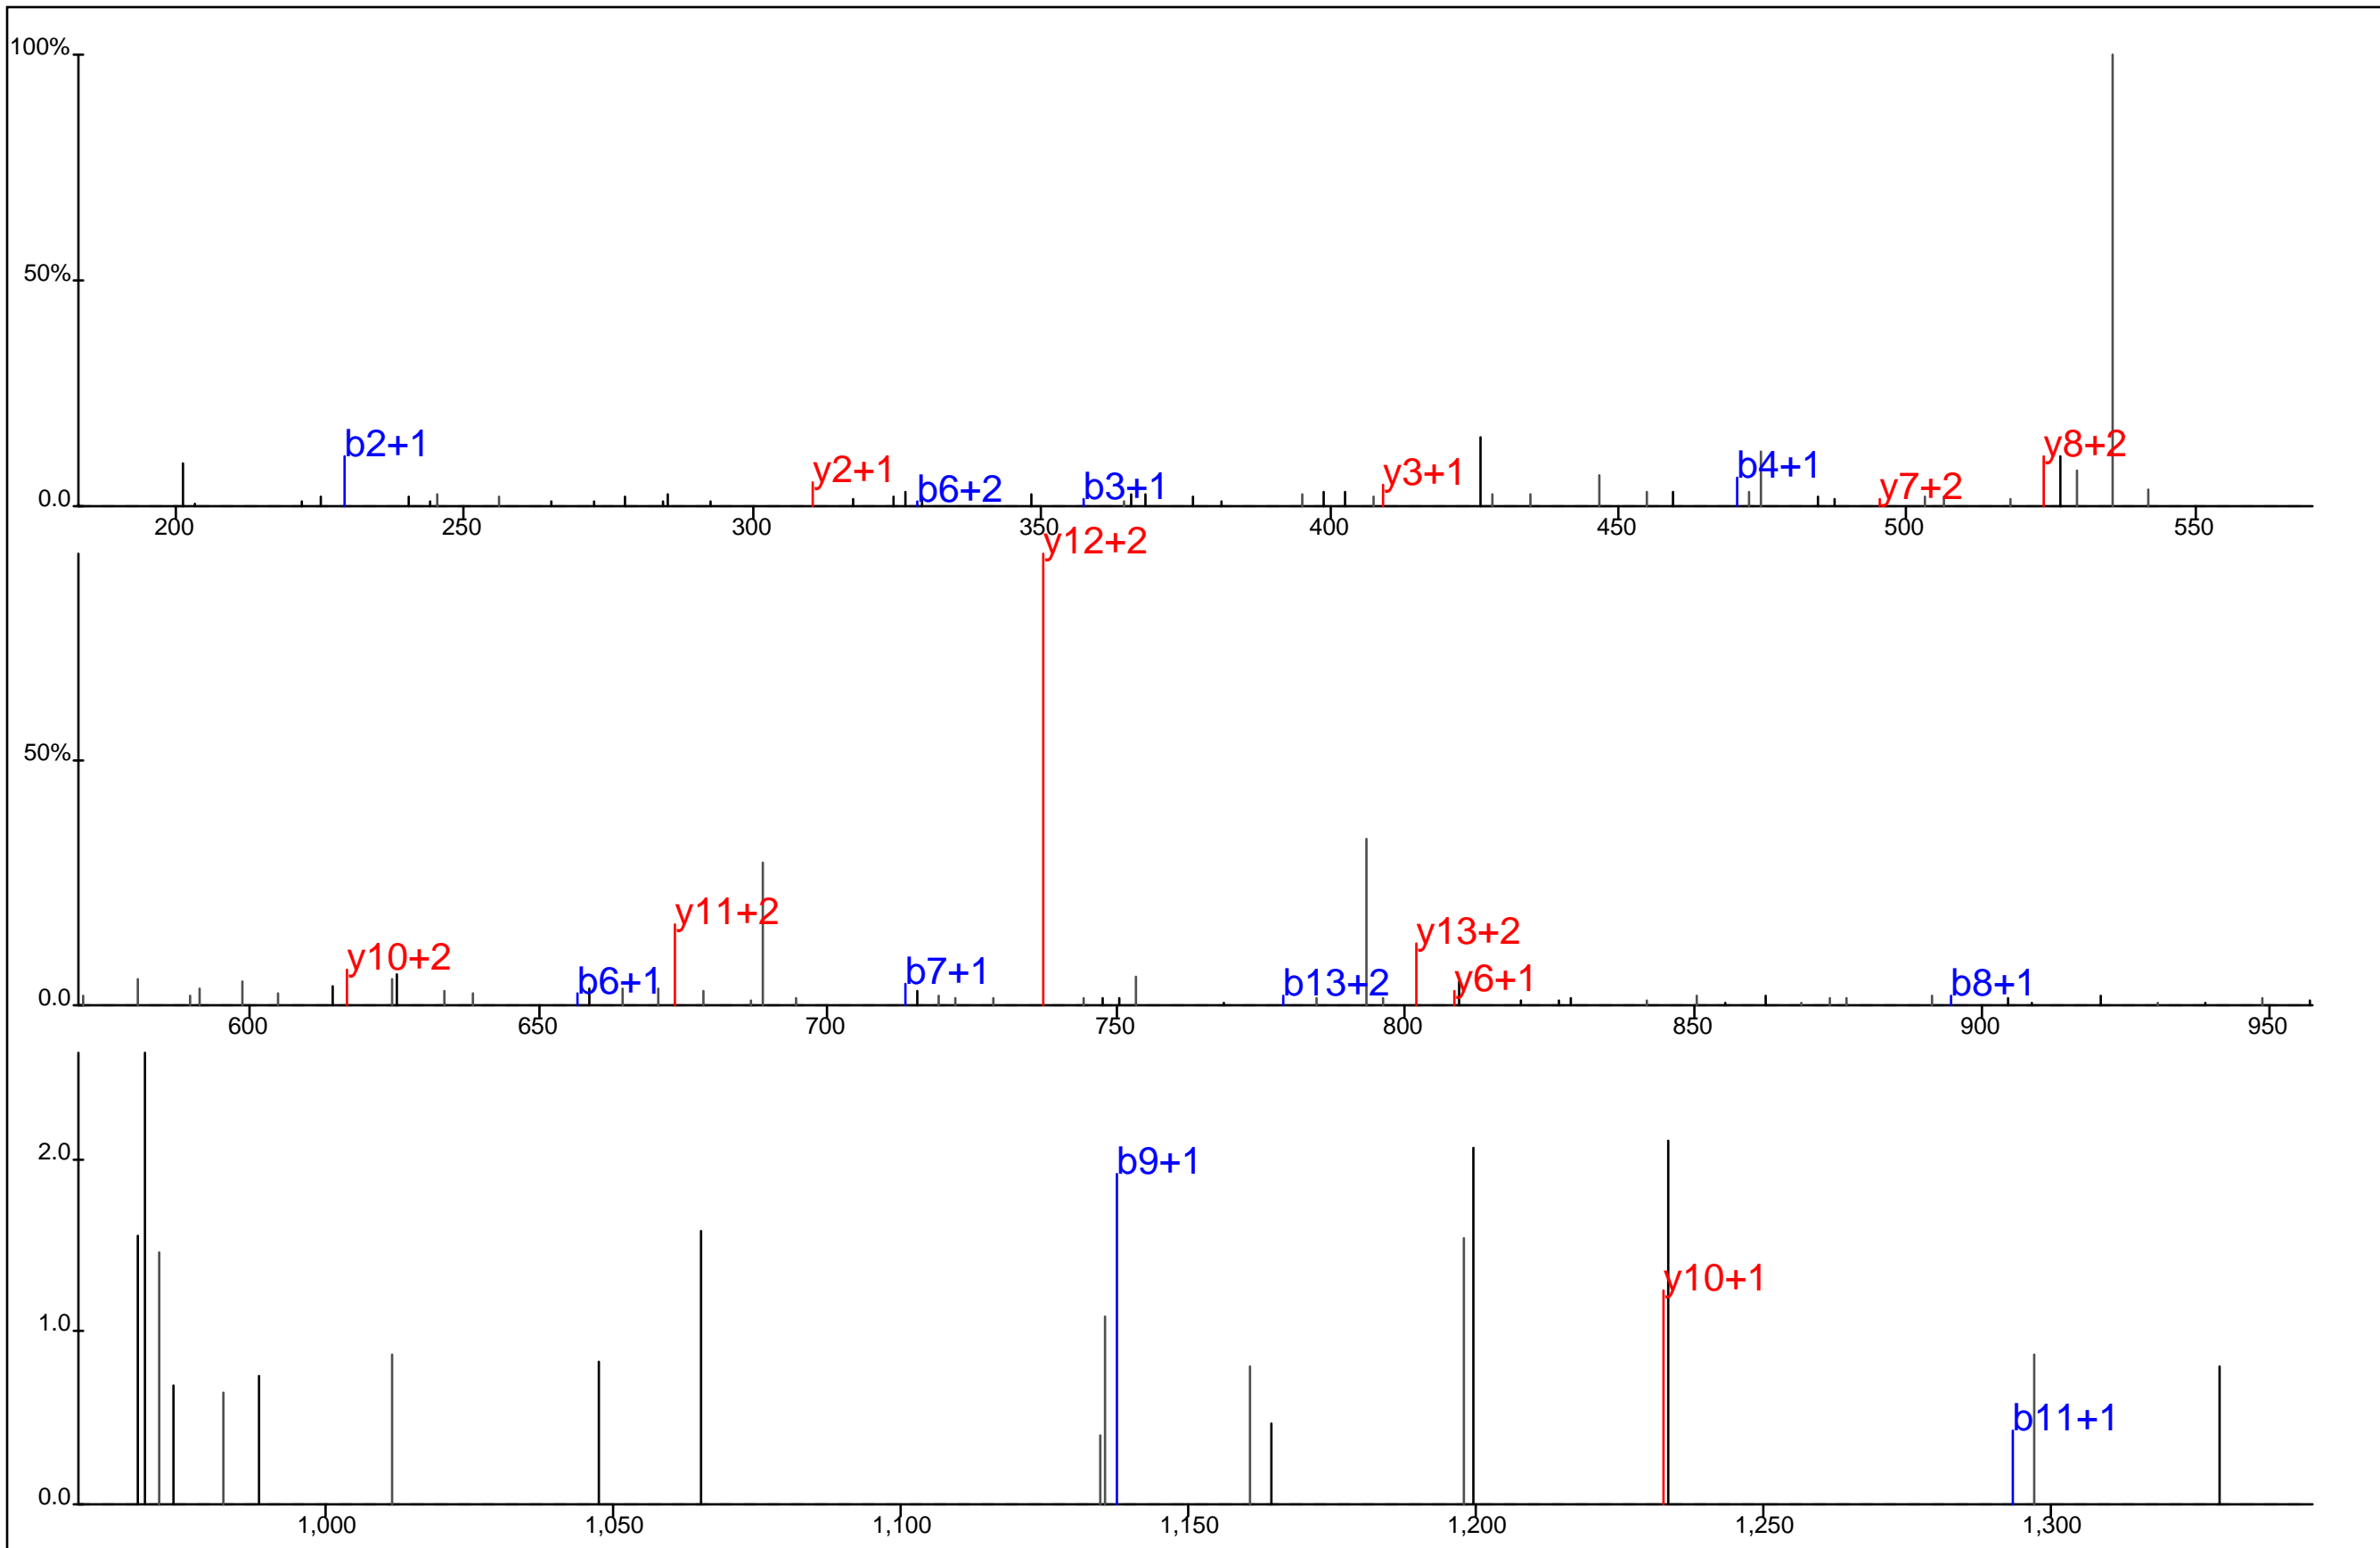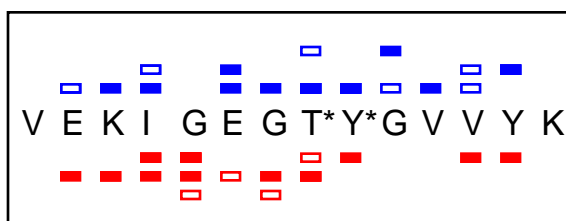

Protein Name: Cyclin dependent kinase 2  
 gi Accession: 0  
 Precursor Mass: 567.9239+3  
 Delta Mass: 2.047 ppm  
 XCorr: 28.24

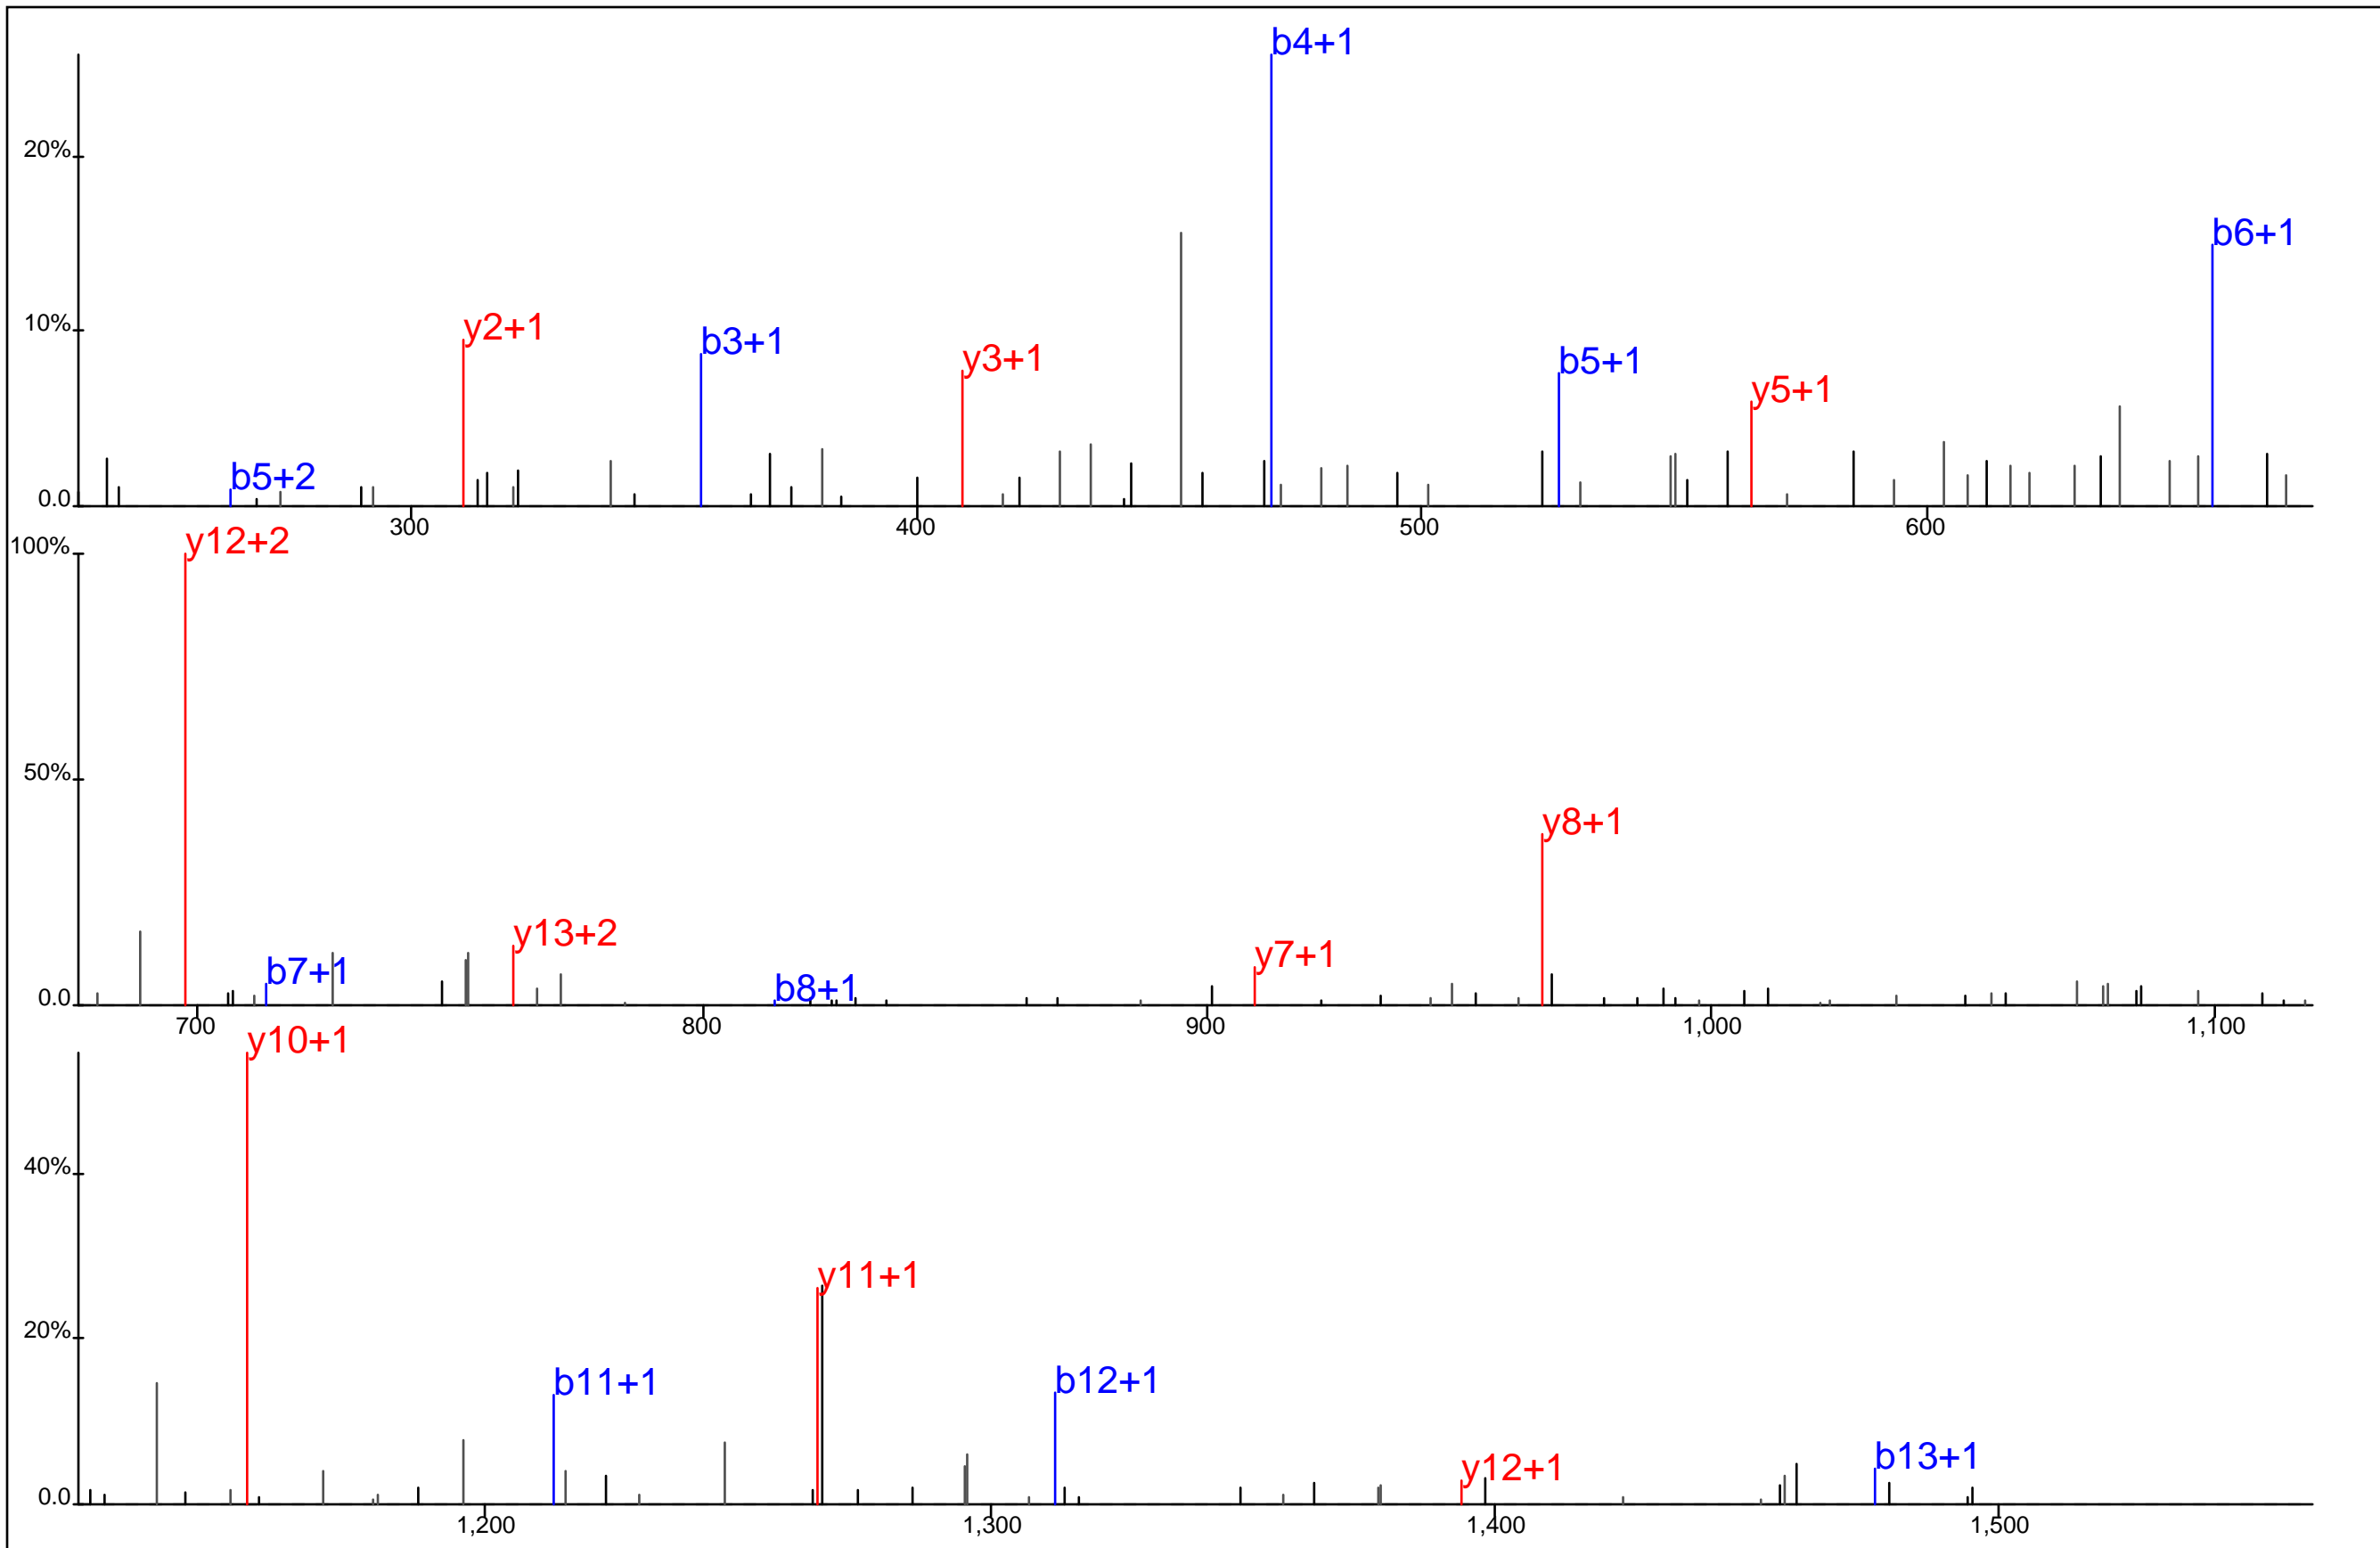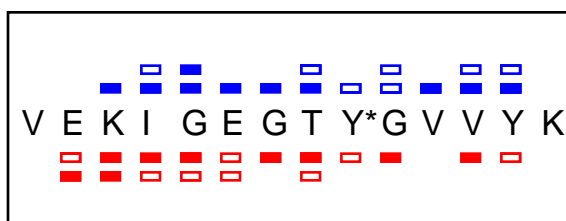

Protein Name: Cyclin dependent kinase 2  
 gi Accession: 0  
 Precursor Mass: 811.3957+2  
 Delta Mass: 1.971 ppm  
 XCorr: 54.8

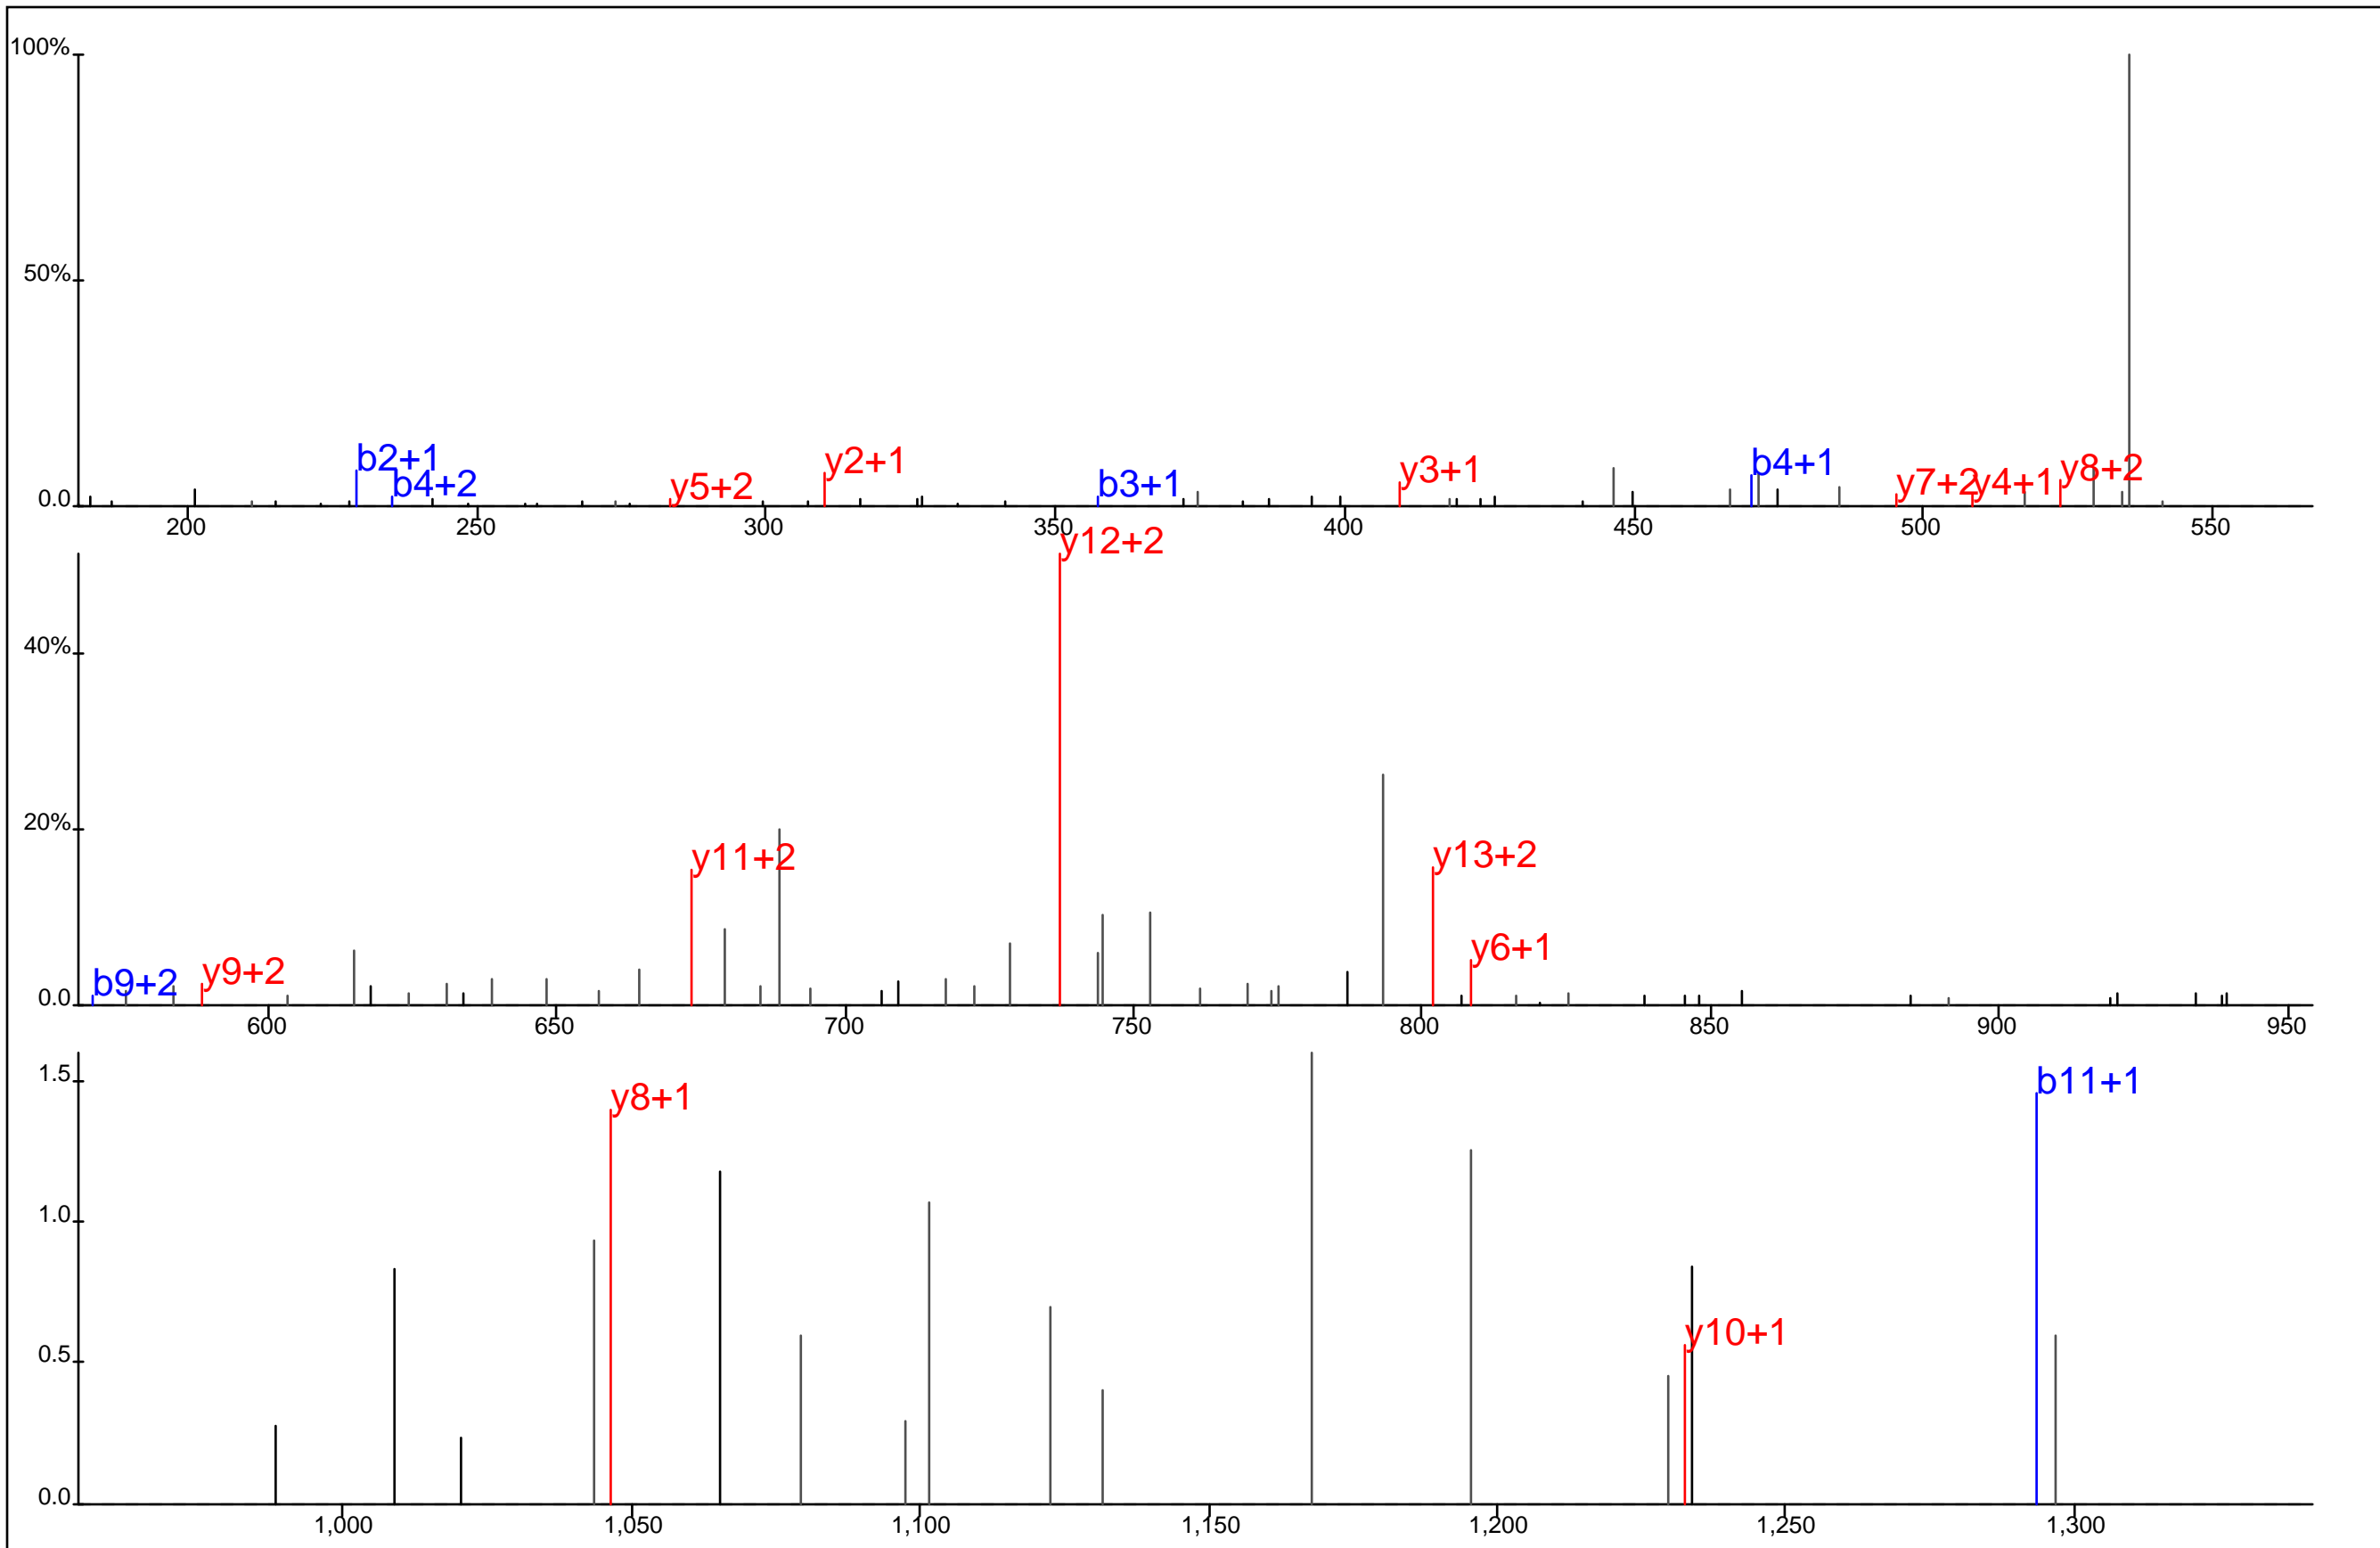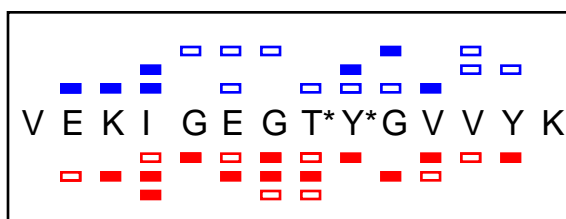

Protein Name: Cyclin dependent kinase 2  
 gi Accession: 0  
 Precursor Mass: 567.9231+3  
 Delta Mass: 0.649 ppm  
 XCorr: 30.56

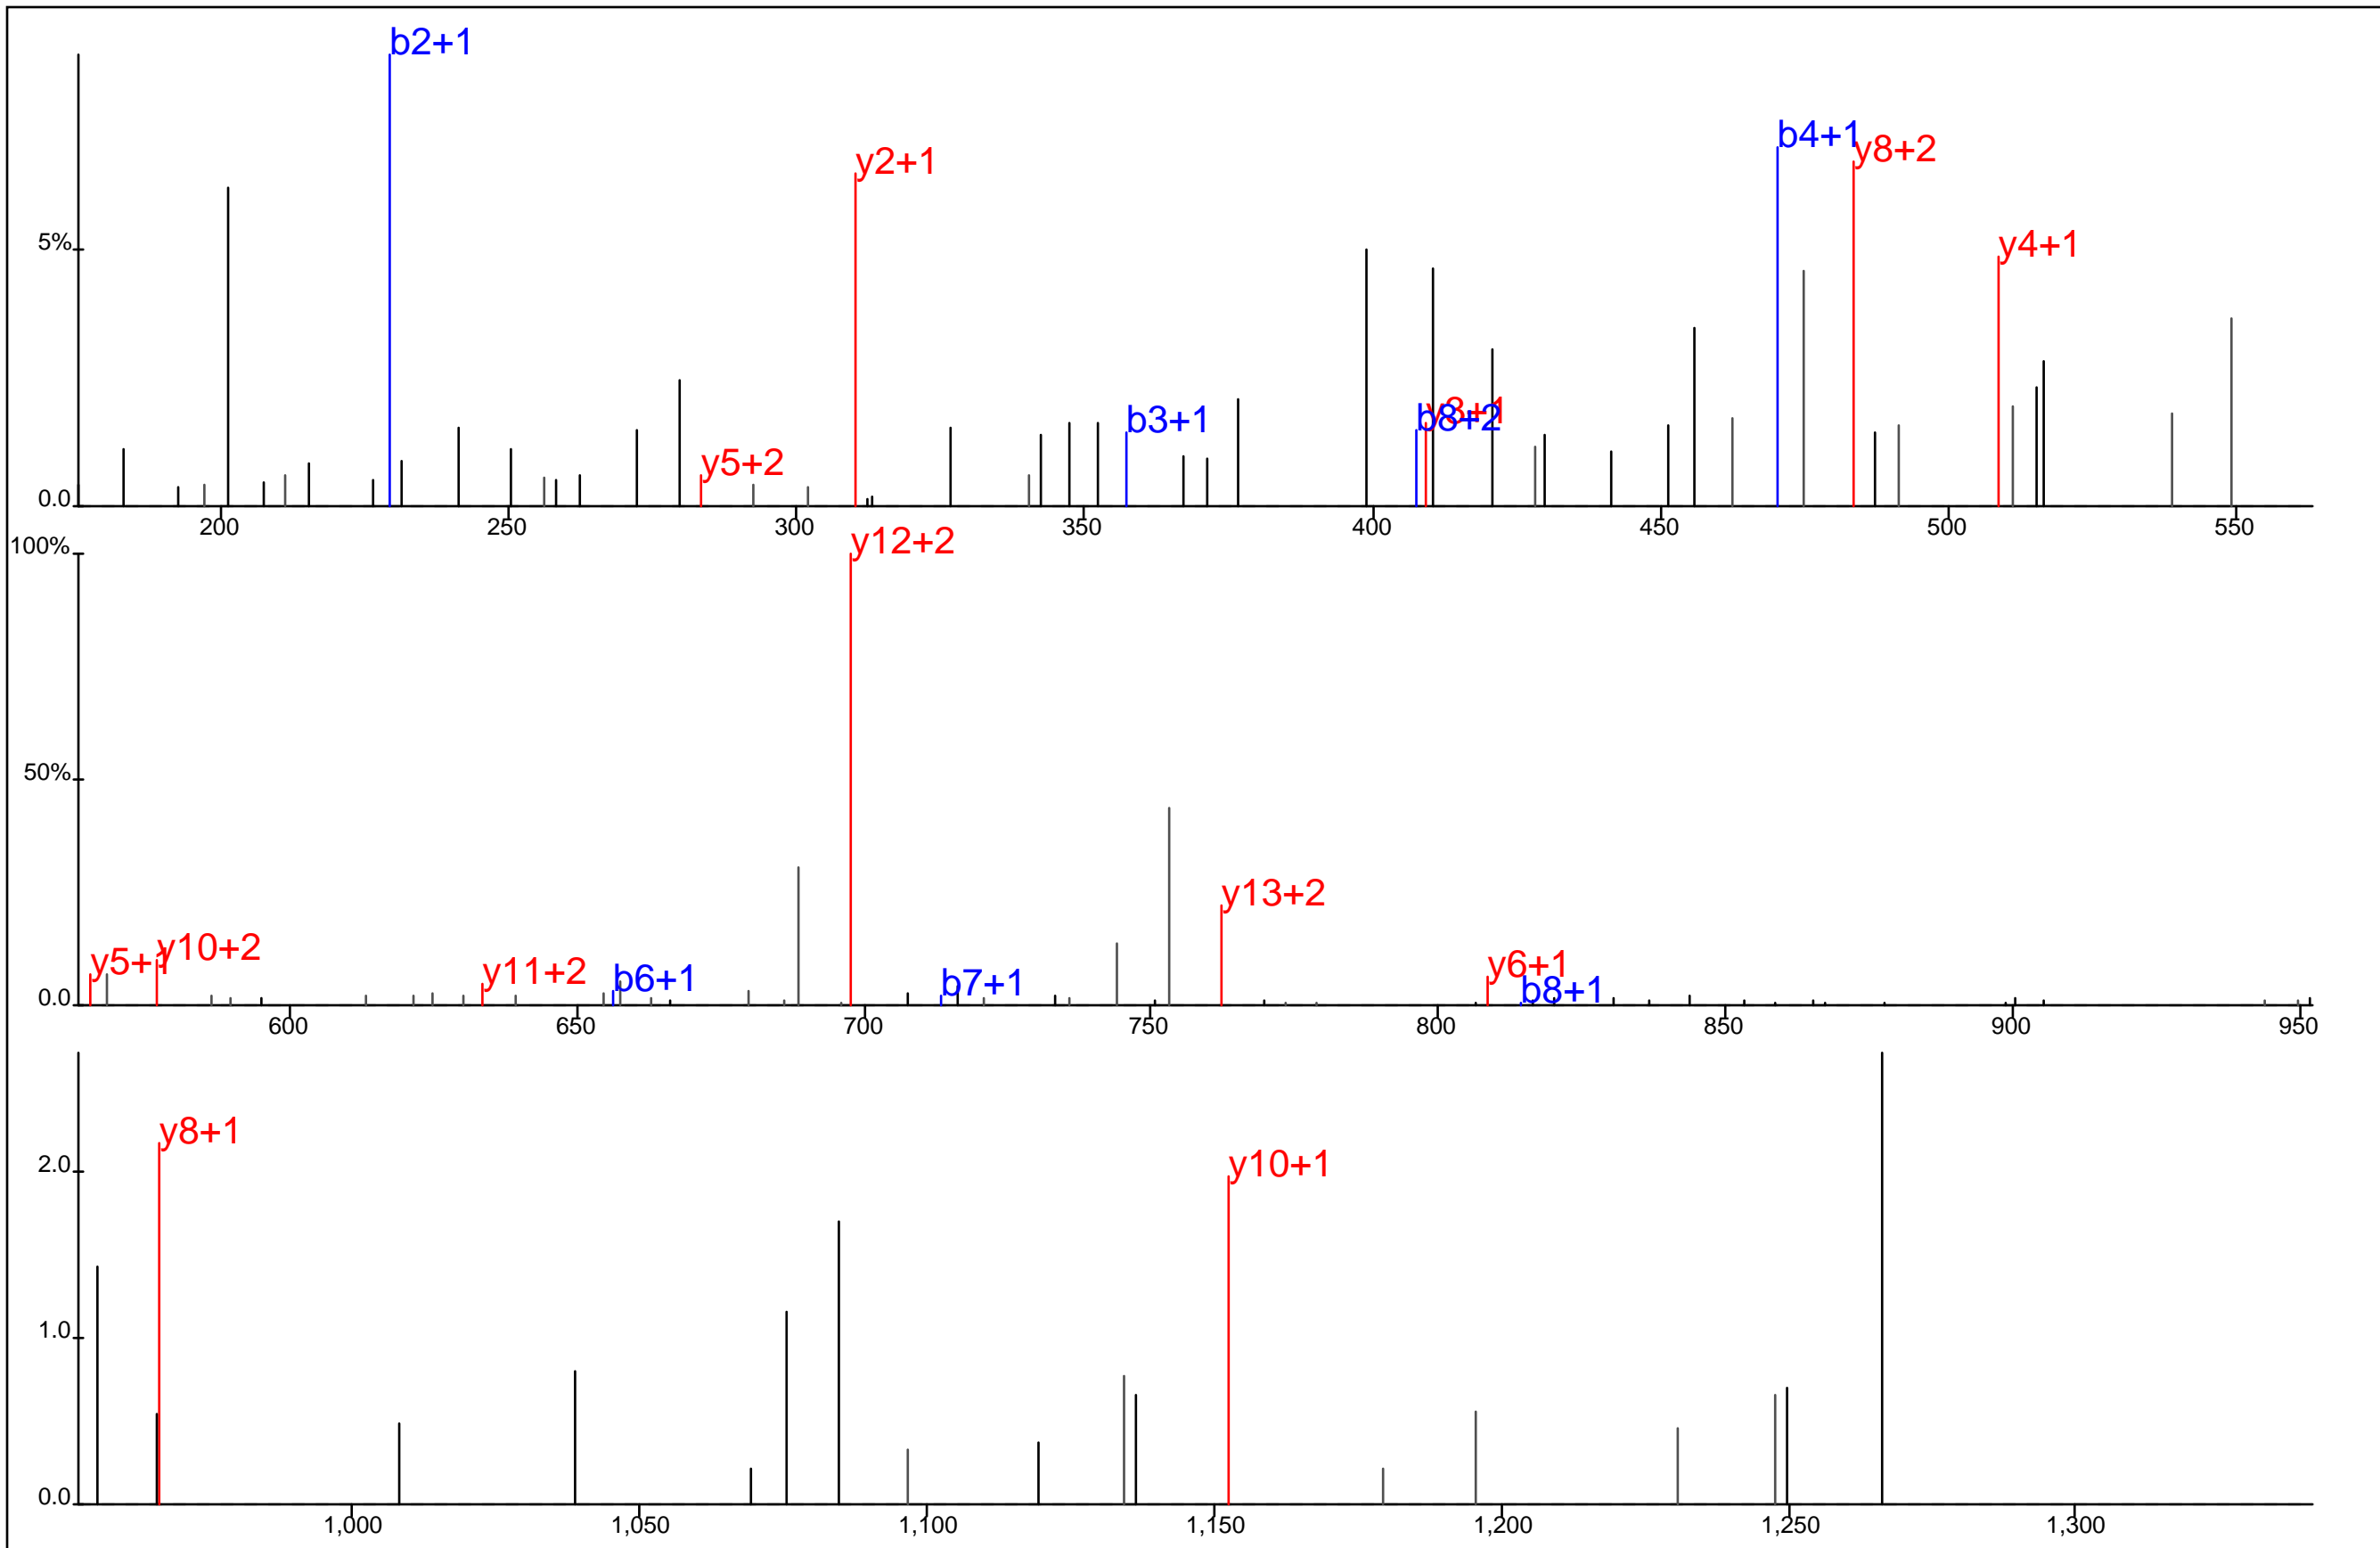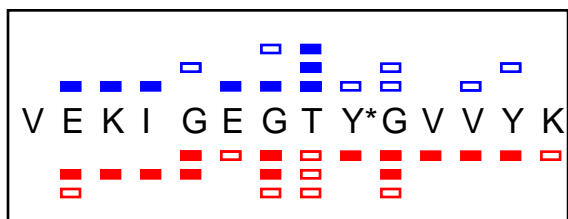

Protein Name: Cyclin dependent kinase 2  
 gi Accession: 0  
 Precursor Mass: 541.2666+3  
 Delta Mass: 1.263 ppm  
 XCorr: 32.58

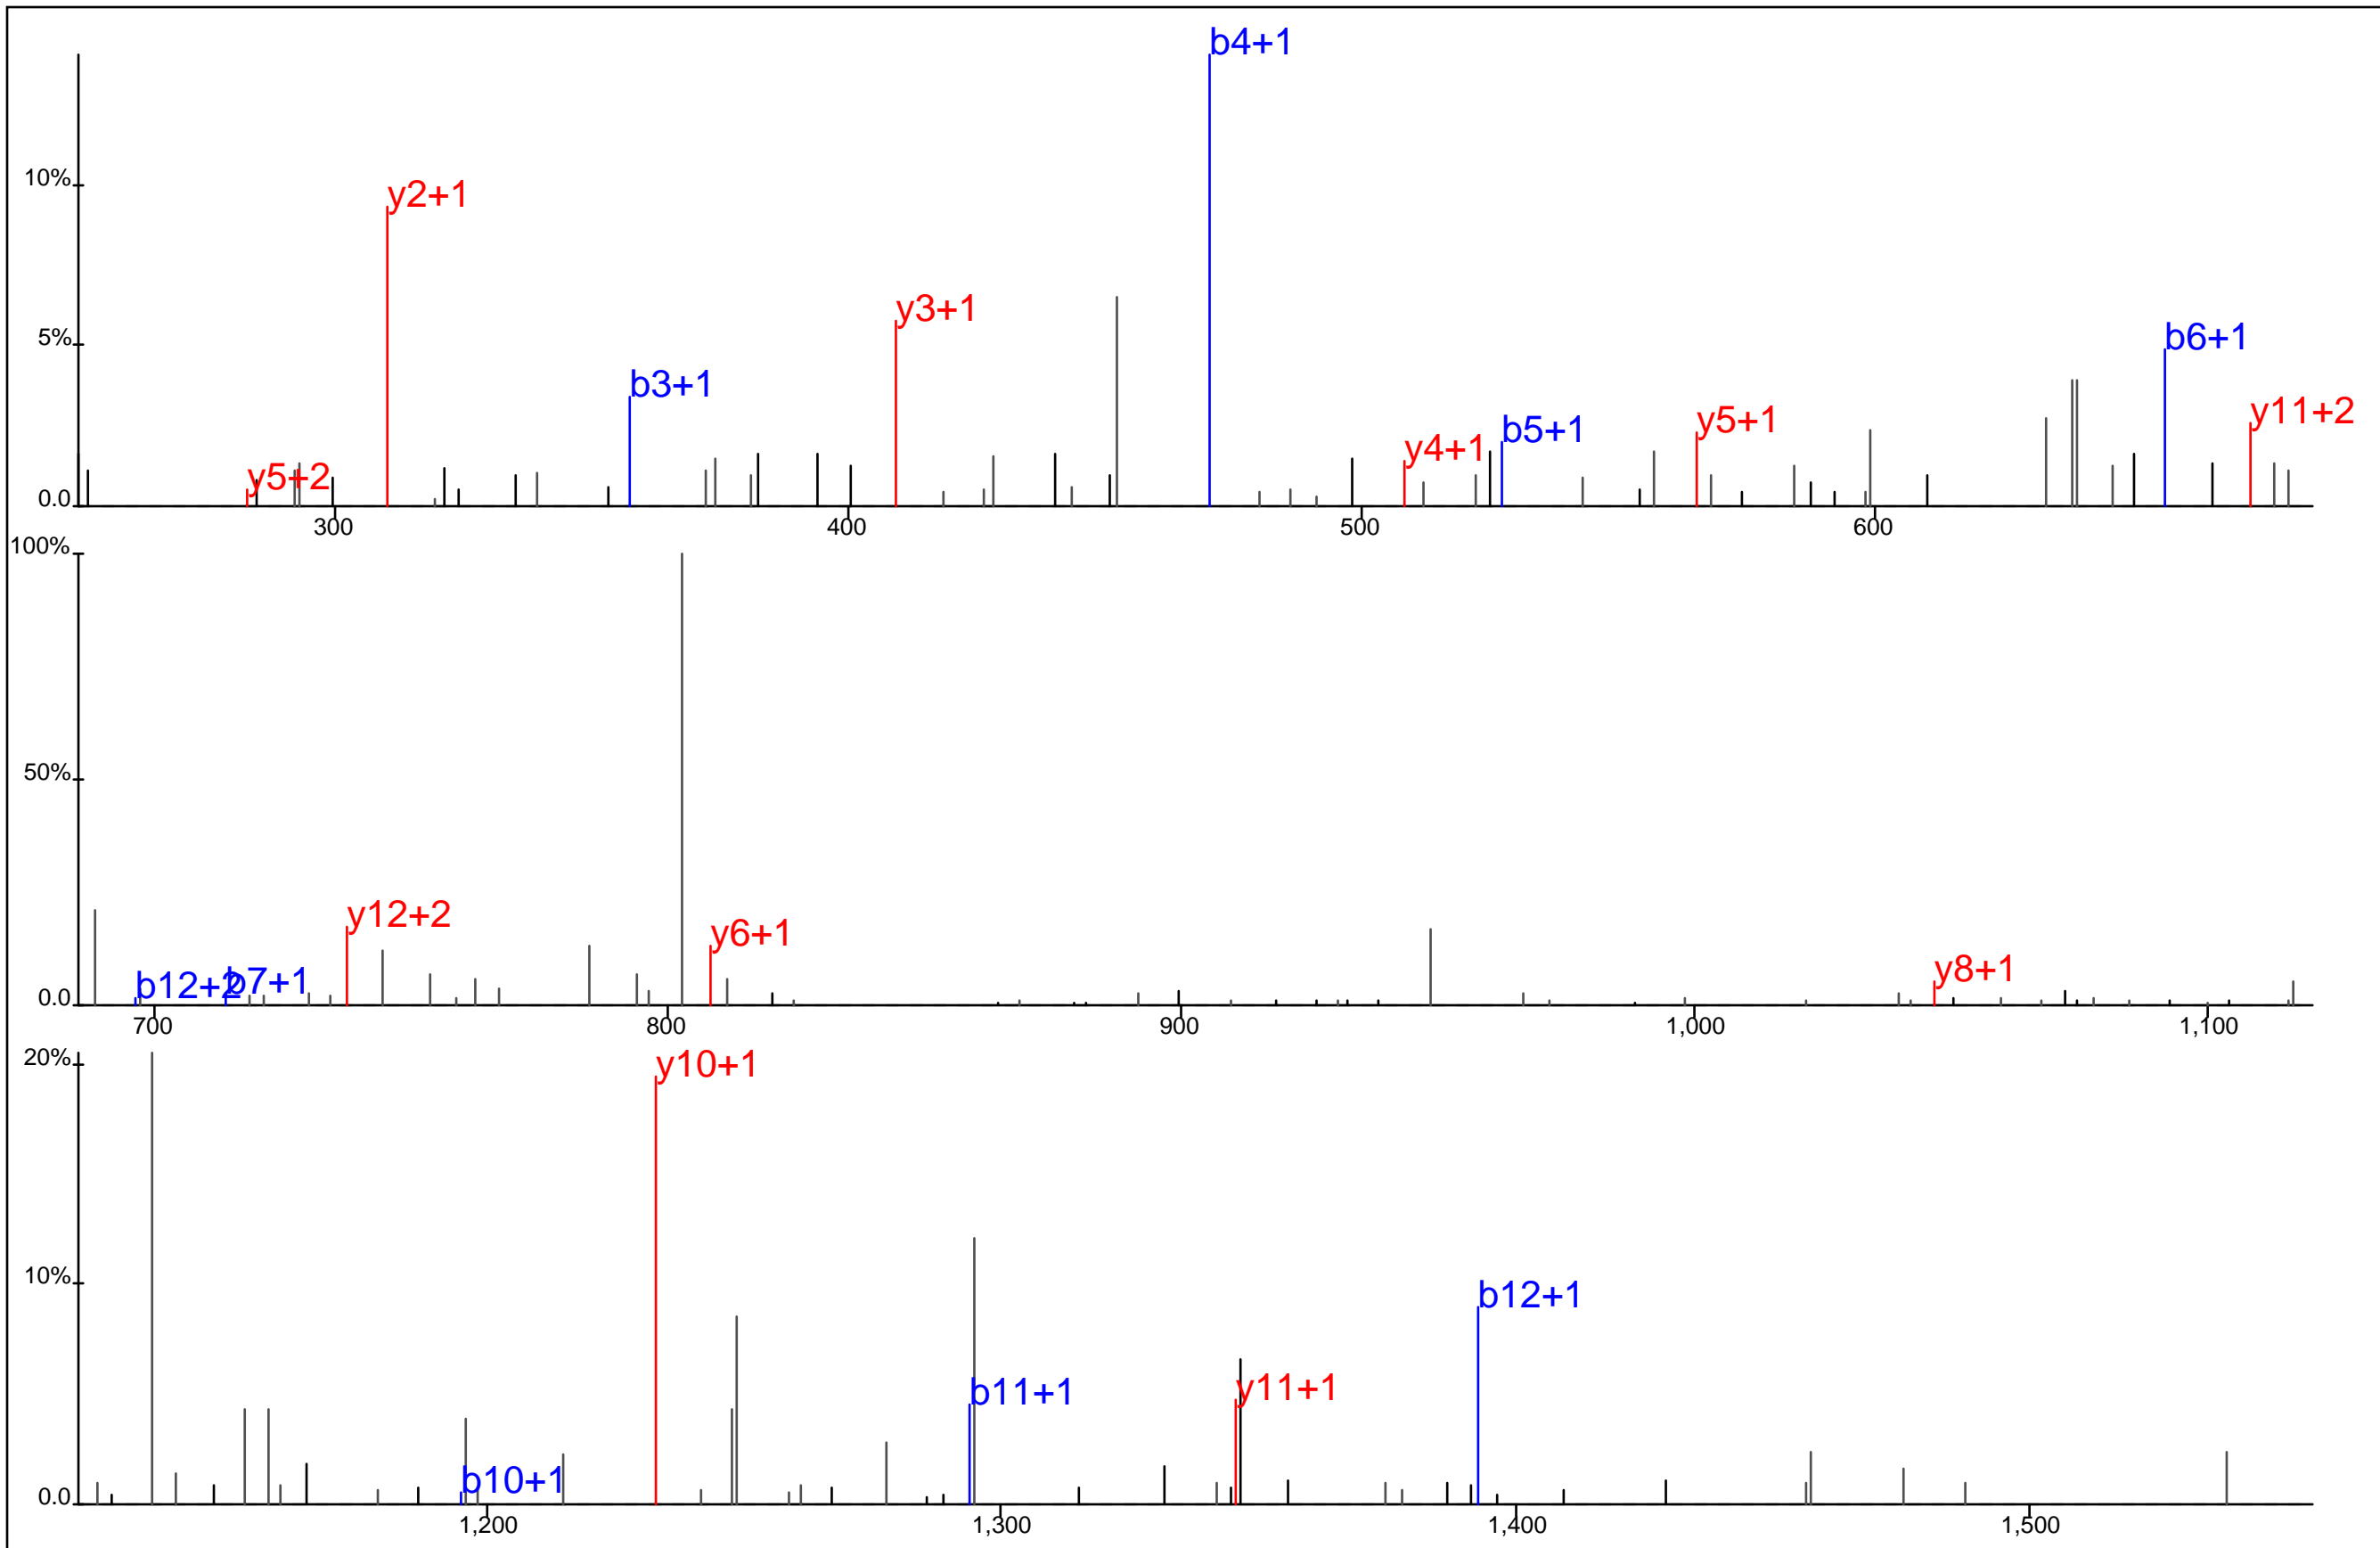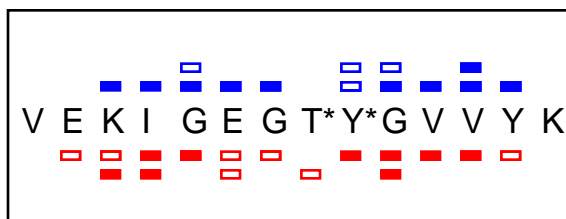

Protein Name: Cyclin dependent kinase 2  
 gi Accession: 0  
 Precursor Mass: 851.3802+2  
 Delta Mass: 0.241 ppm  
 XCorr: 43.37

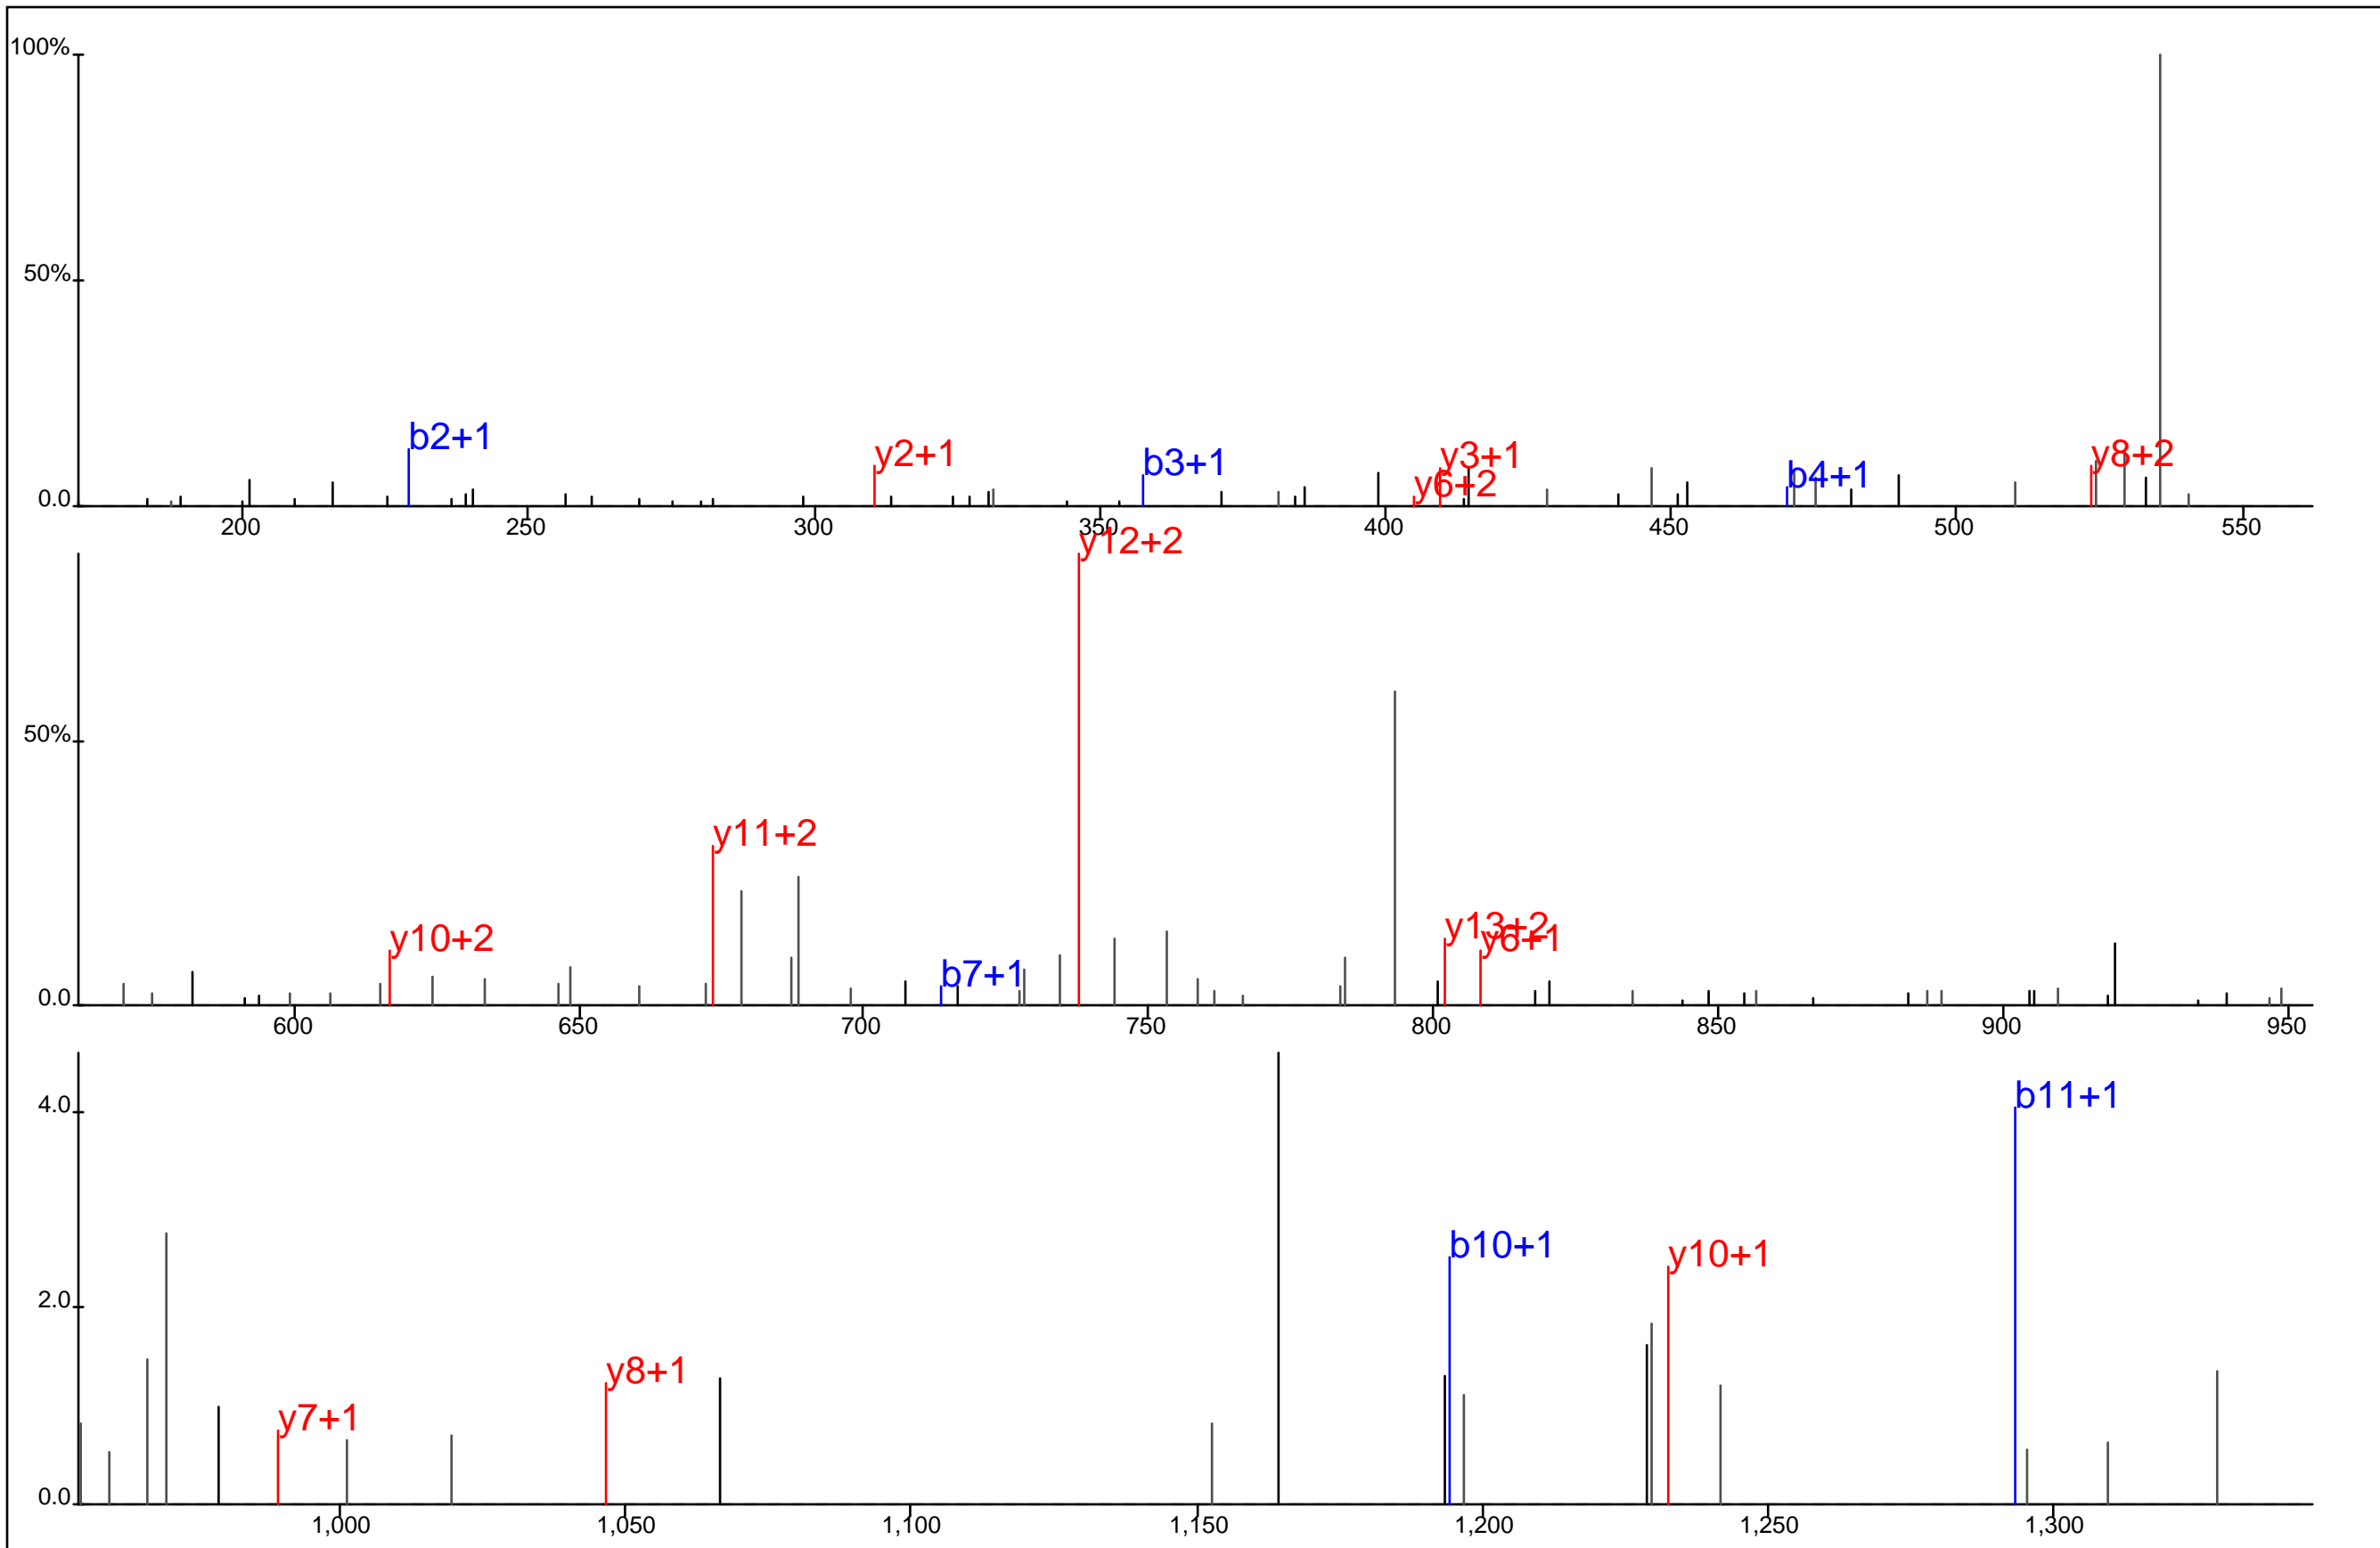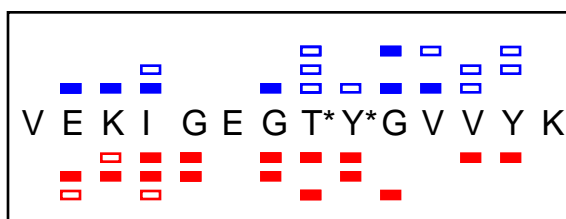

Protein Name: Cyclin dependent kinase 2  
 gi Accession: 0  
 Precursor Mass: 567.9213+3  
 Delta Mass: 2.472 ppm  
 XCorr: 31.26



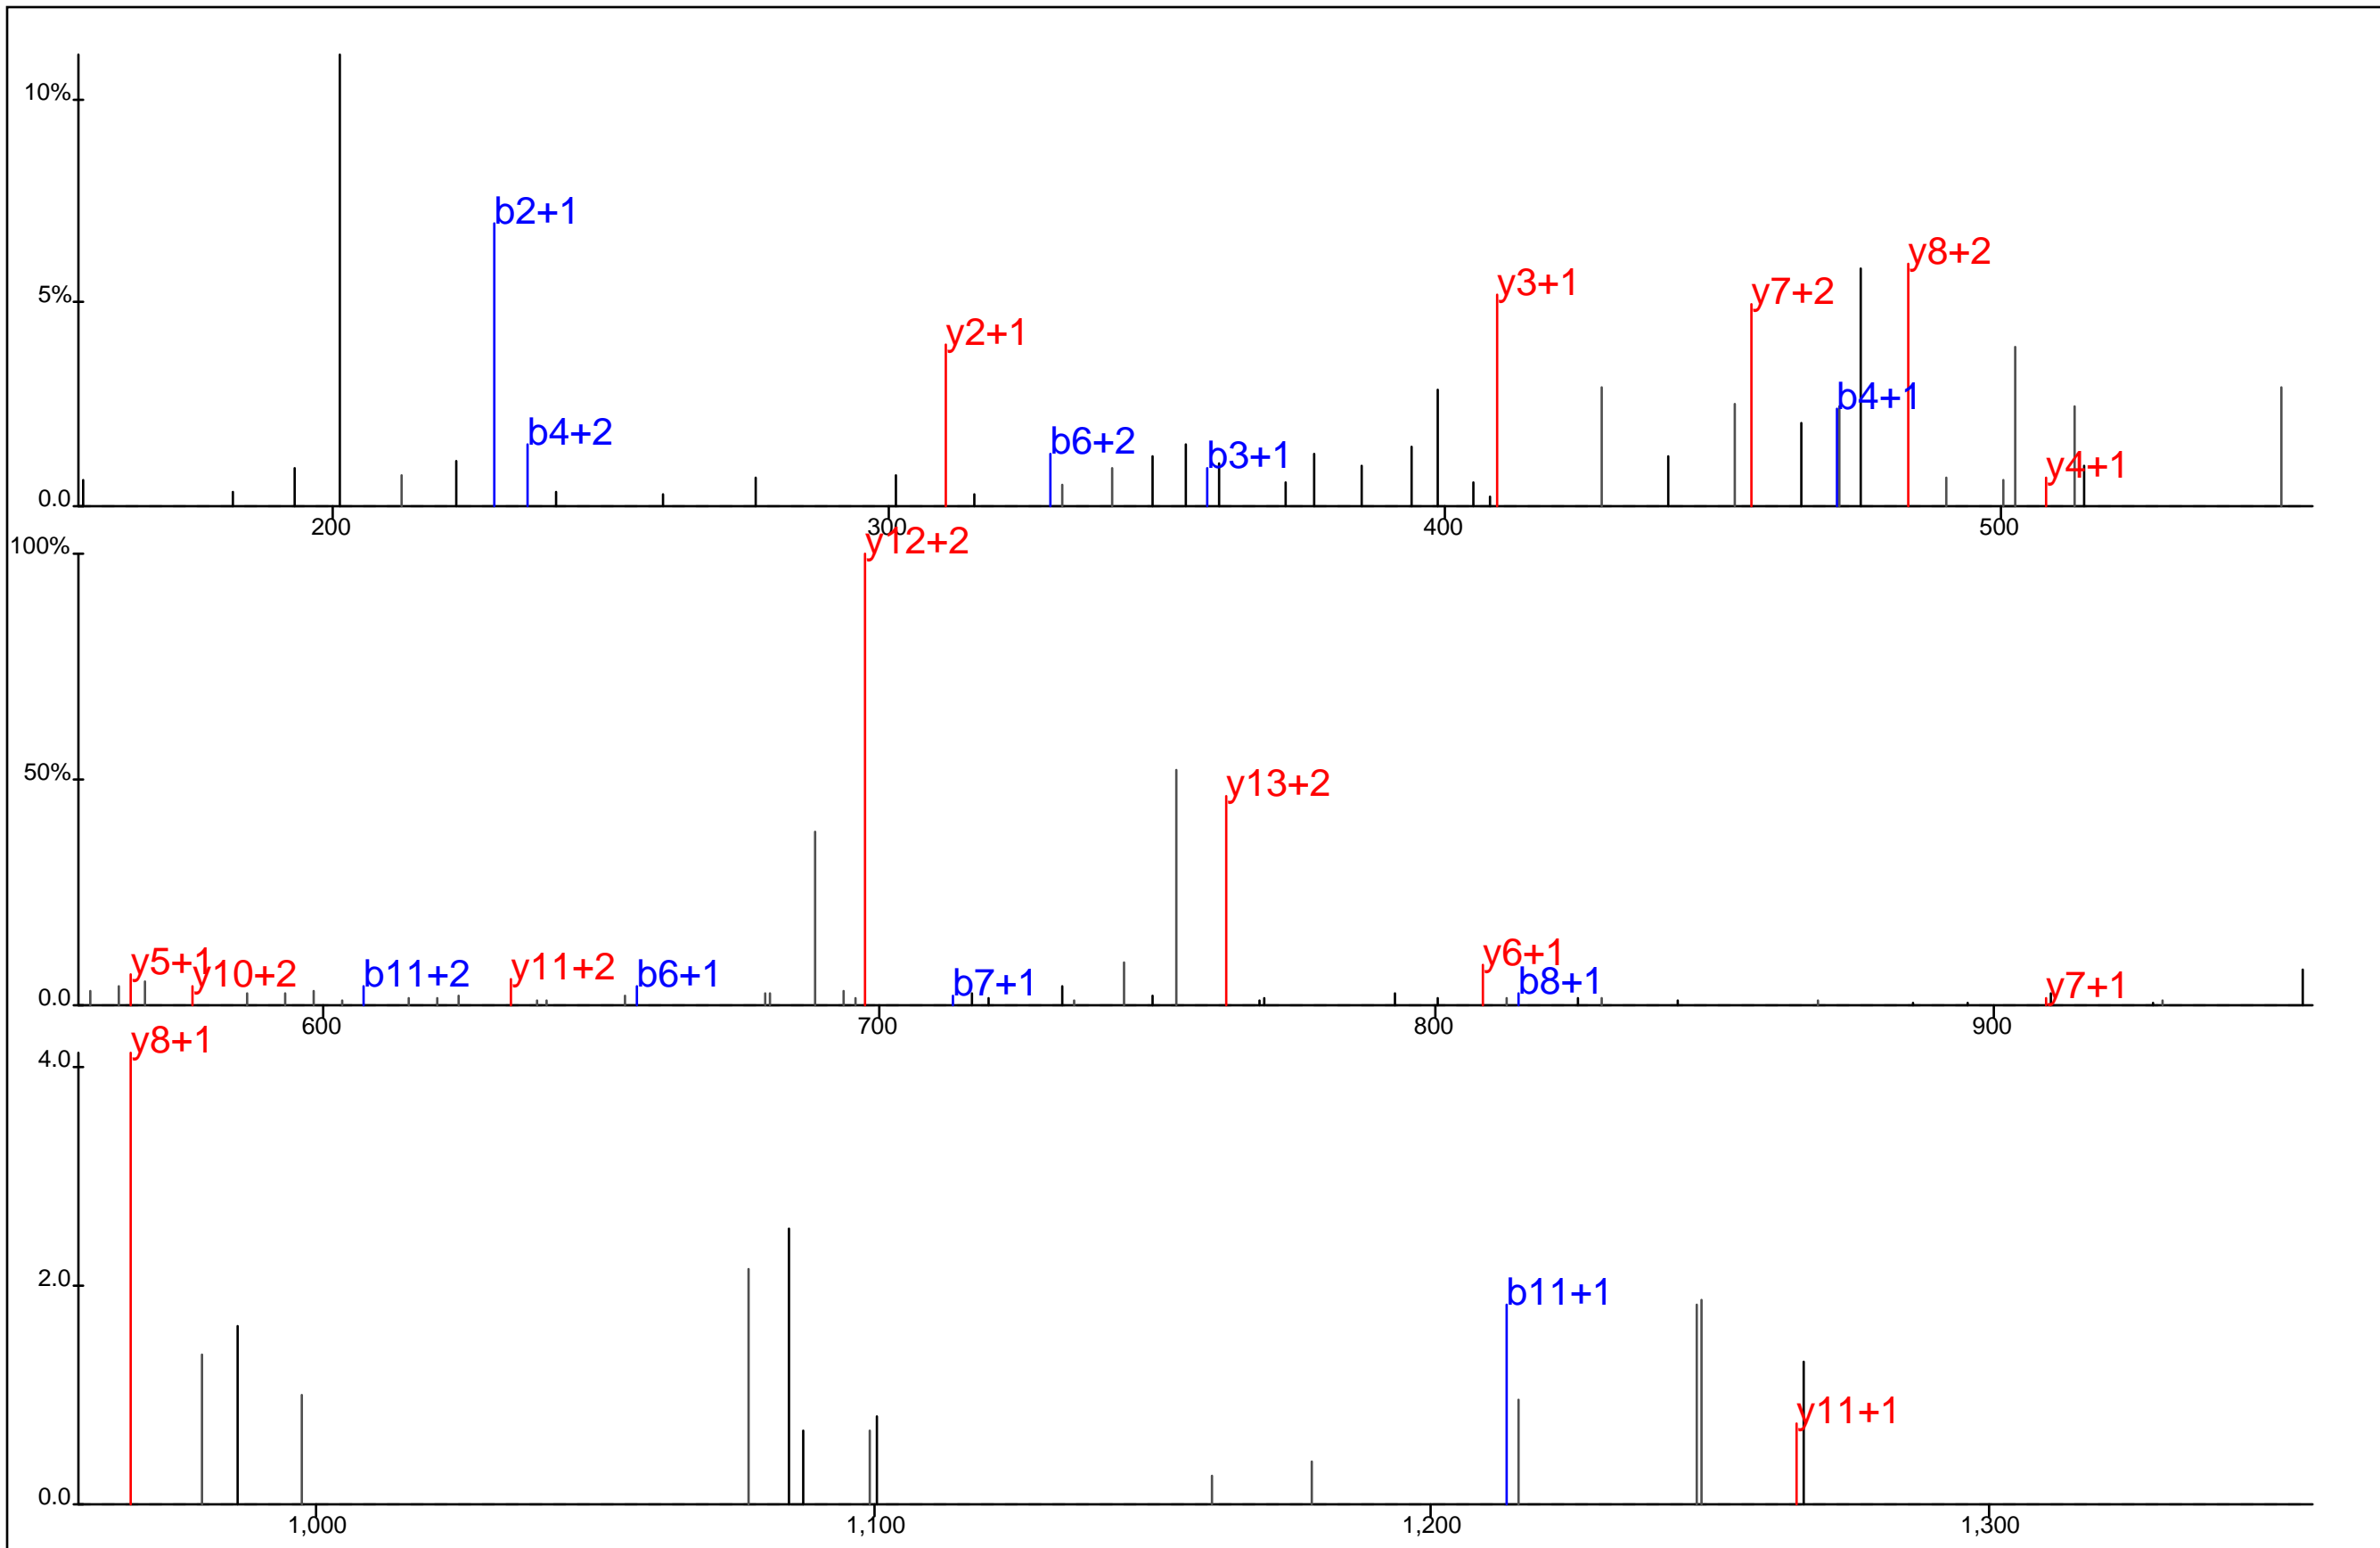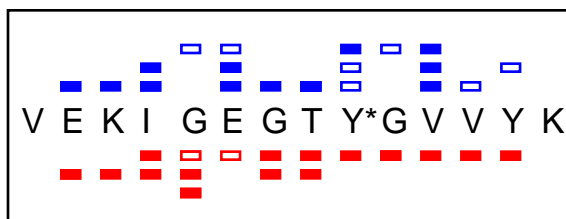

Protein Name: Cyclin dependent kinase 2  
 gi Accession: 0  
 Precursor Mass: 541.2675+3  
 Delta Mass: 0.317 ppm  
 XCorr: 47.13

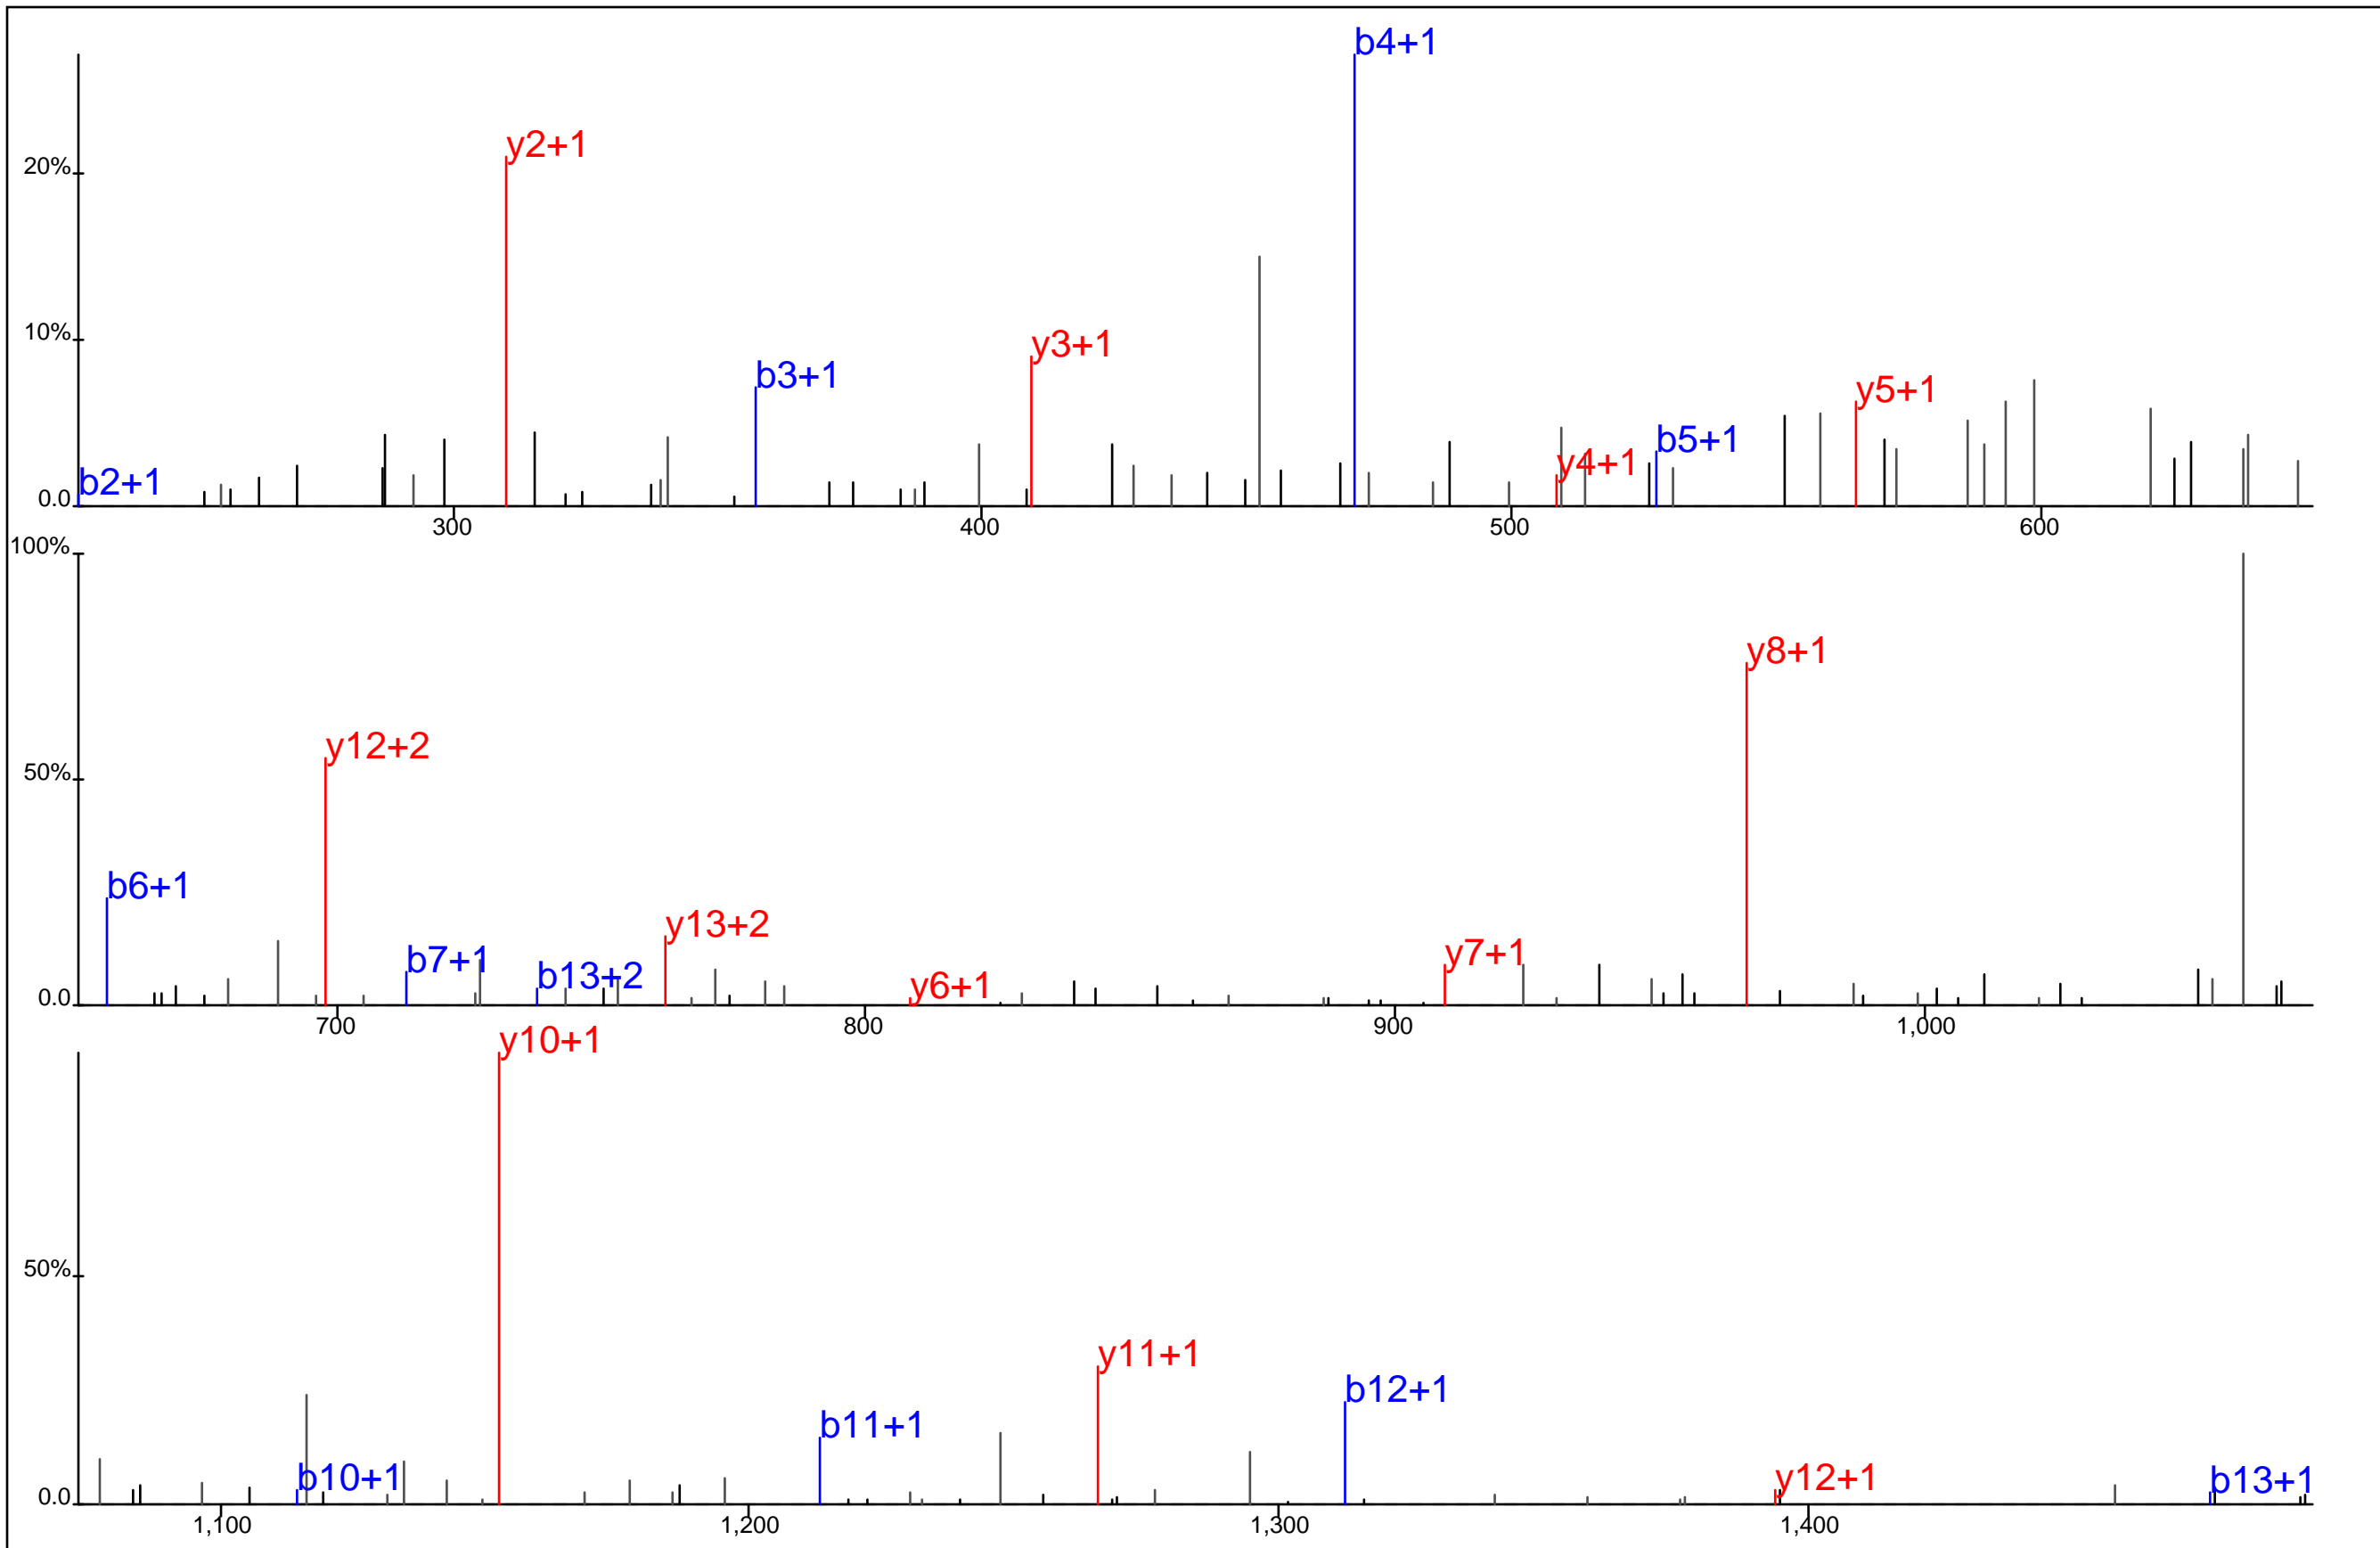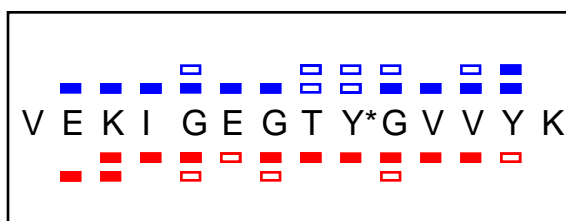

Protein Name: Cyclin dependent kinase 2  
 gi Accession: 0  
 Precursor Mass: 811.3990+2  
 Delta Mass: 2.094 ppm  
 XCorr: 56.22



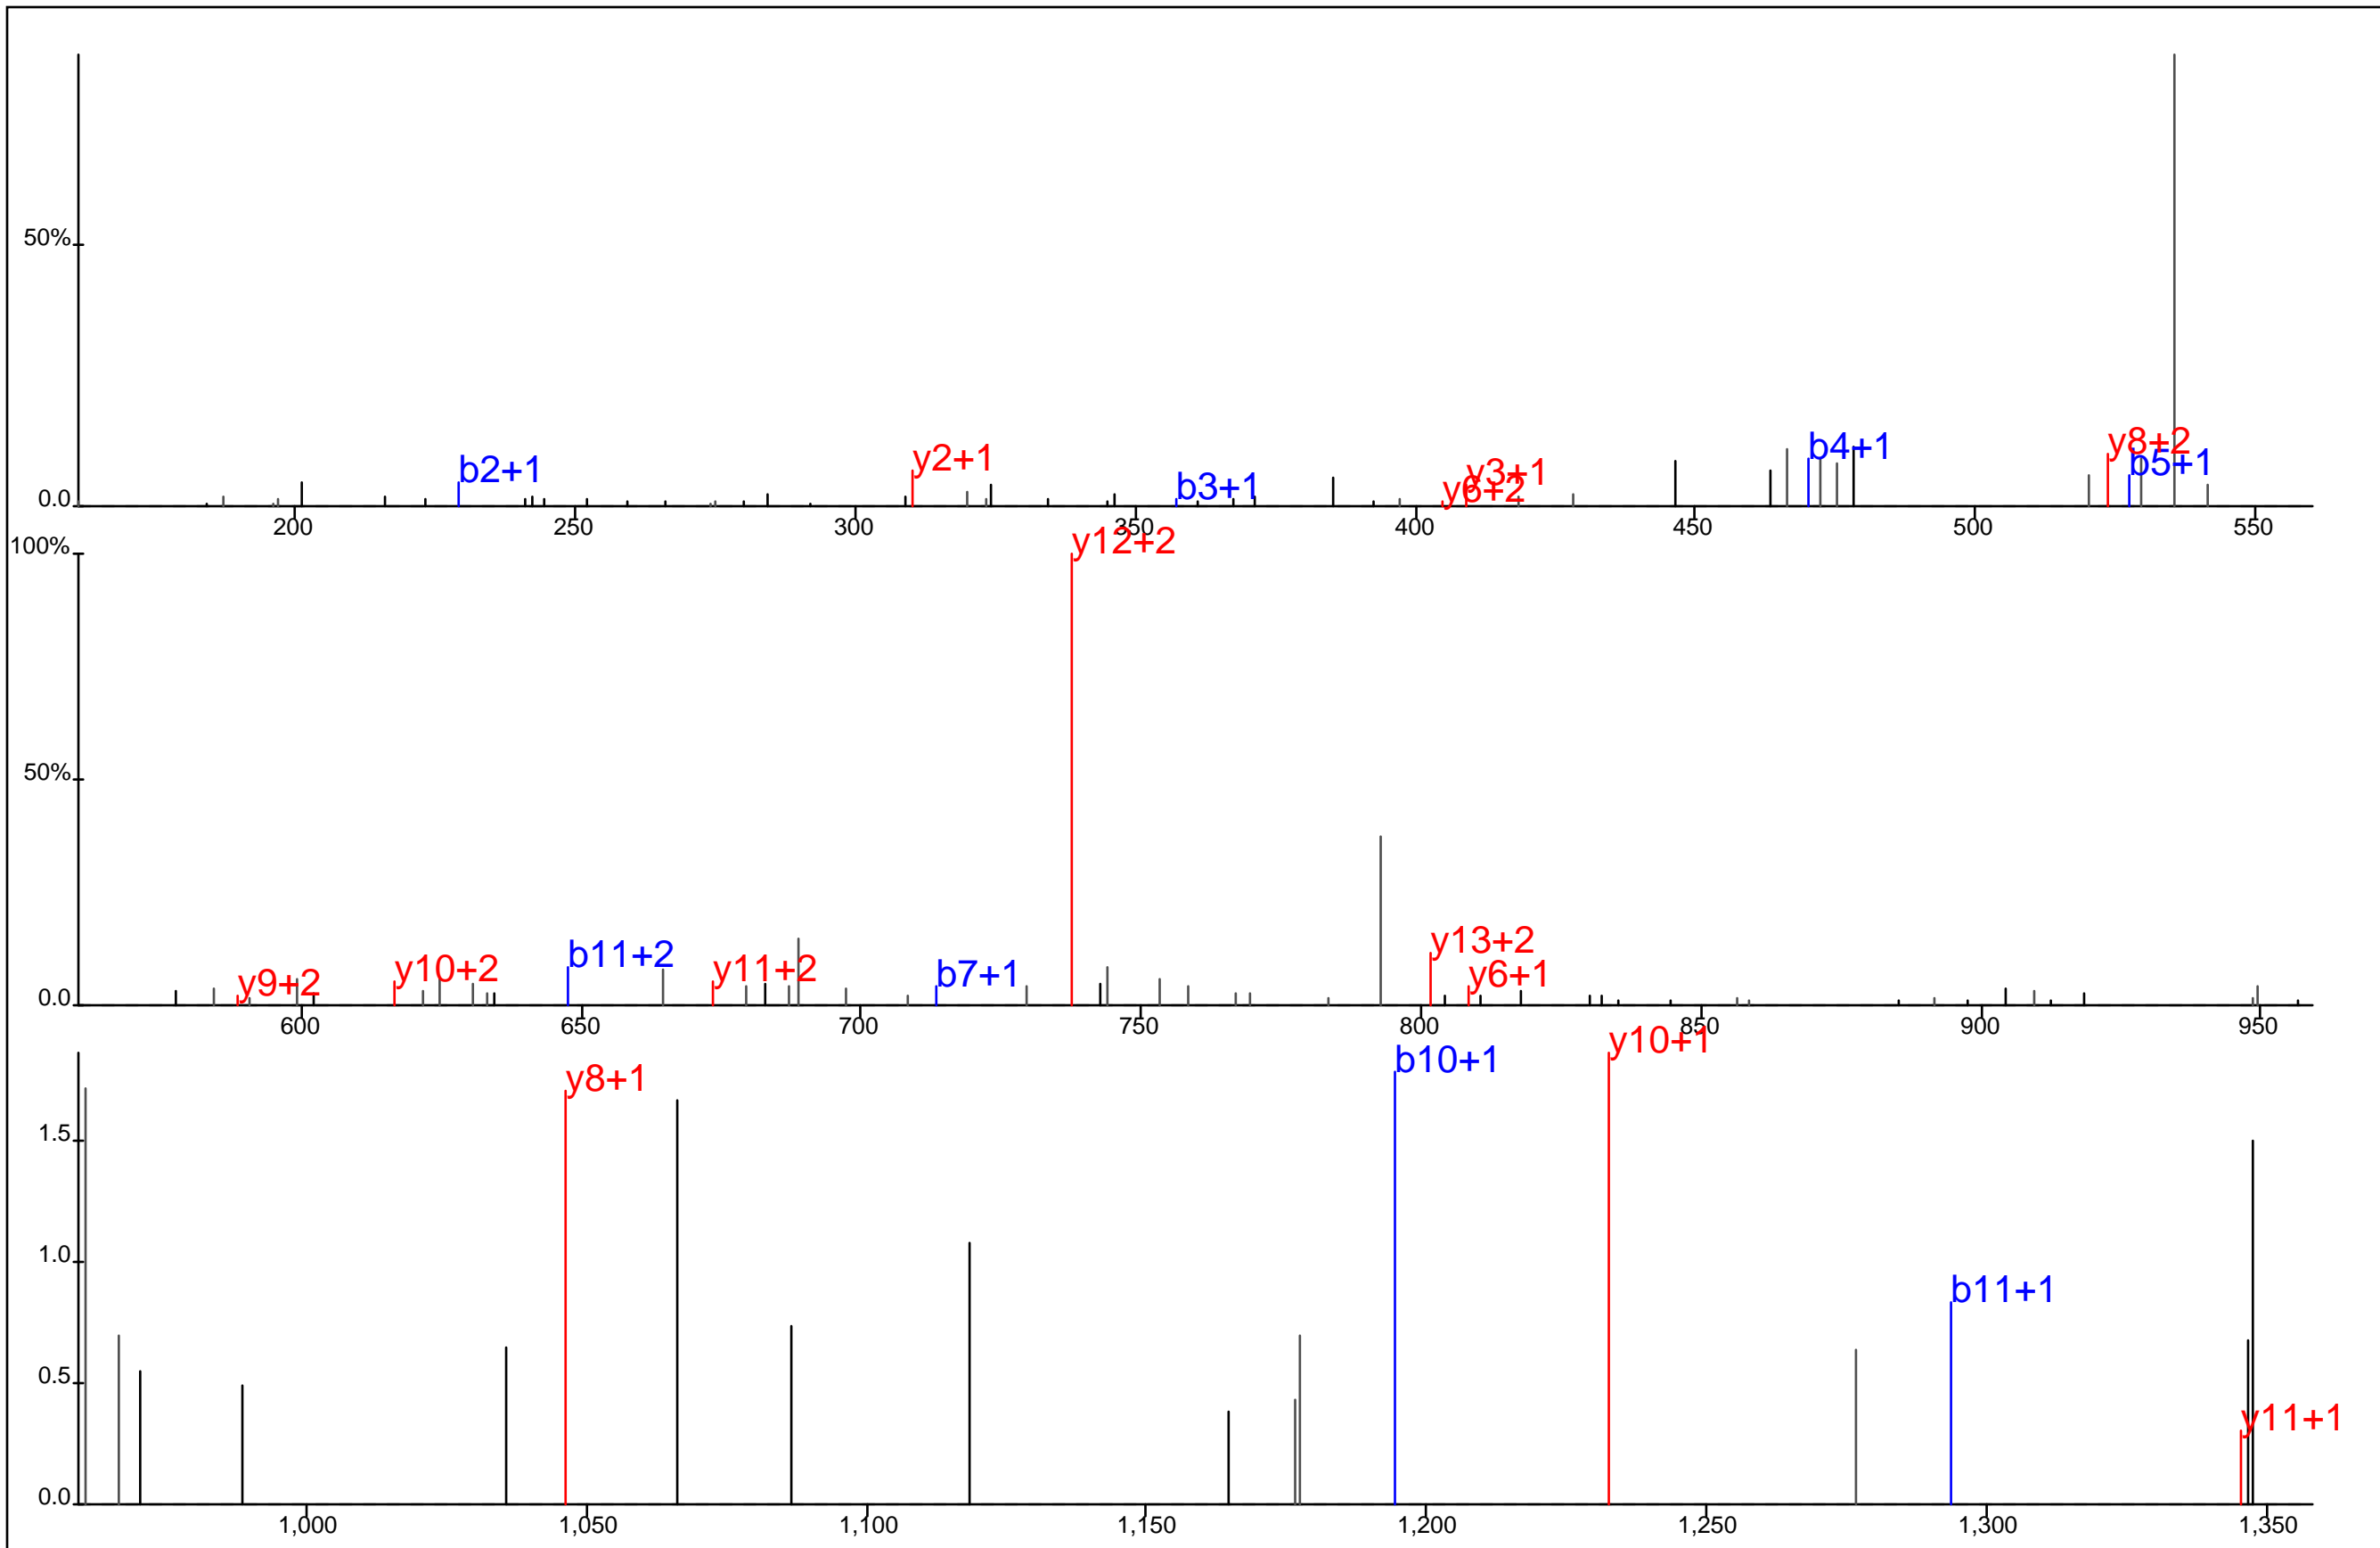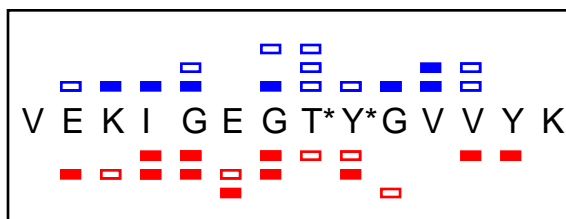

Protein Name: Cyclin dependent kinase 2  
 gi Accession: 0  
 Precursor Mass: 567.9225+3  
 Delta Mass: 0.428 ppm  
 XCorr: 21.26

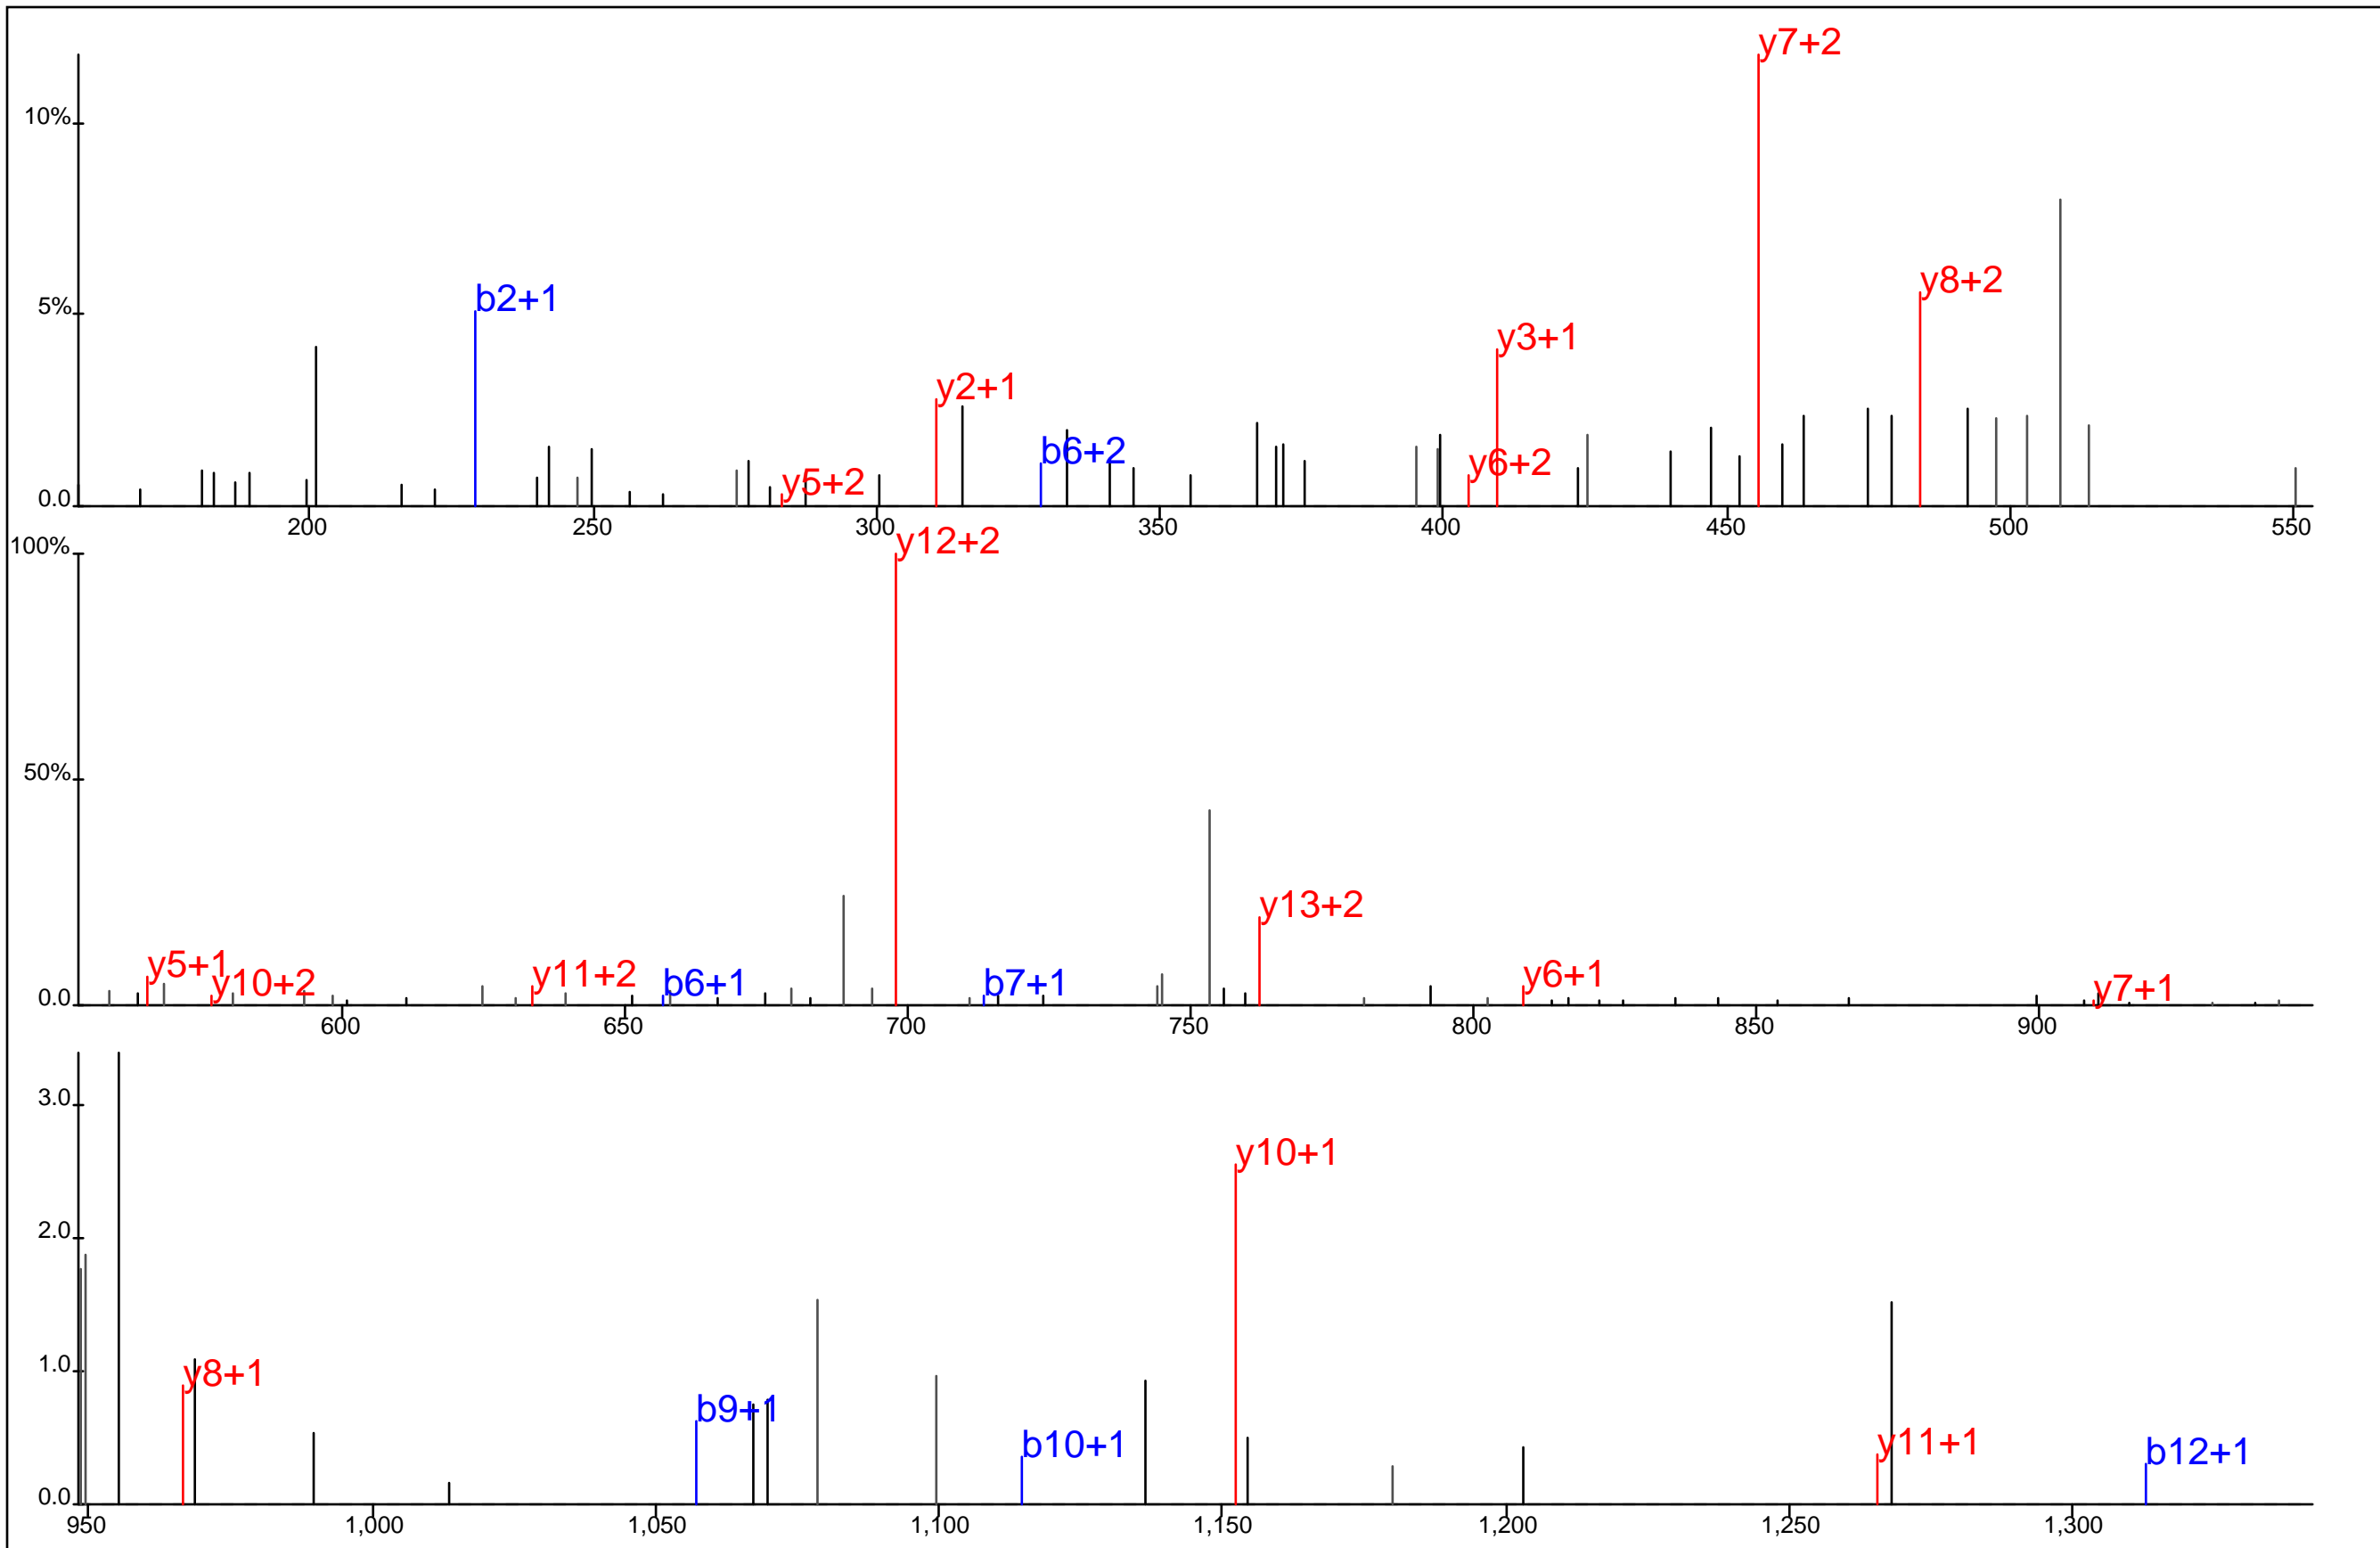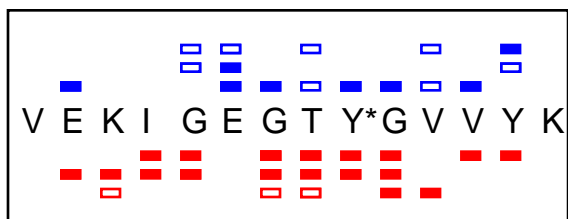

Protein Name: Cyclin dependent kinase 2  
 gi Accession: 0  
 Precursor Mass: 541.2671+3  
 Delta Mass: 0.360 ppm  
 XCorr: 42.54

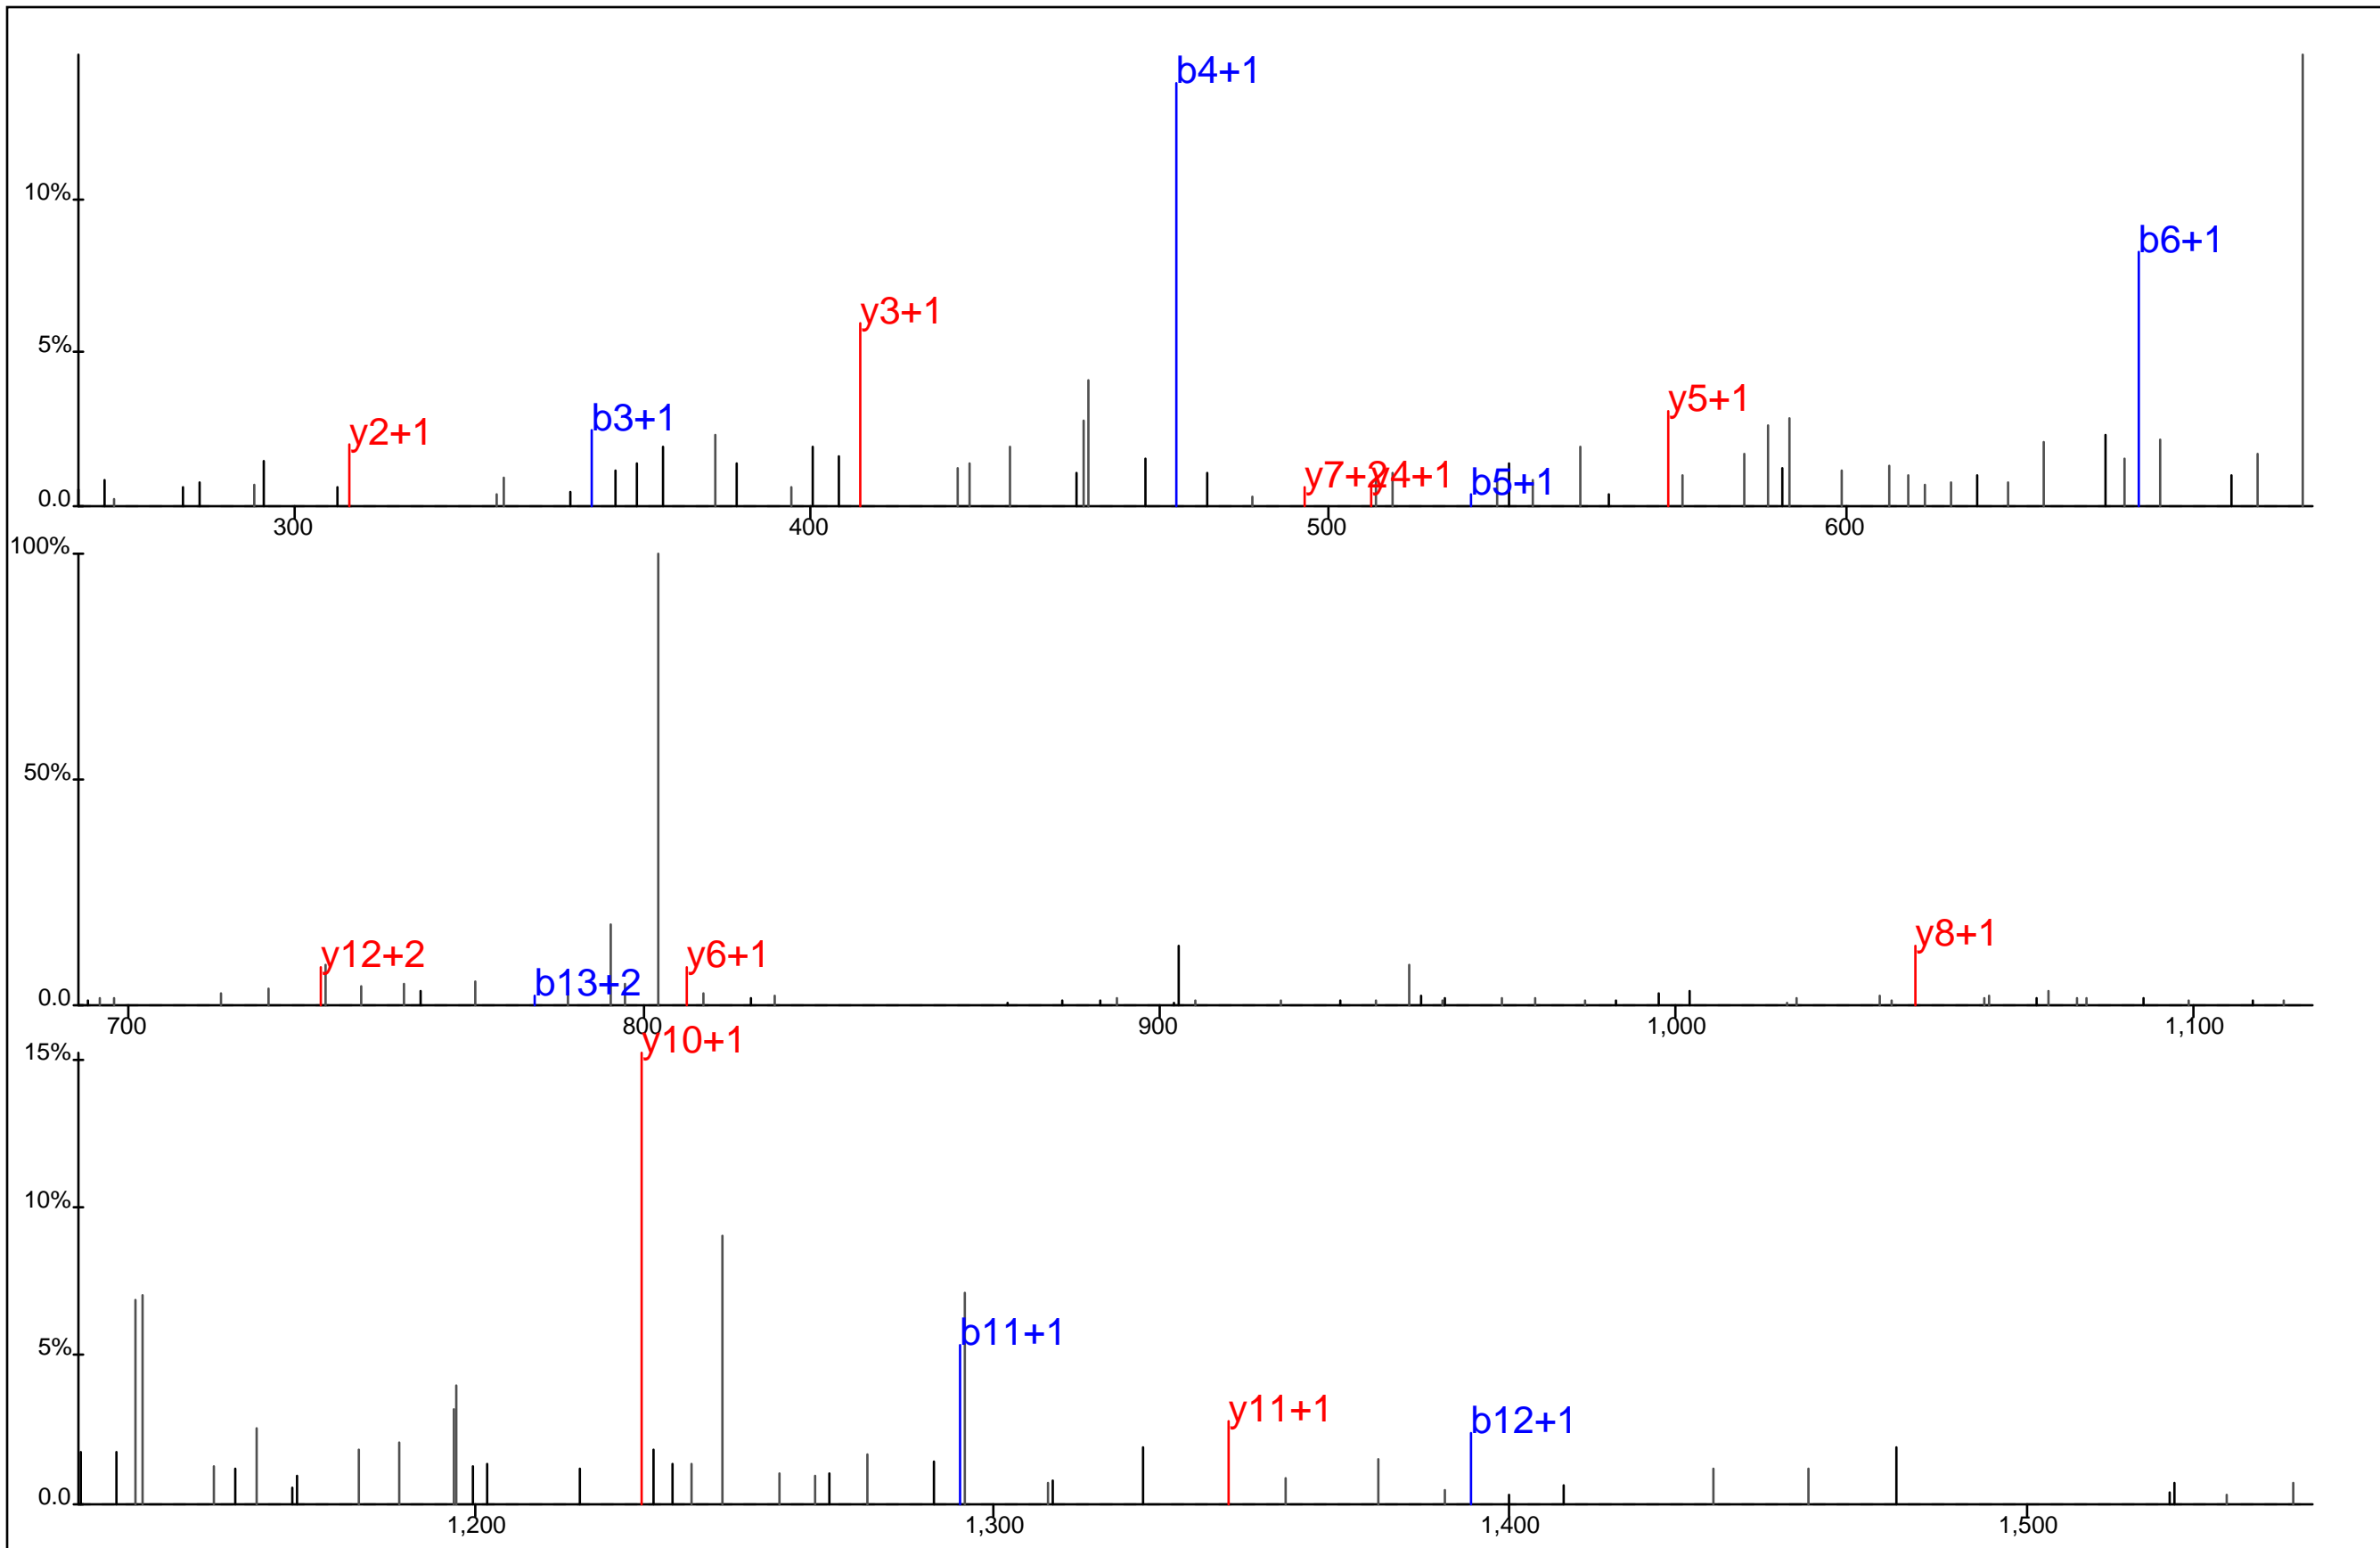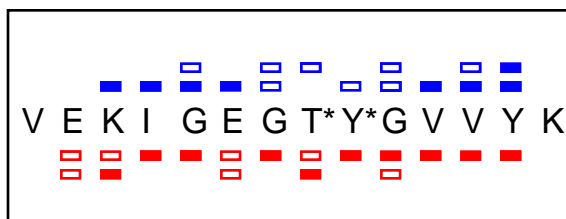

Protein Name: Cyclin dependent kinase 2  
 gi Accession: 0  
 Precursor Mass: 851.3806+2  
 Delta Mass: 0.118 ppm  
 XCorr: 41.82

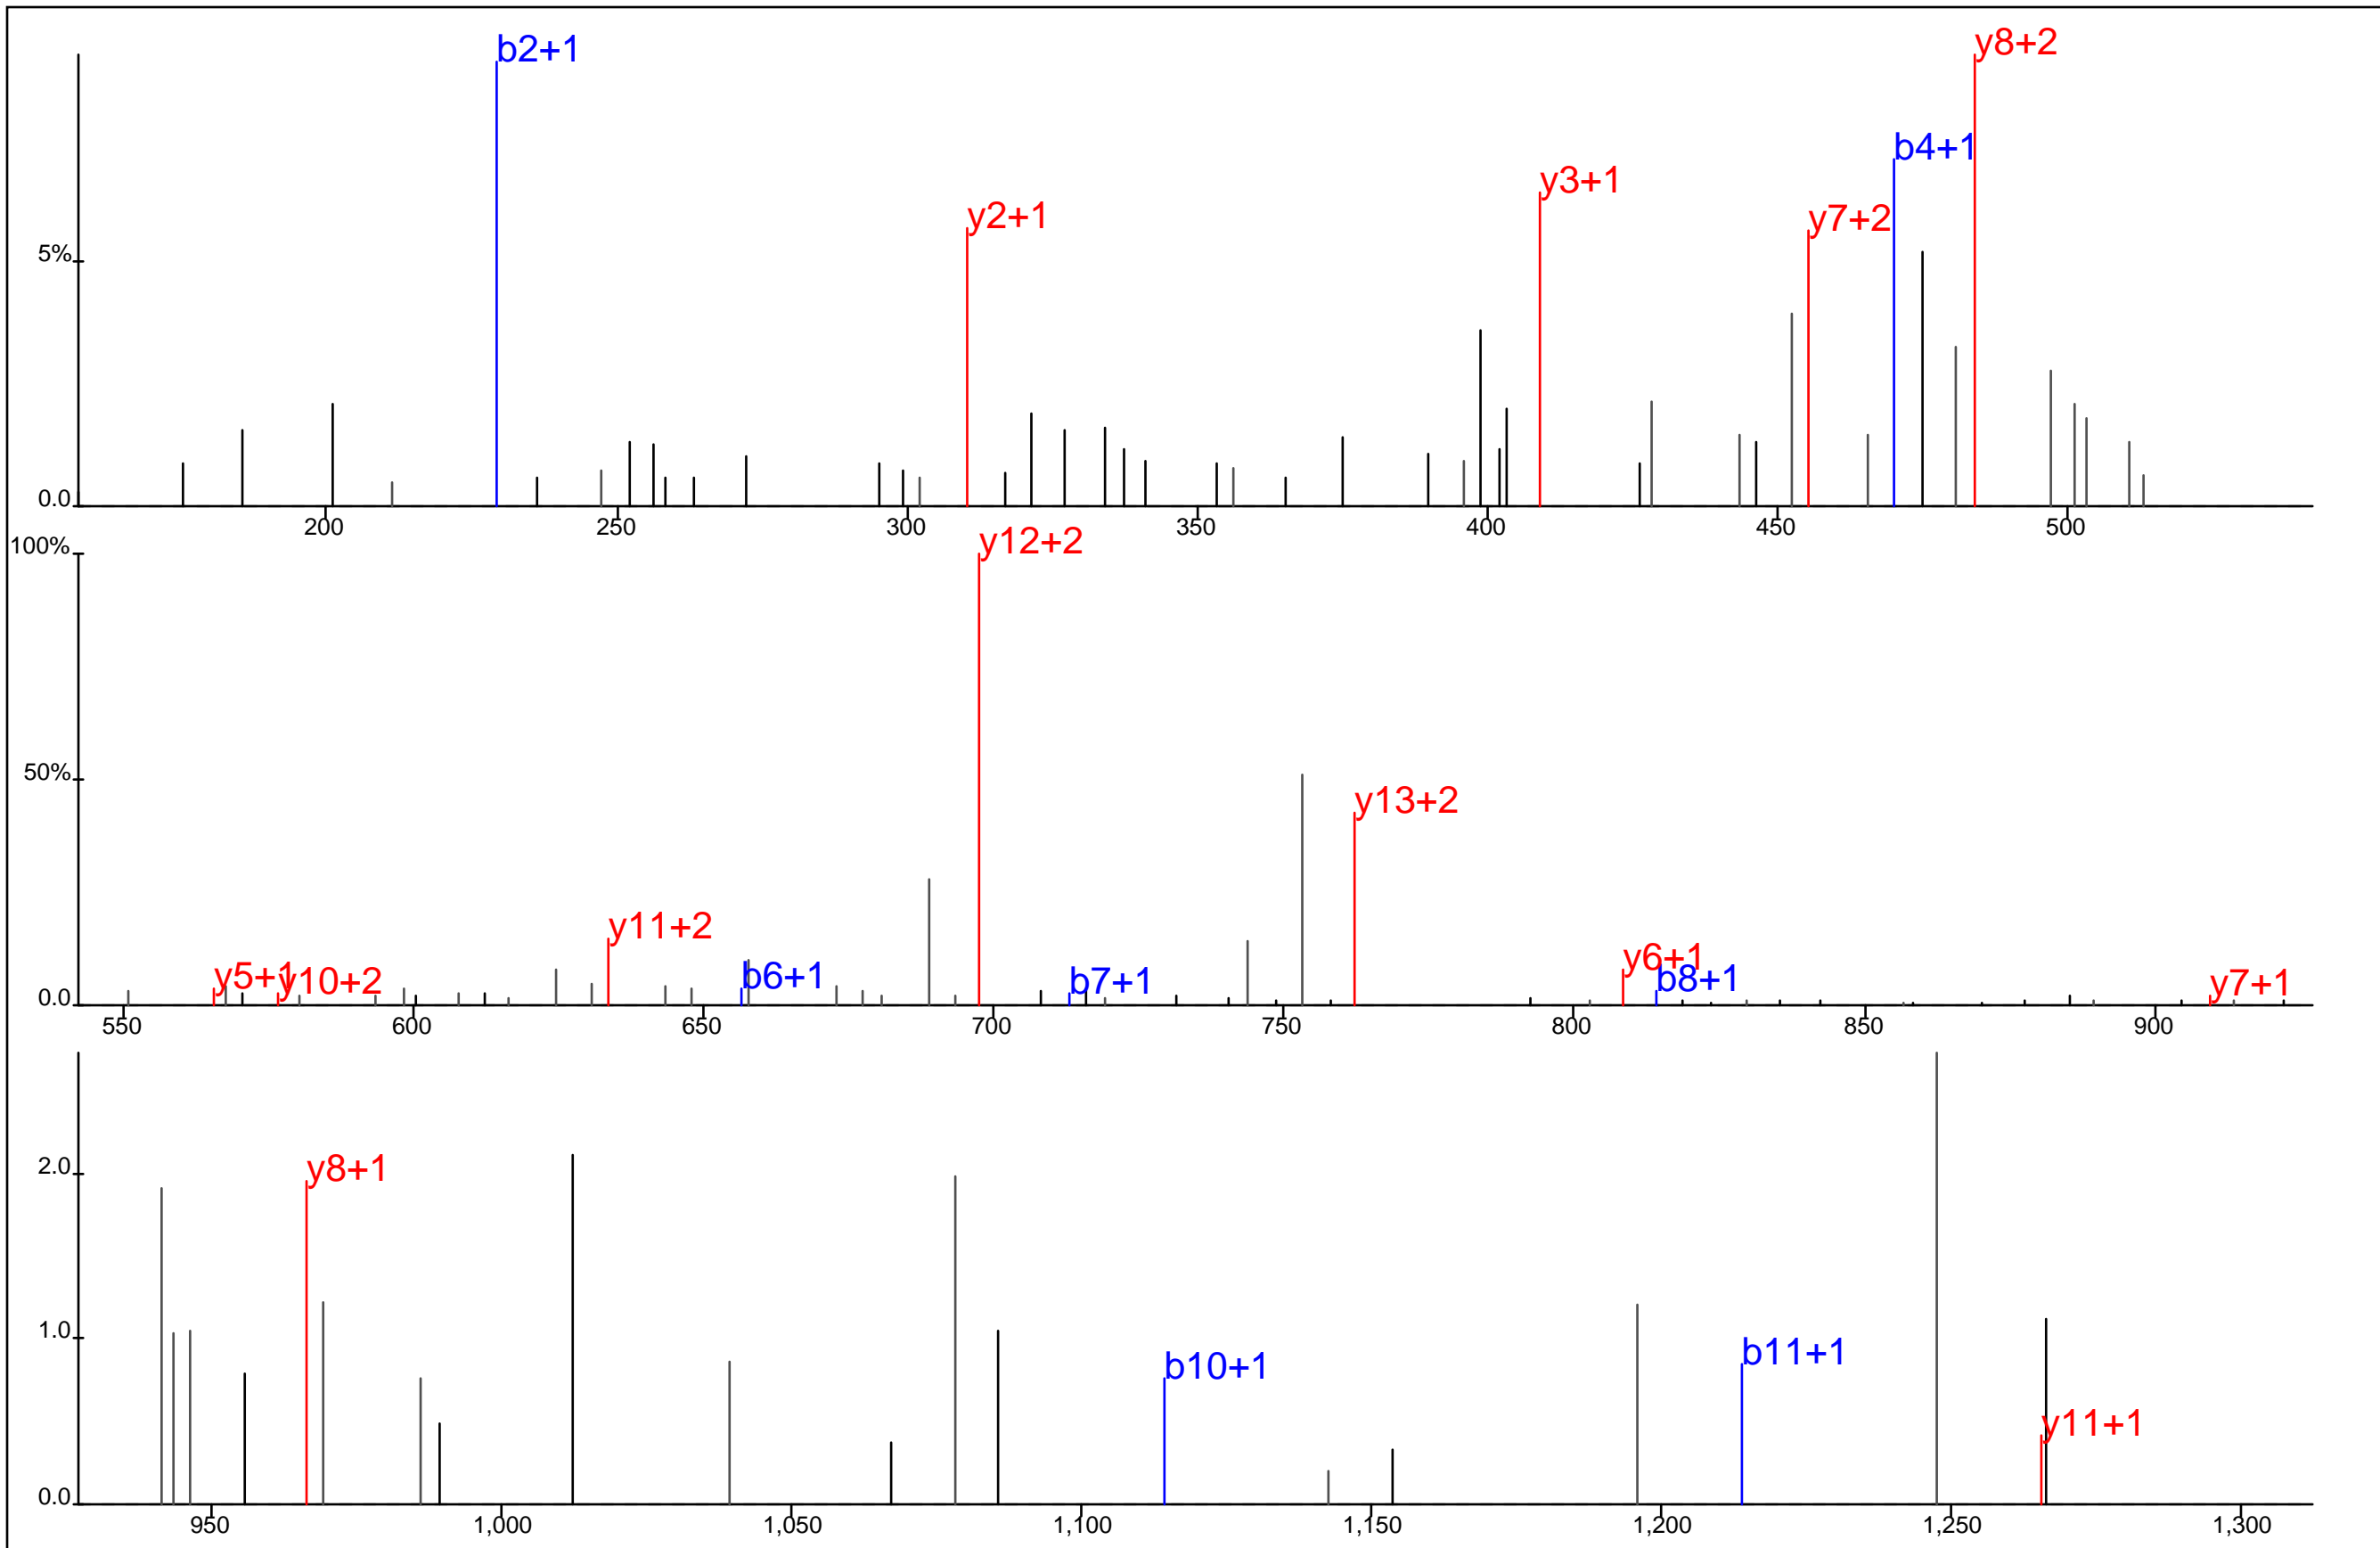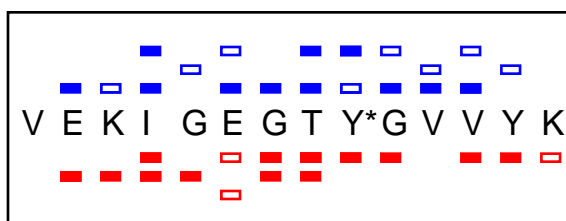

Protein Name: Cyclin dependent kinase 2  
 gi Accession: 0  
 Precursor Mass: 541.2673+3  
 Delta Mass: 0.091 ppm  
 XCorr: 48.57

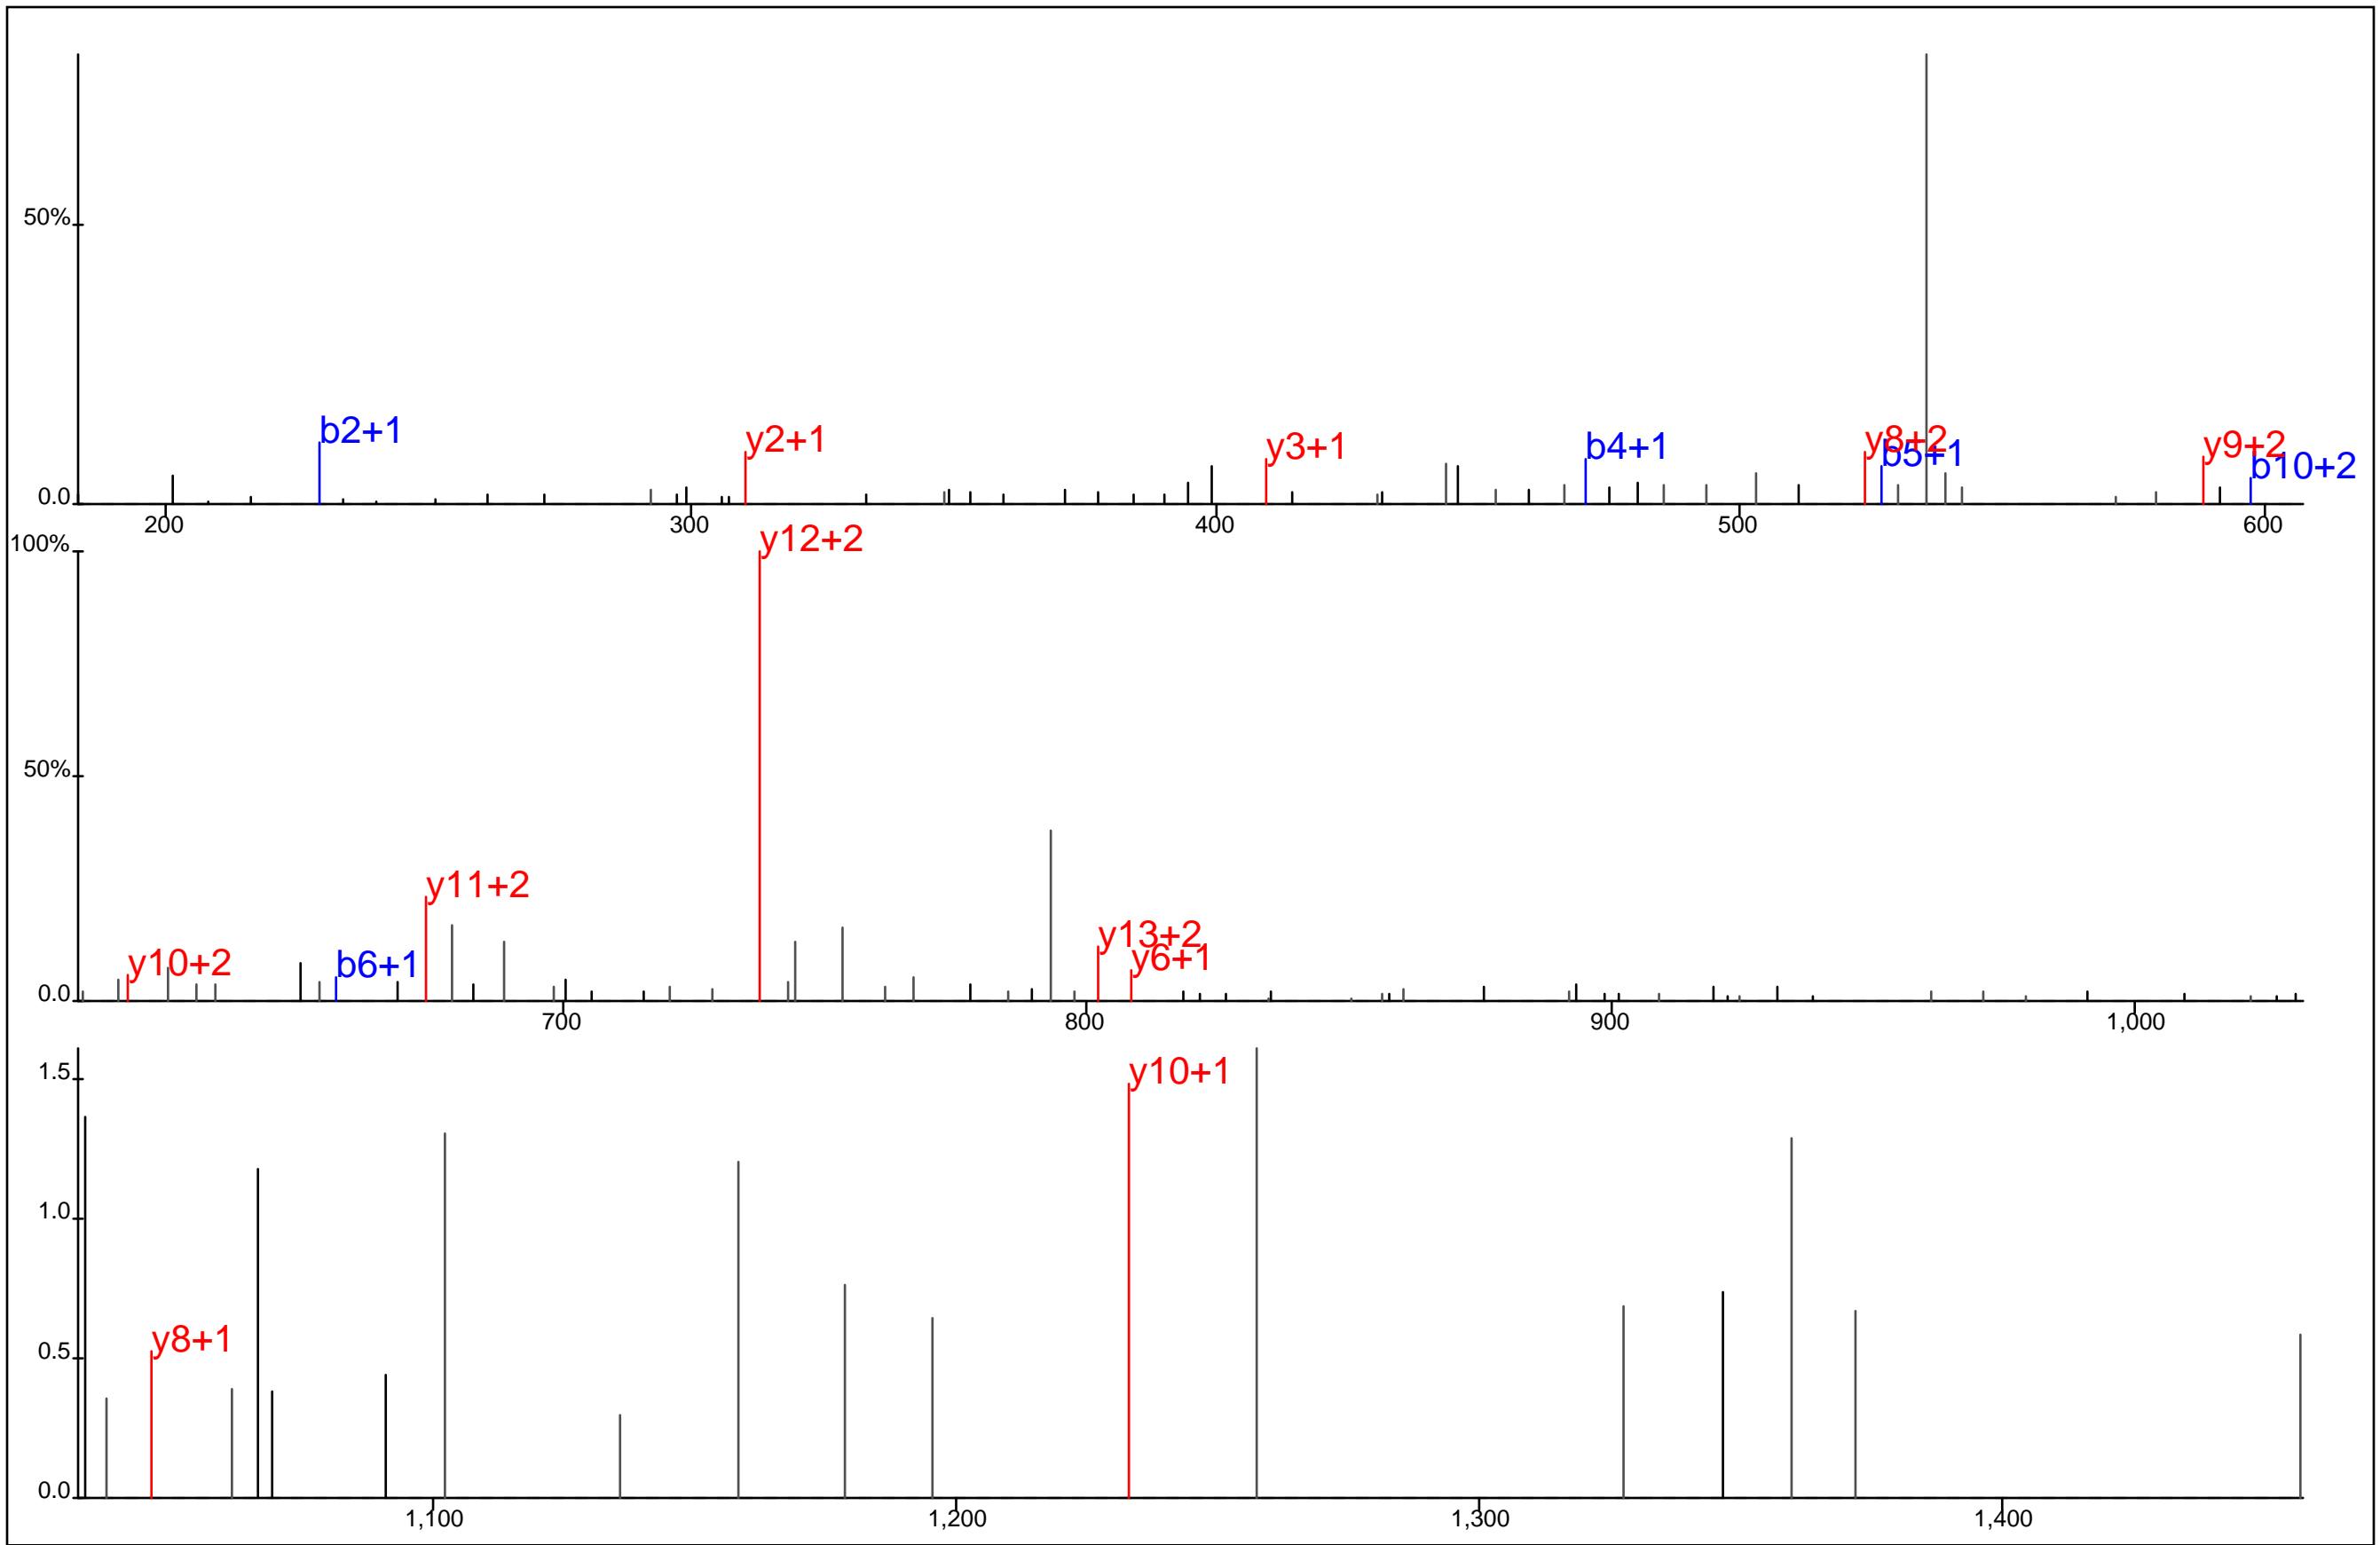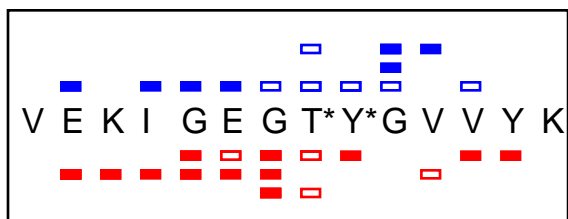

Protein Name: Cyclin dependent kinase 2  
 gi Accession: 0  
 Precursor Mass: 567.9230+3  
 Delta Mass: 0.434 ppm  
 XCorr: 26.93



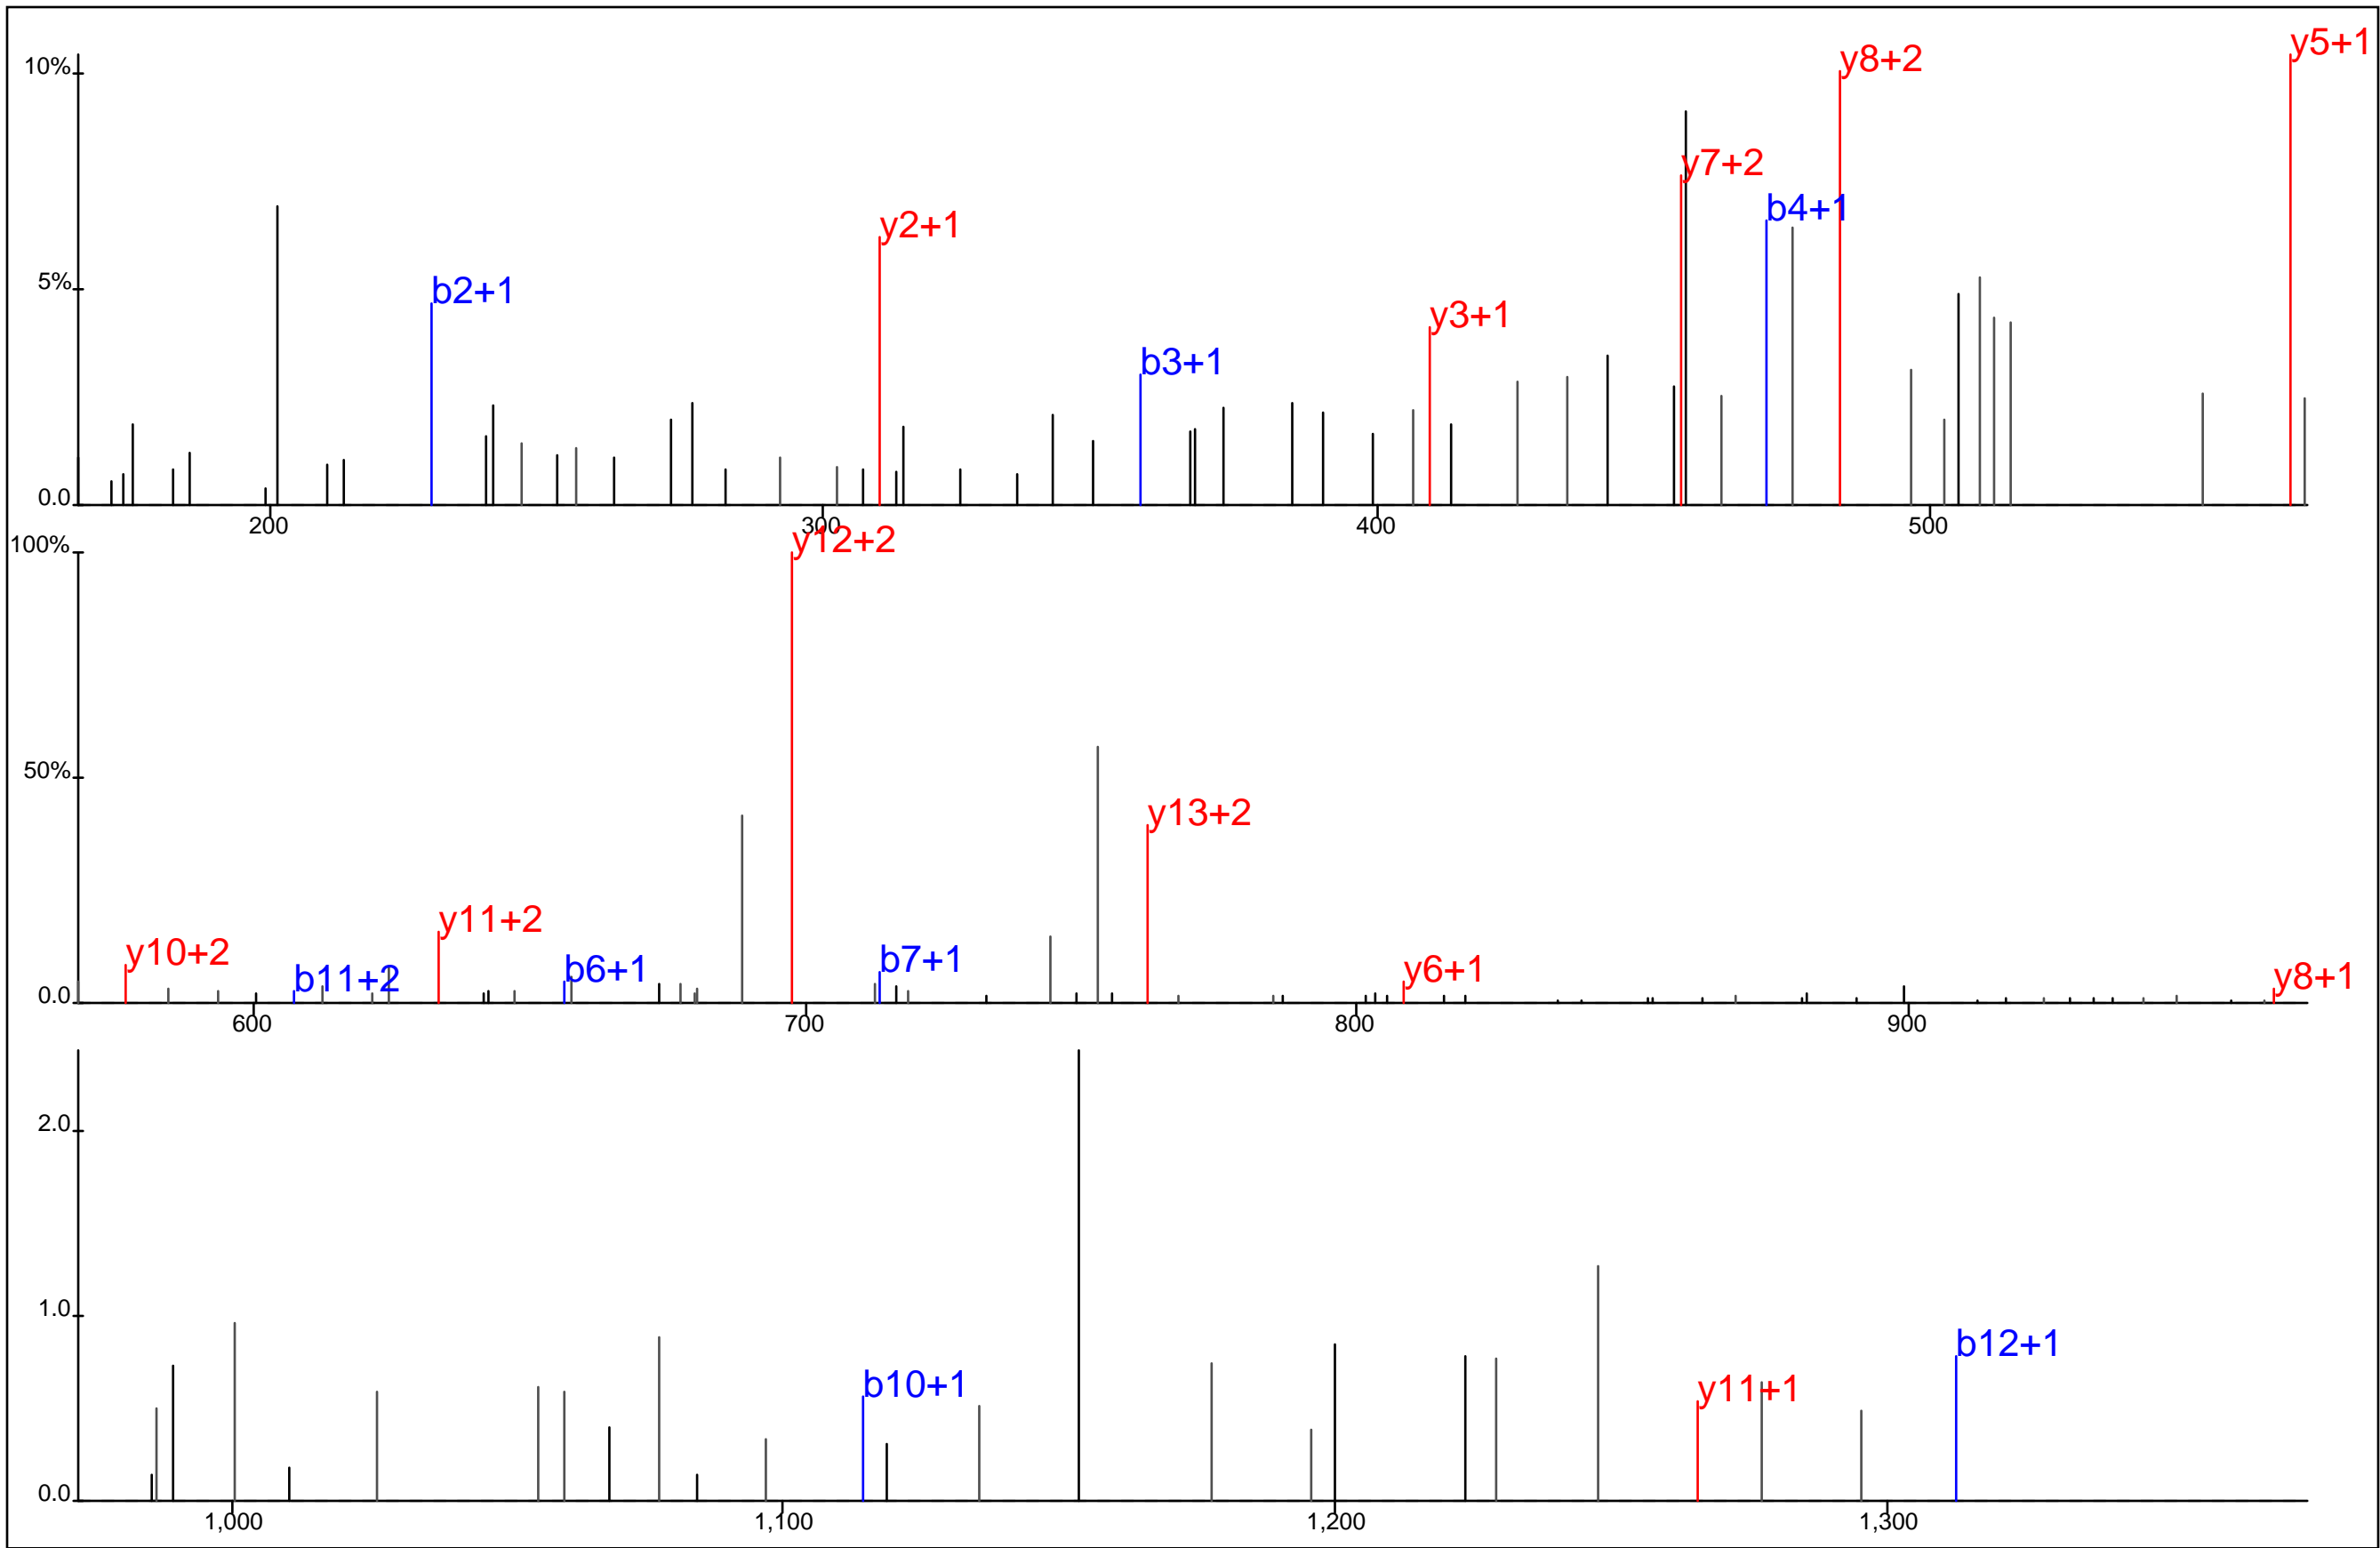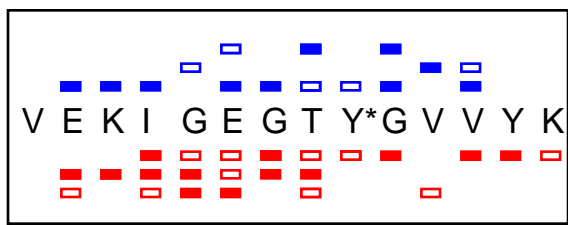

Protein Name: Cyclin dependent kinase 2  
 gi Accession: 0  
 Precursor Mass: 541.2665+3  
 Delta Mass: 1.490 ppm  
 XCorr: 40.8

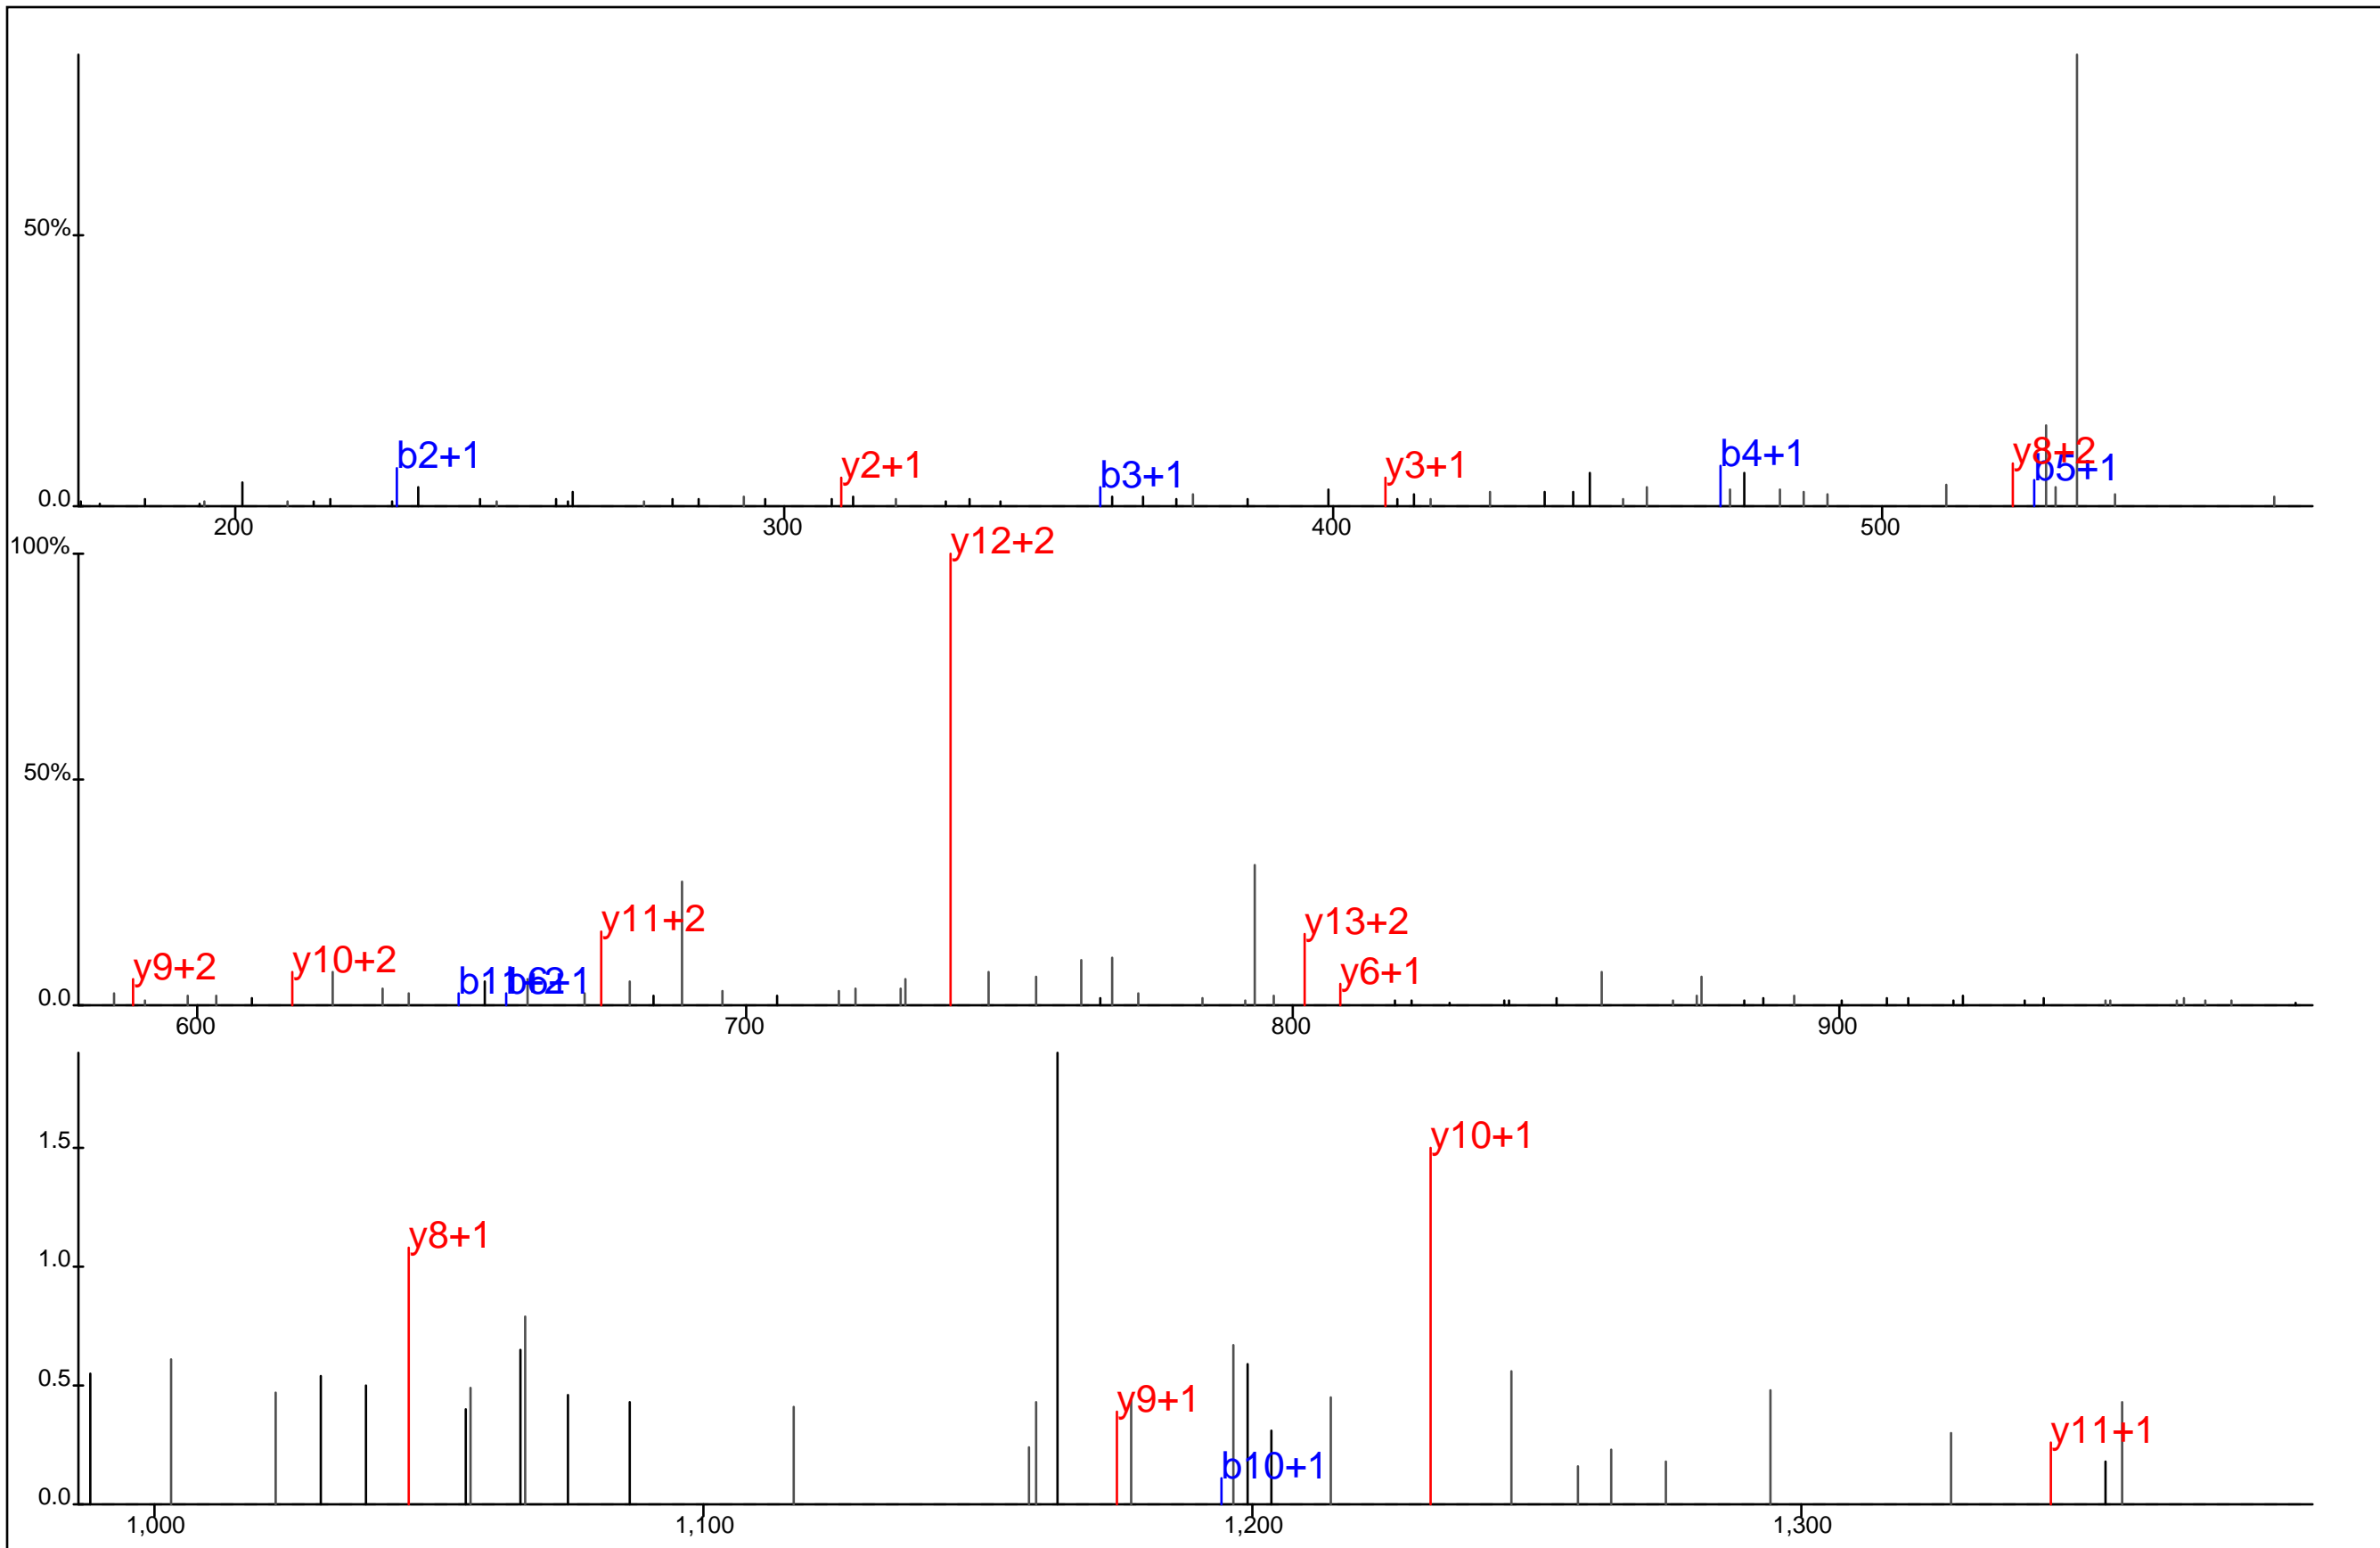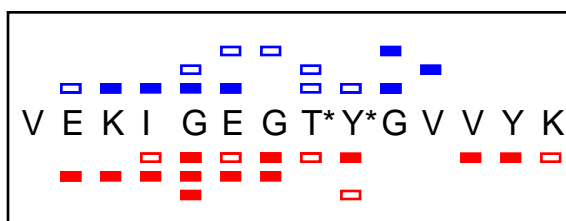

Protein Name: Cyclin dependent kinase 2  
 gi Accession: 0  
 Precursor Mass: 567.9236+3  
 Delta Mass: 1.509 ppm  
 XCorr: 31.4

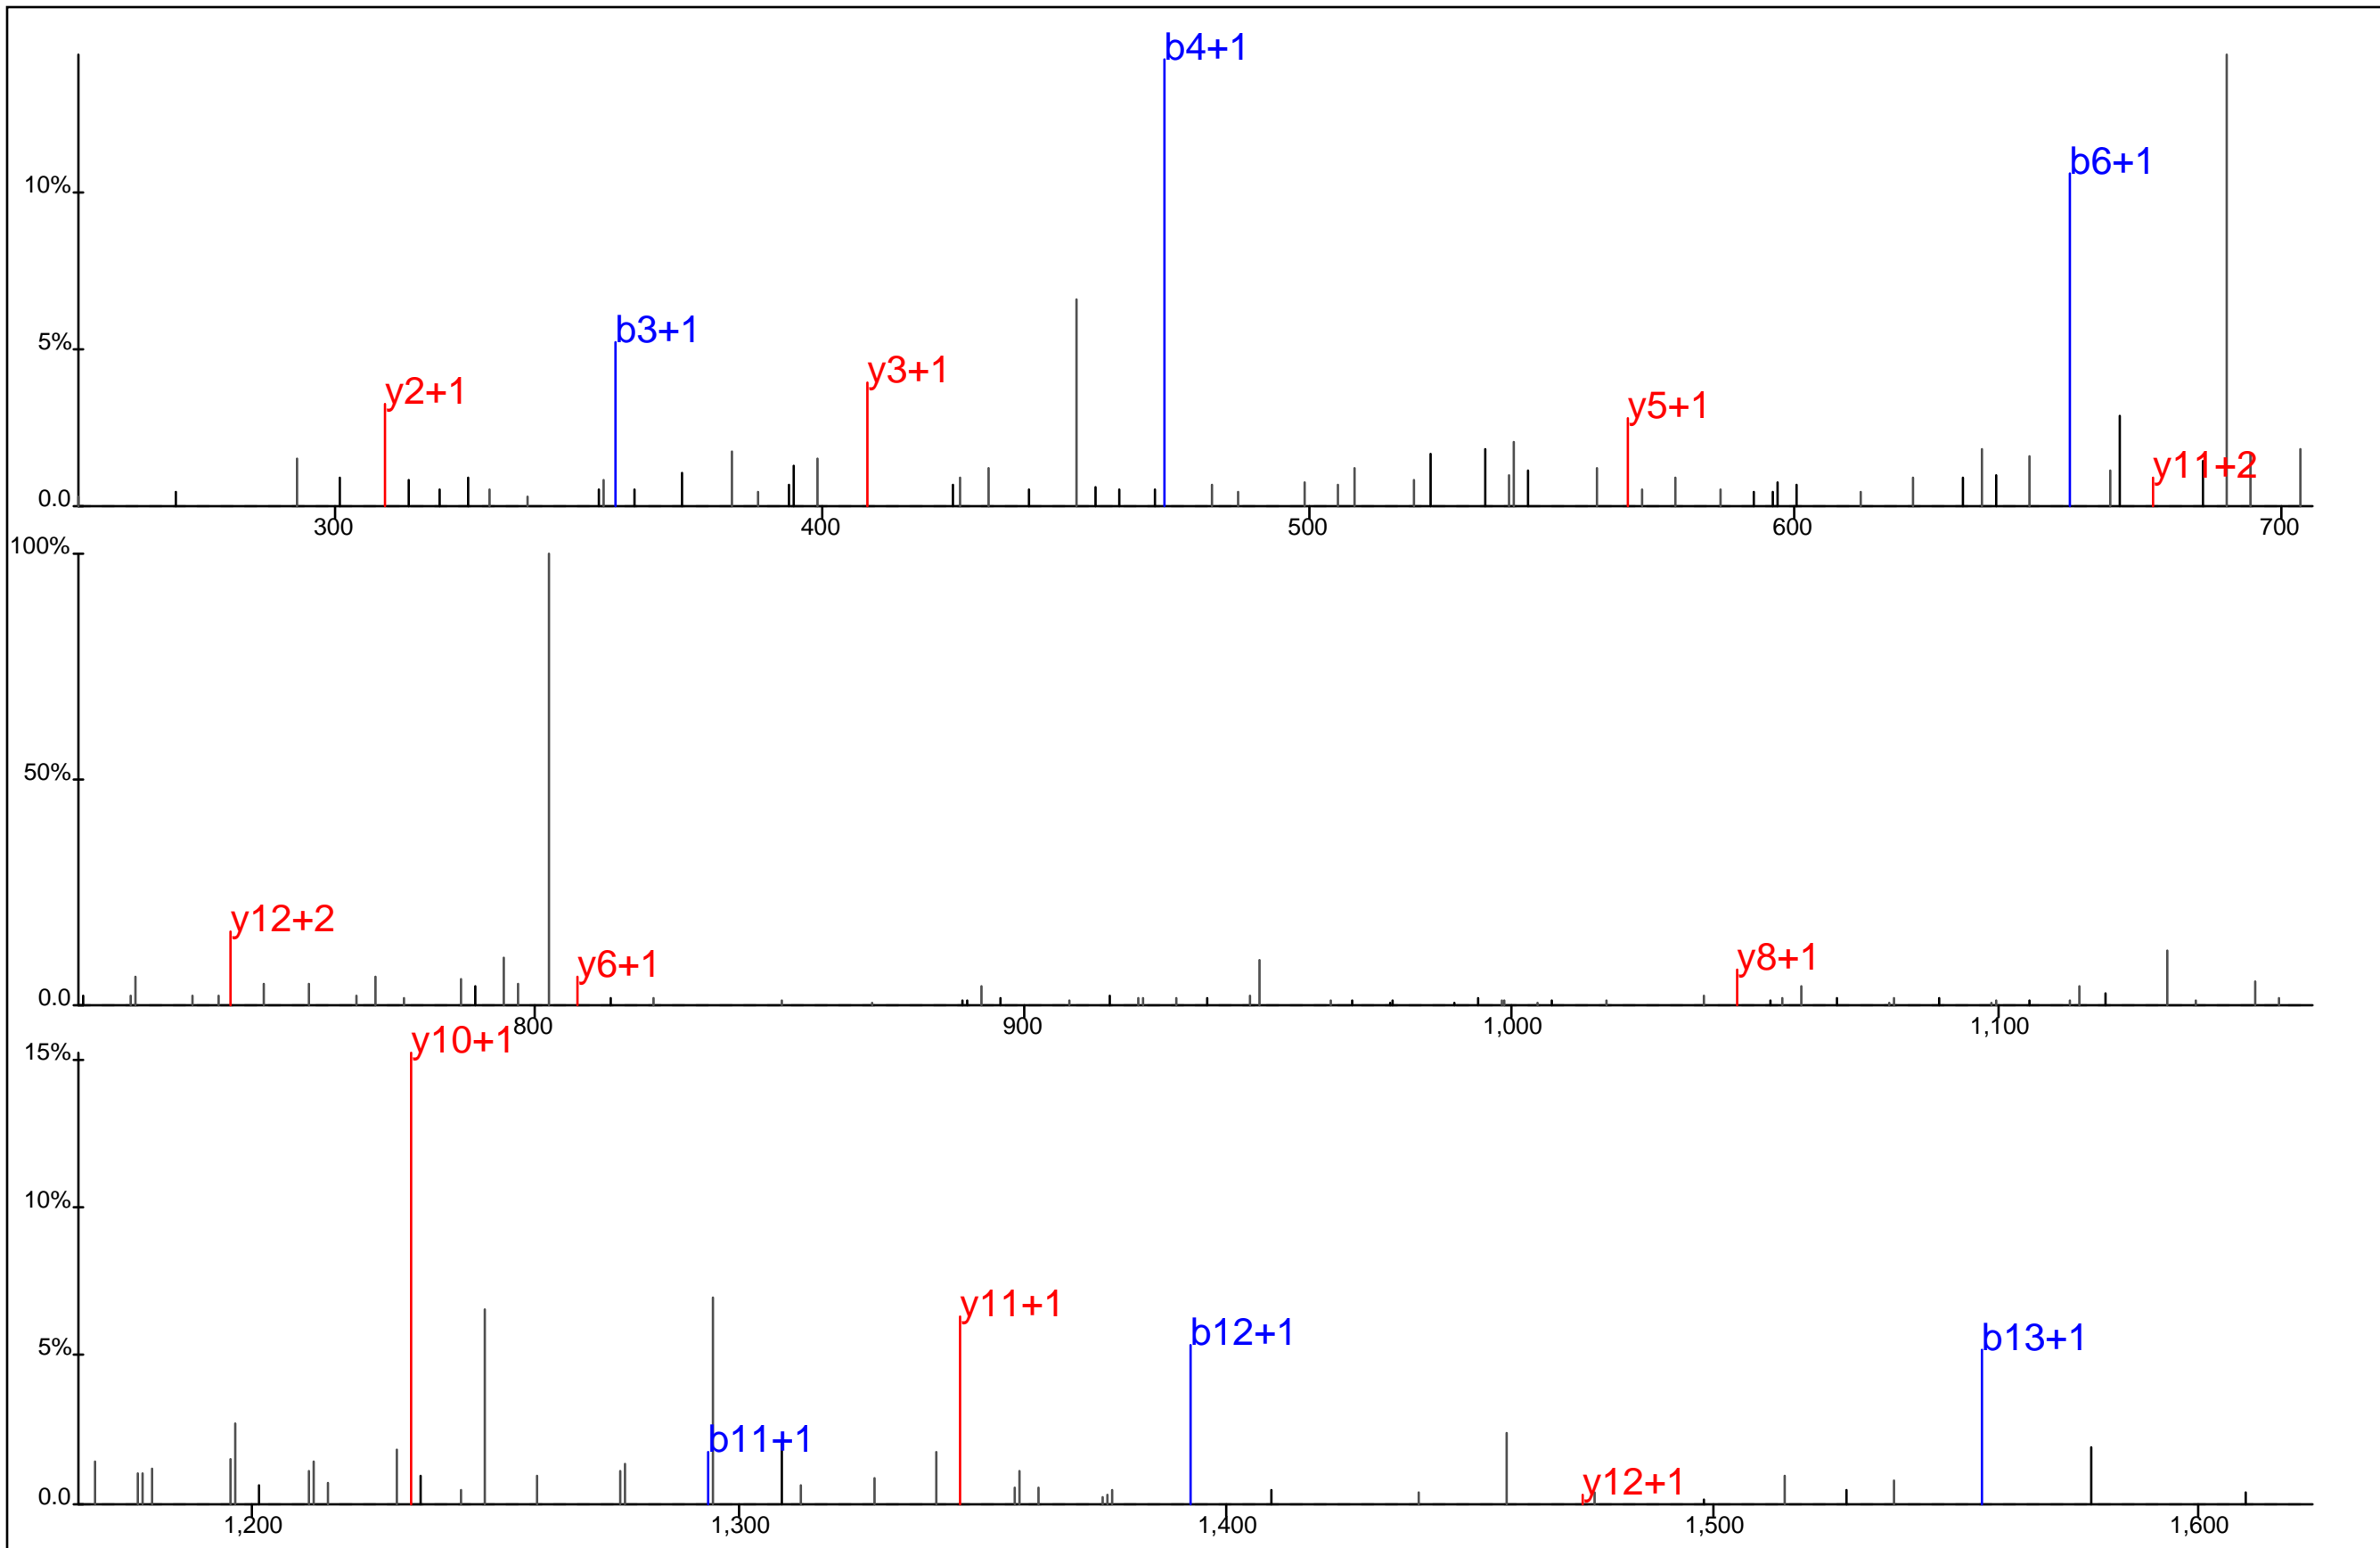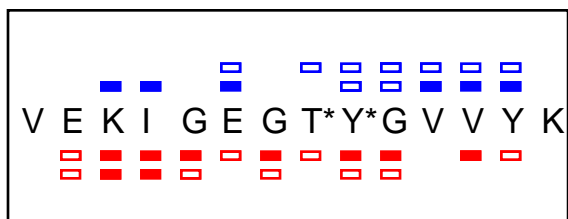

Protein Name: Cyclin dependent kinase 2  
 gi Accession: 0  
 Precursor Mass: 851.3777+2  
 Delta Mass: 3.181 ppm  
 XCorr: 41.75

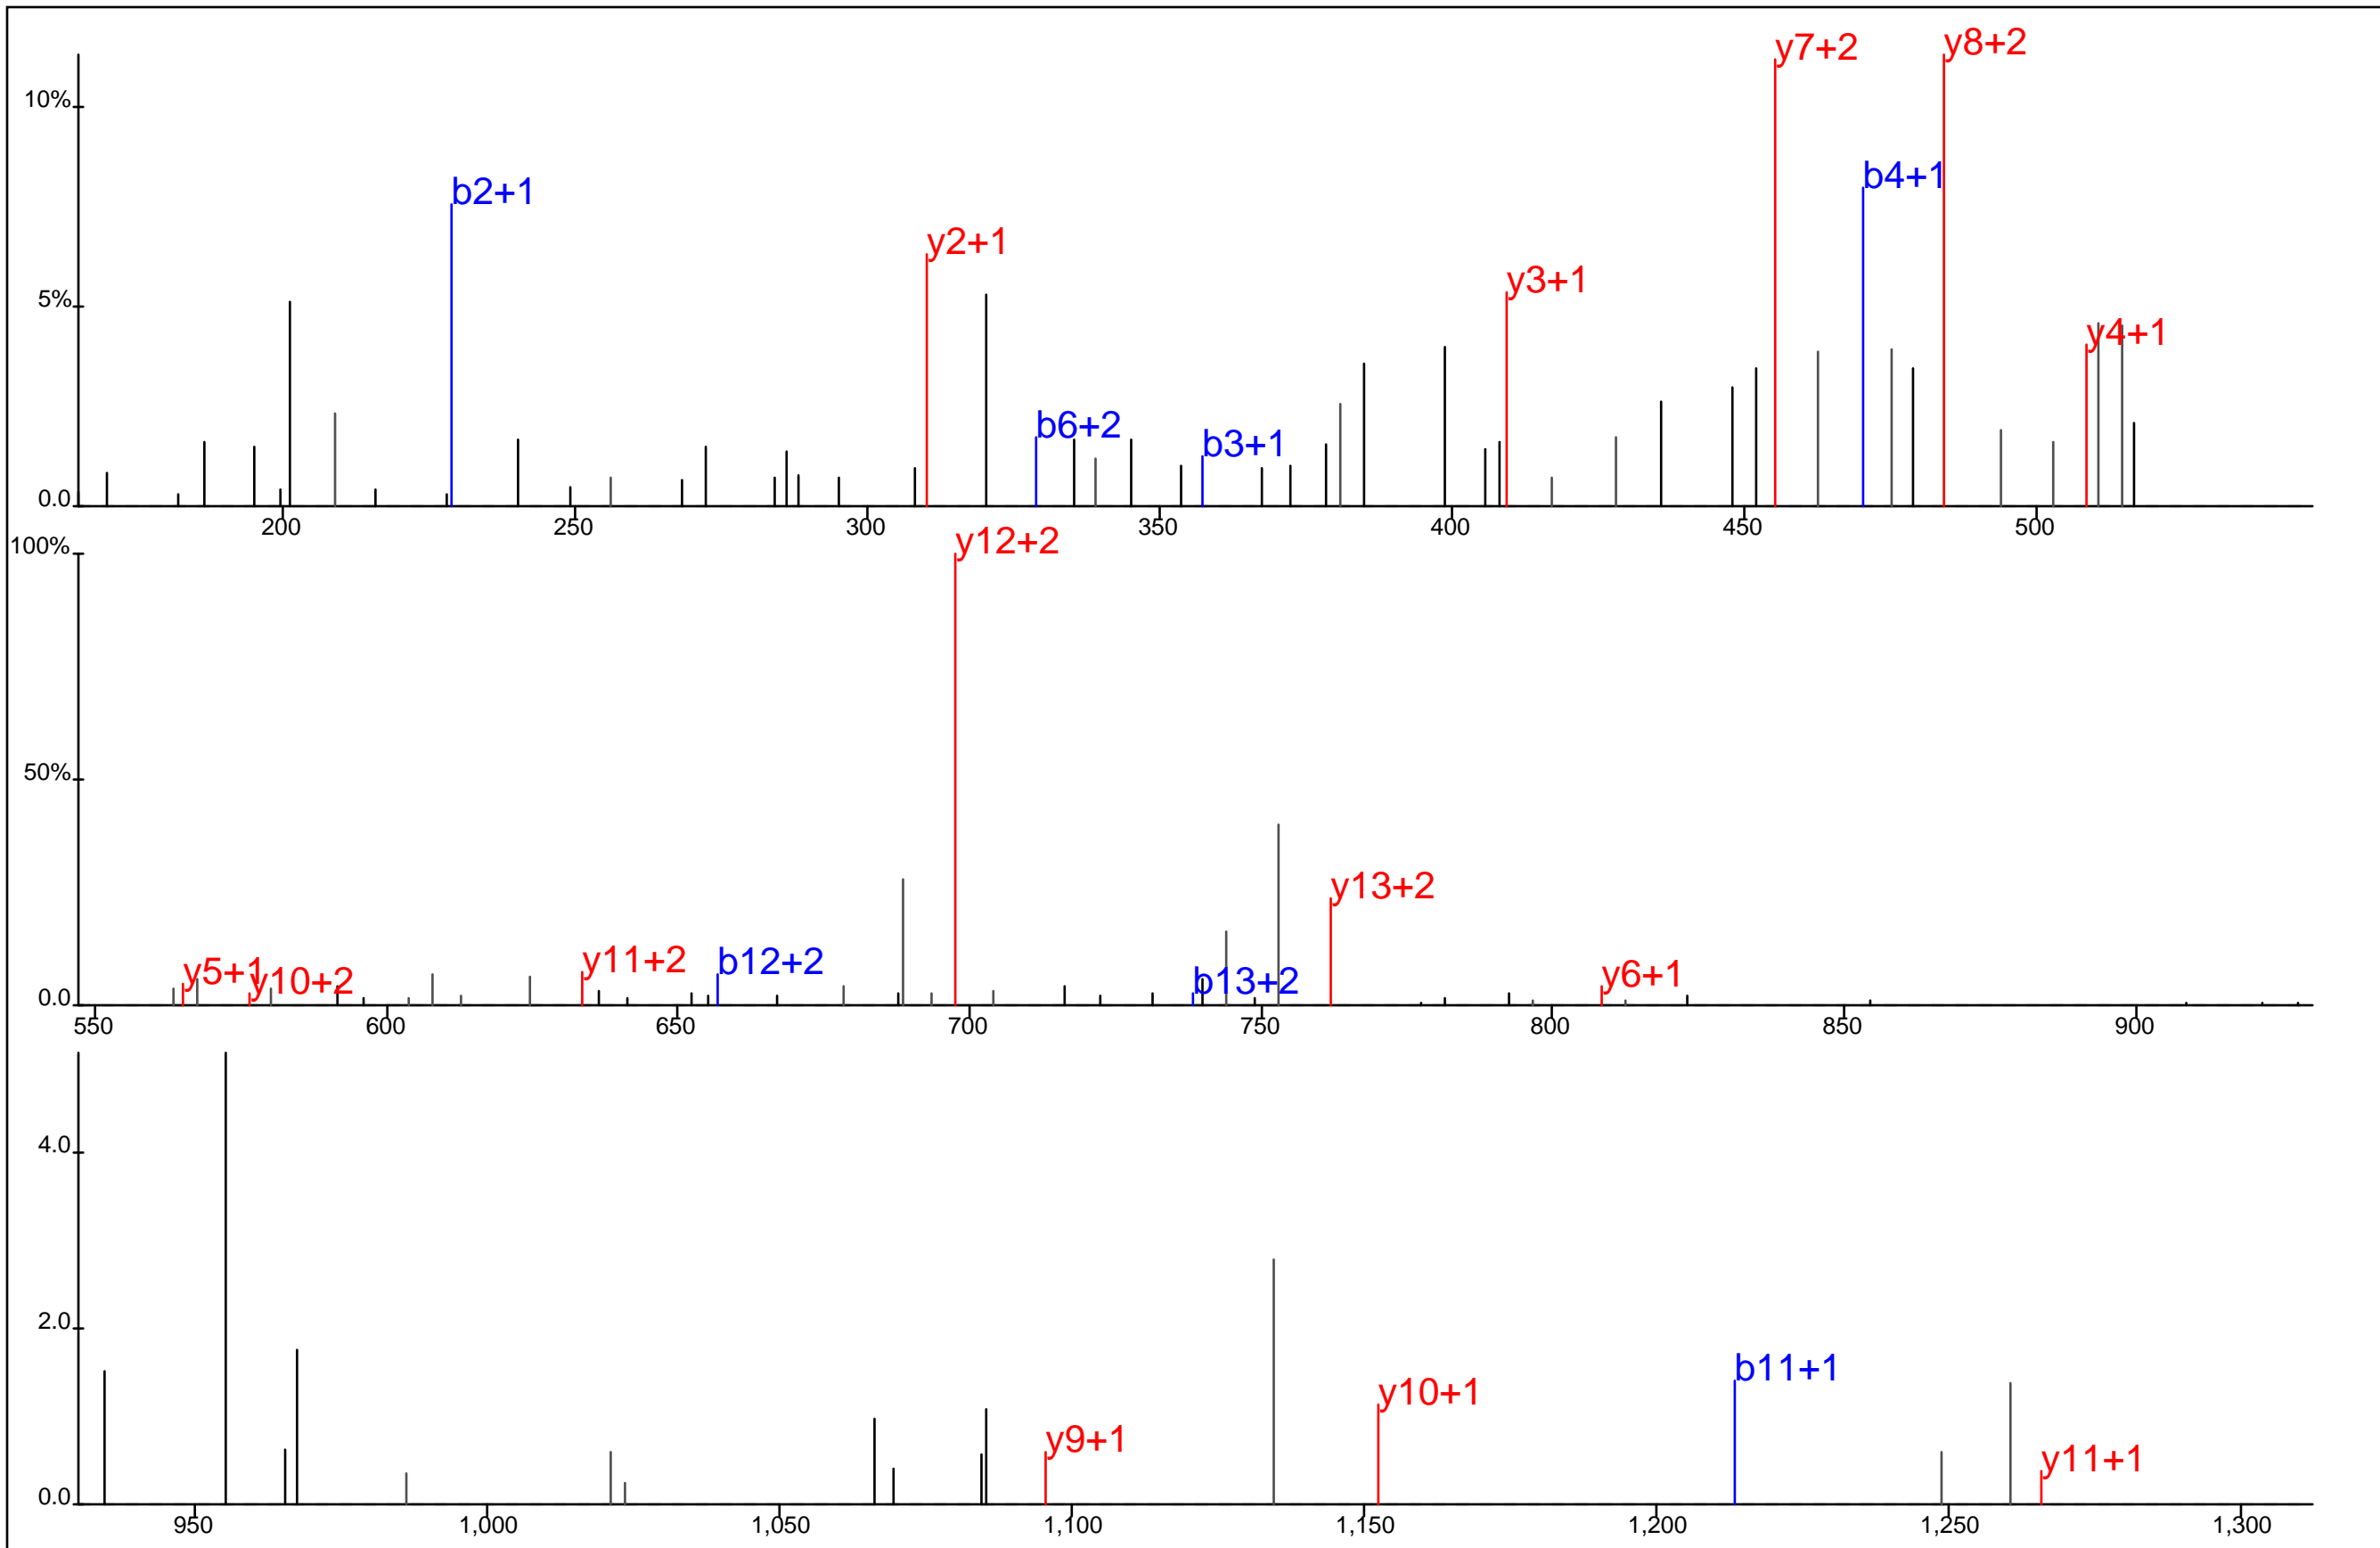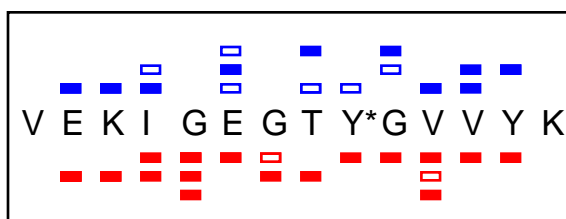

Protein Name: Cyclin dependent kinase 2  
 gi Accession: 0  
 Precursor Mass: 541.2673+3  
 Delta Mass: 0.091 ppm  
 XCorr: 44.4

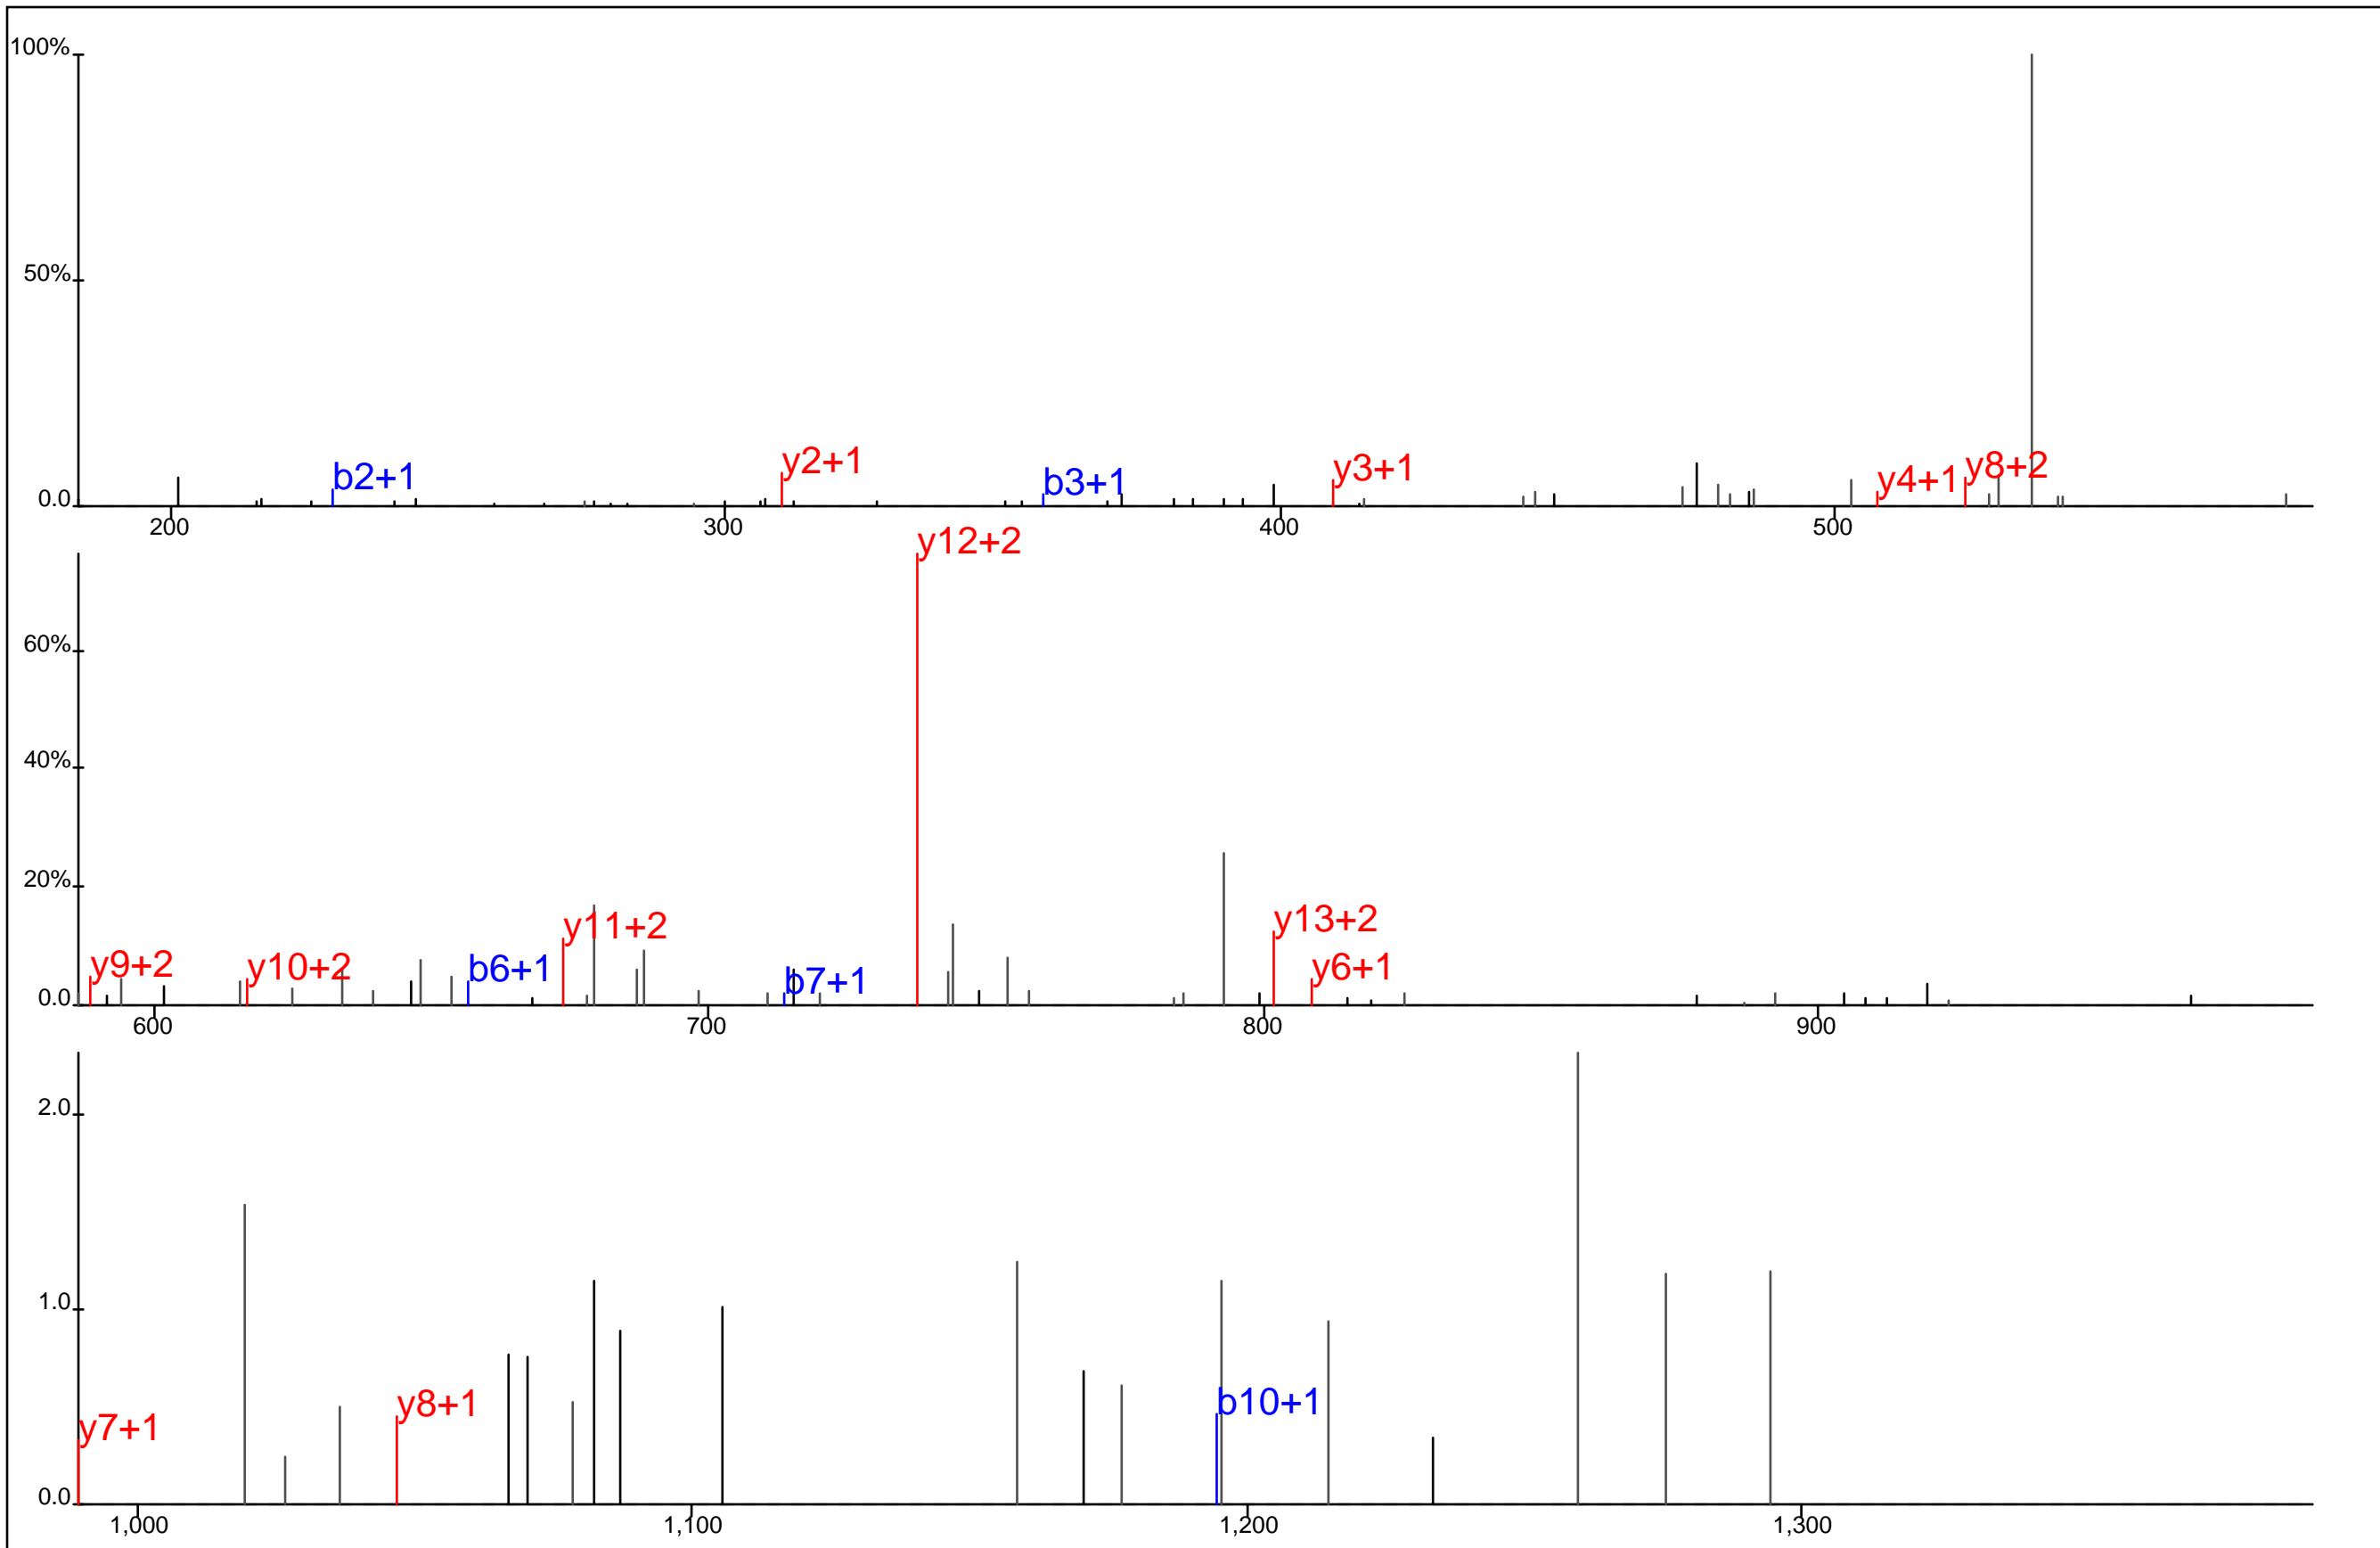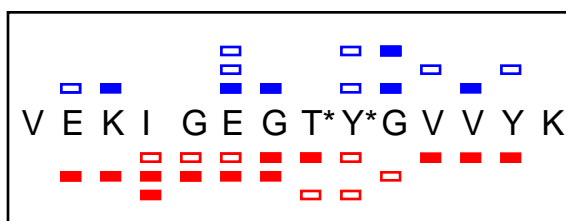

Protein Name: Cyclin dependent kinase 2  
 gi Accession: 0  
 Precursor Mass: 567.9227+3  
 Delta Mass: 0.106 ppm  
 XCorr: 23.26

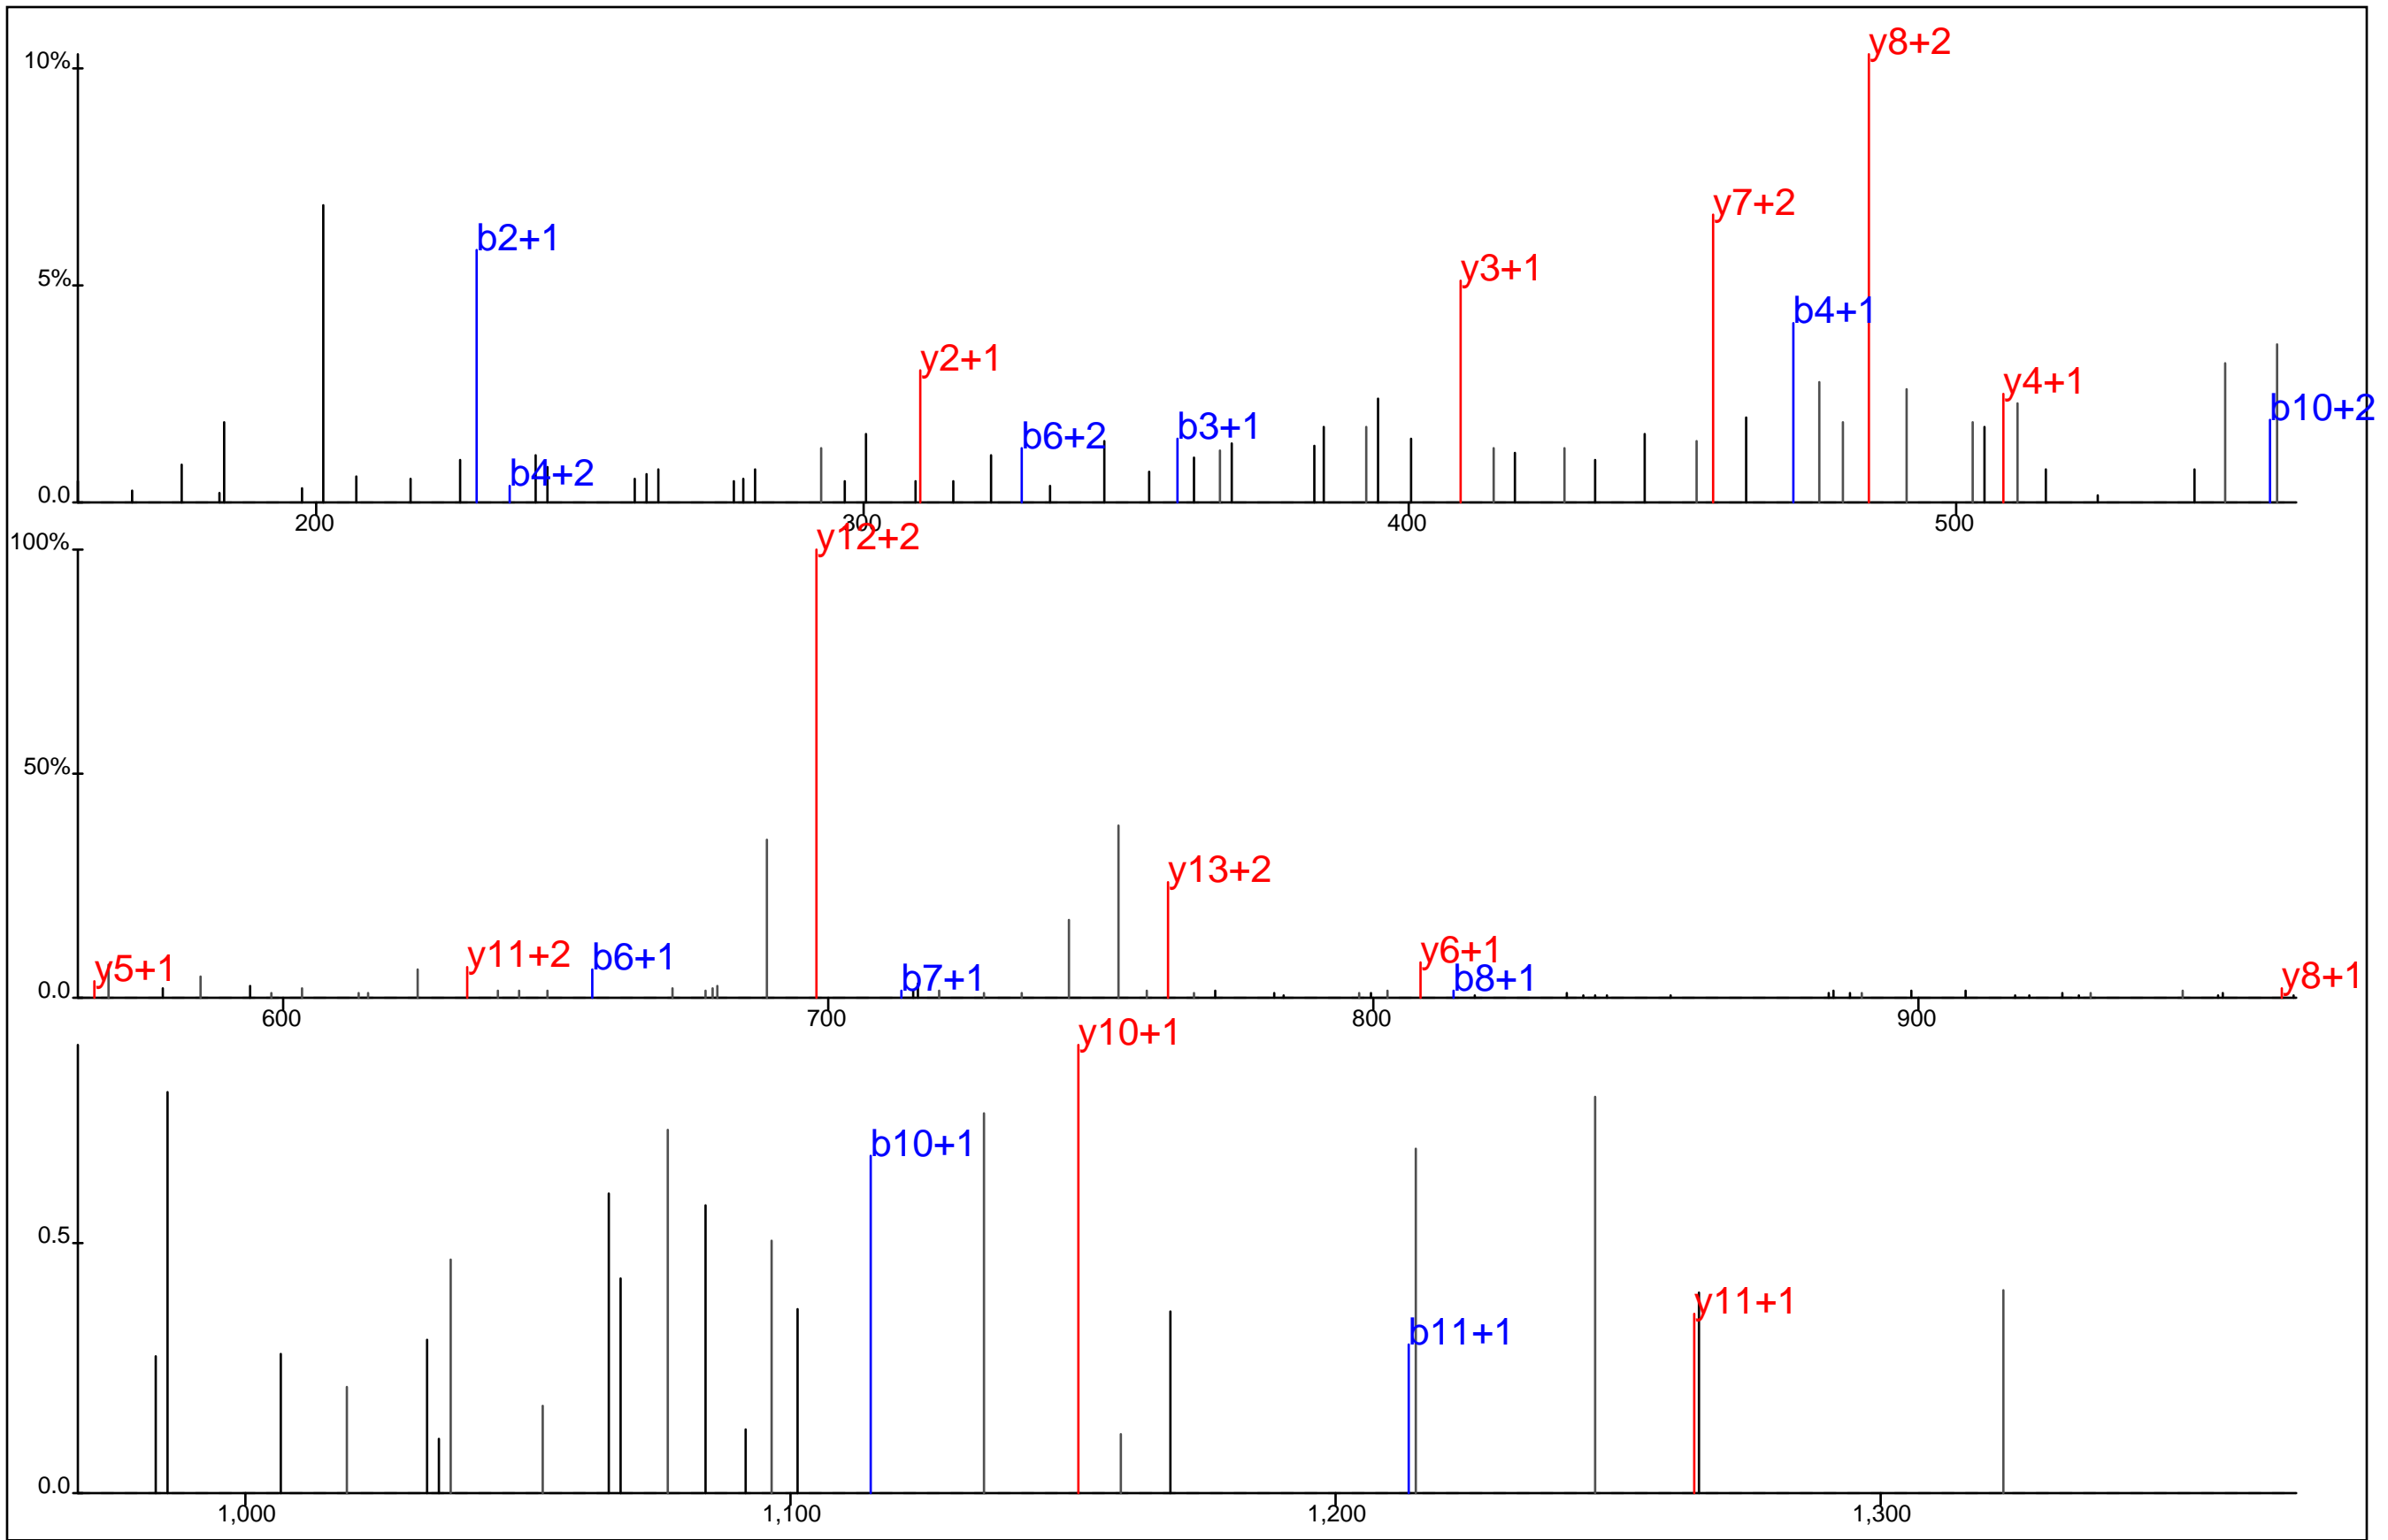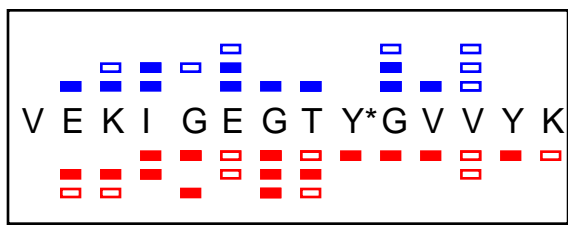

Protein Name: Cyclin dependent kinase 2  
 gi Accession: 0  
 Precursor Mass: 541.2672+3  
 Delta Mass: 0.247 ppm  
 XCorr: 45.23



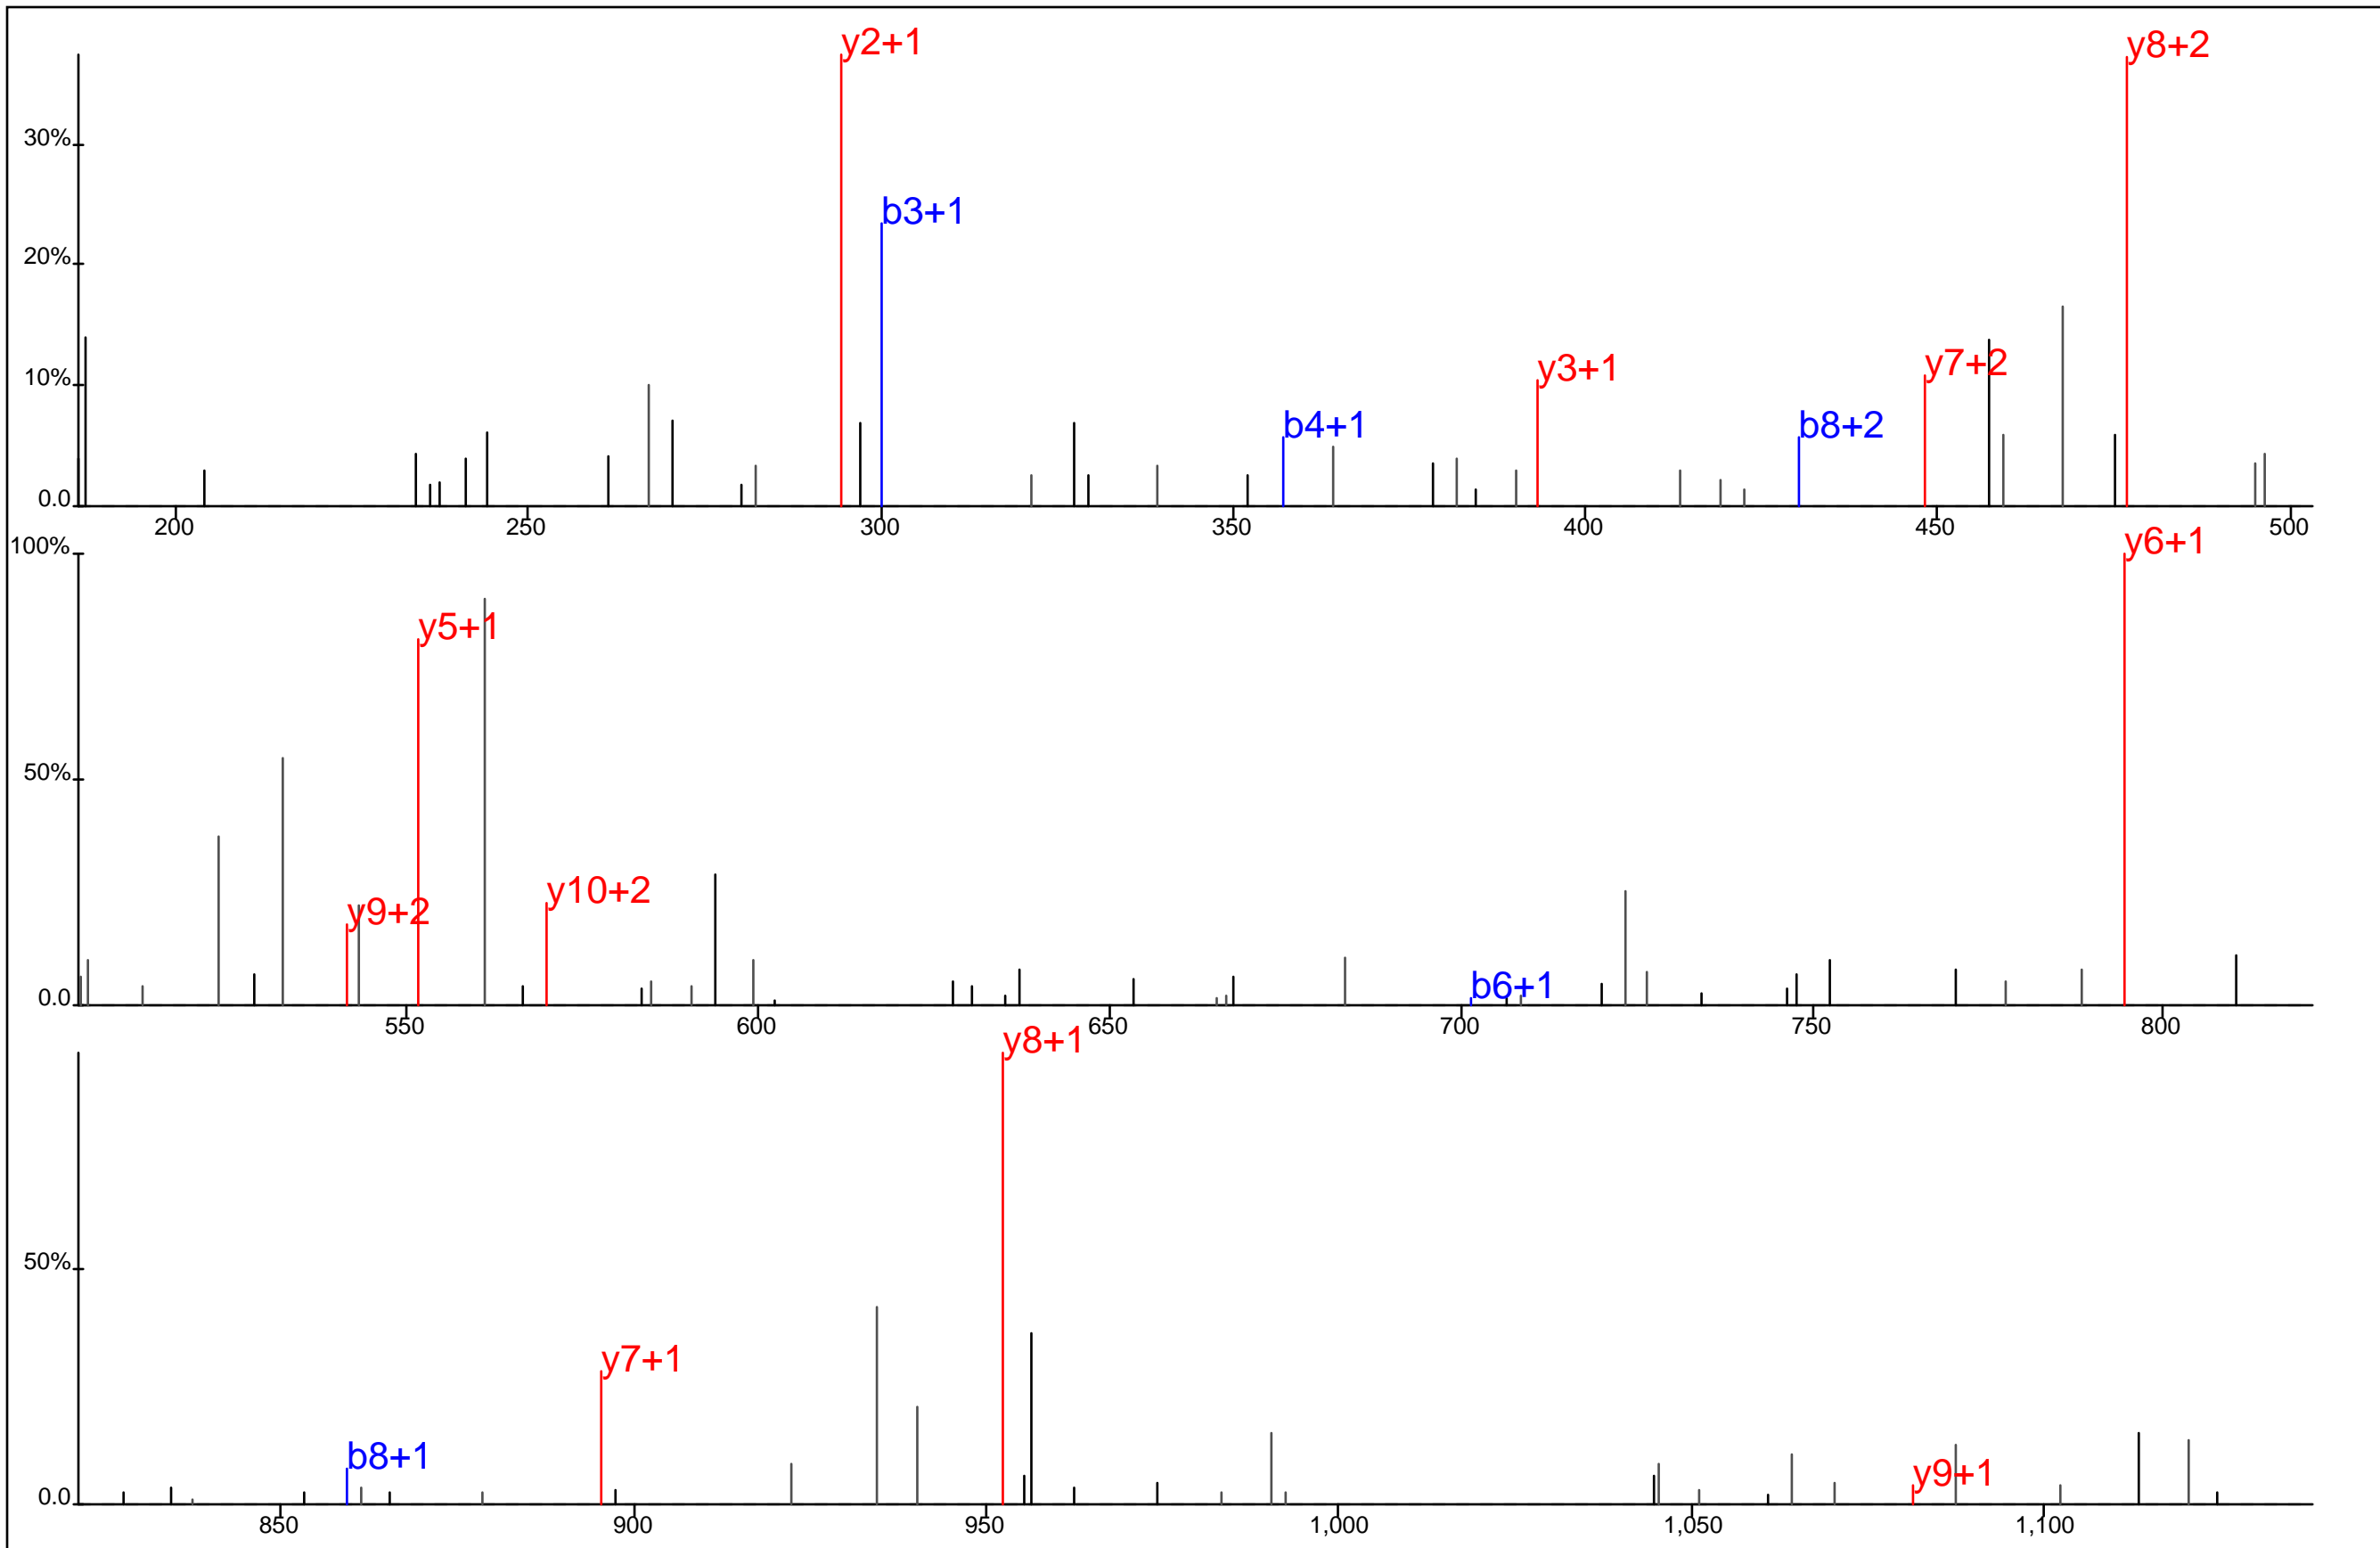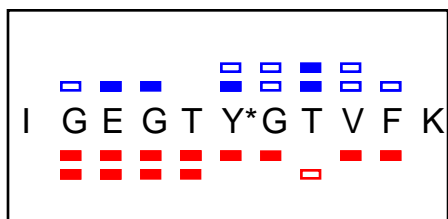

Protein Name: Cyclin dependent kinase 5  
 gi Accession: 0  
 Precursor Mass: 626.2865+2  
 Delta Mass: 0.016 ppm  
 XCorr: 36.94



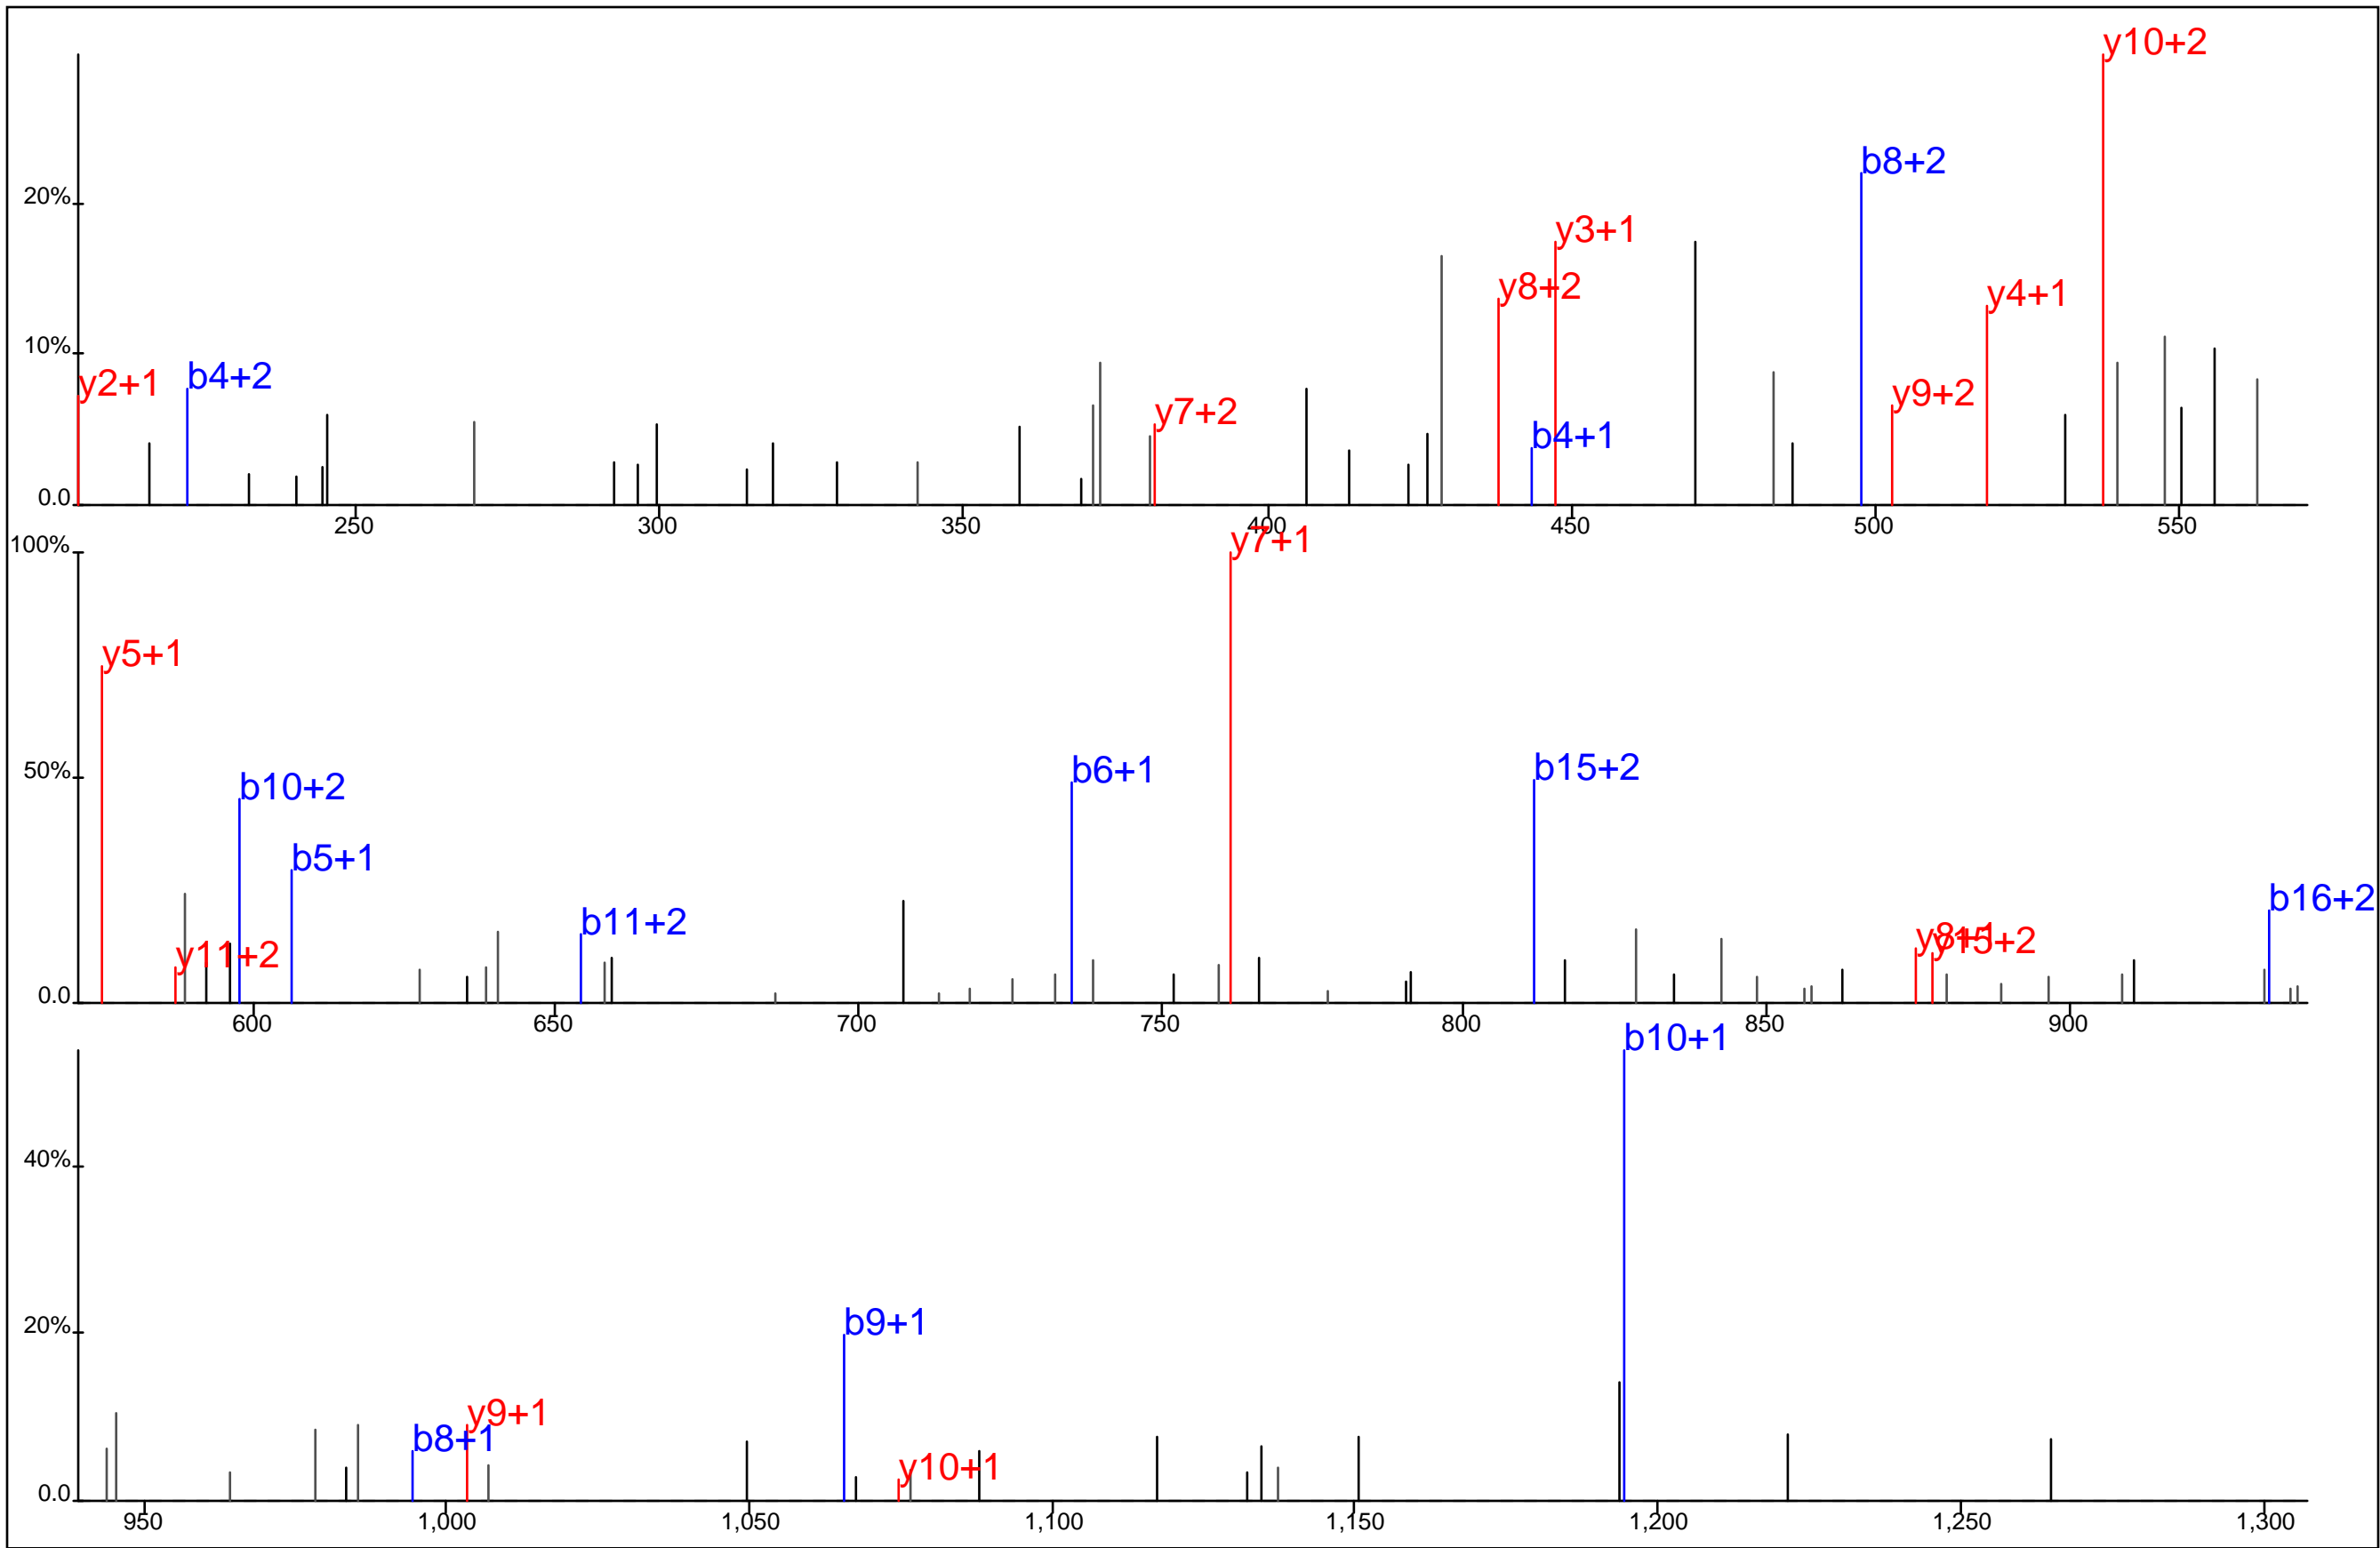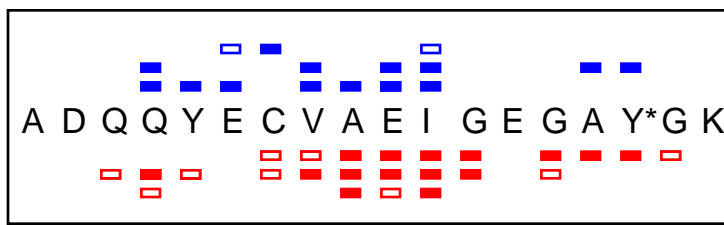

Protein Name: Cyclin dependent kinase 6  
 gi Accession: 0  
 Precursor Mass: 689.9518+3  
 Delta Mass: 2.076 ppm  
 XCorr: 43.43

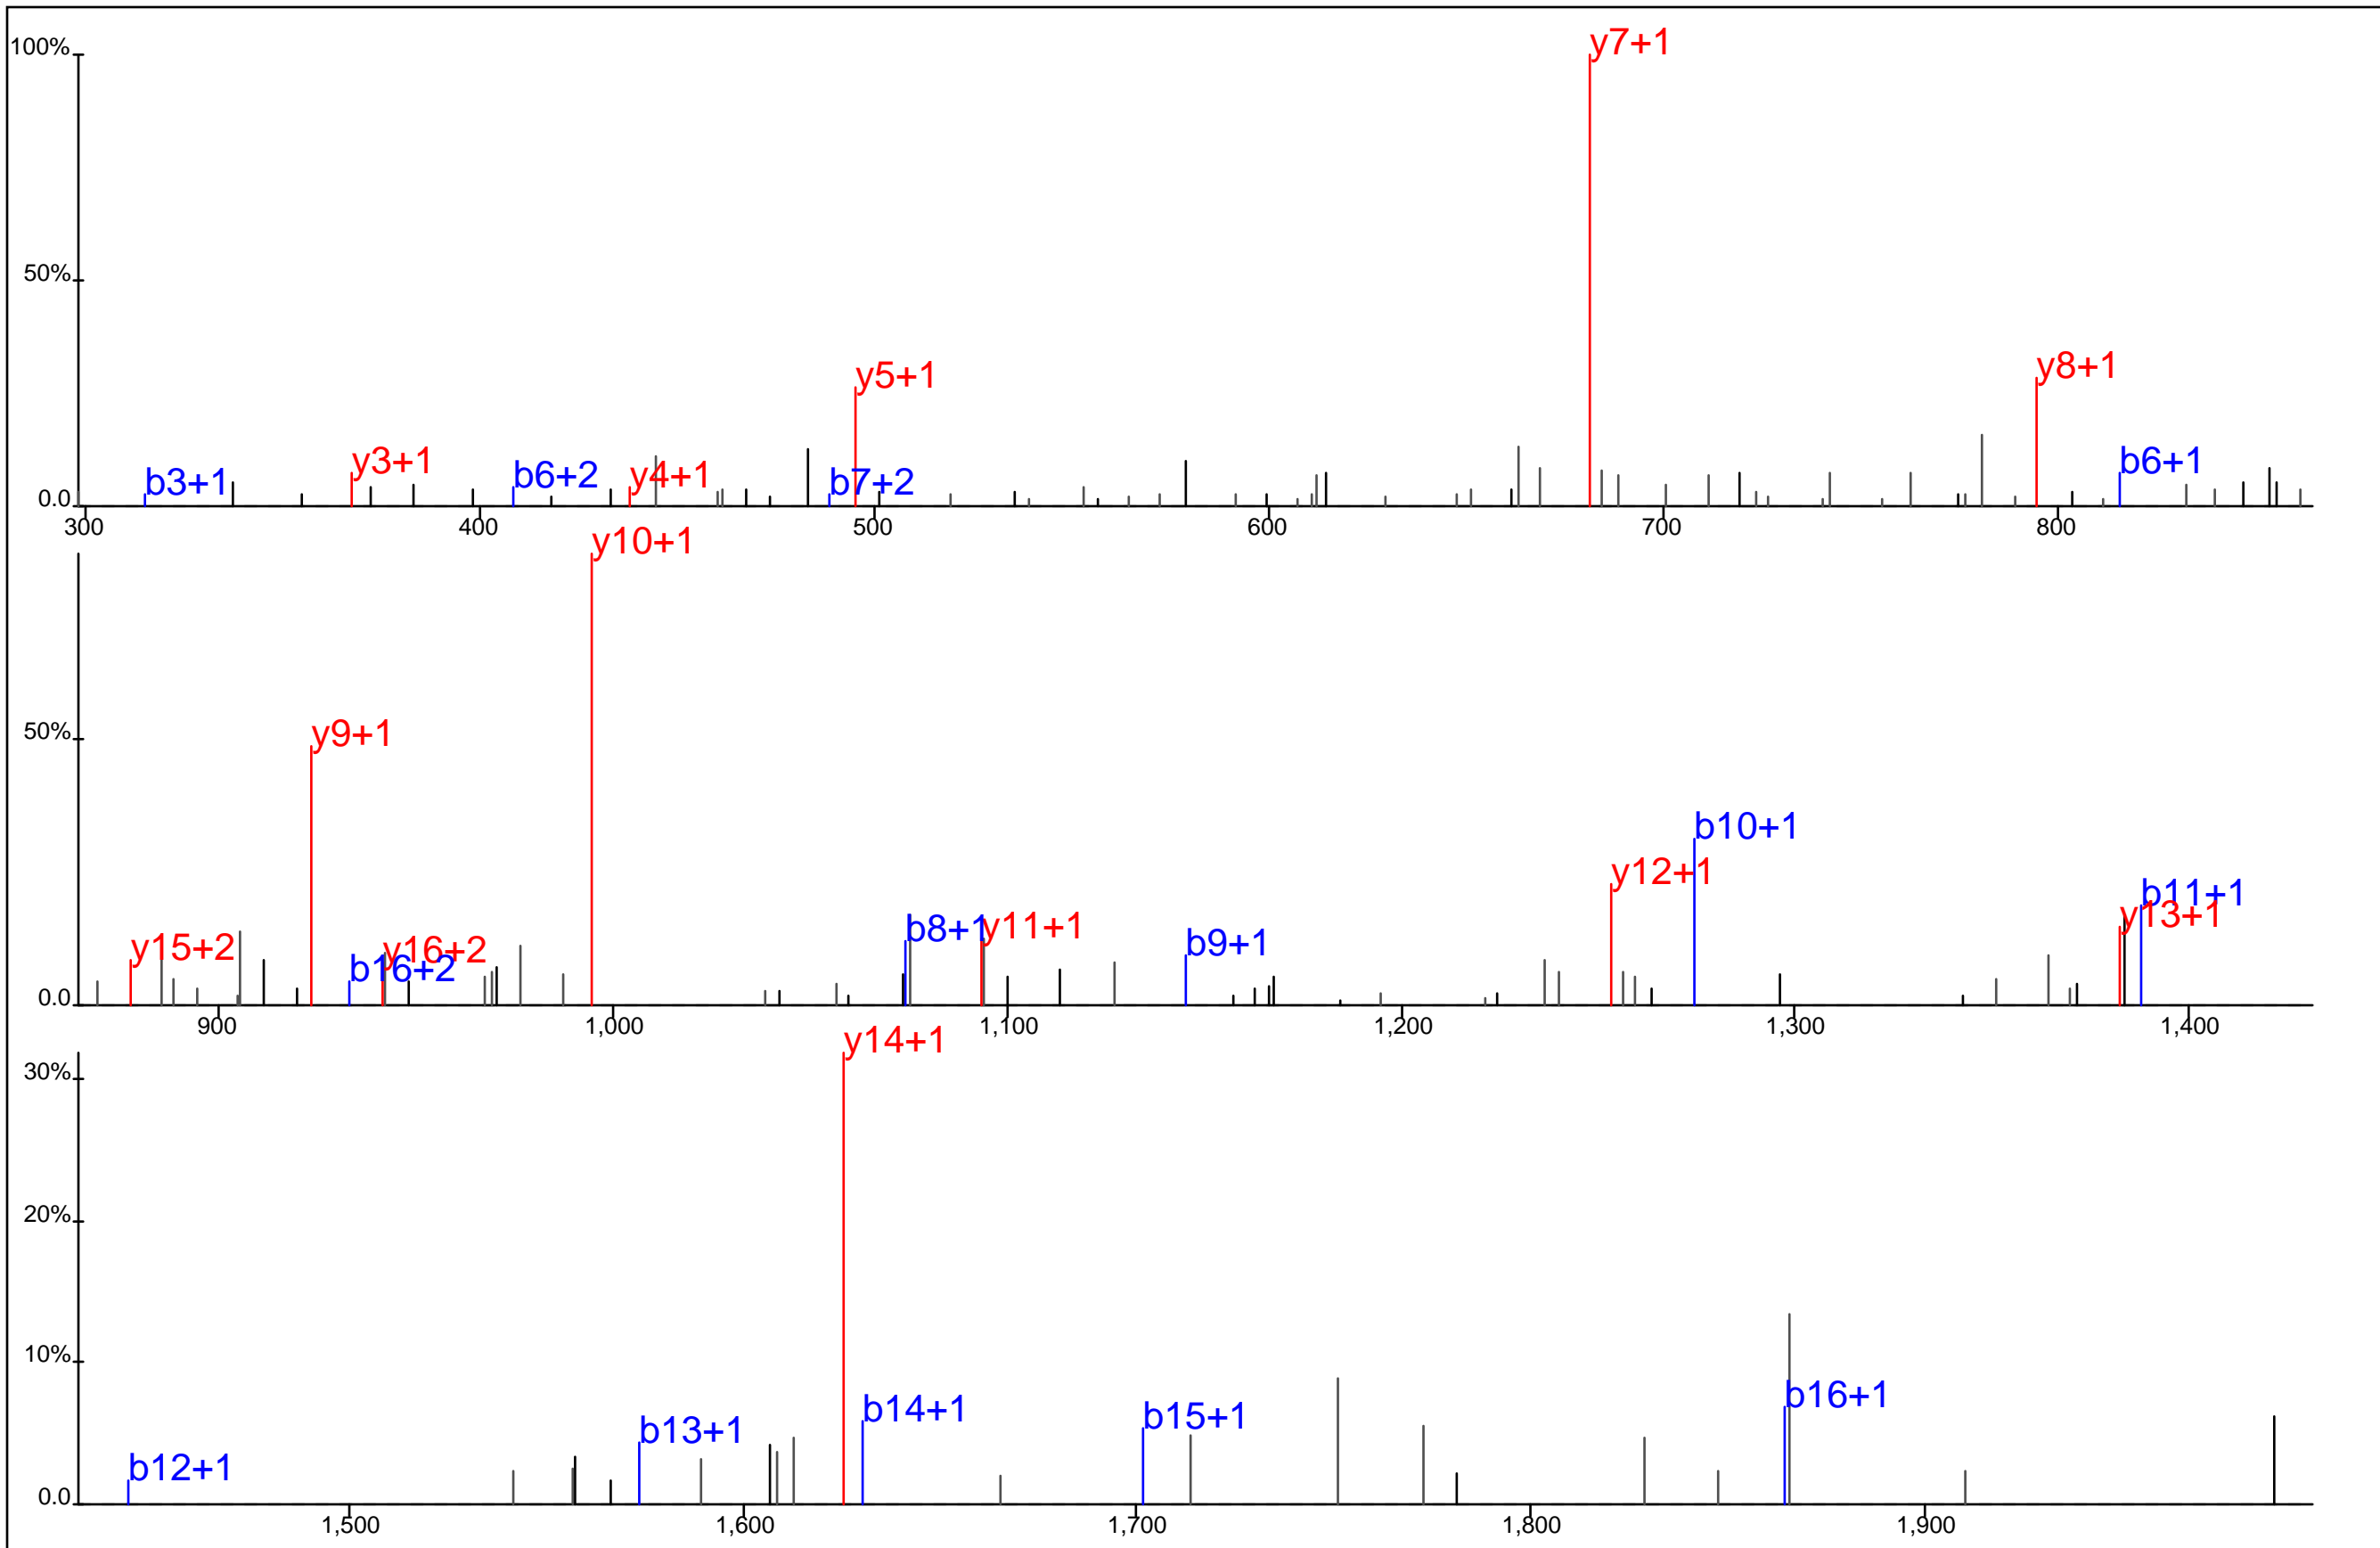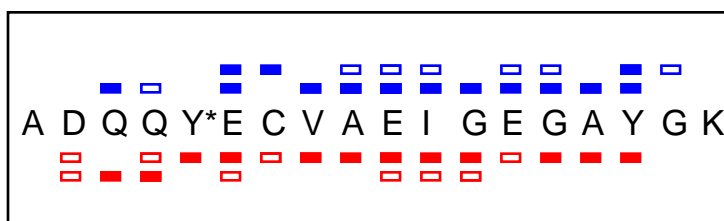

Protein Name: Cyclin dependent kinase 6  
 gi Accession: 0  
 Precursor Mass: 1,034.4174+2  
 Delta Mass: 4.382 ppm  
 XCorr: 57.46

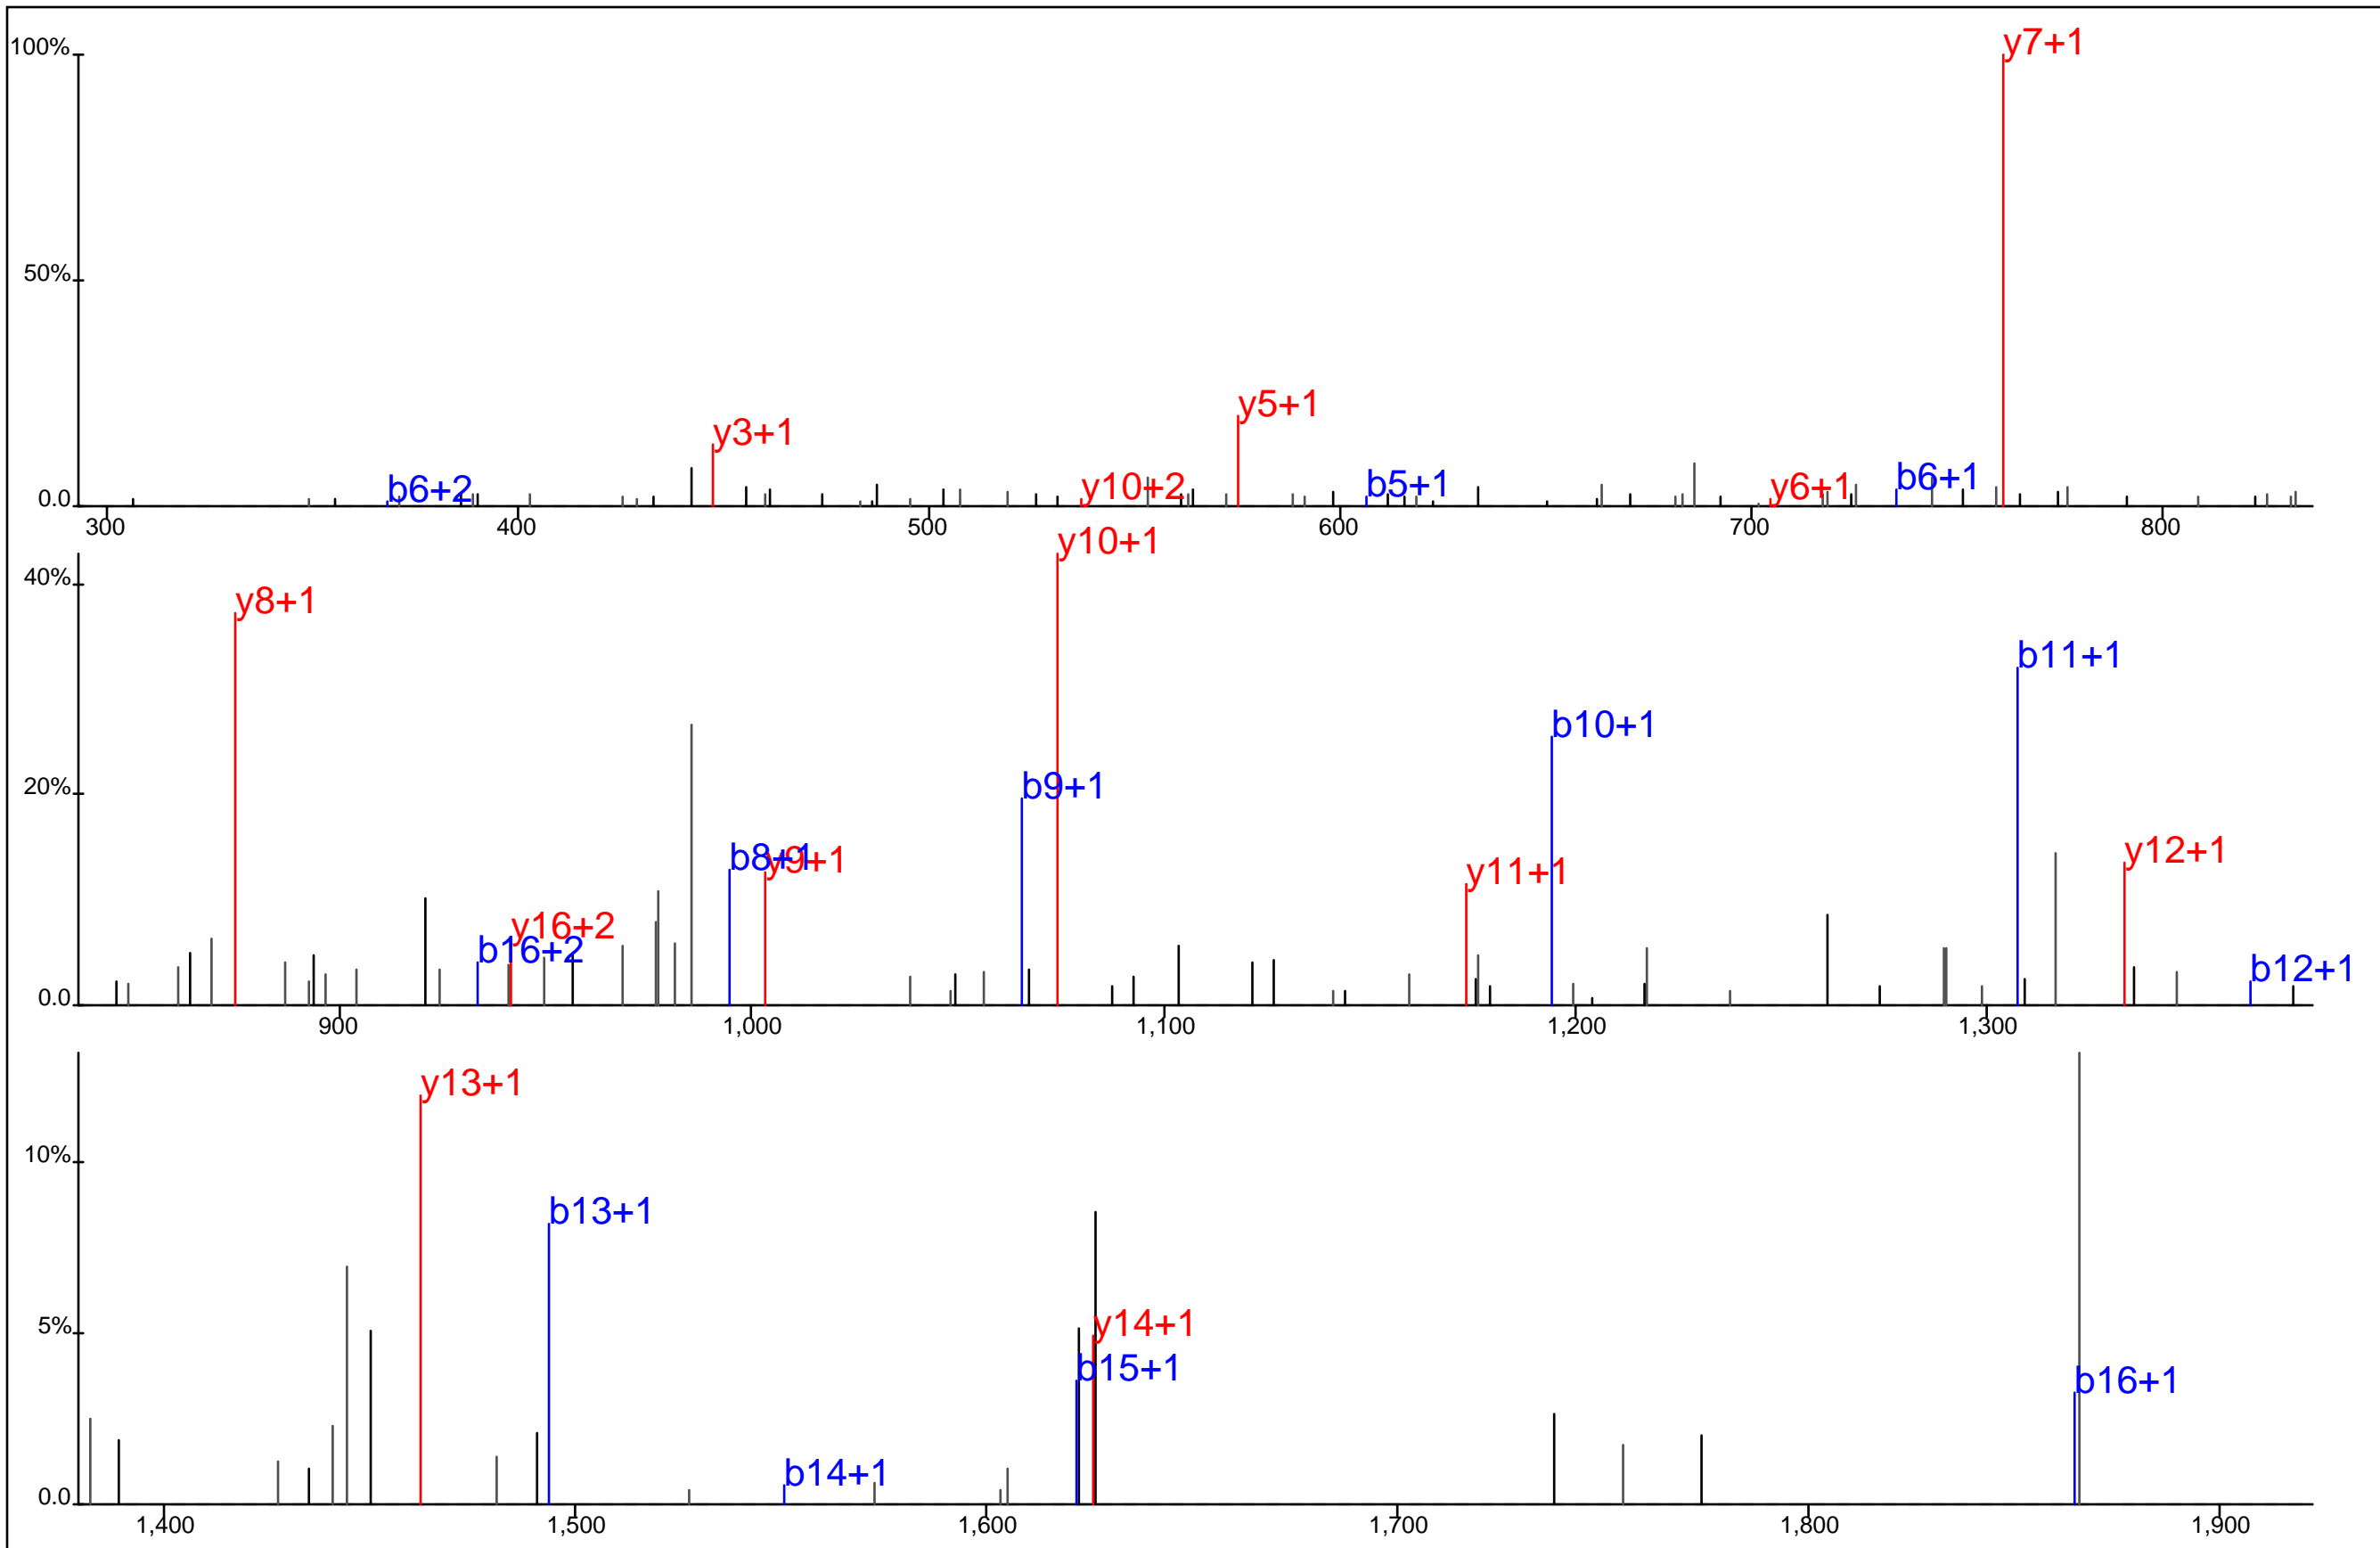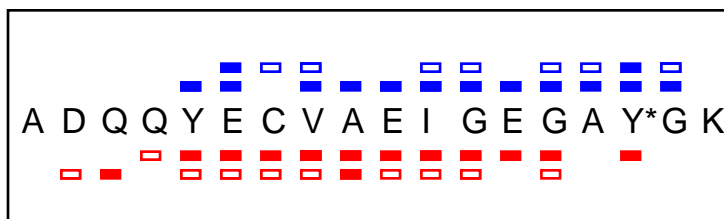

Protein Name: Cyclin dependent kinase 6  
 gi Accession: 0  
 Precursor Mass: 1,034.4200+2  
 Delta Mass: 1.784 ppm  
 XCorr: 56.38

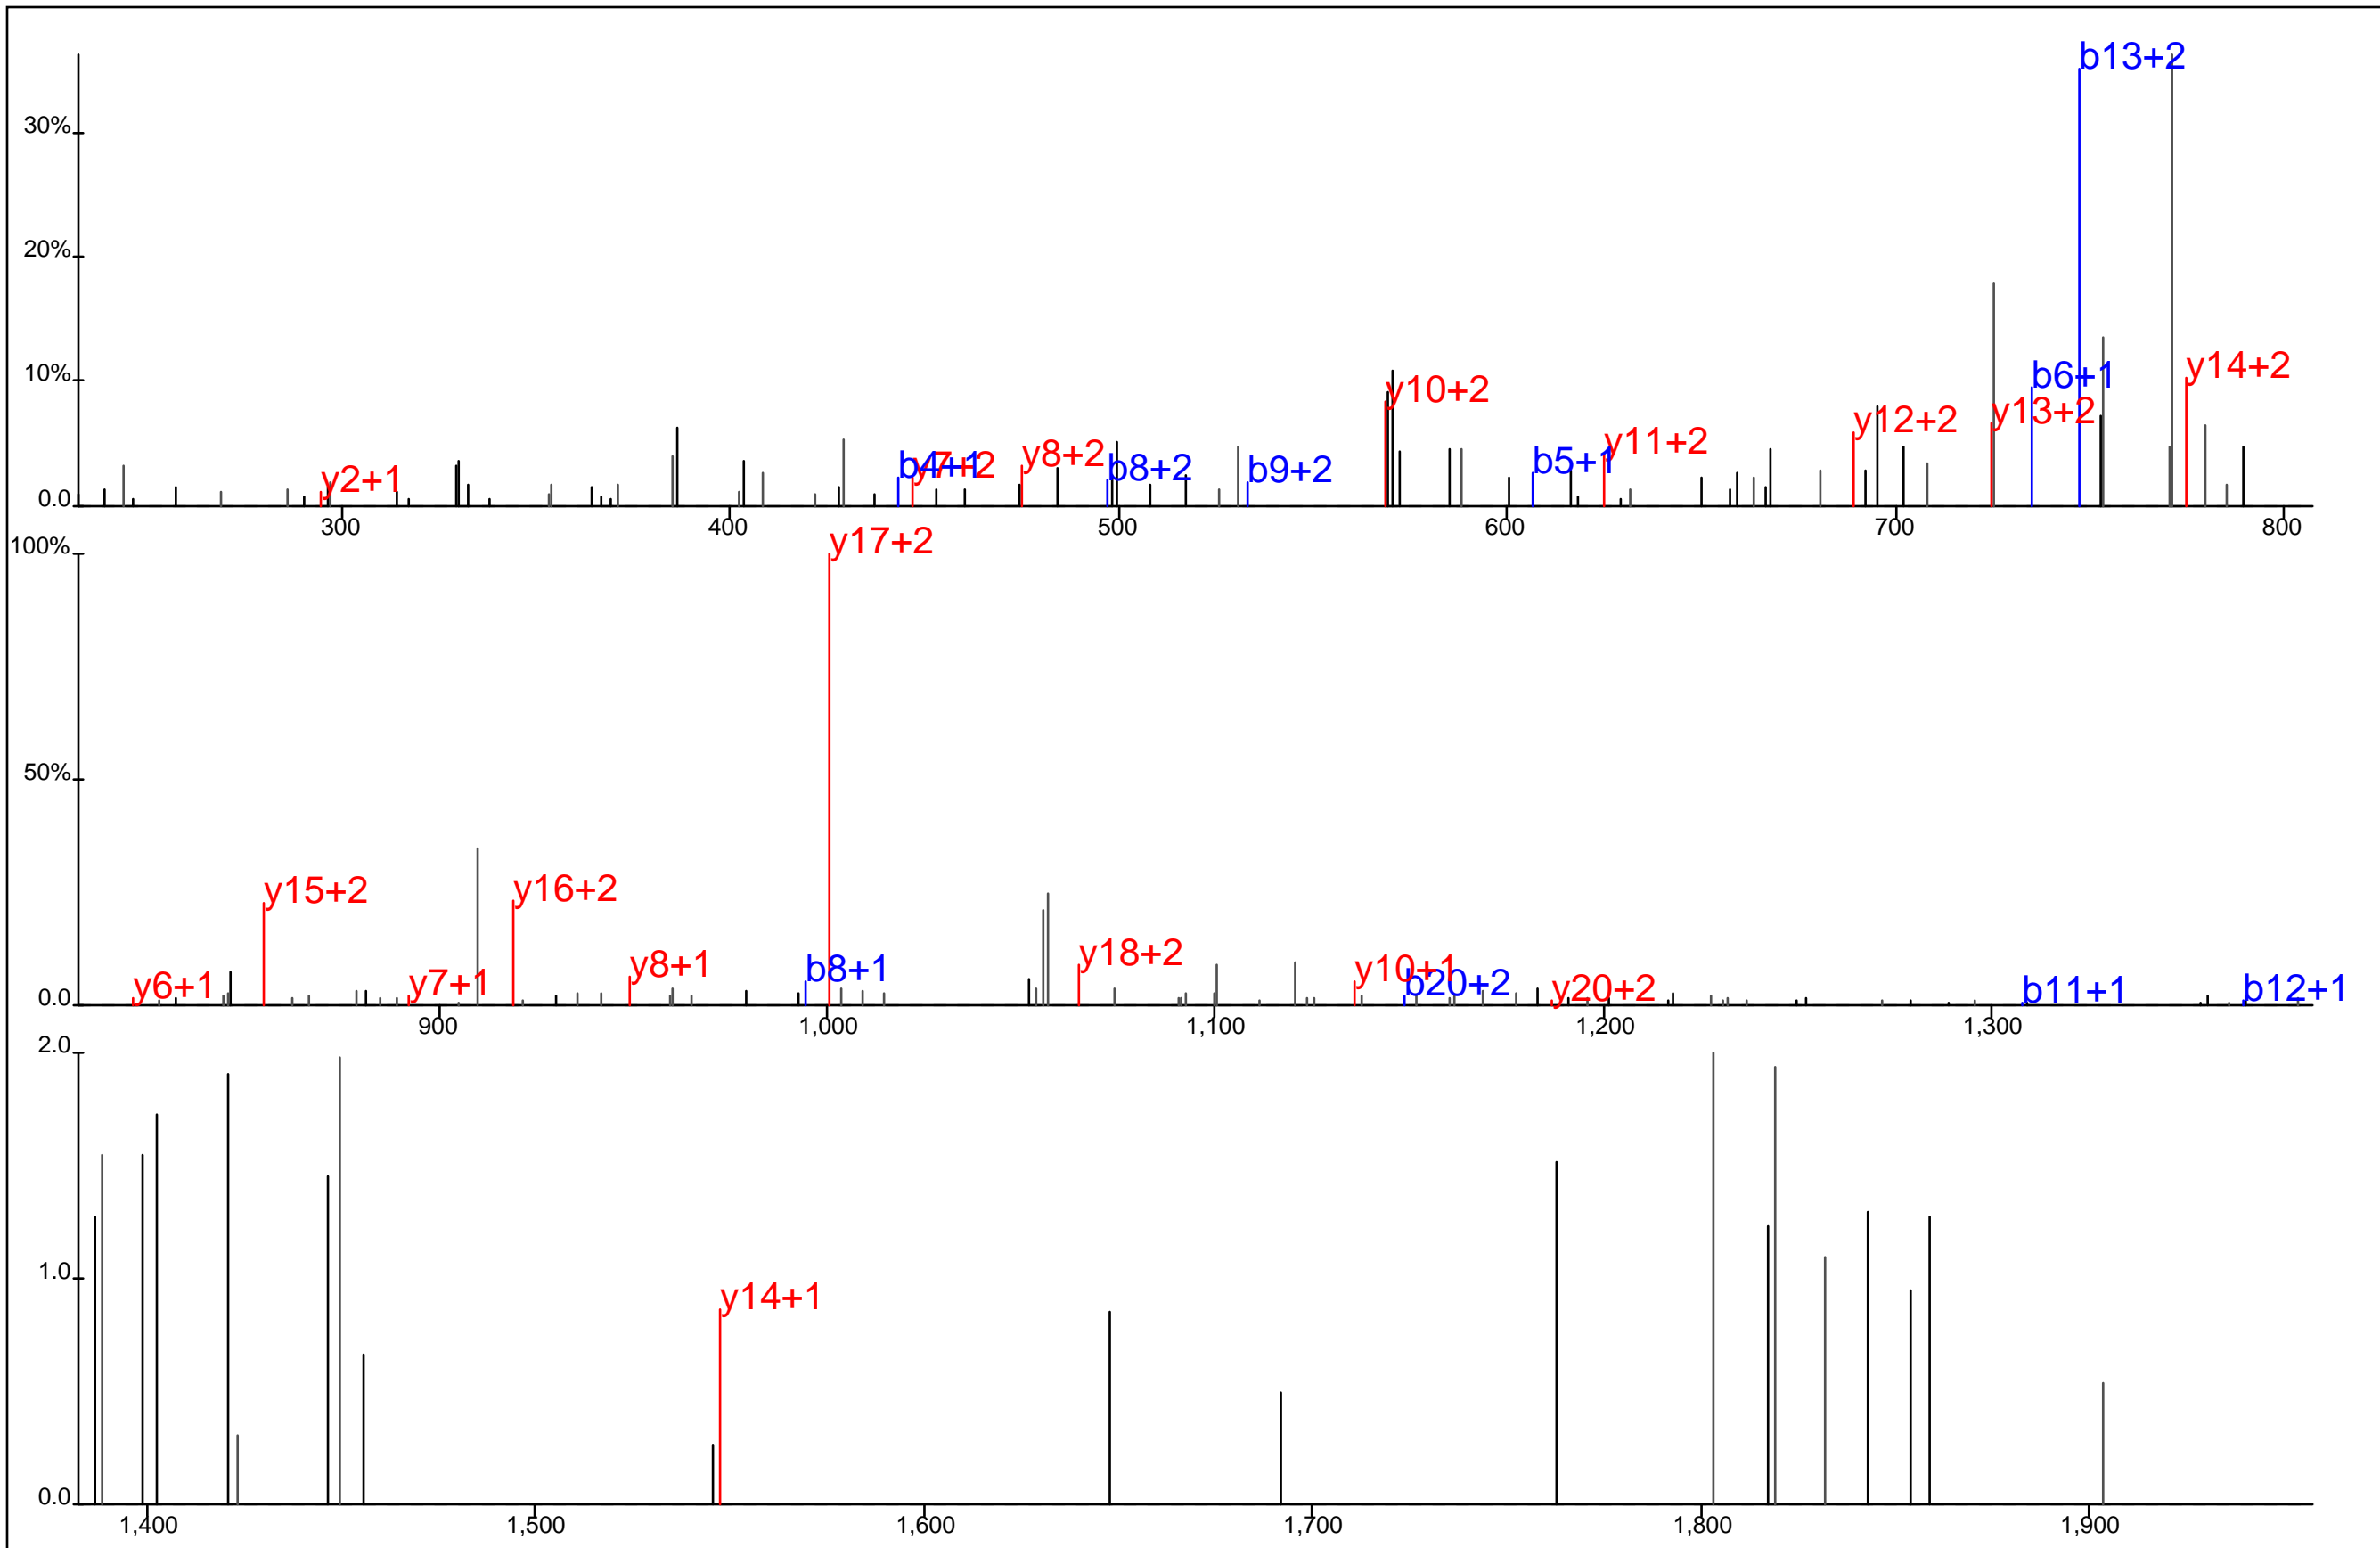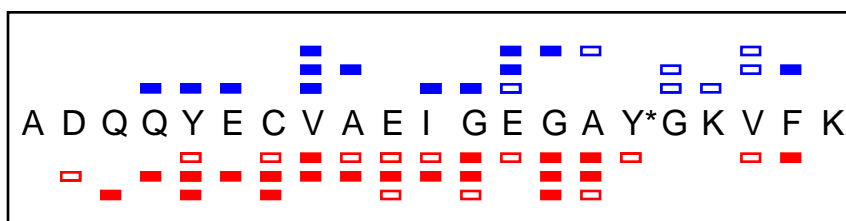

Protein Name: Cyclin dependent kinase 6  
 gi Accession: 0  
 Precursor Mass: 814.6940+3  
 Delta Mass: 0.308 ppm  
 XCorr: 23.06

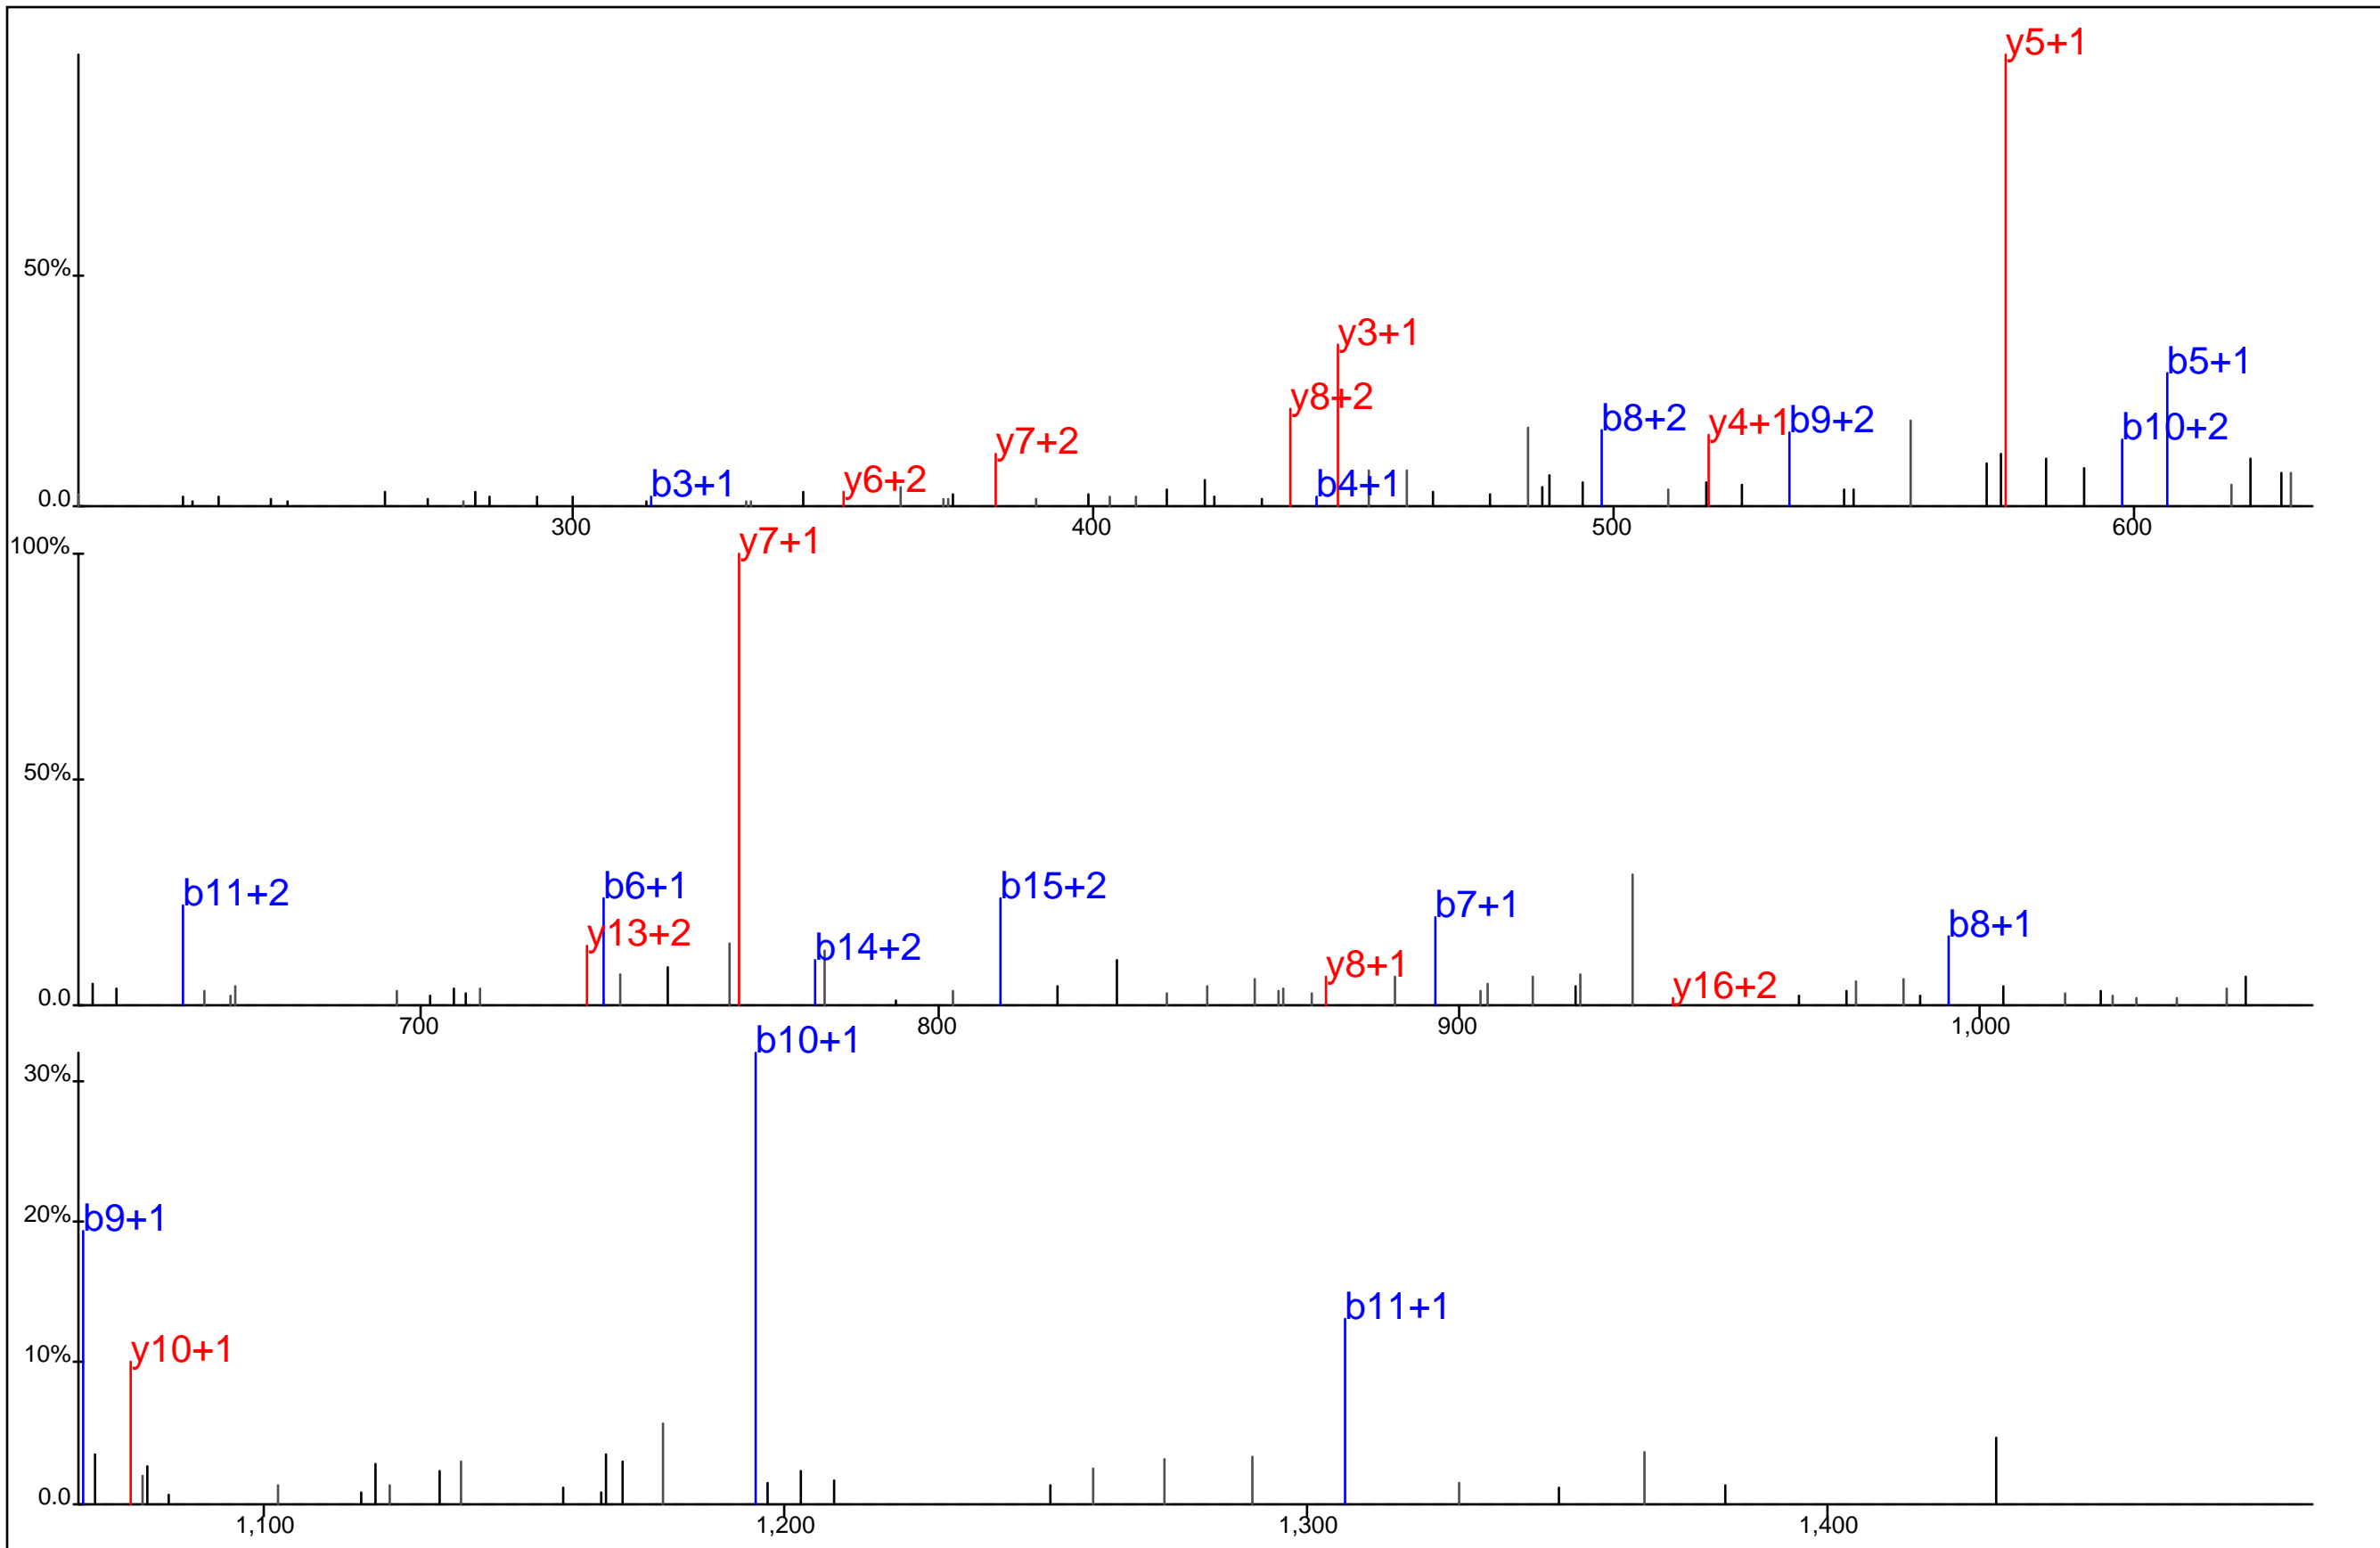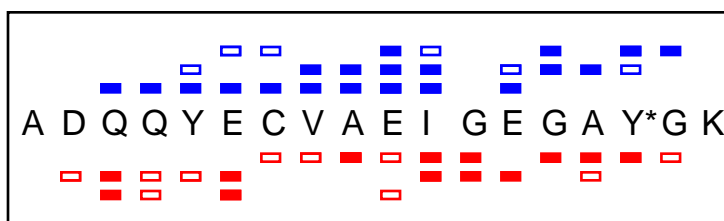

Protein Name: Cyclin dependent kinase 6  
 gi Accession: 0  
 Precursor Mass: 689.9507+3  
 Delta Mass: 0.571 ppm  
 XCorr: 51.84

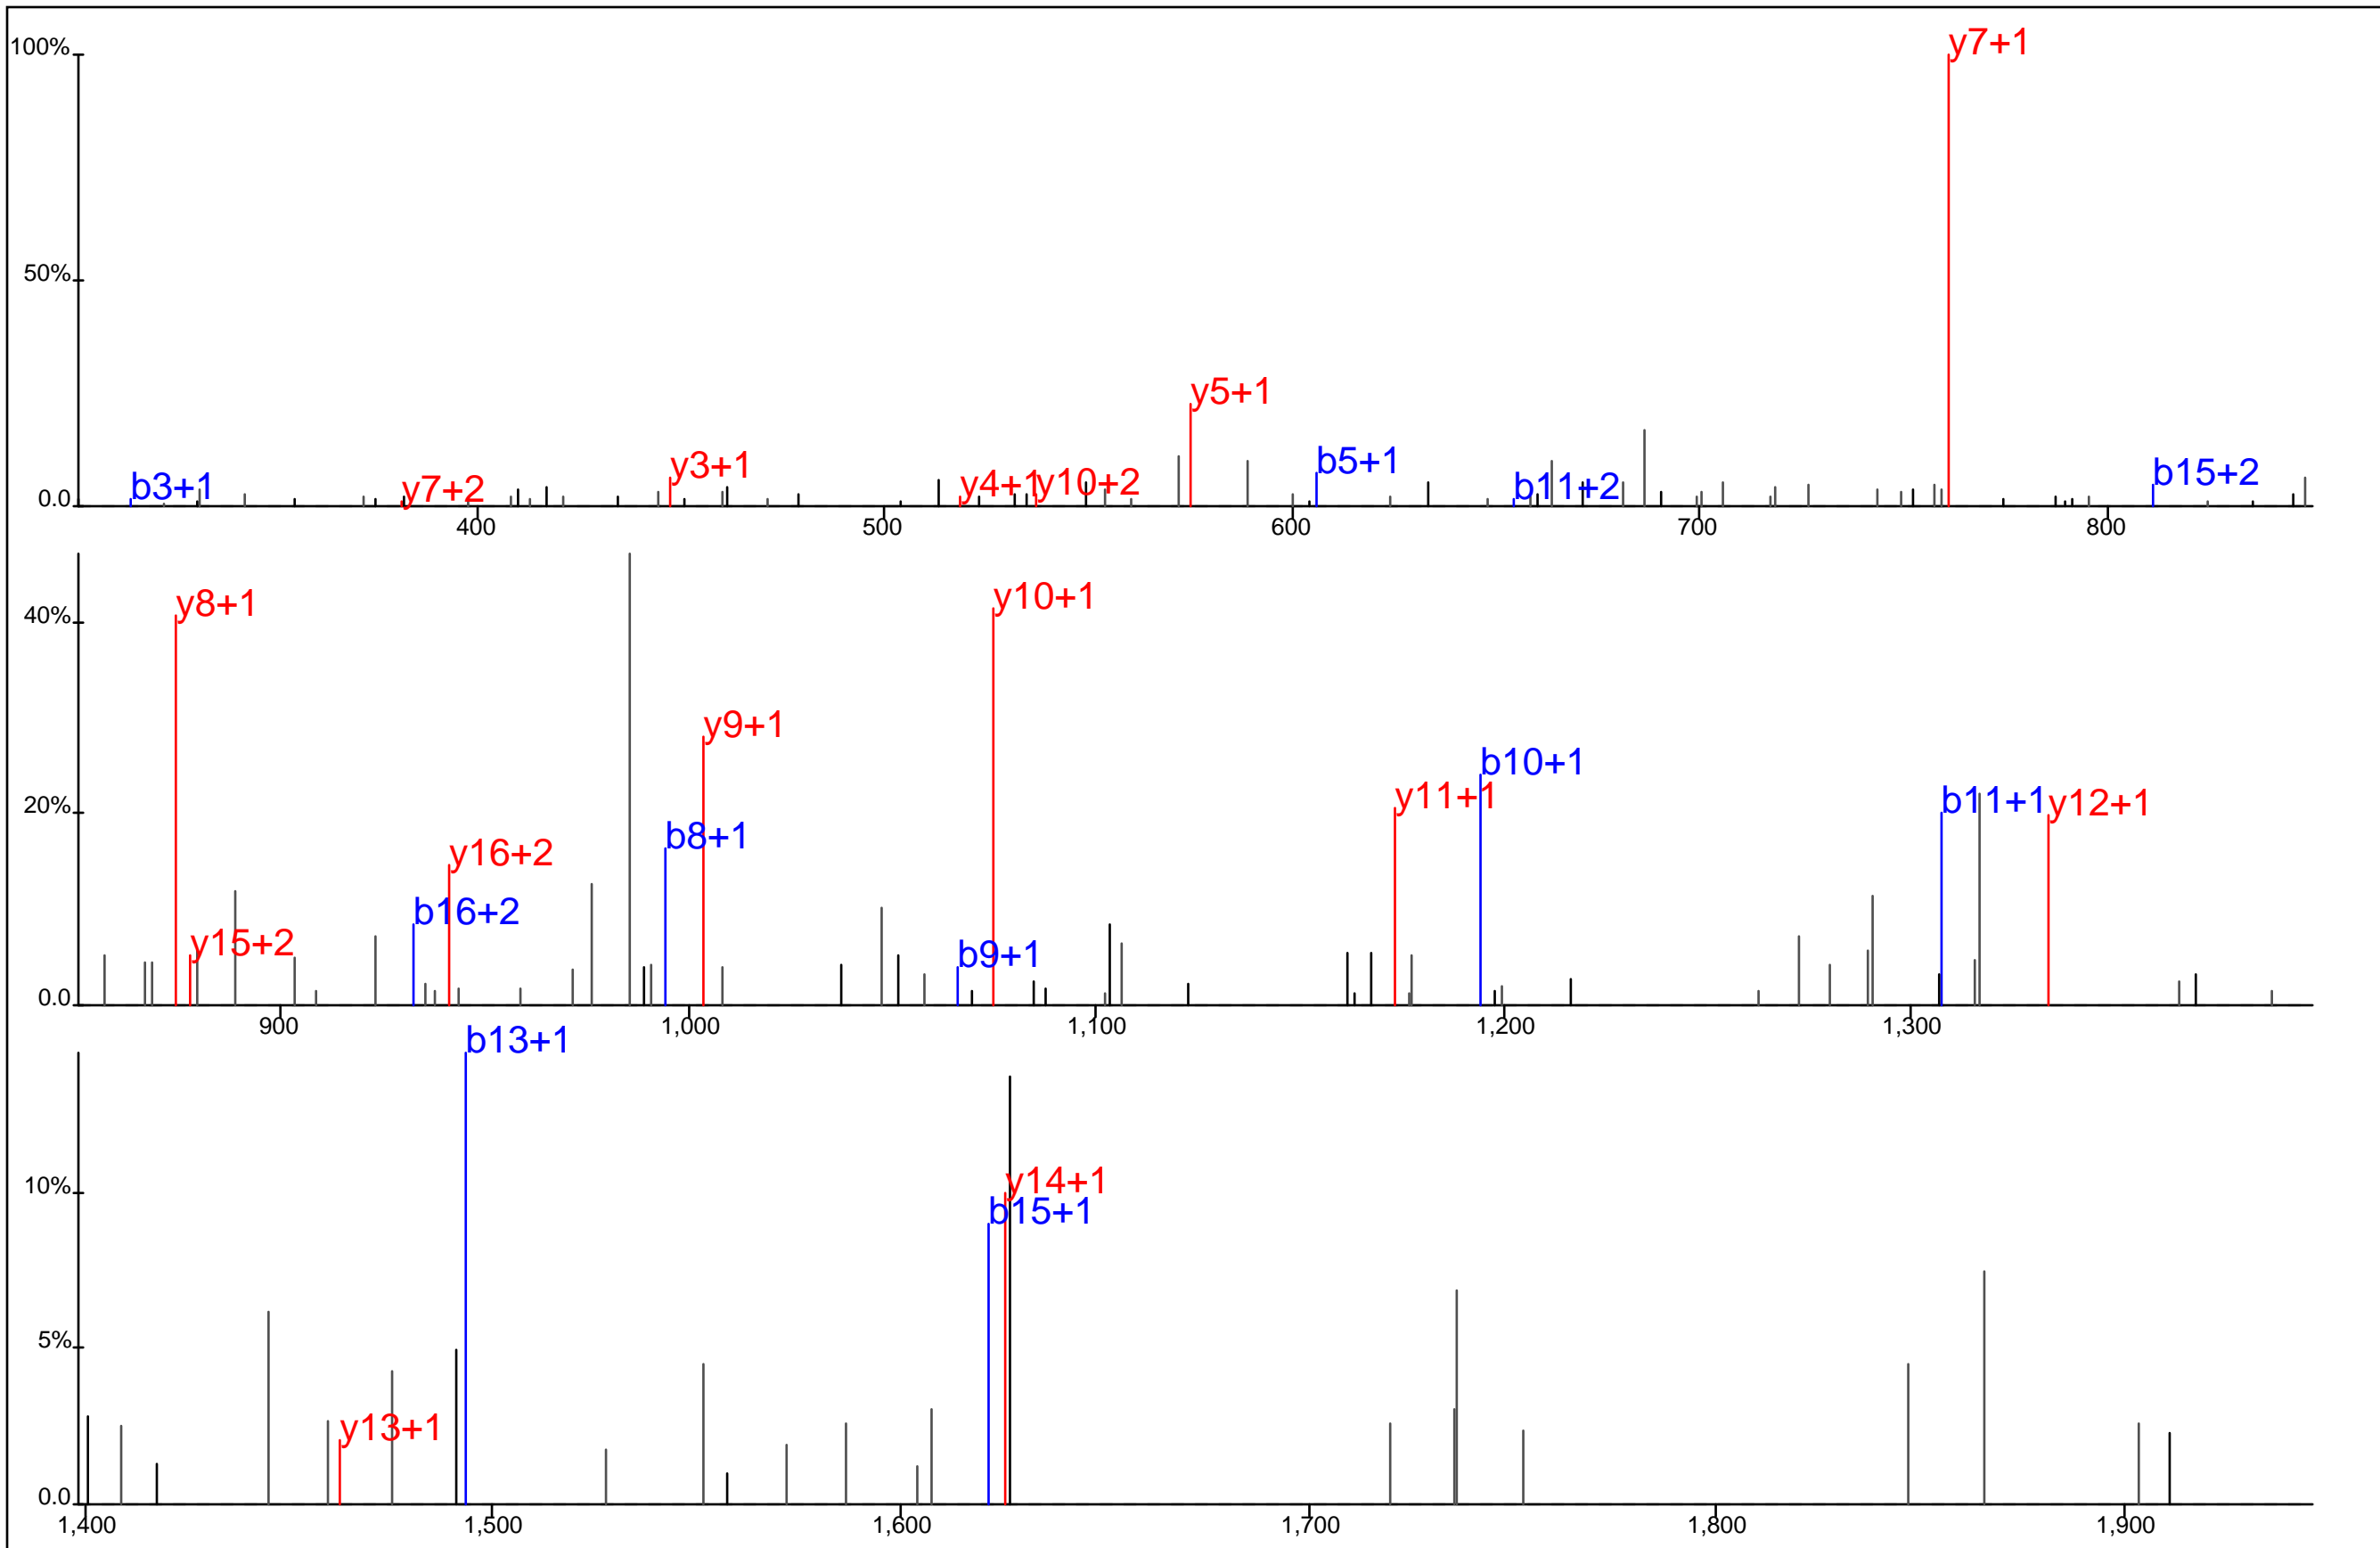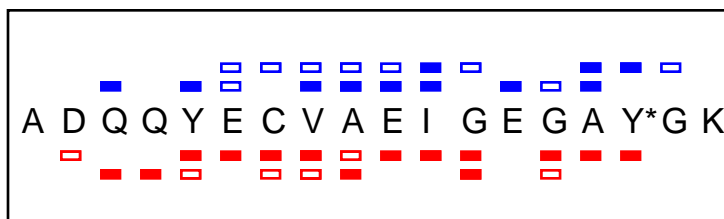

Protein Name: Cyclin dependent kinase 6  
 gi Accession: 0  
 Precursor Mass: 1,034.4203+2  
 Delta Mass: 1.548 ppm  
 XCorr: 46.37

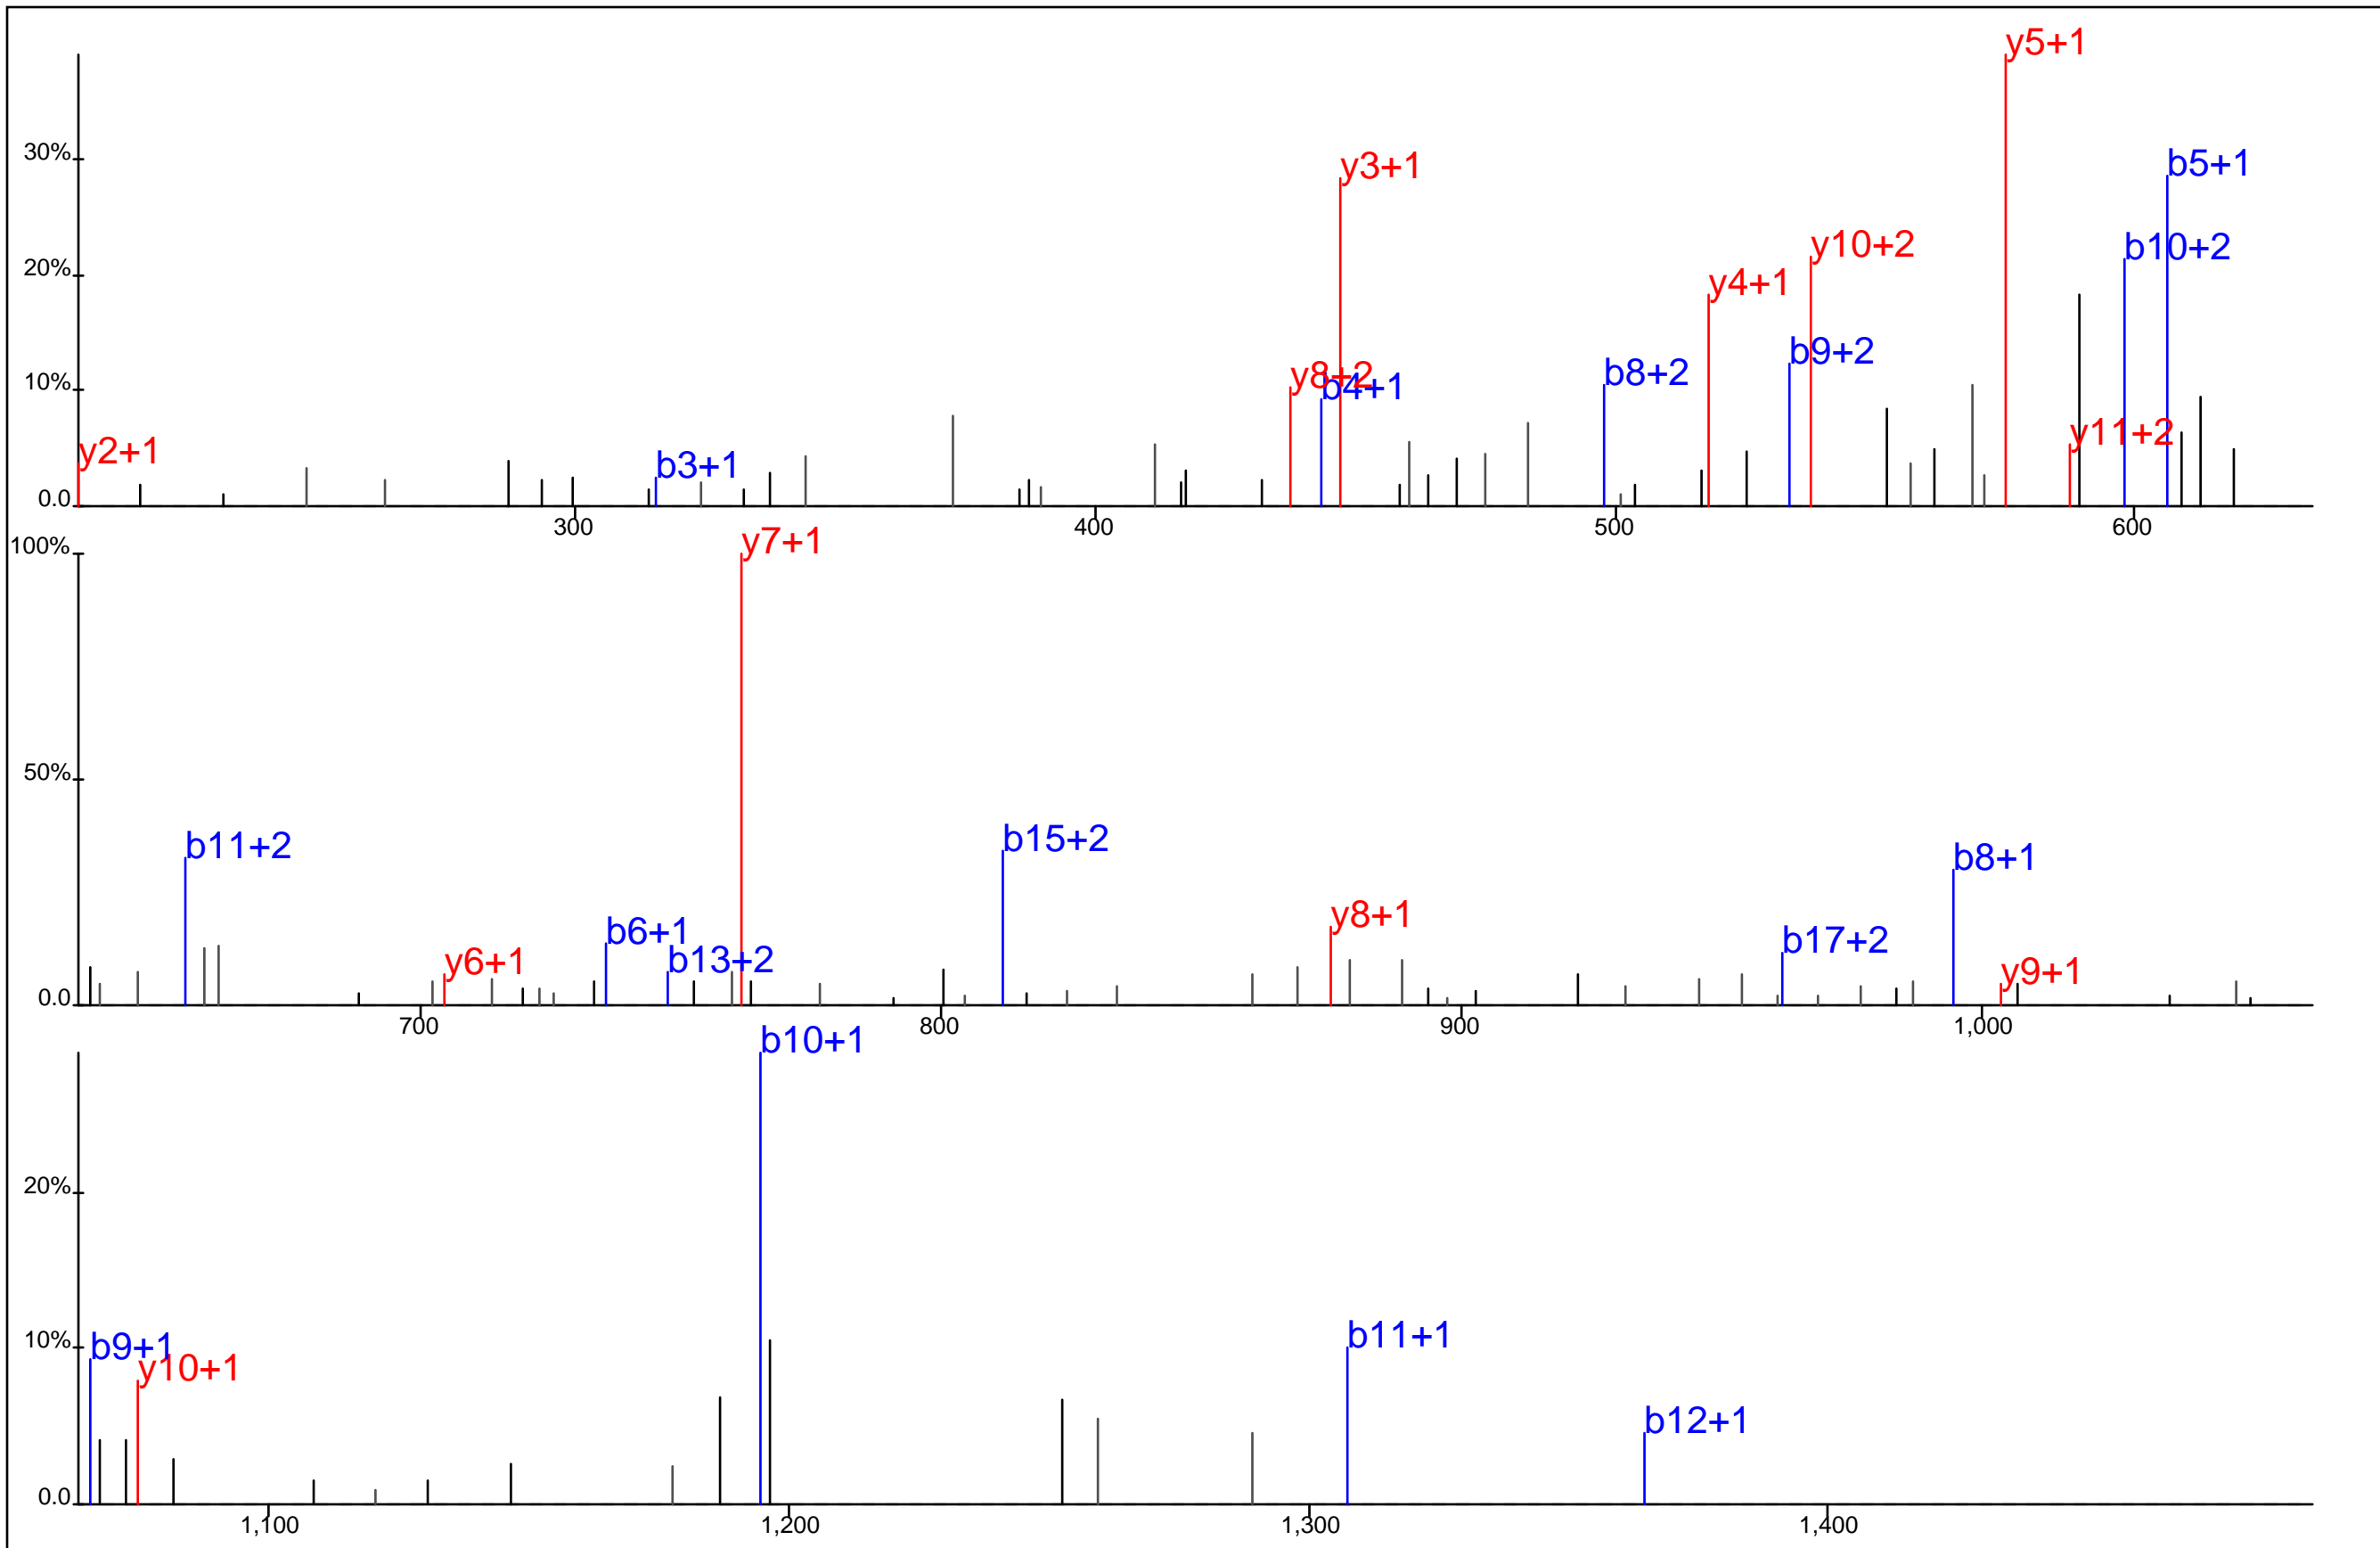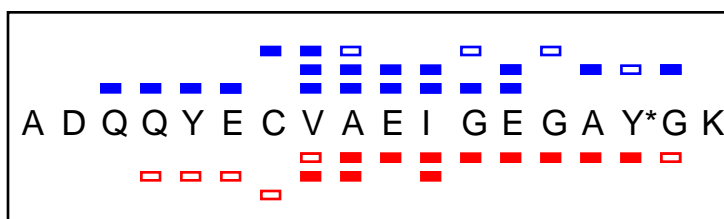

Protein Name: Cyclin dependent kinase 6  
 gi Accession: 0  
 Precursor Mass: 689.9506+3  
 Delta Mass: 0.394 ppm  
 XCorr: 63.9

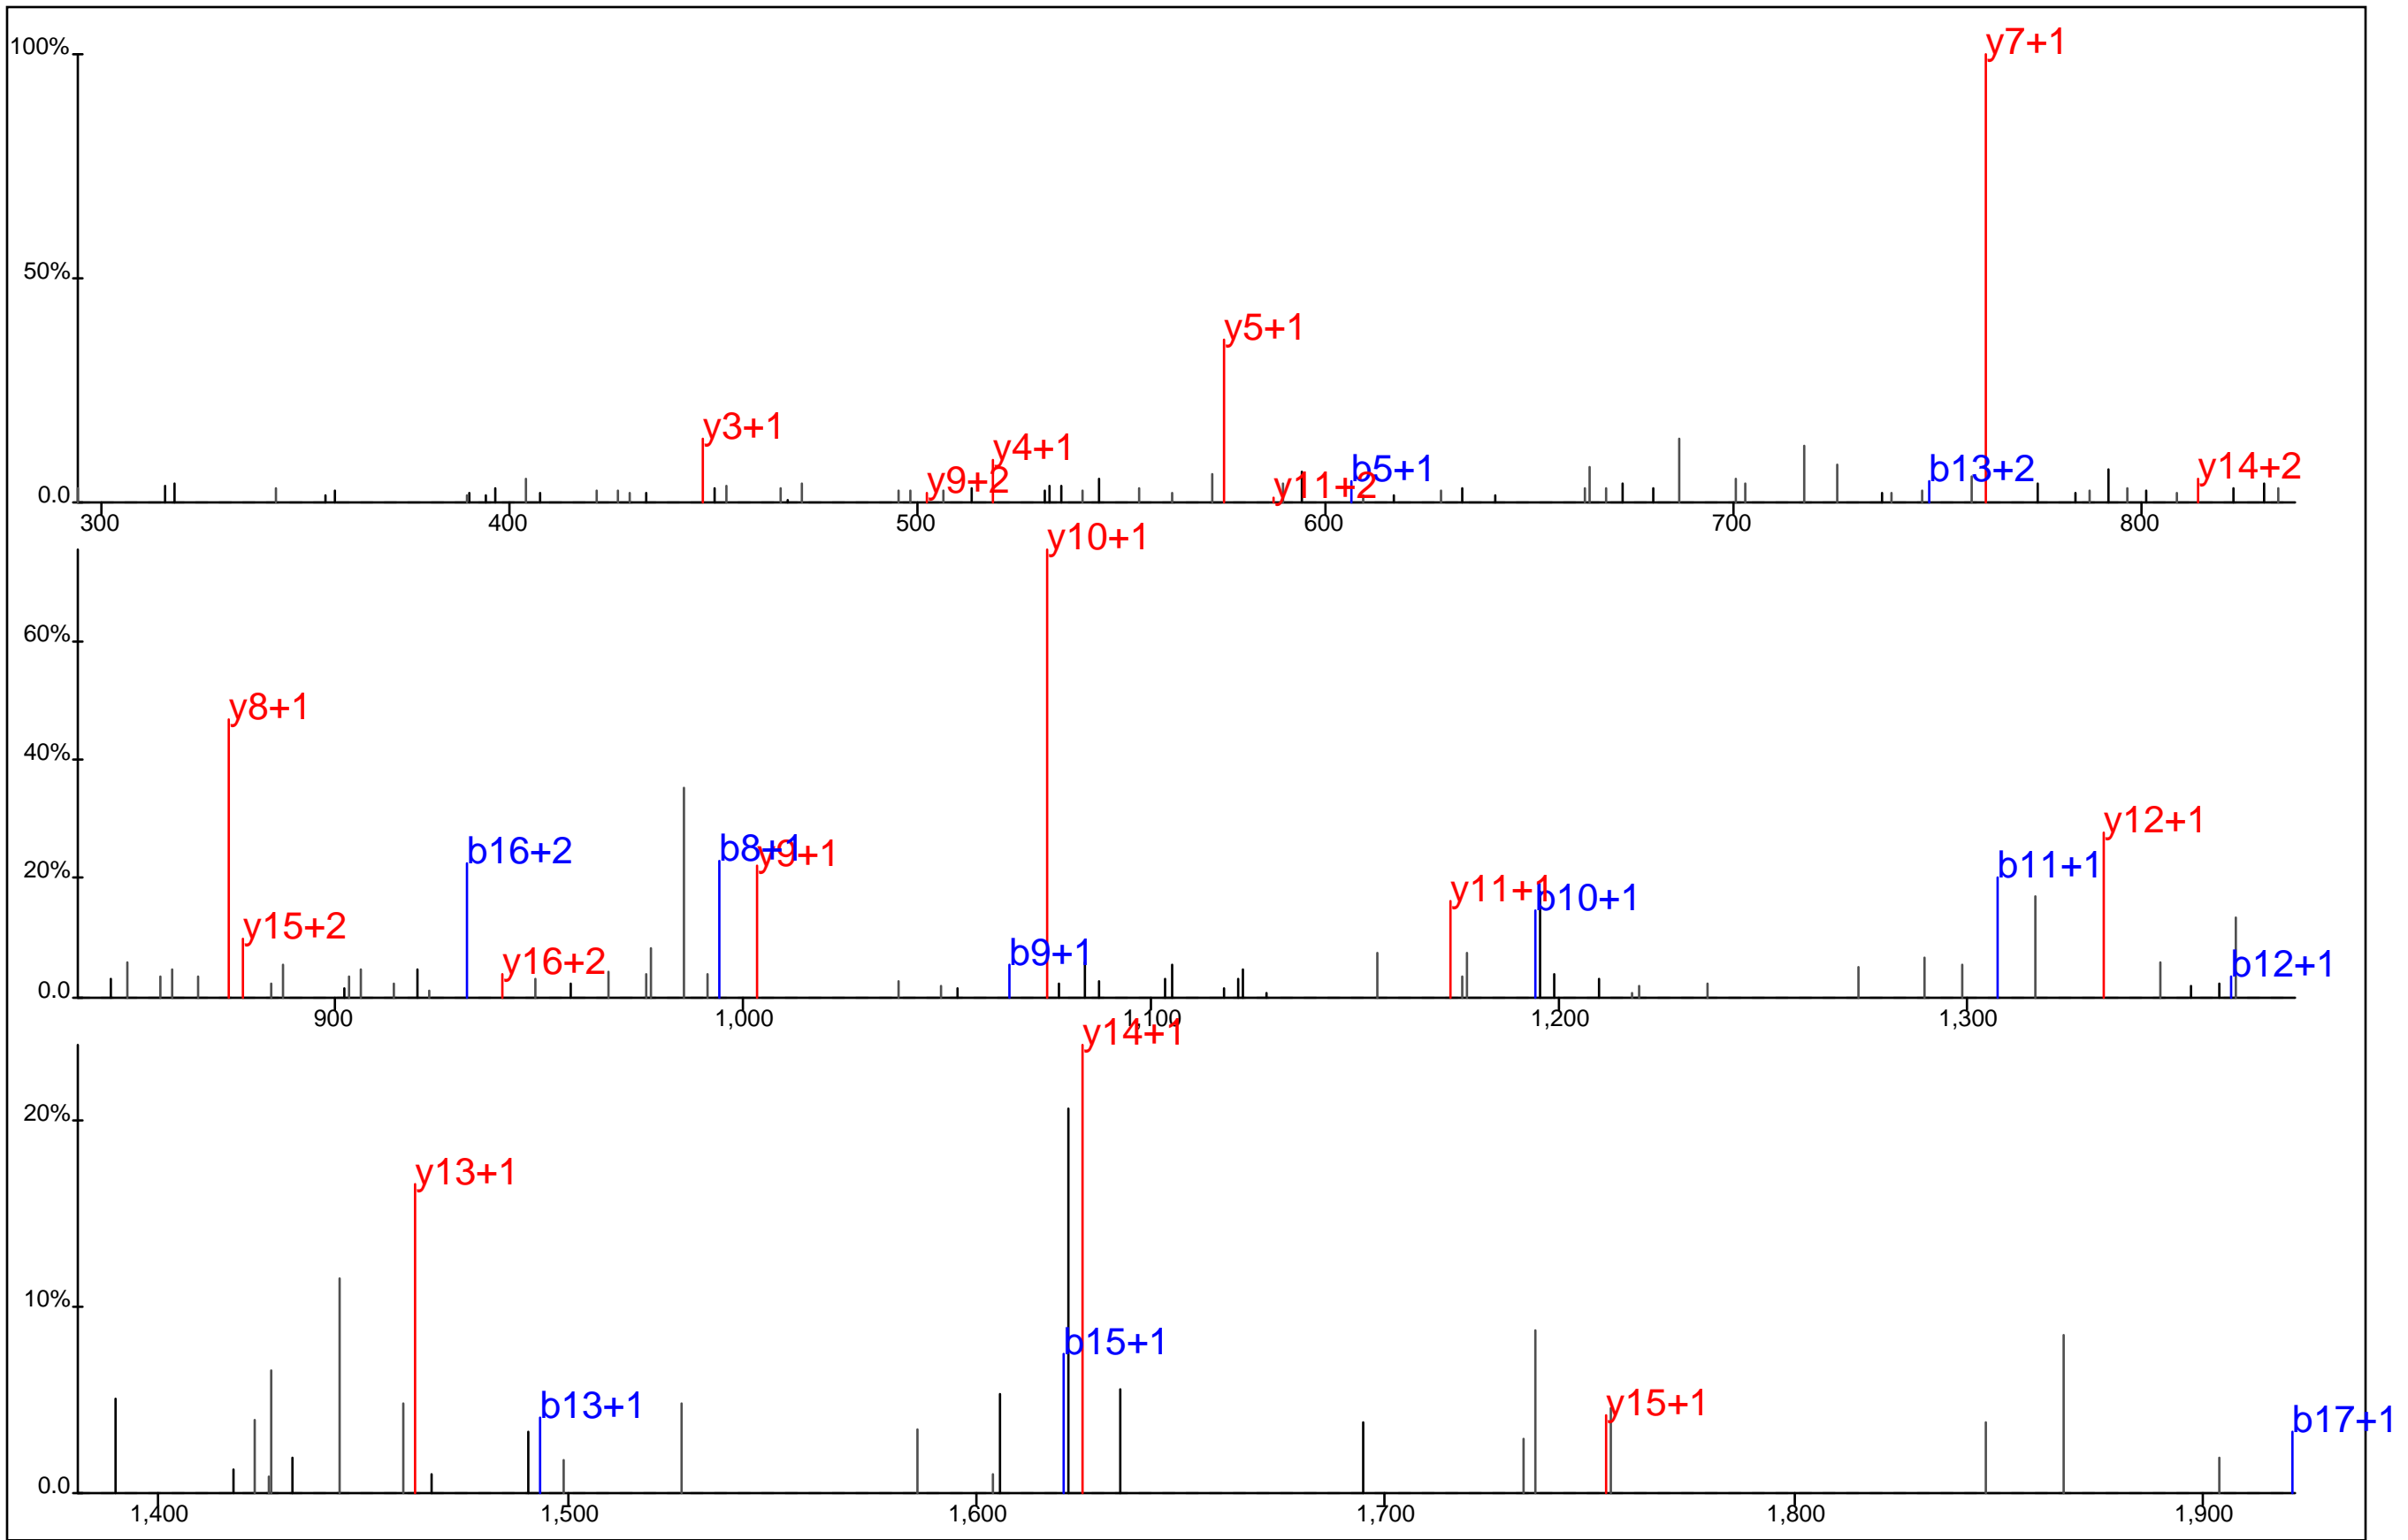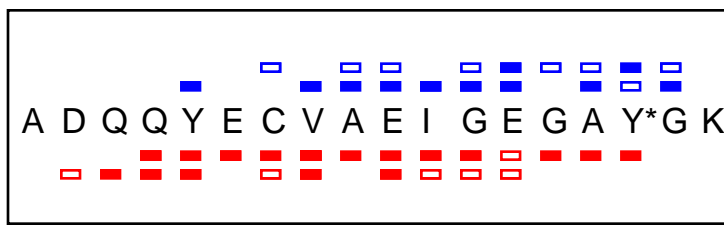

Protein Name: Cyclin dependent kinase 6  
 gi Accession: 0  
 Precursor Mass: 1,034.4199+2  
 Delta Mass: 1.902 ppm  
 XCorr: 81.54



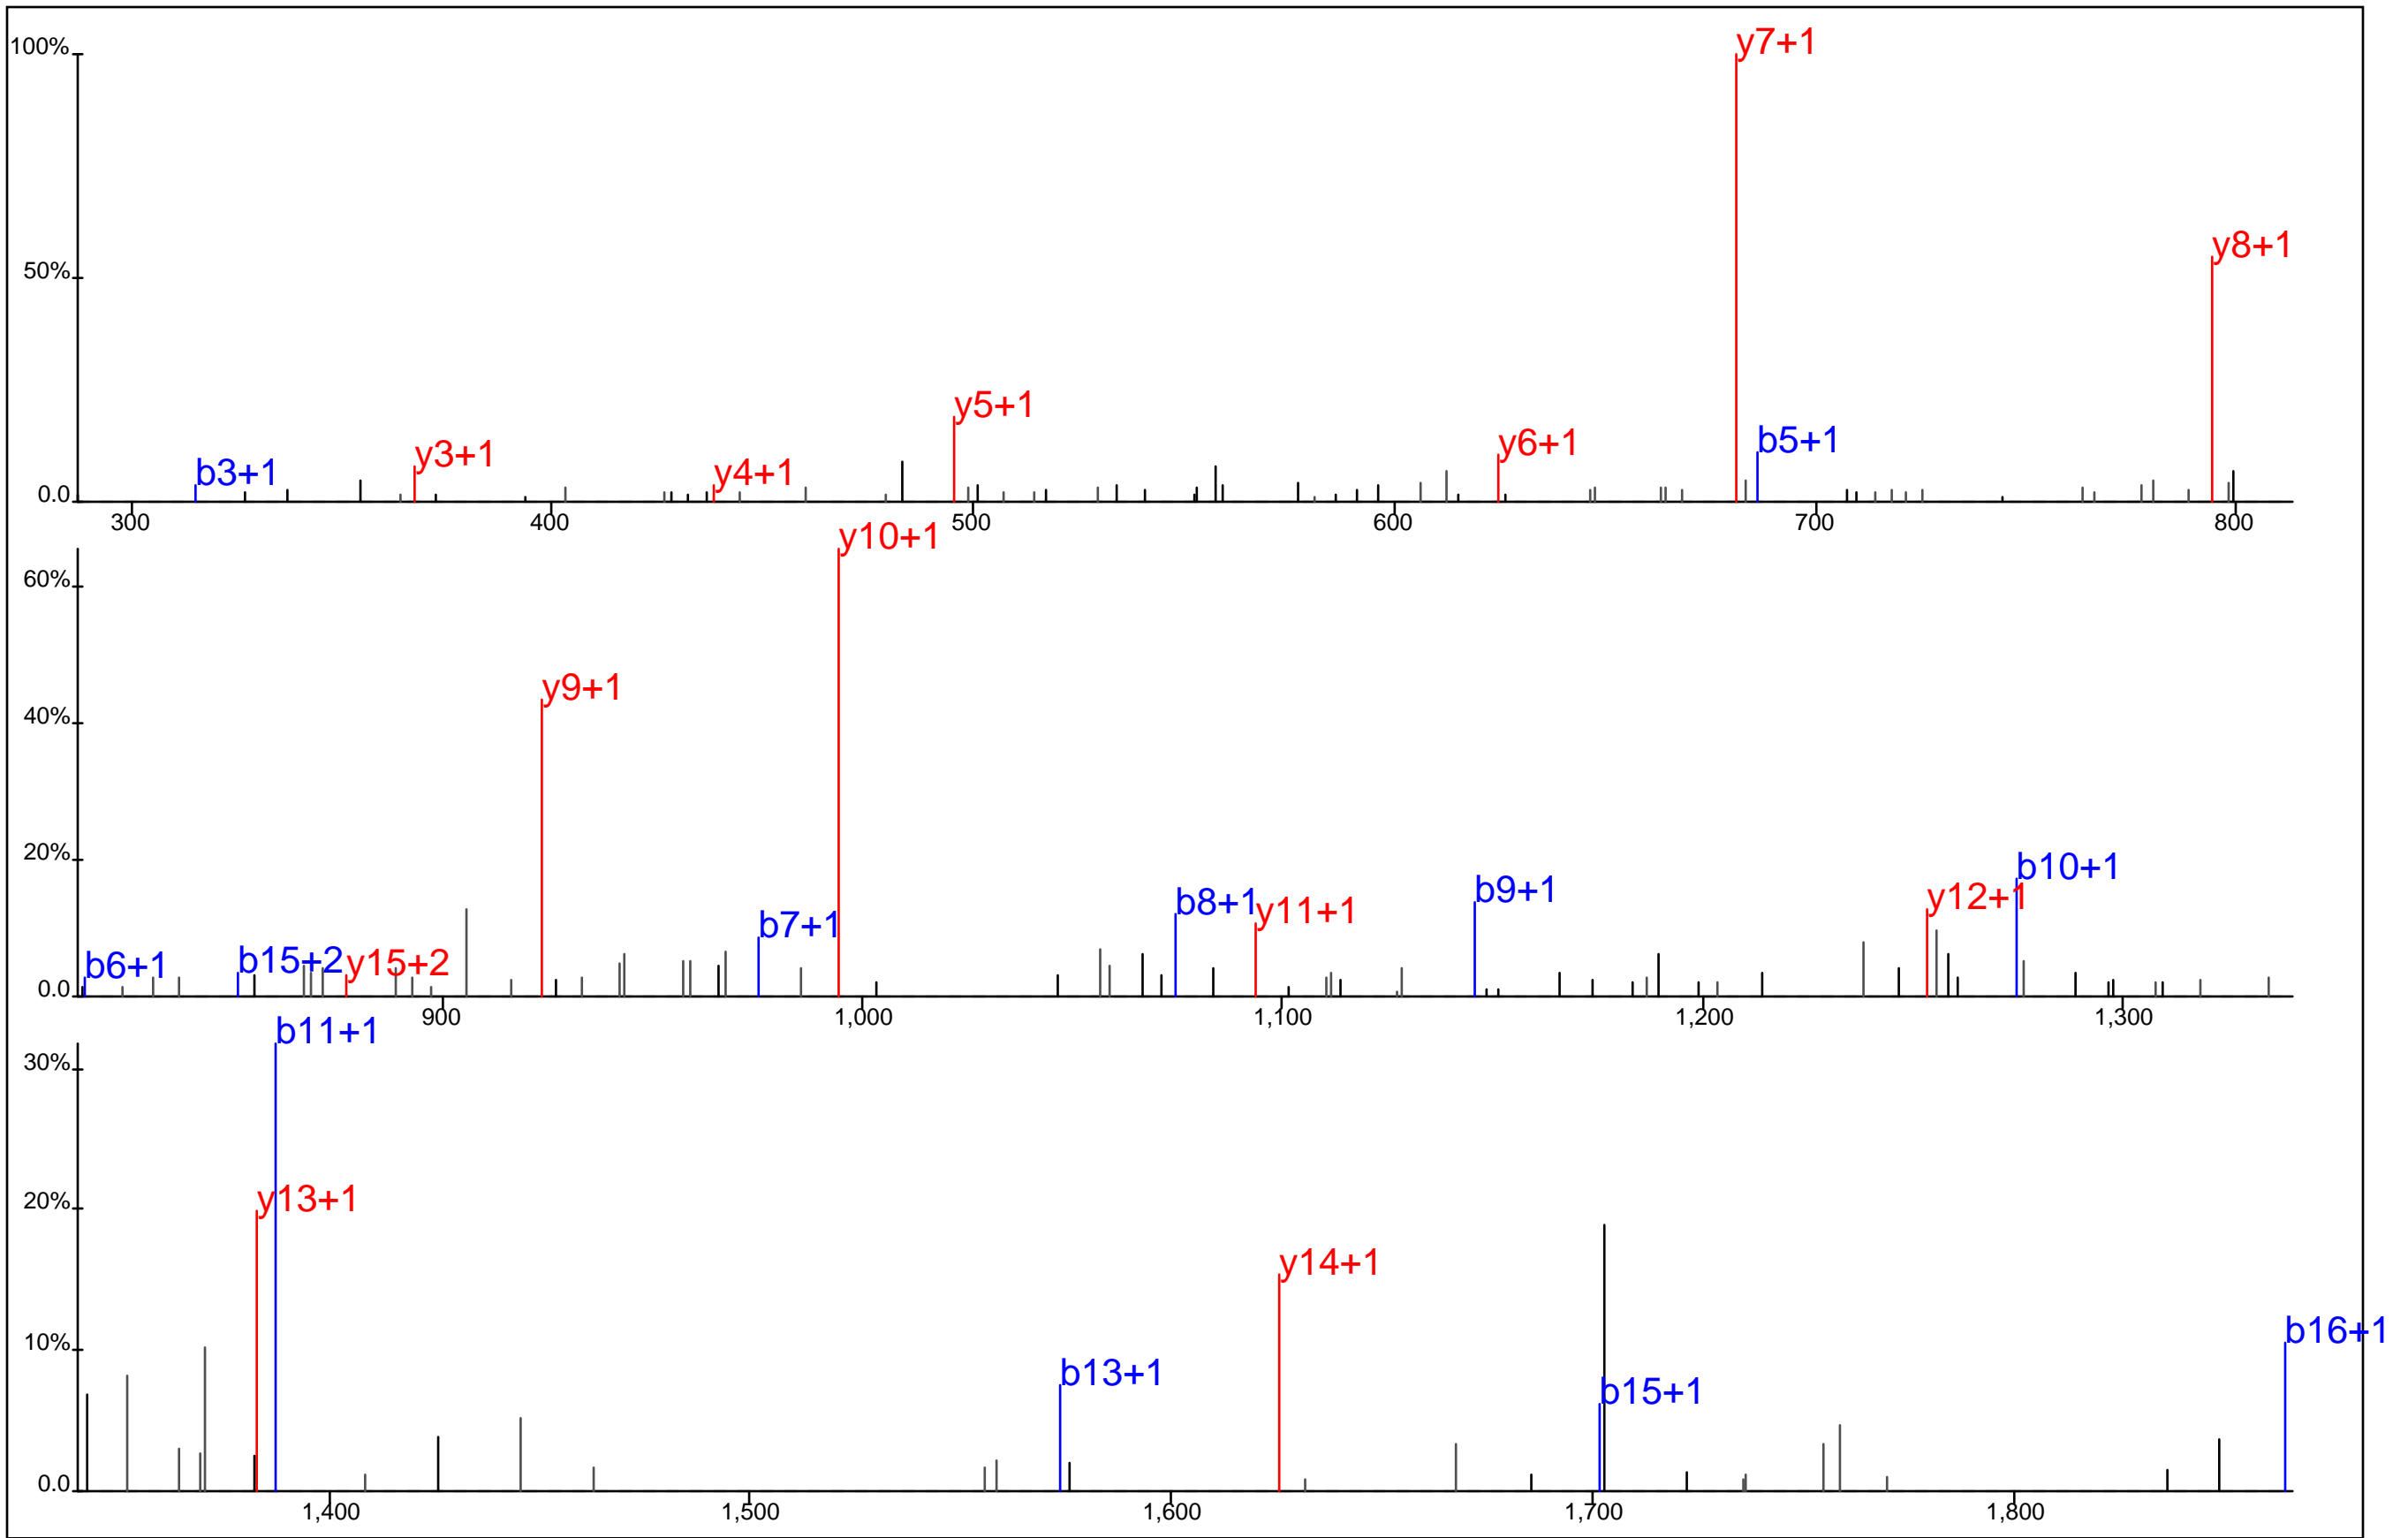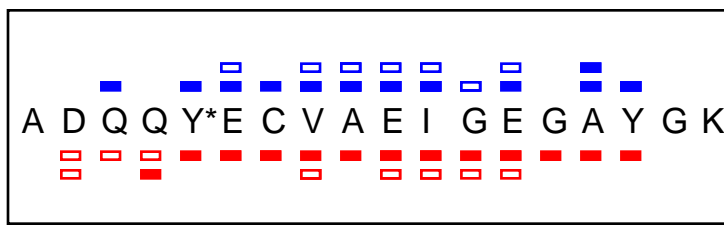

Protein Name: Cyclin dependent kinase 6  
 gi Accession: 0  
 Precursor Mass: 1,034.4222+2  
 Delta Mass: 0.340 ppm  
 XCorr: 81.16

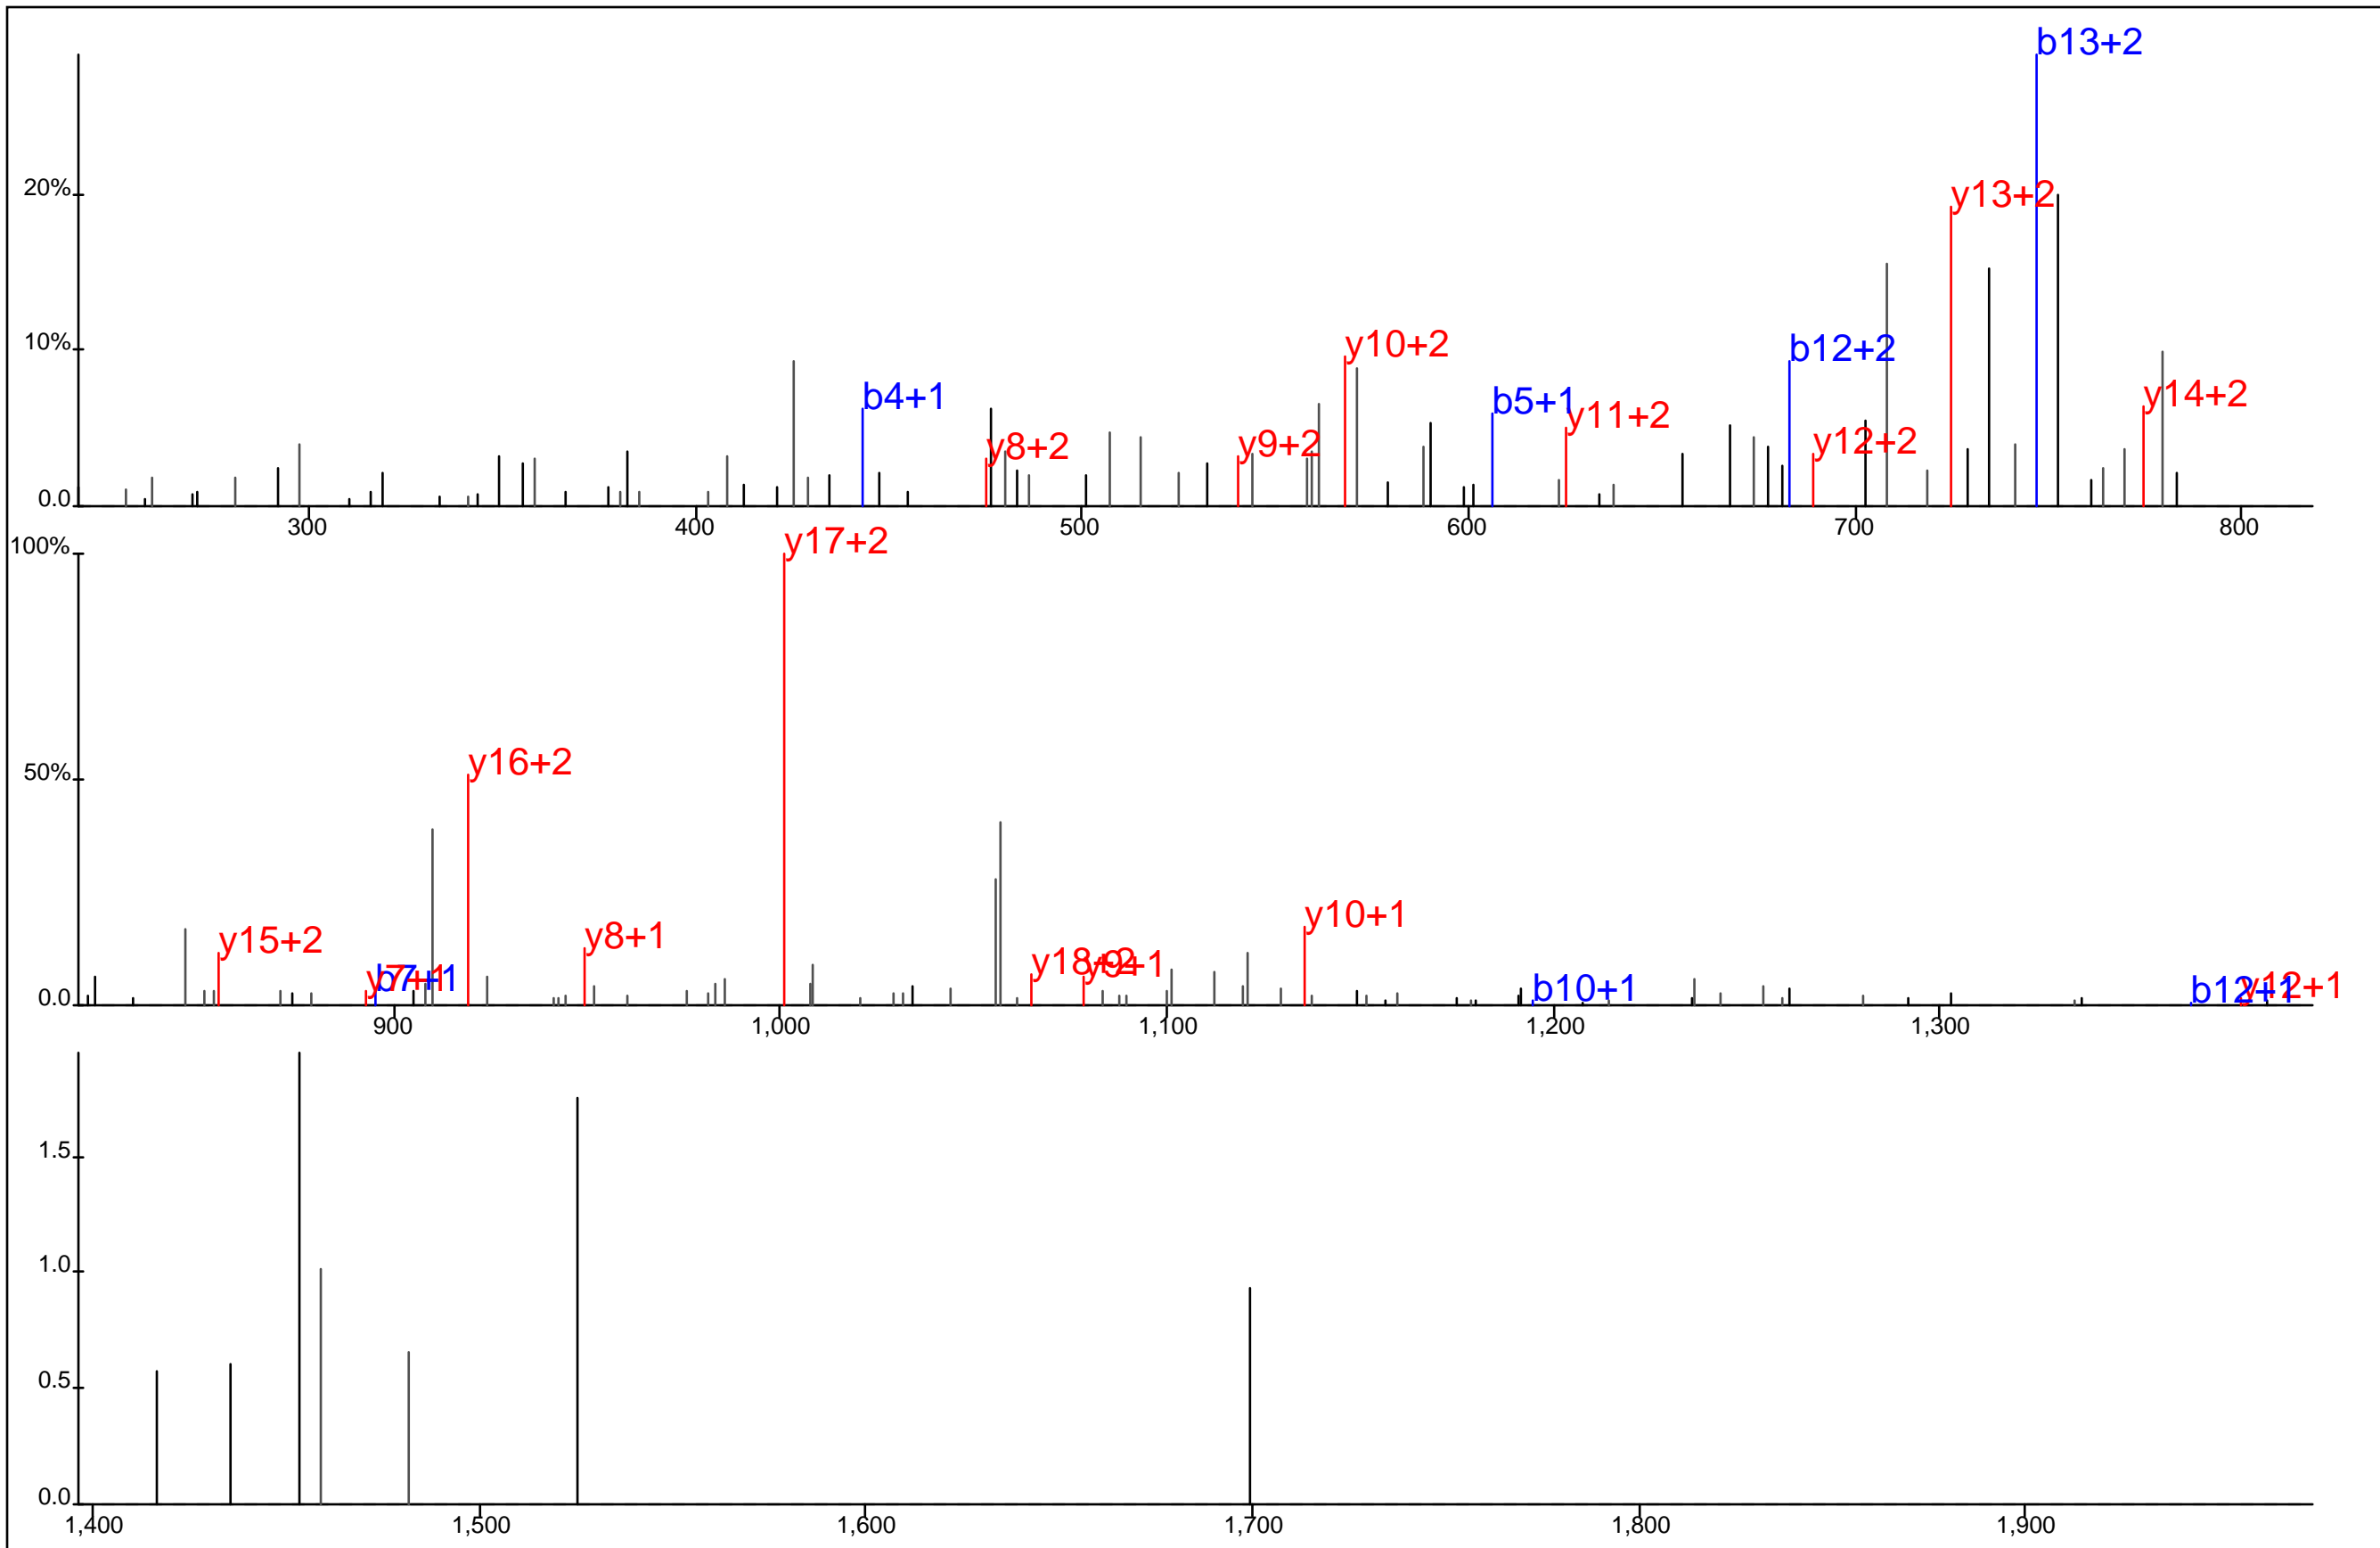

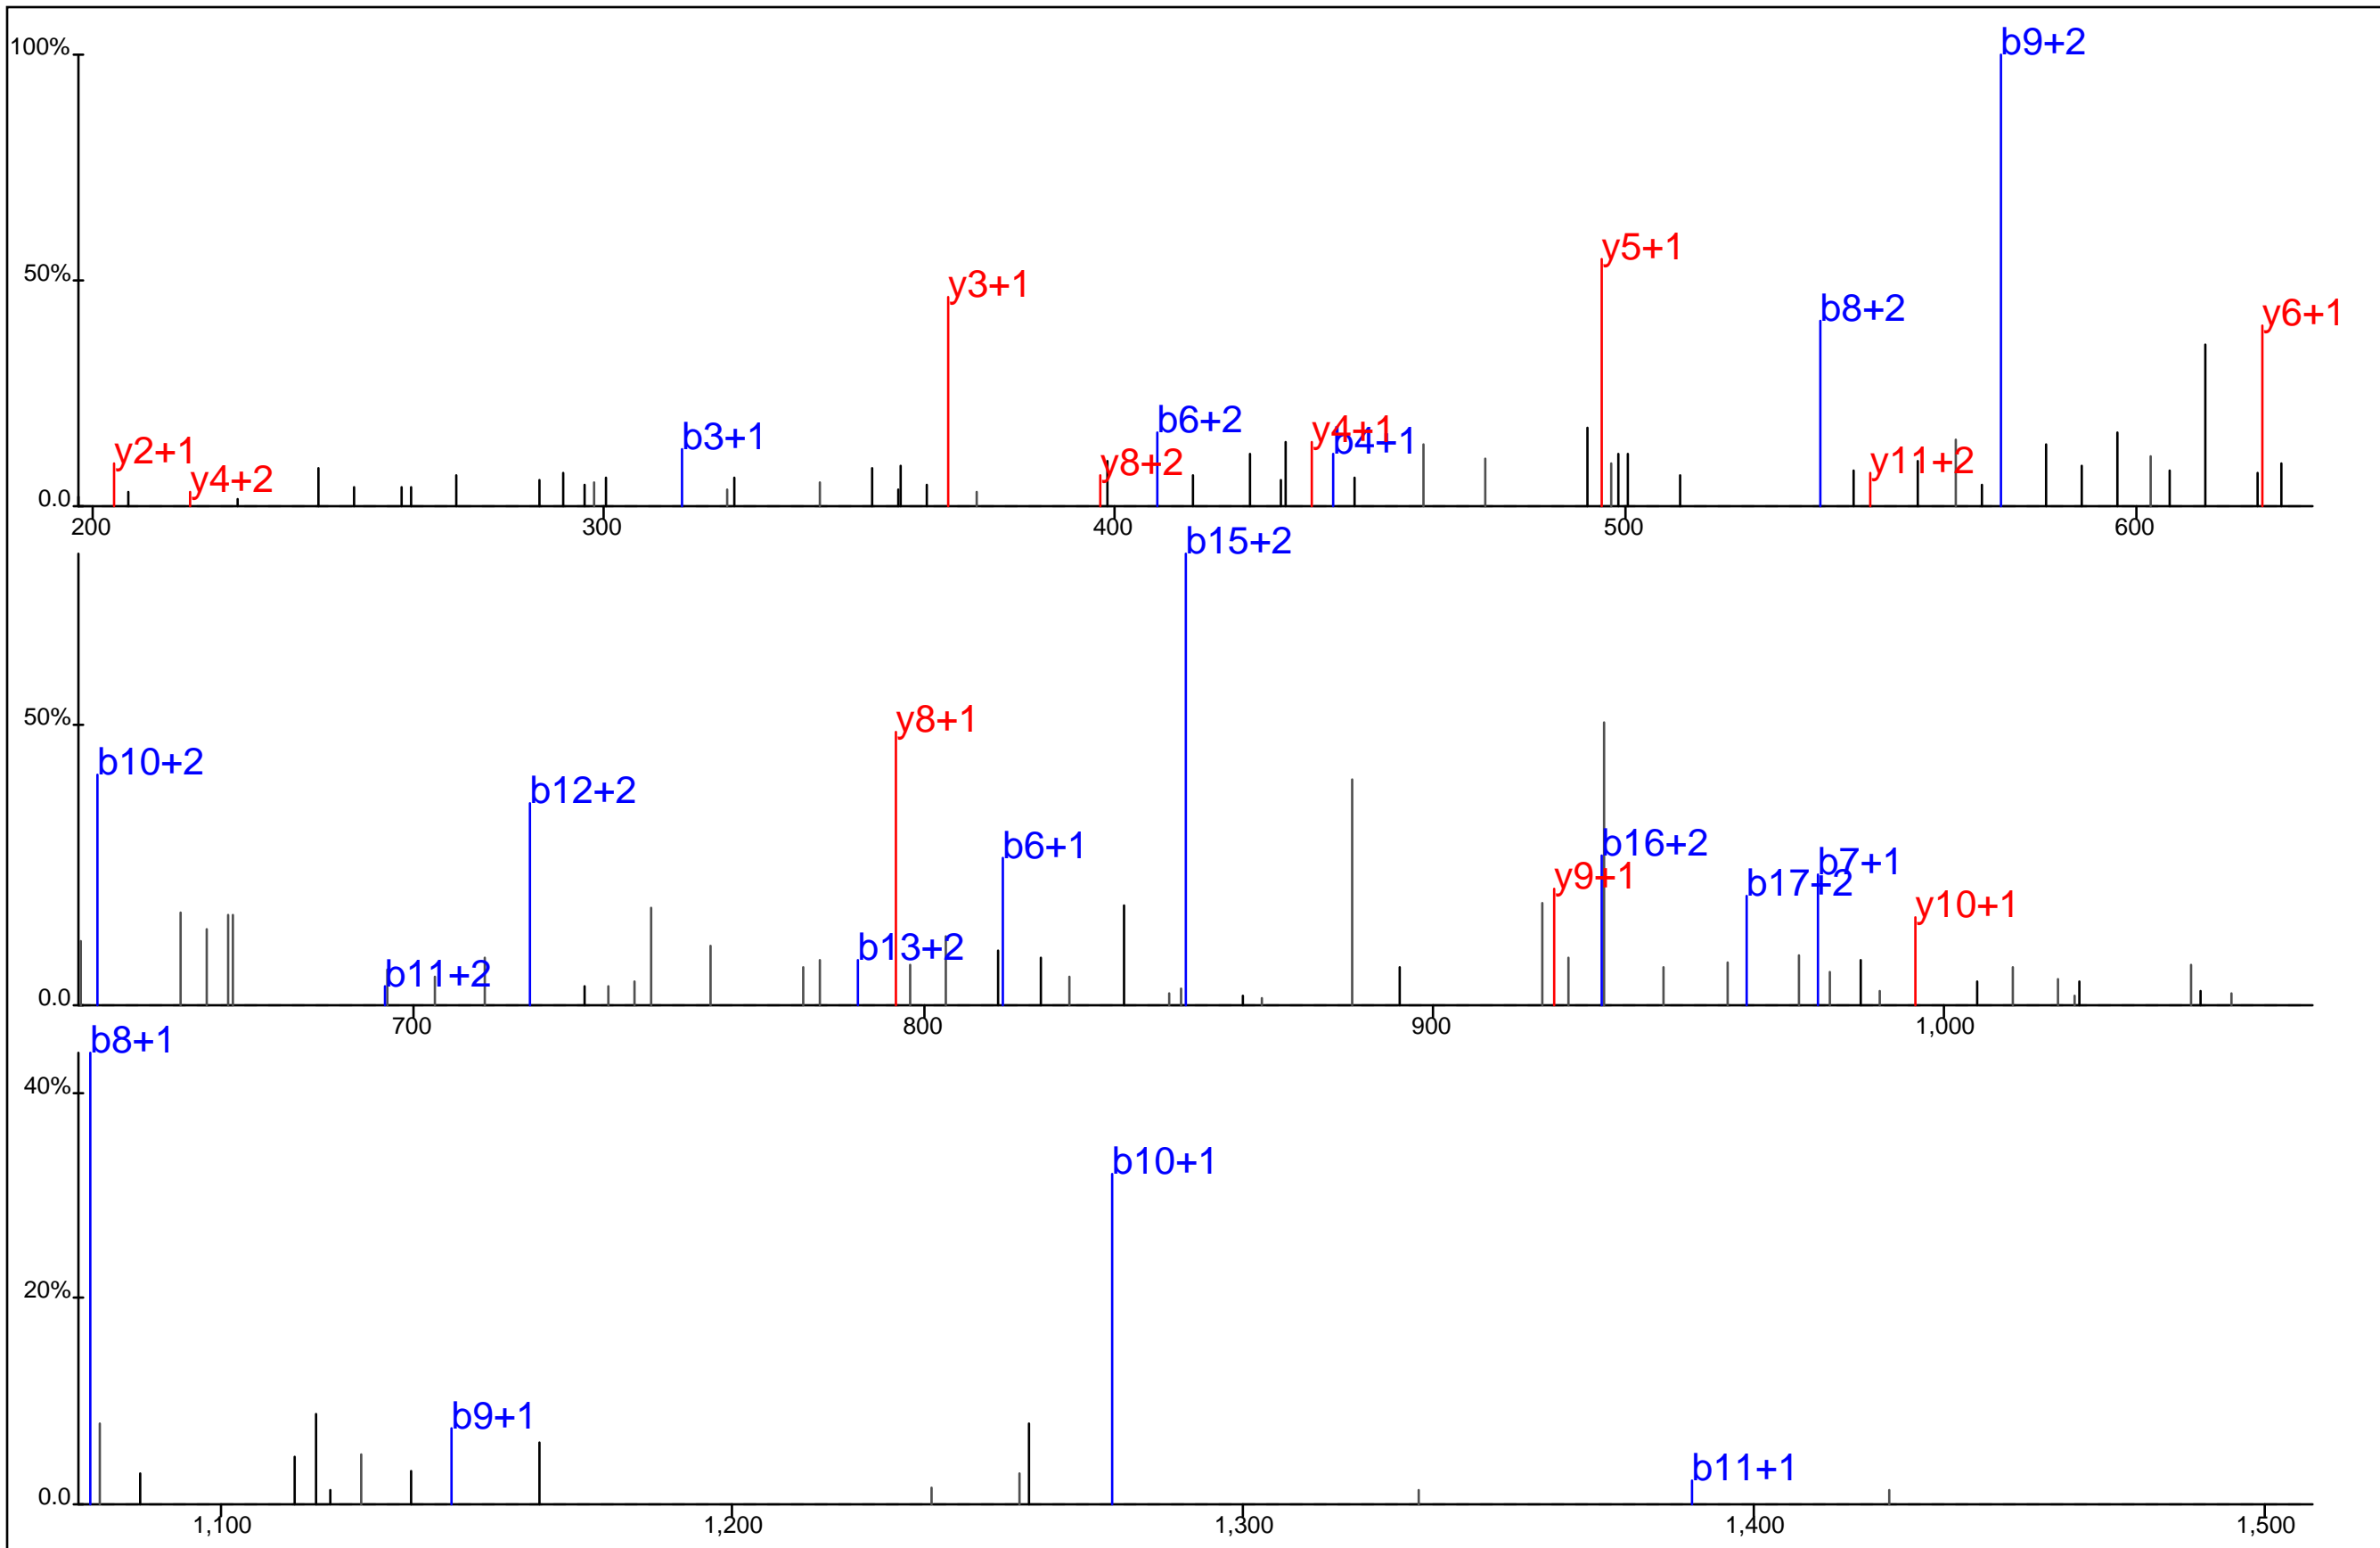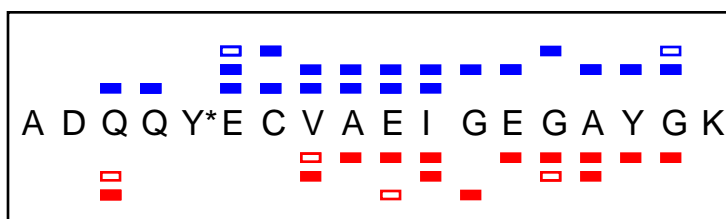

Protein Name: Cyclin dependent kinase 6  
 gi Accession: 0  
 Precursor Mass: 689.9510+3  
 Delta Mass: 1.014 ppm  
 XCorr: 47.43

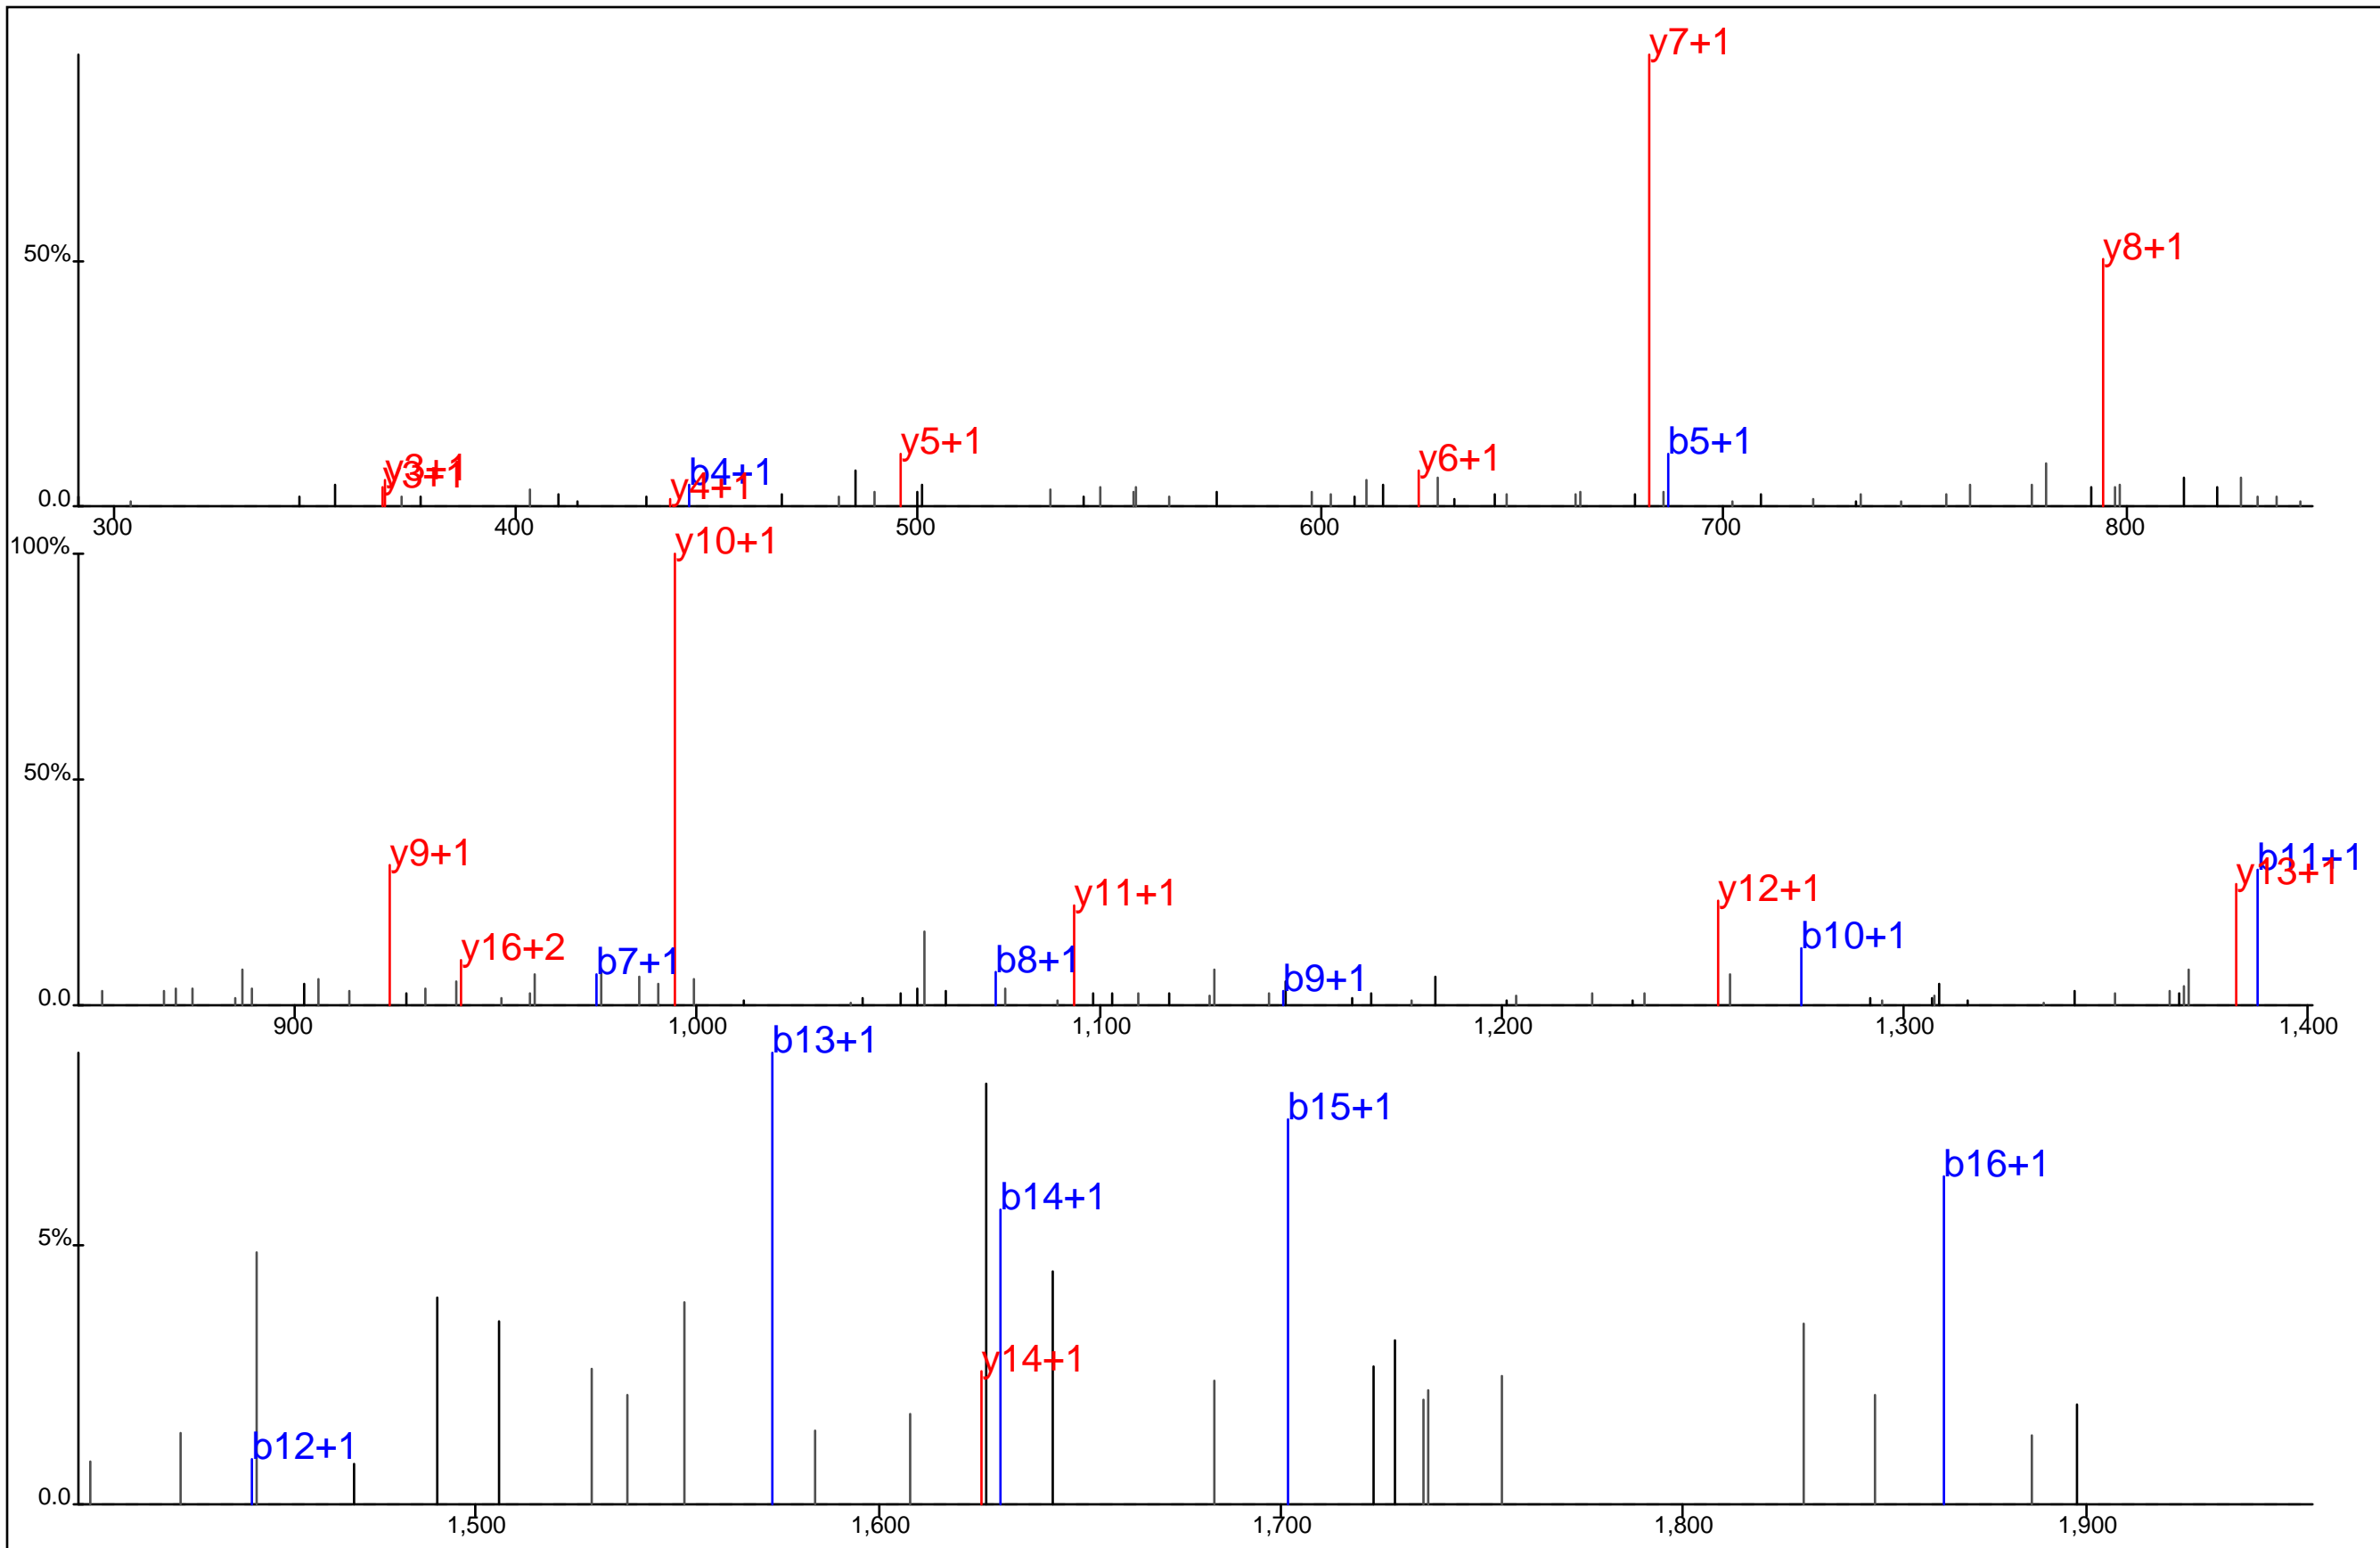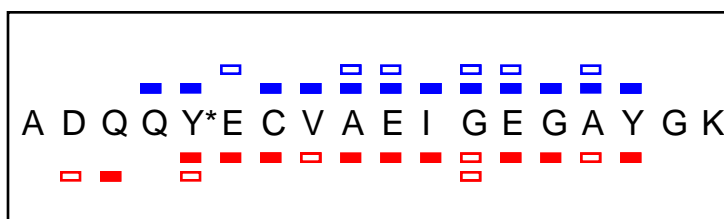

Protein Name: Cyclin dependent kinase 6  
 gi Accession: 0  
 Precursor Mass: 1,034.4203+2  
 Delta Mass: 1.548 ppm  
 XCorr: 64.02

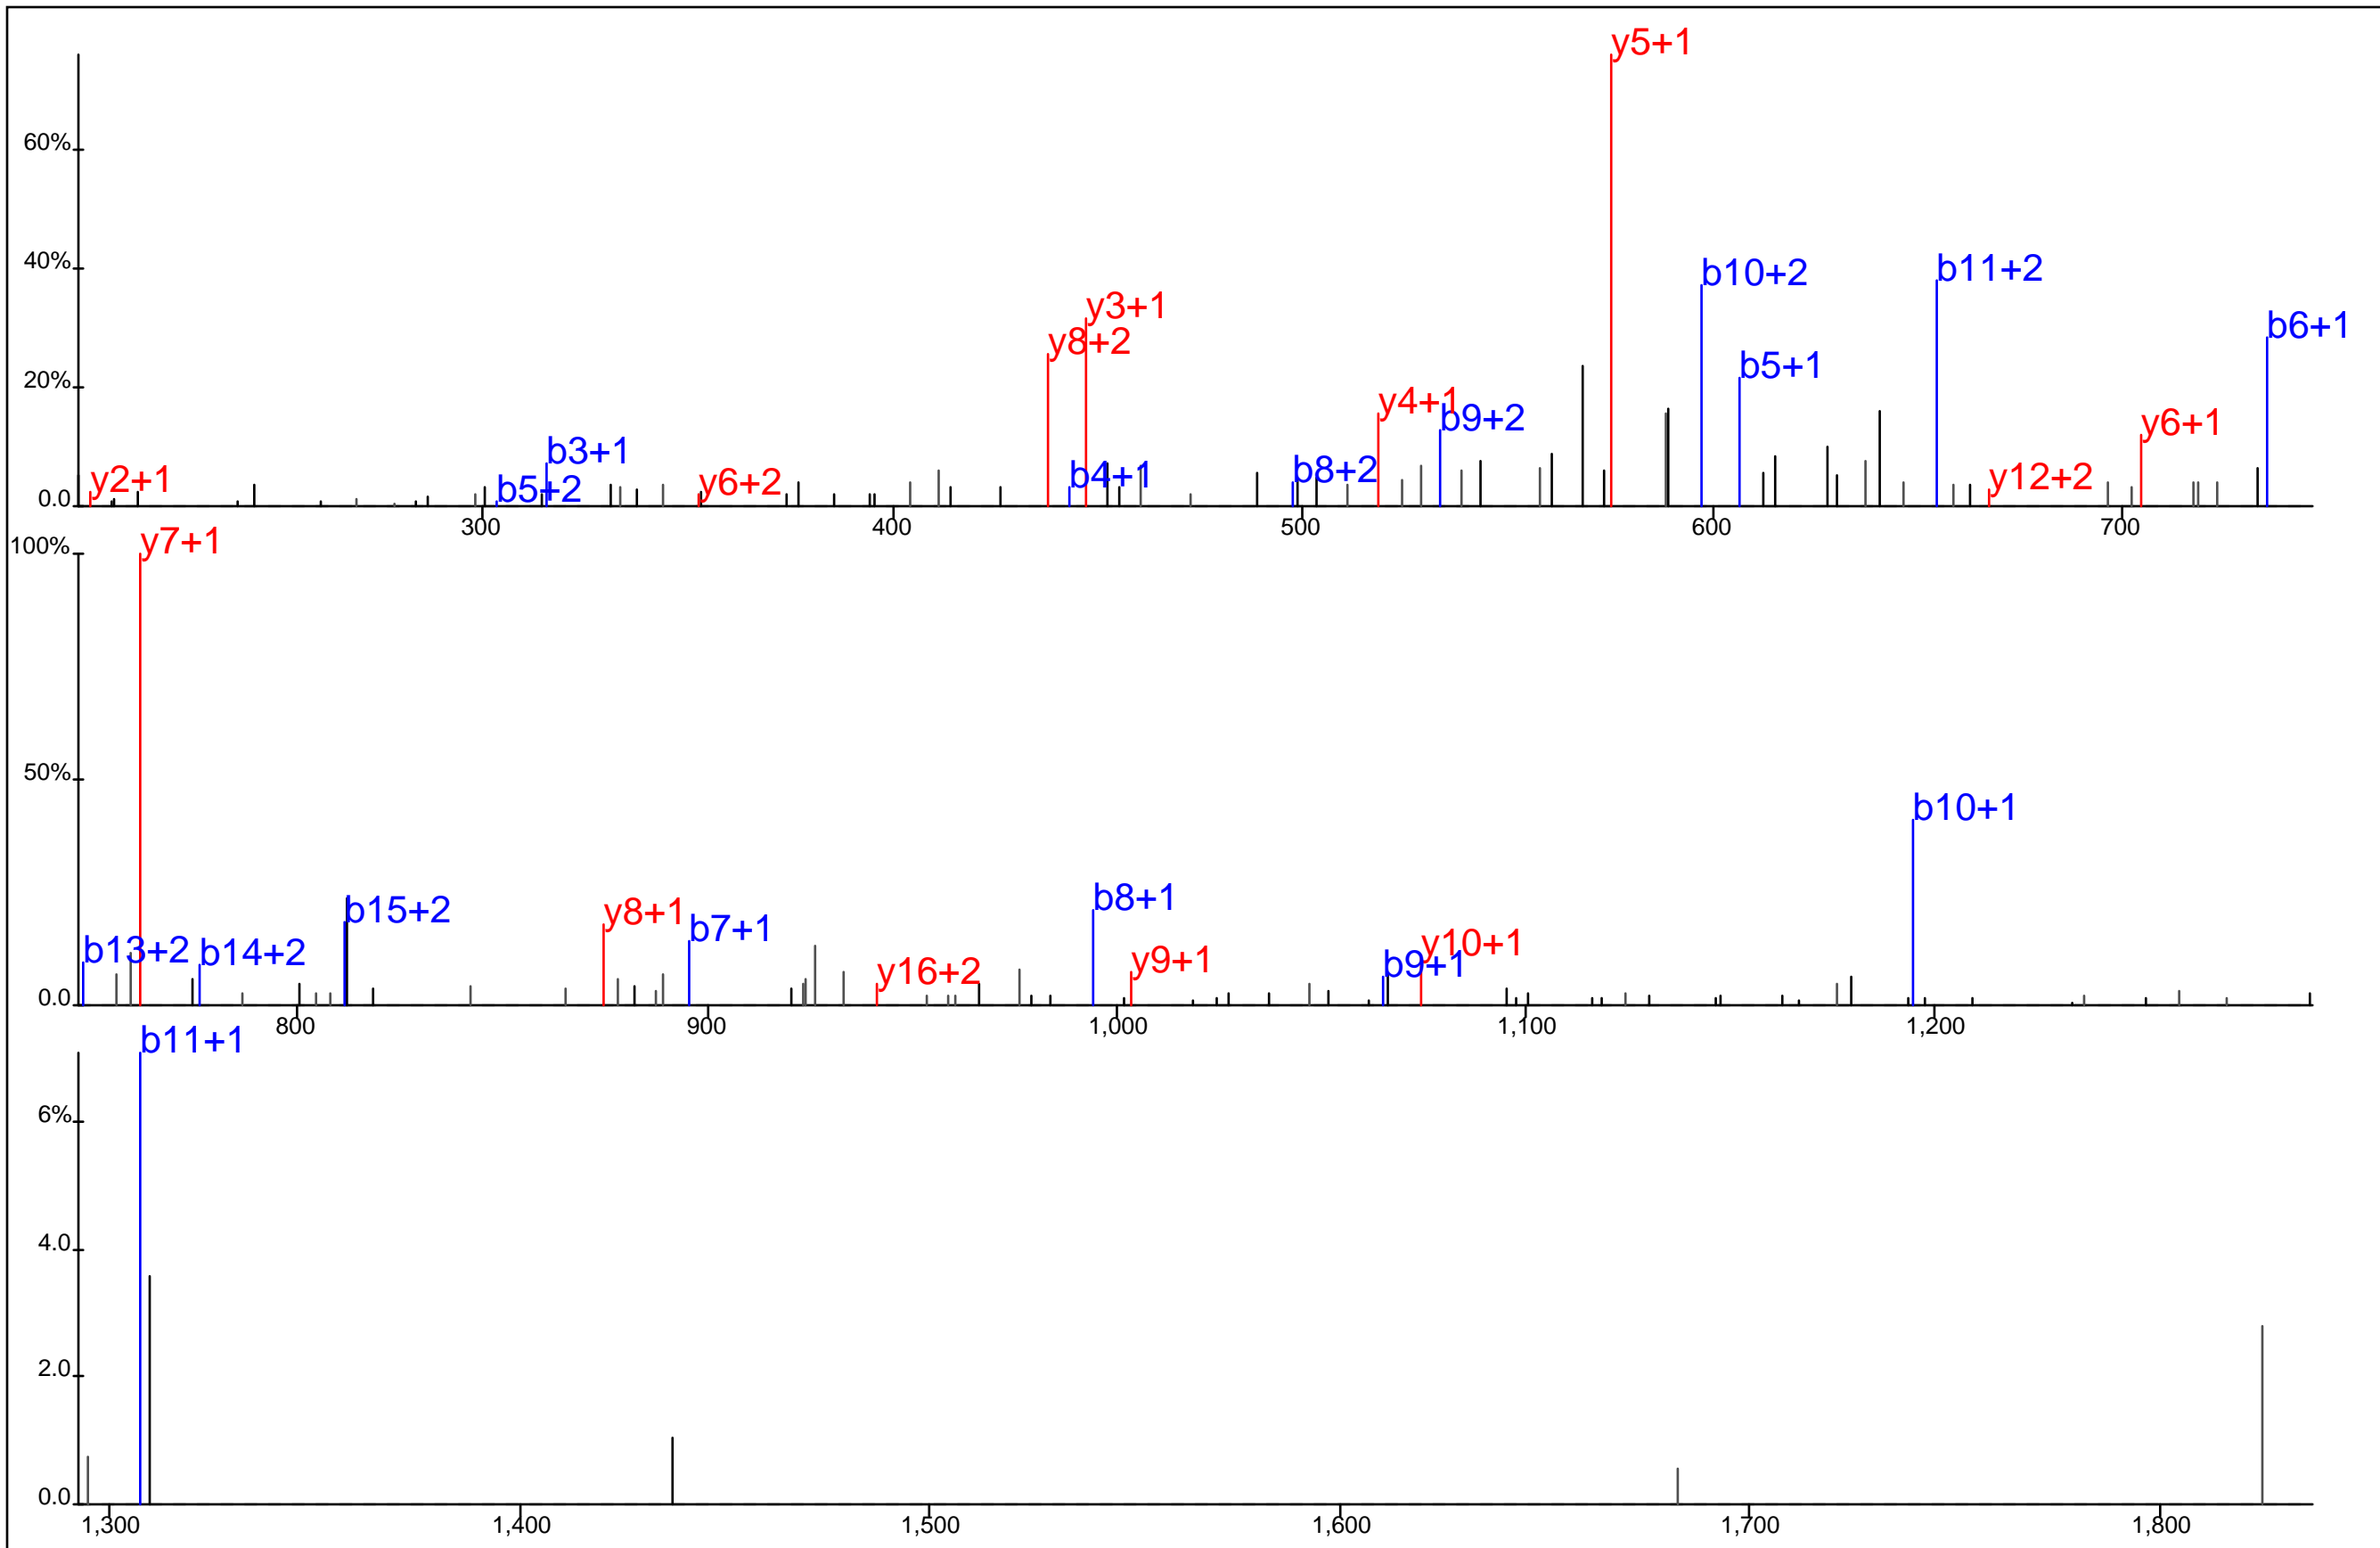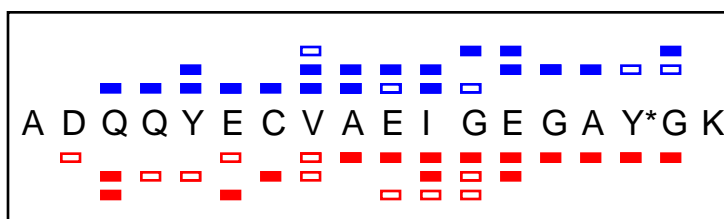

Protein Name: Cyclin dependent kinase 6  
 gi Accession: 0  
 Precursor Mass: 689.9512+3  
 Delta Mass: 1.191 ppm  
 XCorr: 48.28

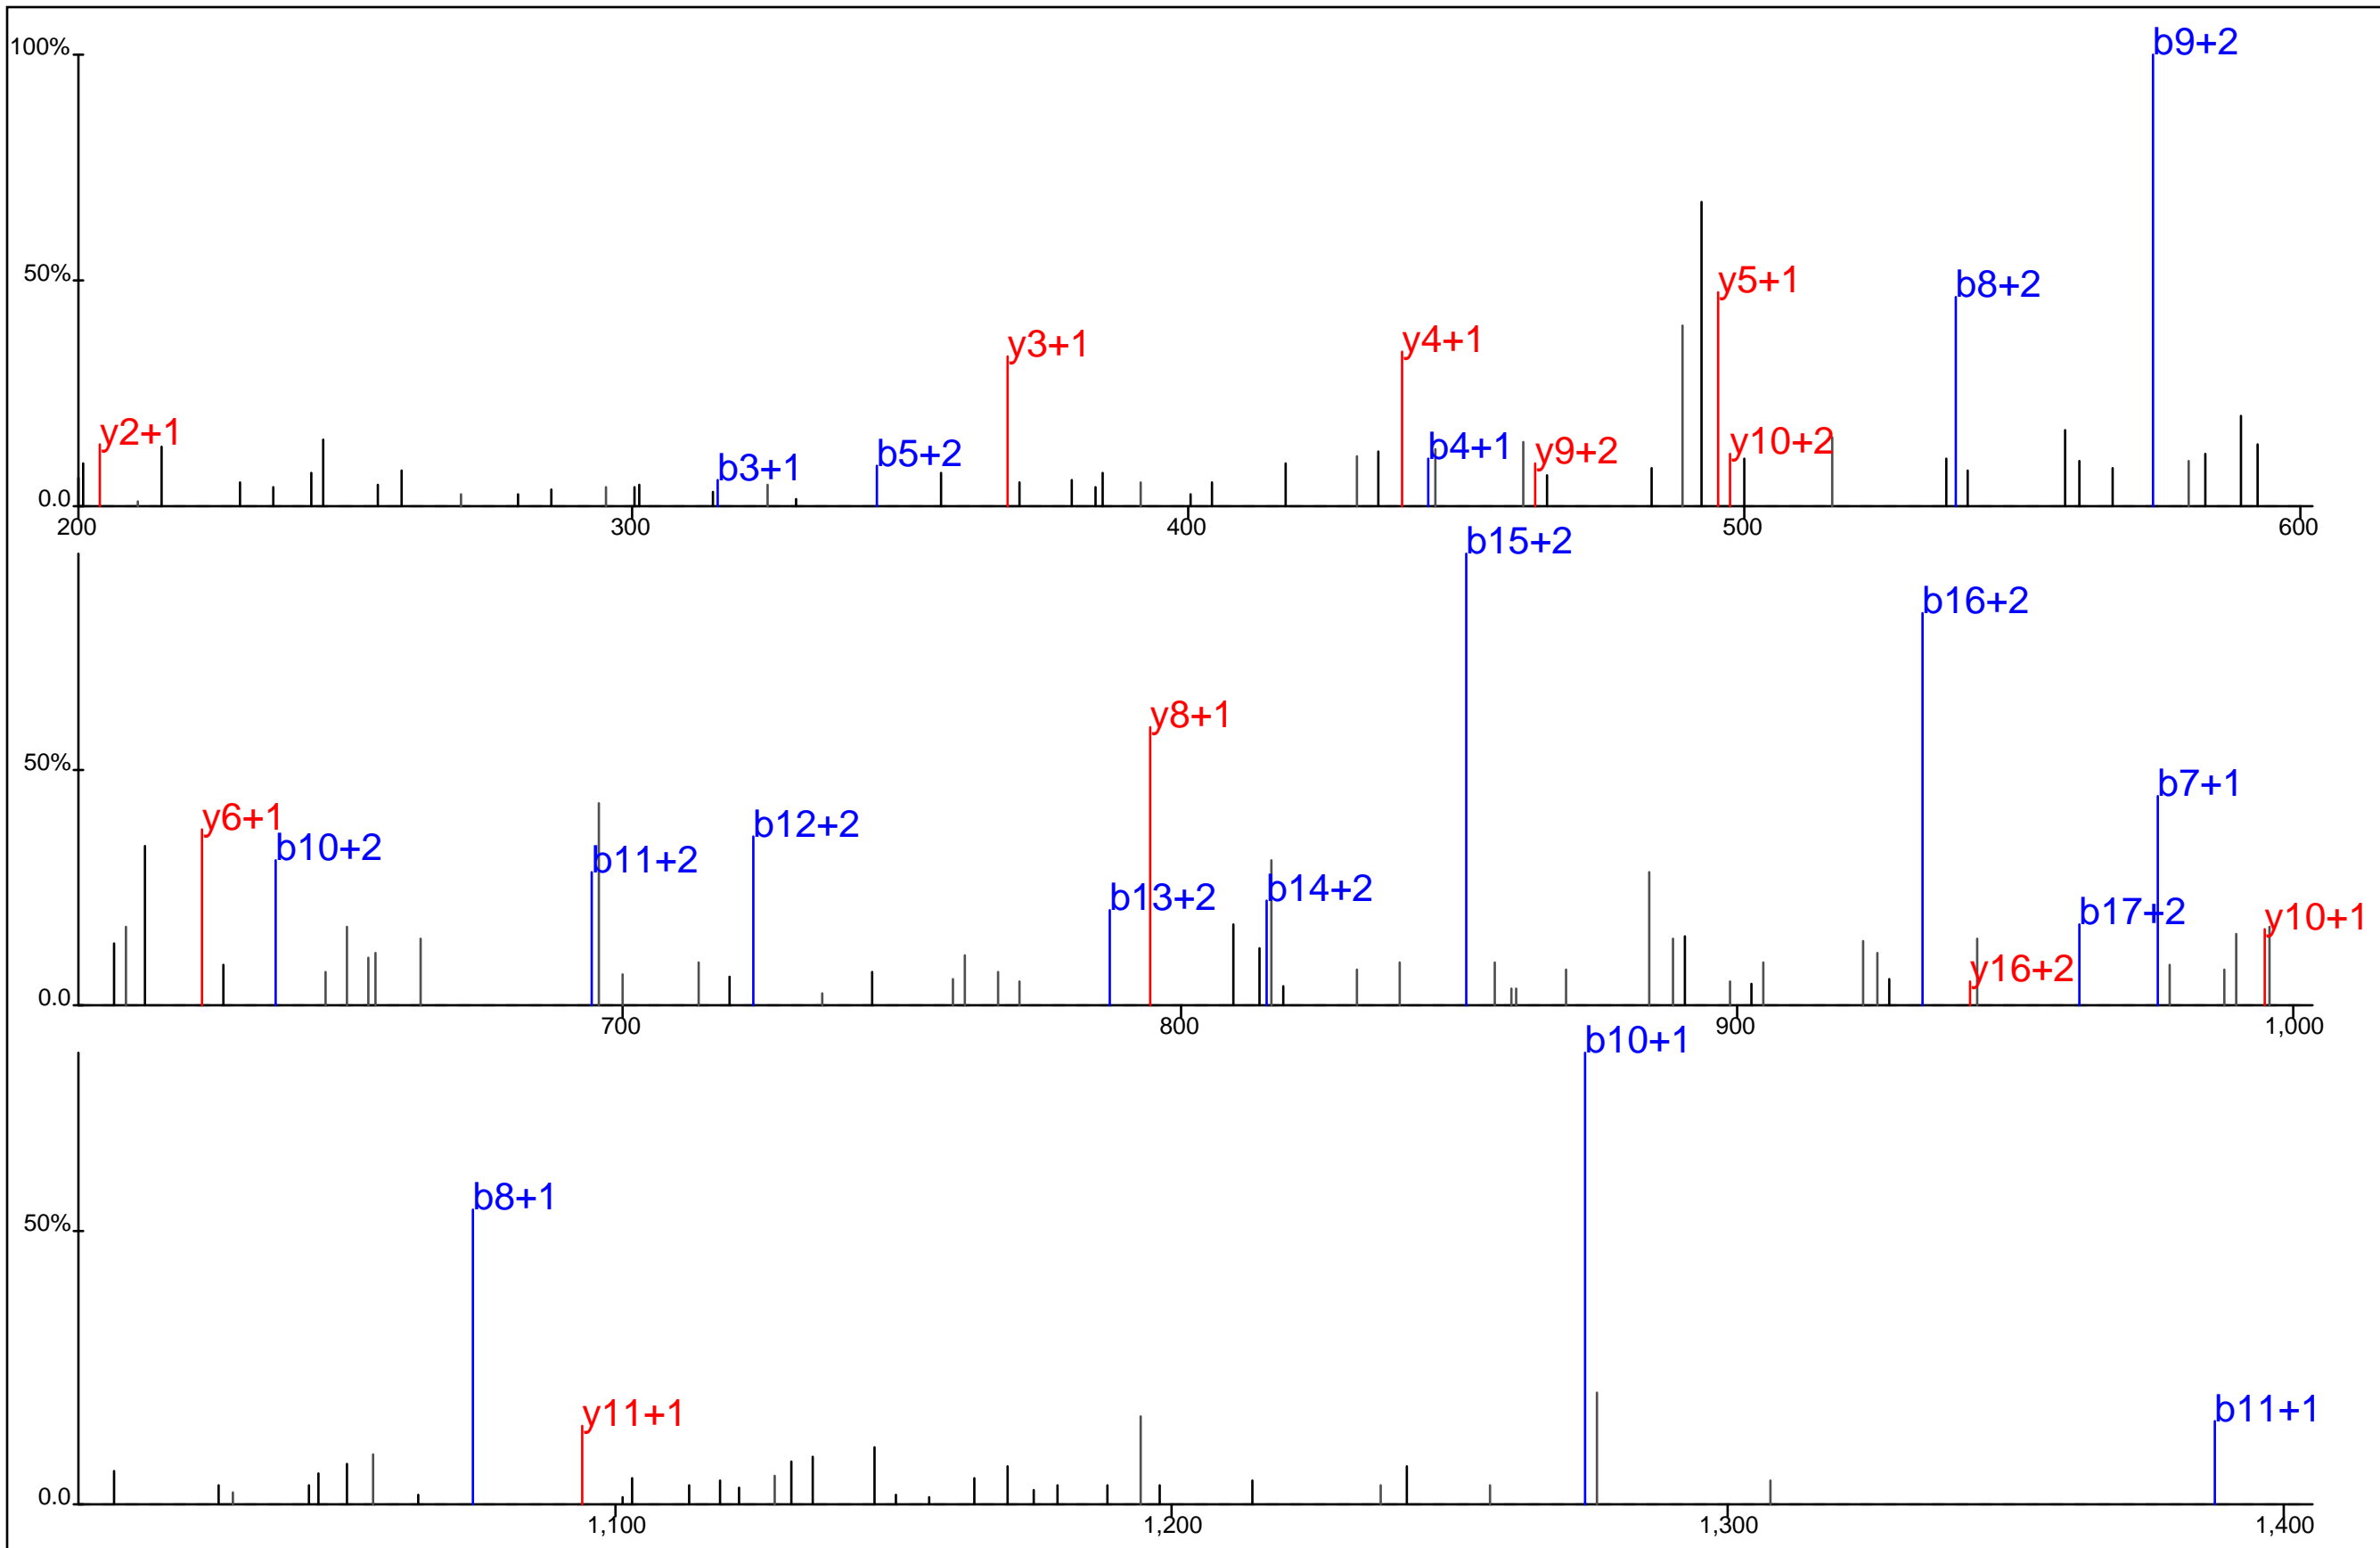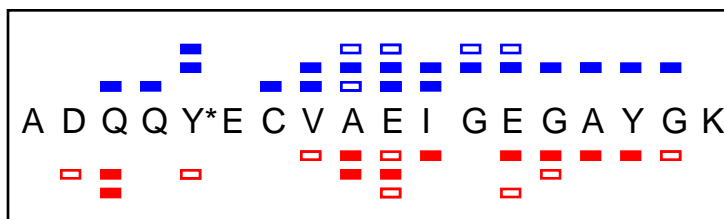

Protein Name: Cyclin dependent kinase 6  
 gi Accession: 0  
 Precursor Mass: 689.9507+3  
 Delta Mass: 0.483 ppm  
 XCorr: 55.63

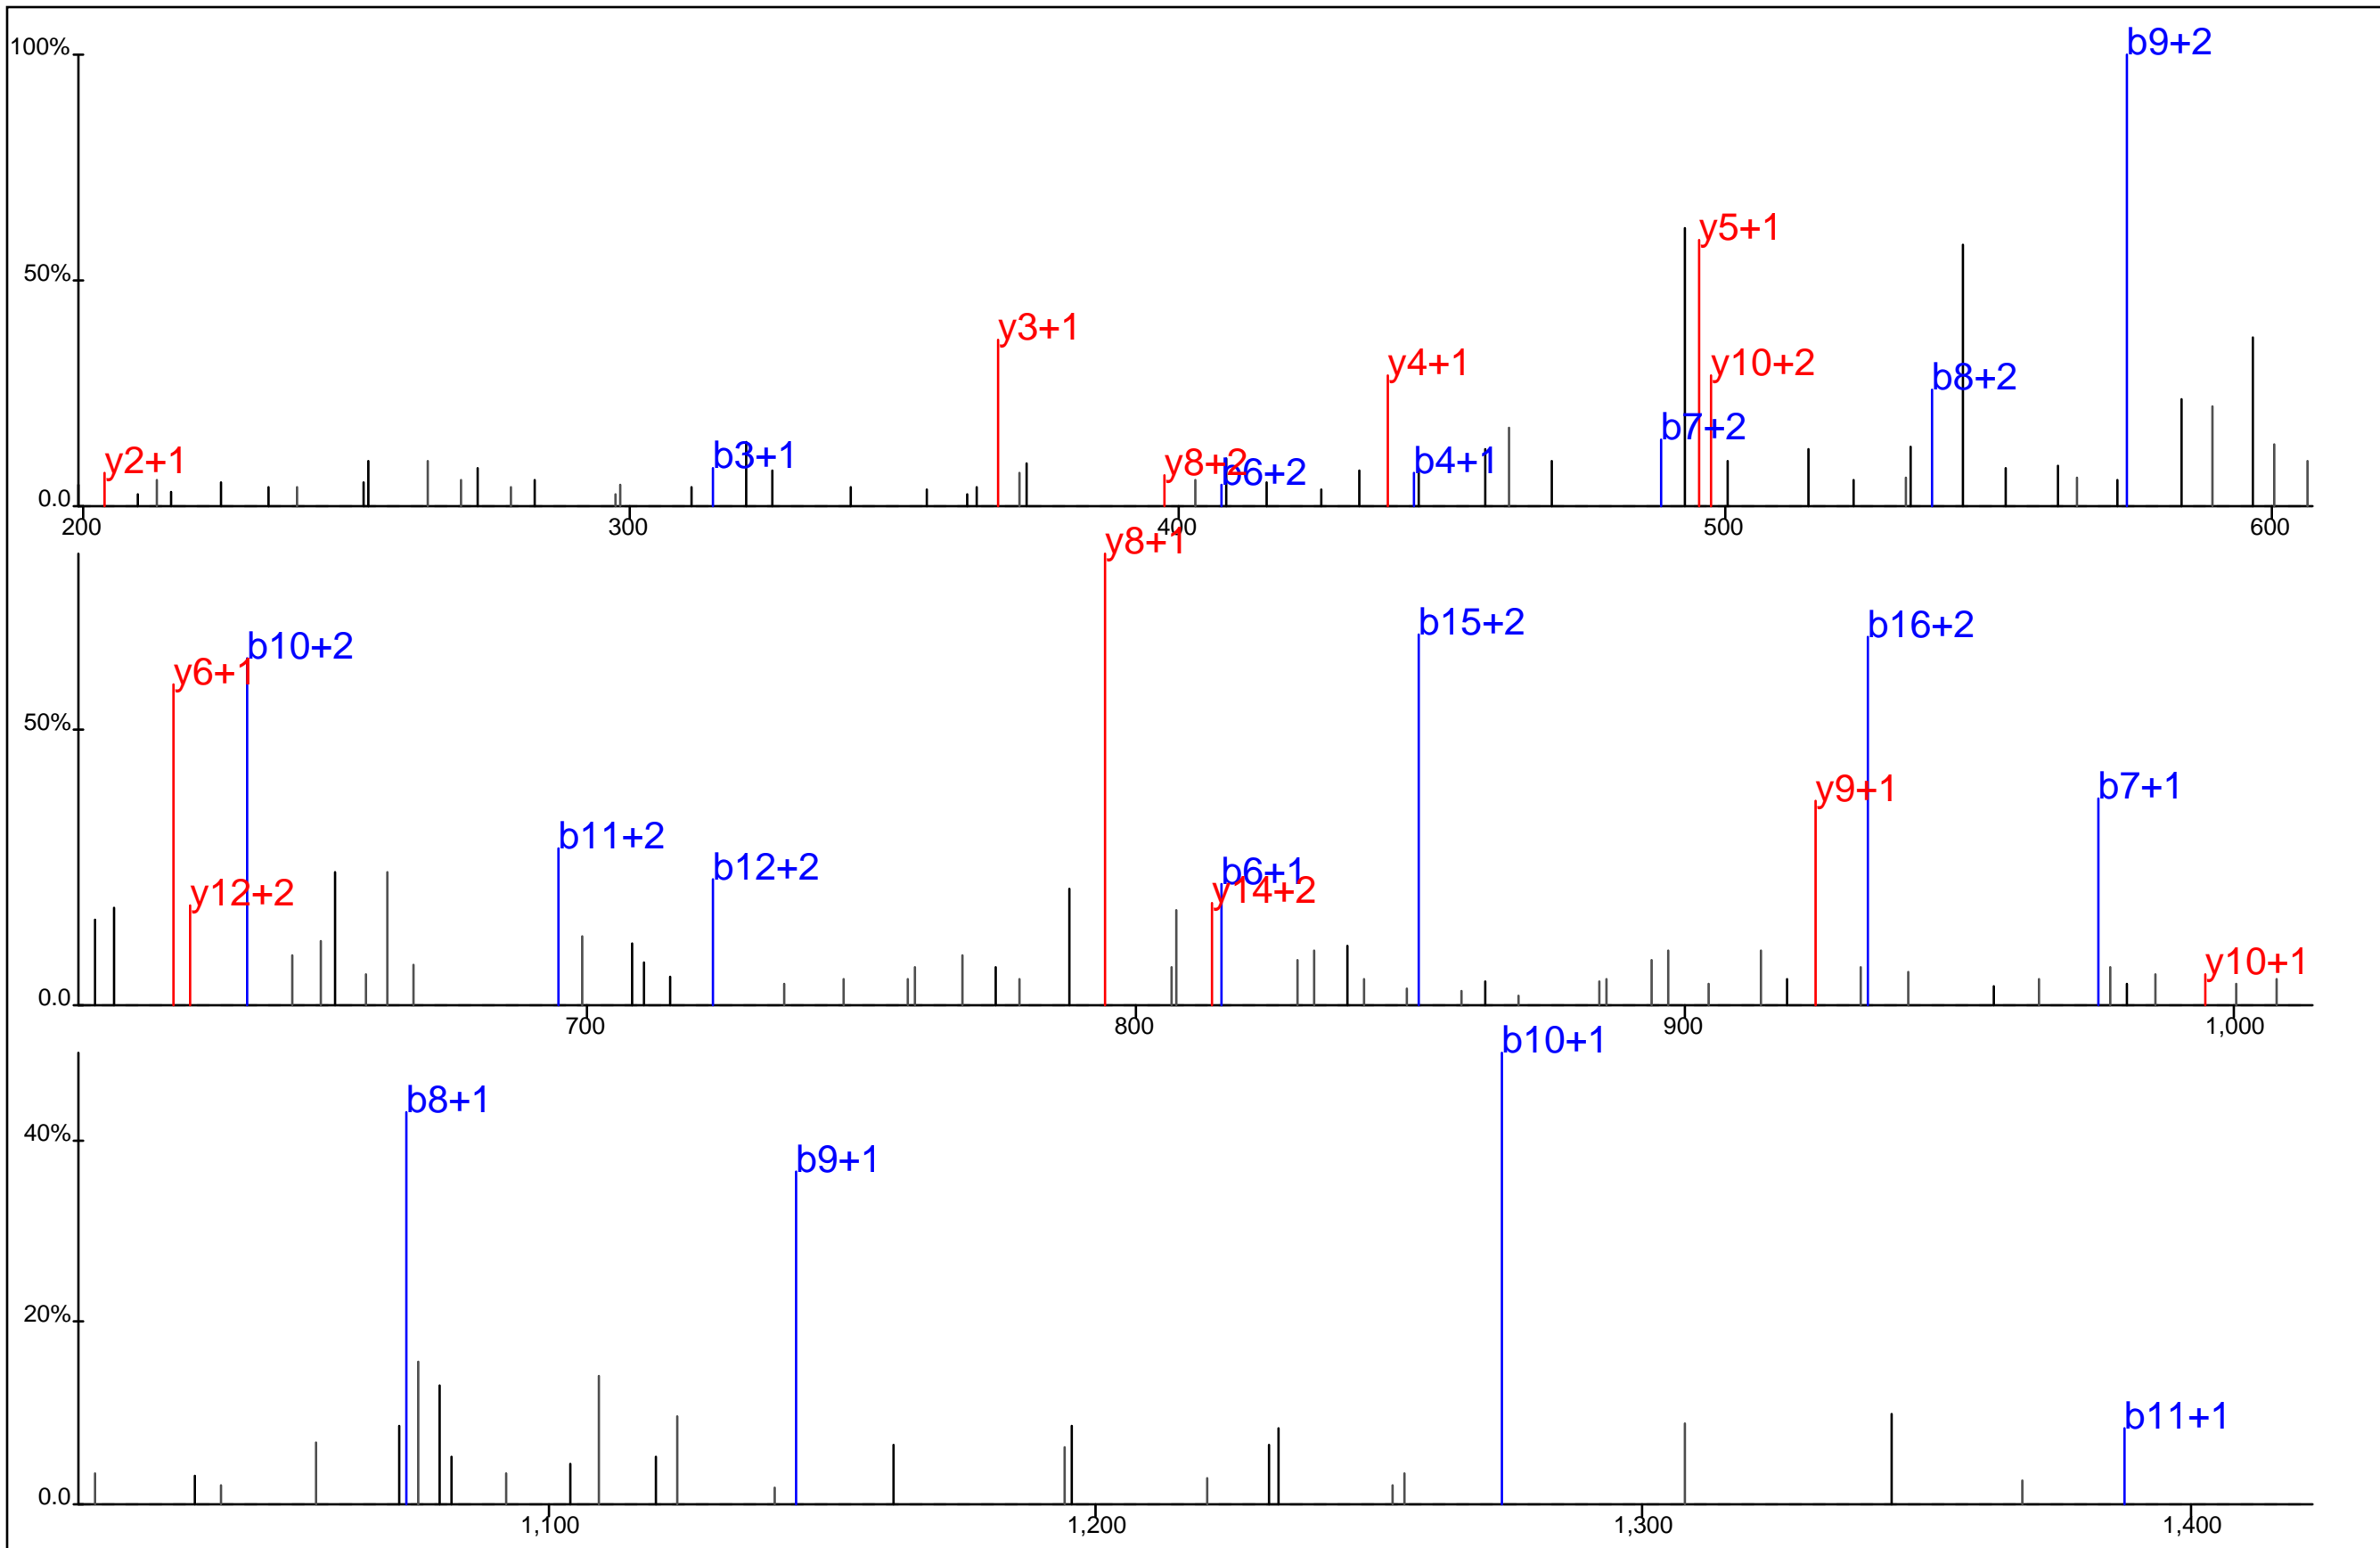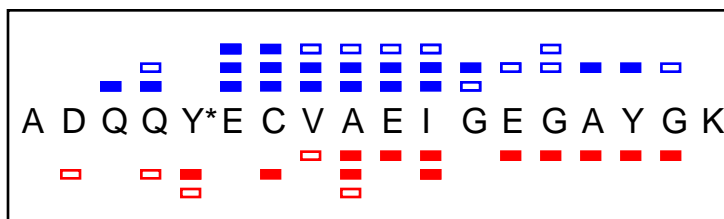

Protein Name: Cyclin dependent kinase 6  
 gi Accession: 0  
 Precursor Mass: 689.9505+3  
 Delta Mass: 0.216 ppm  
 XCorr: 45.21

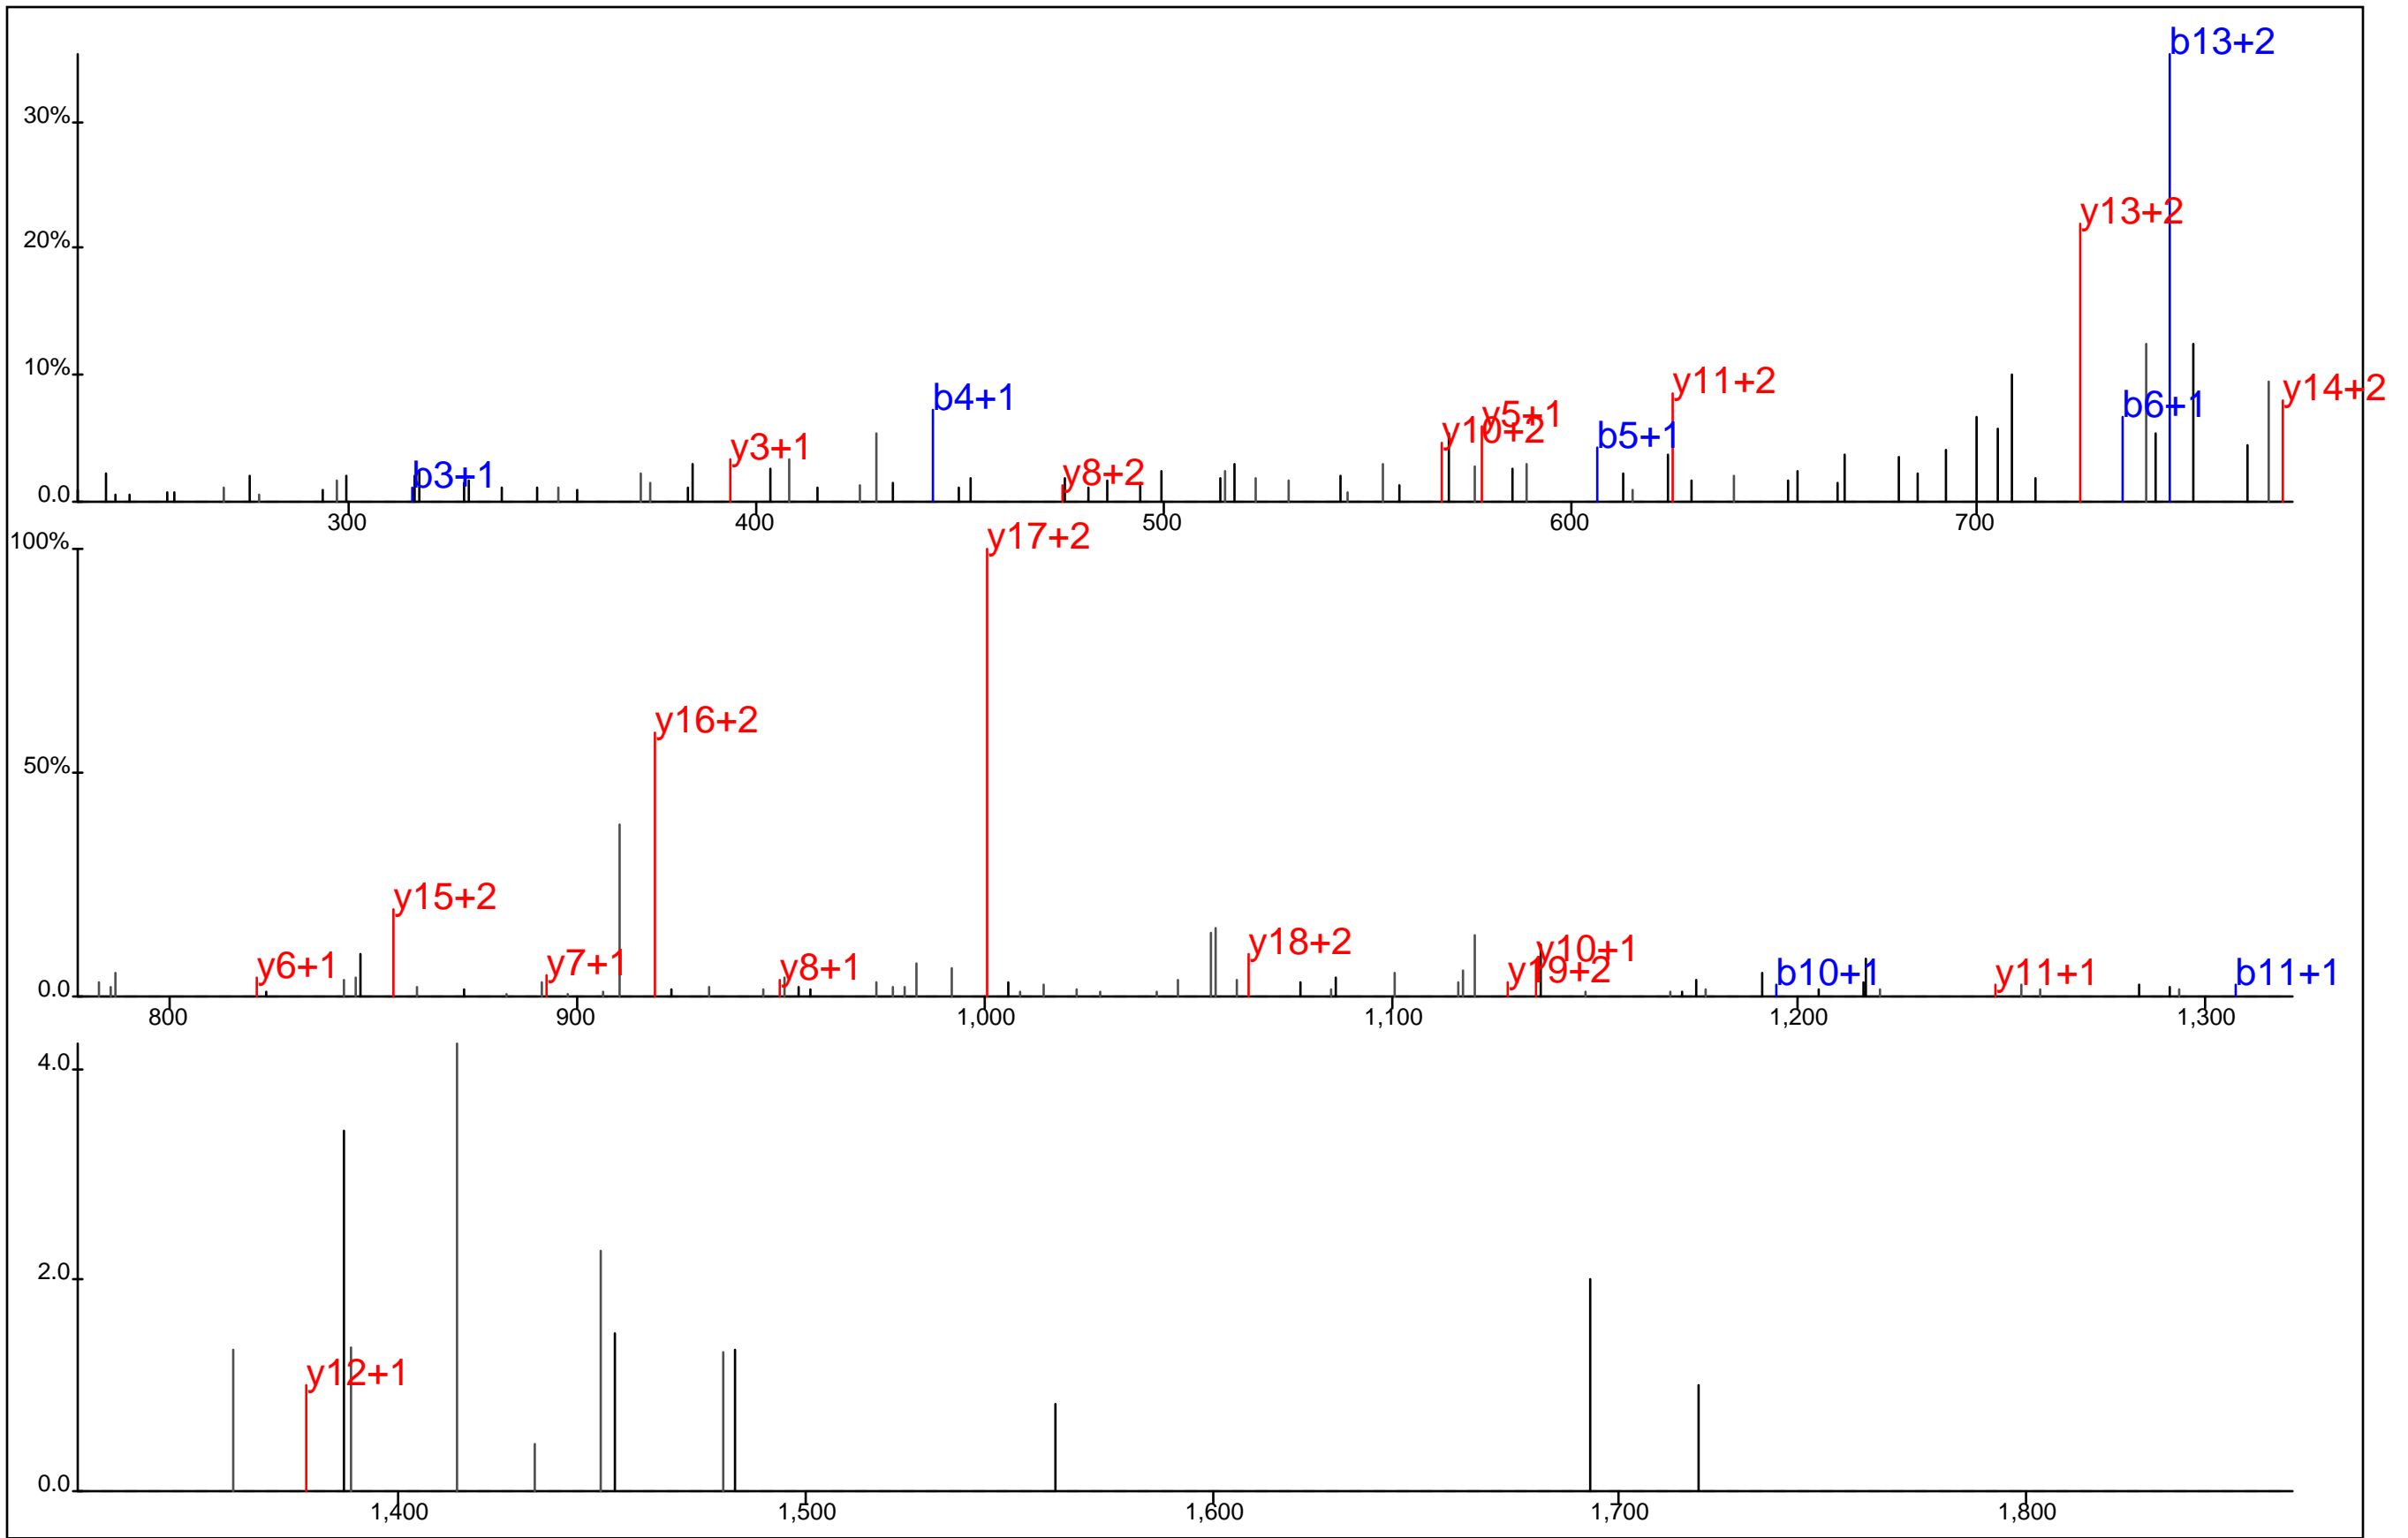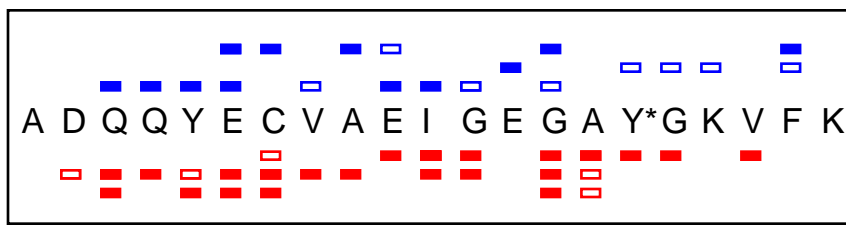

Protein Name: Cyclin dependent kinase 6  
 gi Accession: 0  
 Precursor Mass: 814.6937+3  
 Delta Mass: 0.757 ppm  
 XCorr: 33.31



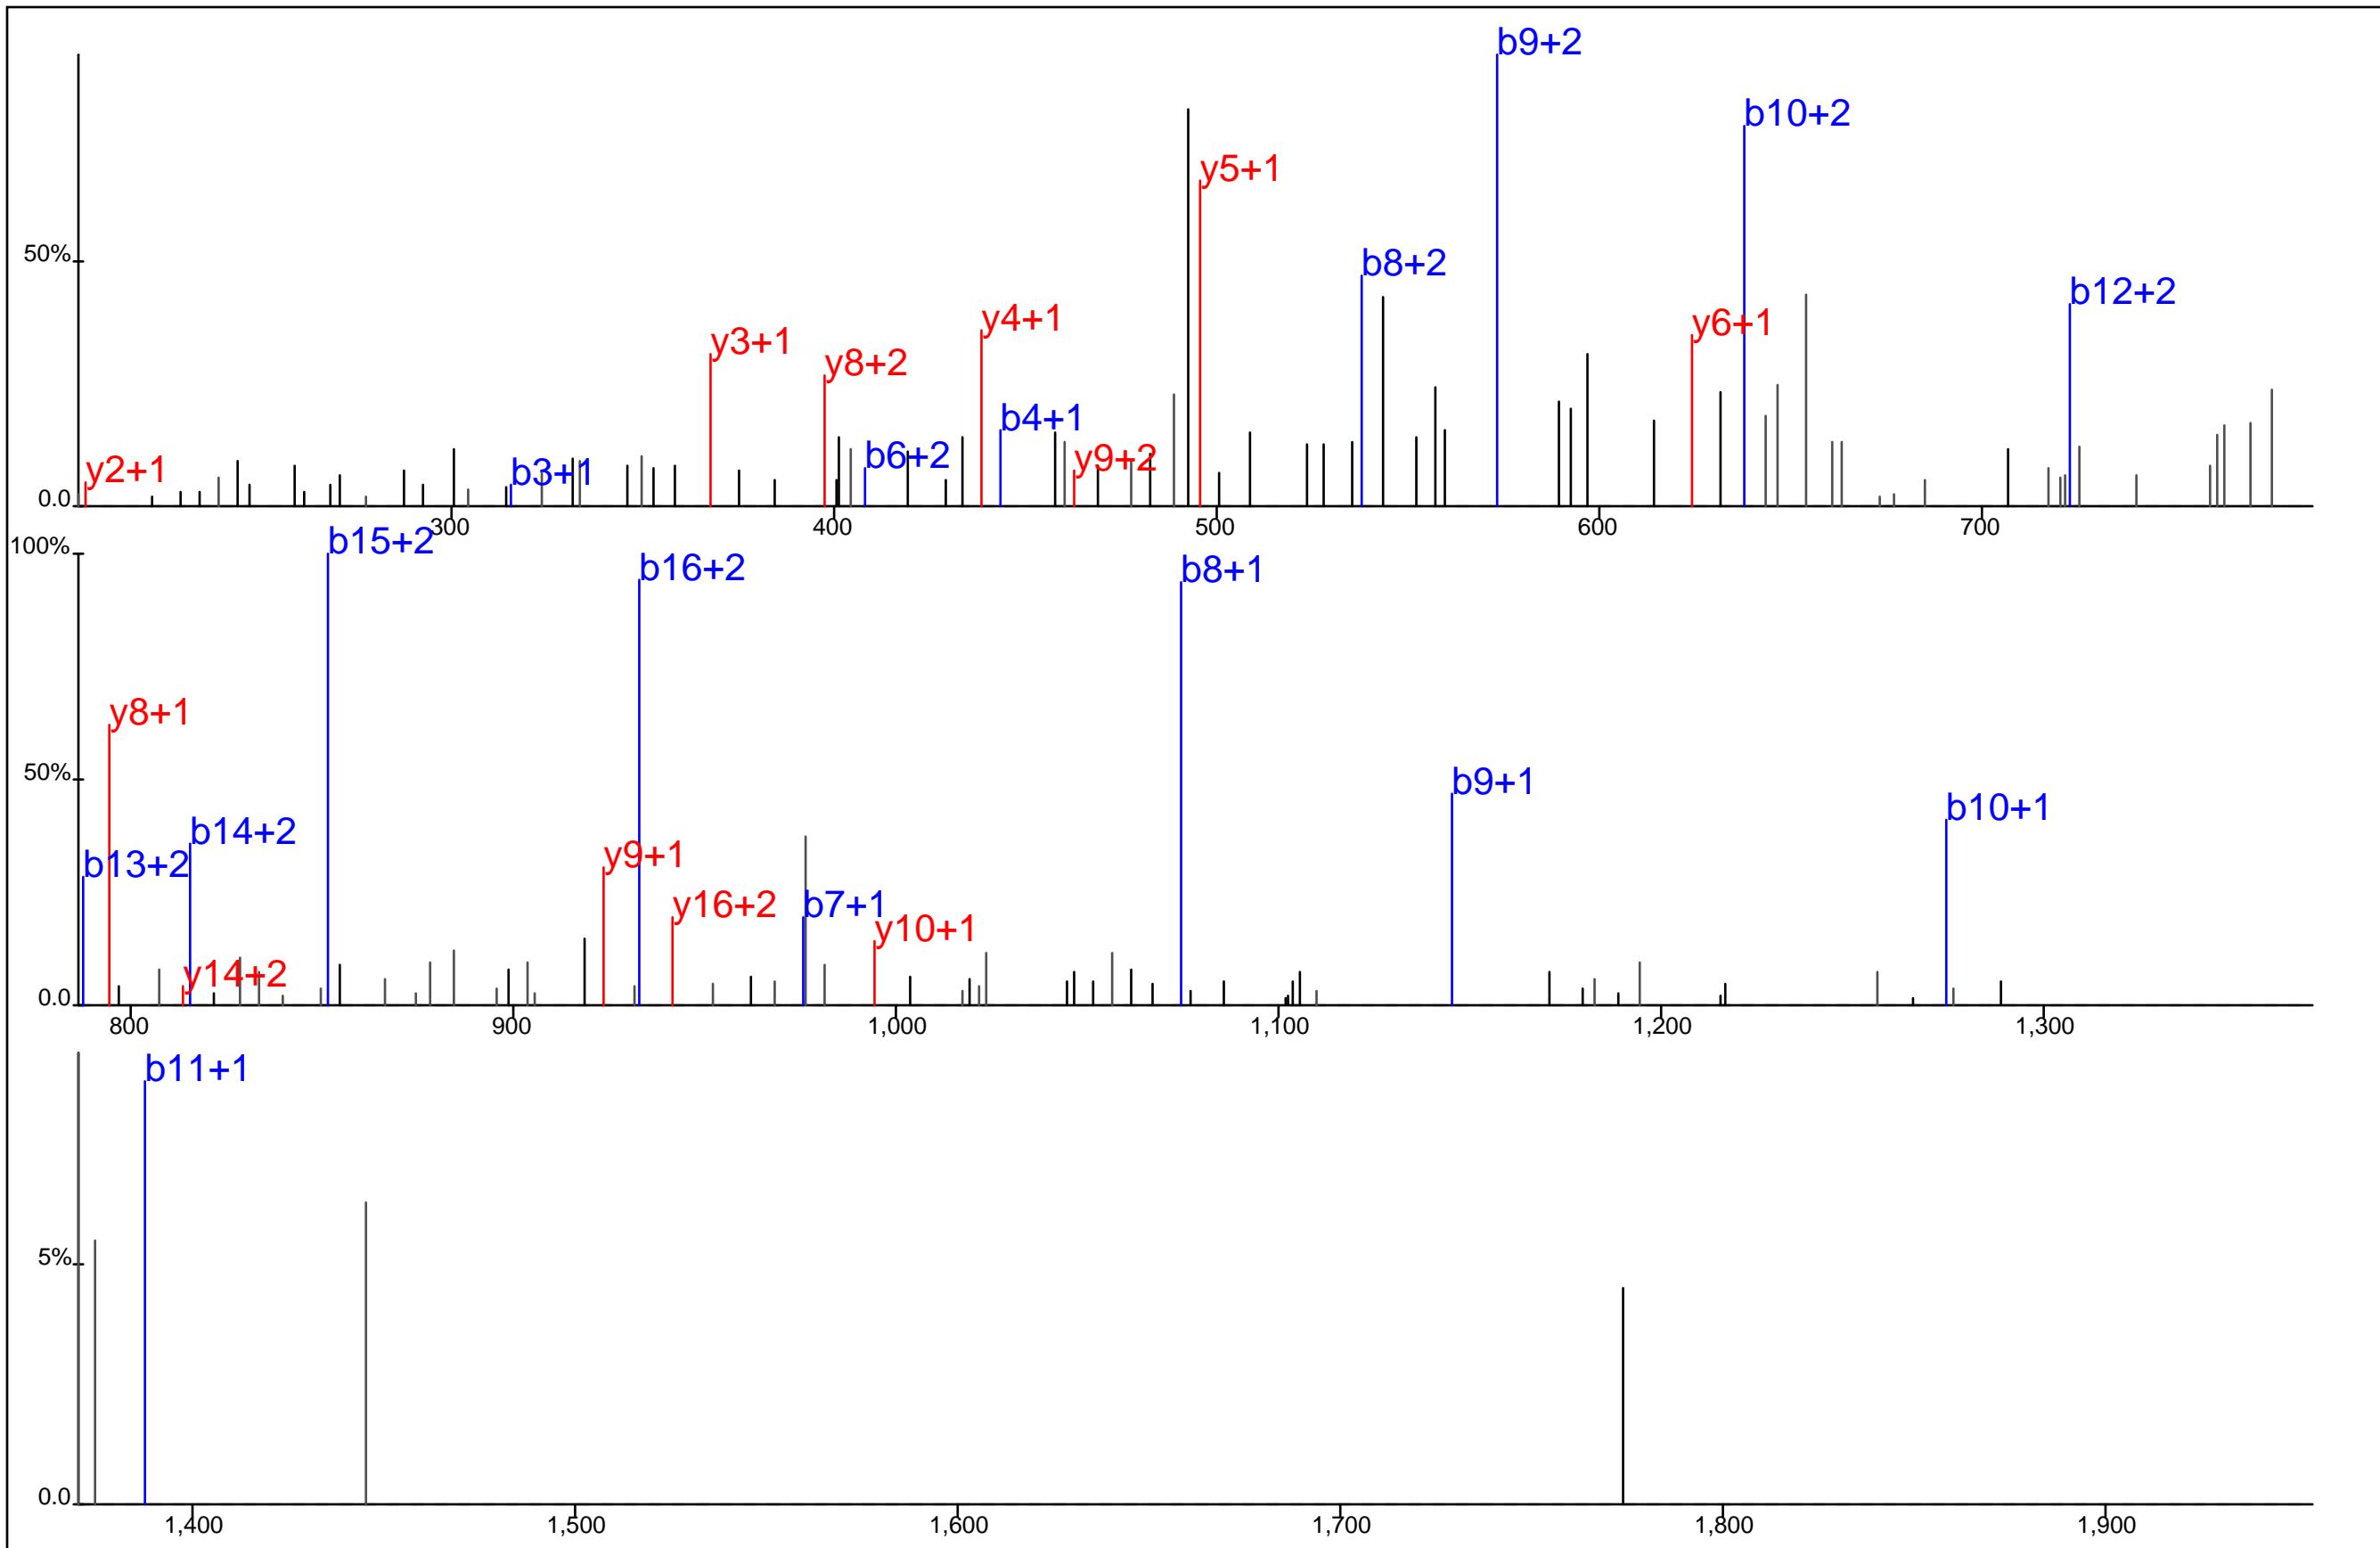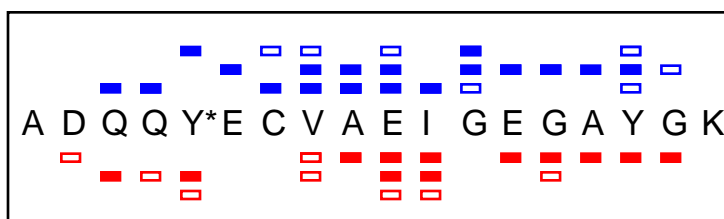

Protein Name: Cyclin dependent kinase 6  
 gi Accession: 0  
 Precursor Mass: 689.9485+3  
 Delta Mass: 2.706 ppm  
 XCorr: 40.19

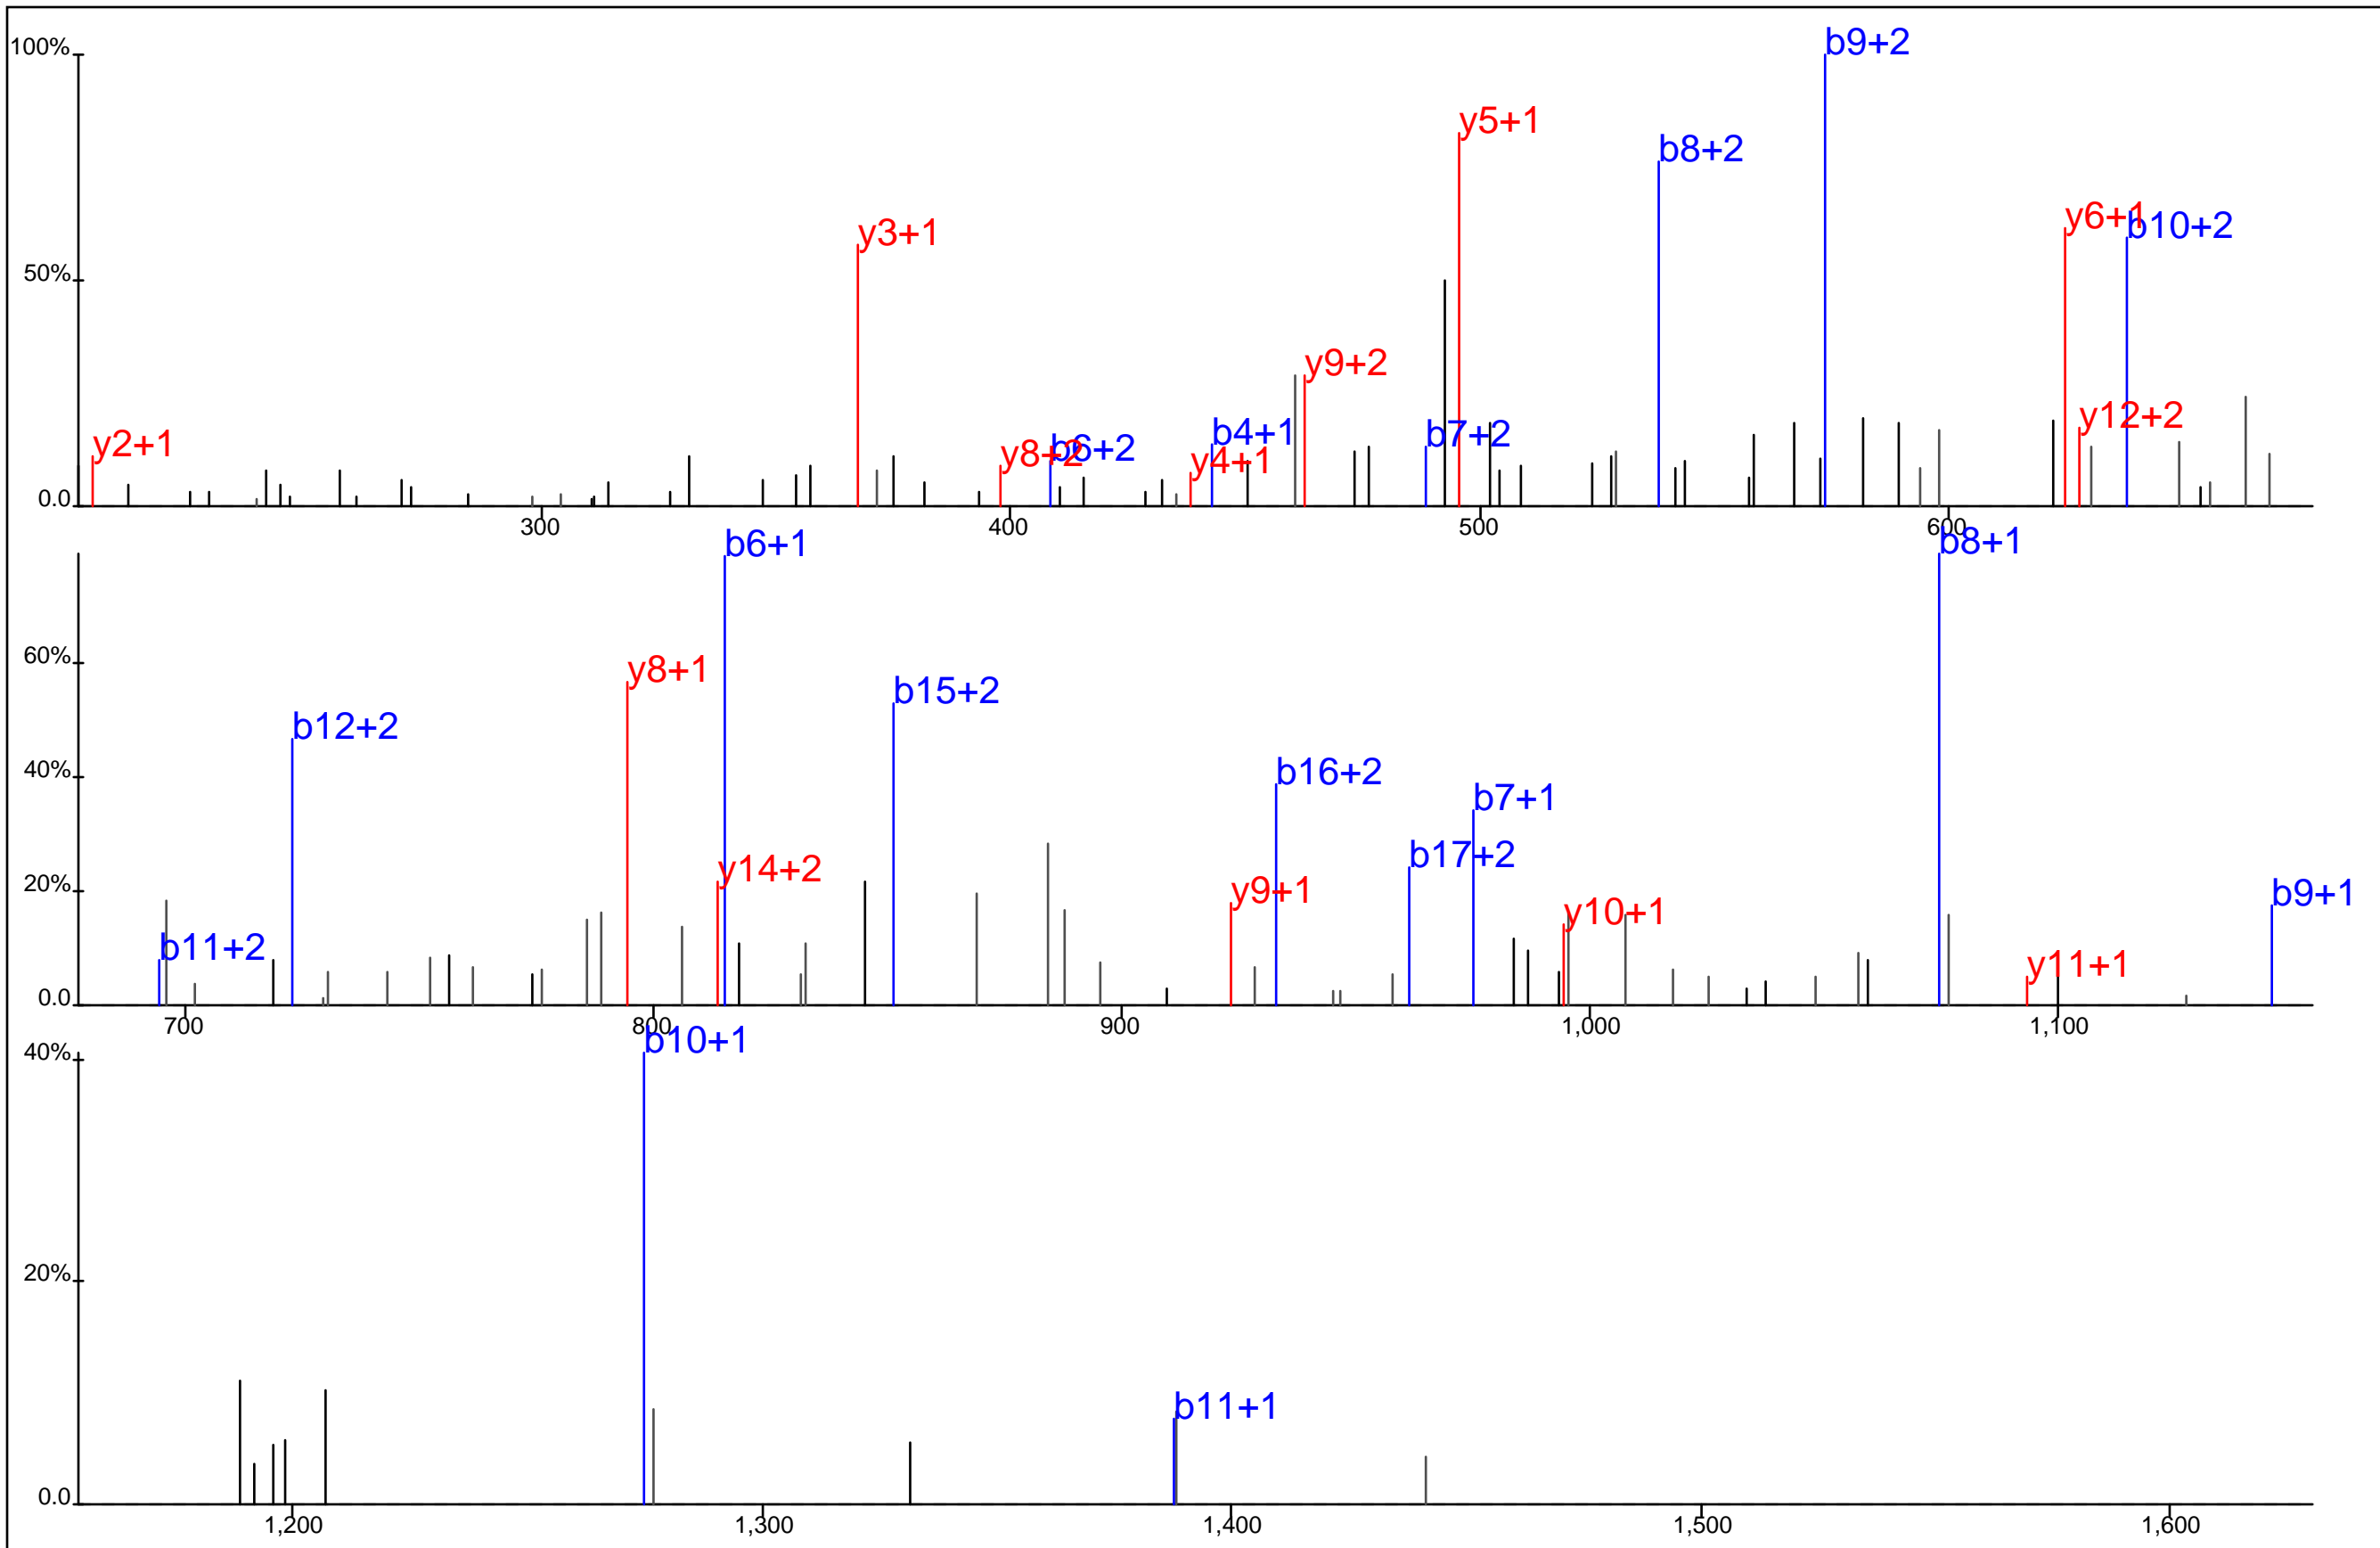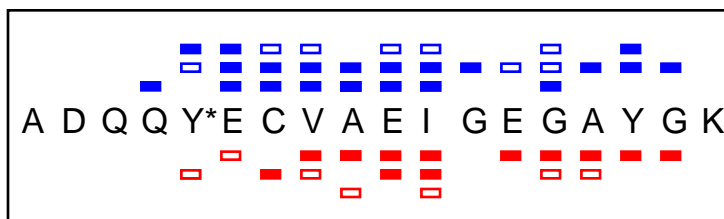

Protein Name: Cyclin dependent kinase 6  
 gi Accession: 0  
 Precursor Mass: 689.9506+3  
 Delta Mass: 0.306 ppm  
 XCorr: 55.21

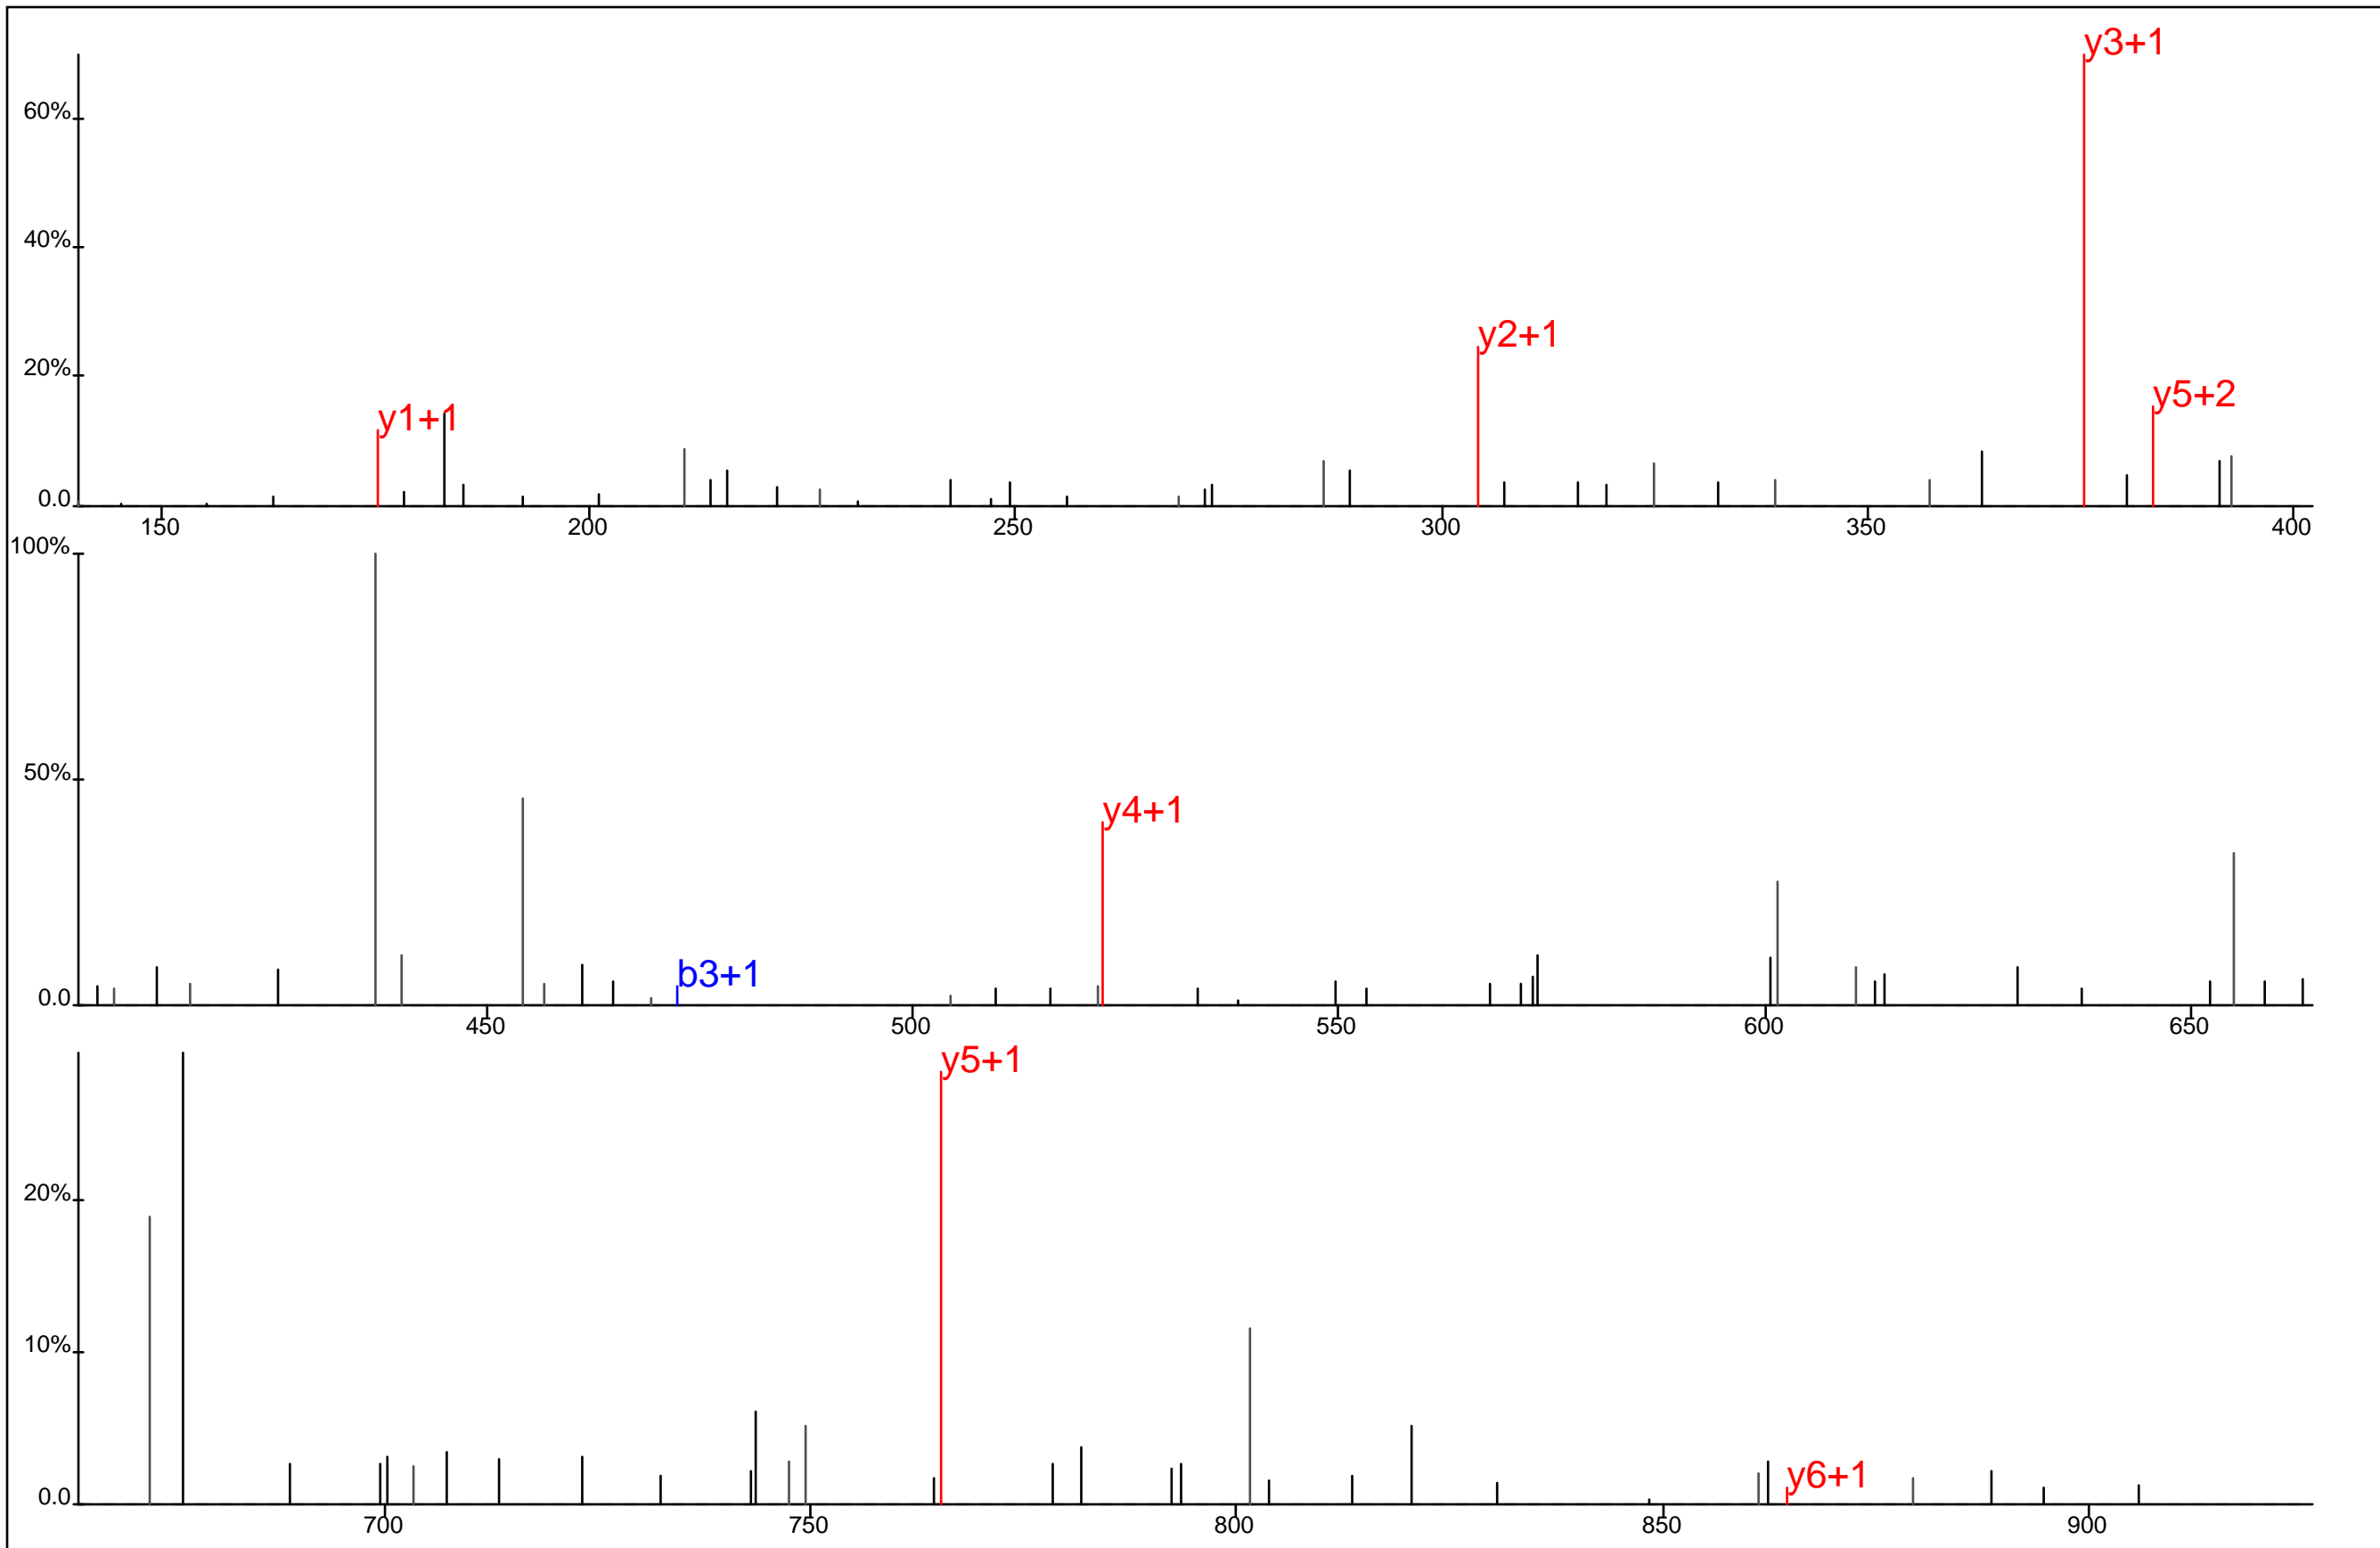

E V Y\*F A E R

Protein Name: Cysteine rich intestinal protein 1  
 gi Accession: 0  
 Precursor Mass: 497.2072+2  
 Delta Mass: 0.564 ppm  
 XCorr: 22.31



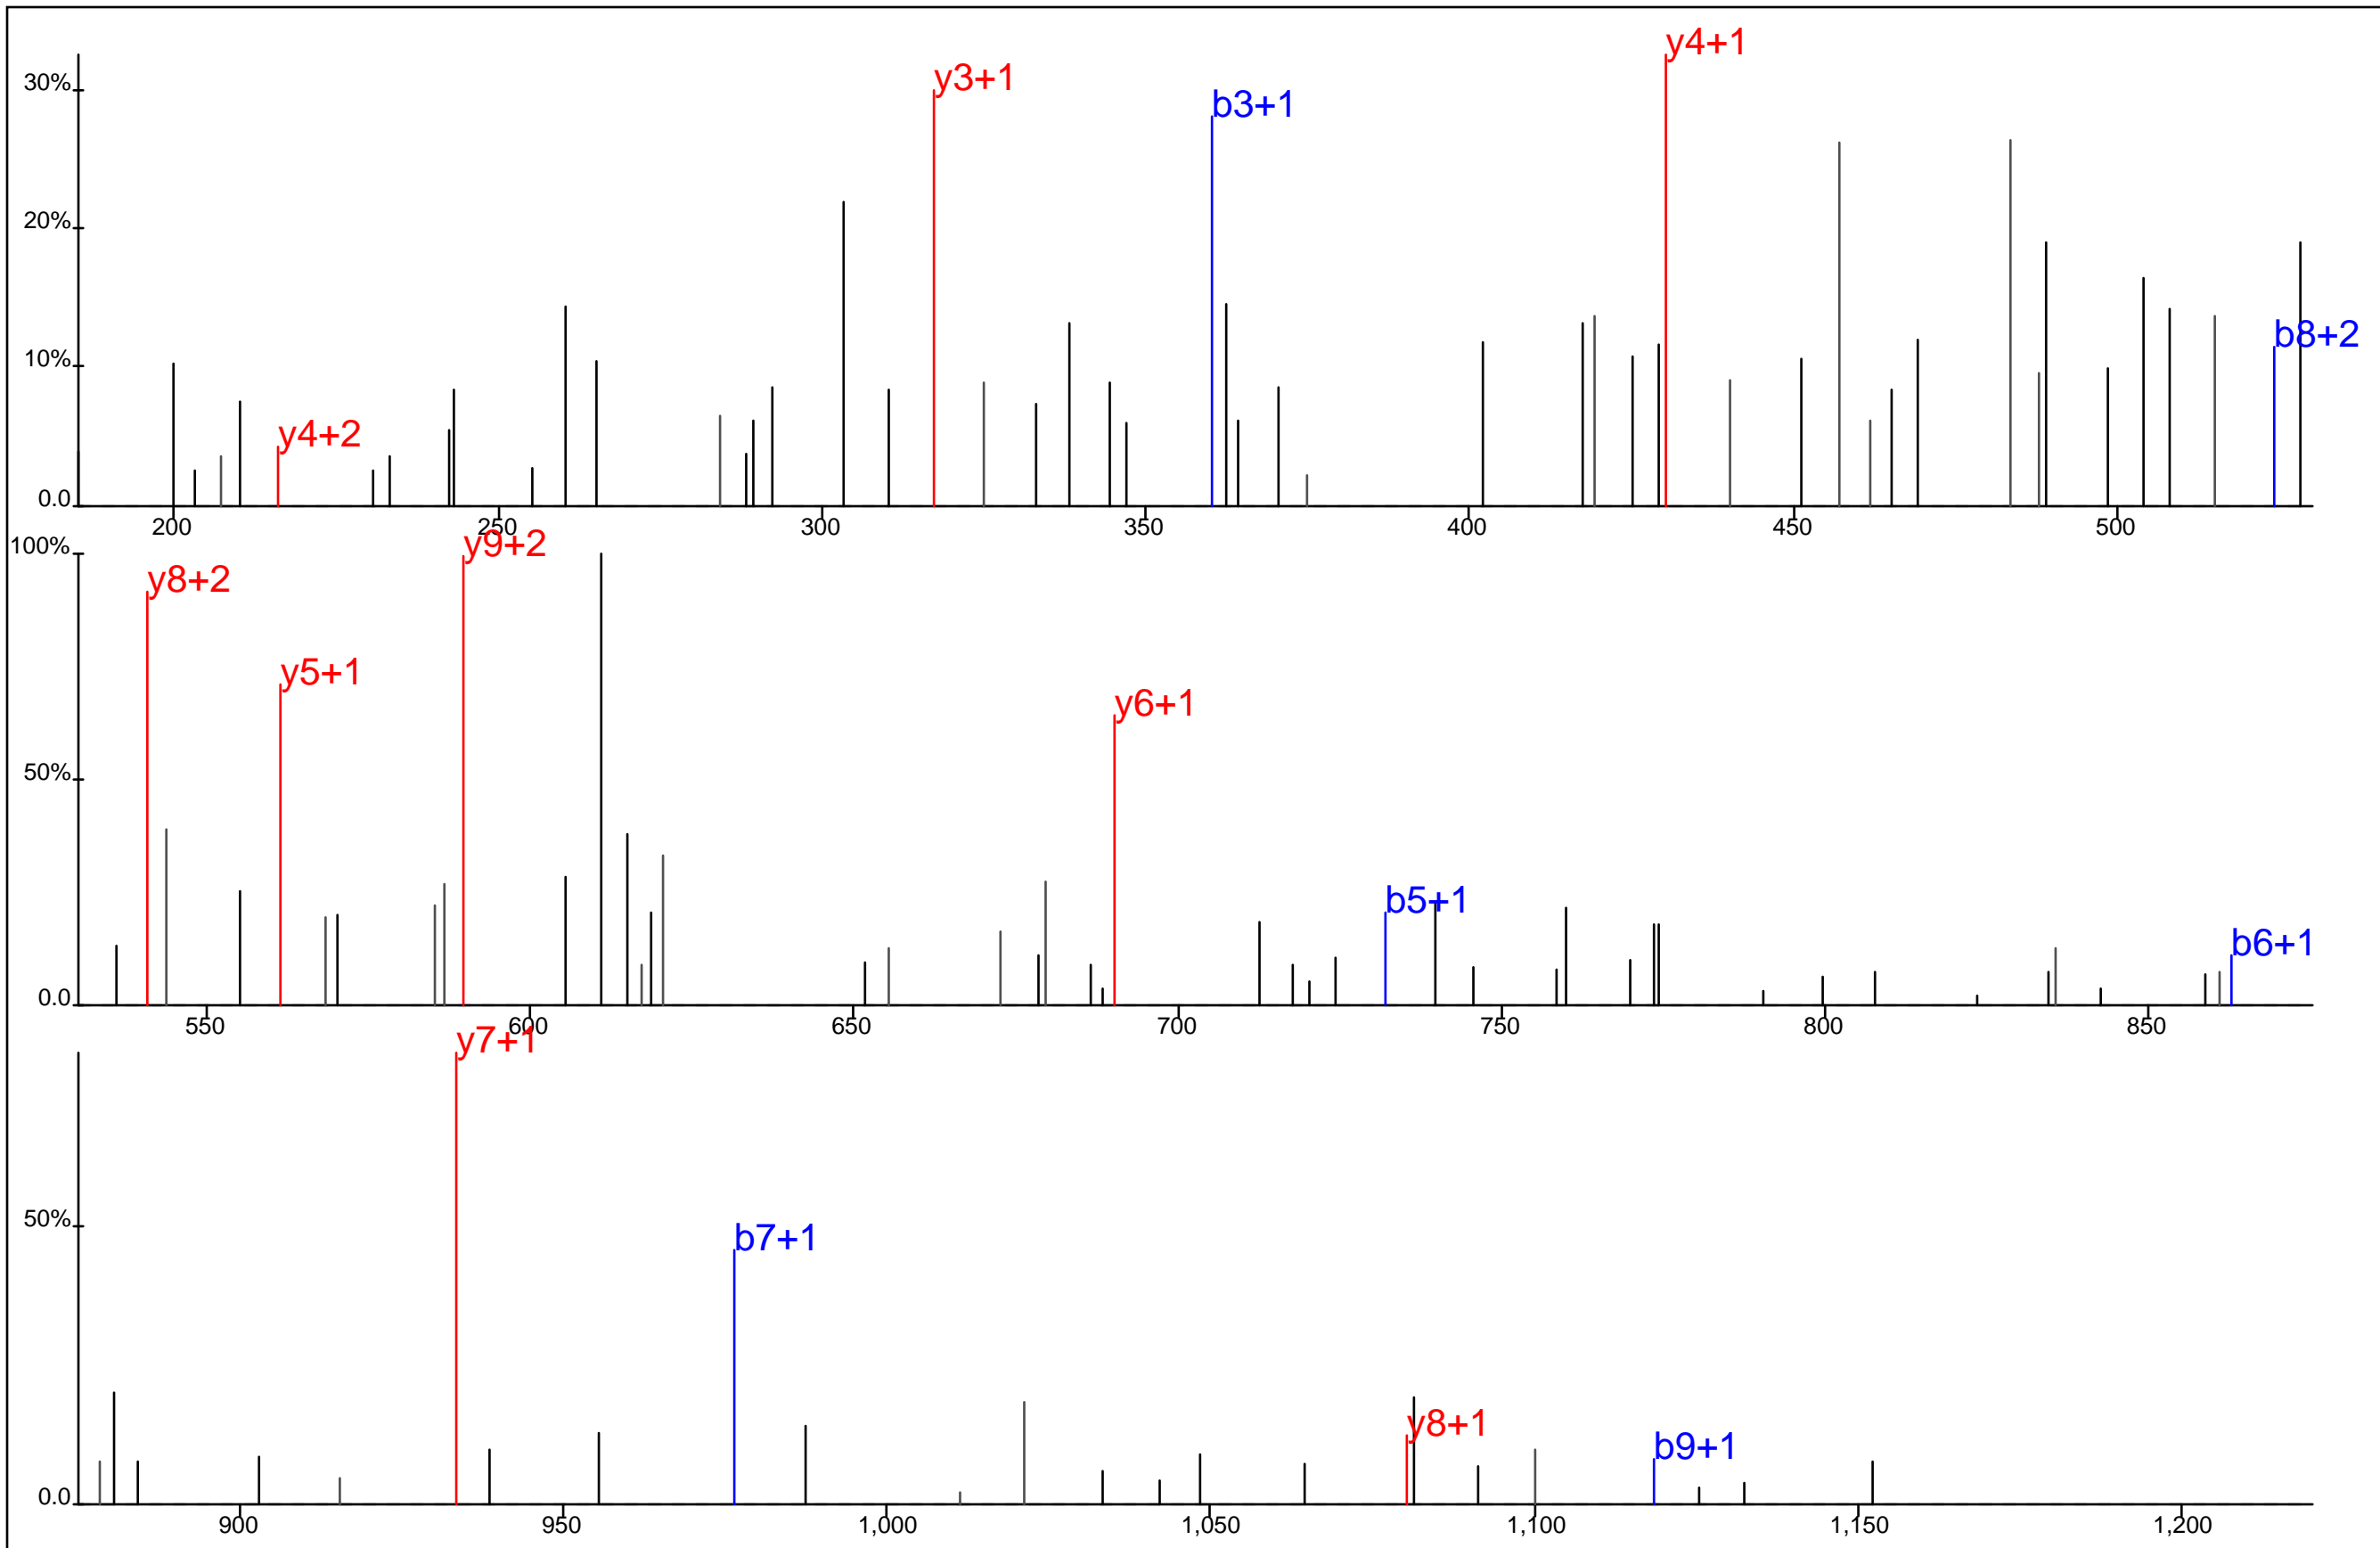

▢ ▢ ▢ ▢ ▢ ▢ ▢  
 D P F Y\* E M L A A R  
▢ ▢ ▢ ▢ ▢ ▢ ▢ ▢

Protein Name: Cytohesin 1  
 gi Accession: 0  
 Precursor Mass: 646.7711+2  
 Delta Mass: 2.408 ppm  
 XCorr: 23.86

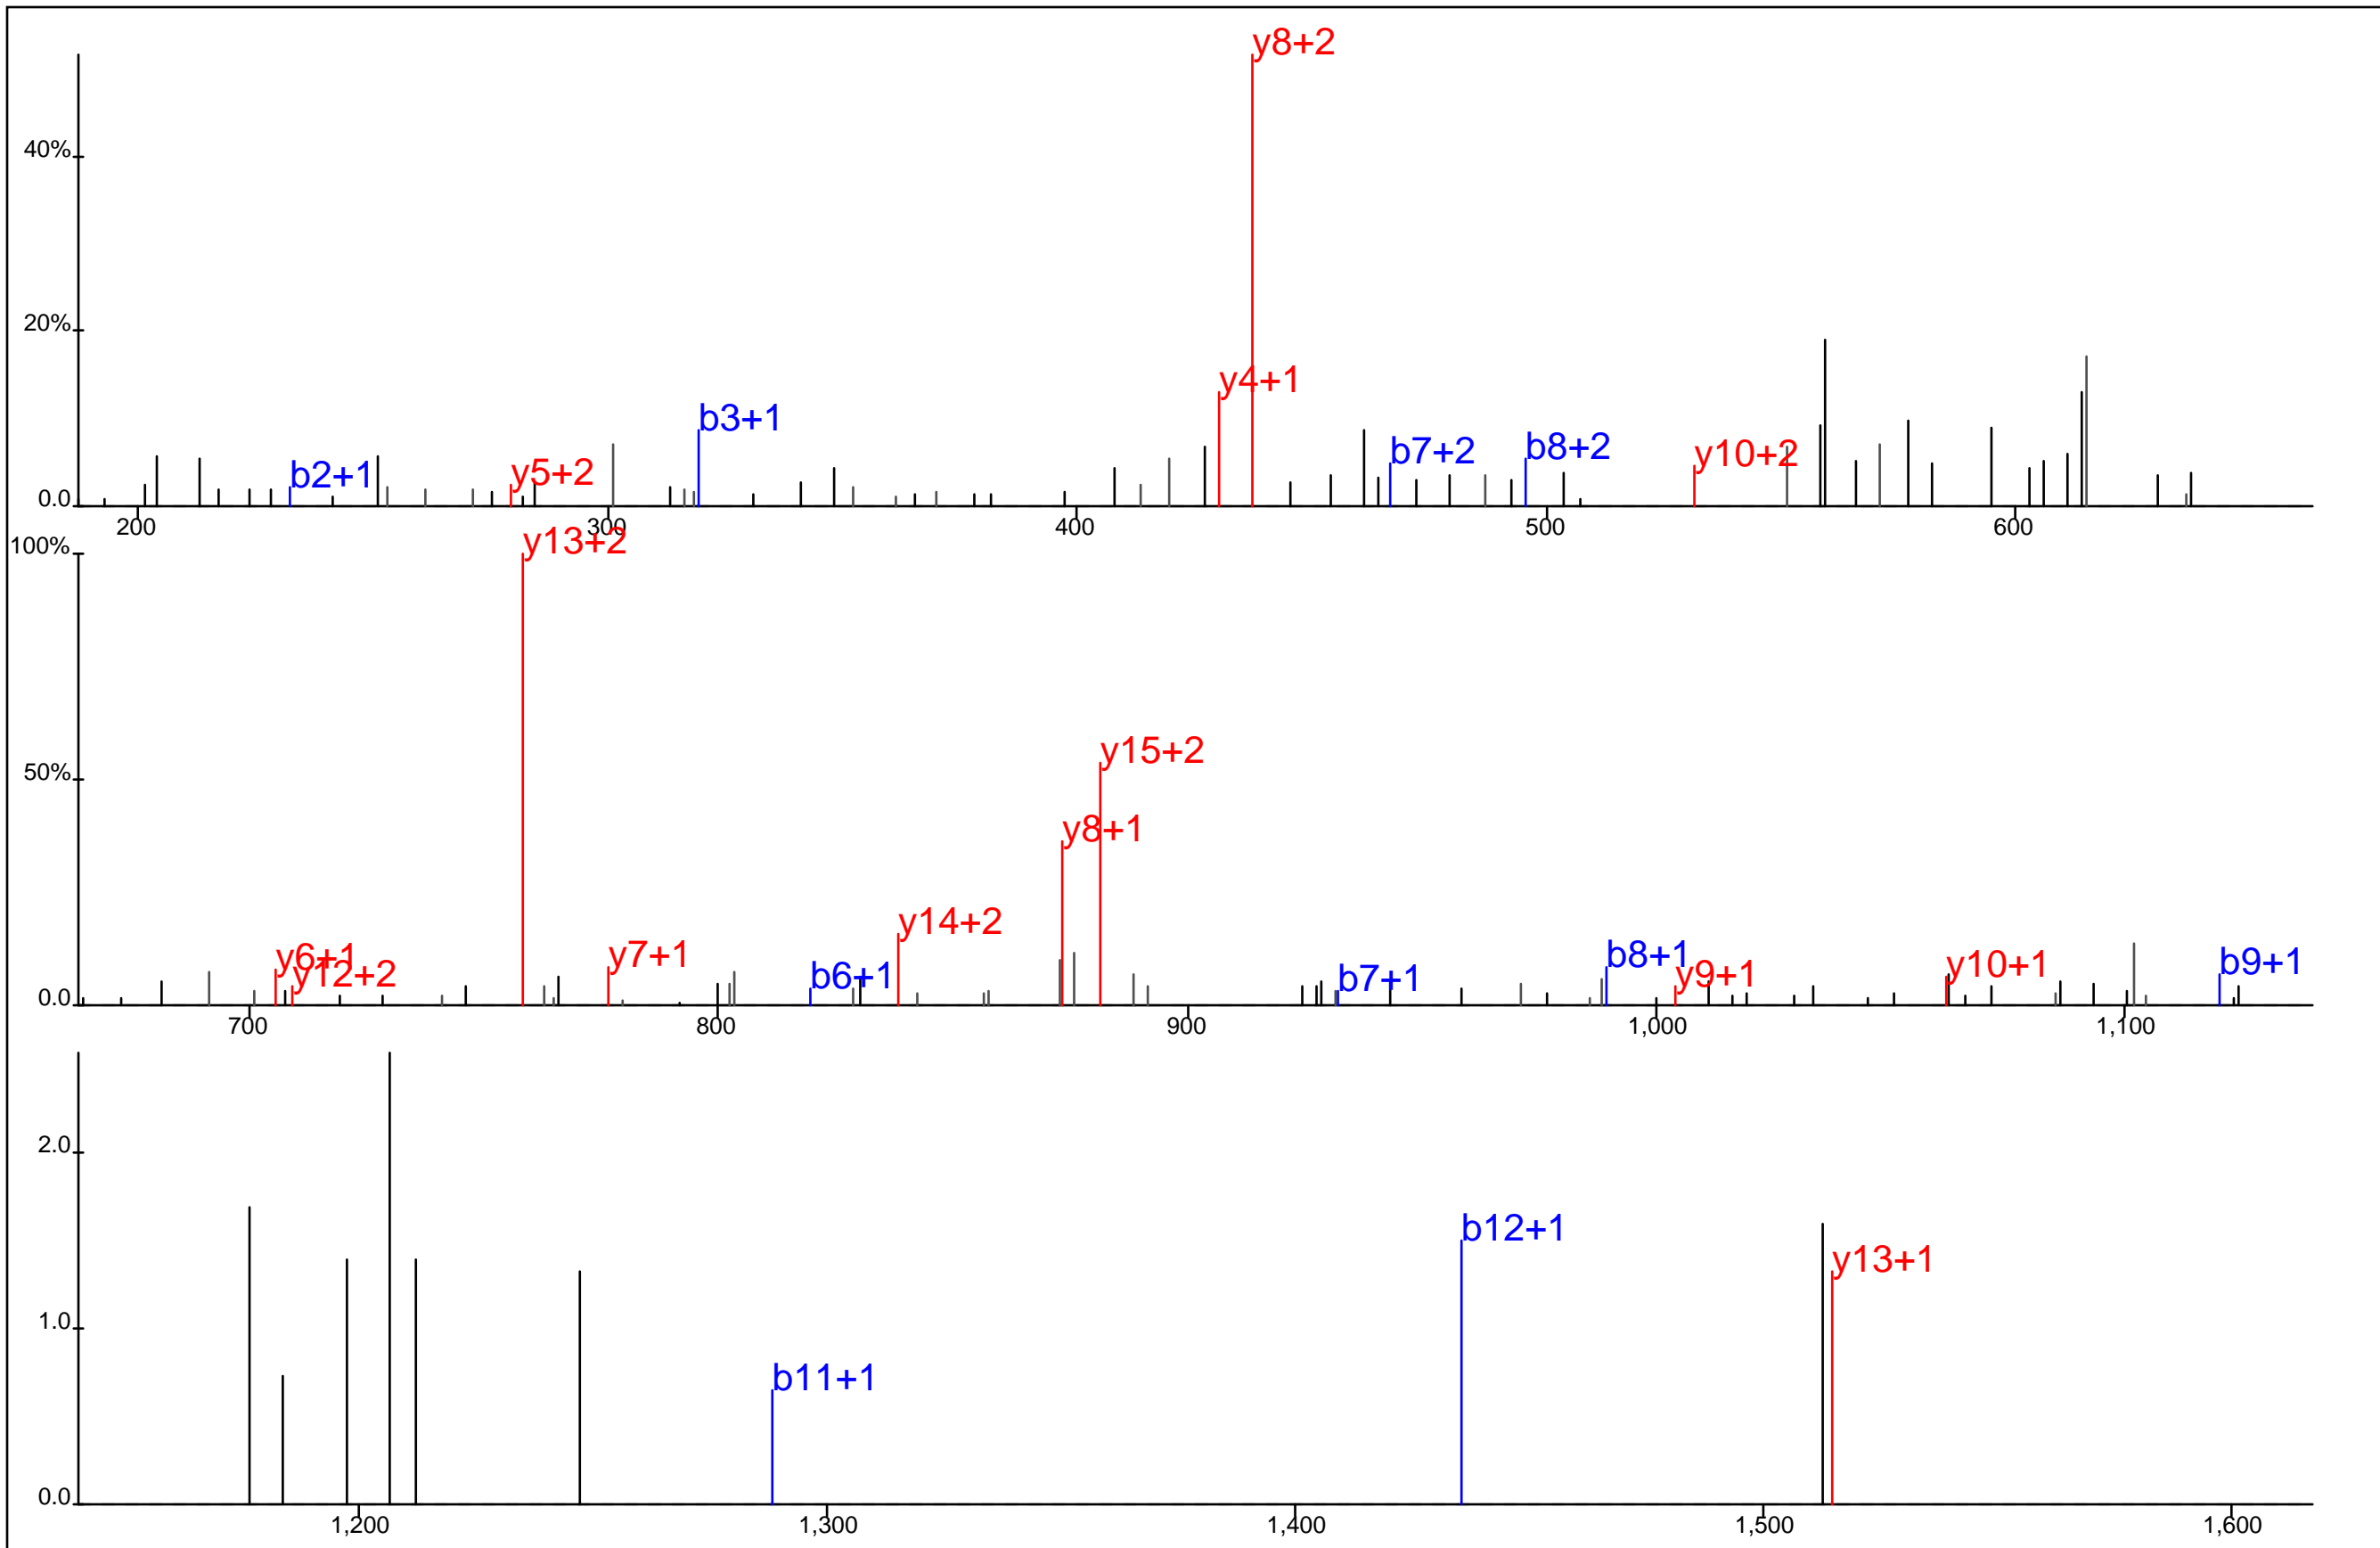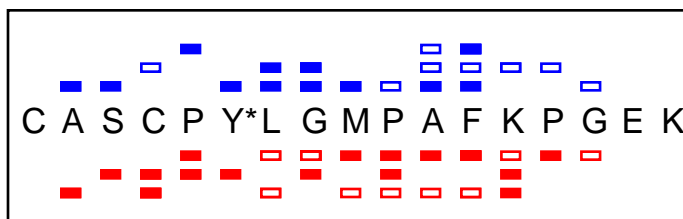

Protein Name: Cytokine induced apoptosis inhibitor 1  
 gi Accession: 0  
 Precursor Mass: 664.9501+3  
 Delta Mass: 2.952 ppm  
 XCorr: 32.13

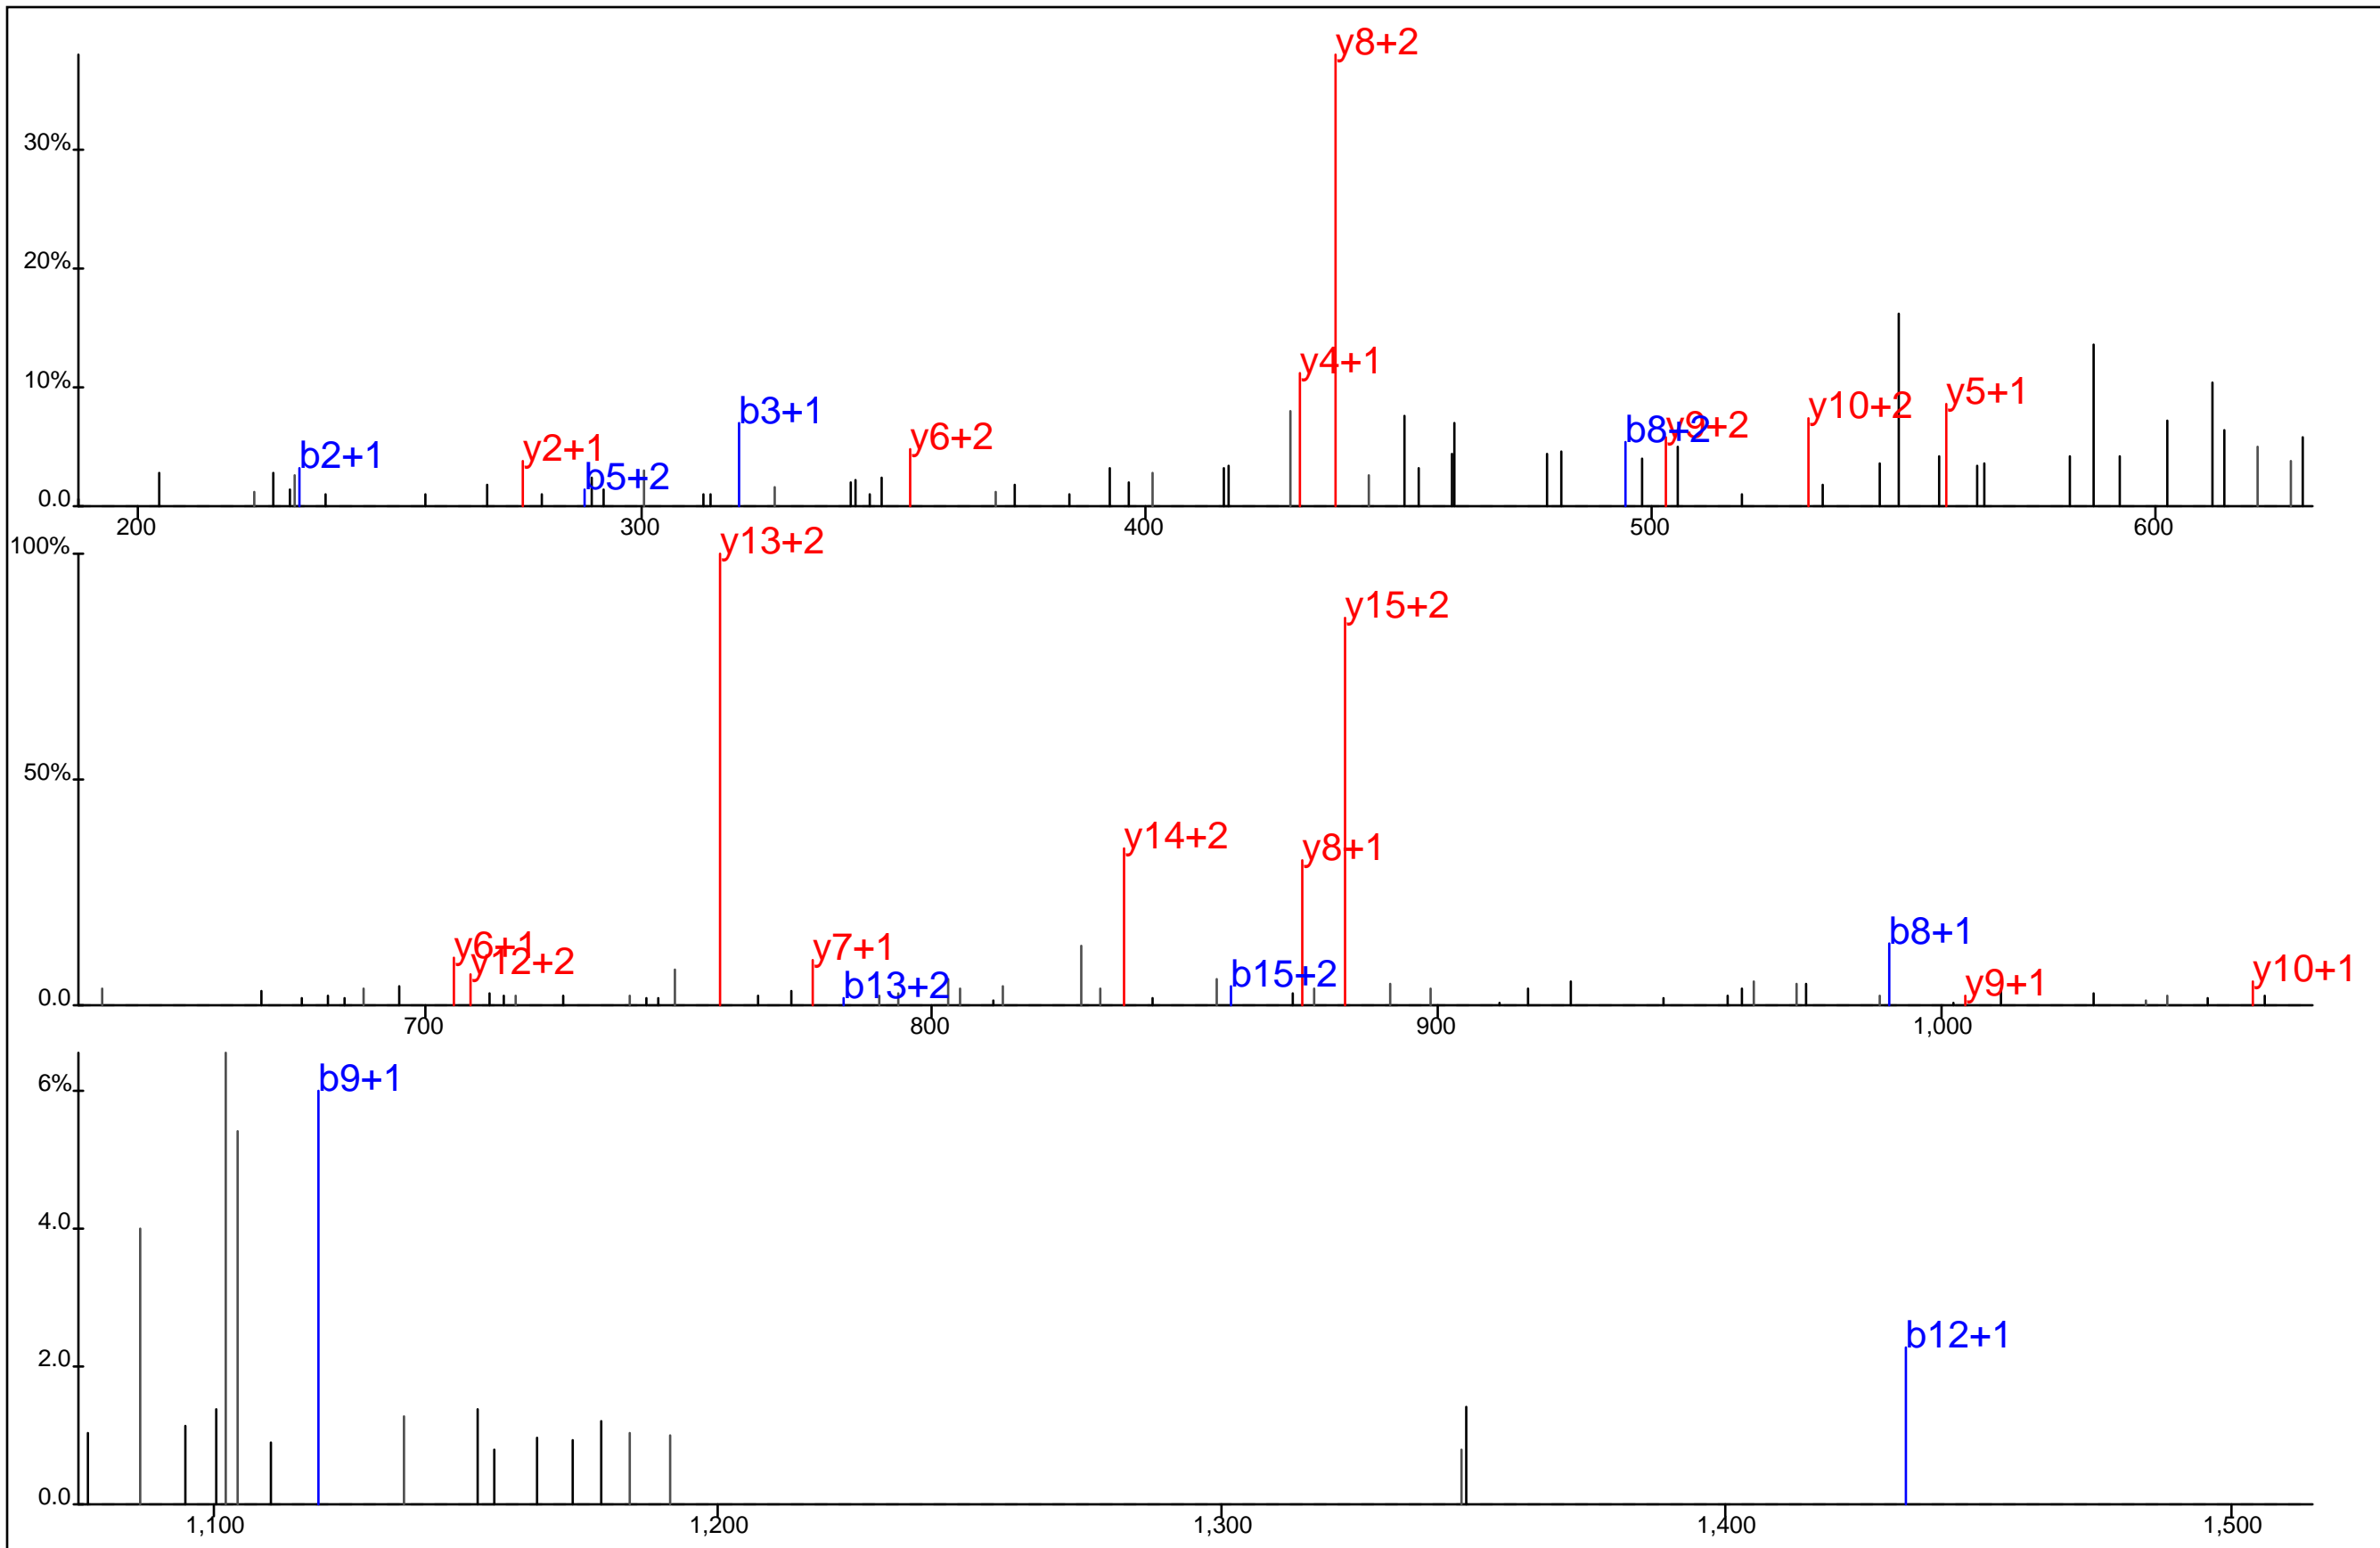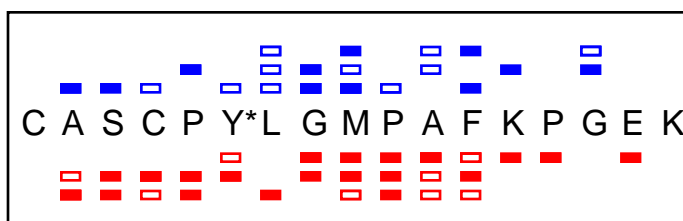

Protein Name: Cytokine induced apoptosis inhibitor 1  
 gi Accession: 0  
 Precursor Mass: 664.9504+3  
 Delta Mass: 2.492 ppm  
 XCorr: 55.71

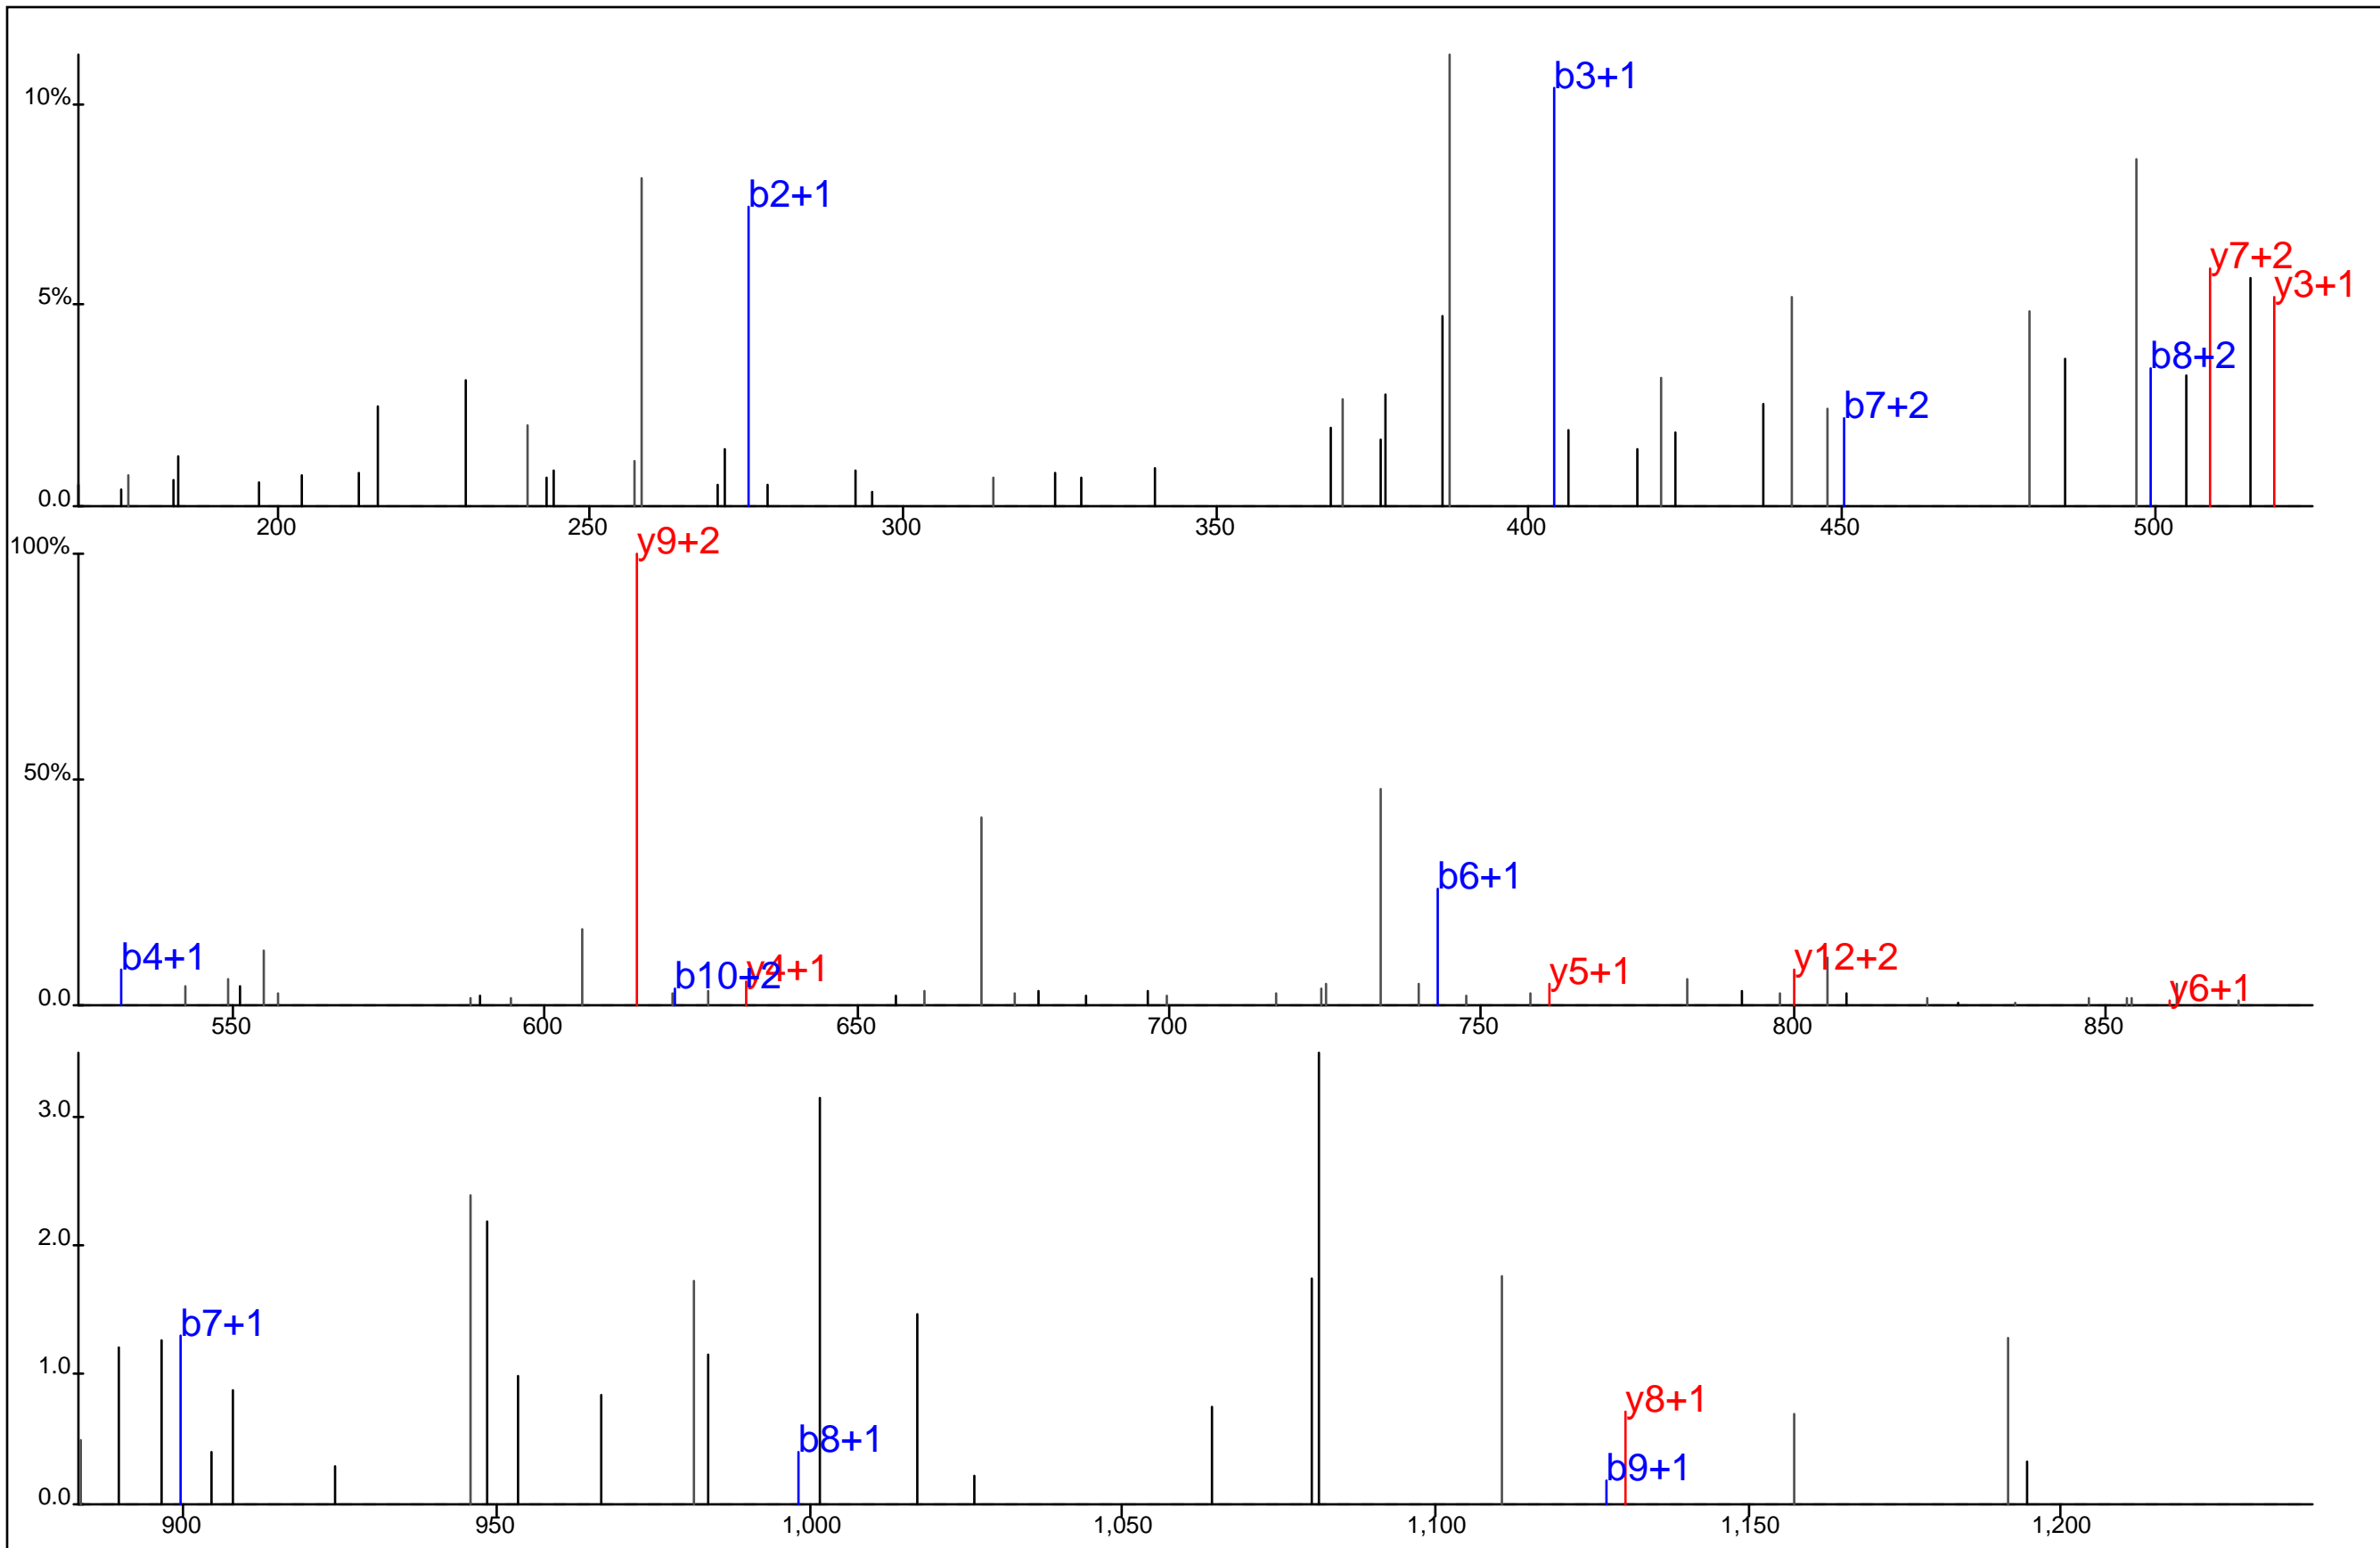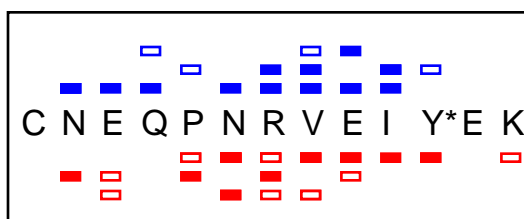

Protein Name: Cytoplasmic FMR1 interacting protein 1  
 gi Accession: 0  
 Precursor Mass: 586.9225+3  
 Delta Mass: 0.827 ppm  
 XCorr: 33.52



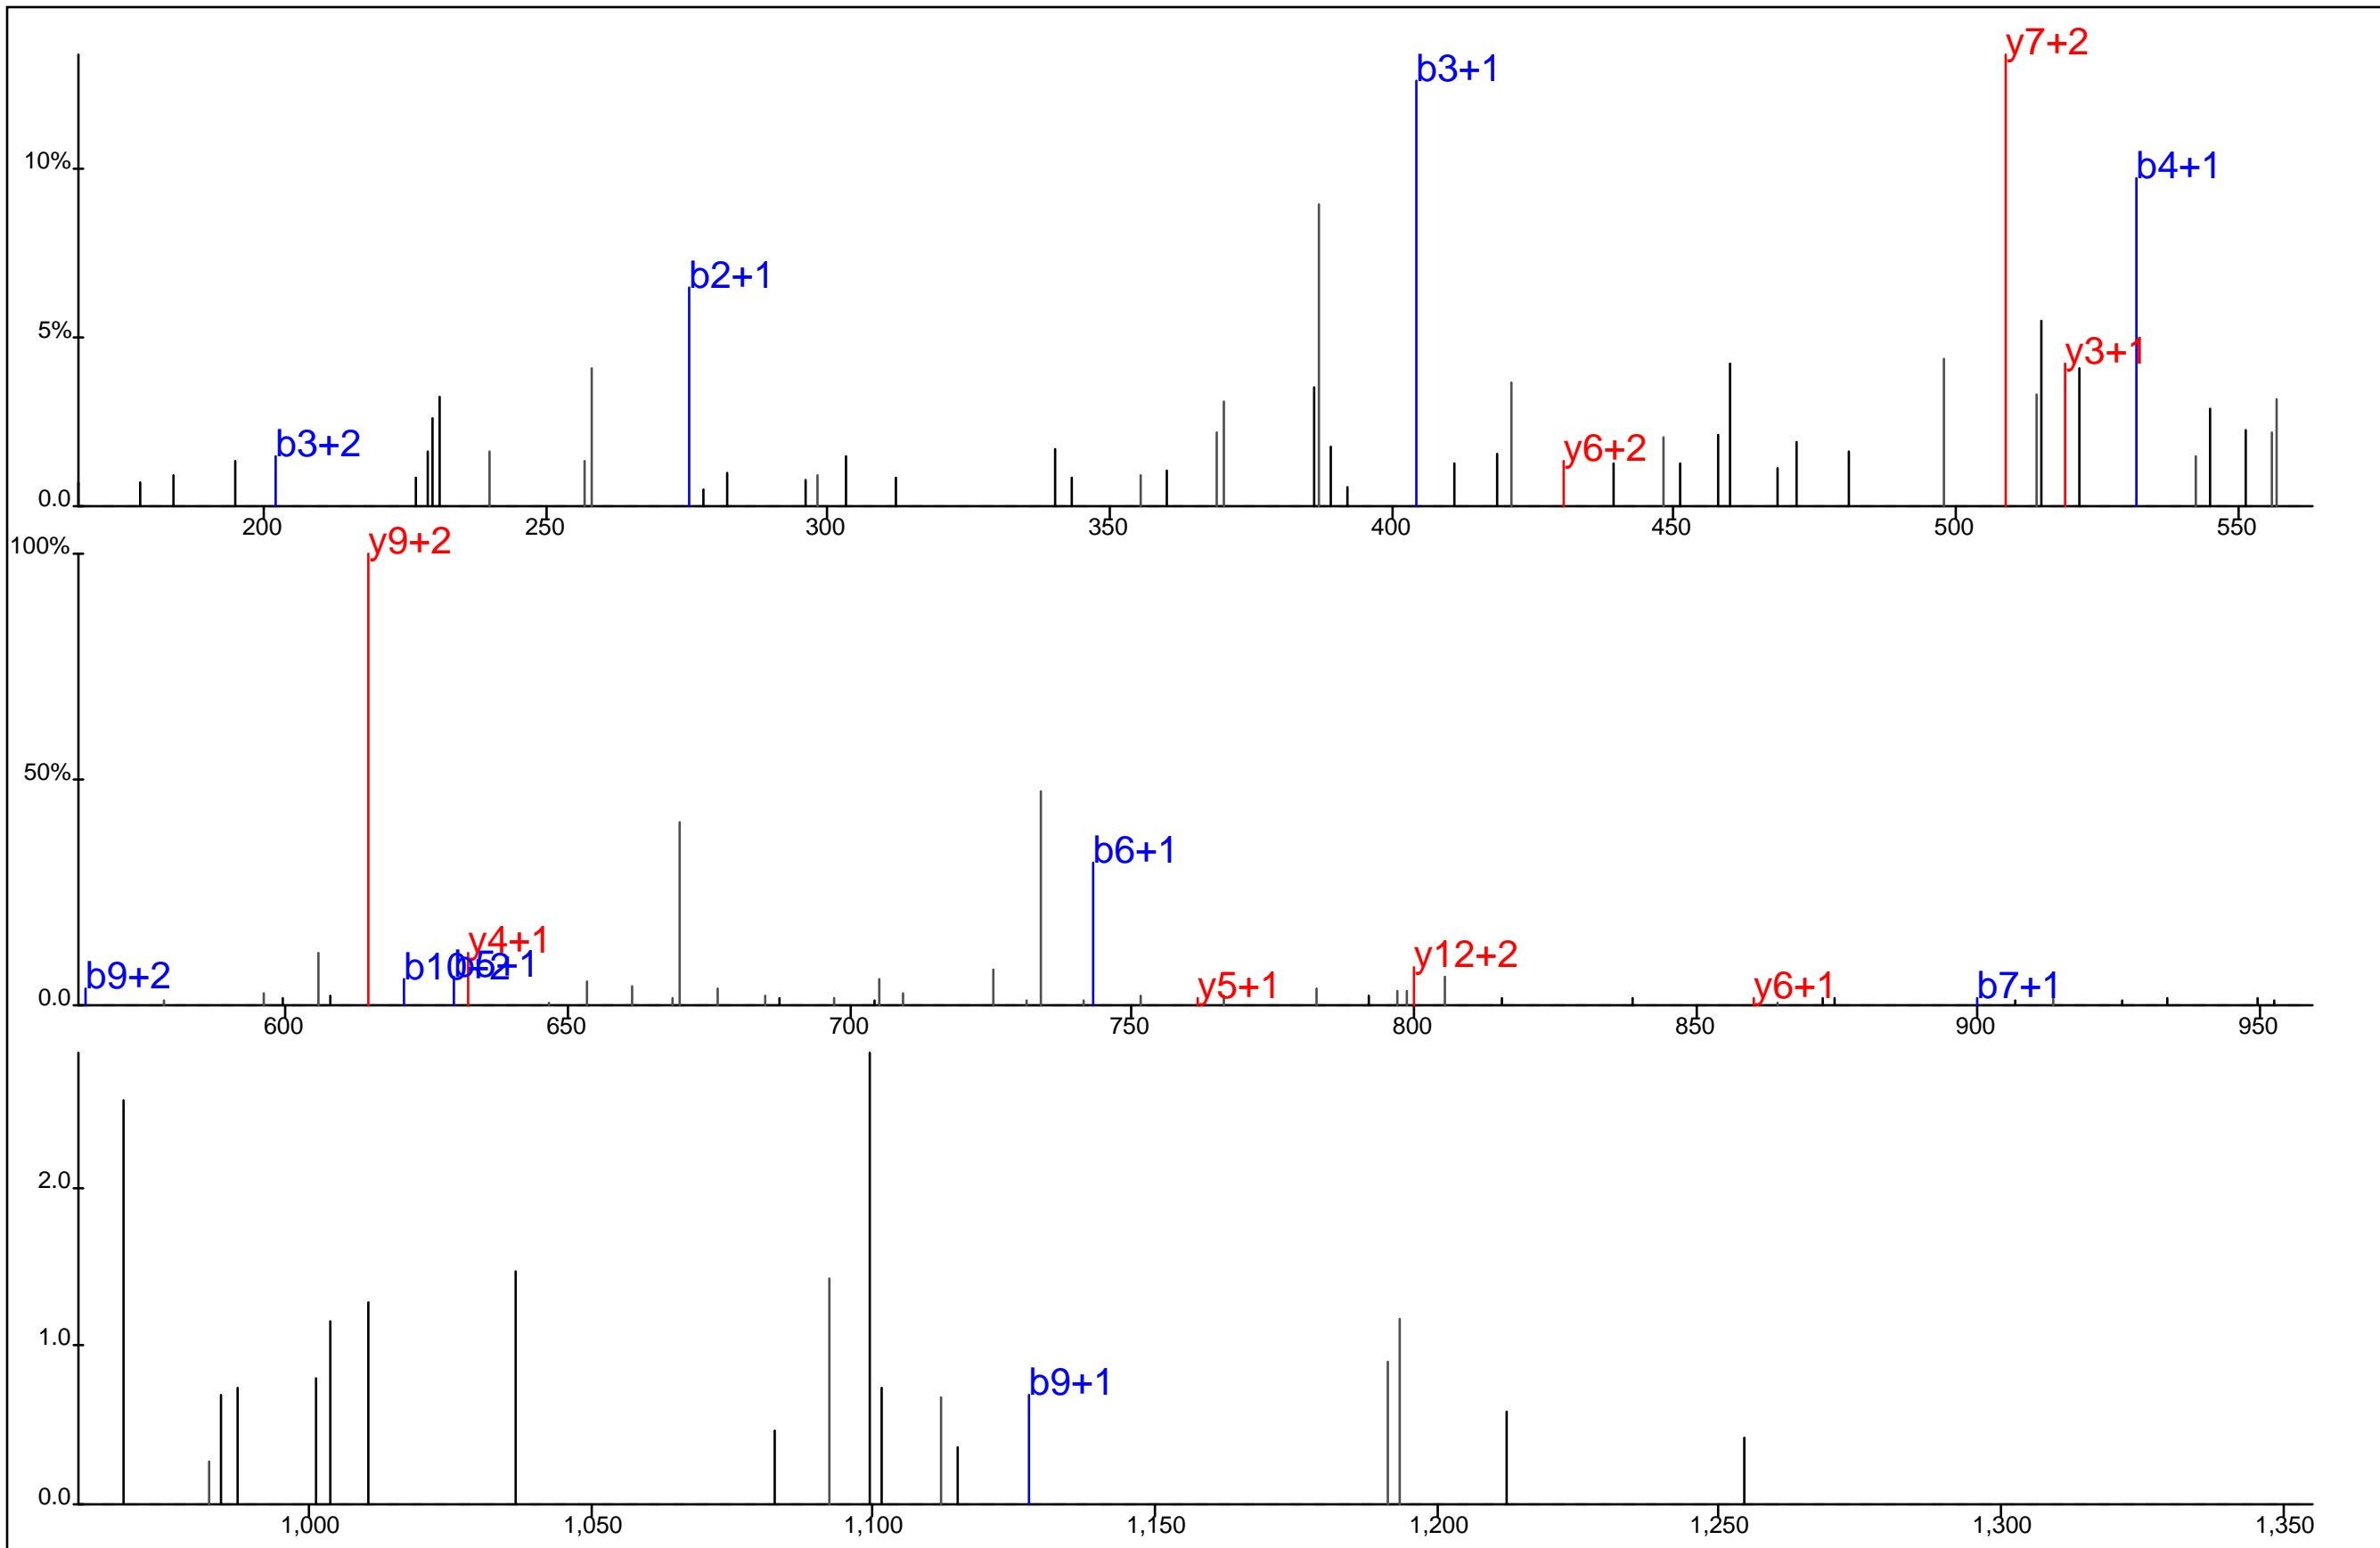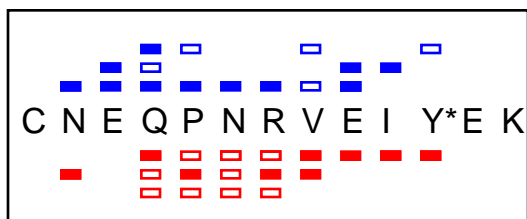

Protein Name: Cytoplasmic FMR1 interacting protein 1  
 gi Accession: 0  
 Precursor Mass: 586.9222+3  
 Delta Mass: 0.306 ppm  
 XCorr: 26.68

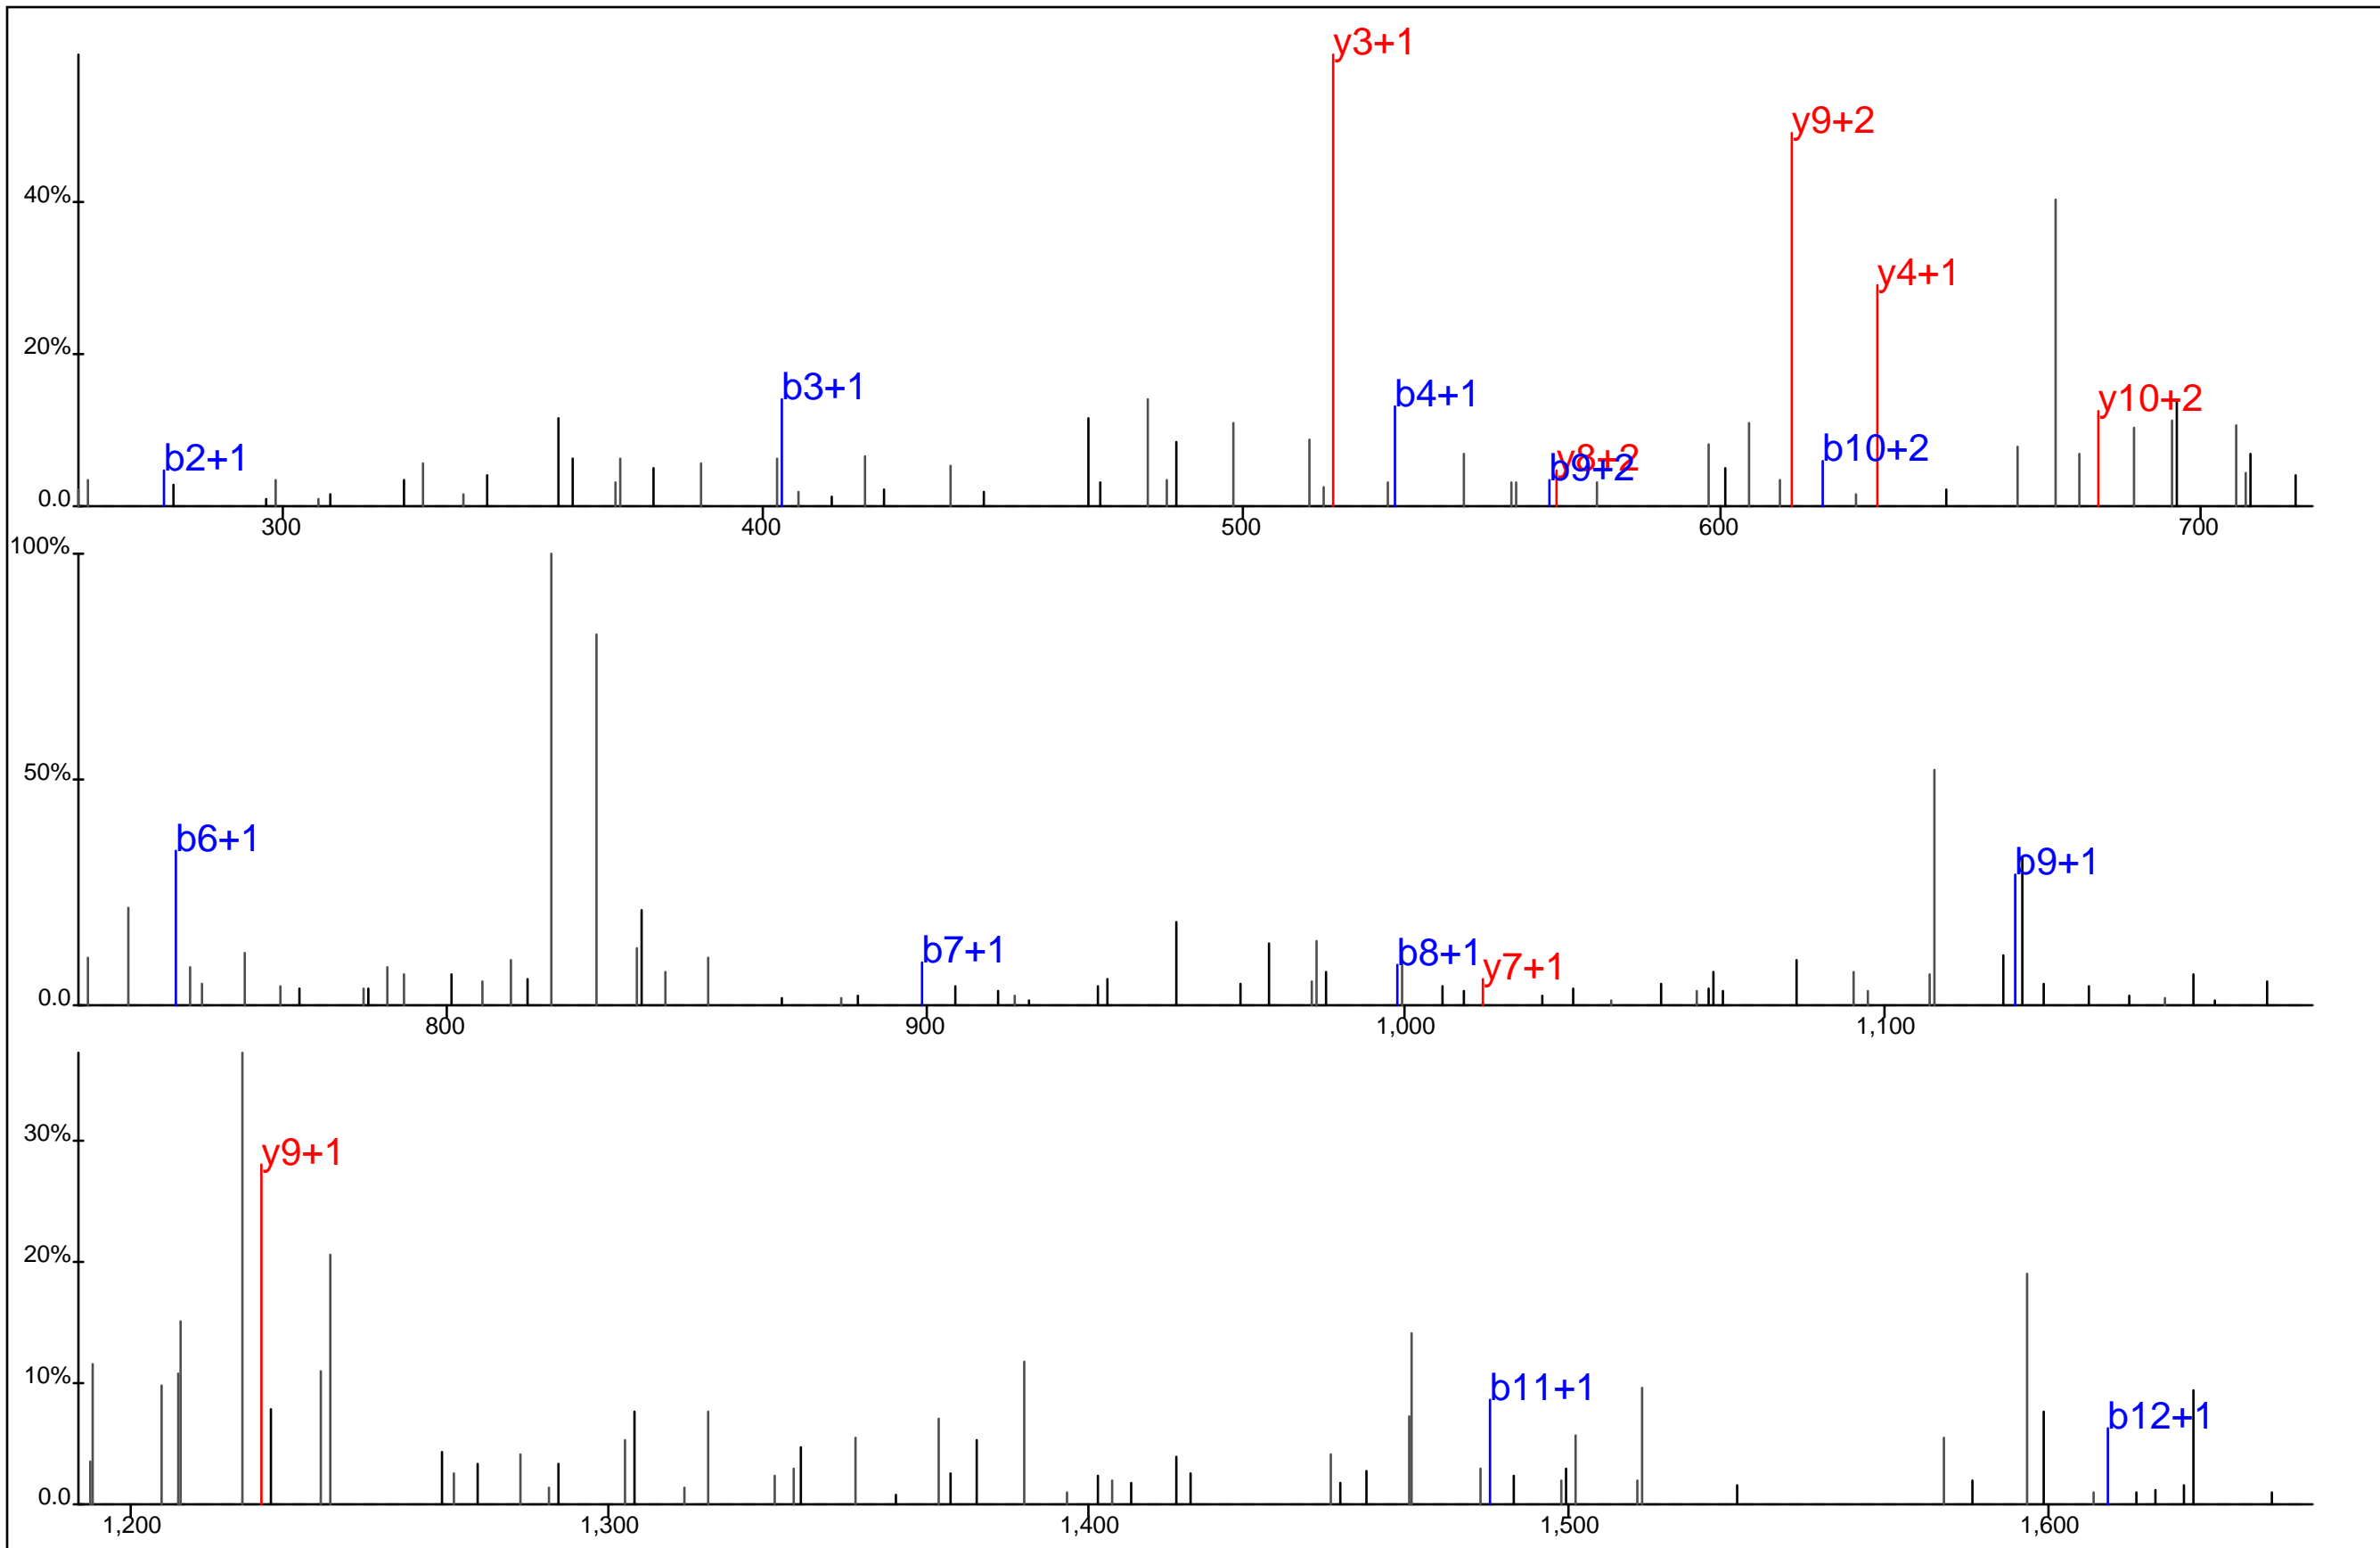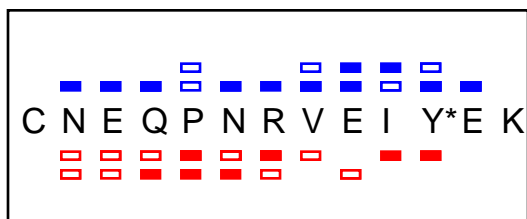

Protein Name: Cytoplasmic FMR1 interacting protein 1  
 gi Accession: 0  
 Precursor Mass: 879.8787+2  
 Delta Mass: 0.831 ppm  
 XCorr: 39.27

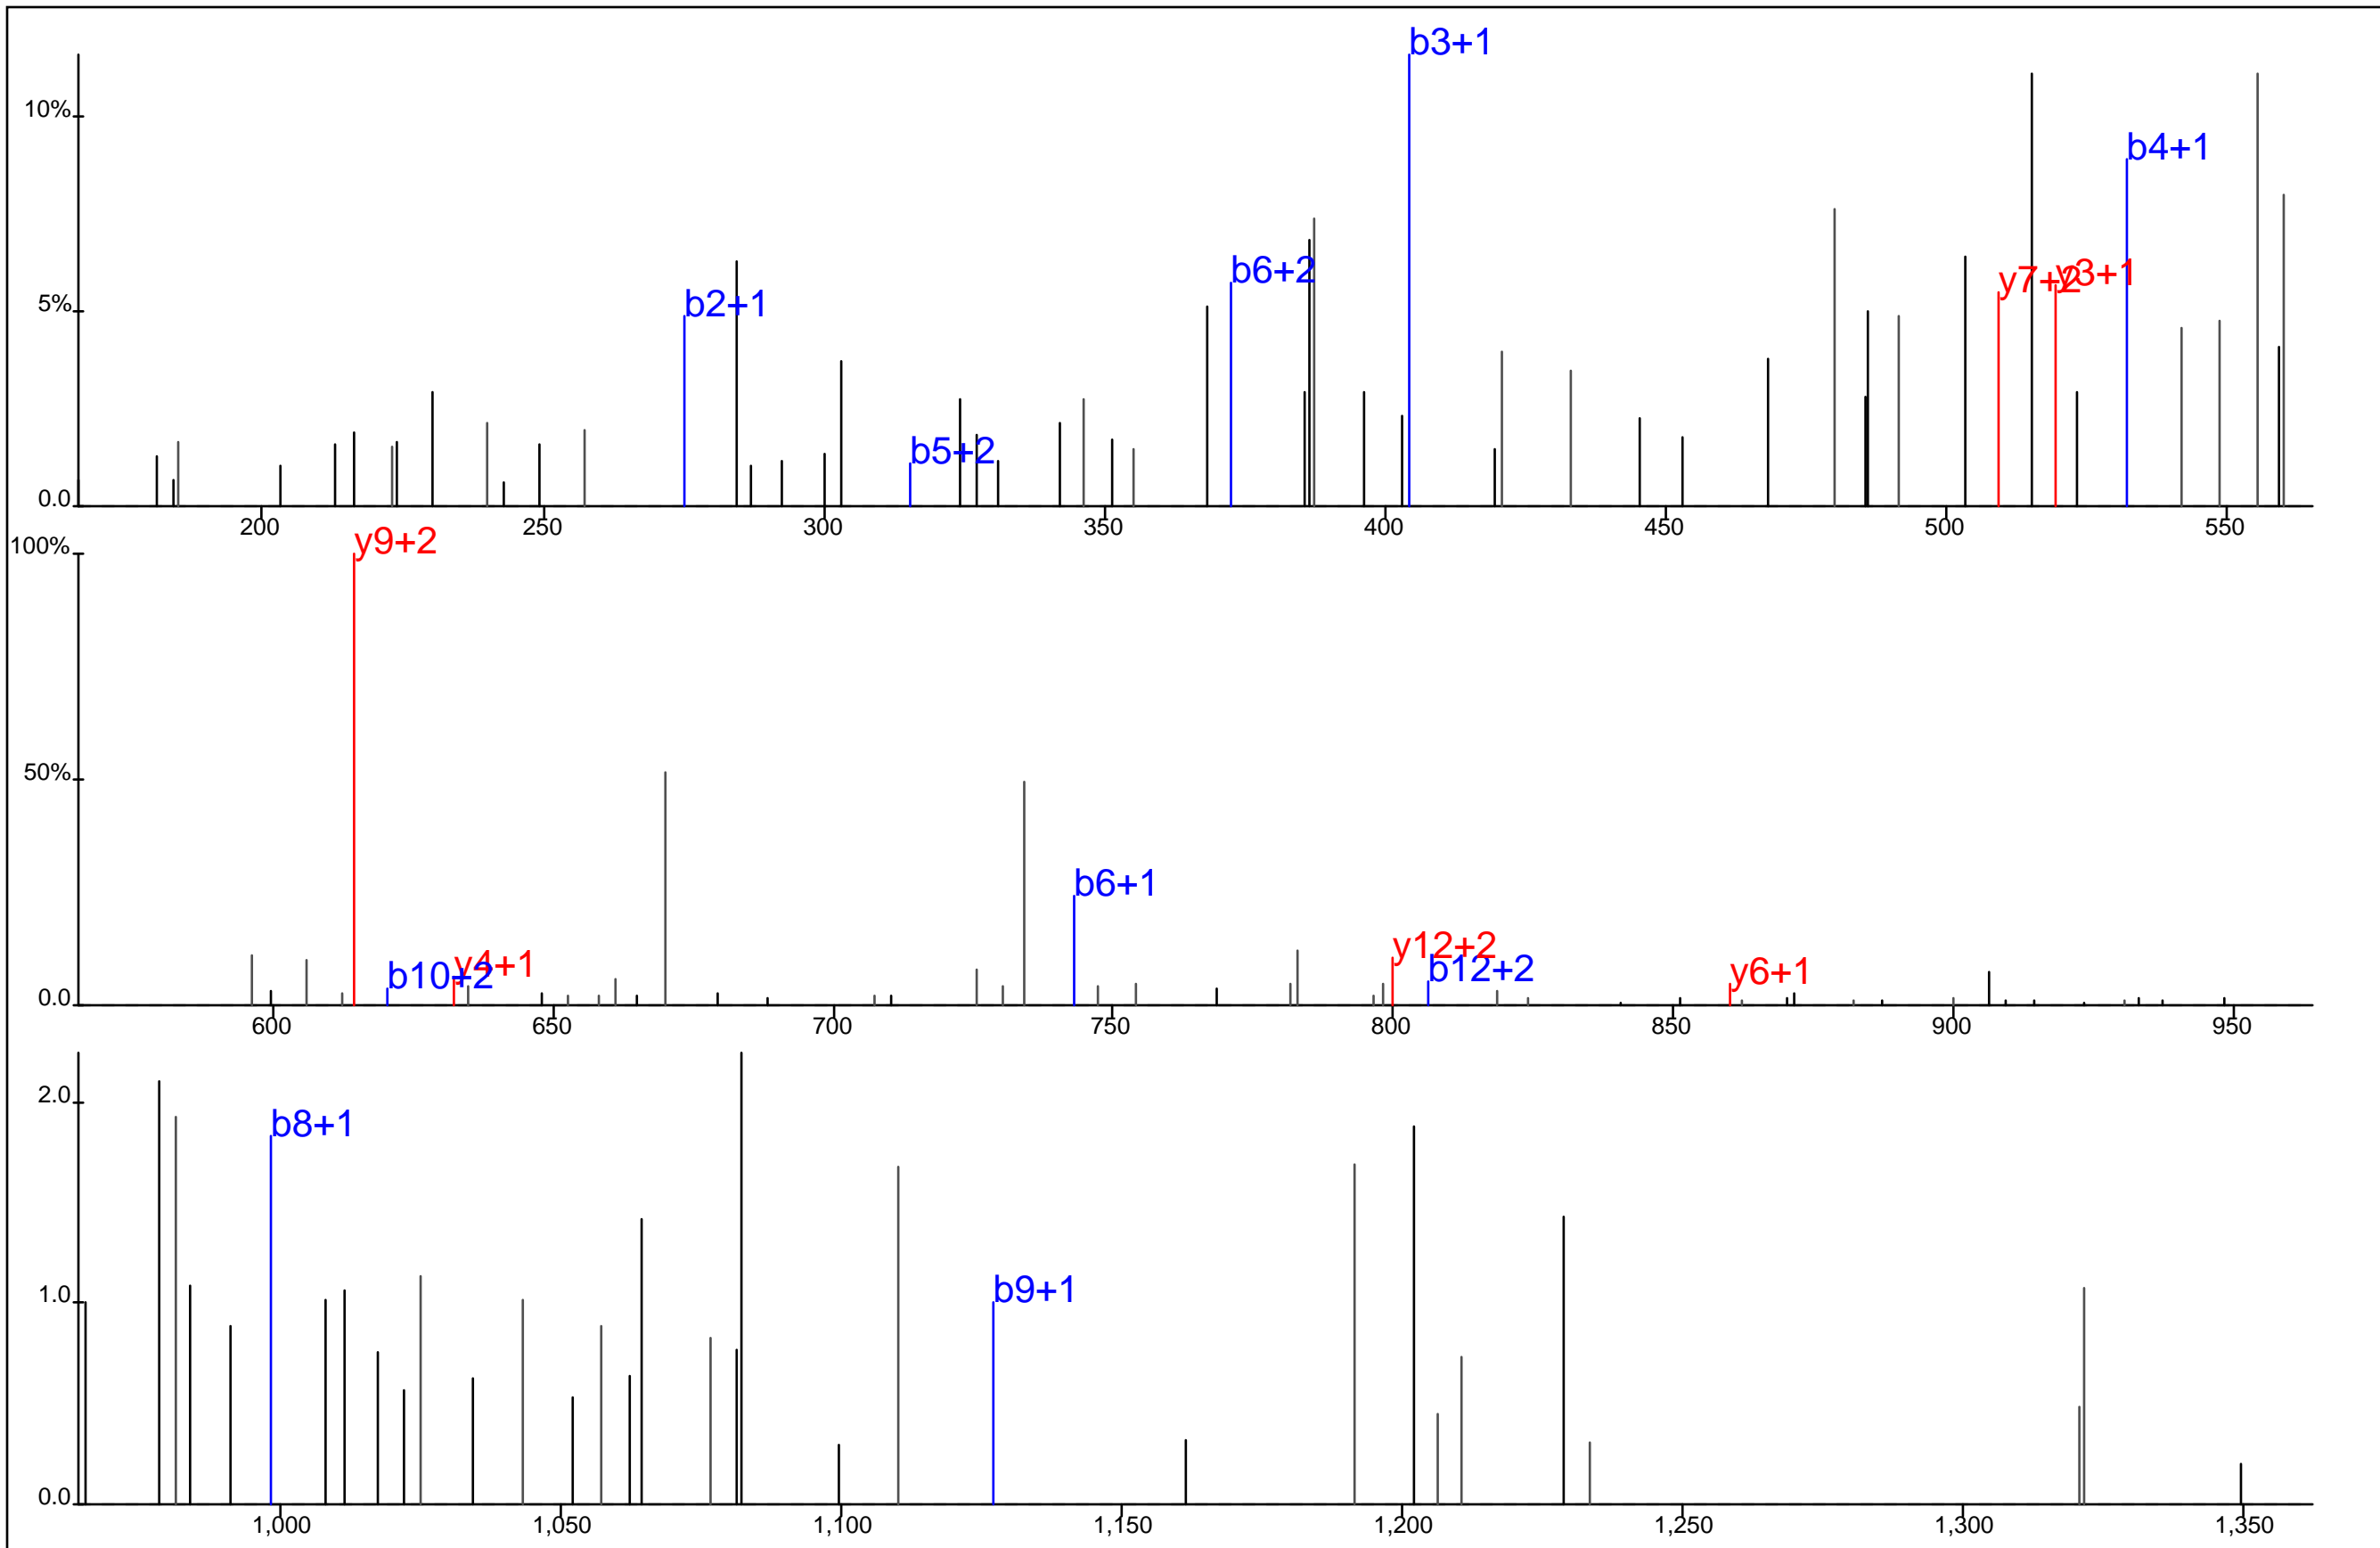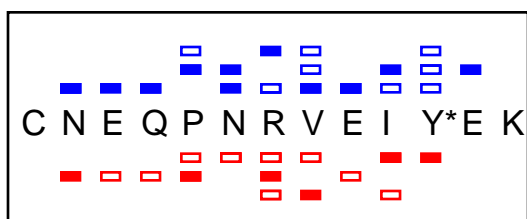

Protein Name: Cytoplasmic FMR1 interacting protein 1  
 gi Accession: 0  
 Precursor Mass: 586.9231+3  
 Delta Mass: 1.765 ppm  
 XCorr: 23.14

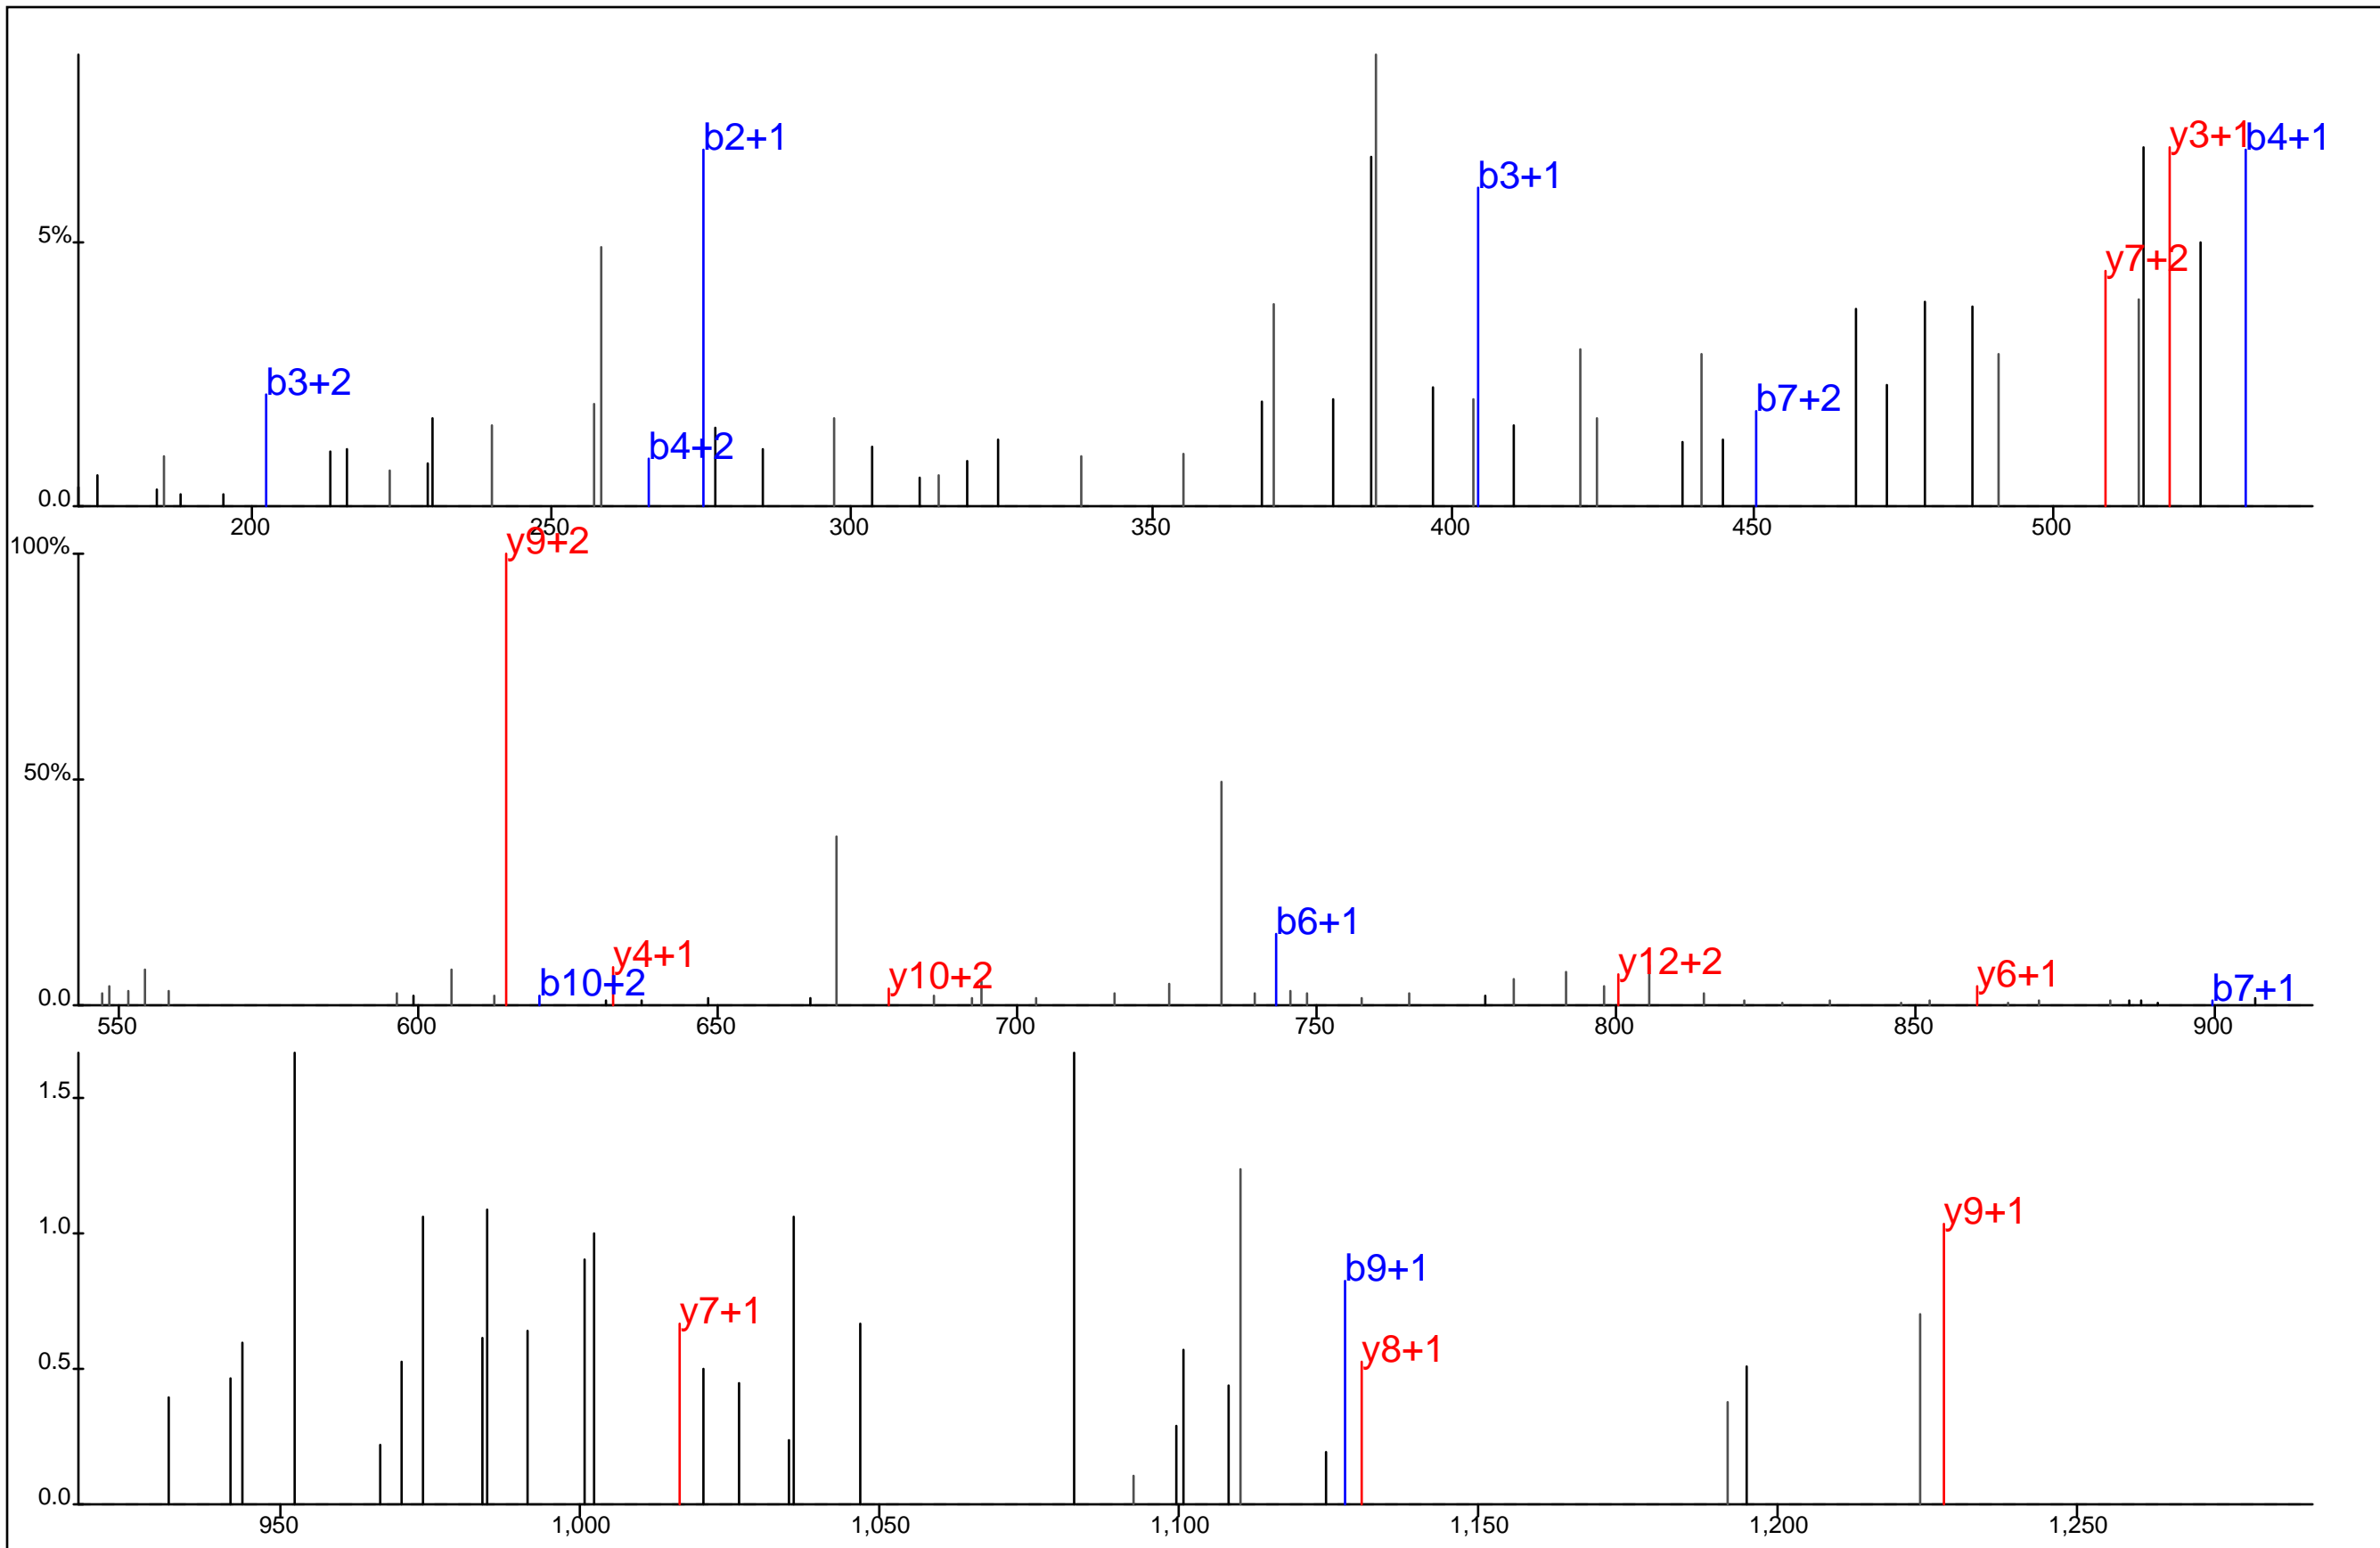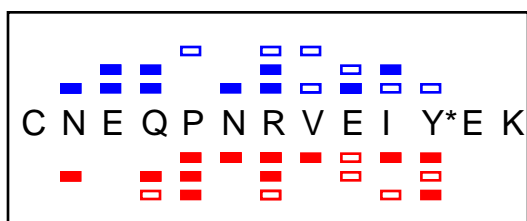

Protein Name: Cytoplasmic FMR1 interacting protein 1  
 gi Accession: 0  
 Precursor Mass: 586.9222+3  
 Delta Mass: 0.306 ppm  
 XCorr: 25.84

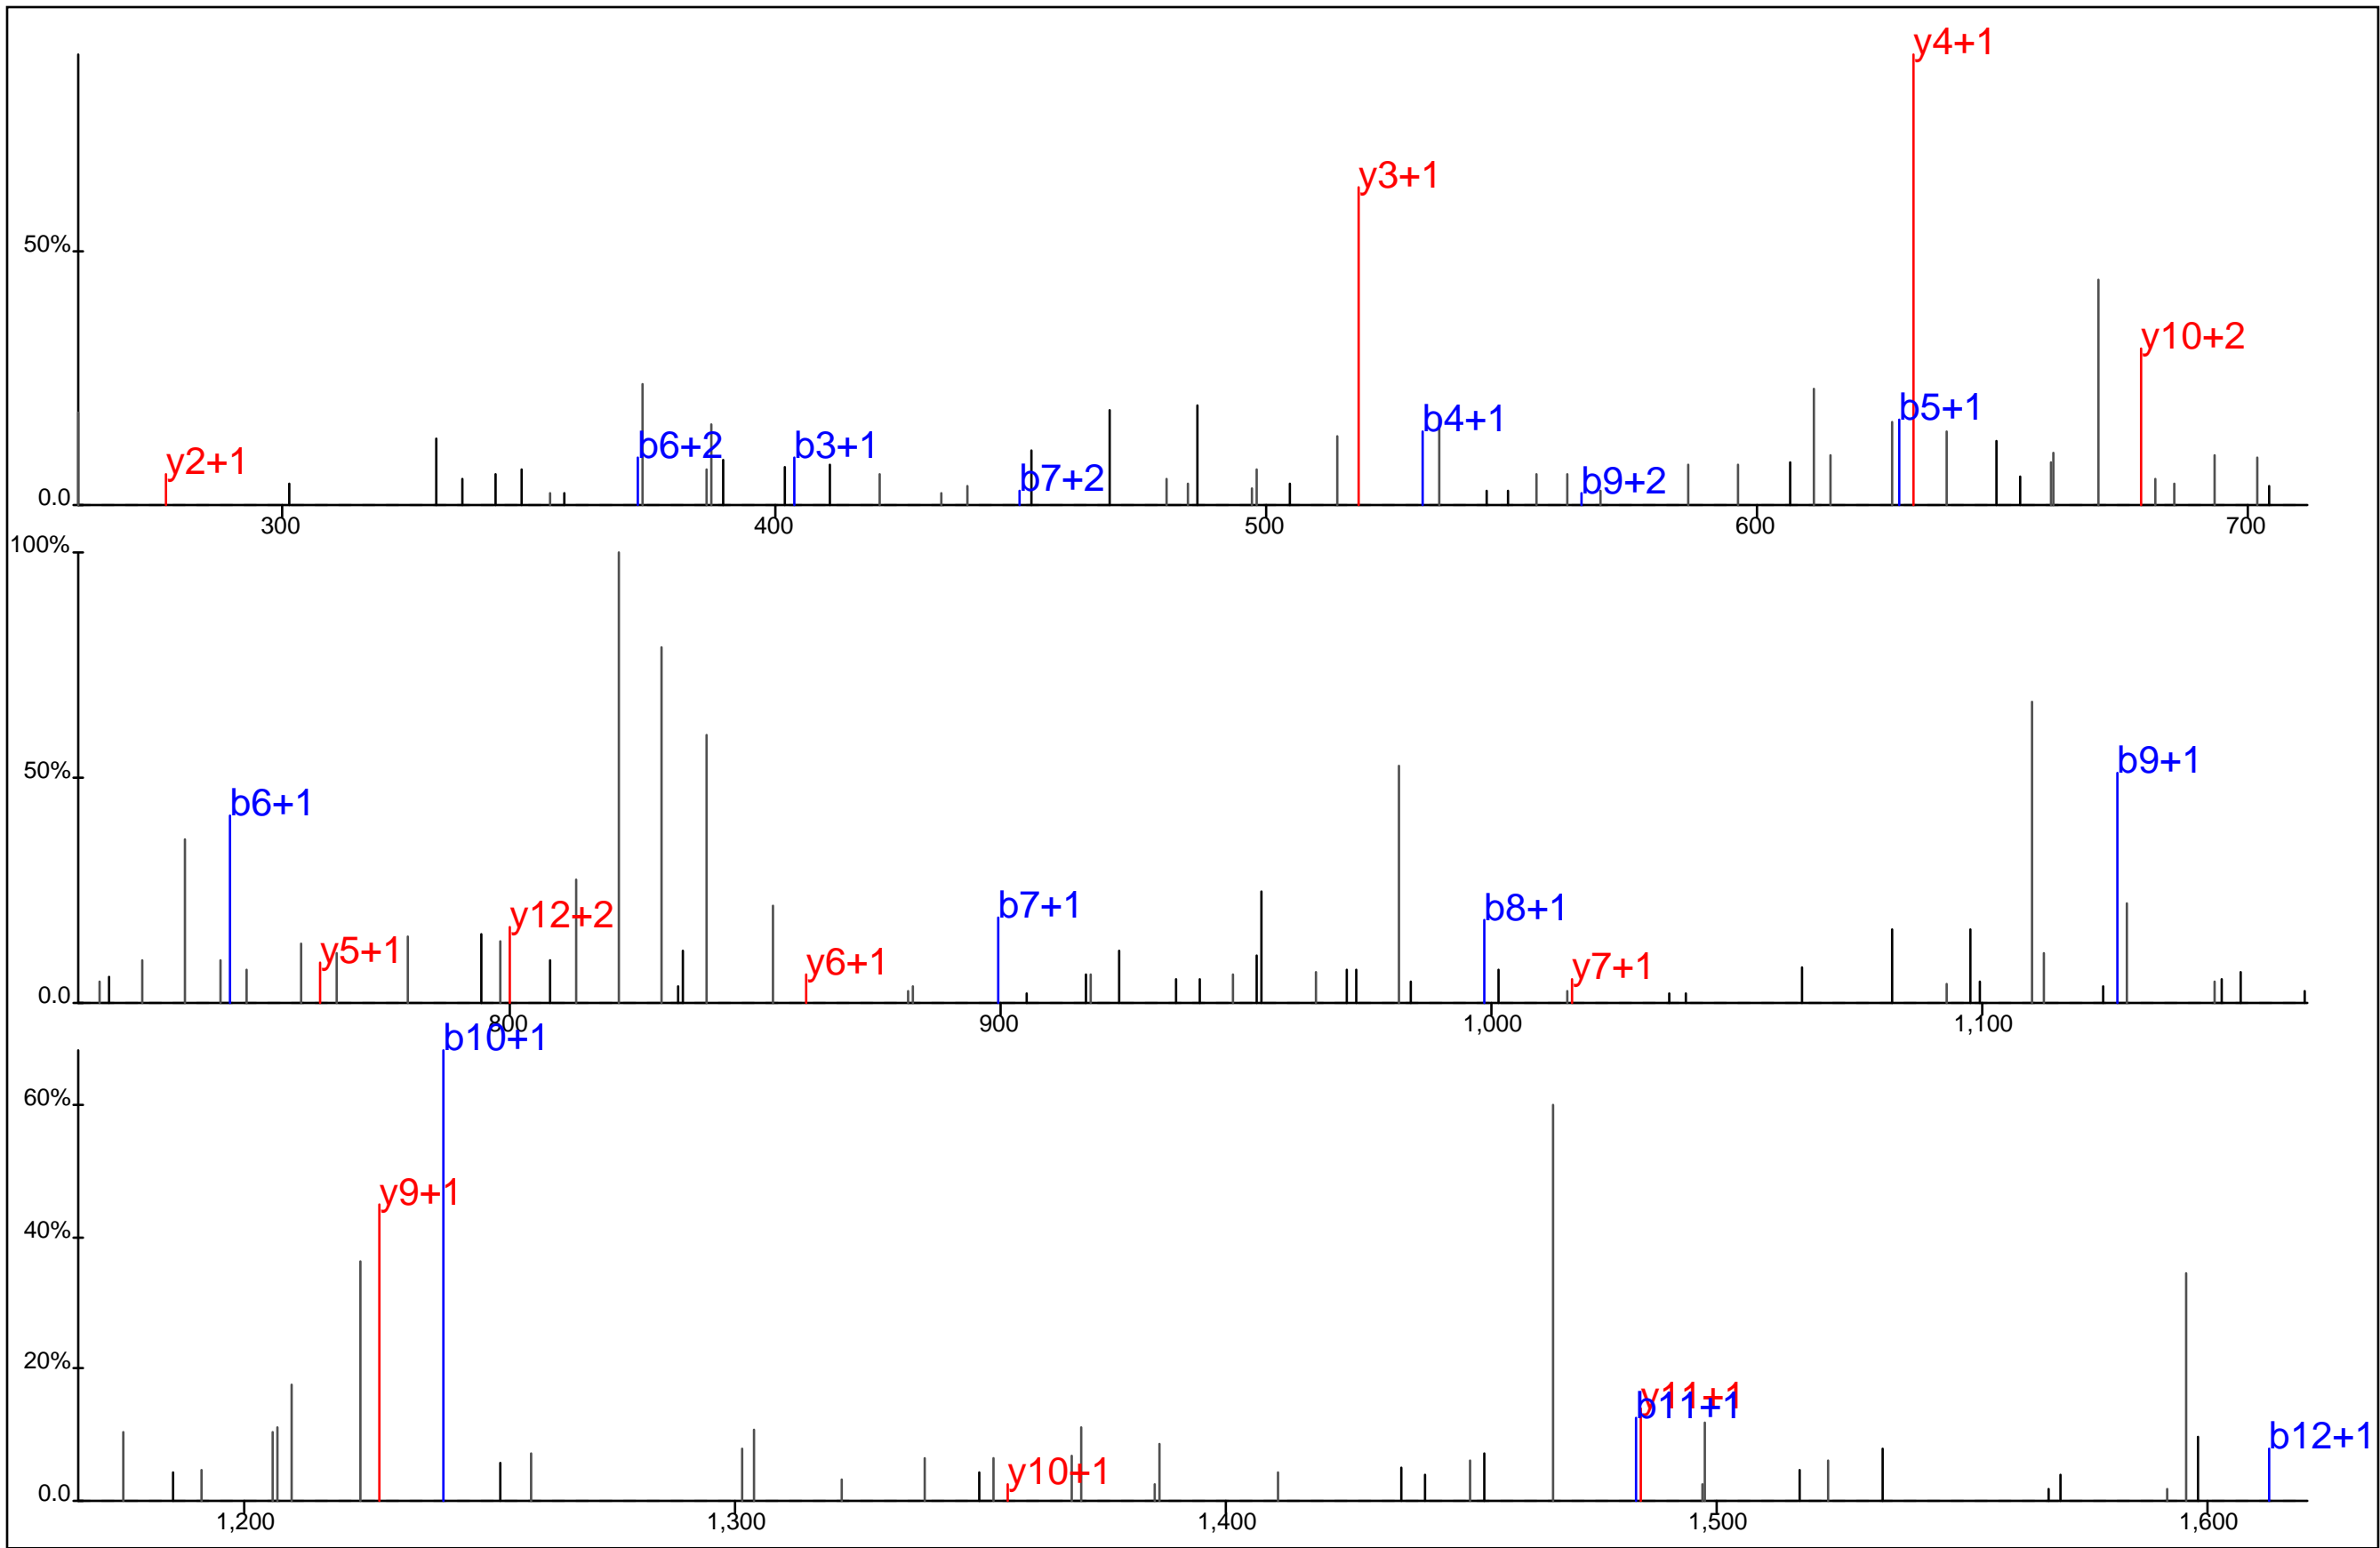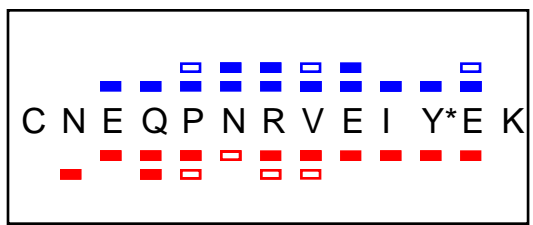

Protein Name: Cytoplasmic FMR1 interacting protein 1  
 gi Accession: 0  
 Precursor Mass: 879.8788+2  
 Delta Mass: 0.762 ppm  
 XCorr: 42.12

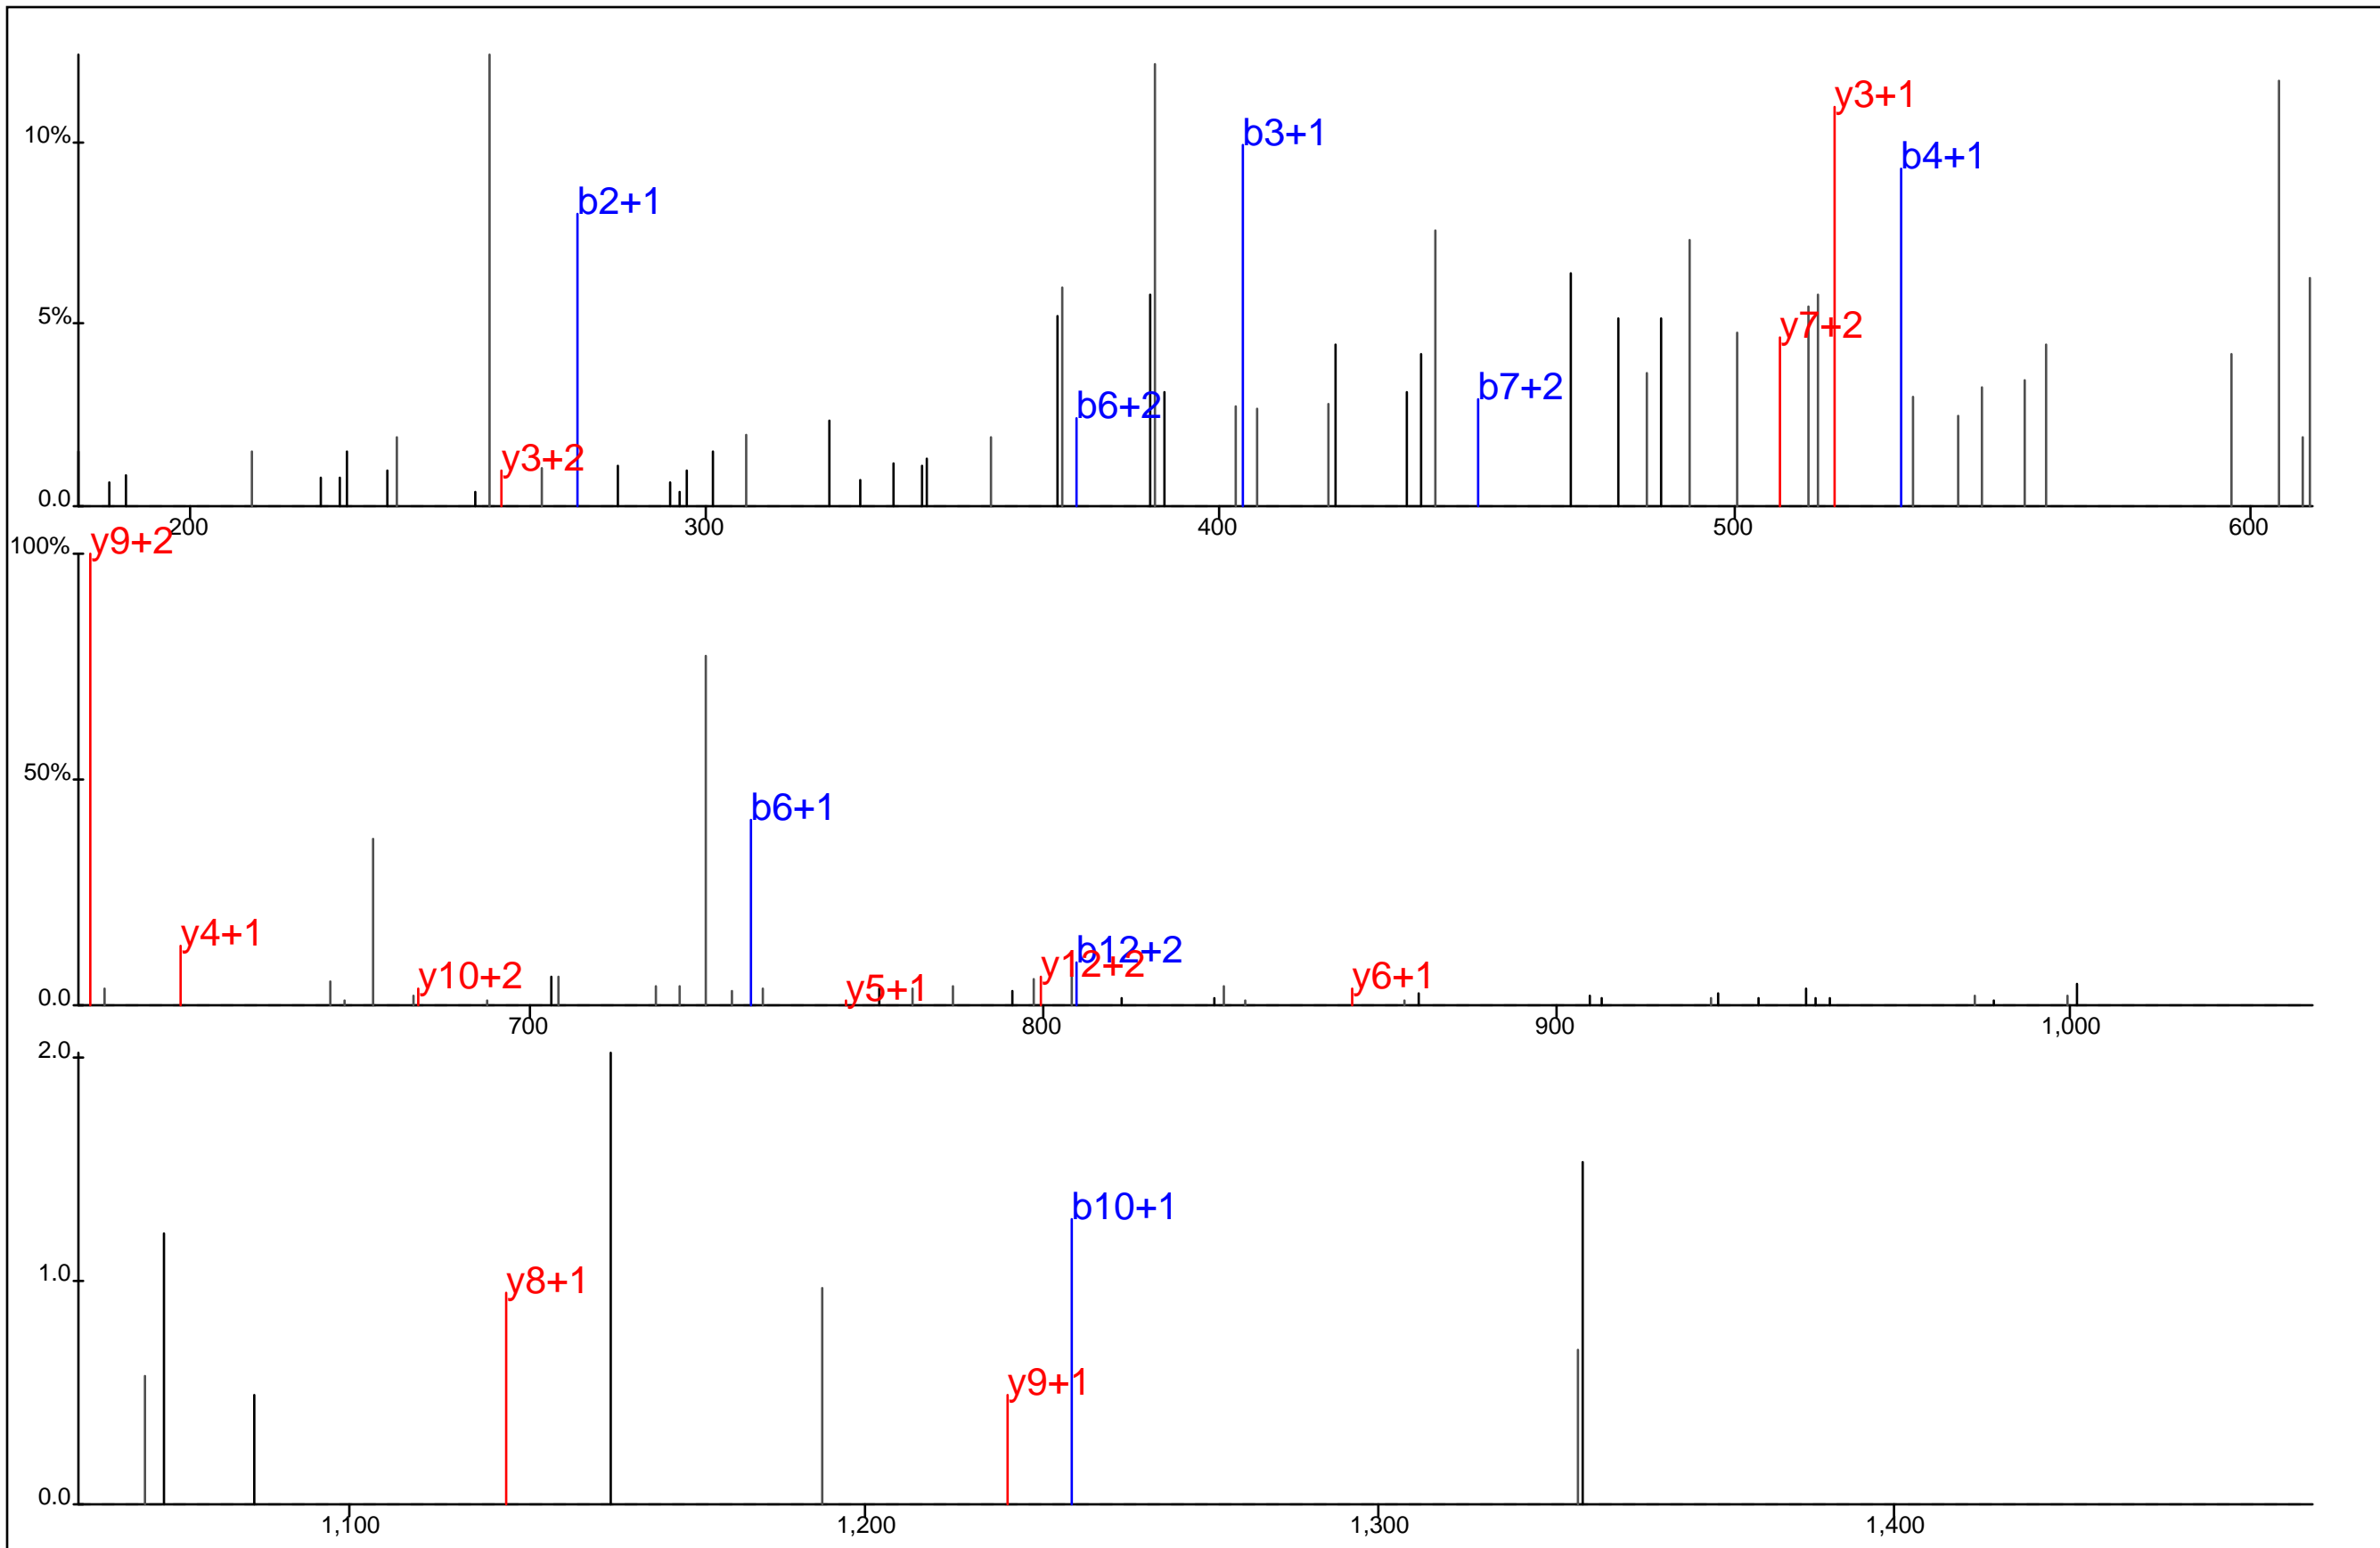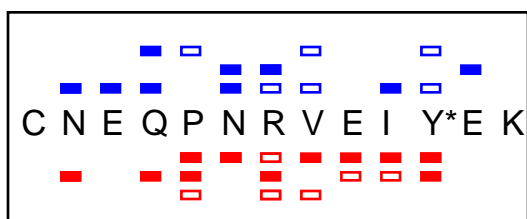

Protein Name: Cytoplasmic FMR1 interacting protein 1  
 gi Accession: 0  
 Precursor Mass: 586.9227+3  
 Delta Mass: 1.035 ppm  
 XCorr: 23.91

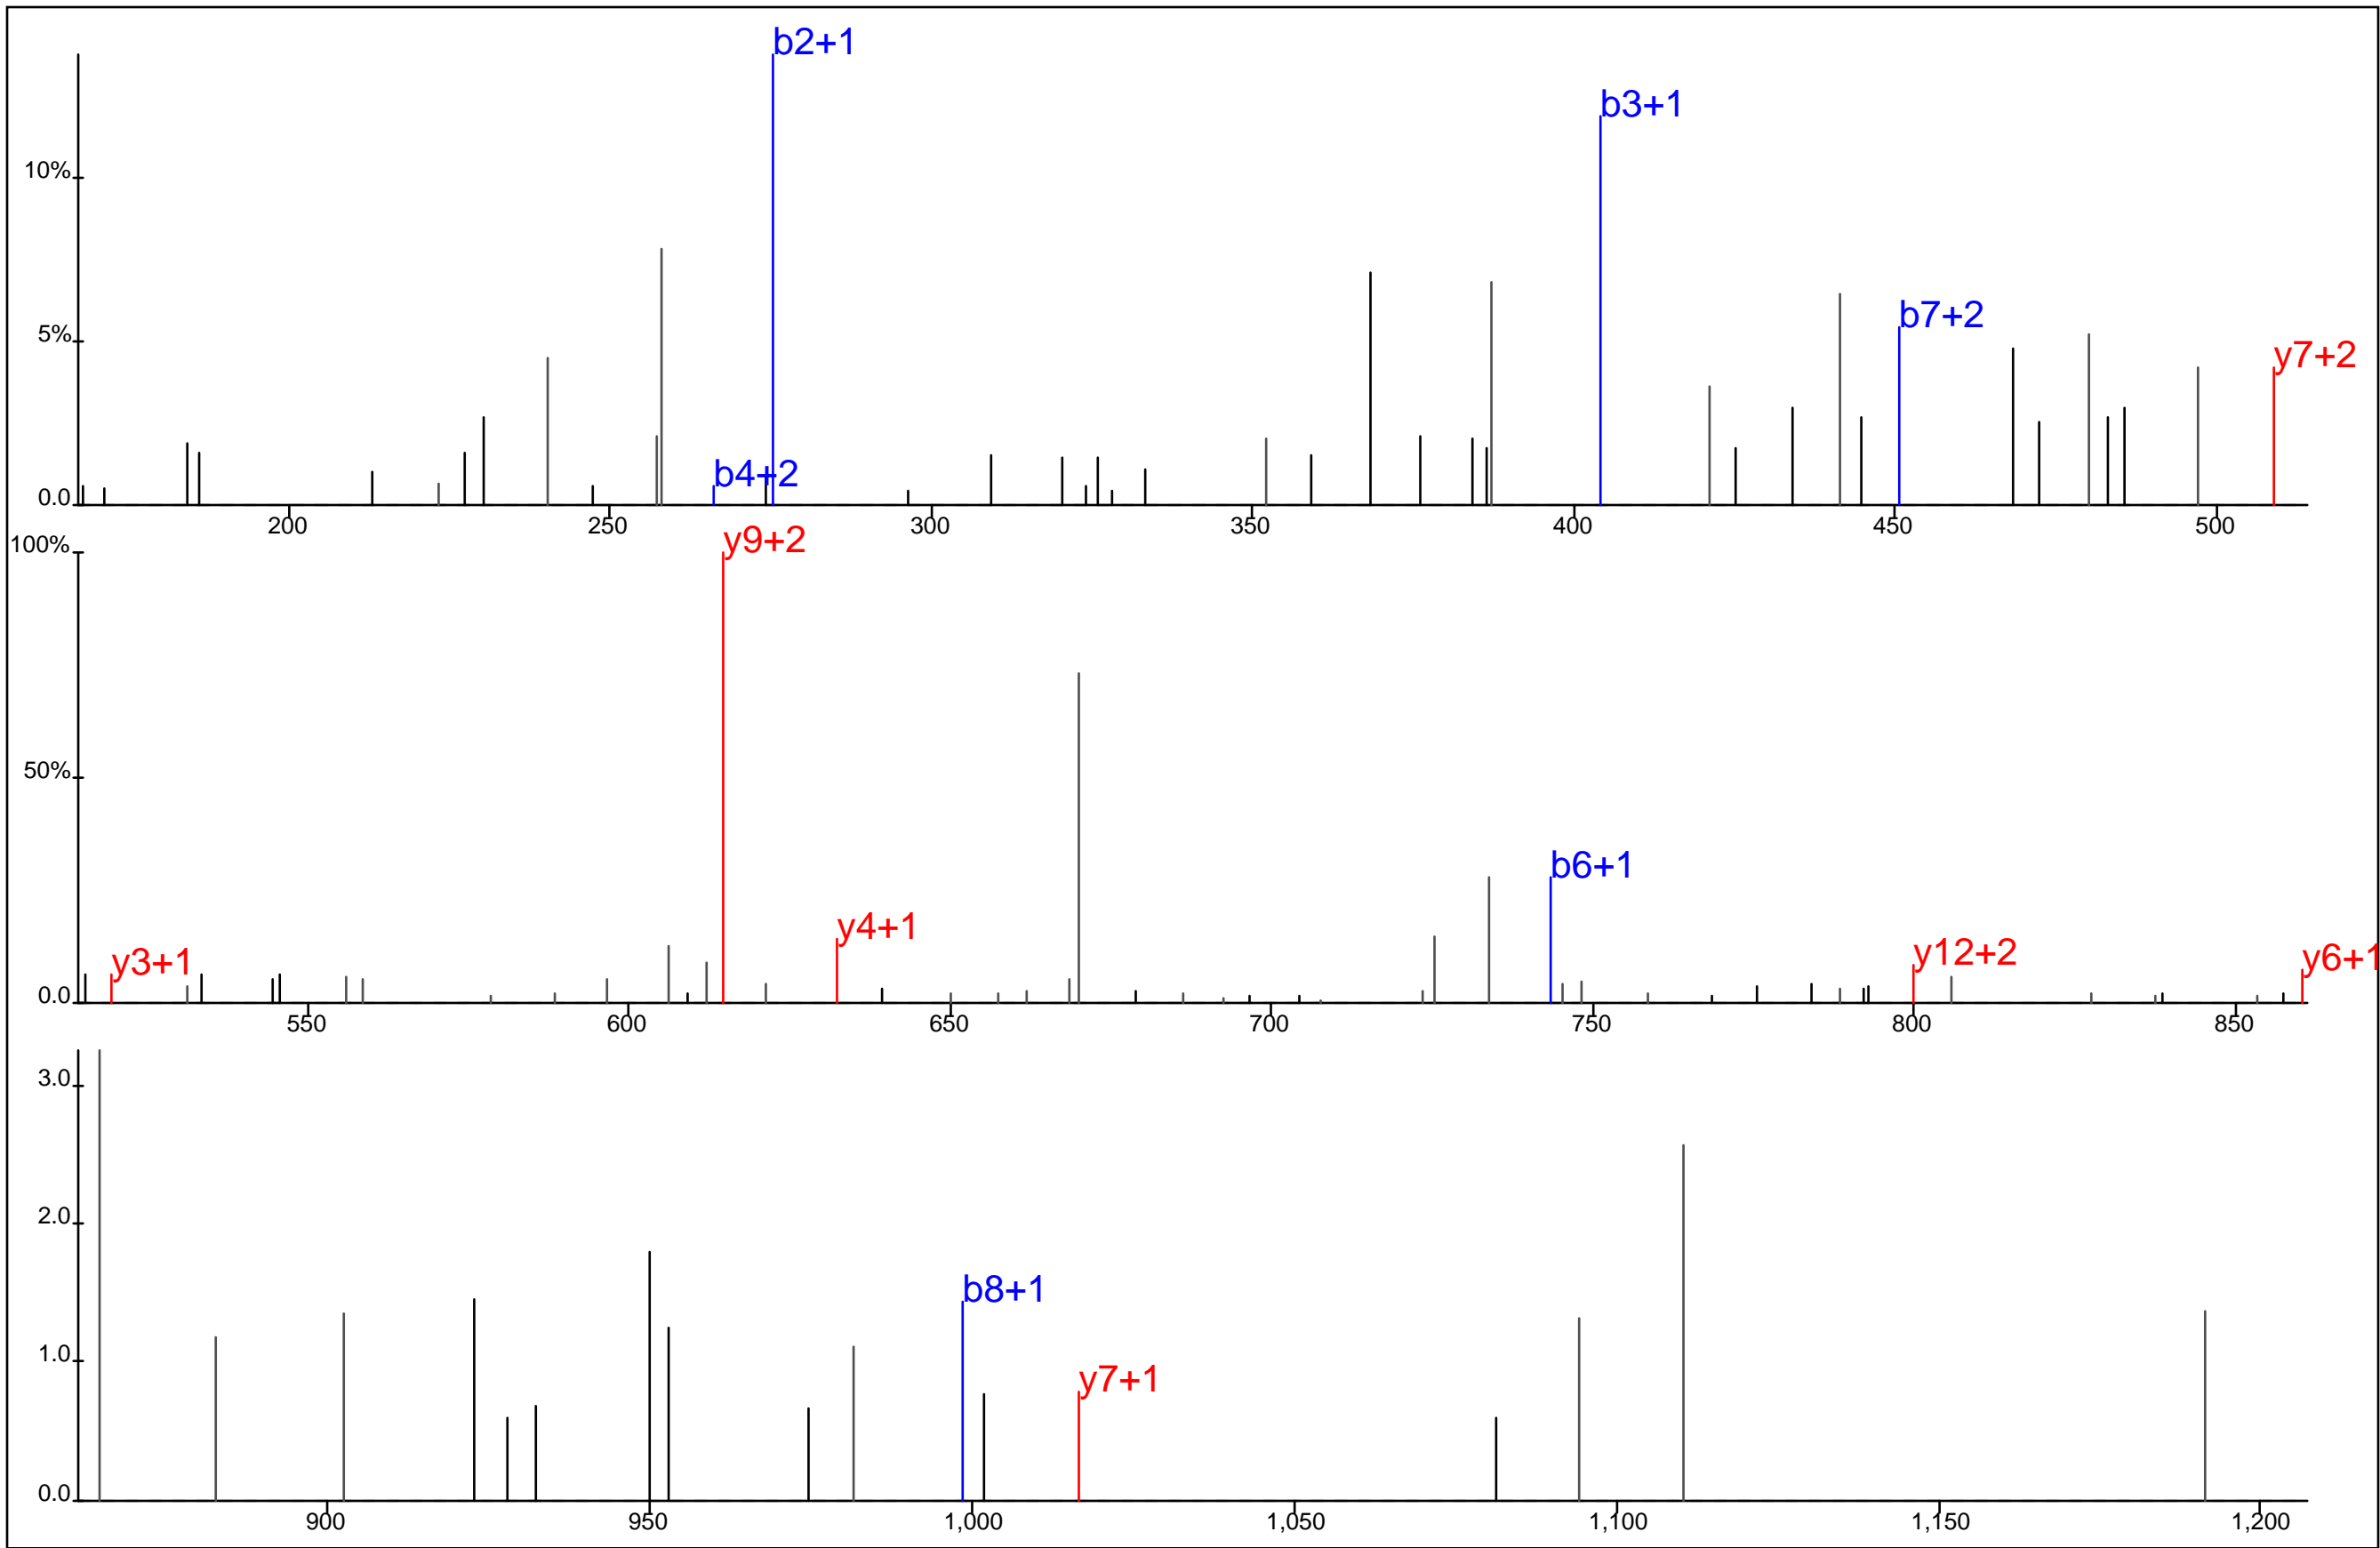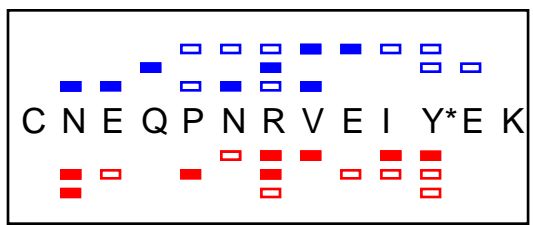

Protein Name: Cytoplasmic FMR1 interacting protein 1  
 gi Accession: 0  
 Precursor Mass: 586.9229+3  
 Delta Mass: 1.349 ppm  
 XCorr: 25.44

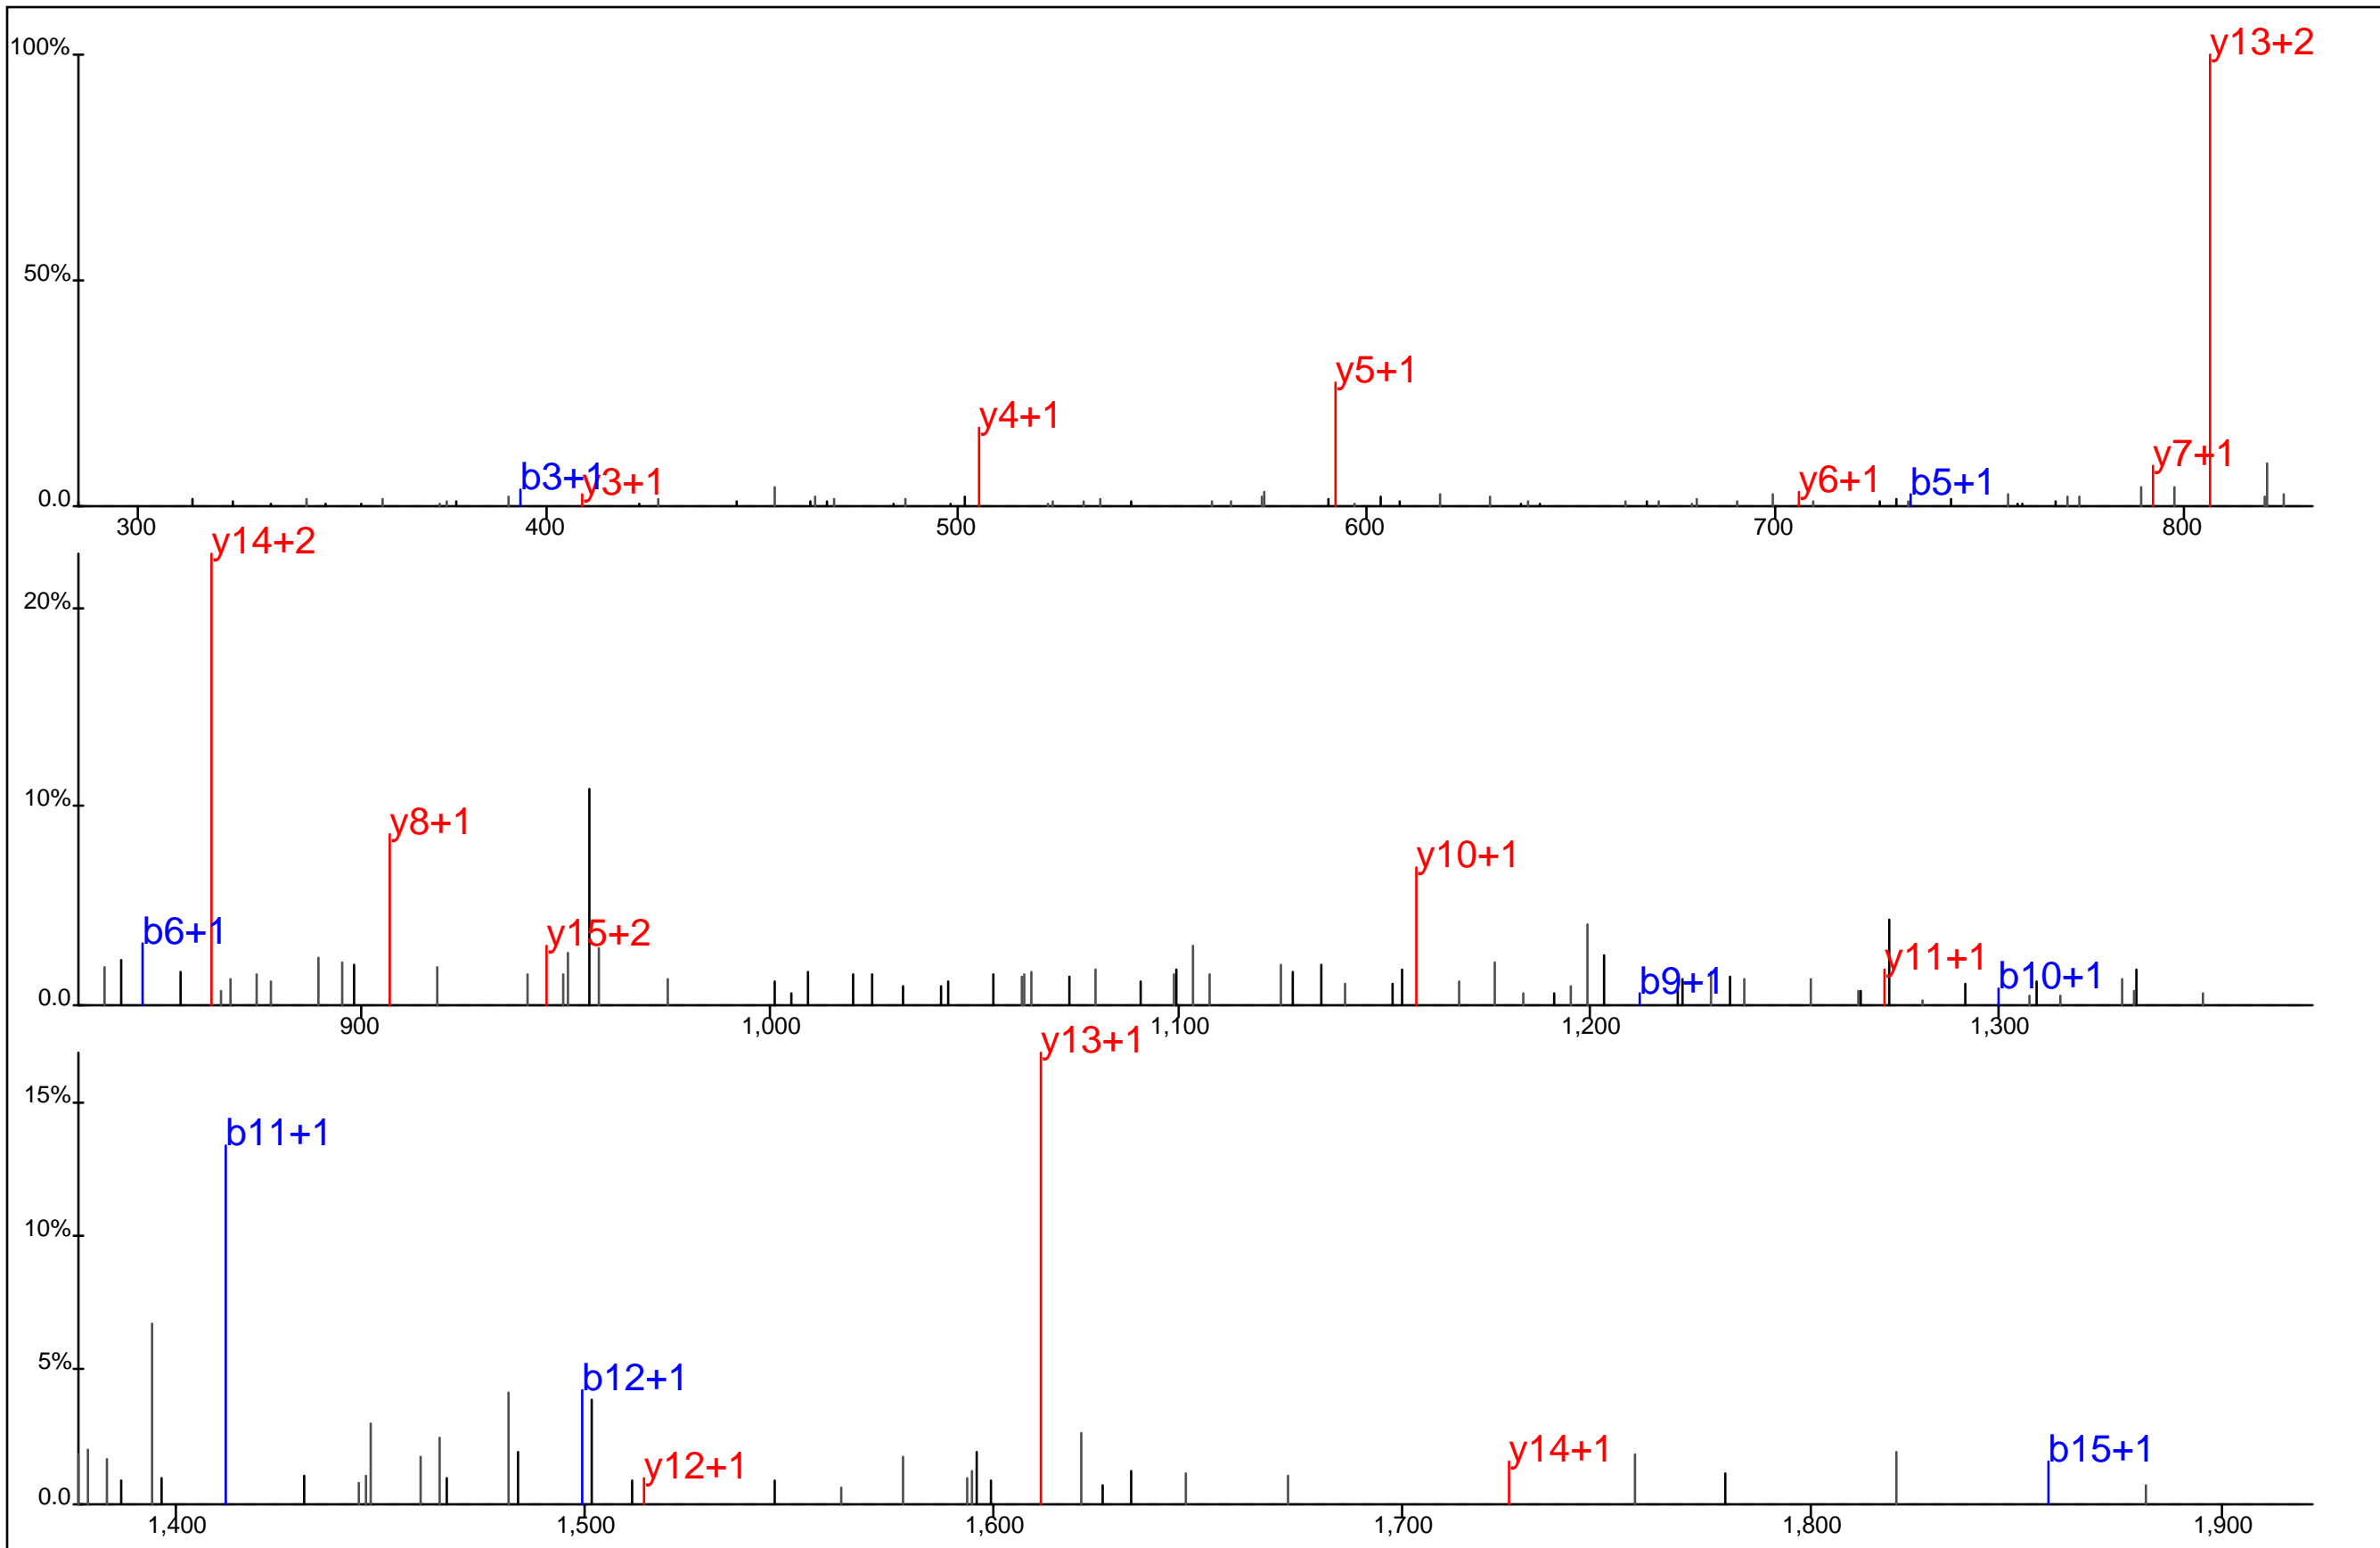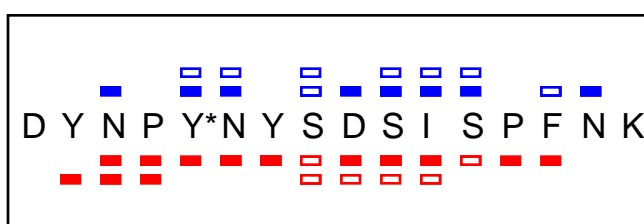

Protein Name: Cytoplasmic linker associated protein 2  
 gi Accession: 0  
 Precursor Mass: 1,002.4076+2  
 Delta Mass: 1.032 ppm  
 XCorr: 47.74



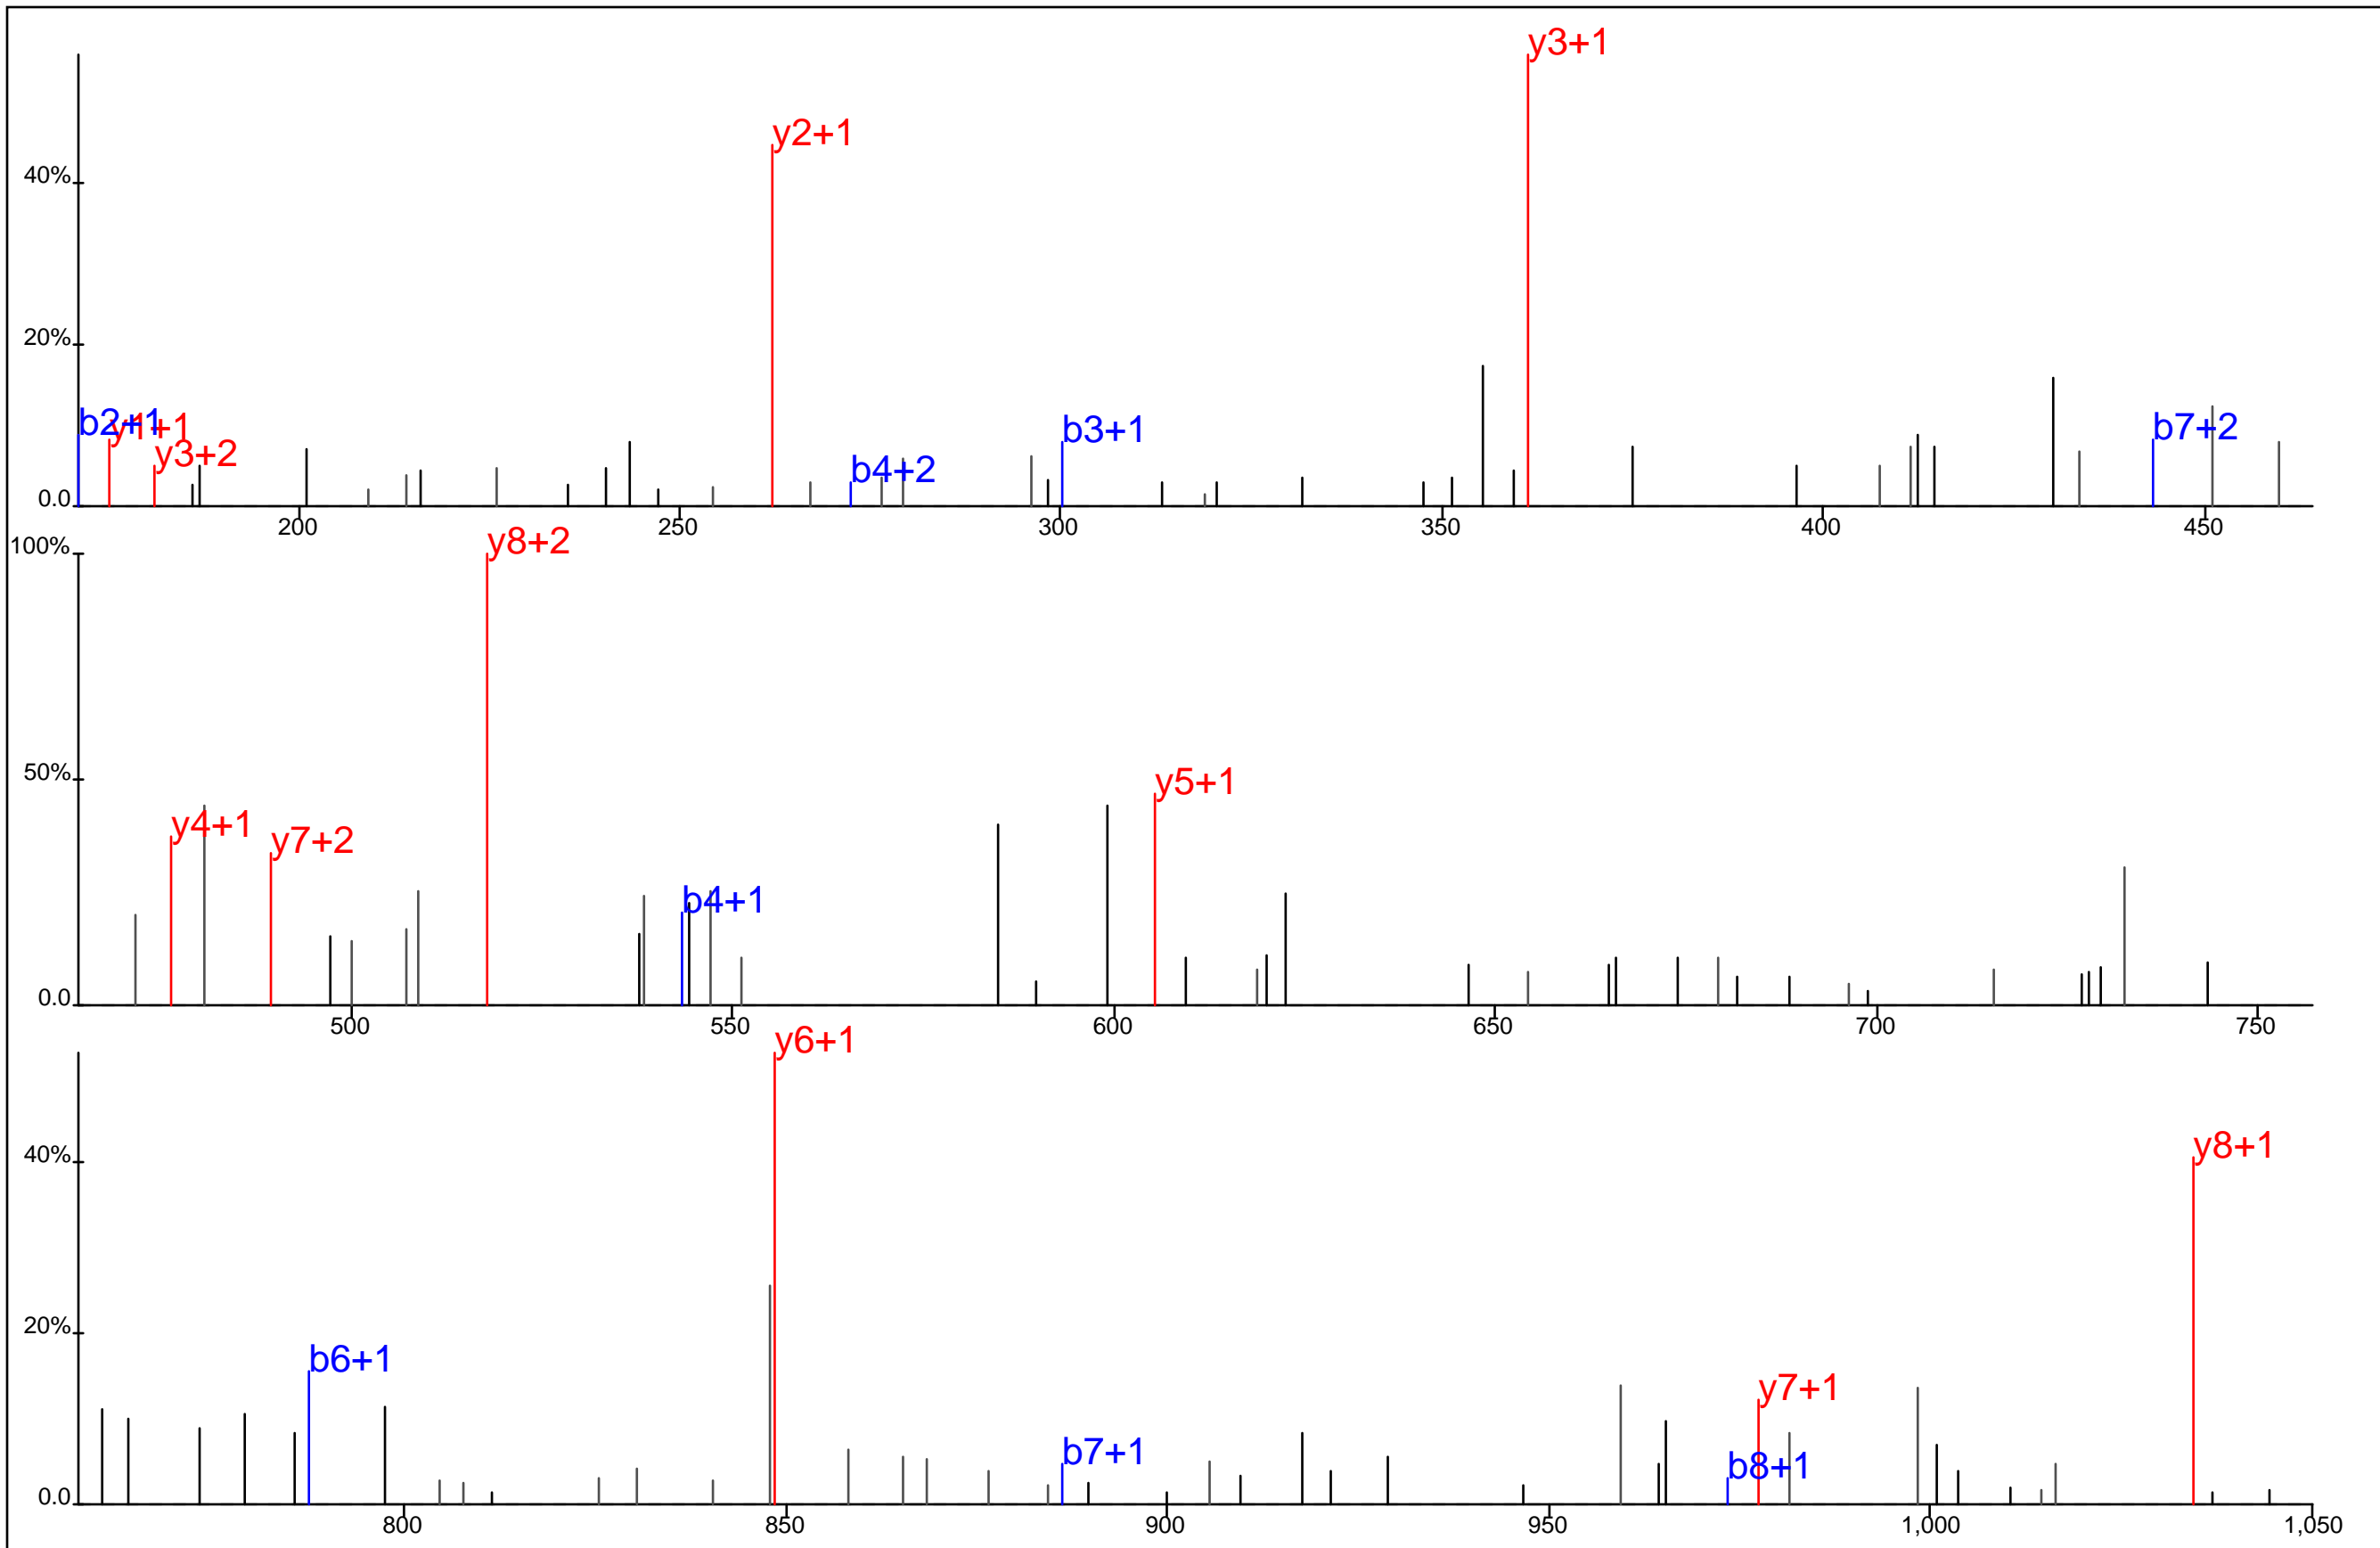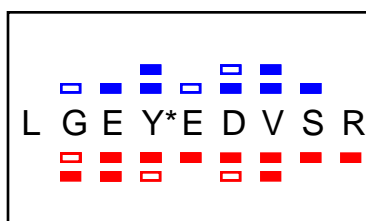

Protein Name: Cytoskeleton associated protein 1  
 gi Accession: 0  
 Precursor Mass: 574.2375+2  
 Delta Mass: 0.878 ppm  
 XCorr: 50.36

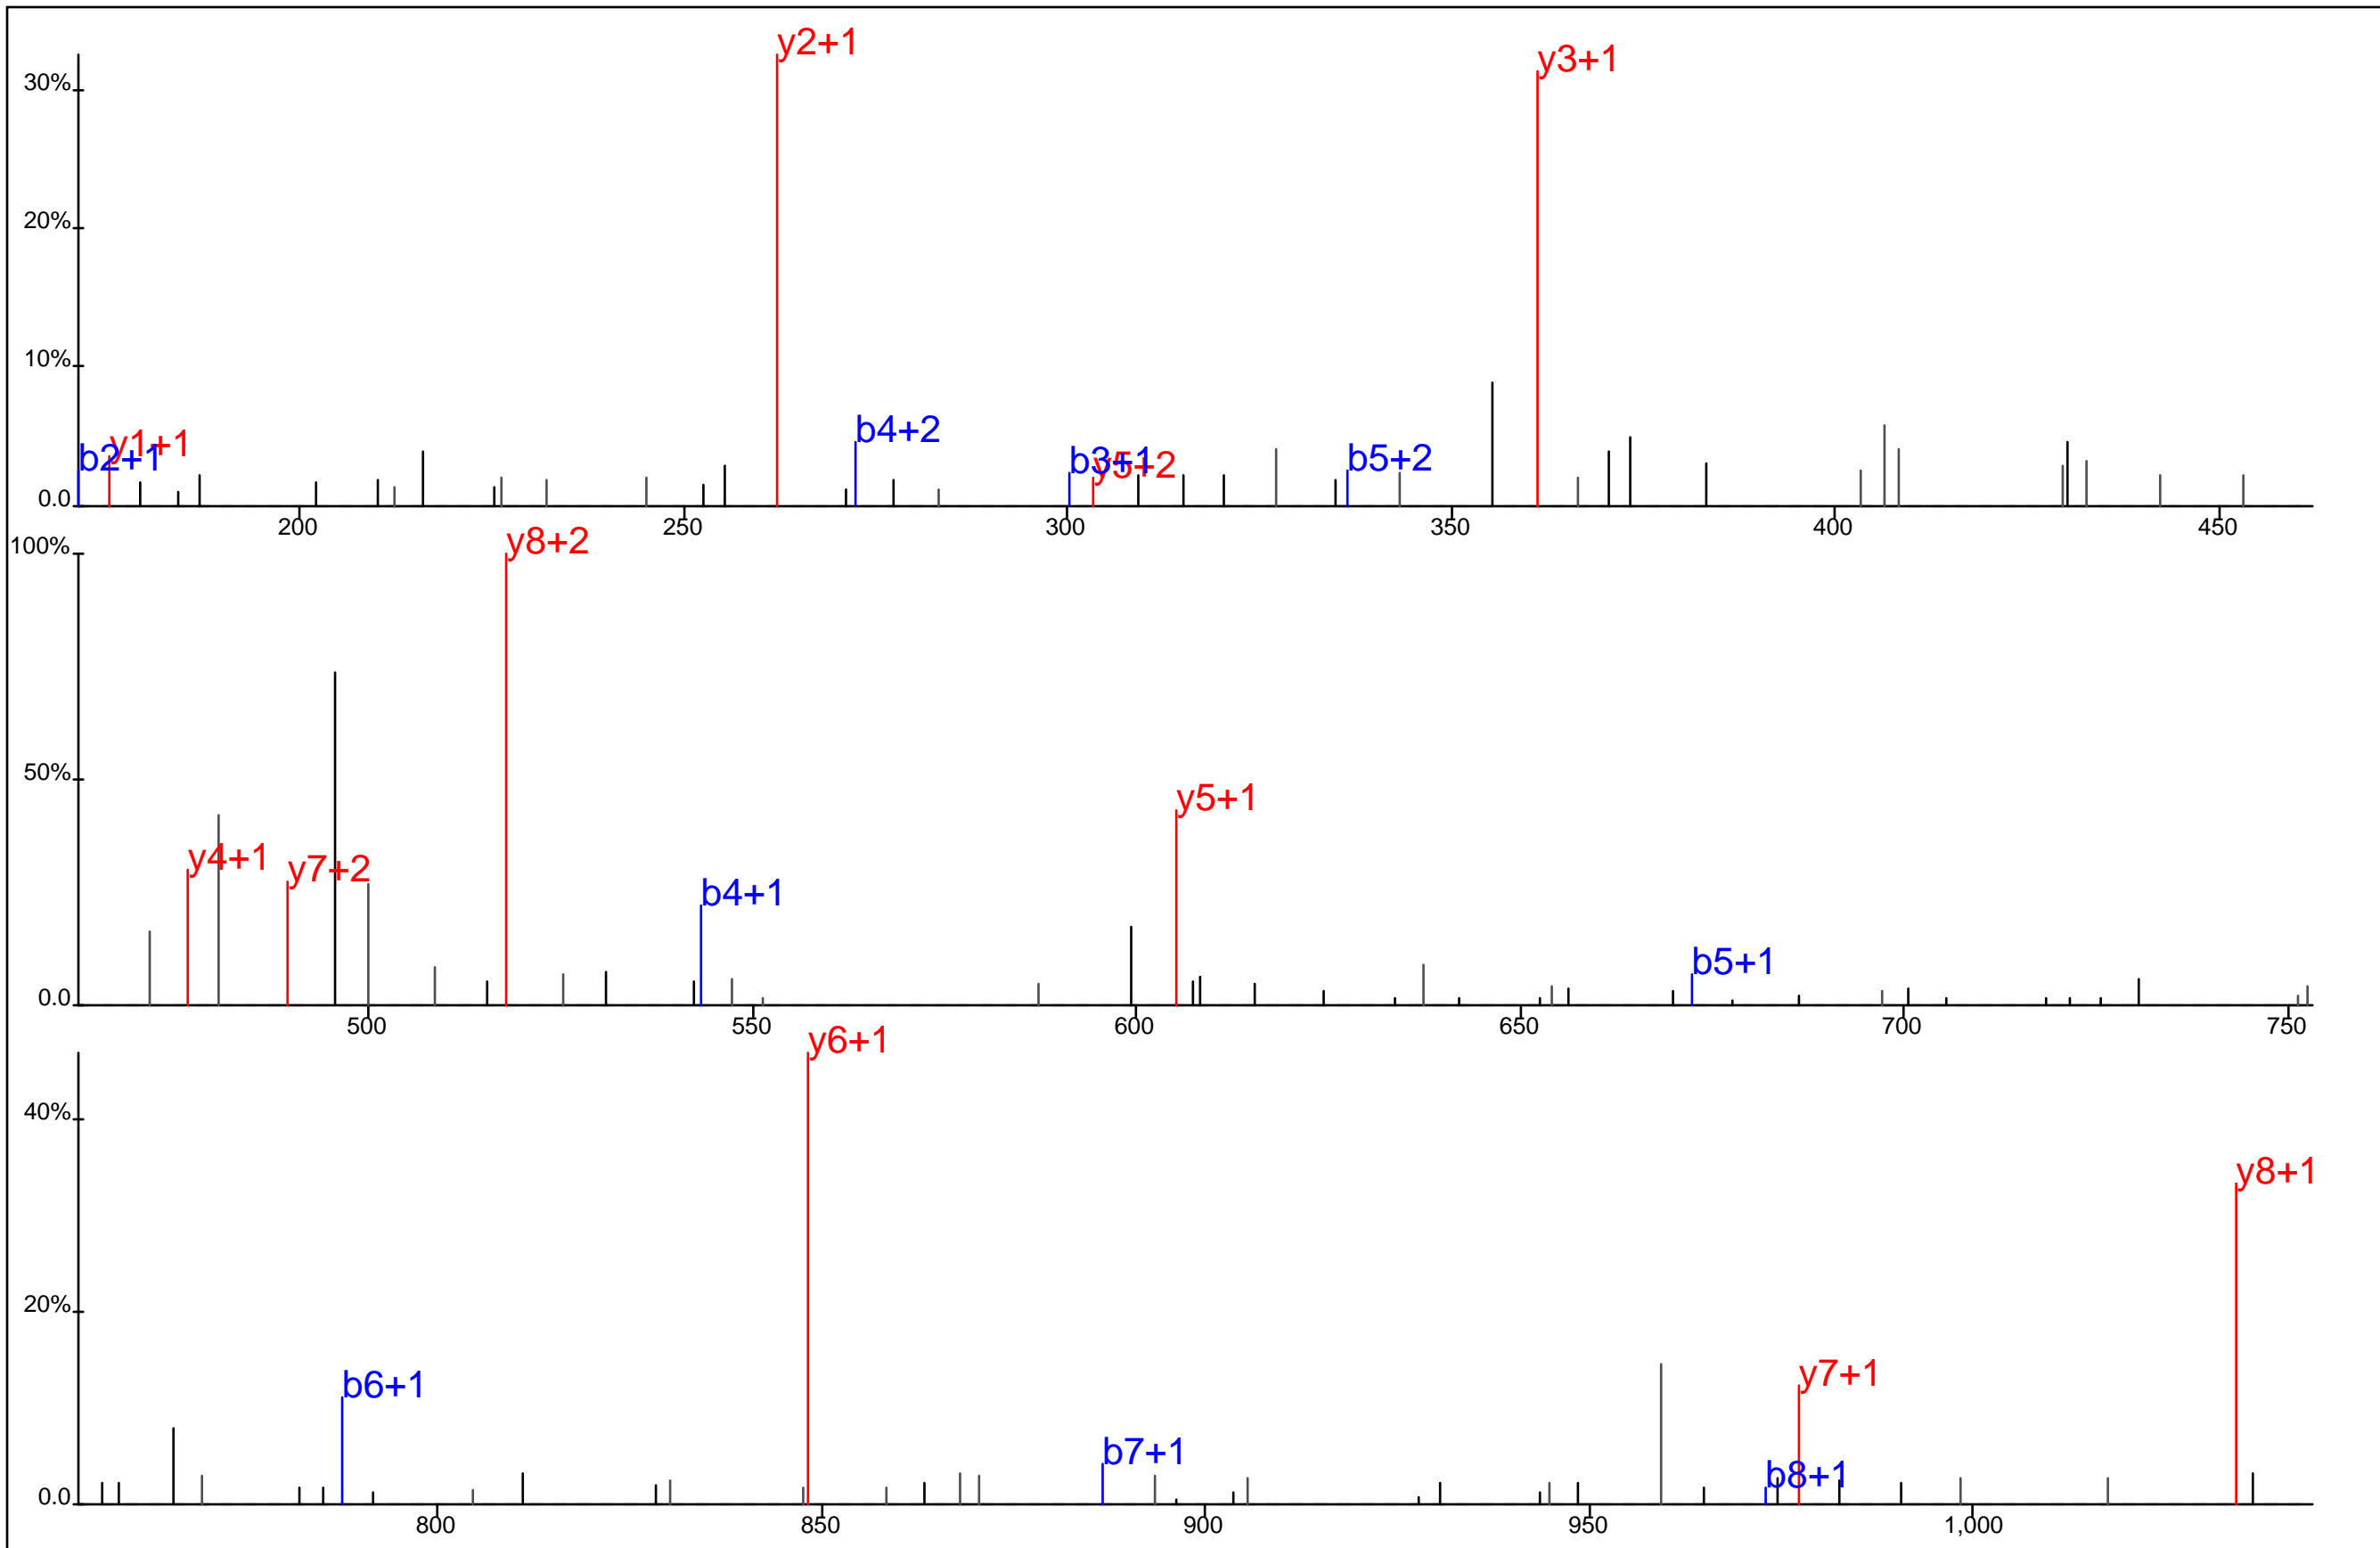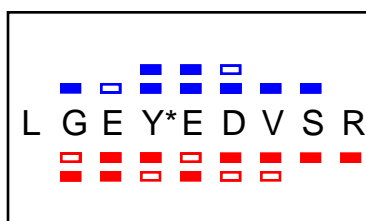

Protein Name: Cytoskeleton associated protein 1  
 gi Accession: 0  
 Precursor Mass: 574.2368+2  
 Delta Mass: 0.399 ppm  
 XCorr: 44.42

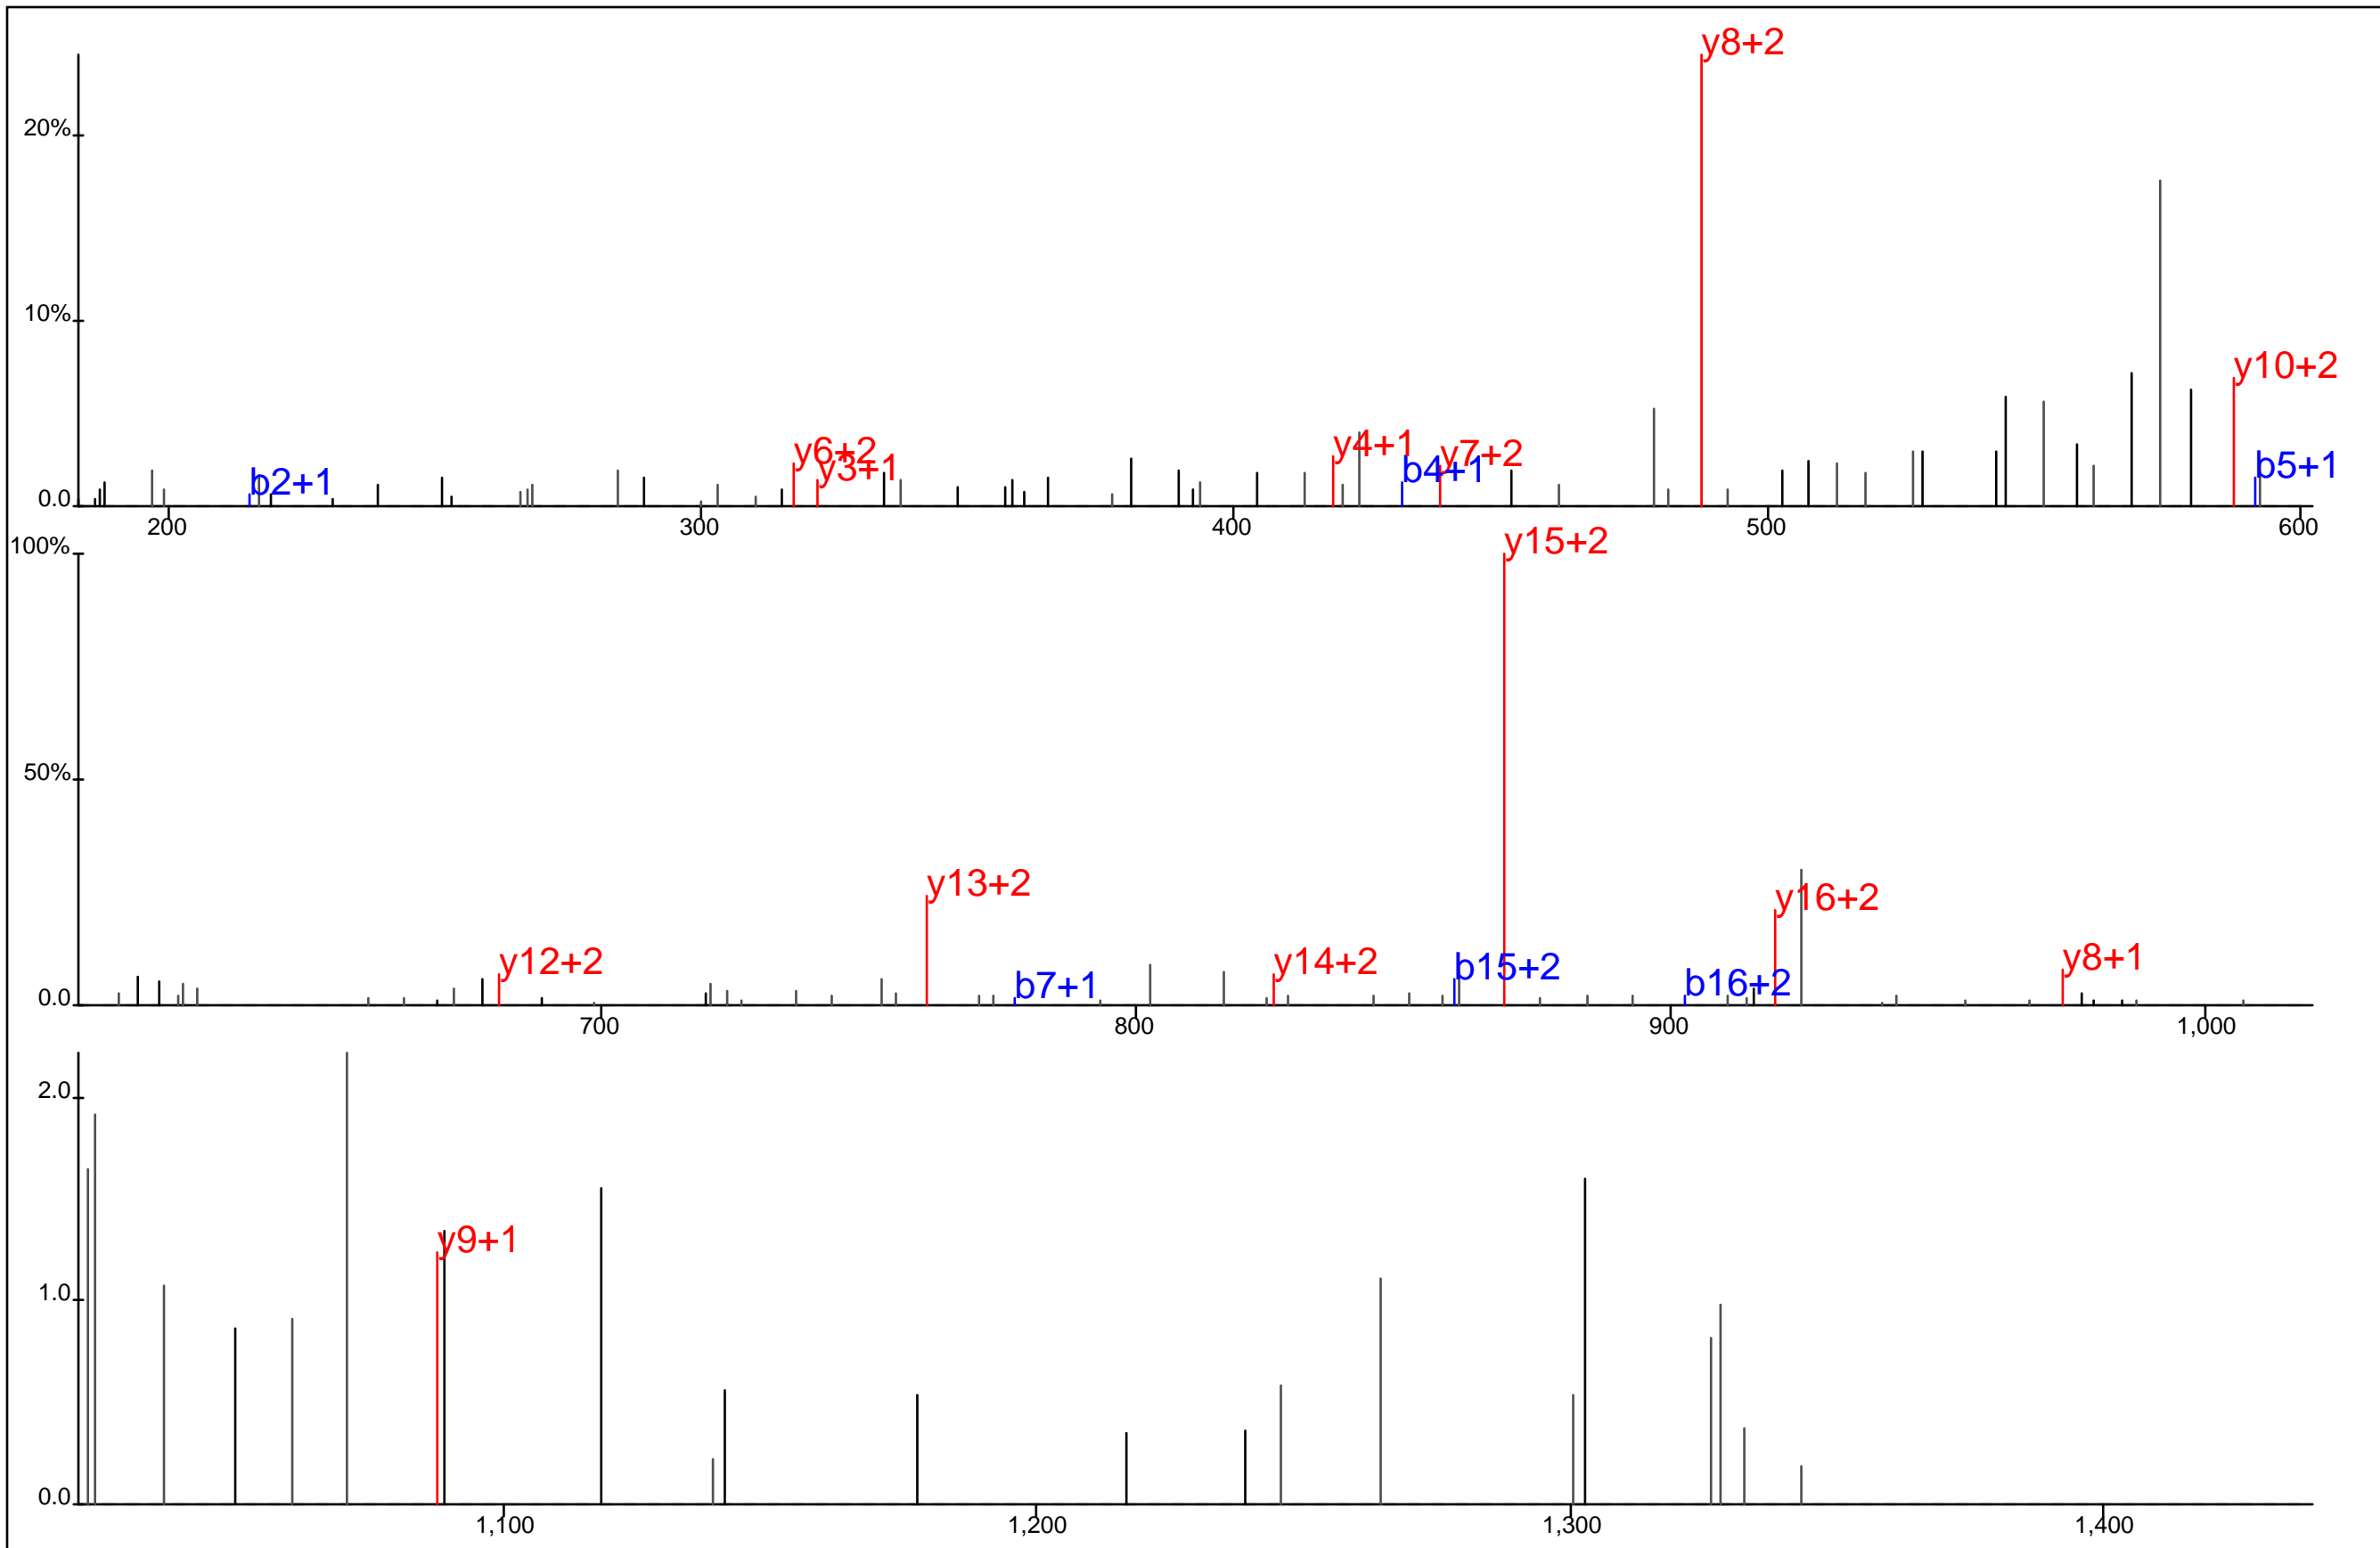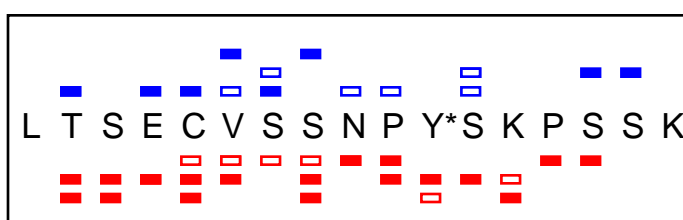

Protein Name: Cytoskeleton associated protein 2-like  
 gi Accession: 0  
 Precursor Mass: 650.9583+3  
 Delta Mass: 4.502 ppm  
 XCorr: 28.75

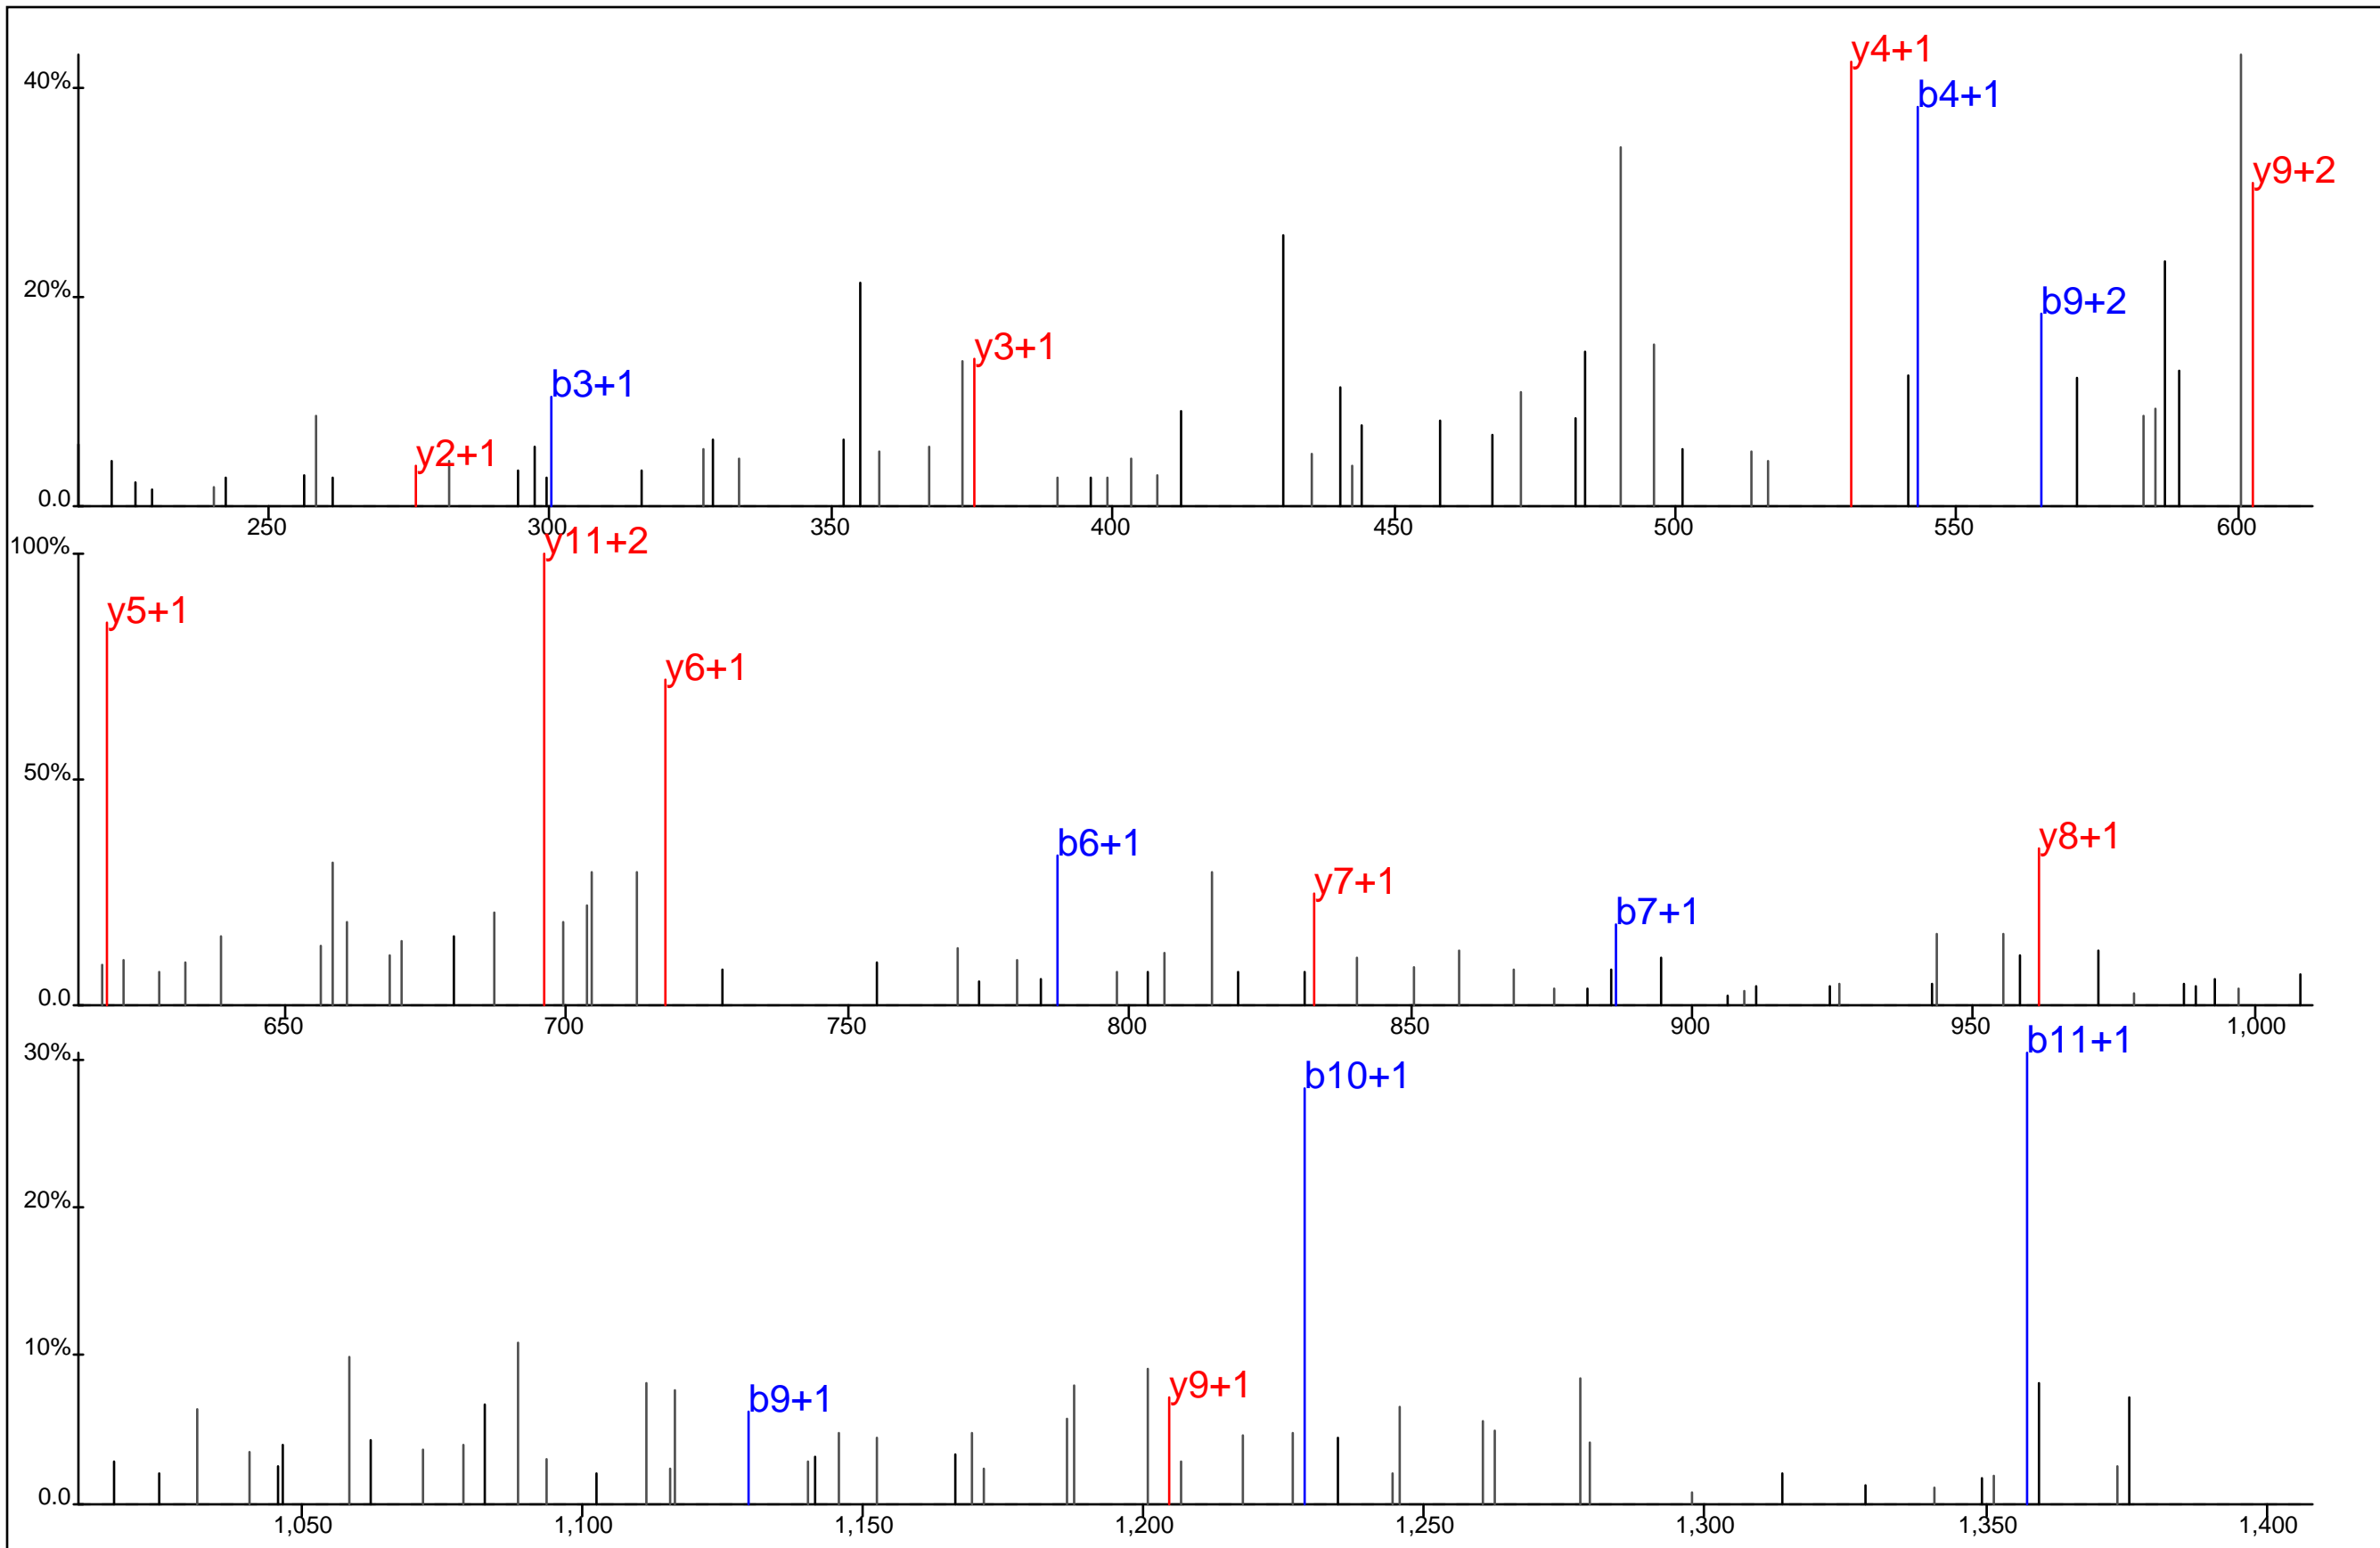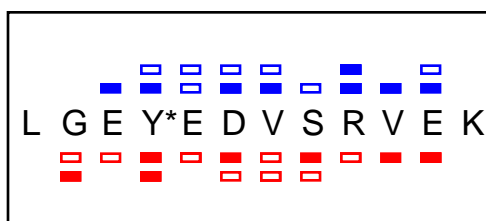

Protein Name: Cytoskeleton associated protein 1  
 gi Accession: 0  
 Precursor Mass: 752.3409+2  
 Delta Mass: 1.220 ppm  
 XCorr: 43.35

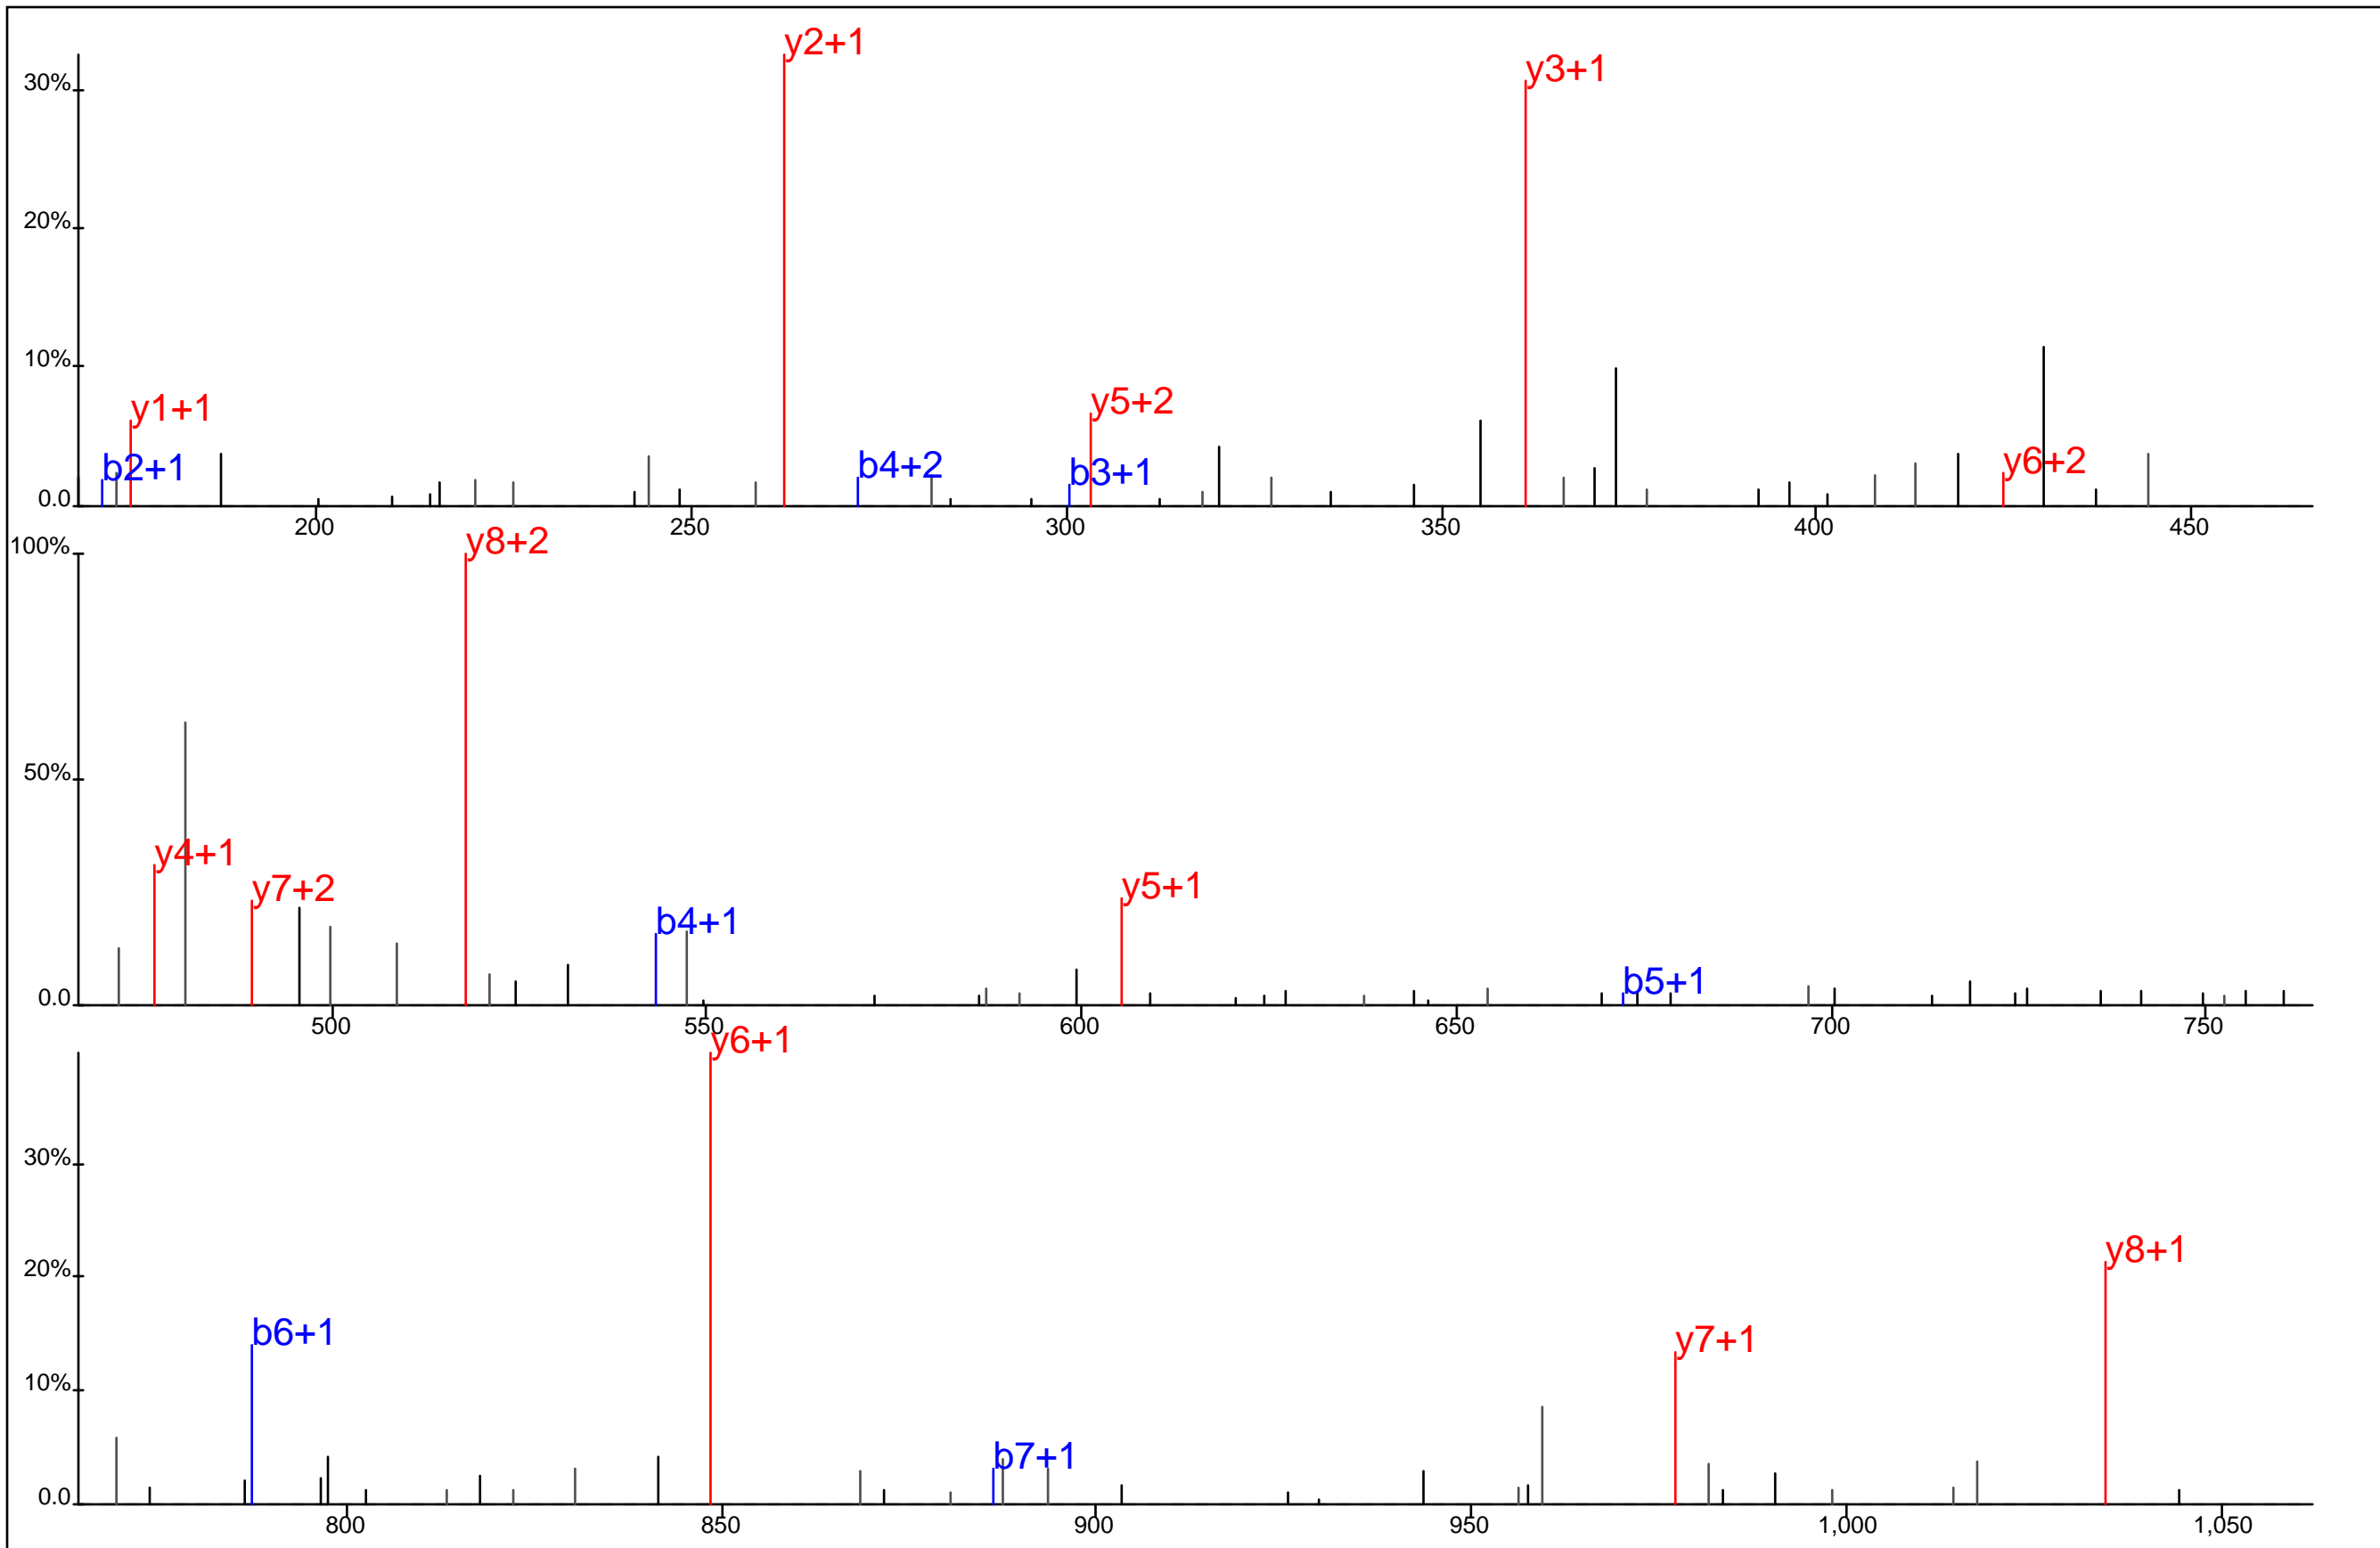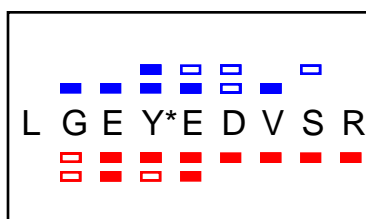

Protein Name: Cytoskeleton associated protein 1  
 gi Accession: 0  
 Precursor Mass: 574.2371+2  
 Delta Mass: 0.241 ppm  
 XCorr: 60.43

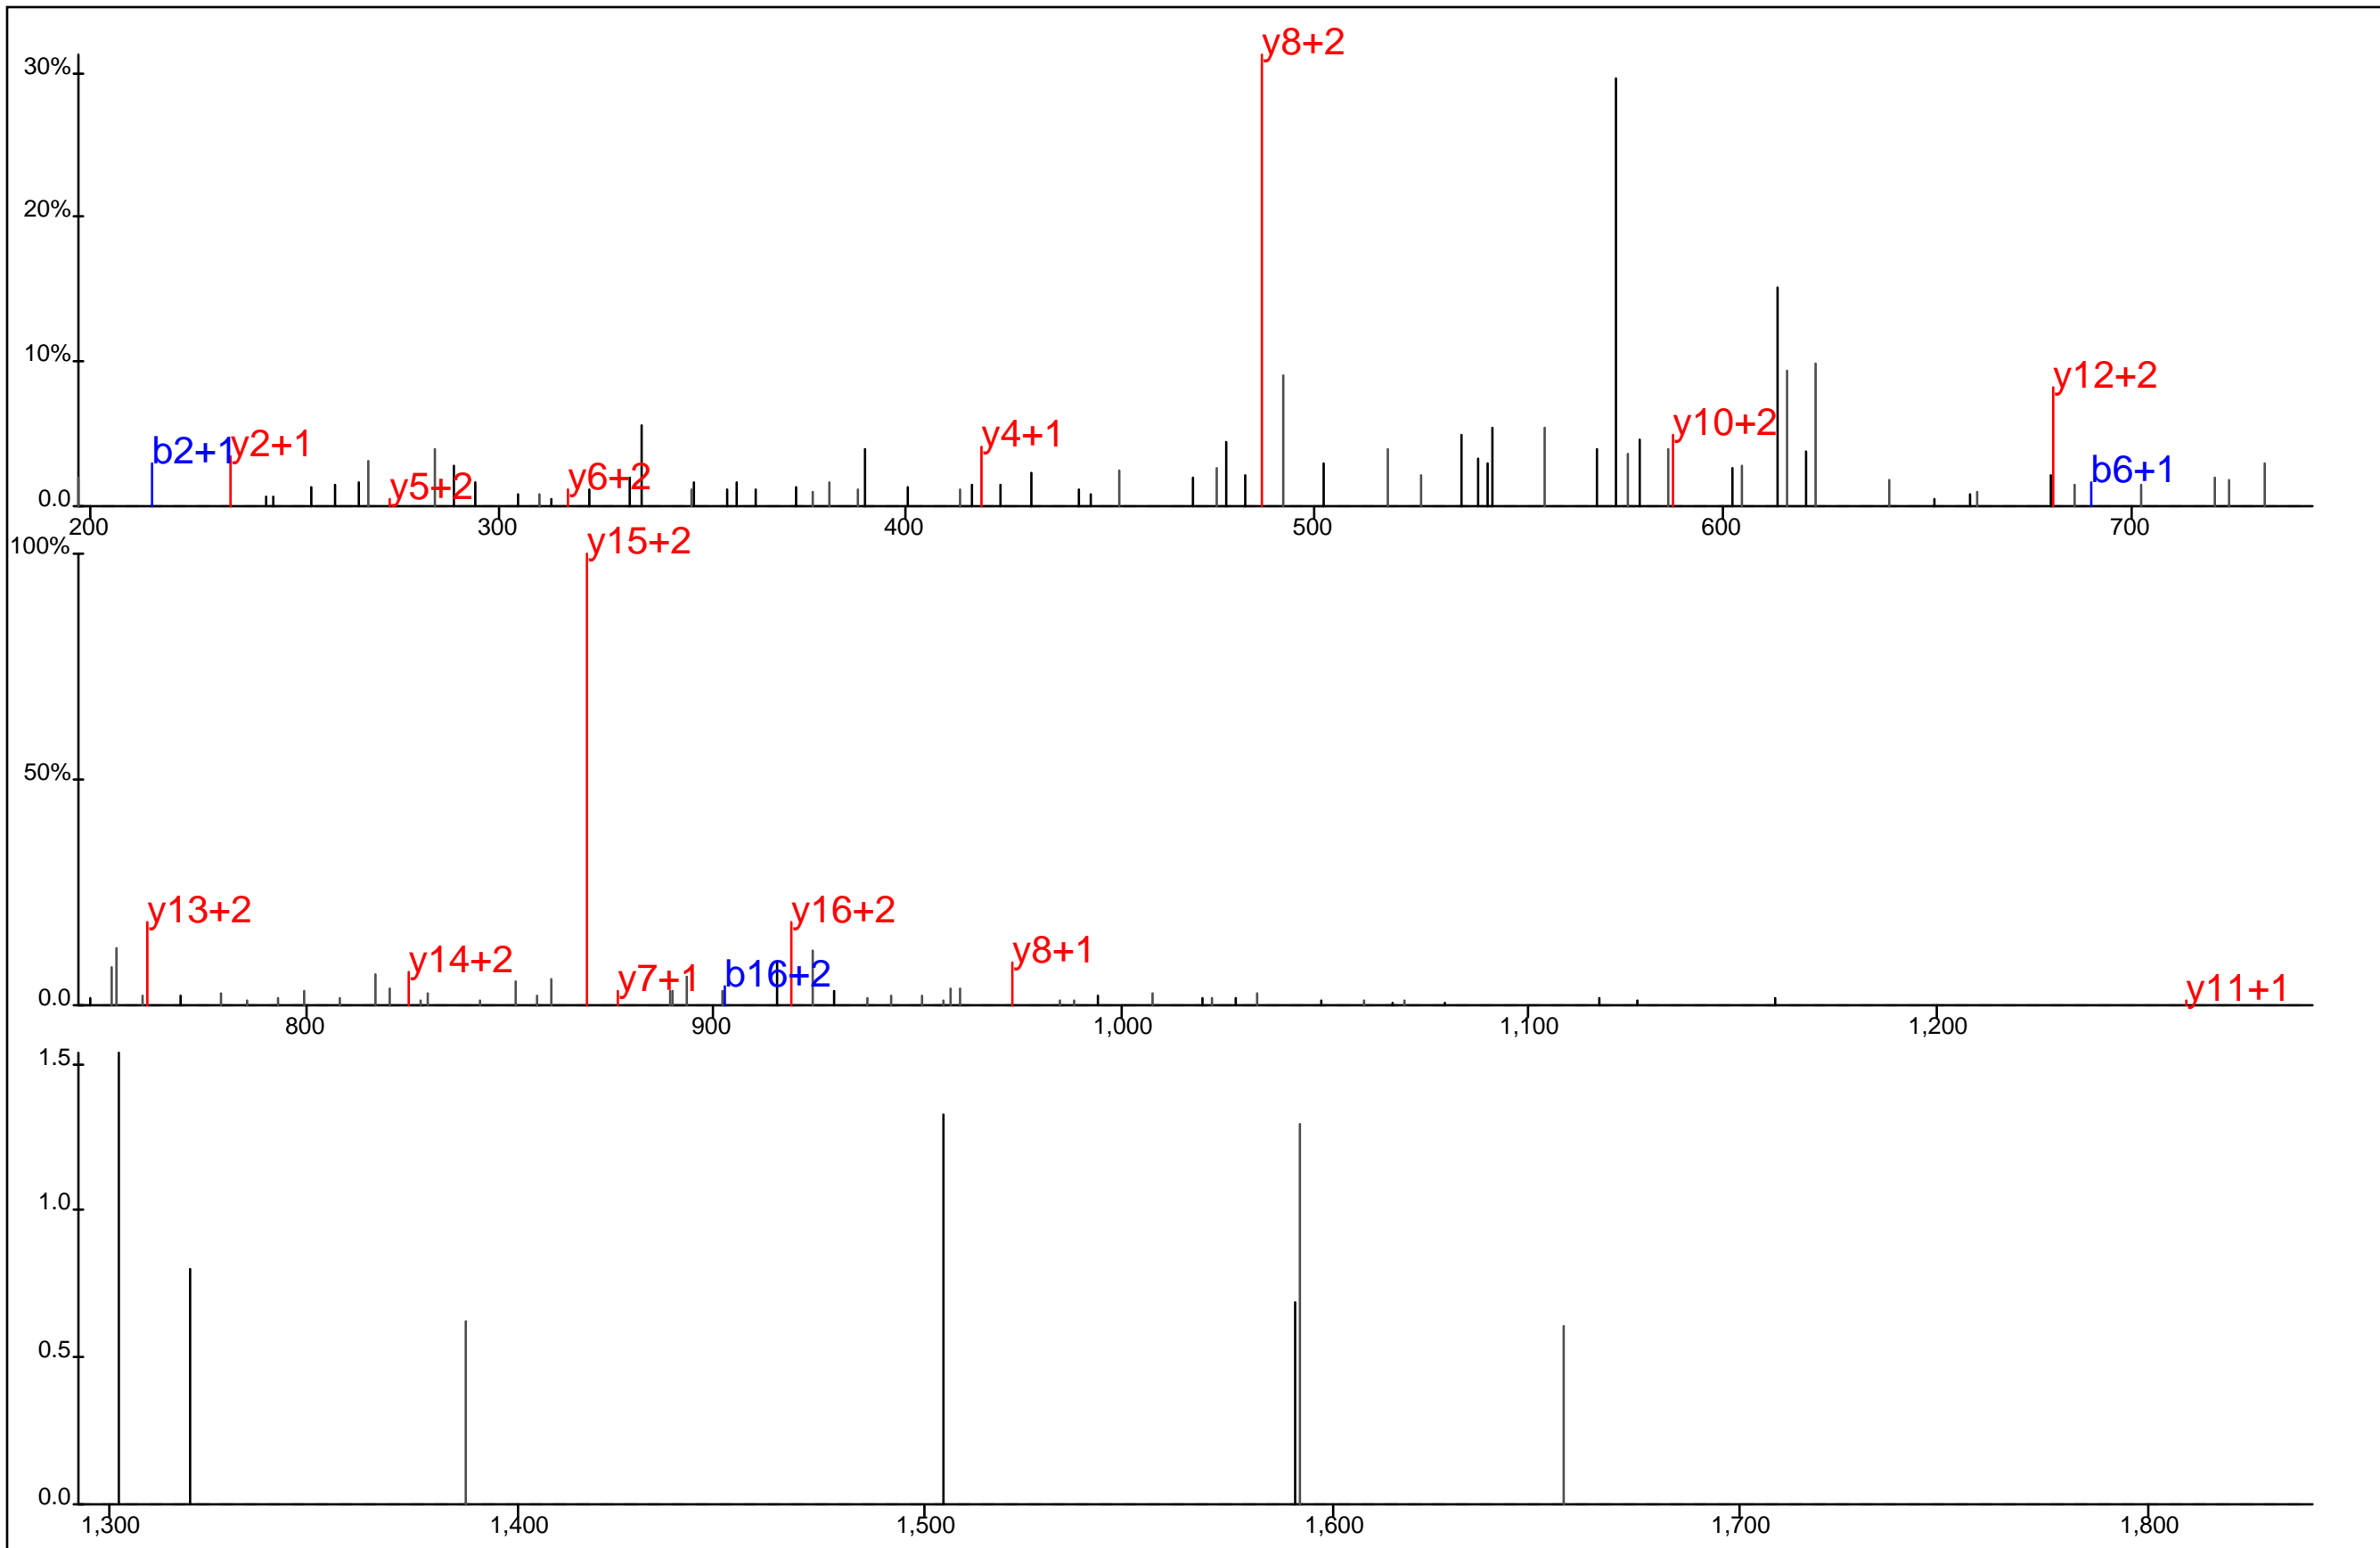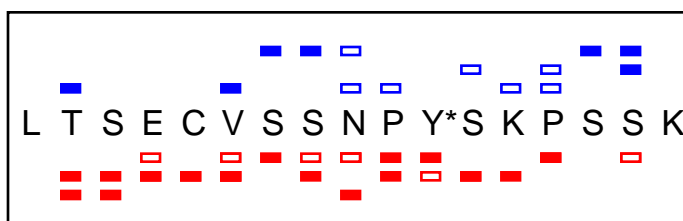

Protein Name: Cytoskeleton associated protein 2-like  
 gi Accession: 0  
 Precursor Mass: 650.9548+3  
 Delta Mass: 0.755 ppm  
 XCorr: 24.81

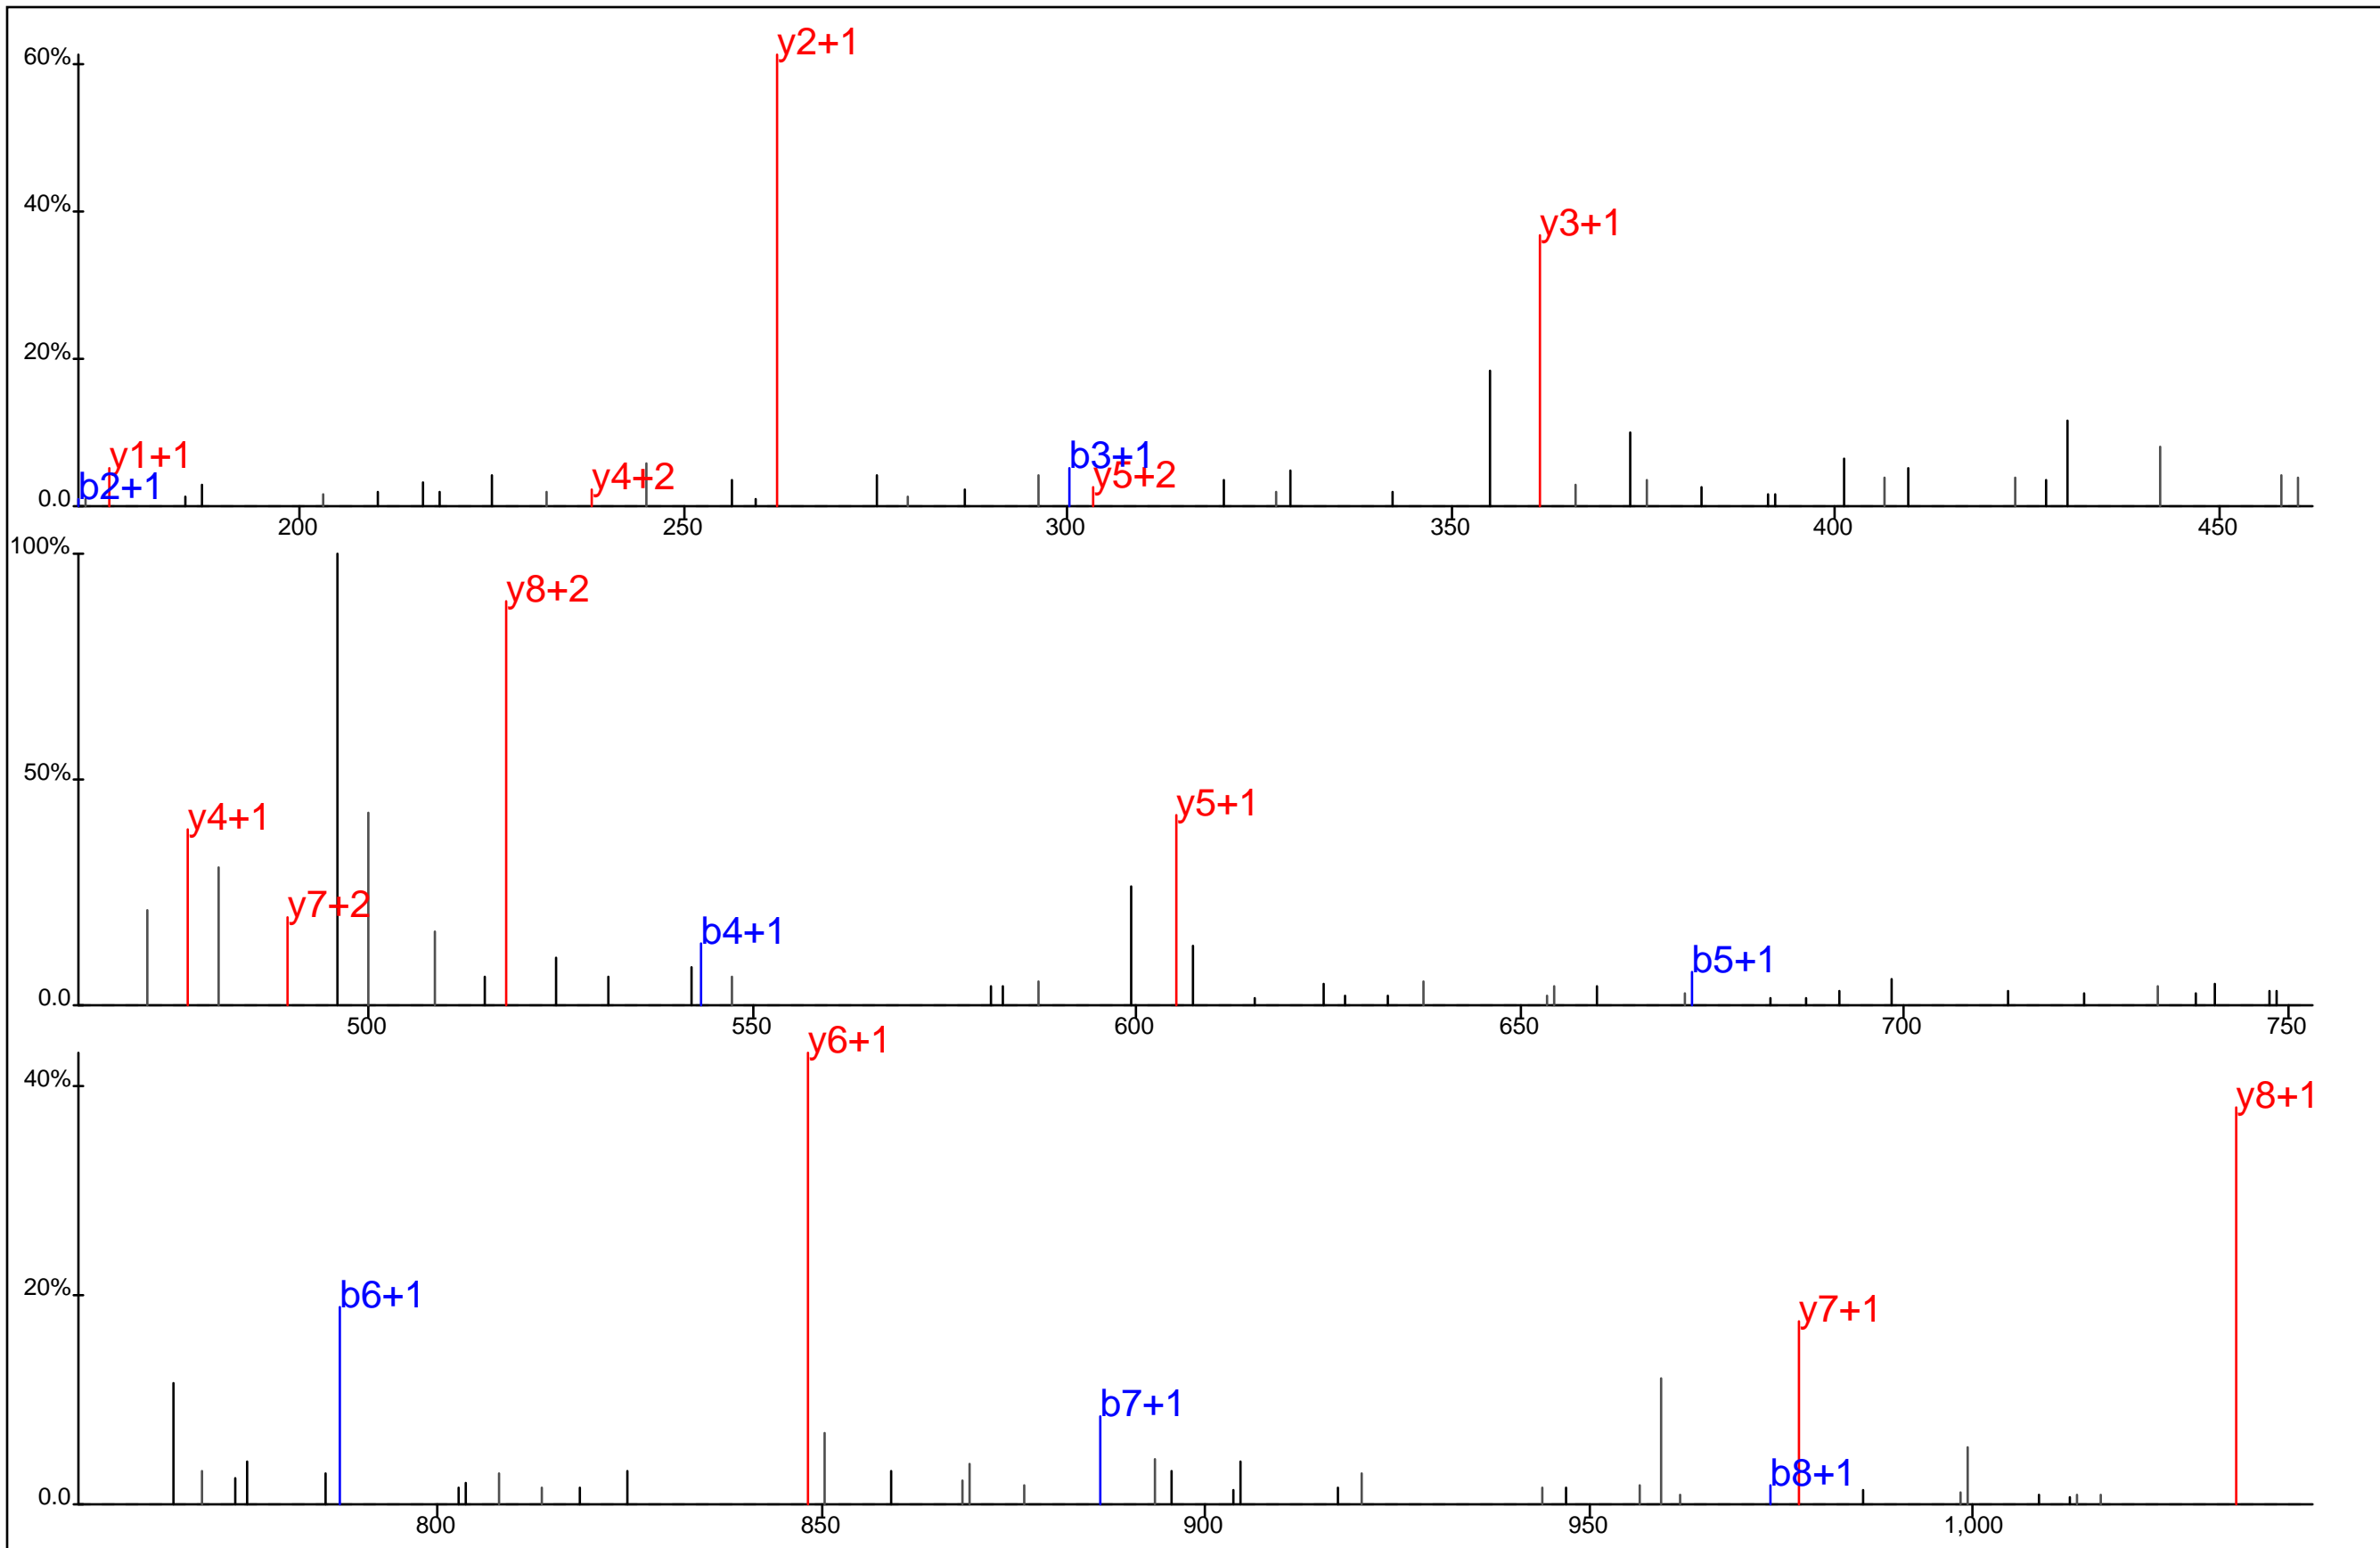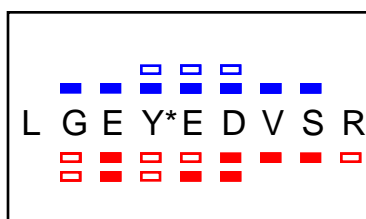

Protein Name: Cytoskeleton associated protein 1  
 gi Accession: 0  
 Precursor Mass: 574.2376+2  
 Delta Mass: 1.091 ppm  
 XCorr: 42.04

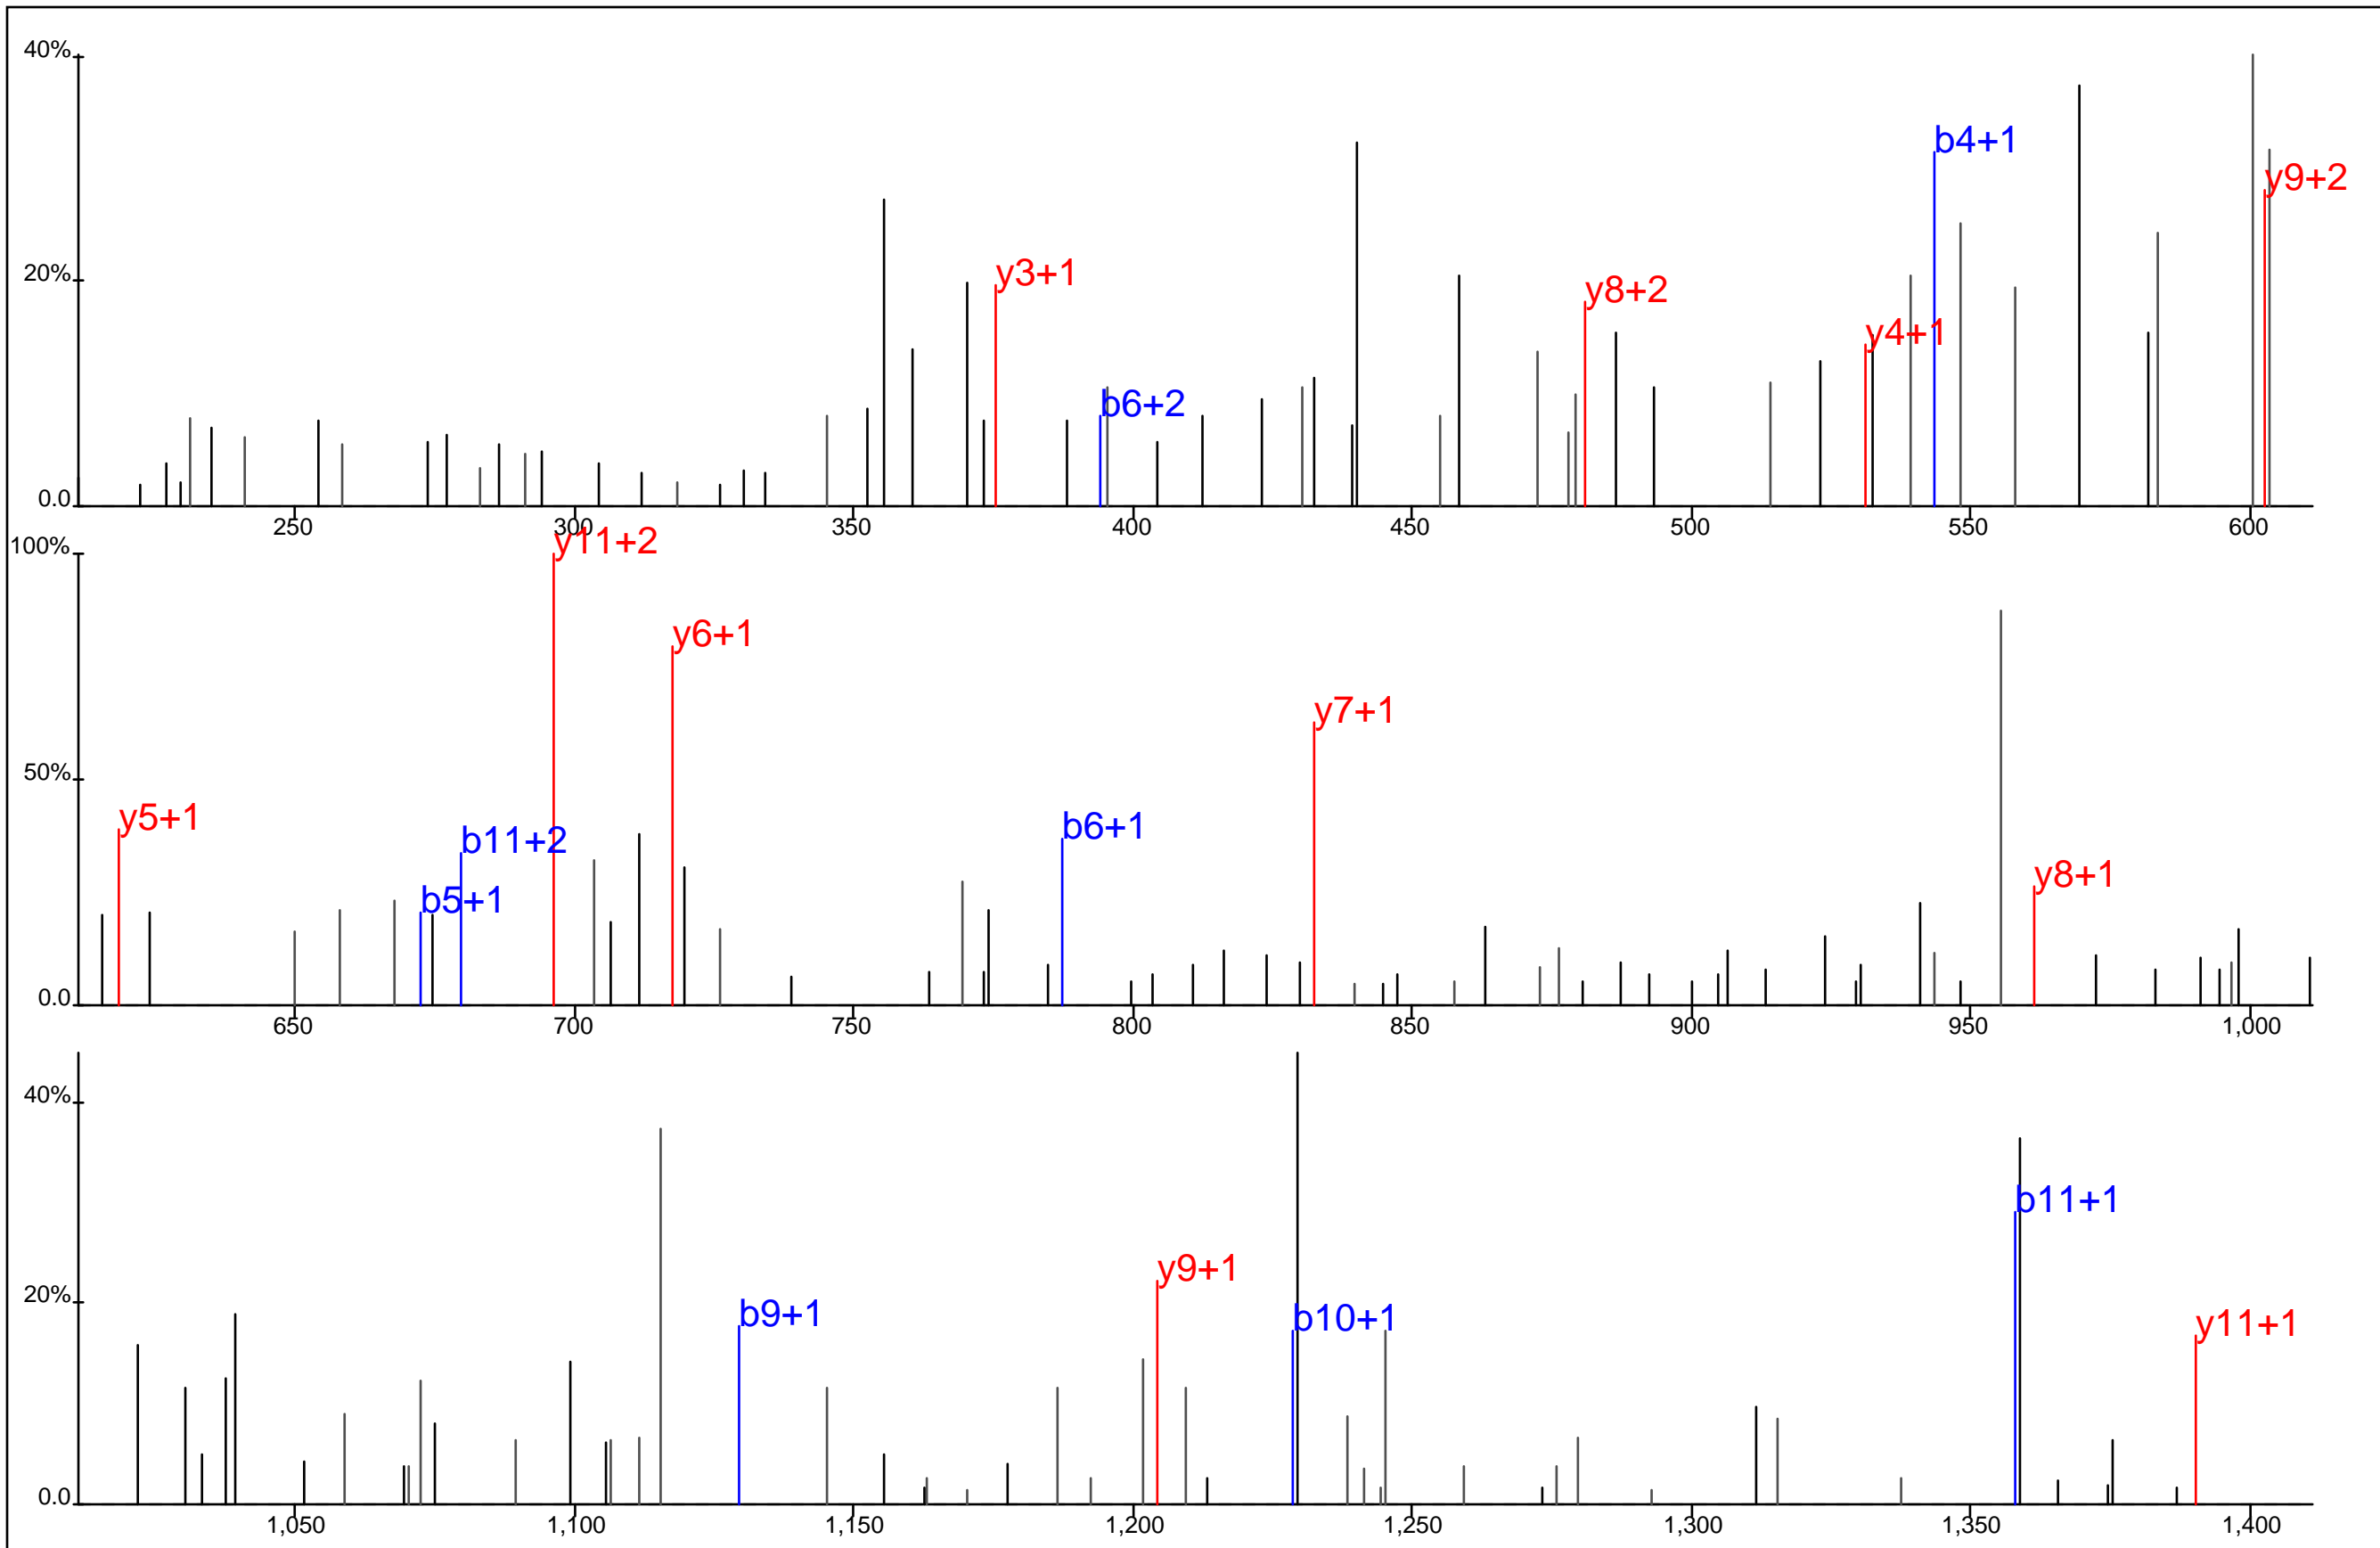

L G E Y\* E D V S R V E K

Protein Name: Cytoskeleton associated protein 1  
 gi Accession: 0  
 Precursor Mass: 752.3408+2  
 Delta Mass: 1.057 ppm  
 XCorr: 28.15



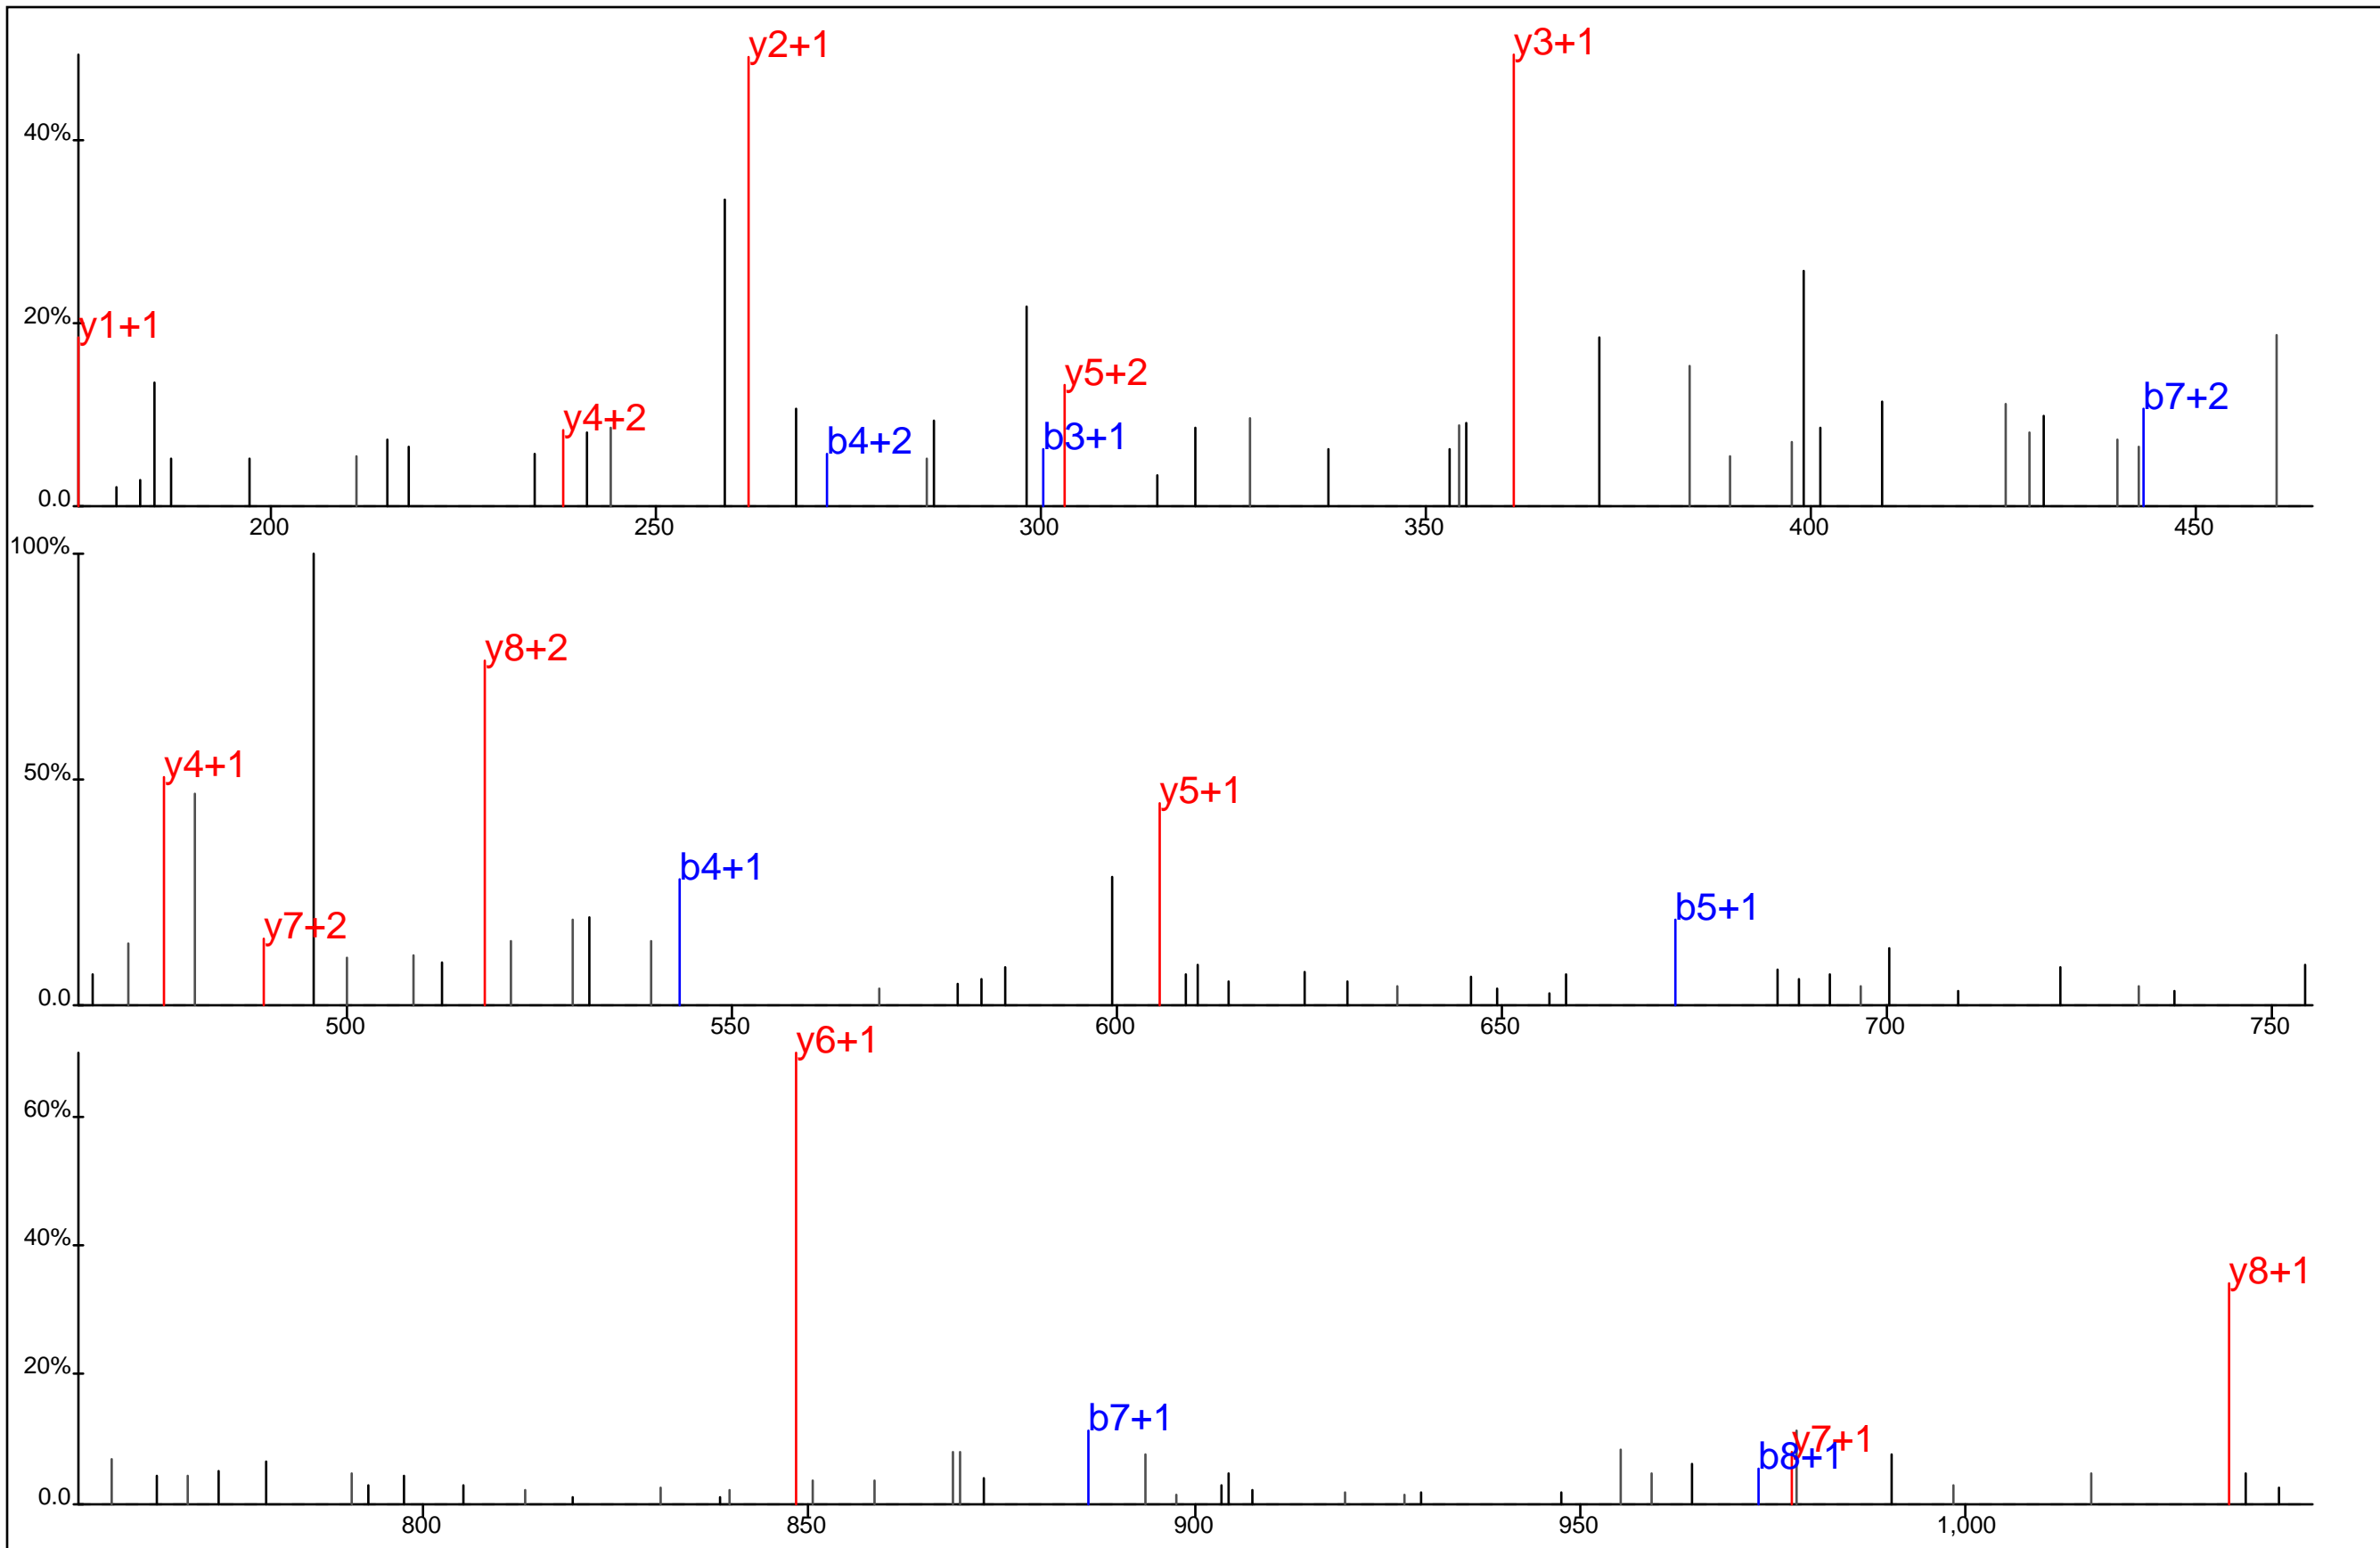

L G E Y\* E D V S R

Protein Name: Cytoskeleton associated protein 1  
 gi Accession: 0  
 Precursor Mass: 574.2372+2  
 Delta Mass: 0.347 ppm  
 XCorr: 47.78

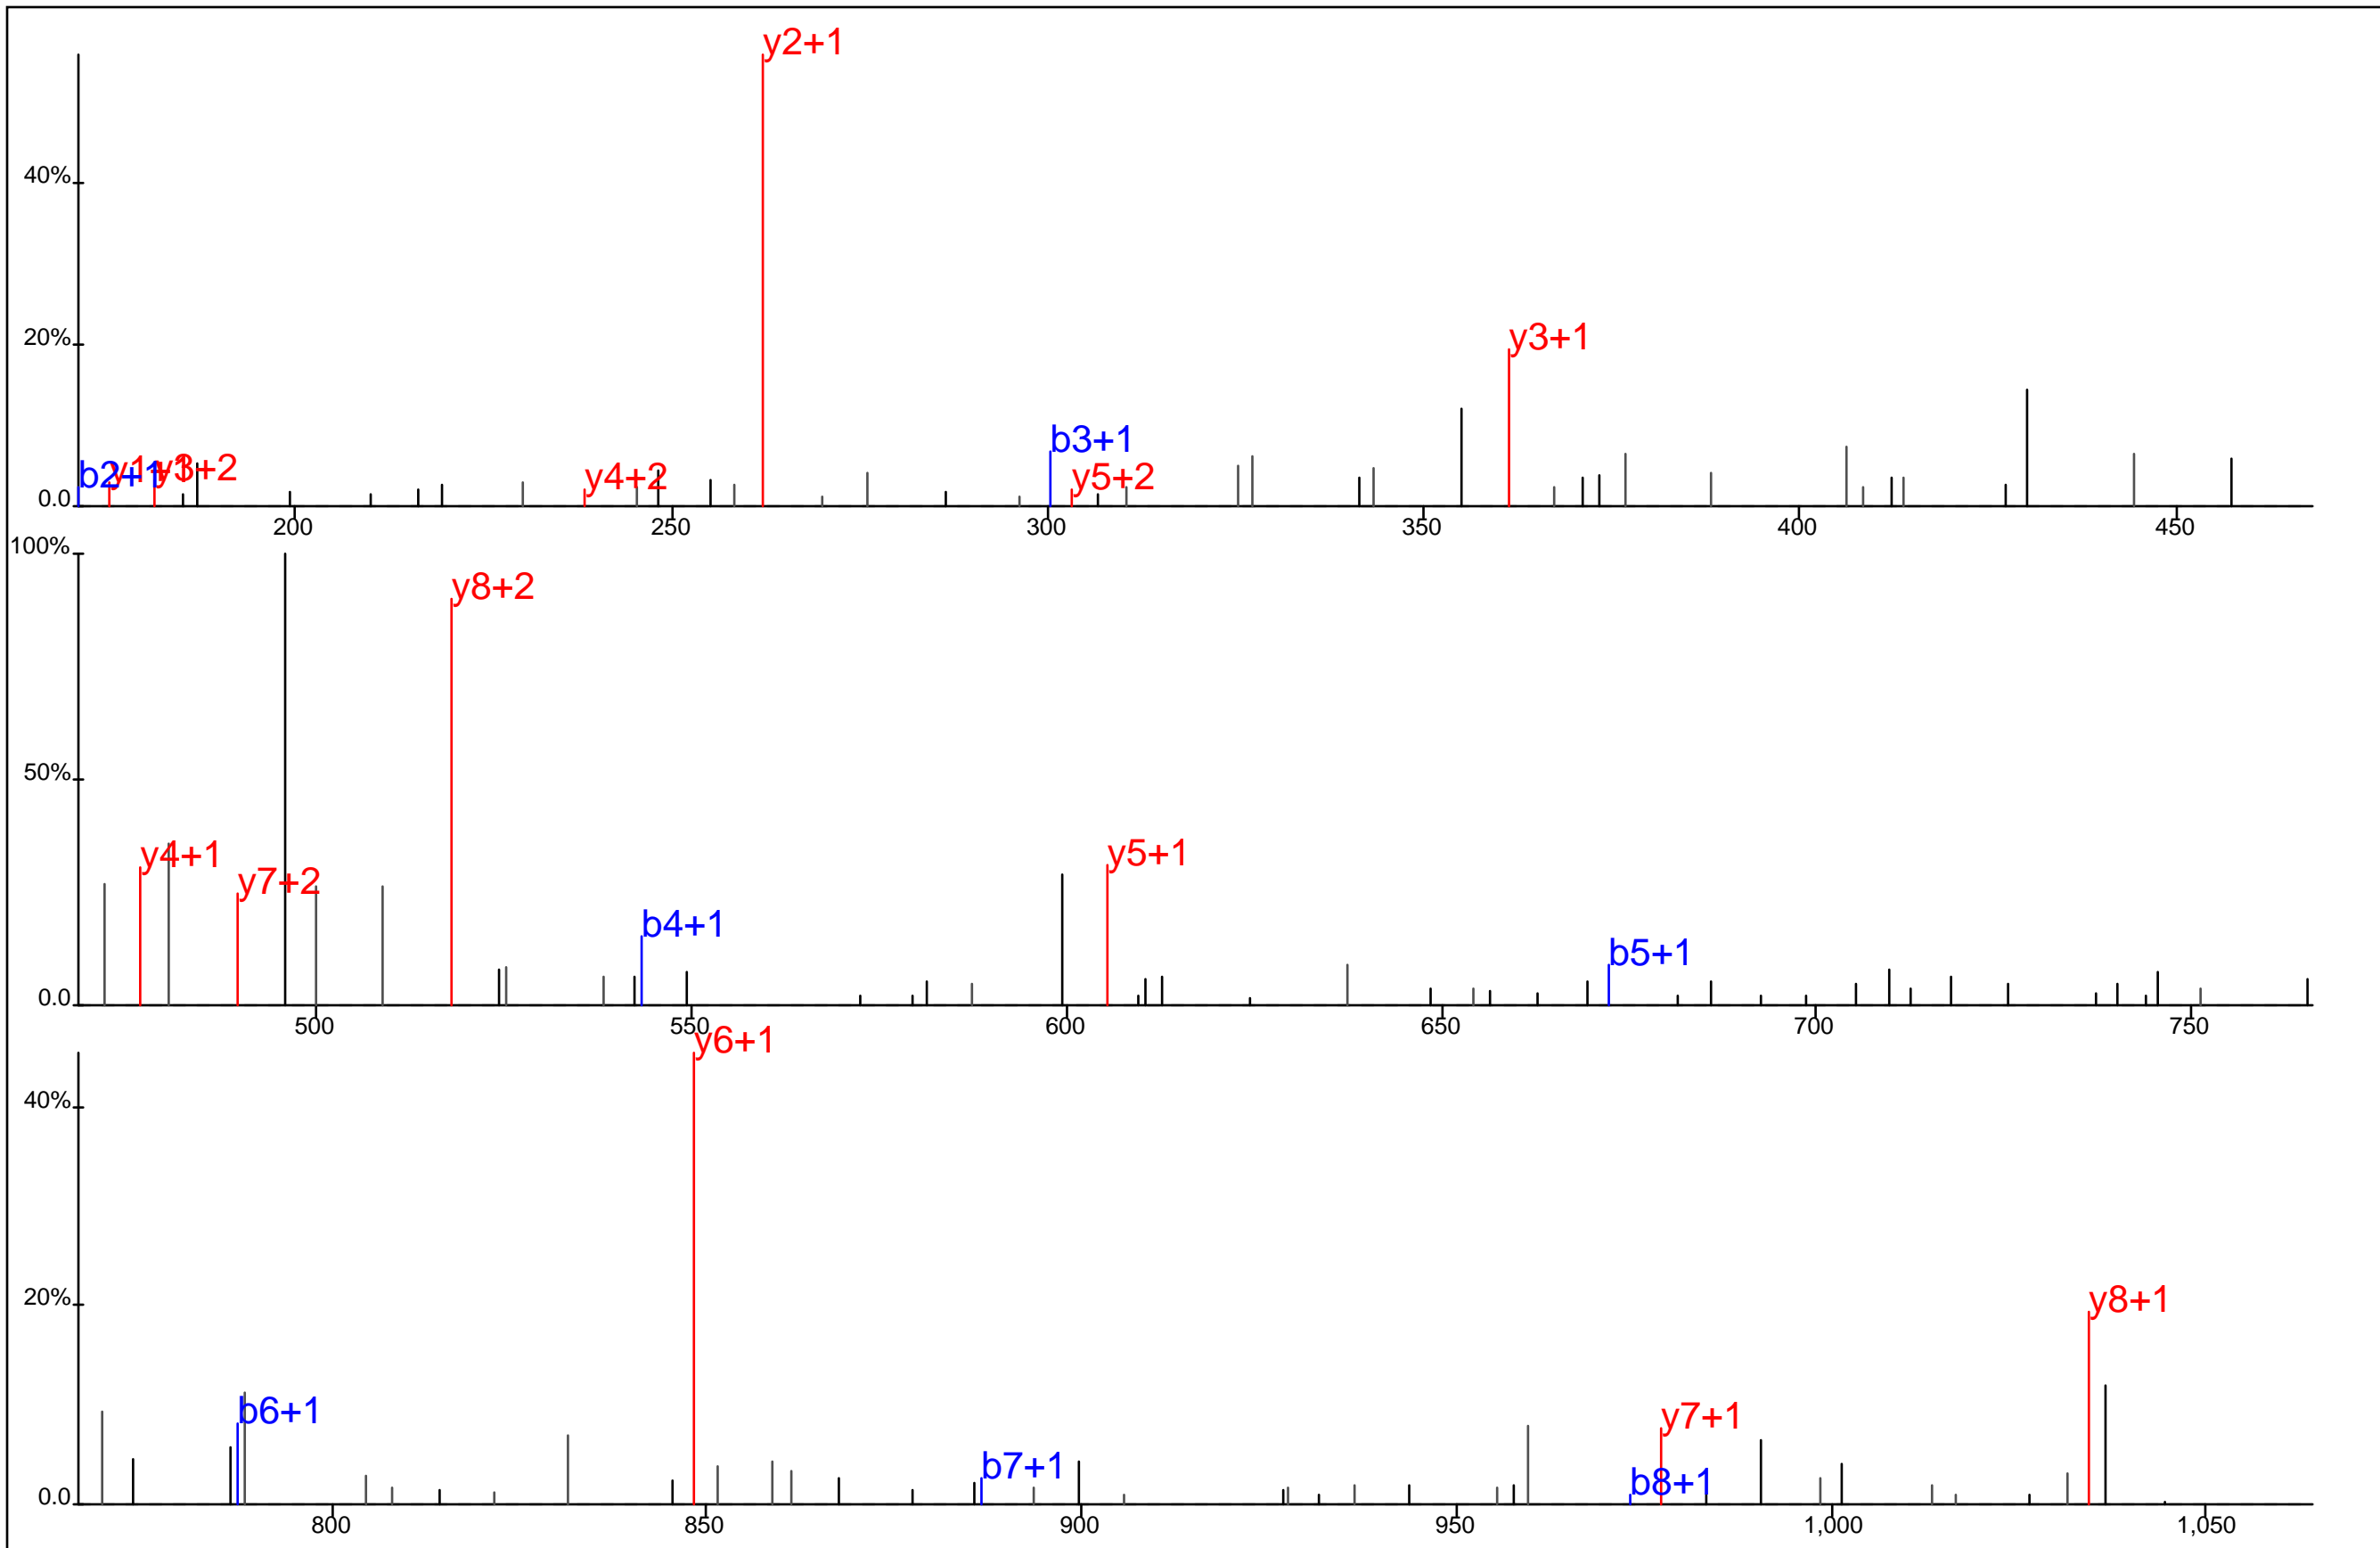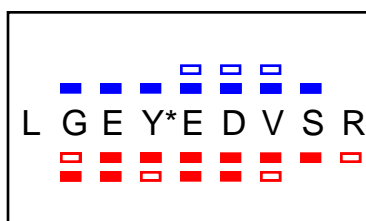

Protein Name: Cytoskeleton associated protein 1  
 gi Accession: 0  
 Precursor Mass: 574.2370+2  
 Delta Mass: 0.028 ppm  
 XCorr: 38.26

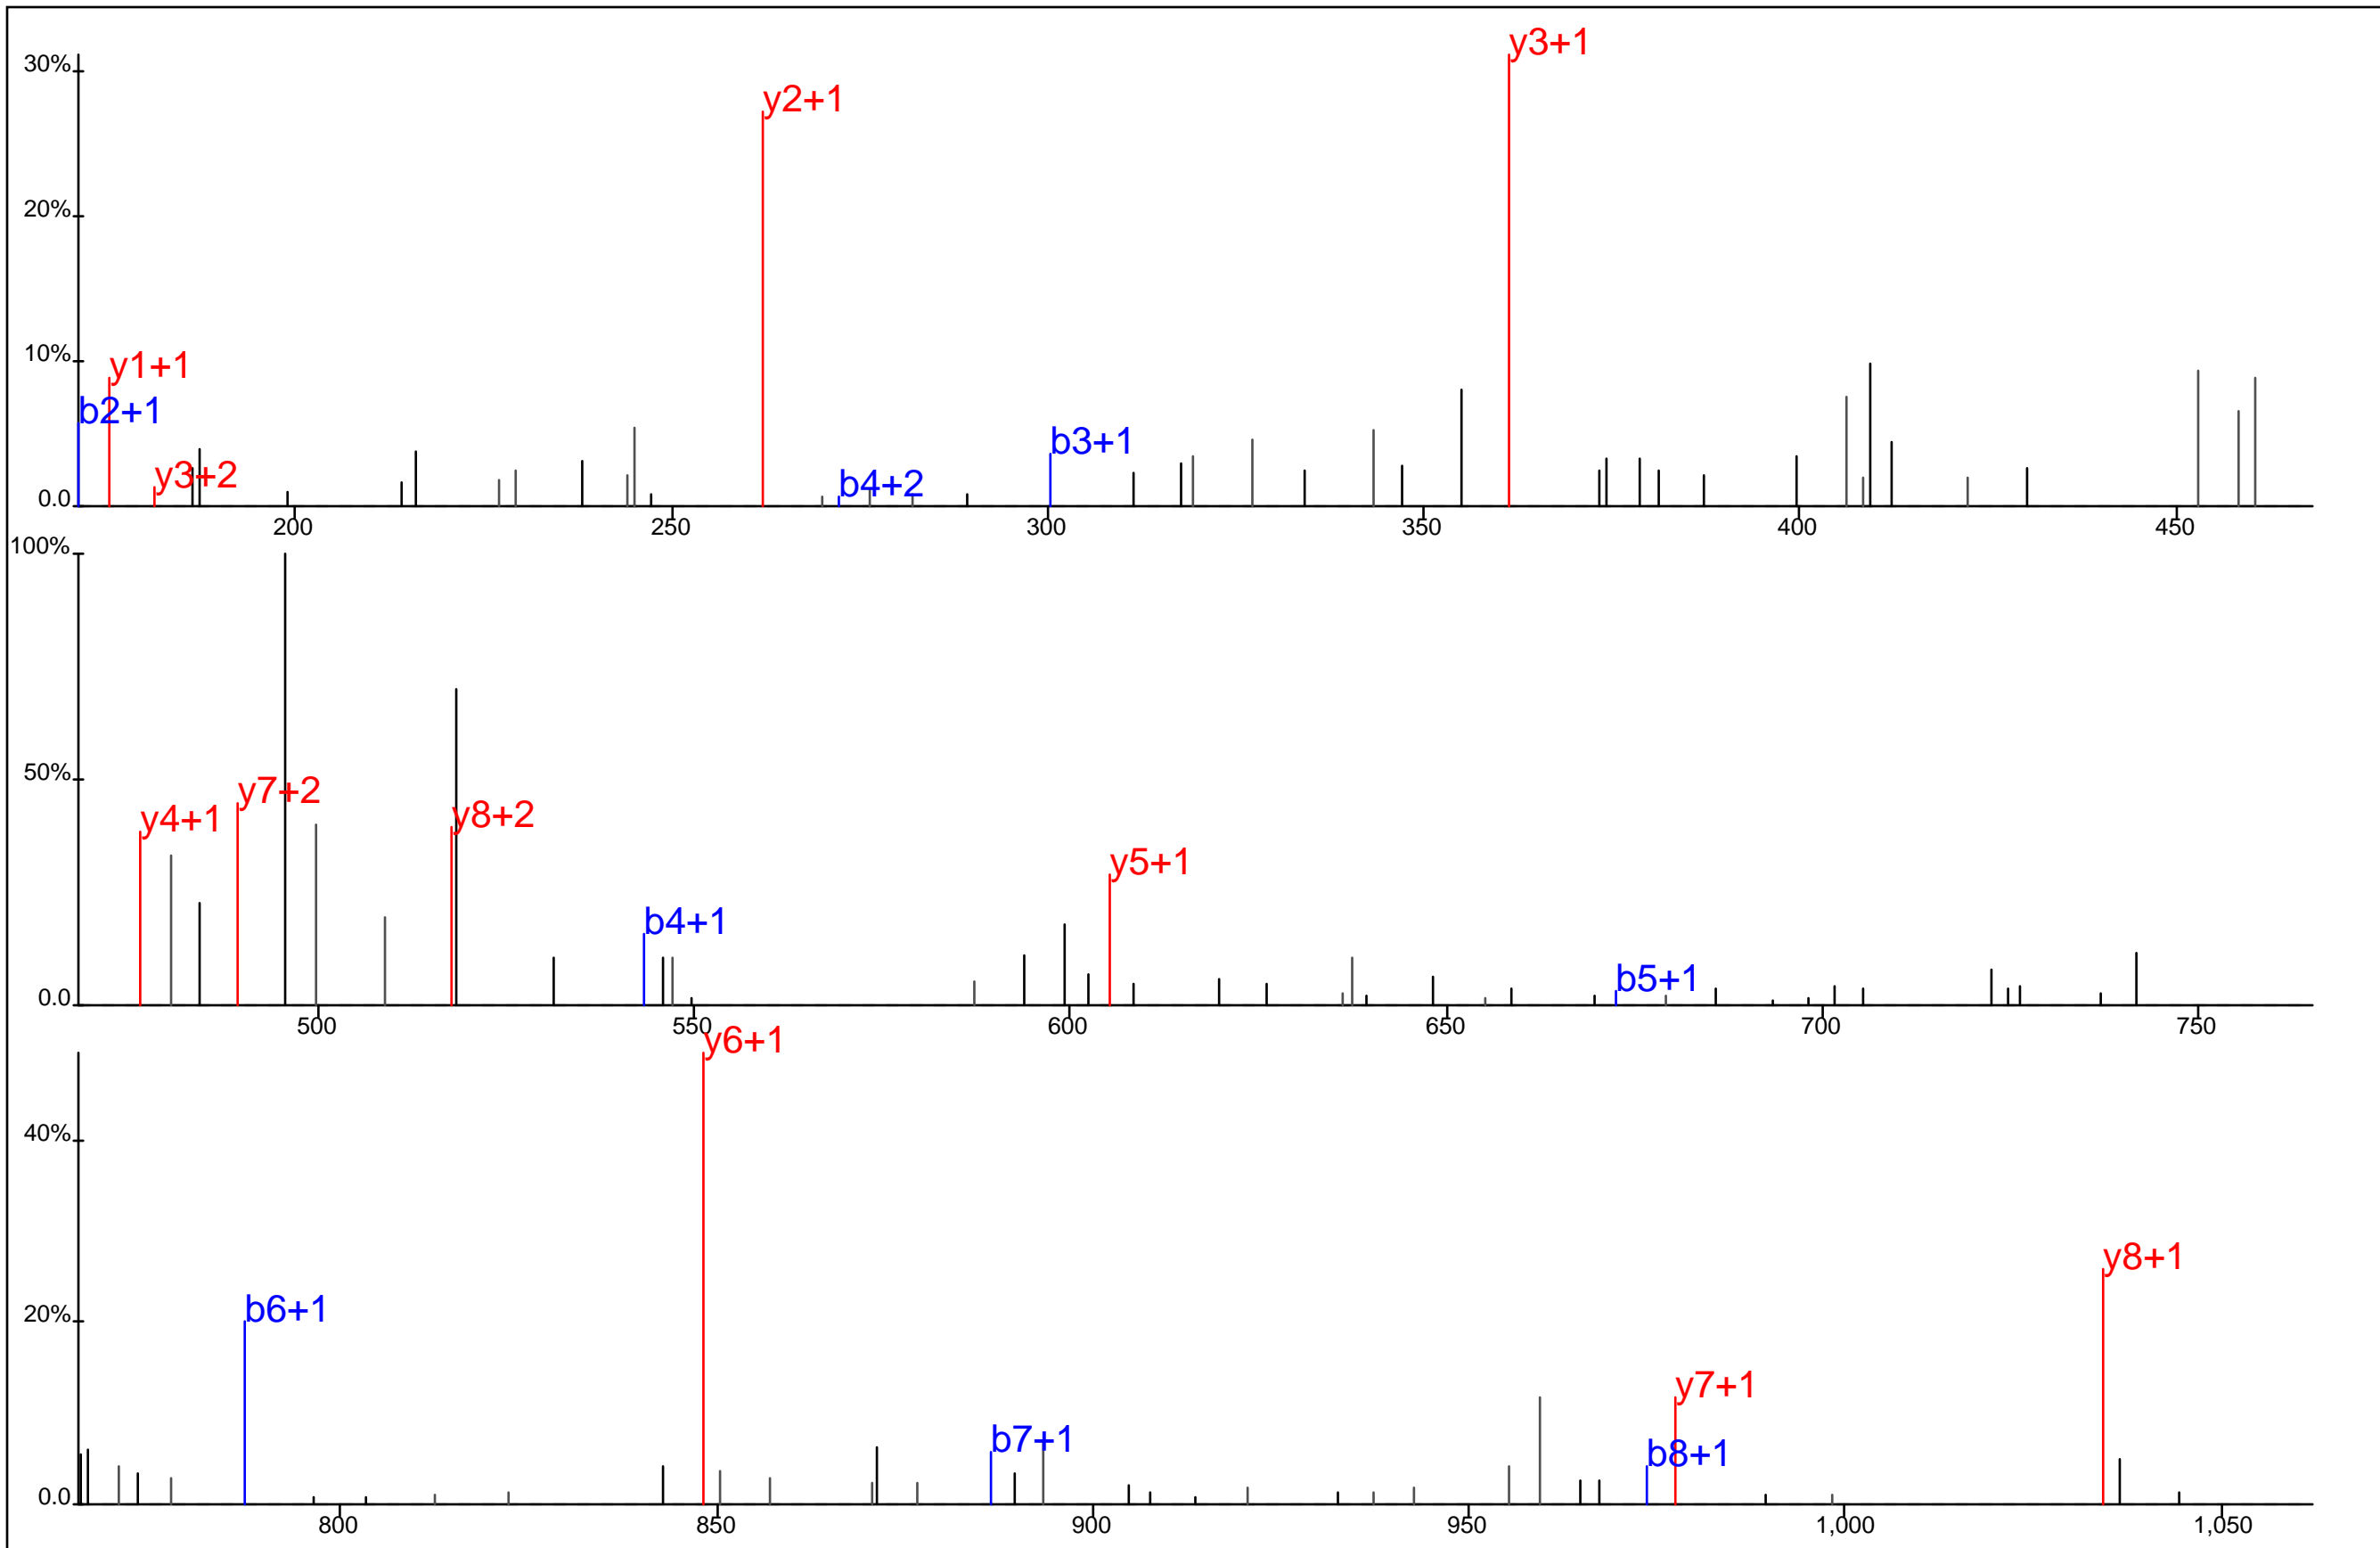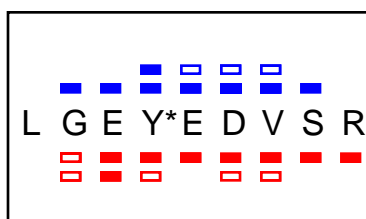

Protein Name: Cytoskeleton associated protein 1  
 gi Accession: 0  
 Precursor Mass: 574.2372+2  
 Delta Mass: 0.347 ppm  
 XCorr: 39.94



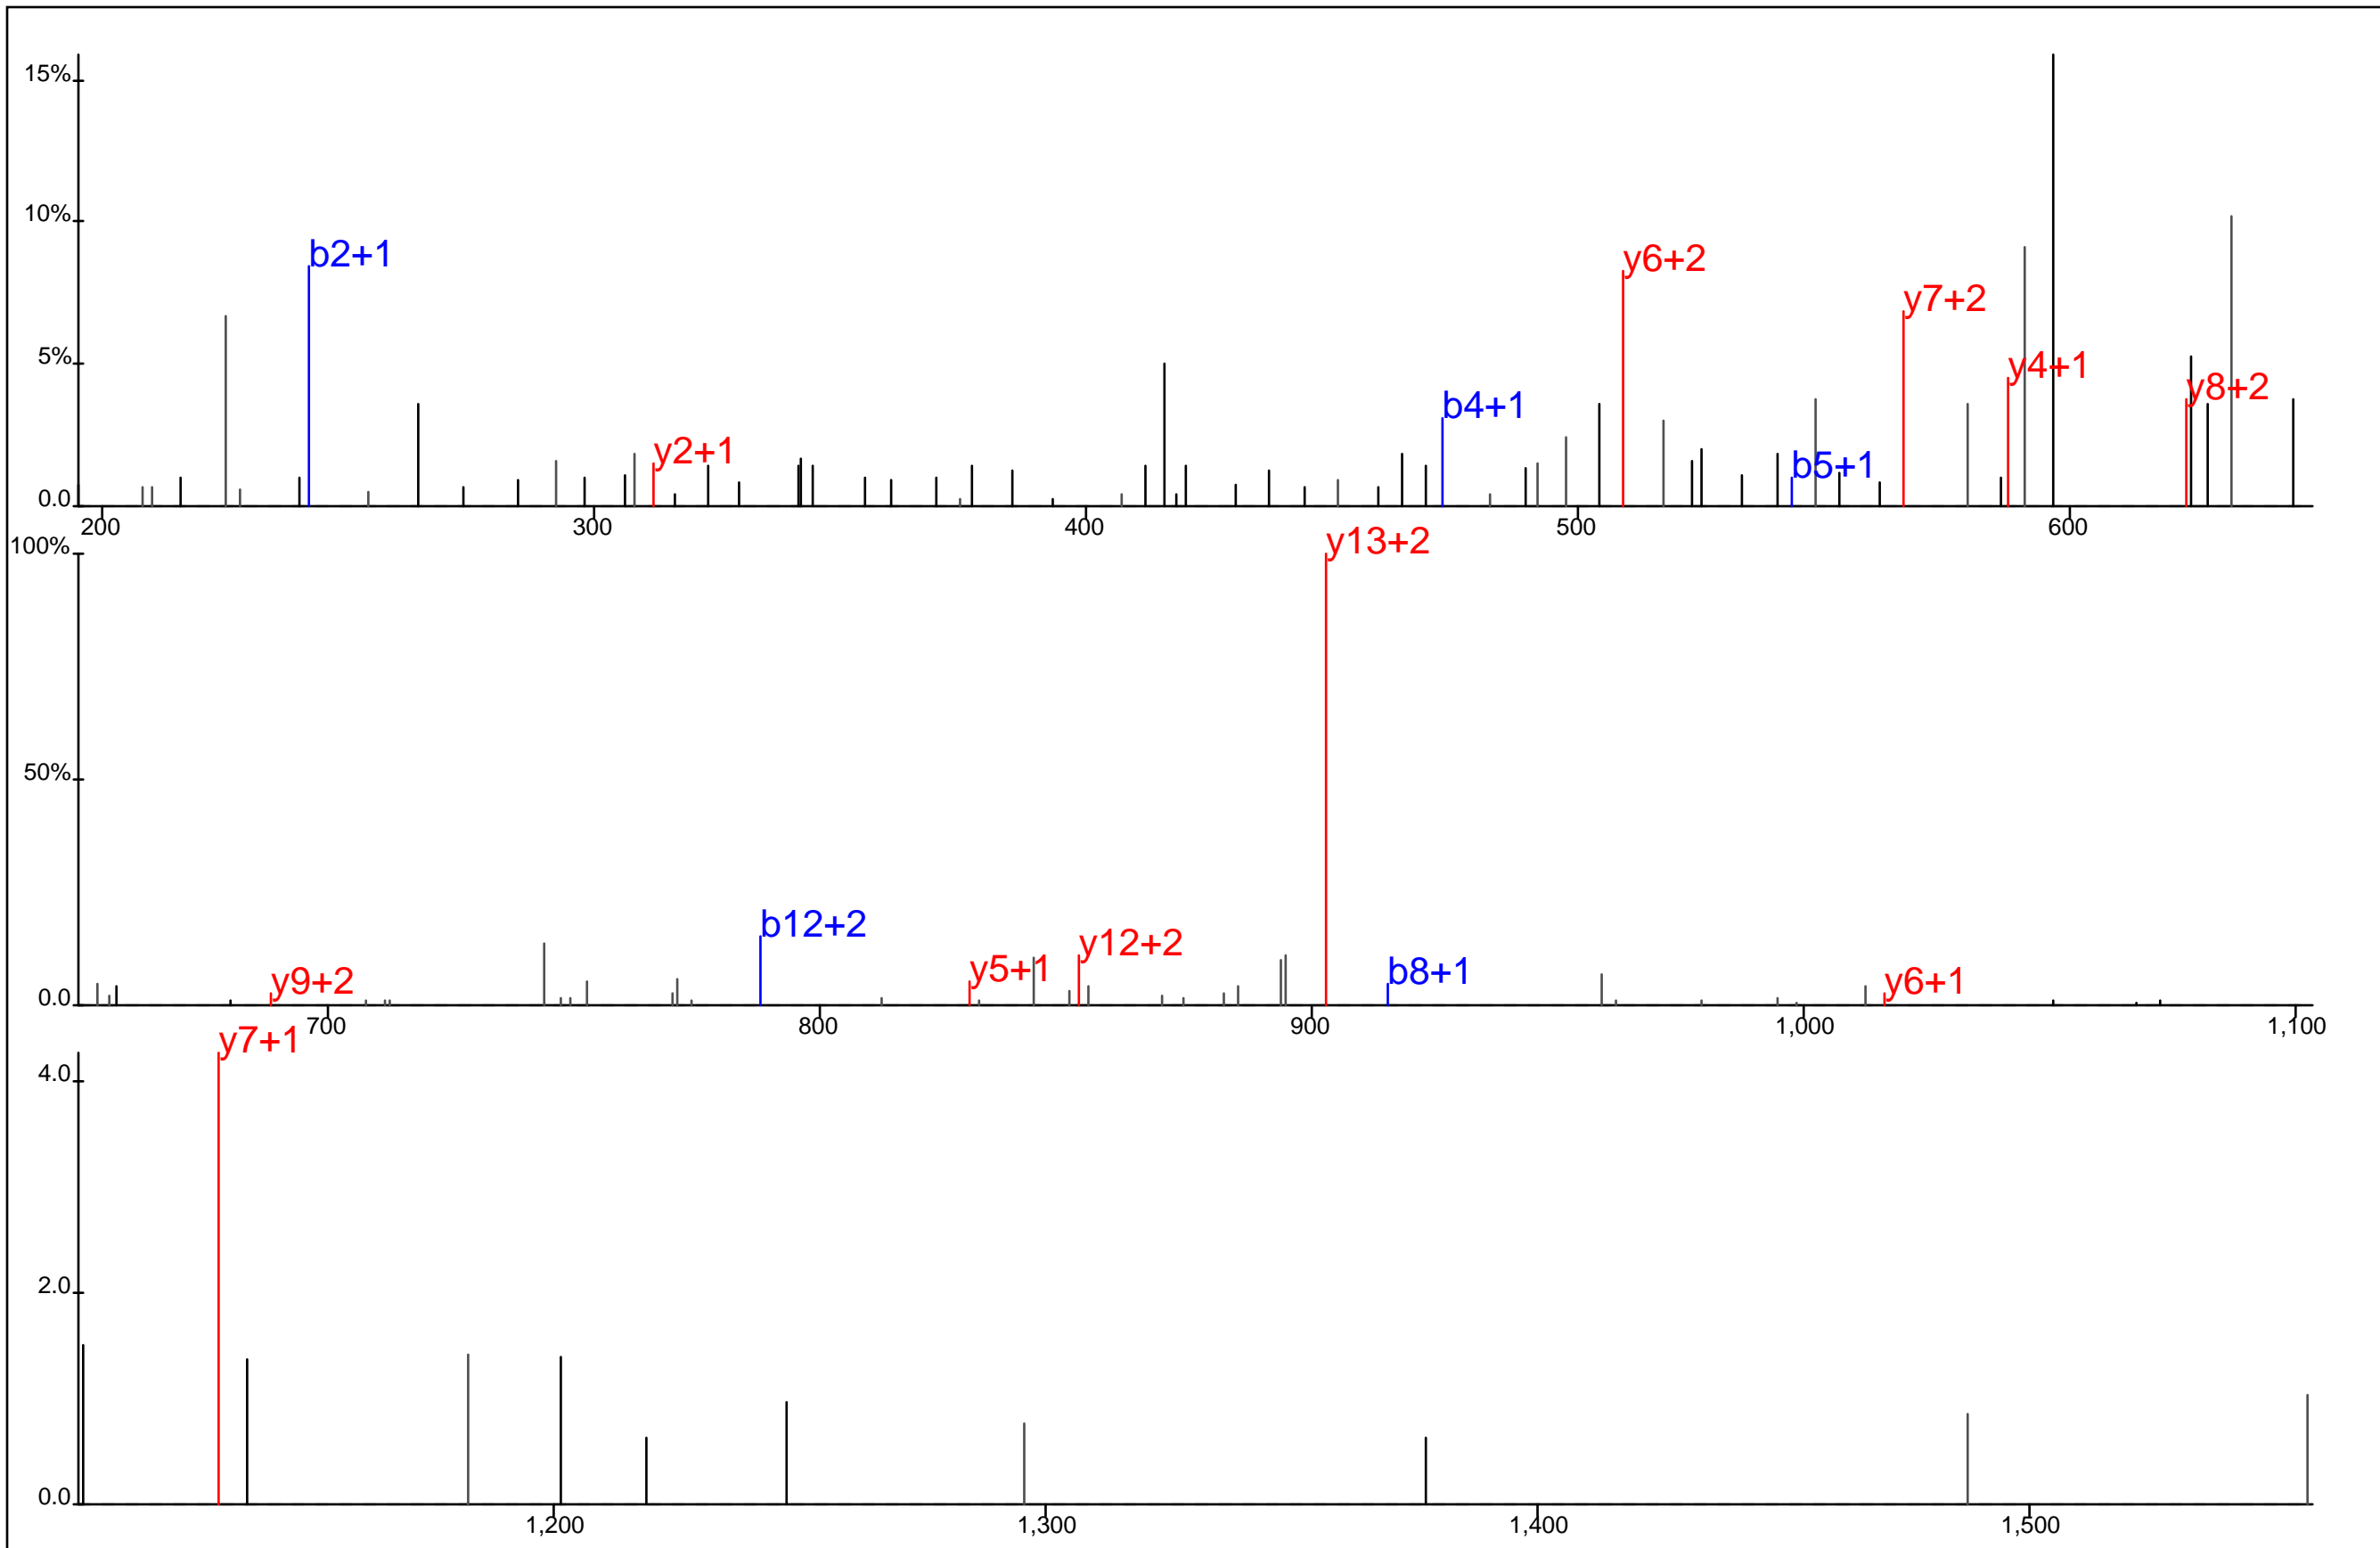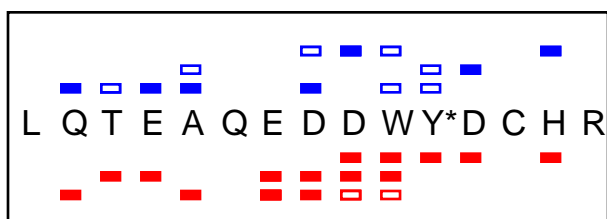

Protein Name: DDX20  
 gi Accession: 0  
 Precursor Mass: 682.5950+3  
 Delta Mass: 0.509 ppm  
 XCorr: 26.56

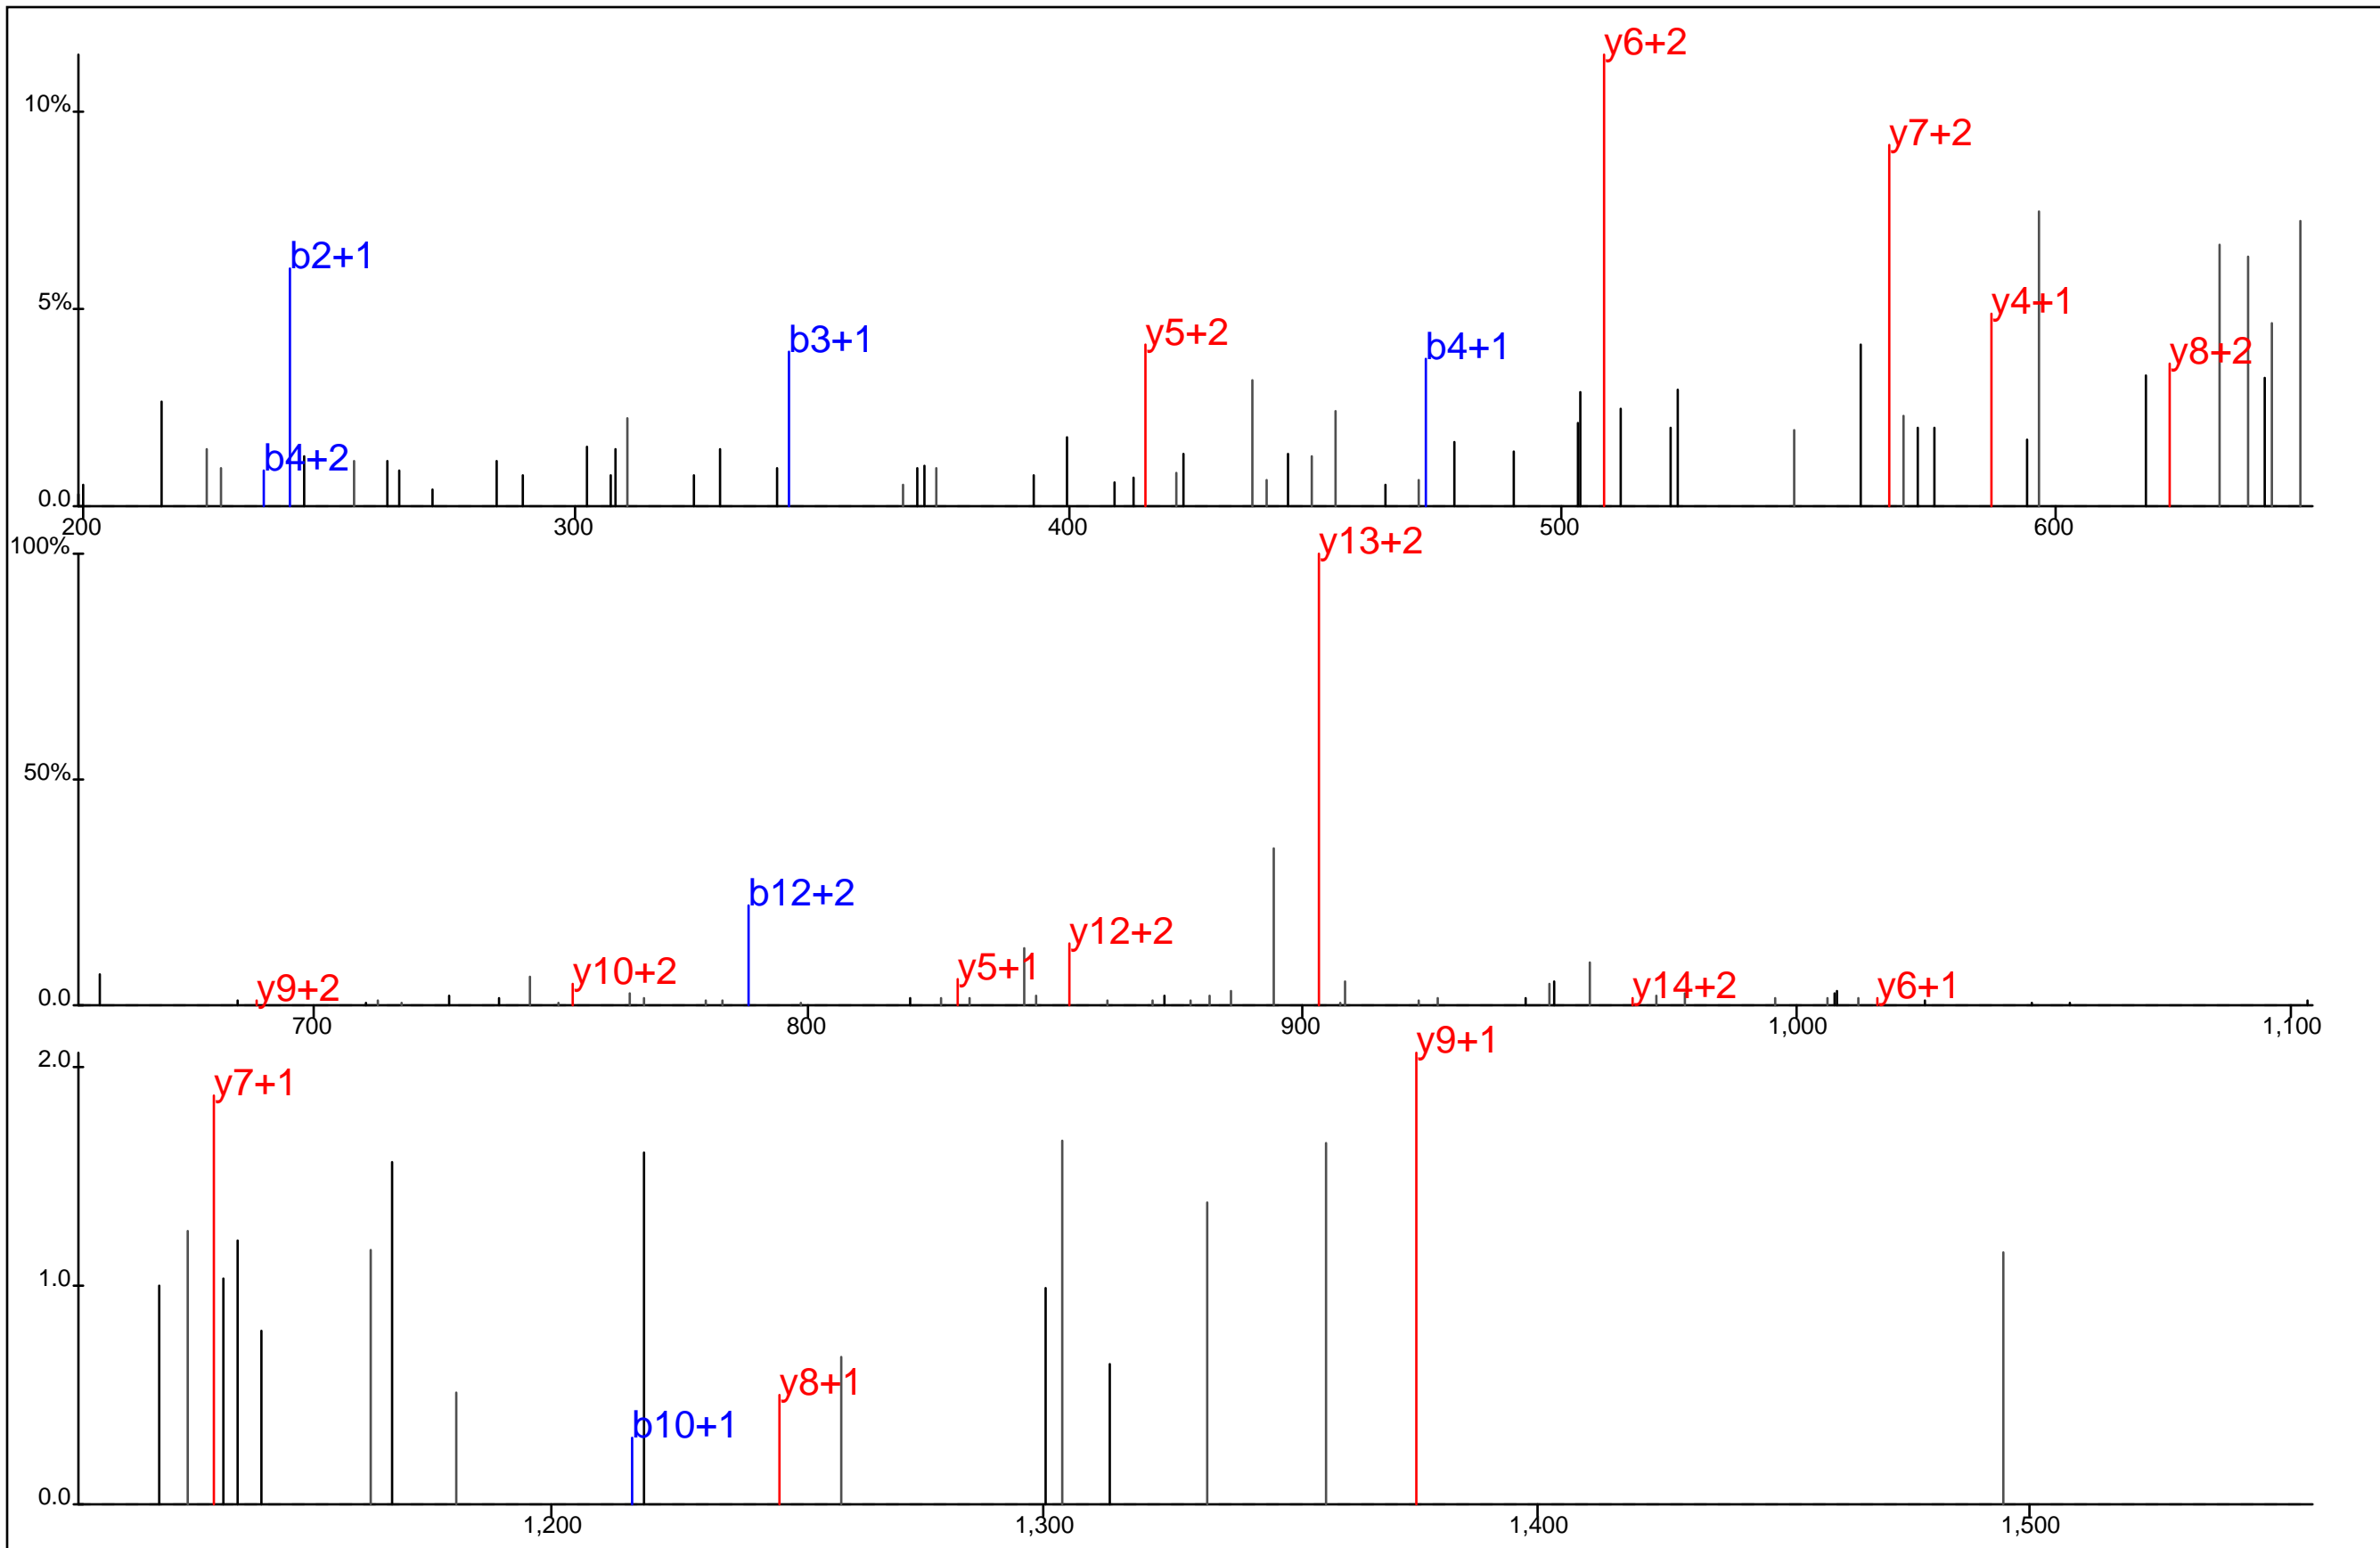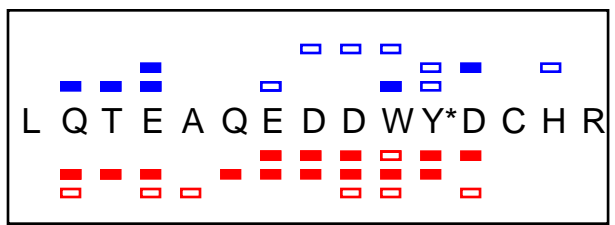

Protein Name: DDX20  
 gi Accession: 0  
 Precursor Mass: 682.5958+3  
 Delta Mass: 1.583 ppm  
 XCorr: 41.07



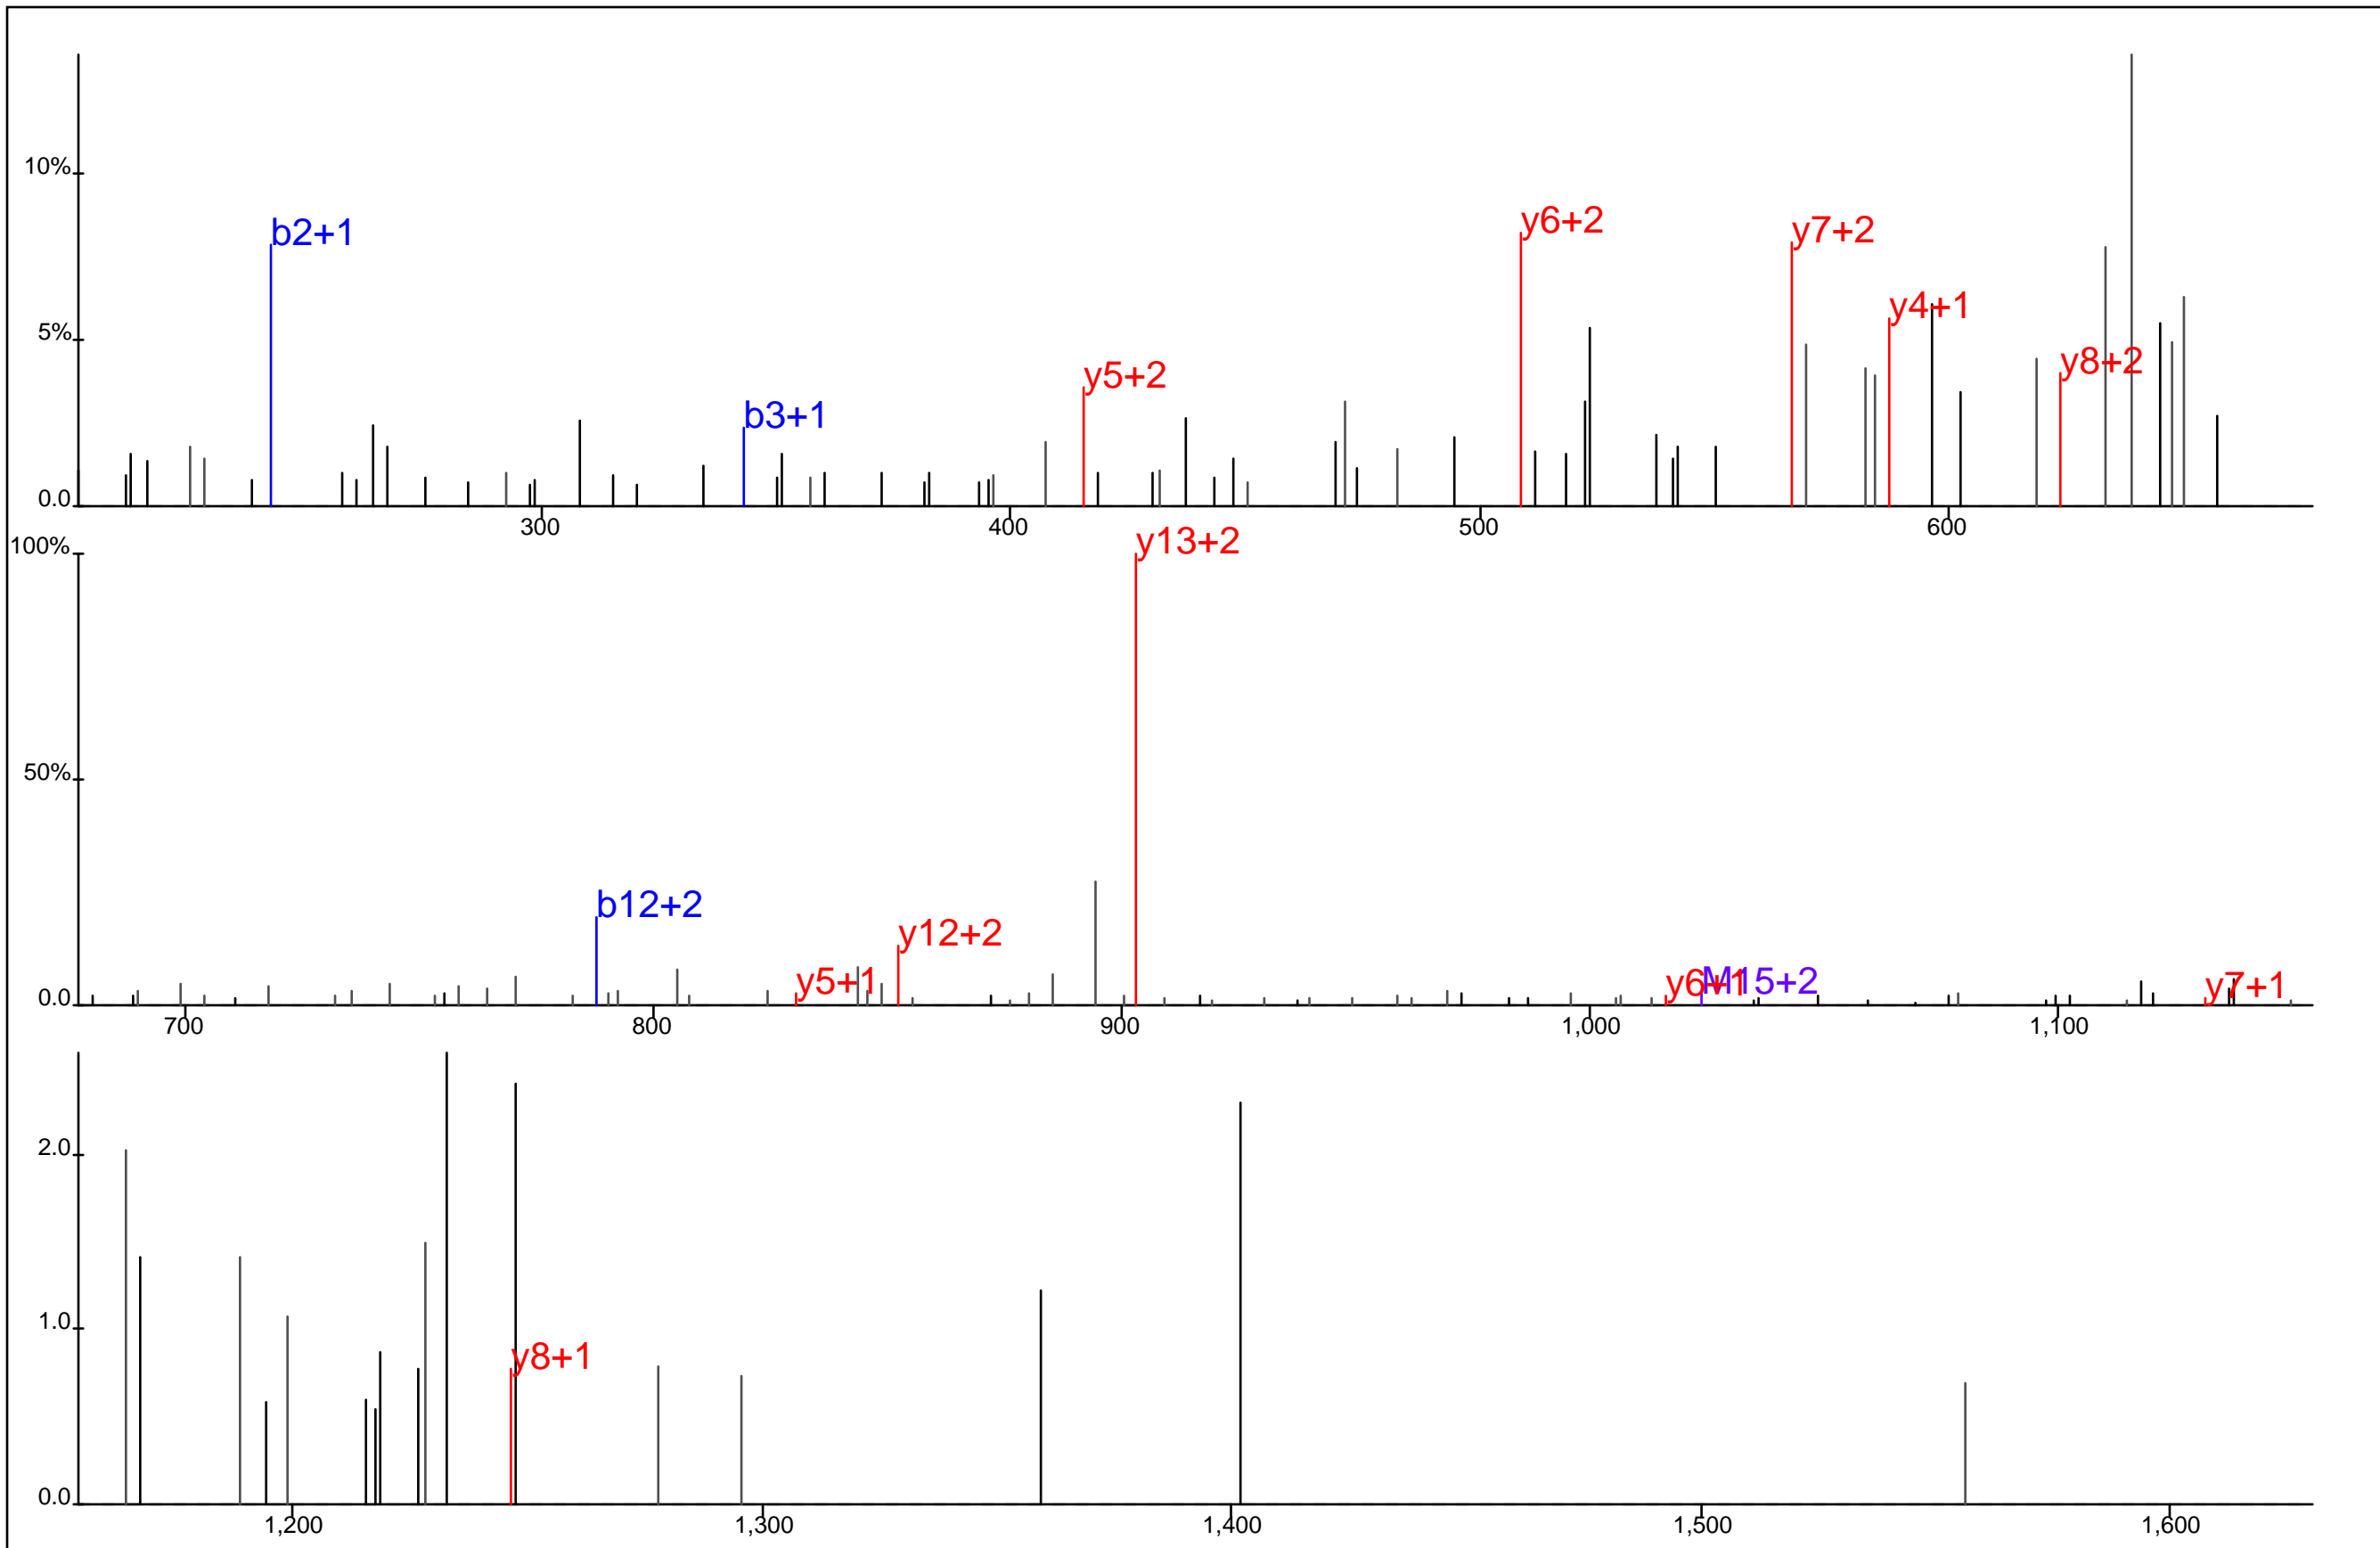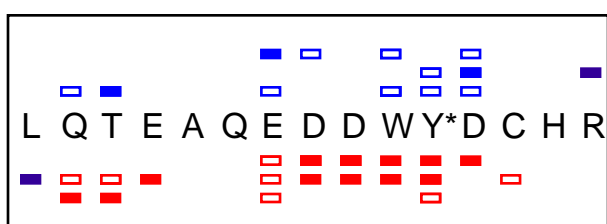

Protein Name: DDX20  
 gi Accession: 0  
 Precursor Mass: 682.5977+3  
 Delta Mass: 4.357 ppm  
 XCorr: 20.59



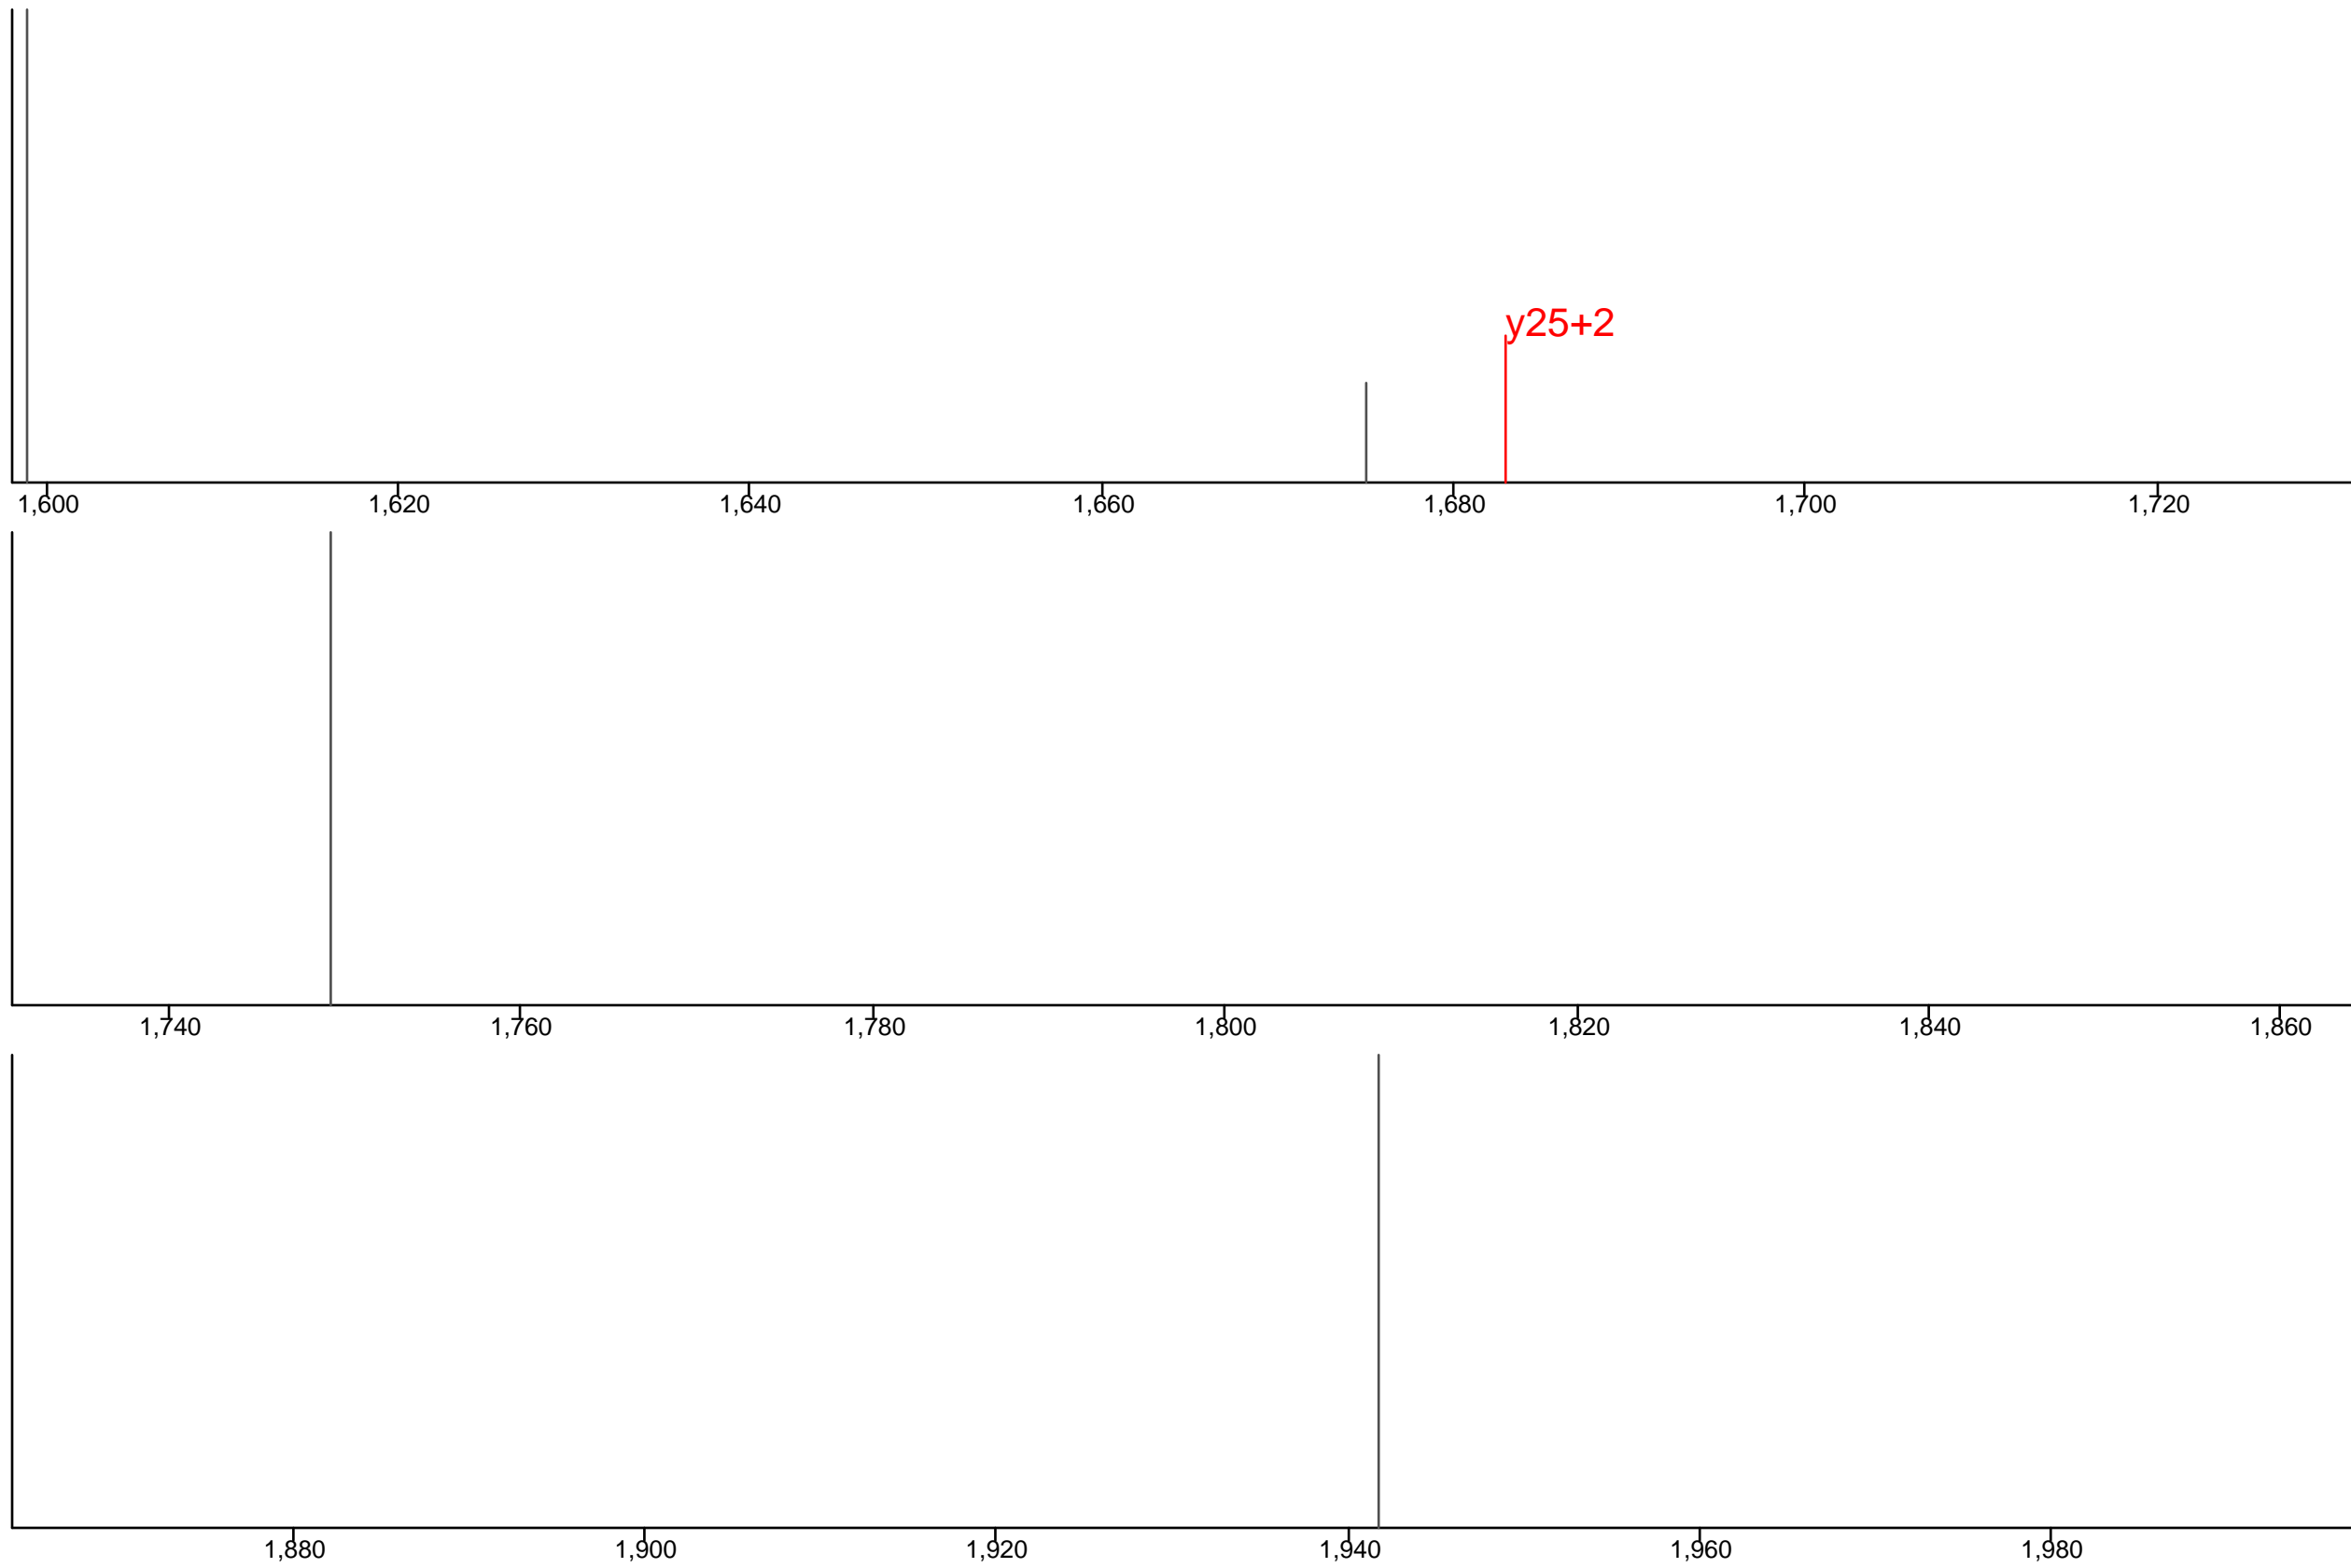

D N S\* I V I V V G E T\* G S\* G K T\* T\* Q L T Q Y L H E D G Y\* T\* D Y\* G M# G C T Q P R

■

Protein Name: DDX38  
 gi Accession: 0  
 Precursor Mass: 1,687.2734+3  
 Delta Mass: 0.862 ppm  
 XCorr: 25.51

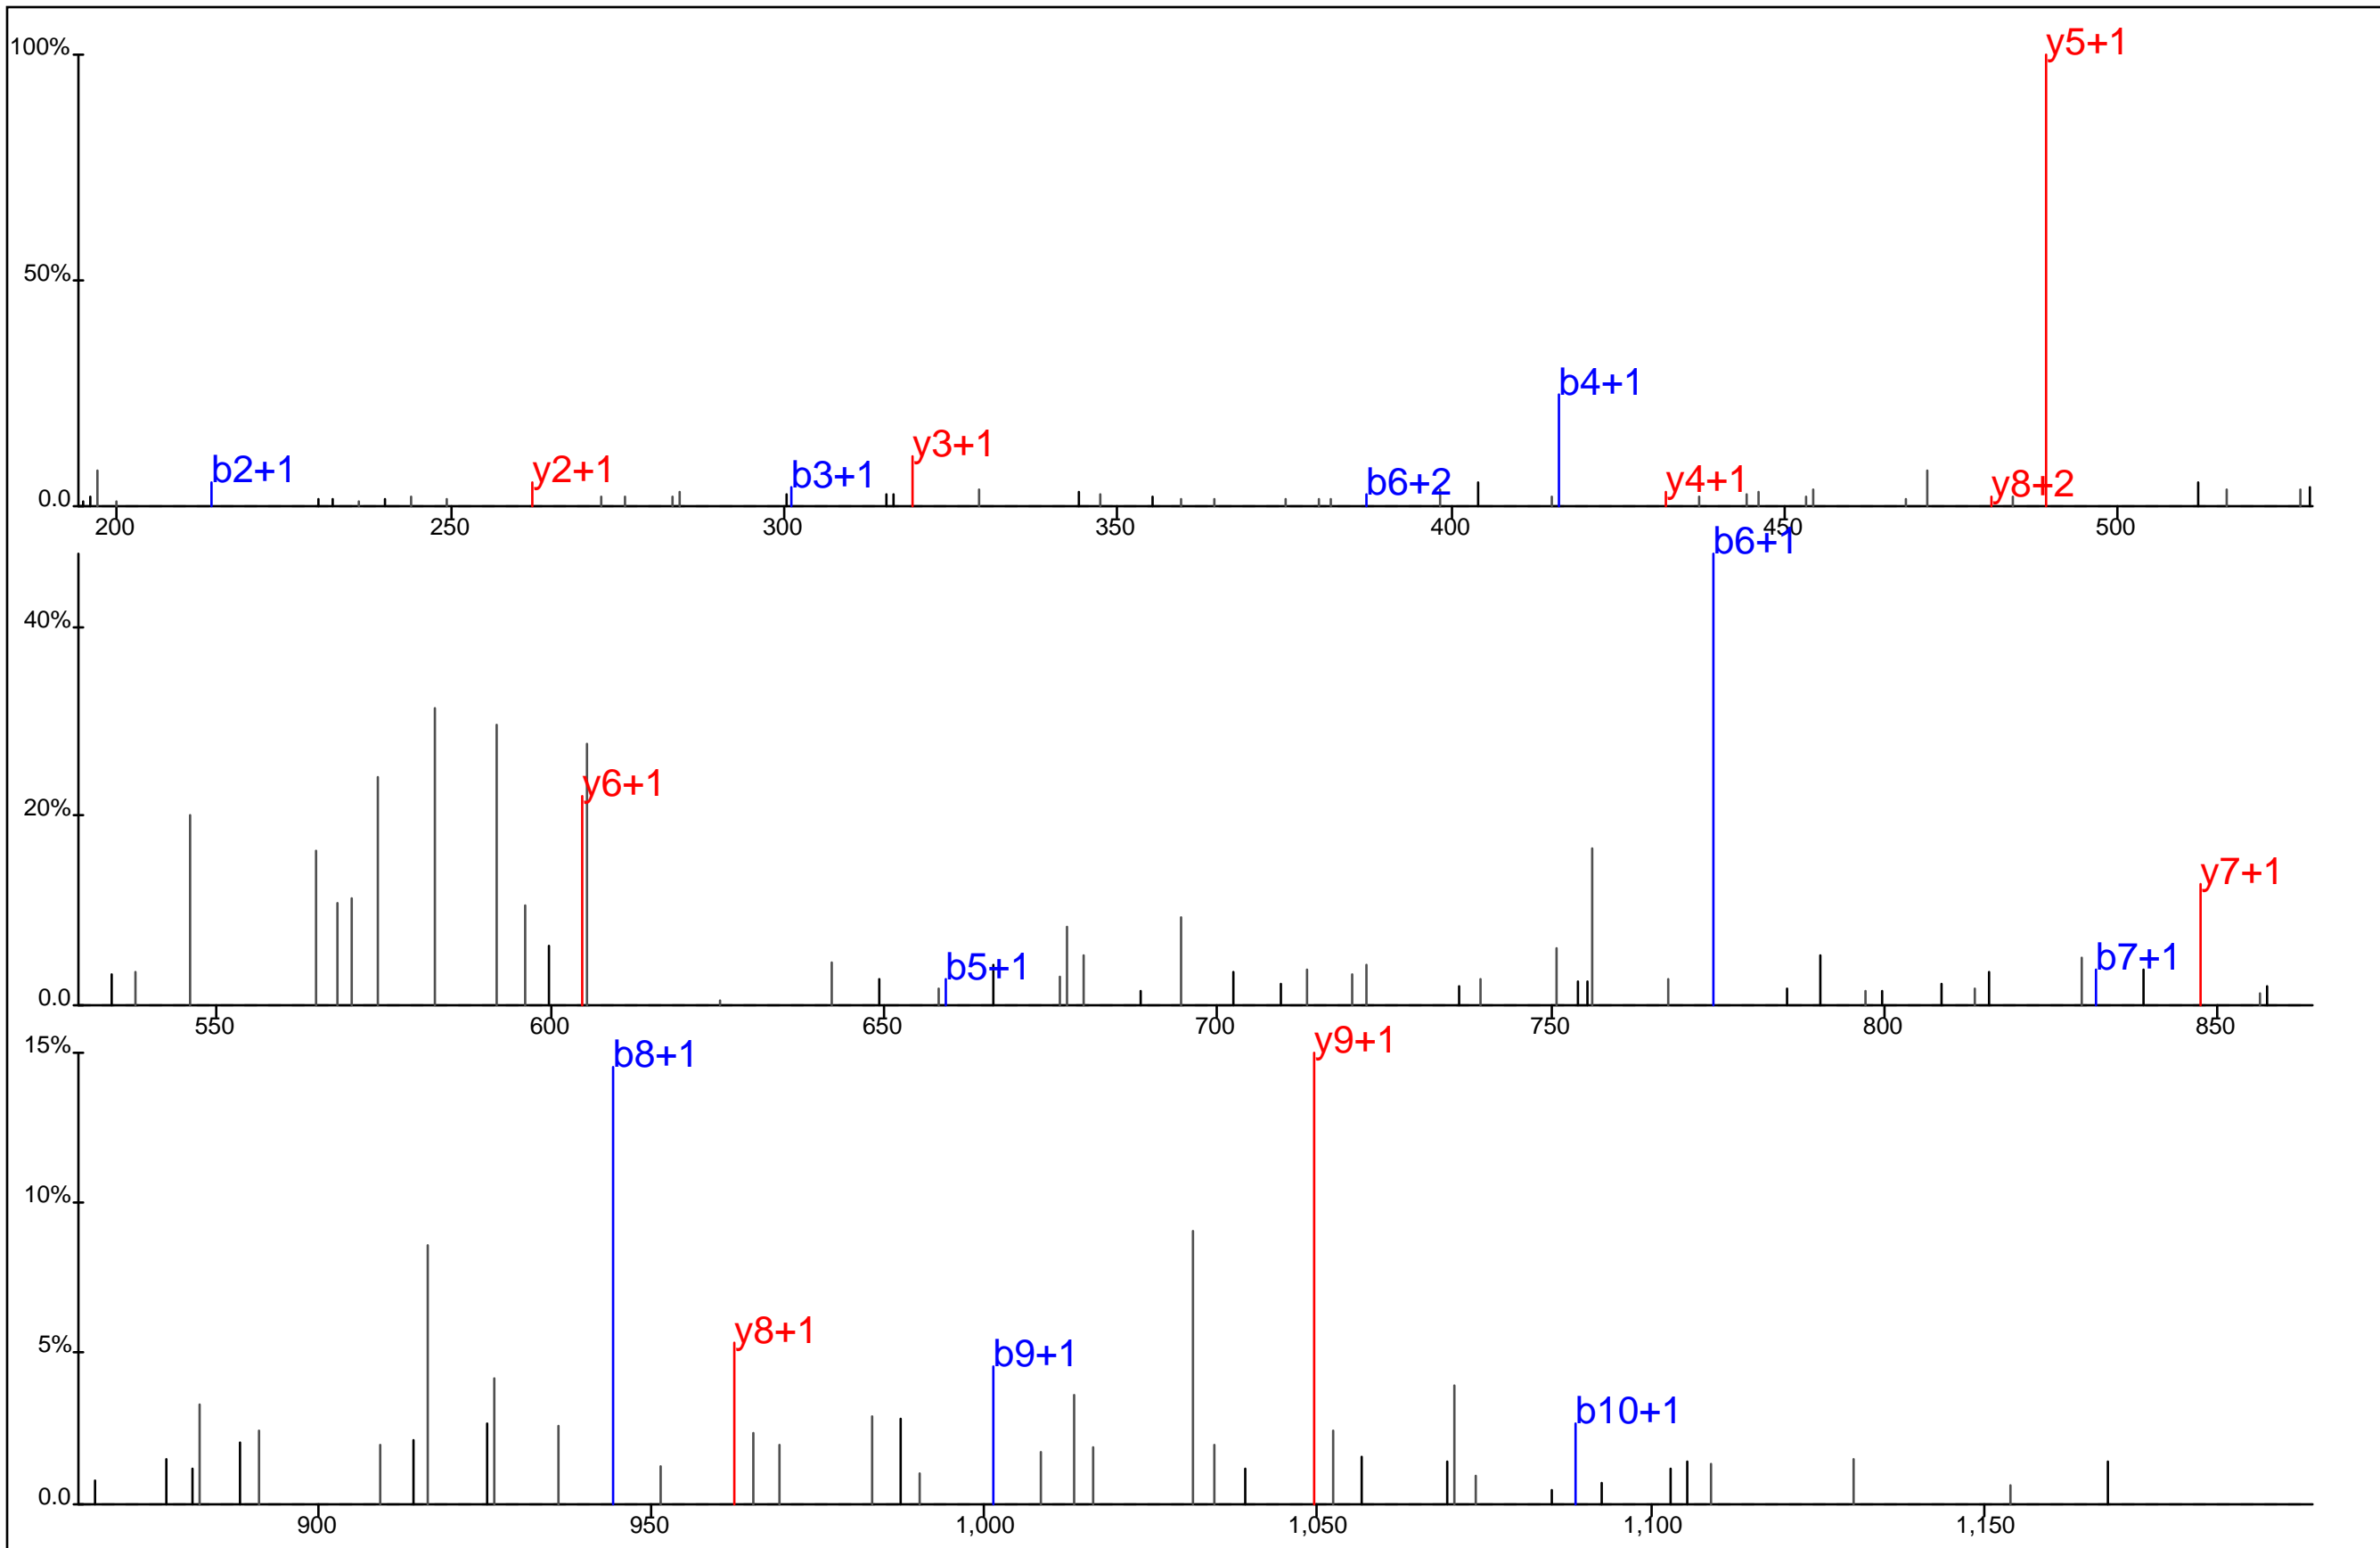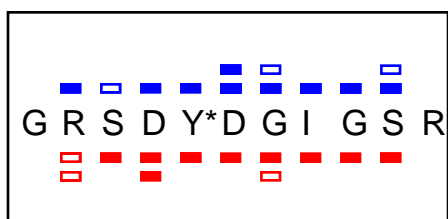

Protein Name: DDX3  
 gi Accession: 0  
 Precursor Mass: 631.7609+2  
 Delta Mass: 1.218 ppm  
 XCorr: 47.73

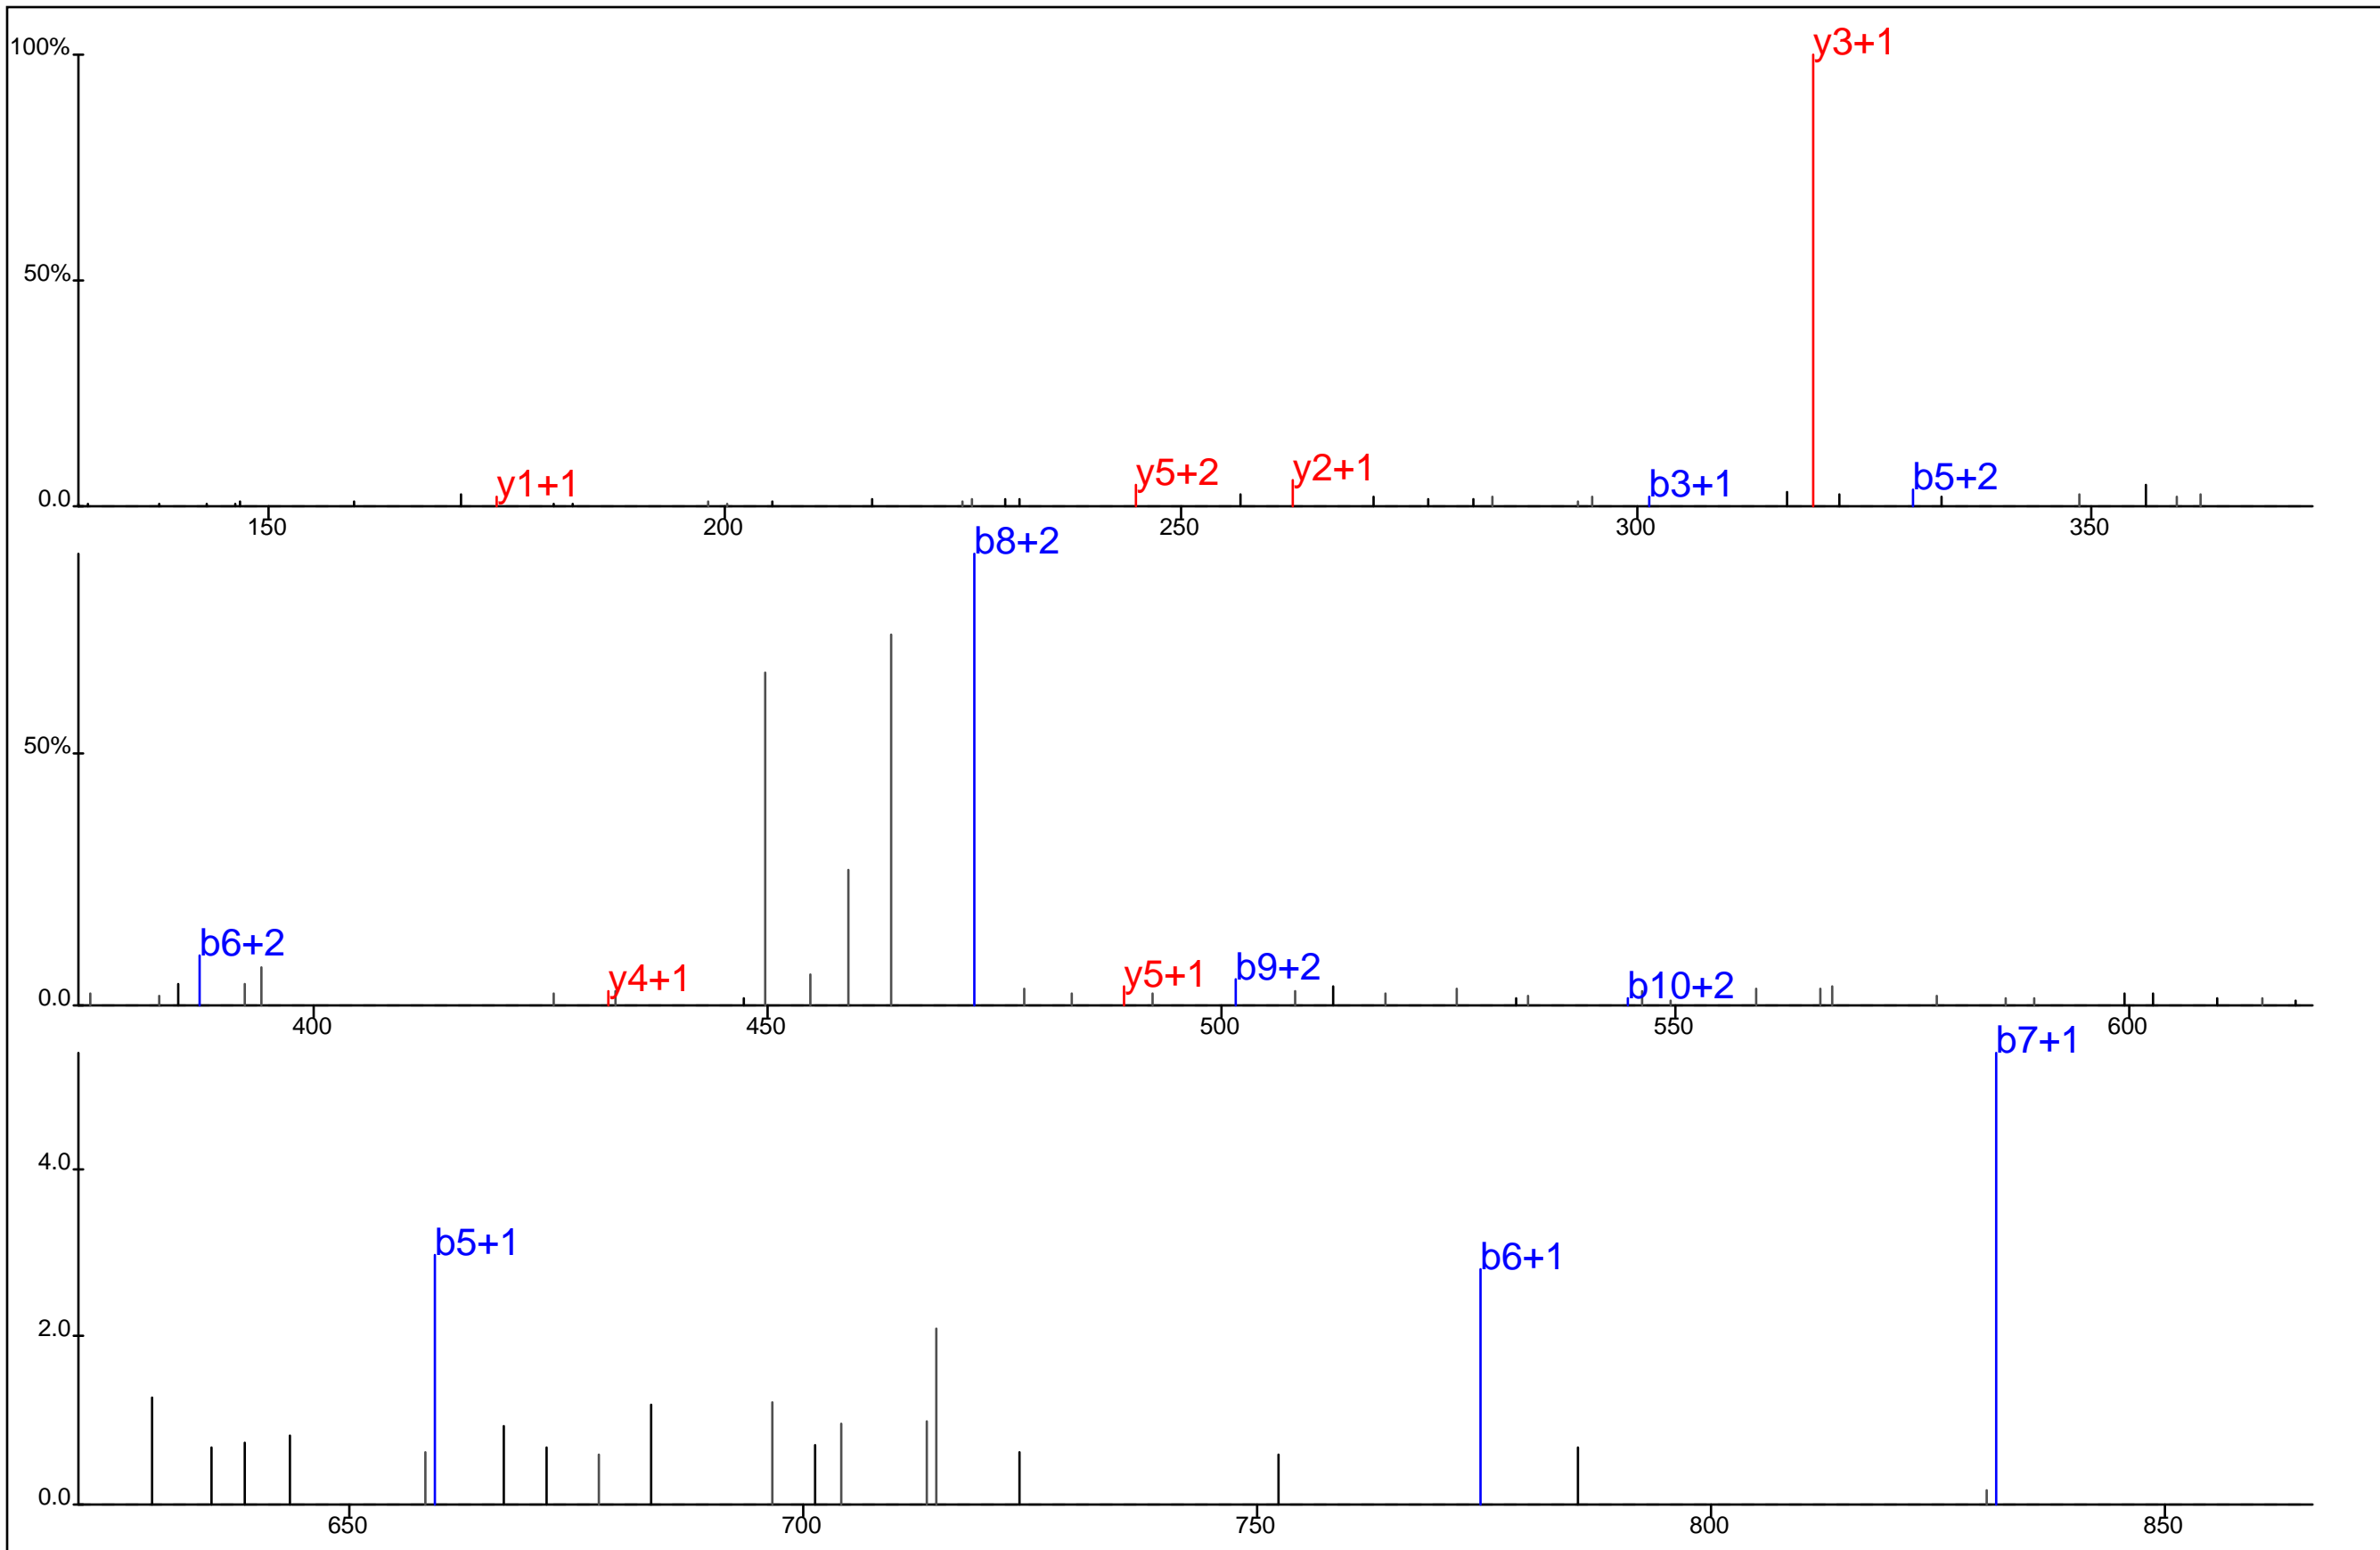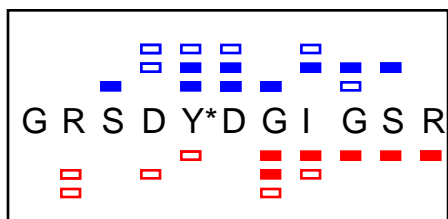

Protein Name: DDX3  
 gi Accession: 0  
 Precursor Mass: 421.5111+3  
 Delta Mass: 2.181 ppm  
 XCorr: 22.53

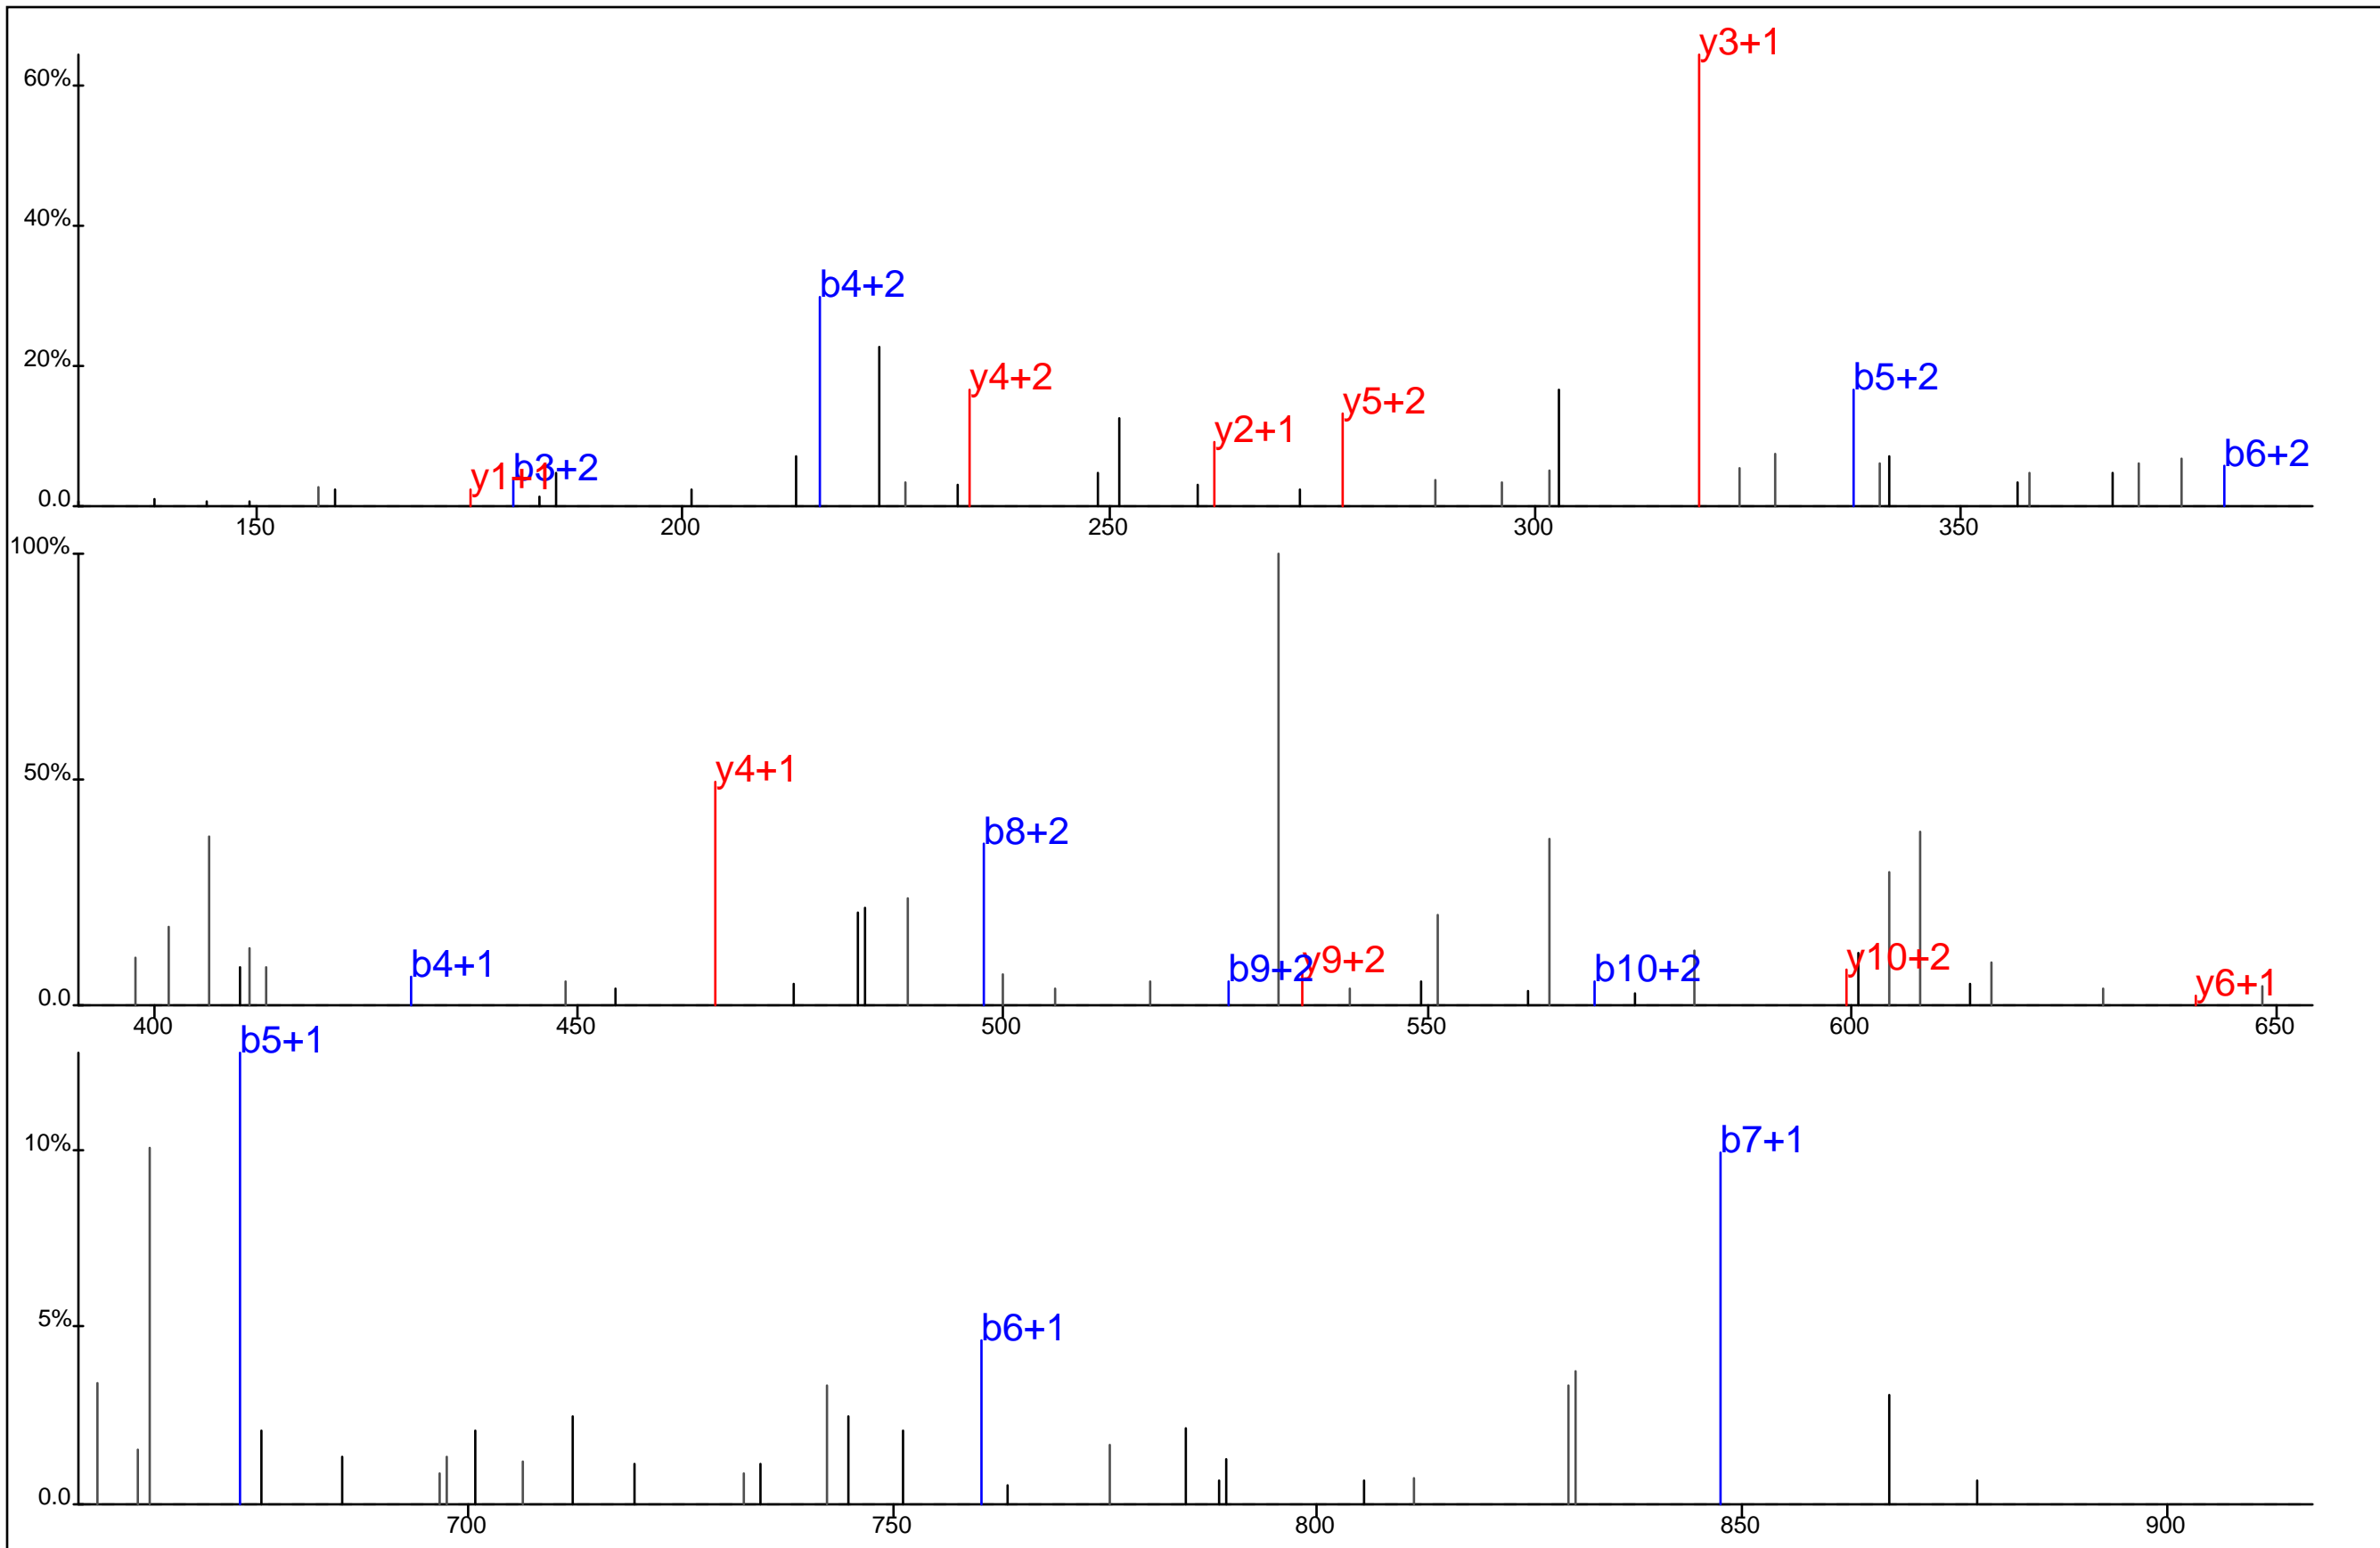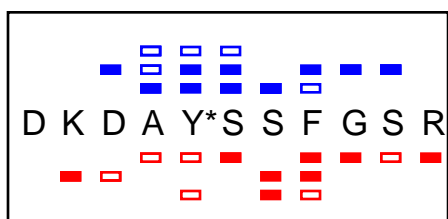

Protein Name: DDX3  
 gi Accession: 0  
 Precursor Mass: 438.1782+3  
 Delta Mass: 0.309 ppm  
 XCorr: 22.91



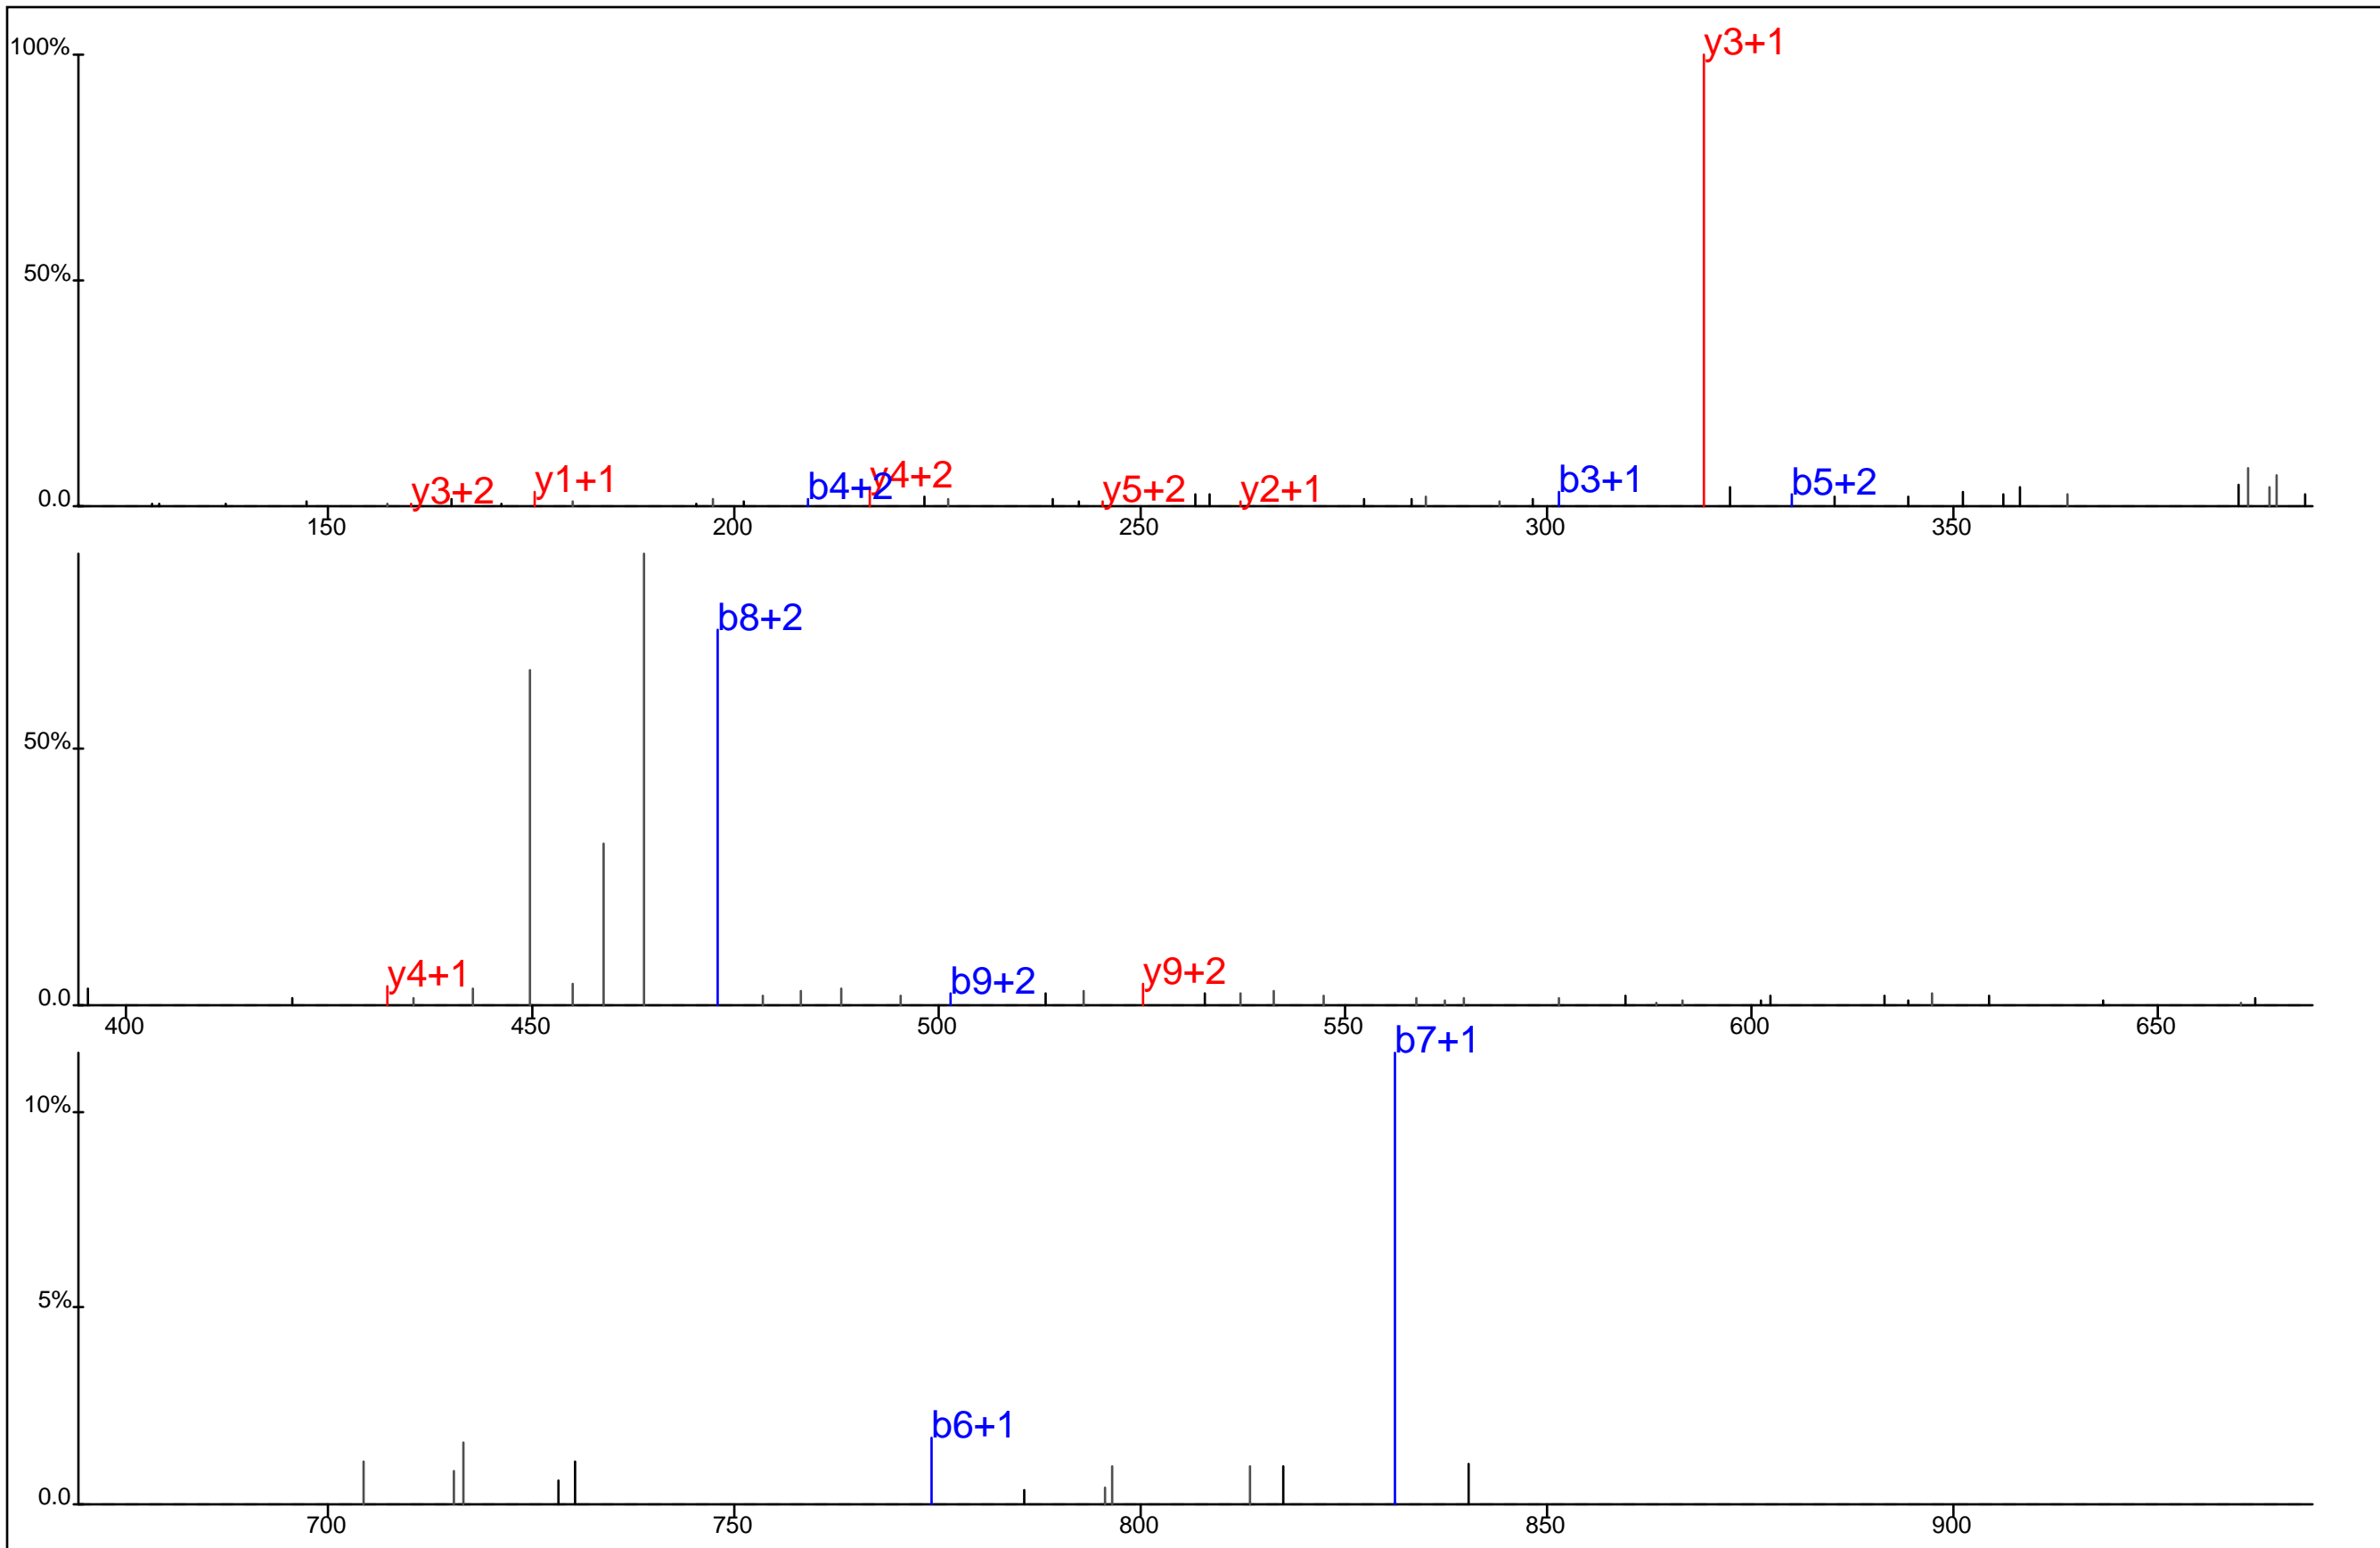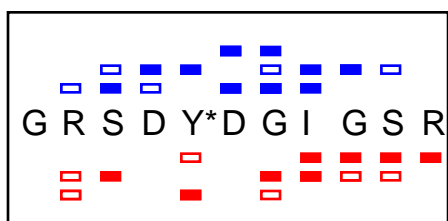

Protein Name: DDX3  
 gi Accession: 0  
 Precursor Mass: 421.5101+3  
 Delta Mass: 0.286 ppm  
 XCorr: 27.98

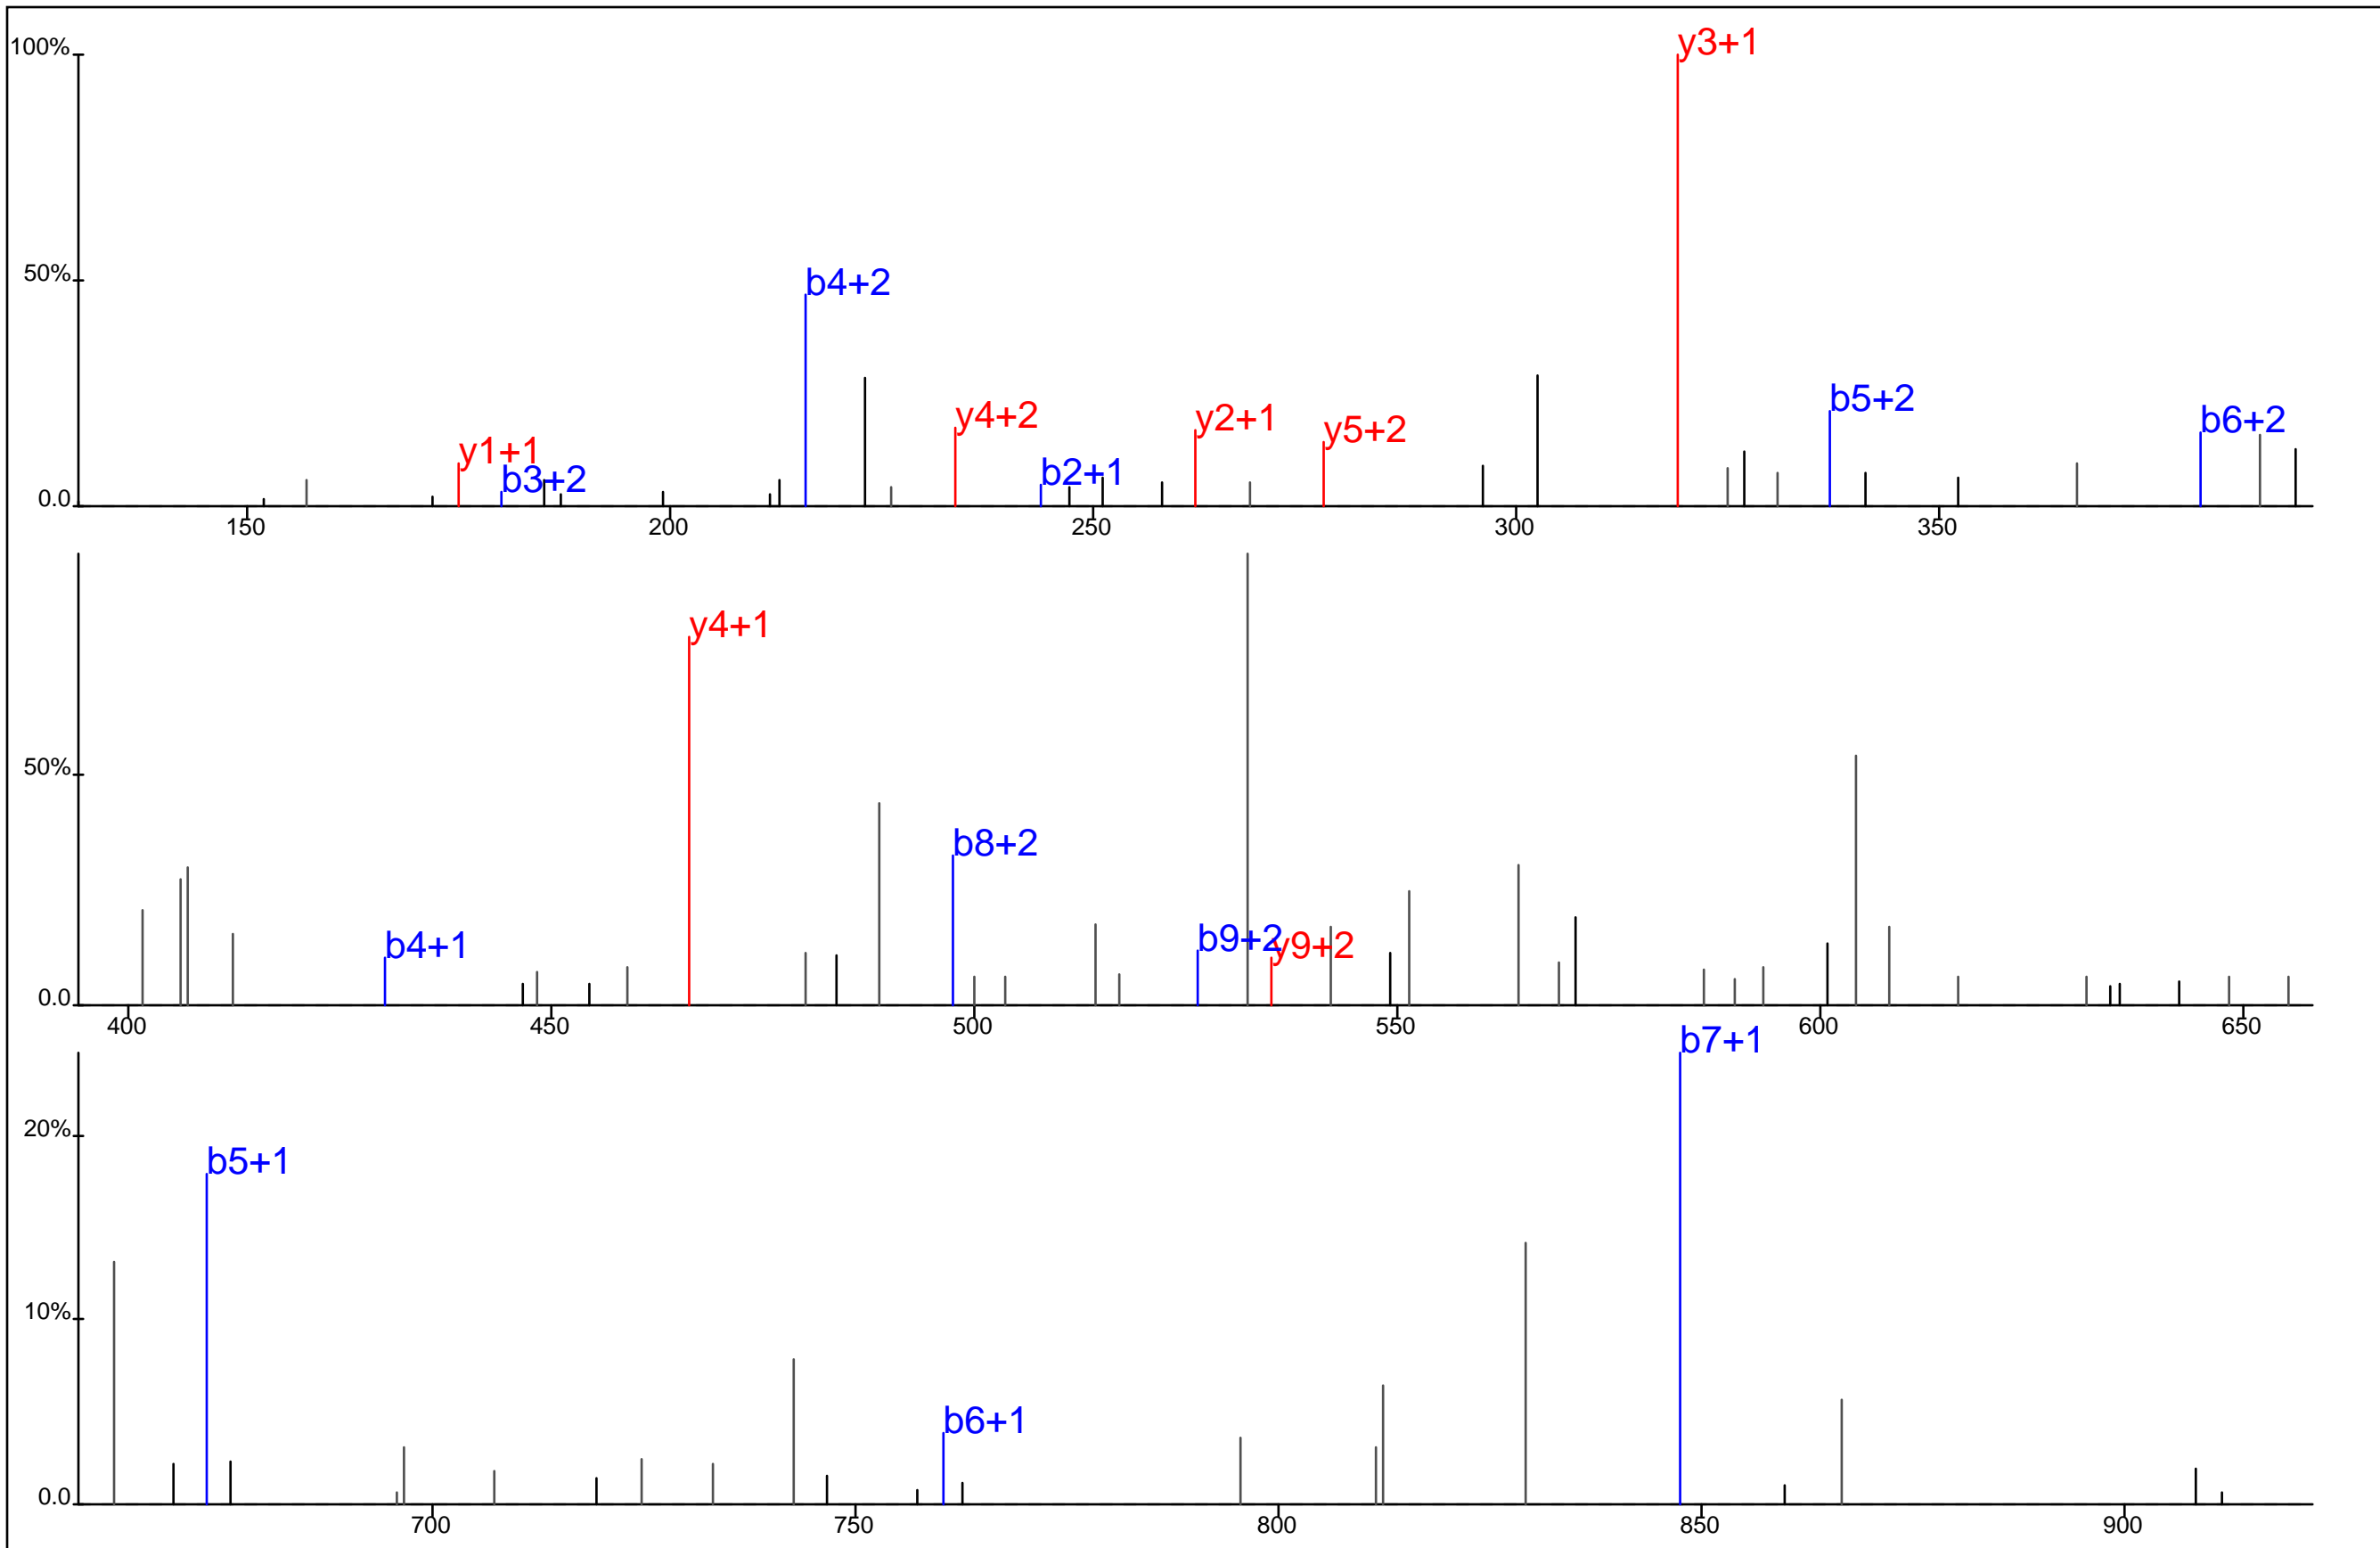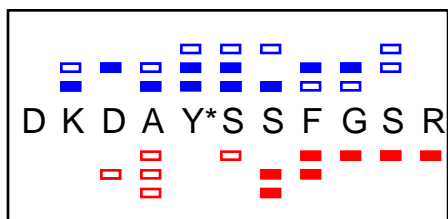

Protein Name: DDX3  
 gi Accession: 0  
 Precursor Mass: 438.1789+3  
 Delta Mass: 1.296 ppm  
 XCorr: 23.18

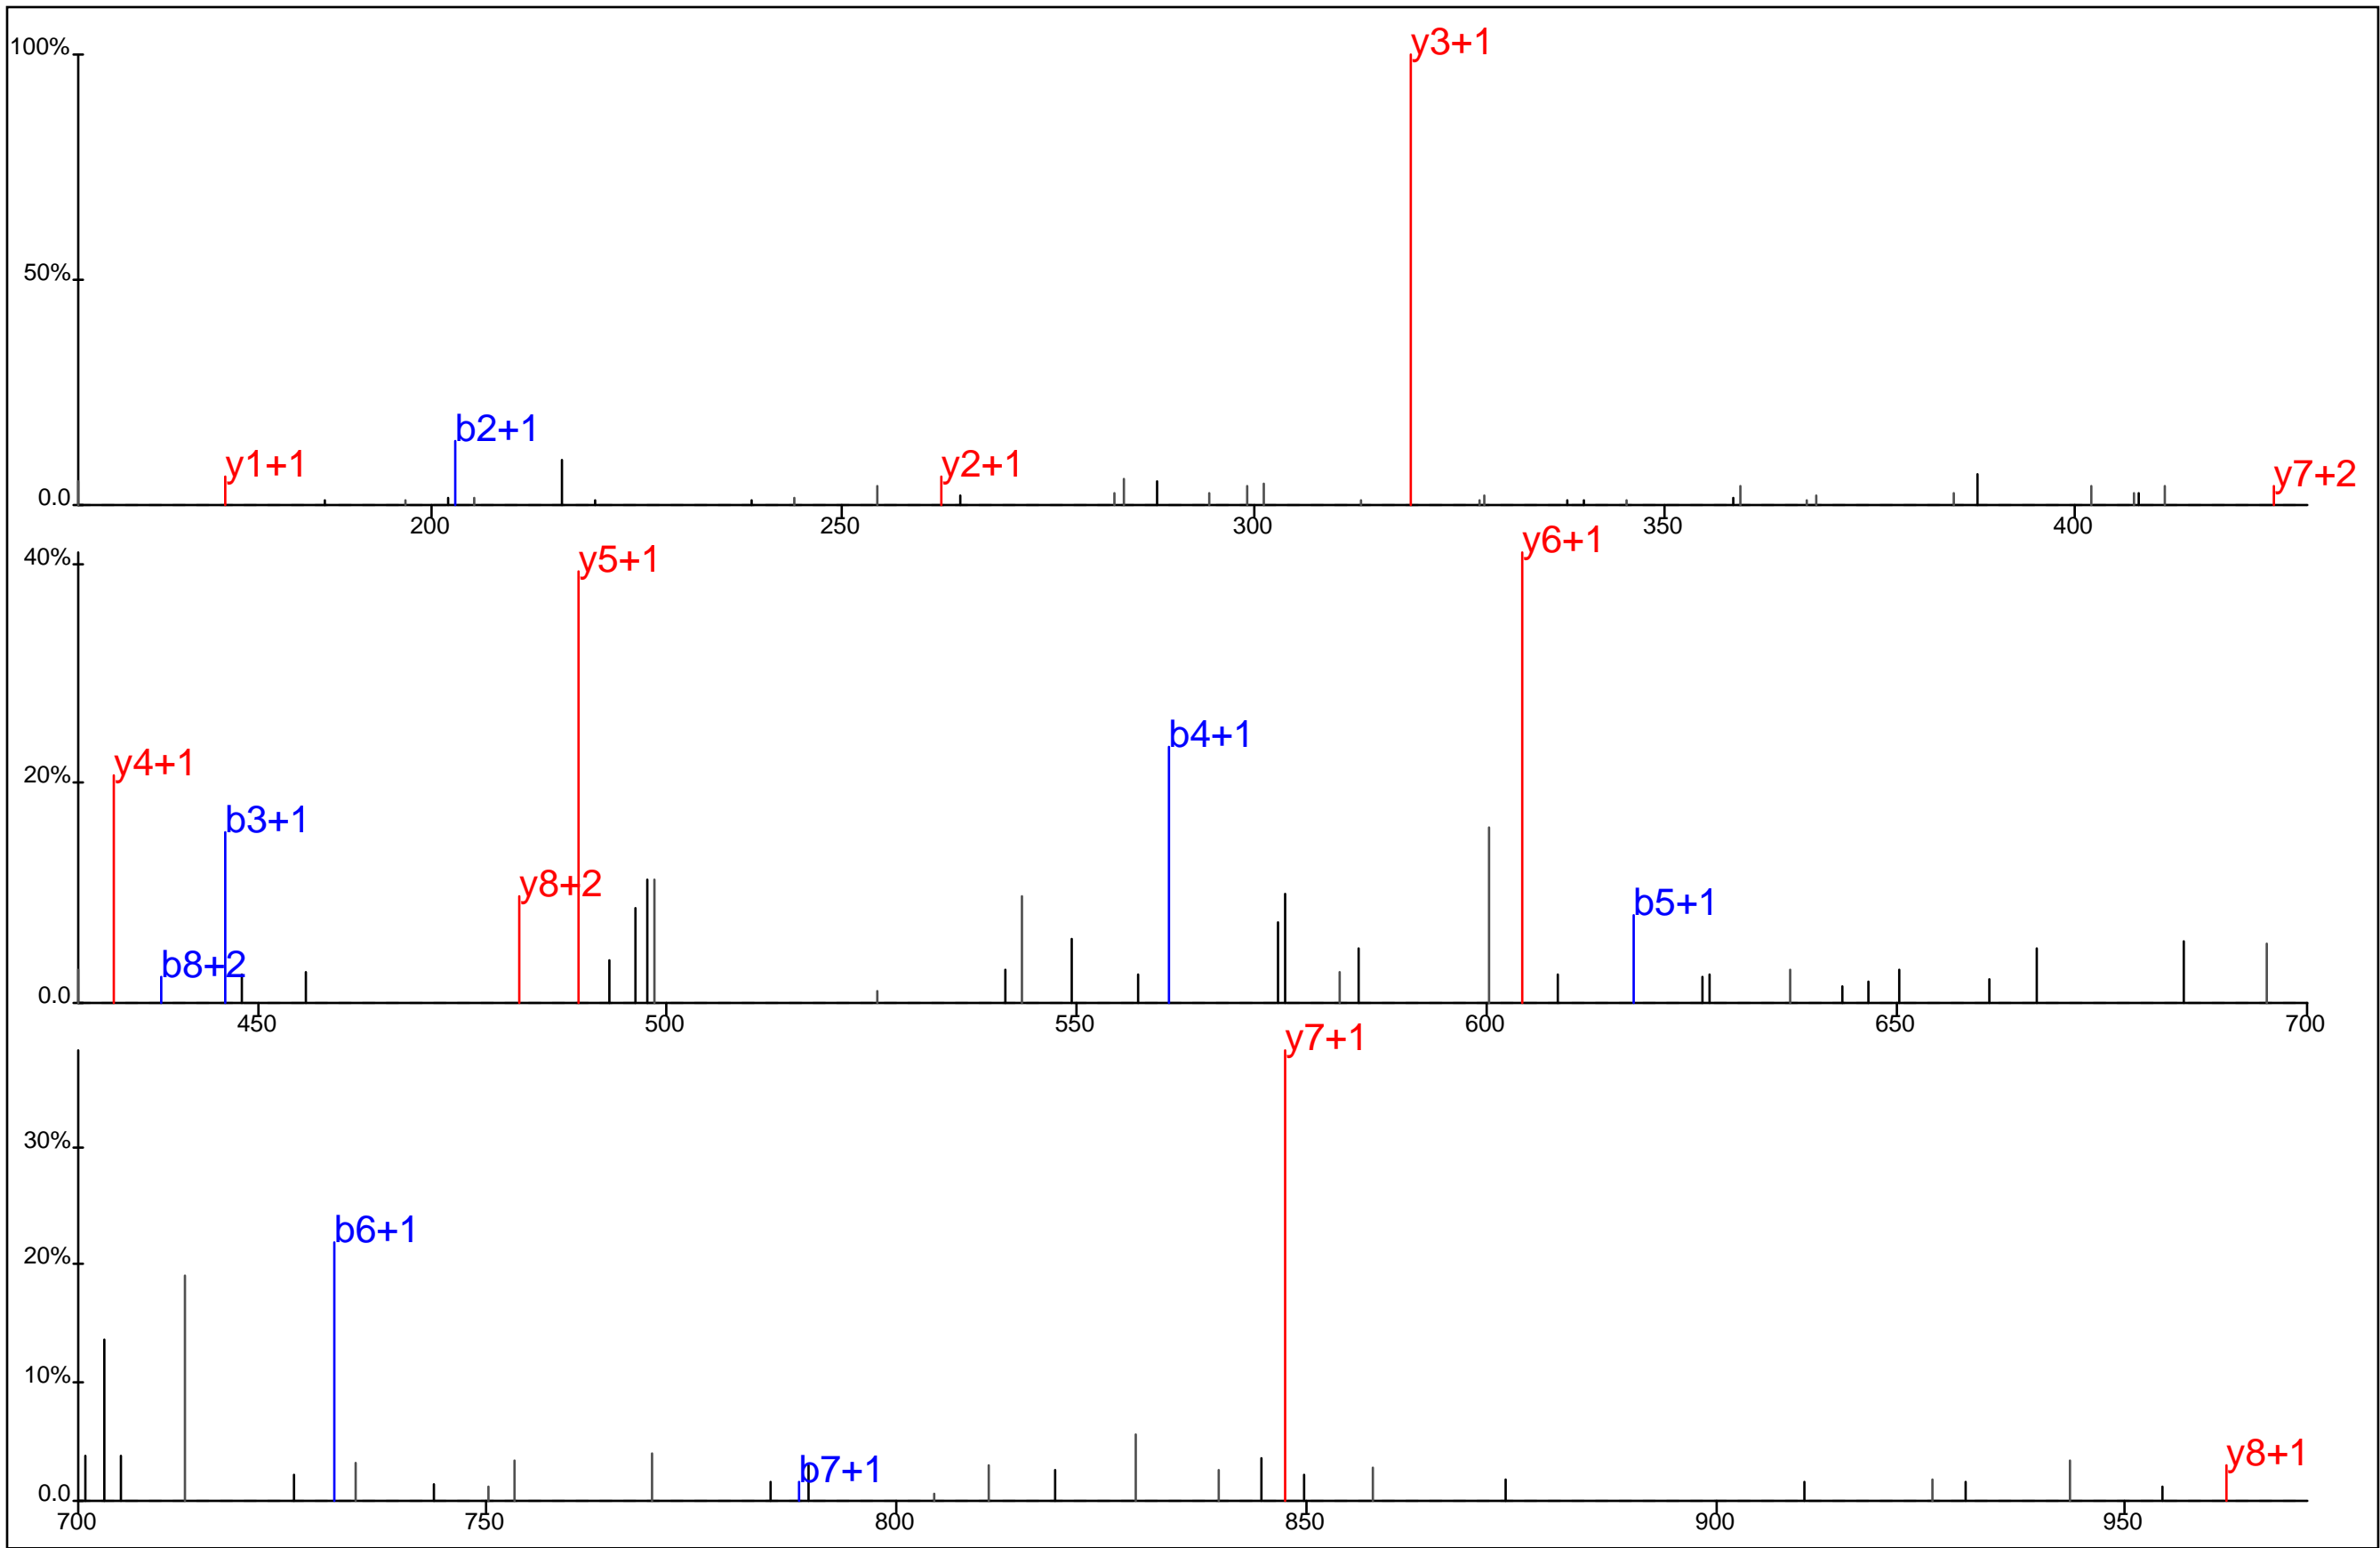

|                           |                                                                                                                             |
|---------------------------|-----------------------------------------------------------------------------------------------------------------------------|
| <p>S D Y* D G I G S R</p> | <p>Protein Name: DDX3<br/> gi Accession: 0<br/> Precursor Mass: 525.2008+2<br/> Delta Mass: 0.757 ppm<br/> XCorr: 62.82</p> |
|---------------------------|-----------------------------------------------------------------------------------------------------------------------------|



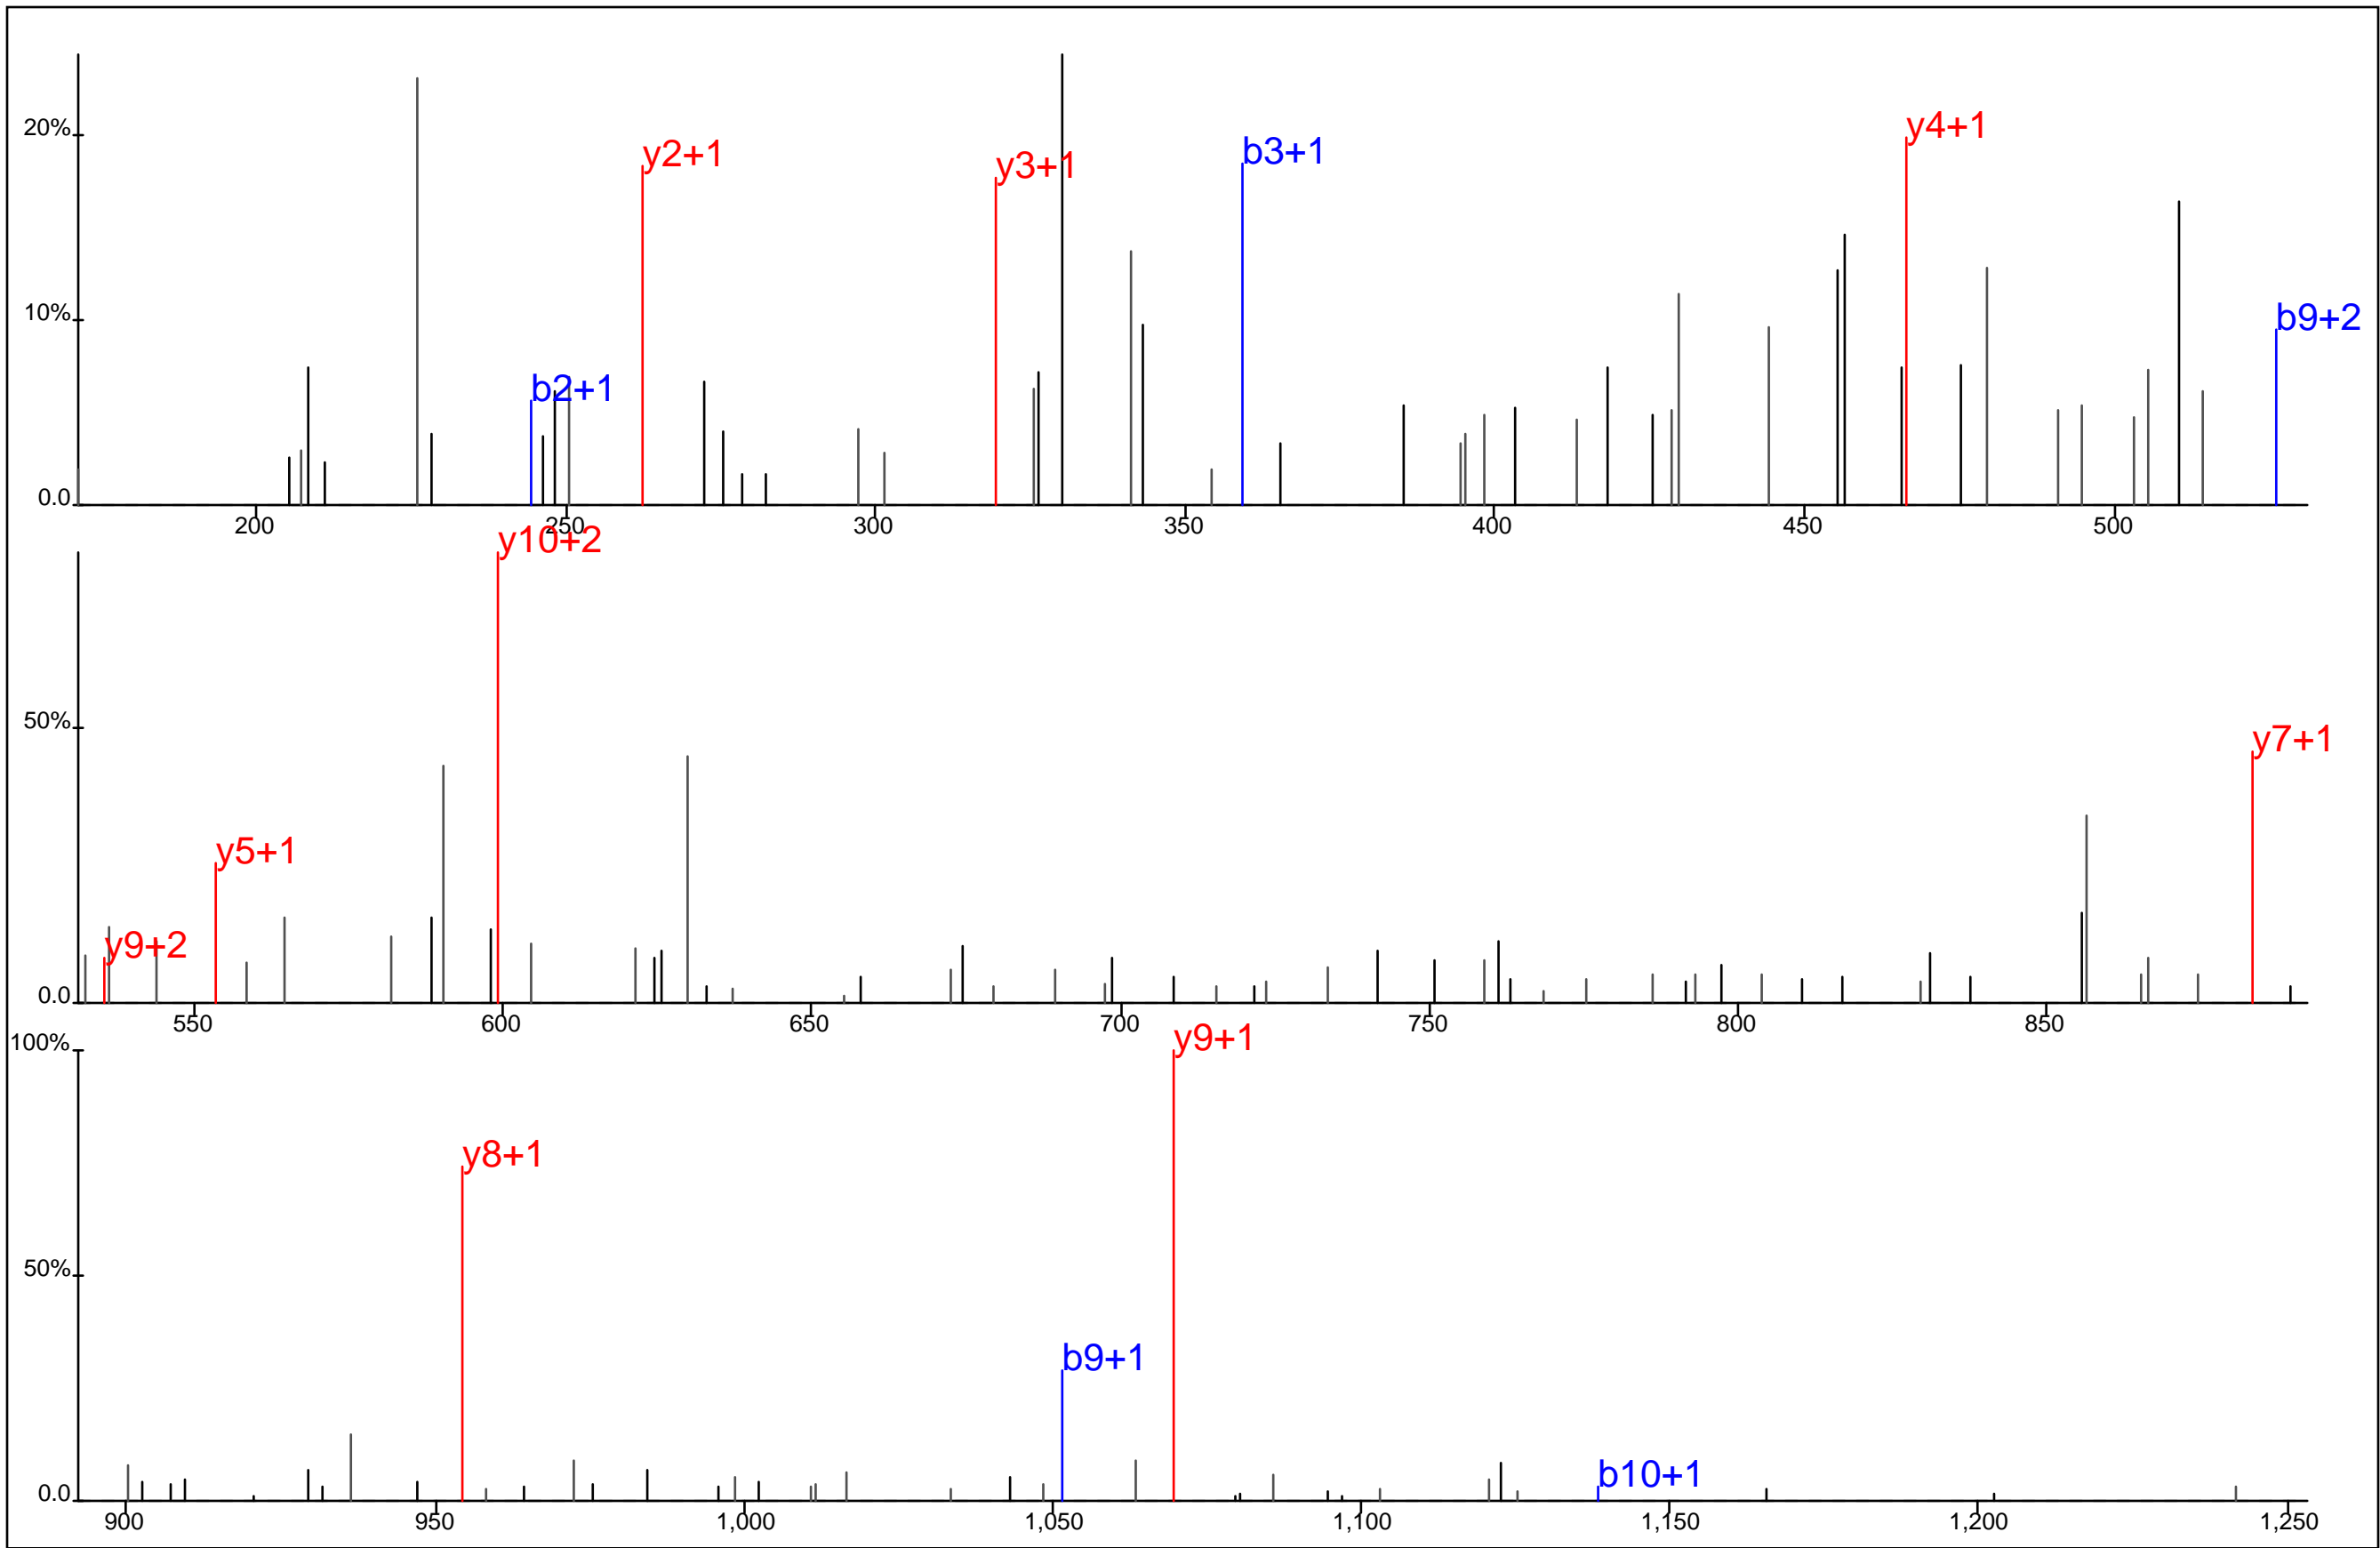

|                               |                                                                                                                                                             |
|-------------------------------|-------------------------------------------------------------------------------------------------------------------------------------------------------------|
| <p>D K D A Y* S S F G S R</p> | <p>Protein Name: DDX3<br/>         gi Accession: 0<br/>         Precursor Mass: 656.7635+2<br/>         Delta Mass: 0.625 ppm<br/>         XCorr: 35.54</p> |
|-------------------------------|-------------------------------------------------------------------------------------------------------------------------------------------------------------|

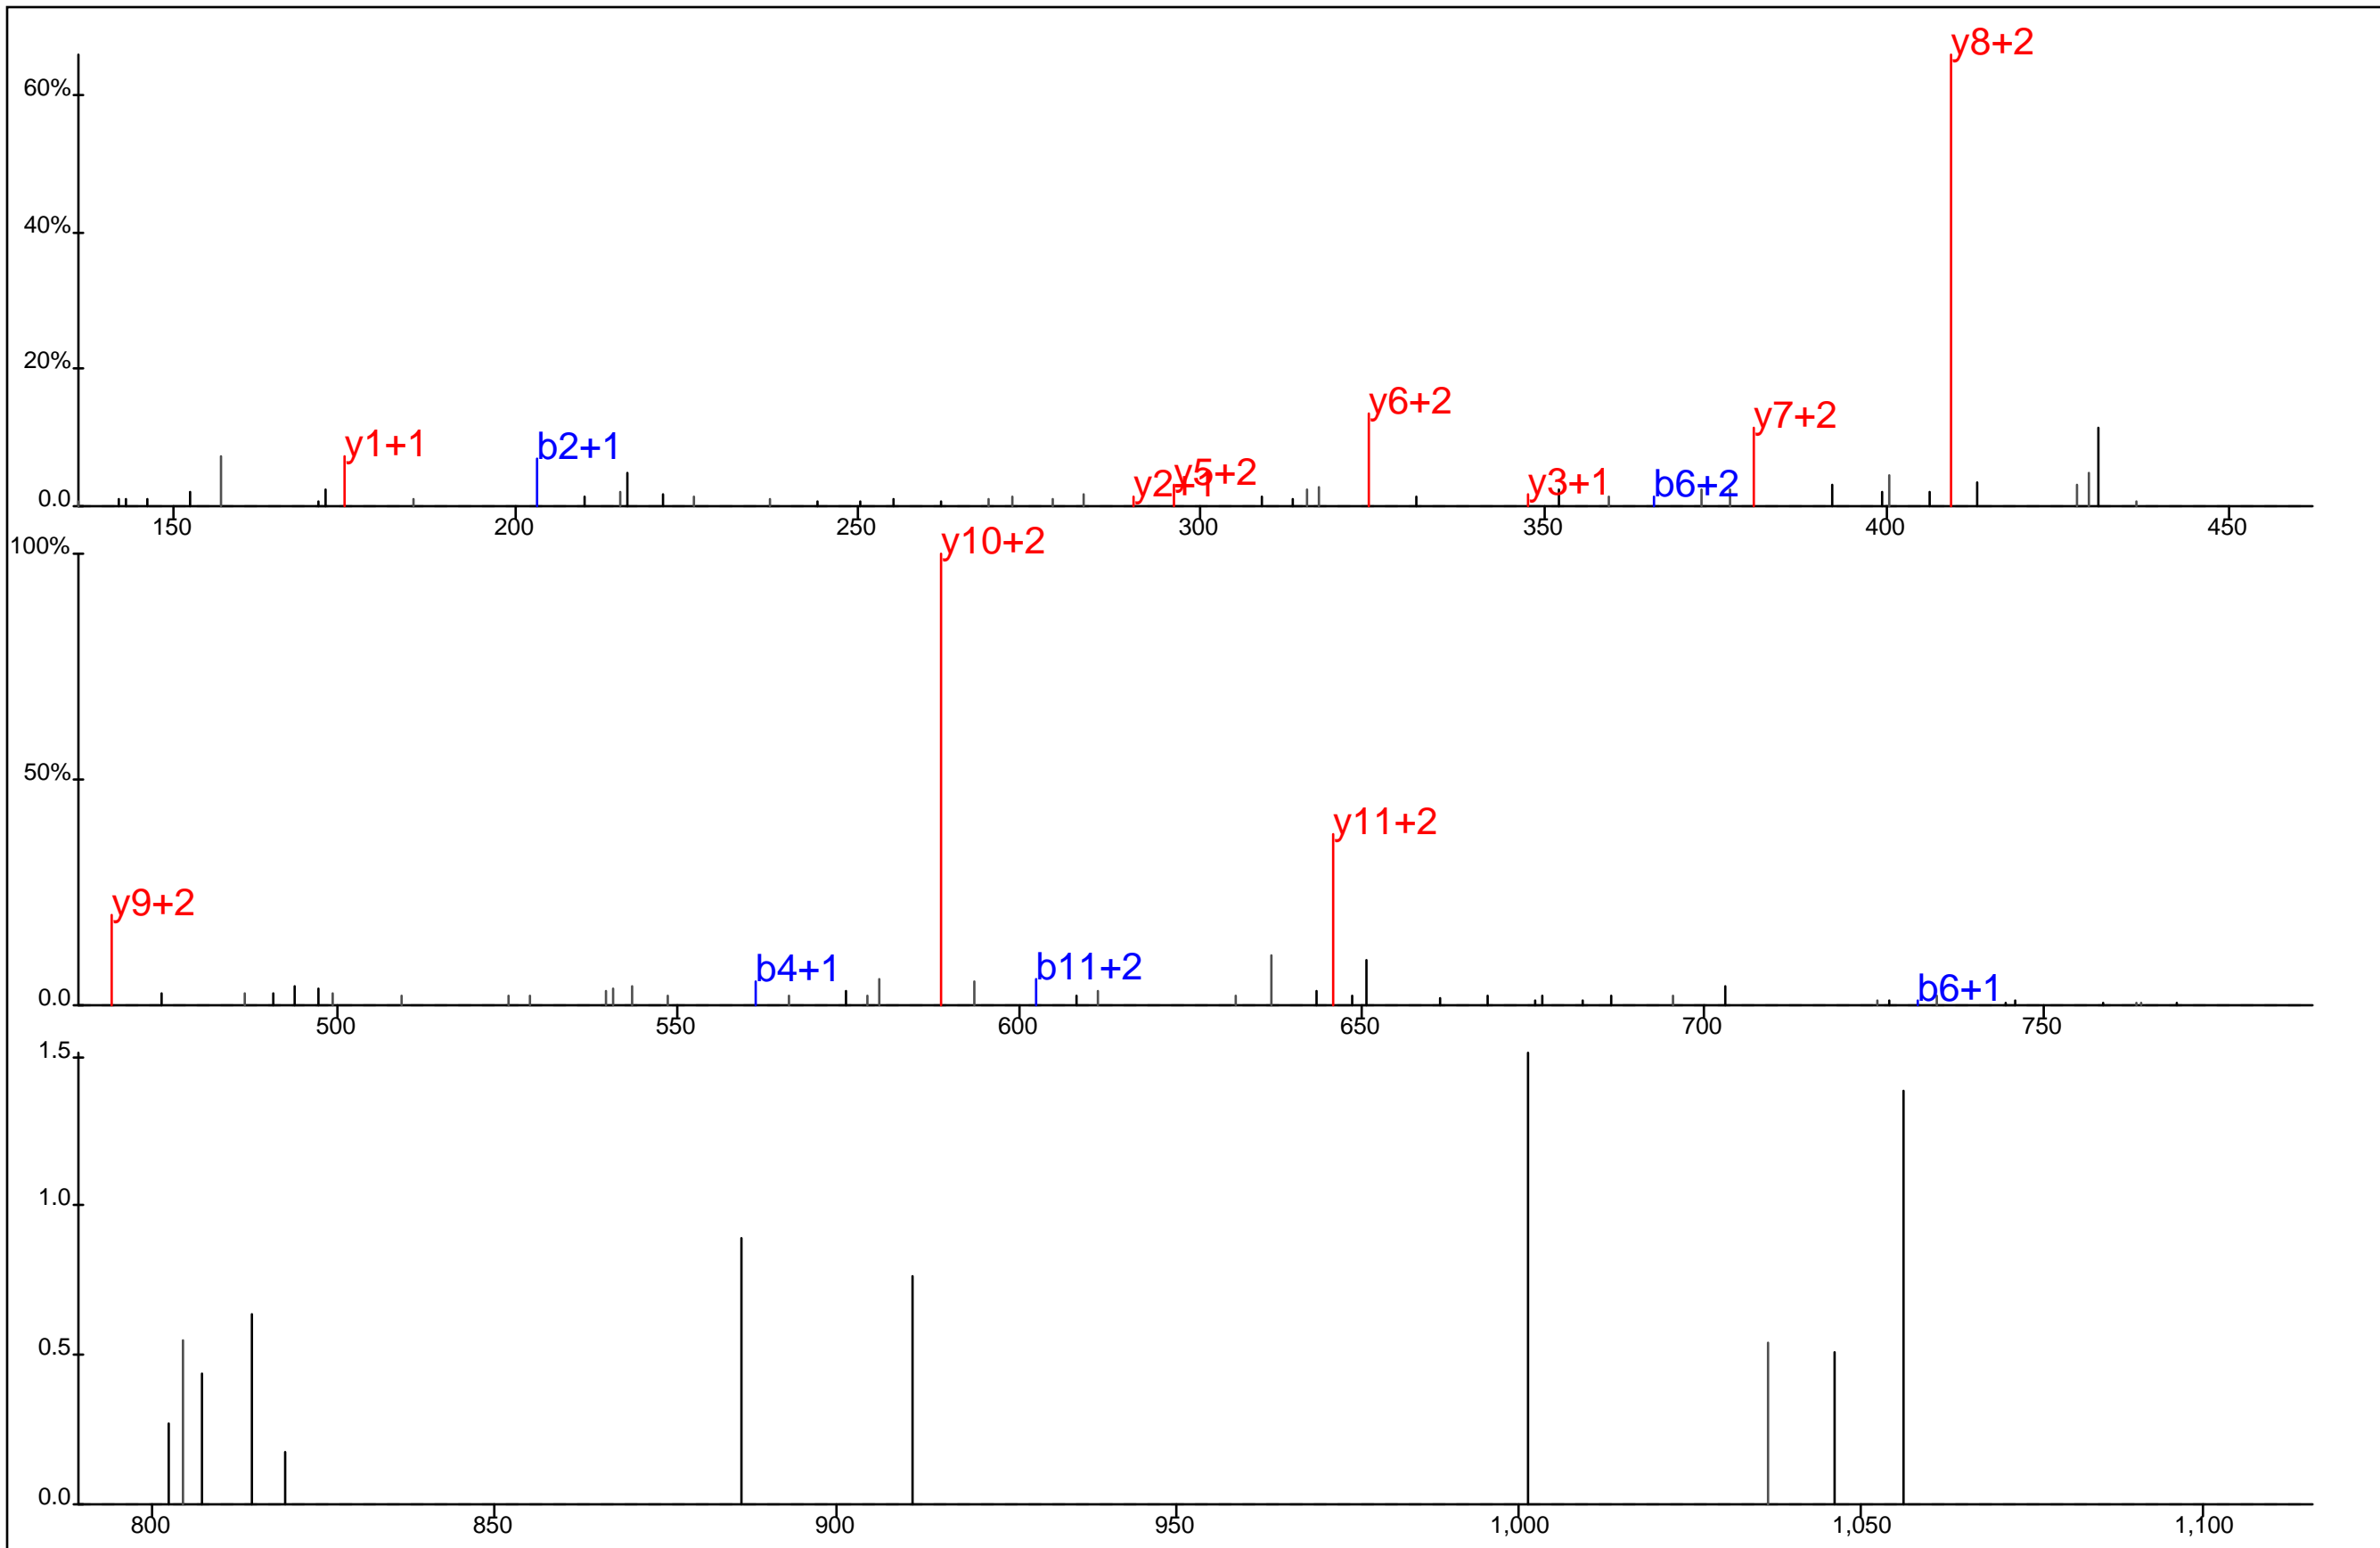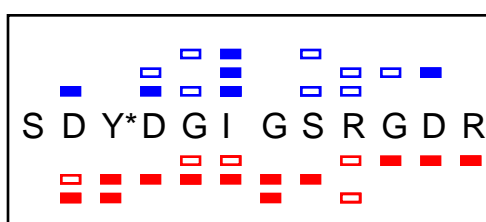

Protein Name: DDX3  
 gi Accession: 0  
 Precursor Mass: 459.8528+3  
 Delta Mass: 0.601 ppm  
 XCorr: 36.79



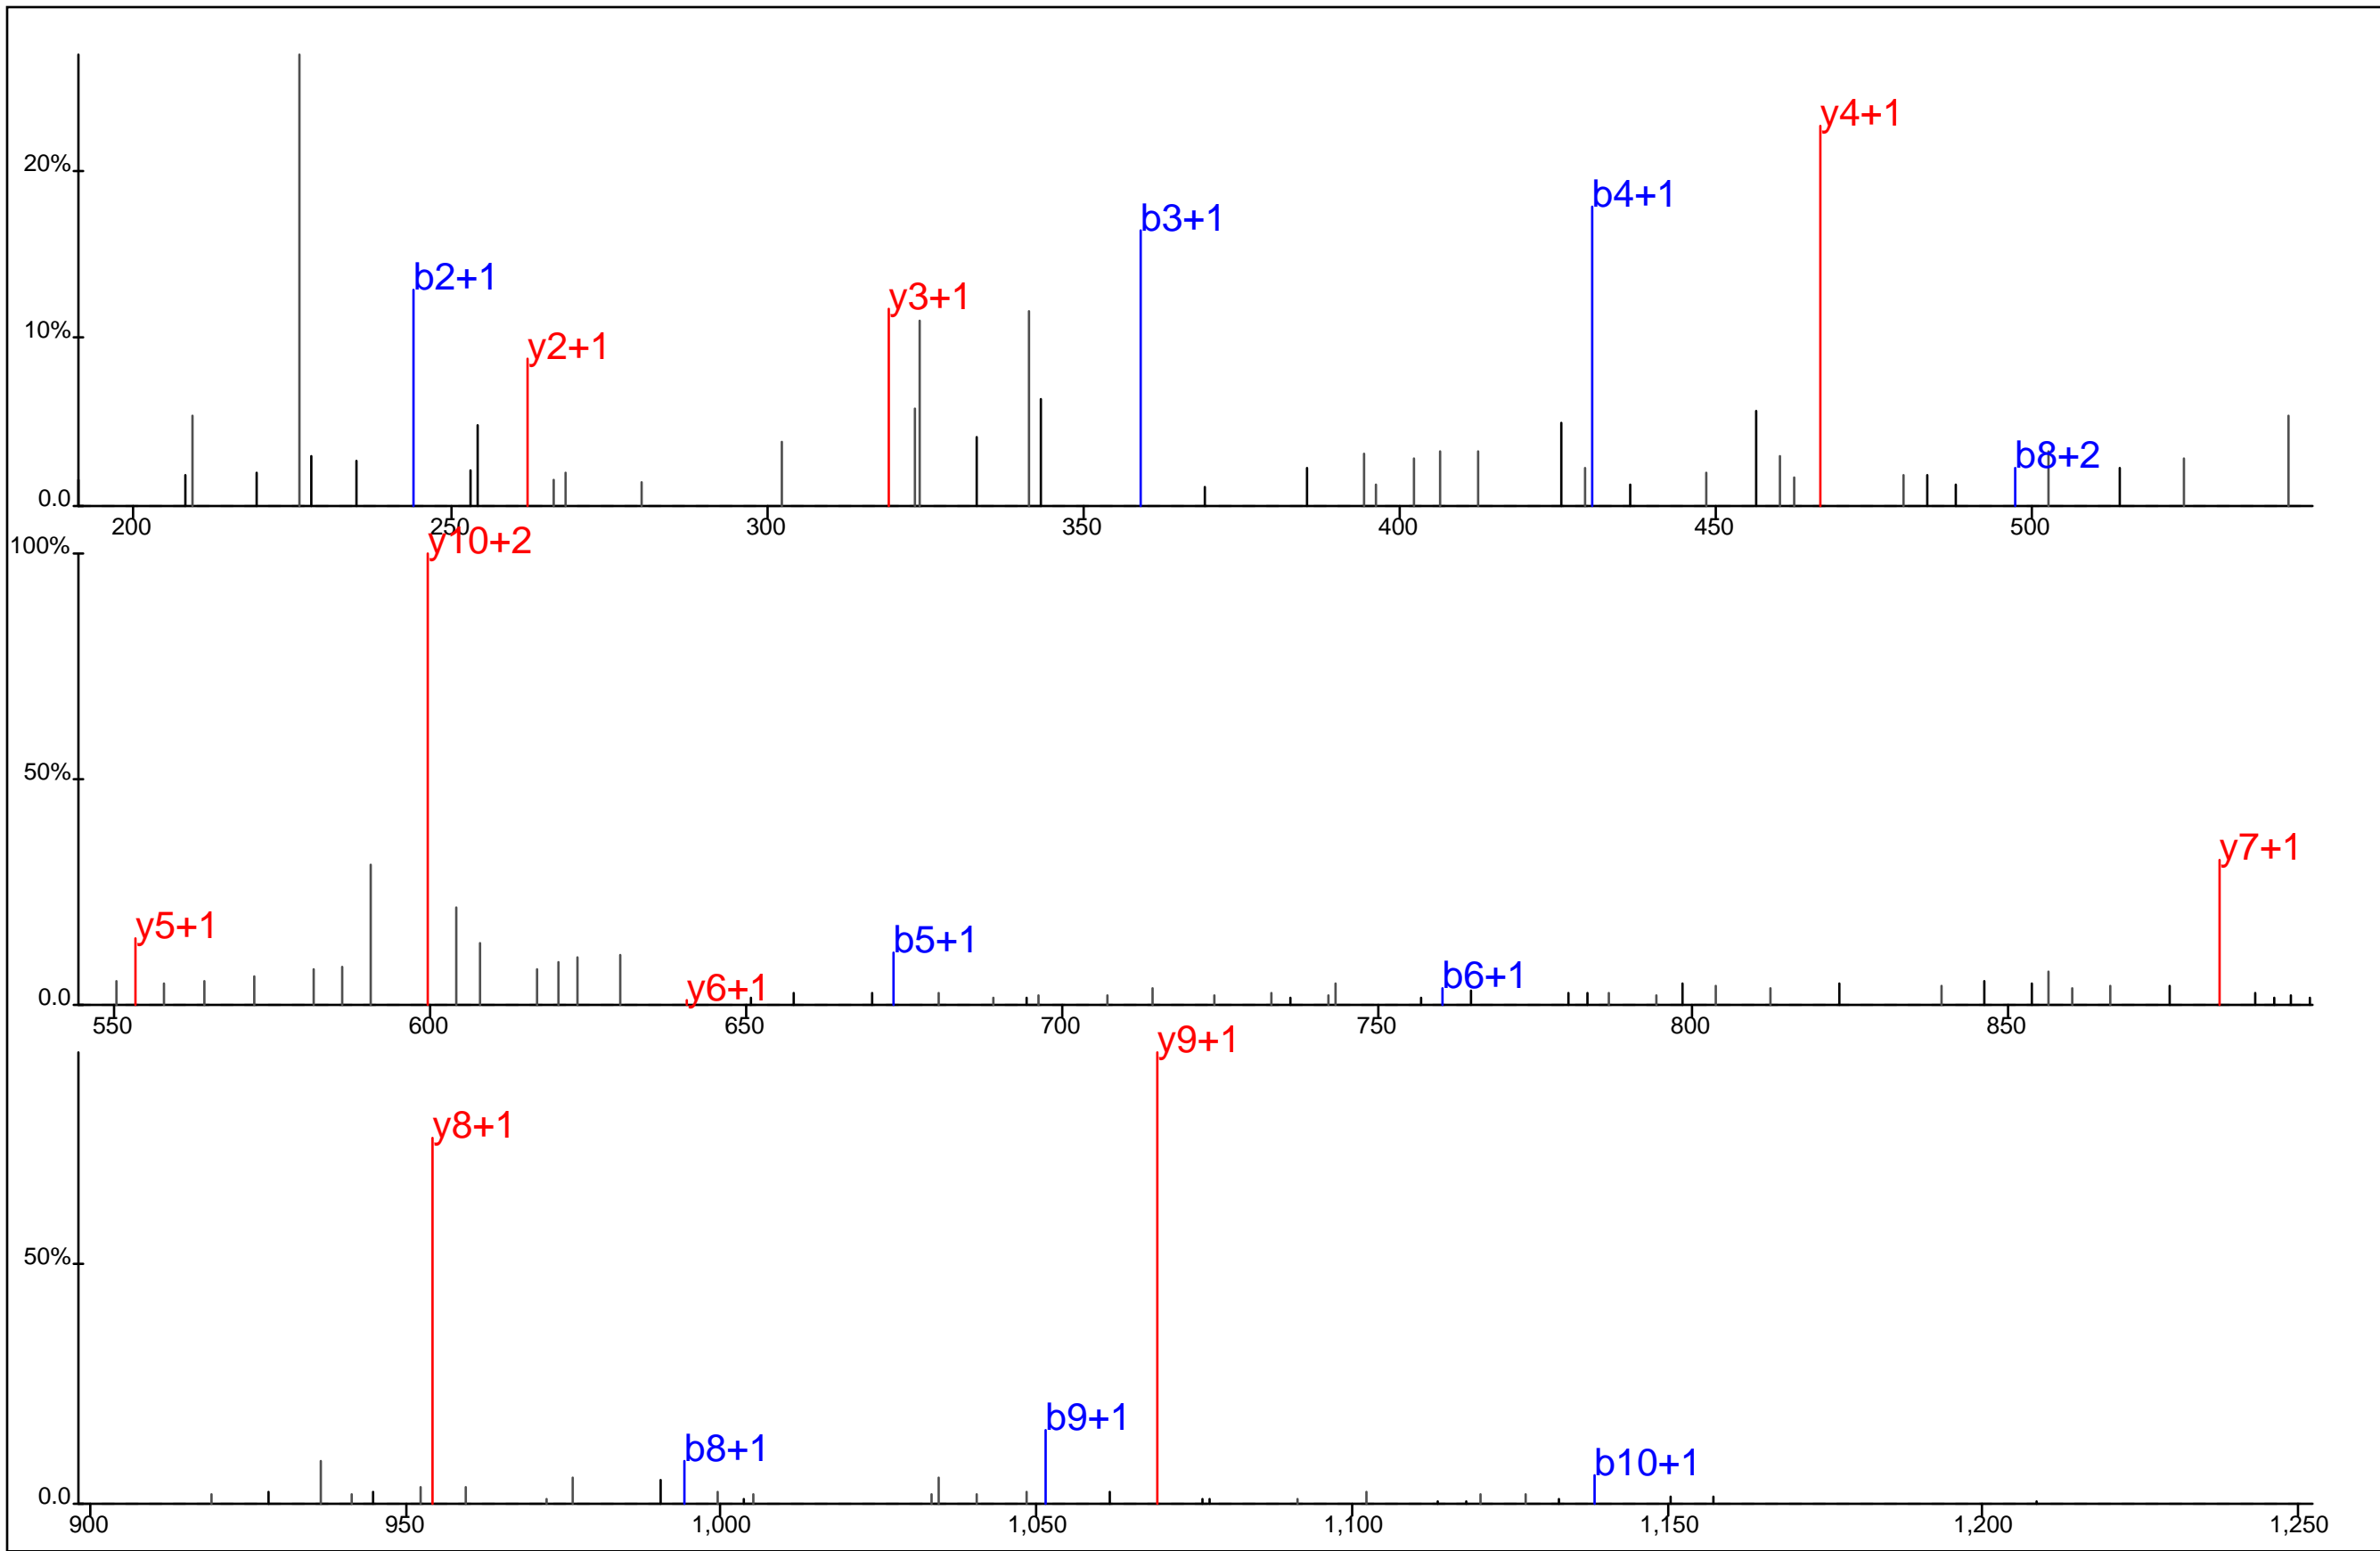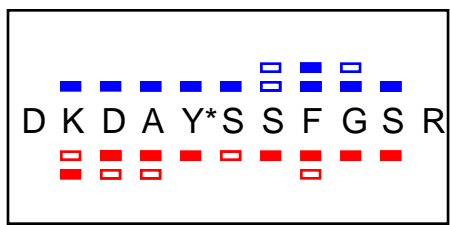

Protein Name: DDX3  
 gi Accession: 0  
 Precursor Mass: 656.7640+2  
 Delta Mass: 0.212 ppm  
 XCorr: 53.02

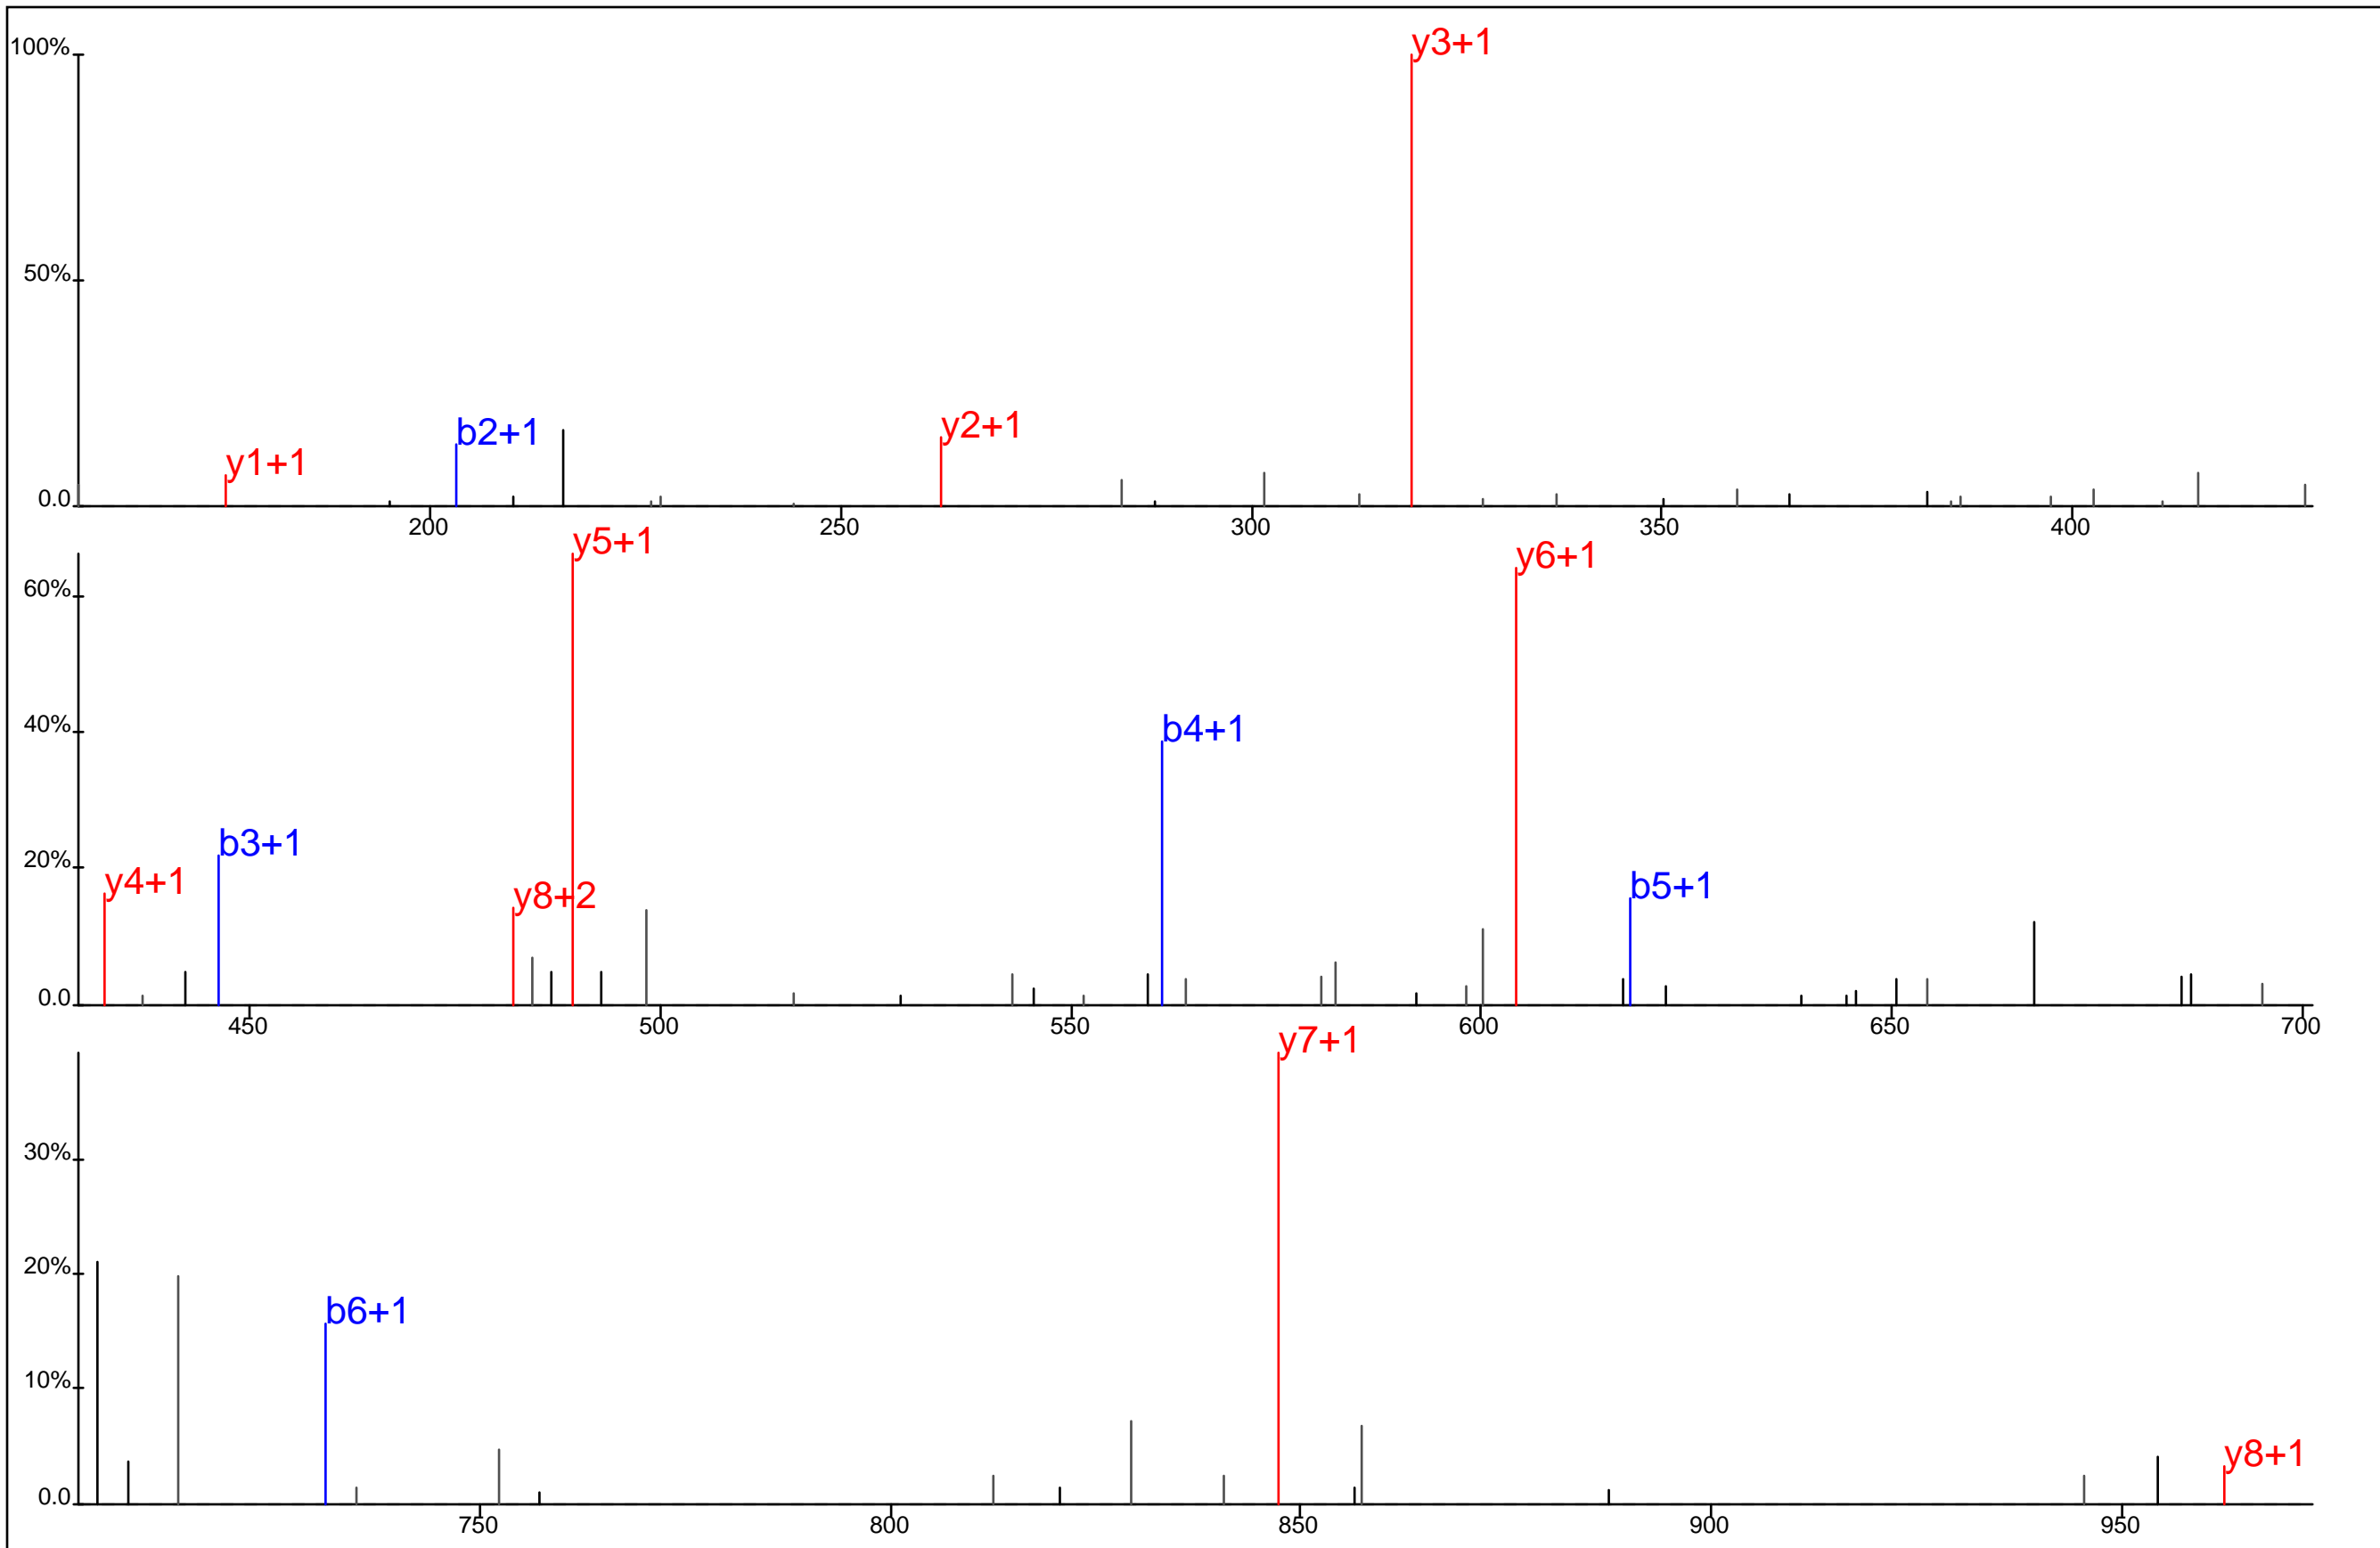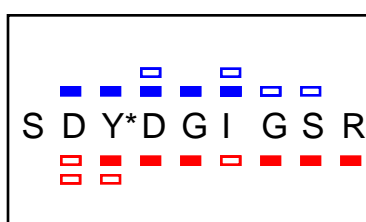

Protein Name: DDX3  
 gi Accession: 0  
 Precursor Mass: 525.2003+2  
 Delta Mass: 0.292 ppm  
 XCorr: 70.3

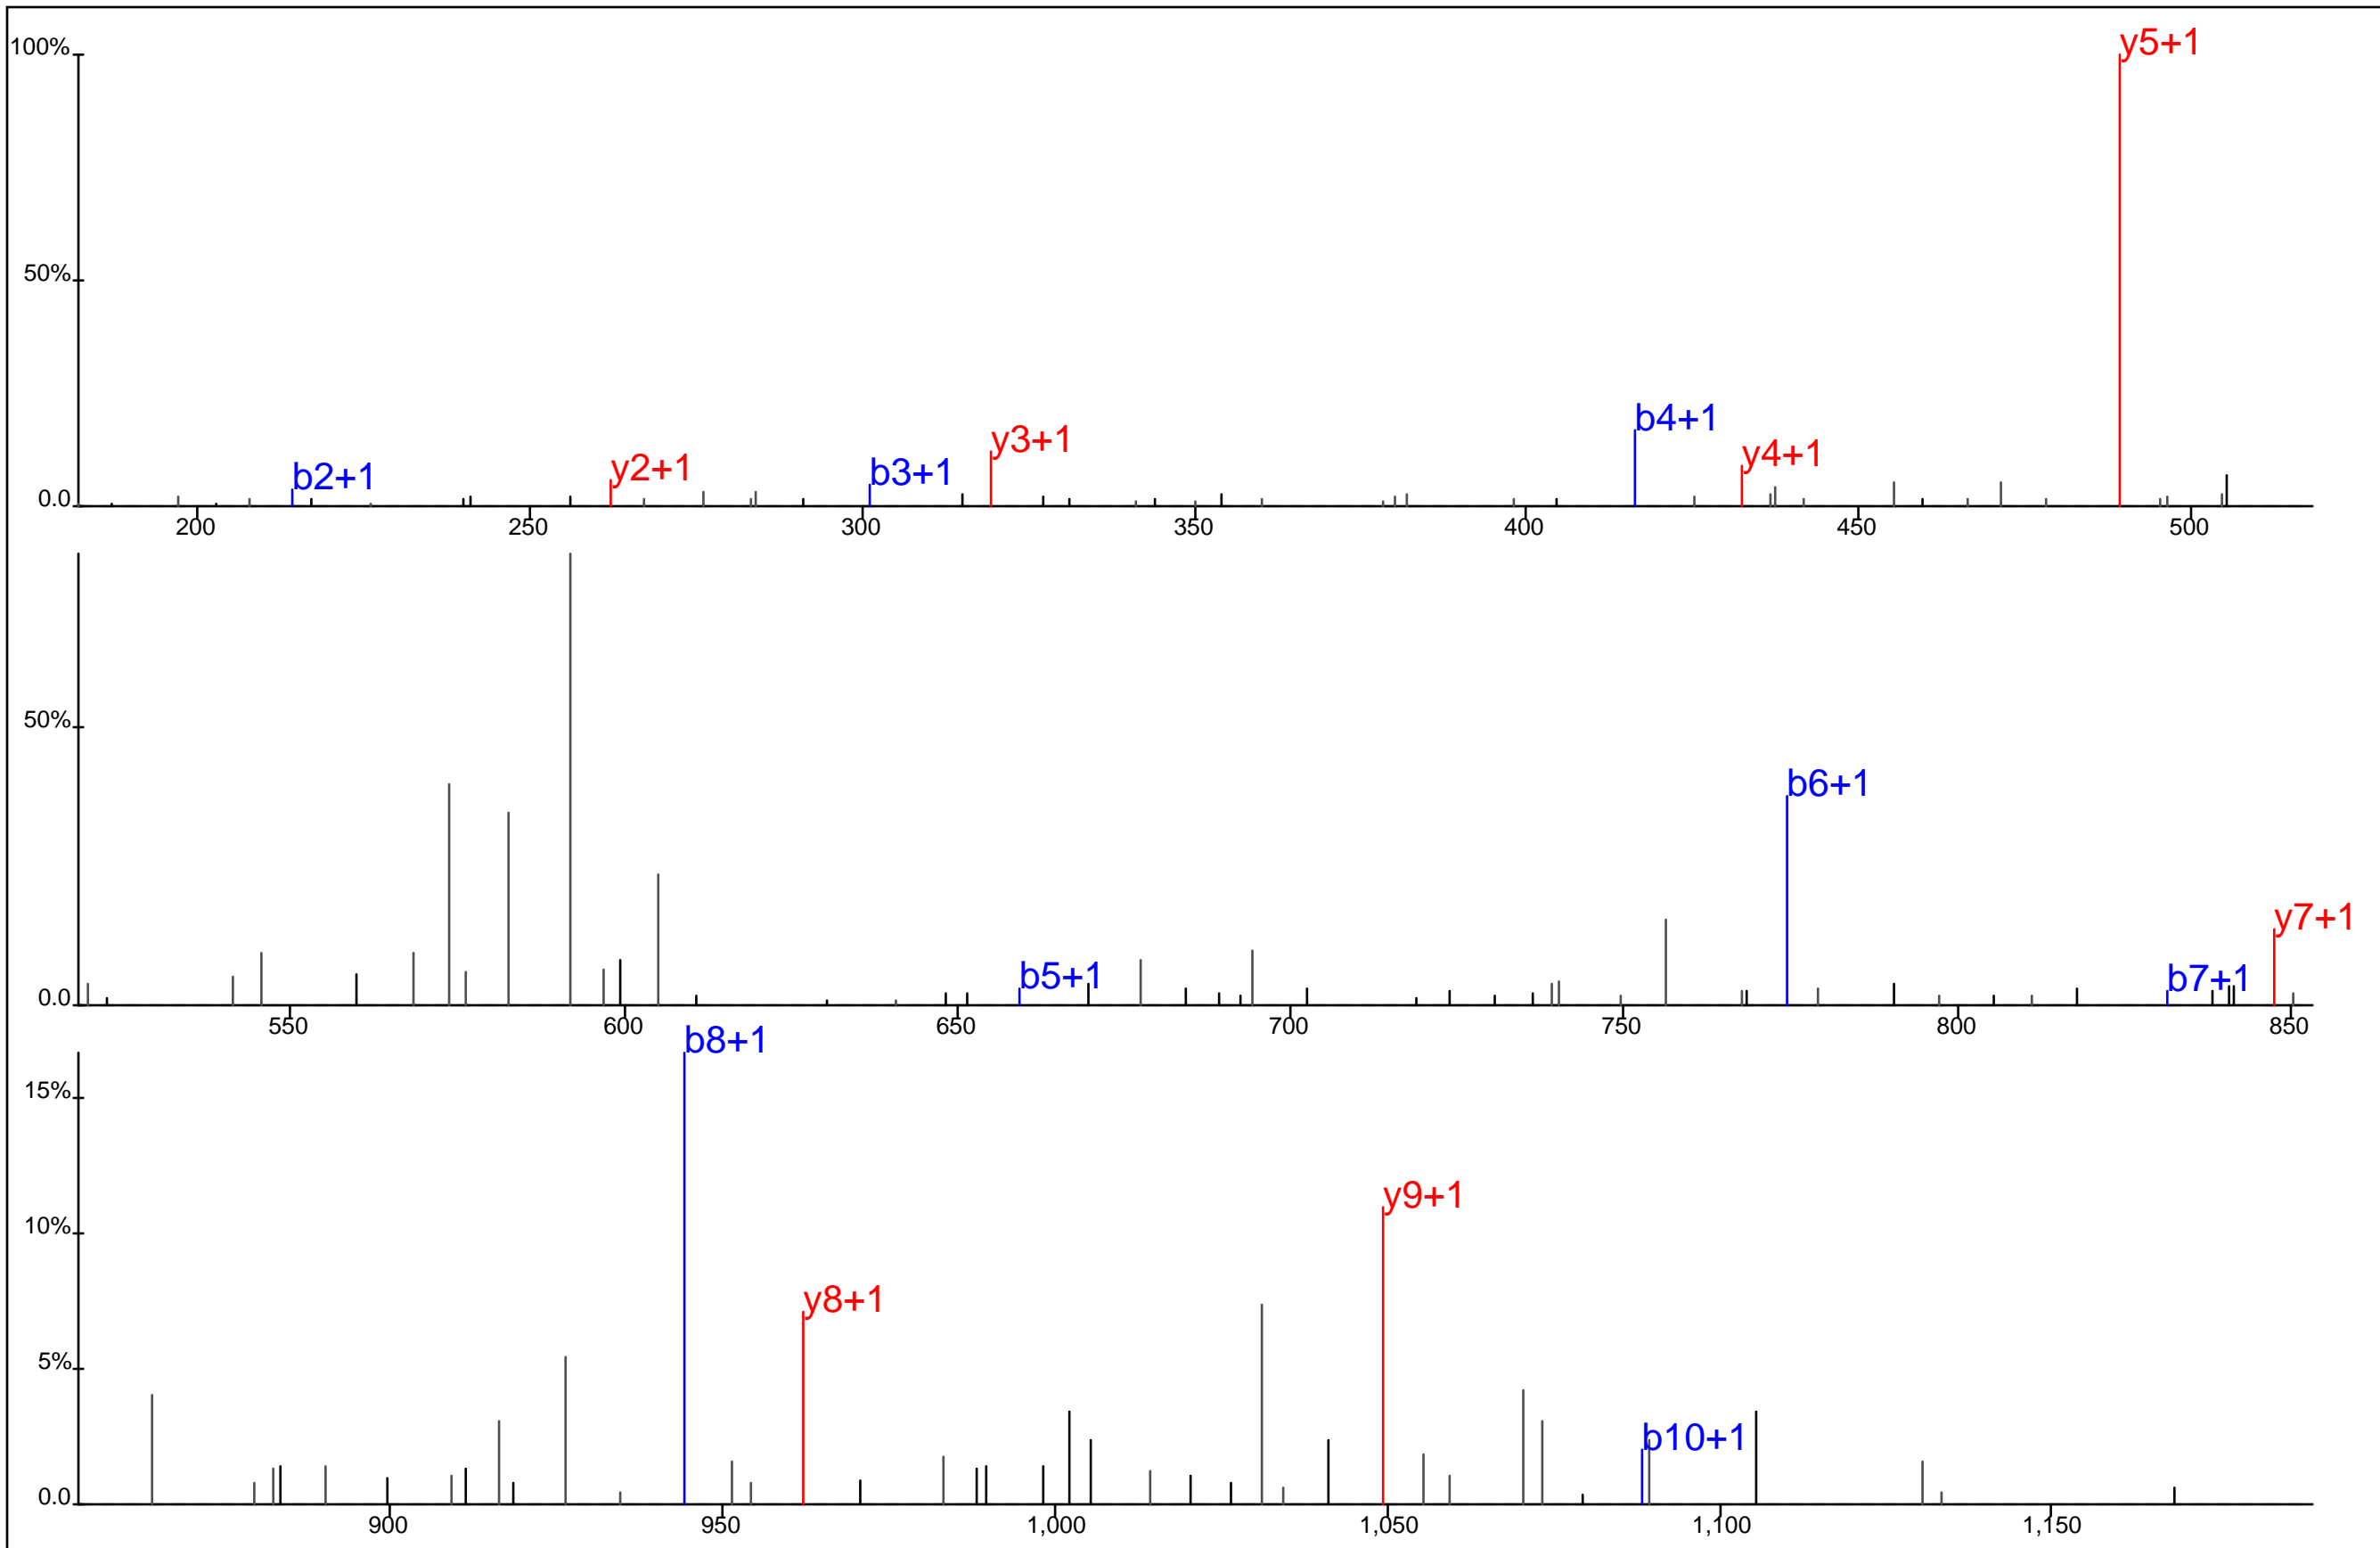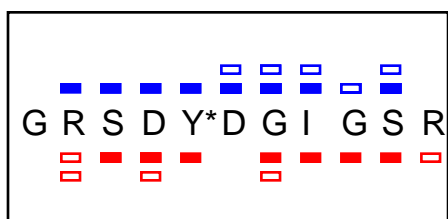

Protein Name: DDX3  
 gi Accession: 0  
 Precursor Mass: 631.7626+2  
 Delta Mass: 1.392 ppm  
 XCorr: 49.77

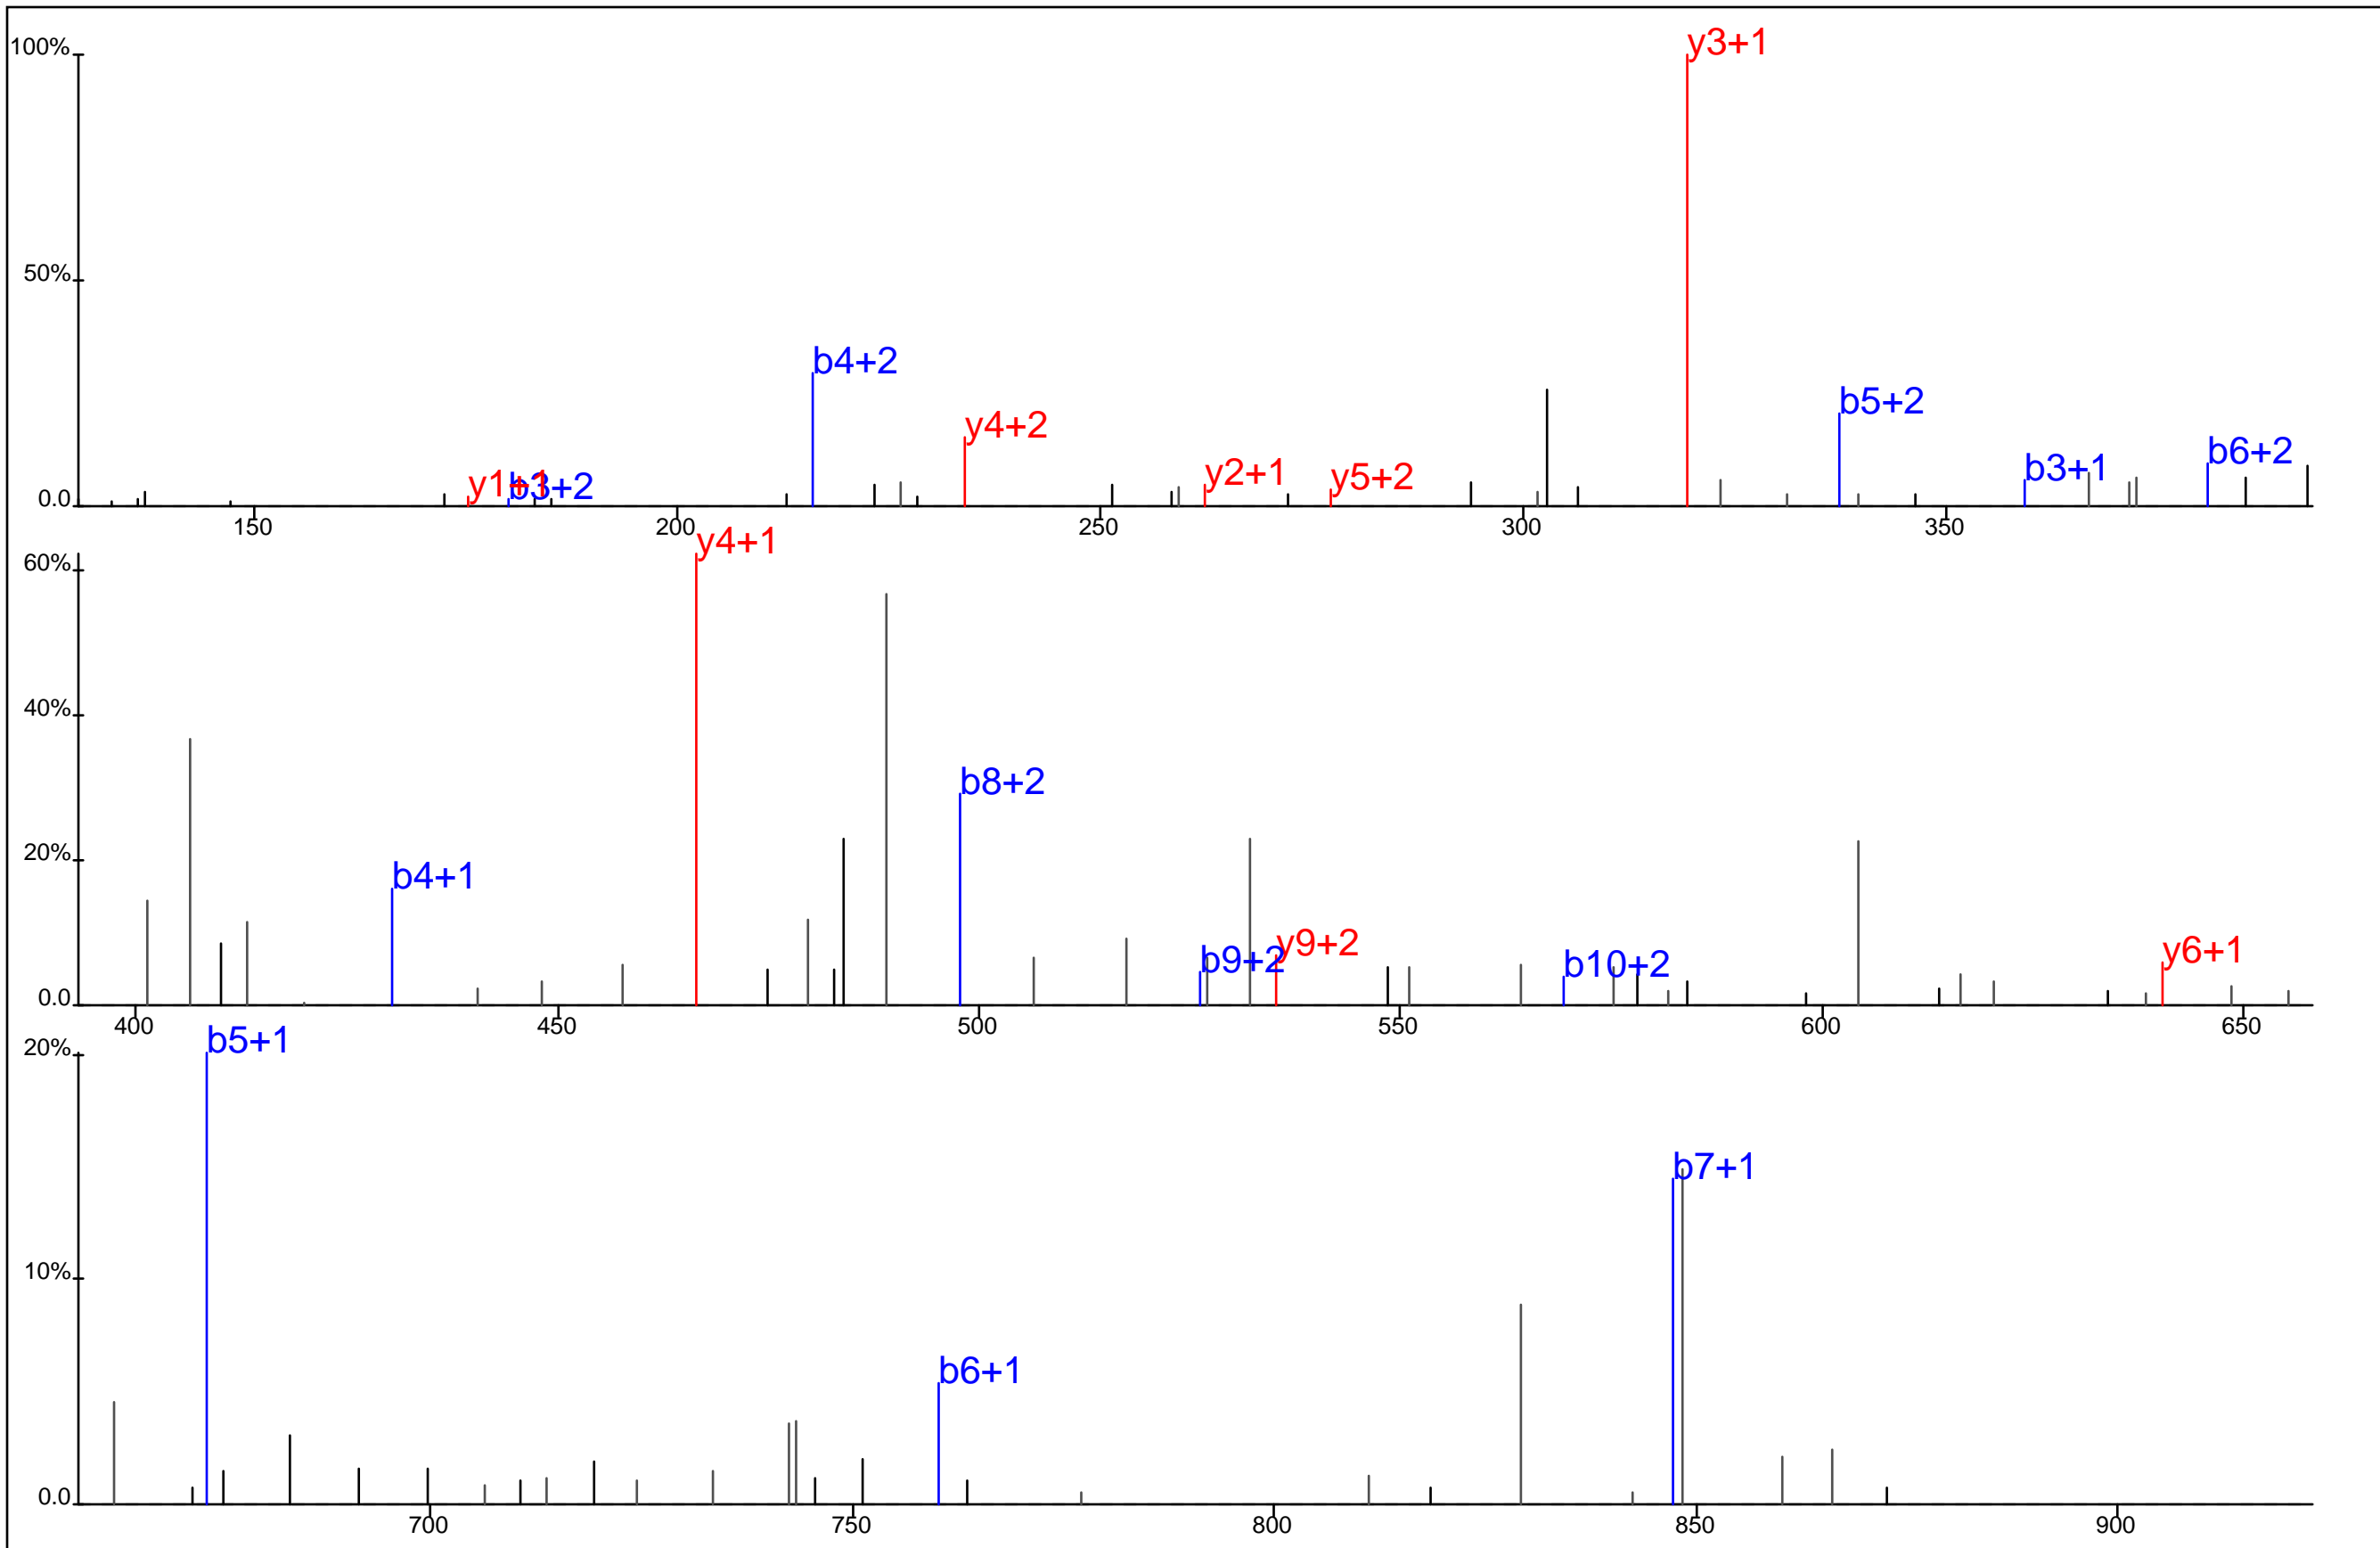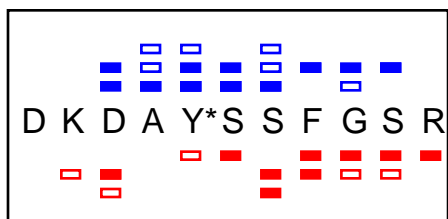

Protein Name: DDX3  
 gi Accession: 0  
 Precursor Mass: 438.1783+3  
 Delta Mass: 0.101 ppm  
 XCorr: 21.55

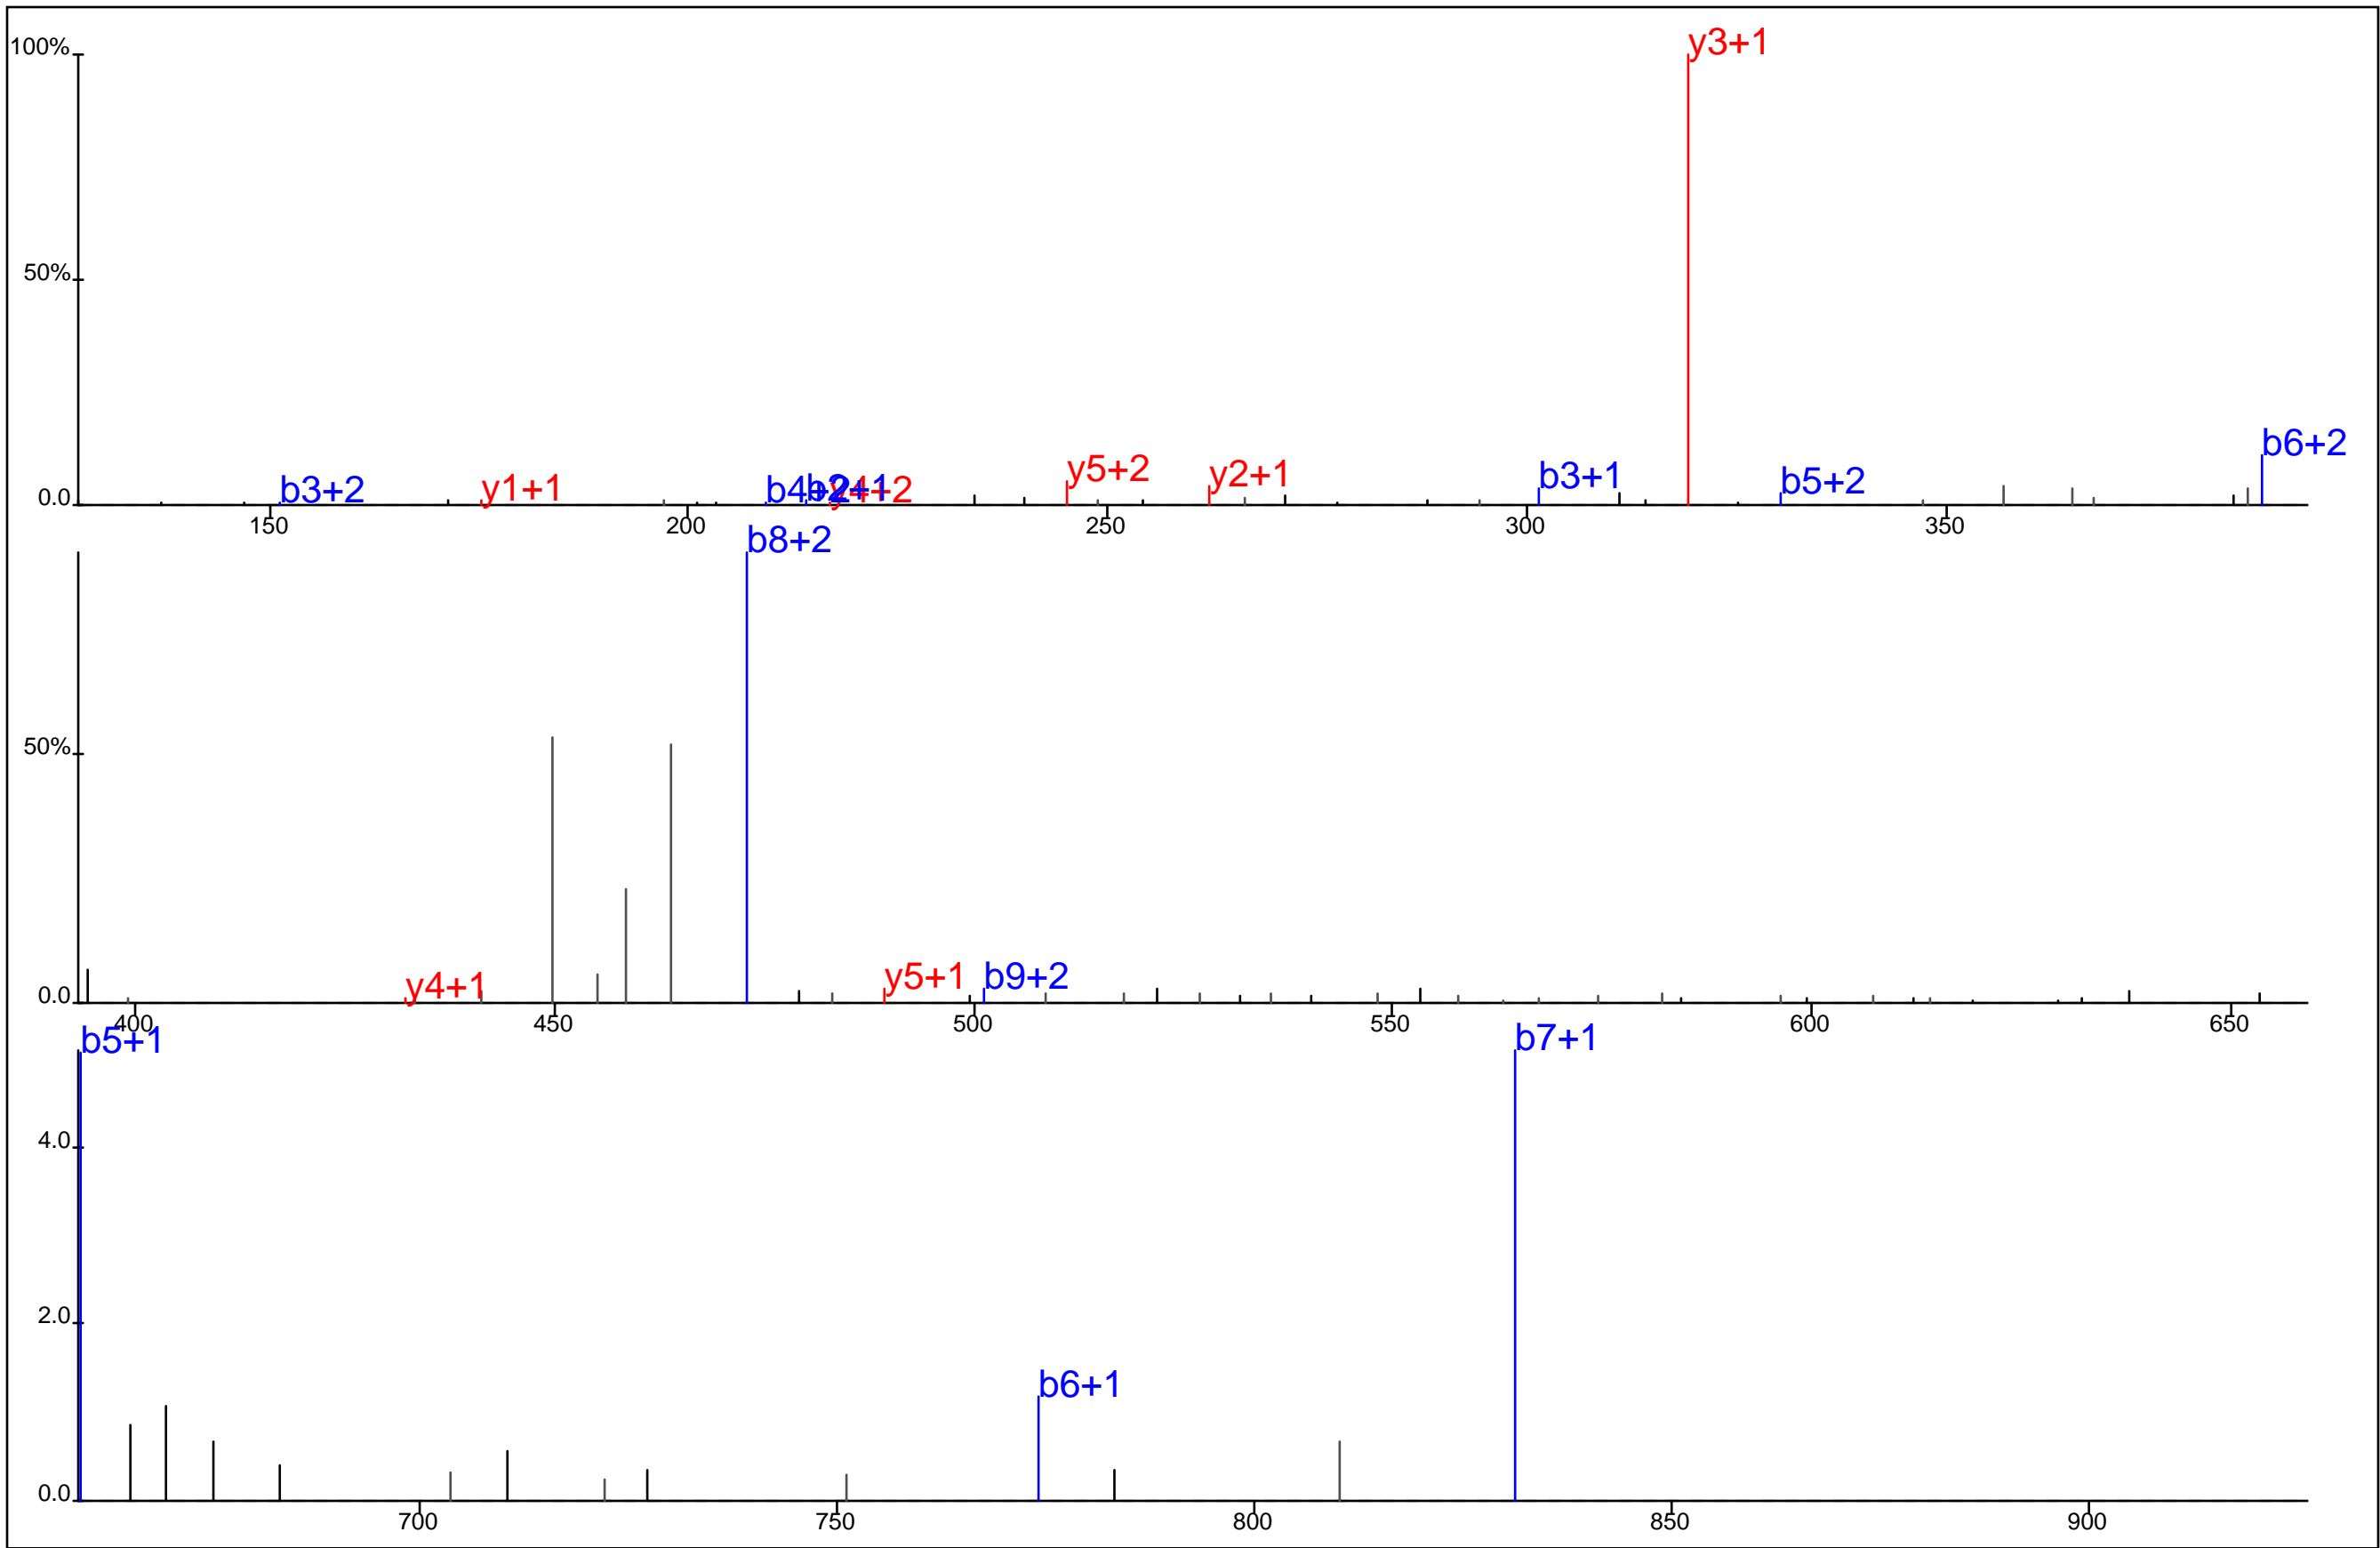

|                               |                                                                                                                                                             |
|-------------------------------|-------------------------------------------------------------------------------------------------------------------------------------------------------------|
| <p>G R S D Y* D G I G S R</p> | <p>Protein Name: DDX3<br/>         gi Accession: 0<br/>         Precursor Mass: 421.5104+3<br/>         Delta Mass: 0.368 ppm<br/>         XCorr: 28.26</p> |
|-------------------------------|-------------------------------------------------------------------------------------------------------------------------------------------------------------|



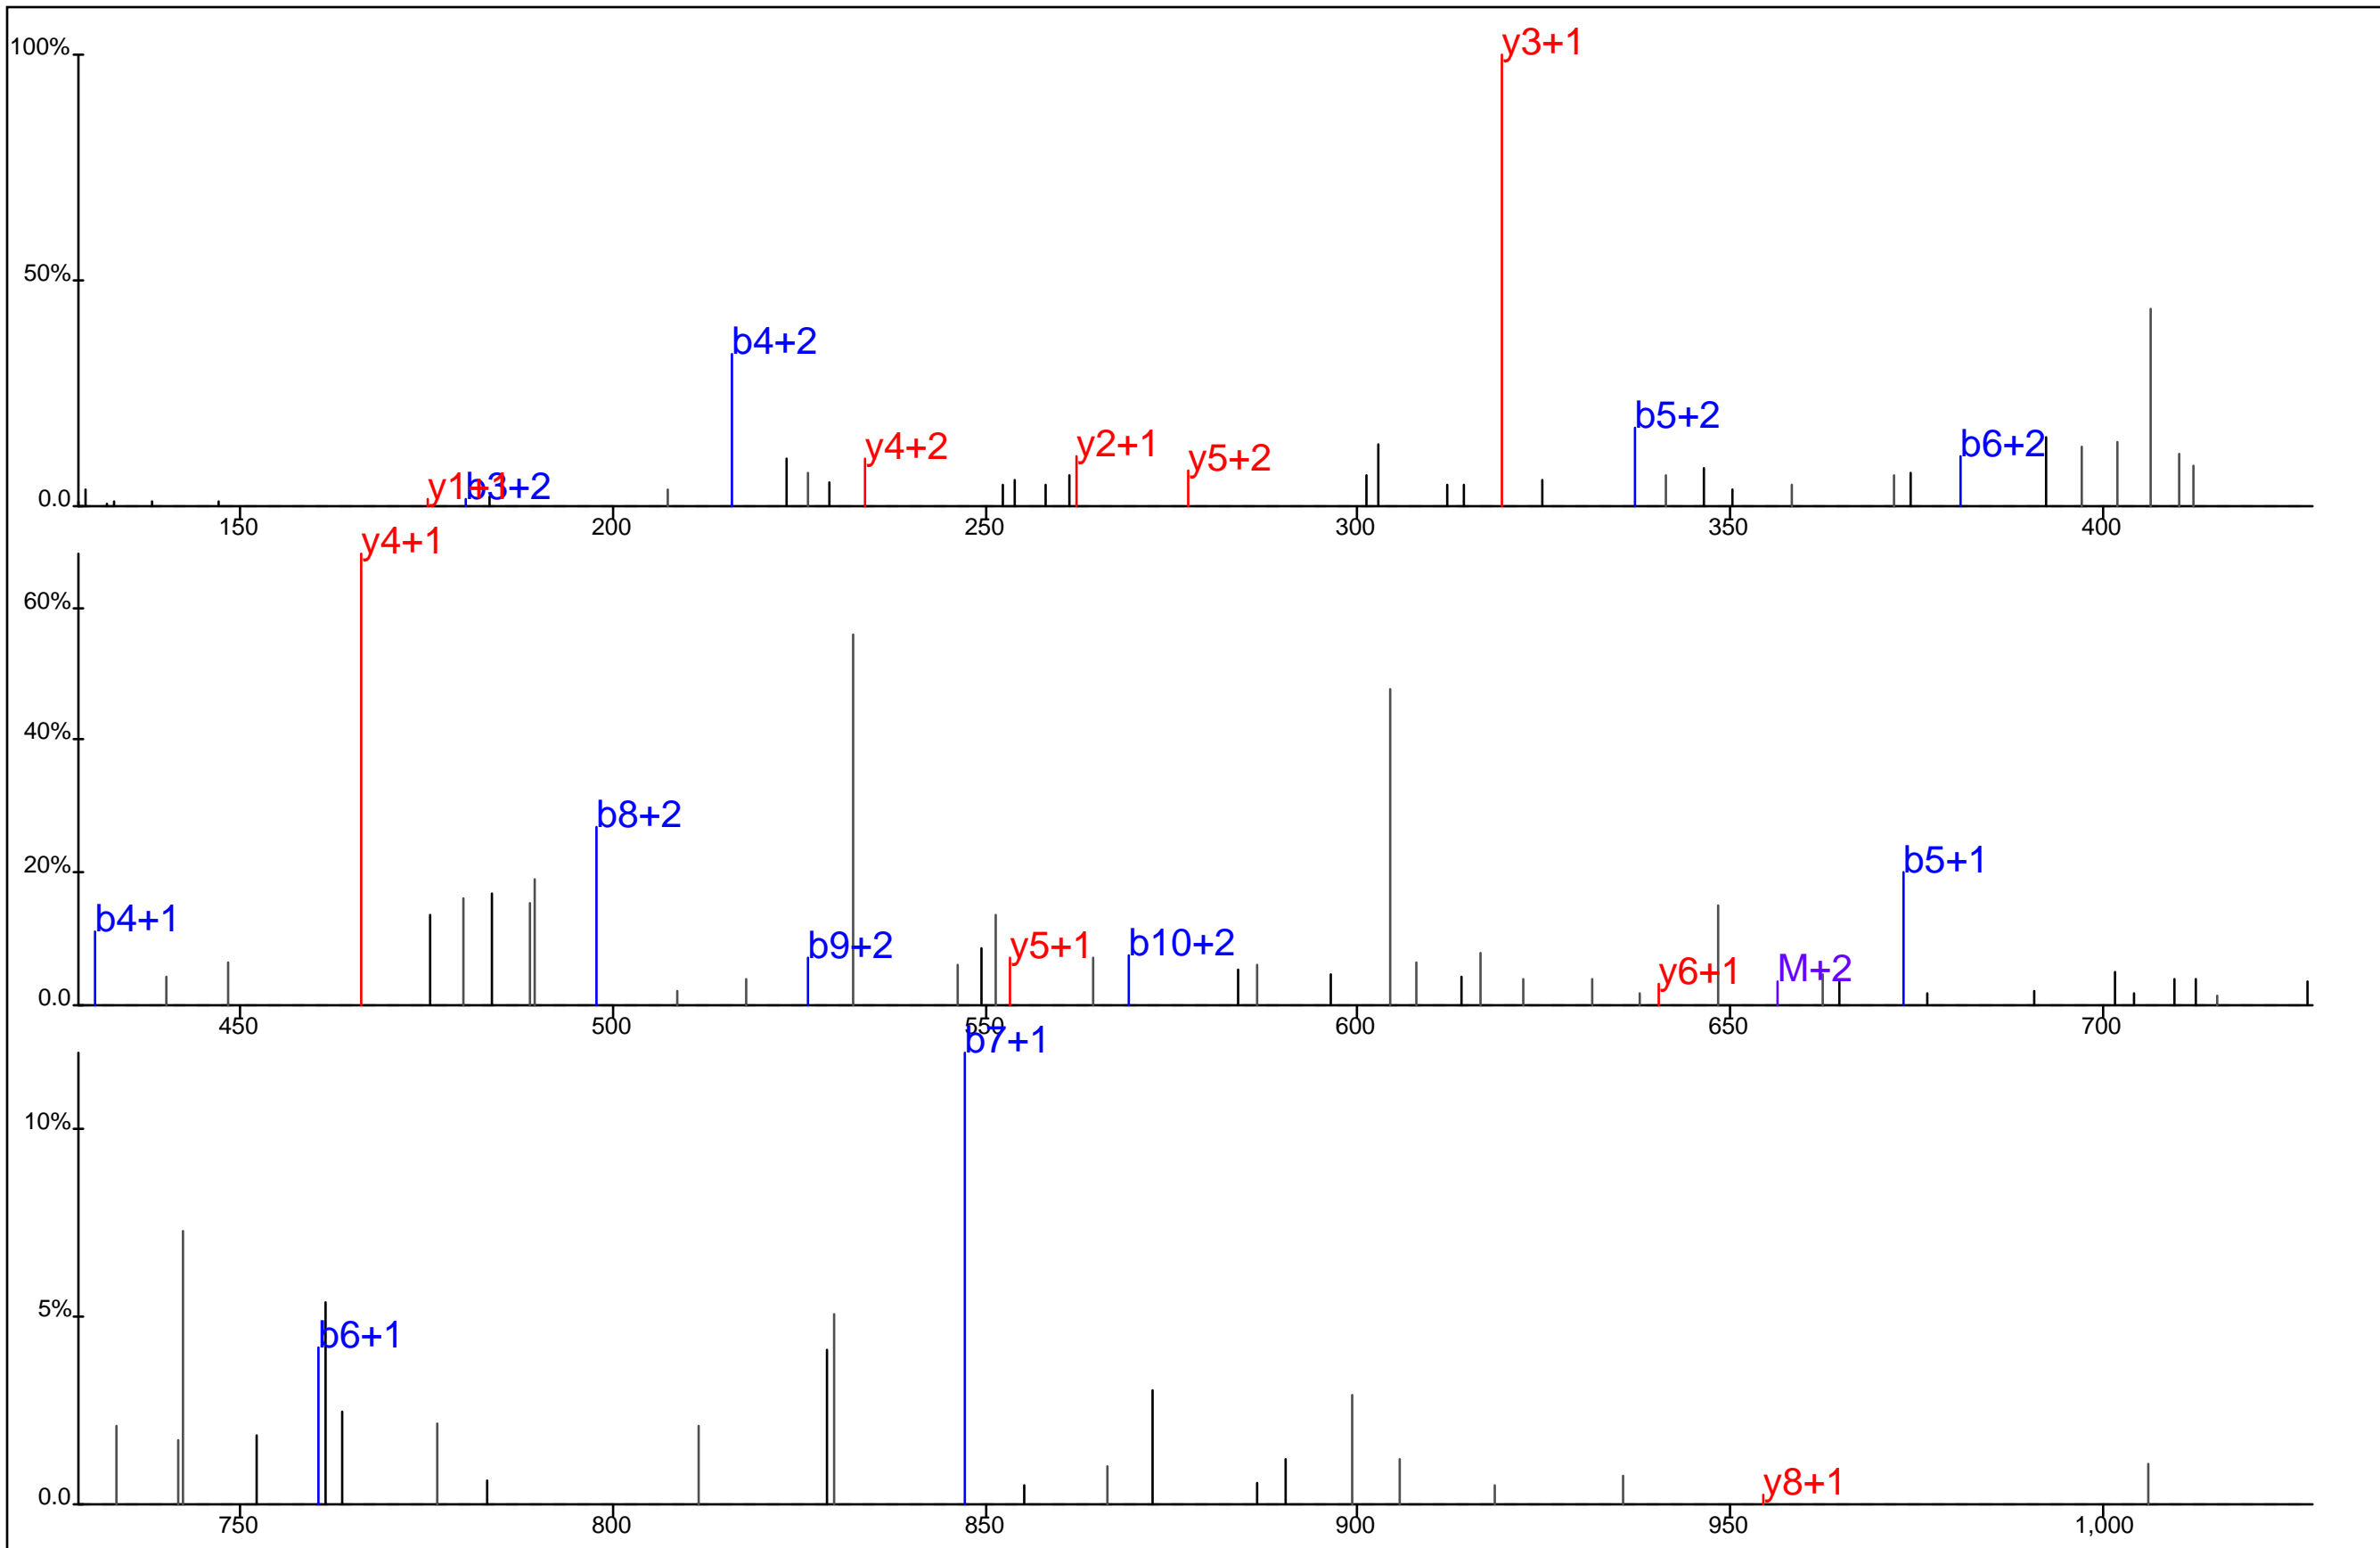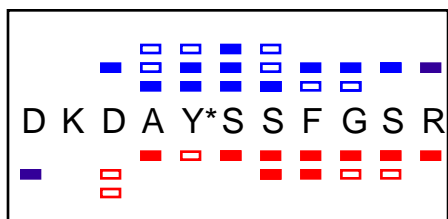

Protein Name: DDX3  
 gi Accession: 0  
 Precursor Mass: 438.1789+3  
 Delta Mass: 1.157 ppm  
 XCorr: 23.49

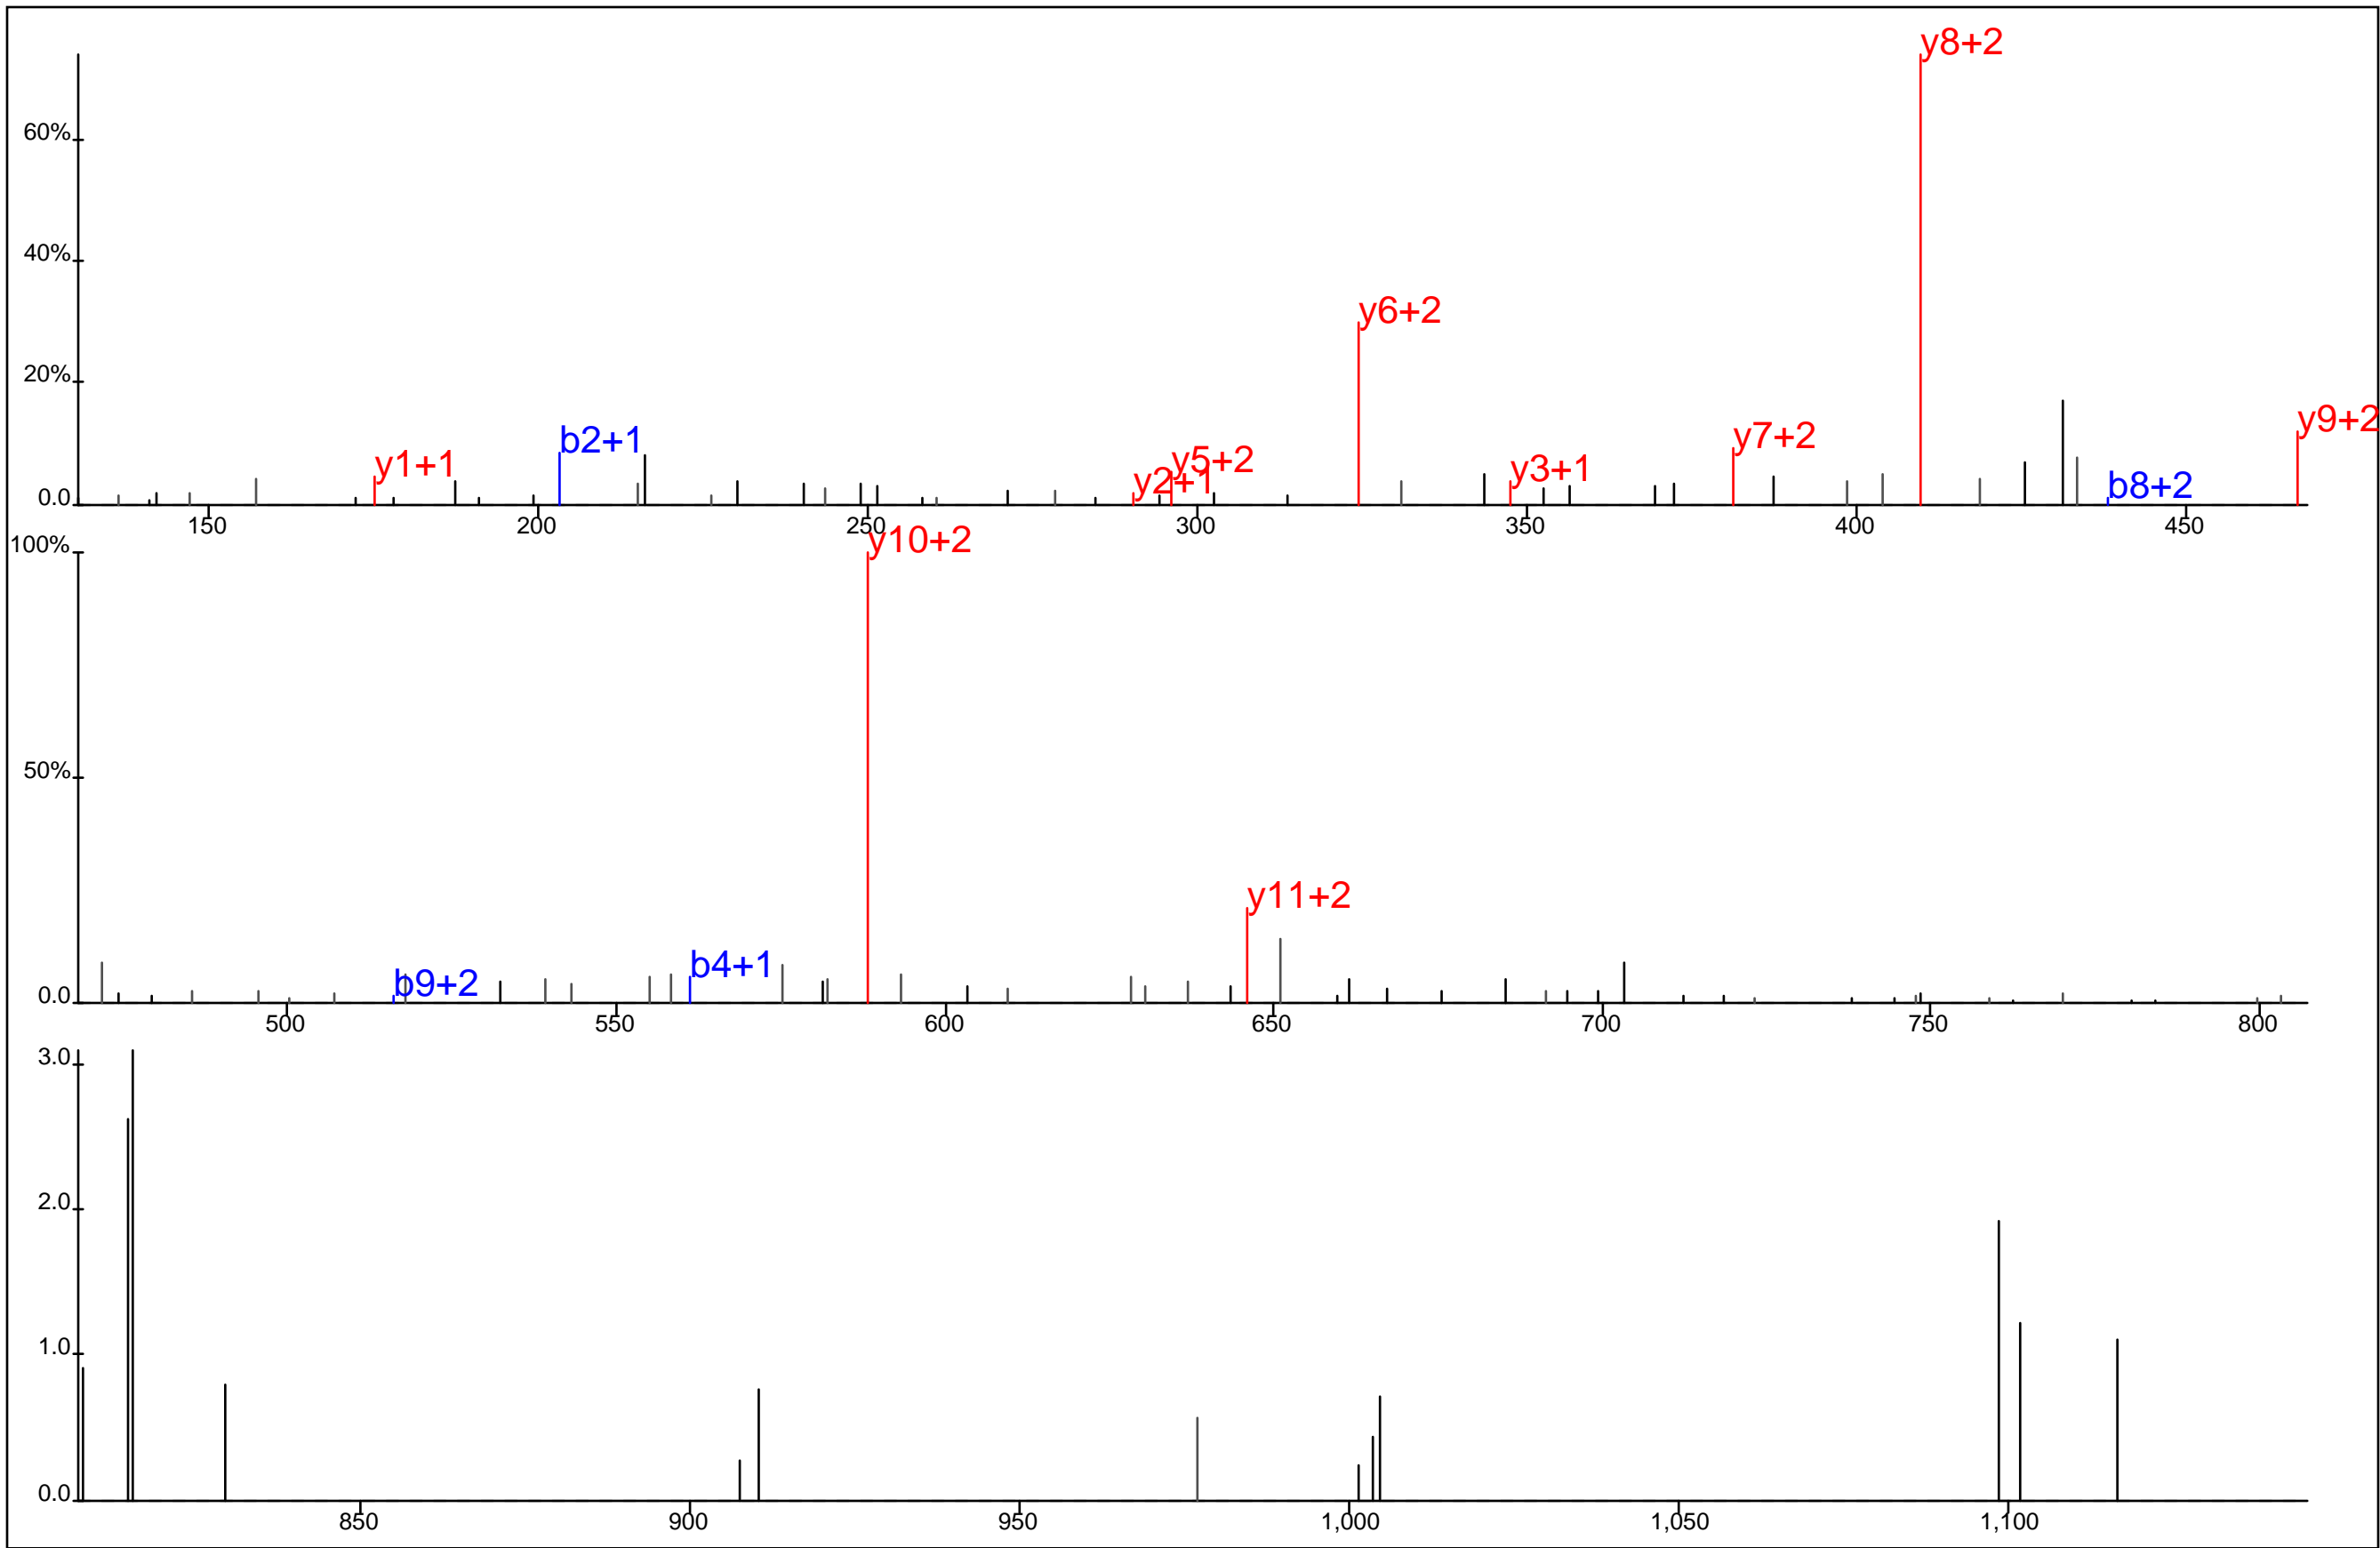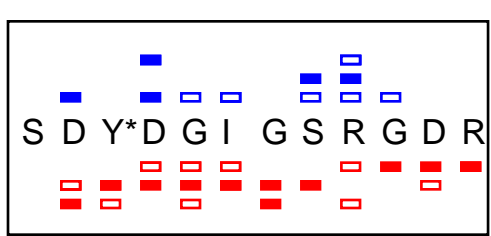

Protein Name: DDX3  
 gi Accession: 0  
 Precursor Mass: 459.8528+3  
 Delta Mass: 0.601 ppm  
 XCorr: 33.12

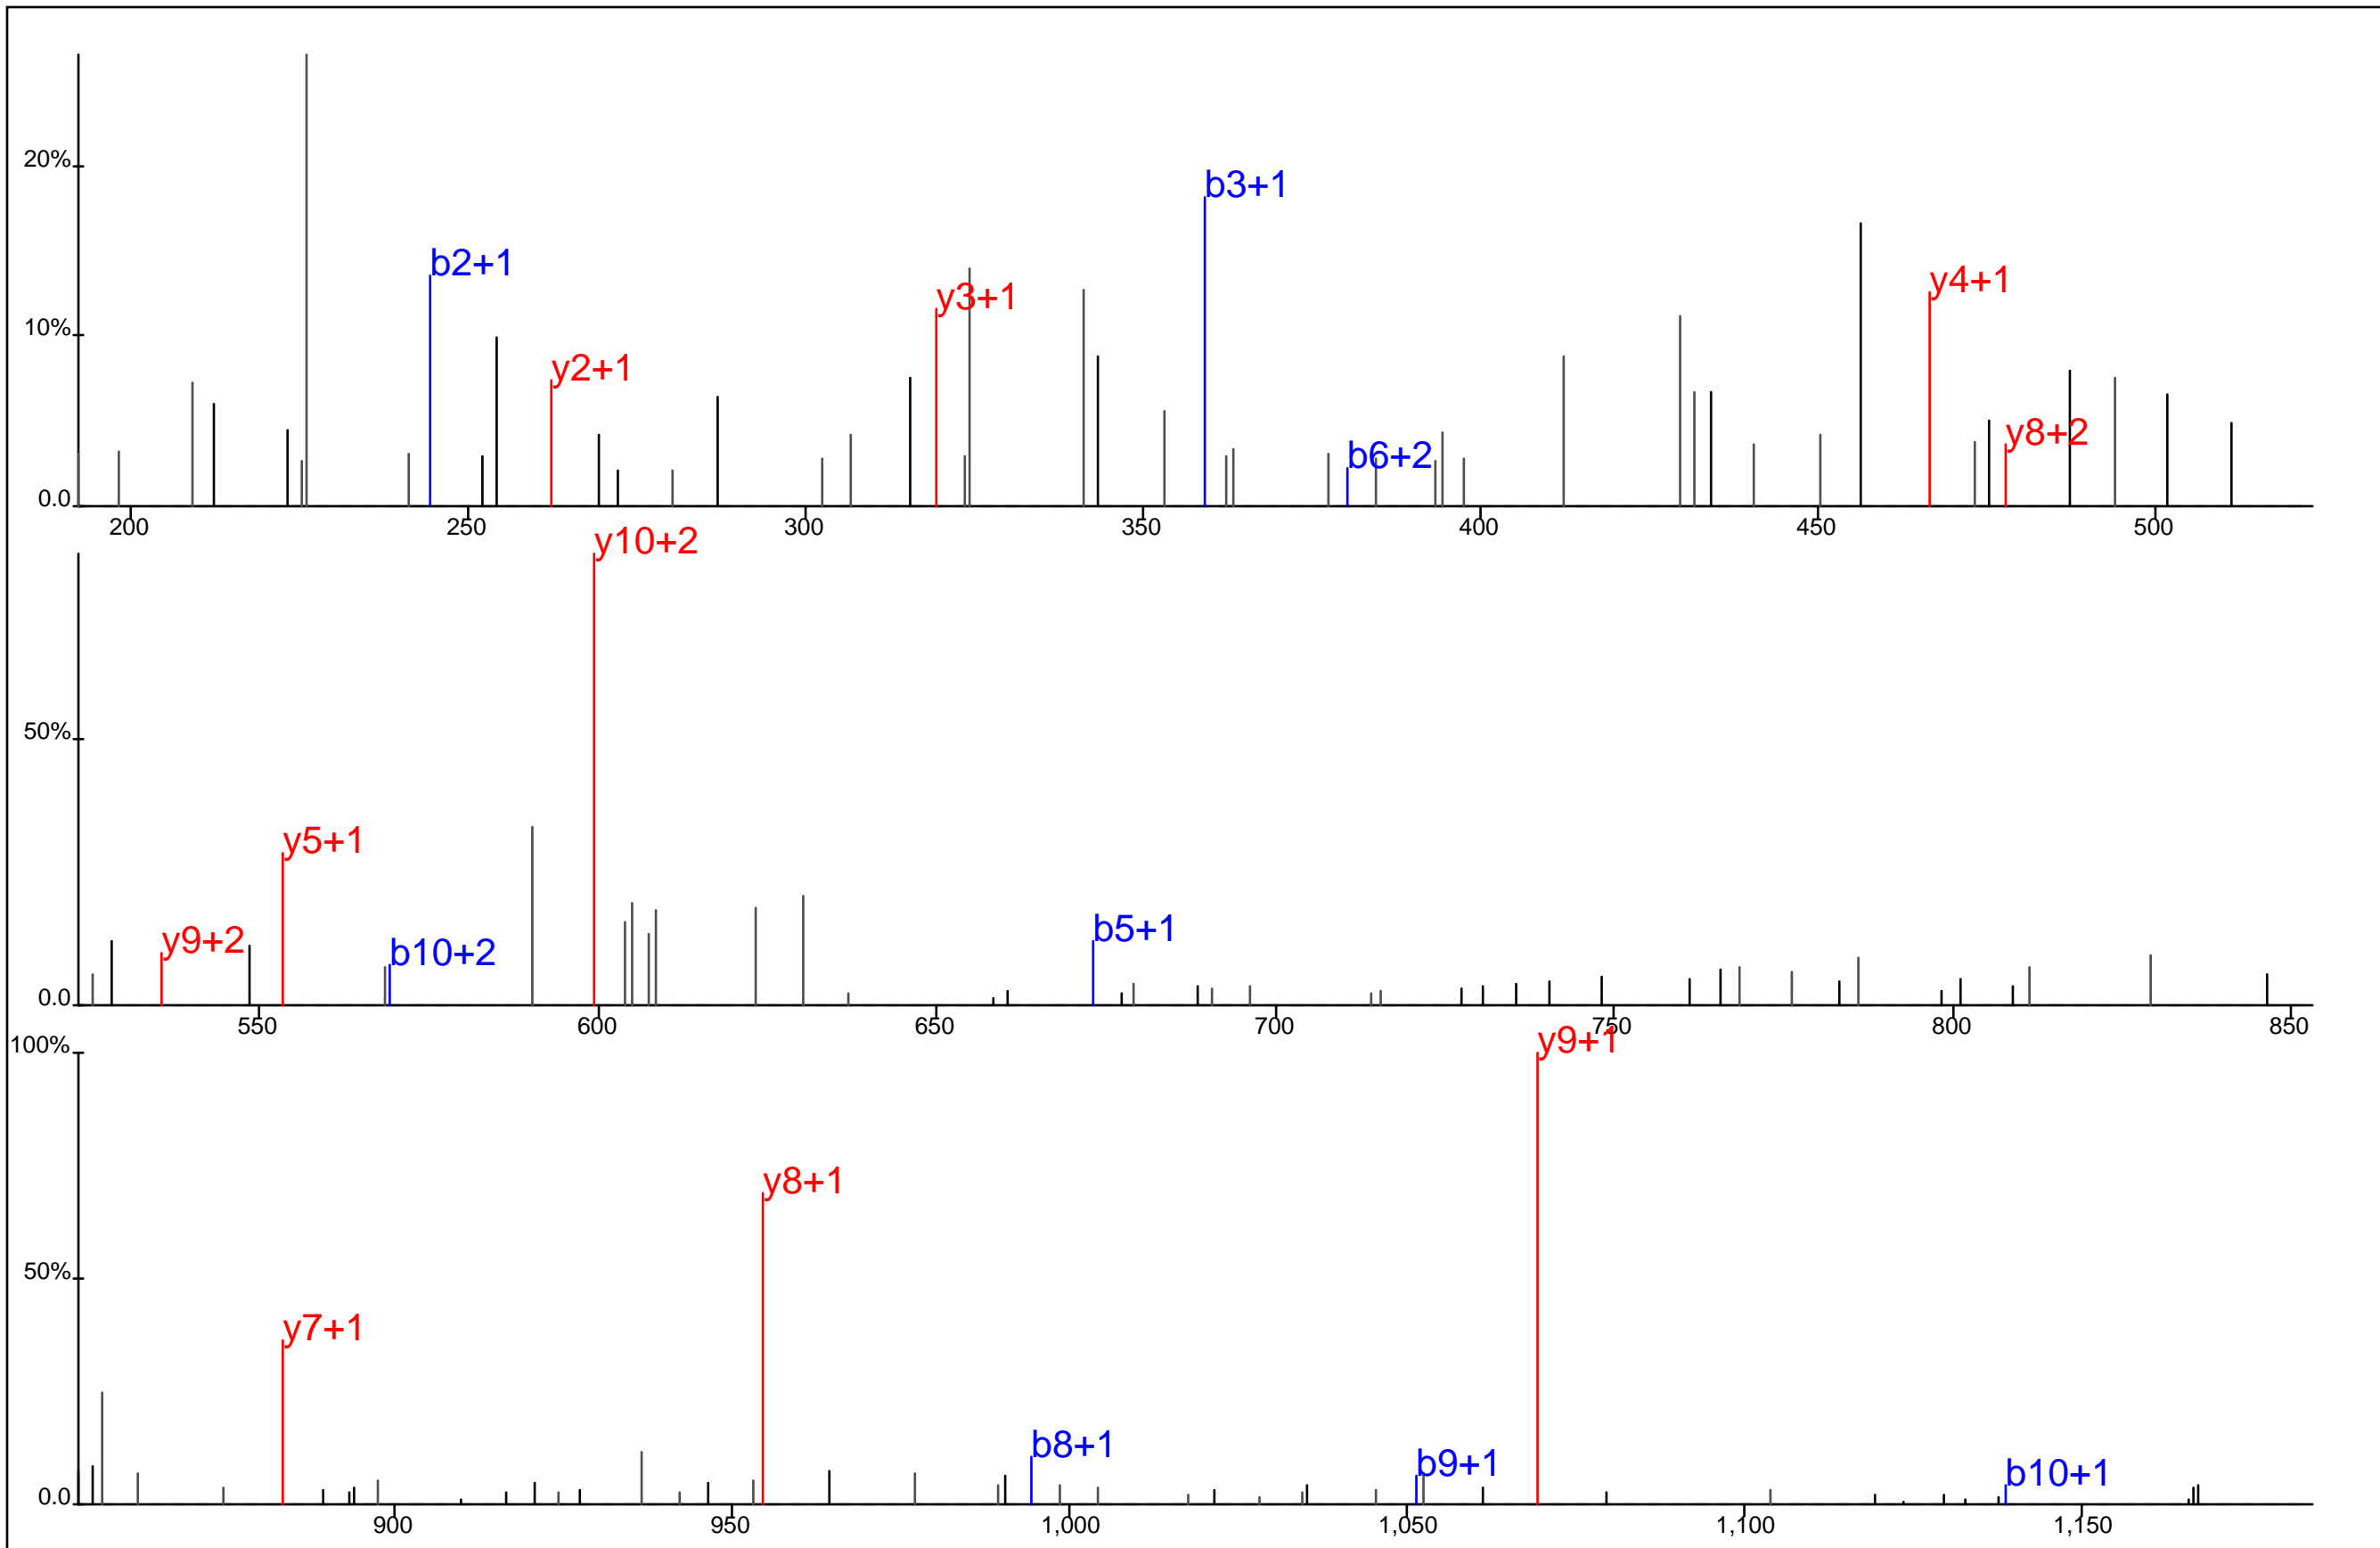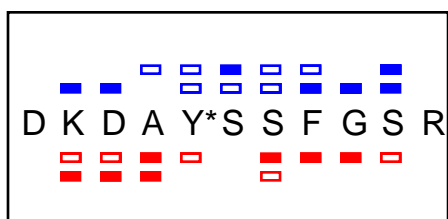

Protein Name: DDX3  
 gi Accession: 0  
 Precursor Mass: 656.7622+2  
 Delta Mass: 2.578 ppm  
 XCorr: 37.57

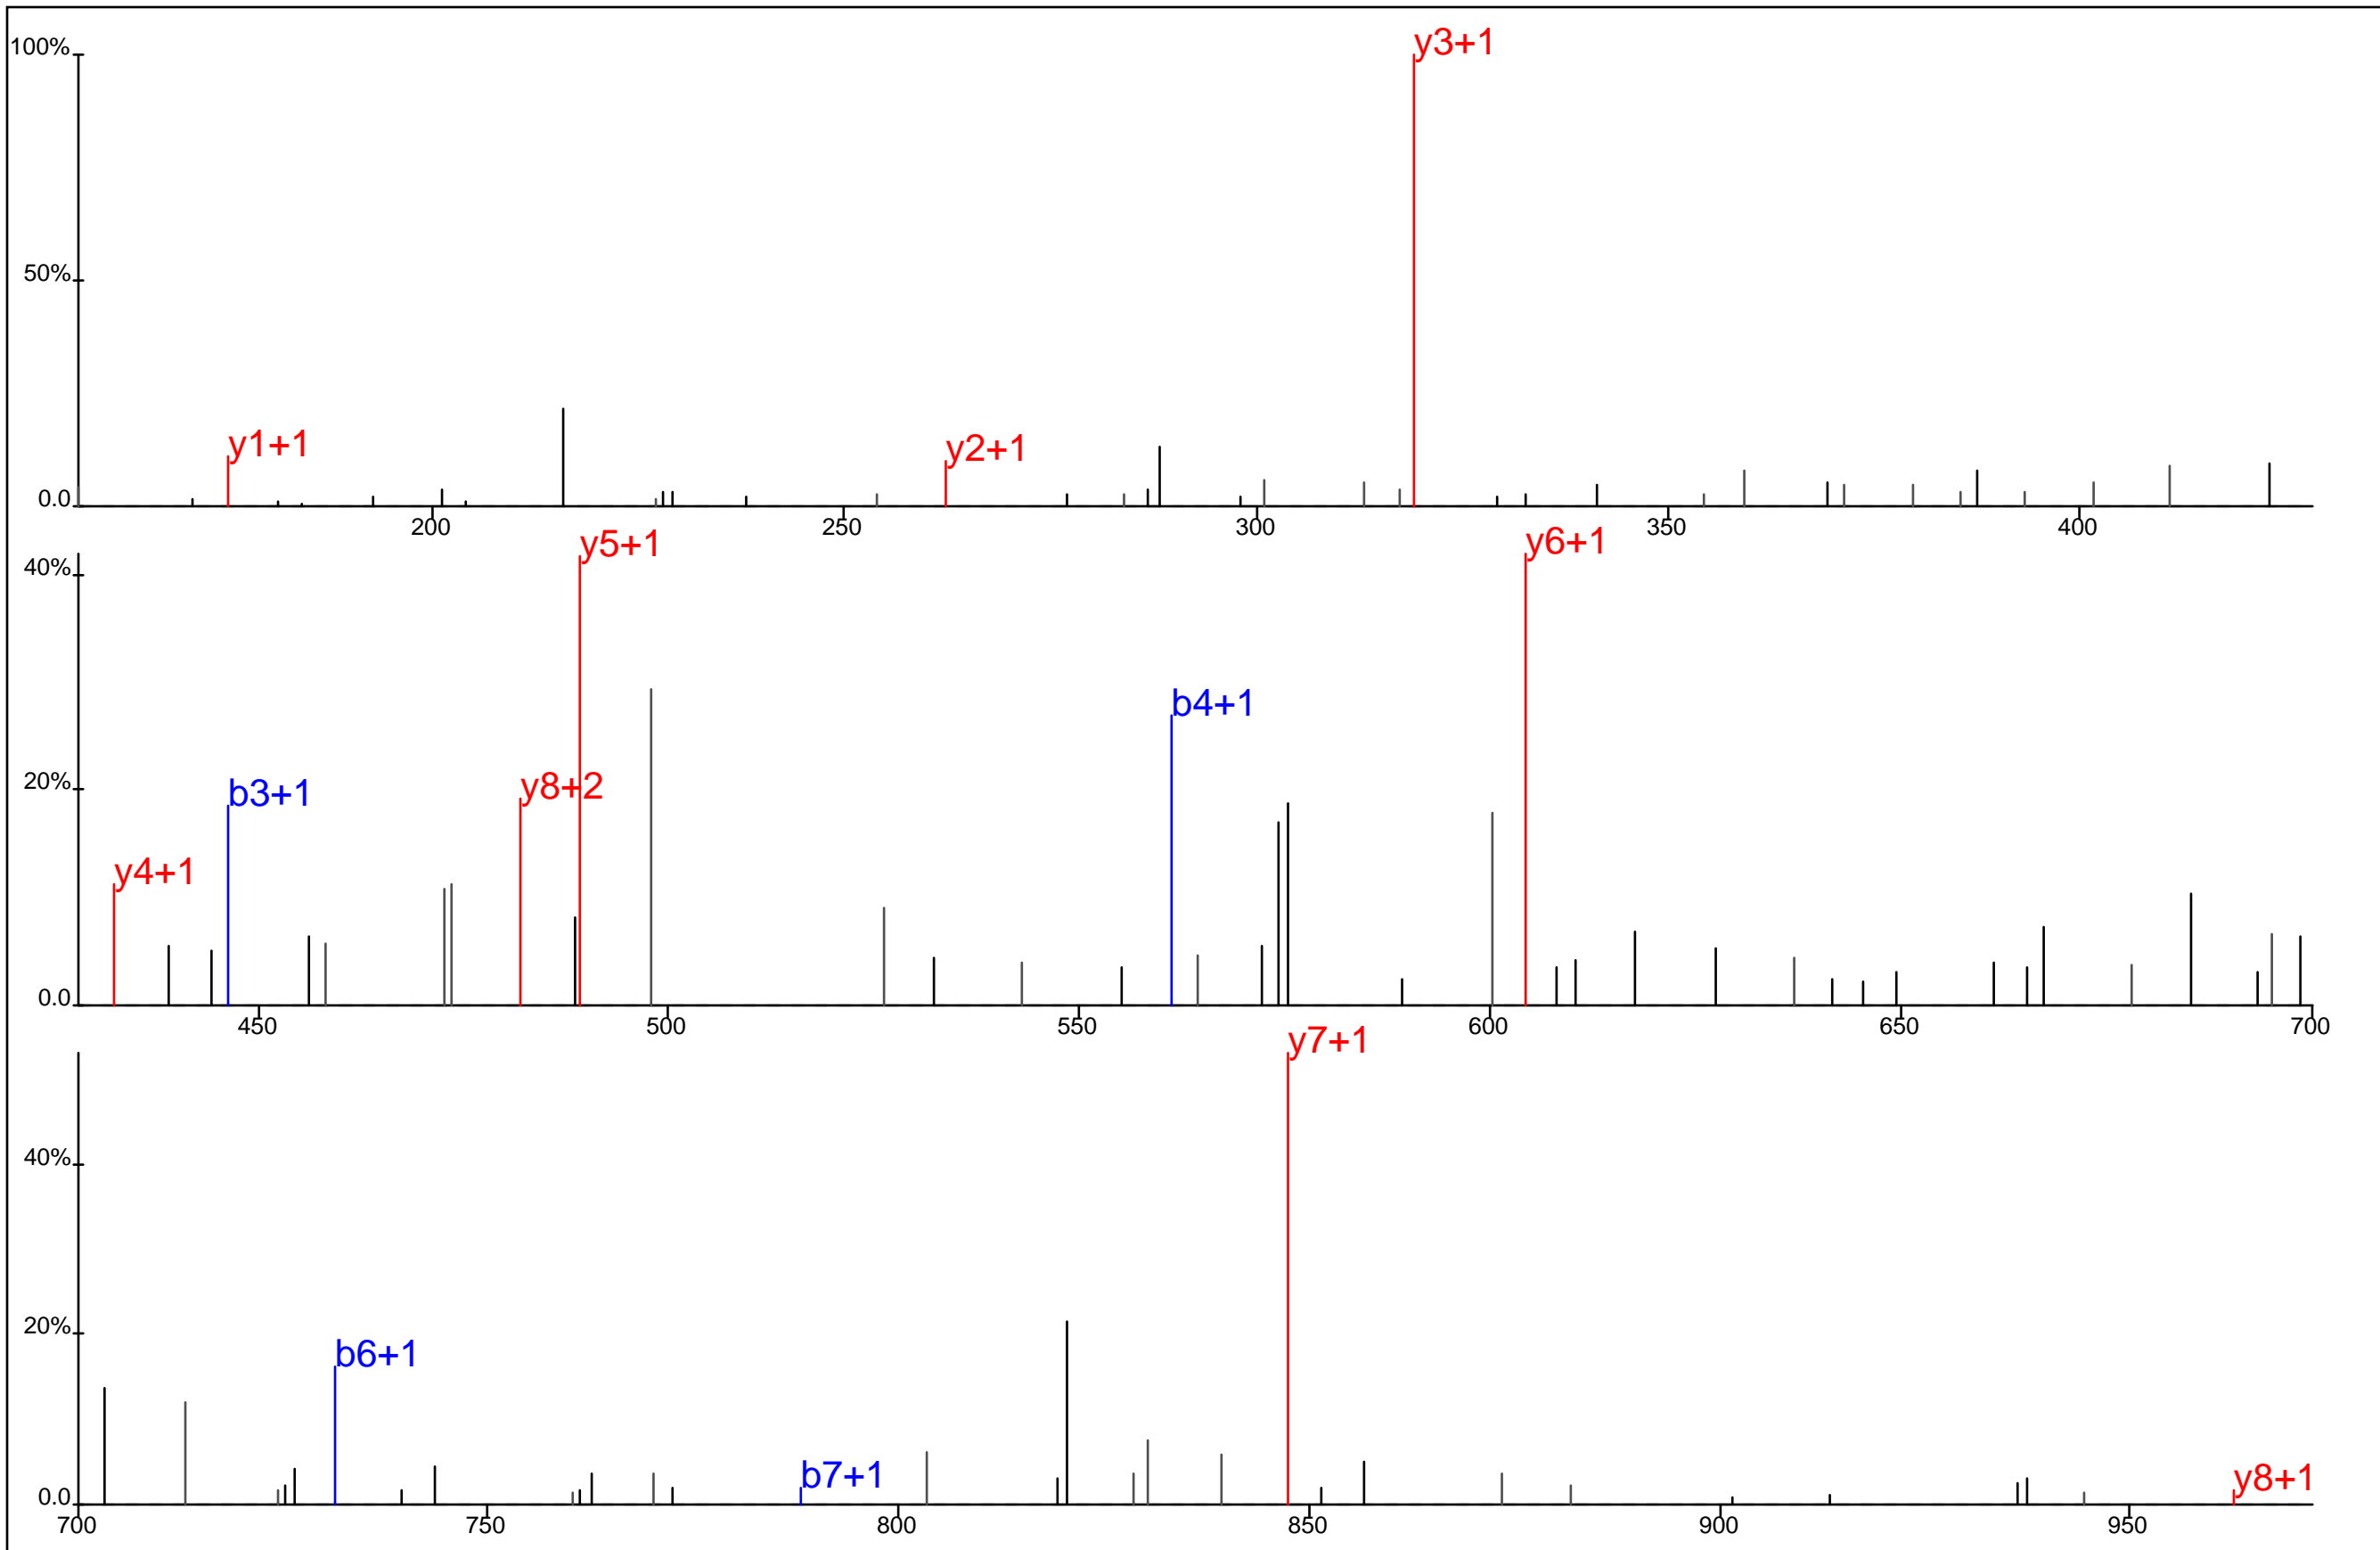


  
**S D Y\* D G I G S R**

Protein Name: DDX3  
 gi Accession: 0  
 Precursor Mass: 525.2012+2  
 Delta Mass: 1.454 ppm  
 XCorr: 55.34

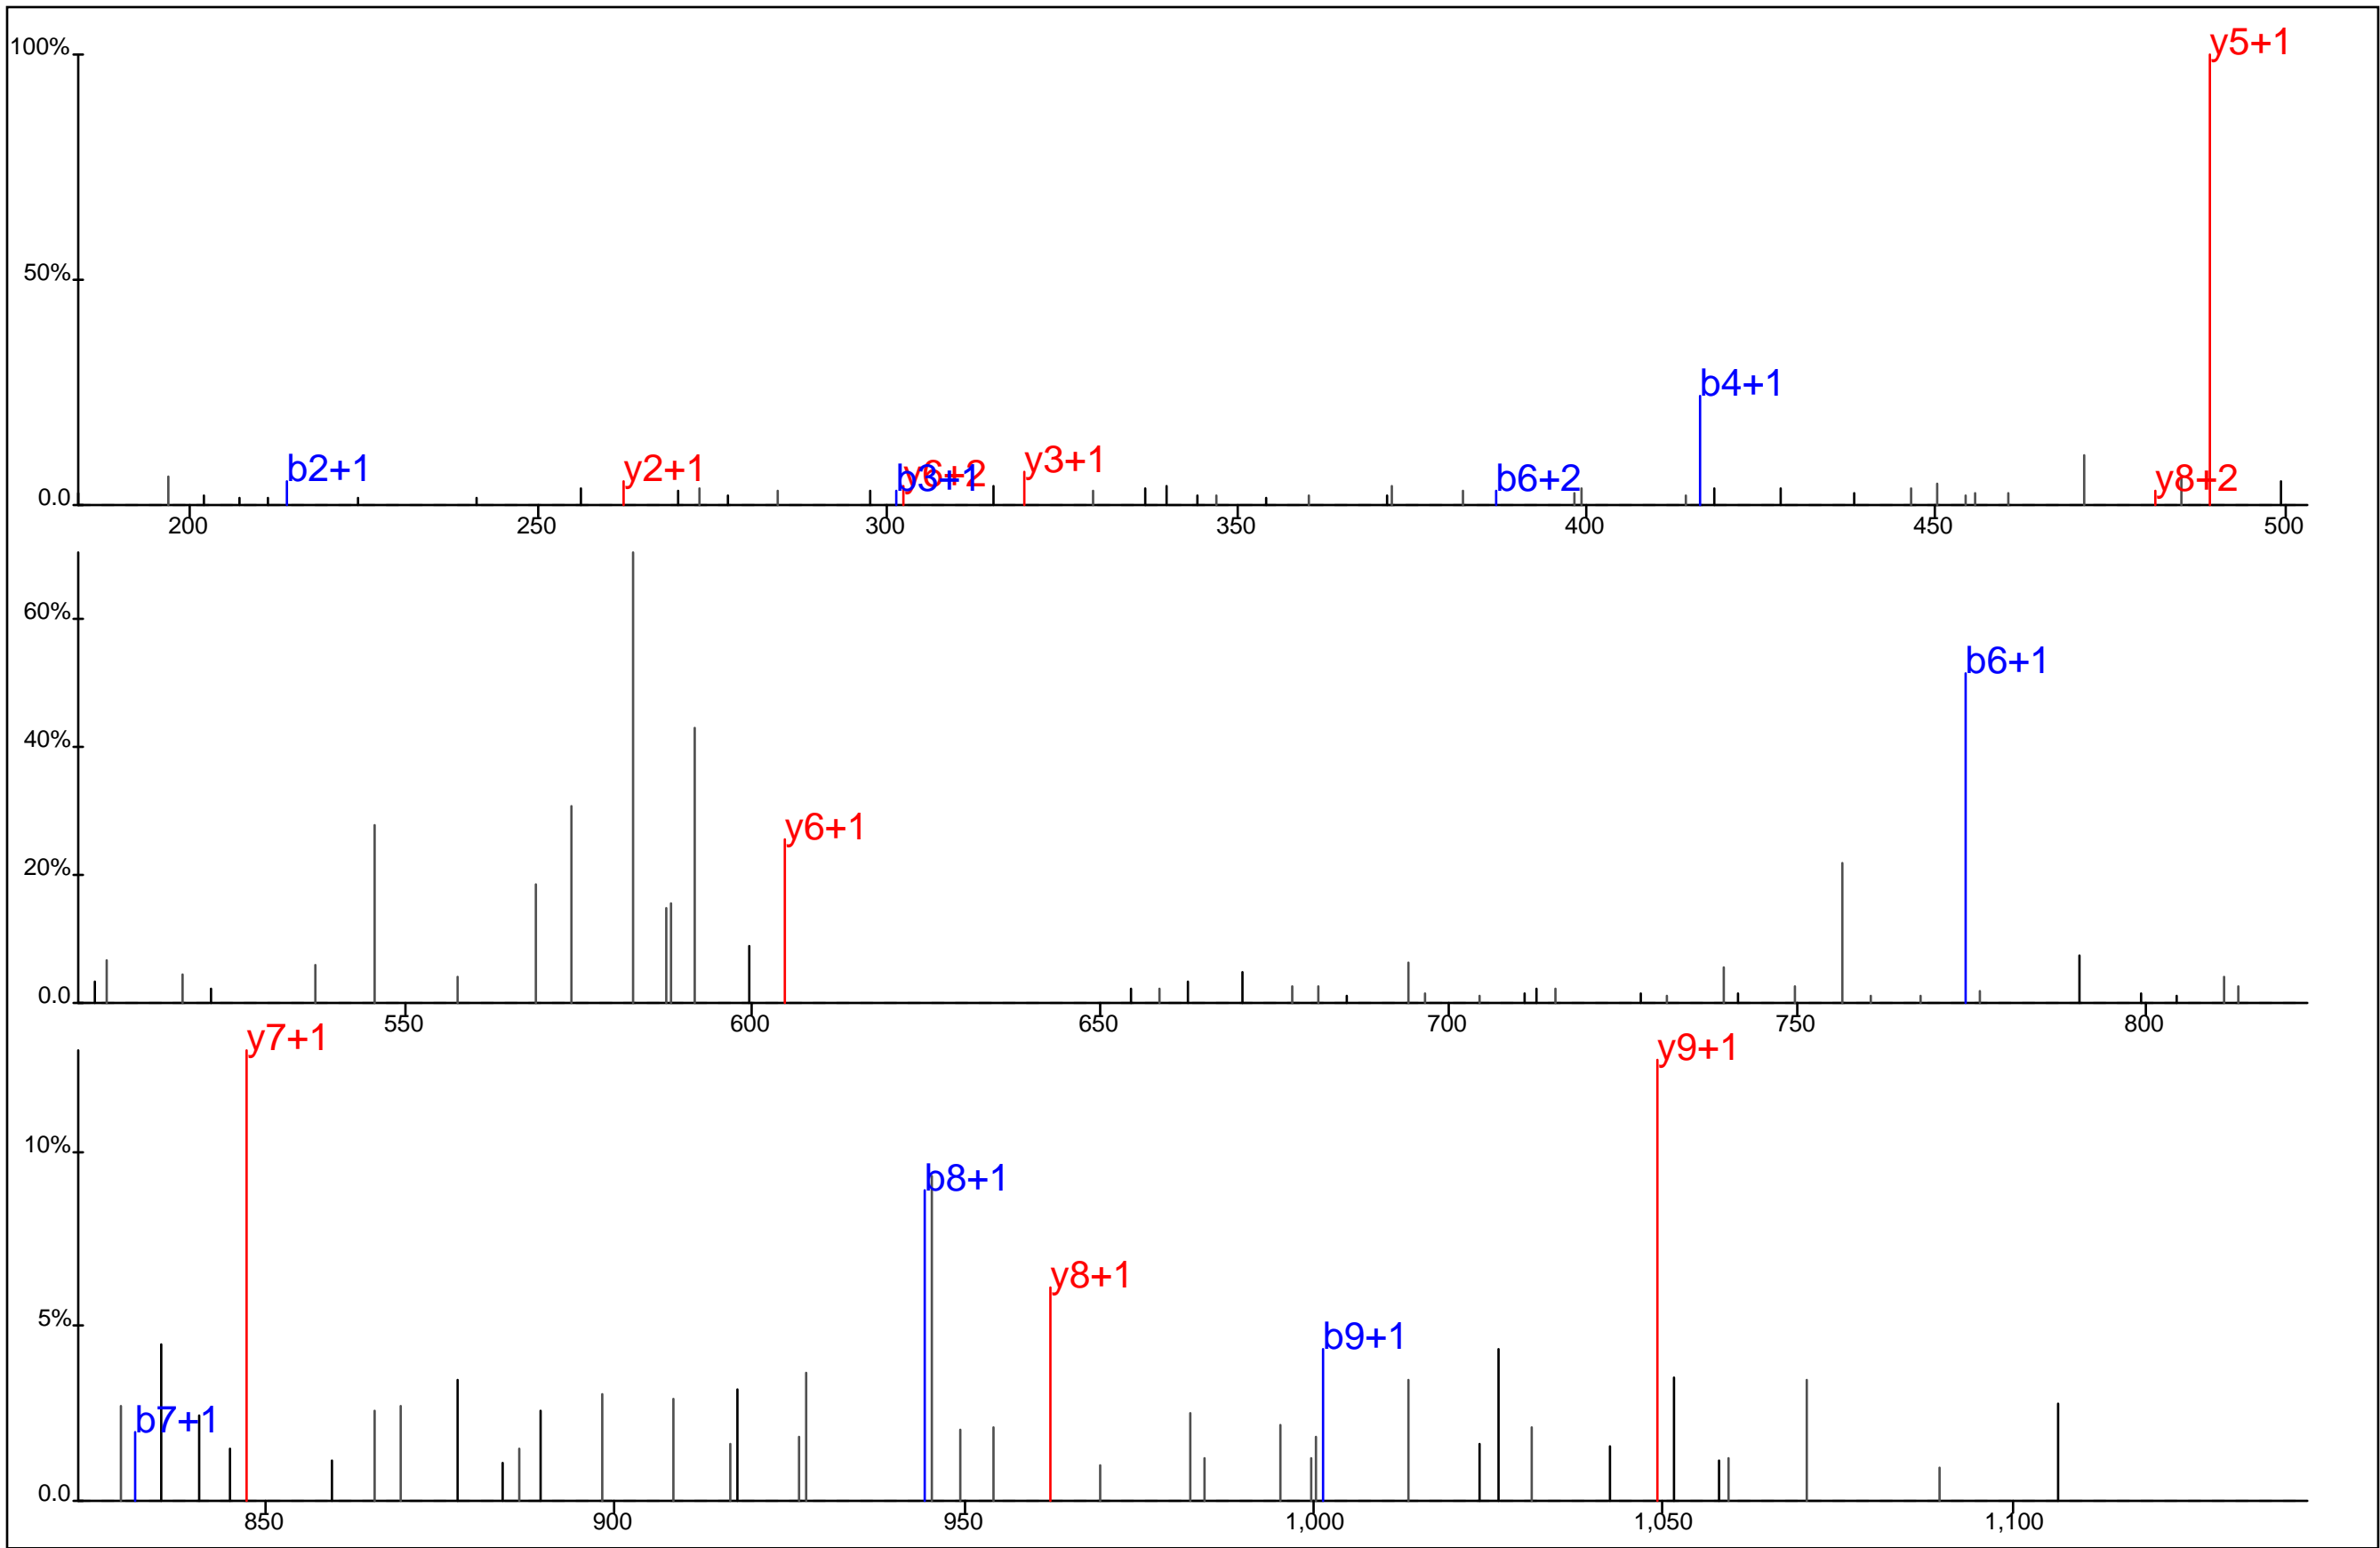

|                               |                                                                                                                                                            |
|-------------------------------|------------------------------------------------------------------------------------------------------------------------------------------------------------|
| <p>G R S D Y* D G I G S R</p> | <p>Protein Name: DDX3<br/>         gi Accession: 0<br/>         Precursor Mass: 631.7623+2<br/>         Delta Mass: 0.909 ppm<br/>         XCorr: 41.7</p> |
|-------------------------------|------------------------------------------------------------------------------------------------------------------------------------------------------------|

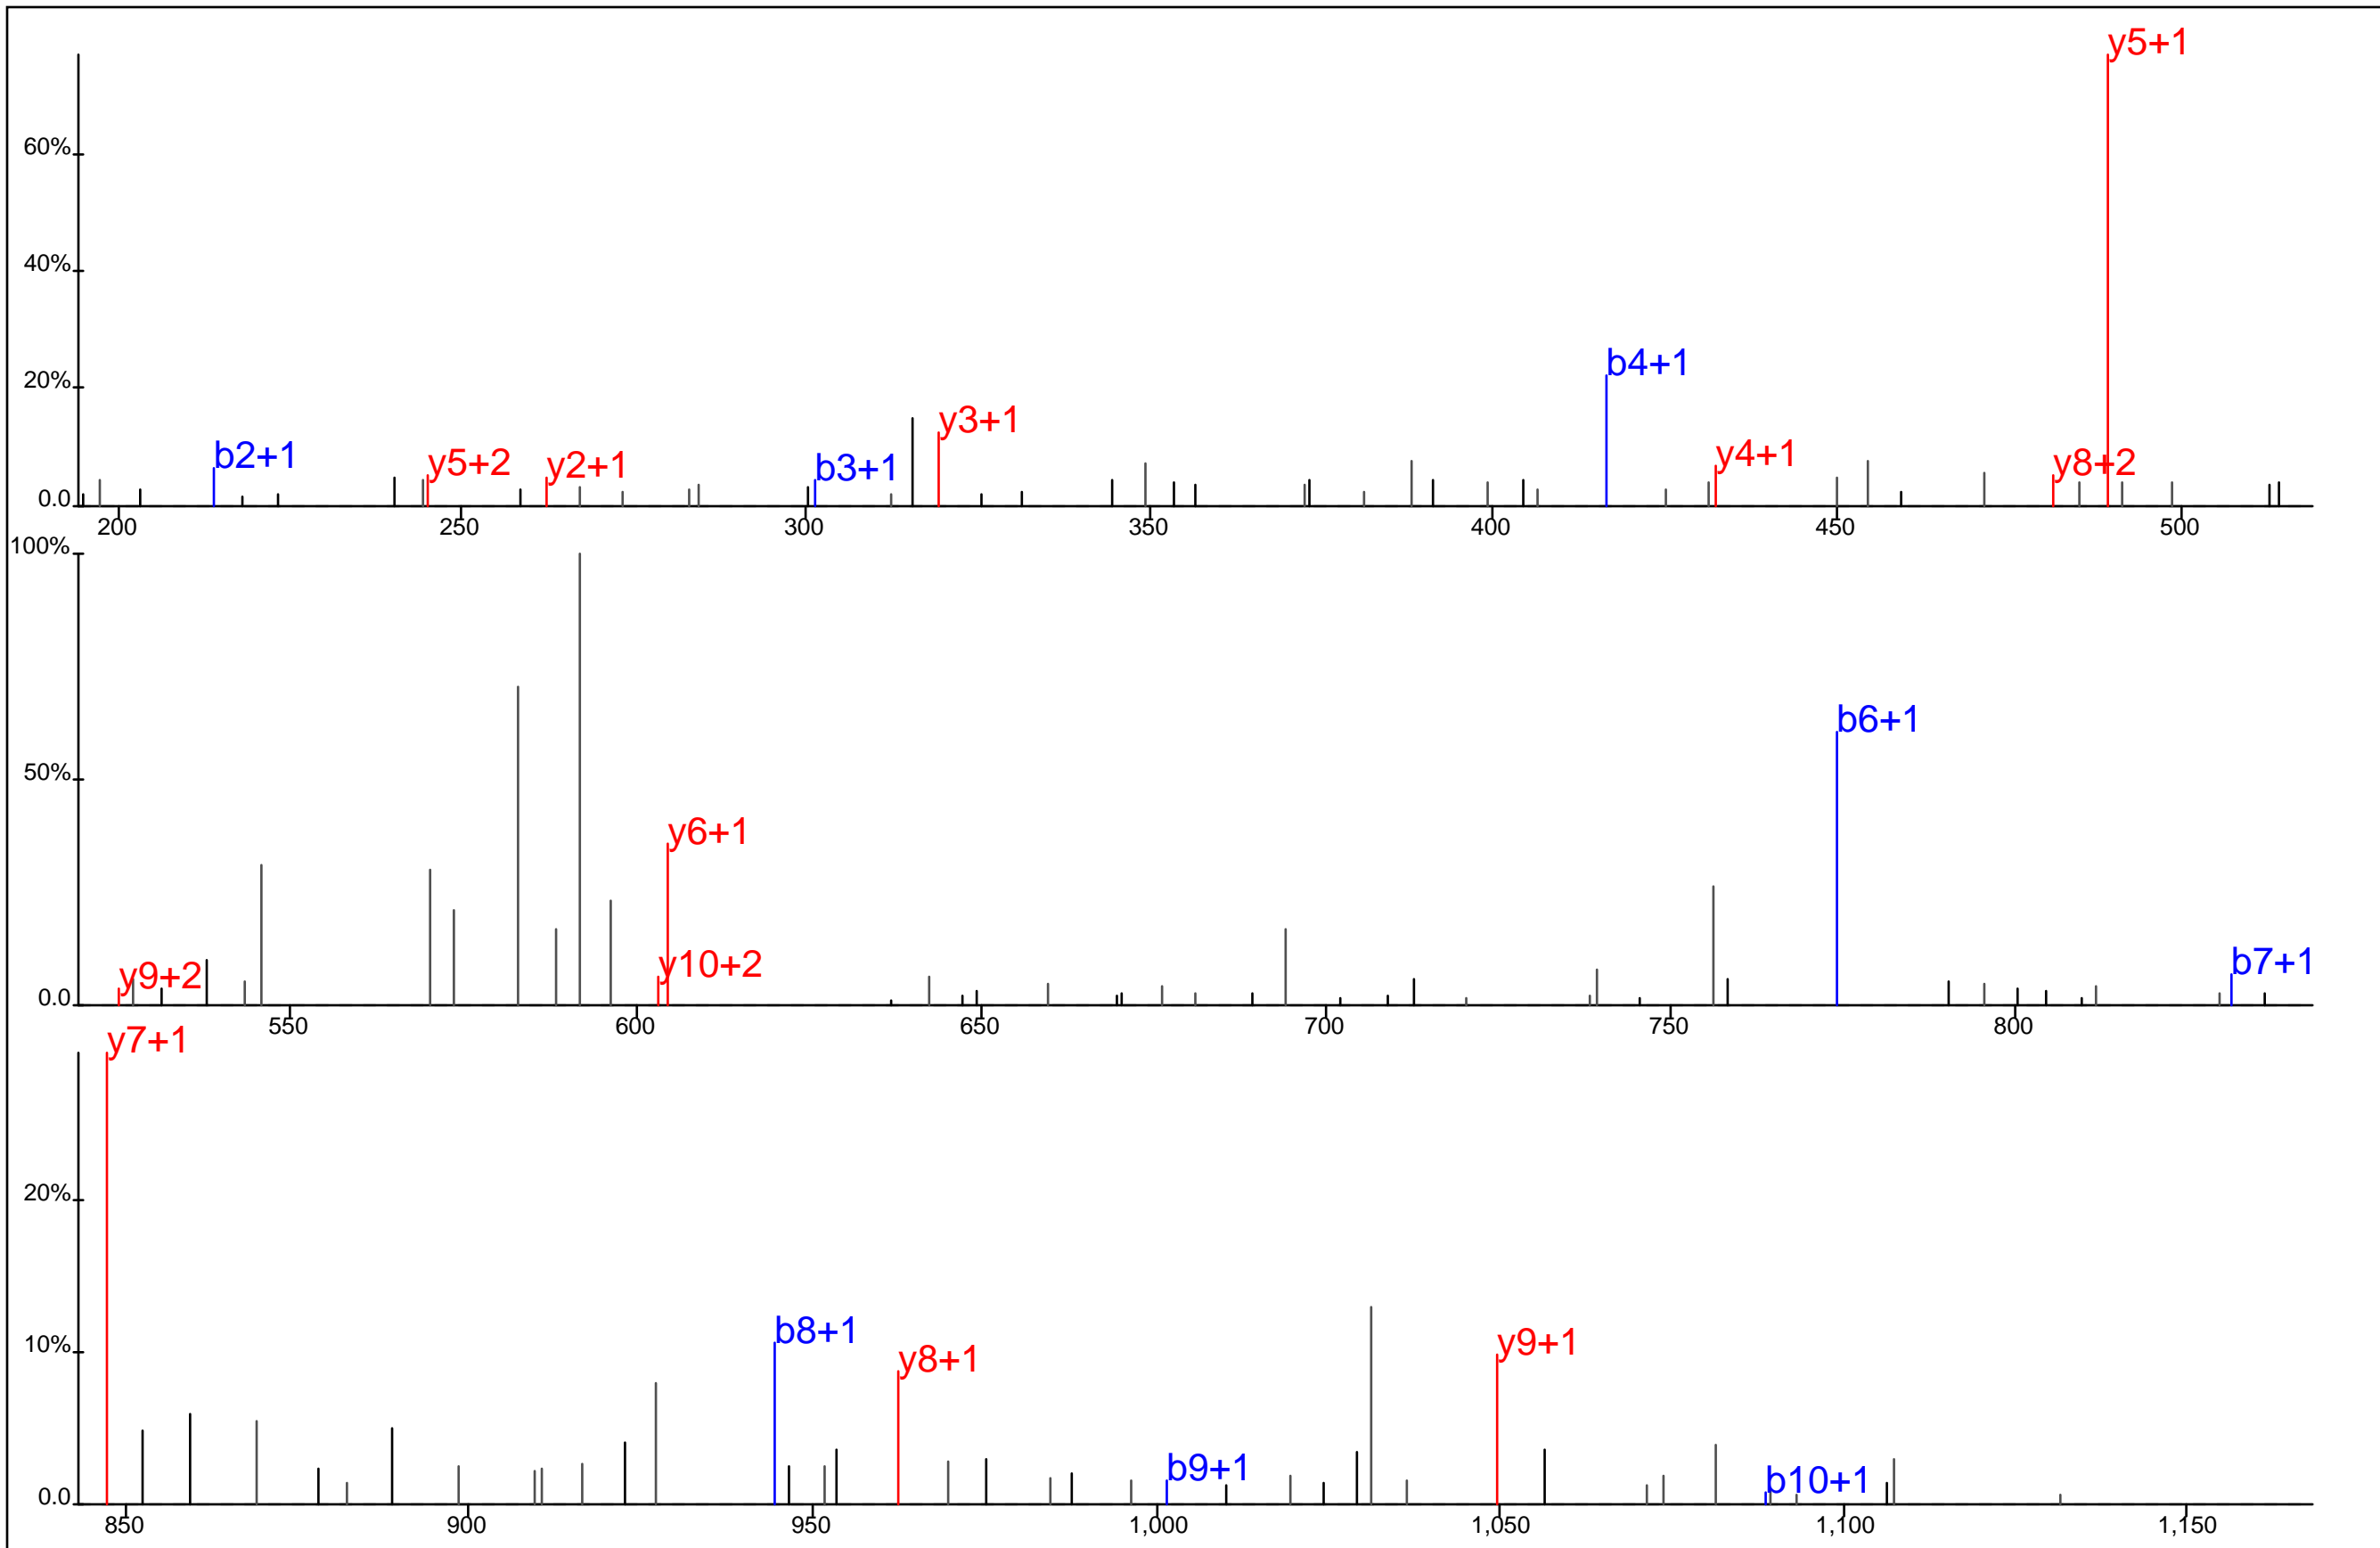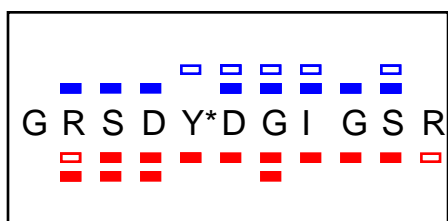

Protein Name: DDX3  
 gi Accession: 0  
 Precursor Mass: 631.7629+2  
 Delta Mass: 1.876 ppm  
 XCorr: 42.48

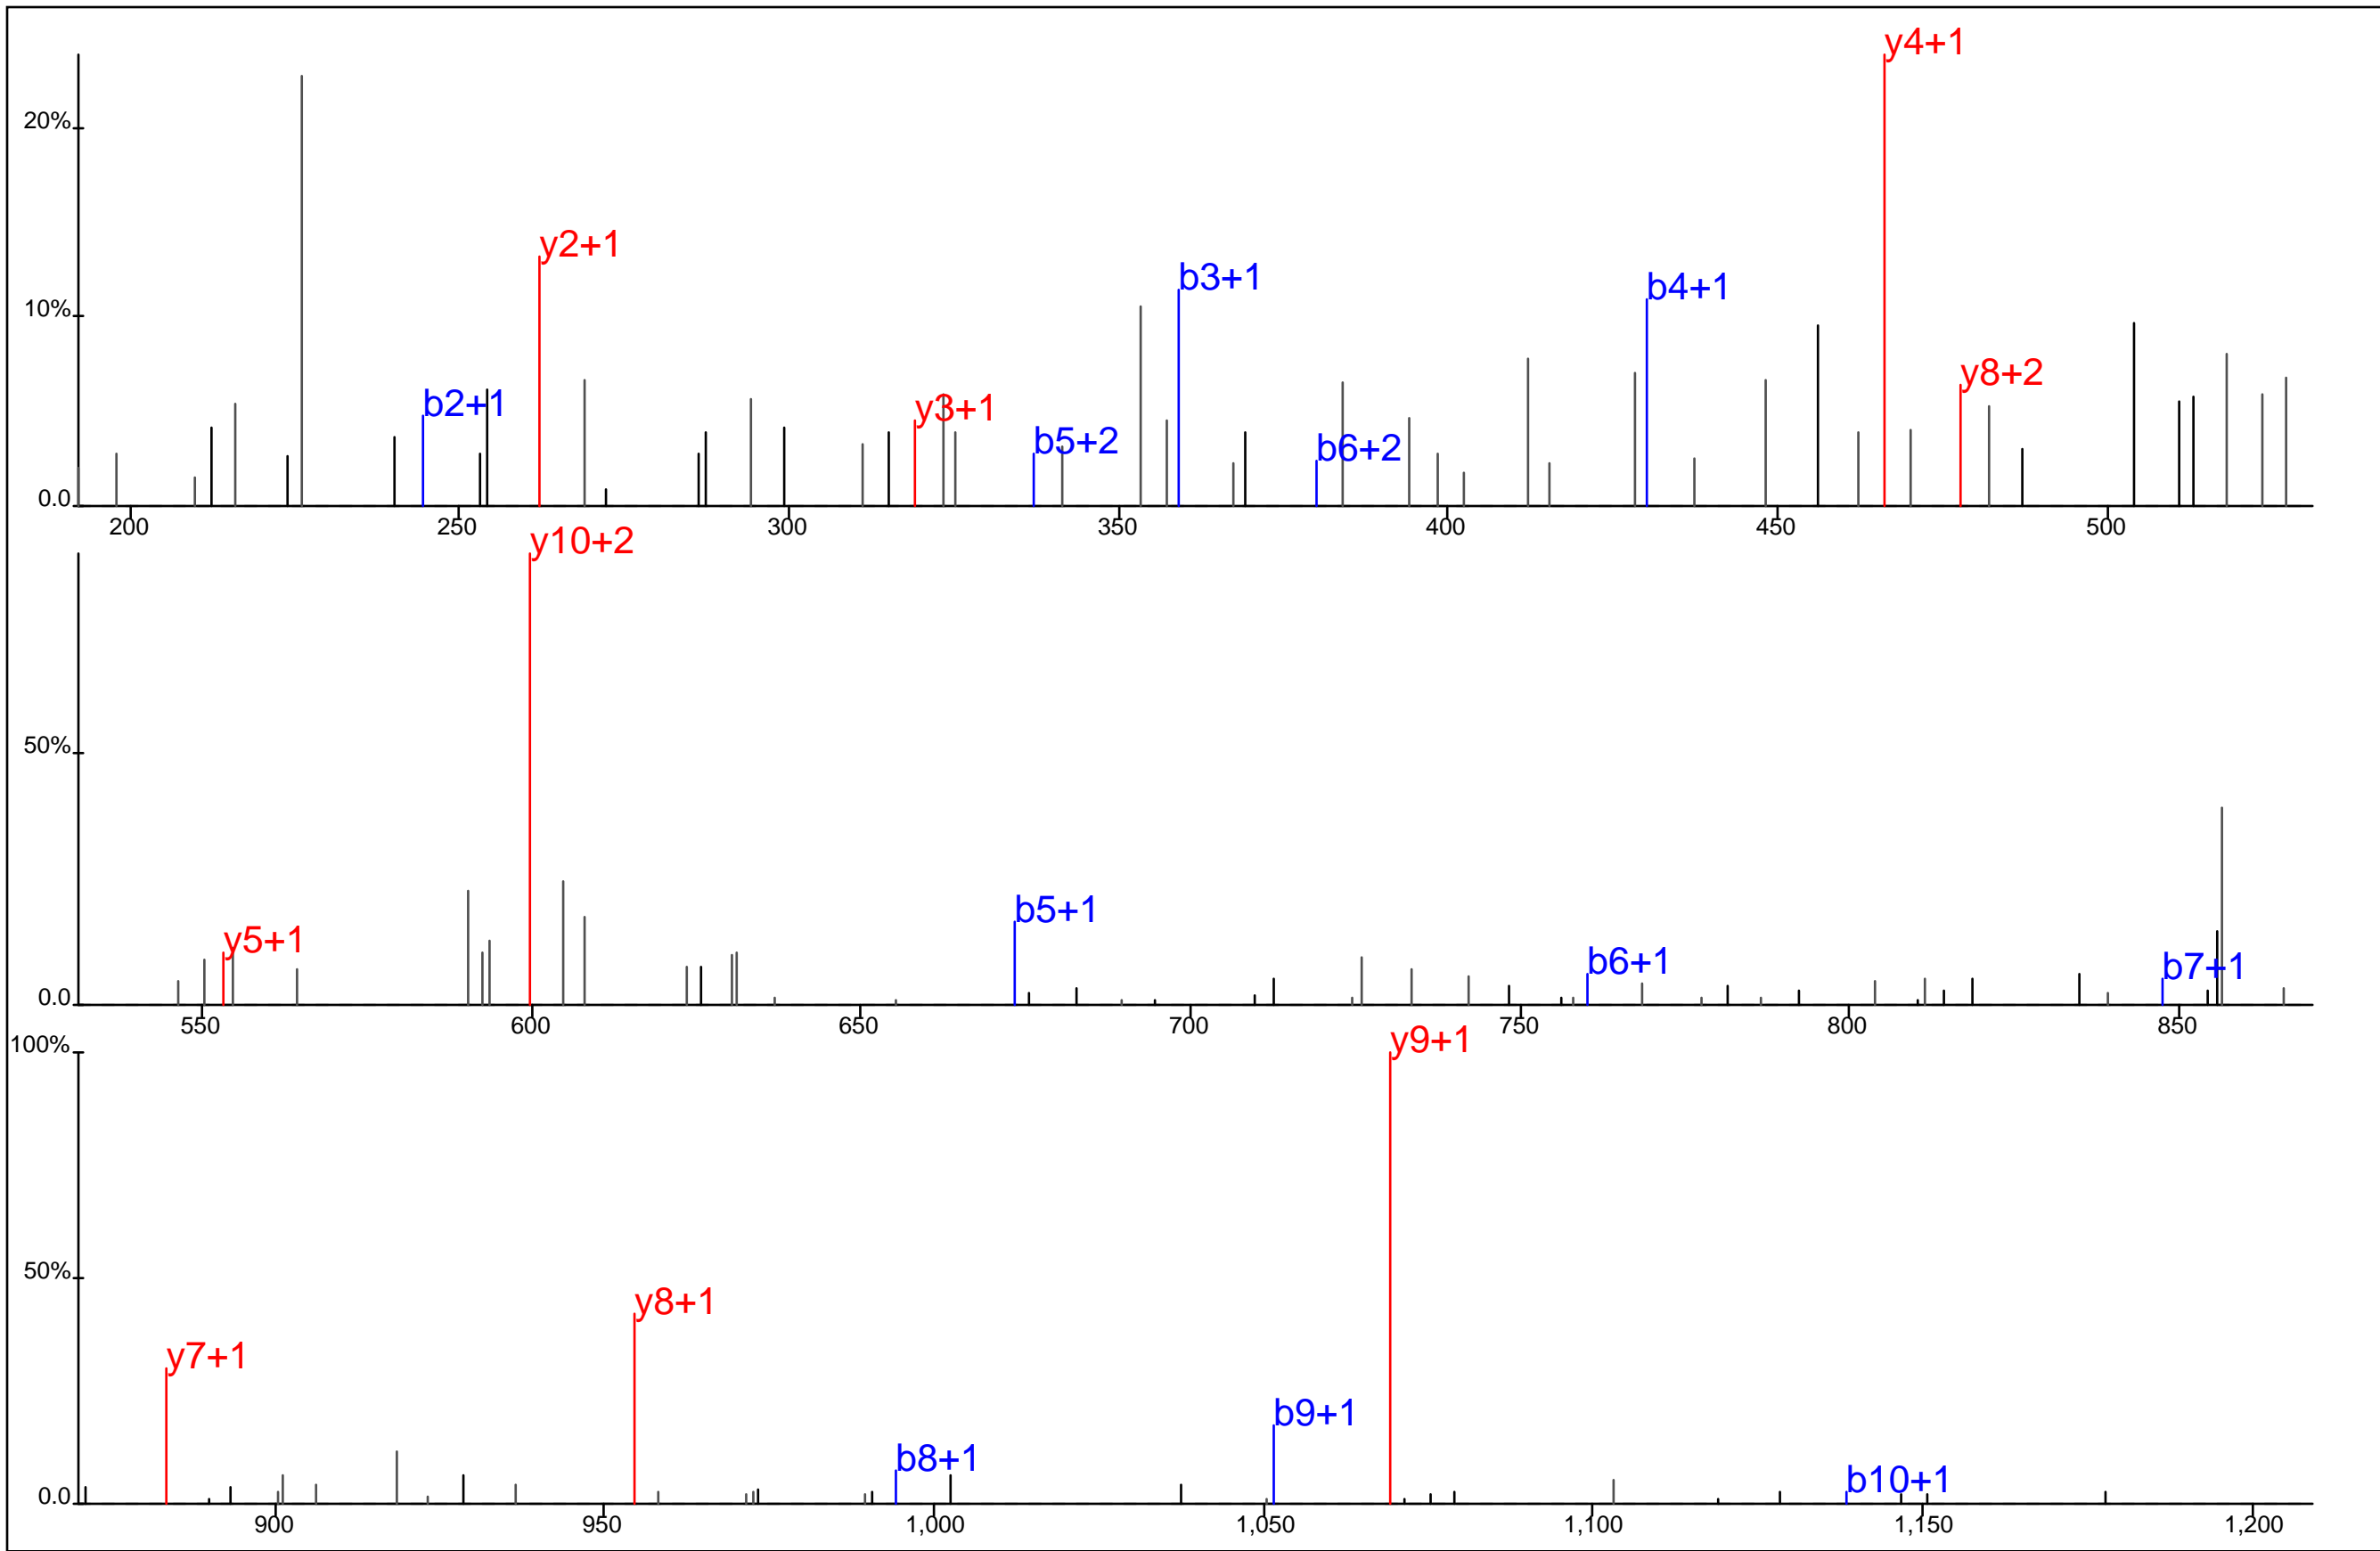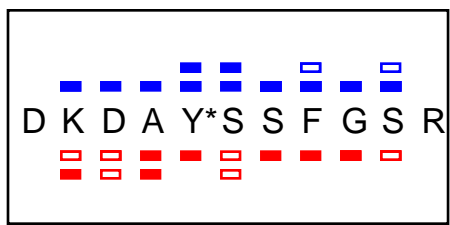

Protein Name: DDX3  
 gi Accession: 0  
 Precursor Mass: 656.7645+2  
 Delta Mass: 0.955 ppm  
 XCorr: 41.24

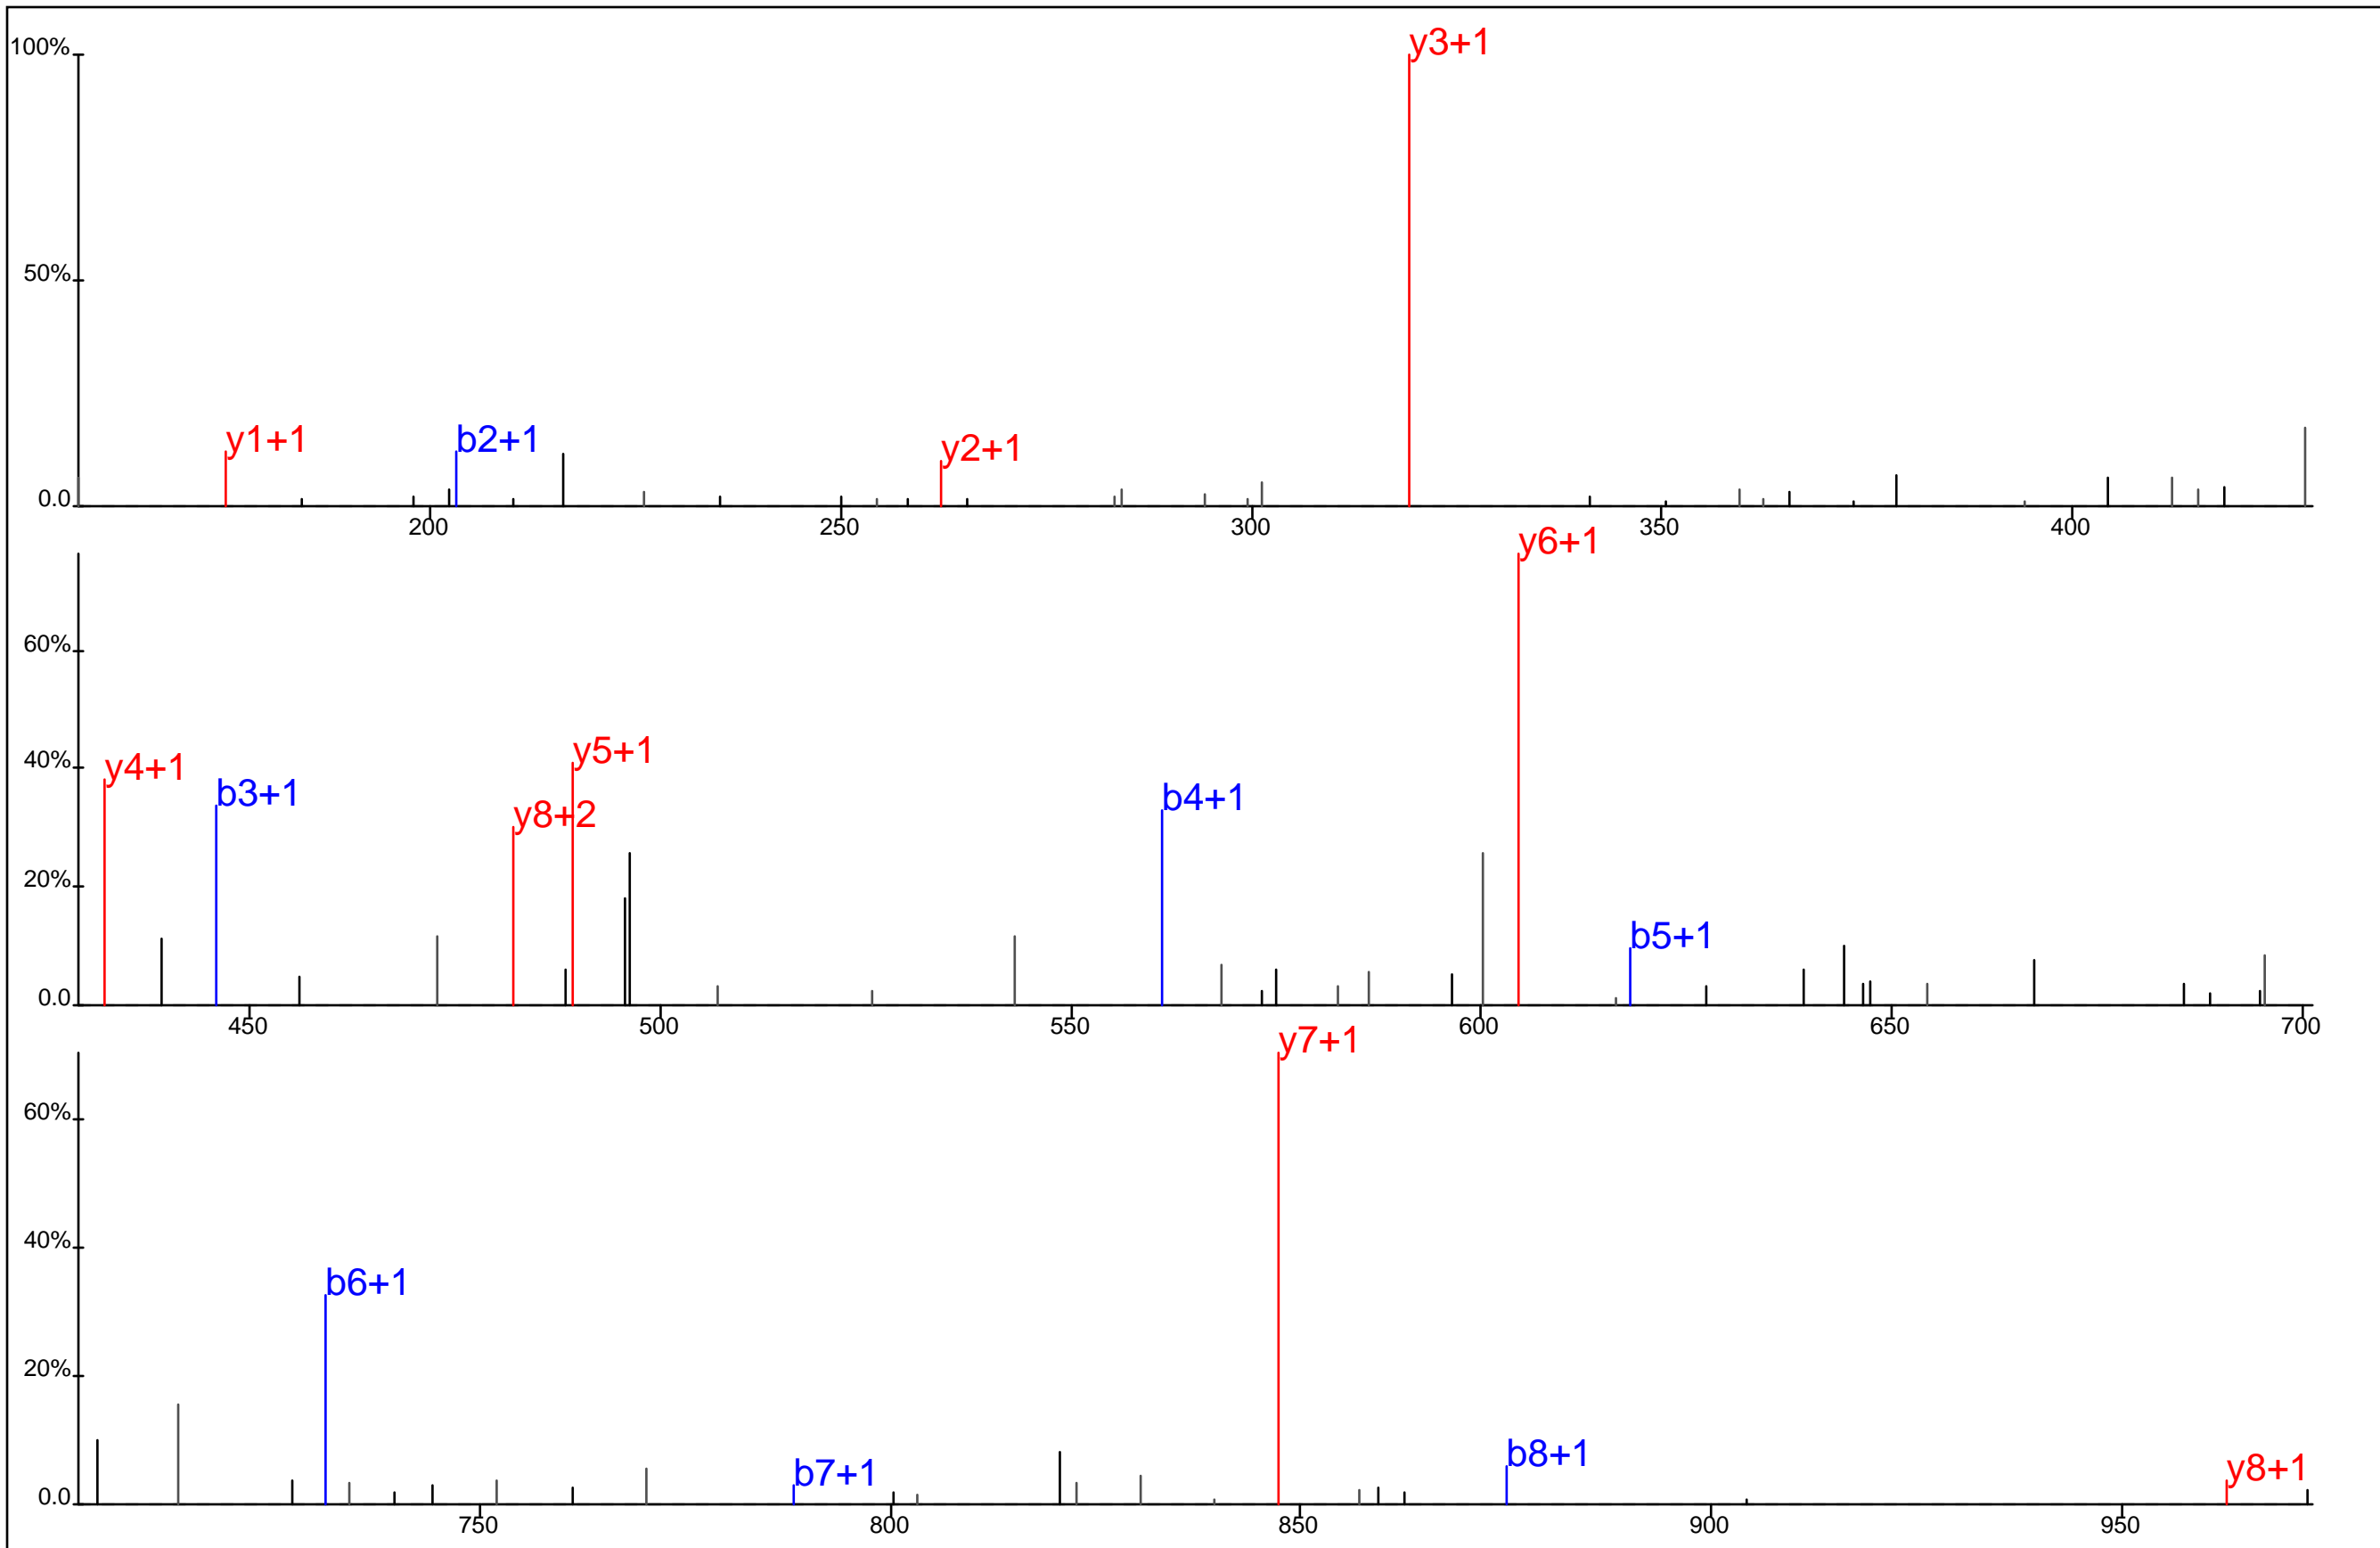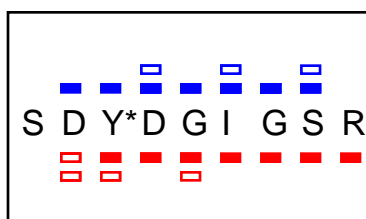

Protein Name: DDX3  
 gi Accession: 0  
 Precursor Mass: 525.2009+2  
 Delta Mass: 0.989 ppm  
 XCorr: 77.01



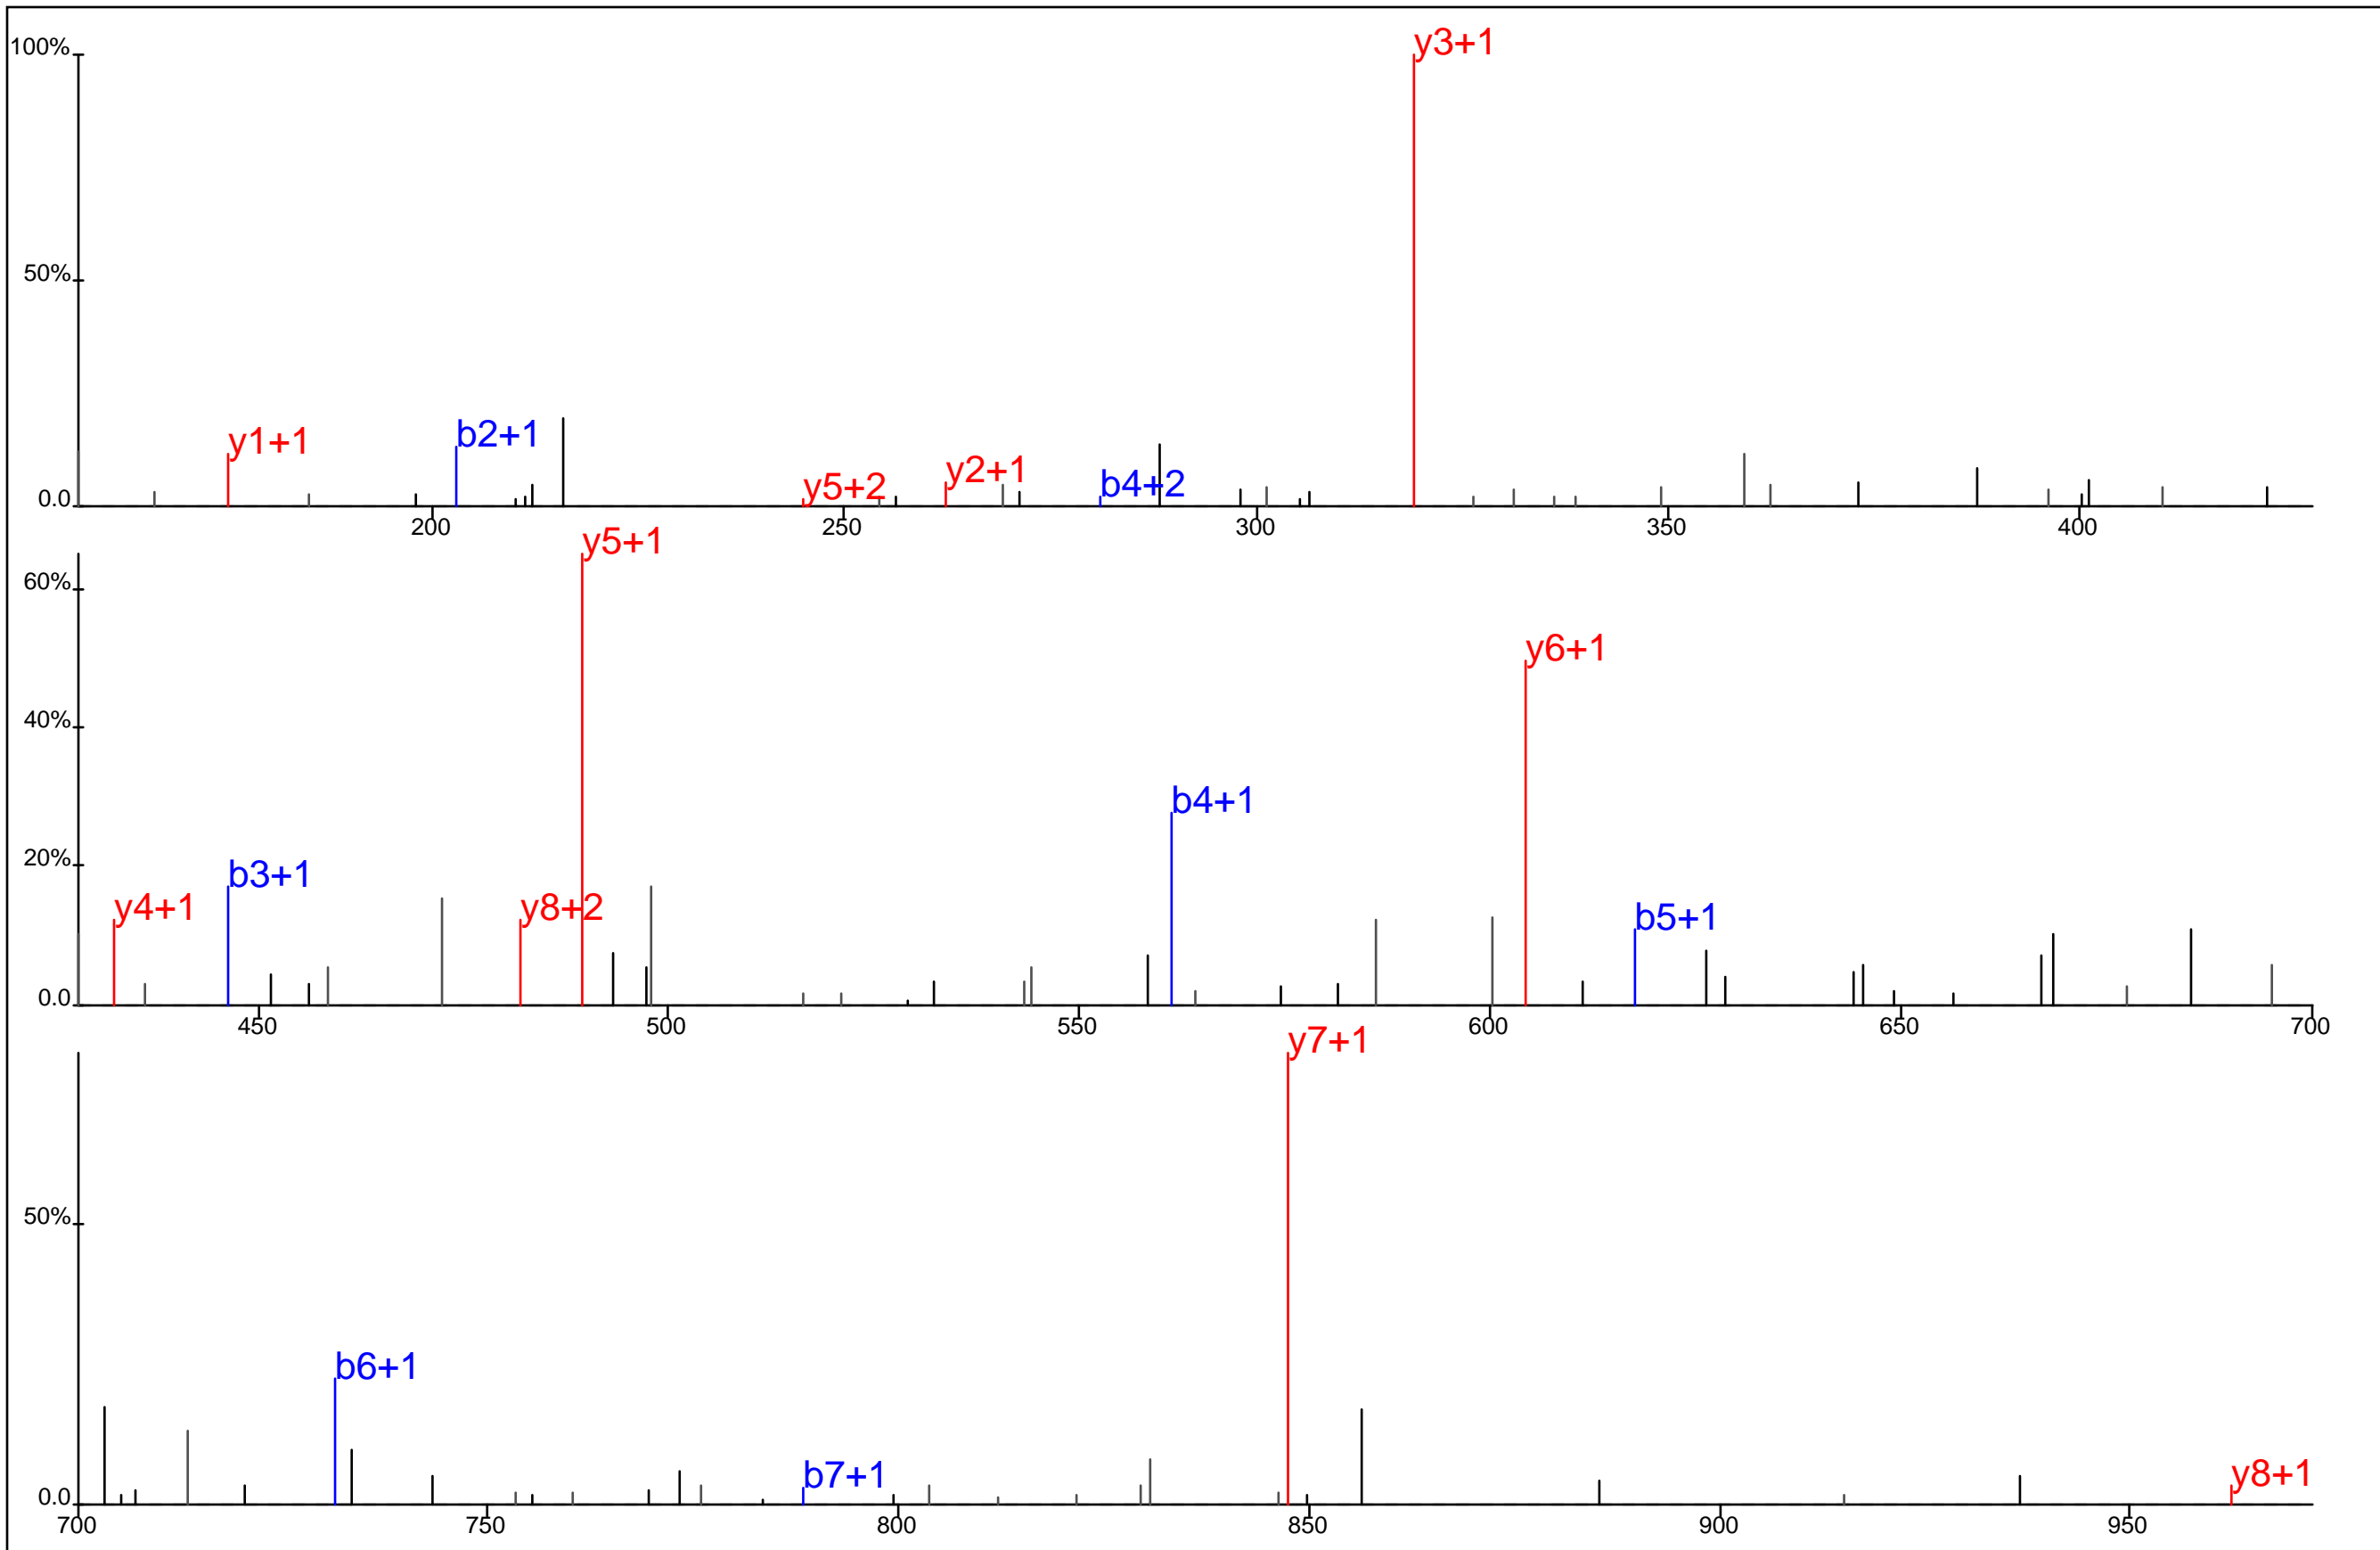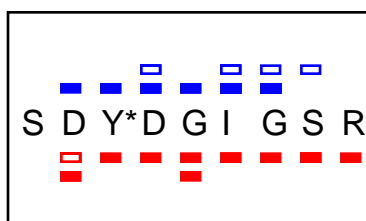

Protein Name: DDX3  
 gi Accession: 0  
 Precursor Mass: 525.2007+2  
 Delta Mass: 0.524 ppm  
 XCorr: 56.15

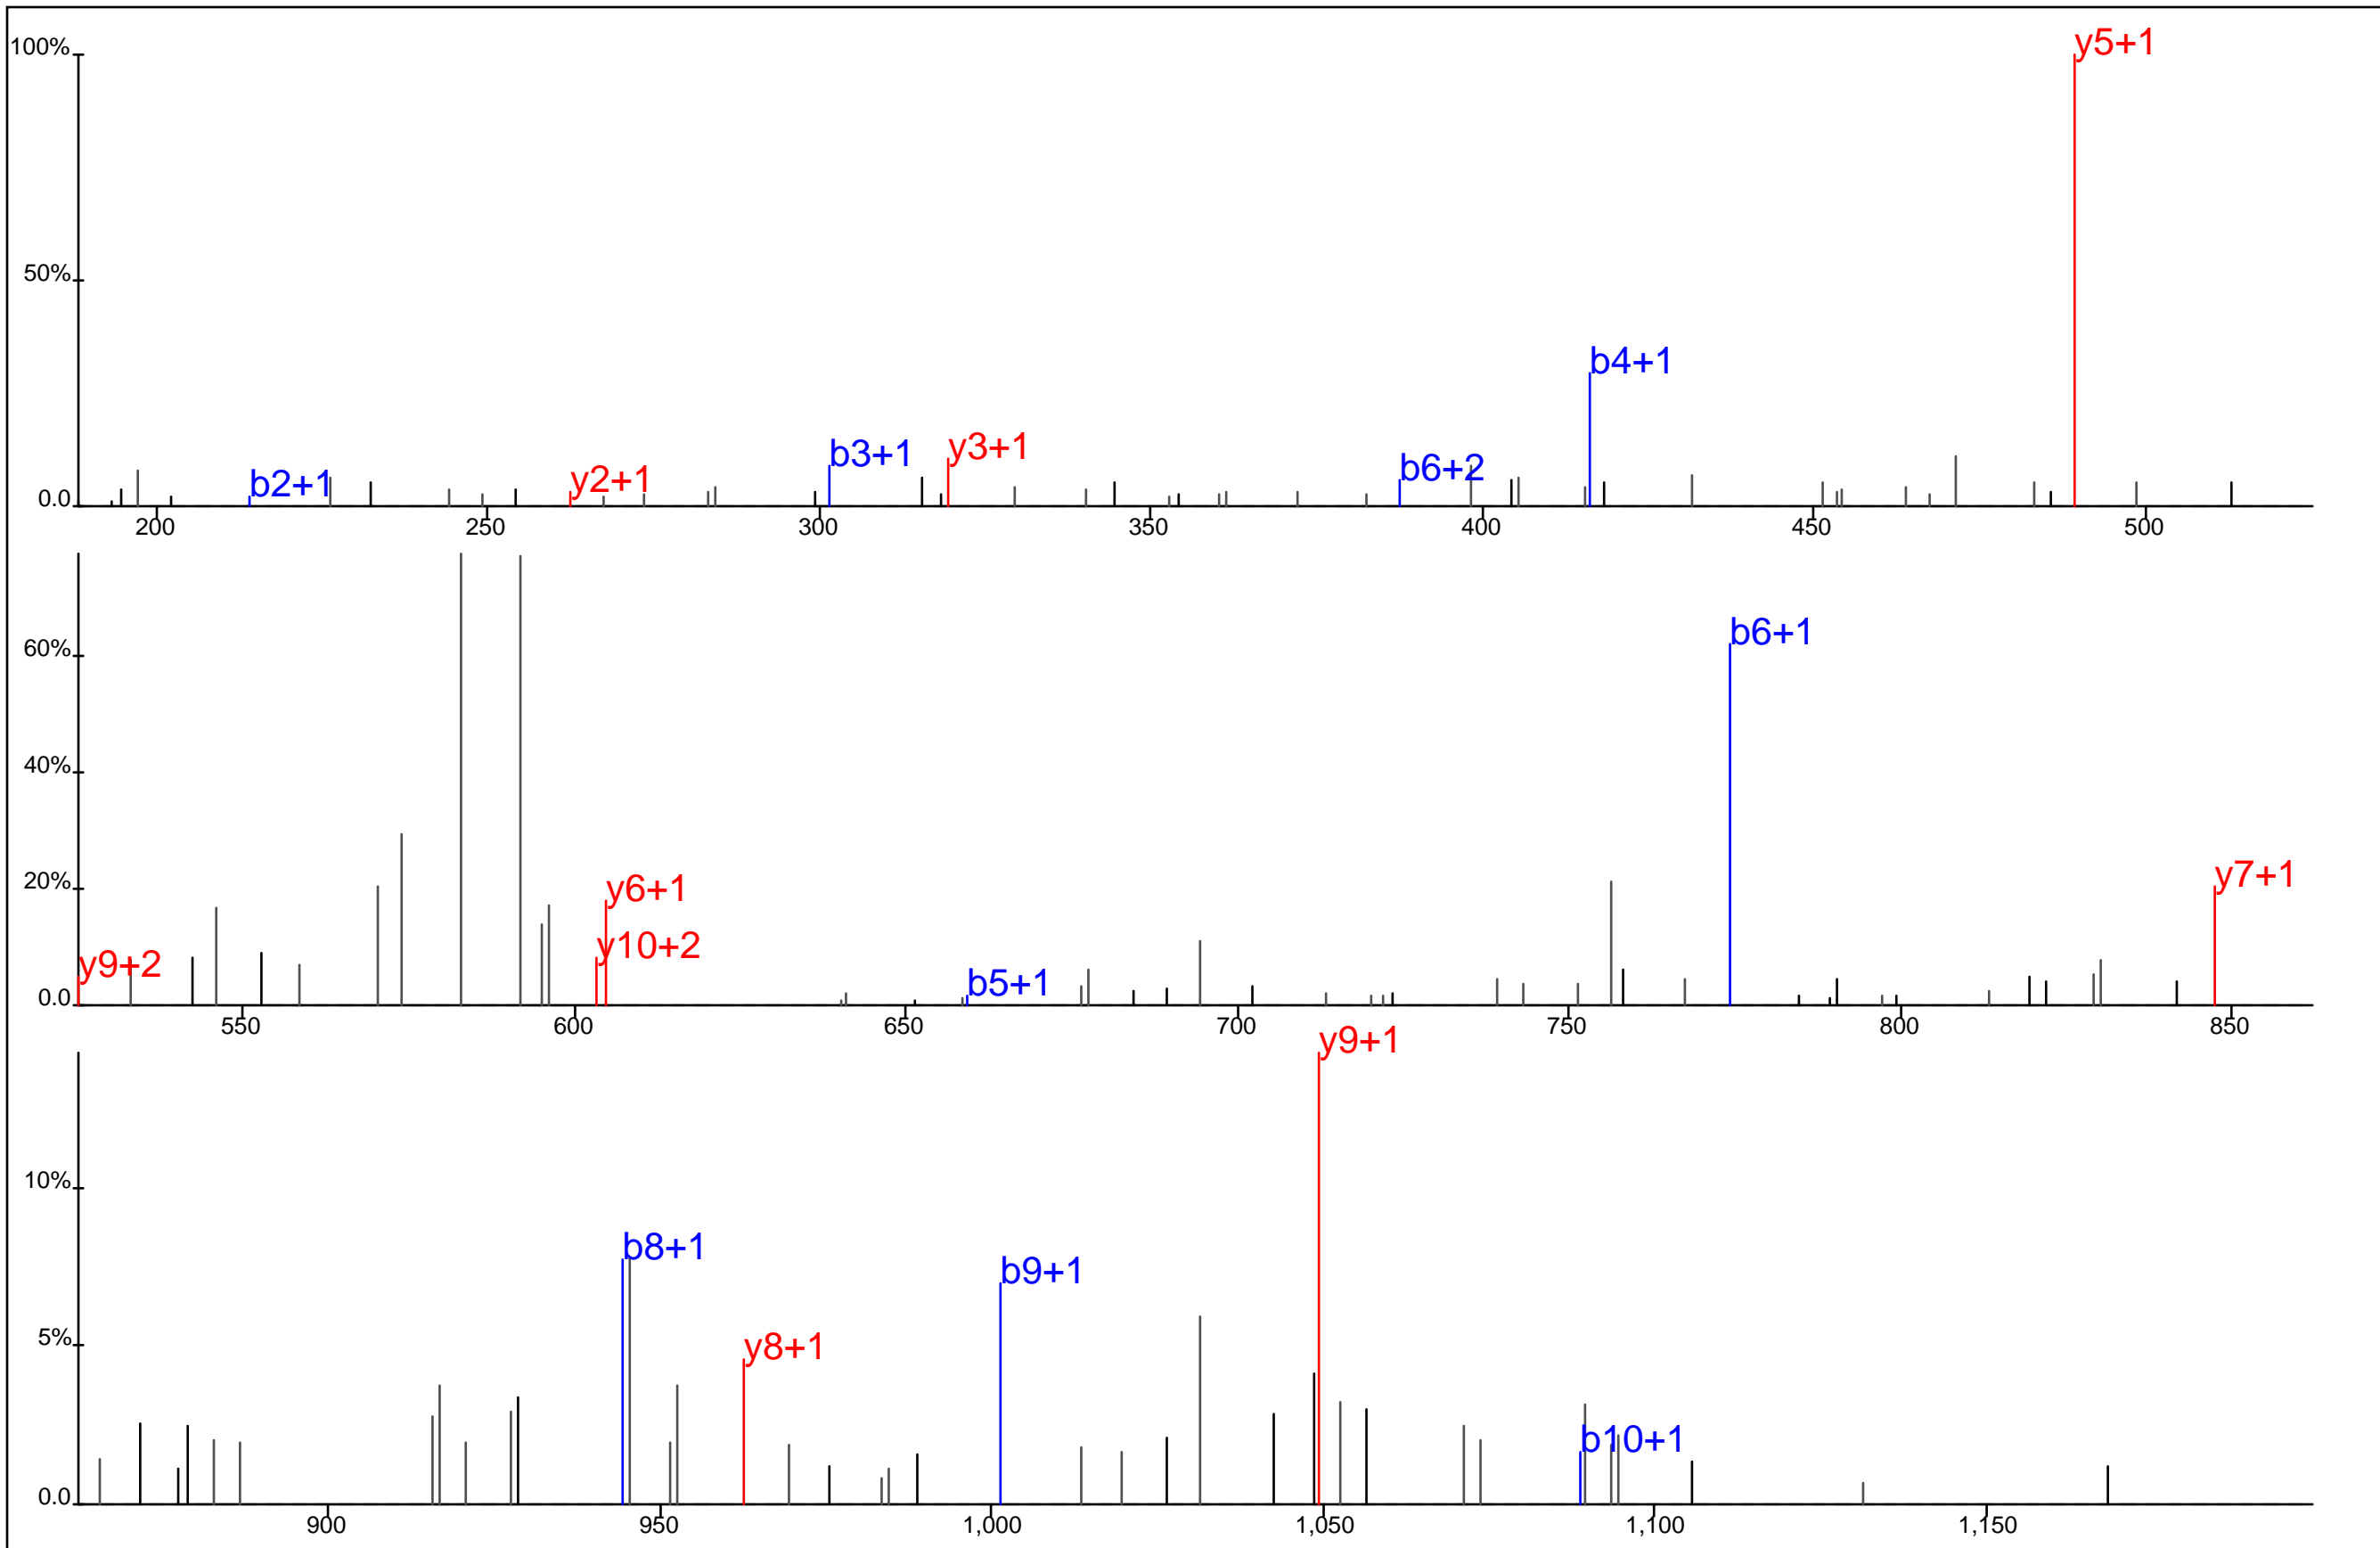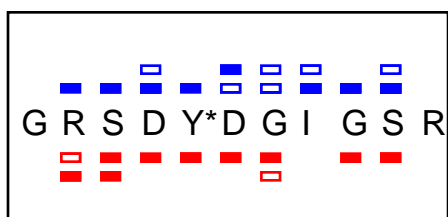

Protein Name: DDX3  
 gi Accession: 0  
 Precursor Mass: 631.7644+2  
 Delta Mass: 4.293 ppm  
 XCorr: 39.67



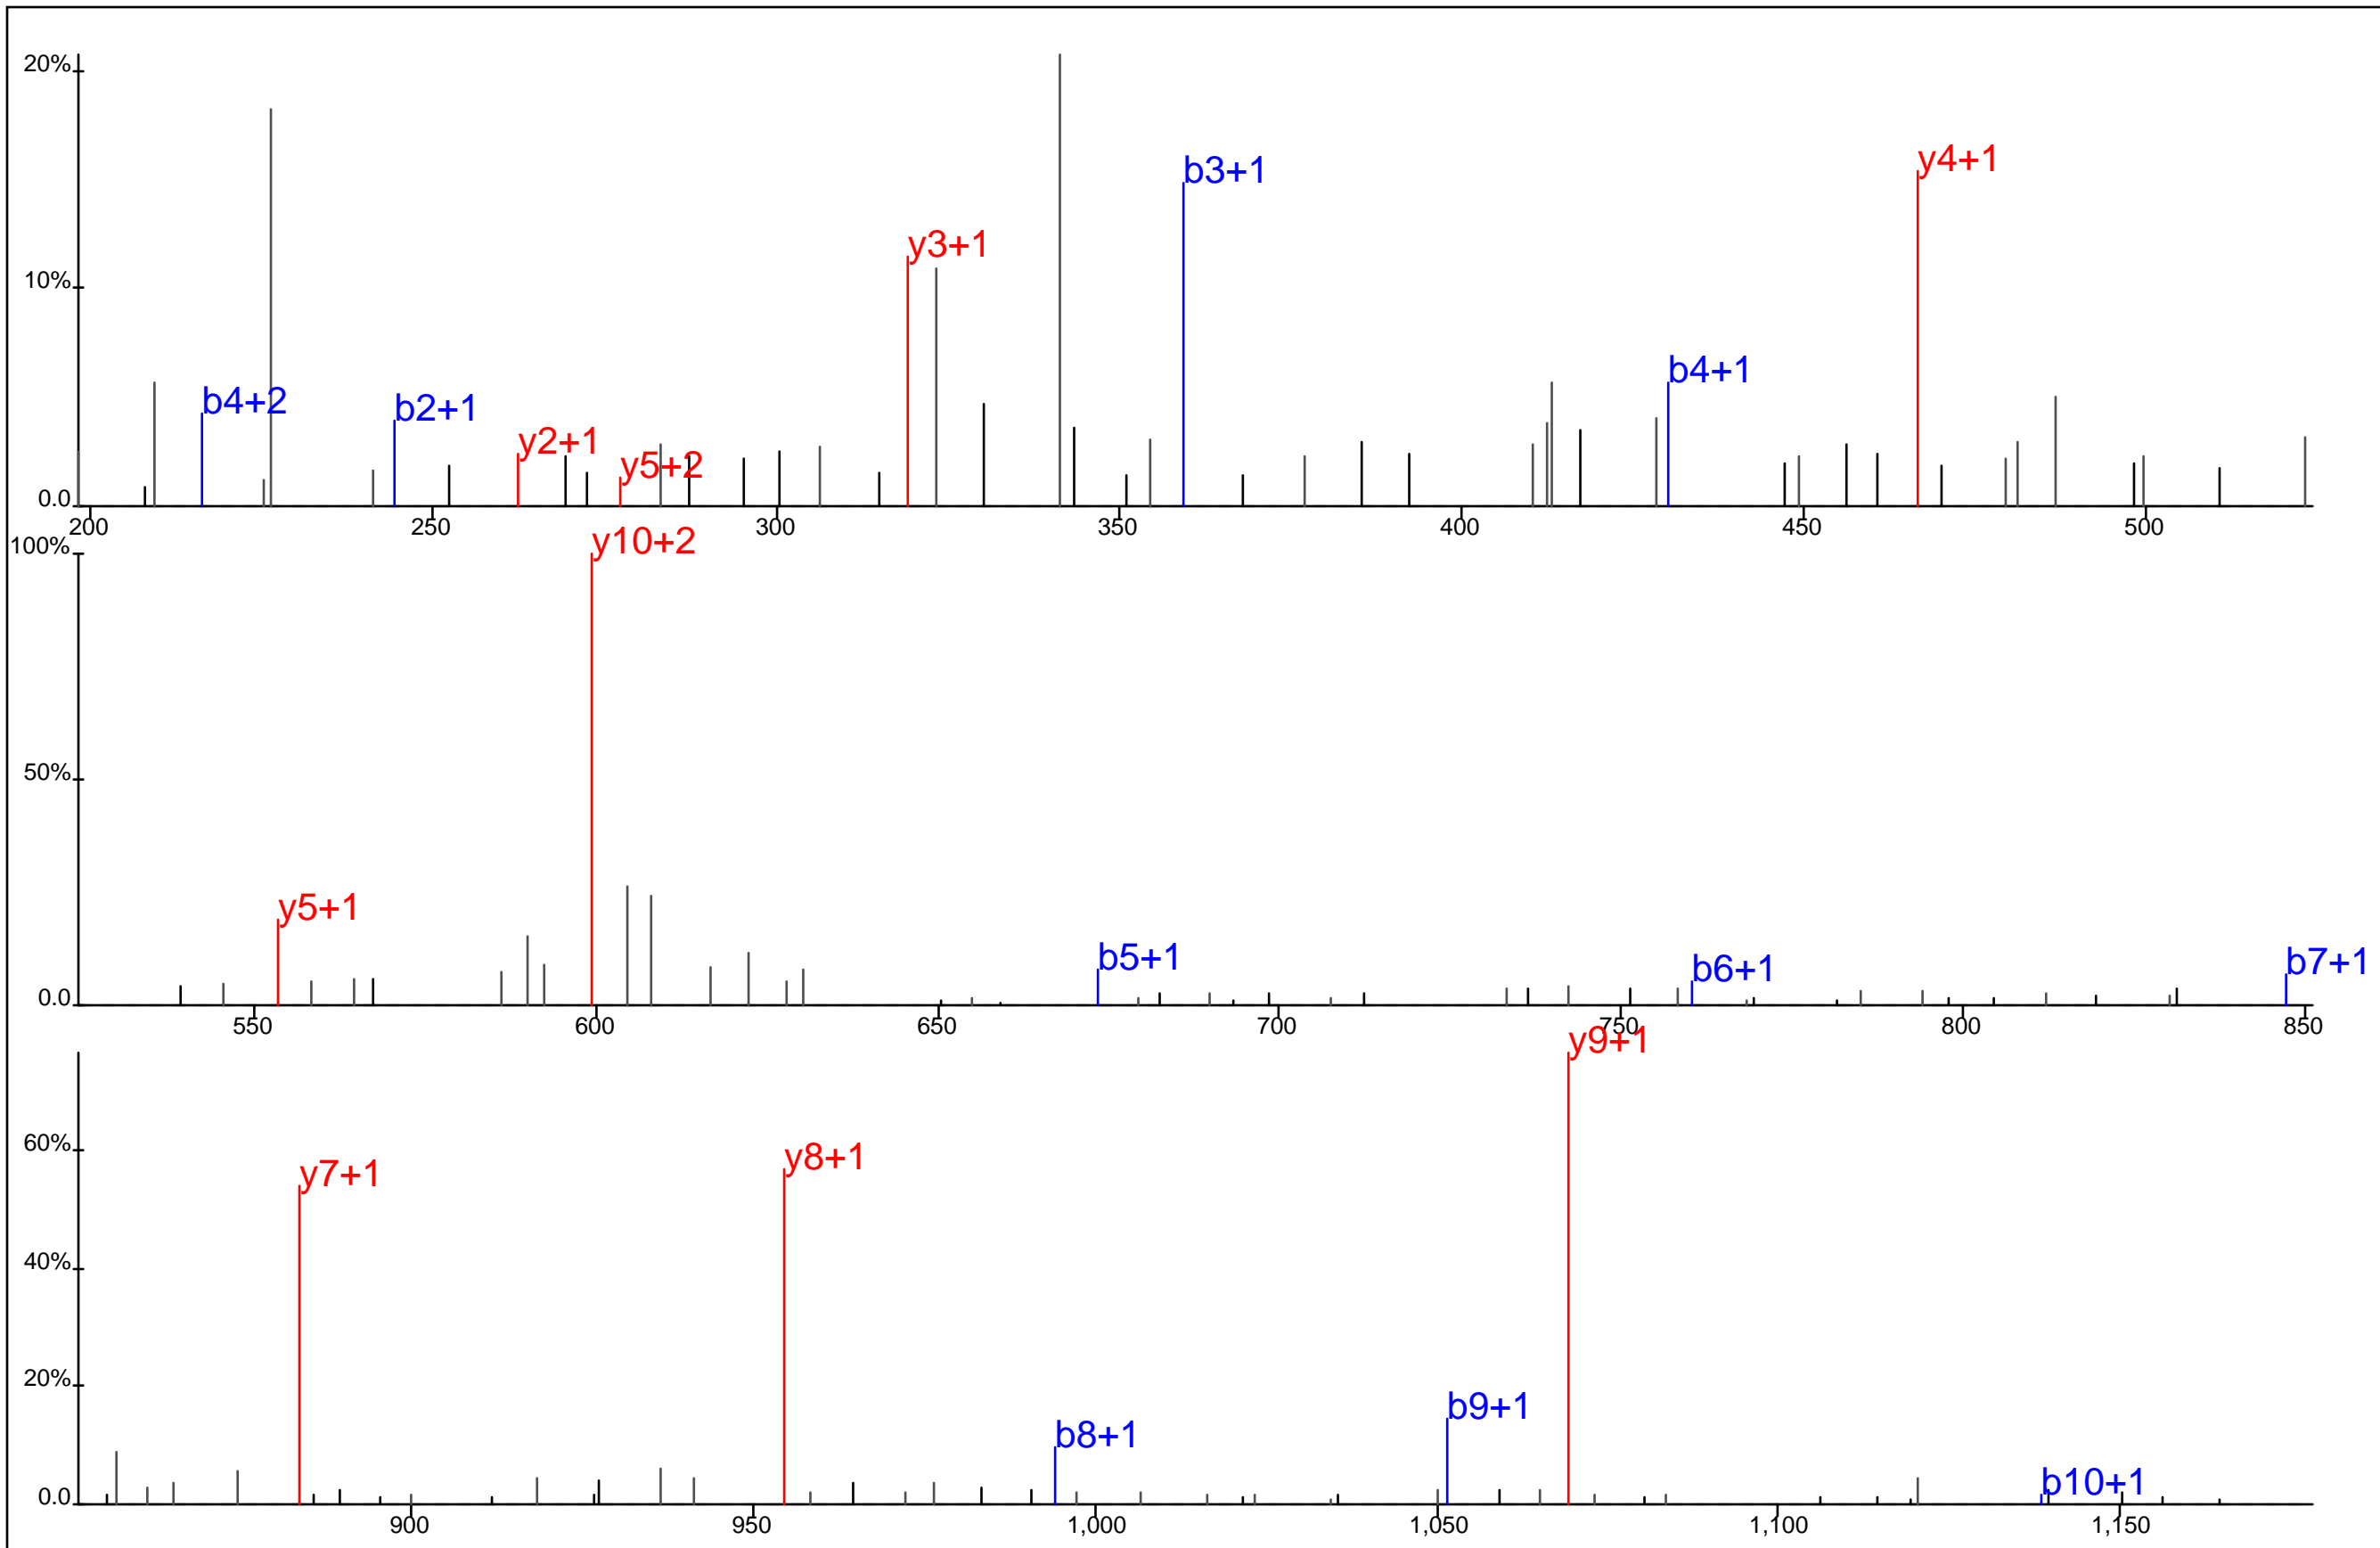

■ ■ ■ ■ ■ ■ ■ ■ ■  
 D K D A Y\* S S F G S R  
■ ■ ■ ■ ■ ■ ■ ■ ■

Protein Name: DDX3  
 gi Accession: 0  
 Precursor Mass: 656.7664+2  
 Delta Mass: 3.745 ppm  
 XCorr: 54.09

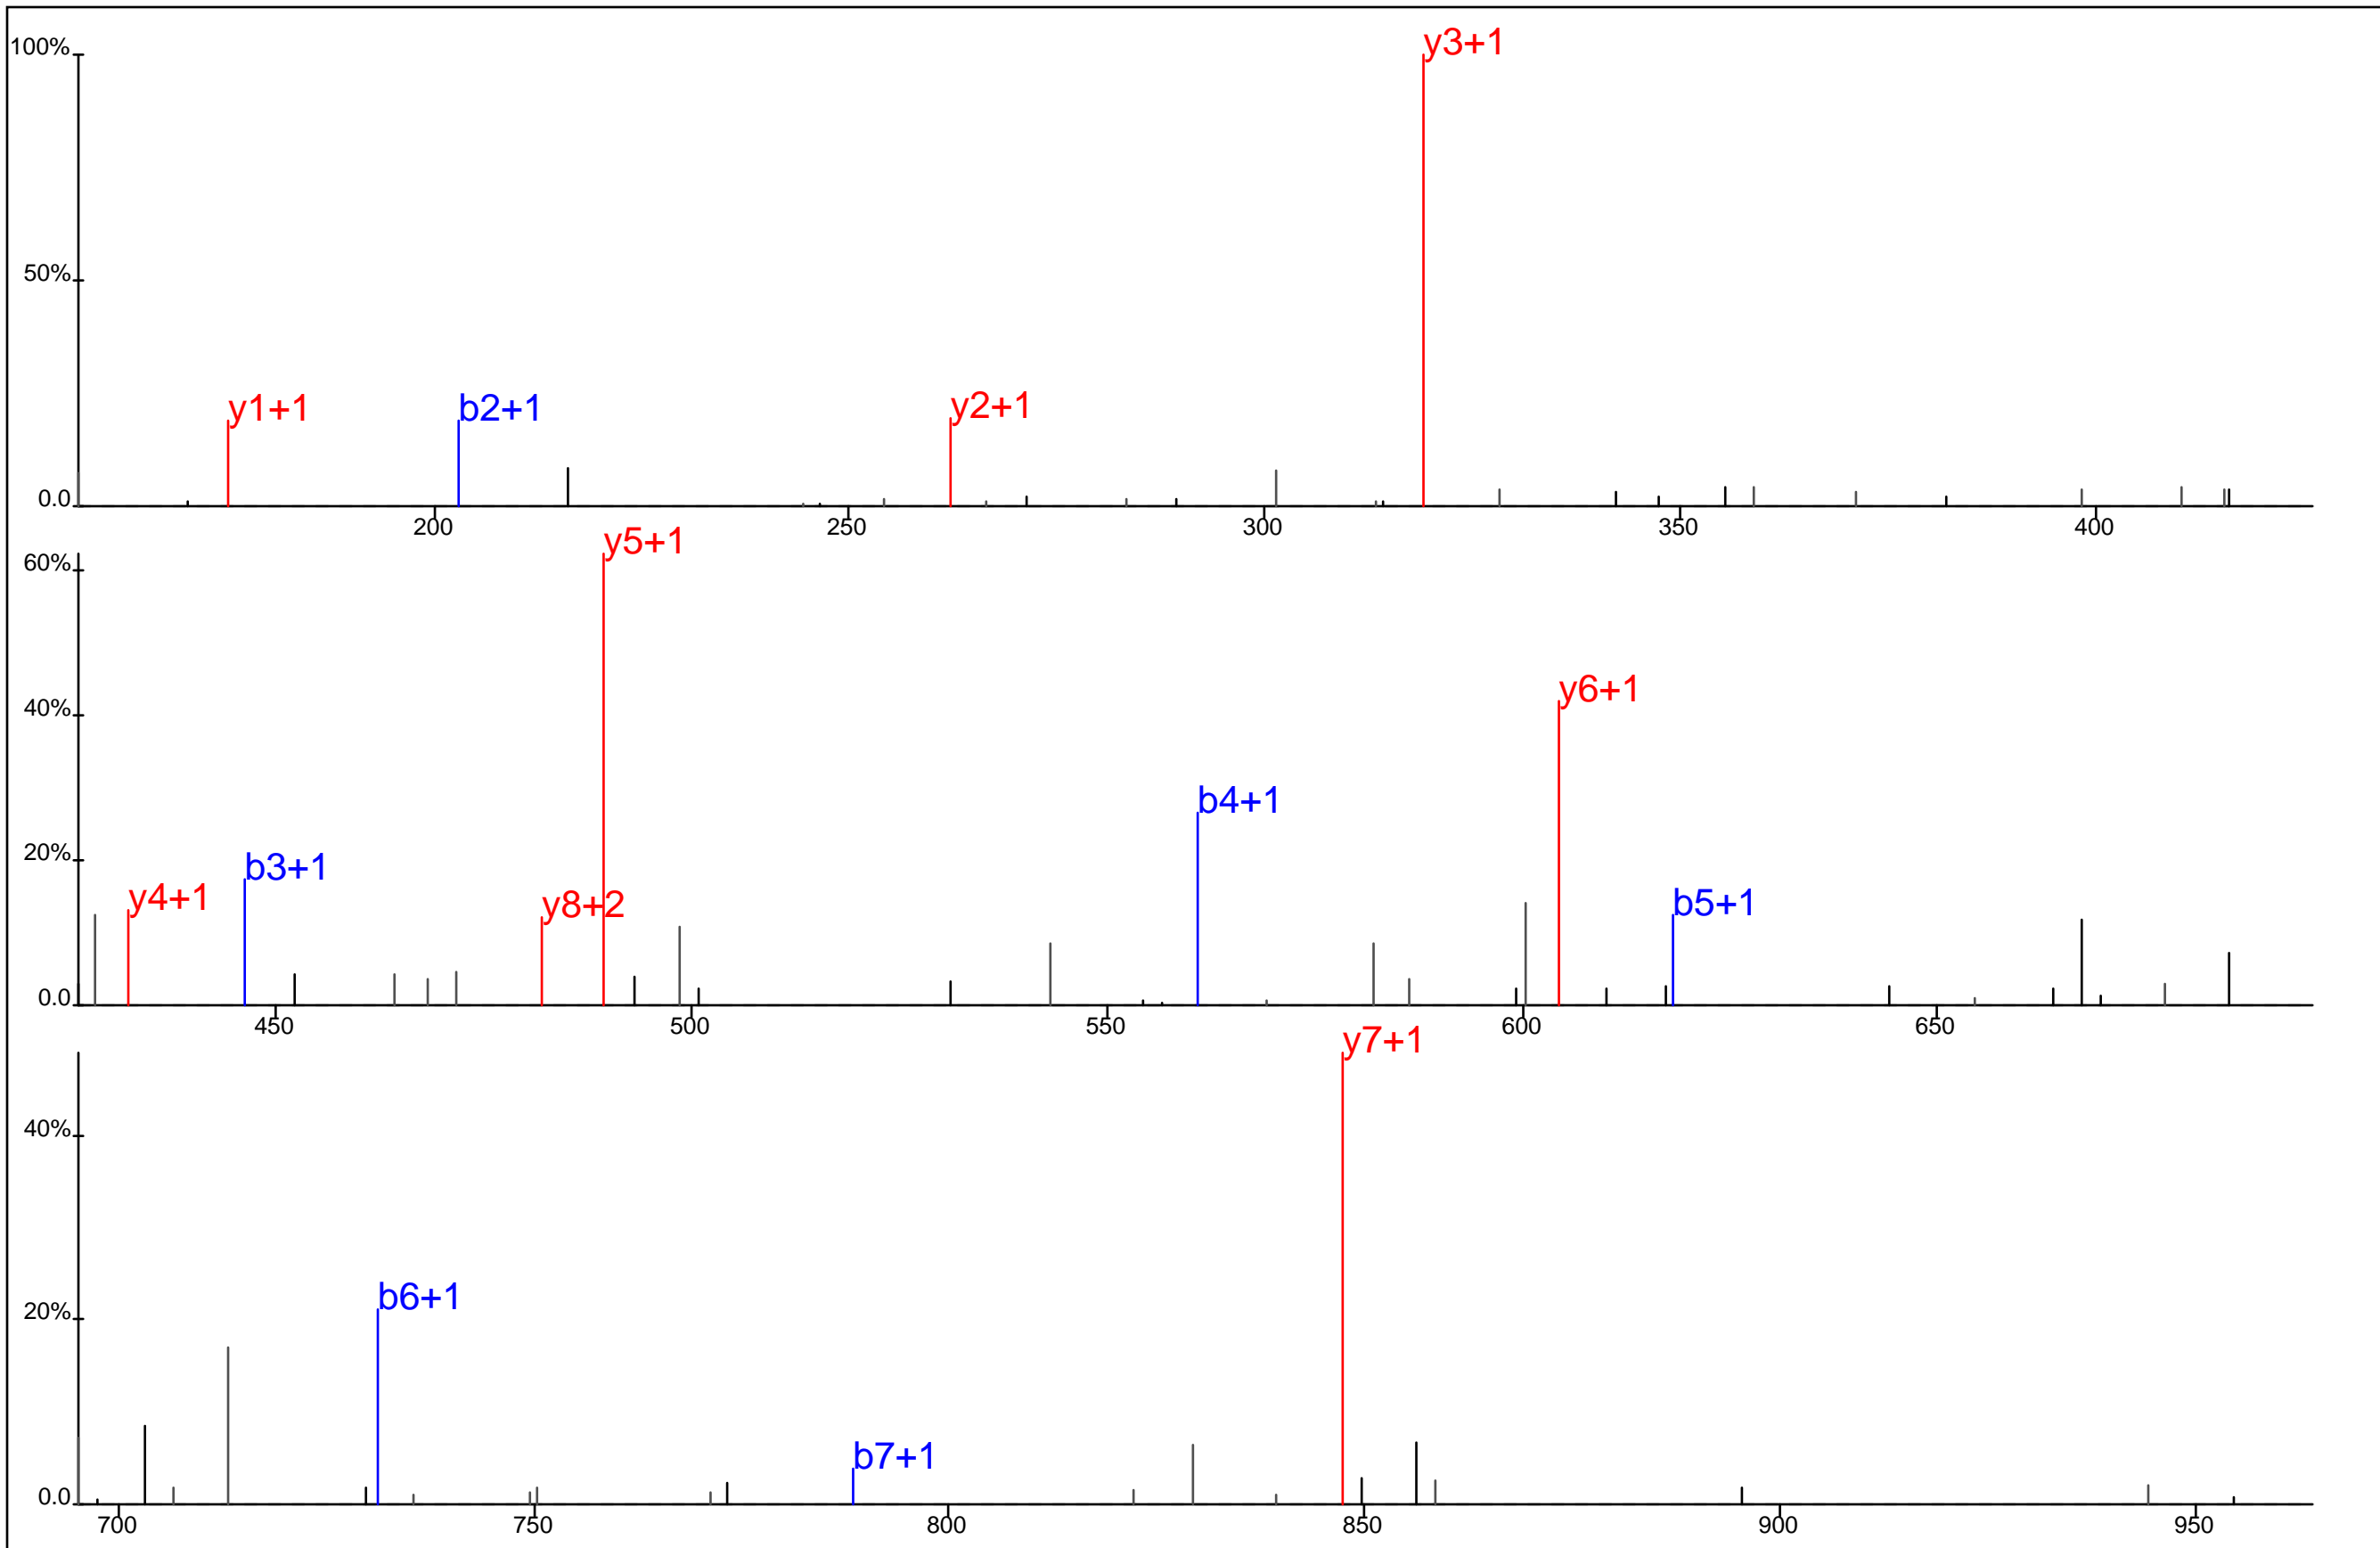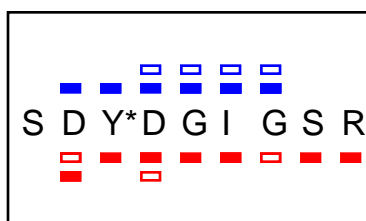

Protein Name: DDX3  
 gi Accession: 0  
 Precursor Mass: 525.2012+2  
 Delta Mass: 1.454 ppm  
 XCorr: 62.43

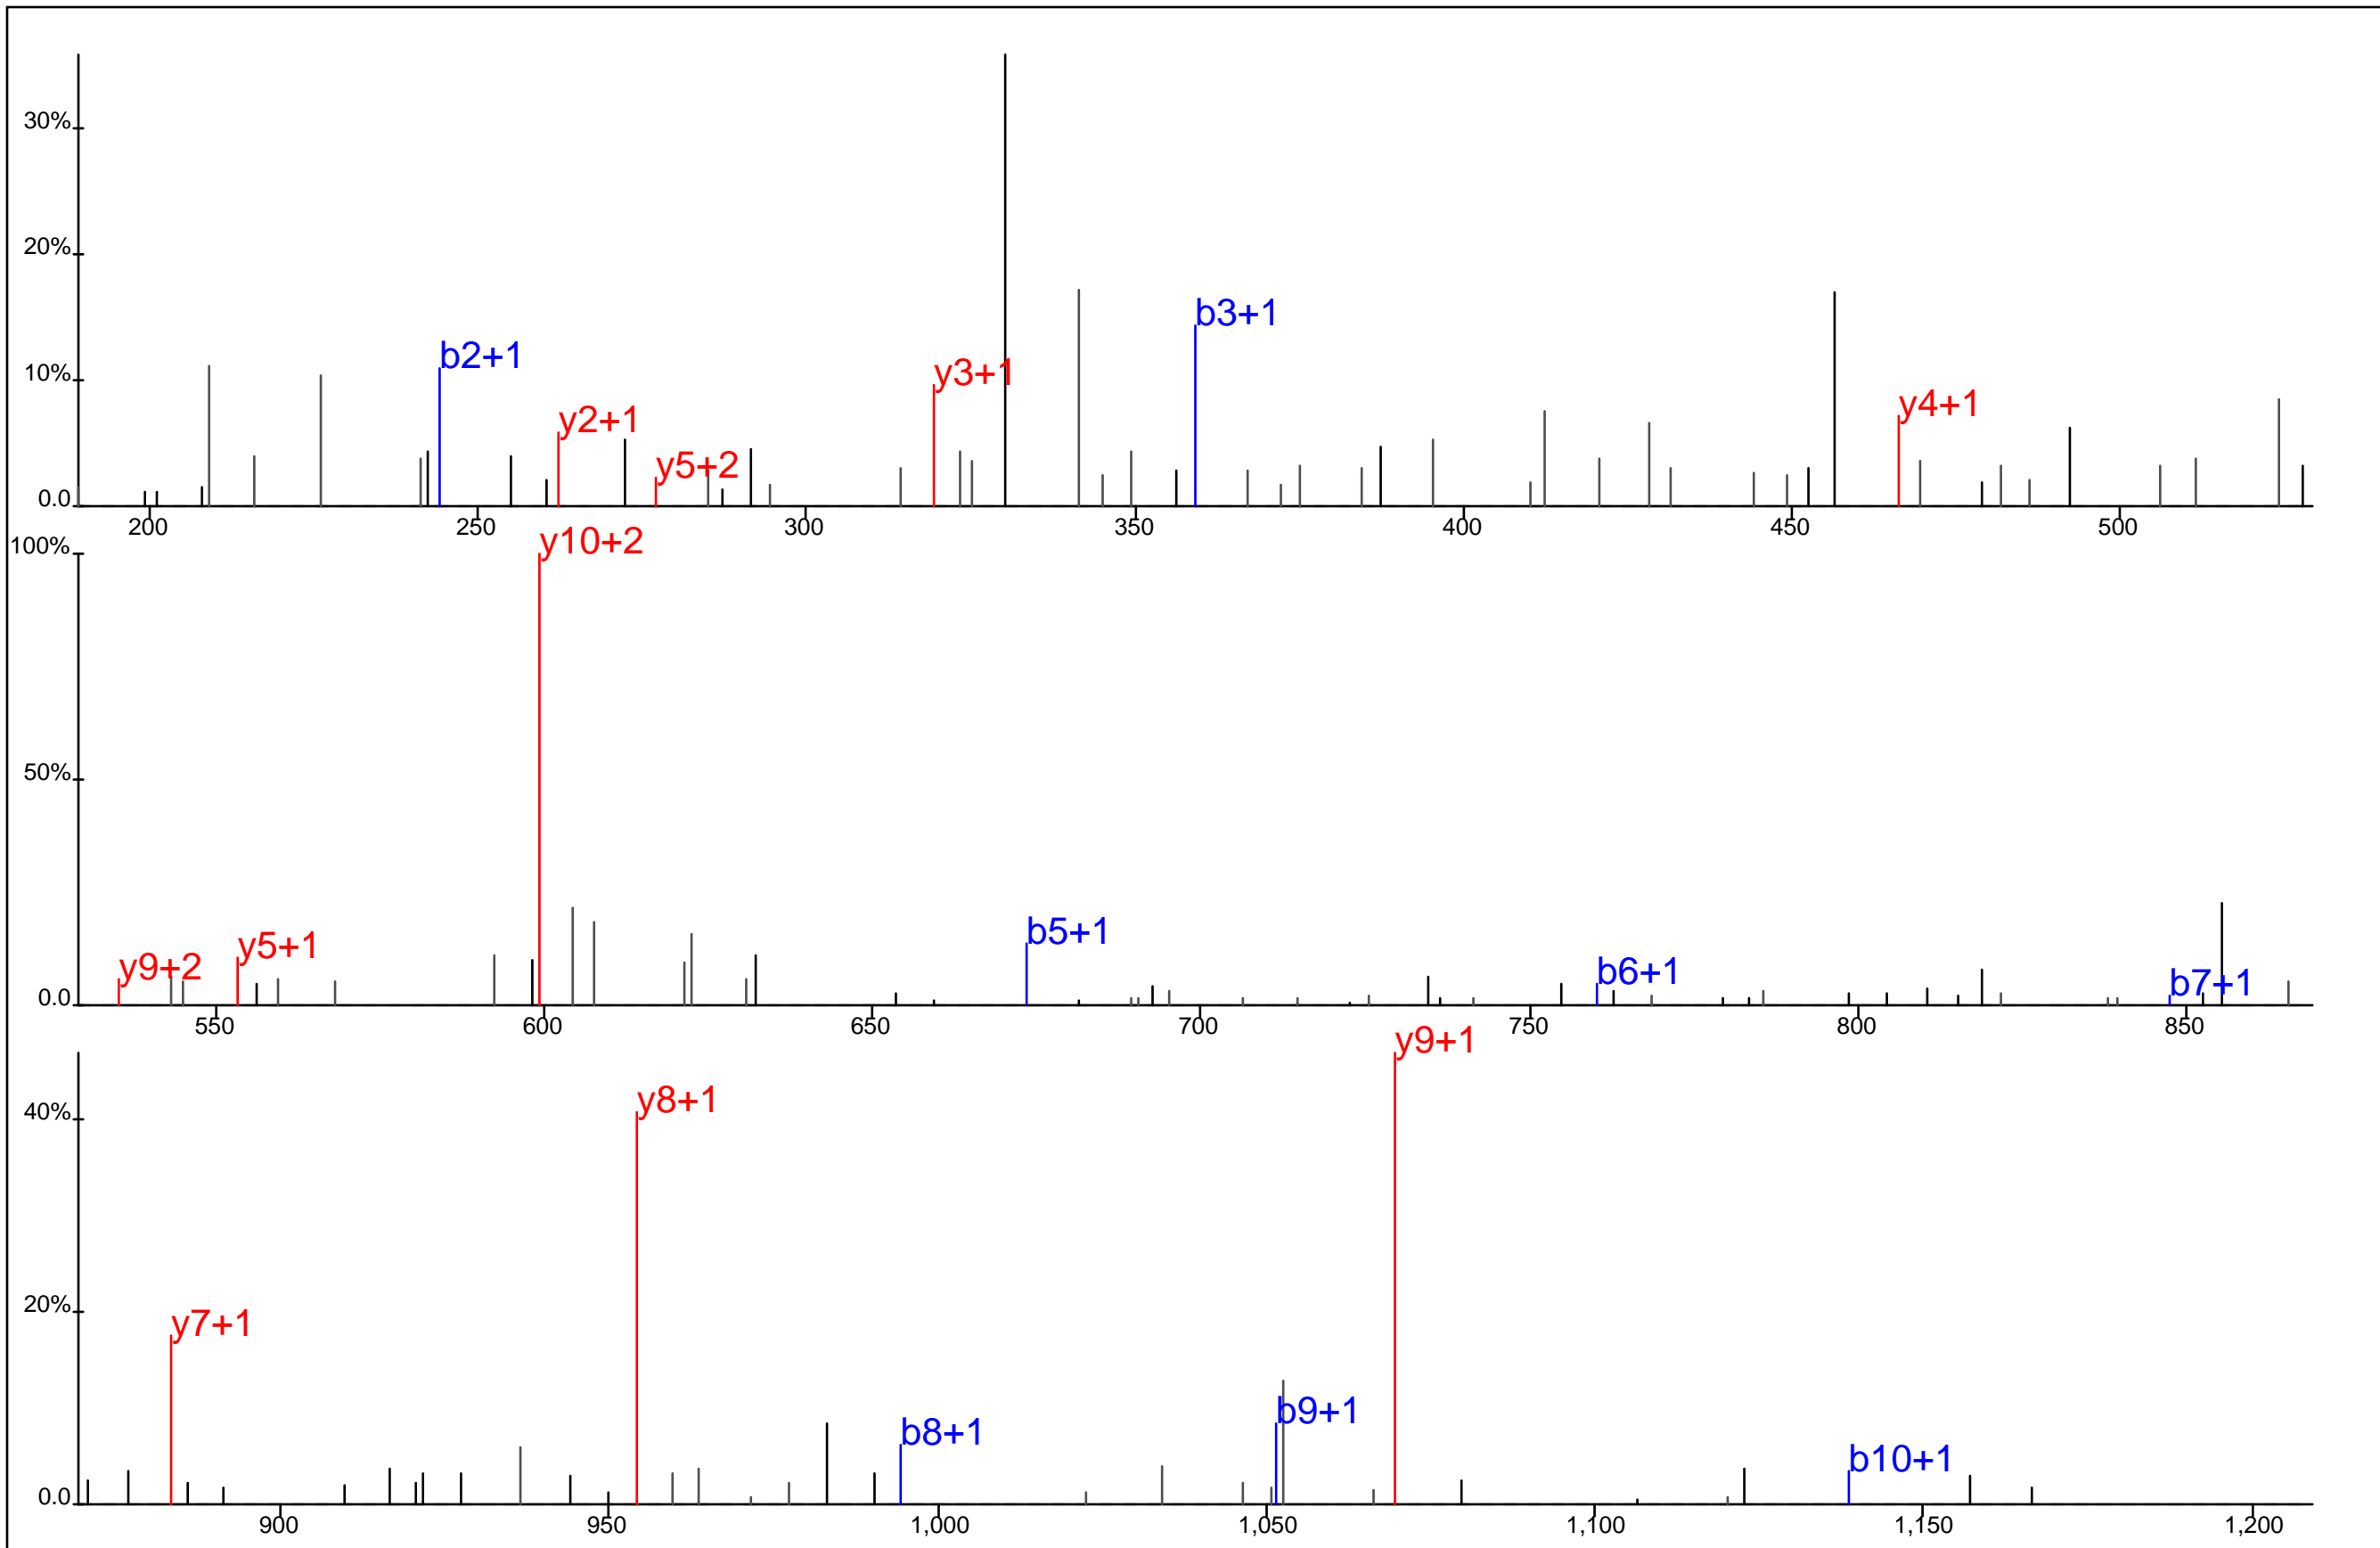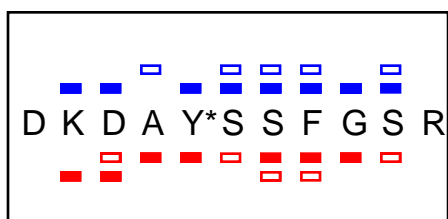

Protein Name: DDX3  
 gi Accession: 0  
 Precursor Mass: 656.7632+2  
 Delta Mass: 0.997 ppm  
 XCorr: 38.22

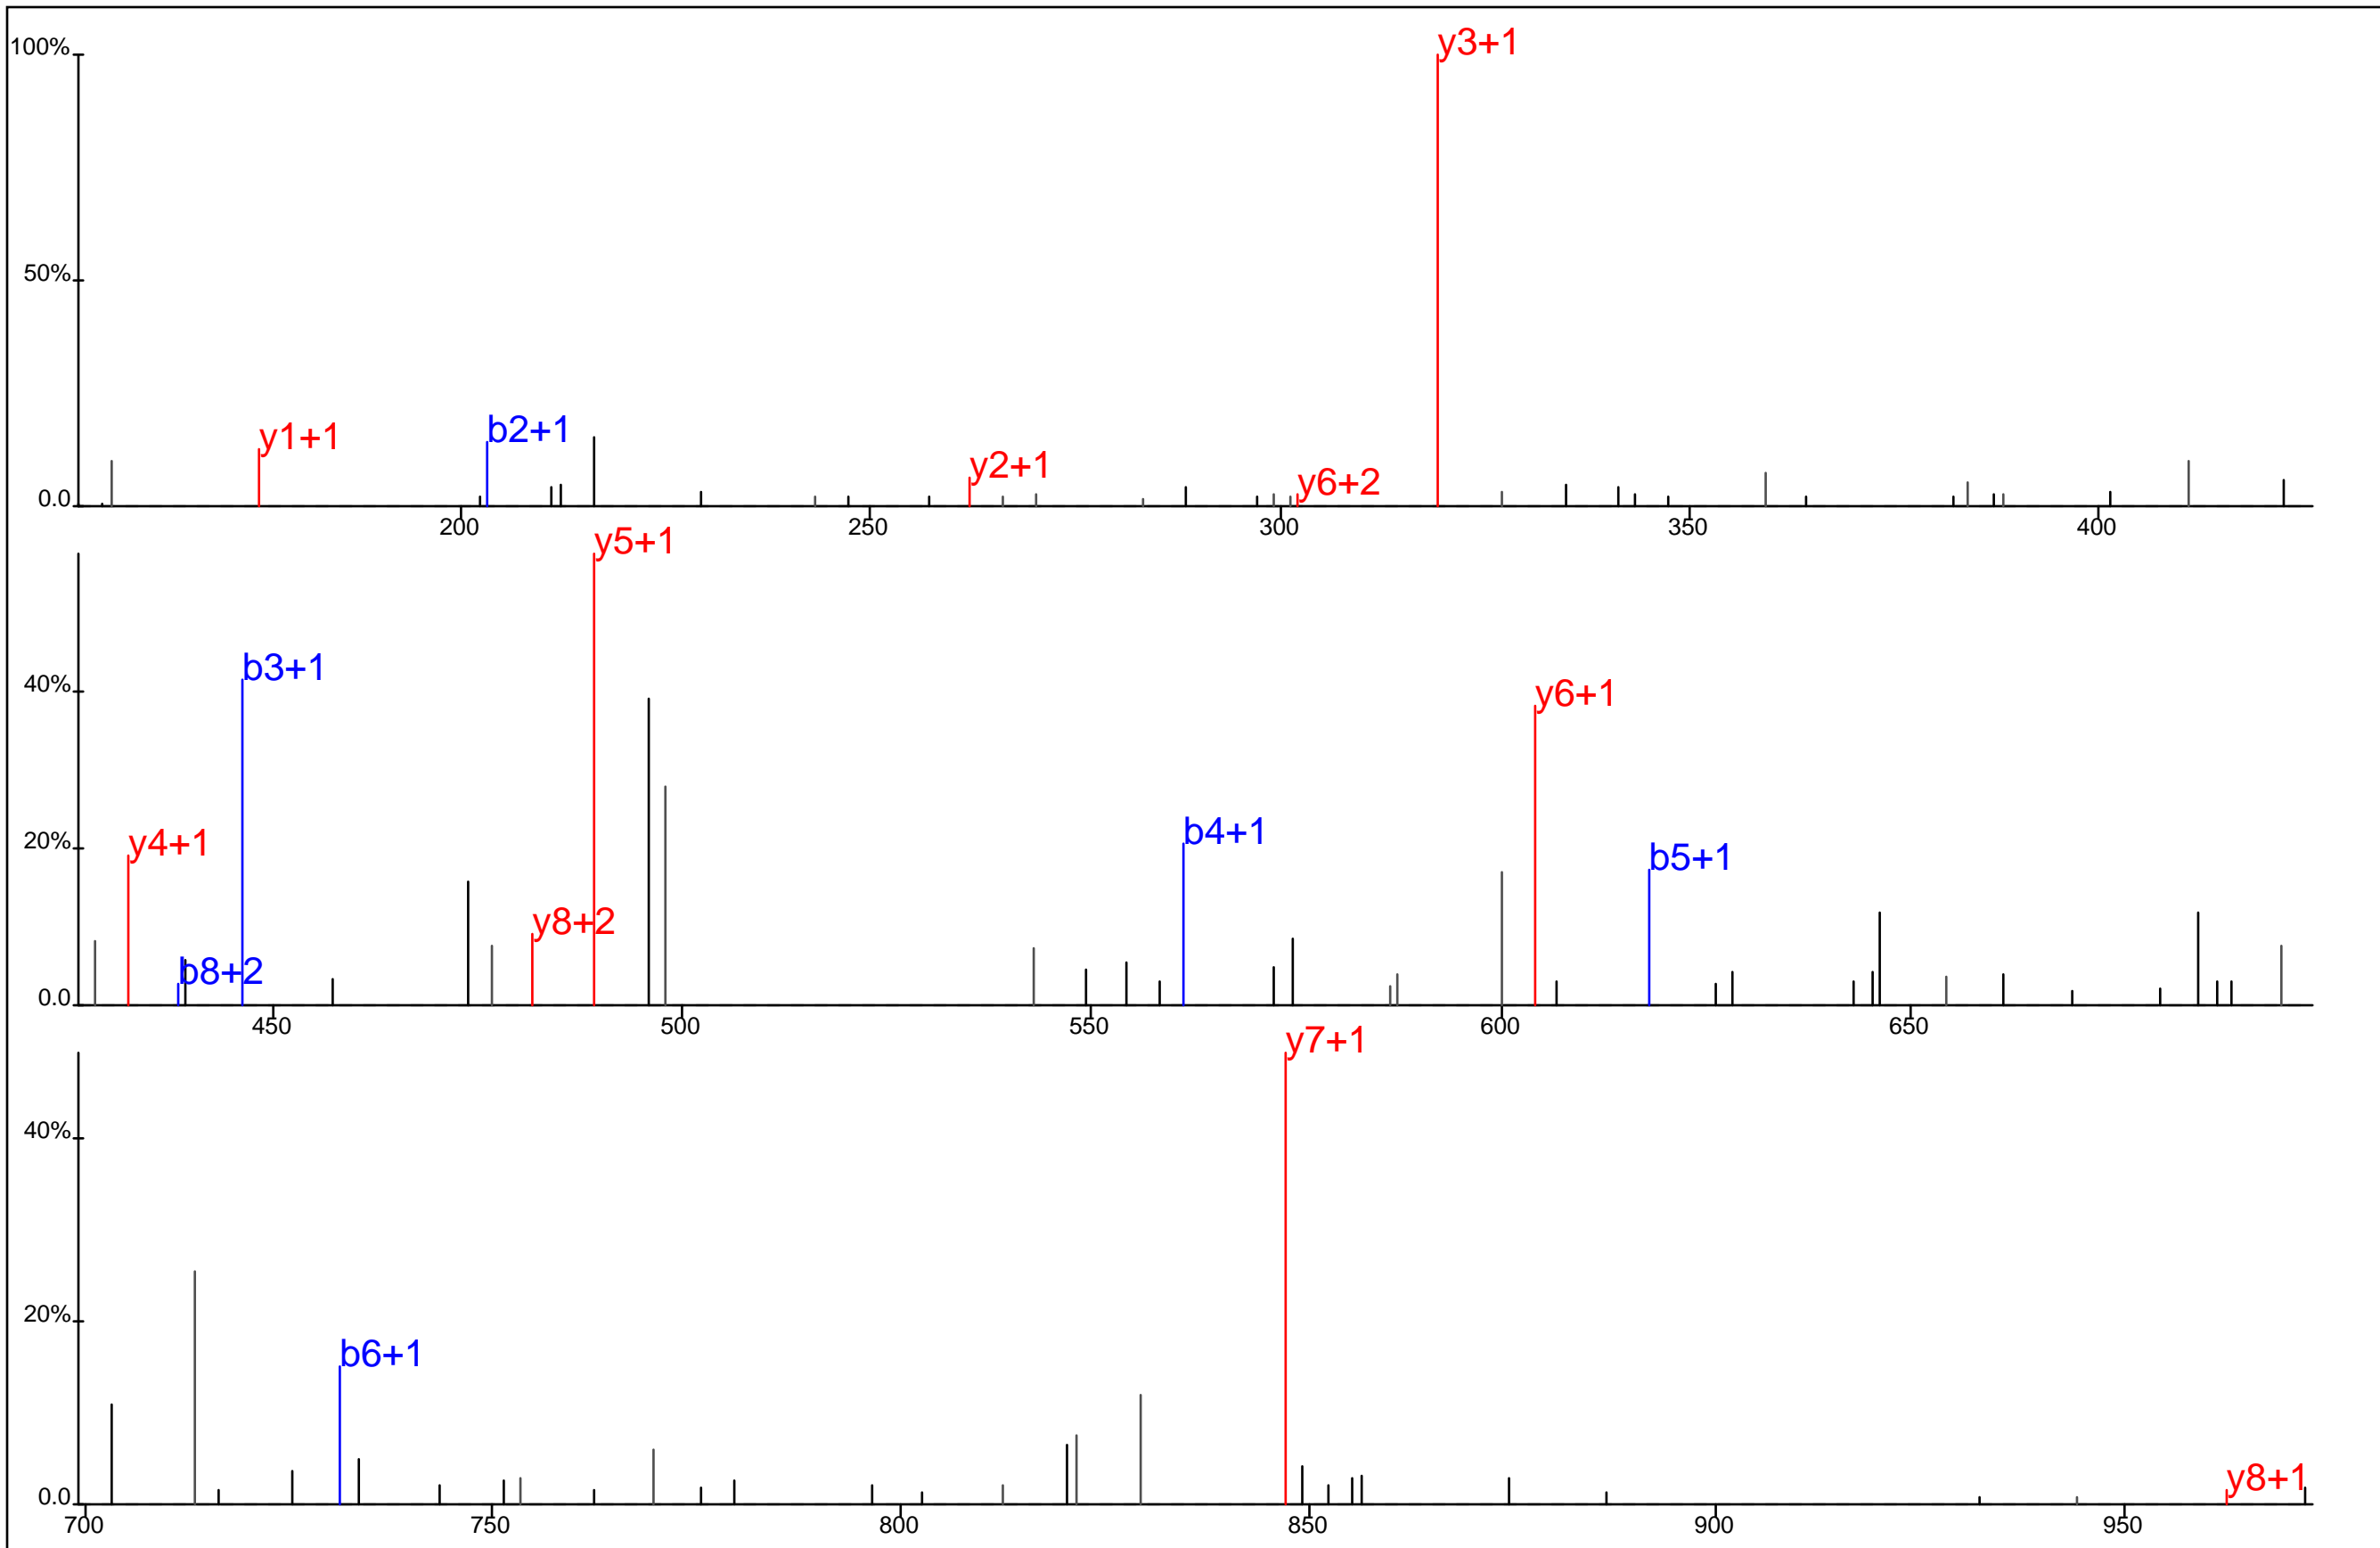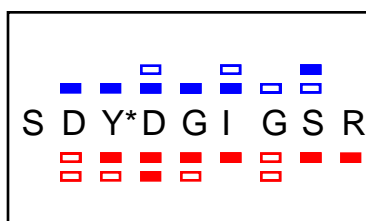

Protein Name: DDX3  
 gi Accession: 0  
 Precursor Mass: 525.2014+2  
 Delta Mass: 1.919 ppm  
 XCorr: 58.58

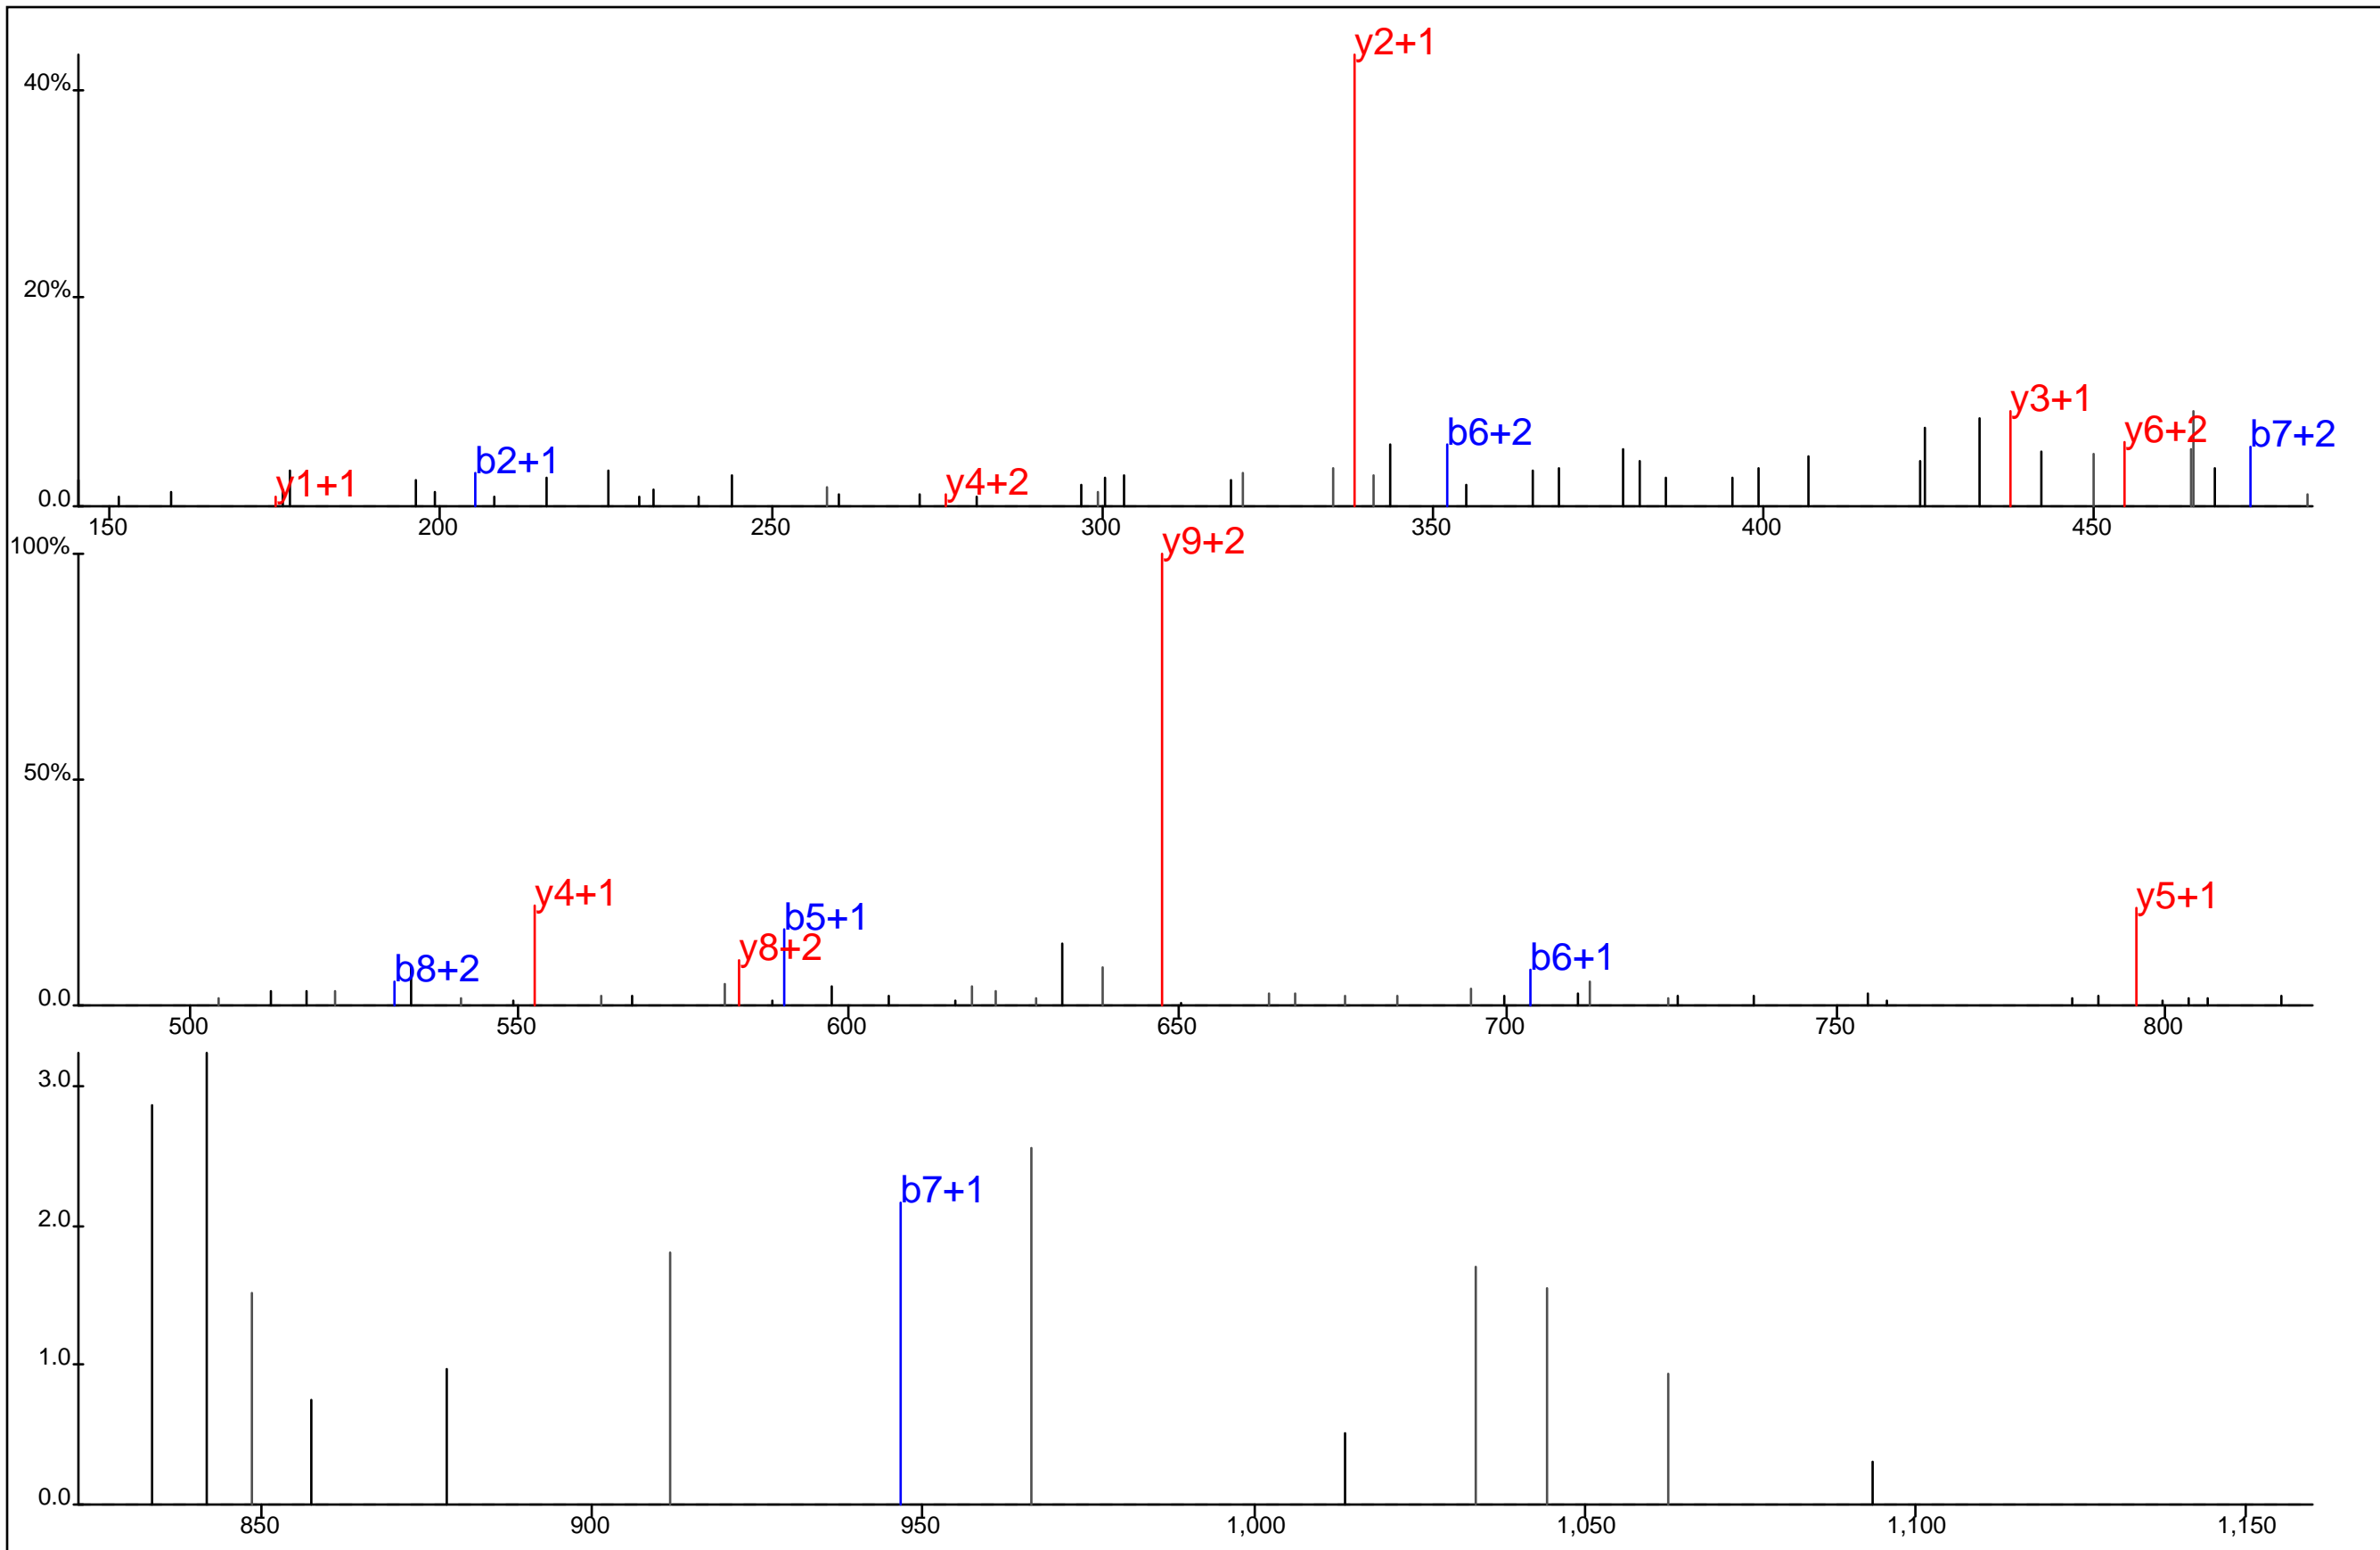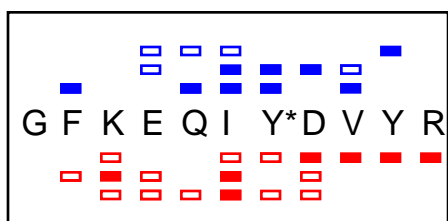

Protein Name: DDX48  
 gi Accession: 0  
 Precursor Mass: 499.8967+3  
 Delta Mass: 1.209 ppm  
 XCorr: 20.84



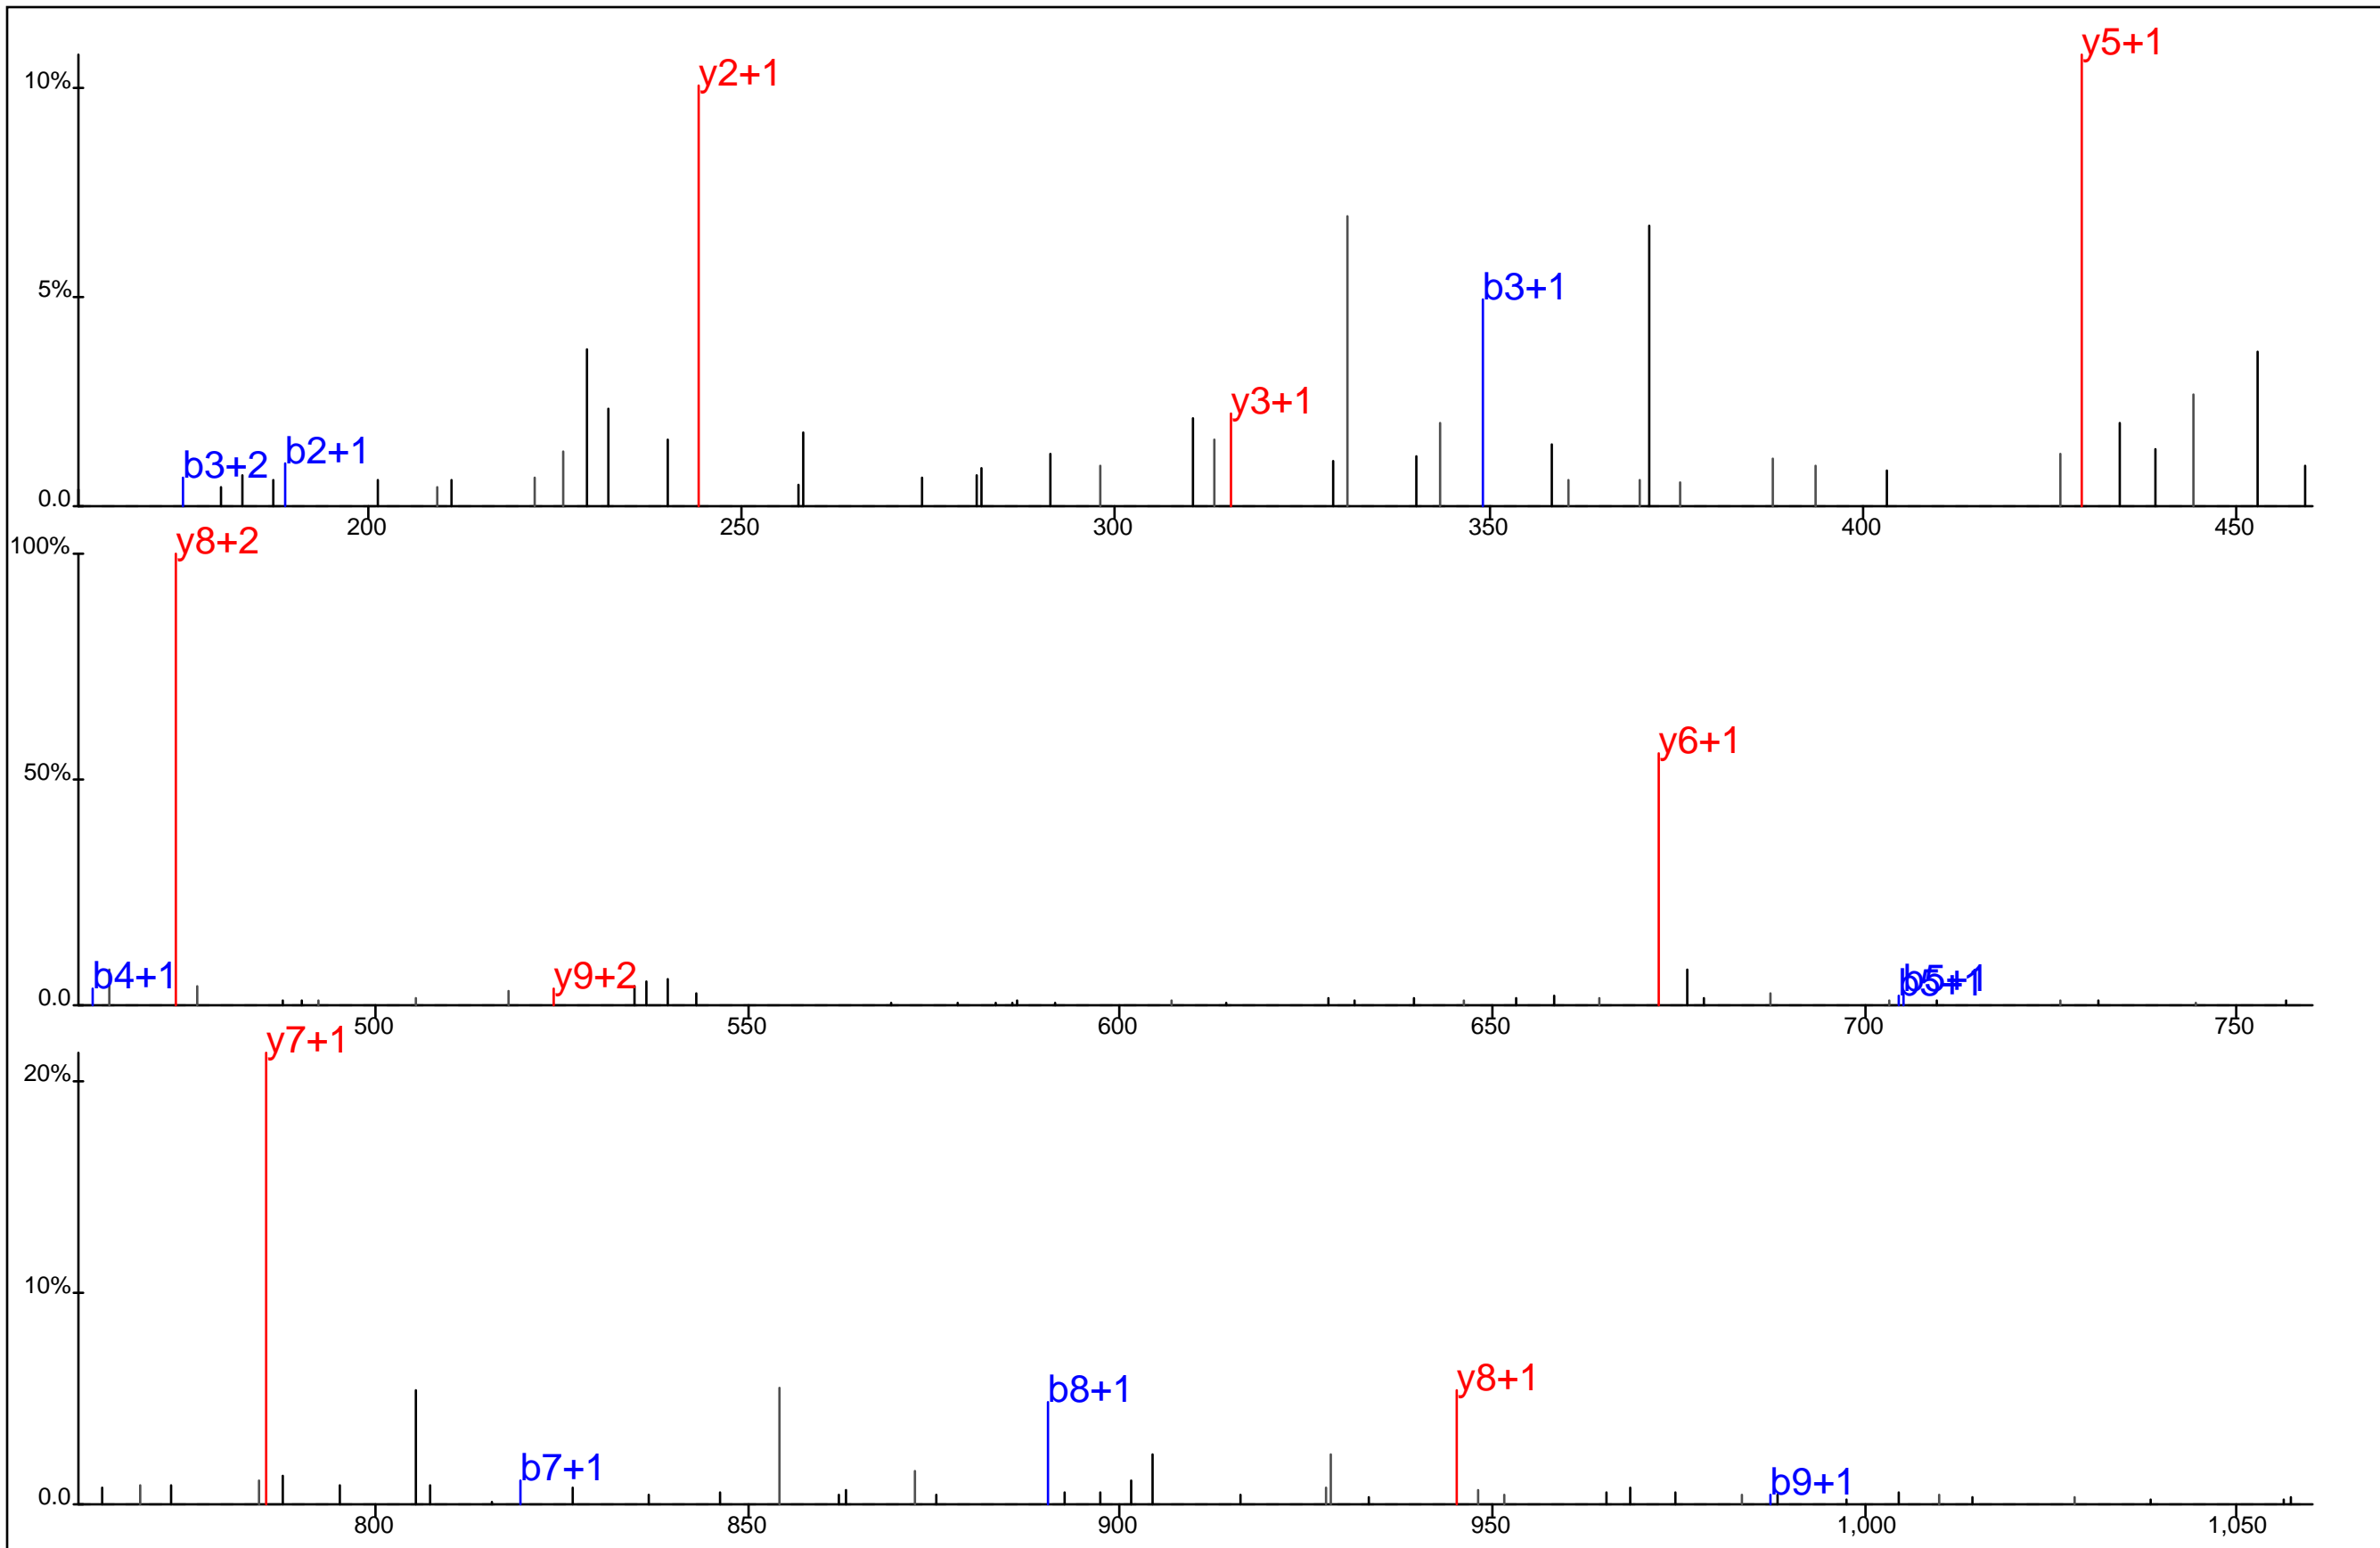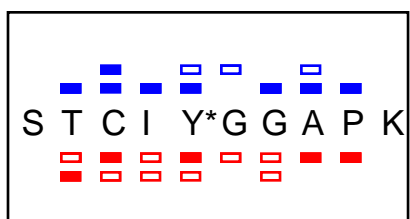

Protein Name: DDX5  
 gi Accession: 0  
 Precursor Mass: 567.2346+2  
 Delta Mass: 6.811 ppm  
 XCorr: 33.79

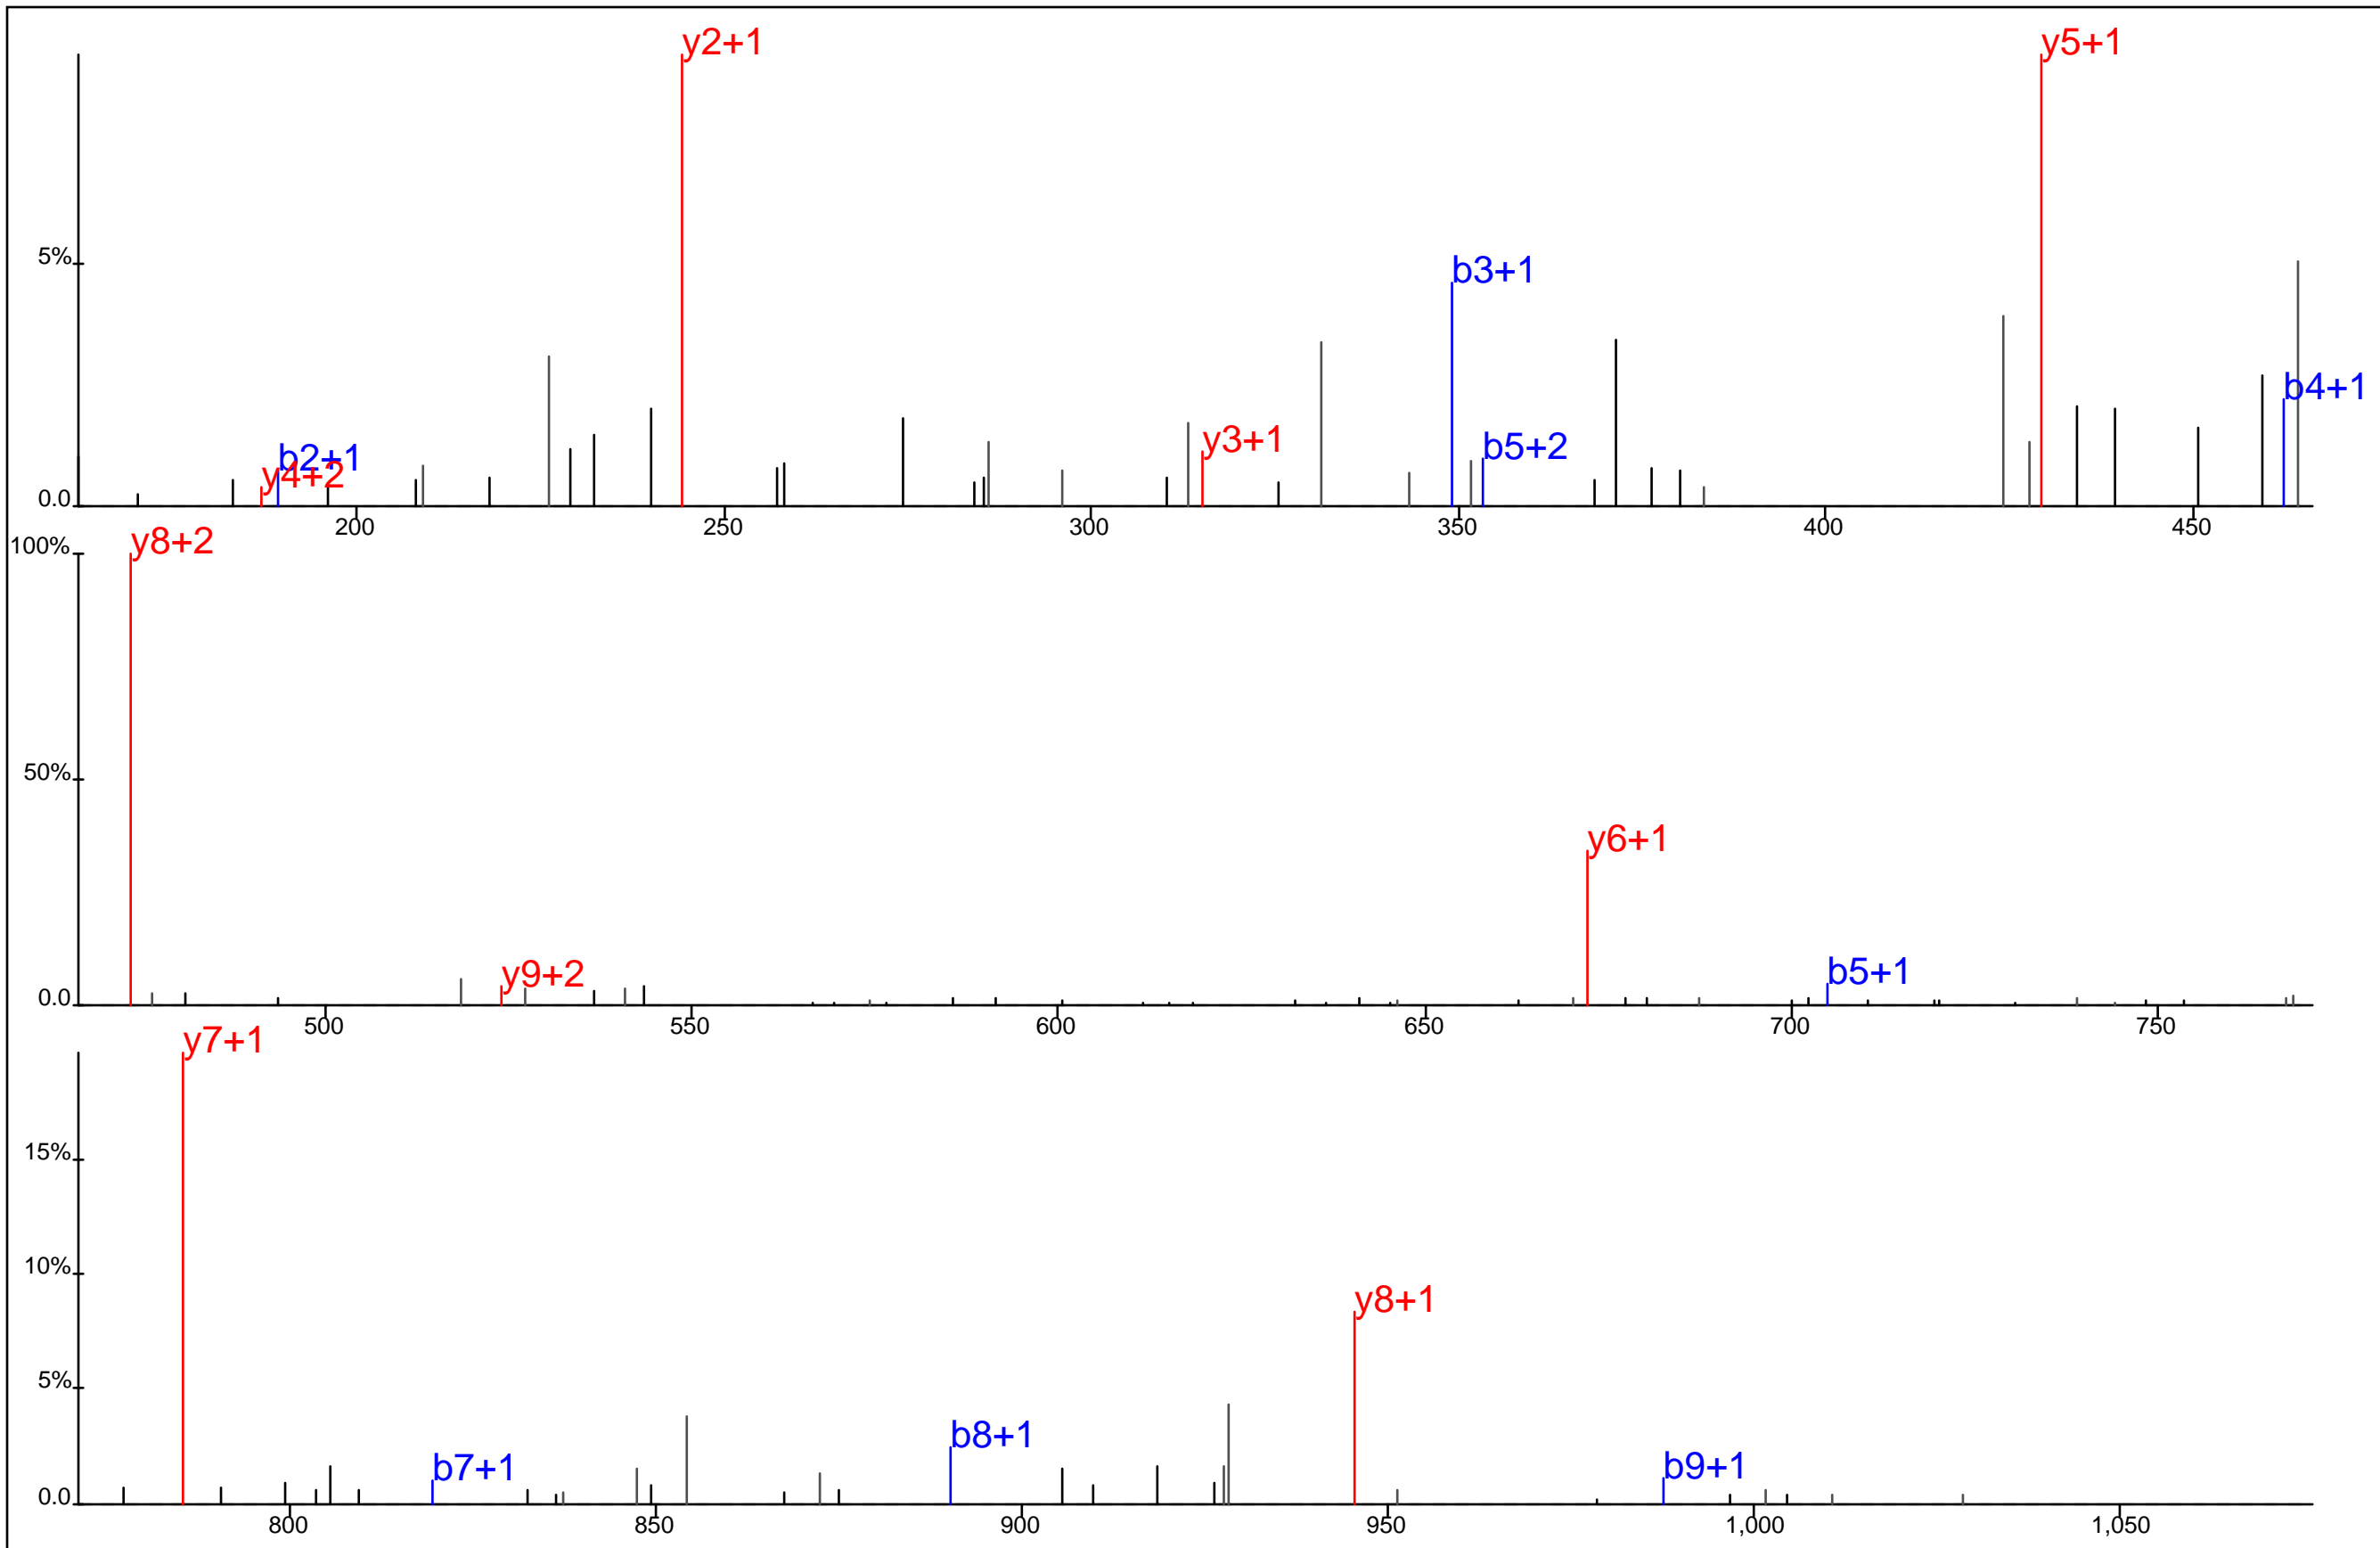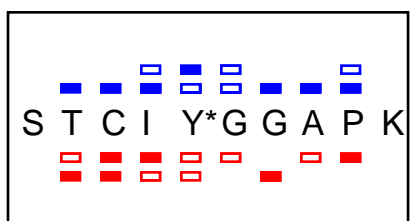

Protein Name: DDX5  
 gi Accession: 0  
 Precursor Mass: 567.2386+2  
 Delta Mass: 0.296 ppm  
 XCorr: 37.83

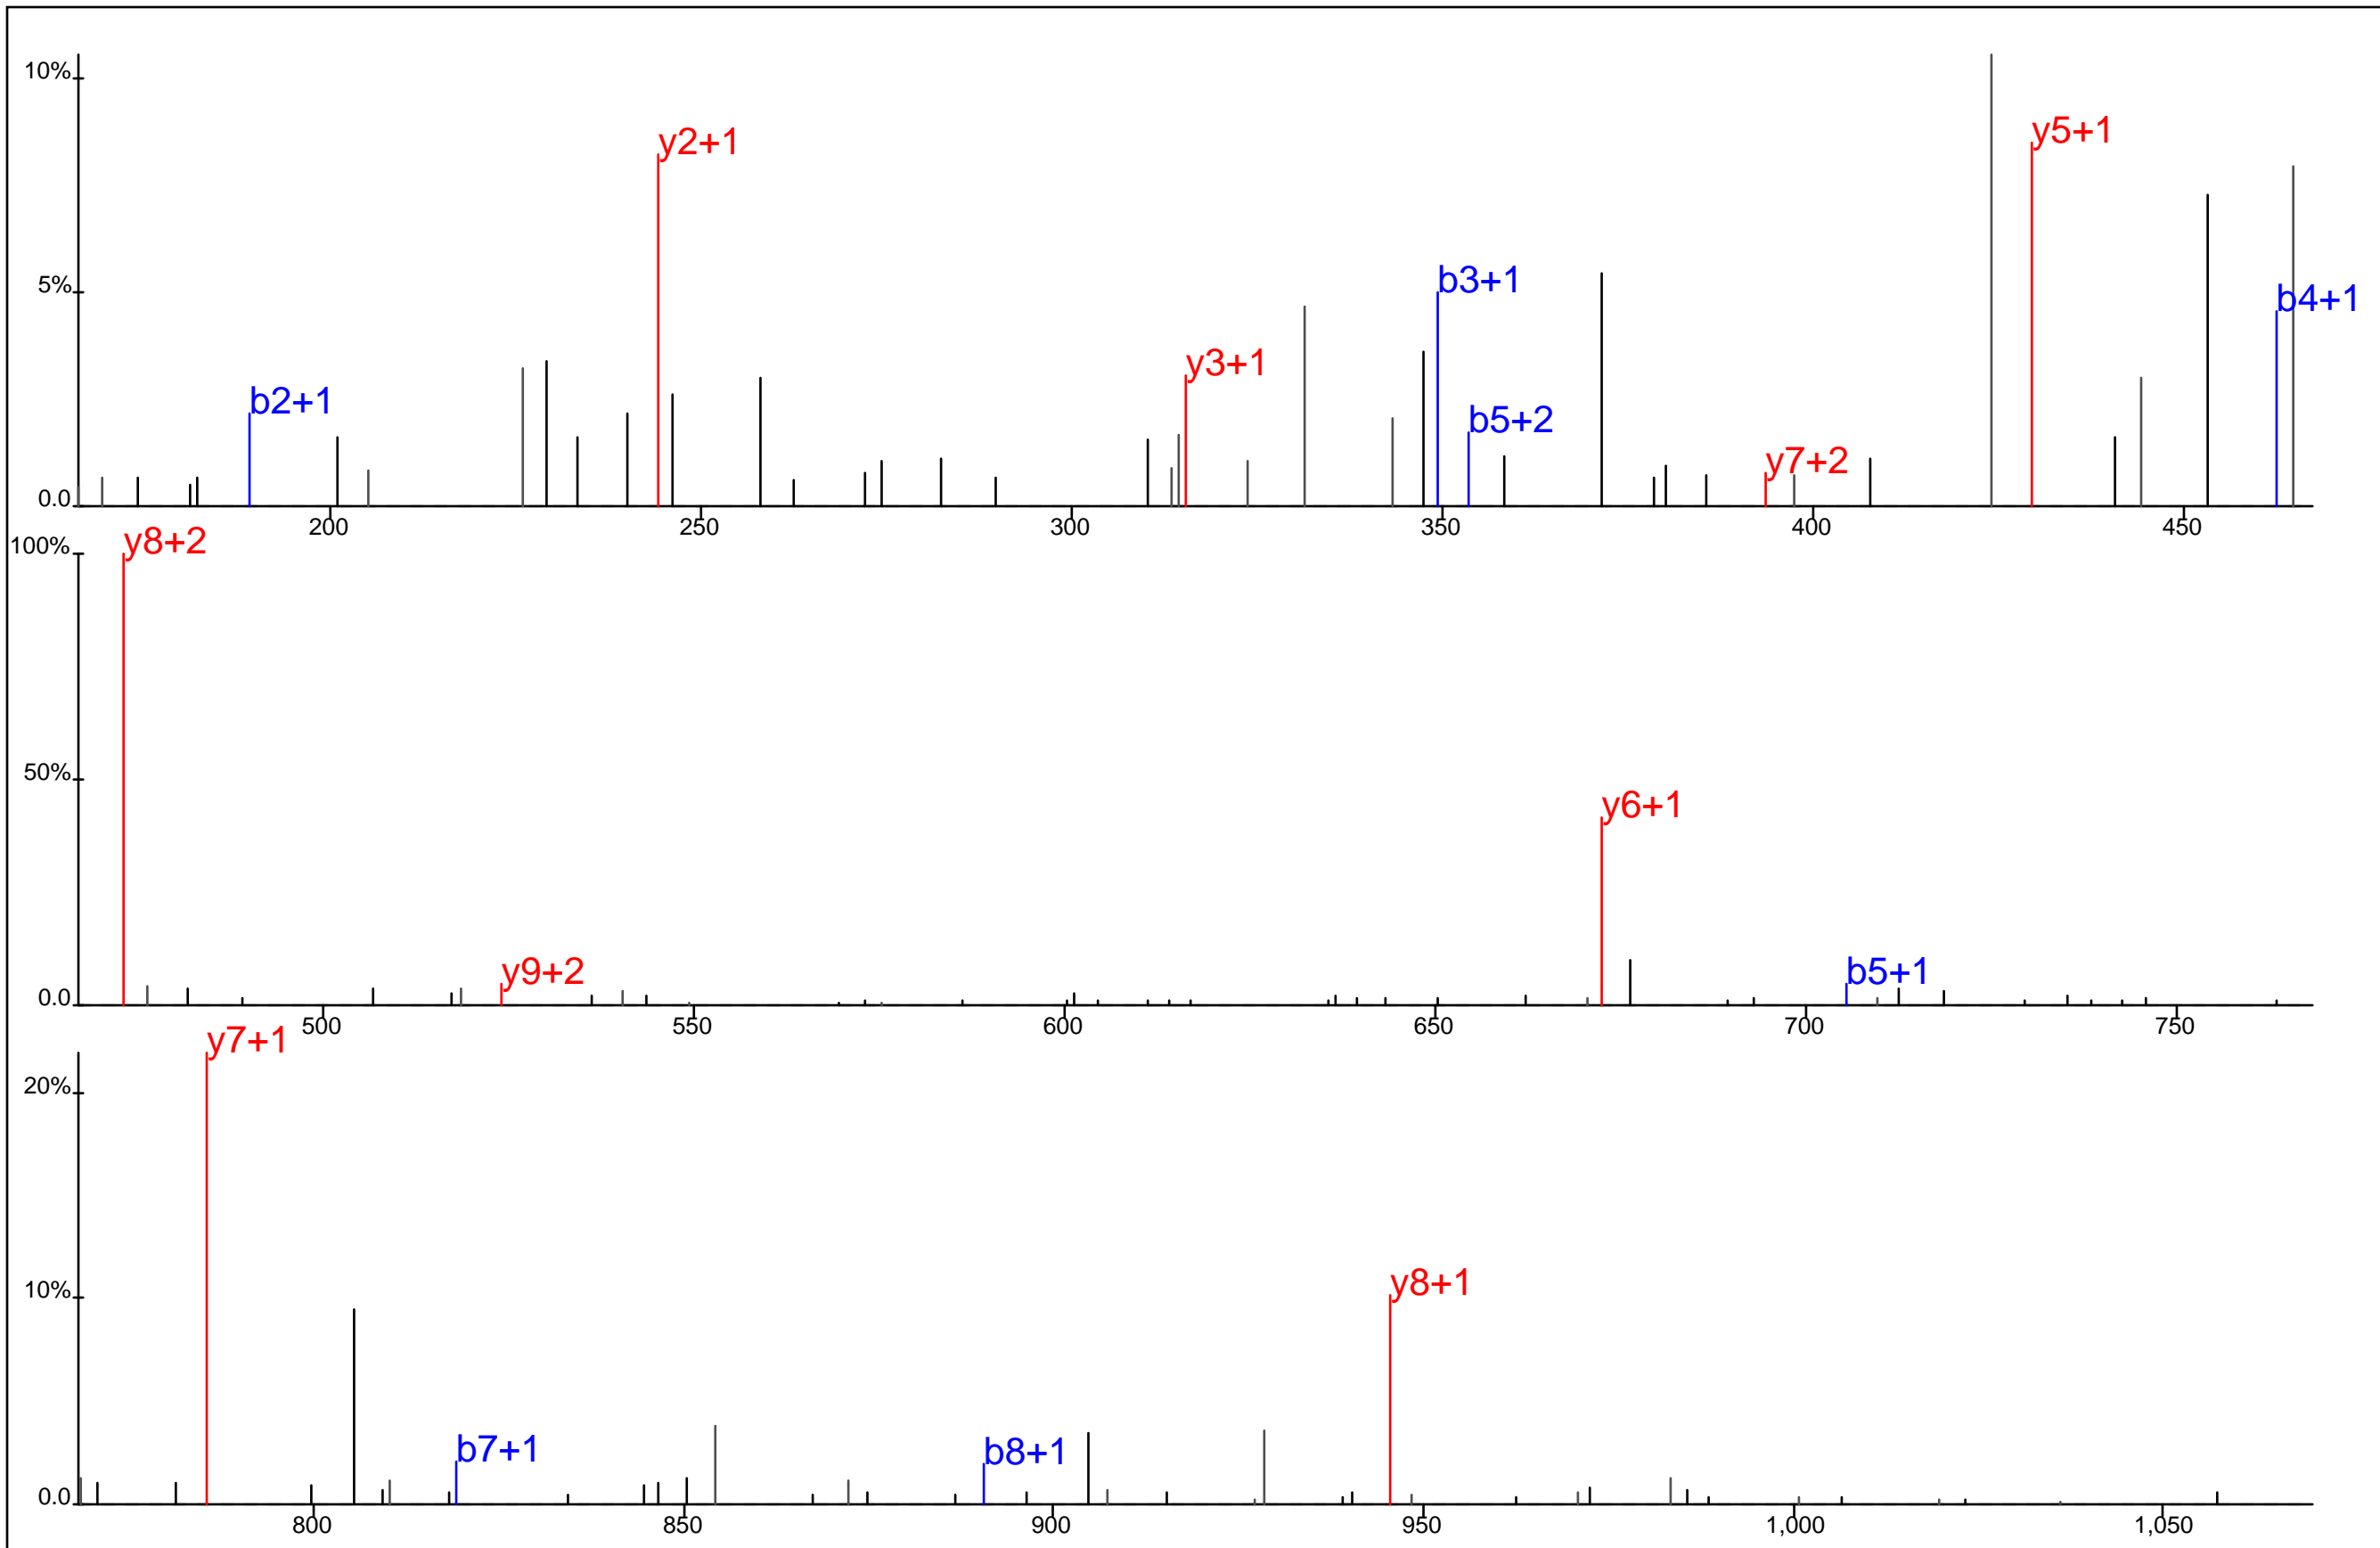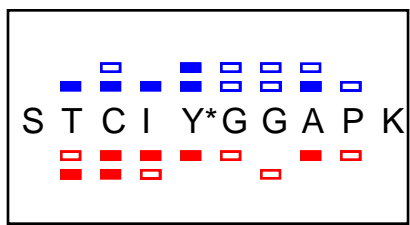

Protein Name: DDX5  
 gi Accession: 0  
 Precursor Mass: 567.2385+2  
 Delta Mass: 0.081 ppm  
 XCorr: 26.34

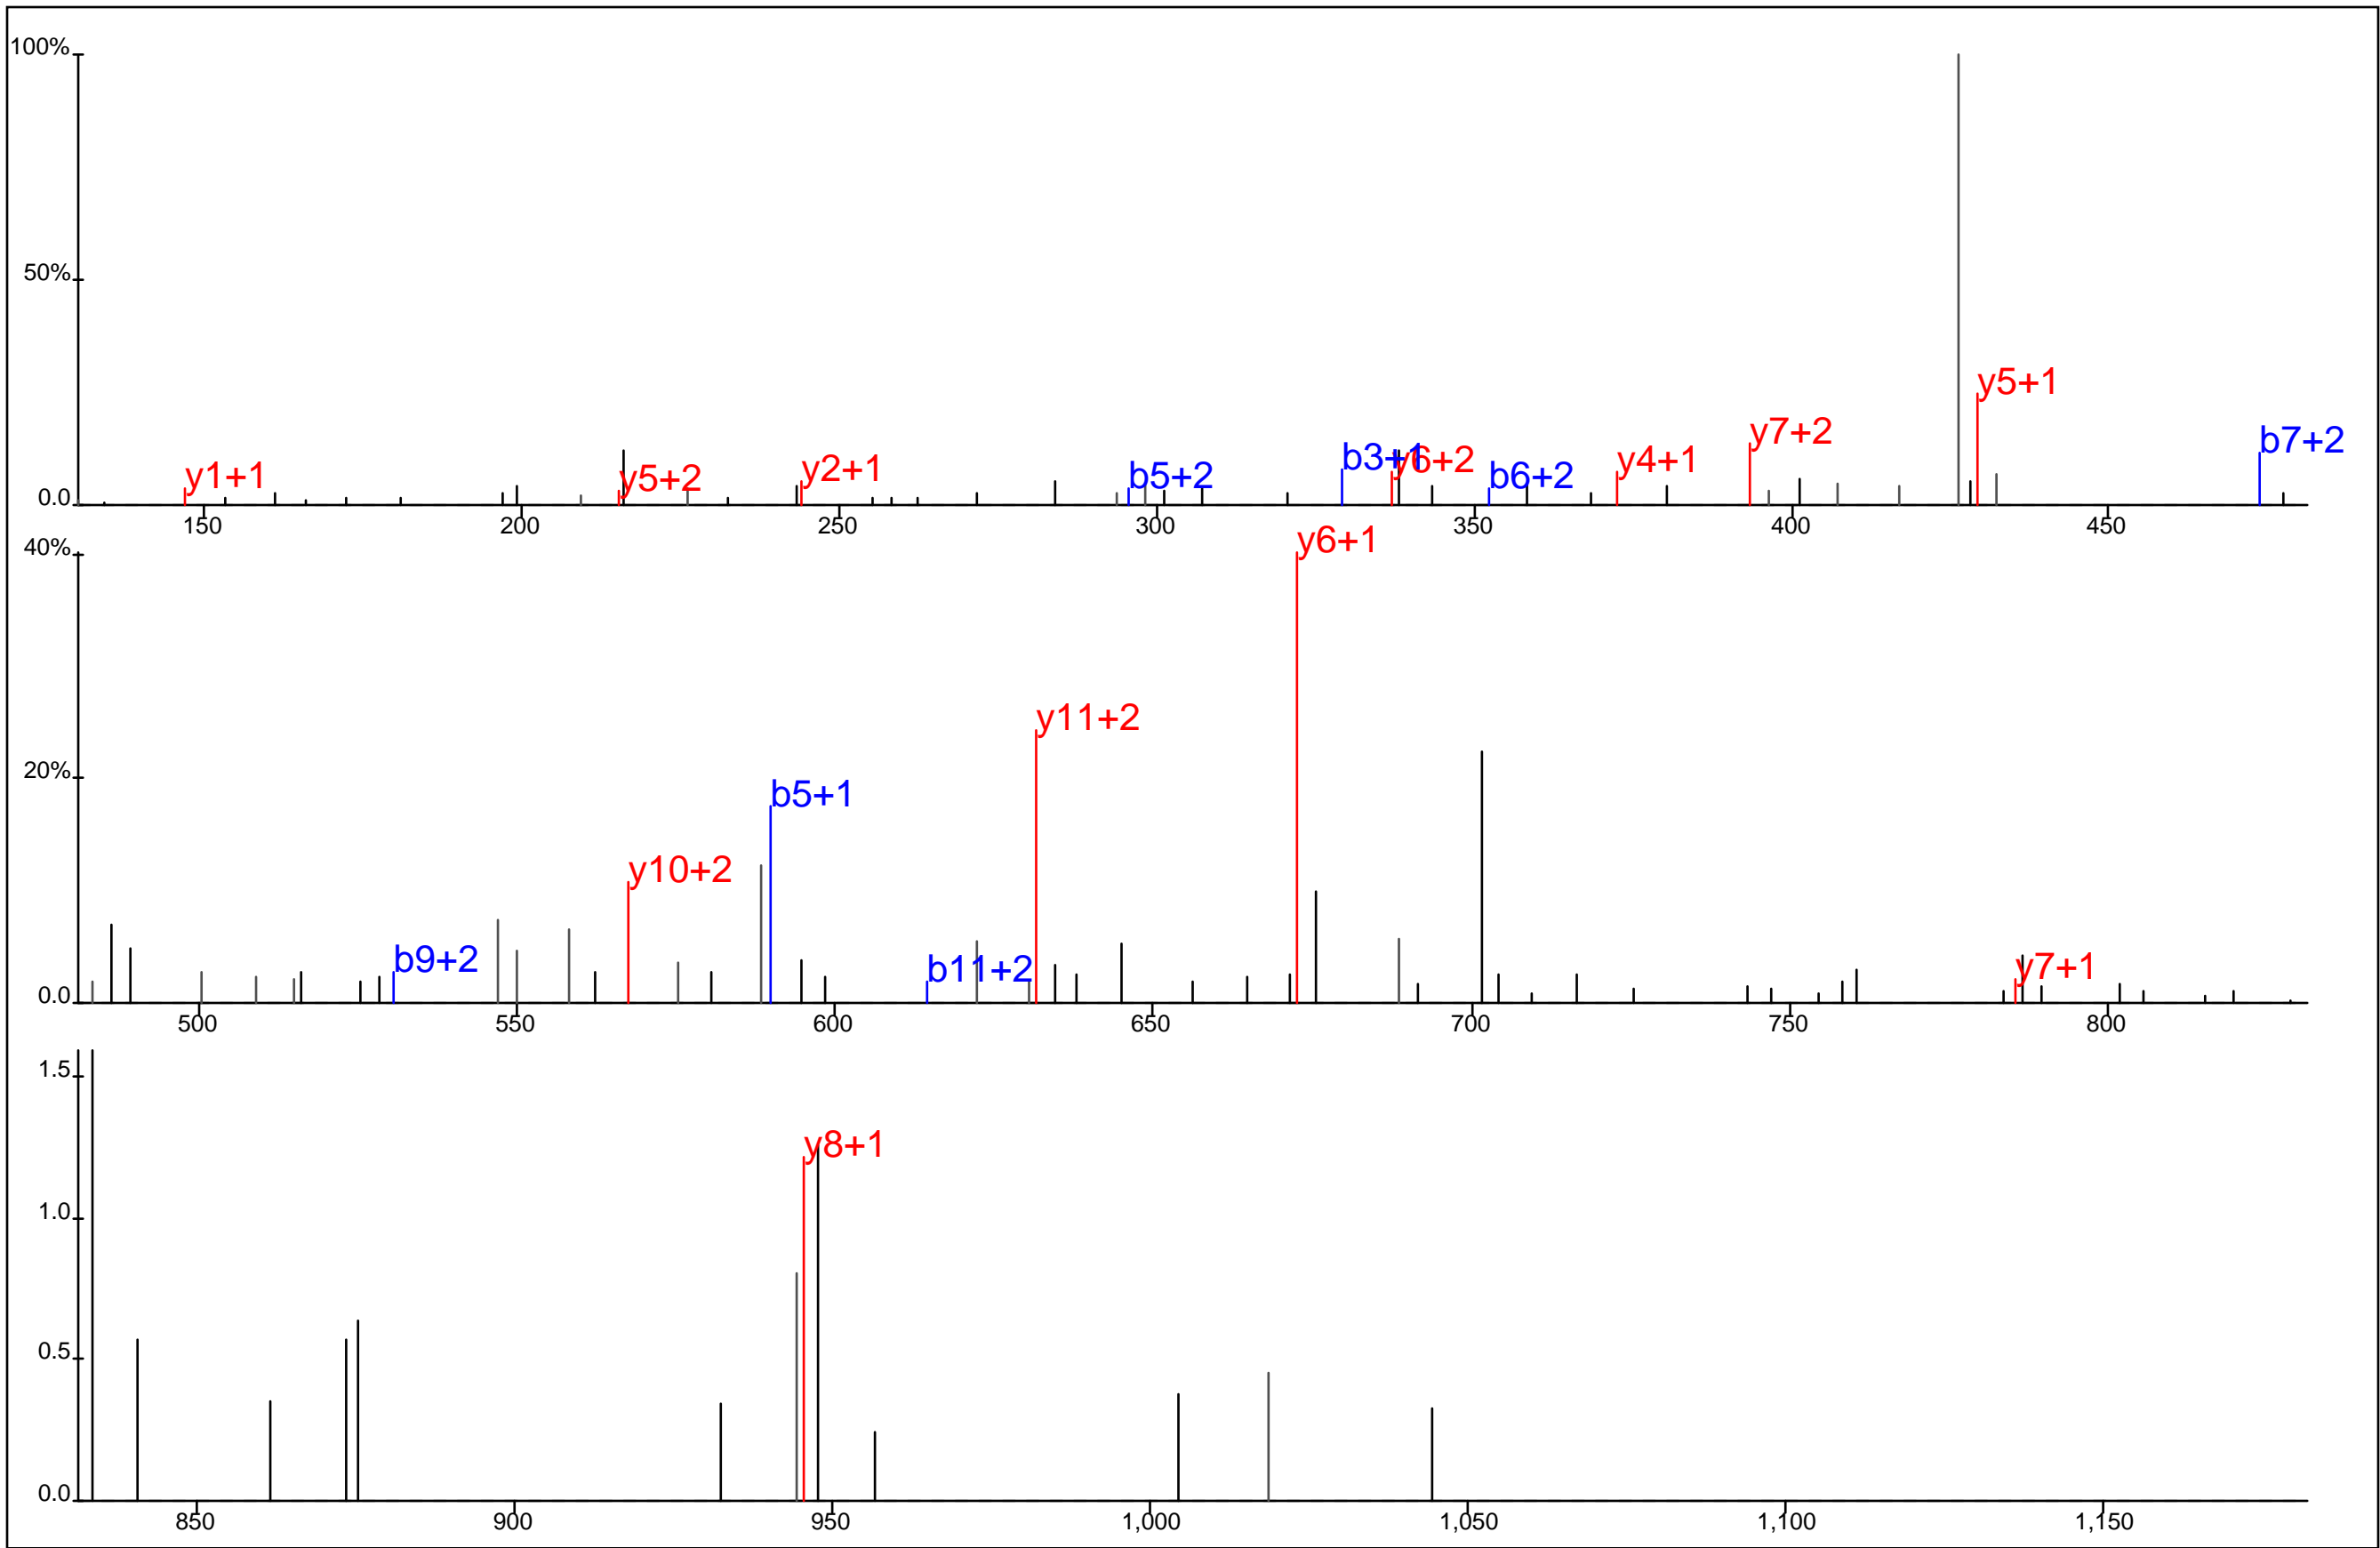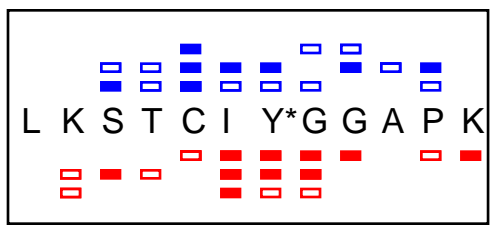

Protein Name: DDX5  
 gi Accession: 0  
 Precursor Mass: 458.8886+3  
 Delta Mass: 1.949 ppm  
 XCorr: 26.21

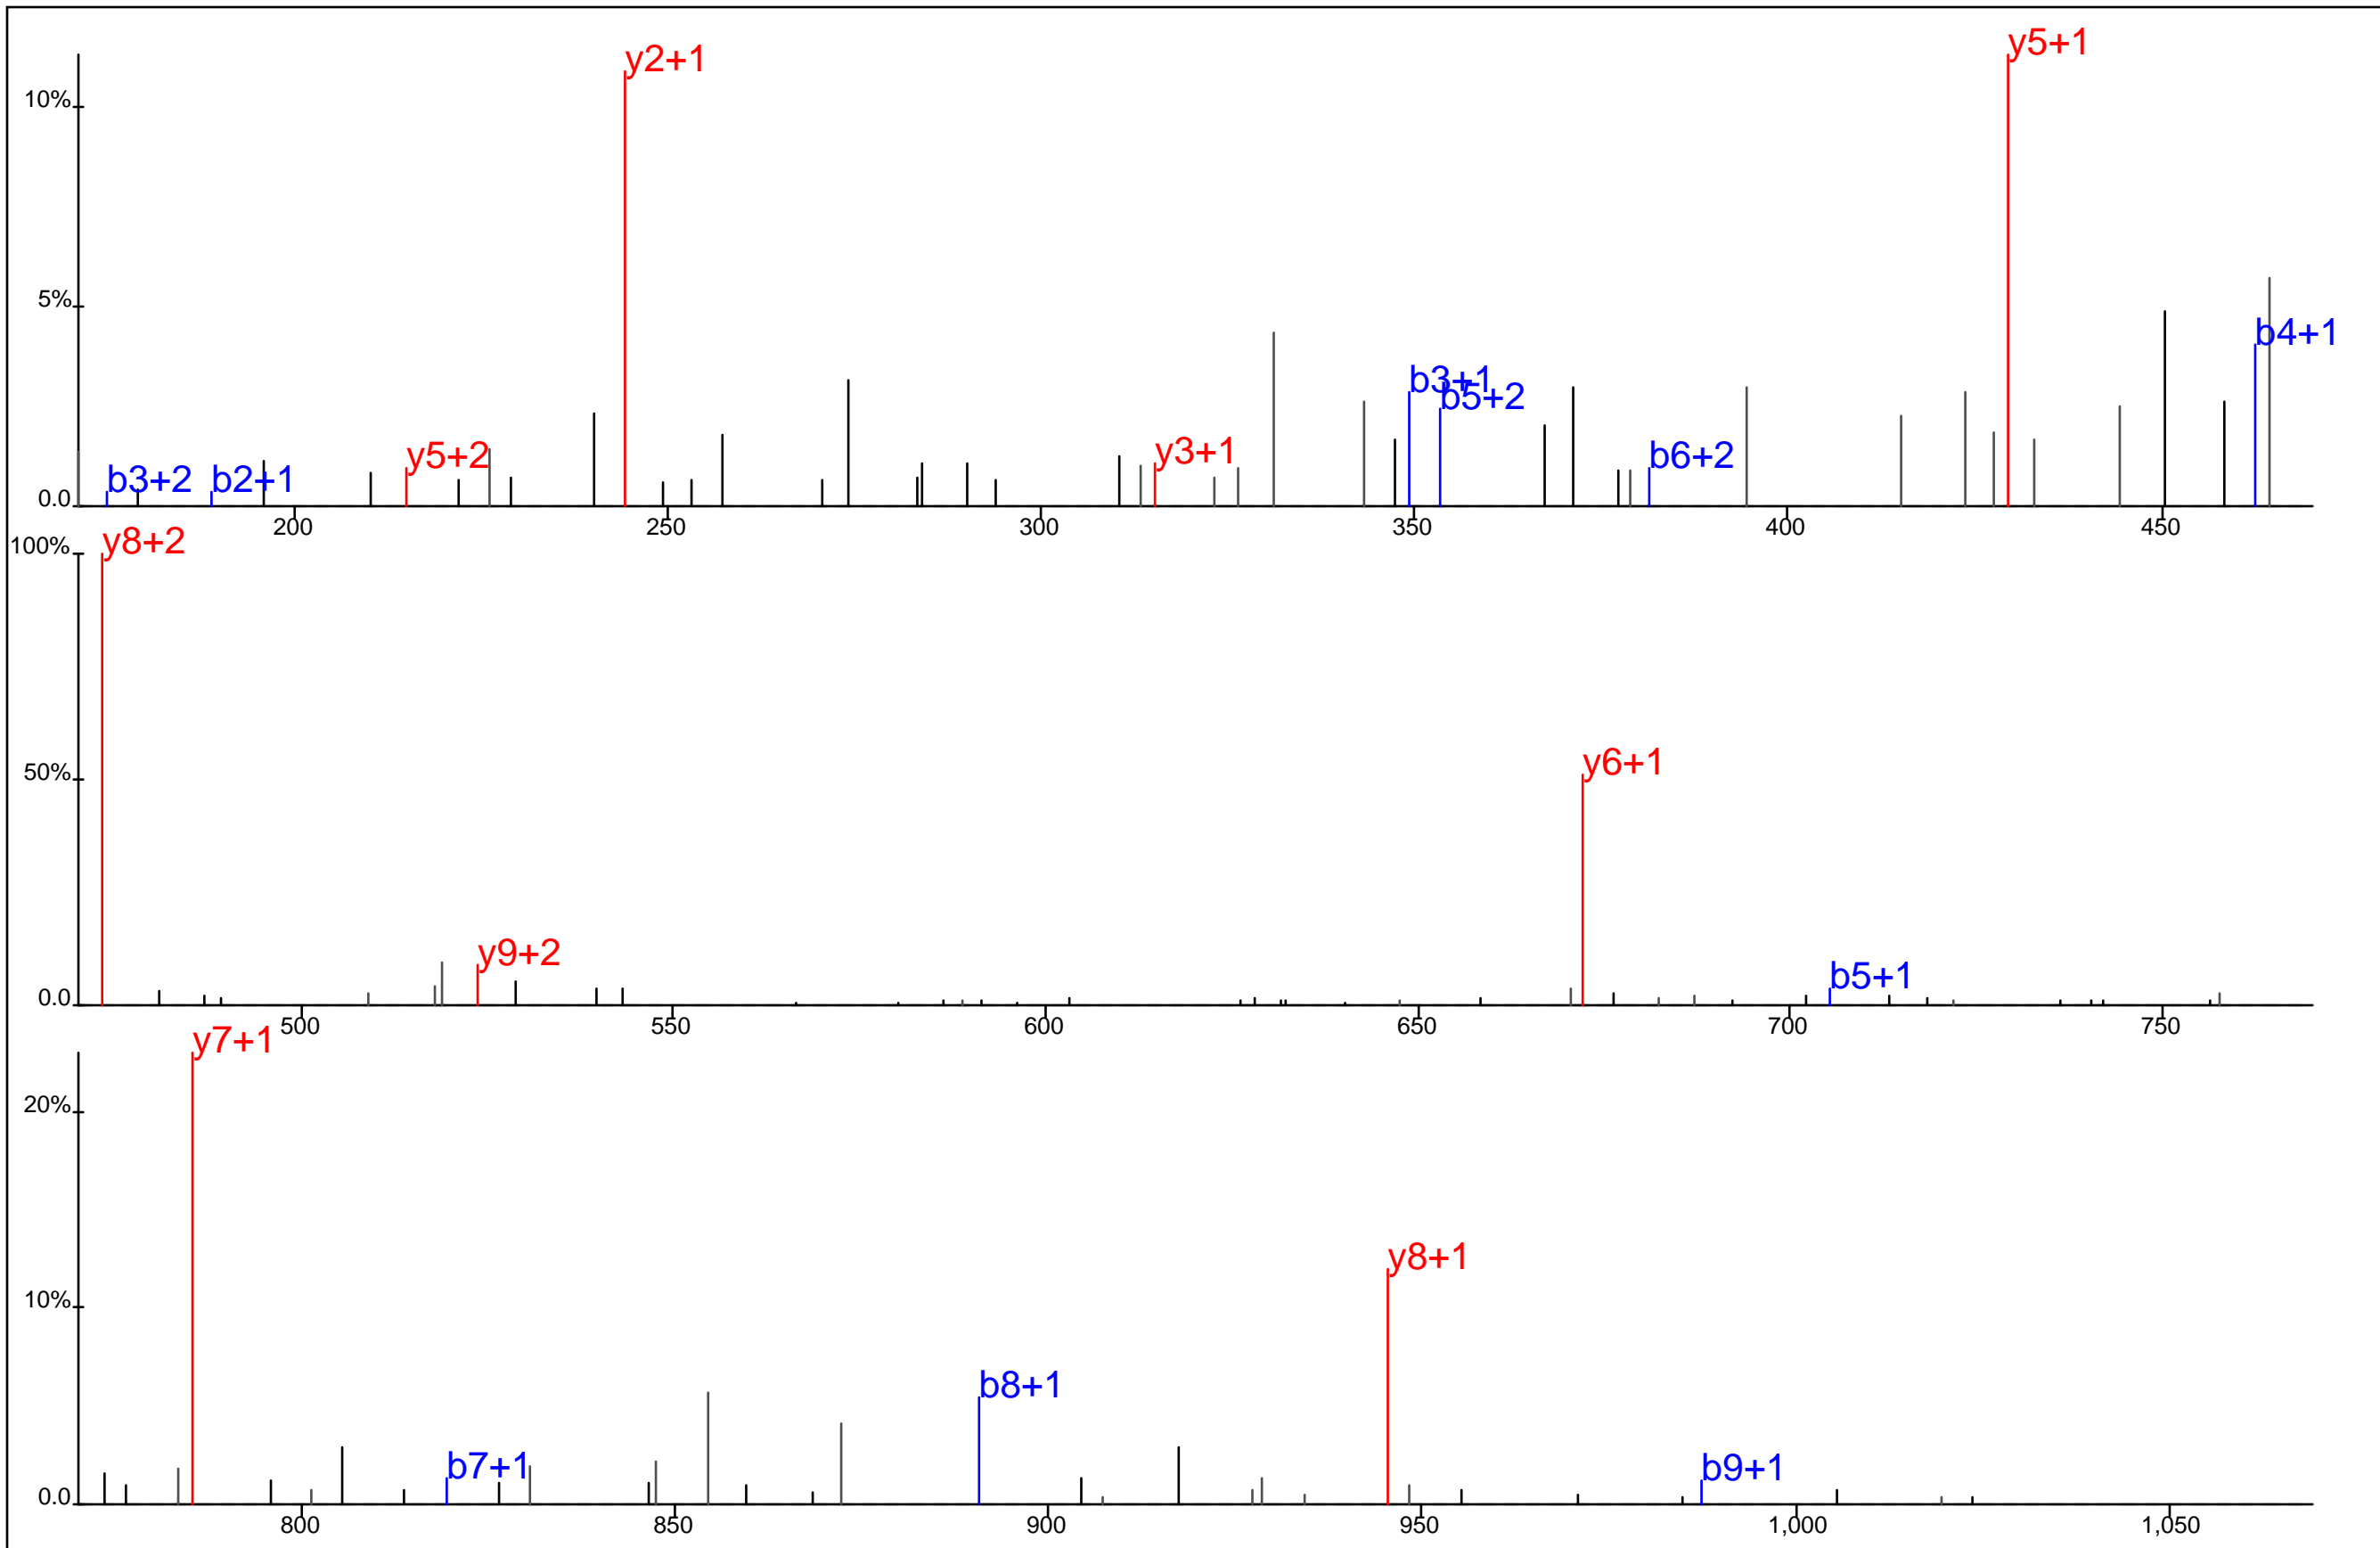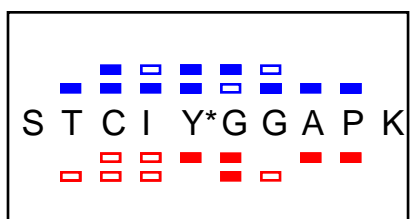

Protein Name: DDX5  
 gi Accession: 0  
 Precursor Mass: 567.2387+2  
 Delta Mass: 0.404 ppm  
 XCorr: 33.66

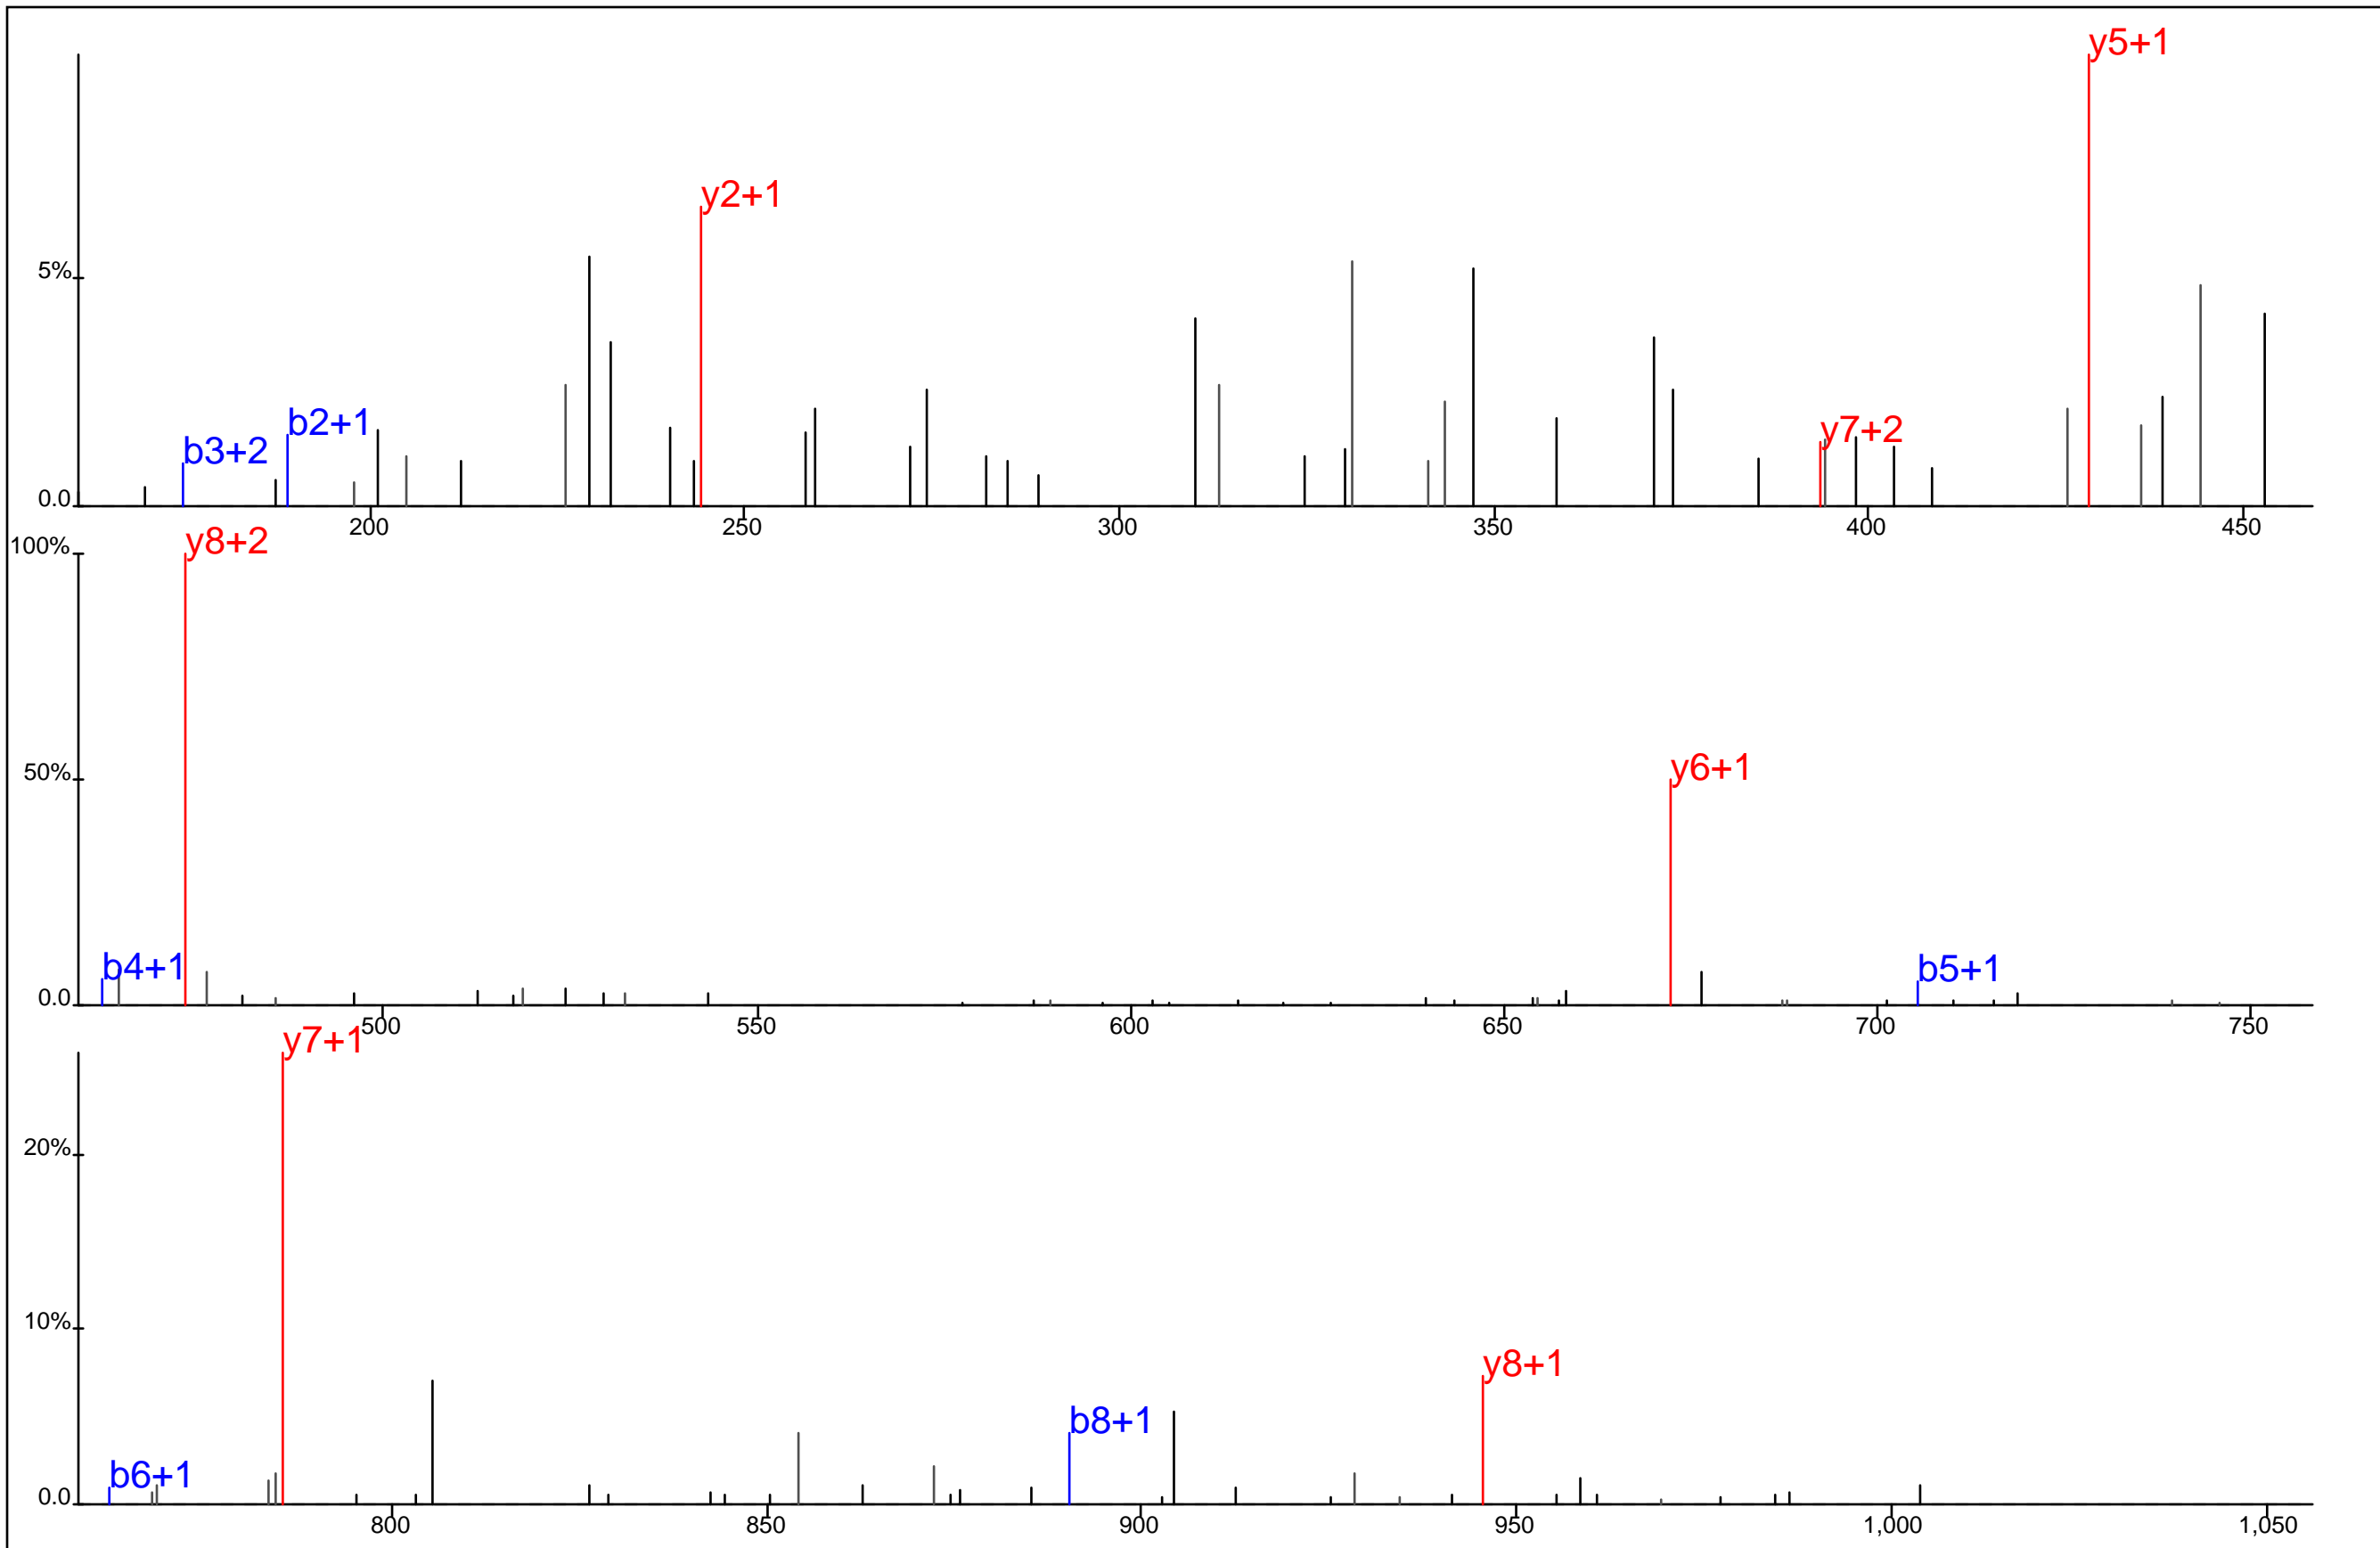

S T C I Y\* G G A P K

Protein Name: DDX5  
 gi Accession: 0  
 Precursor Mass: 567.2355+2  
 Delta Mass: 5.302 ppm  
 XCorr: 33.52

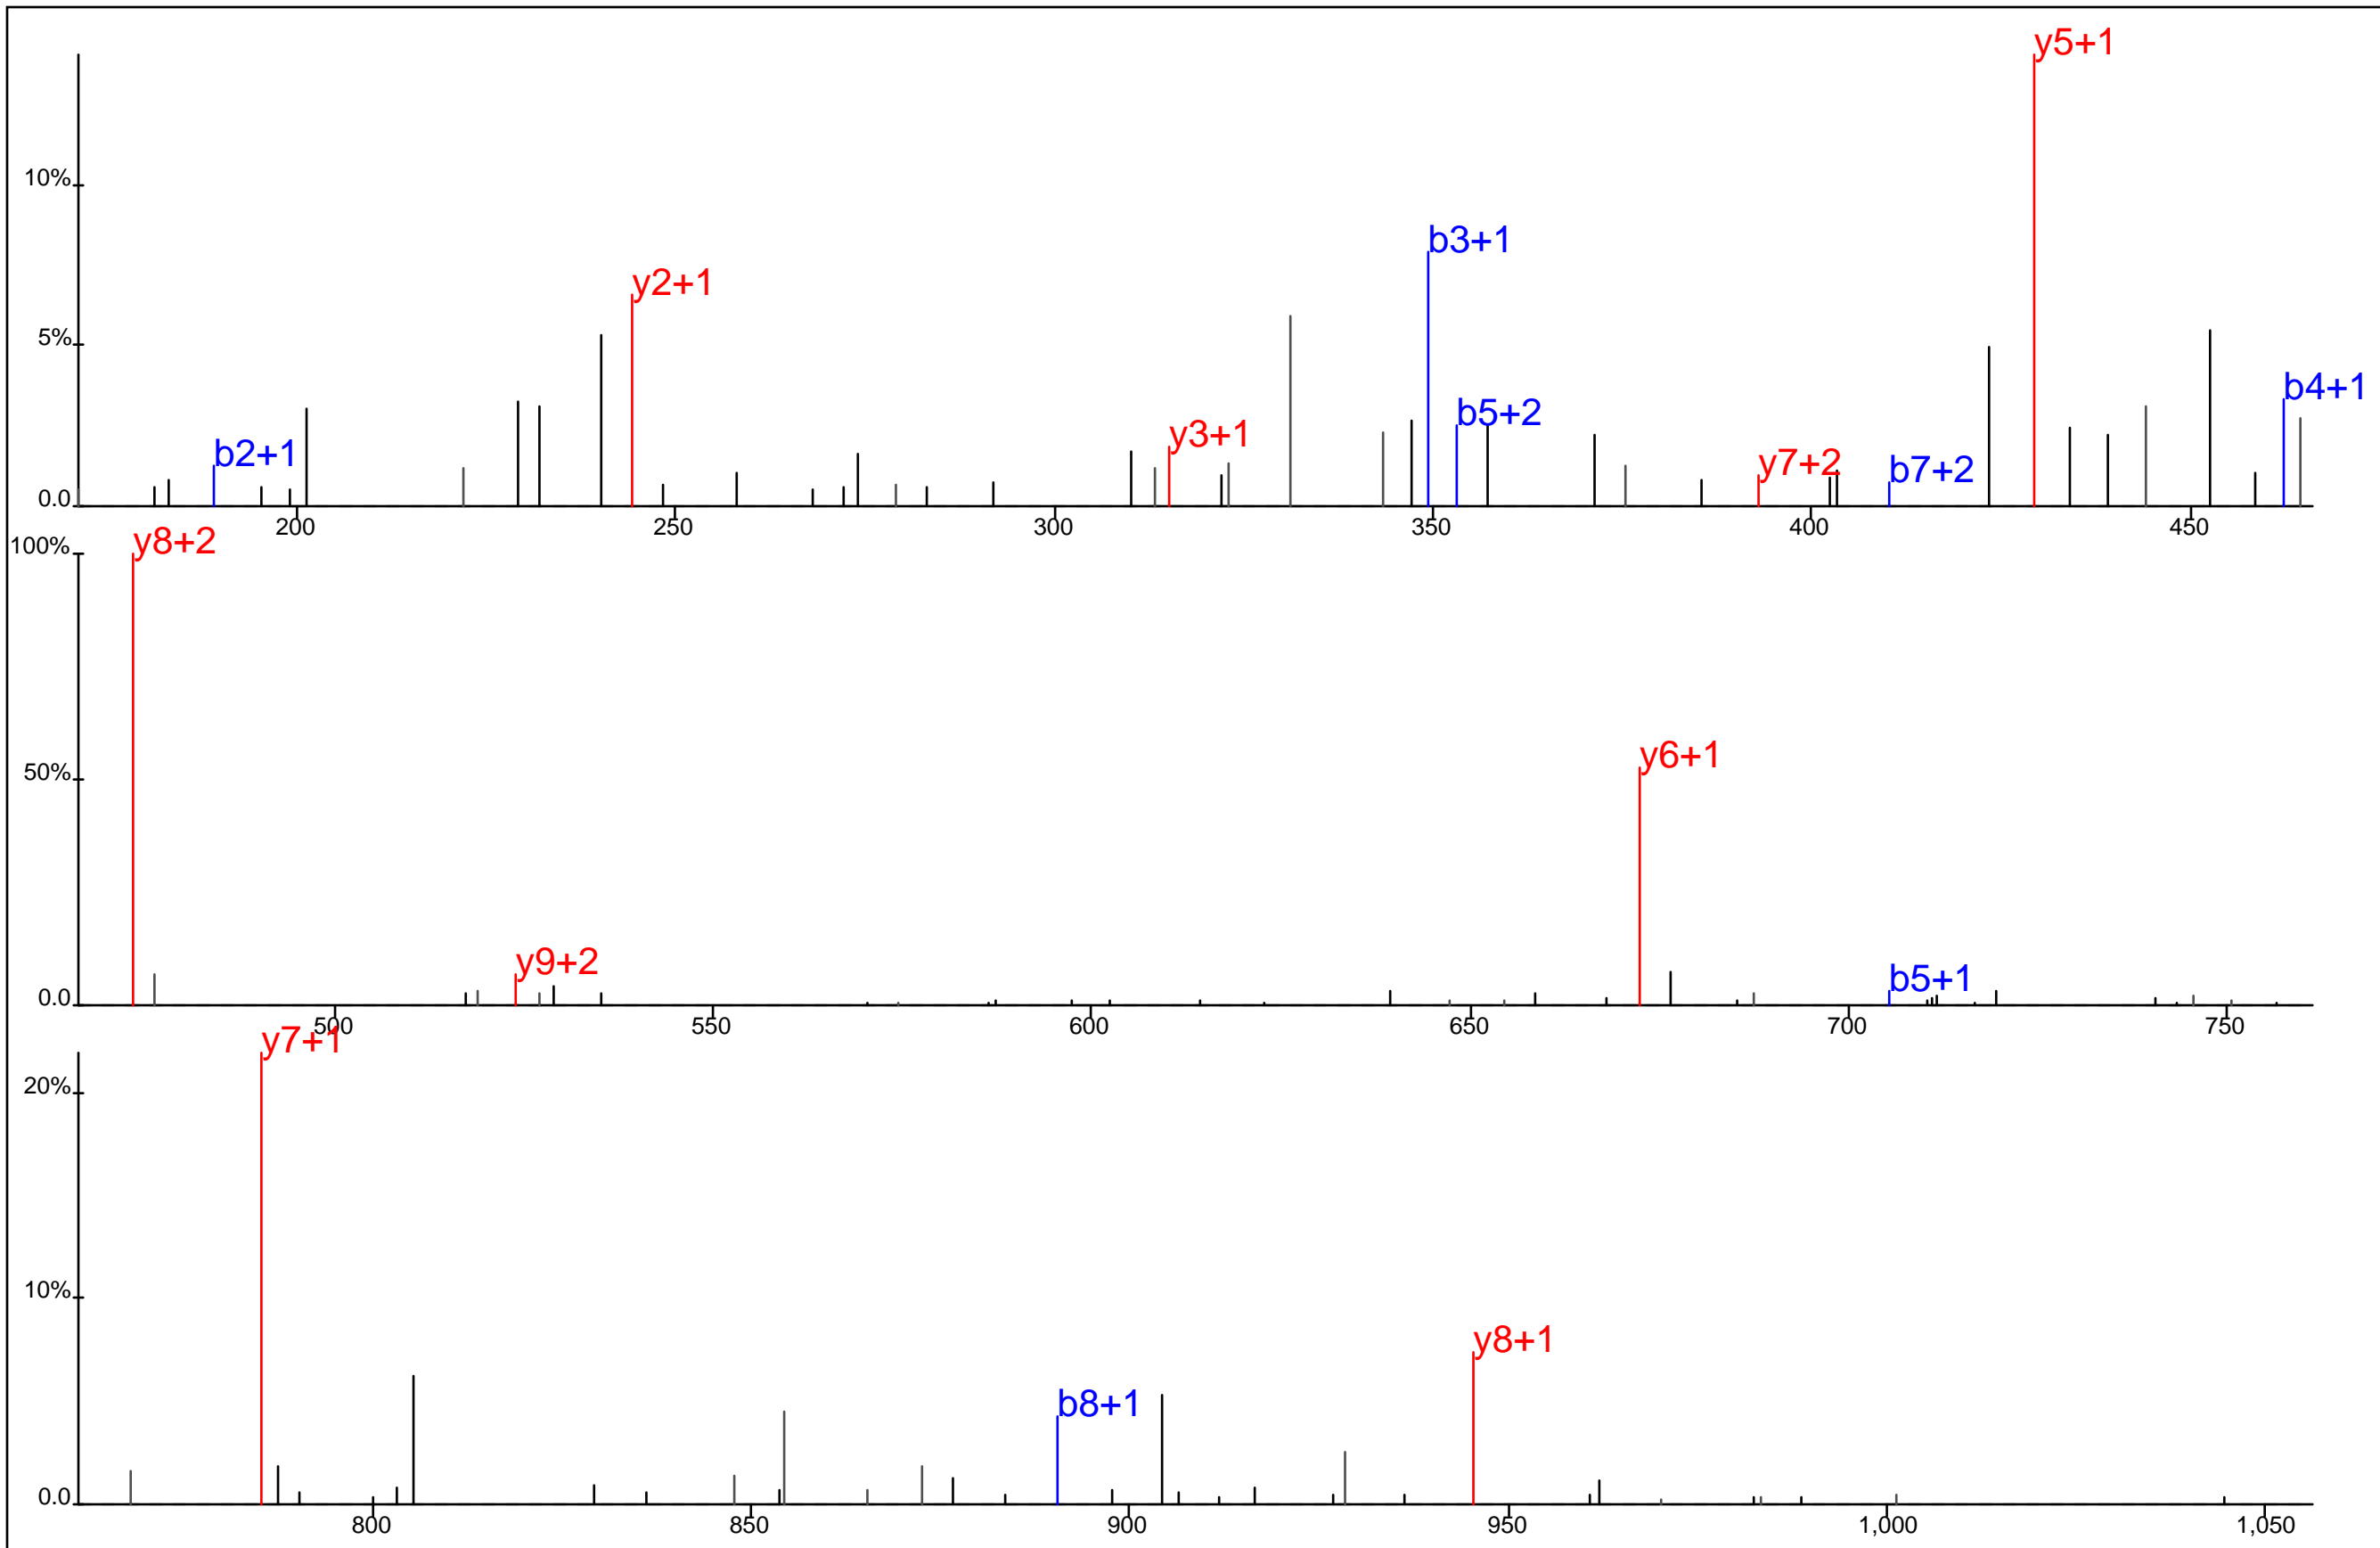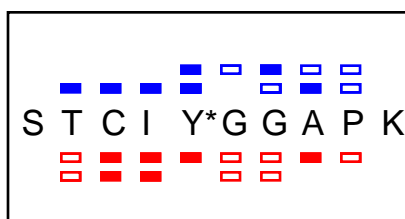

Protein Name: DDX5  
 gi Accession: 0  
 Precursor Mass: 567.2363+2  
 Delta Mass: 3.903 ppm  
 XCorr: 33.64

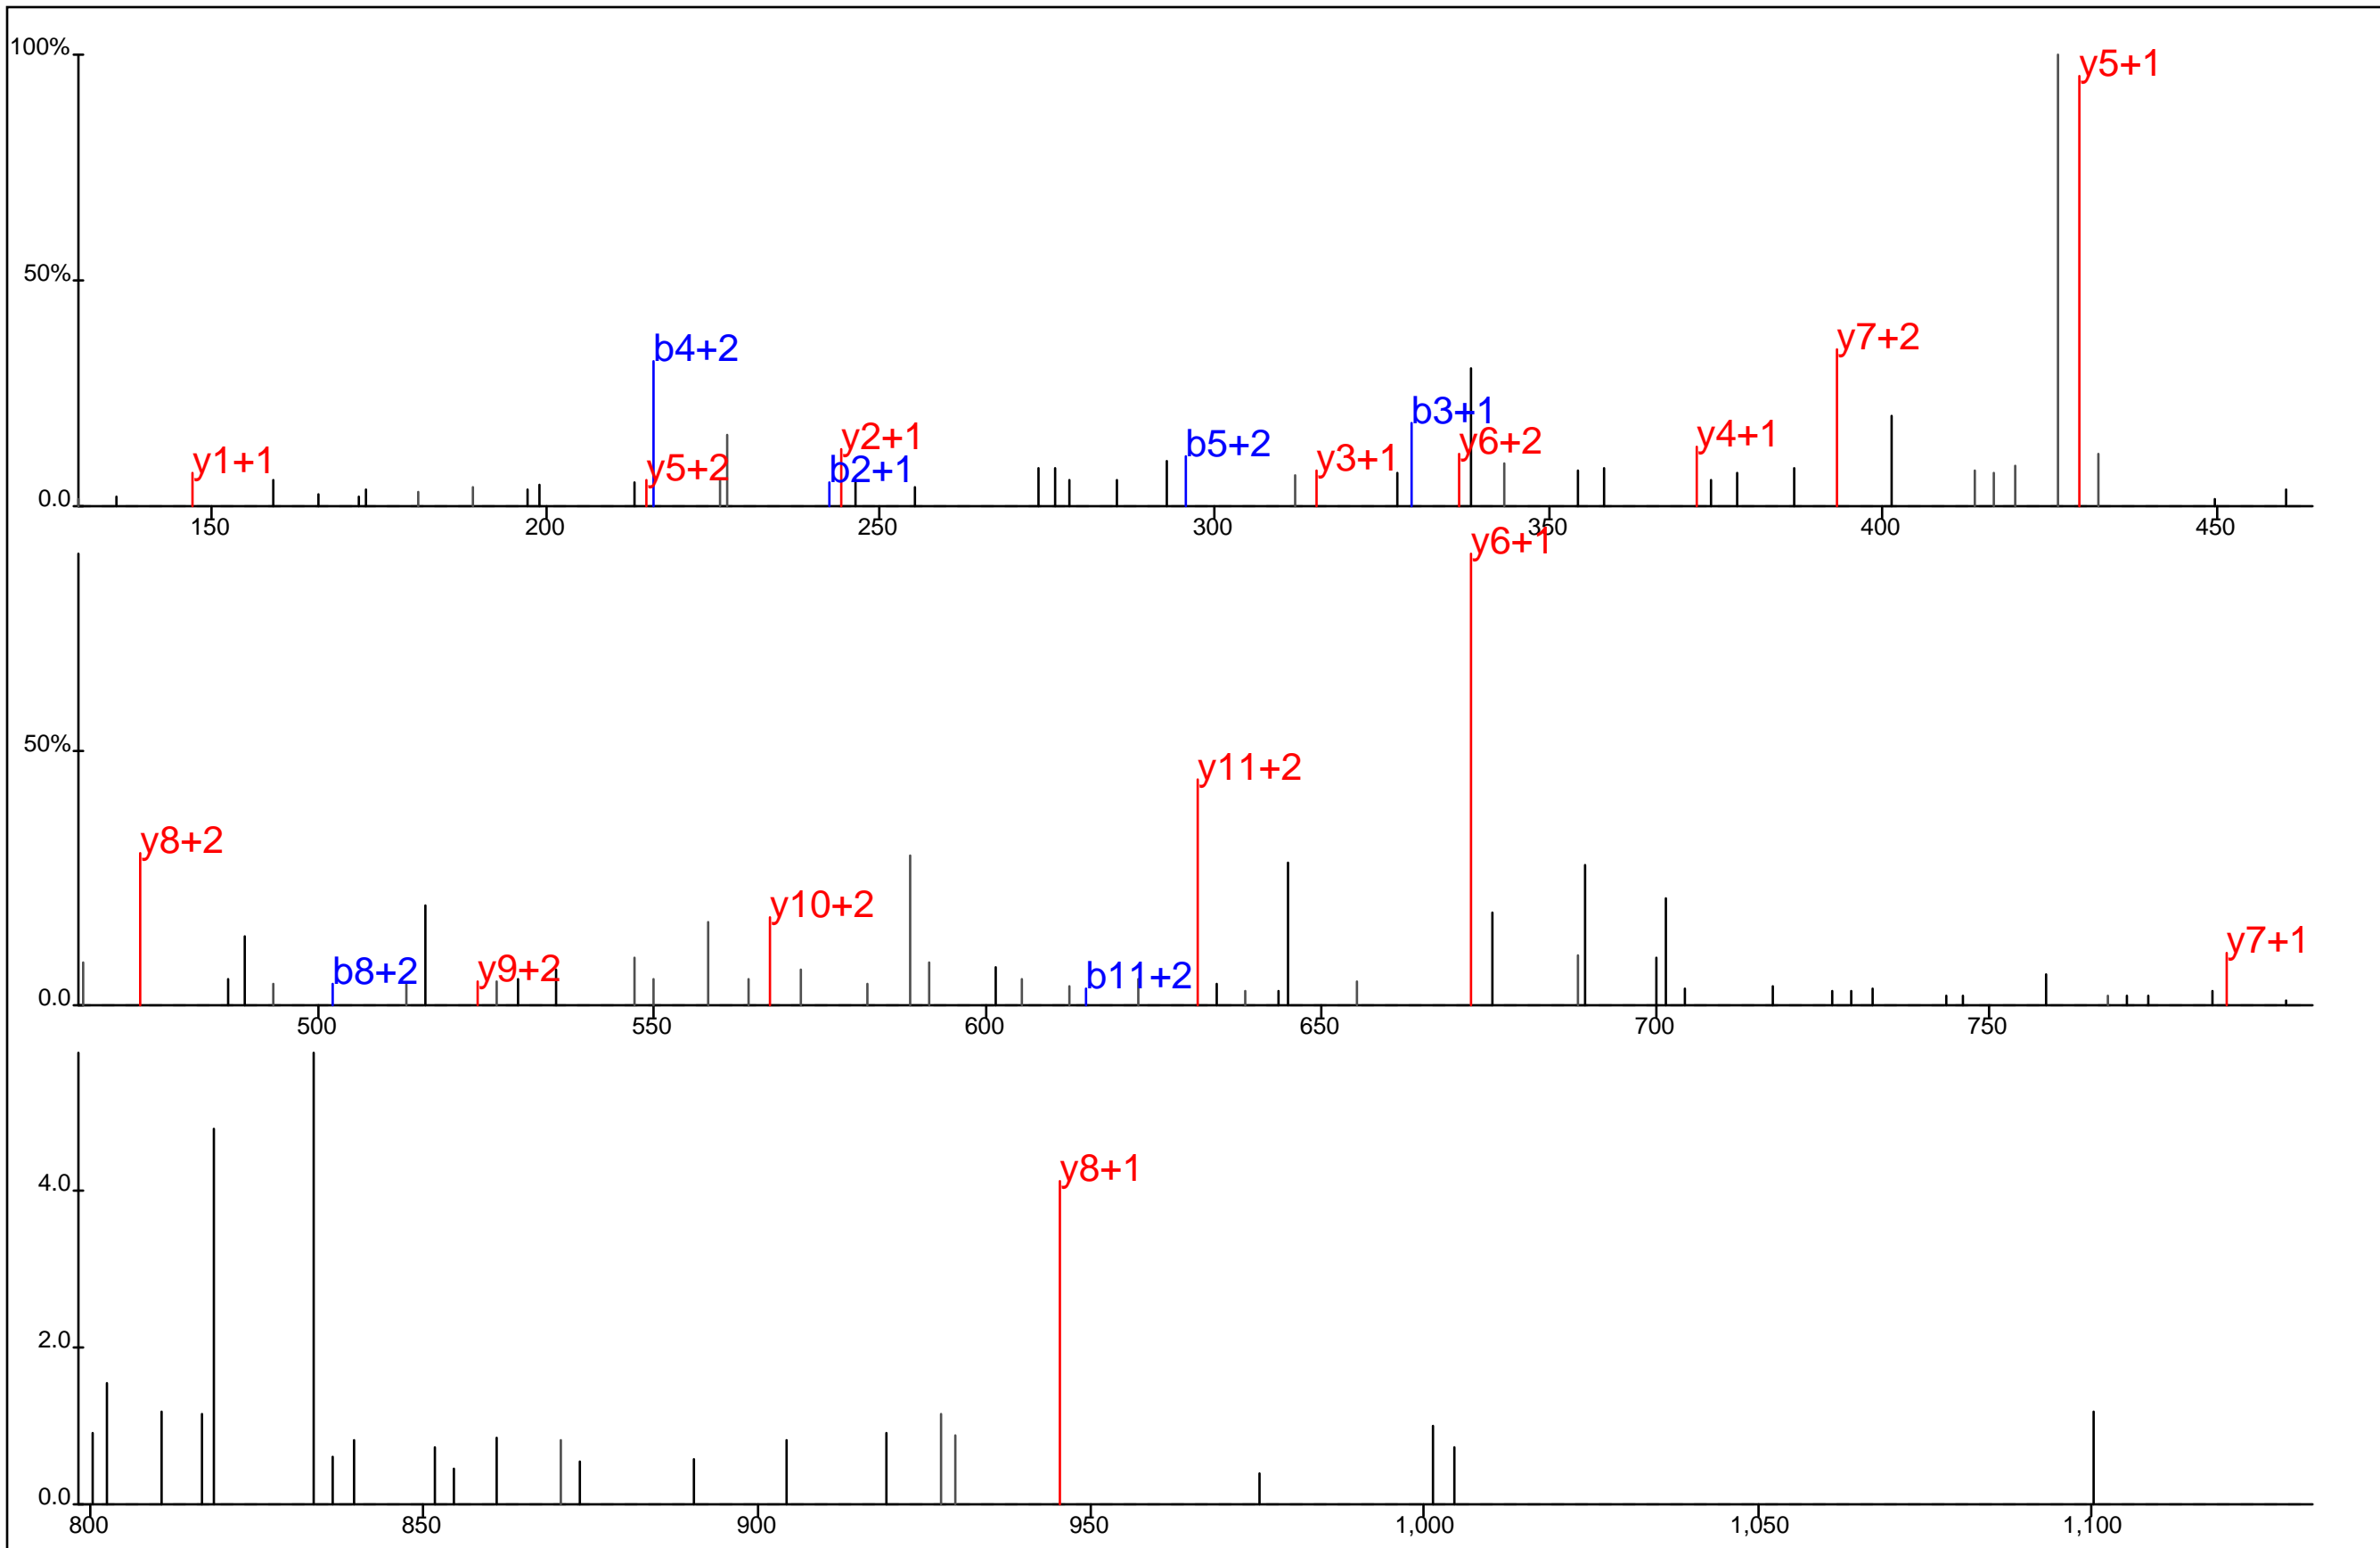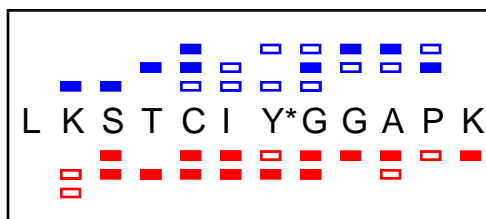

Protein Name: DDX5  
 gi Accession: 0  
 Precursor Mass: 458.8878+3  
 Delta Mass: 0.085 ppm  
 XCorr: 38.24



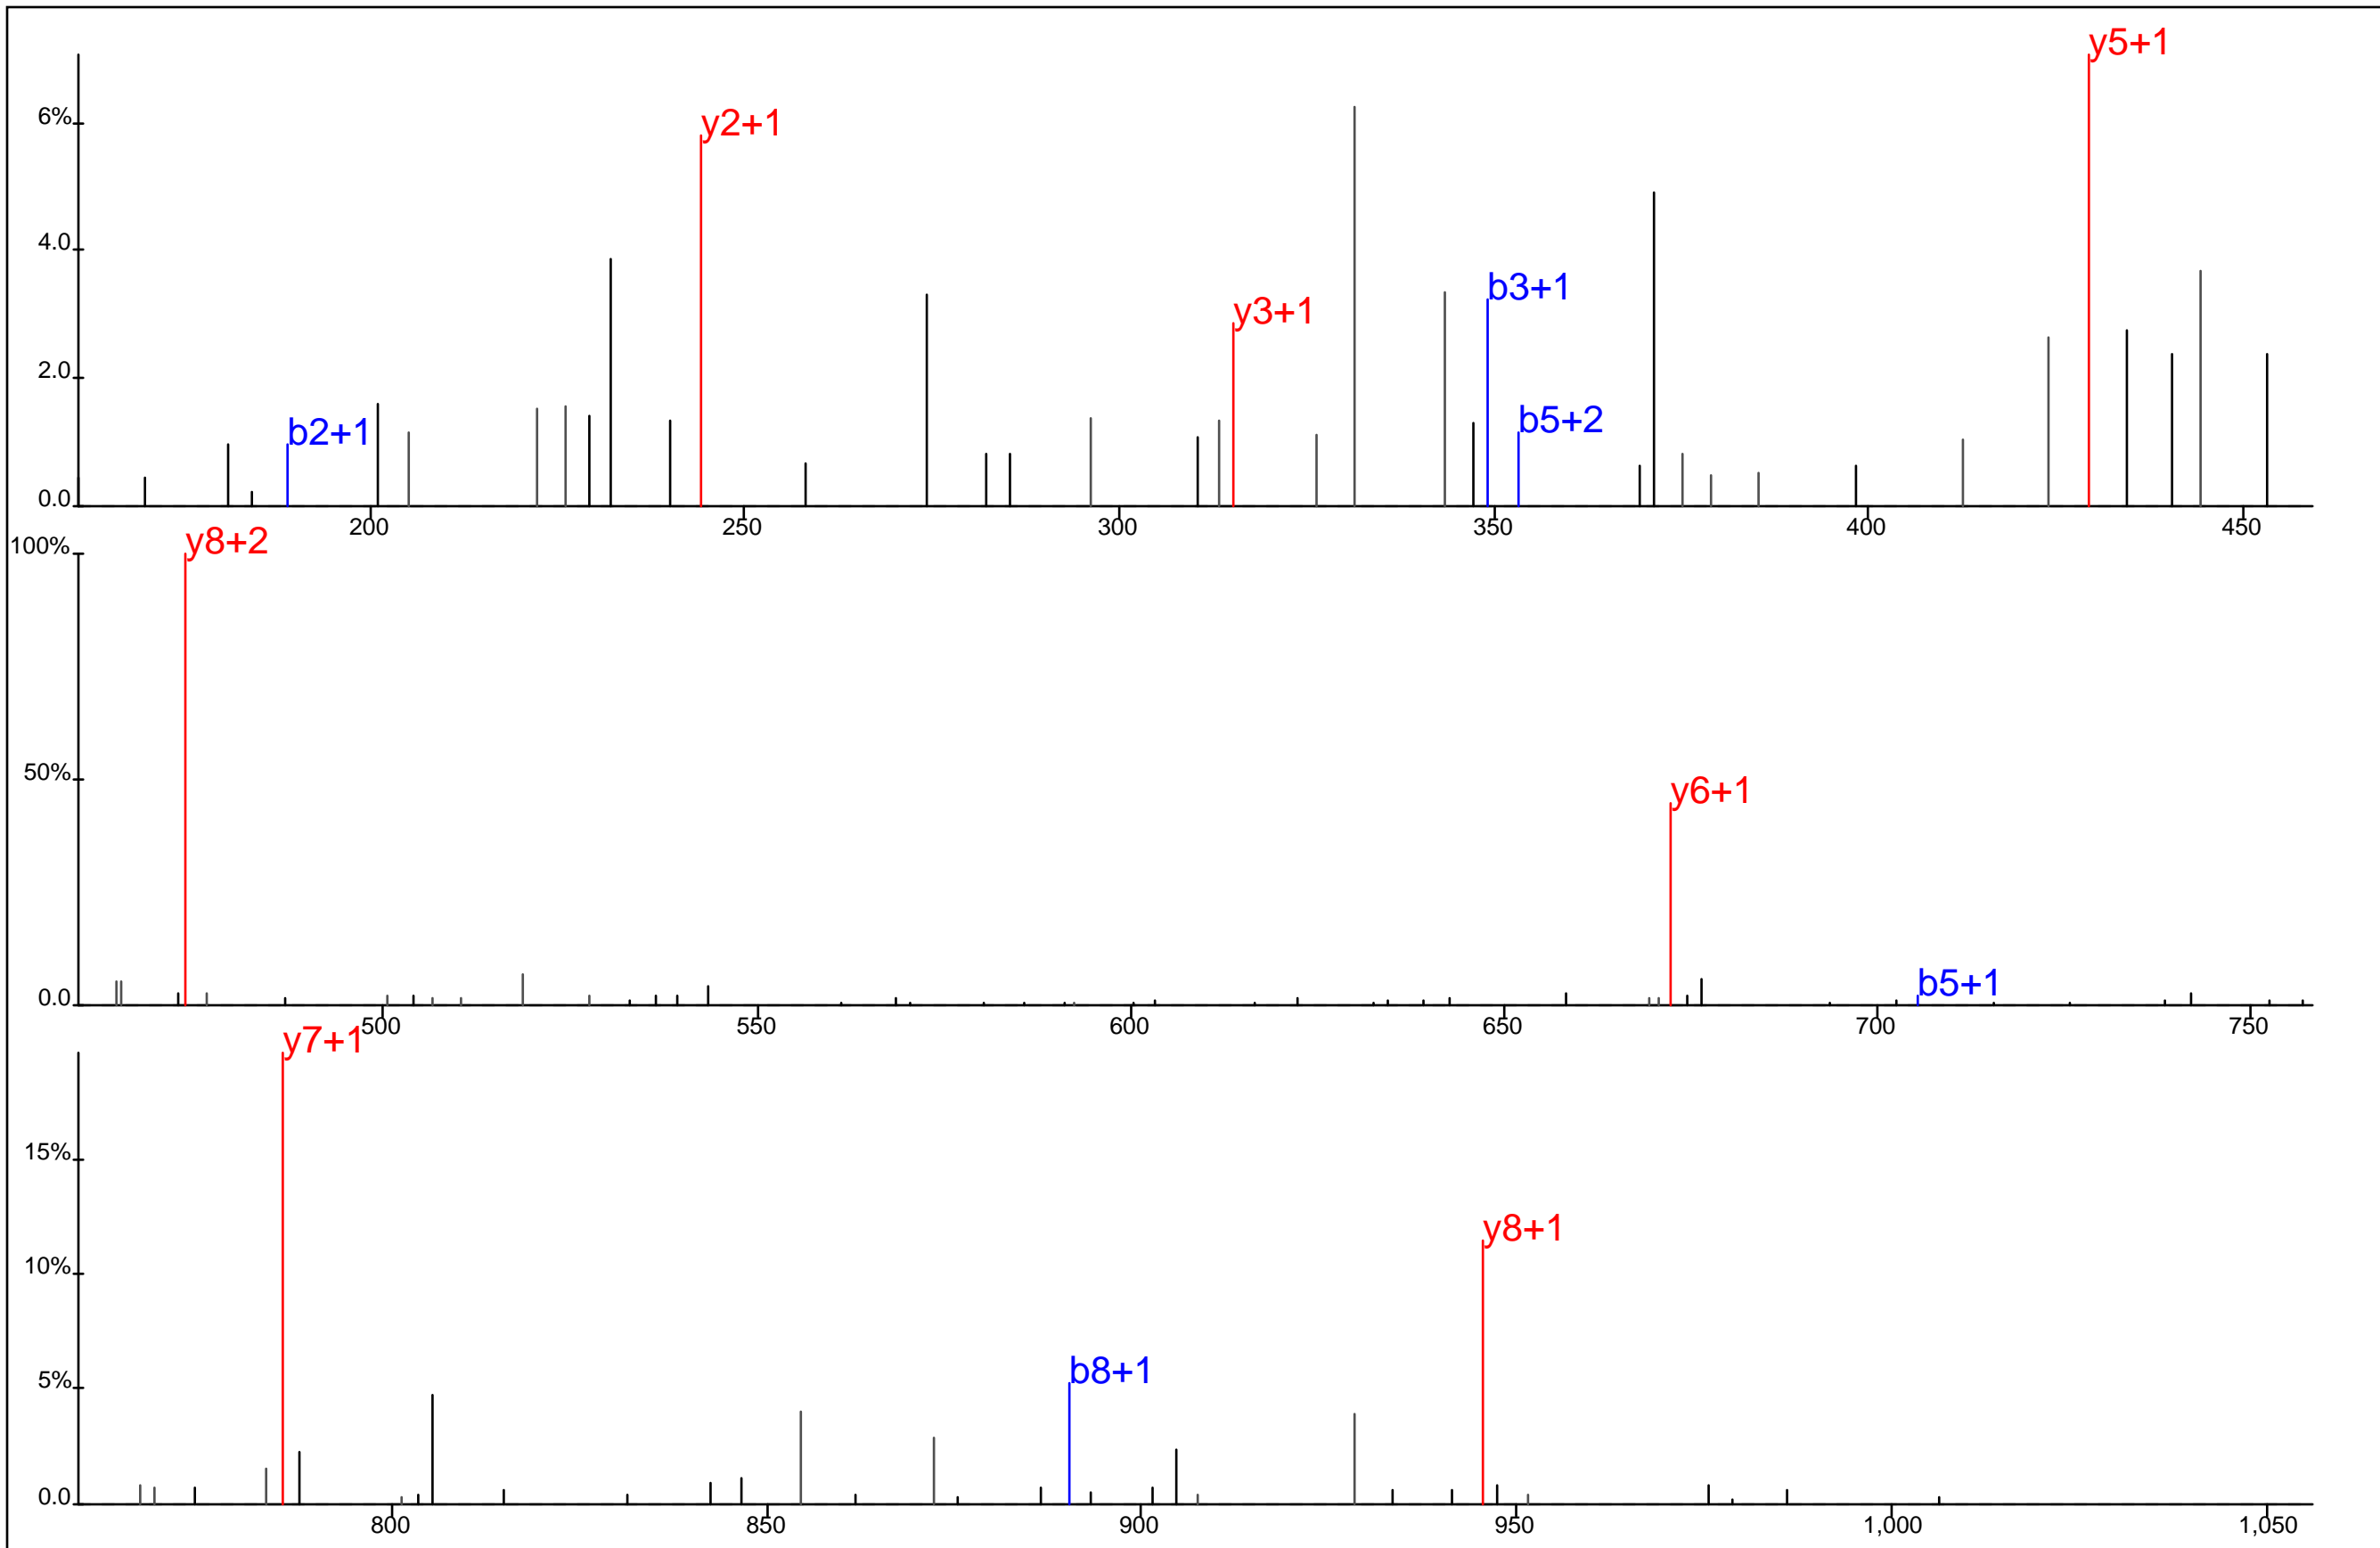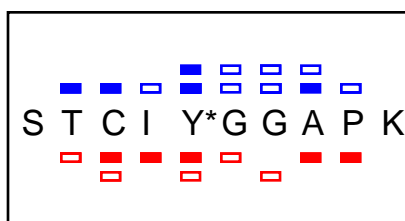

Protein Name: DDX5  
 gi Accession: 0  
 Precursor Mass: 567.2369+2  
 Delta Mass: 2.719 ppm  
 XCorr: 33.77

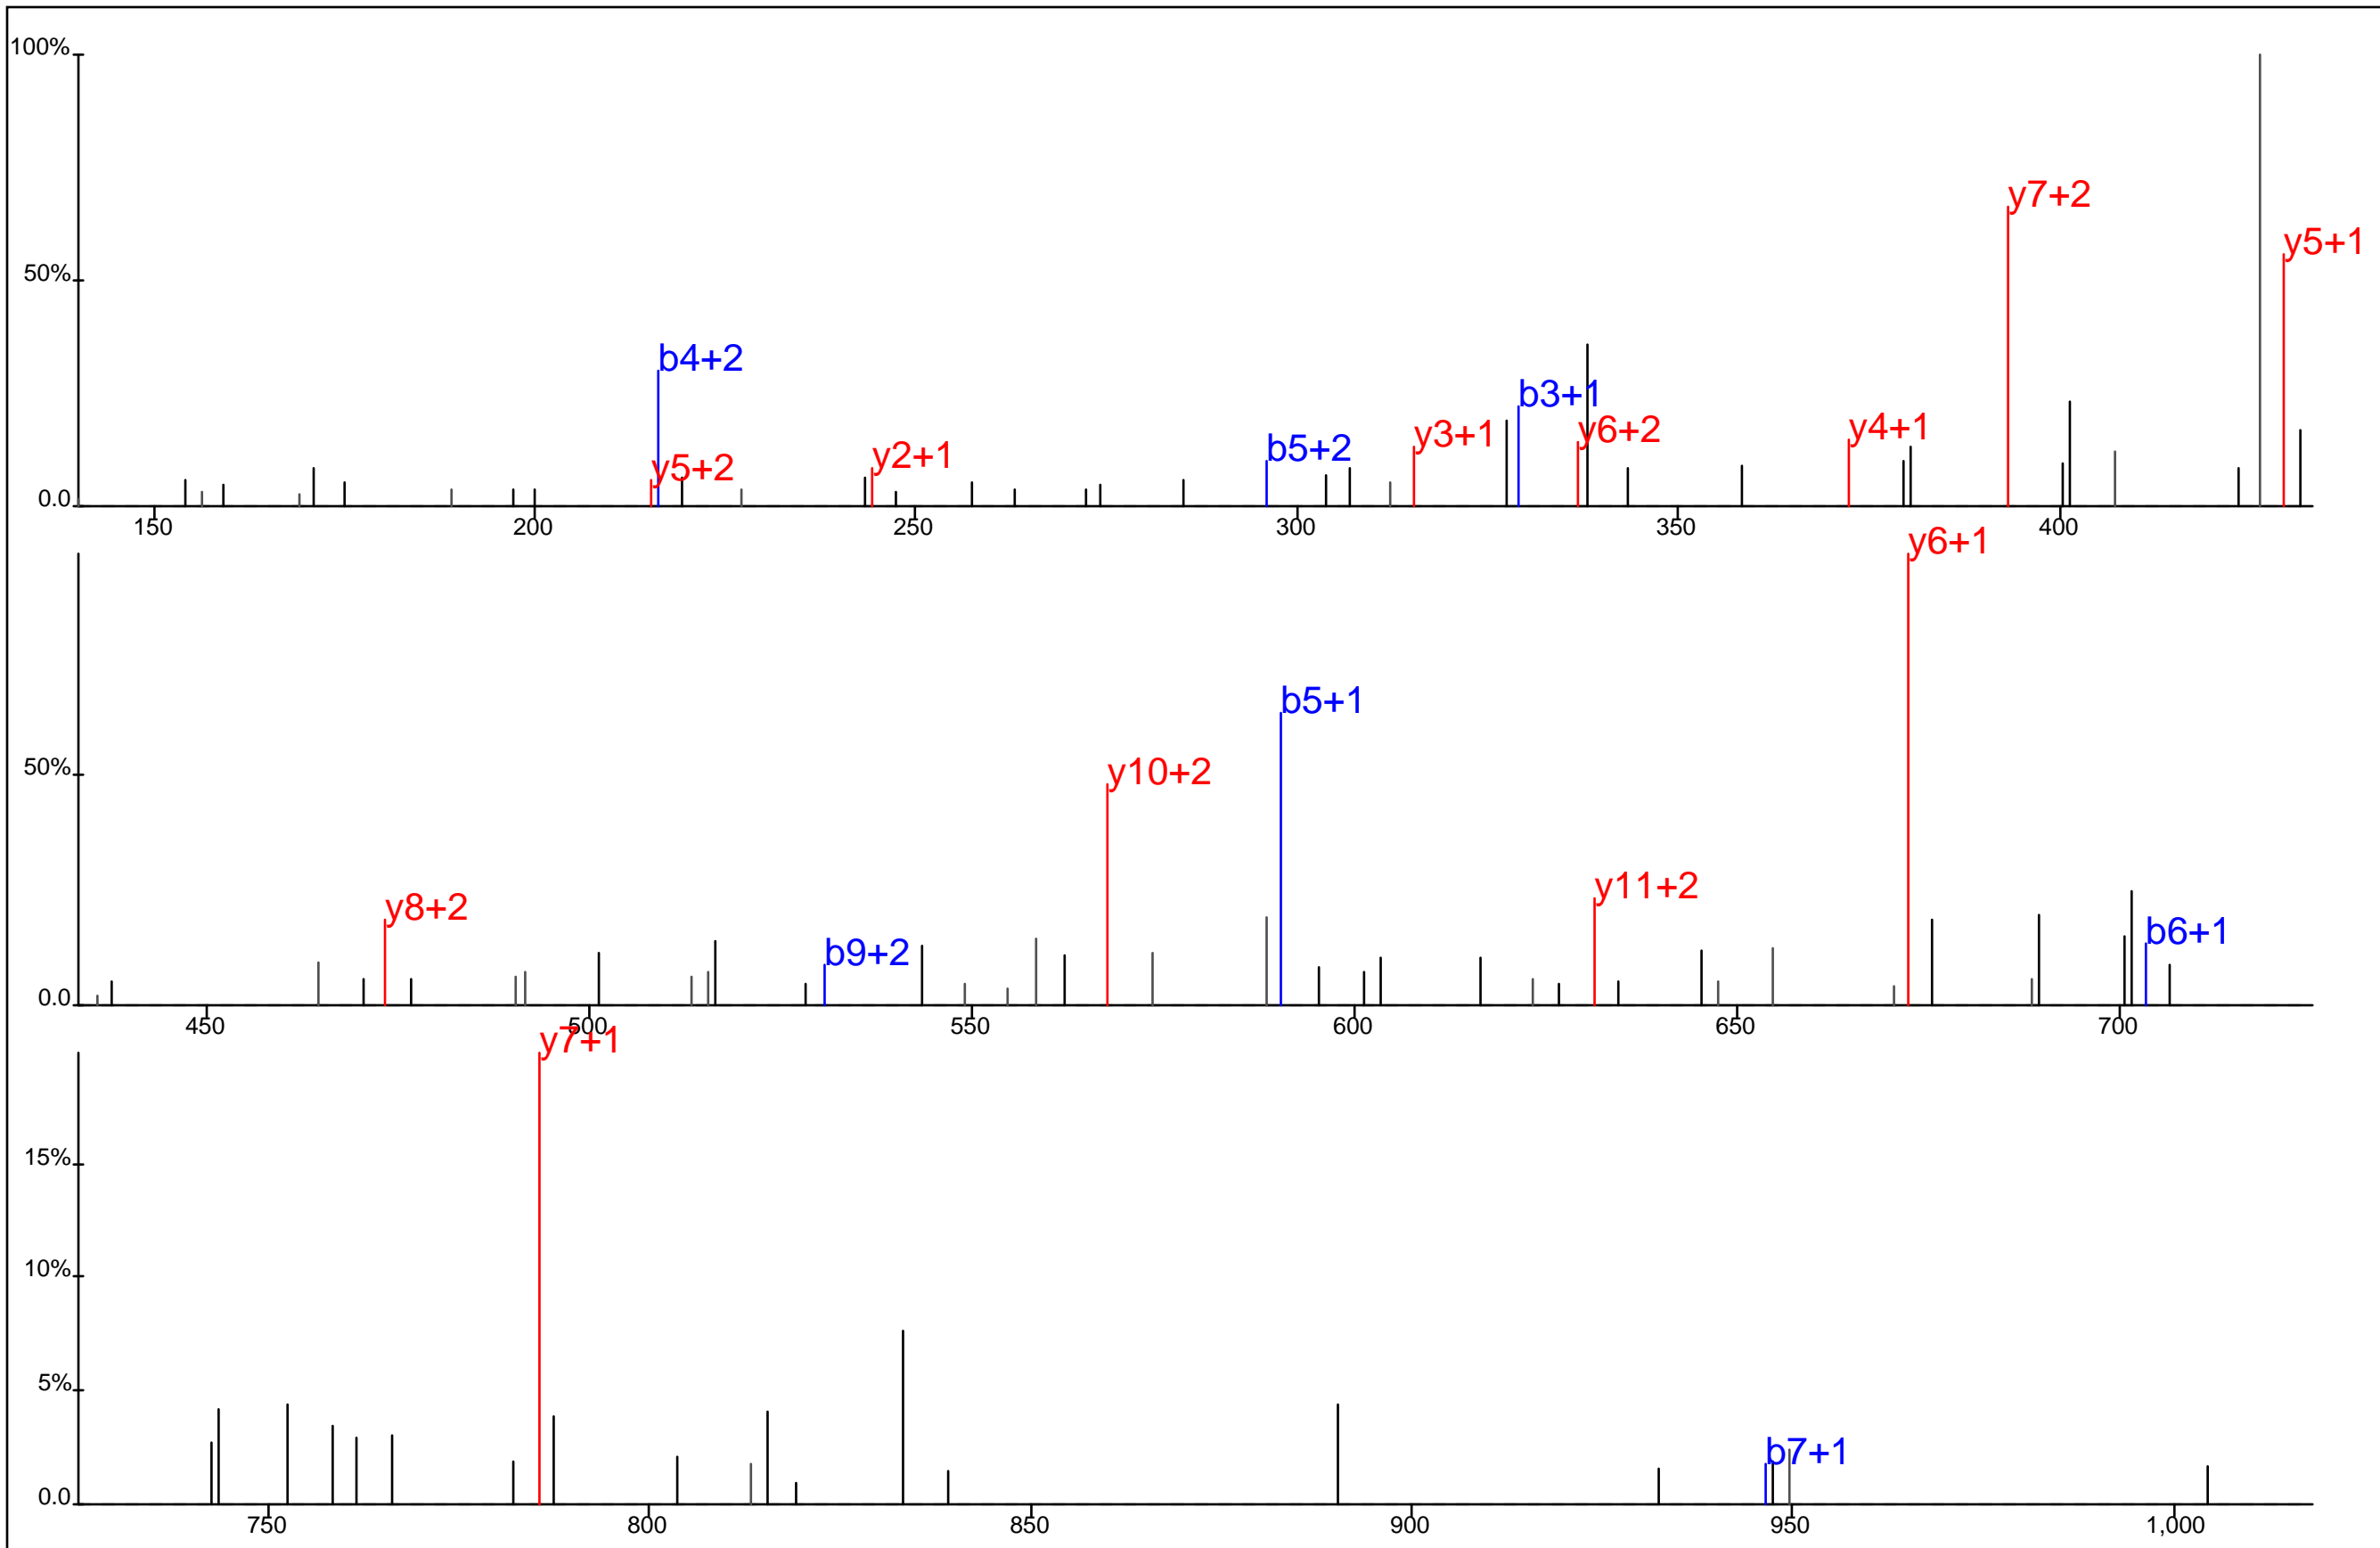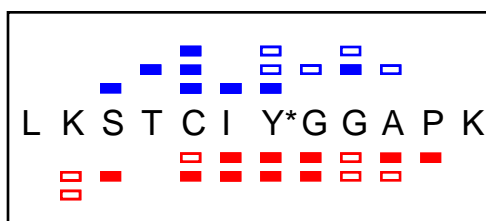

Protein Name: DDX5  
 gi Accession: 0  
 Precursor Mass: 458.8879+3  
 Delta Mass: 0.284 ppm  
 XCorr: 28.8

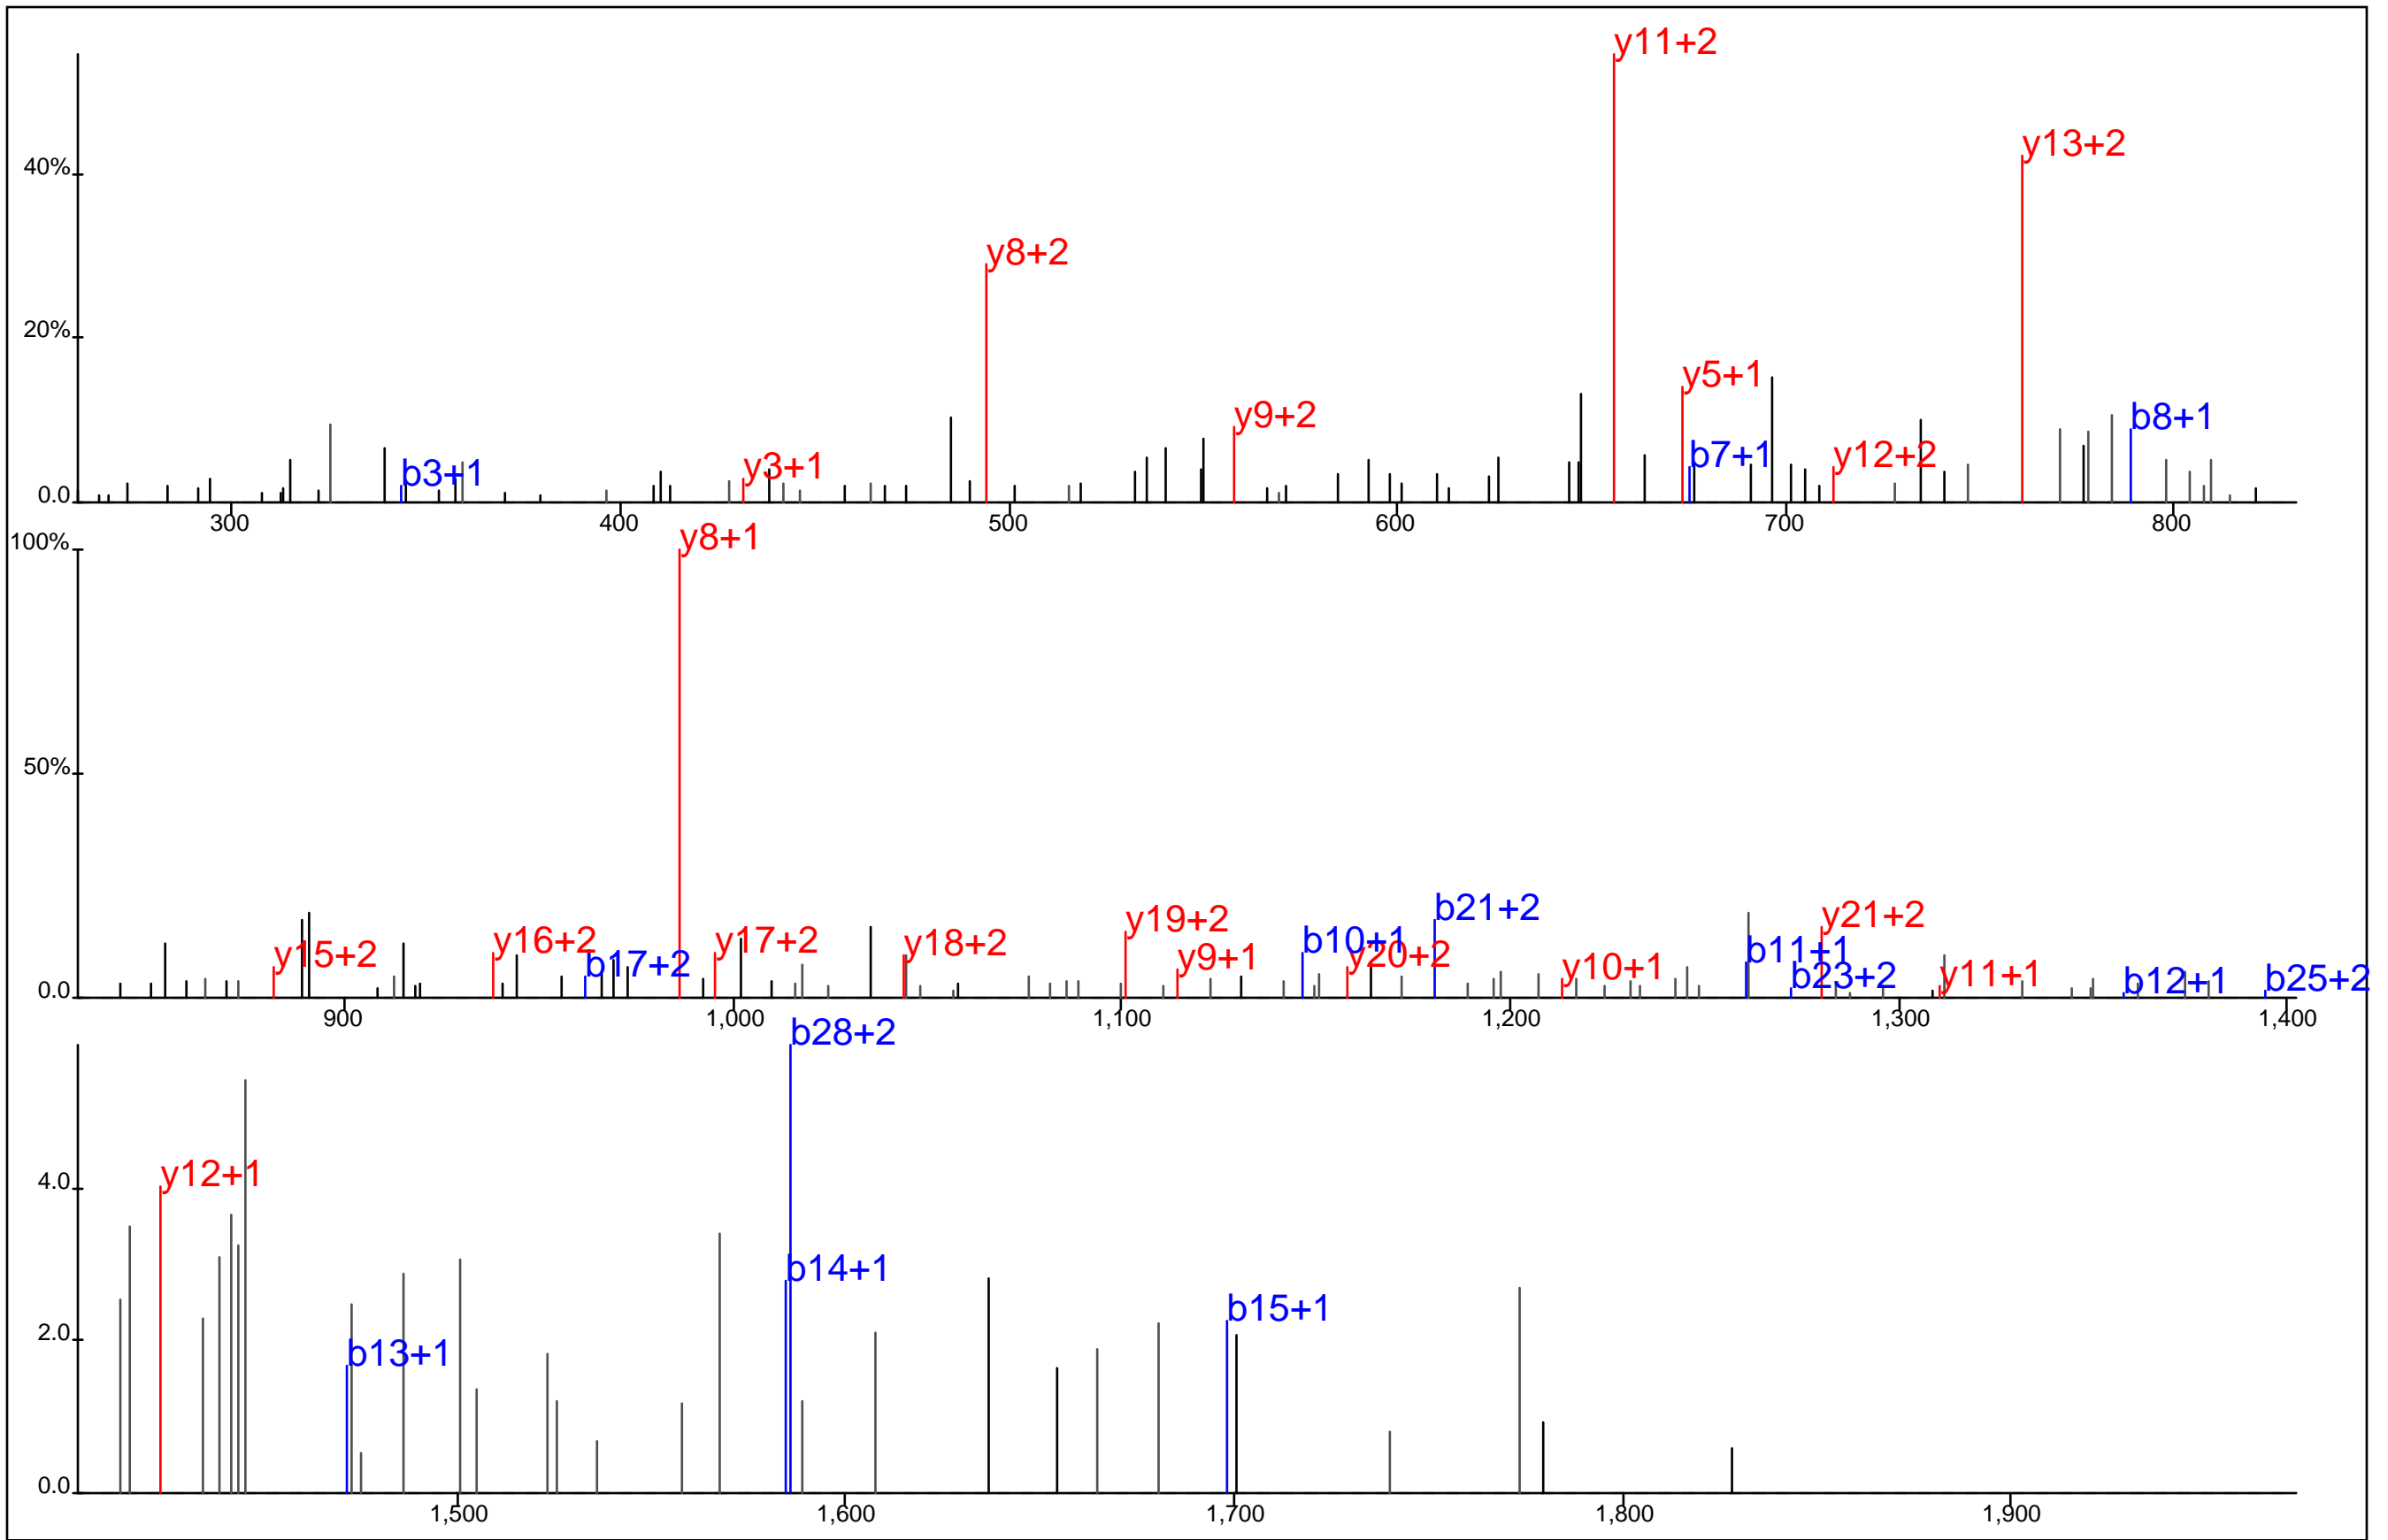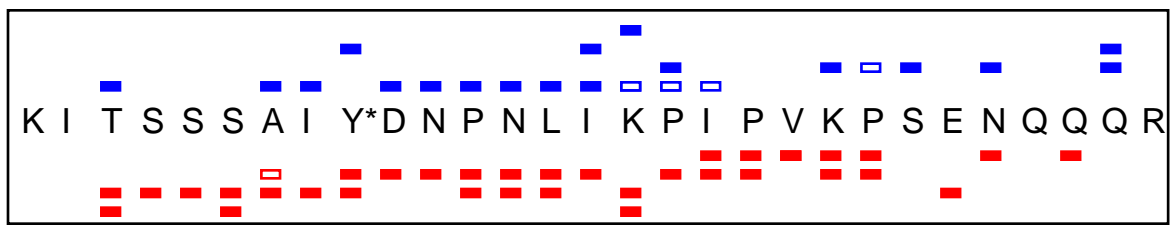

Protein Name: Decapping enzyme hDcp1b  
 gi Accession: 0  
 Precursor Mass: 837.1864+4  
 Delta Mass: 1.074 ppm  
 XCorr: 29.97

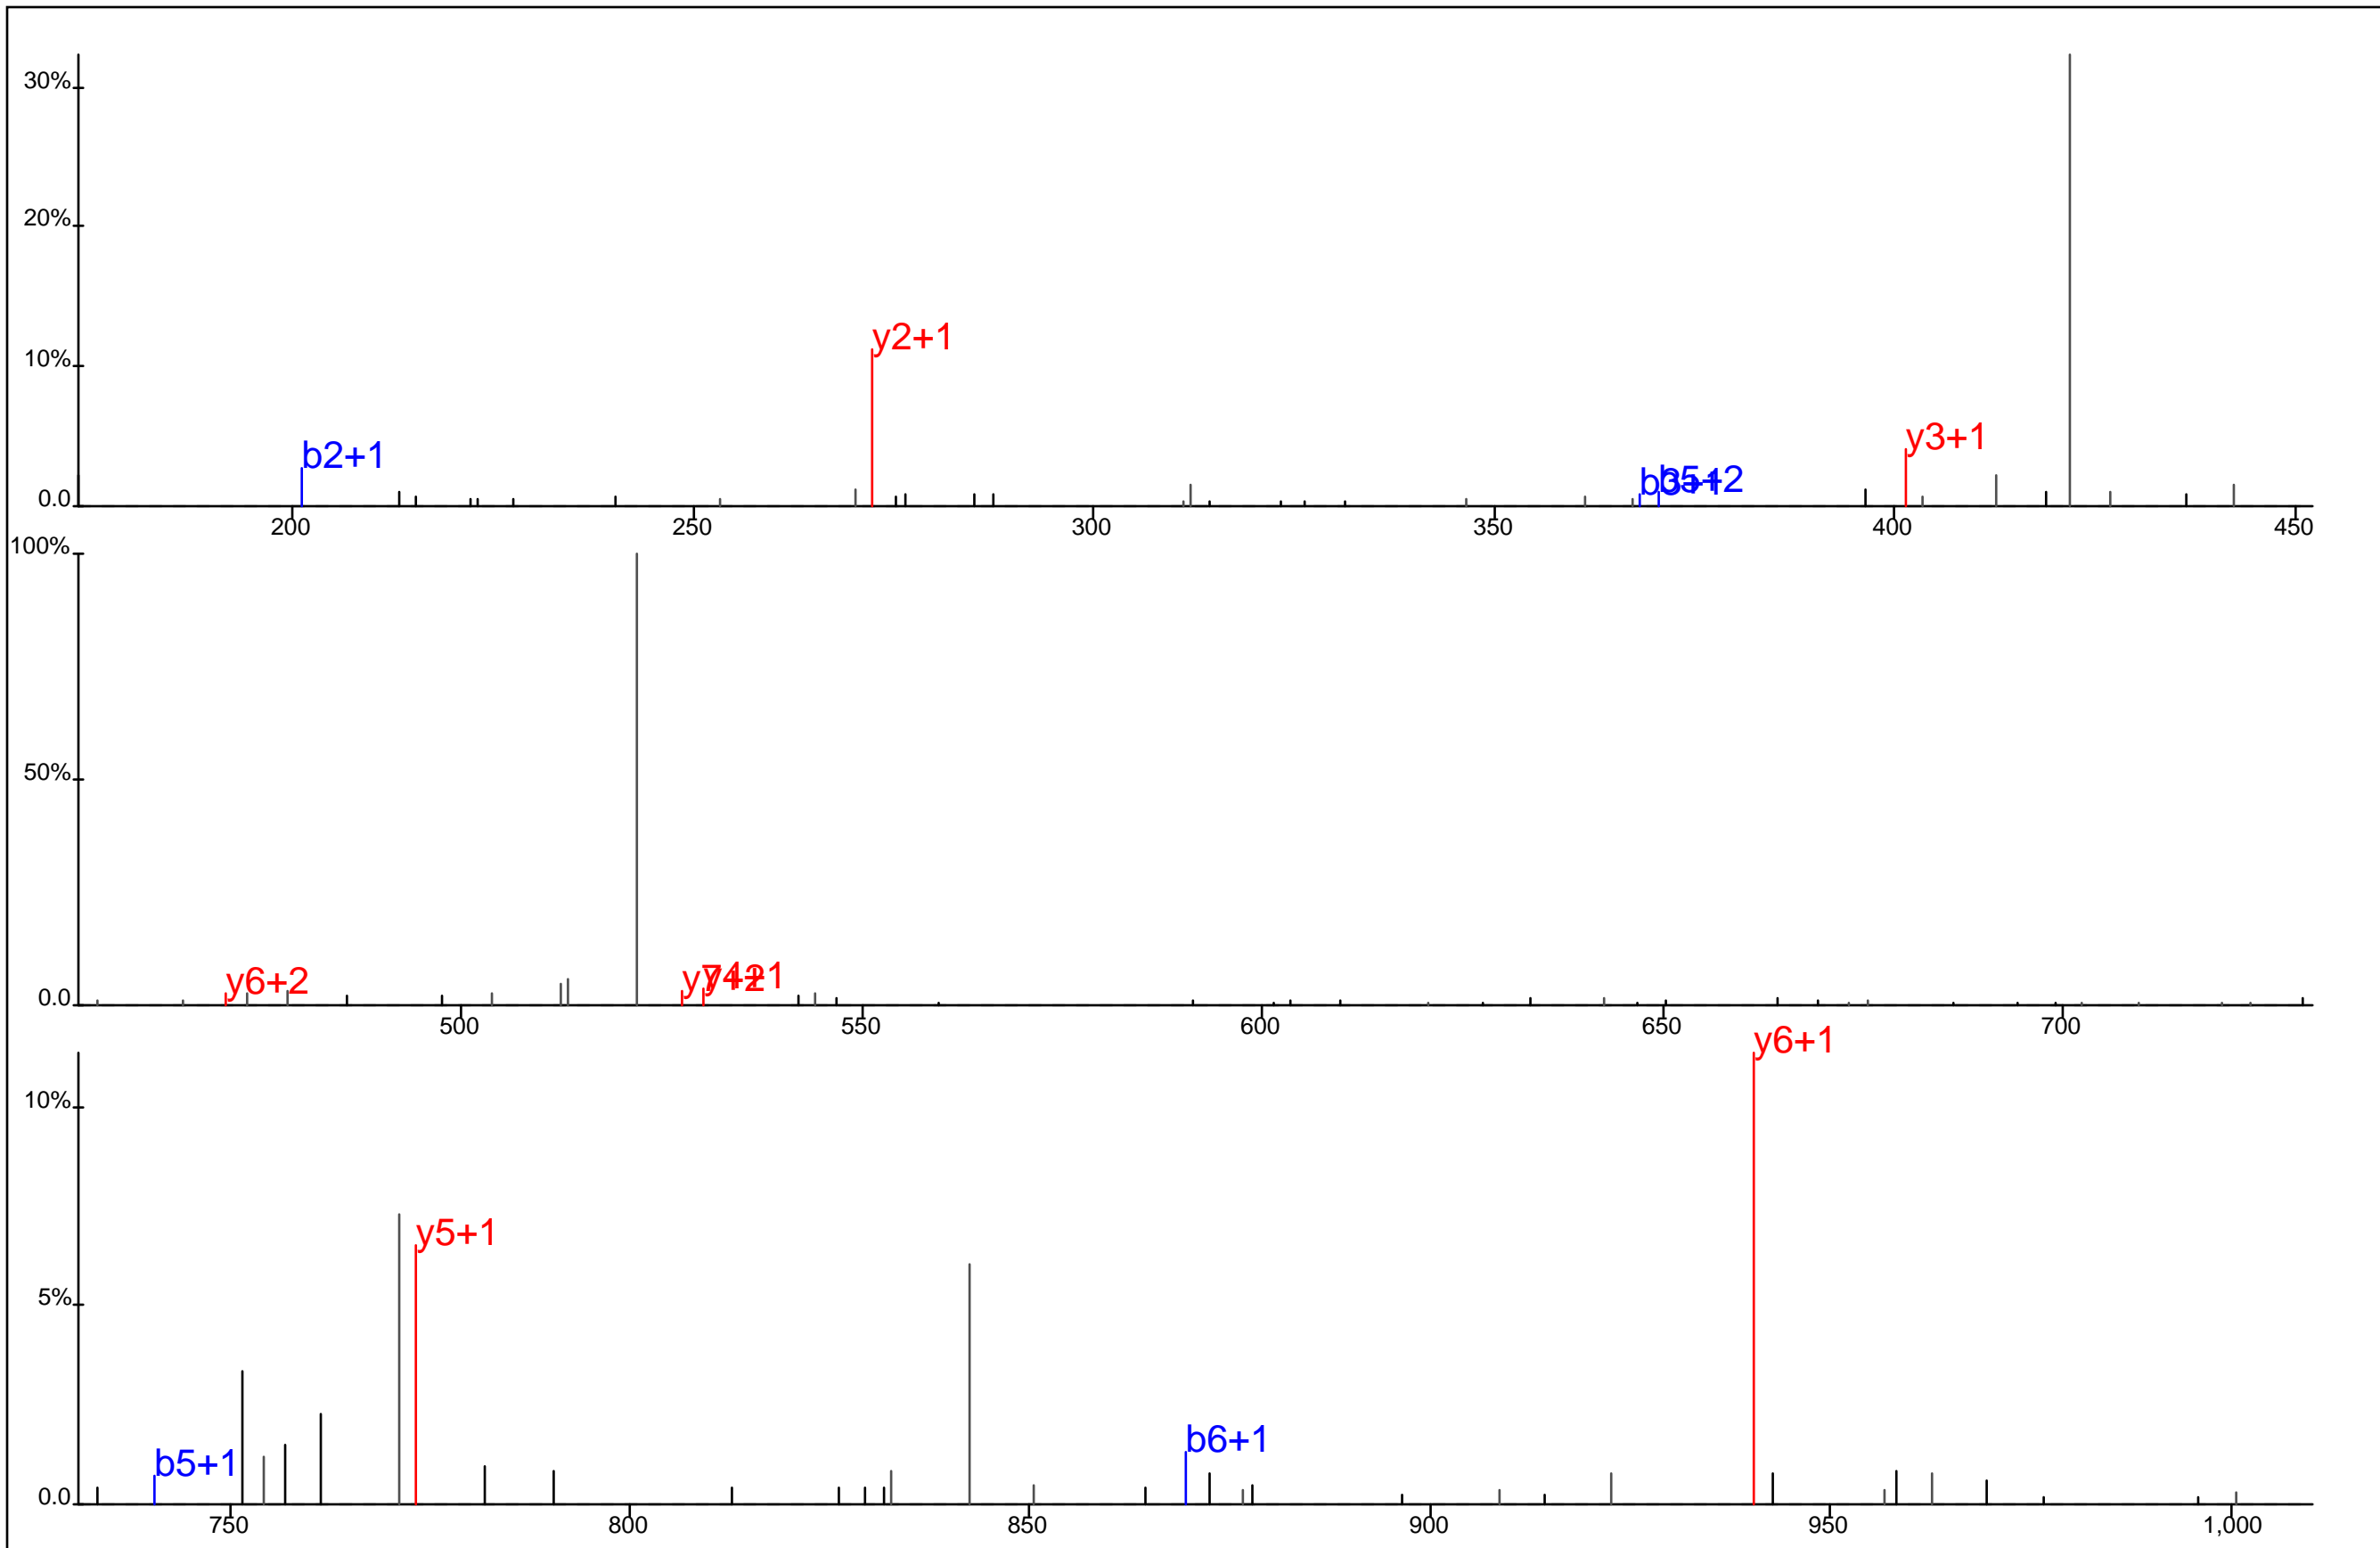

S L S\* Y\* E E P R

Protein Name: Decapping enzyme hDcp1b  
 gi Accession: 0  
 Precursor Mass: 570.7042+2  
 Delta Mass: 0.068 ppm  
 XCorr: 26.89

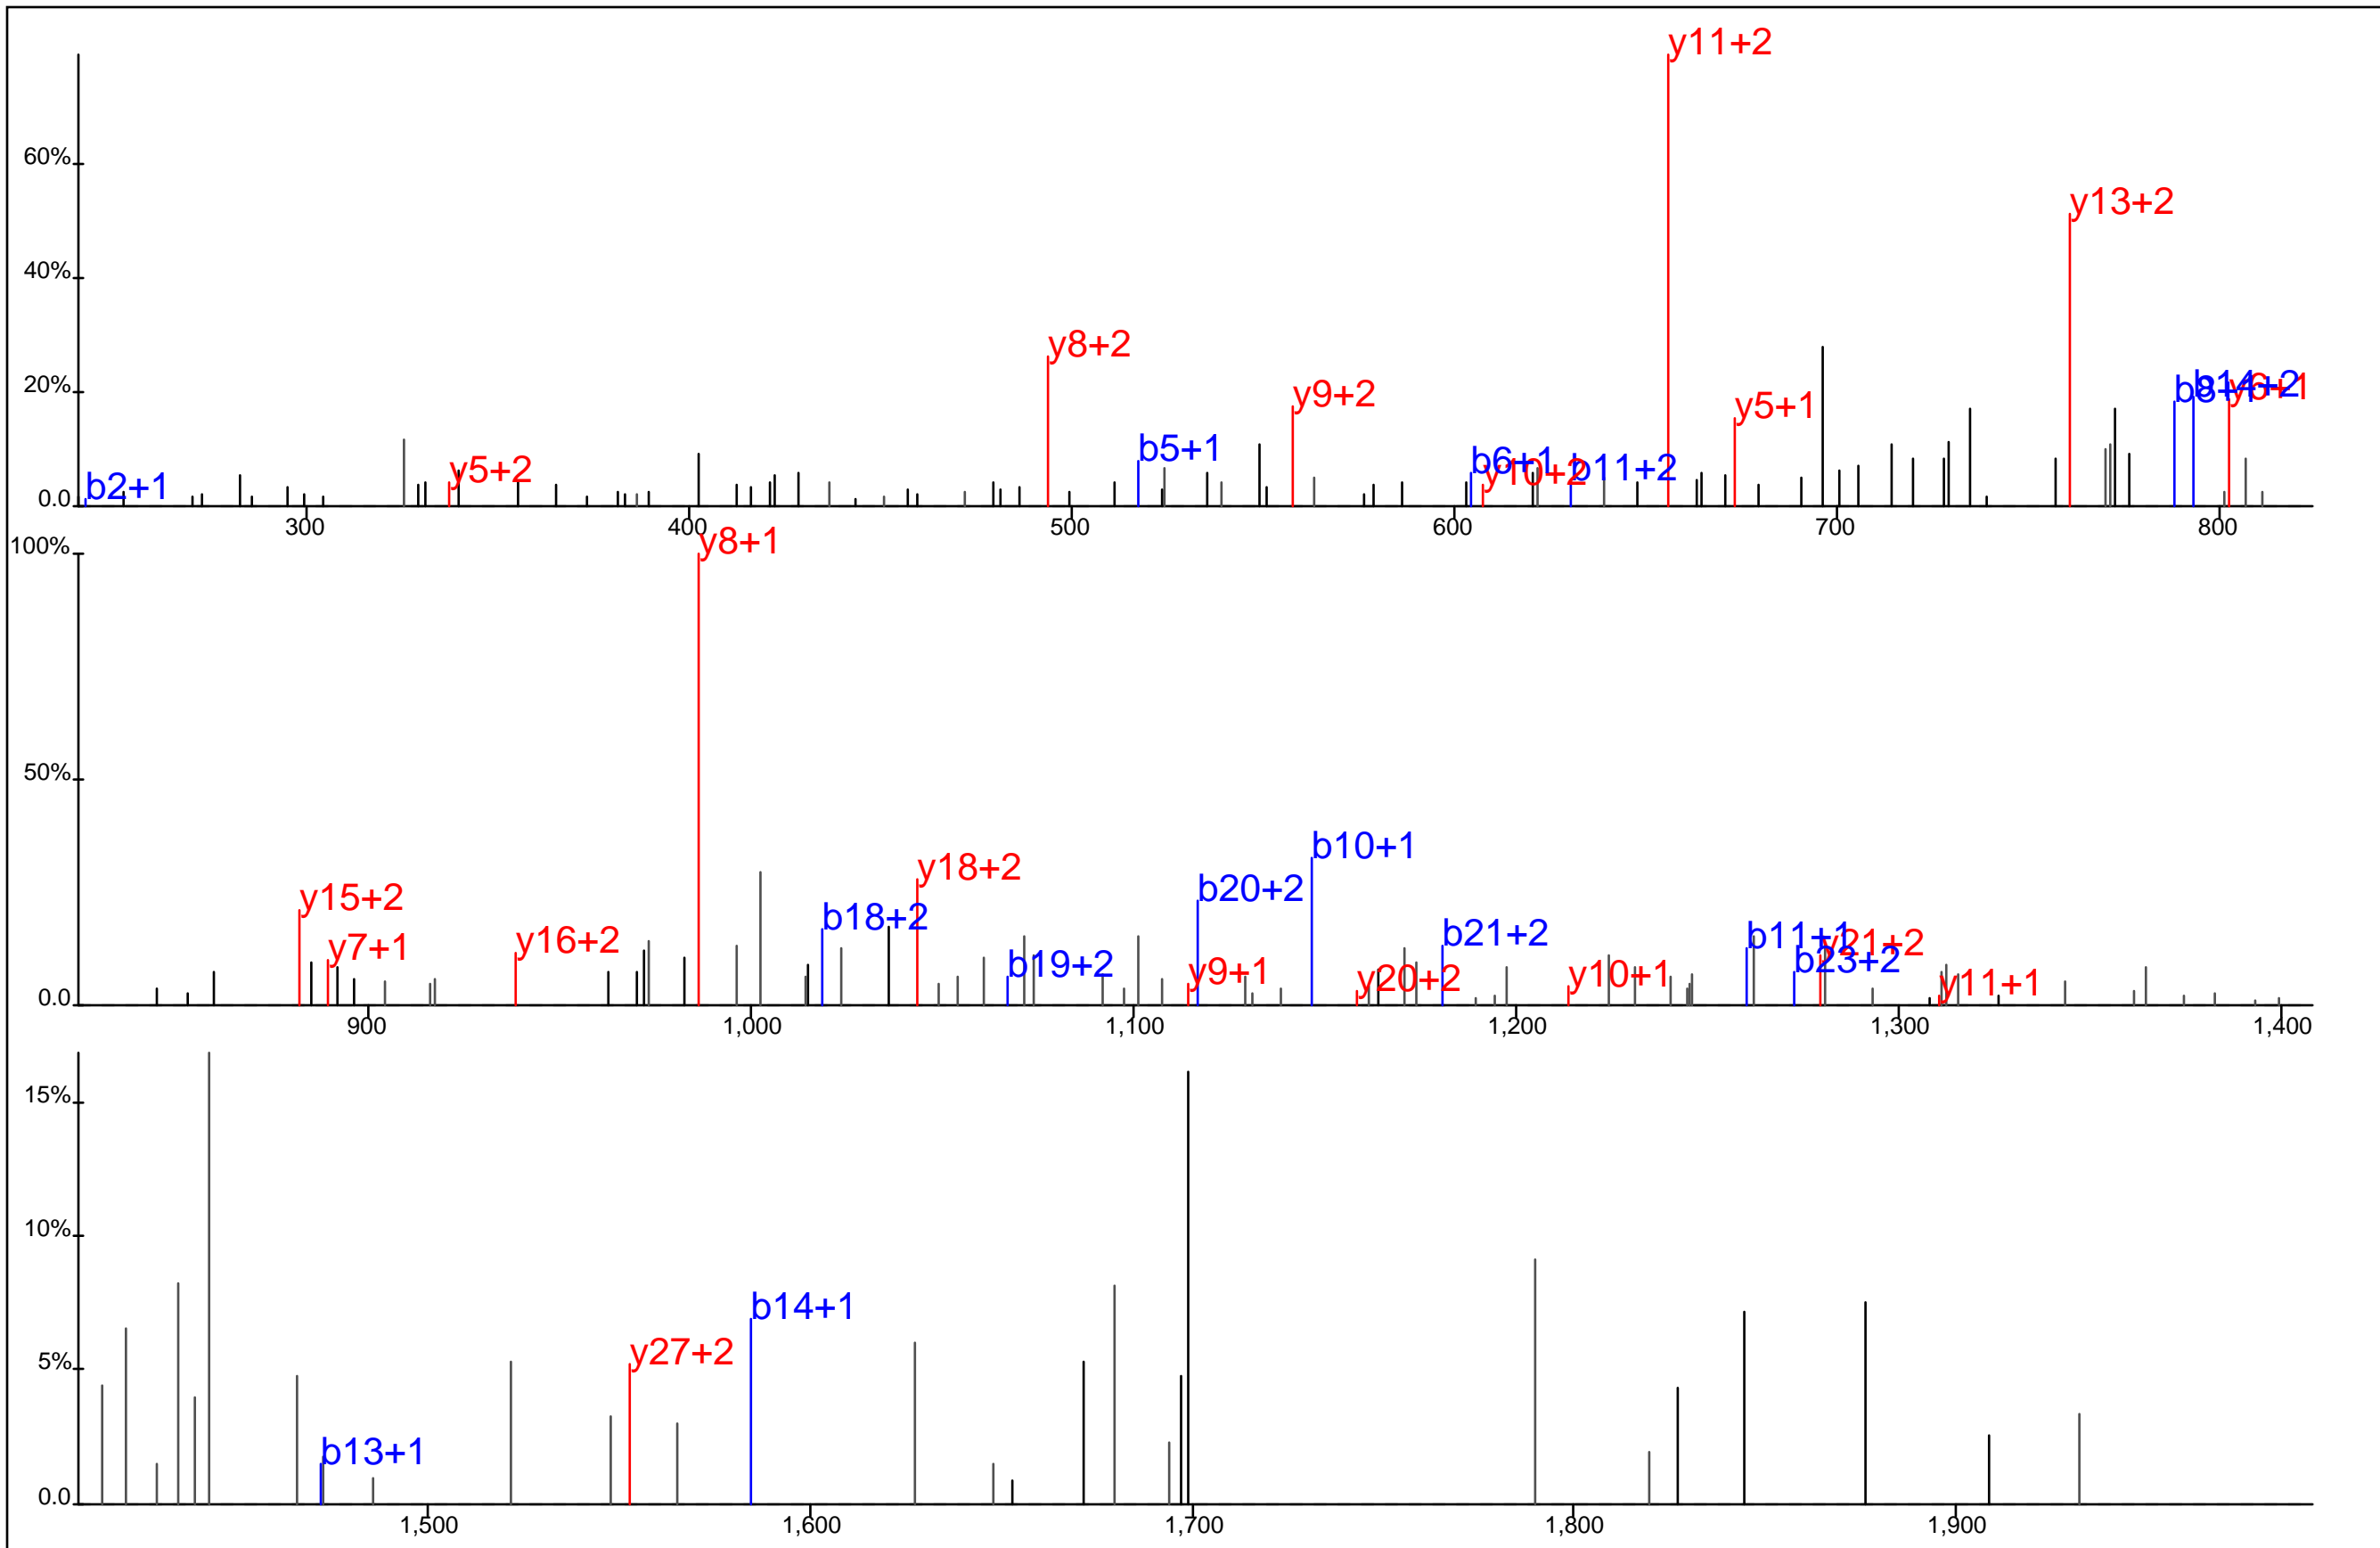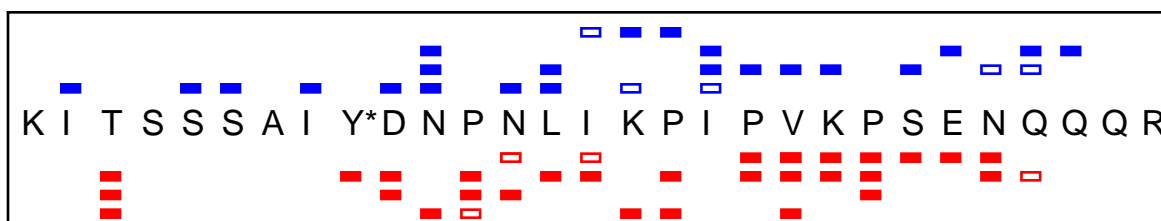

Protein Name: Decapping enzyme hDcp1b  
 gi Accession: 0  
 Precursor Mass: 837.1860+4  
 Delta Mass: 0.637 ppm  
 XCorr: 27.64

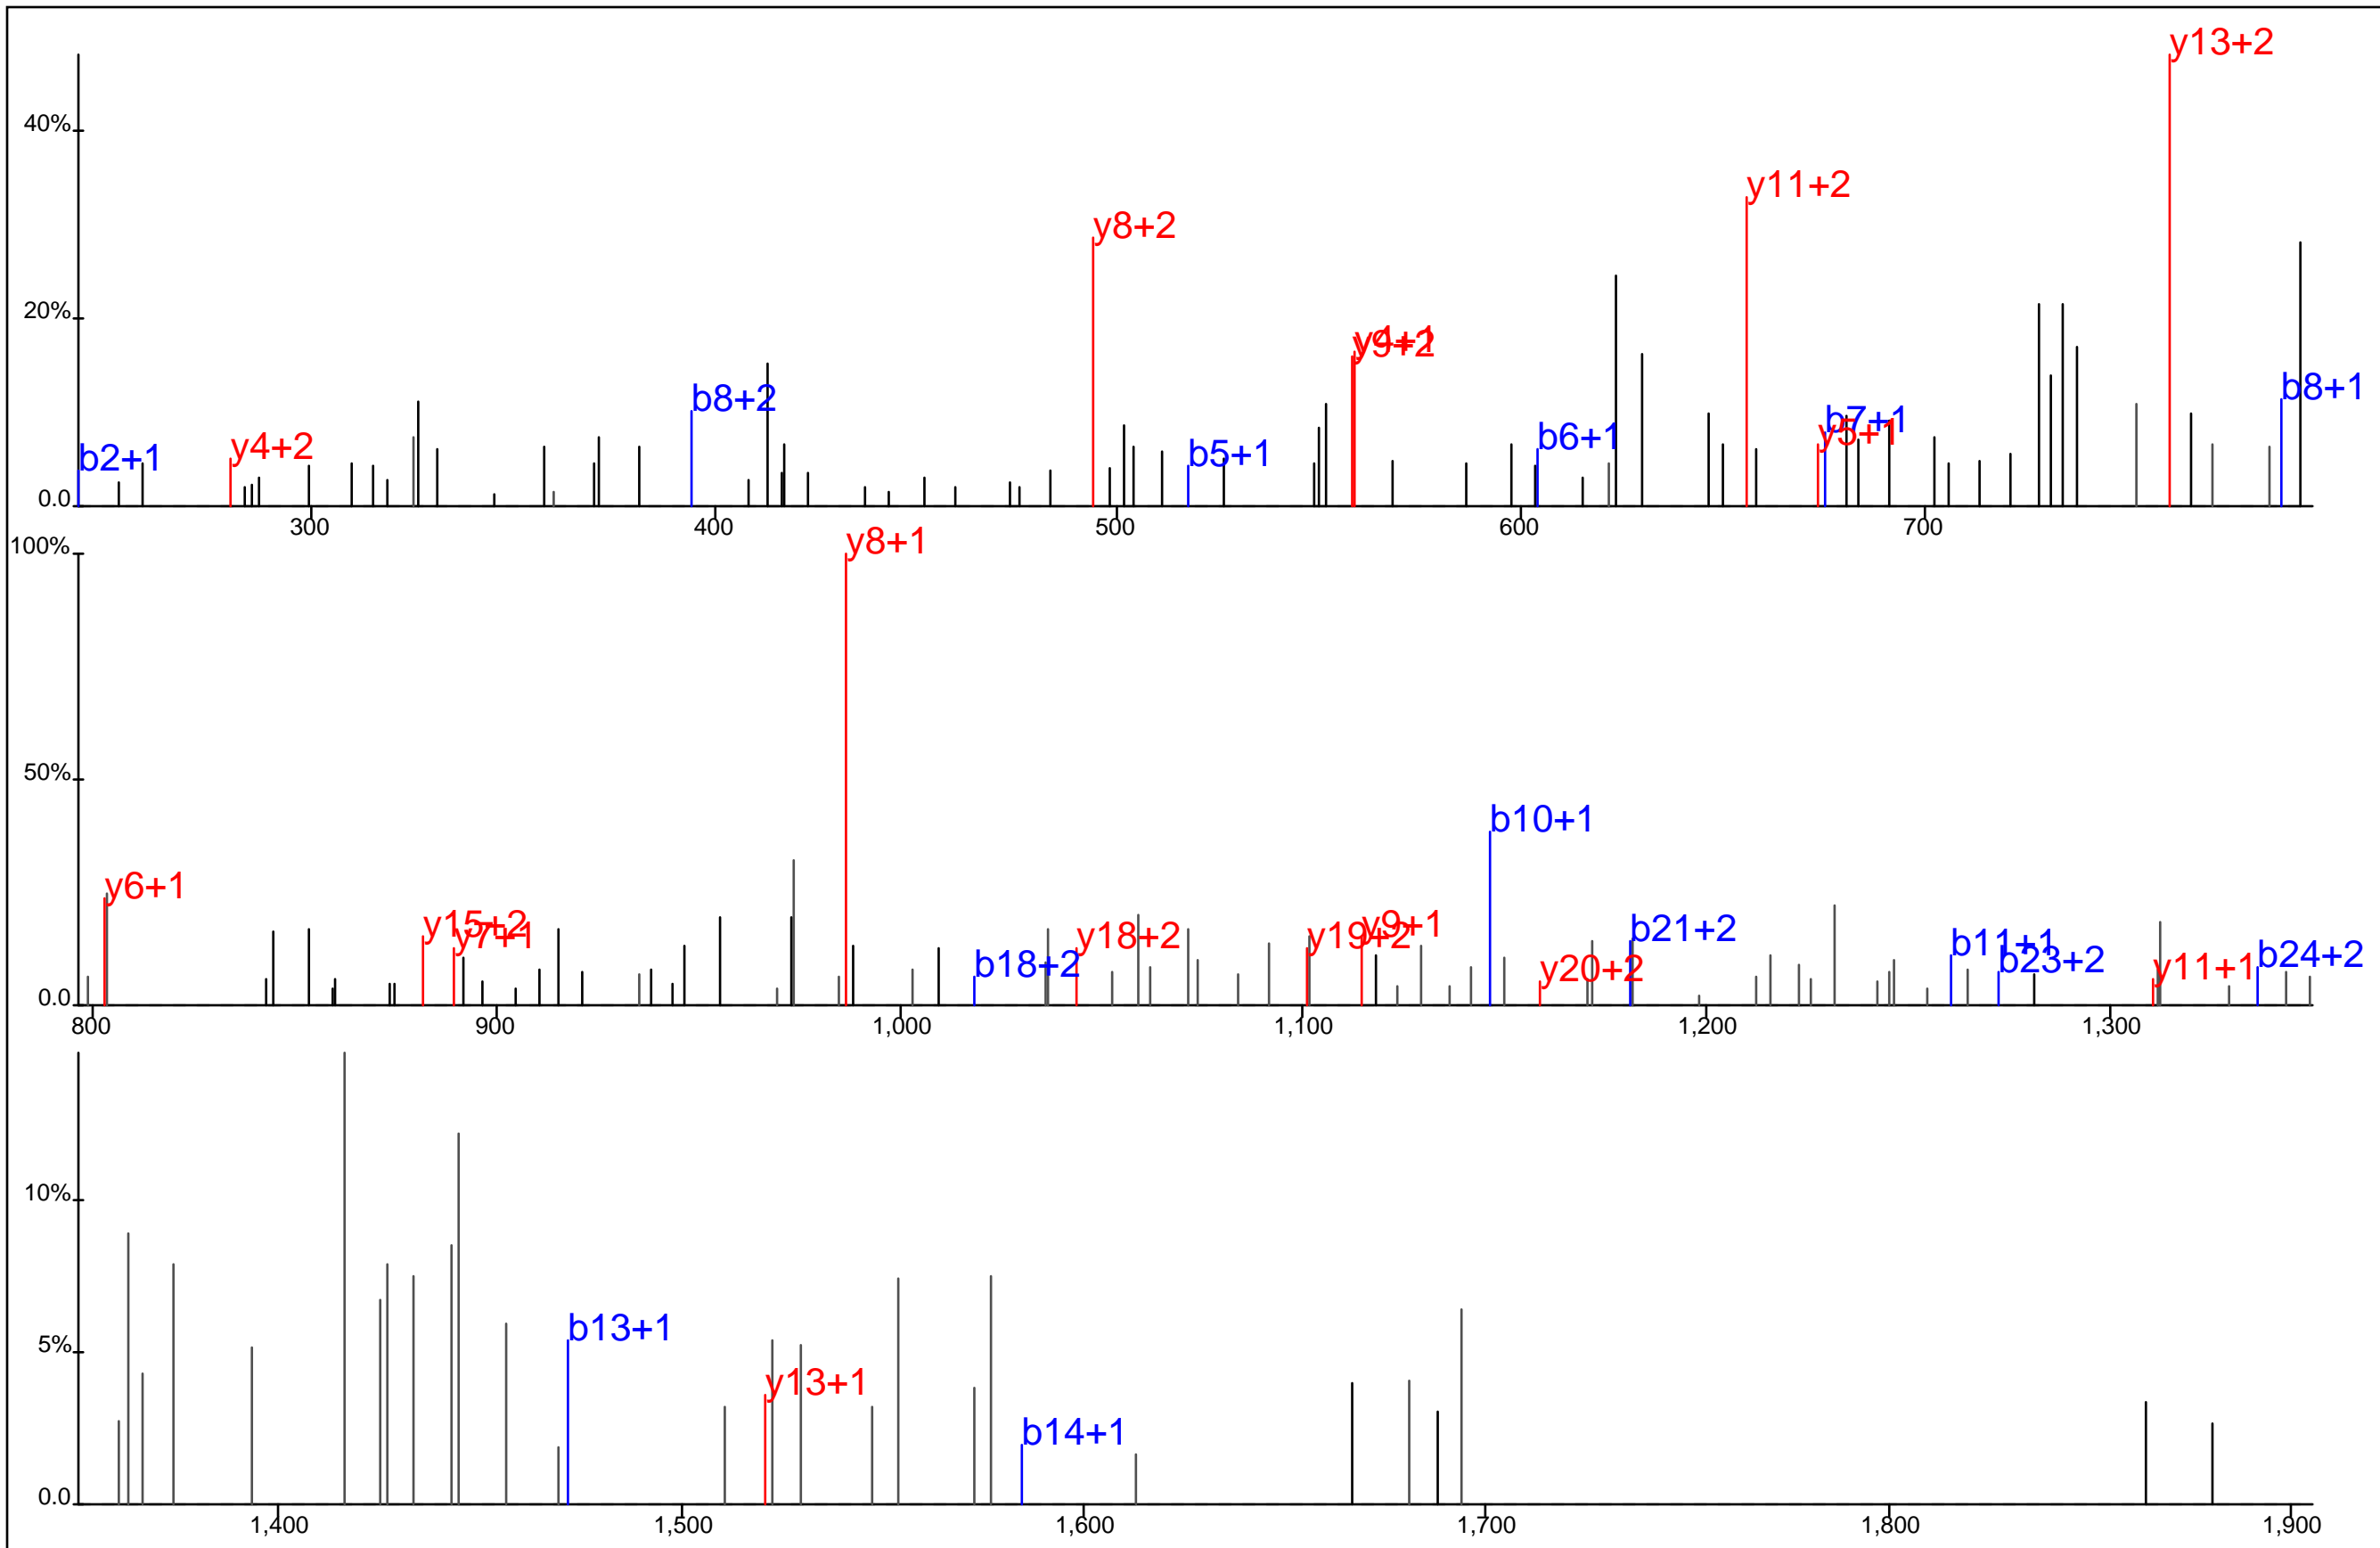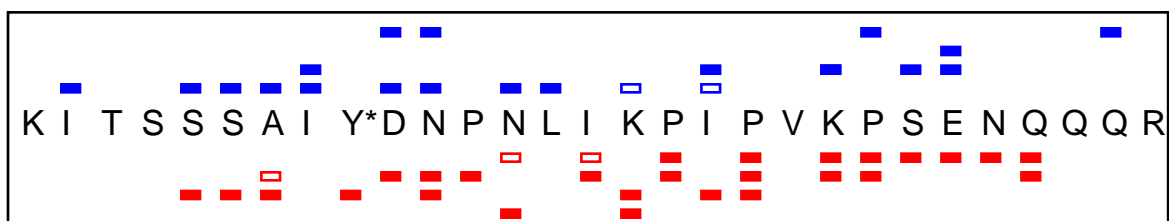

Protein Name: Decapping enzyme hDcp1b  
 gi Accession: 0  
 Precursor Mass: 837.1849+4  
 Delta Mass: 0.750 ppm  
 XCorr: 22.79

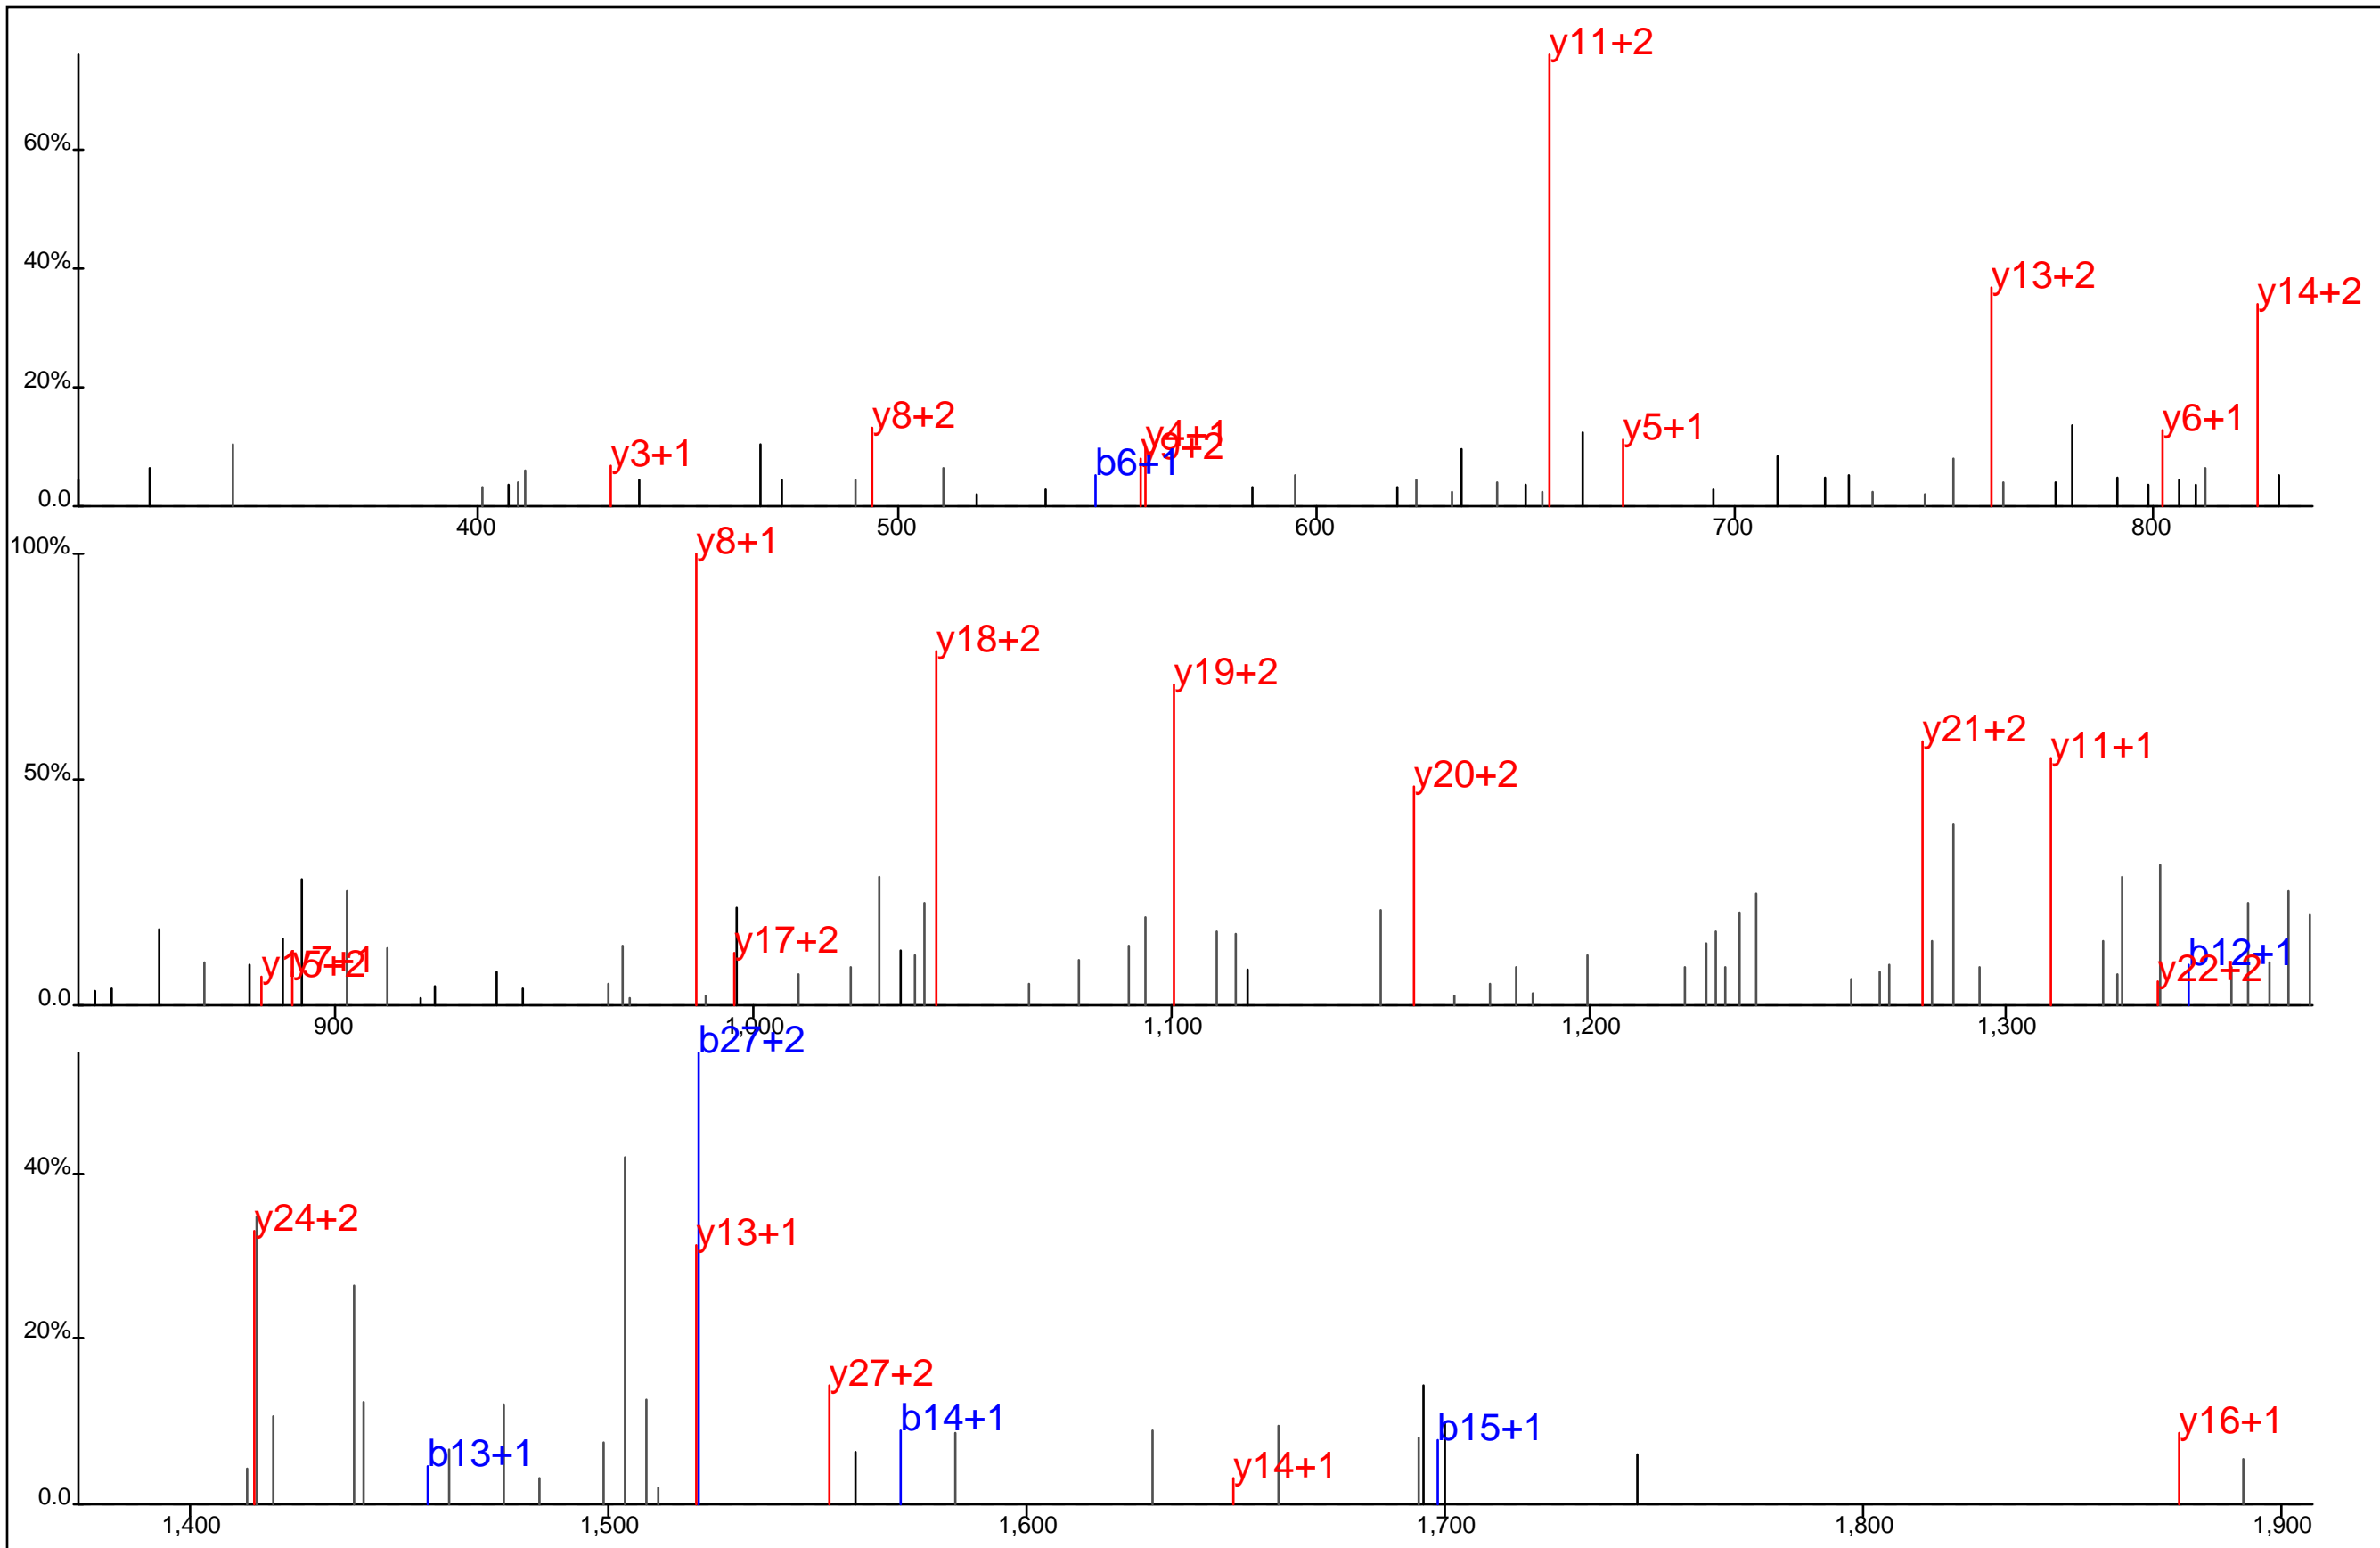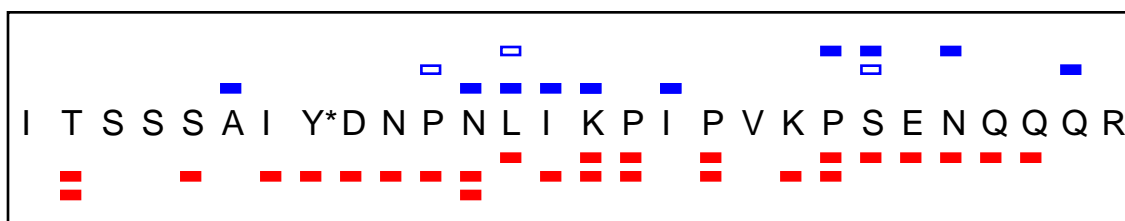

Protein Name: Decapping enzyme hDcp1b  
 gi Accession: 0  
 Precursor Mass: 1,073.2100+3  
 Delta Mass: 3.074 ppm  
 XCorr: 59.79

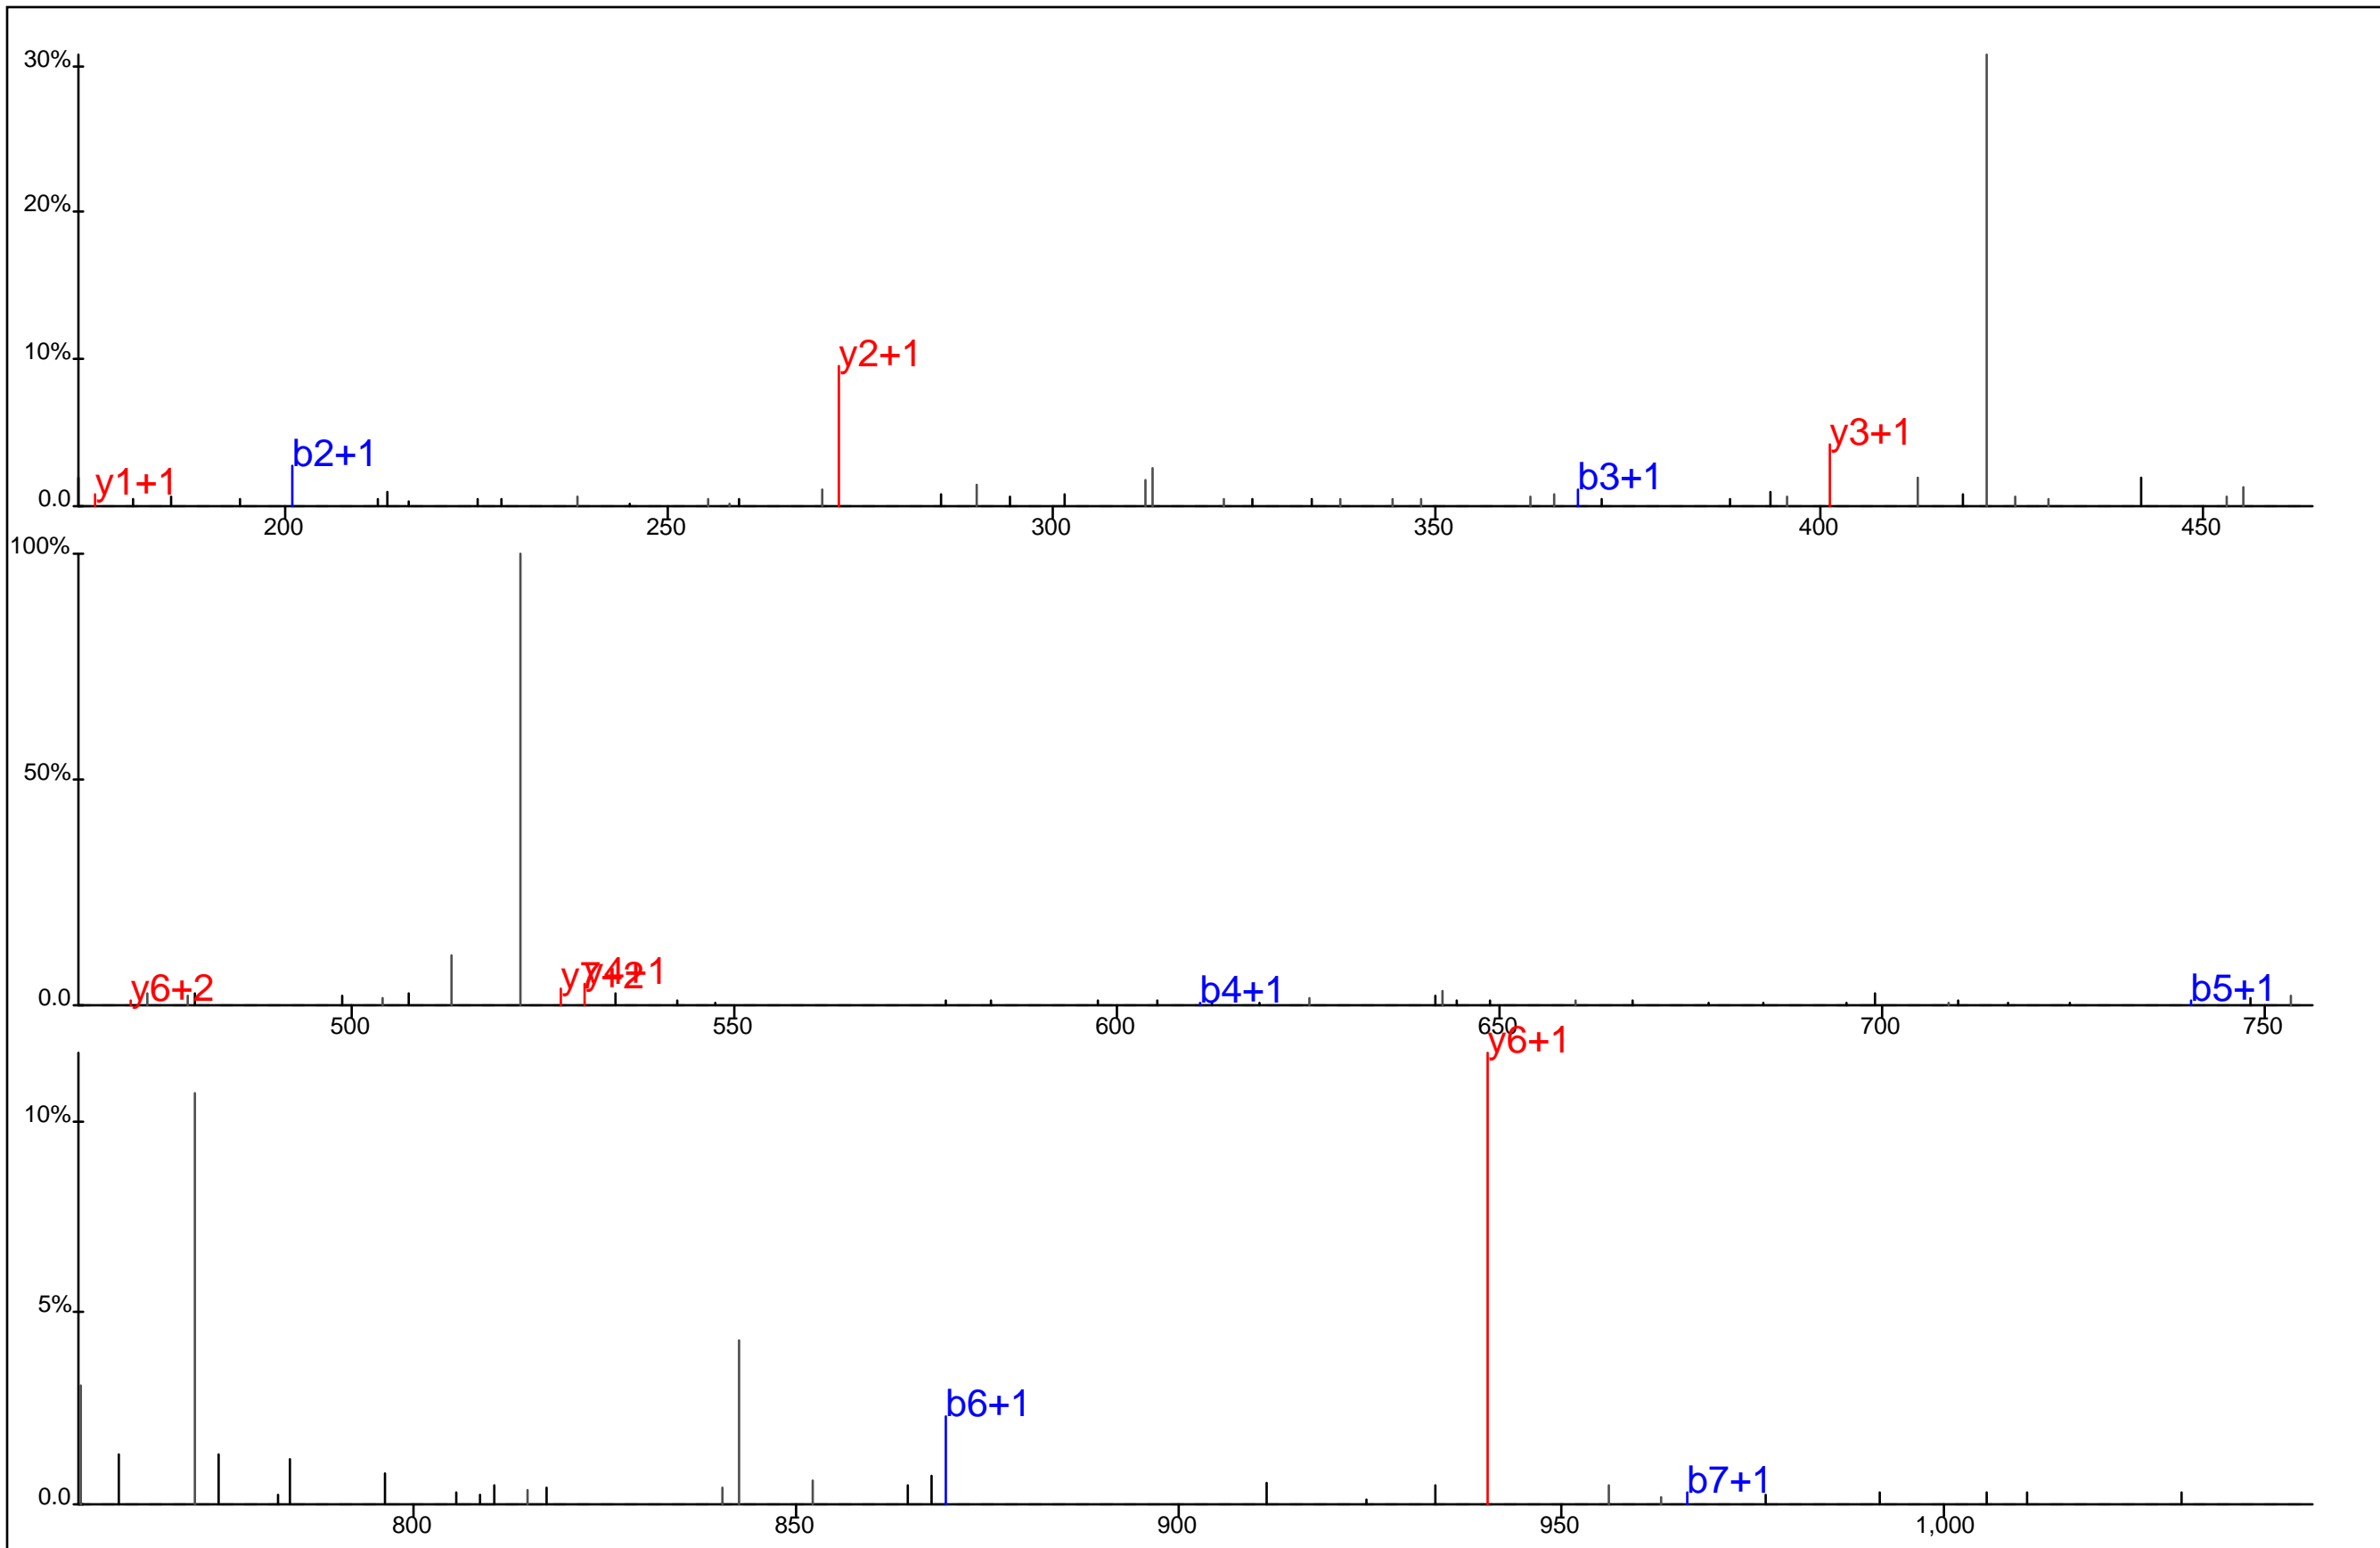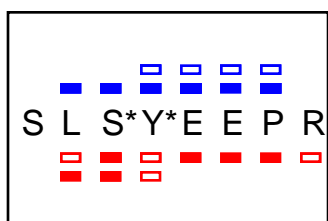

Protein Name: Decapping enzyme hDcp1b  
 gi Accession: 0  
 Precursor Mass: 570.7040+2  
 Delta Mass: 0.254 ppm  
 XCorr: 22.71



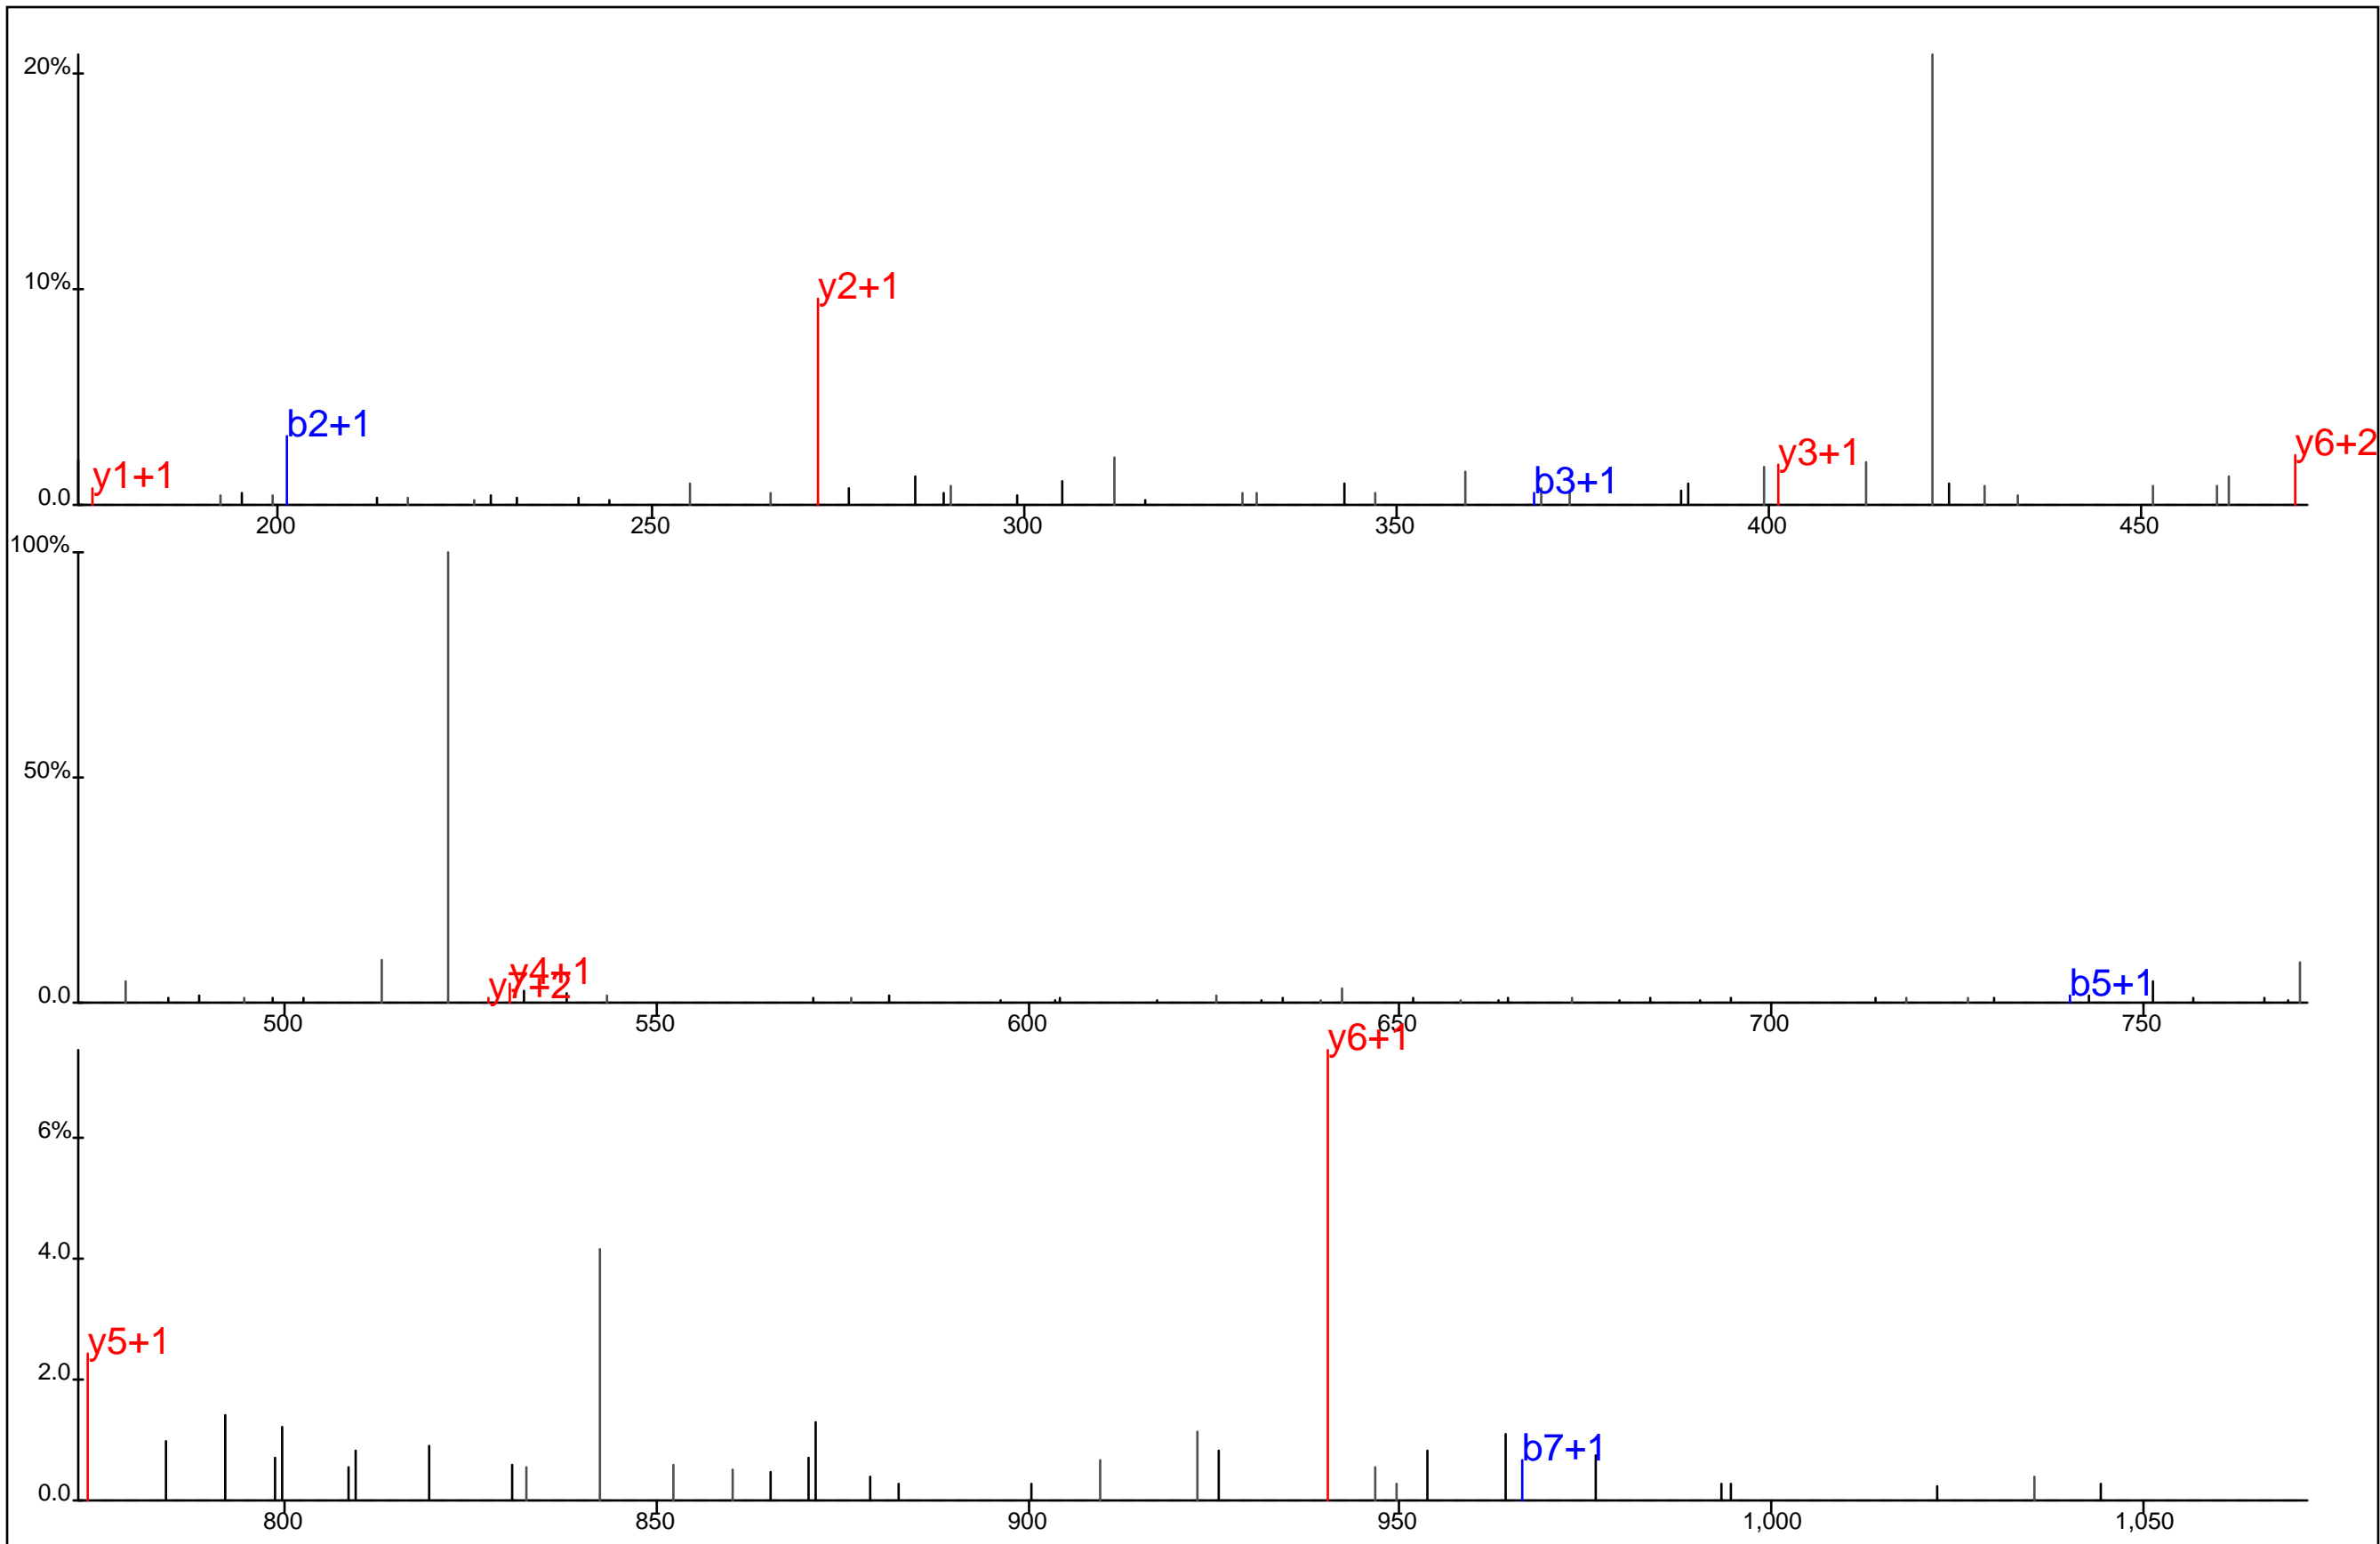

■ ■ ■ ■ ■ ■  
 S L S\* Y\* E E P R  
□ □ □ □ □ □

Protein Name: Decapping enzyme hDcp1b  
 gi Accession: 0  
 Precursor Mass: 570.7036+2  
 Delta Mass: 1.003 ppm  
 XCorr: 23.33

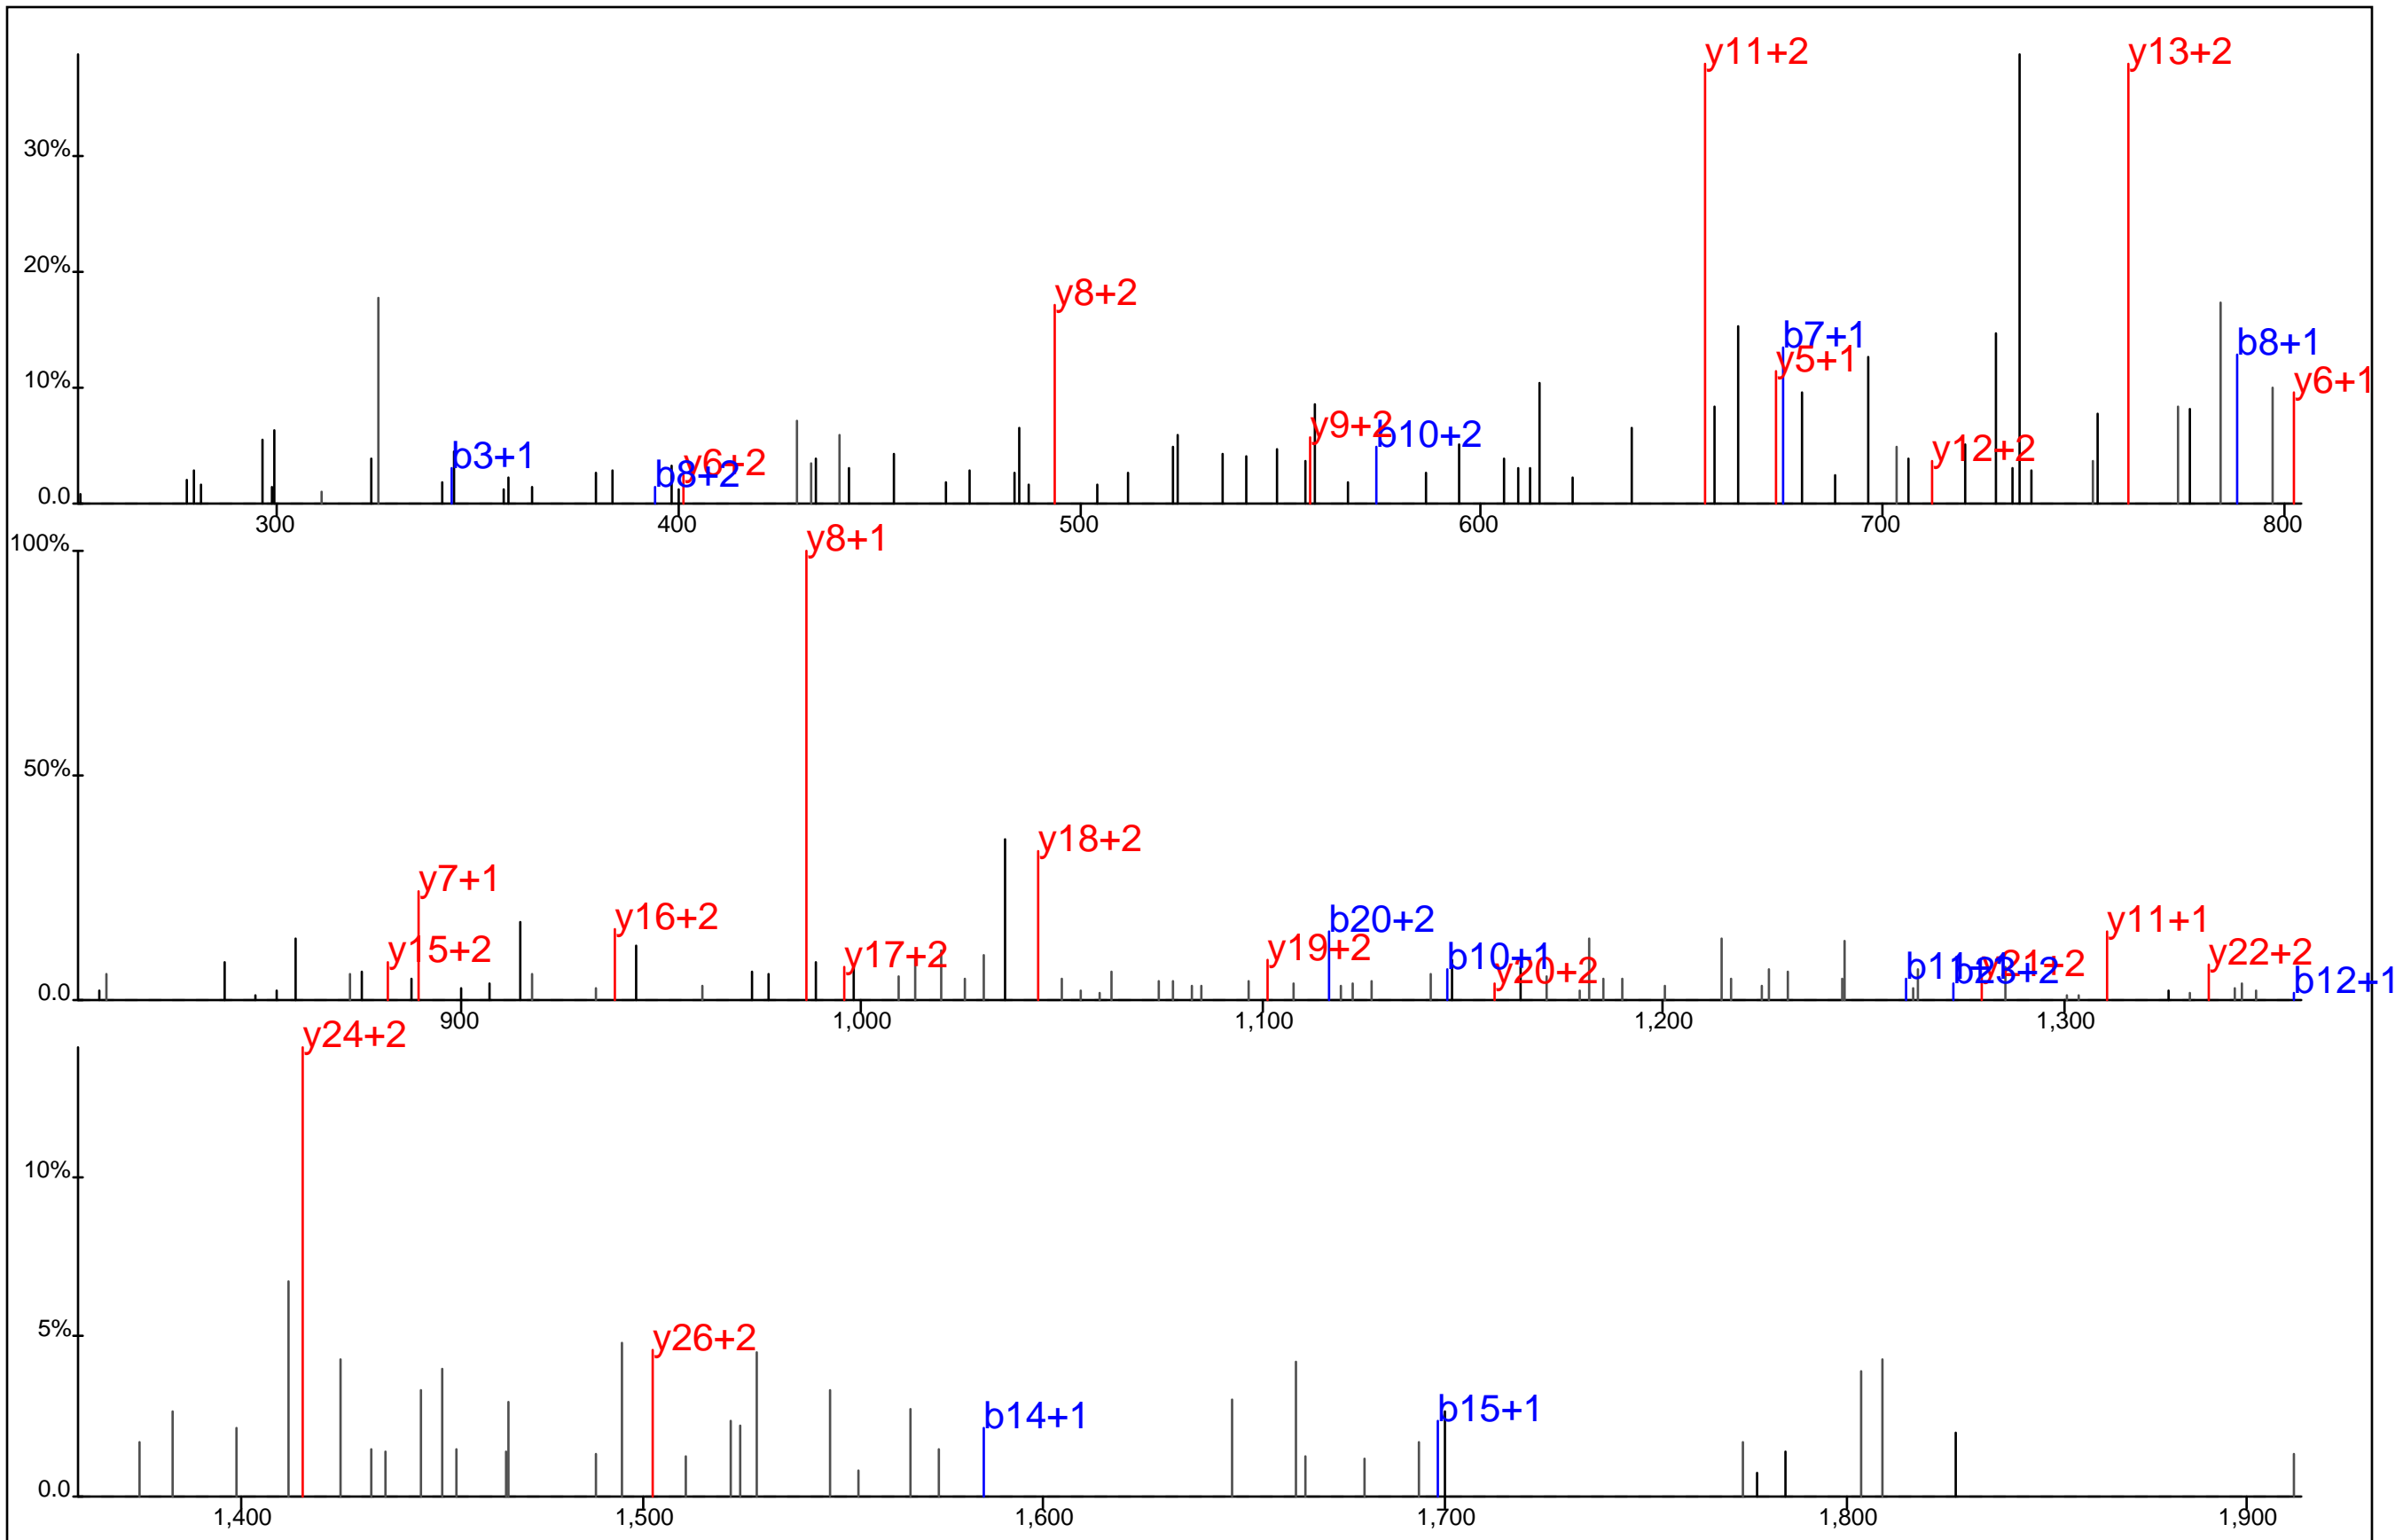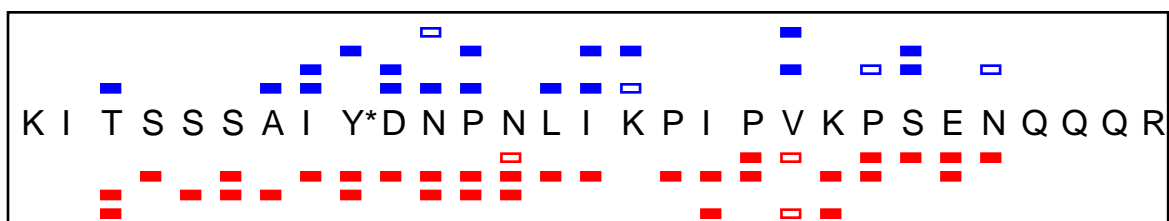

Protein Name: Decapping enzyme hDcp1b  
 gi Accession: 0  
 Precursor Mass: 837.1859+4  
 Delta Mass: 0.491 ppm  
 XCorr: 32.46

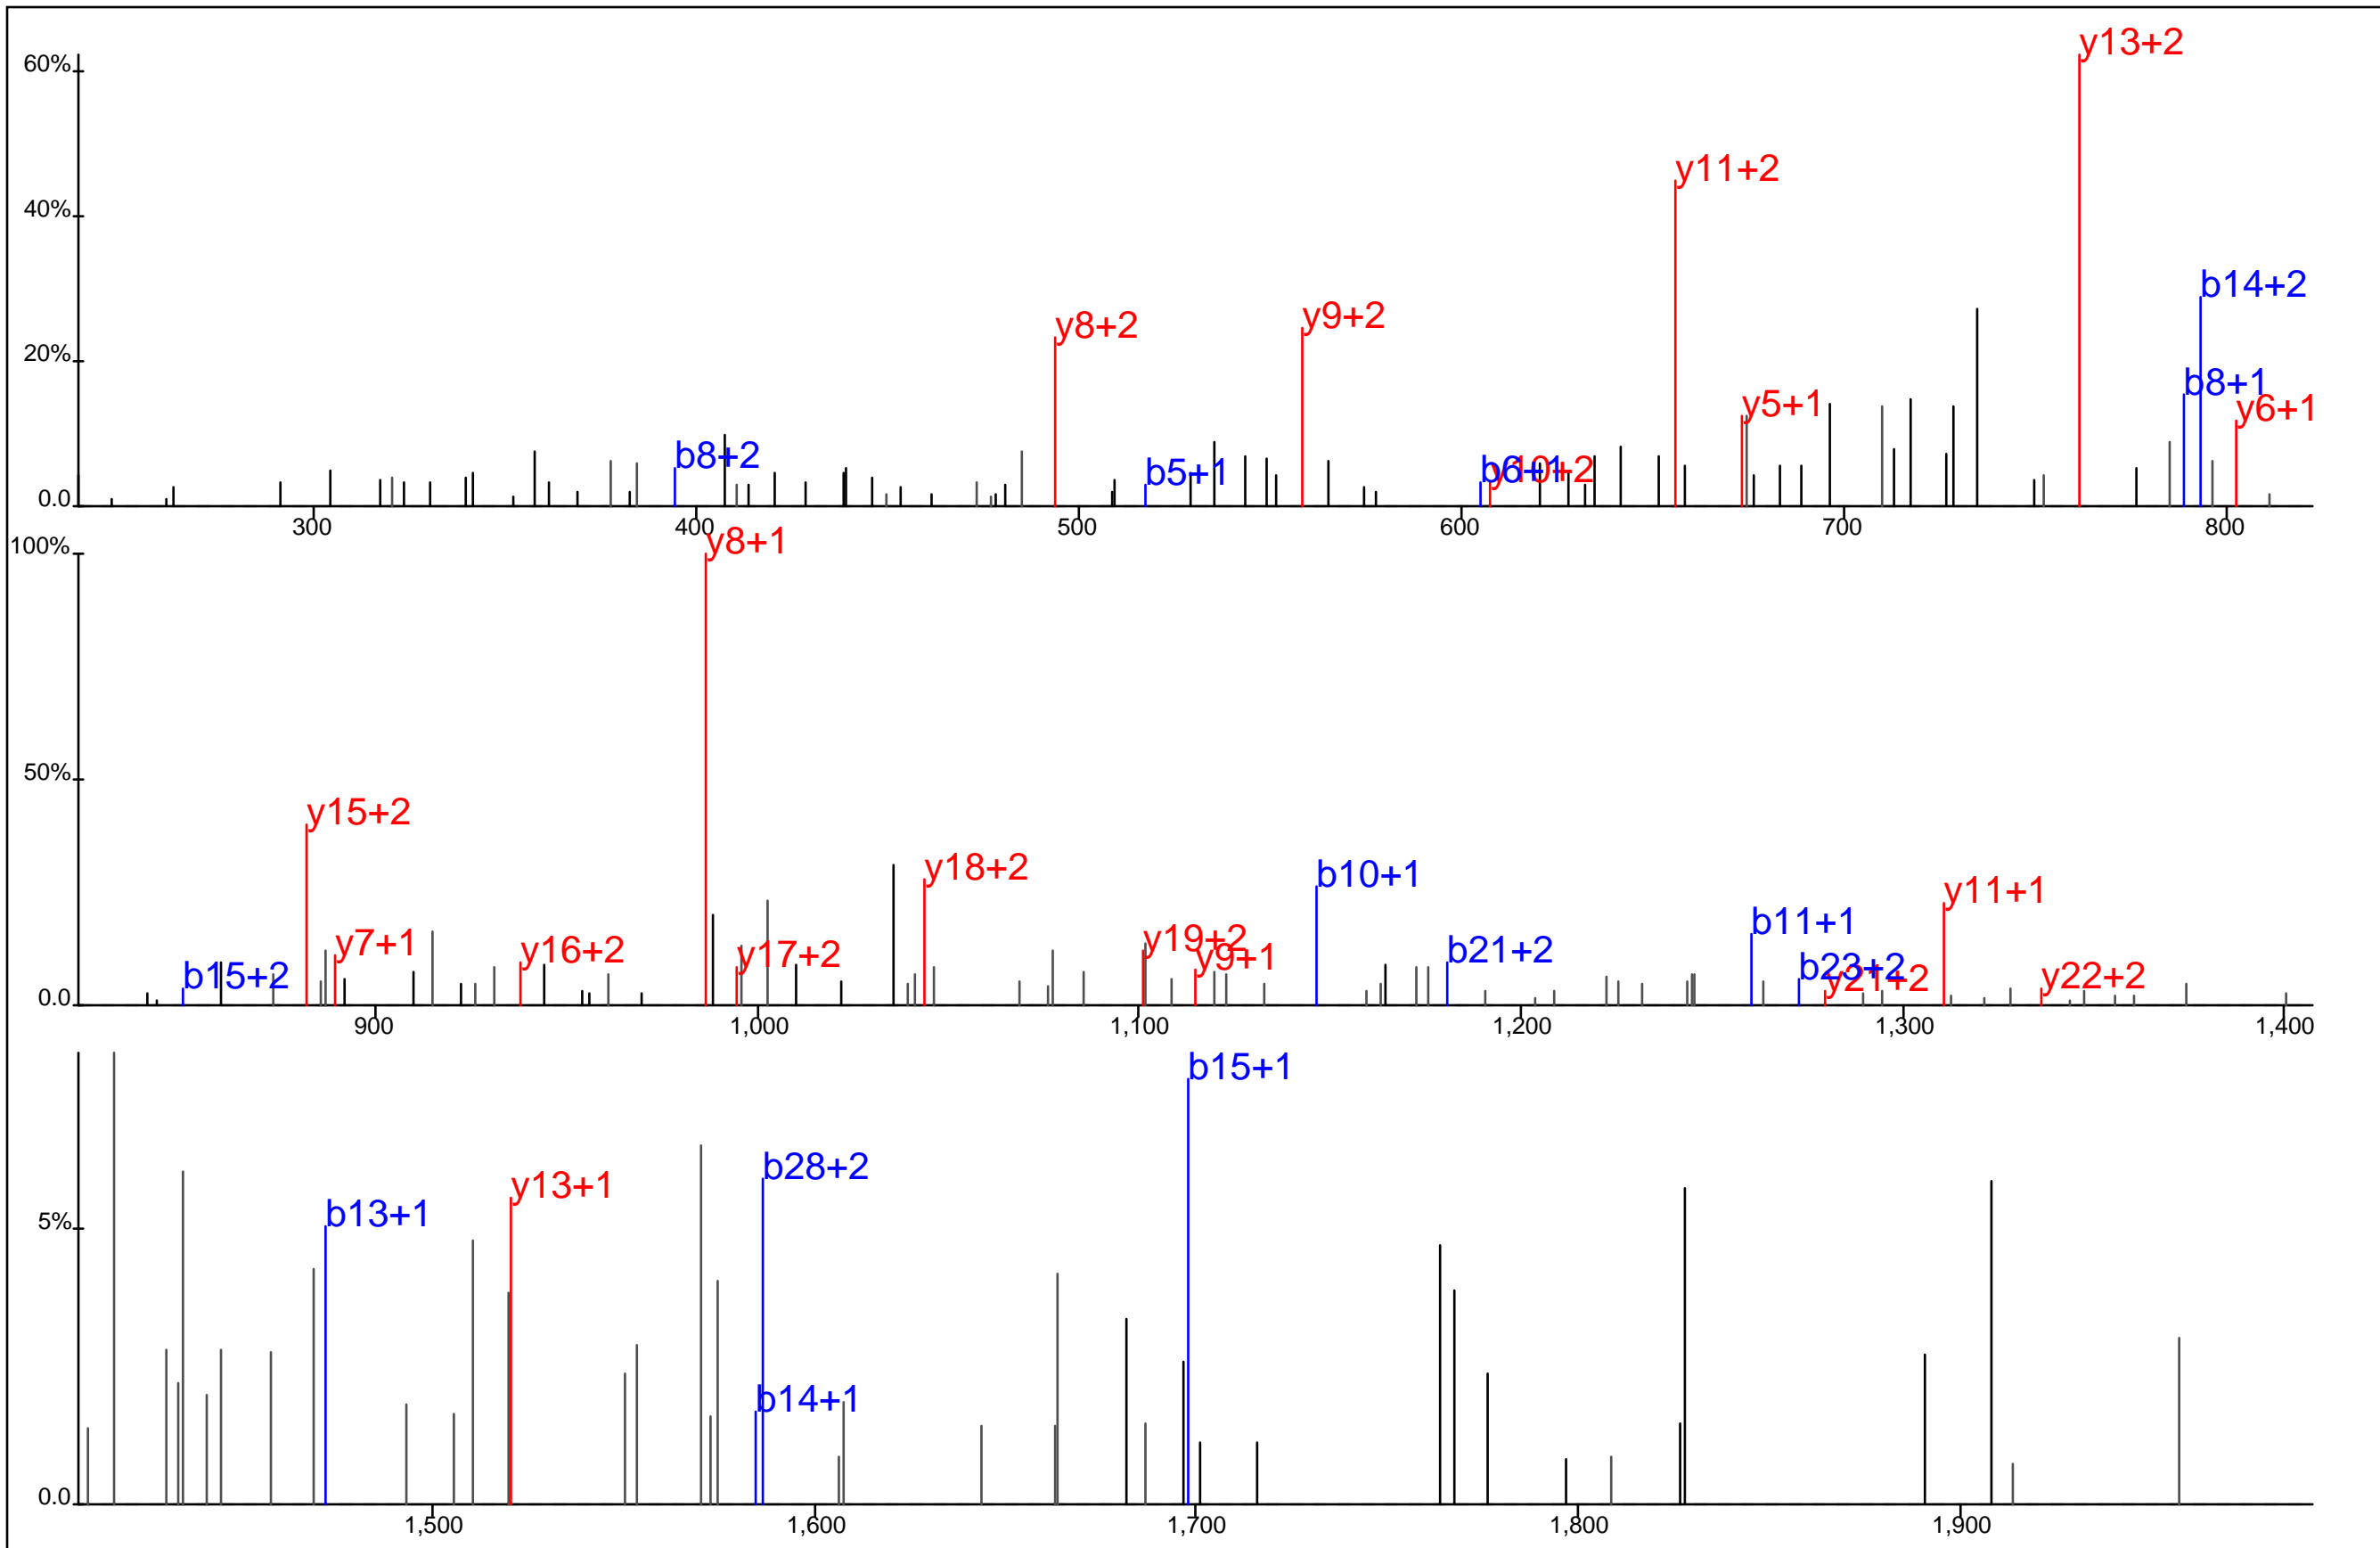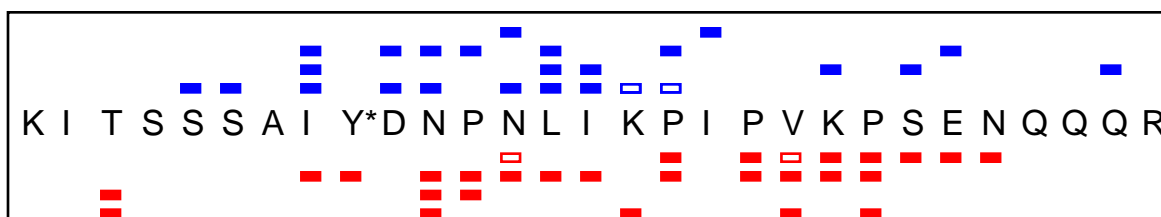

Protein Name: Decapping enzyme hDcp1b  
 gi Accession: 0  
 Precursor Mass: 837.1842+4  
 Delta Mass: 1.552 ppm  
 XCorr: 25.91

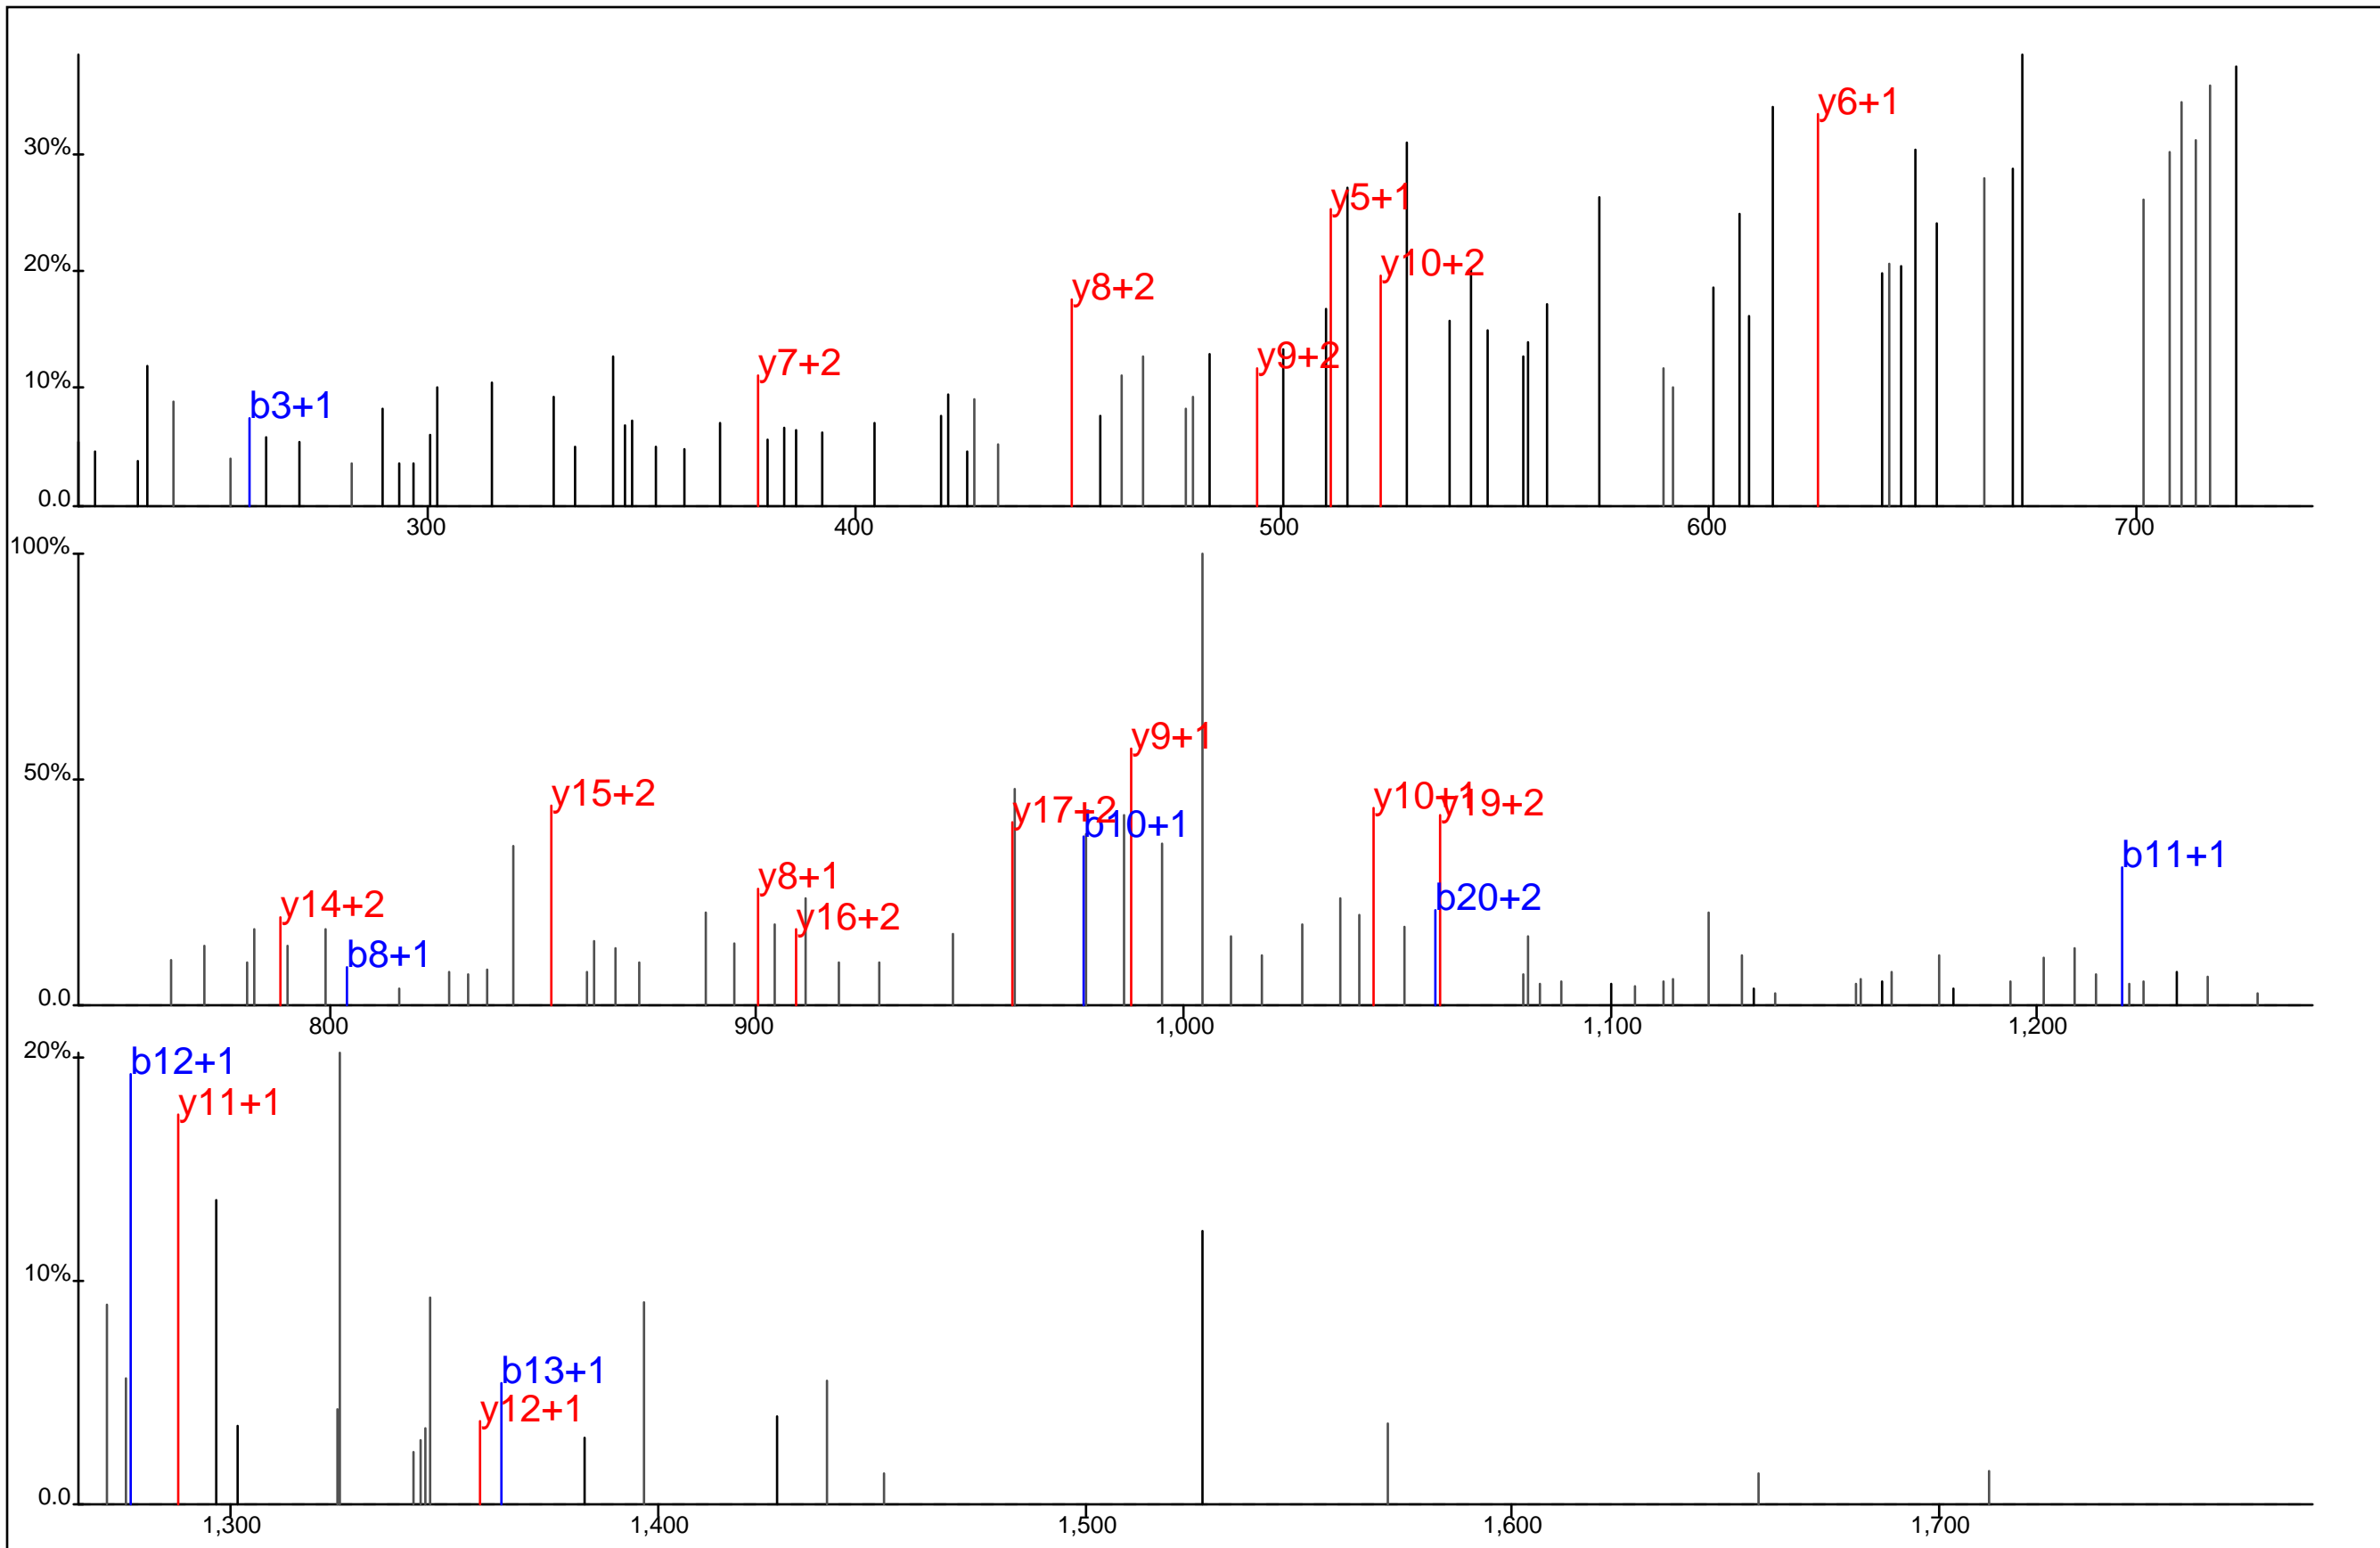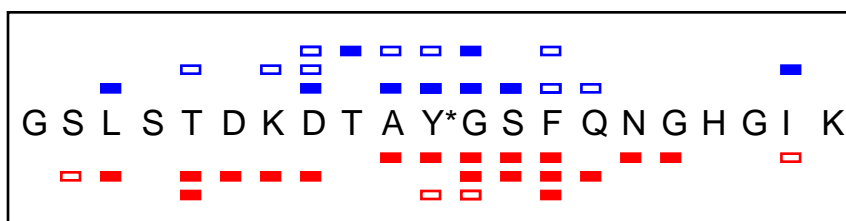

Protein Name: Deducator of cytokinesis 11  
 gi Accession: 0  
 Precursor Mass: 755.0072+3  
 Delta Mass: 1.932 ppm  
 XCorr: 28.23

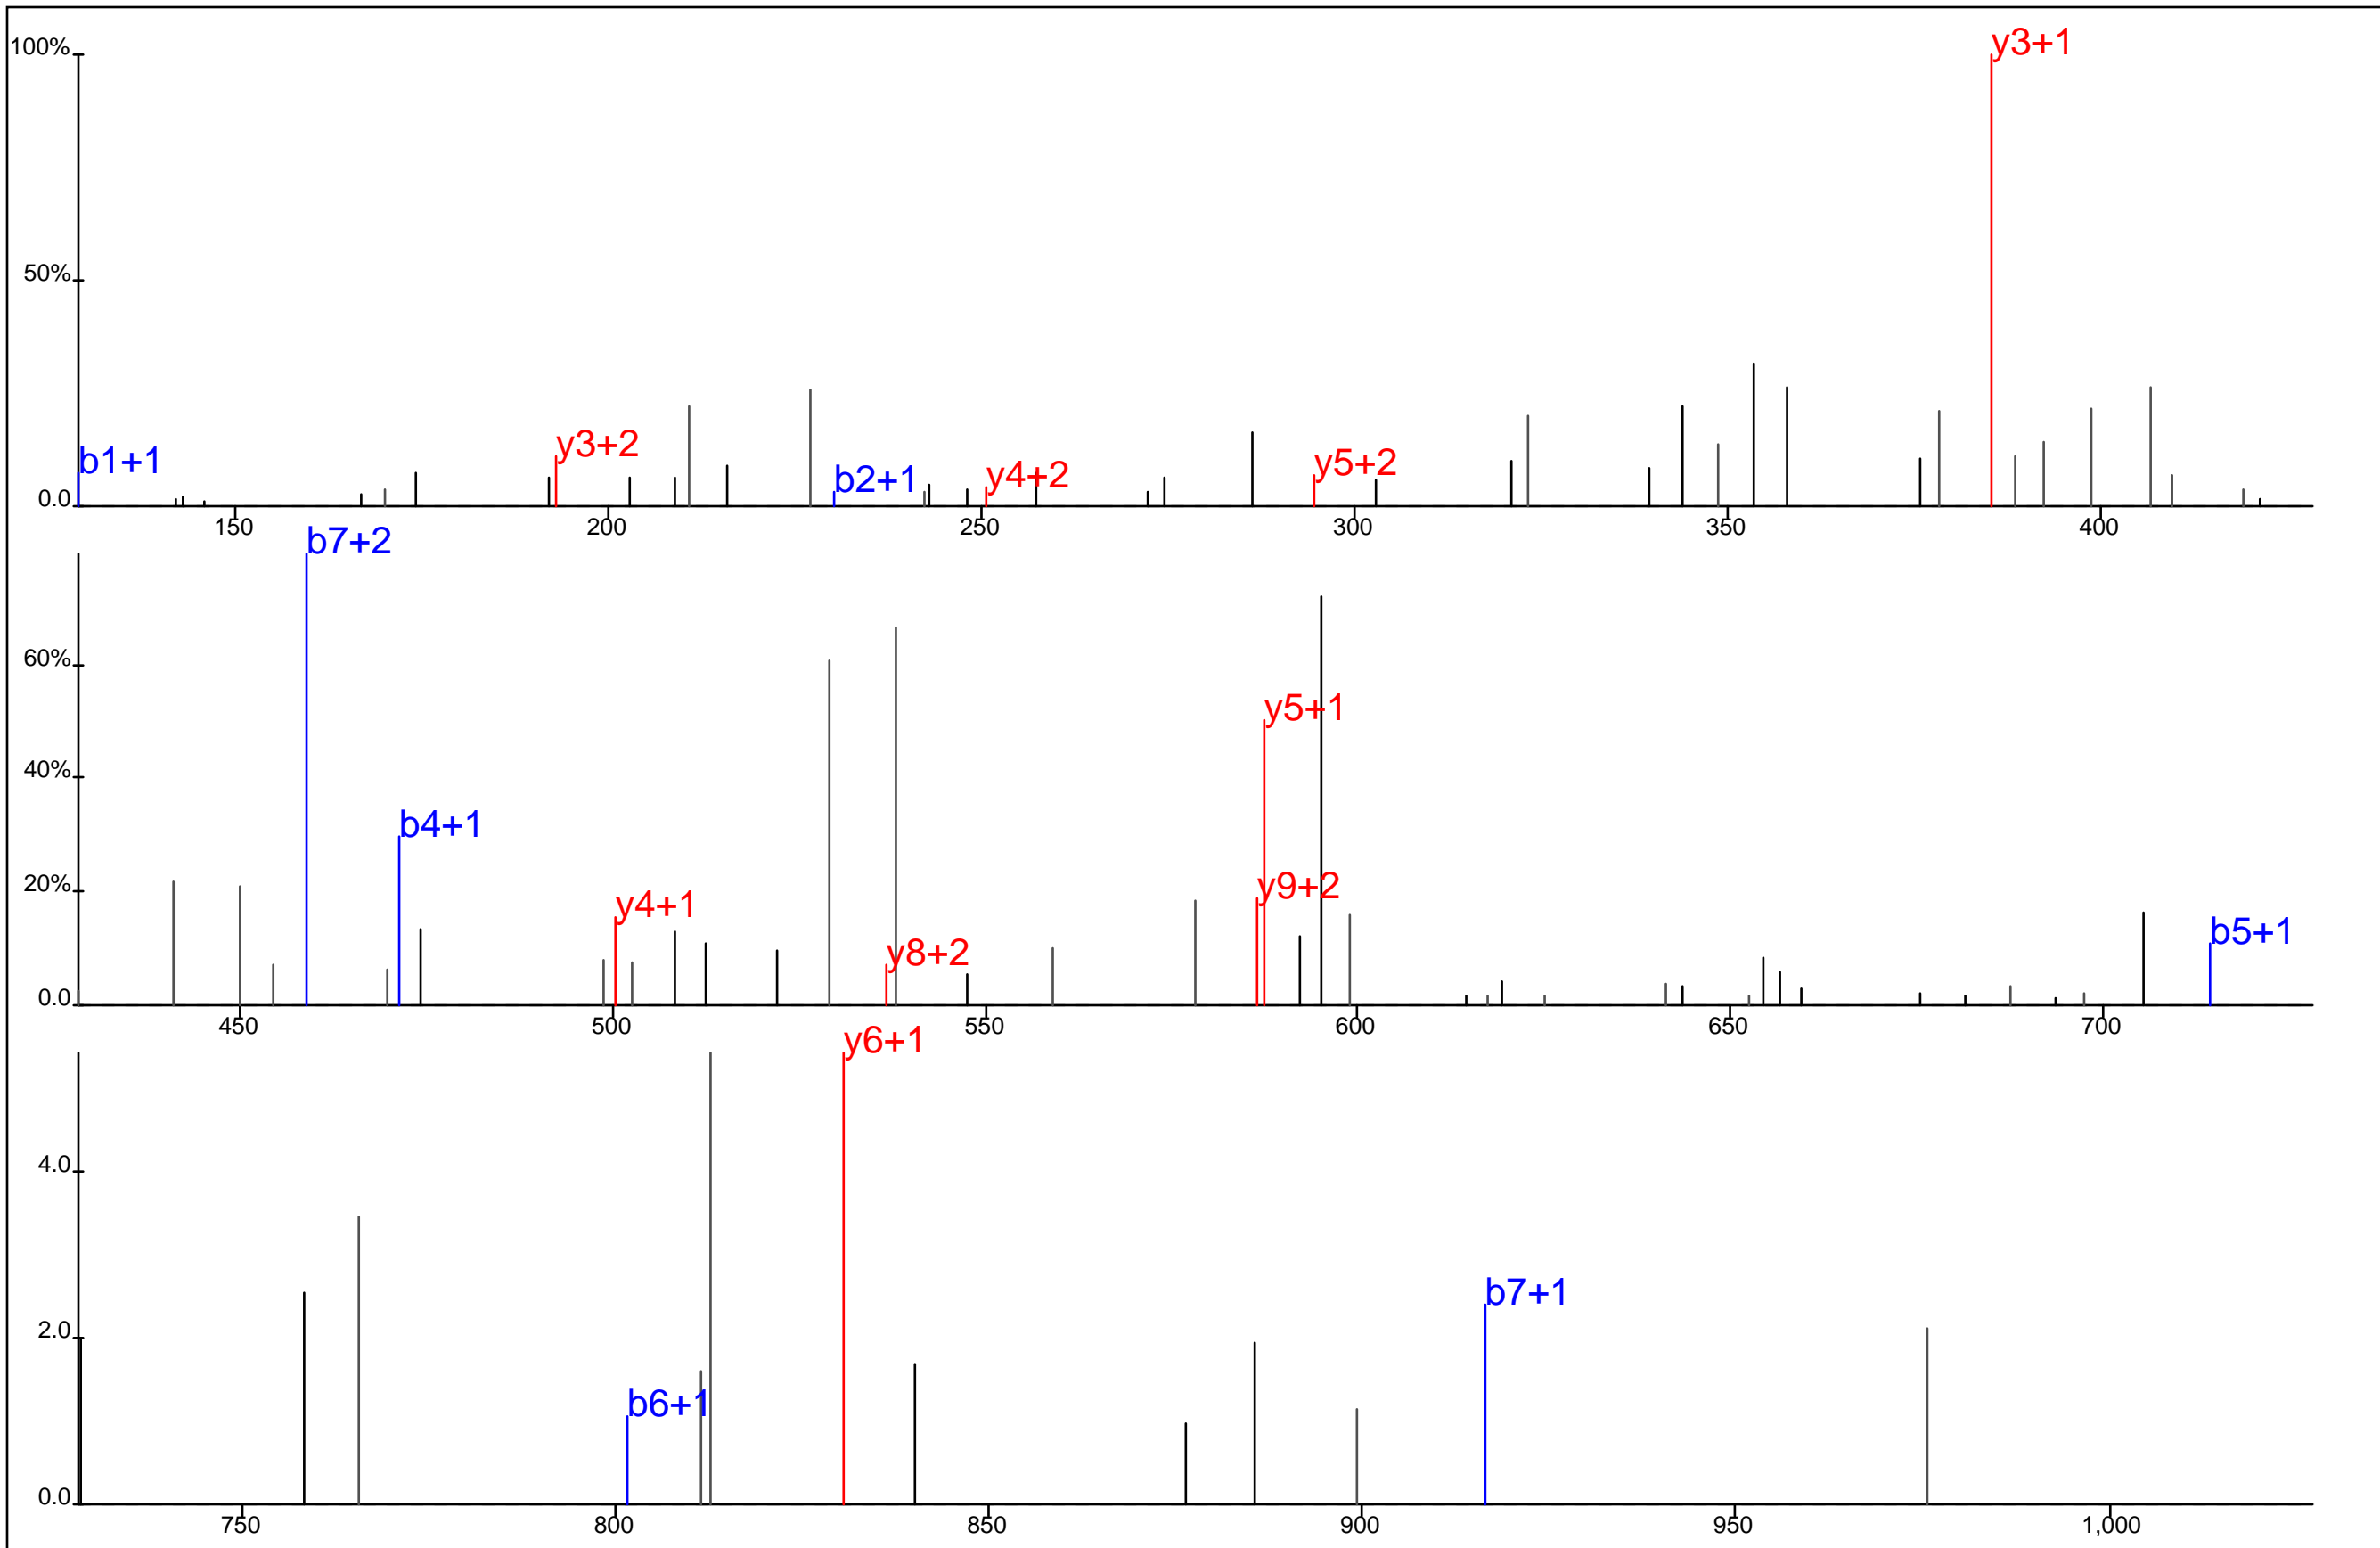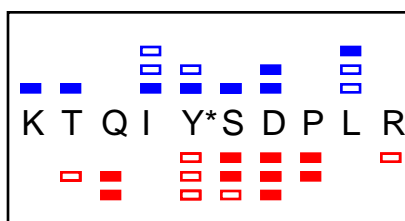

Protein Name: Deducator of cytokinesis 11  
 gi Accession: 0  
 Precursor Mass: 434.2155+3  
 Delta Mass: 1.644 ppm  
 XCorr: 25.31

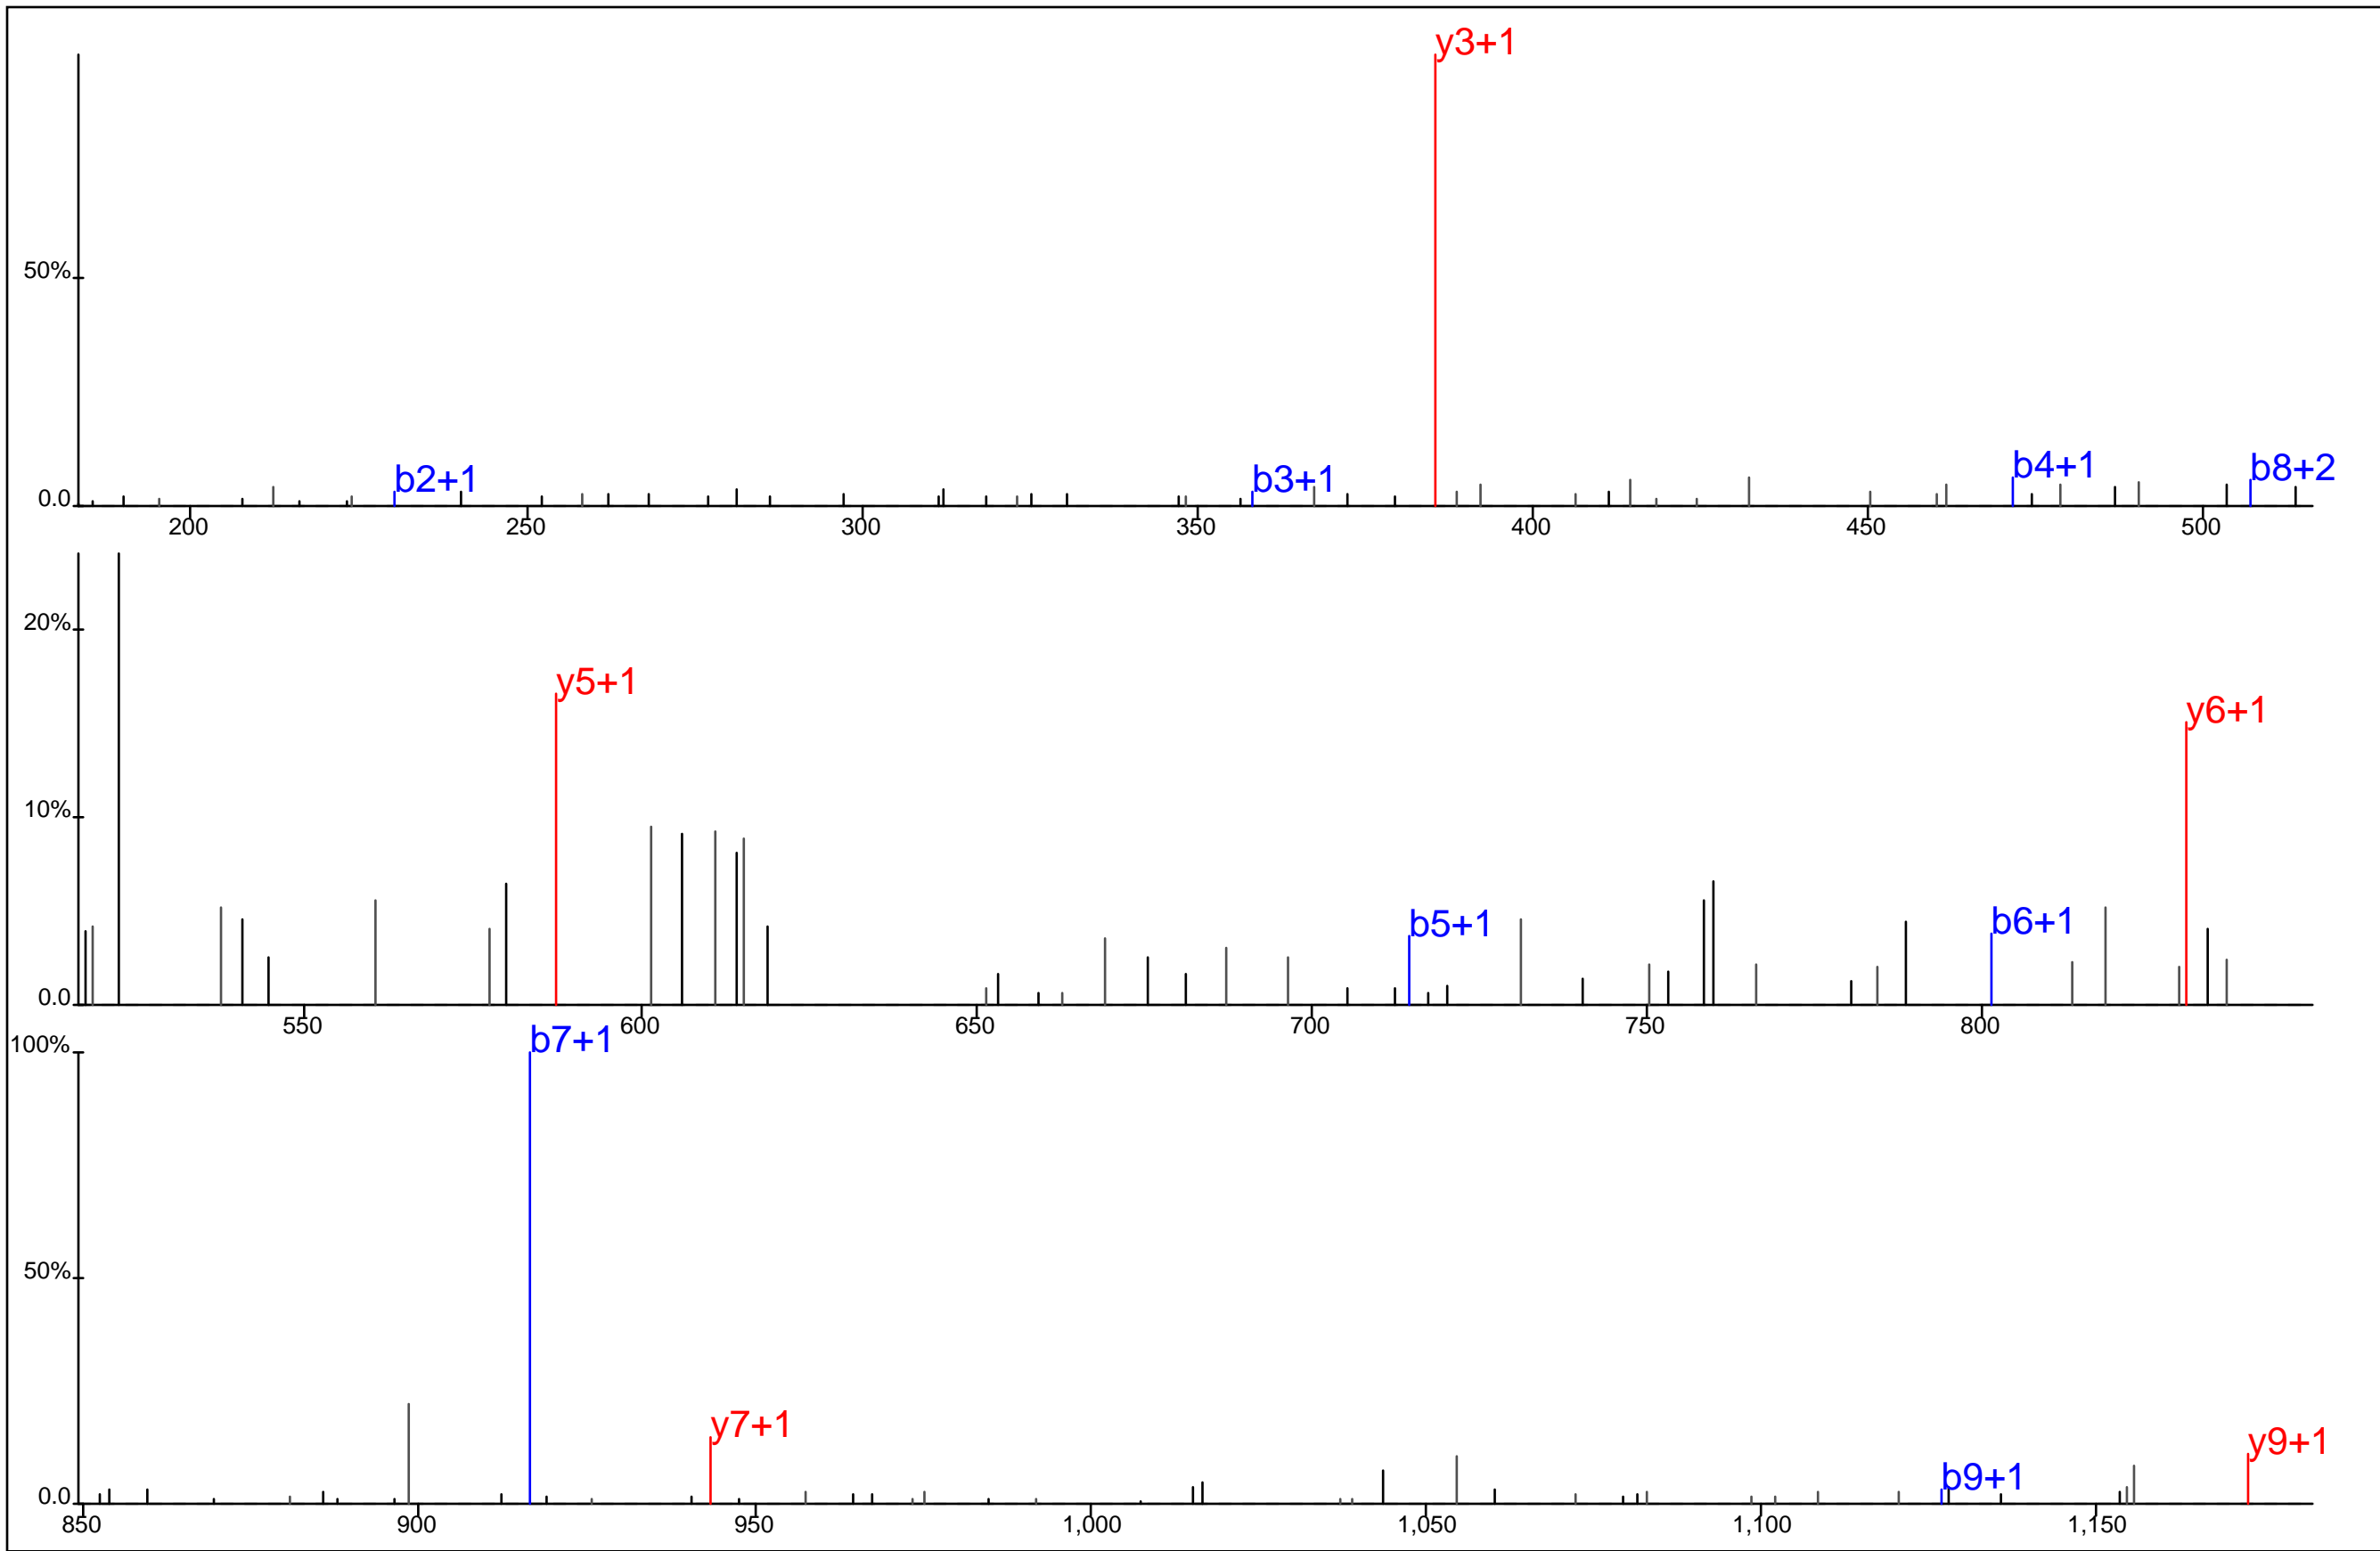

■ ■ ■ ■ ■ ■ ■ ■  
 K T Q I Y\* S D P L R  
□ □ □ □ □ □ □ □

Protein Name: Deducator of cytokinesis 11  
 gi Accession: 0  
 Precursor Mass: 650.8177+2  
 Delta Mass: 1.115 ppm  
 XCorr: 26.02

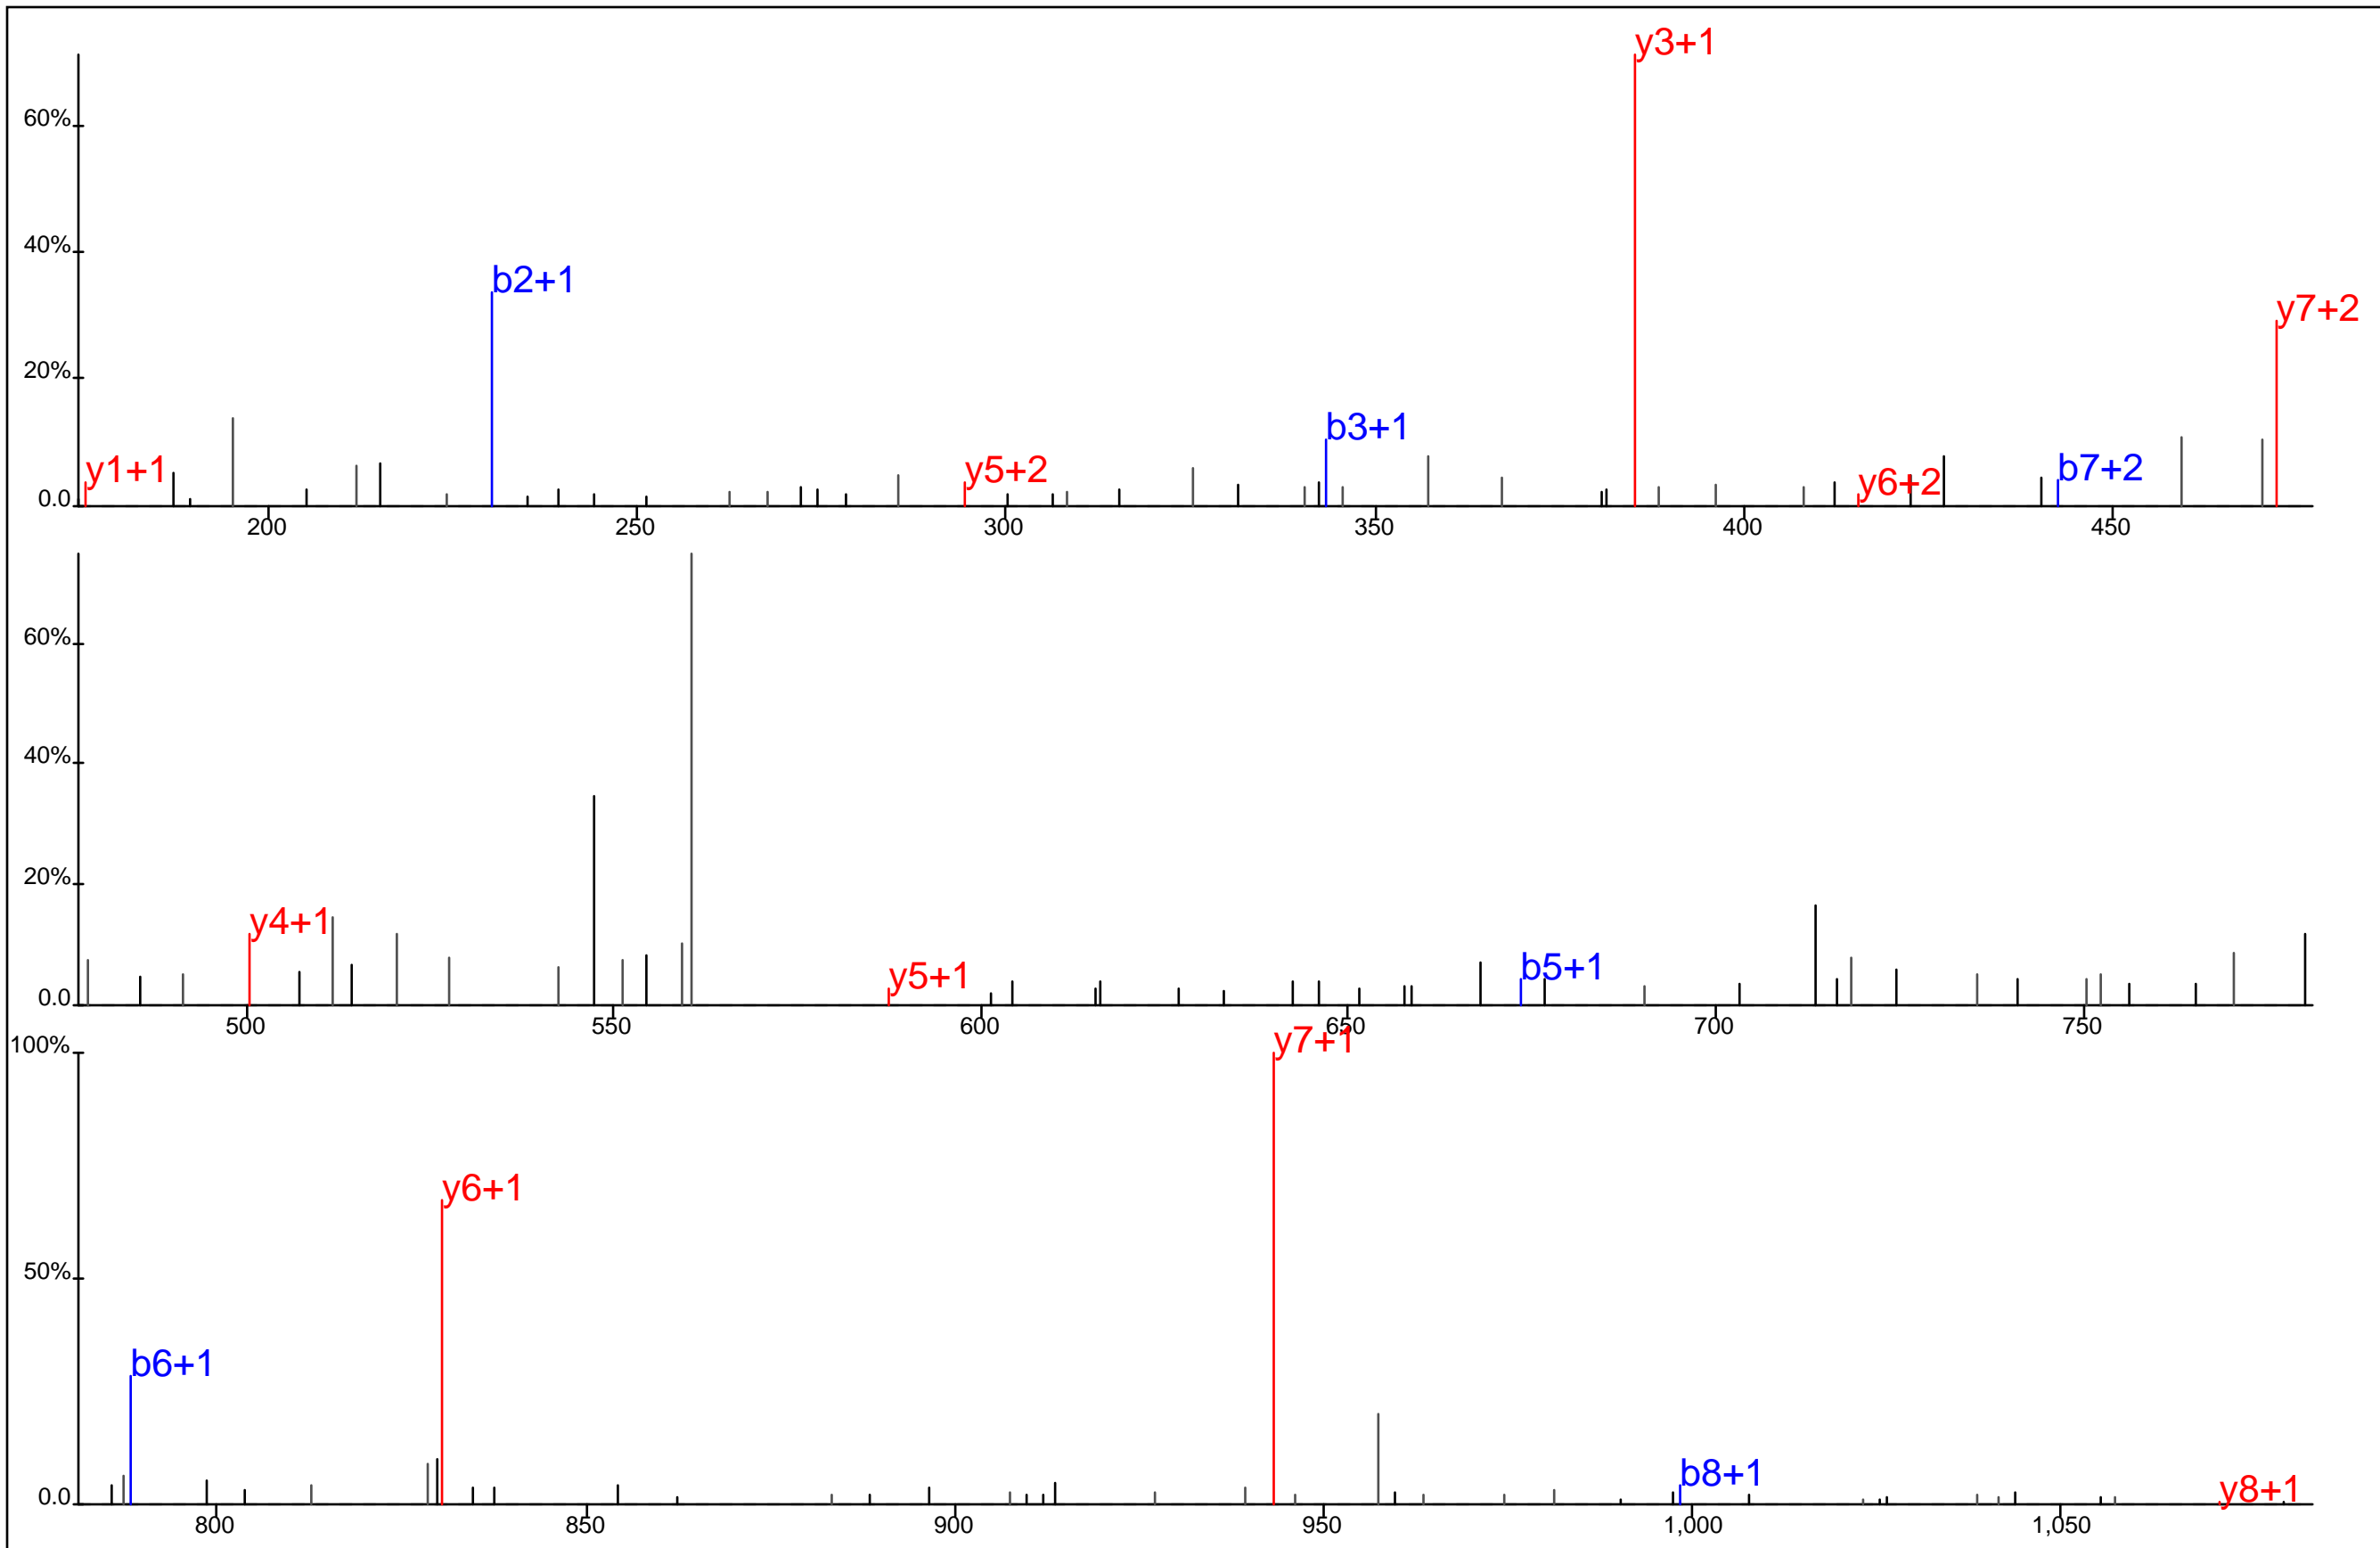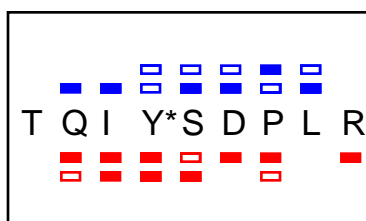

Protein Name: Deducator of cytokinesis 11  
 gi Accession: 0  
 Precursor Mass: 586.7679+2  
 Delta Mass: 5.202 ppm  
 XCorr: 25.1

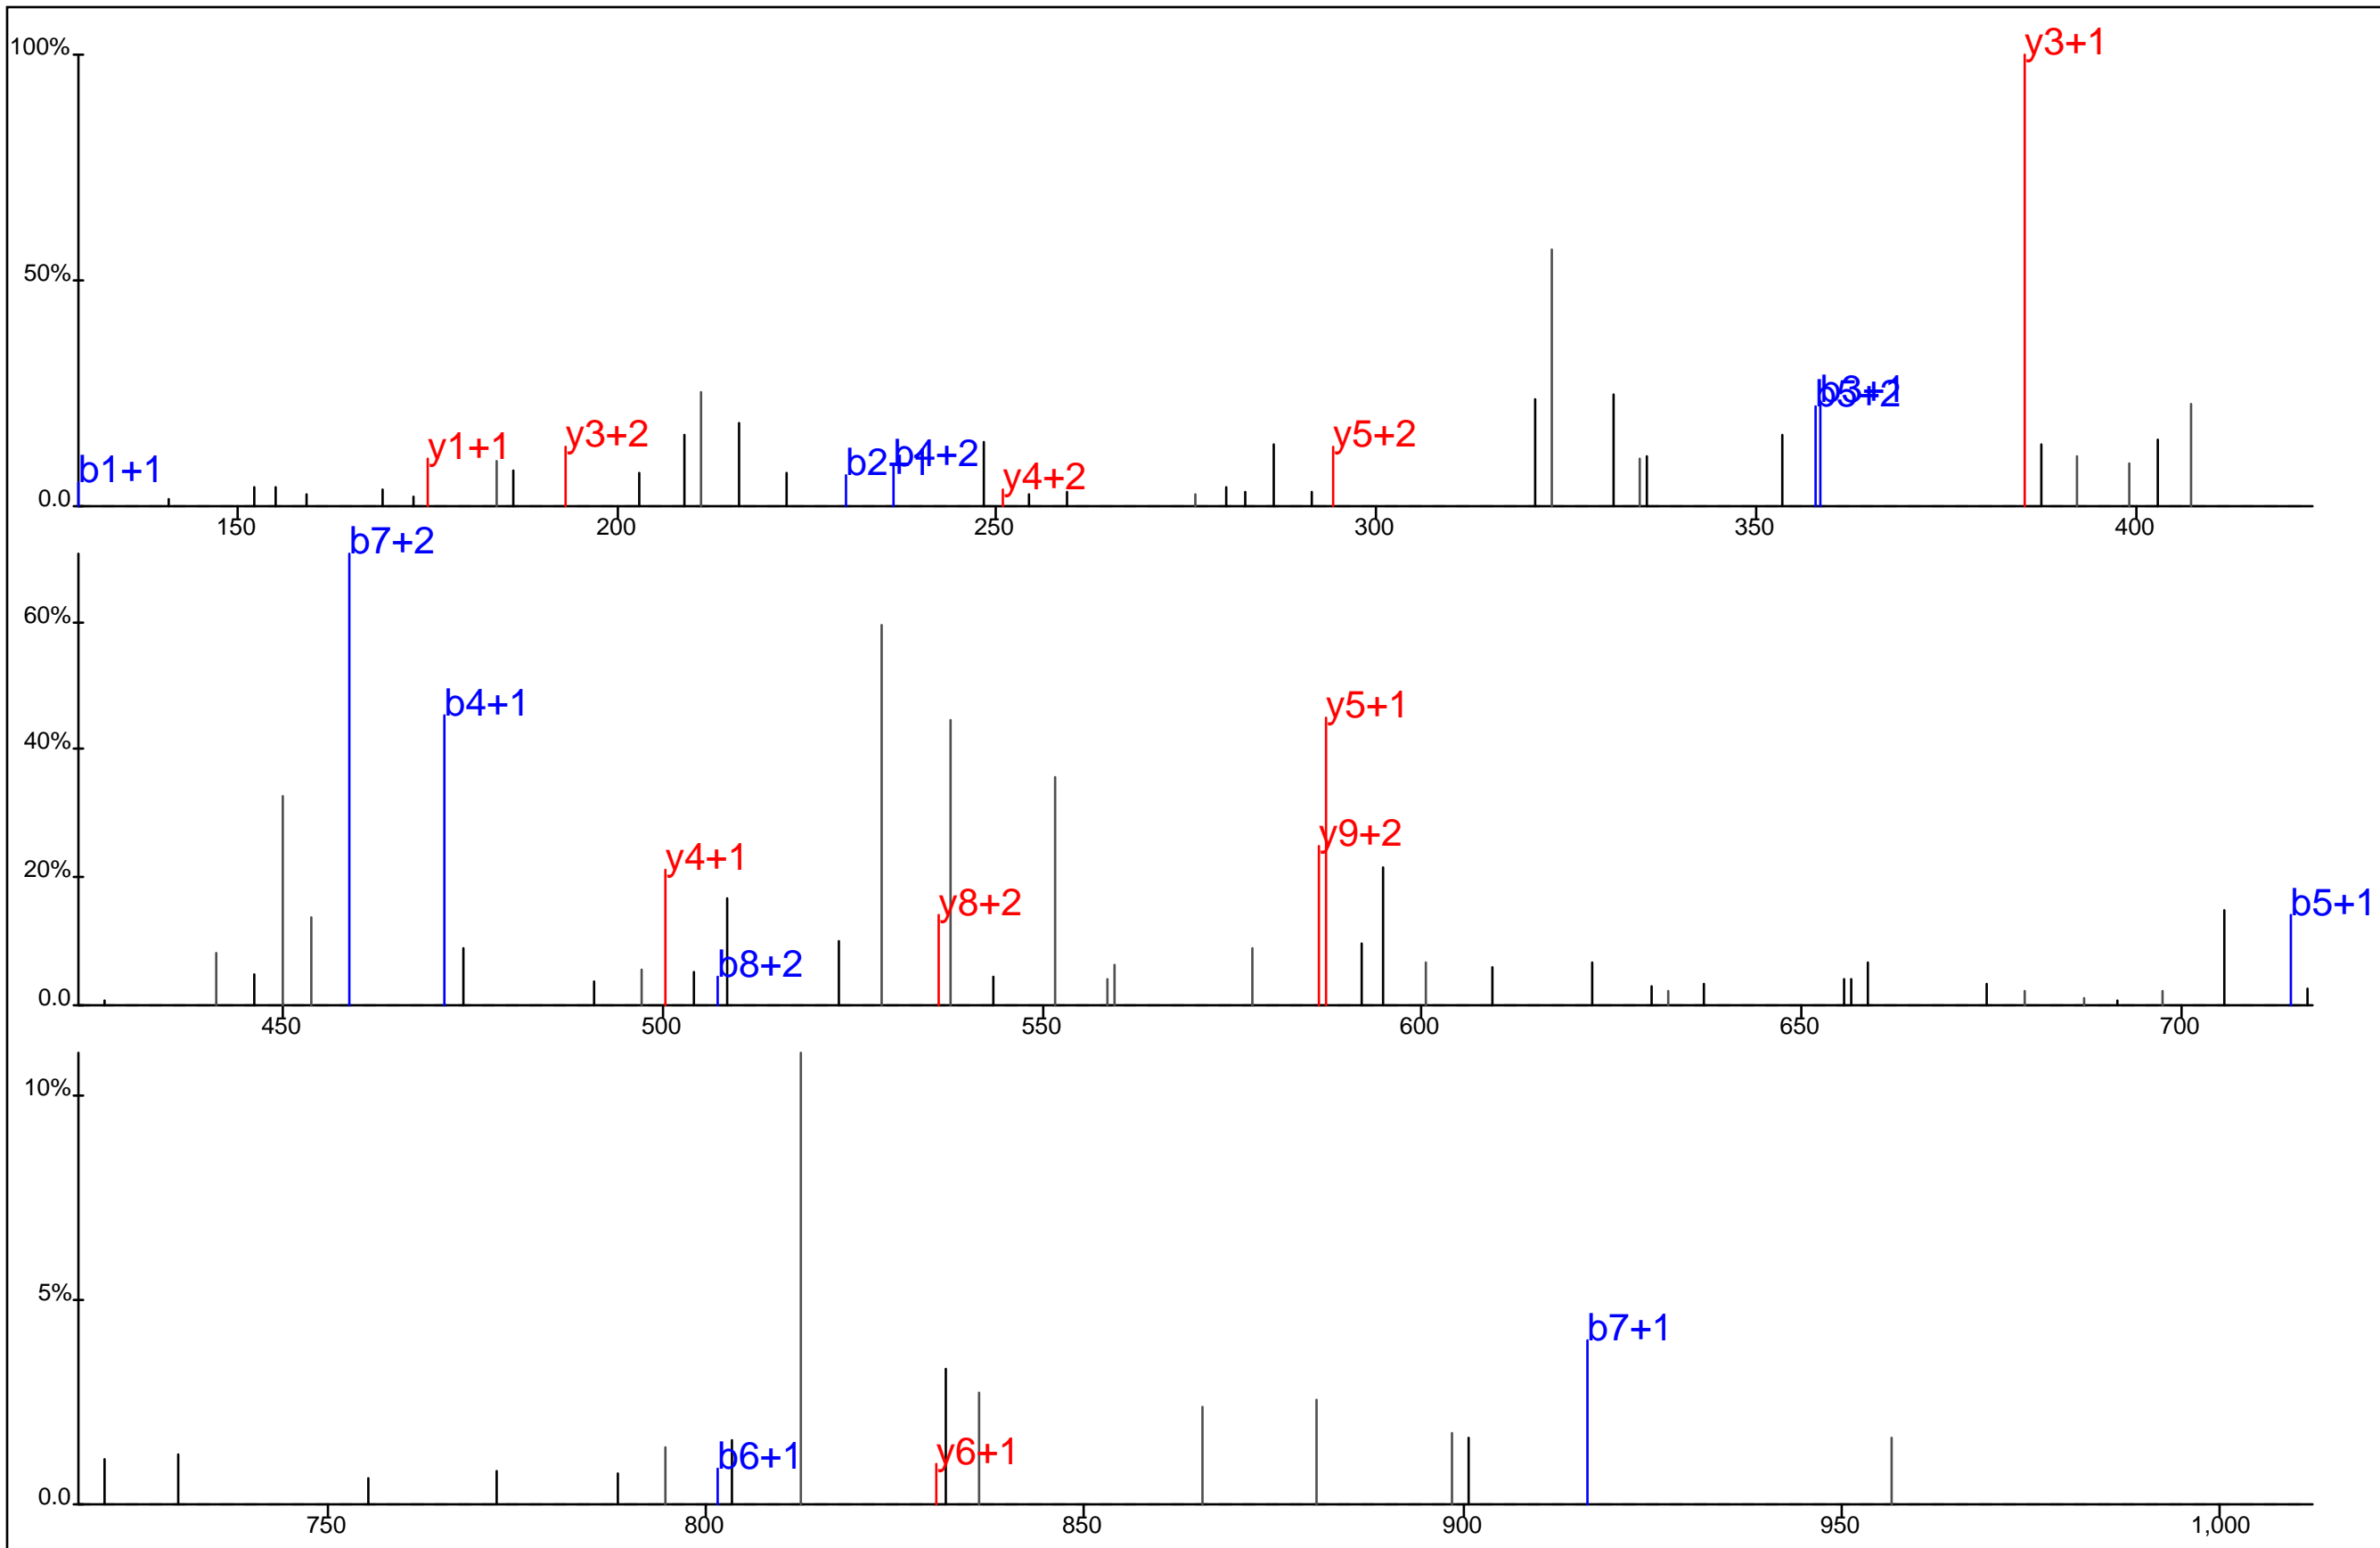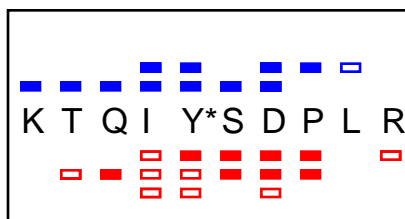

Protein Name: Deducator of cytokinesis 11  
 gi Accession: 0  
 Precursor Mass: 434.2129+3  
 Delta Mass: 4.339 ppm  
 XCorr: 22.69



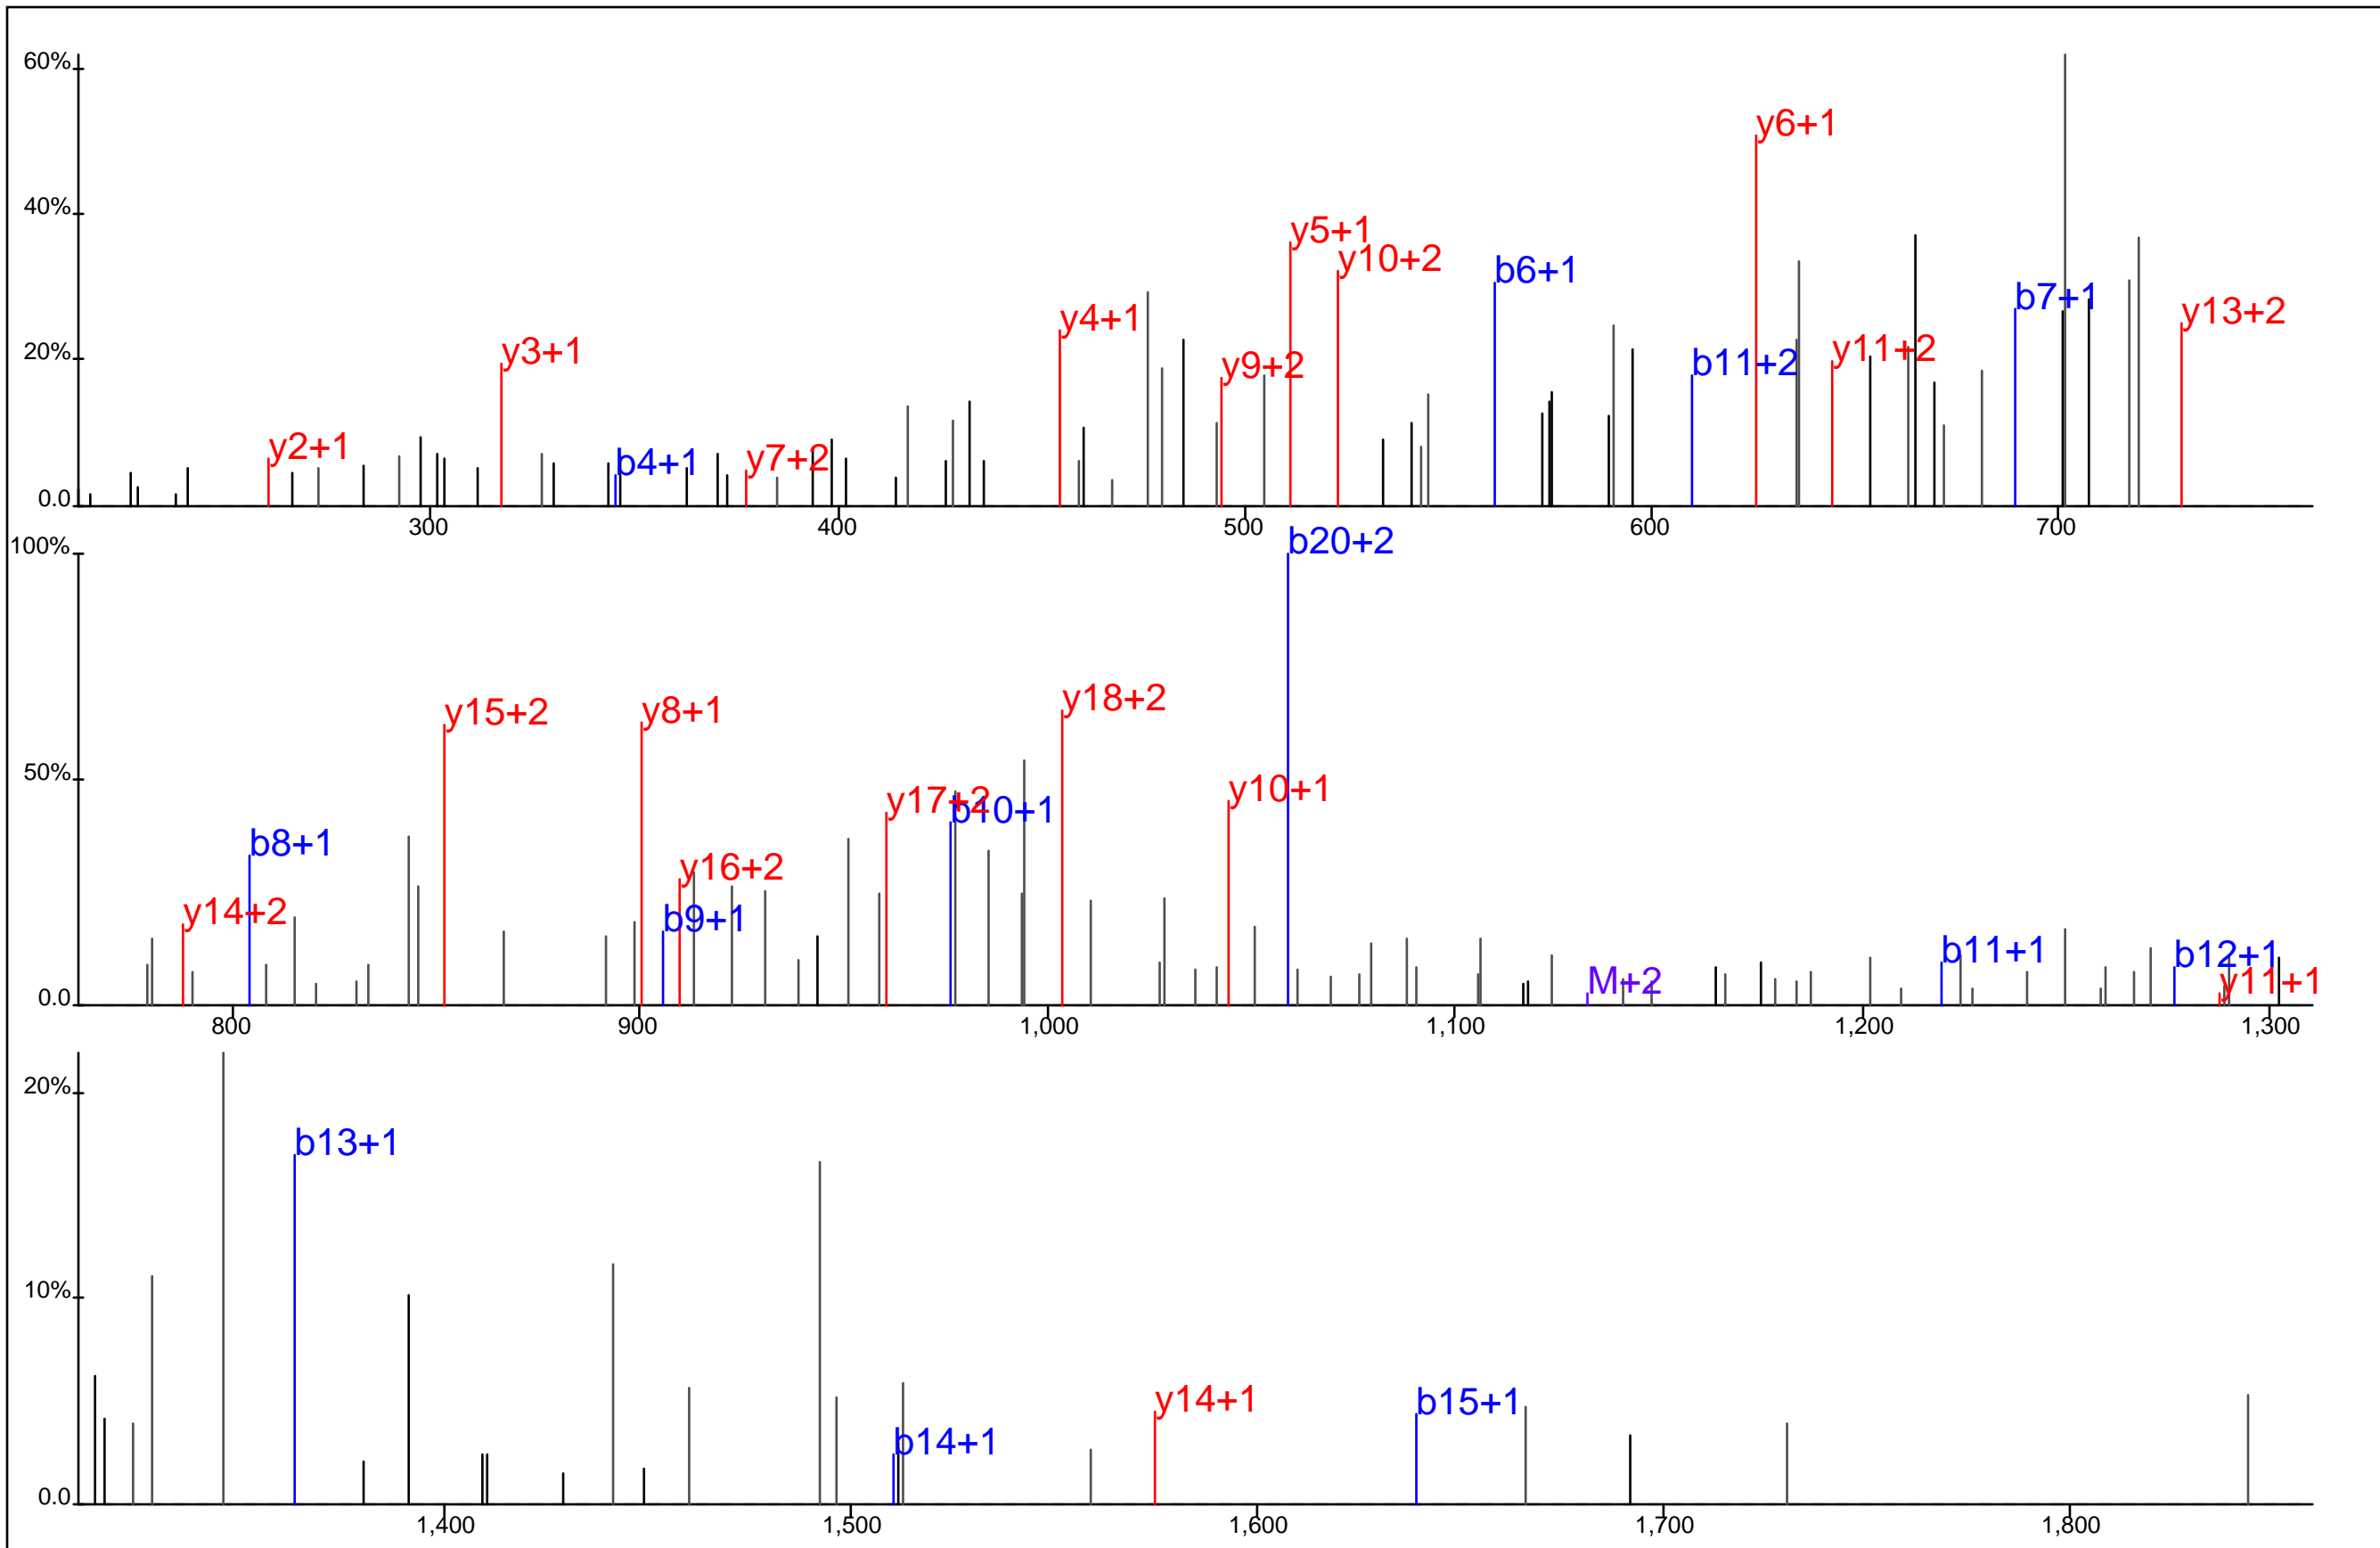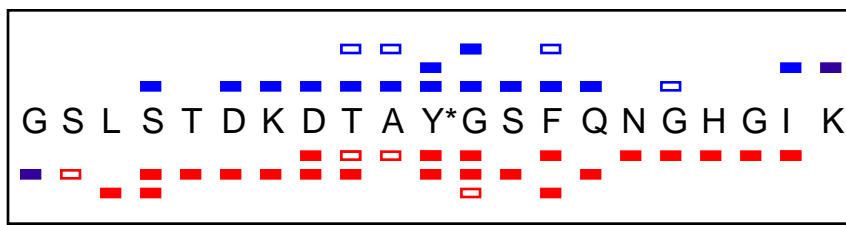

Protein Name: Deducator of cytokinesis 11  
 gi Accession: 0  
 Precursor Mass: 755.0061+3  
 Delta Mass: 0.476 ppm  
 XCorr: 38.61

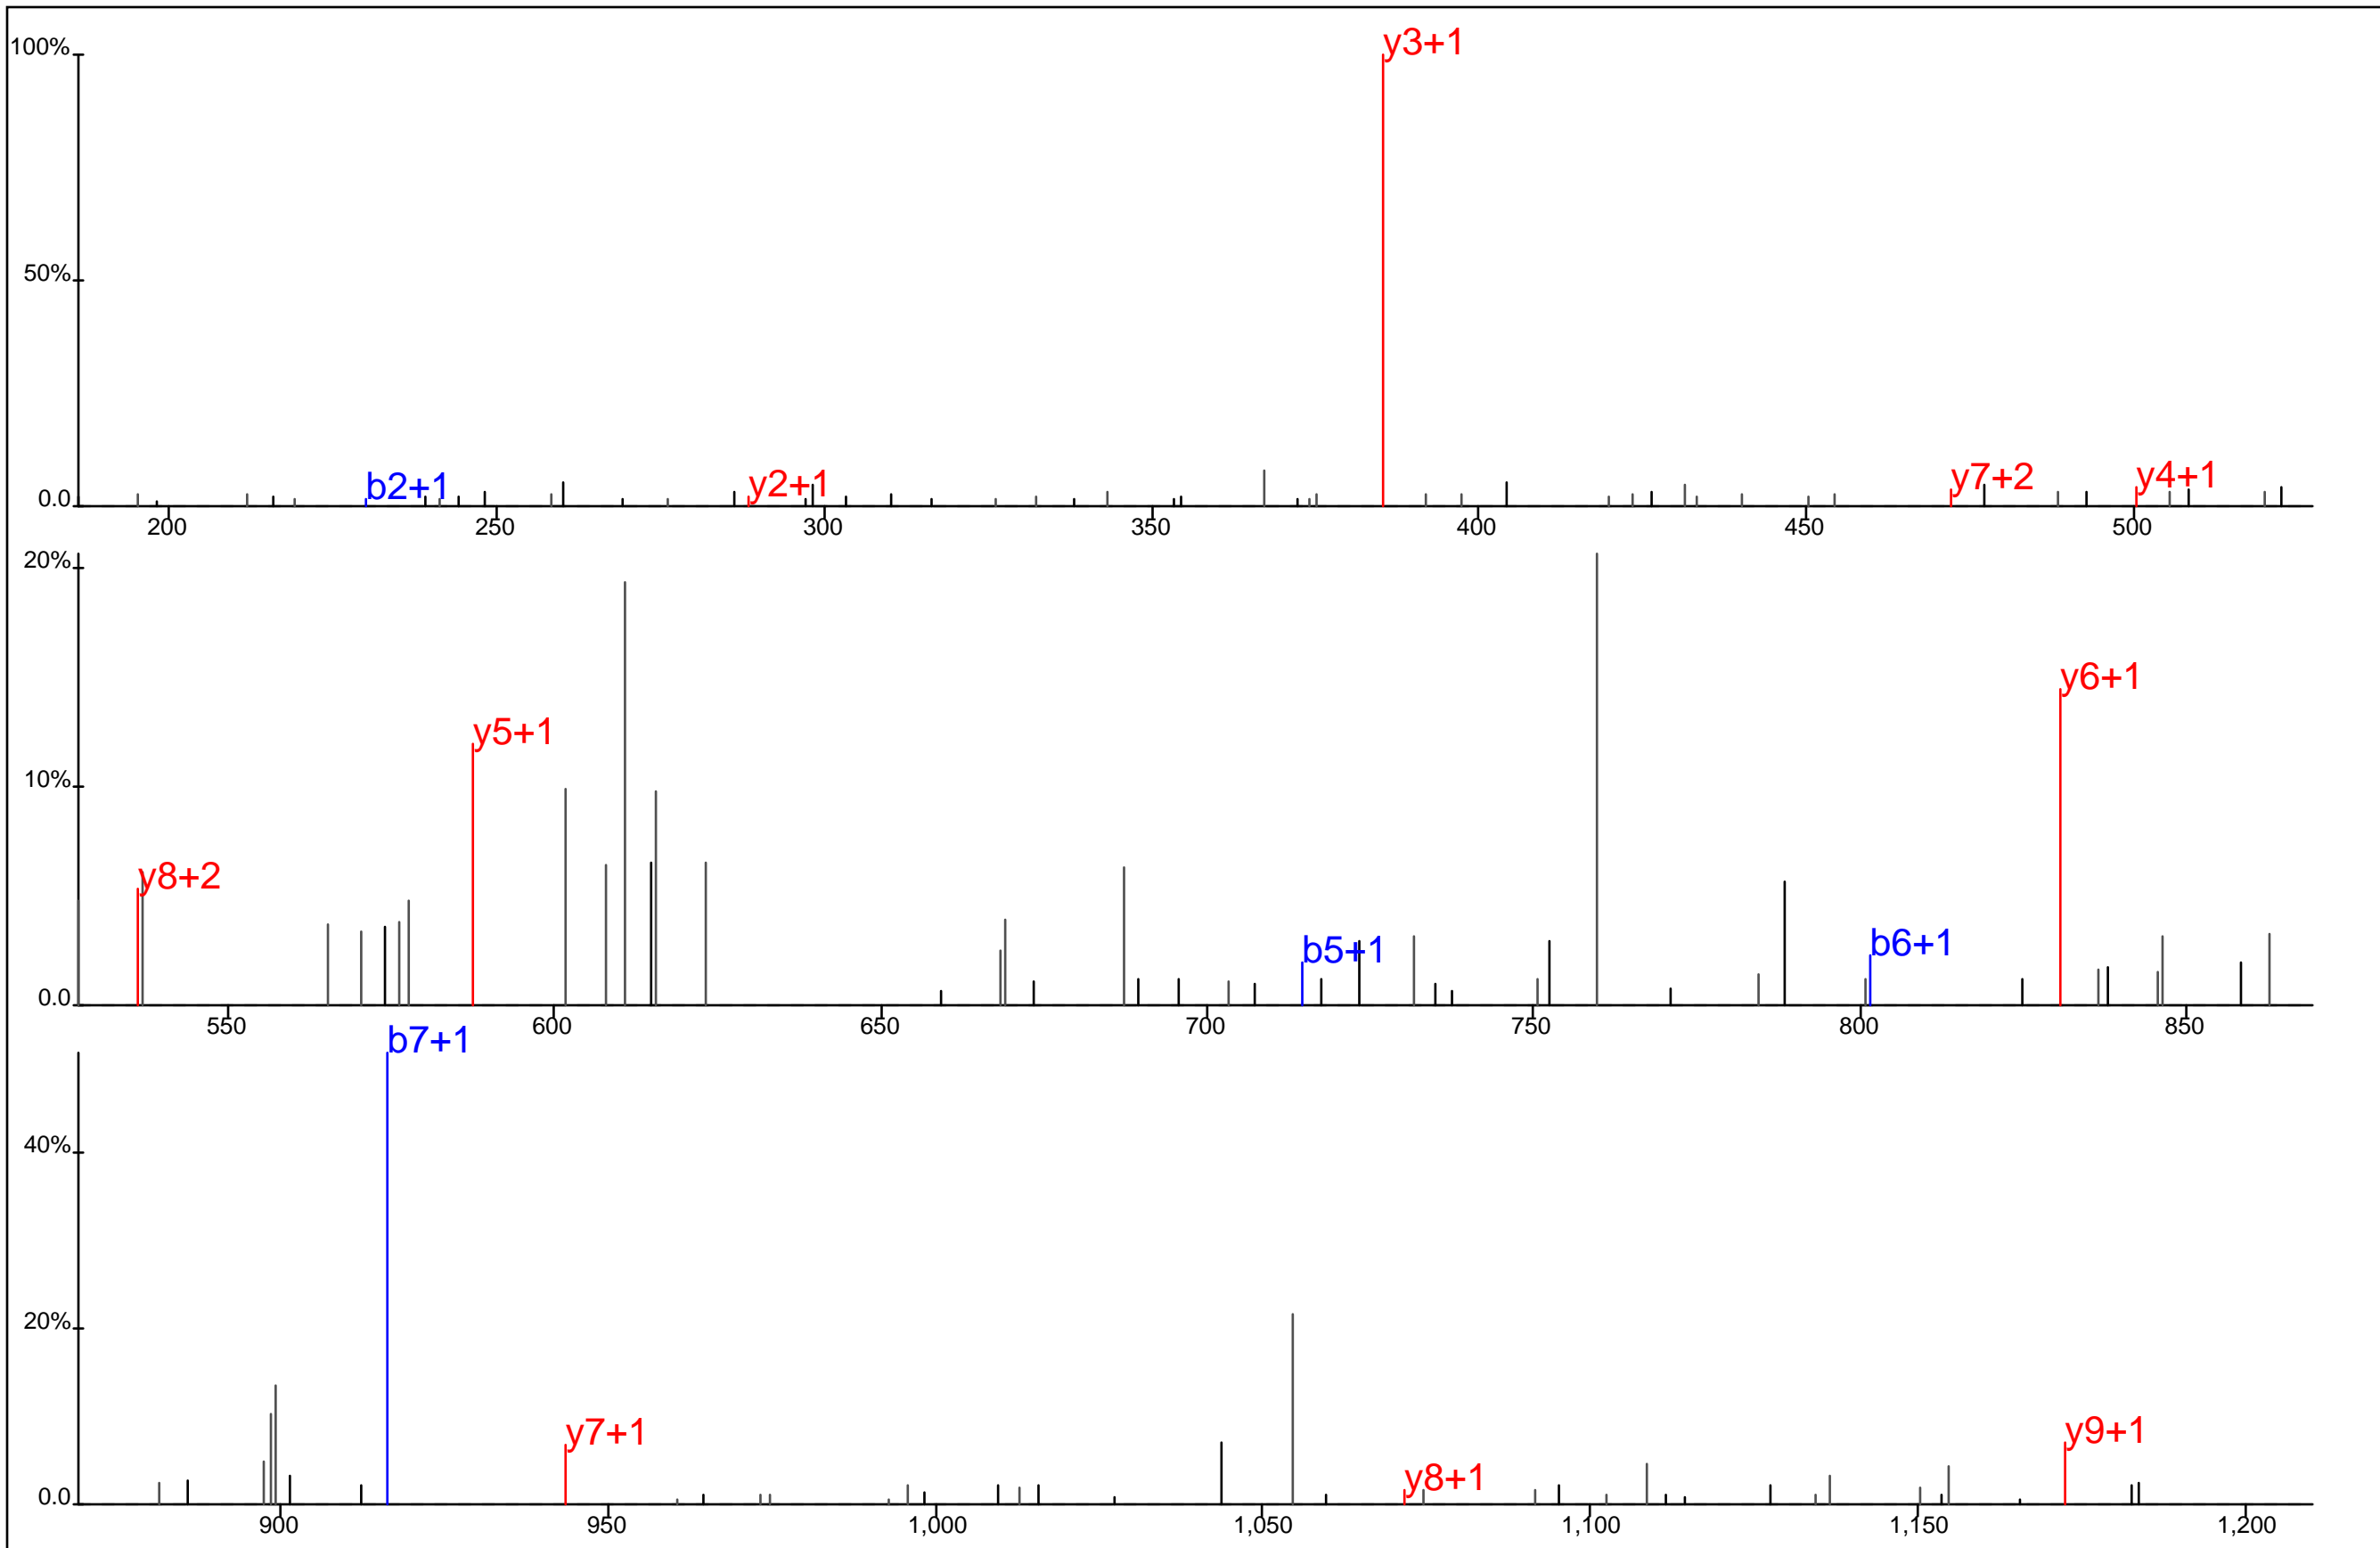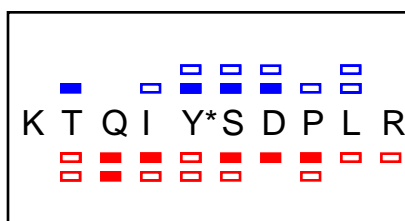

Protein Name: Deducator of cytokinesis 11  
 gi Accession: 0  
 Precursor Mass: 650.8178+2  
 Delta Mass: 1.021 ppm  
 XCorr: 23.9

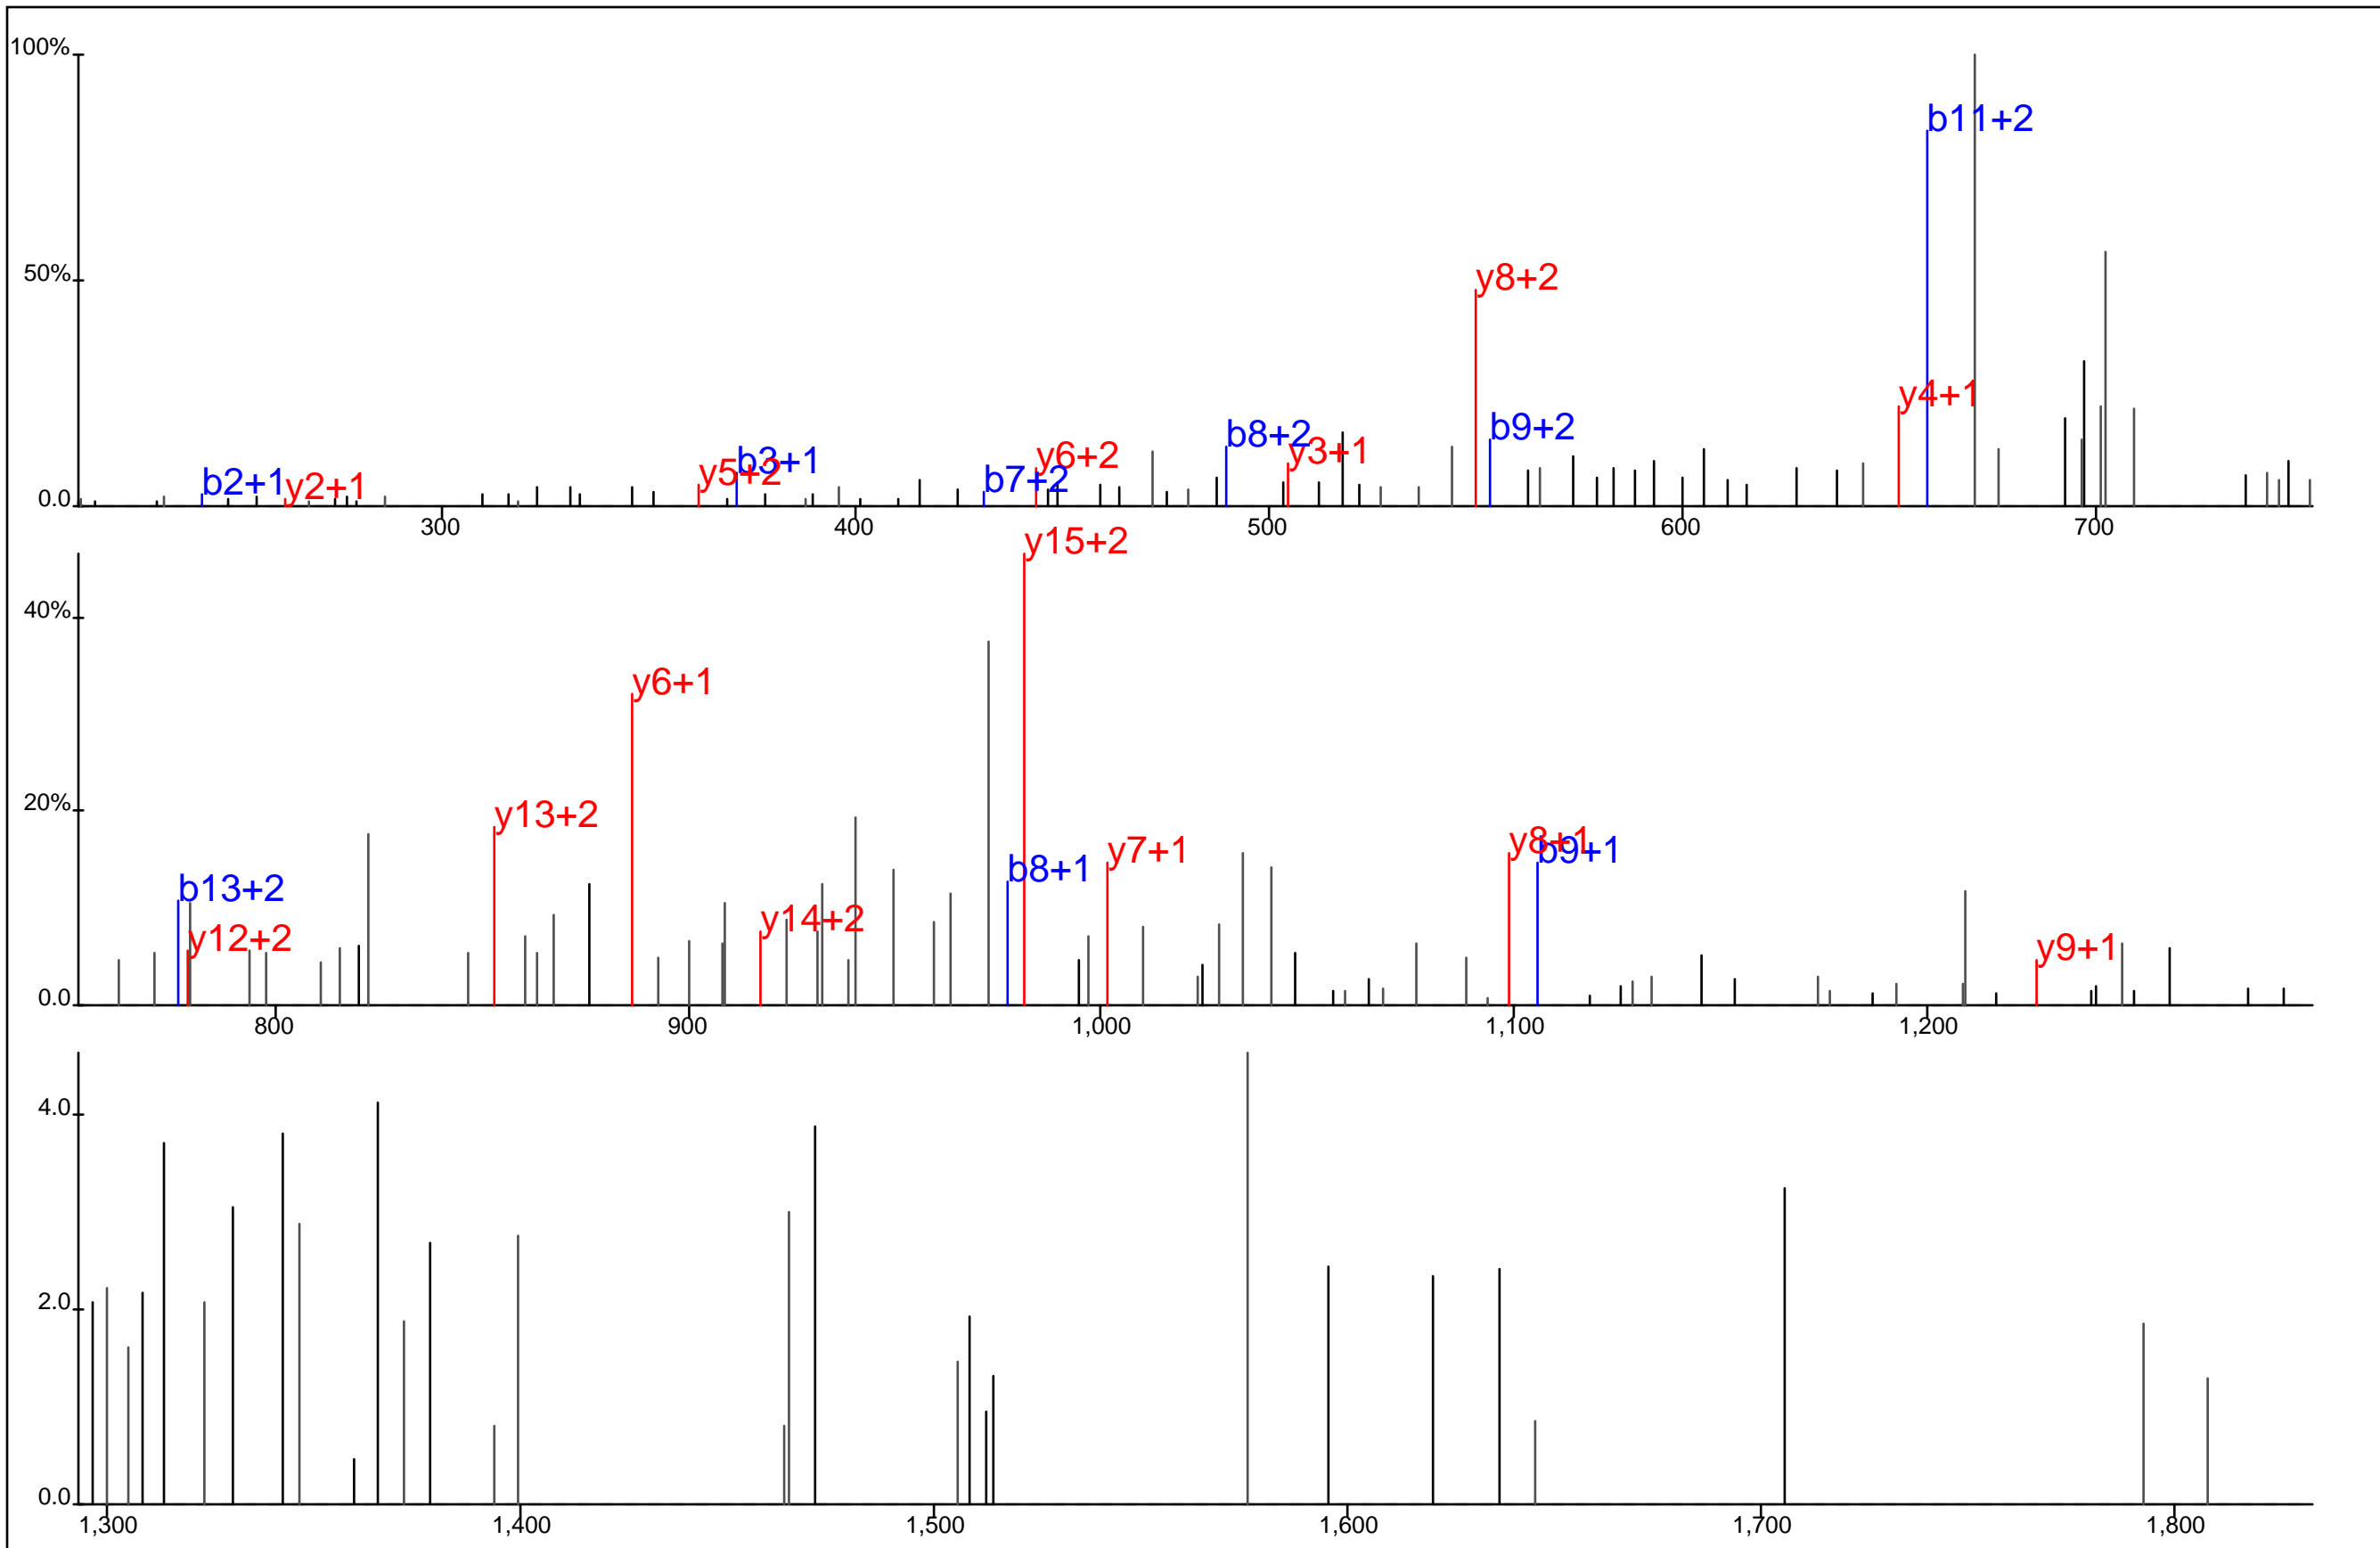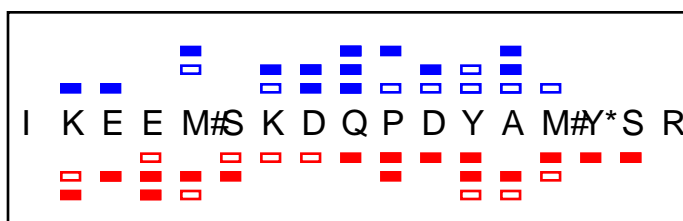

Protein Name: Dedicator of cytokinesis 2  
 gi Accession: 0  
 Precursor Mass: 734.9748+3  
 Delta Mass: 0.709 ppm  
 XCorr: 21.33

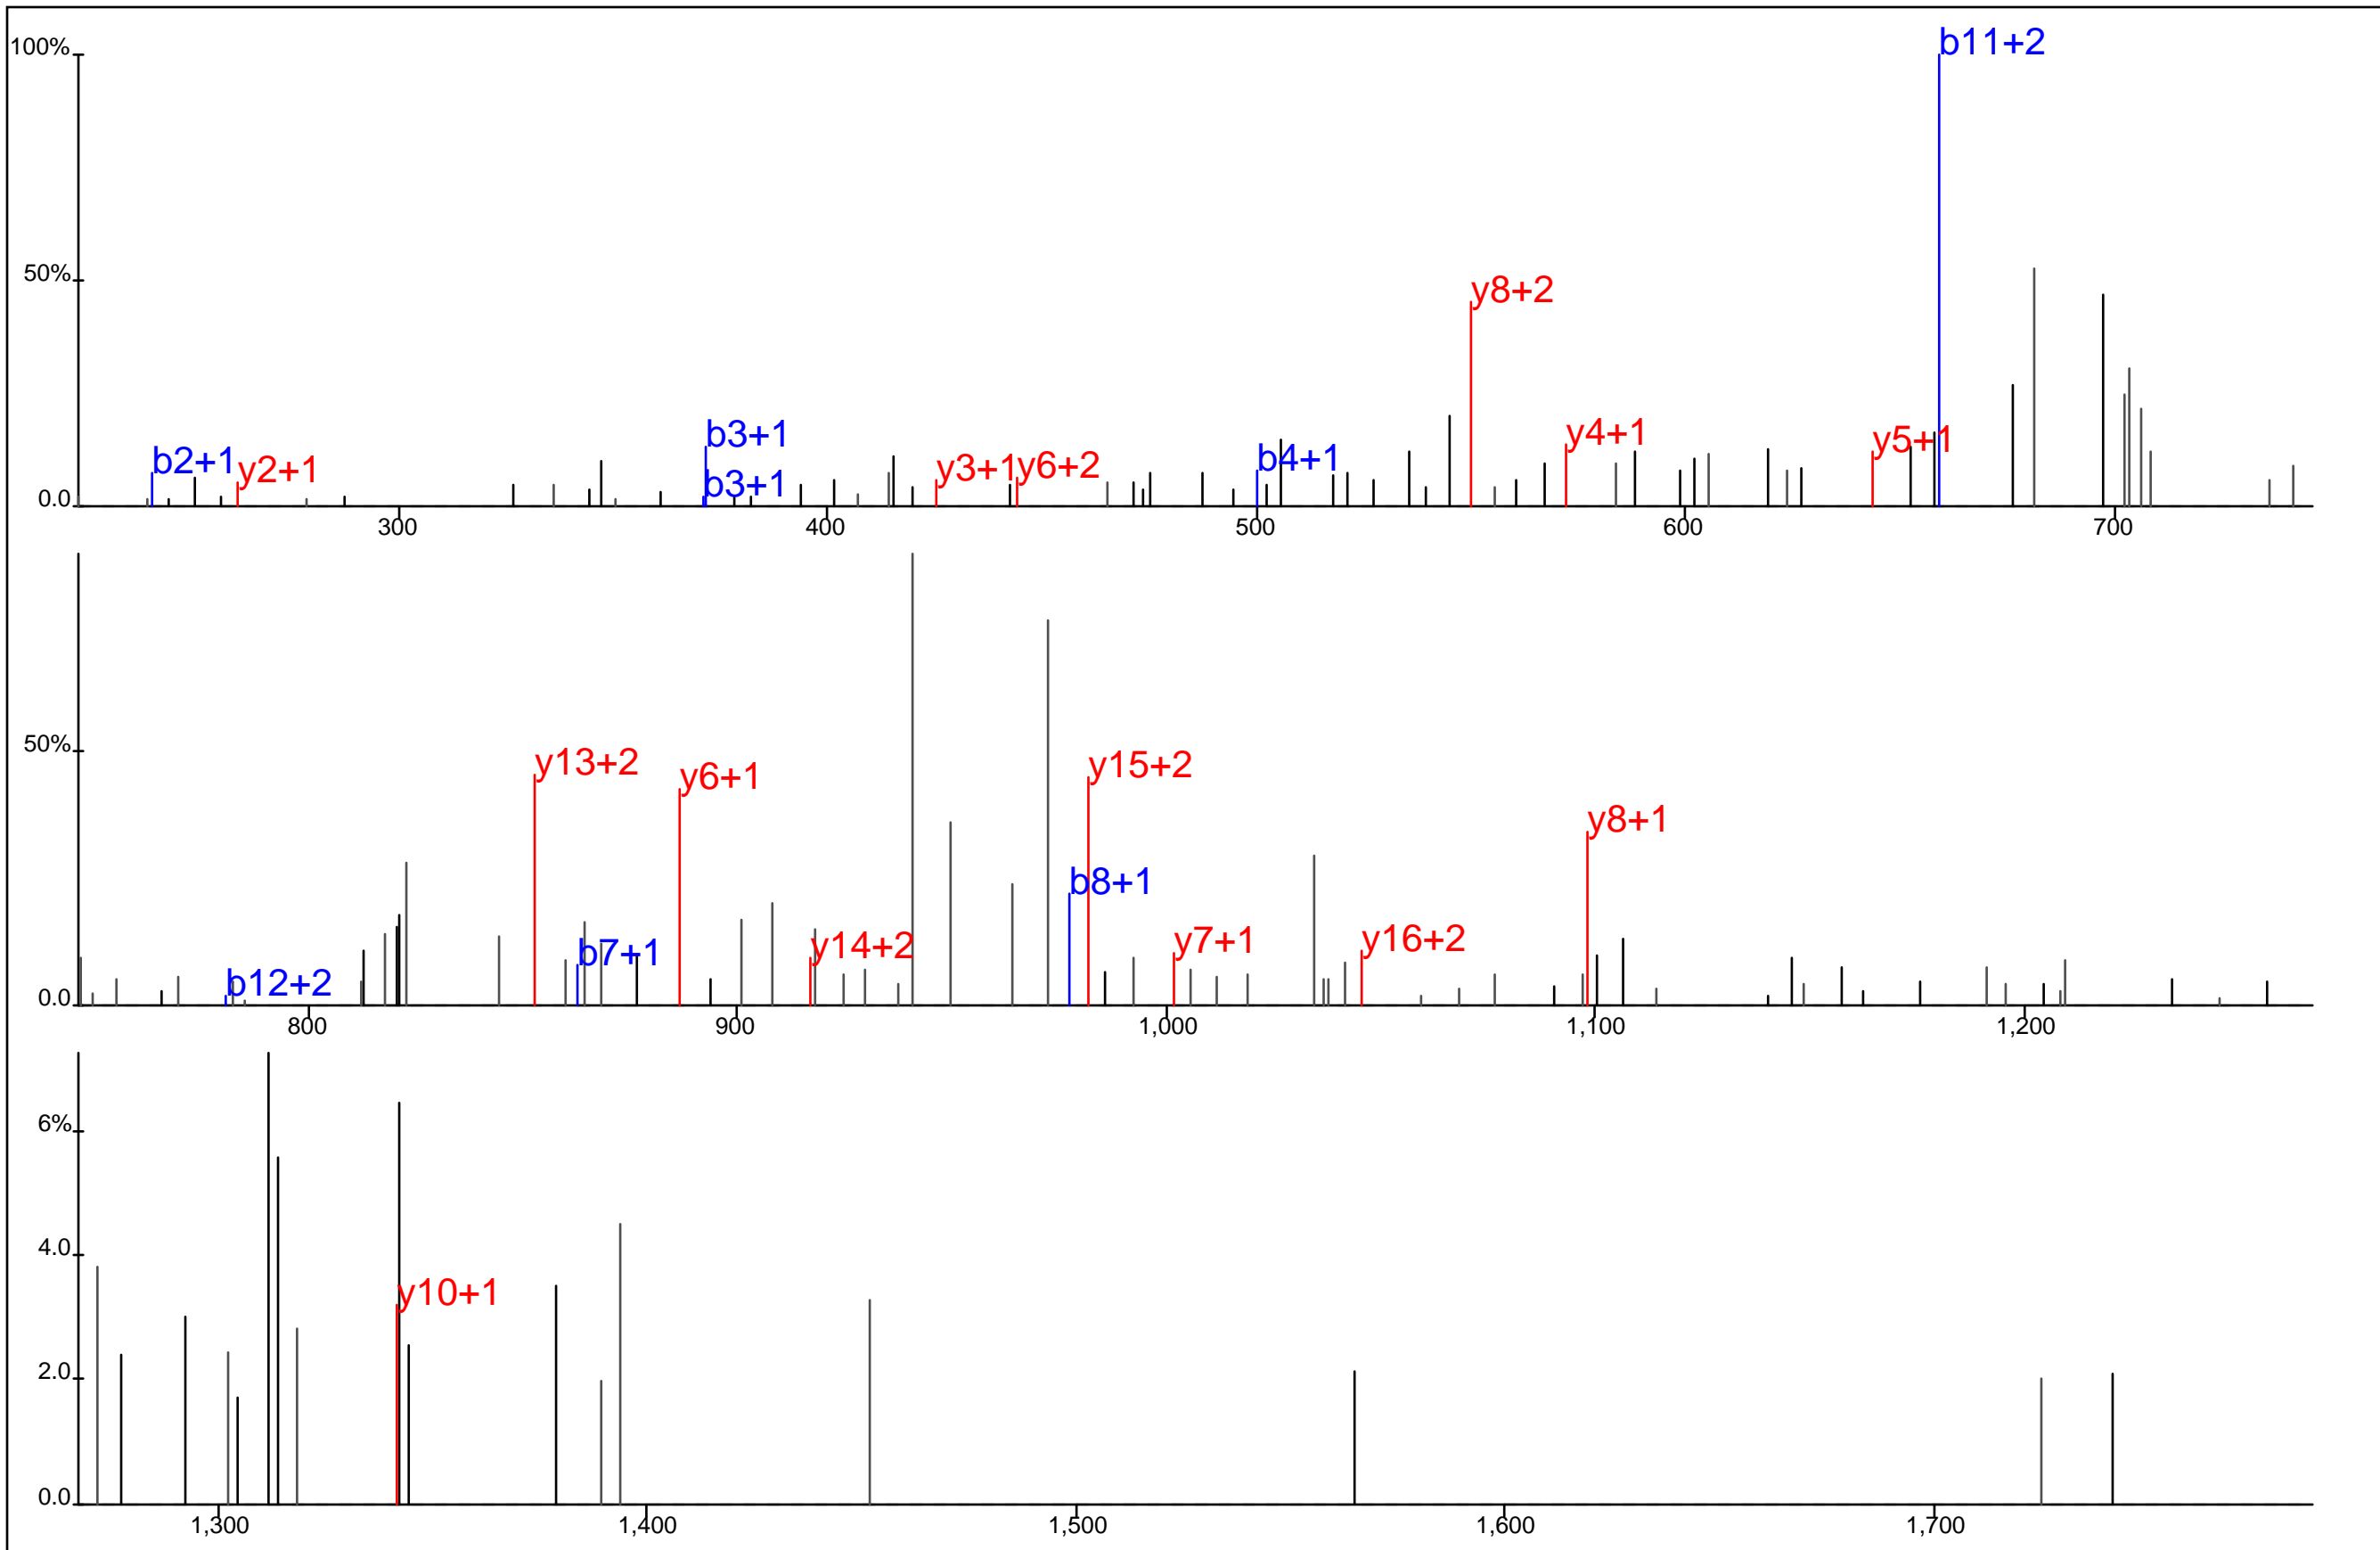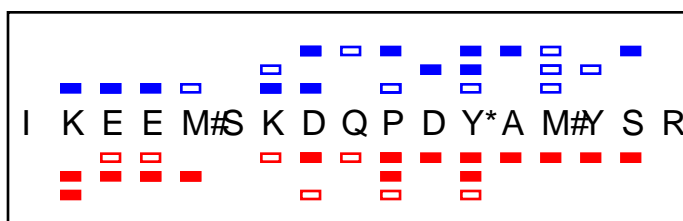

Protein Name: Dedicator of cytokinesis 2  
 gi Accession: 0  
 Precursor Mass: 734.9740+3  
 Delta Mass: 0.371 ppm  
 XCorr: 22.57

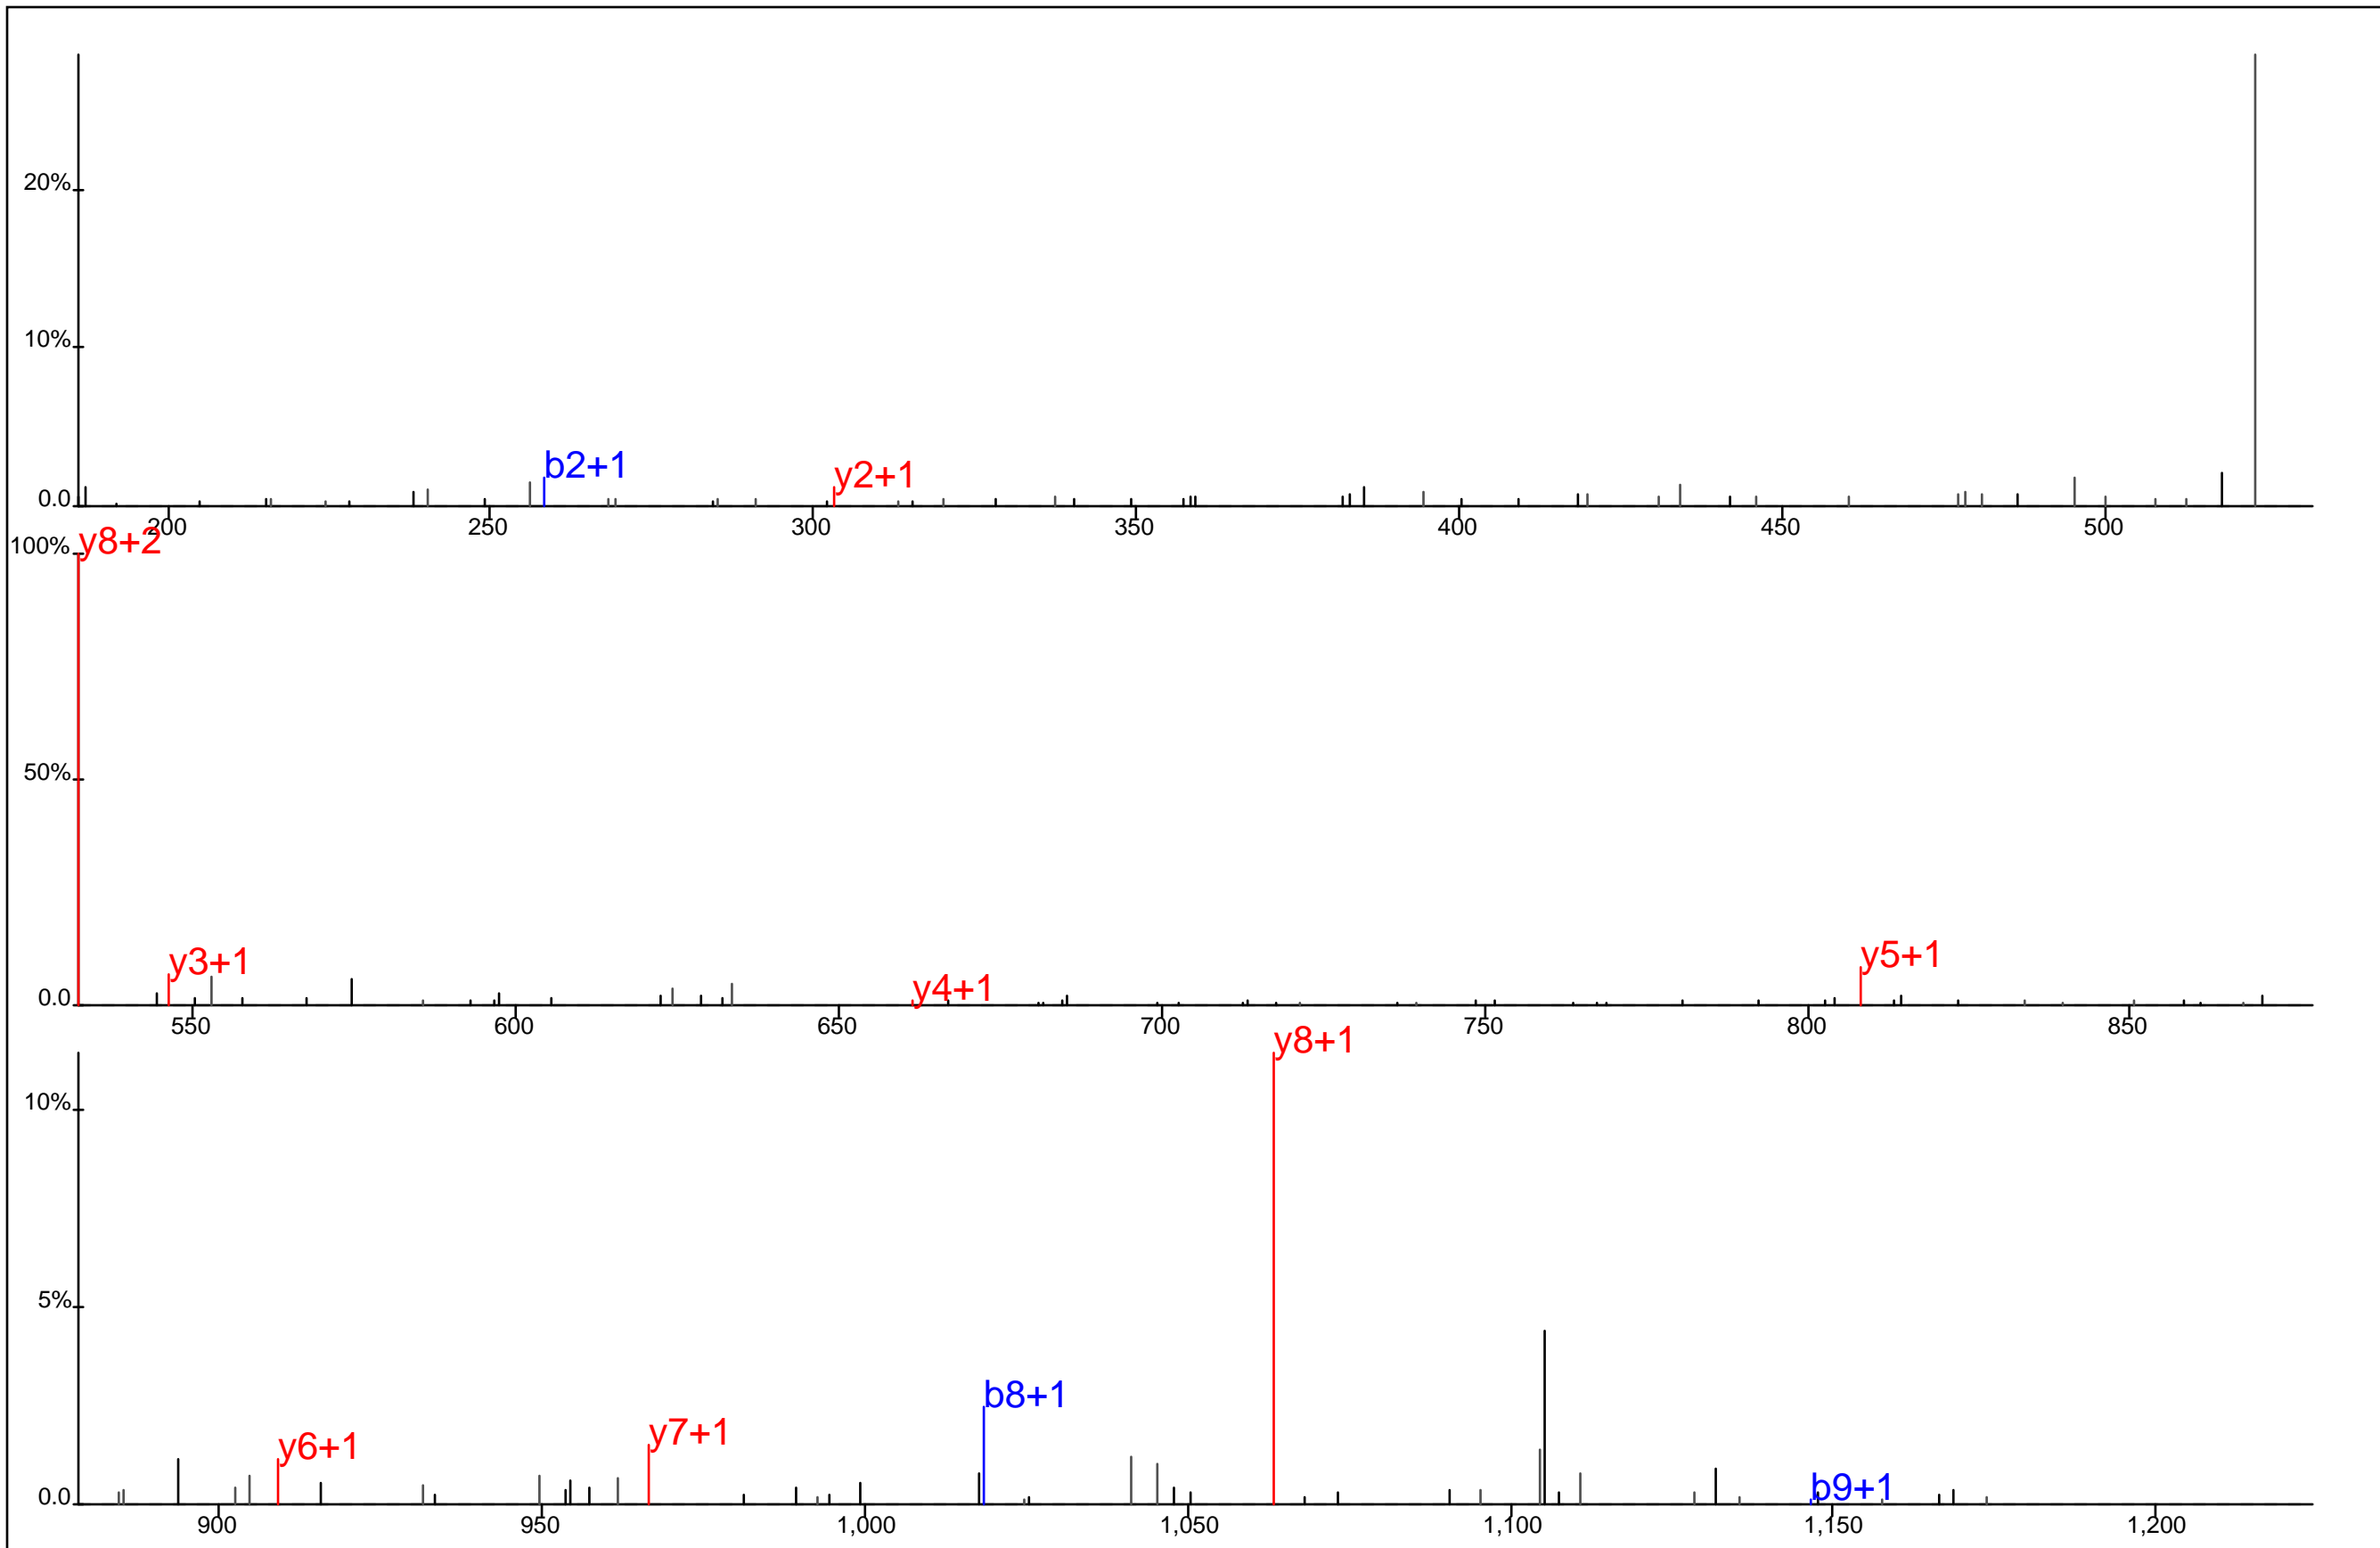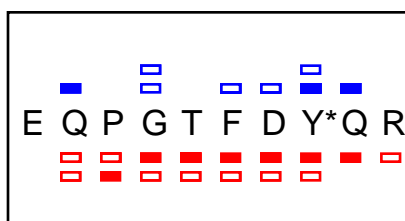

Protein Name: DENN/MADD domain containing 1A  
 gi Accession: 0  
 Precursor Mass: 660.7659+2  
 Delta Mass: 0.786 ppm  
 XCorr: 23.36

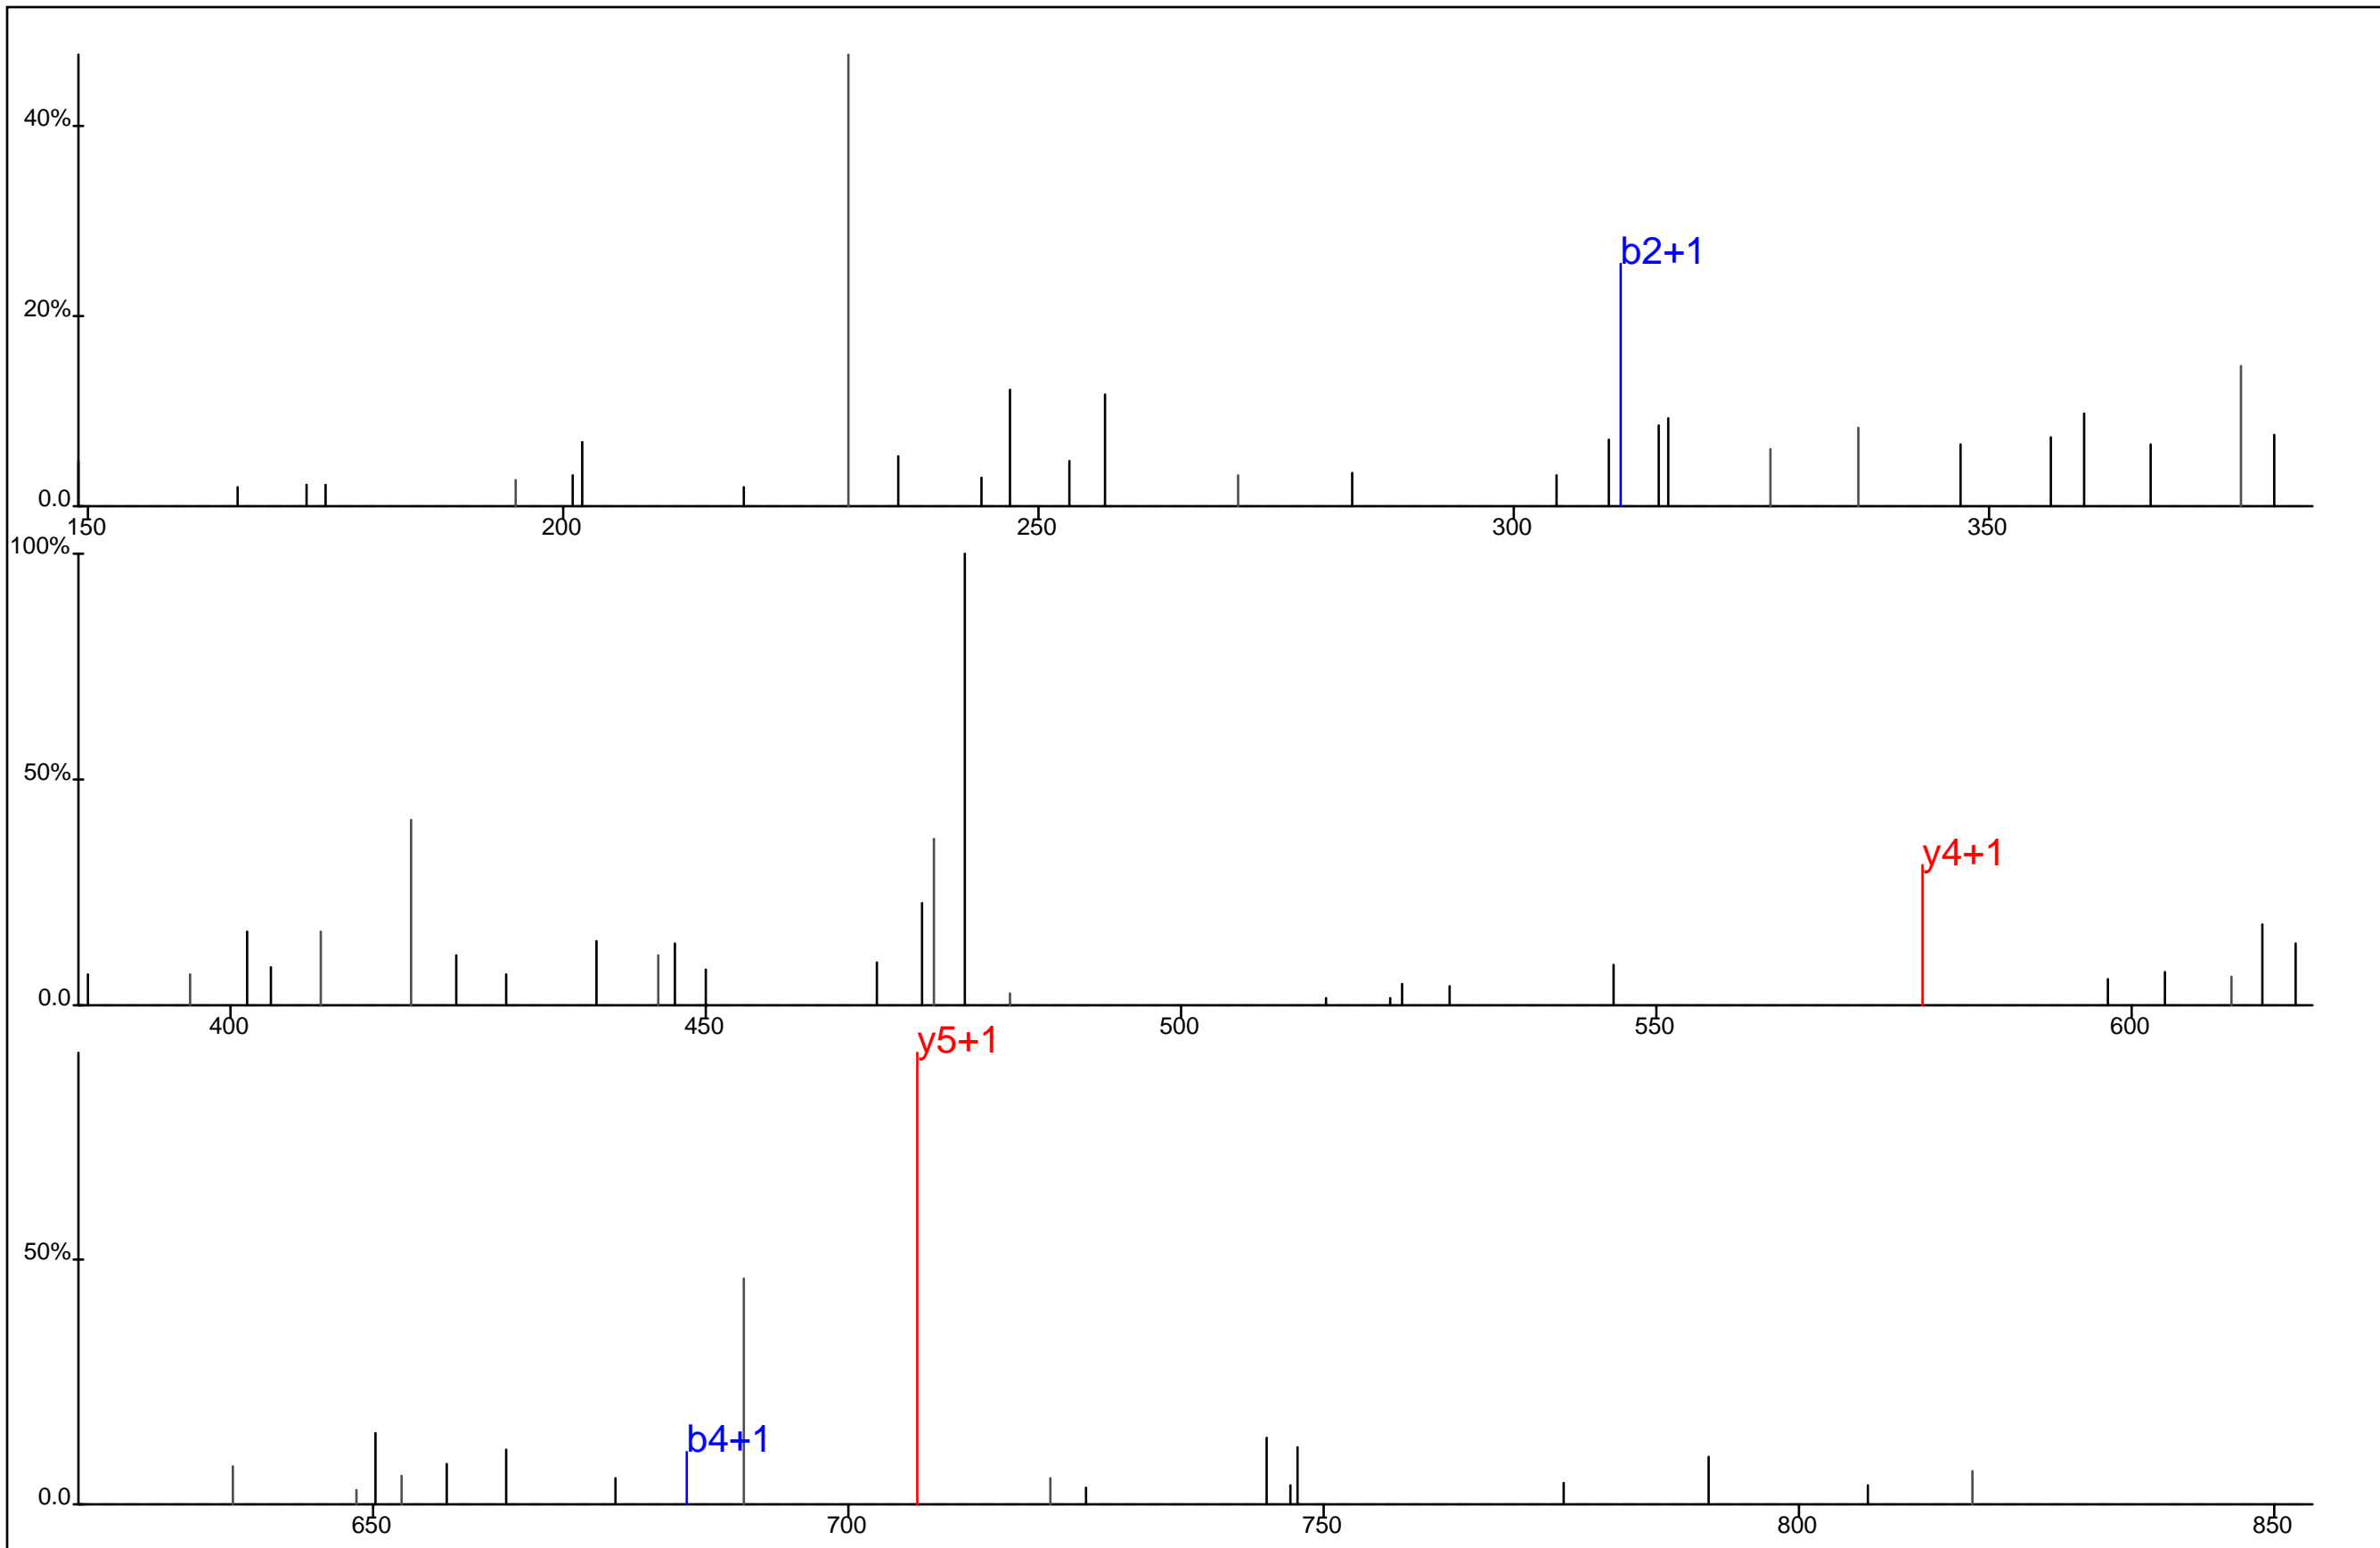

■ ▢ ▢ ▢ ▢  
■ ▢ ▢ ▢ ▢  
**Y M E Y\* S T K**

Protein Name: Diacylglycerol kinase, alpha  
 gi Accession: 0  
 Precursor Mass: 509.1850+2  
 Delta Mass: 0.670 ppm  
 XCorr: 21.73

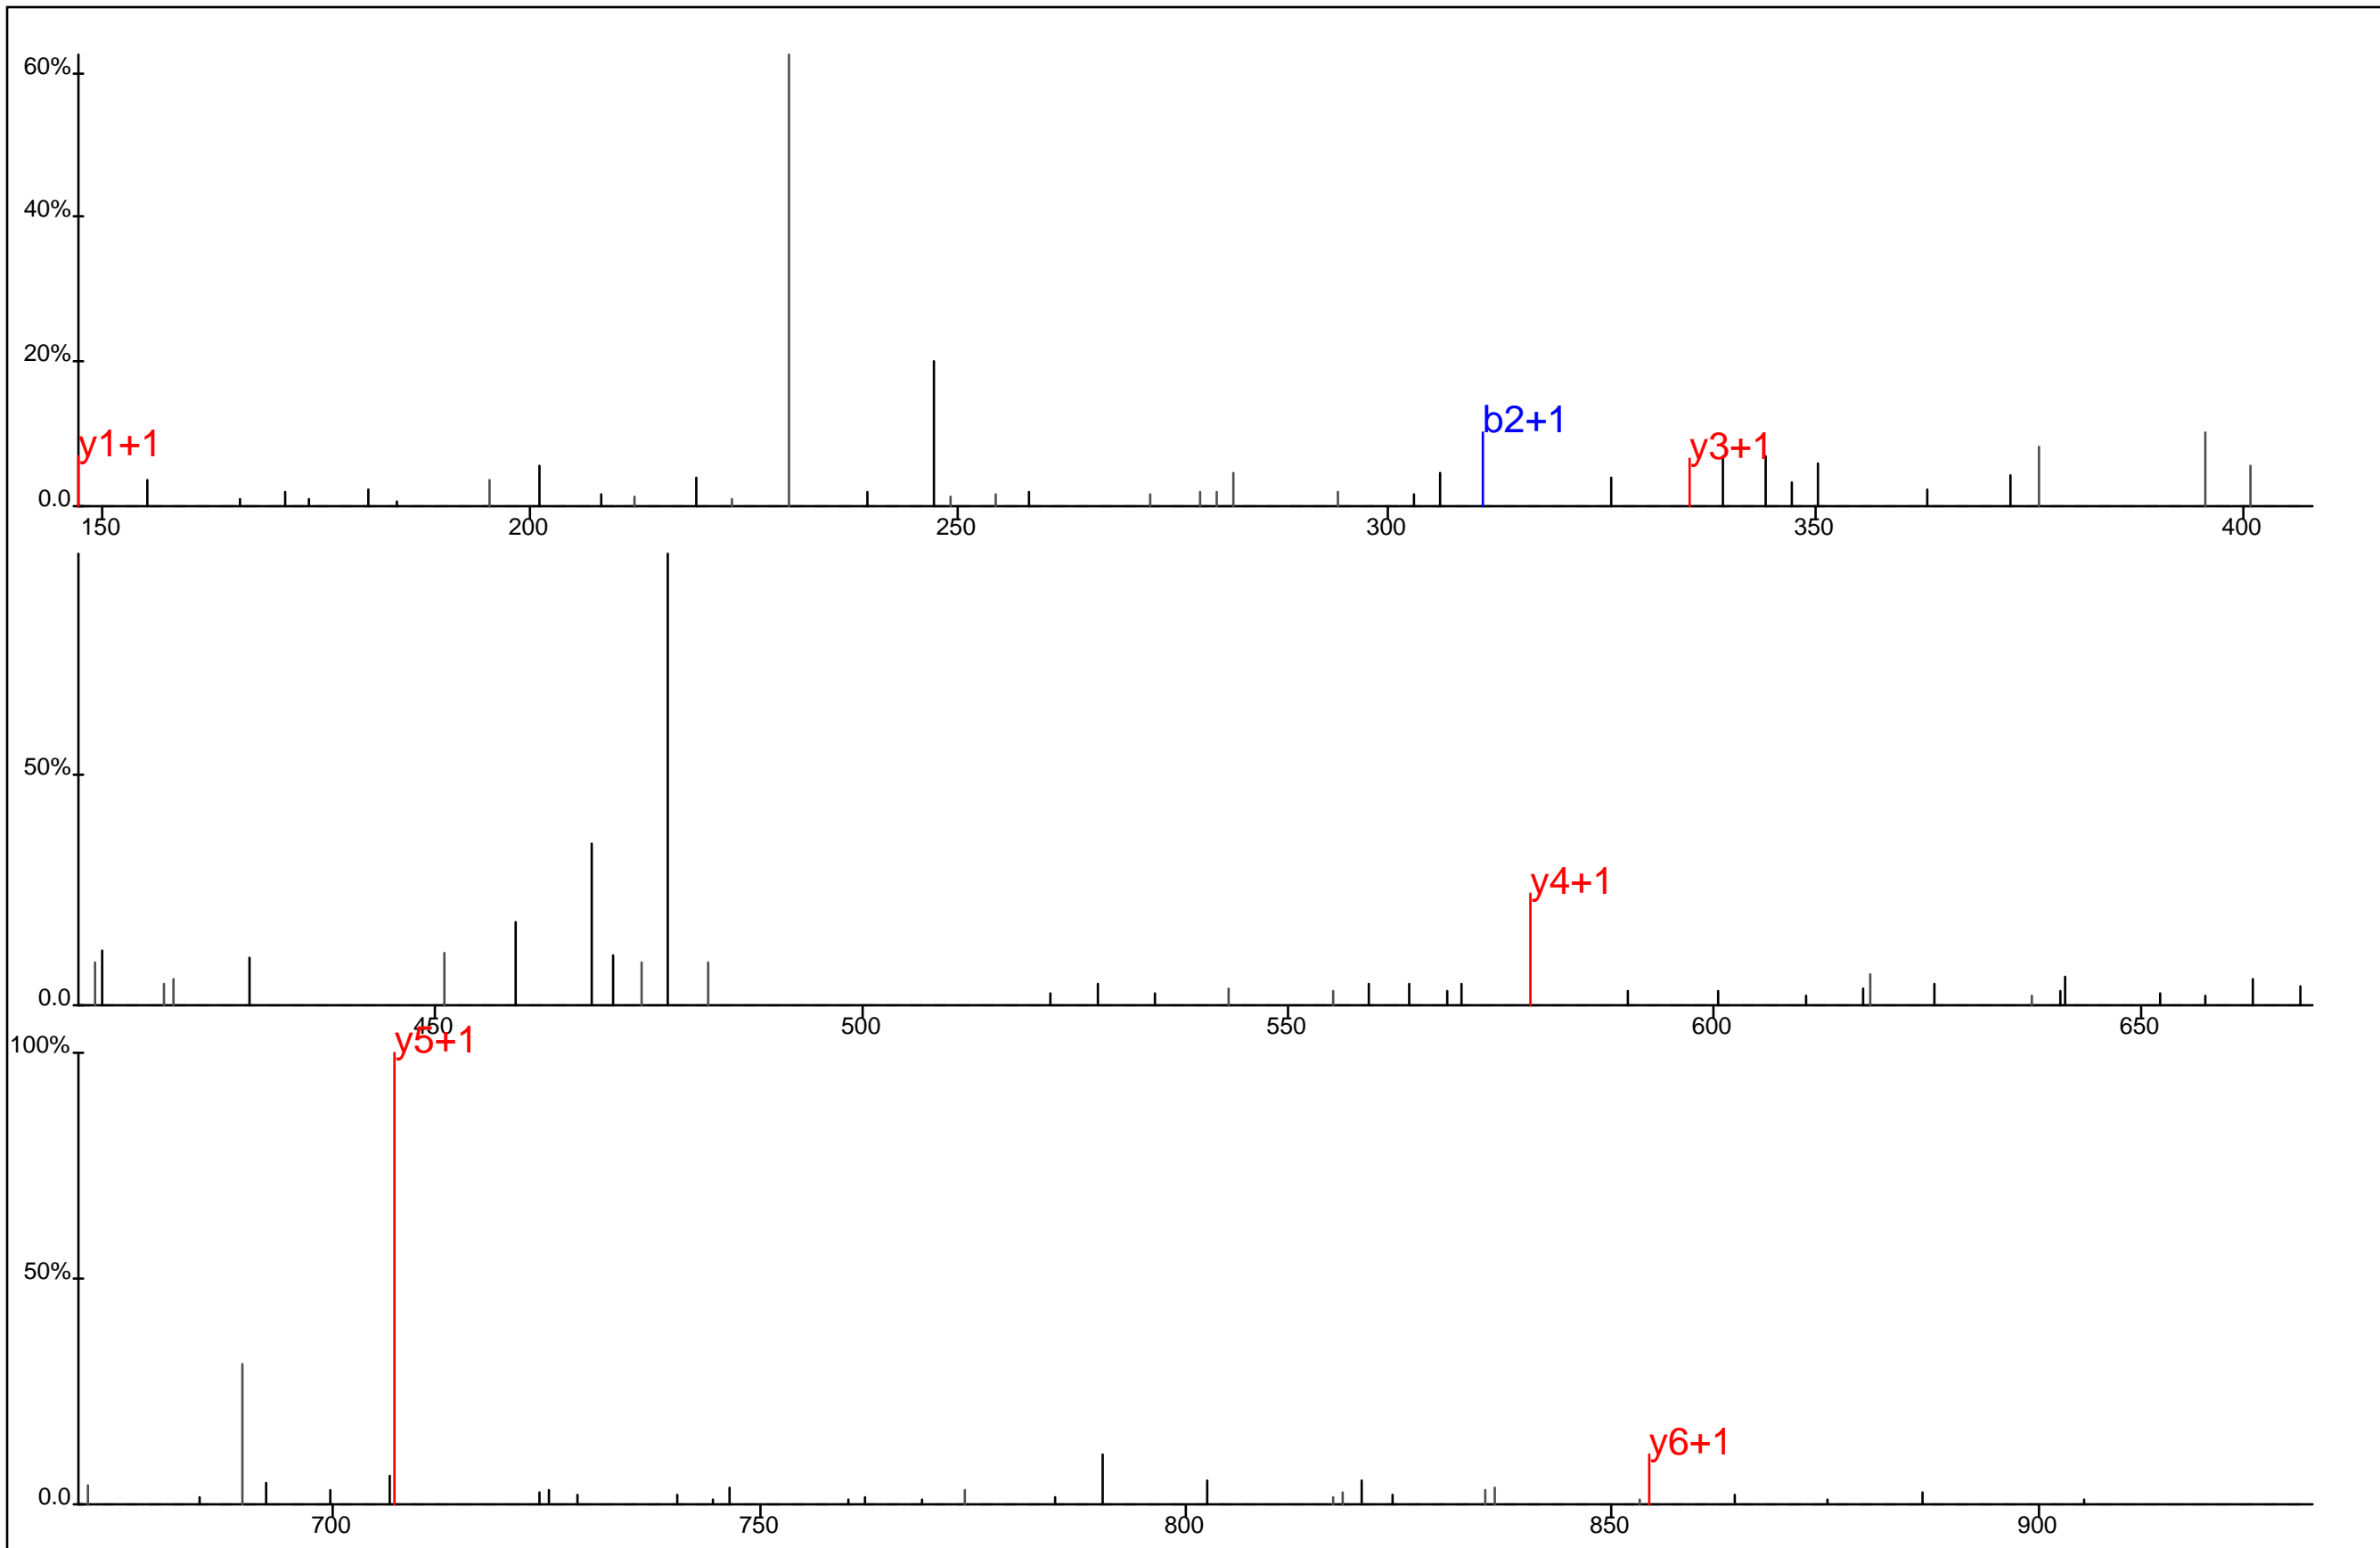

Y M E Y\* S T K

Protein Name: Diacylglycerol kinase, alpha  
 gi Accession: 0  
 Precursor Mass: 509.1854+2  
 Delta Mass: 0.110 ppm  
 XCorr: 22.15

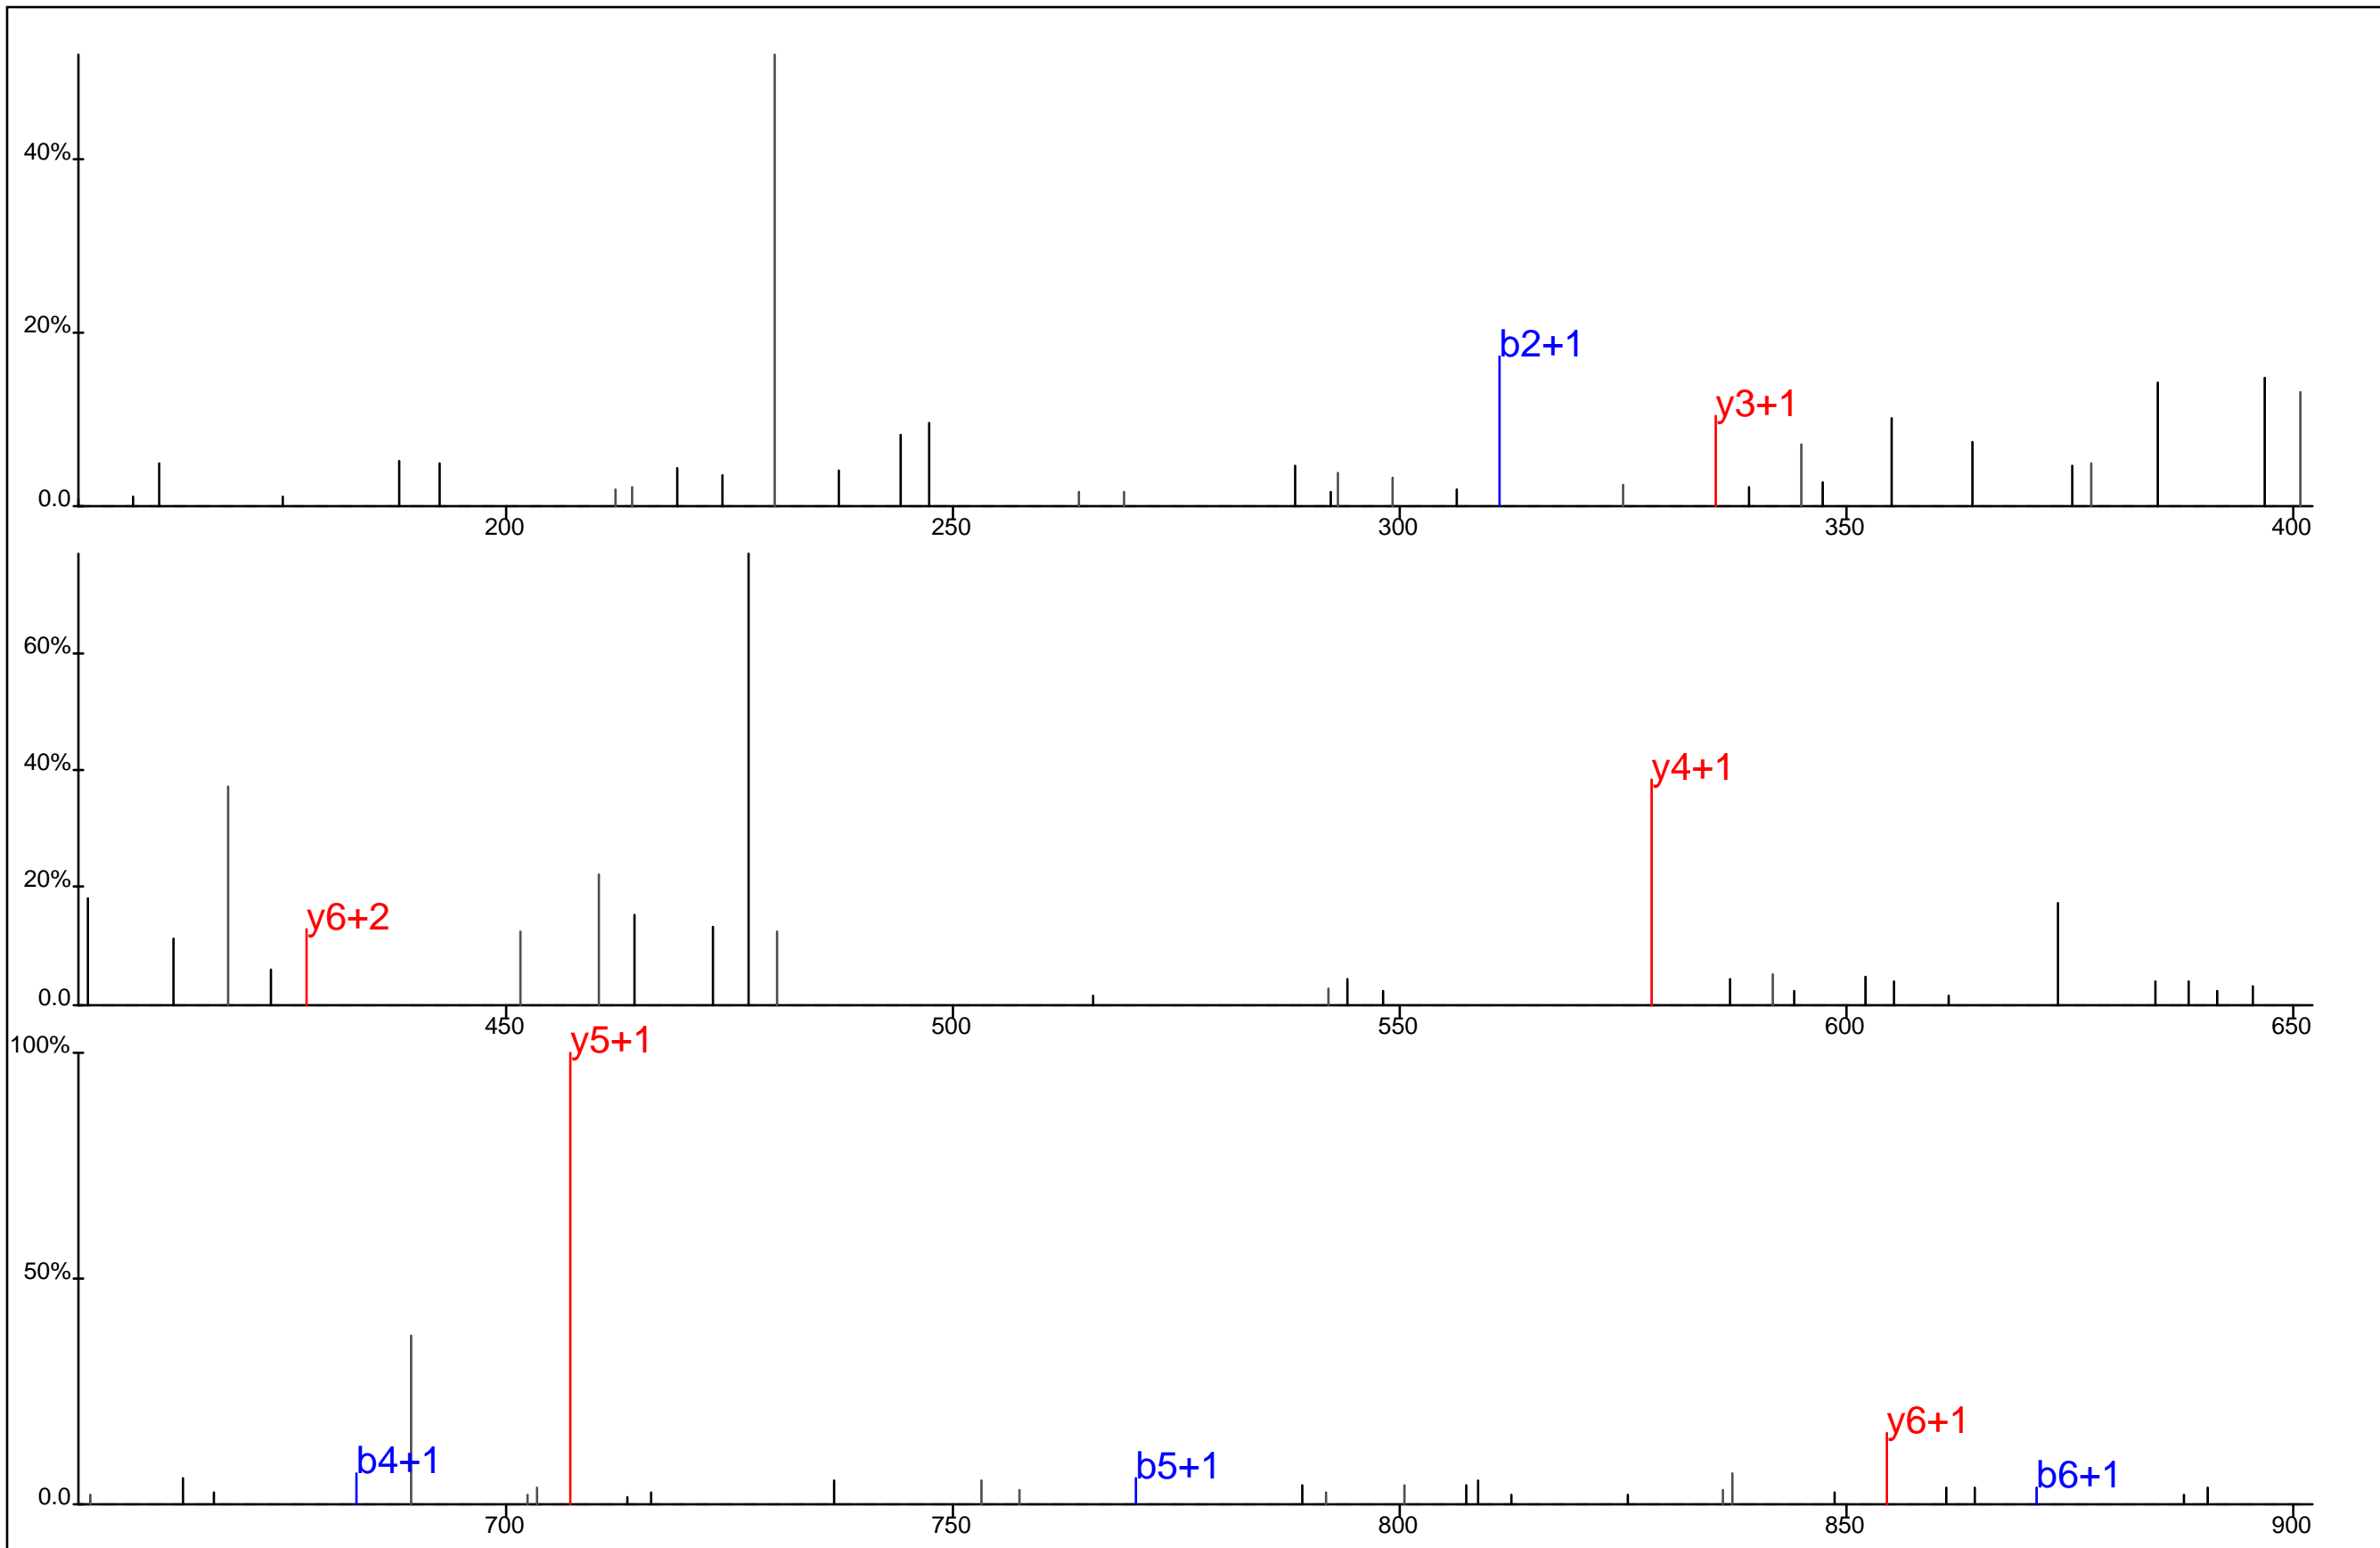

**Y** **M** **E** **Y\*** **S** **T** **K**

Protein Name: Diacylglycerol kinase, alpha  
 gi Accession: 0  
 Precursor Mass: 509.1842+2  
 Delta Mass: 2.349 ppm  
 XCorr: 26.94



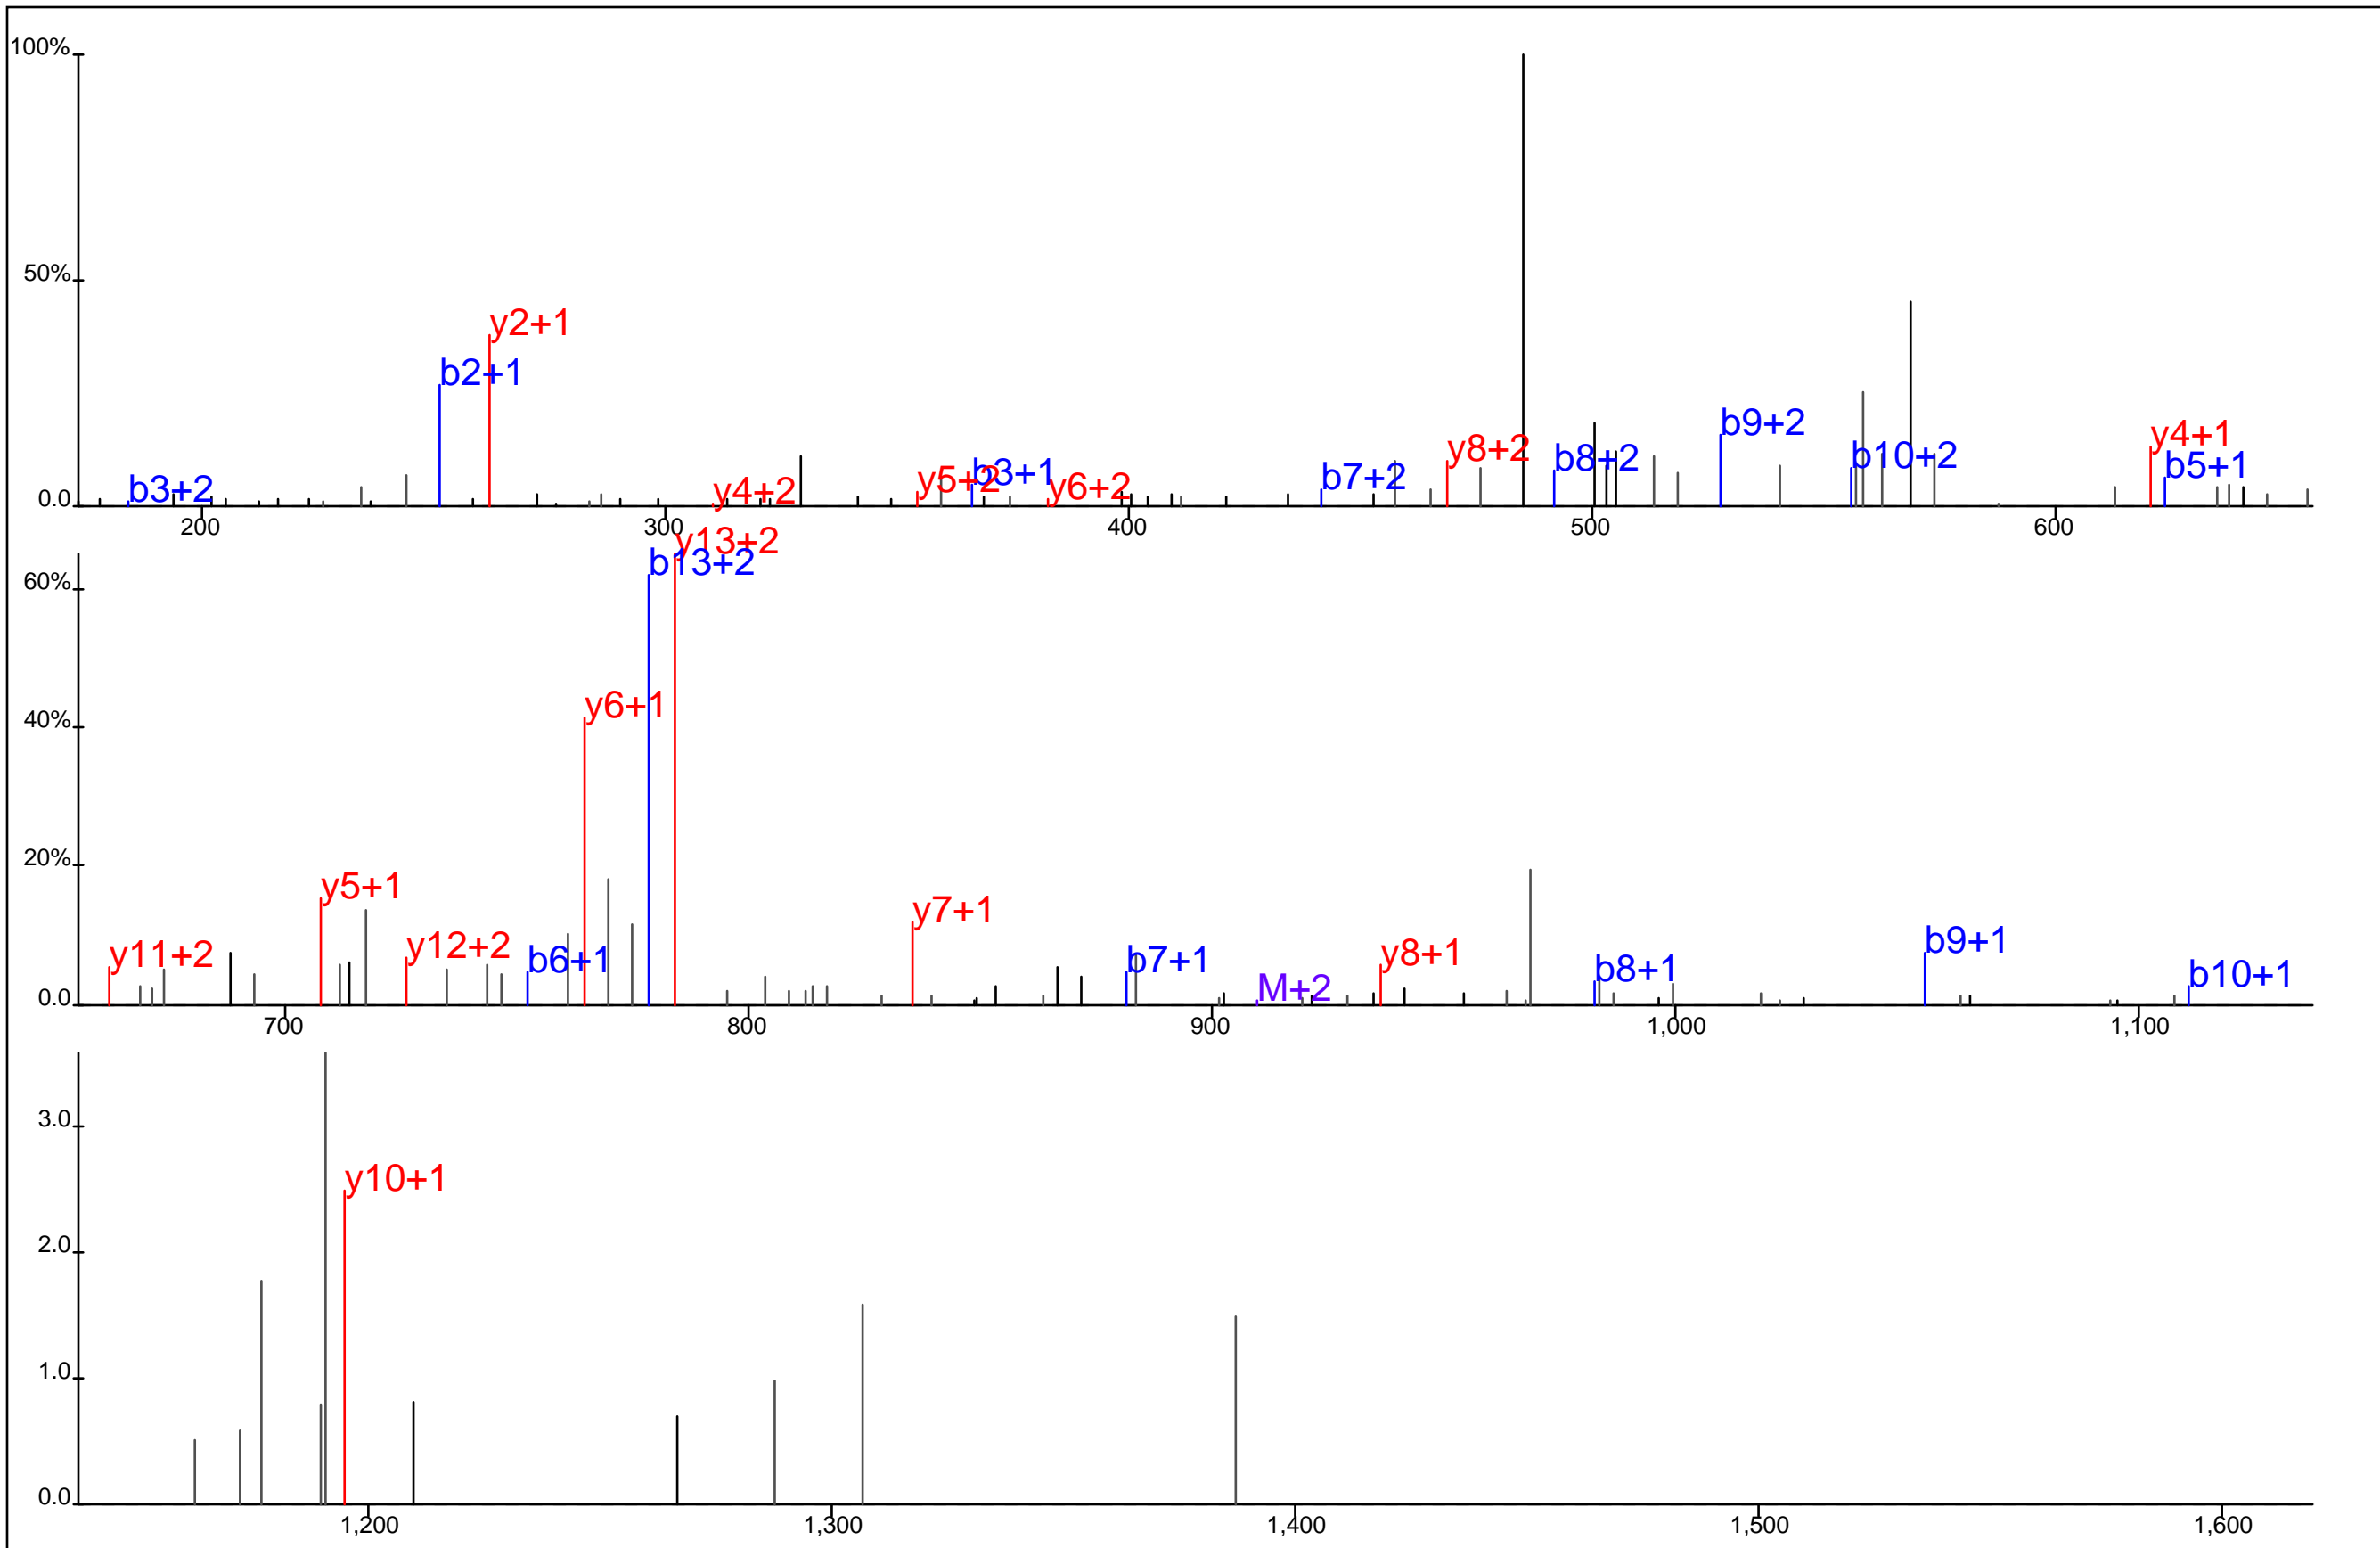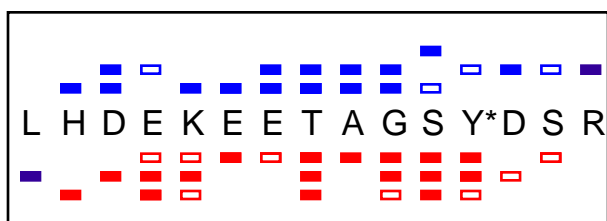

Protein Name: Diaphanous related formin 1  
 gi Accession: 0  
 Precursor Mass: 606.2532+3  
 Delta Mass: 3.566 ppm  
 XCorr: 38.27

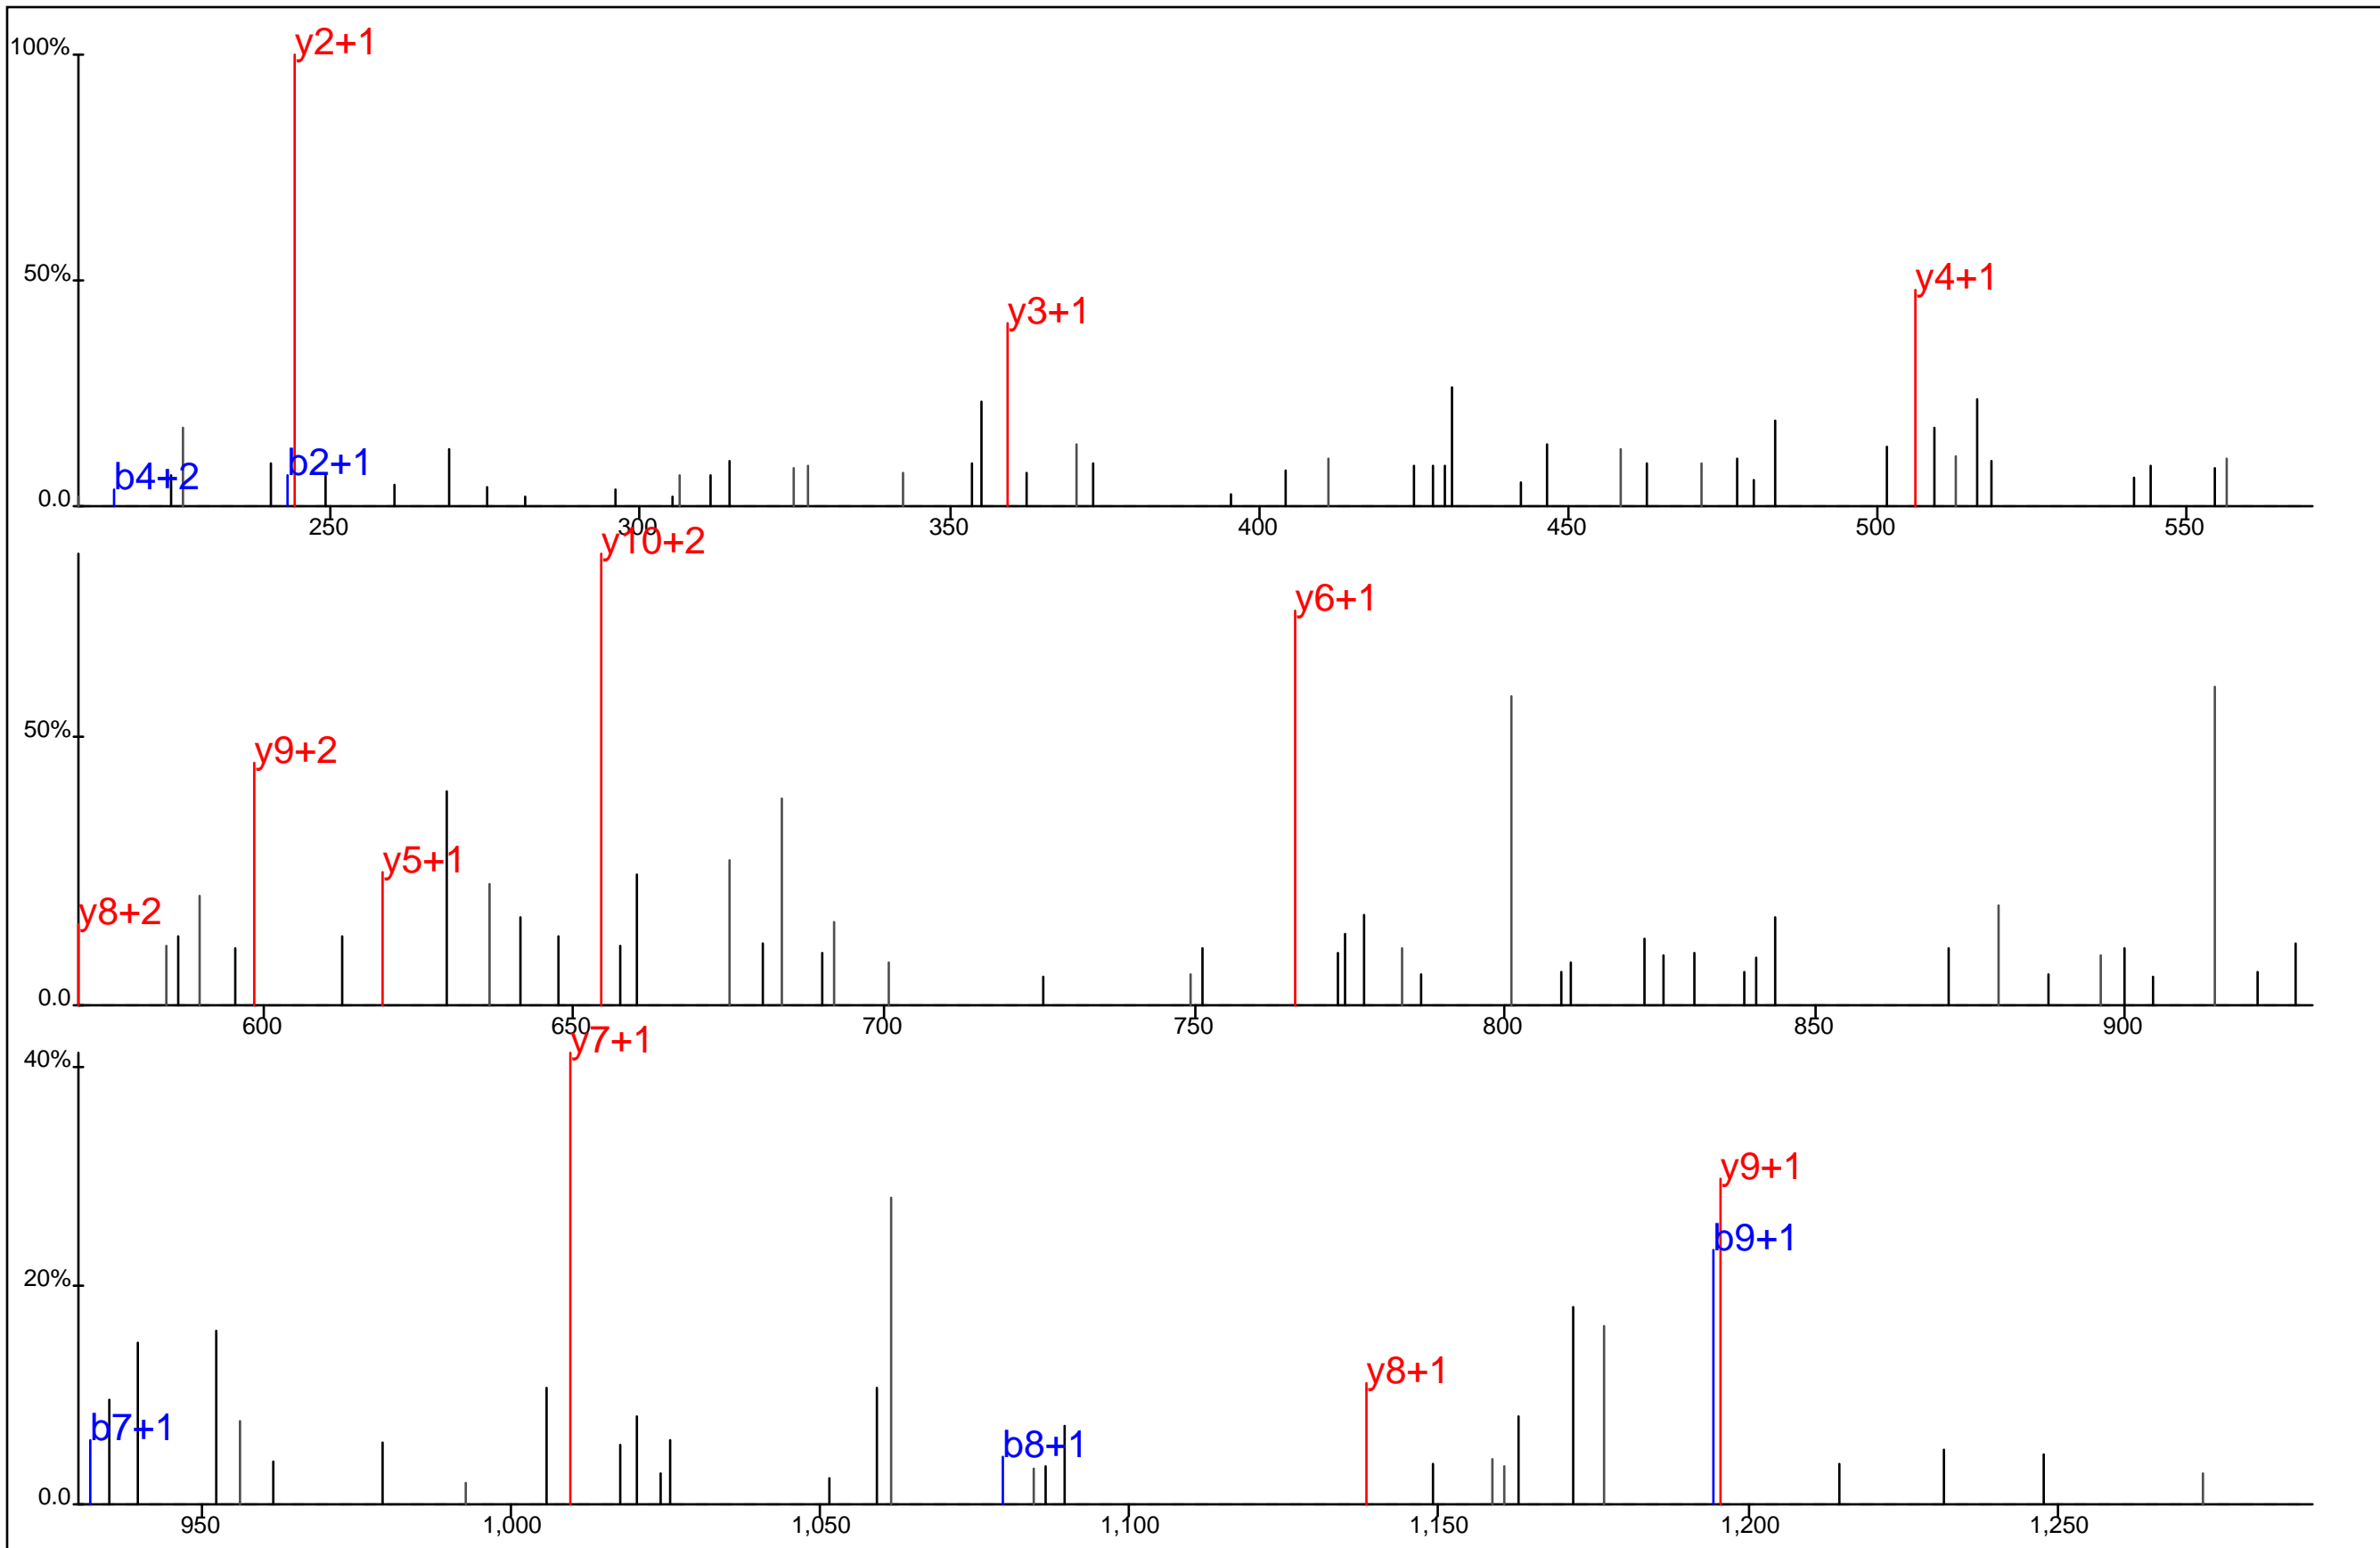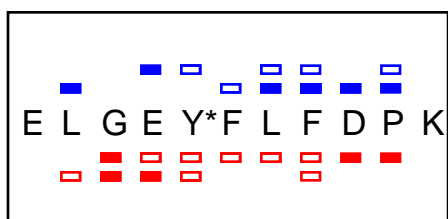

Protein Name: Diaphanous related formin 1  
 gi Accession: 0  
 Precursor Mass: 719.3226+2  
 Delta Mass: 2.947 ppm  
 XCorr: 47.83

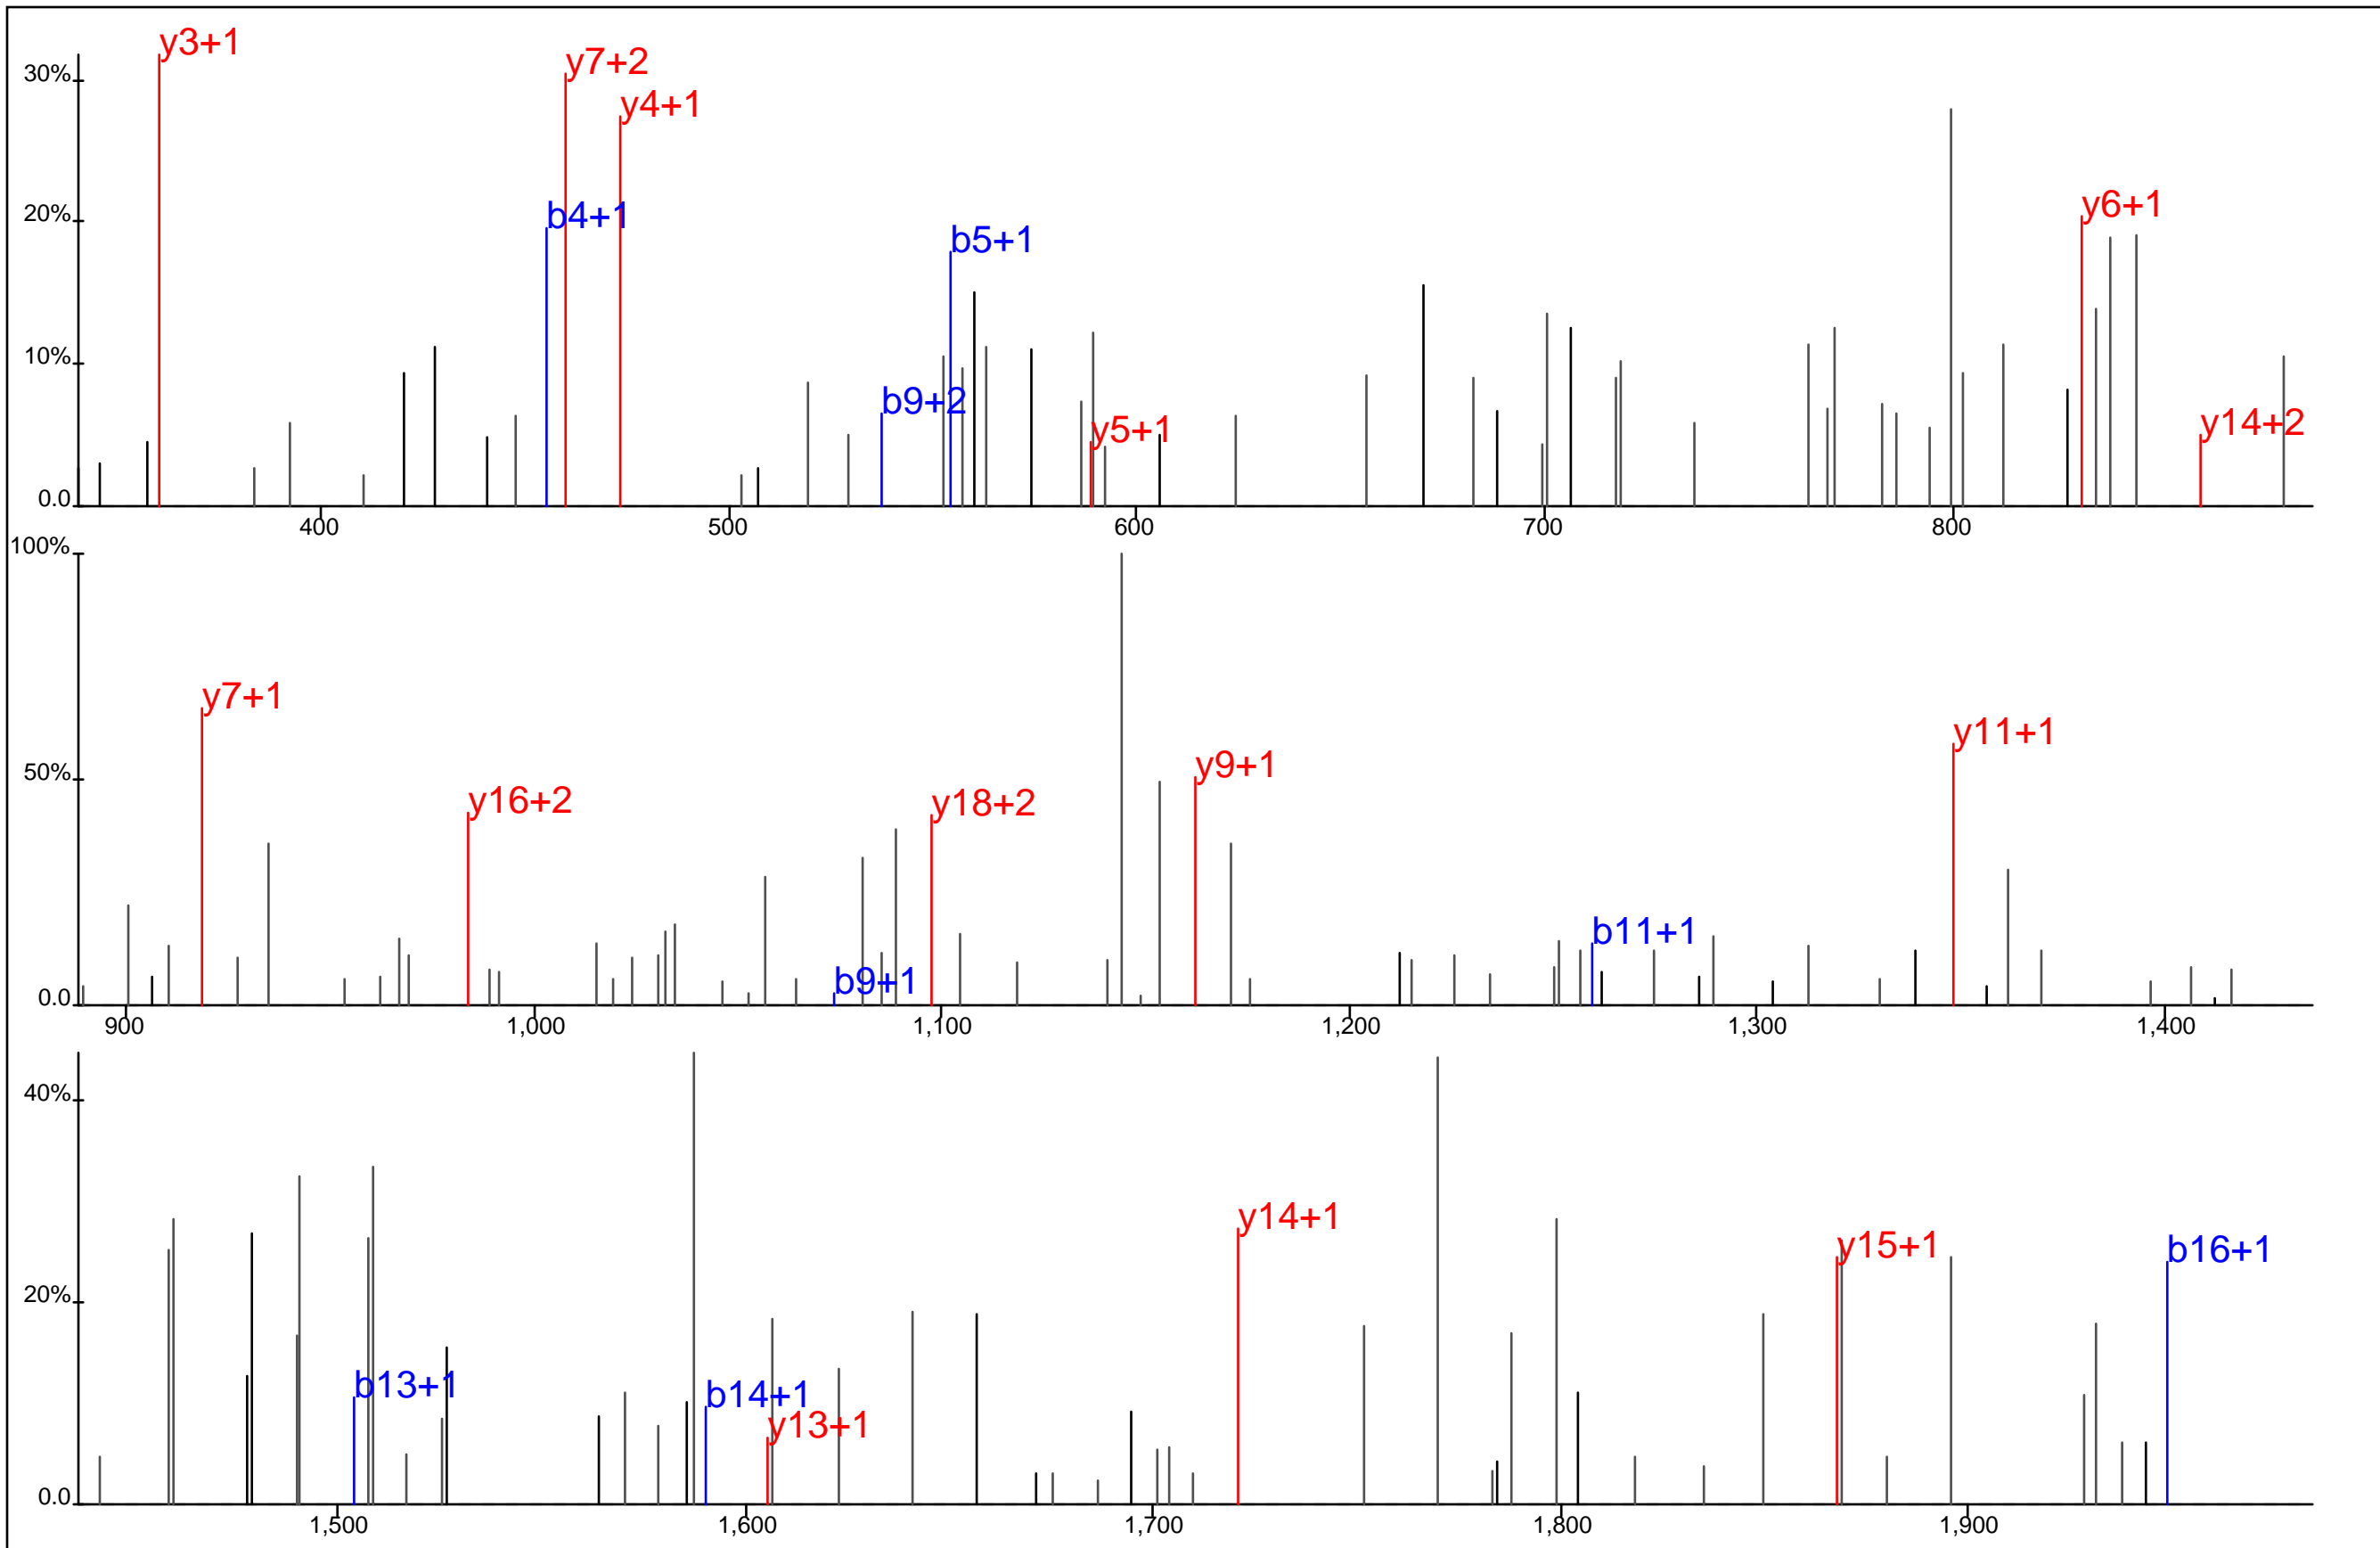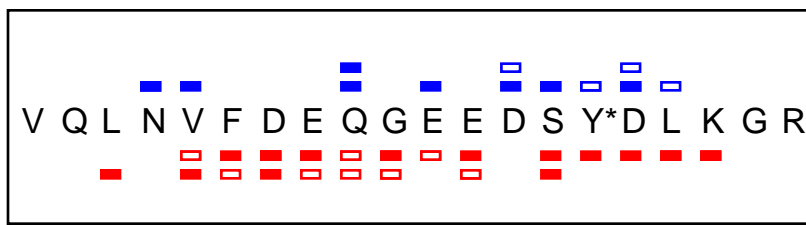

Protein Name: Diaphanous related formin 1  
 gi Accession: 0  
 Precursor Mass: 1,211.0424+2  
 Delta Mass: 6.967 ppm  
 XCorr: 33.58

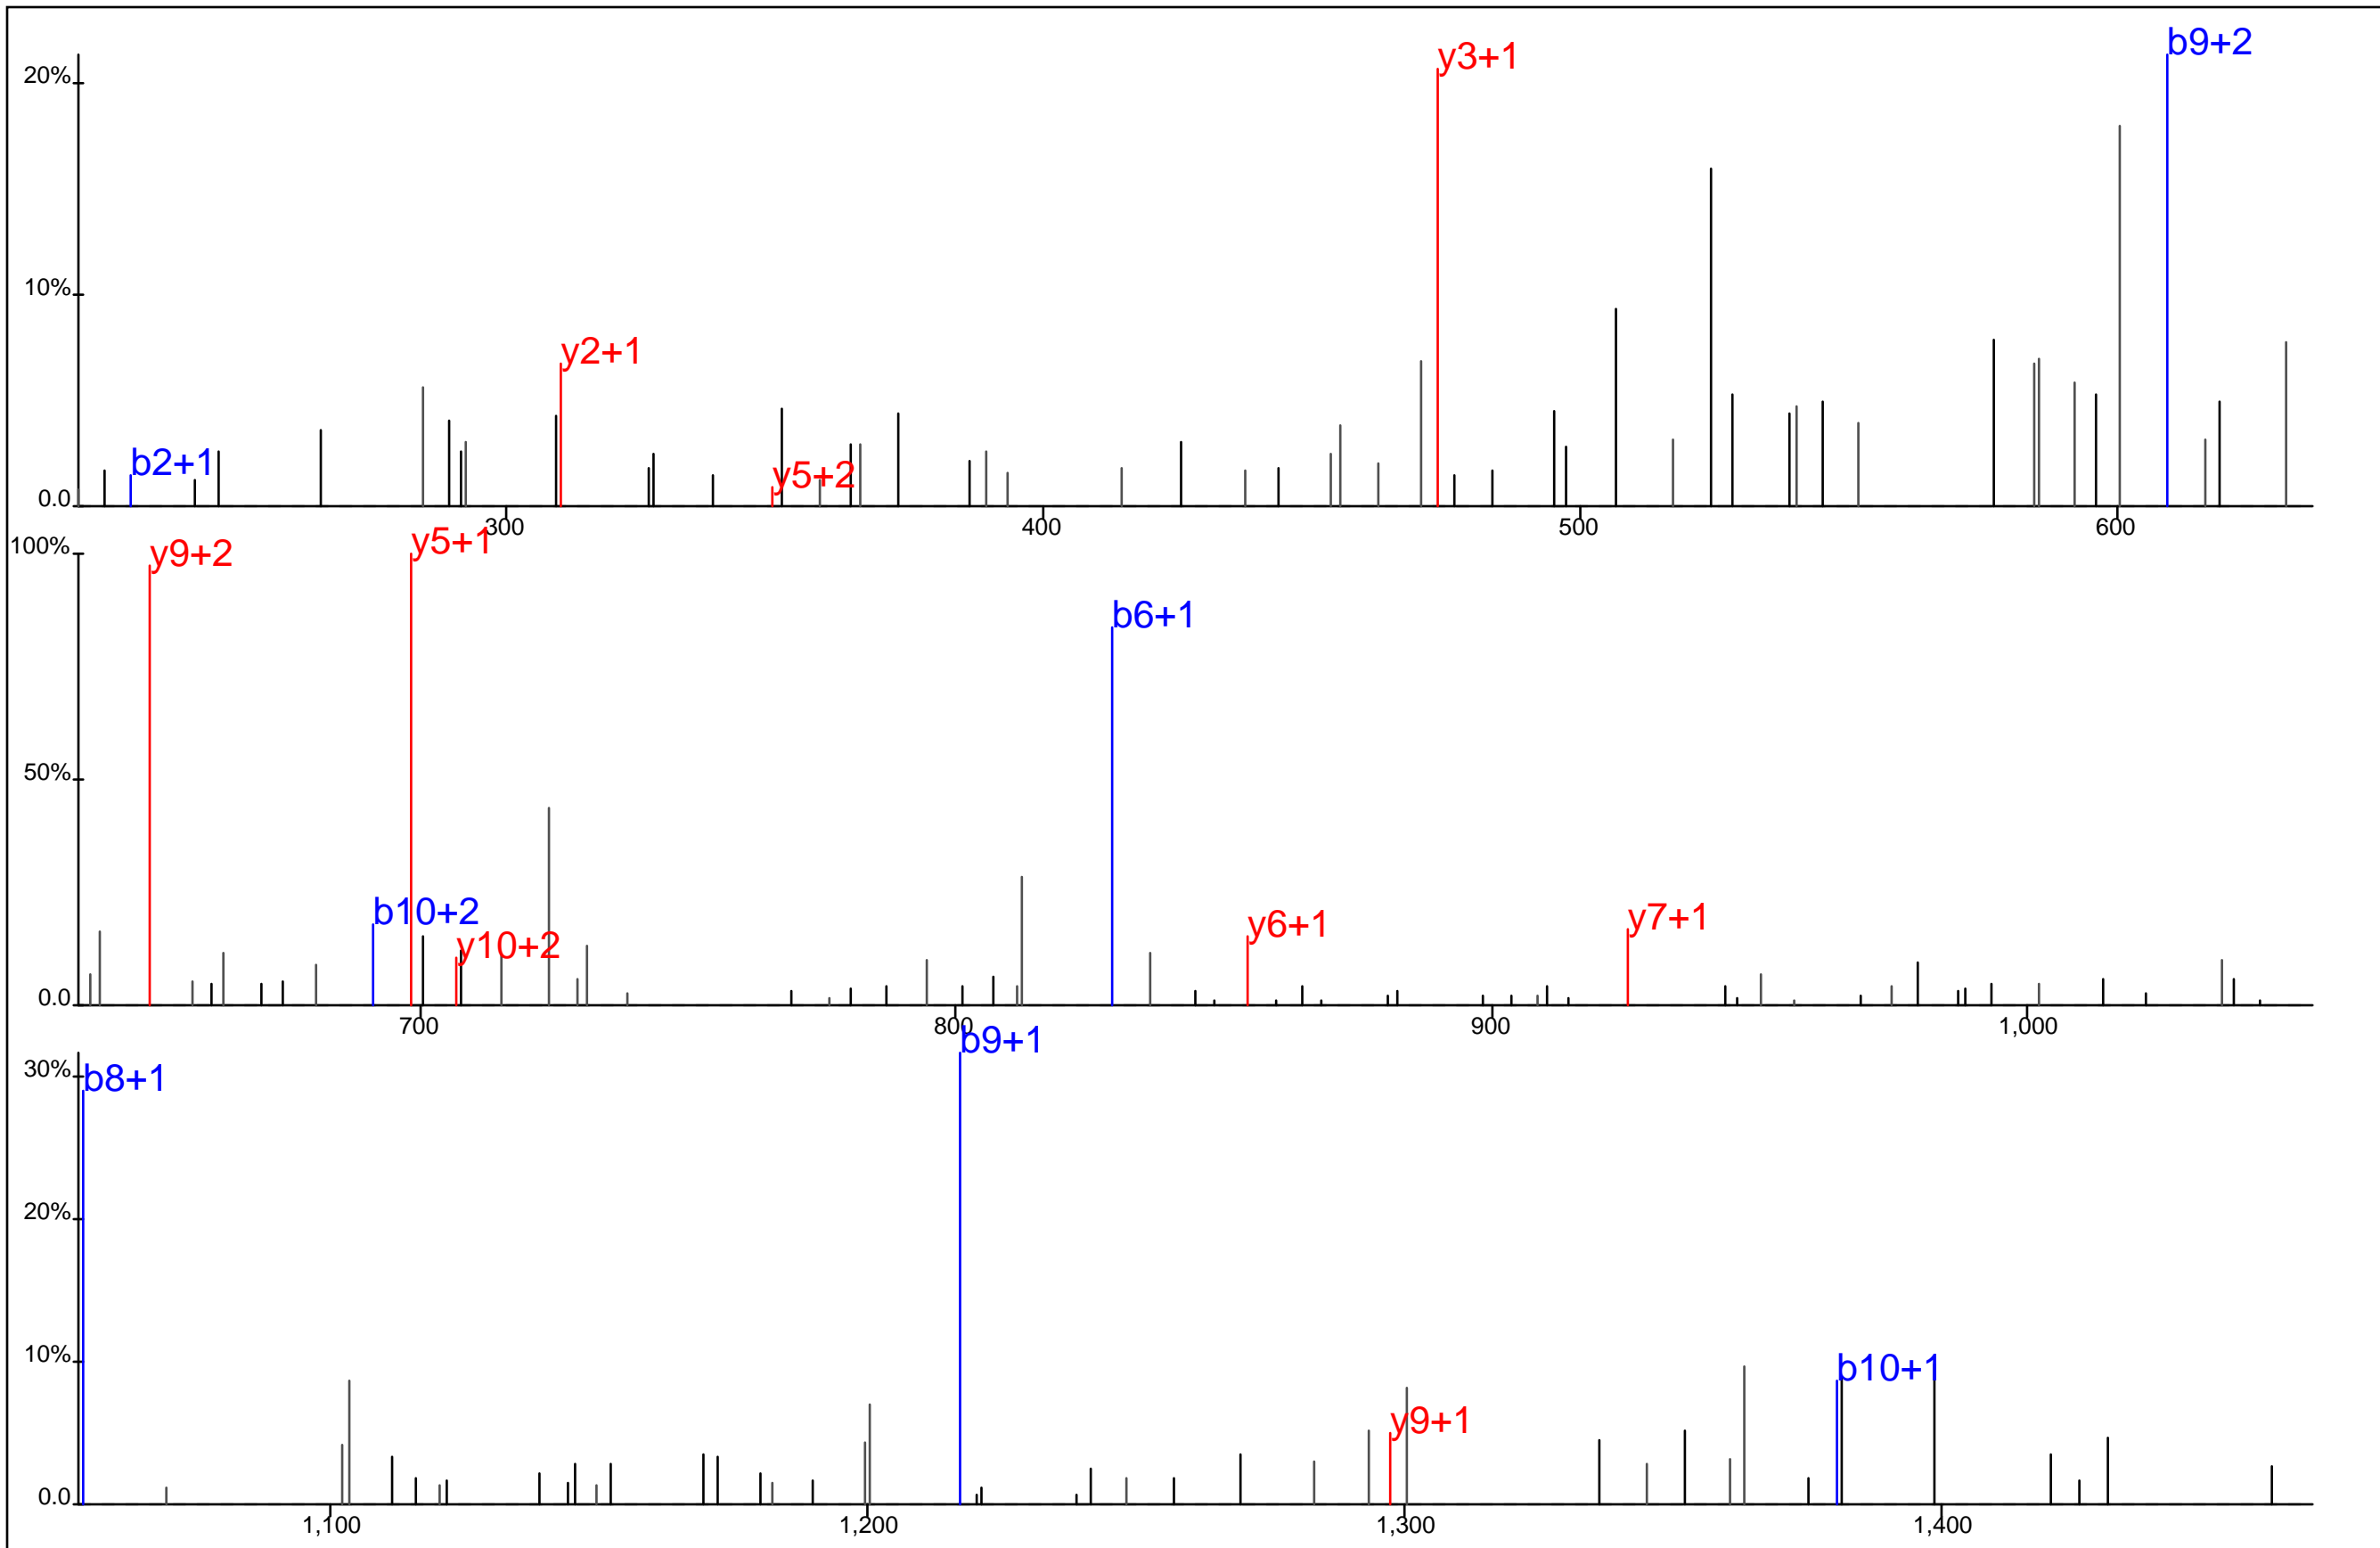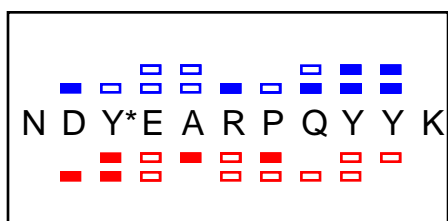

Protein Name: Diaphanous related formin 1  
 gi Accession: 0  
 Precursor Mass: 763.8177+2  
 Delta Mass: 1.966 ppm  
 XCorr: 30.62

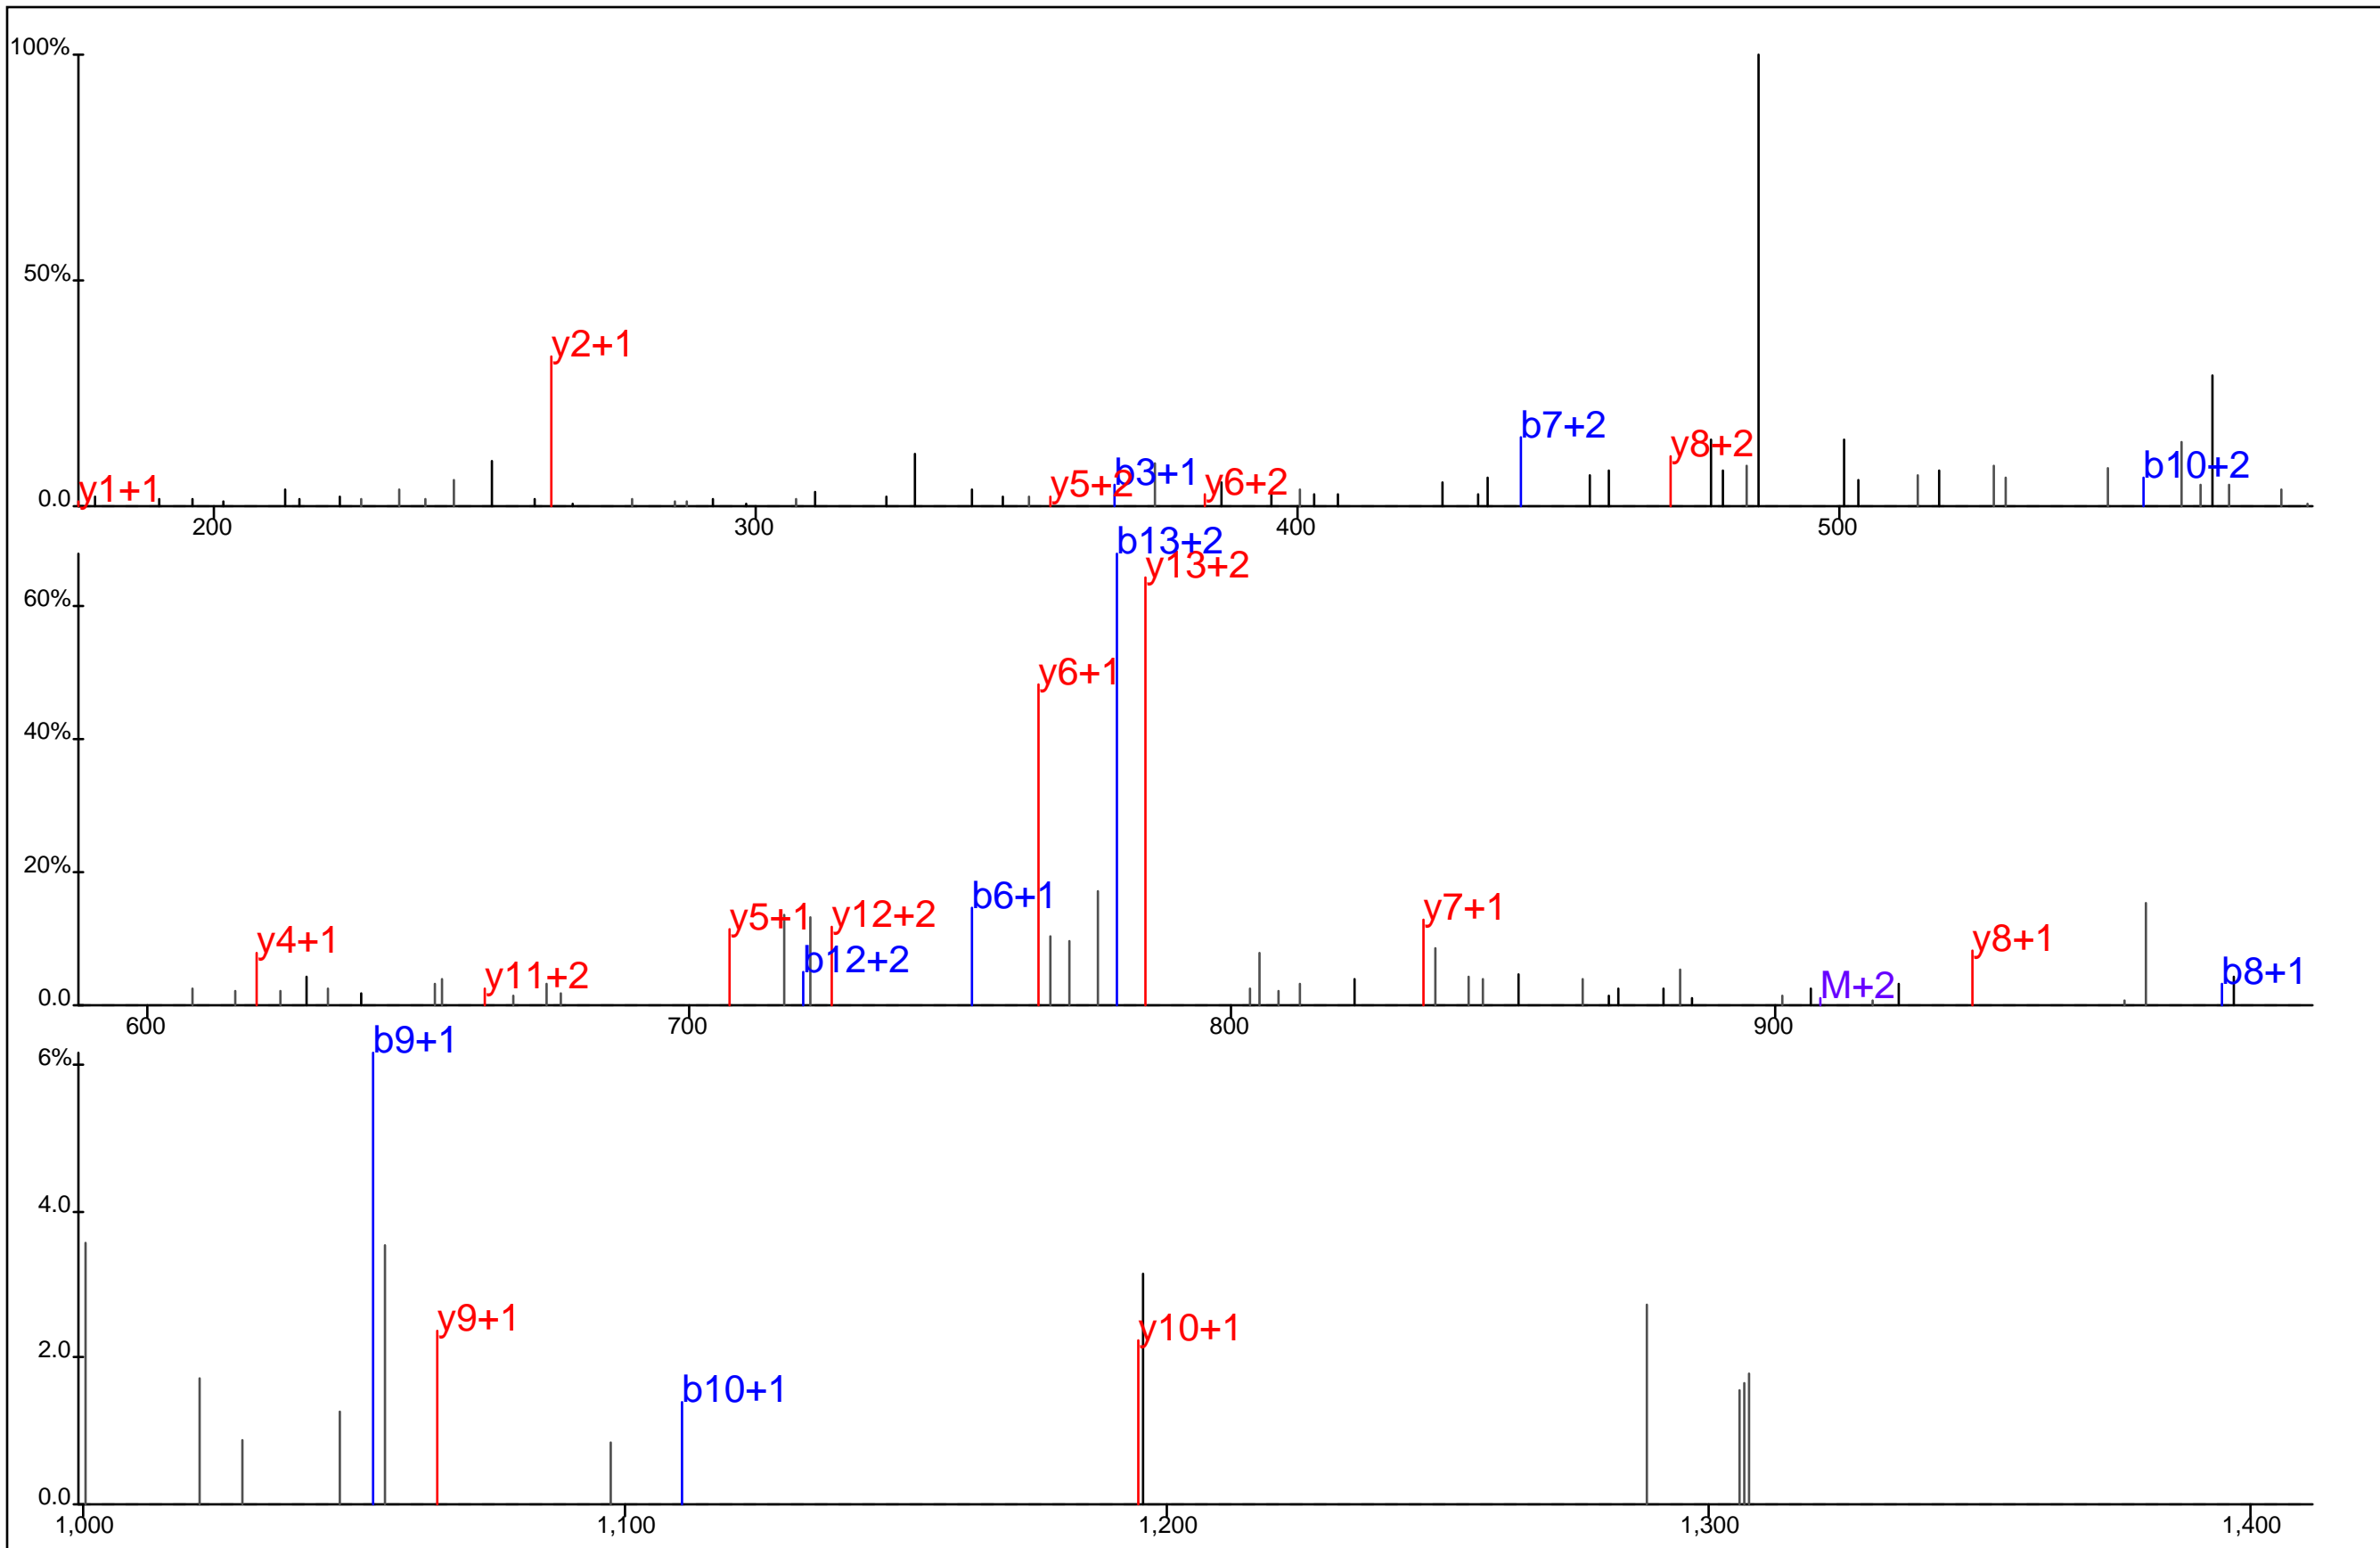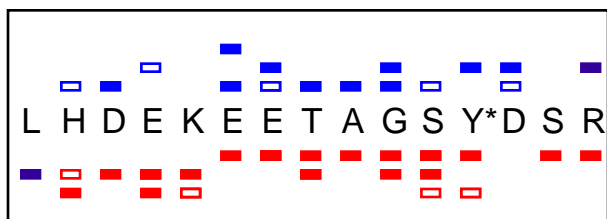

Protein Name: Diaphanous related formin 1  
 gi Accession: 0  
 Precursor Mass: 606.2540+3  
 Delta Mass: 4.875 ppm  
 XCorr: 34.96

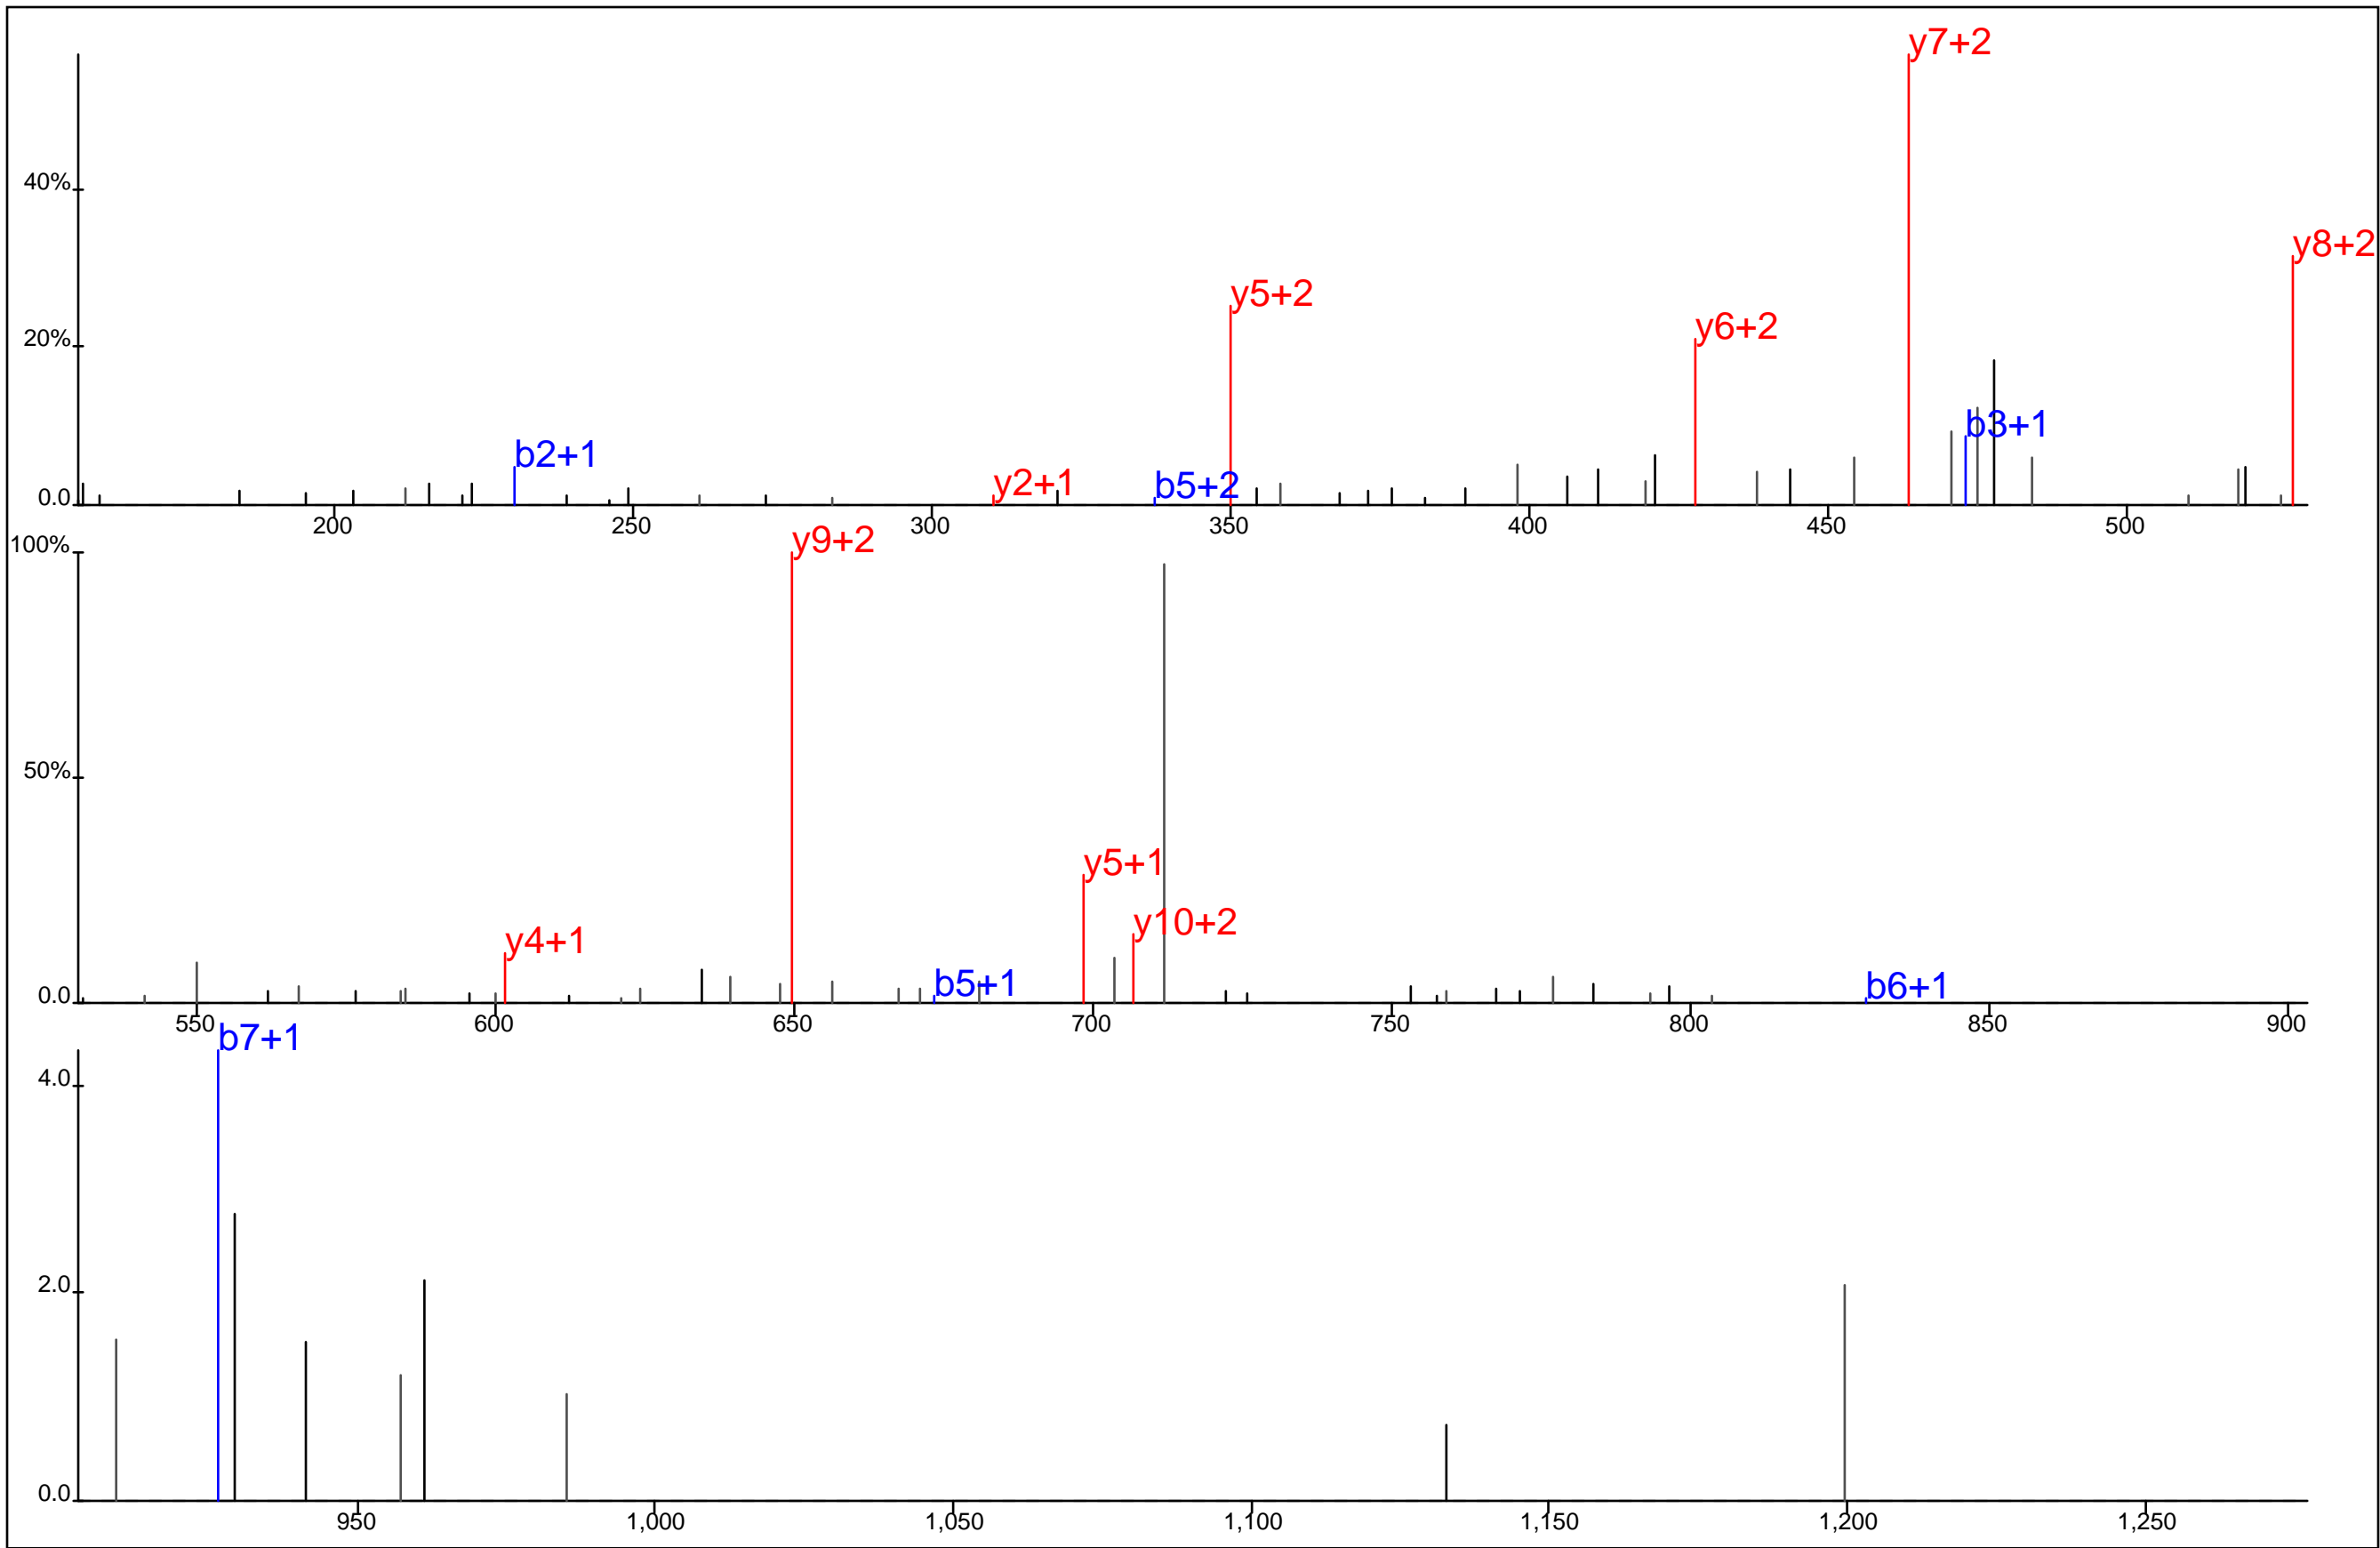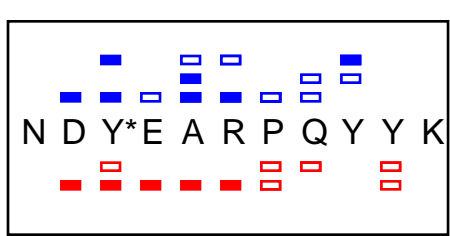

Protein Name: Diaphanous related formin 1  
 gi Accession: 0  
 Precursor Mass: 509.5490+3  
 Delta Mass: 0.964 ppm  
 XCorr: 25.3

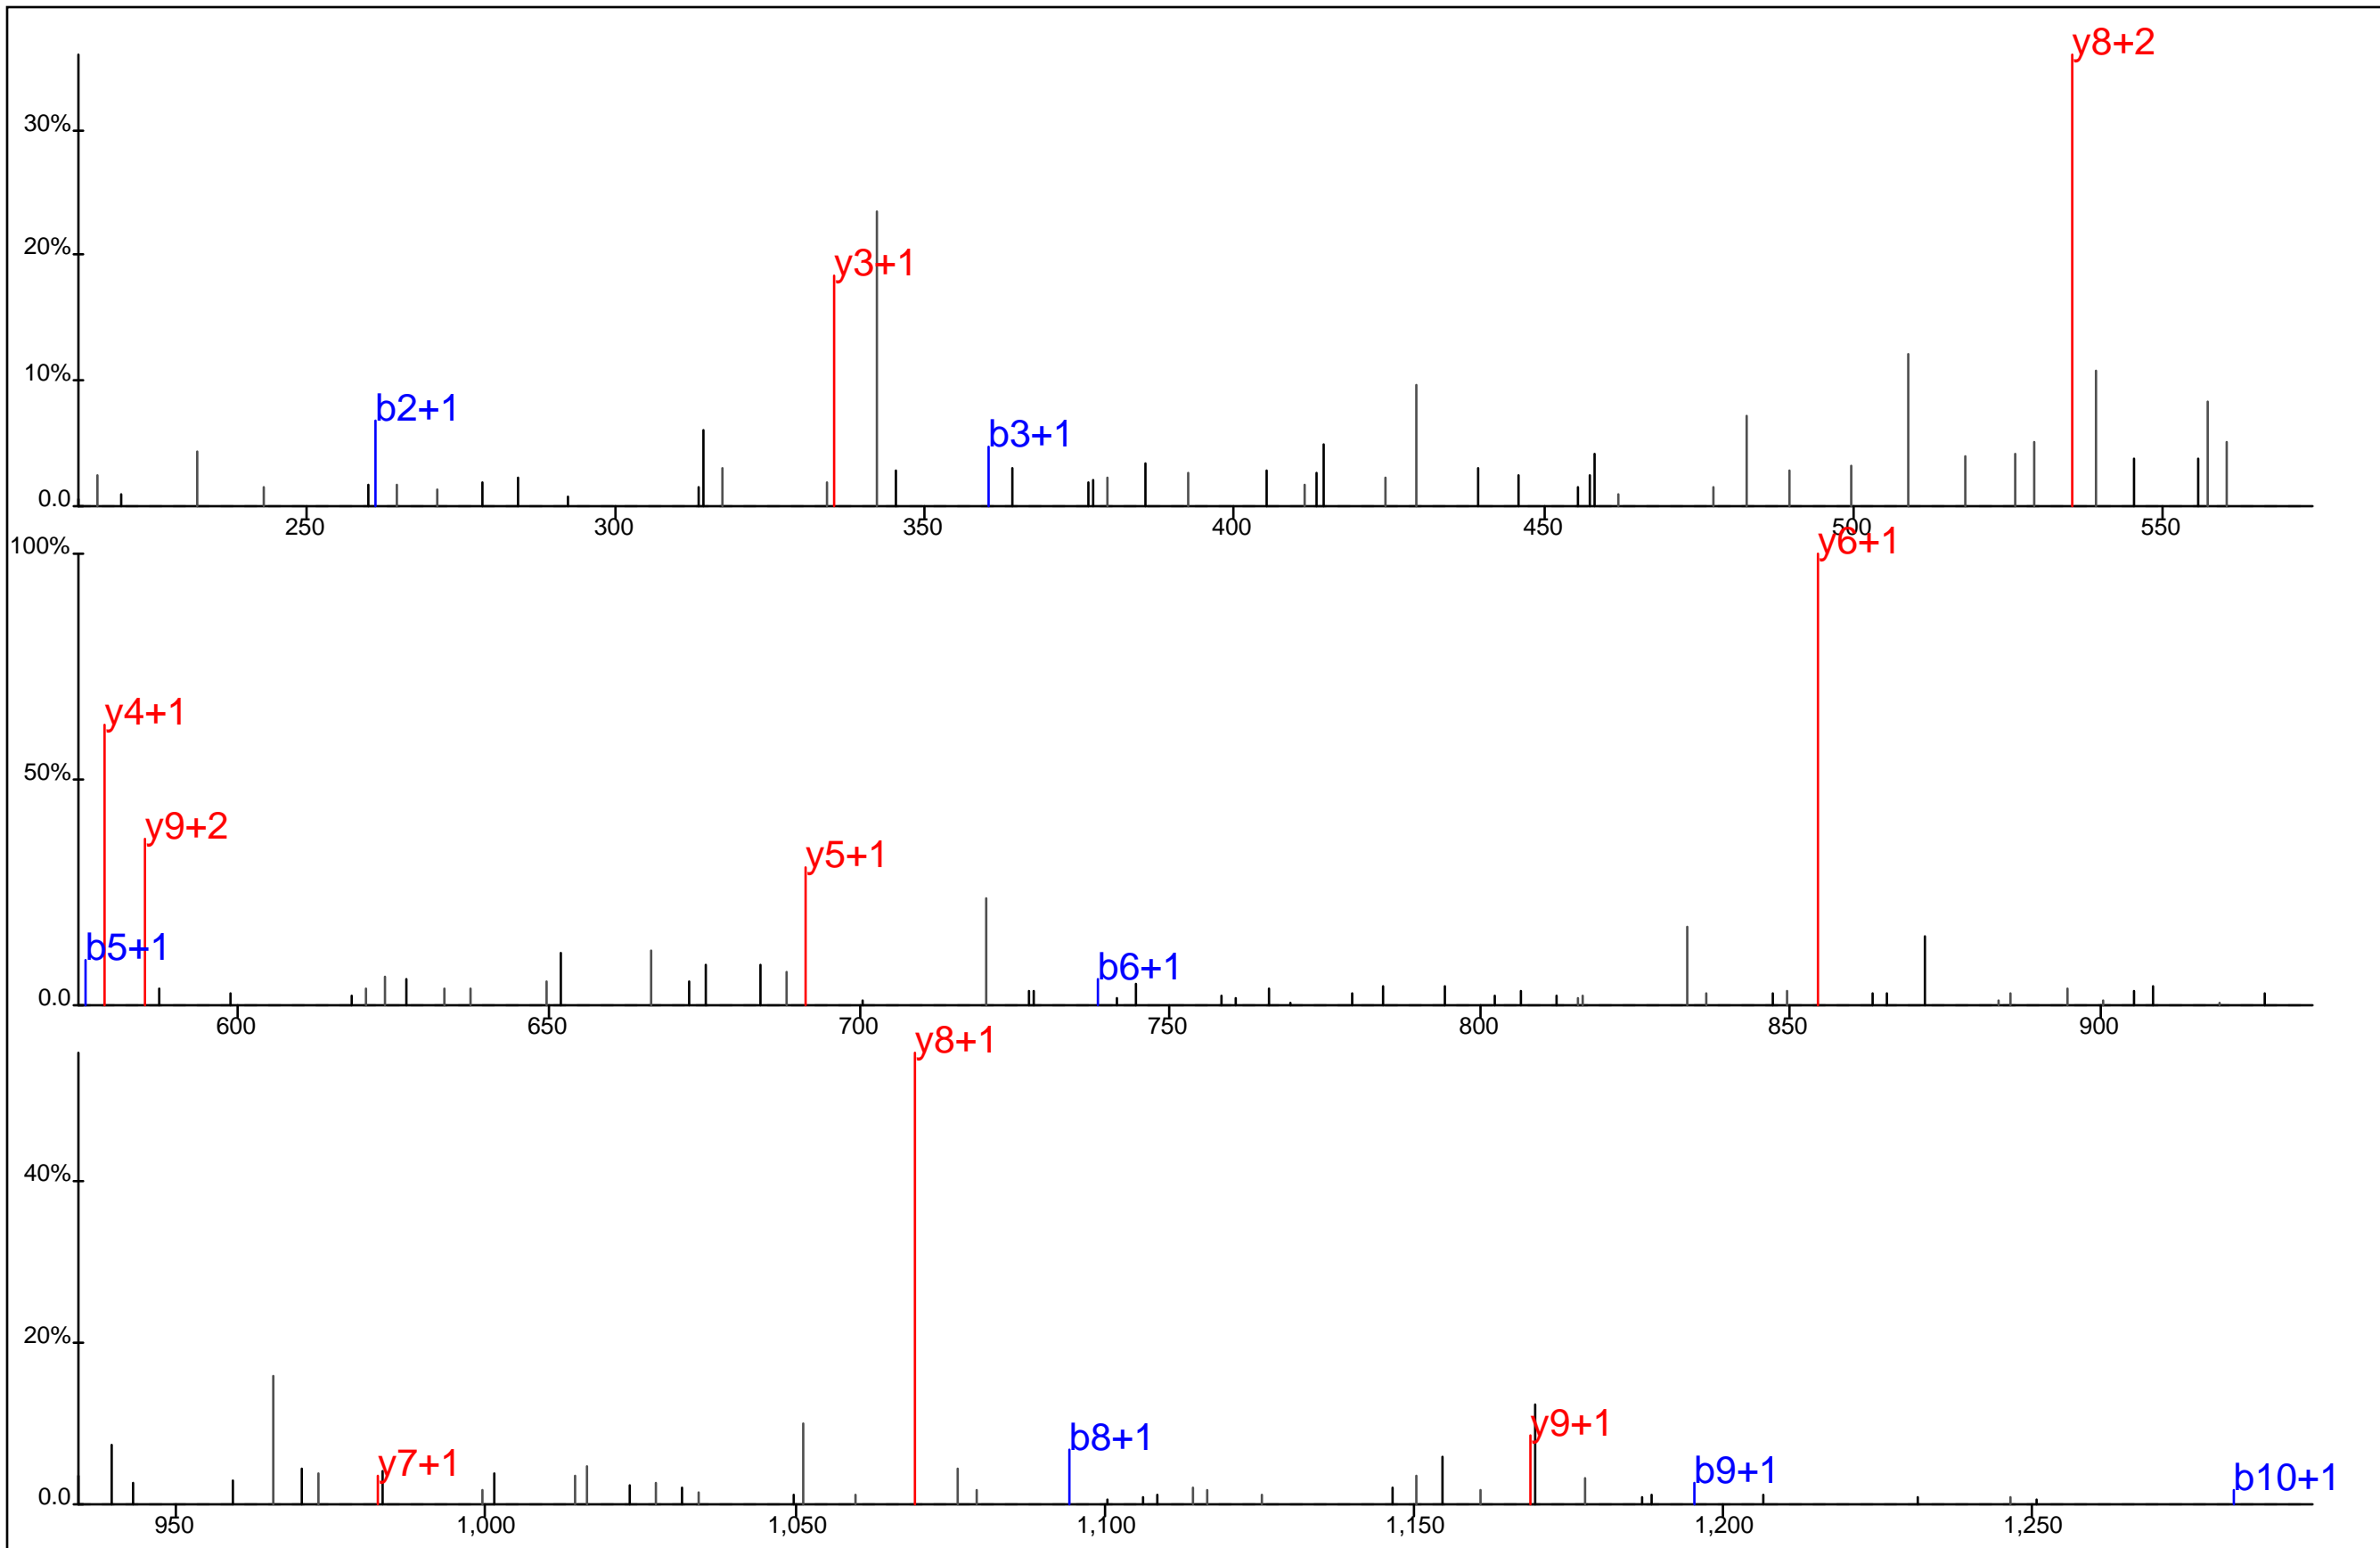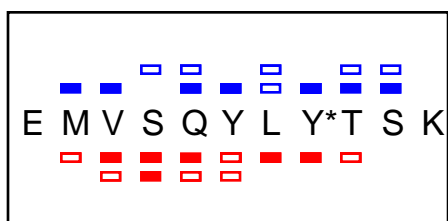

Protein Name: Diaphanous related formin 1  
 gi Accession: 0  
 Precursor Mass: 714.8096+2  
 Delta Mass: 0.248 ppm  
 XCorr: 39.4

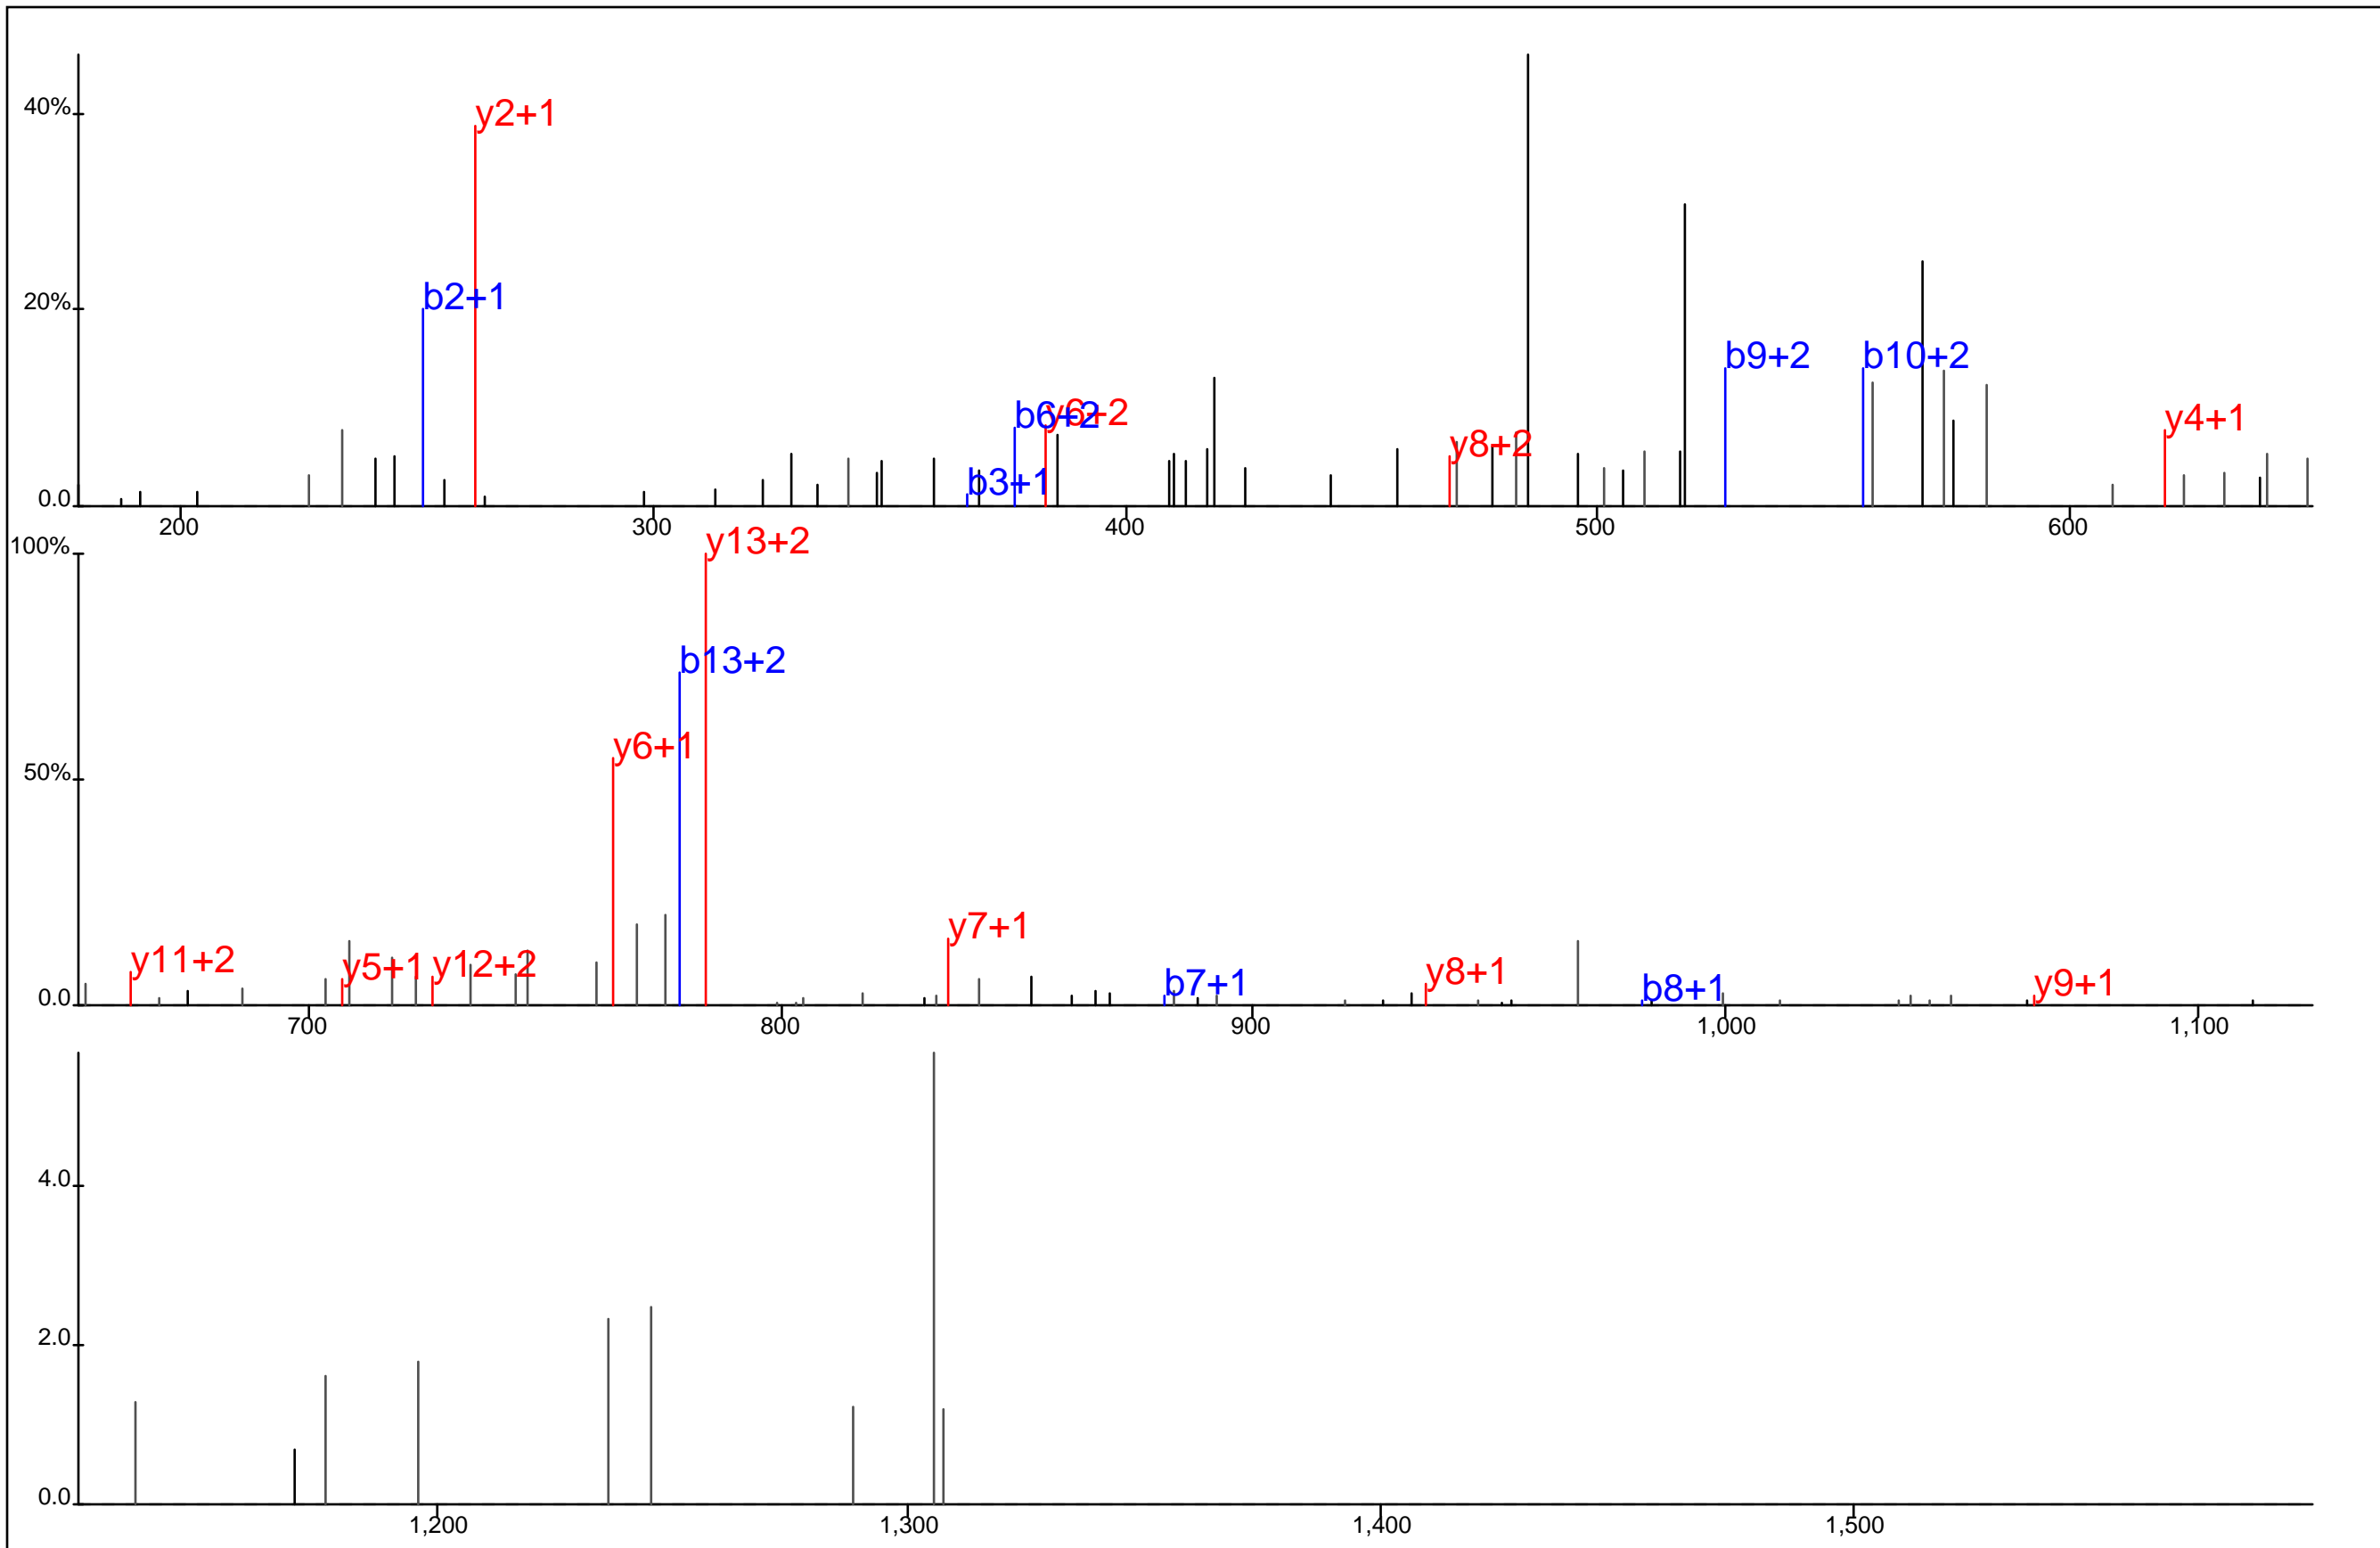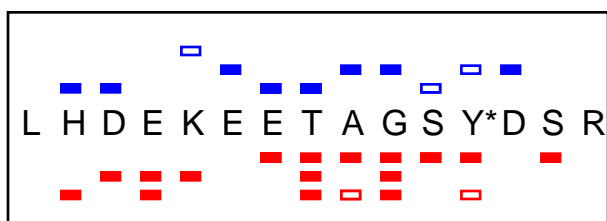

Protein Name: Diaphanous related formin 1  
 gi Accession: 0  
 Precursor Mass: 606.2527+3  
 Delta Mass: 2.760 ppm  
 XCorr: 23.61



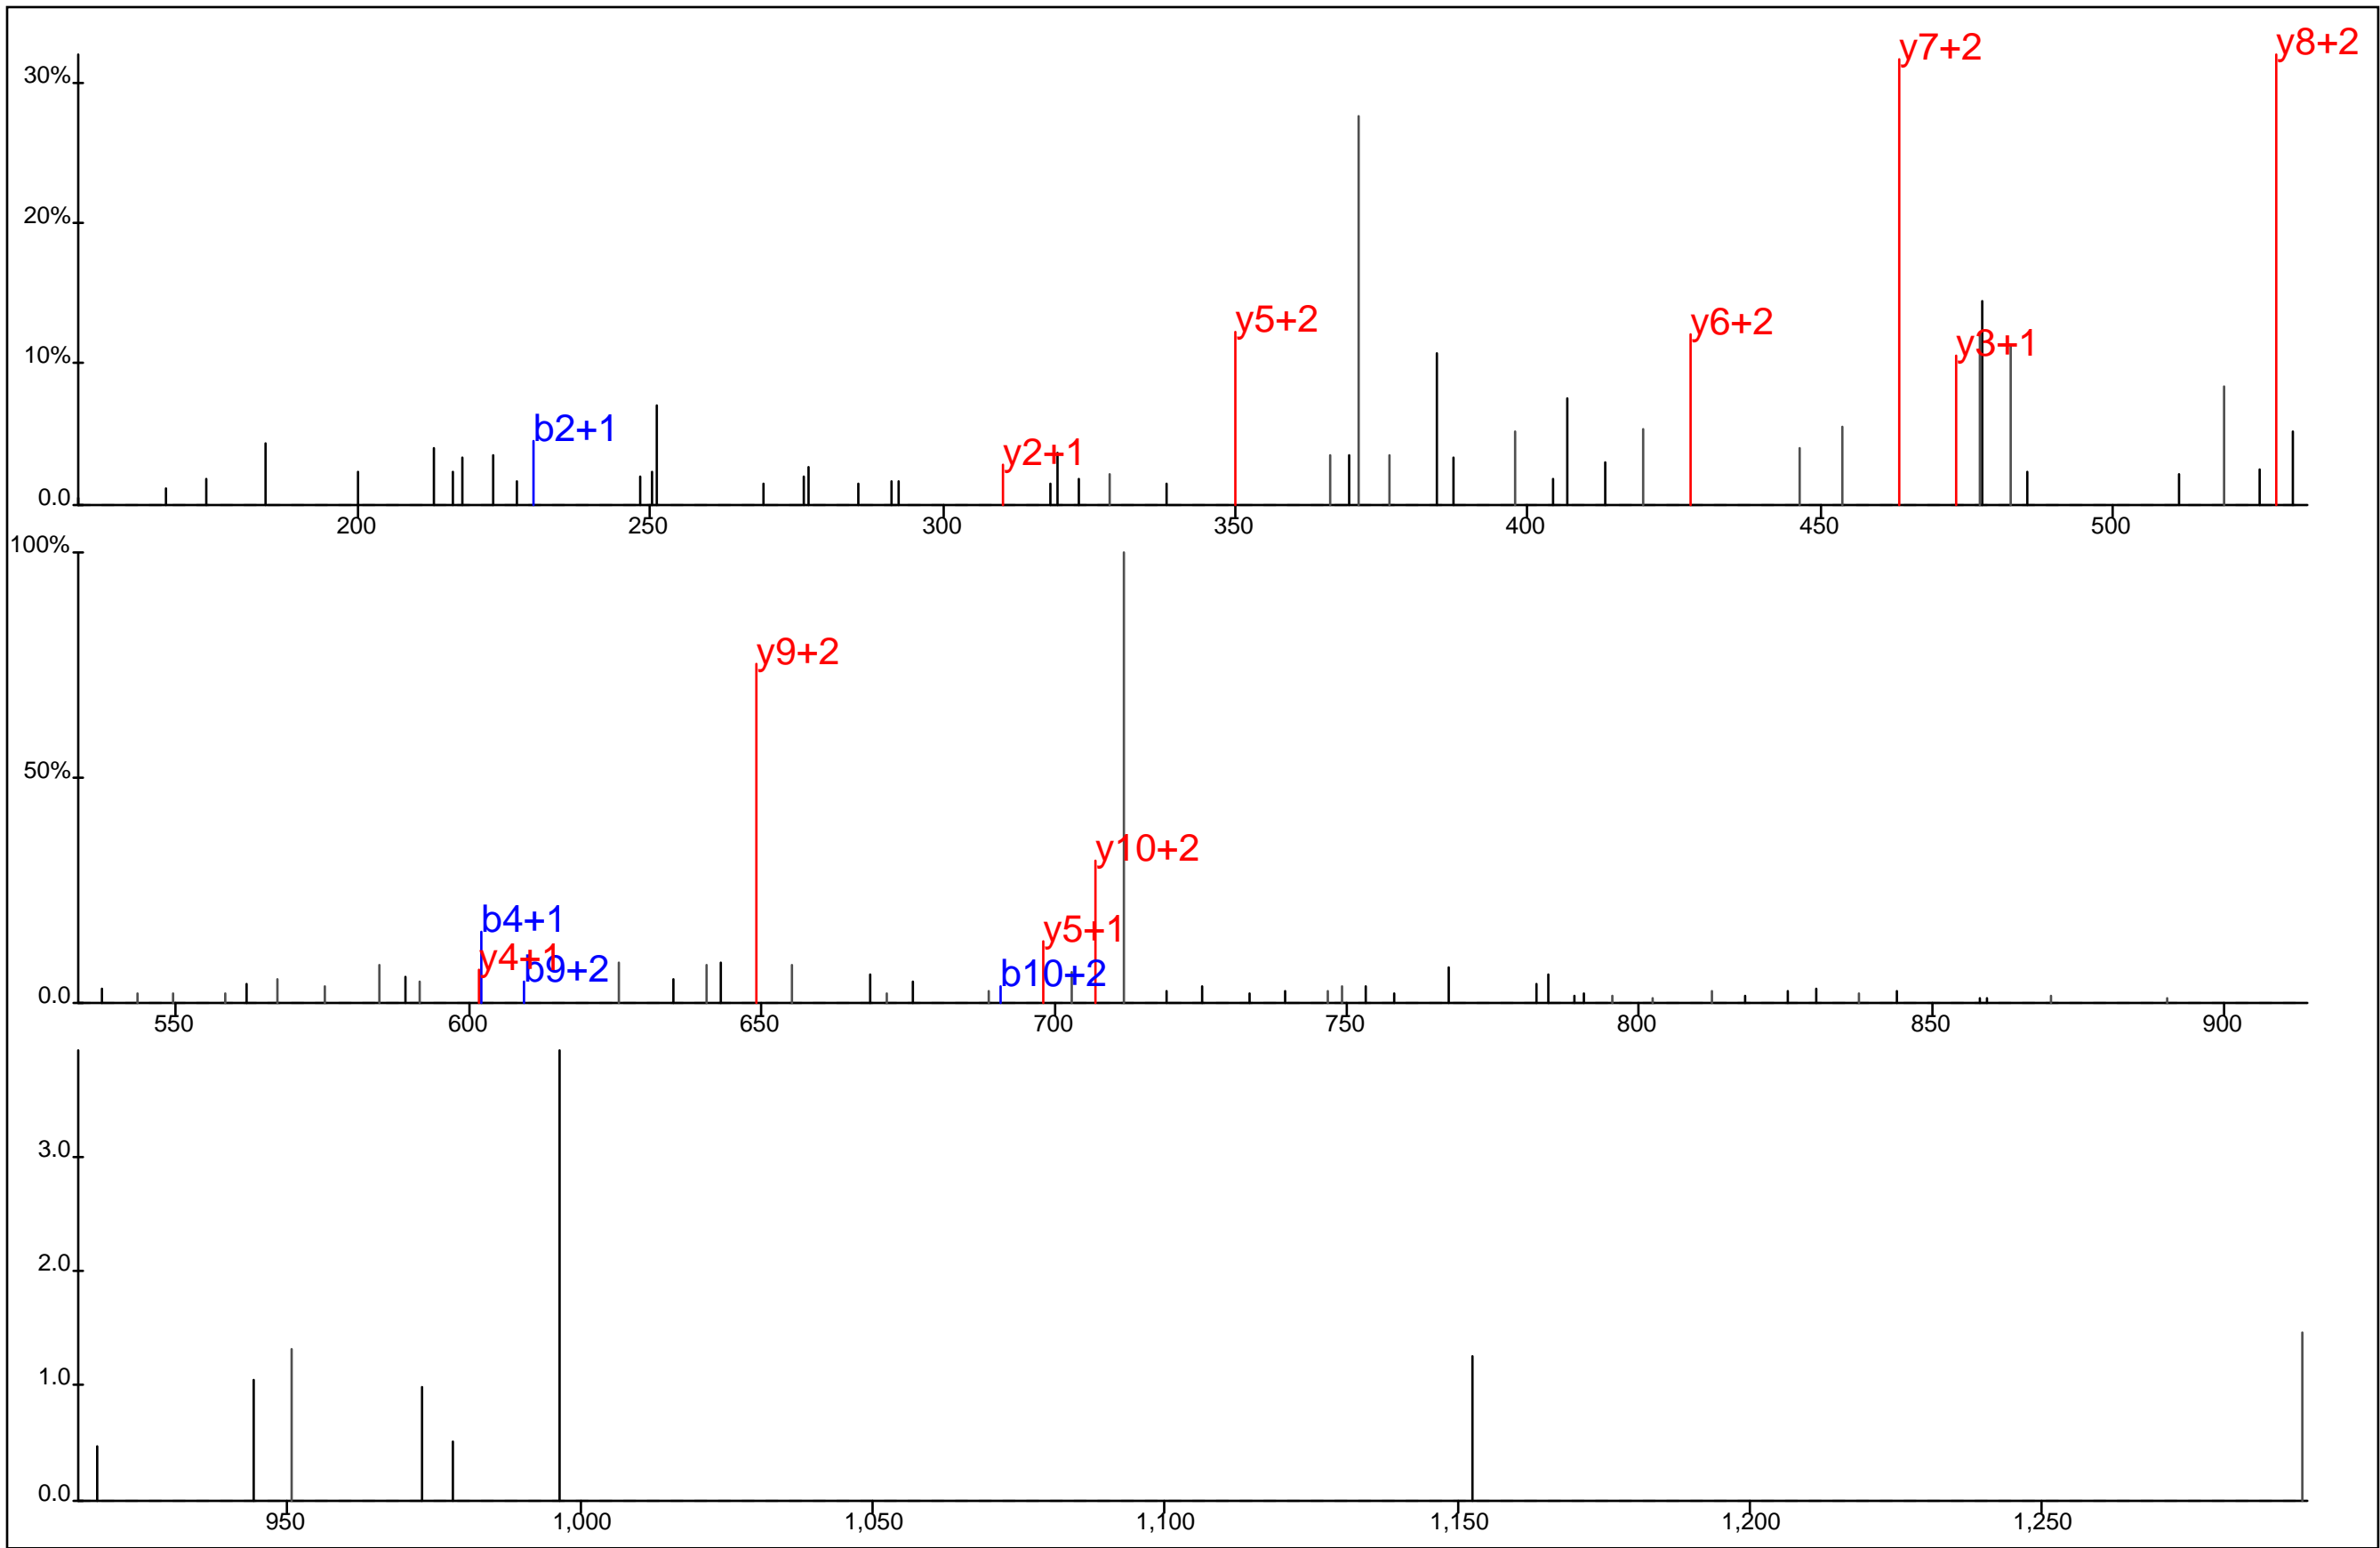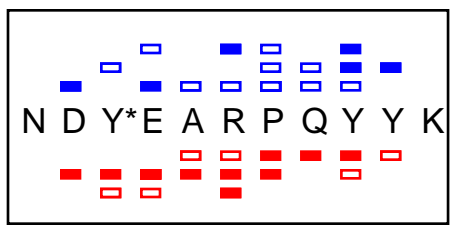

Protein Name: Diaphanous related formin 1  
 gi Accession: 0  
 Precursor Mass: 509.5488+3  
 Delta Mass: 0.485 ppm  
 XCorr: 24.57

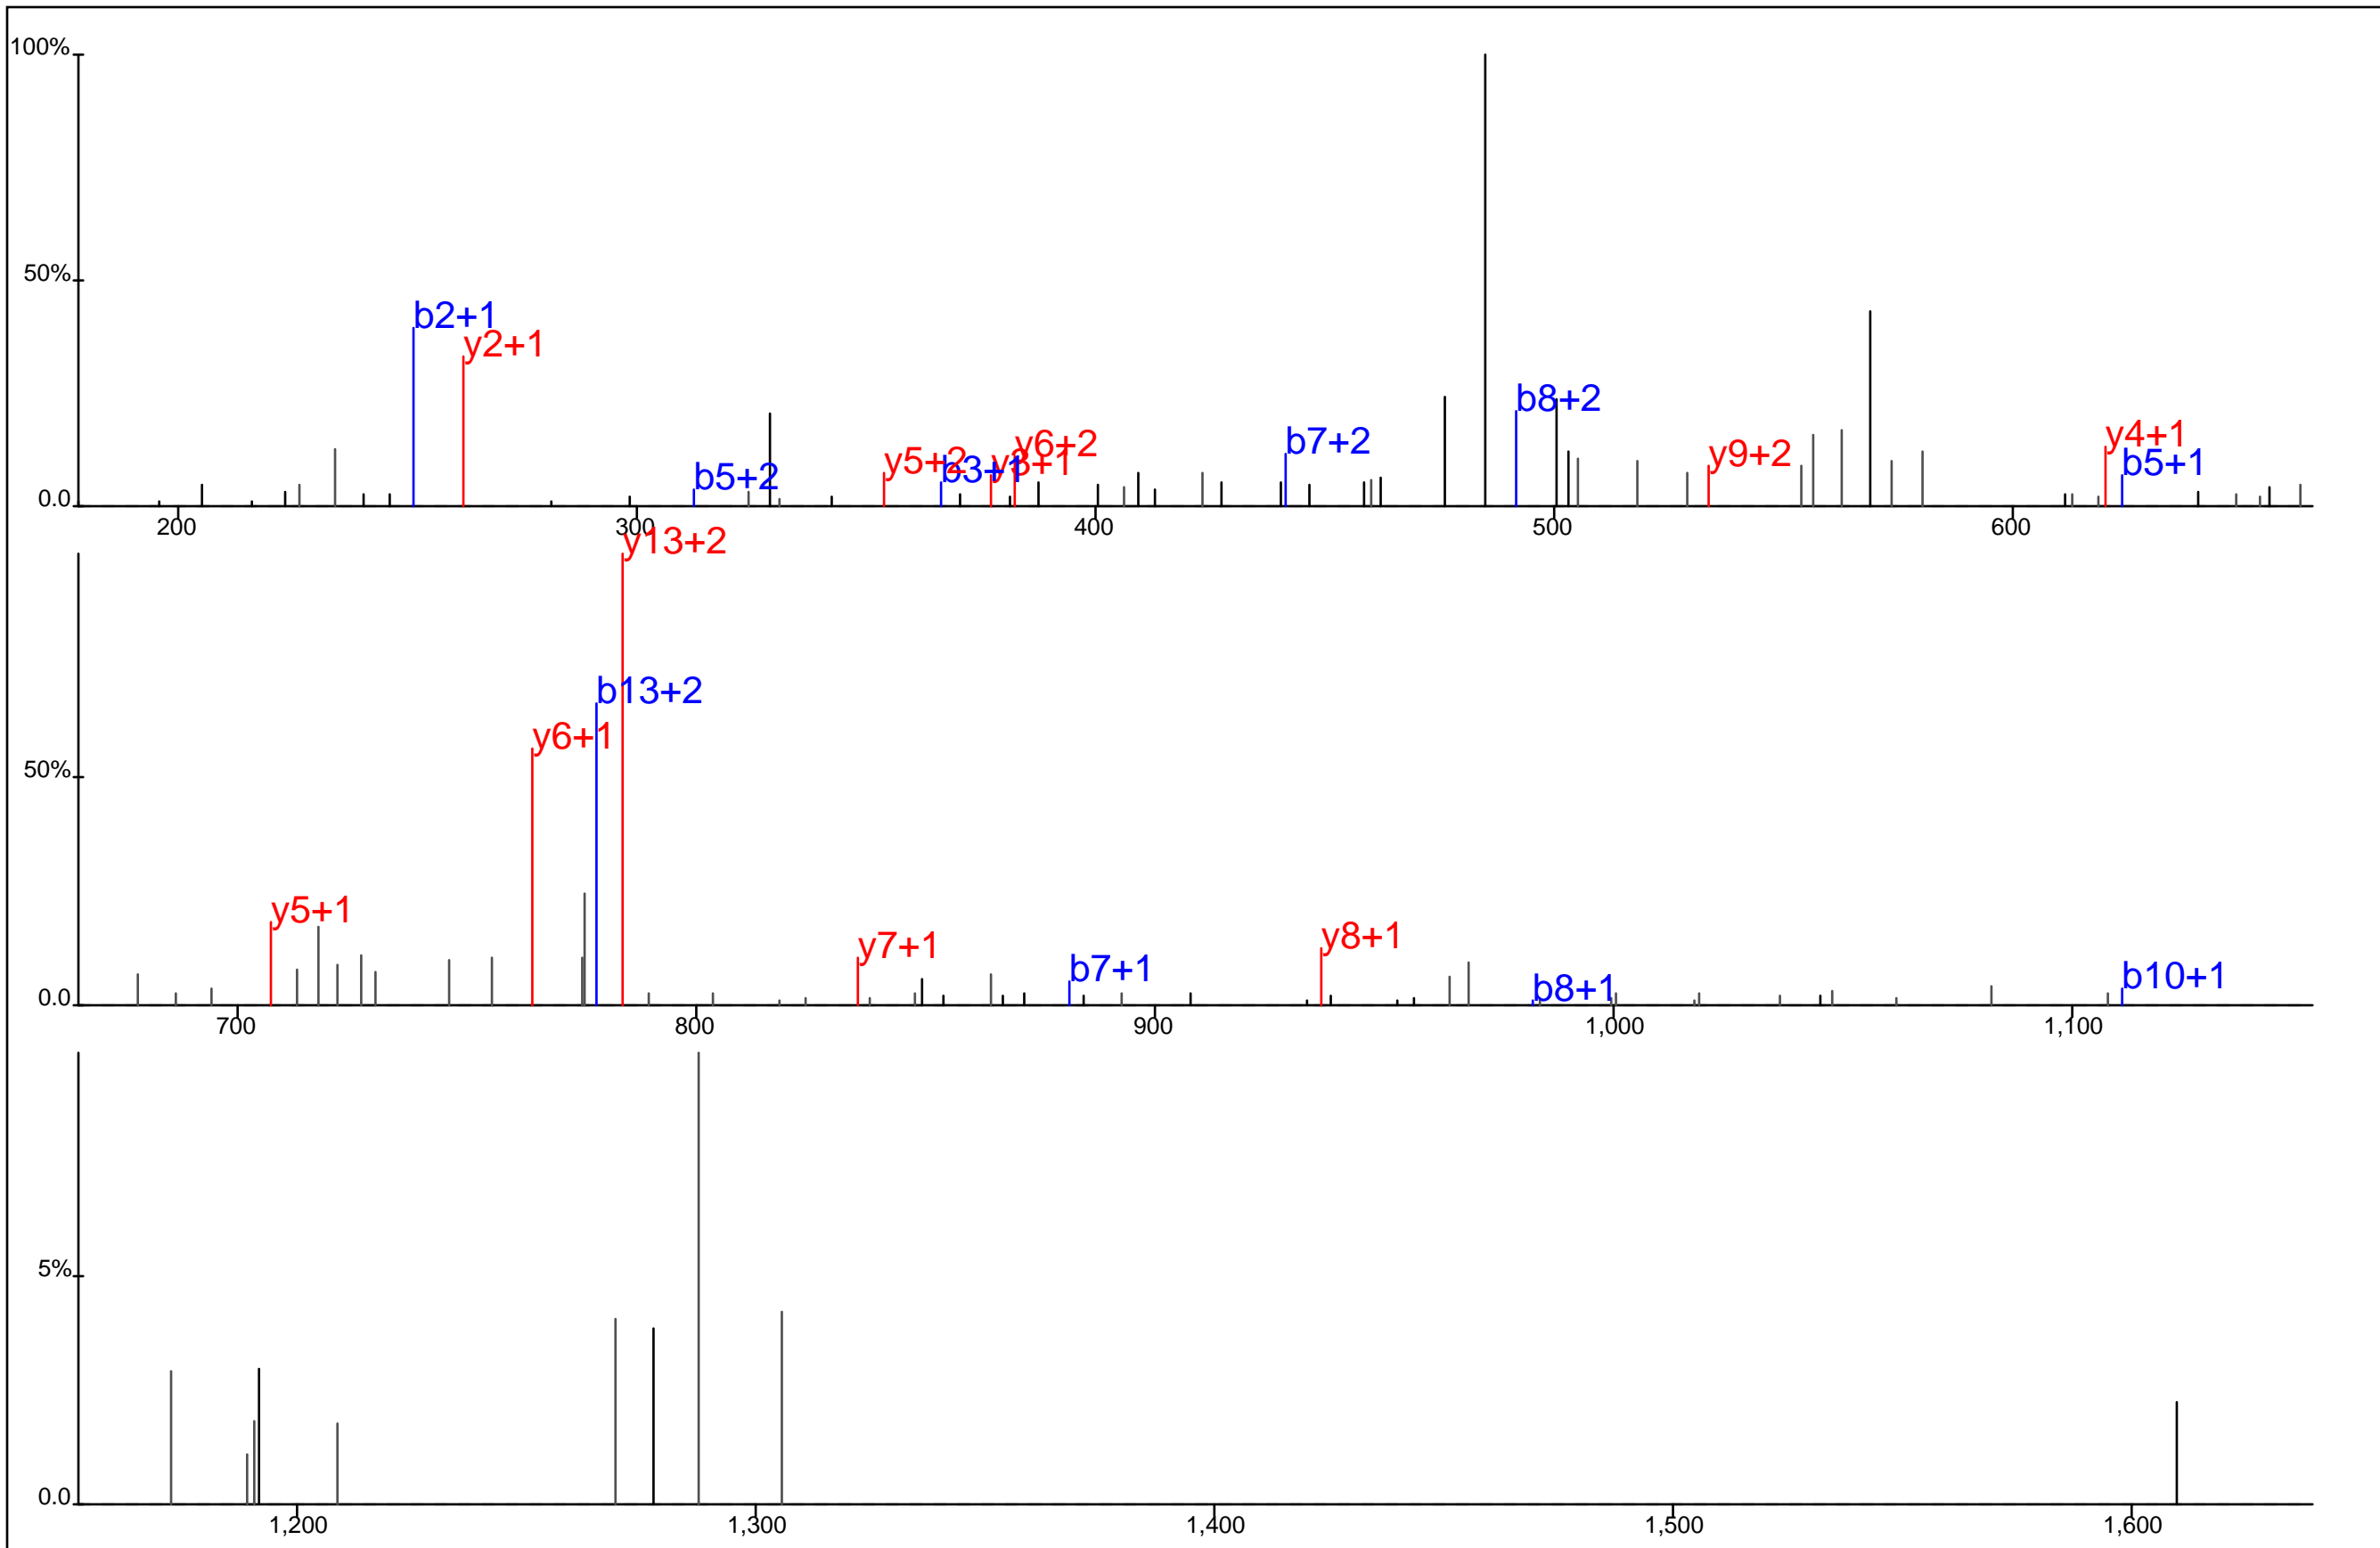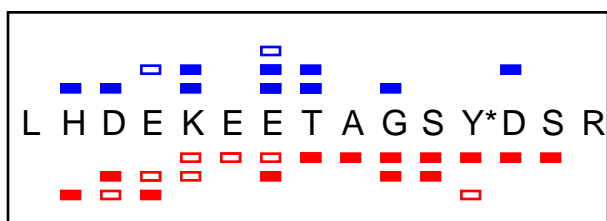

Protein Name: Diaphanous related formin 1  
 gi Accession: 0  
 Precursor Mass: 606.2518+3  
 Delta Mass: 1.247 ppm  
 XCorr: 31.09

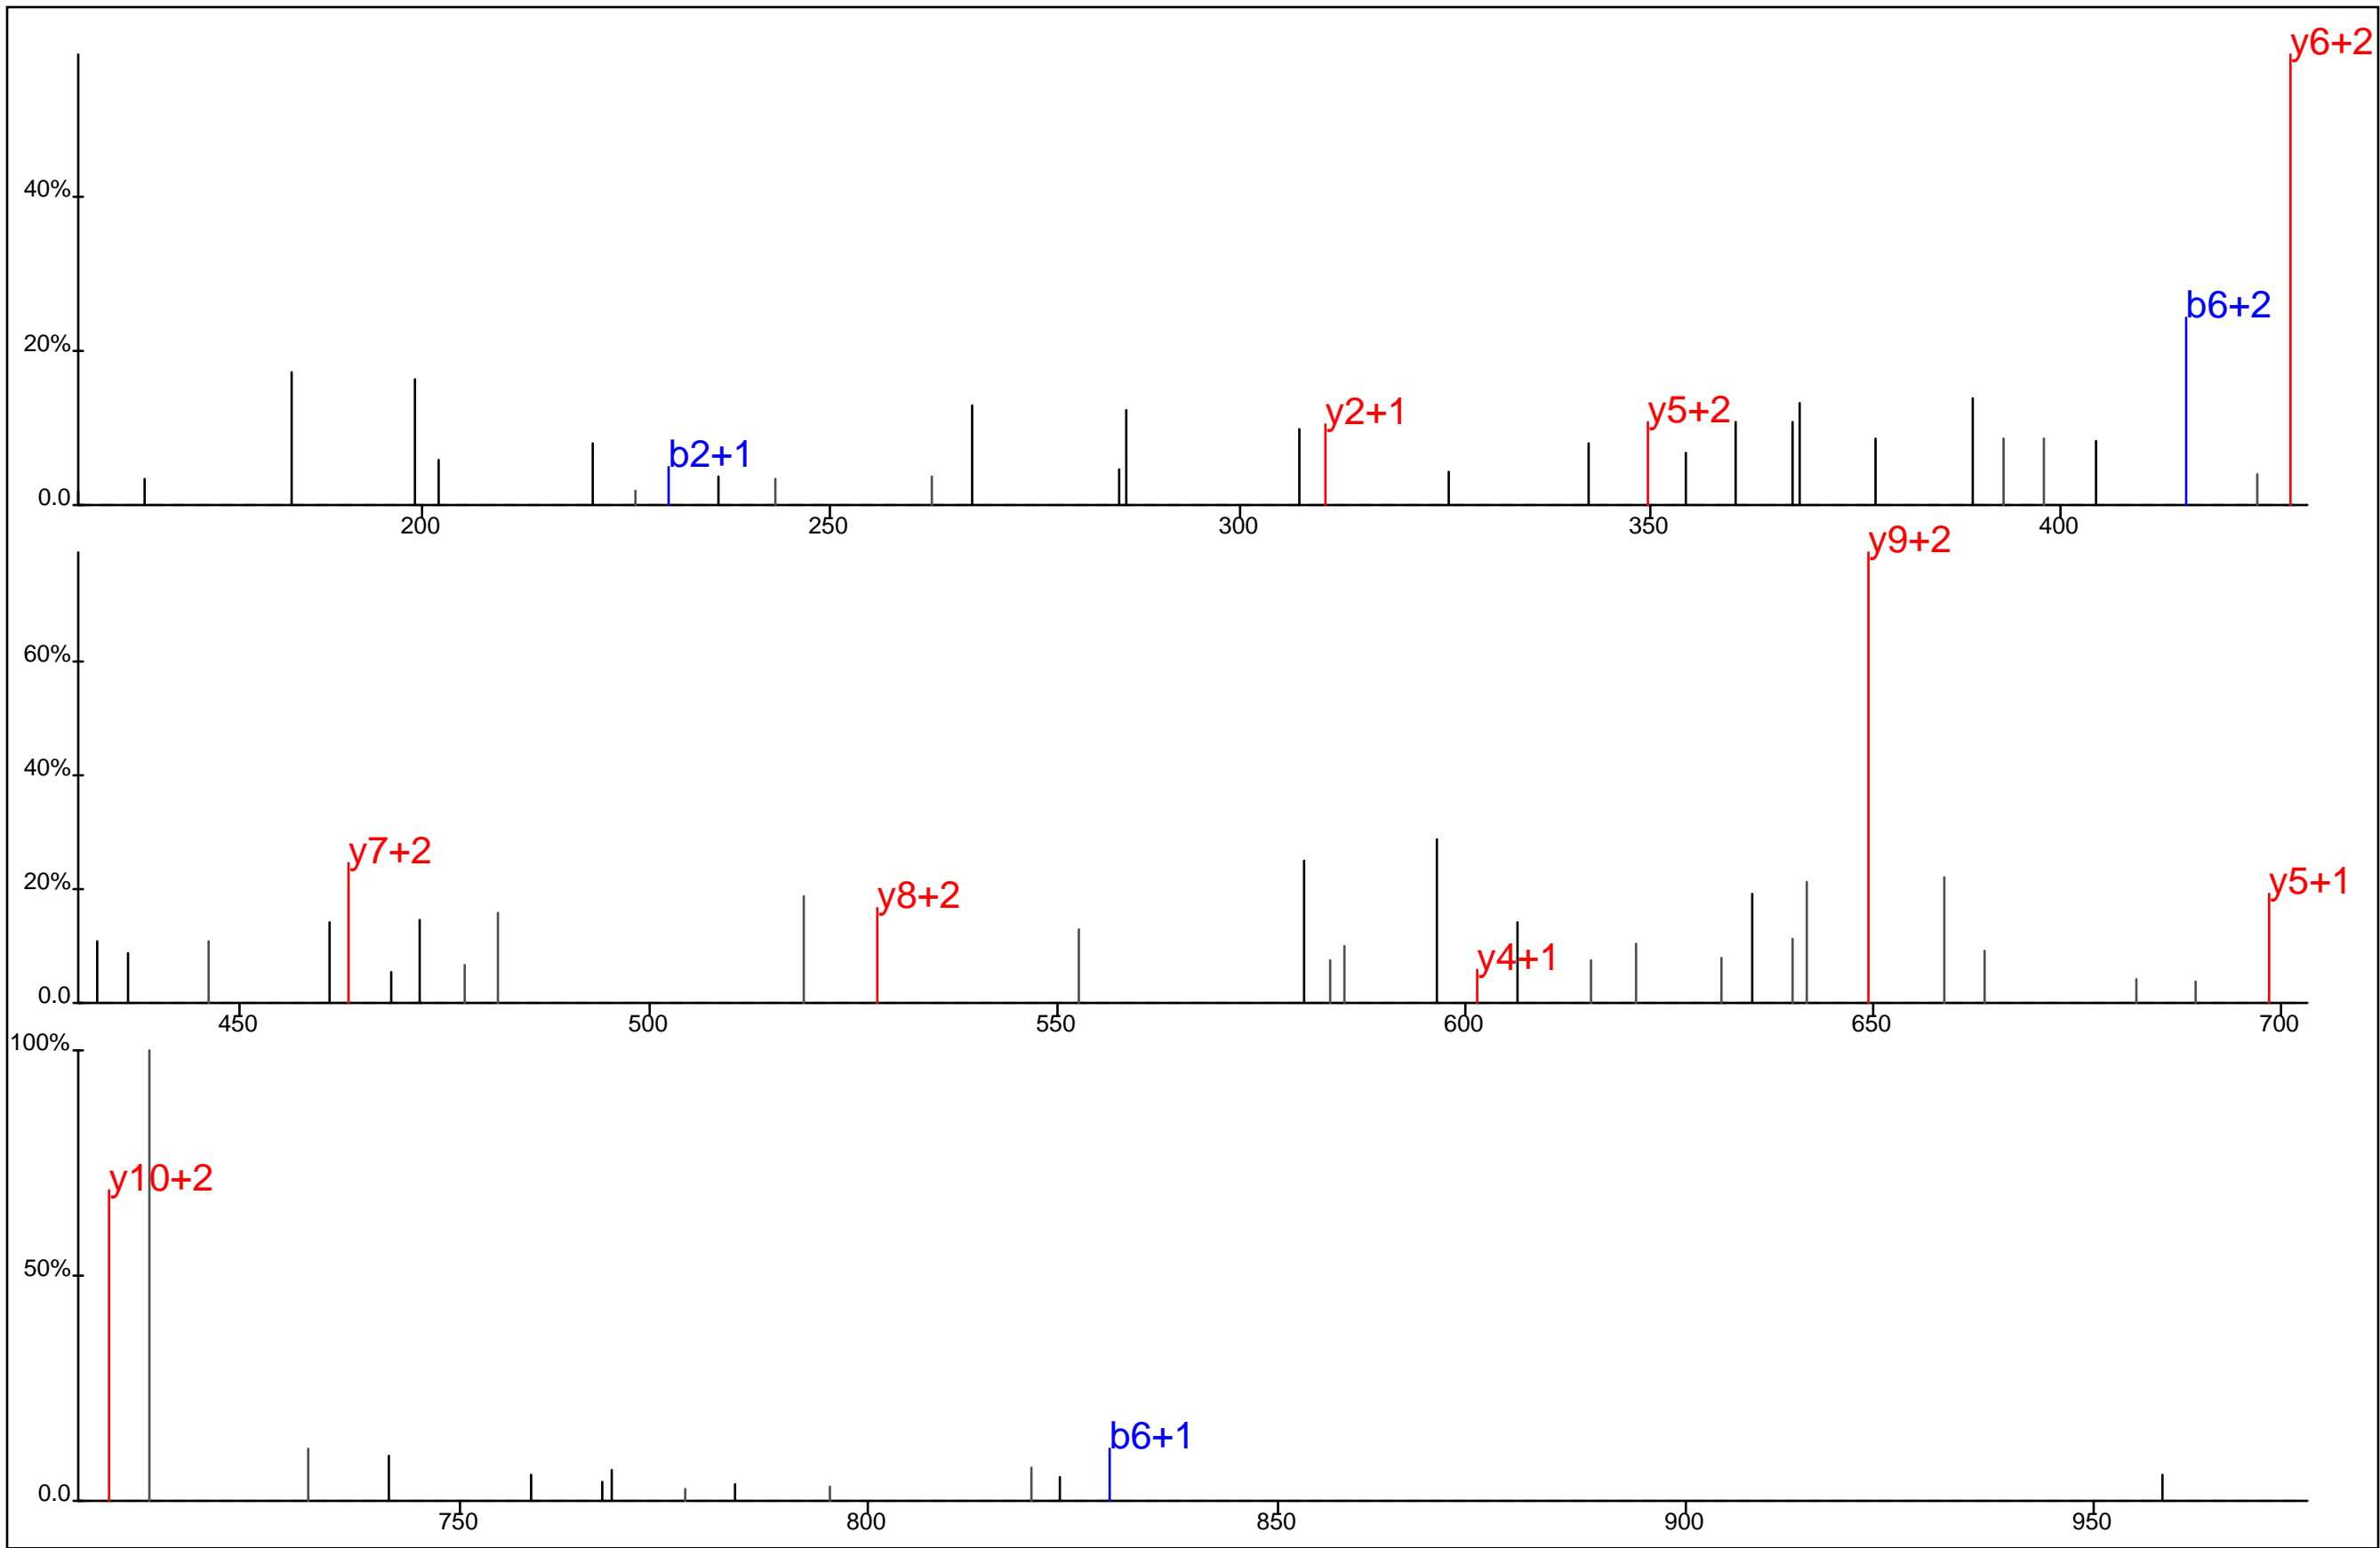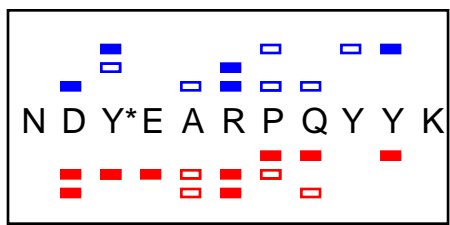

Protein Name: Diaphanous related formin 1  
 gi Accession: 0  
 Precursor Mass: 509.5496+3  
 Delta Mass: 2.104 ppm  
 XCorr: 20.43

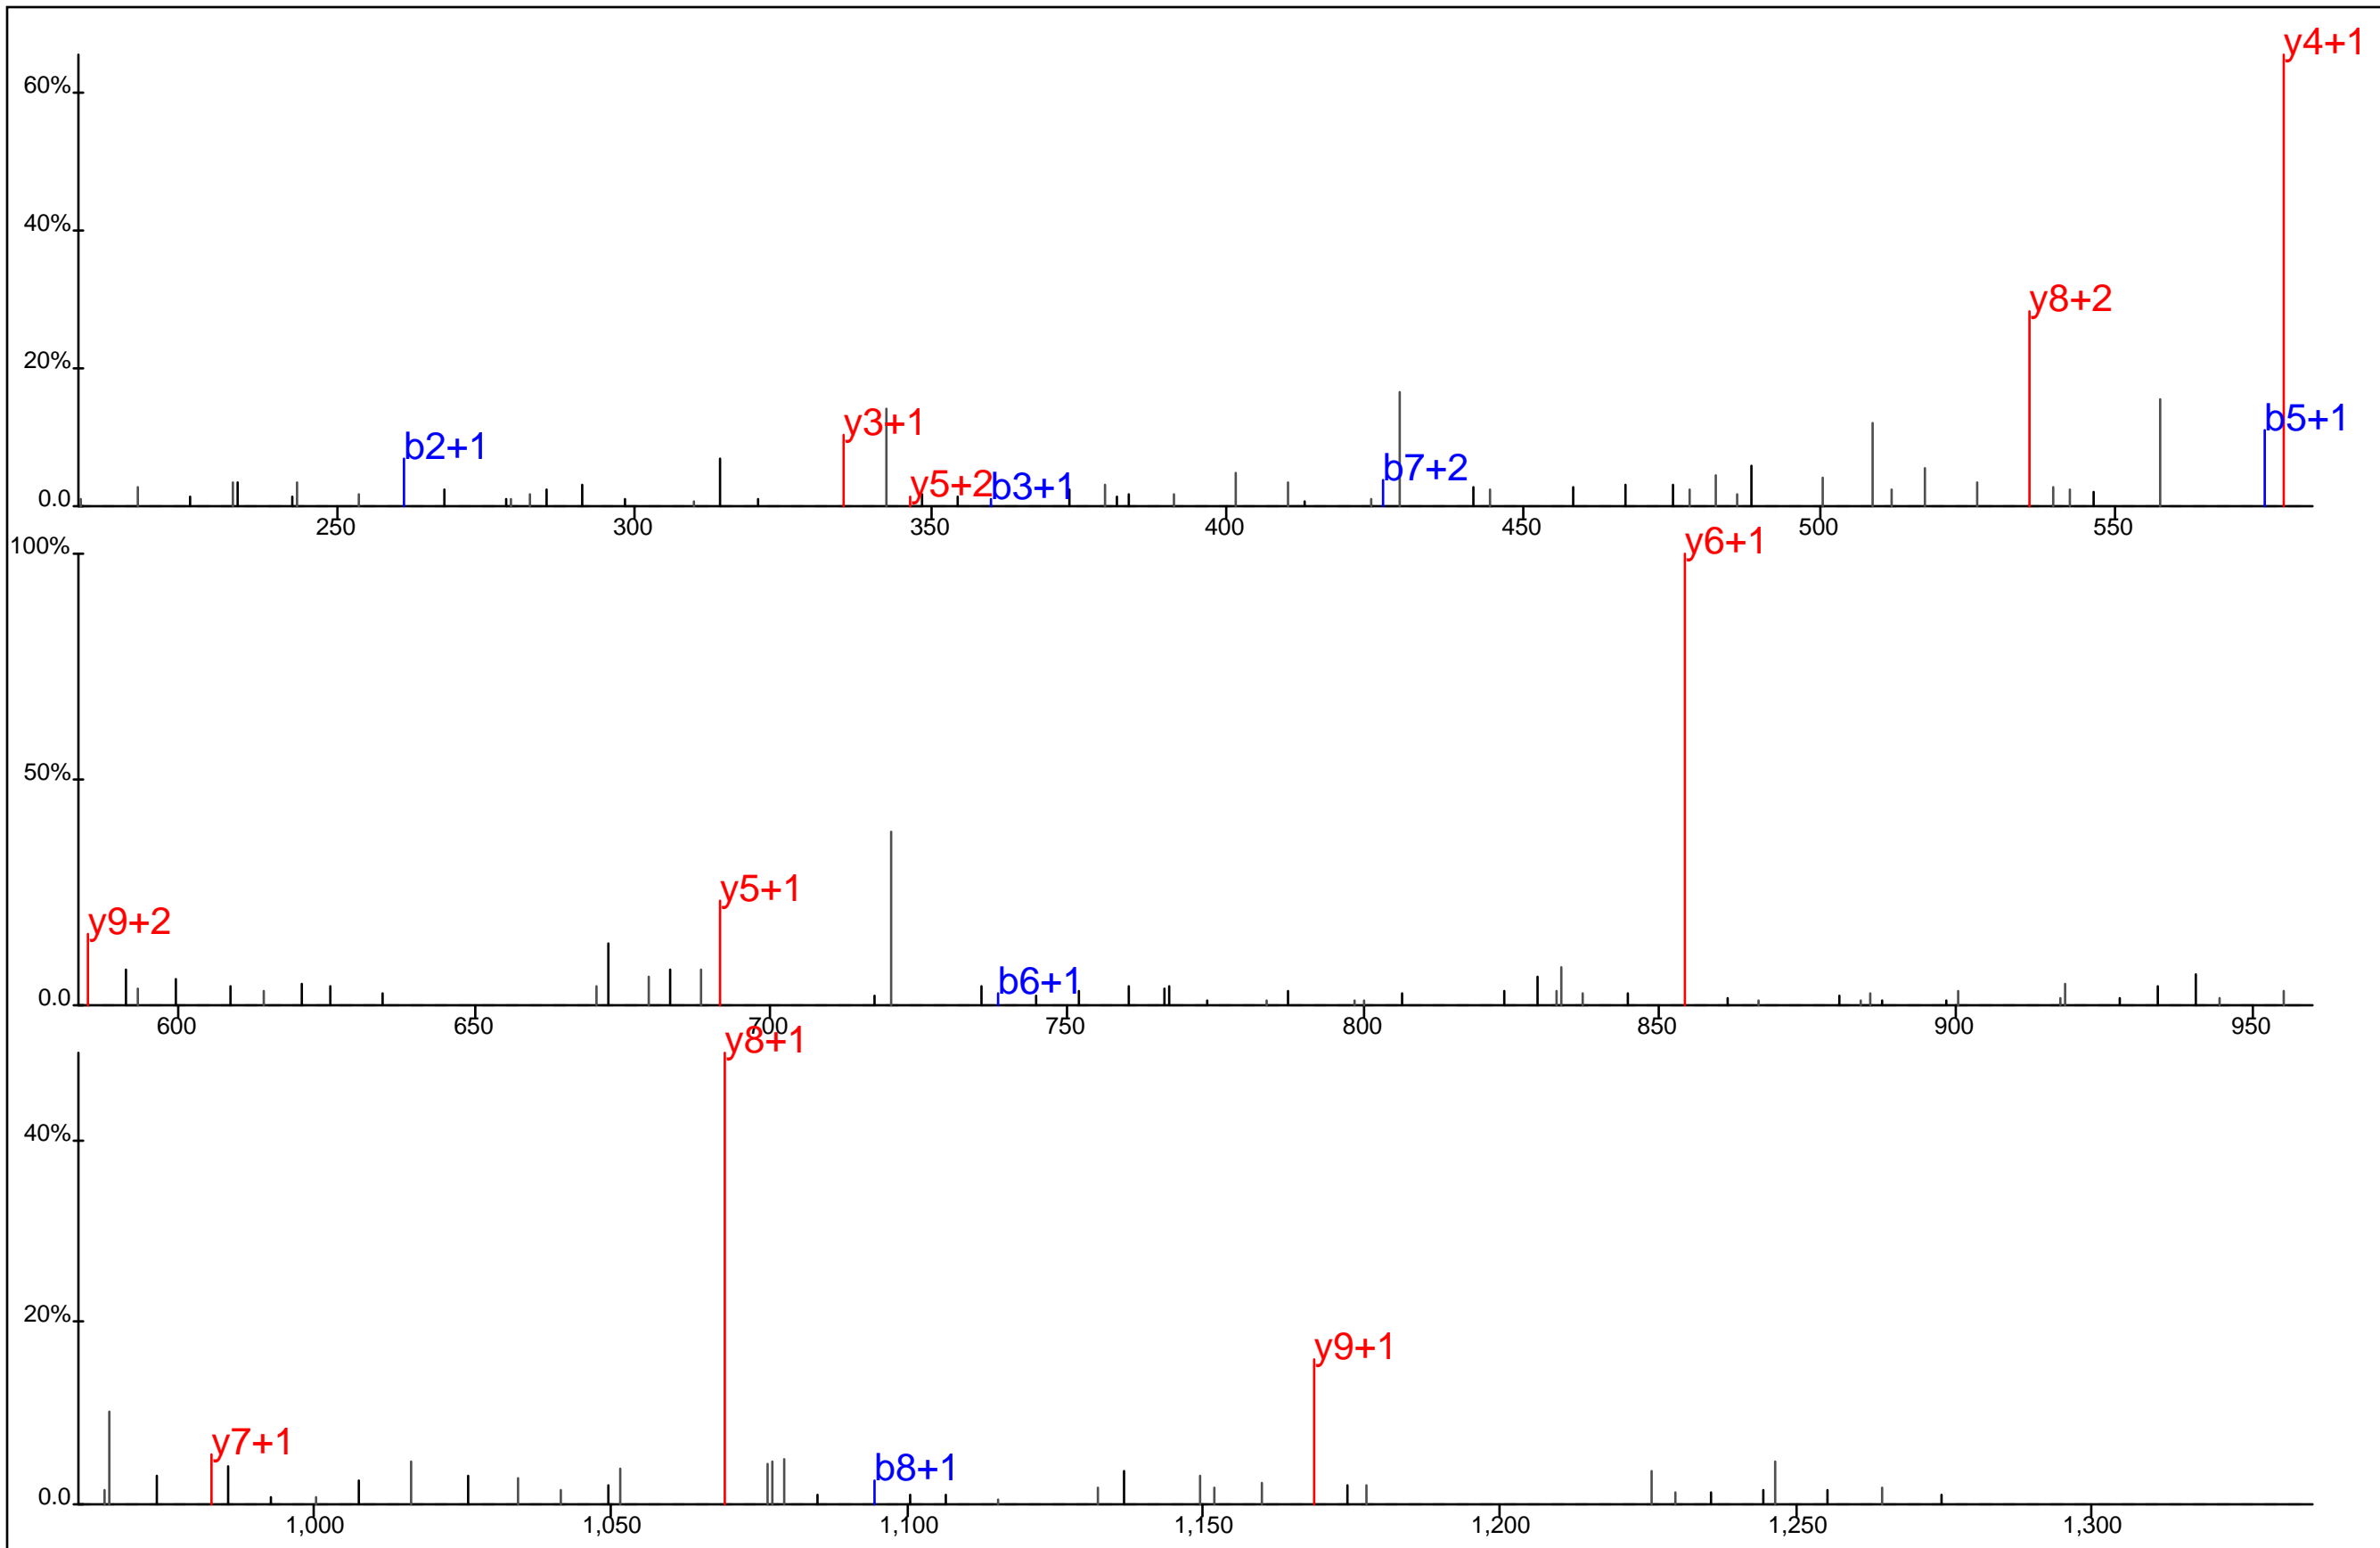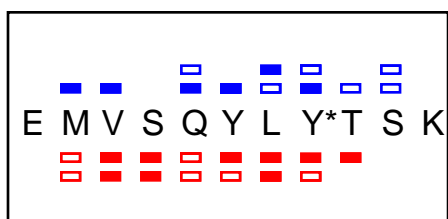

Protein Name: Diaphanous related formin 1  
 gi Accession: 0  
 Precursor Mass: 714.8082+2  
 Delta Mass: 1.716 ppm  
 XCorr: 27.44

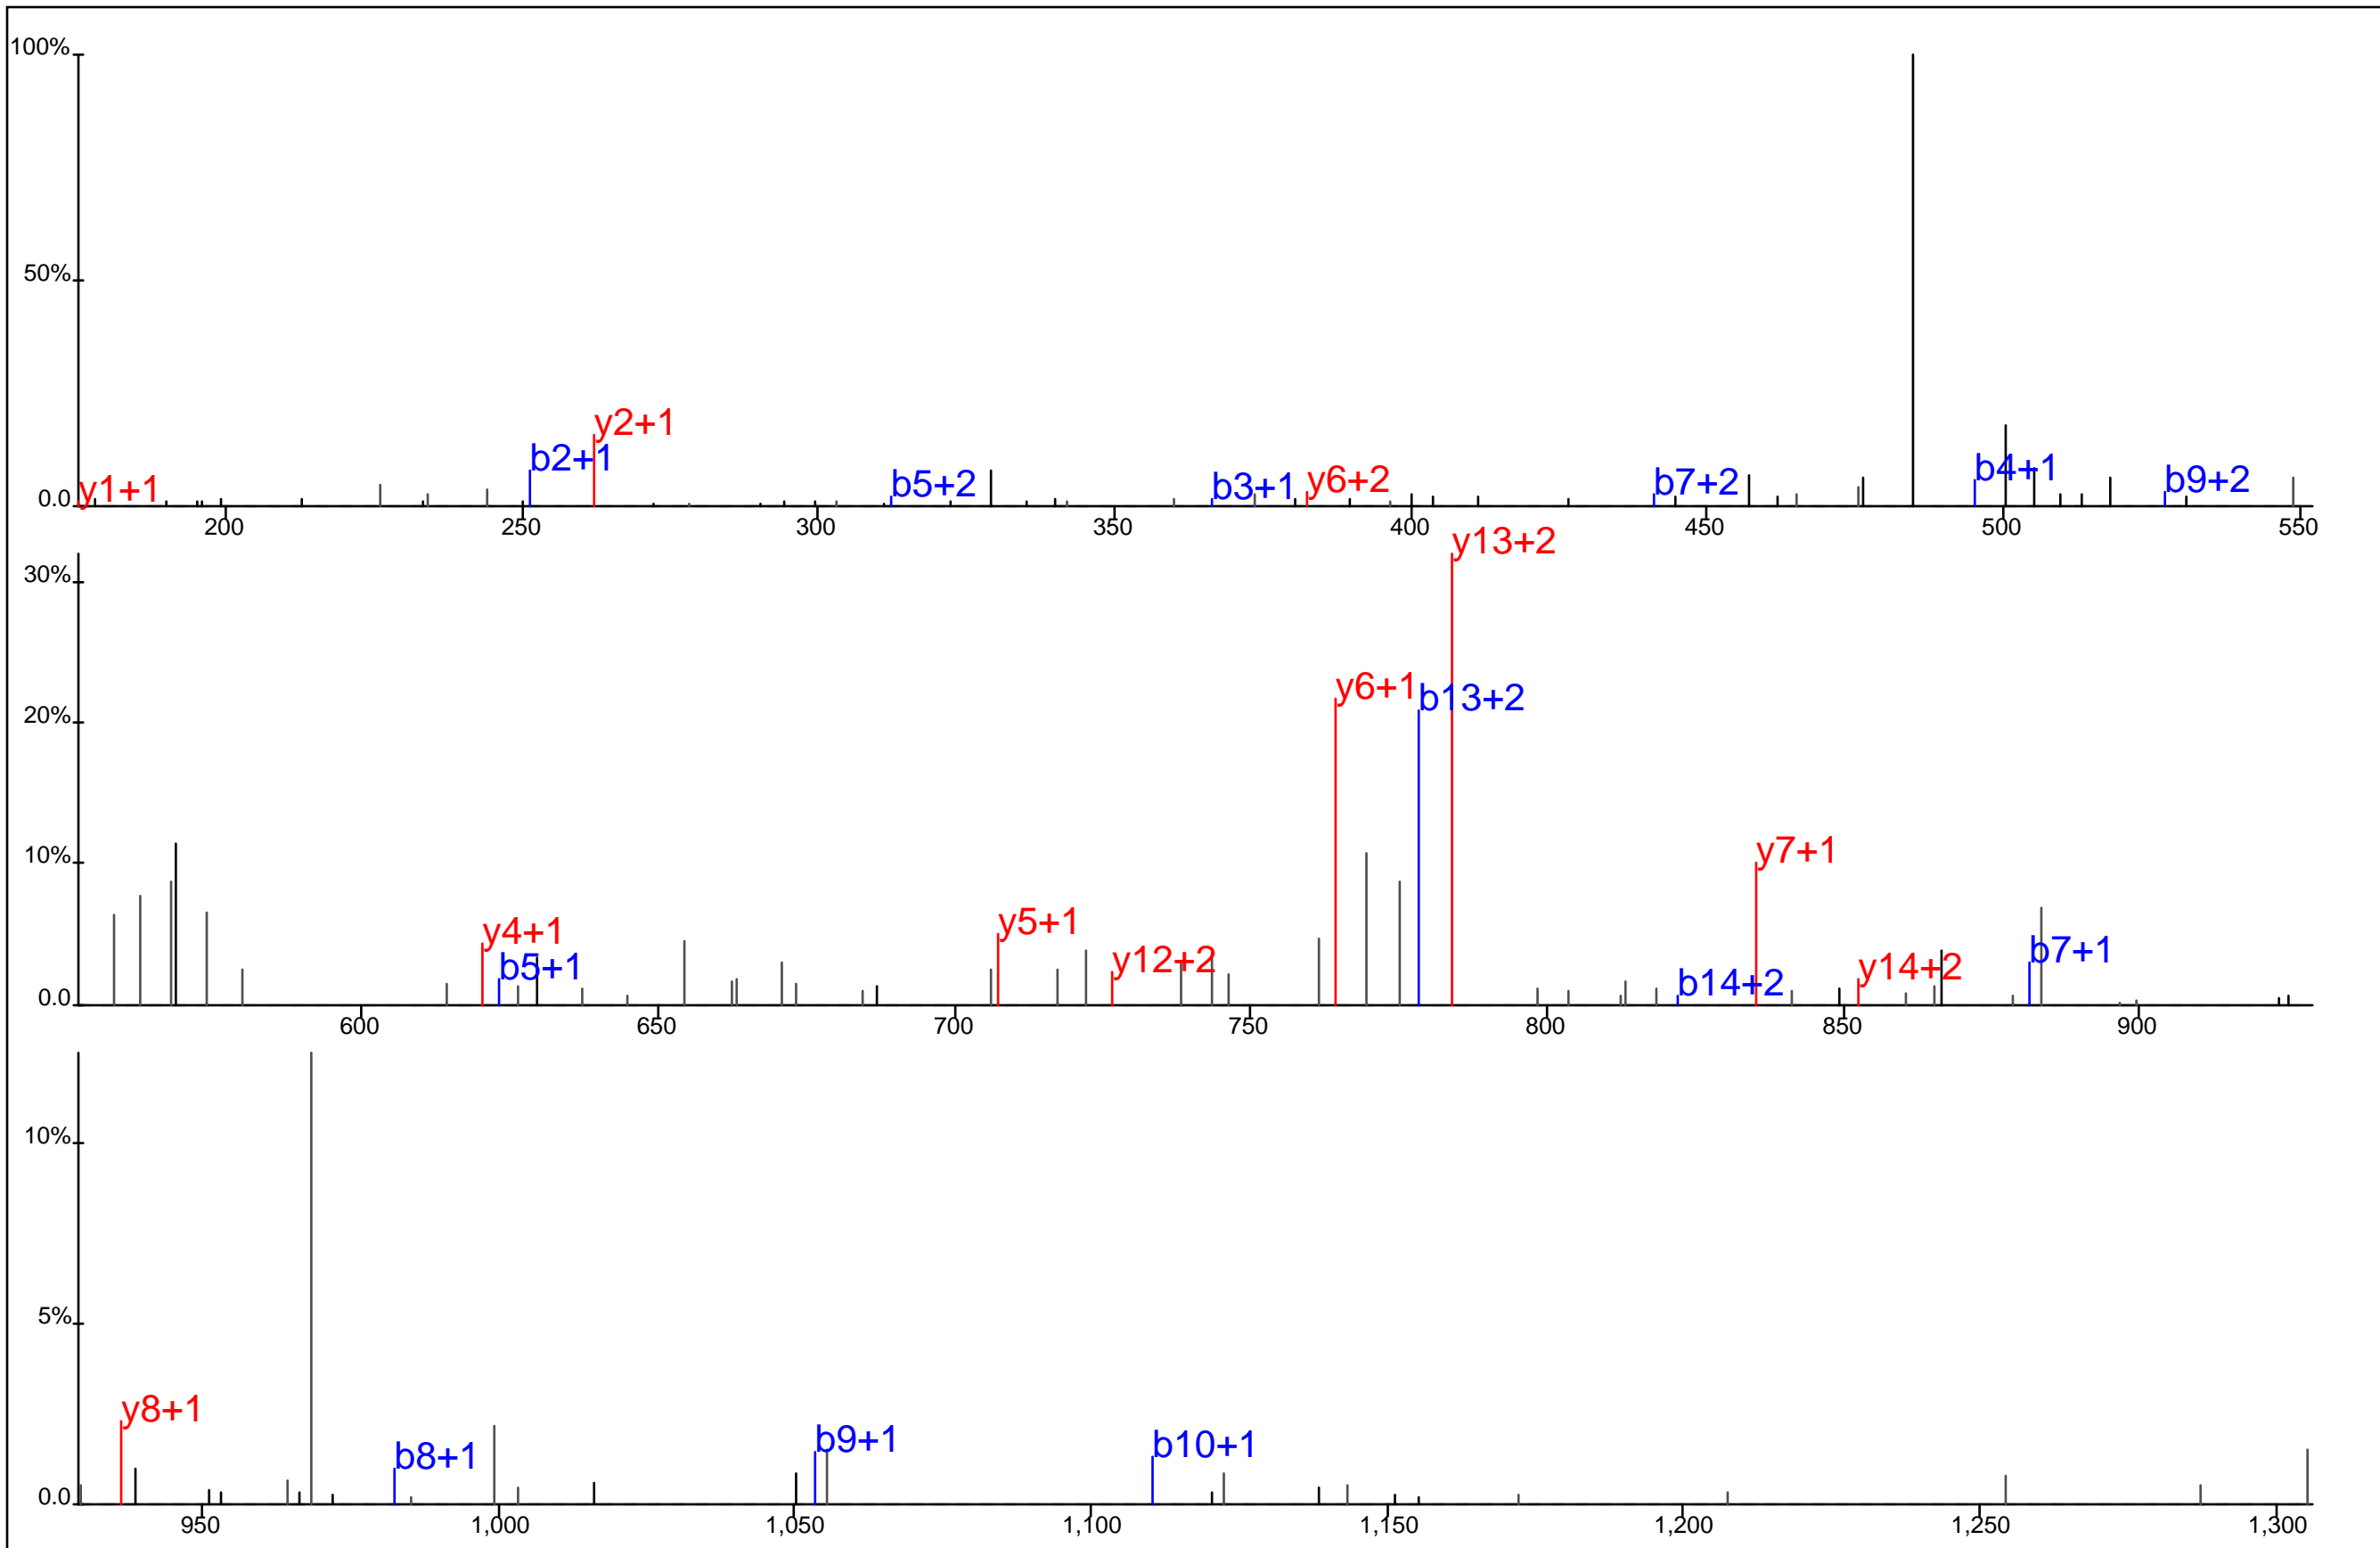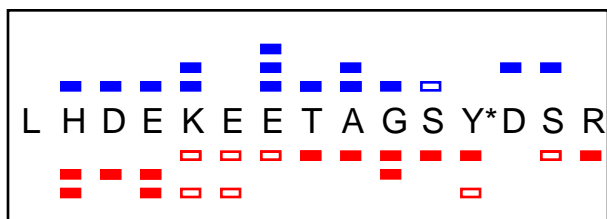

Protein Name: Diaphanous related formin 1  
 gi Accession: 0  
 Precursor Mass: 606.2534+3  
 Delta Mass: 3.868 ppm  
 XCorr: 23.23

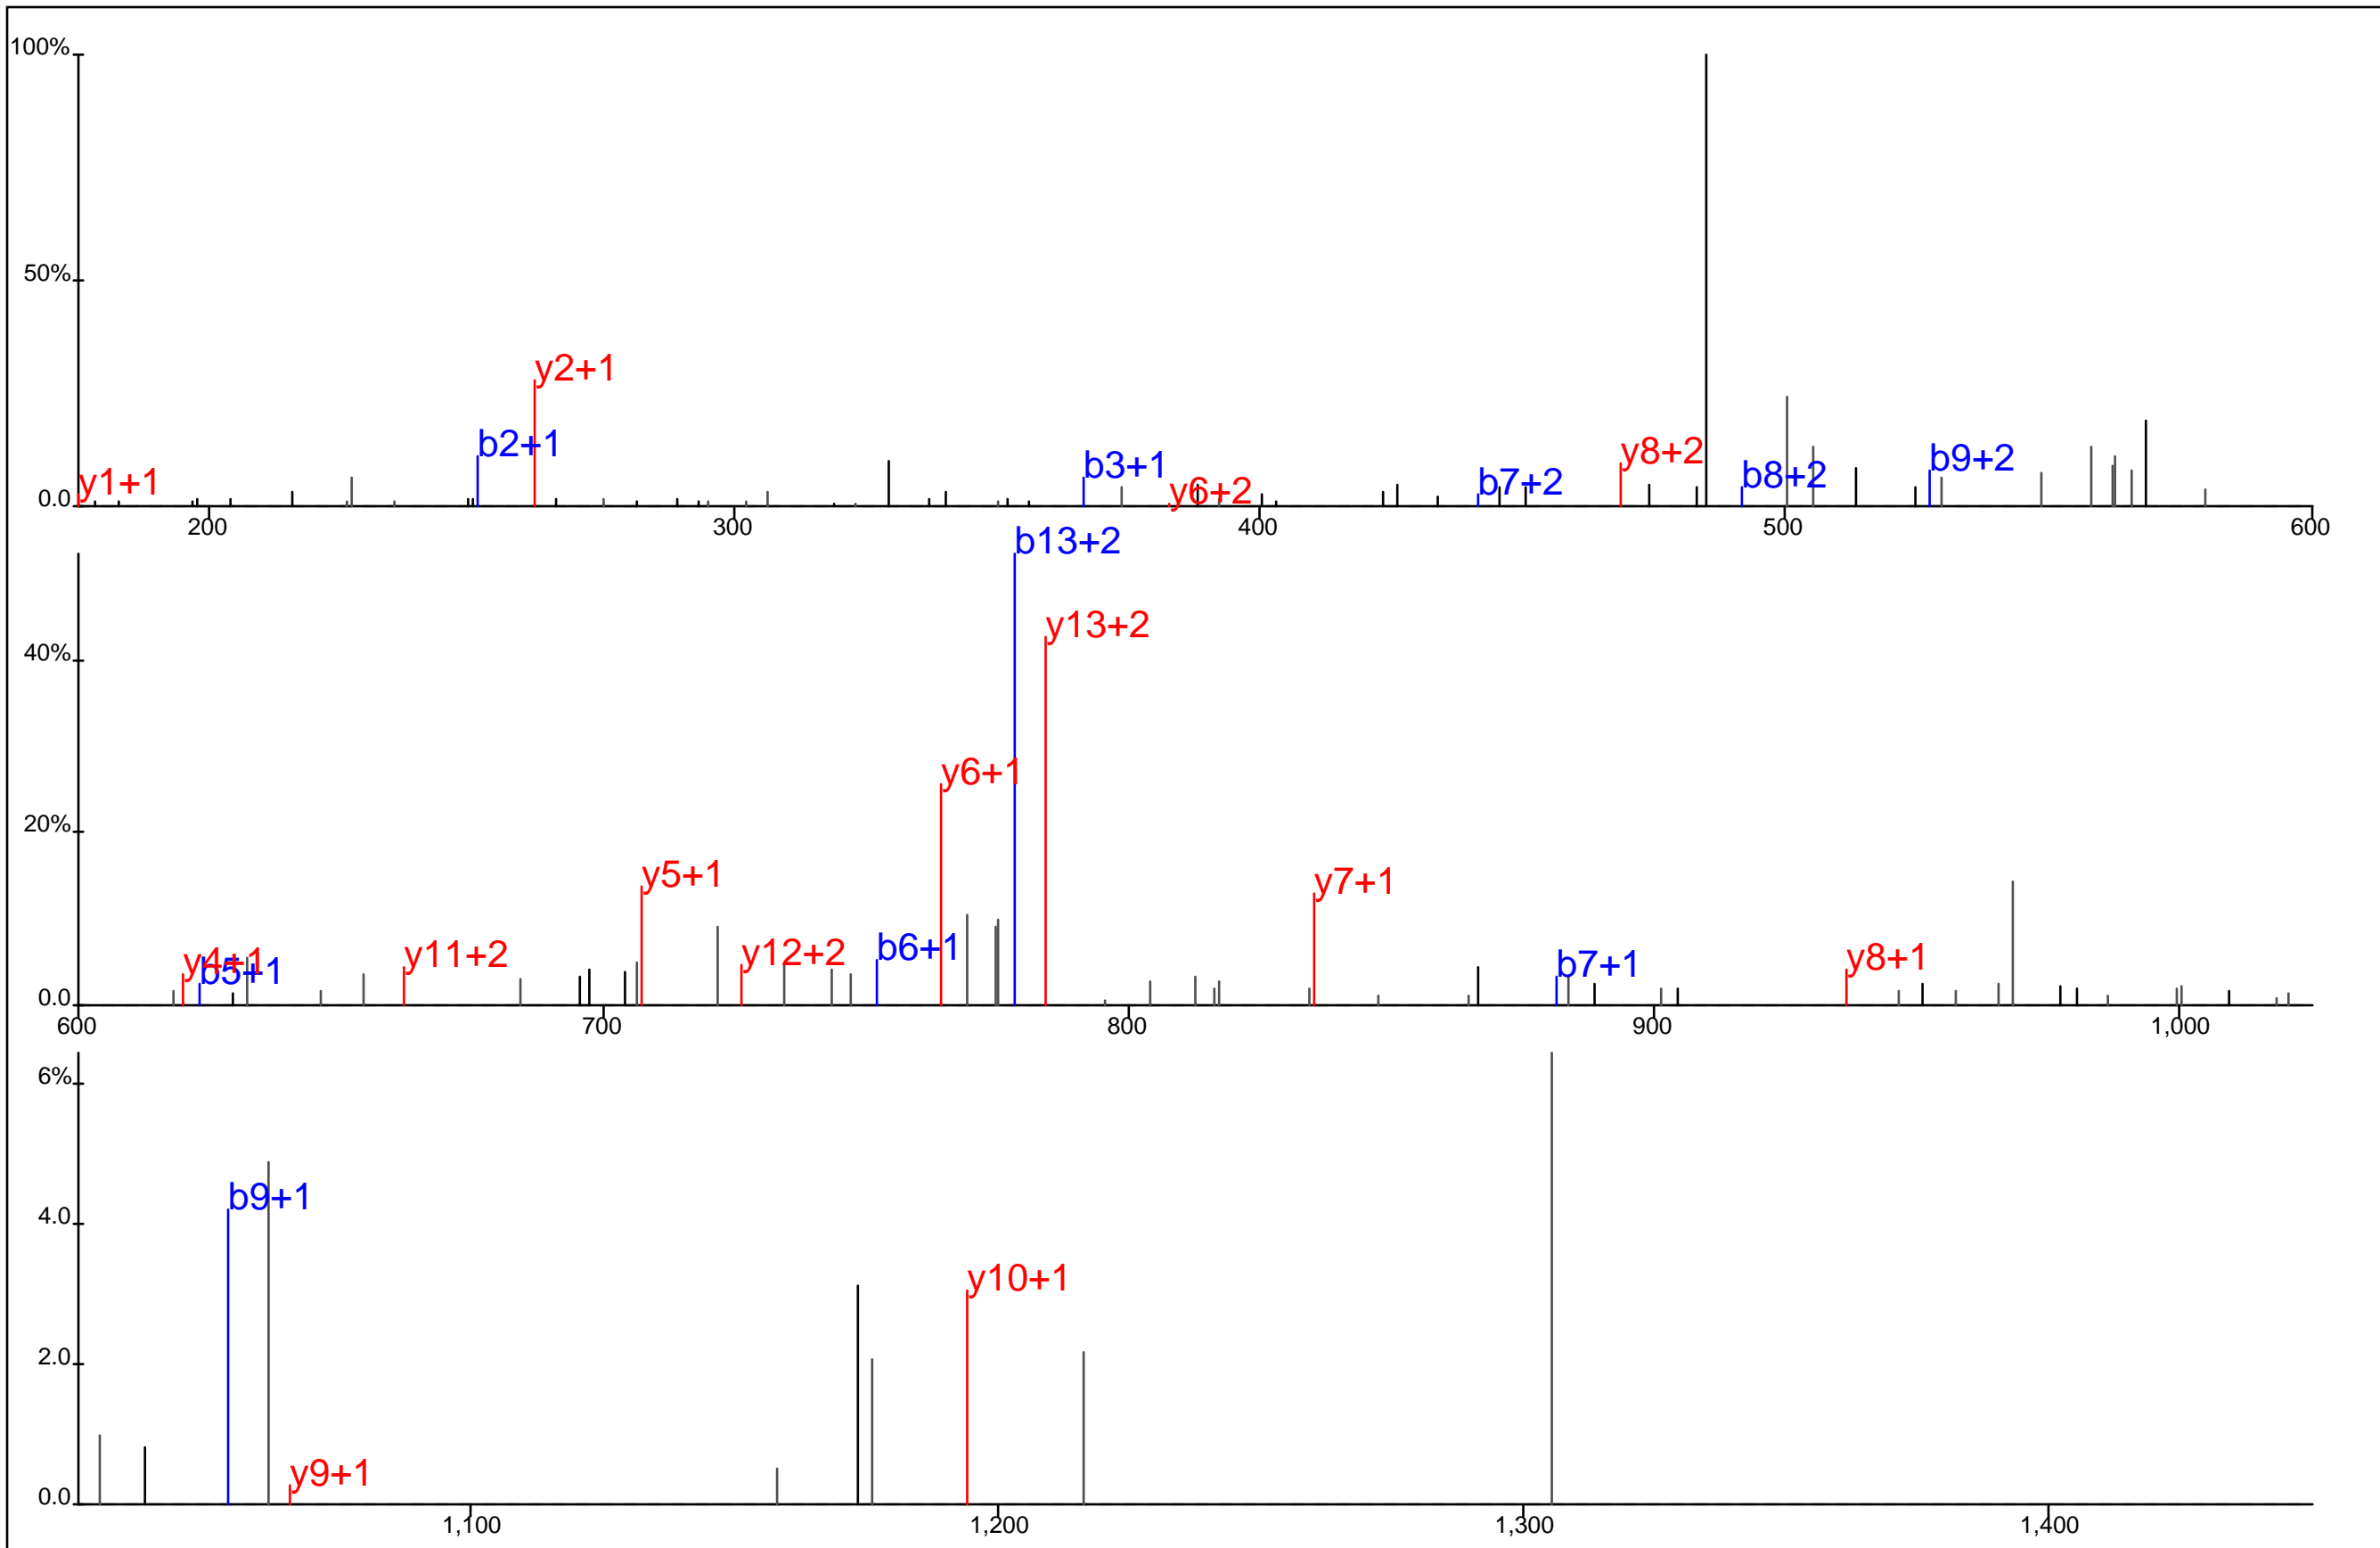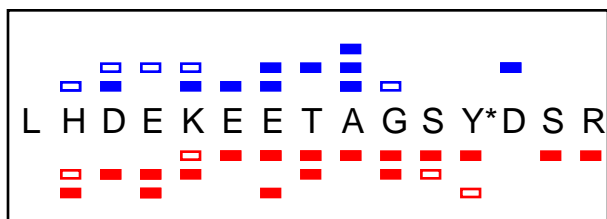

Protein Name: Diaphanous related formin 1  
 gi Accession: 0  
 Precursor Mass: 606.2513+3  
 Delta Mass: 0.542 ppm  
 XCorr: 32.92

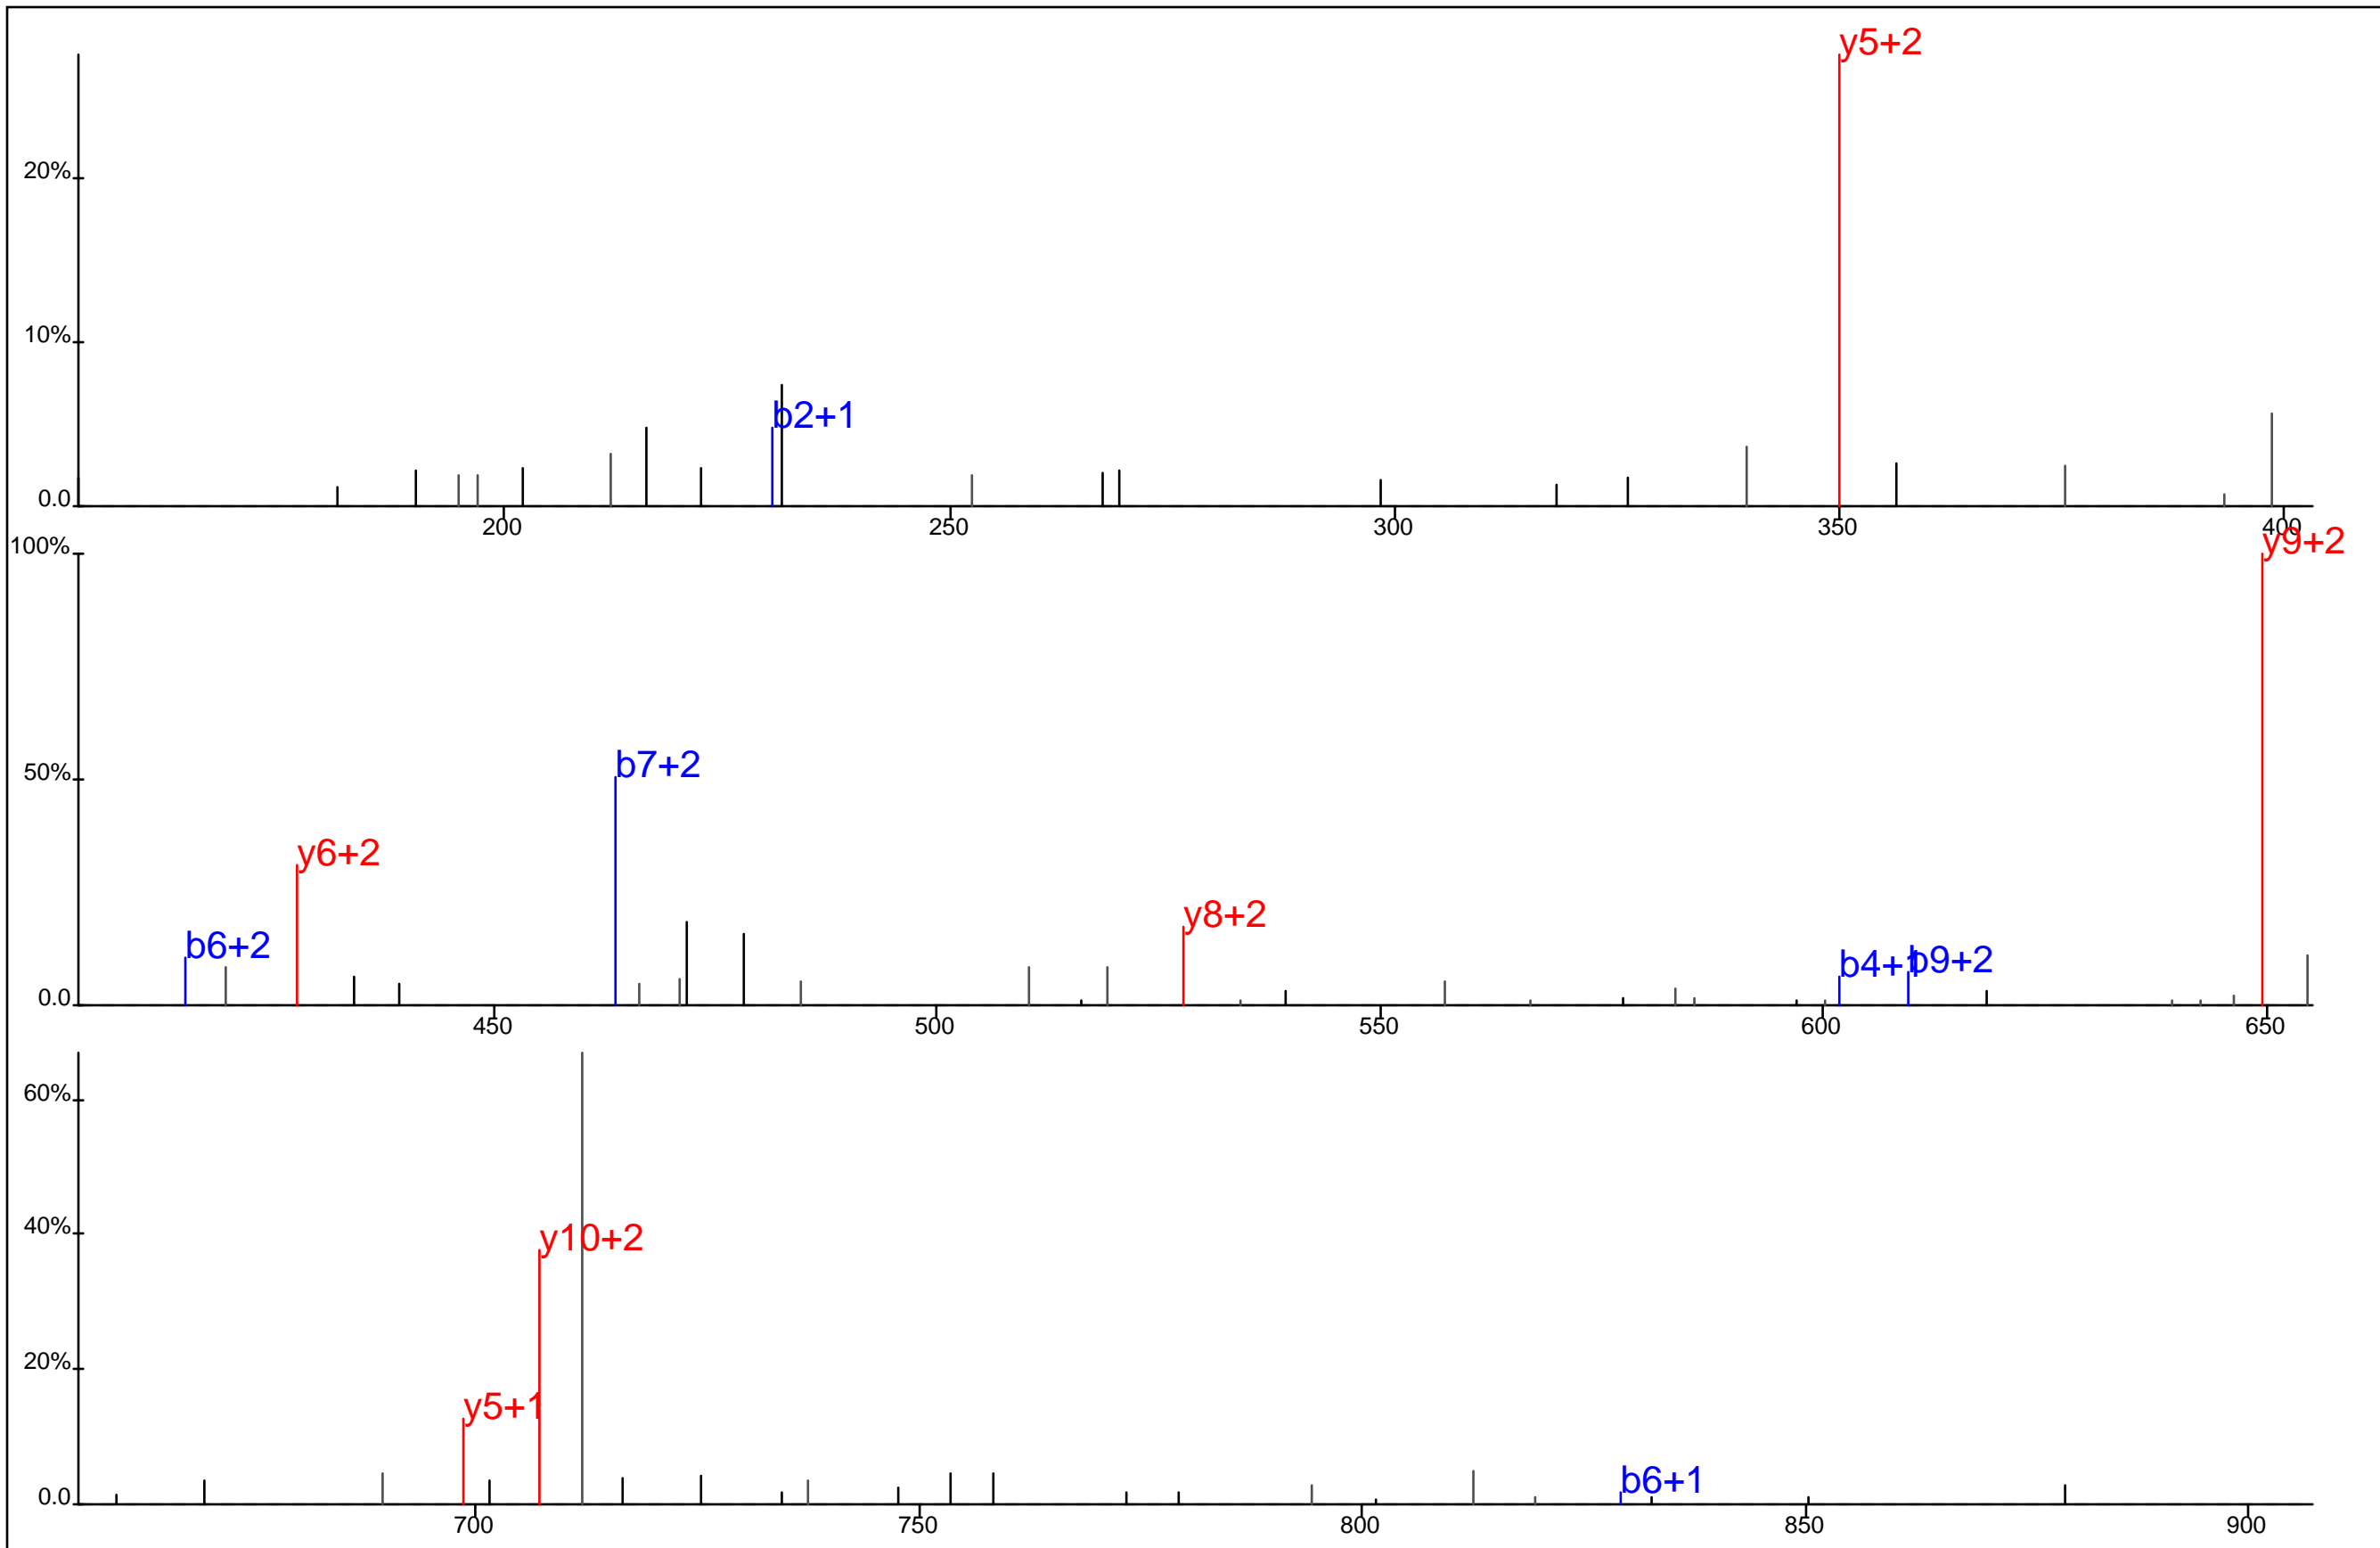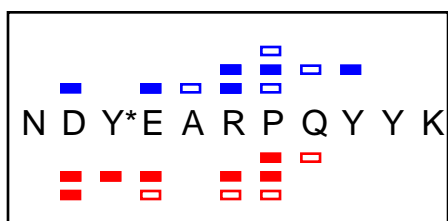

Protein Name: Diaphanous related formin 1  
 gi Accession: 0  
 Precursor Mass: 509.5500+3  
 Delta Mass: 2.943 ppm  
 XCorr: 29.88

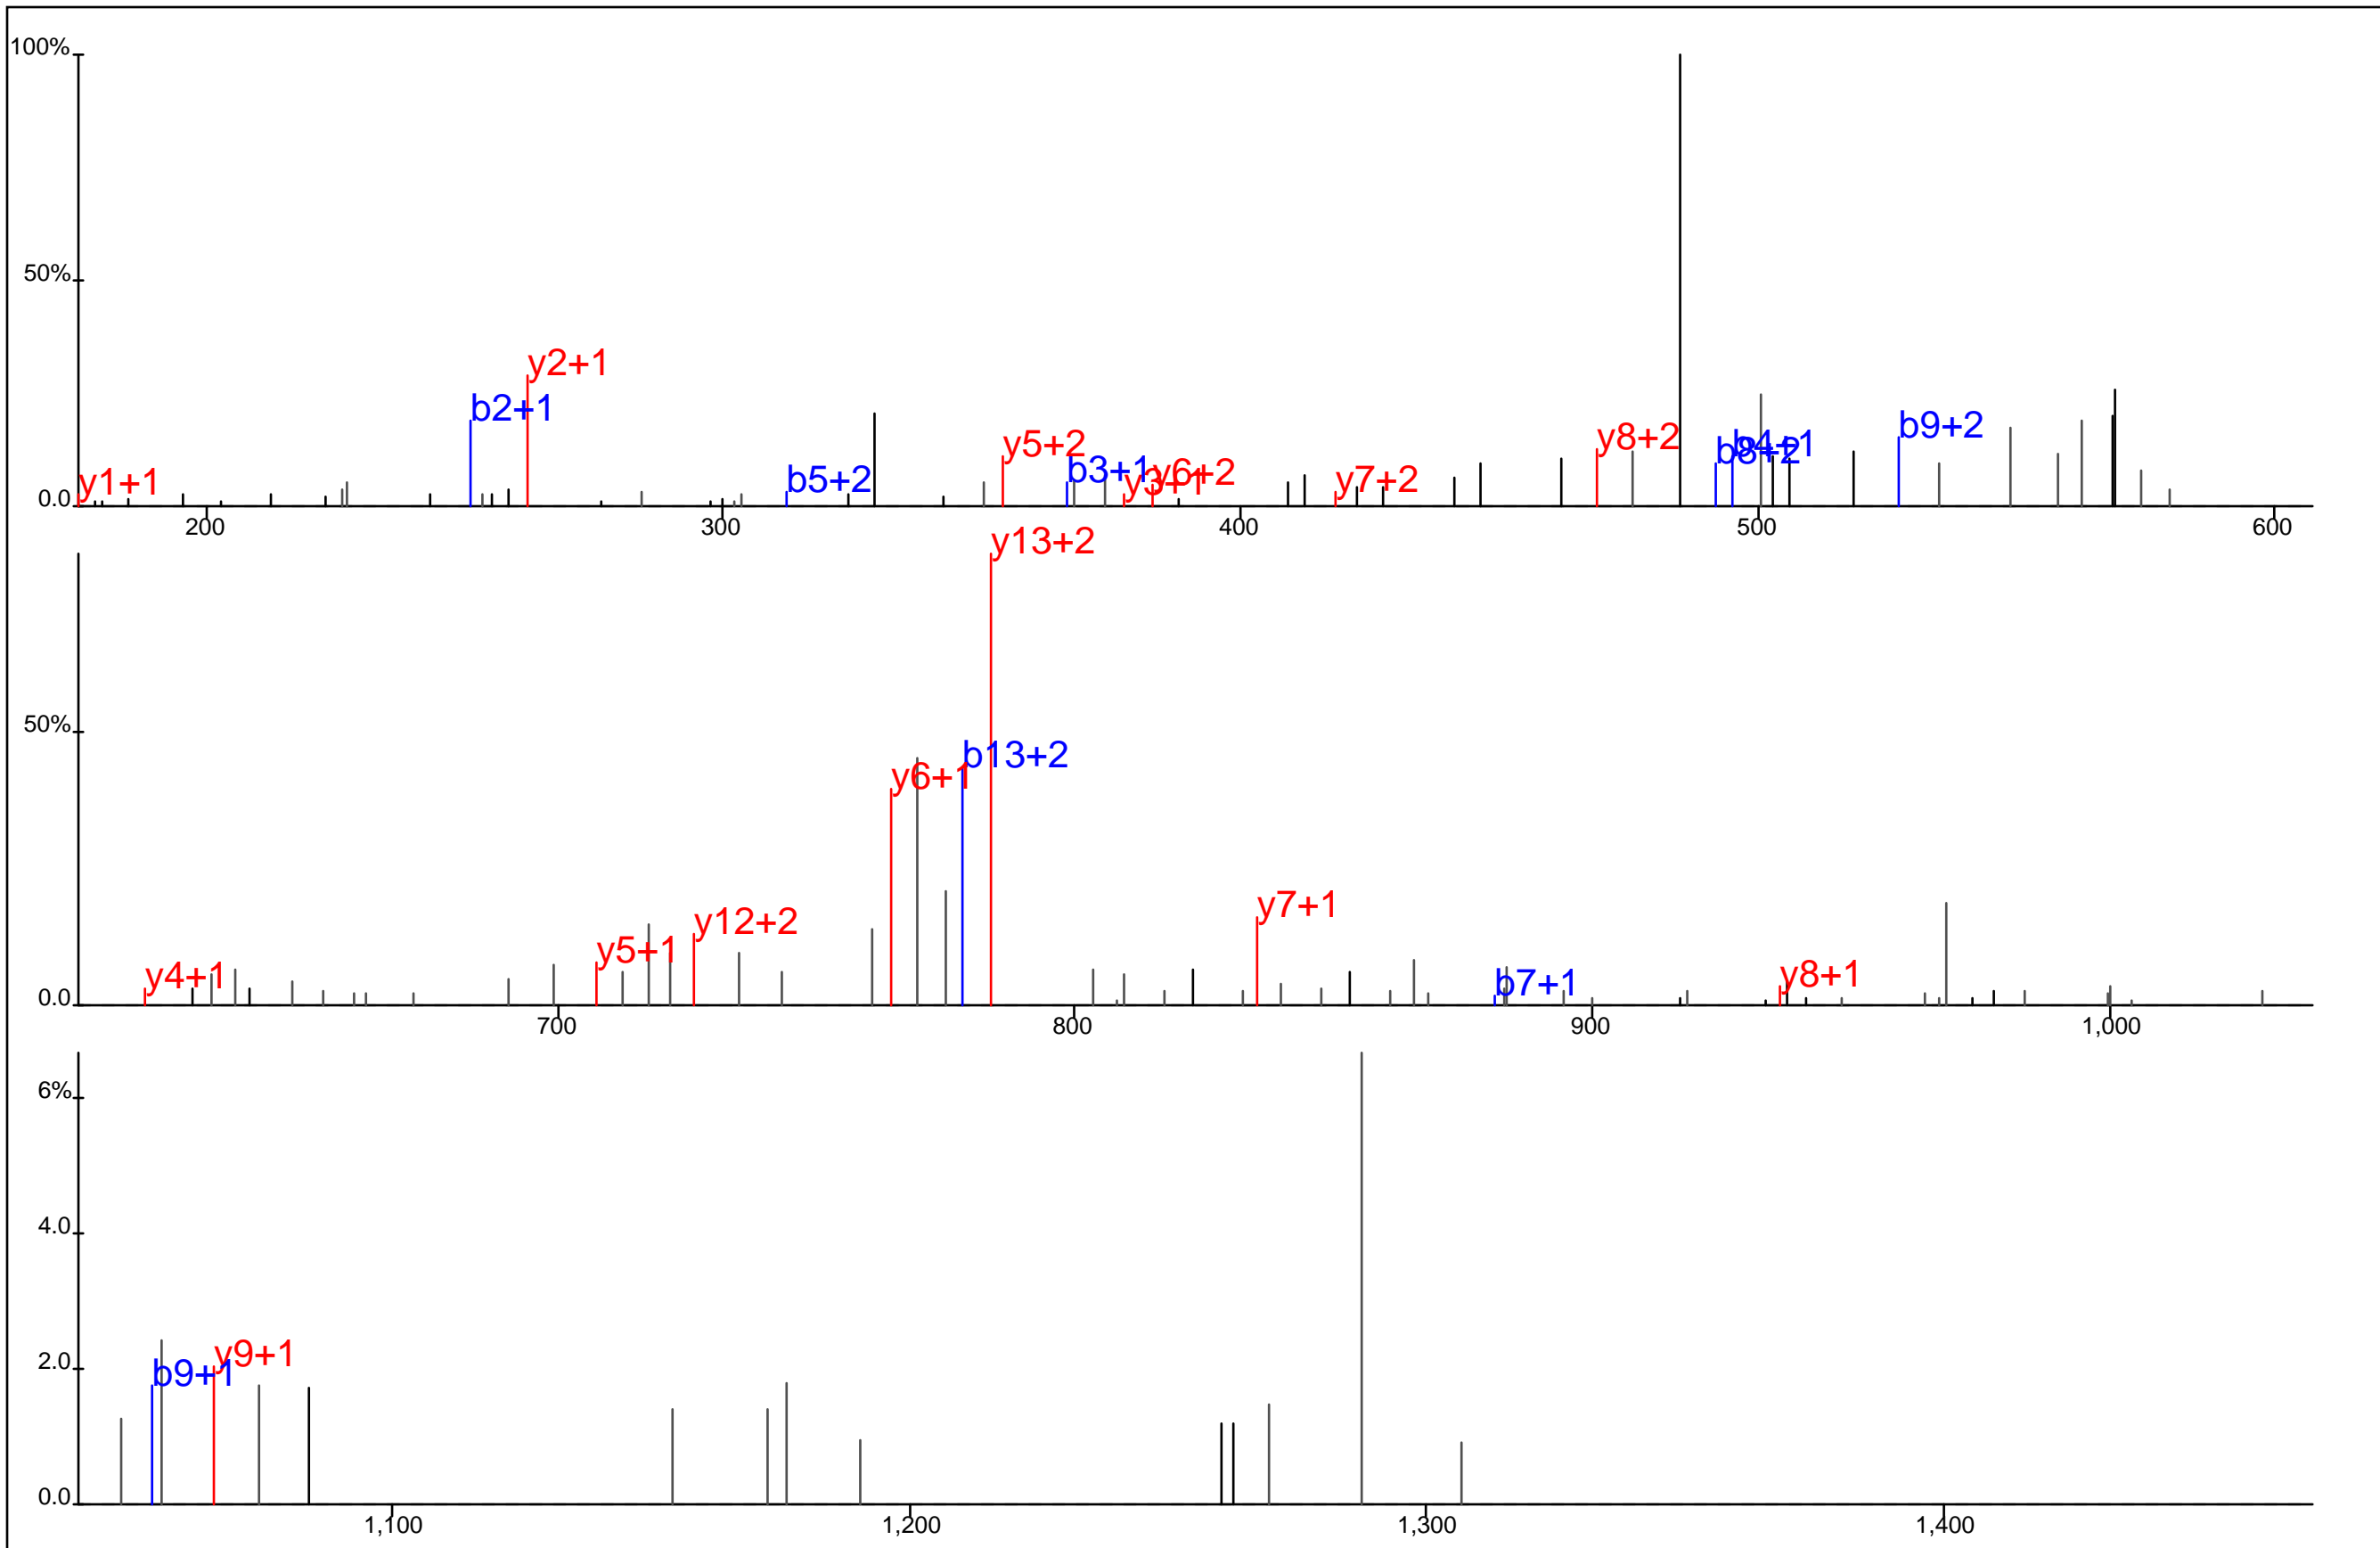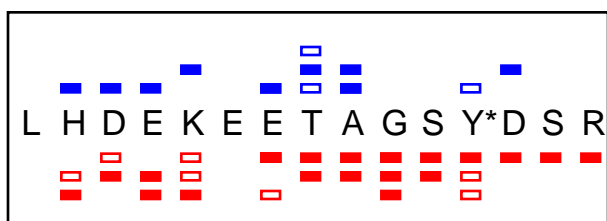

Protein Name: Diaphanous related formin 1  
 gi Accession: 0  
 Precursor Mass: 606.2516+3  
 Delta Mass: 1.046 ppm  
 XCorr: 21.67



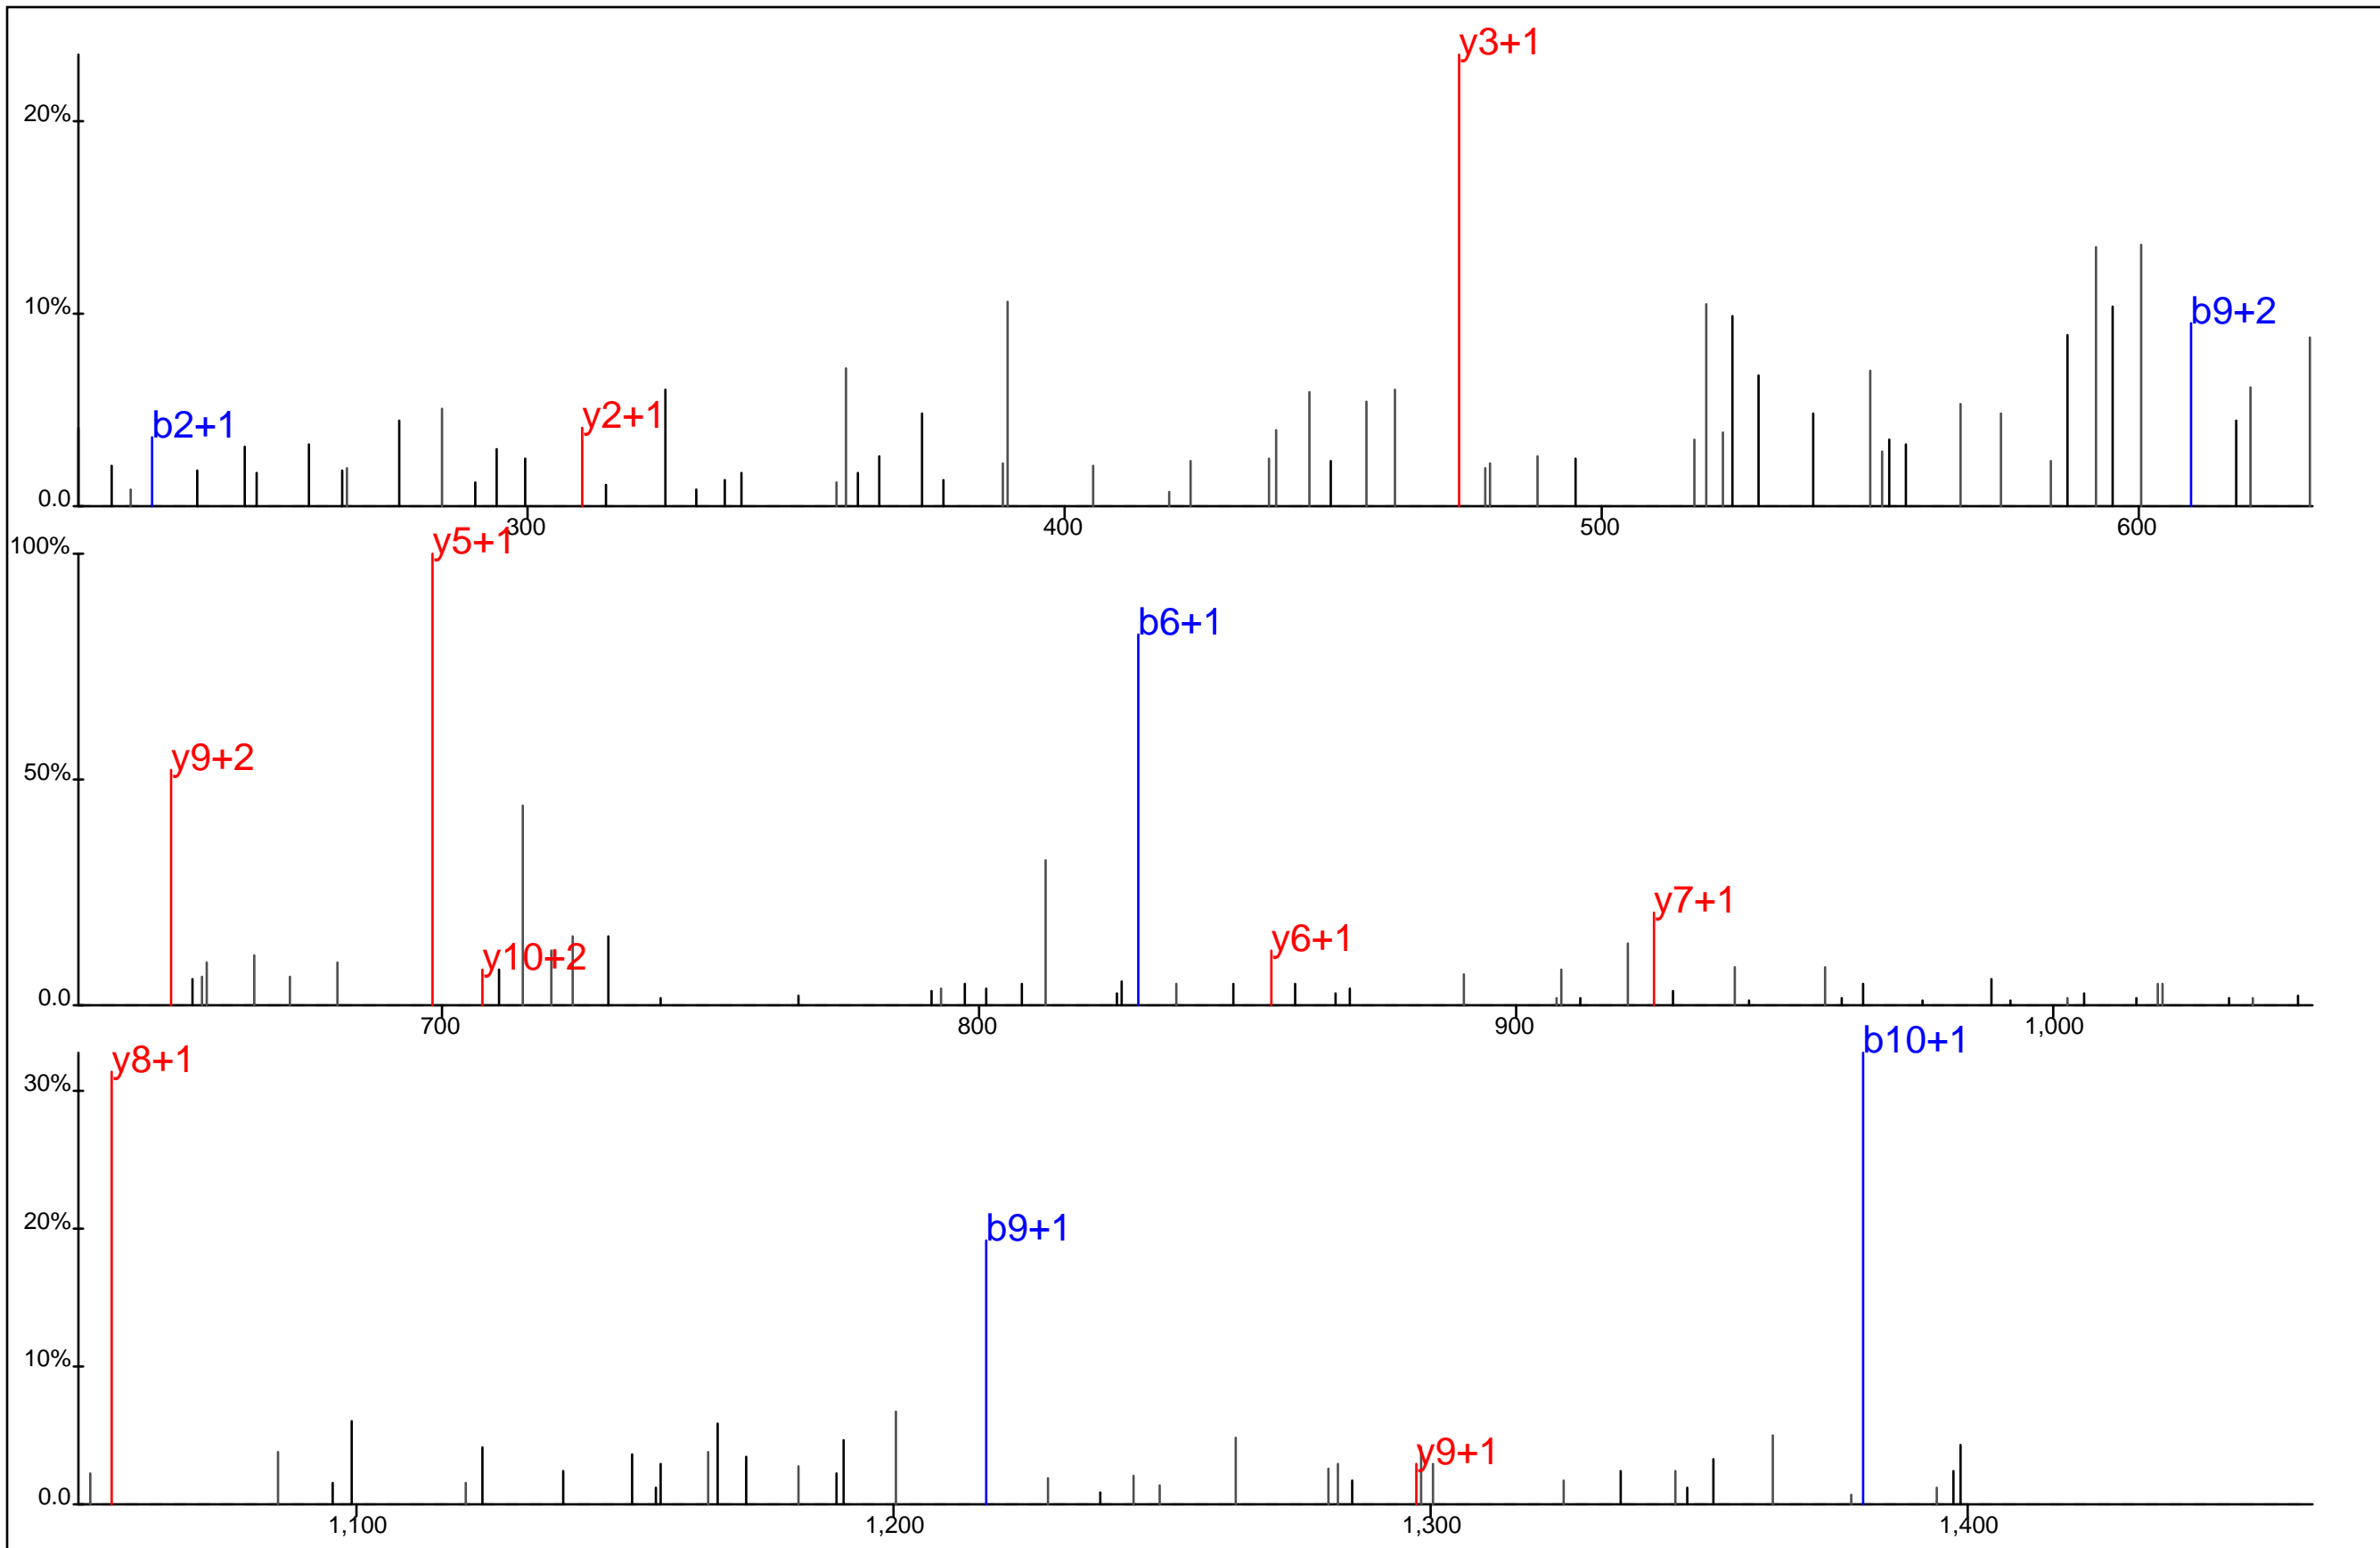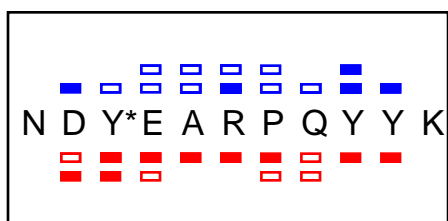

Protein Name: Diaphanous related formin 1  
 gi Accession: 0  
 Precursor Mass: 763.8184+2  
 Delta Mass: 1.007 ppm  
 XCorr: 36.78

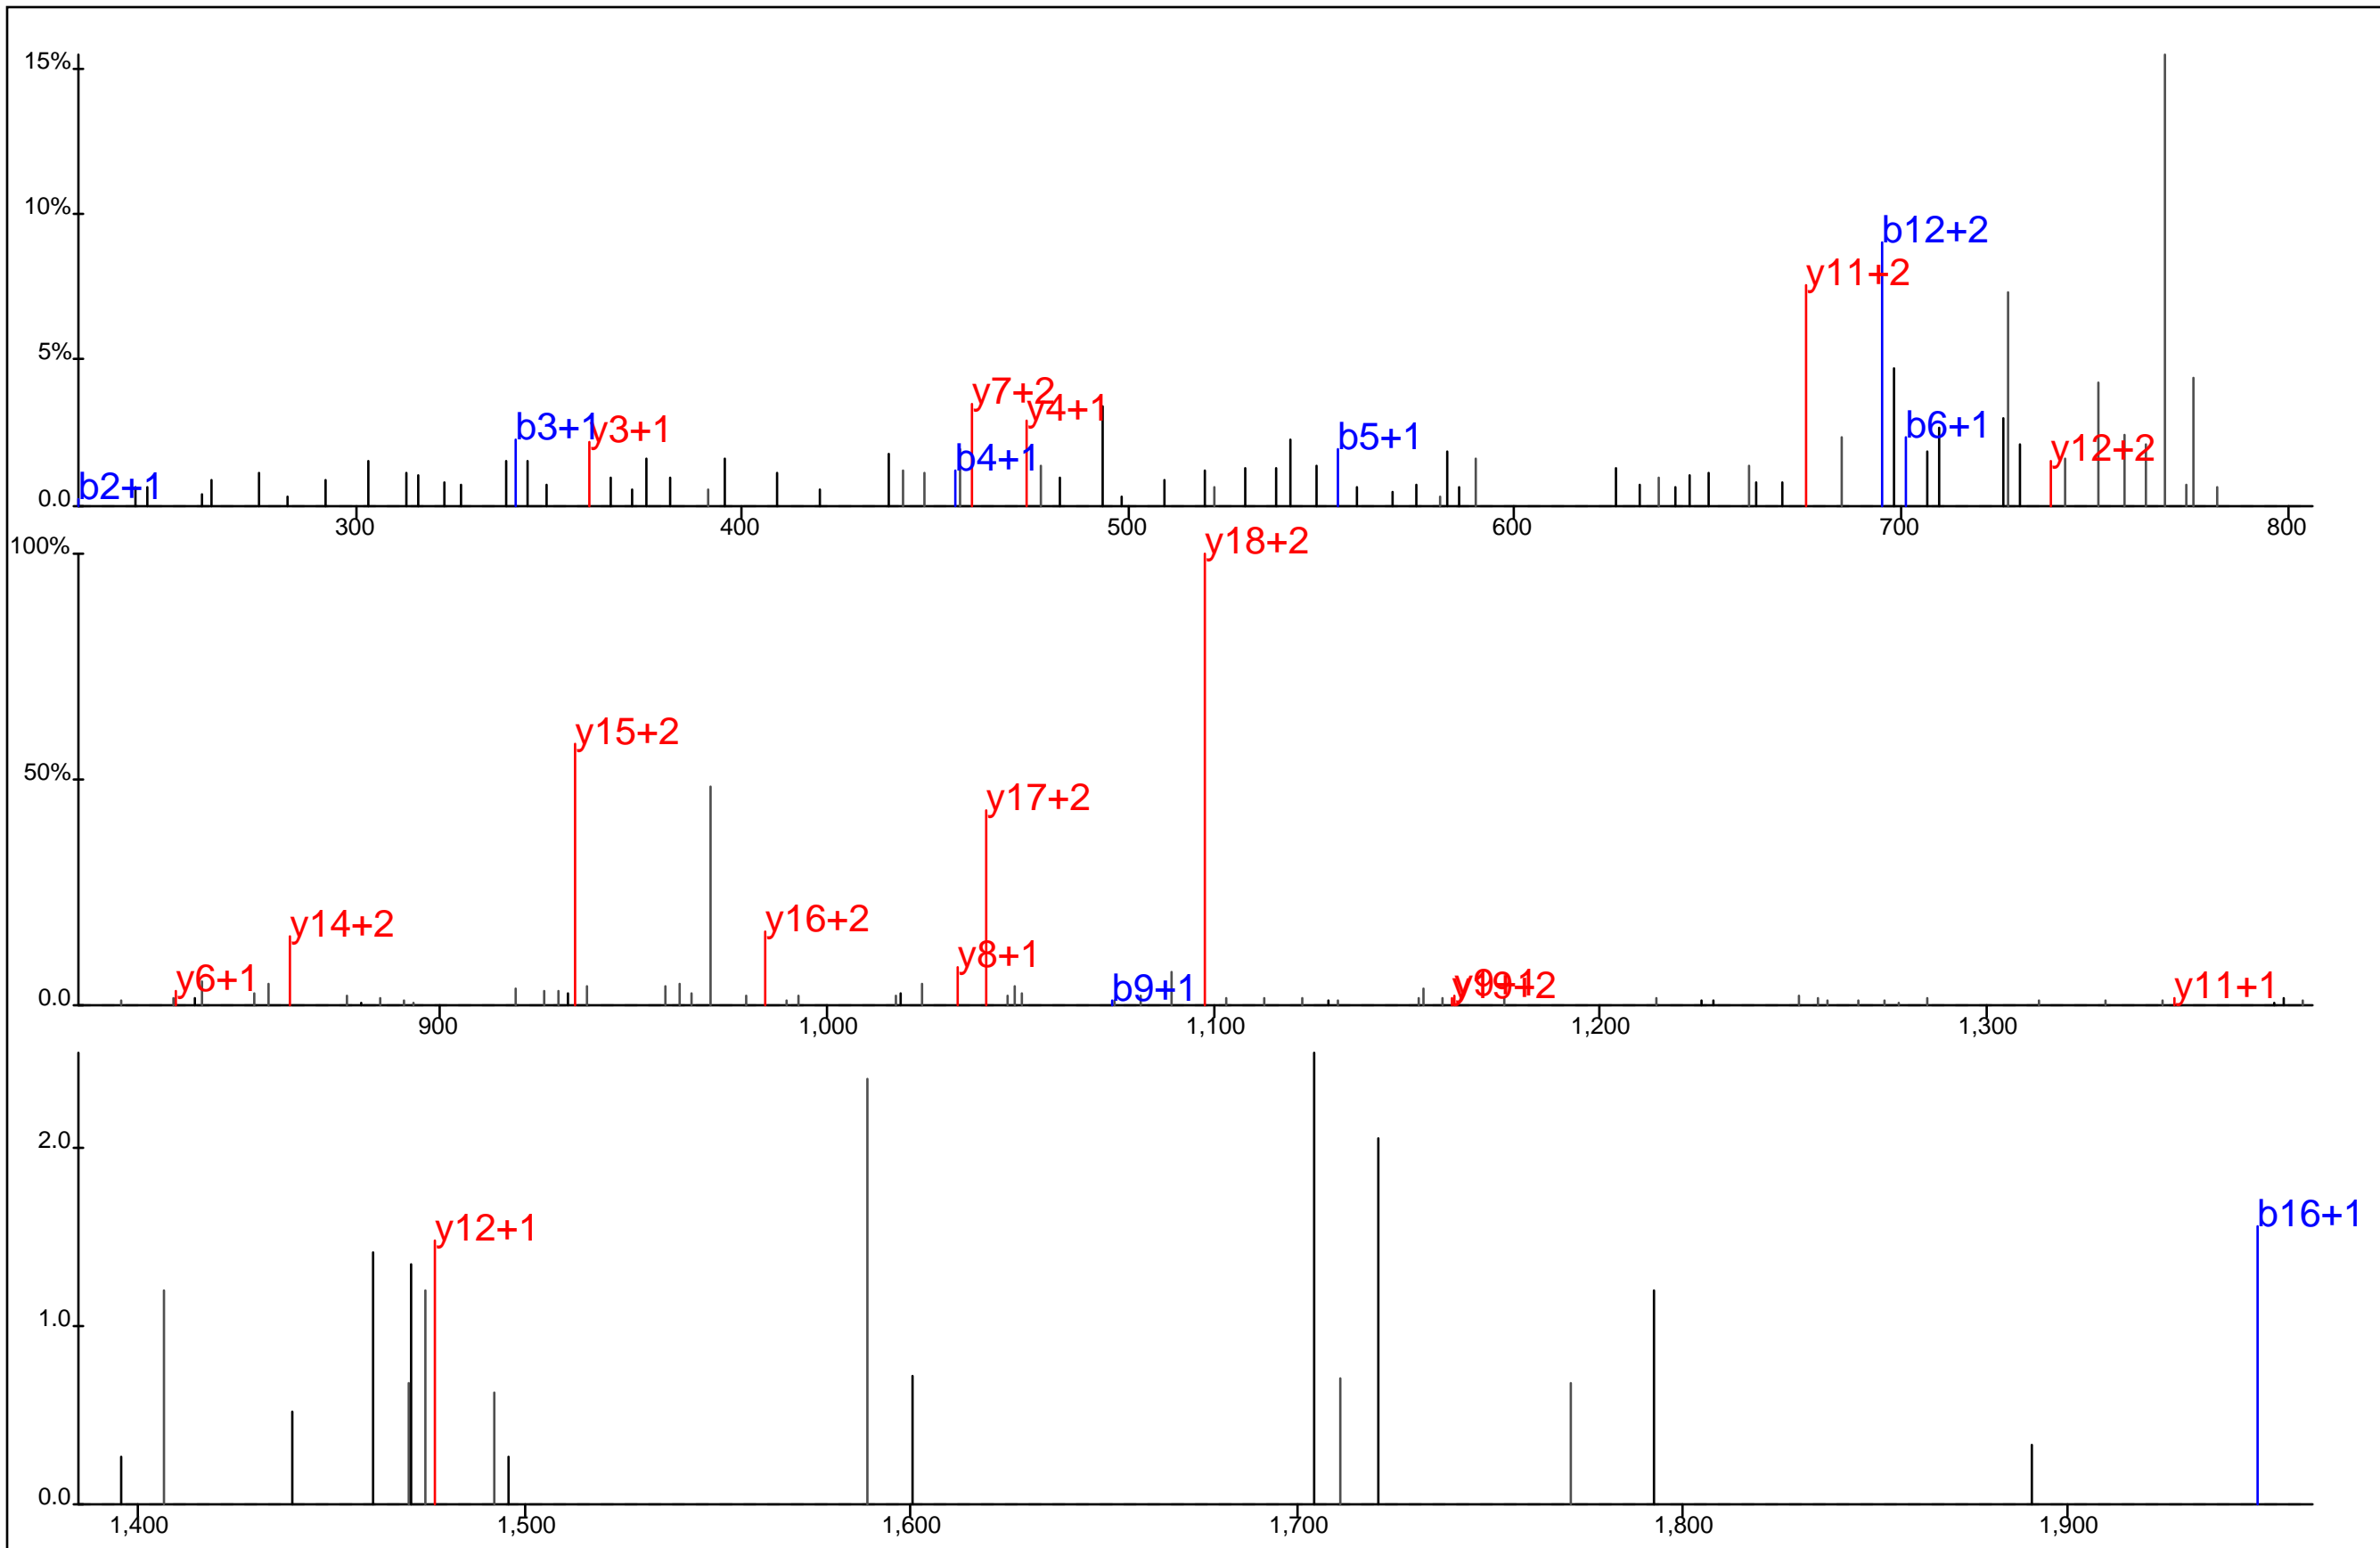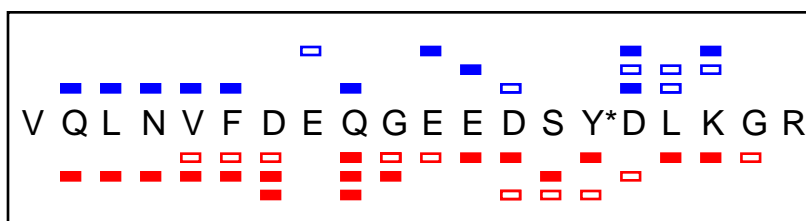

Protein Name: Diaphanous related formin 1  
 gi Accession: 0  
 Precursor Mass: 807.6885+3  
 Delta Mass: 3.928 ppm  
 XCorr: 27.36

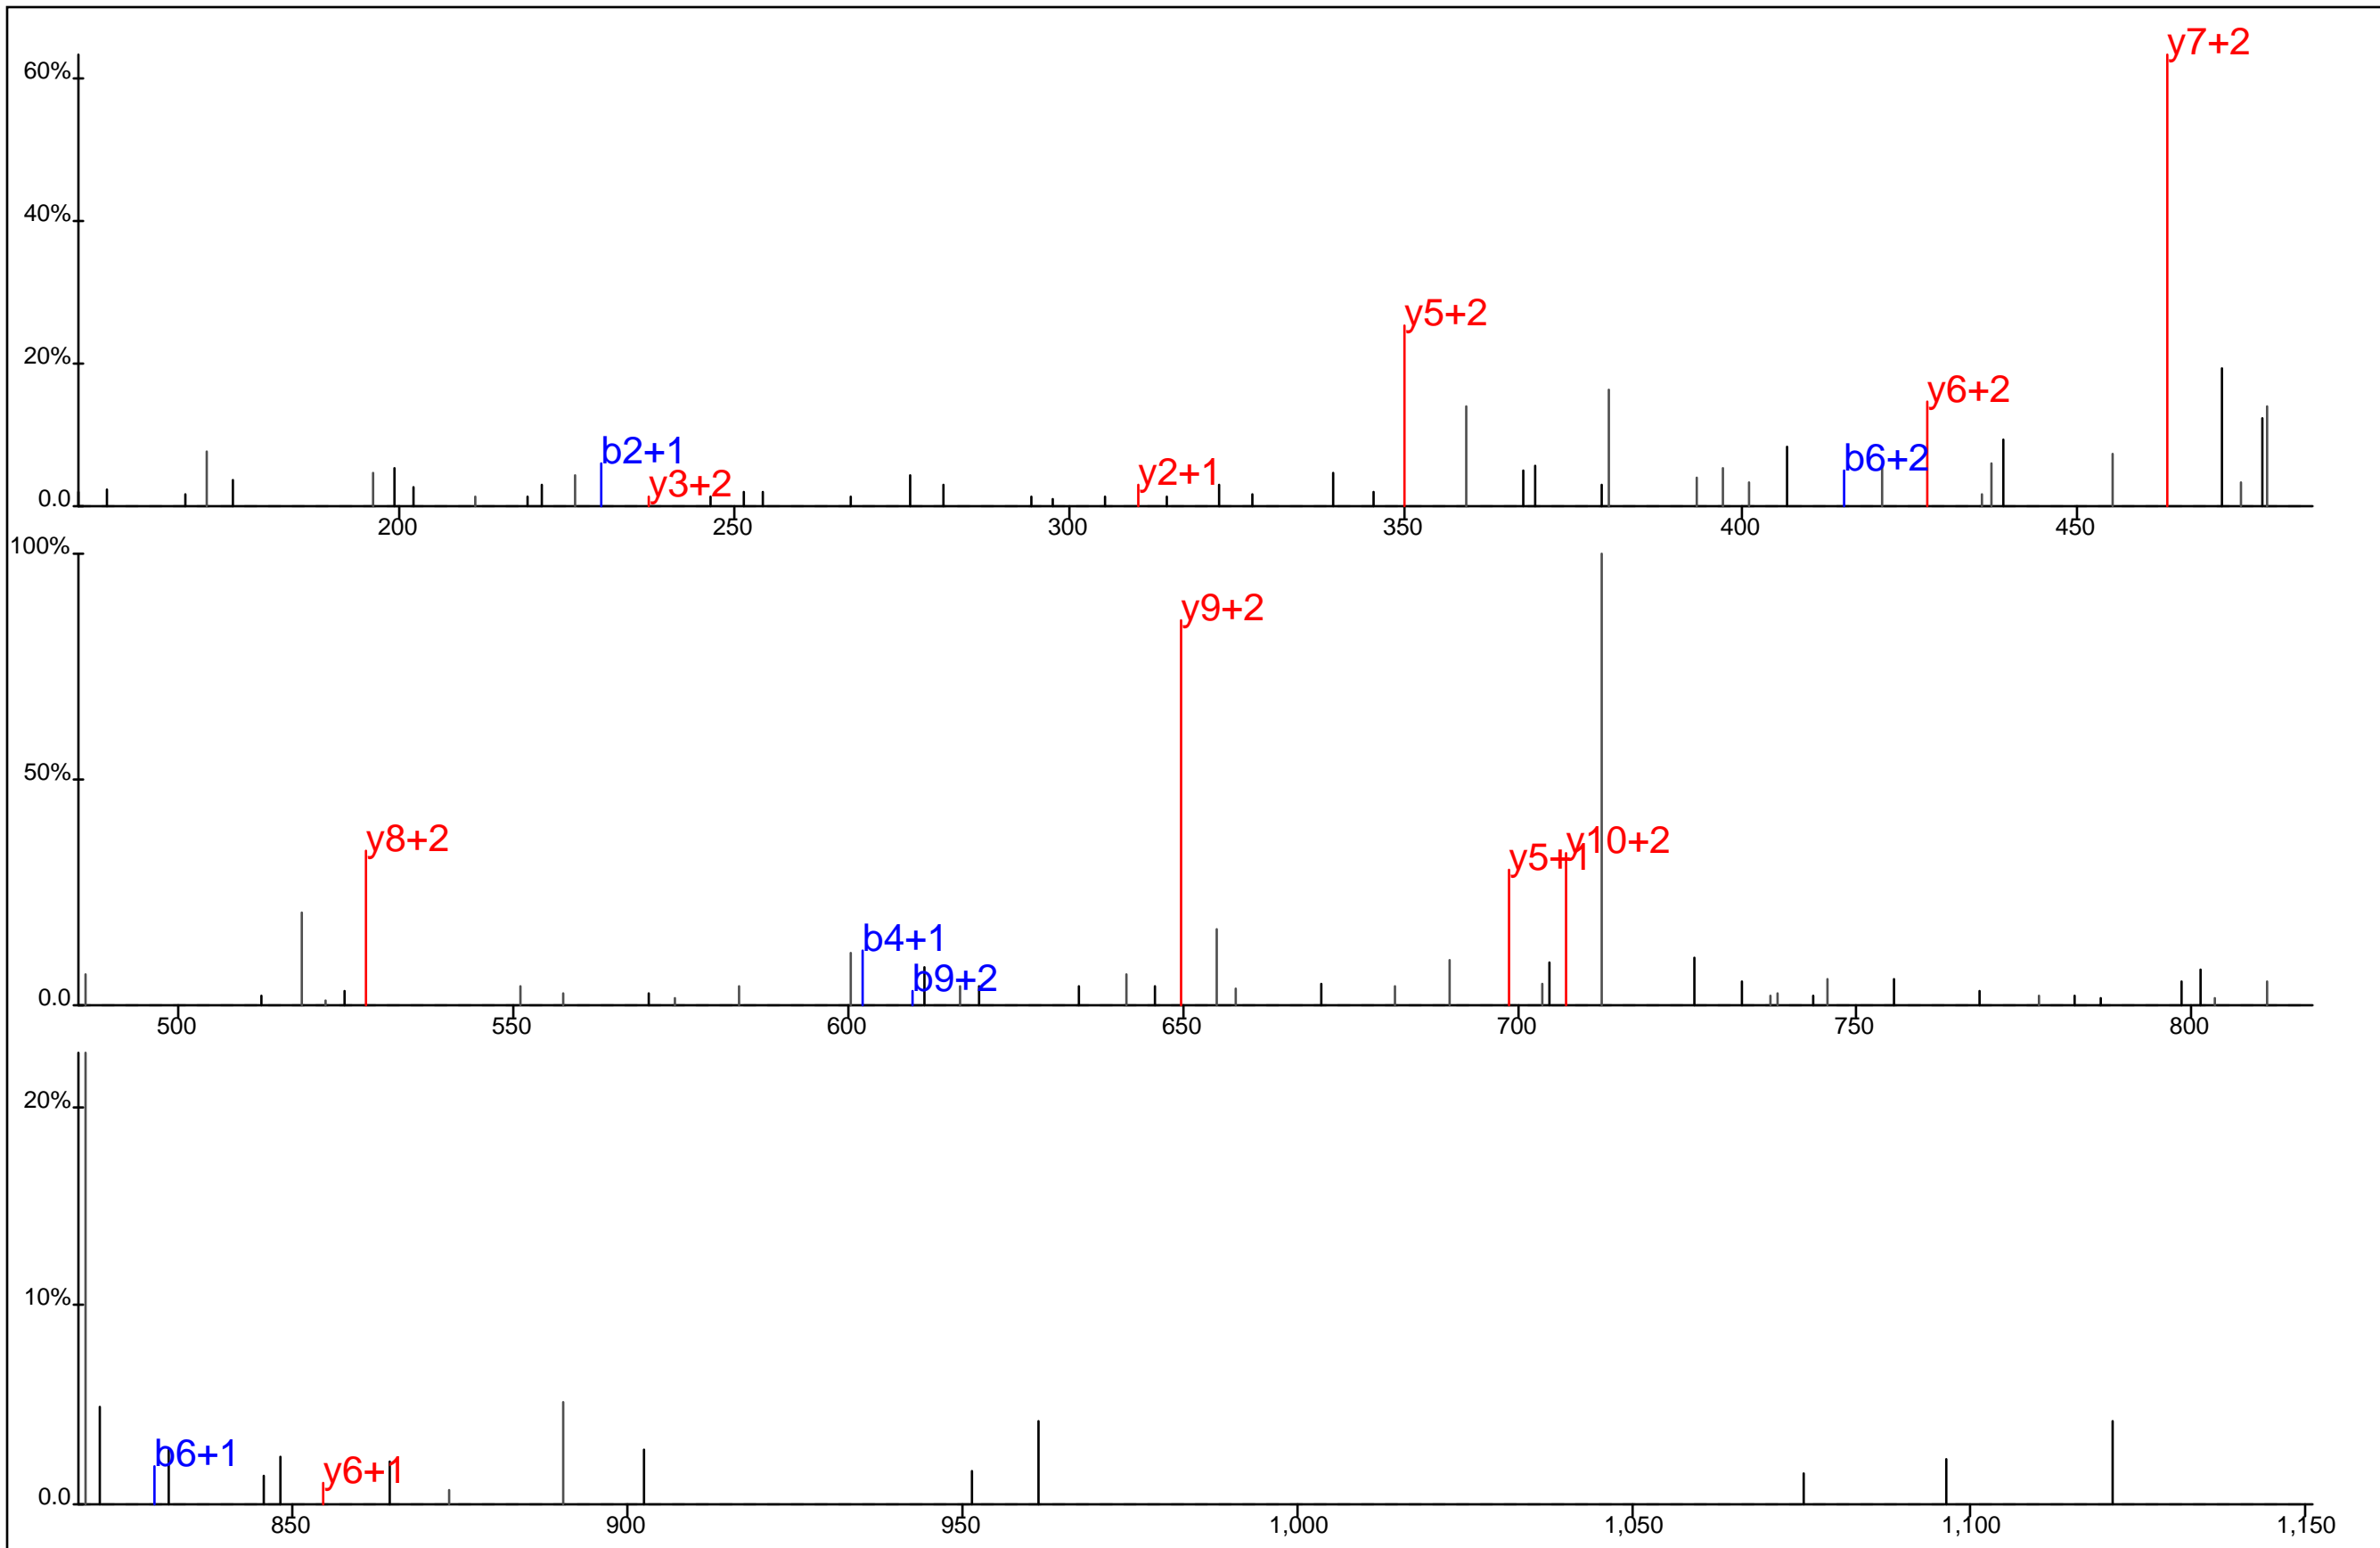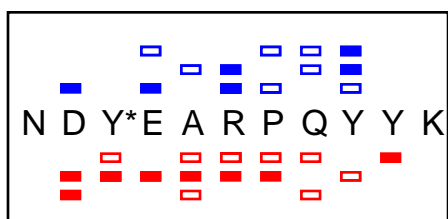

Protein Name: Diaphanous related formin 1  
 gi Accession: 0  
 Precursor Mass: 509.5492+3  
 Delta Mass: 1.324 ppm  
 XCorr: 27.26

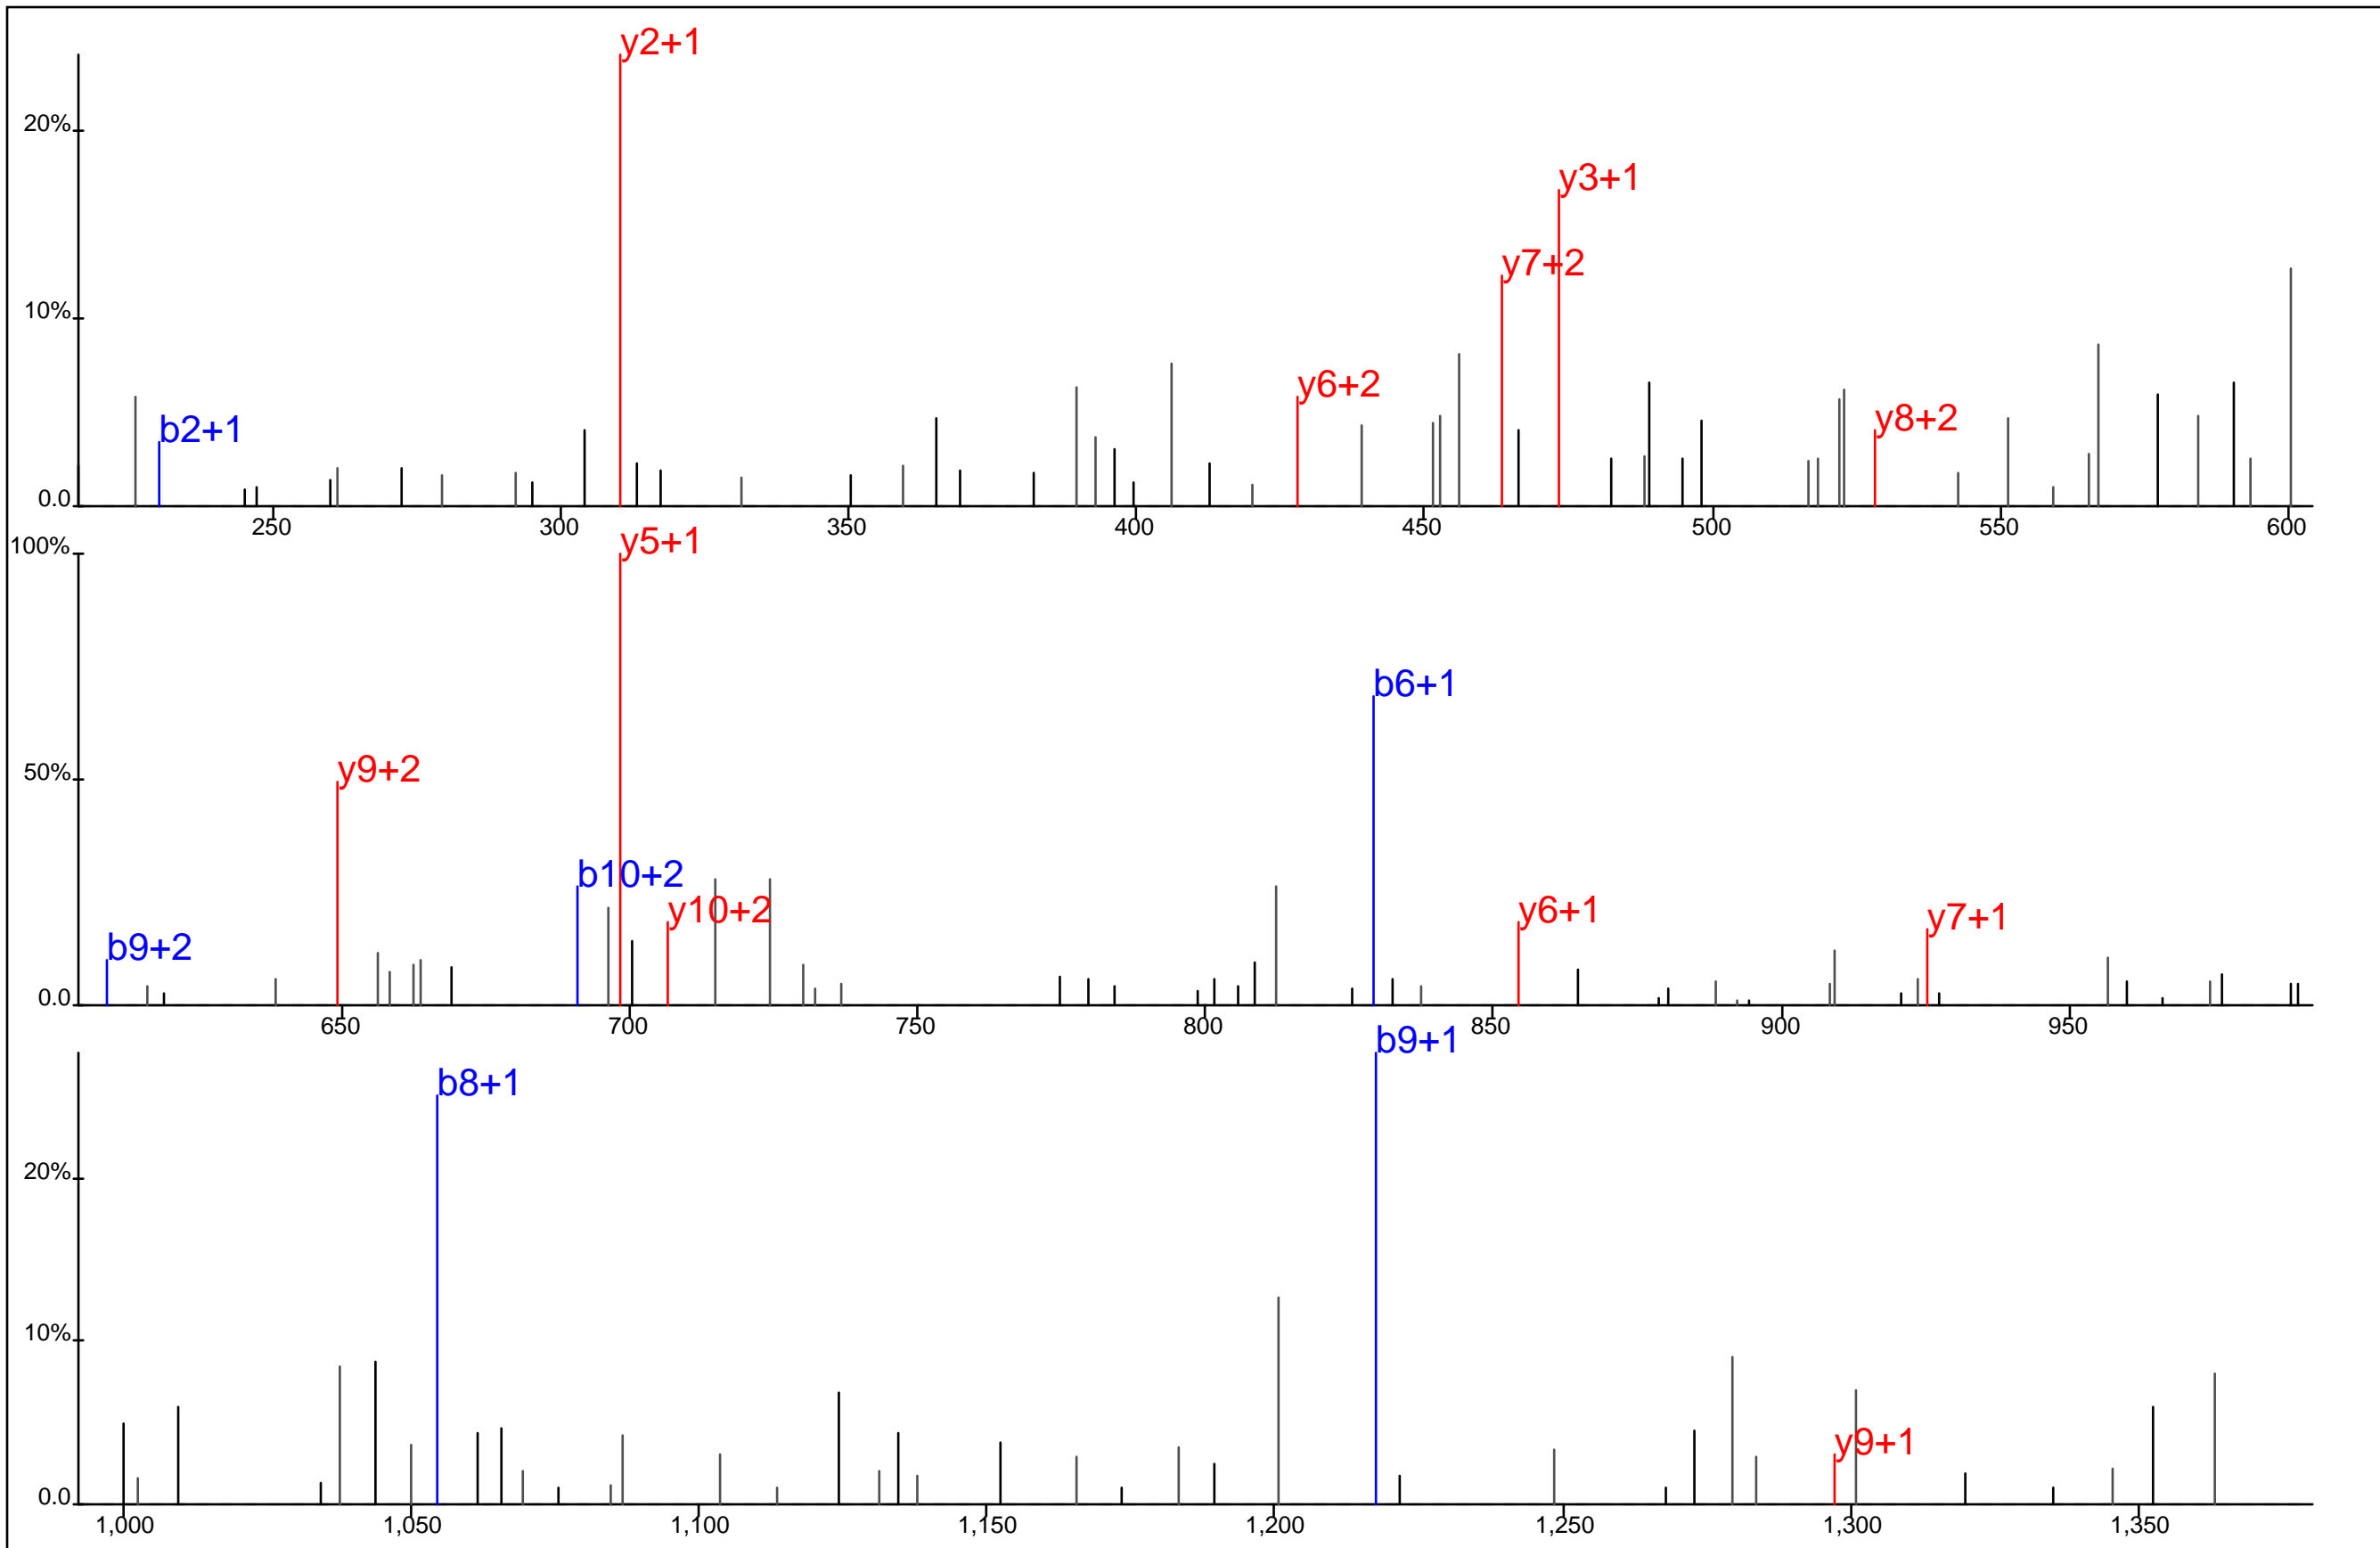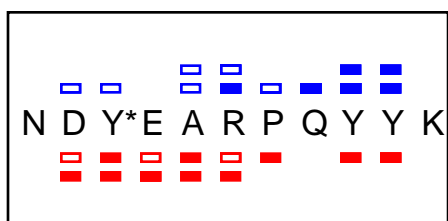

Protein Name: Diaphanous related formin 1  
 gi Accession: 0  
 Precursor Mass: 763.8221+2  
 Delta Mass: 3.791 ppm  
 XCorr: 47.41

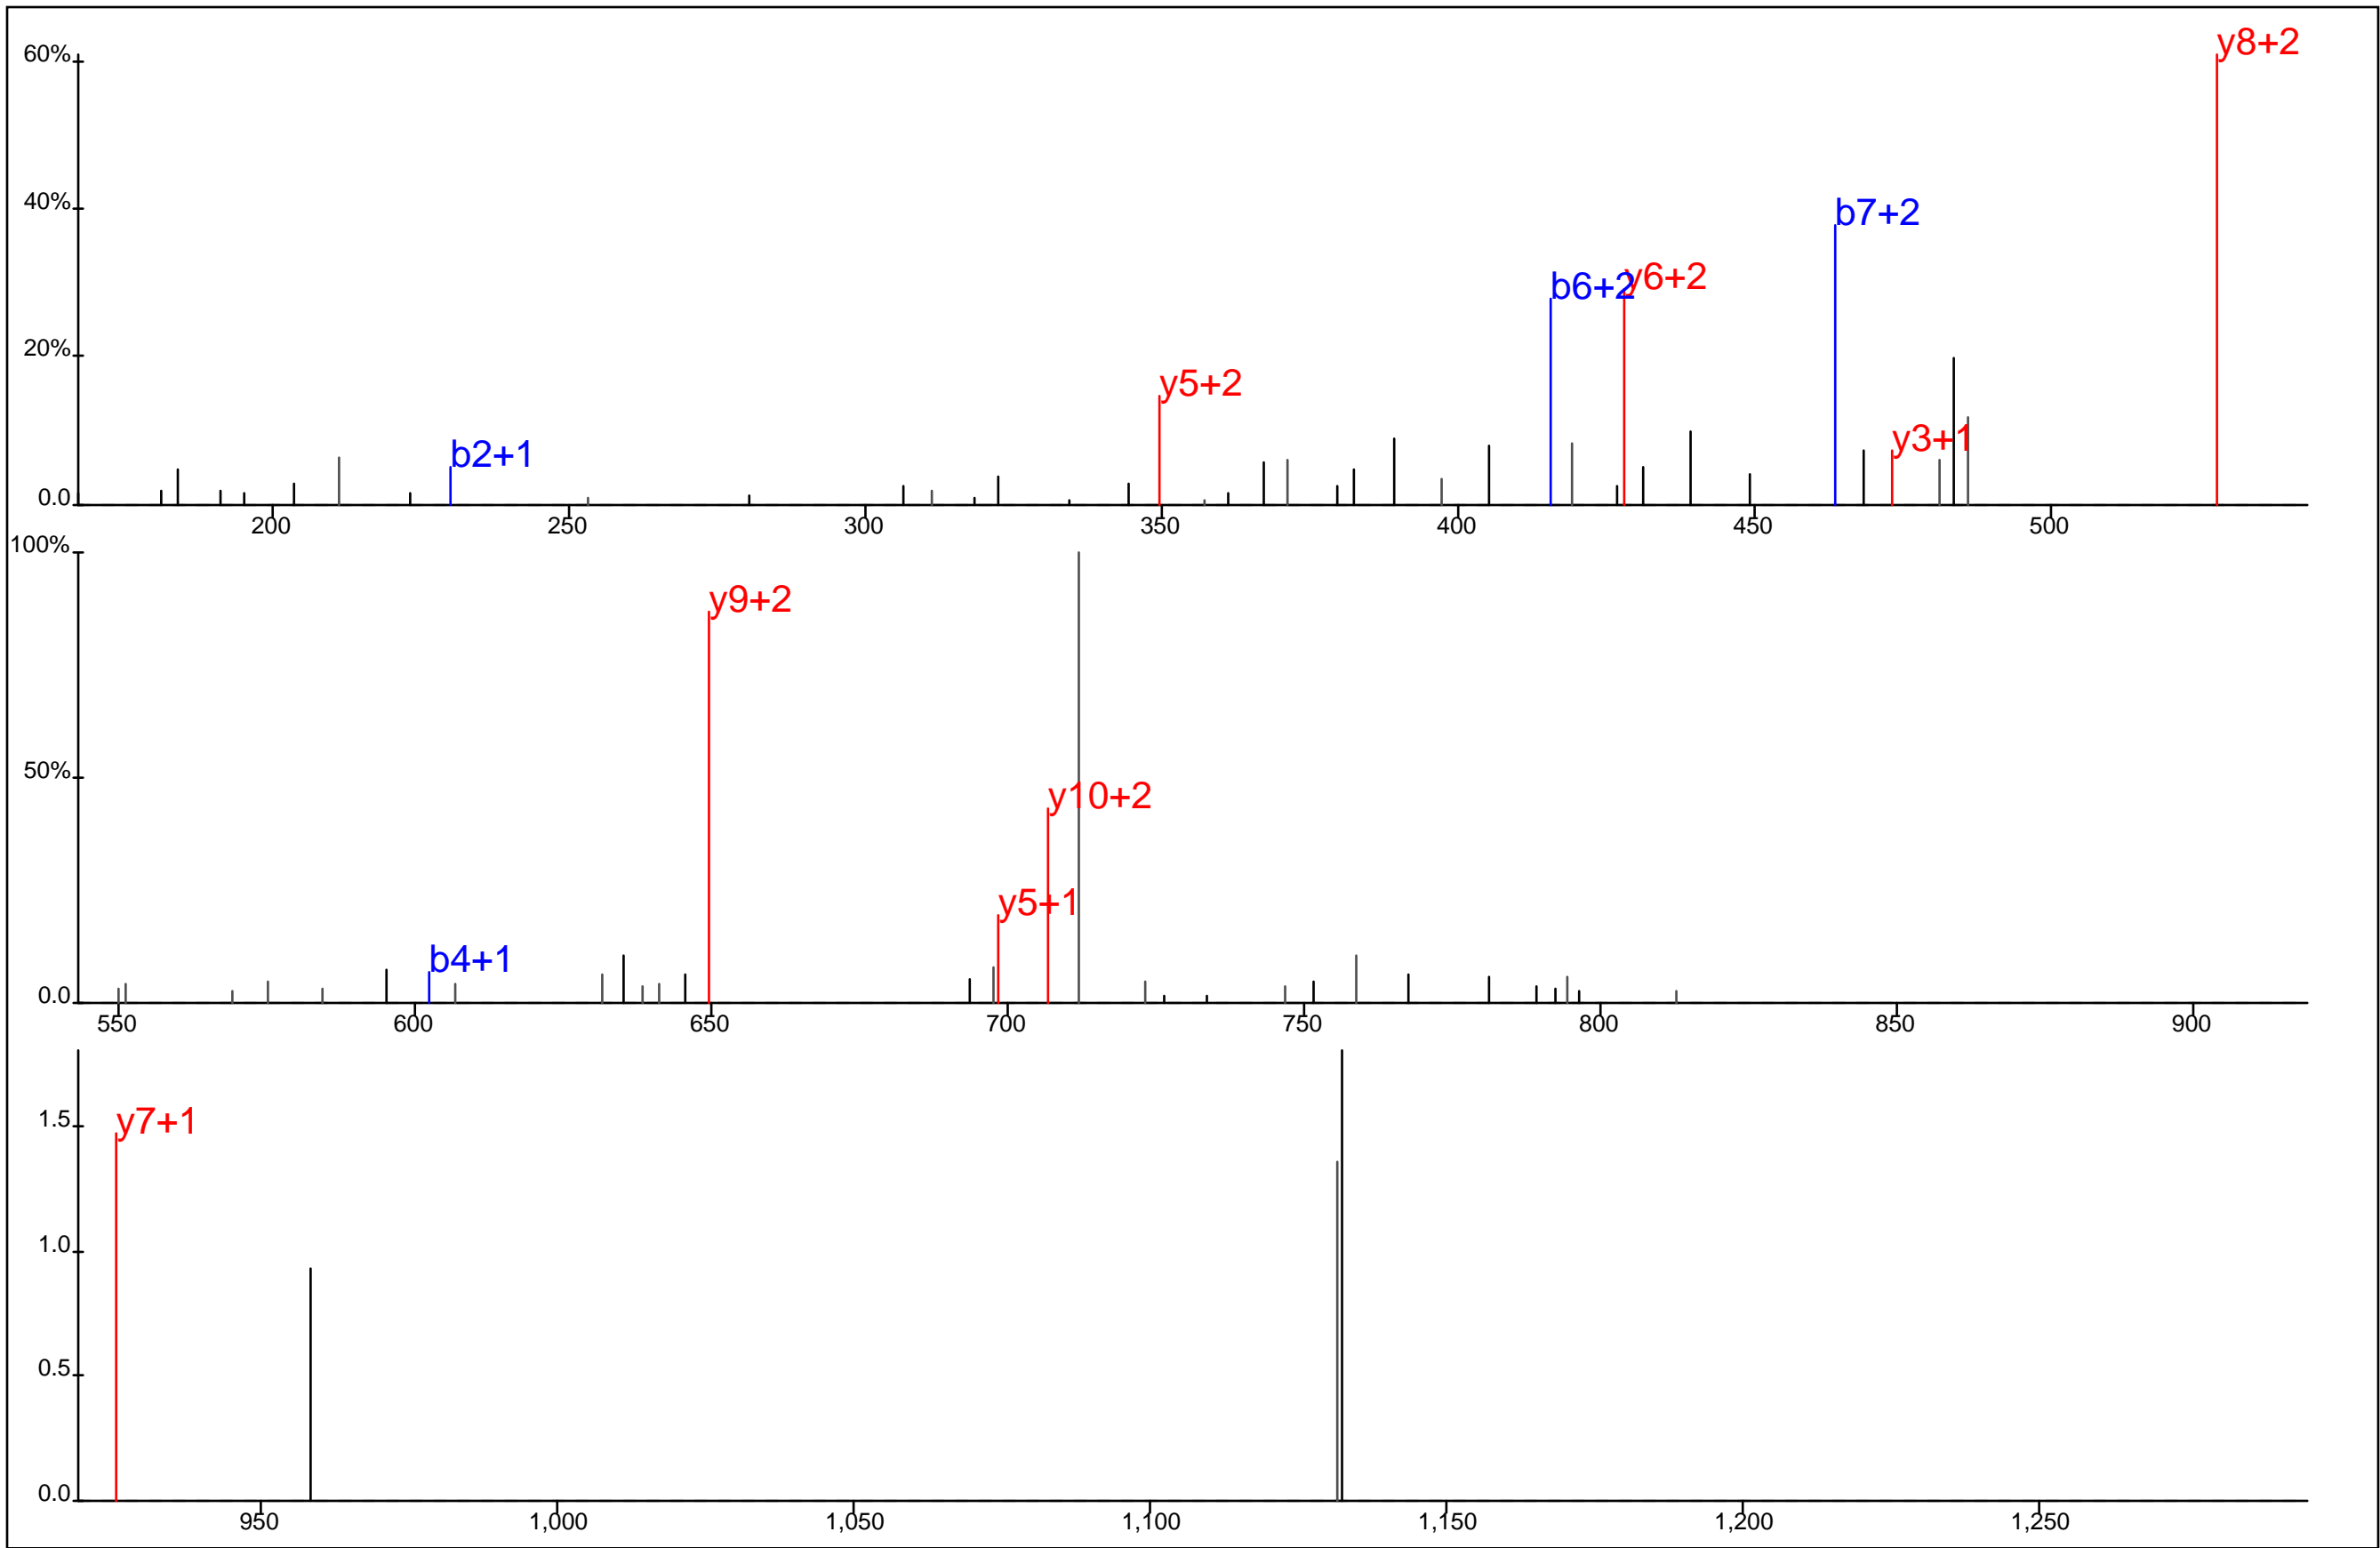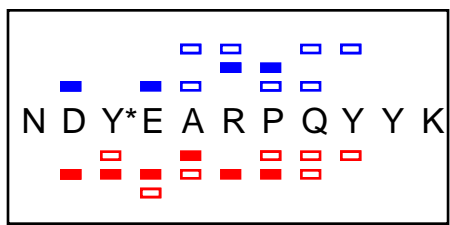

Protein Name: Diaphanous related formin 1  
 gi Accession: 0  
 Precursor Mass: 509.5498+3  
 Delta Mass: 2.403 ppm  
 XCorr: 23.62

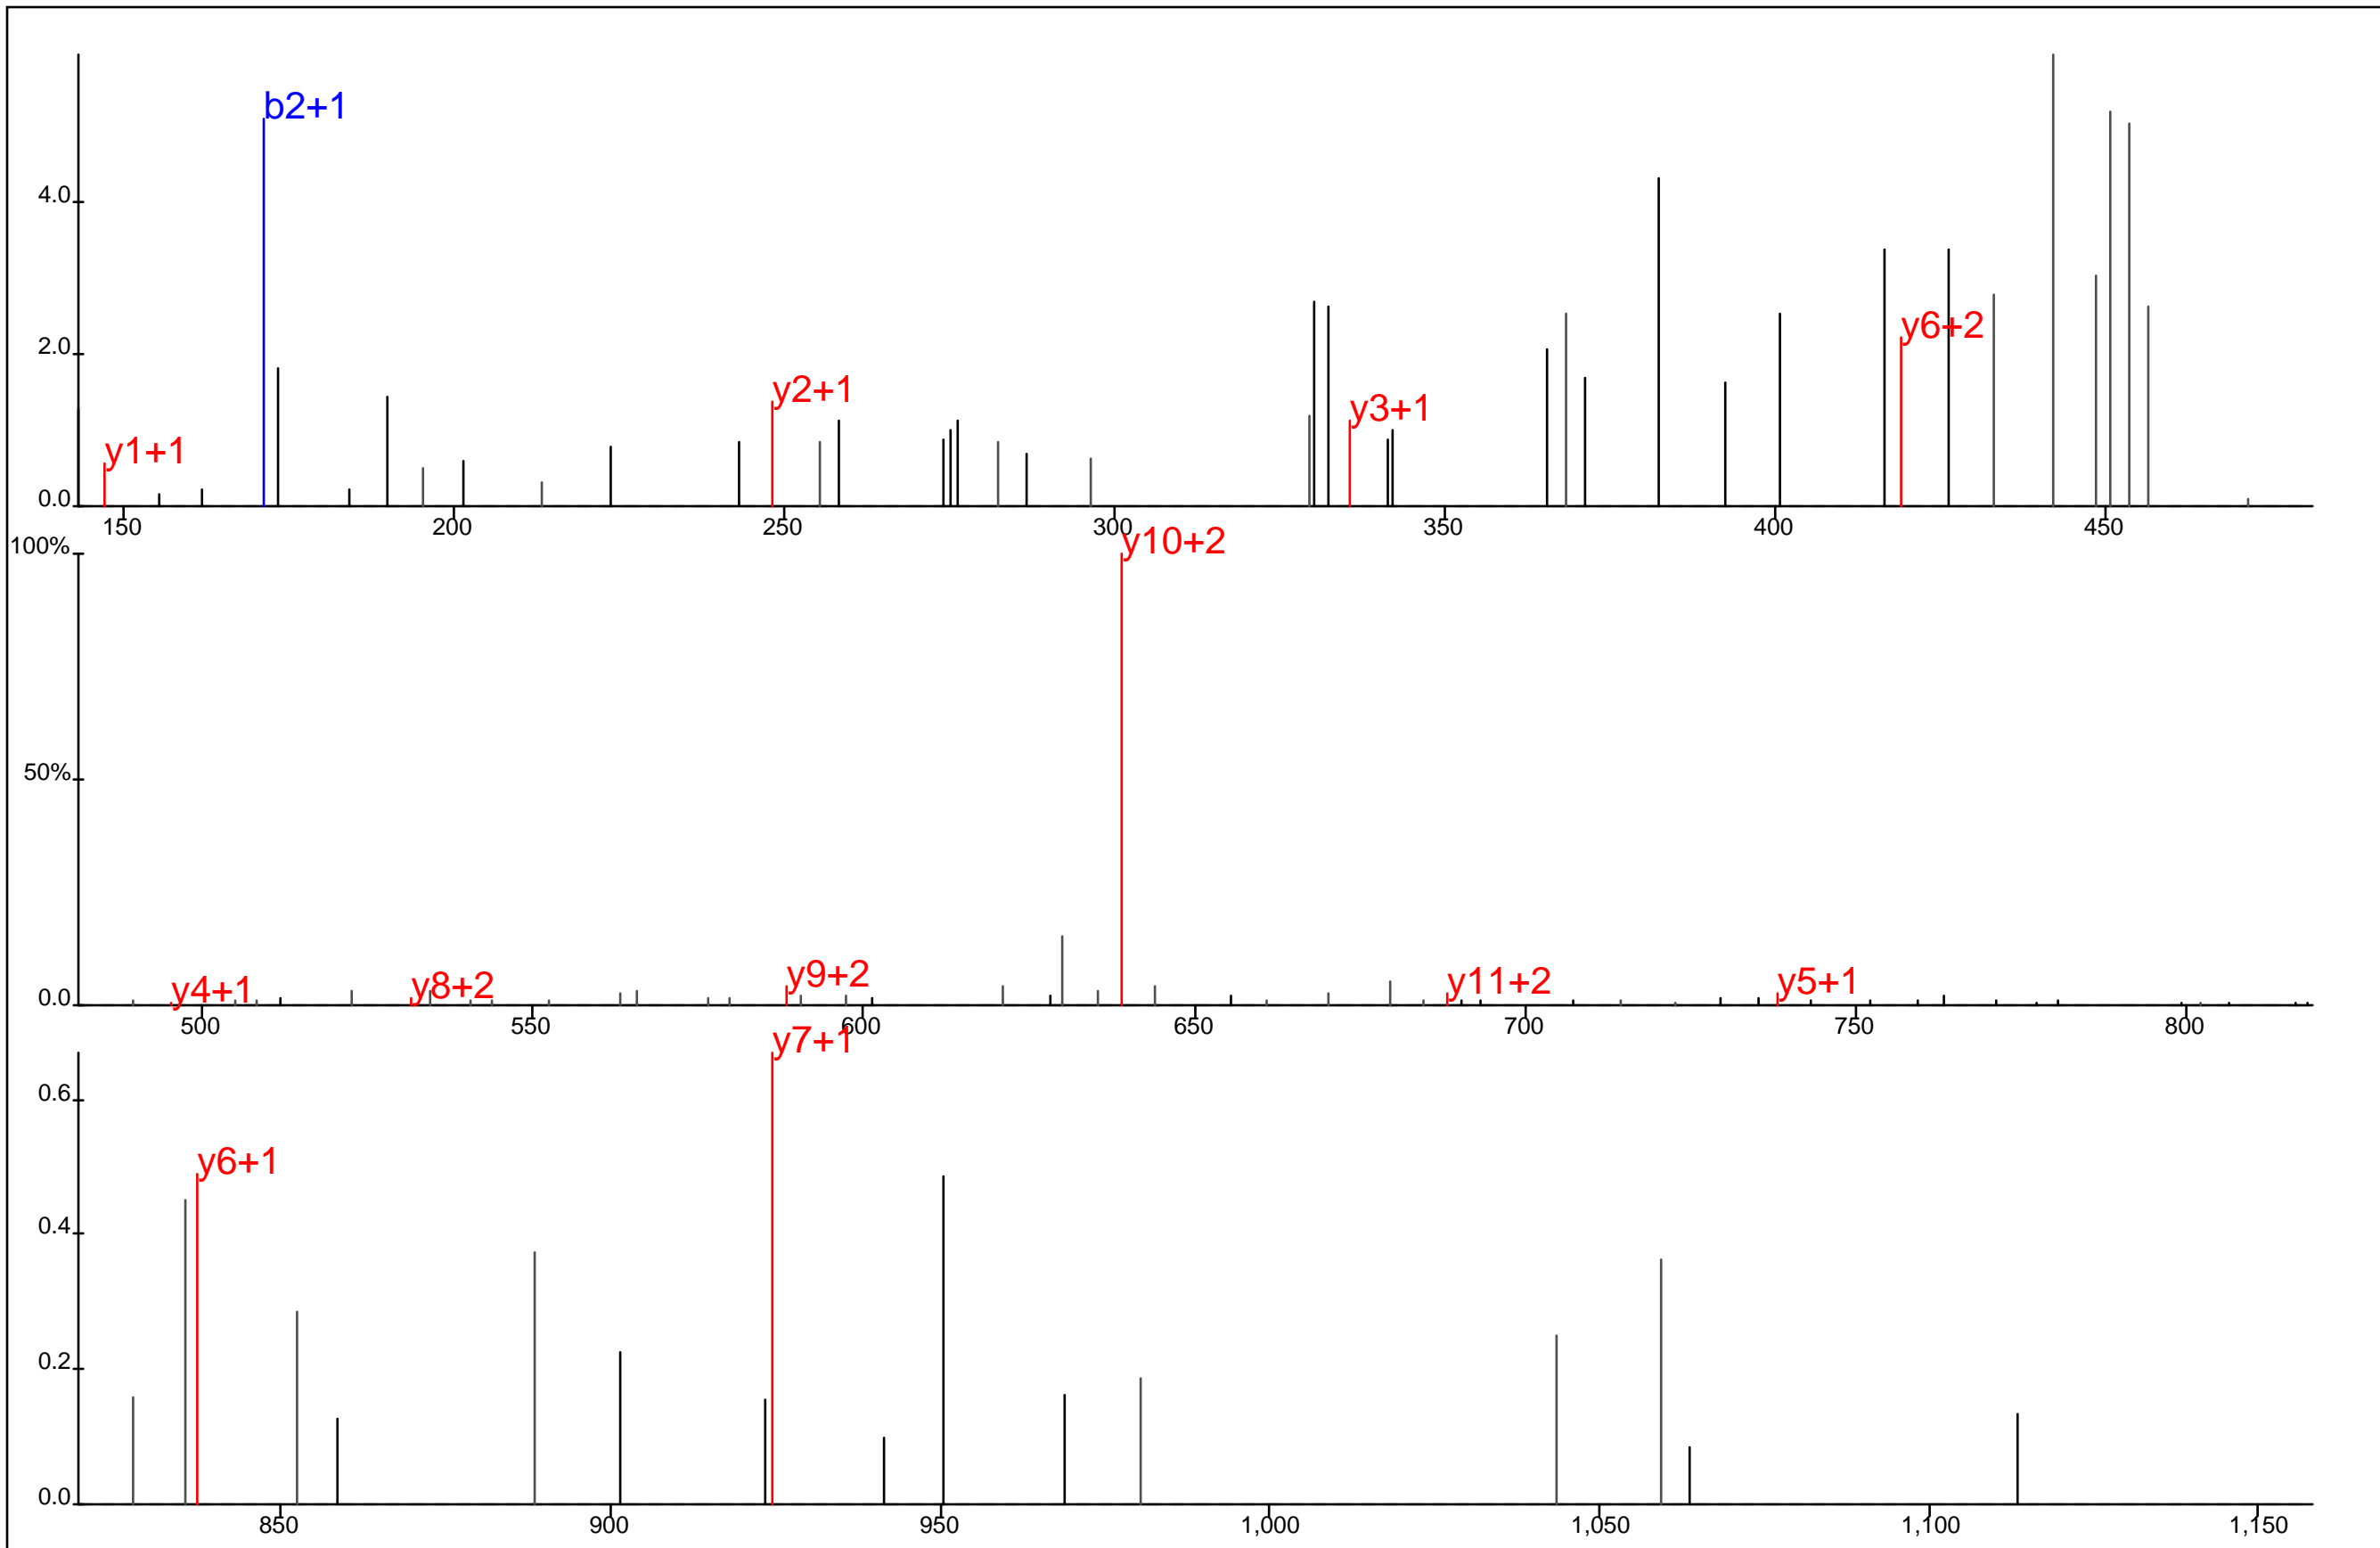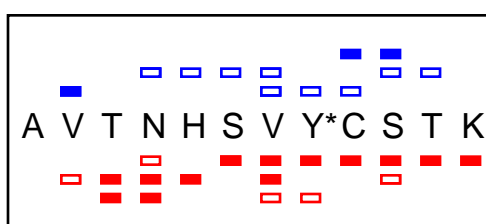

Protein Name: Dicarbonyl/L-xylulose reductase  
 gi Accession: 0  
 Precursor Mass: 482.8745+3  
 Delta Mass: 0.534 ppm  
 XCorr: 20.5

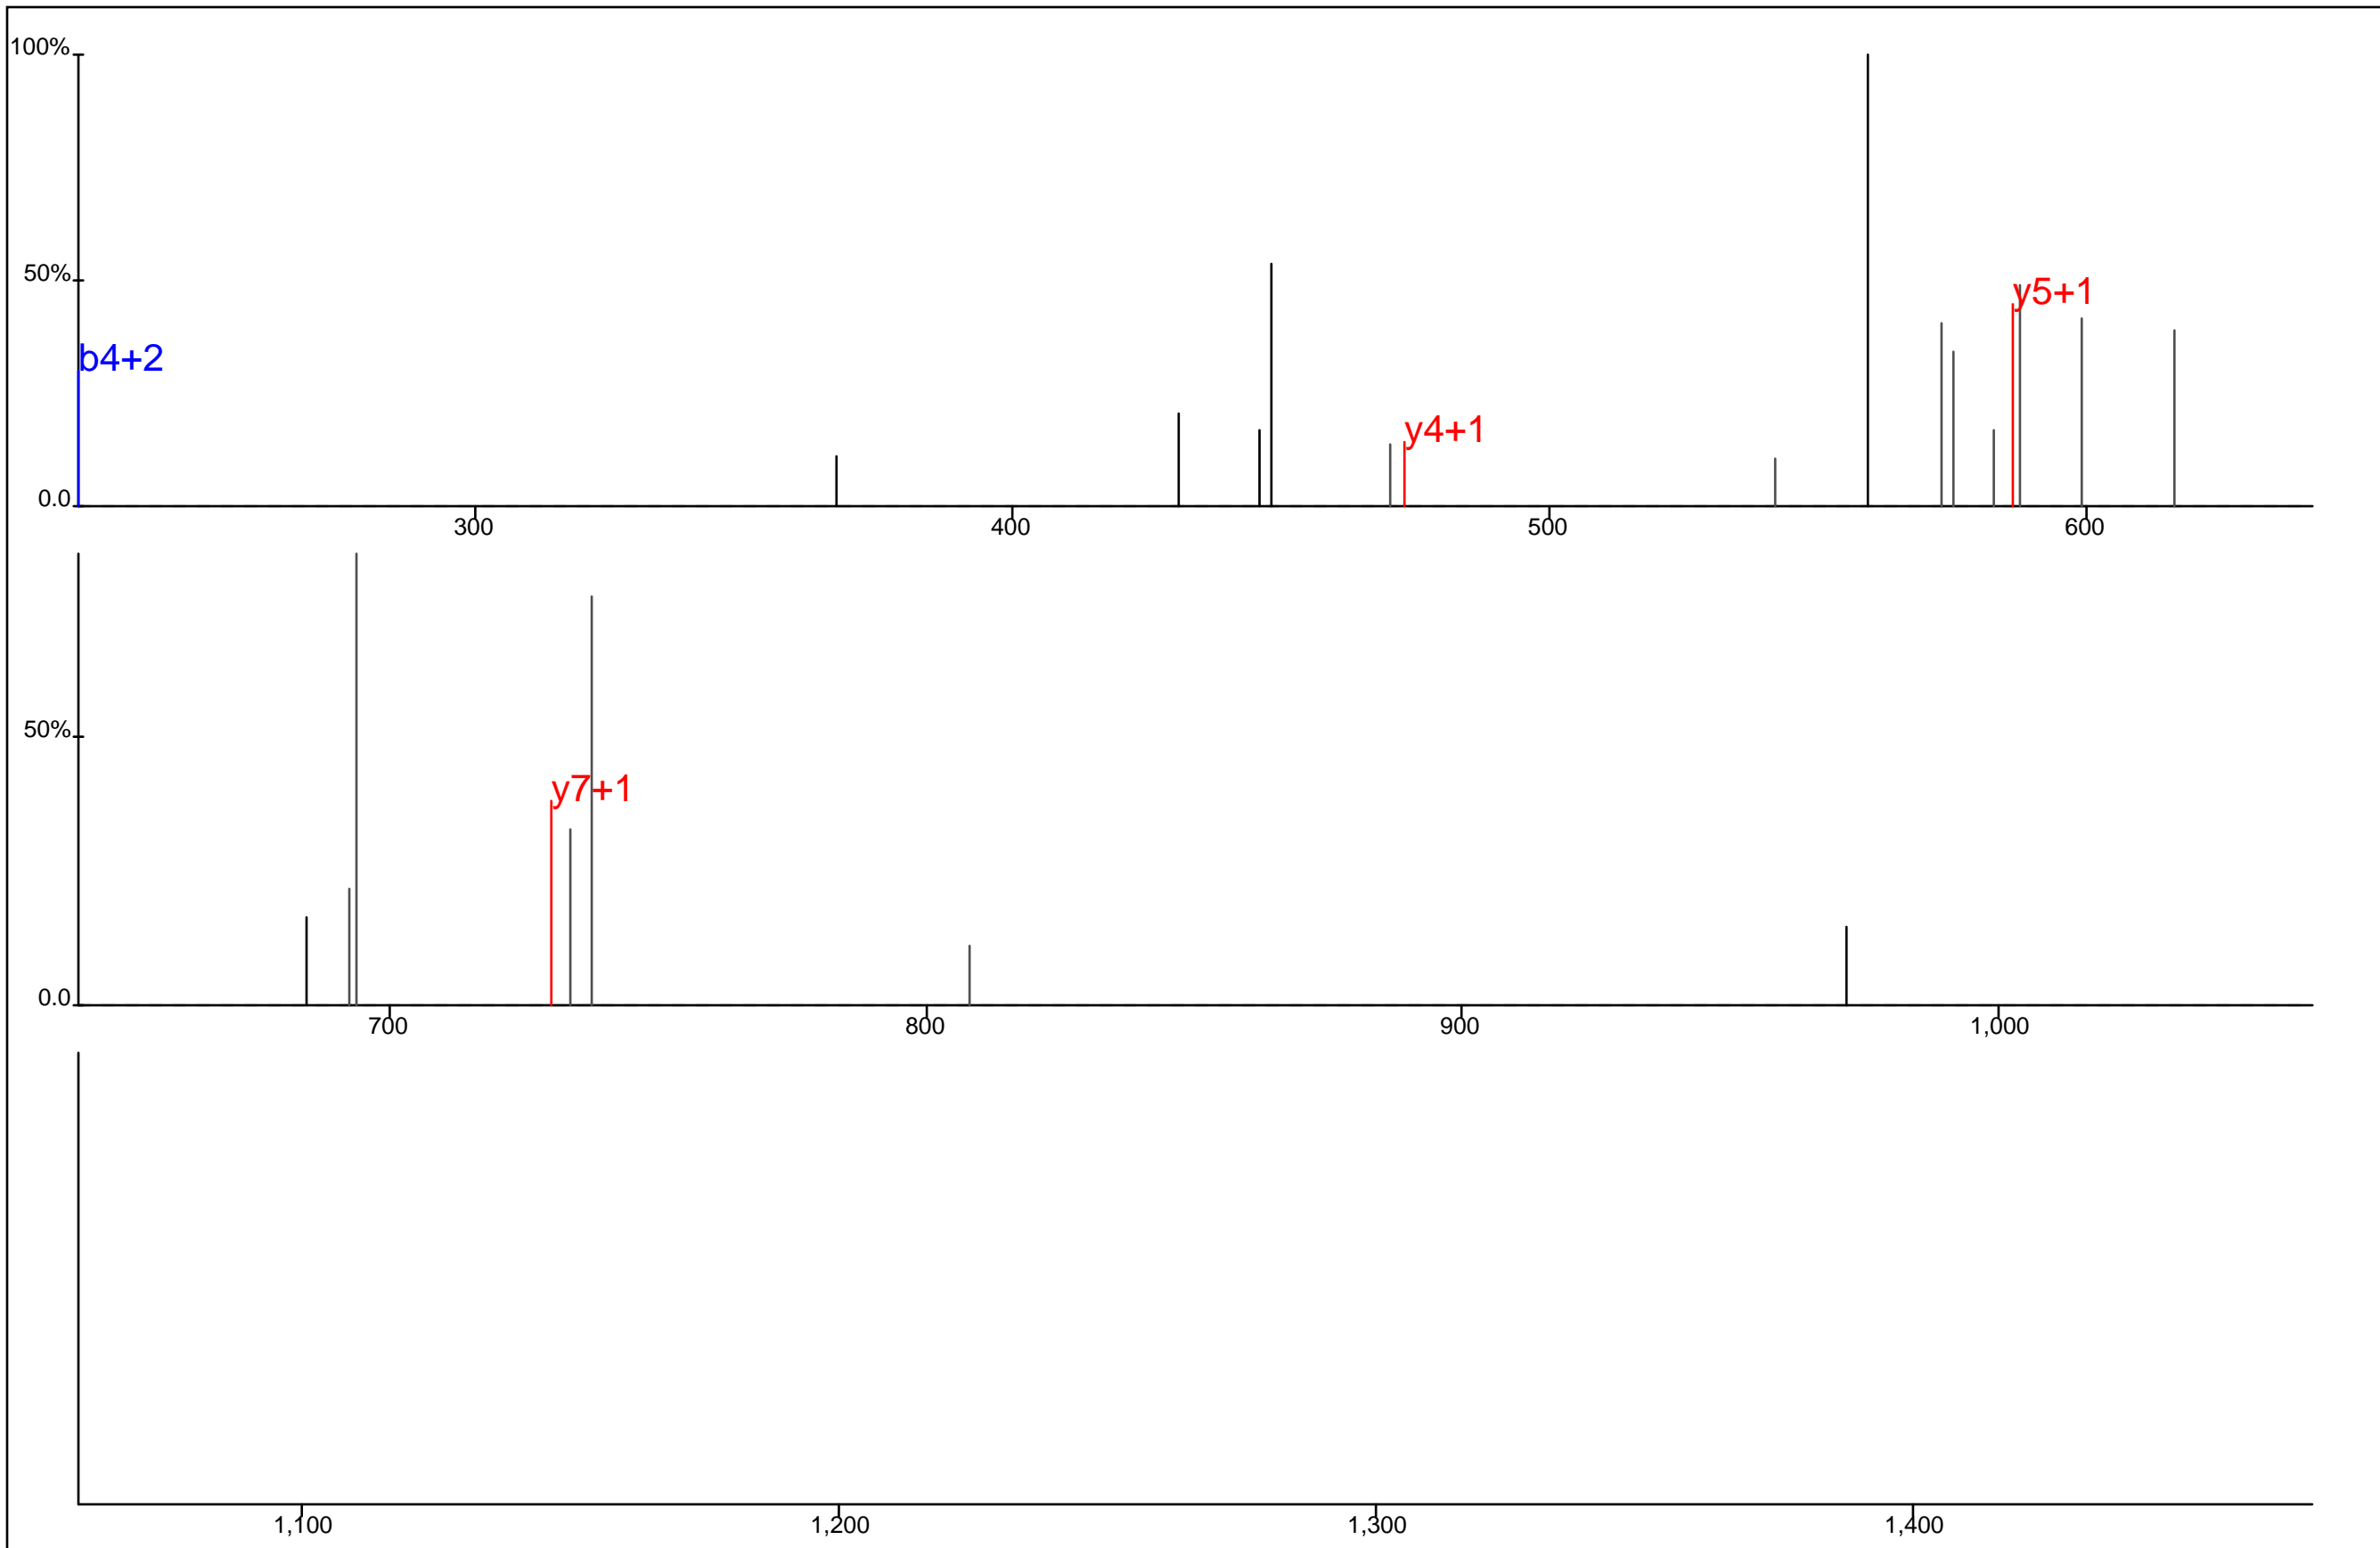

■ □  
 S I I H G S \* R K Y \* S G L I V N K  
□ ■ ■ ■ ■

Protein Name: Dipeptidyl peptidase IX  
 gi Accession: 0  
 Precursor Mass: 644.6511+3  
 Delta Mass: 6.060 ppm  
 XCorr: 26.91

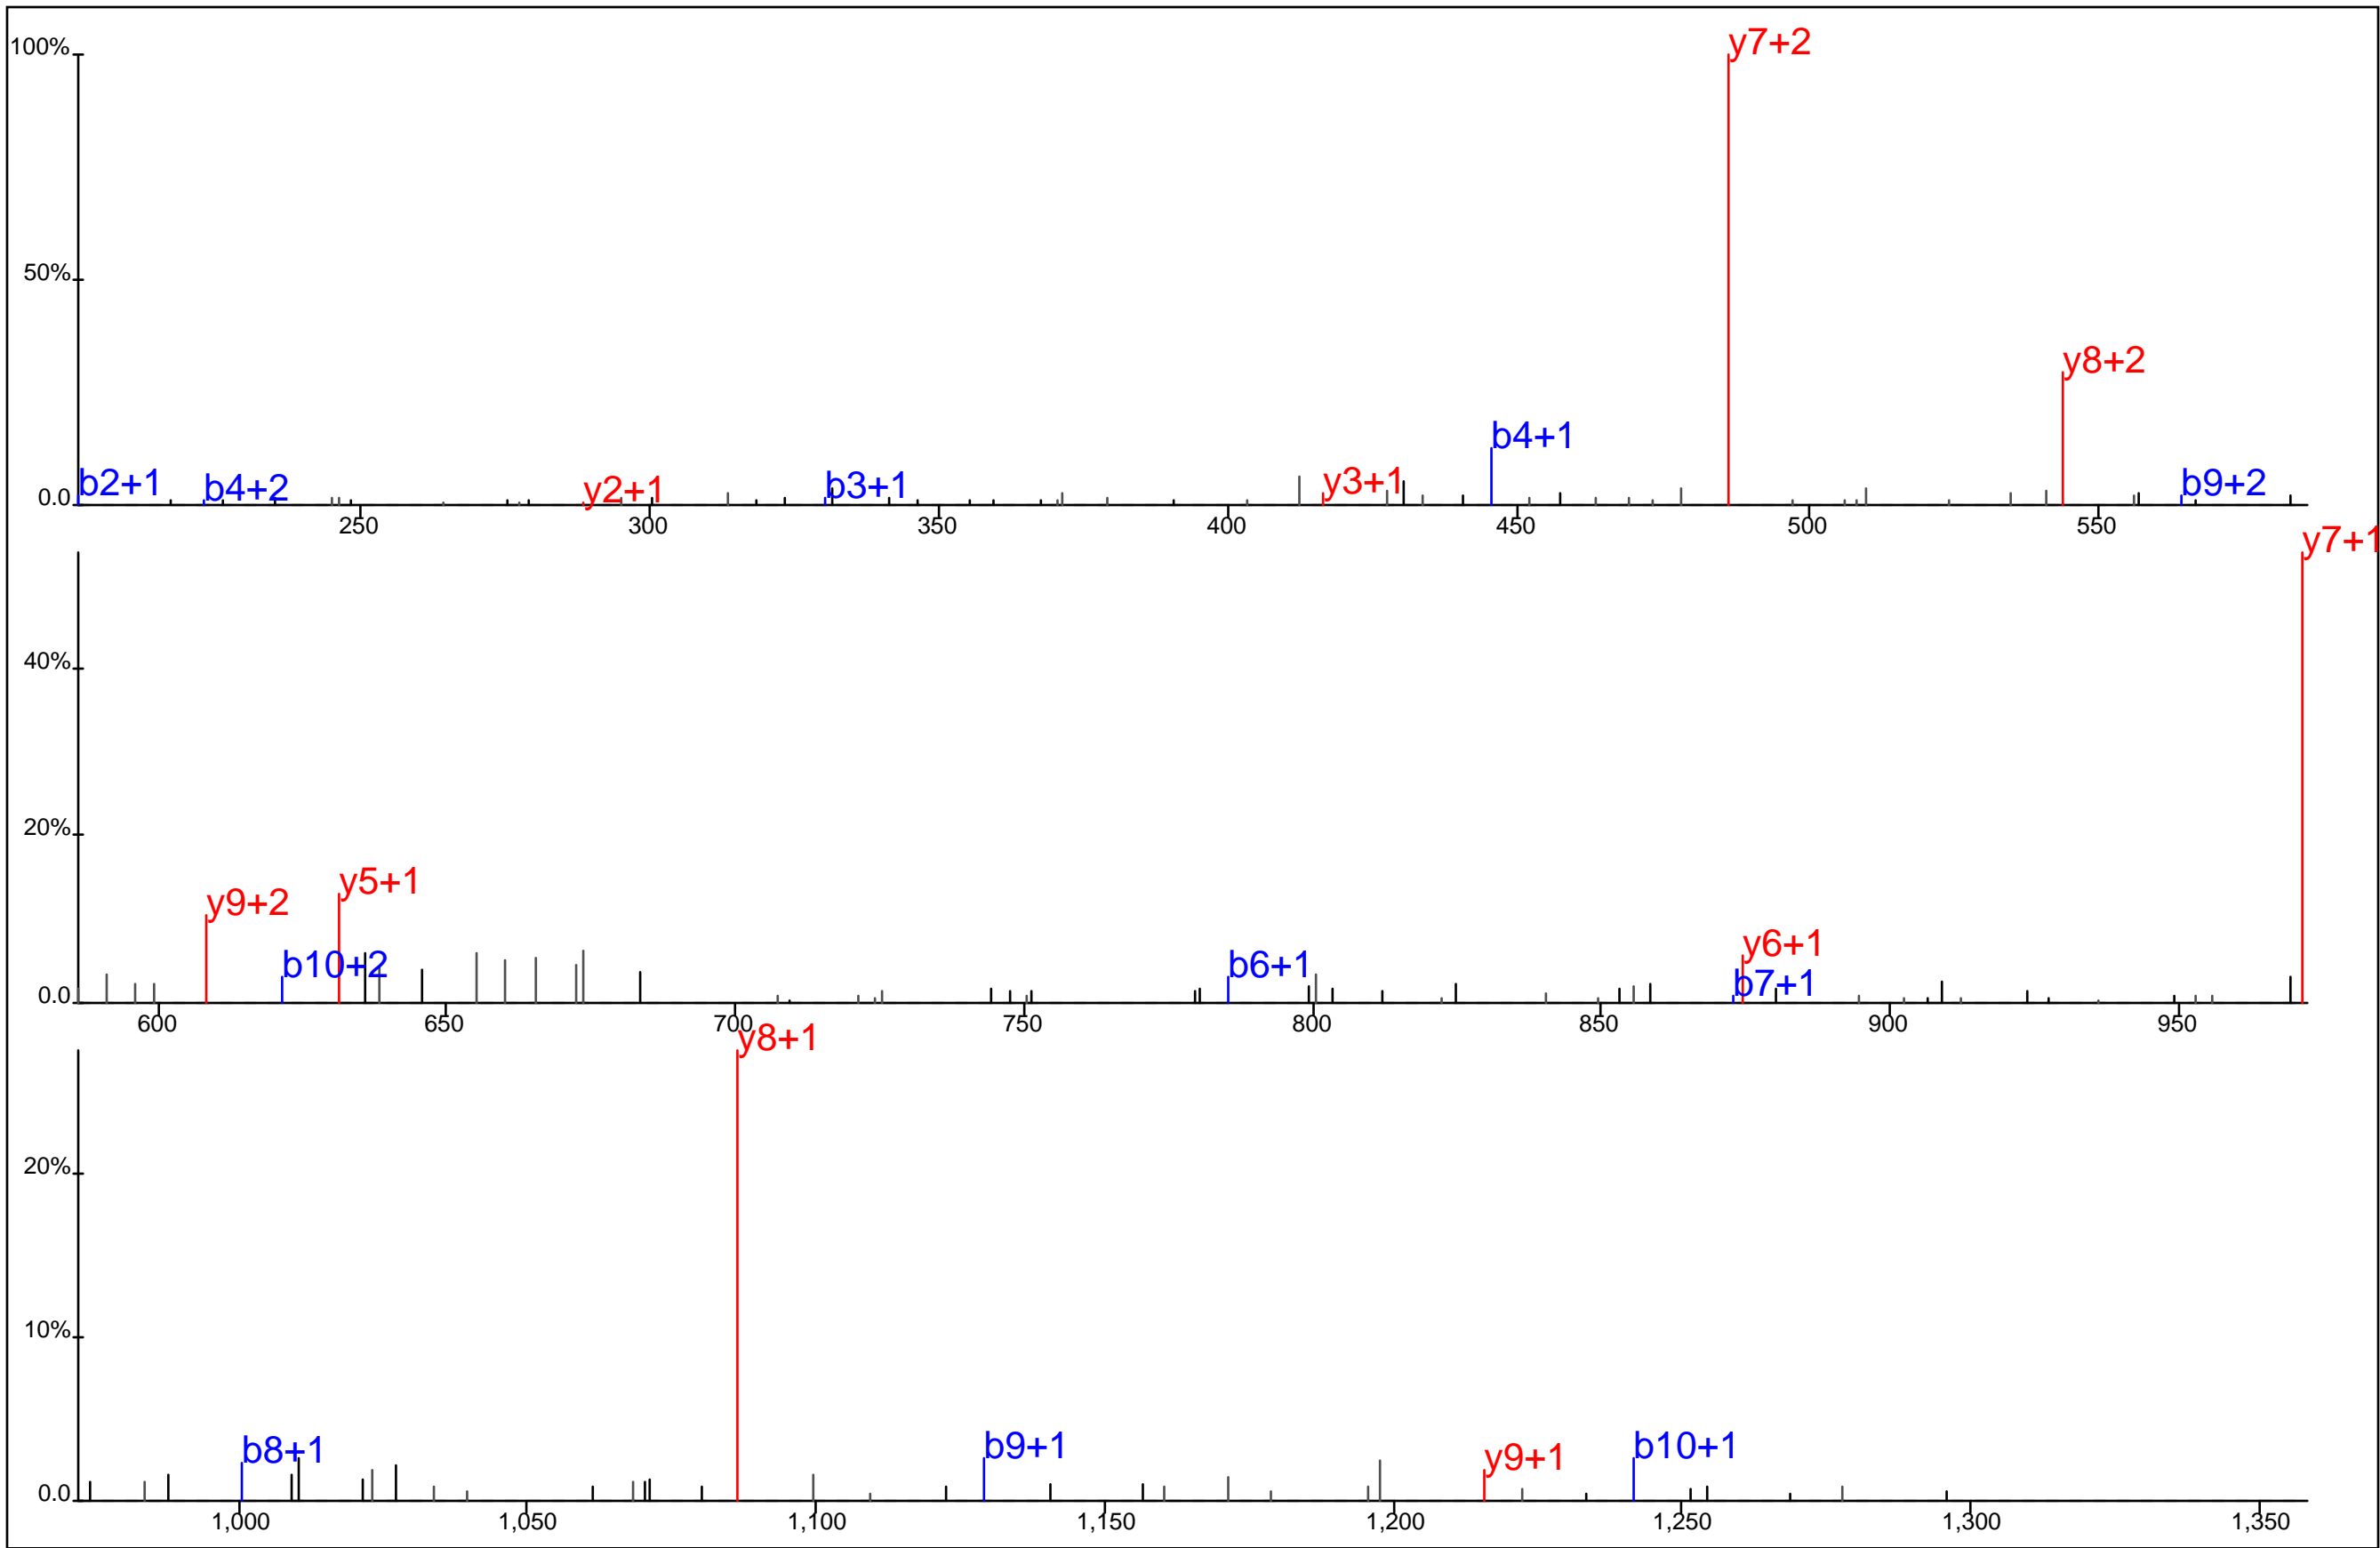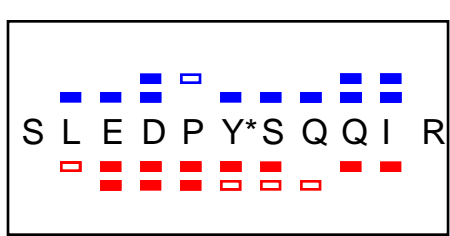

Protein Name: DKFZP434B168 protein  
 gi Accession: 0  
 Precursor Mass: 708.3151+2  
 Delta Mass: 1.944 ppm  
 XCorr: 39.13





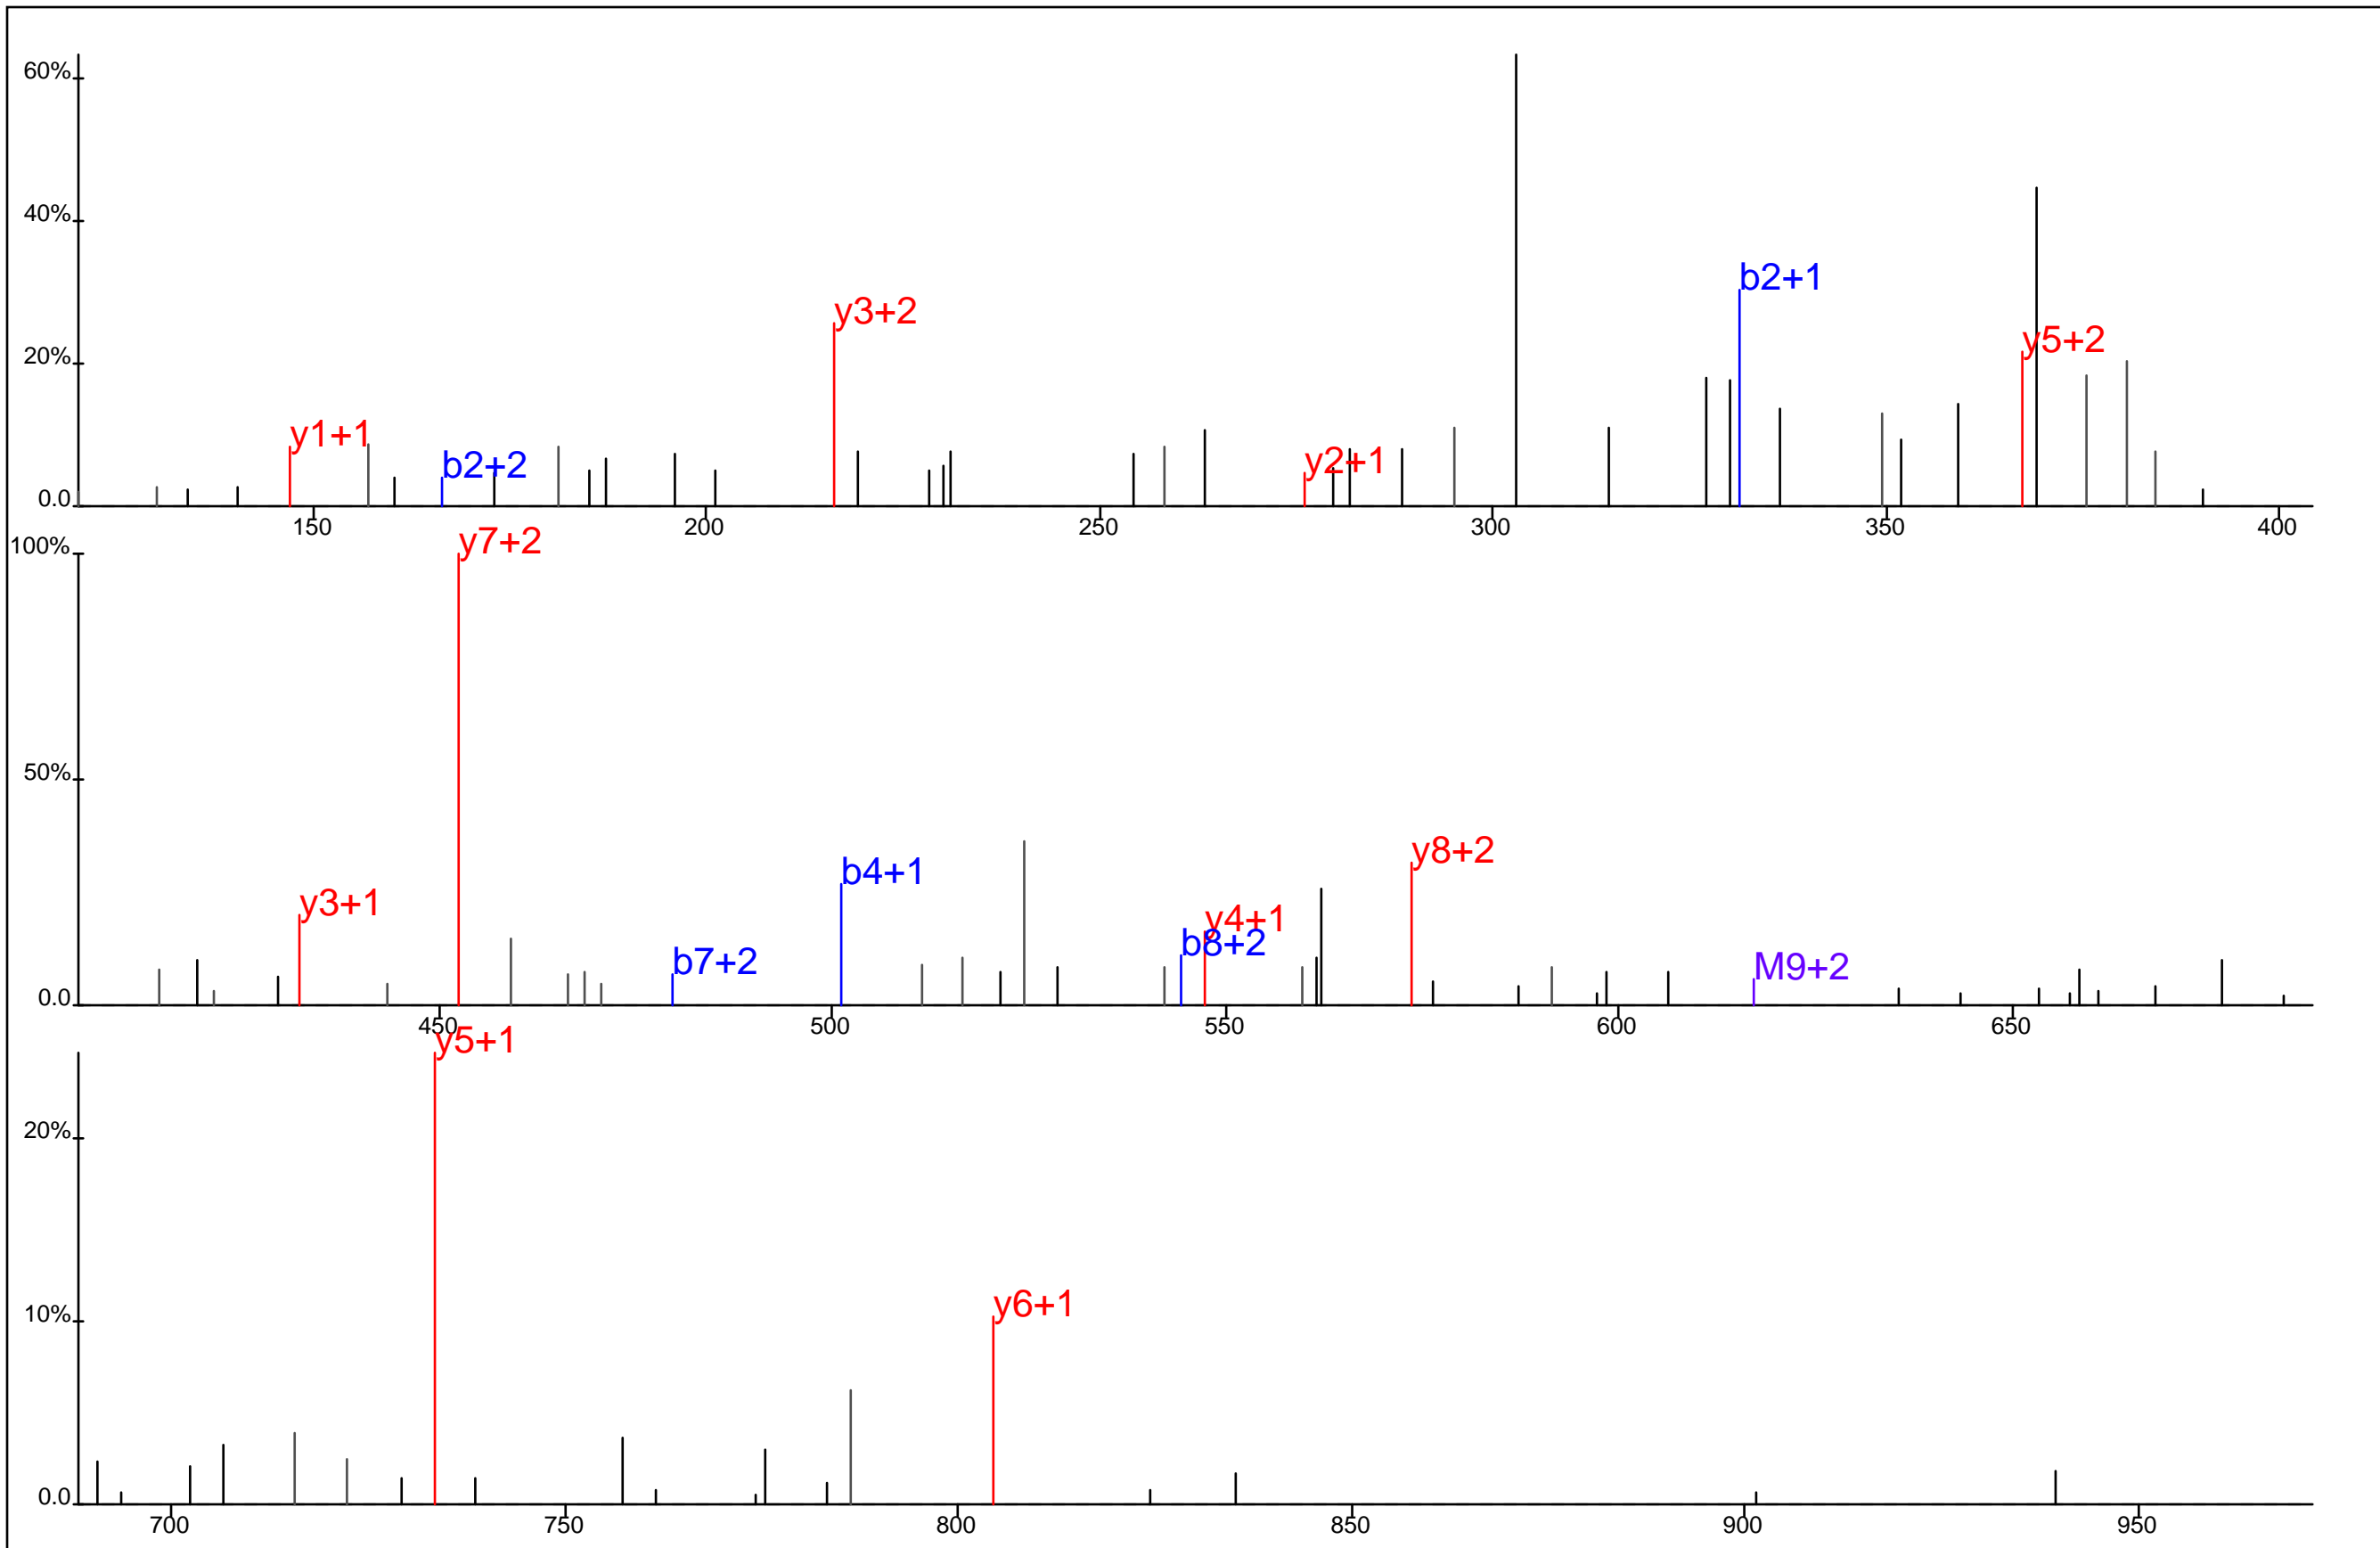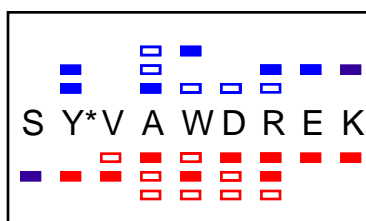

Protein Name: DNA dependent protein kinase catalytic subunit  
 gi Accession: 0  
 Precursor Mass: 411.8486+3  
 Delta Mass: 1.131 ppm  
 XCorr: 21.51

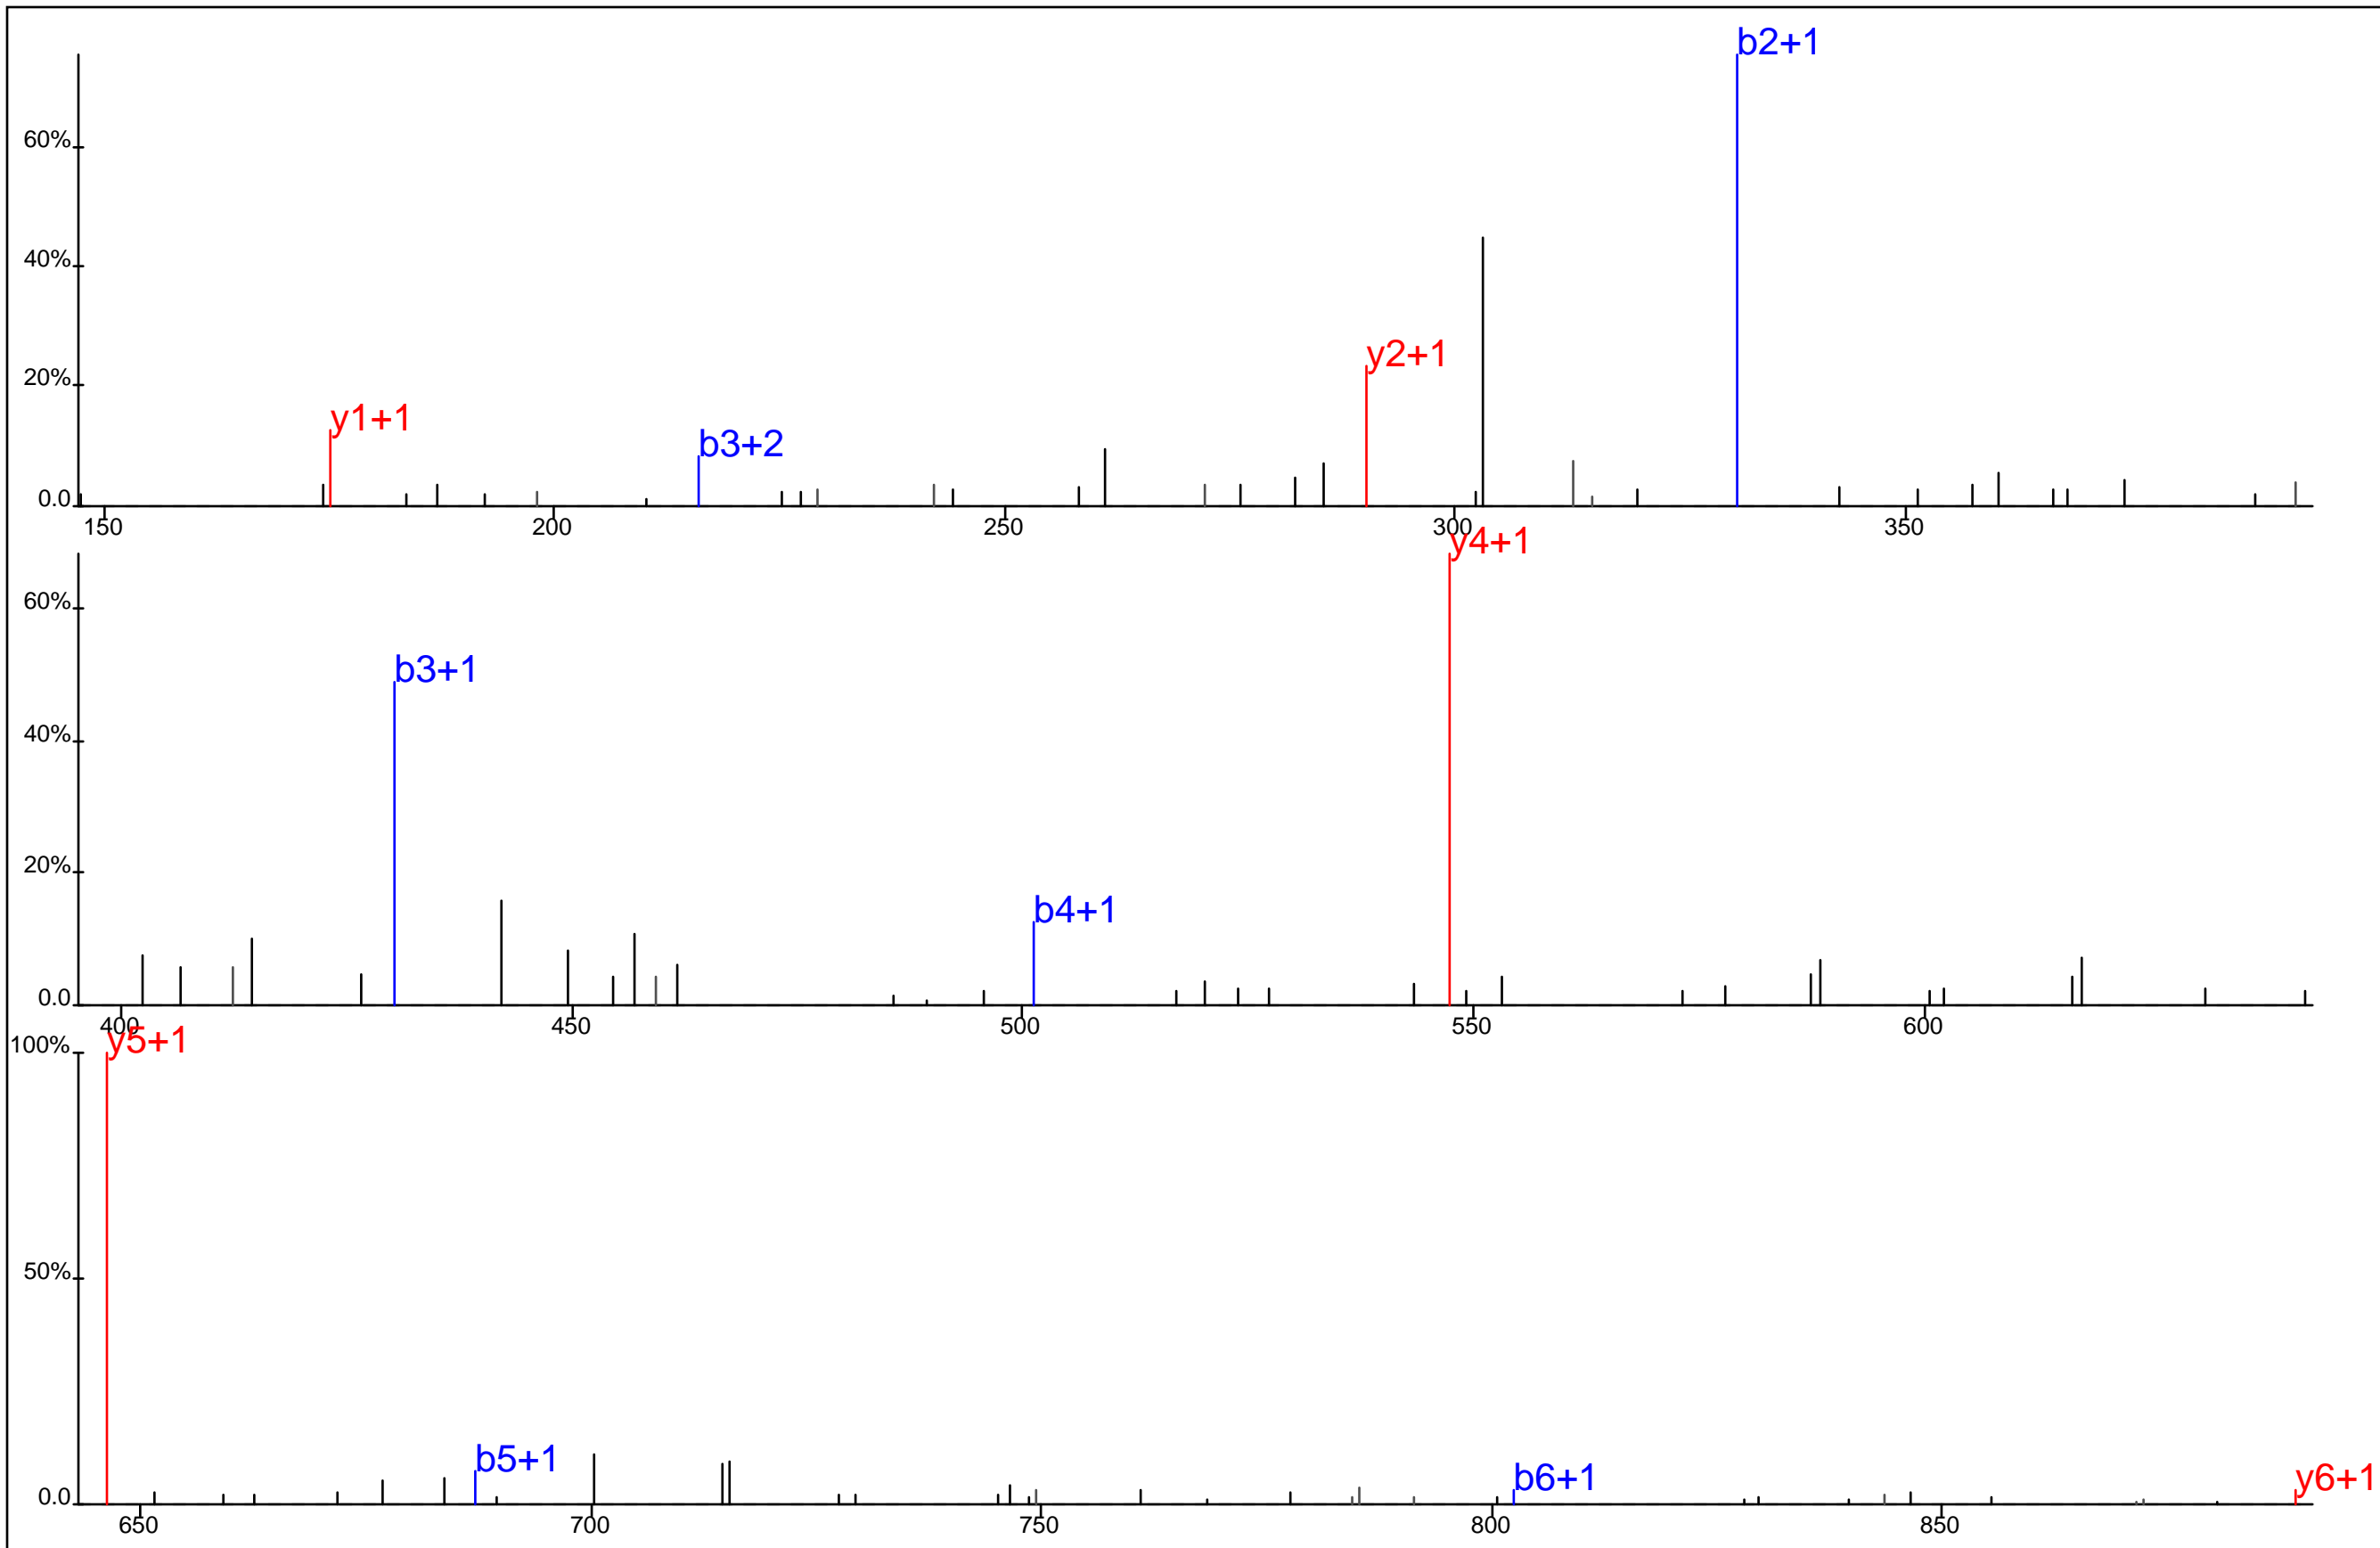

**S Y\*V A W D R**

Protein Name: DNA dependent protein kinase catalytic subunit  
 gi Accession: 0  
 Precursor Mass: 488.7005+2  
 Delta Mass: 1.407 ppm  
 XCorr: 30.44

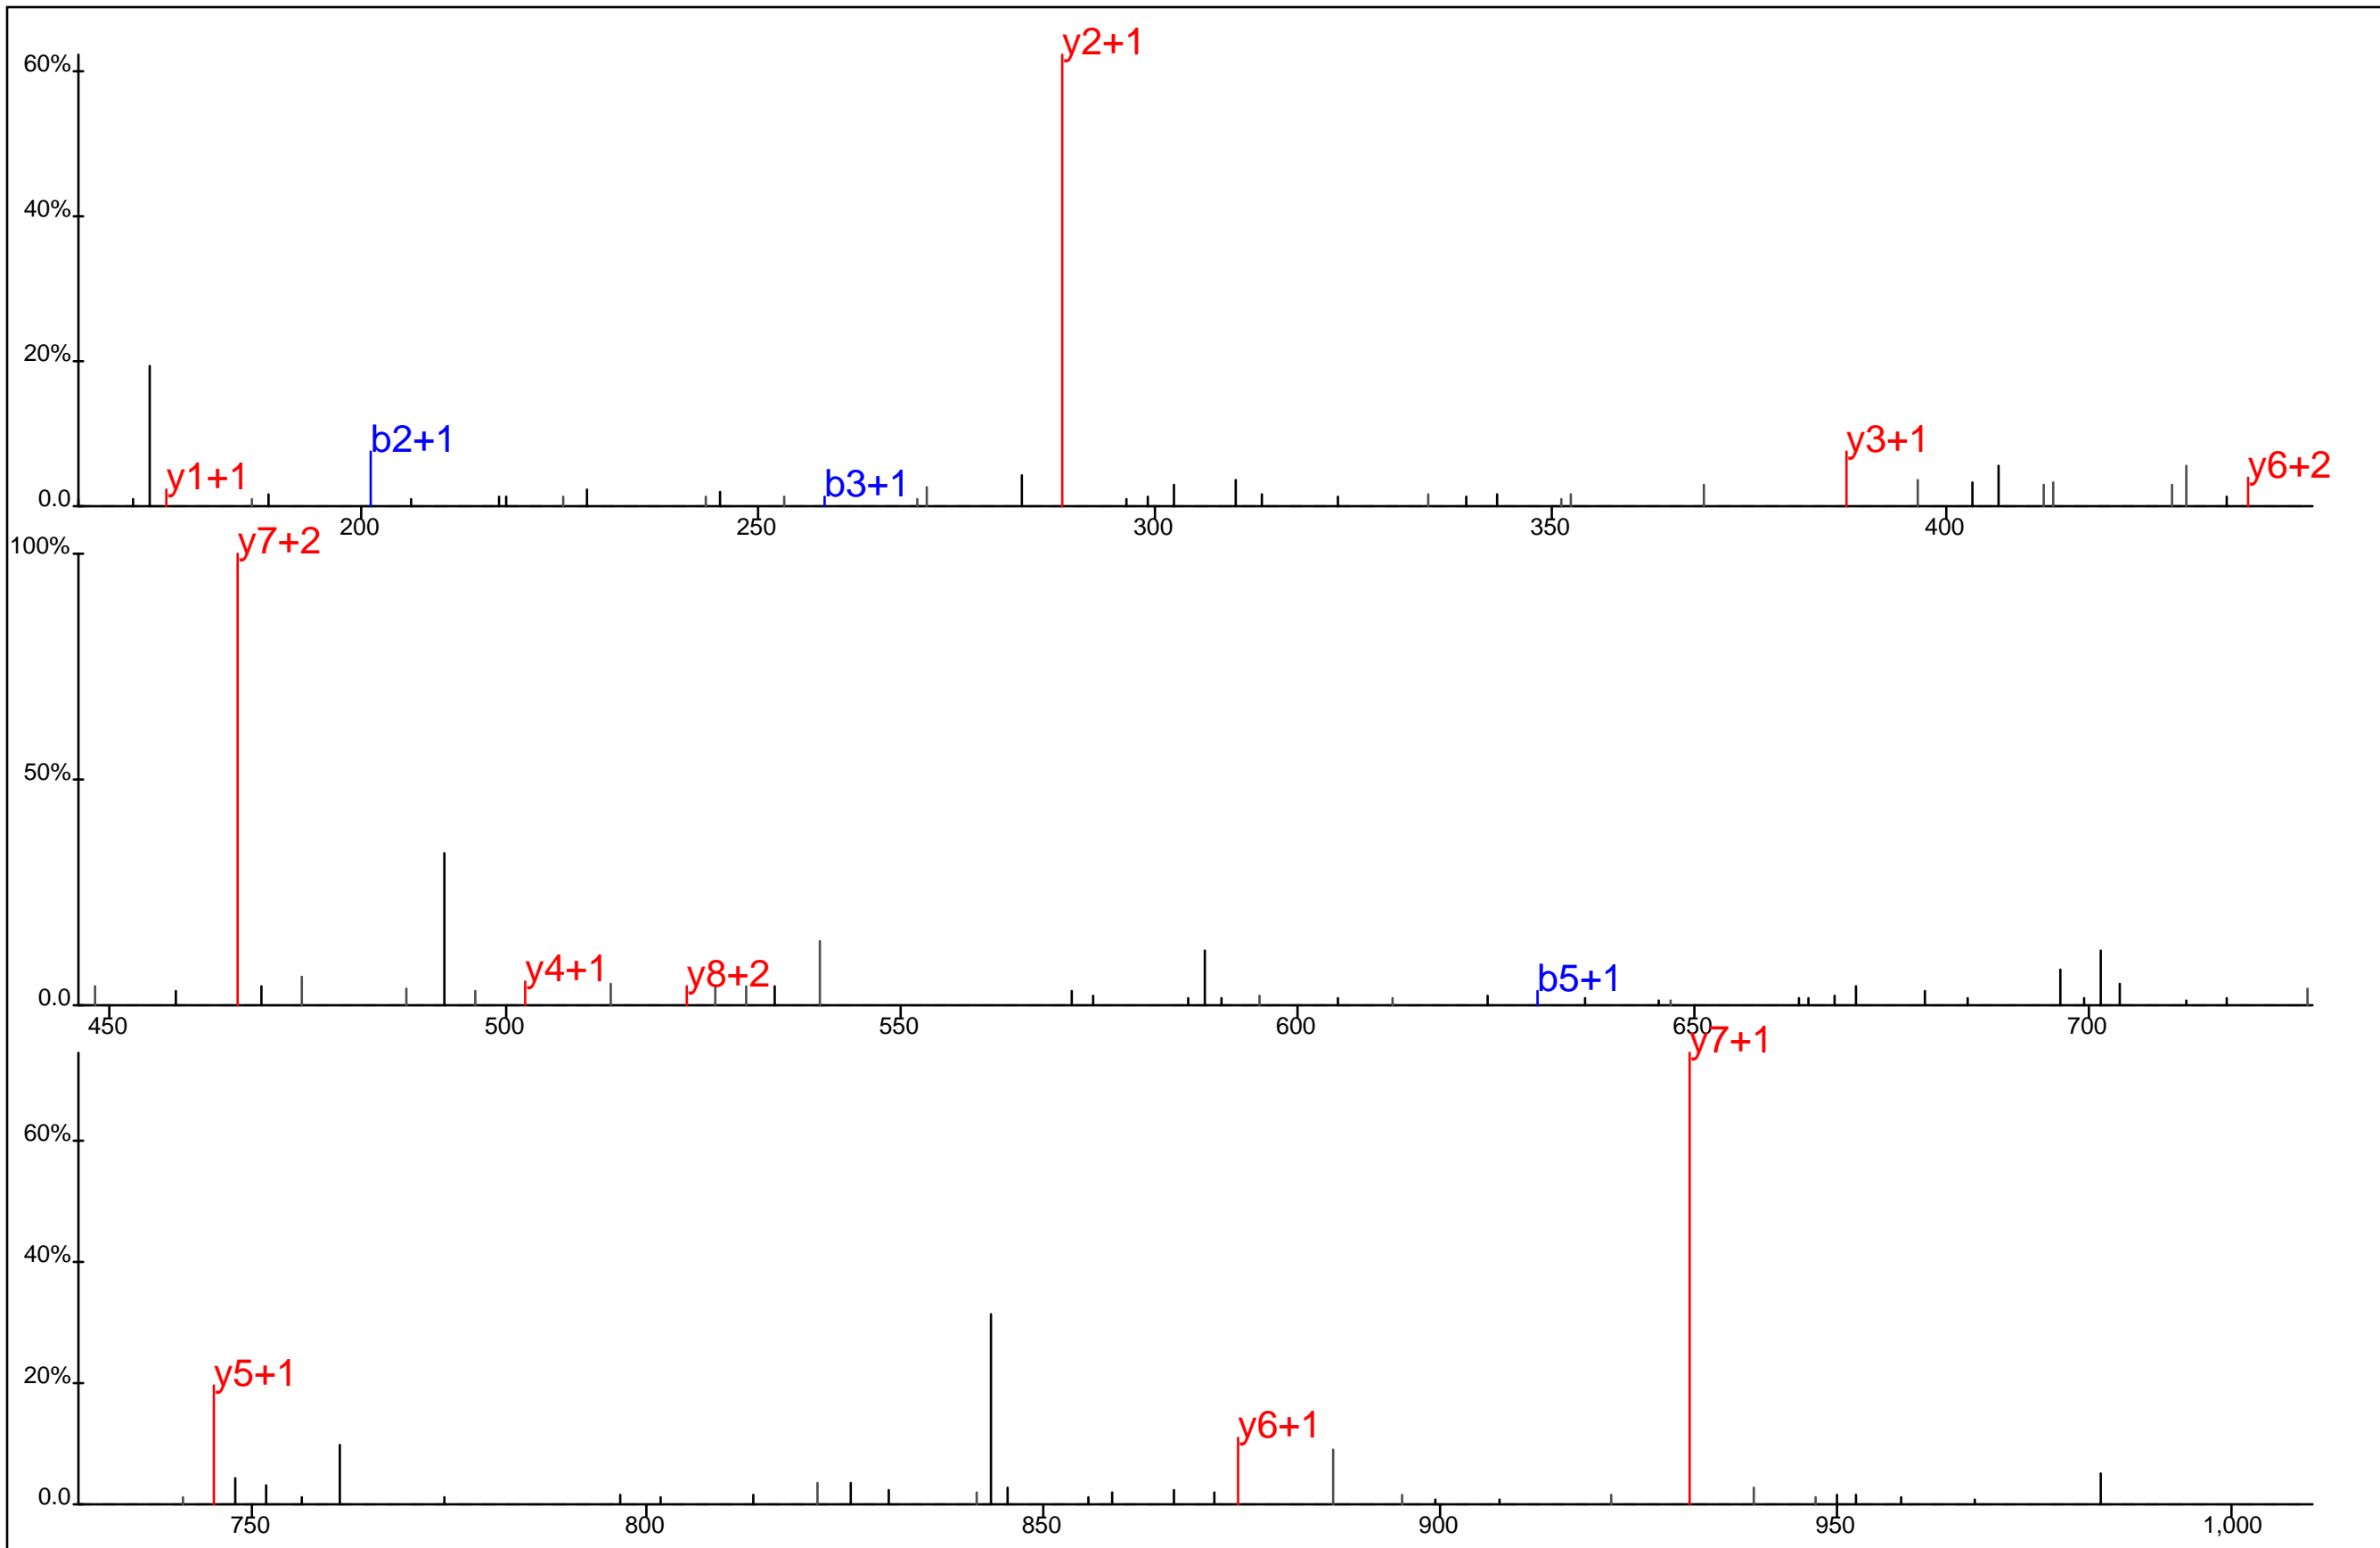

**S I G E Y\* D V L R**

Protein Name: DNA dependent protein kinase catalytic subunit  
 gi Accession: 0  
 Precursor Mass: 566.2581+2  
 Delta Mass: 0.597 ppm  
 XCorr: 24.46



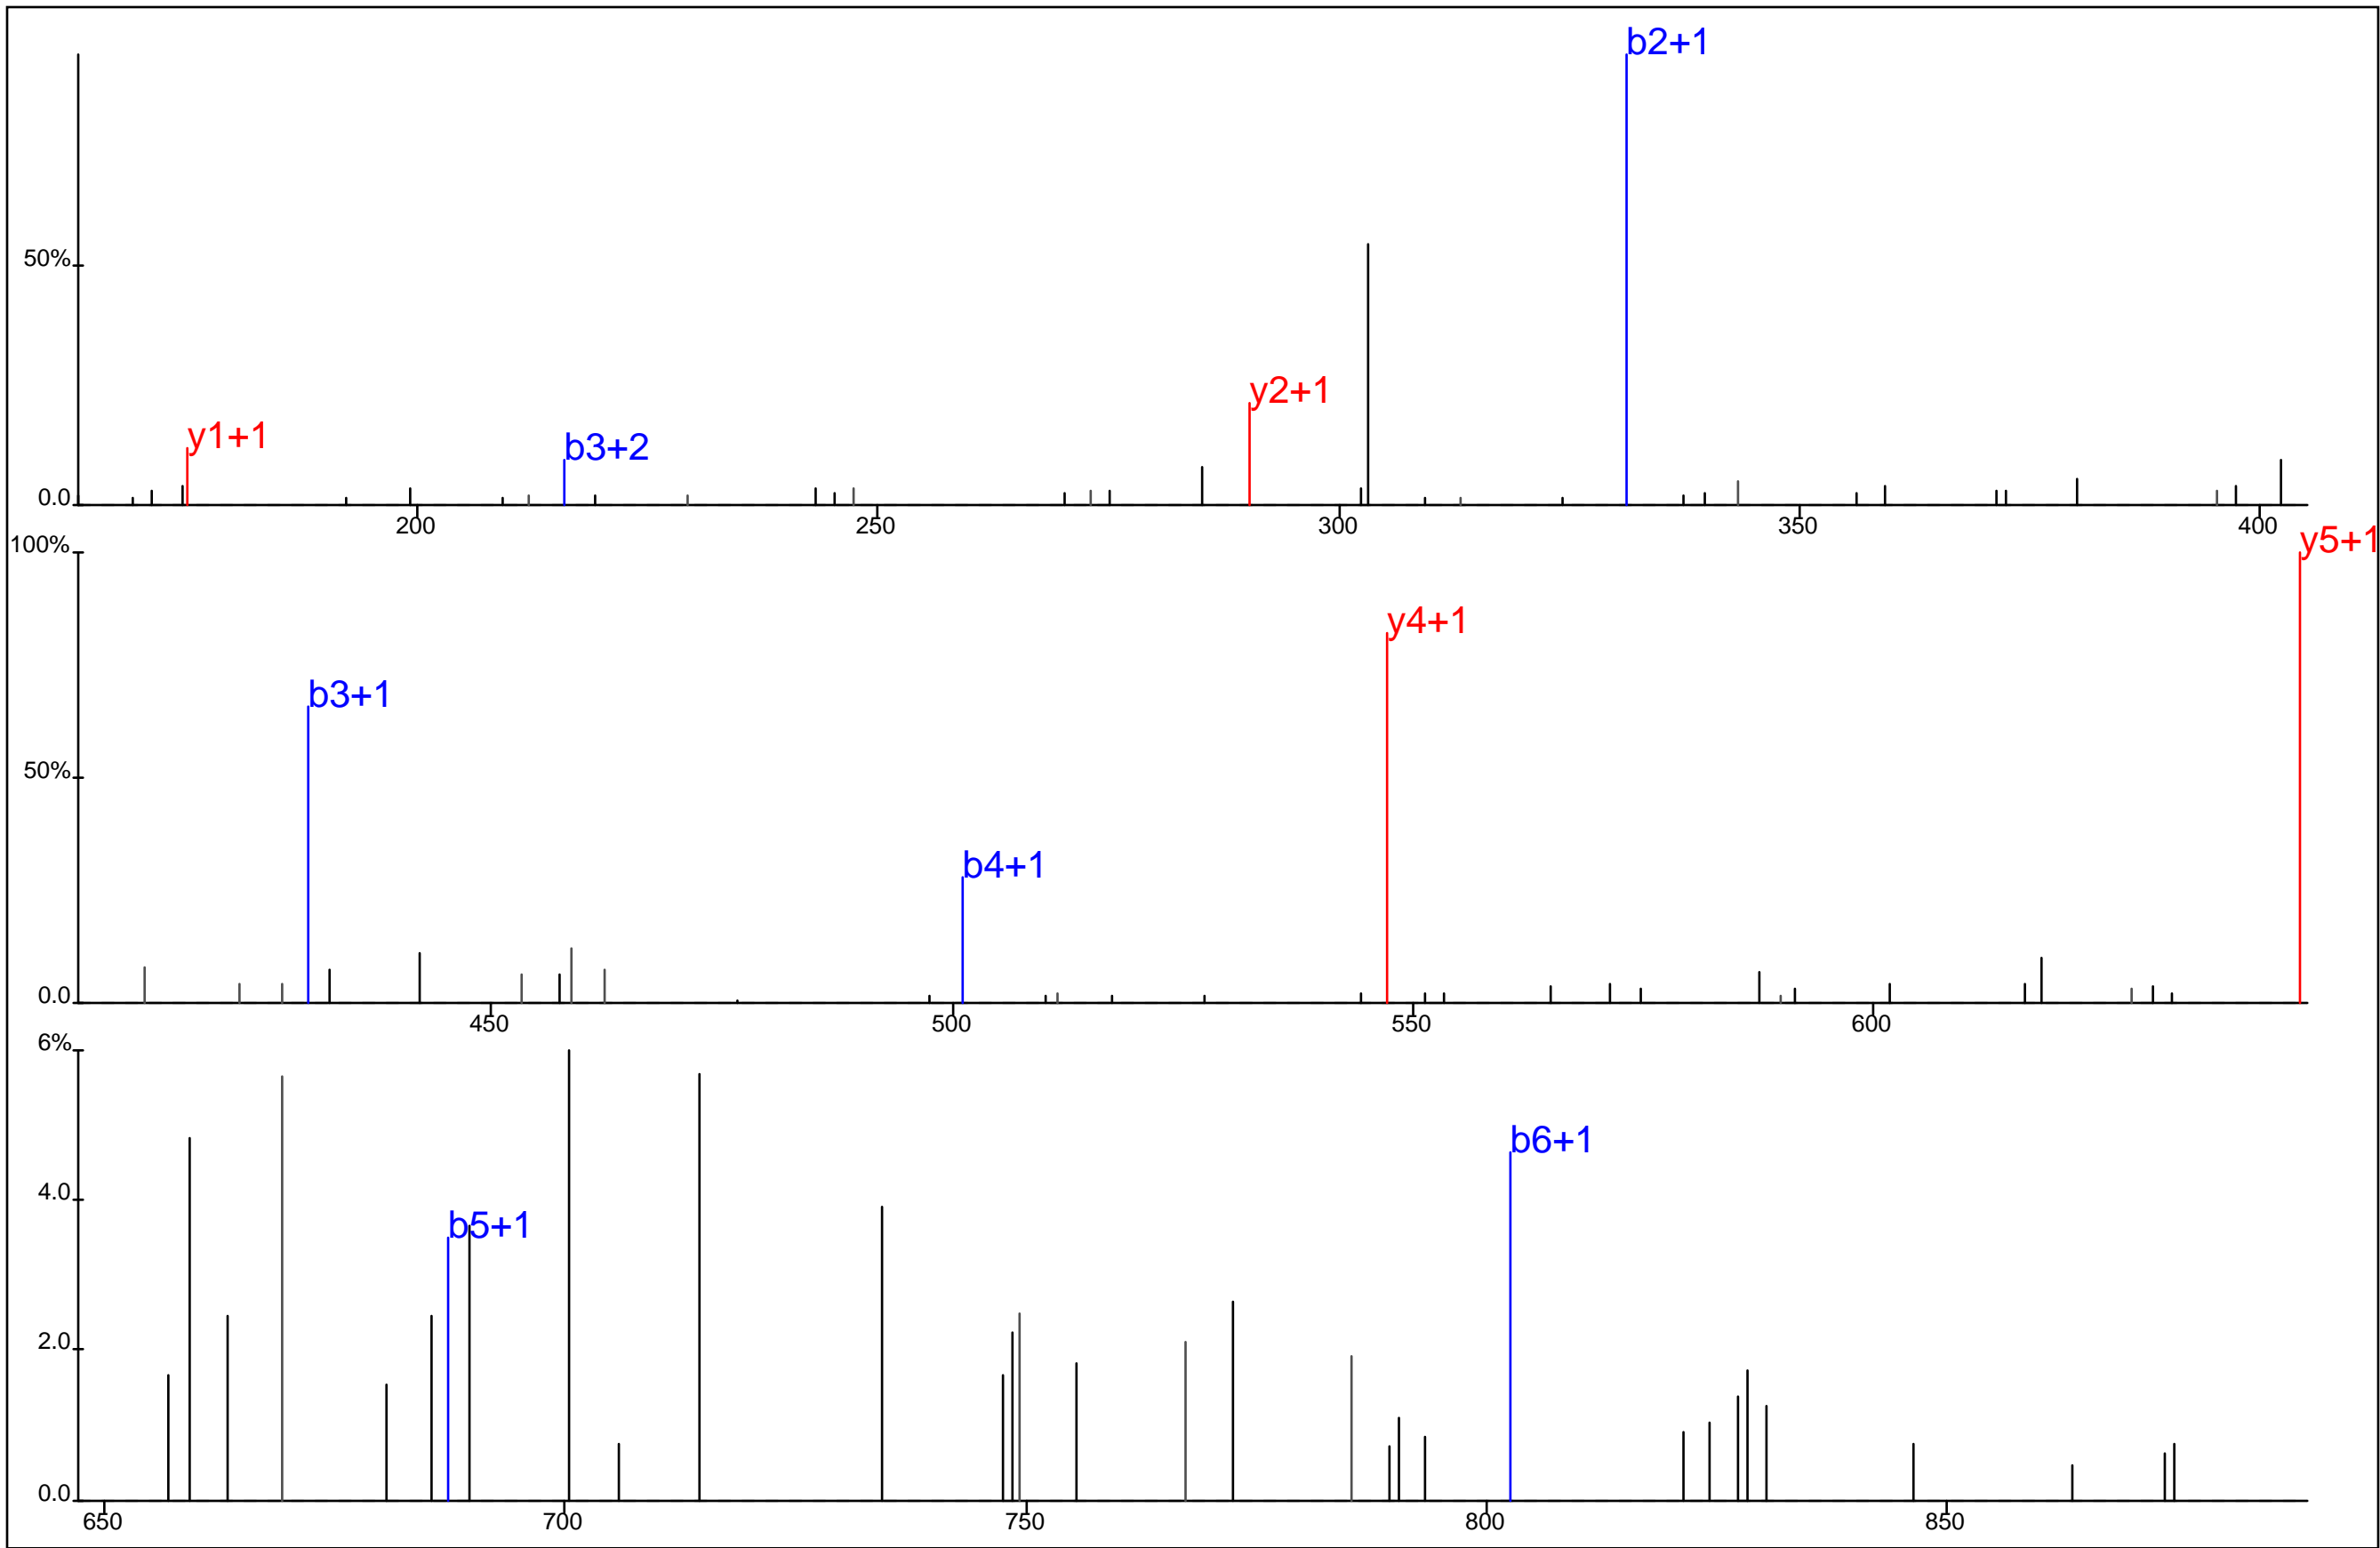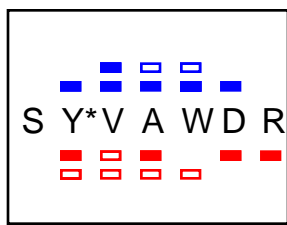

Protein Name: DNA dependent protein kinase catalytic subunit  
 gi Accession: 0  
 Precursor Mass: 488.7005+2  
 Delta Mass: 1.344 ppm  
 XCorr: 34.47

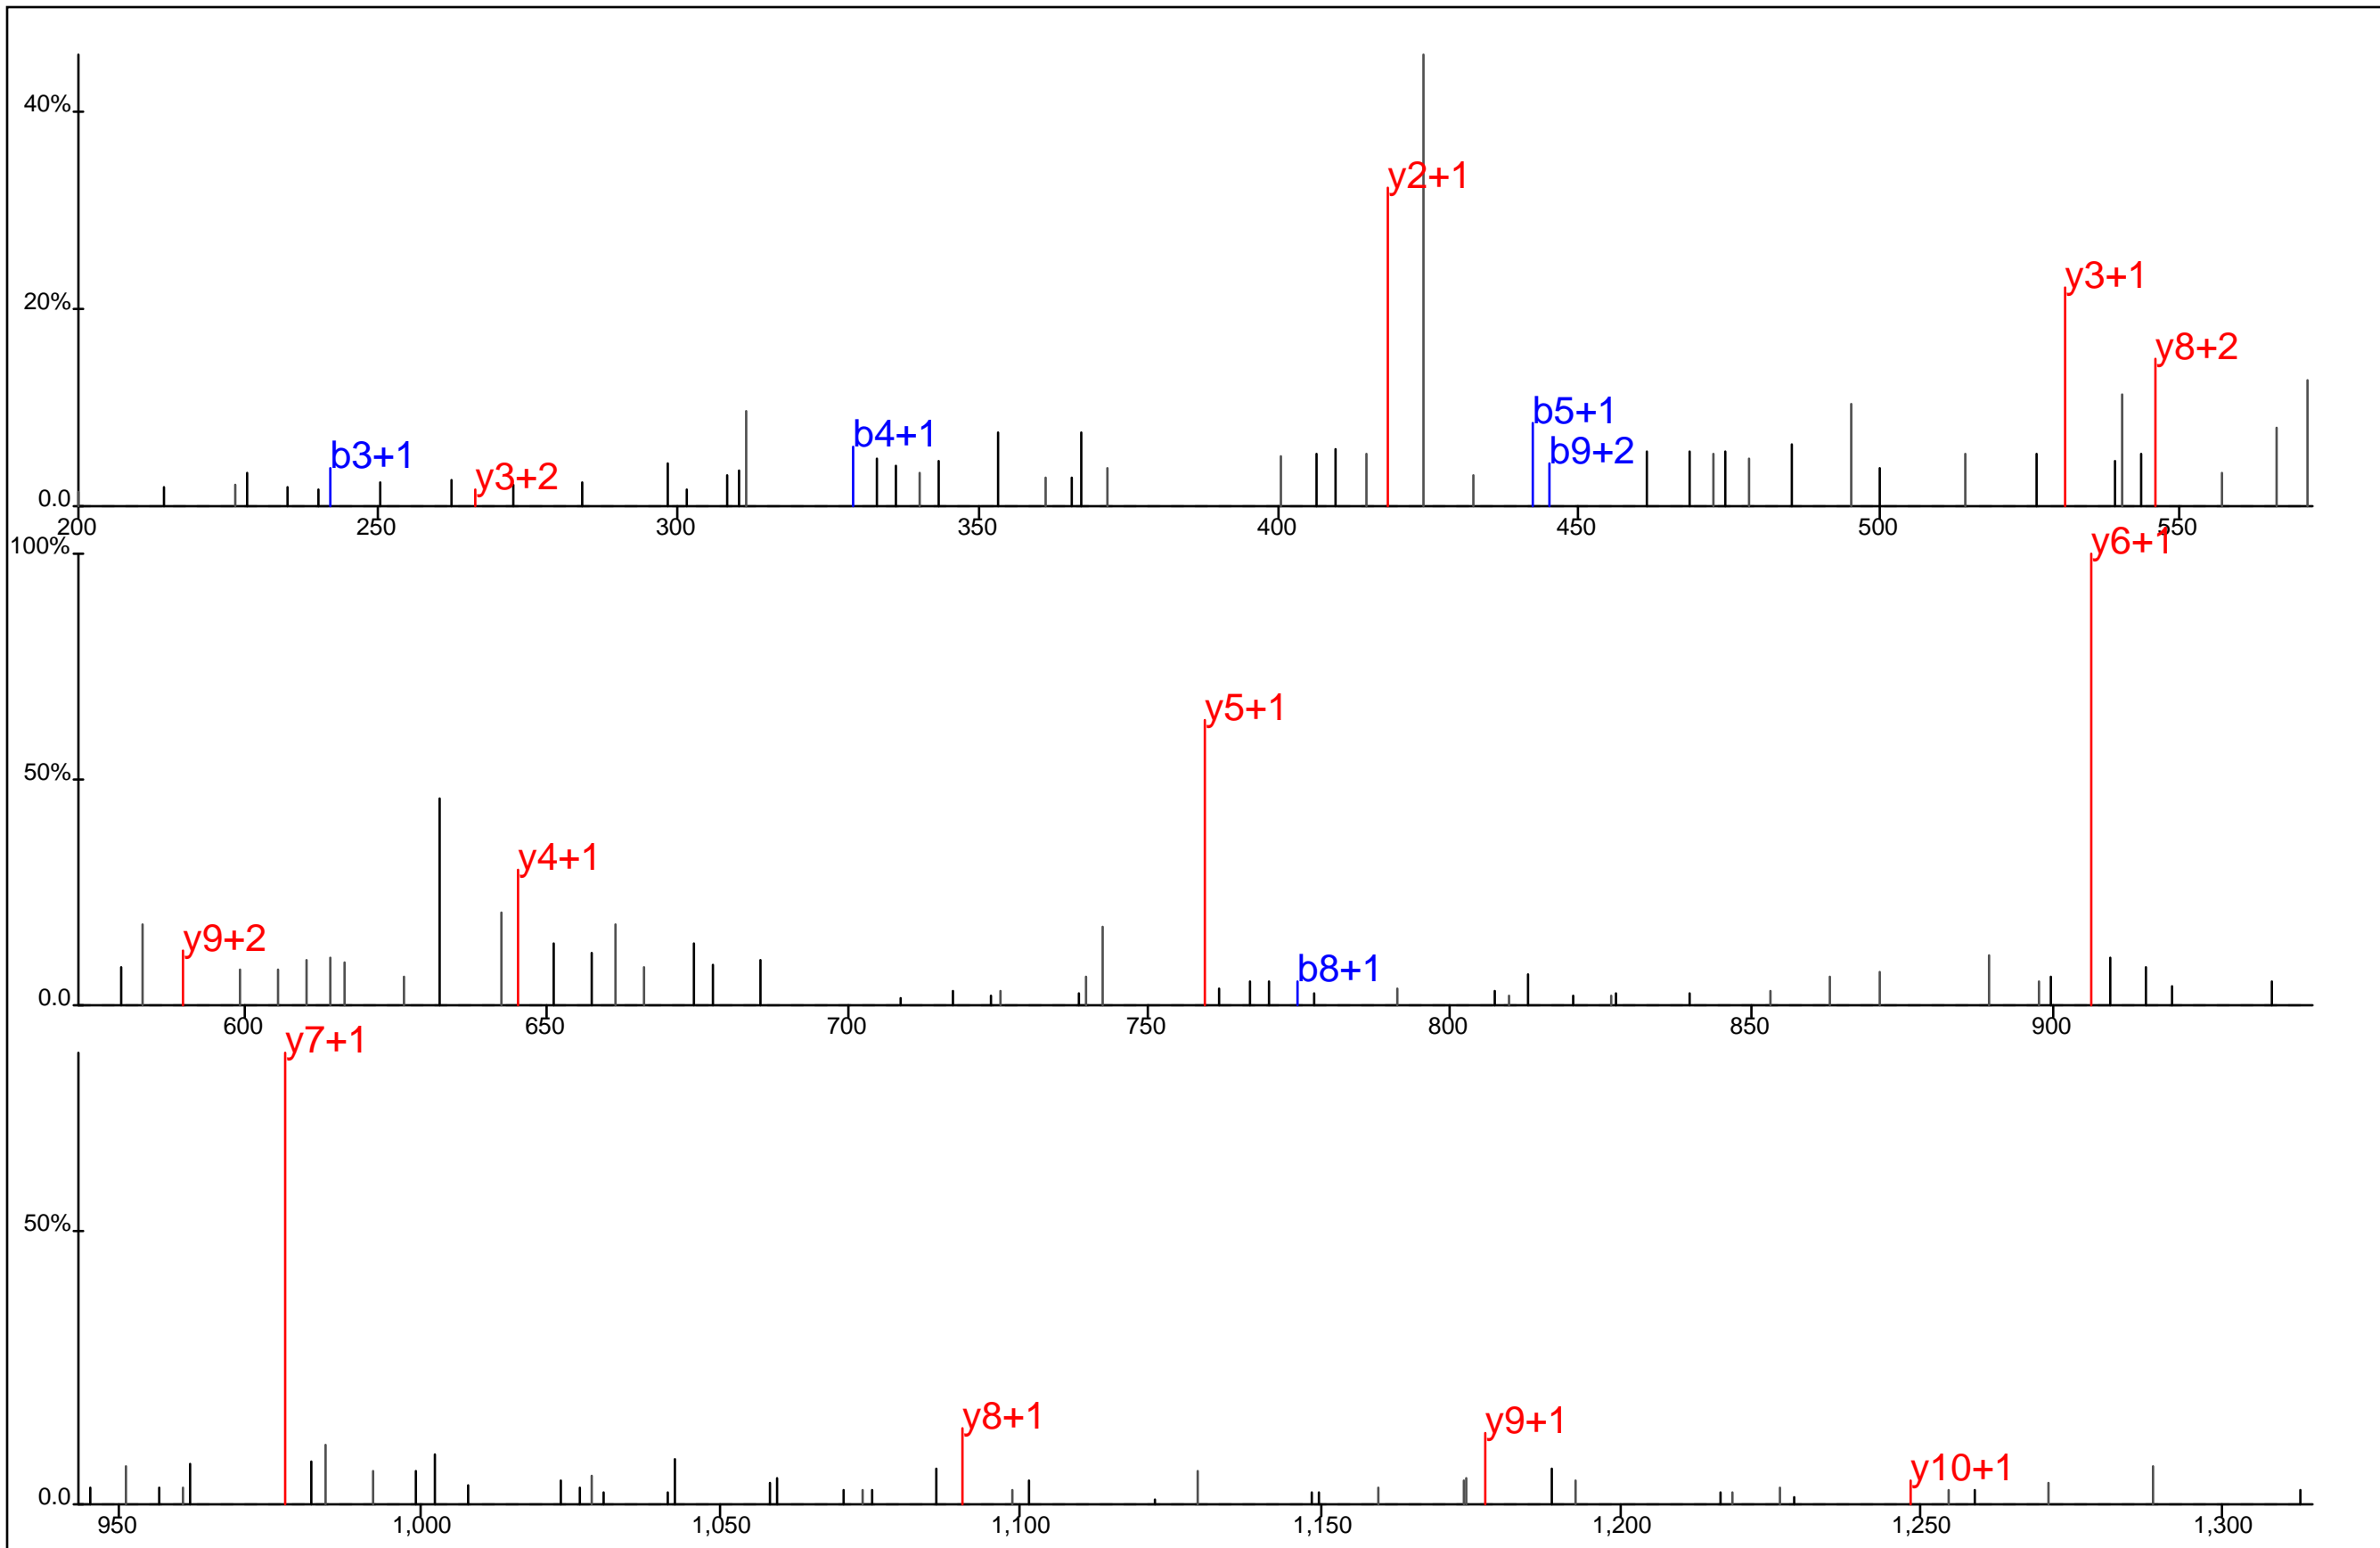

■ ■ ■ ■ ■ ■ ■ ■  
 L G A S L A F N N I Y\*R  
□ □ □ □ □ □ □ □

Protein Name: DNA dependent protein kinase catalytic subunit  
 gi Accession: 0  
 Precursor Mass: 709.8448+2  
 Delta Mass: 0.319 ppm  
 XCorr: 59.97

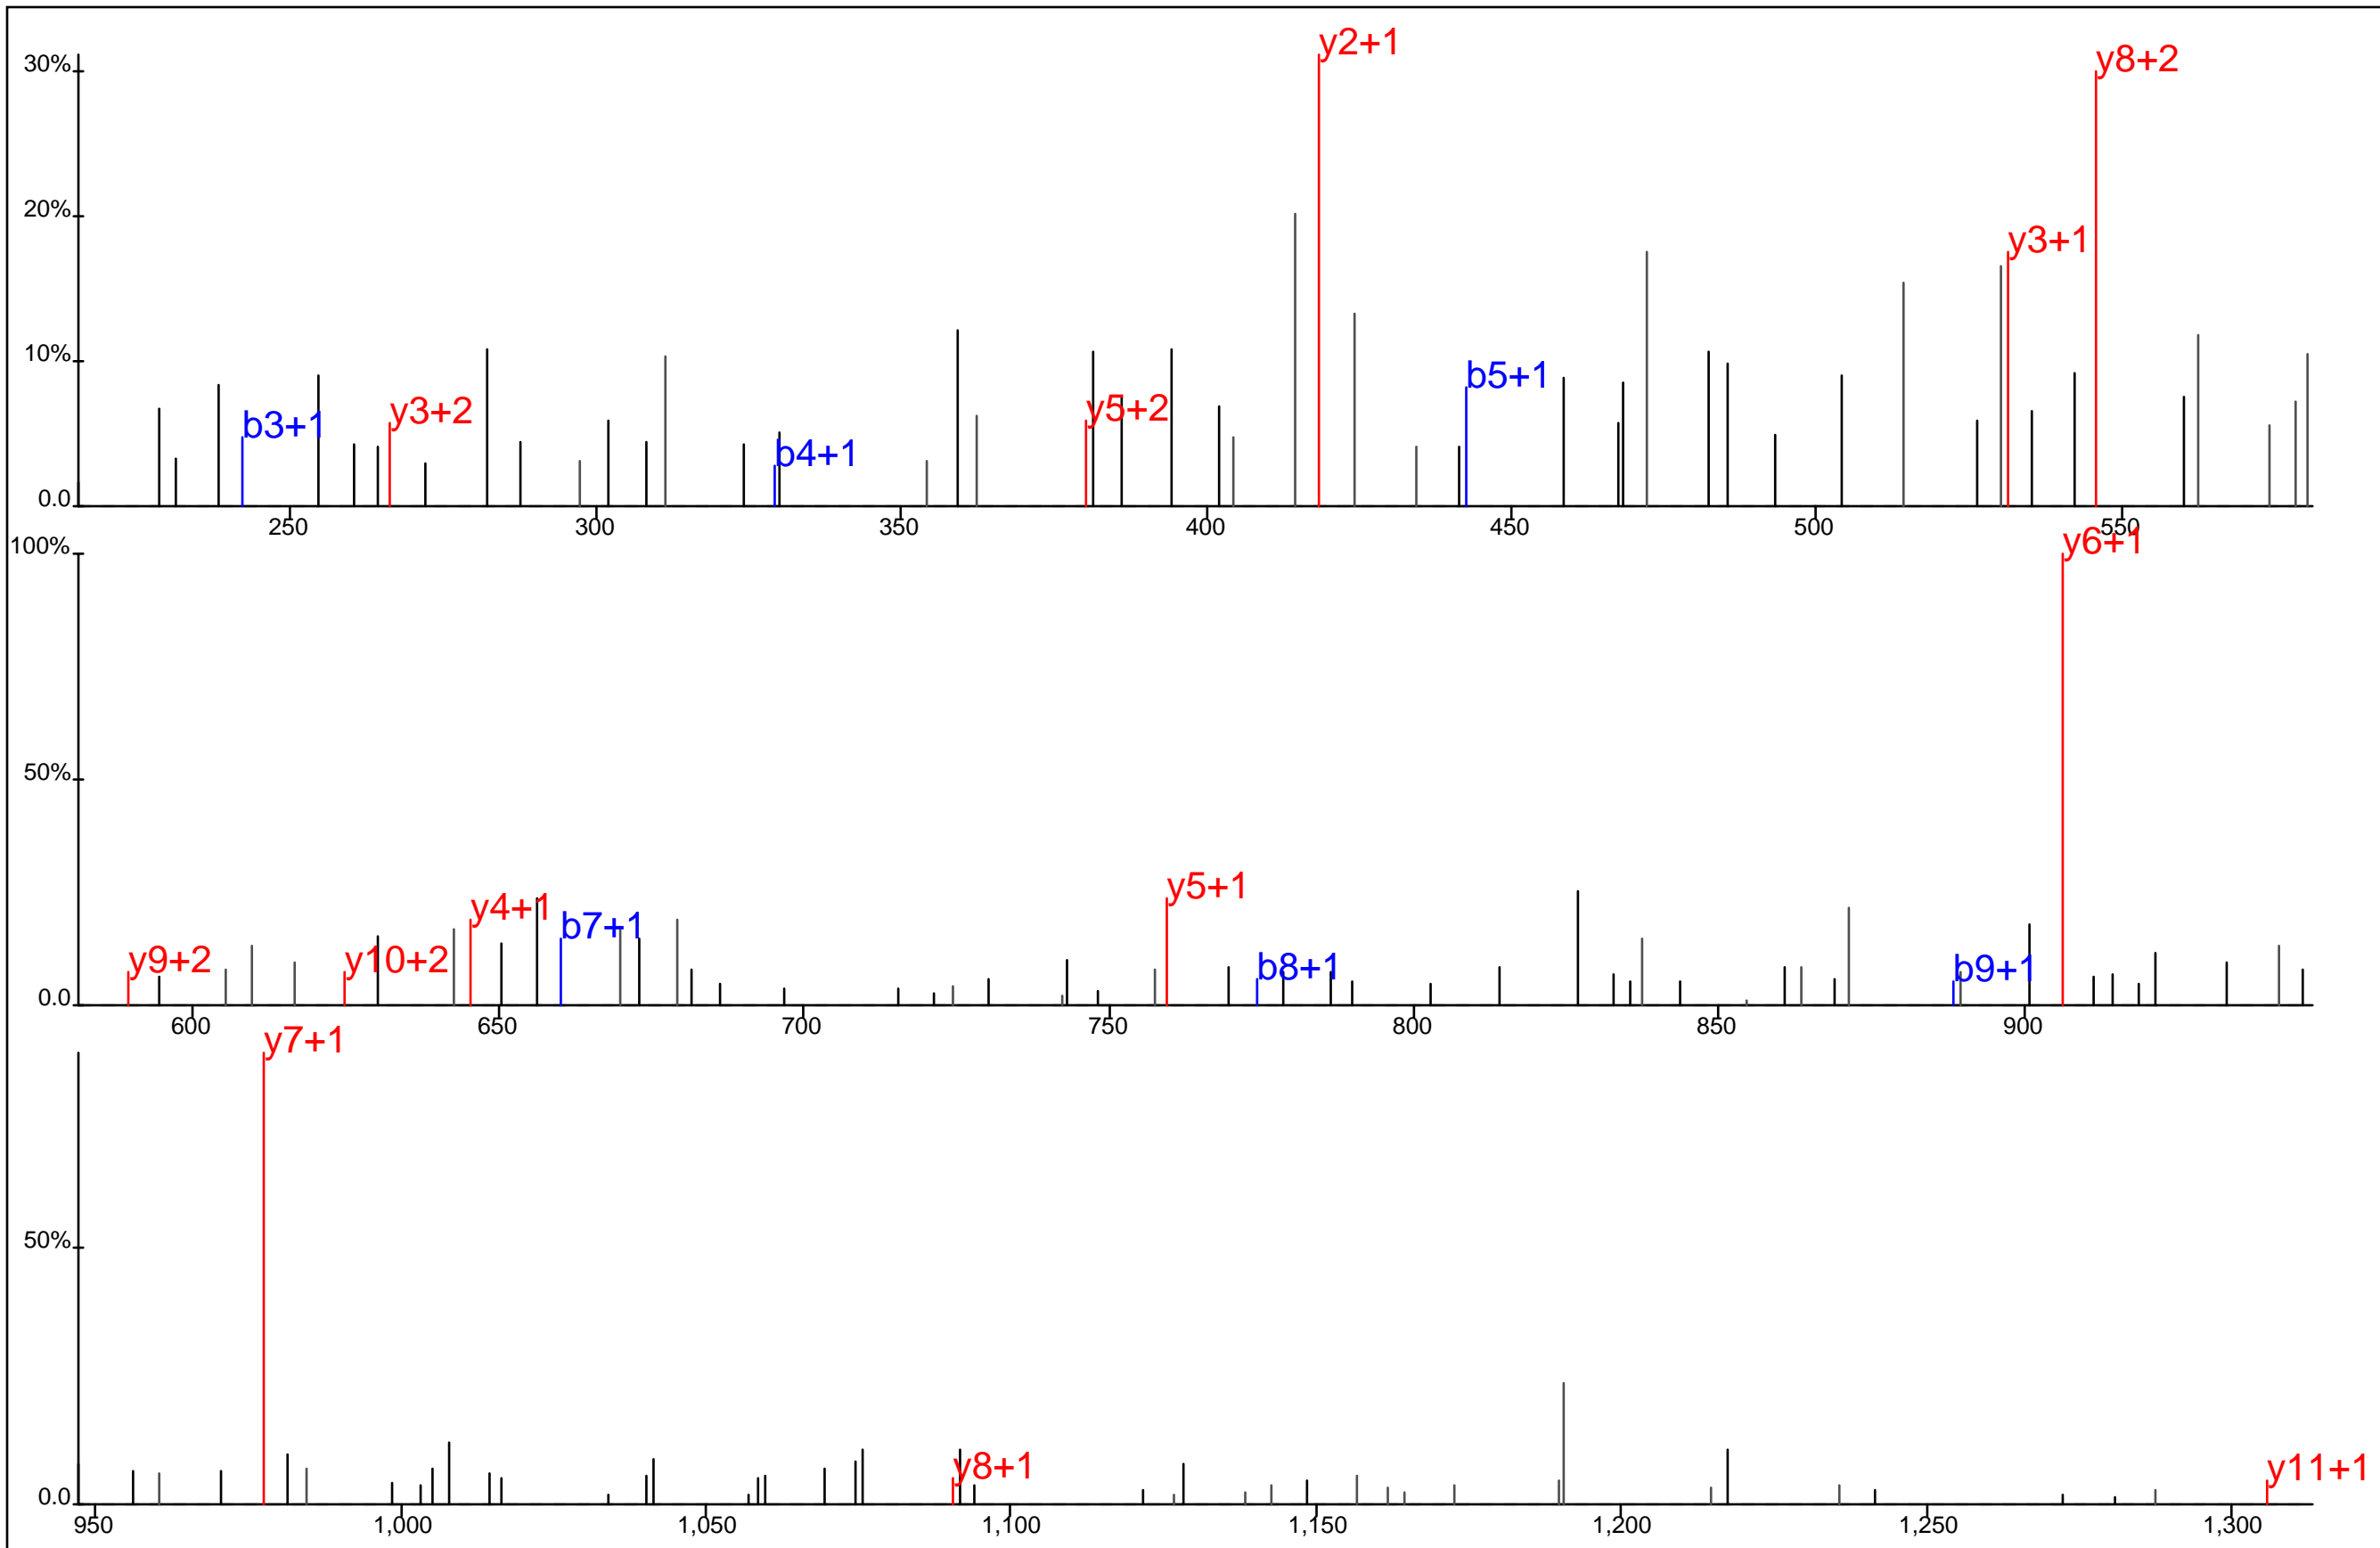

■ ■ ■ ■ ■ ■ ■ ■ ■ ■  
 L G A S L A F N N I Y\*R  
■ ■ ■ ■ ■ ■ ■ ■ ■ ■

Protein Name: DNA dependent protein kinase catalytic subunit  
 gi Accession: 0  
 Precursor Mass: 709.8455+2  
 Delta Mass: 0.713 ppm  
 XCorr: 20.84



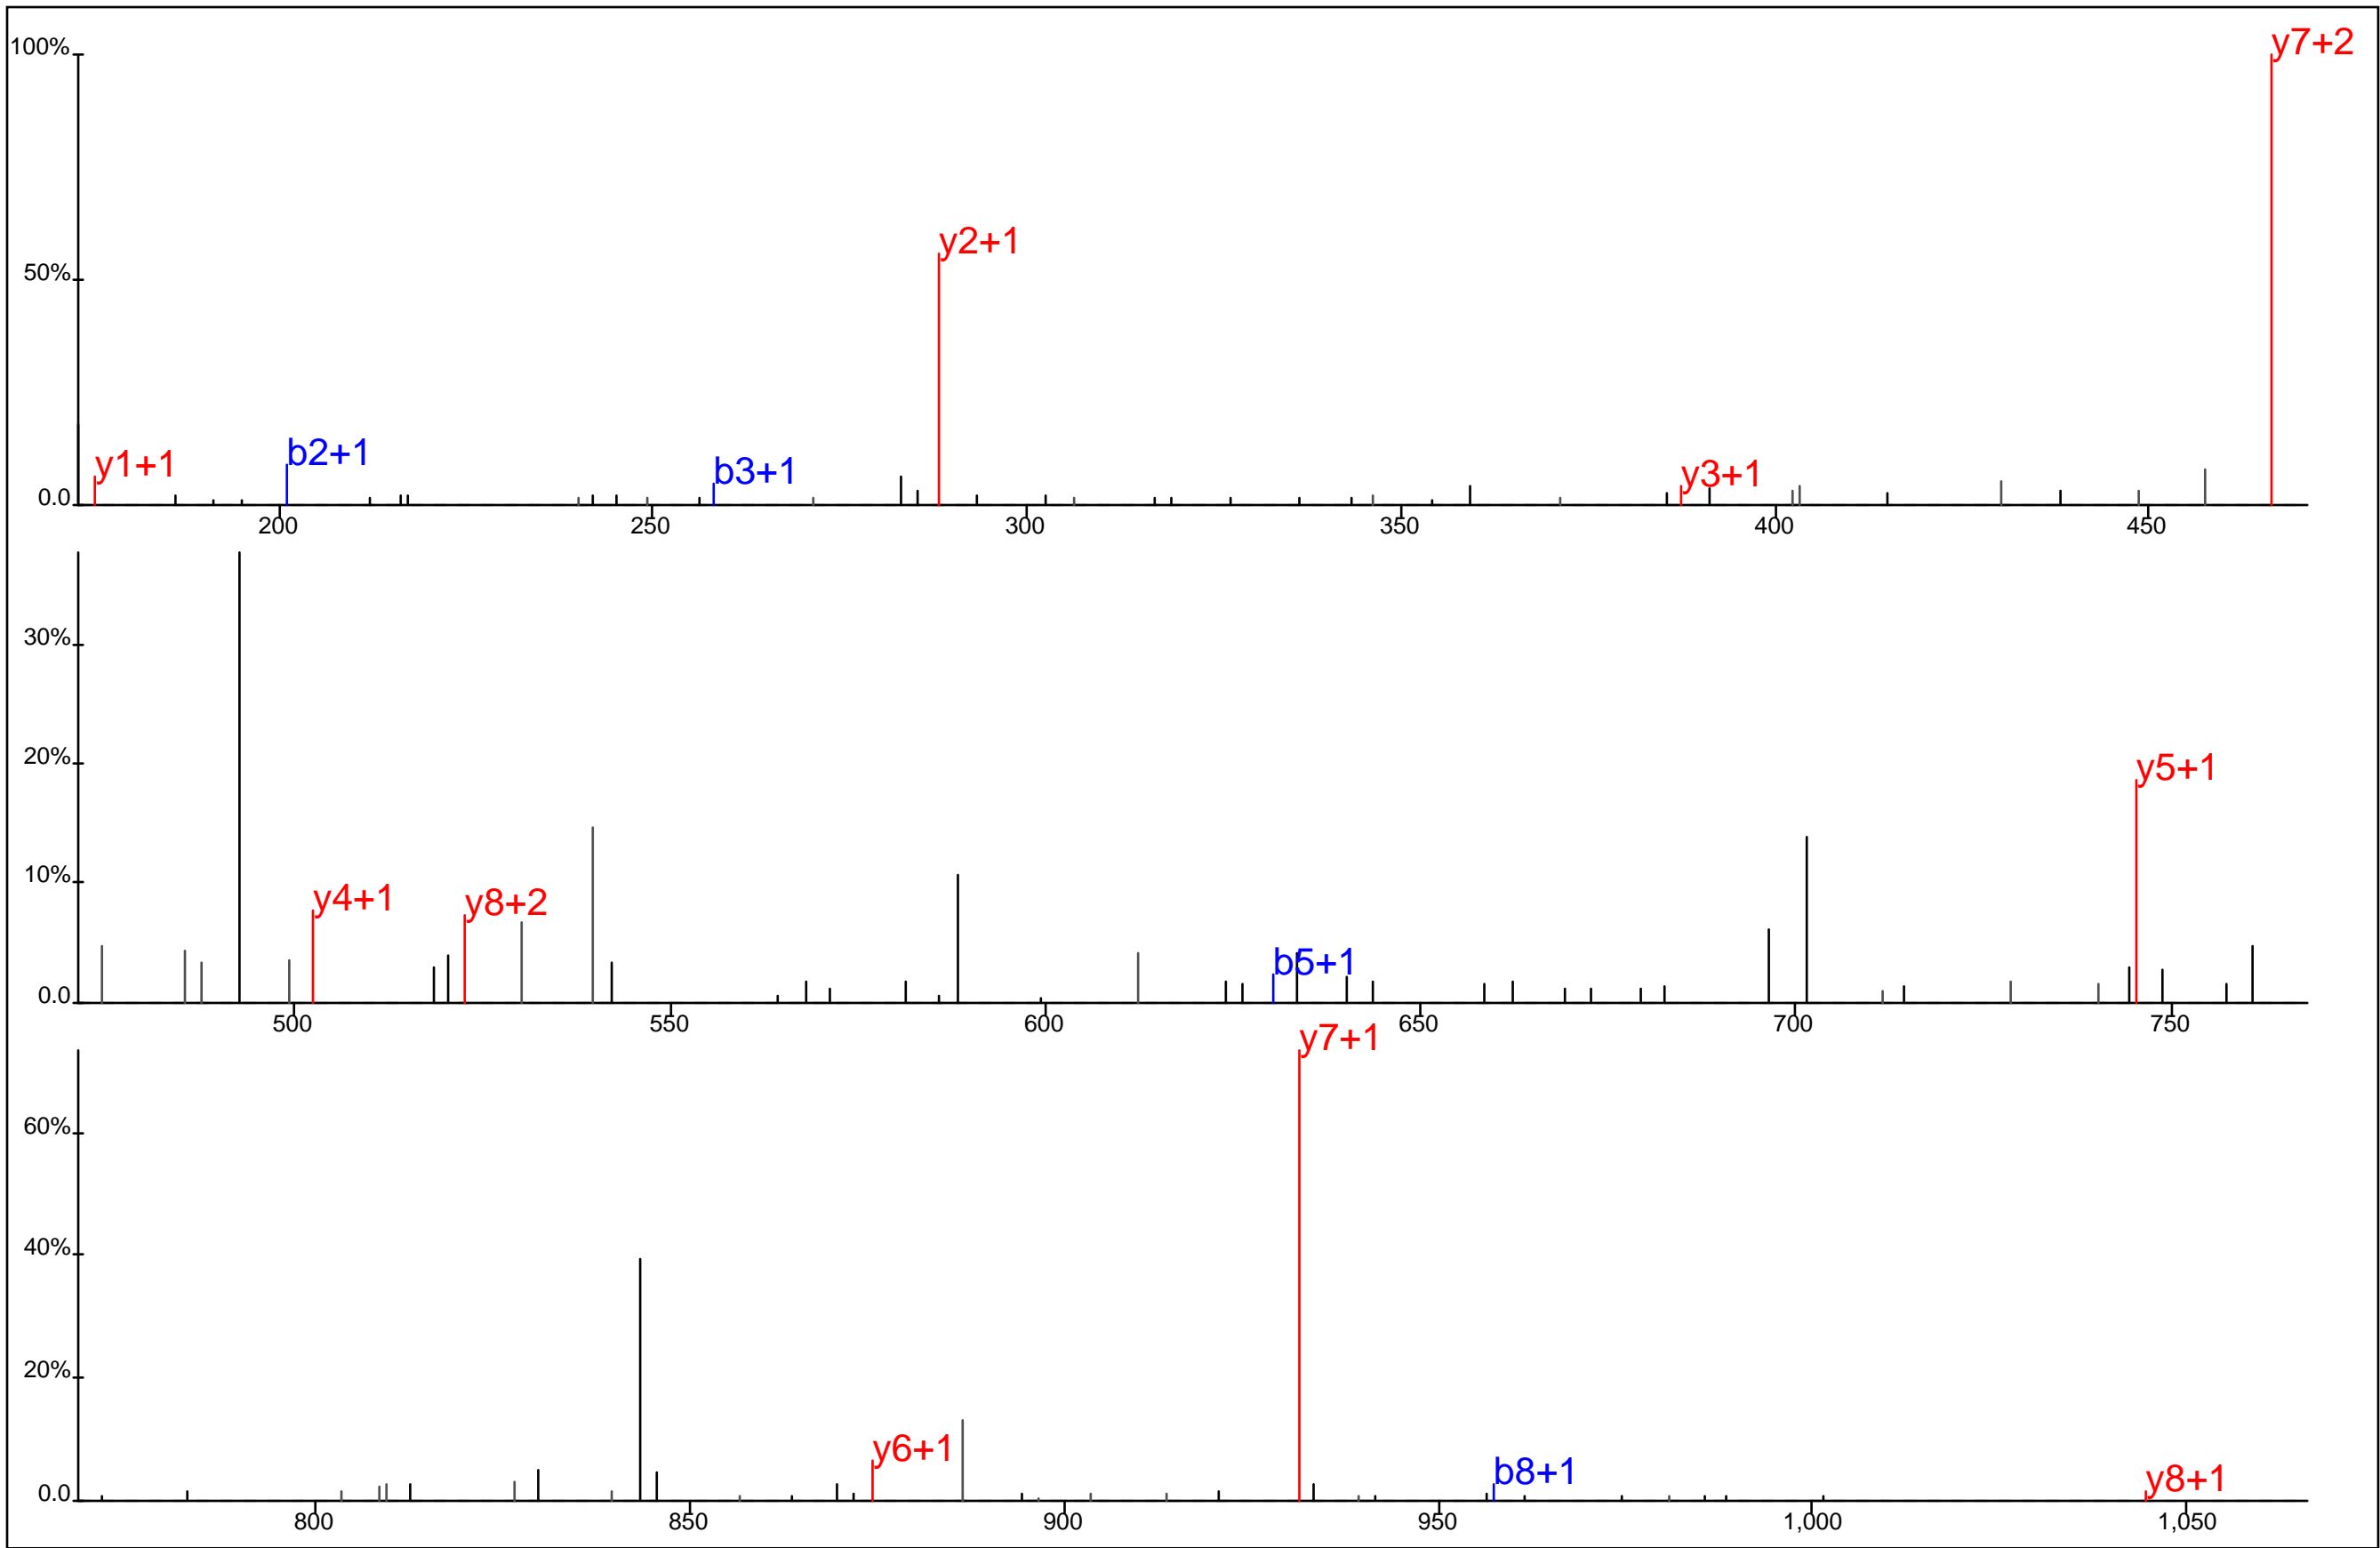

S I G E Y\* D V L R

Protein Name: DNA dependent protein kinase catalytic subunit  
 gi Accession: 0  
 Precursor Mass: 566.2564+2  
 Delta Mass: 2.315 ppm  
 XCorr: 36.47

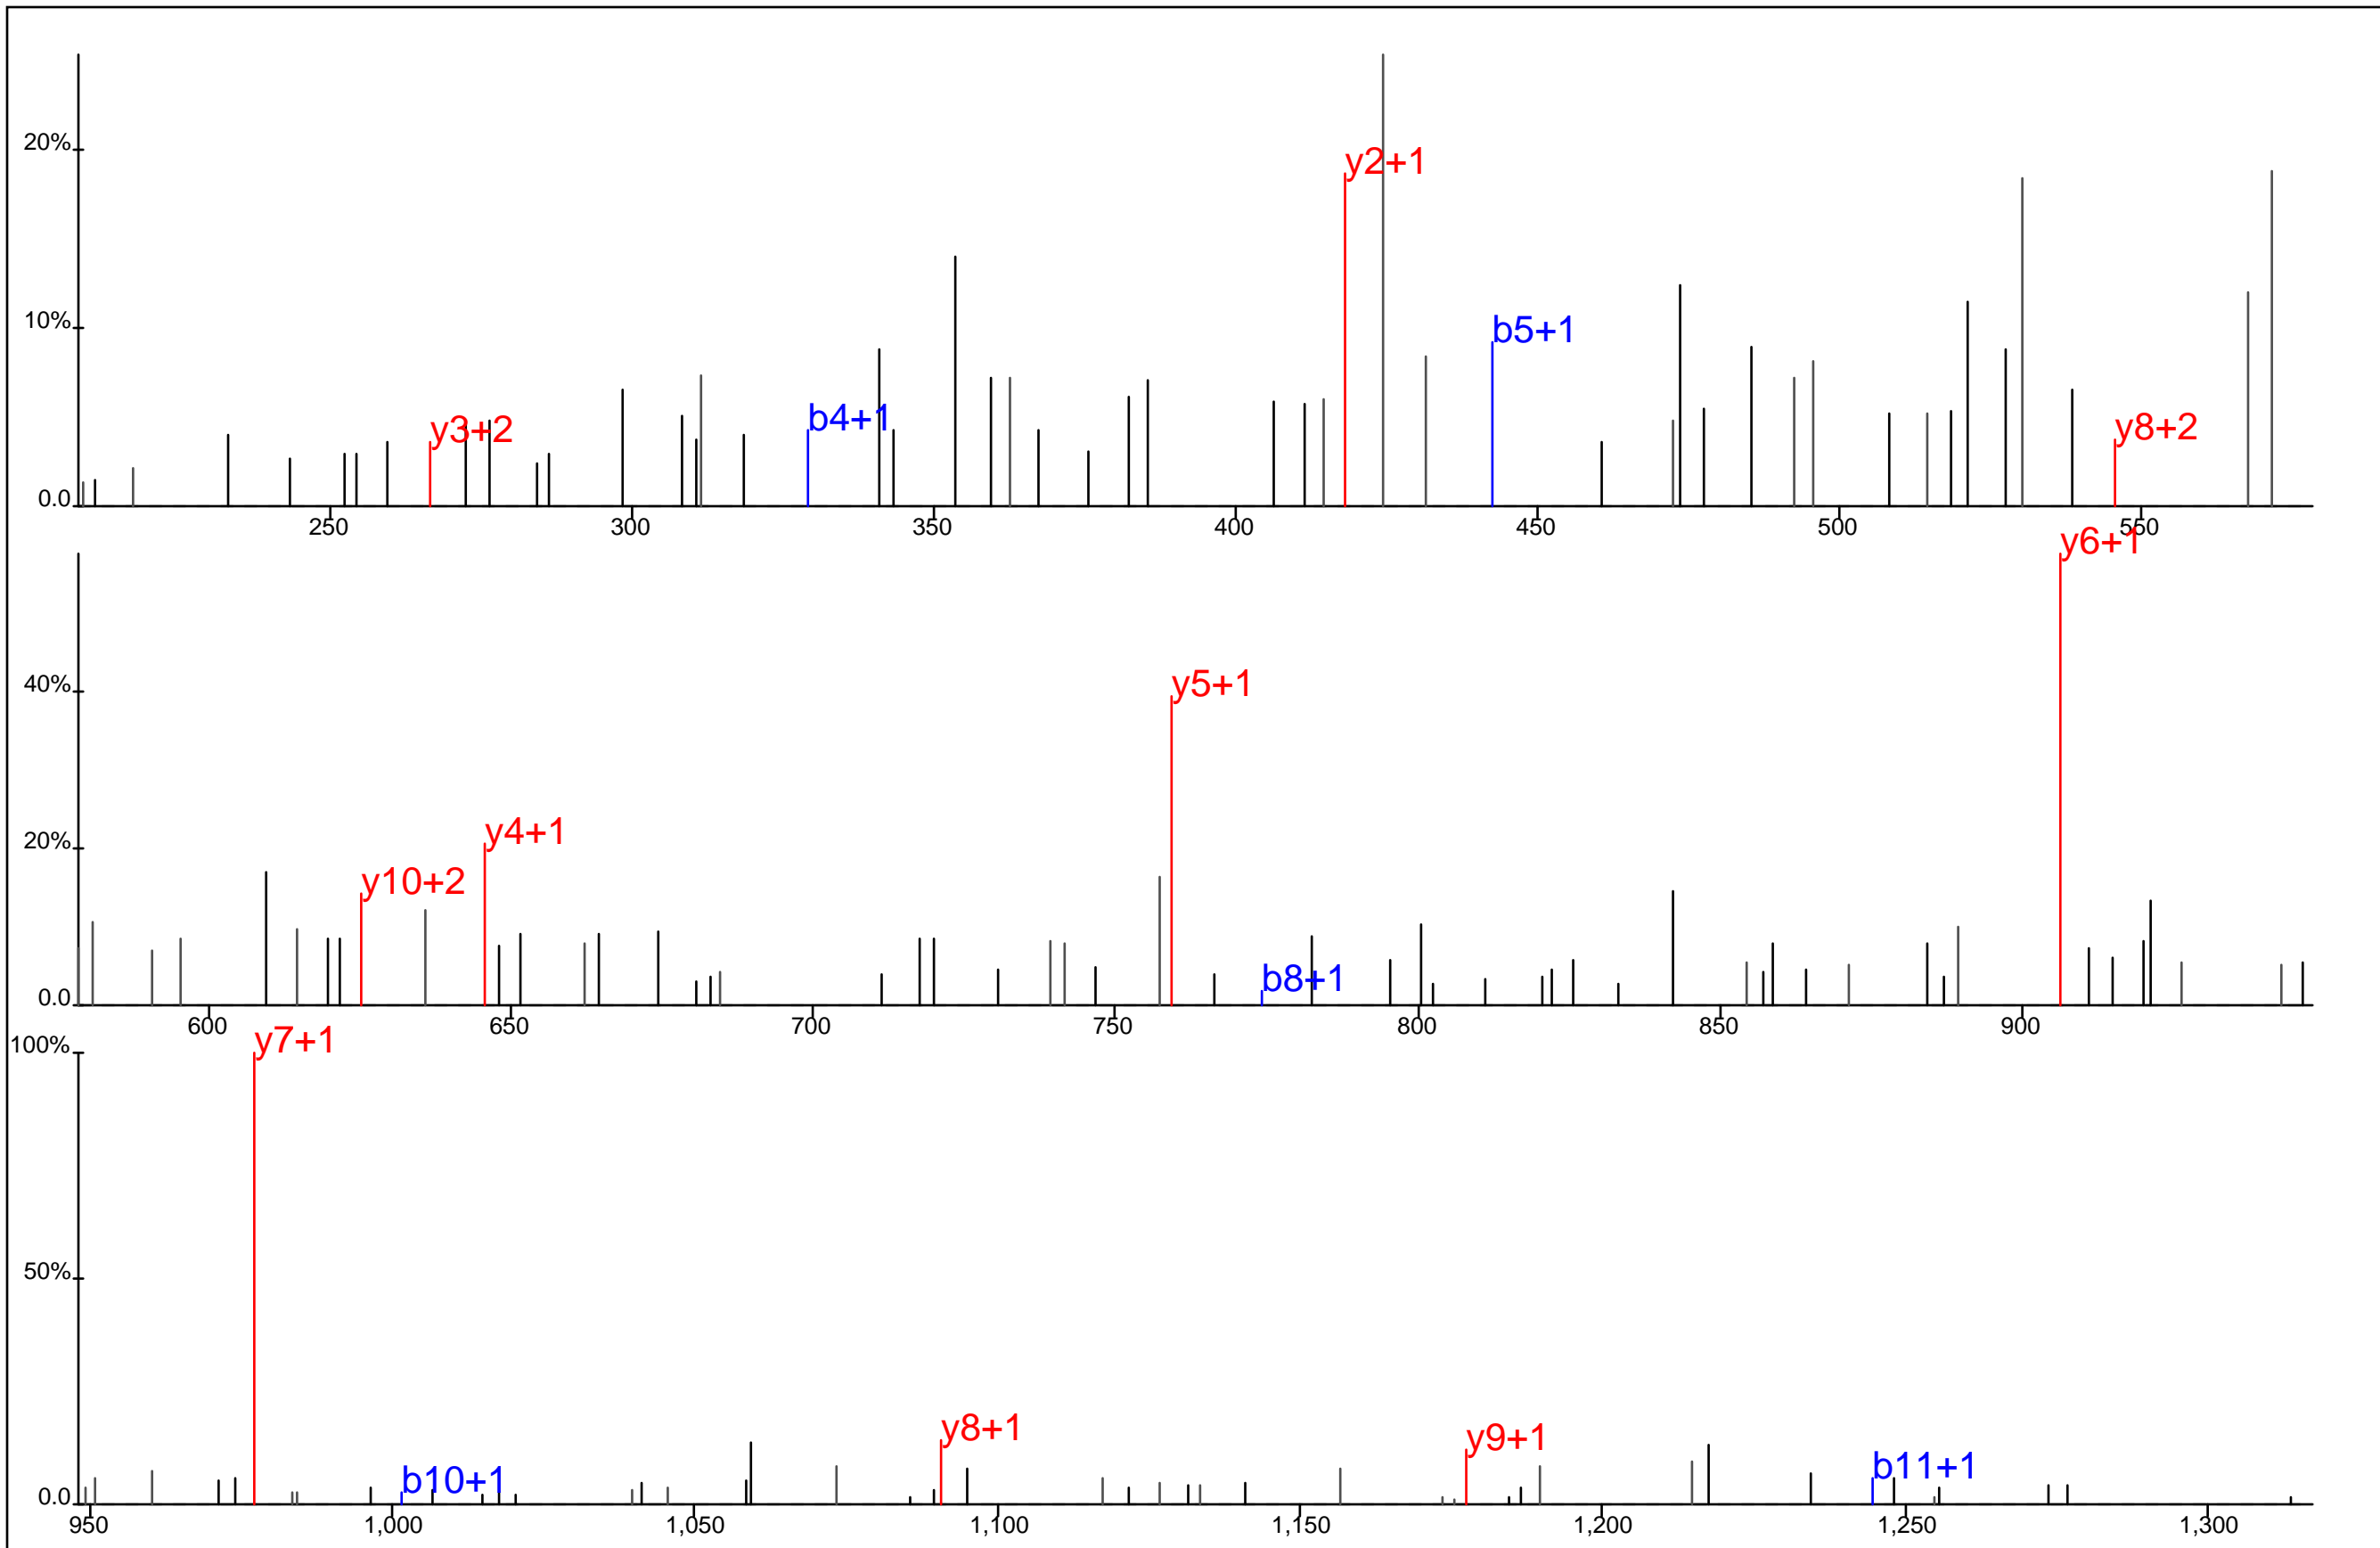

L G A S L A F N N I Y\*  
 R

Protein Name: DNA dependent protein kinase catalytic subunit  
 gi Accession: 0  
 Precursor Mass: 709.8459+2  
 Delta Mass: 1.229 ppm  
 XCorr: 33.67

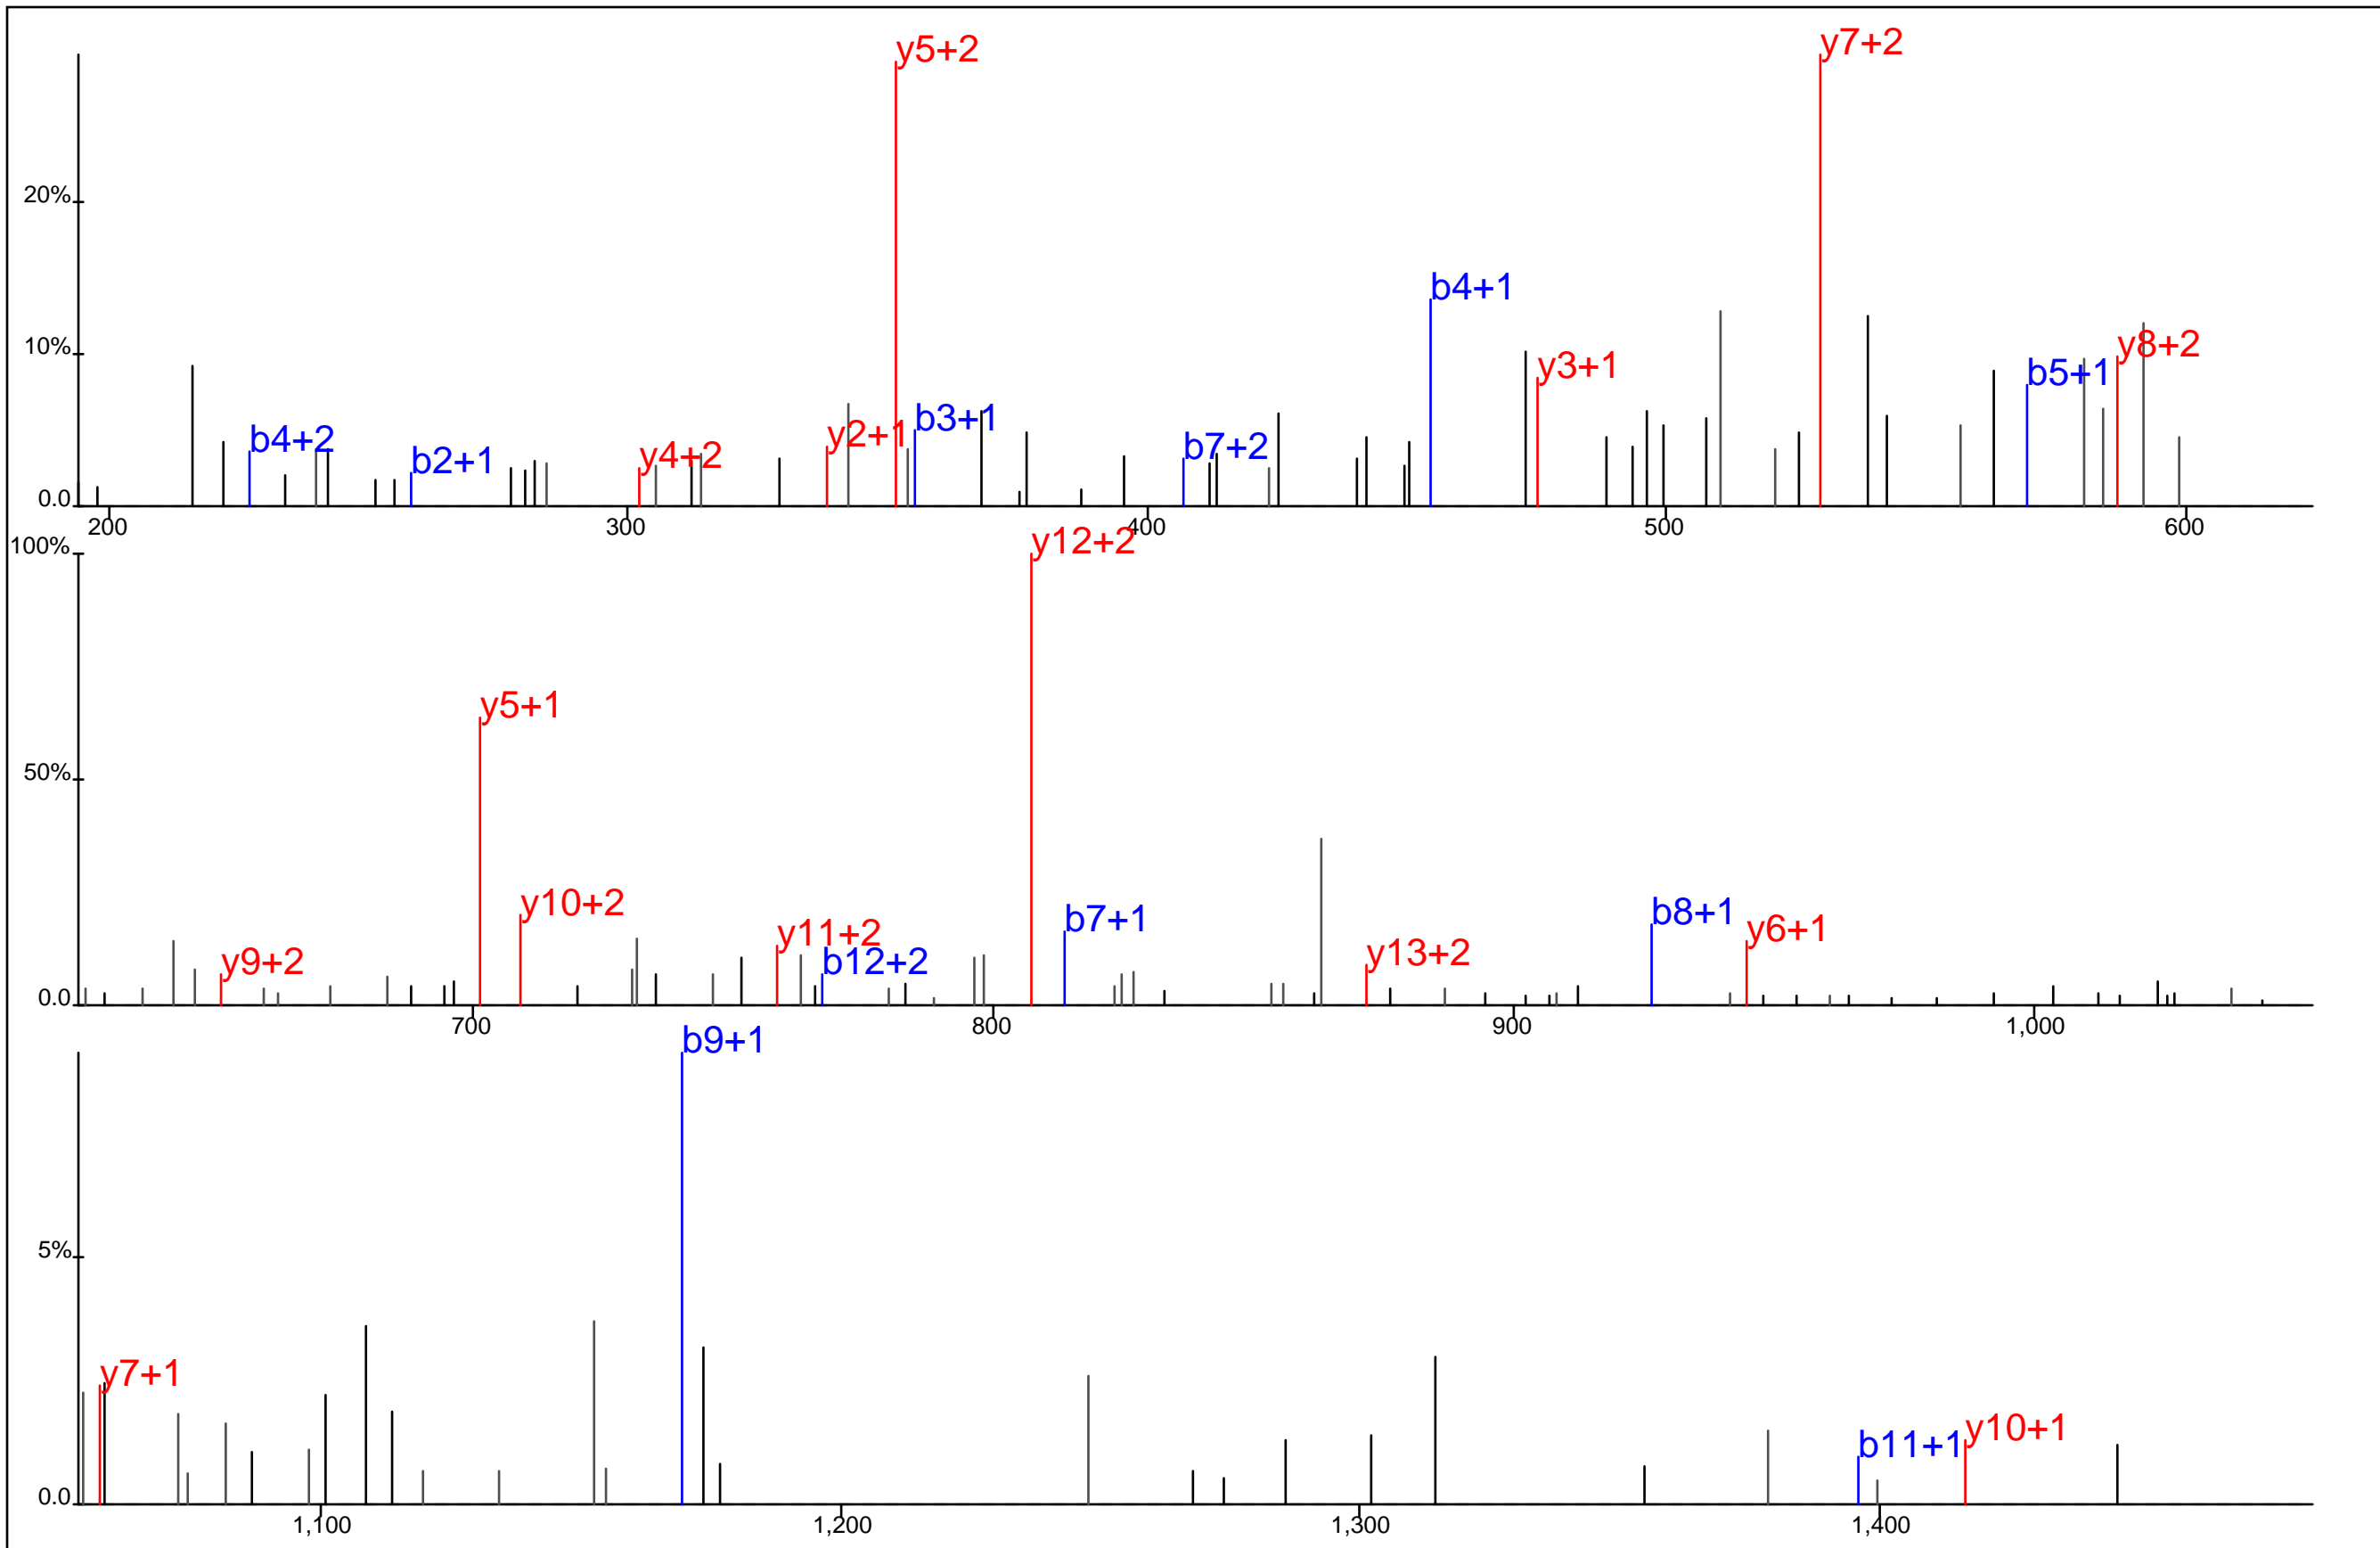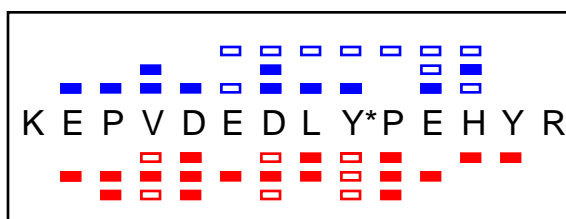

Protein Name: DNA methyltransferase 1  
 gi Accession: 0  
 Precursor Mass: 623.9417+3  
 Delta Mass: 2.743 ppm  
 XCorr: 34.99

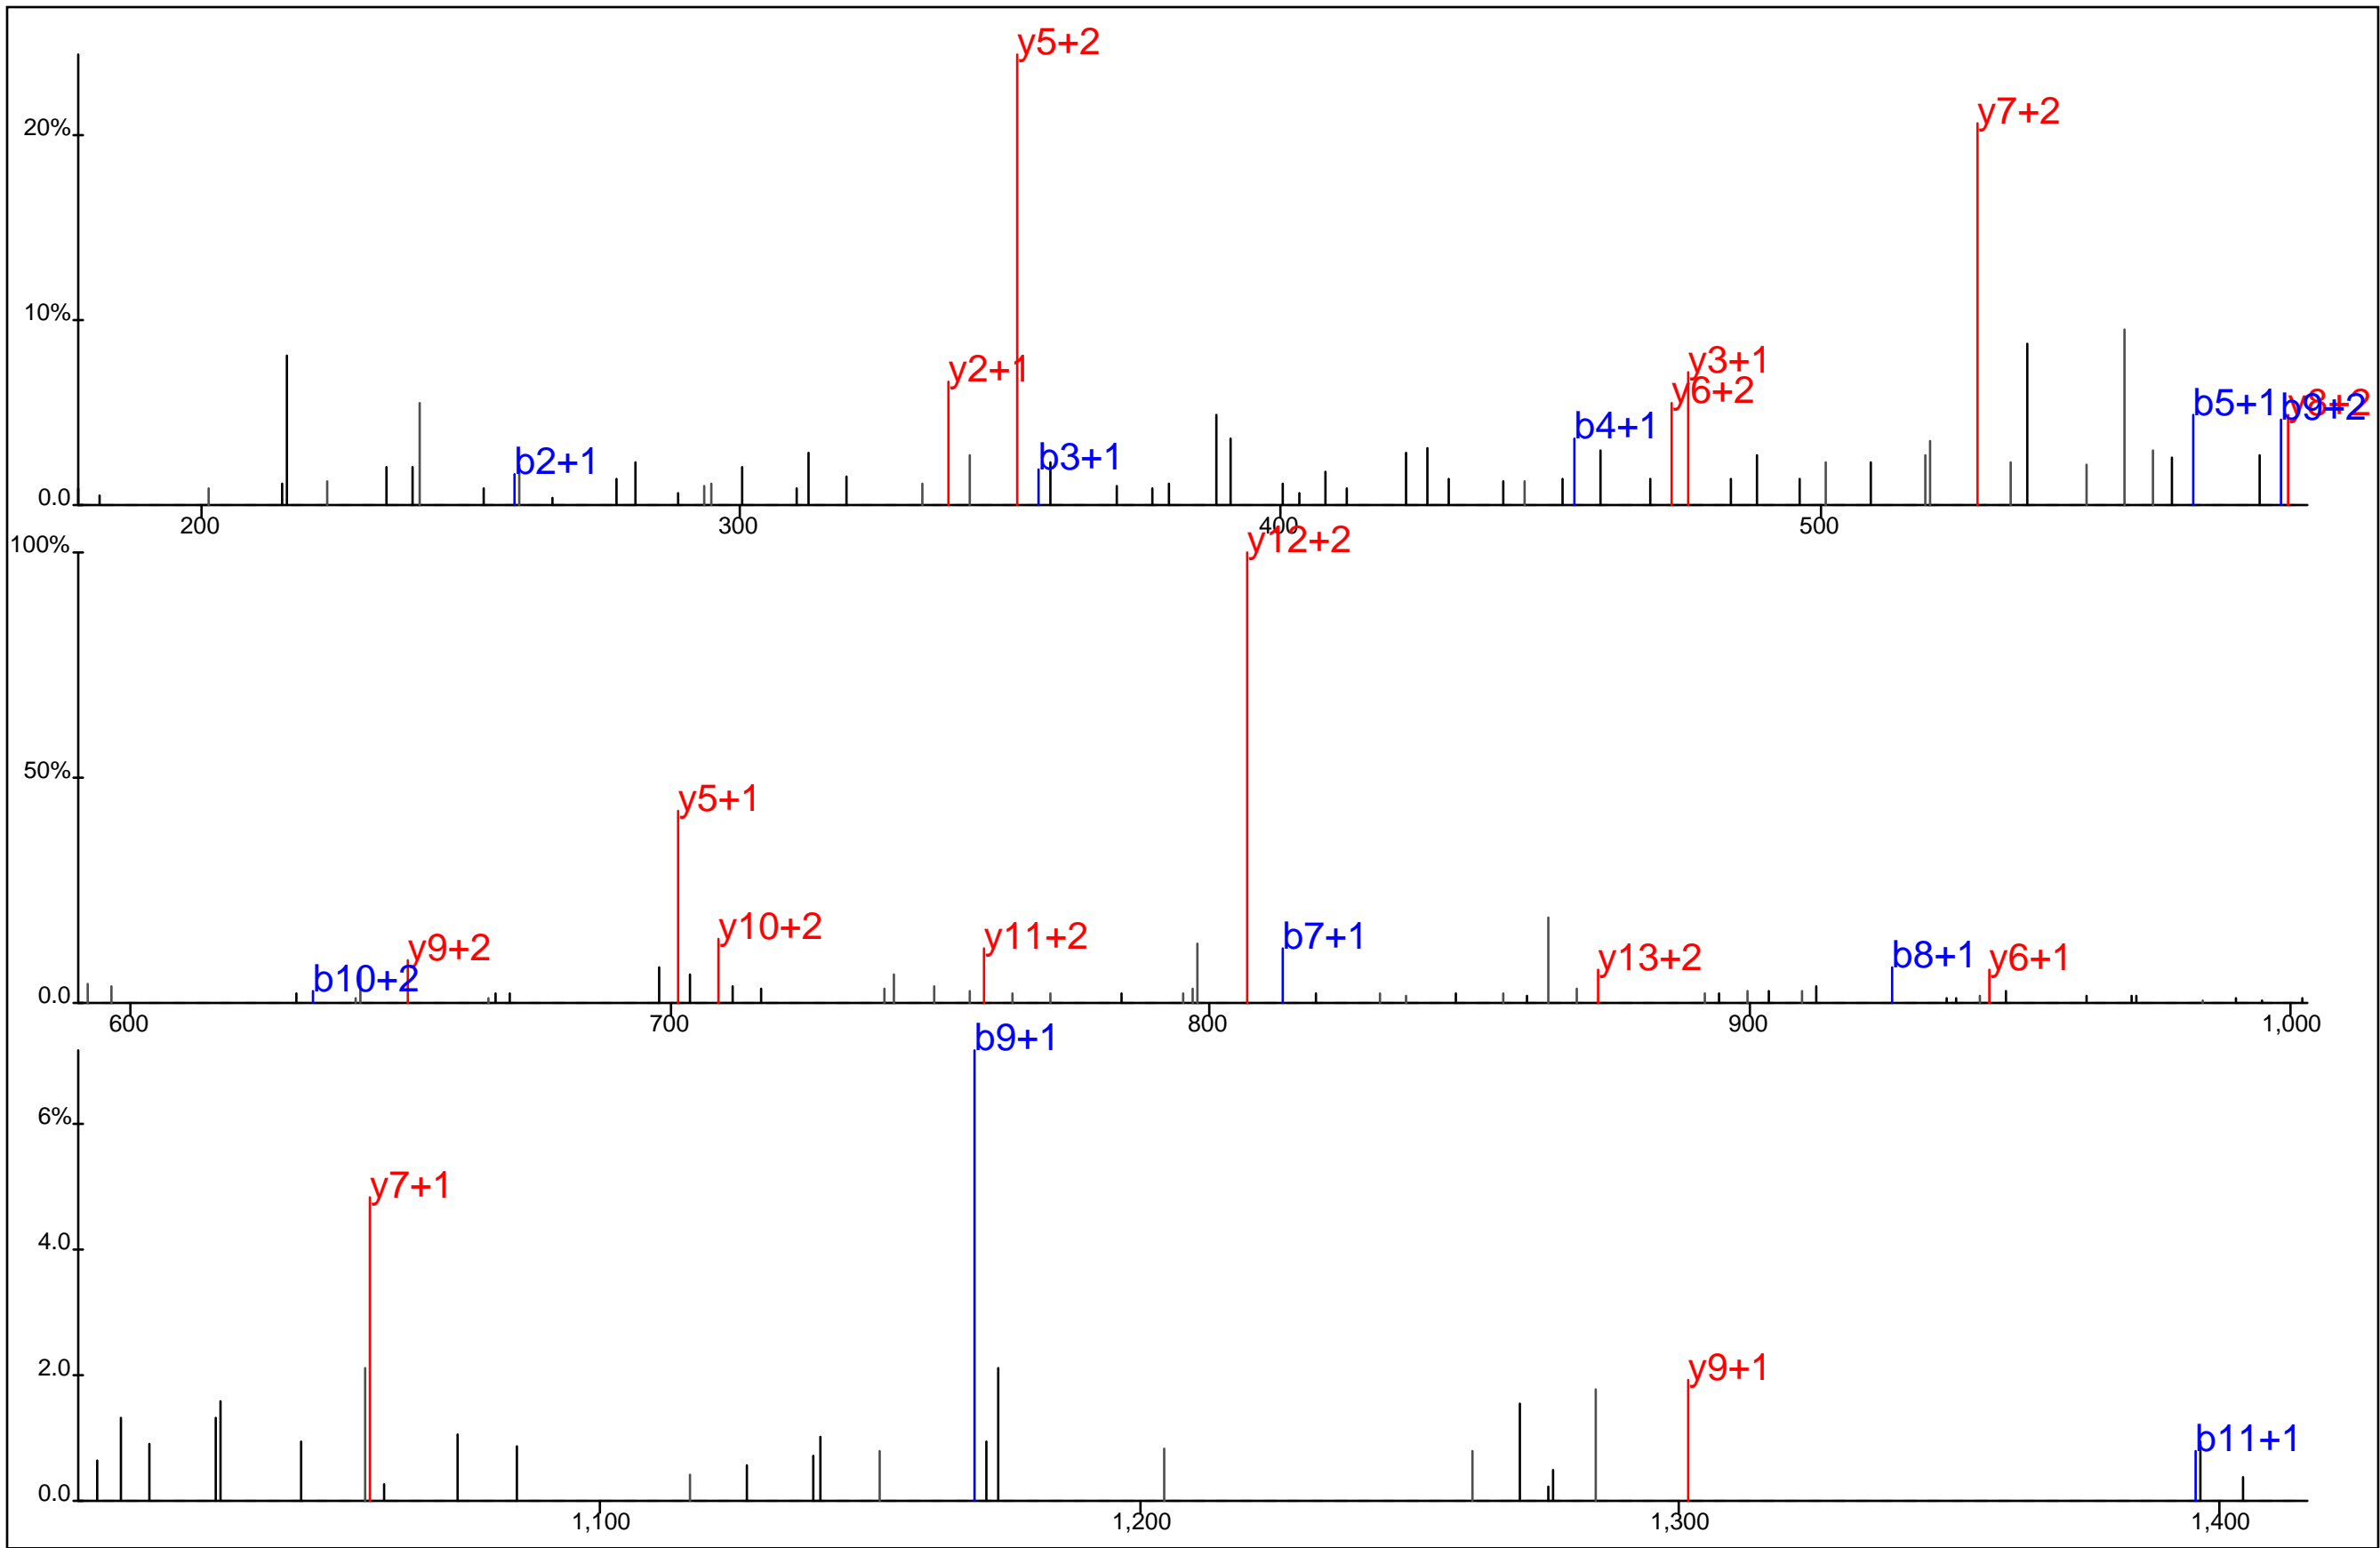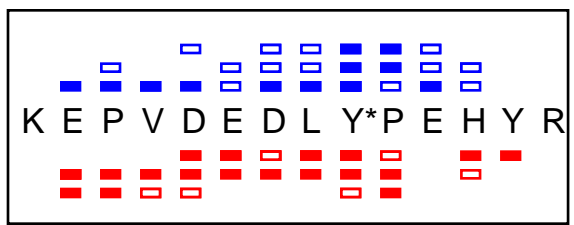

Protein Name: DNA methyltransferase 1  
 gi Accession: 0  
 Precursor Mass: 623.9388+3  
 Delta Mass: 1.956 ppm  
 XCorr: 50.73

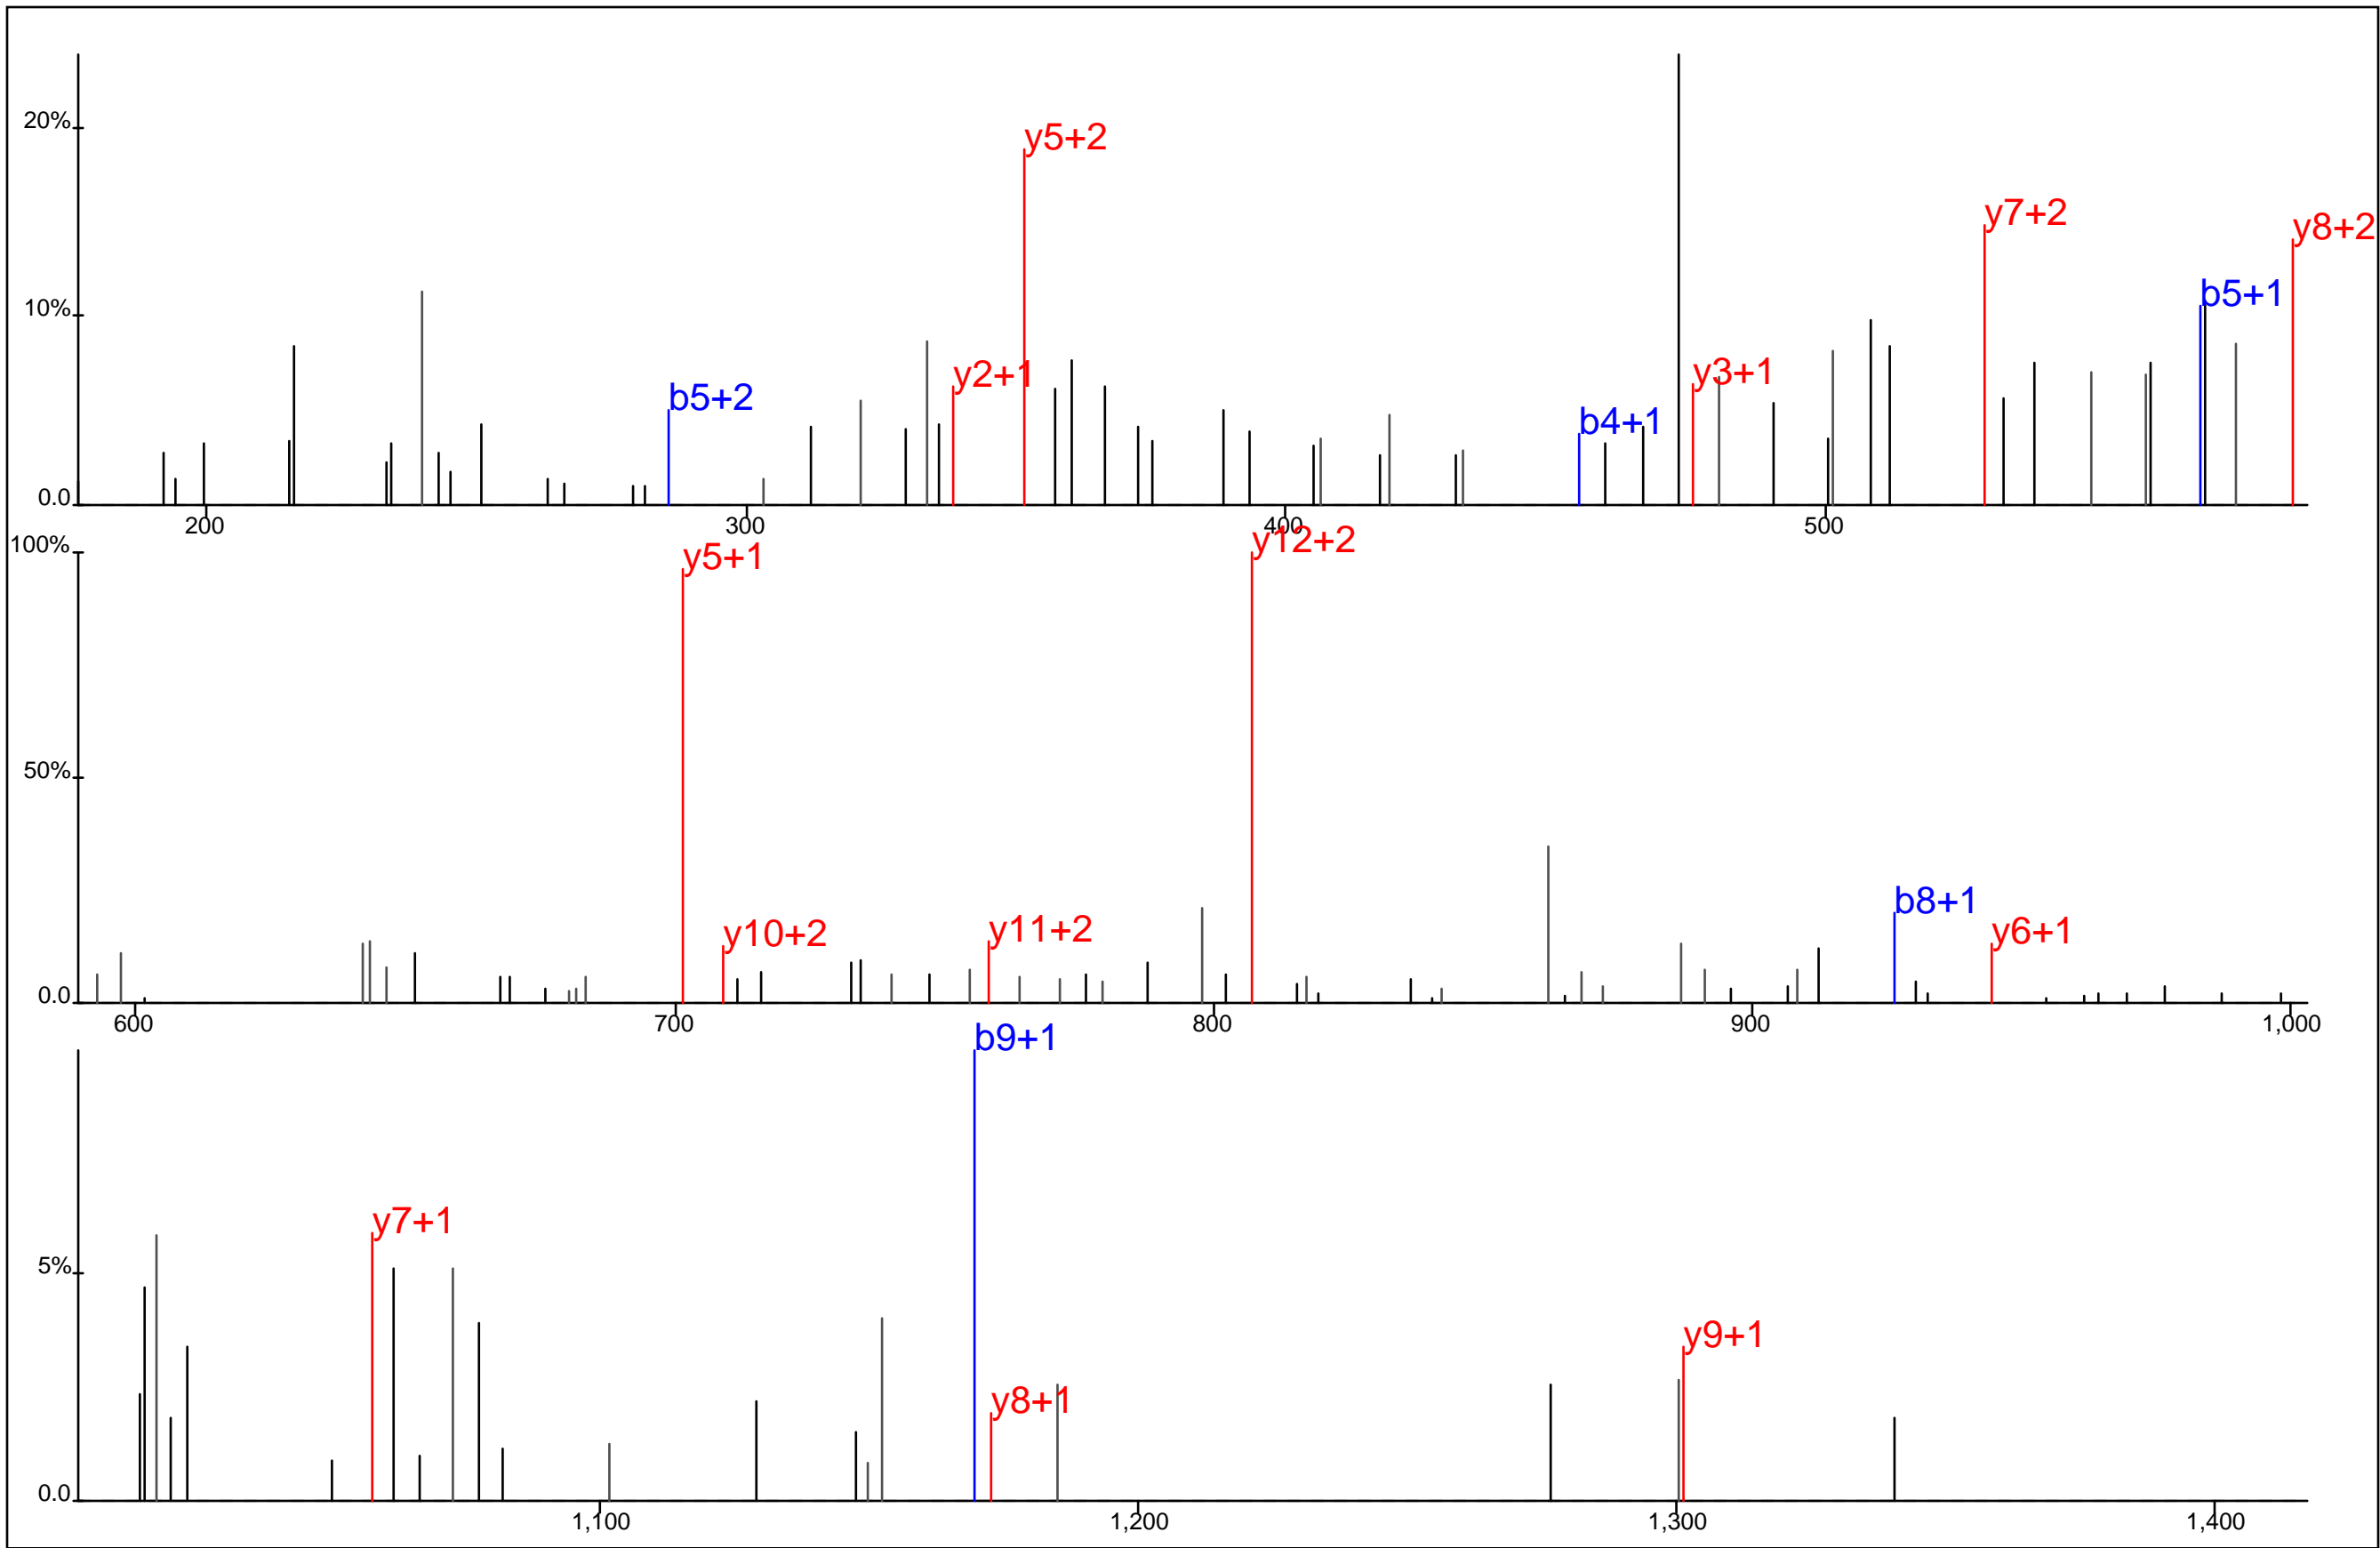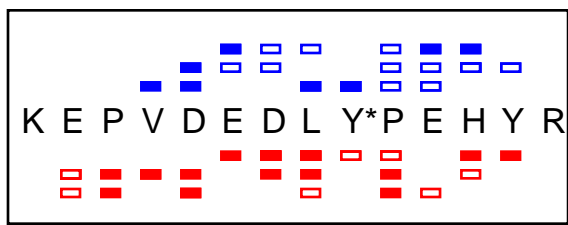

Protein Name: DNA methyltransferase 1  
 gi Accession: 0  
 Precursor Mass: 623.9418+3  
 Delta Mass: 2.939 ppm  
 XCorr: 39.12

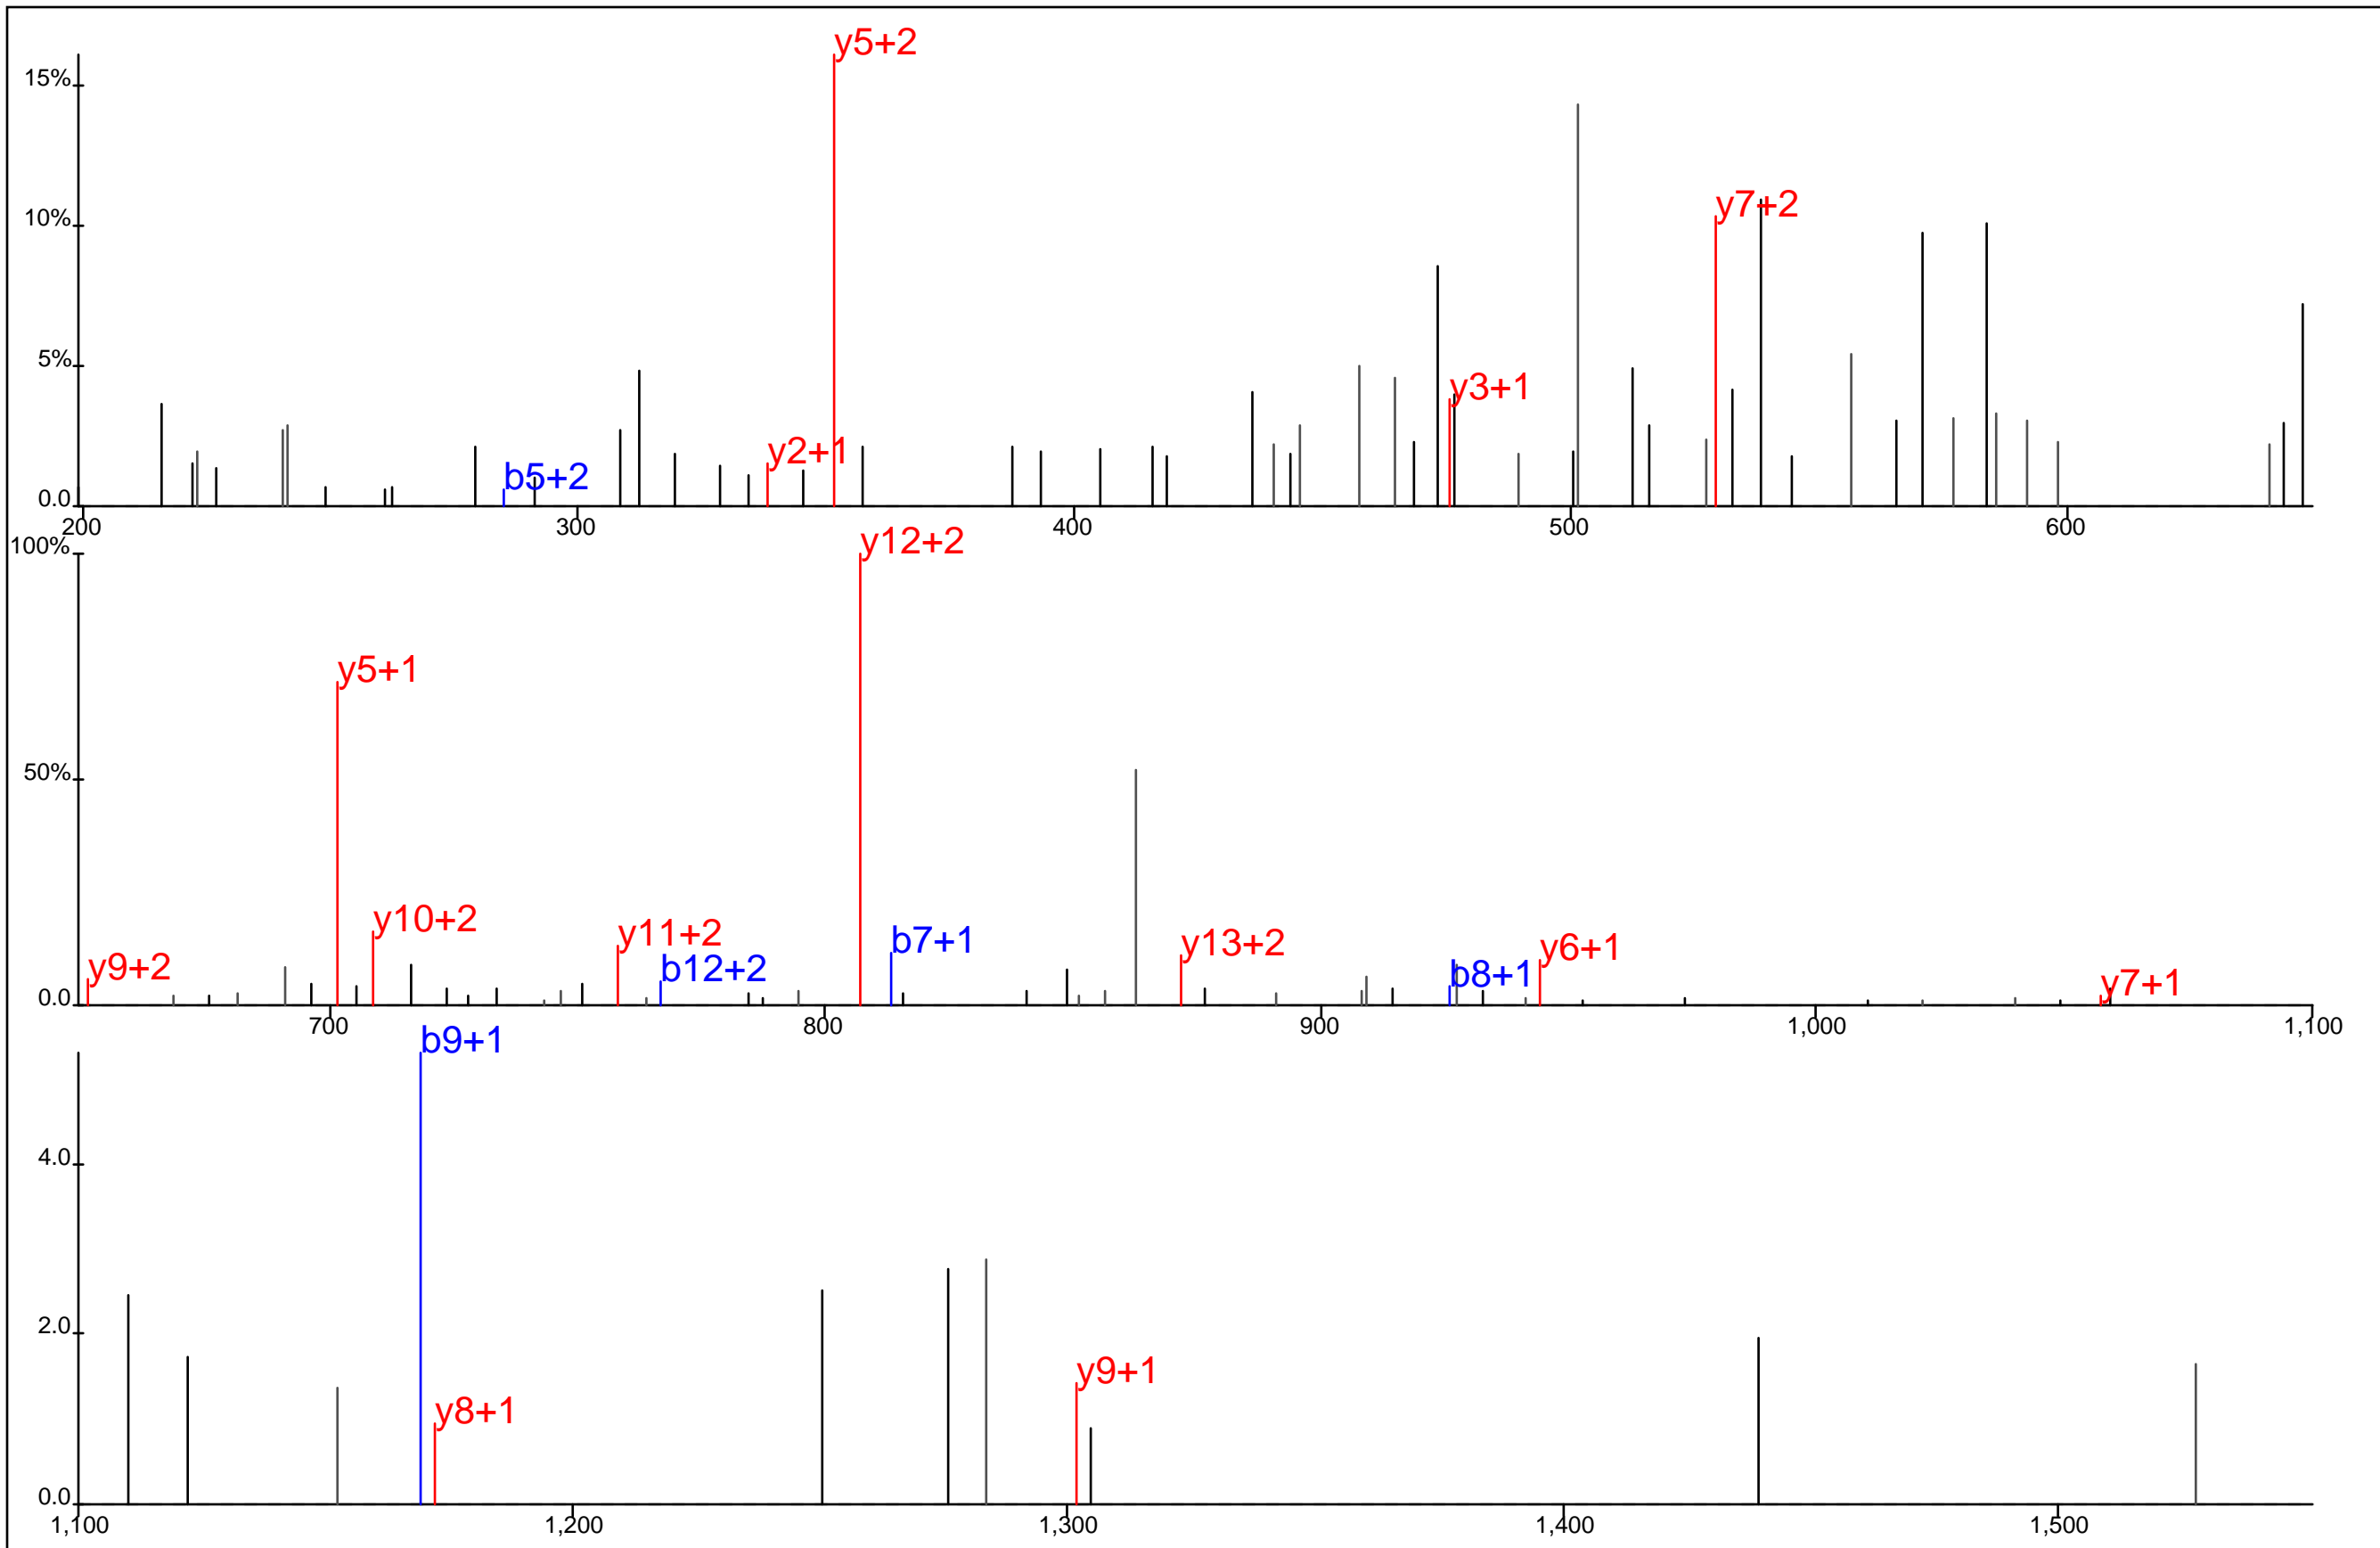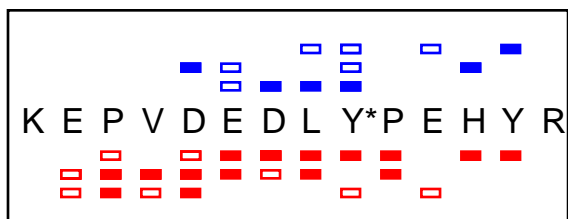

Protein Name: DNA methyltransferase 1  
 gi Accession: 0  
 Precursor Mass: 623.9399+3  
 Delta Mass: 0.195 ppm  
 XCorr: 38.24

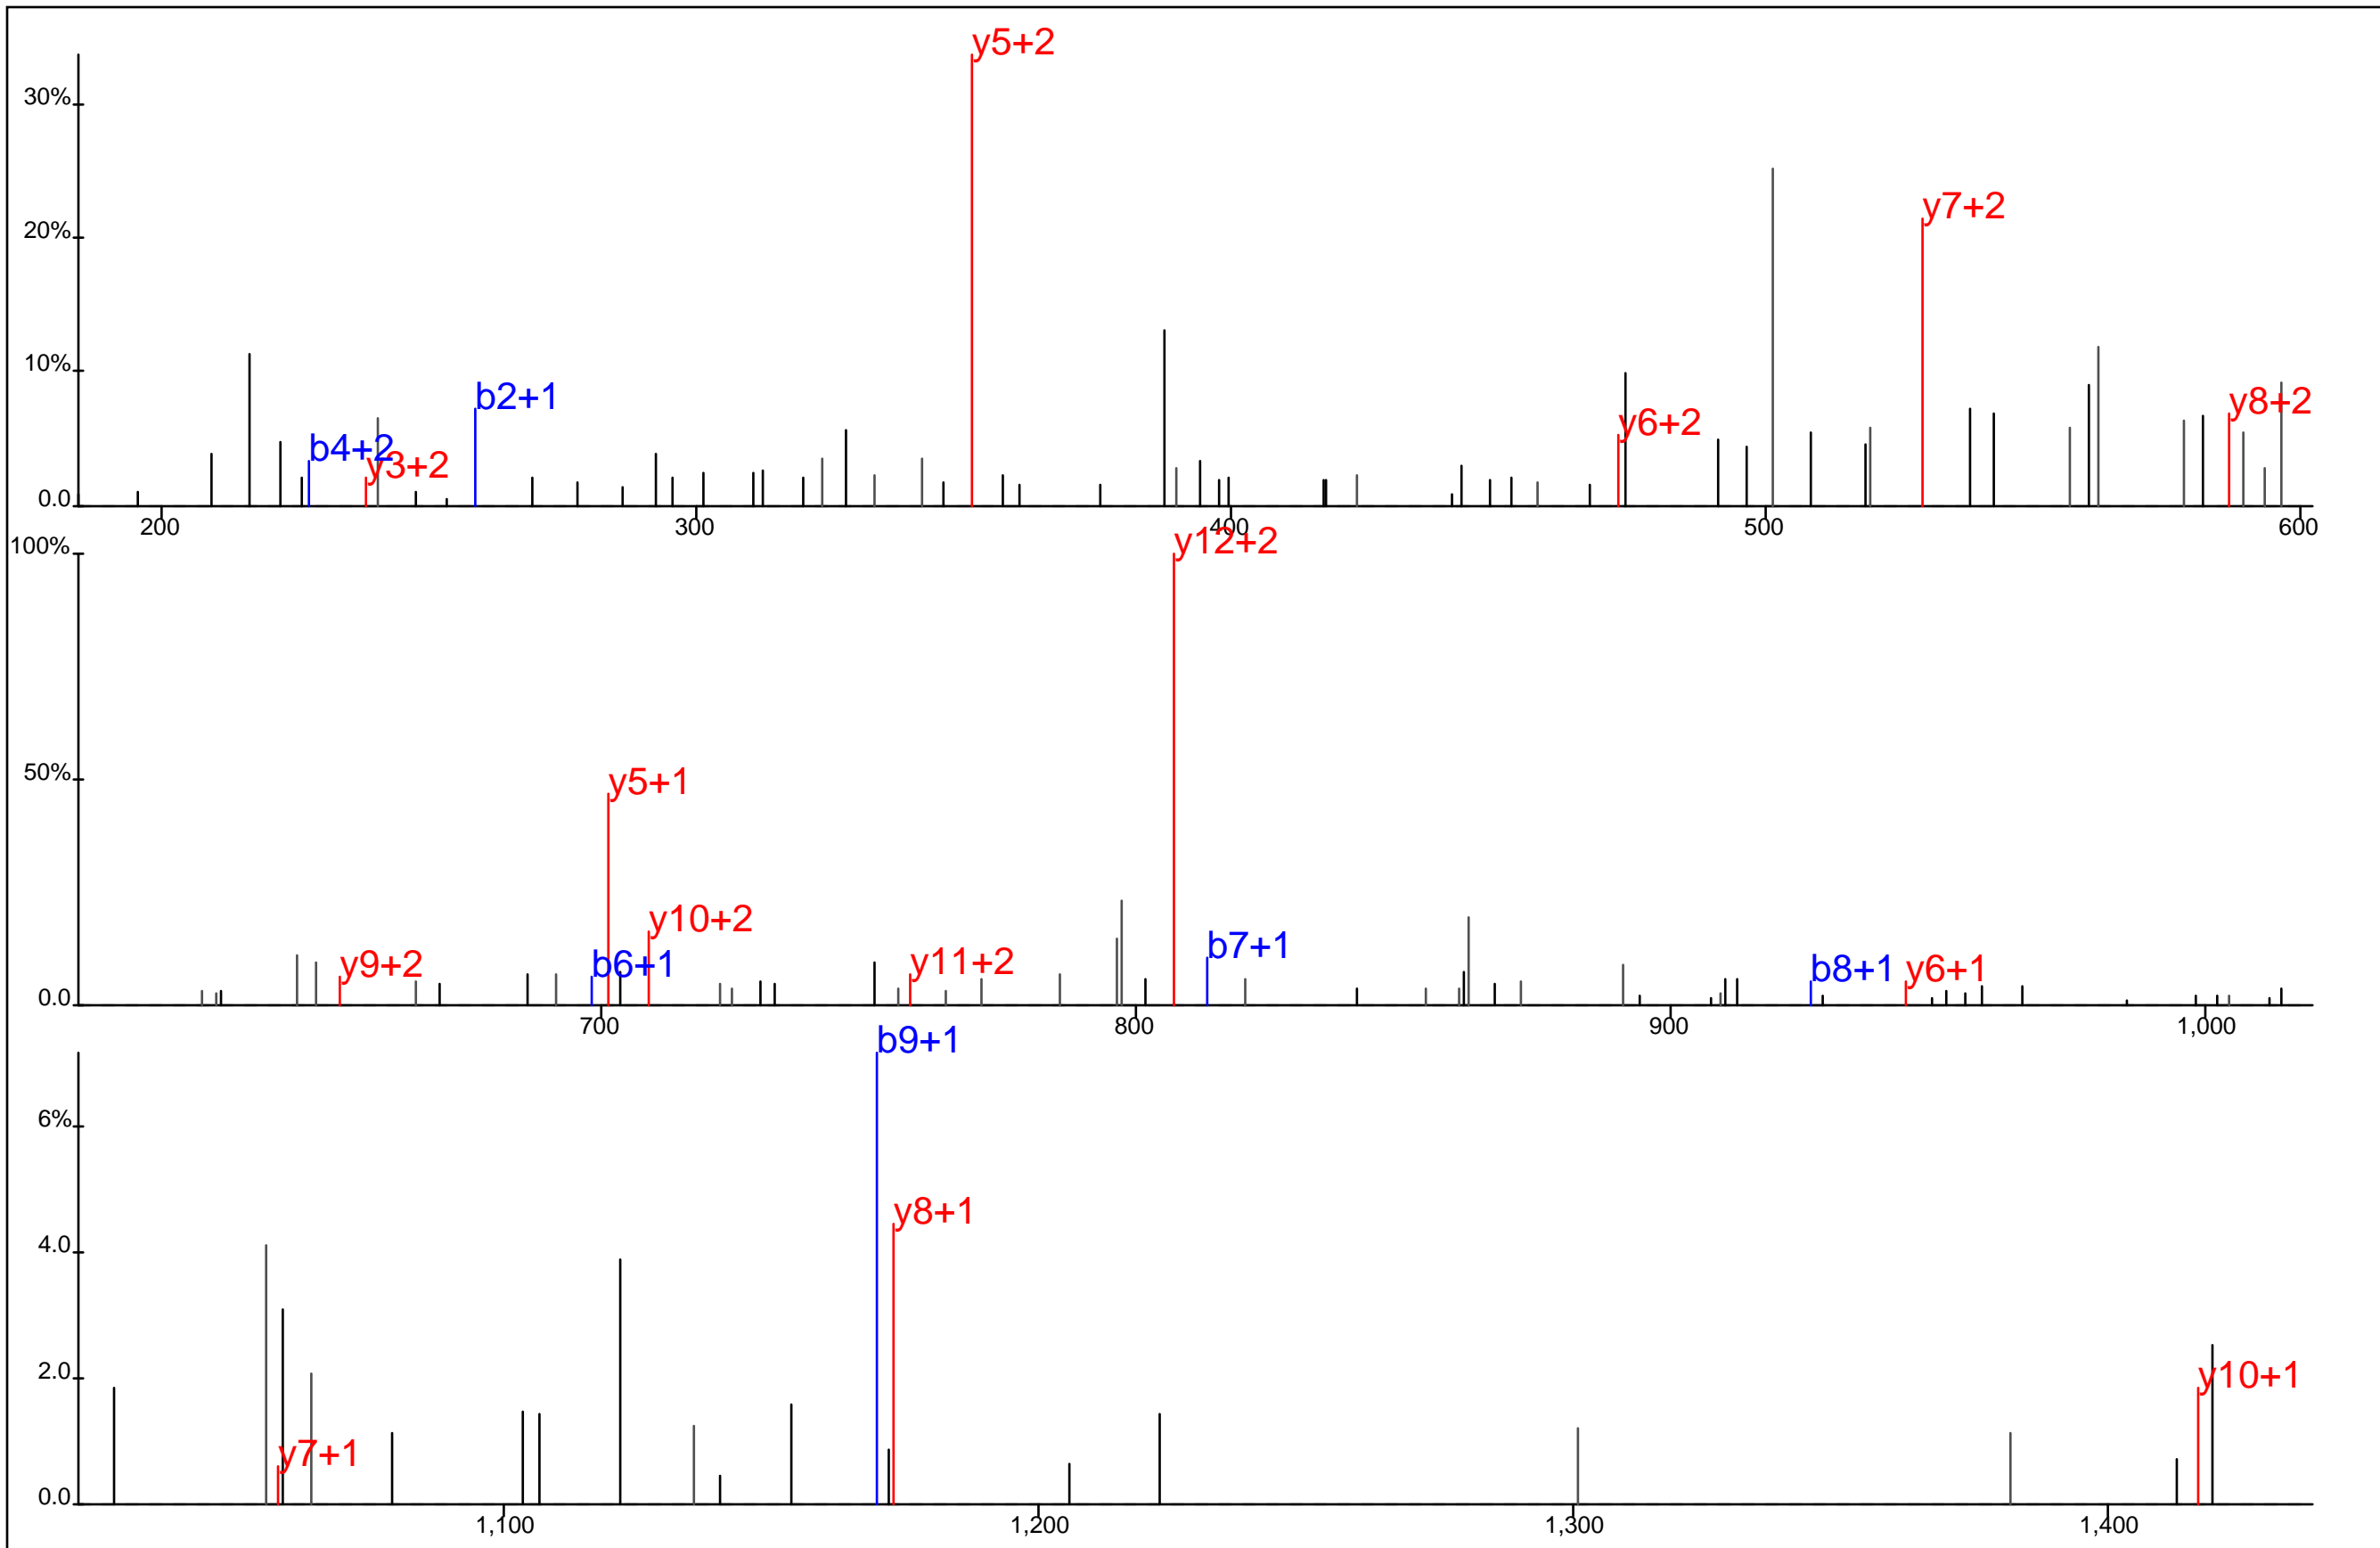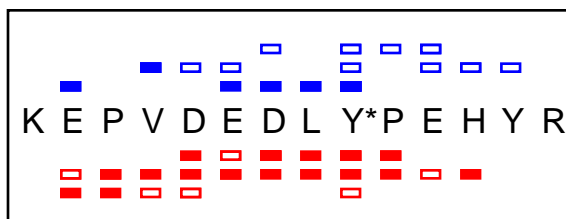

Protein Name: DNA methyltransferase 1  
 gi Accession: 0  
 Precursor Mass: 623.9418+3  
 Delta Mass: 2.939 ppm  
 XCorr: 33.43

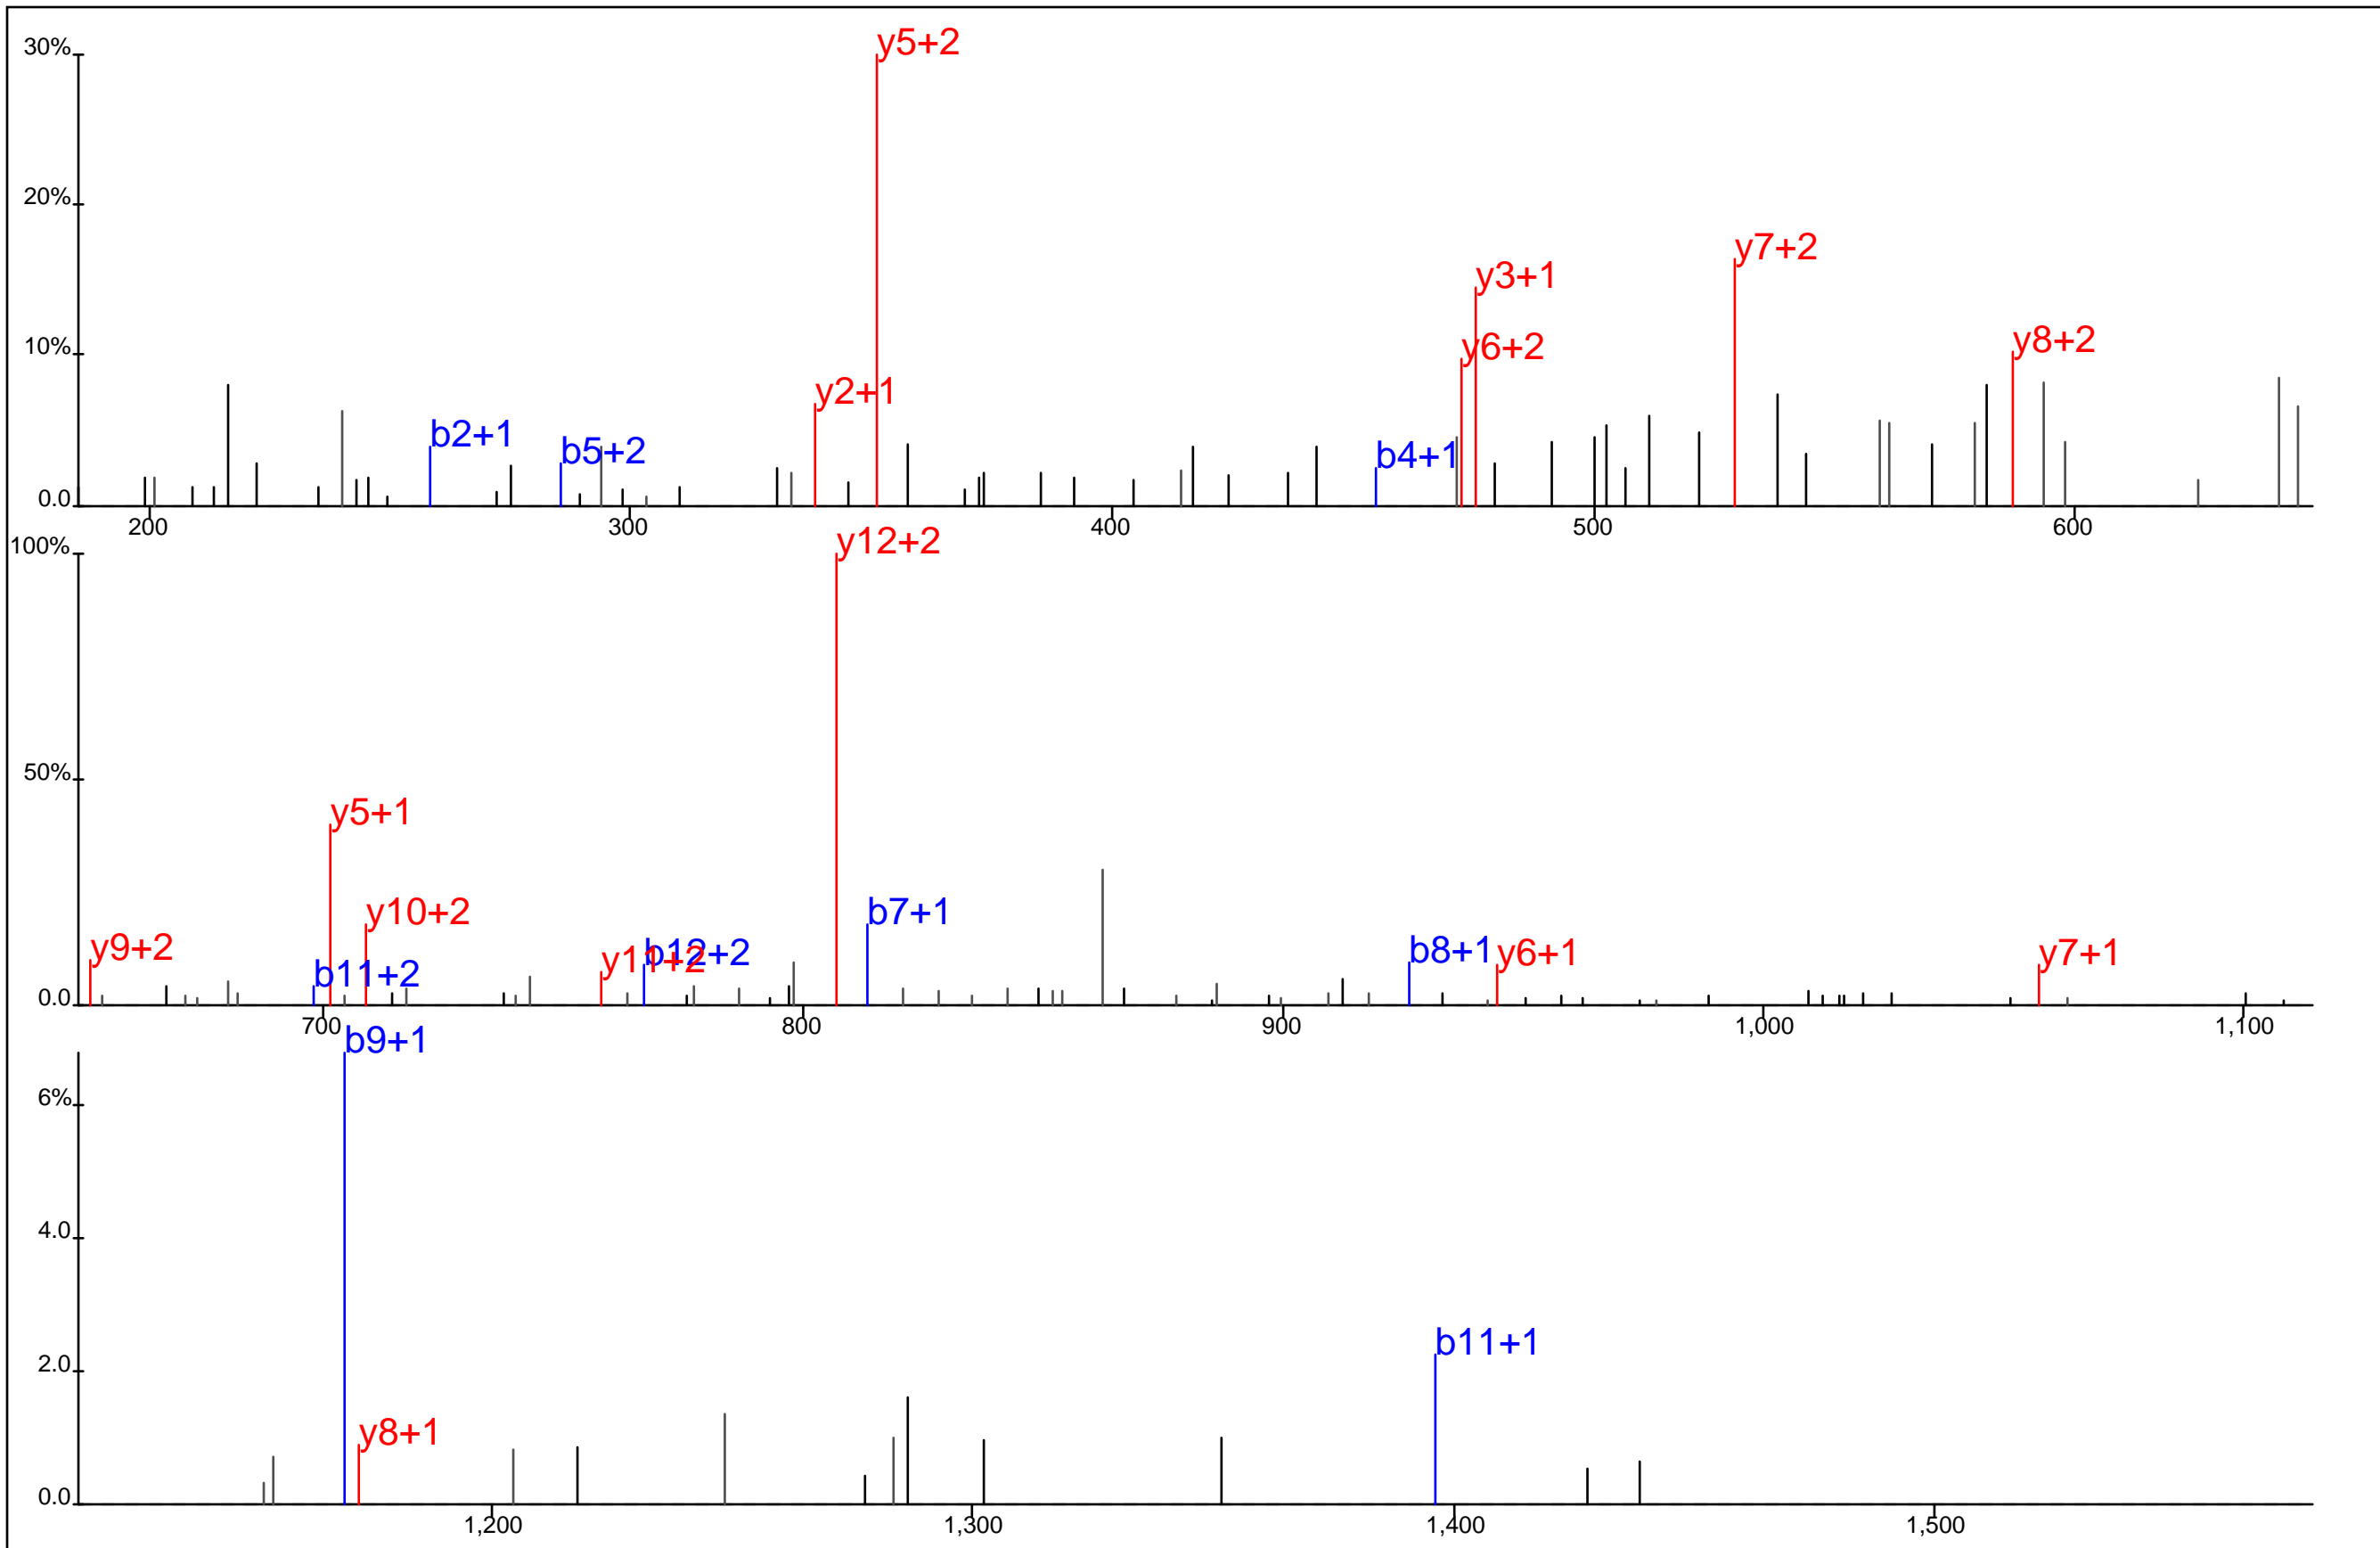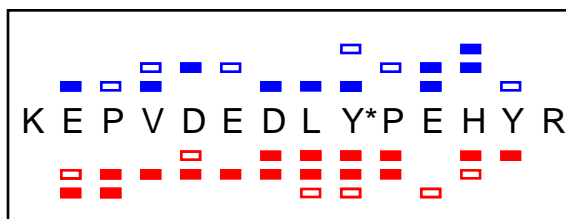

Protein Name: DNA methyltransferase 1  
 gi Accession: 0  
 Precursor Mass: 623.9399+3  
 Delta Mass: 0.097 ppm  
 XCorr: 47.57



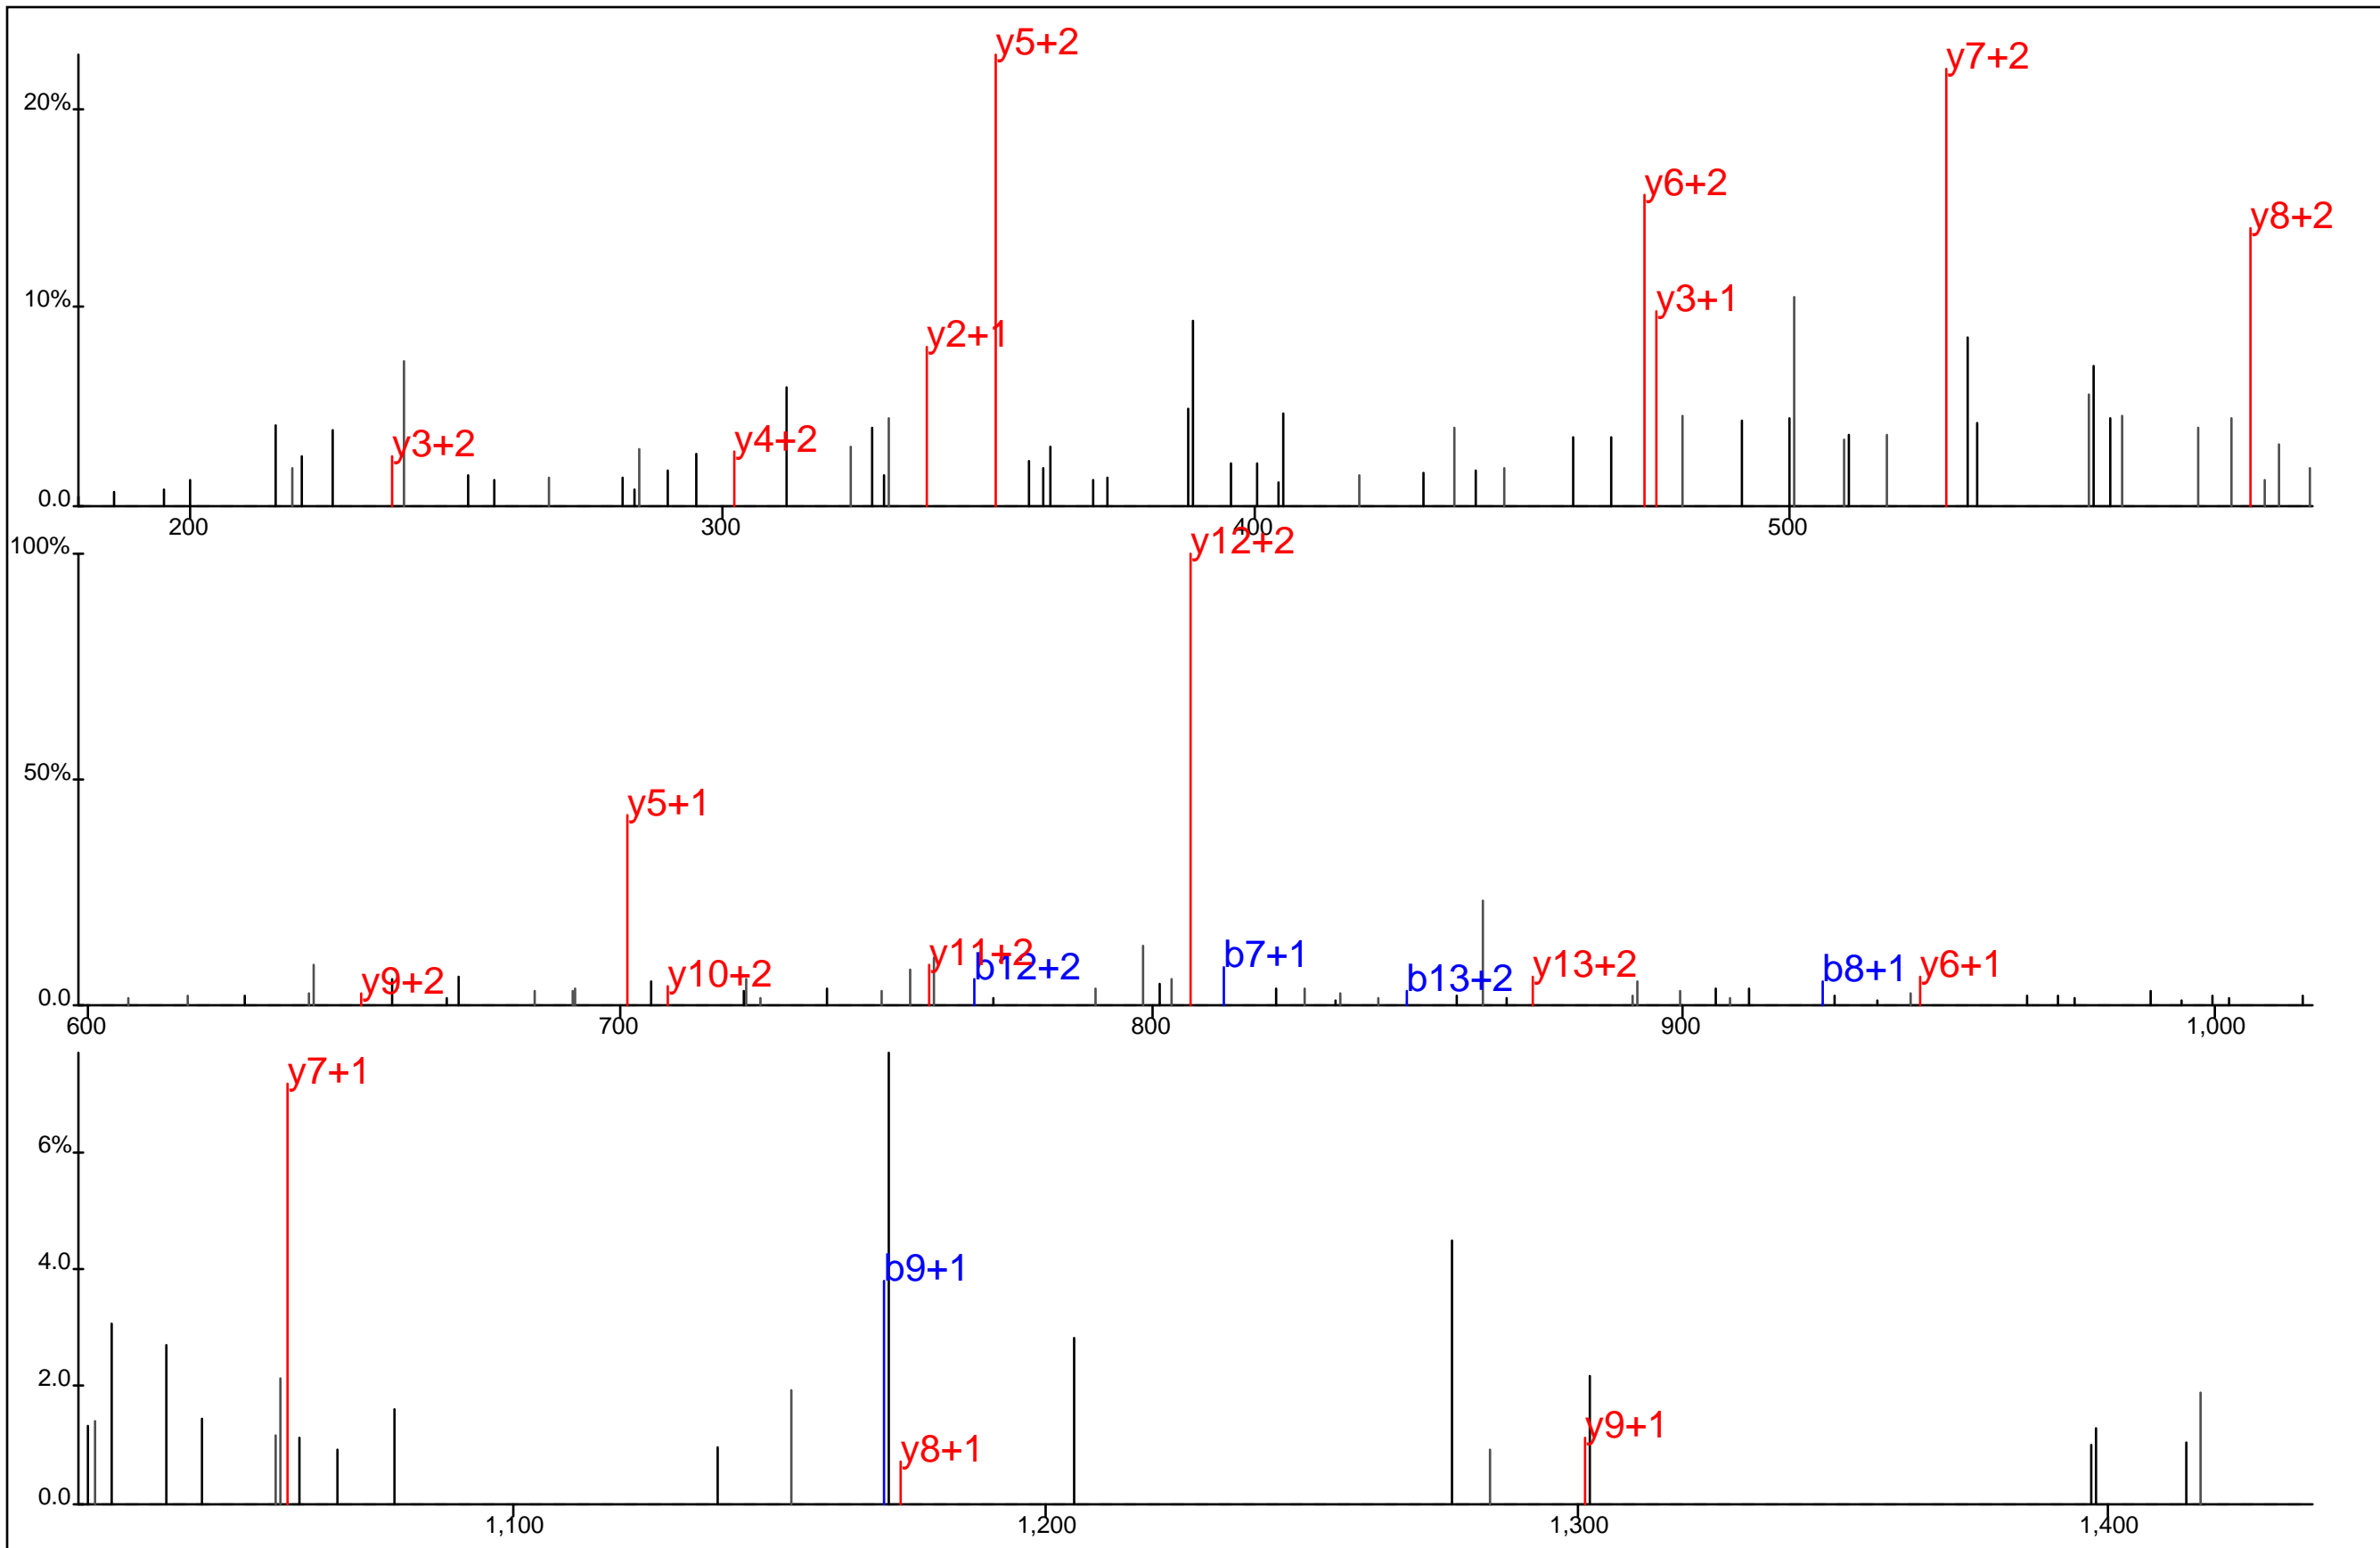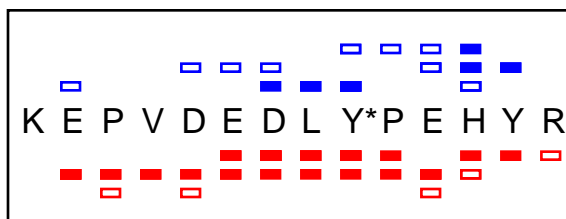

Protein Name: DNA methyltransferase 1  
 gi Accession: 0  
 Precursor Mass: 623.9384+3  
 Delta Mass: 2.544 ppm  
 XCorr: 36.47

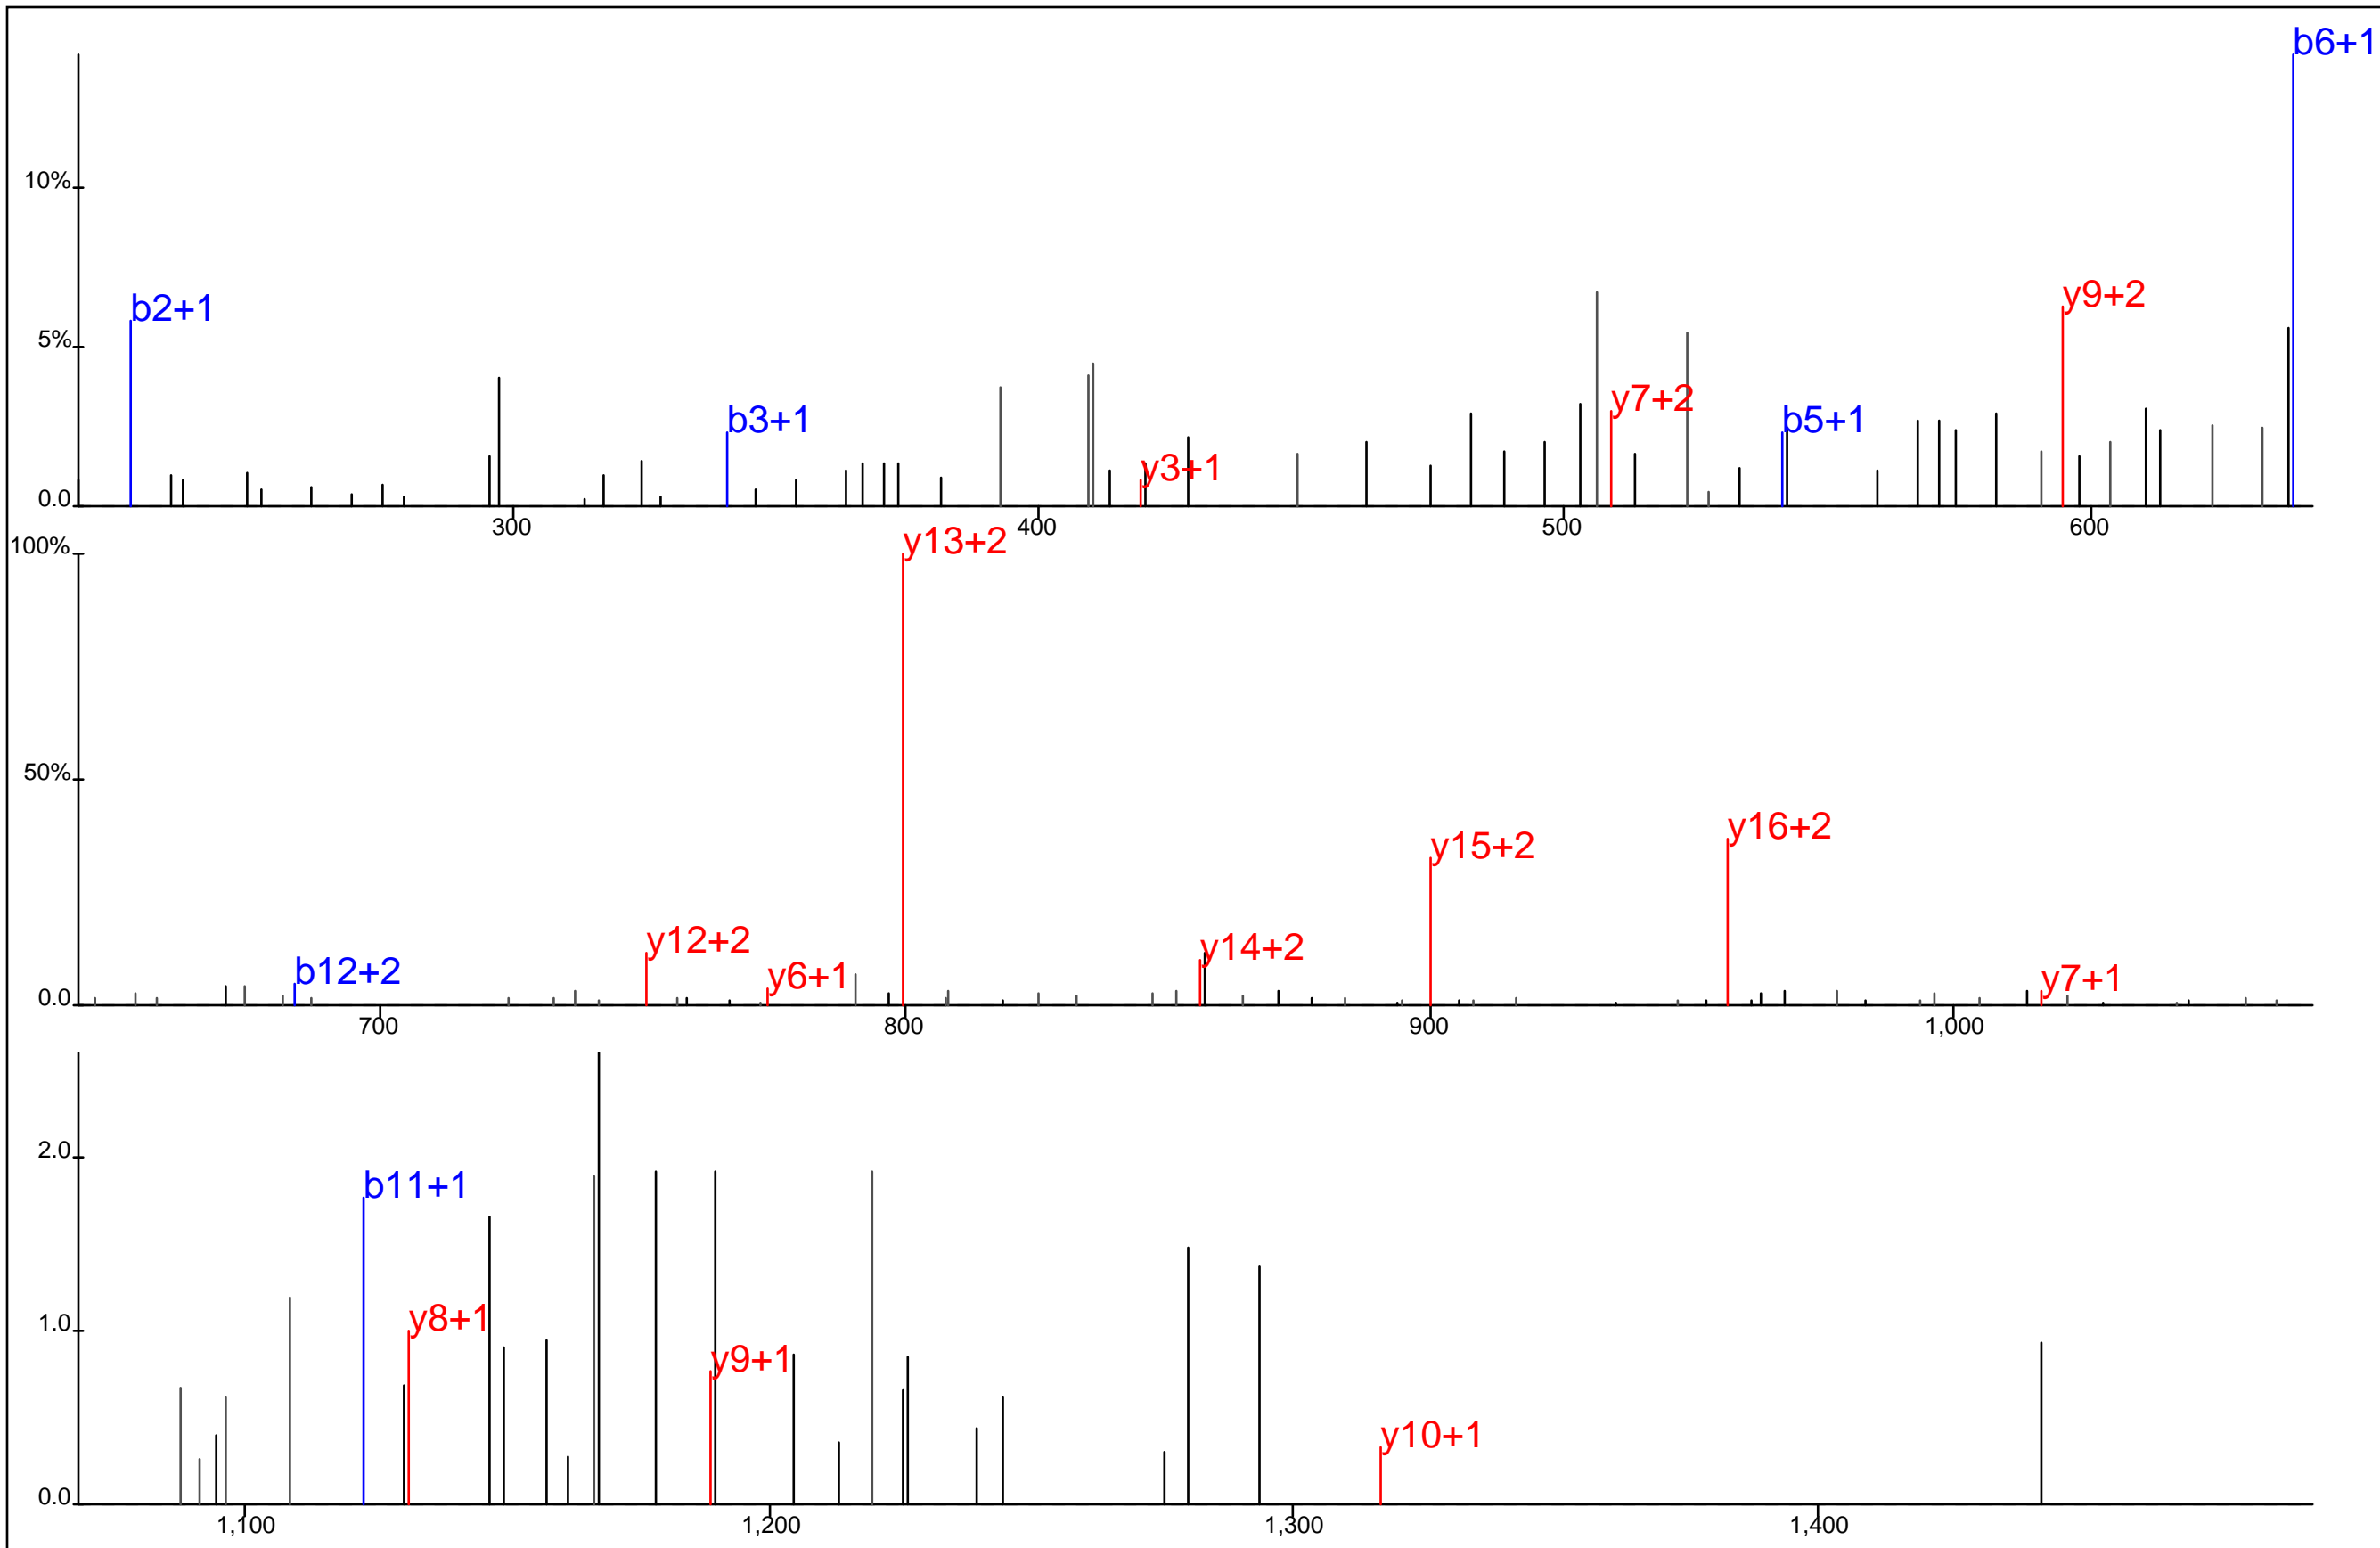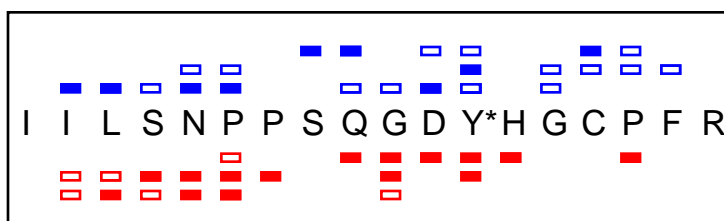

Protein Name: DNA primase large subunit  
 gi Accession: 0  
 Precursor Mass: 713.3232+3  
 Delta Mass: 1.250 ppm  
 XCorr: 21.62

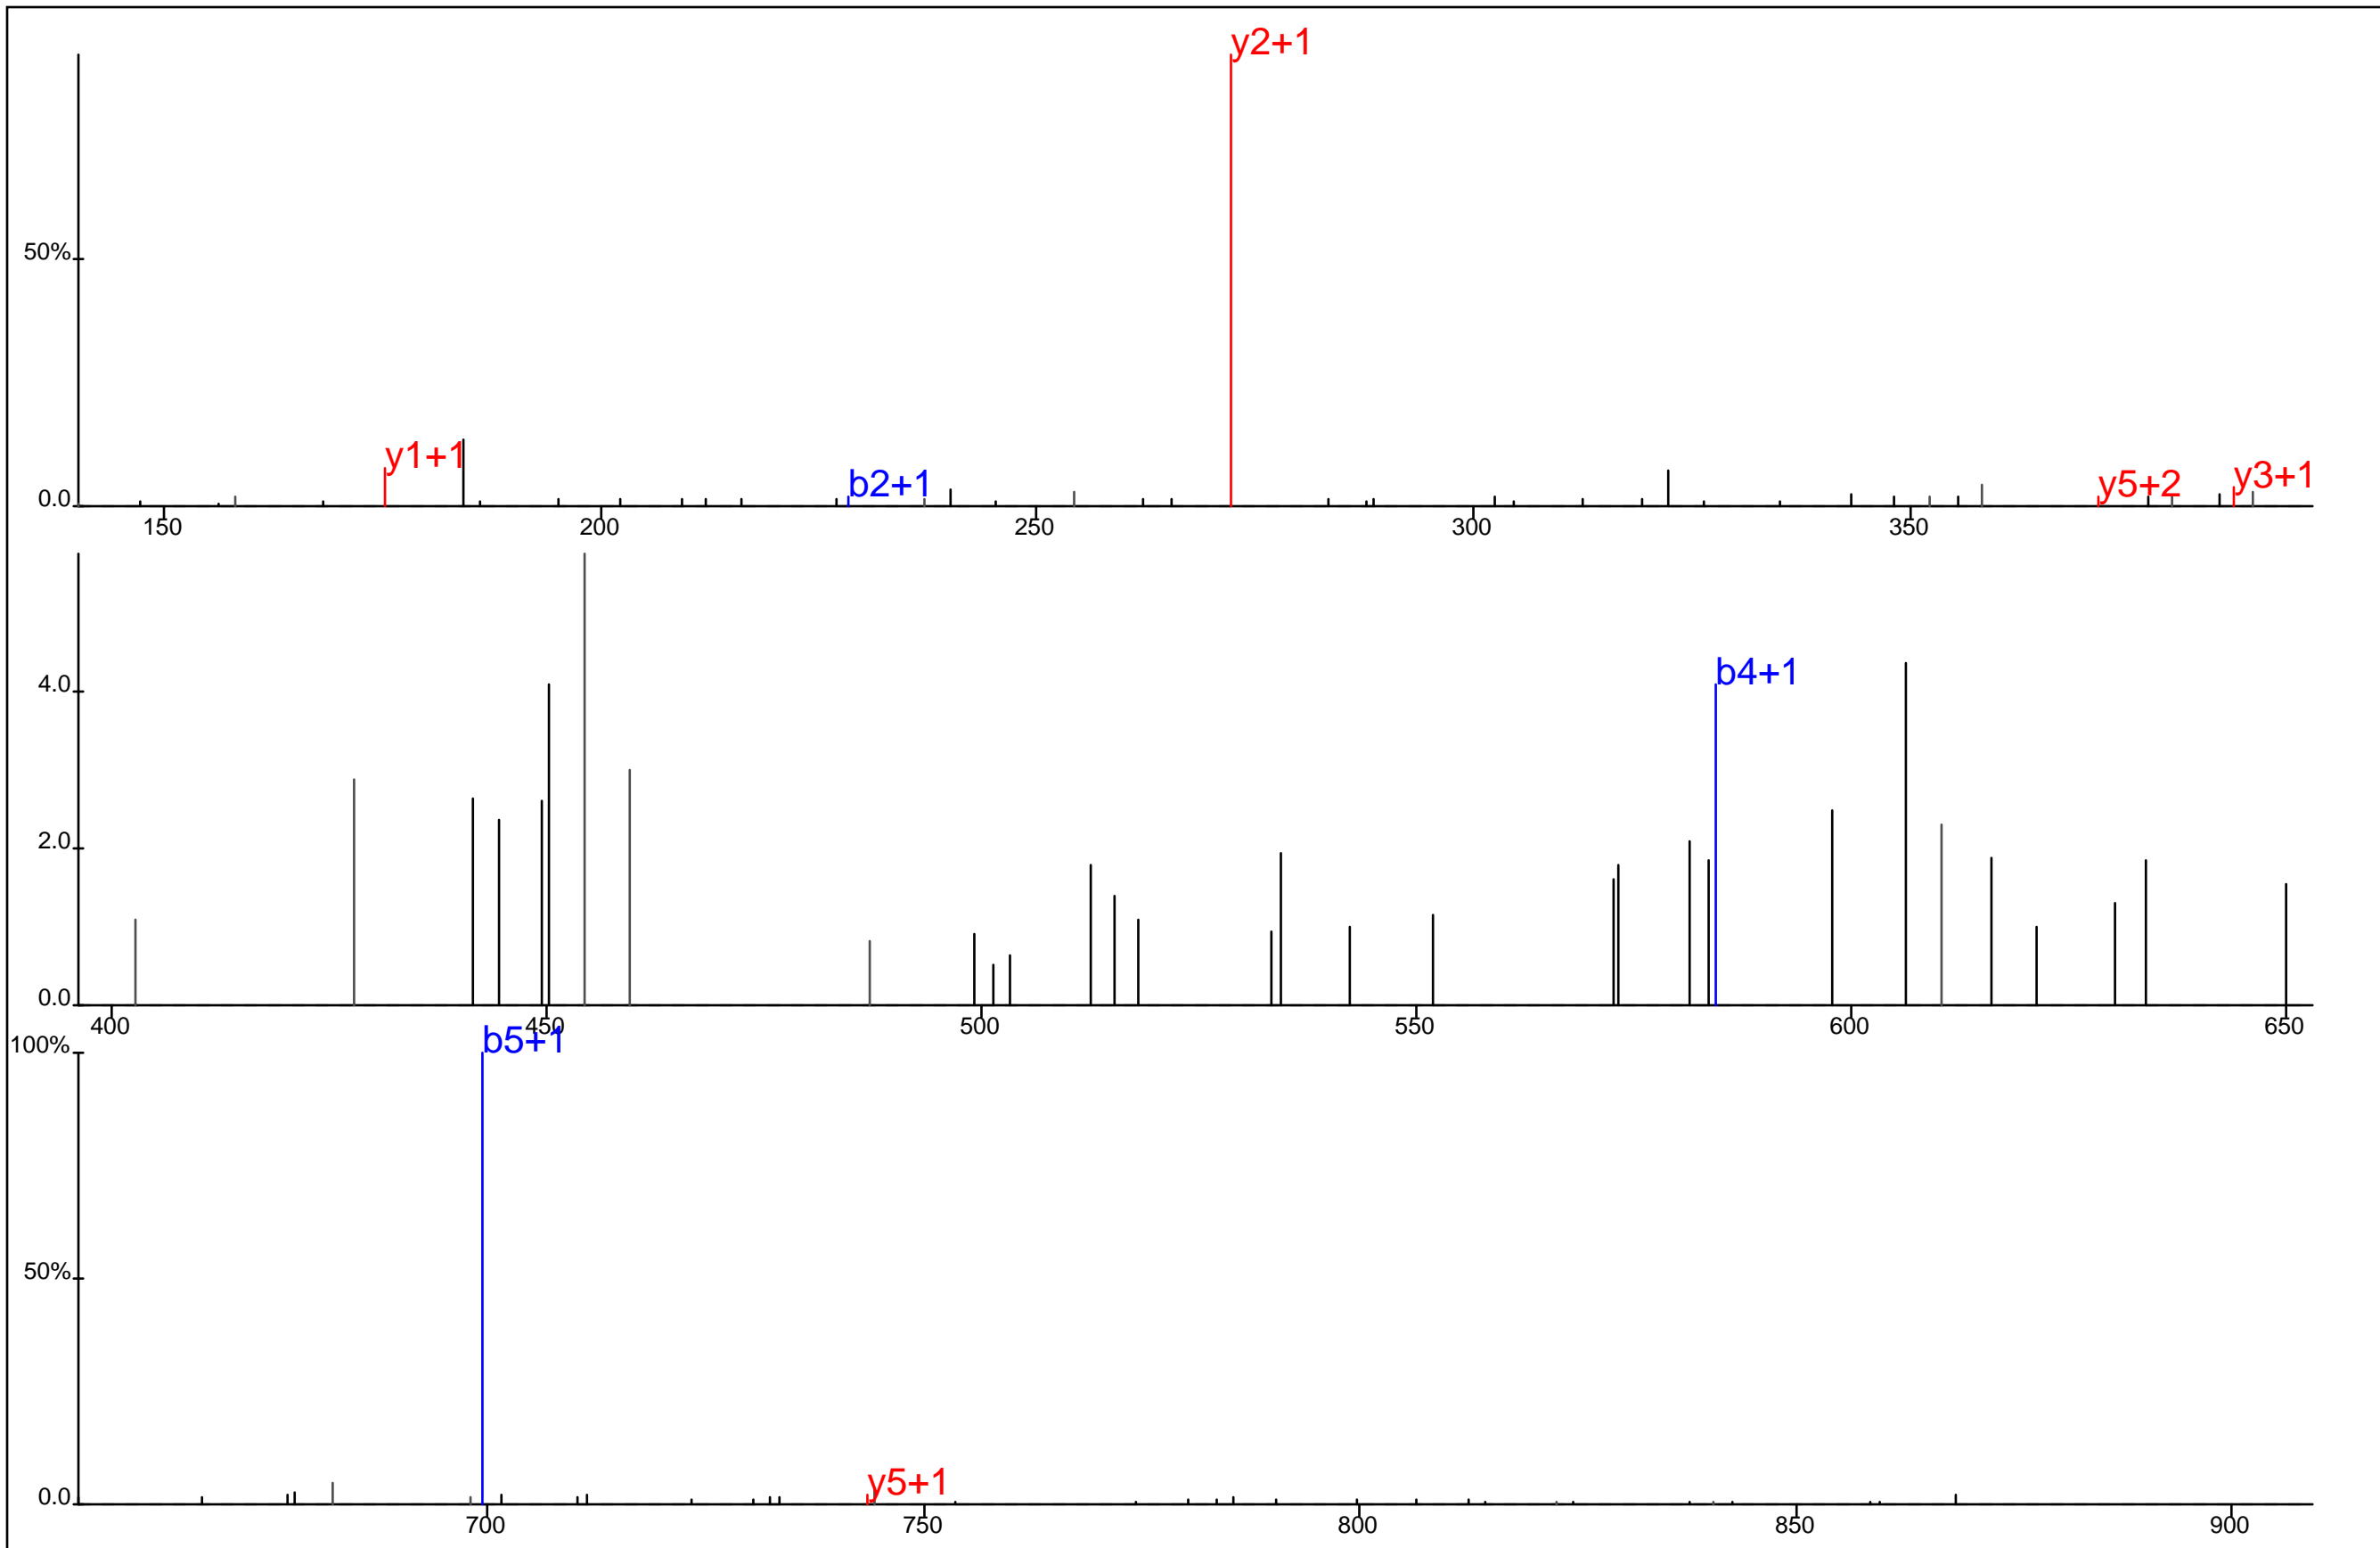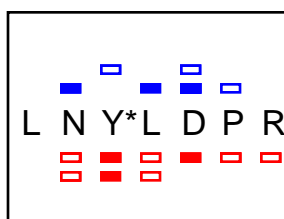

Protein Name: DNA topoisomerase I  
 gi Accession: 0  
 Precursor Mass: 485.7242+2  
 Delta Mass: 1.925 ppm  
 XCorr: 21.77

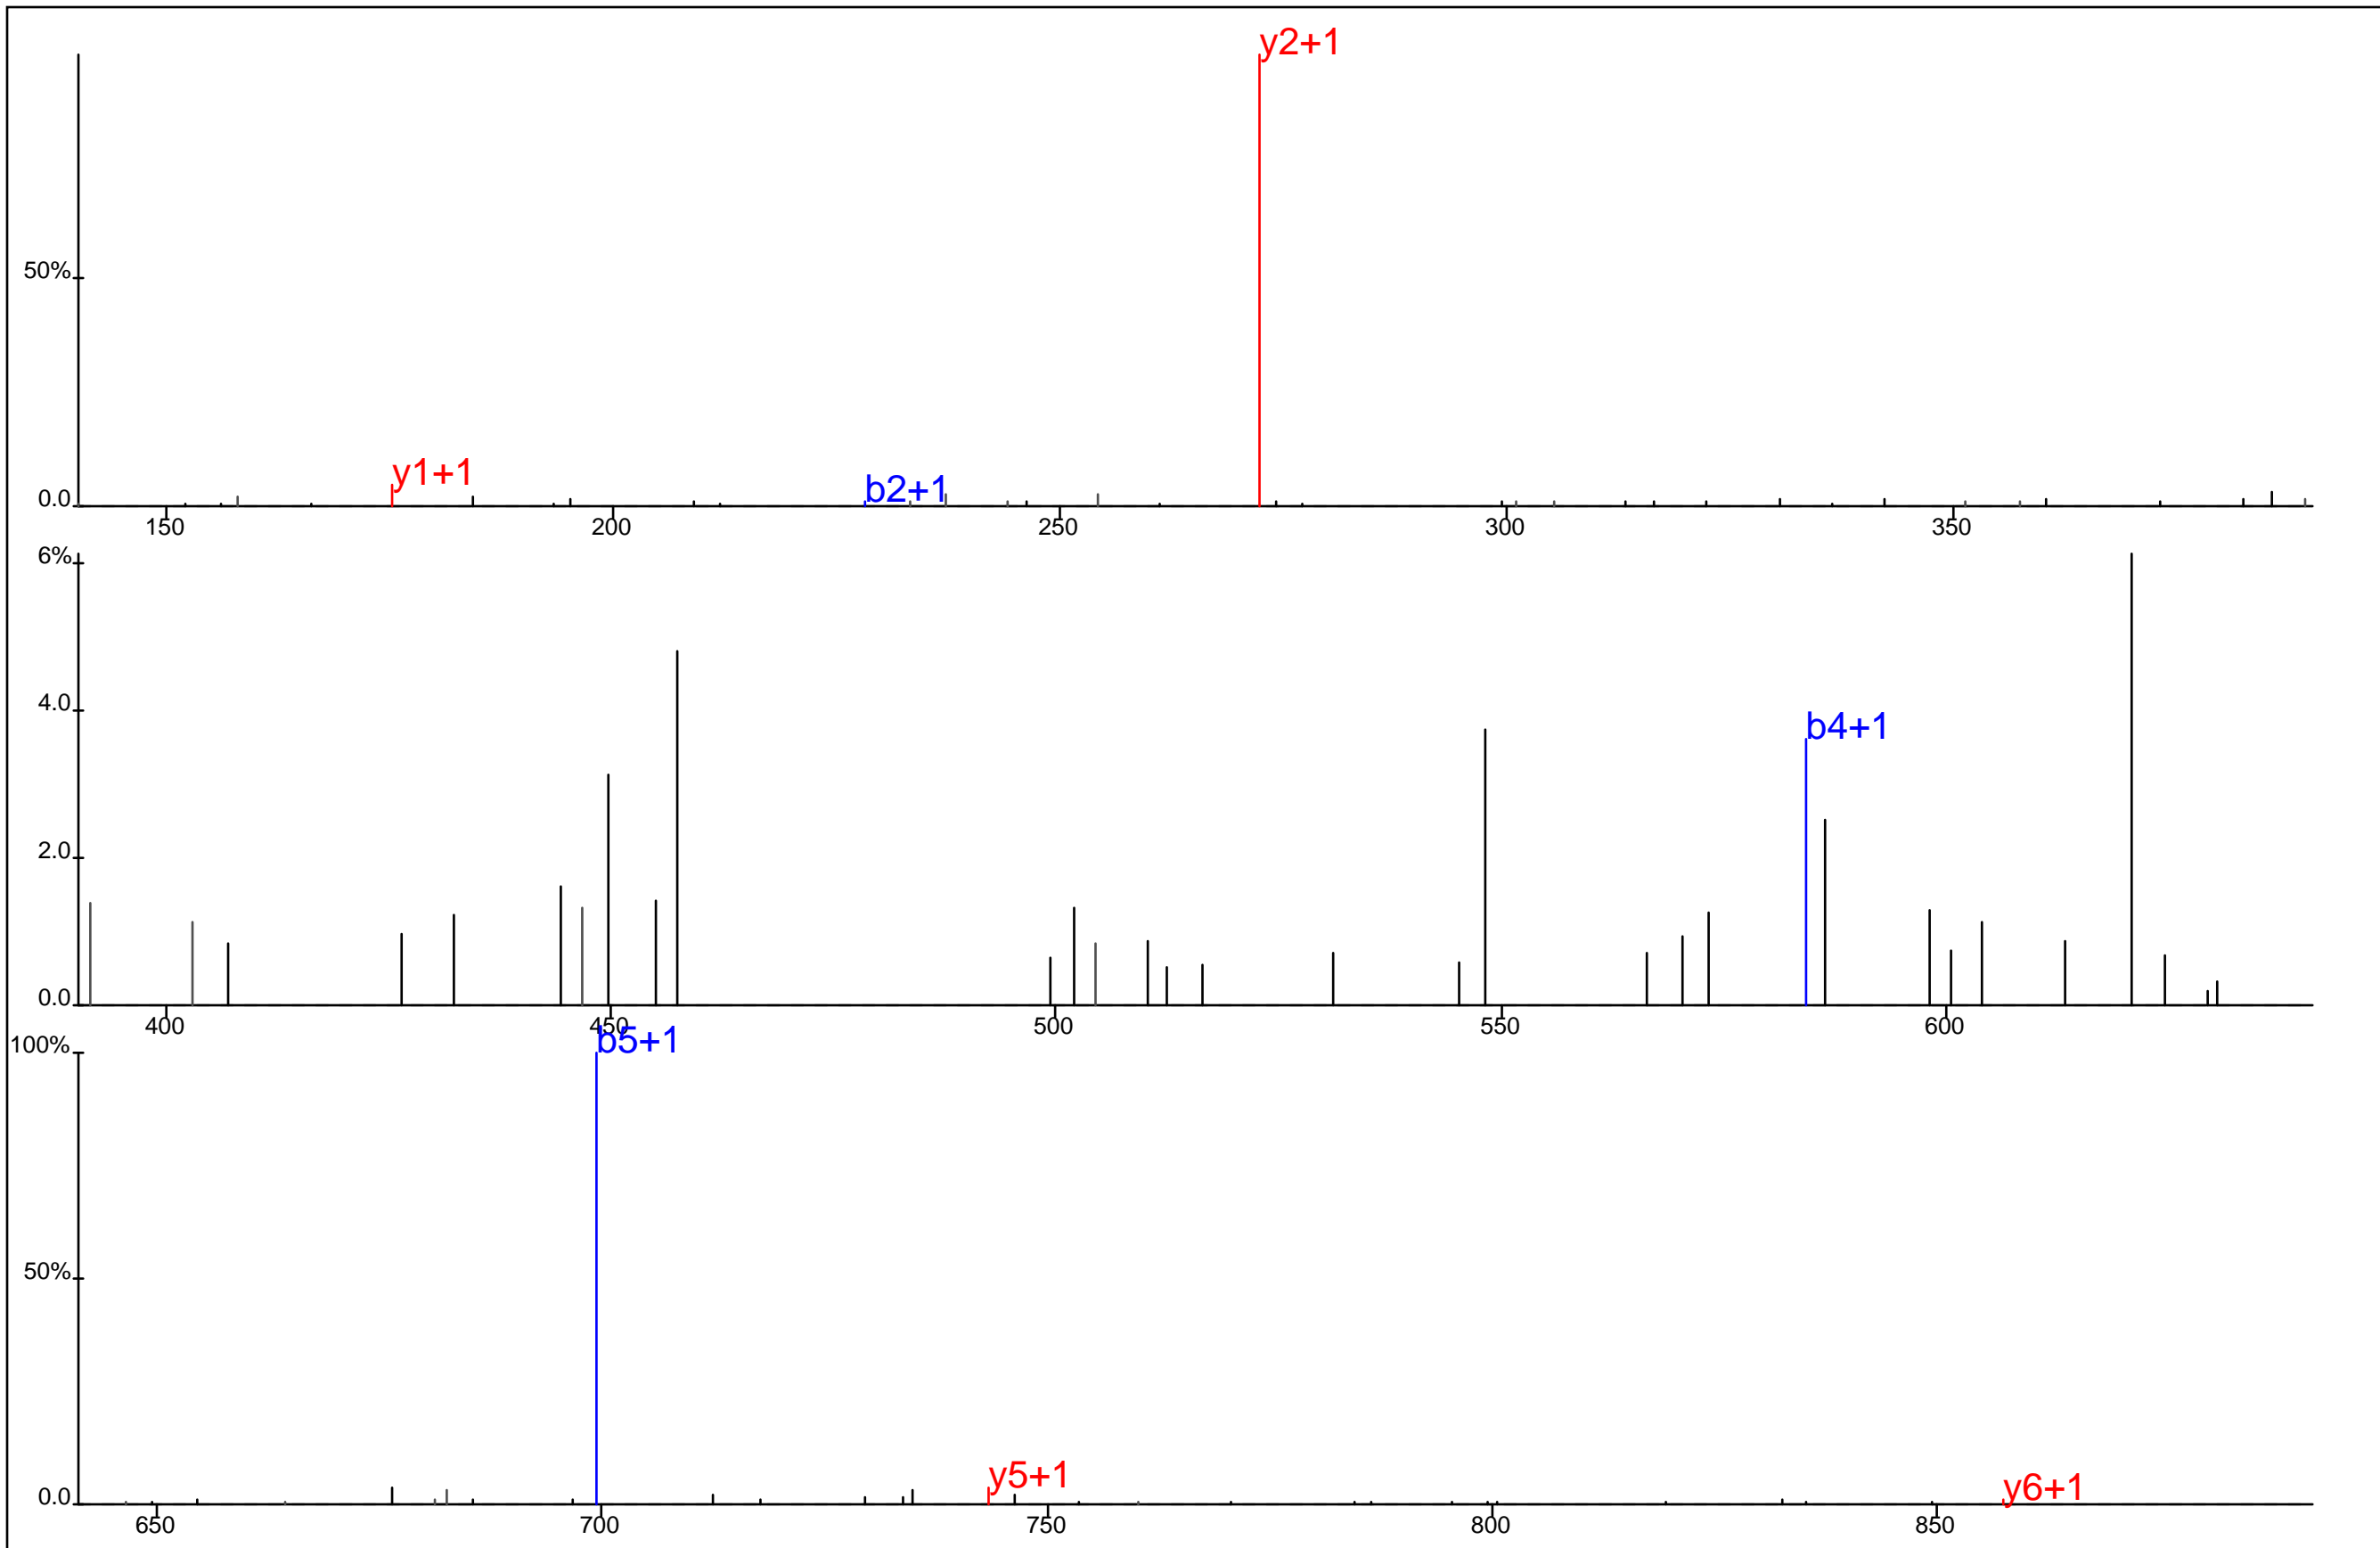

L N Y\* L D P R

Protein Name: DNA topoisomerase I  
 gi Accession: 0  
 Precursor Mass: 485.7237+2  
 Delta Mass: 0.793 ppm  
 XCorr: 26.03

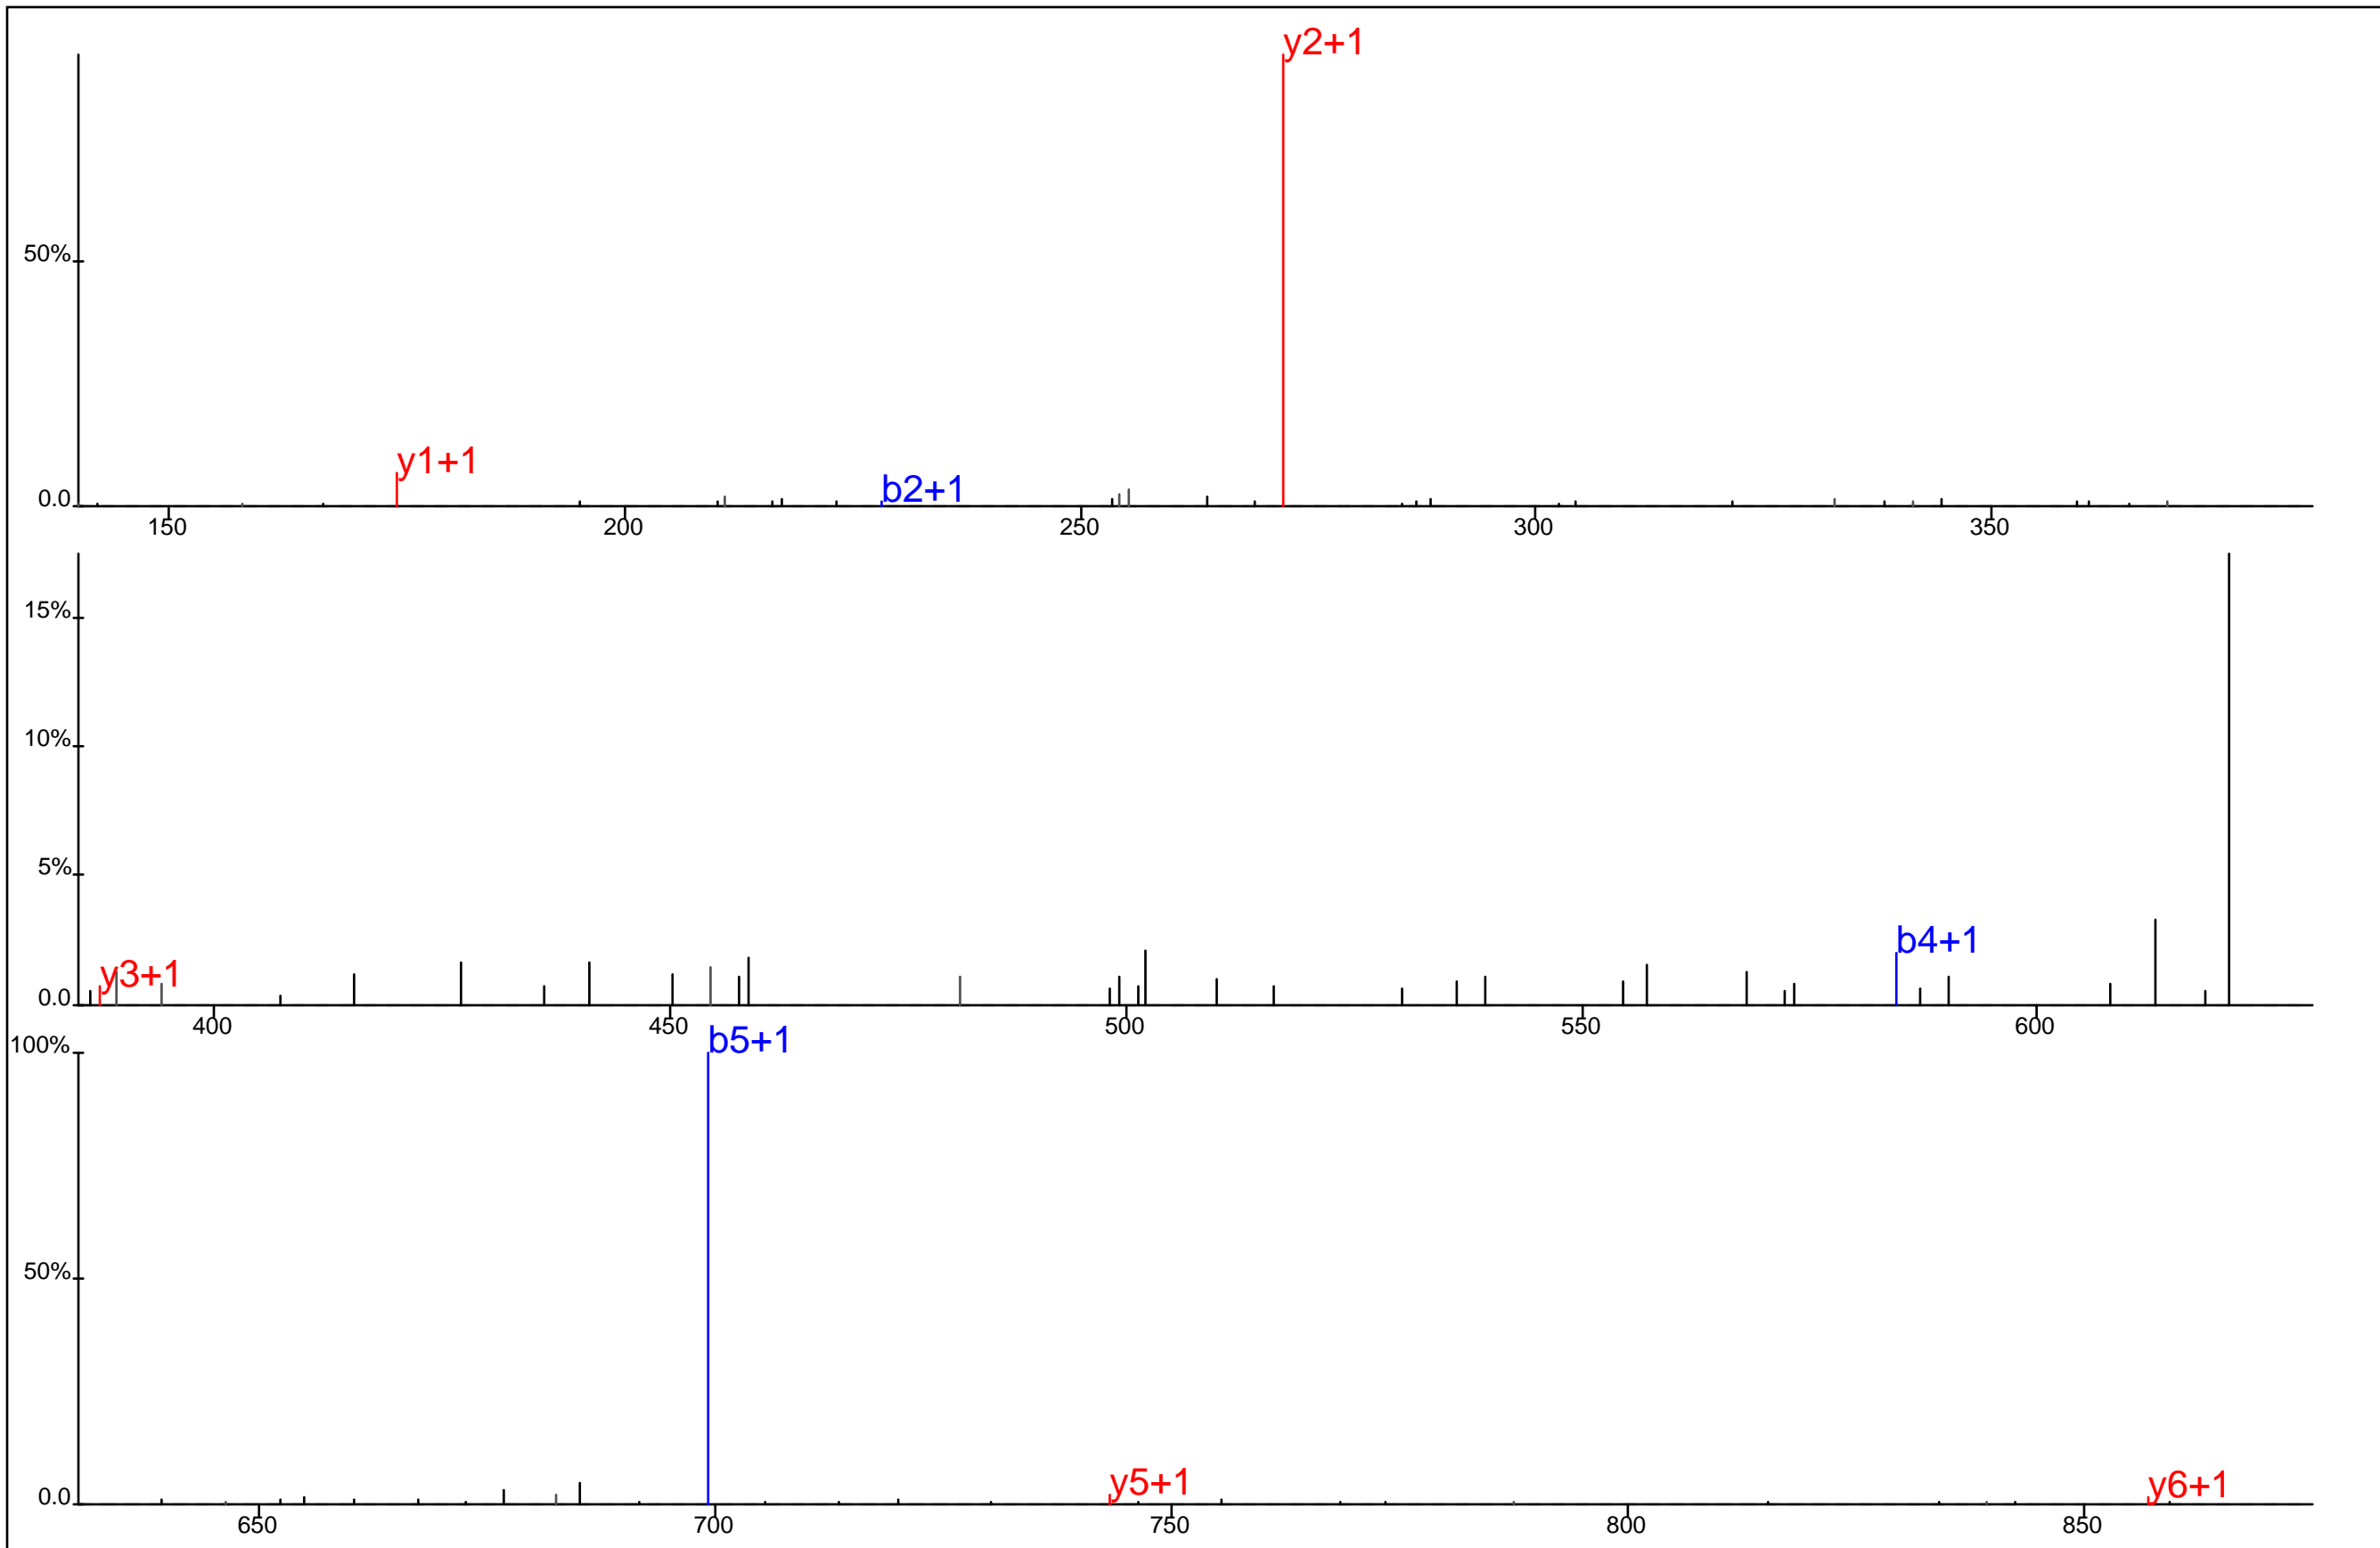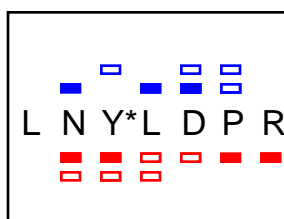

Protein Name: DNA topoisomerase I  
 gi Accession: 0  
 Precursor Mass: 485.7240+2  
 Delta Mass: 1.486 ppm  
 XCorr: 26.02

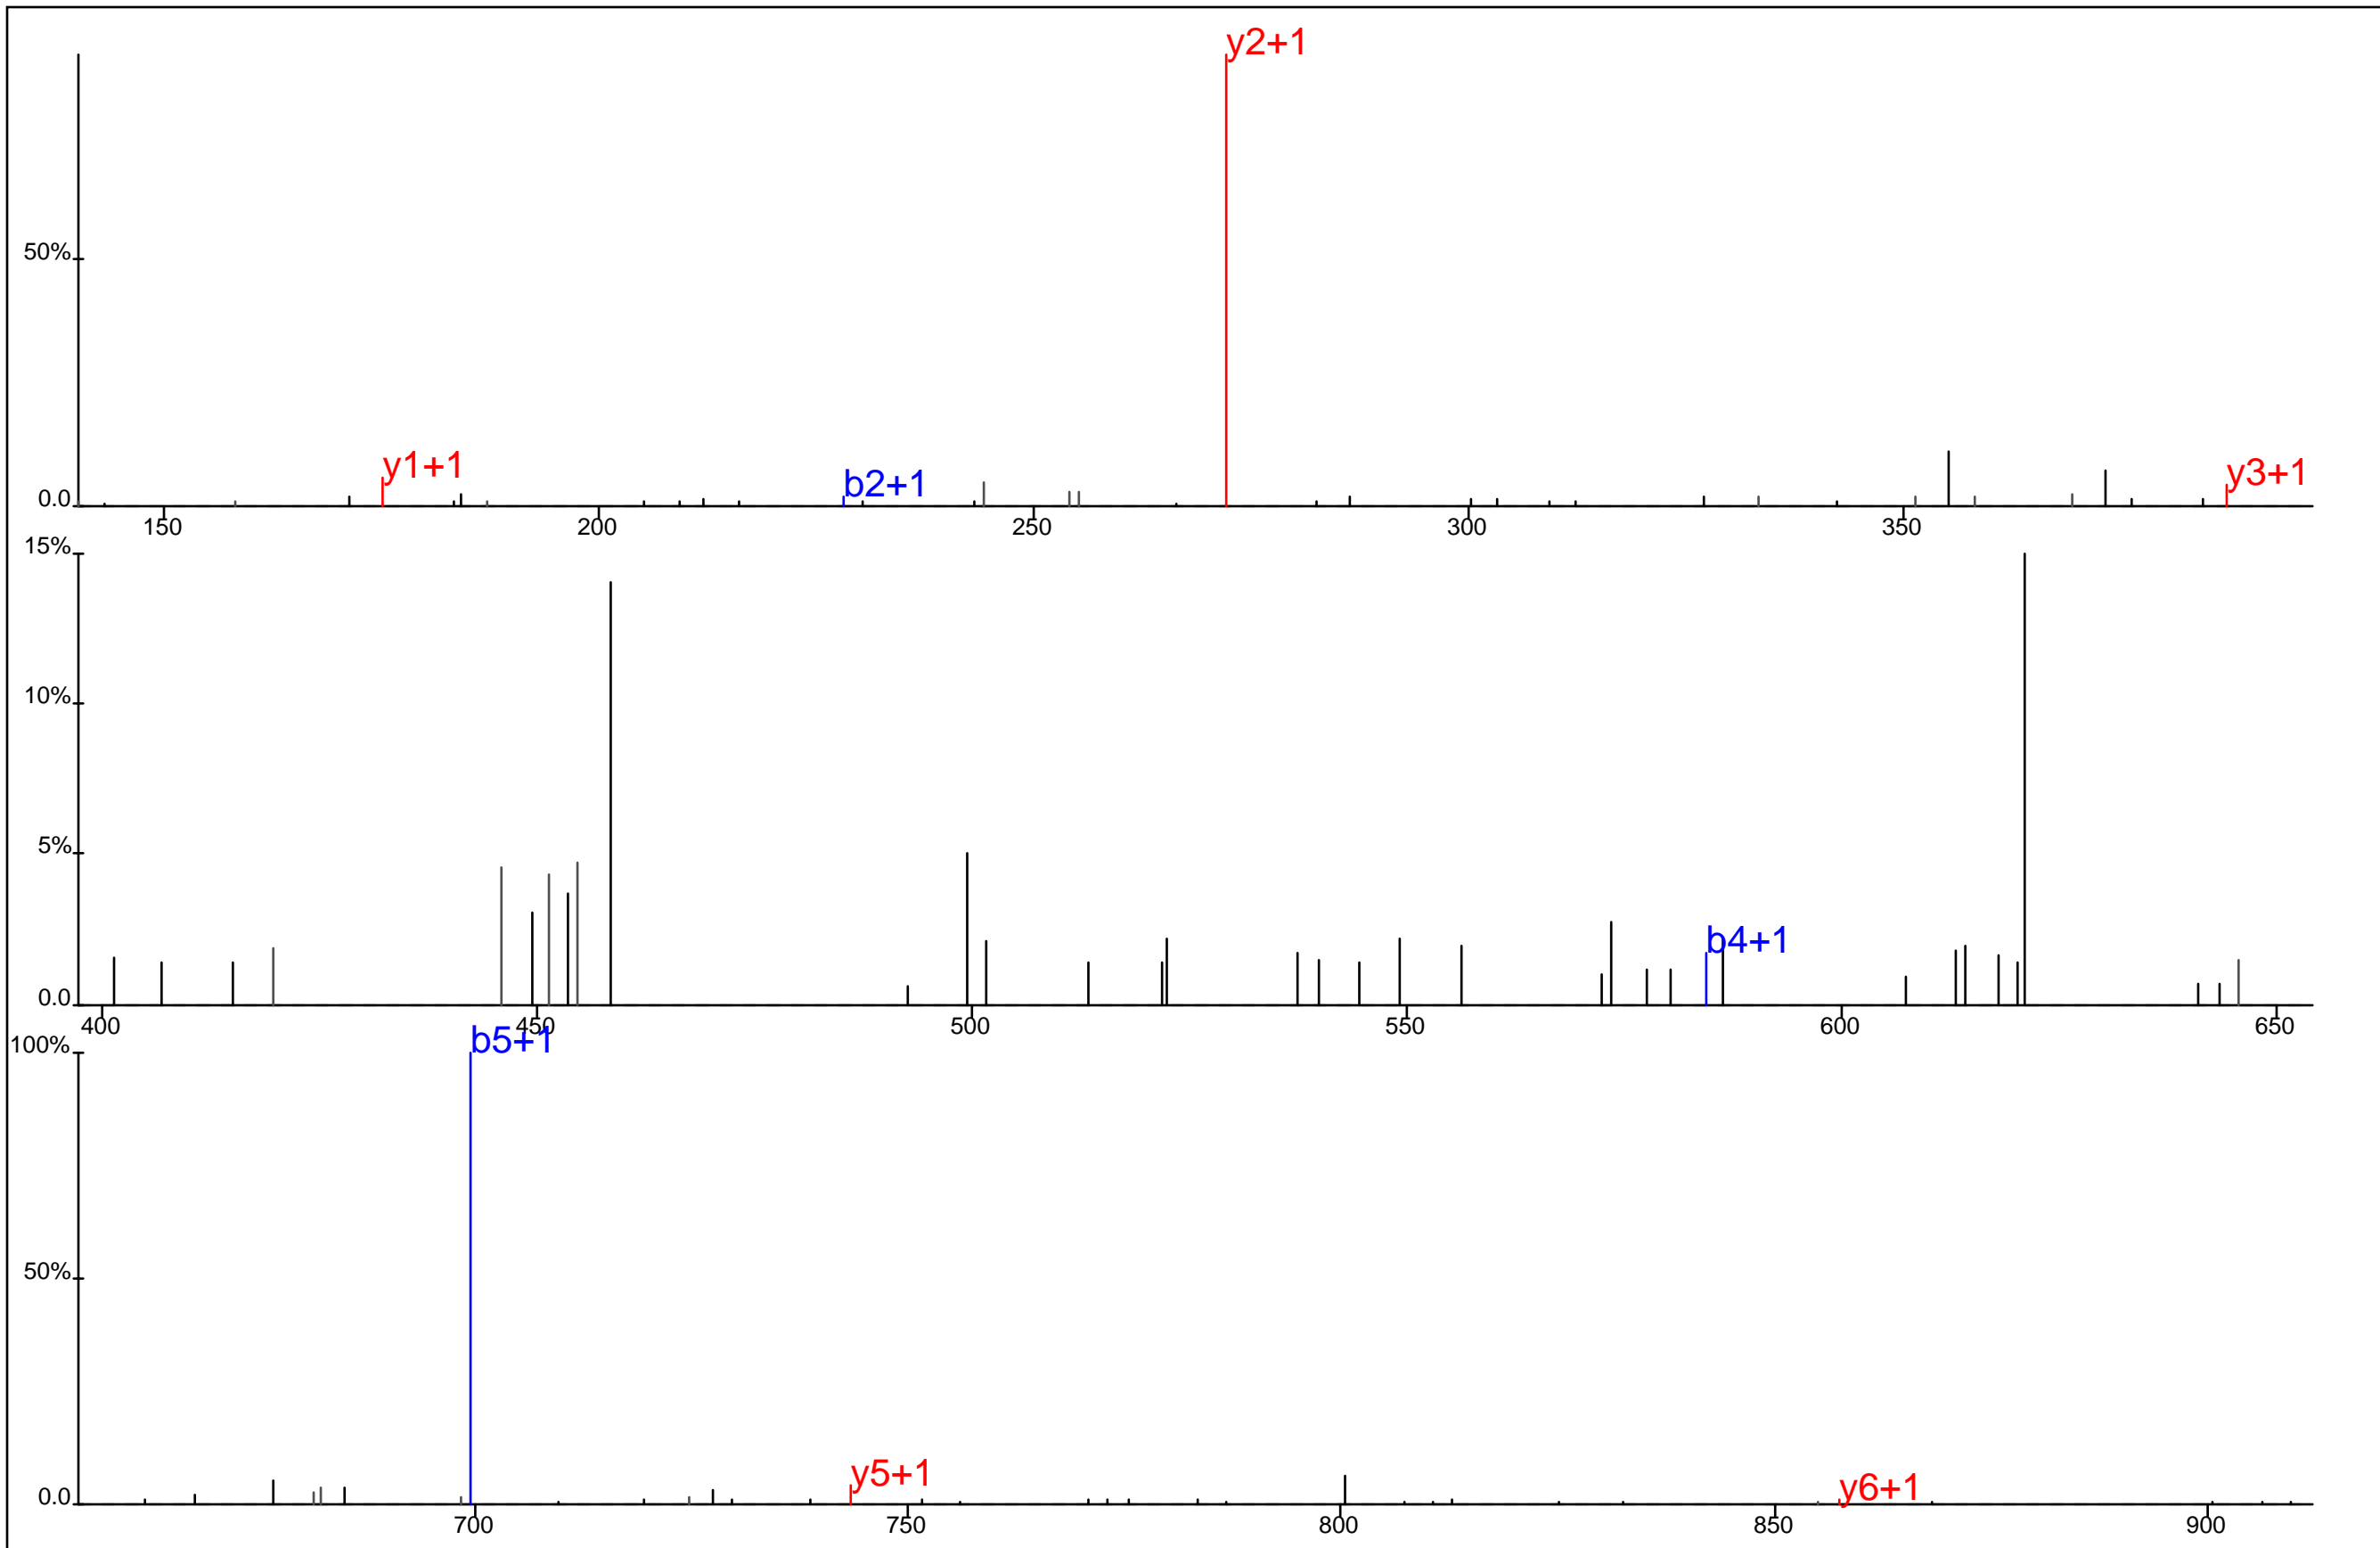

L N Y\* L D P R

Protein Name: DNA topoisomerase I  
 gi Accession: 0  
 Precursor Mass: 485.7236+2  
 Delta Mass: 0.542 ppm  
 XCorr: 23.11

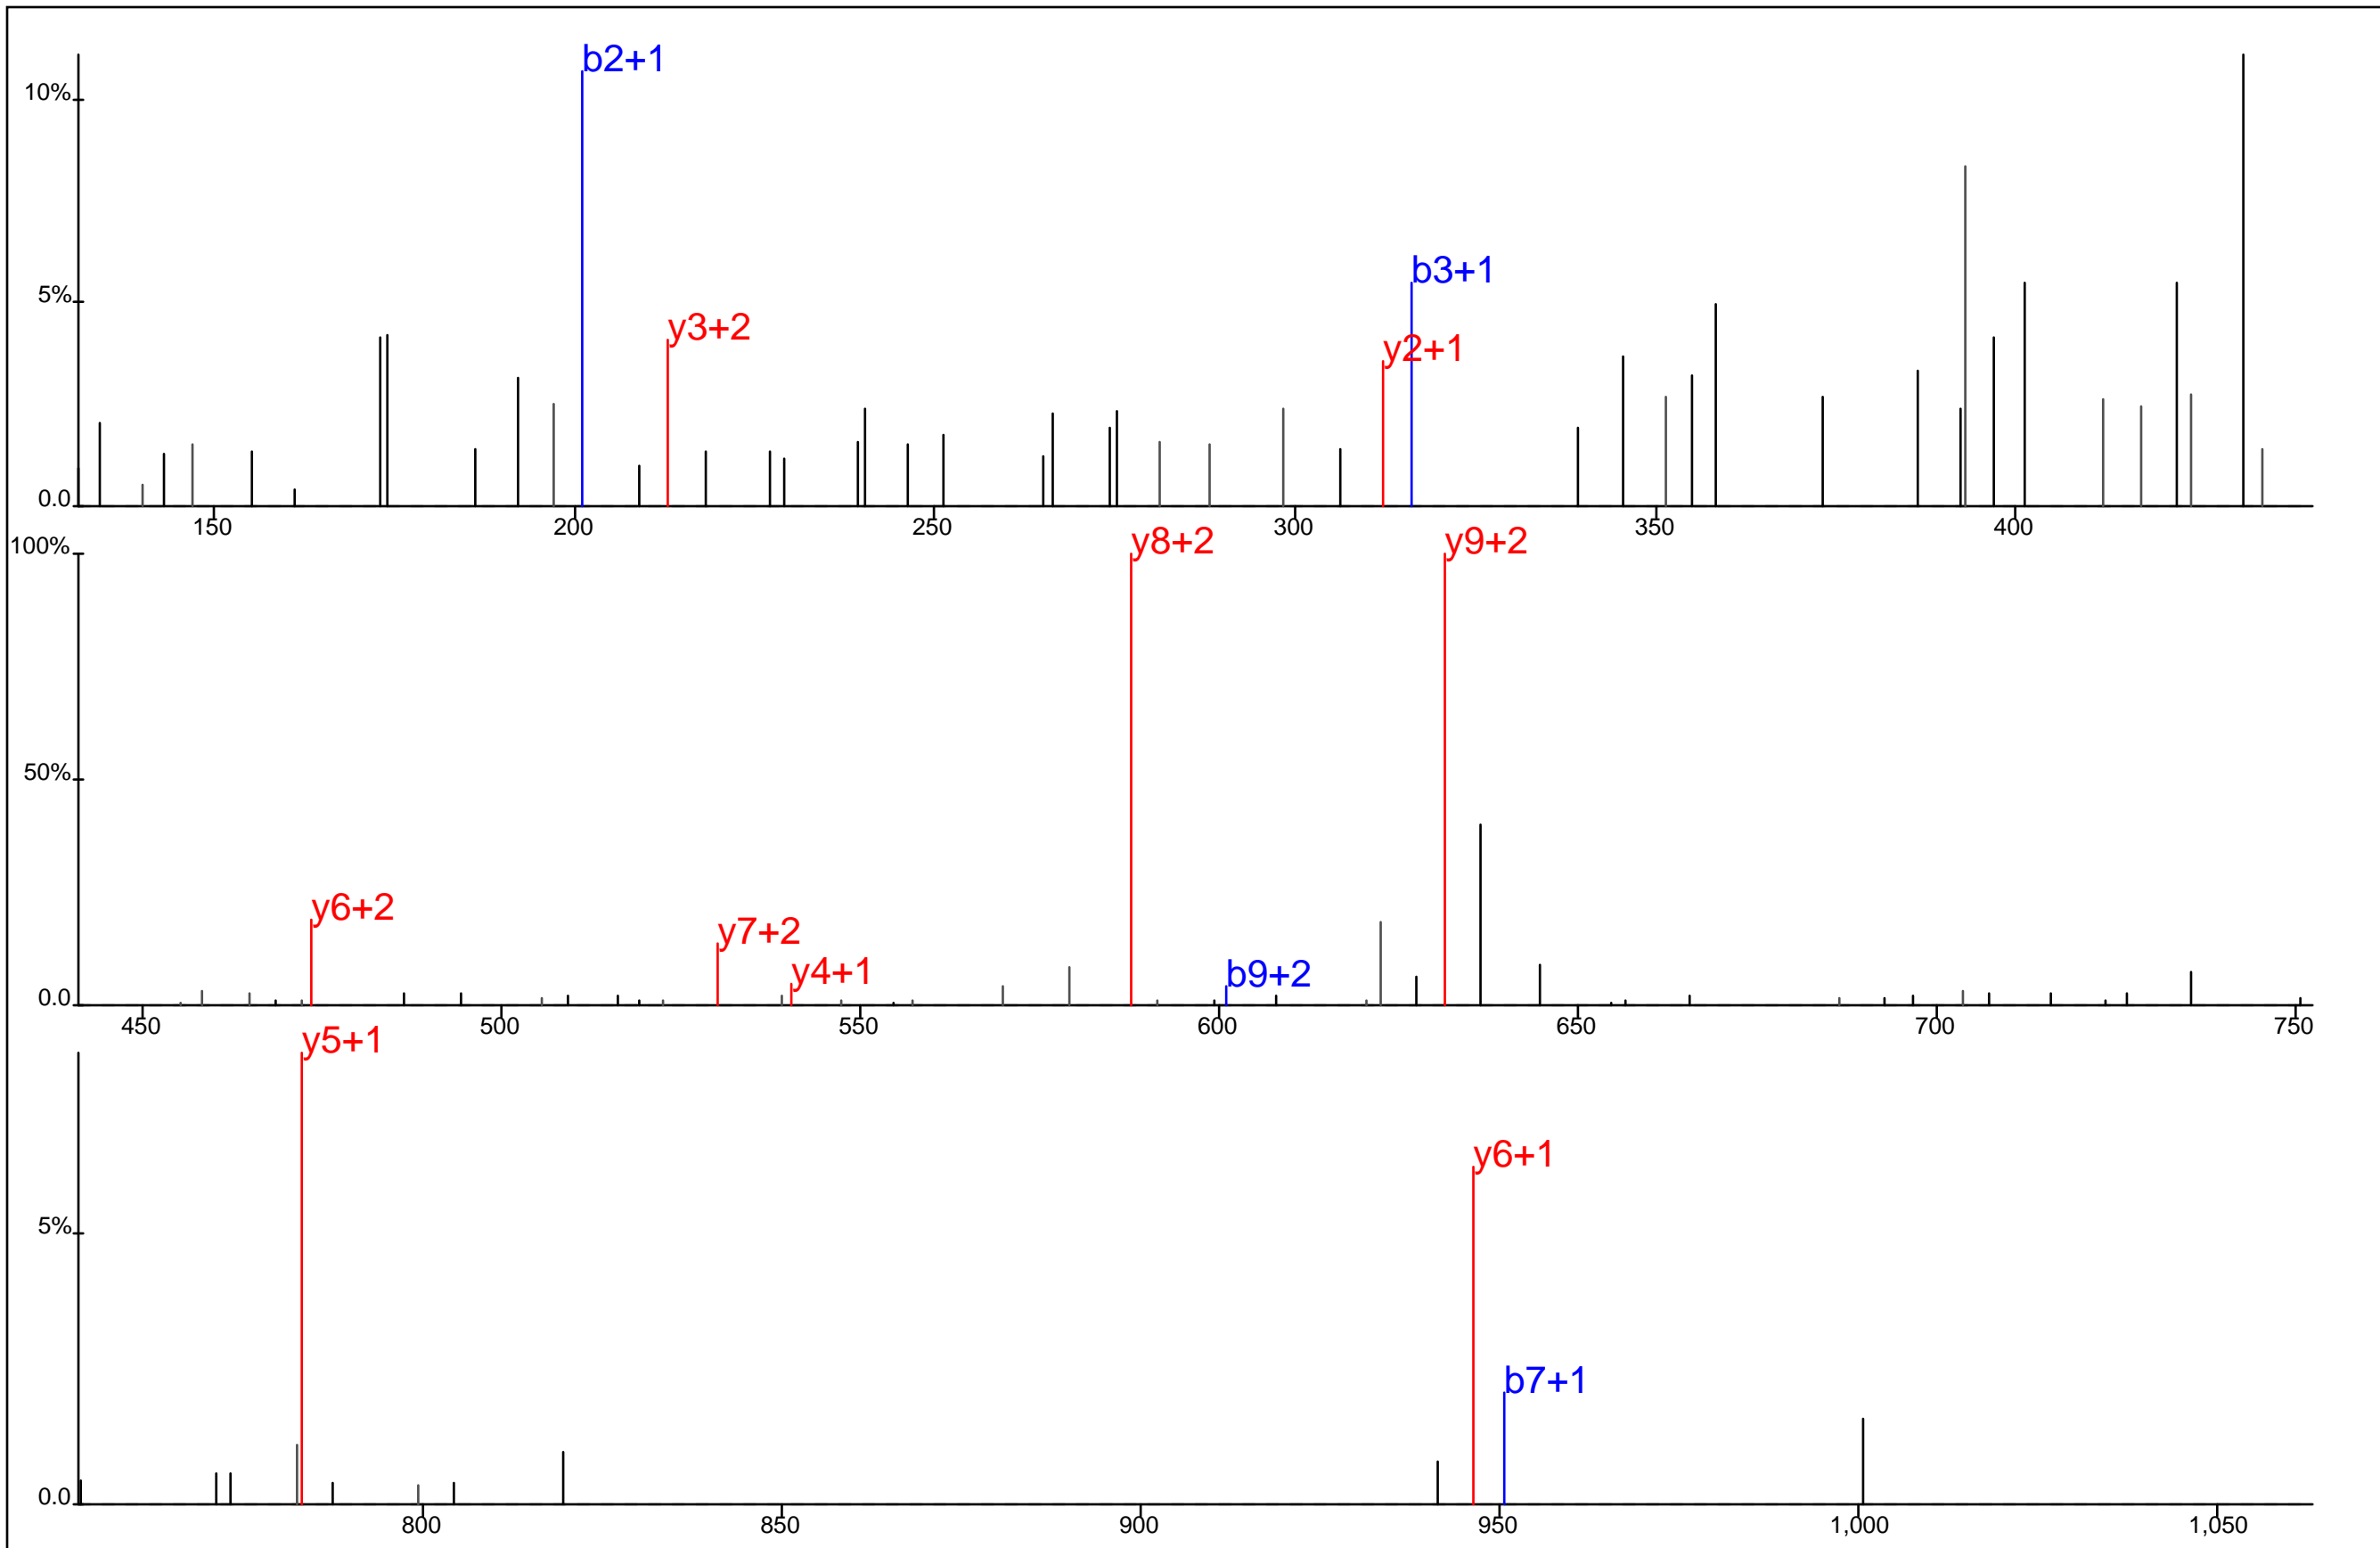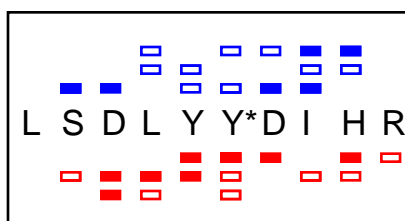

Protein Name: DOCK10  
 gi Accession: 0  
 Precursor Mass: 458.8747+3  
 Delta Mass: 0.370 ppm  
 XCorr: 31.63

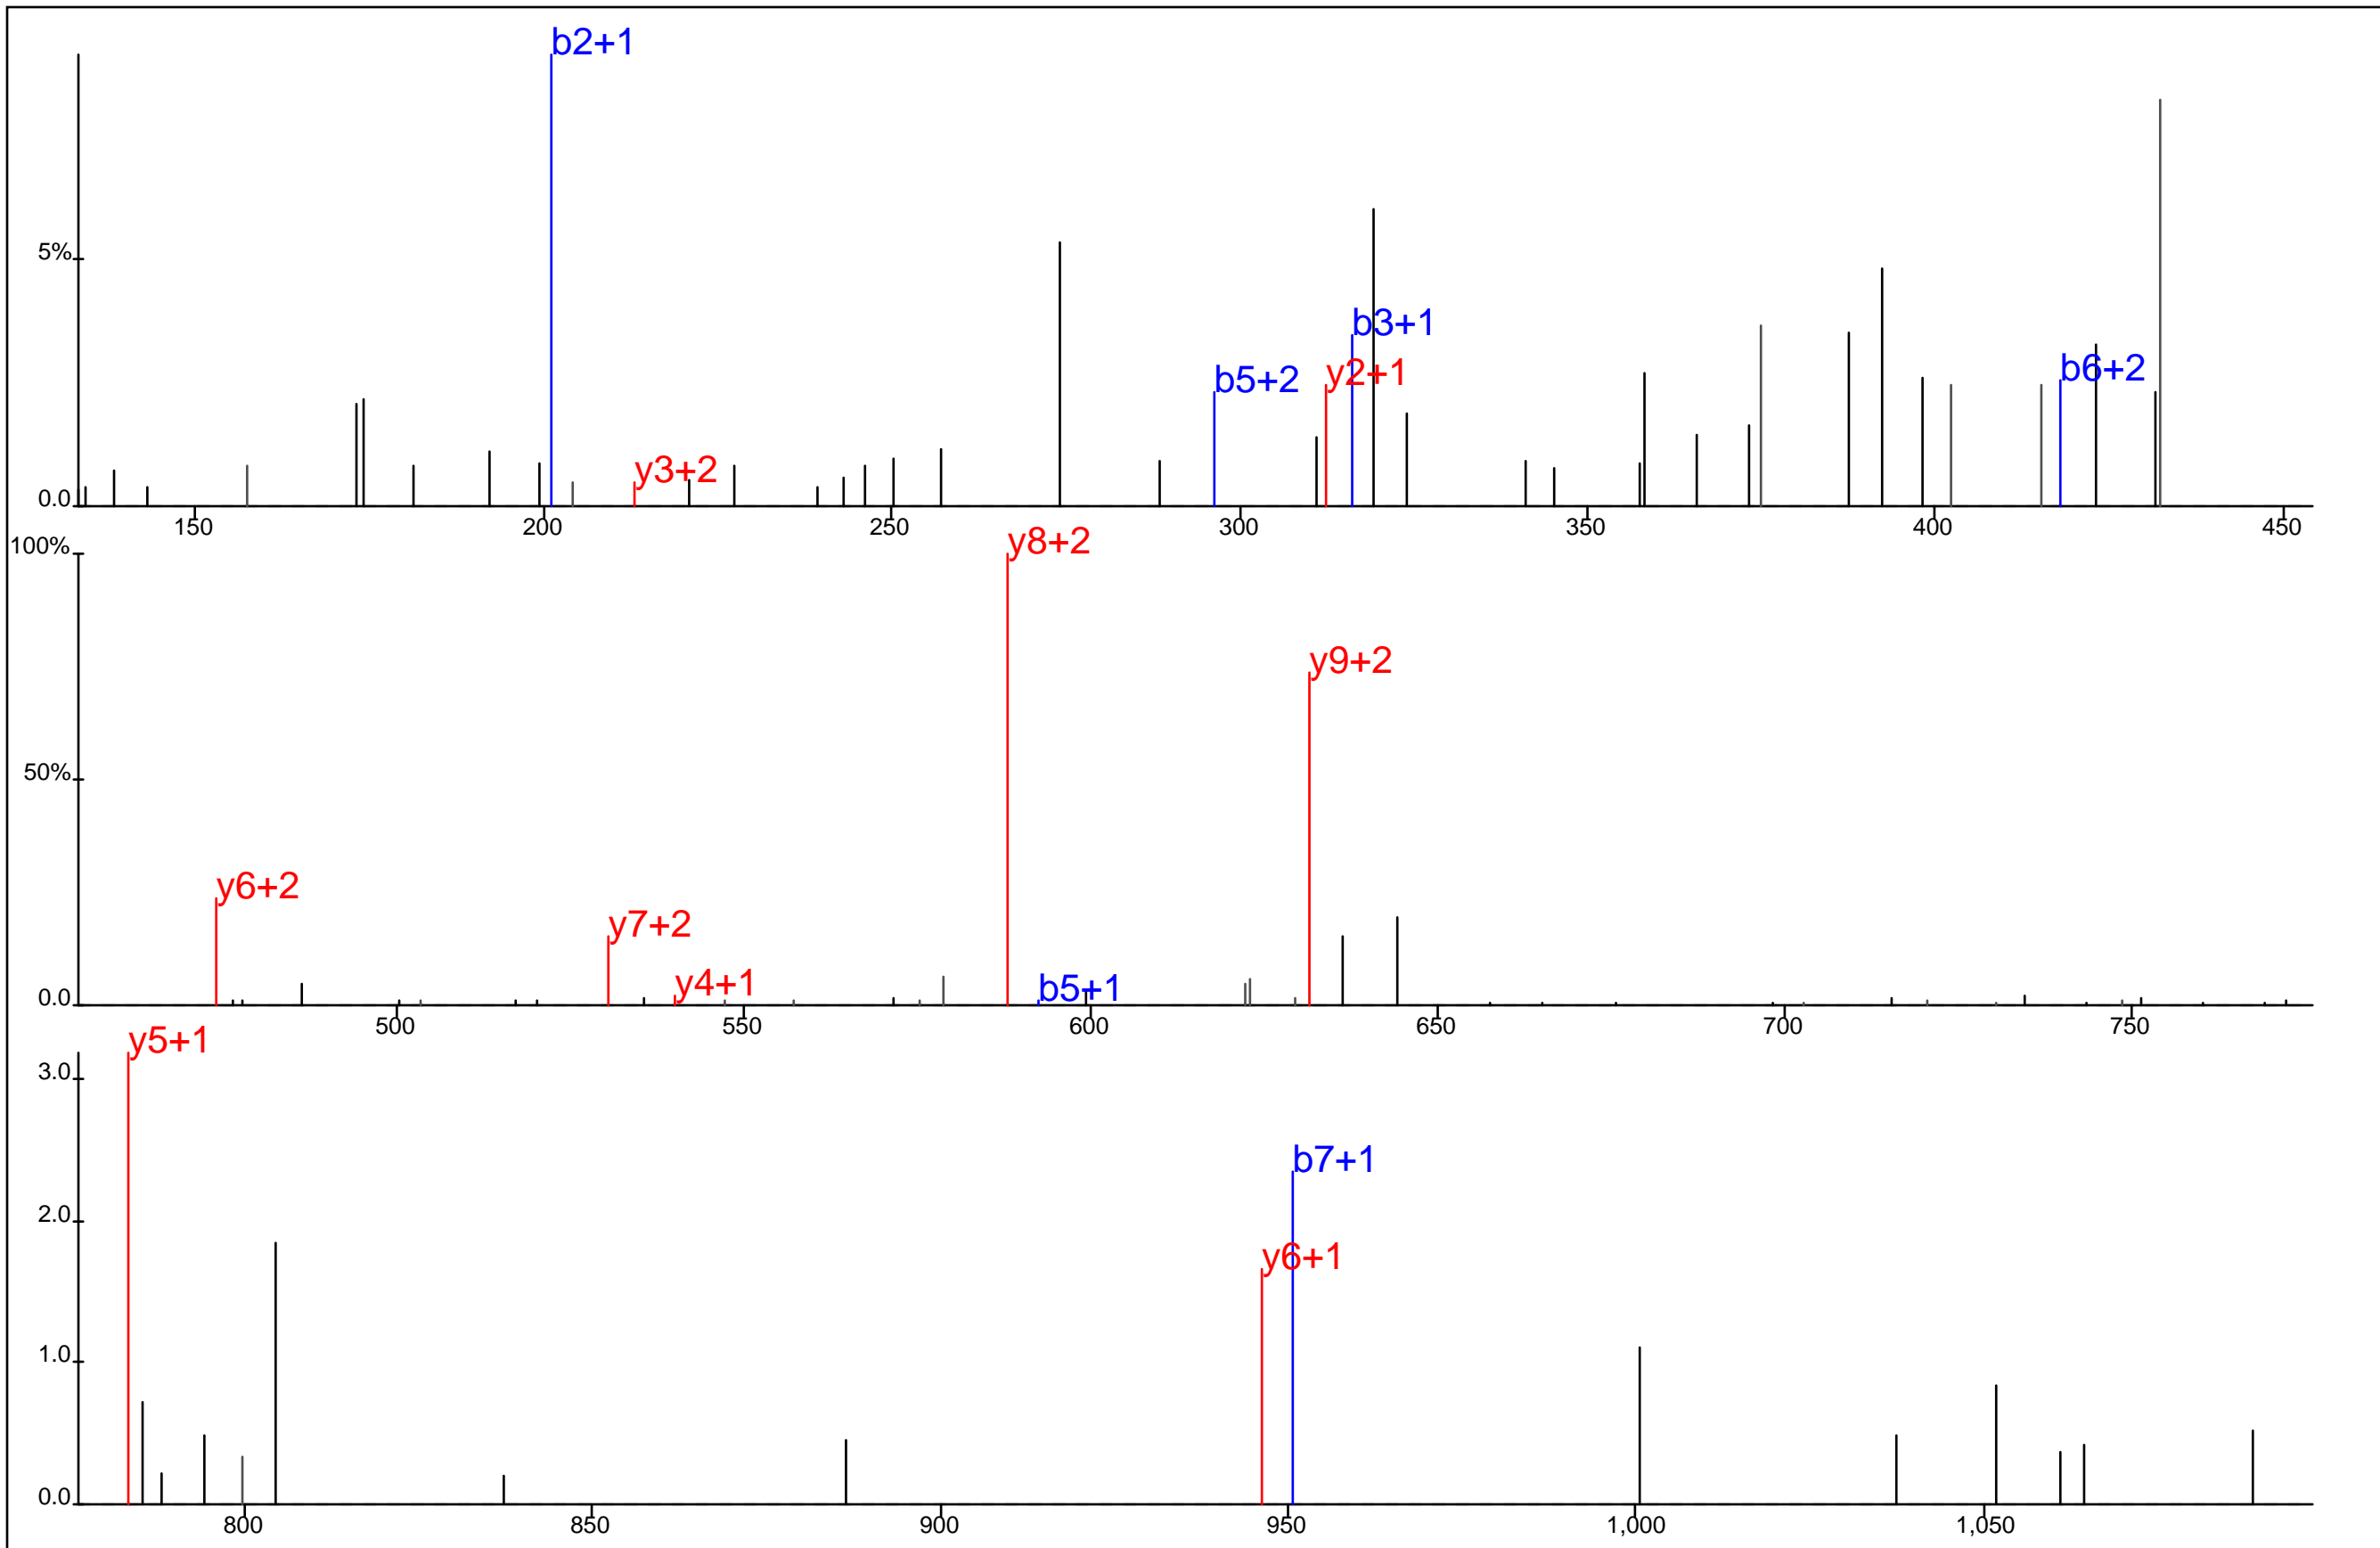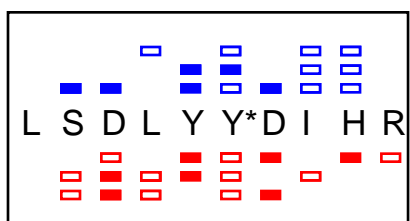

Protein Name: DOCK10  
 gi Accession: 0  
 Precursor Mass: 458.8744+3  
 Delta Mass: 0.163 ppm  
 XCorr: 23.45



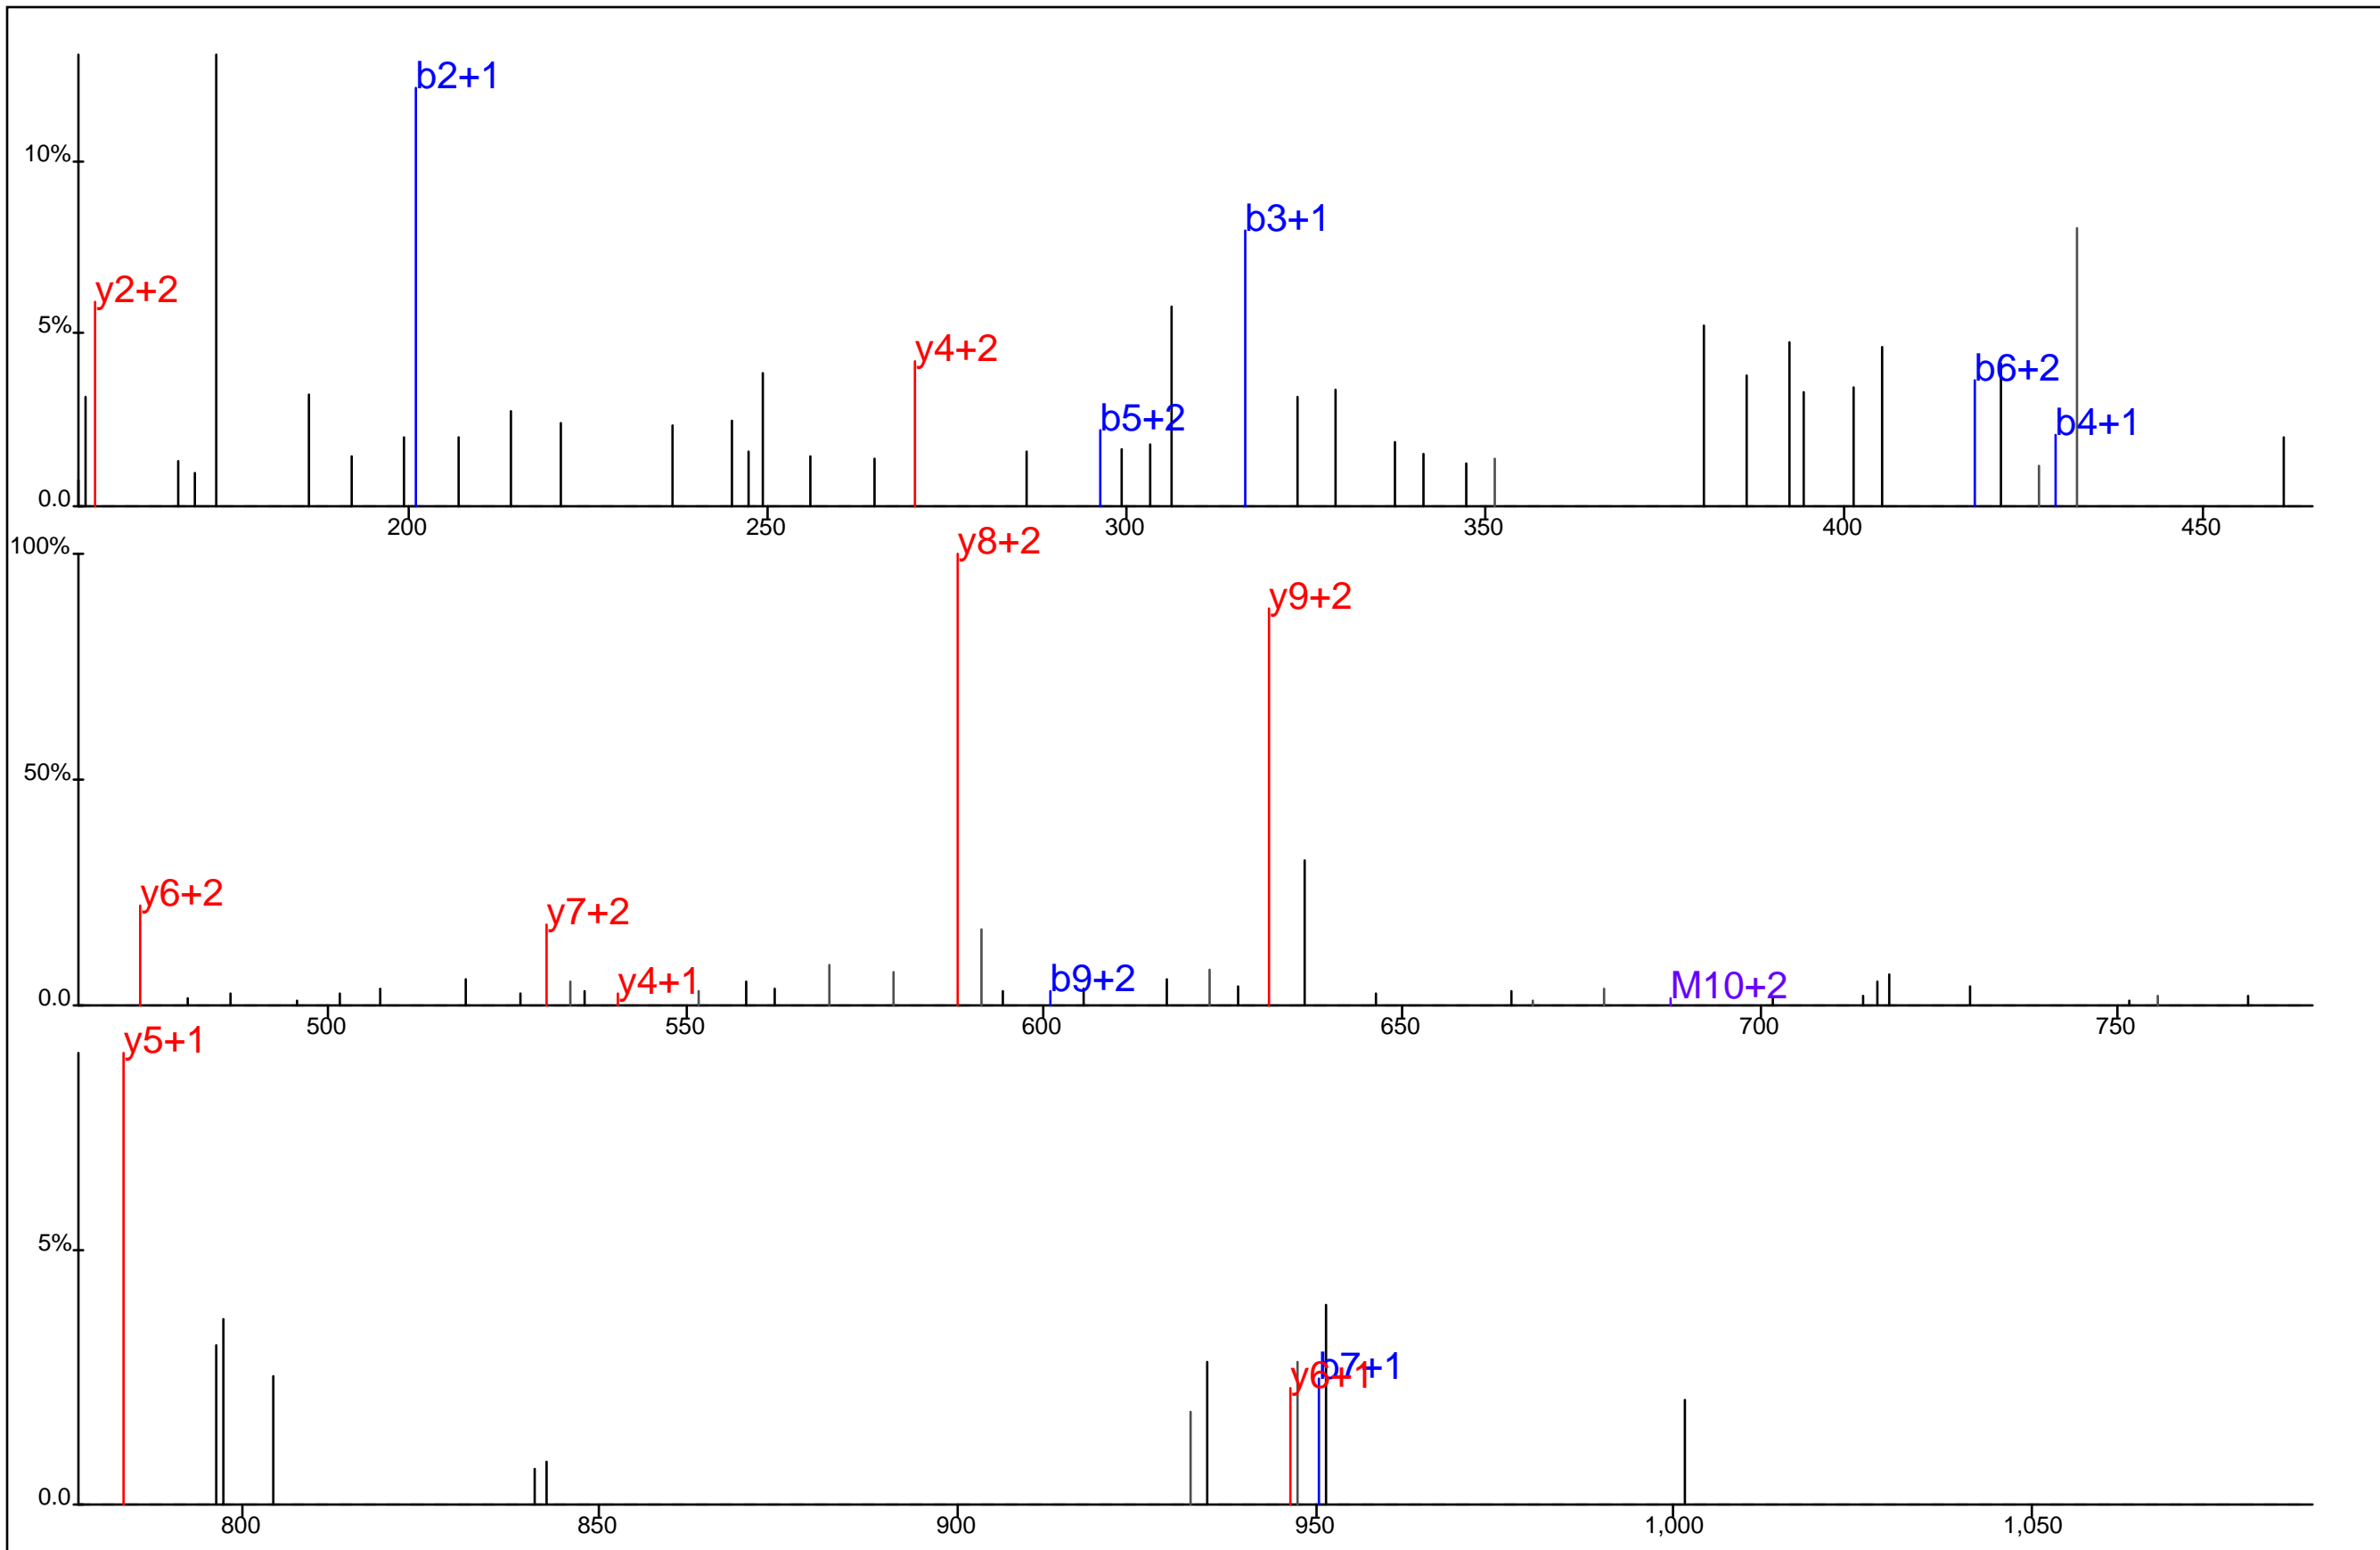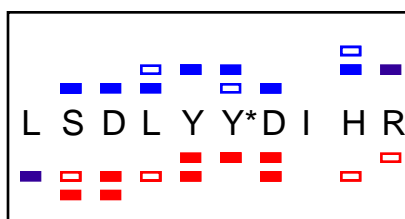

Protein Name: DOCK10  
 gi Accession: 0  
 Precursor Mass: 458.8743+3  
 Delta Mass: 0.429 ppm  
 XCorr: 31.61

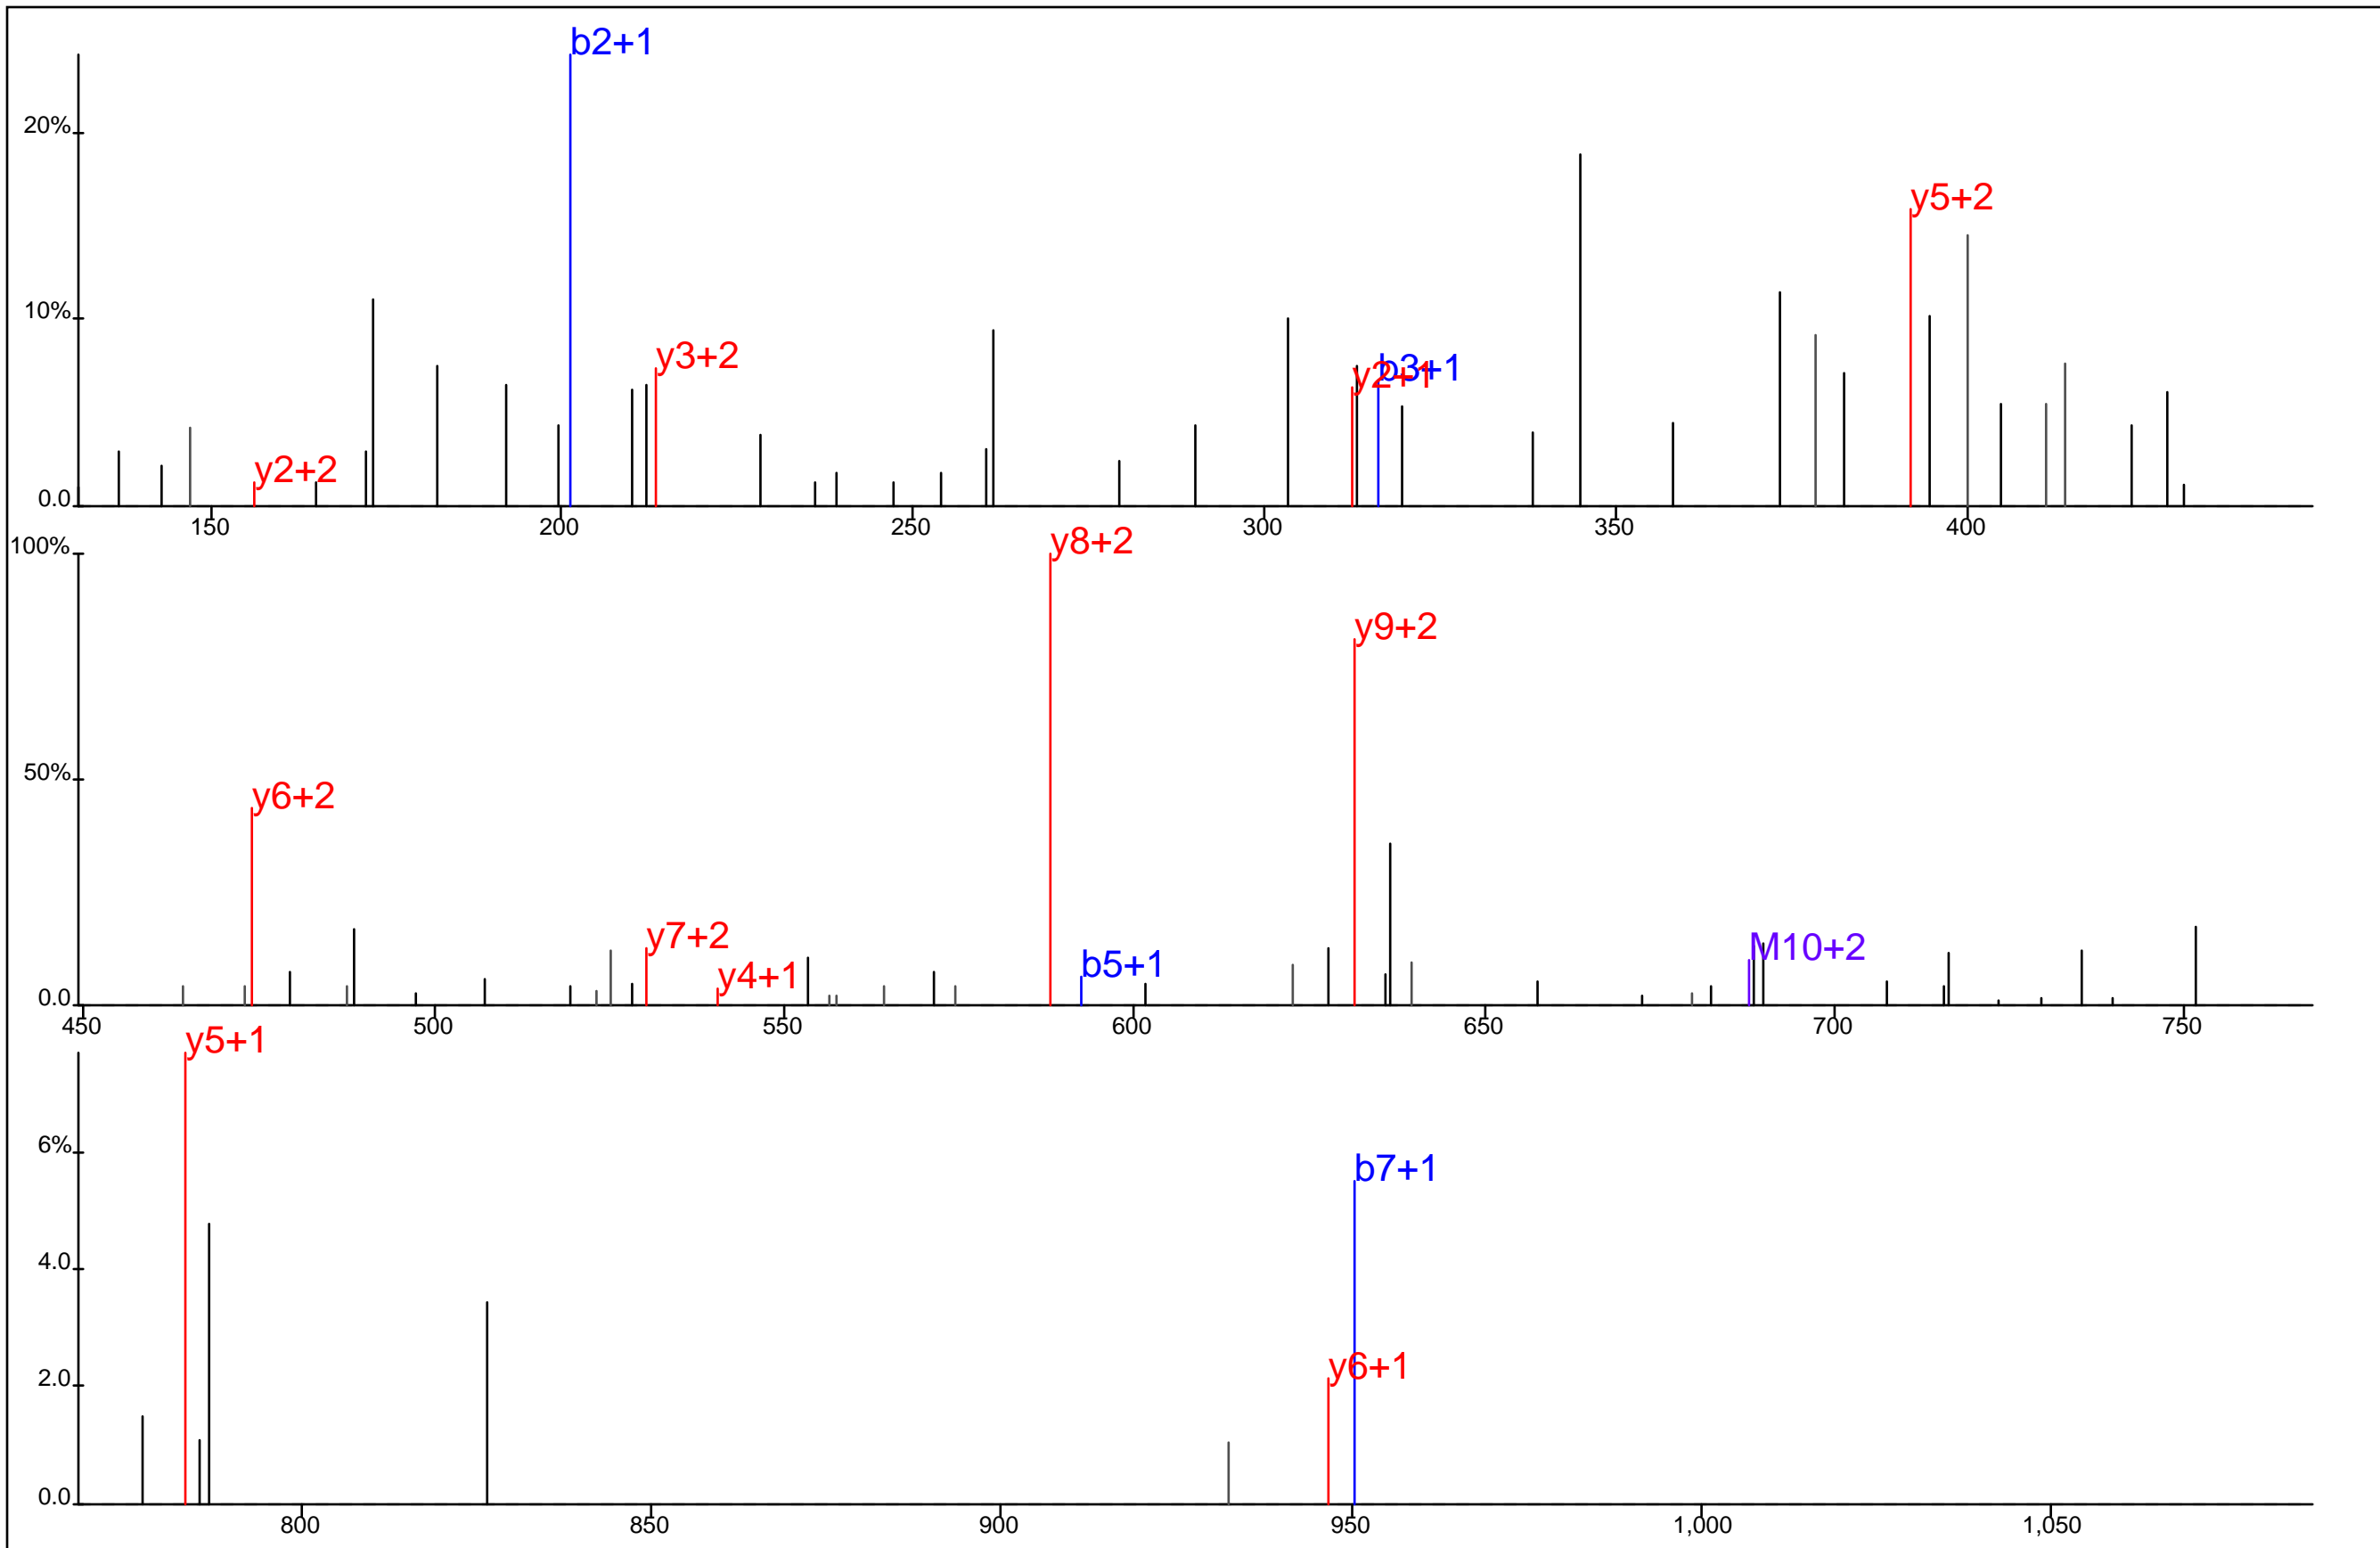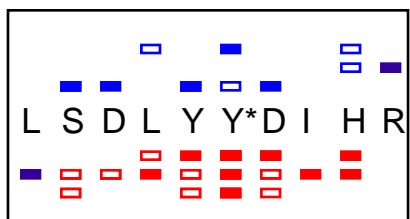

Protein Name: DOCK10  
 gi Accession: 0  
 Precursor Mass: 458.8742+3  
 Delta Mass: 0.628 ppm  
 XCorr: 25.25

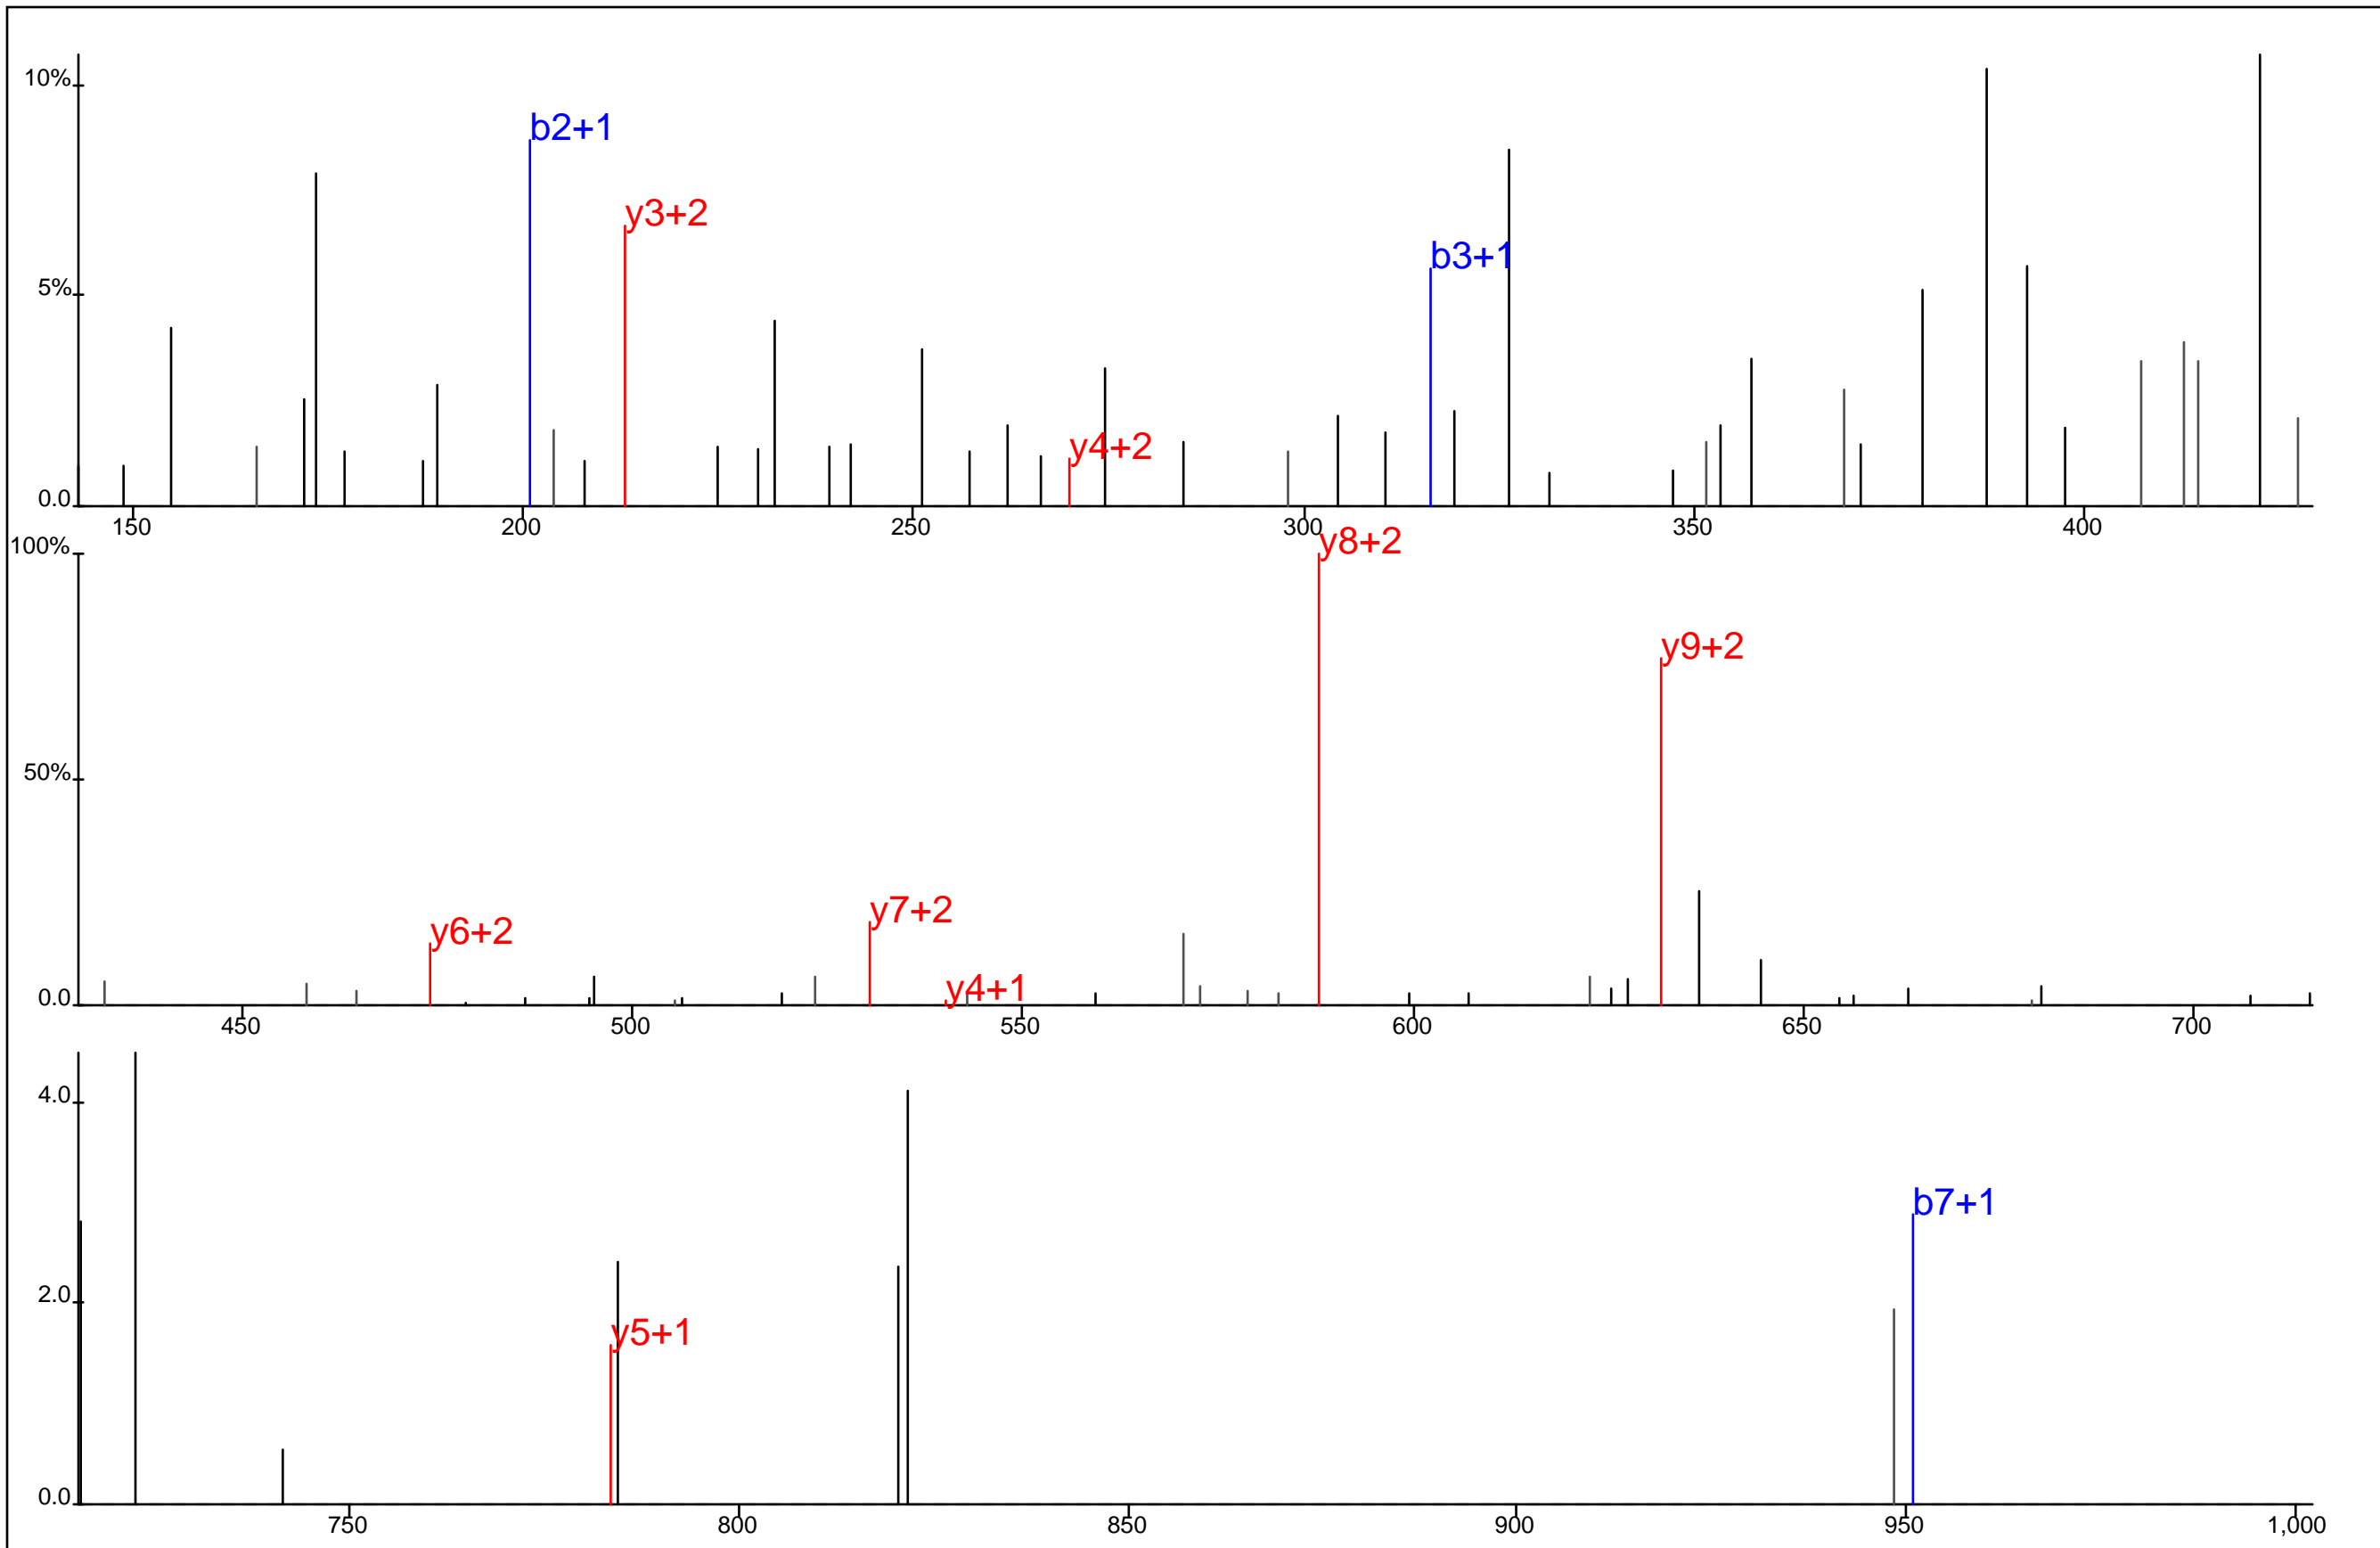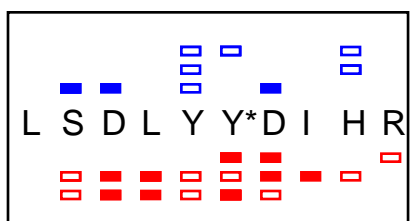

Protein Name: DOCK10  
 gi Accession: 0  
 Precursor Mass: 458.8753+3  
 Delta Mass: 1.703 ppm  
 XCorr: 25.88

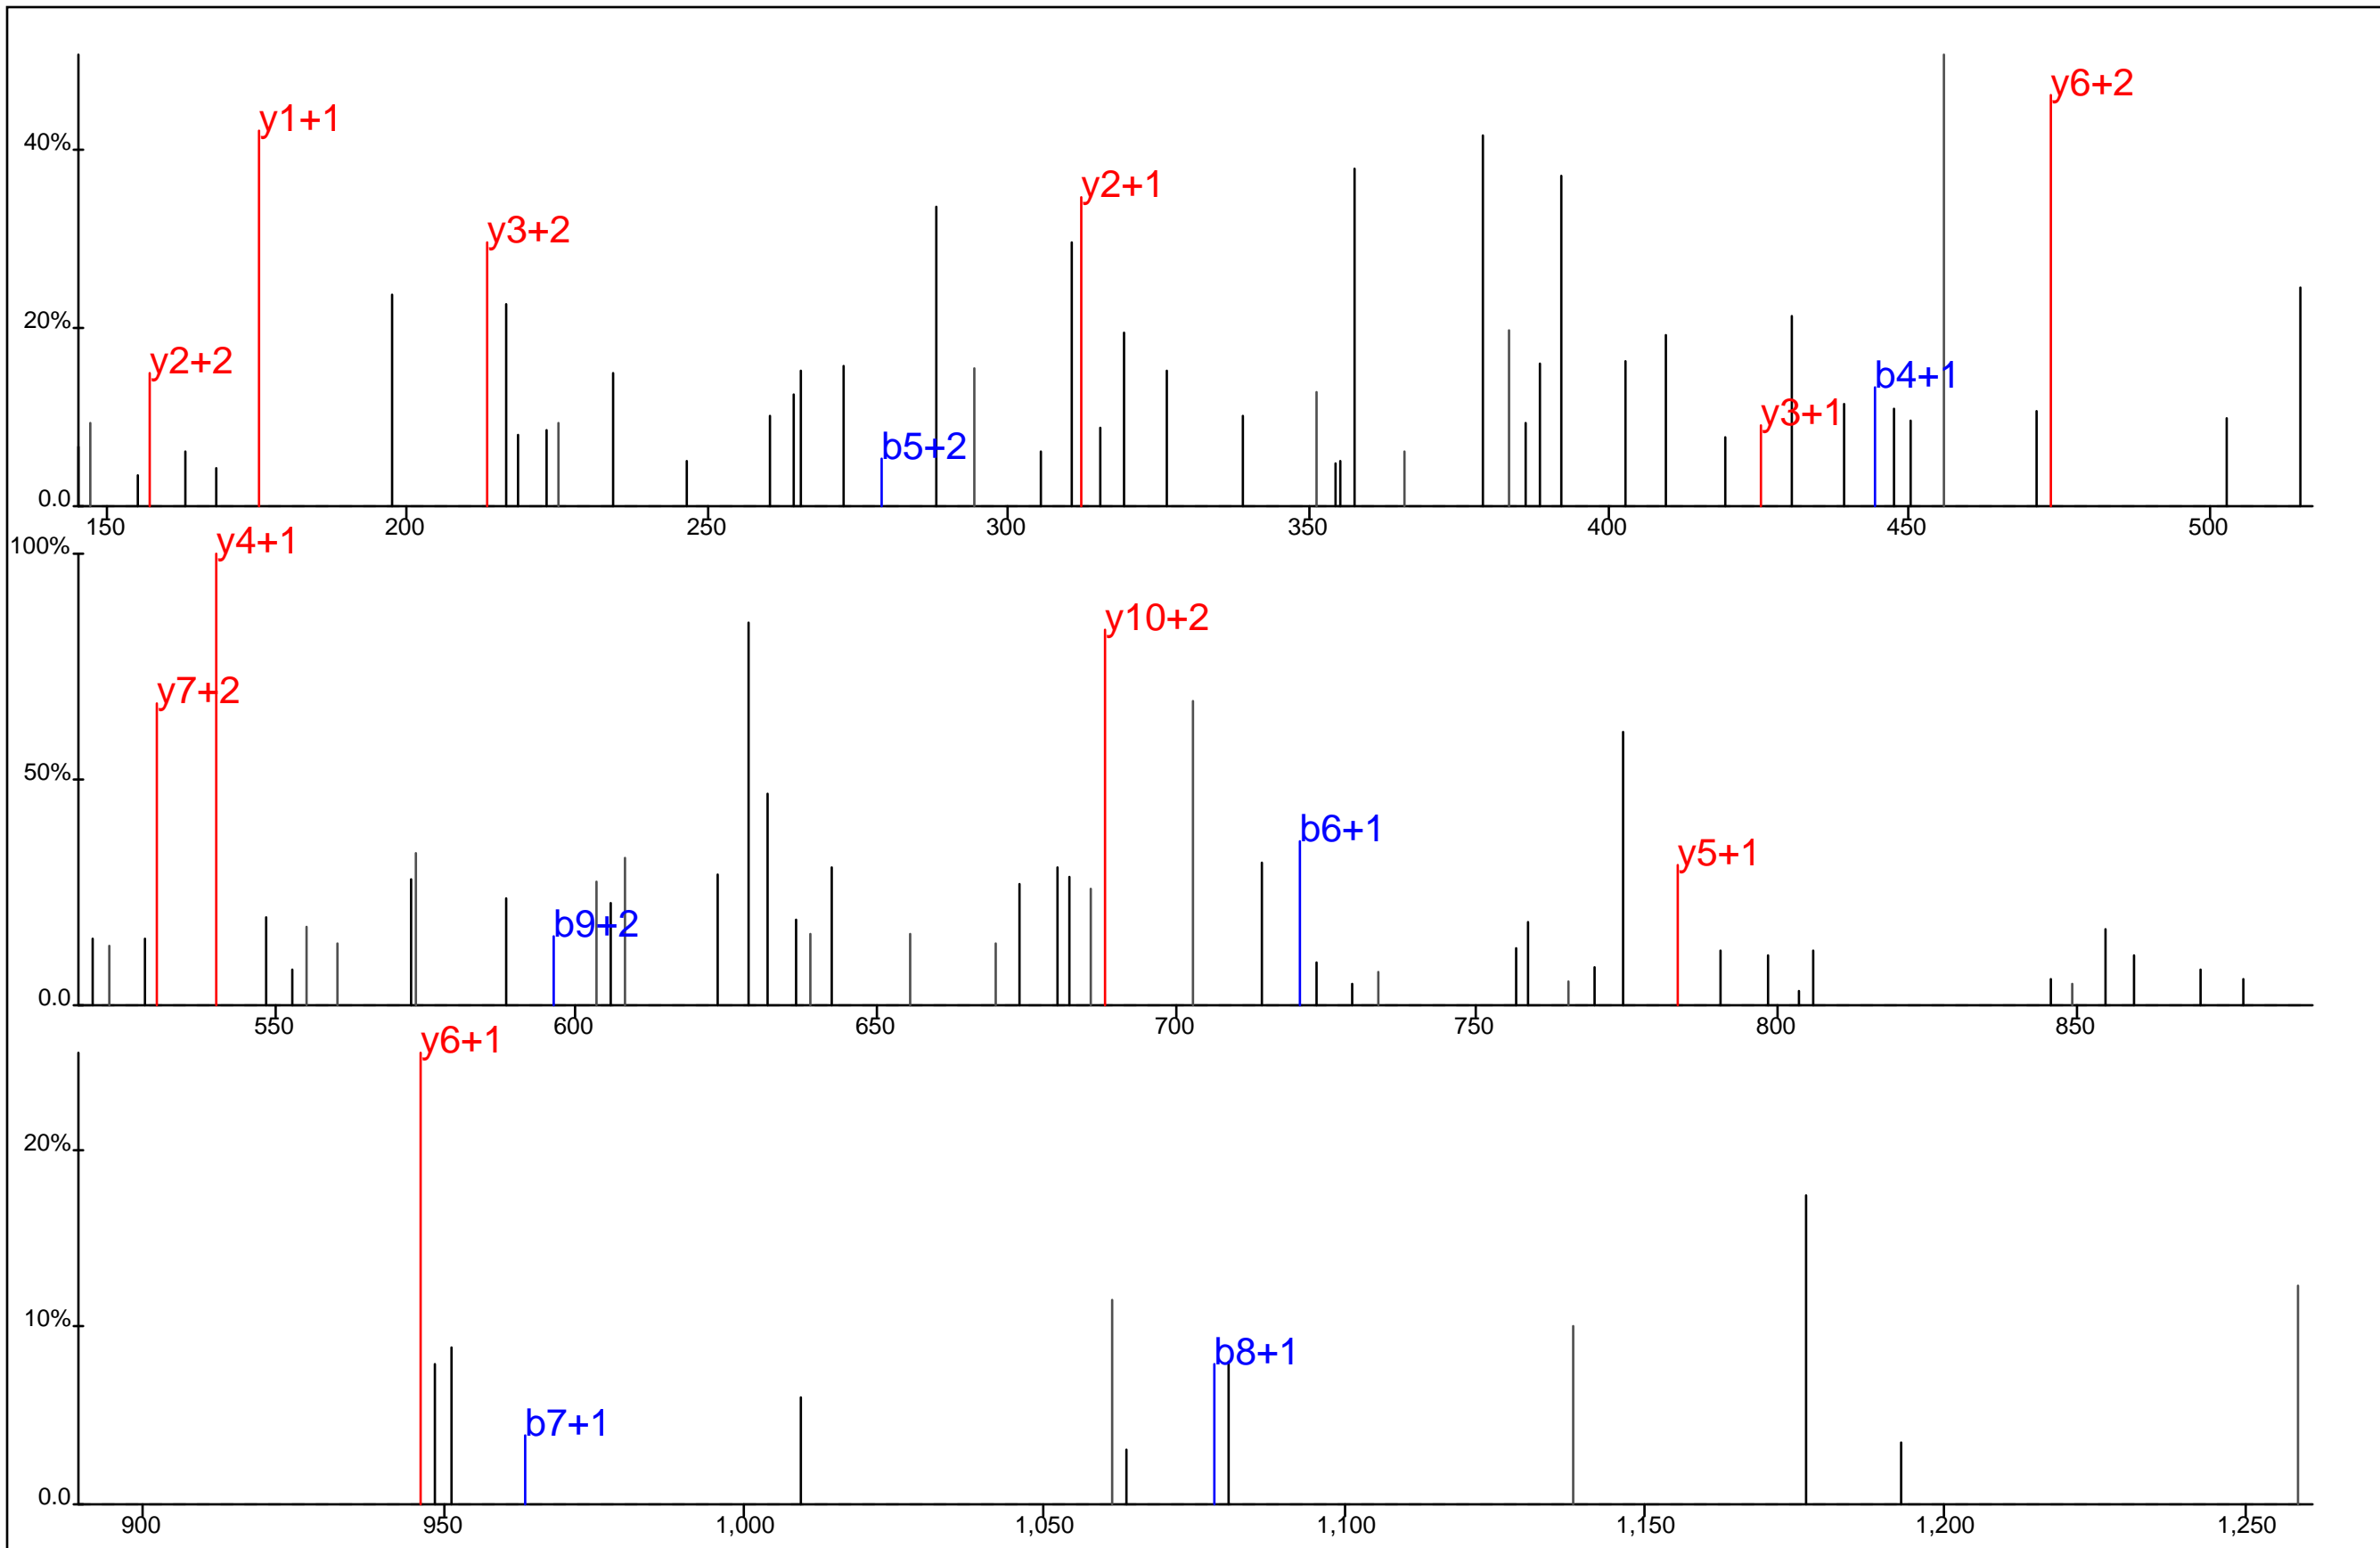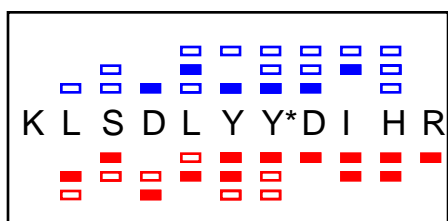

Protein Name: DOCK10  
 gi Accession: 0  
 Precursor Mass: 501.5730+3  
 Delta Mass: 0.435 ppm  
 XCorr: 25.57

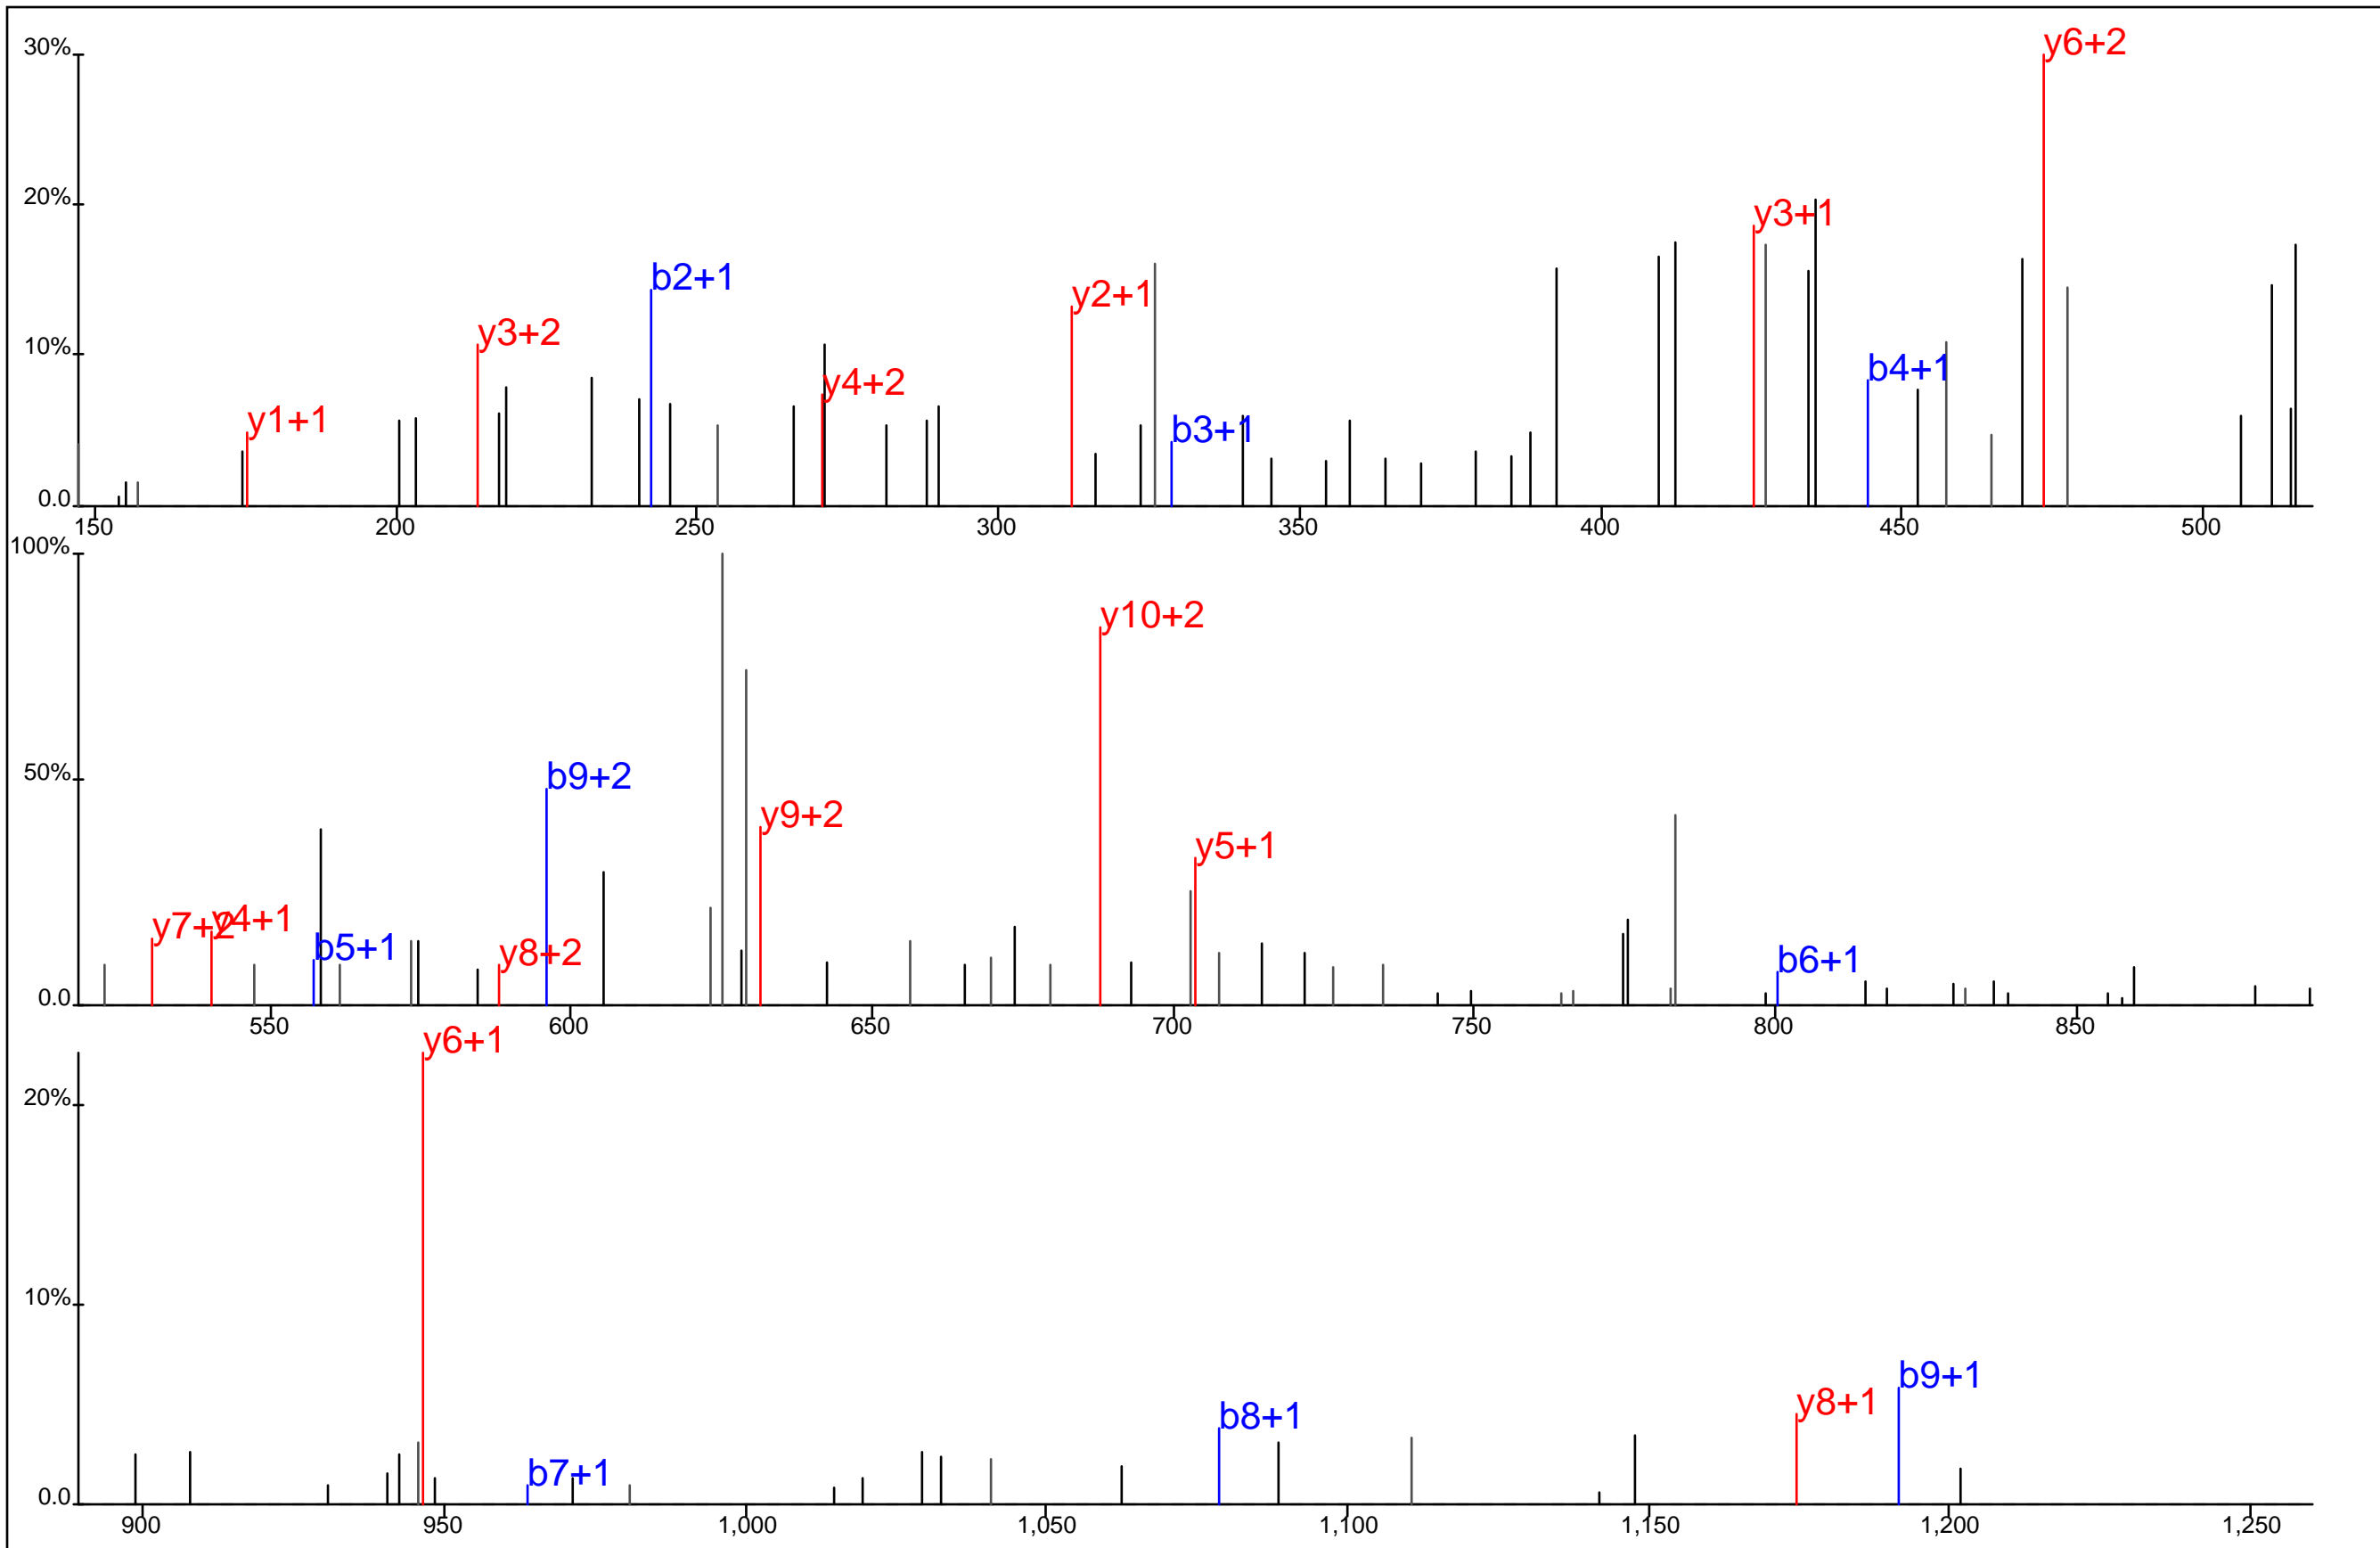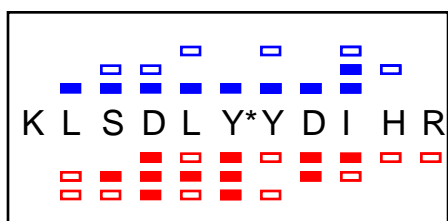

Protein Name: DOCK10  
 gi Accession: 0  
 Precursor Mass: 501.5726+3  
 Delta Mass: 0.480 ppm  
 XCorr: 21.55

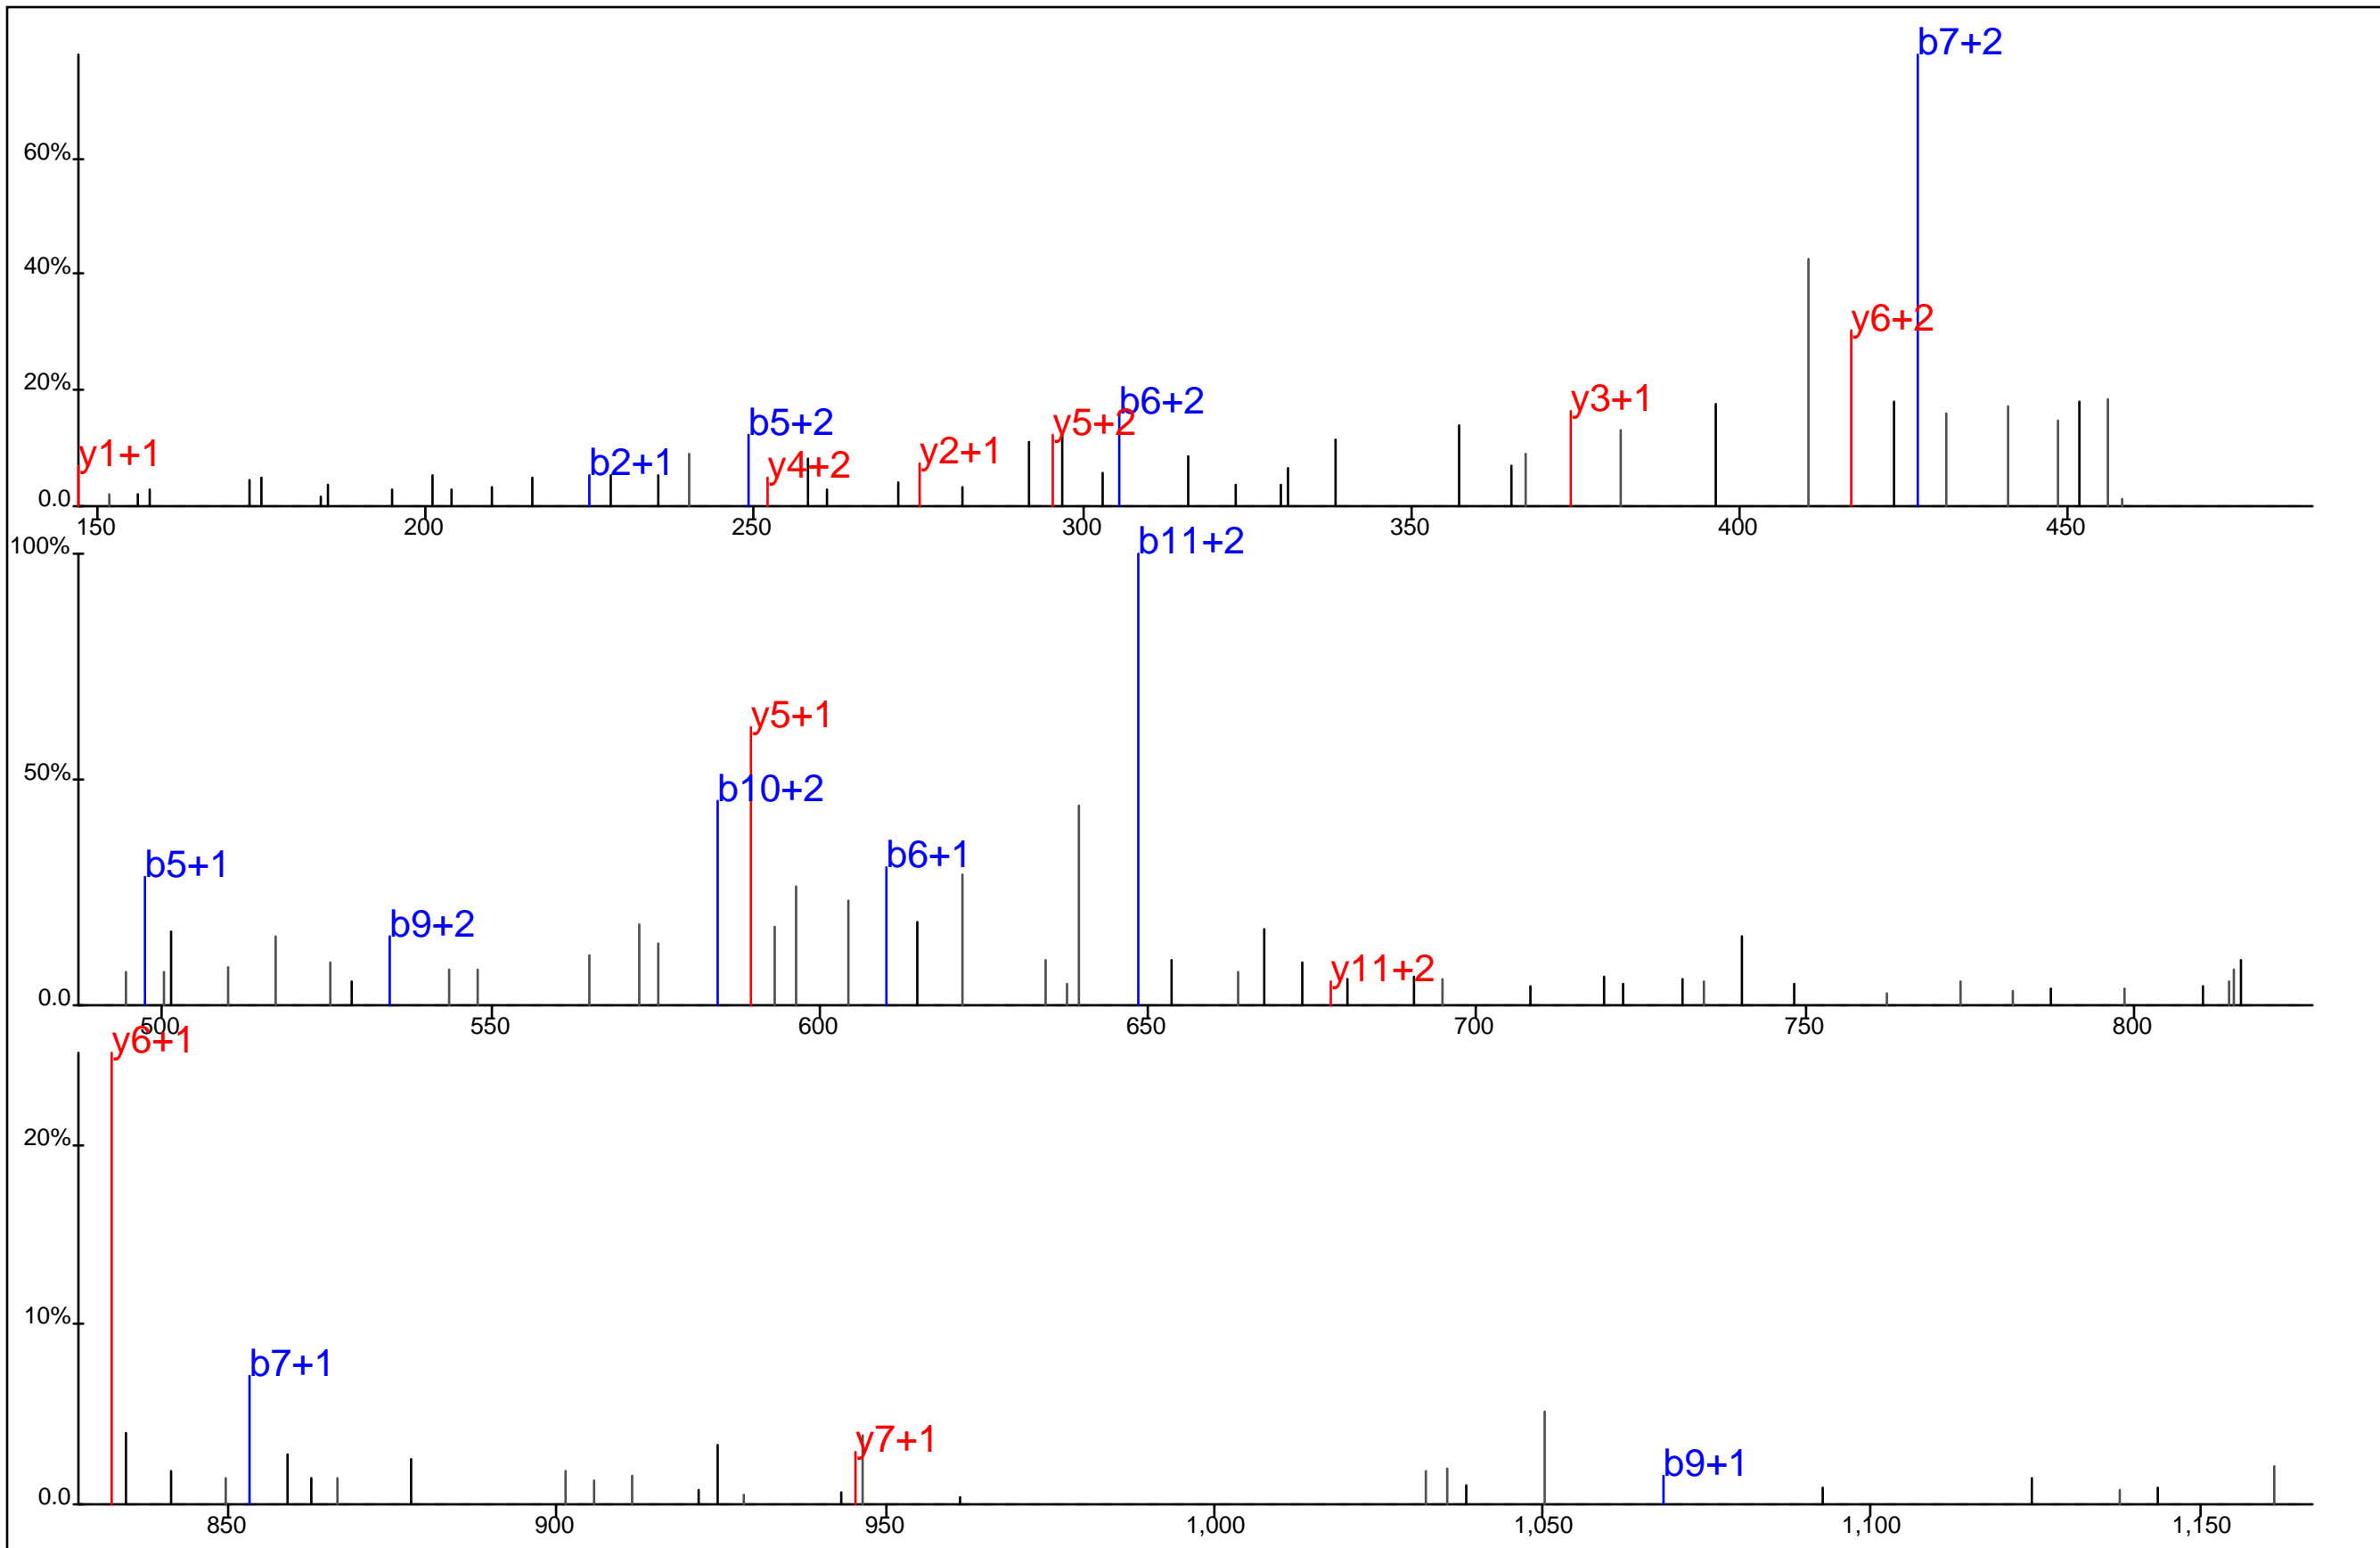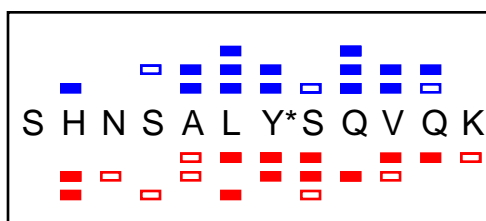

Protein Name: Docking protein 1  
 gi Accession: 0  
 Precursor Mass: 481.2204+3  
 Delta Mass: 0.264 ppm  
 XCorr: 28.78

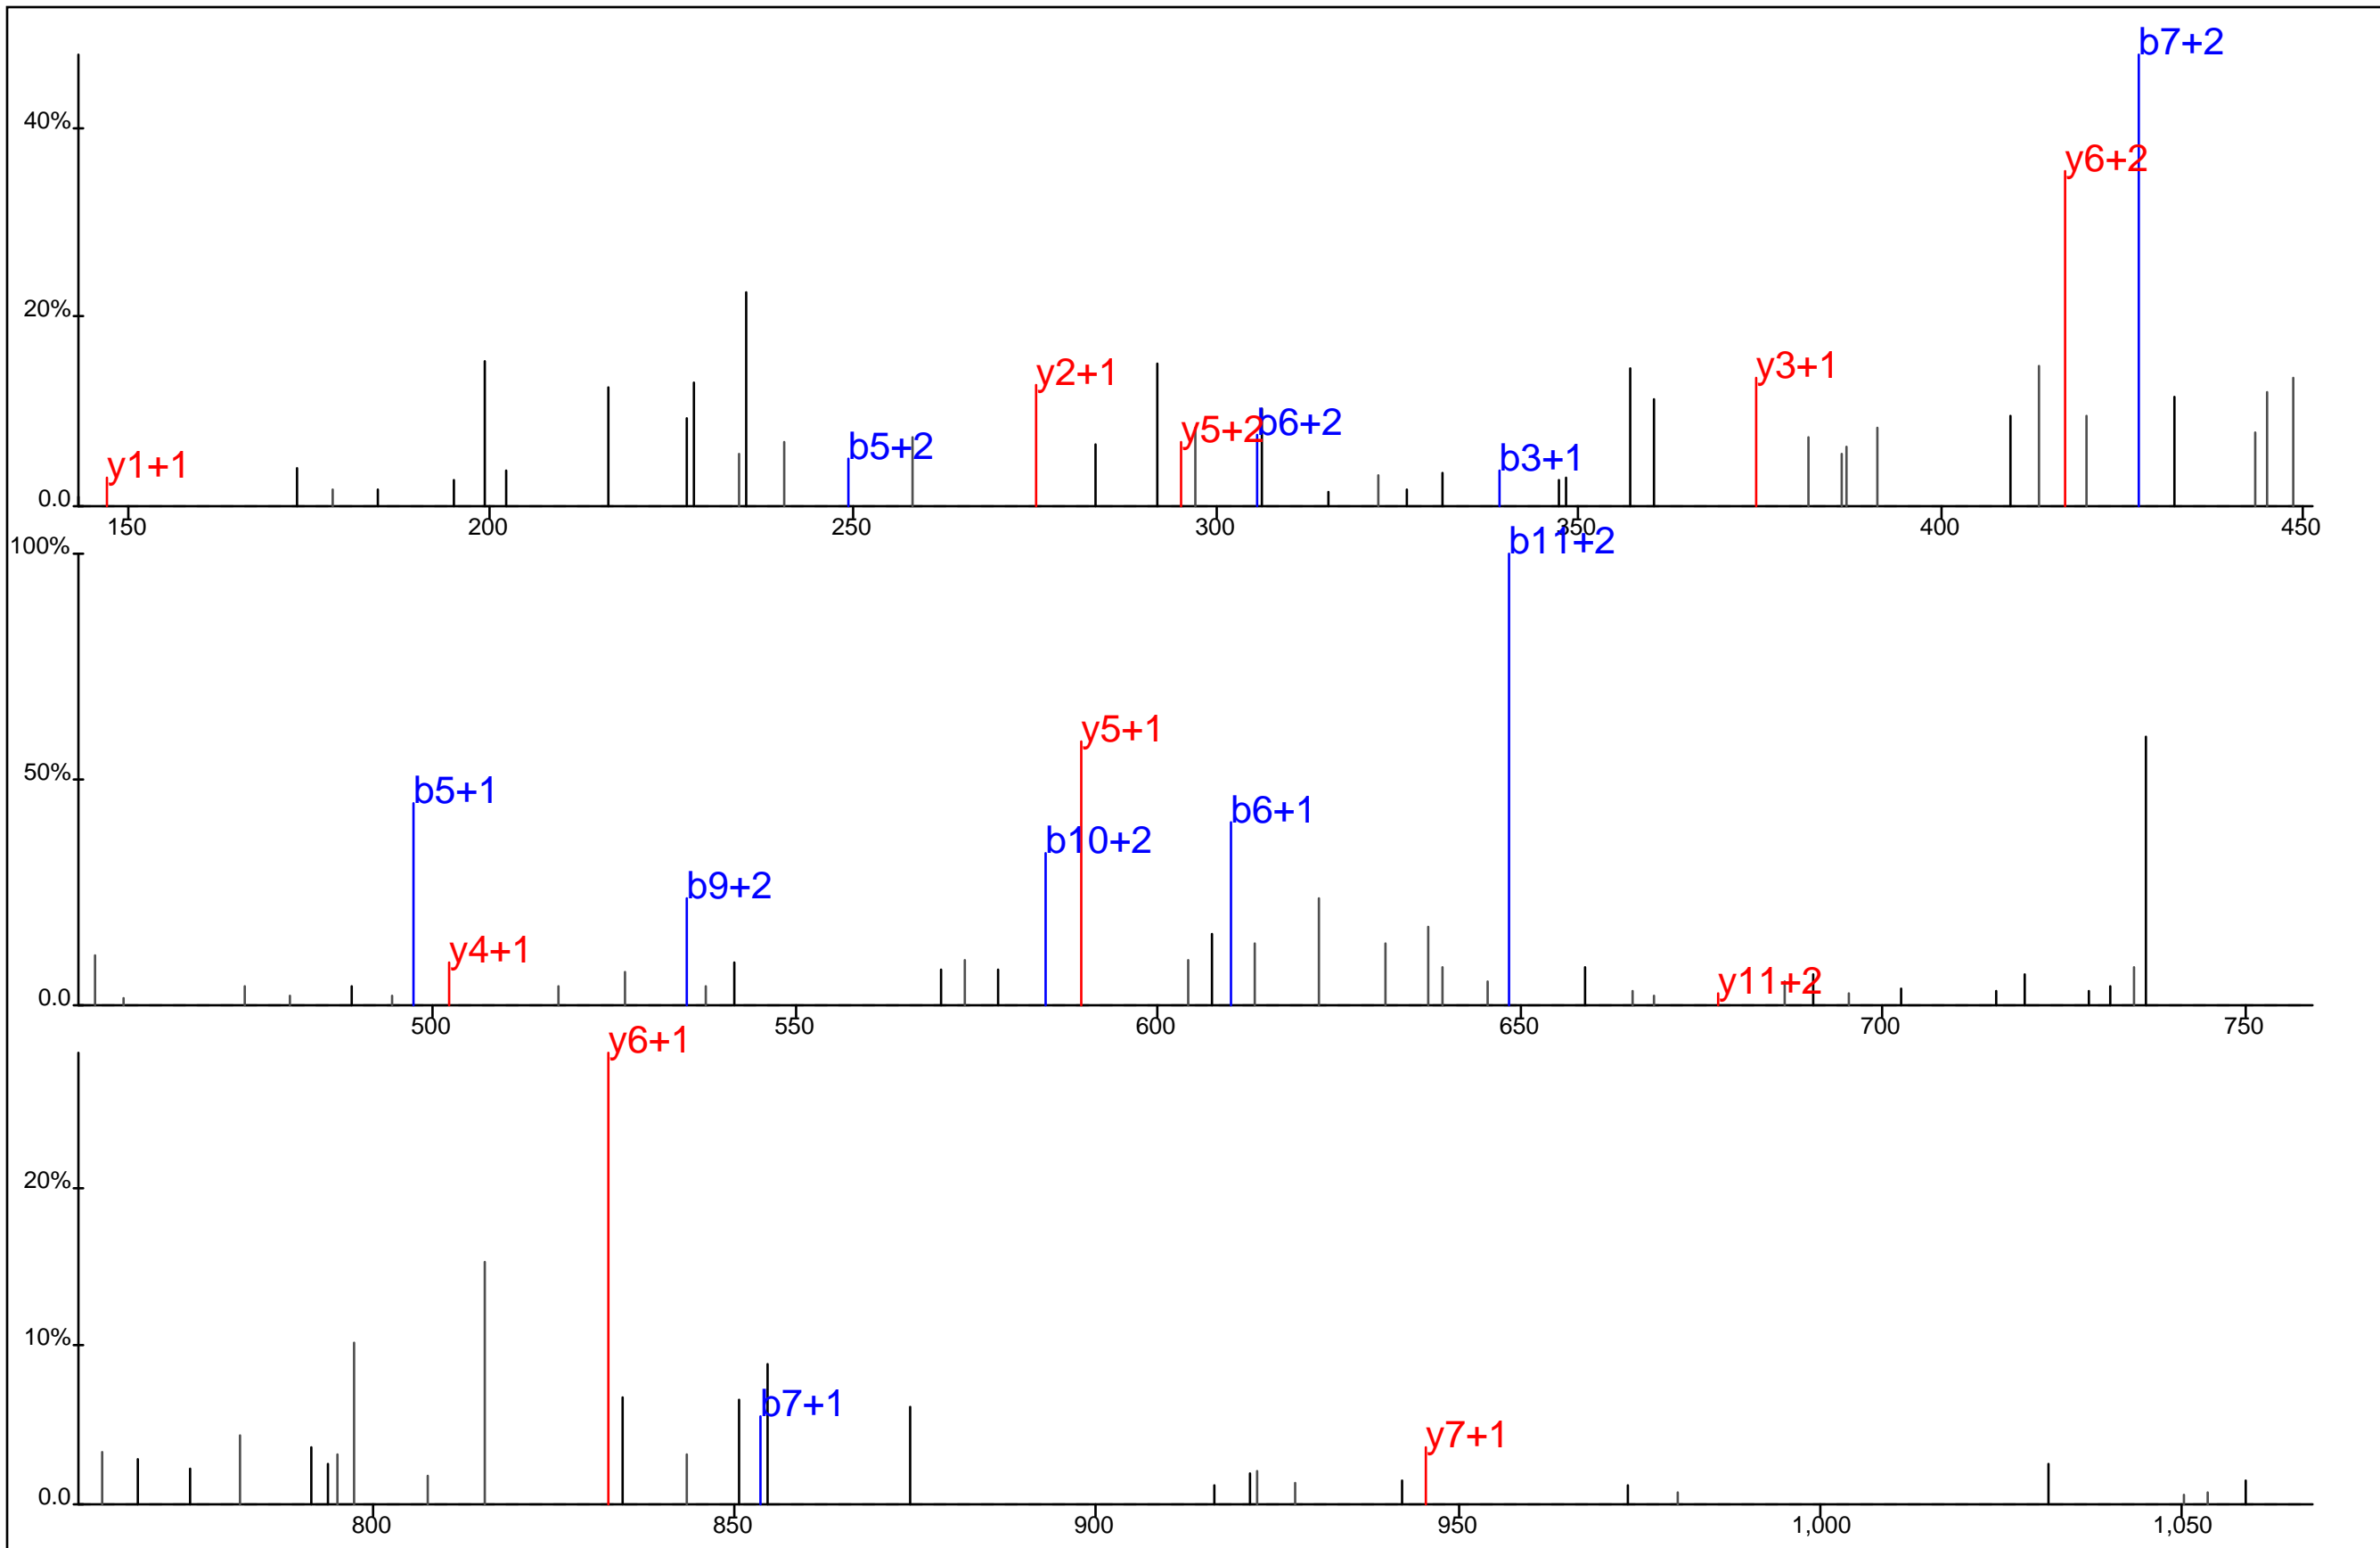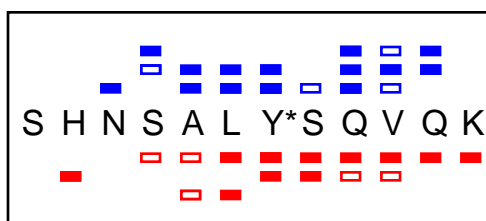

Protein Name: Docking protein 1  
 gi Accession: 0  
 Precursor Mass: 481.2209+3  
 Delta Mass: 0.627 ppm  
 XCorr: 21.03

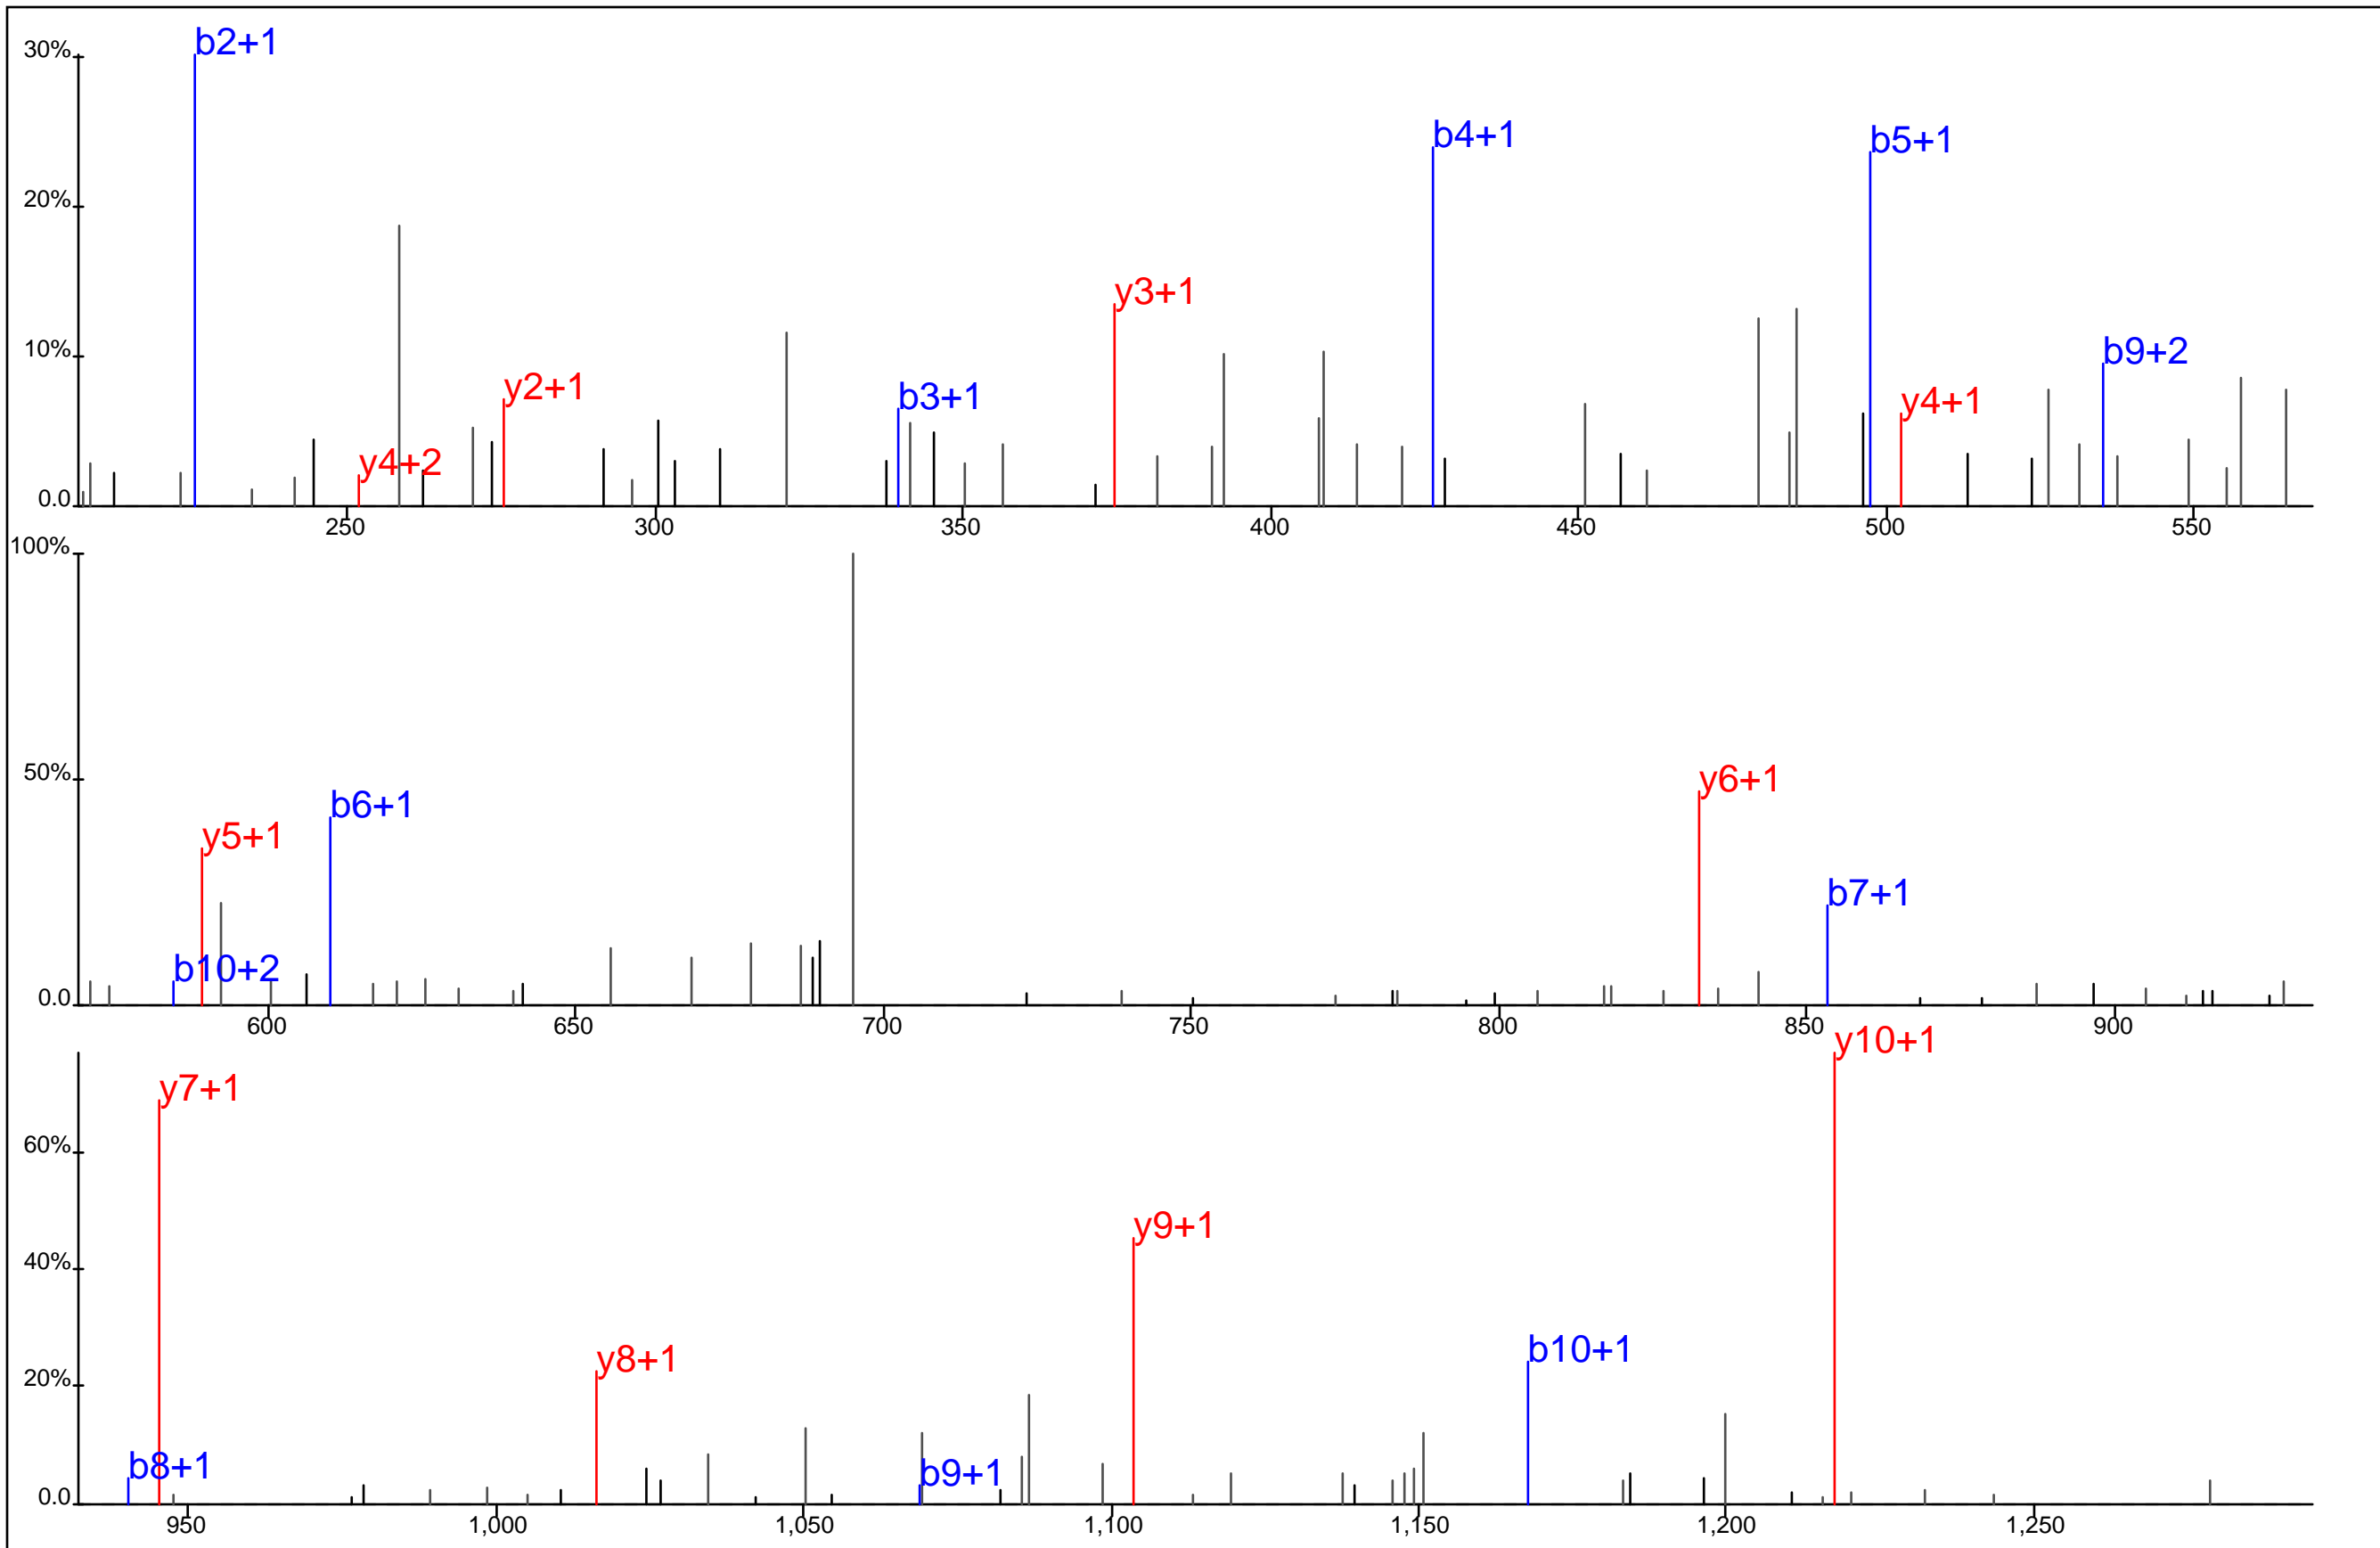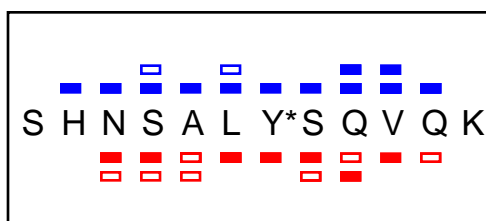

Protein Name: Docking protein 1  
 gi Accession: 0  
 Precursor Mass: 721.3245+2  
 Delta Mass: 3.704 ppm  
 XCorr: 71.59



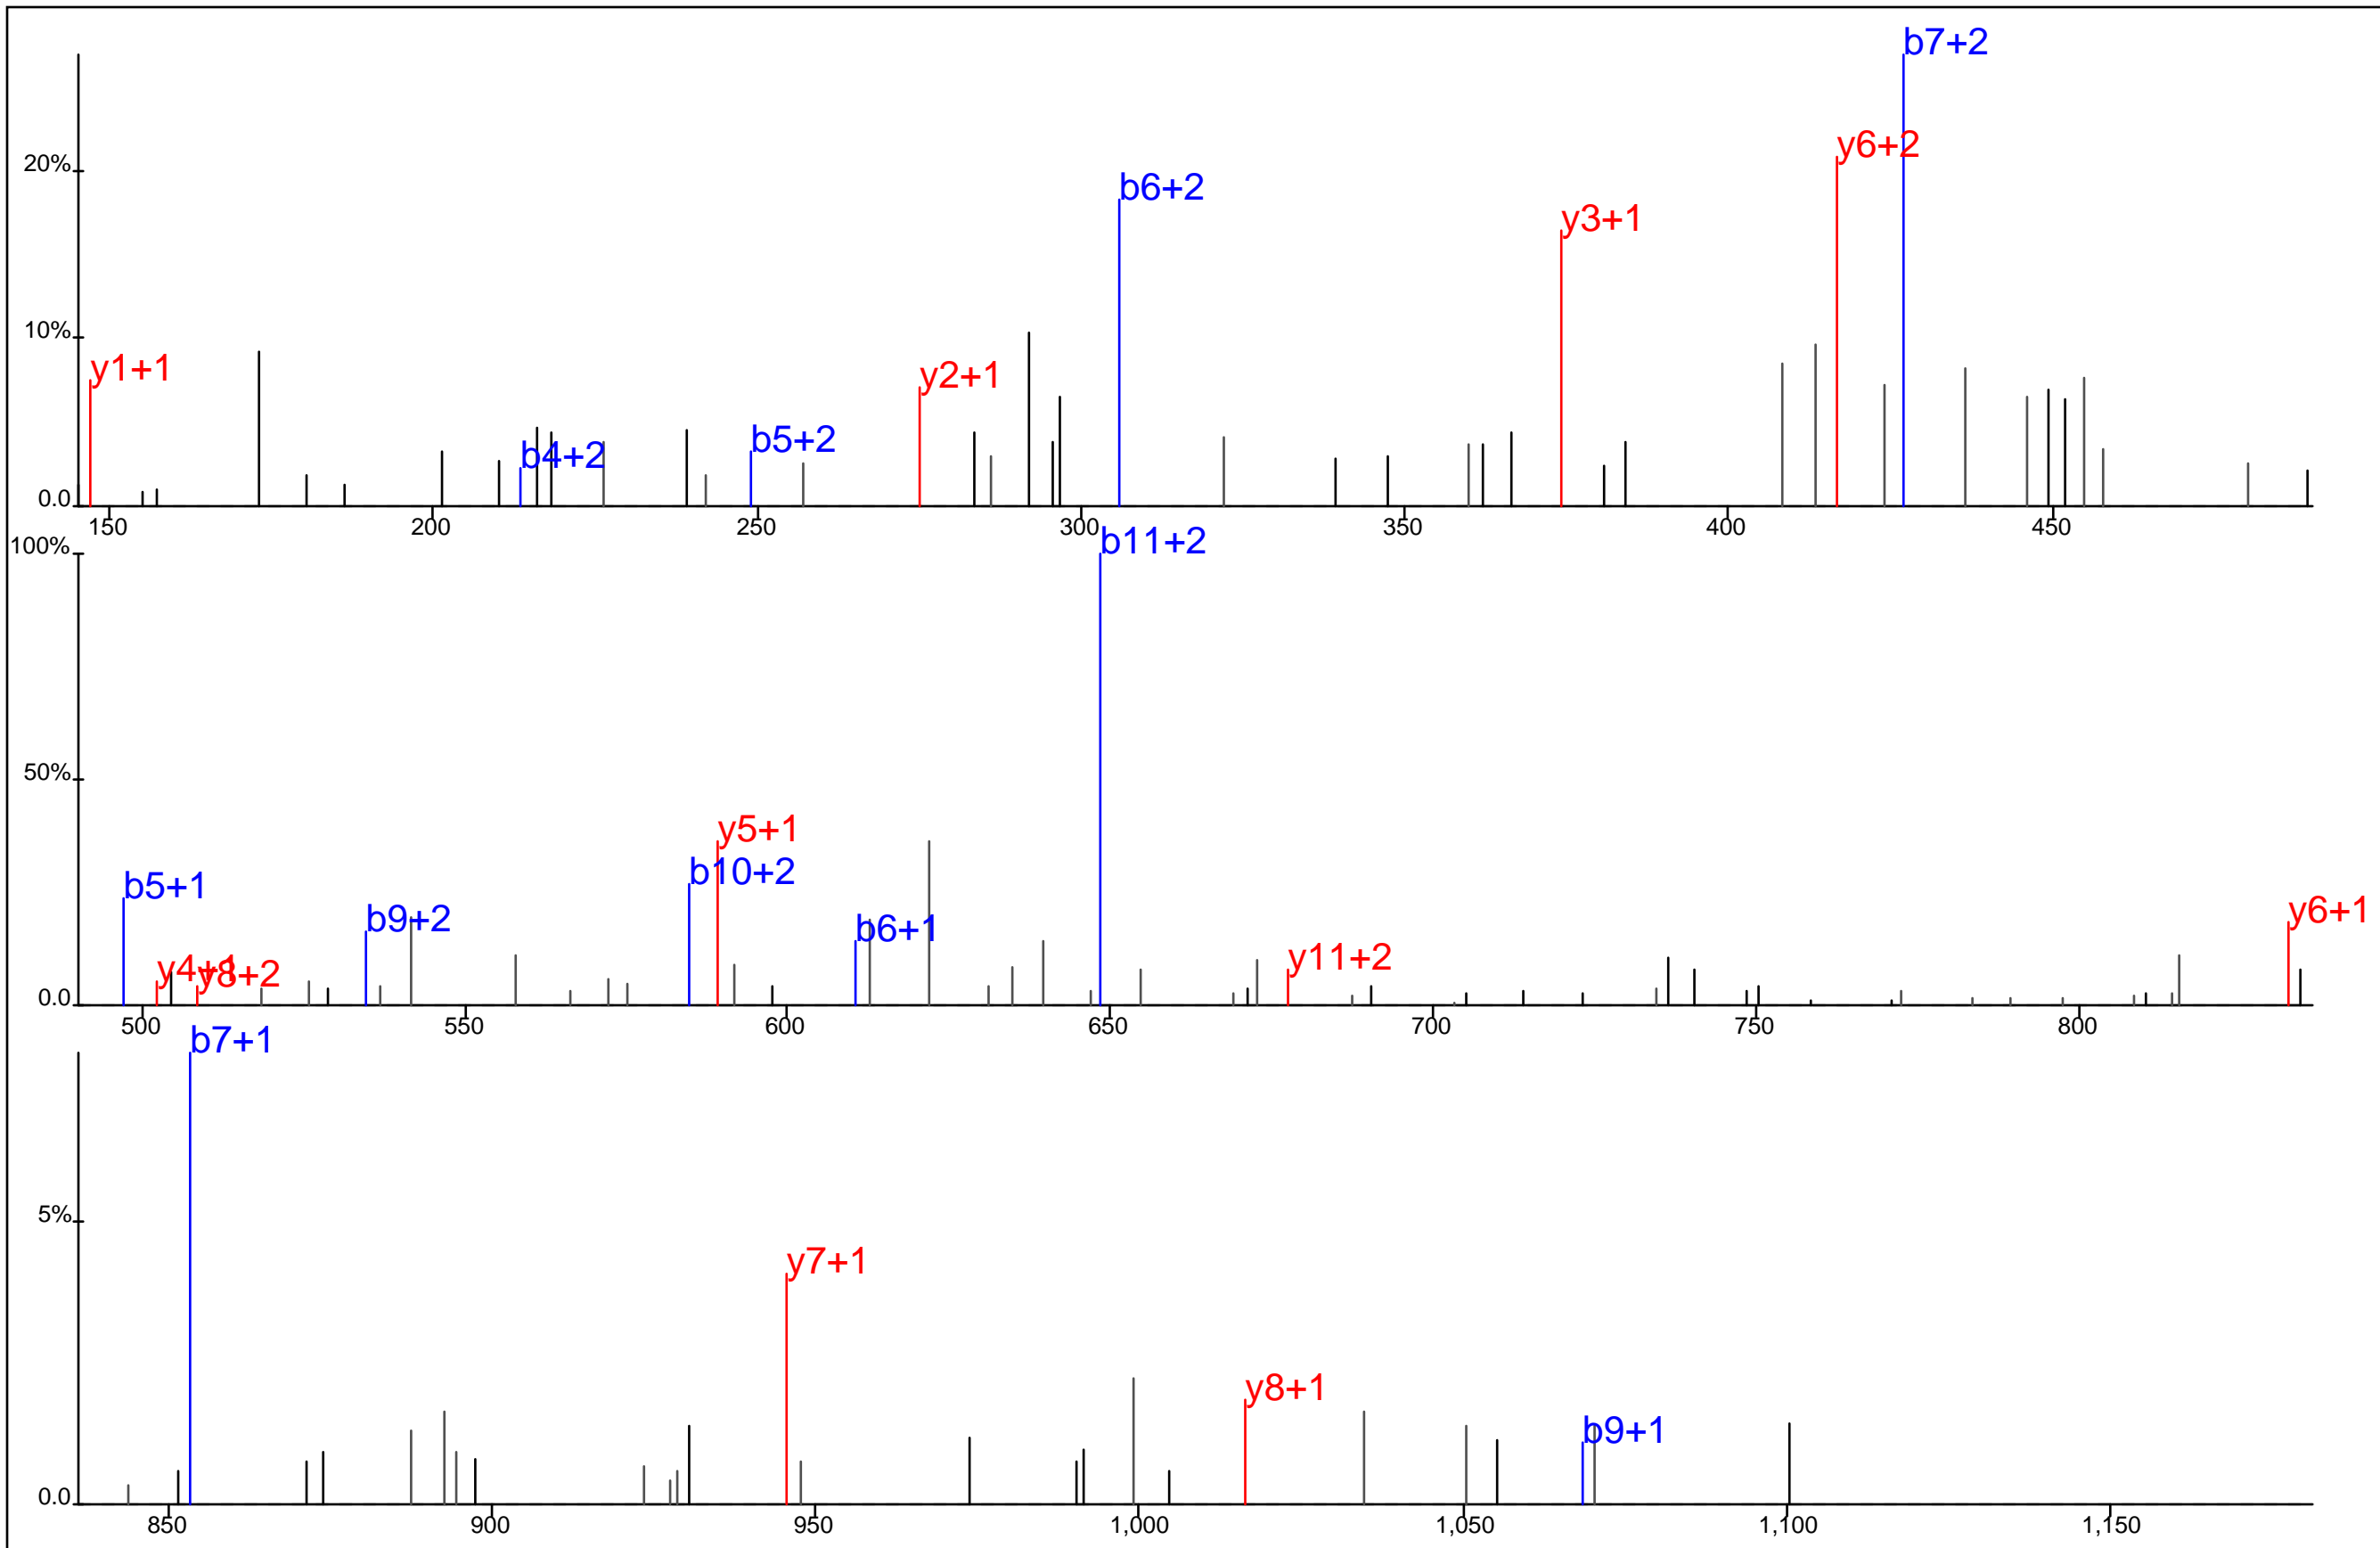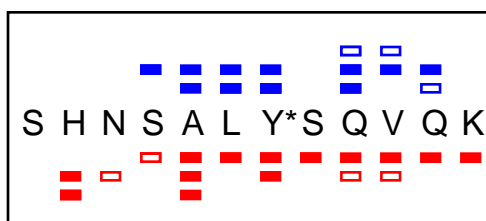

Protein Name: Docking protein 1  
 gi Accession: 0  
 Precursor Mass: 481.2198+3  
 Delta Mass: 1.660 ppm  
 XCorr: 39.47

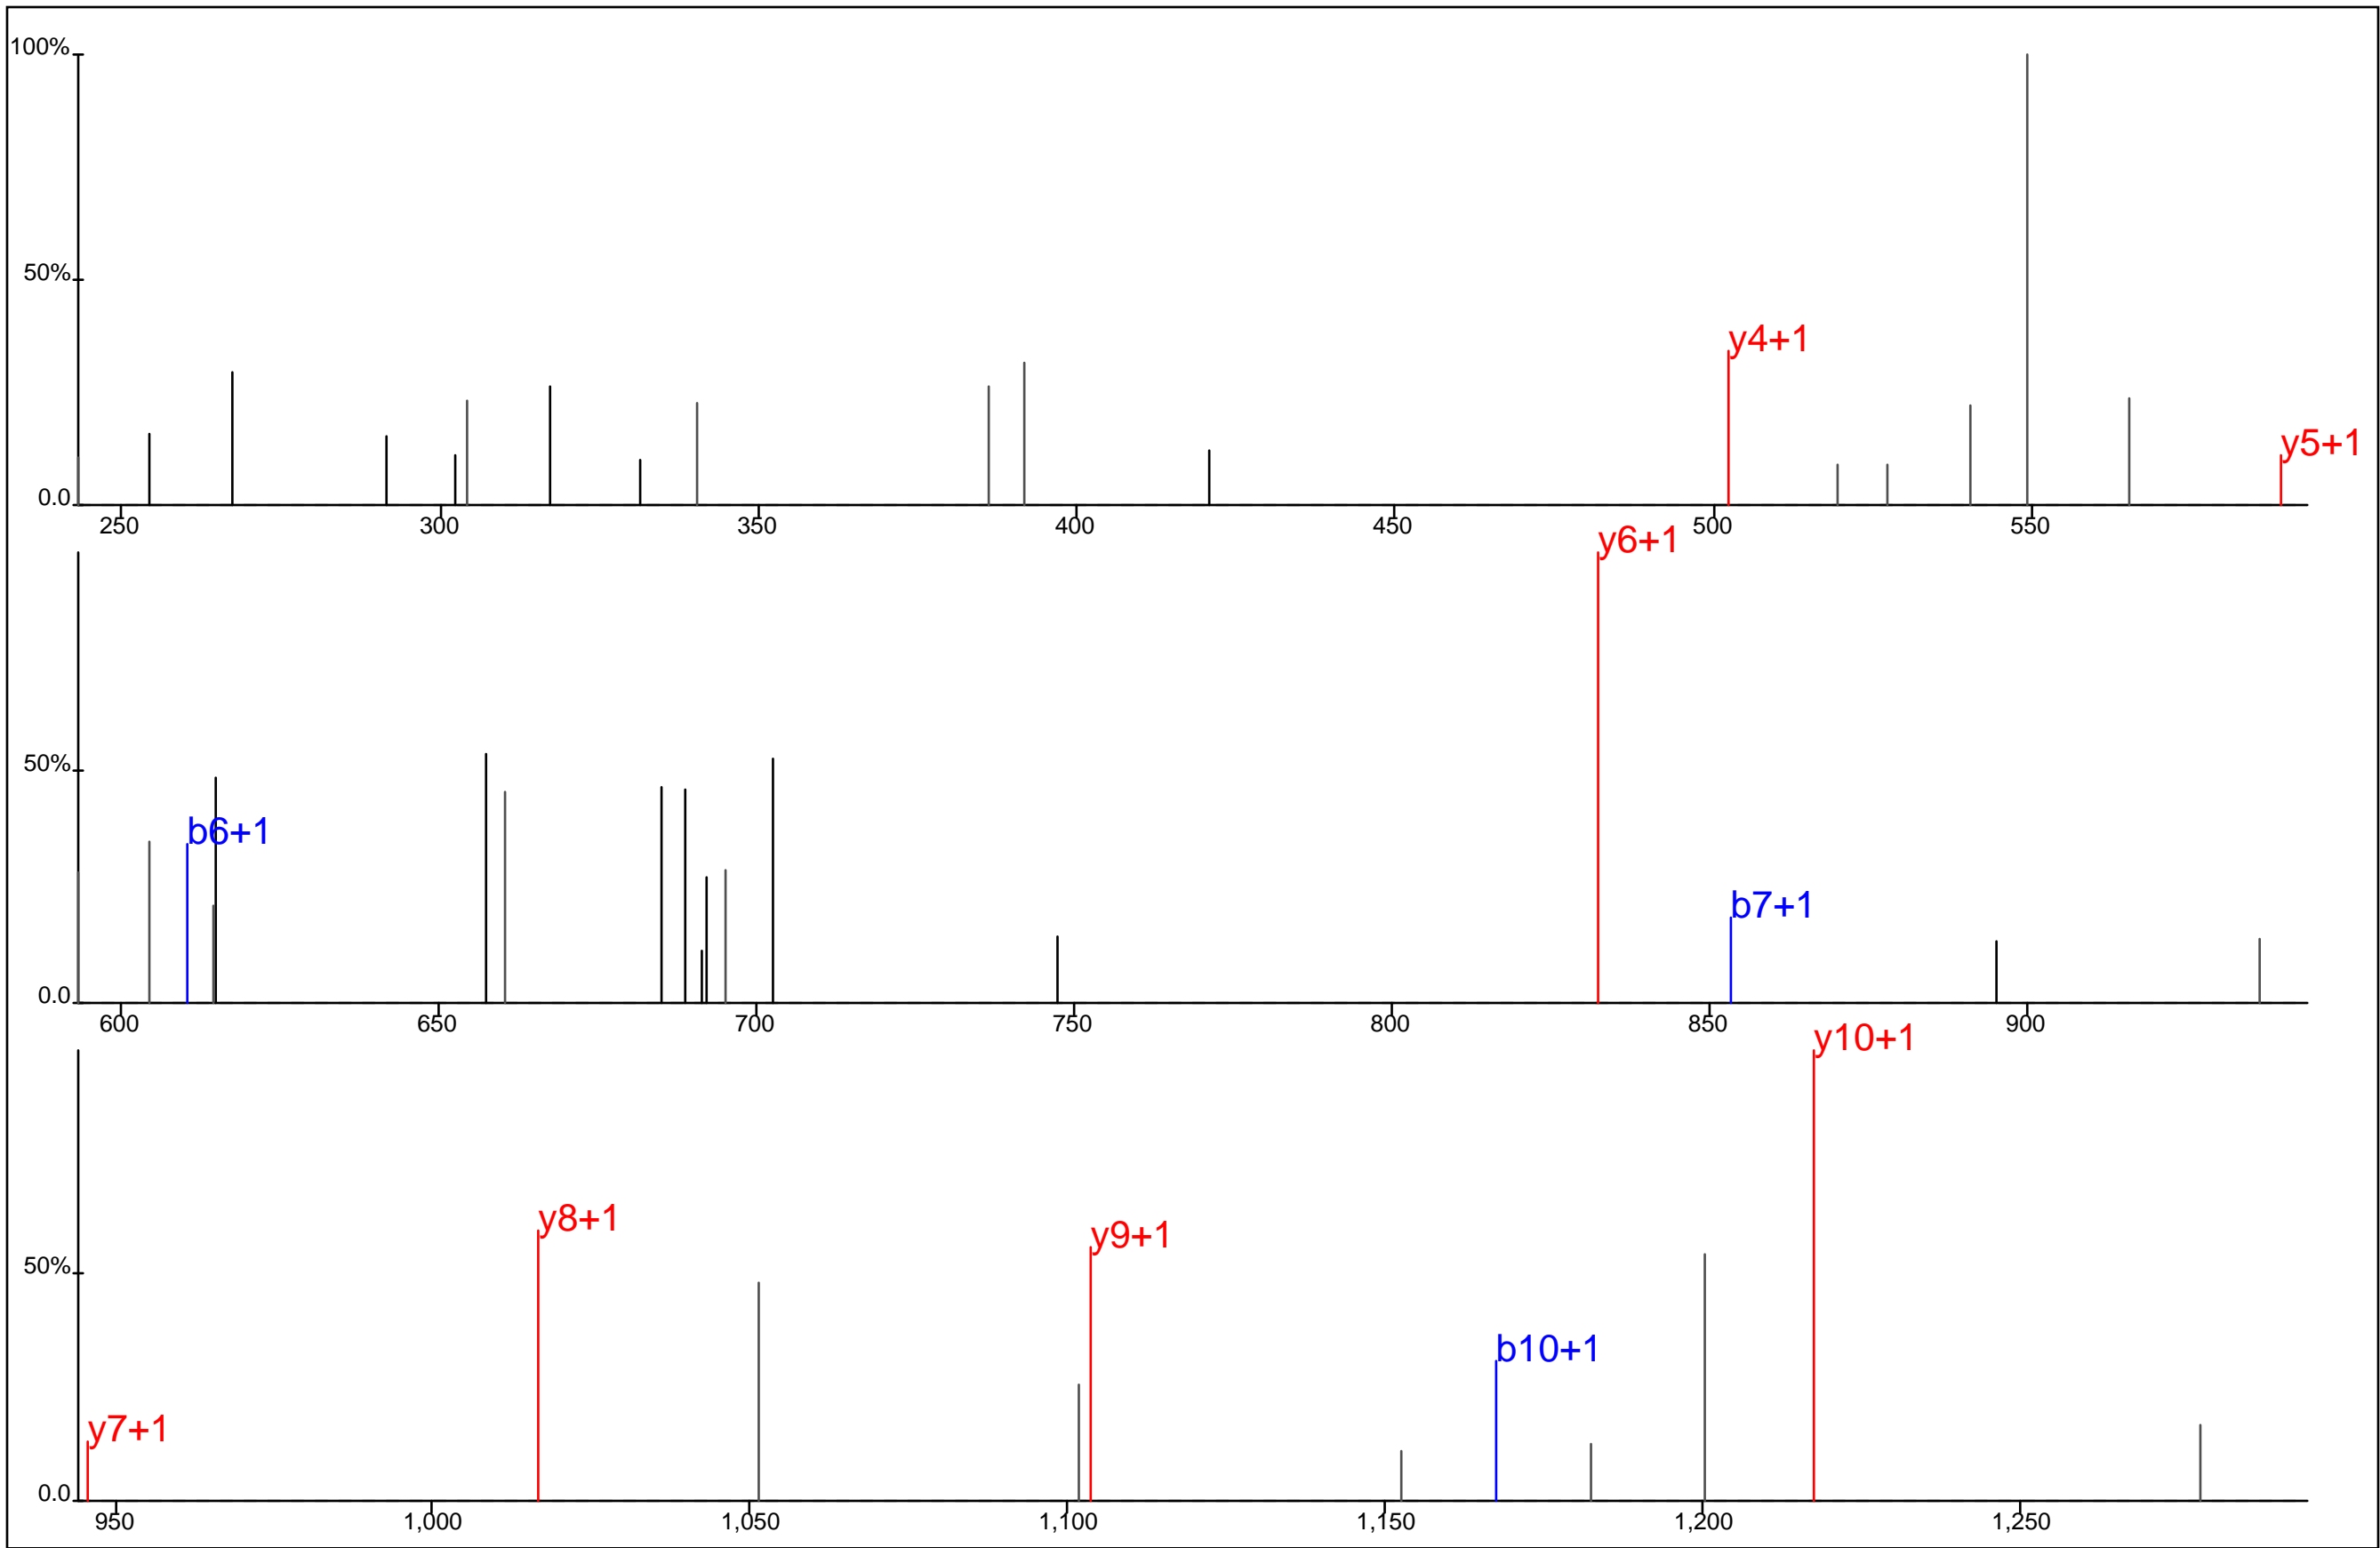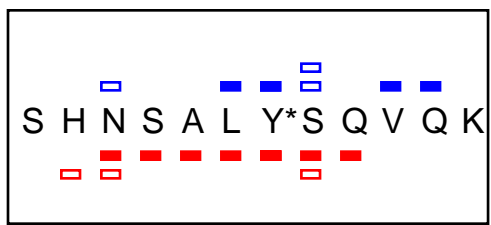

Protein Name: Docking protein 1  
 gi Accession: 0  
 Precursor Mass: 721.3241+2  
 Delta Mass: 4.296 ppm  
 XCorr: 30.34

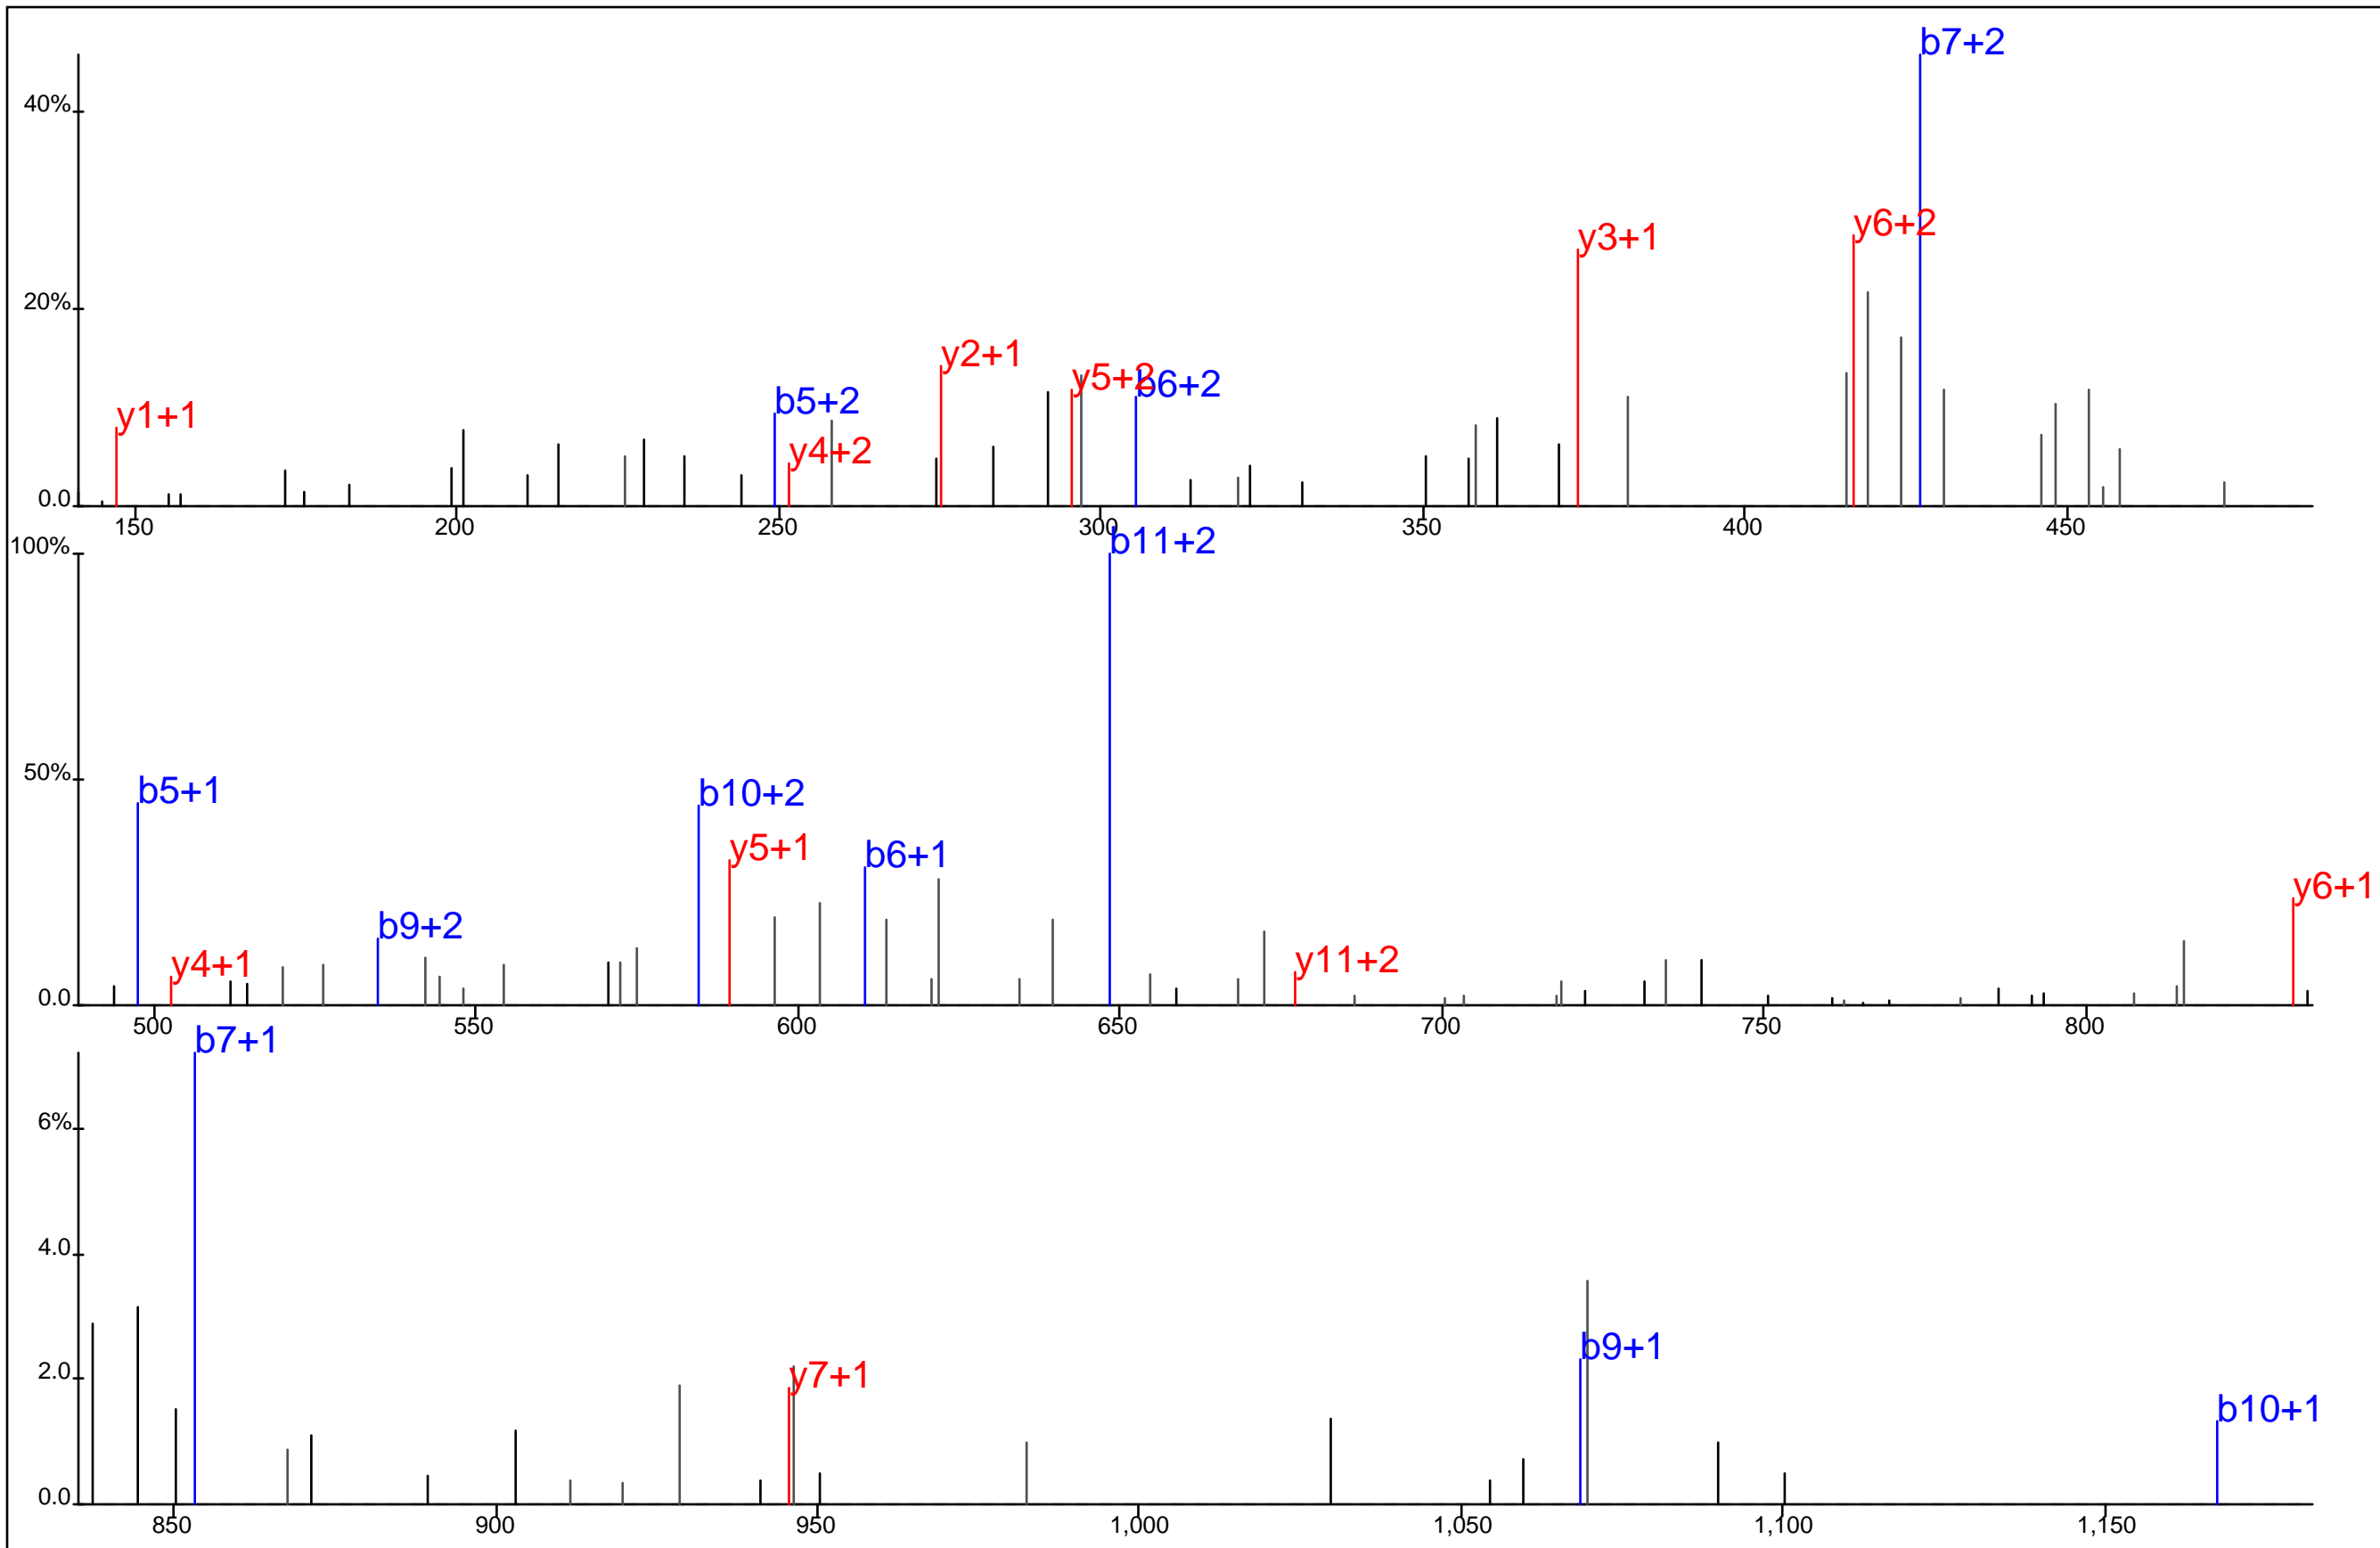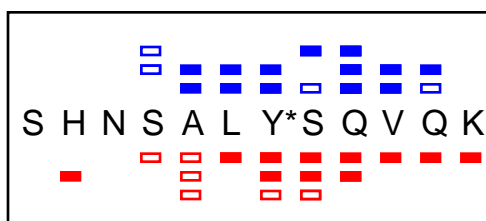

Protein Name: Docking protein 1  
 gi Accession: 0  
 Precursor Mass: 481.2202+3  
 Delta Mass: 0.644 ppm  
 XCorr: 34.88

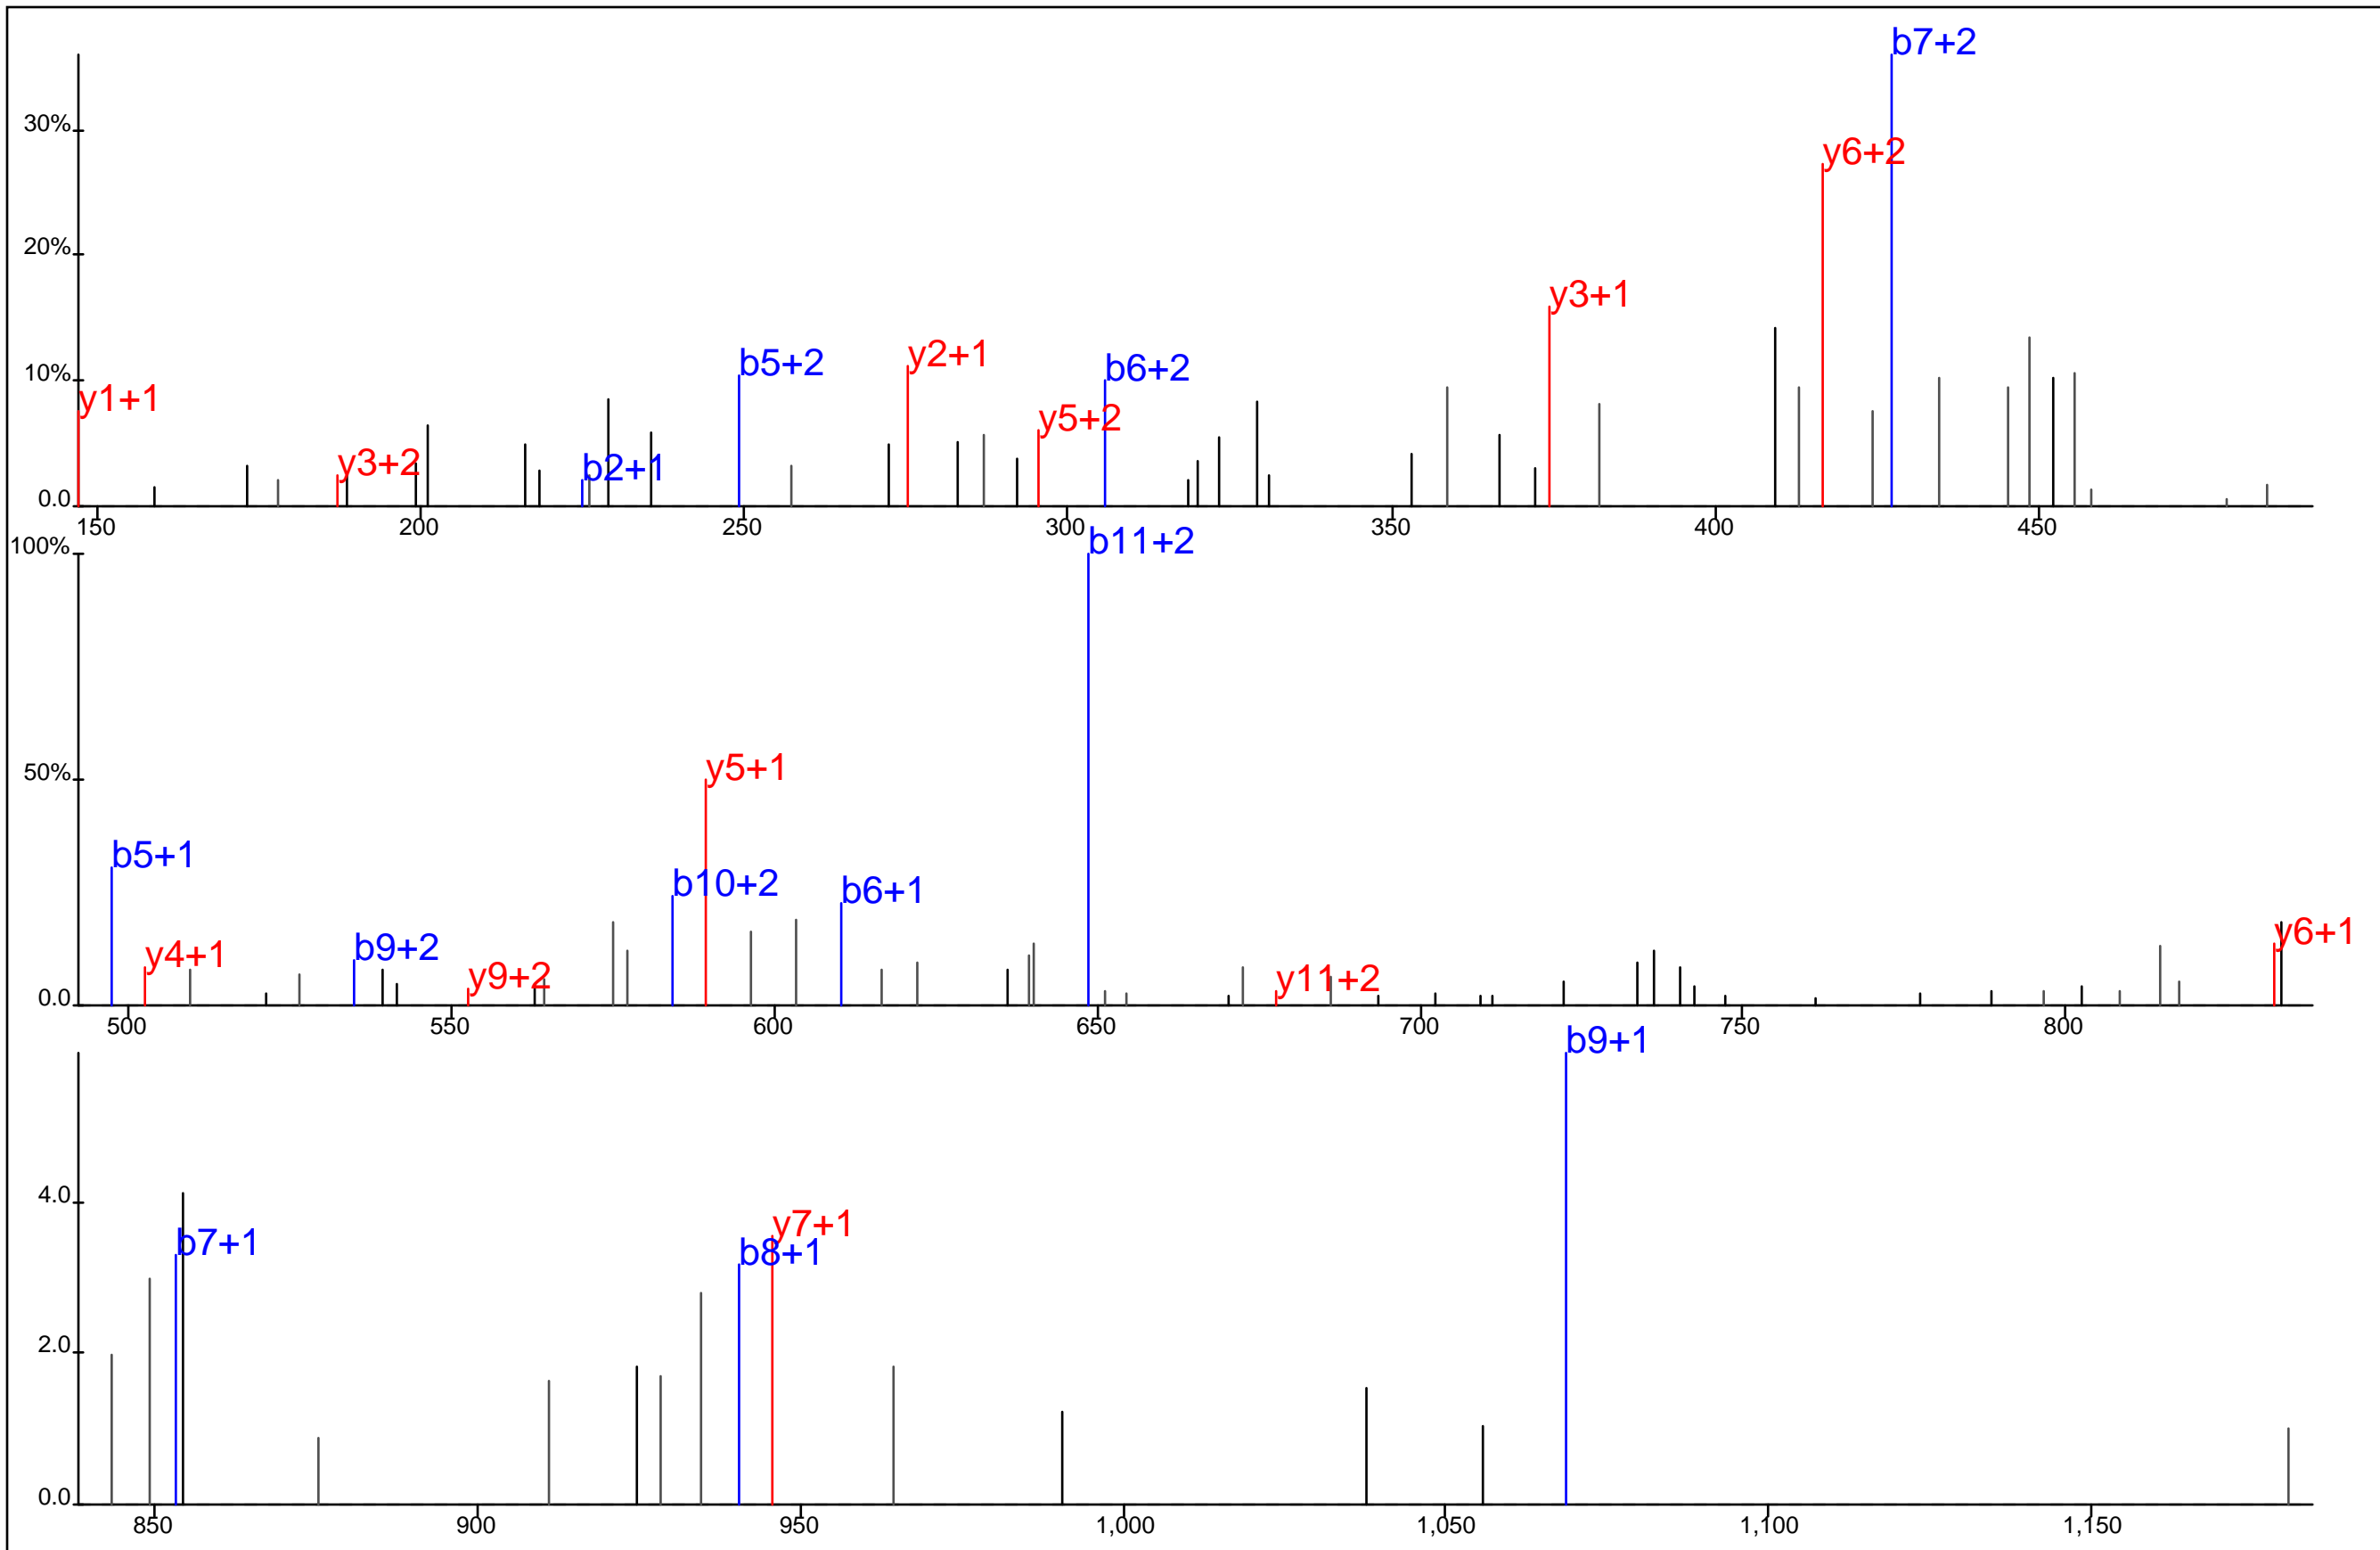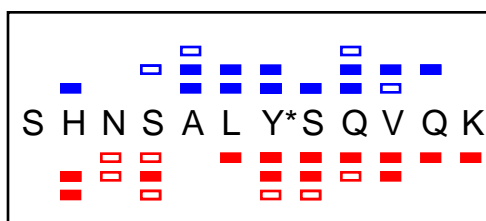

Protein Name: Docking protein 1  
 gi Accession: 0  
 Precursor Mass: 481.2211+3  
 Delta Mass: 1.070 ppm  
 XCorr: 29.09

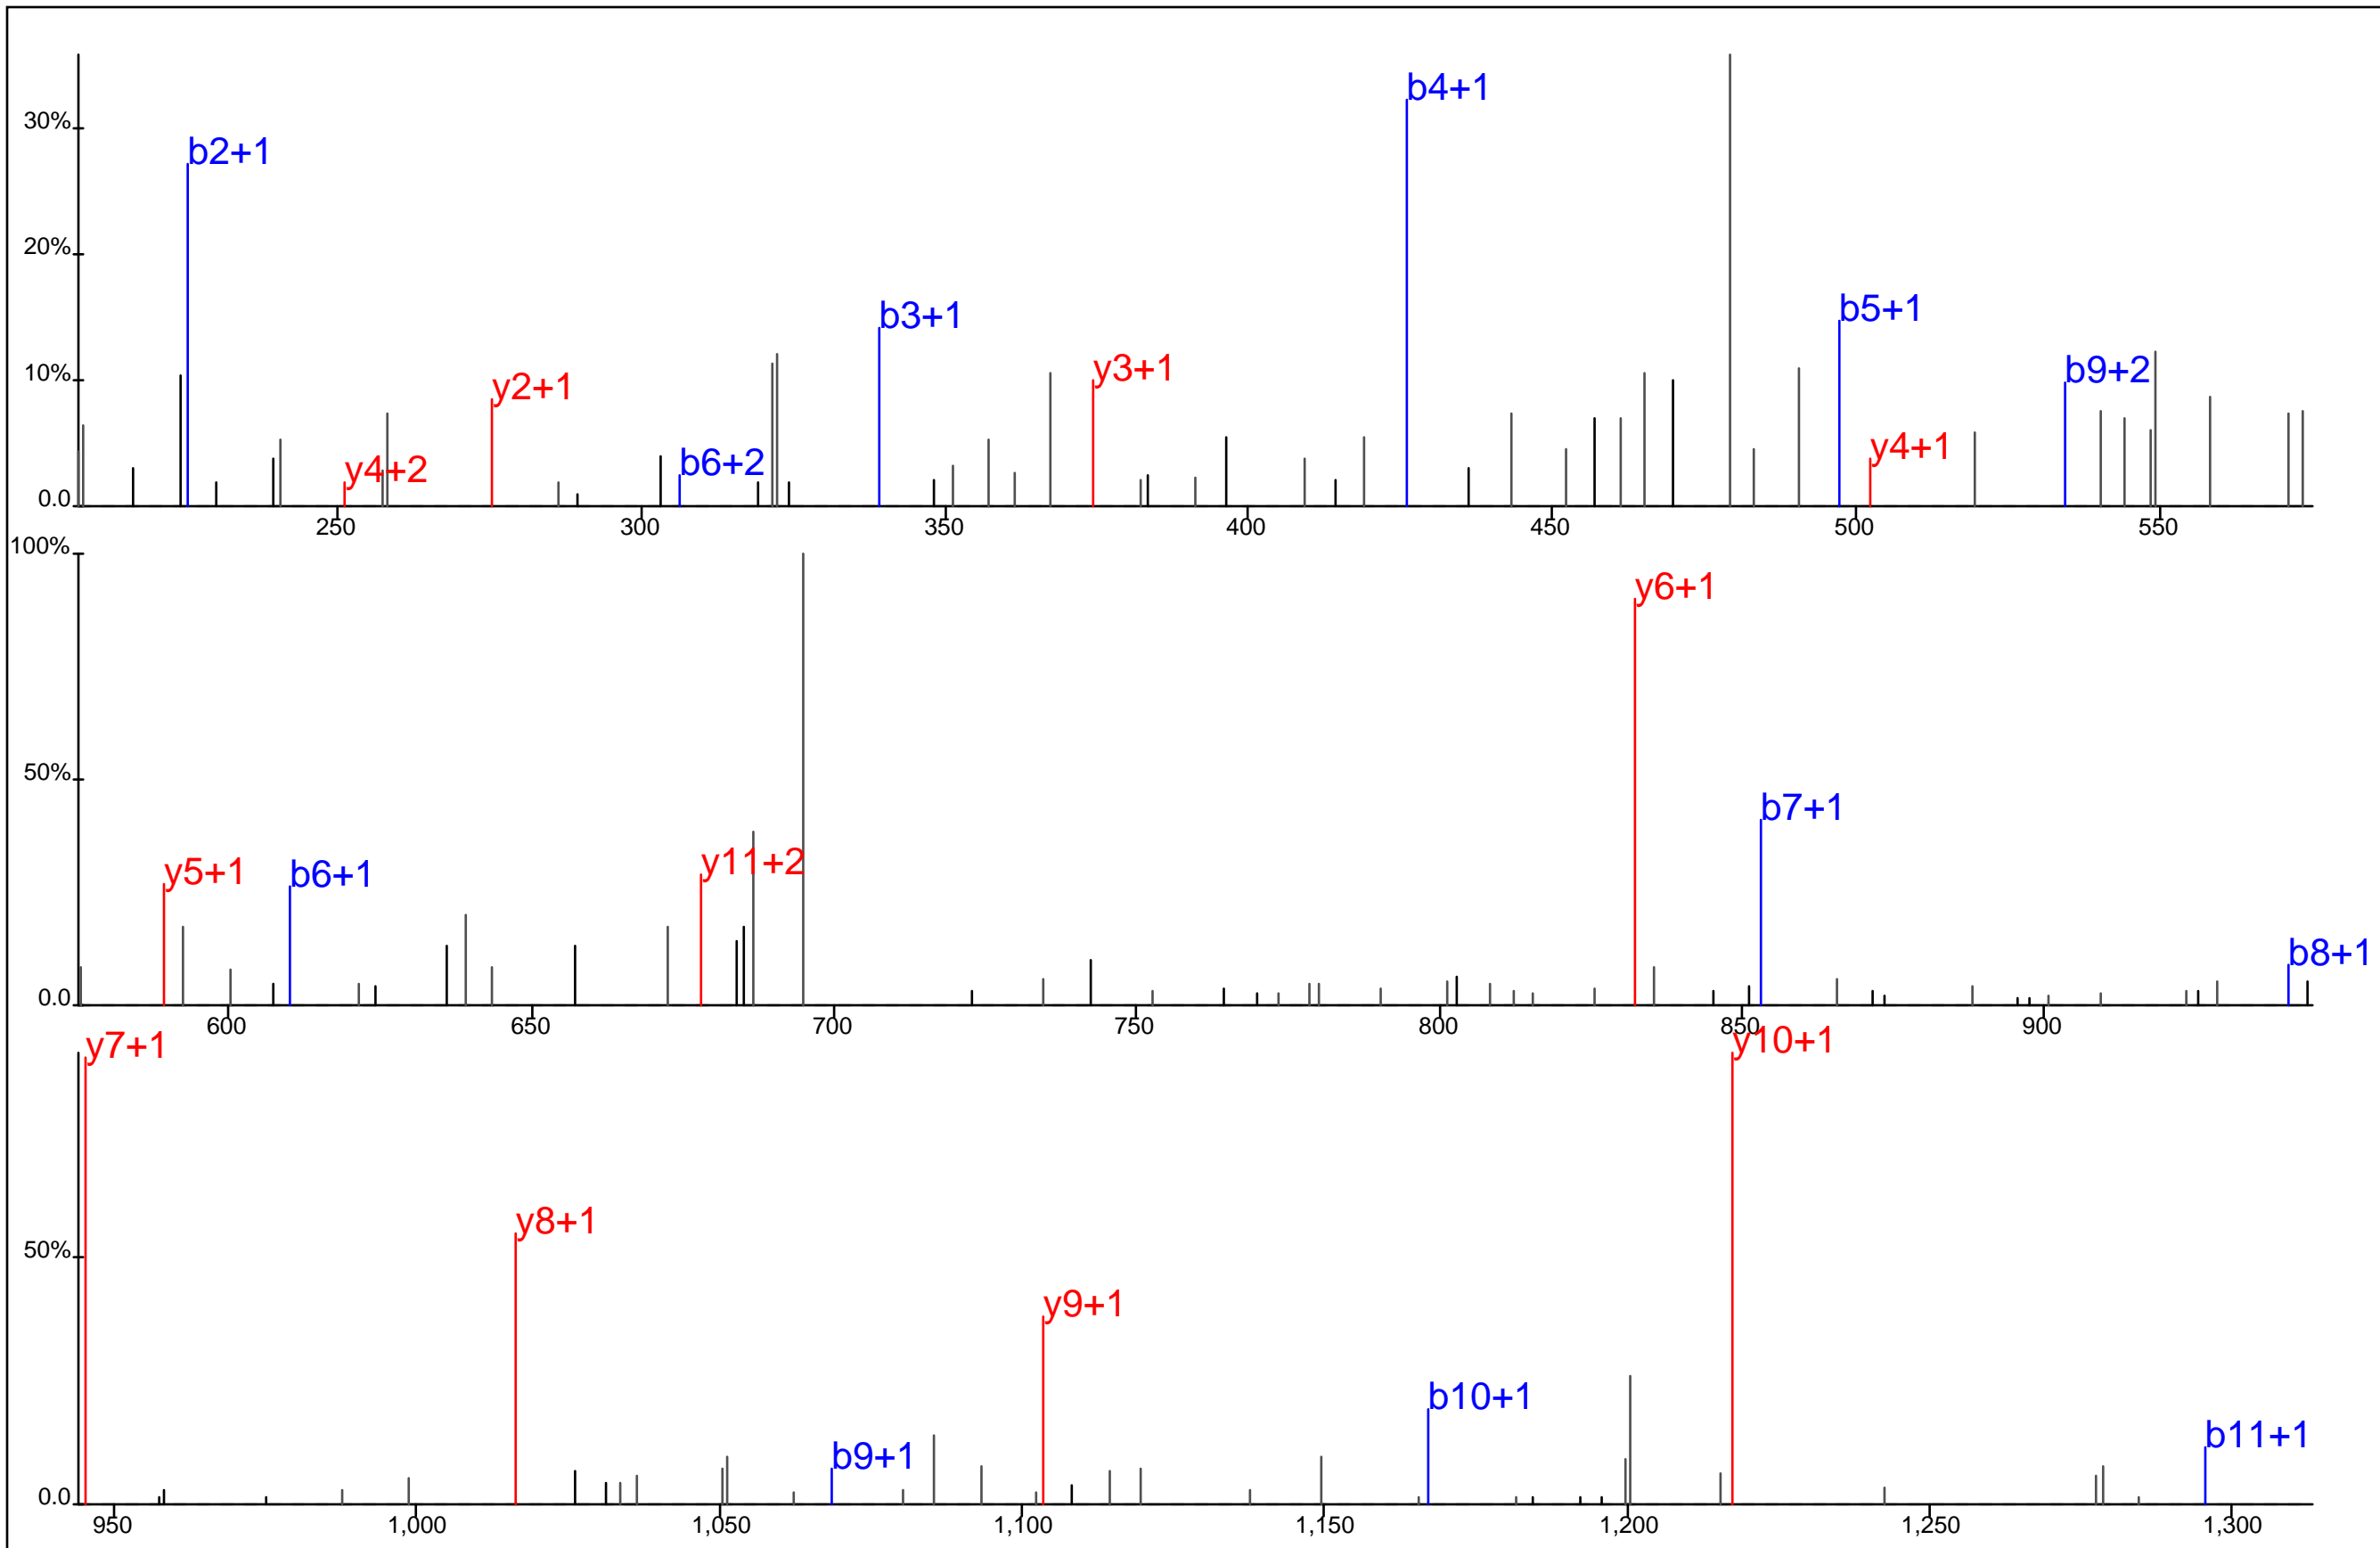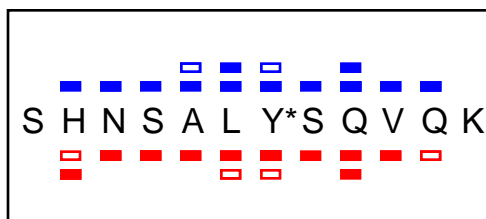

Protein Name: Docking protein 1  
 gi Accession: 0  
 Precursor Mass: 721.3247+2  
 Delta Mass: 3.450 ppm  
 XCorr: 63.68

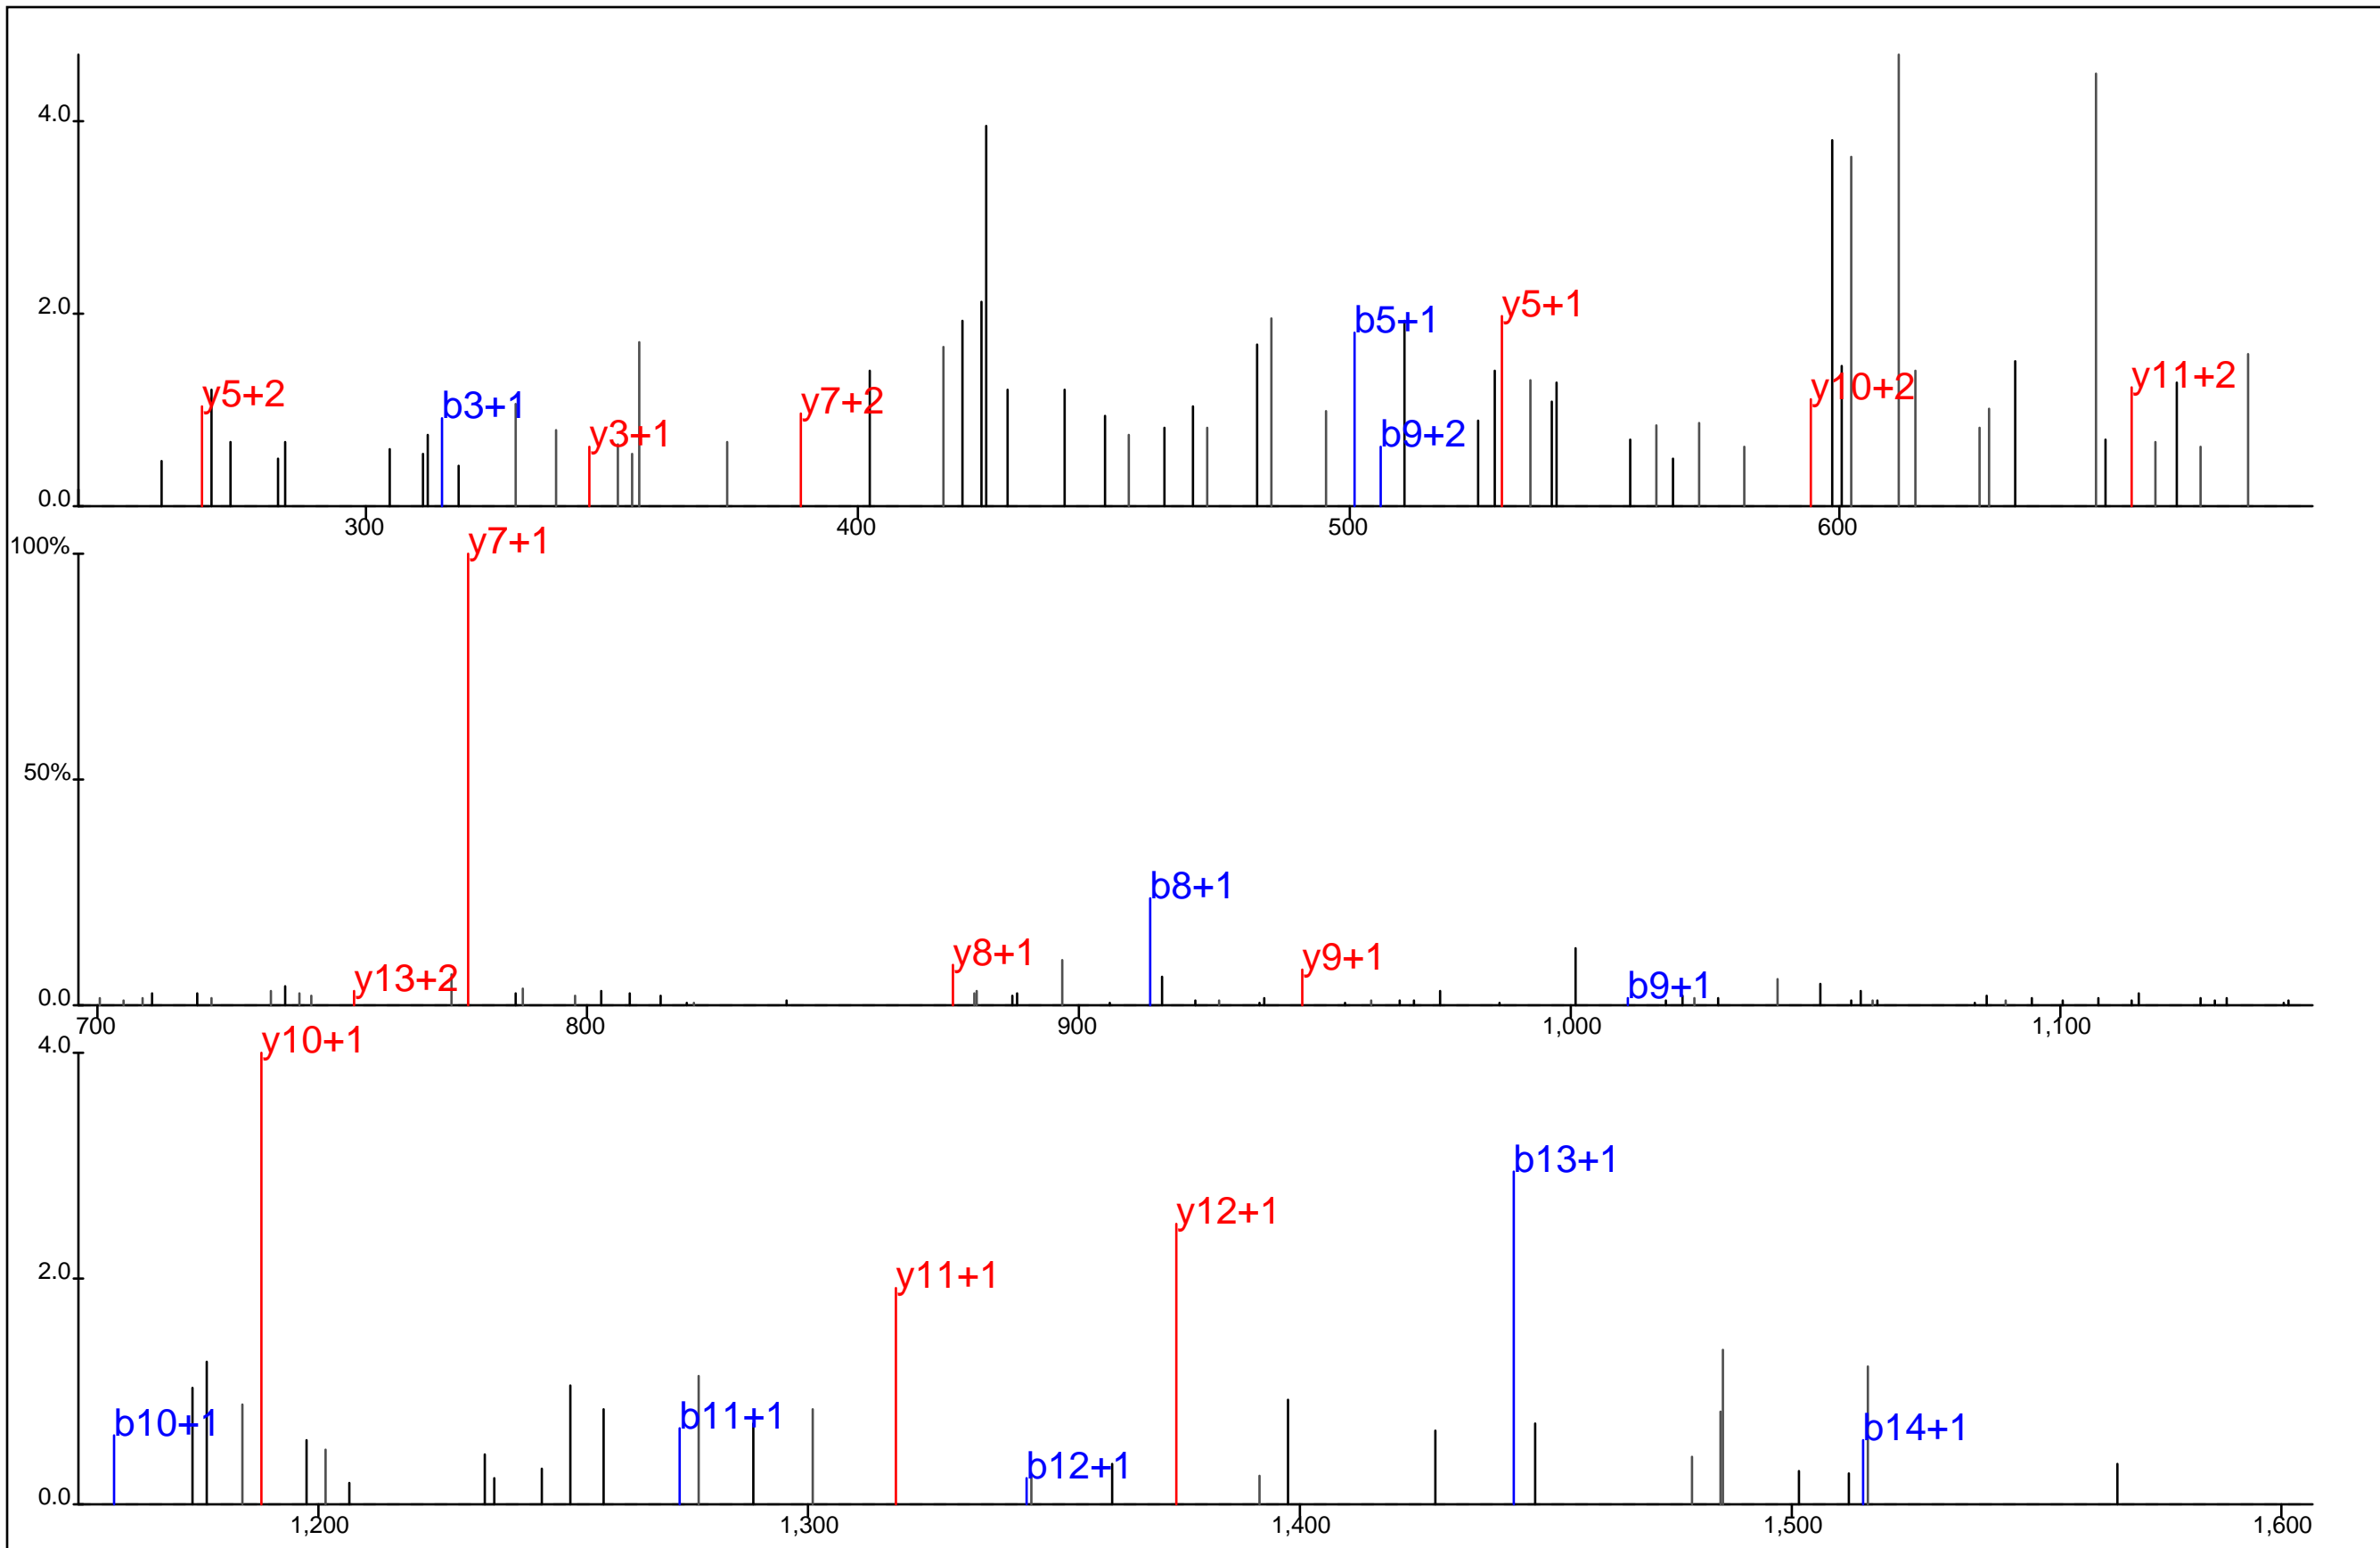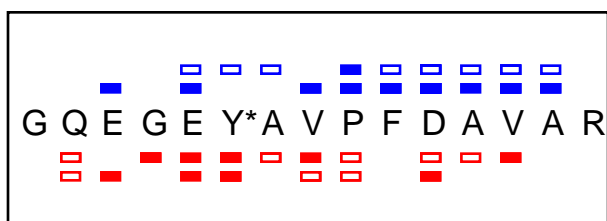

Protein Name: Docking protein 2, 56kDa  
 gi Accession: 0  
 Precursor Mass: 844.8704+2  
 Delta Mass: 1.104 ppm  
 XCorr: 25.6







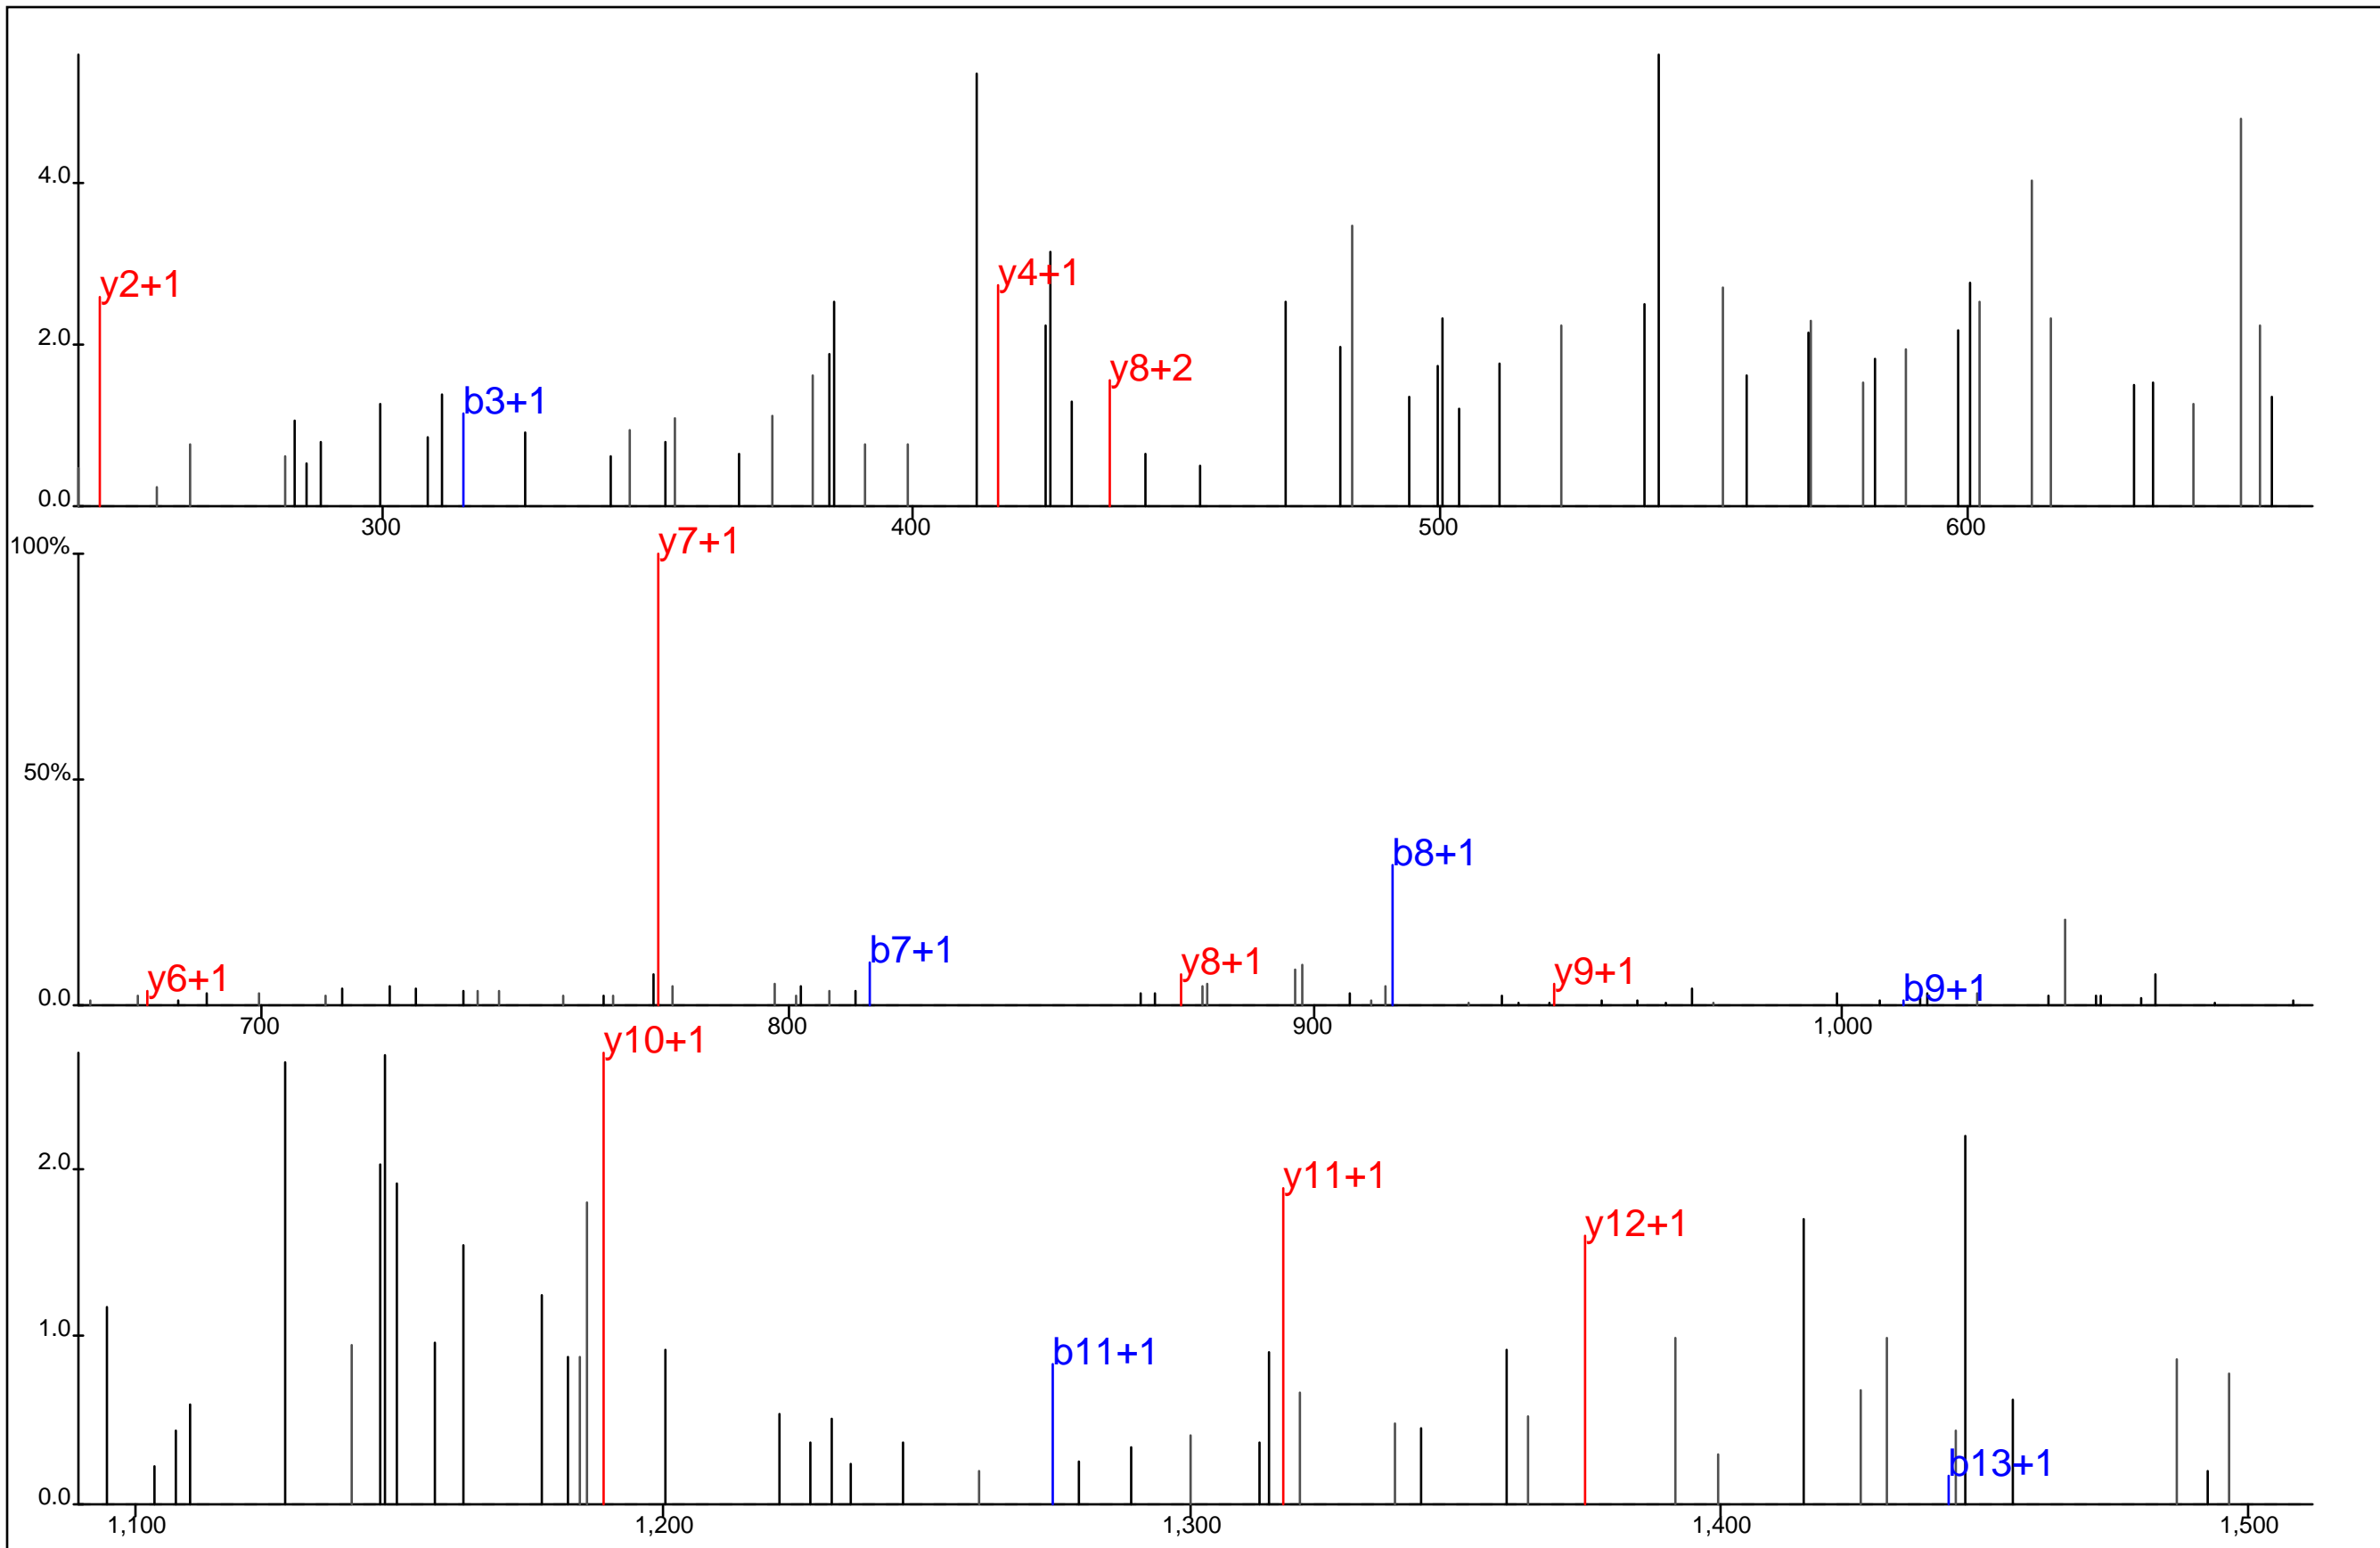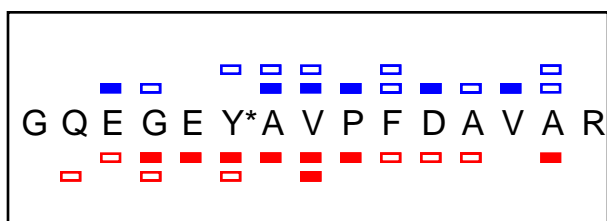

Protein Name: Docking protein 2, 56kDa  
 gi Accession: 0  
 Precursor Mass: 844.8748+2  
 Delta Mass: 6.309 ppm  
 XCorr: 27.34

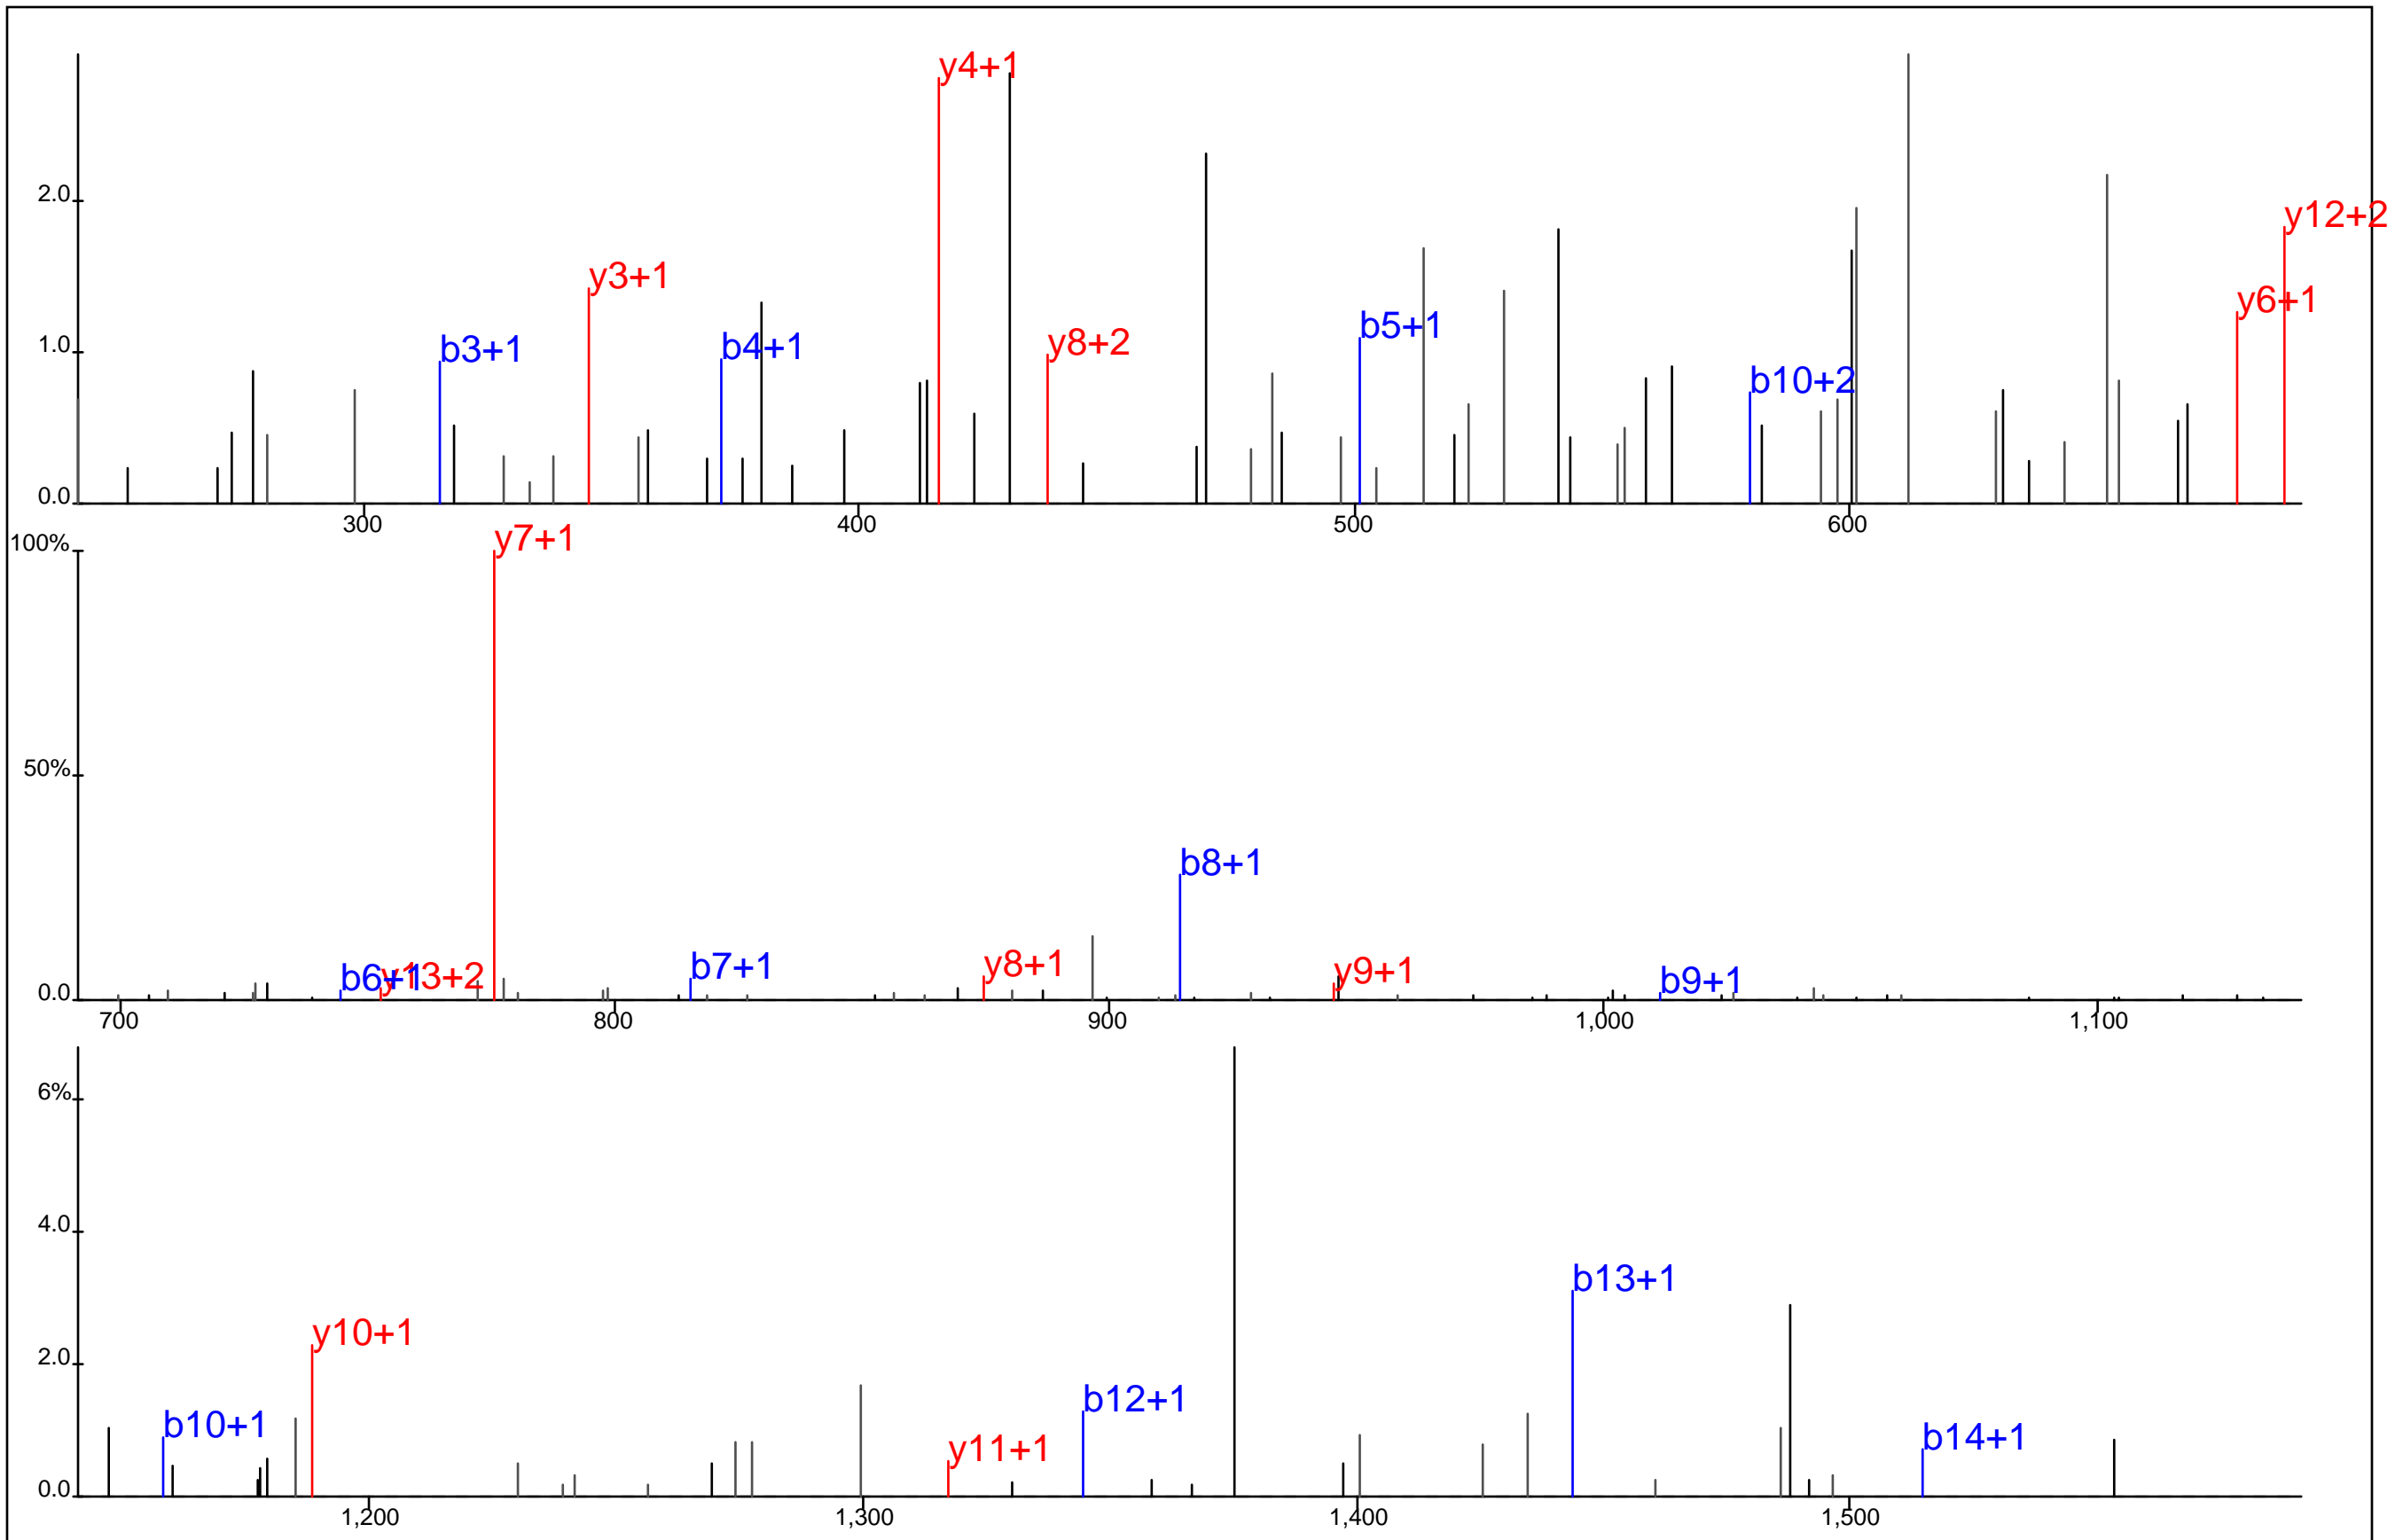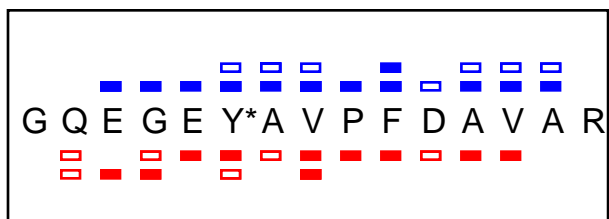

Protein Name: Docking protein 2, 56kDa  
 gi Accession: 0  
 Precursor Mass: 844.8688+2  
 Delta Mass: 0.776 ppm  
 XCorr: 46.76

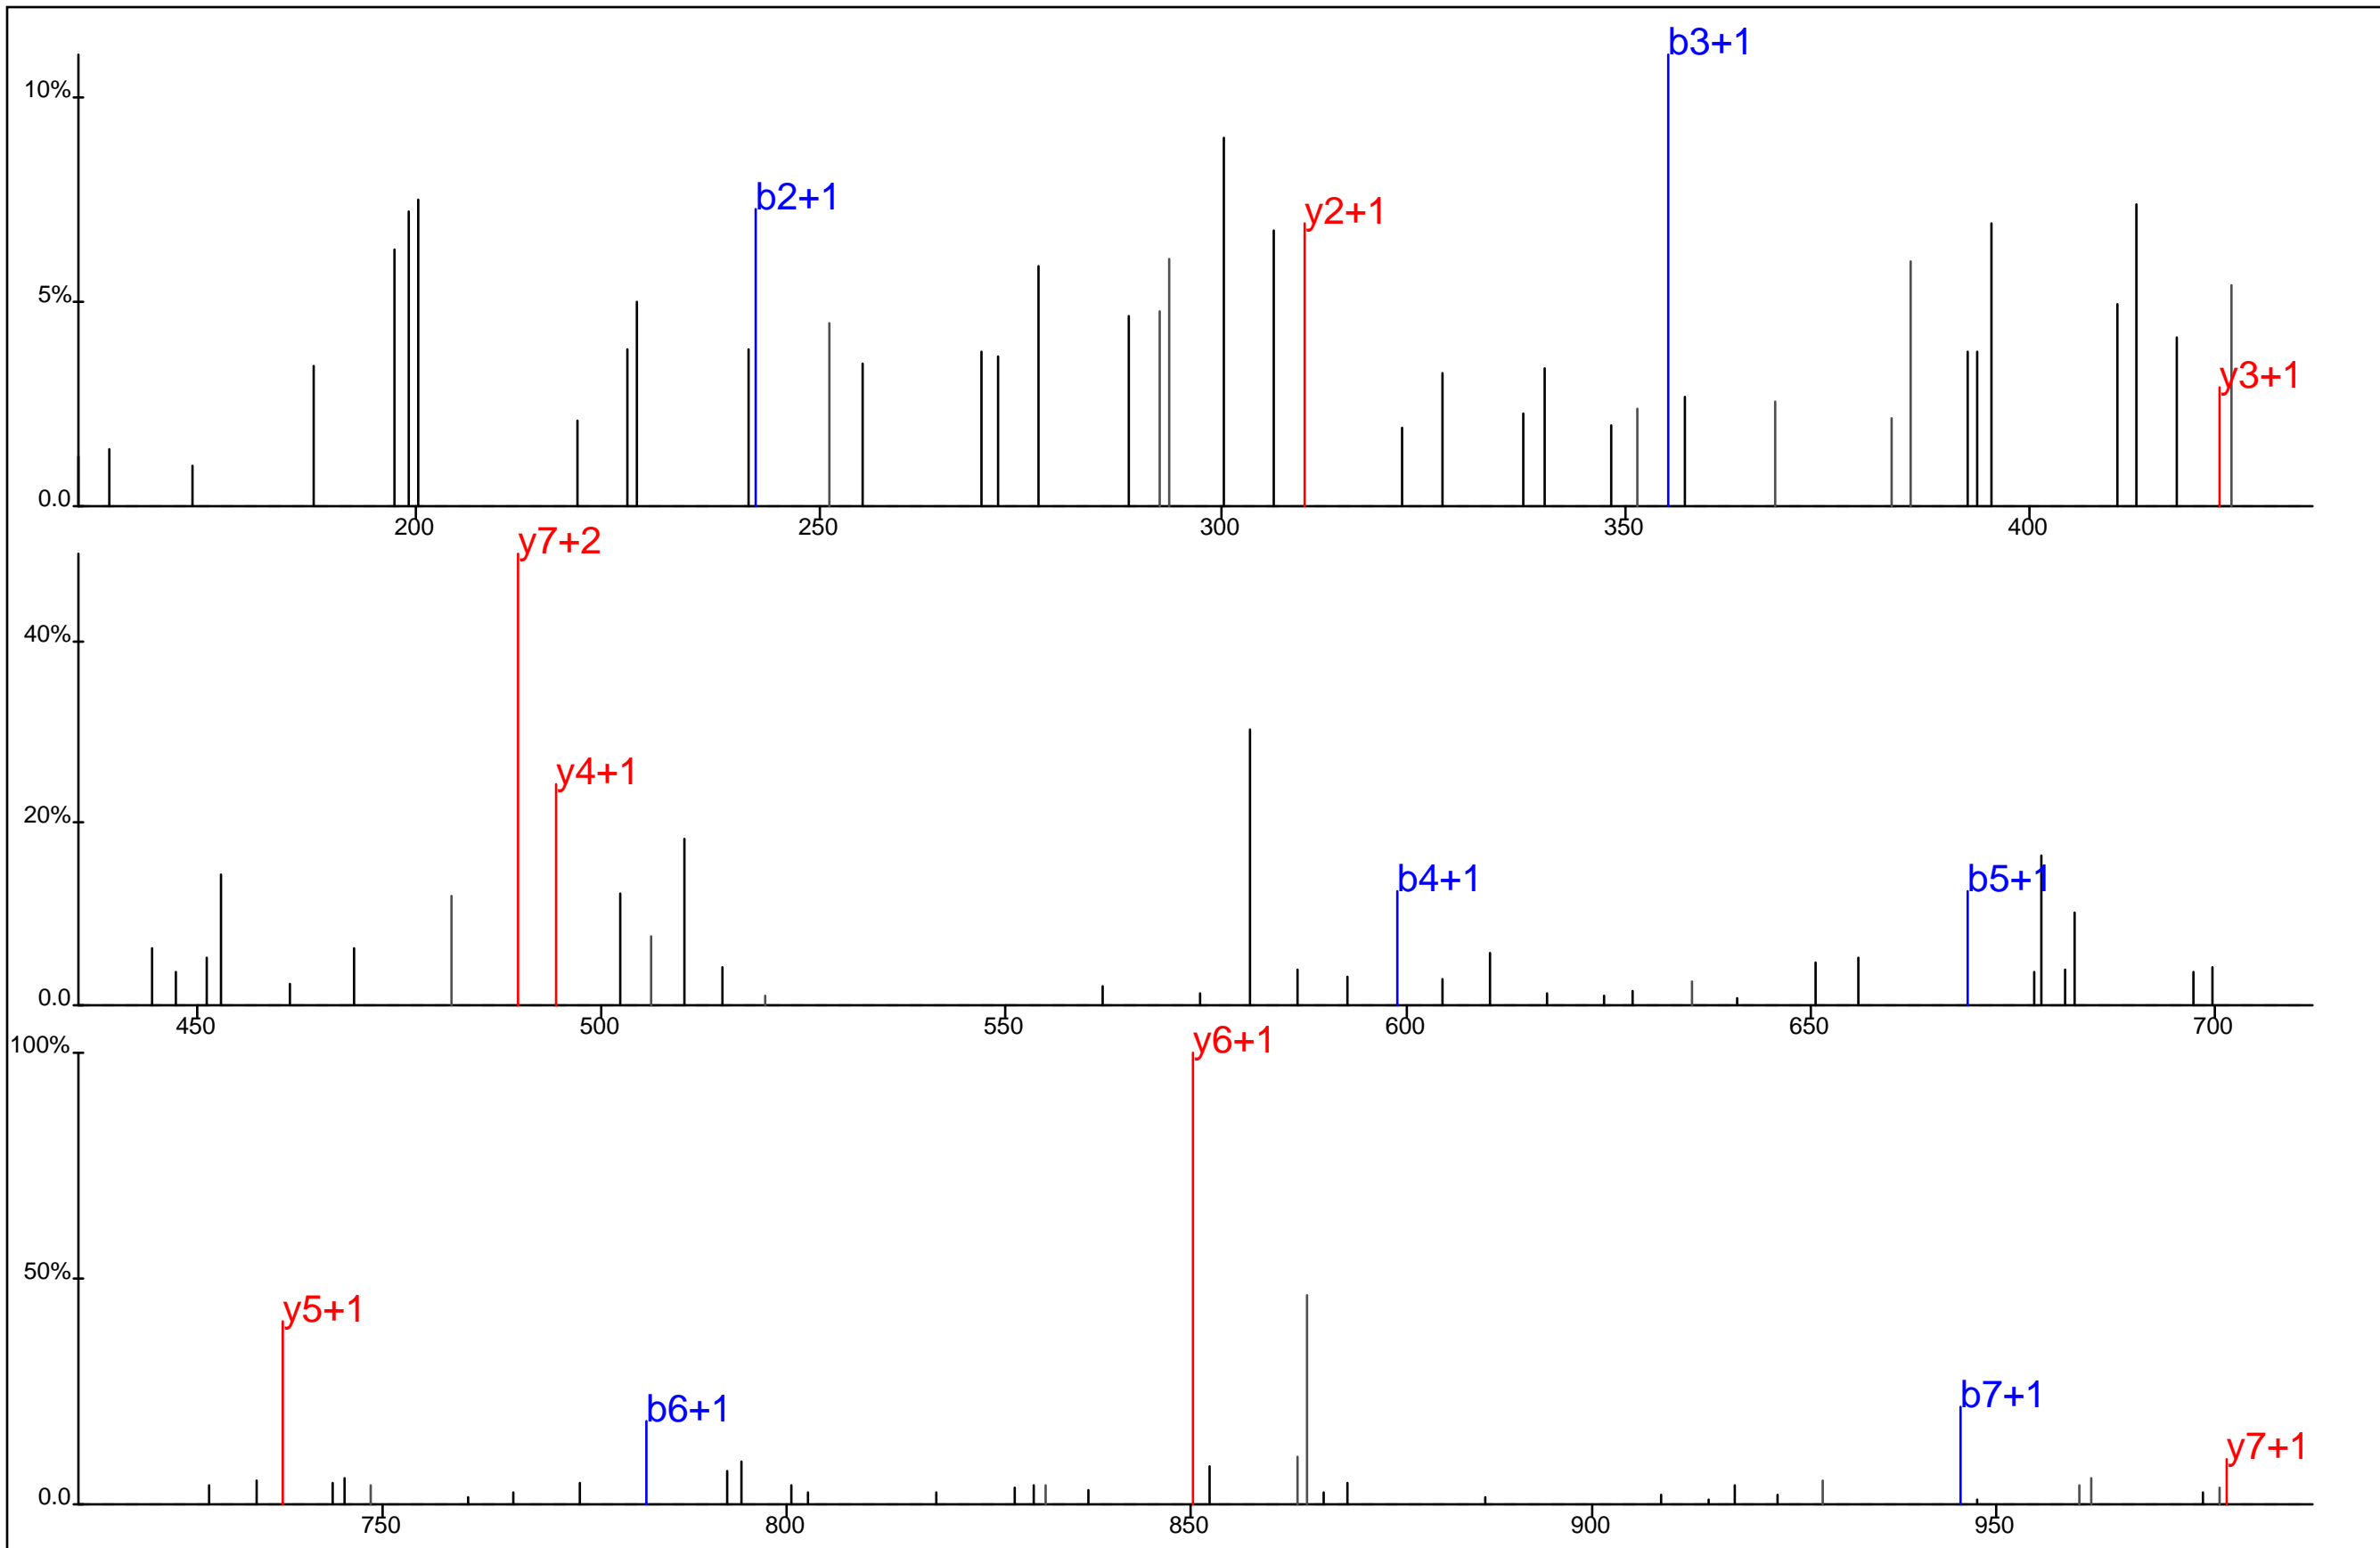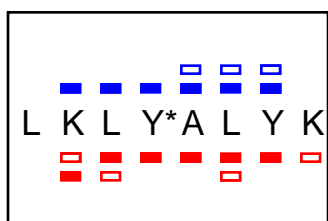

Protein Name: Dodecenoyl-CoA delta-isomerase  
 gi Accession: 0  
 Precursor Mass: 546.2990+2  
 Delta Mass: 0.561 ppm  
 XCorr: 31.62

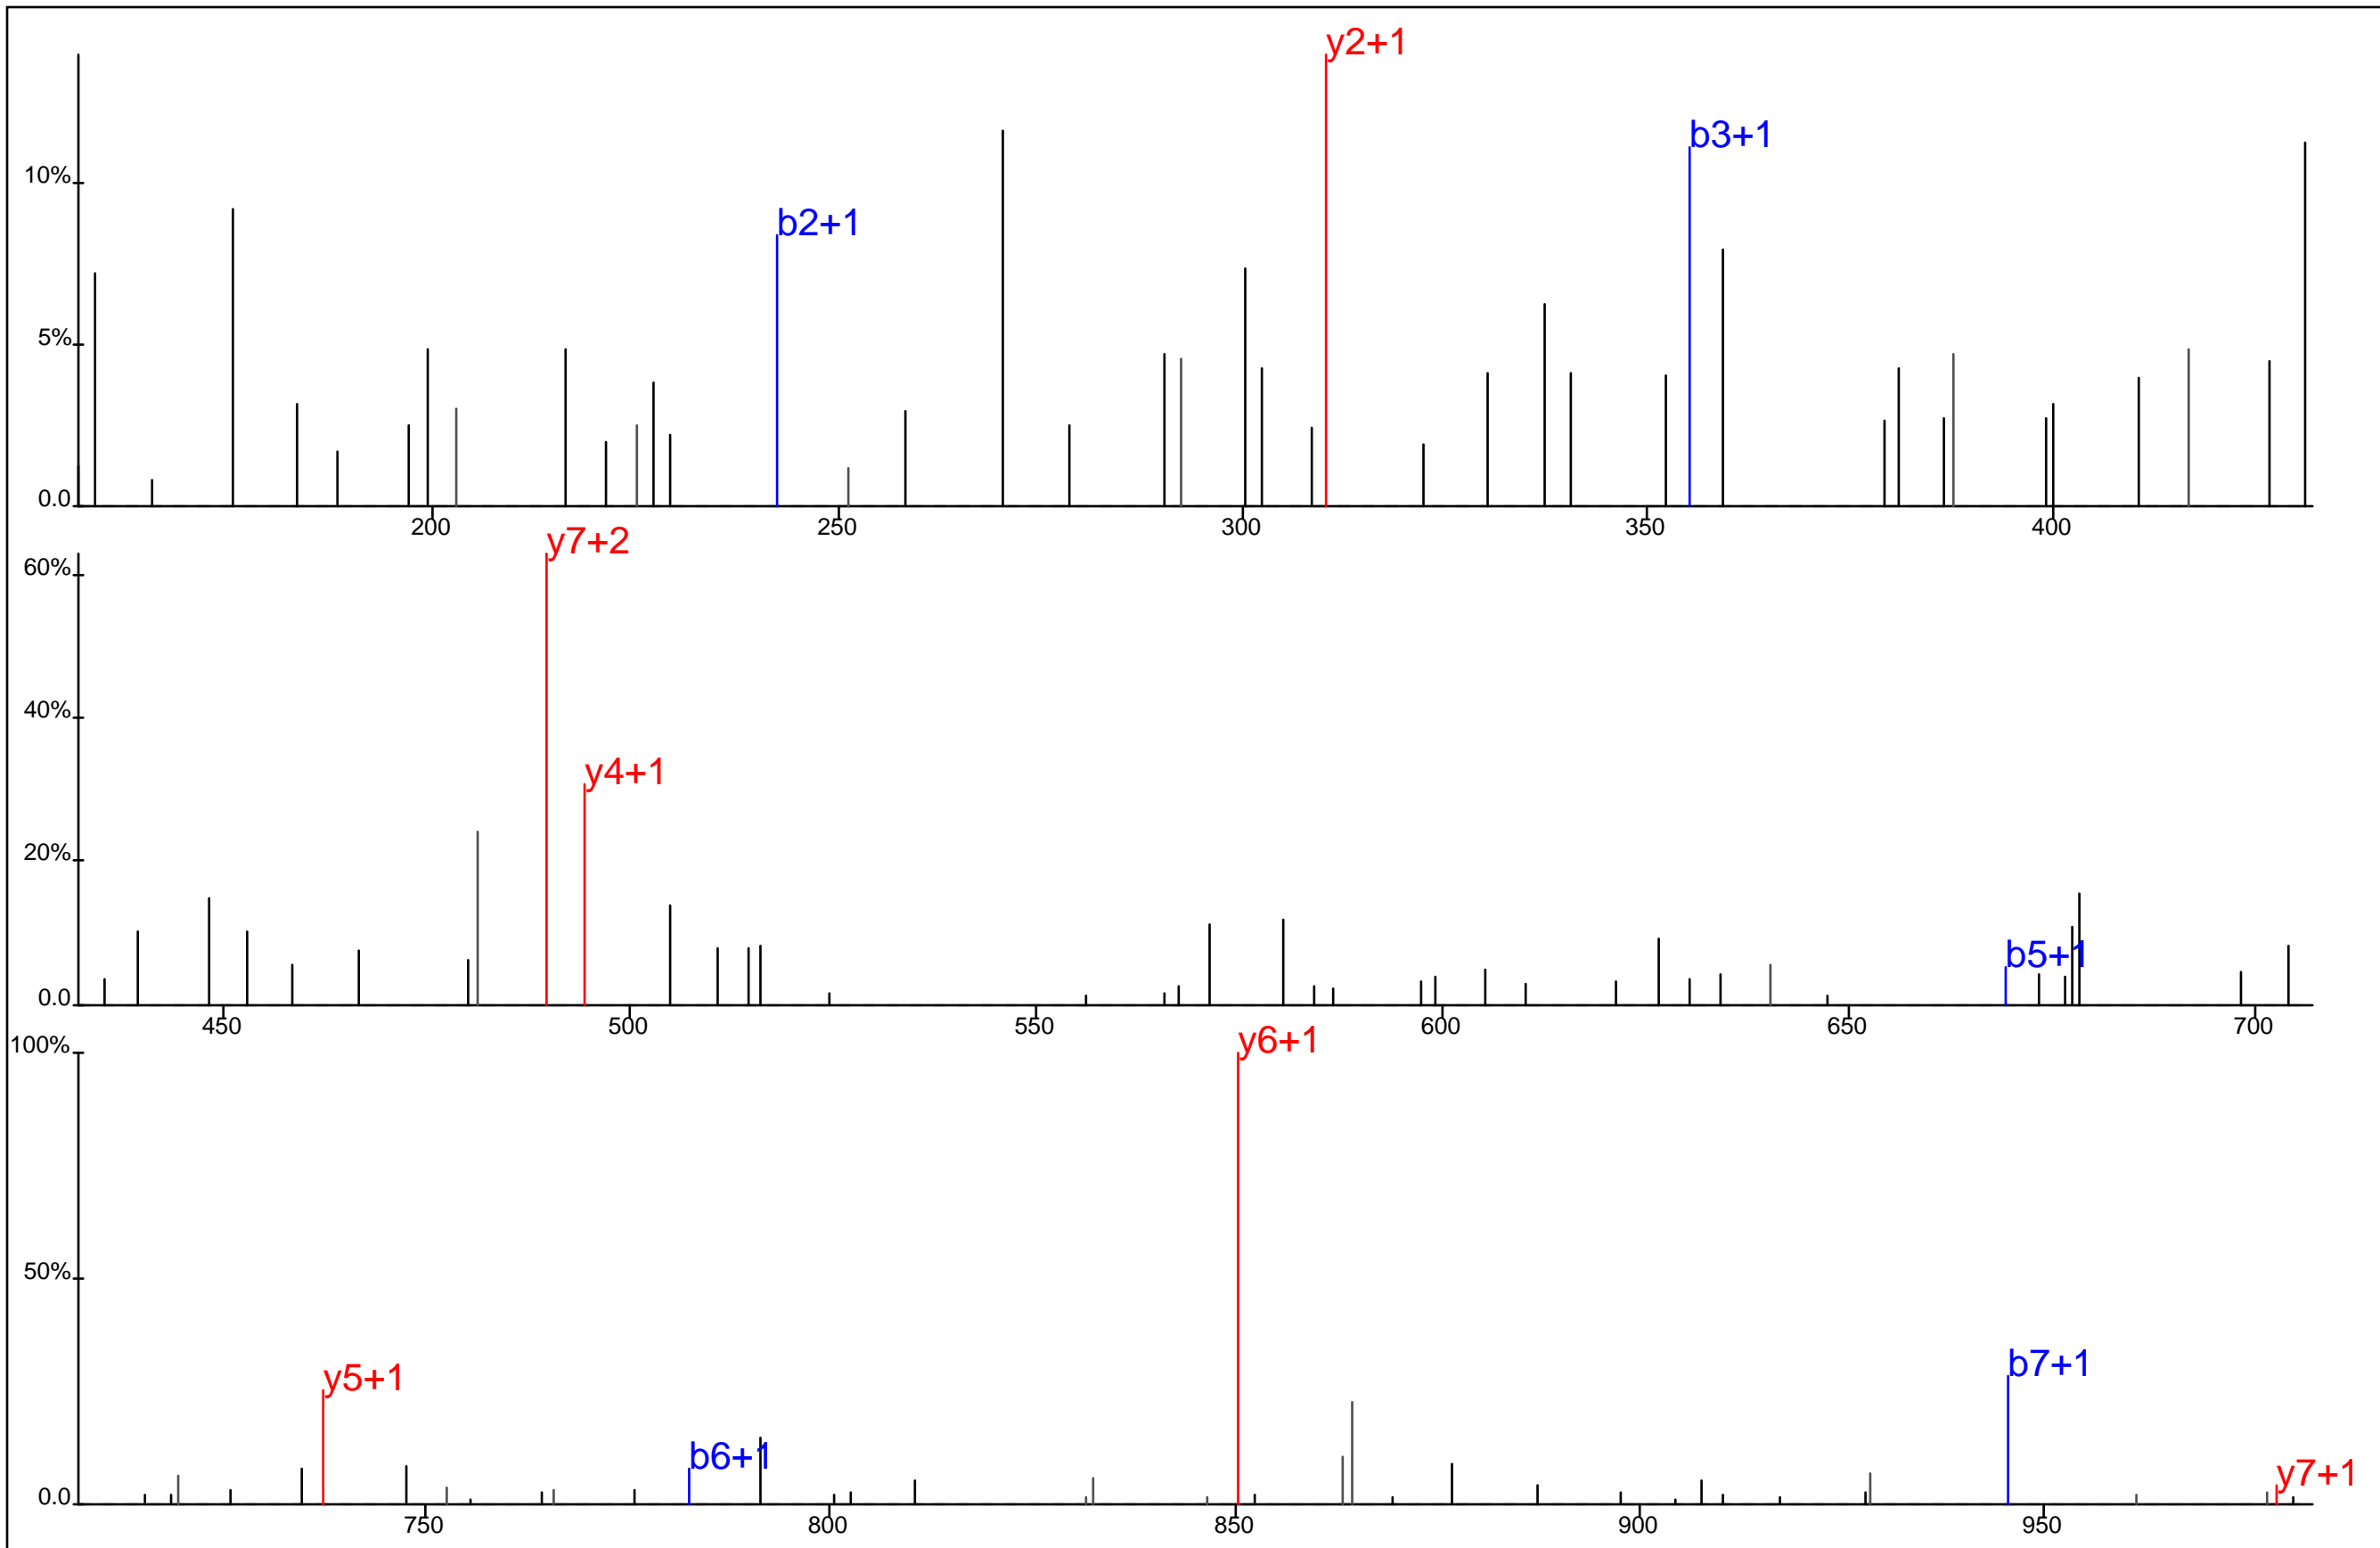

■ ■ □ □ □ □  
 L K L Y\* A L Y K  
■ ■ □ □ □ □

Protein Name: Dodecenoyl-CoA delta-isomerase  
 gi Accession: 0  
 Precursor Mass: 546.3019+2  
 Delta Mass: 5.929 ppm  
 XCorr: 22.48

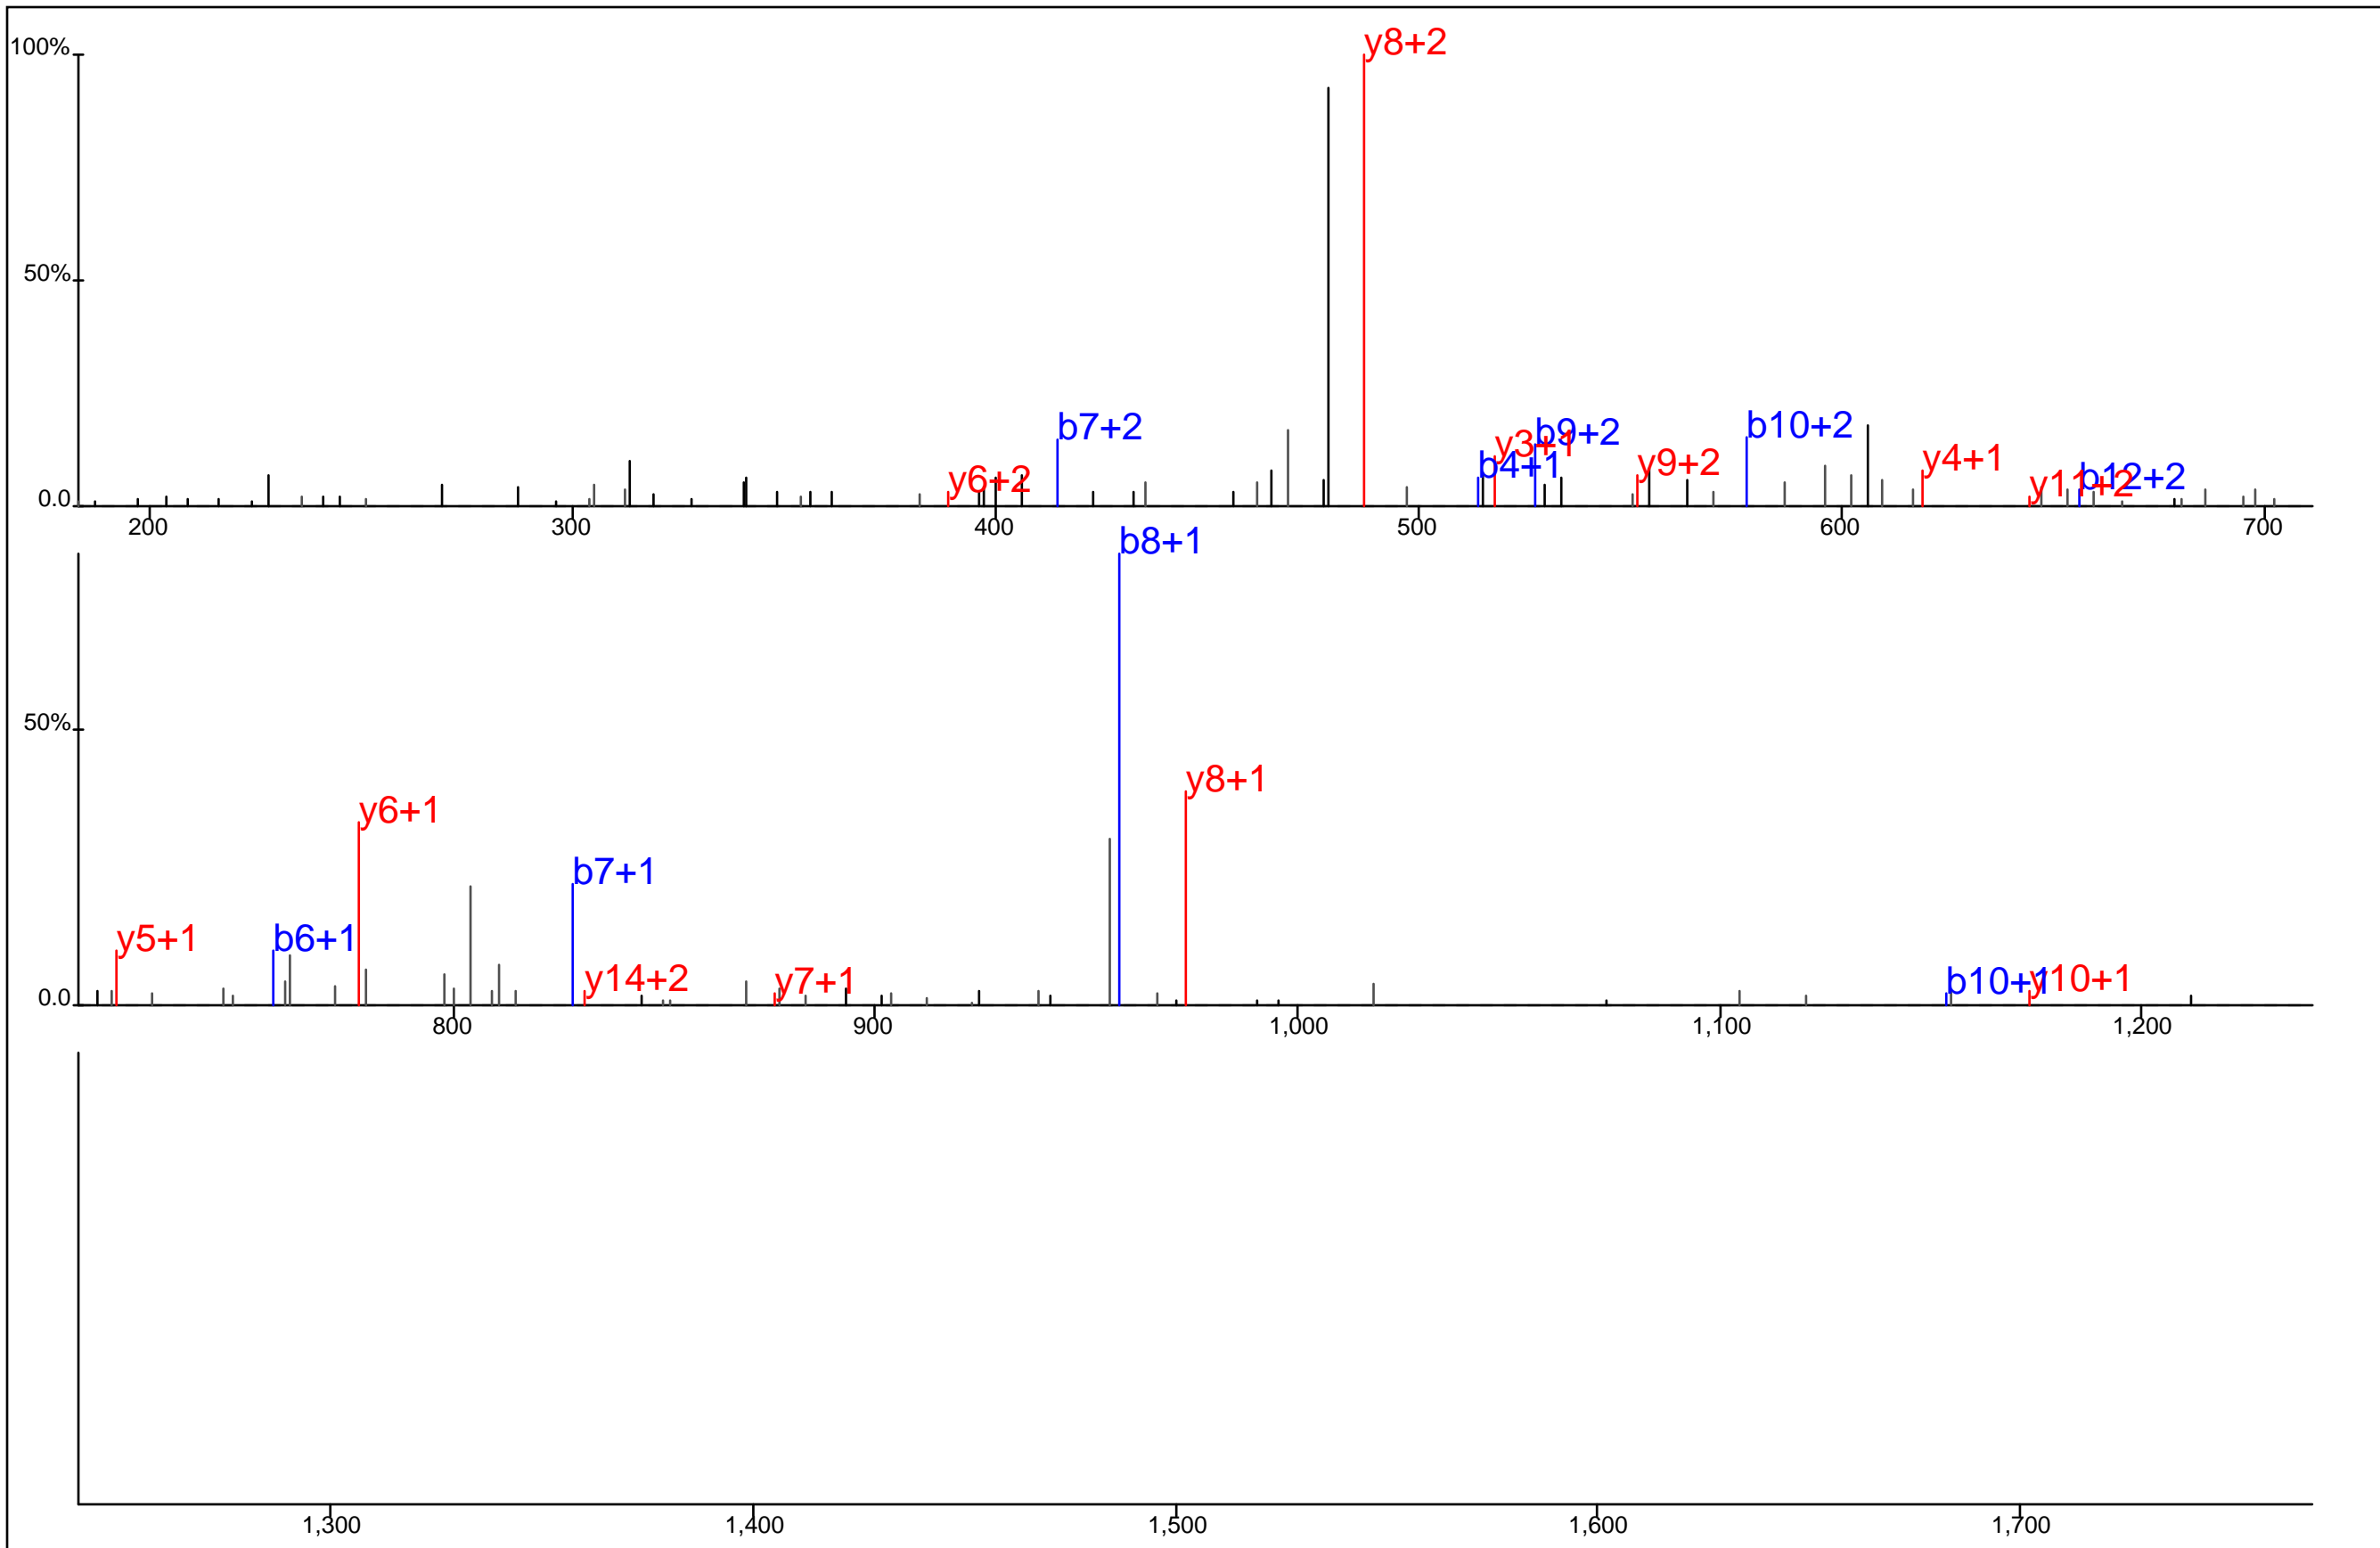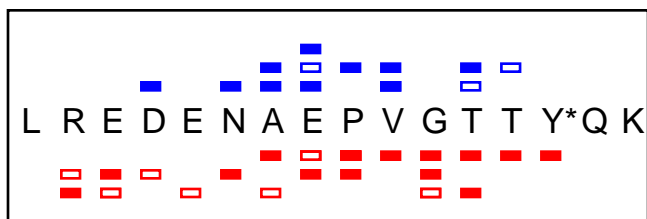

Protein Name: Drebrin E  
 gi Accession: 0  
 Precursor Mass: 643.9598+3  
 Delta Mass: 3.121 ppm  
 XCorr: 28.6

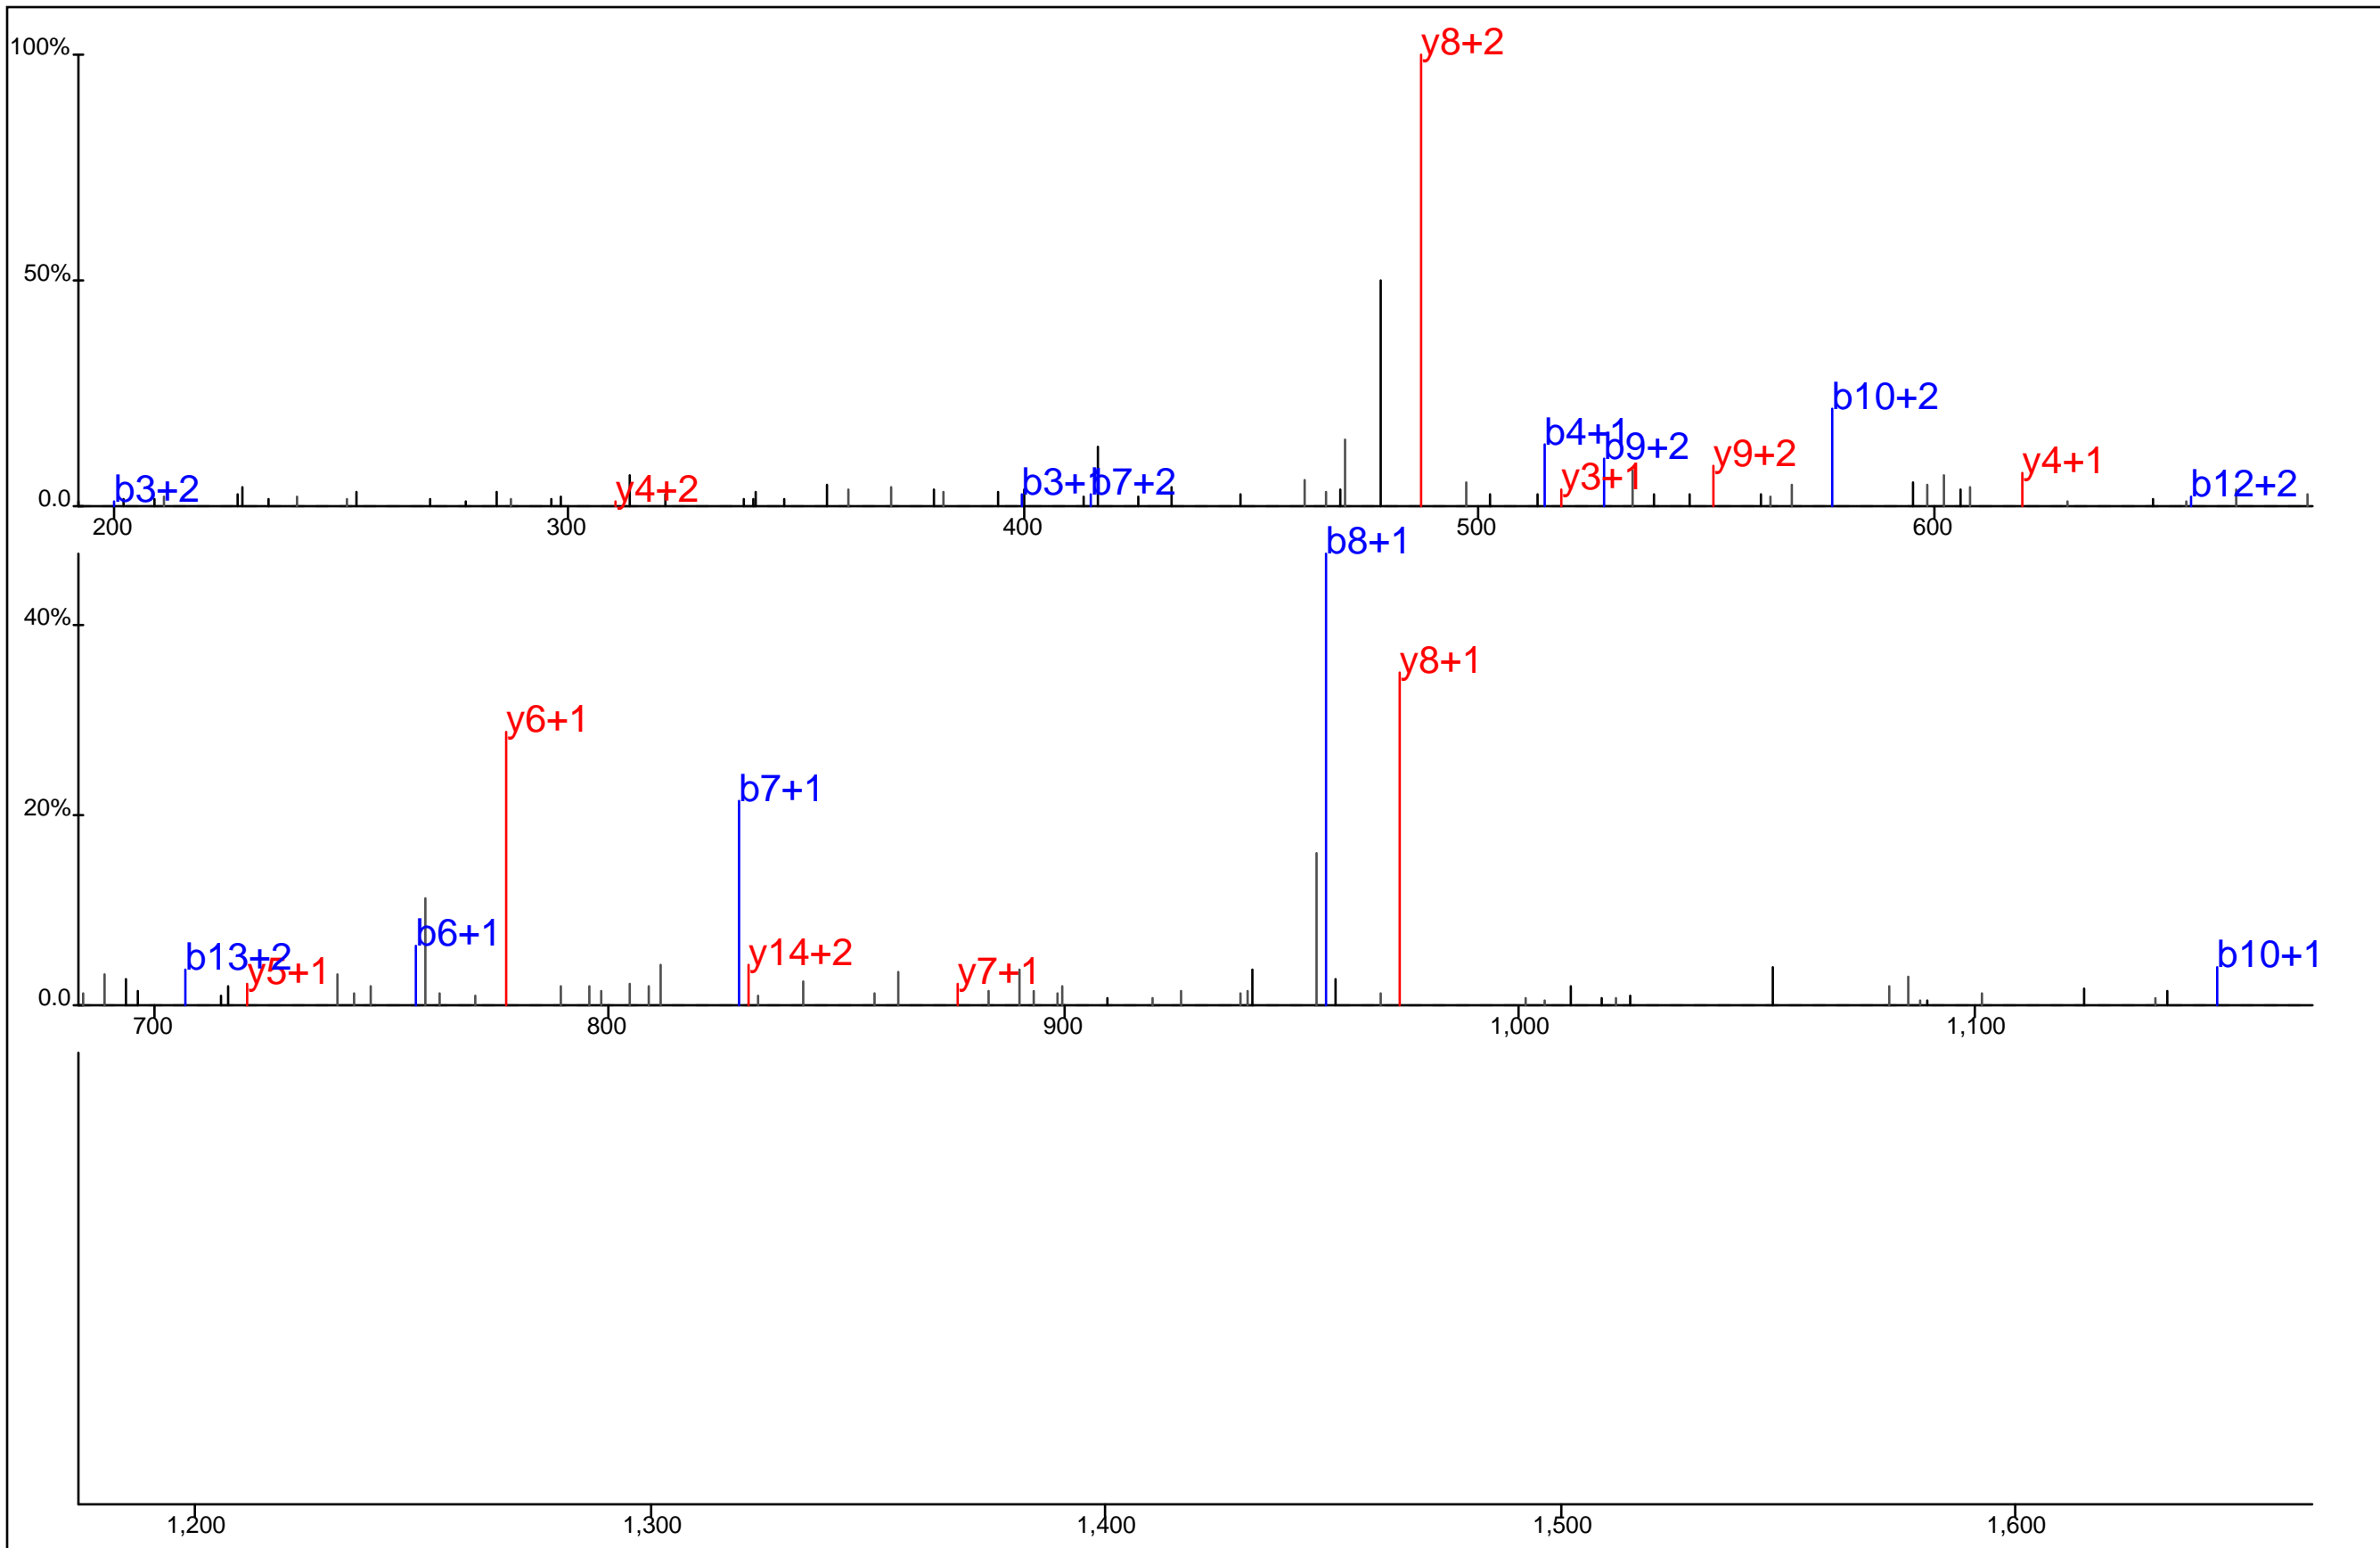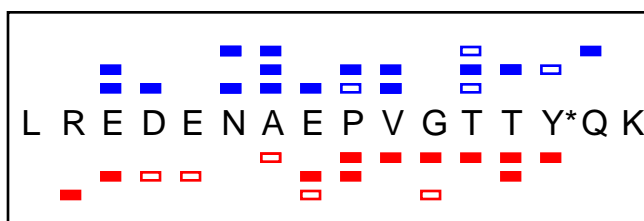

Protein Name: Drebrin E  
 gi Accession: 0  
 Precursor Mass: 643.9568+3  
 Delta Mass: 1.529 ppm  
 XCorr: 27.5

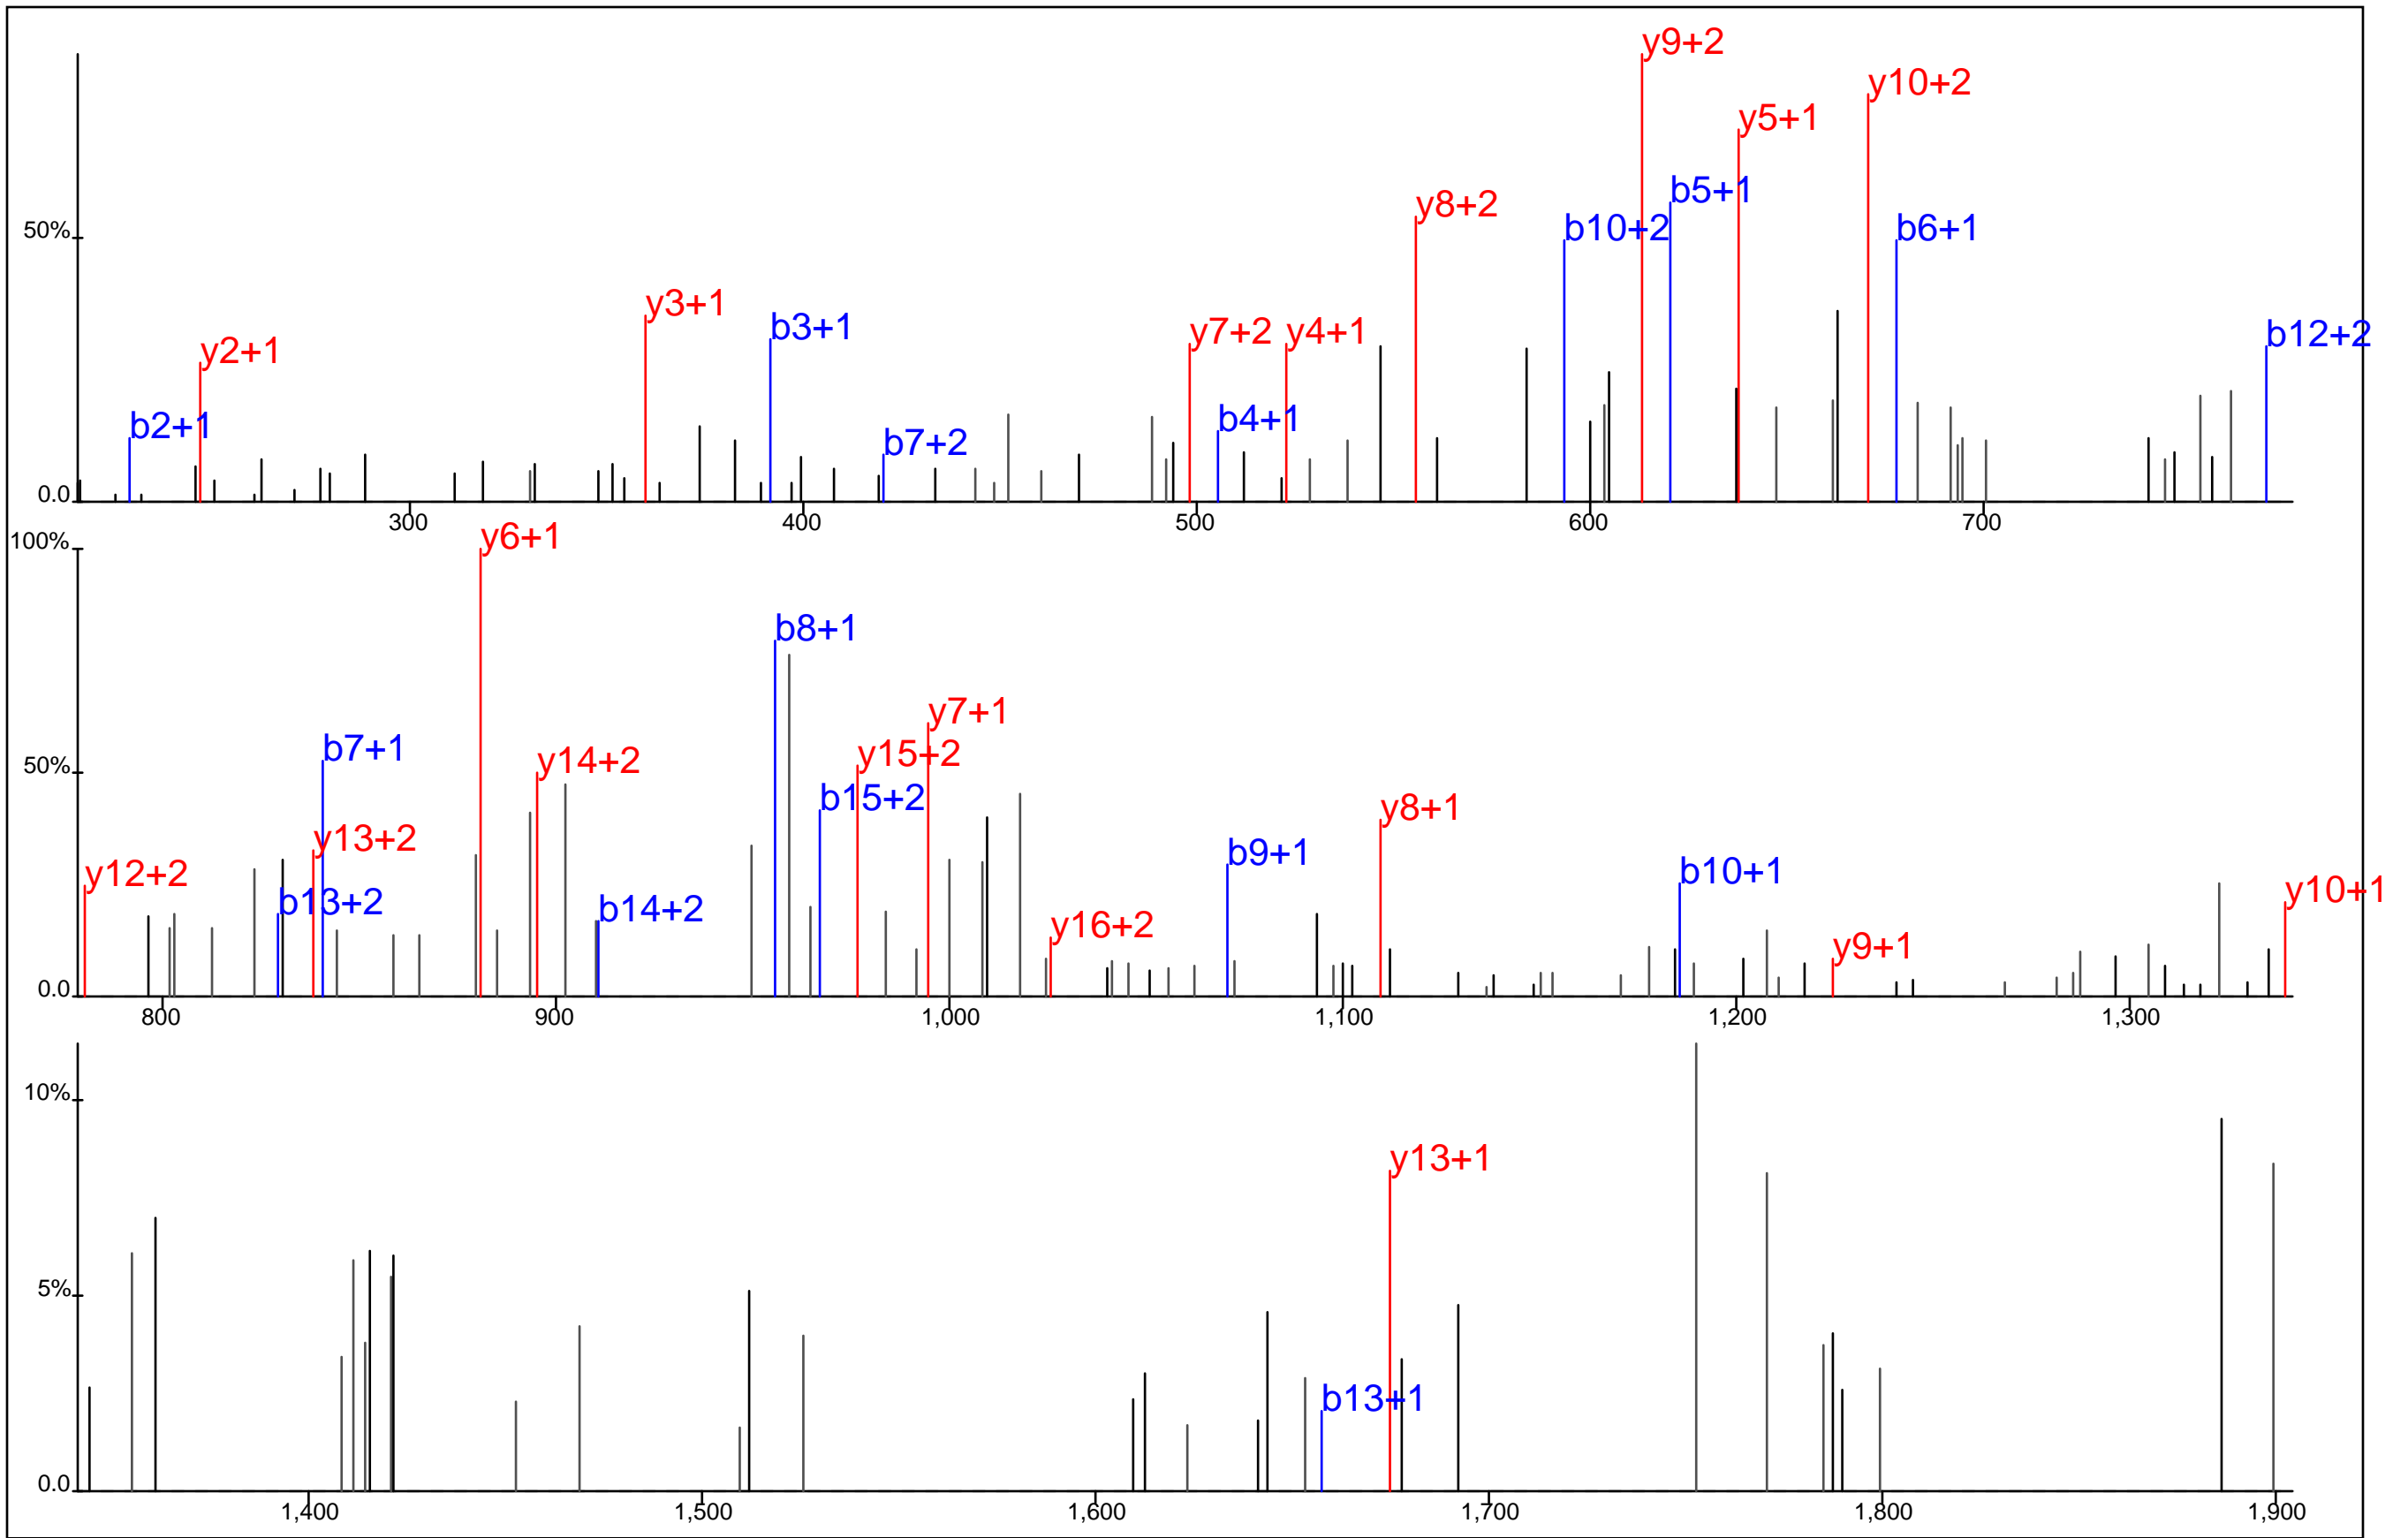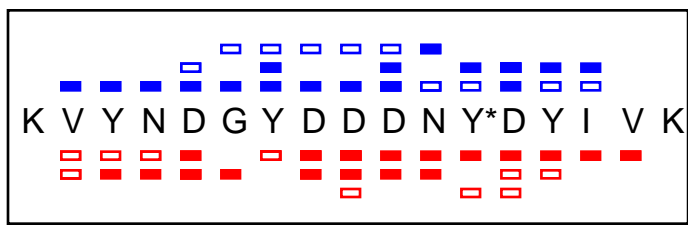

Protein Name: Dual-specificity tyrosine phosphorylation regulated kinase 1A  
 gi Accession: 0  
 Precursor Mass: 726.9673+3  
 Delta Mass: 1.386 ppm  
 XCorr: 59.93

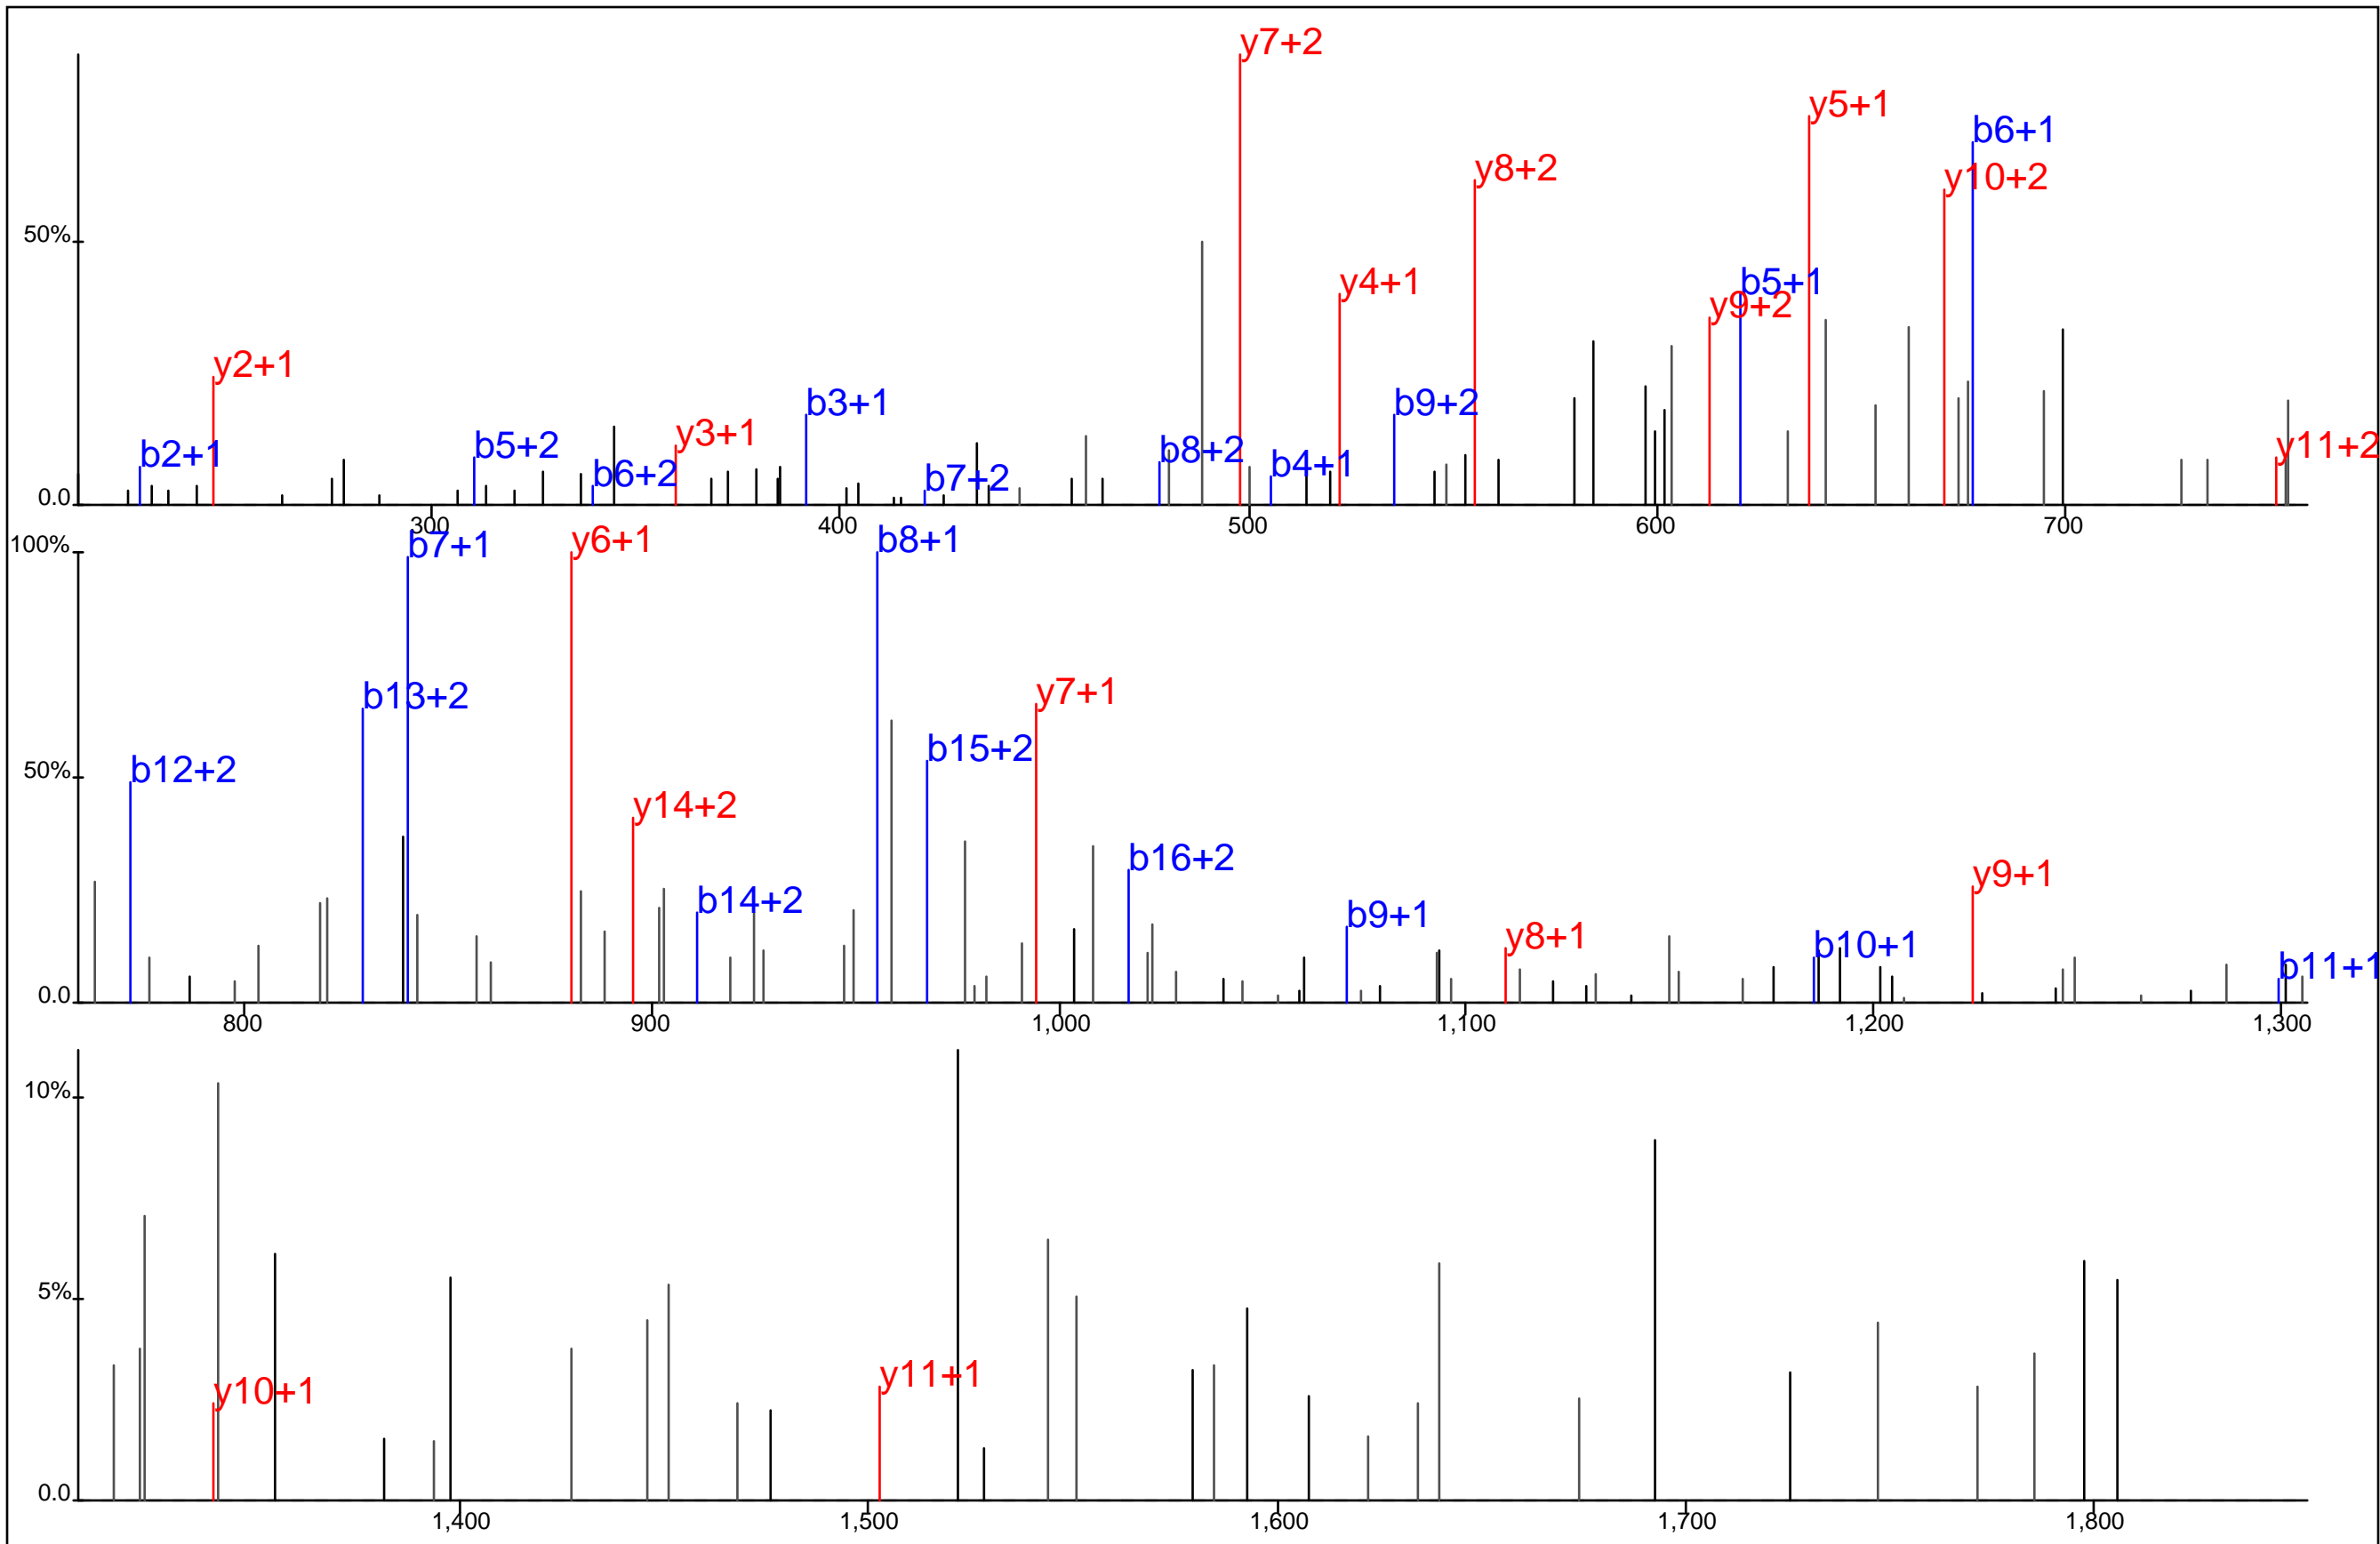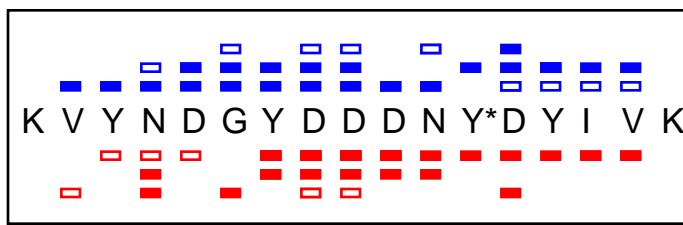

Protein Name: Dual-specificity tyrosine phosphorylation regulated kinase 1A  
 gi Accession: 0  
 Precursor Mass: 726.9675+3  
 Delta Mass: 1.134 ppm  
 XCorr: 48.88



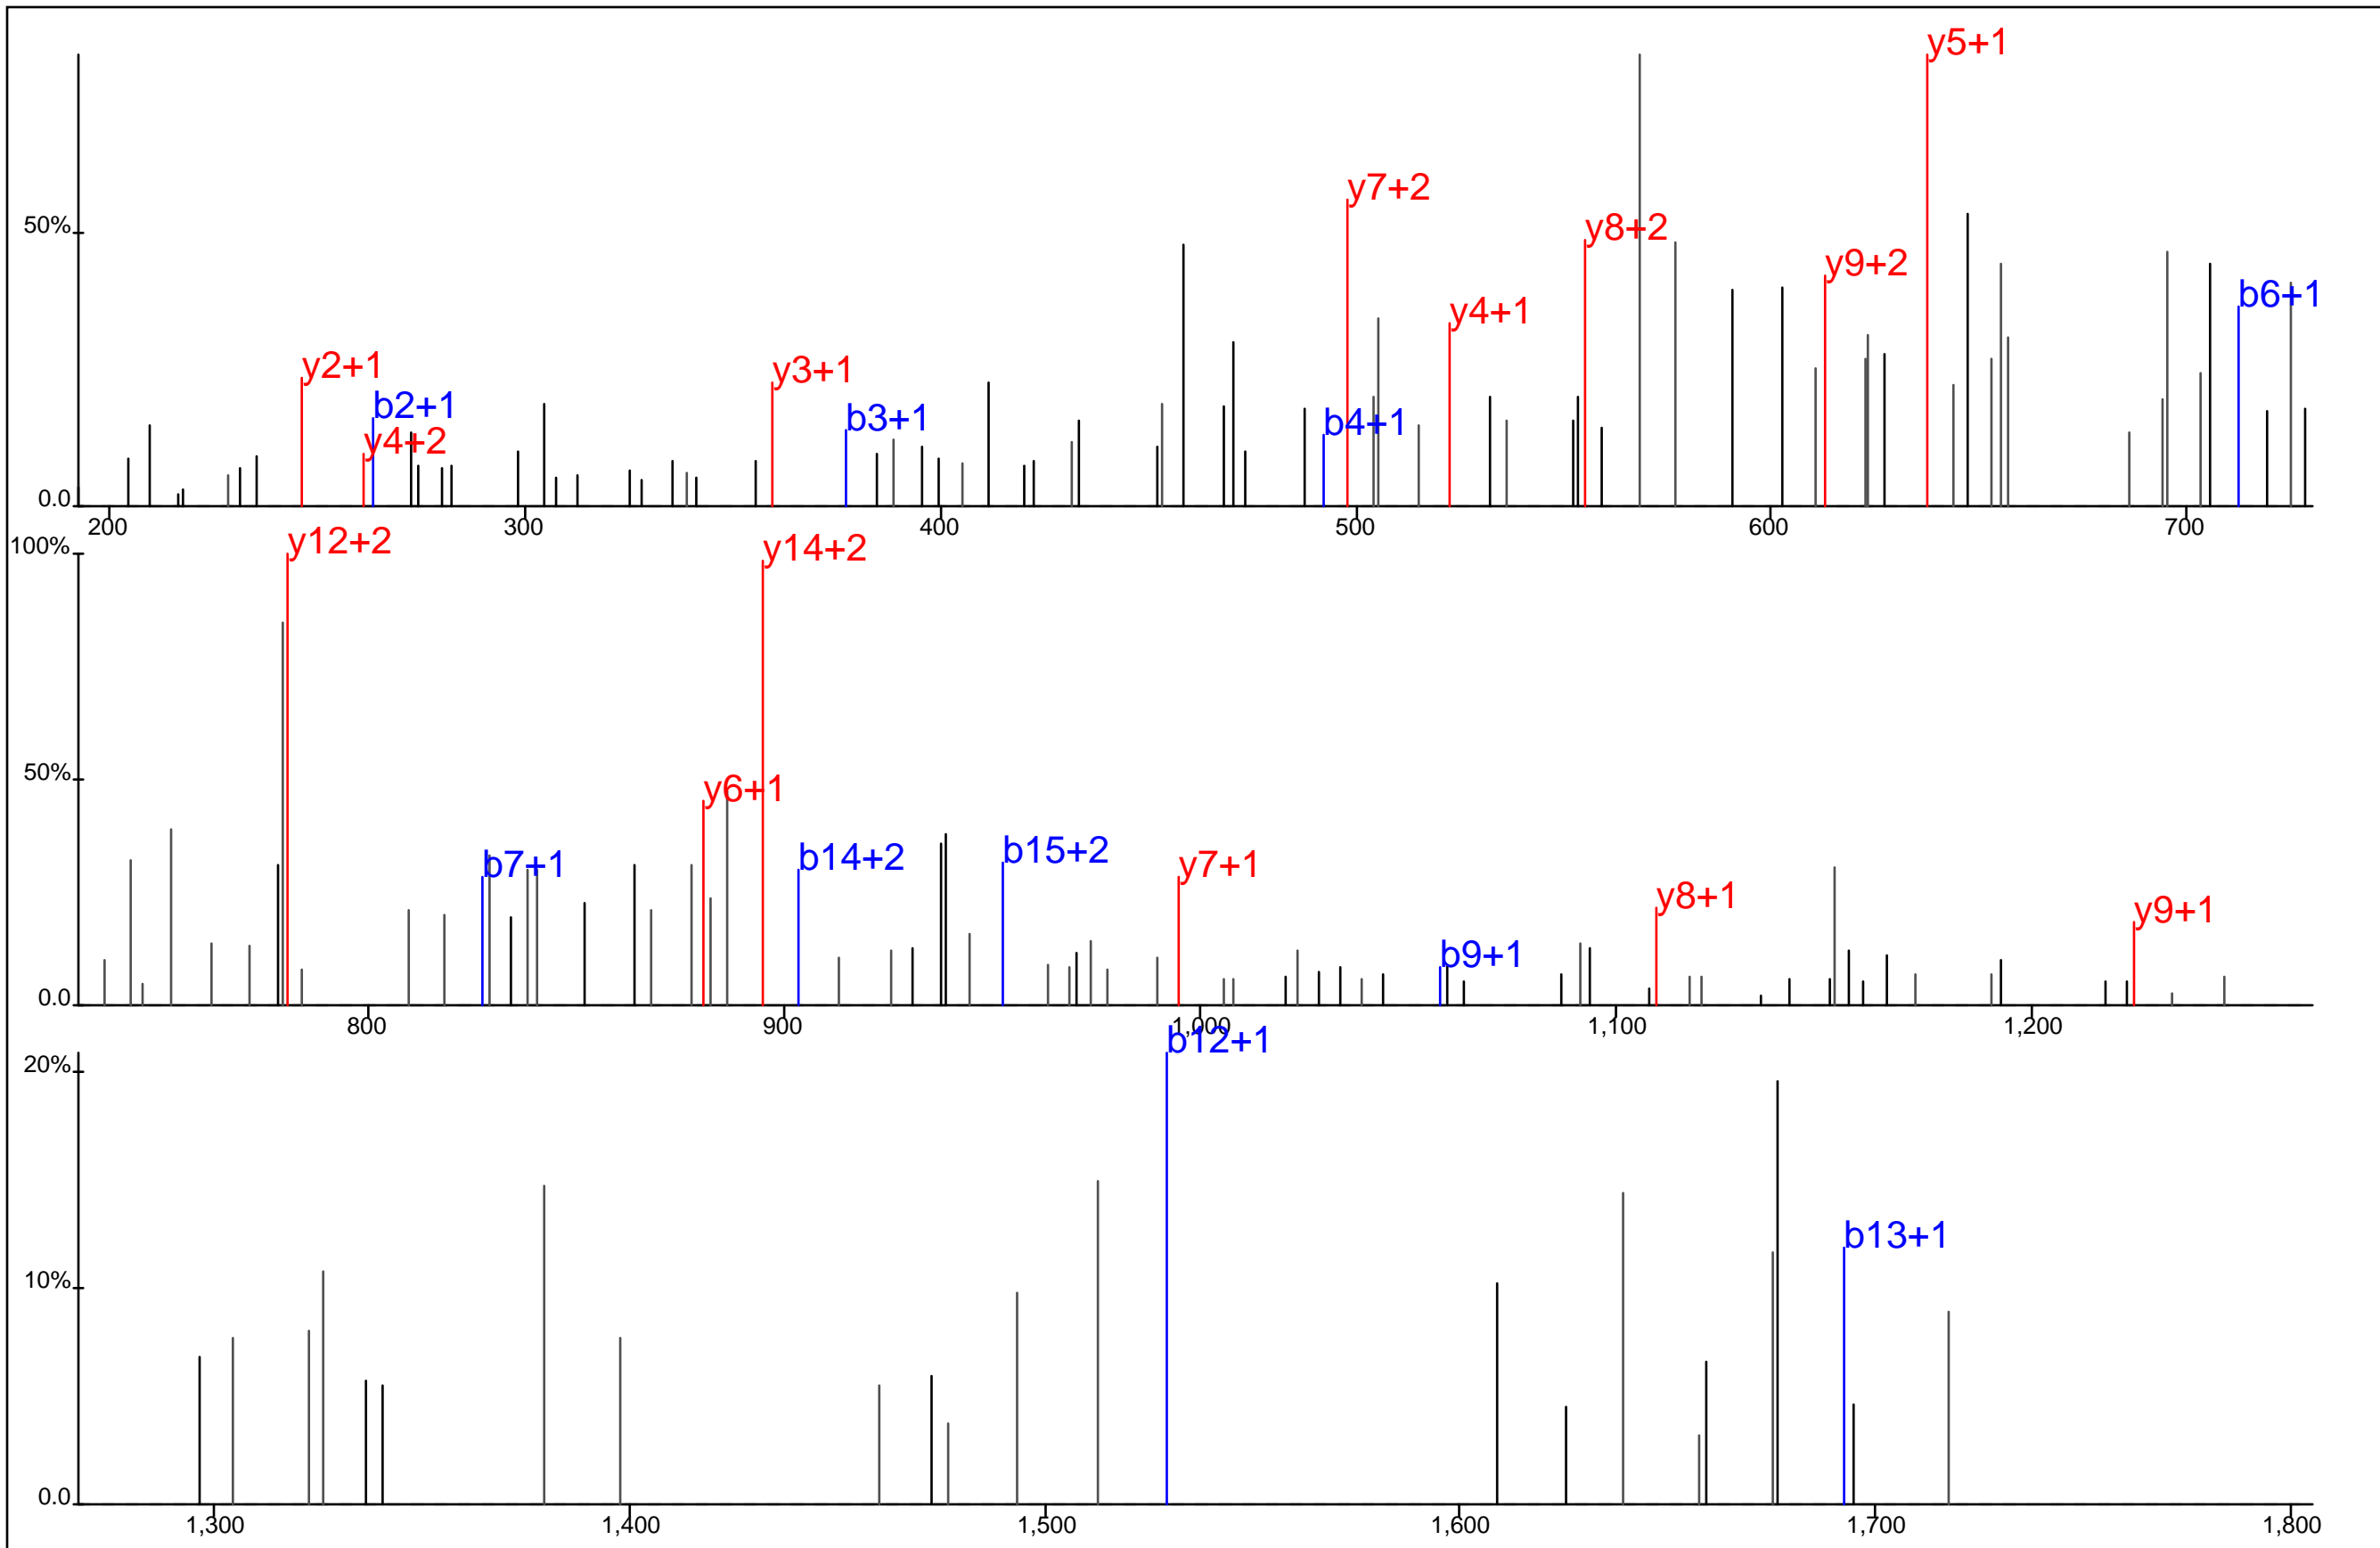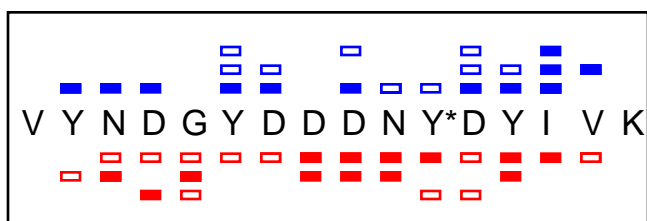

Protein Name: Dual-specificity tyrosine phosphorylation regulated kinase 1A  
 gi Accession: 0  
 Precursor Mass: 684.2679+3  
 Delta Mass: 2.966 ppm  
 XCorr: 29.59

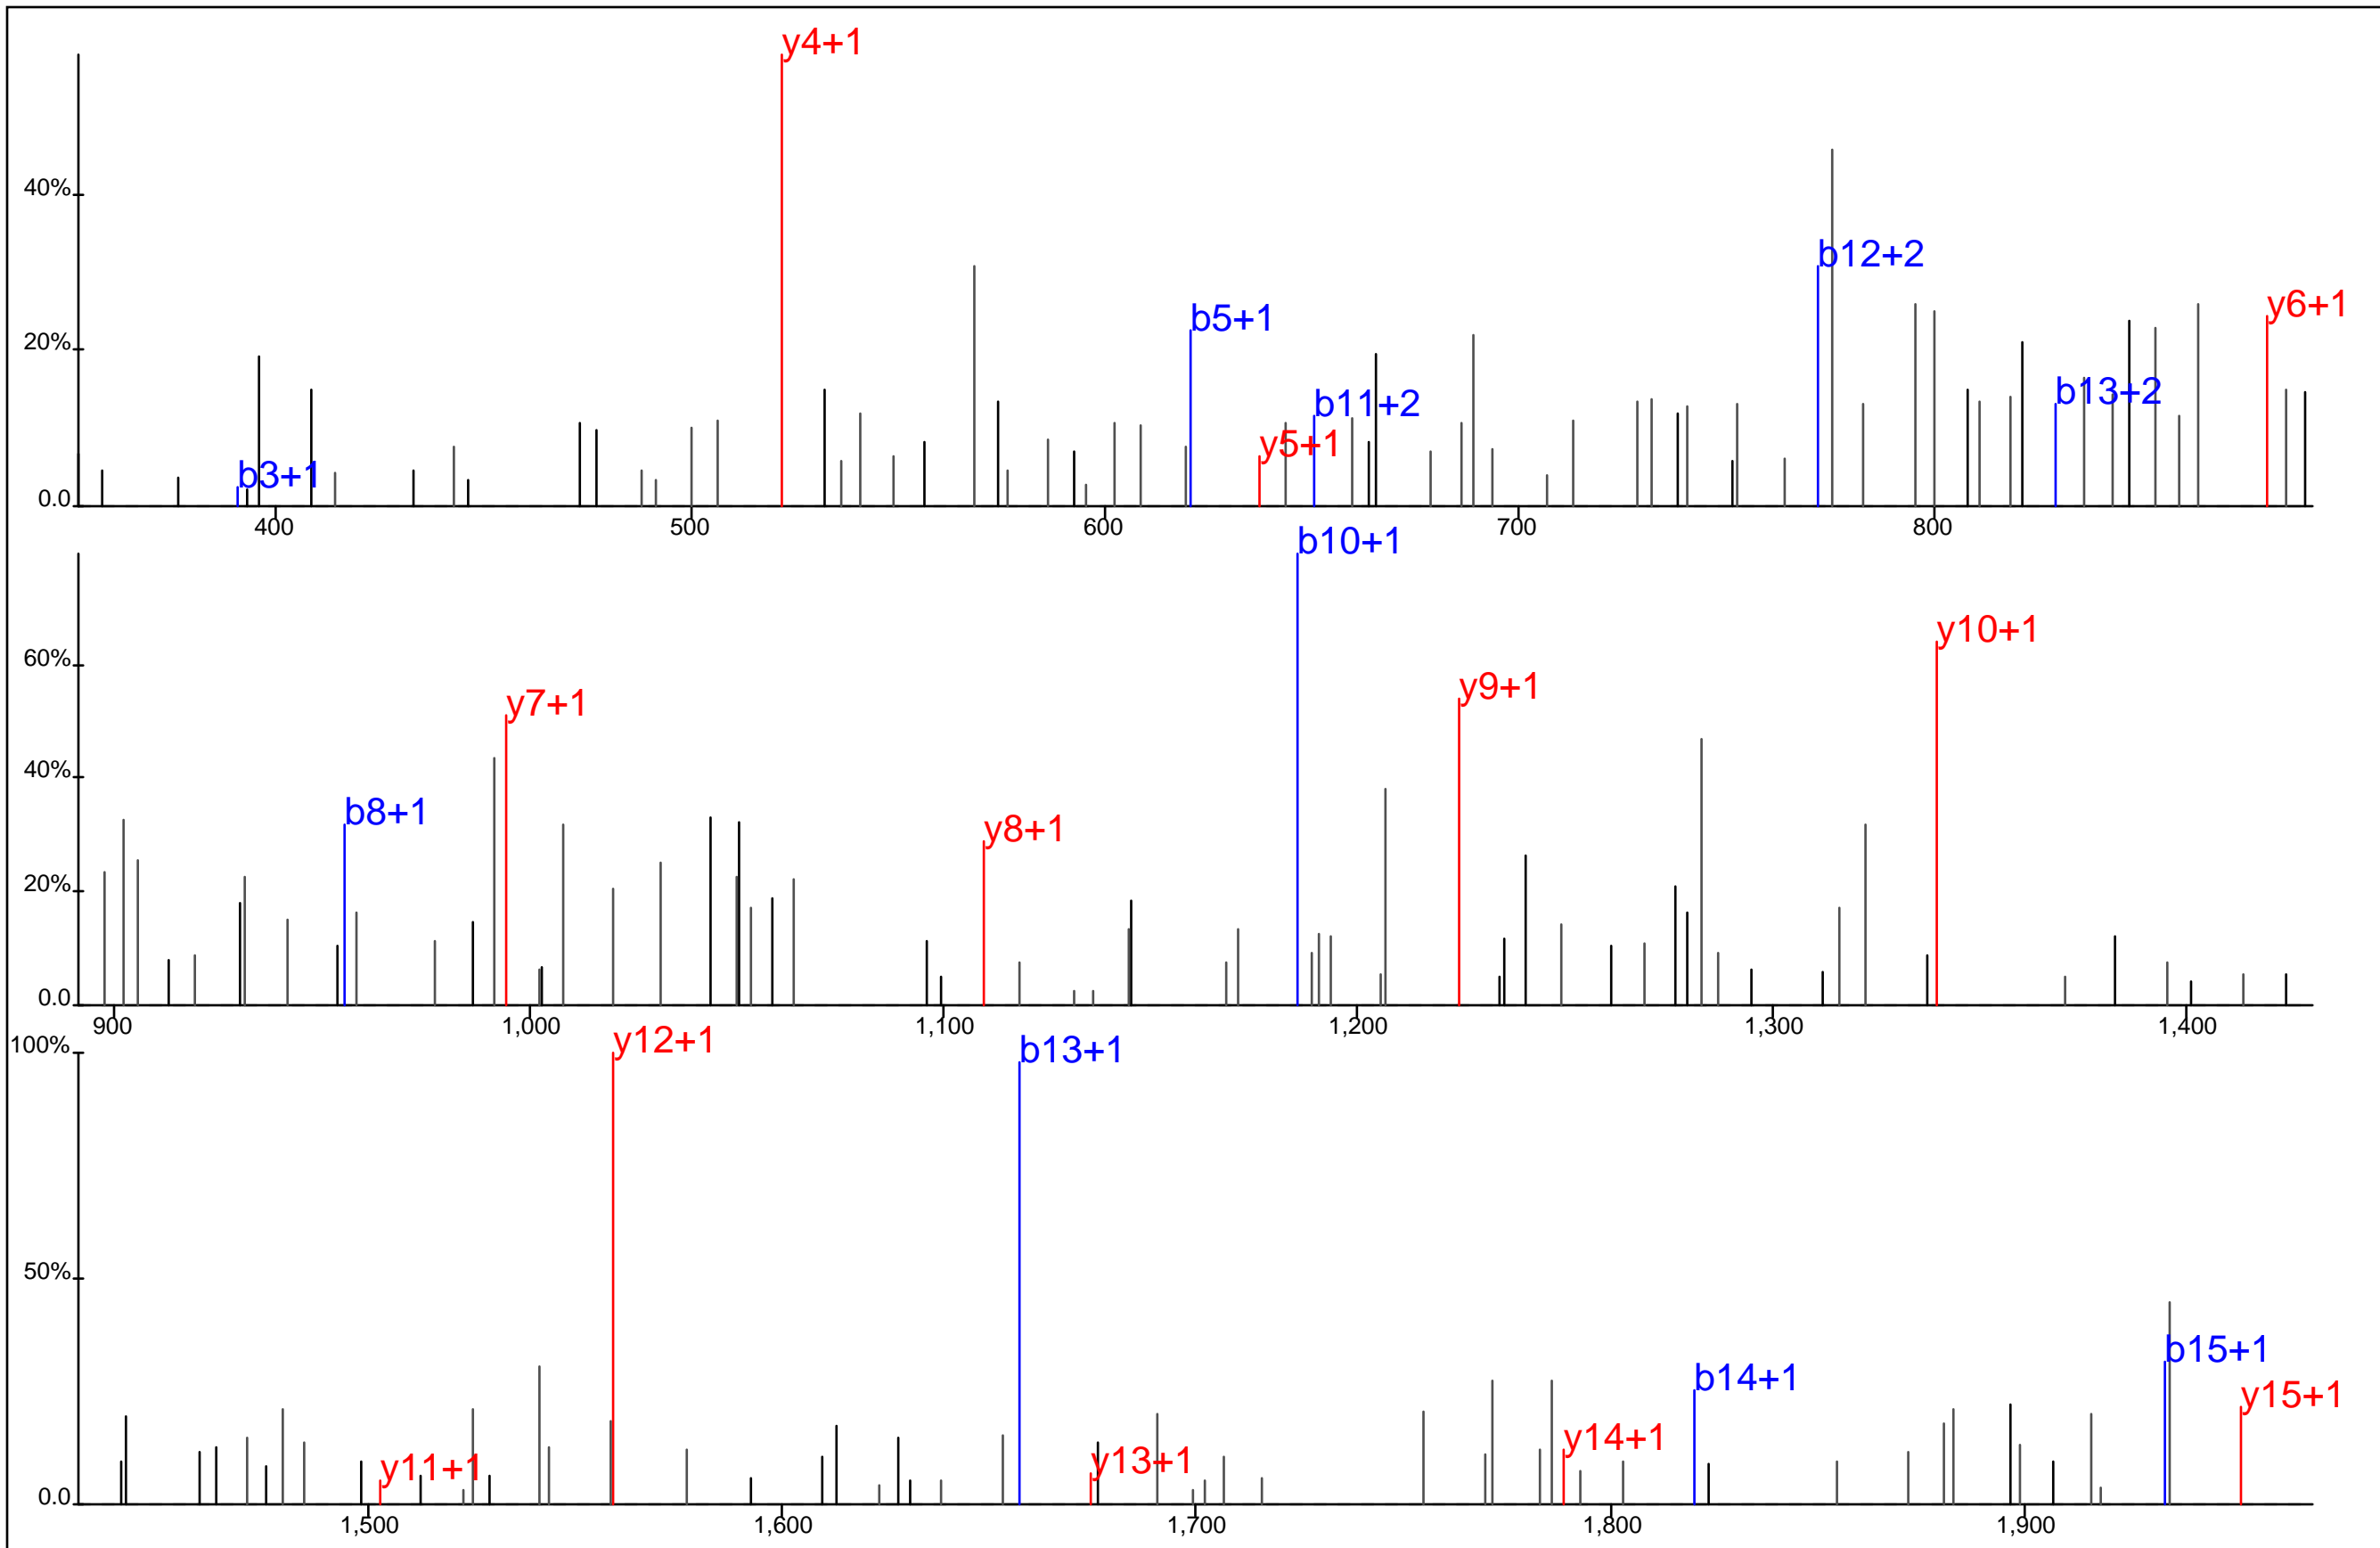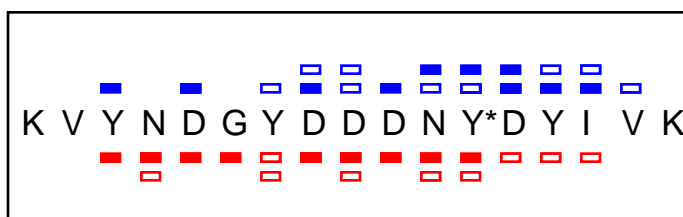

Protein Name: Dual-specificity tyrosine phosphorylation regulated kinase 1A  
 gi Accession: 0  
 Precursor Mass: 1,089.9541+2  
 Delta Mass: 4.868 ppm  
 XCorr: 25.65

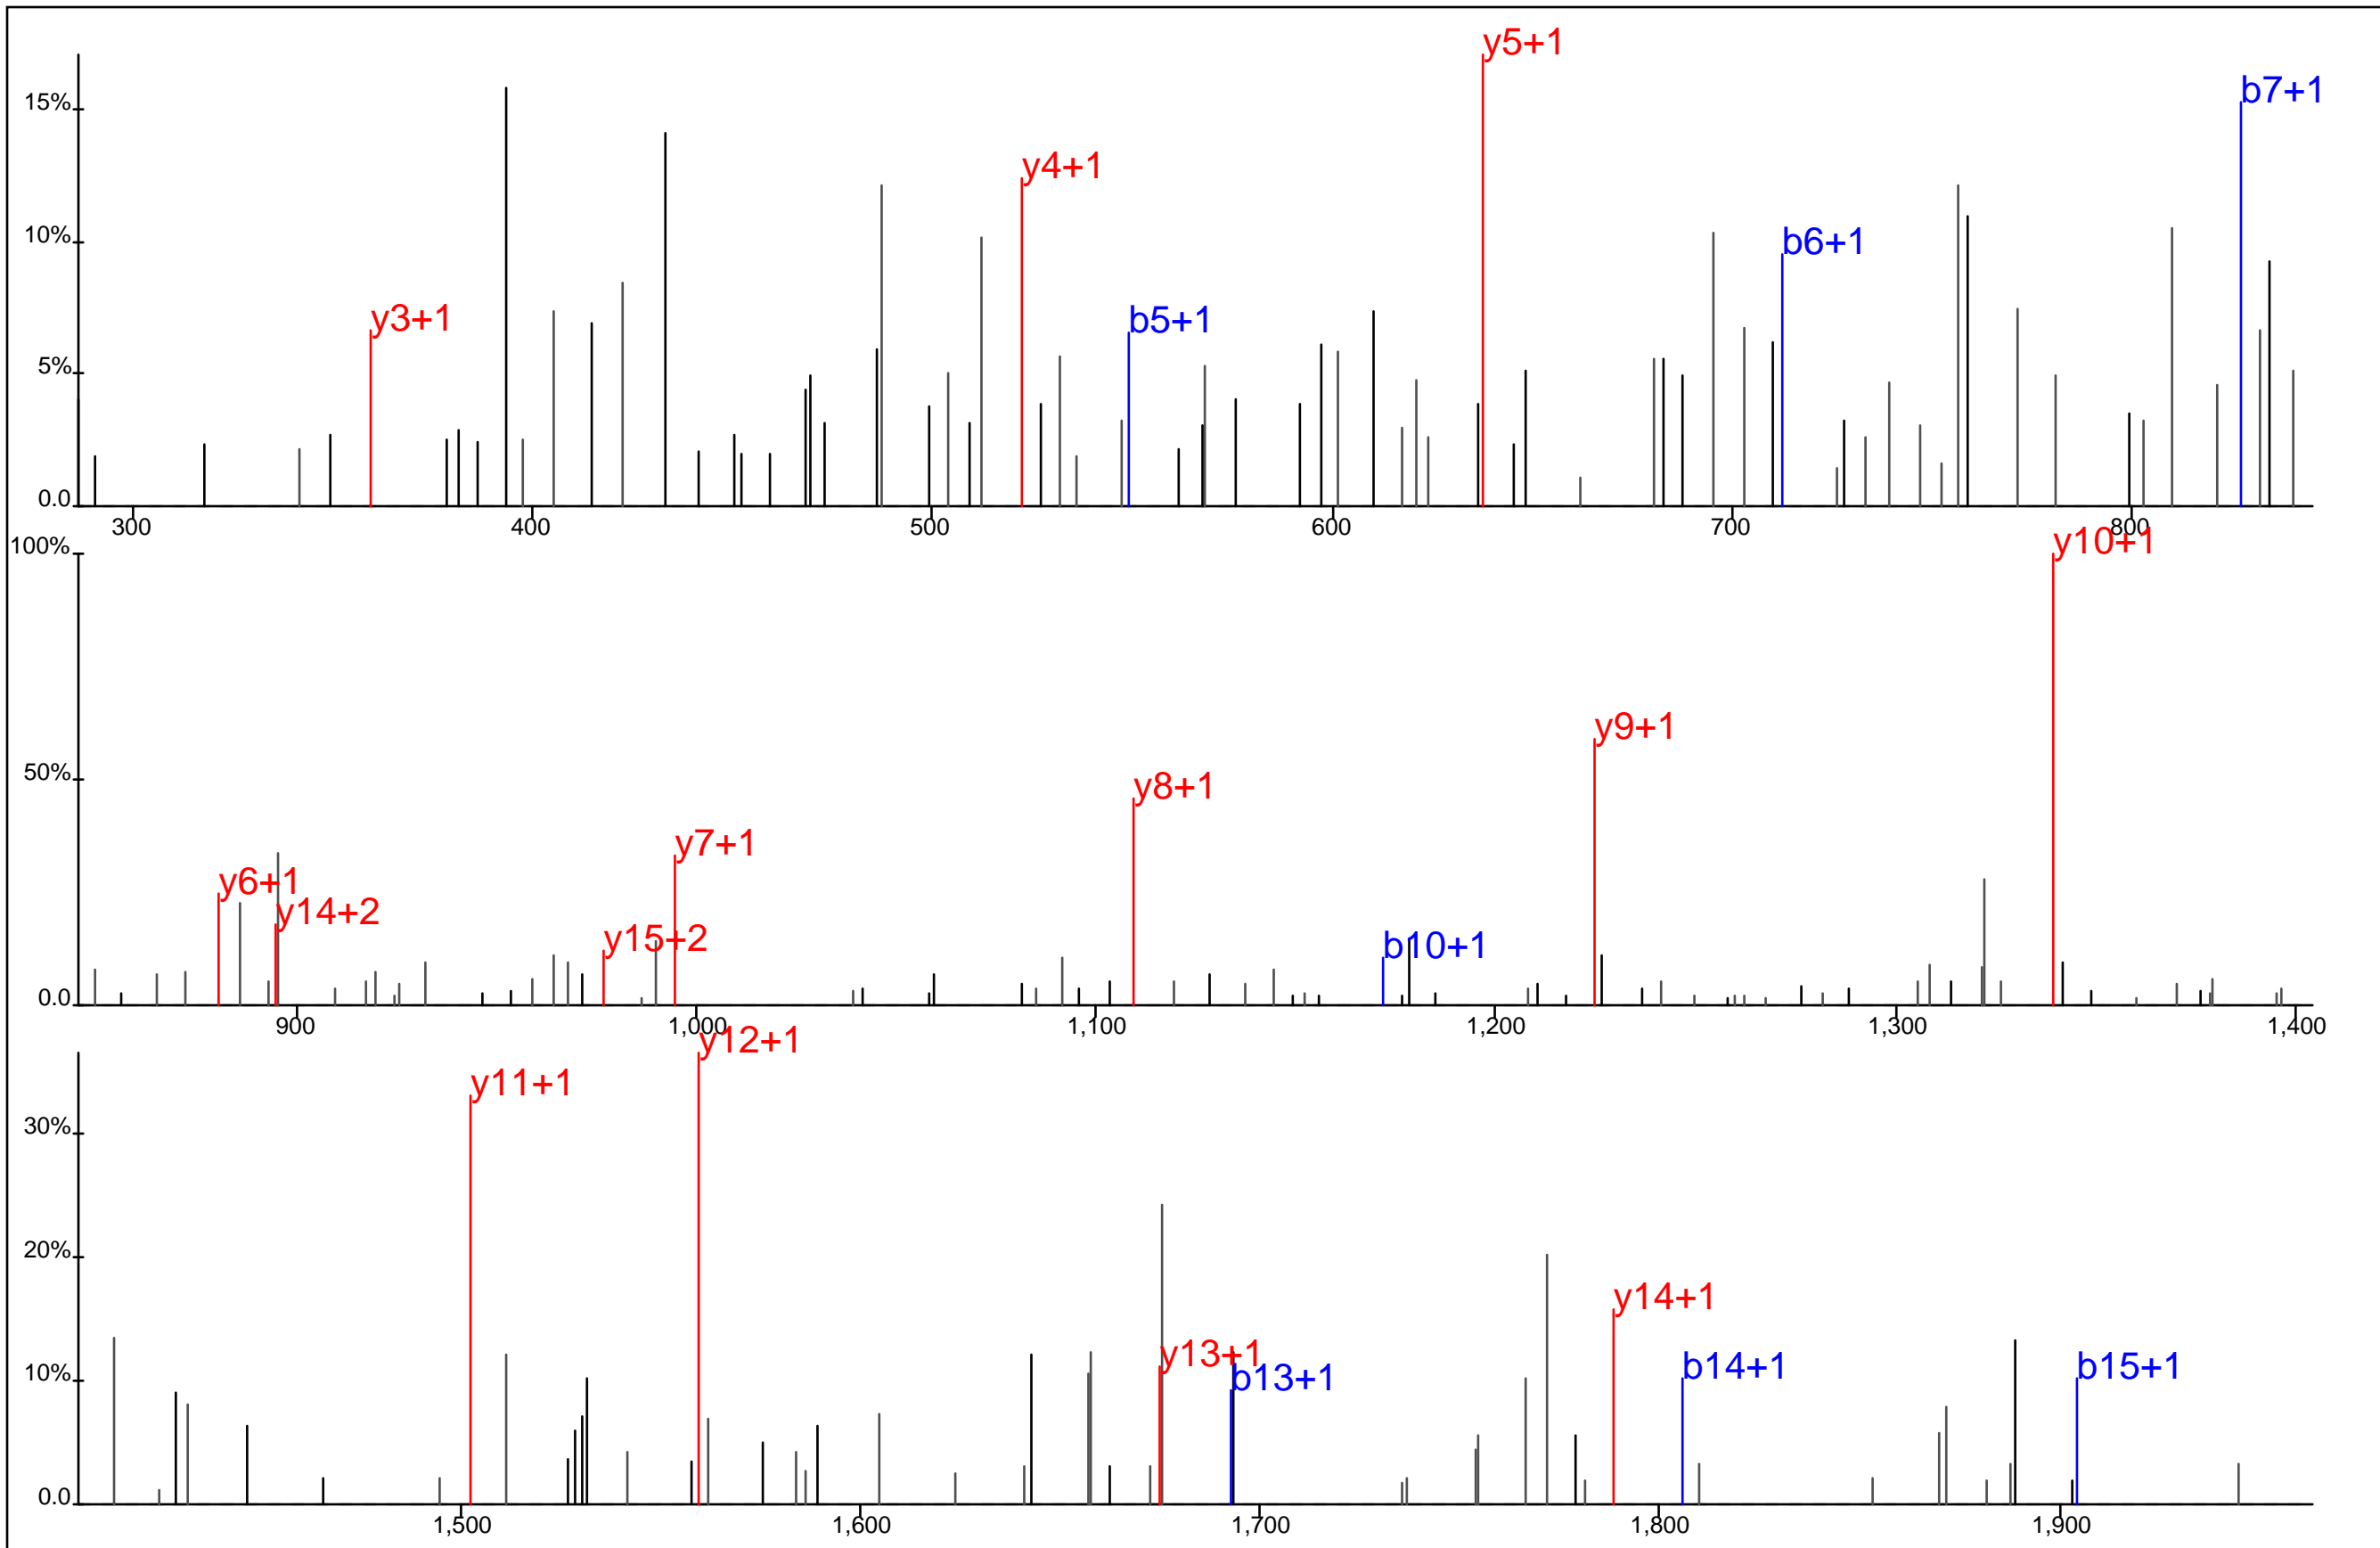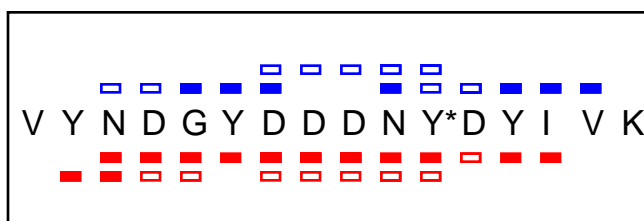

Protein Name: Dual-specificity tyrosine phosphorylation regulated kinase 1A  
 gi Accession: 0  
 Precursor Mass: 1,025.9001+2  
 Delta Mass: 1.144 ppm  
 XCorr: 72.47

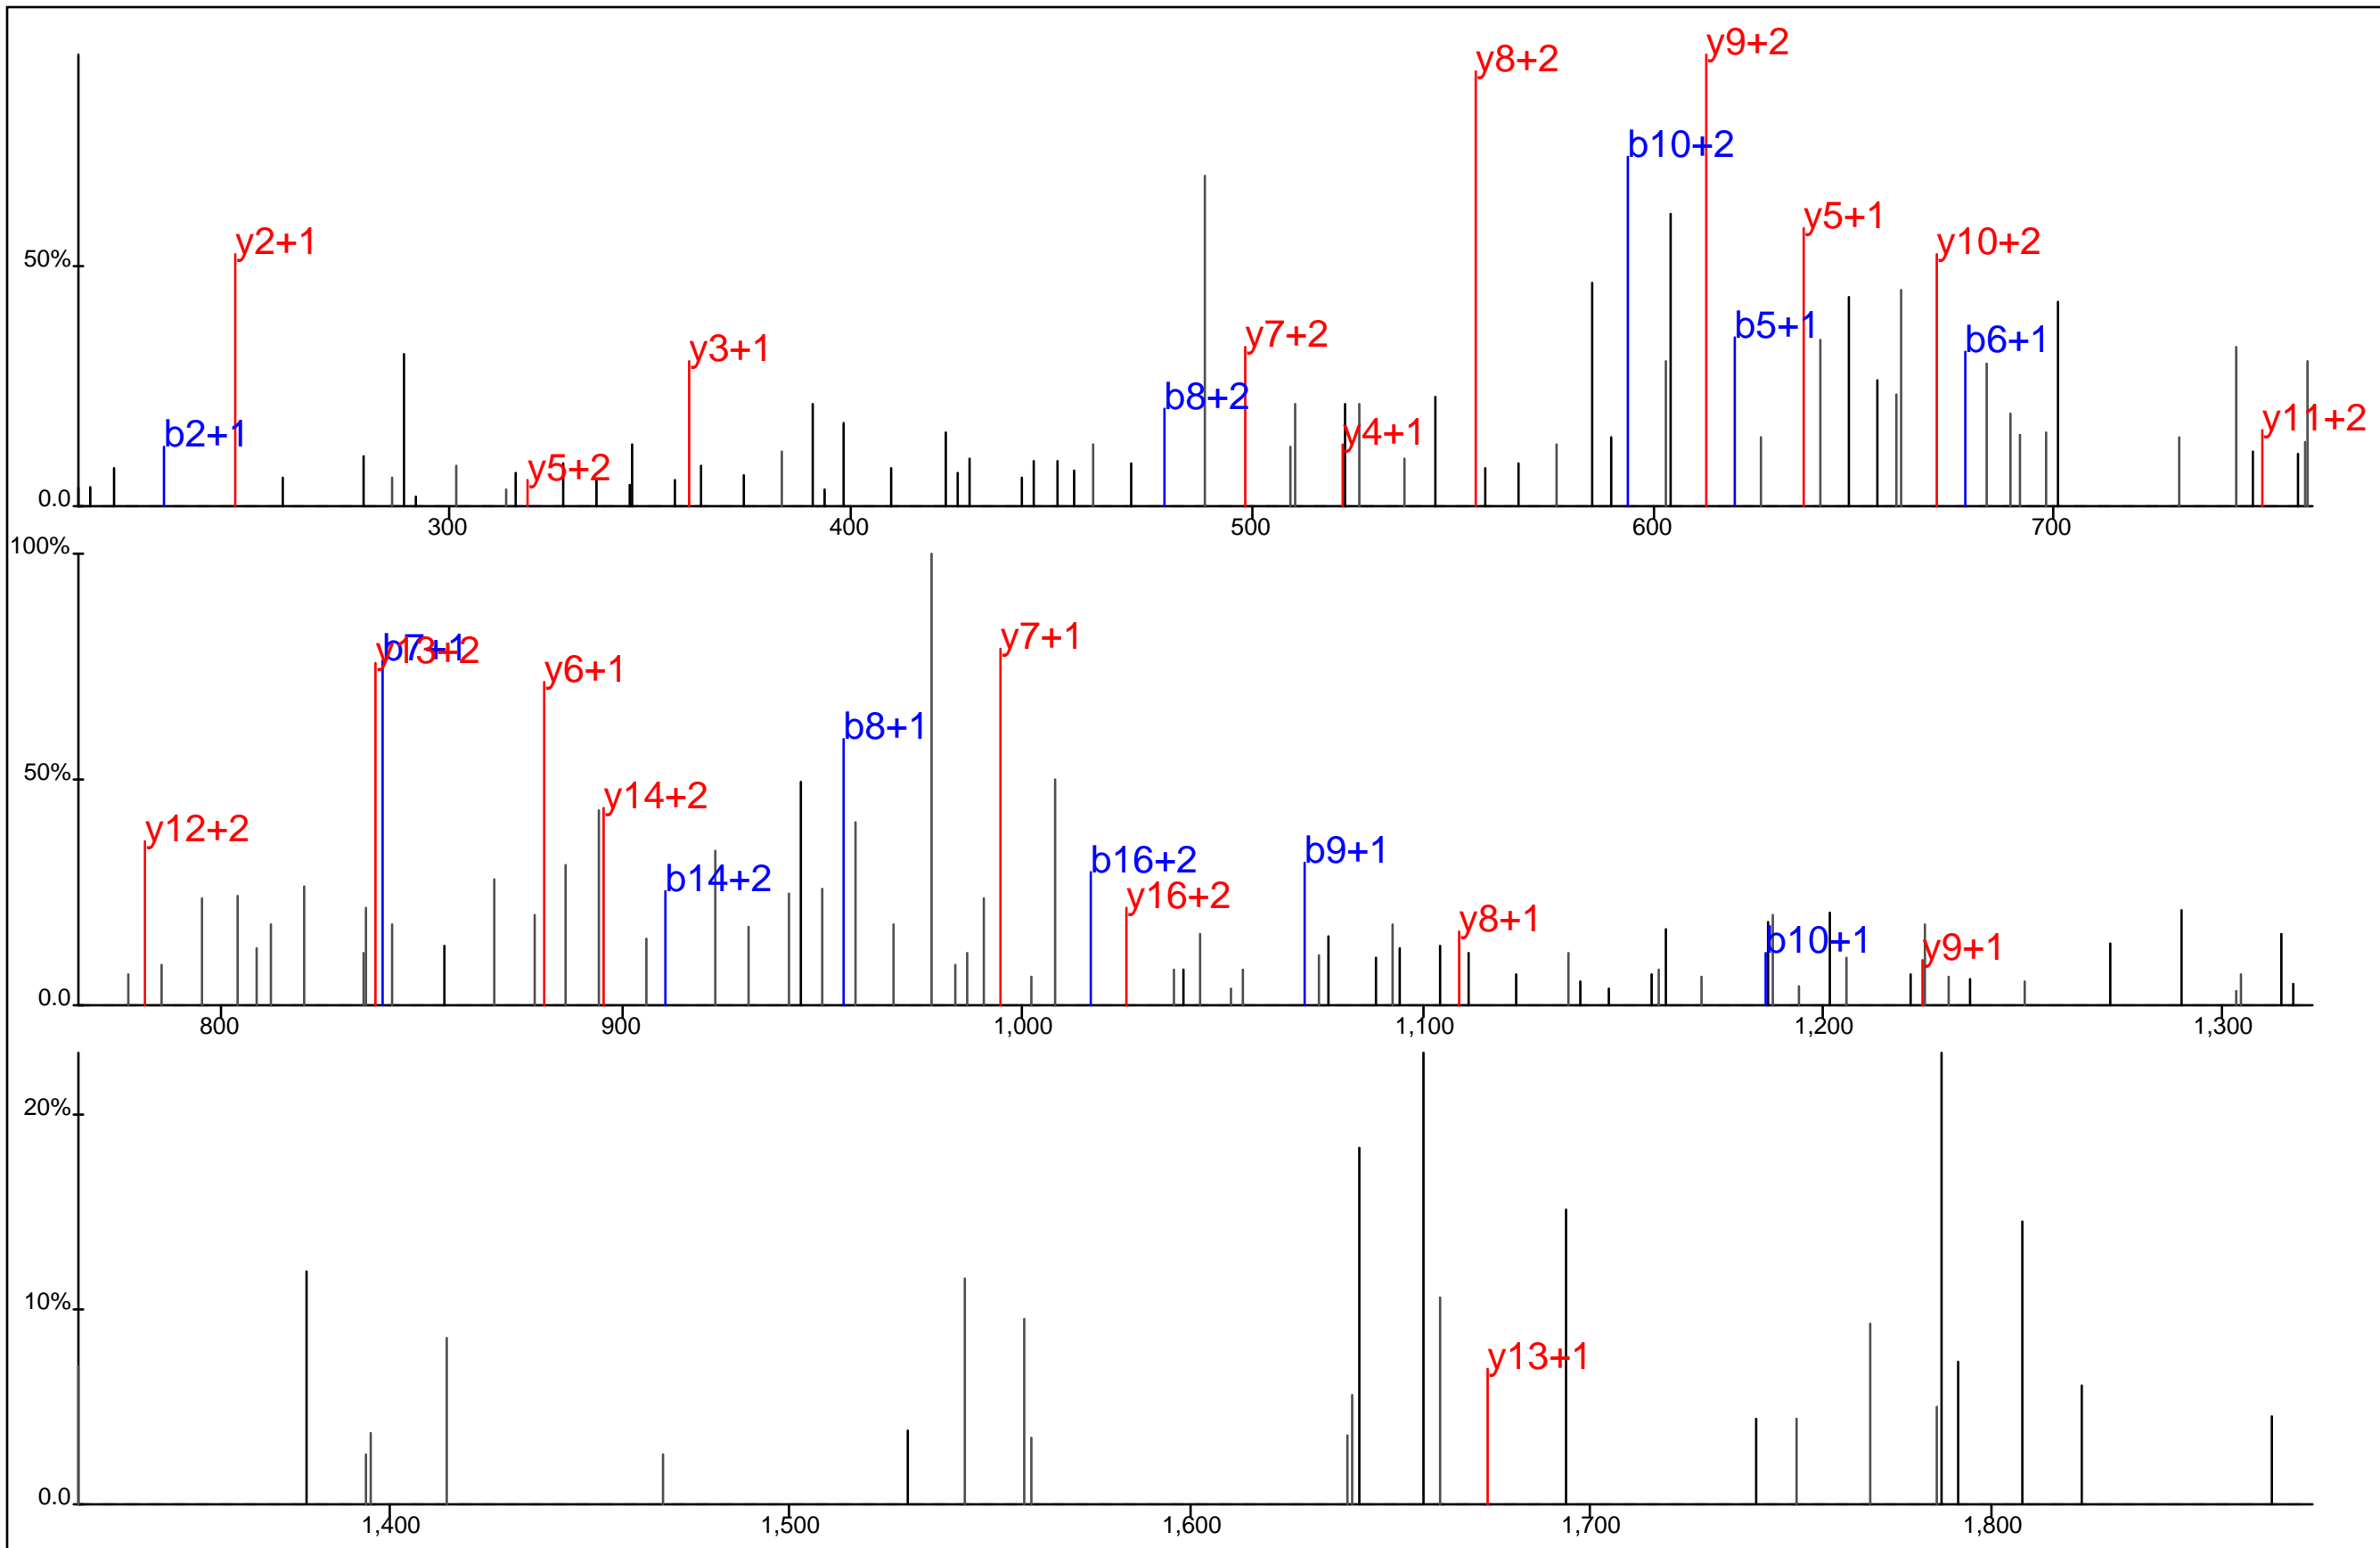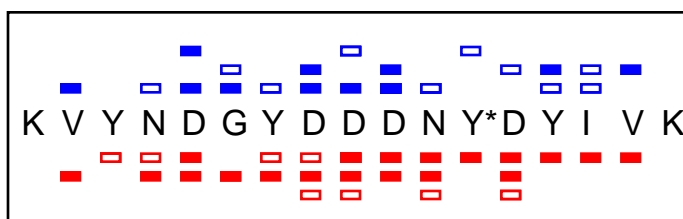

Protein Name: Dual-specificity tyrosine phosphorylation regulated kinase 1A  
 gi Accession: 0  
 Precursor Mass: 726.9666+3  
 Delta Mass: 2.309 ppm  
 XCorr: 39.14

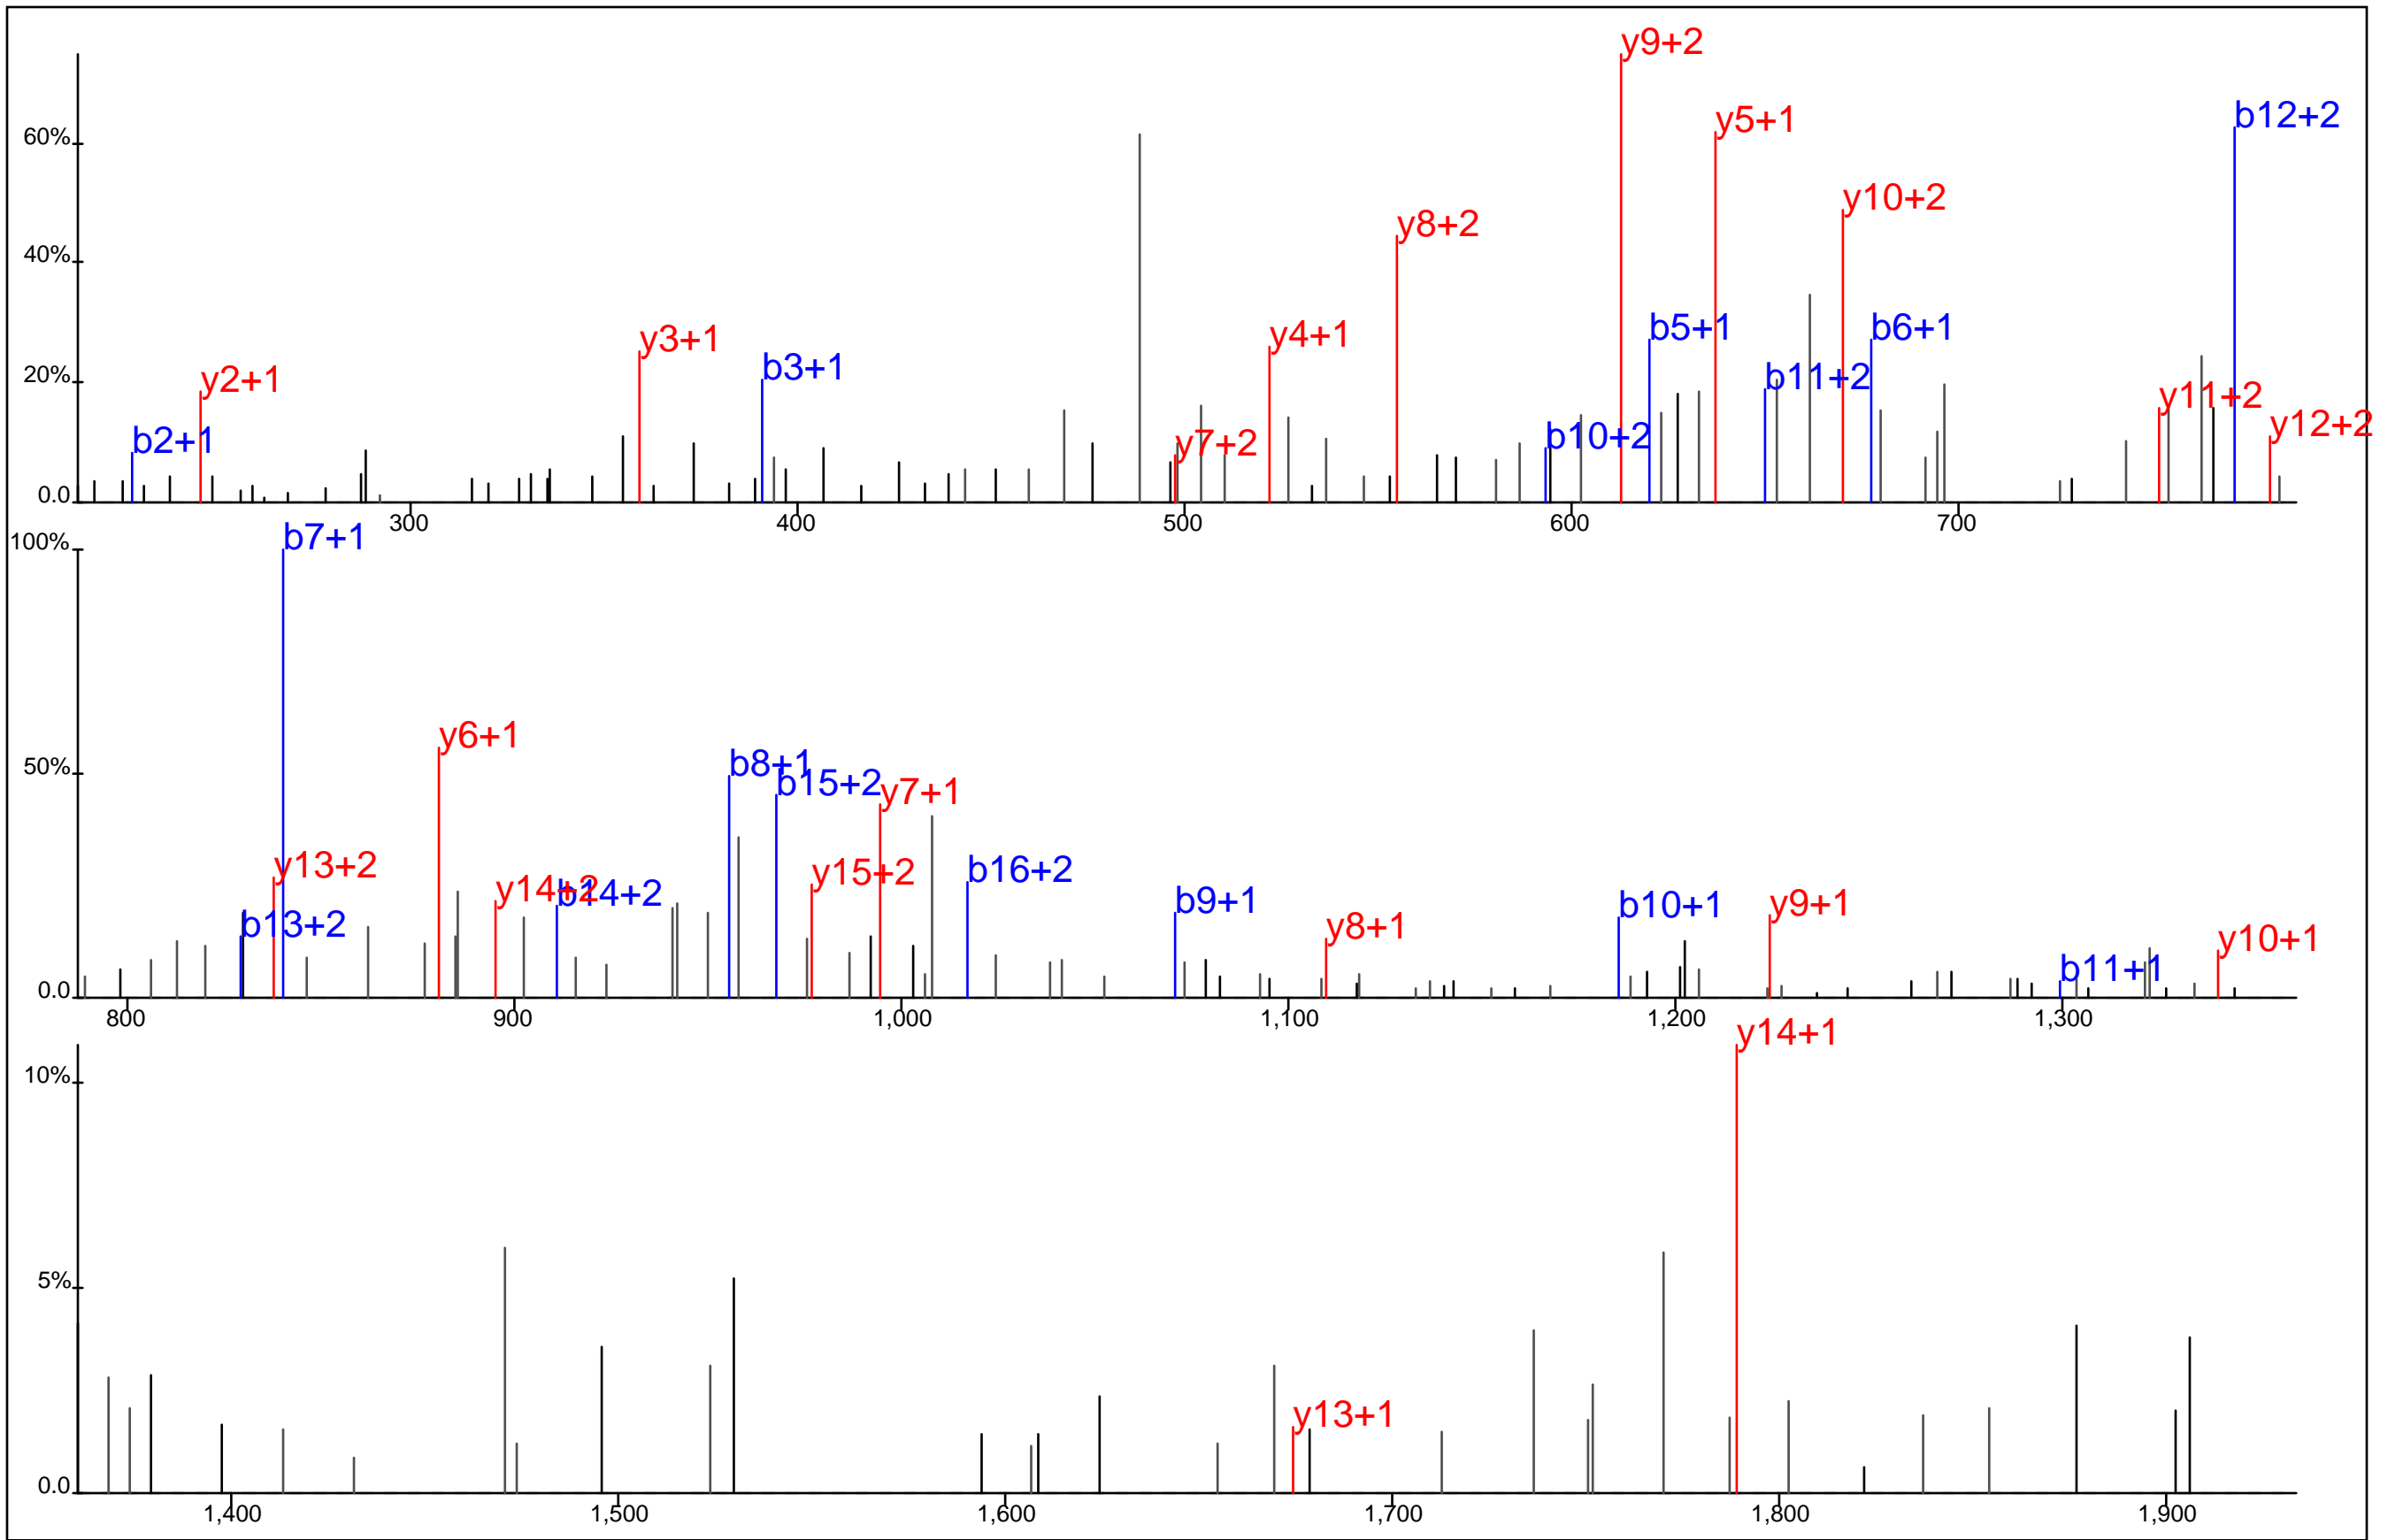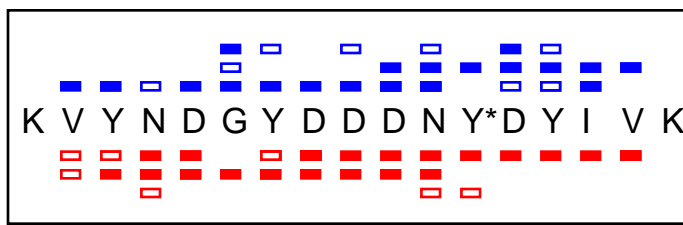

Protein Name: Dual-specificity tyrosine phosphorylation regulated kinase 1A  
 gi Accession: 0  
 Precursor Mass: 726.9684+3  
 Delta Mass: 0.128 ppm  
 XCorr: 64.38

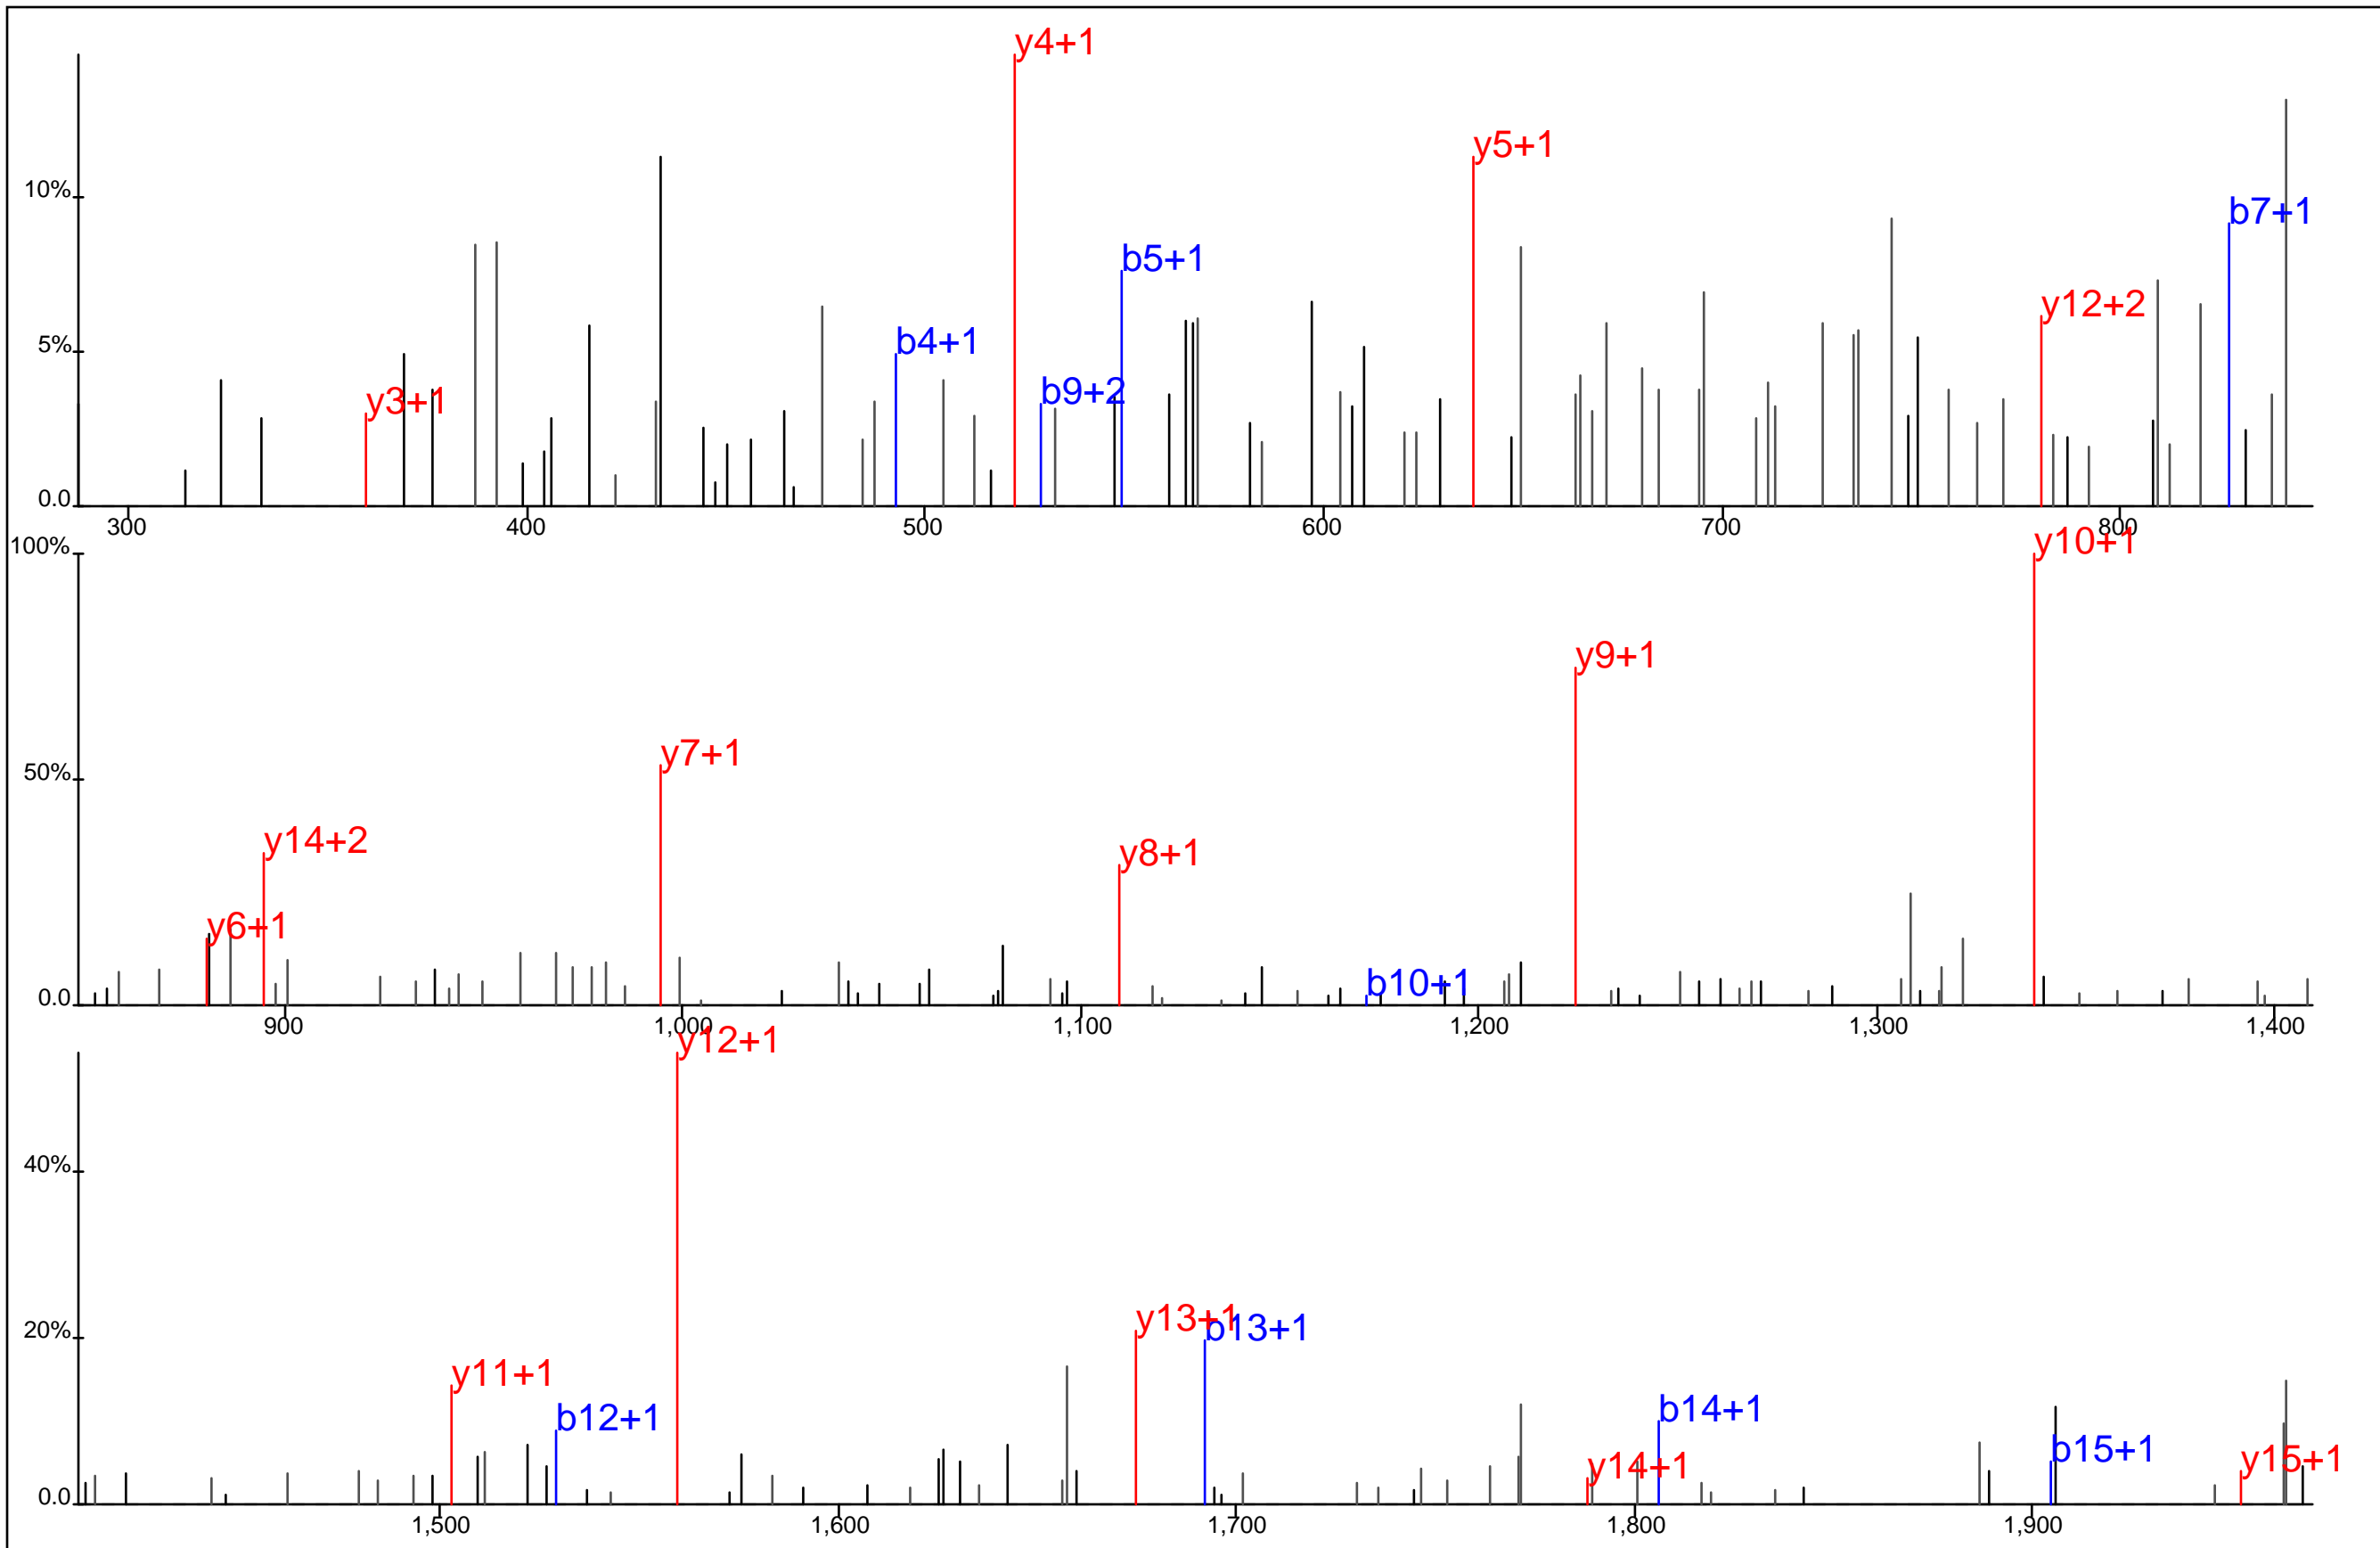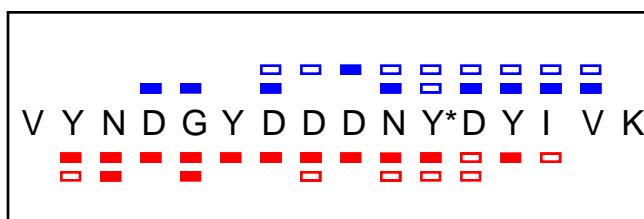

Protein Name: Dual-specificity tyrosine phosphorylation regulated kinase 1A  
 gi Accession: 0  
 Precursor Mass: 1,025.9025+2  
 Delta Mass: 1.119 ppm  
 XCorr: 58.41

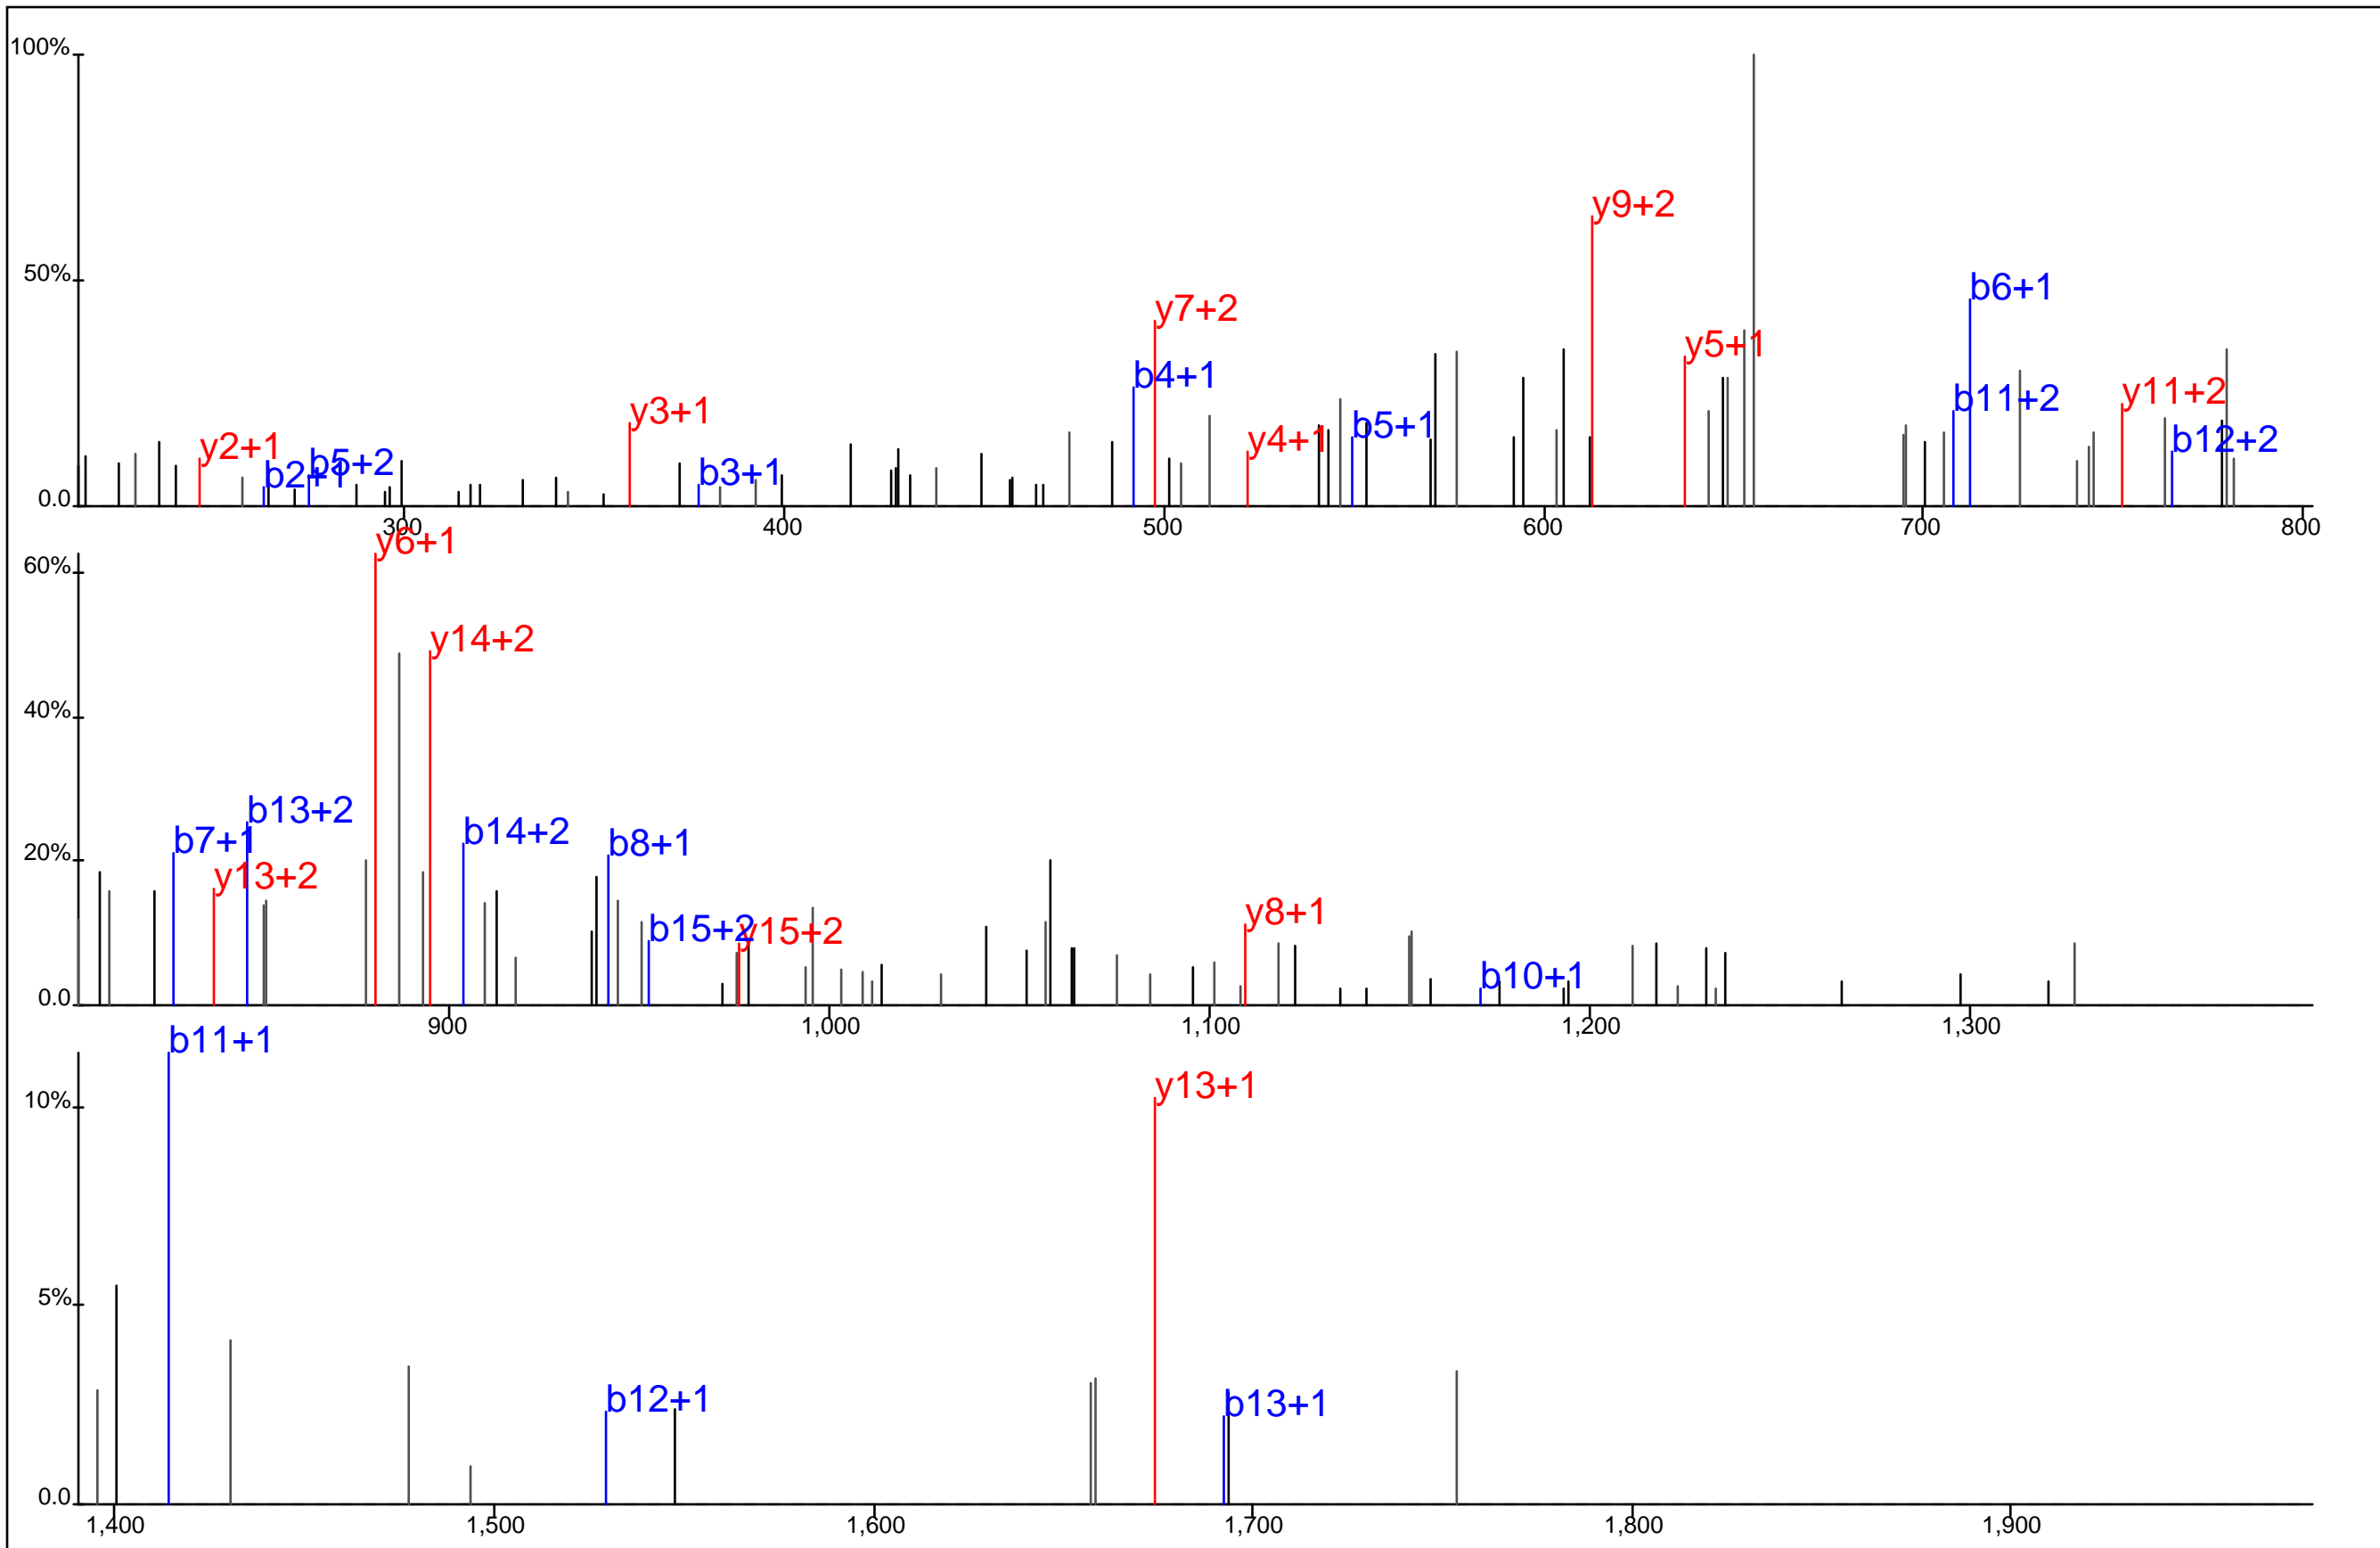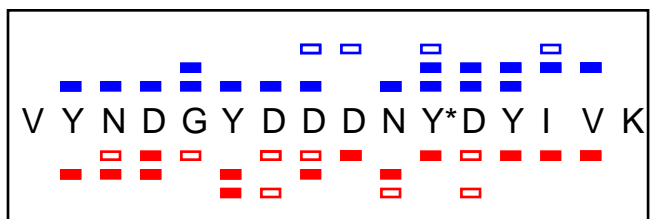

Protein Name: Dual-specificity tyrosine phosphorylation regulated kinase 1A  
 gi Accession: 0  
 Precursor Mass: 684.2682+3  
 Delta Mass: 2.518 ppm  
 XCorr: 23.1

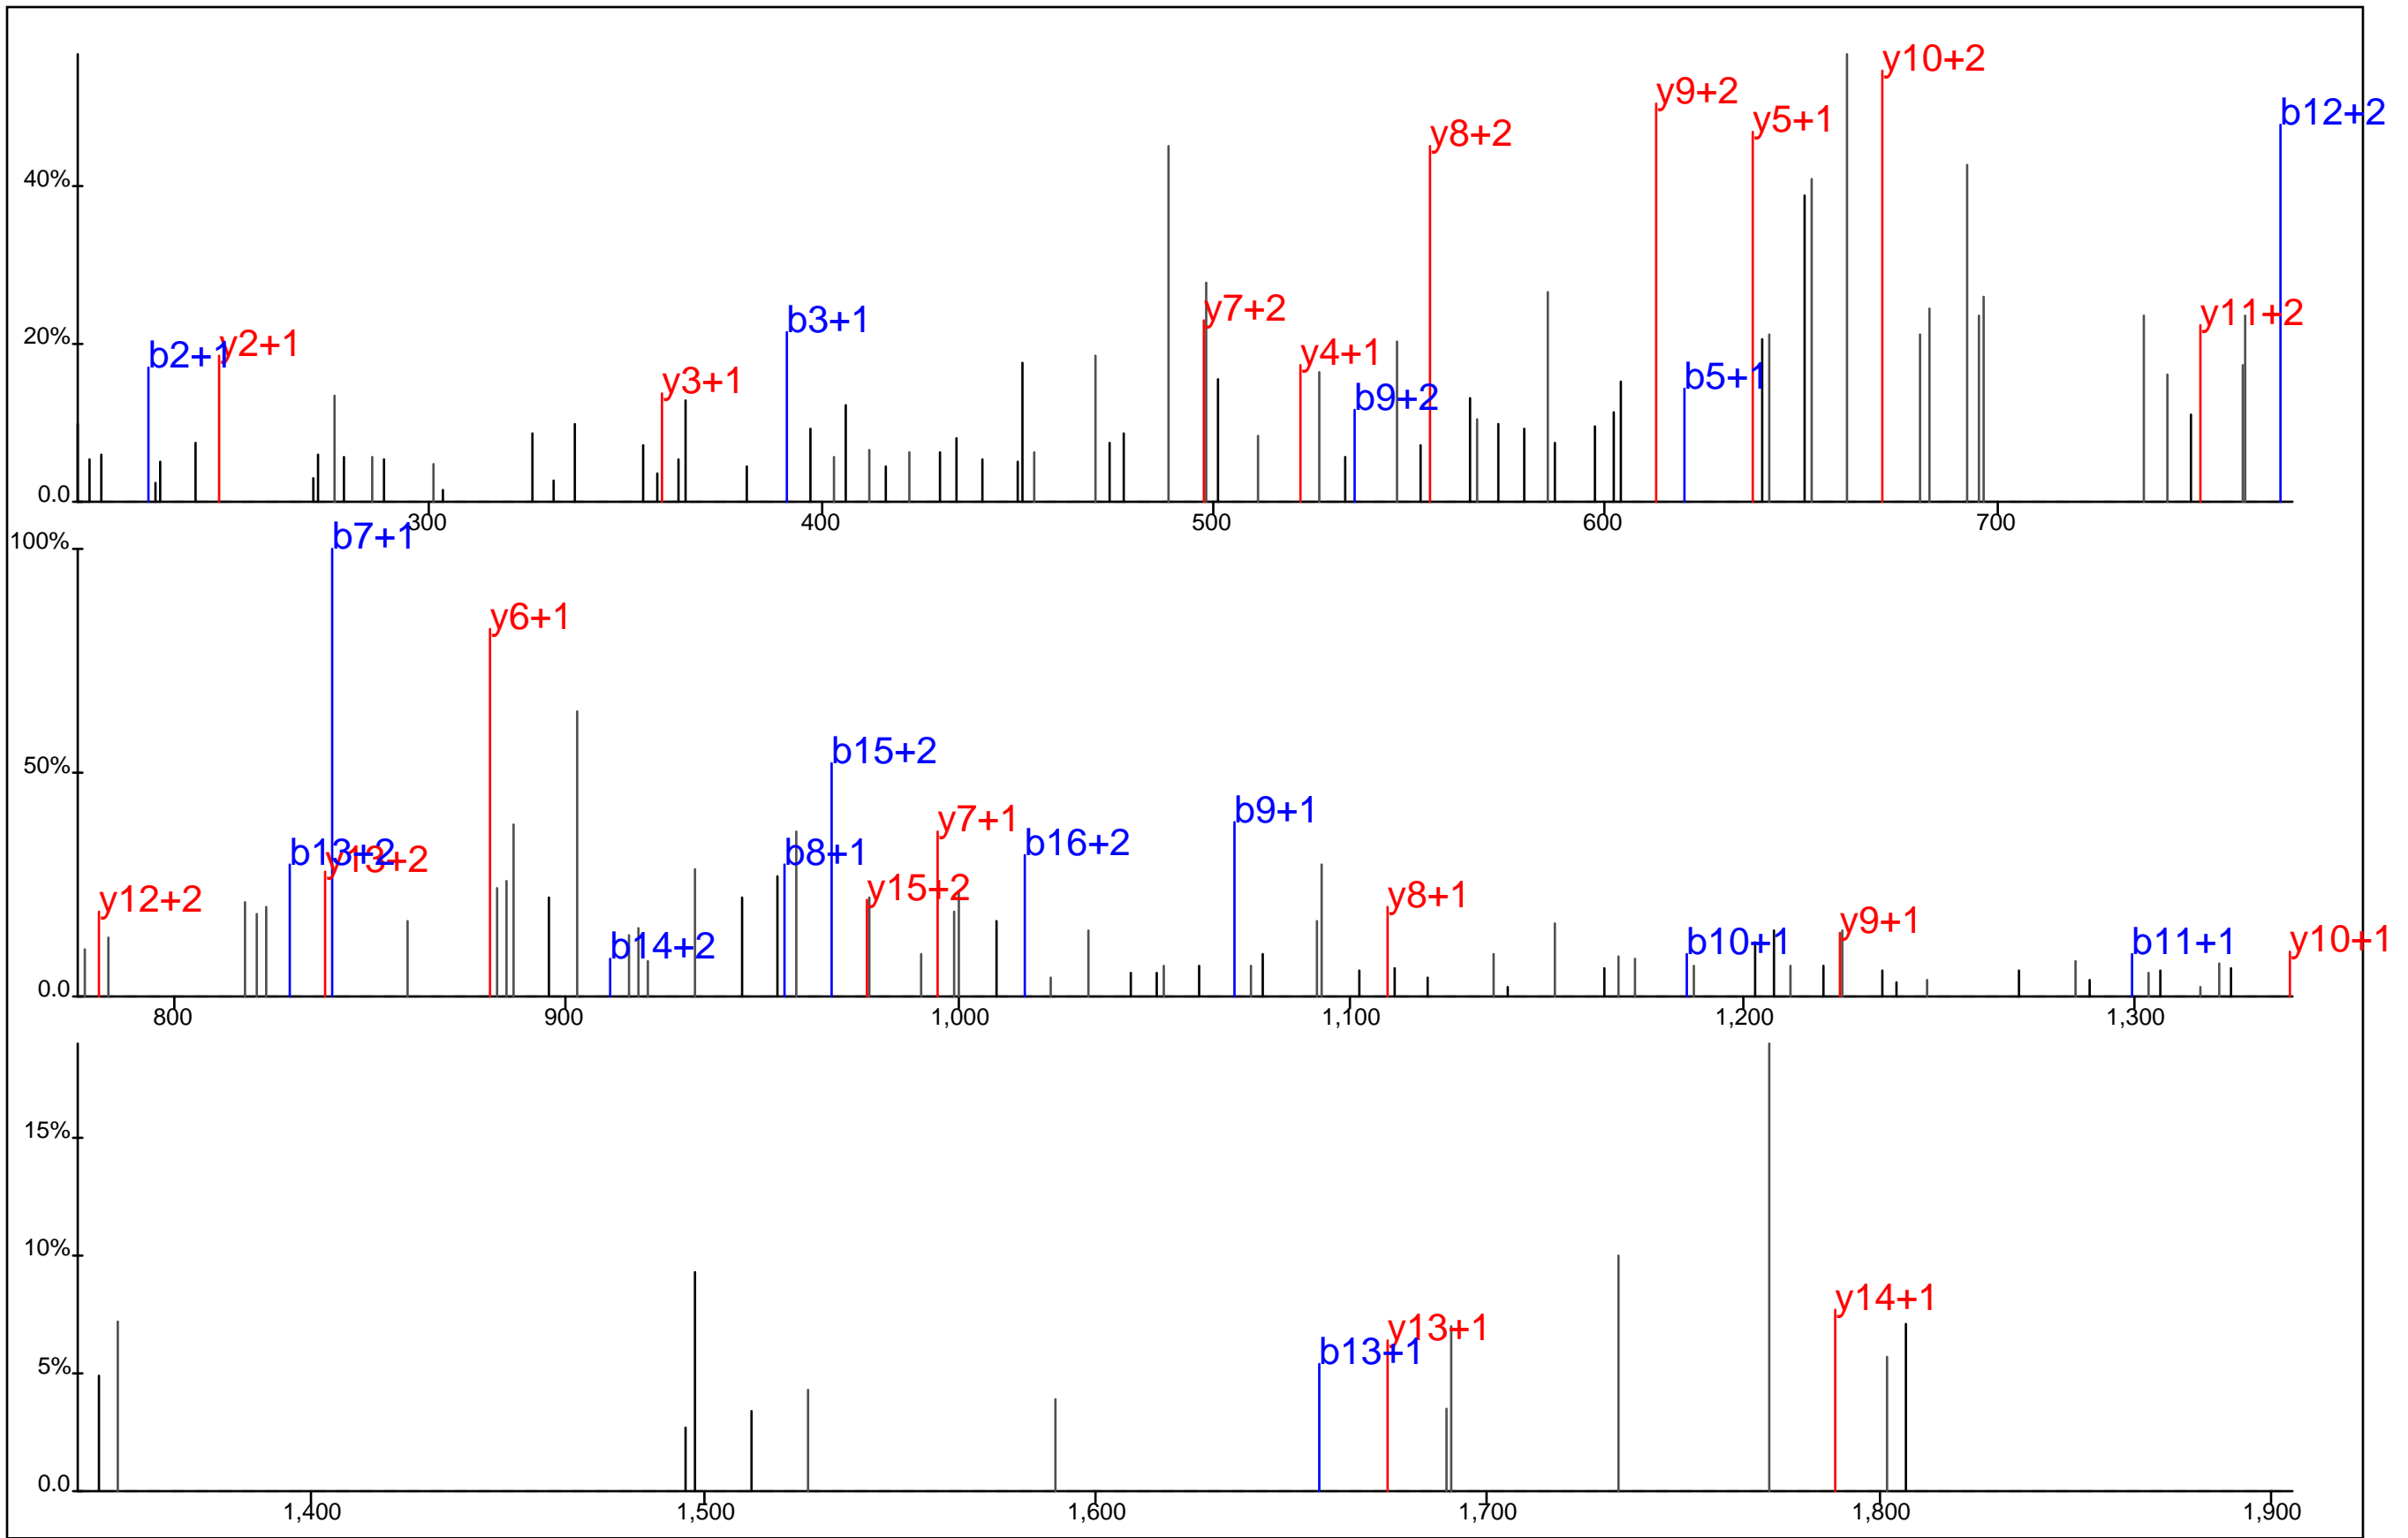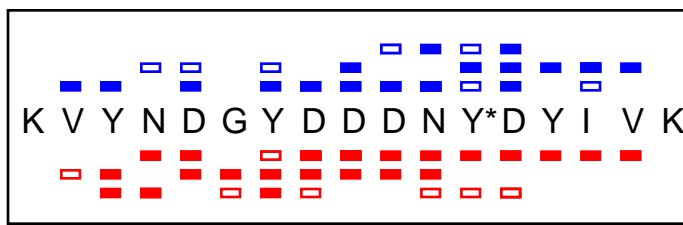

Protein Name: Dual-specificity tyrosine phosphorylation regulated kinase 1A  
 gi Accession: 0  
 Precursor Mass: 726.9681+3  
 Delta Mass: 0.208 ppm  
 XCorr: 61.49



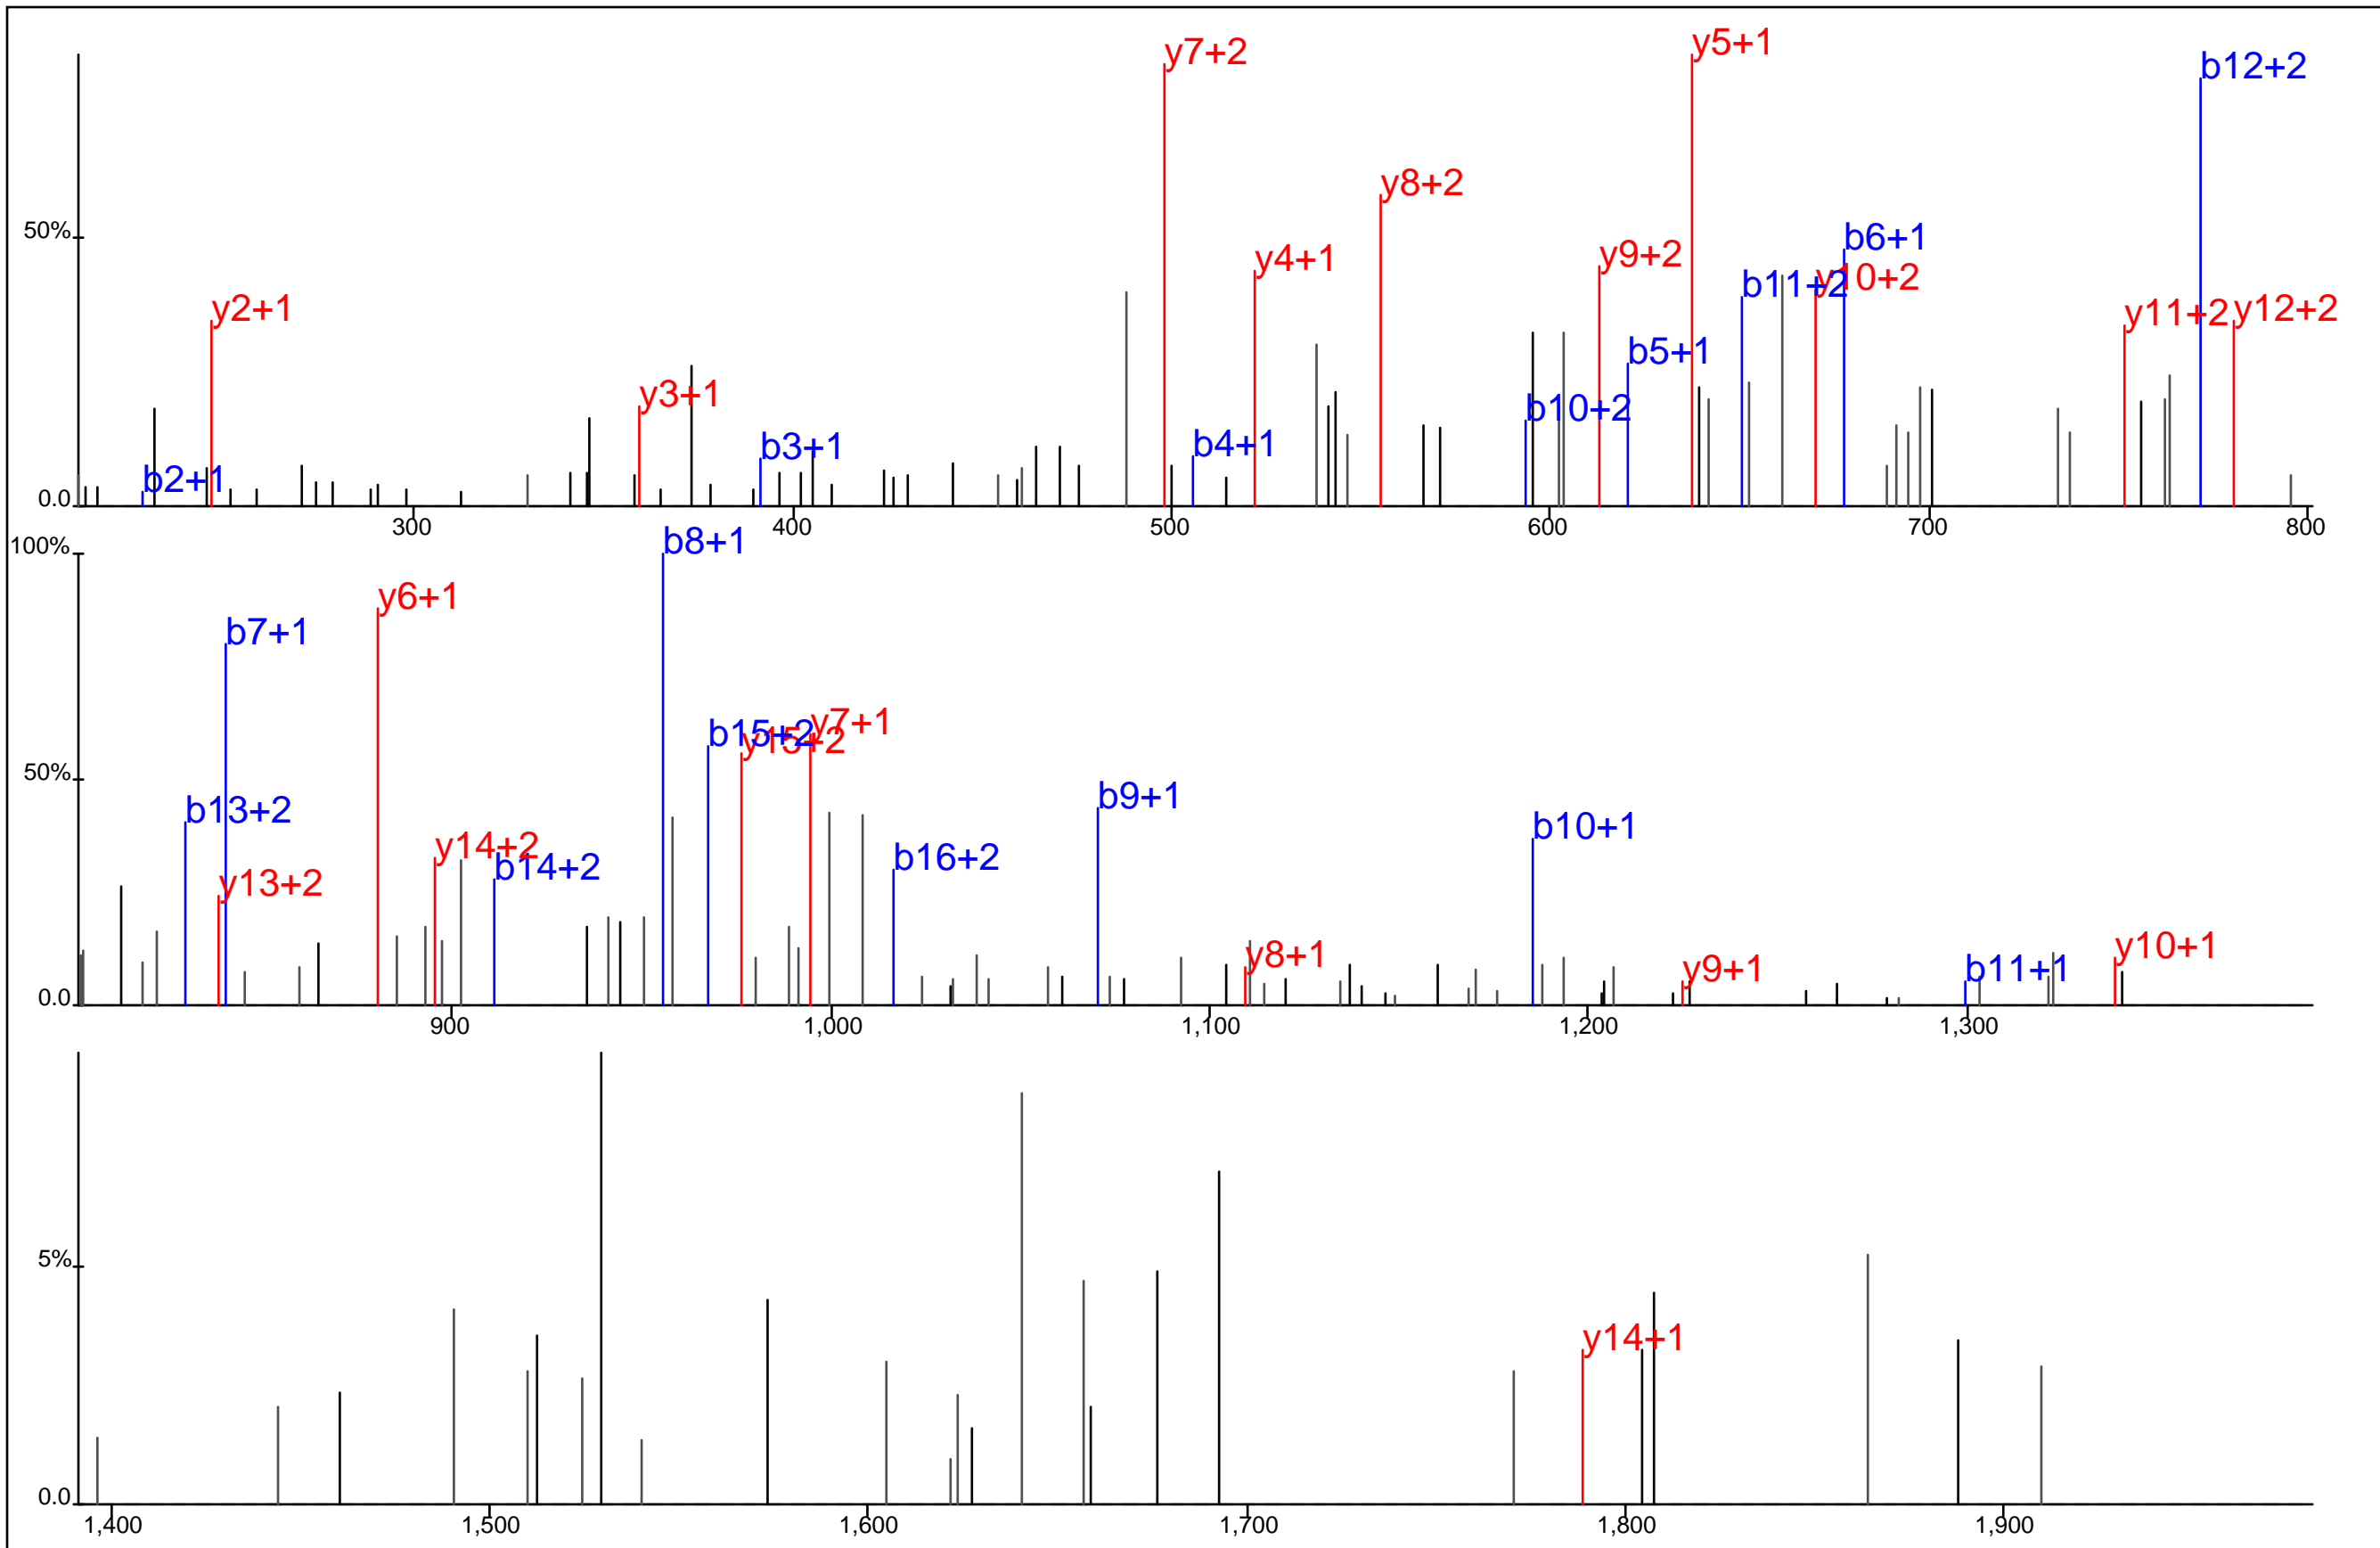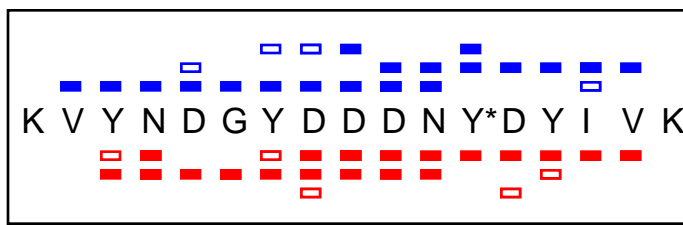

Protein Name: Dual-specificity tyrosine phosphorylation regulated kinase 1A  
 gi Accession: 0  
 Precursor Mass: 726.9692+3  
 Delta Mass: 1.219 ppm  
 XCorr: 46.55

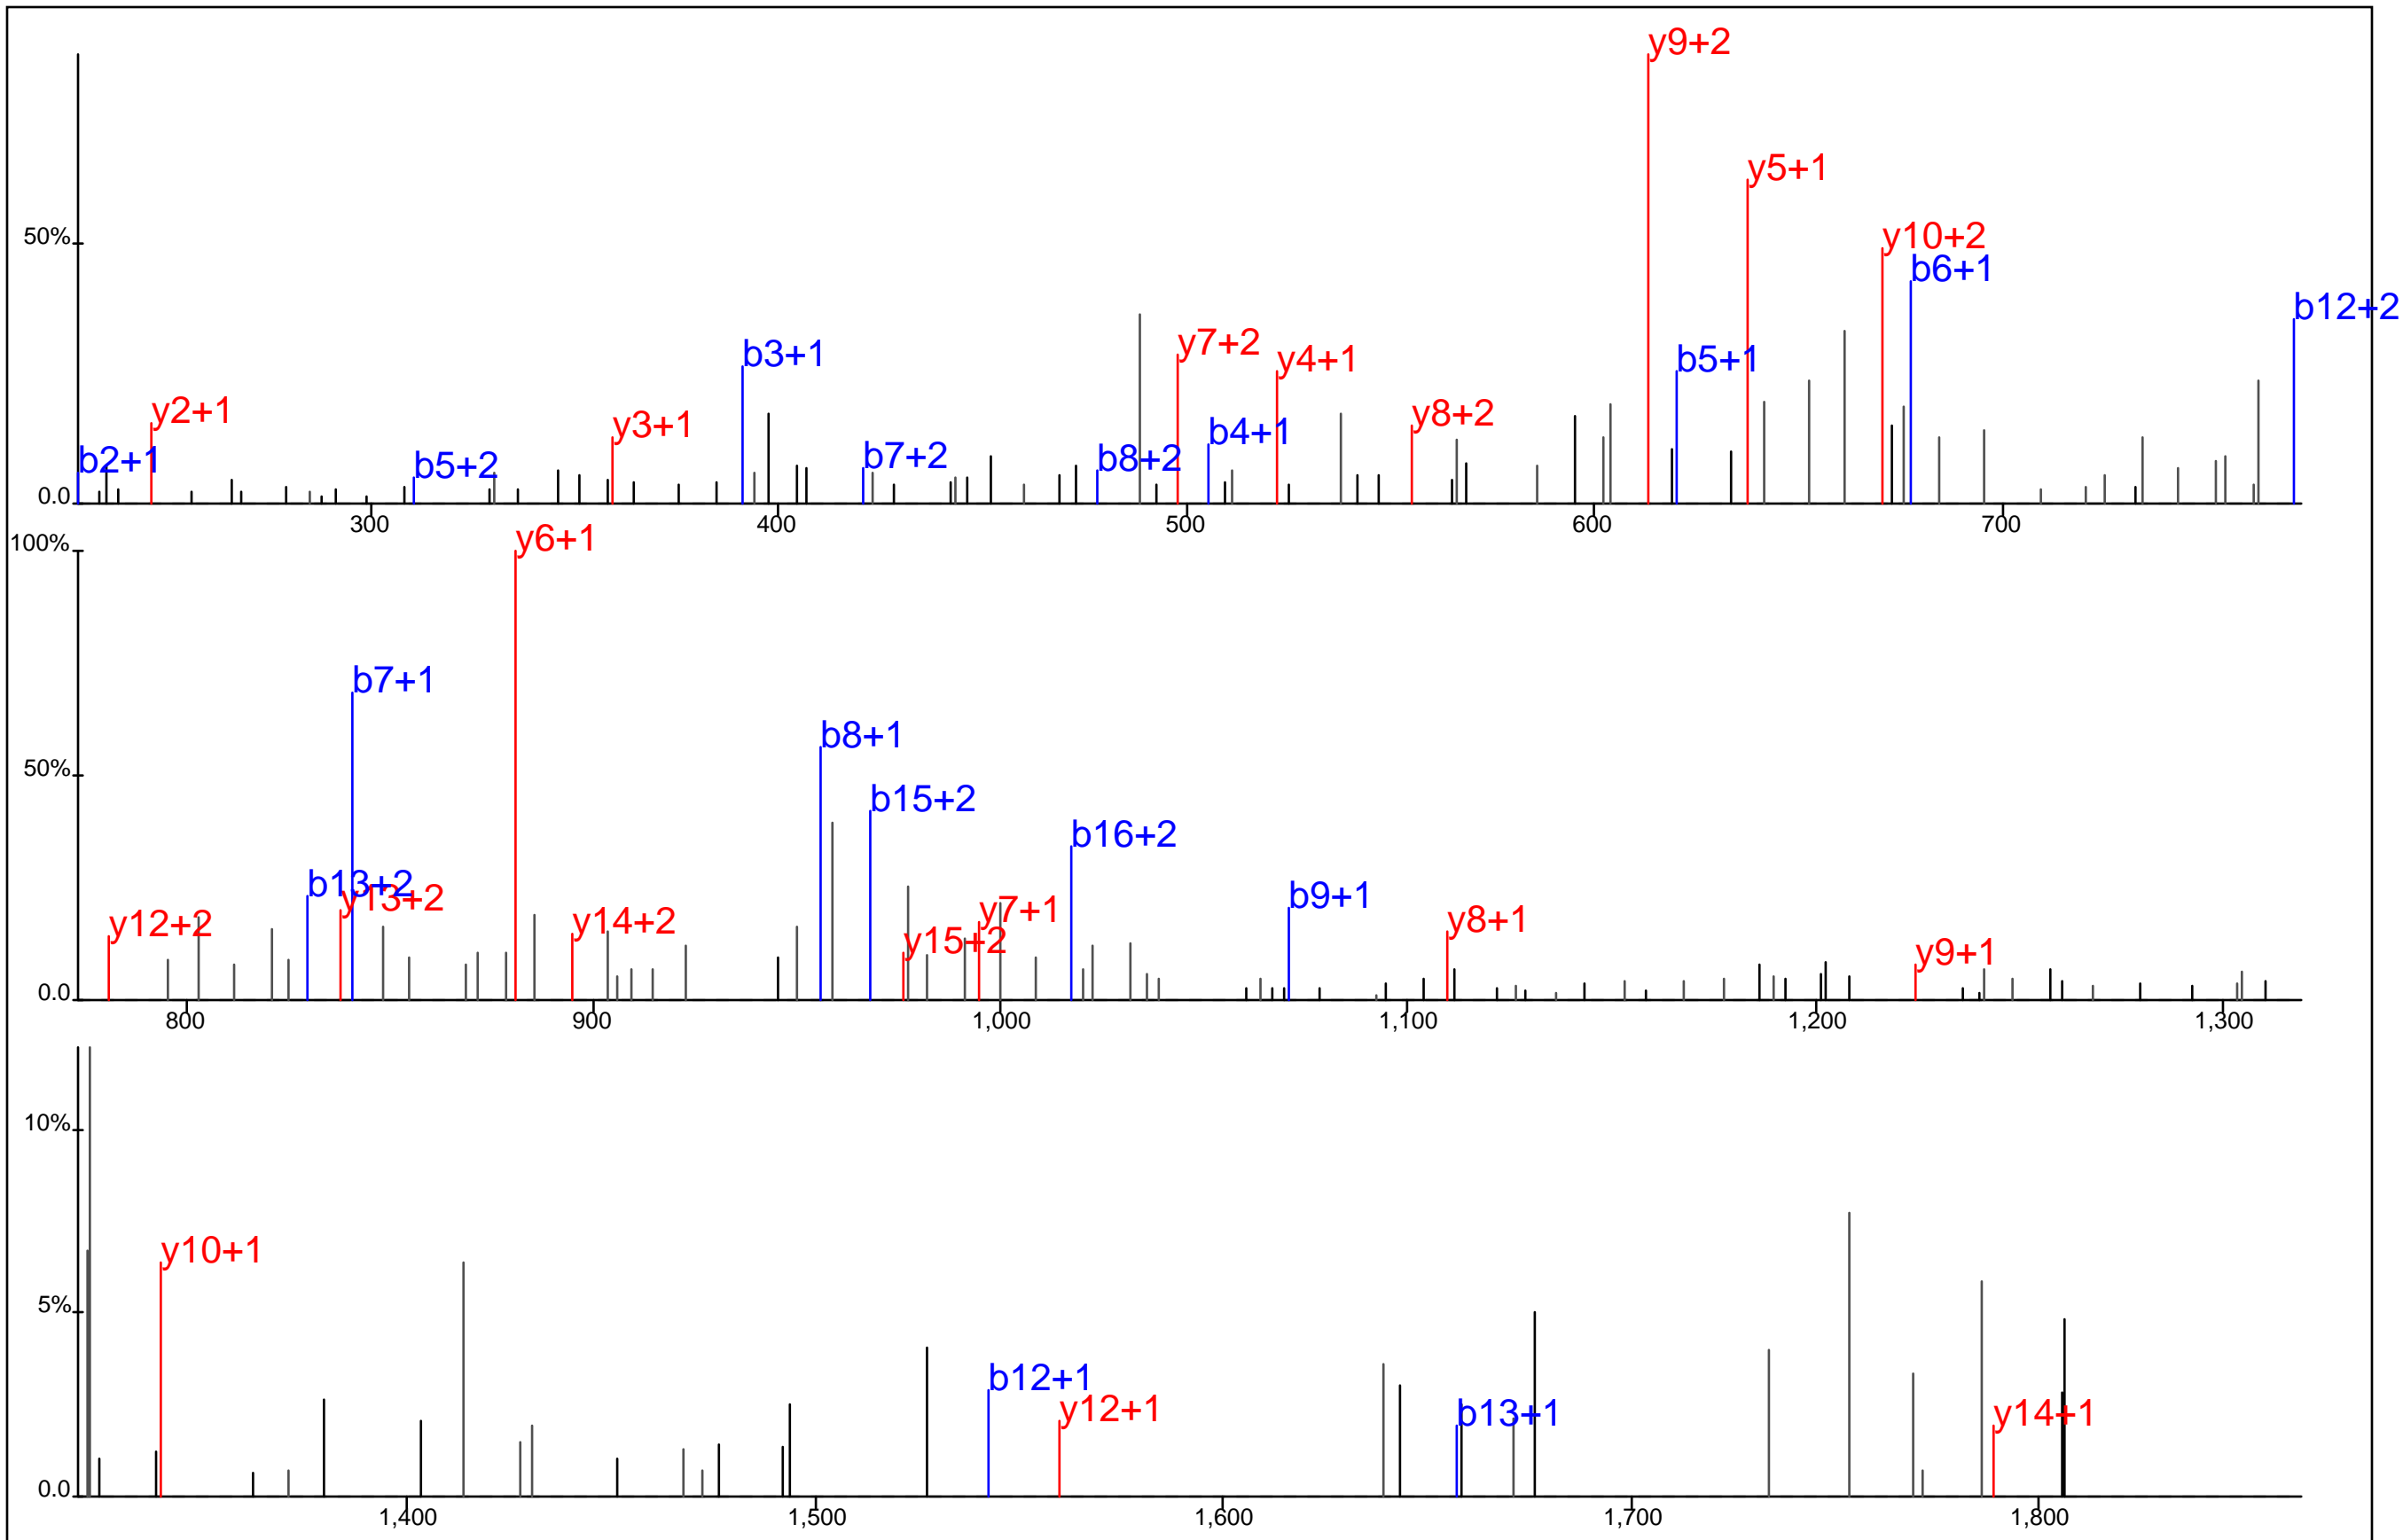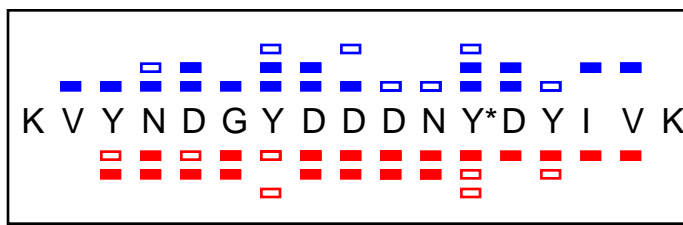

Protein Name: Dual-specificity tyrosine phosphorylation regulated kinase 1A  
 gi Accession: 0  
 Precursor Mass: 726.9672+3  
 Delta Mass: 1.470 ppm  
 XCorr: 57.7

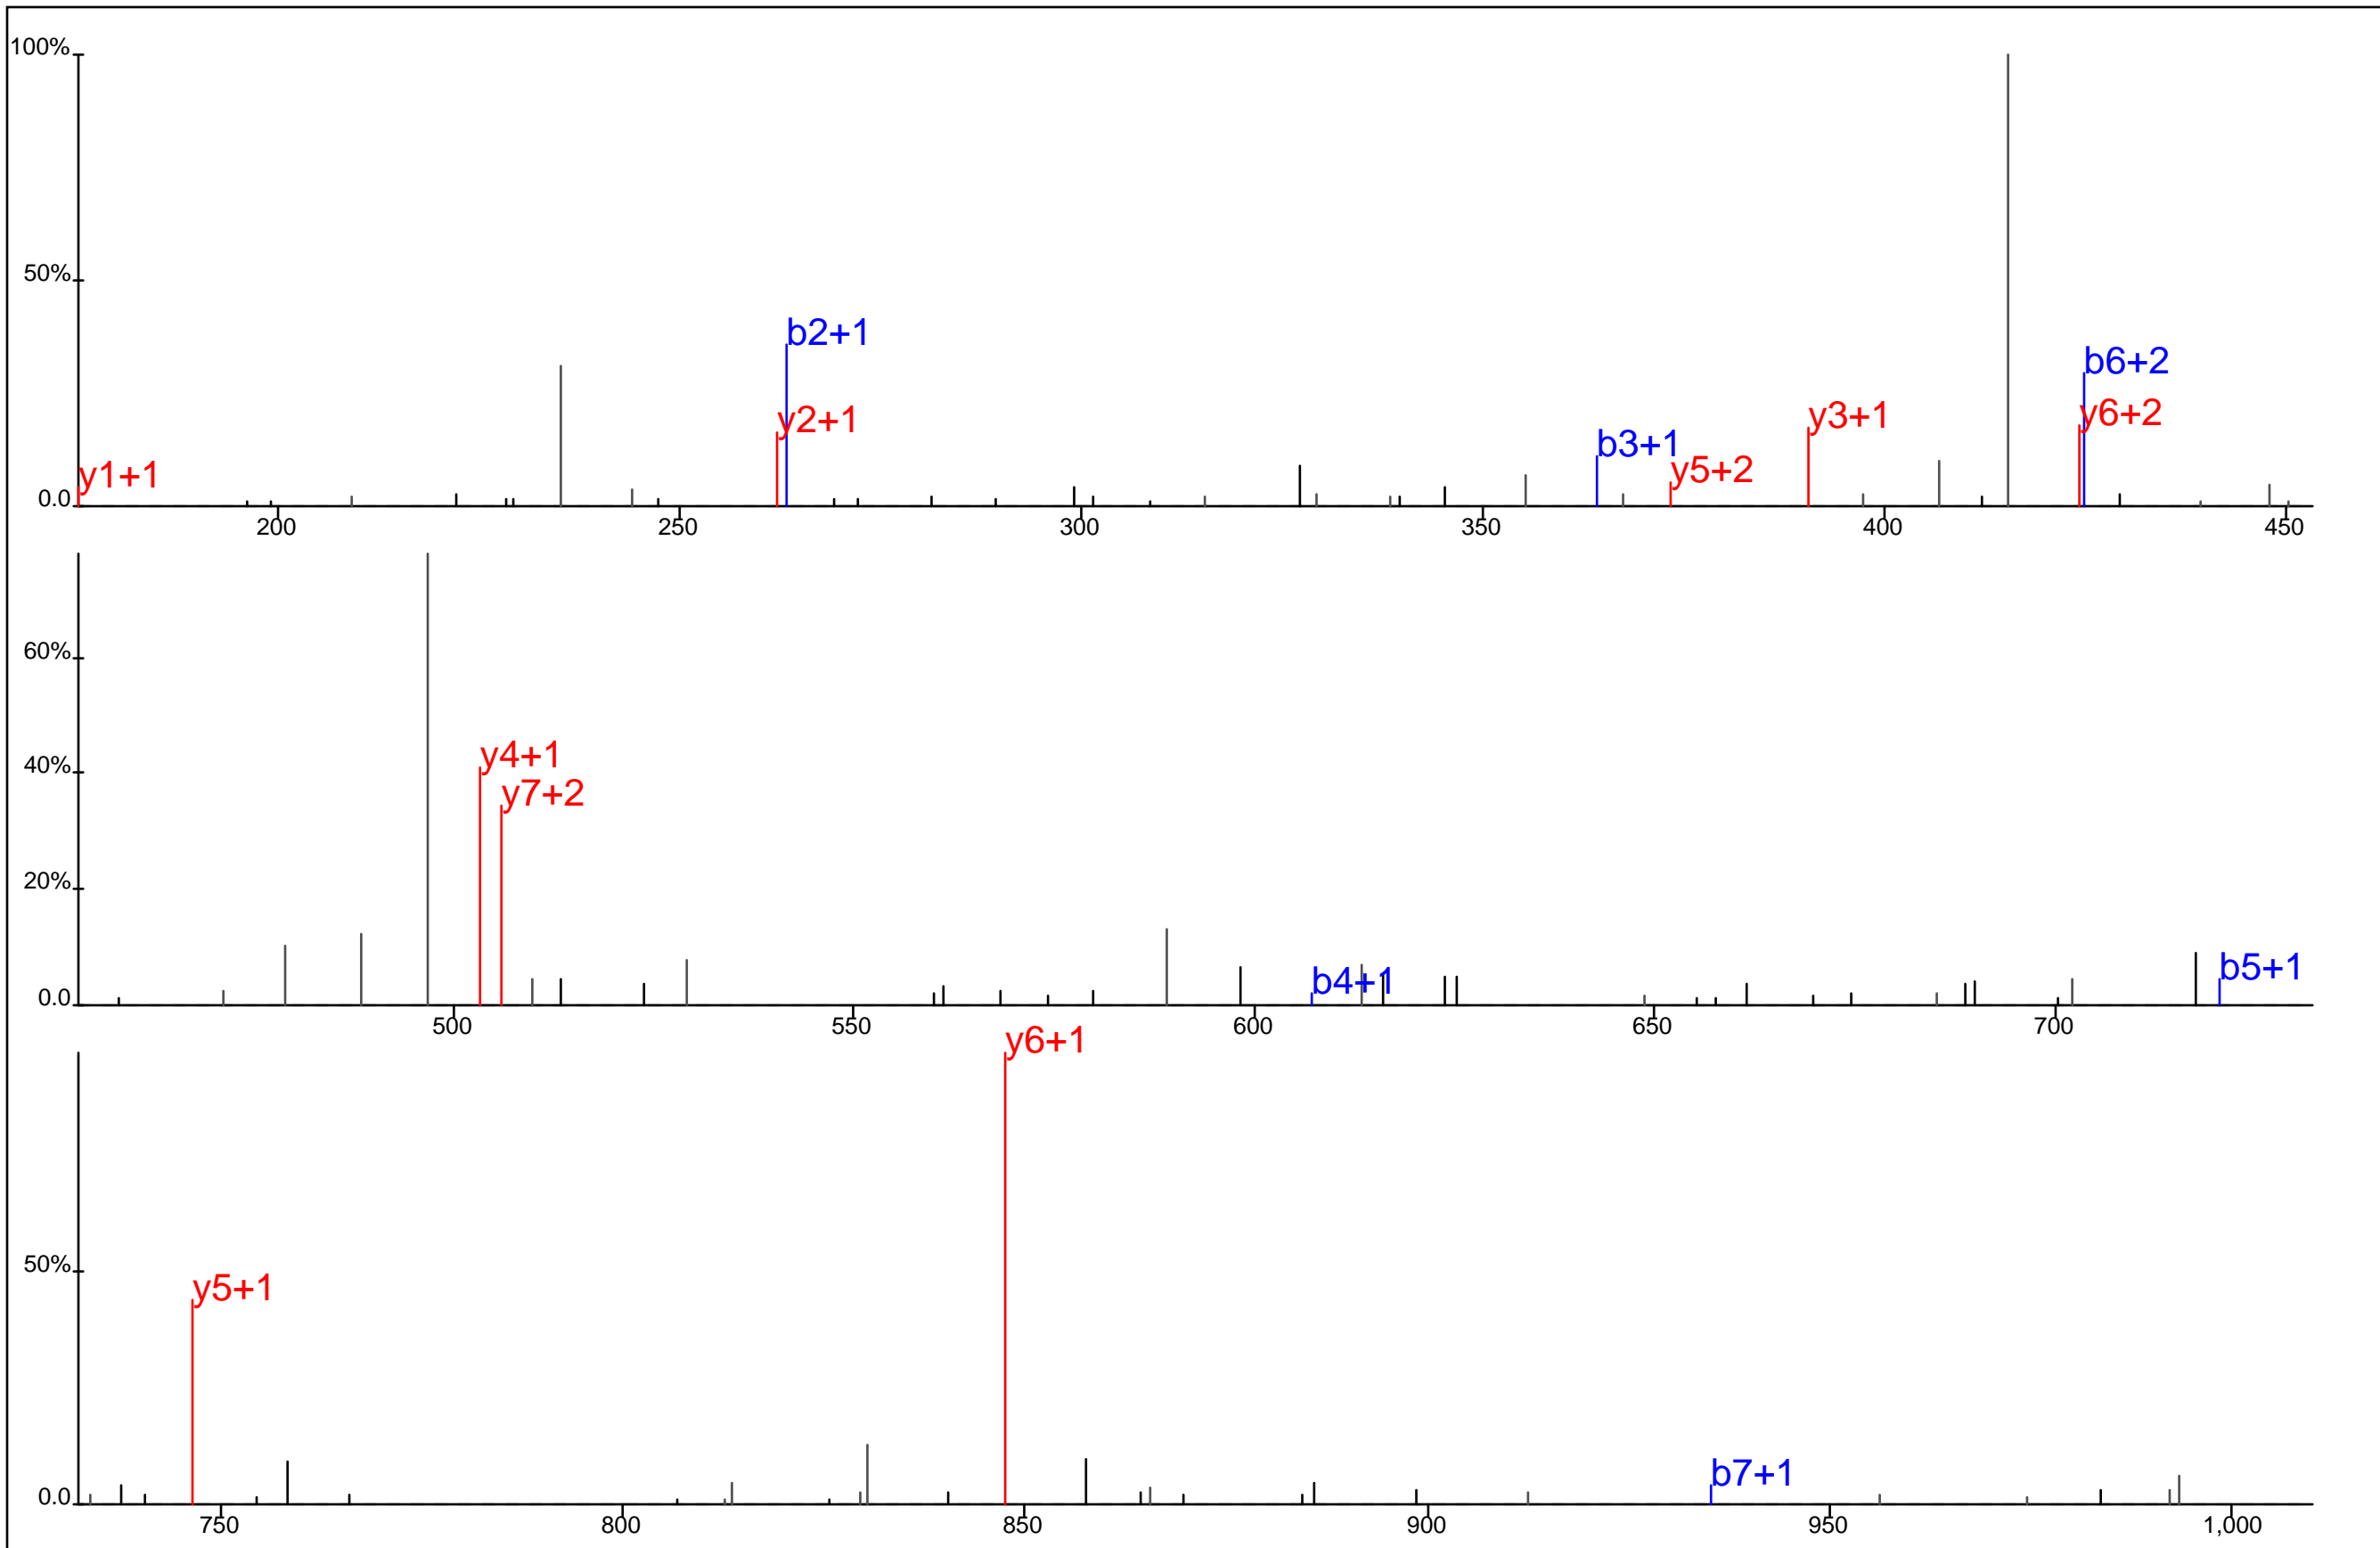

V Y T Y\*I Q S R

Protein Name: Dual-specificitytyrosine phosphorylation-regulated kinase 2  
 gi Accession: 0  
 Precursor Mass: 555.2549+2  
 Delta Mass: 0.063 ppm  
 XCorr: 45.12

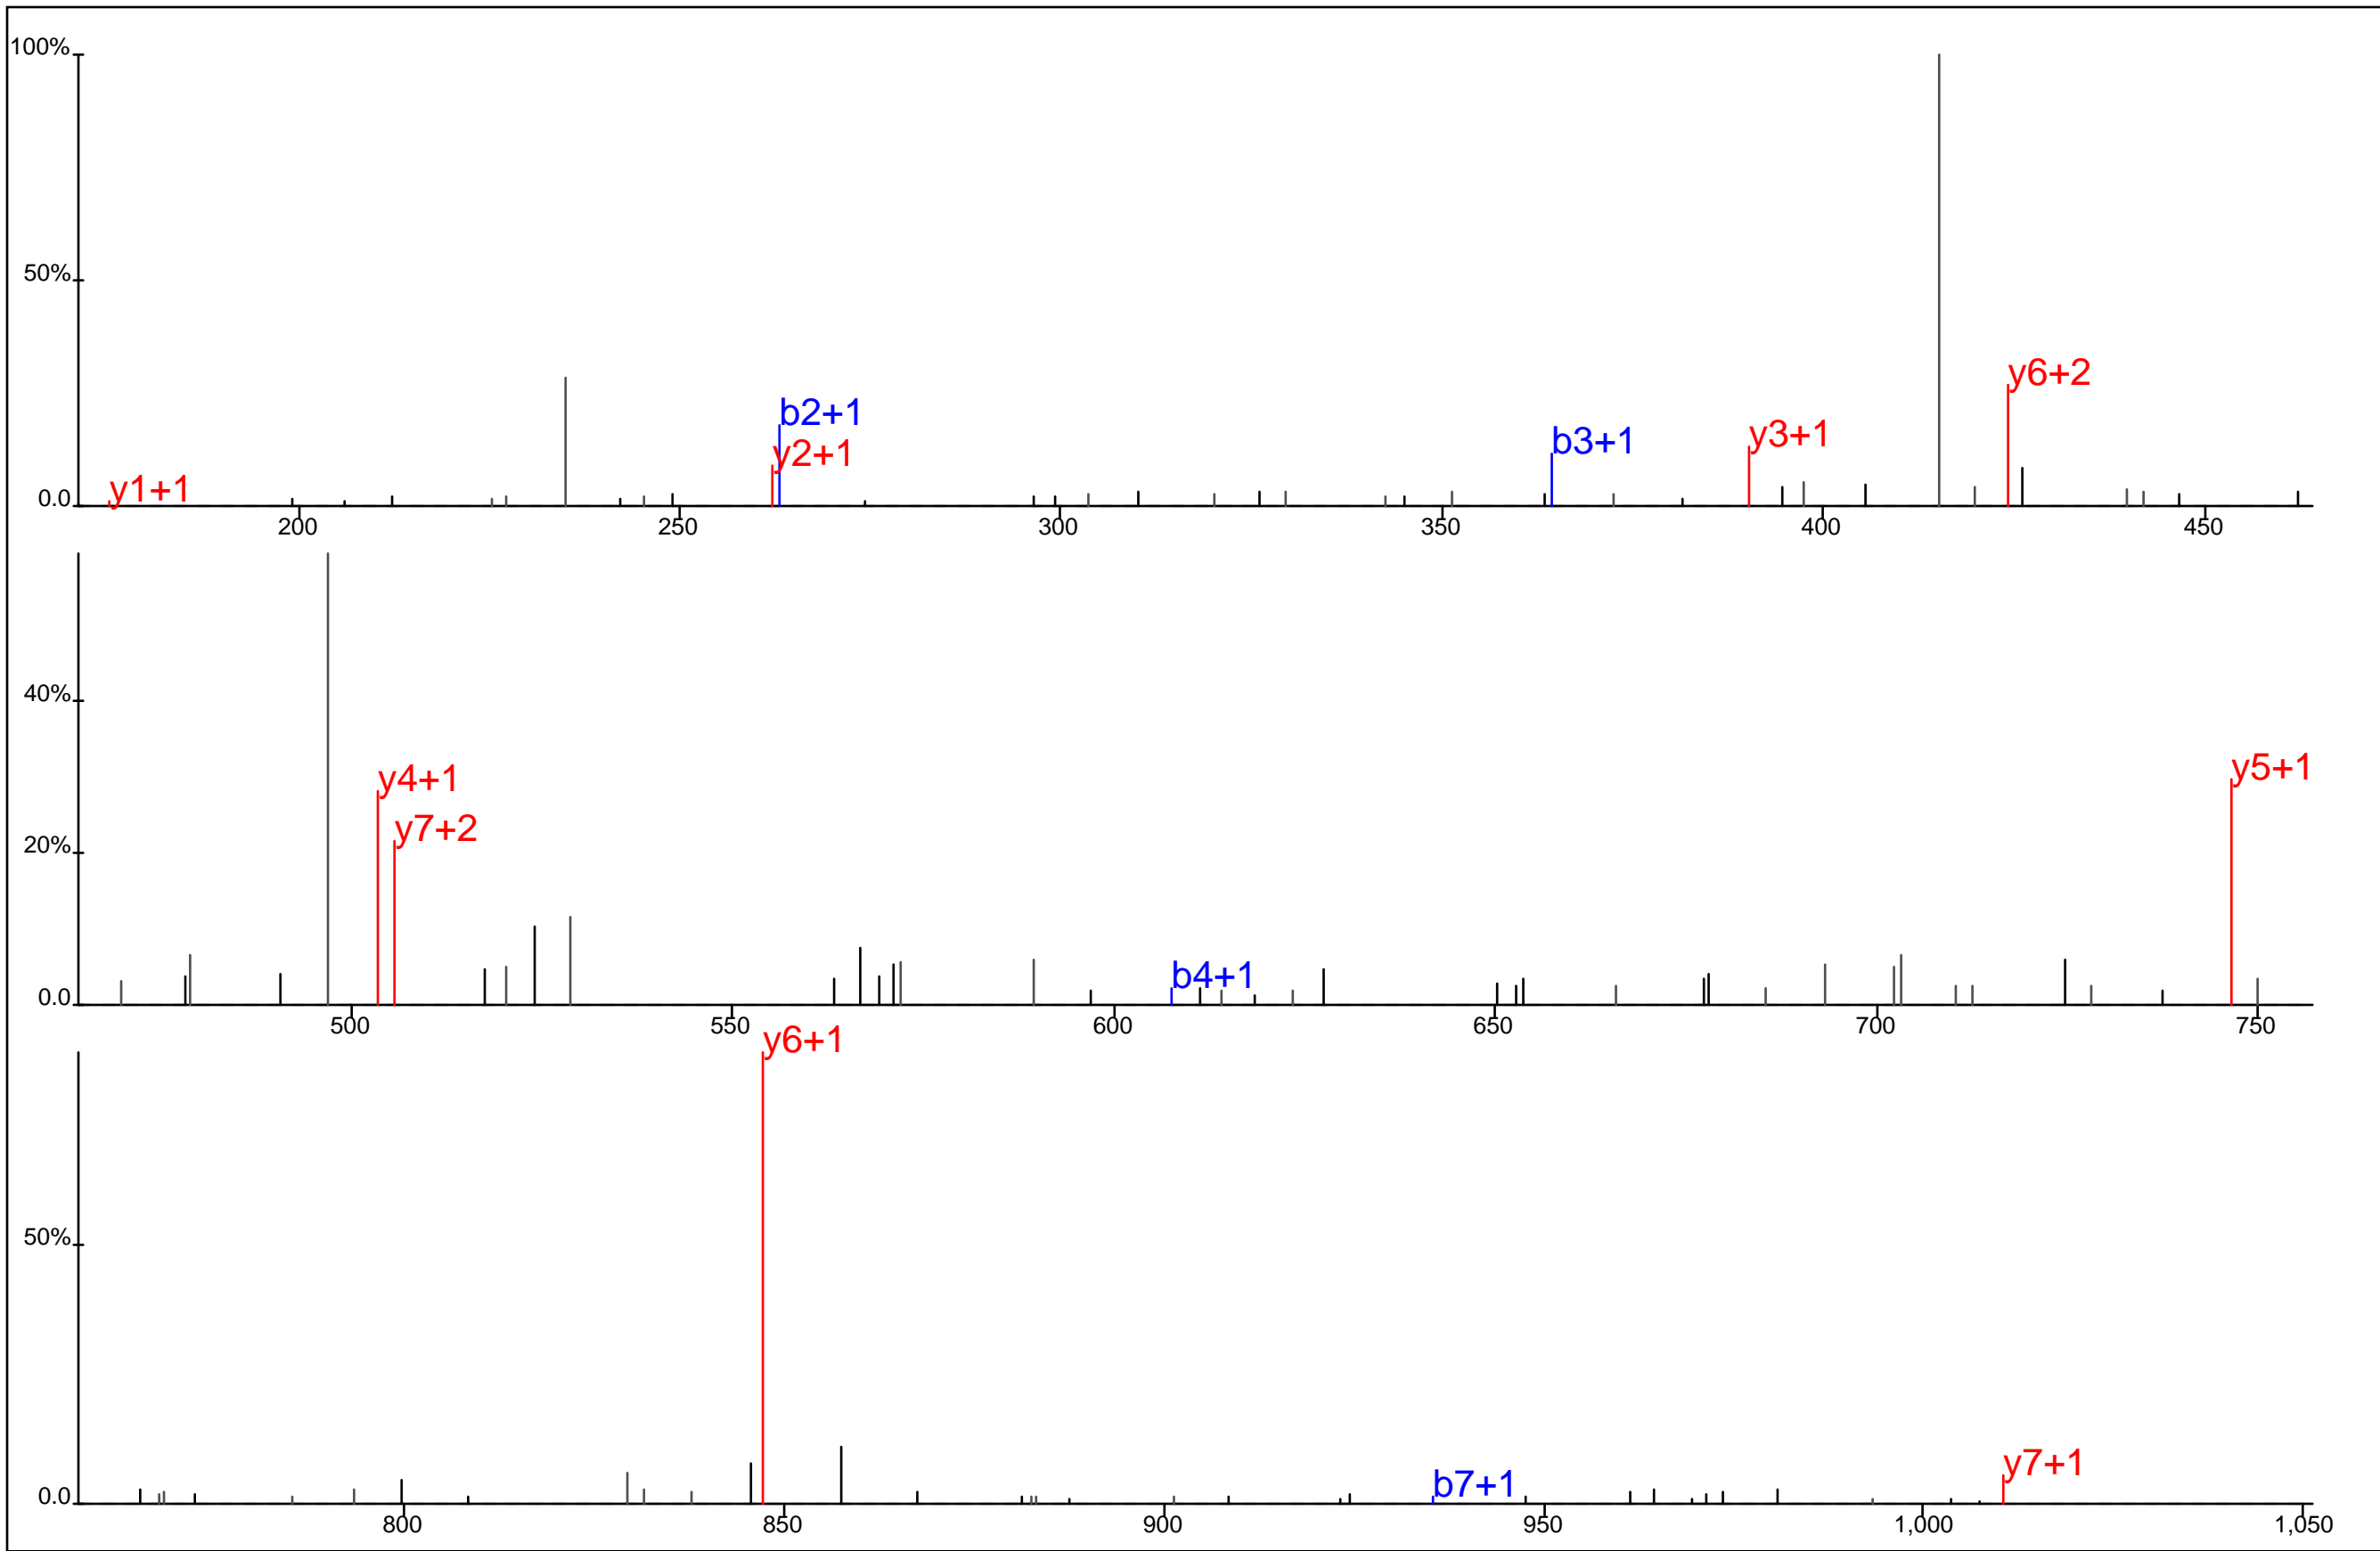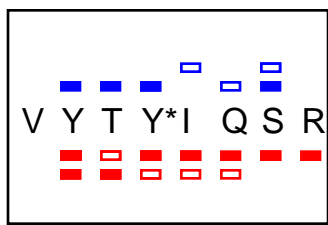

Protein Name: Dual-specificitytyrosine phosphorylation-regulated kinase 2  
 gi Accession: 0  
 Precursor Mass: 555.2548+2  
 Delta Mass: 0.283 ppm  
 XCorr: 35.54

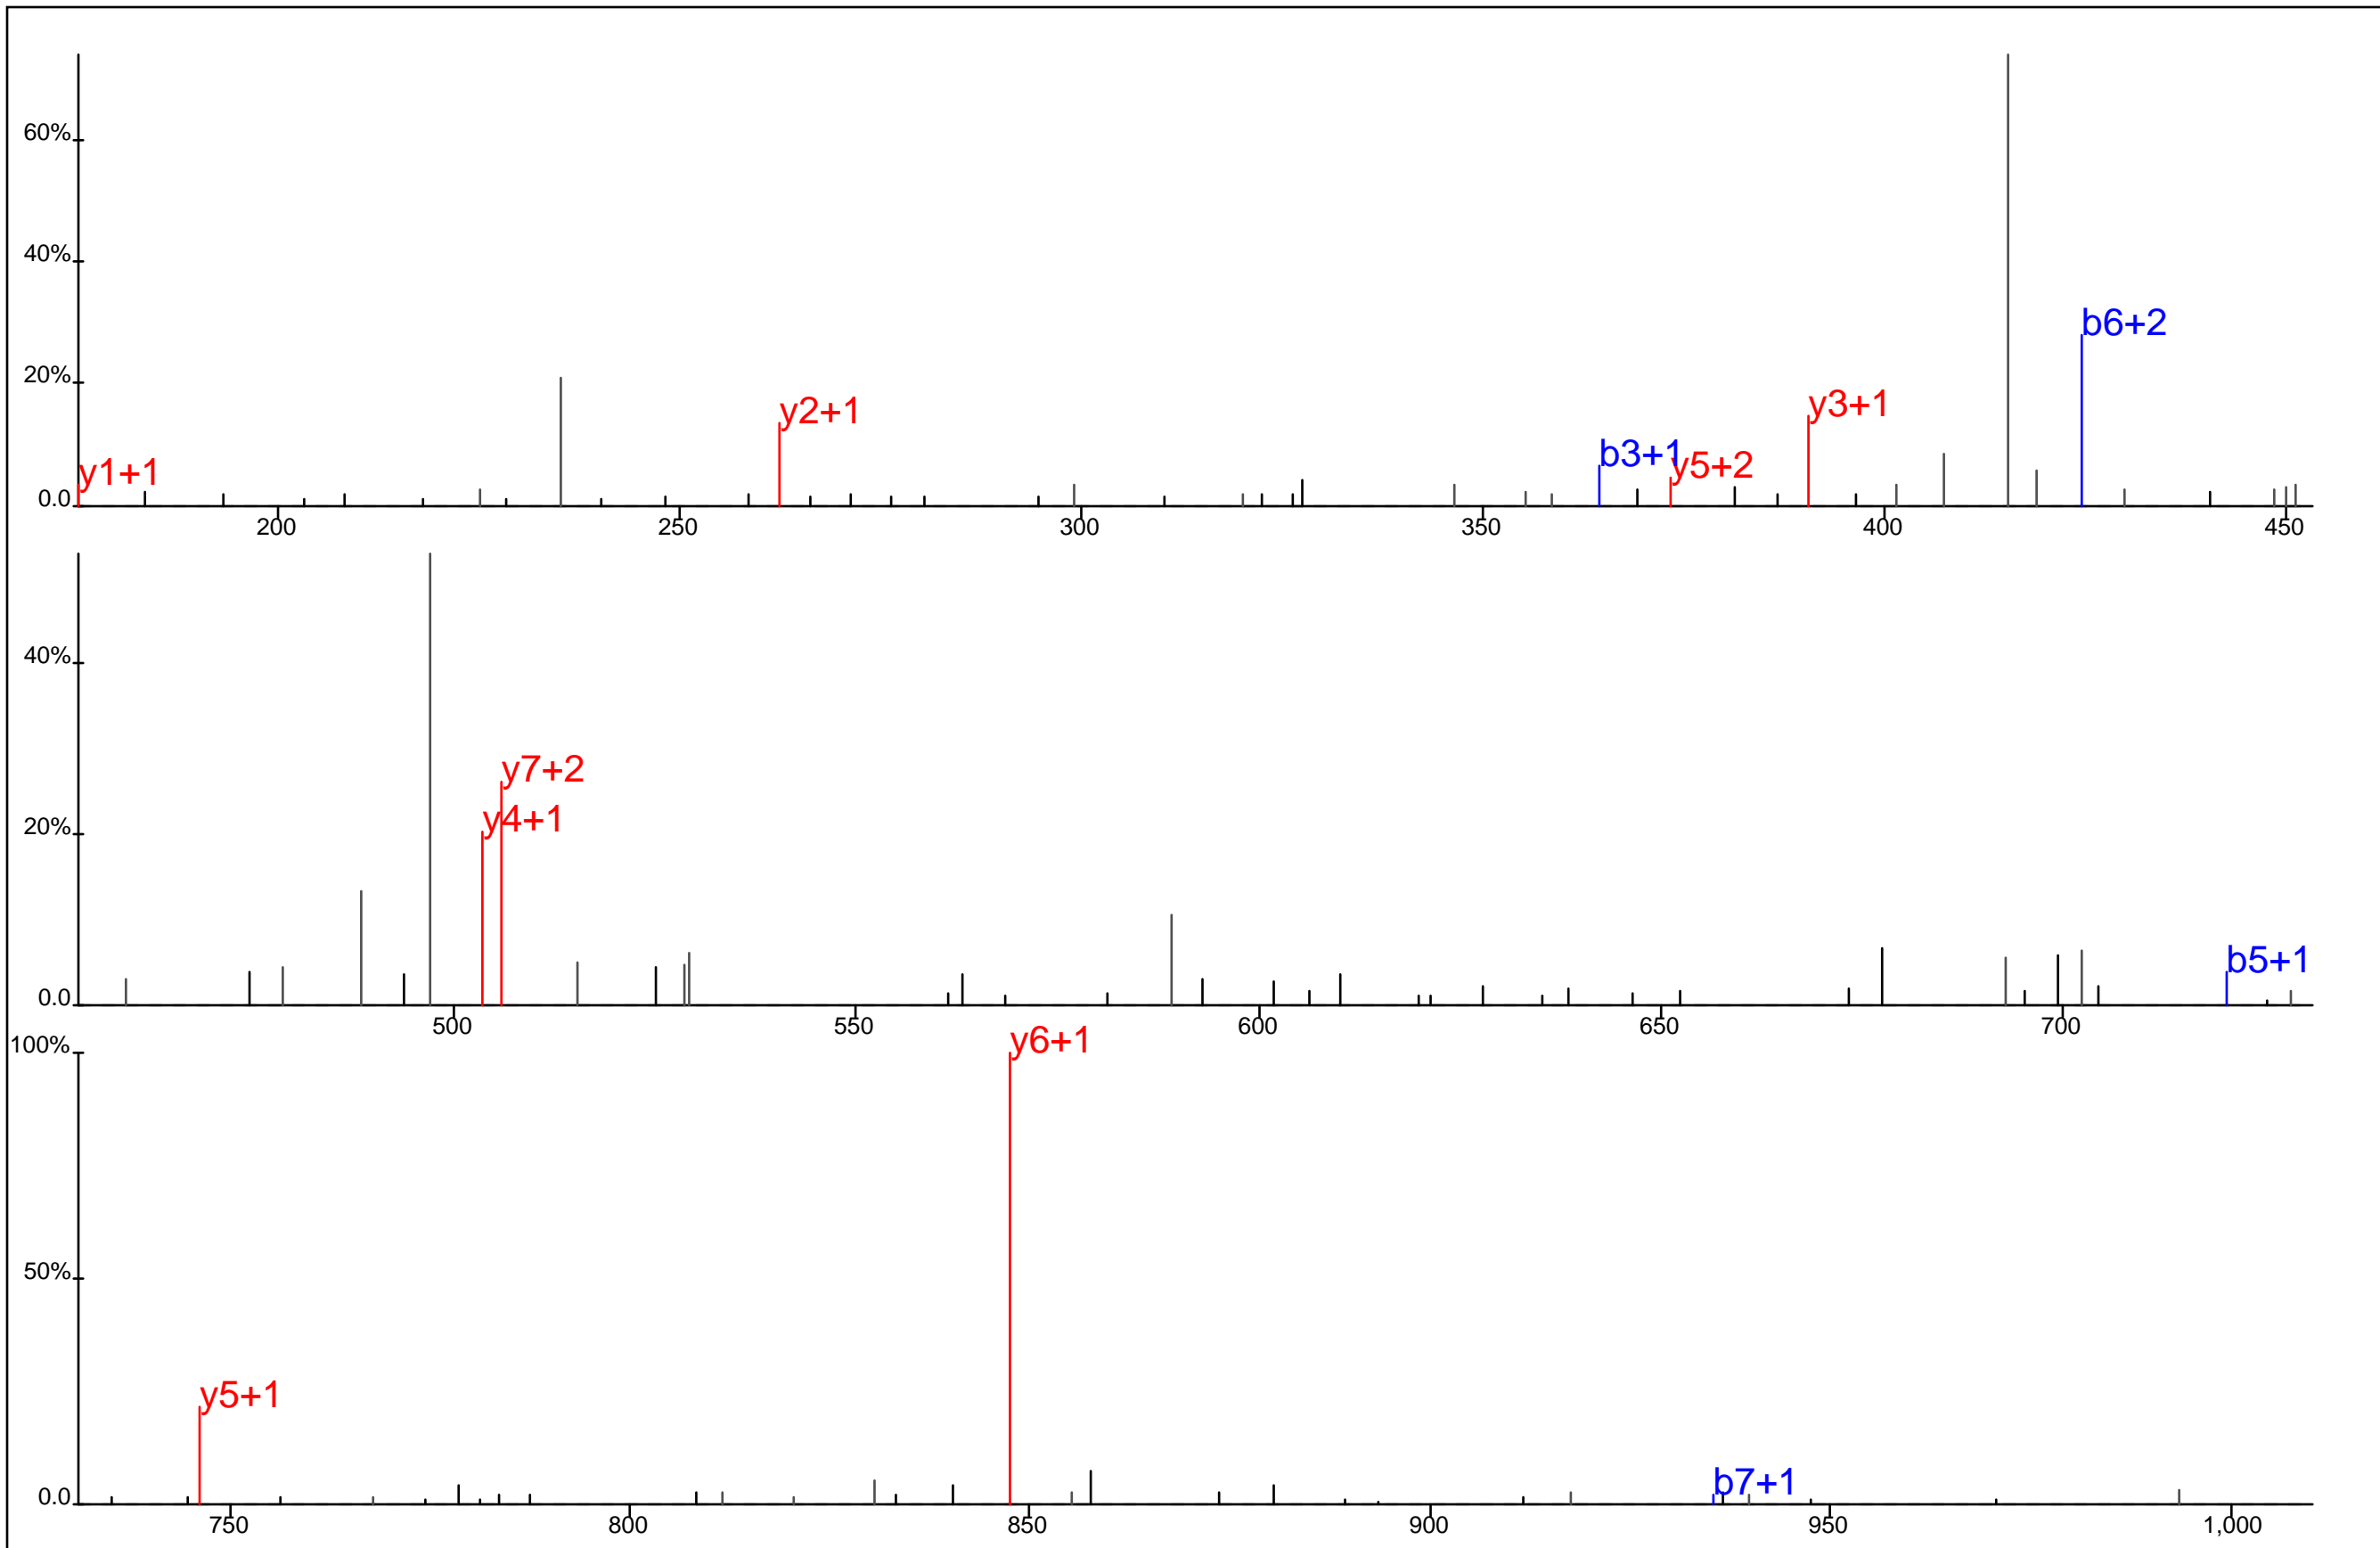

▢ ▢ ▢ ▢ ▢ ▢  
 V Y T Y\*I Q S R  
▢ ▢ ▢ ▢ ▢ ▢

Protein Name: Dual-specificitytyrosine phosphorylation-regulated kinase 2  
 gi Accession: 0  
 Precursor Mass: 555.2552+2  
 Delta Mass: 0.487 ppm  
 XCorr: 49.28

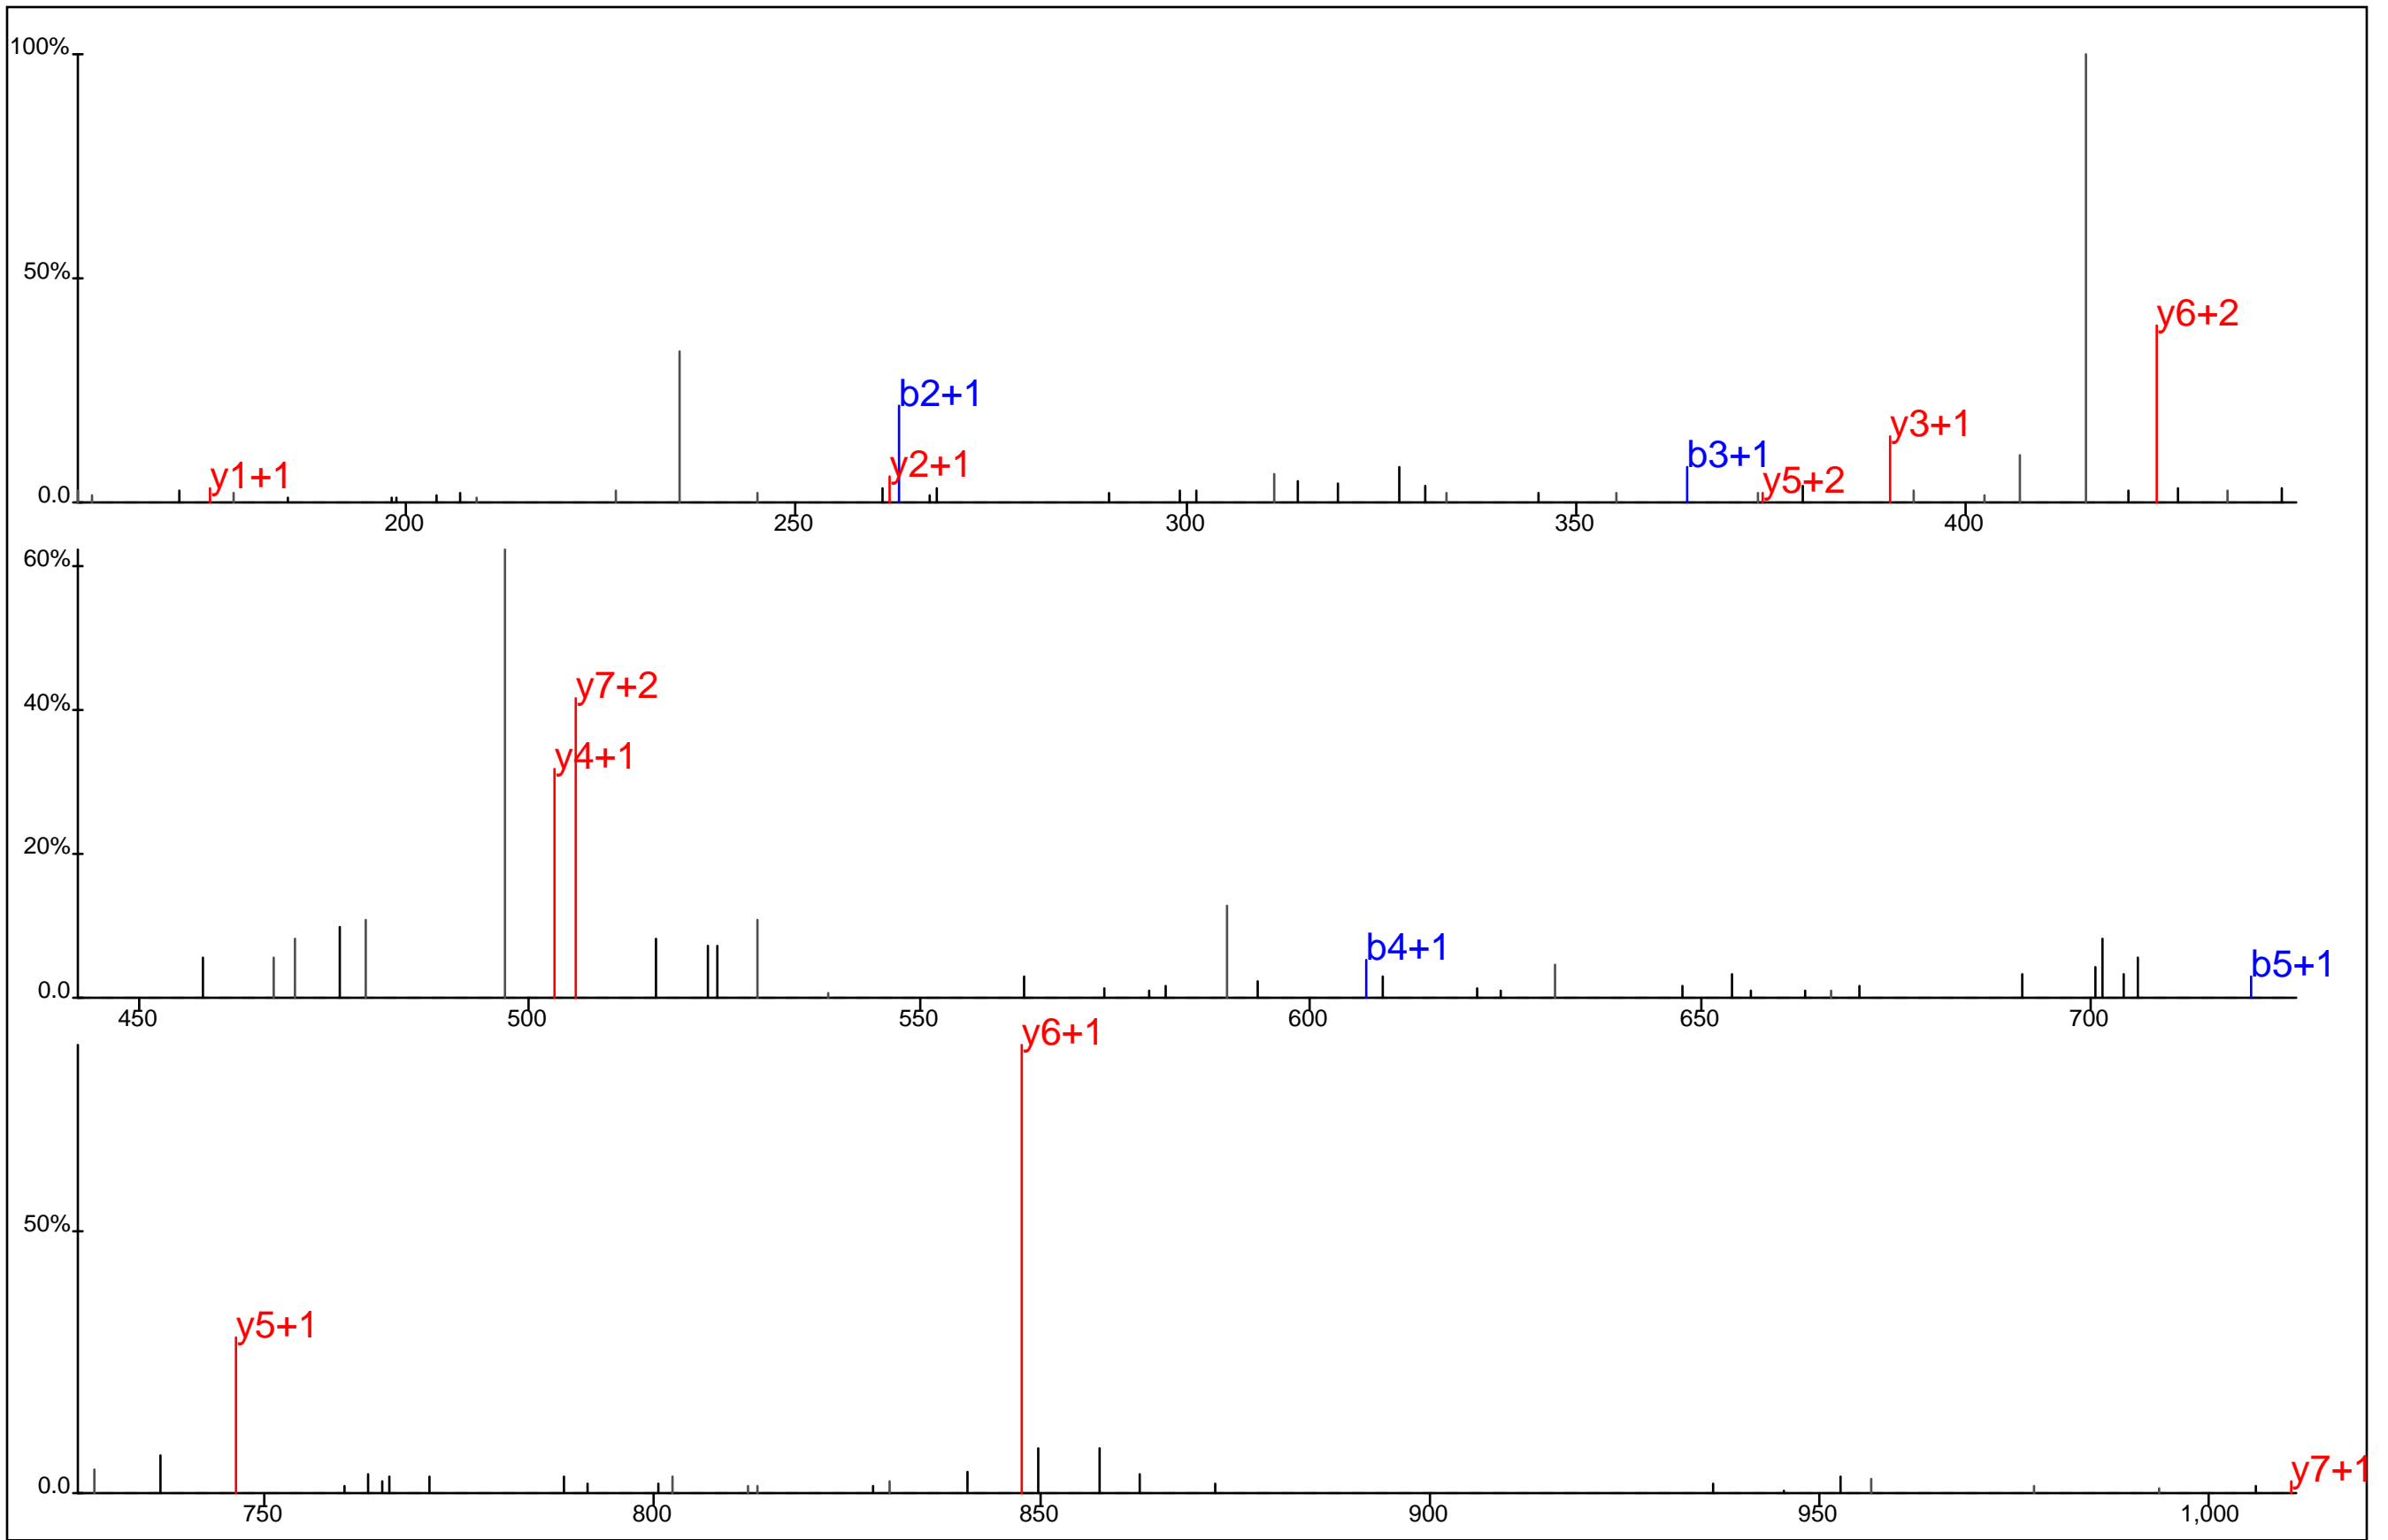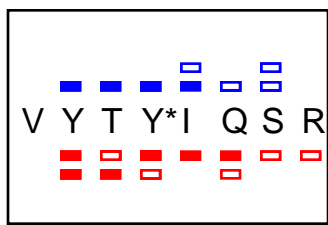

Protein Name: Dual-specificitytyrosine phosphorylation-regulated kinase 2  
 gi Accession: 0  
 Precursor Mass: 555.2560+2  
 Delta Mass: 1.806 ppm  
 XCorr: 37.62

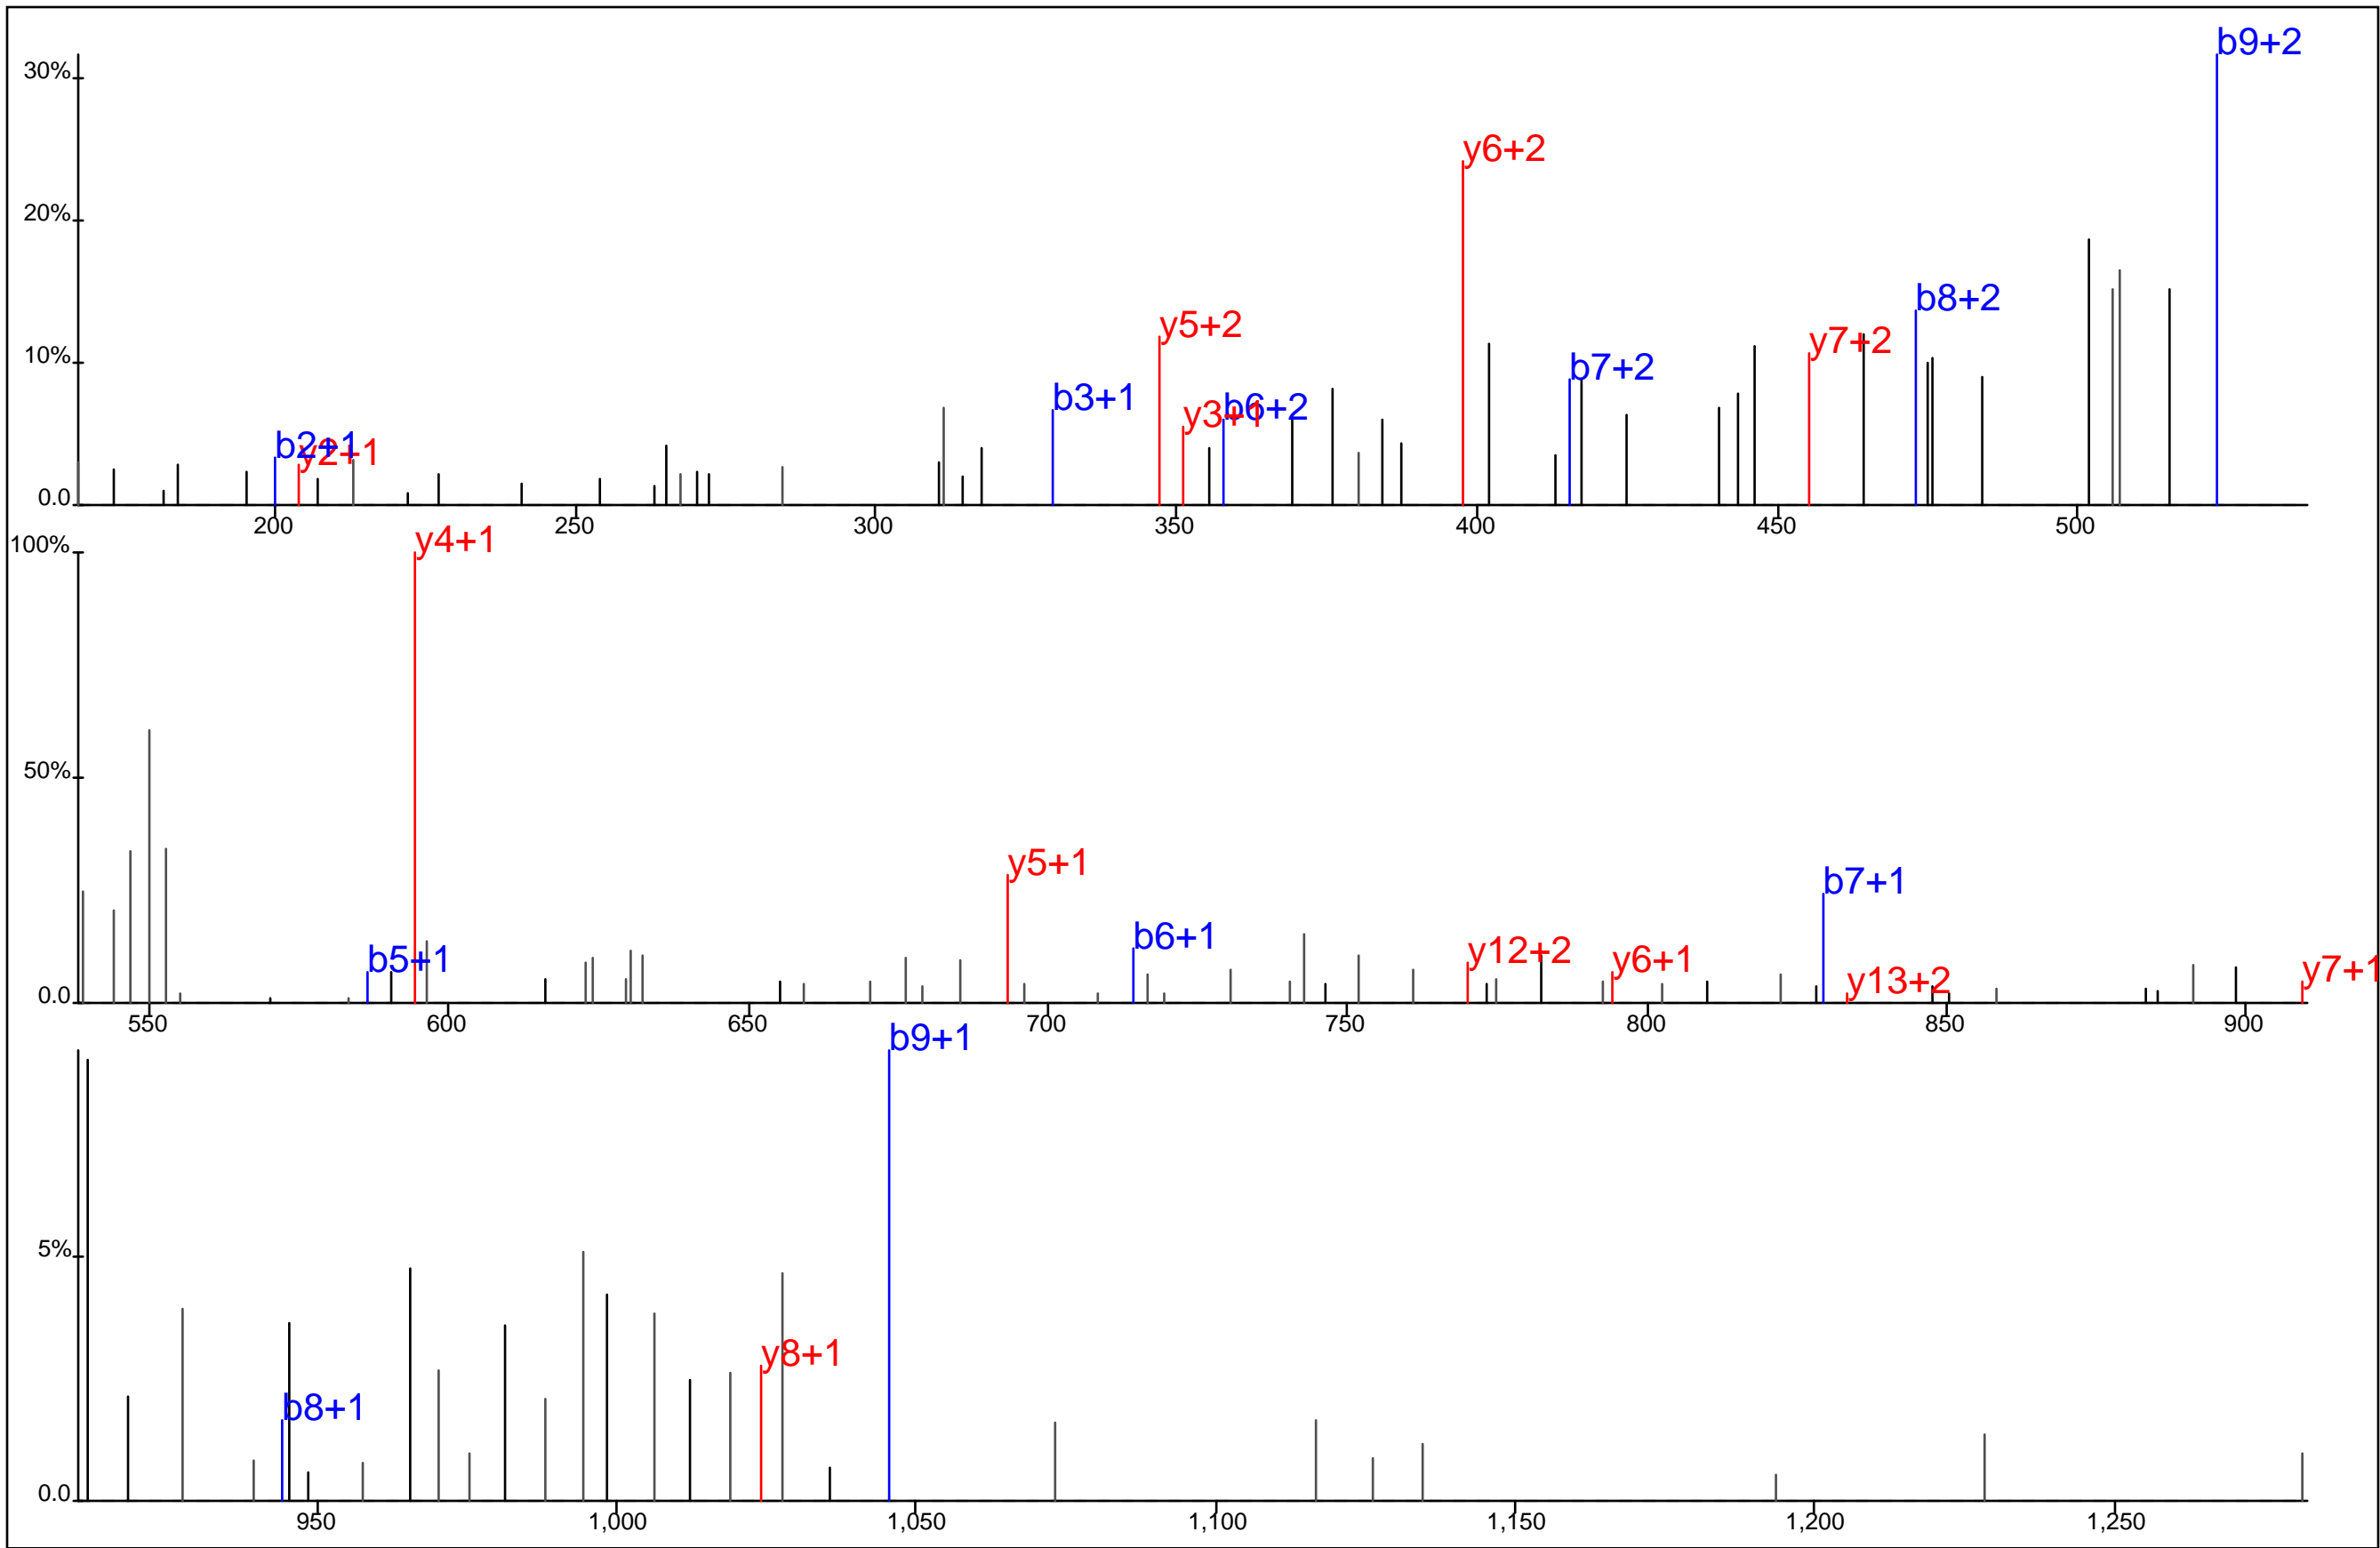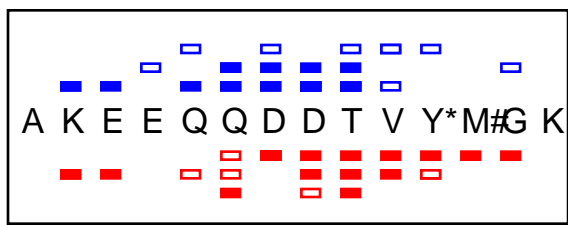

Protein Name: Dynactin 1  
 gi Accession: 0  
 Precursor Mass: 579.9062+3  
 Delta Mass: 0.180 ppm  
 XCorr: 31.4

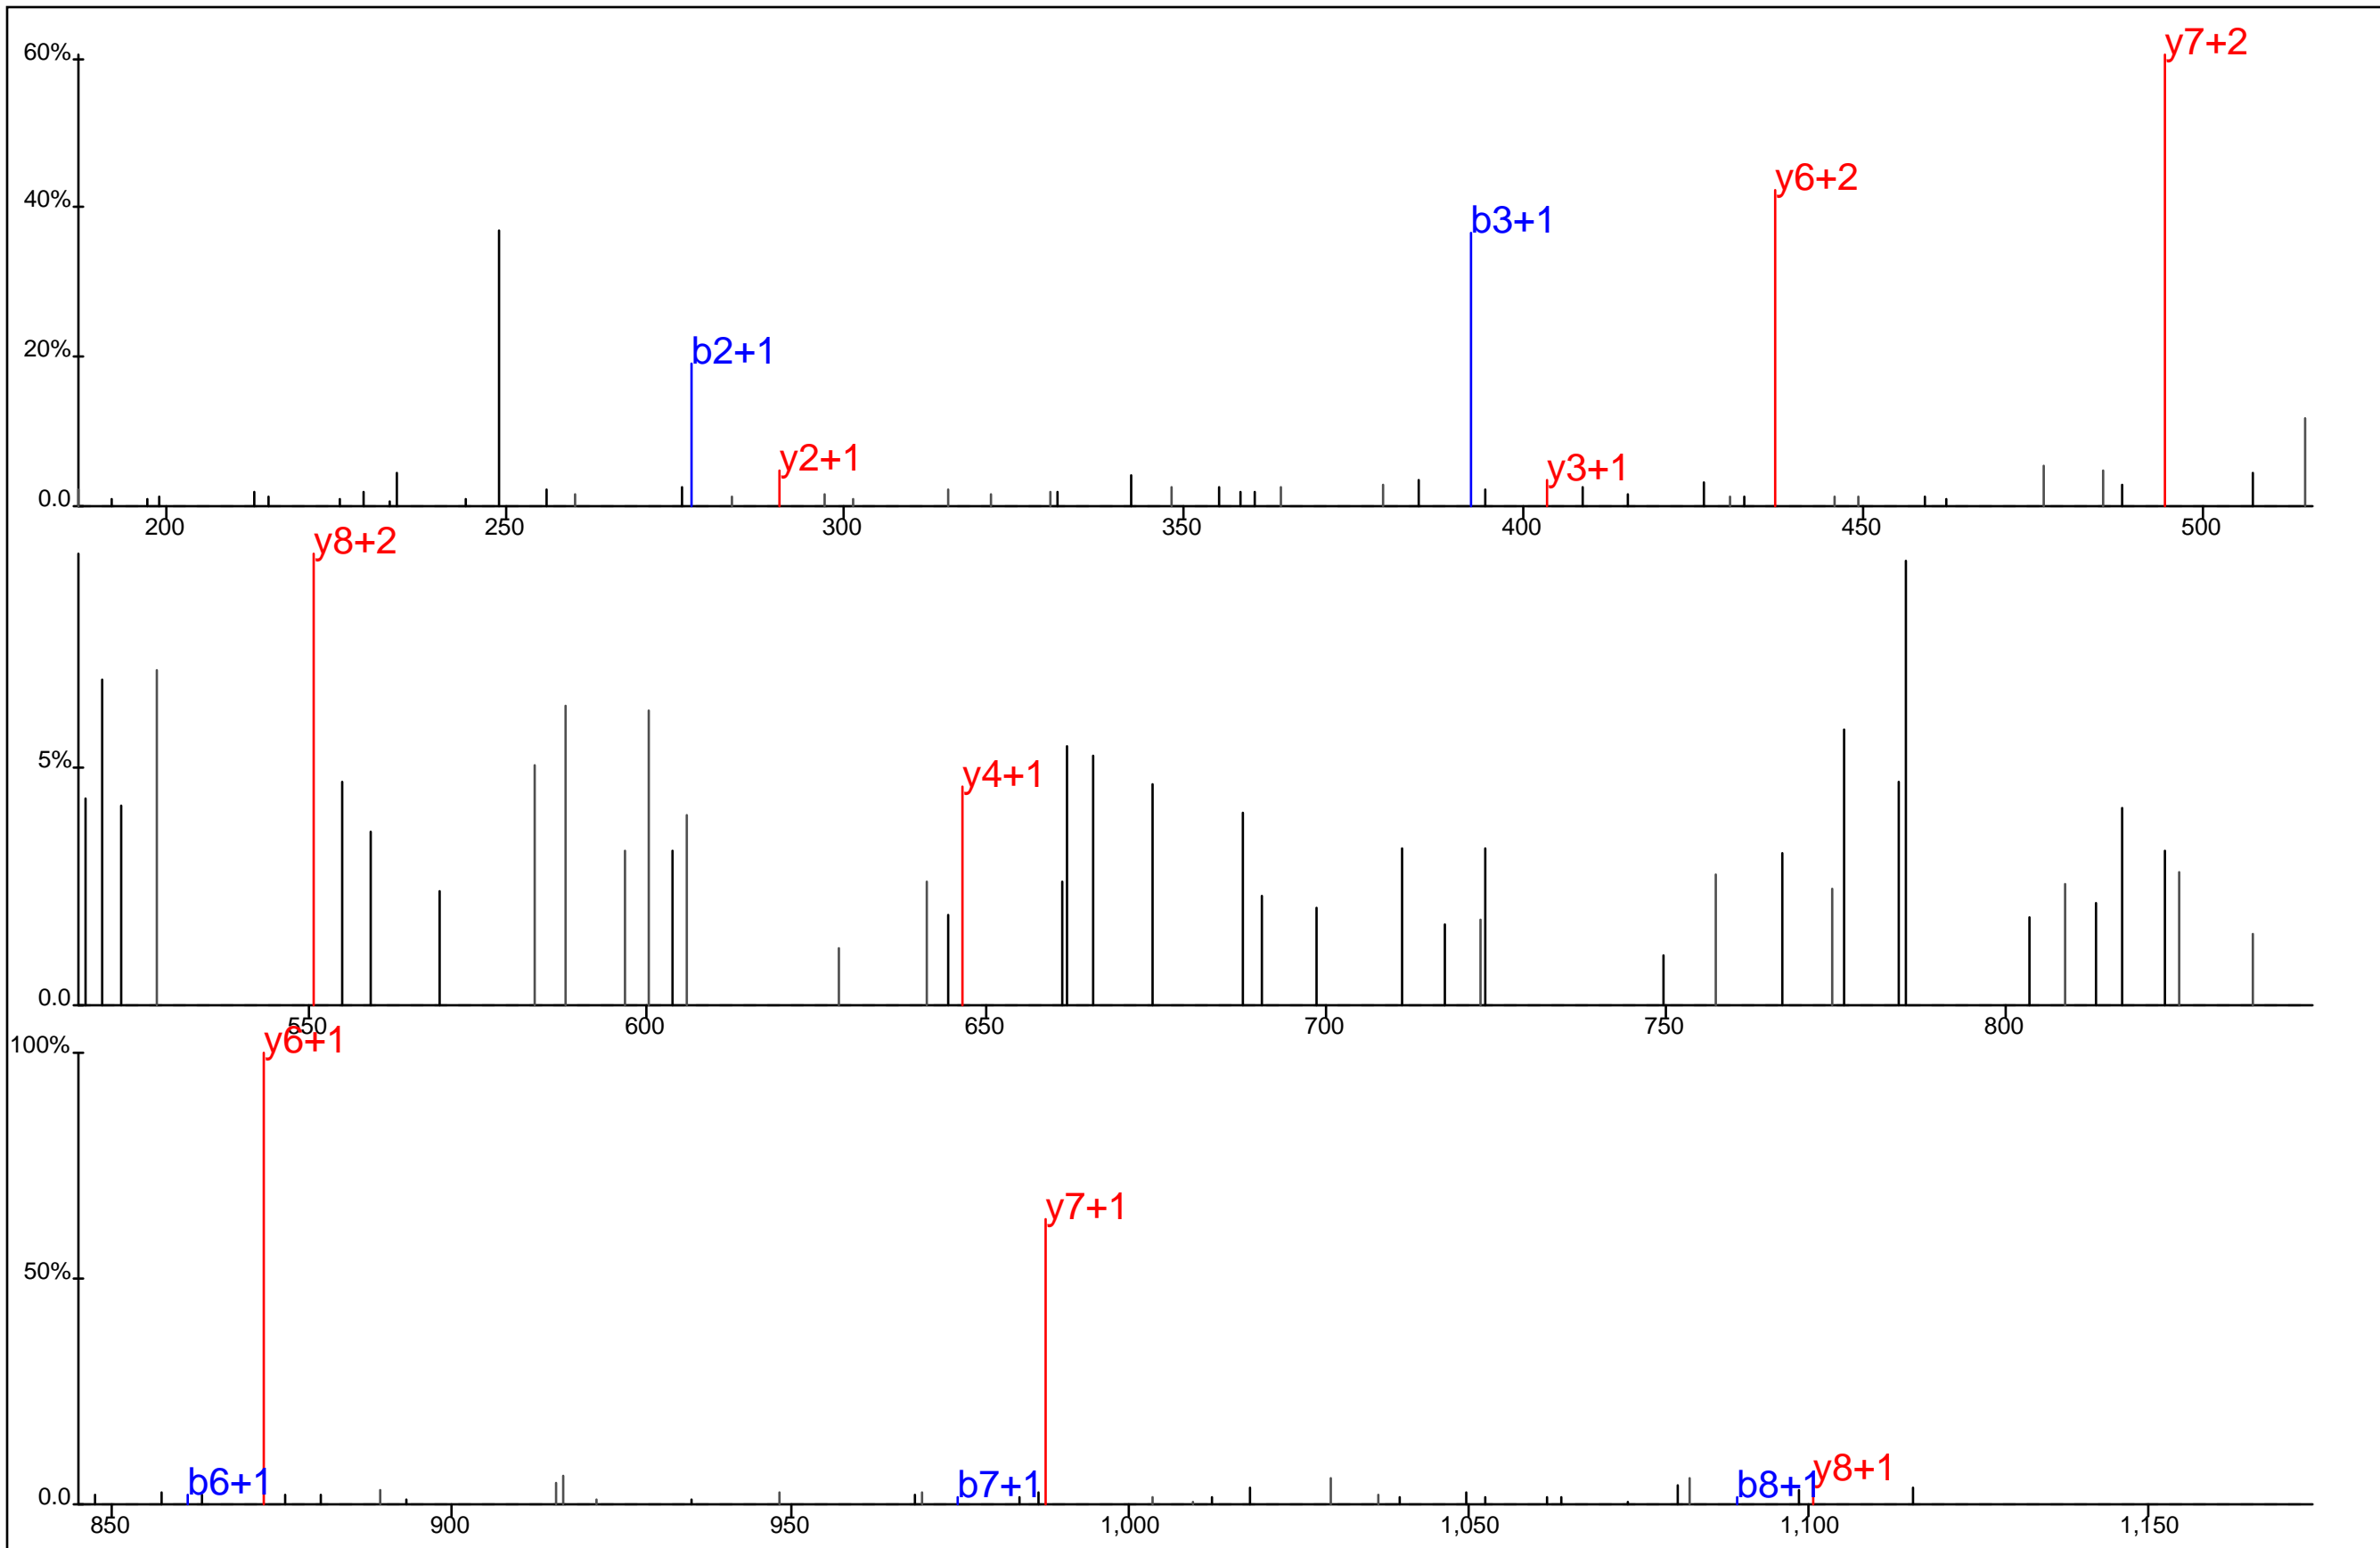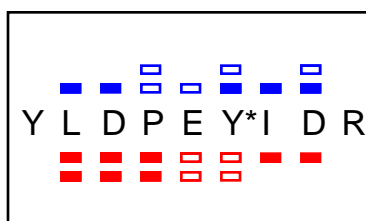

Protein Name: Dynactin 3  
 gi Accession: 0  
 Precursor Mass: 632.2678+2  
 Delta Mass: 0.820 ppm  
 XCorr: 22.83



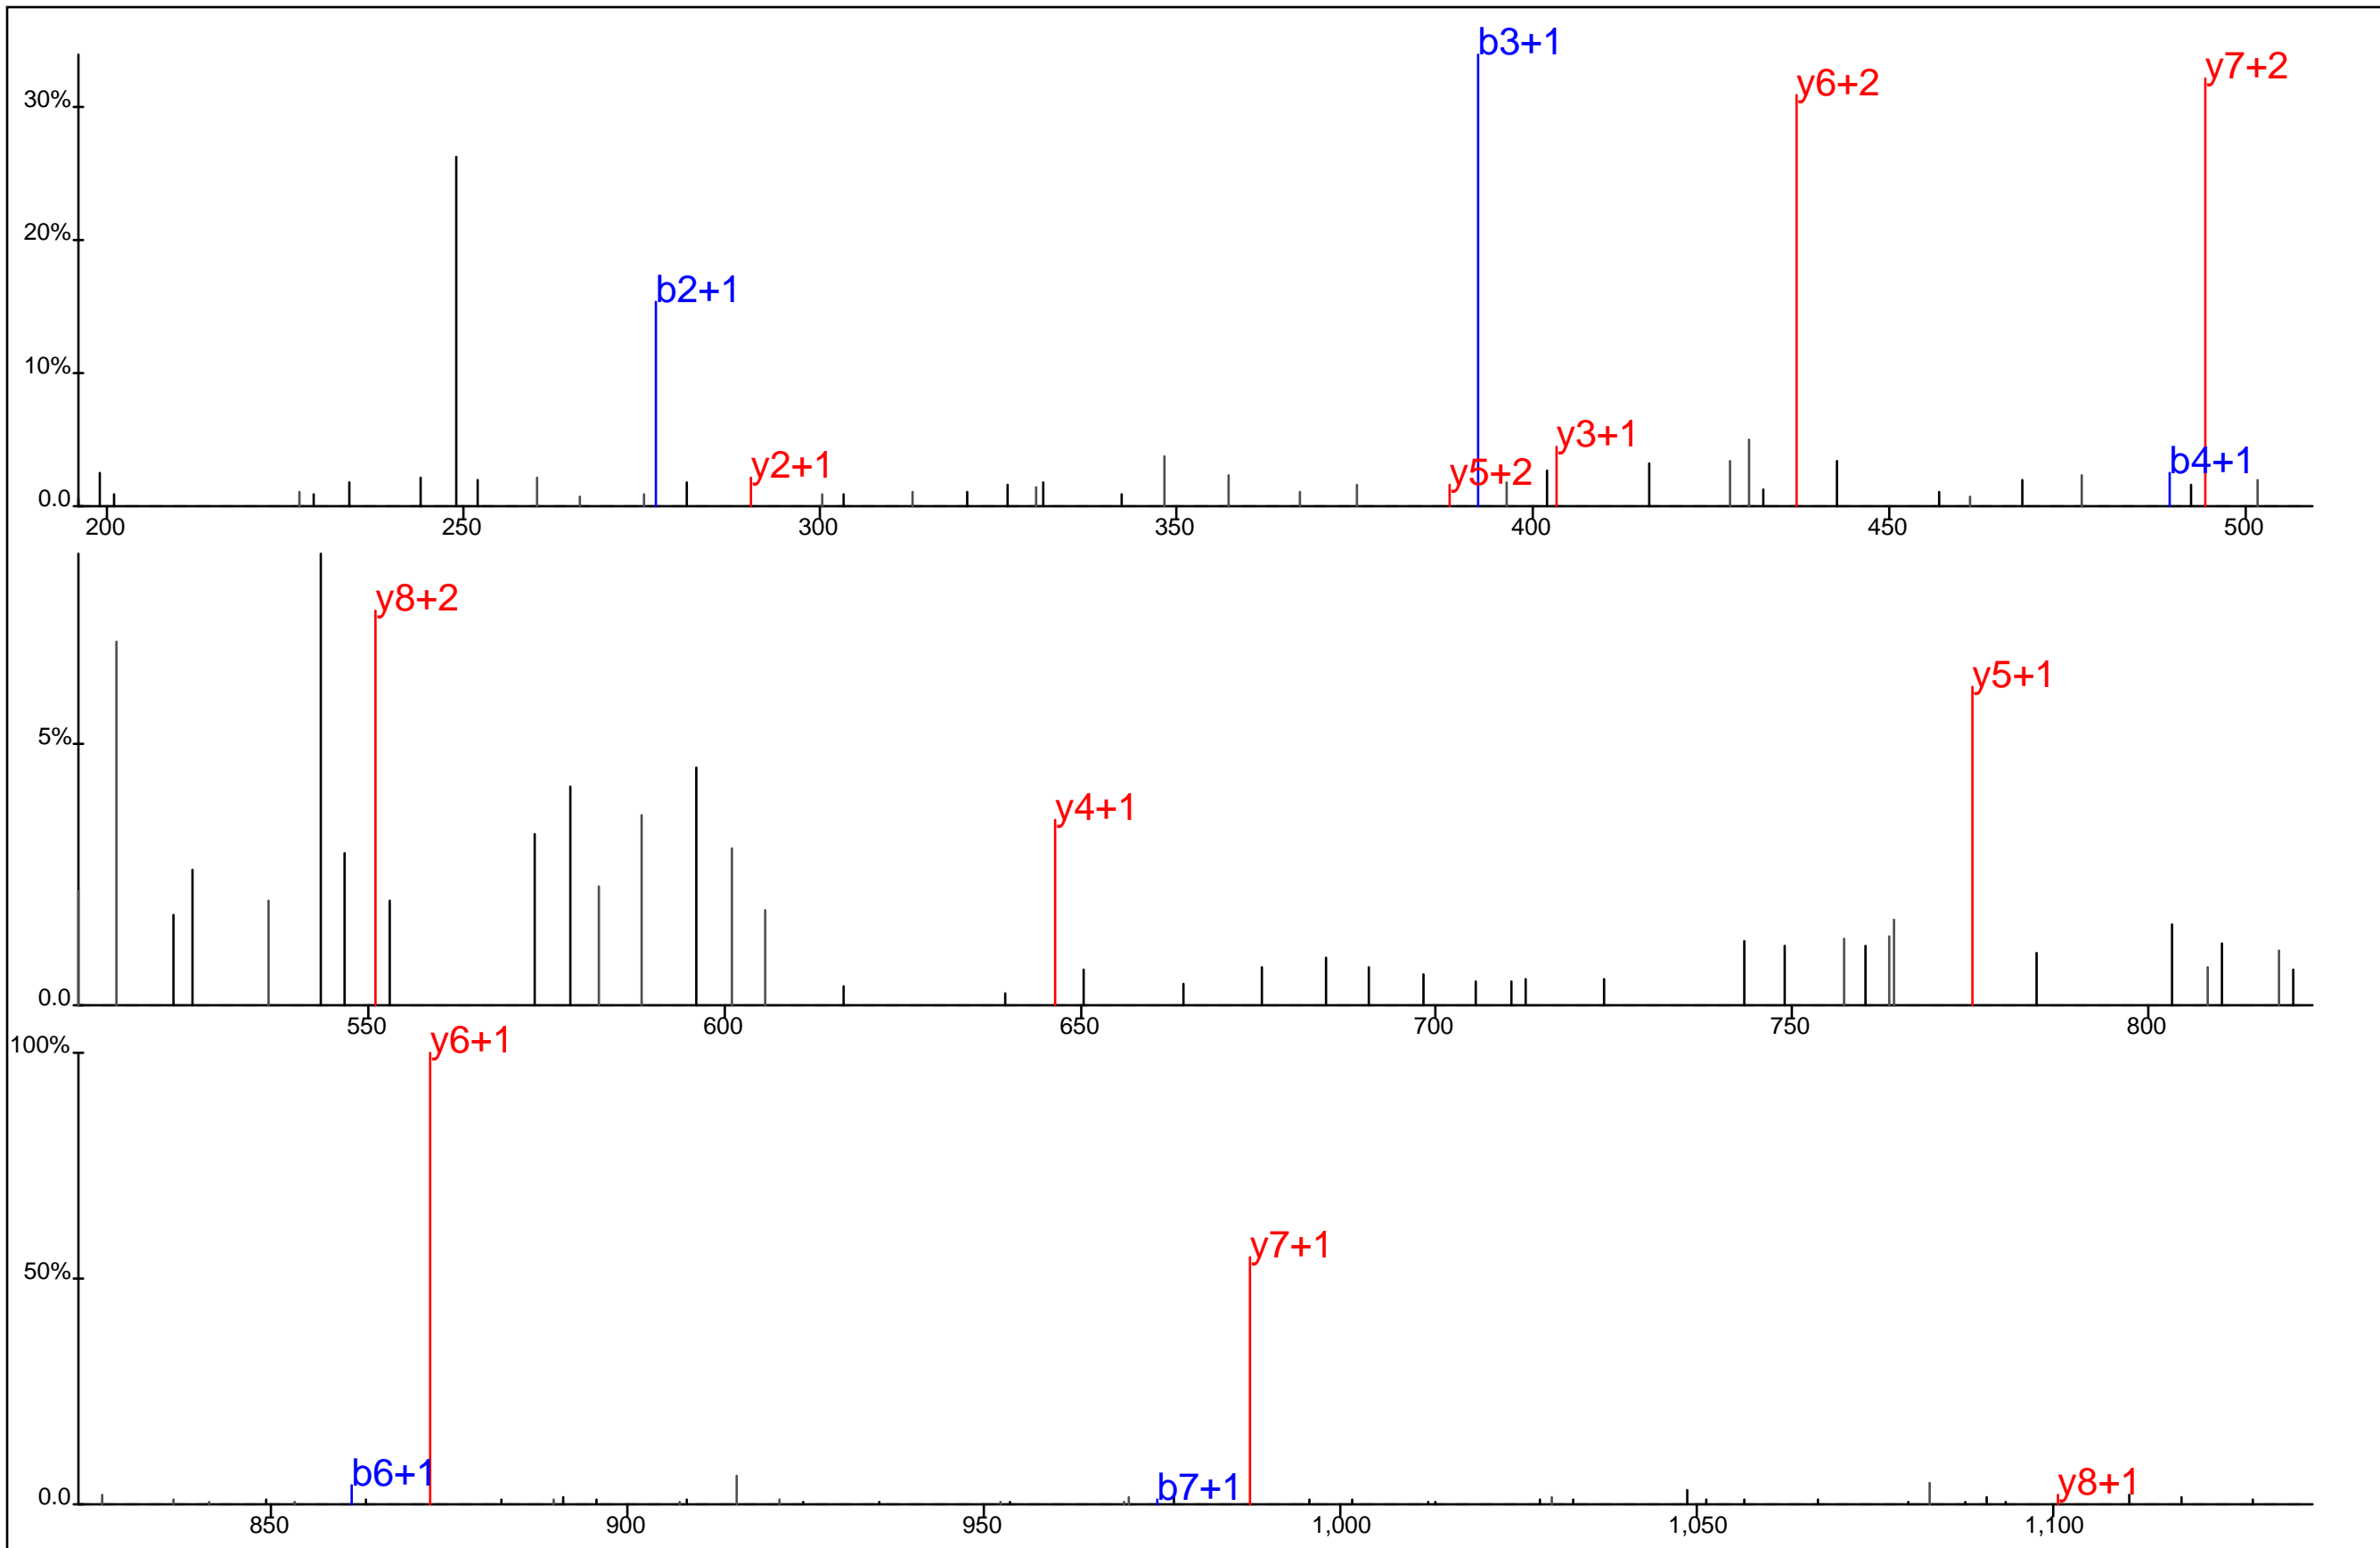

■ ▢ ▢ ▢ ▢ ▢ ▢  
**Y L D P E Y\* I D R**  
▢ ▢ ▢ ▢ ▢ ▢ ▢

Protein Name: Dynactin 3  
 gi Accession: 0  
 Precursor Mass: 632.2648+2  
 Delta Mass: 5.553 ppm  
 XCorr: 29.29

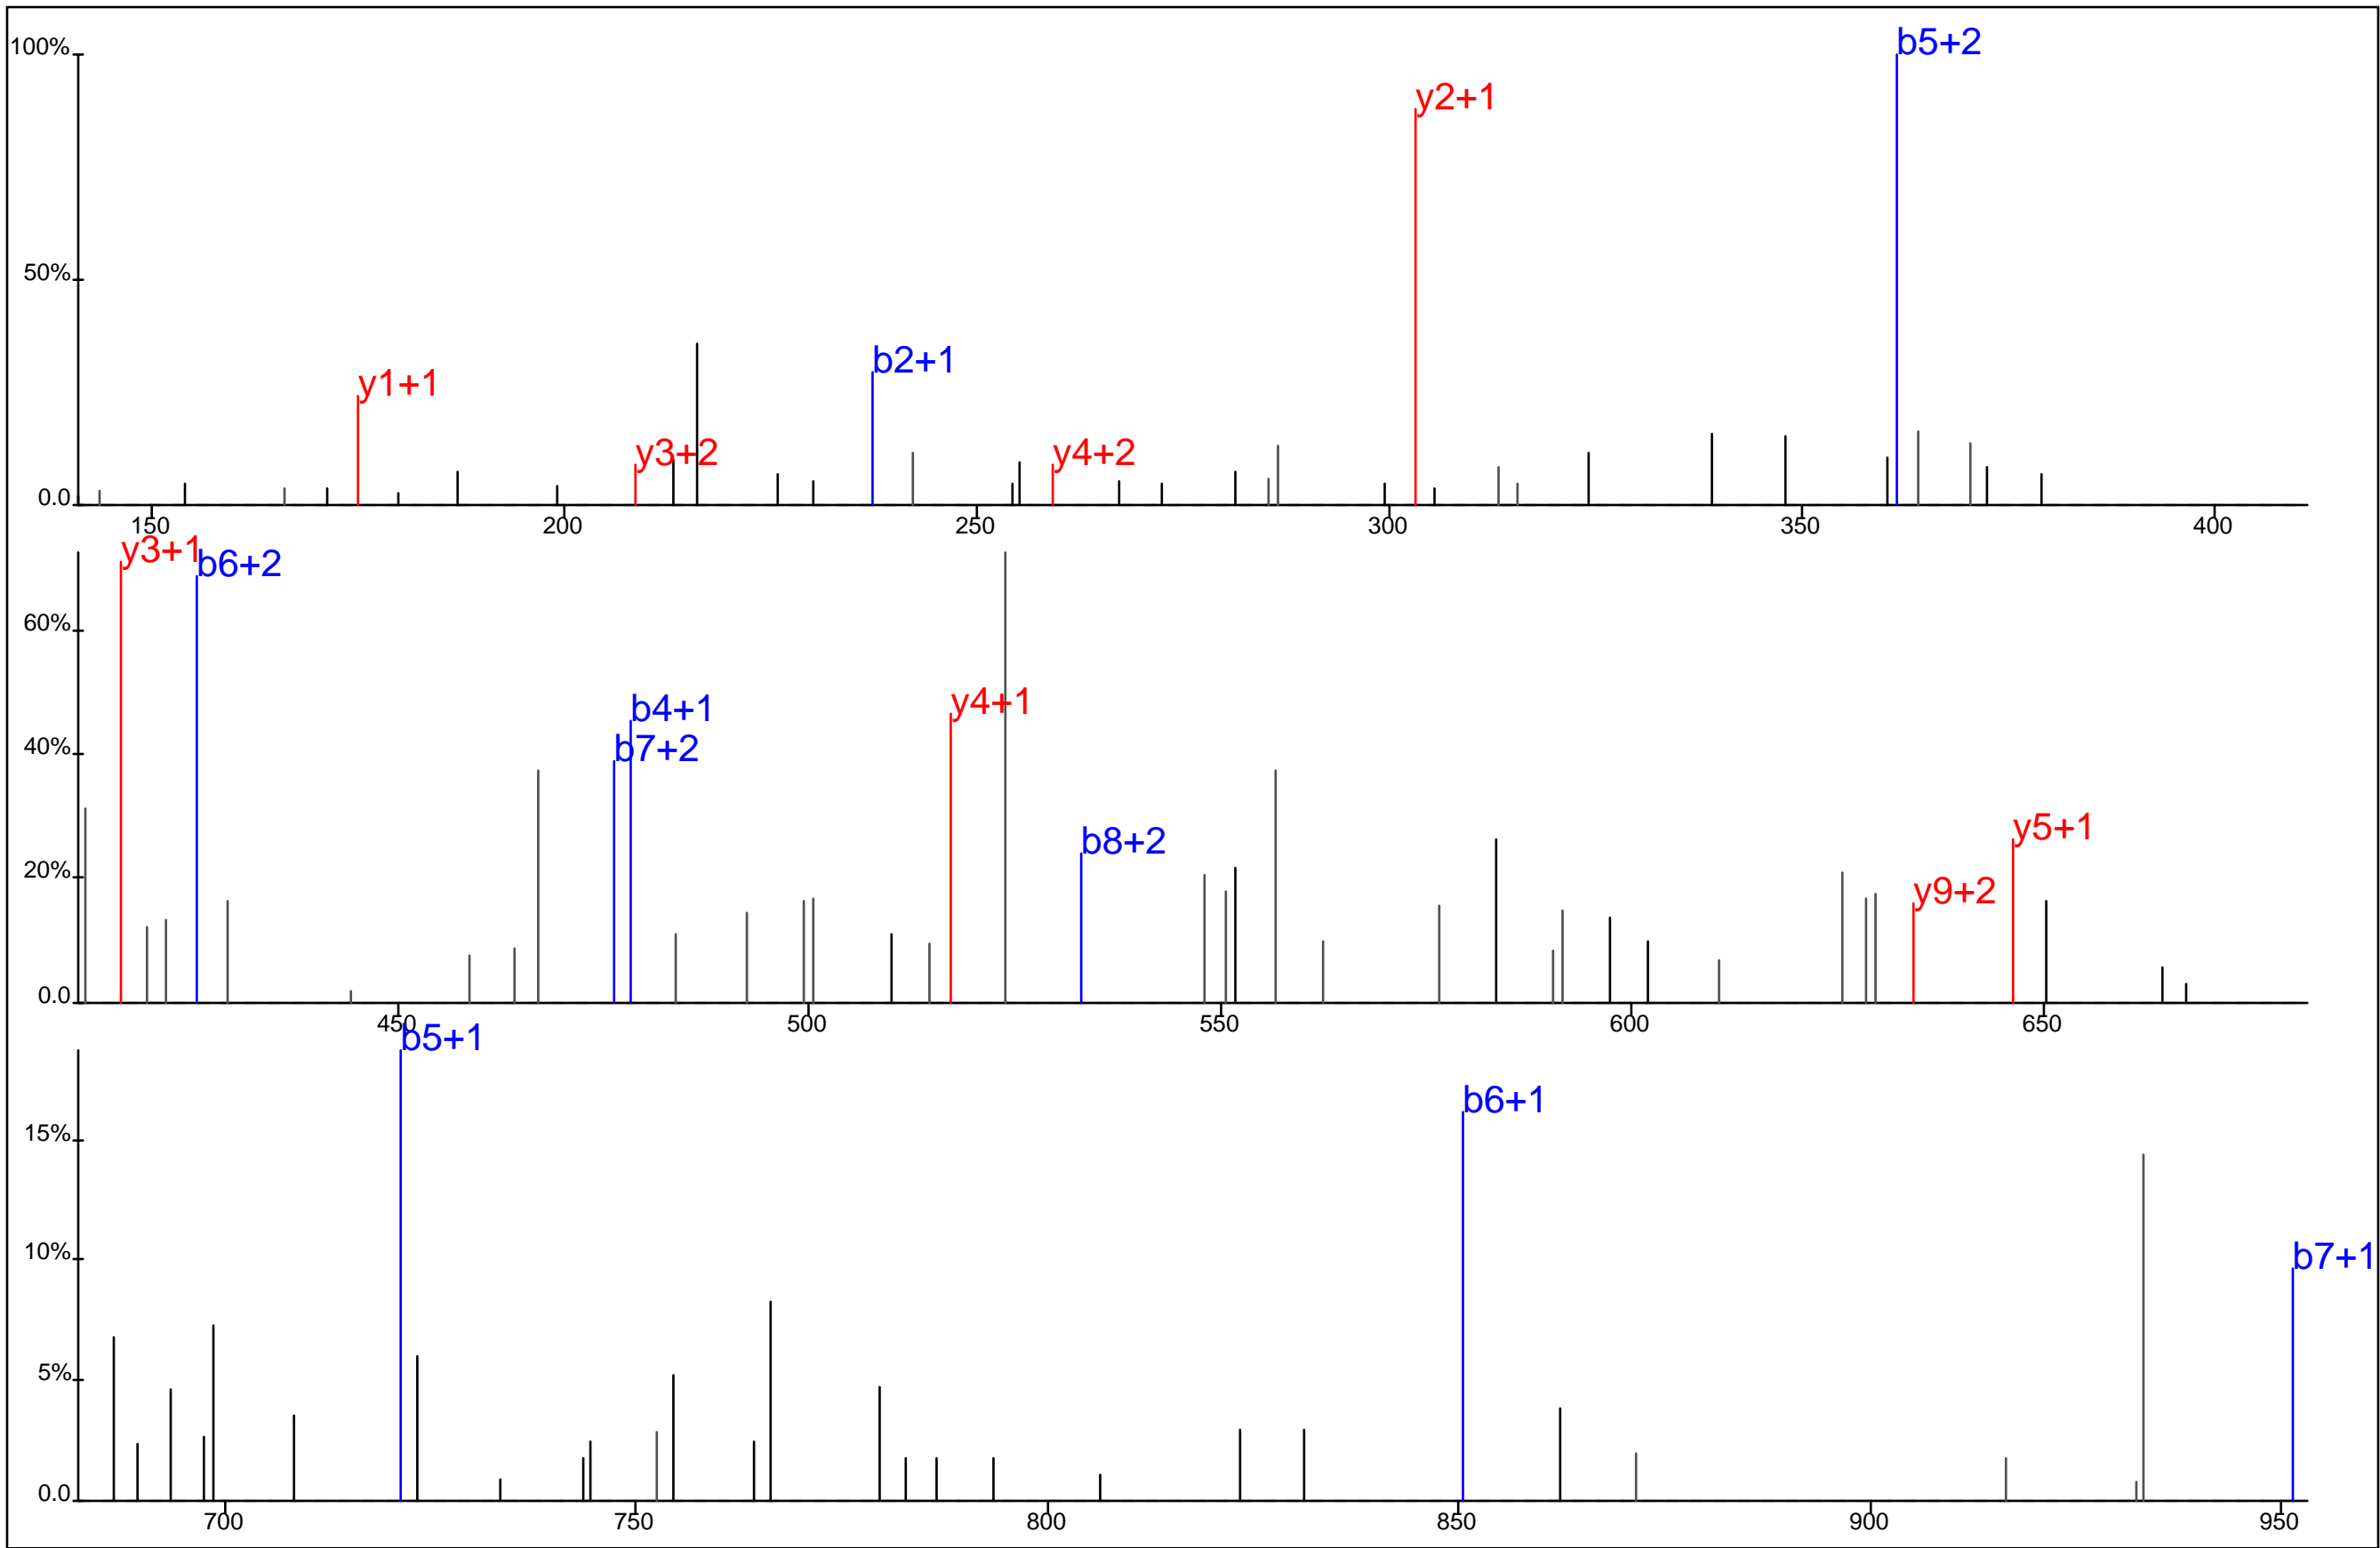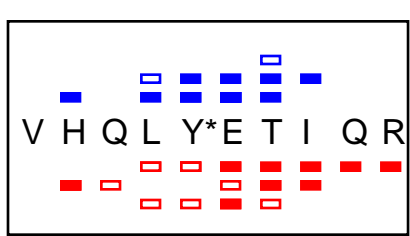

Protein Name: Dynamitin  
 gi Accession: 0  
 Precursor Mass: 456.2221+3  
 Delta Mass: 0.283 ppm  
 XCorr: 33.61

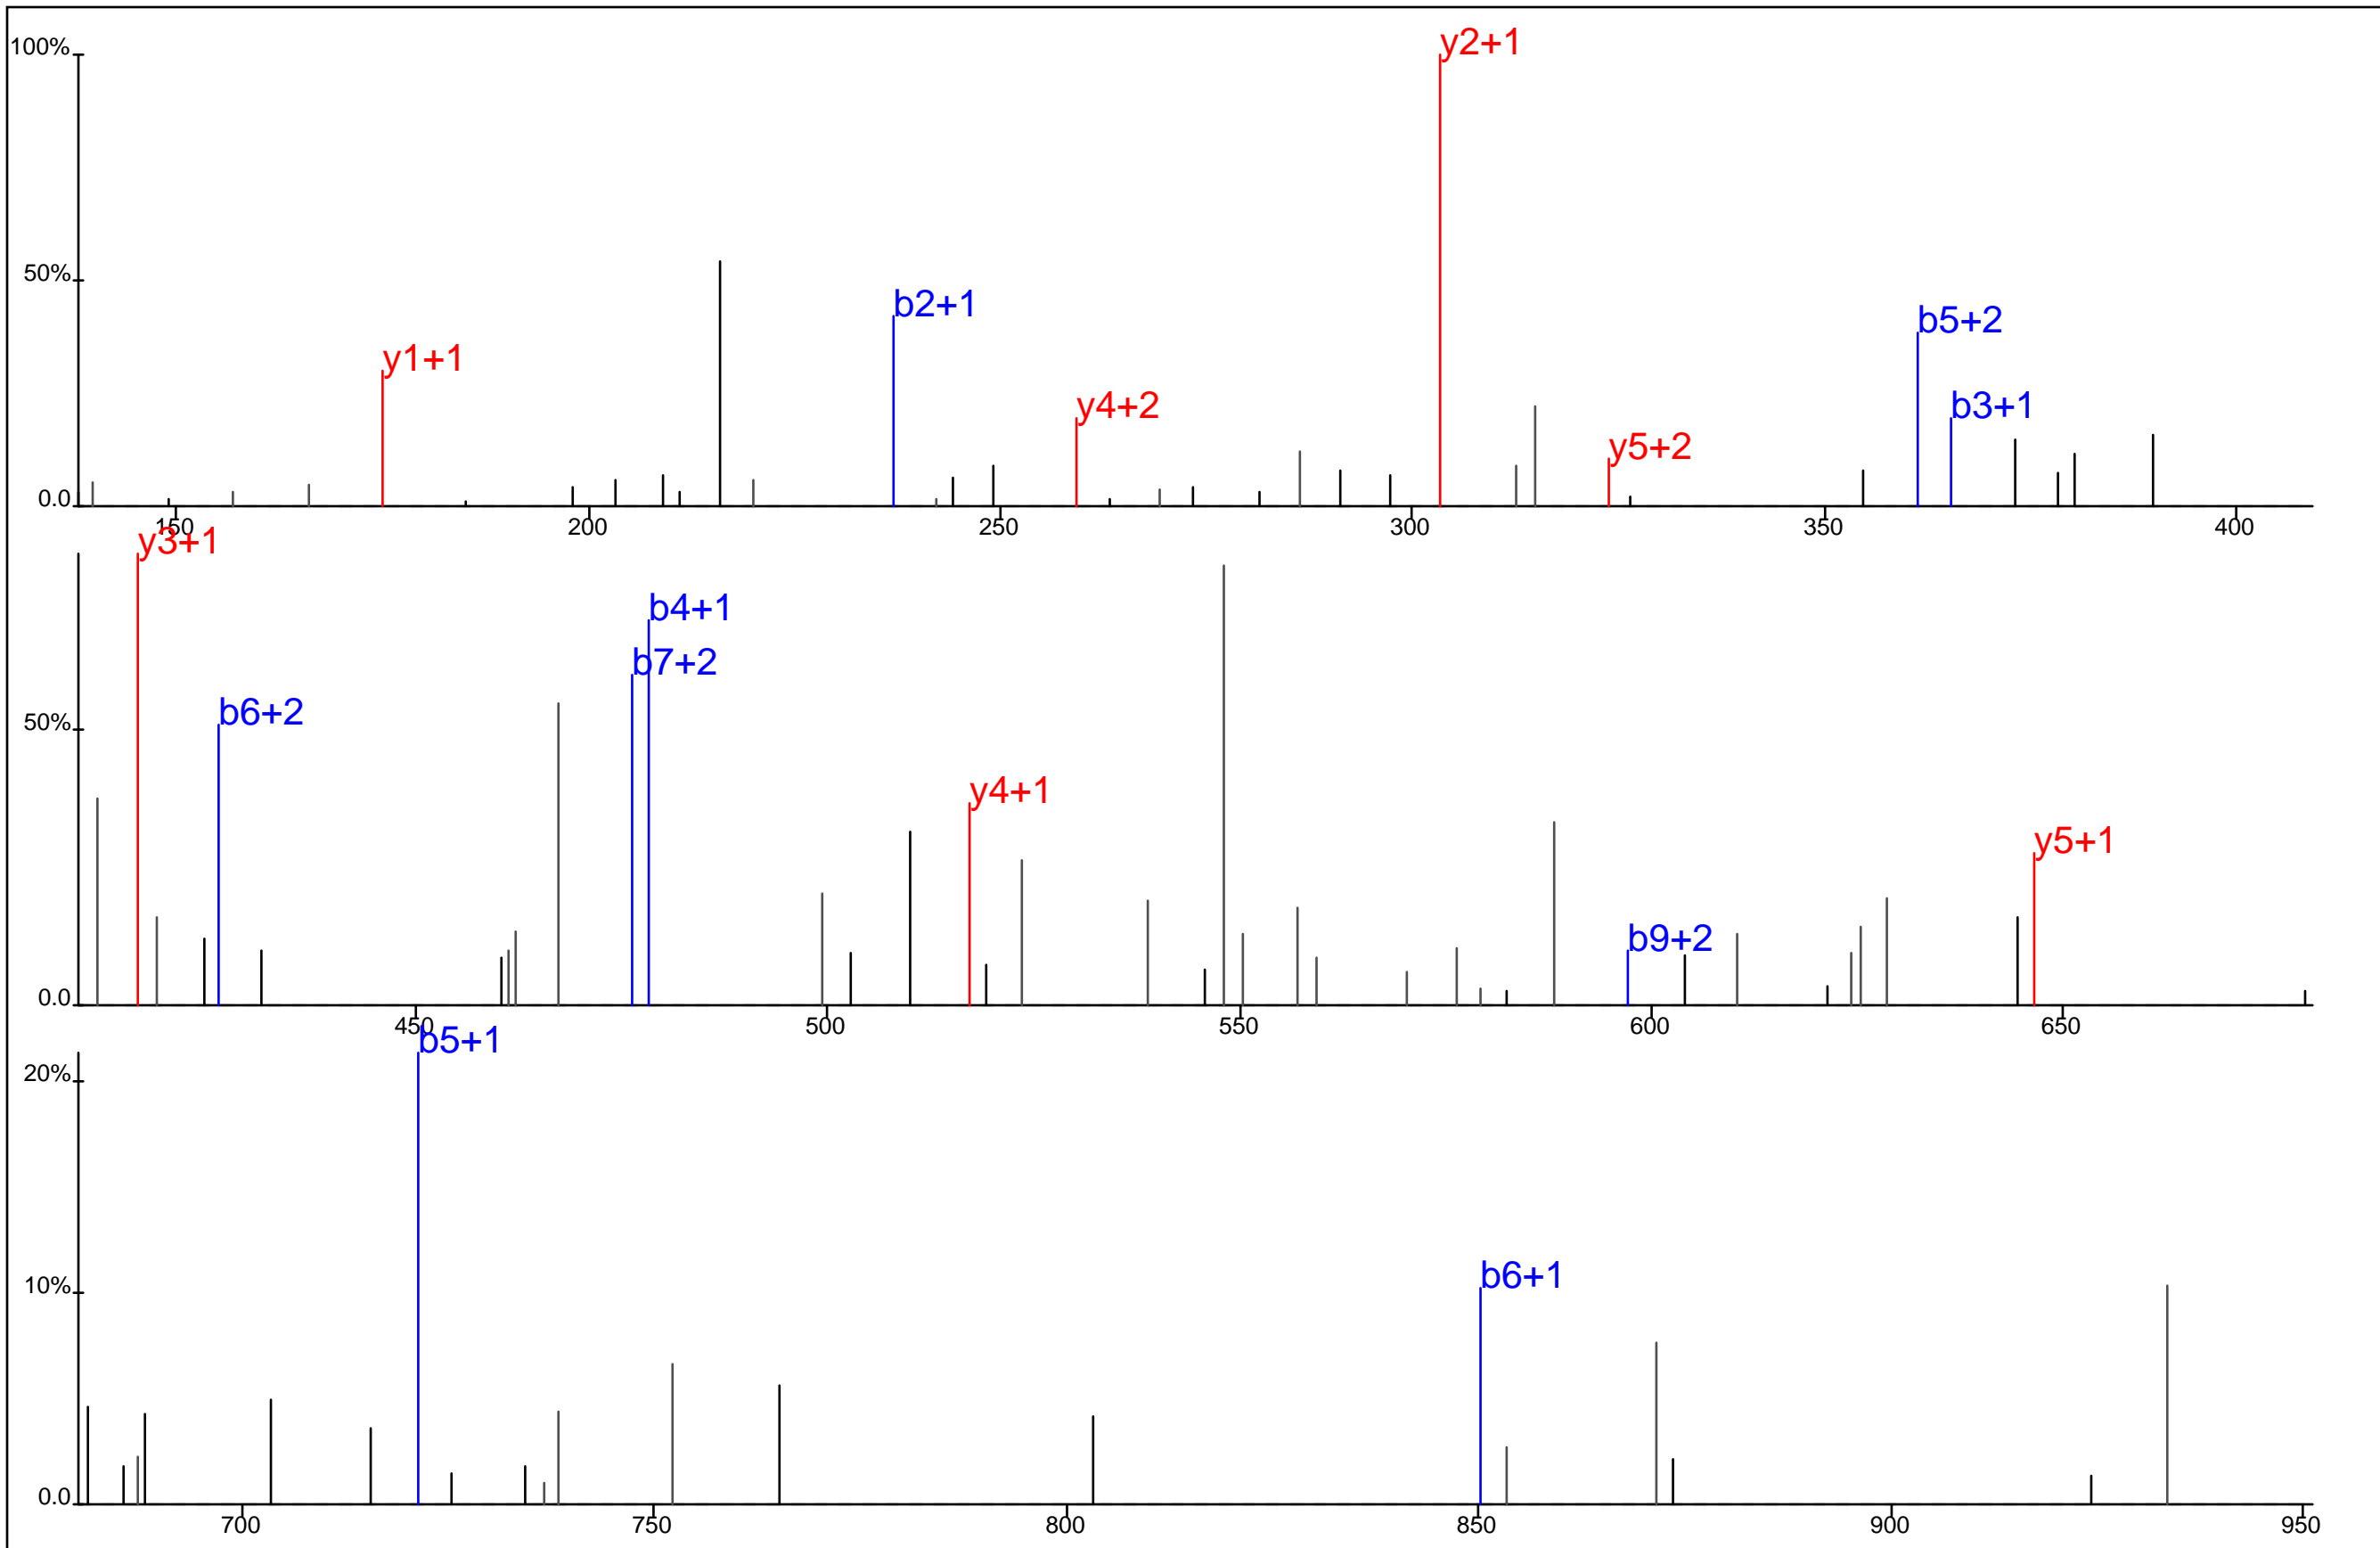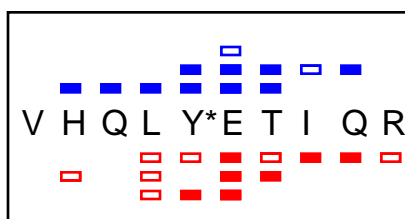

Protein Name: Dynamitin  
 gi Accession: 0  
 Precursor Mass: 456.2220+3  
 Delta Mass: 0.119 ppm  
 XCorr: 35.85

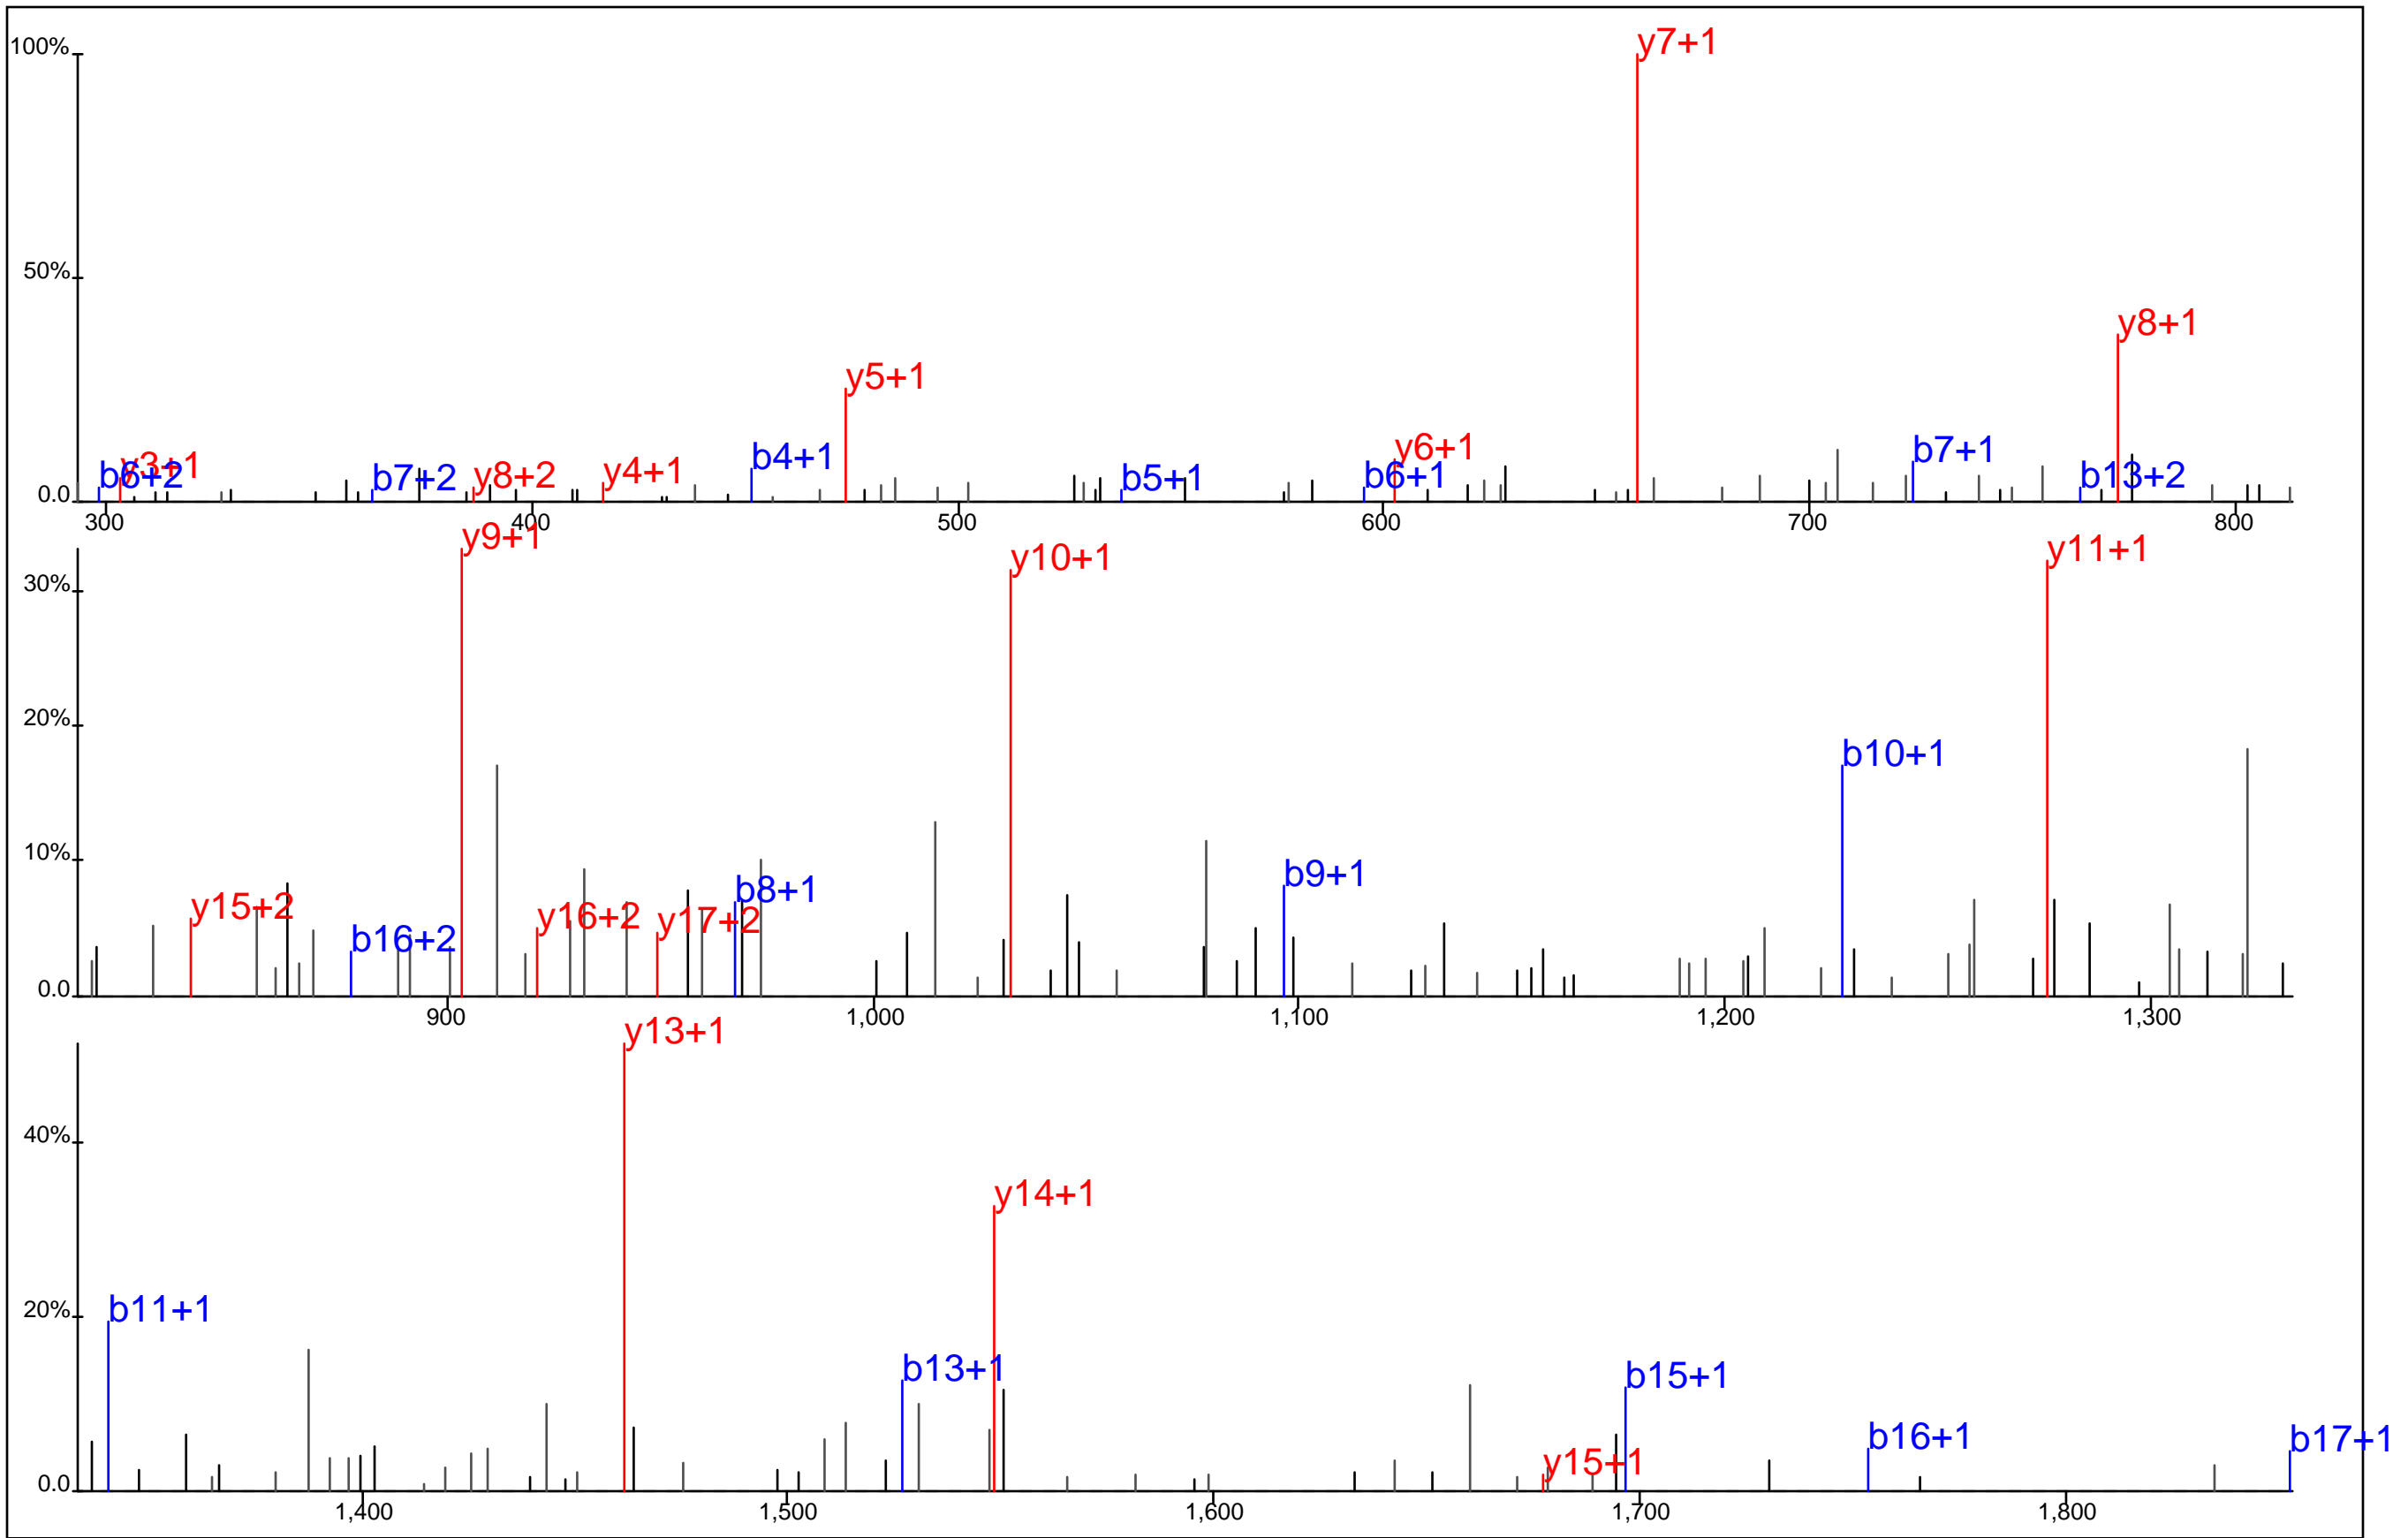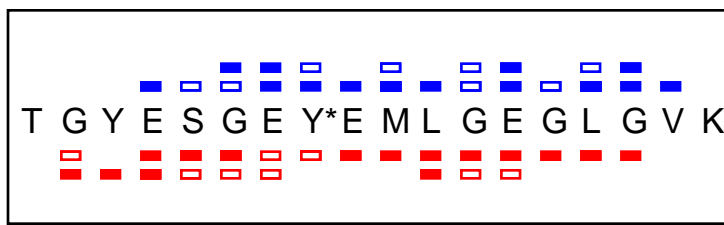

Protein Name: Dynamitin  
 gi Accession: 0  
 Precursor Mass: 999.9234+2  
 Delta Mass: 0.333 ppm  
 XCorr: 73.27

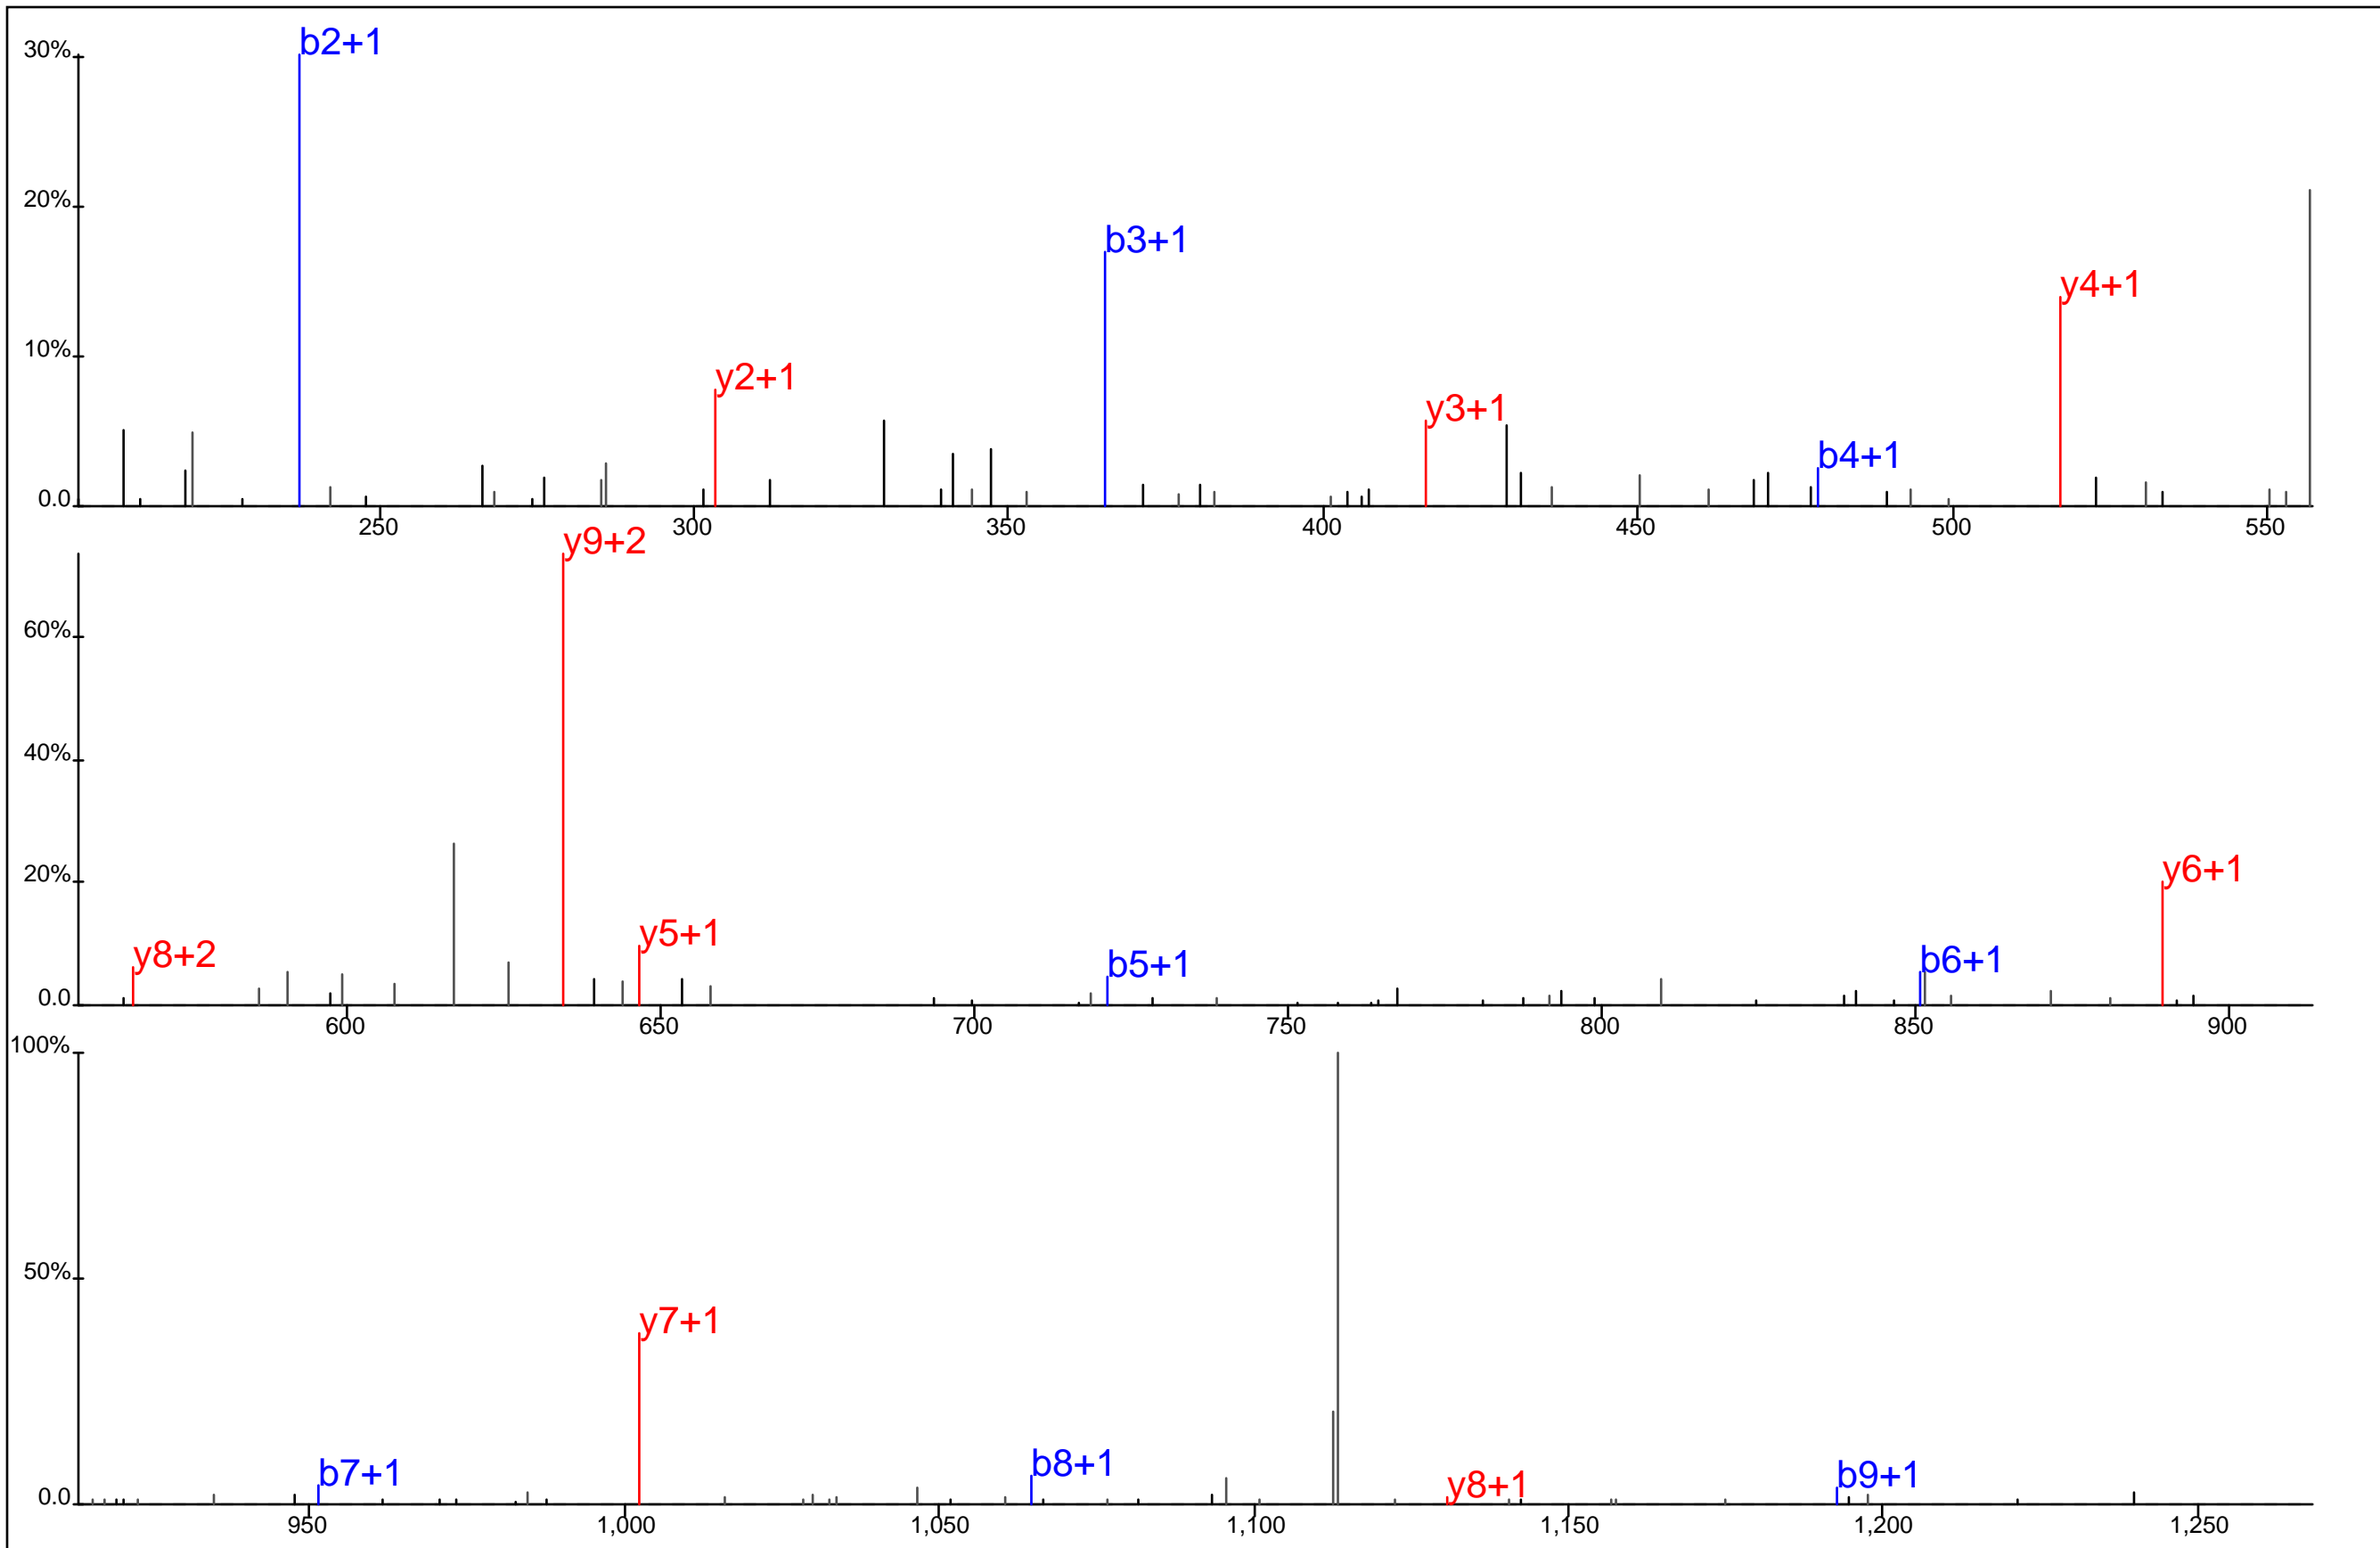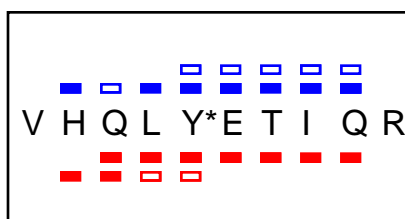

Protein Name: Dynamitin  
 gi Accession: 0  
 Precursor Mass: 683.8292+2  
 Delta Mass: 0.309 ppm  
 XCorr: 53.36

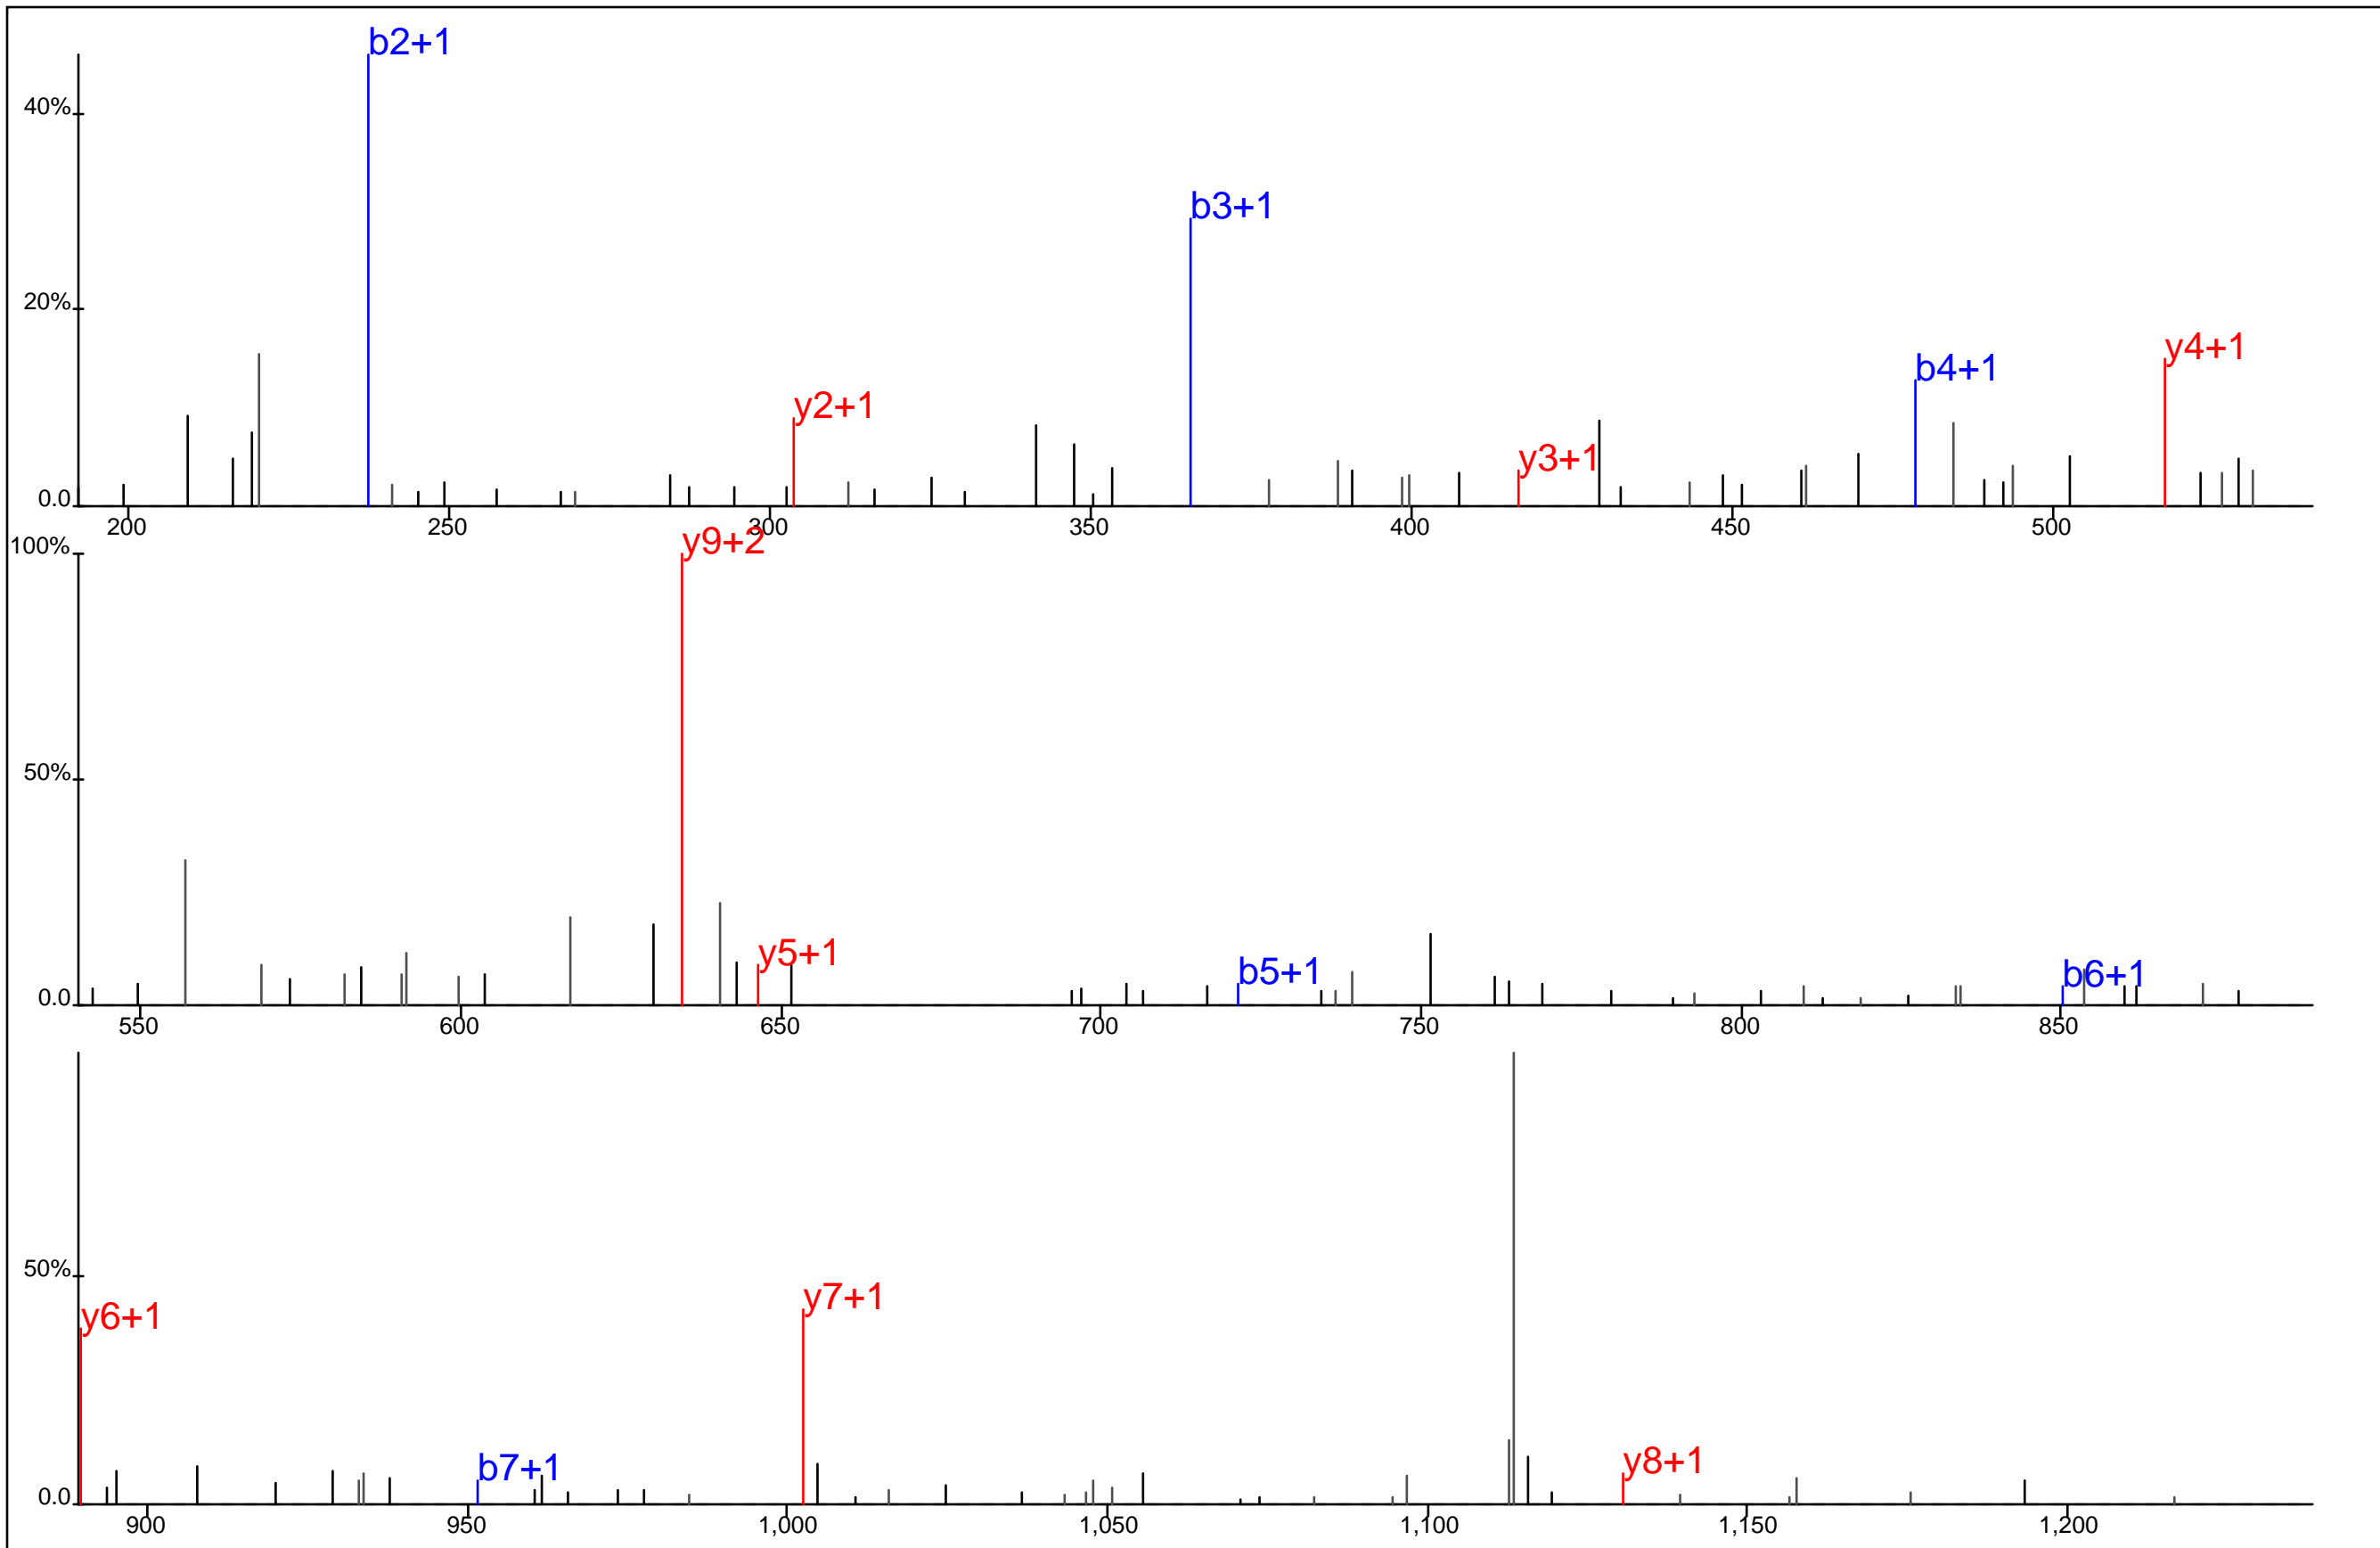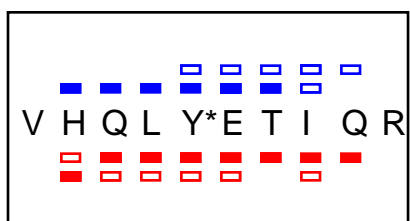

Protein Name: Dynamitin  
 gi Accession: 0  
 Precursor Mass: 683.8298+2  
 Delta Mass: 0.673 ppm  
 XCorr: 20.33

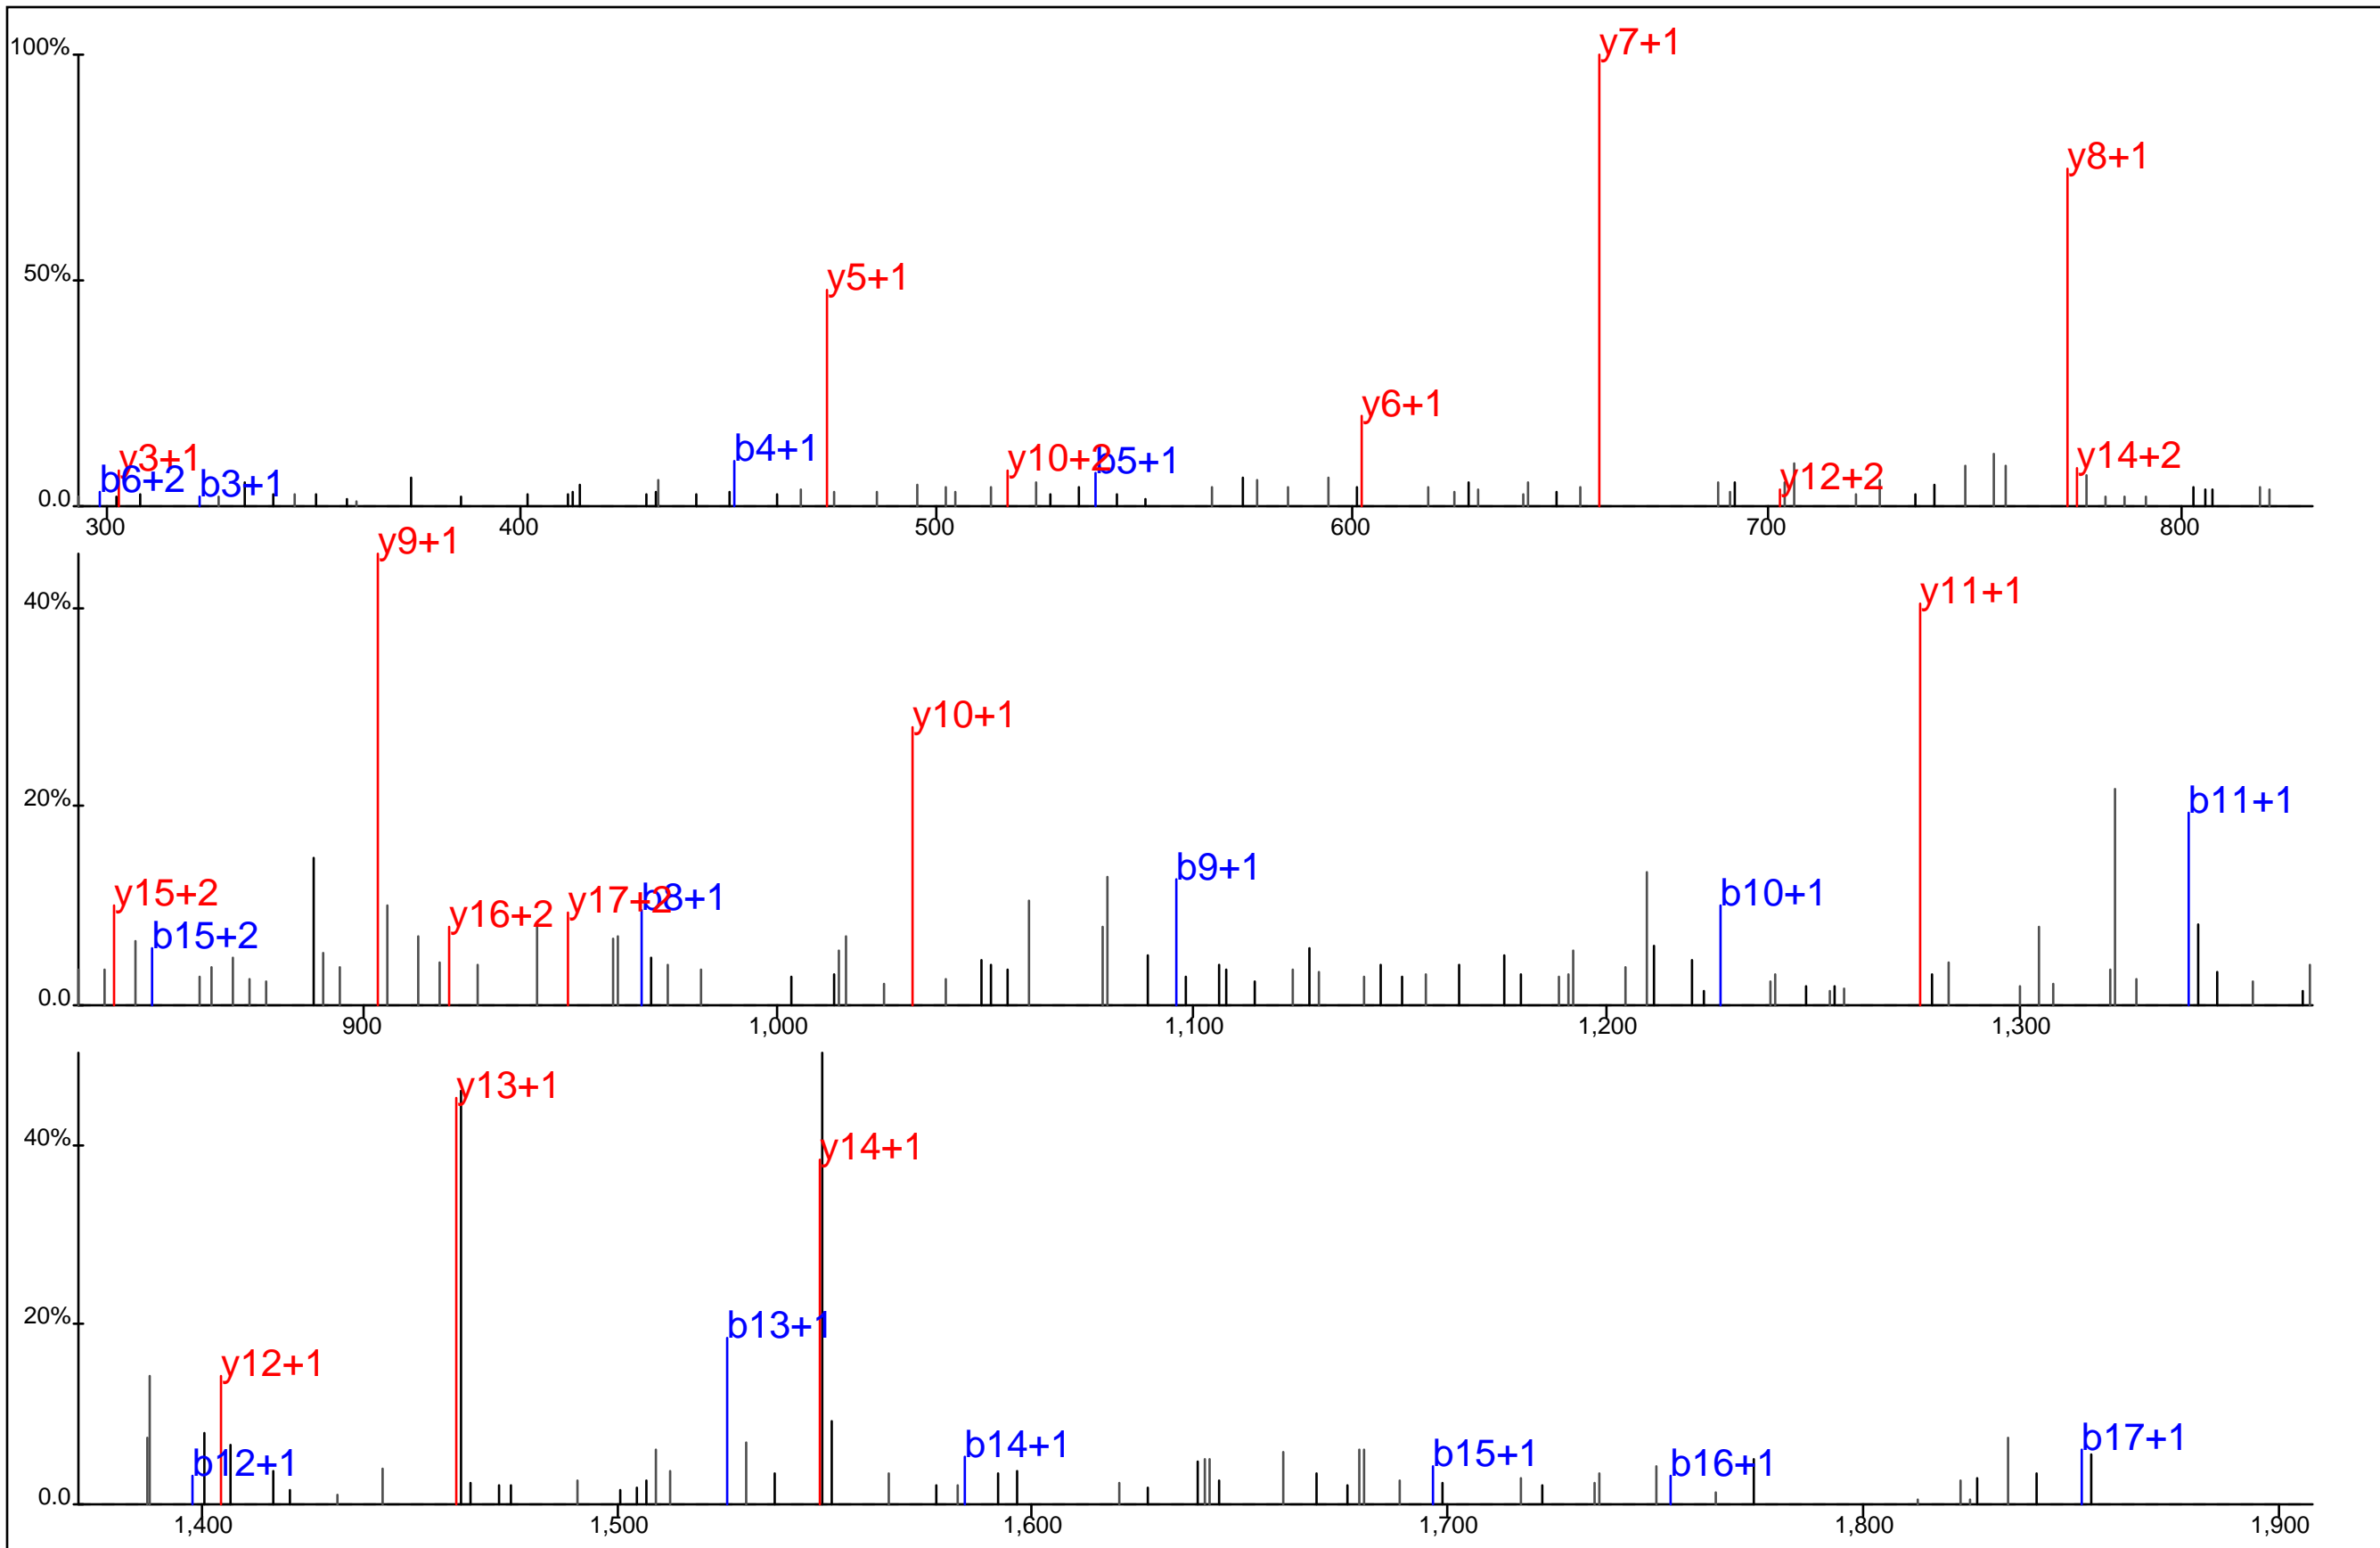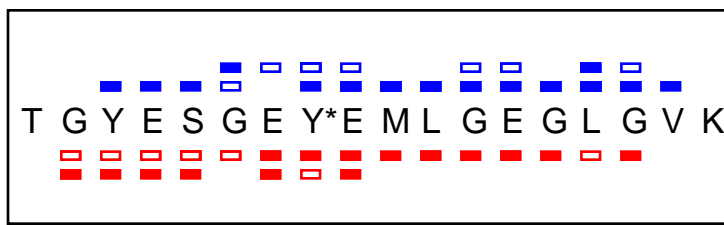

Protein Name: Dynamitin  
 gi Accession: 0  
 Precursor Mass: 999.9230+2  
 Delta Mass: 0.760 ppm  
 XCorr: 70.83

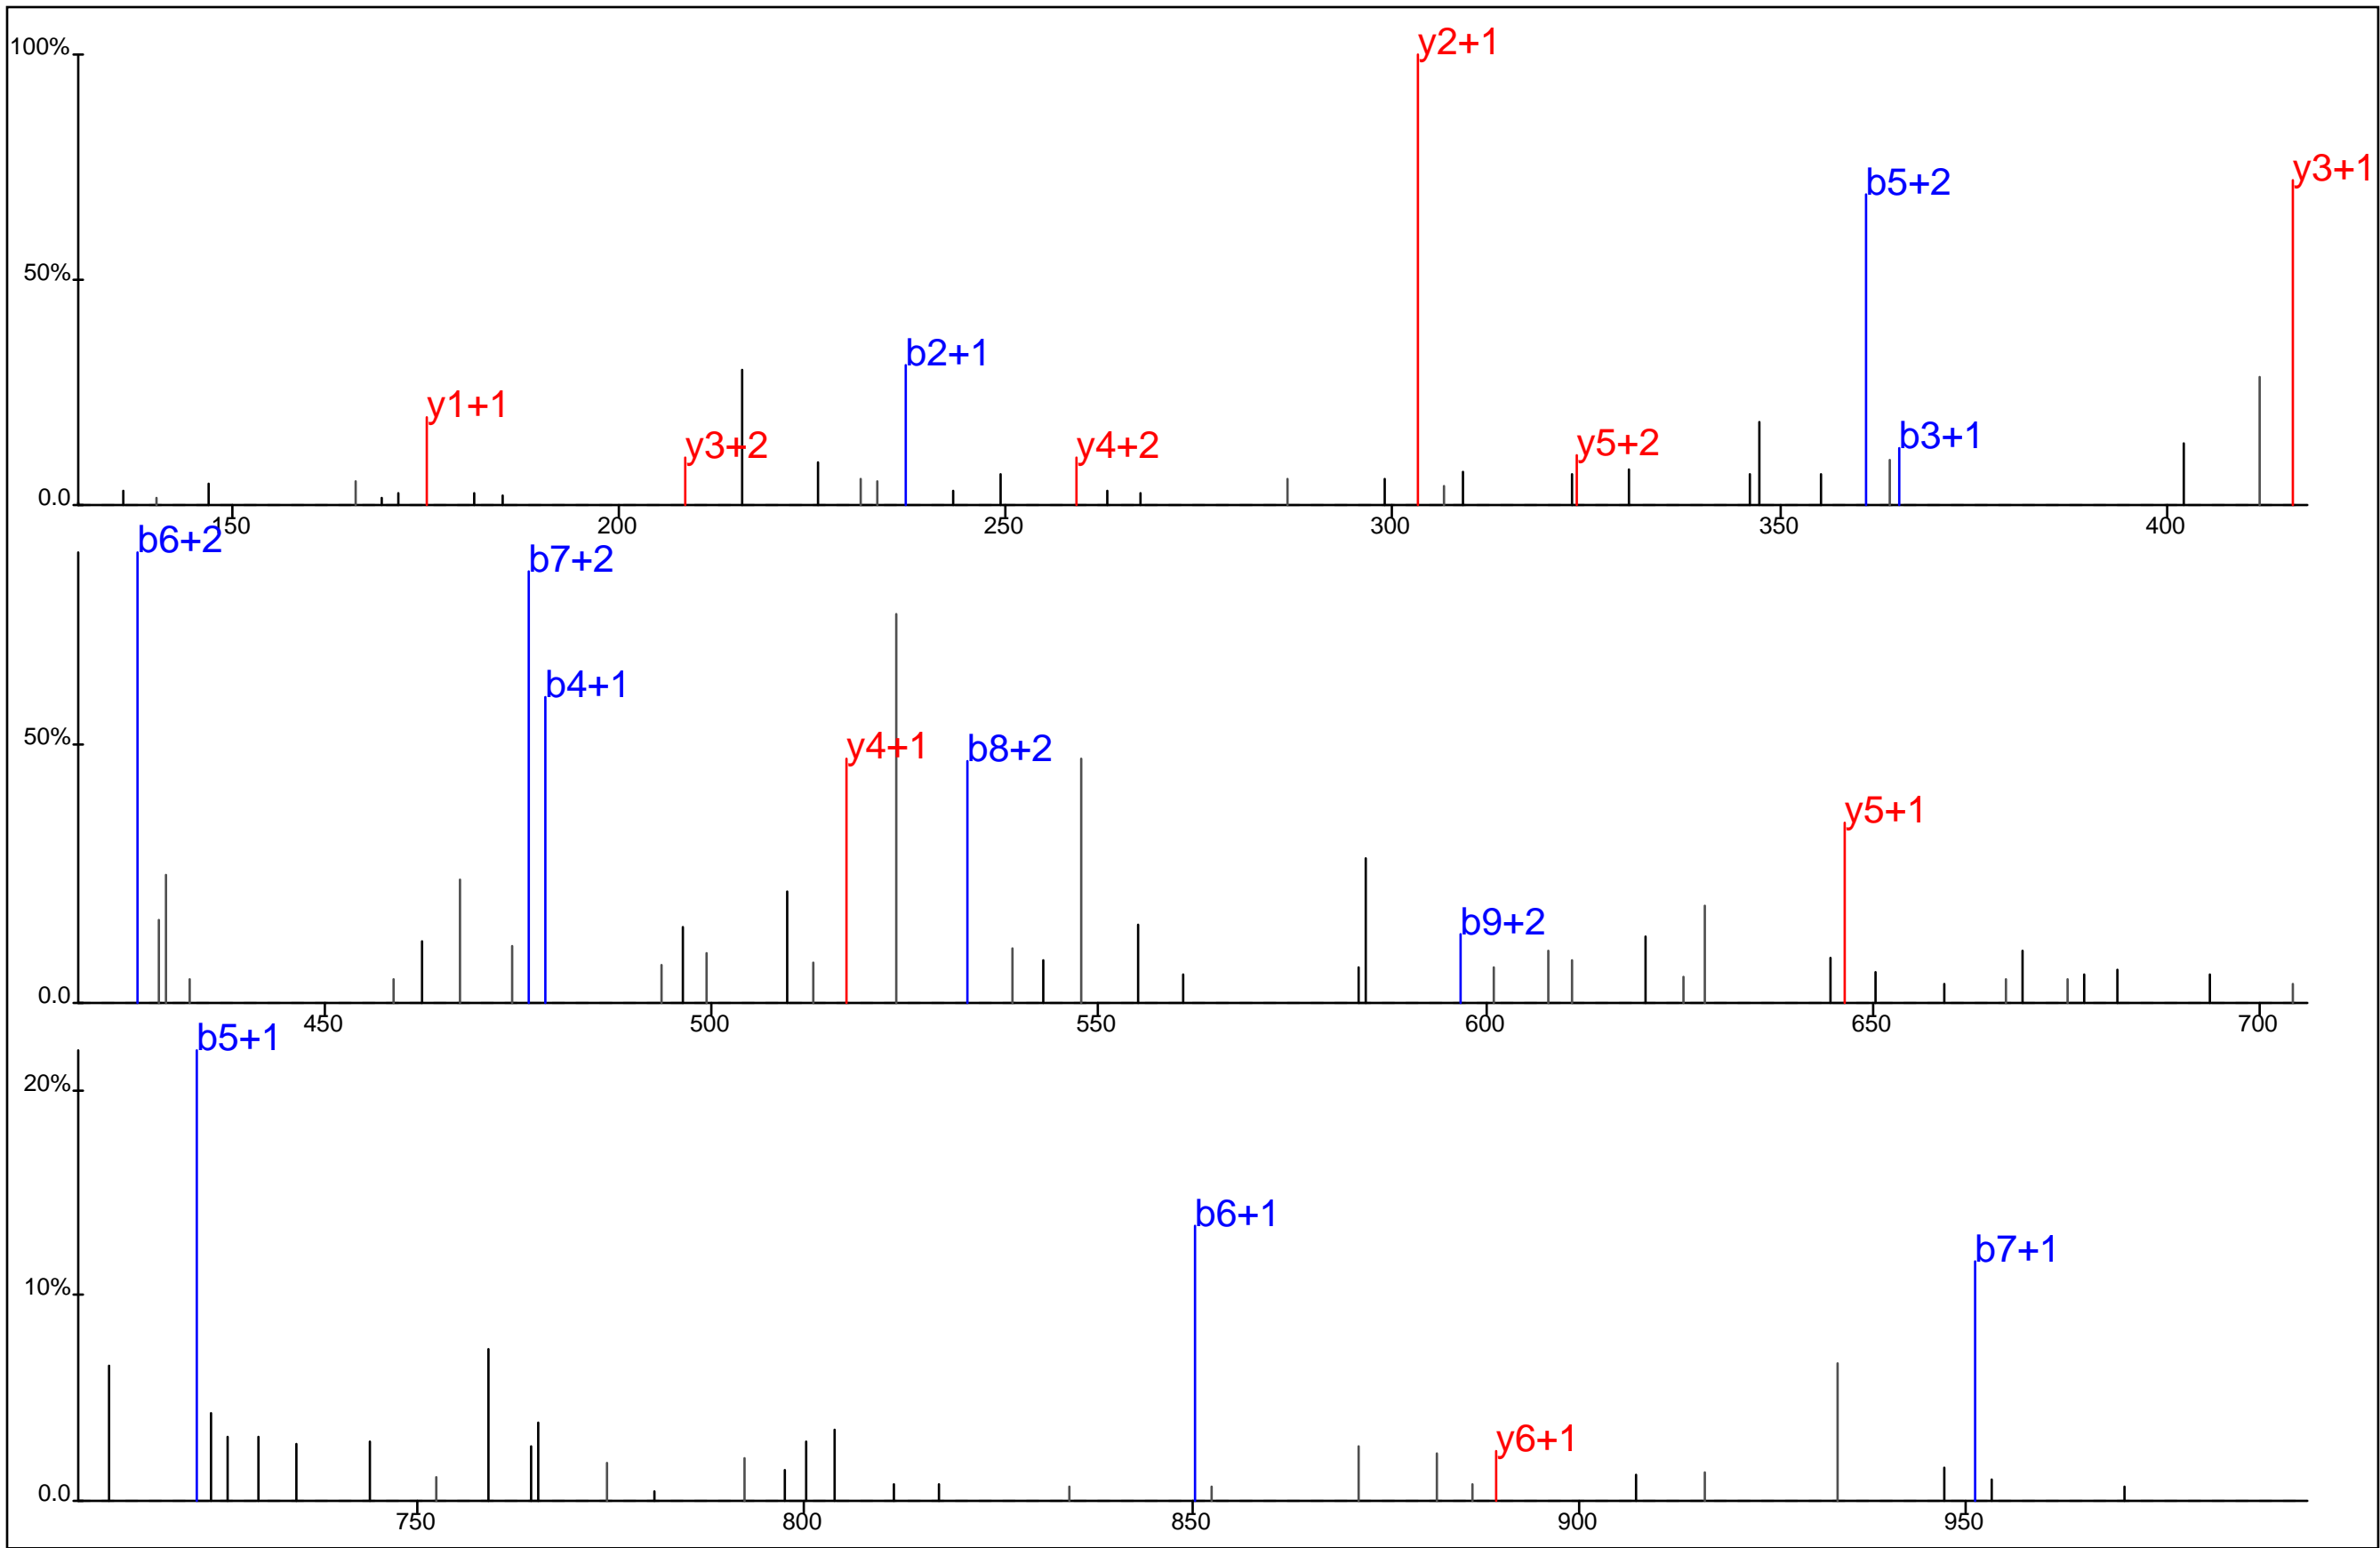

|  |                                                                                                                                  |
|--|----------------------------------------------------------------------------------------------------------------------------------|
|  | <p>Protein Name: Dynamitin<br/> gi Accession: 0<br/> Precursor Mass: 456.2230+3<br/> Delta Mass: 2.160 ppm<br/> XCorr: 37.51</p> |
|--|----------------------------------------------------------------------------------------------------------------------------------|





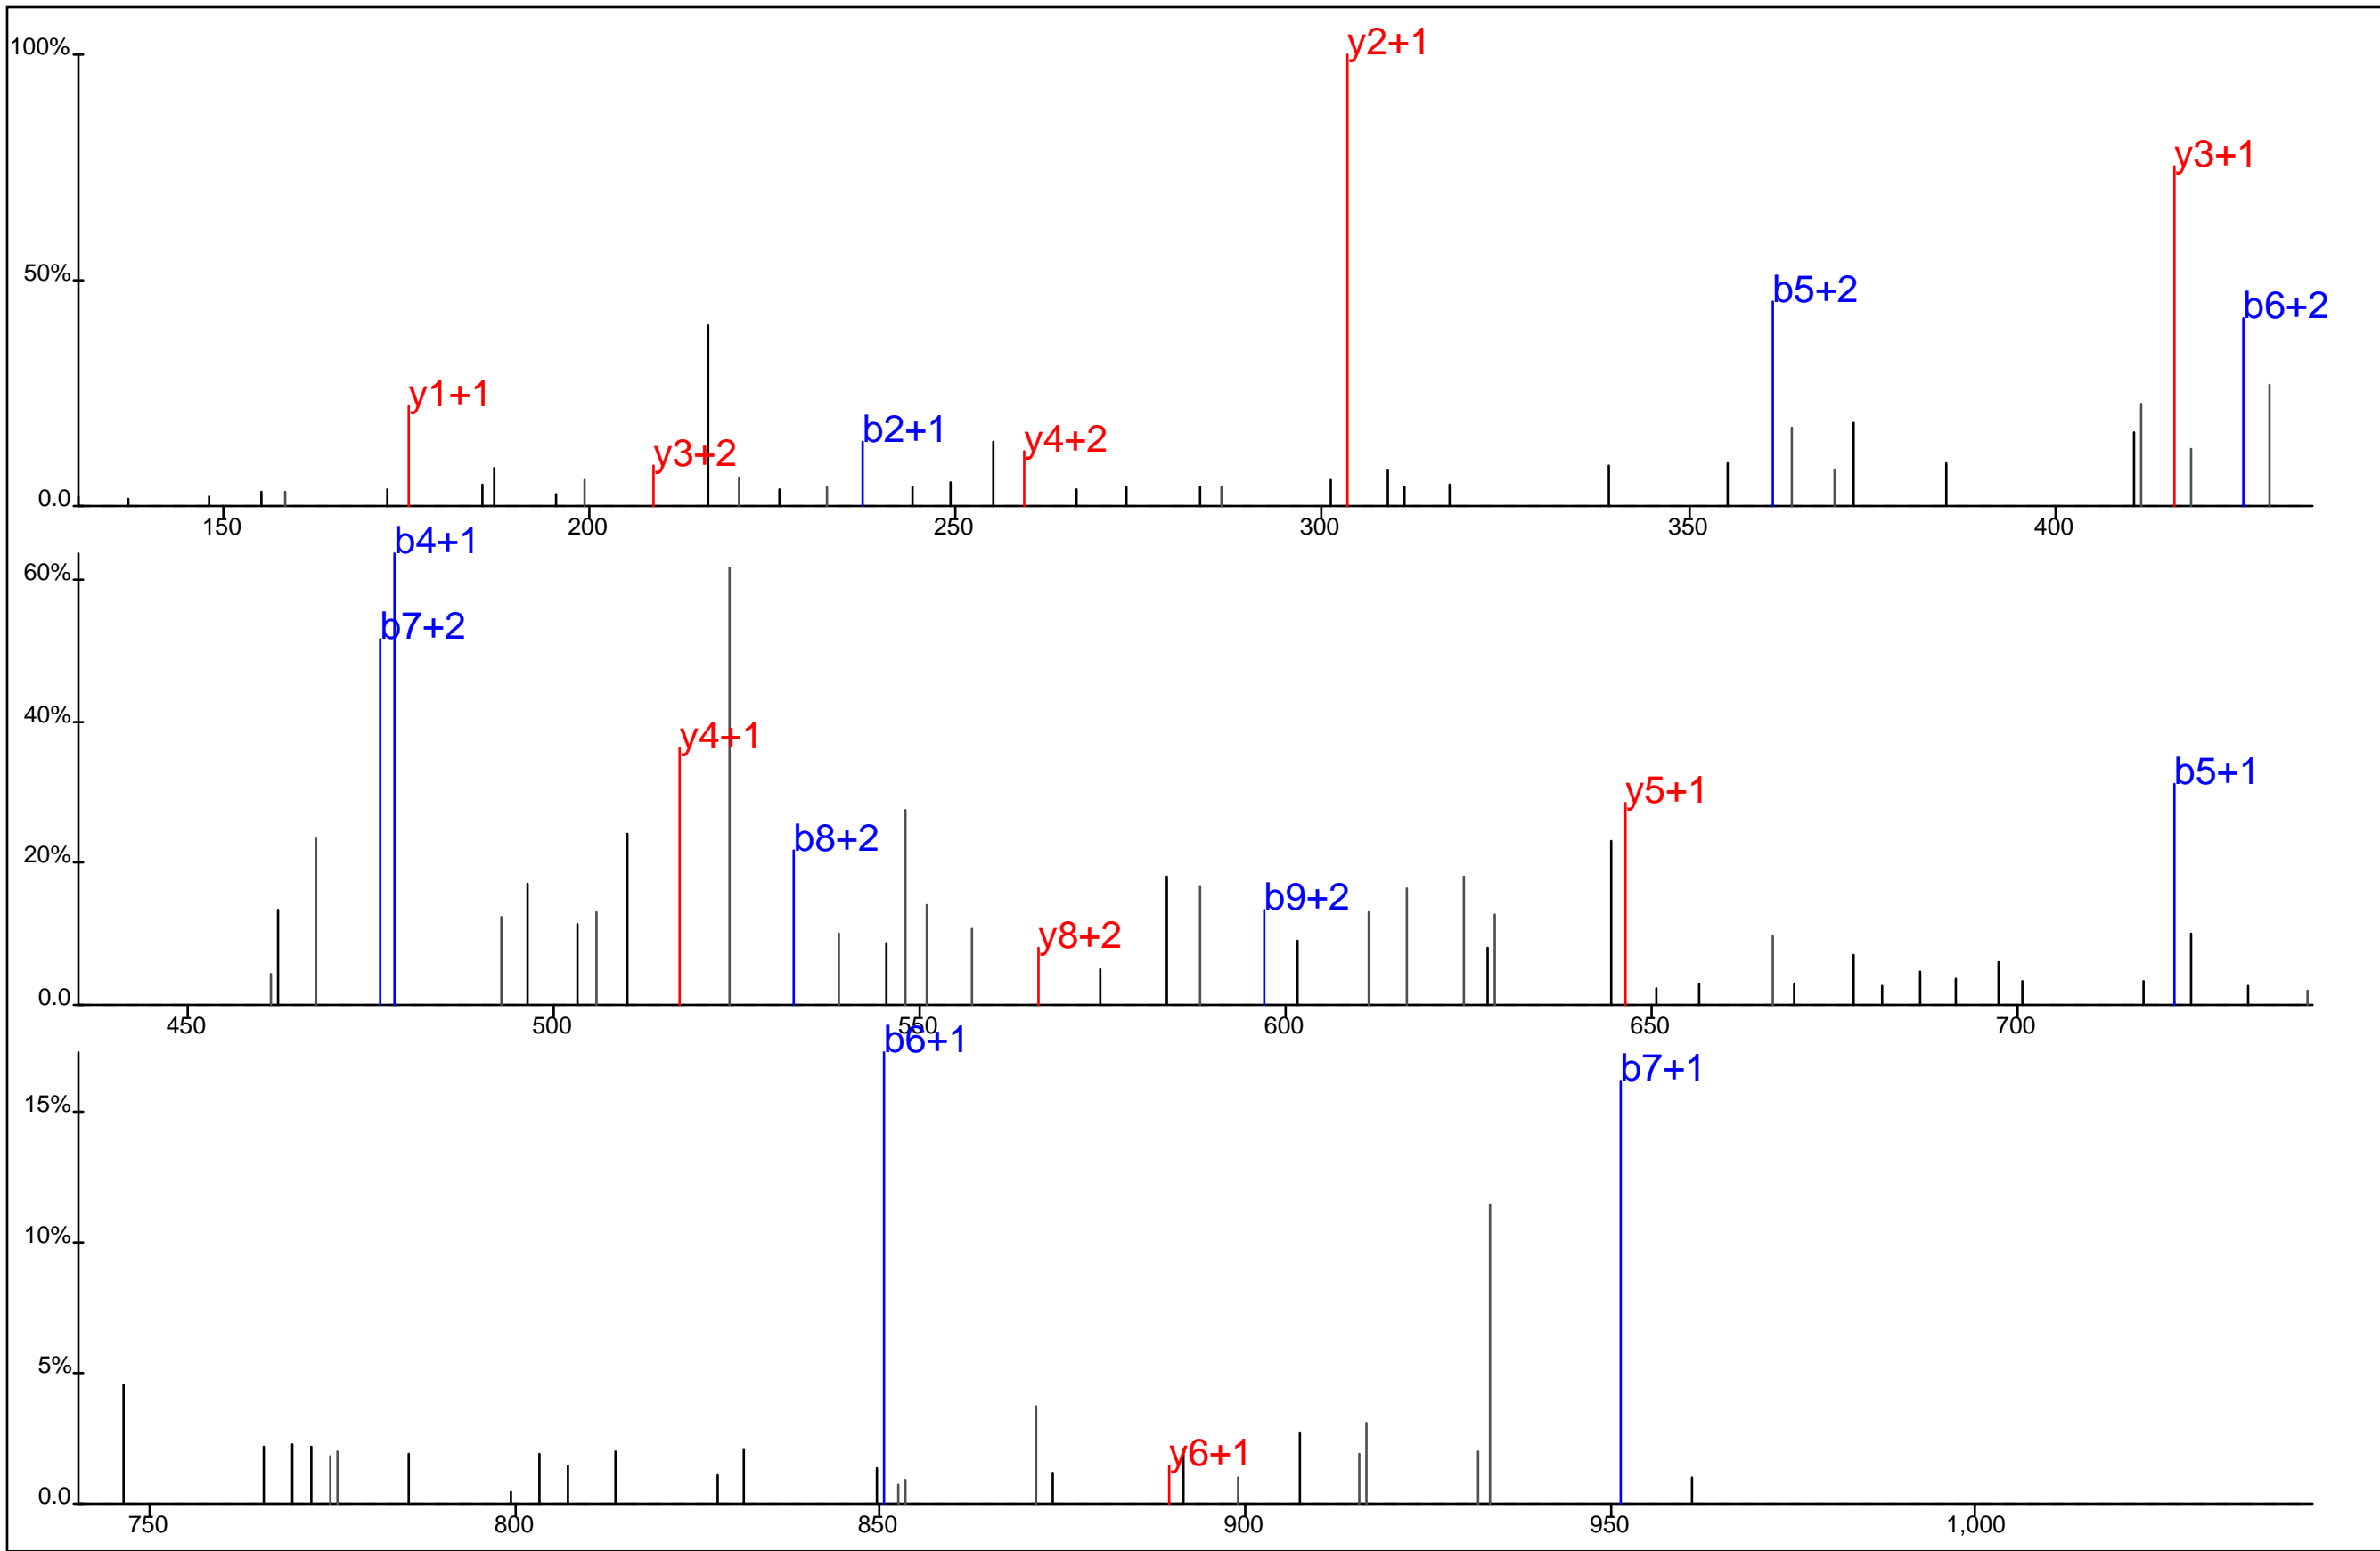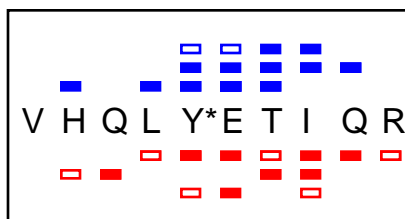

Protein Name: Dynamitin  
 gi Accession: 0  
 Precursor Mass: 456.2213+3  
 Delta Mass: 1.660 ppm  
 XCorr: 30.39



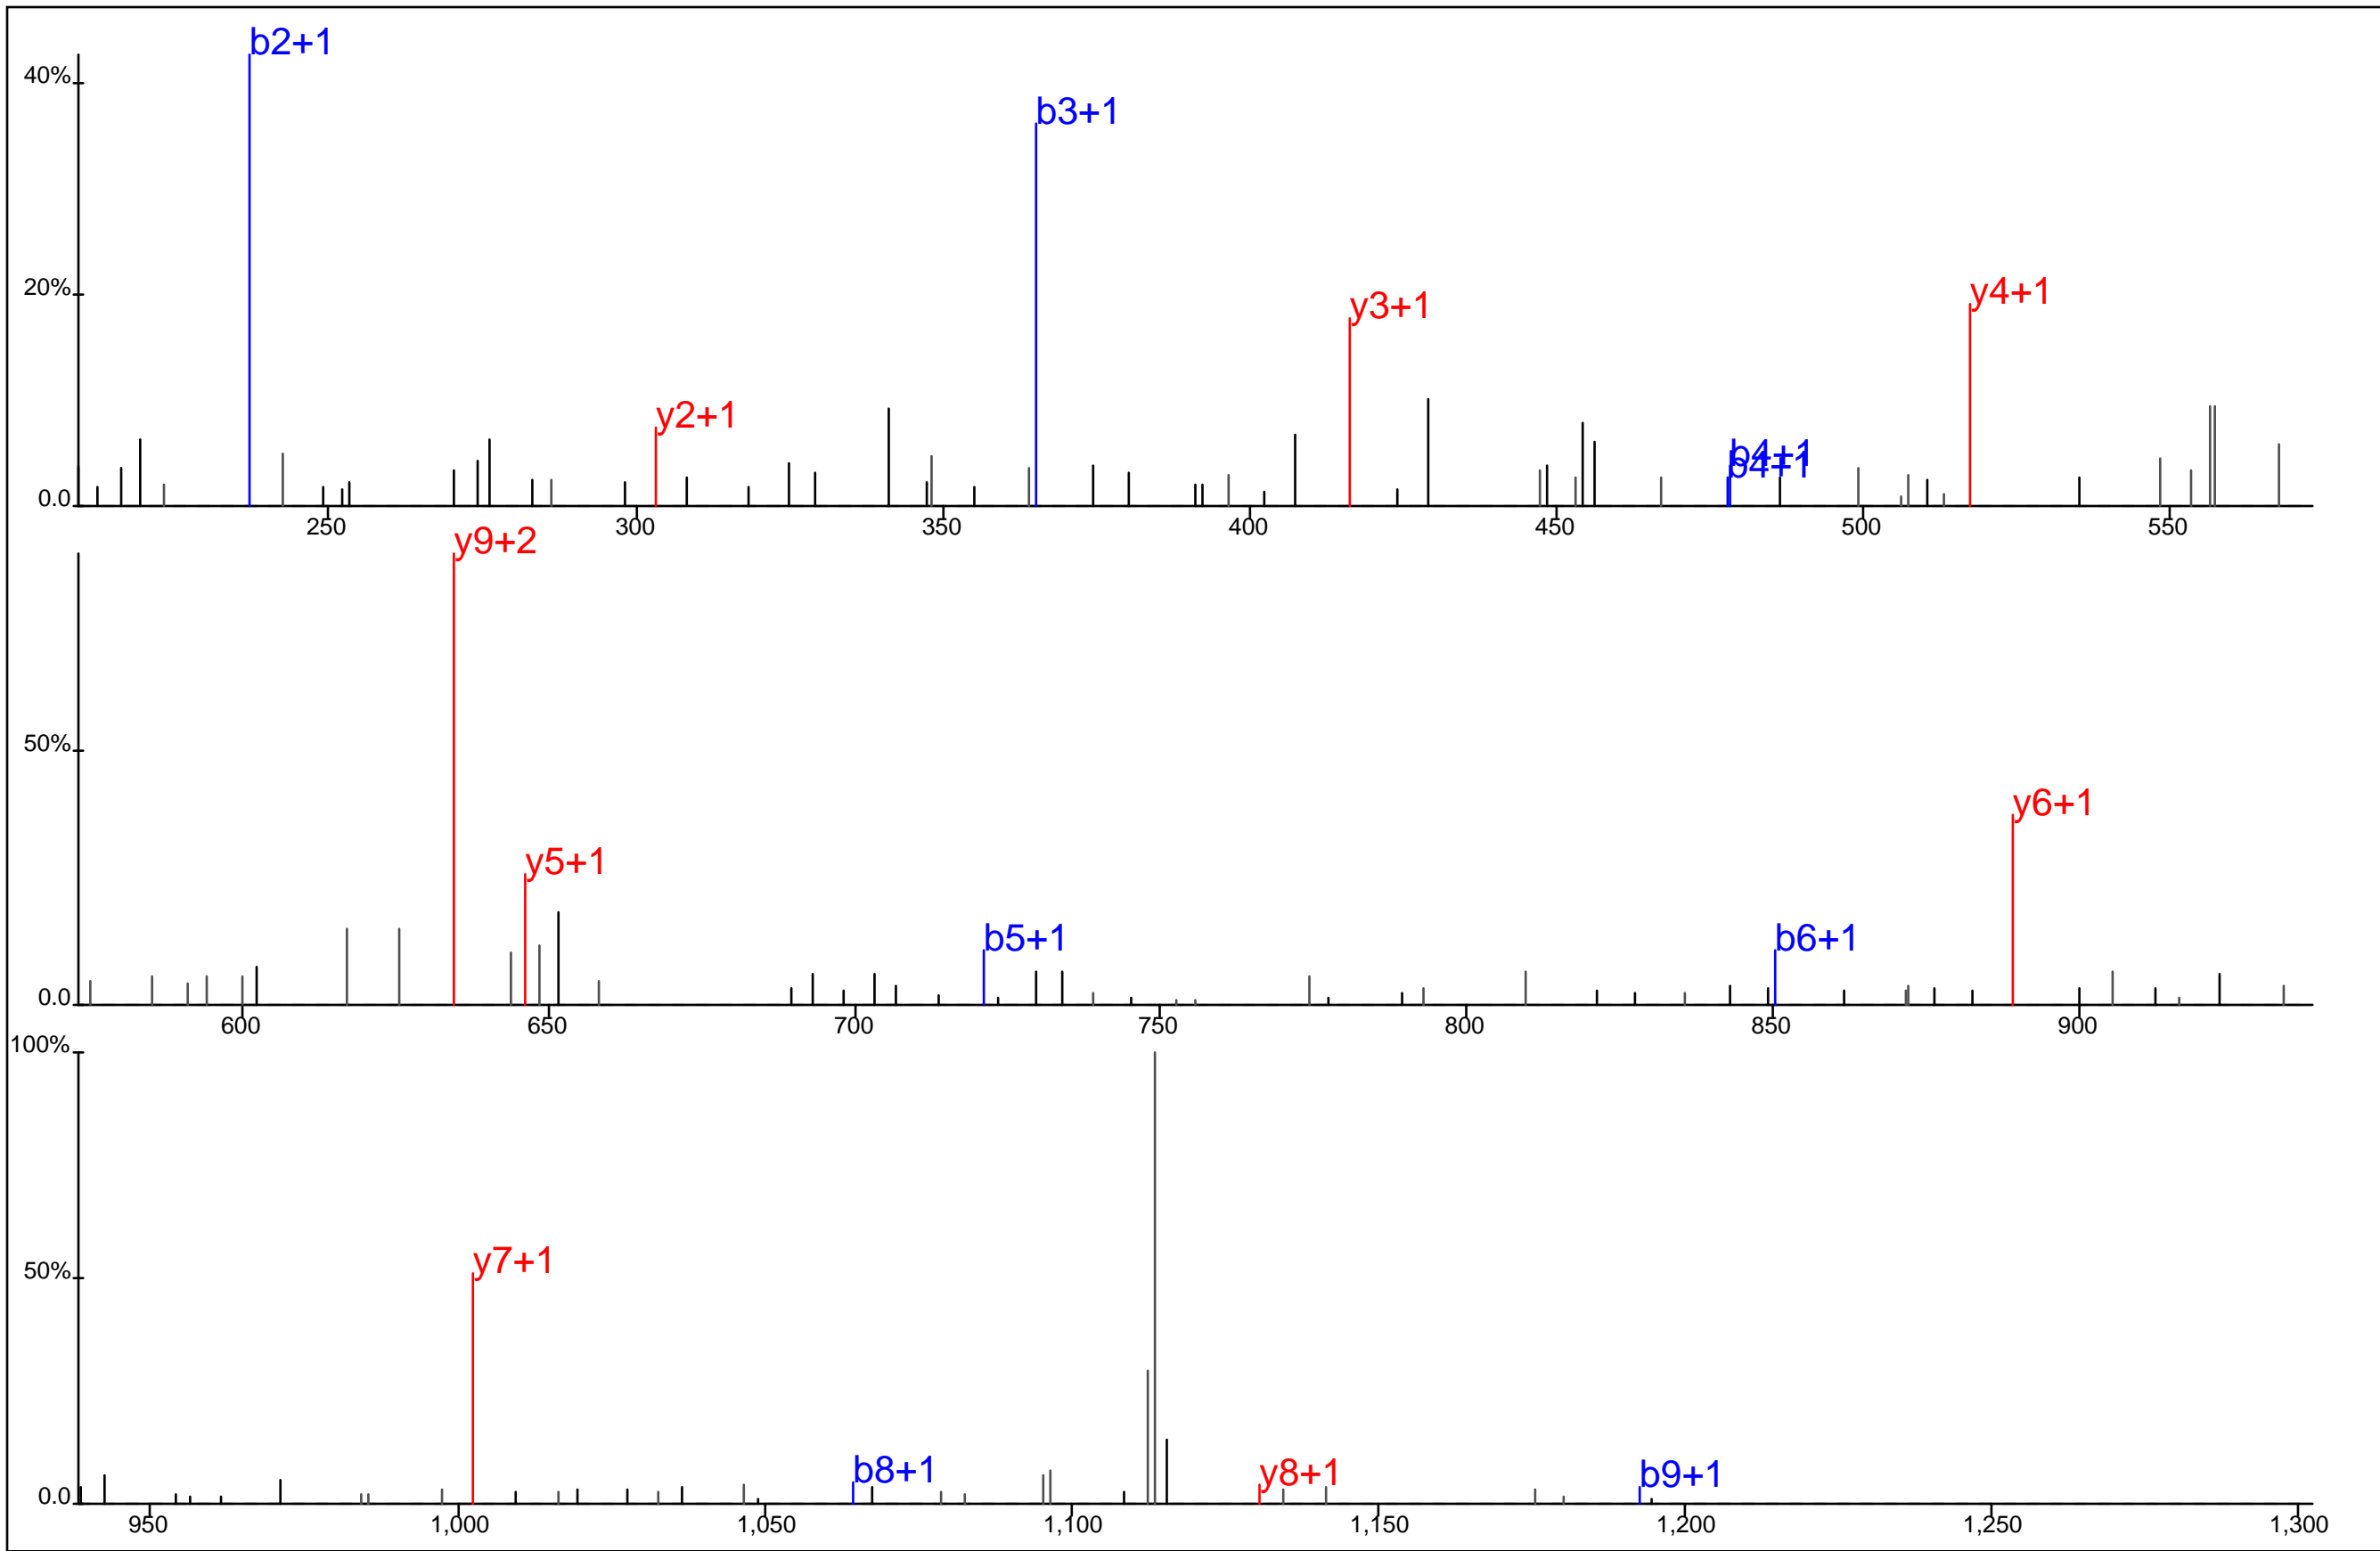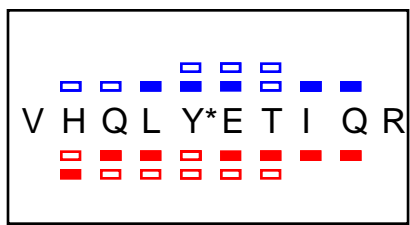

Protein Name: Dynamitin  
 gi Accession: 0  
 Precursor Mass: 683.8289+2  
 Delta Mass: 0.667 ppm  
 XCorr: 37.35

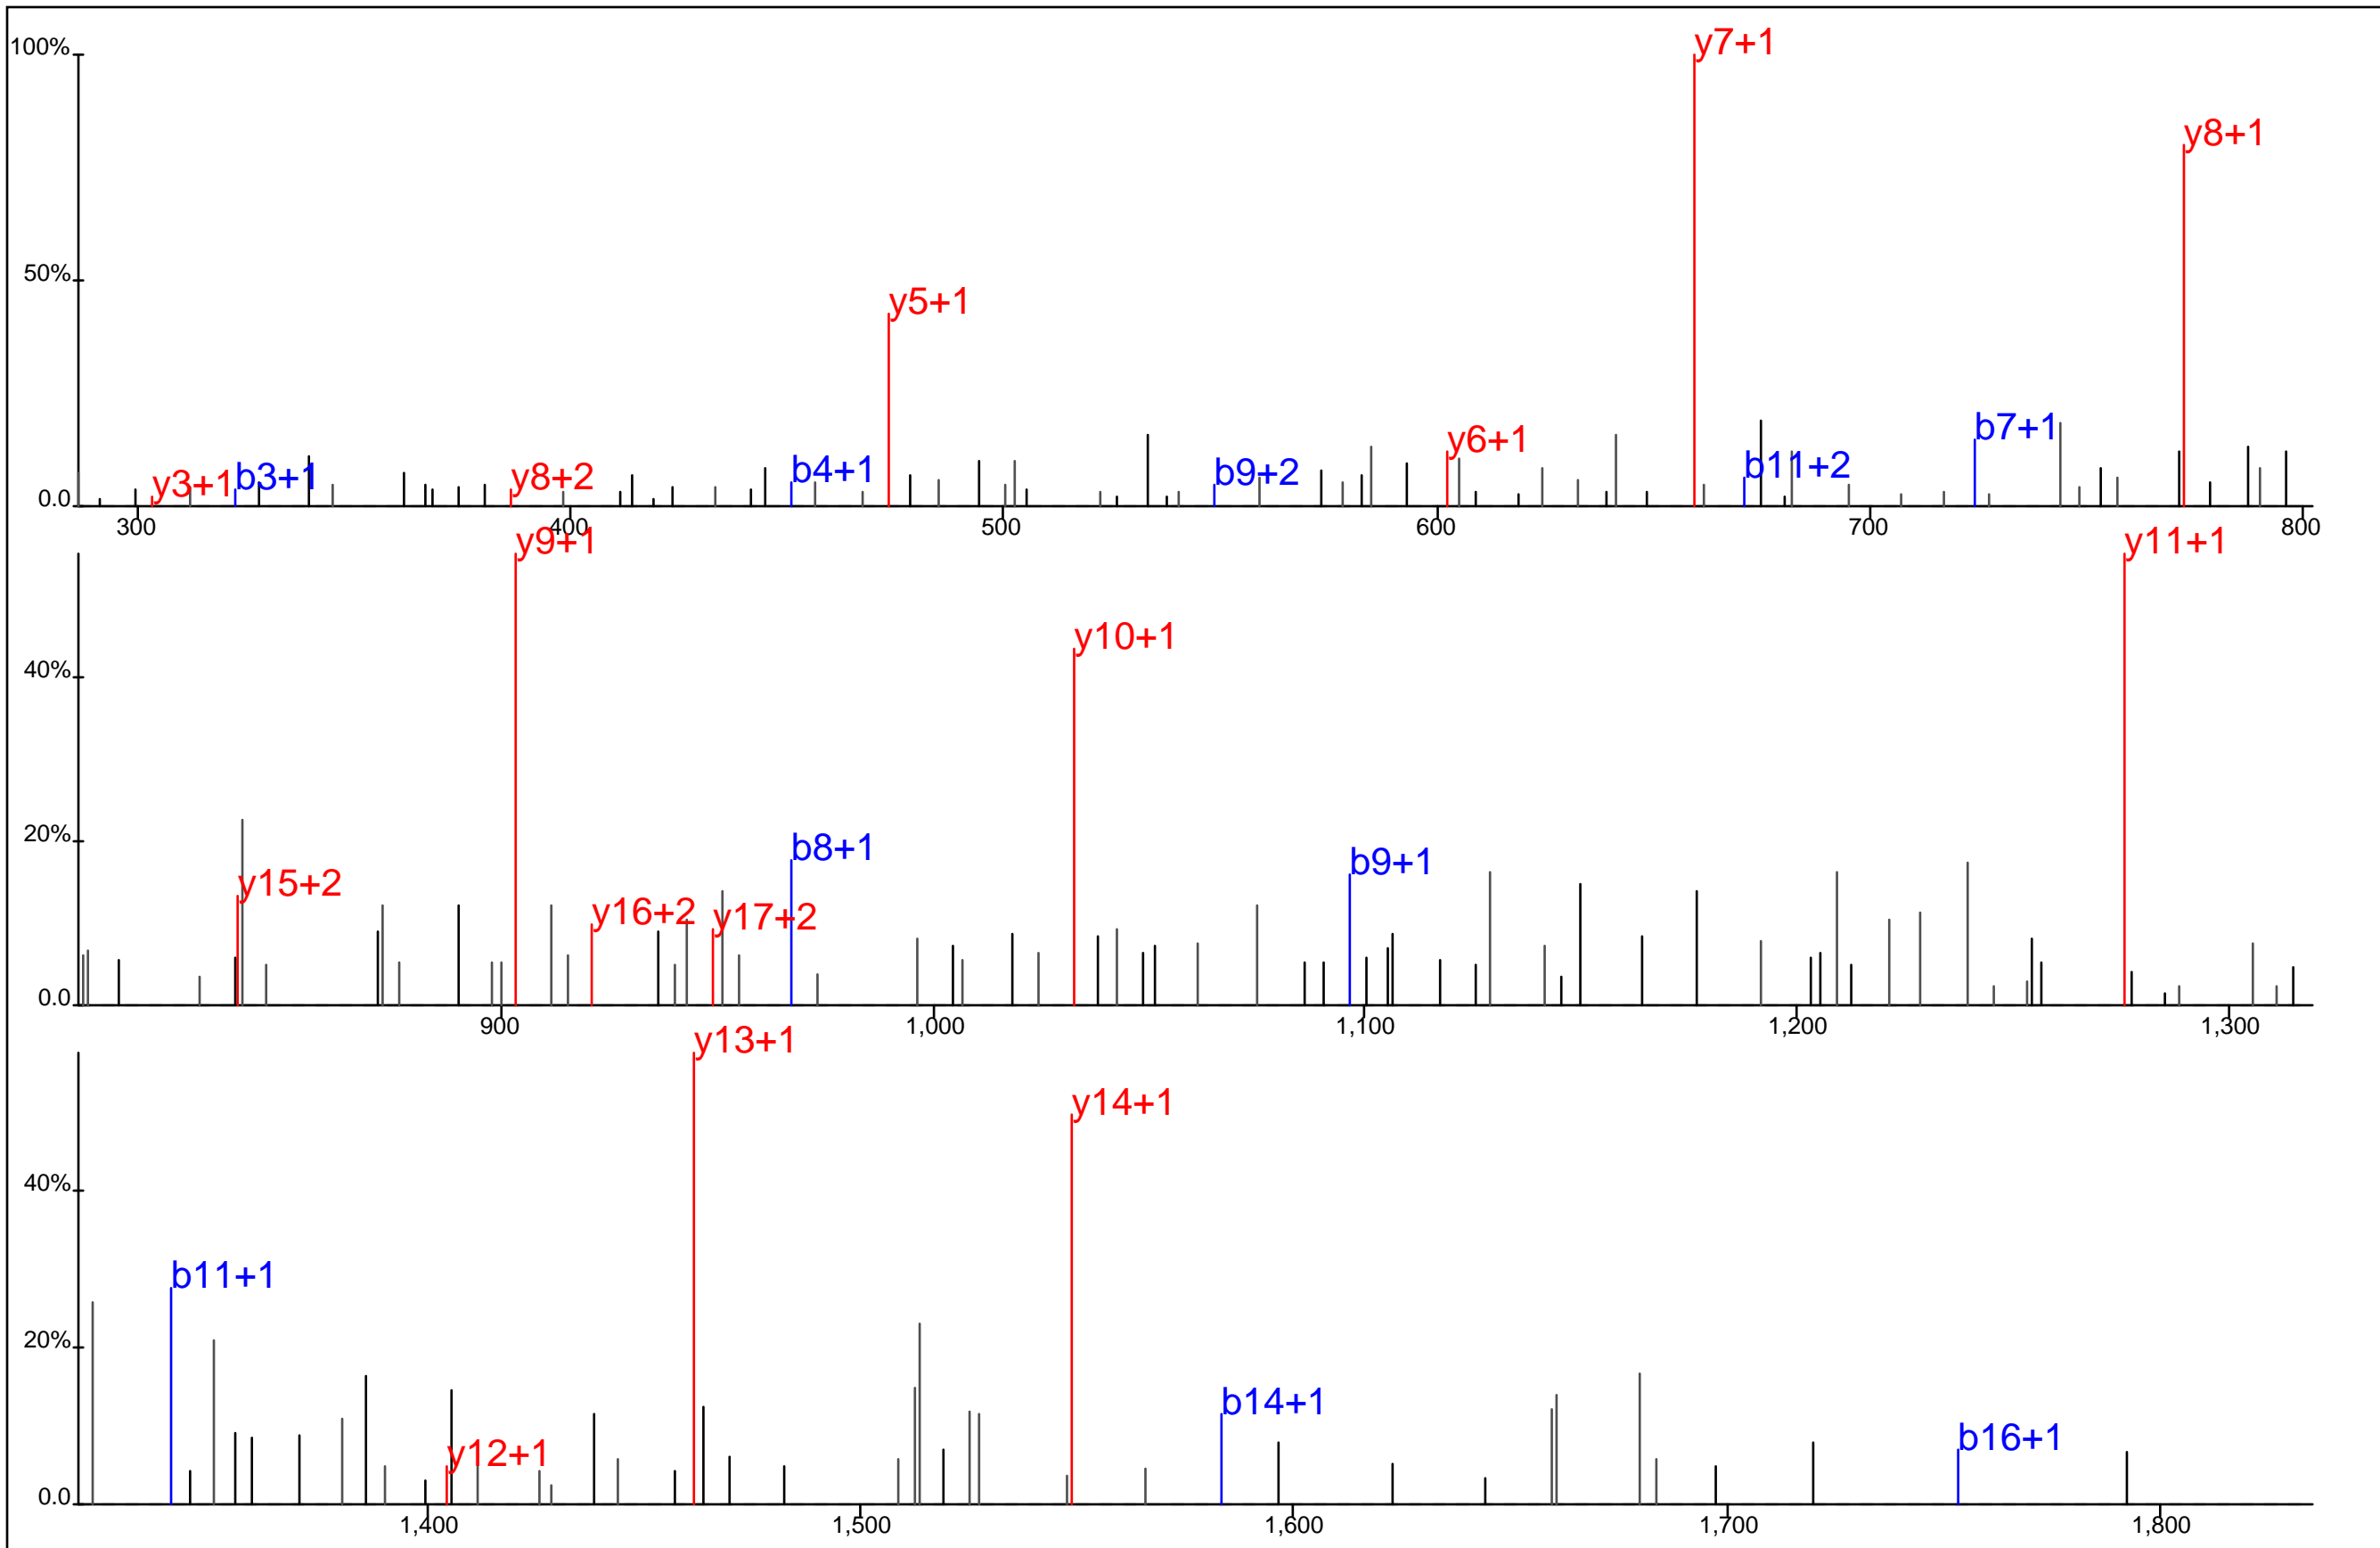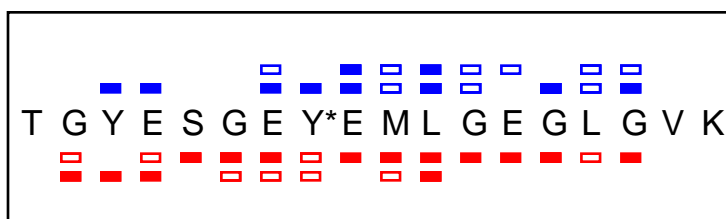

Protein Name: Dynamitin  
 gi Accession: 0  
 Precursor Mass: 999.9275+2  
 Delta Mass: 3.758 ppm  
 XCorr: 45.9

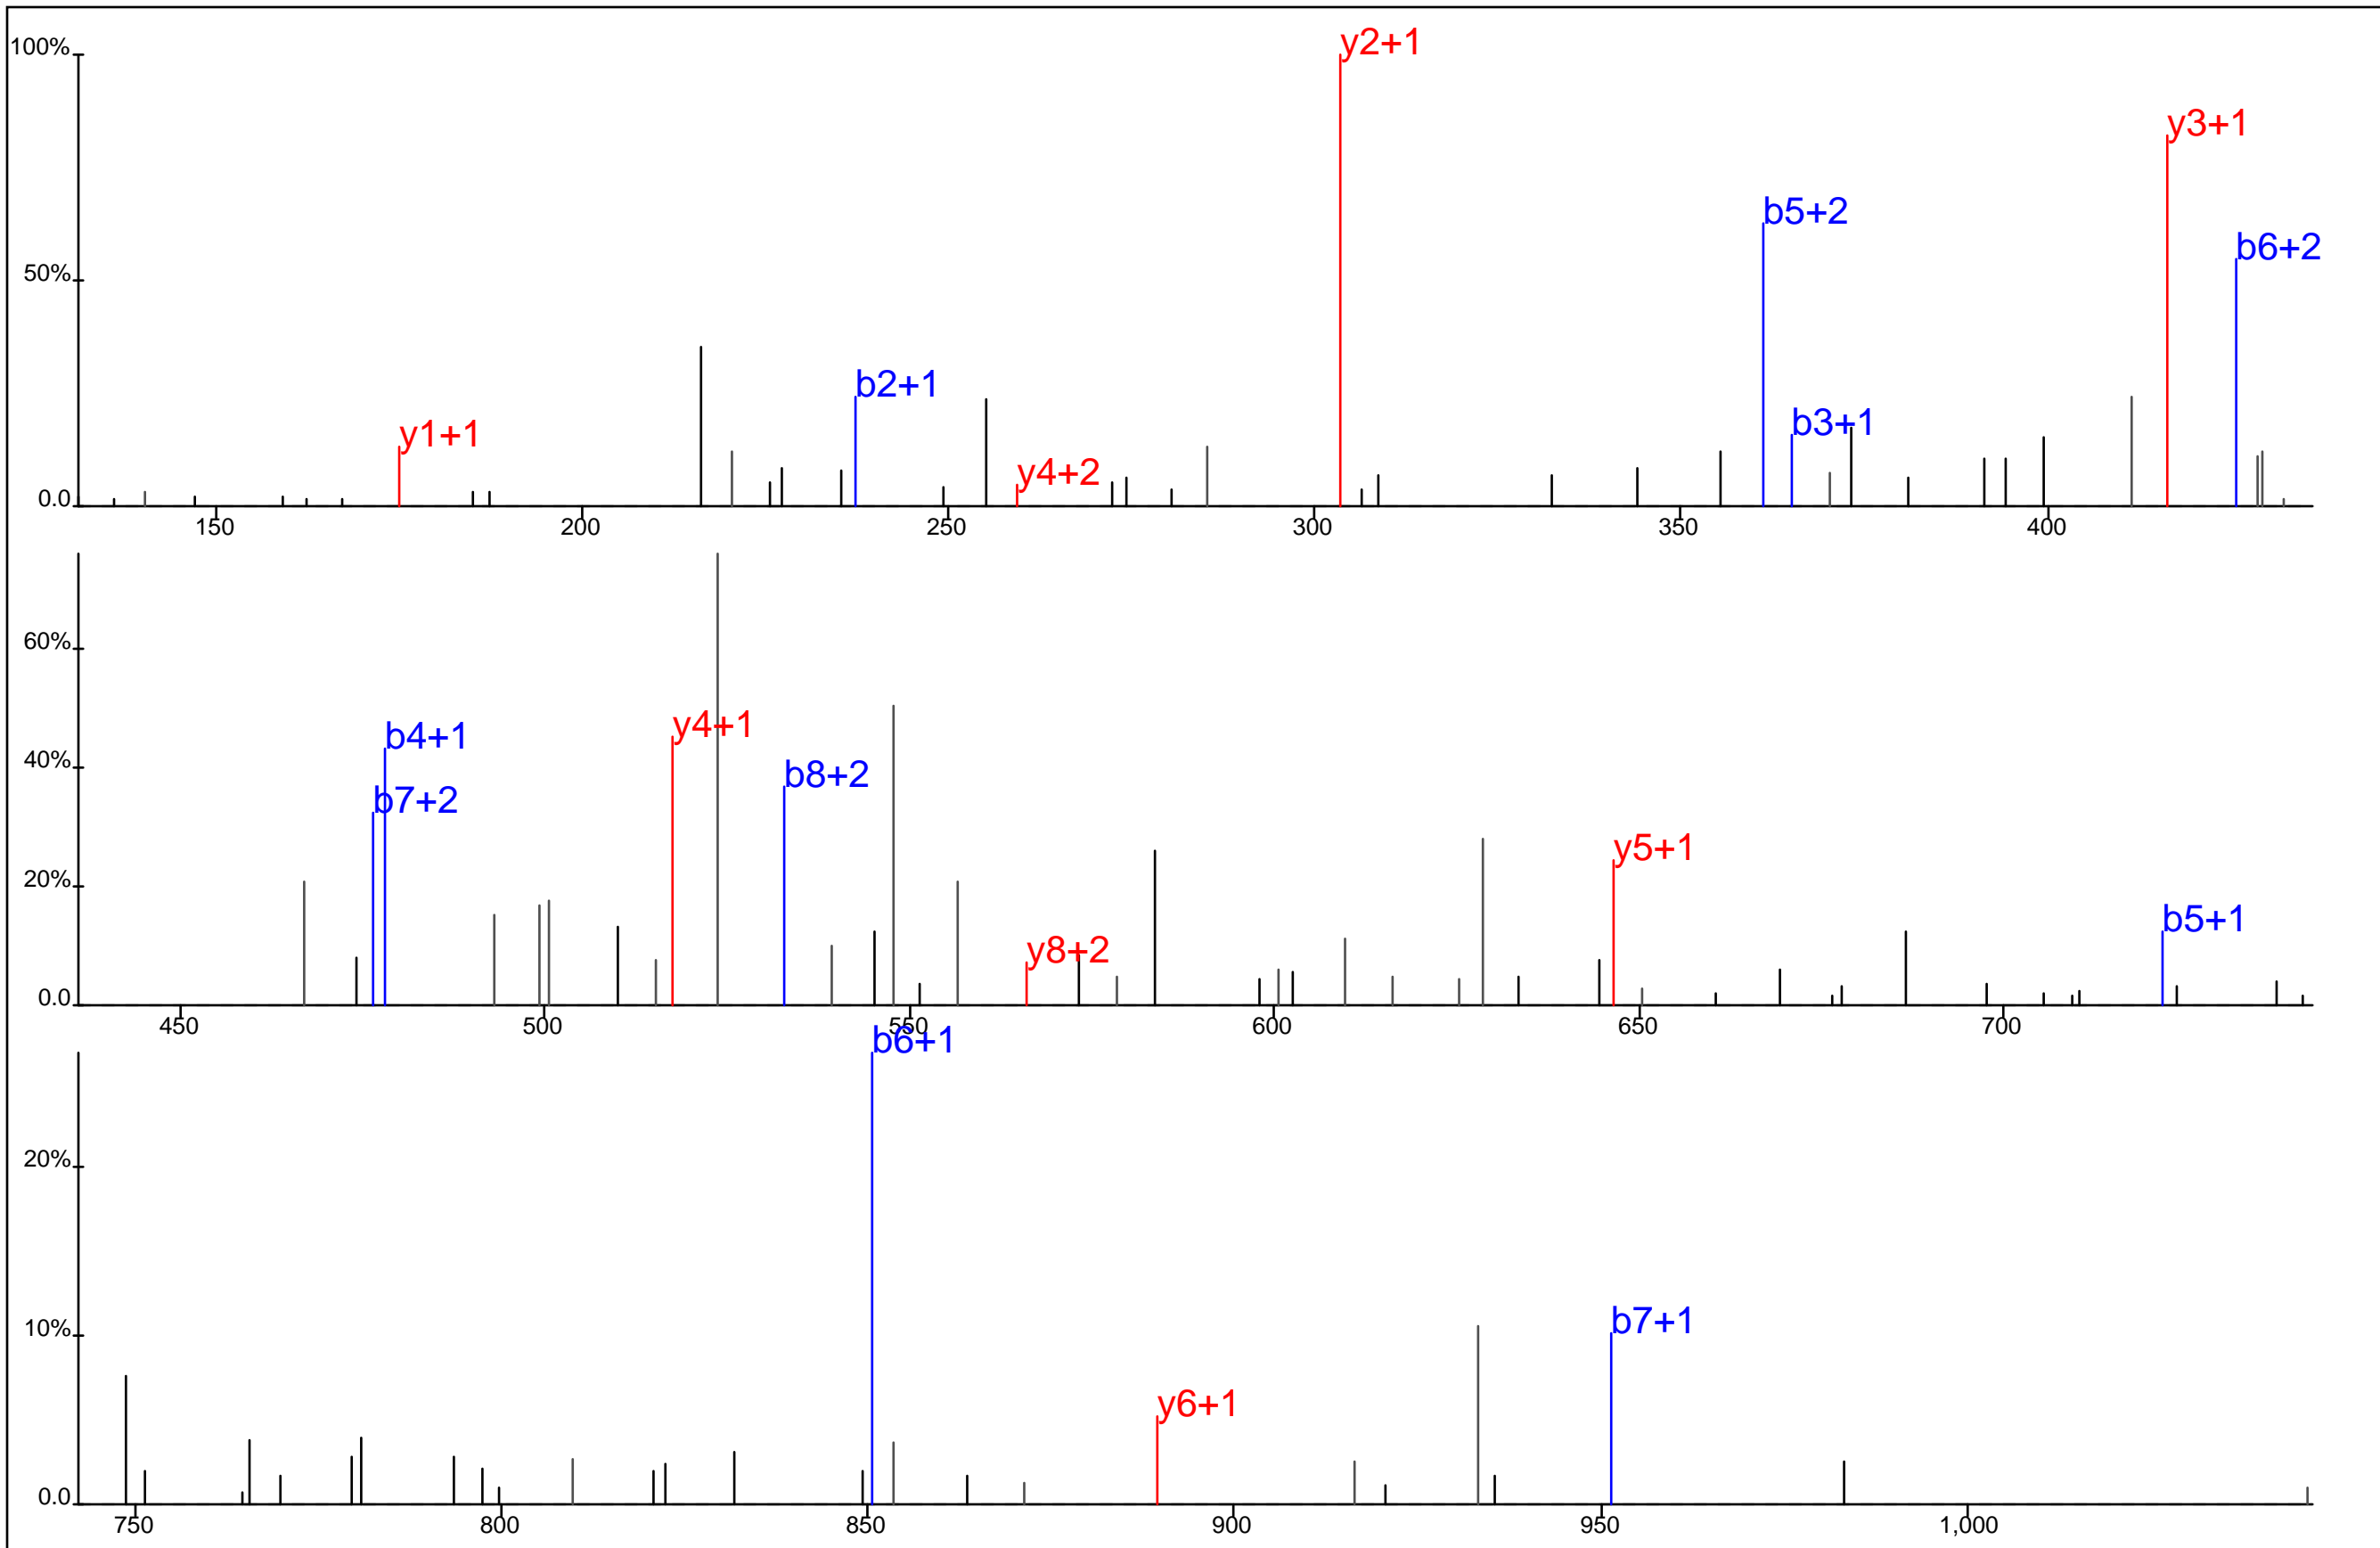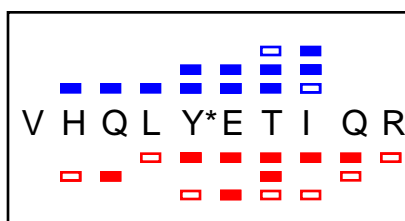

Protein Name: Dynamitin  
 gi Accession: 0  
 Precursor Mass: 456.2214+3  
 Delta Mass: 1.324 ppm  
 XCorr: 44.63

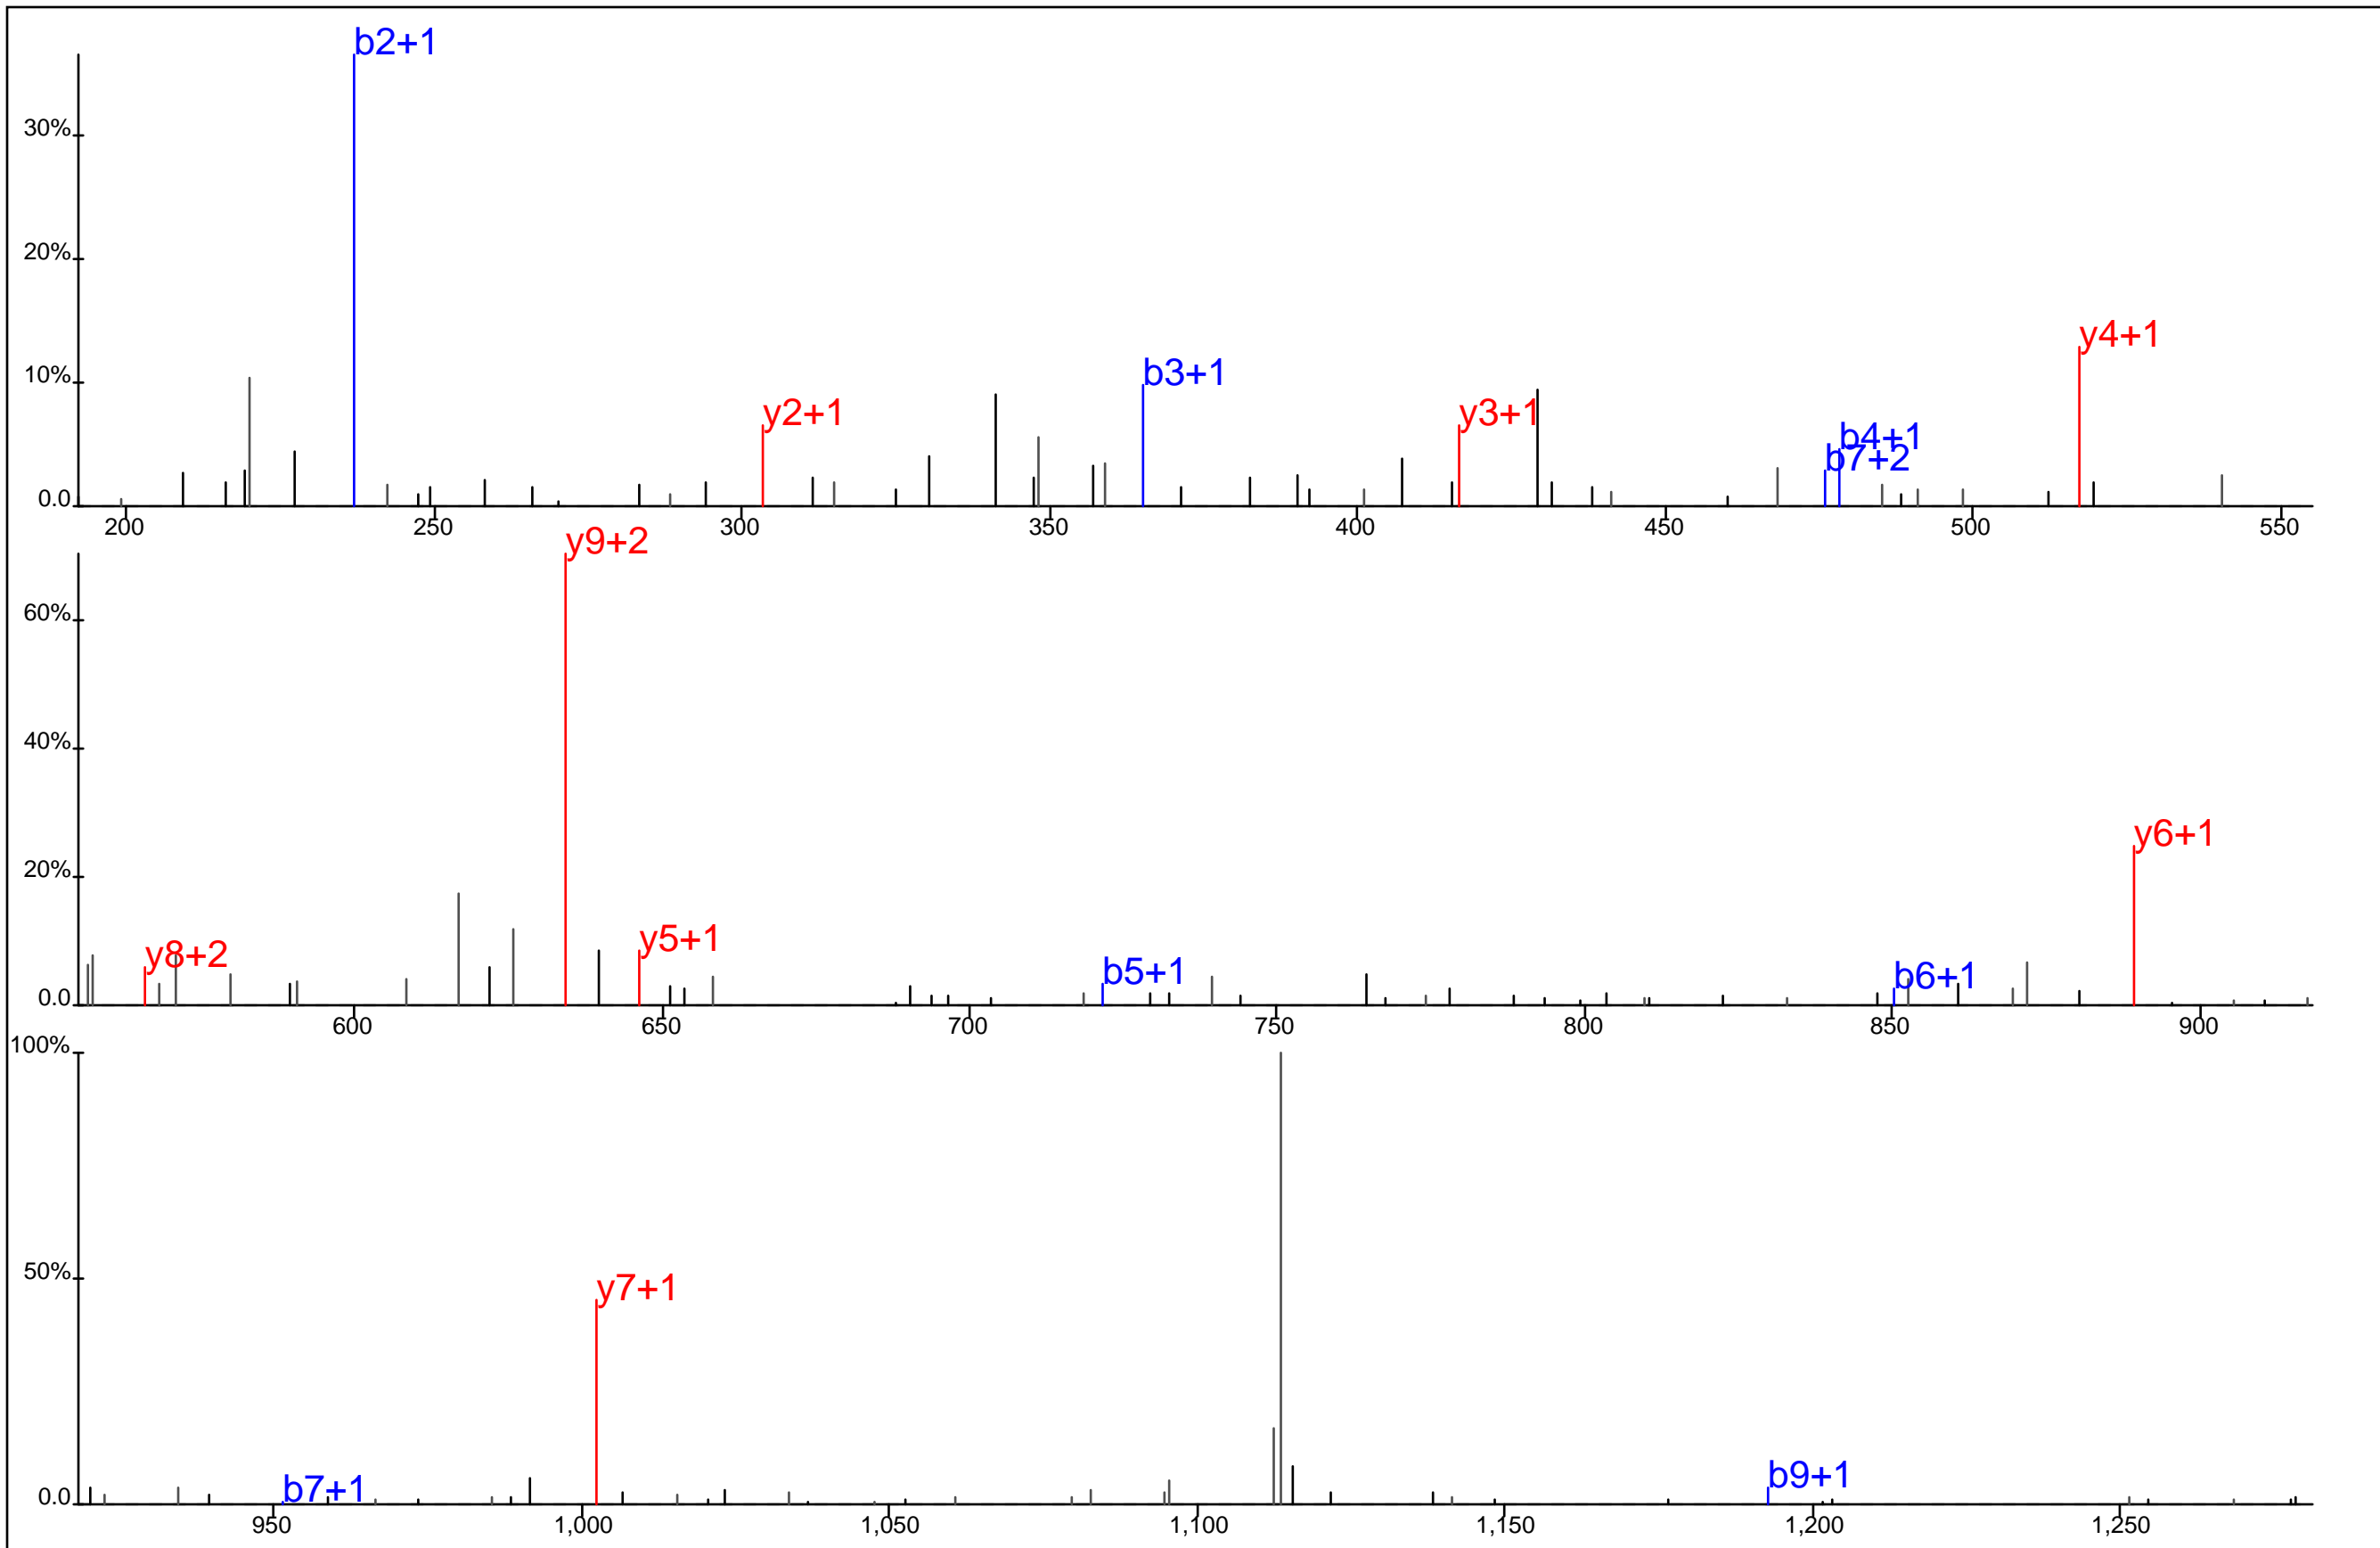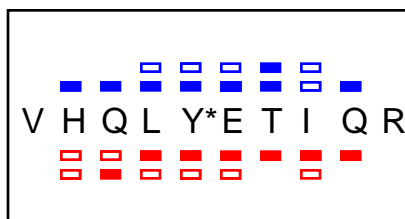

Protein Name: Dynamitin  
 gi Accession: 0  
 Precursor Mass: 683.8298+2  
 Delta Mass: 0.673 ppm  
 XCorr: 30.35

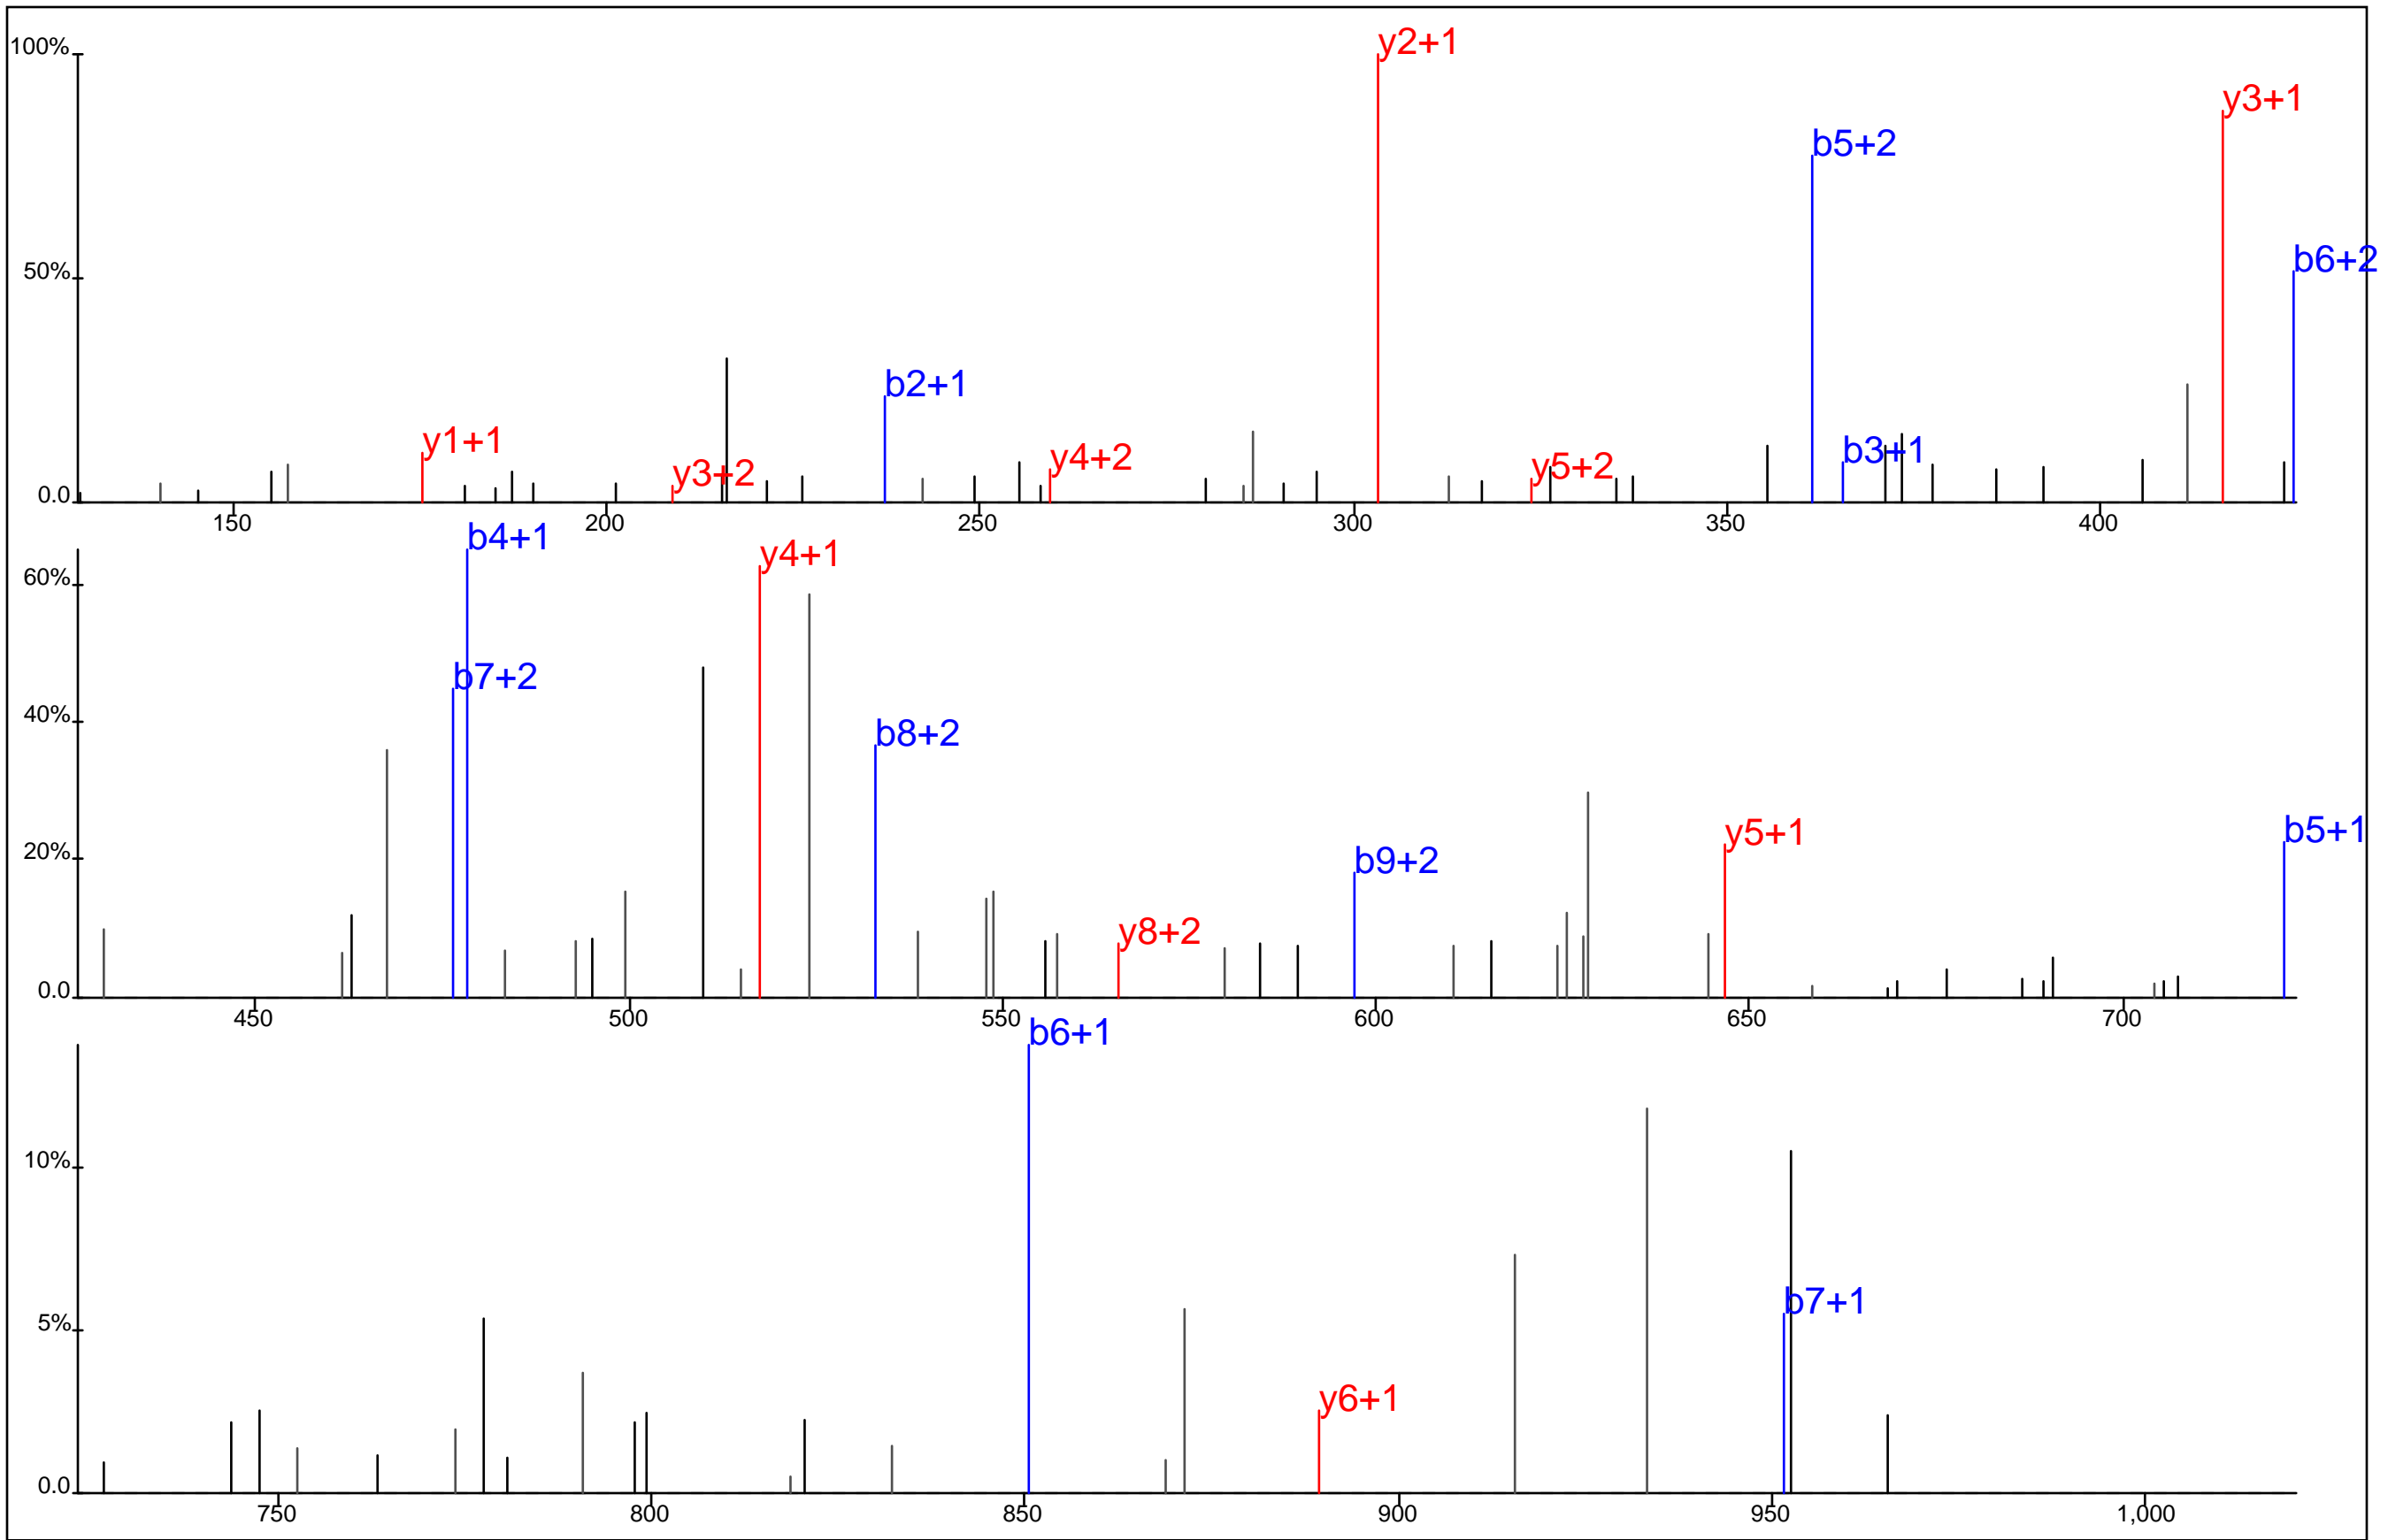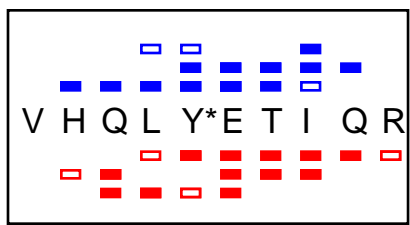

Protein Name: Dynamitin  
 gi Accession: 0  
 Precursor Mass: 456.2220+3  
 Delta Mass: 0.050 ppm  
 XCorr: 37.8



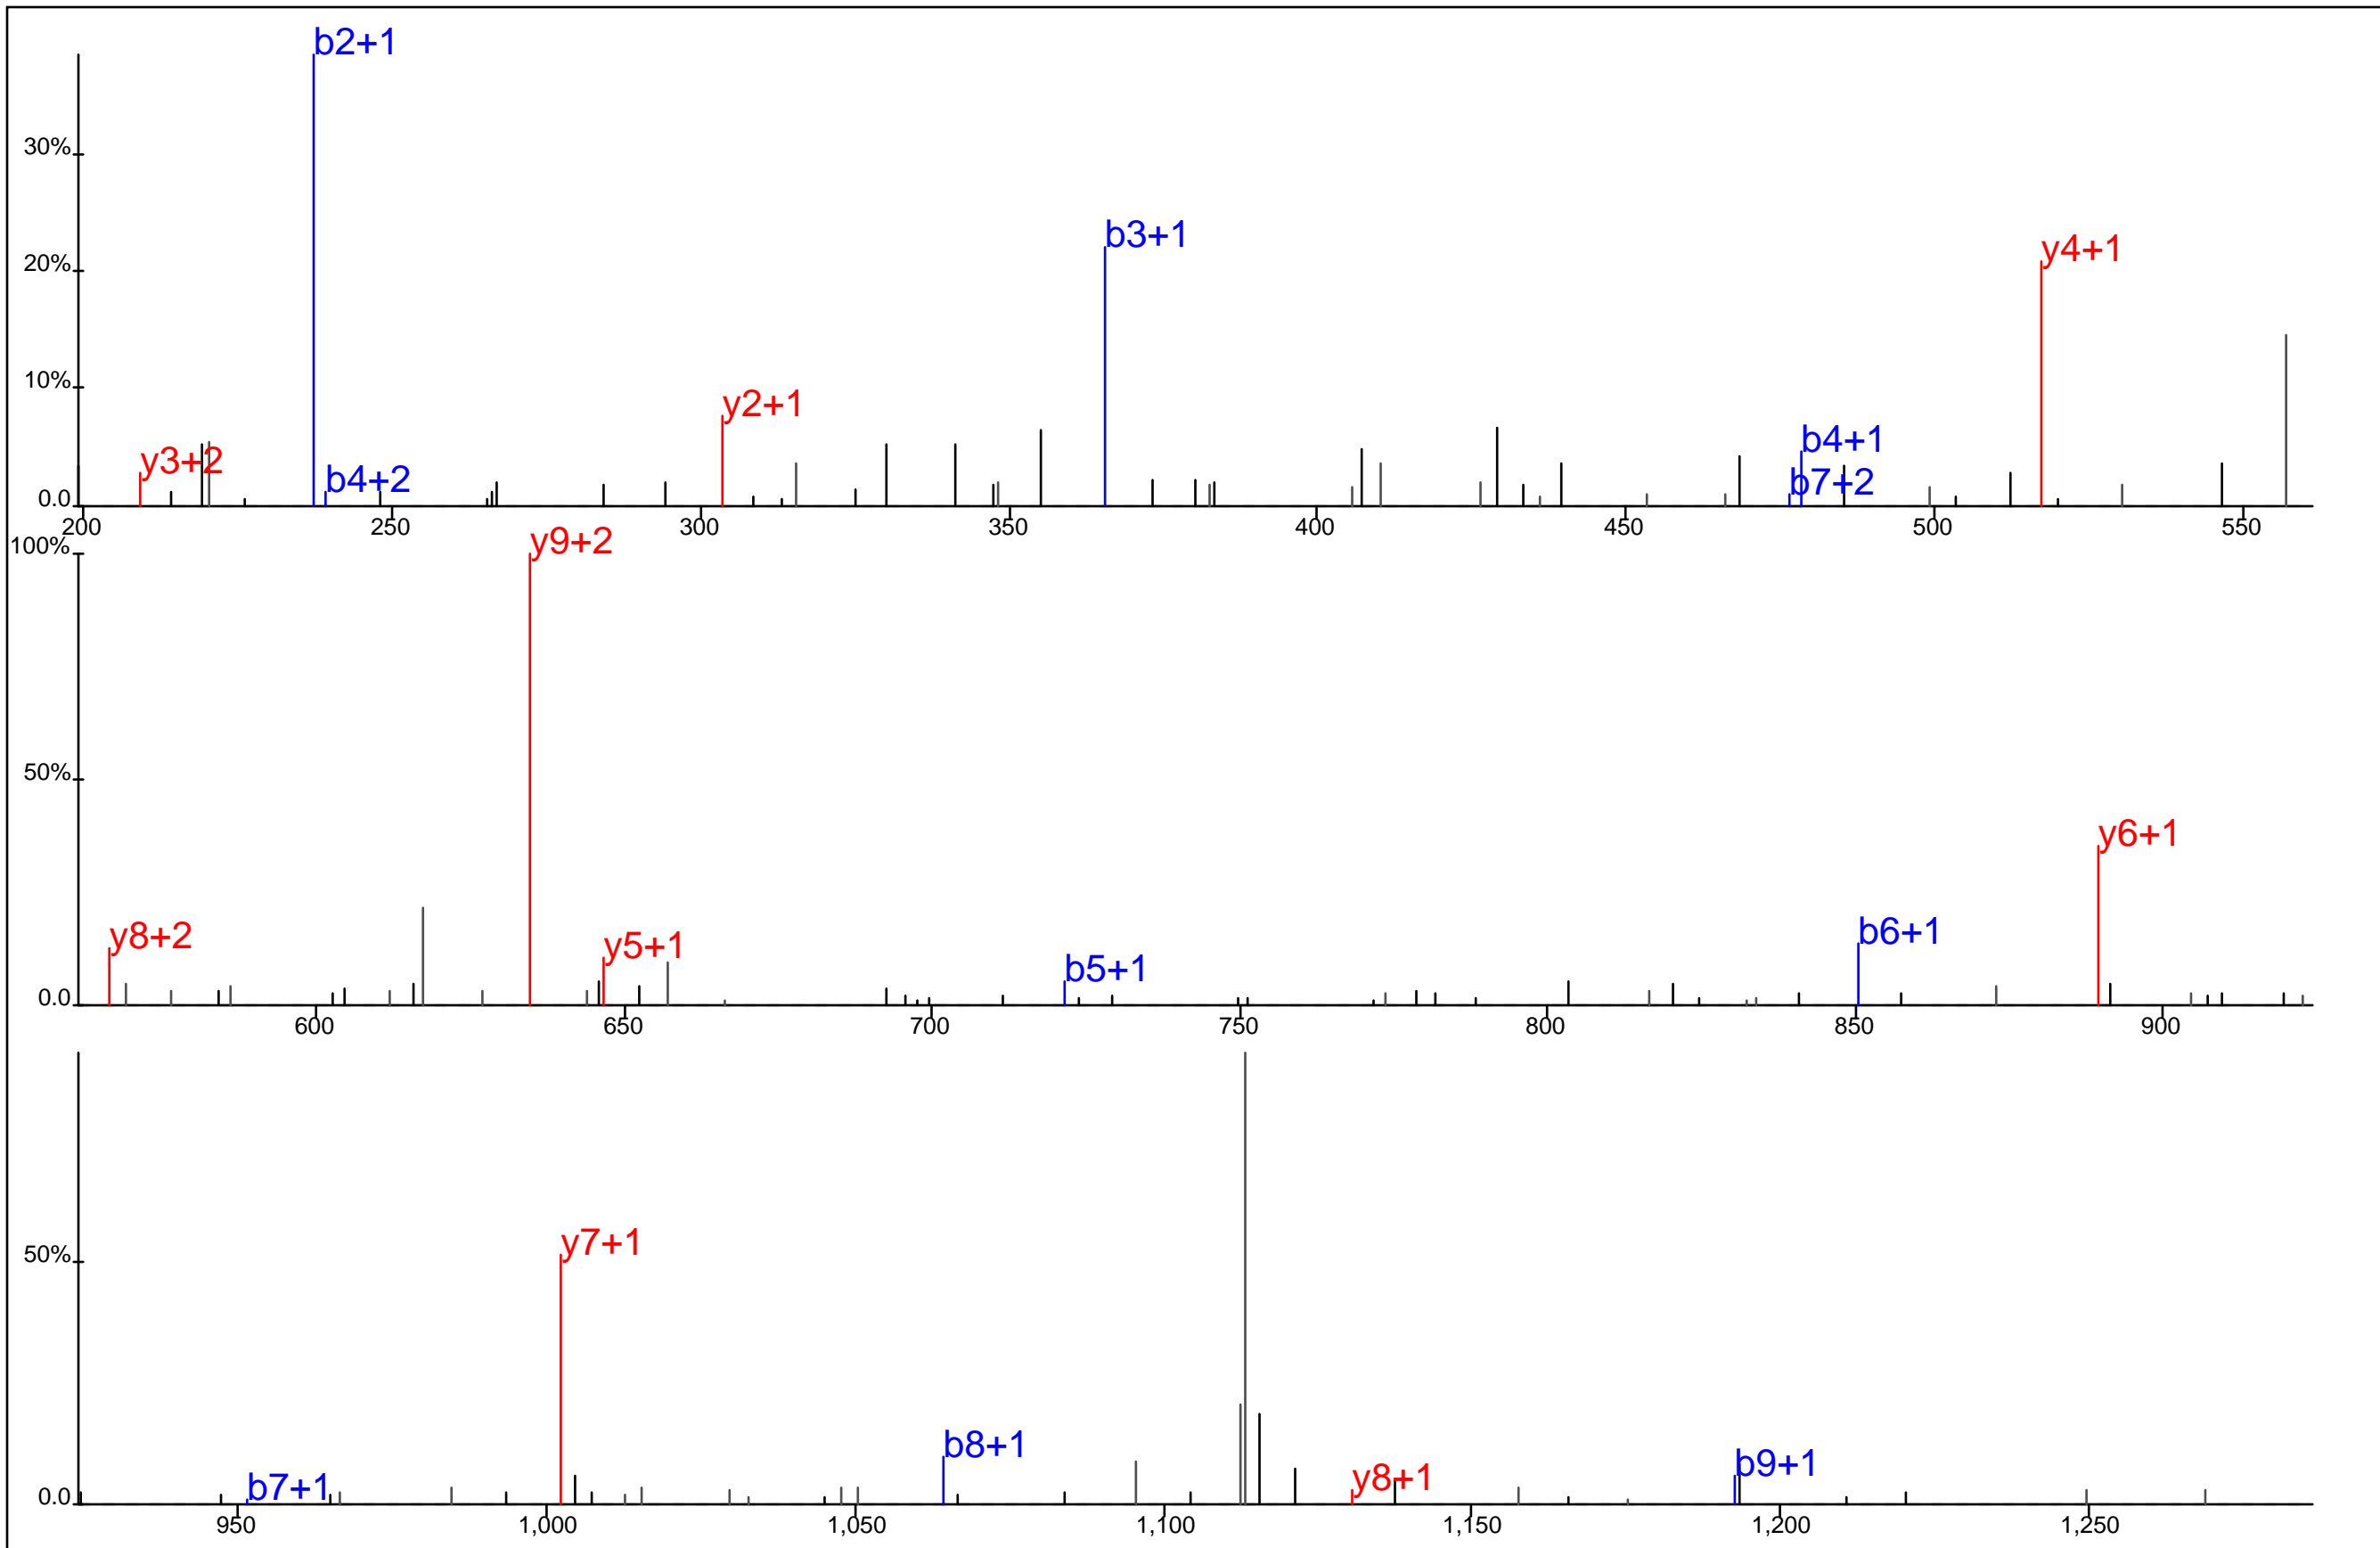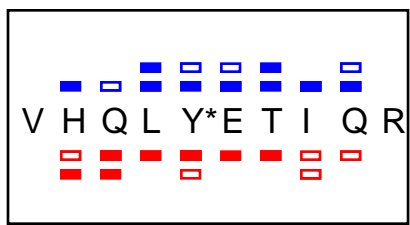

Protein Name: Dynamitin  
 gi Accession: 0  
 Precursor Mass: 683.8295+2  
 Delta Mass: 0.138 ppm  
 XCorr: 30.85

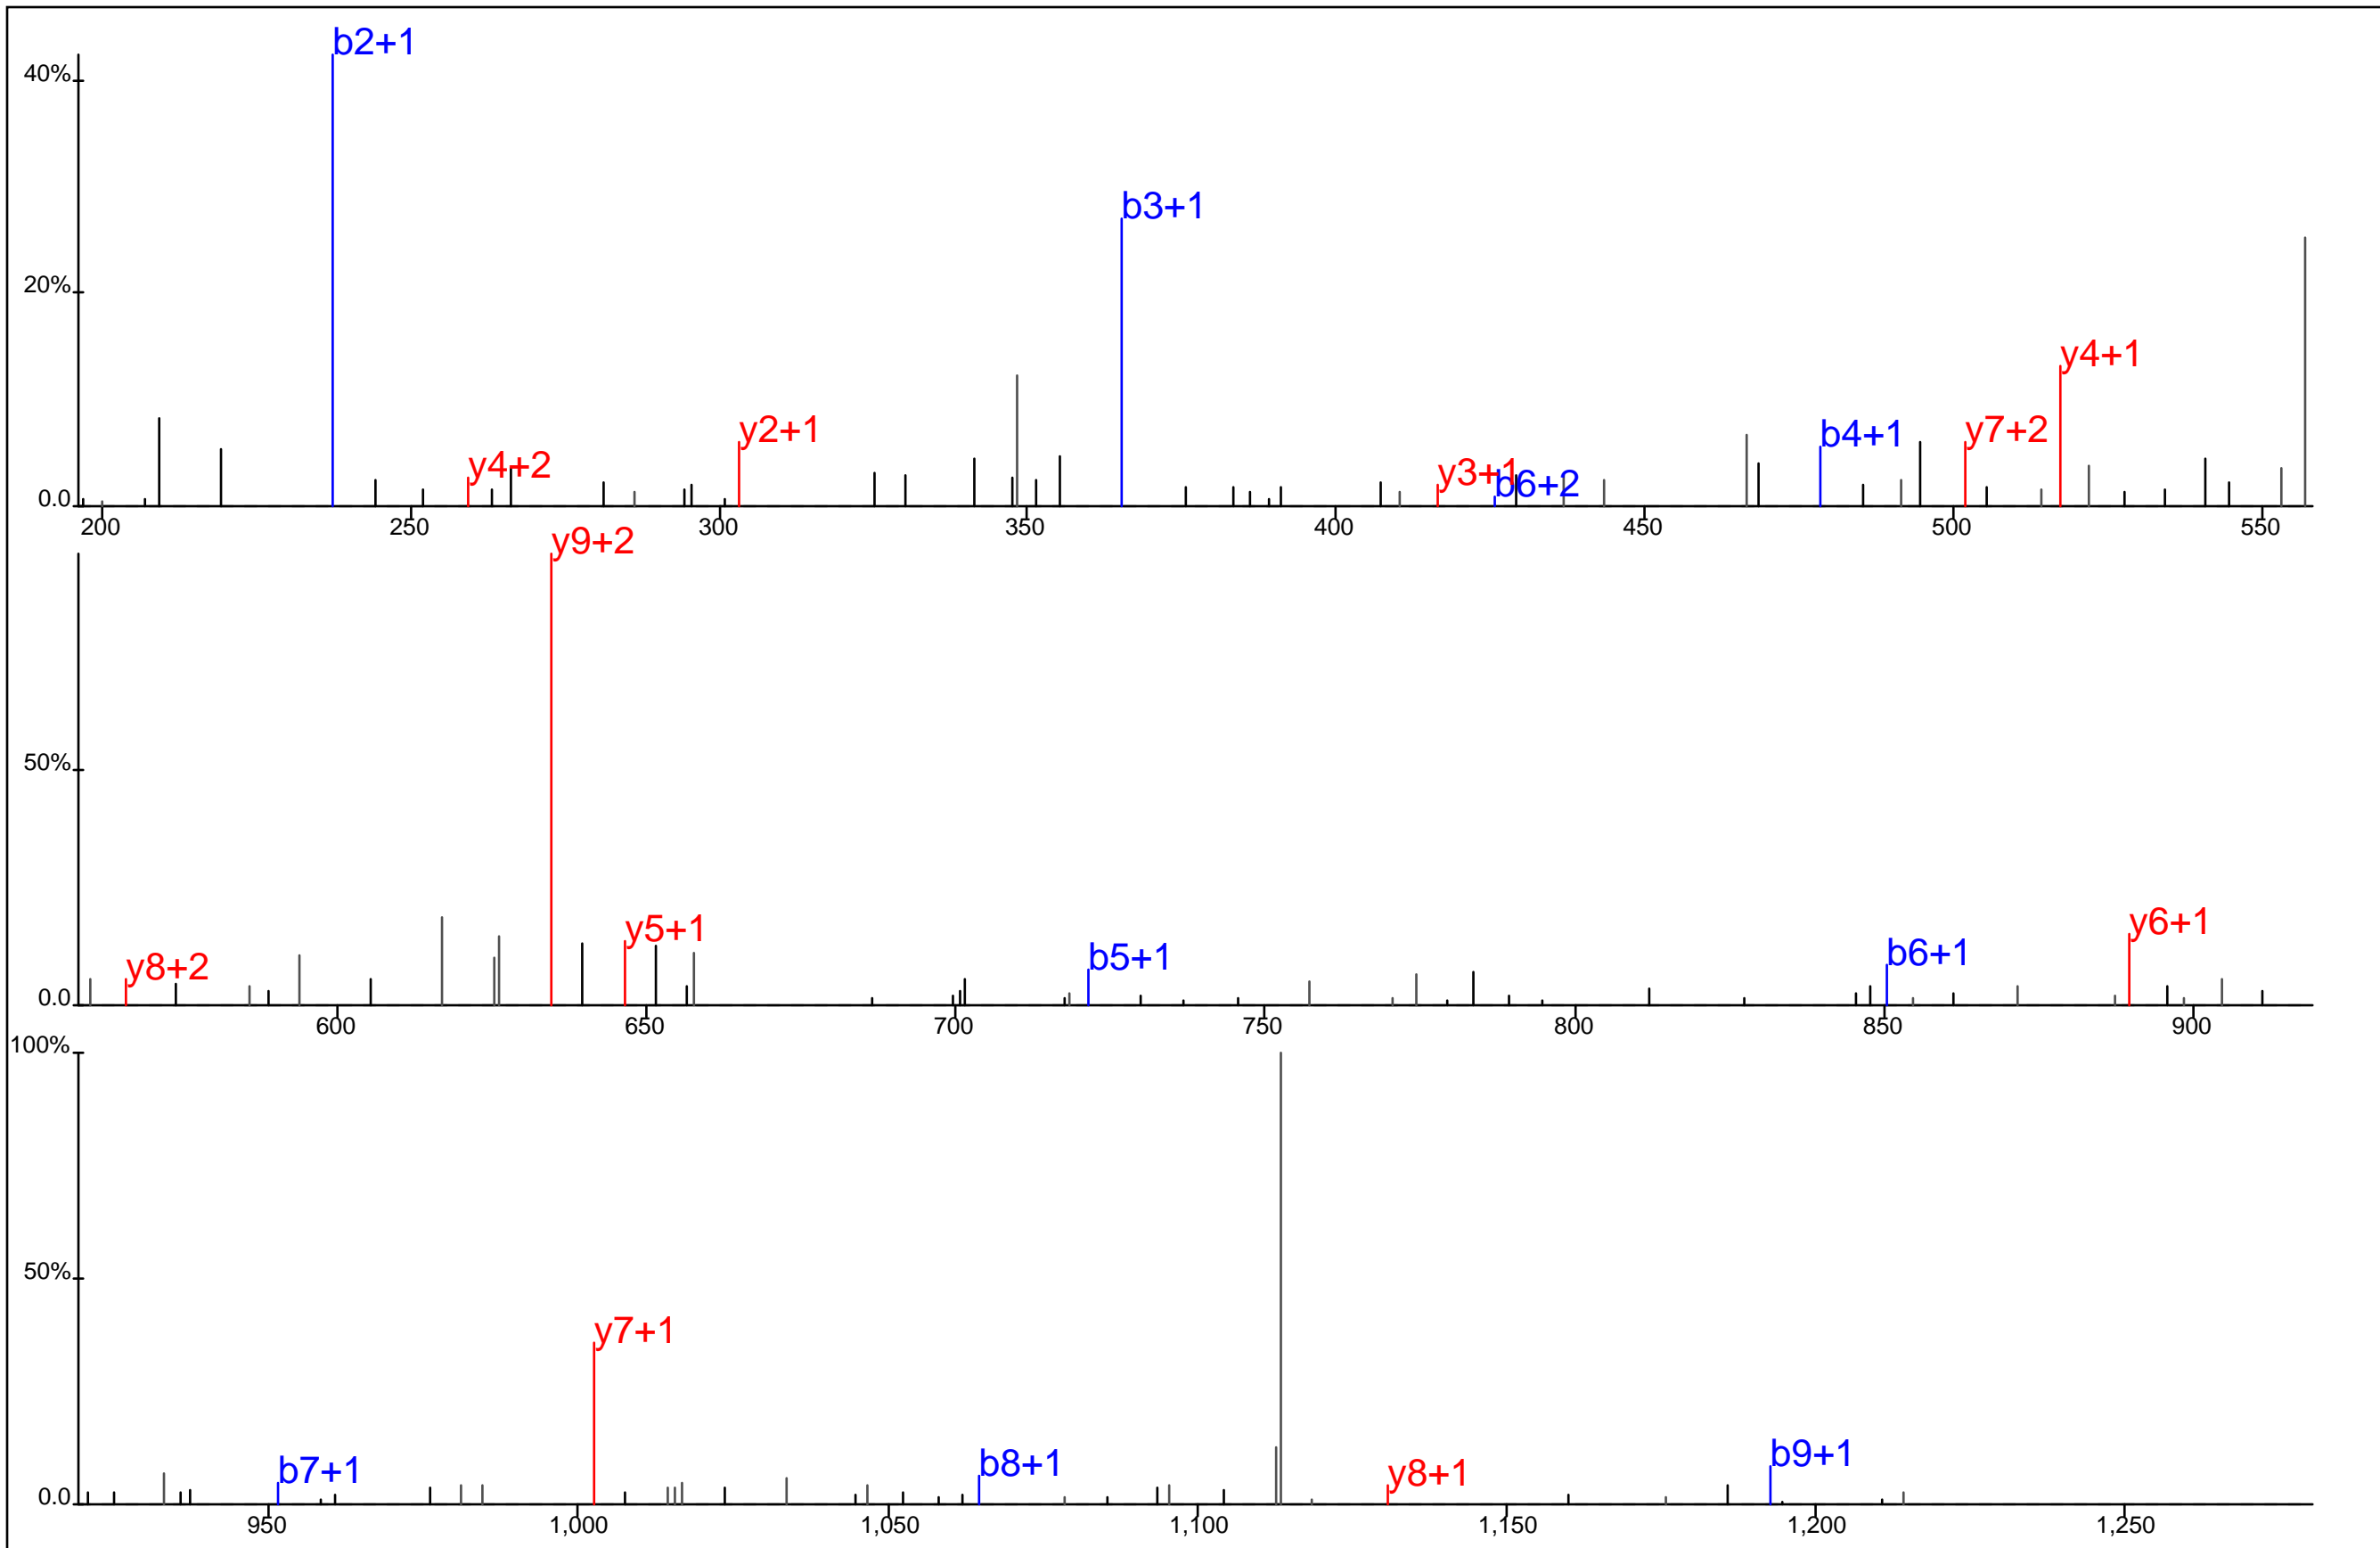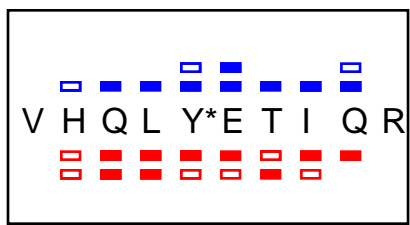

Protein Name: Dynamitin  
 gi Accession: 0  
 Precursor Mass: 683.8295+2  
 Delta Mass: 0.227 ppm  
 XCorr: 49.27

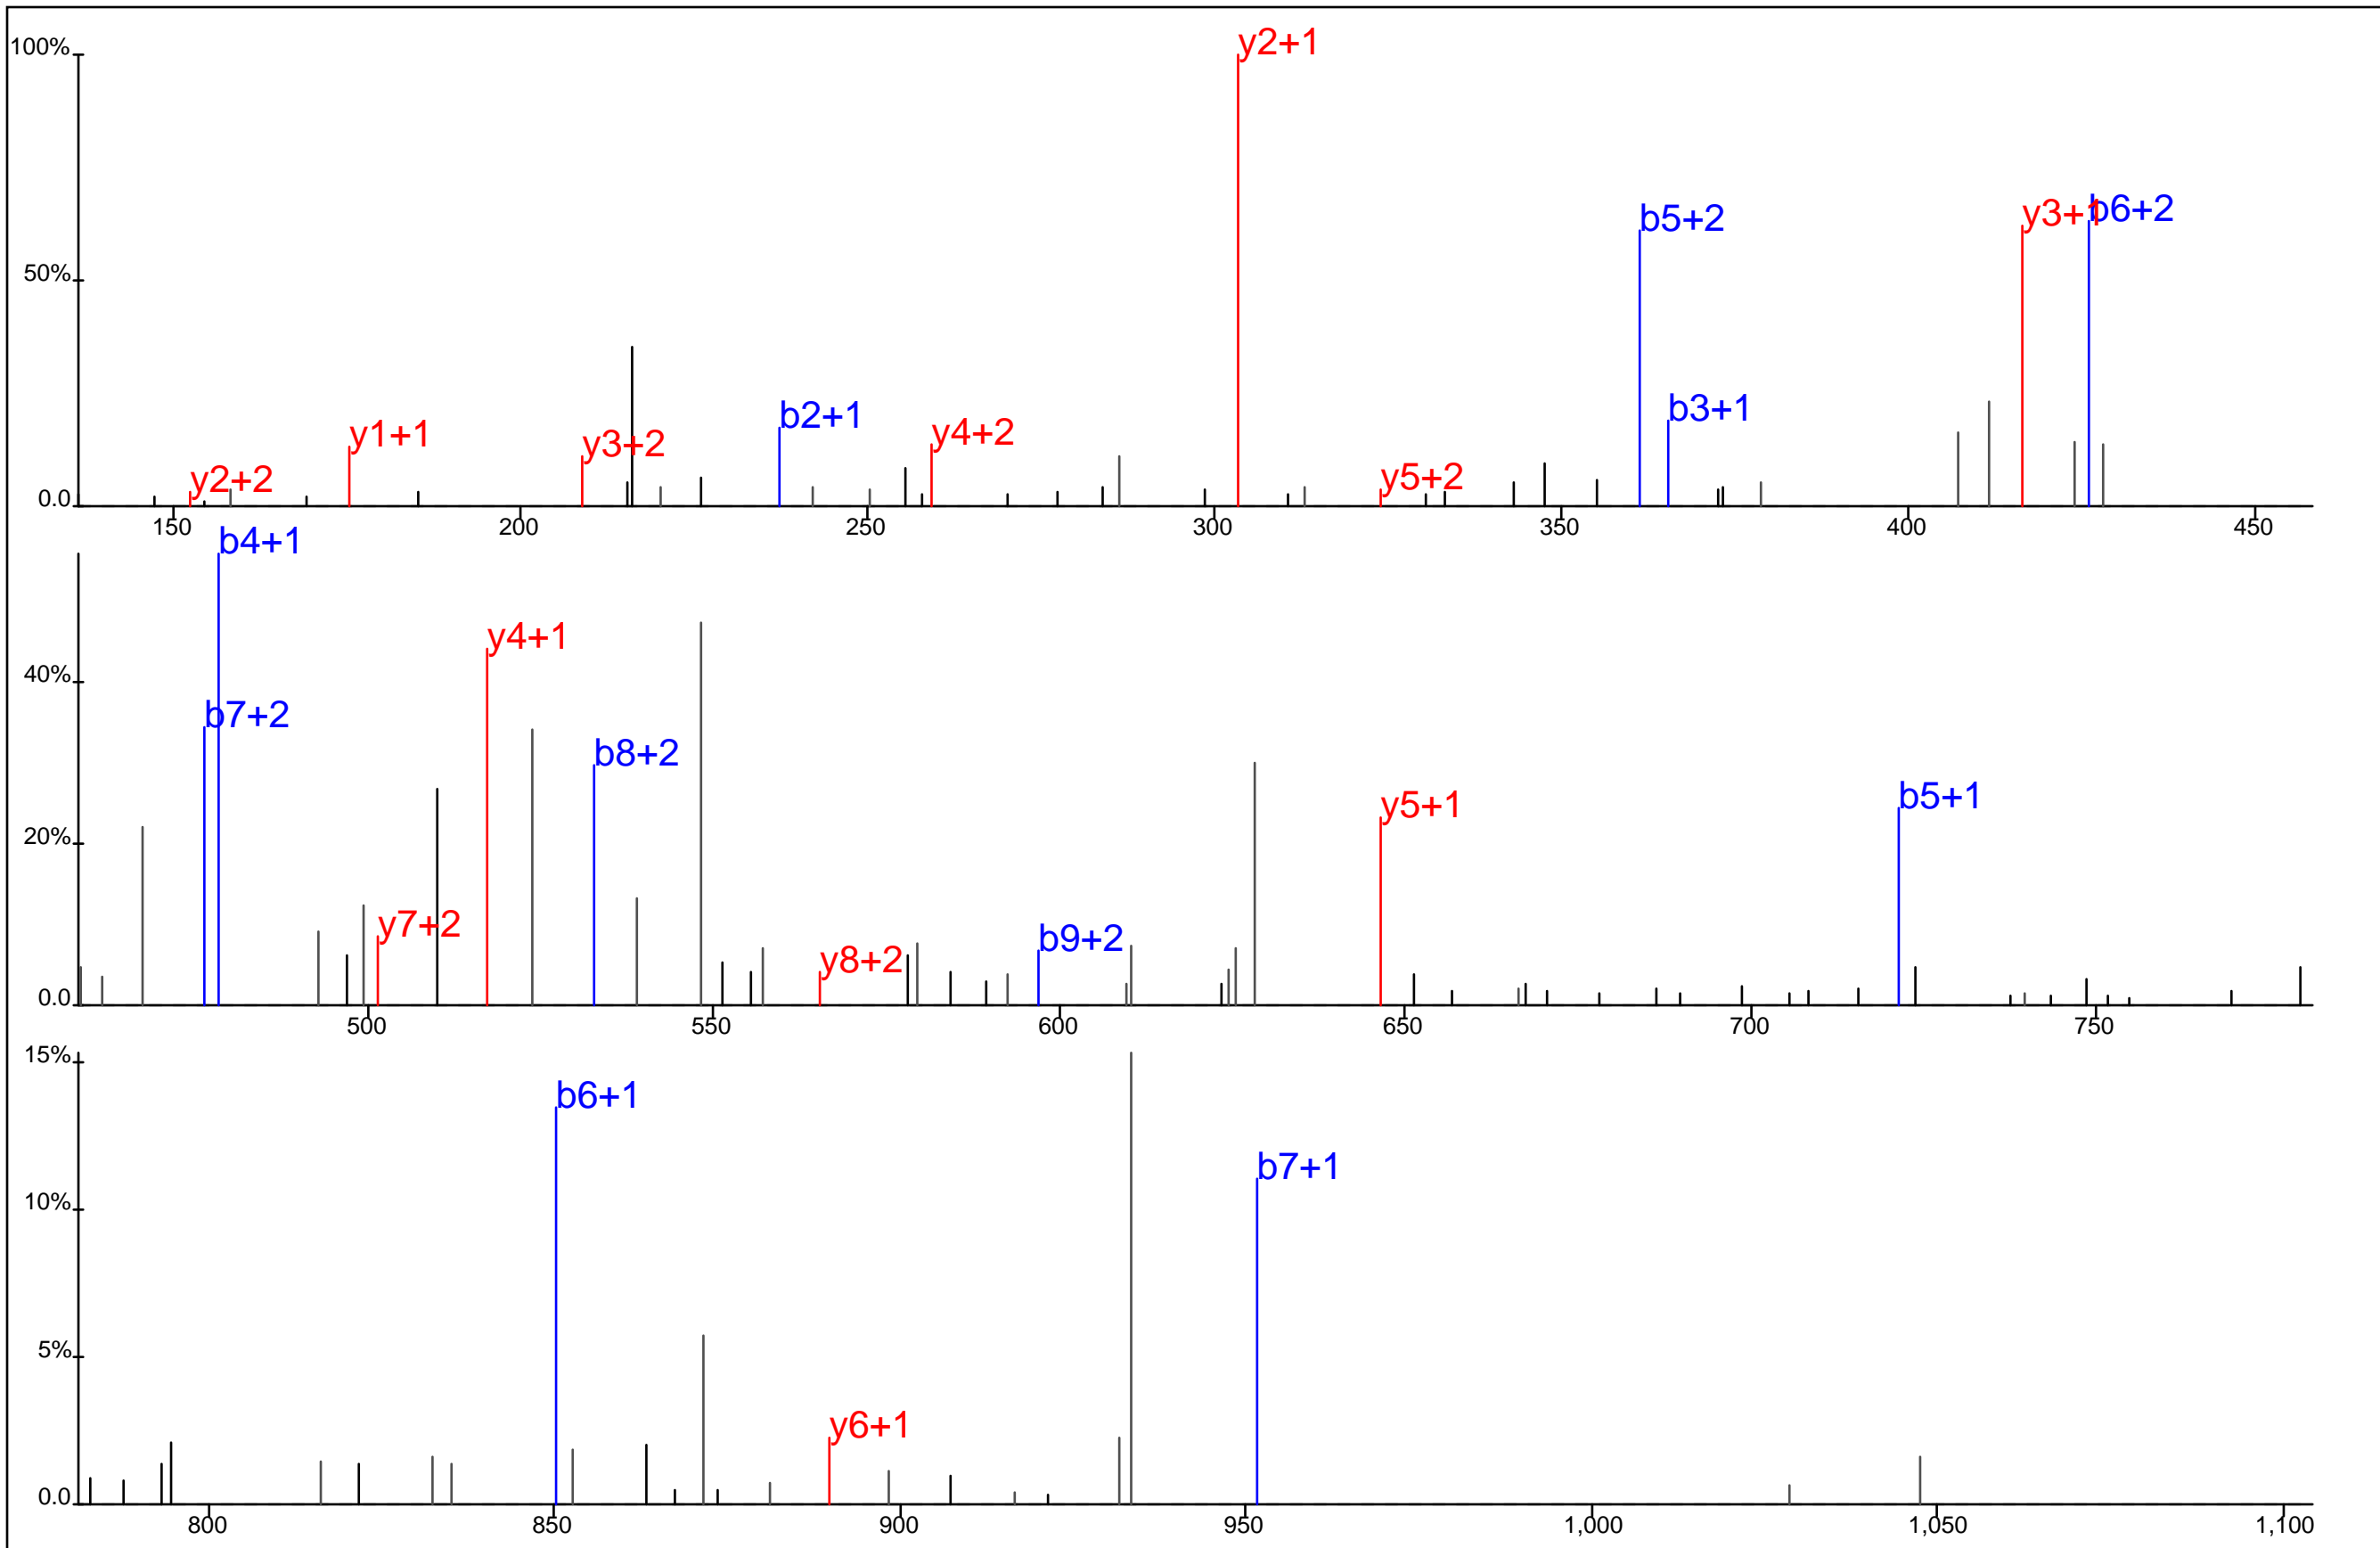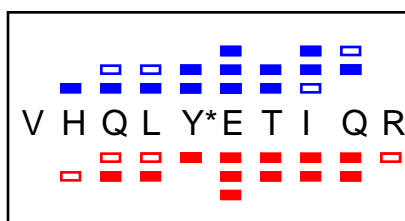

Protein Name: Dynamitin  
 gi Accession: 0  
 Precursor Mass: 456.2221+3  
 Delta Mass: 0.149 ppm  
 XCorr: 36.97

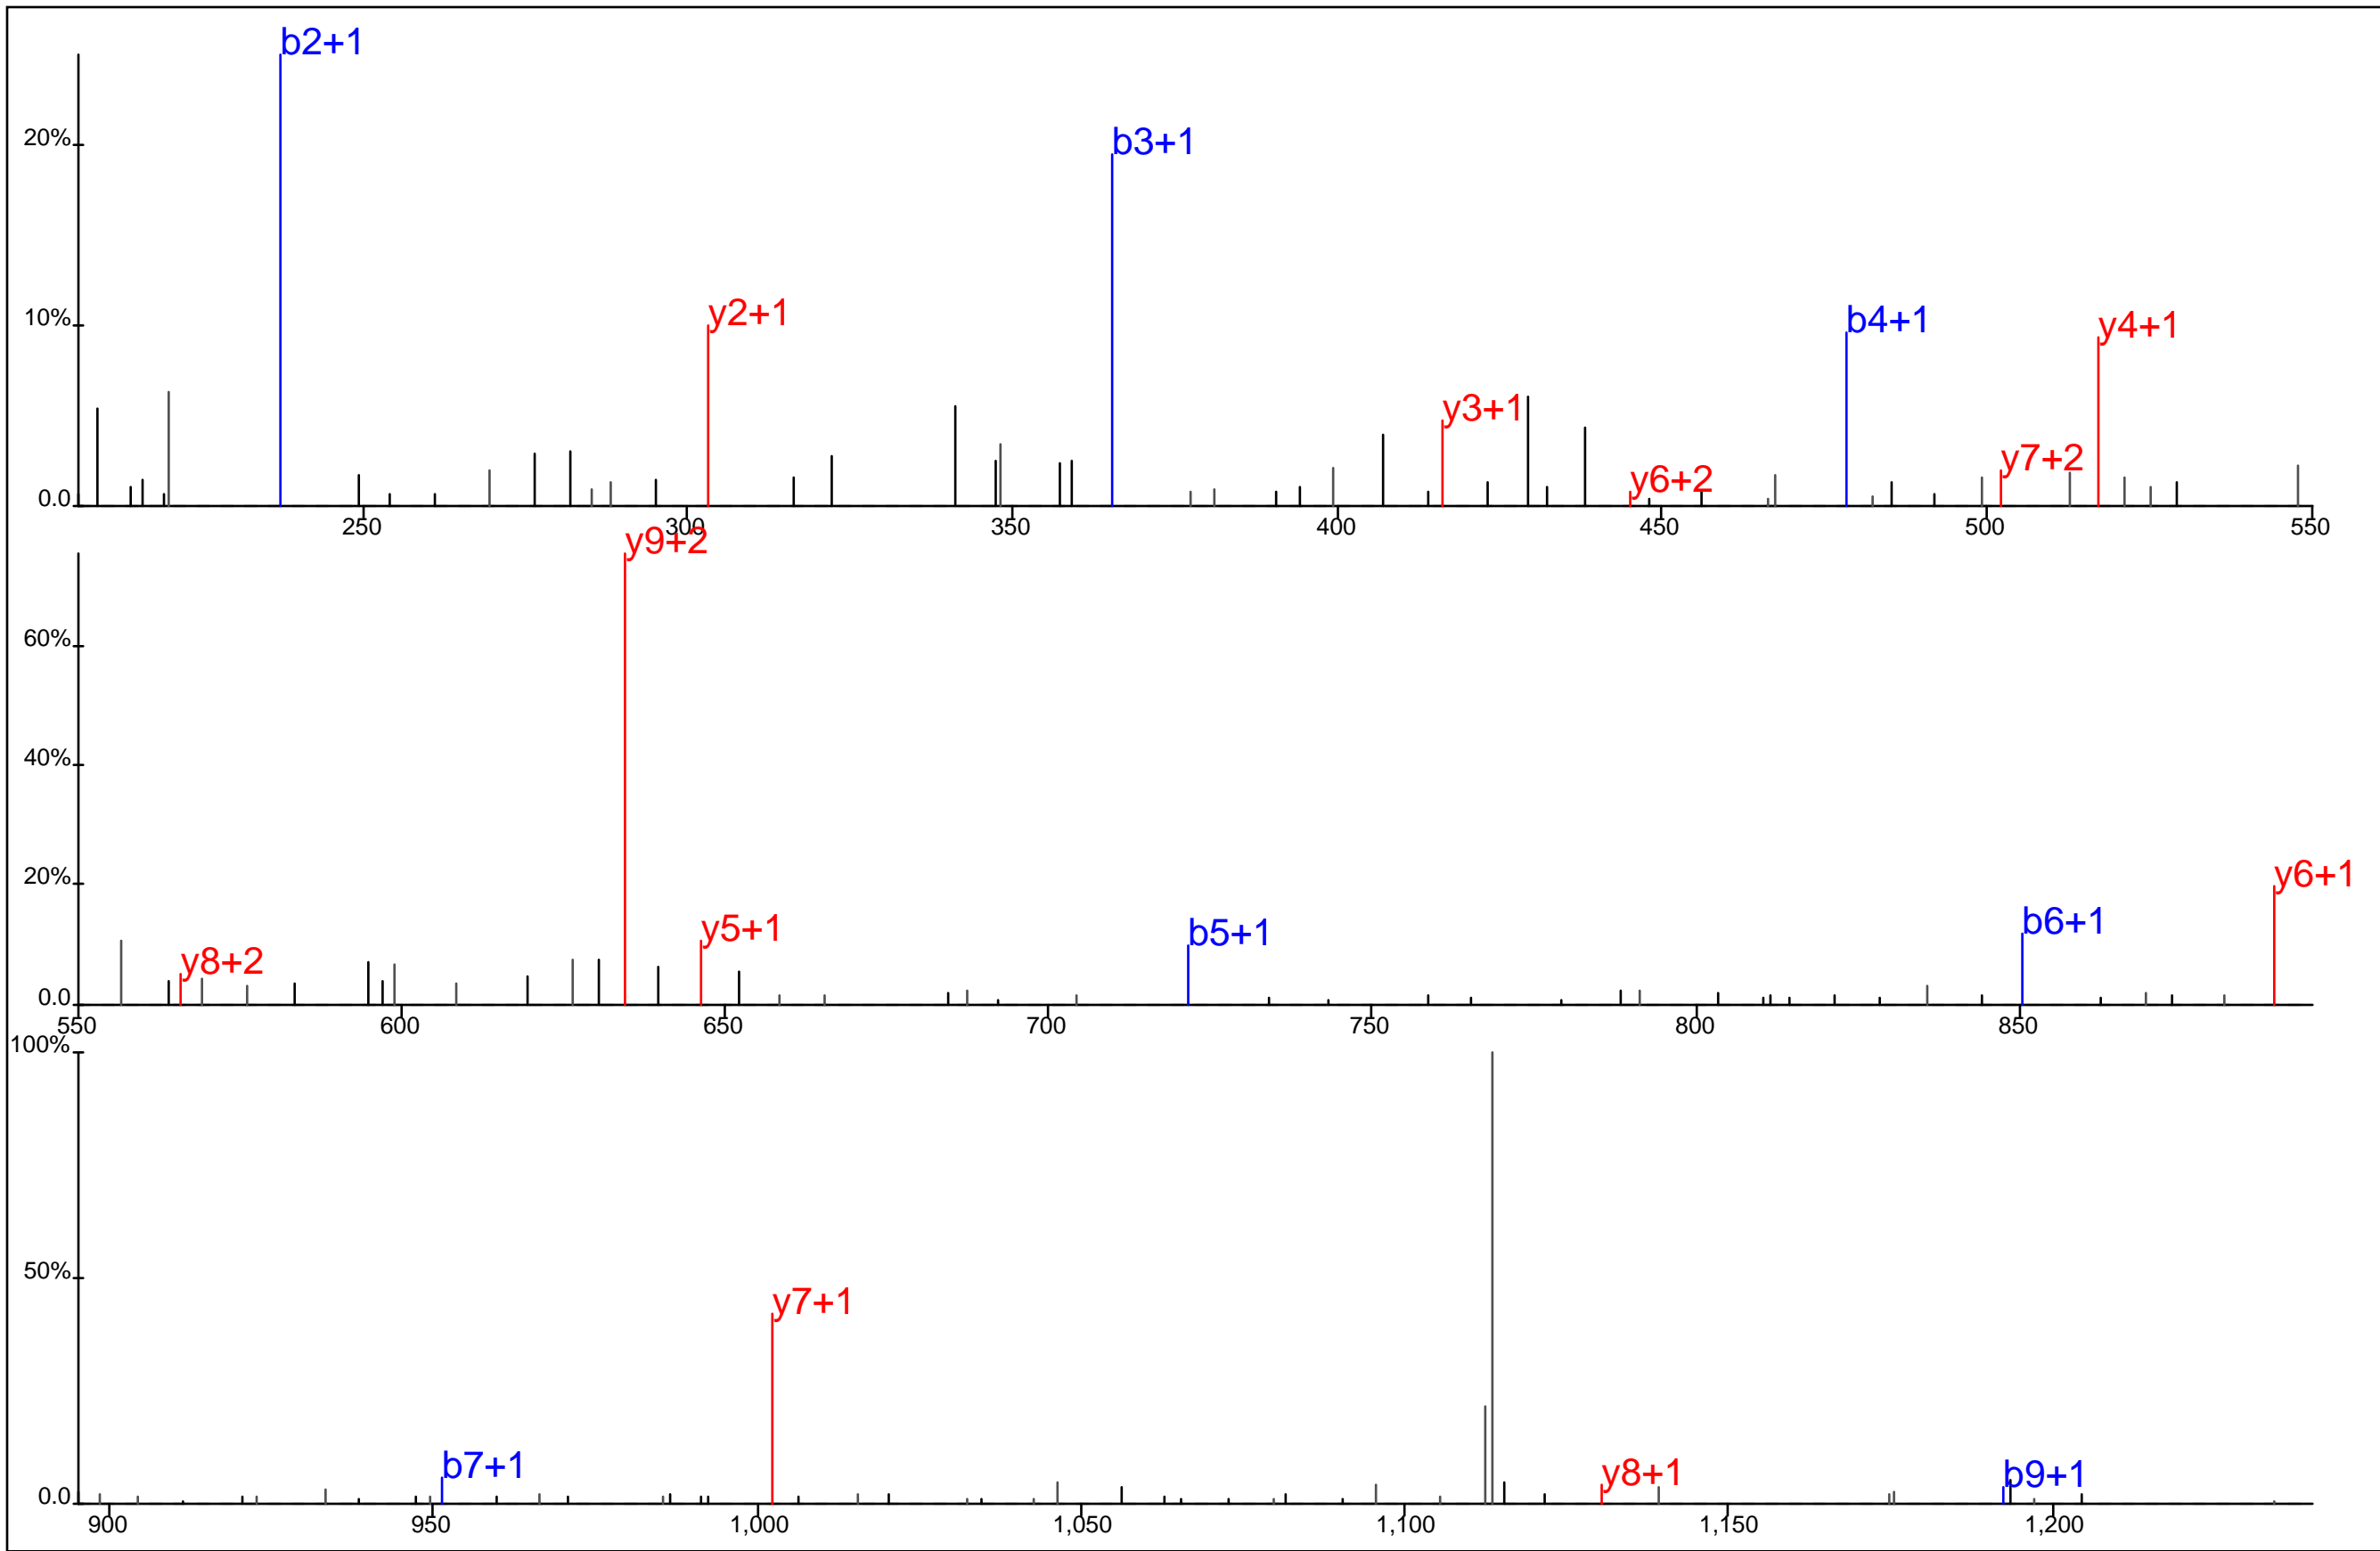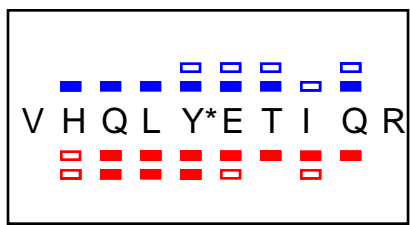

Protein Name: Dynamitin  
 gi Accession: 0  
 Precursor Mass: 683.8287+2  
 Delta Mass: 0.935 ppm  
 XCorr: 42.23

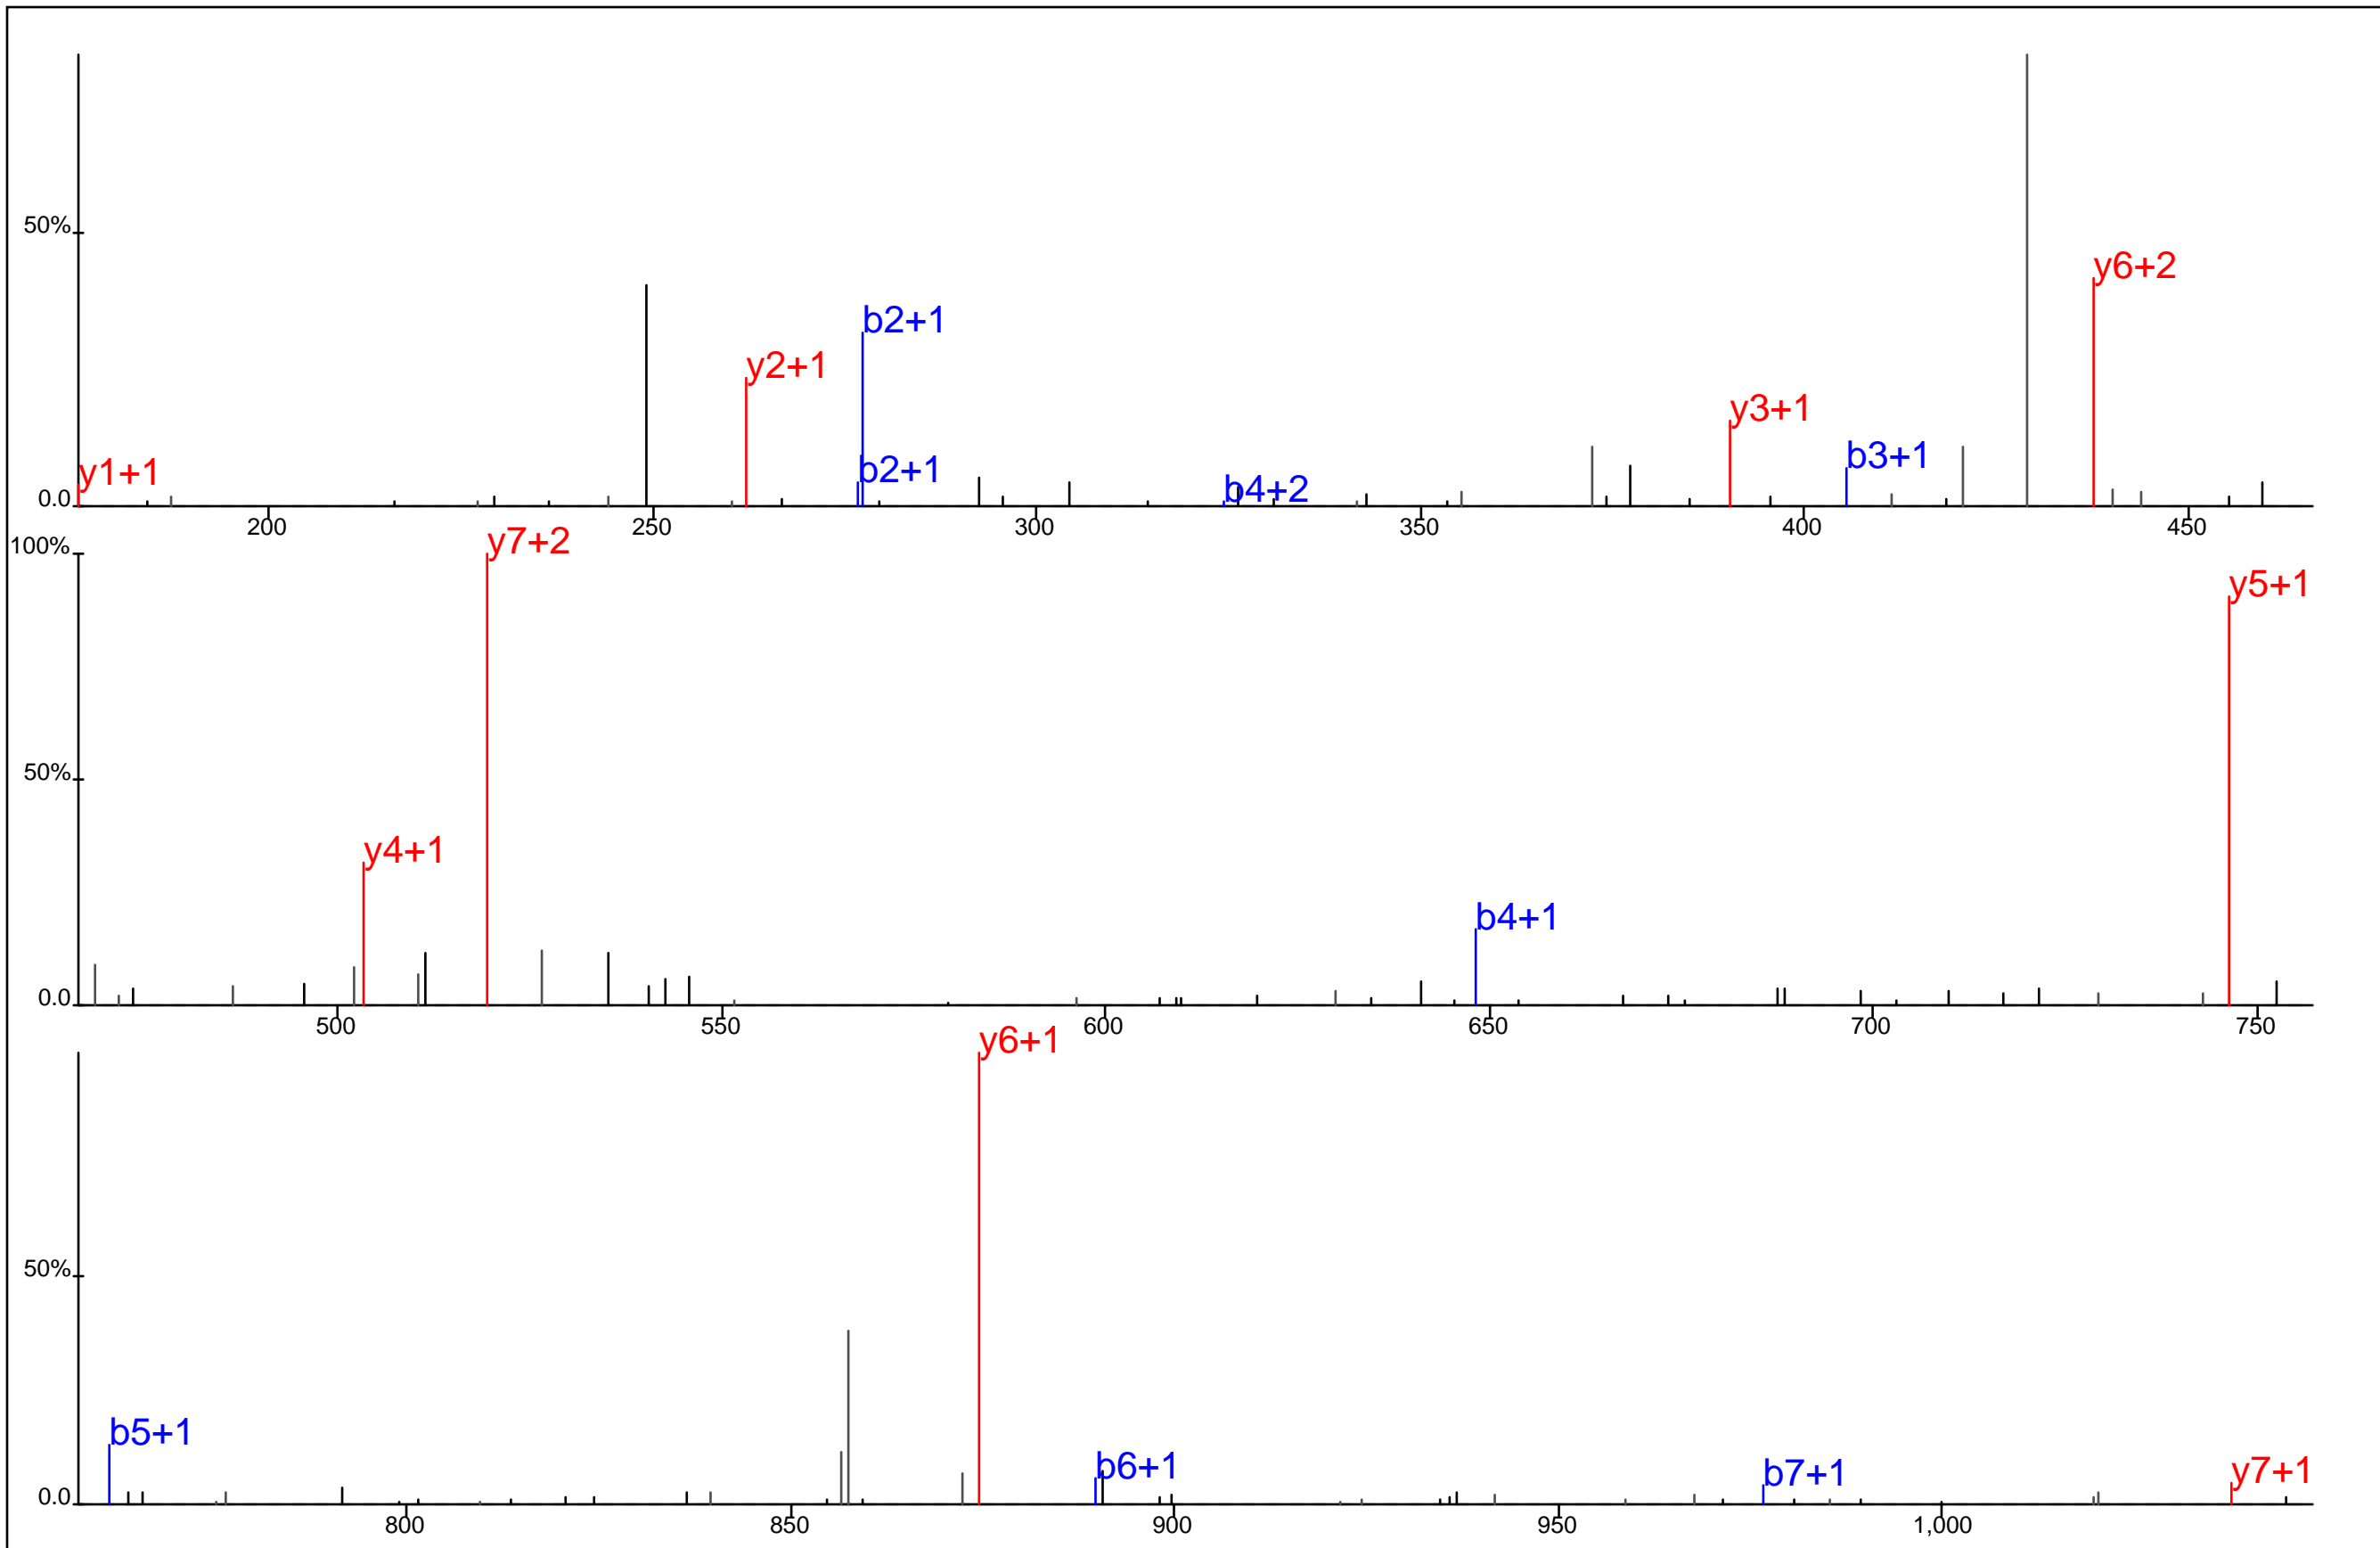

■ ■ ■ ■ ■ ■  
■ ■ ■ ■ ■ ■

■ I ■ Y ■ Q ■ Y\*■ I ■ Q ■ S ■ R  
■ I ■ Y ■ Q ■ Y\*■ I ■ Q ■ S ■ R

Protein Name: DYRK1B  
 gi Accession: 0  
 Precursor Mass: 575.7686+2  
 Delta Mass: 0.638 ppm  
 XCorr: 53.62

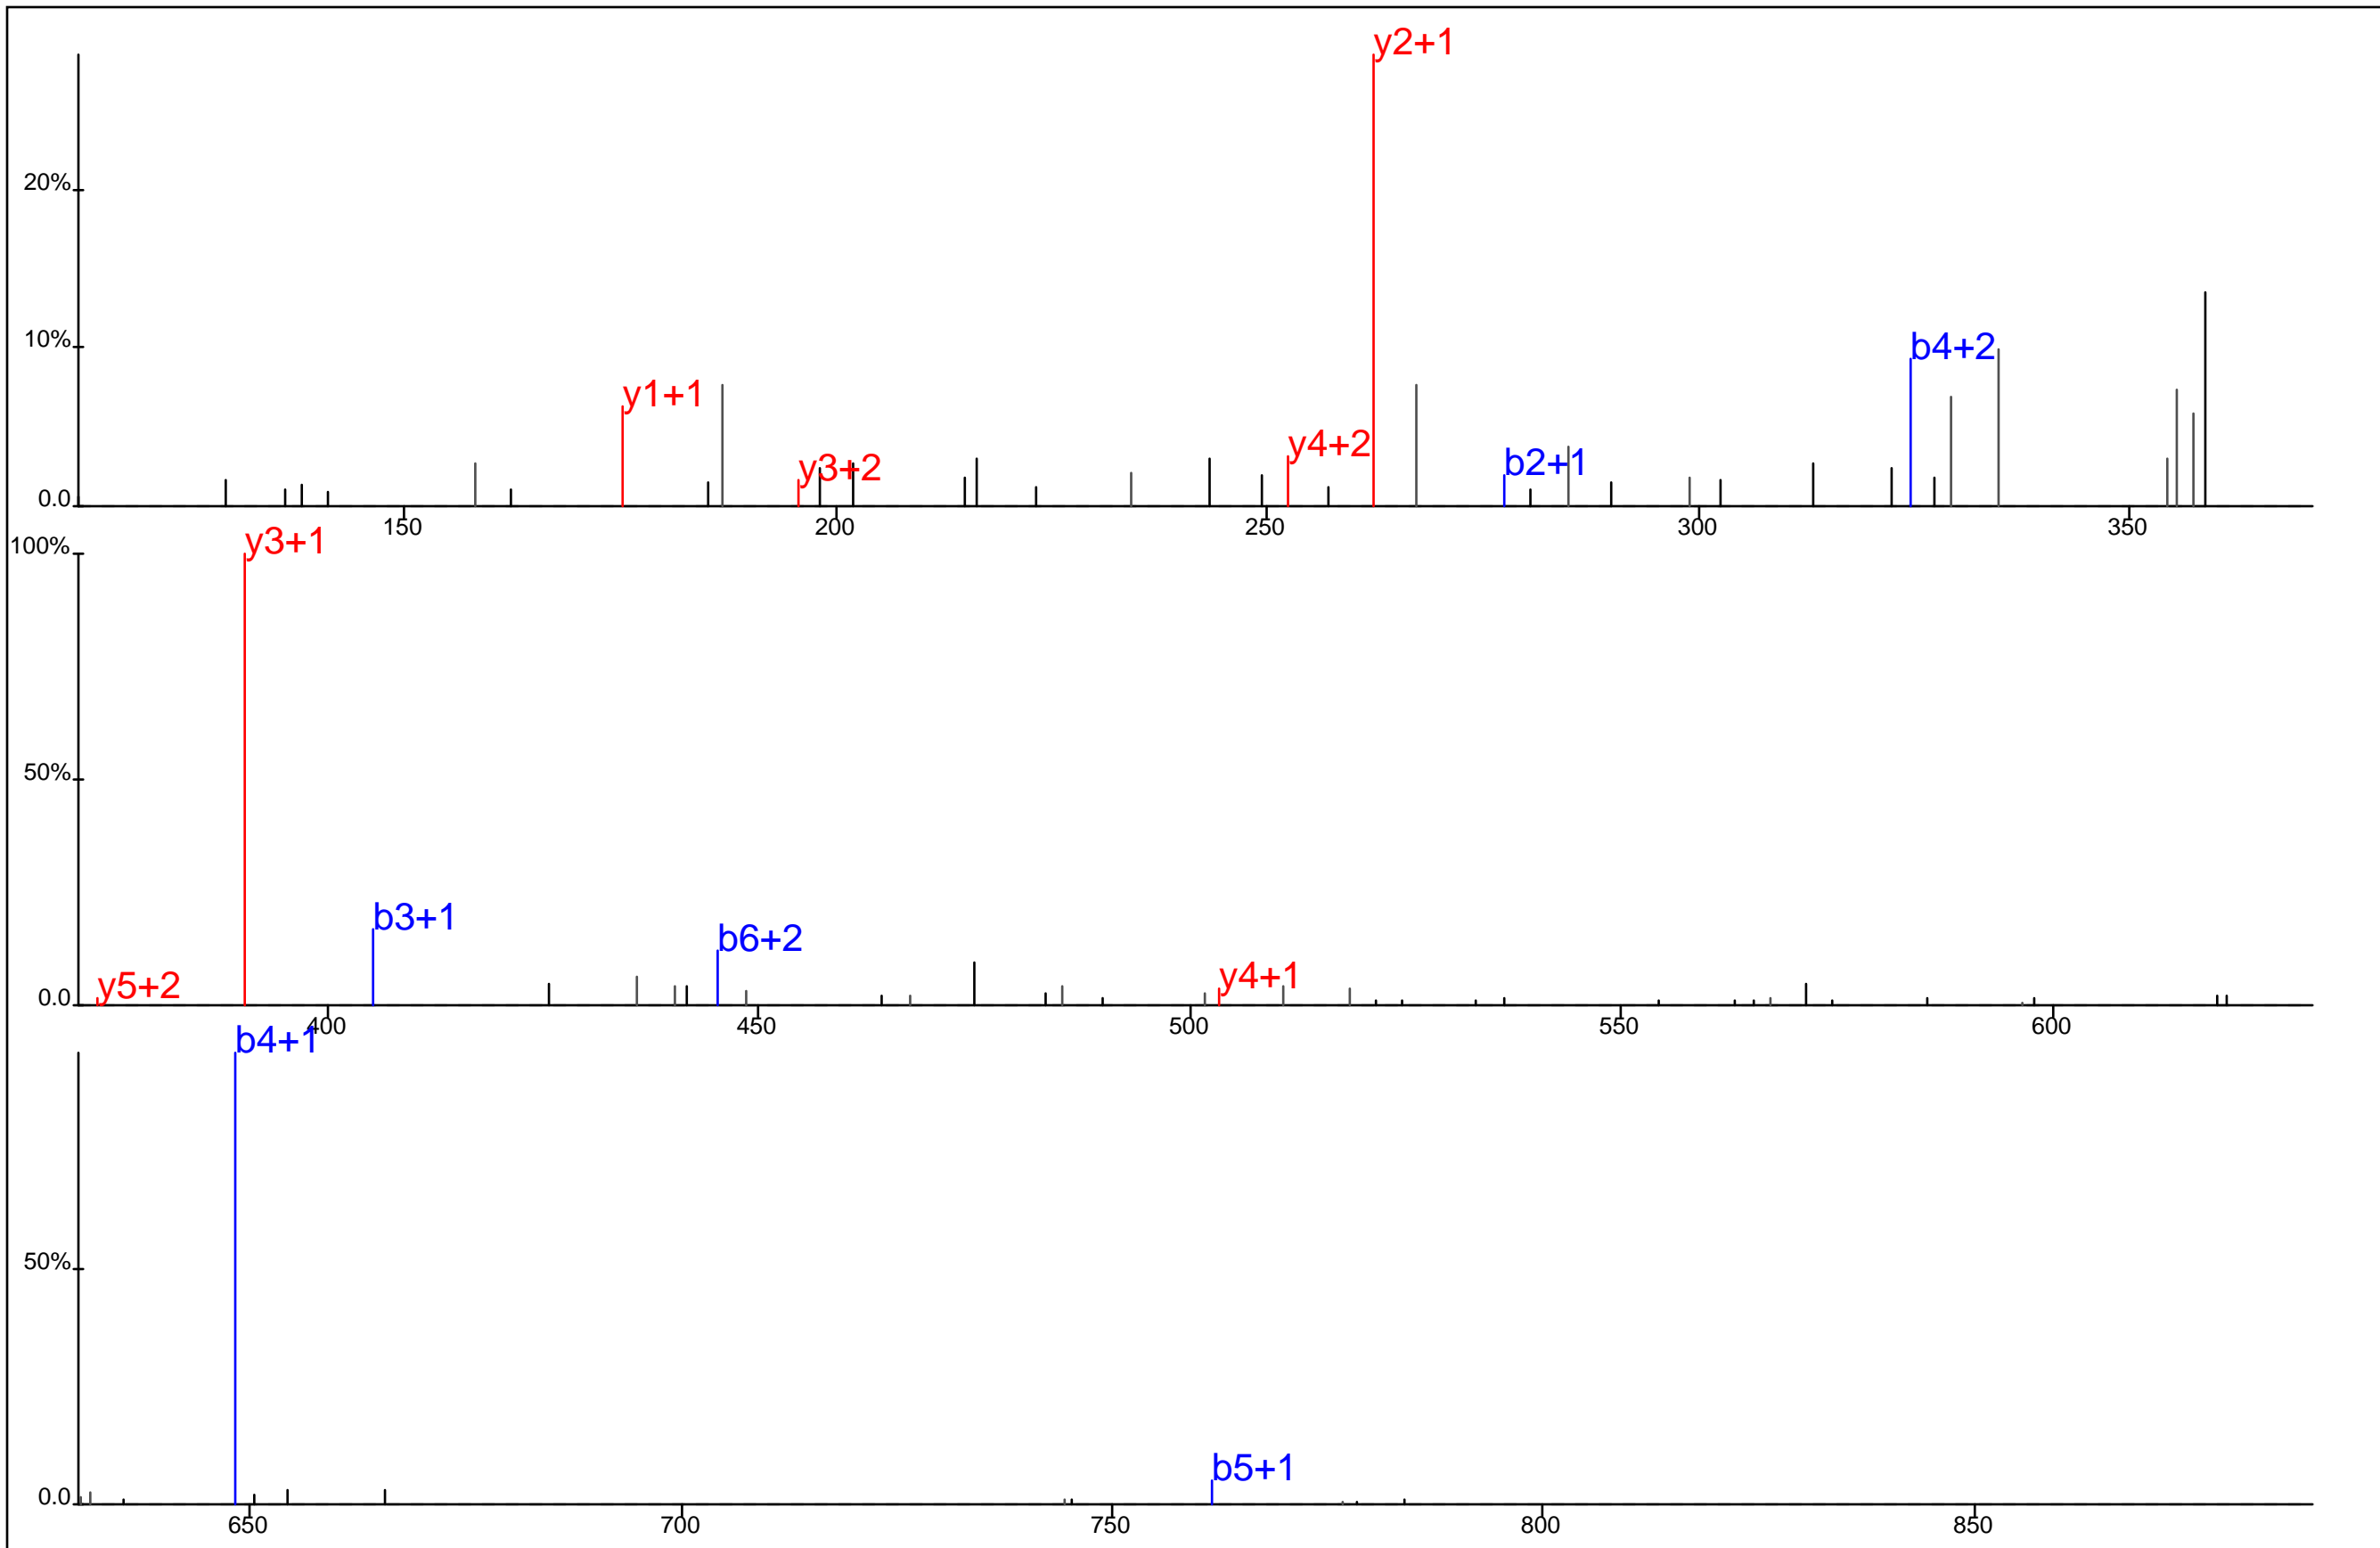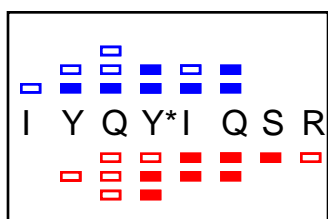

Protein Name: DYRK1B  
 gi Accession: 0  
 Precursor Mass: 384.1822+3  
 Delta Mass: 2.508 ppm  
 XCorr: 22.76

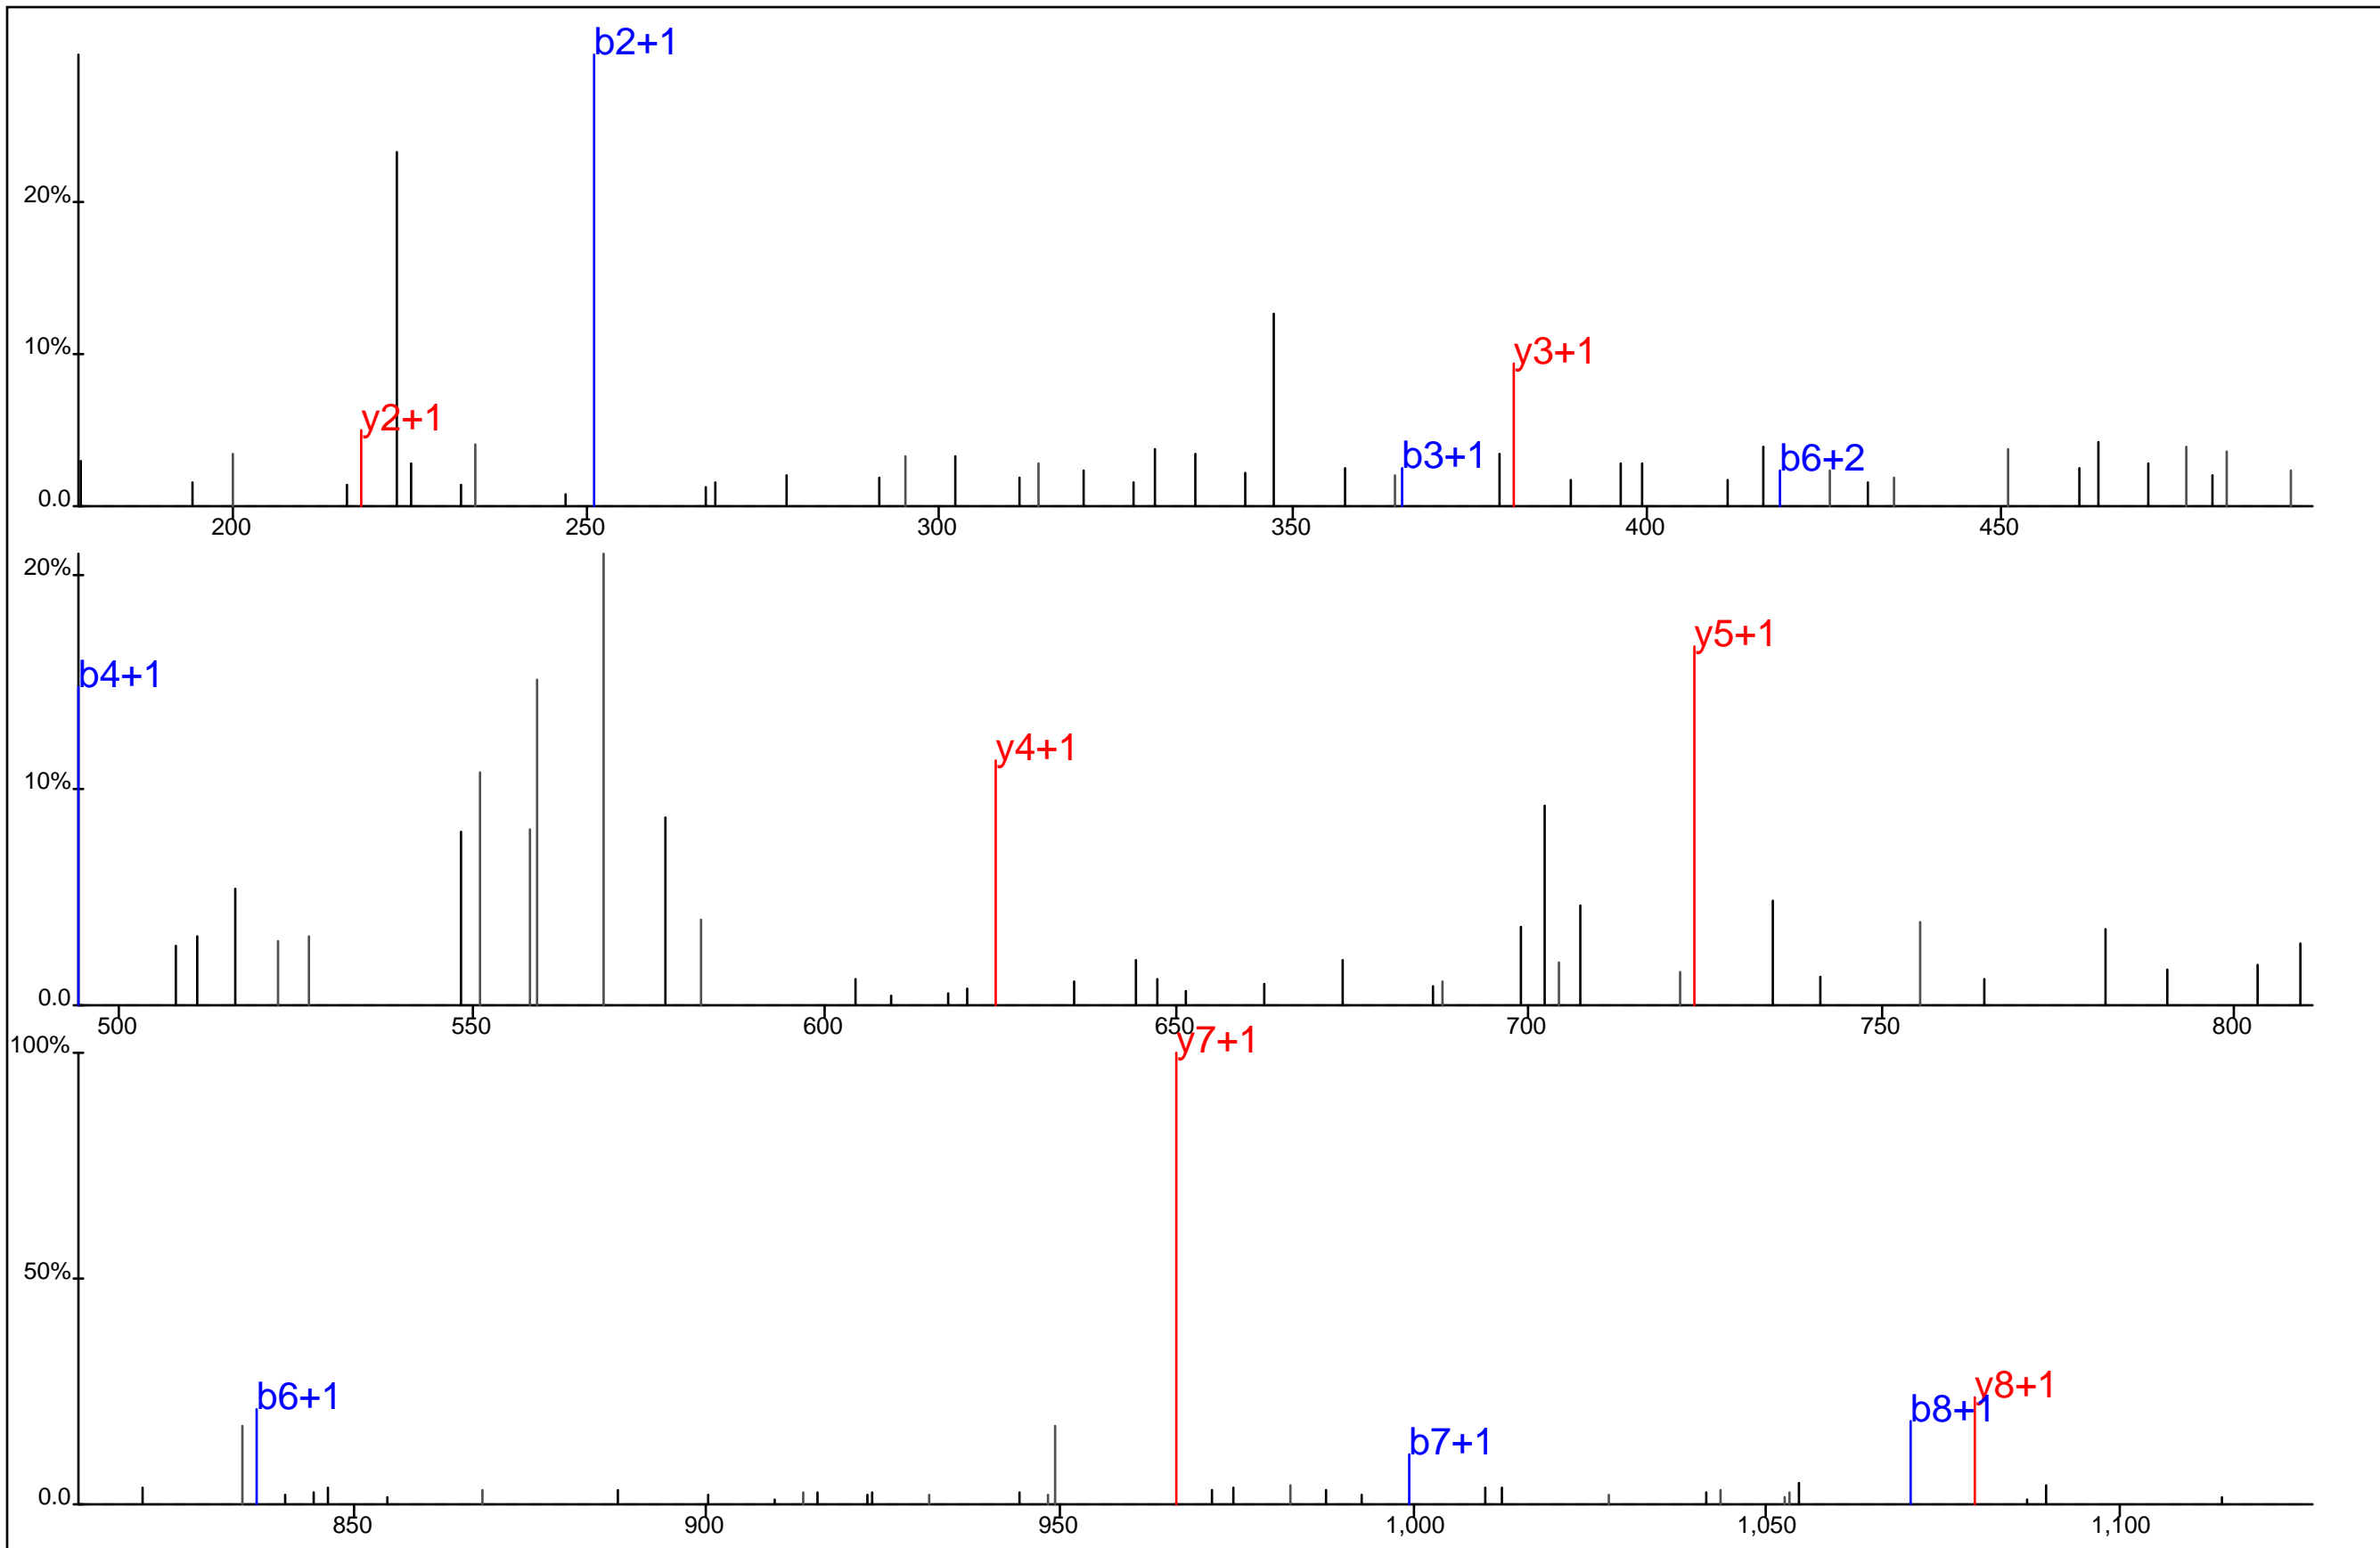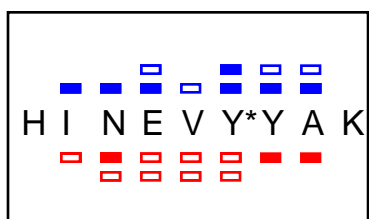

Protein Name: DYRK1B  
 gi Accession: 0  
 Precursor Mass: 608.7738+2  
 Delta Mass: 0.452 ppm  
 XCorr: 39.2

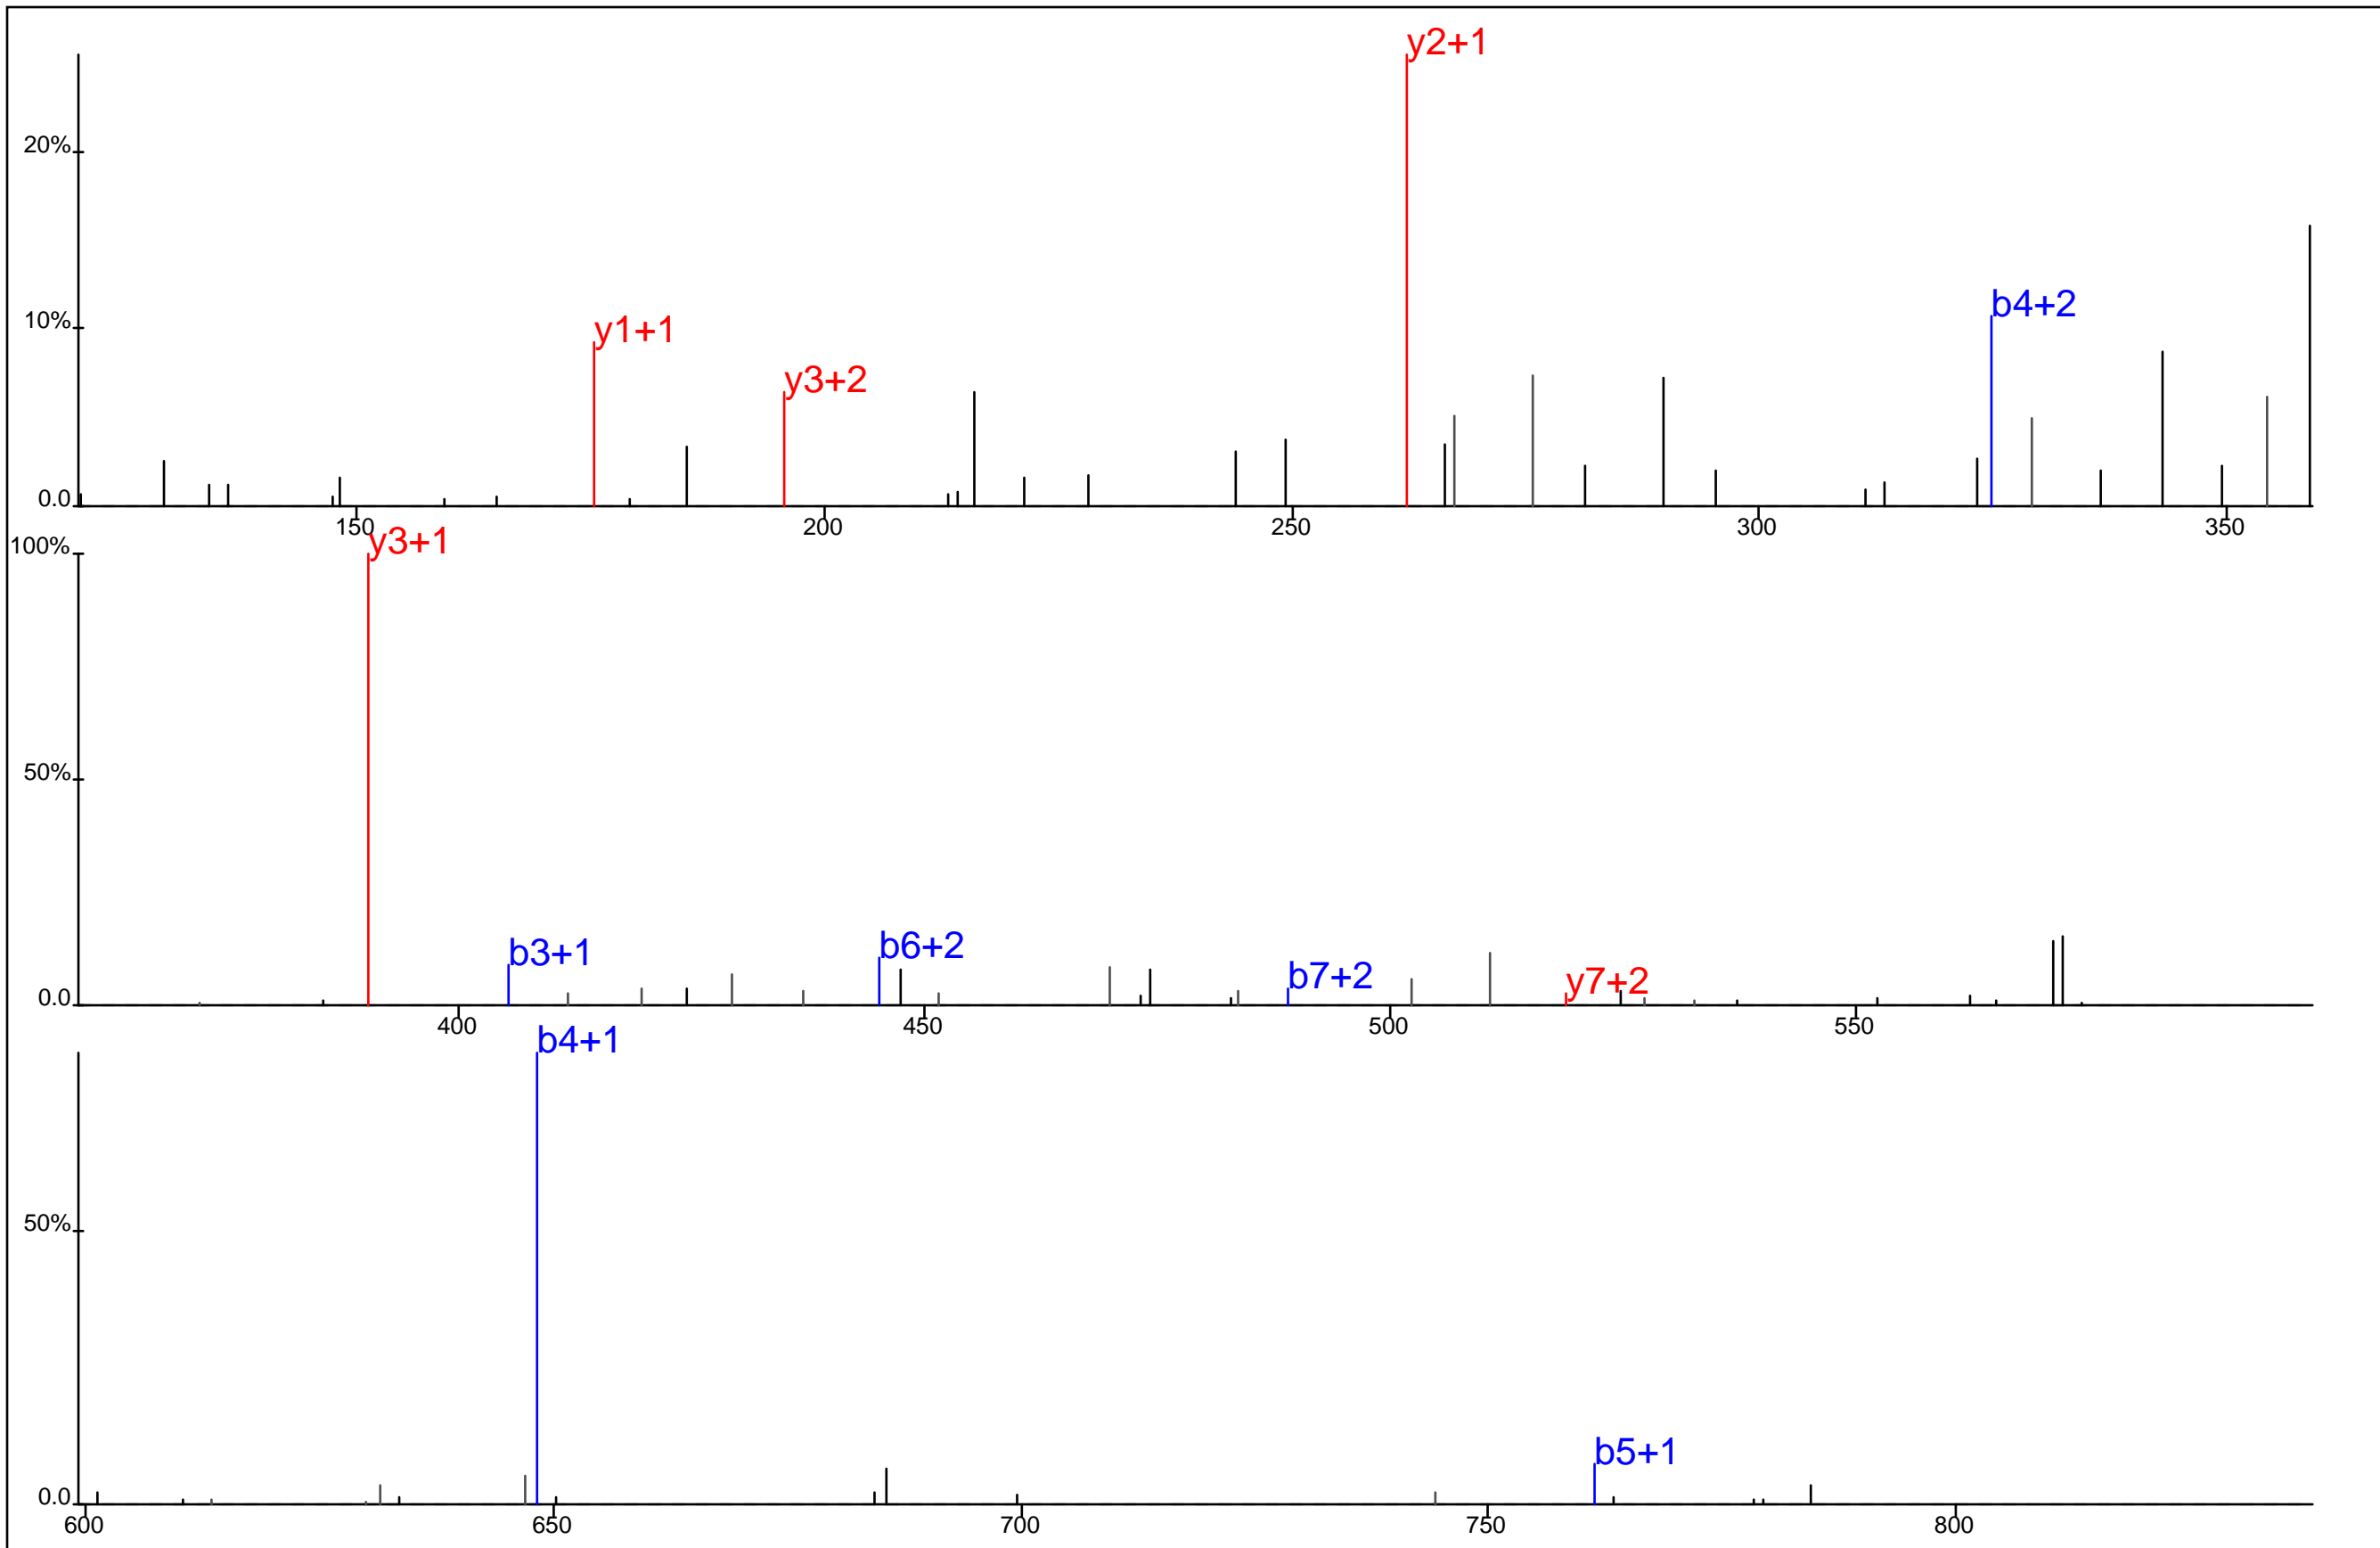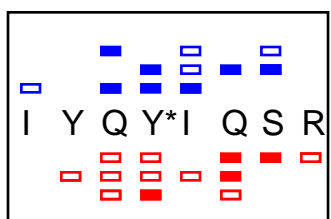

Protein Name: DYRK1B  
 gi Accession: 0  
 Precursor Mass: 384.1819+3  
 Delta Mass: 1.635 ppm  
 XCorr: 20.73



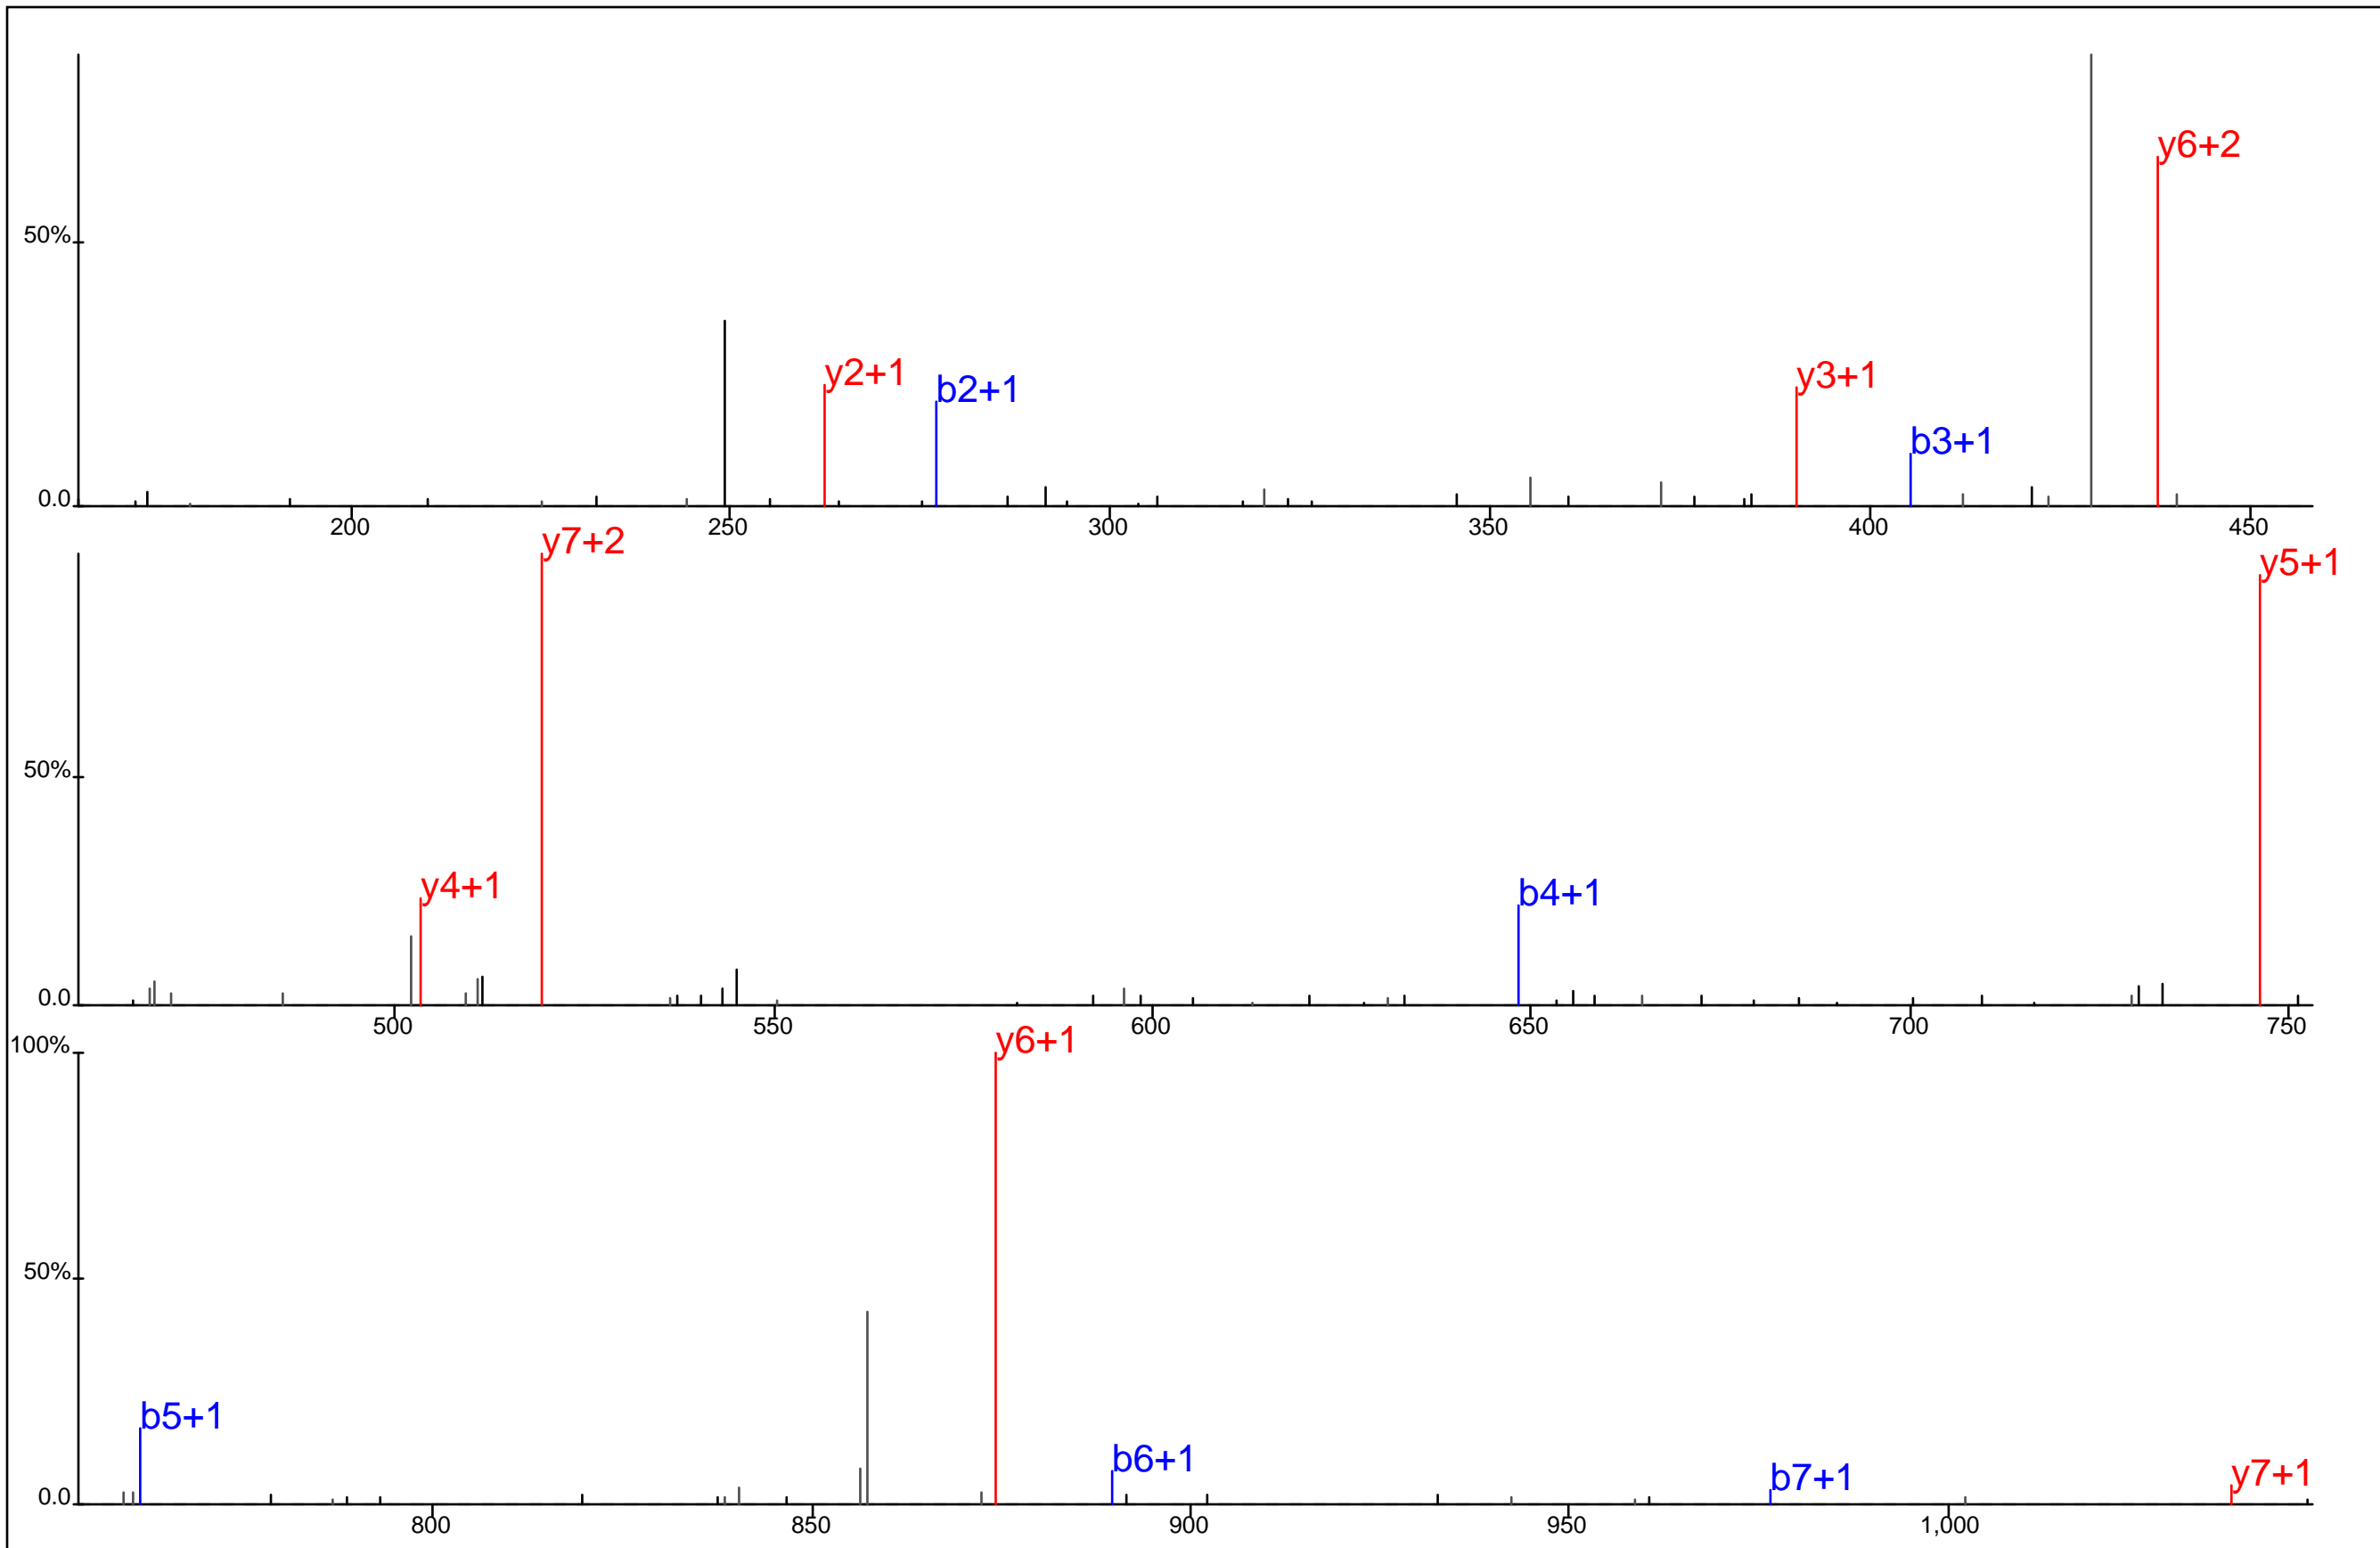

I Y Q Y\* I Q S R

Protein Name: DYRK1B  
 gi Accession: 0  
 Precursor Mass: 575.7684+2  
 Delta Mass: 0.214 ppm  
 XCorr: 50.87

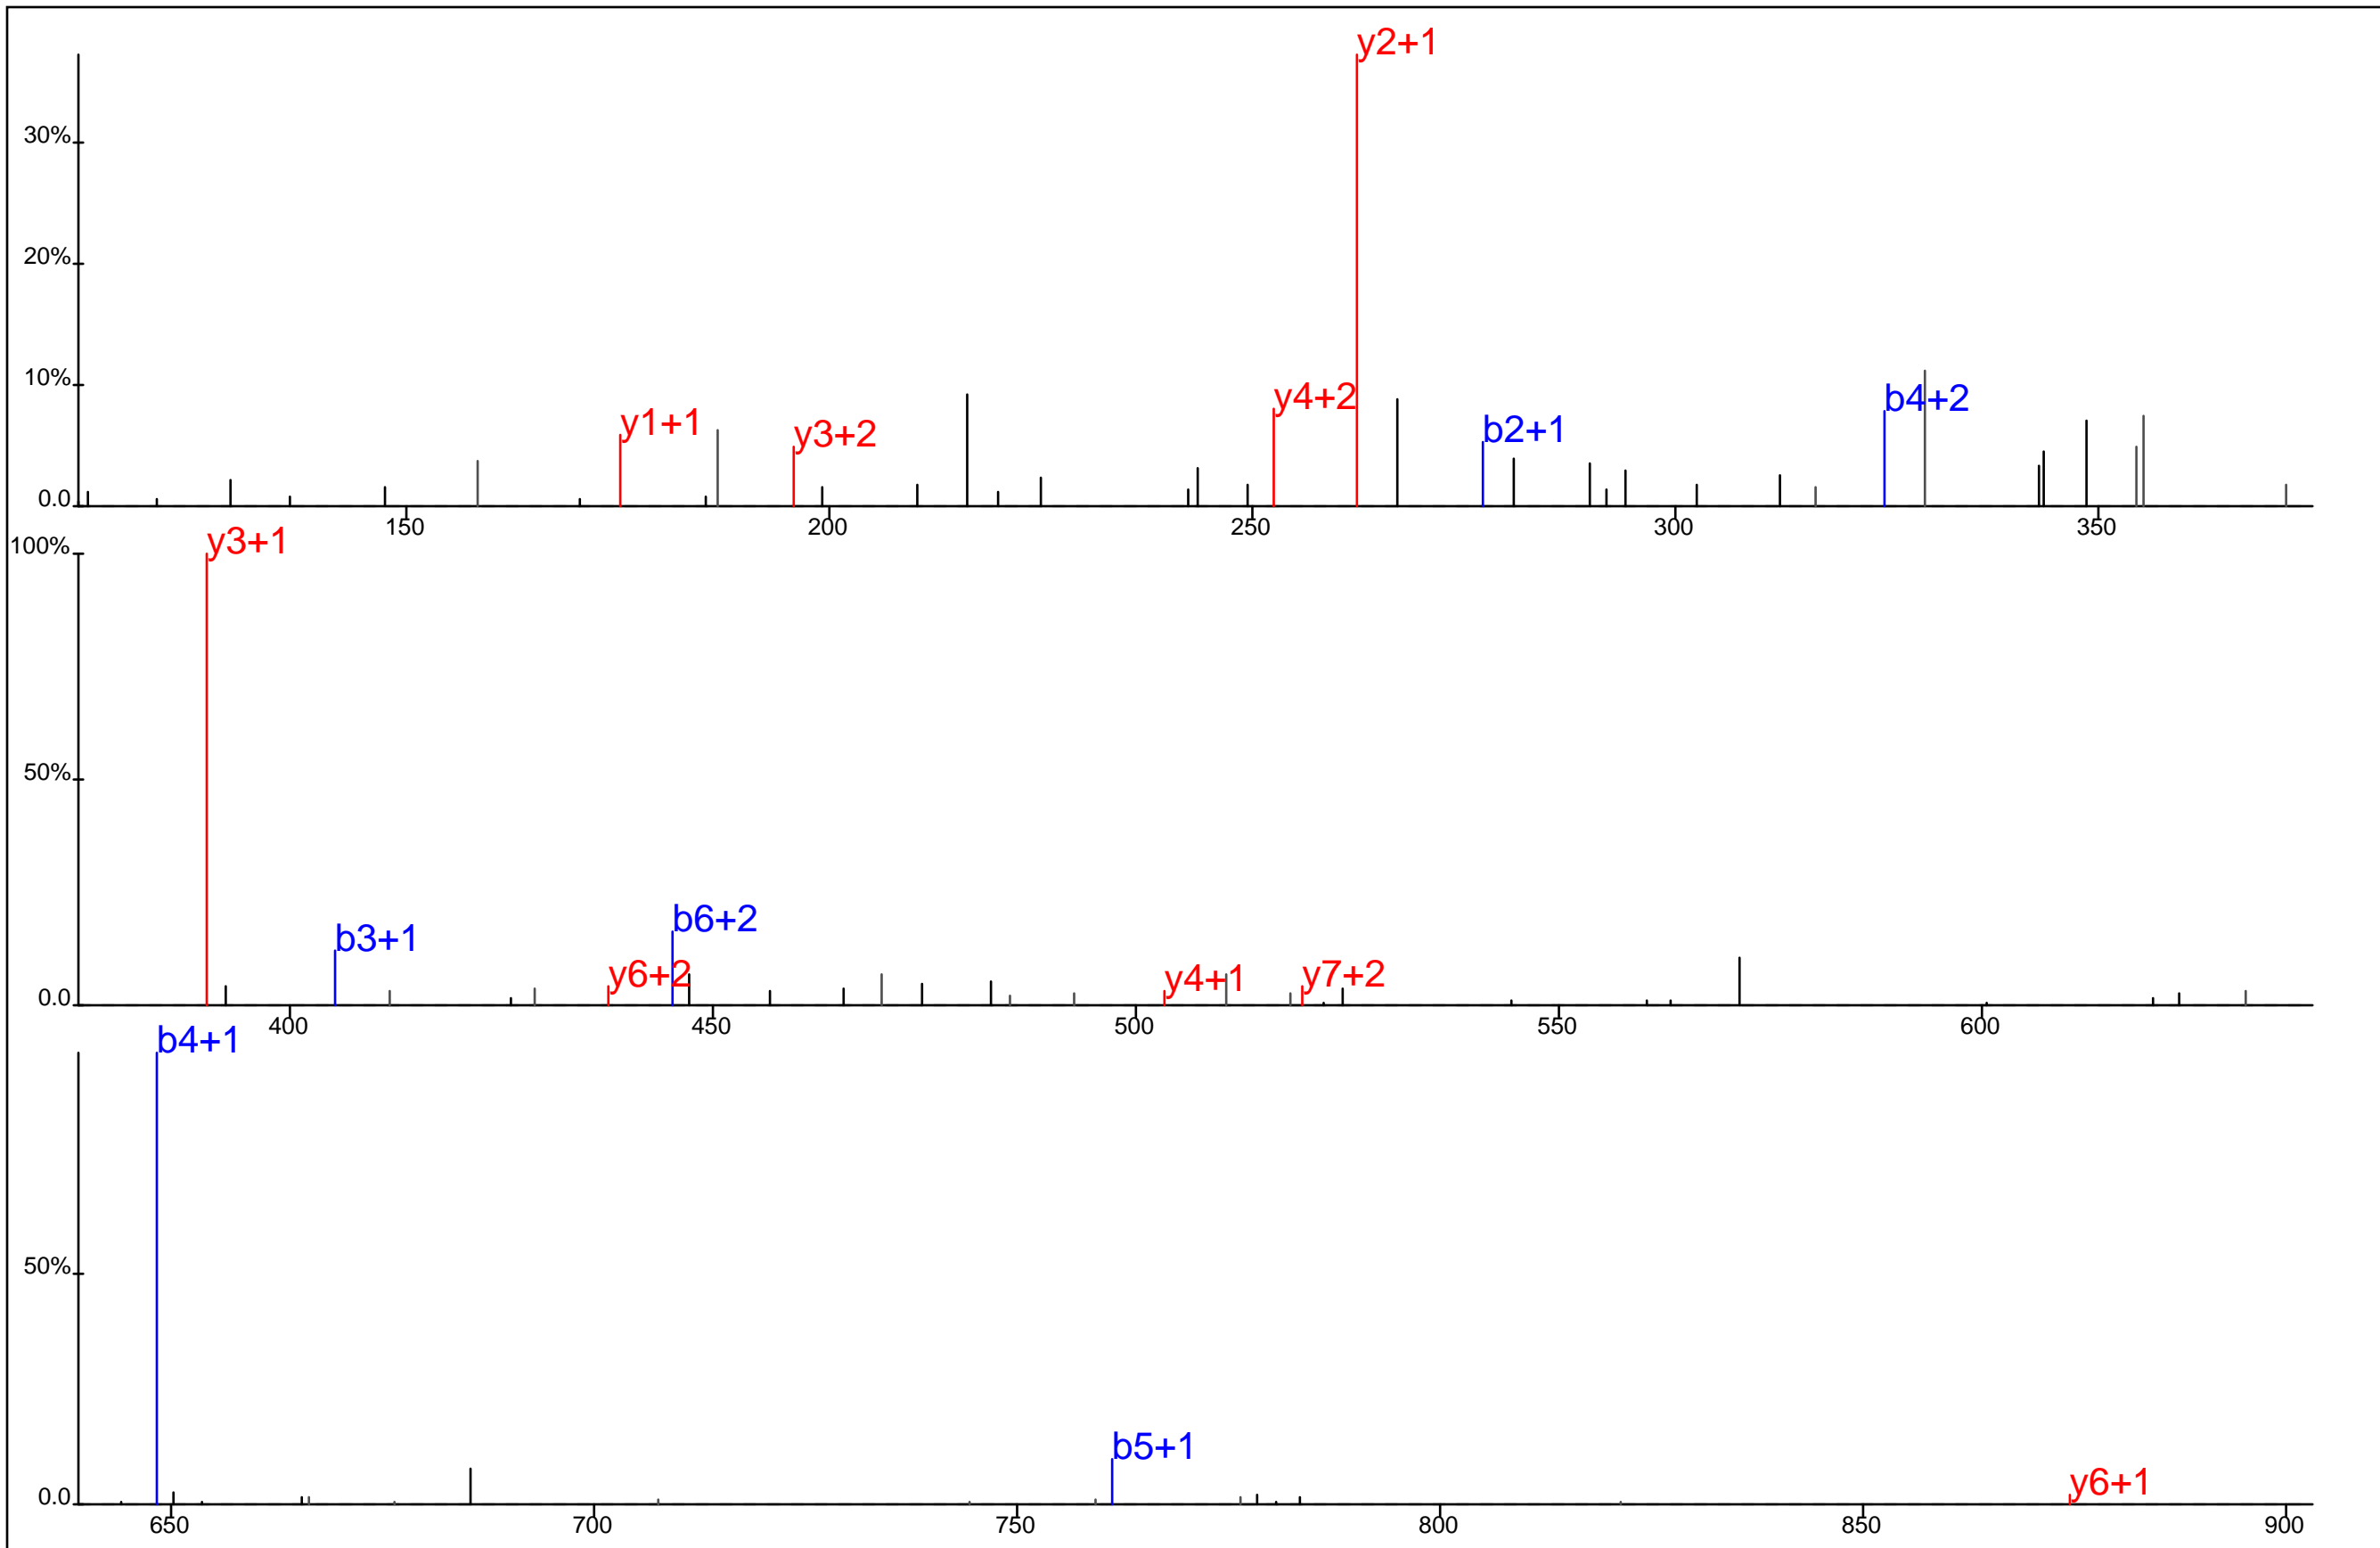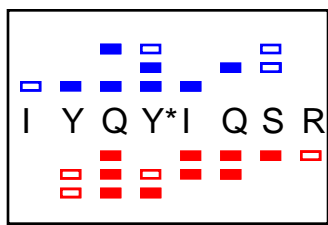

Protein Name: DYRK1B  
 gi Accession: 0  
 Precursor Mass: 384.1812+3  
 Delta Mass: 0.037 ppm  
 XCorr: 24.51

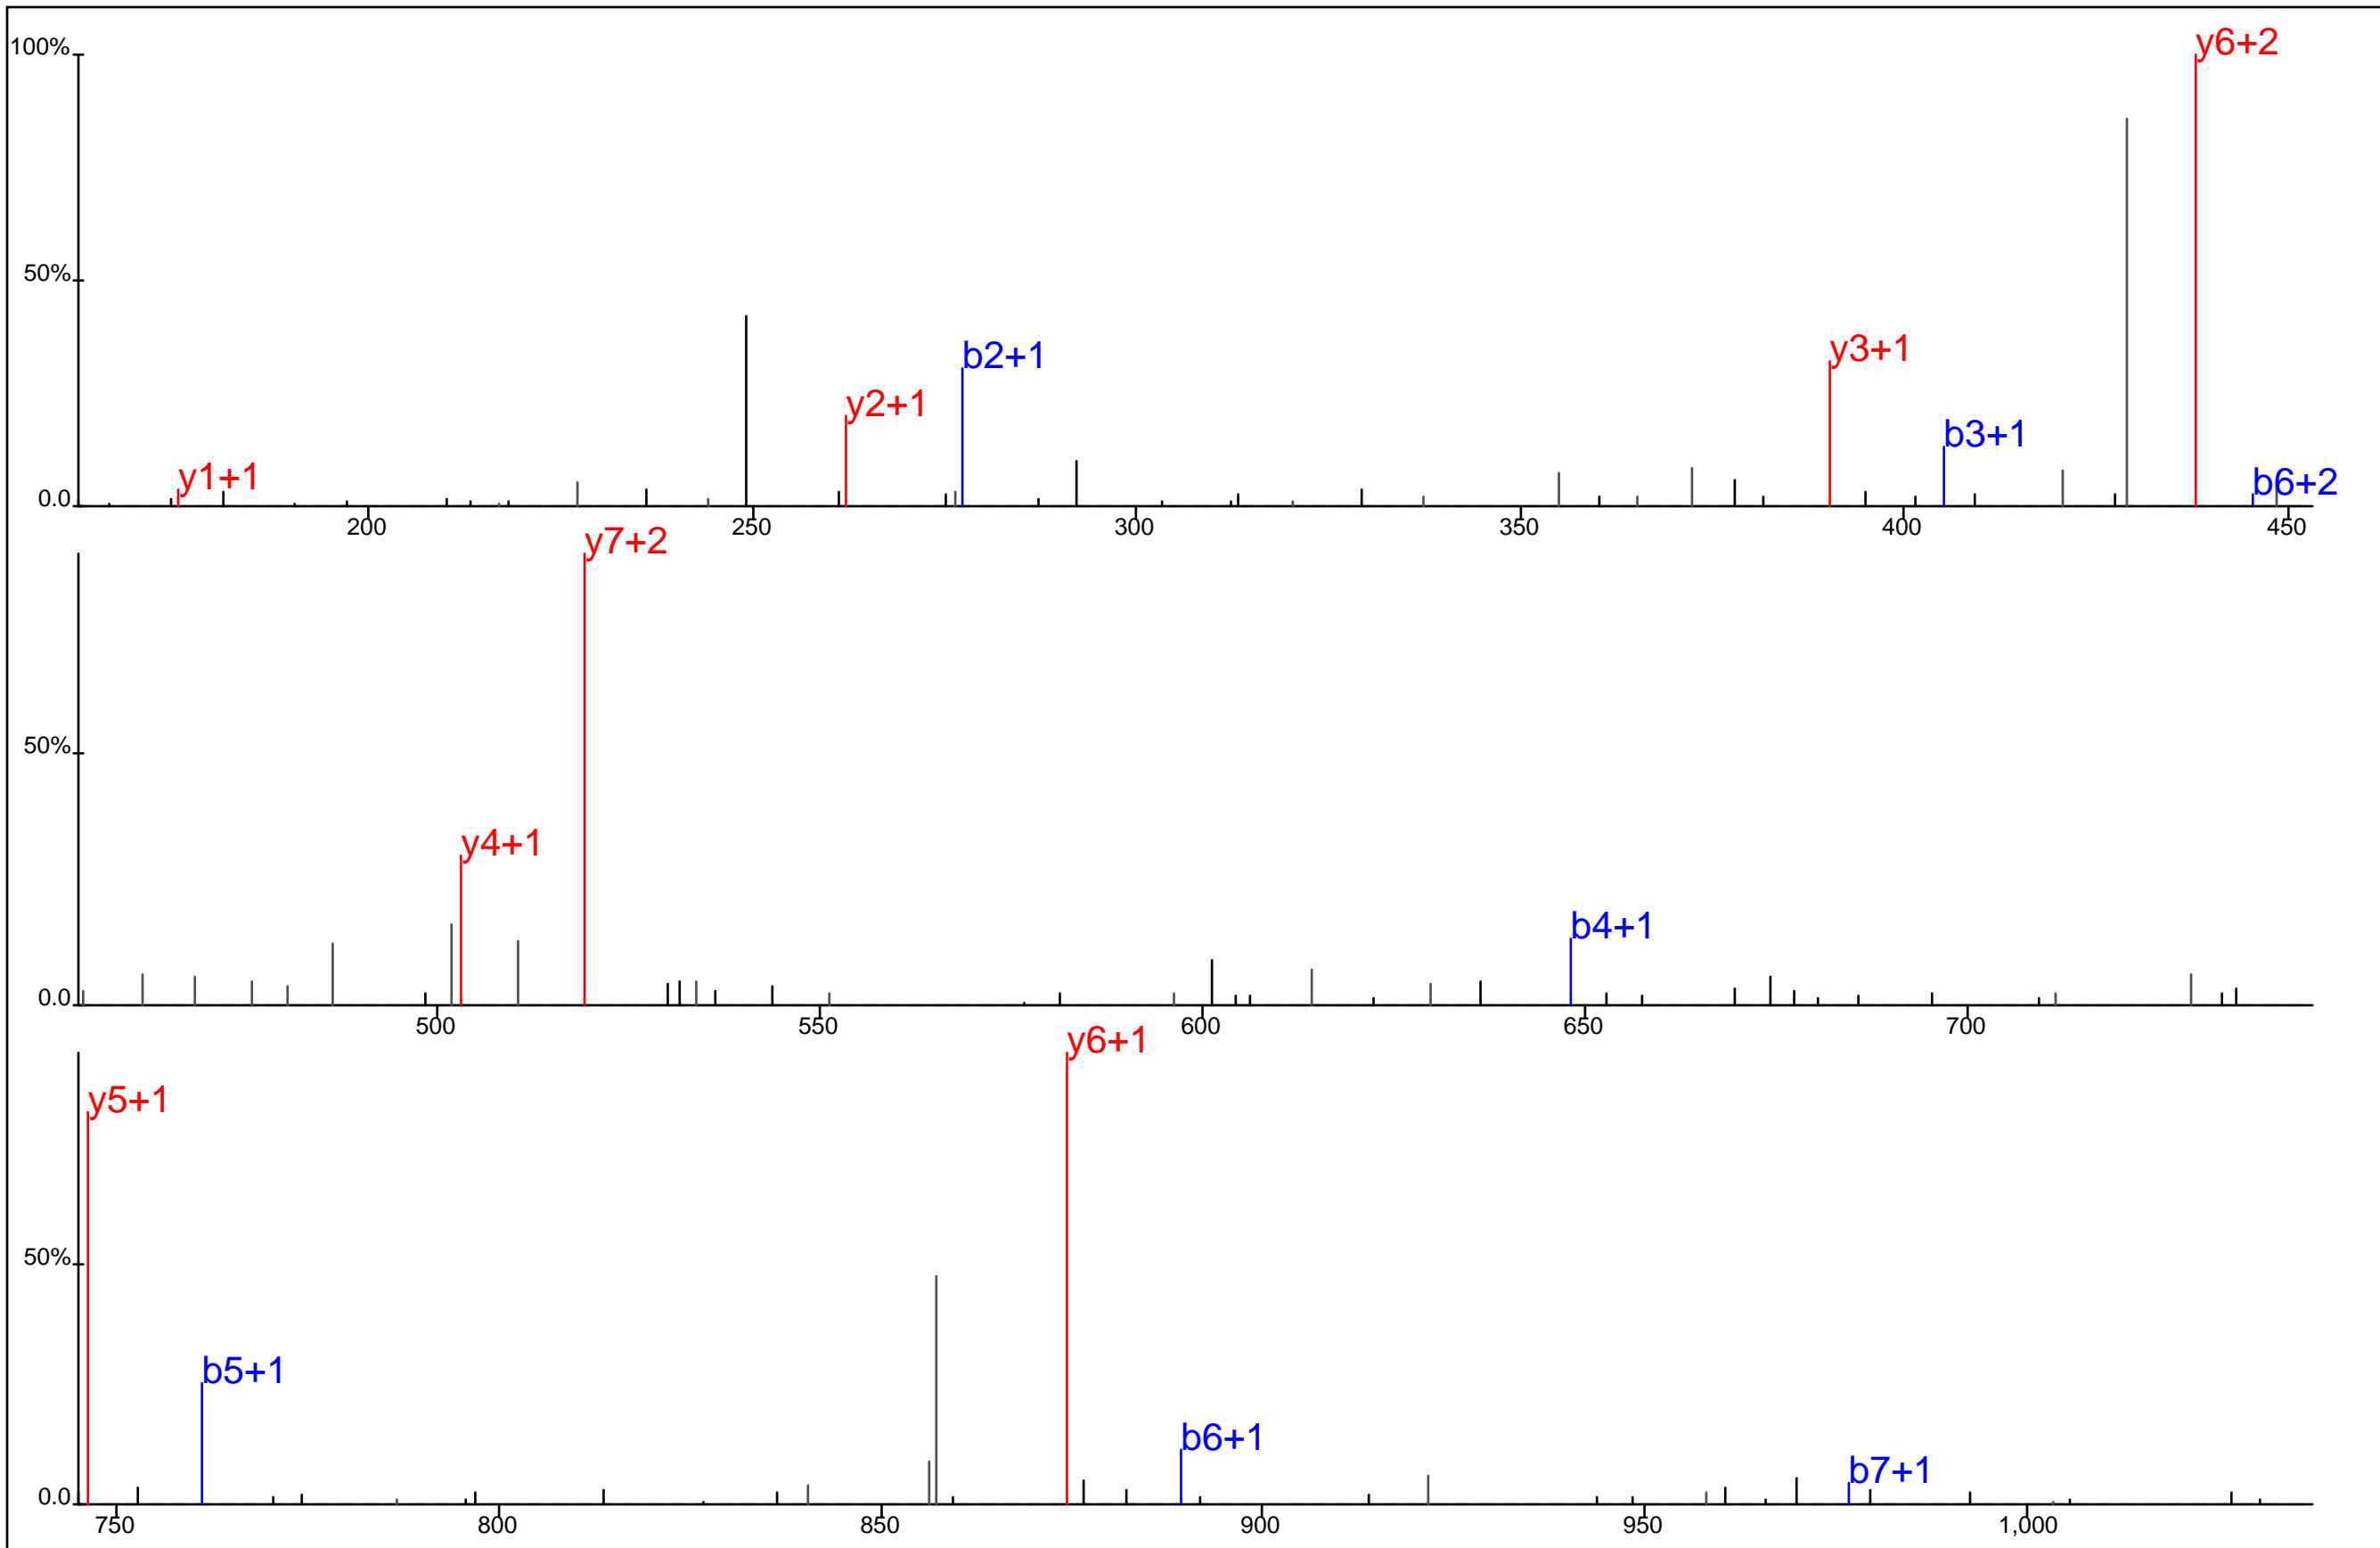


  

  
**I Y Q Y\*I Q S R**

Protein Name: DYRK1B  
 gi Accession: 0  
 Precursor Mass: 575.7684+2  
 Delta Mass: 0.214 ppm  
 XCorr: 51.63

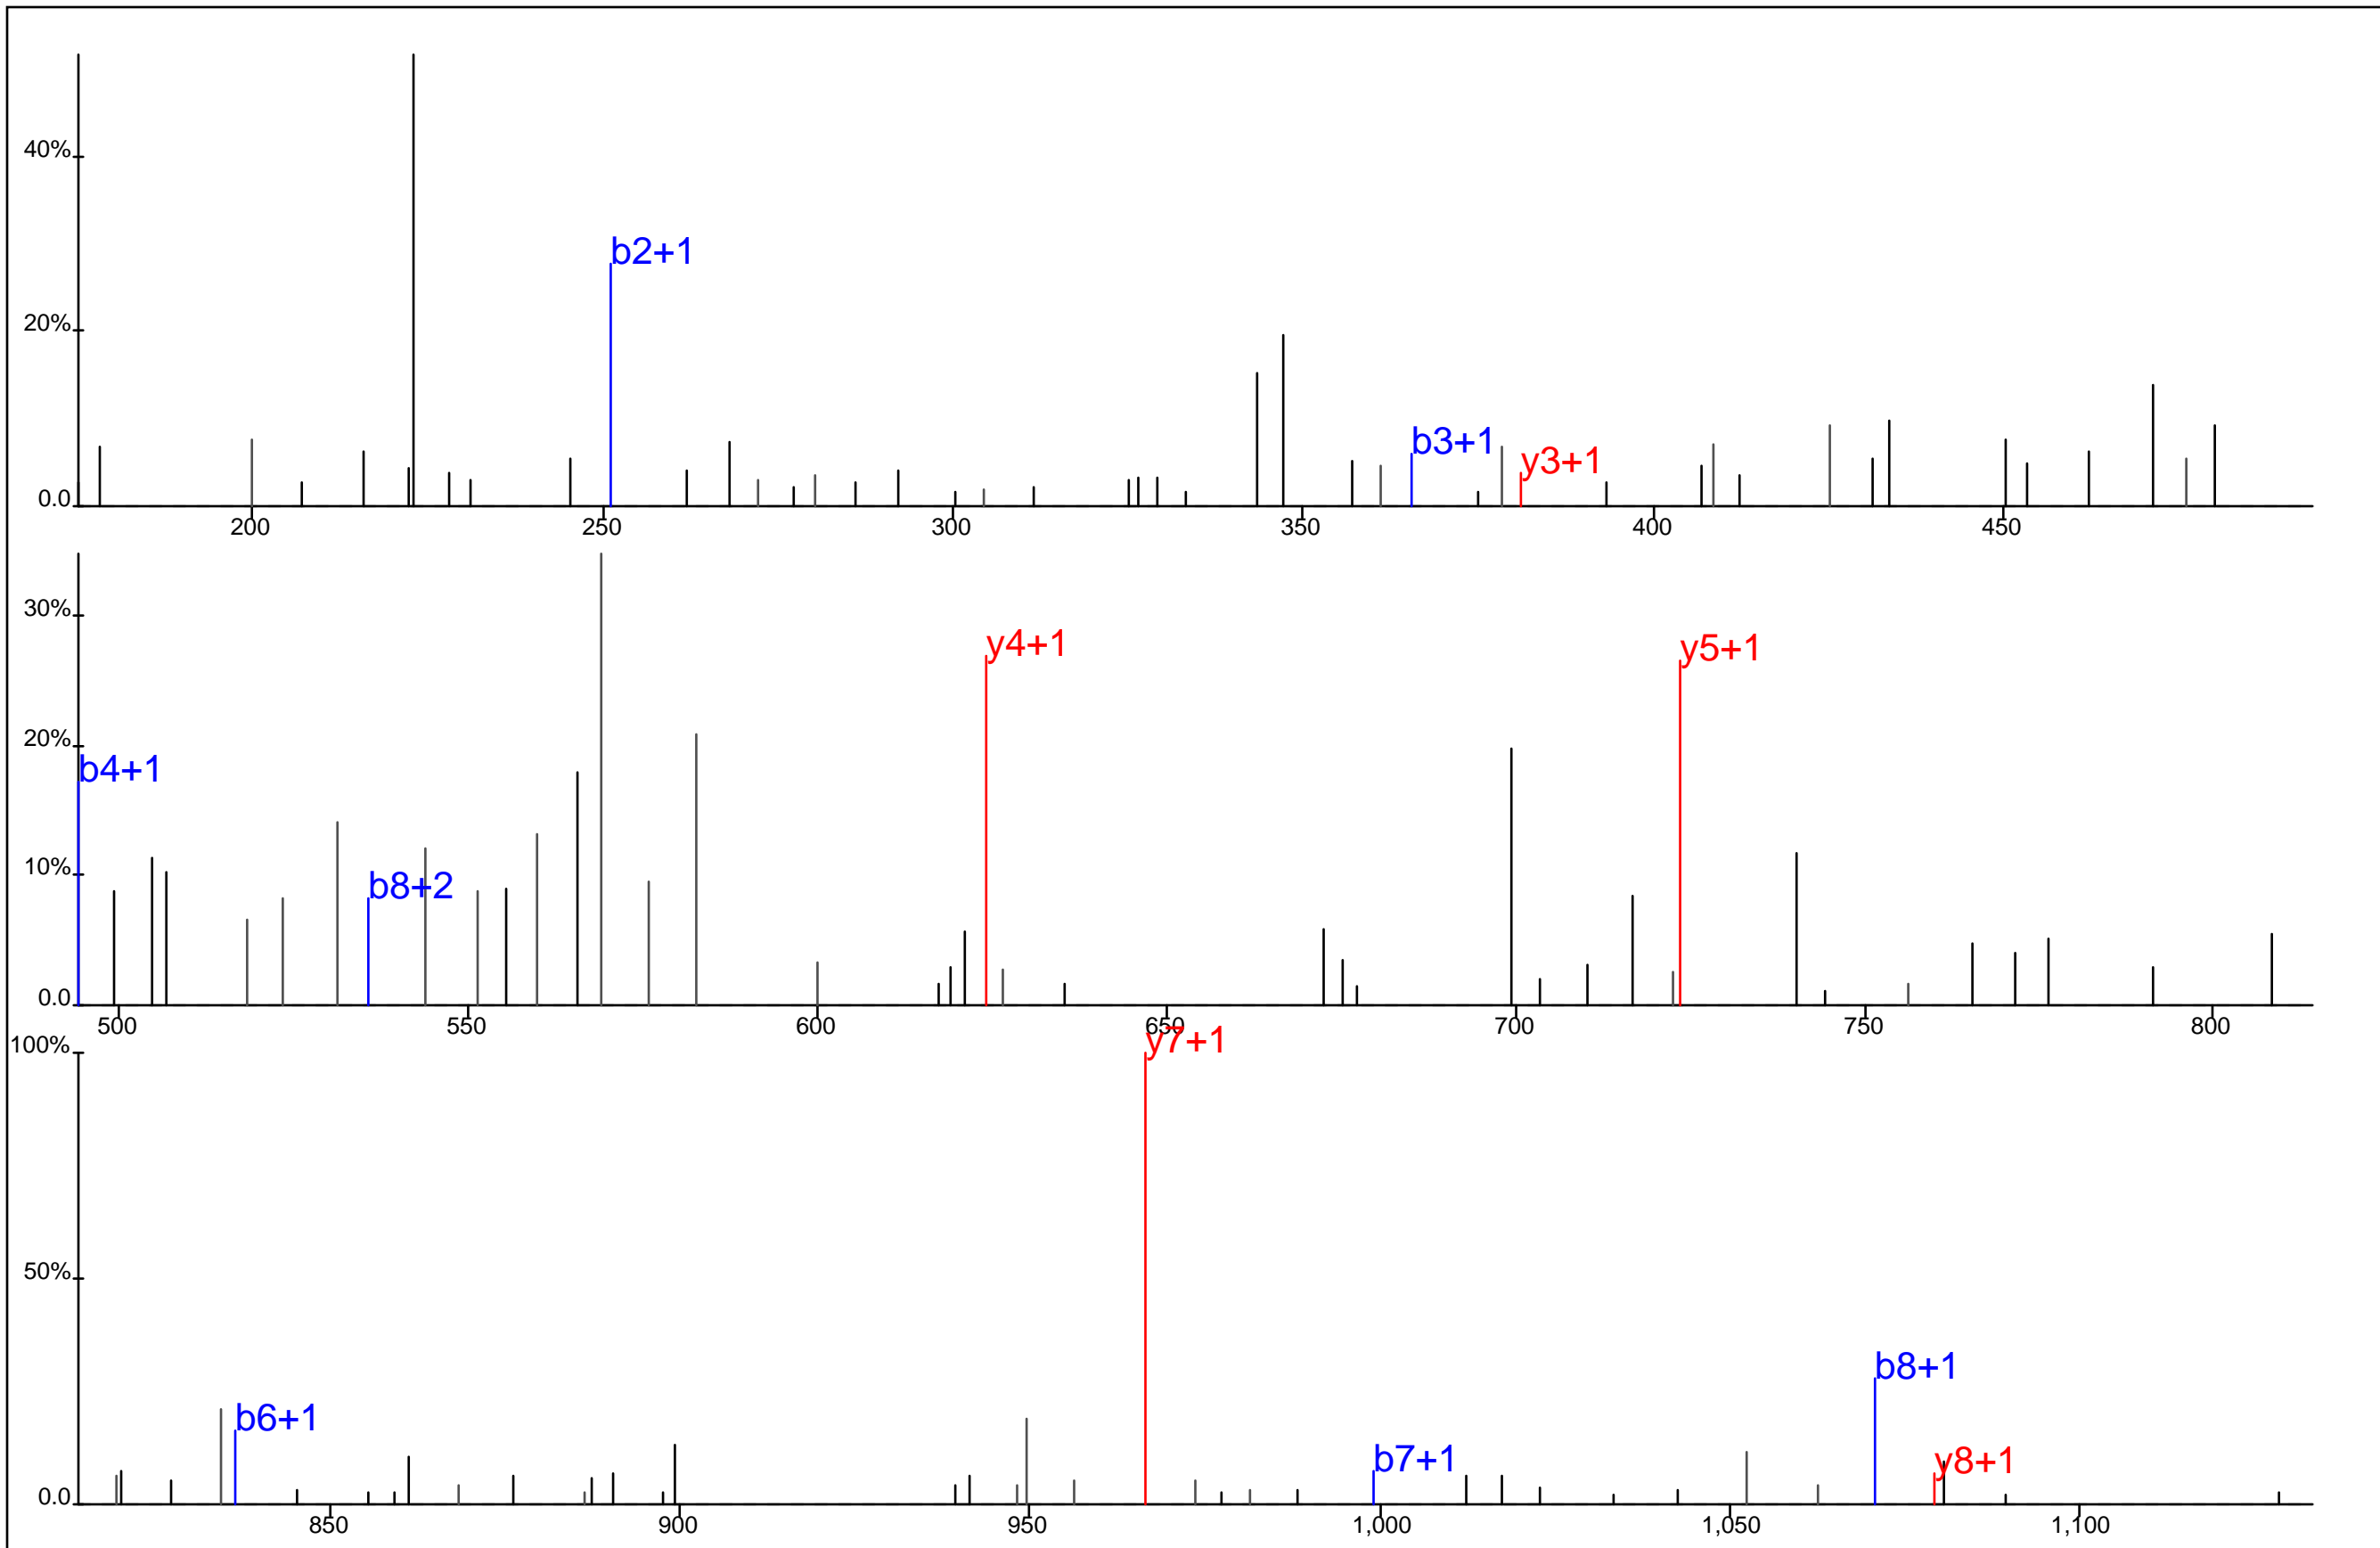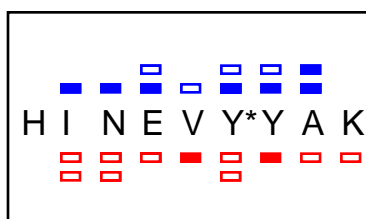

Protein Name: DYRK1B  
 gi Accession: 0  
 Precursor Mass: 608.7742+2  
 Delta Mass: 1.154 ppm  
 XCorr: 31.22

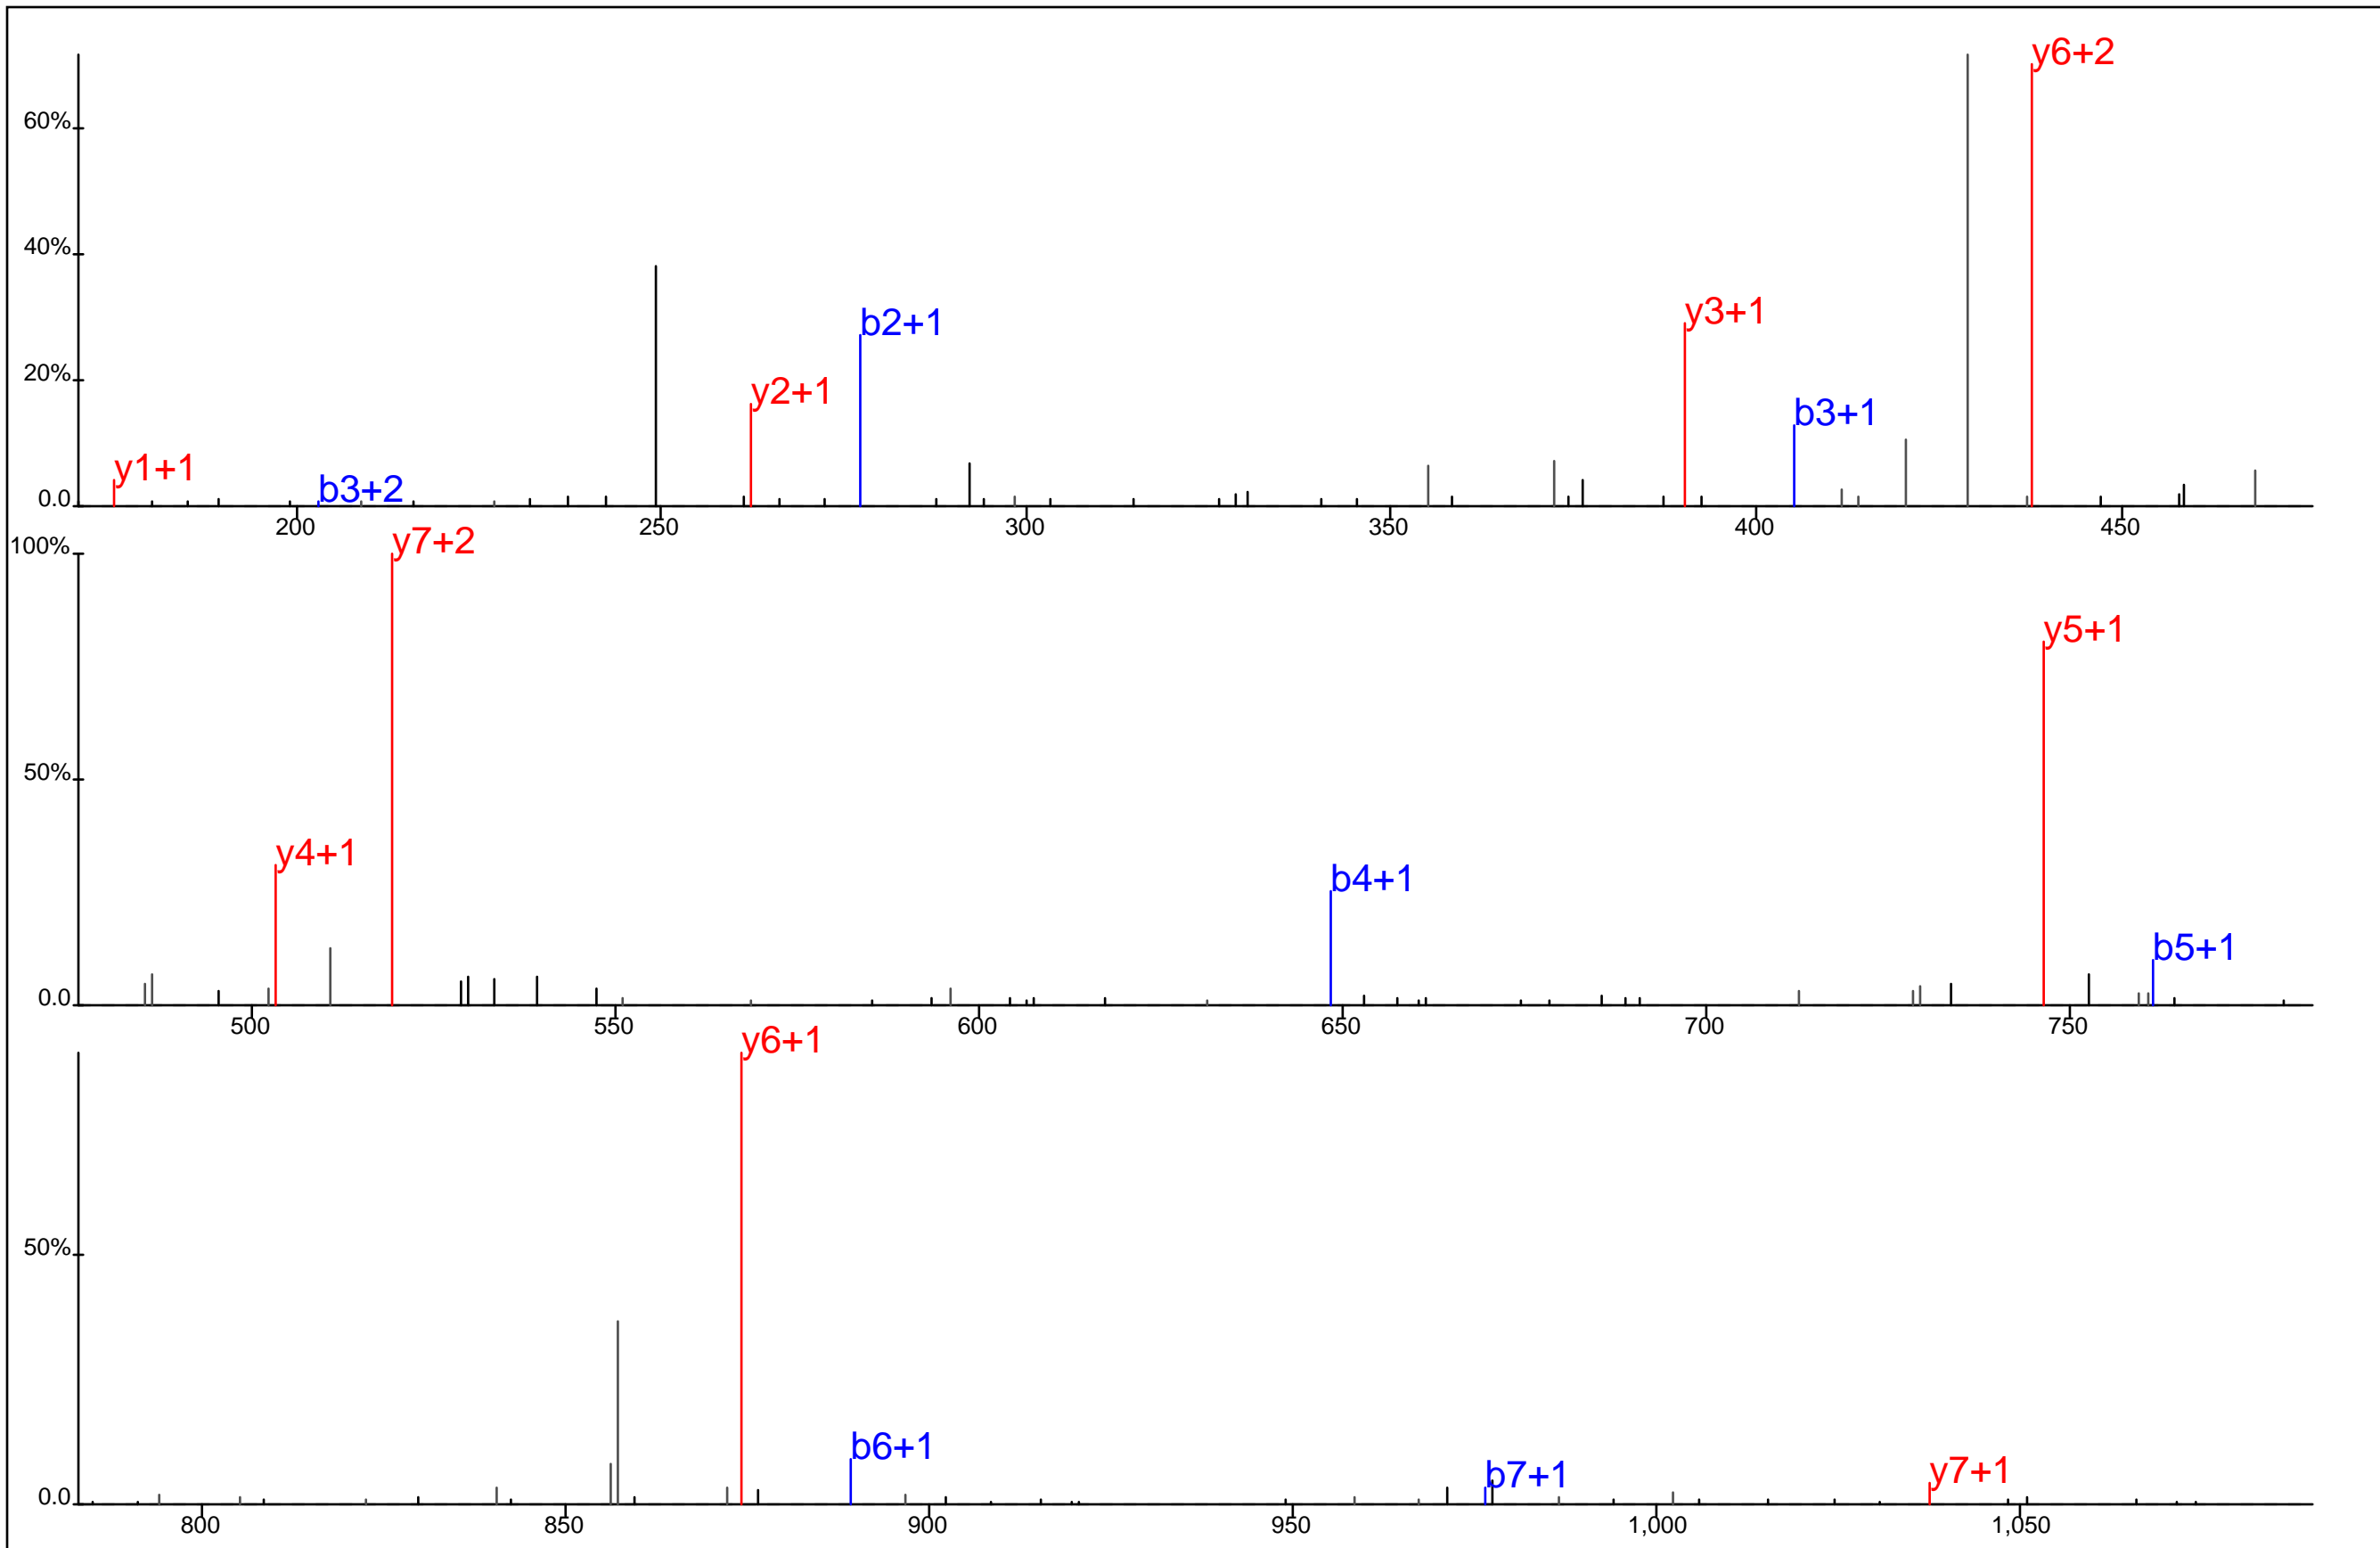

**I** **Y** **Q** **Y\*** **I** **Q** **S** **R**

Protein Name: DYRK1B  
 gi Accession: 0  
 Precursor Mass: 575.7693+2  
 Delta Mass: 1.804 ppm  
 XCorr: 49.17

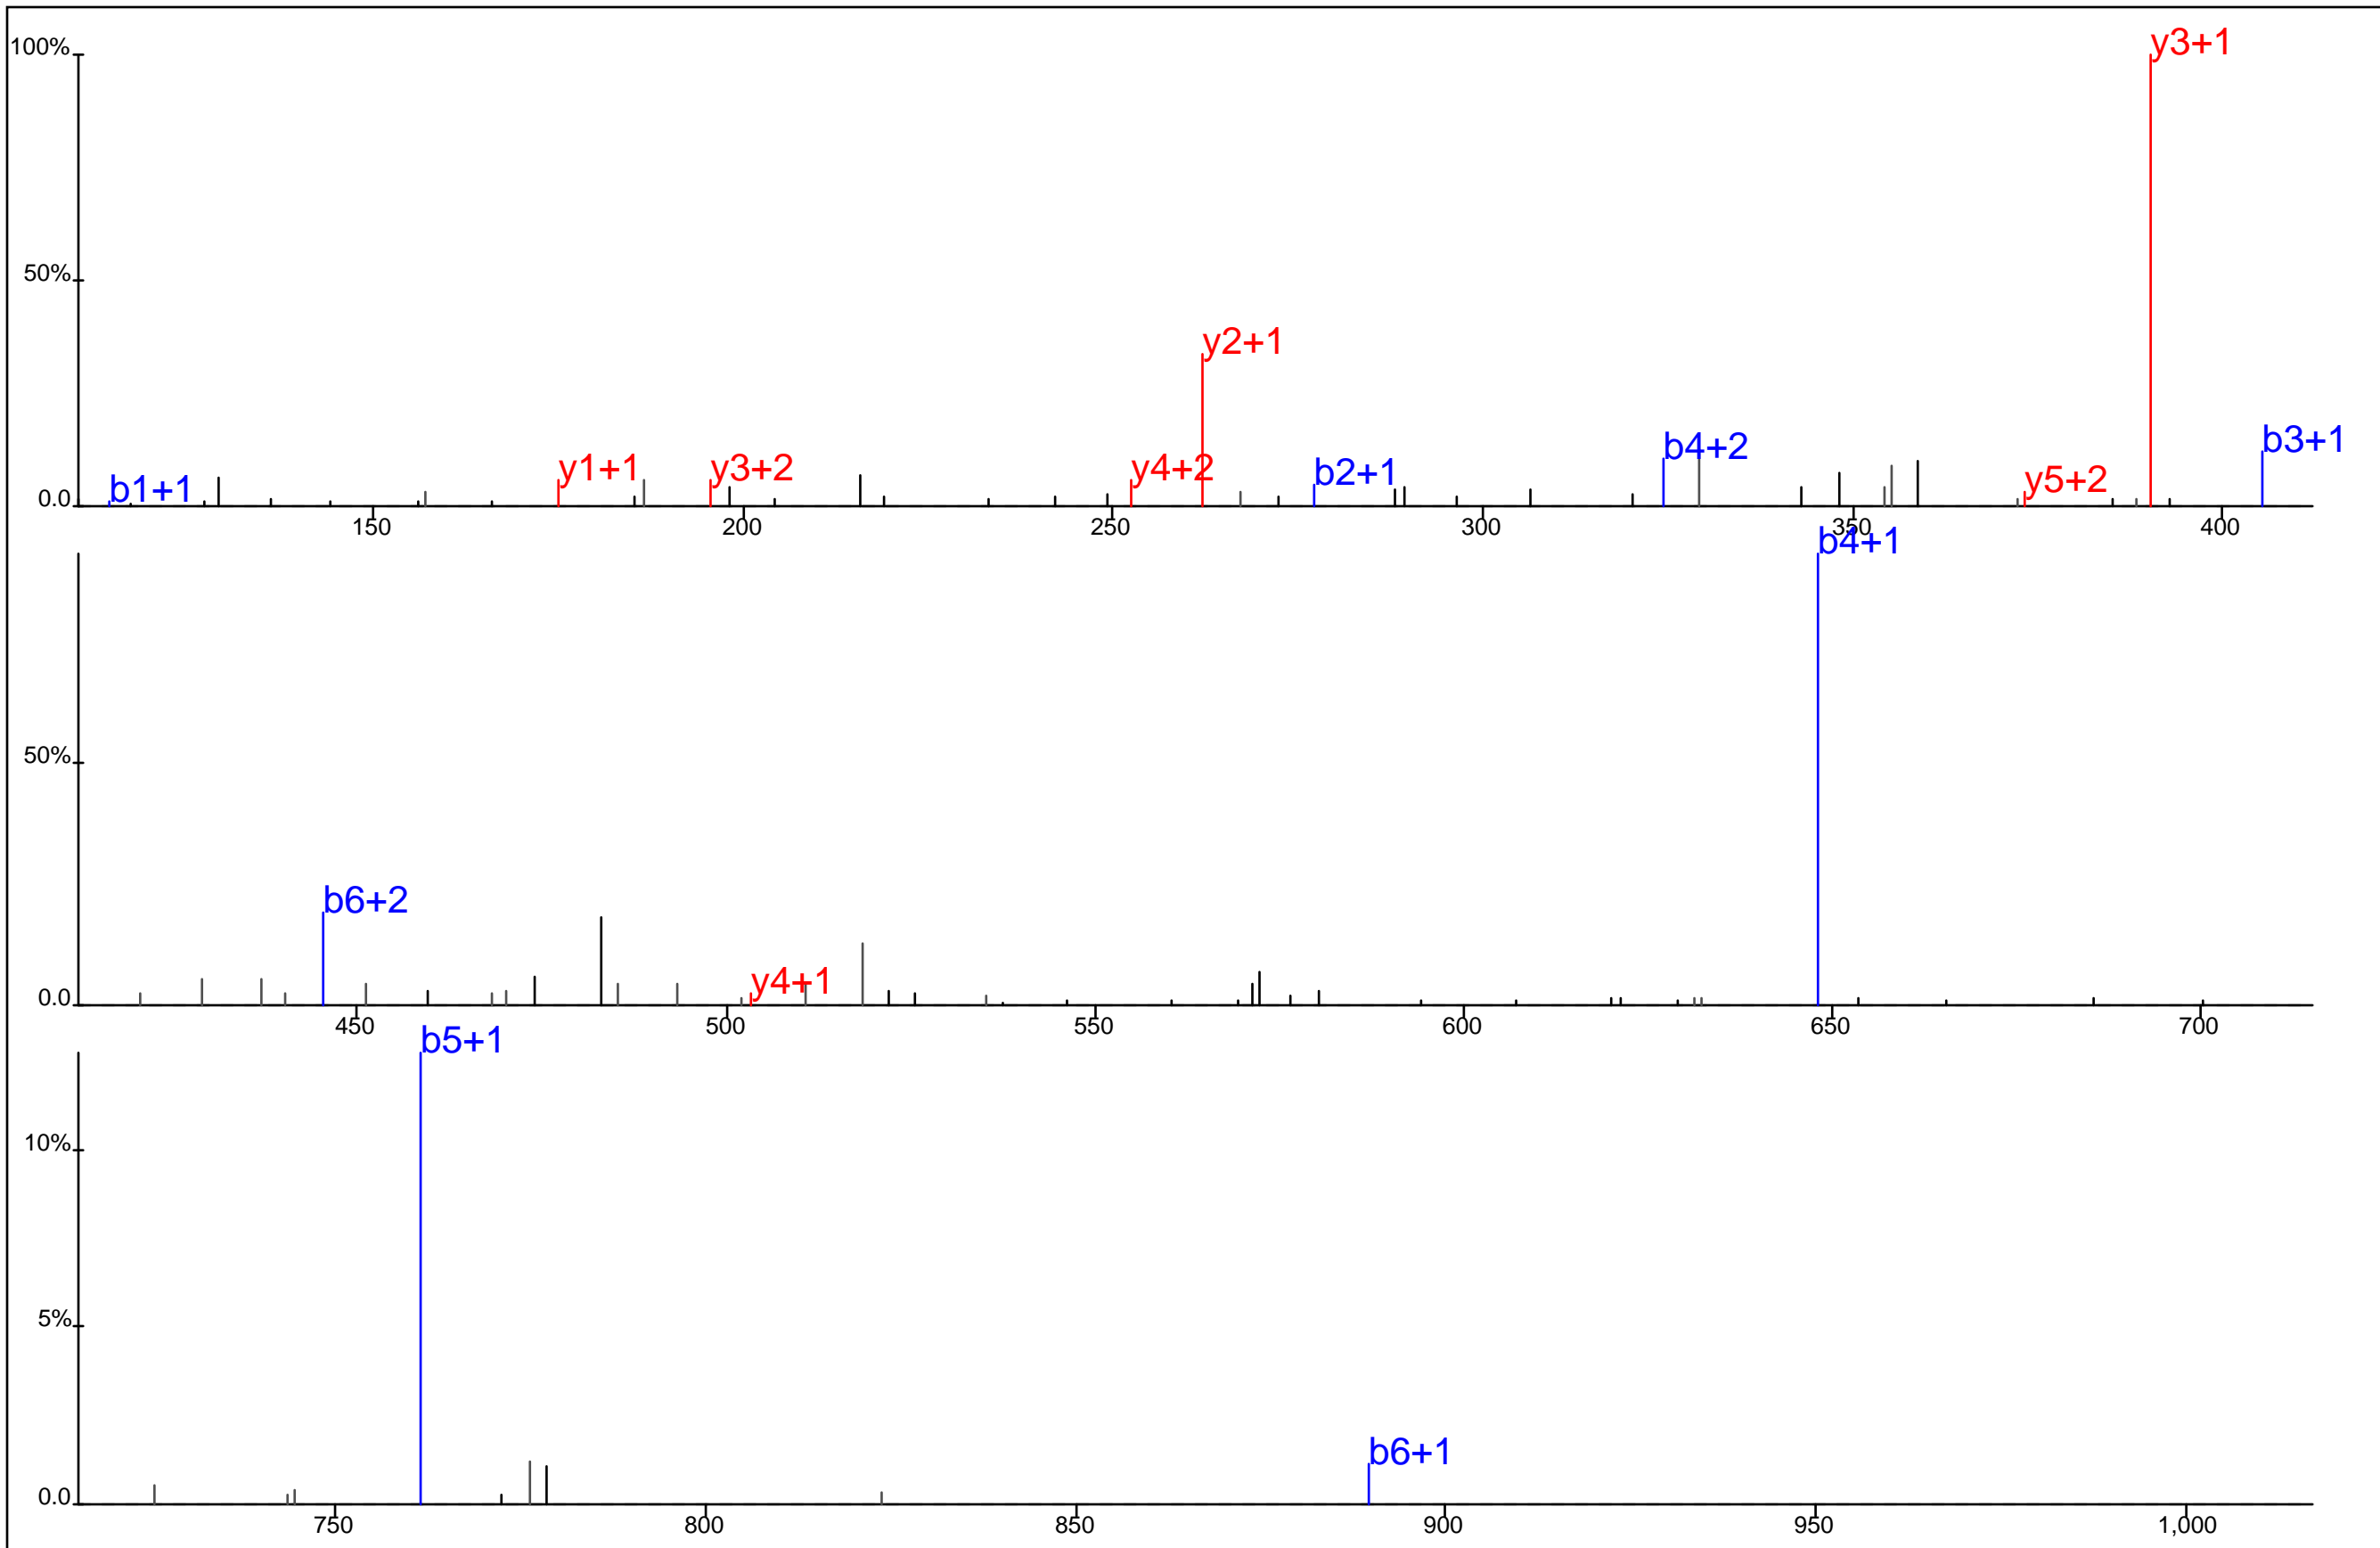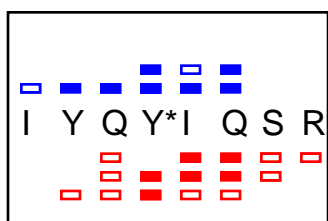

Protein Name: DYRK1B  
 gi Accession: 0  
 Precursor Mass: 384.1819+3  
 Delta Mass: 1.794 ppm  
 XCorr: 24.29

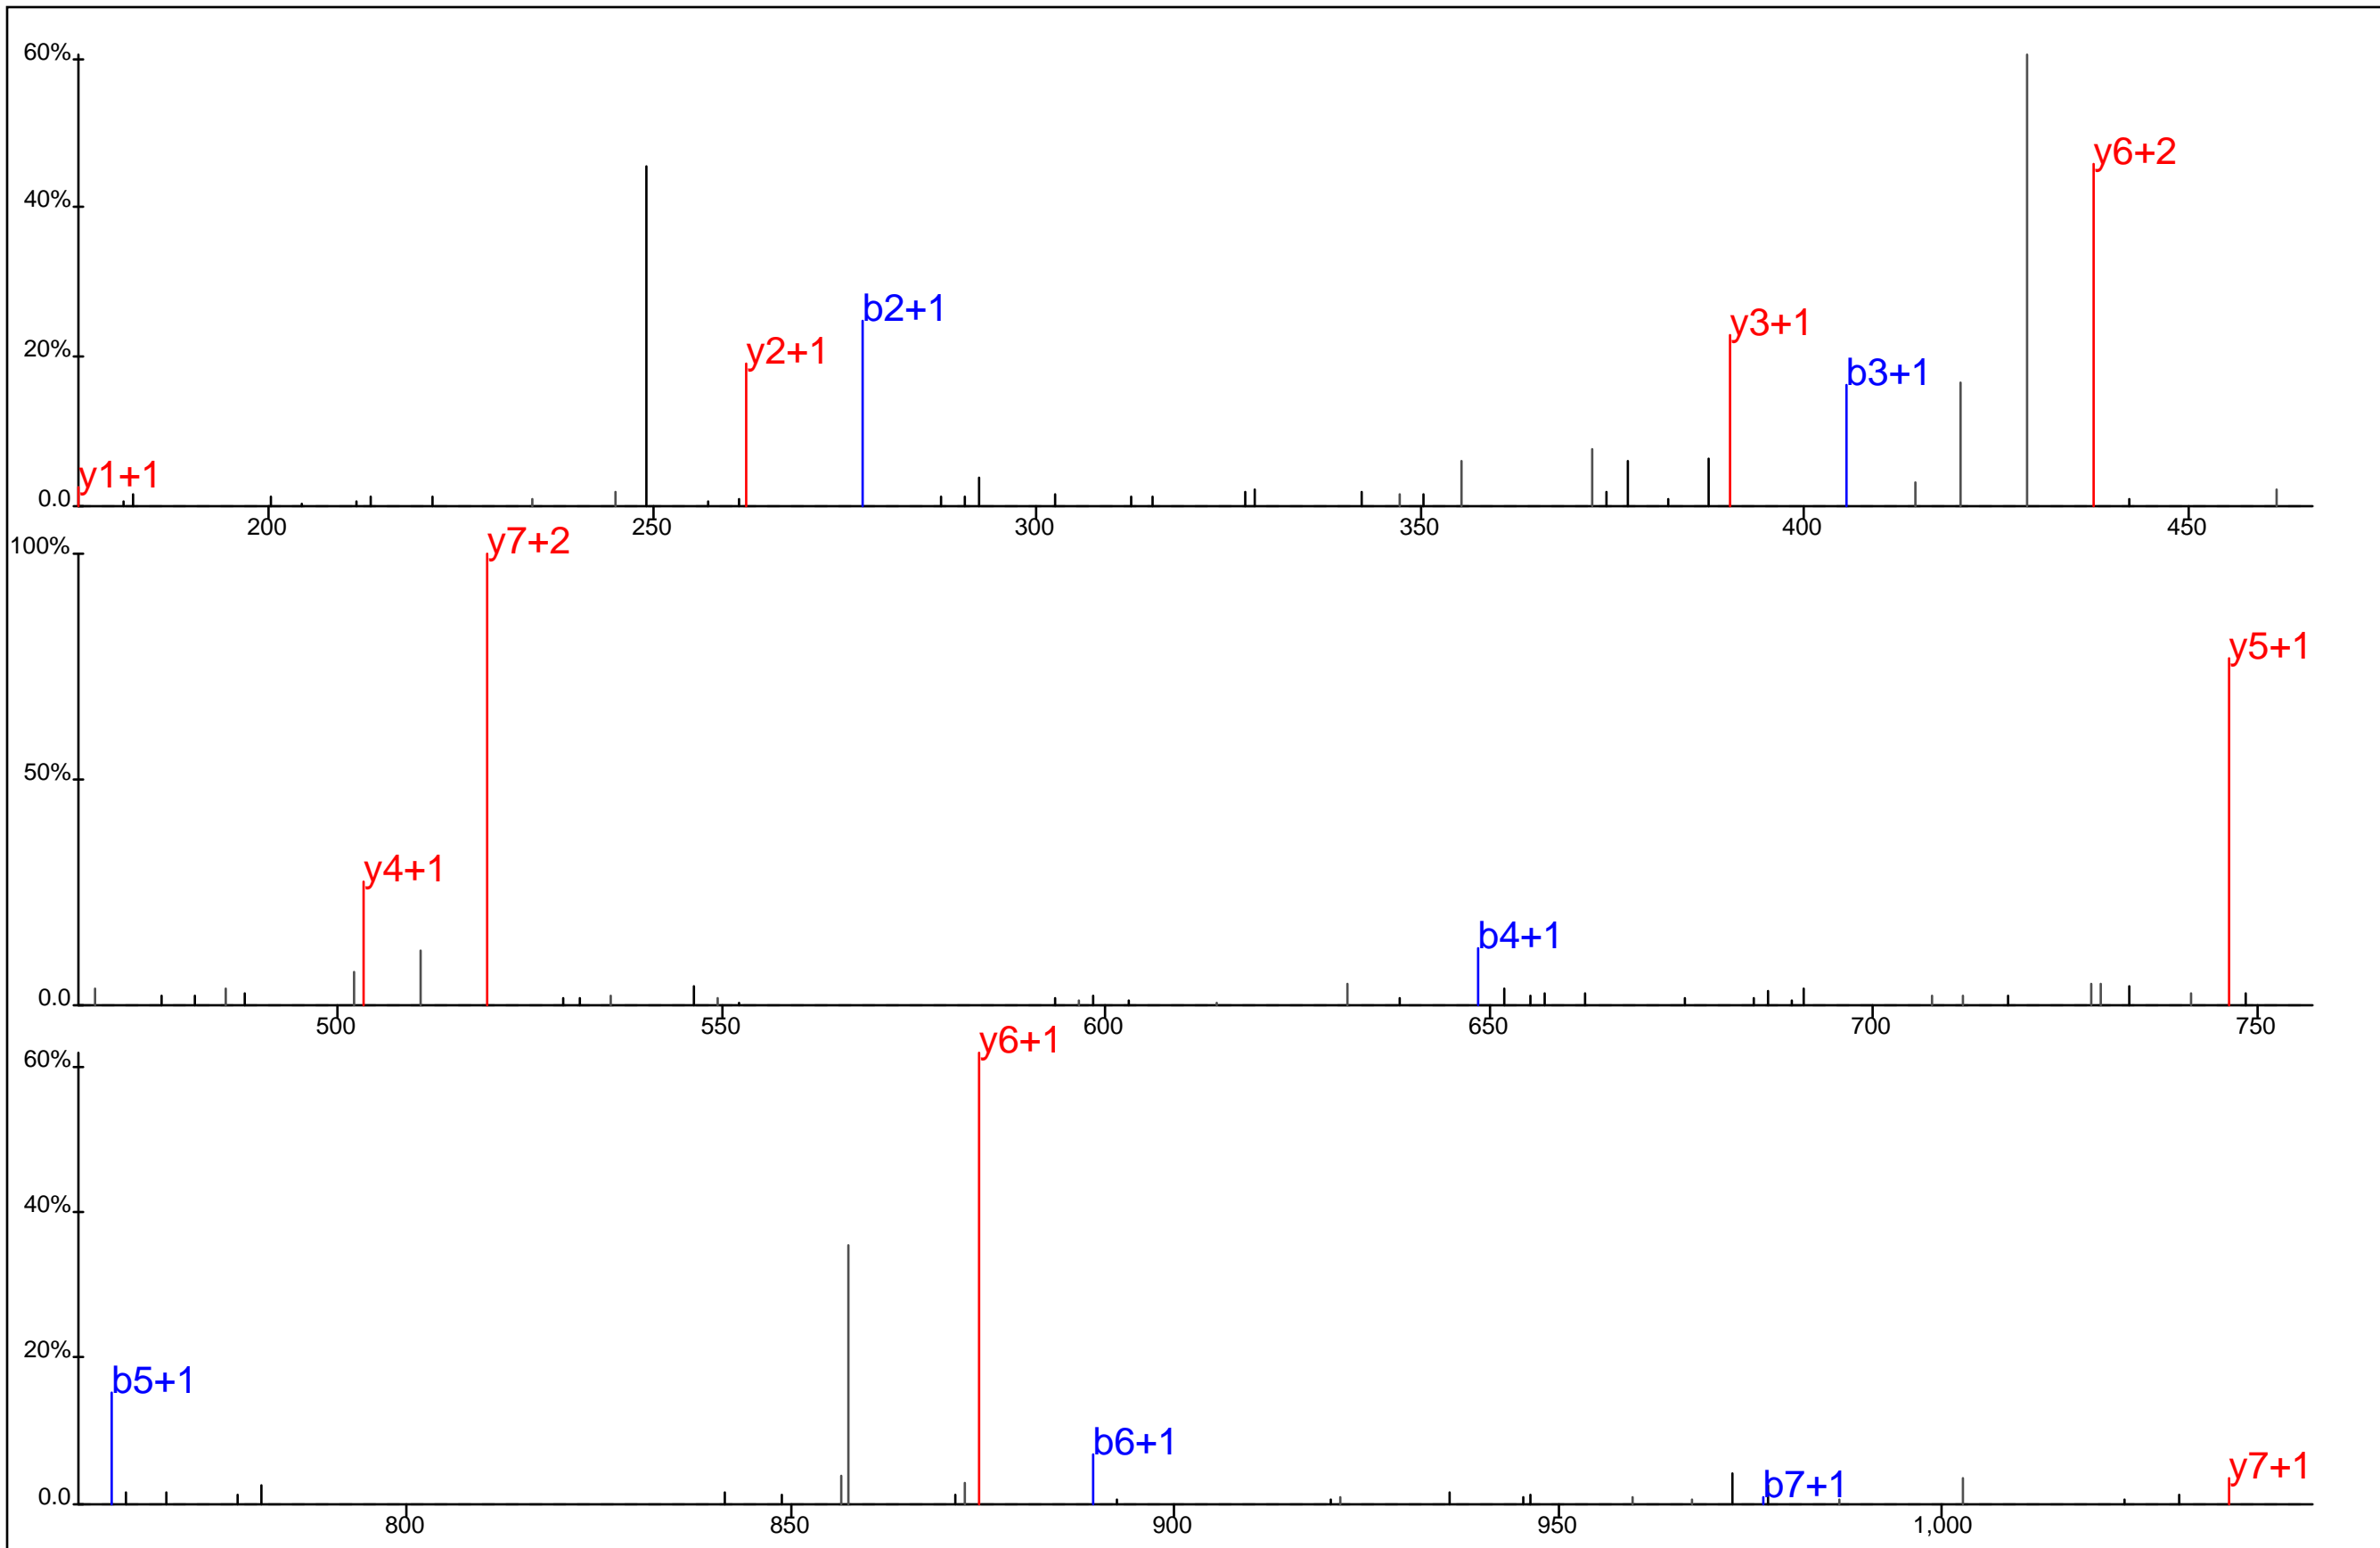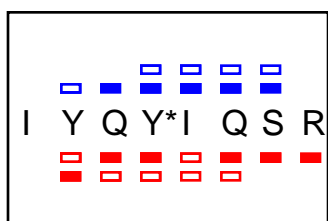

Protein Name: DYRK1B  
 gi Accession: 0  
 Precursor Mass: 575.7686+2  
 Delta Mass: 0.532 ppm  
 XCorr: 55.71

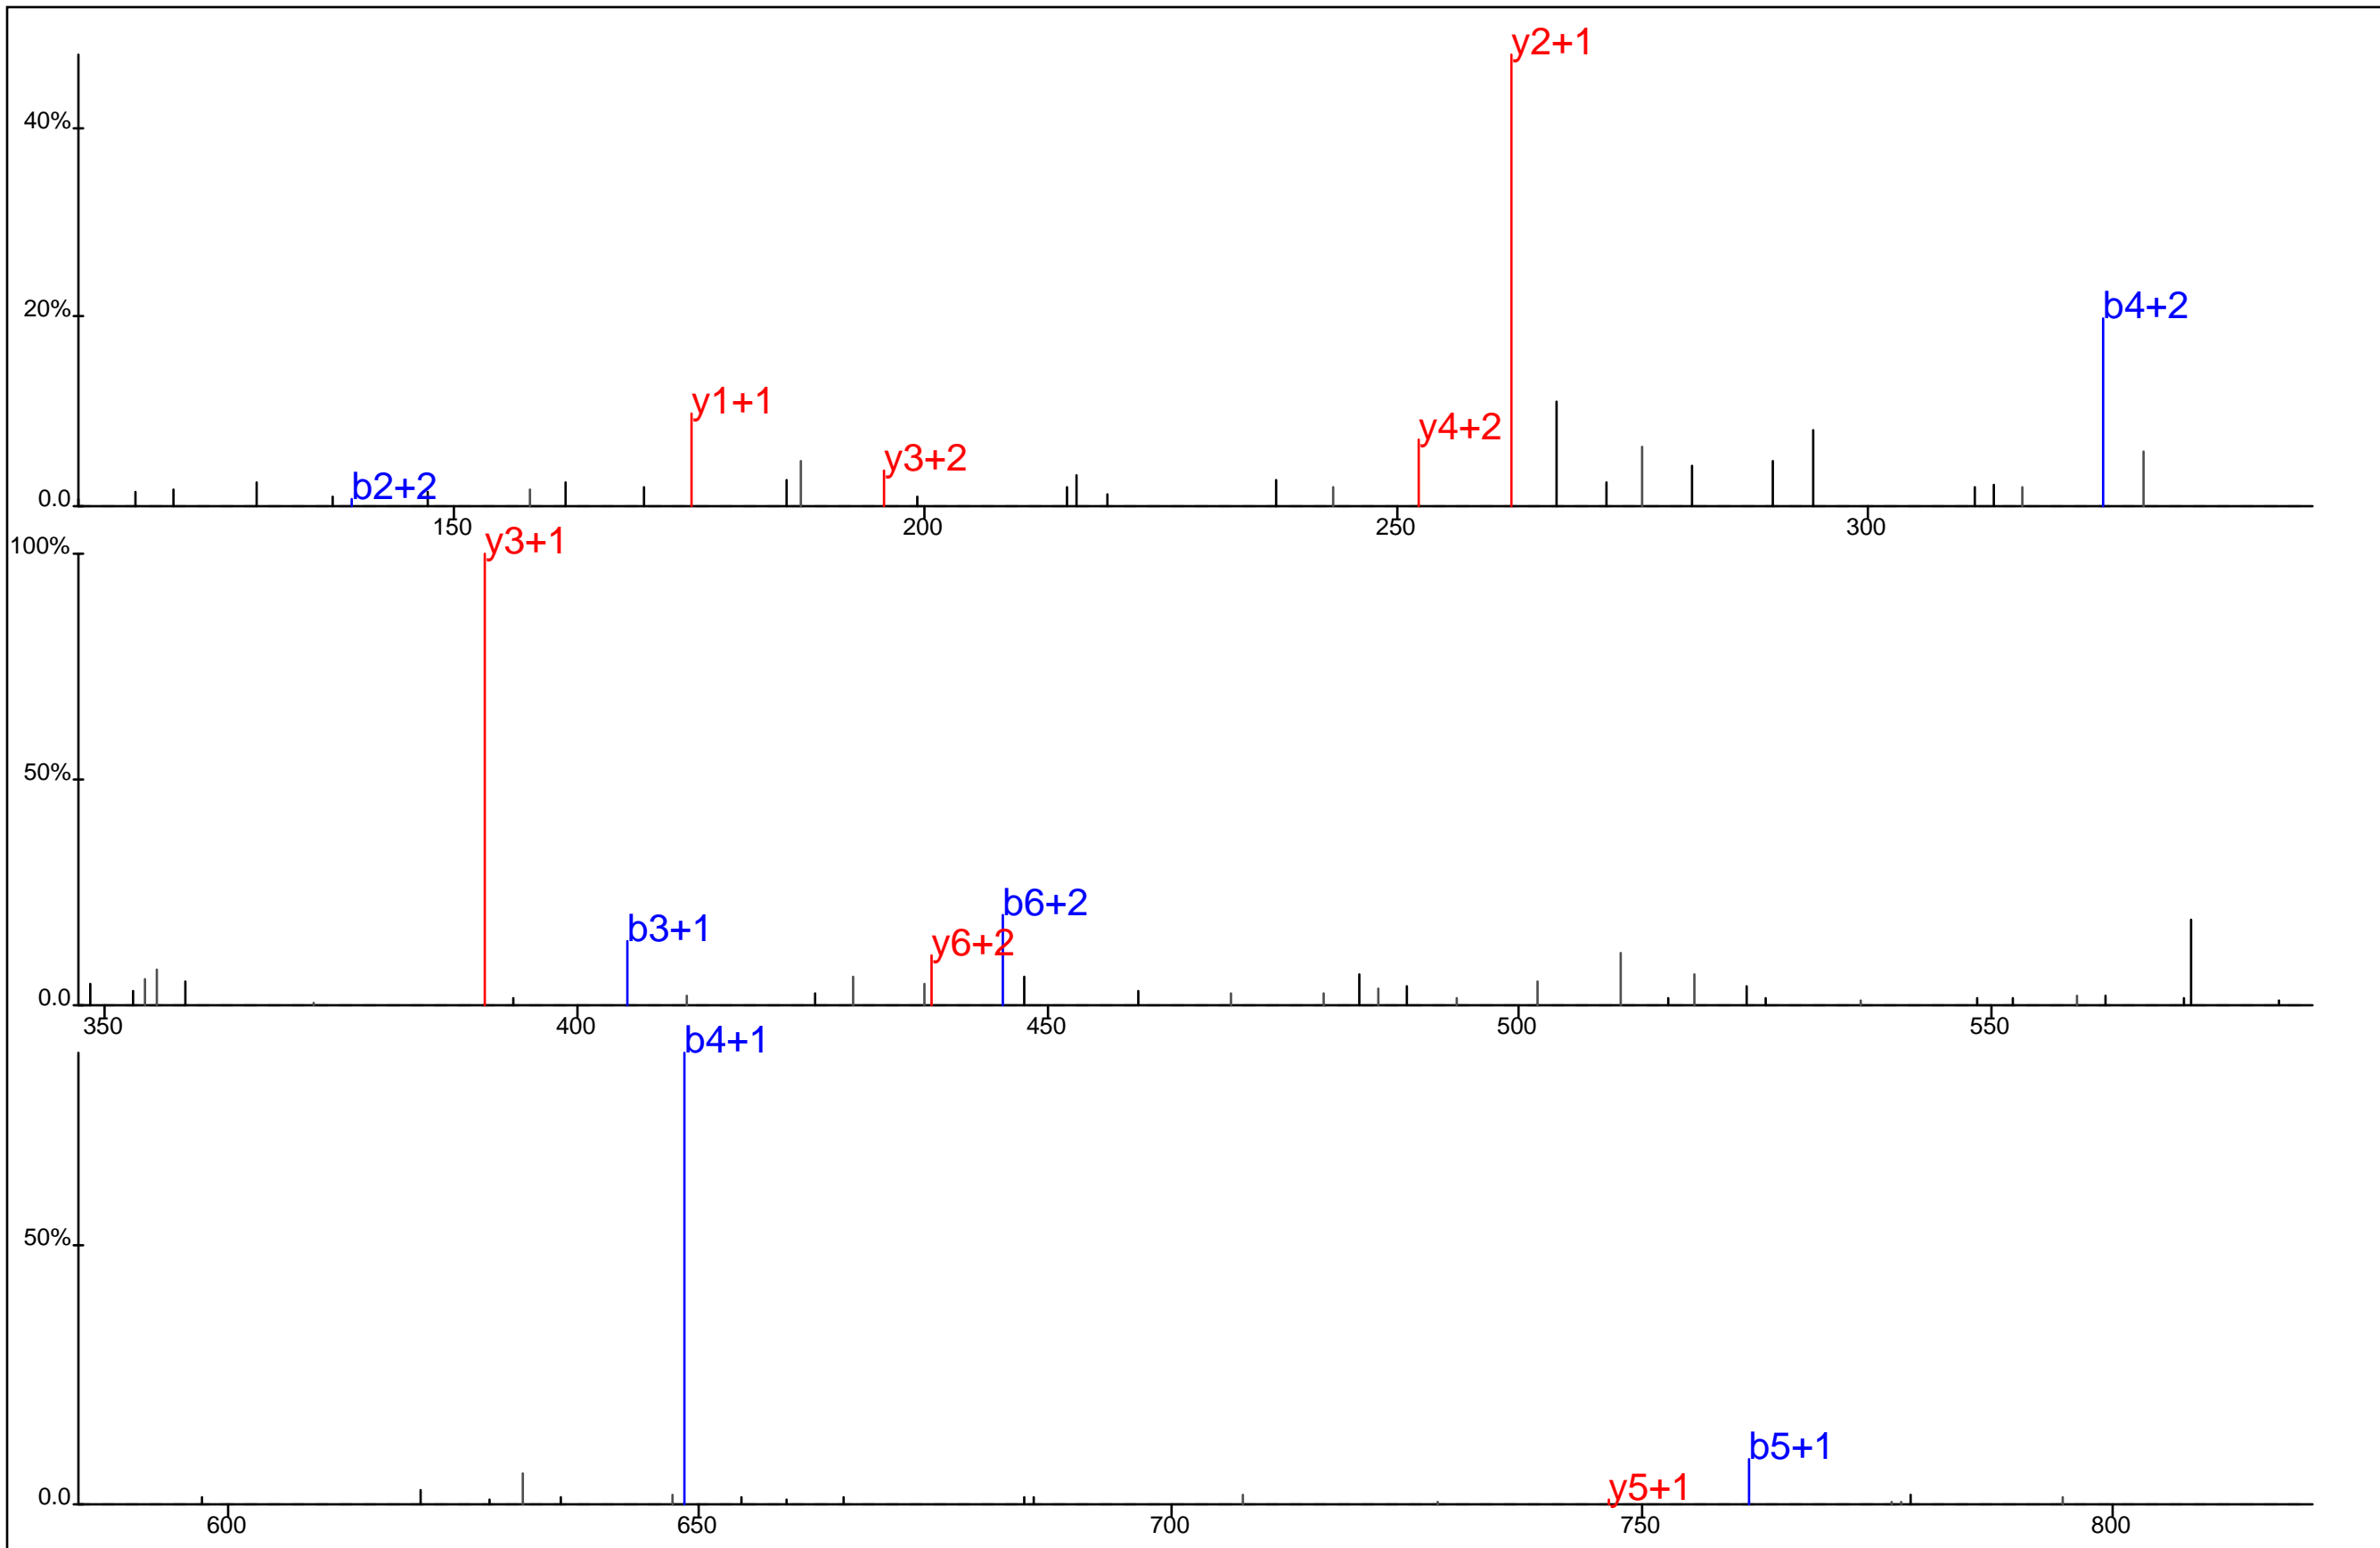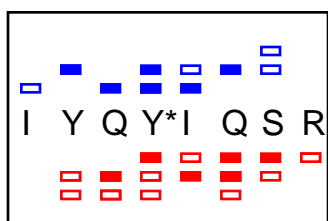

Protein Name: DYRK1B  
 gi Accession: 0  
 Precursor Mass: 384.1816+3  
 Delta Mass: 0.918 ppm  
 XCorr: 21.45



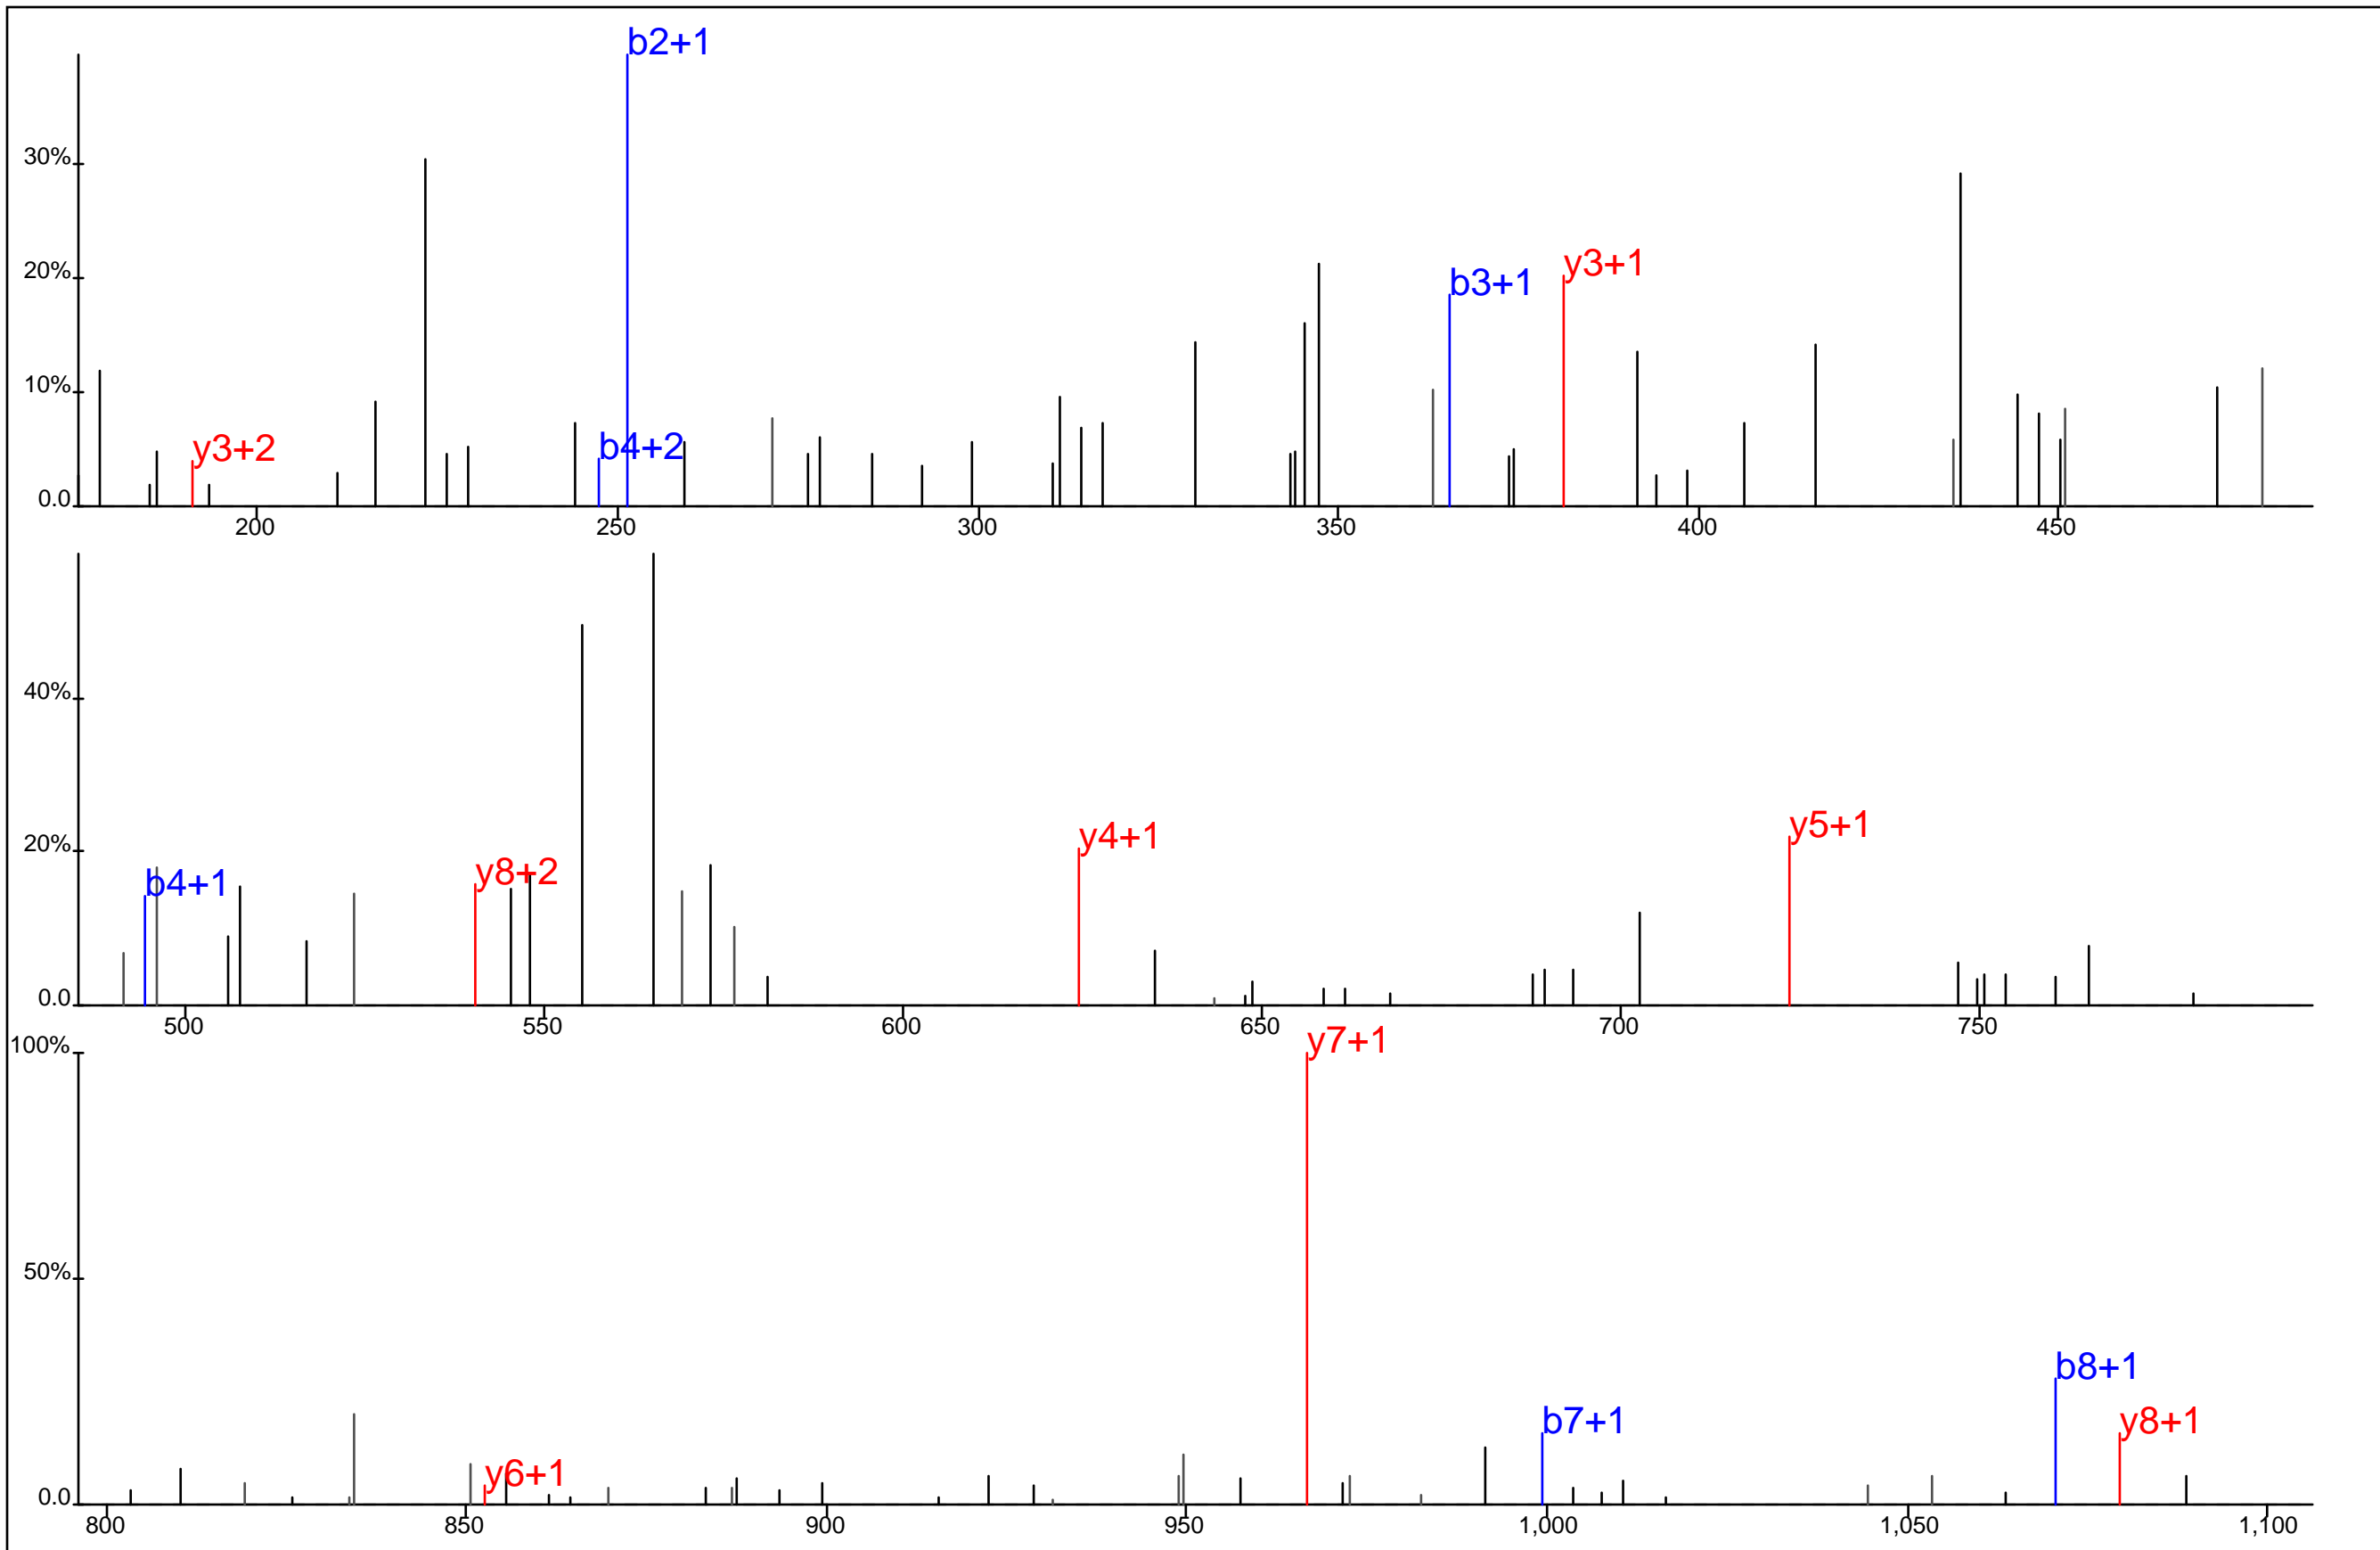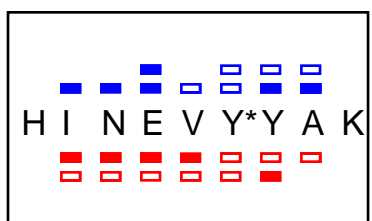

Protein Name: DYRK1B  
 gi Accession: 0  
 Precursor Mass: 608.7717+2  
 Delta Mass: 3.061 ppm  
 XCorr: 37.13

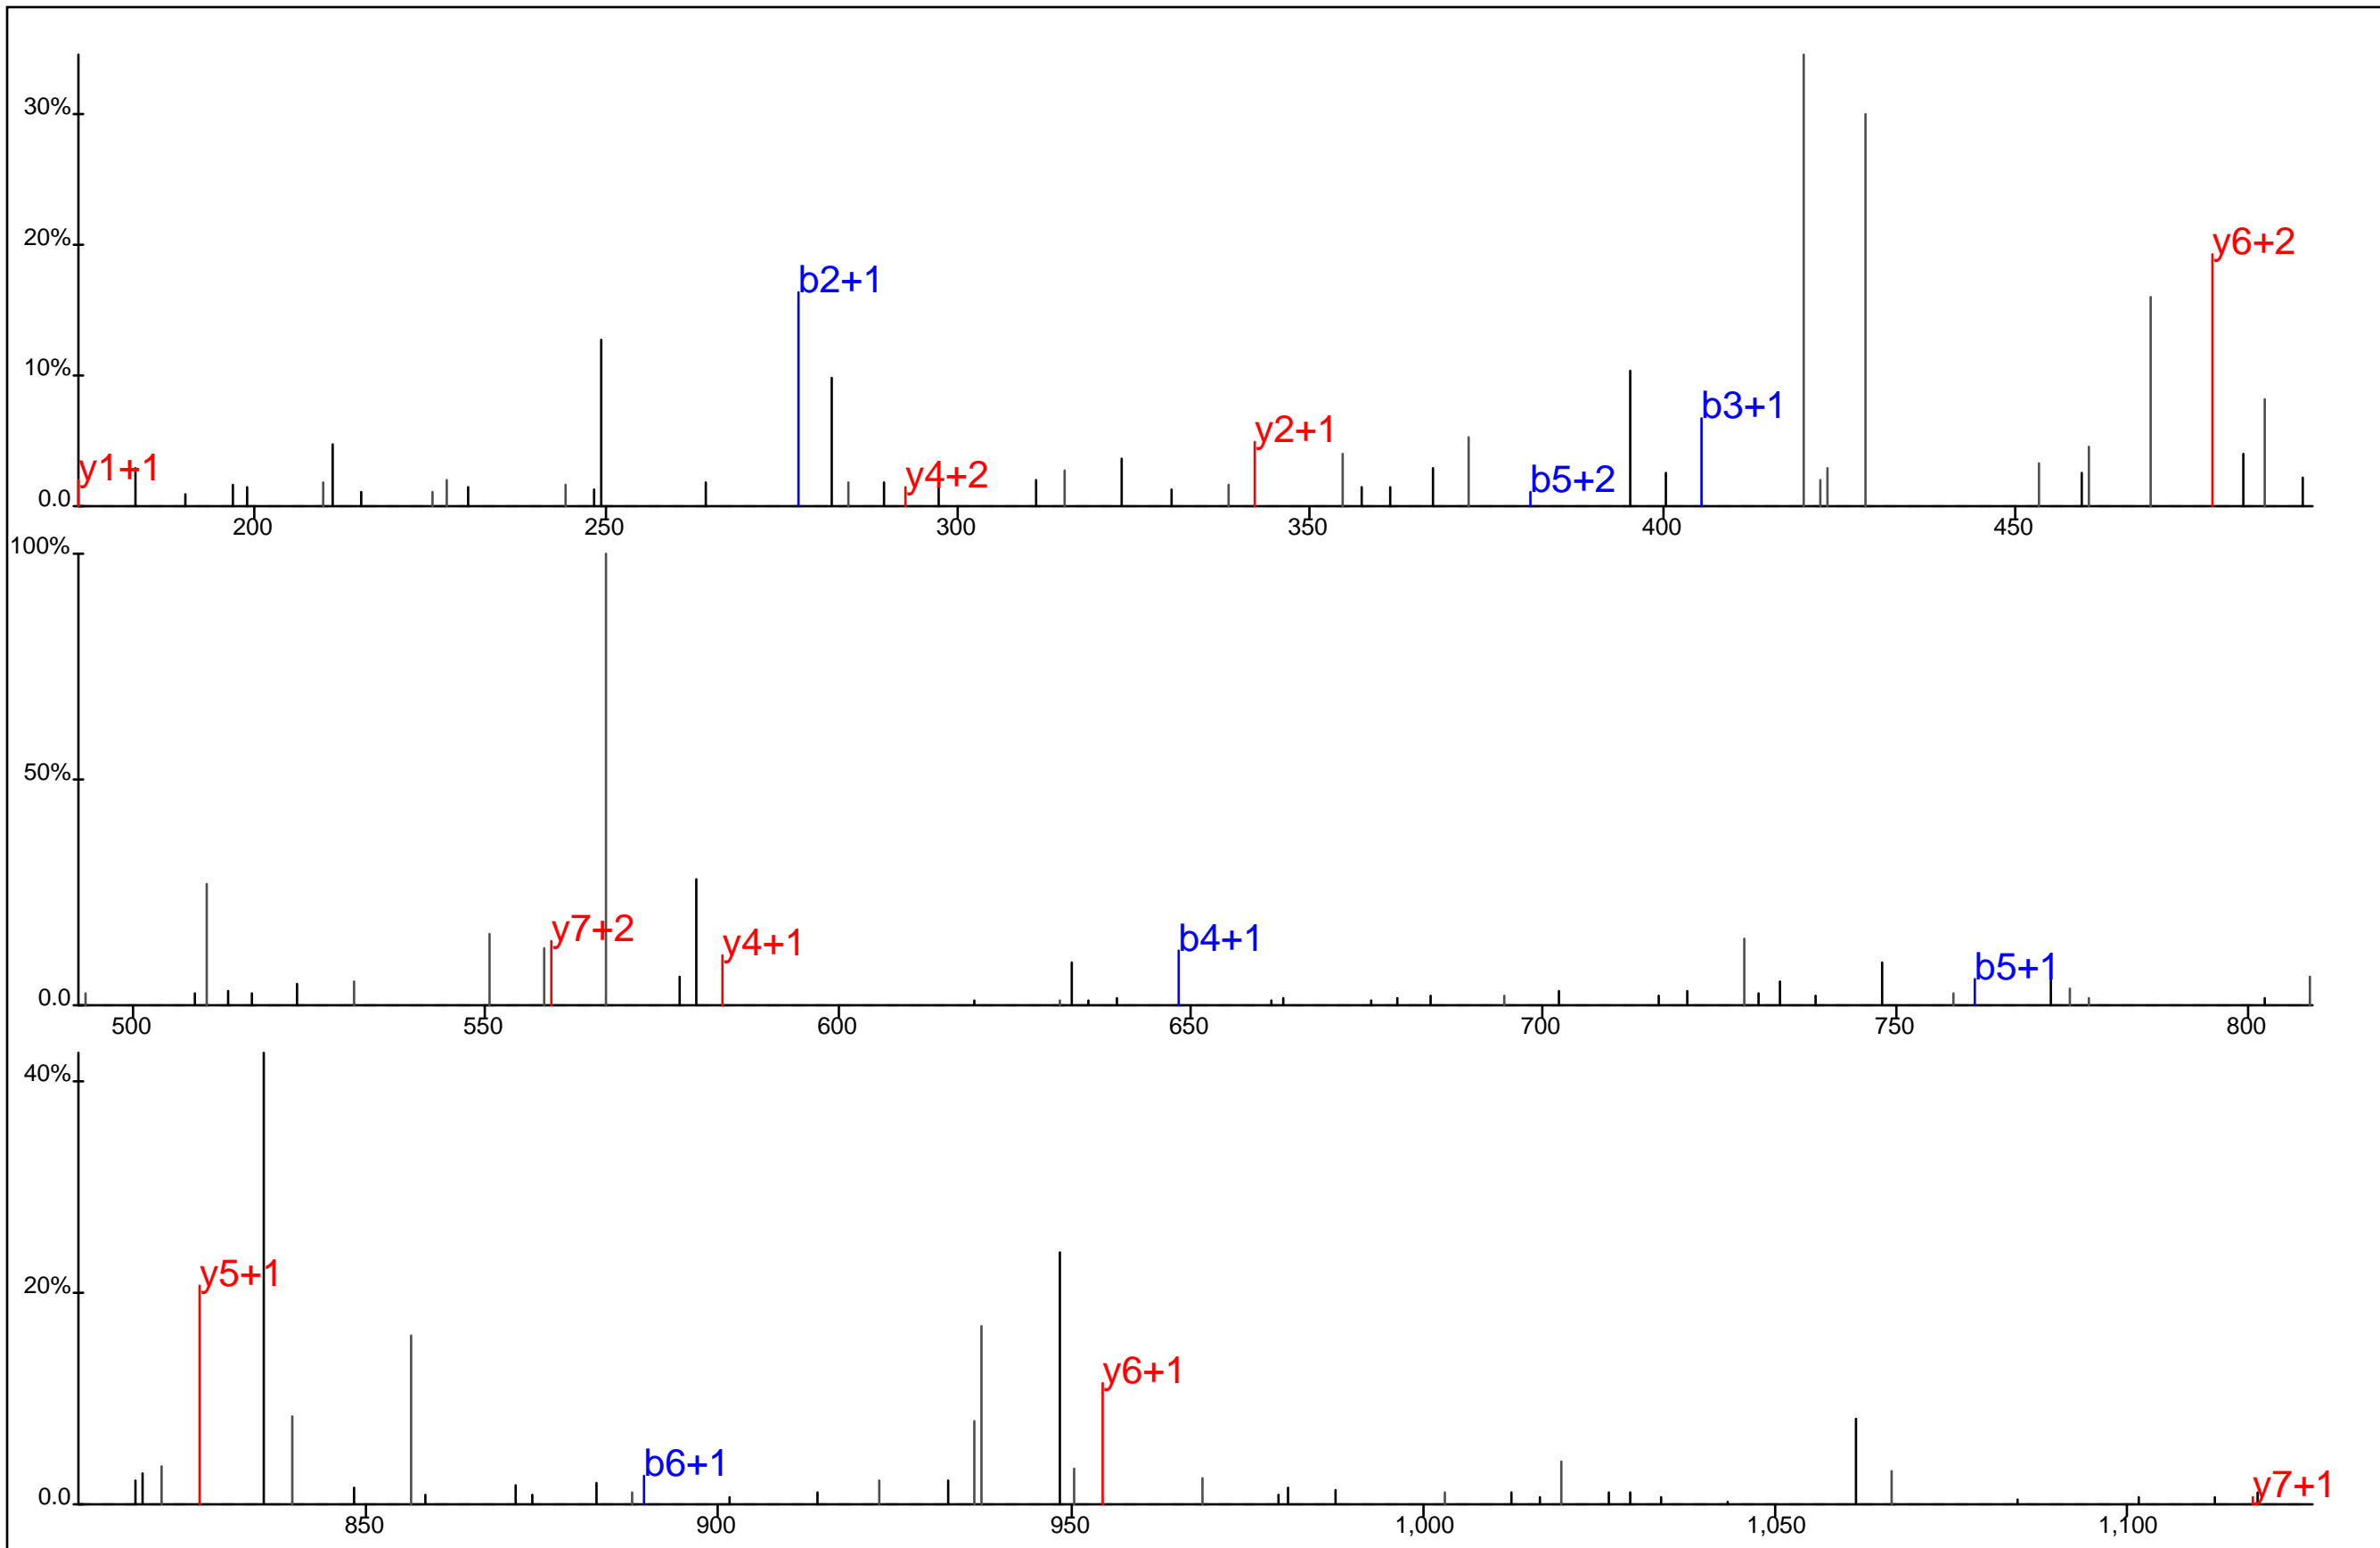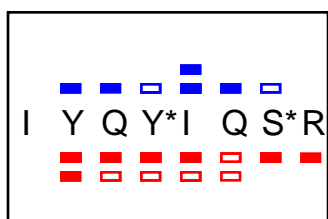

Protein Name: DYRK1B  
 gi Accession: 0  
 Precursor Mass: 615.7512+2  
 Delta Mass: 0.405 ppm  
 XCorr: 24.23

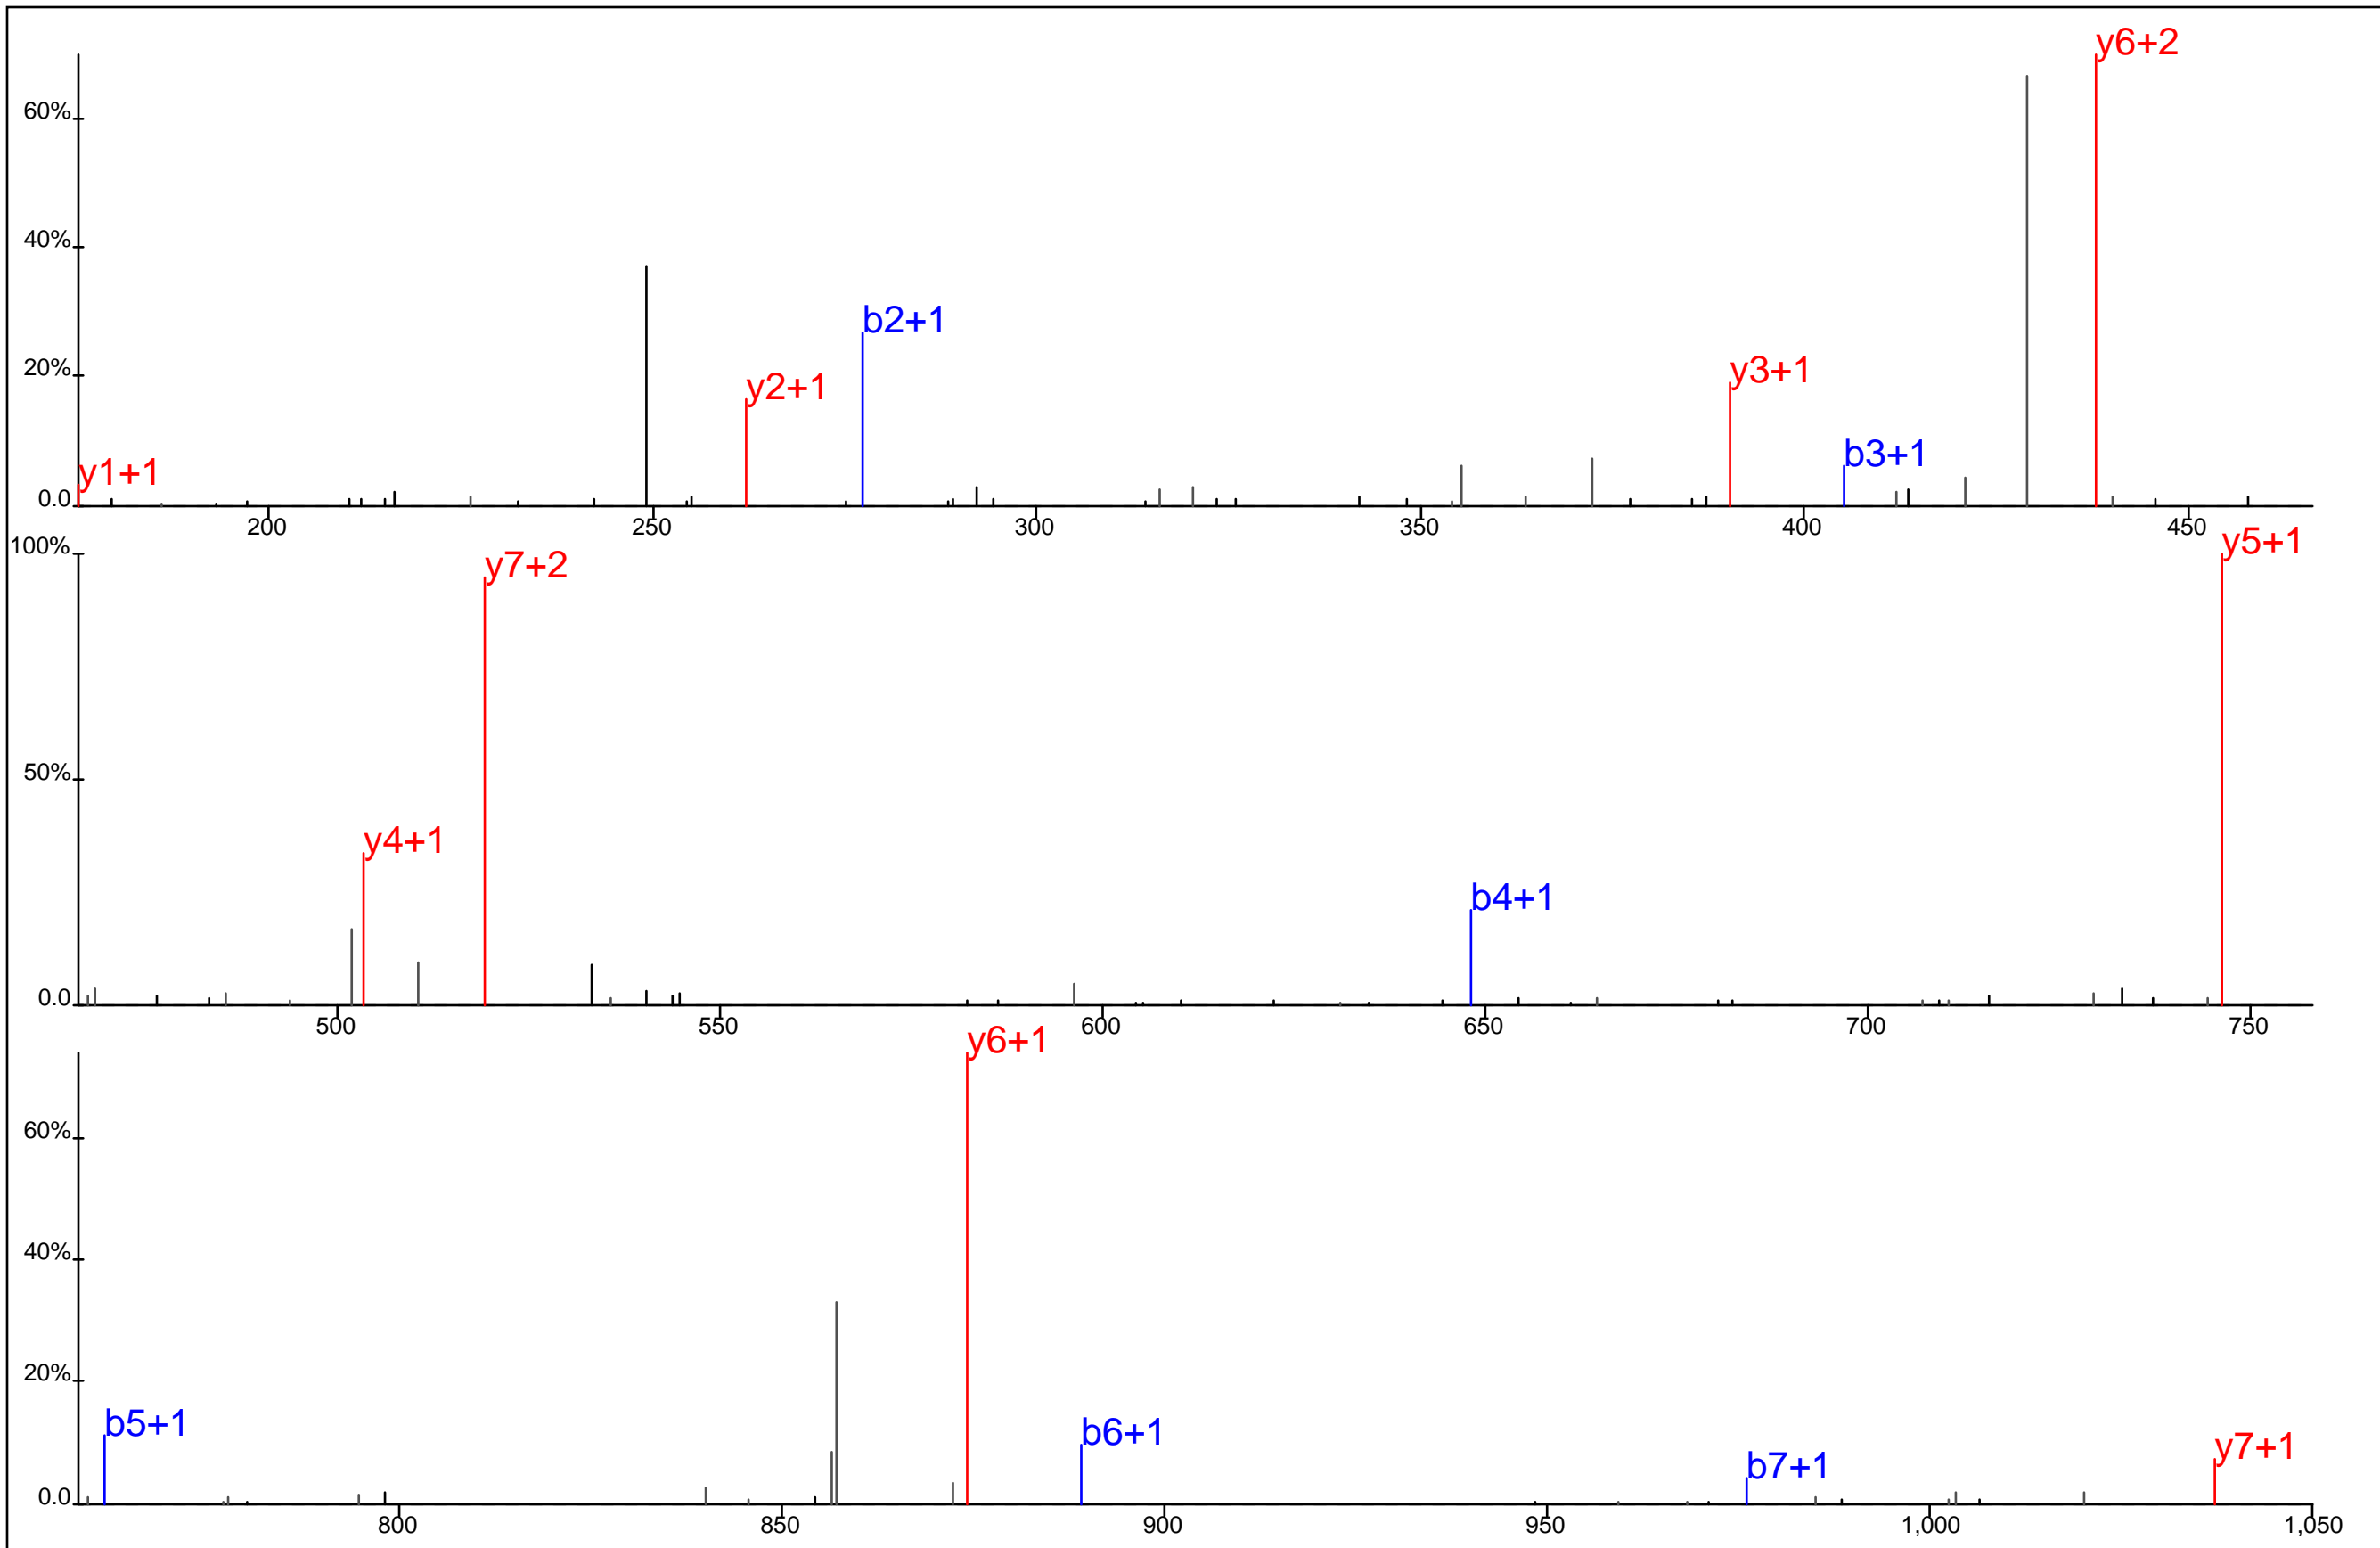


  
**I Y Q Y\*I Q S R**

Protein Name: DYRK1B  
 gi Accession: 0  
 Precursor Mass: 575.7687+2  
 Delta Mass: 0.744 ppm  
 XCorr: 52.15

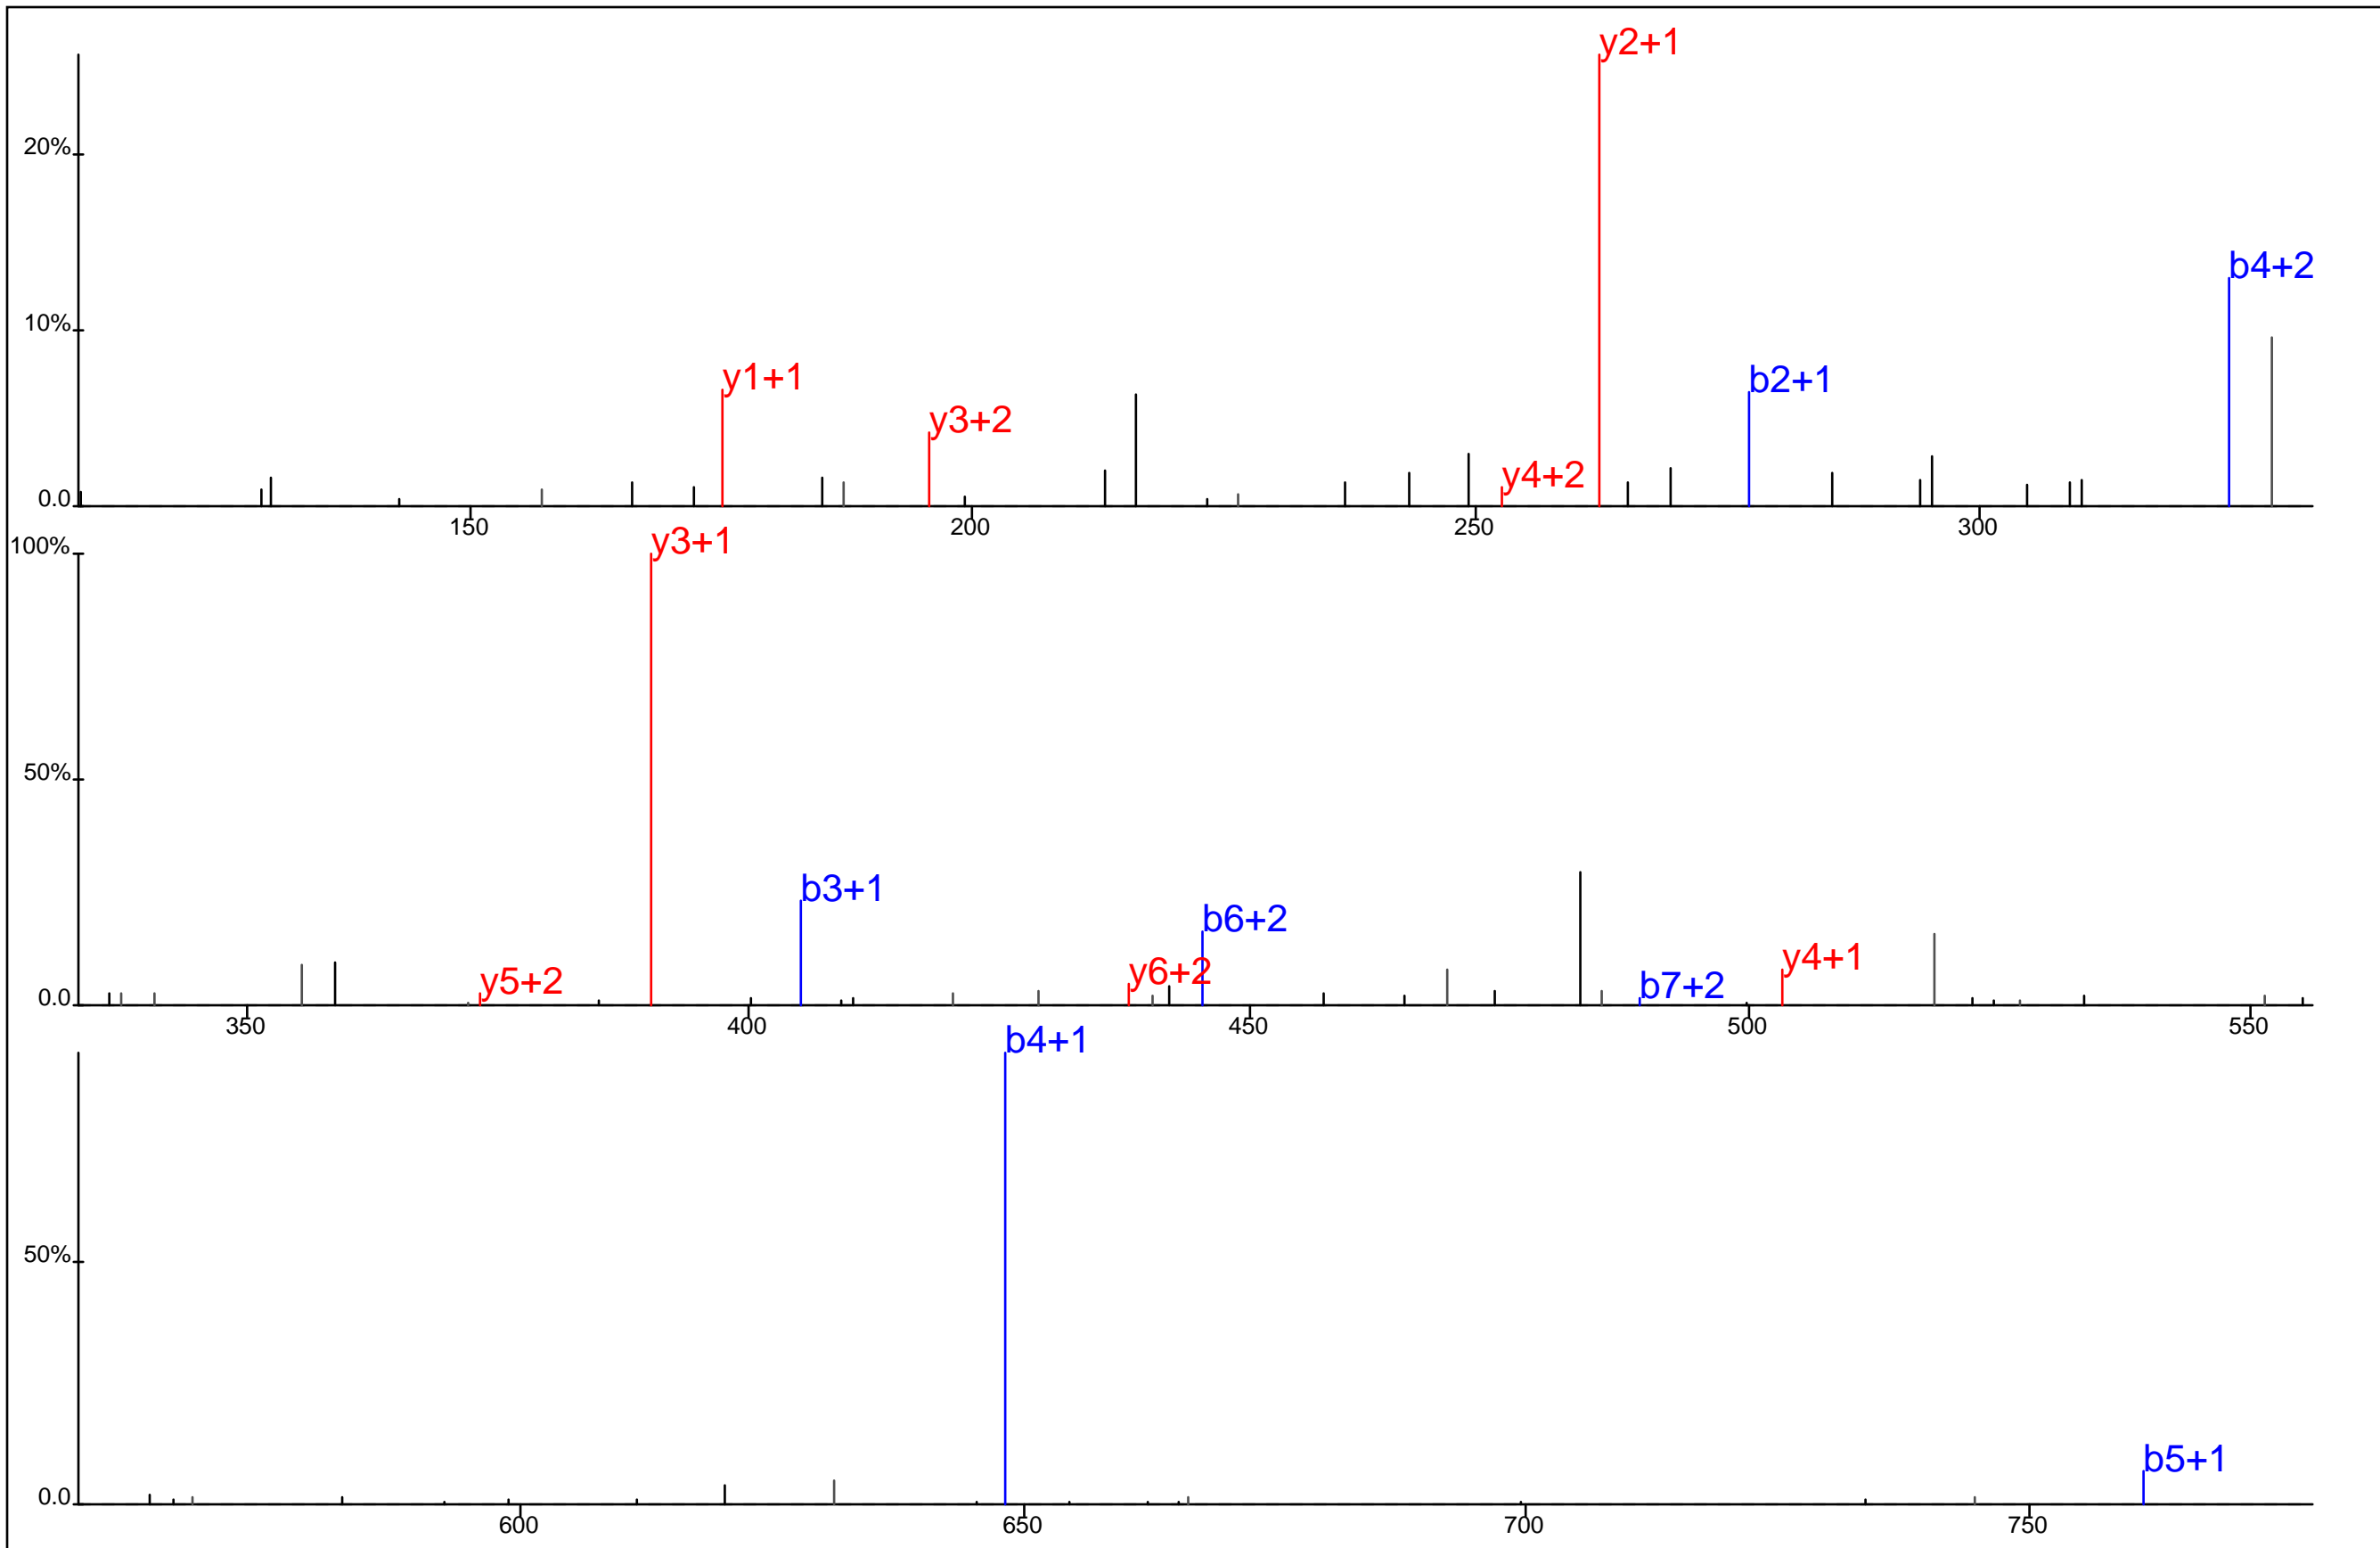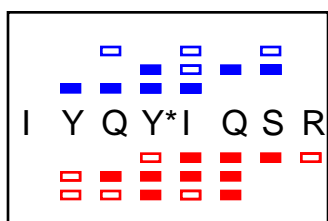

Protein Name: DYRK1B  
 gi Accession: 0  
 Precursor Mass: 384.1819+3  
 Delta Mass: 1.635 ppm  
 XCorr: 29.77

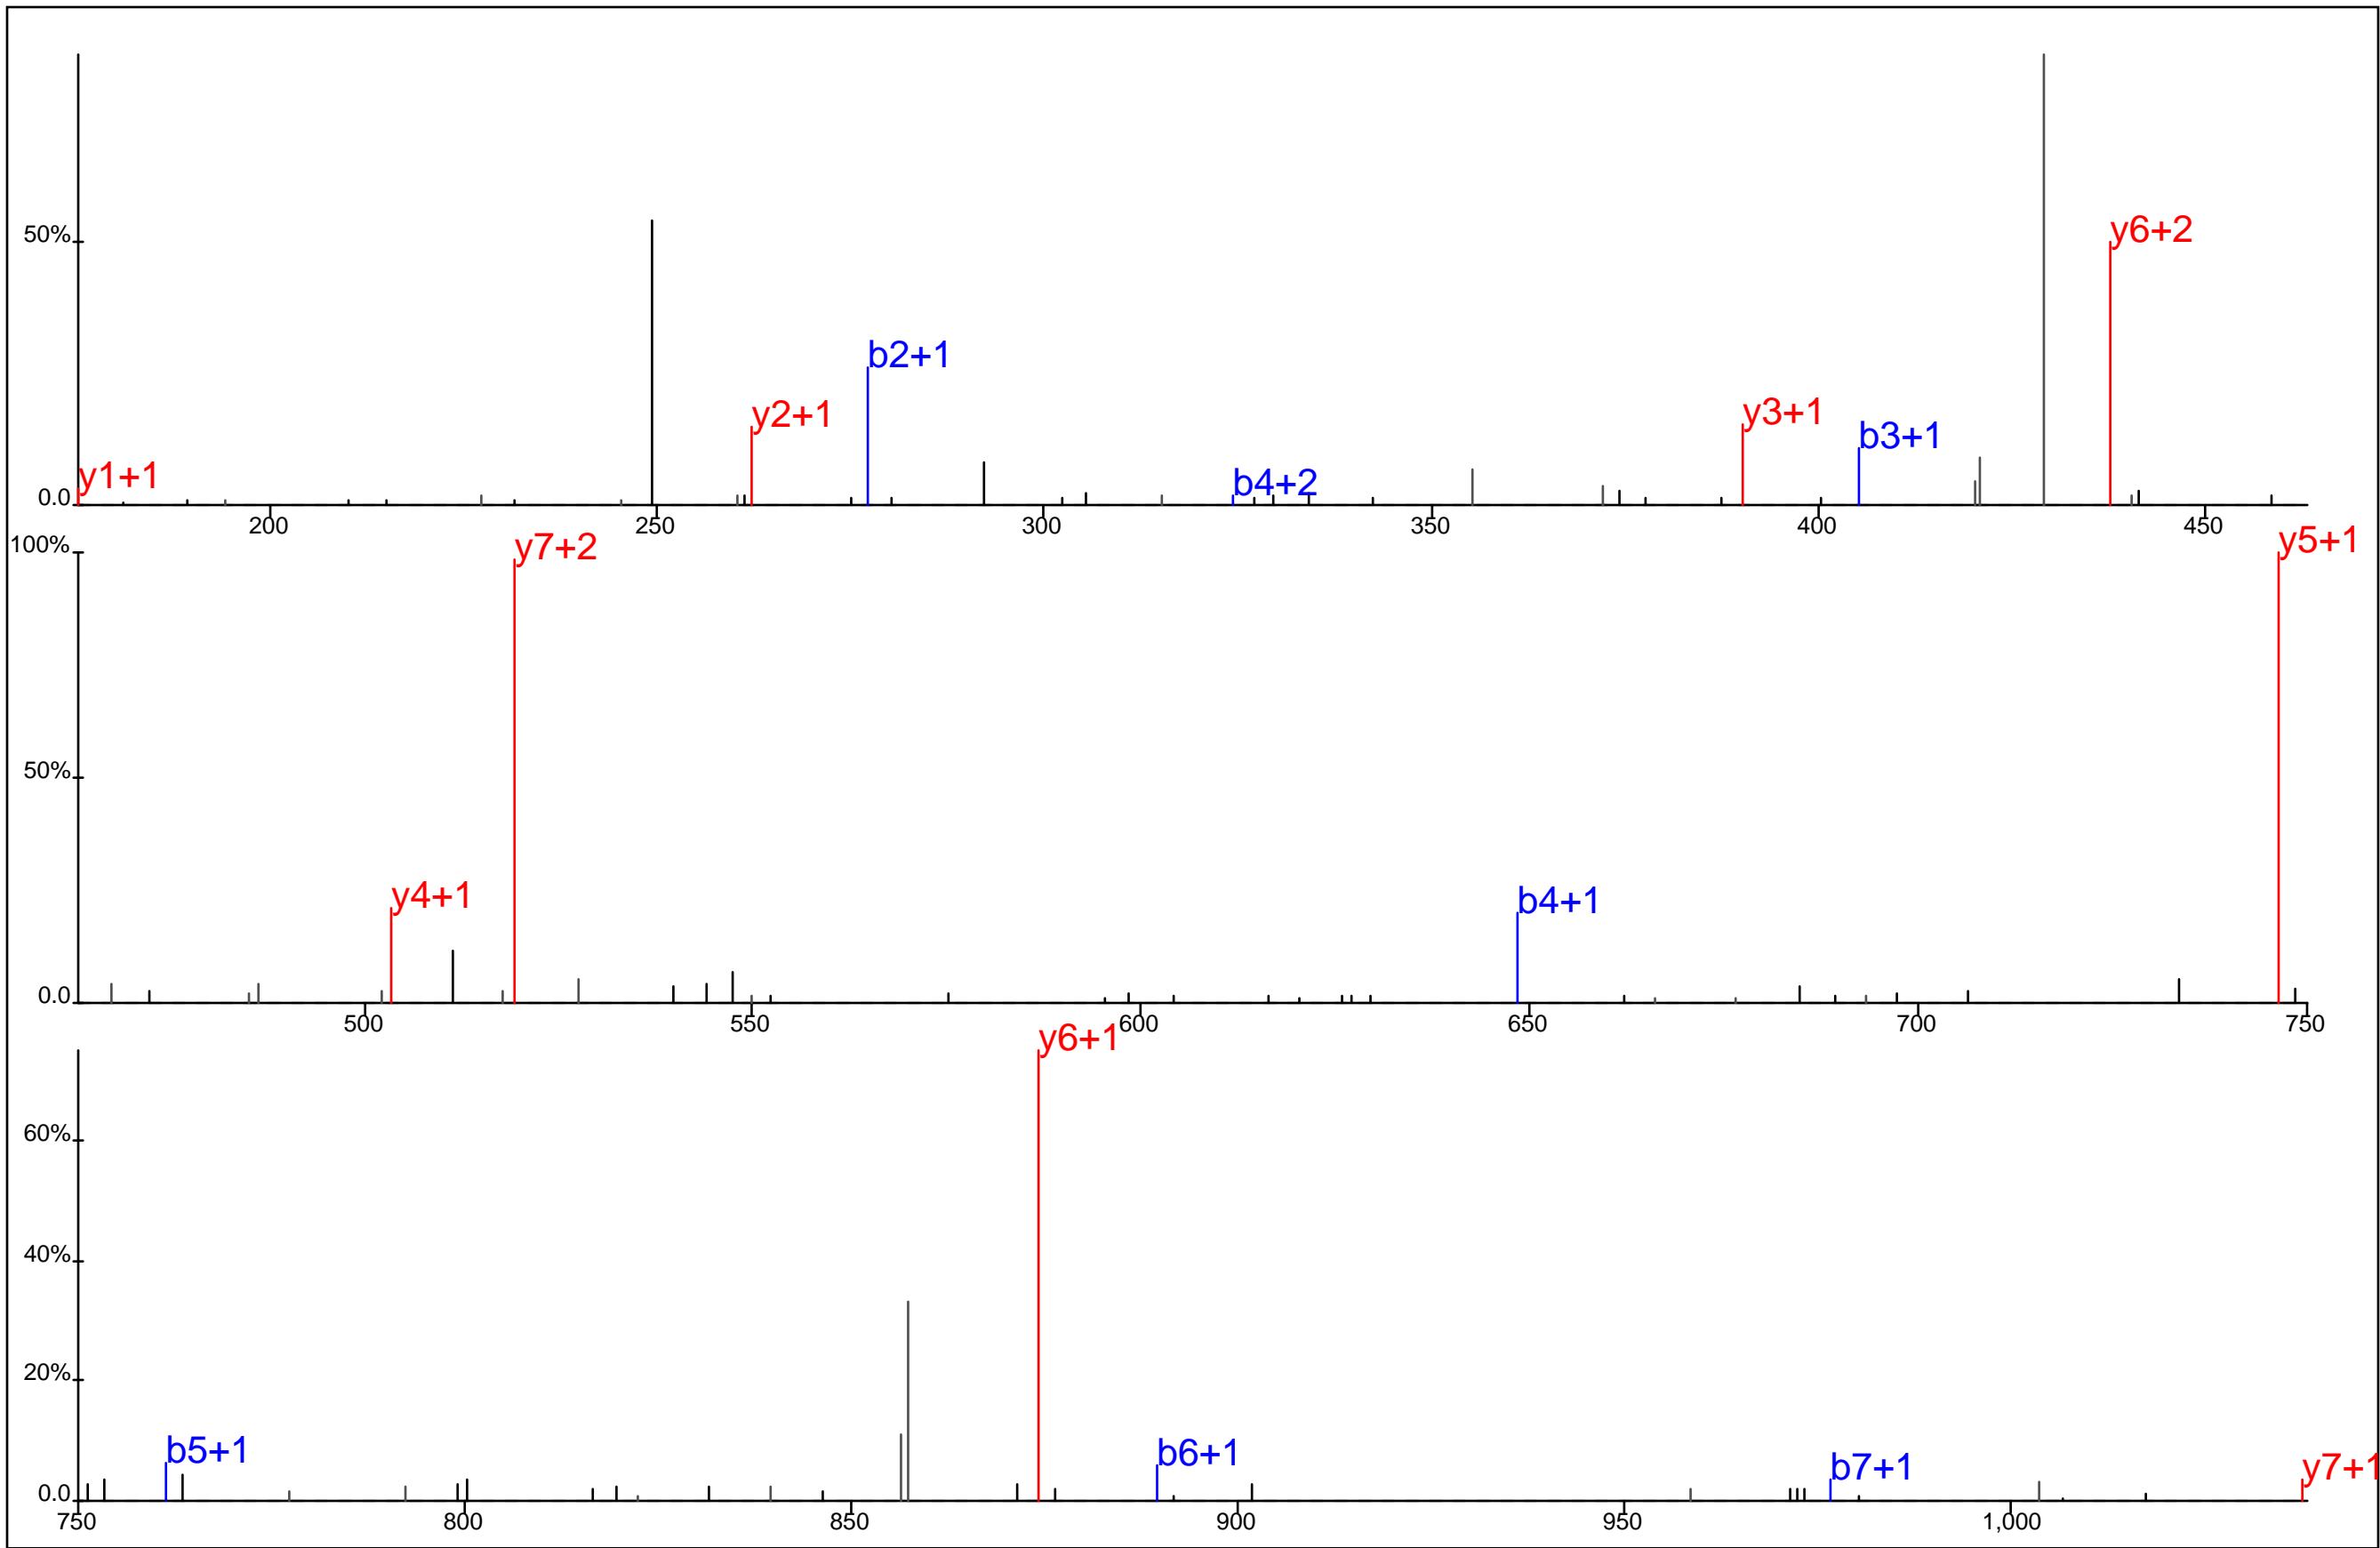

I Y Q Y\*I Q S R

Protein Name: DYRK1B  
 gi Accession: 0  
 Precursor Mass: 575.7692+2  
 Delta Mass: 1.698 ppm  
 XCorr: 51.72

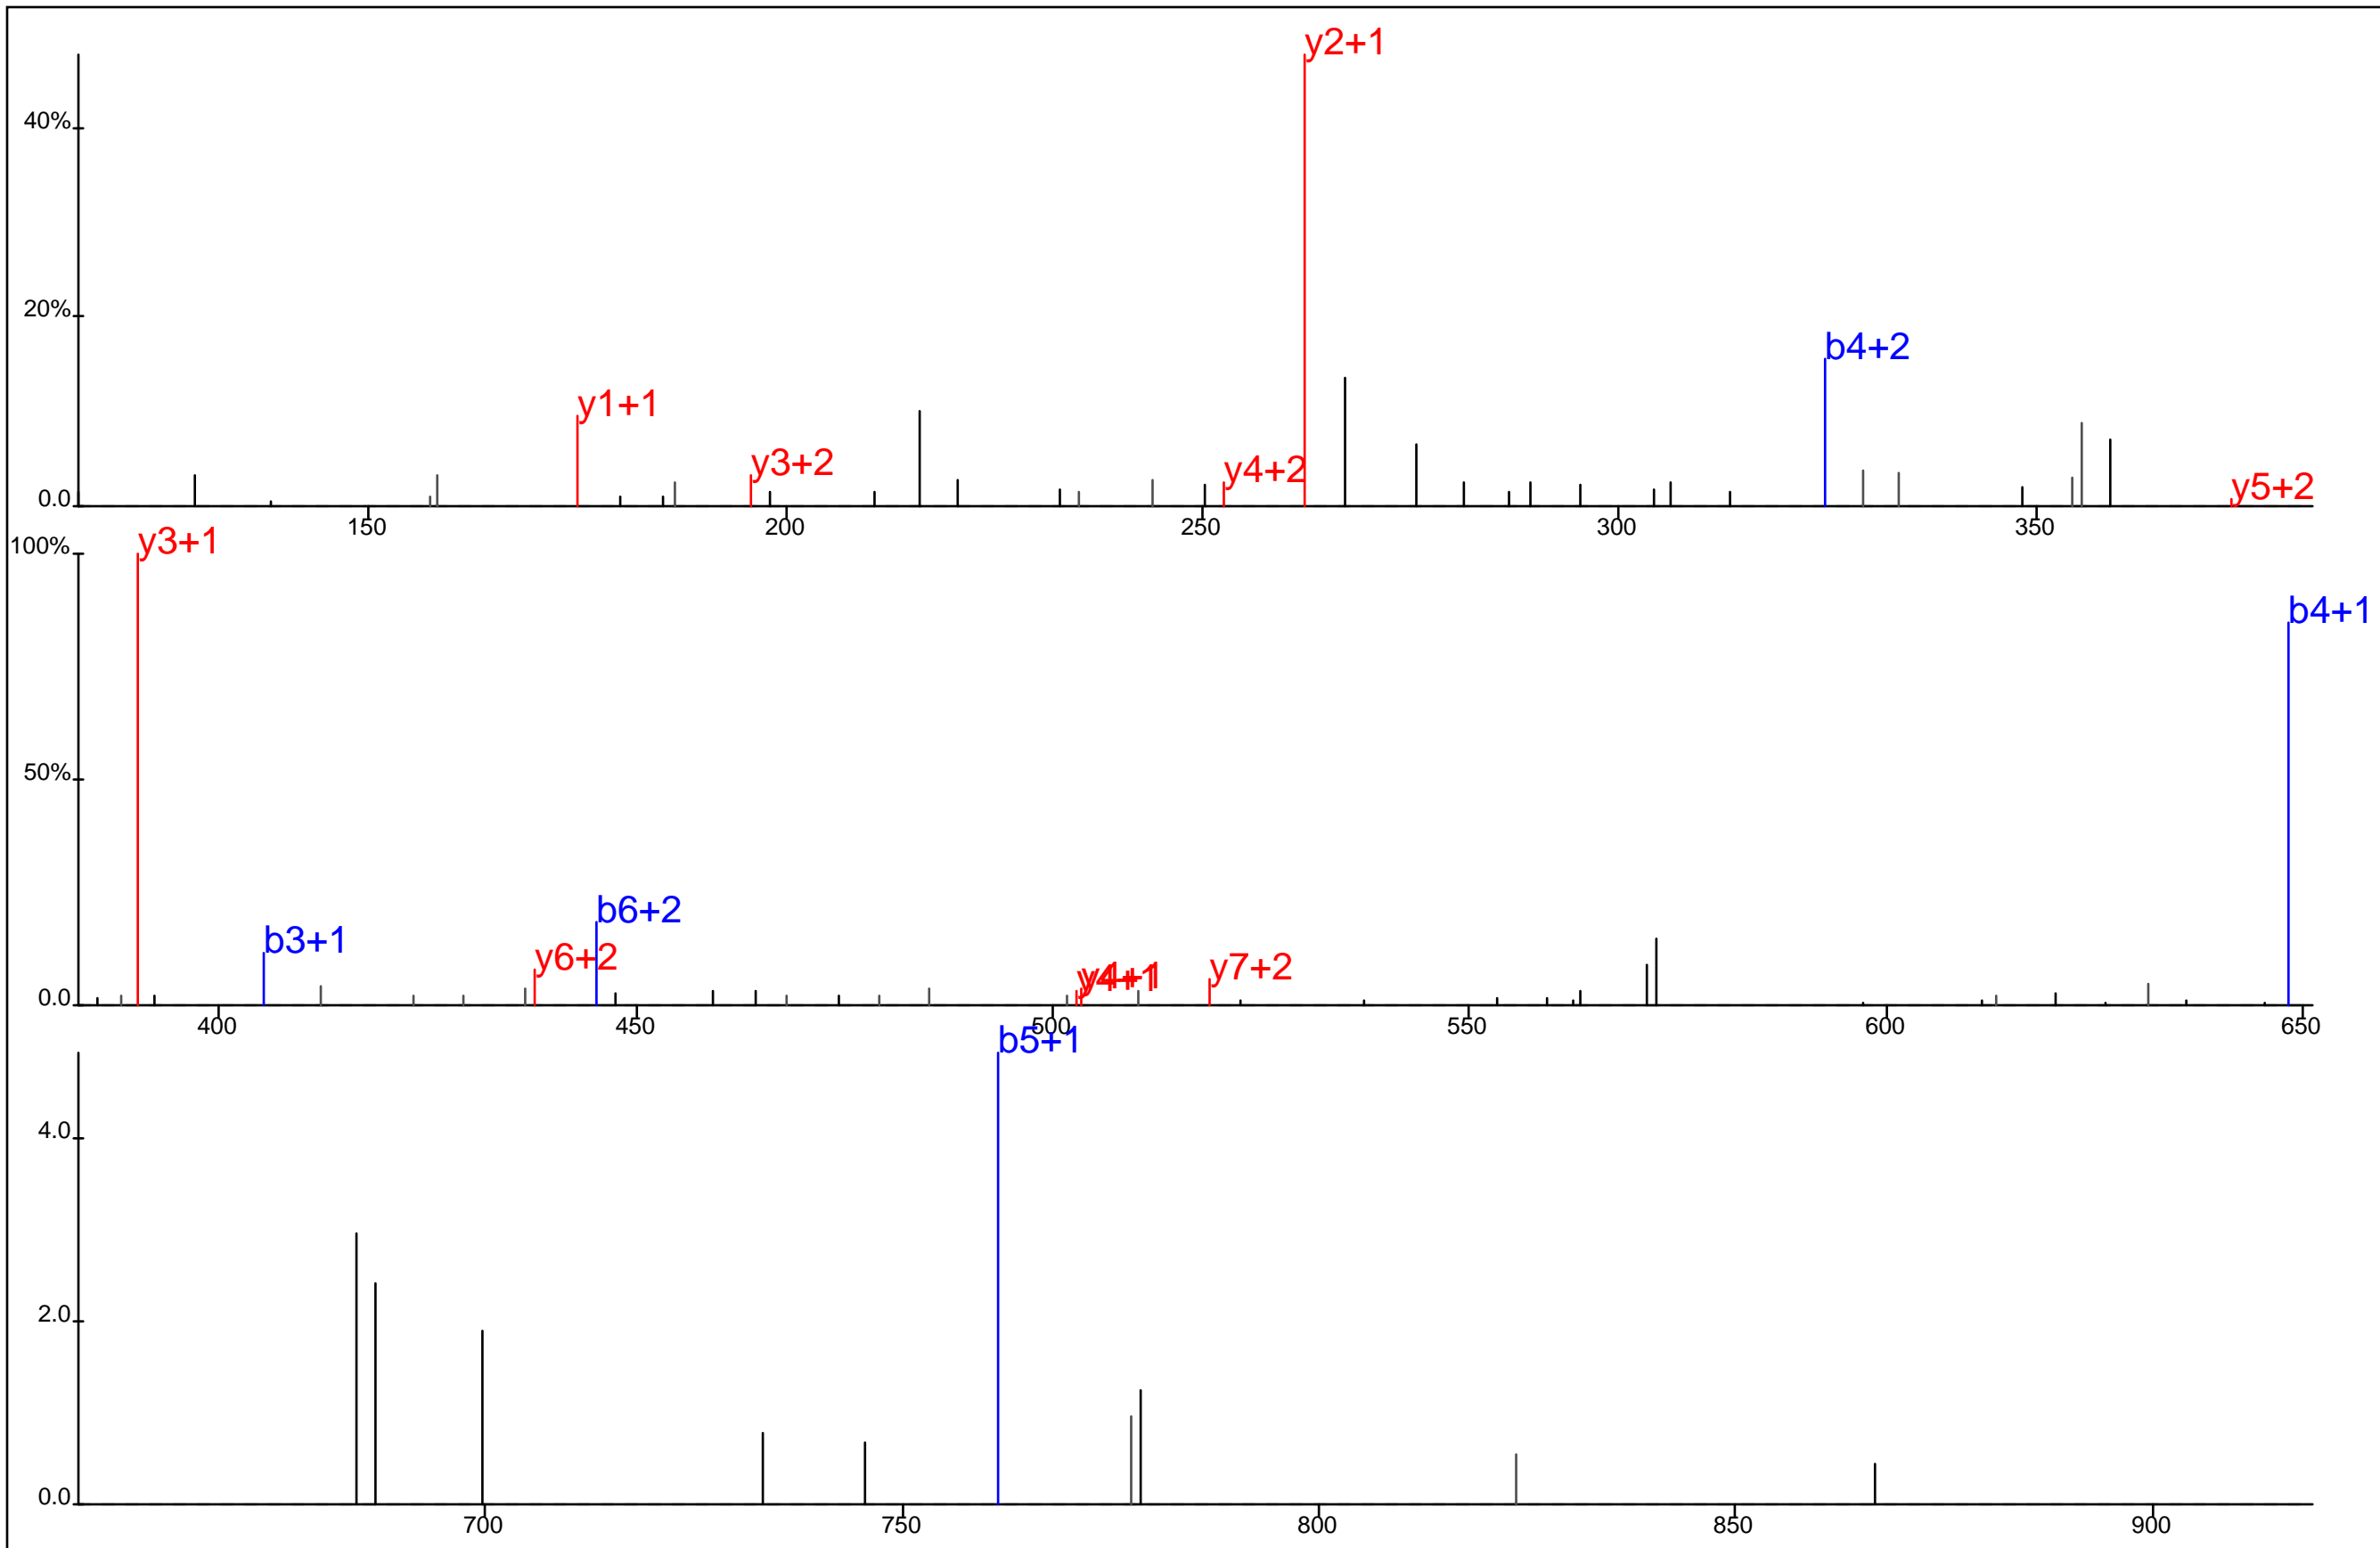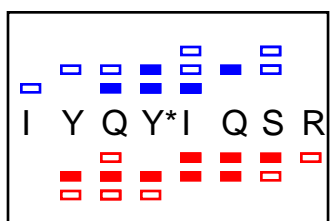

Protein Name: DYRK1B  
 gi Accession: 0  
 Precursor Mass: 384.1819+3  
 Delta Mass: 1.713 ppm  
 XCorr: 23.3

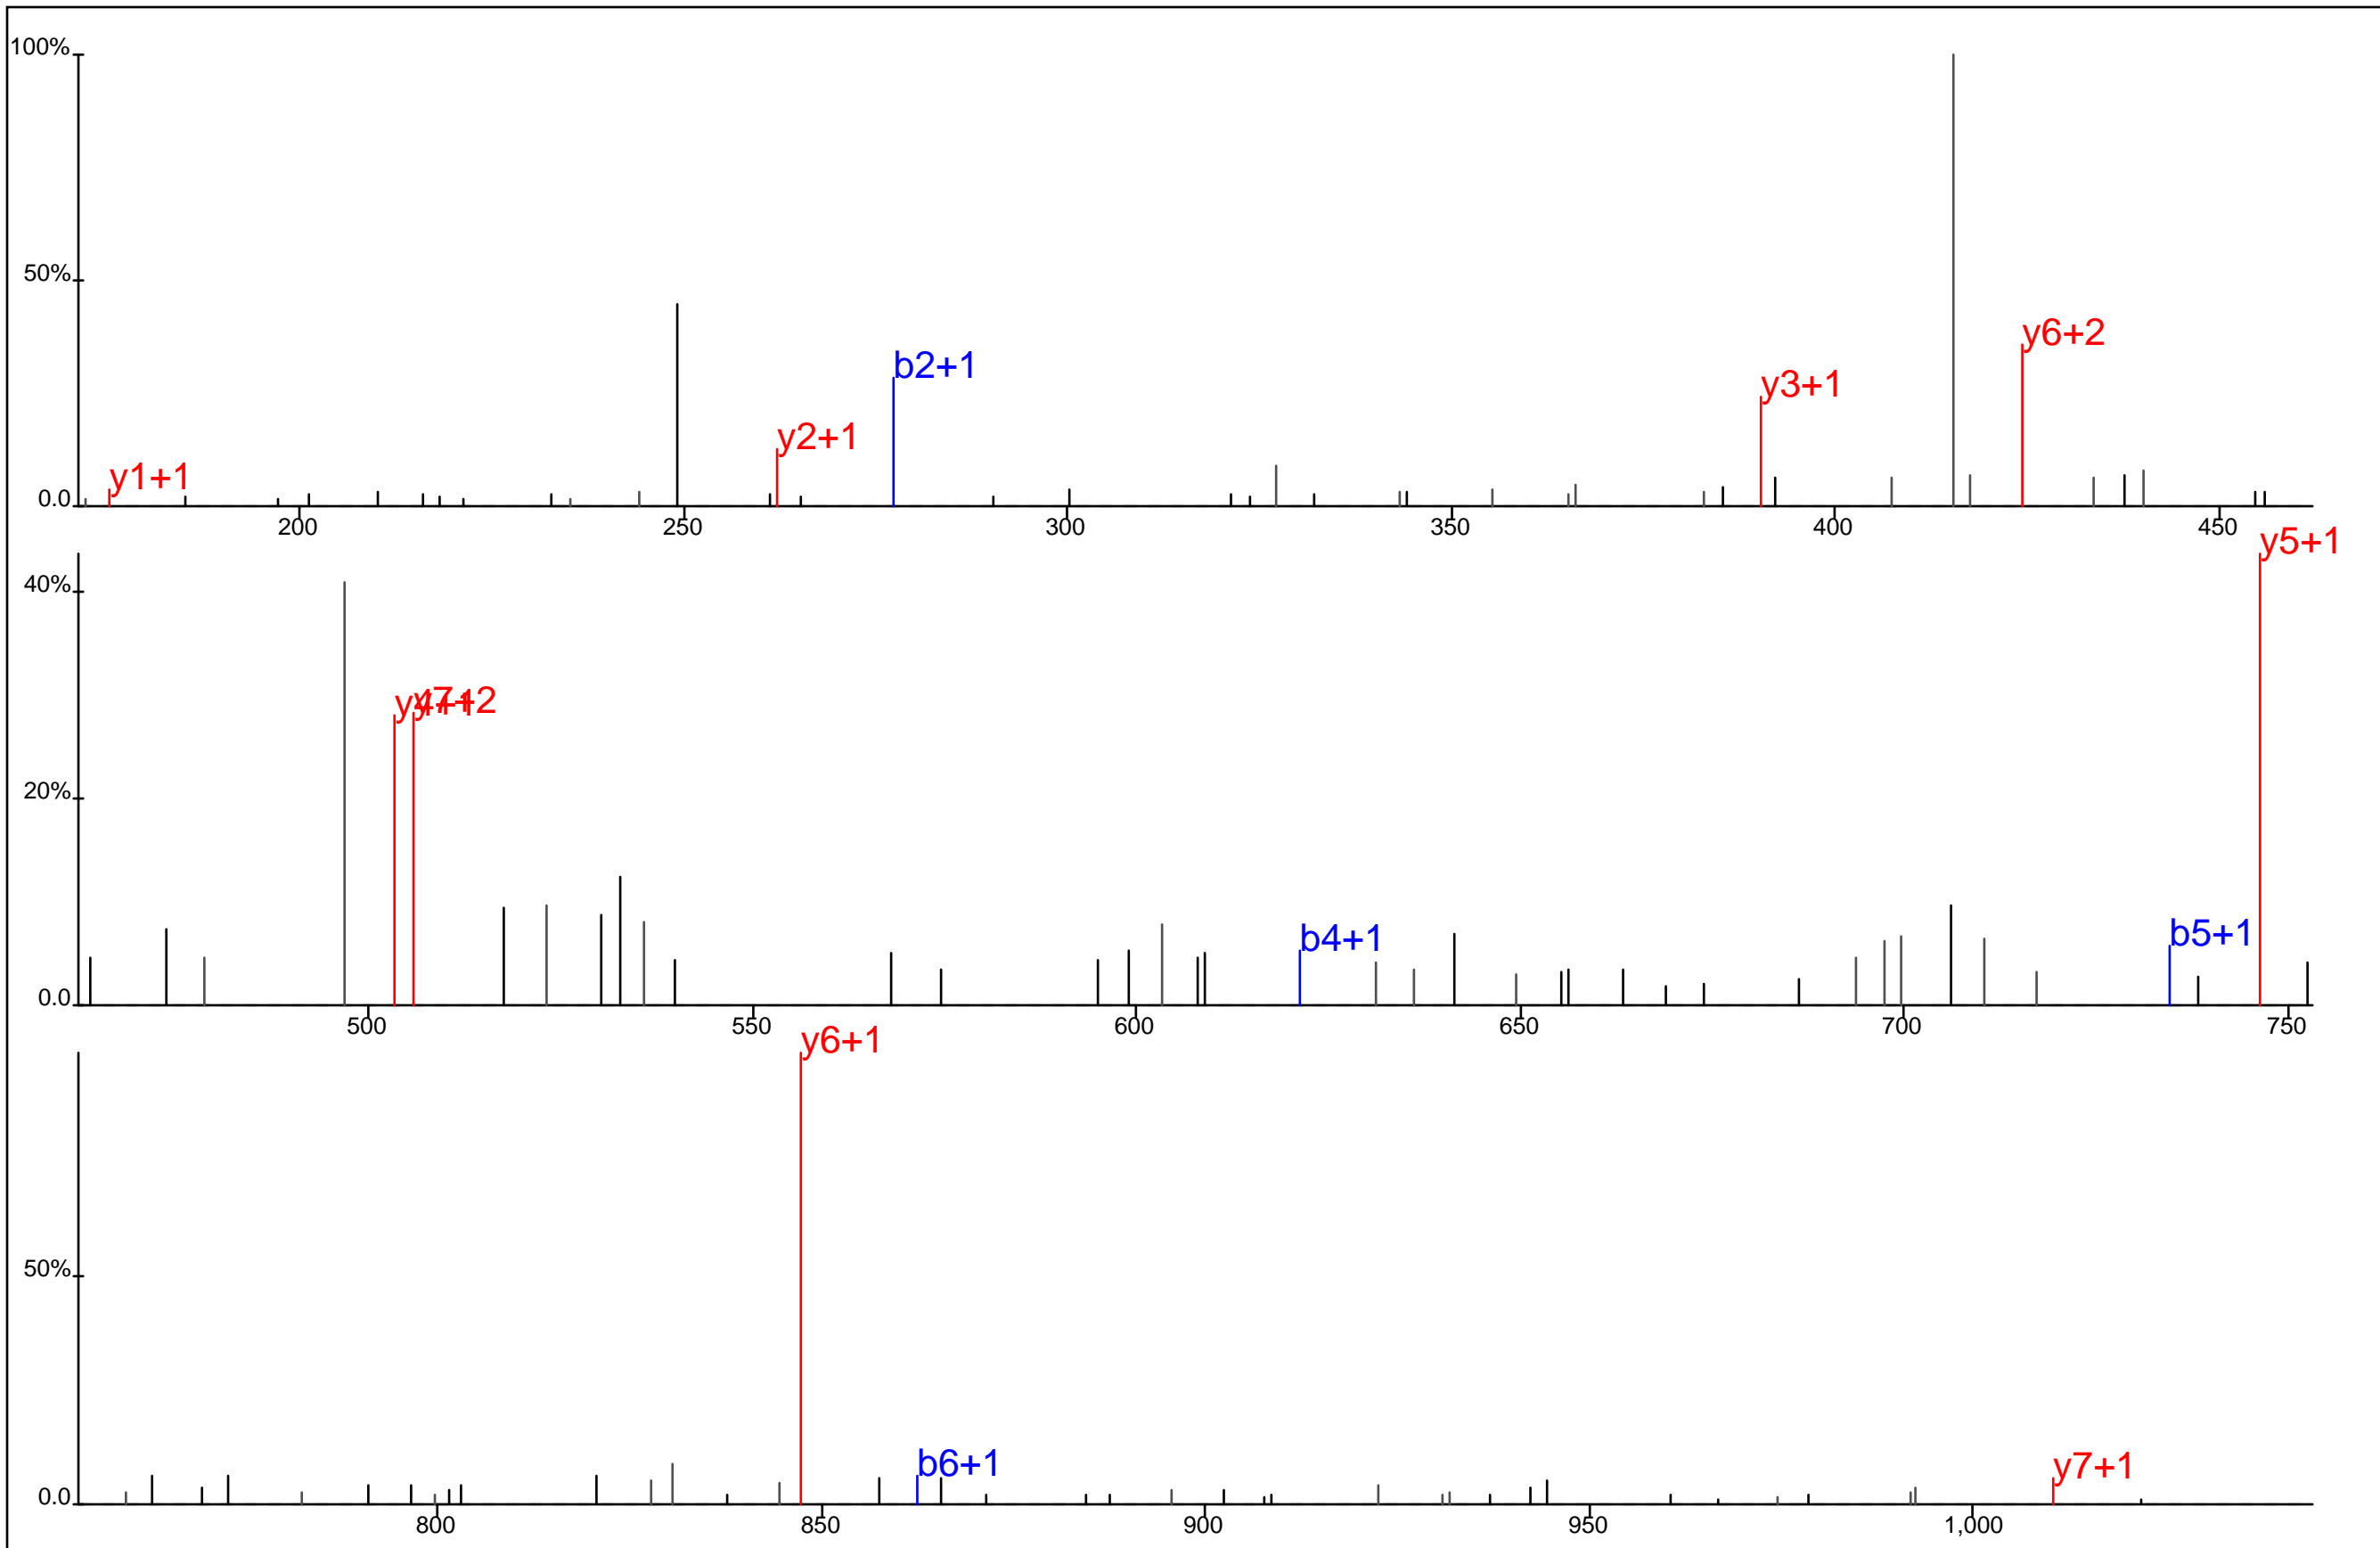

■ ▢ ▢ ▢ ■ ▢  
 L Y T Y\*I Q S R  
▢ ▢ ▢ ▢ ▢ ▢

Protein Name: DYRK3  
 gi Accession: 0  
 Precursor Mass: 562.2634+2  
 Delta Mass: 1.011 ppm  
 XCorr: 47.09

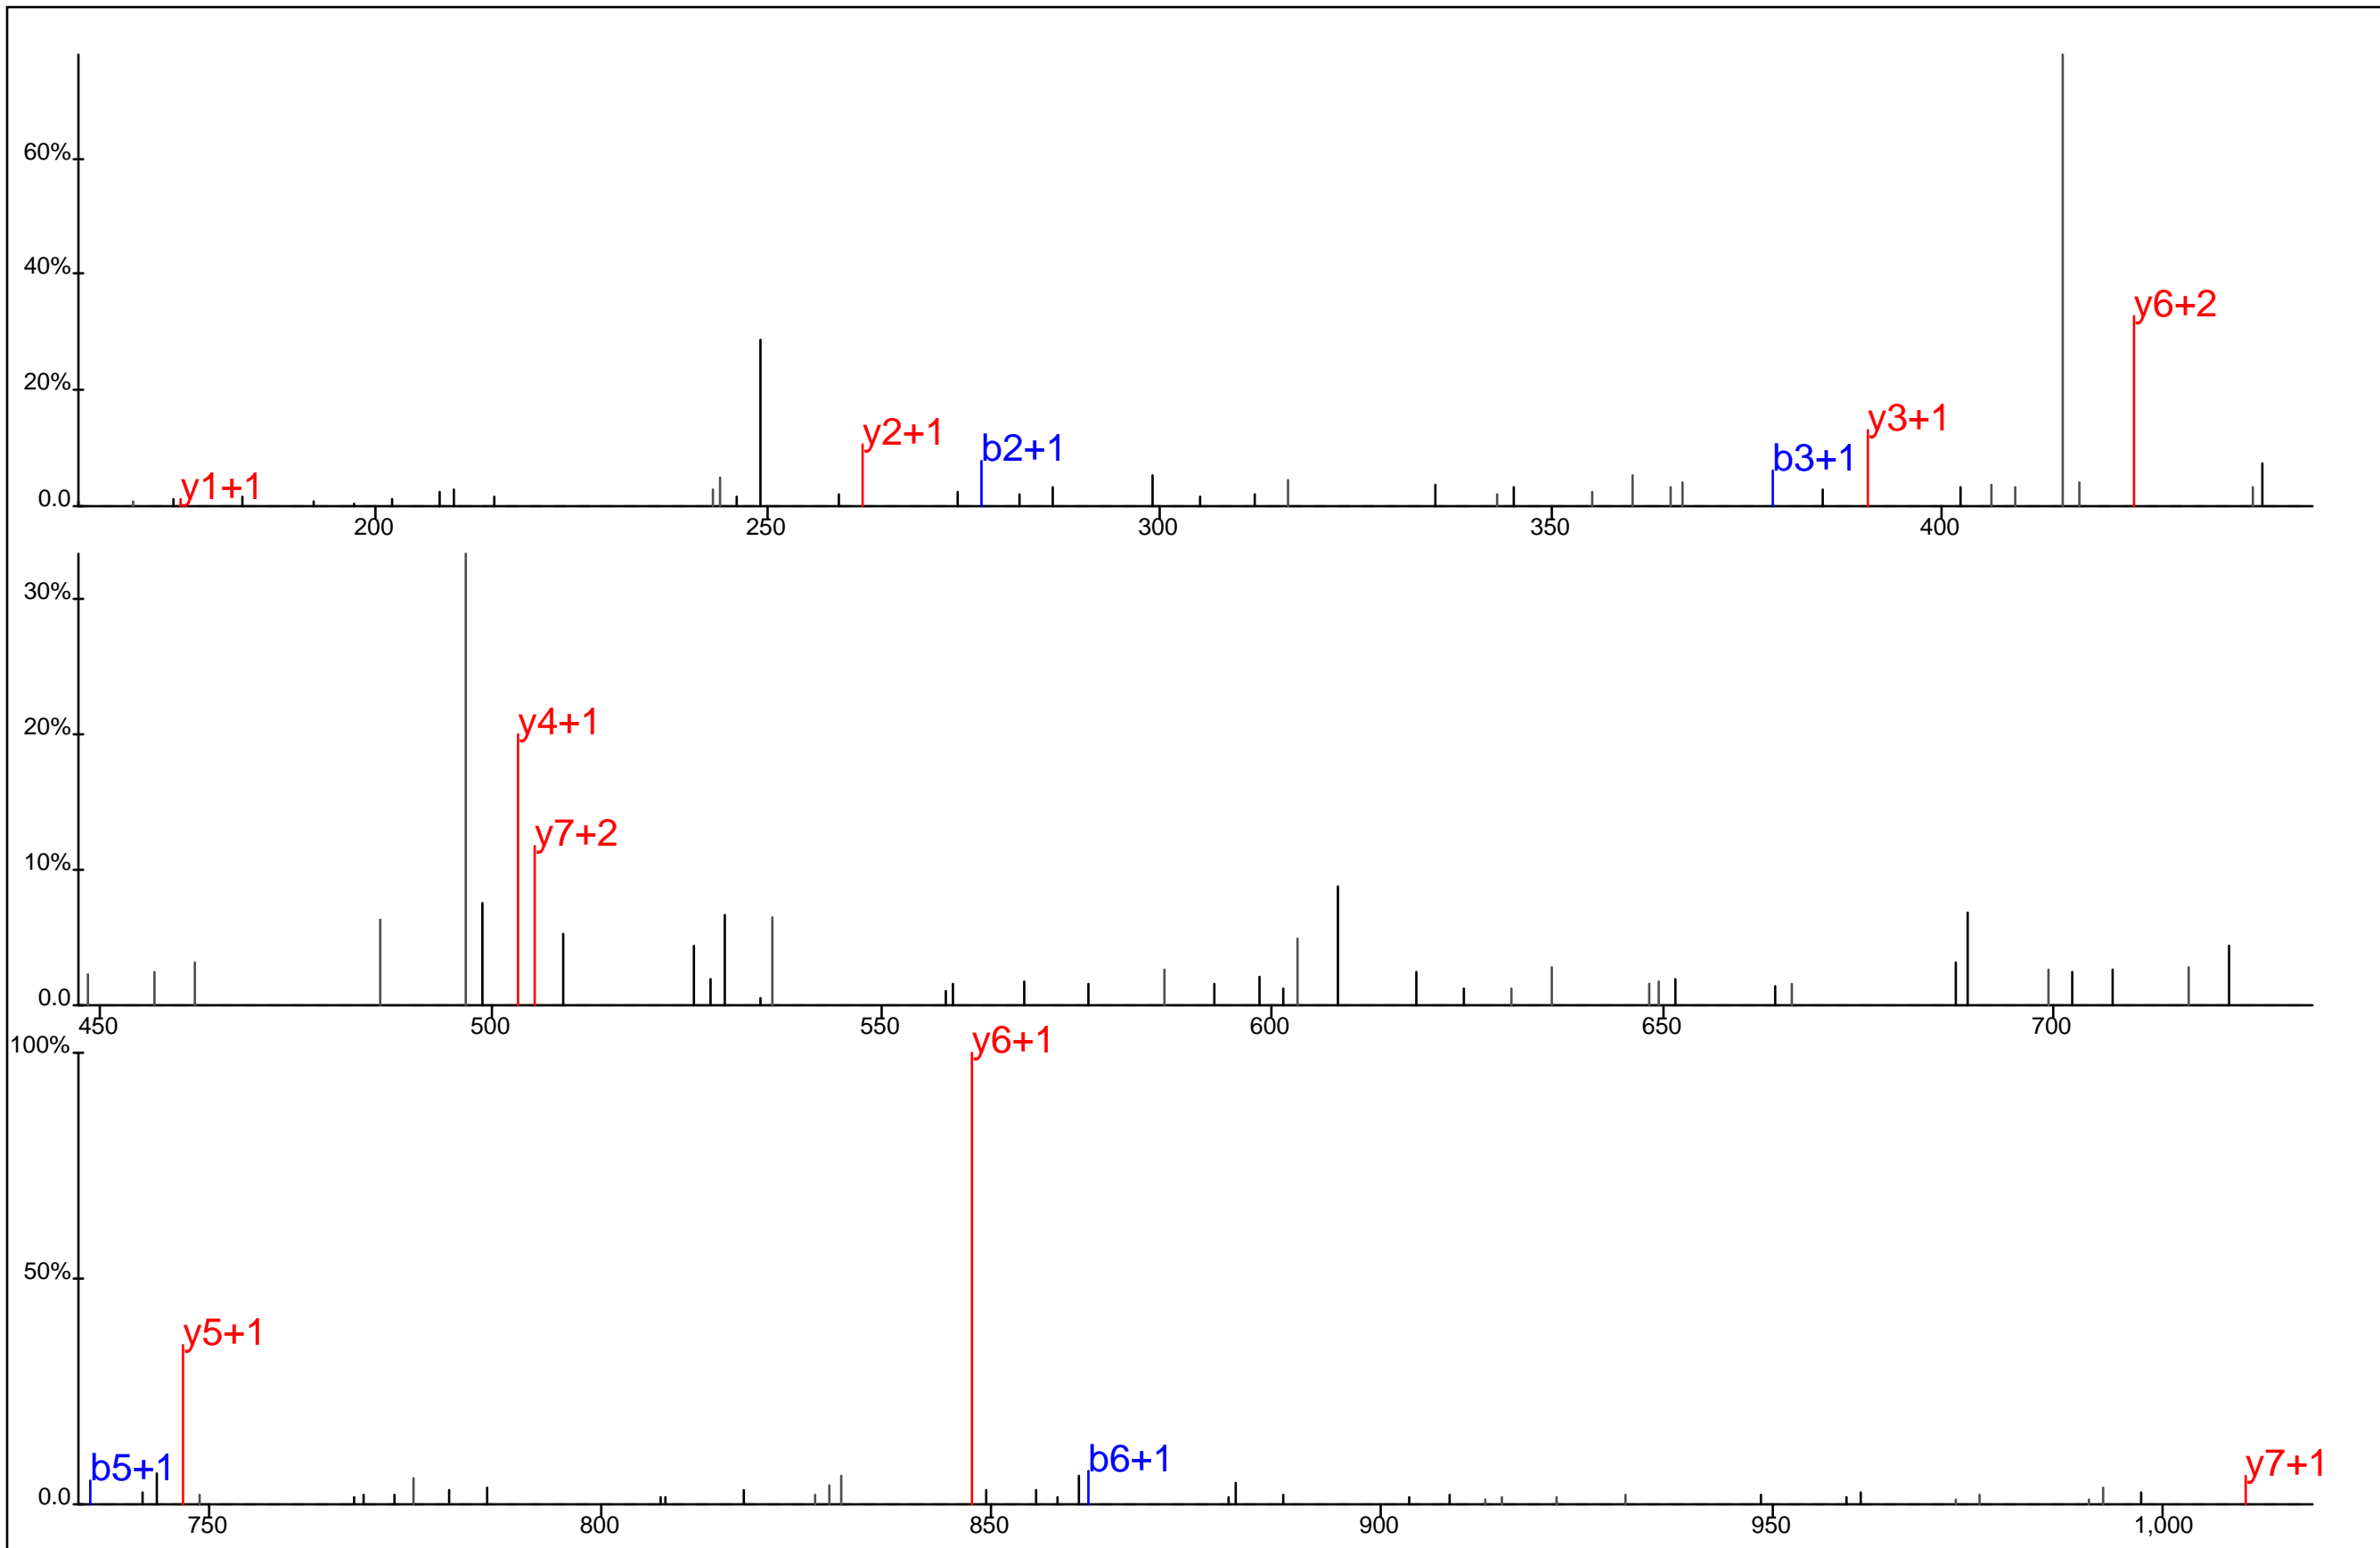

Protein Name: DYRK3  
 gi Accession: 0  
 Precursor Mass: 562.2625+2  
 Delta Mass: 0.511 ppm  
 XCorr: 40.22



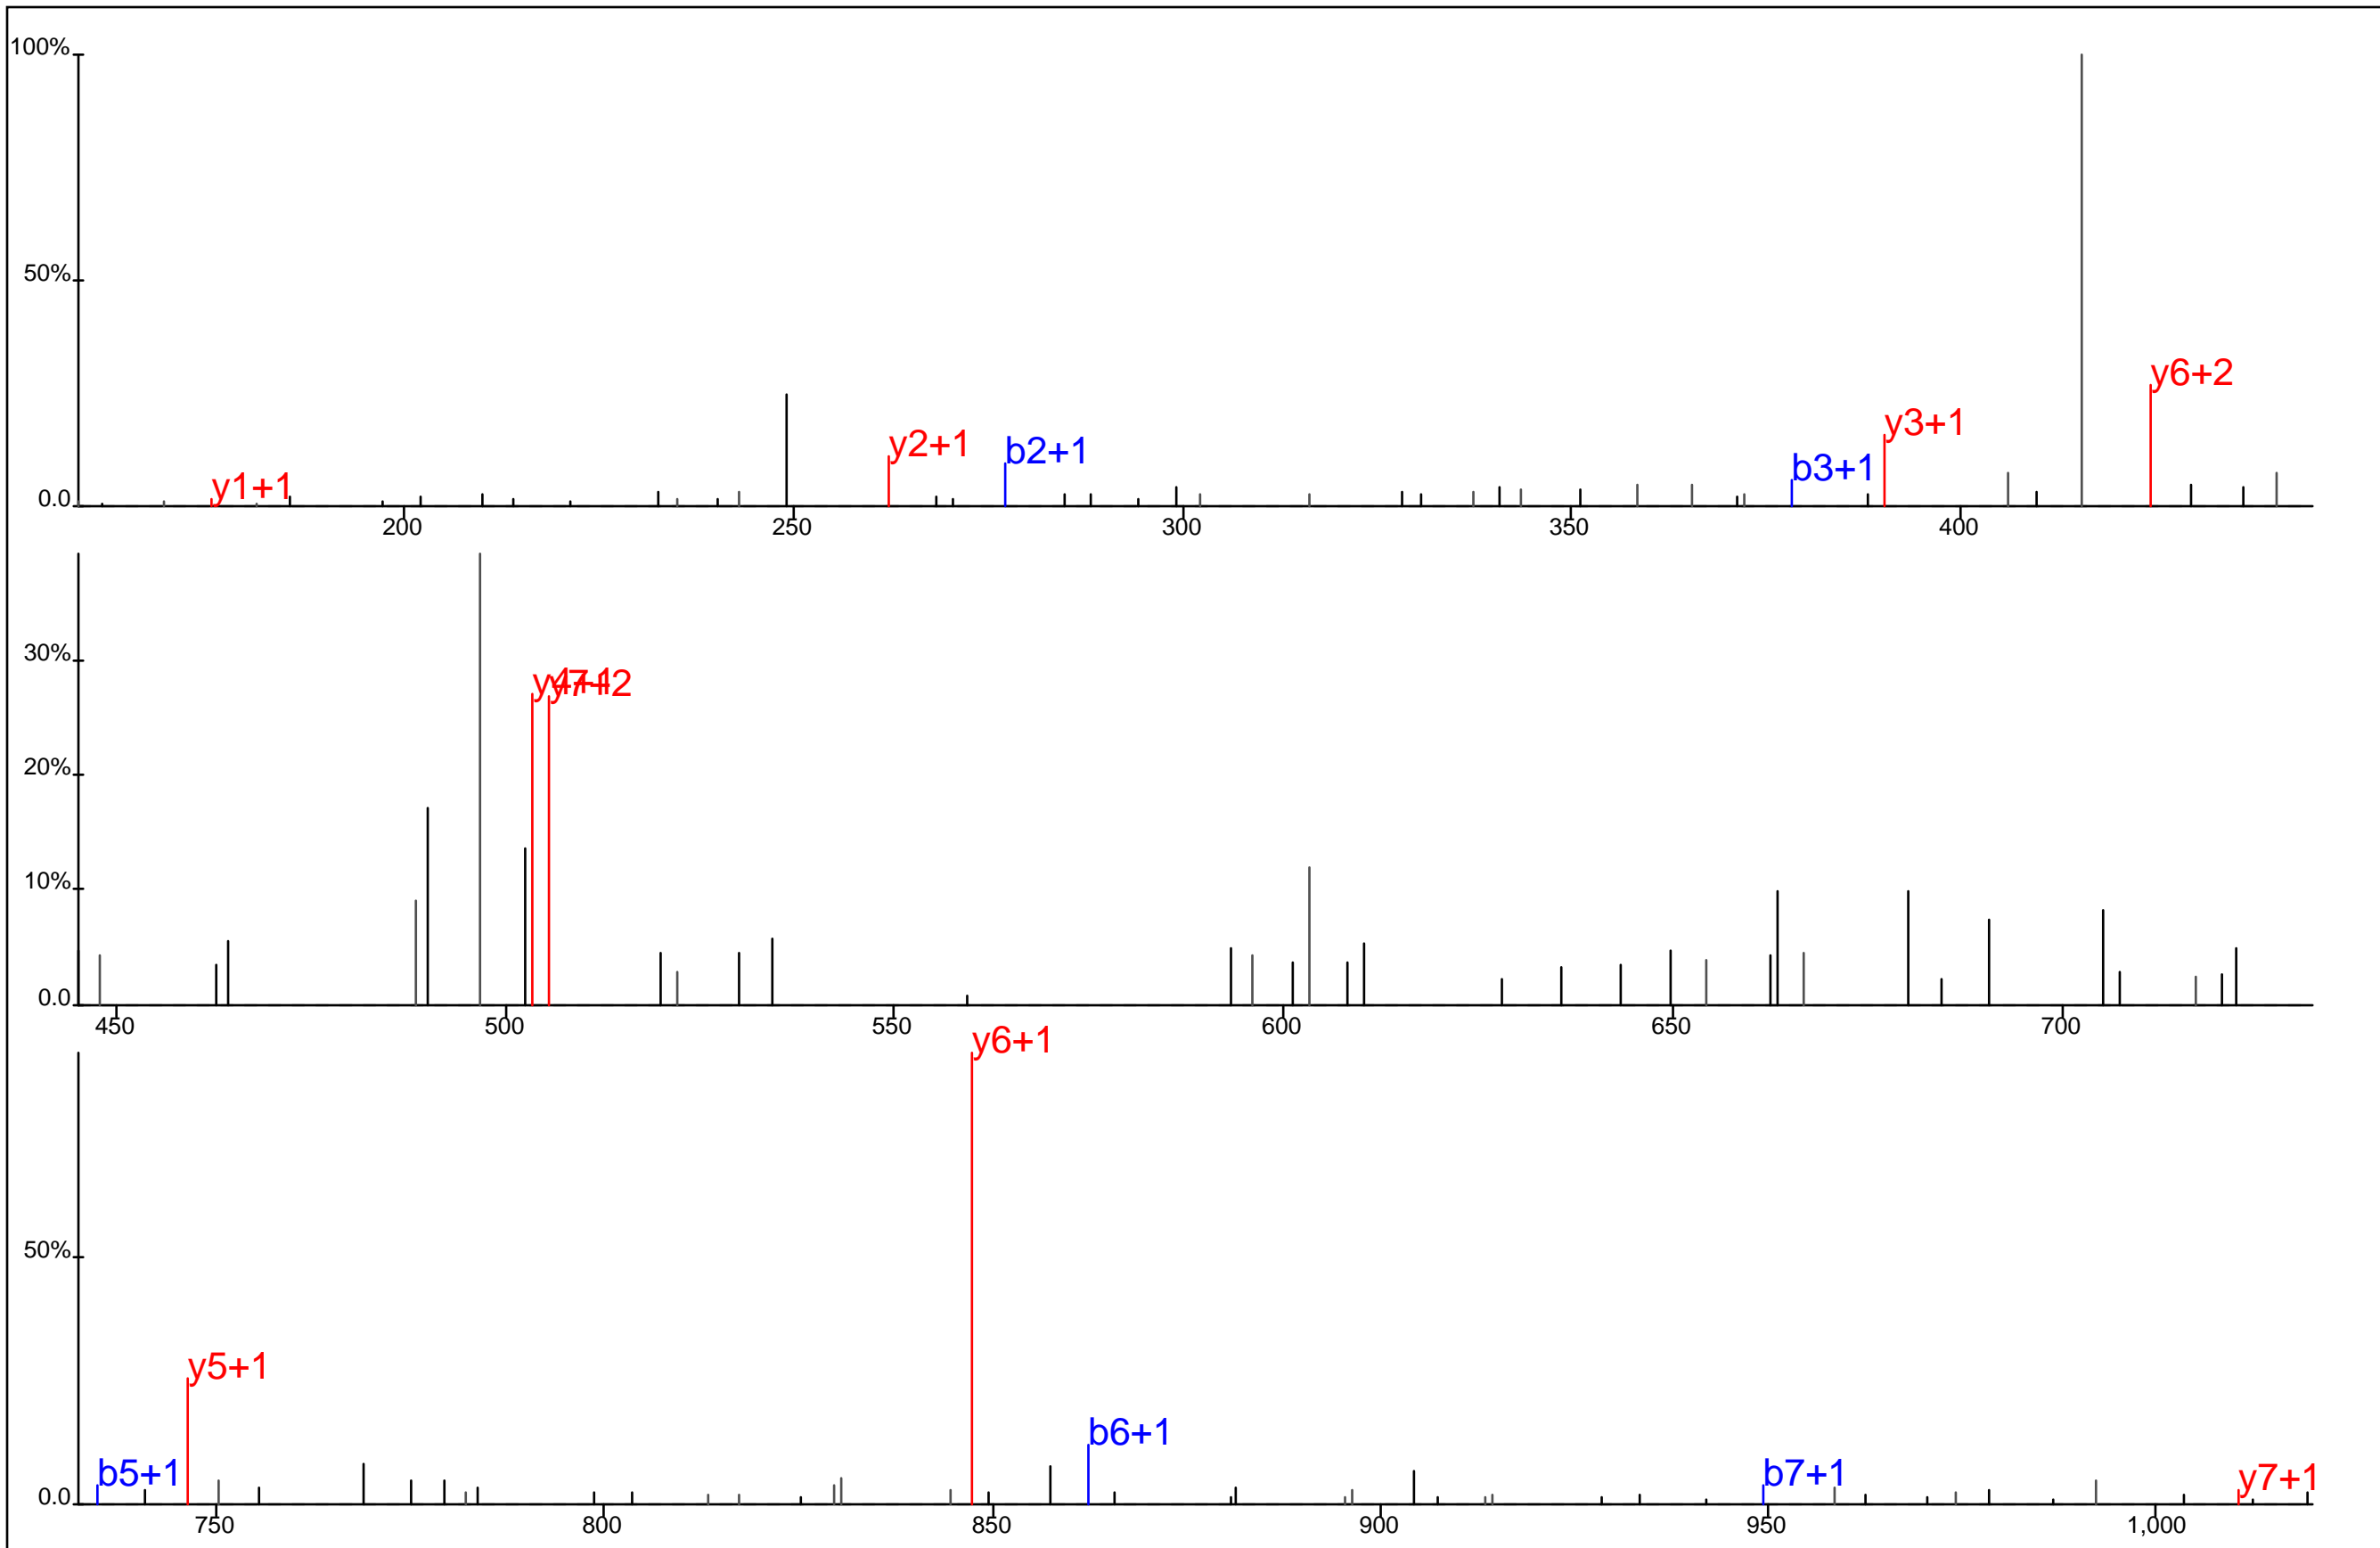

L Y T Y\* I Q S R

Protein Name: DYRK3  
 gi Accession: 0  
 Precursor Mass: 562.2620+2  
 Delta Mass: 1.488 ppm  
 XCorr: 26.03

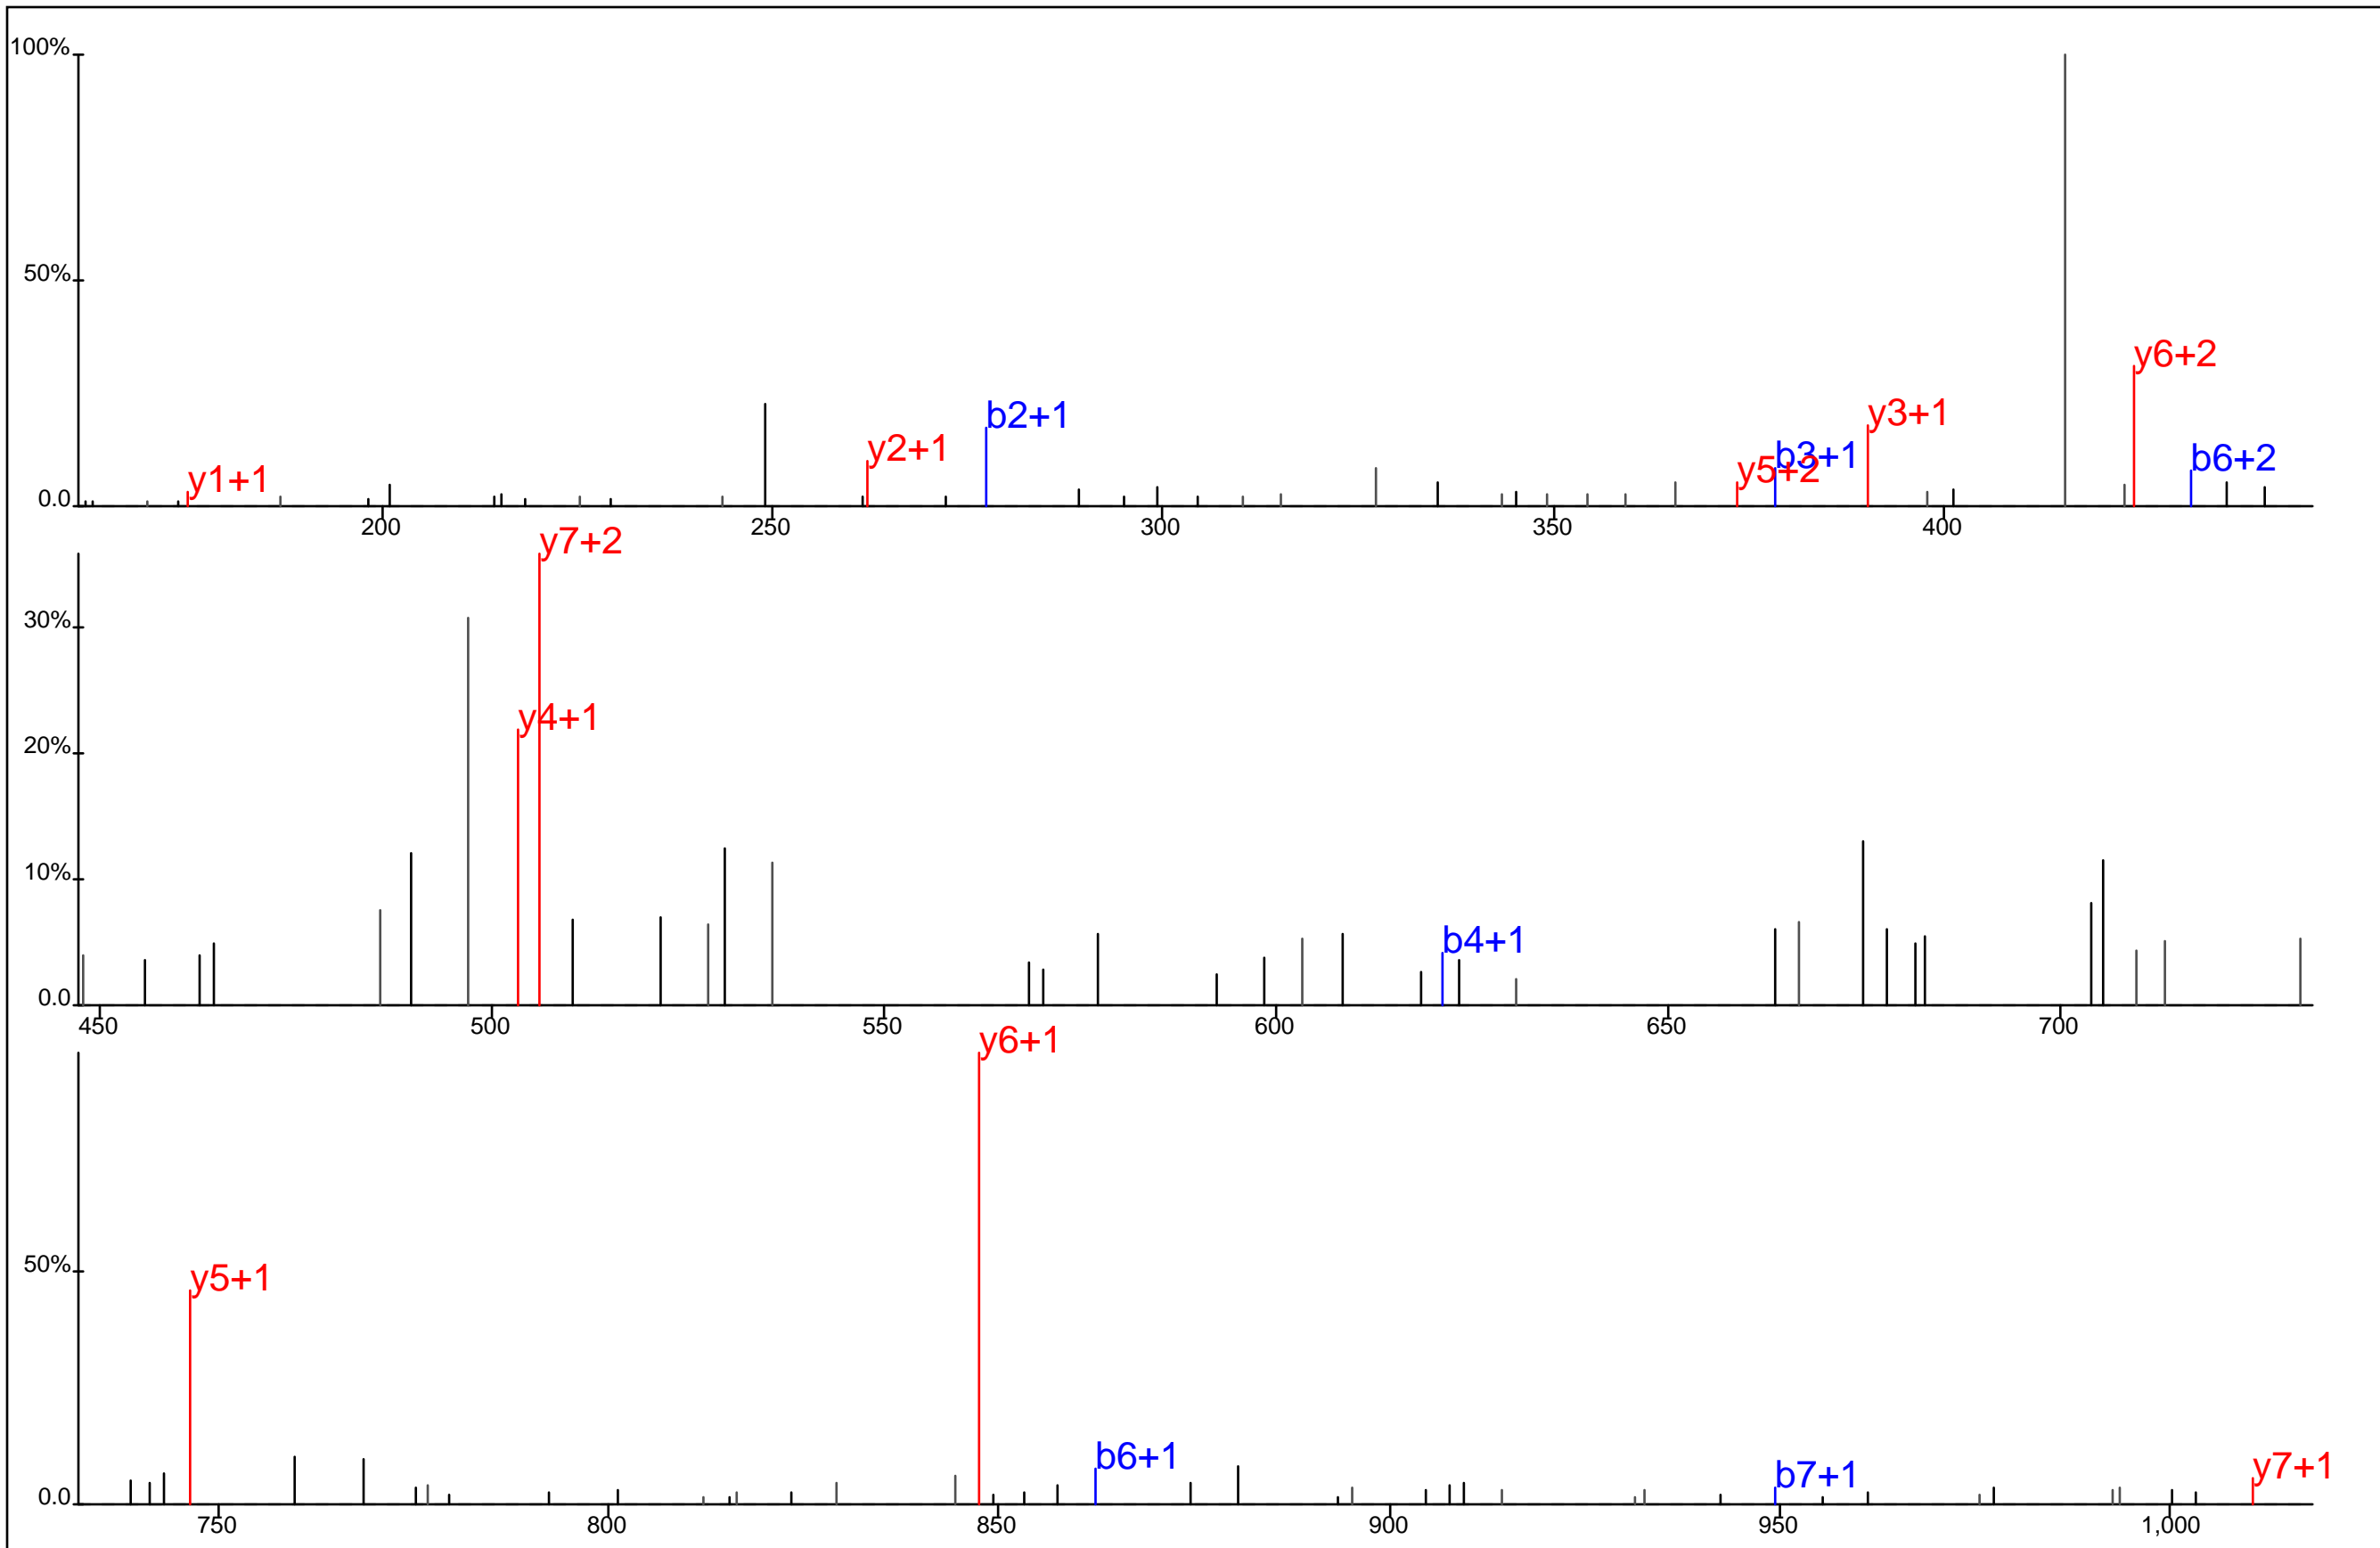

Protein Name: DYRK3  
 gi Accession: 0  
 Precursor Mass: 562.2621+2  
 Delta Mass: 1.162 ppm  
 XCorr: 46.94

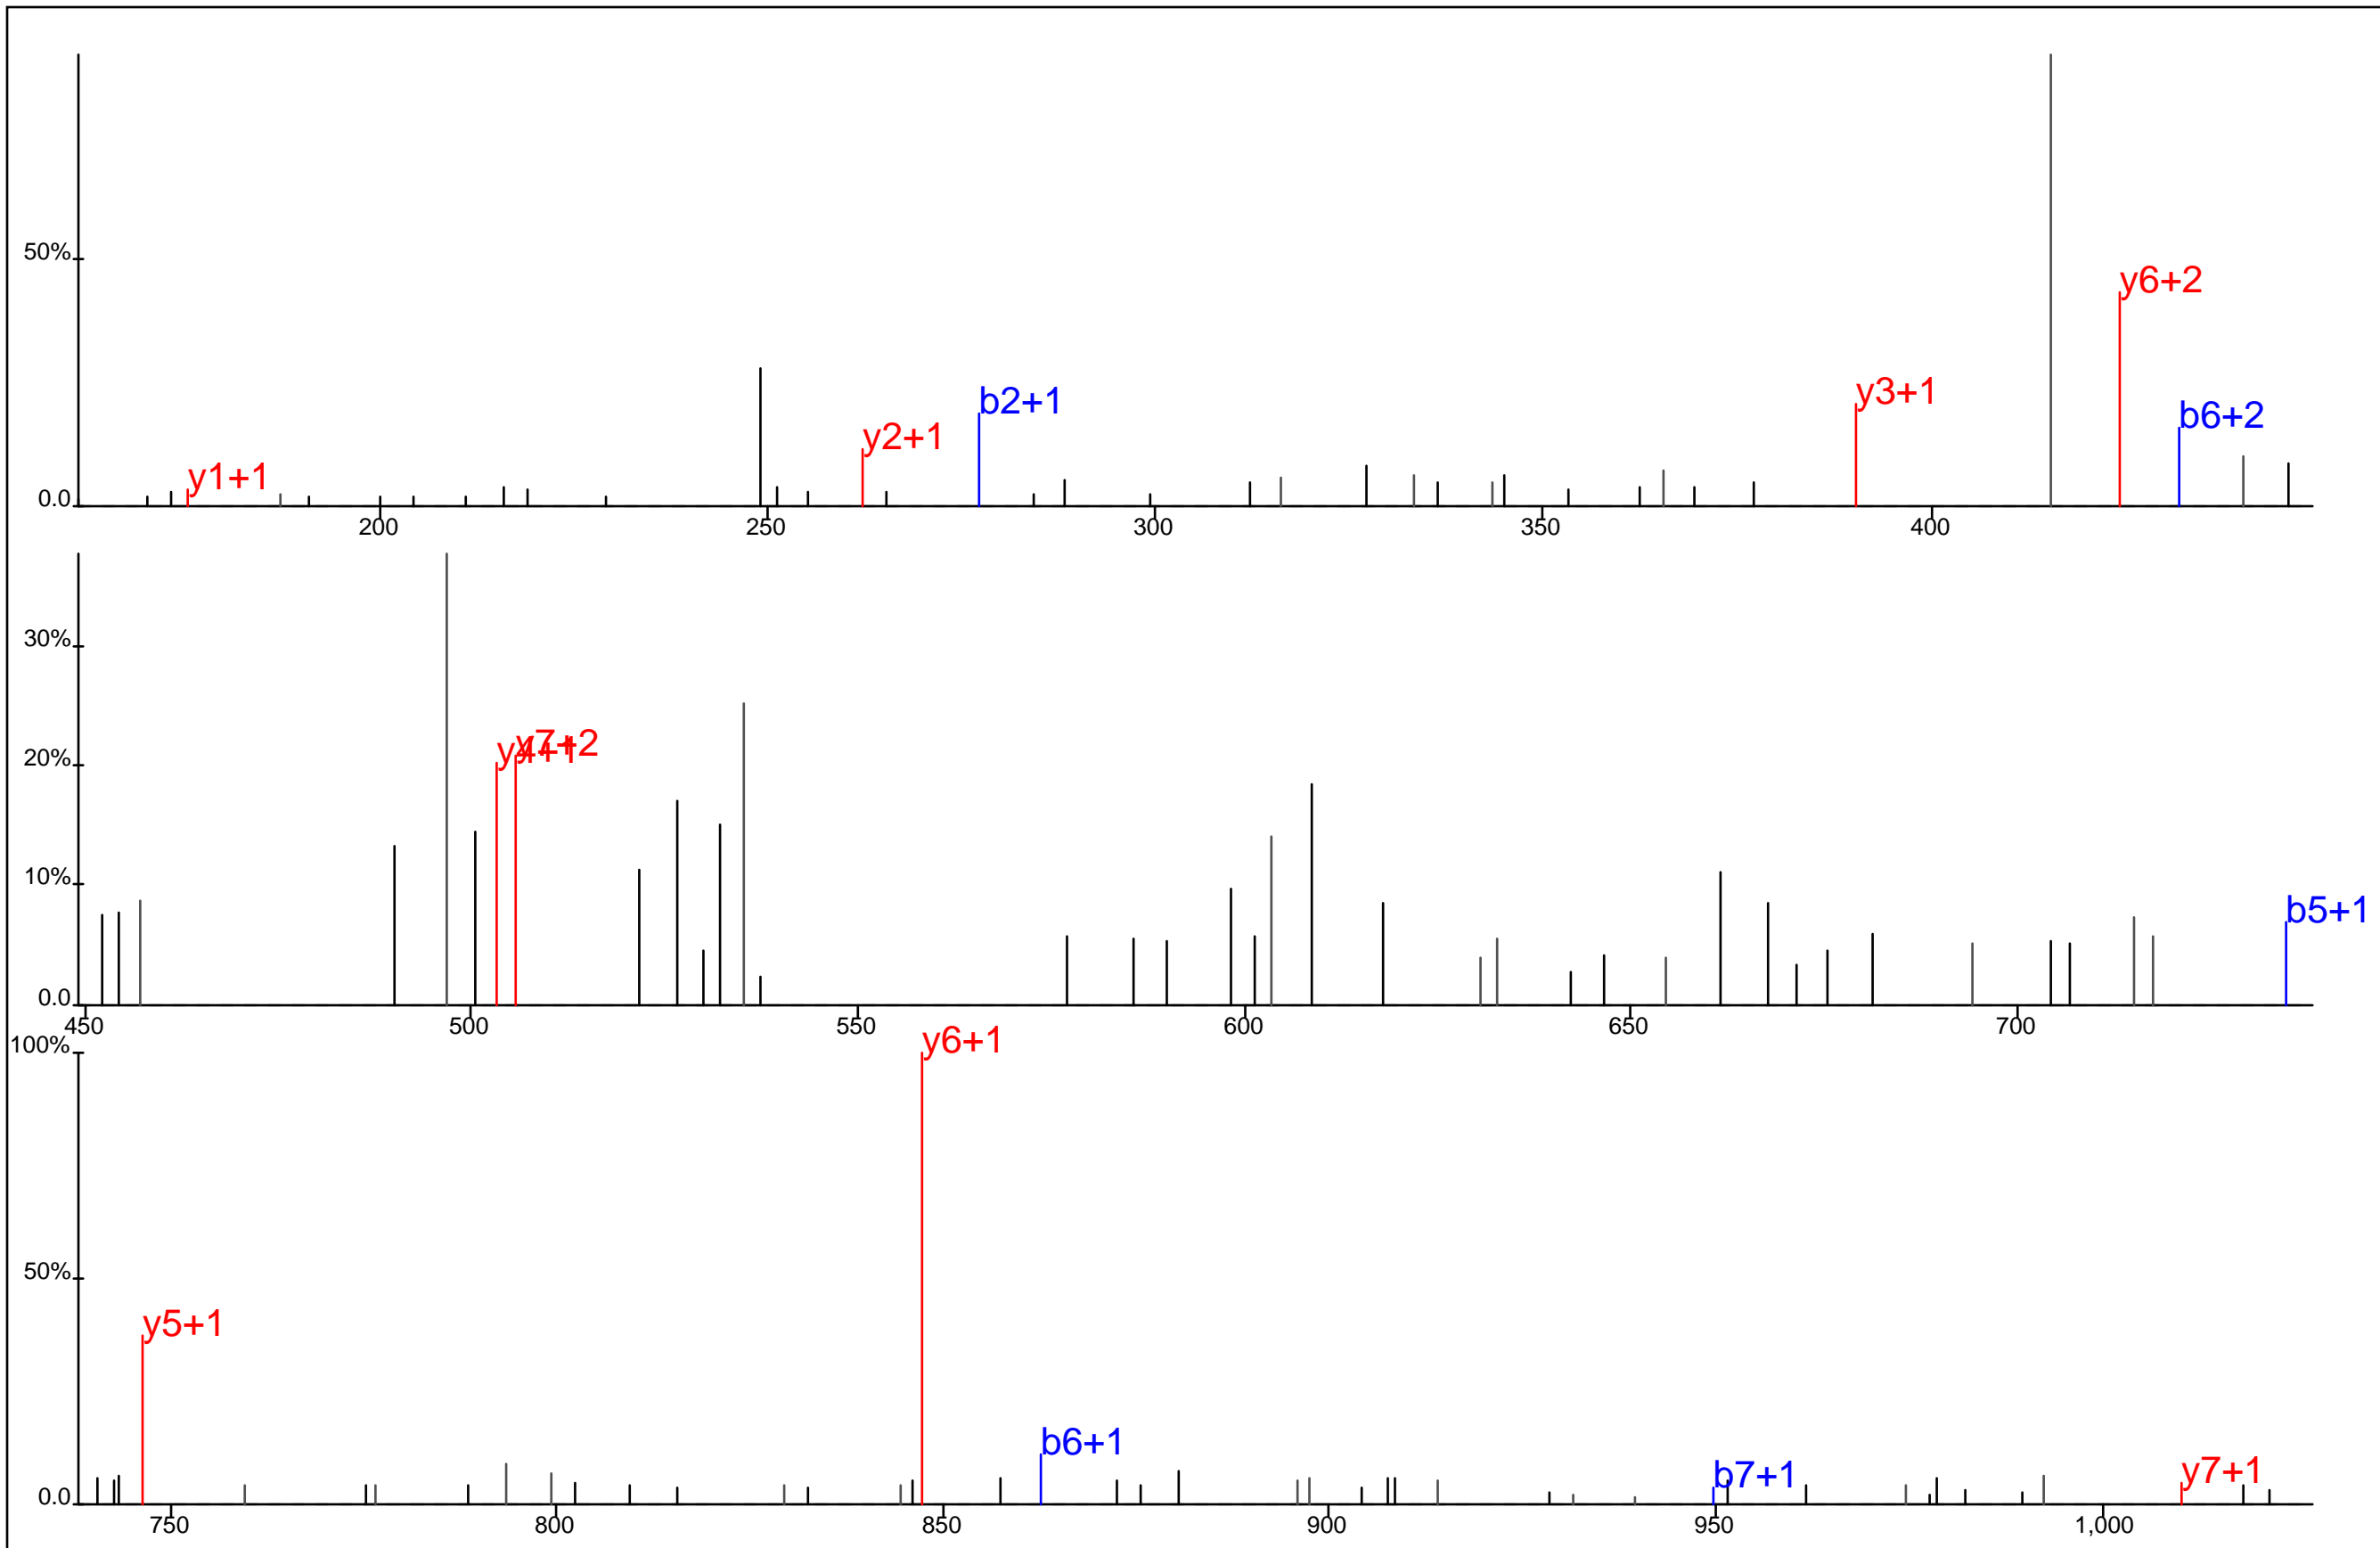

■ ▢ ▣ ▤ ▥  
 L Y T Y\*I Q S R  
▨ ▩ ▪ ▫ ▬ ▭

Protein Name: DYRK3  
 gi Accession: 0  
 Precursor Mass: 562.2620+2  
 Delta Mass: 1.488 ppm  
 XCorr: 34.64

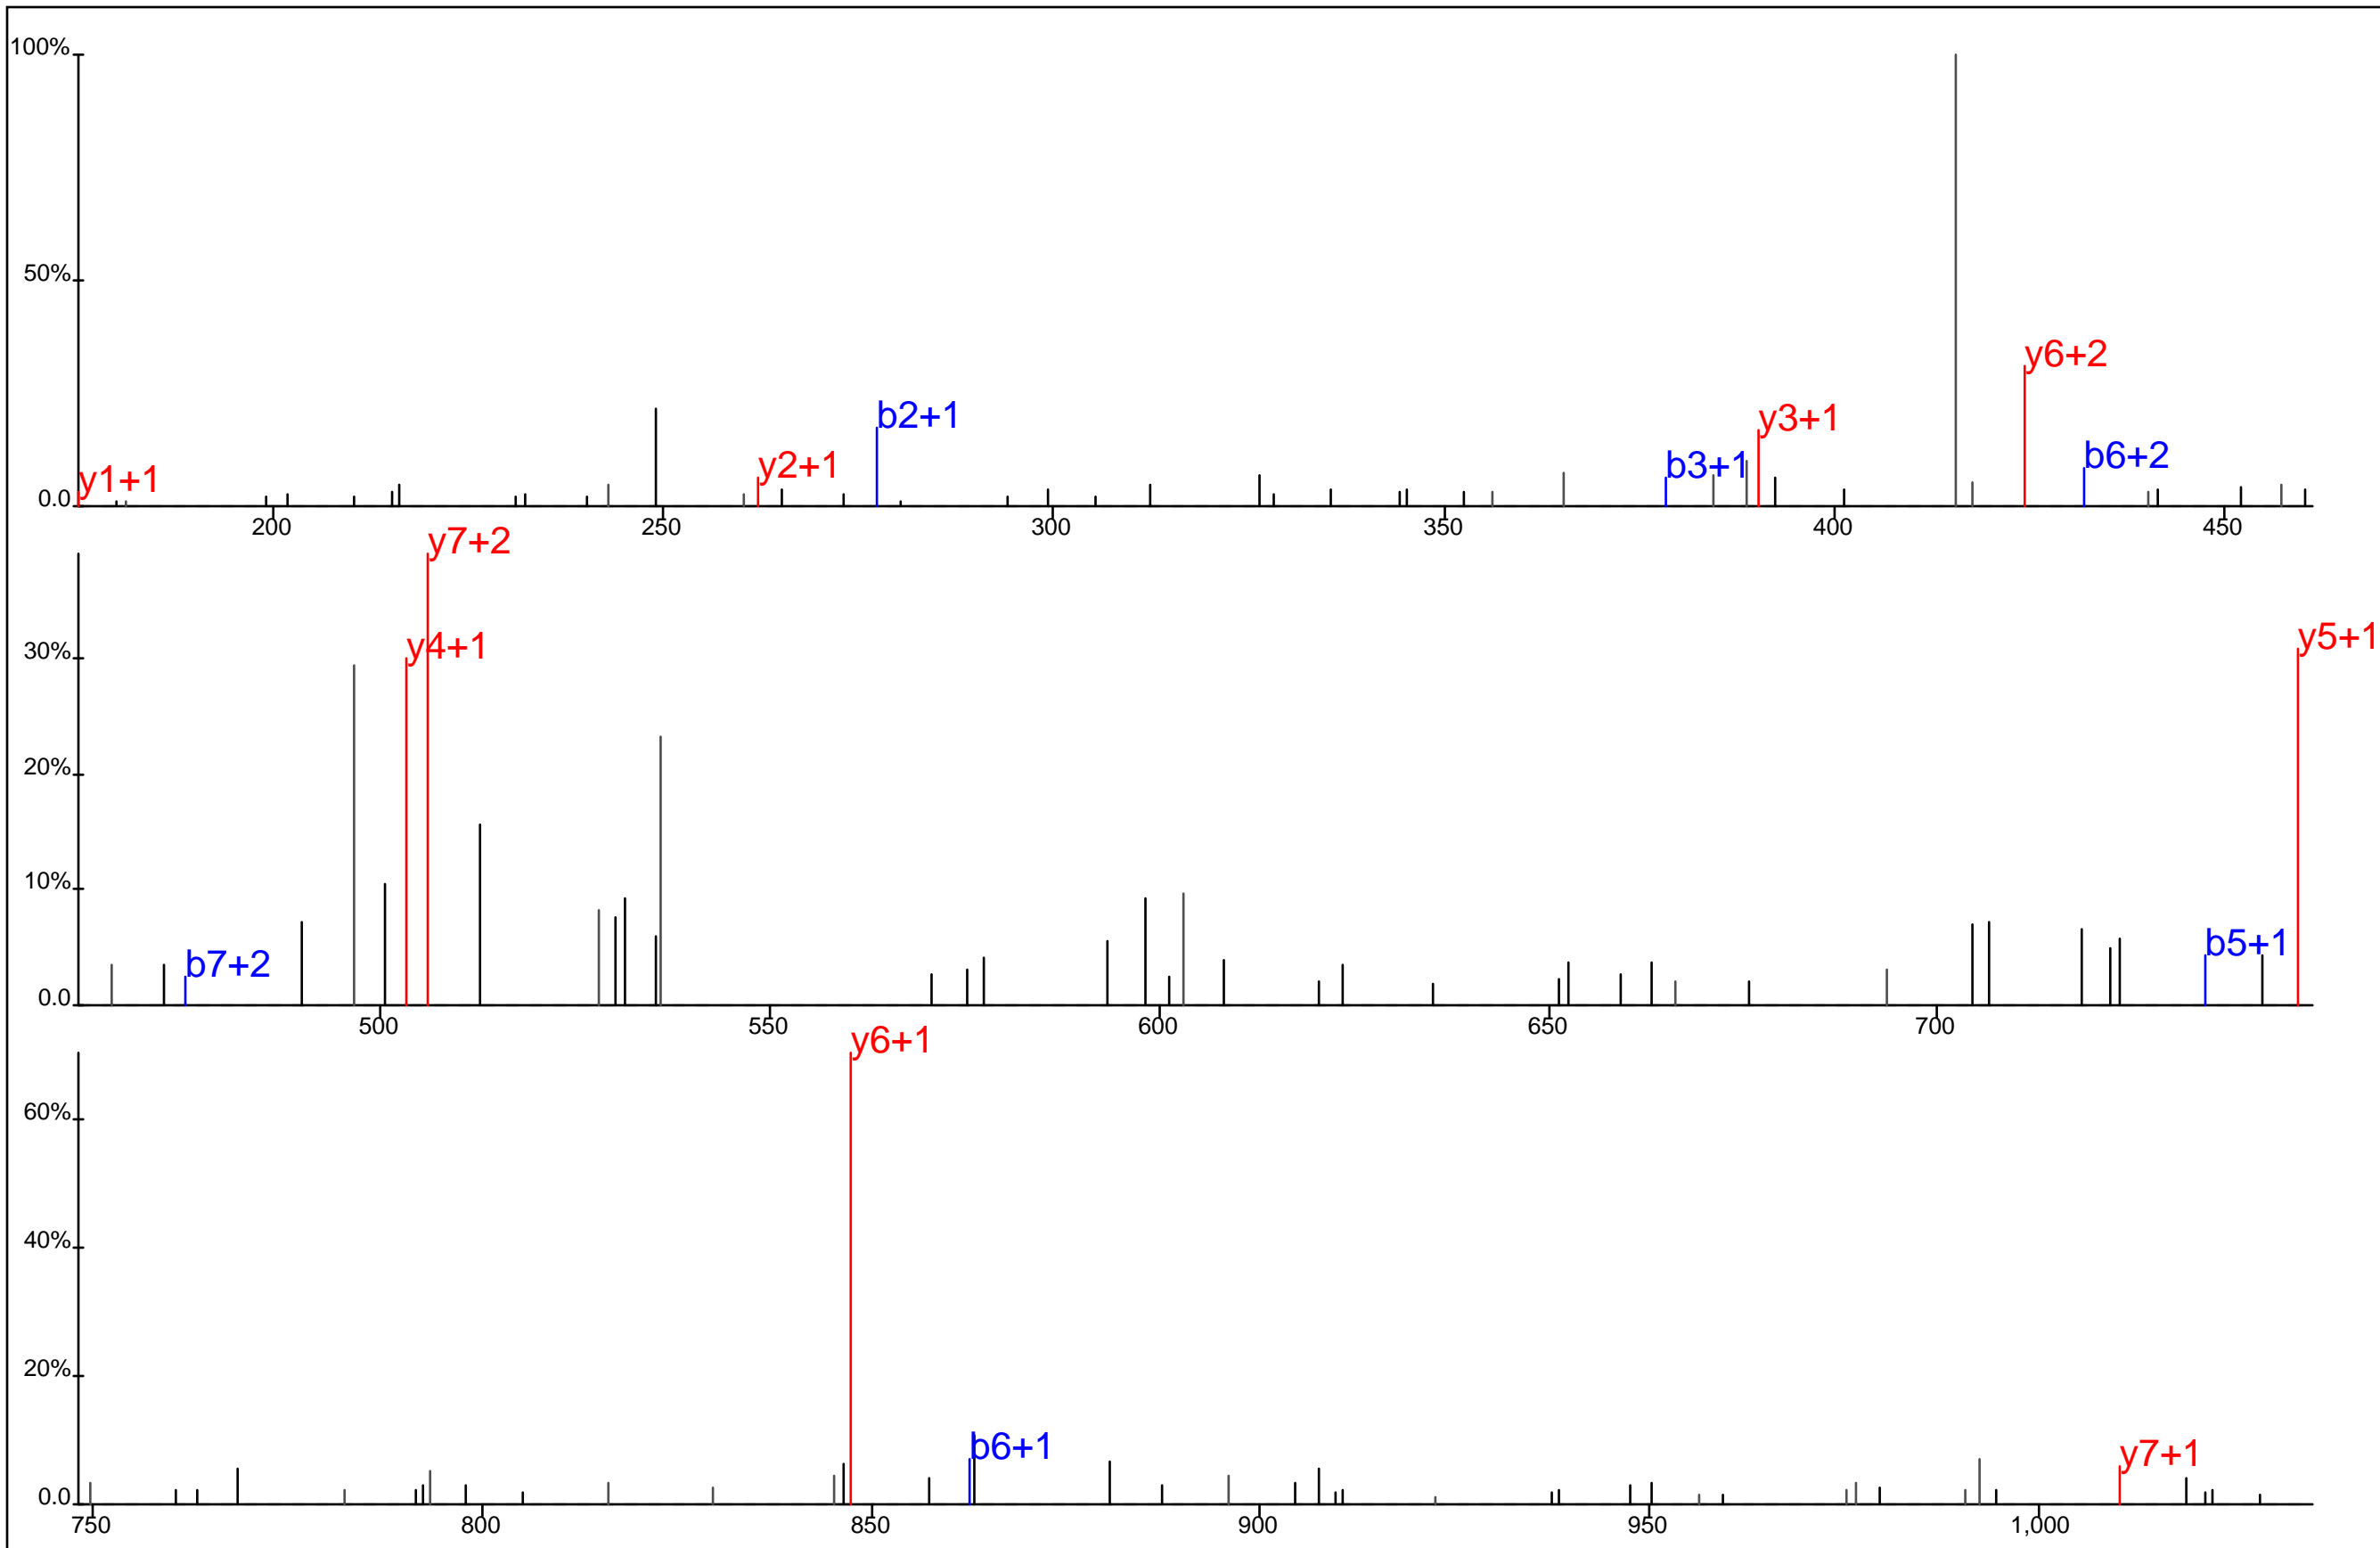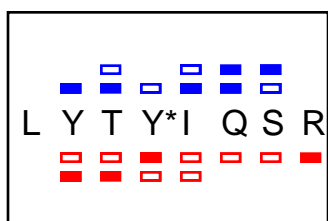

Protein Name: DYRK3  
 gi Accession: 0  
 Precursor Mass: 562.2637+2  
 Delta Mass: 1.554 ppm  
 XCorr: 36.44

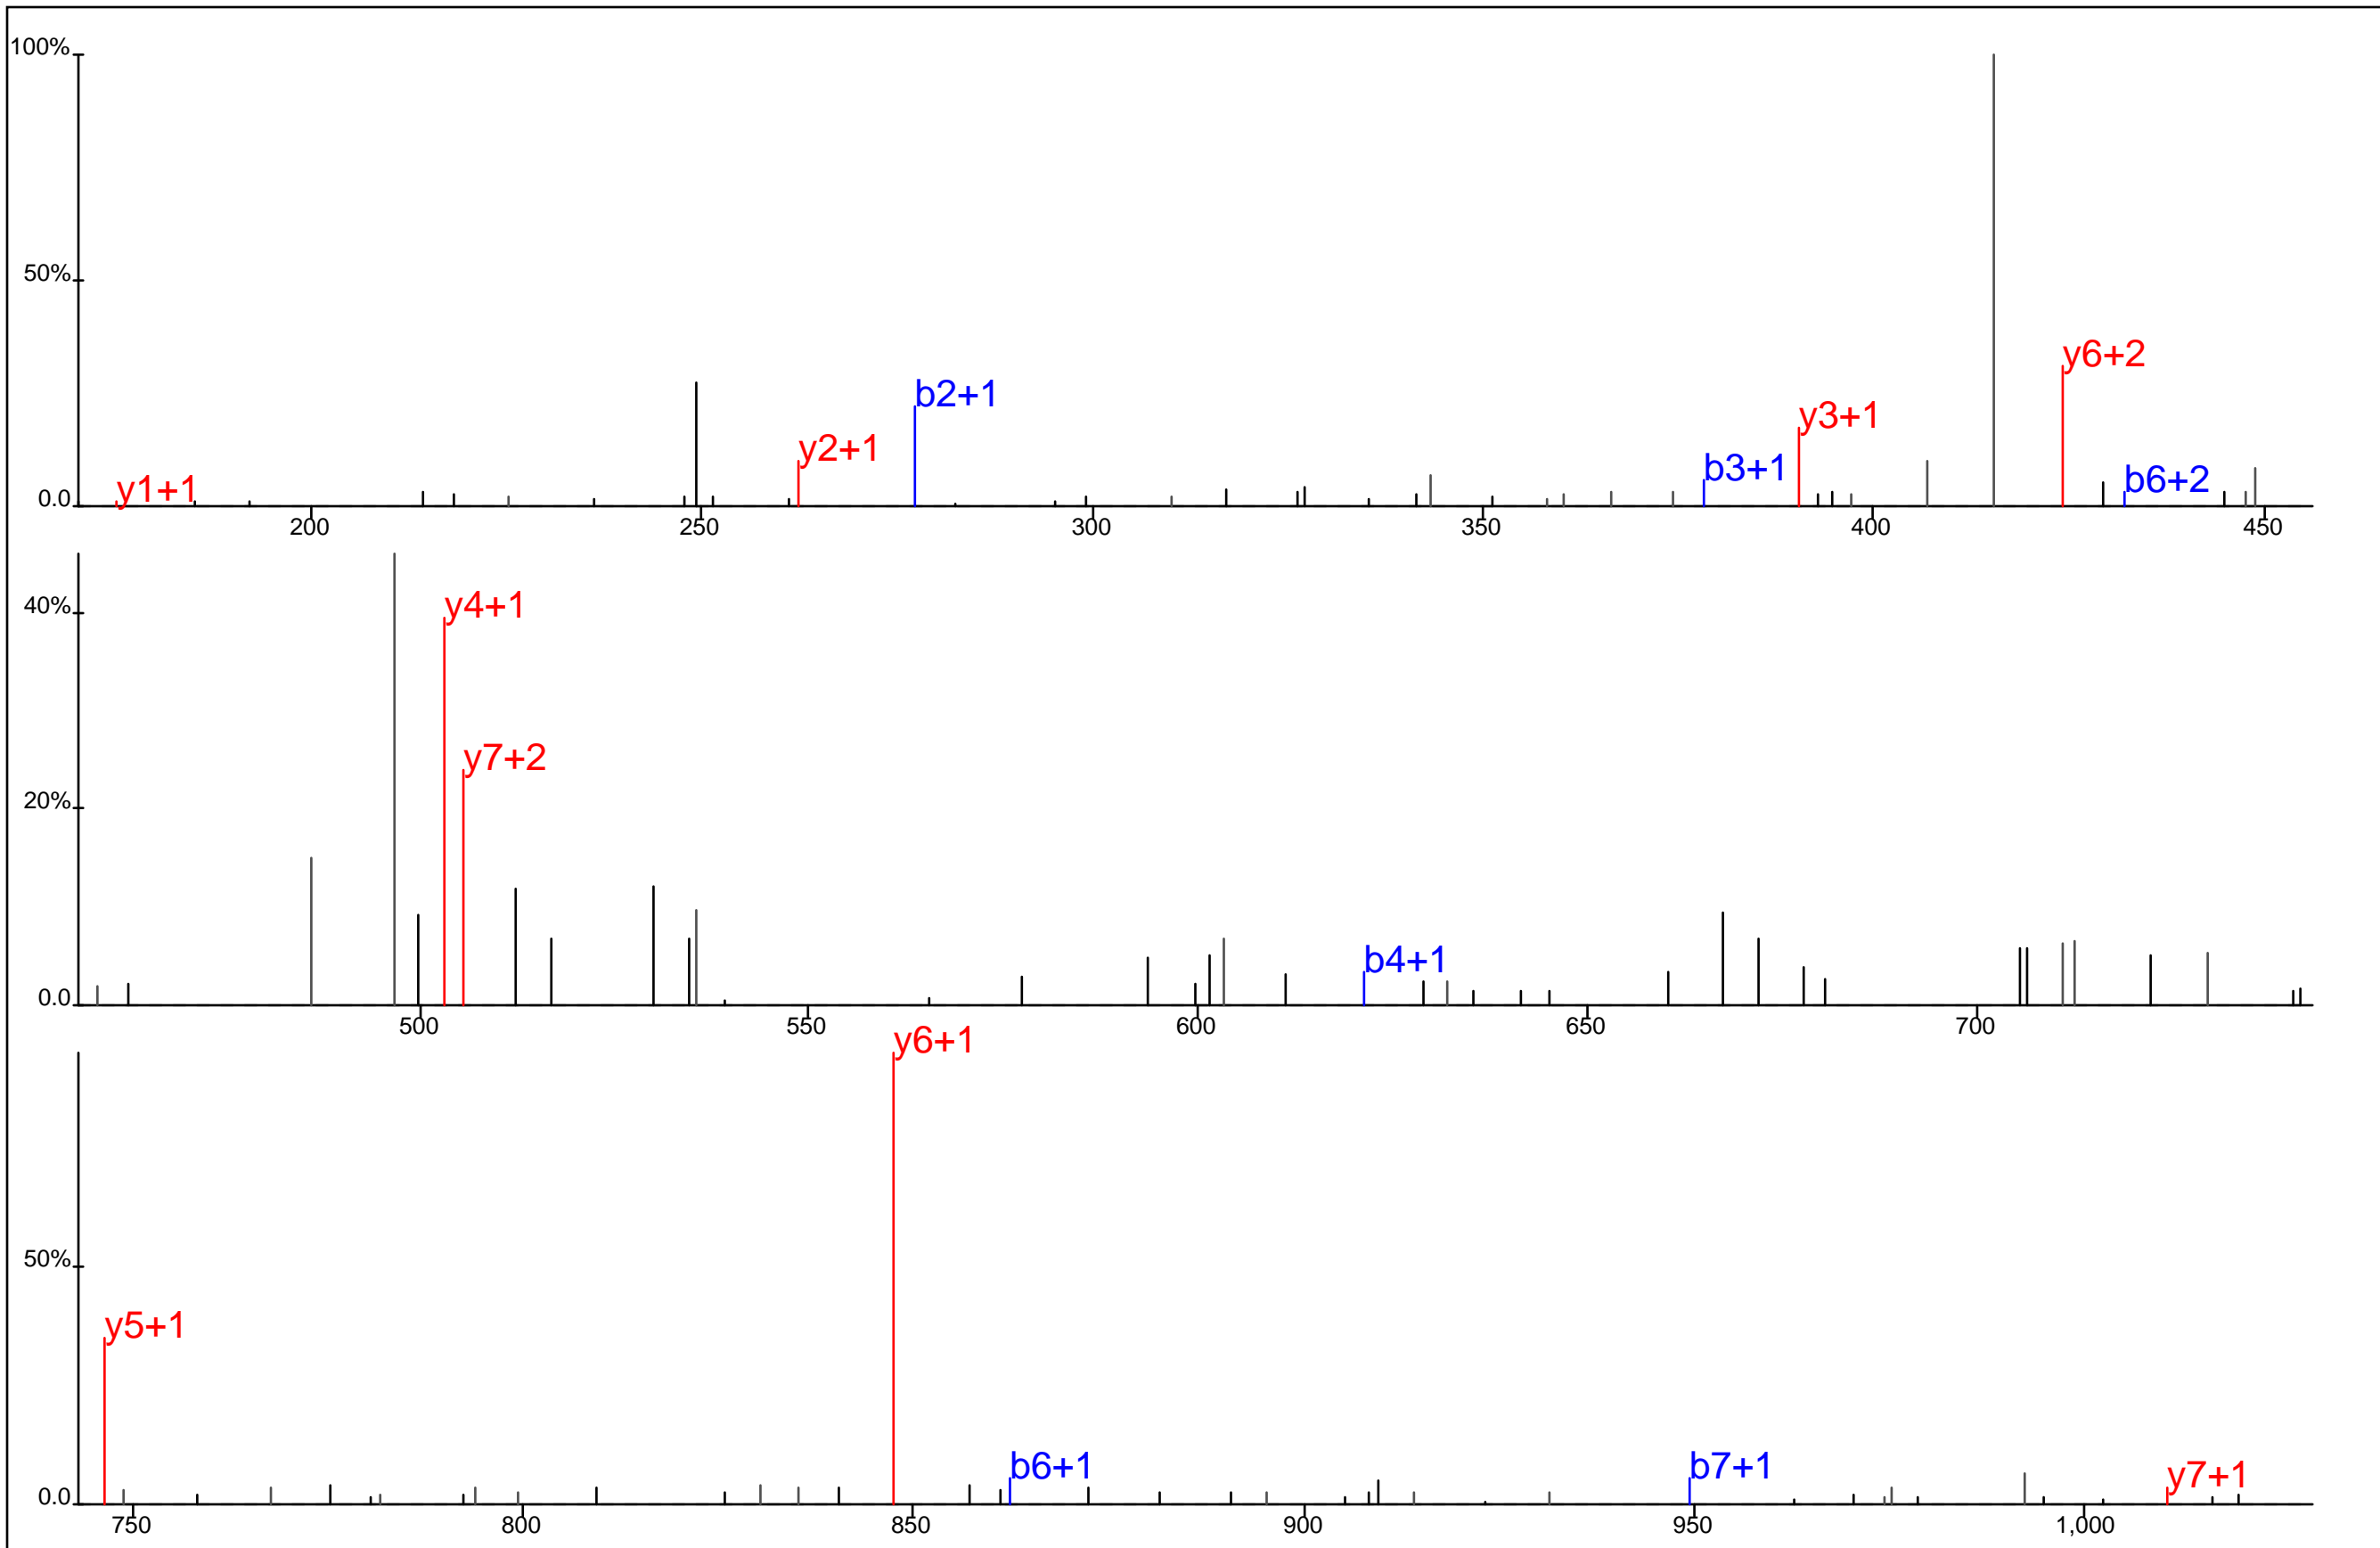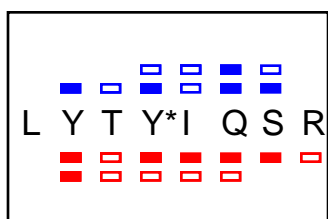

Protein Name: DYRK3  
 gi Accession: 0  
 Precursor Mass: 562.2625+2  
 Delta Mass: 0.619 ppm  
 XCorr: 35.34

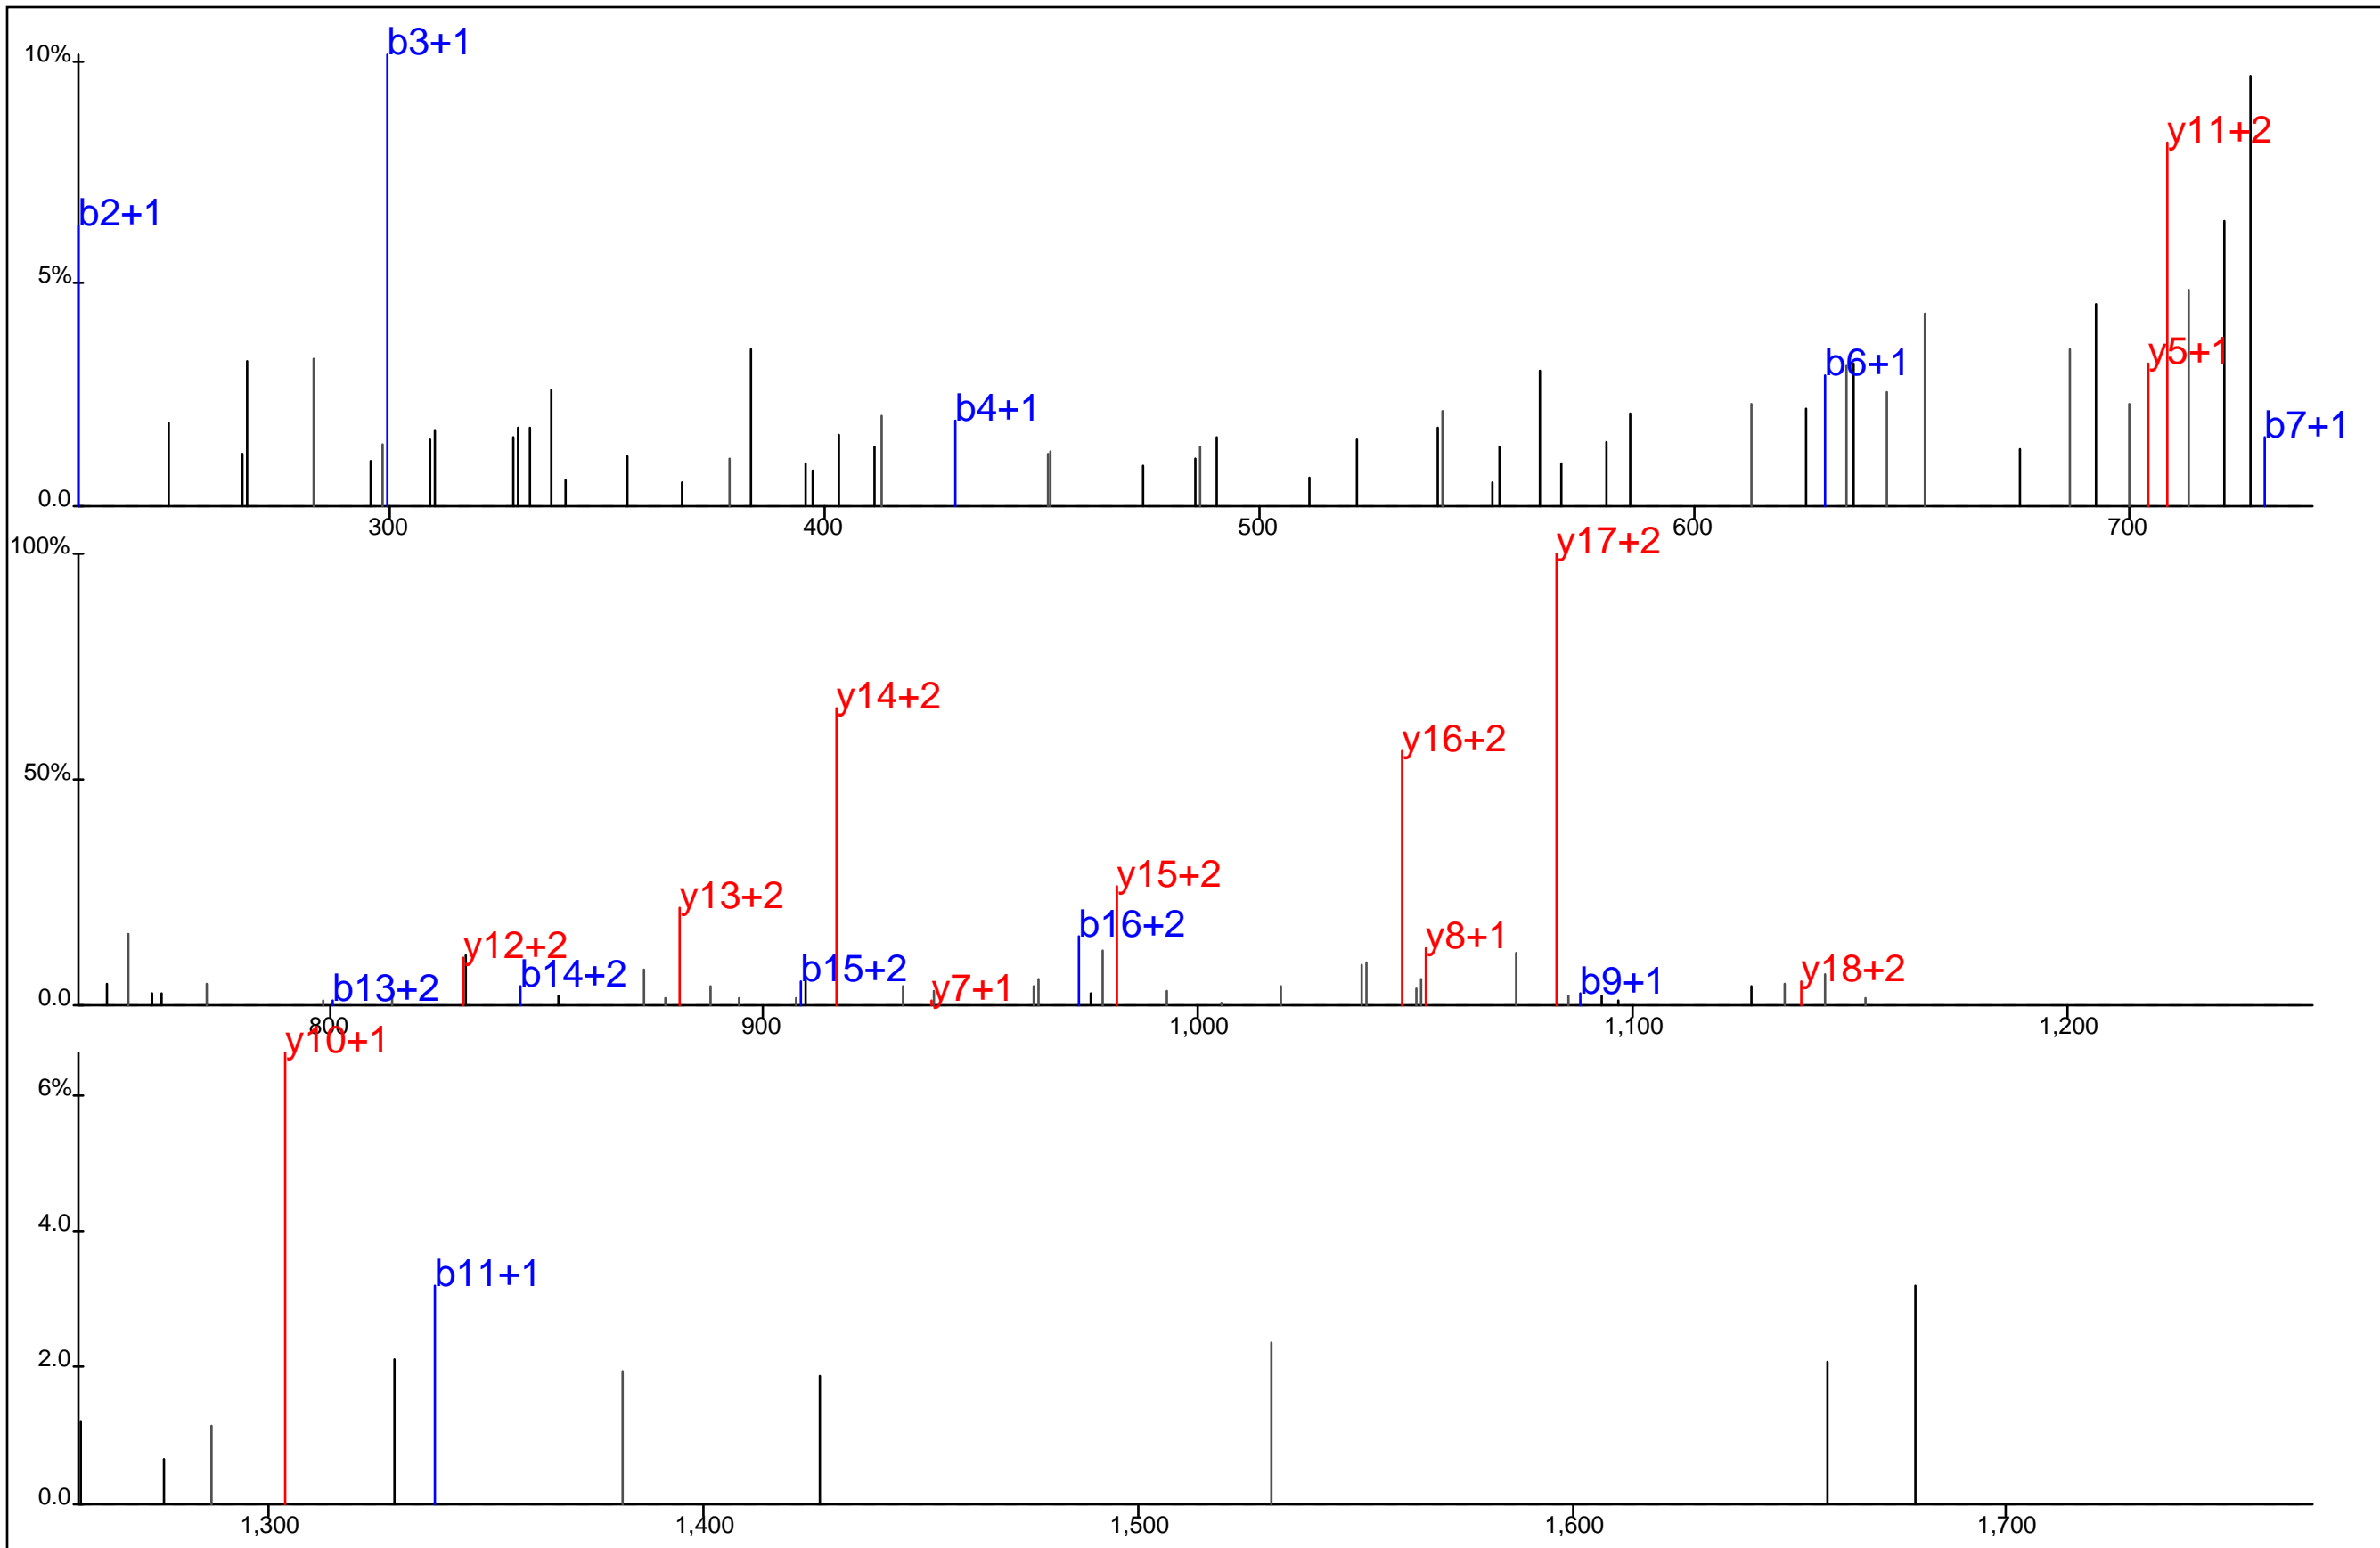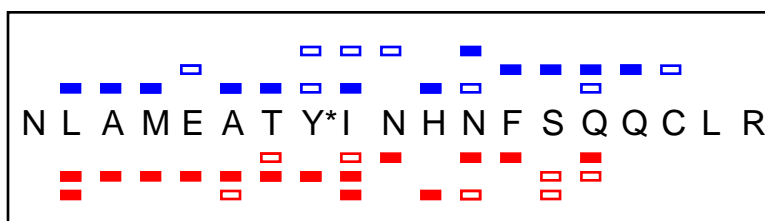

Protein Name: EIF3S7  
 gi Accession: 0  
 Precursor Mass: 797.3499+3  
 Delta Mass: 2.792 ppm  
 XCorr: 27.64







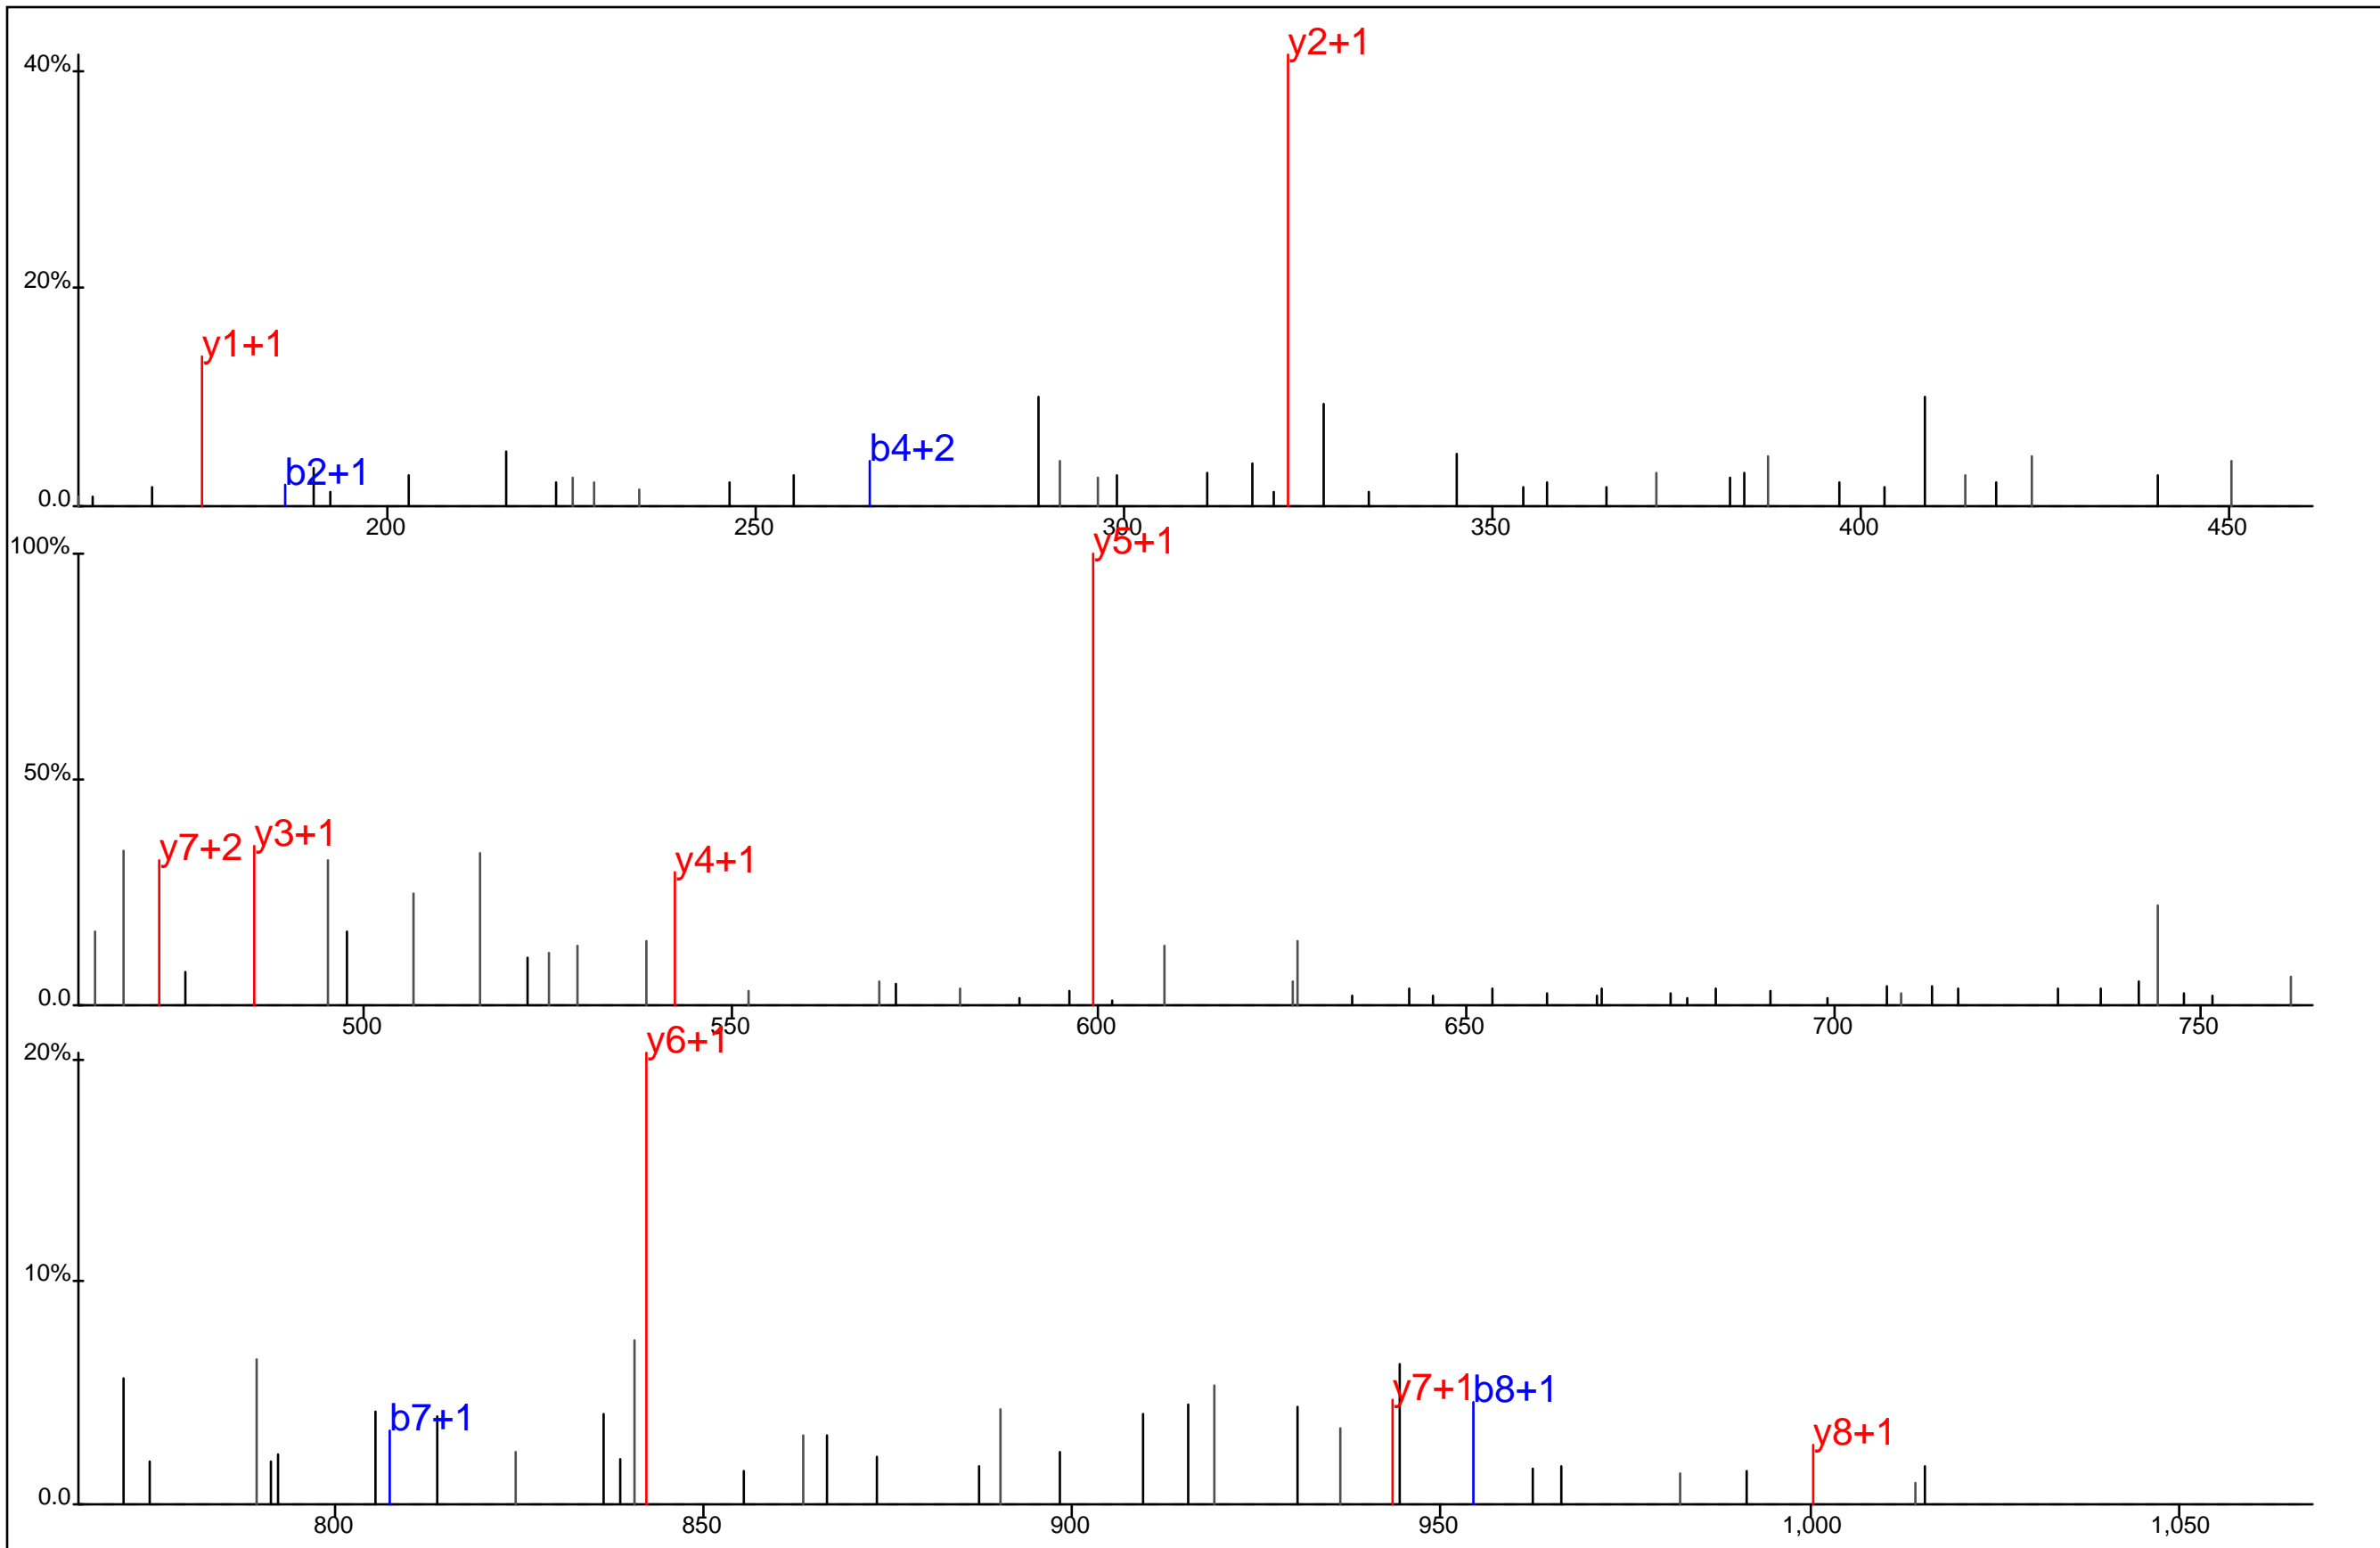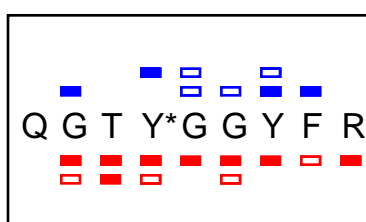

Protein Name: EIF3S8  
 gi Accession: 0  
 Precursor Mass: 564.7290+2  
 Delta Mass: 0.239 ppm  
 XCorr: 41.96

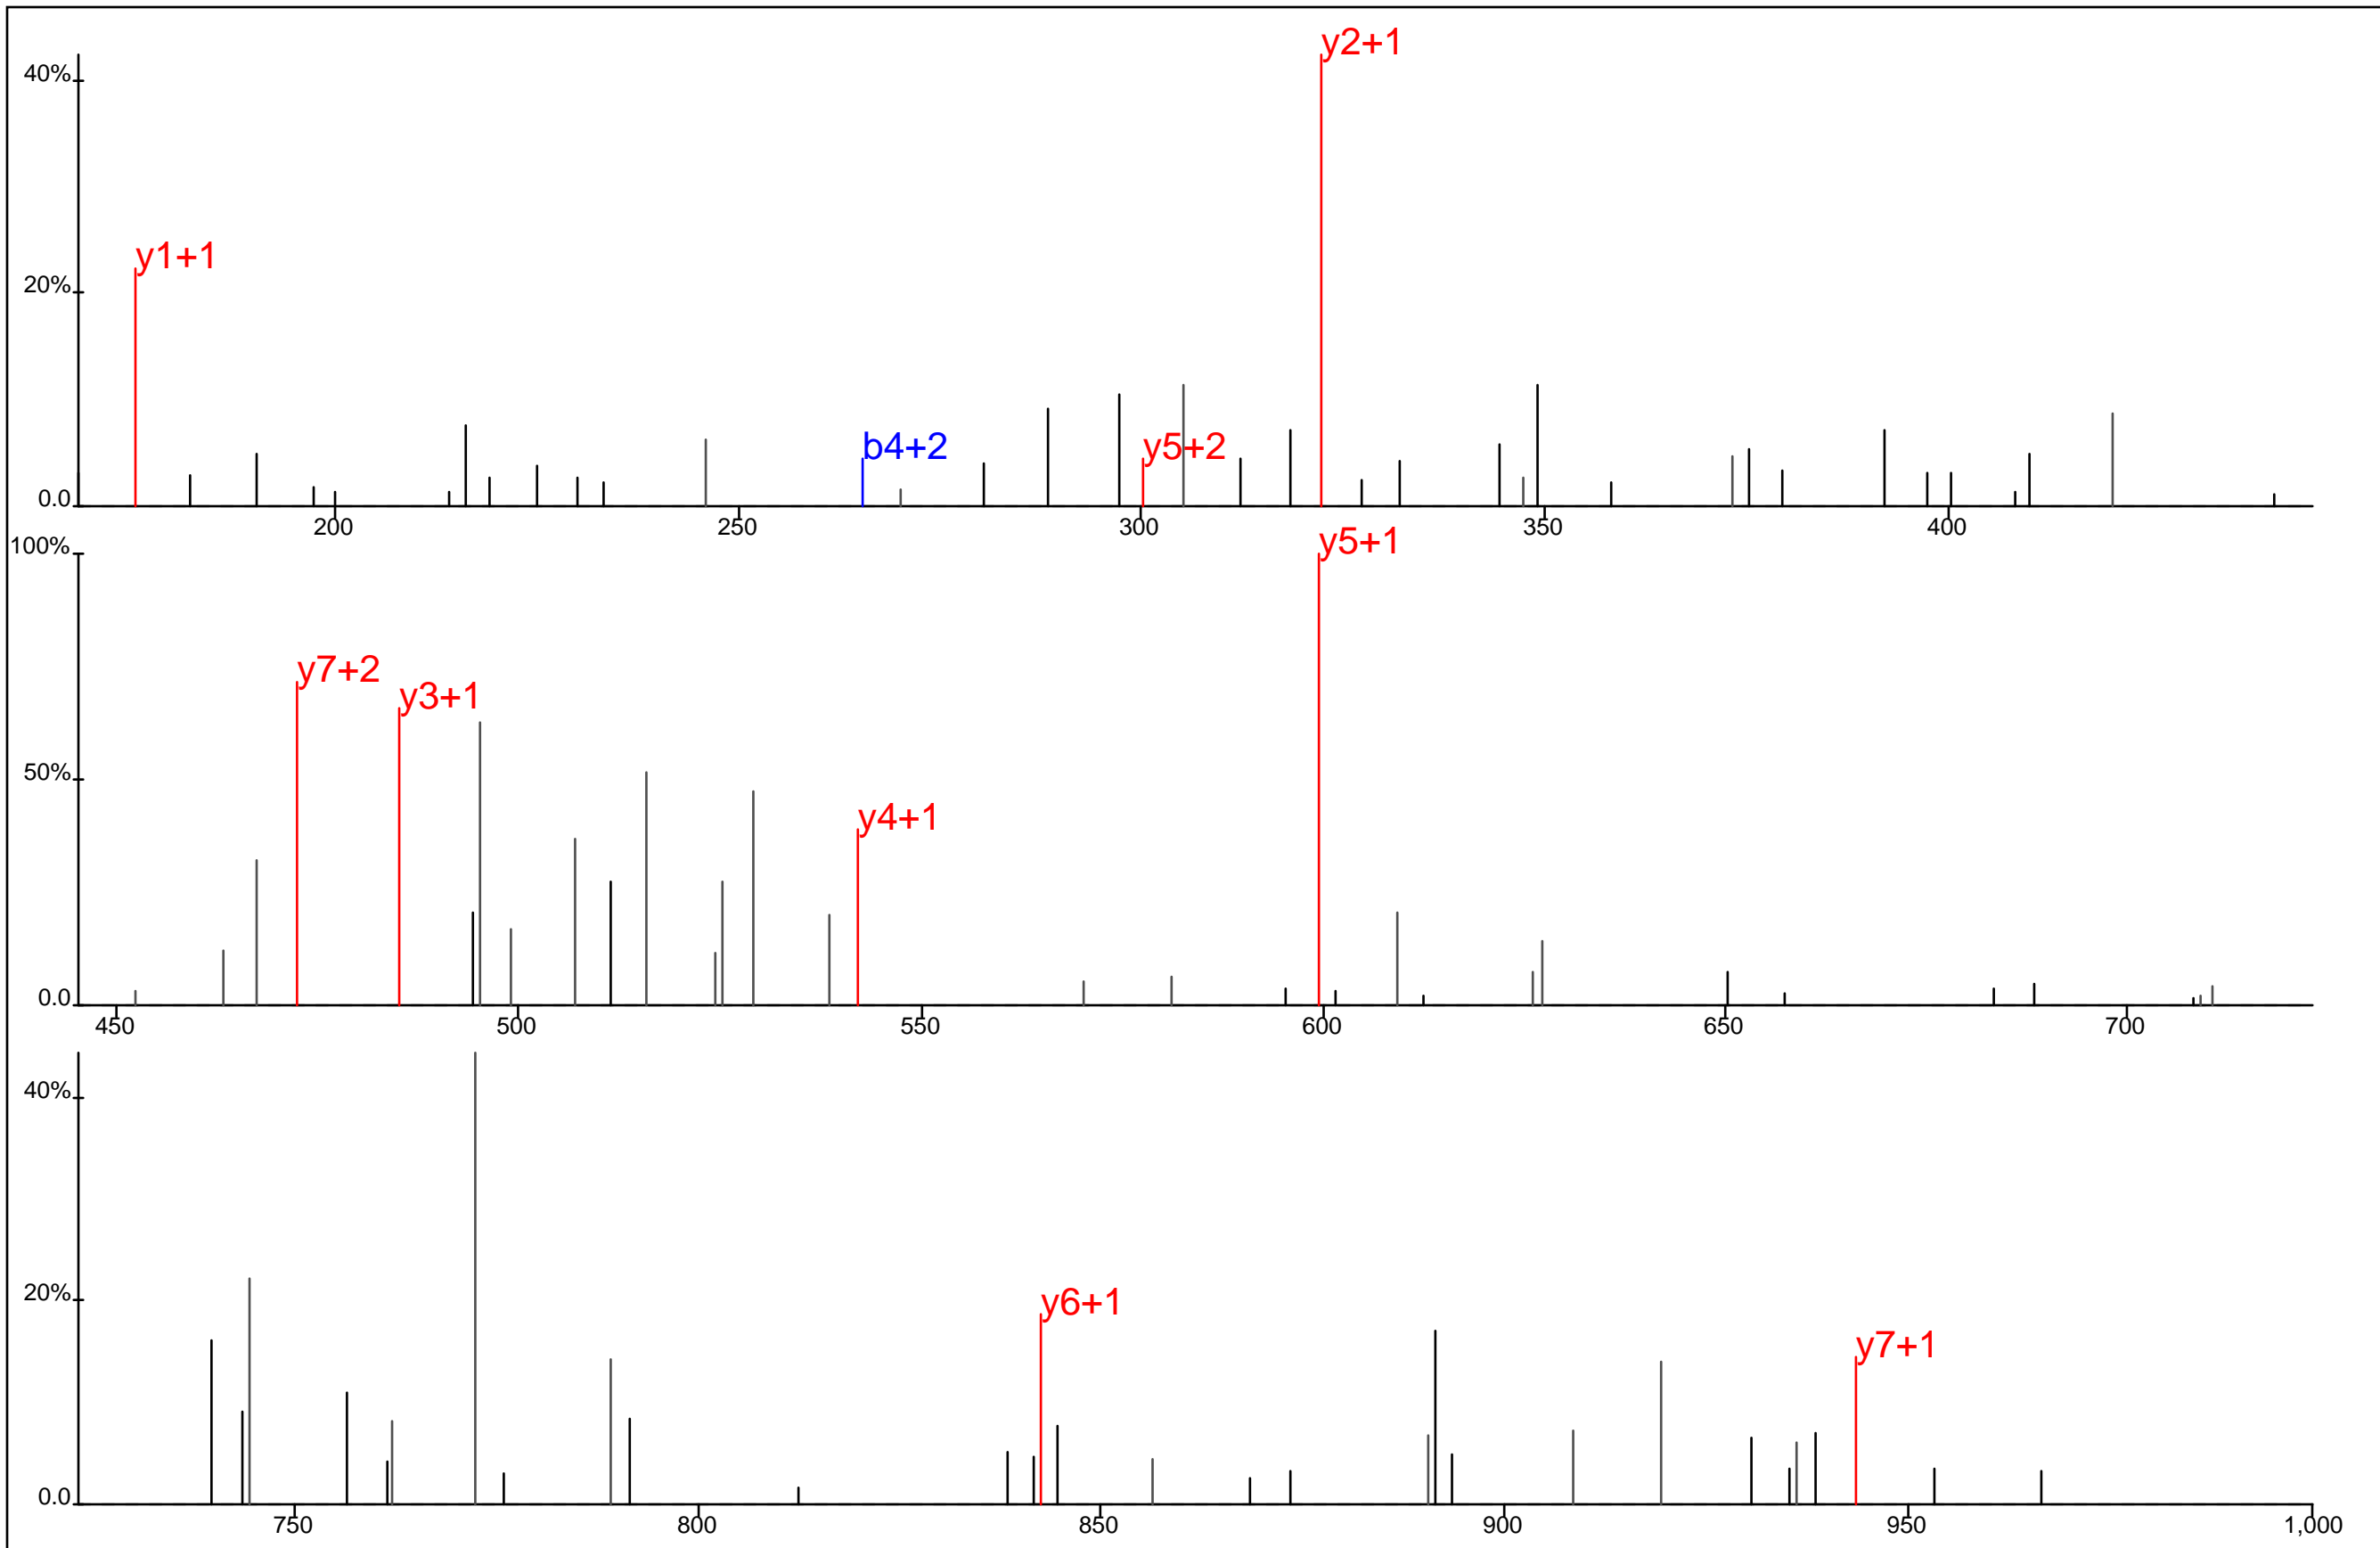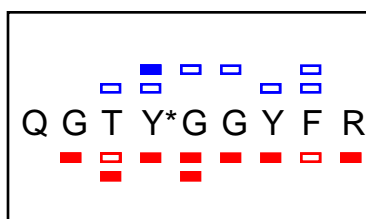

Protein Name: EIF3S8  
 gi Accession: 0  
 Precursor Mass: 564.7300+2  
 Delta Mass: 1.600 ppm  
 XCorr: 43.06

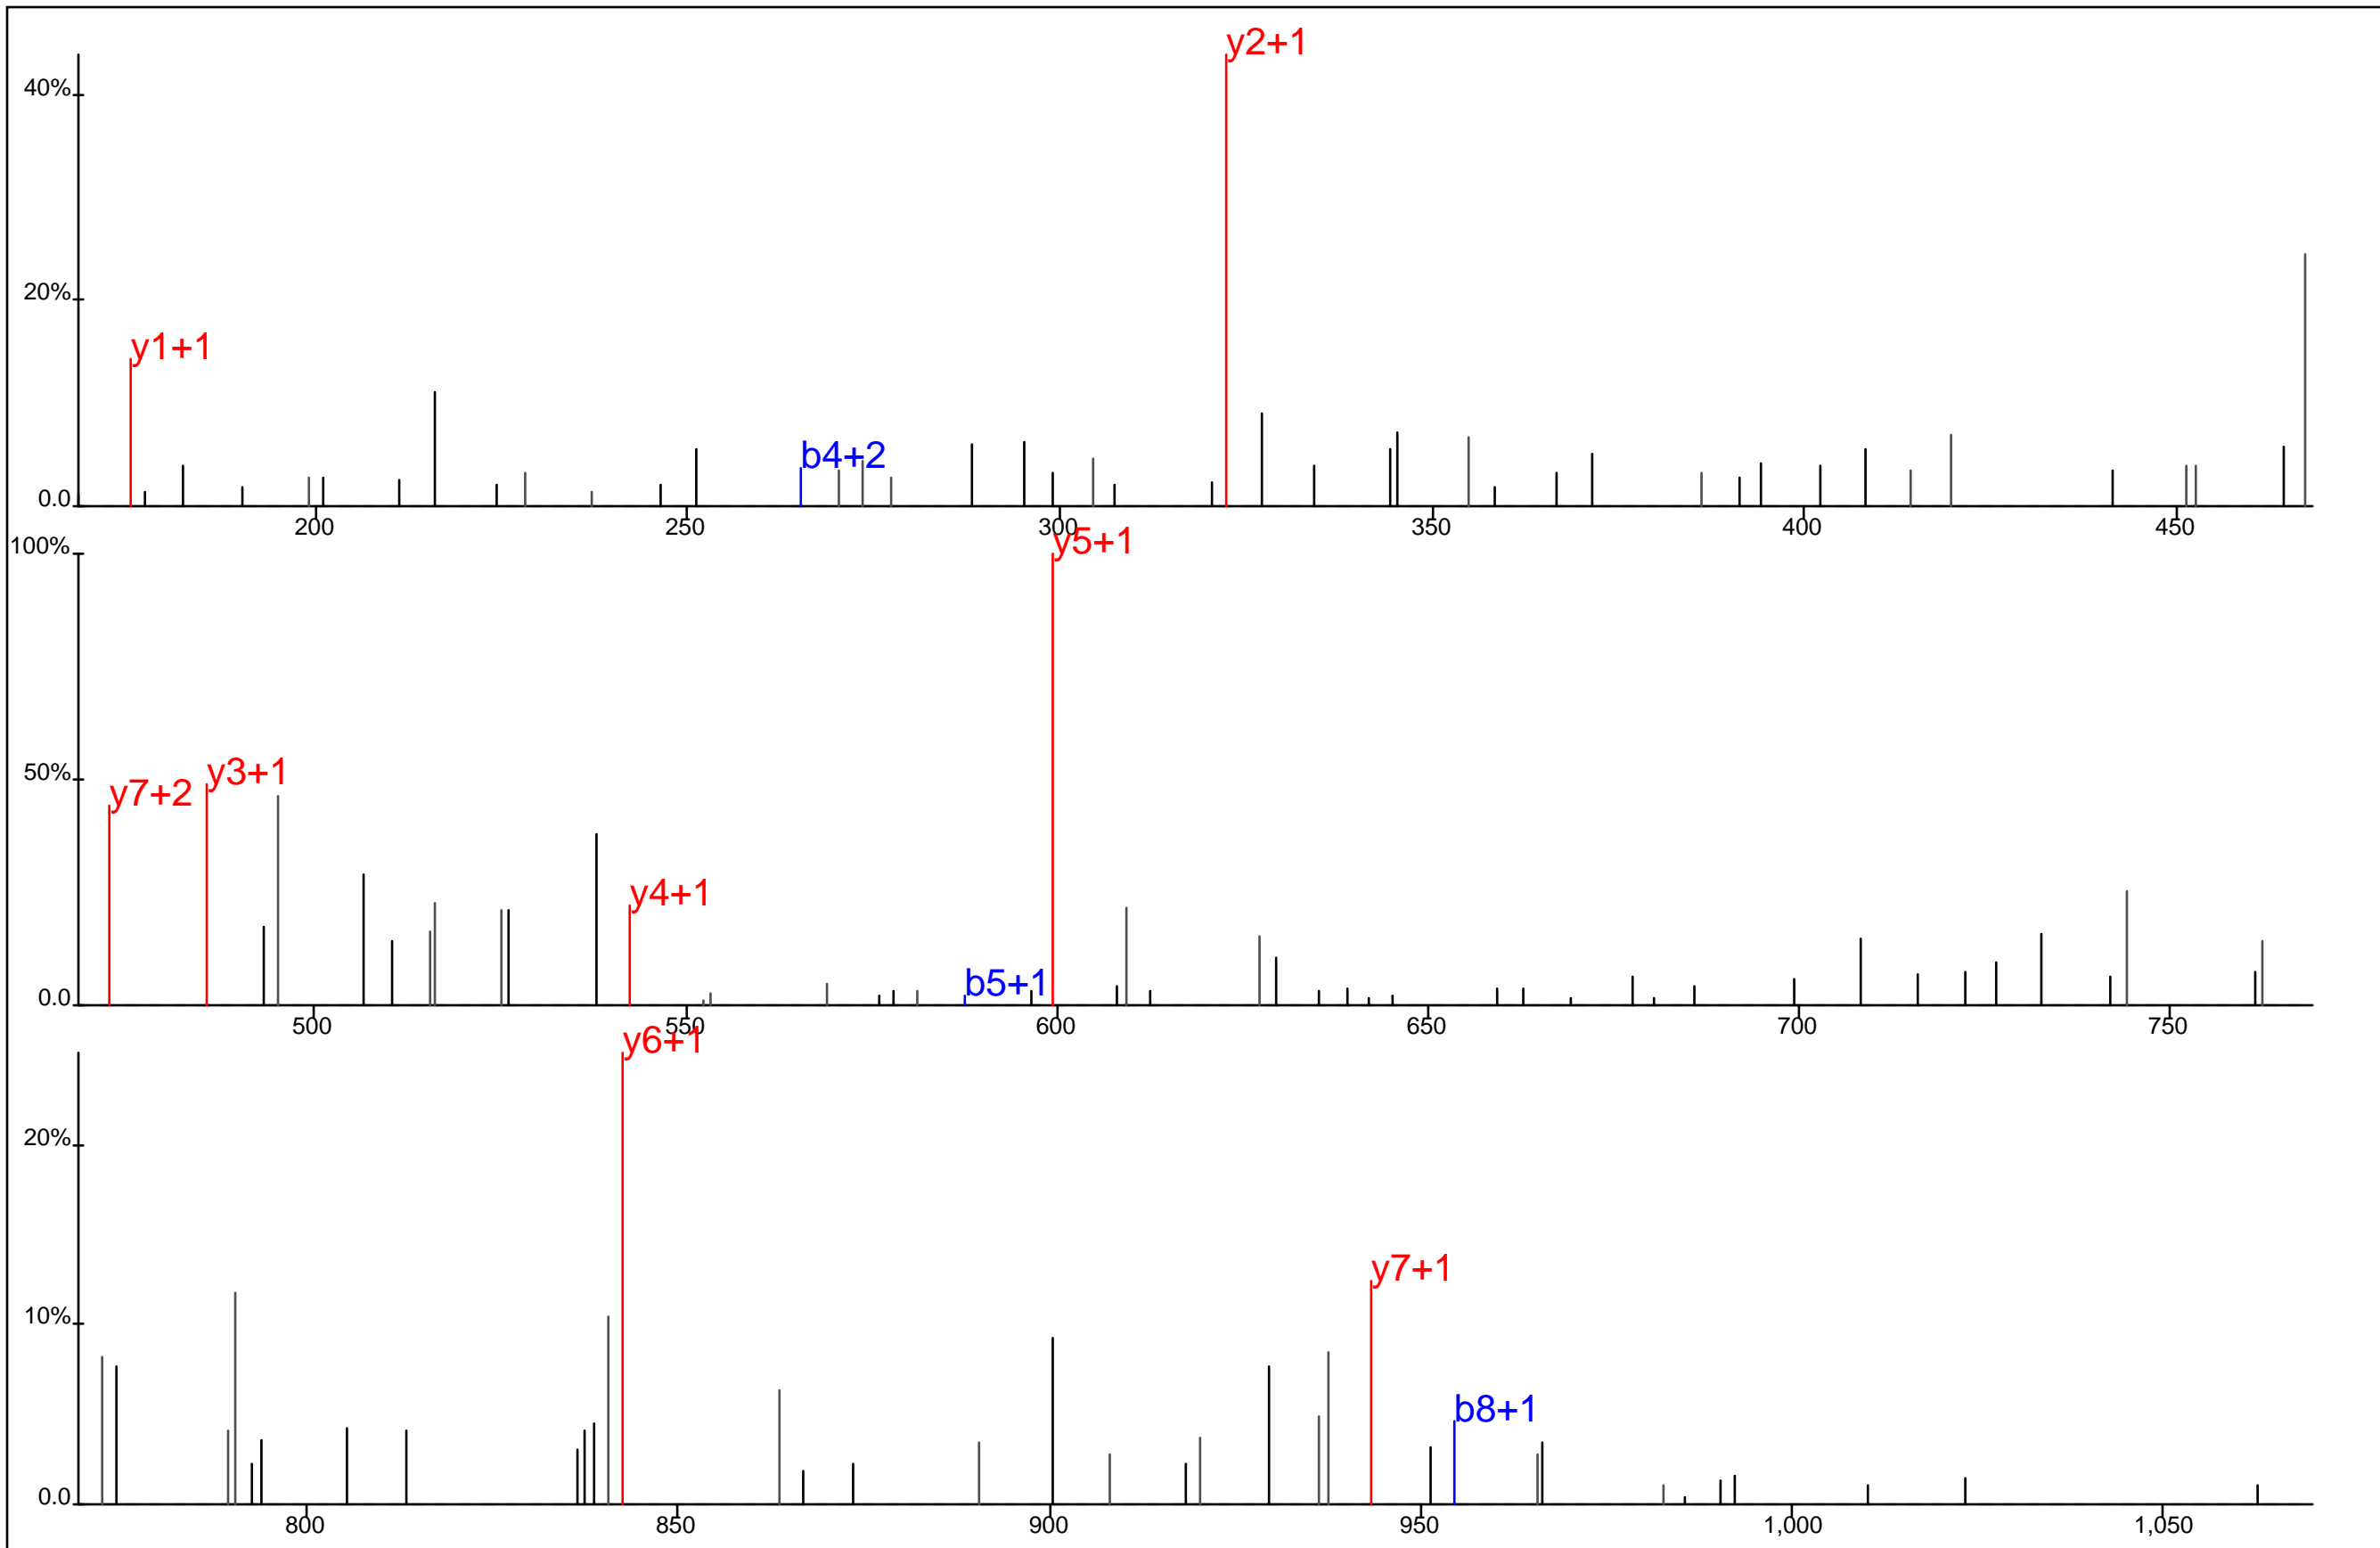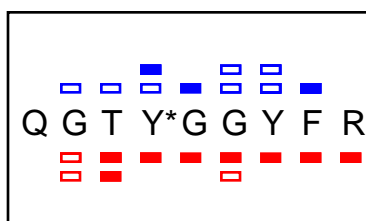

Protein Name: EIF3S8  
 gi Accession: 0  
 Precursor Mass: 564.7289+2  
 Delta Mass: 0.455 ppm  
 XCorr: 41.54

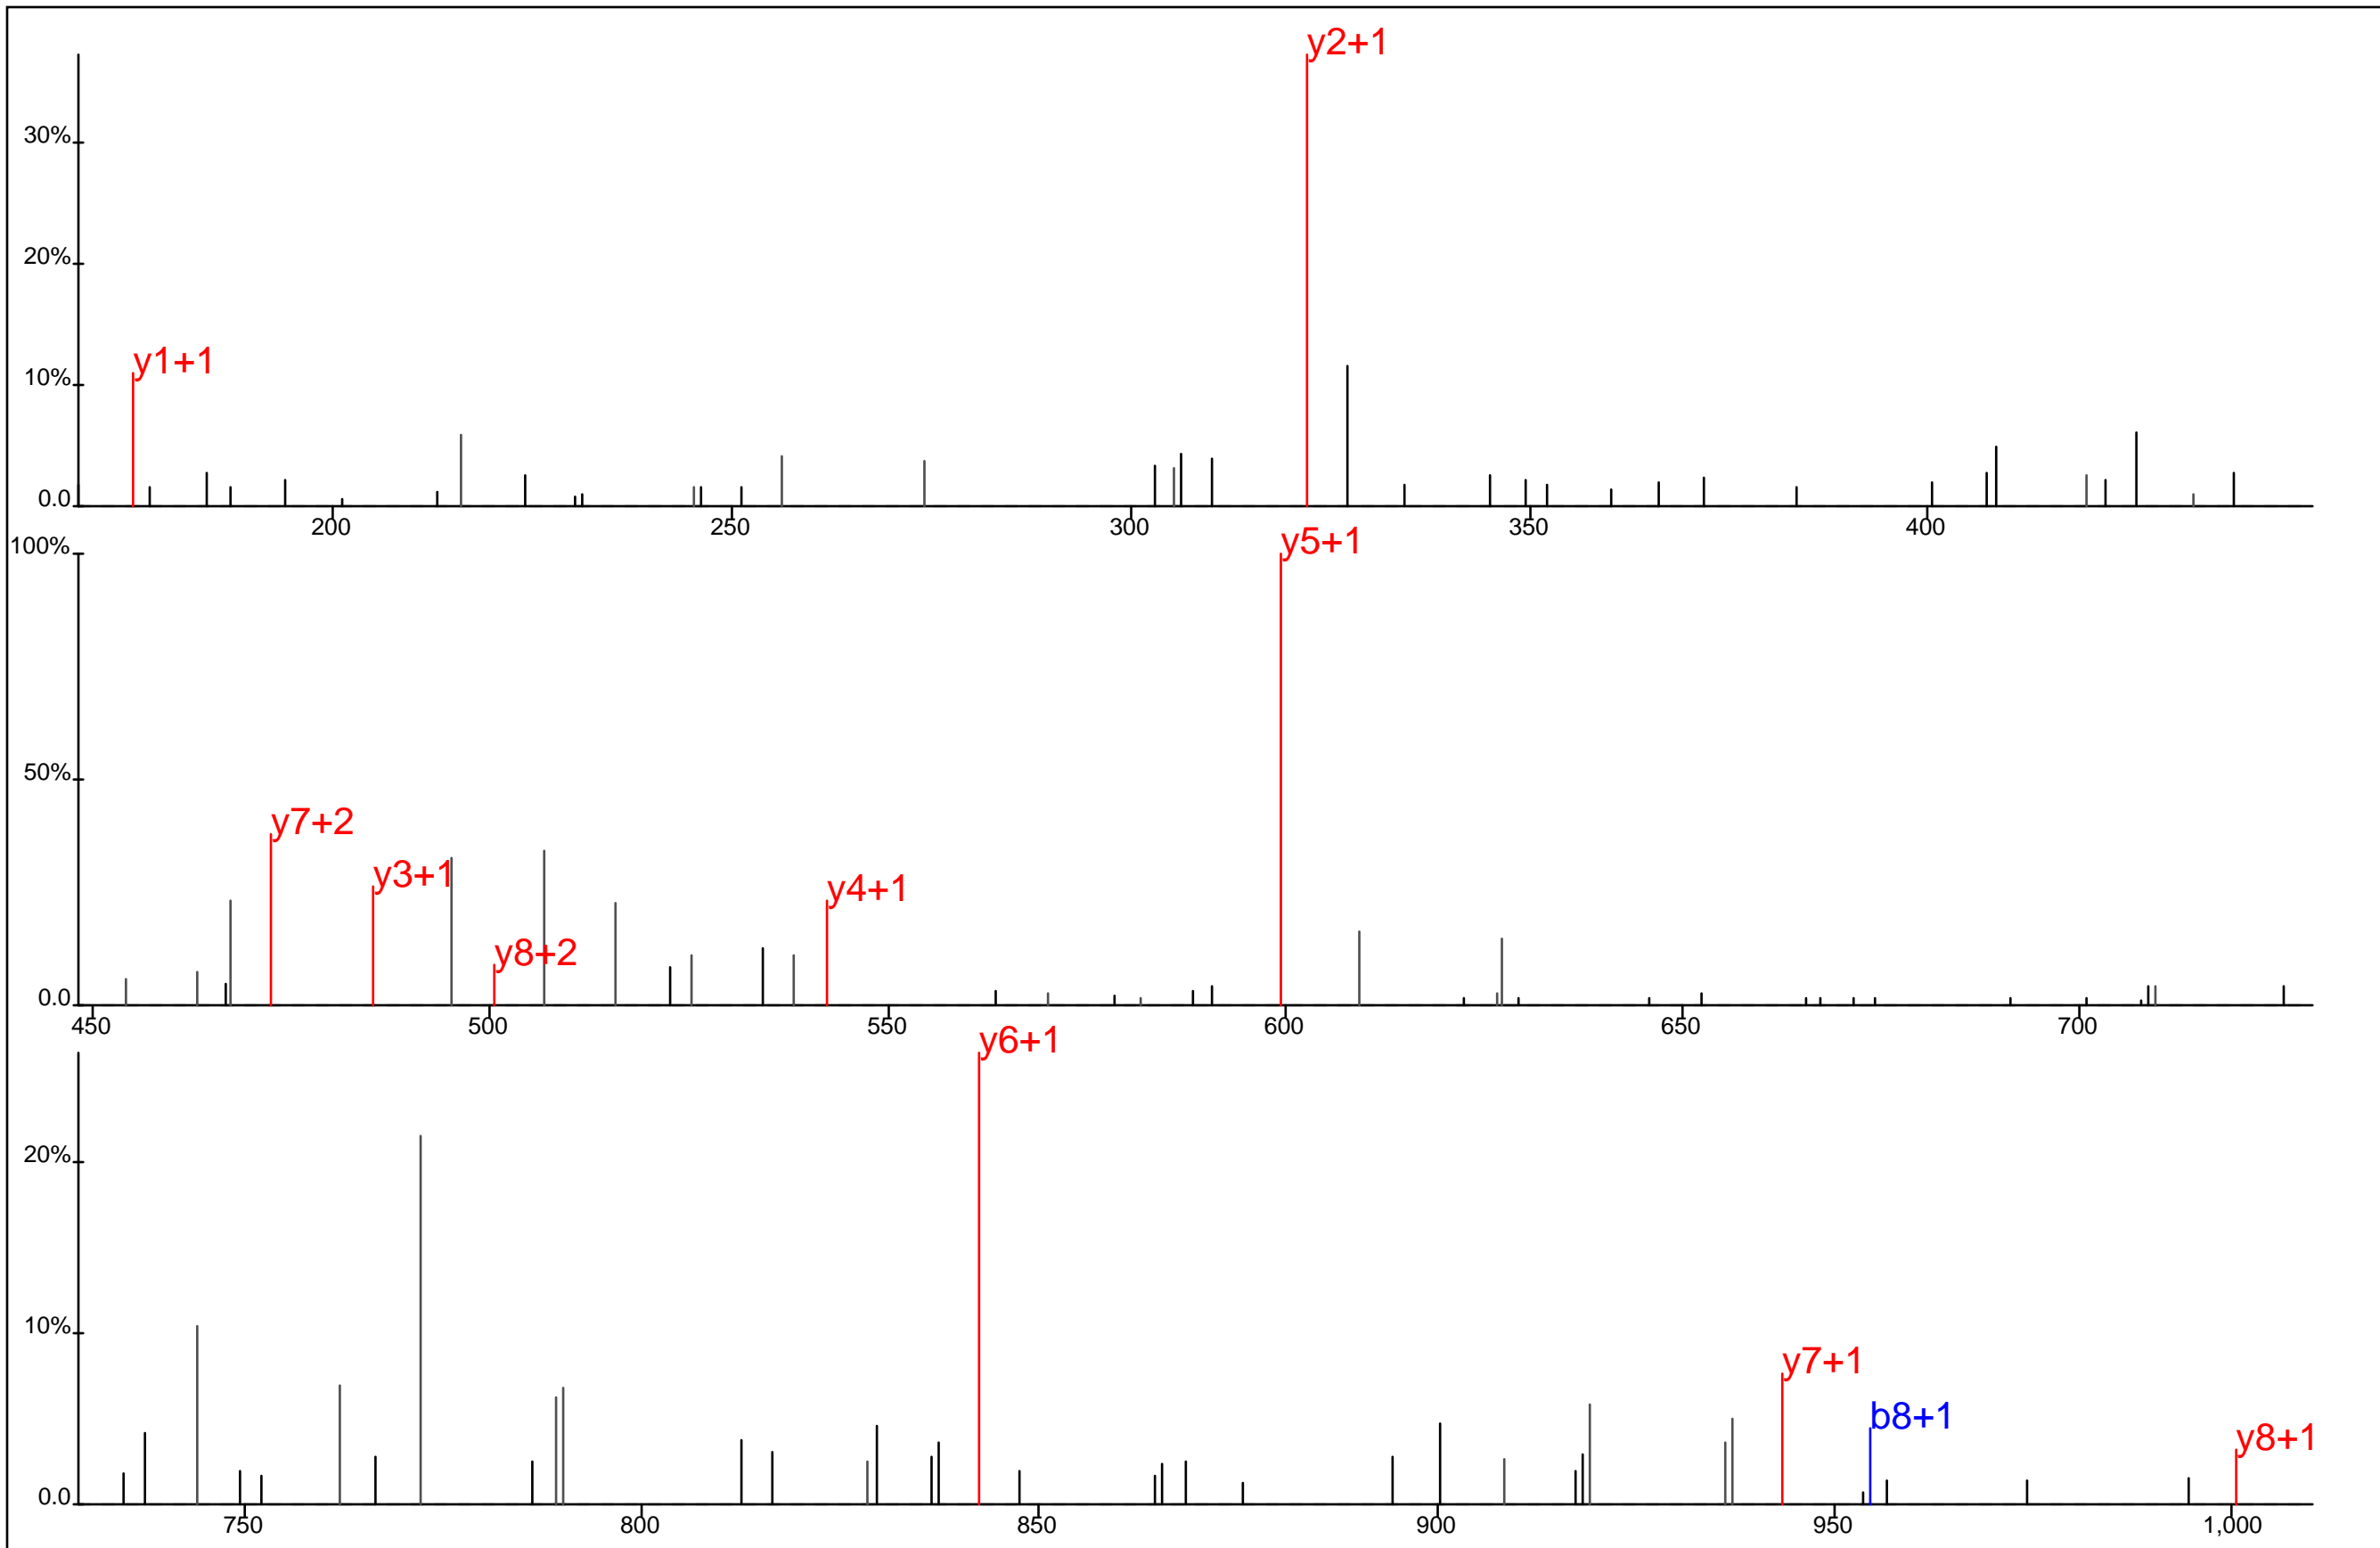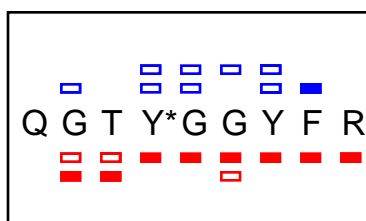

Protein Name: EIF3S8  
 gi Accession: 0  
 Precursor Mass: 564.7299+2  
 Delta Mass: 1.382 ppm  
 XCorr: 45.63

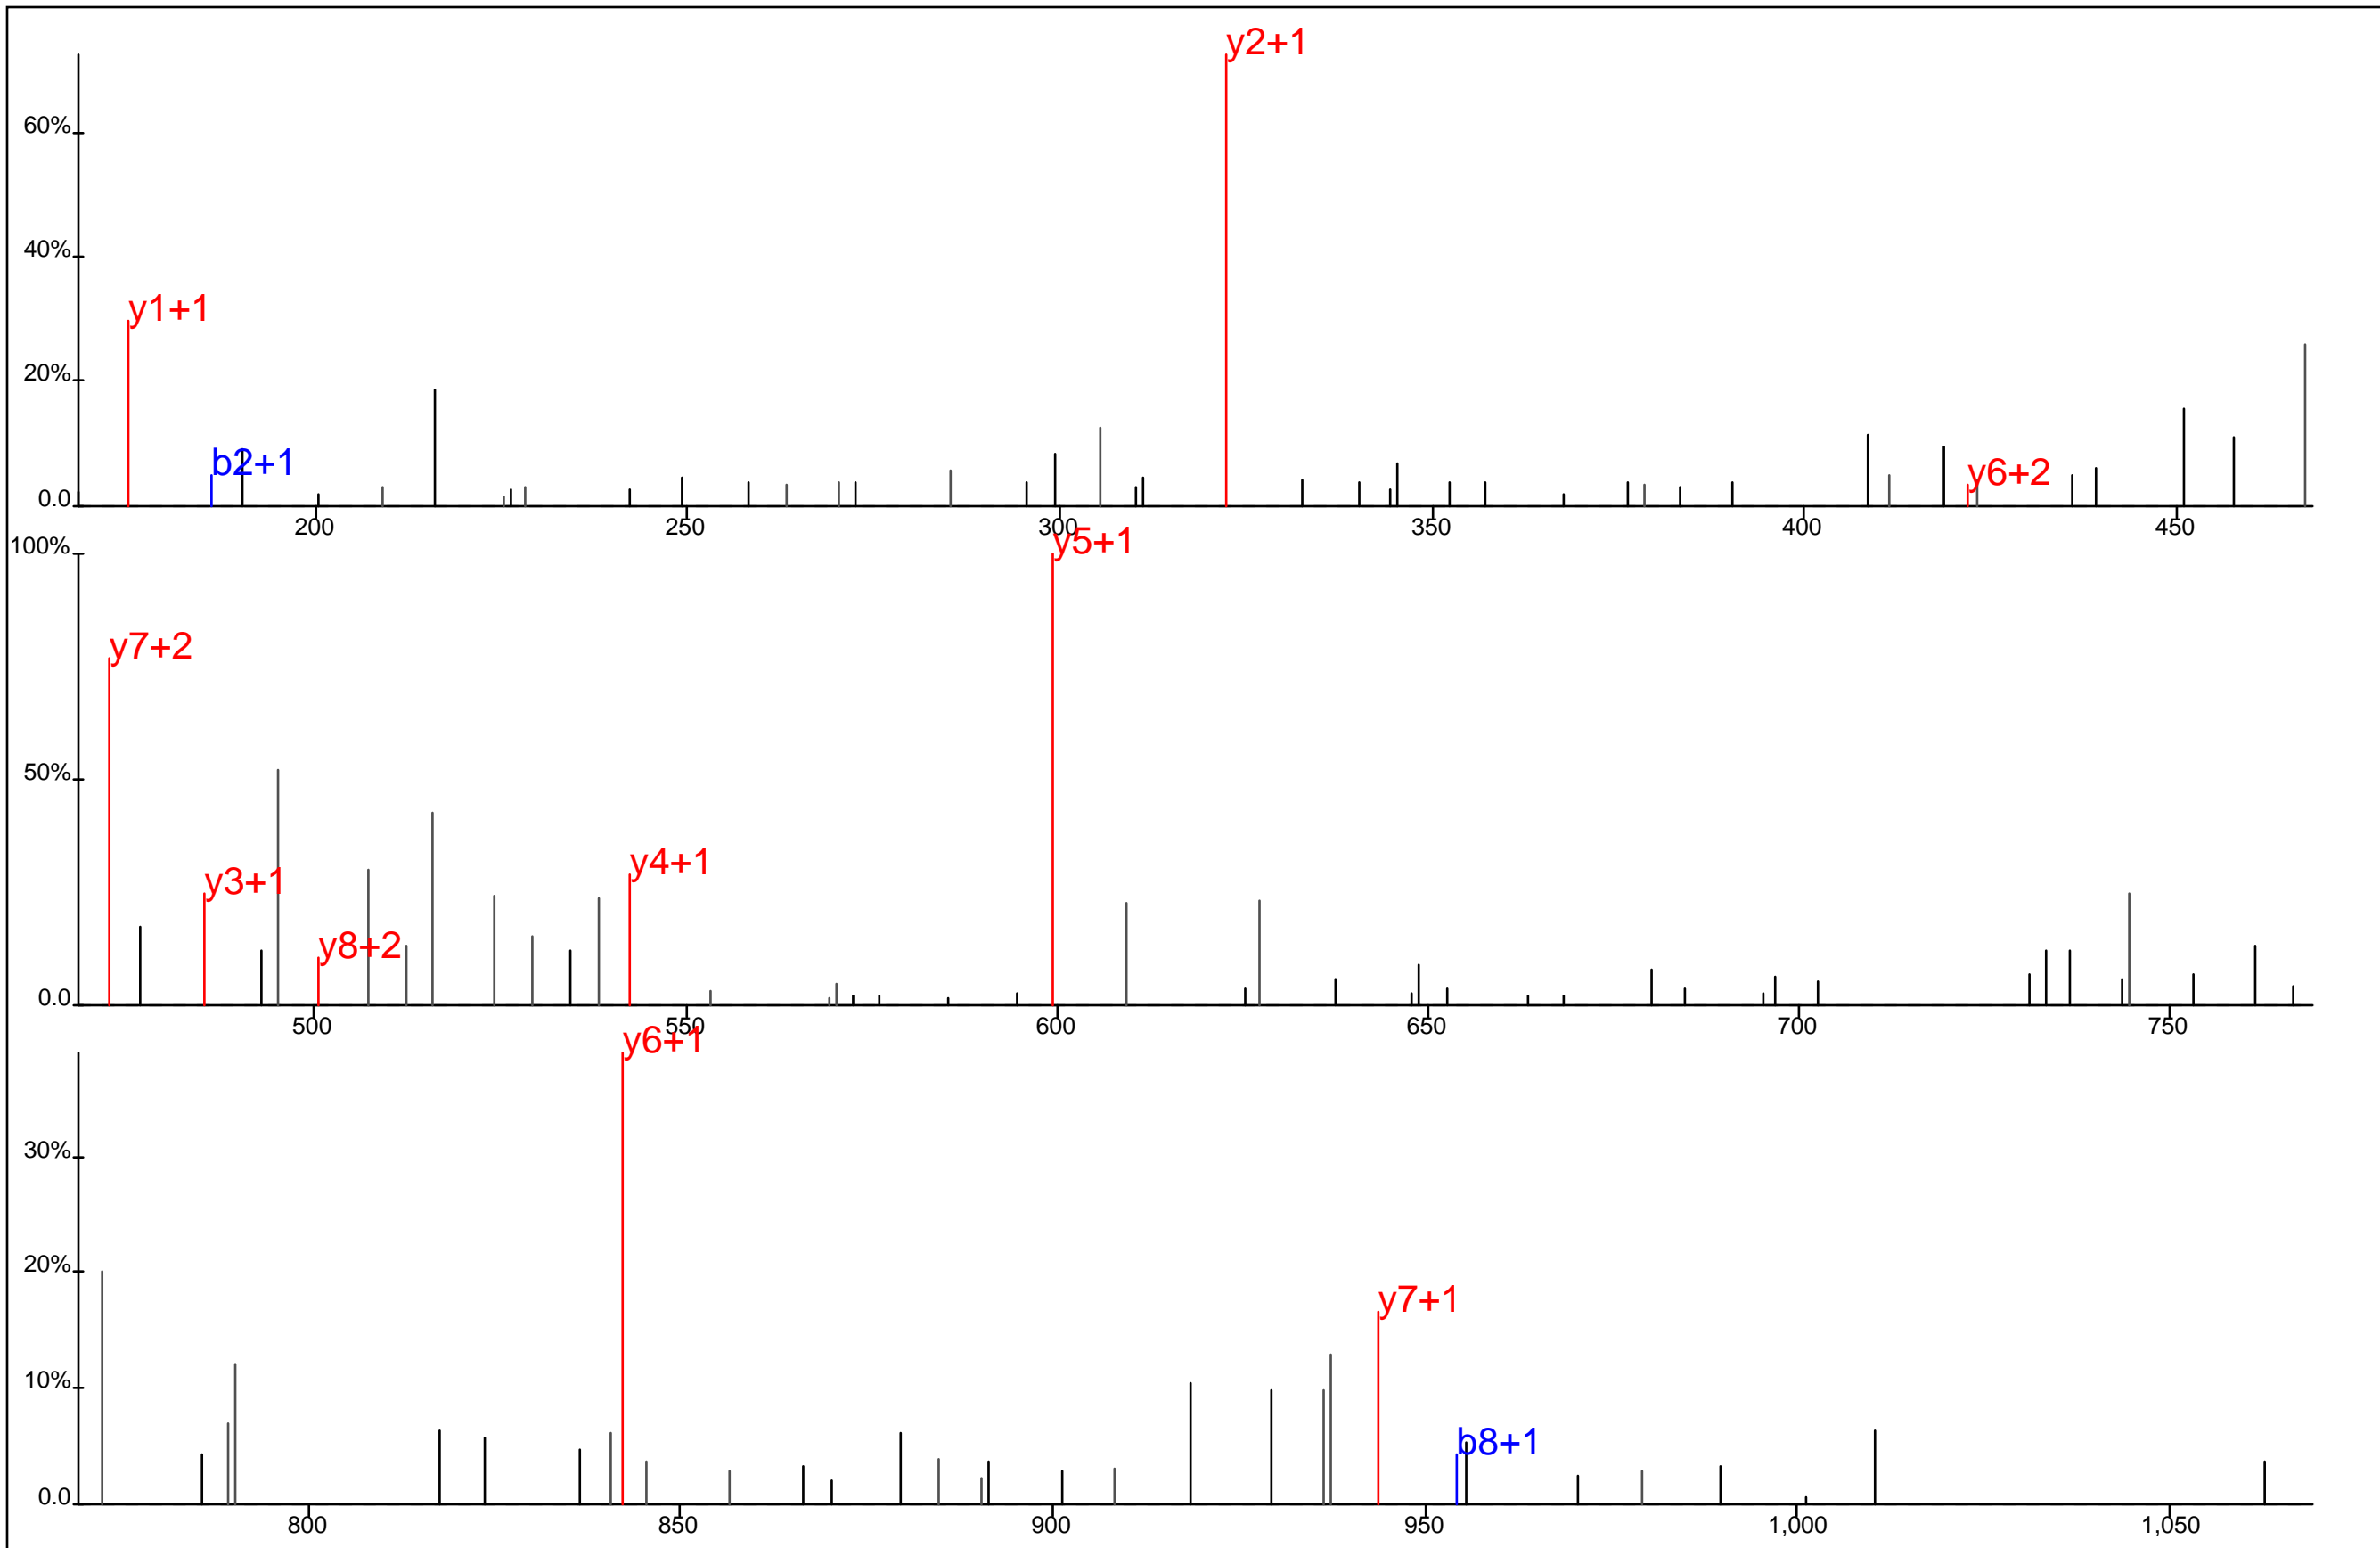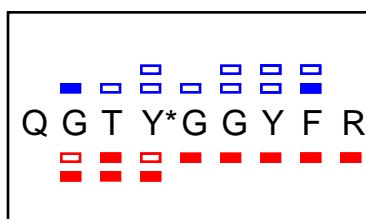

Protein Name: EIF3S8  
 gi Accession: 0  
 Precursor Mass: 564.7300+2  
 Delta Mass: 1.600 ppm  
 XCorr: 28.56

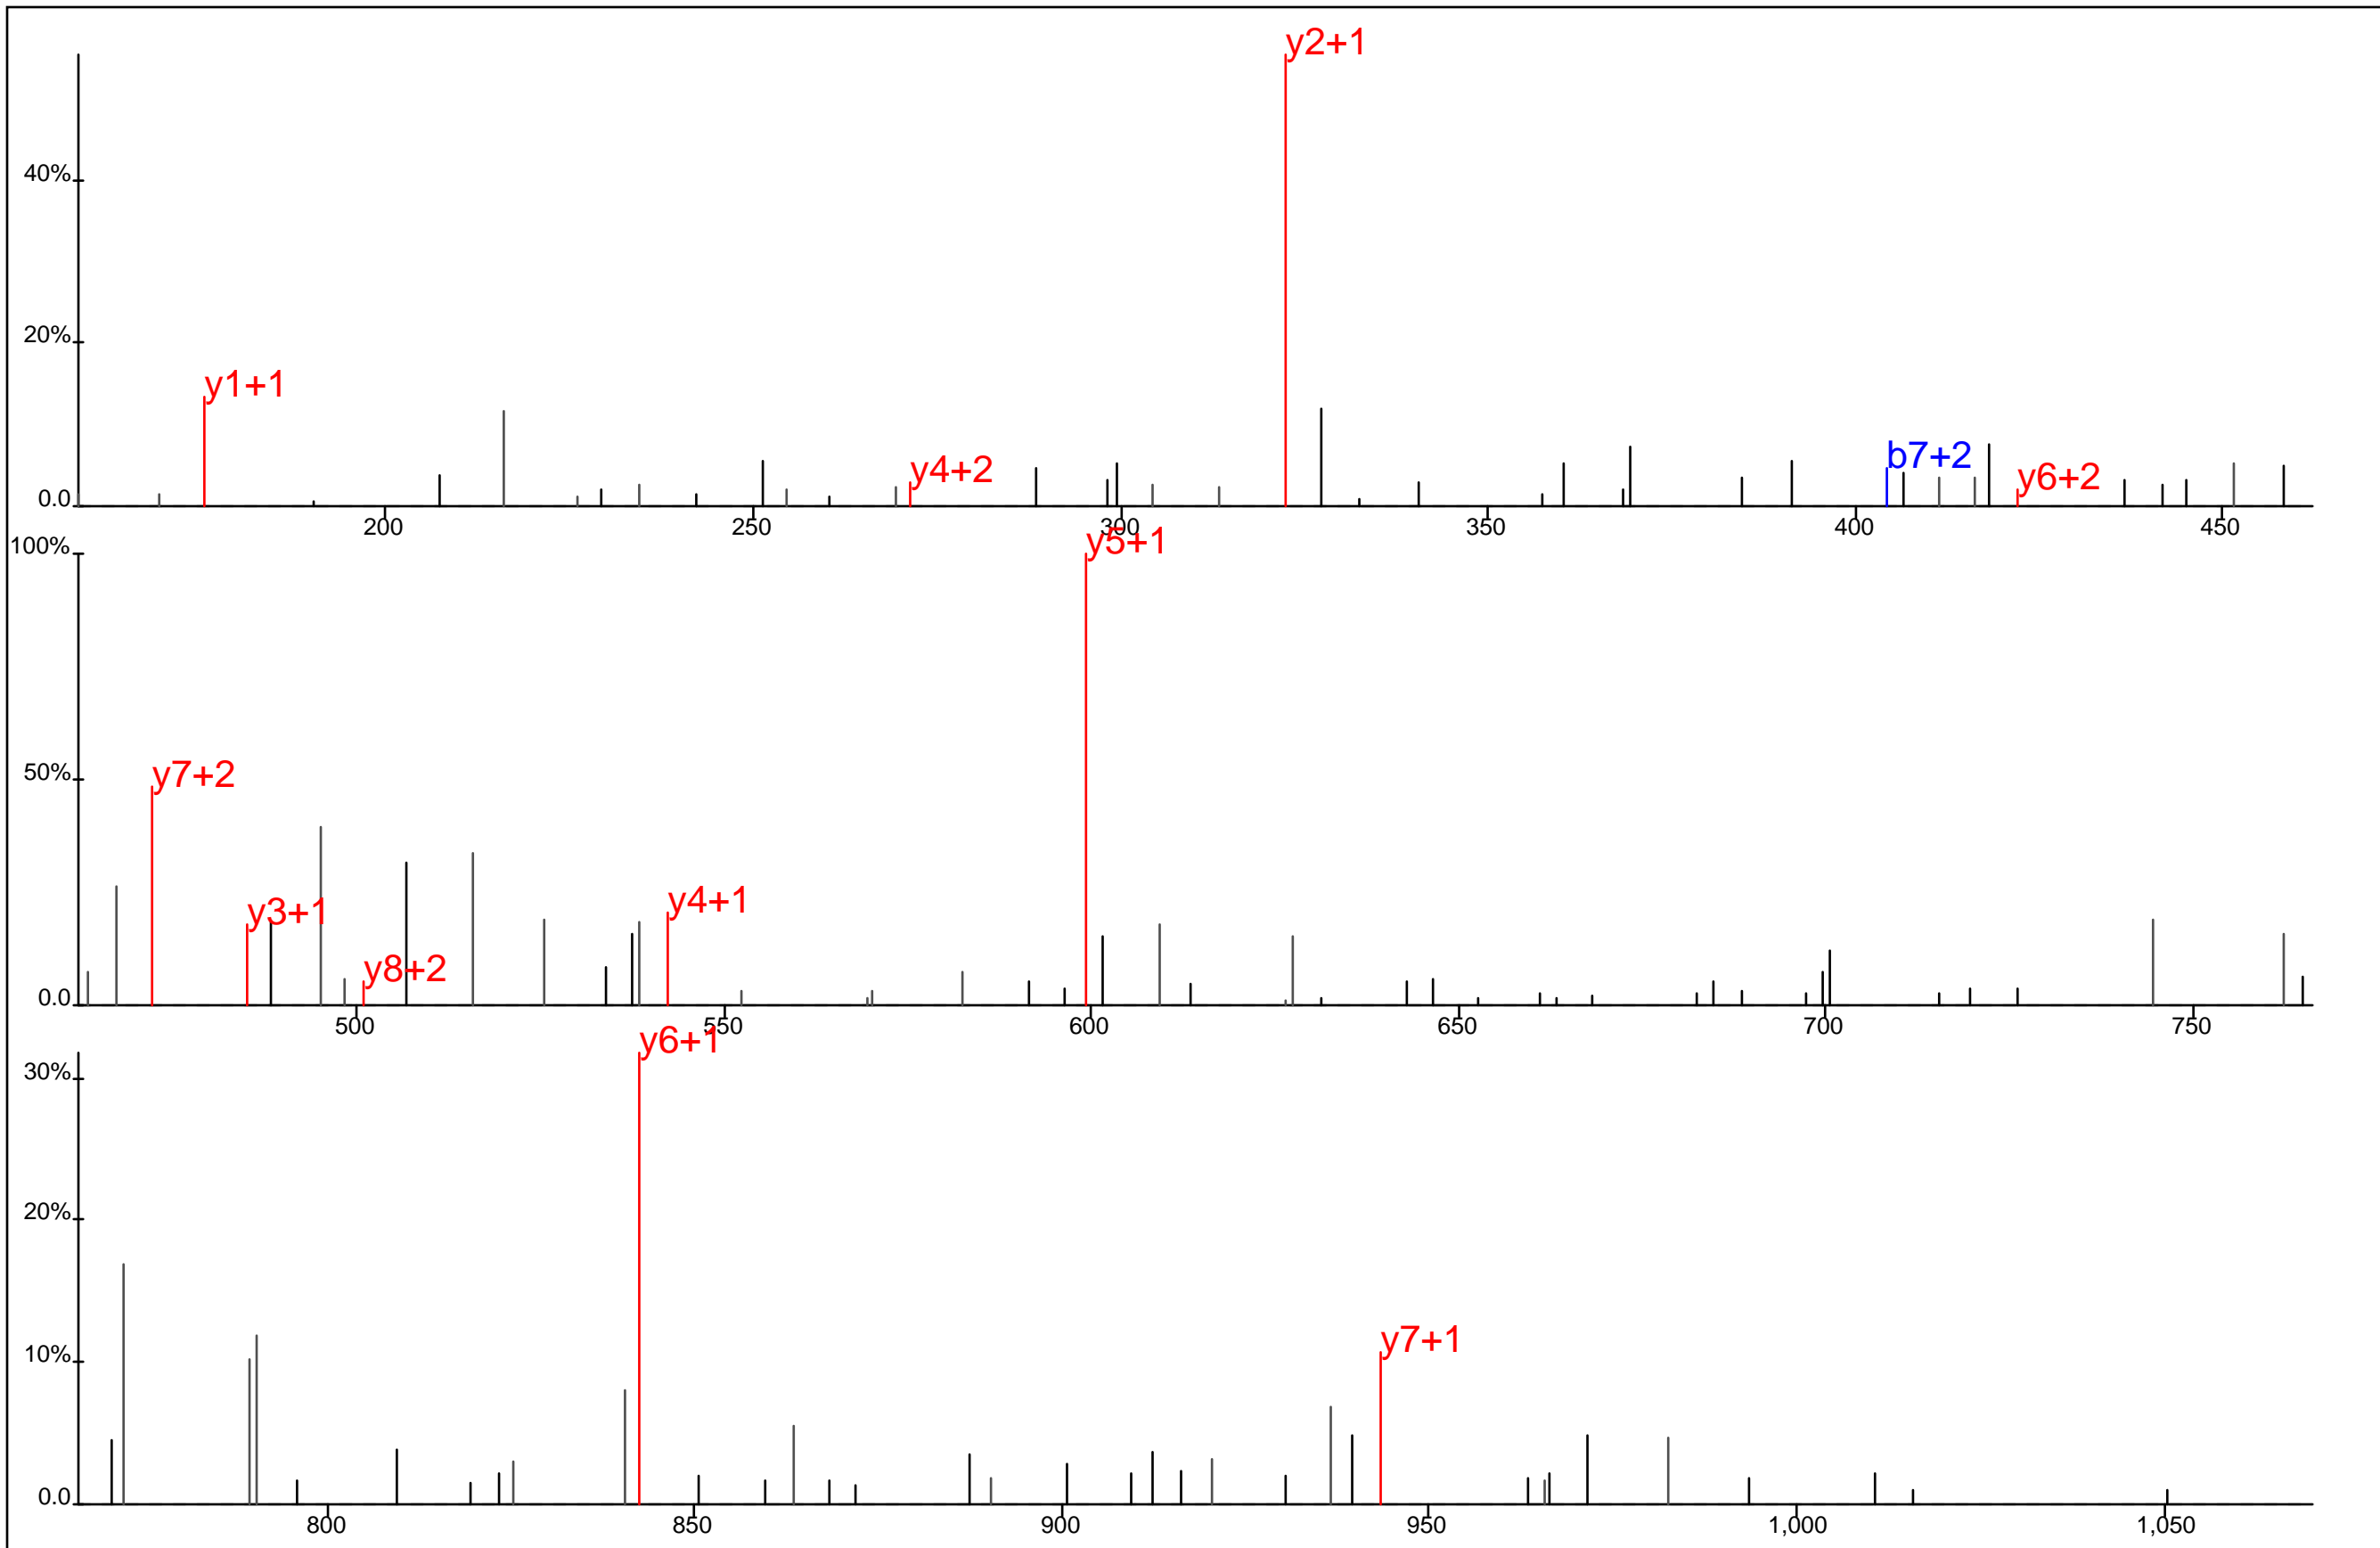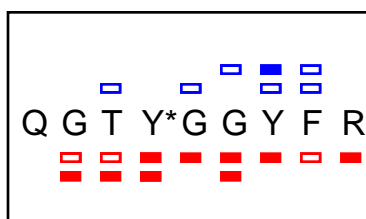

Protein Name: EIF3S8  
 gi Accession: 0  
 Precursor Mass: 564.7303+2  
 Delta Mass: 2.033 ppm  
 XCorr: 28.54

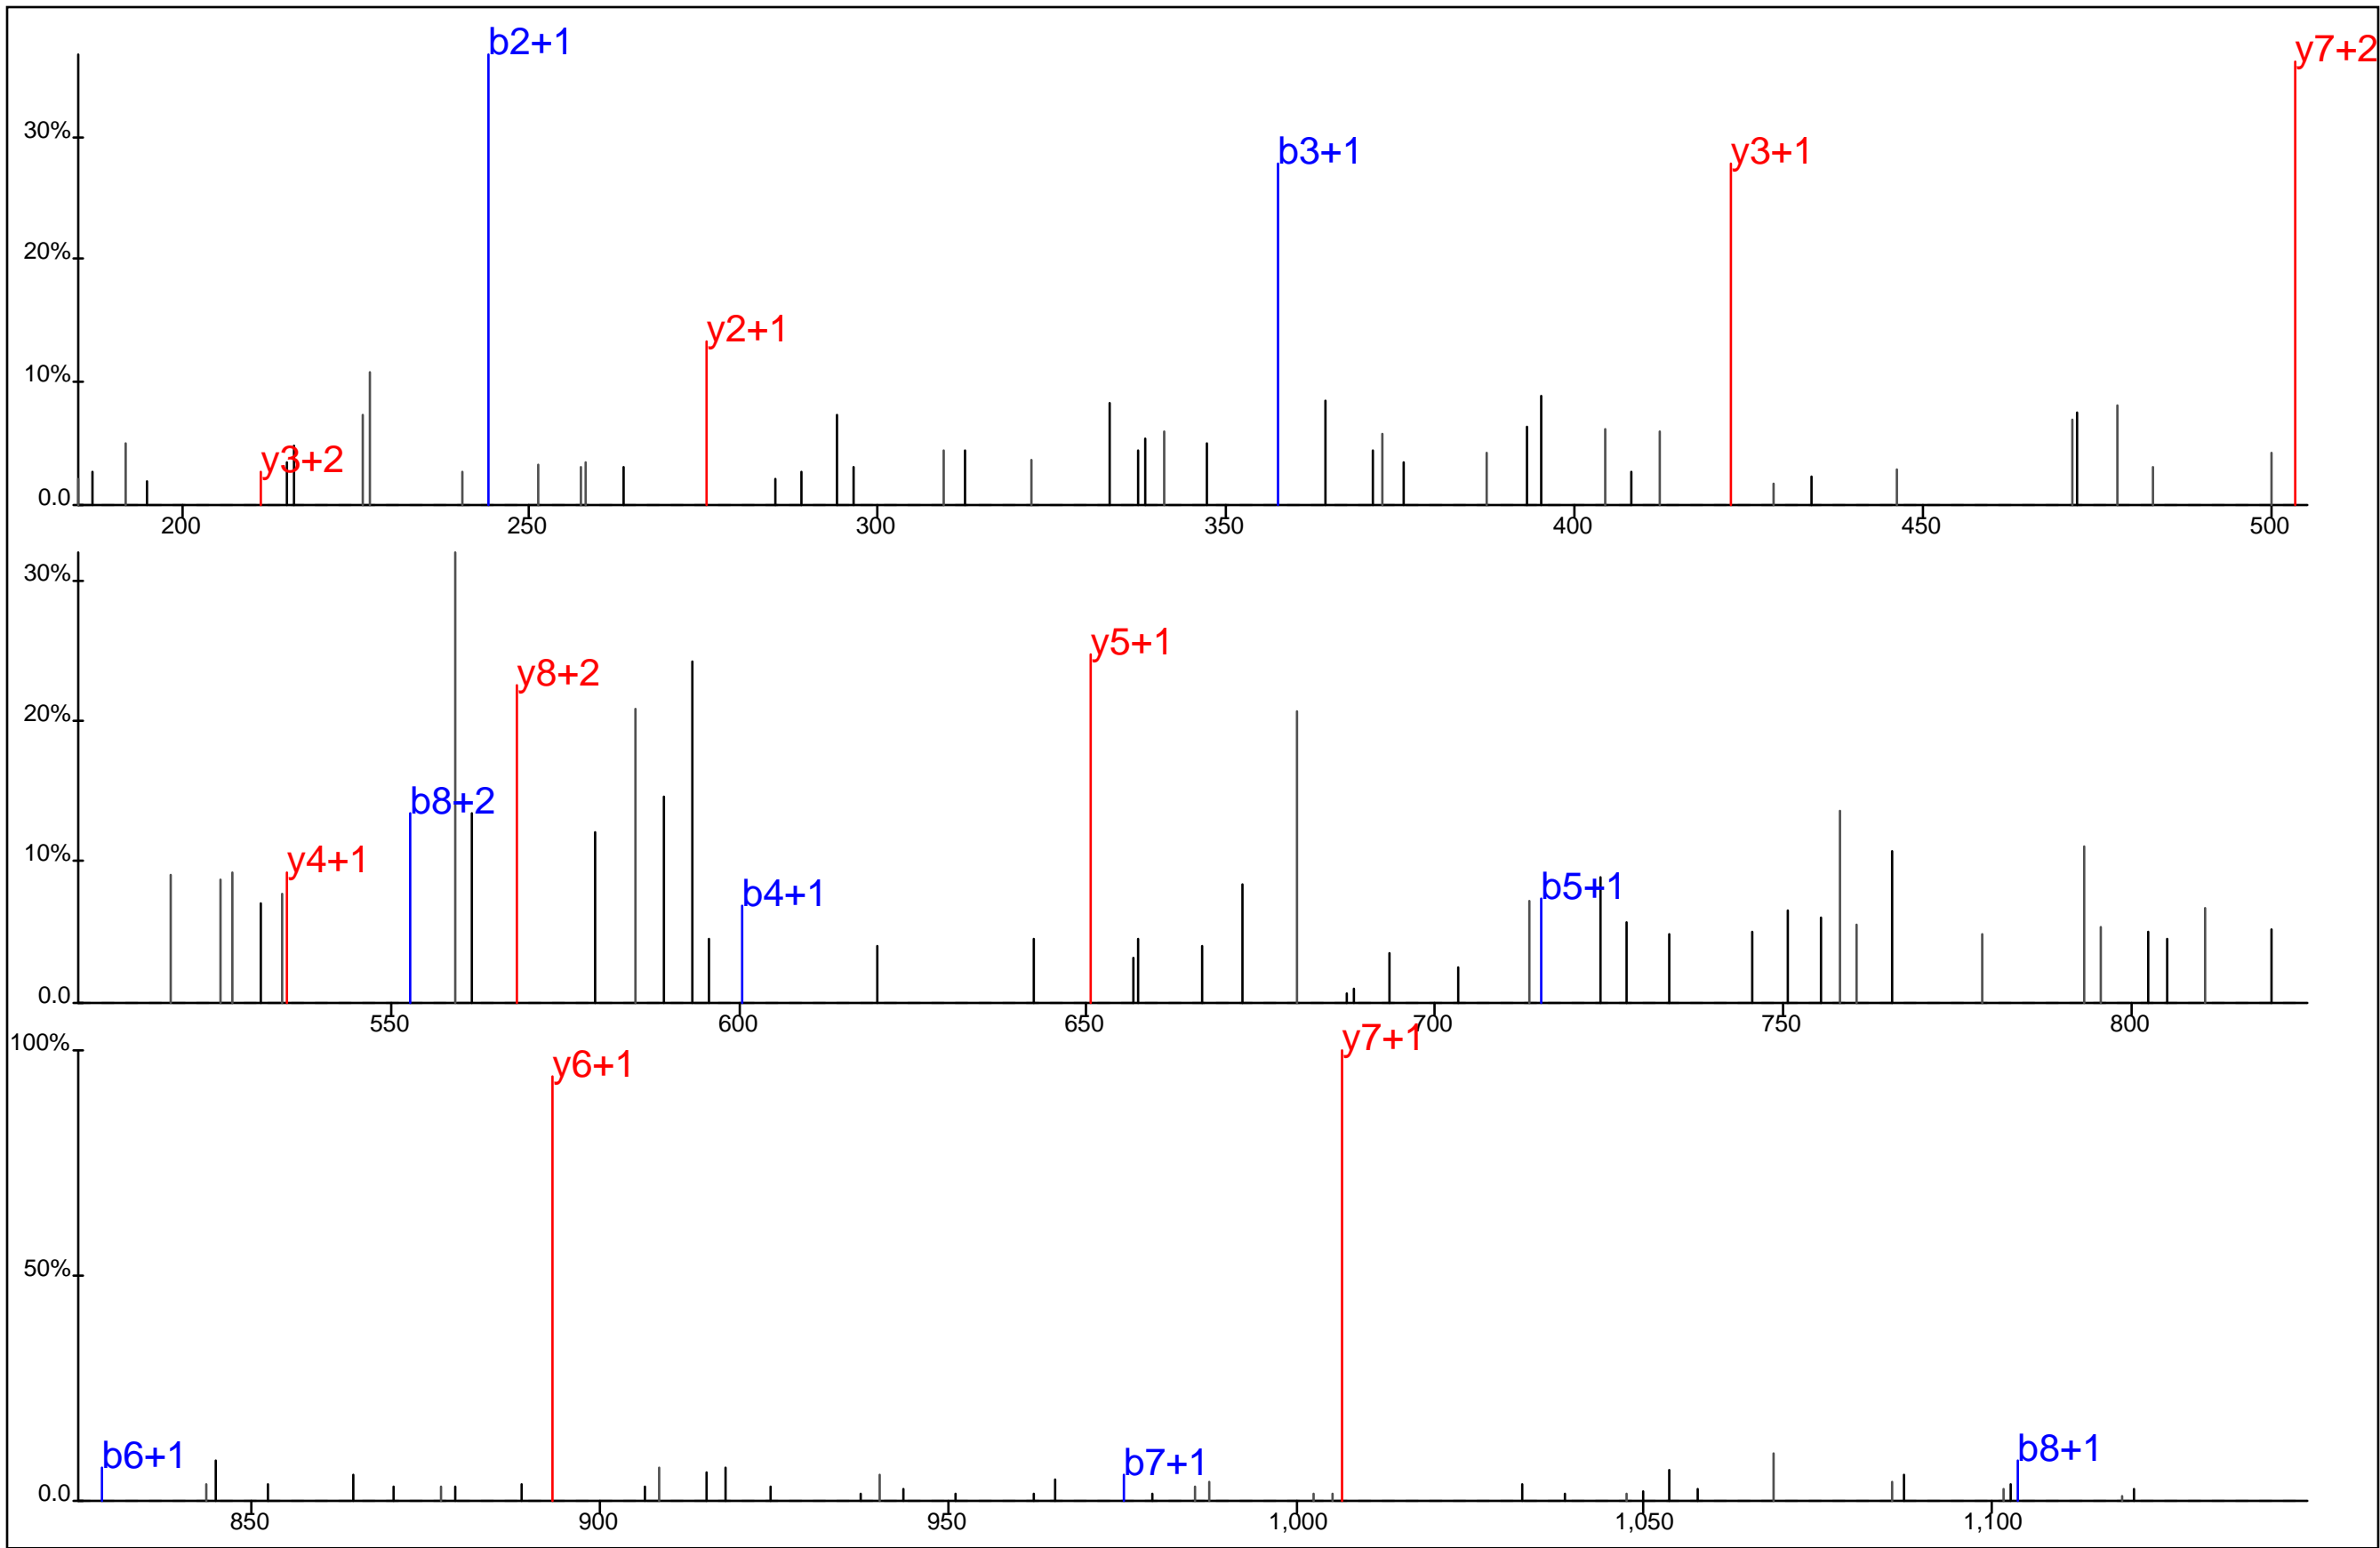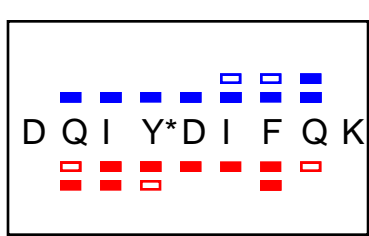

Protein Name: EIF4A1  
 gi Accession: 0  
 Precursor Mass: 625.2785+2  
 Delta Mass: 0.242 ppm  
 XCorr: 26.8

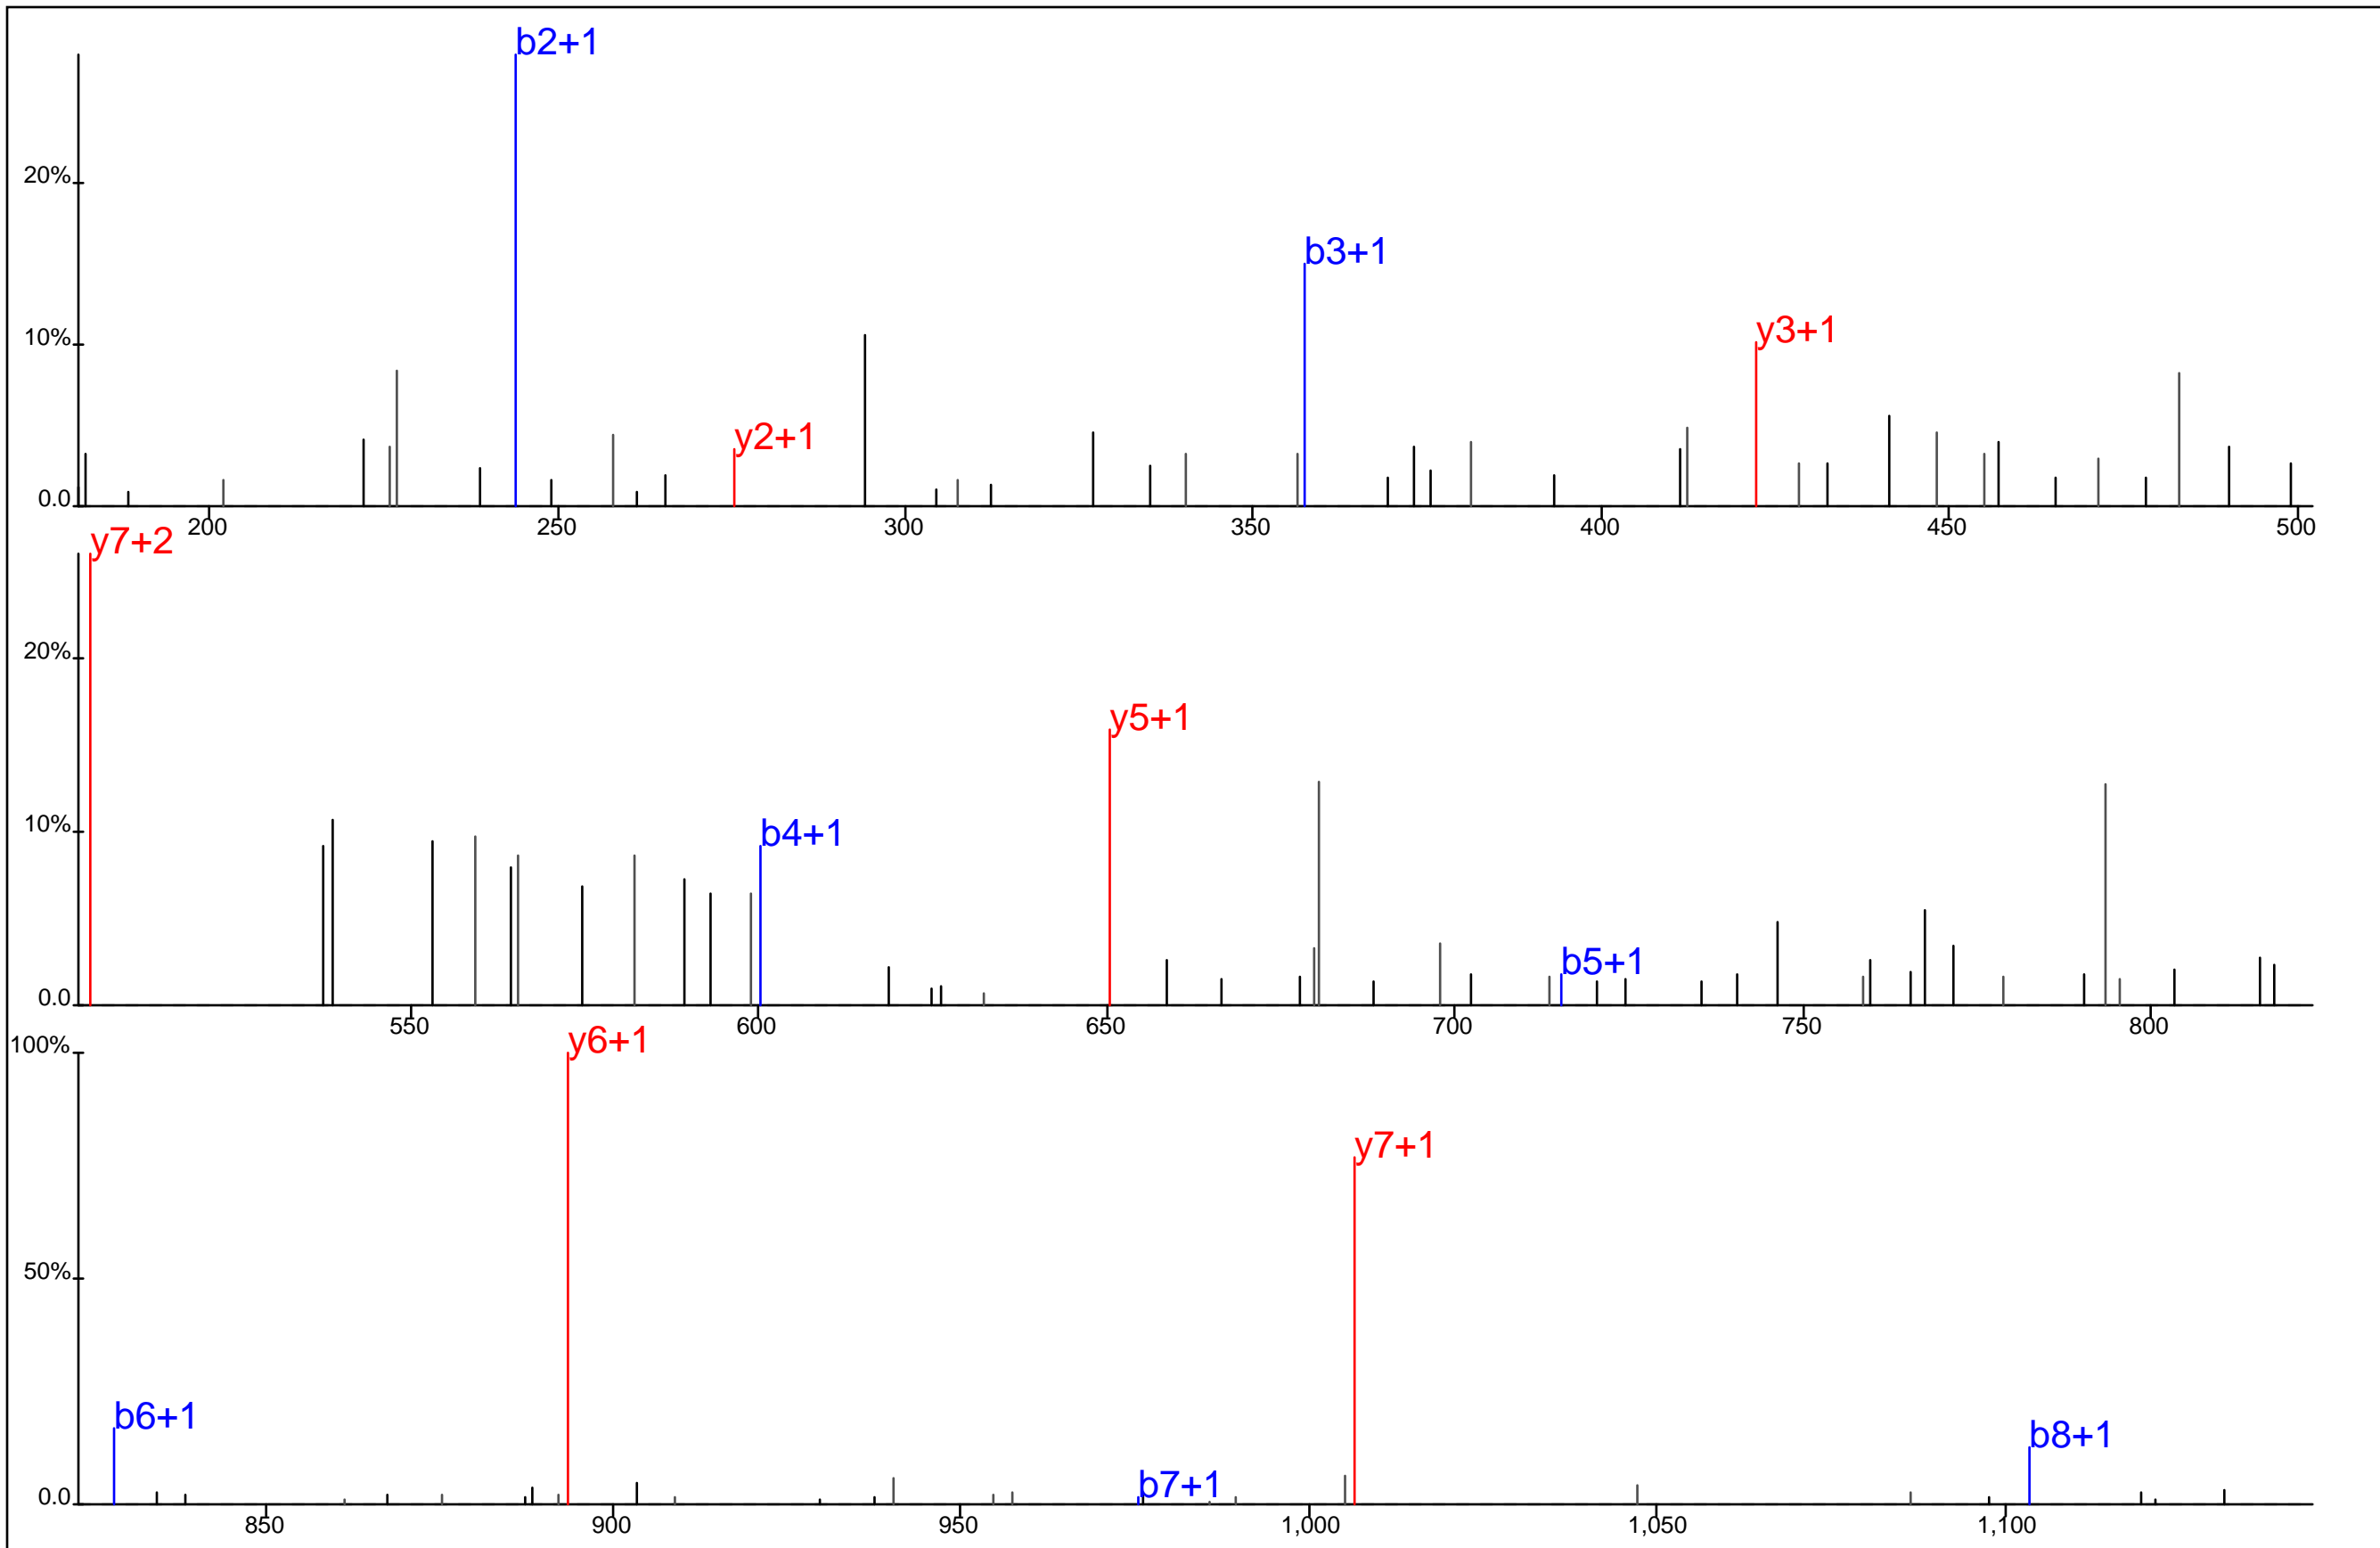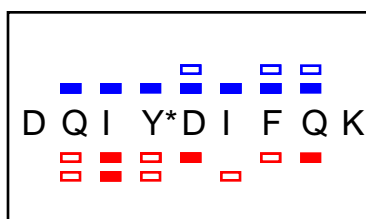

Protein Name: EIF4A1  
 gi Accession: 0  
 Precursor Mass: 625.2781+2  
 Delta Mass: 0.827 ppm  
 XCorr: 34.65



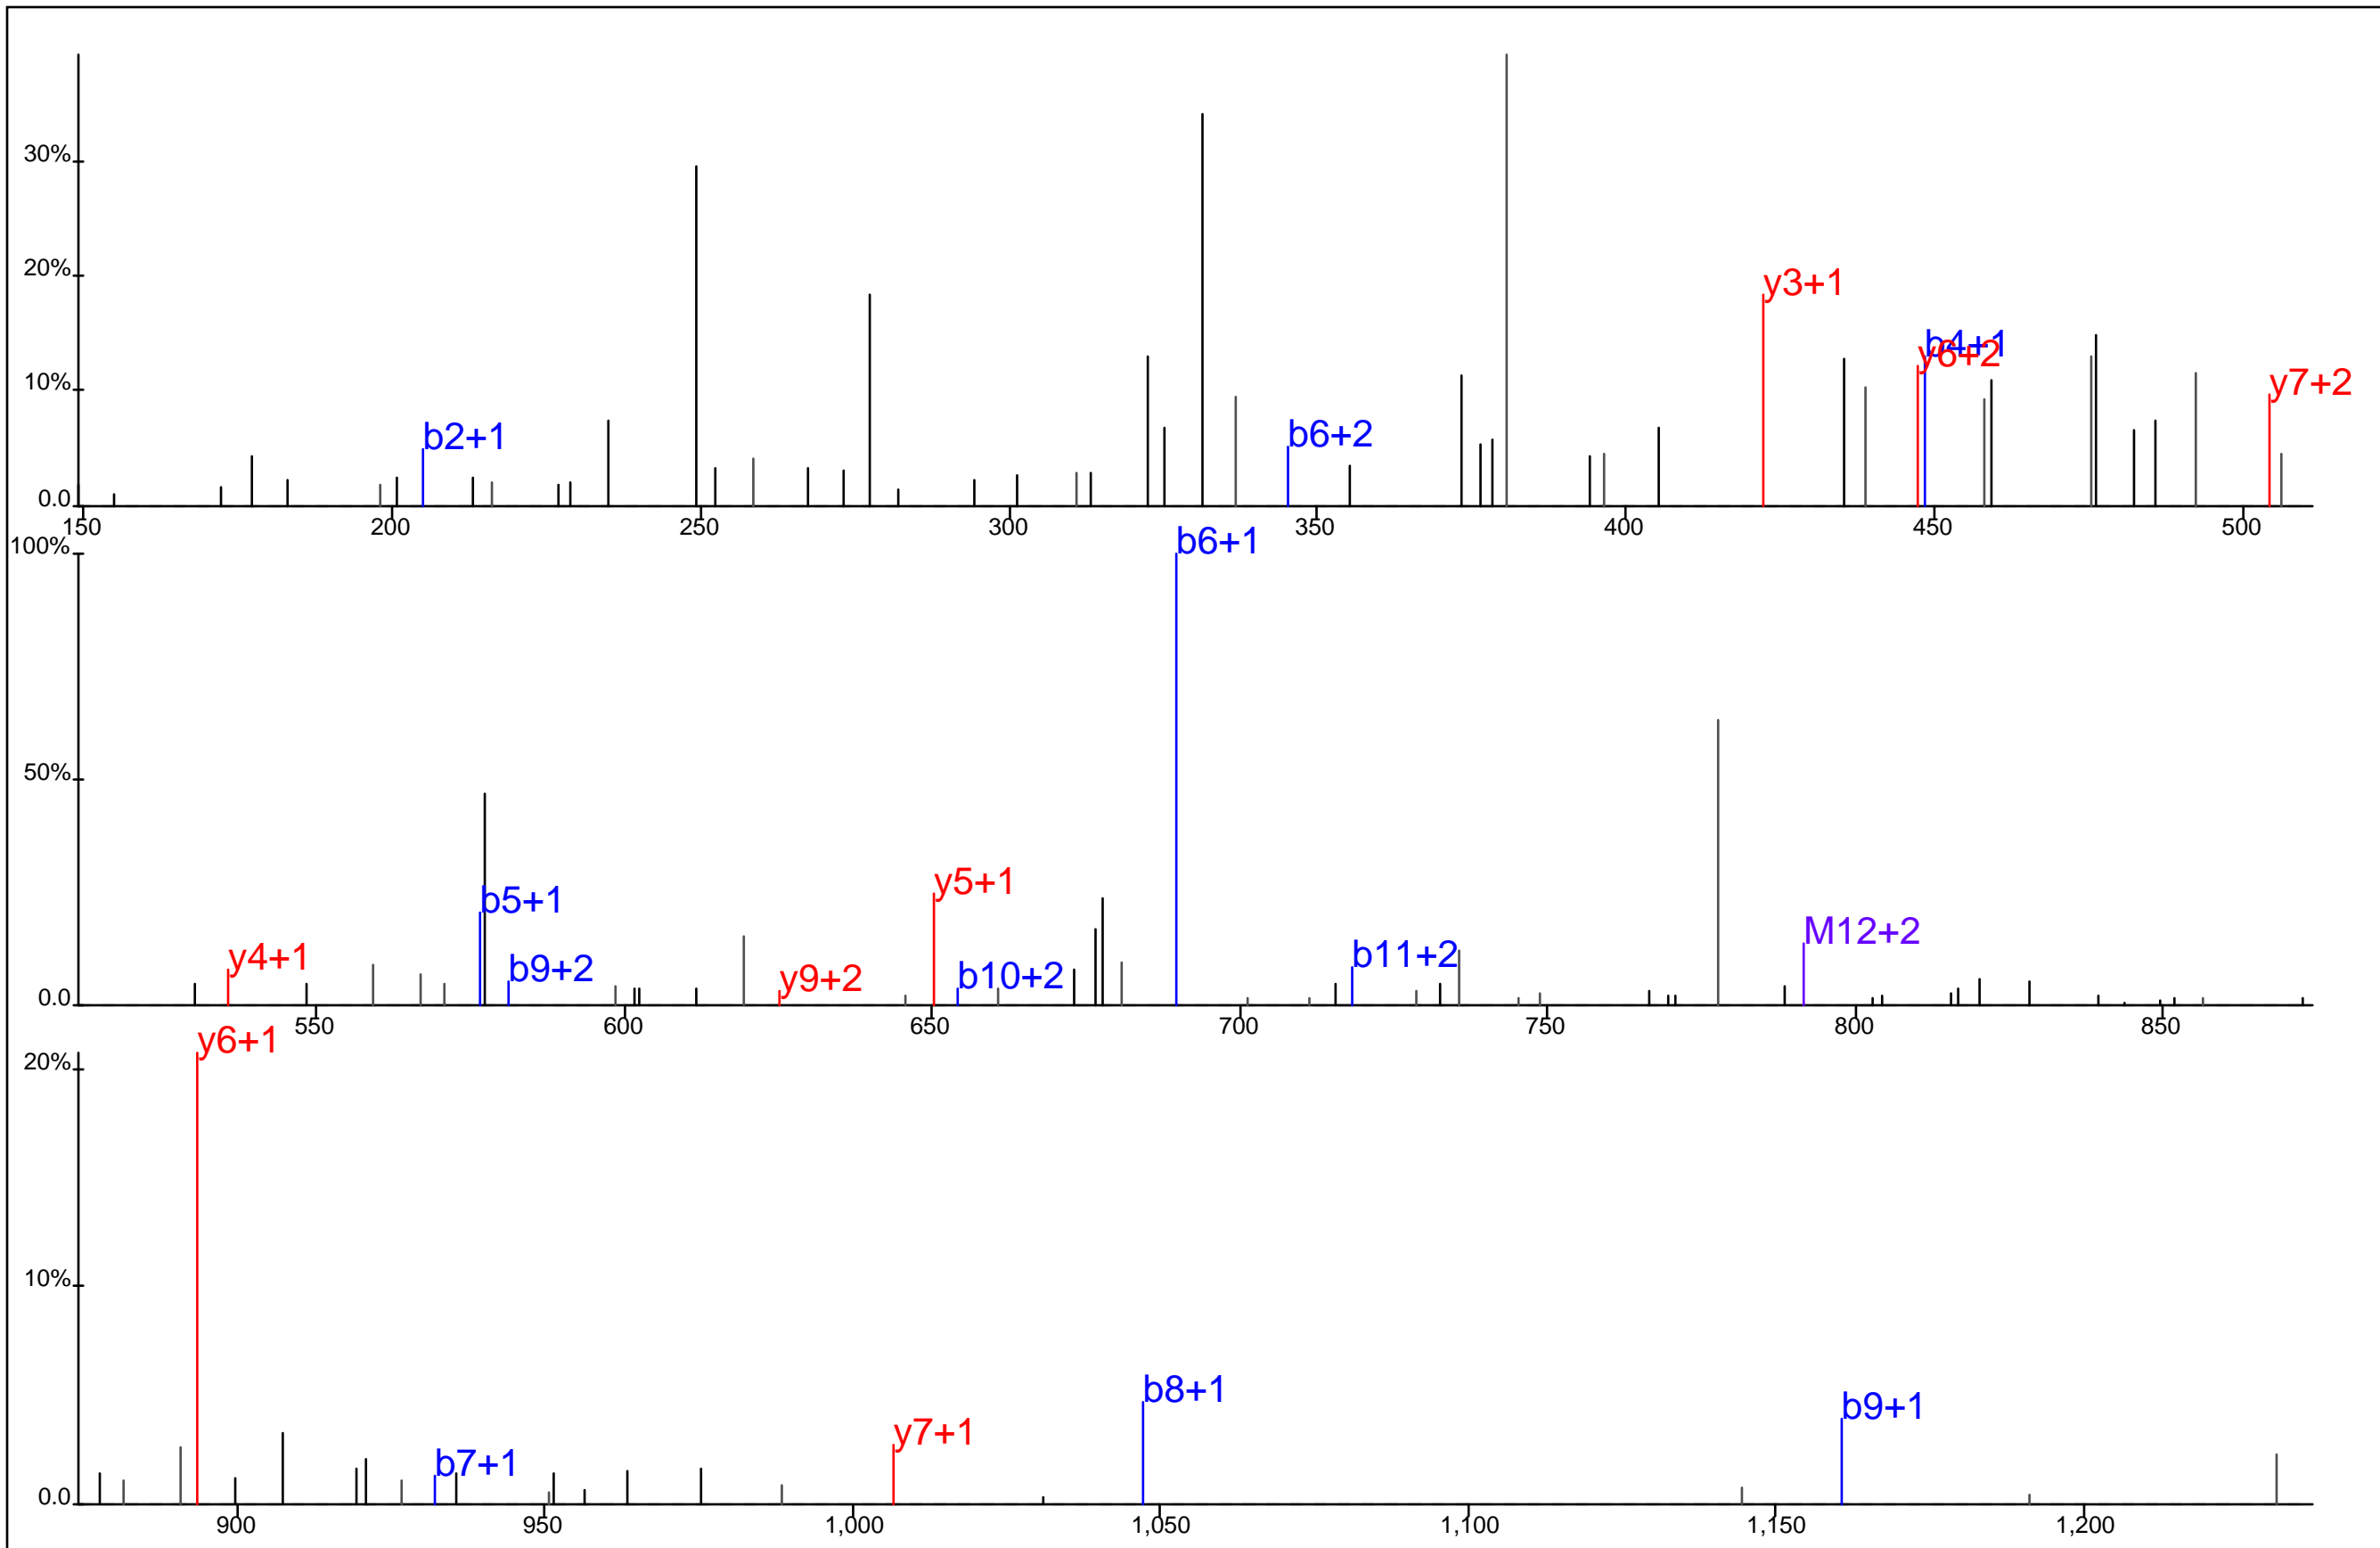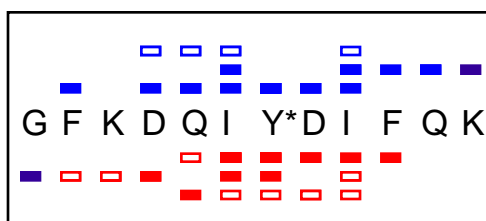

Protein Name: EIF4A1  
 gi Accession: 0  
 Precursor Mass: 527.9148+3  
 Delta Mass: 3.186 ppm  
 XCorr: 20.38

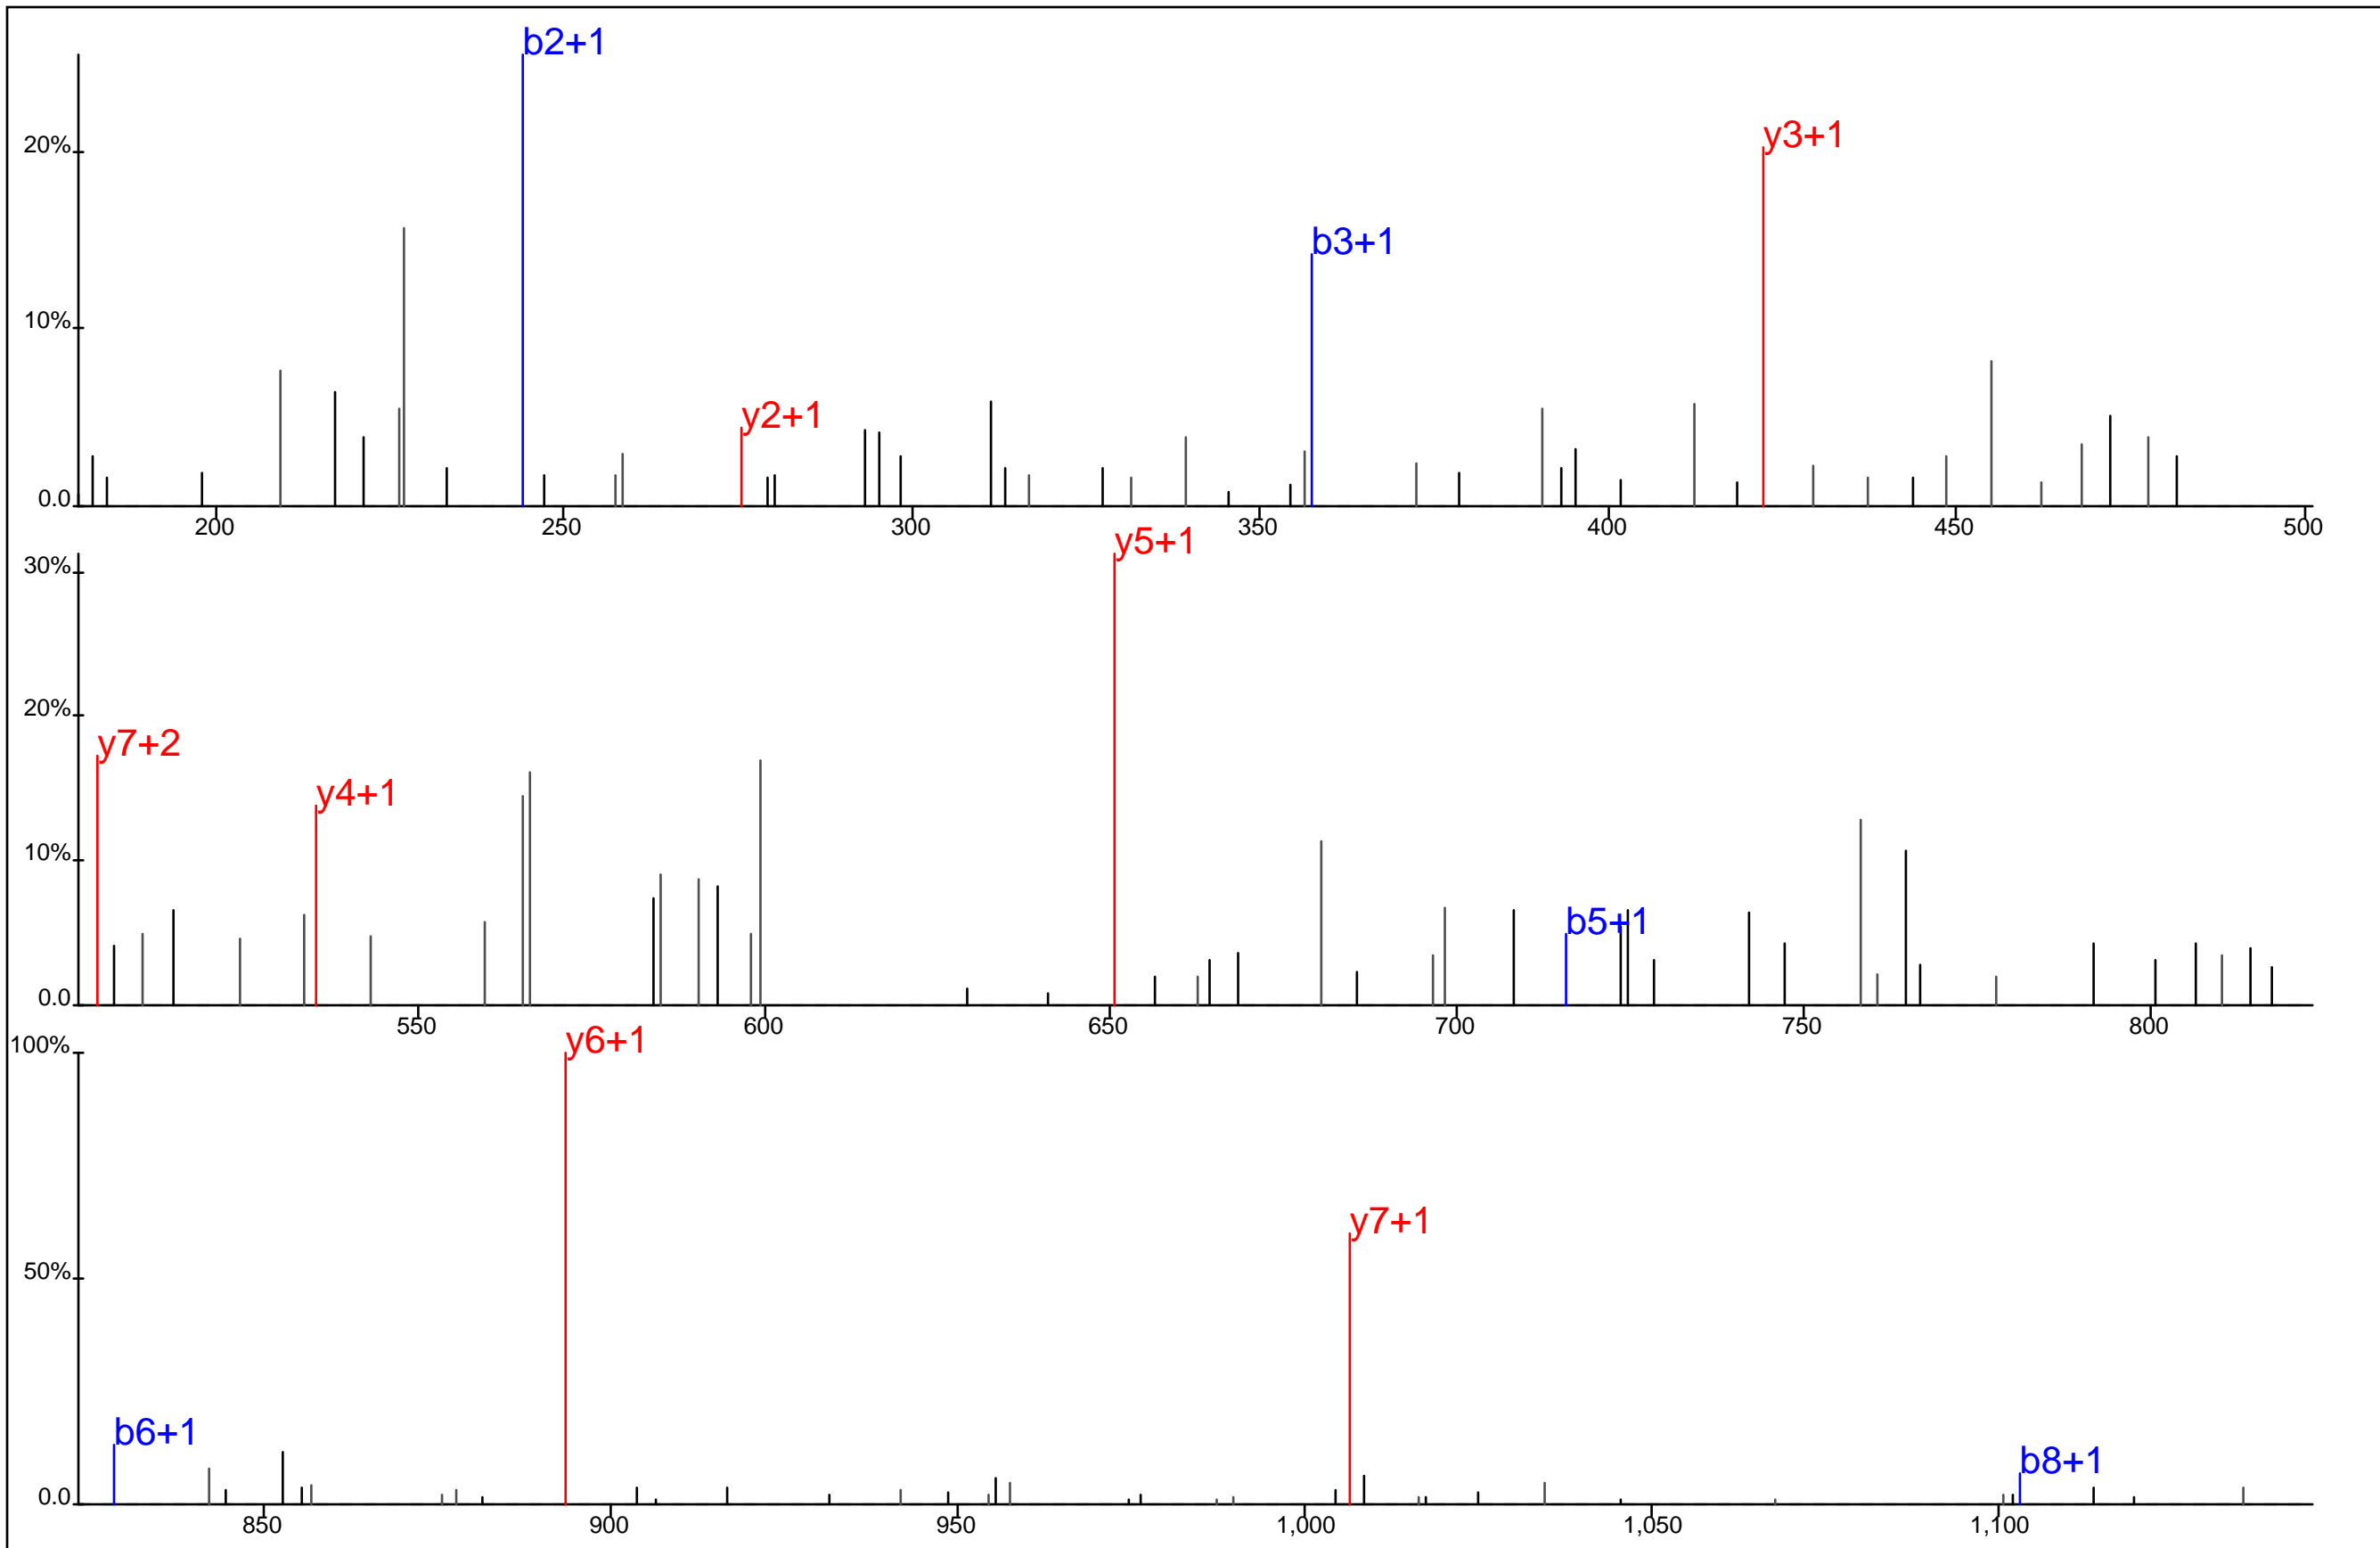

■ ■ □ □ ■ □ ■  
**D Q I Y\* D I F Q K**  
□ □ □ □ □ □ □

Protein Name: EIF4A1  
 gi Accession: 0  
 Precursor Mass: 625.2758+2  
 Delta Mass: 4.539 ppm  
 XCorr: 33.87

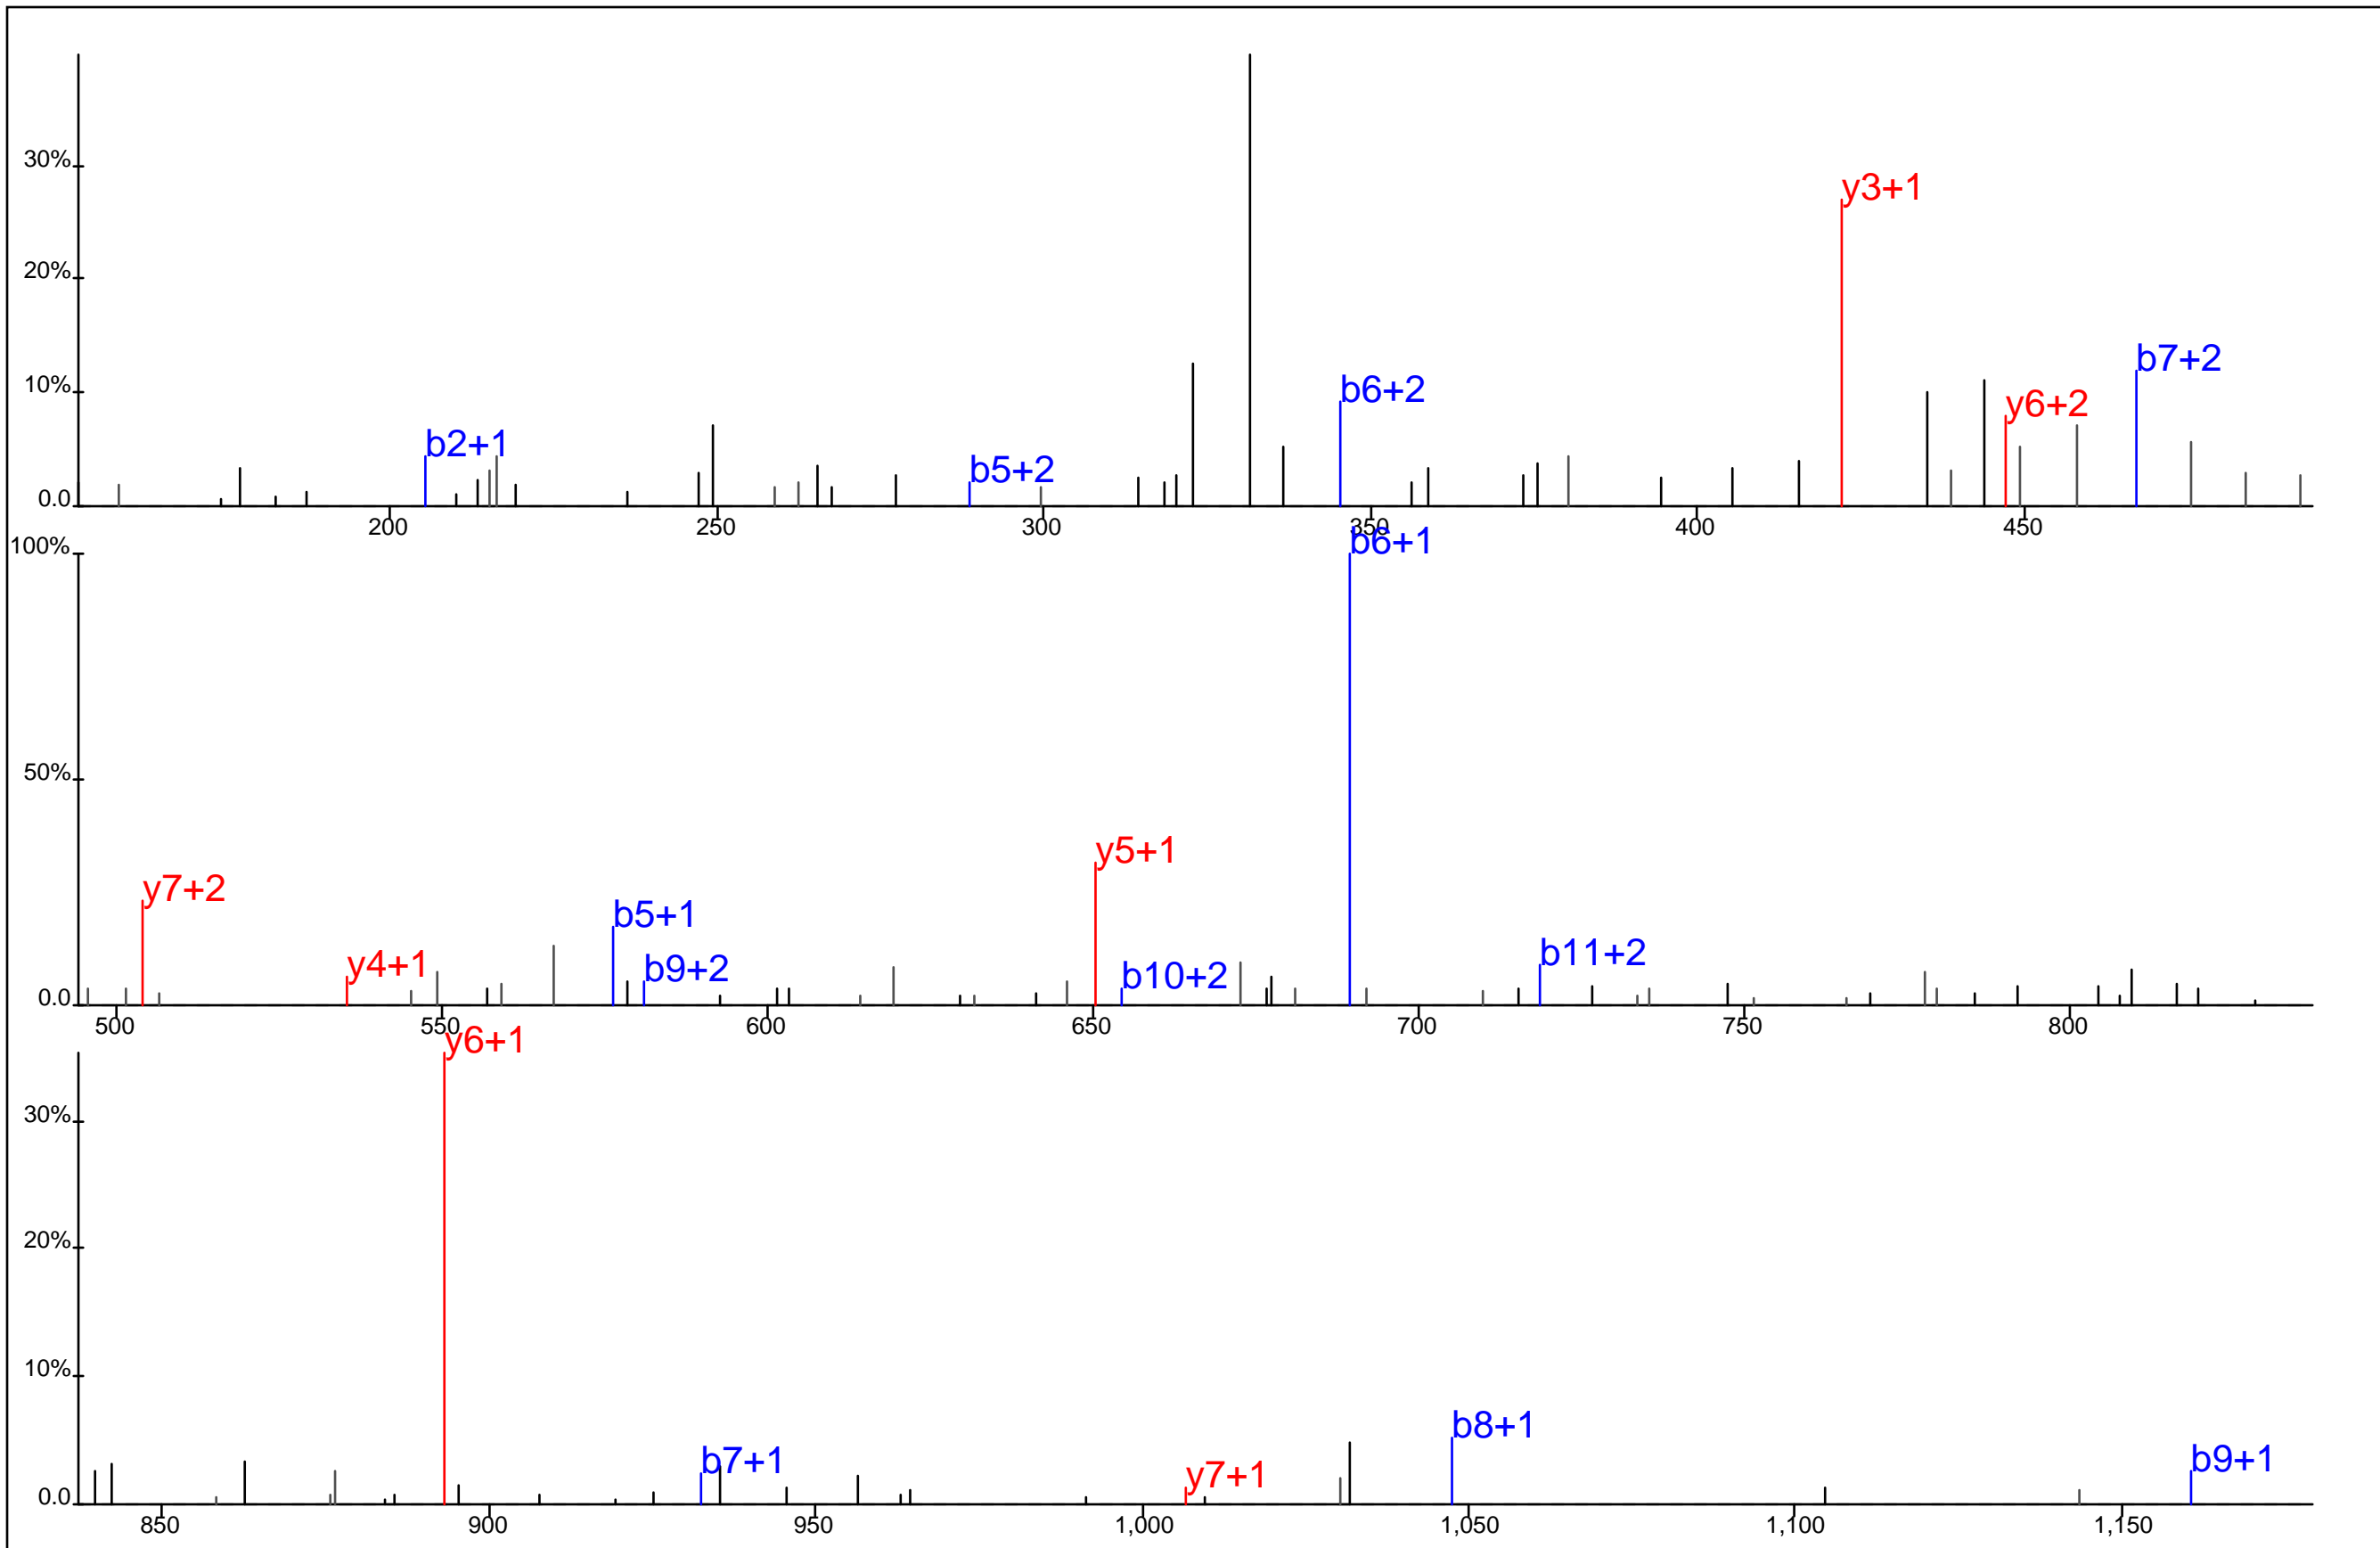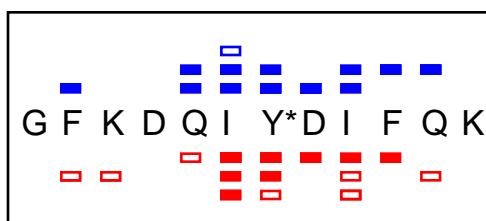

Protein Name: EIF4A1  
 gi Accession: 0  
 Precursor Mass: 527.9163+3  
 Delta Mass: 0.407 ppm  
 XCorr: 23.53

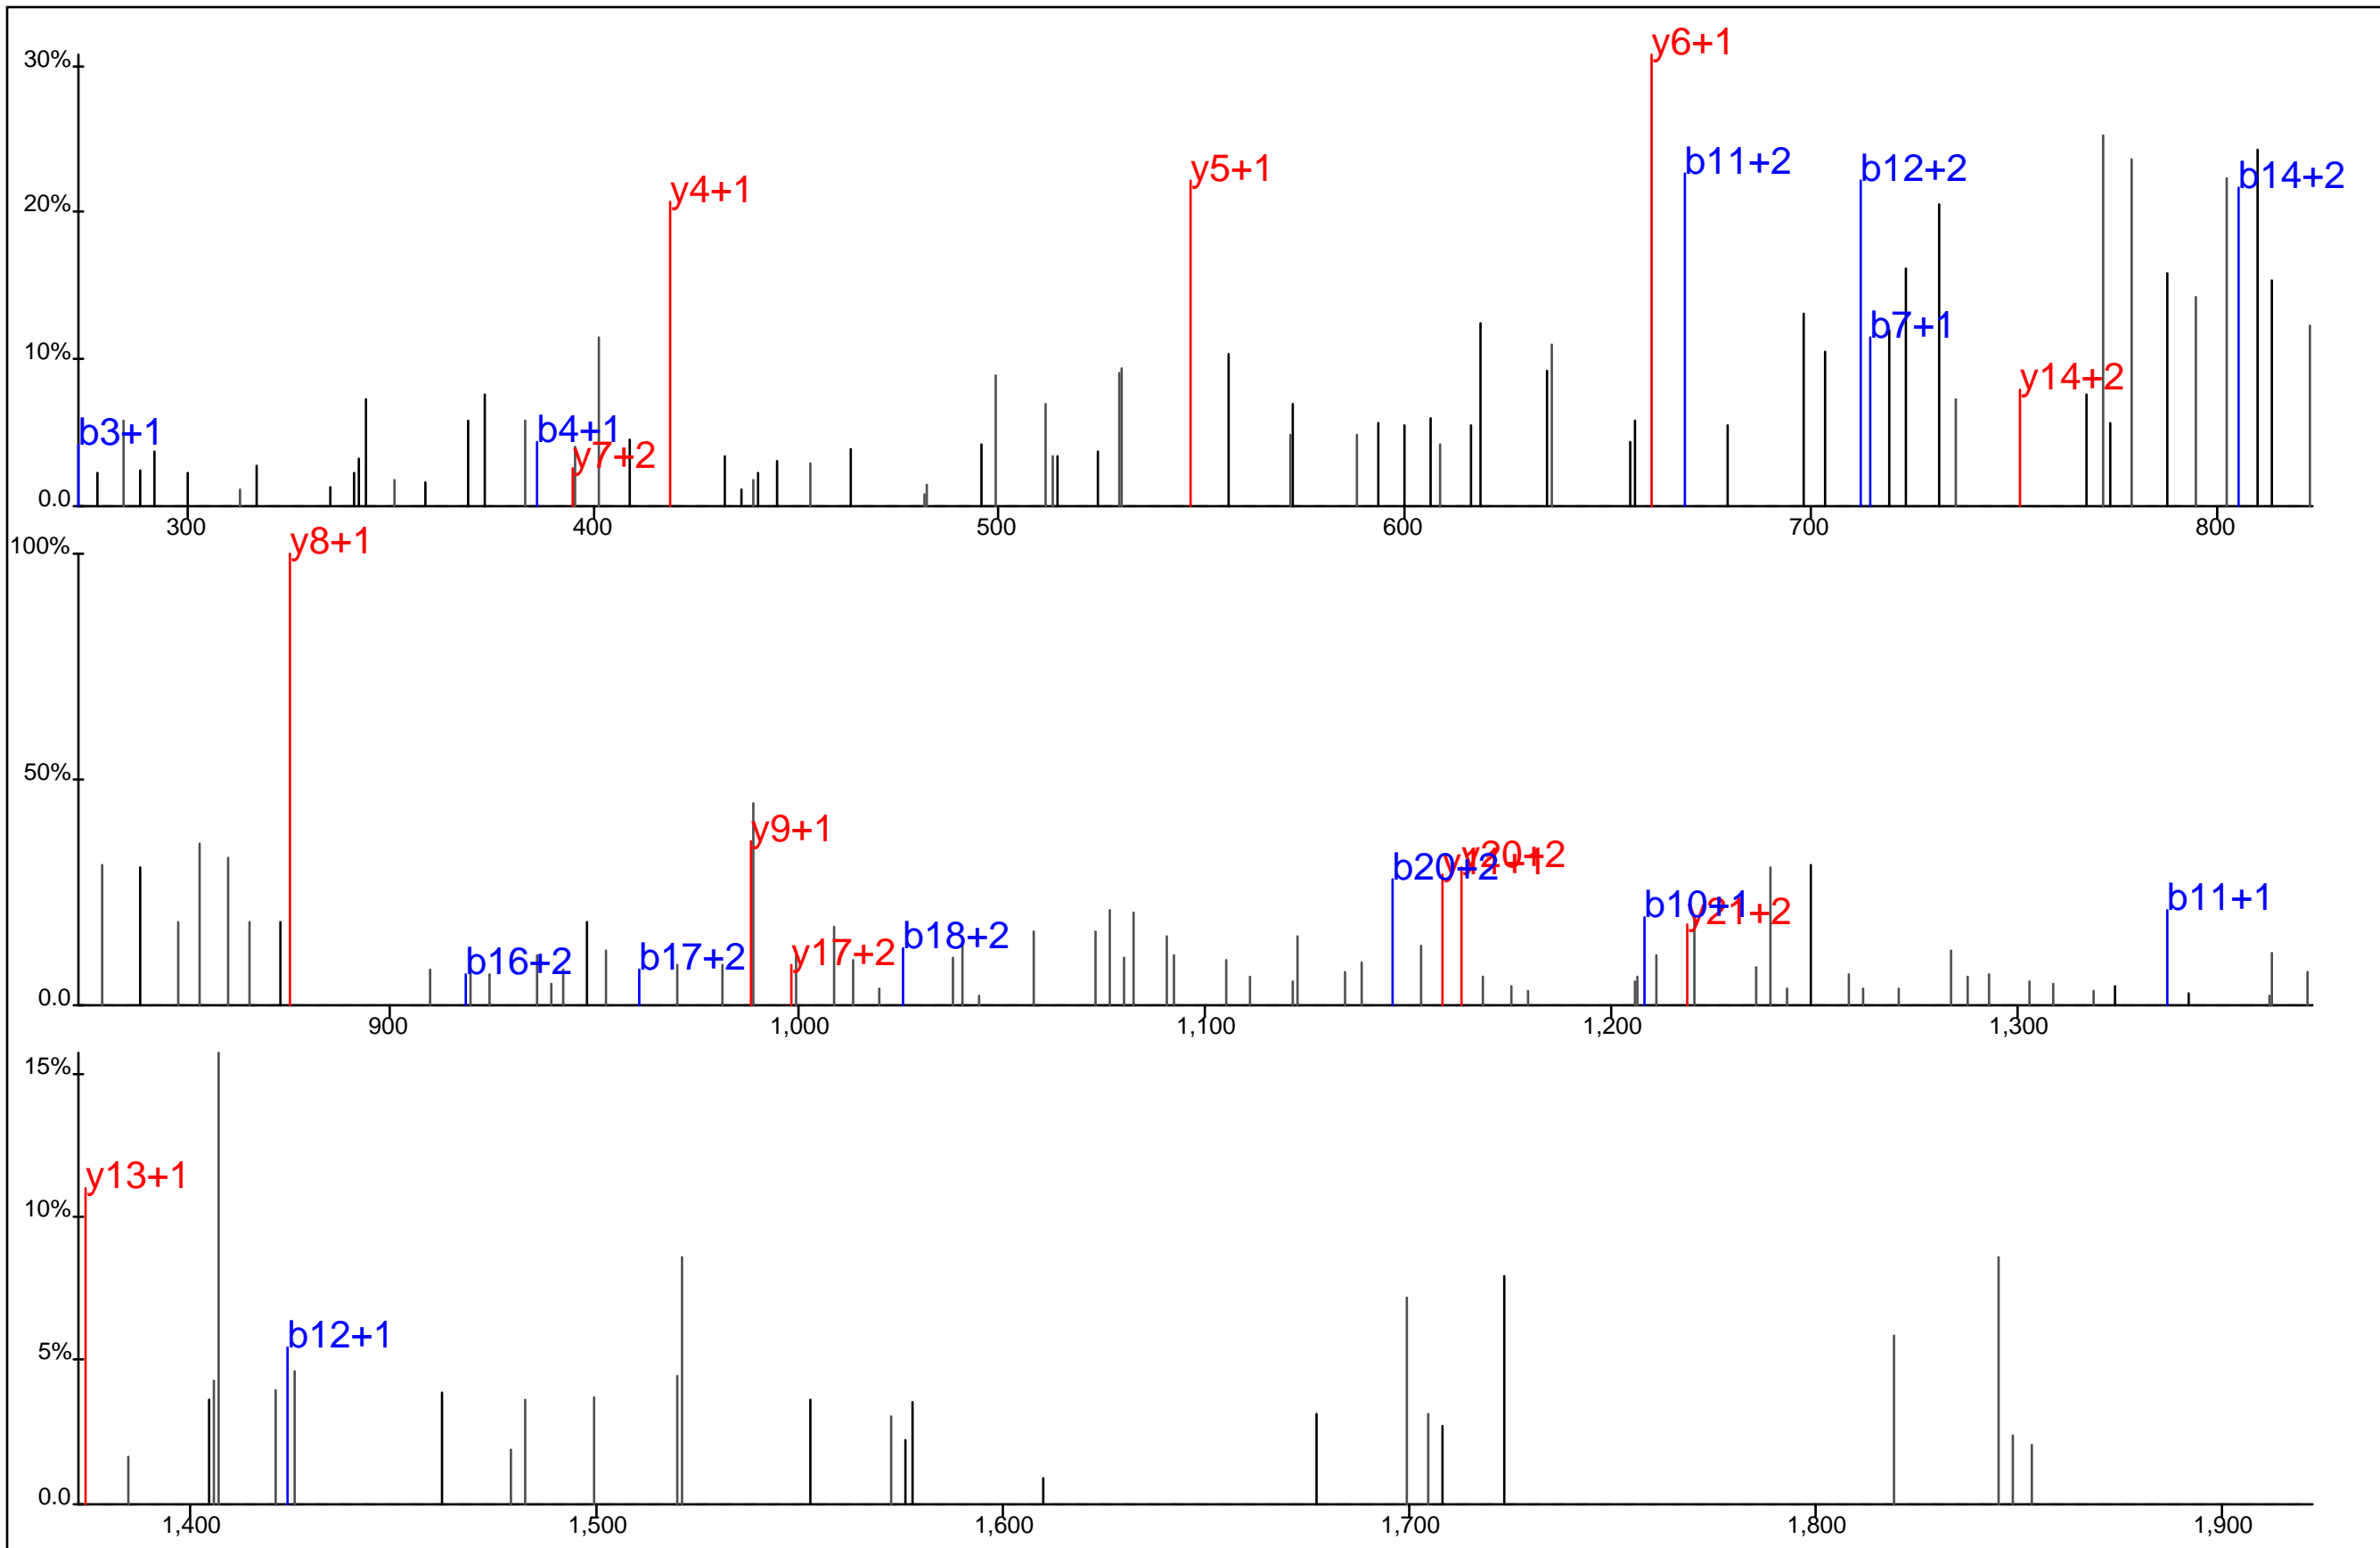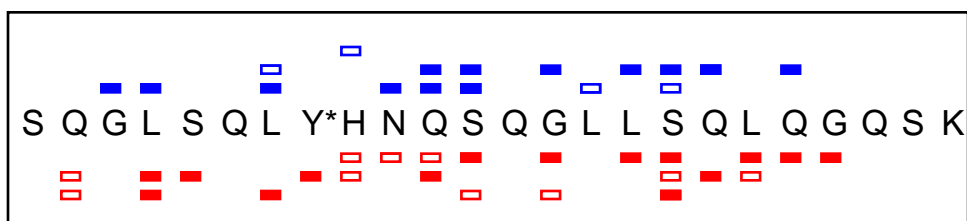

Protein Name: EIF4G2  
 gi Accession: 0  
 Precursor Mass: 903.7725+3  
 Delta Mass: 1.347 ppm  
 XCorr: 22.15

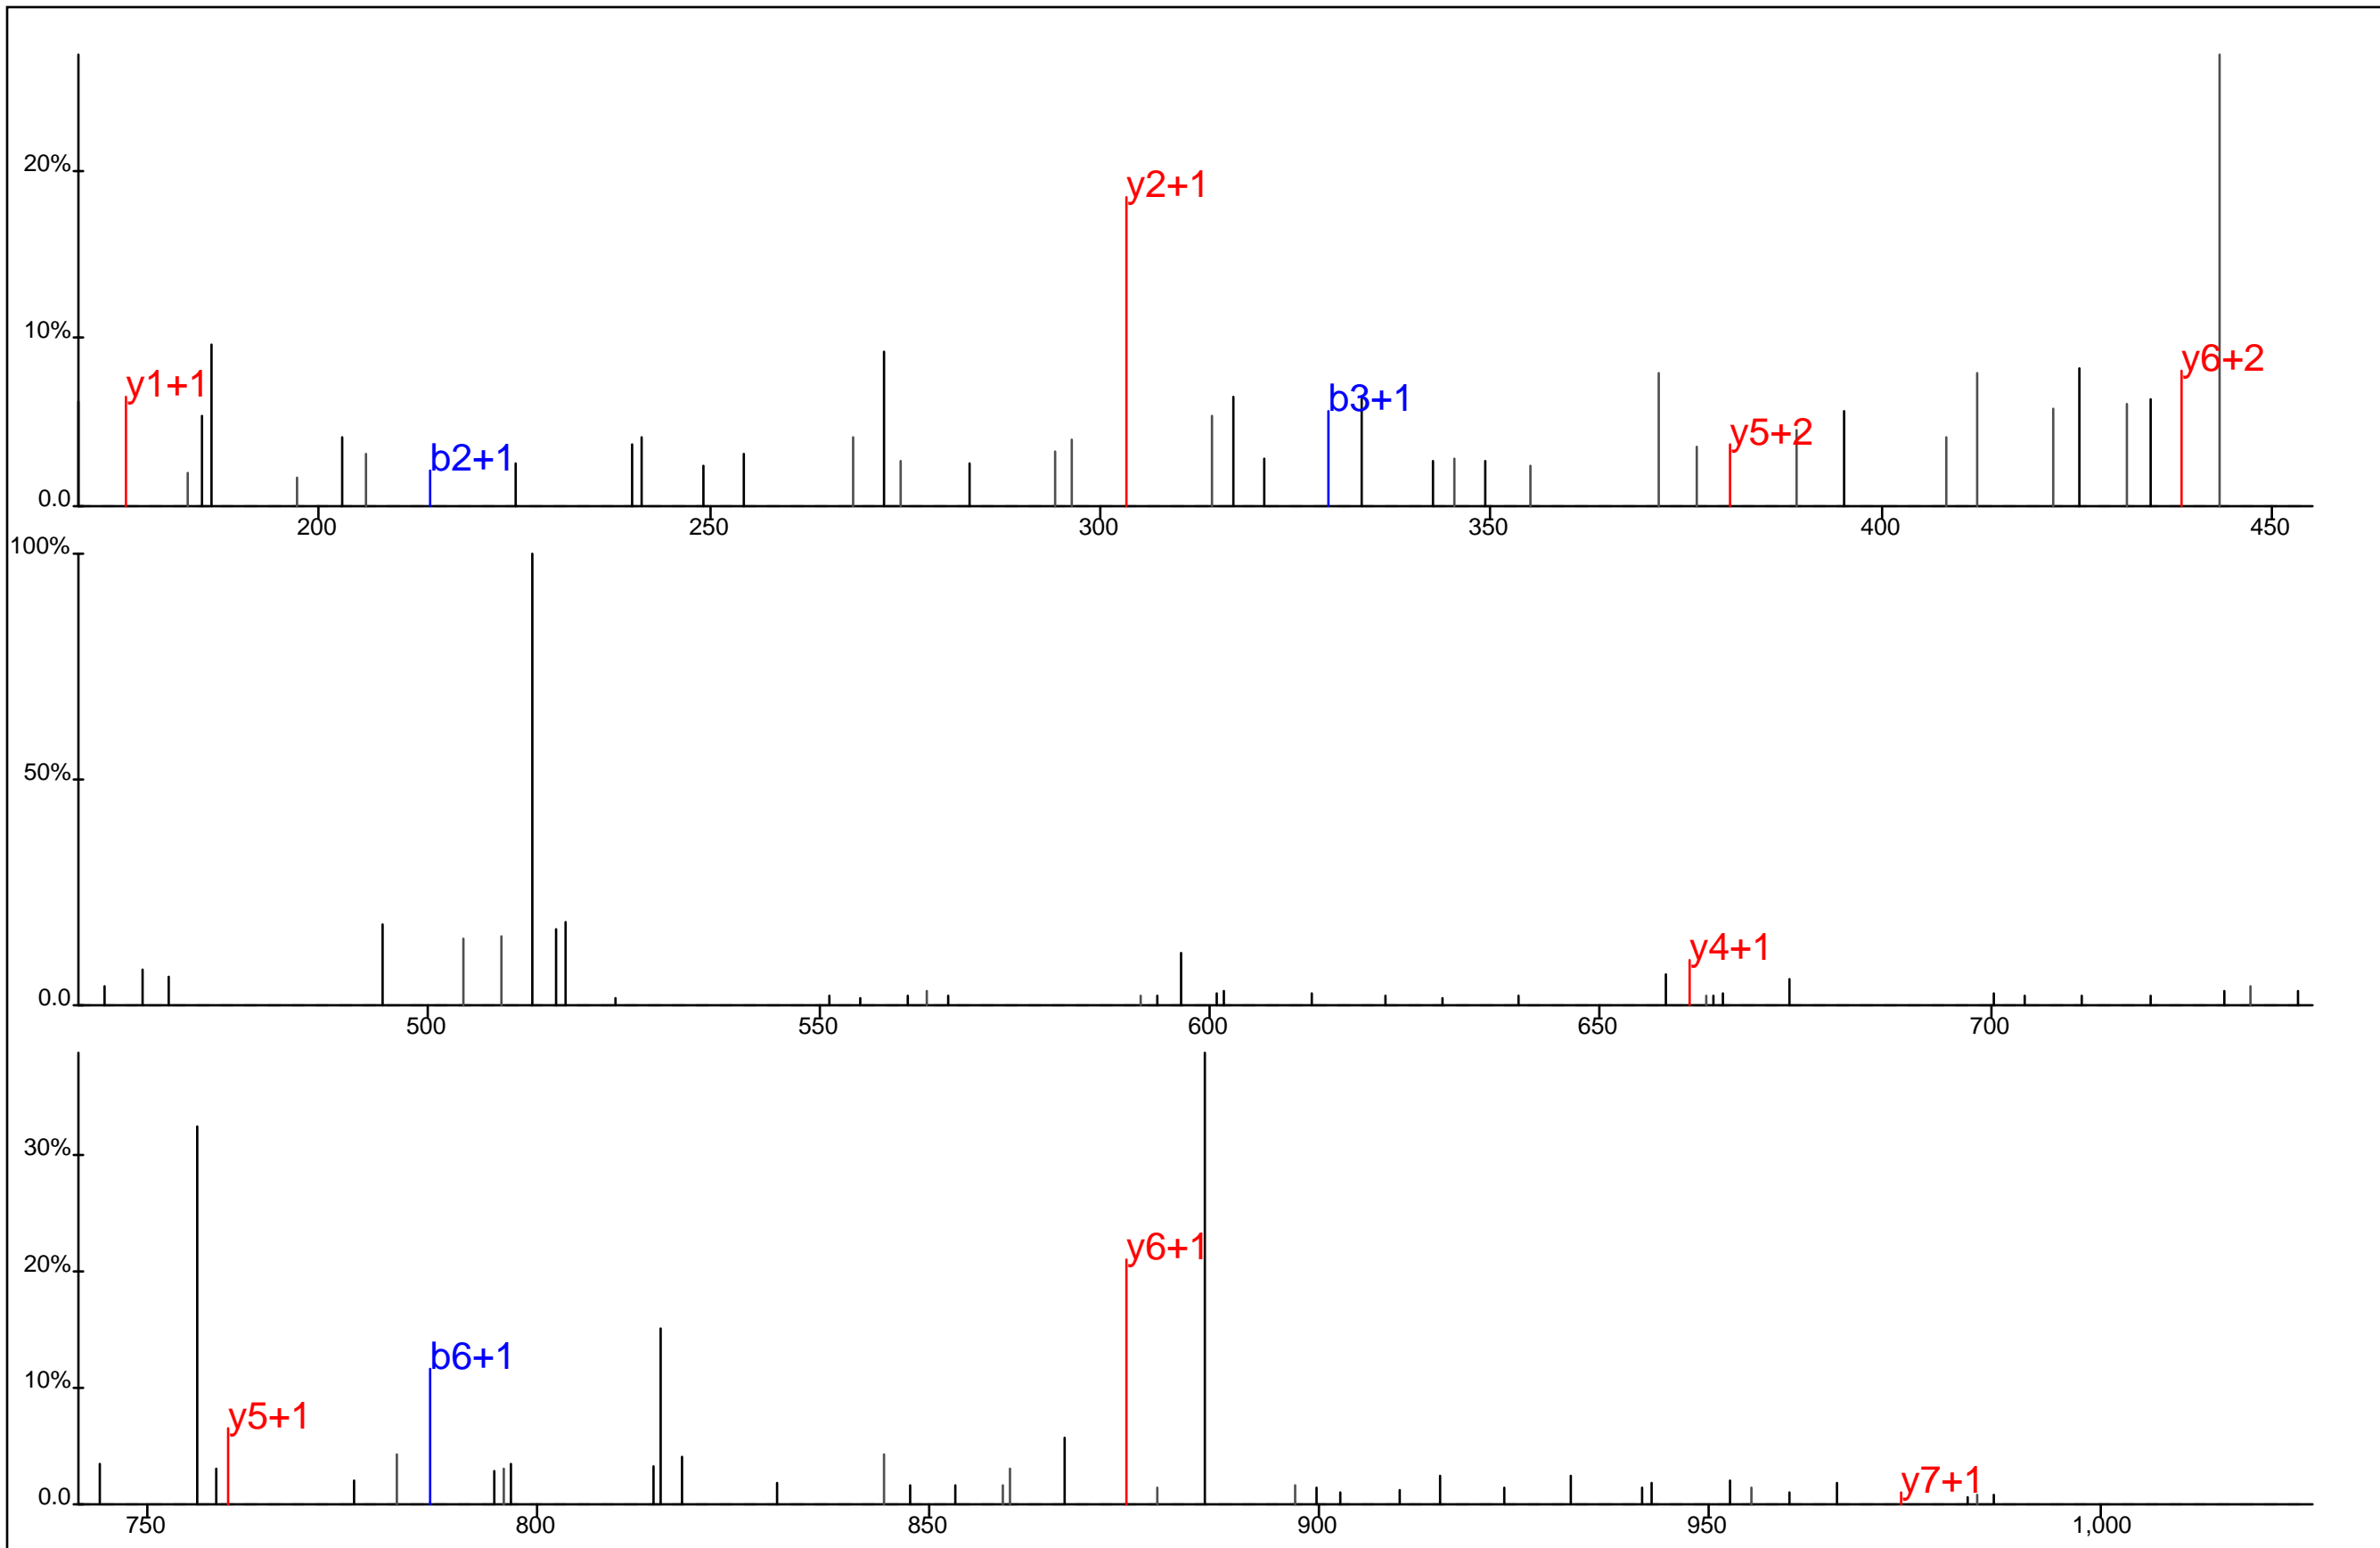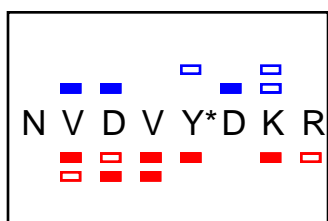

Protein Name: EIF4G2  
 gi Accession: 0  
 Precursor Mass: 544.7411+2  
 Delta Mass: 2.113 ppm  
 XCorr: 23.83

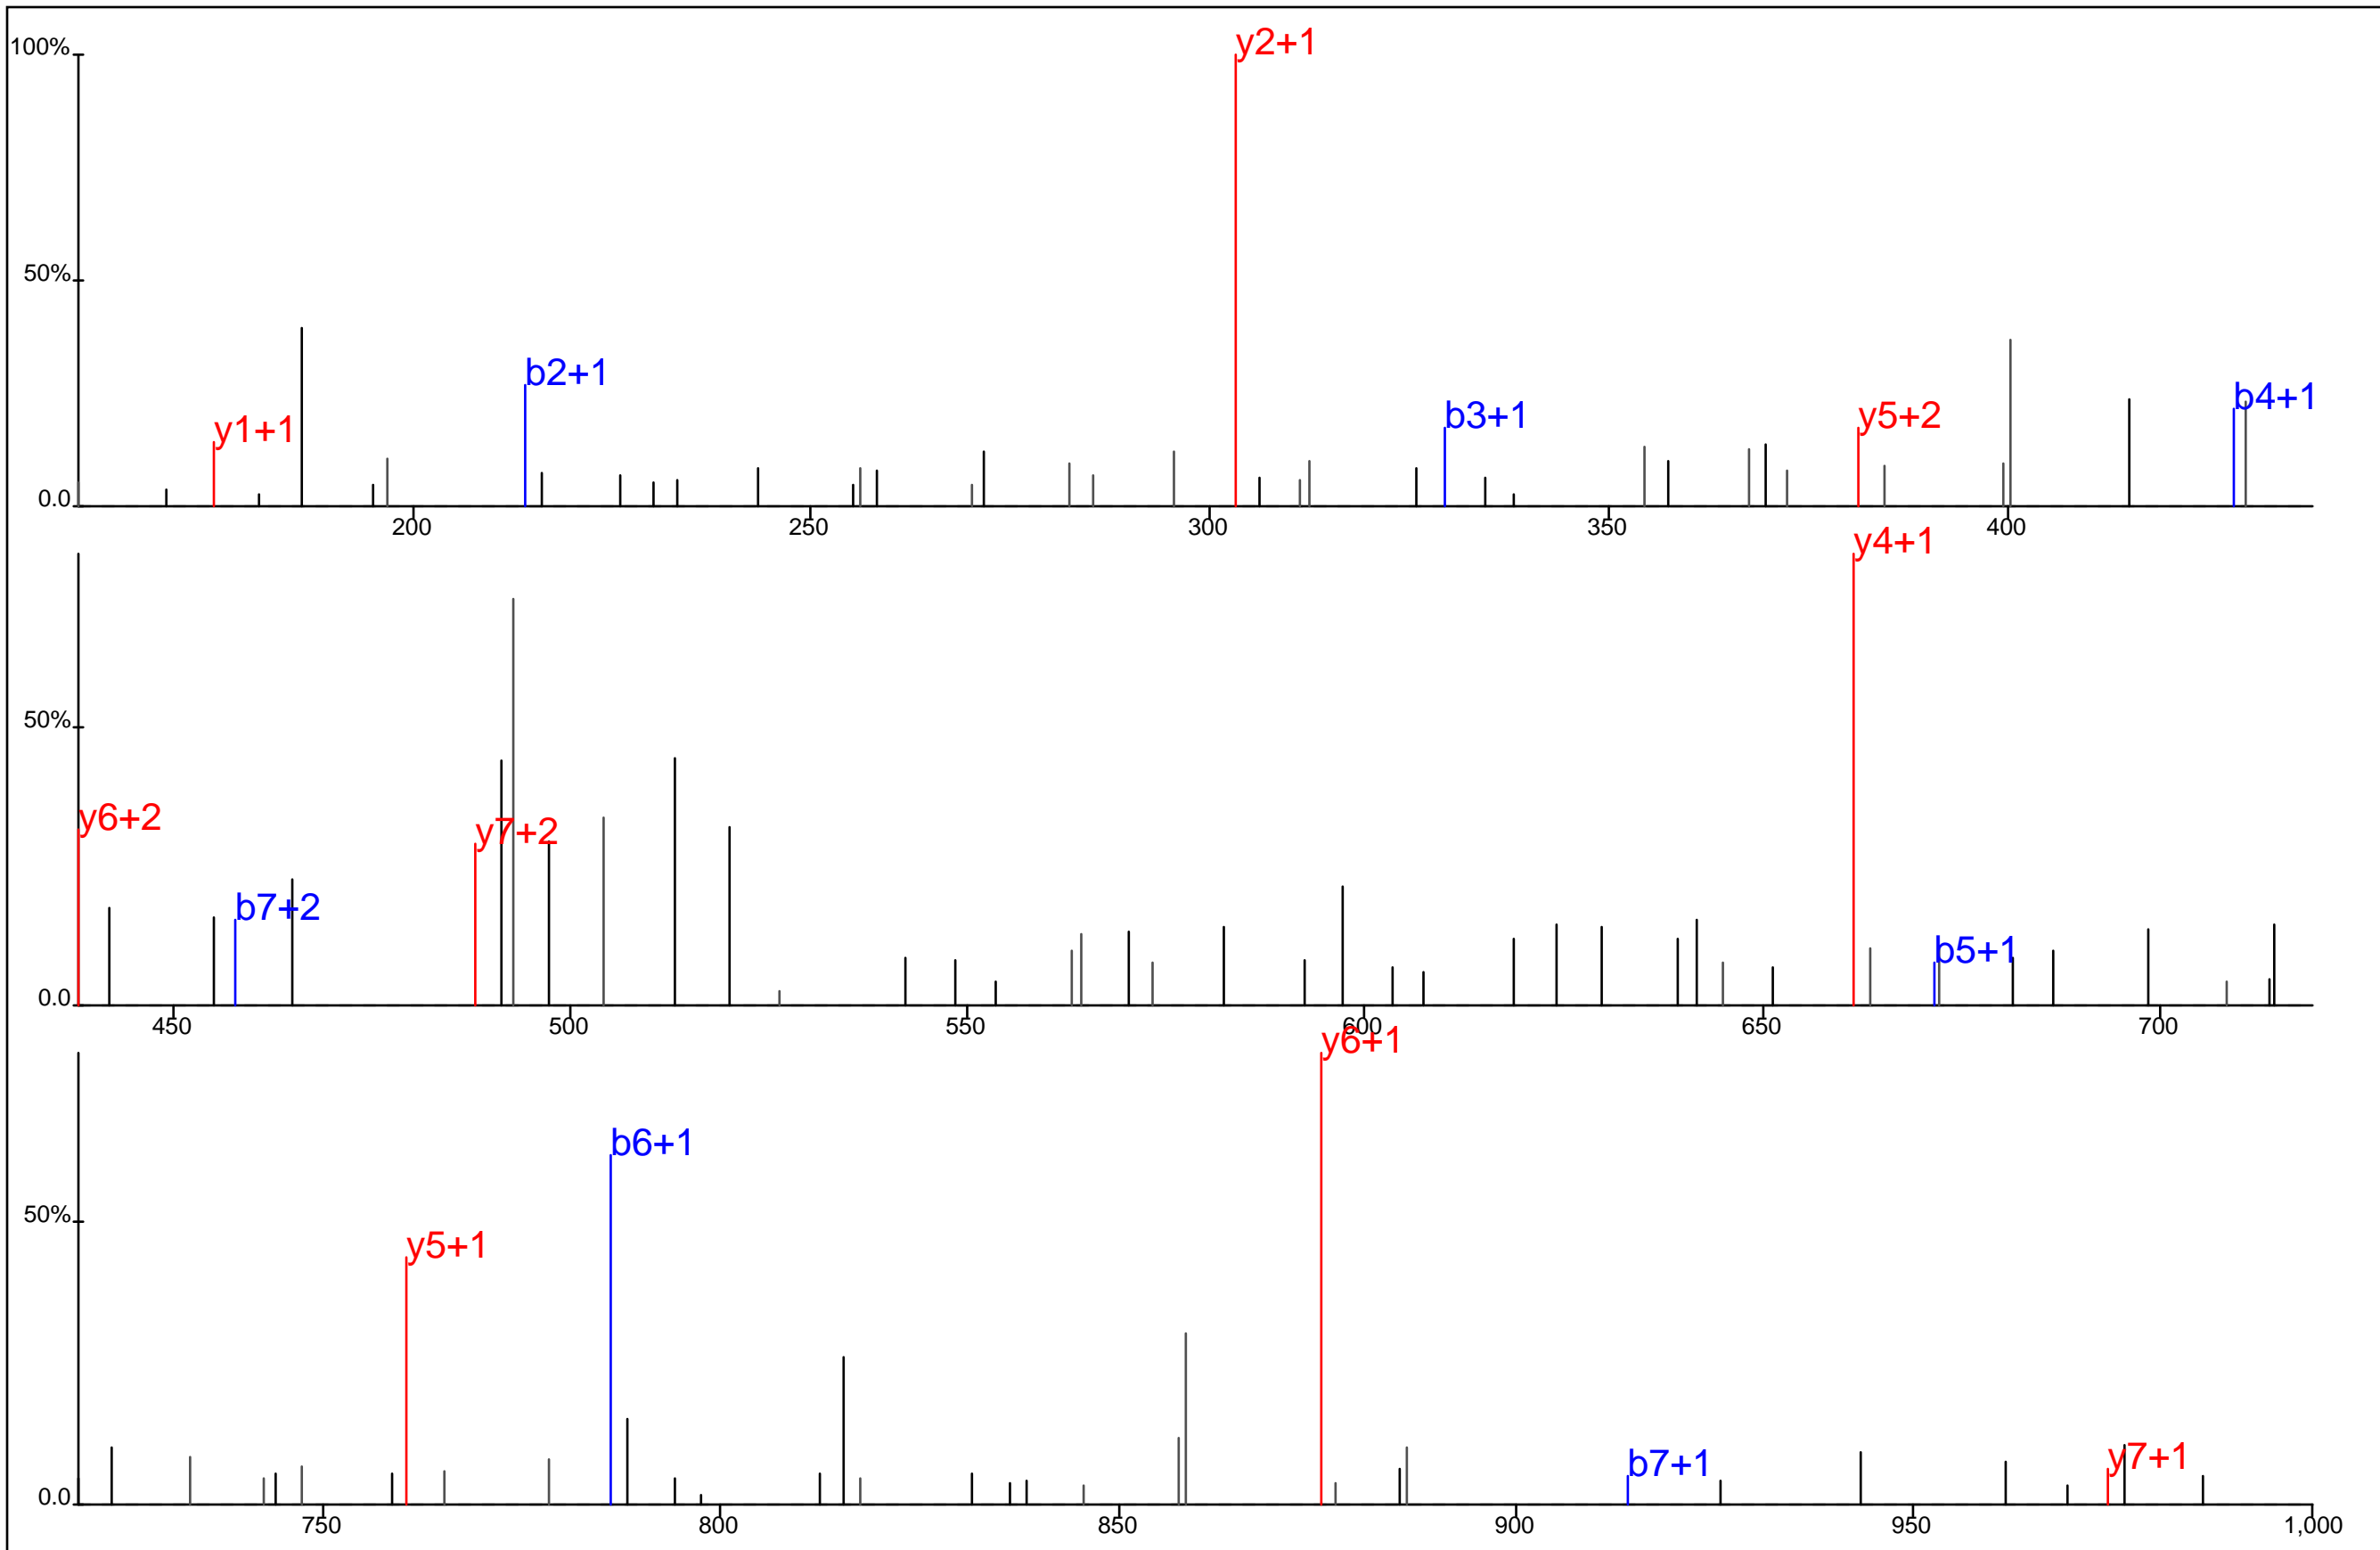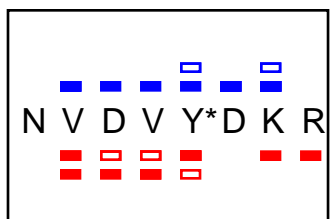

Protein Name: EIF4G2  
 gi Accession: 0  
 Precursor Mass: 544.7413+2  
 Delta Mass: 1.665 ppm  
 XCorr: 28.28

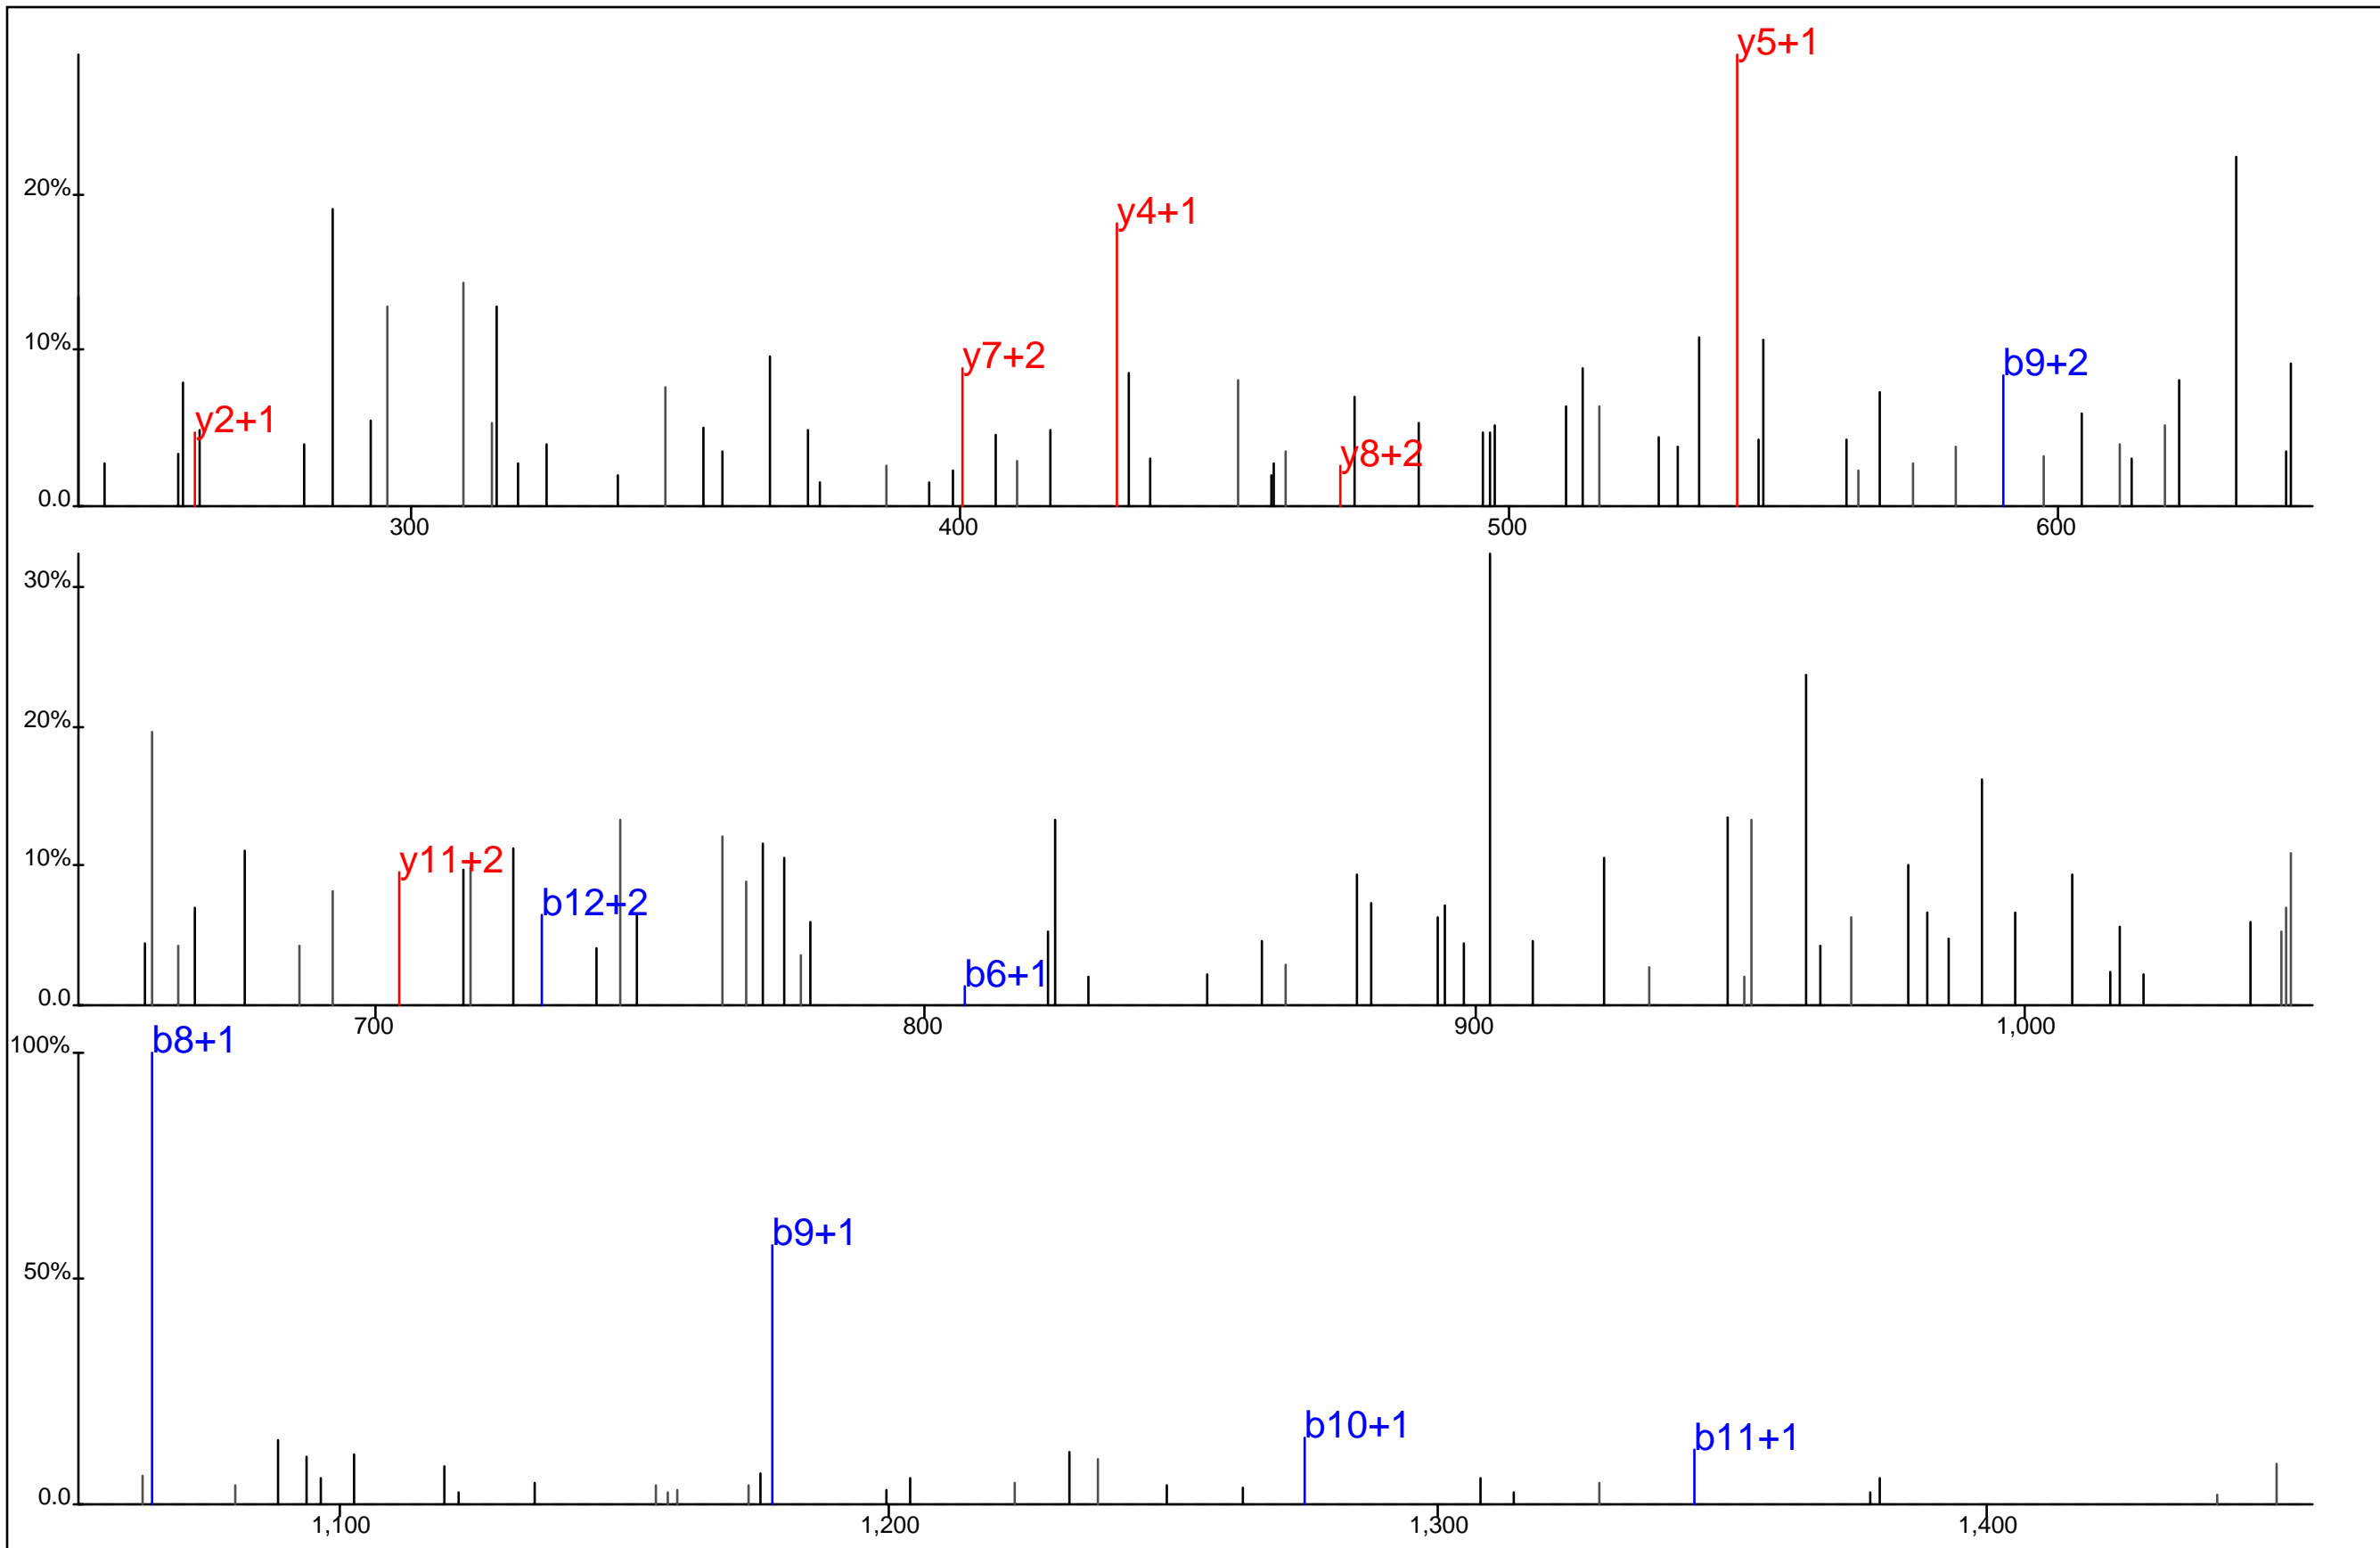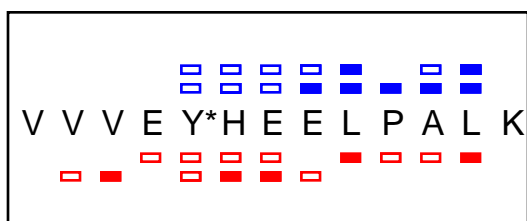

Protein Name: ELG protein  
 gi Accession: 0  
 Precursor Mass: 803.3998+2  
 Delta Mass: 0.021 ppm  
 XCorr: 26.12

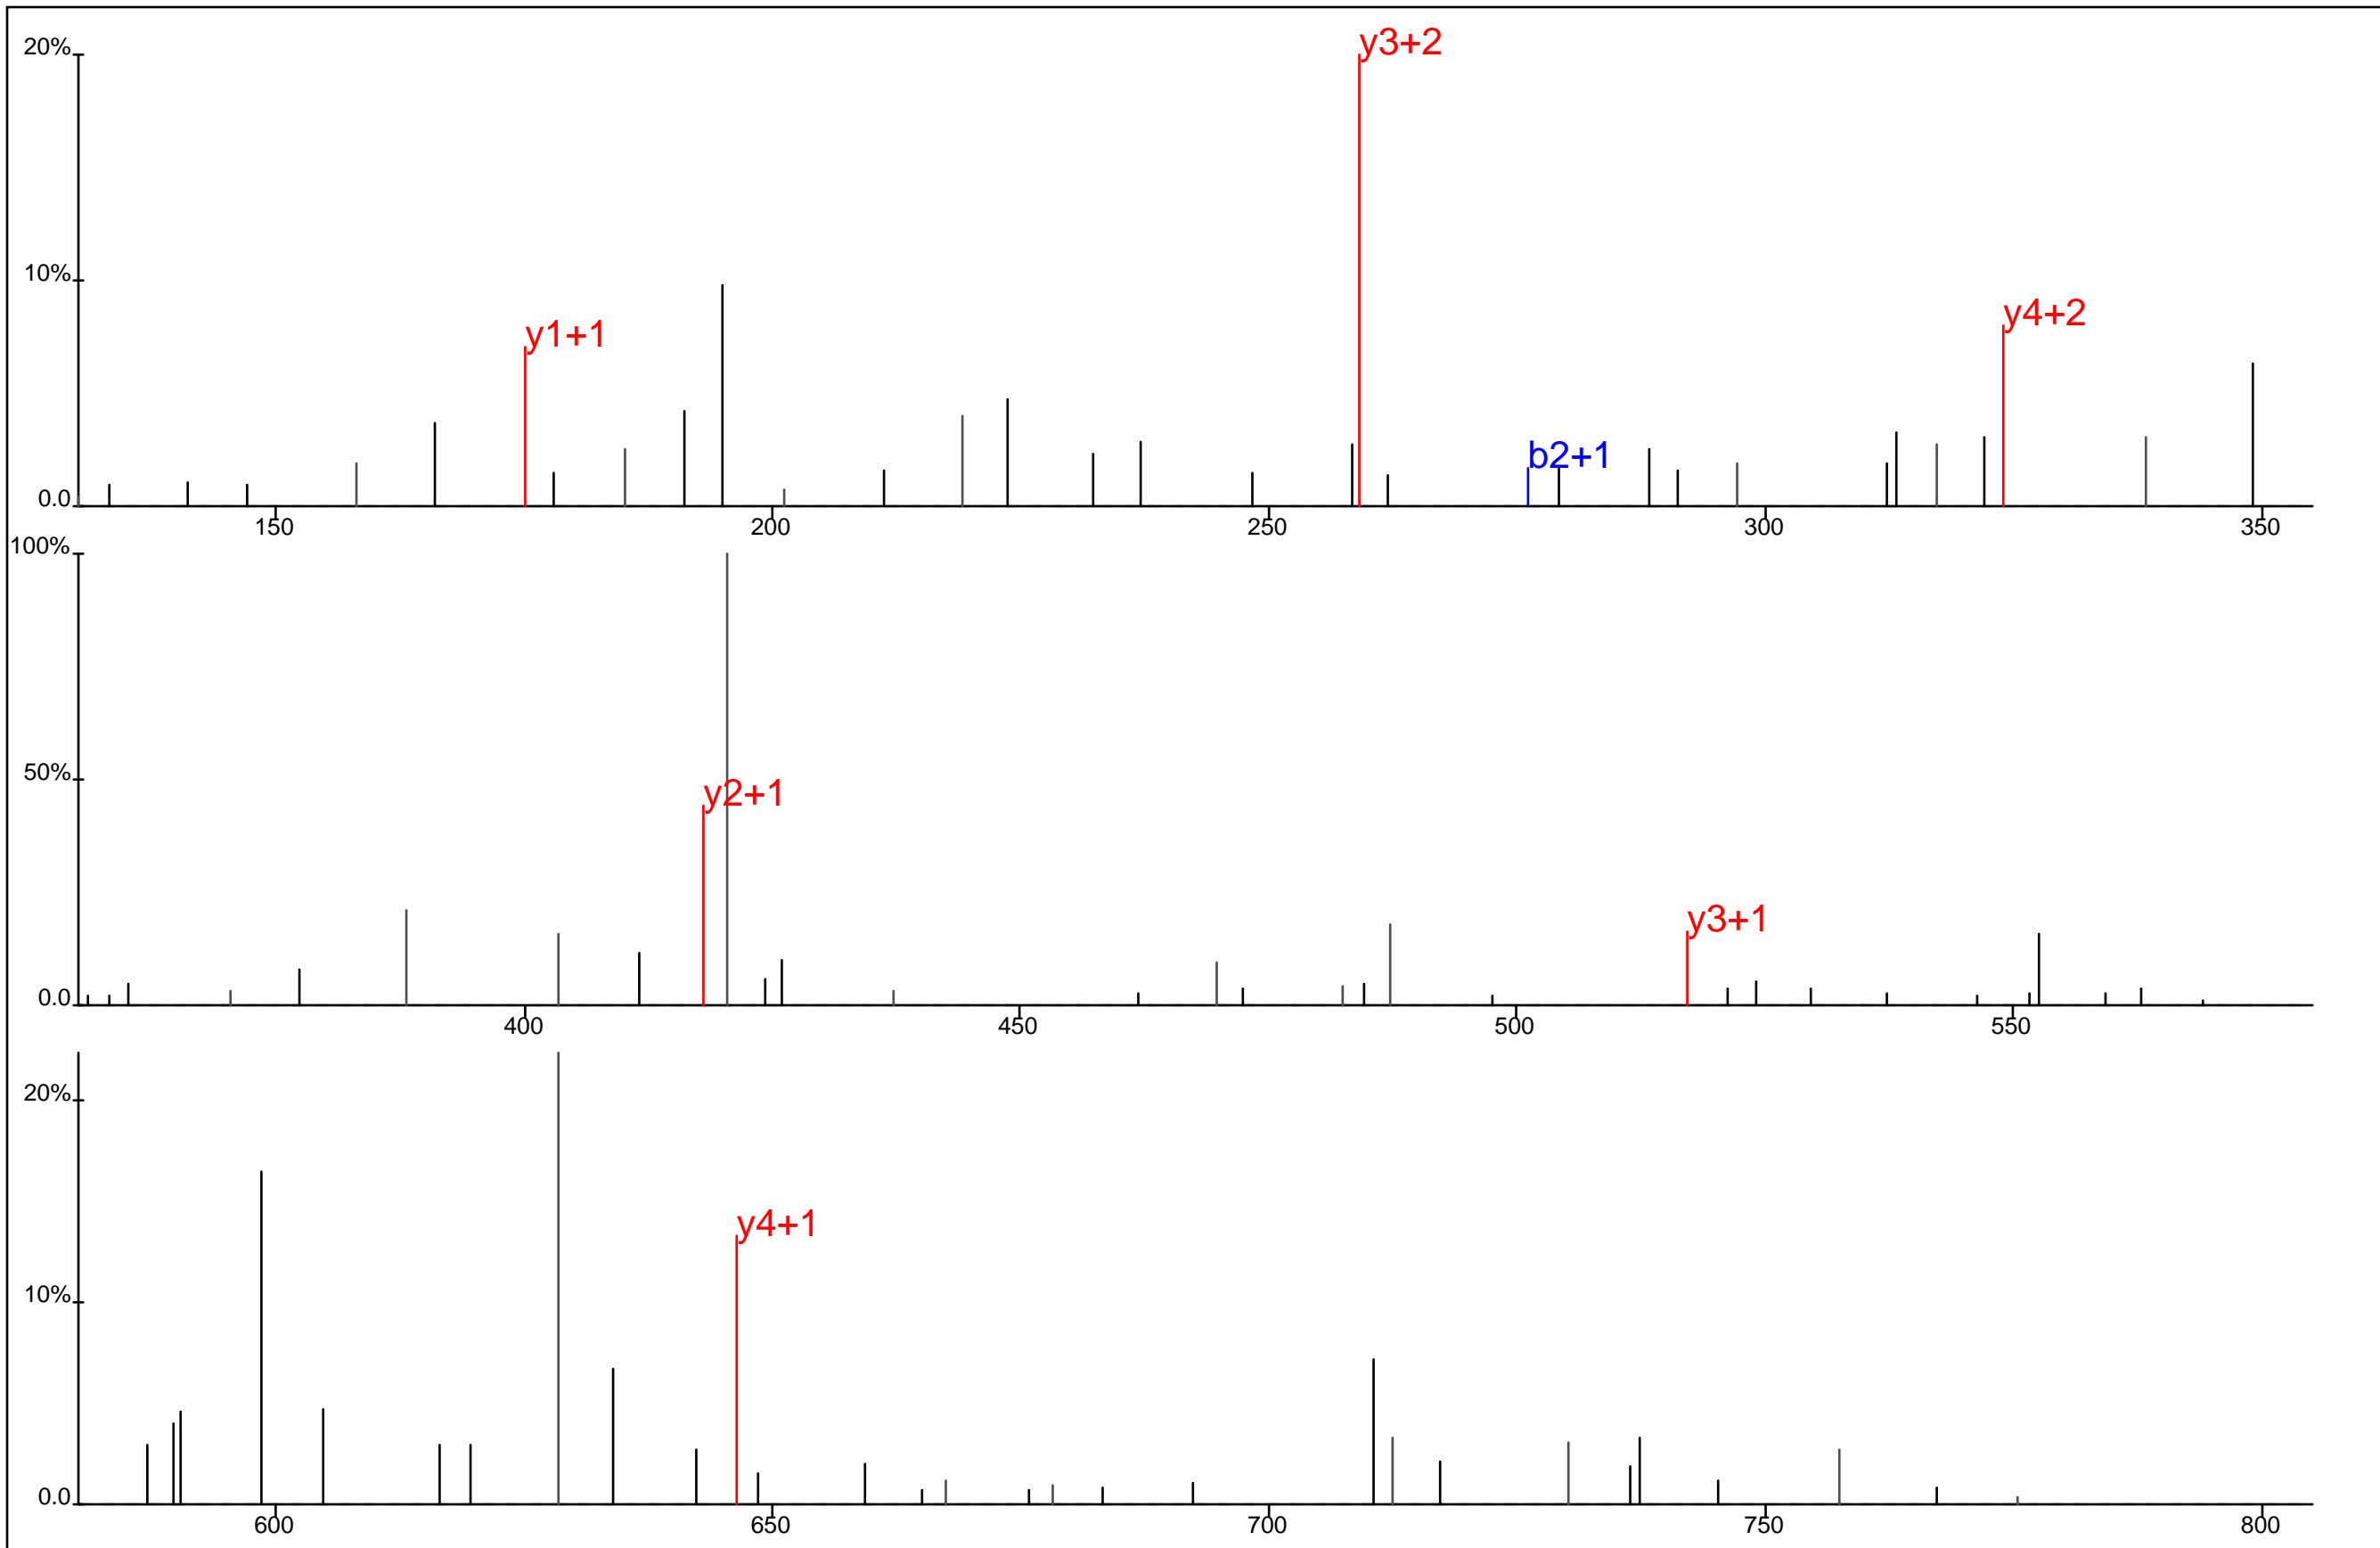

□ □ □ □  
 Q M E V Y\* R  
□ □ □ □

Protein Name: ELKS protein  
 gi Accession: 0  
 Precursor Mass: 461.1810+2  
 Delta Mass: 1.183 ppm  
 XCorr: 22.97



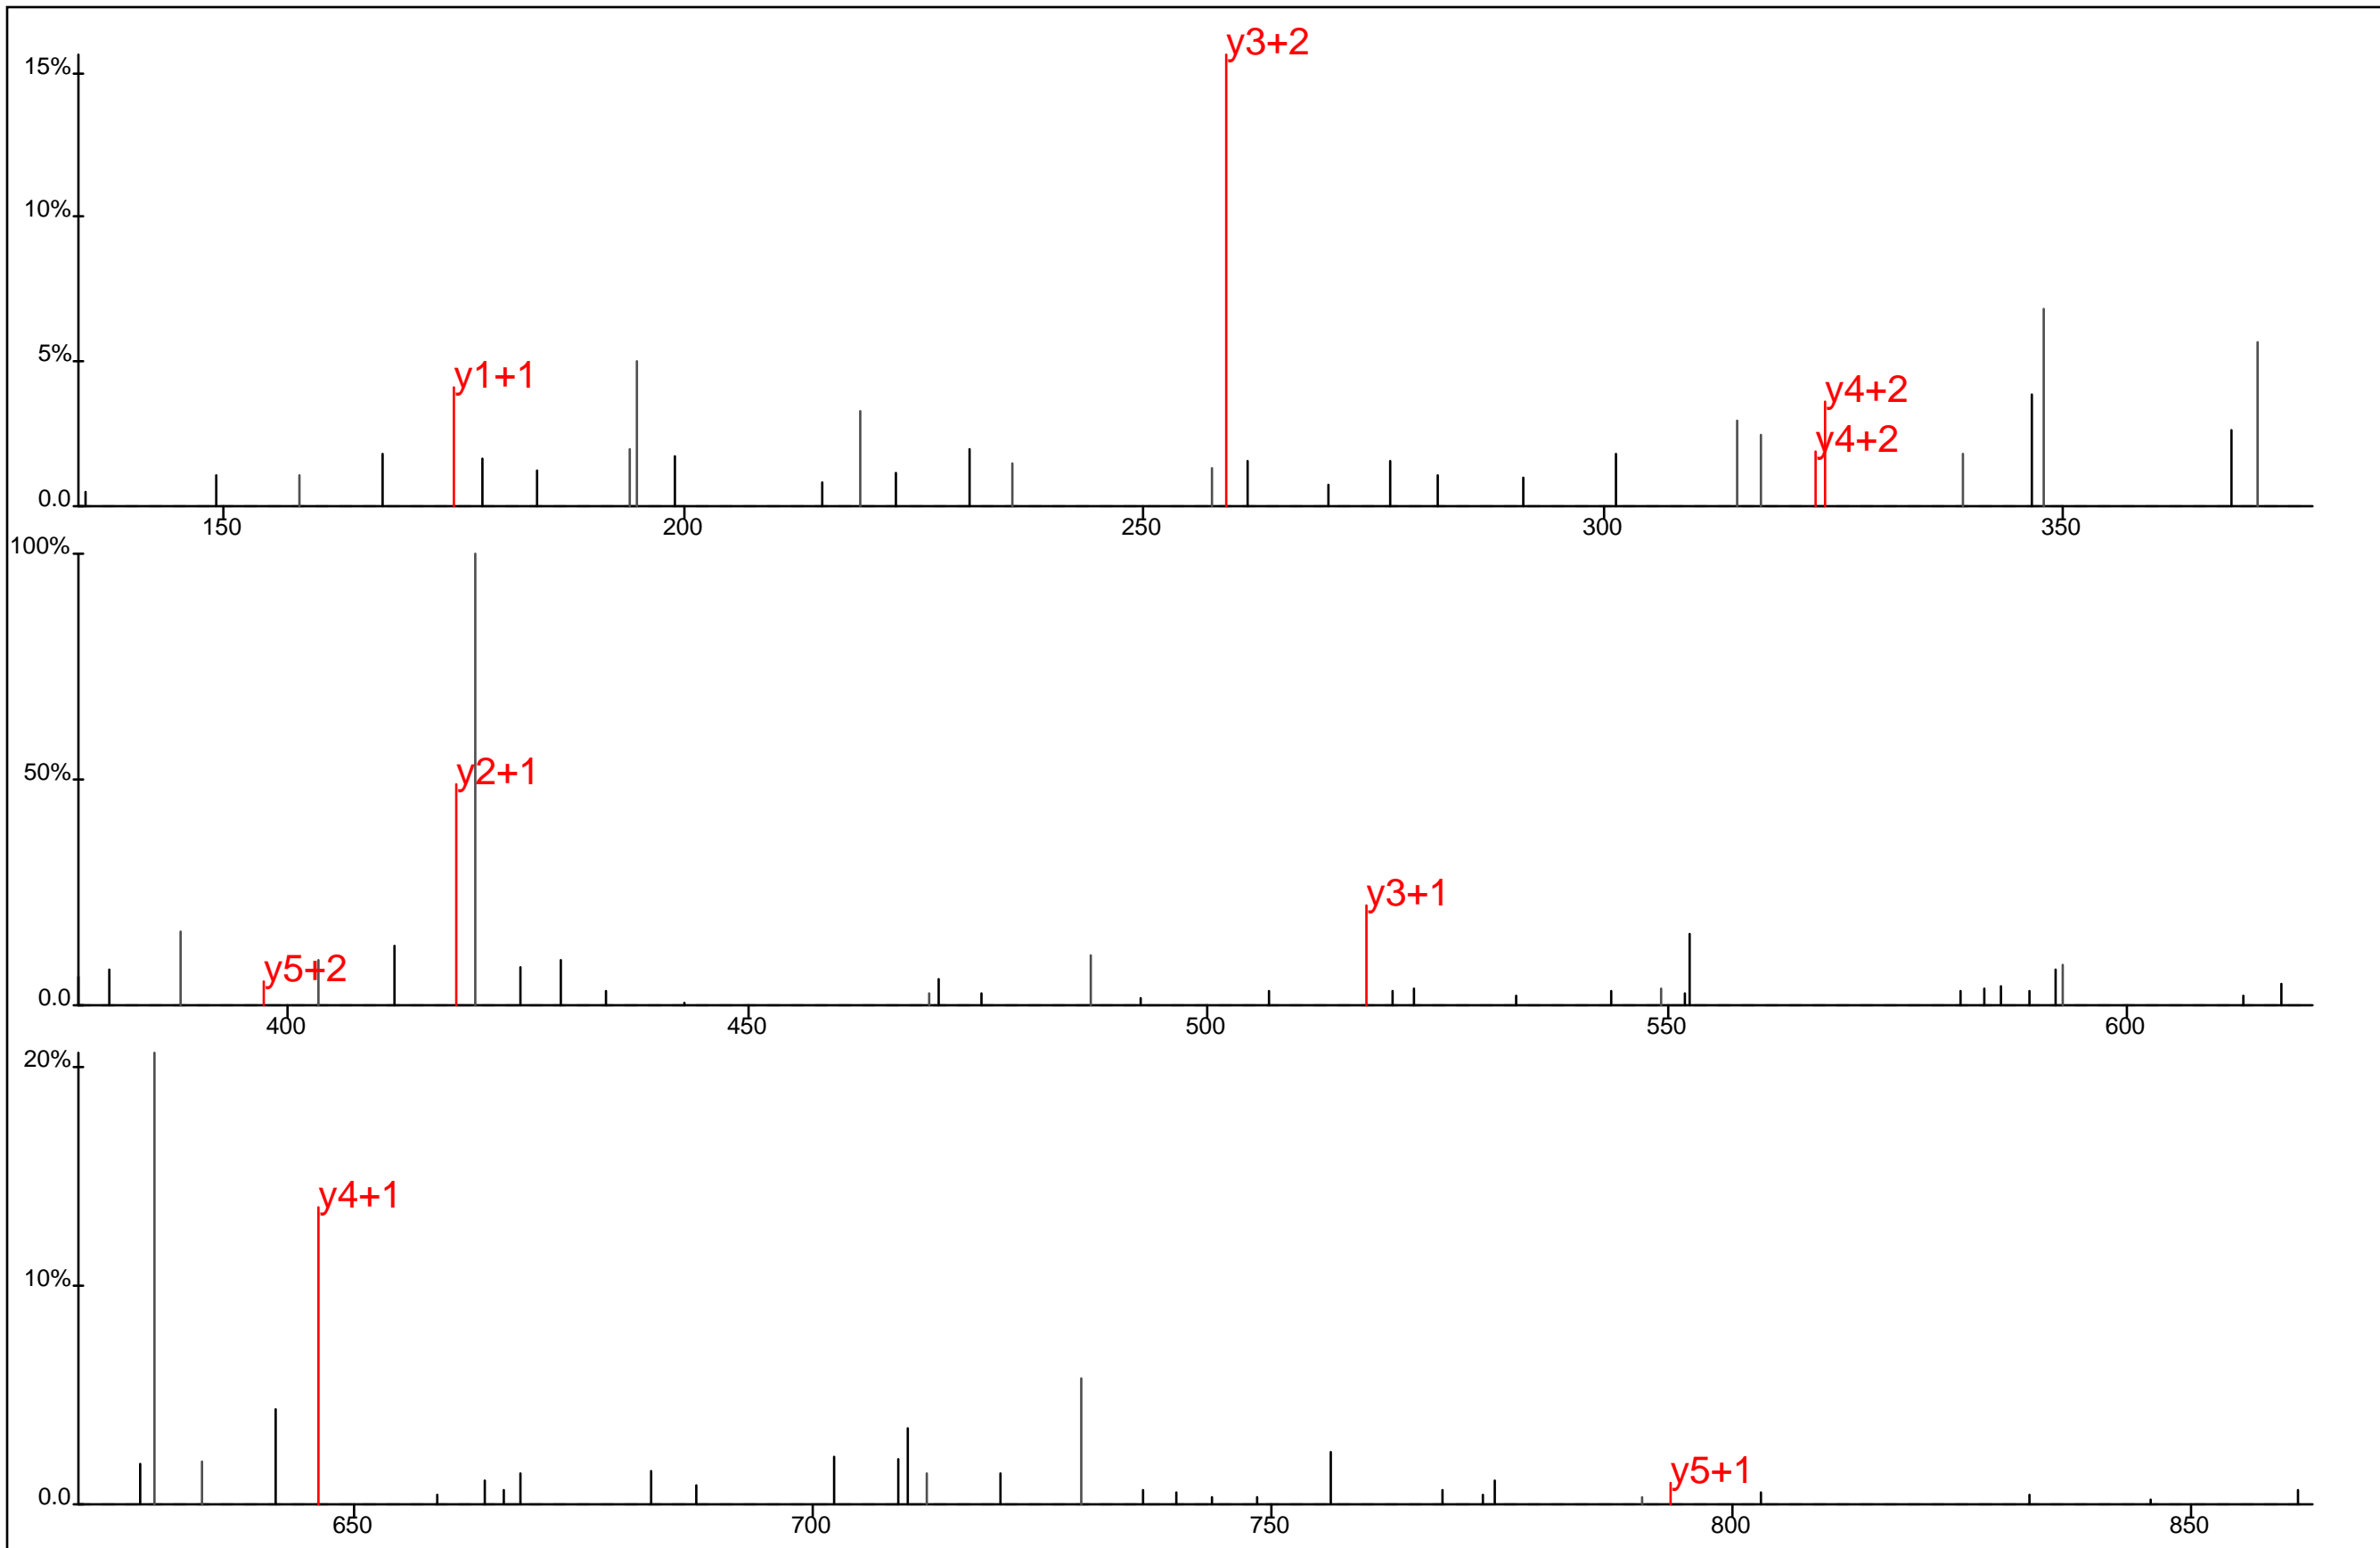

□ □ □  
 Q M E V Y\* R  
□ □ □ □ ■

Protein Name: ELKS protein  
 gi Accession: 0  
 Precursor Mass: 461.1810+2  
 Delta Mass: 1.250 ppm  
 XCorr: 32.16

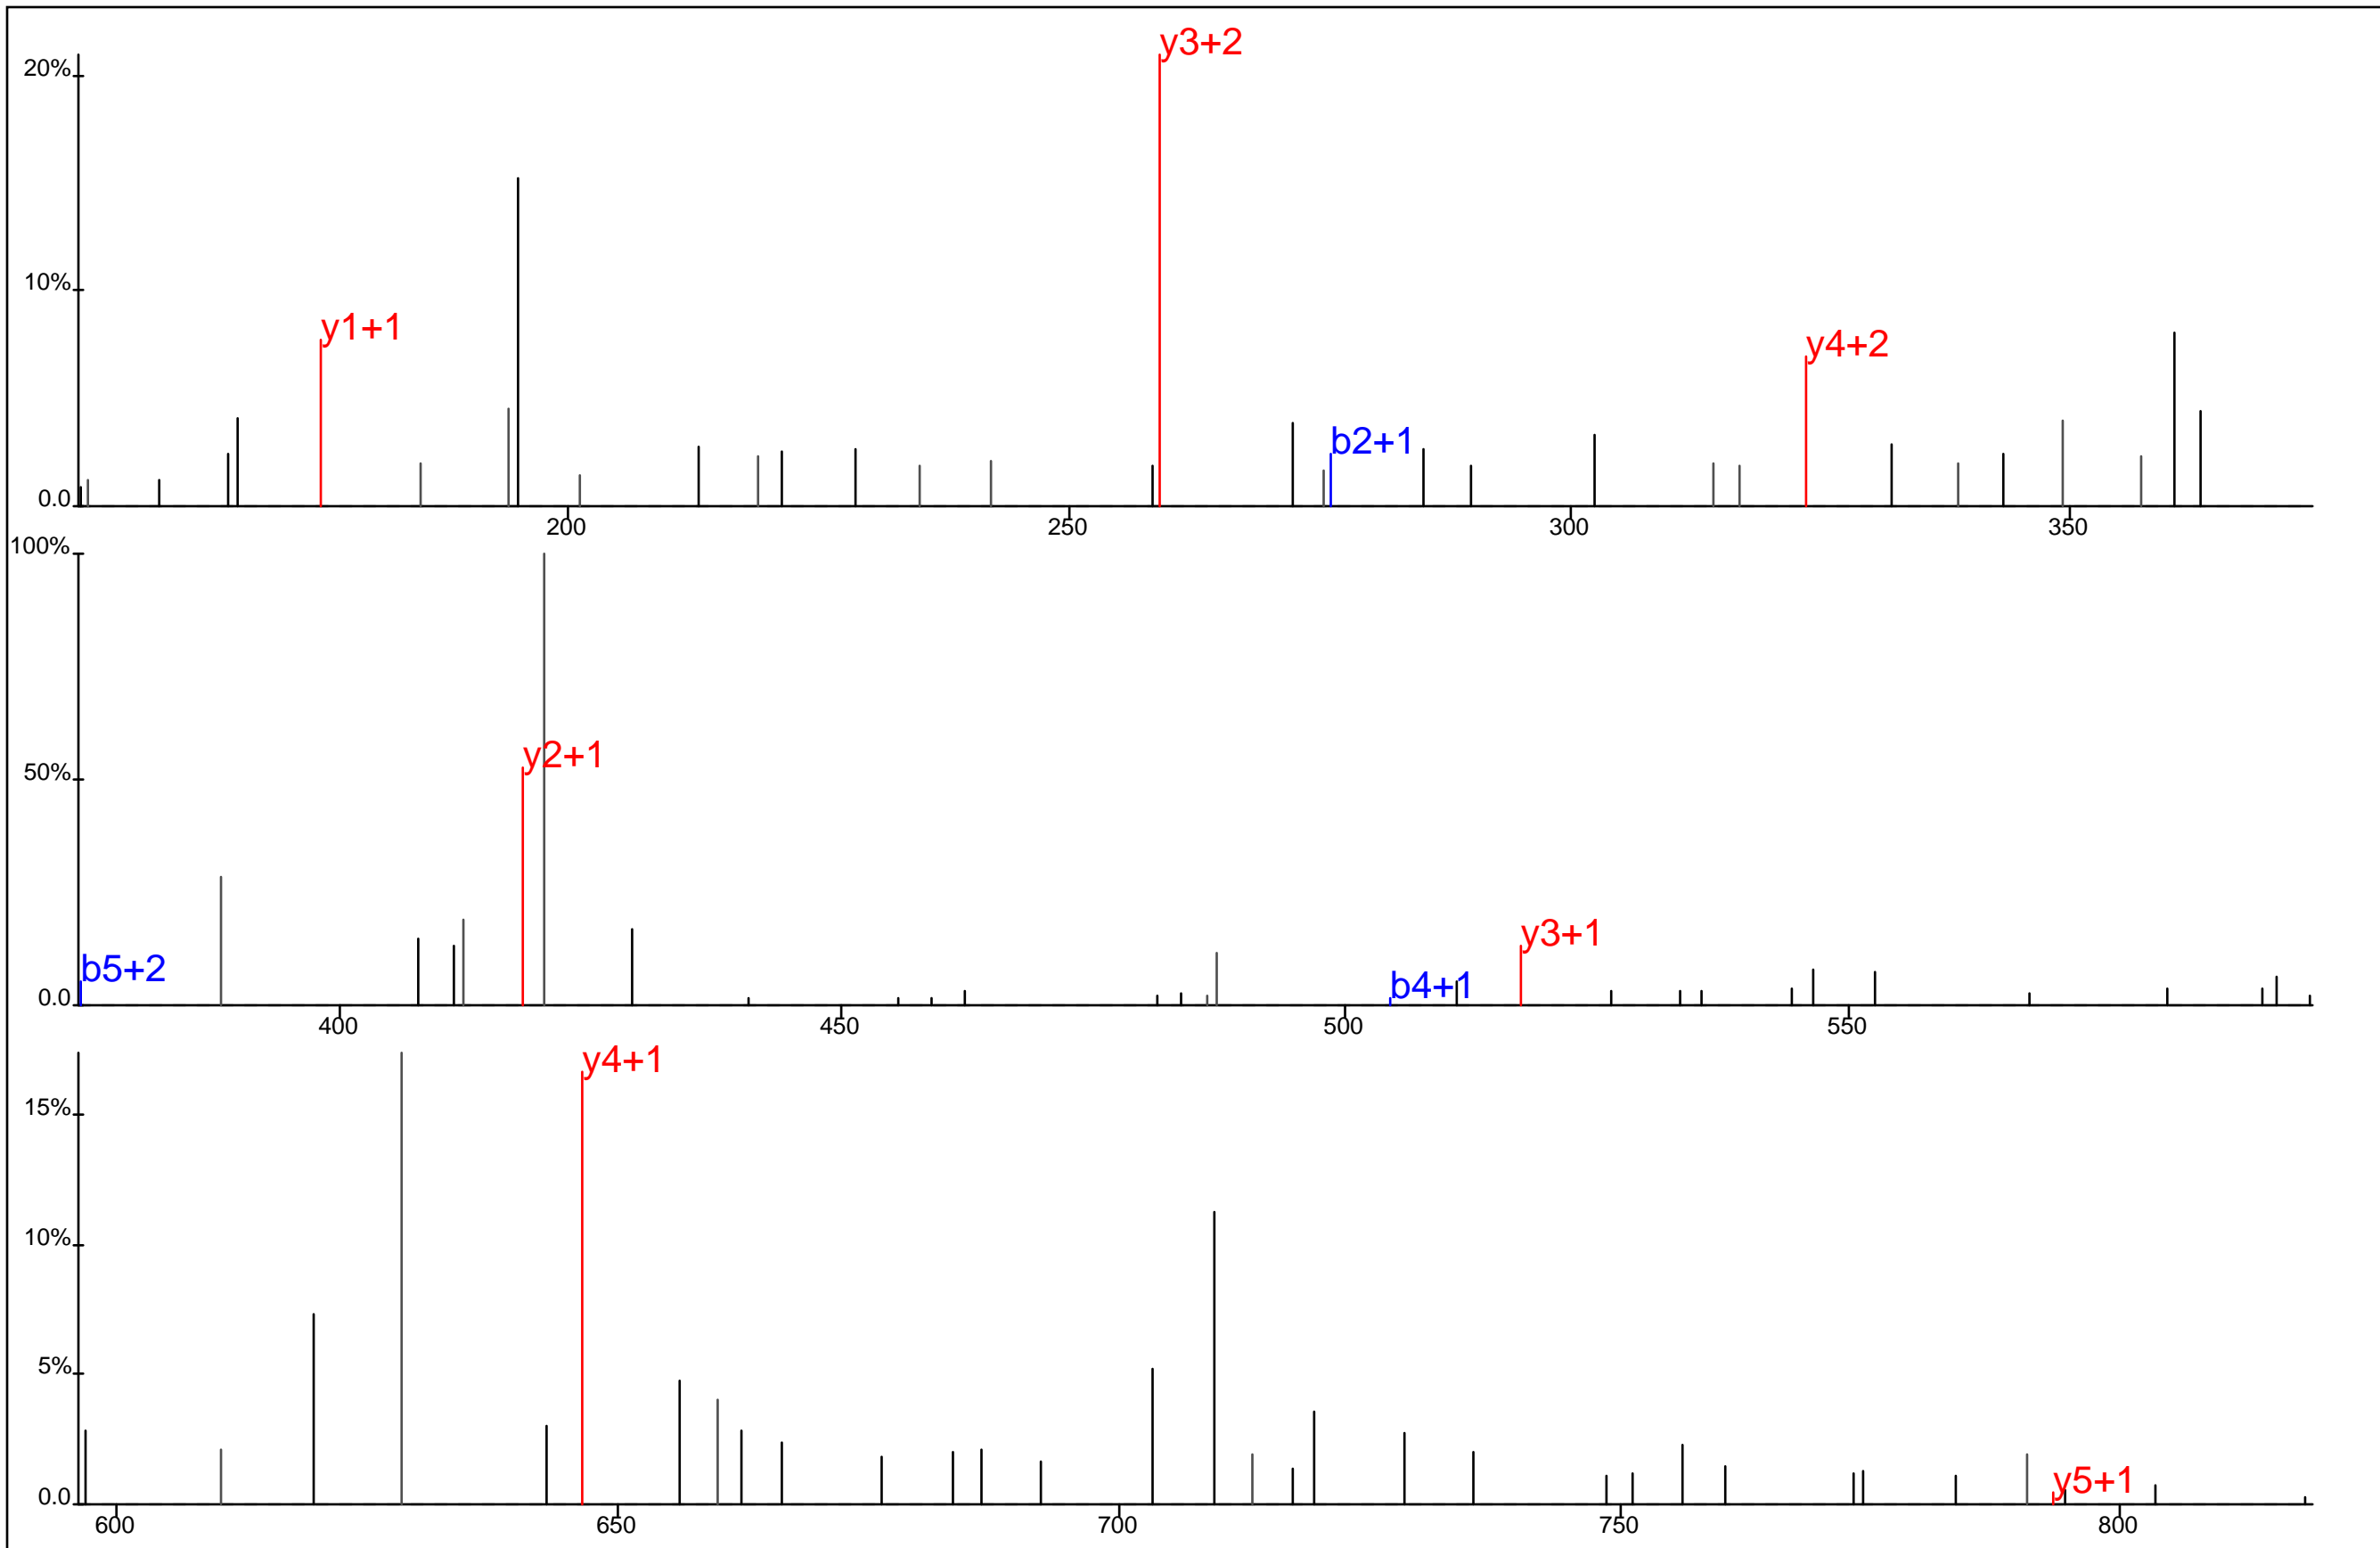

■ ▢ ▣  
**Q M E V Y\* R**  
▢ ▣ ▤ ▥

Protein Name: ELKS protein  
 gi Accession: 0  
 Precursor Mass: 461.1823+2  
 Delta Mass: 3.966 ppm  
 XCorr: 22.92

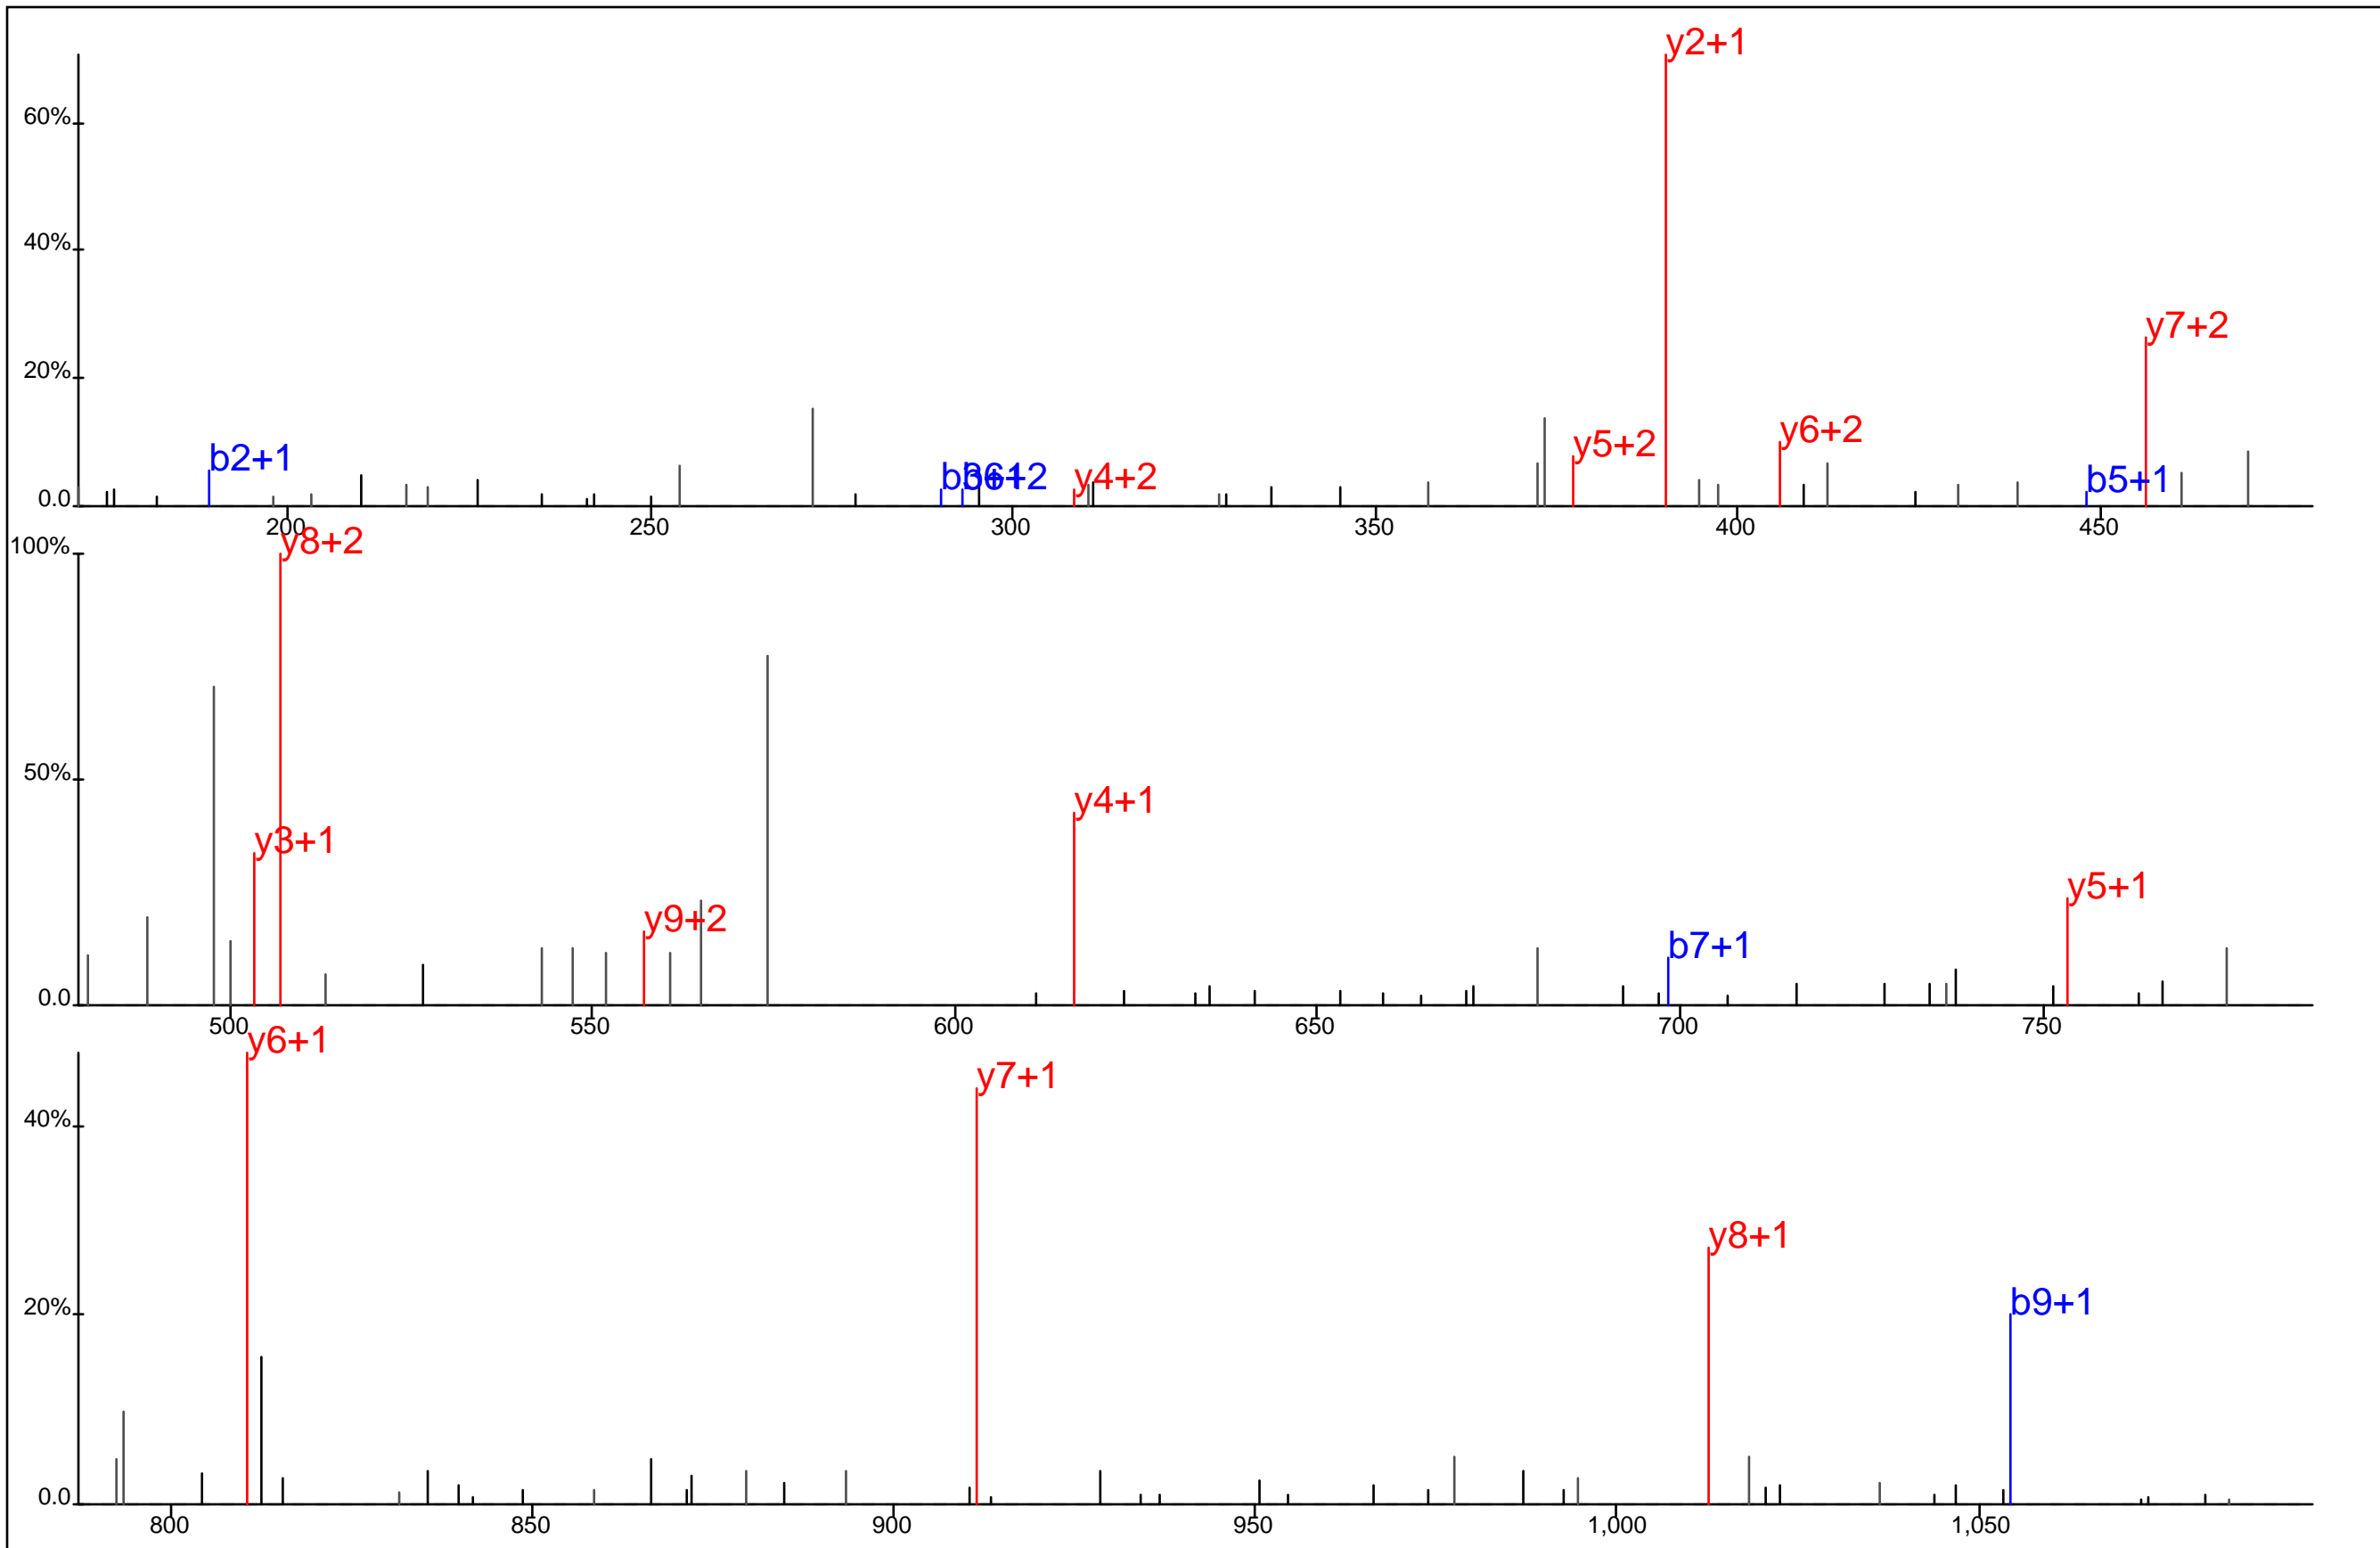

S T T T G H L I Y\* K

Protein Name: Elongation factor 1 alpha 1  
 gi Accession: 0  
 Precursor Mass: 600.7860+2  
 Delta Mass: 1.063 ppm  
 XCorr: 46.3



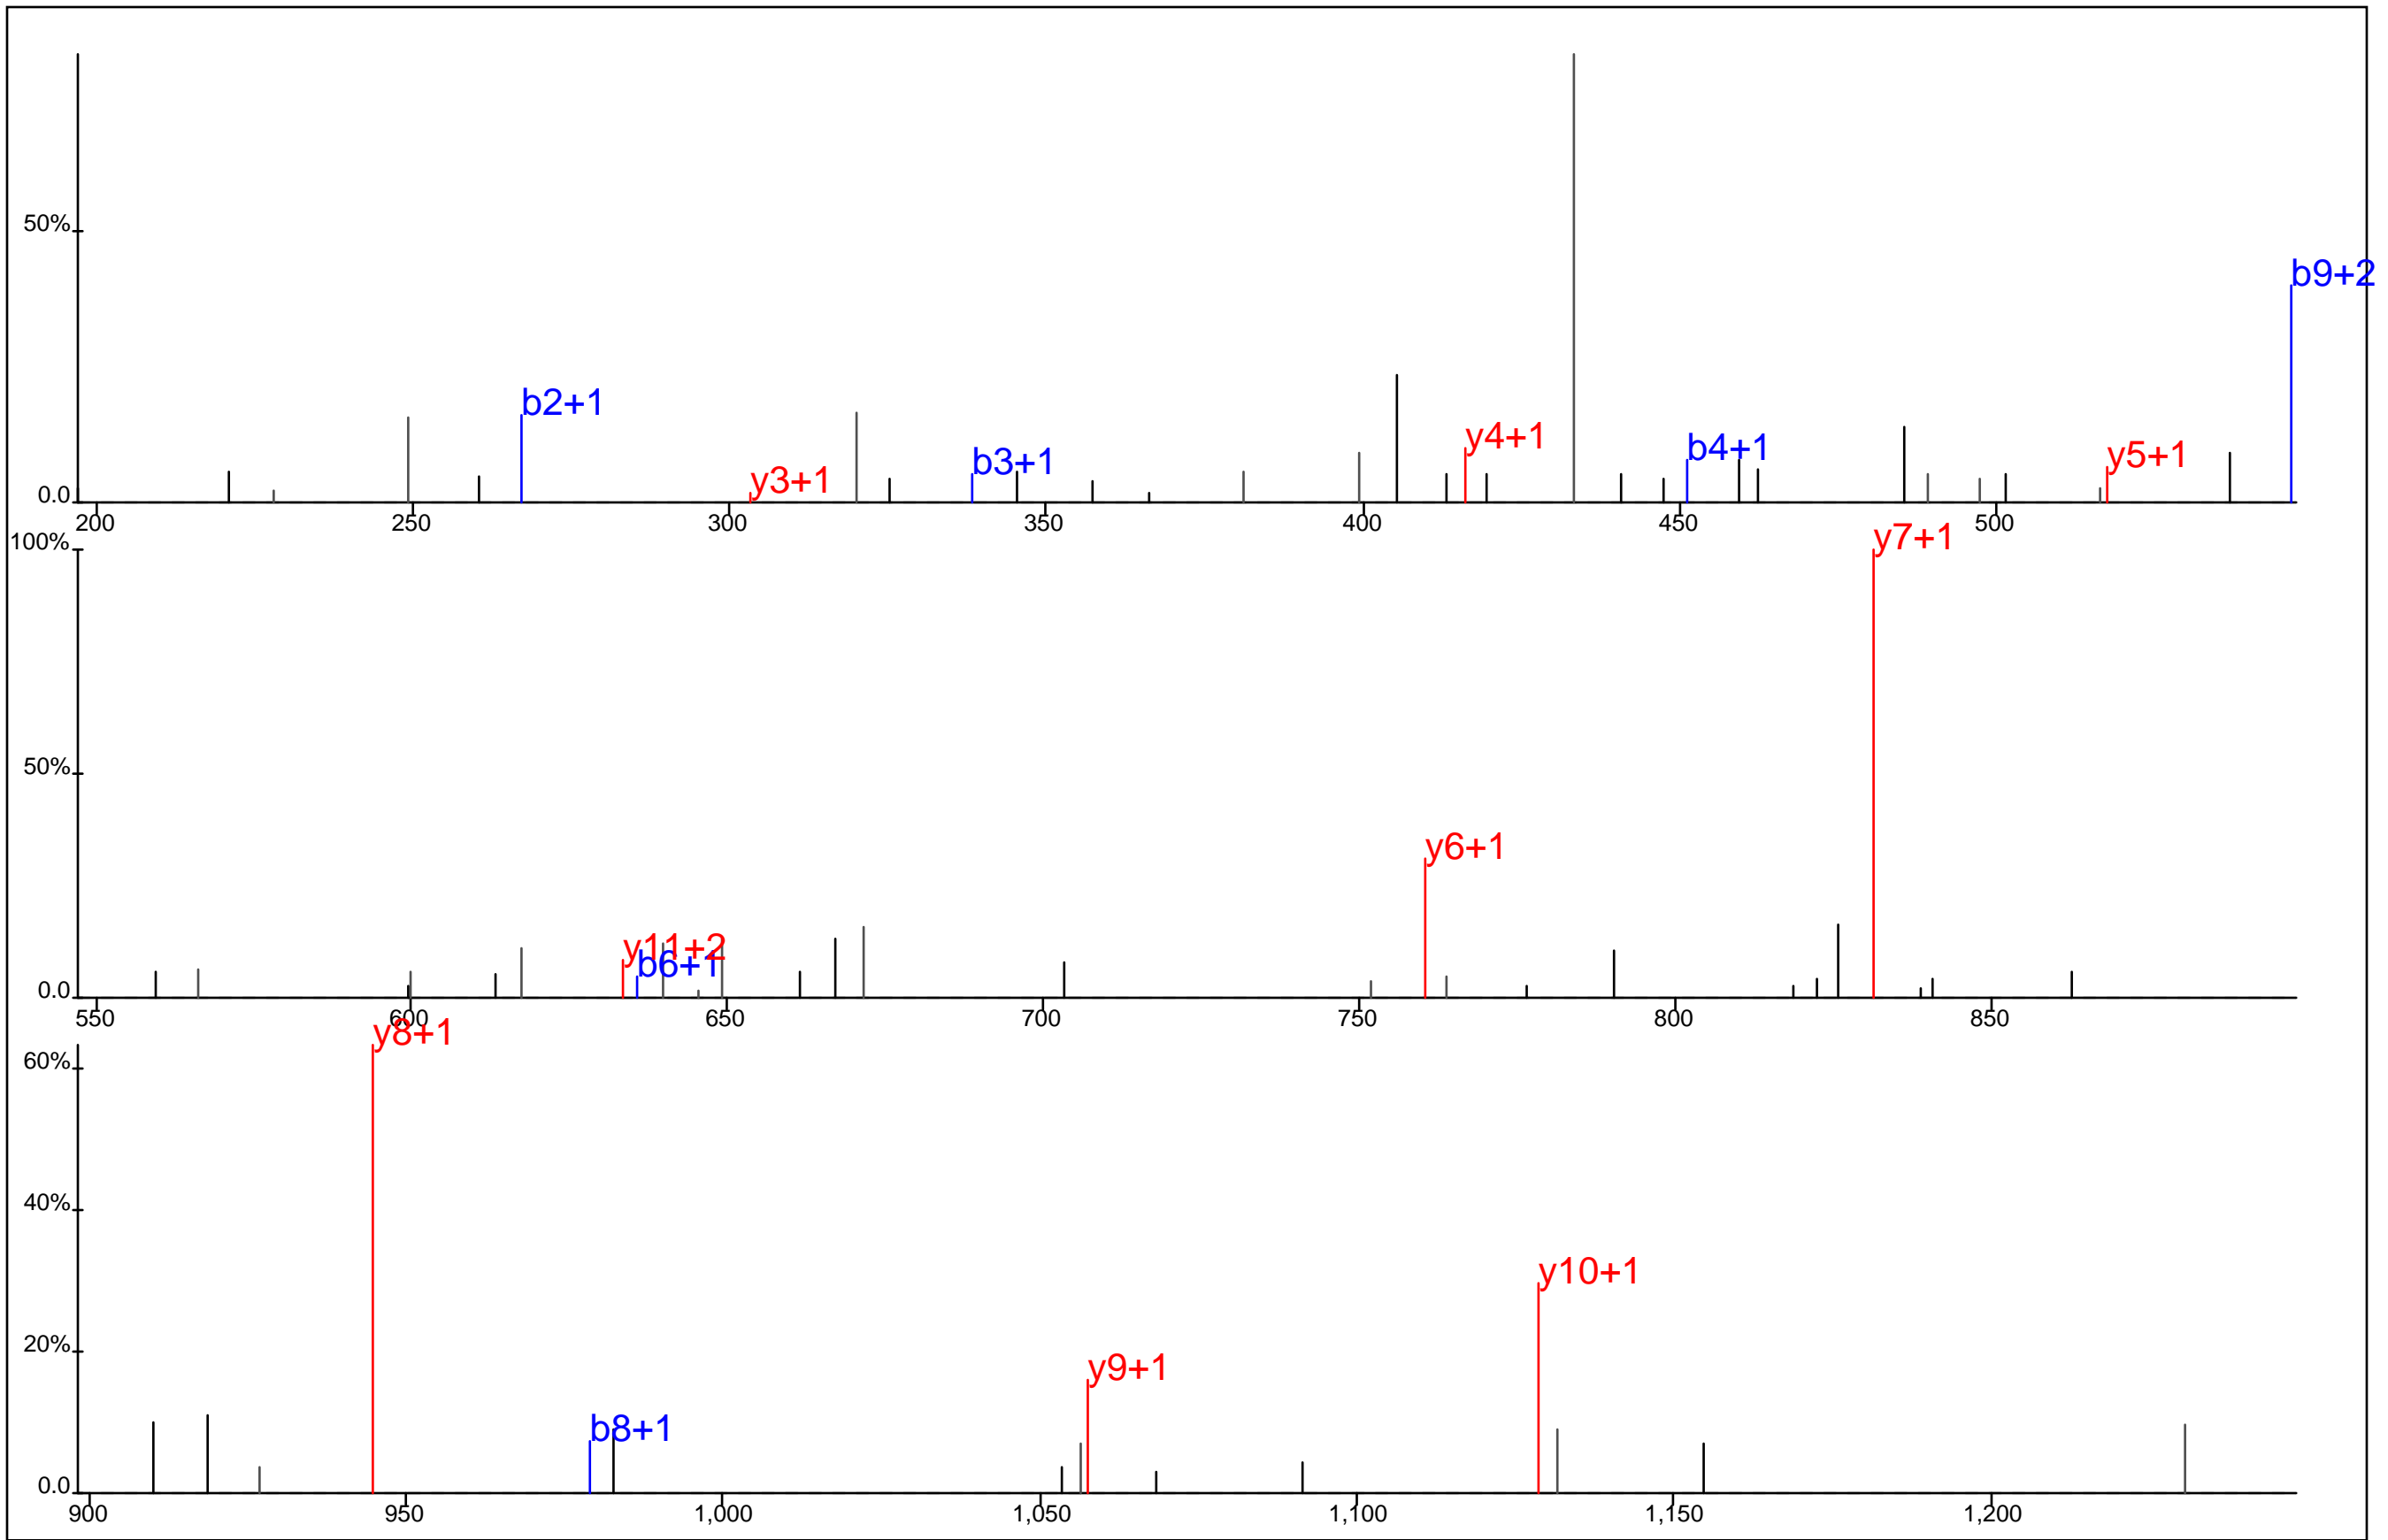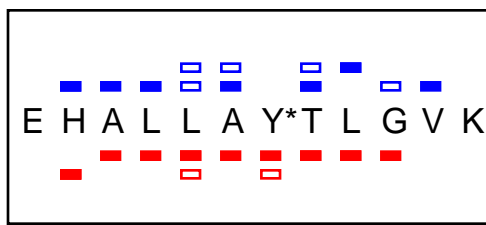

Protein Name: Elongation factor 1 alpha 1  
 gi Accession: 0  
 Precursor Mass: 697.8588+2  
 Delta Mass: 1.767 ppm  
 XCorr: 42.39

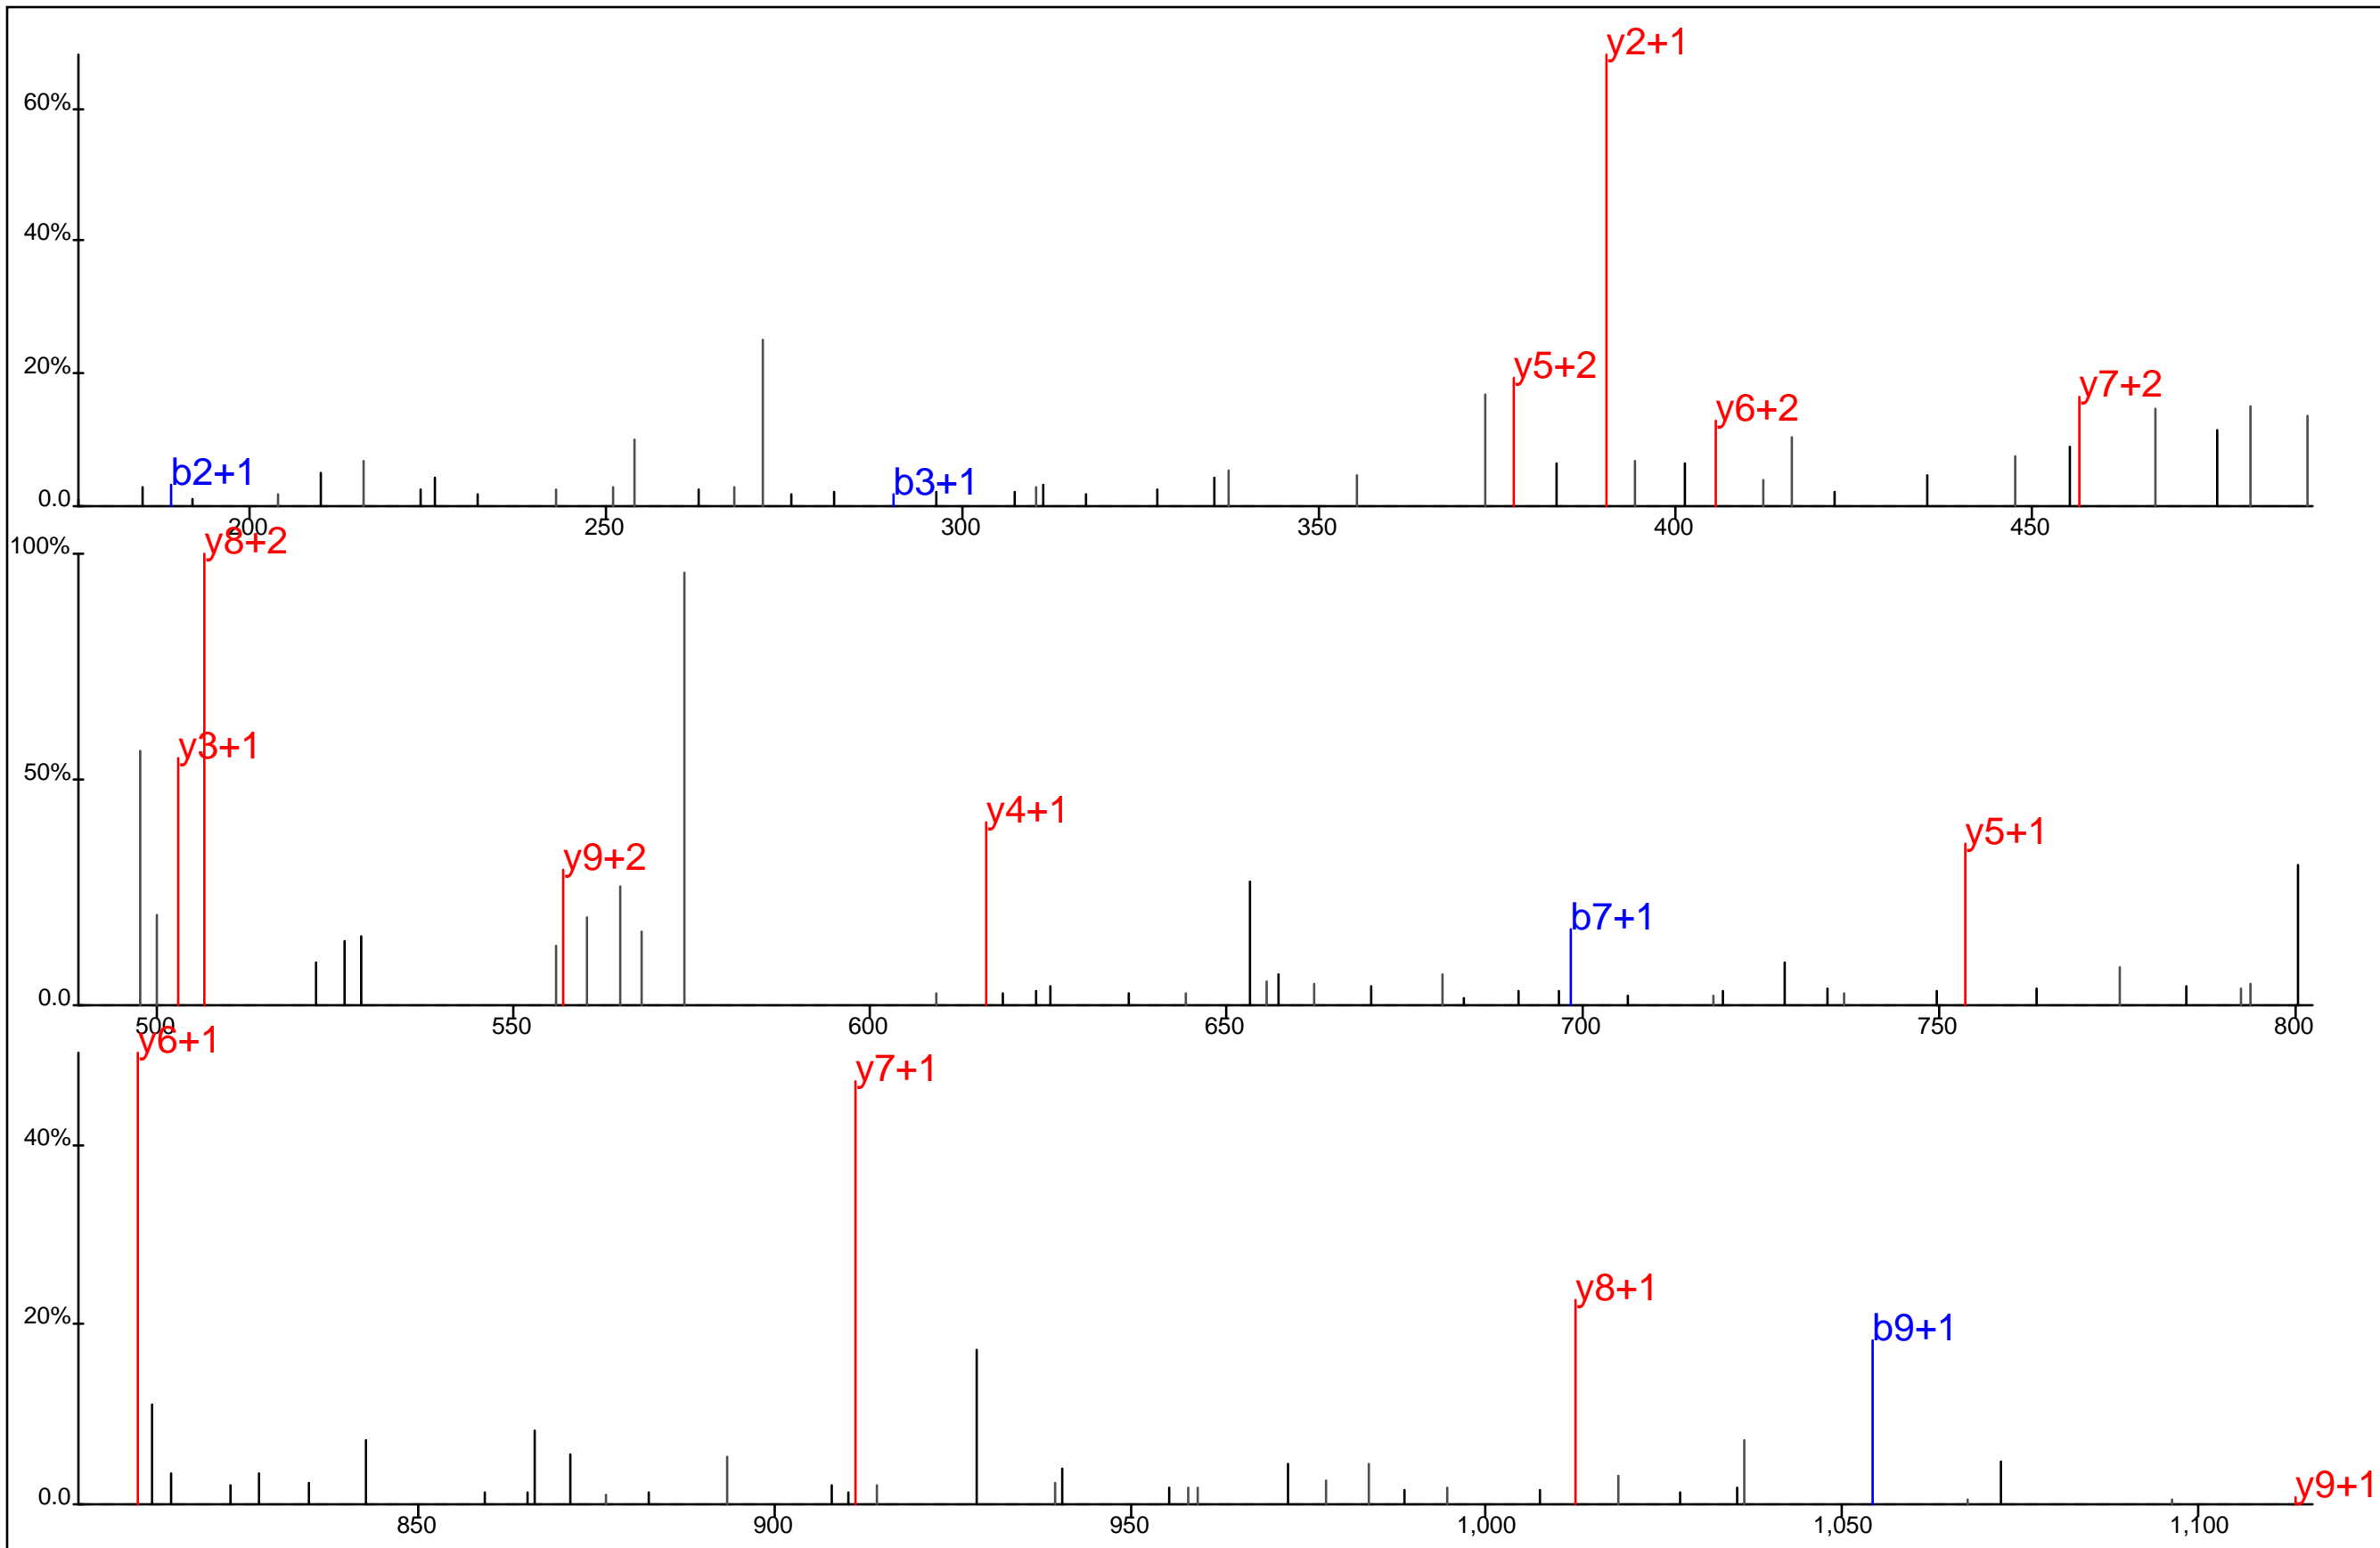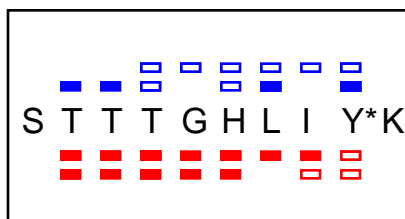

Protein Name: Elongation factor 1 alpha 1  
 gi Accession: 0  
 Precursor Mass: 600.7853+2  
 Delta Mass: 2.182 ppm  
 XCorr: 51.13

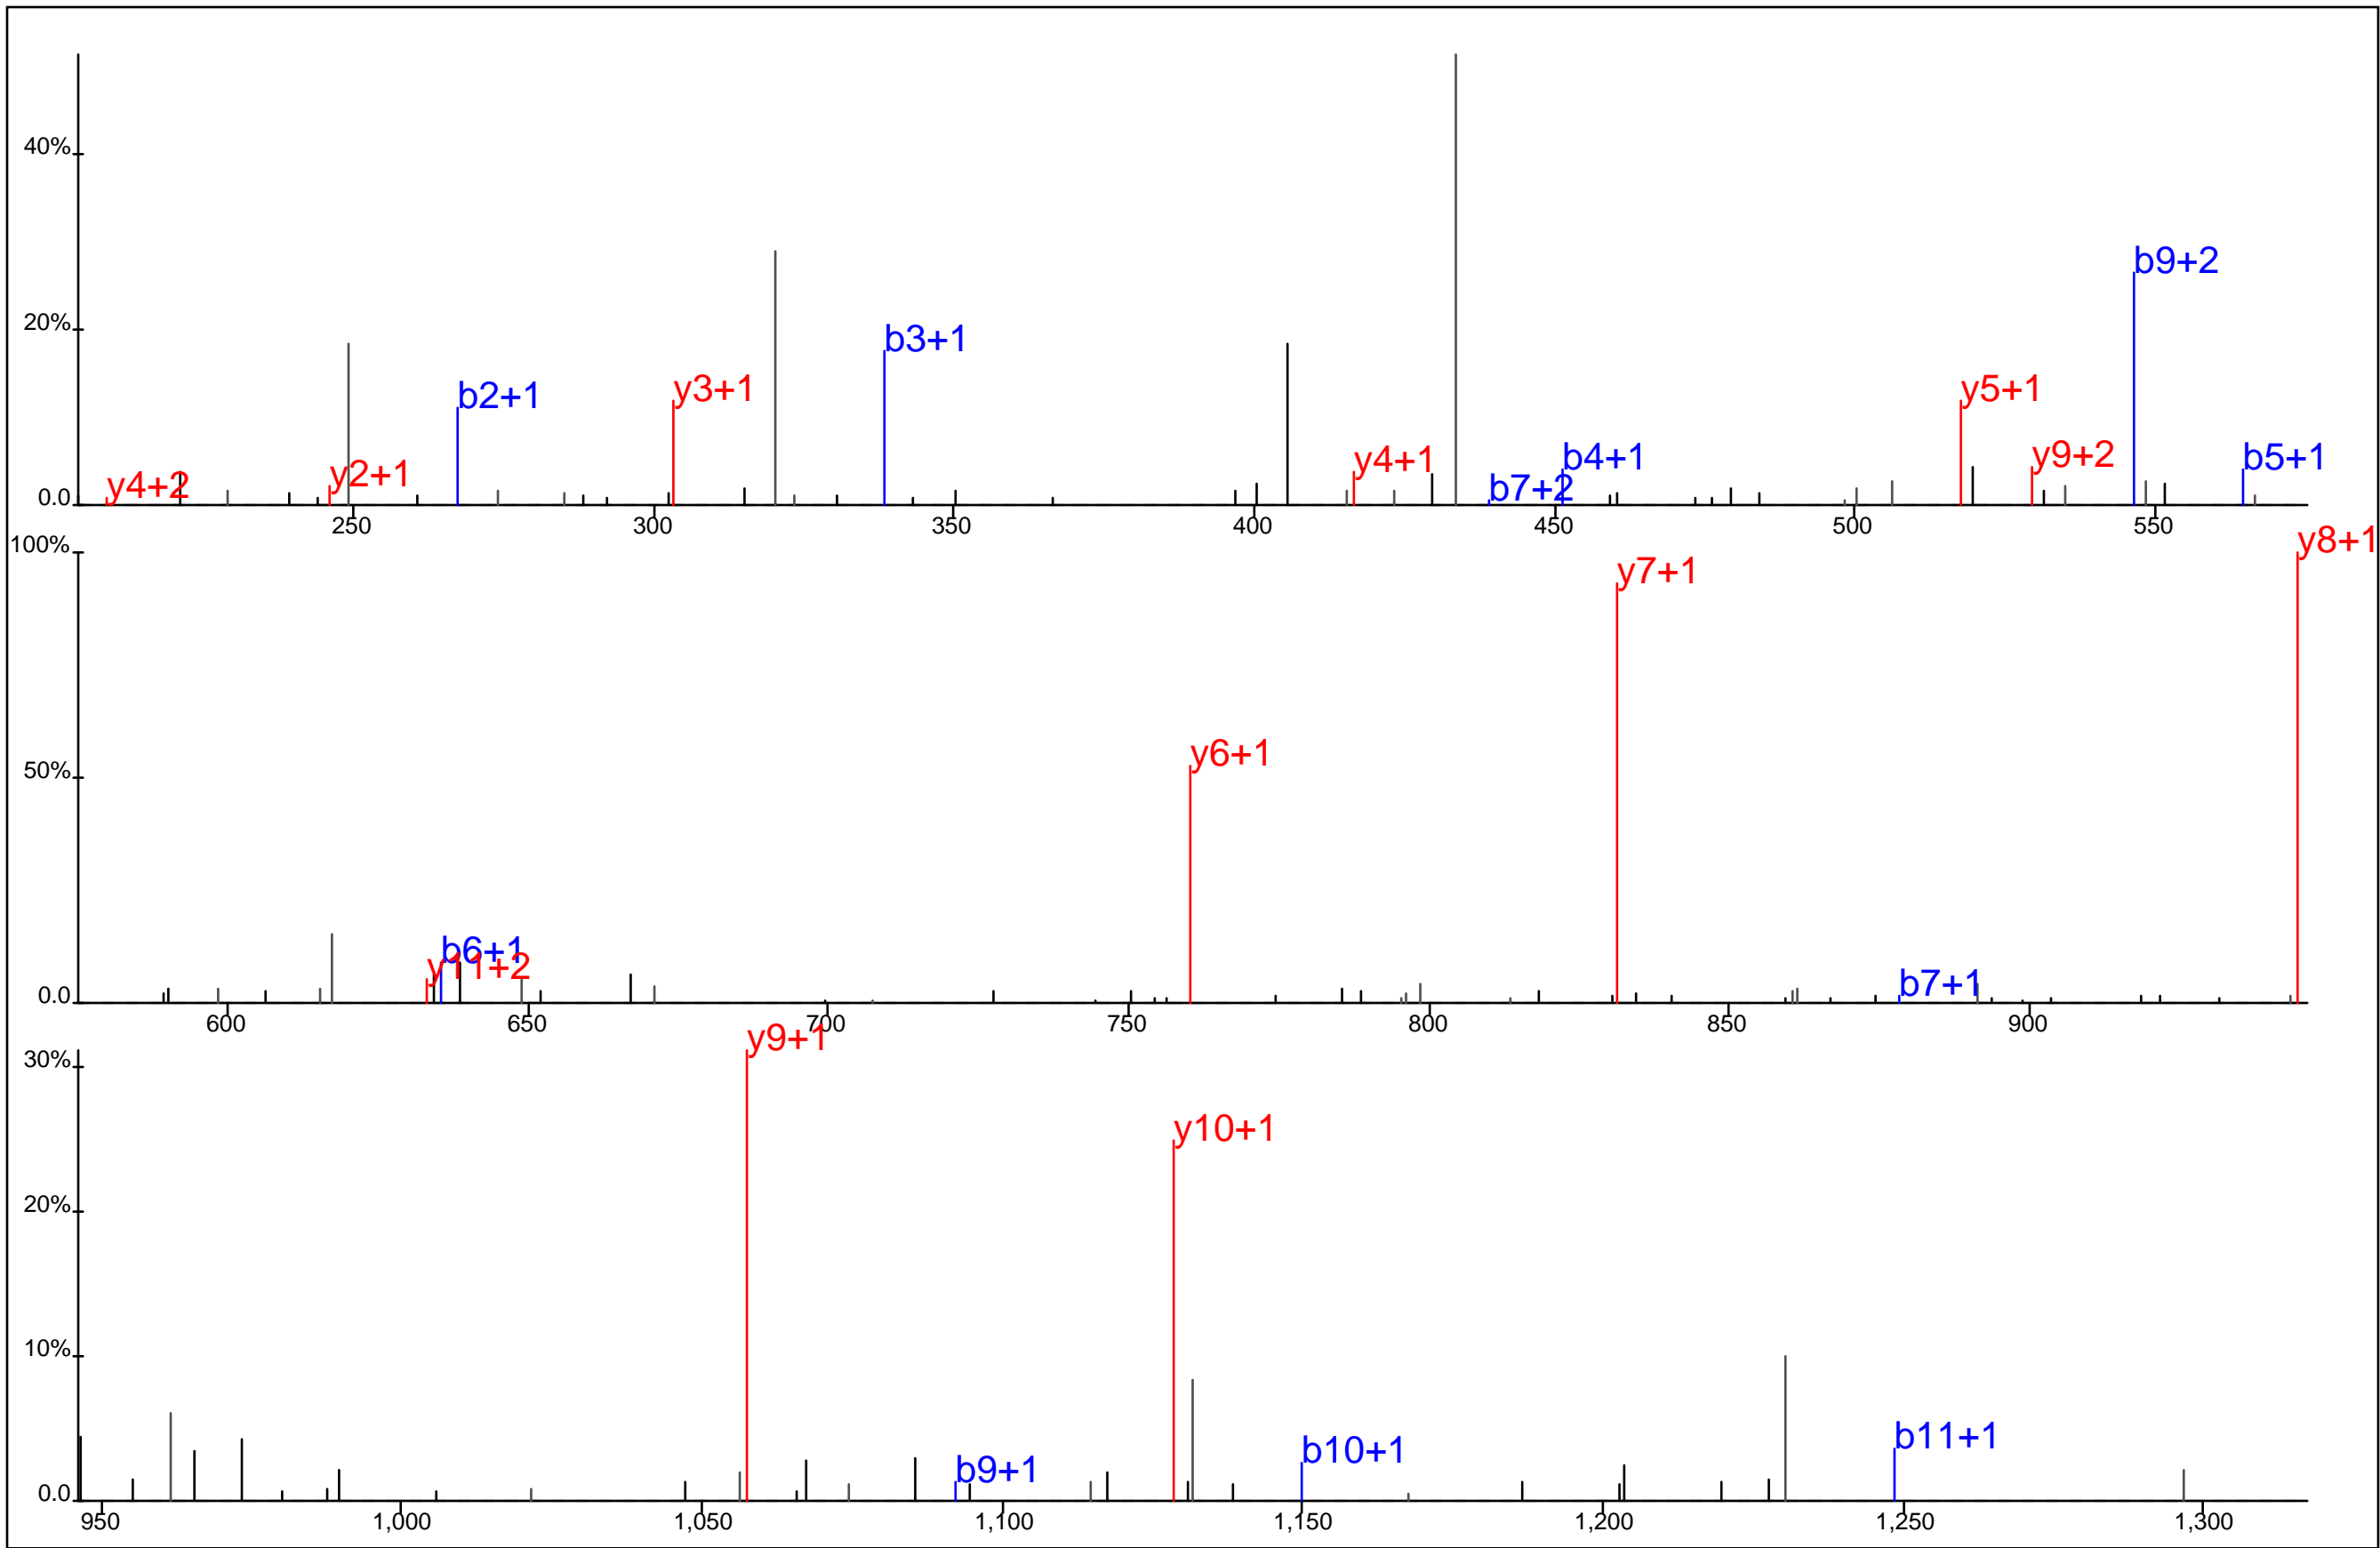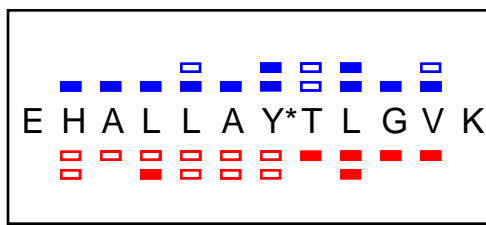

Protein Name: Elongation factor 1 alpha 1  
 gi Accession: 0  
 Precursor Mass: 697.8586+2  
 Delta Mass: 1.417 ppm  
 XCorr: 56.09

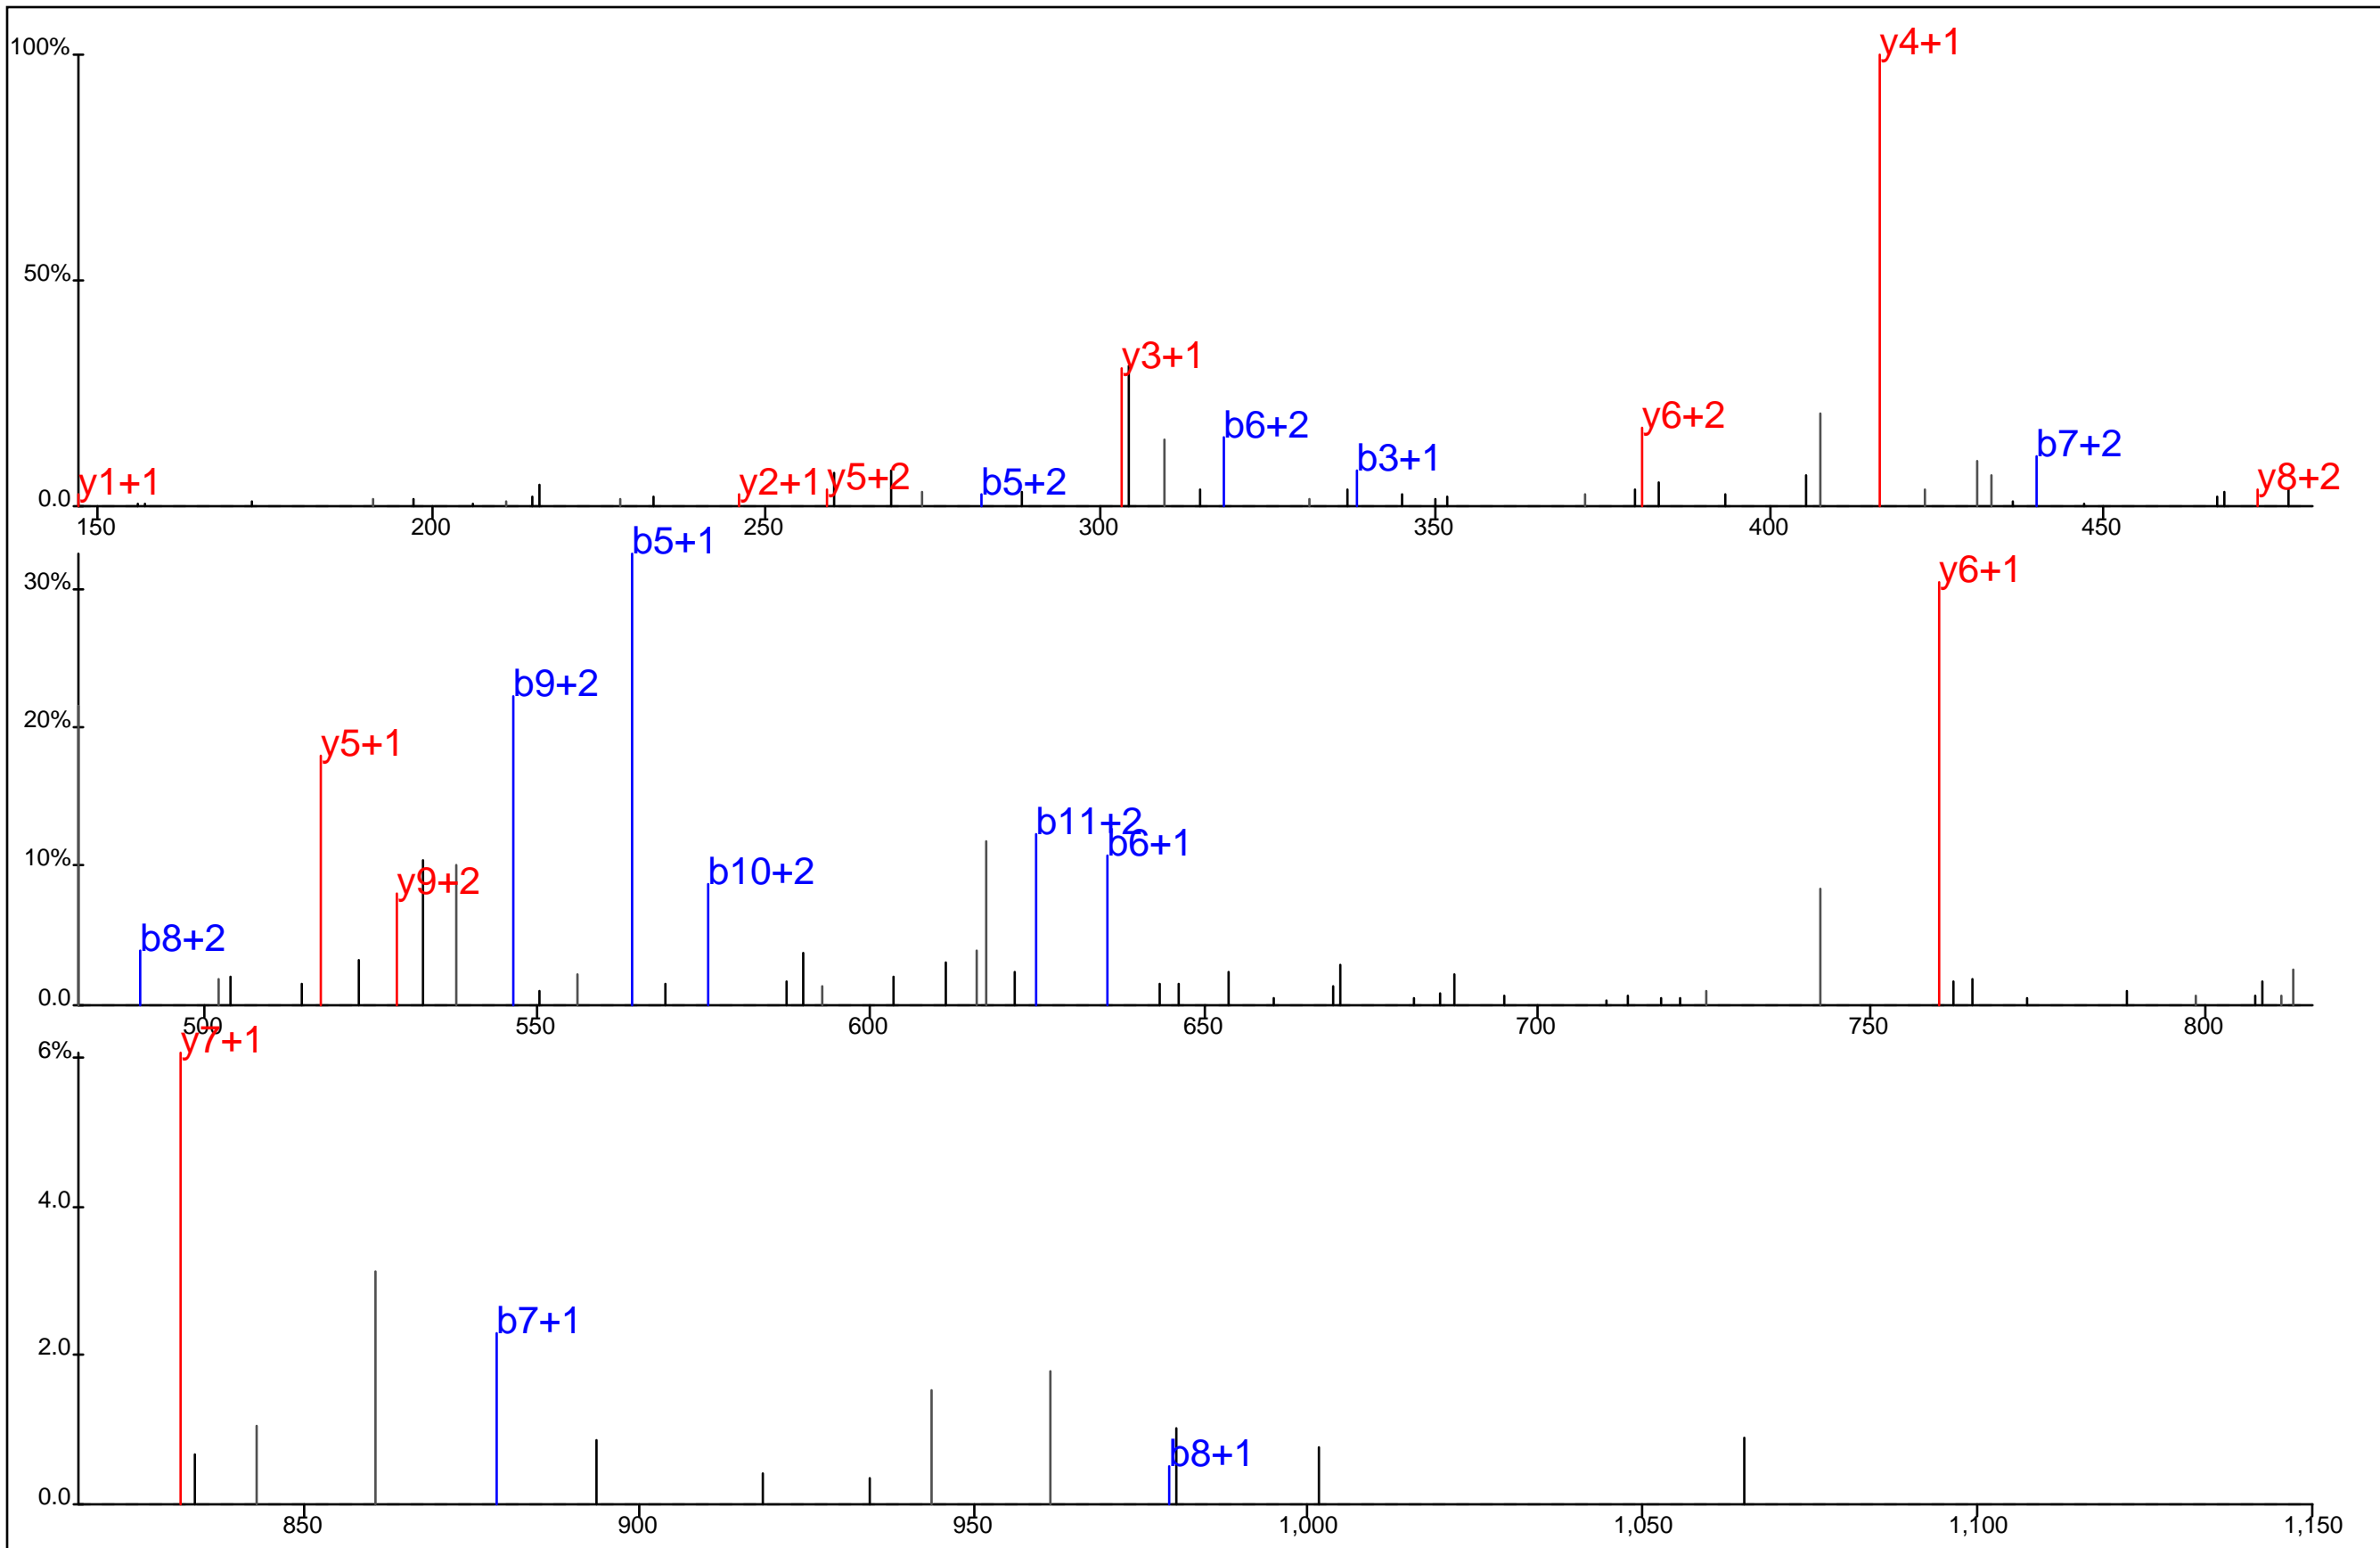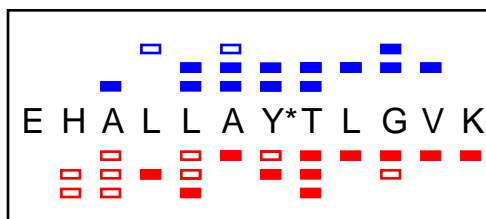

Protein Name: Elongation factor 1 alpha 1  
 gi Accession: 0  
 Precursor Mass: 465.5749+3  
 Delta Mass: 1.582 ppm  
 XCorr: 48.27





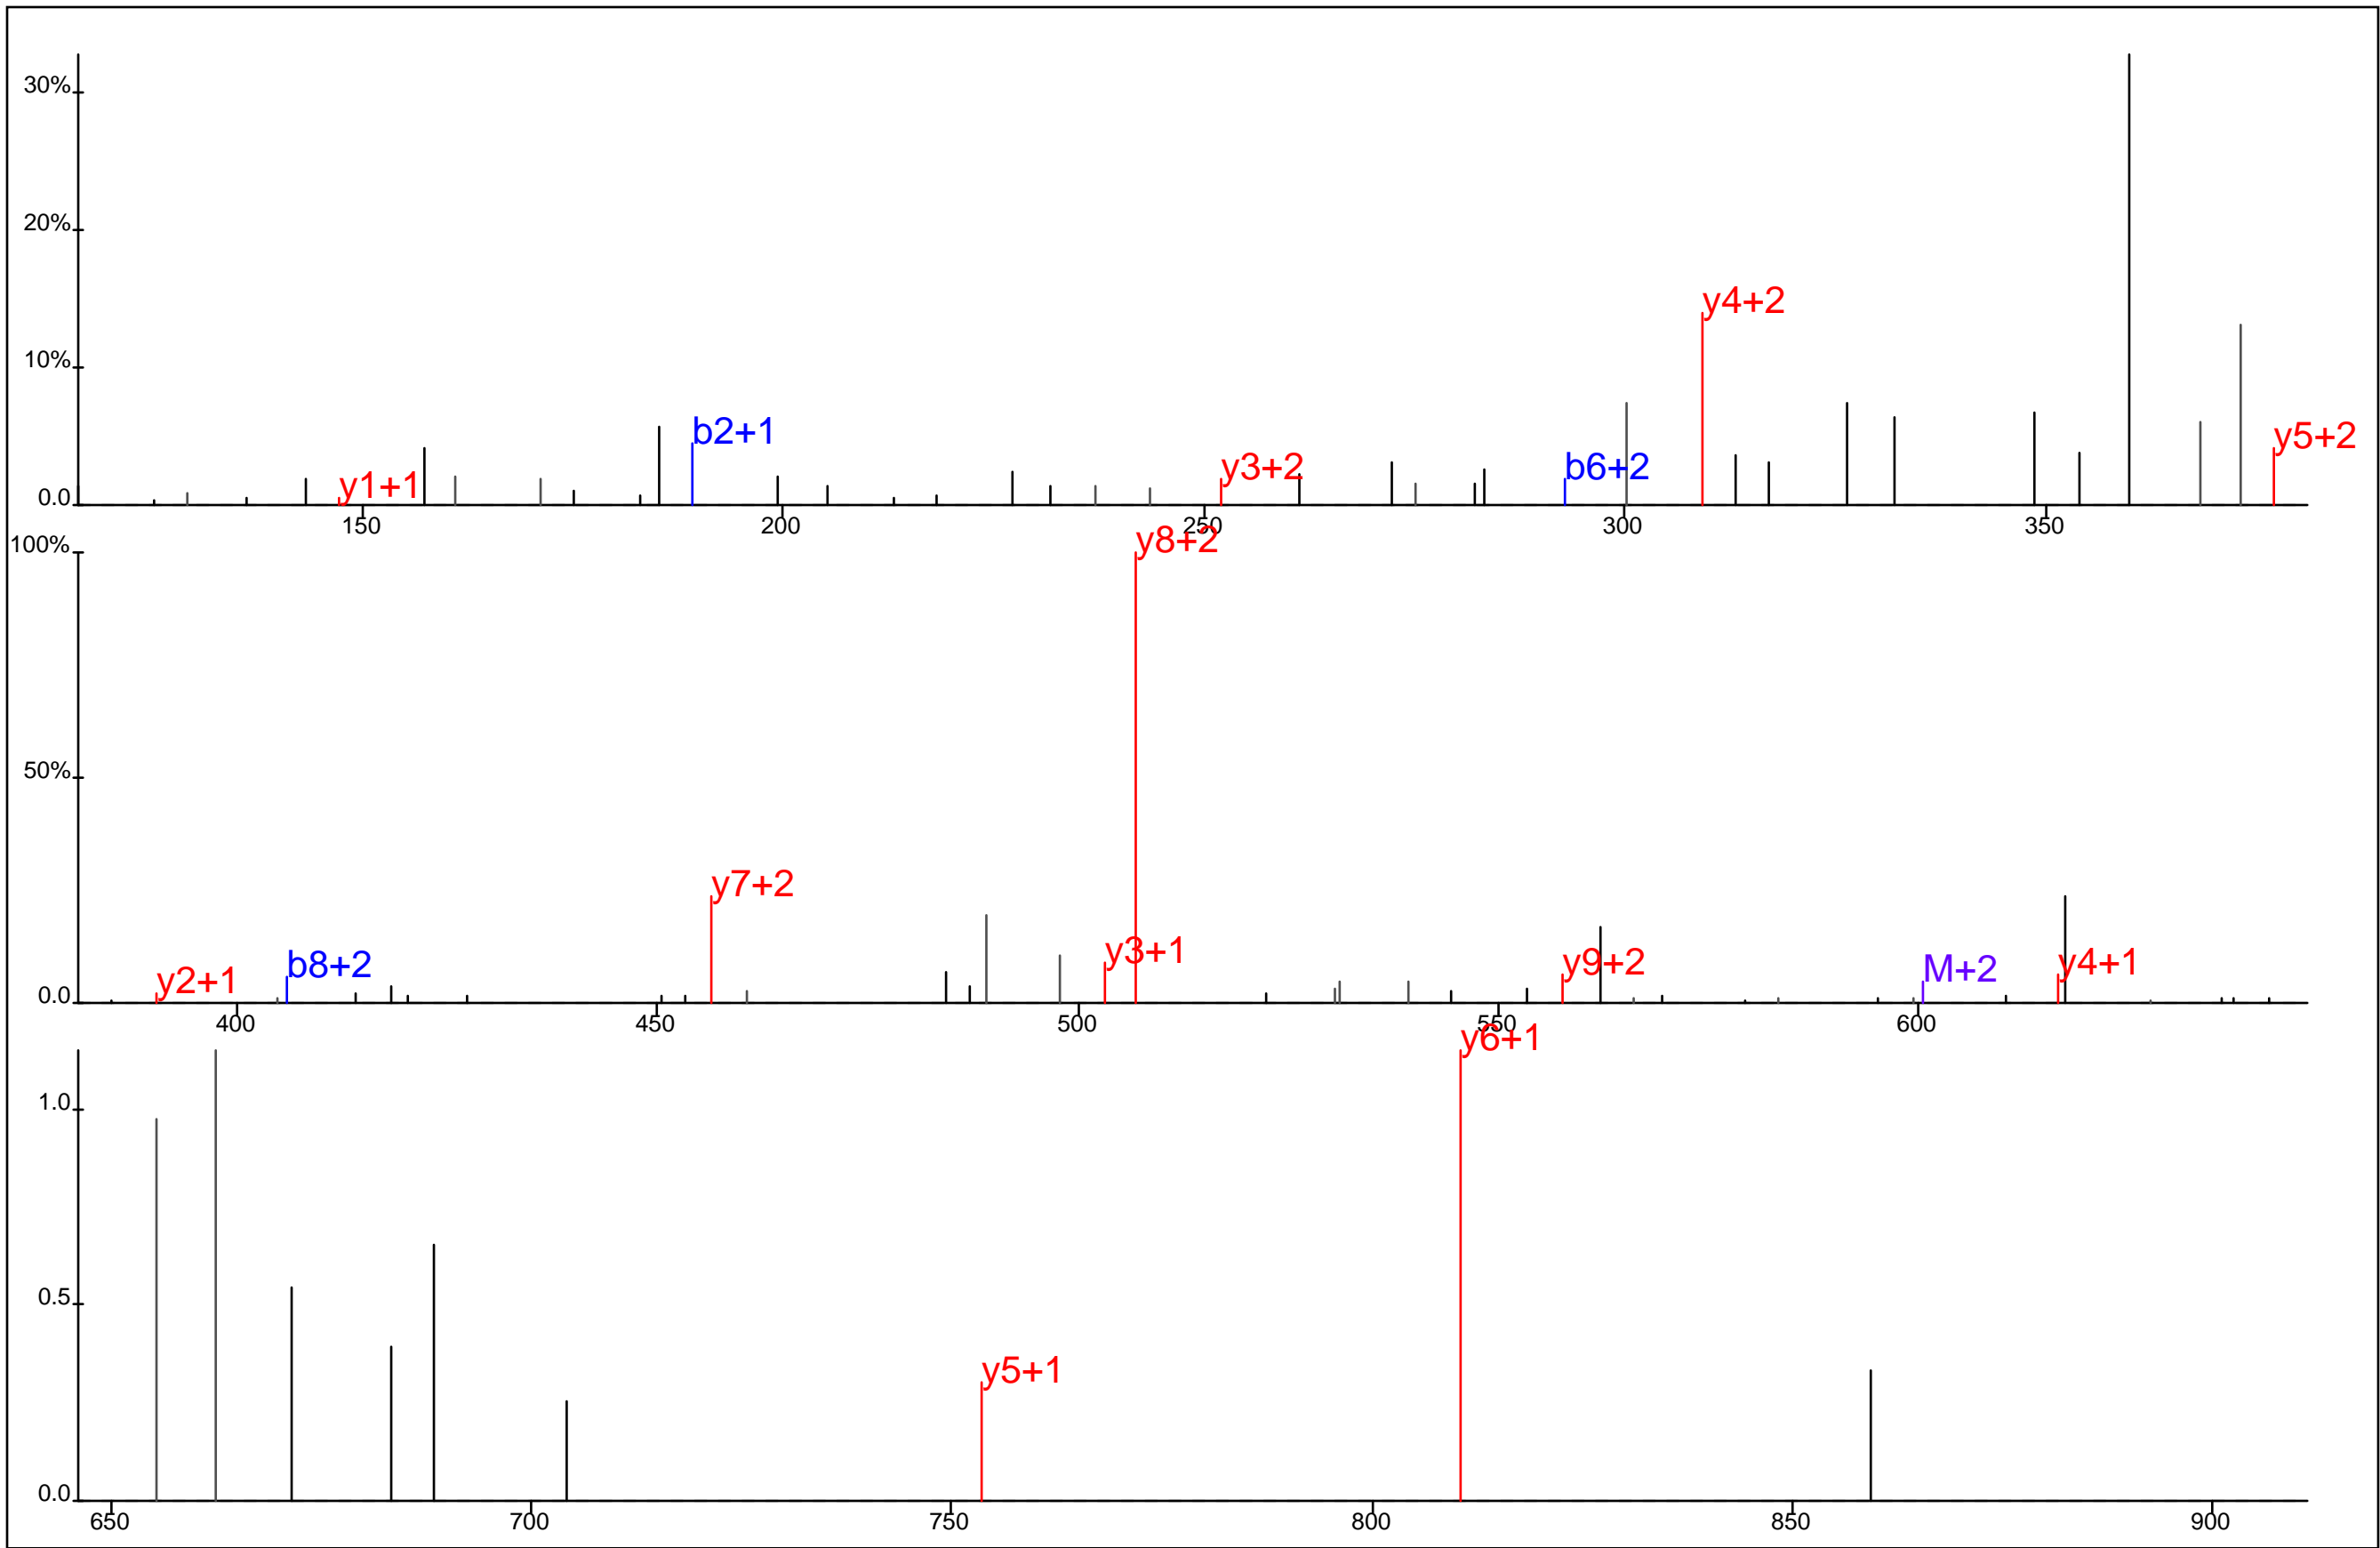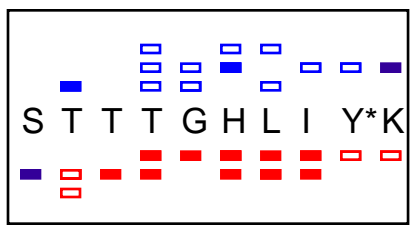

Protein Name: Elongation factor 1 alpha 1  
 gi Accession: 0  
 Precursor Mass: 400.8605+3  
 Delta Mass: 0.781 ppm  
 XCorr: 29.73



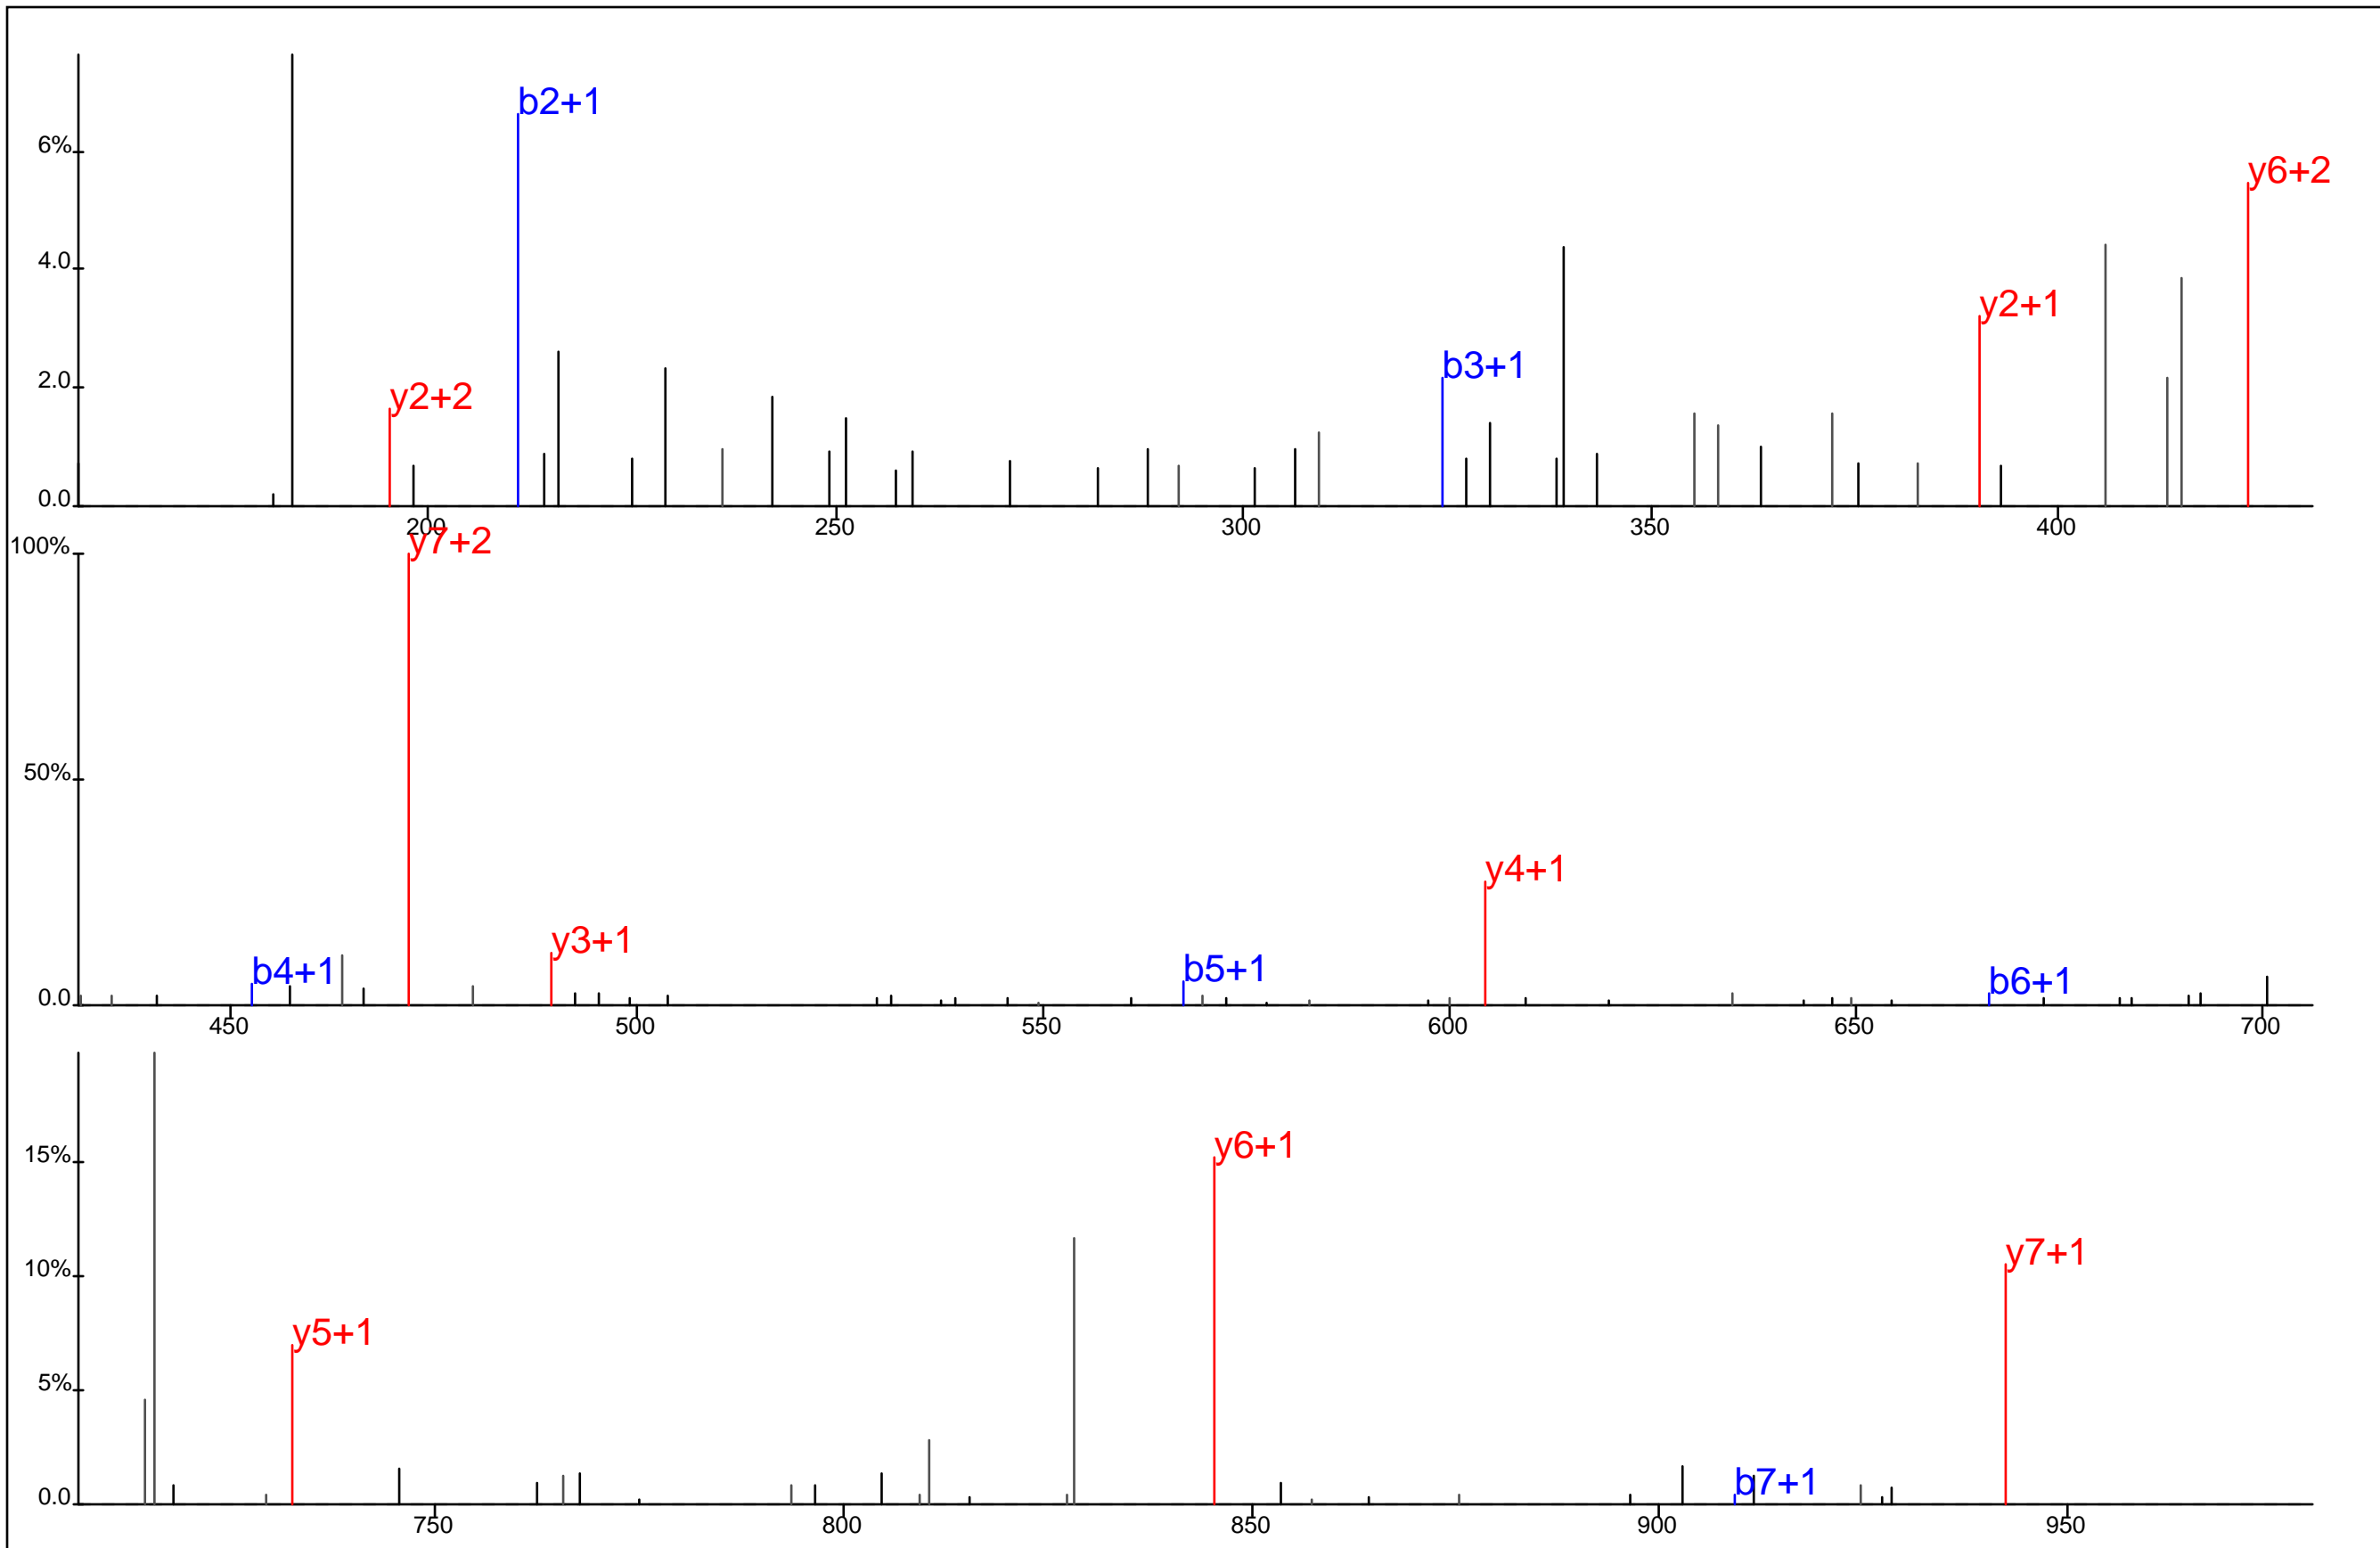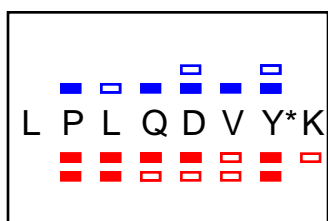

Protein Name: Elongation factor 1 alpha 1  
 gi Accession: 0  
 Precursor Mass: 528.2622+2  
 Delta Mass: 0.127 ppm  
 XCorr: 38.46

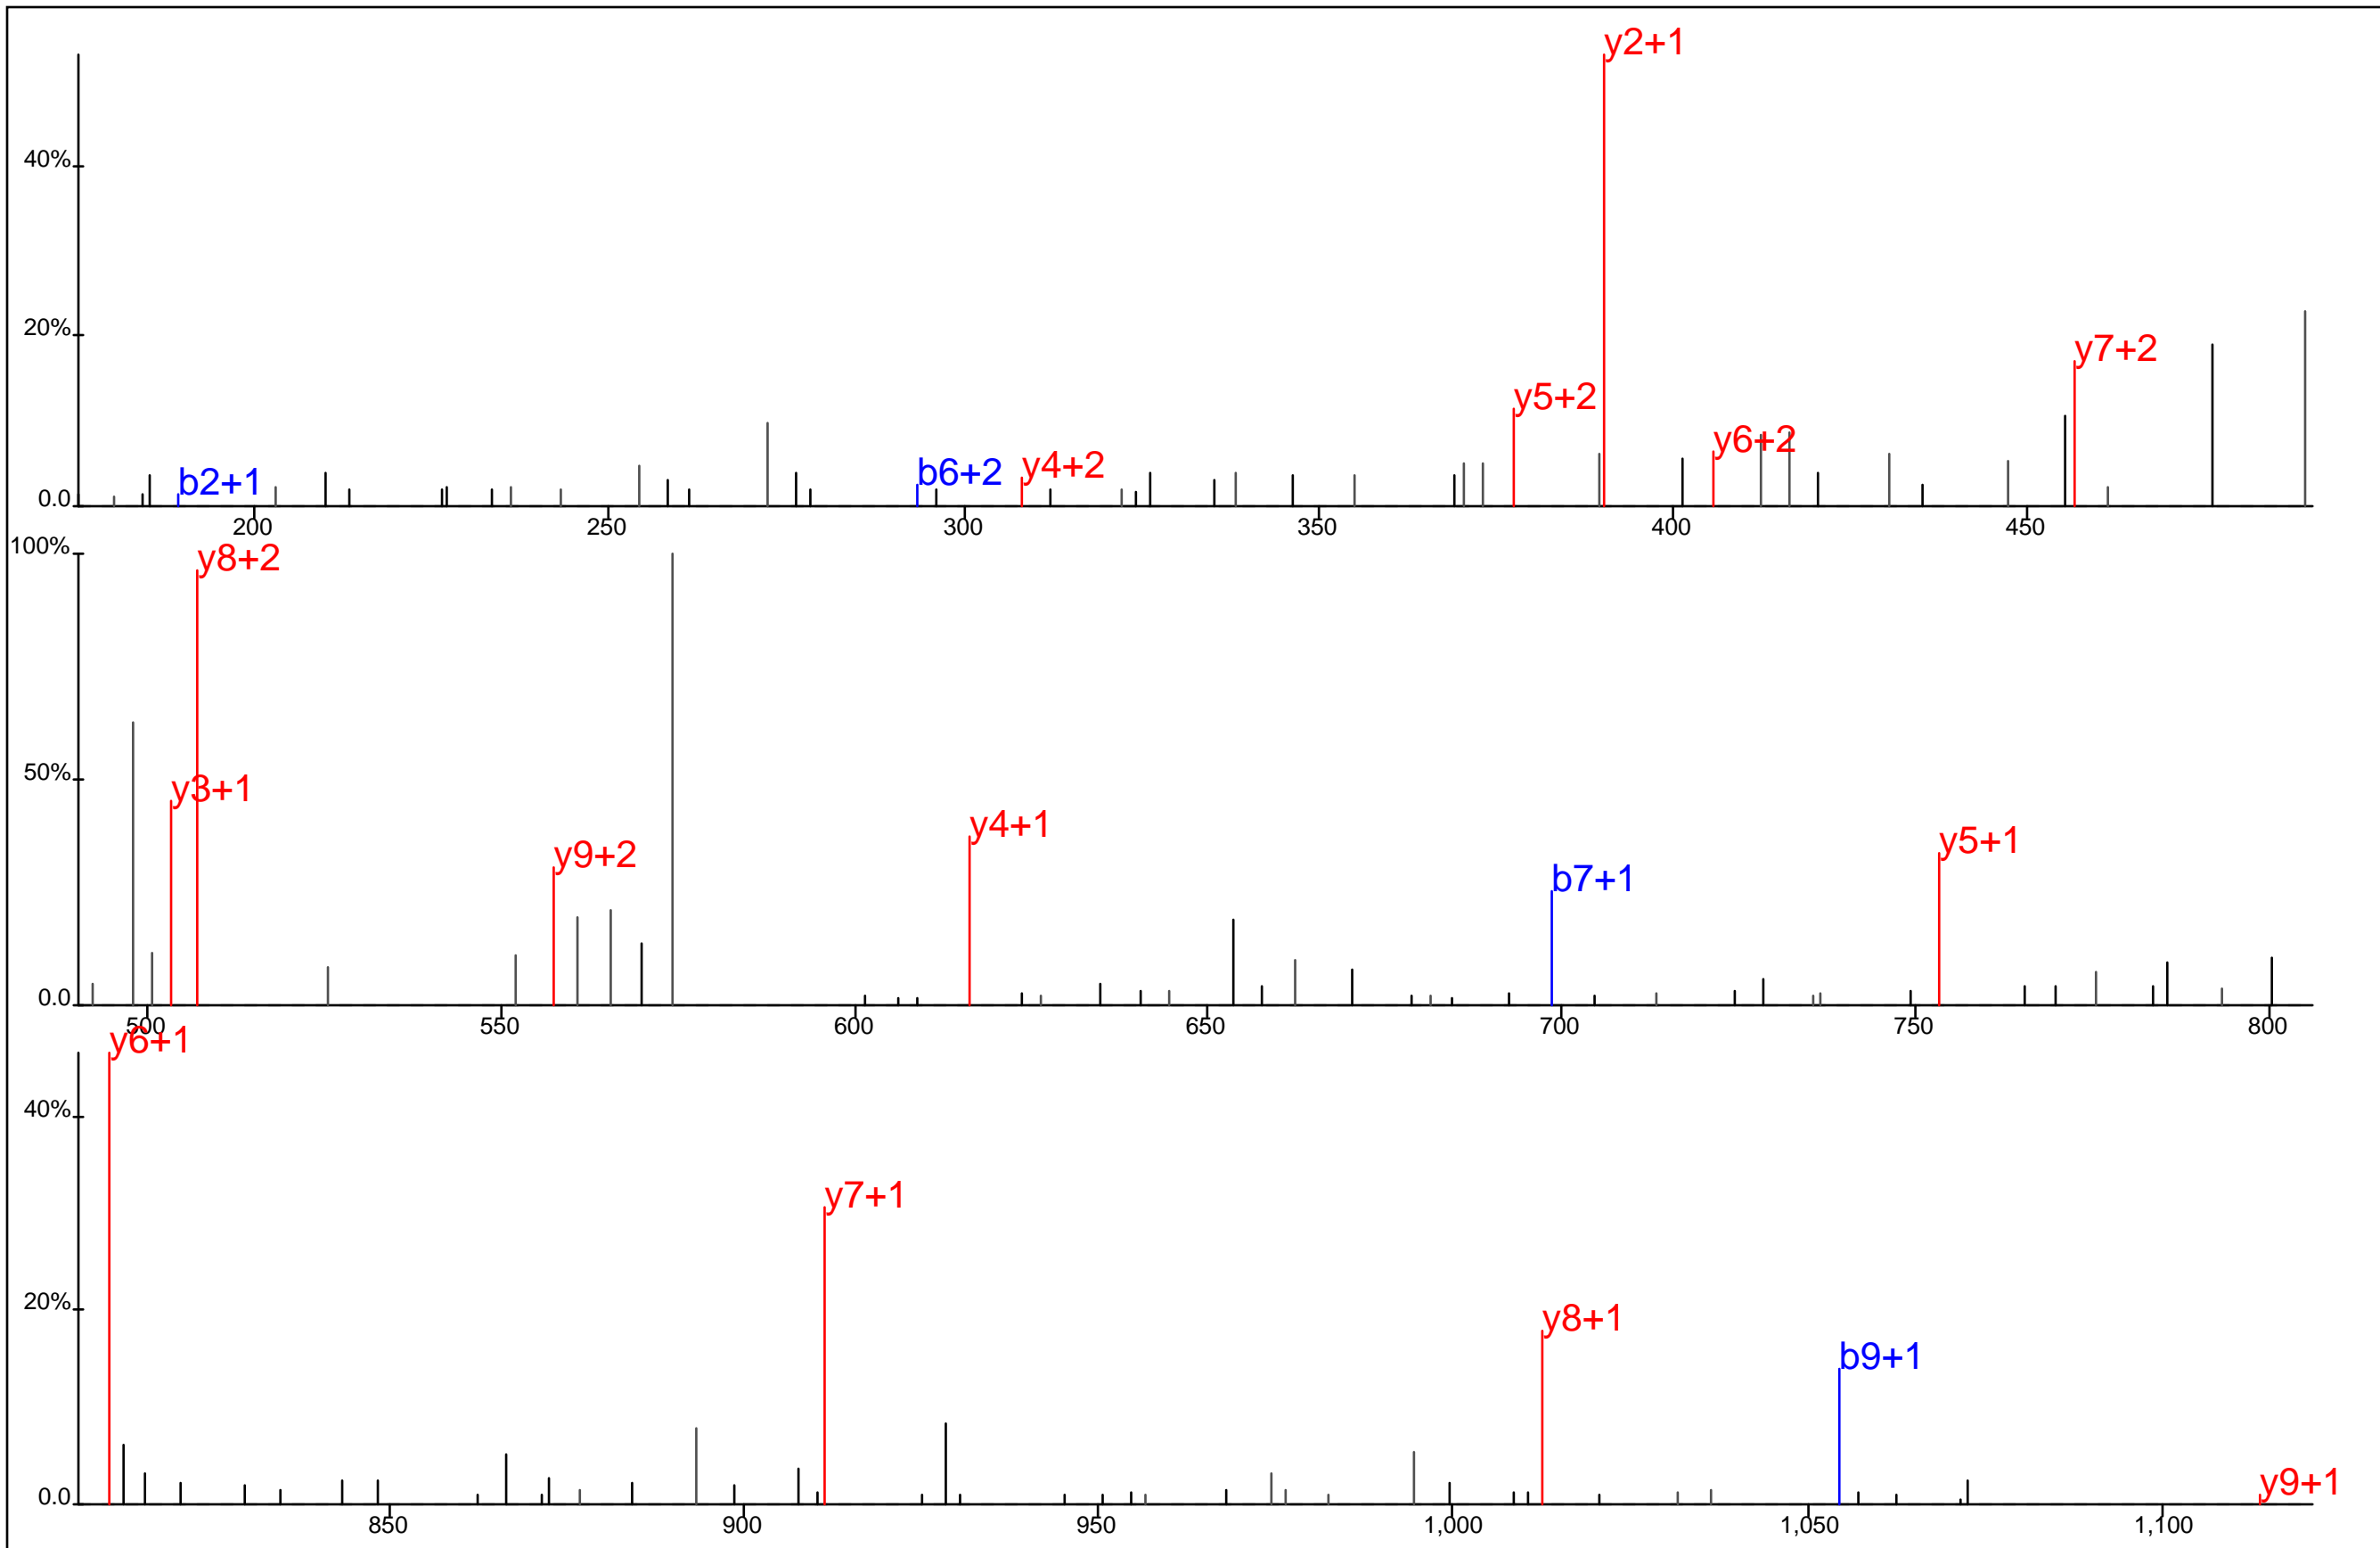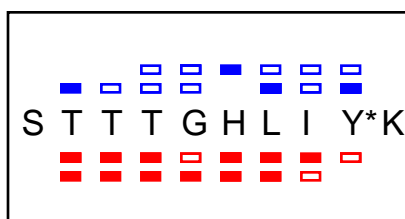

Protein Name: Elongation factor 1 alpha 1  
 gi Accession: 0  
 Precursor Mass: 600.7830+2  
 Delta Mass: 6.045 ppm  
 XCorr: 56.7

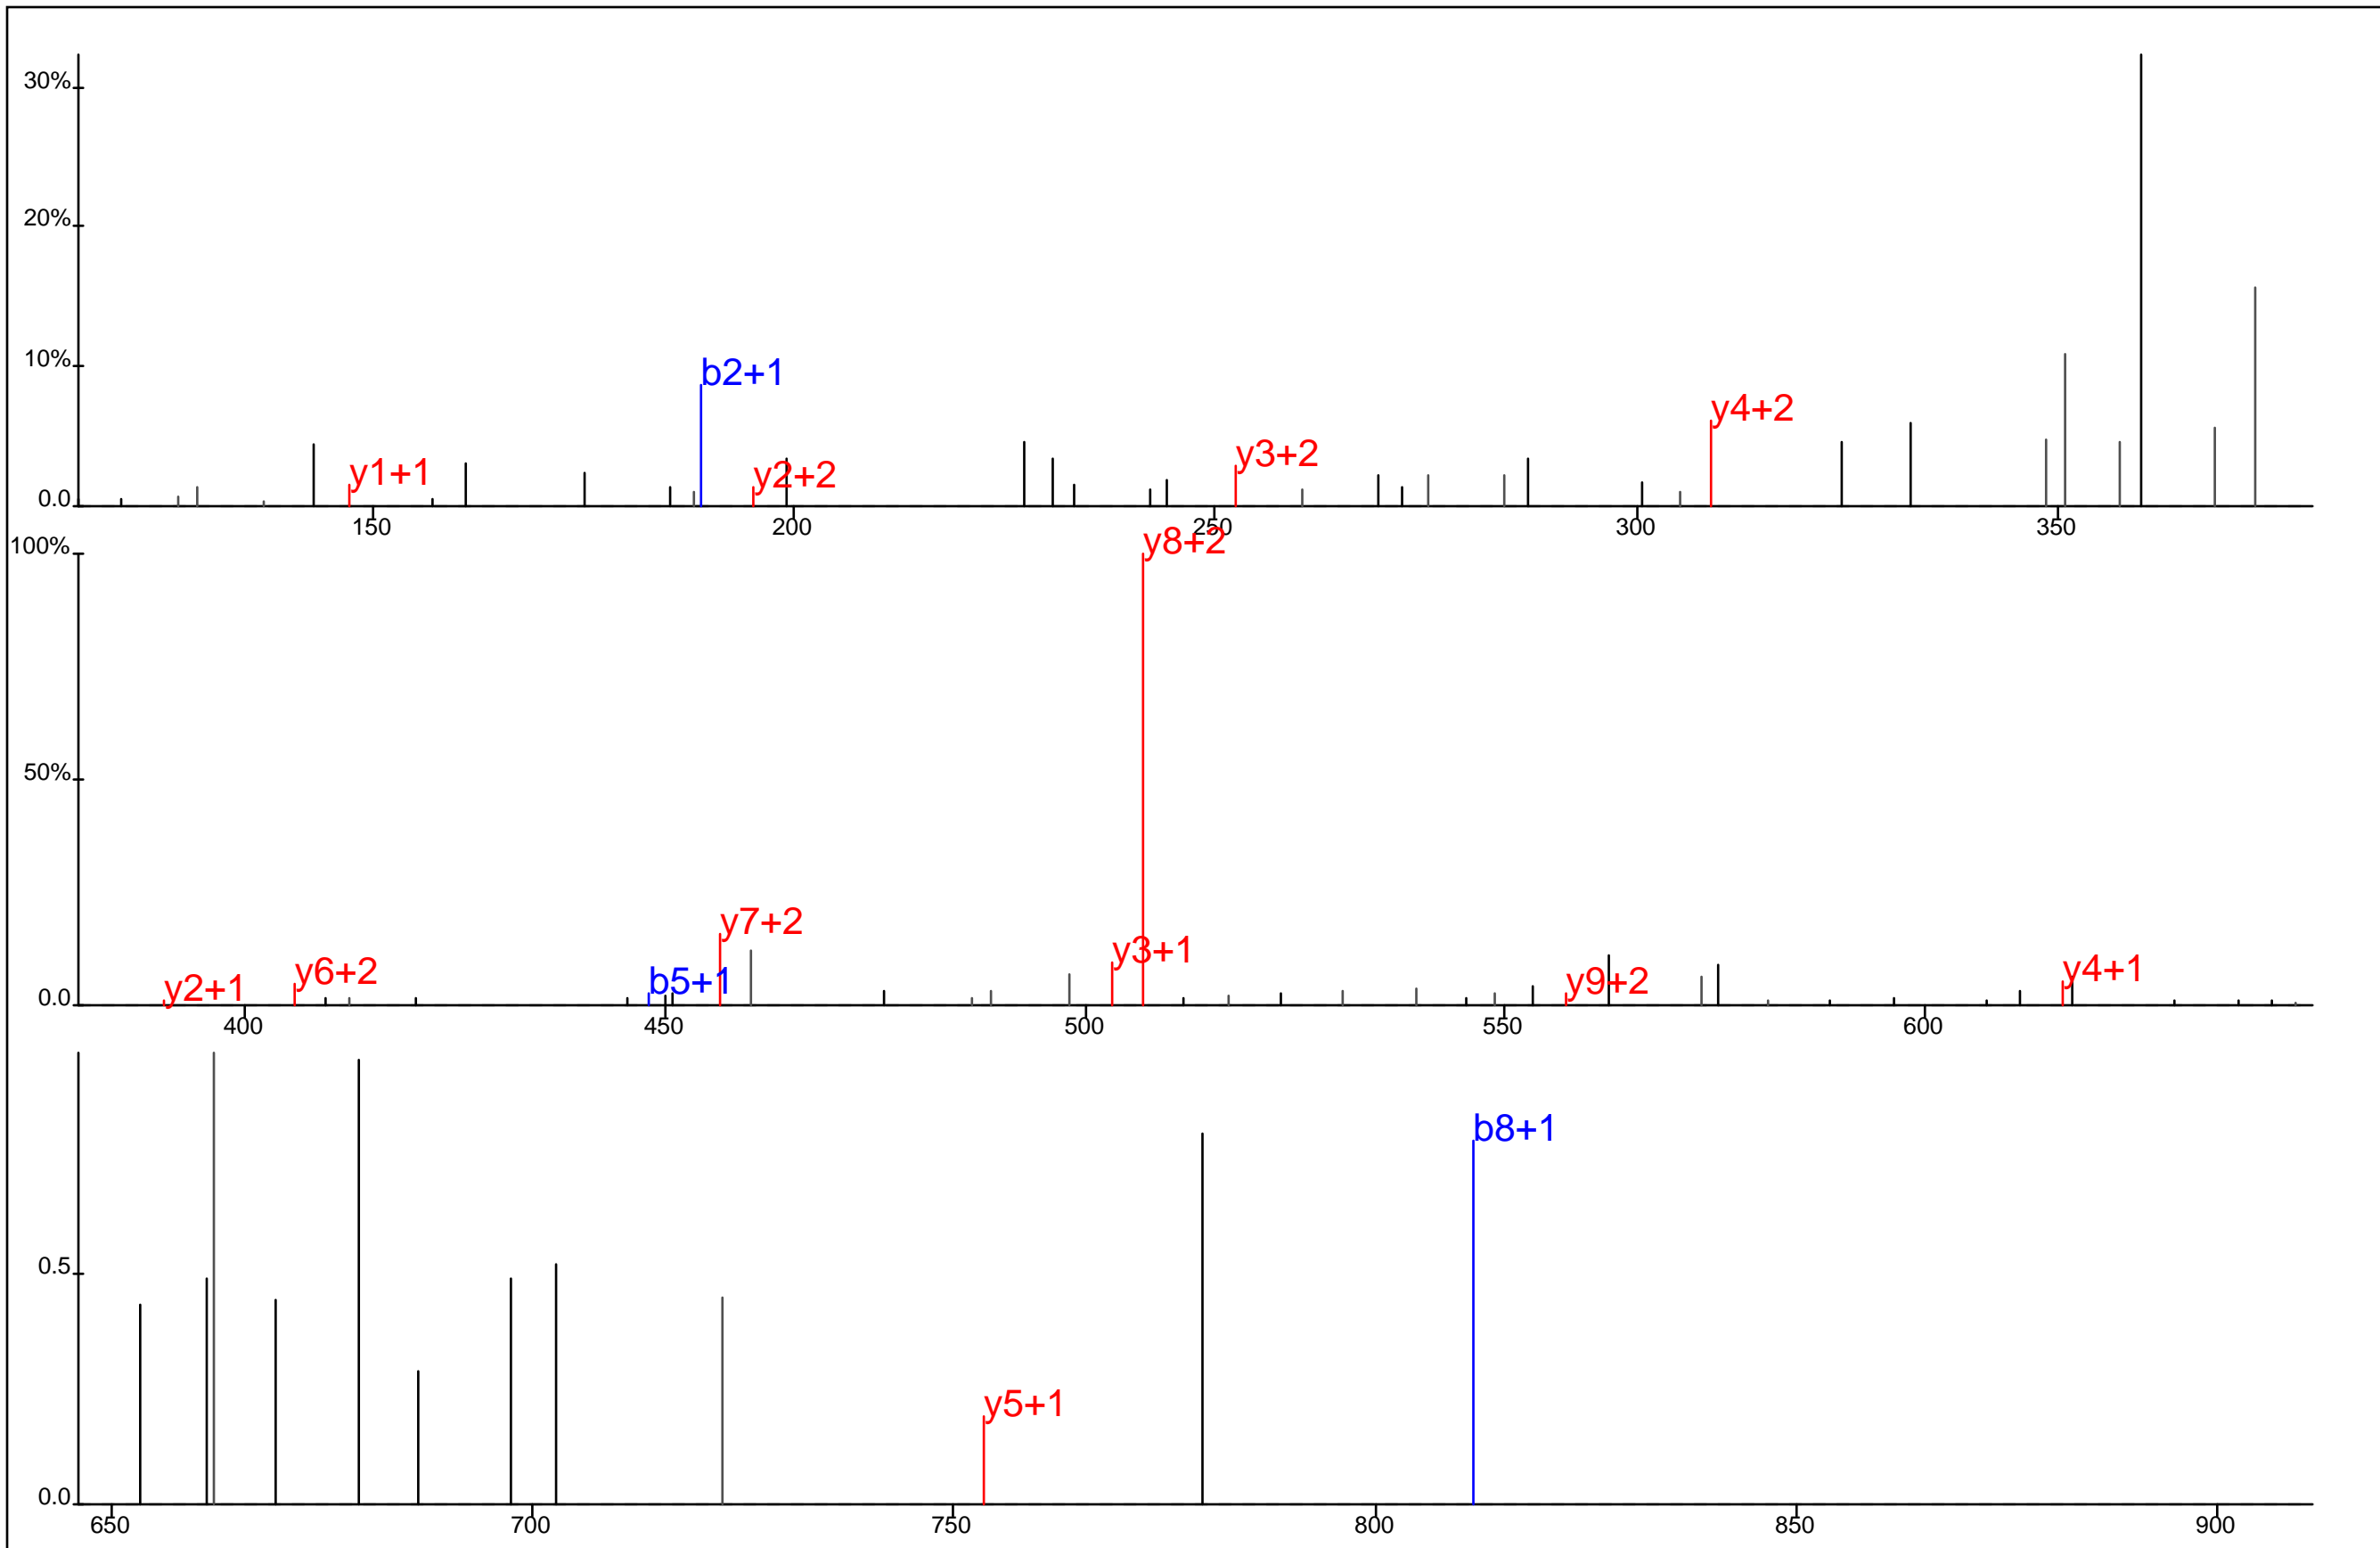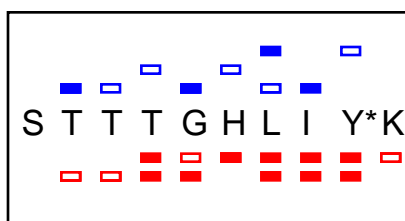

Protein Name: Elongation factor 1 alpha 1  
 gi Accession: 0  
 Precursor Mass: 400.8600+3  
 Delta Mass: 0.591 ppm  
 XCorr: 27.41

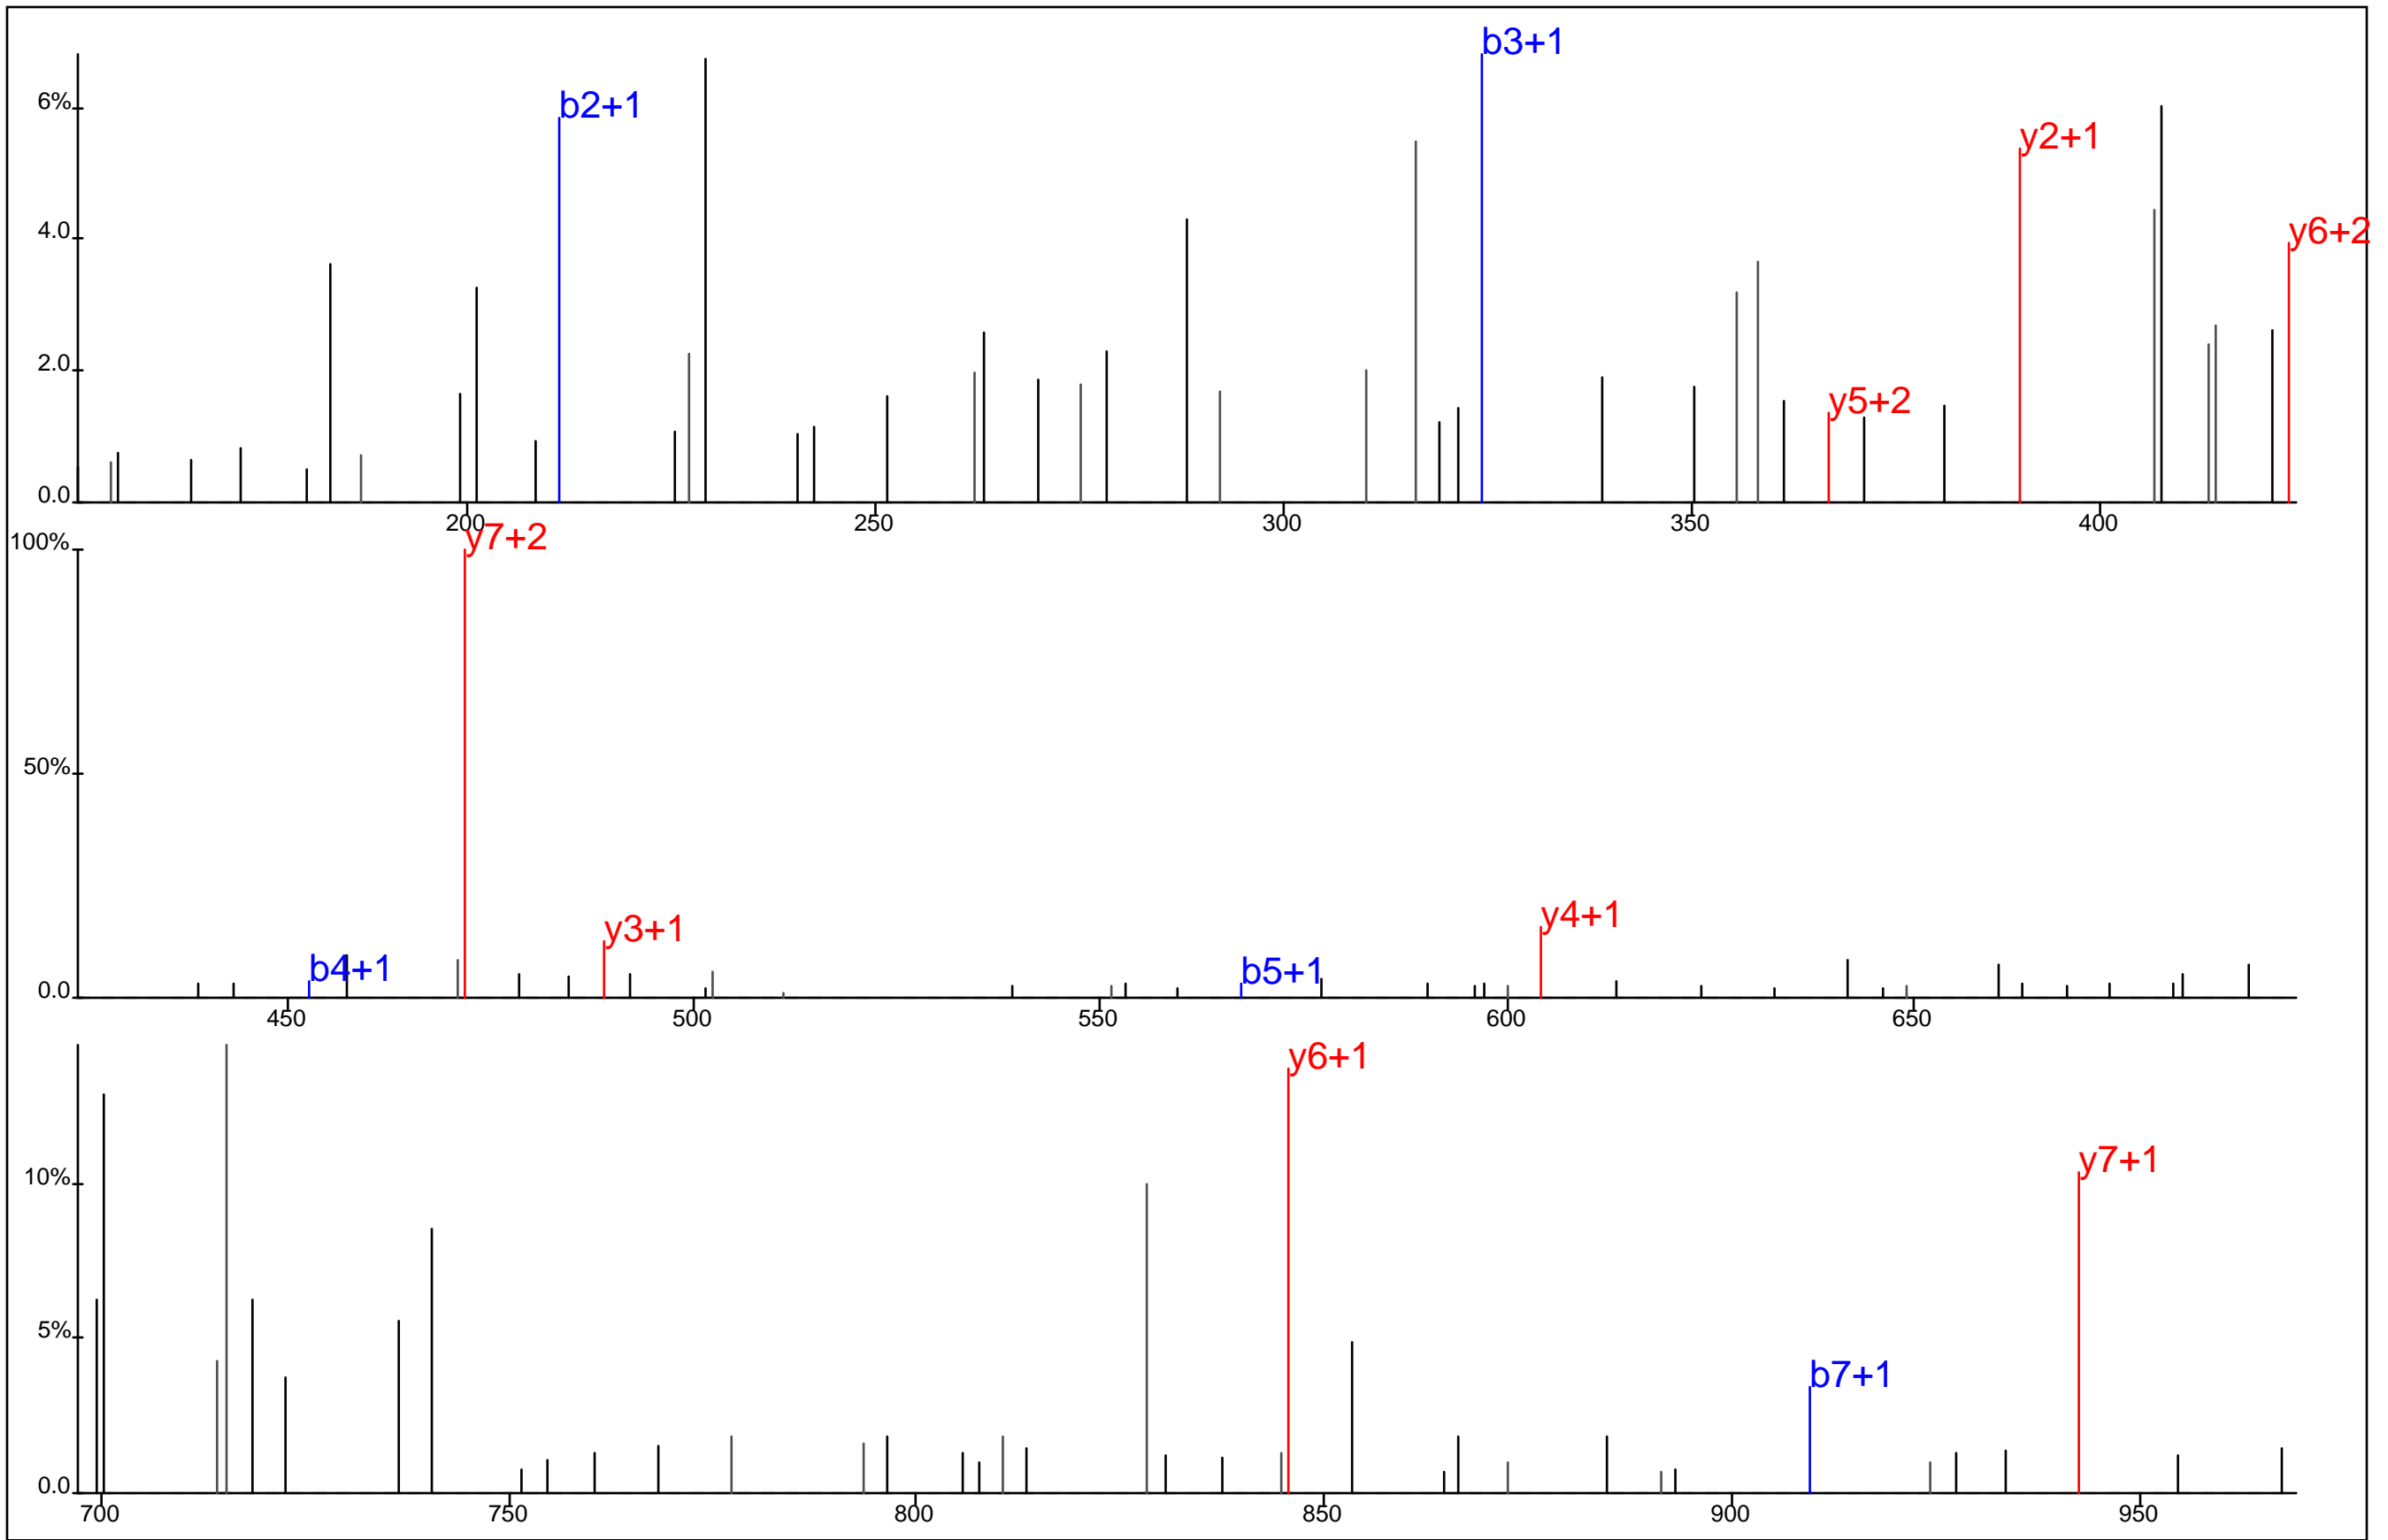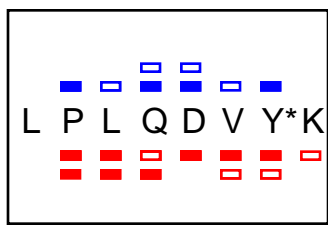

Protein Name: Elongation factor 1 alpha 1  
 gi Accession: 0  
 Precursor Mass: 528.2616+2  
 Delta Mass: 1.283 ppm  
 XCorr: 29.14

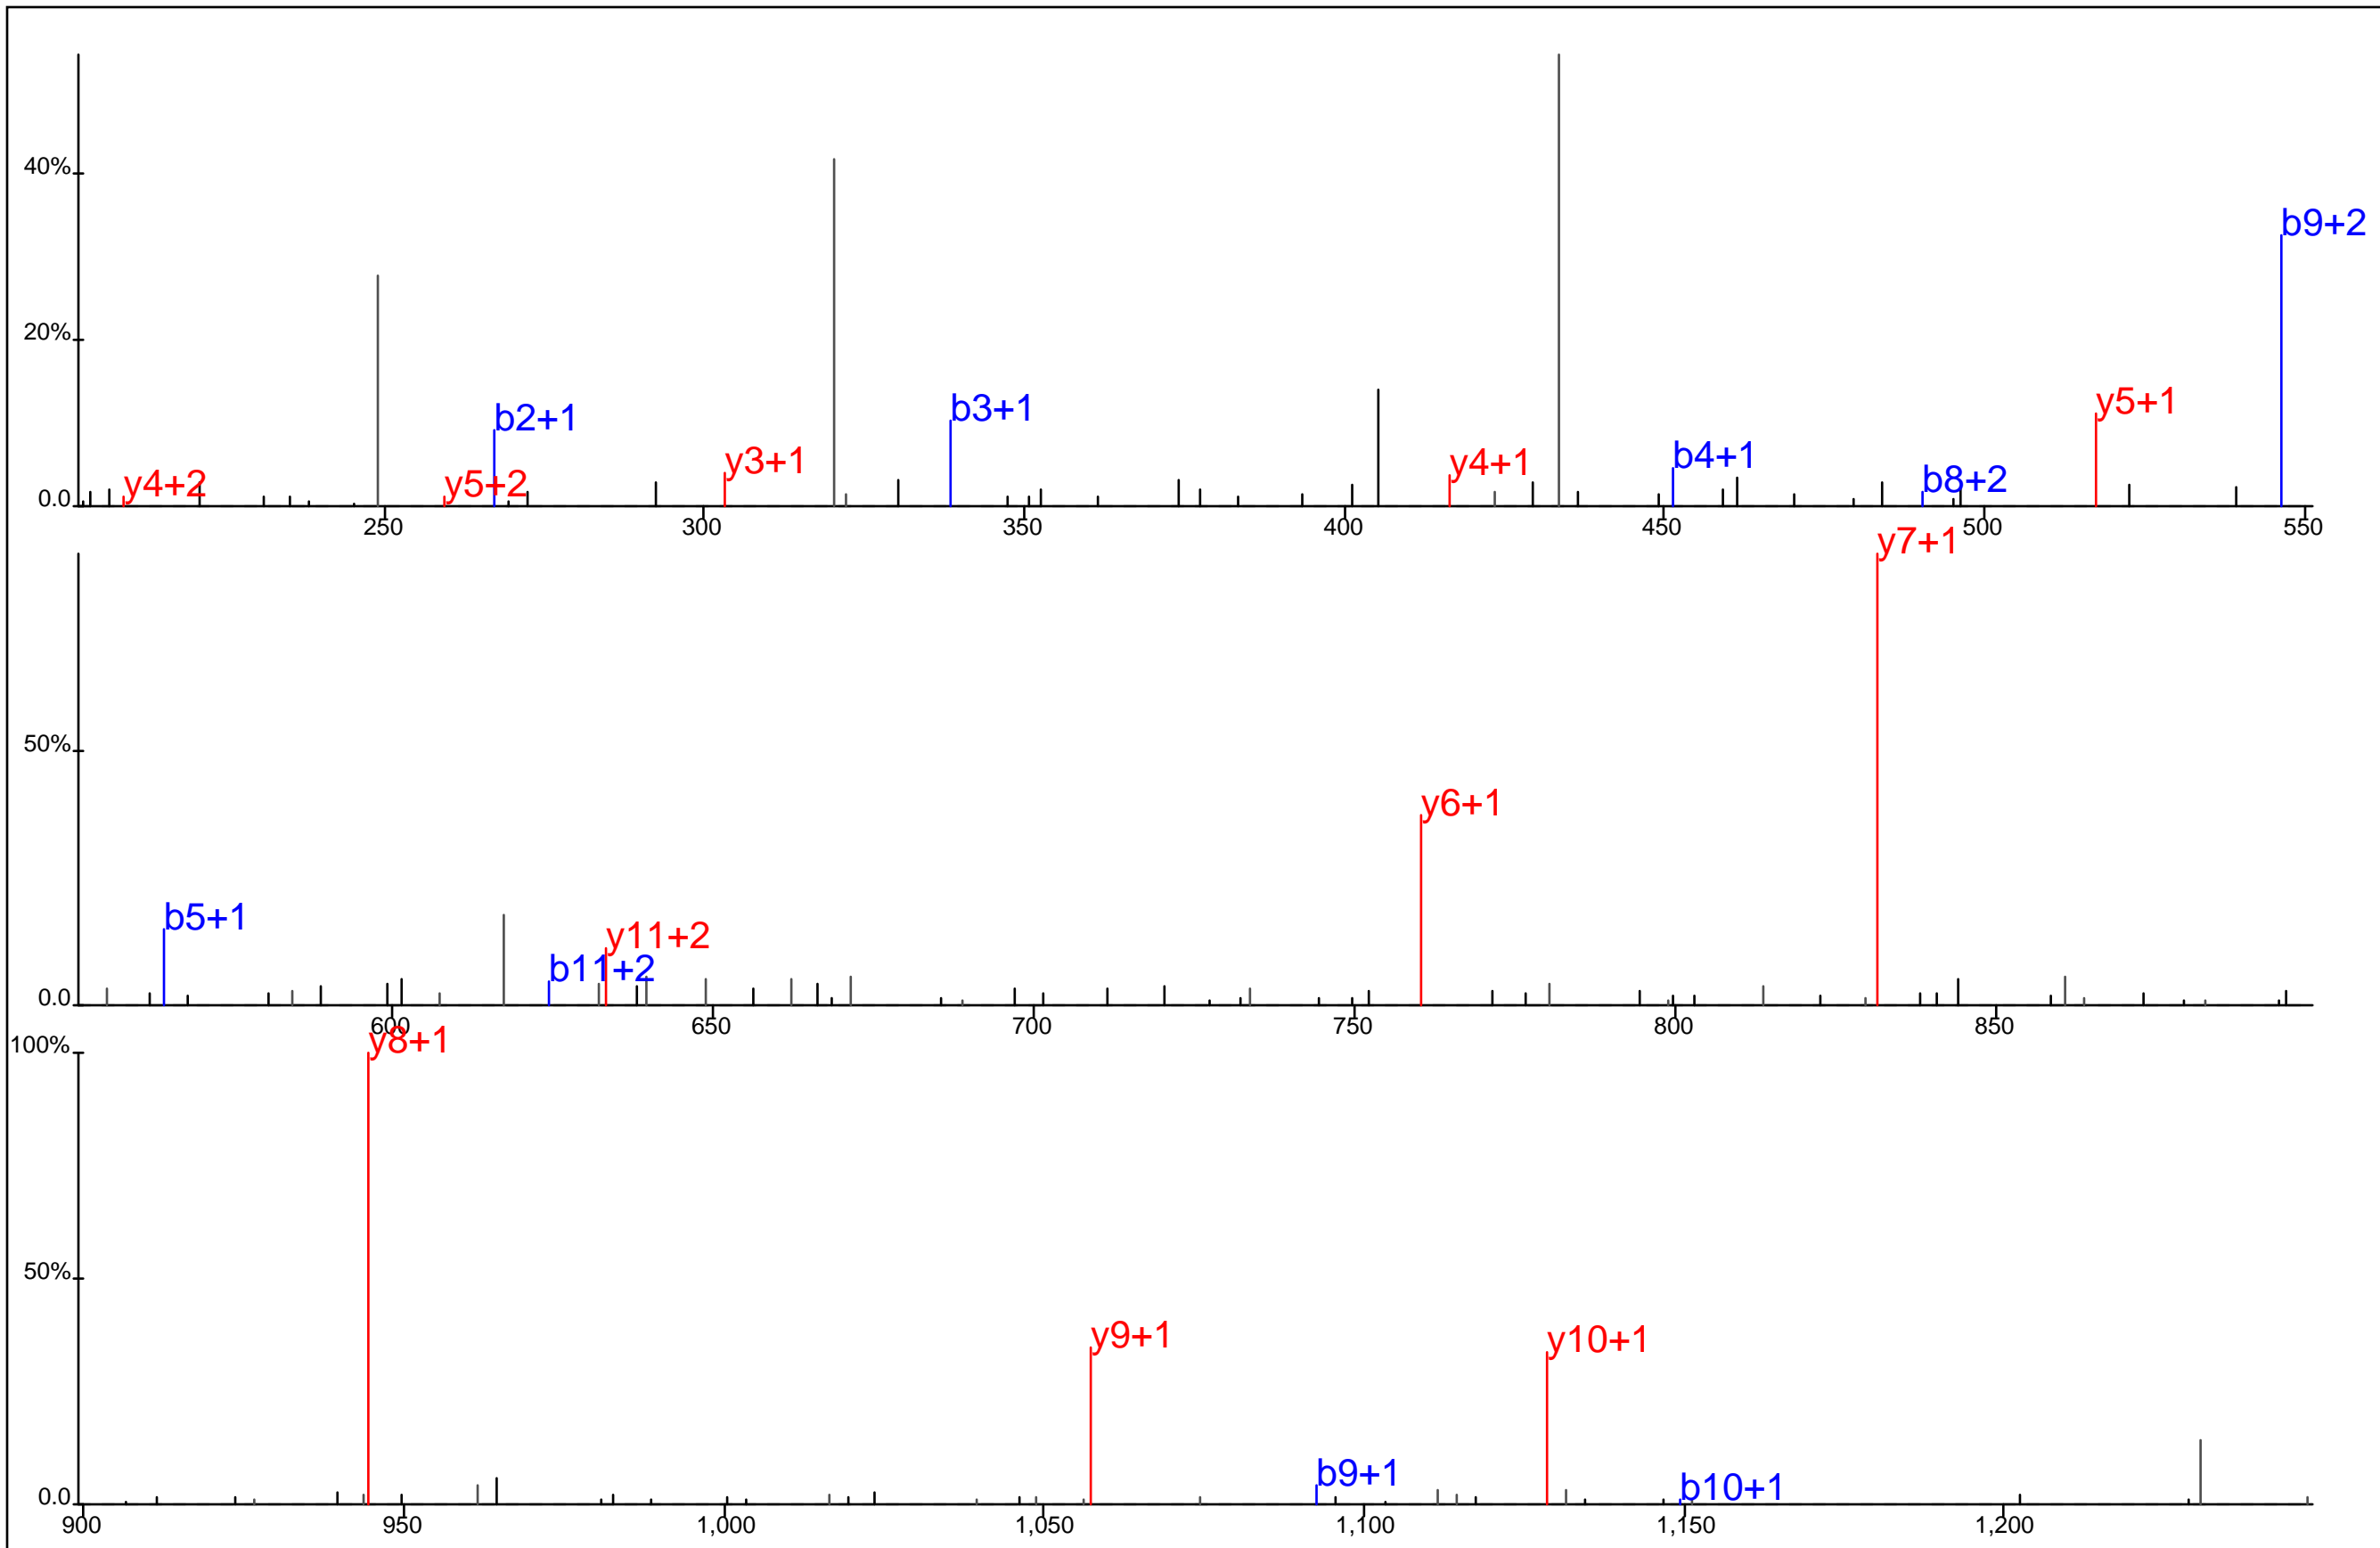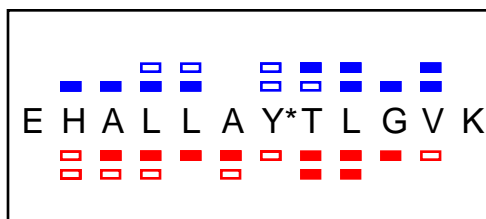

Protein Name: Elongation factor 1 alpha 1  
 gi Accession: 0  
 Precursor Mass: 697.8572+2  
 Delta Mass: 0.597 ppm  
 XCorr: 53.1



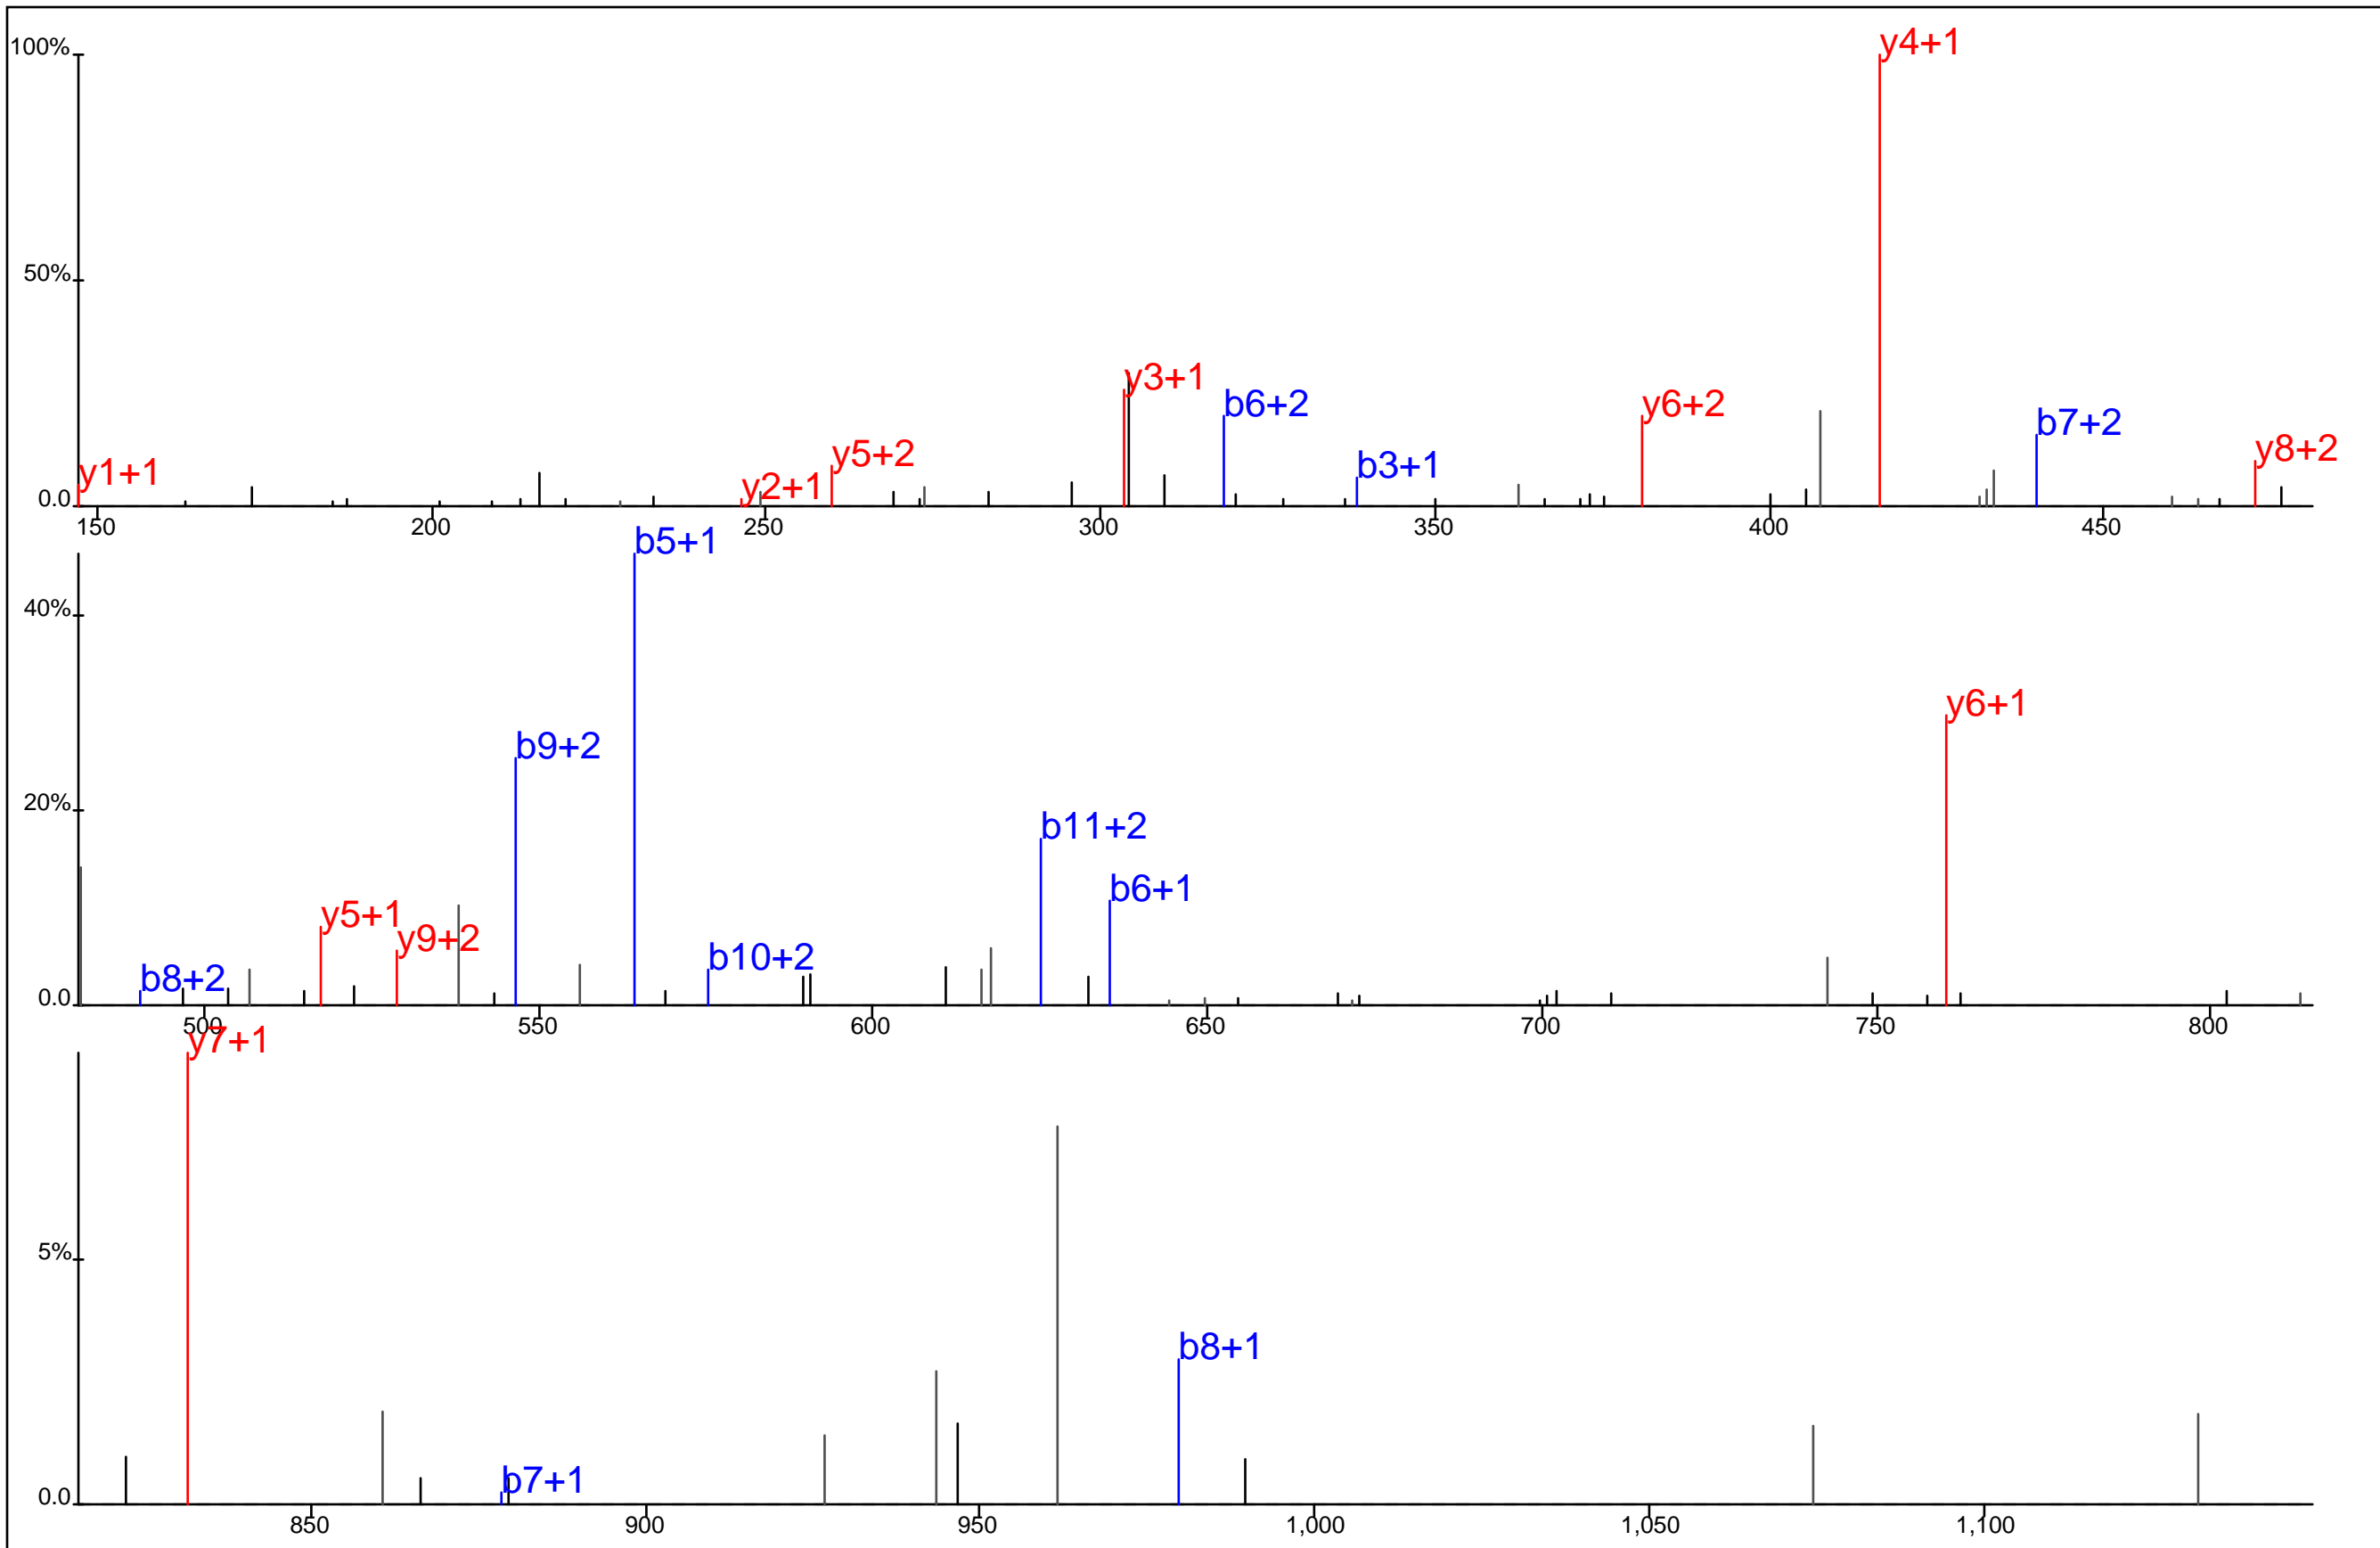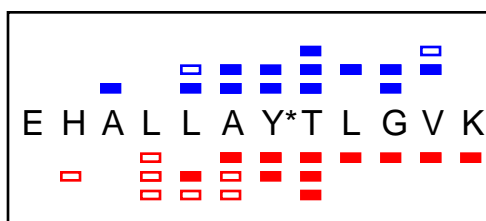

Protein Name: Elongation factor 1 alpha 1  
 gi Accession: 0  
 Precursor Mass: 465.5739+3  
 Delta Mass: 0.518 ppm  
 XCorr: 43.81

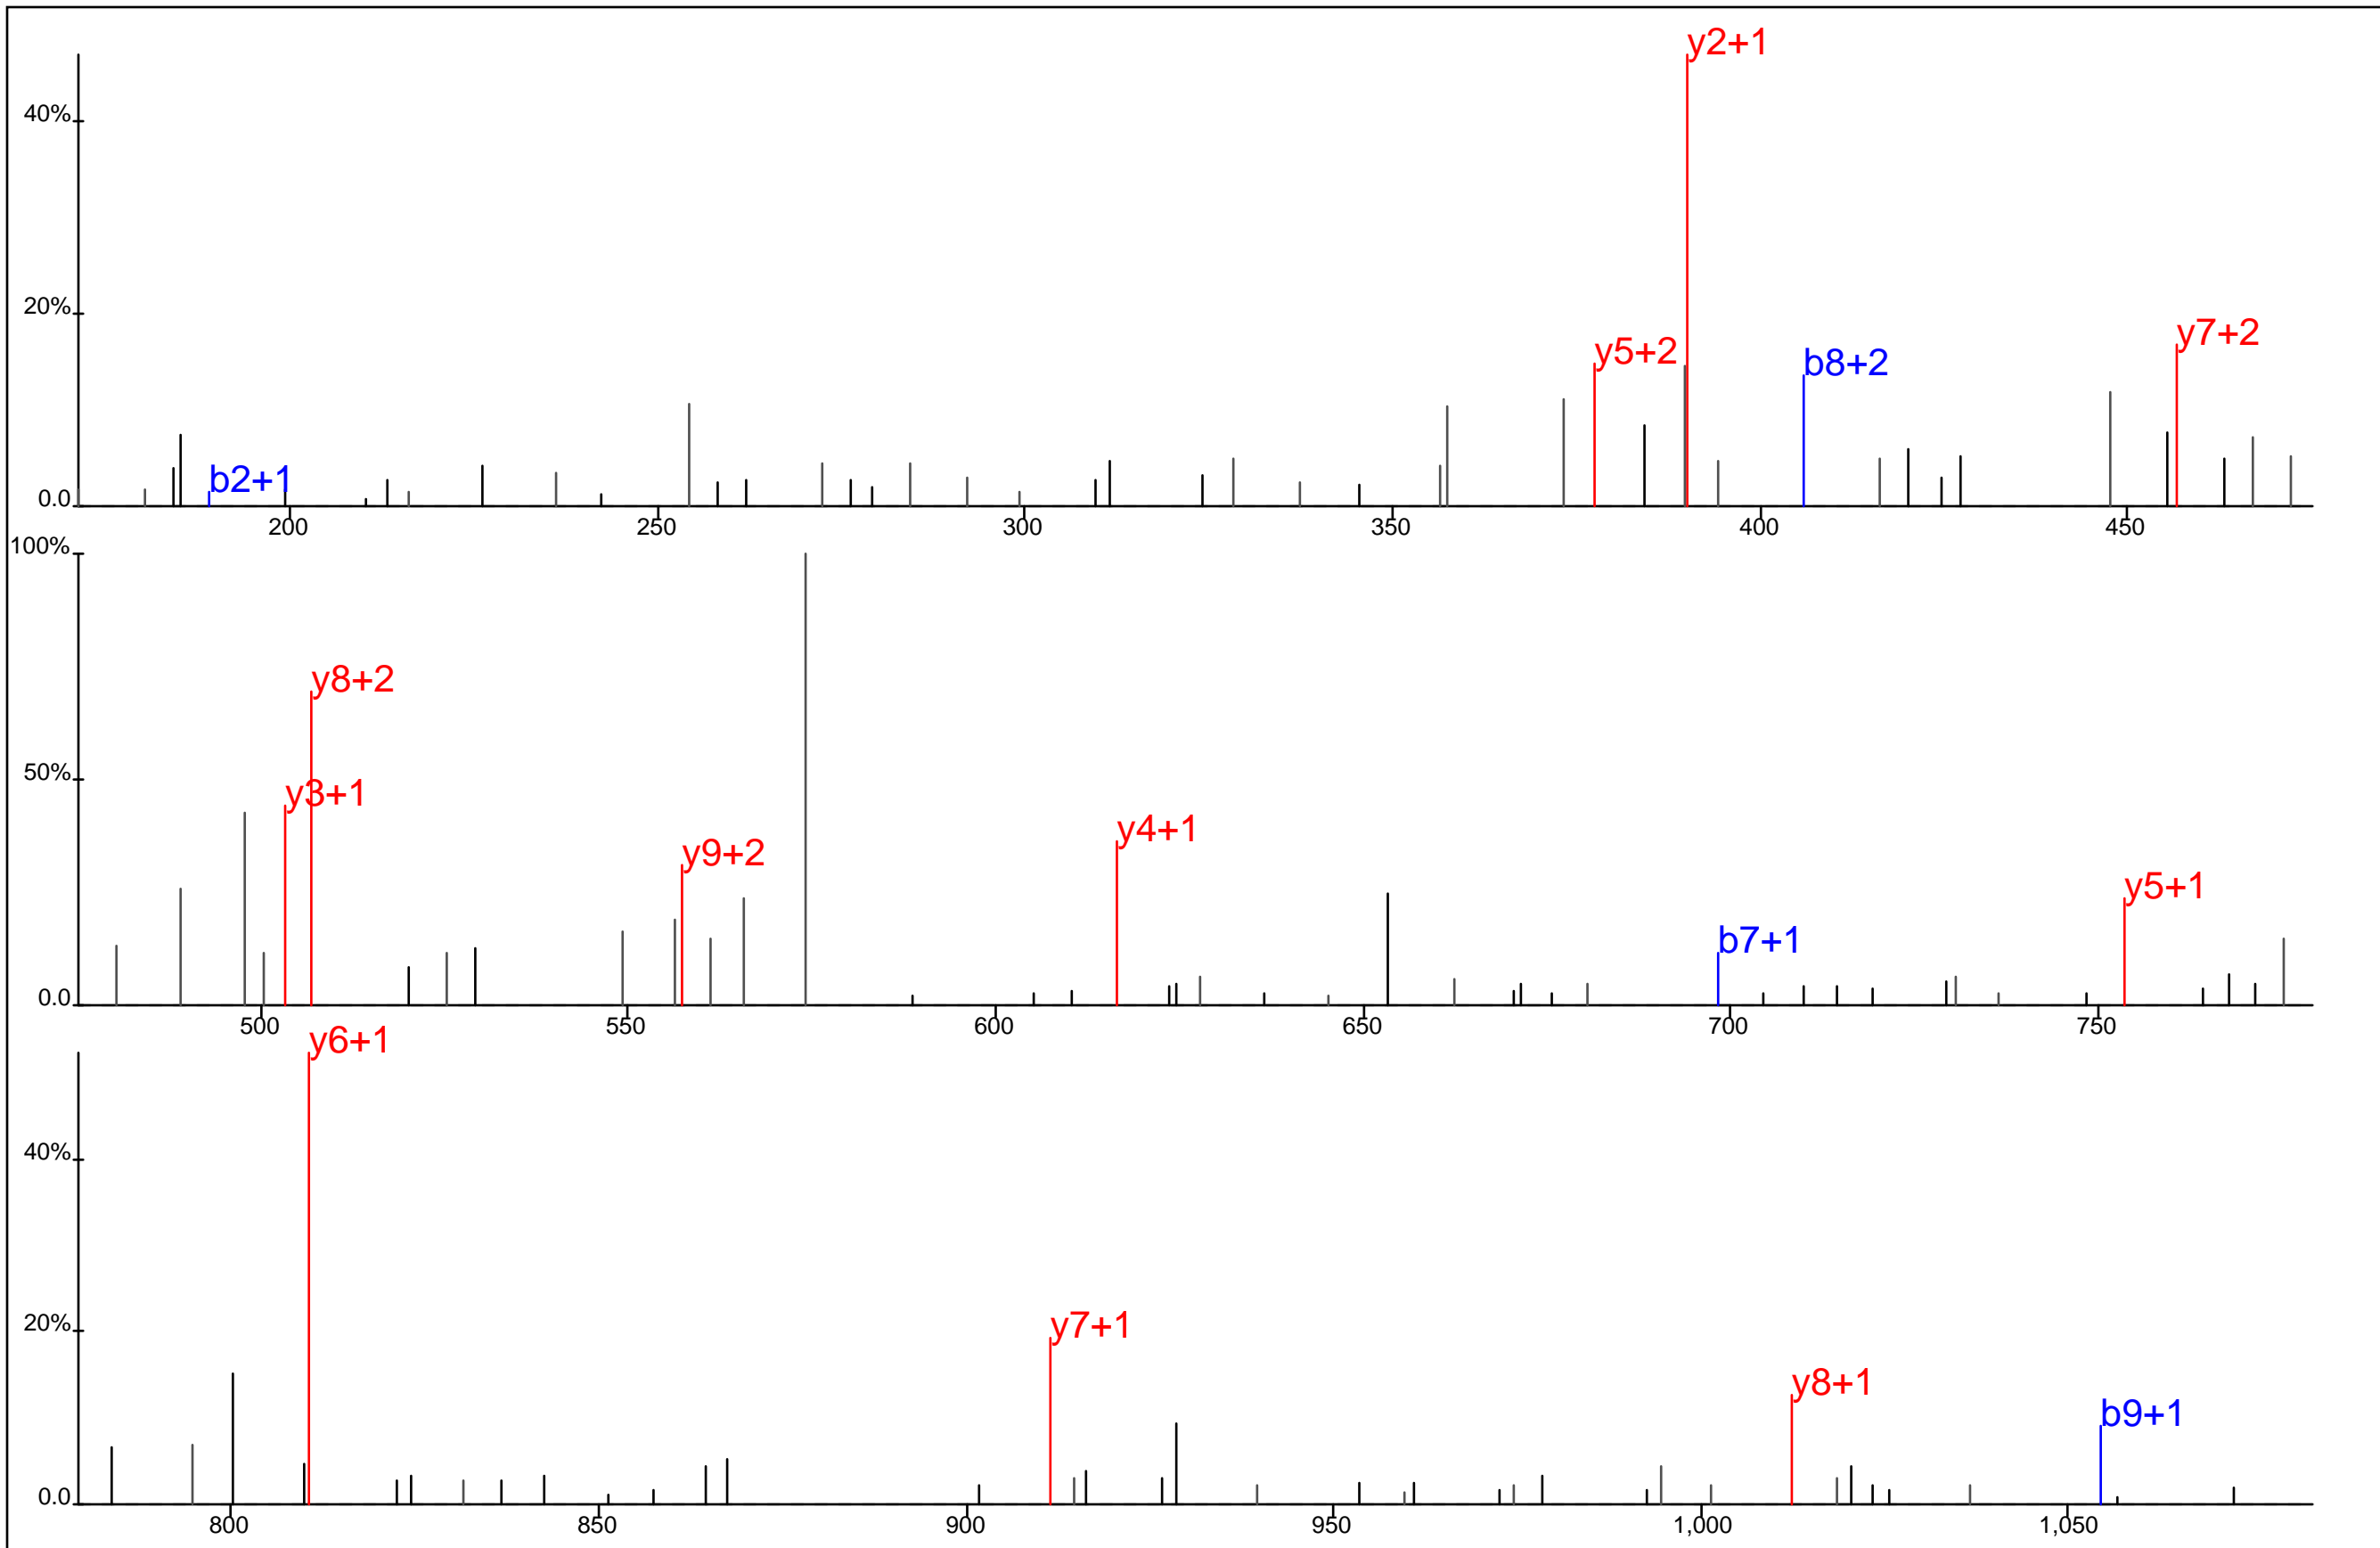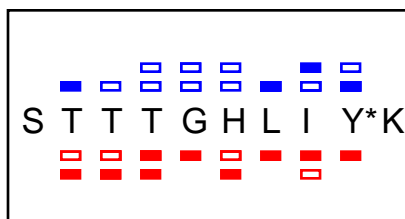

Protein Name: Elongation factor 1 alpha 1  
 gi Accession: 0  
 Precursor Mass: 600.7844+2  
 Delta Mass: 3.707 ppm  
 XCorr: 45.78

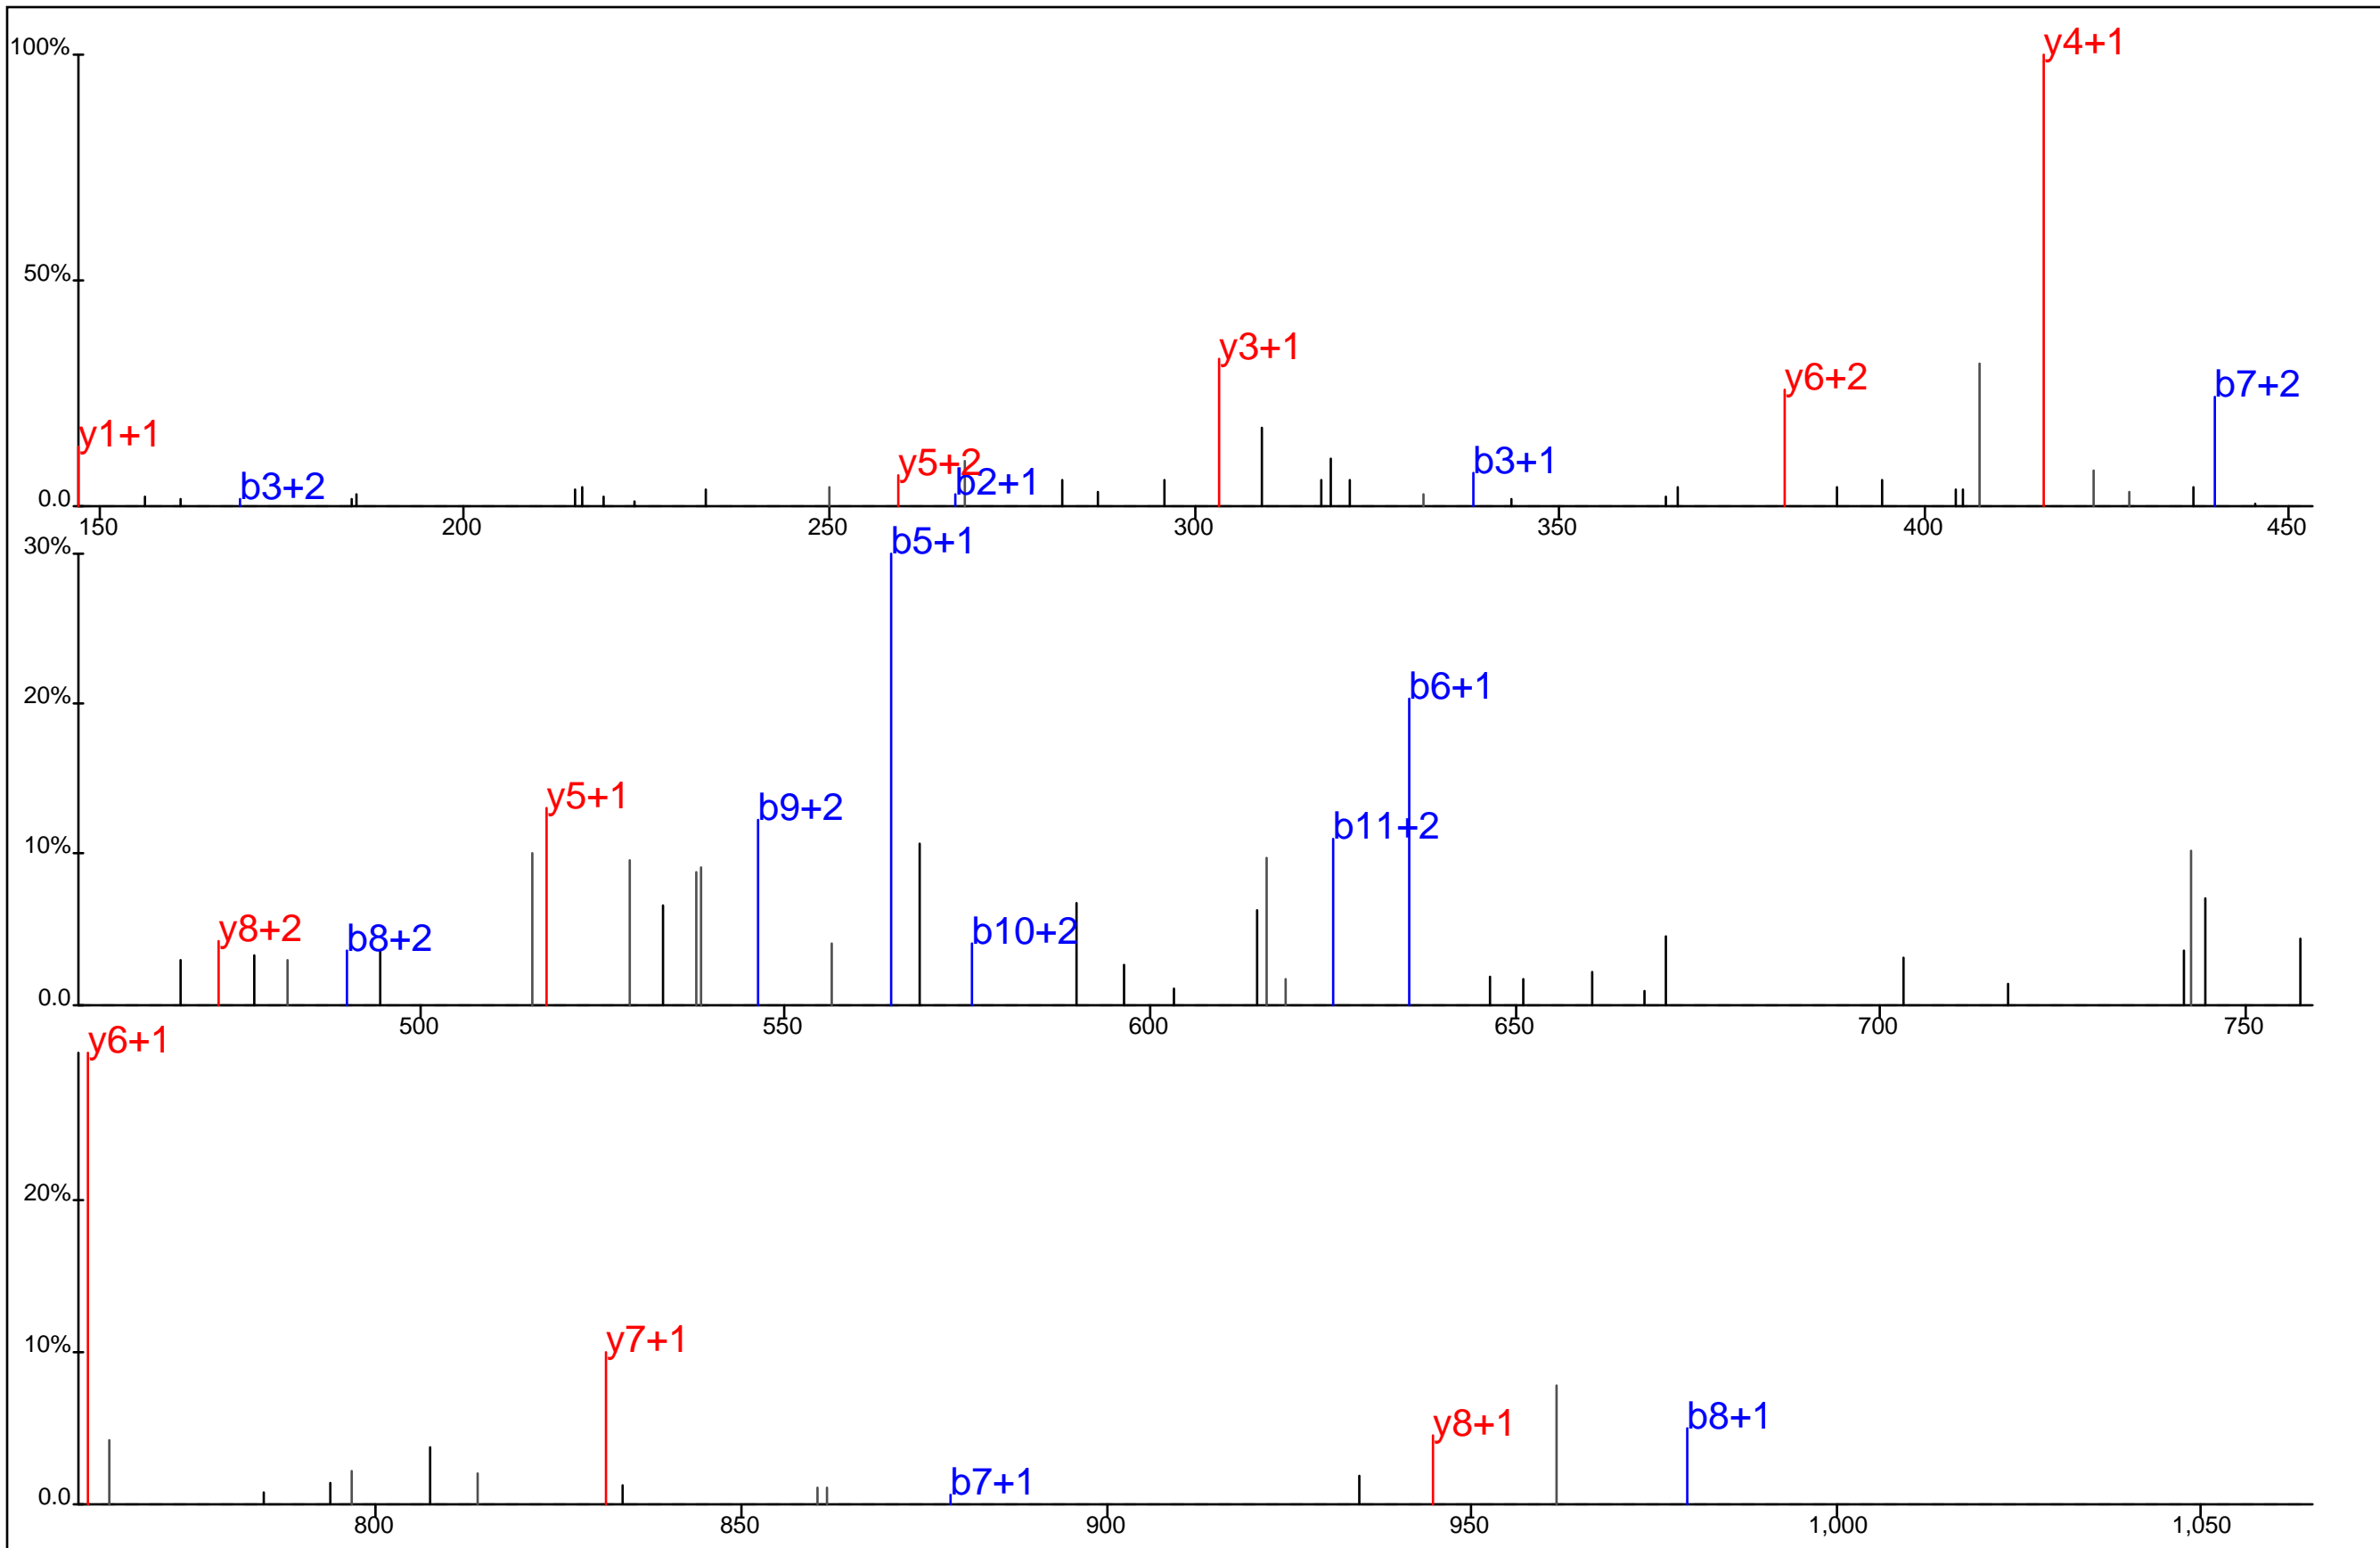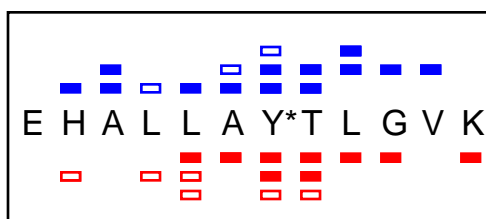

Protein Name: Elongation factor 1 alpha 1  
 gi Accession: 0  
 Precursor Mass: 465.5745+3  
 Delta Mass: 0.663 ppm  
 XCorr: 56.69

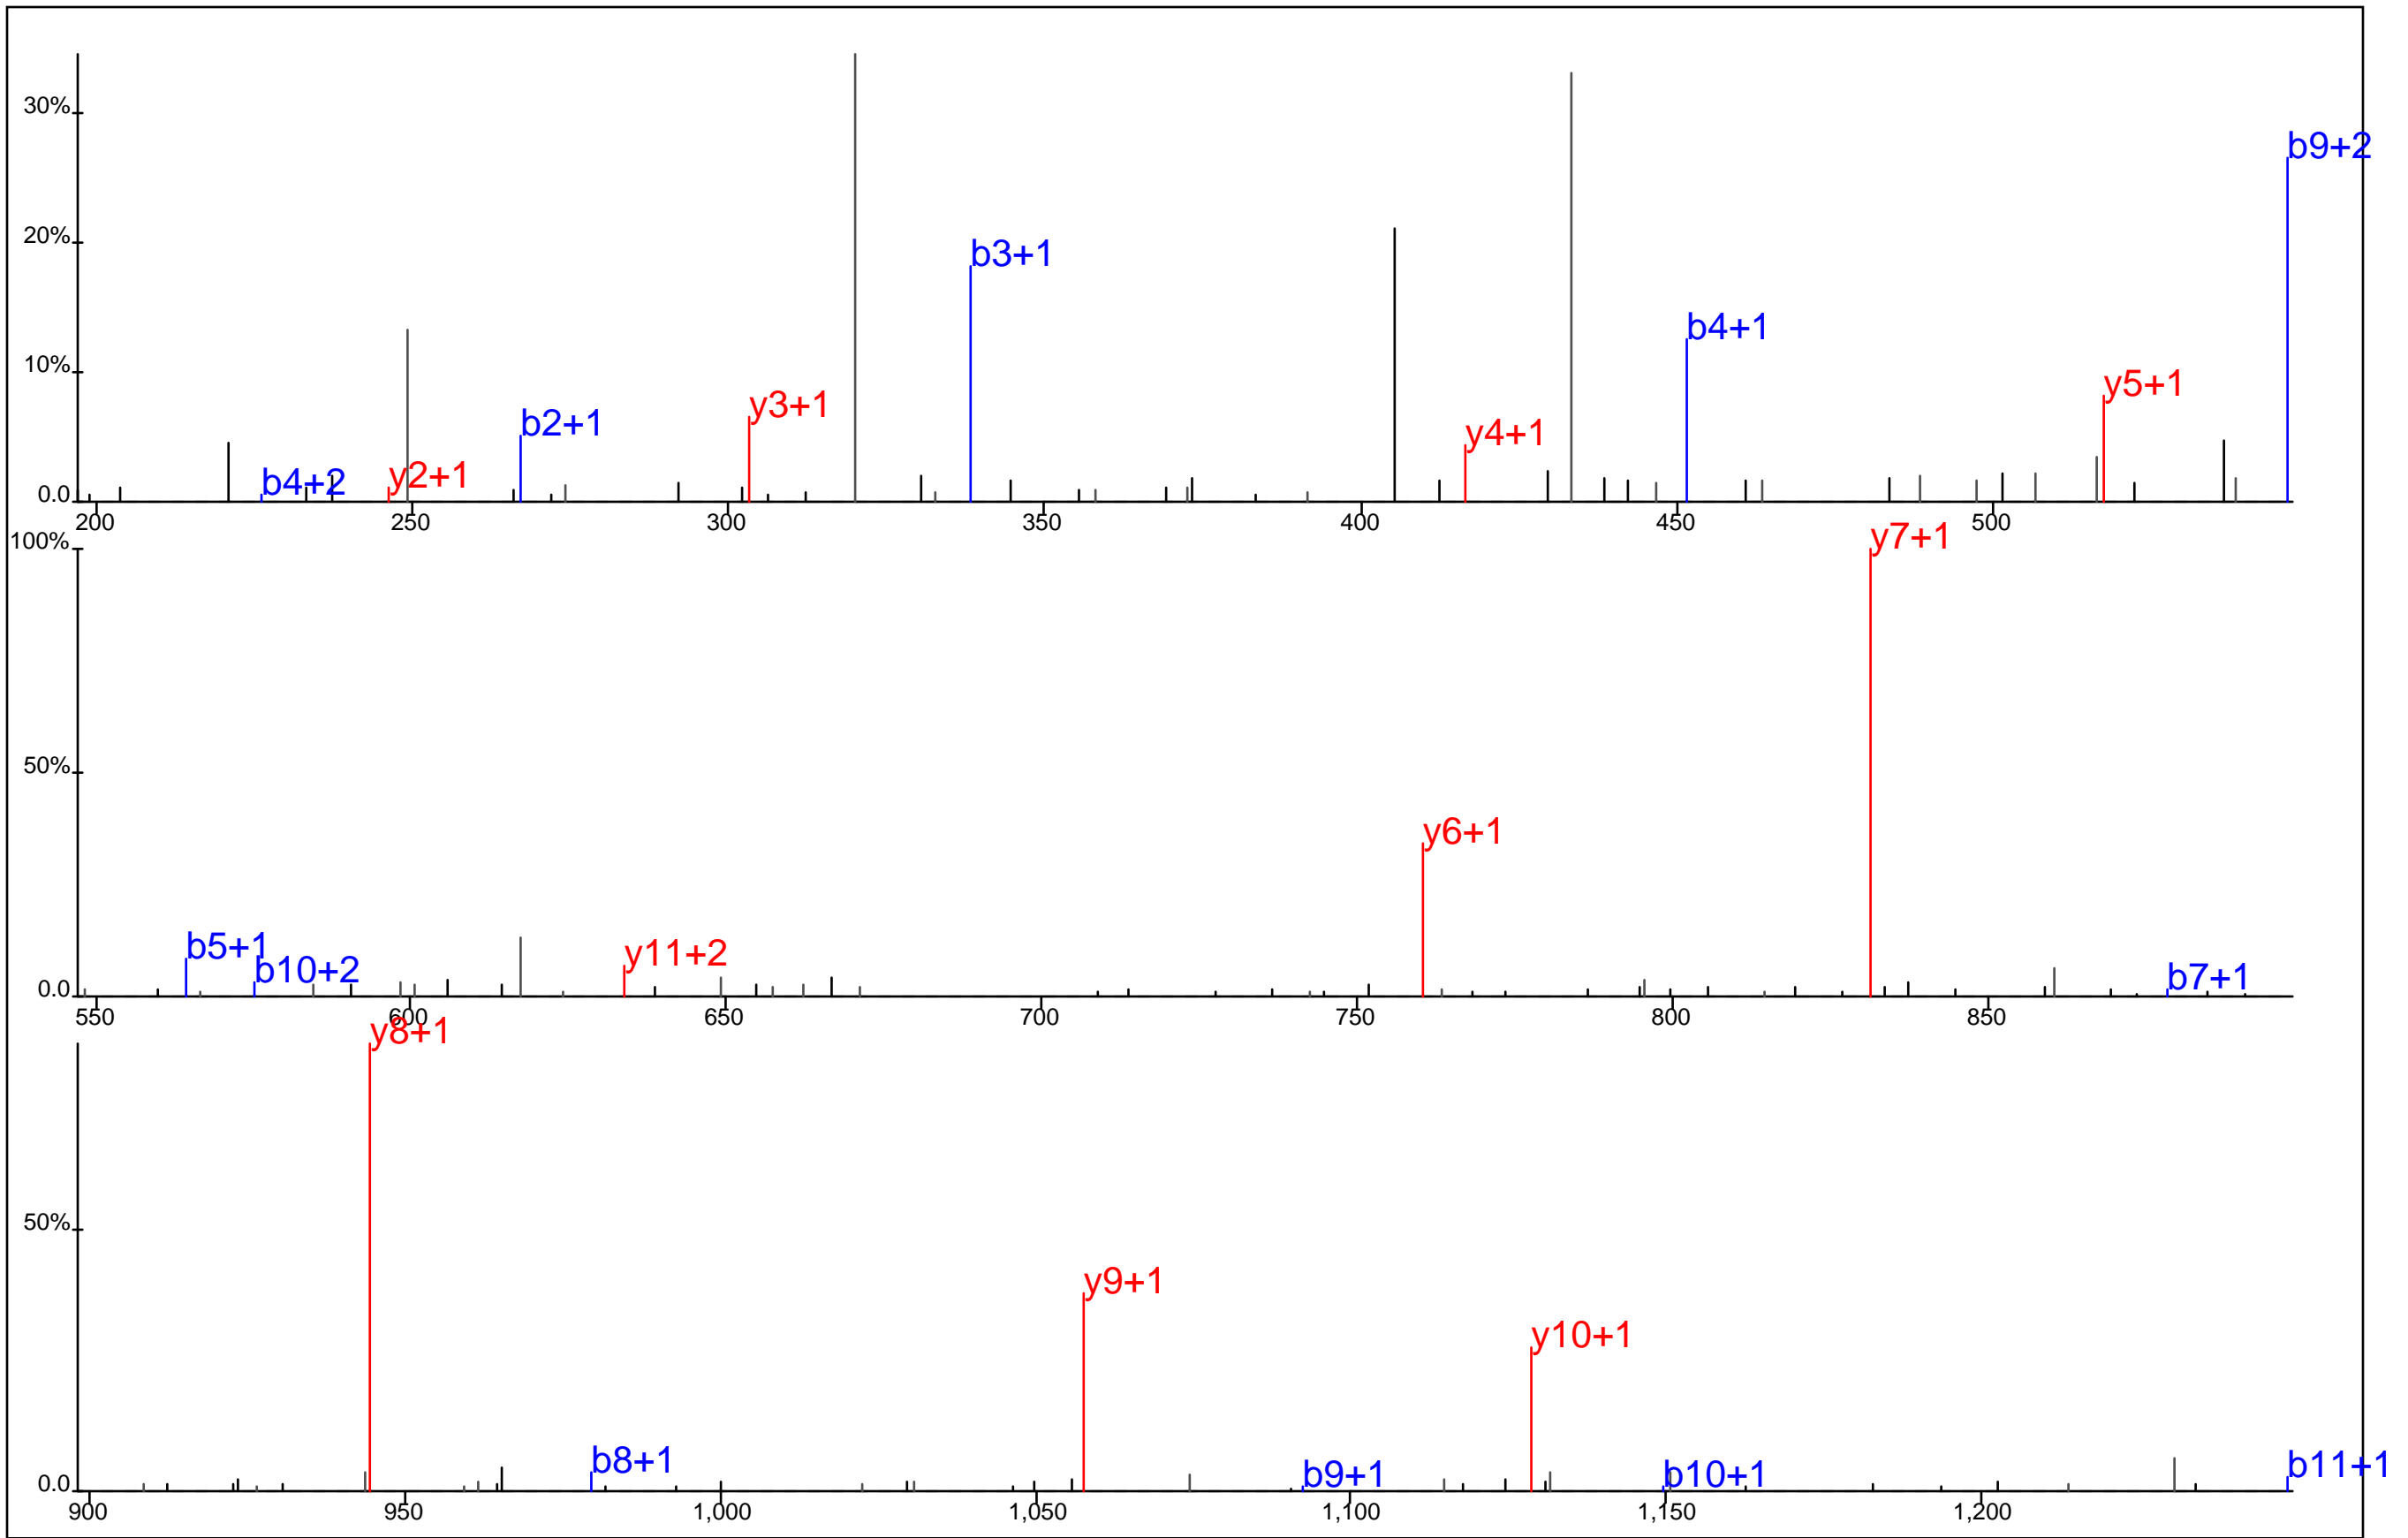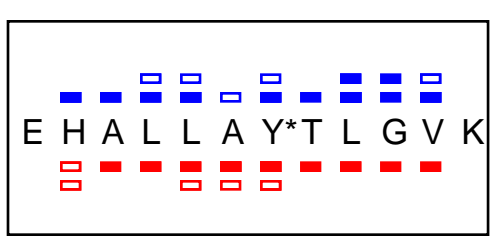

Protein Name: Elongation factor 1 alpha 1  
 gi Accession: 0  
 Precursor Mass: 697.8577+2  
 Delta Mass: 0.103 ppm  
 XCorr: 54.02

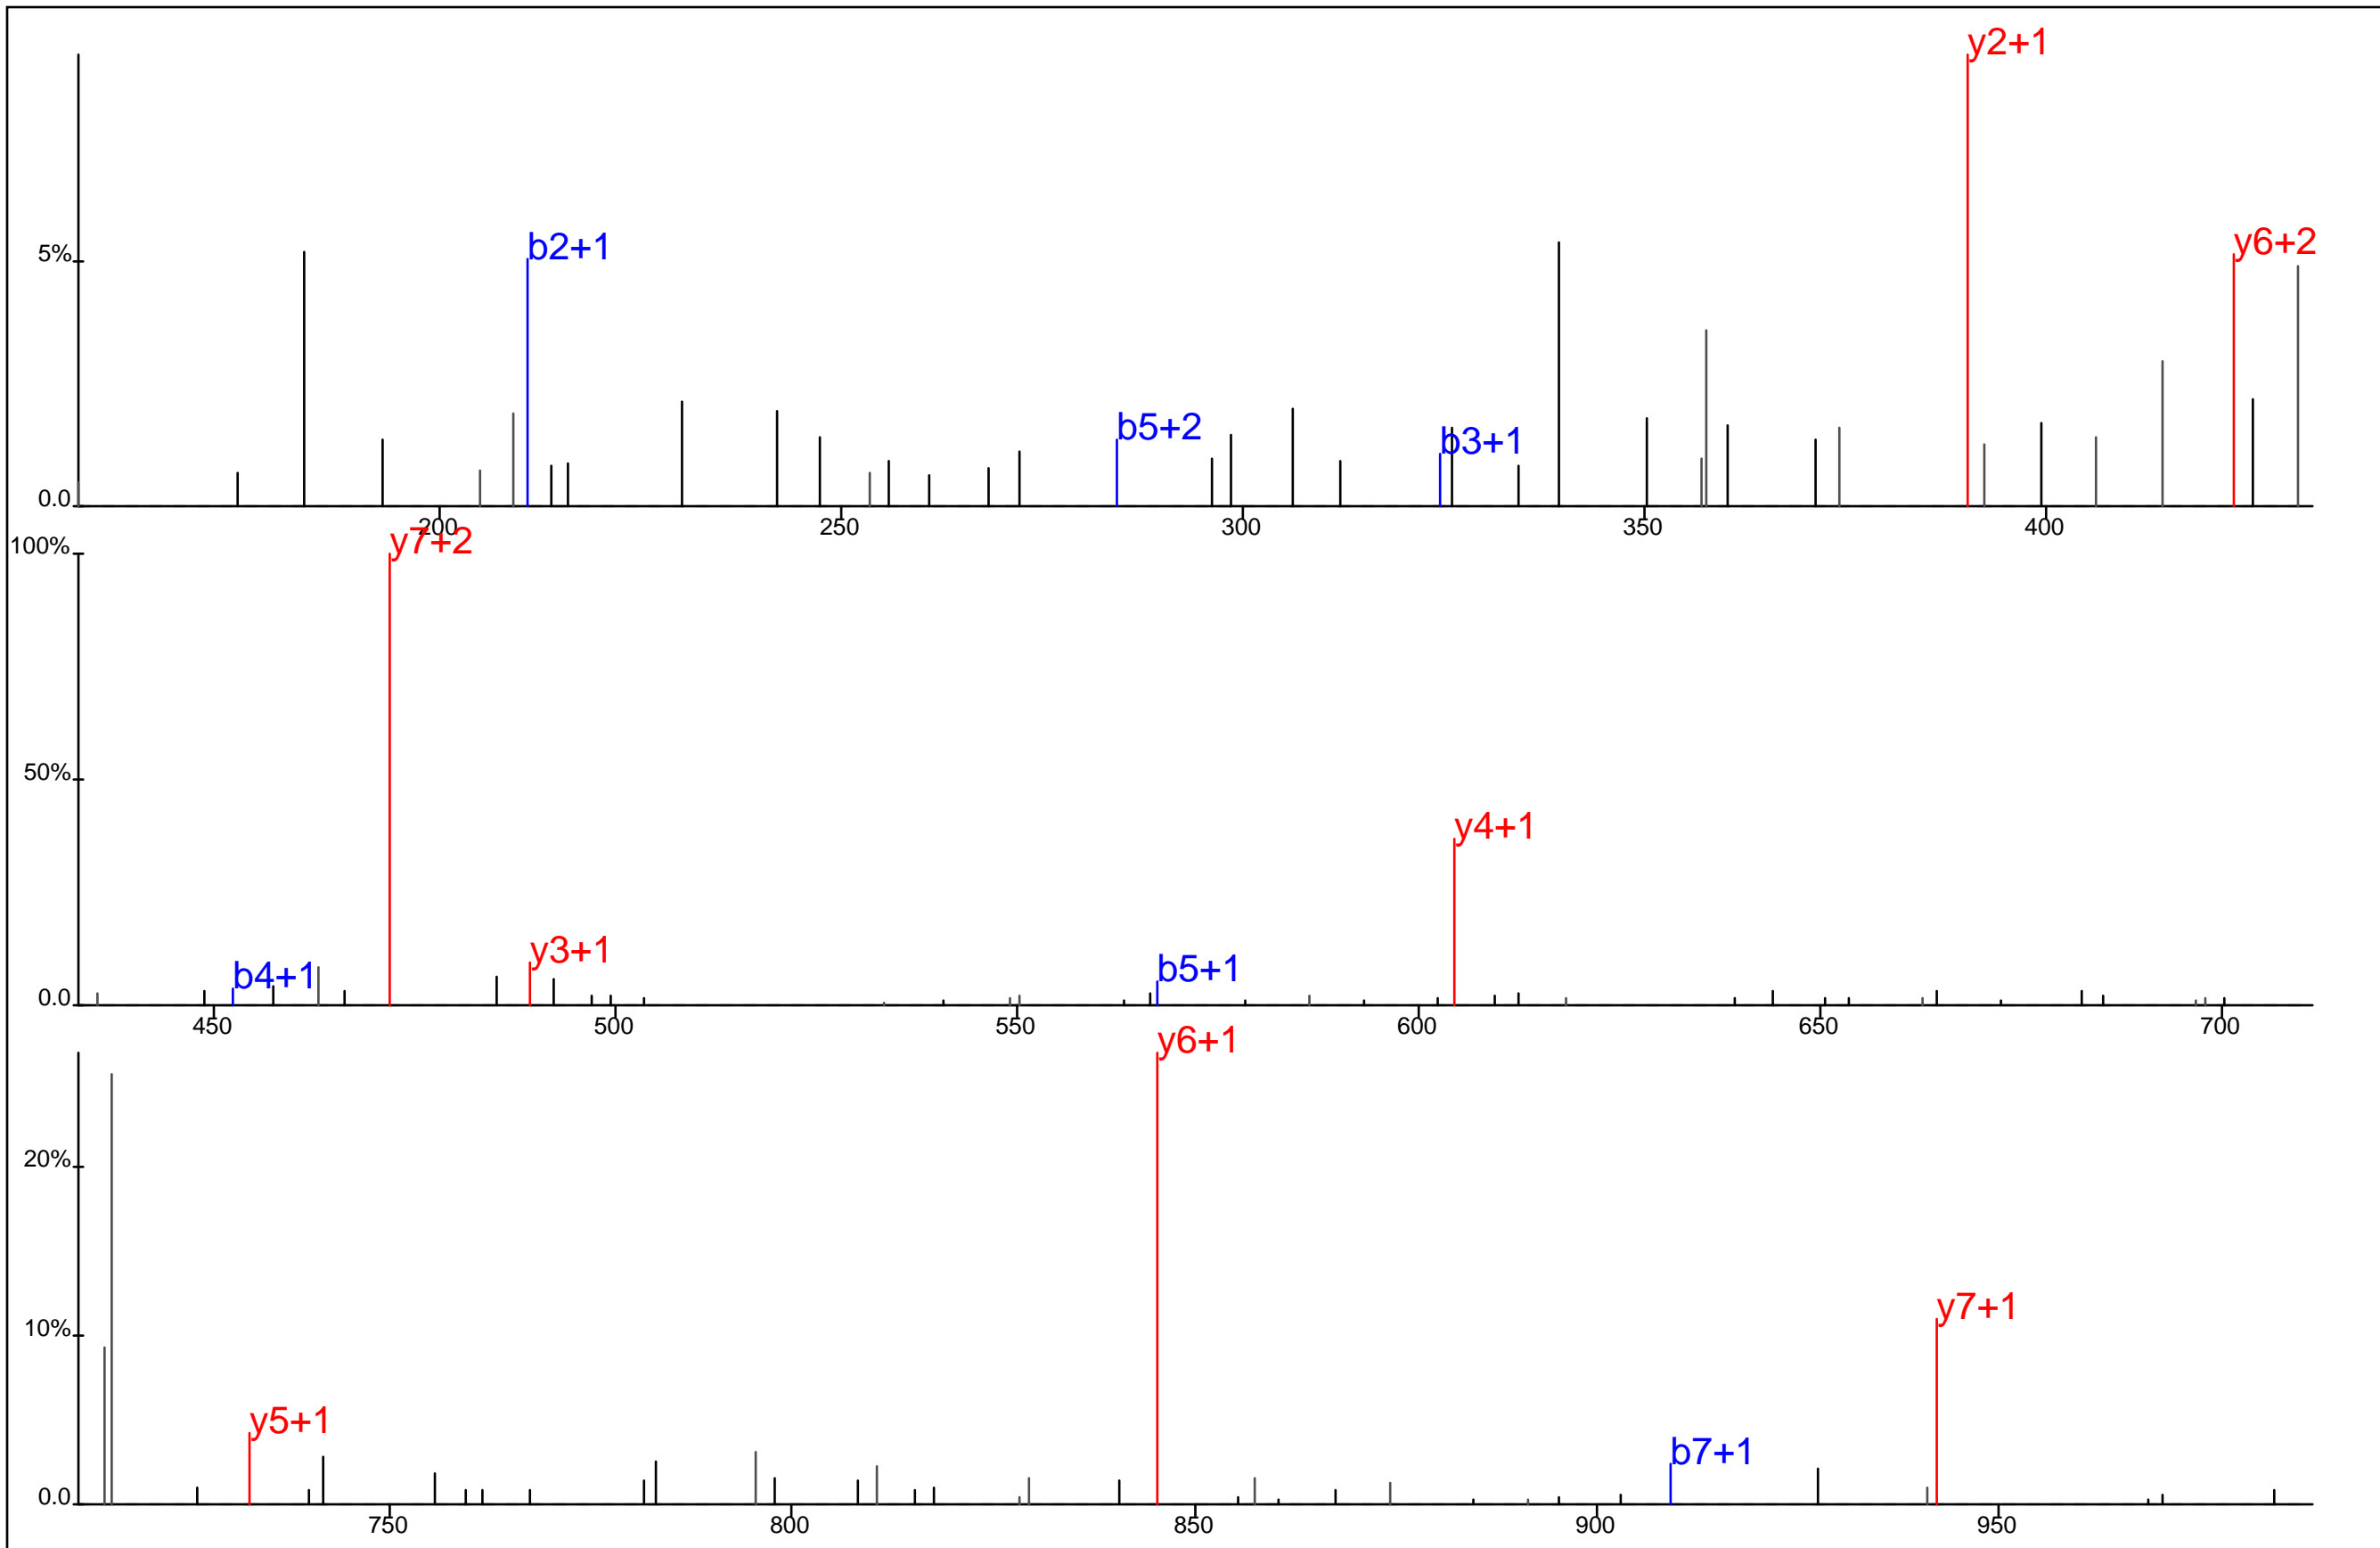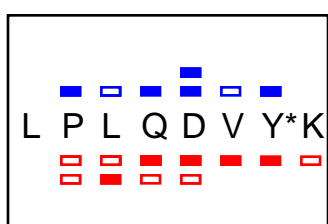

Protein Name: Elongation factor 1 alpha 1  
 gi Accession: 0  
 Precursor Mass: 528.2621+2  
 Delta Mass: 0.358 ppm  
 XCorr: 35.82

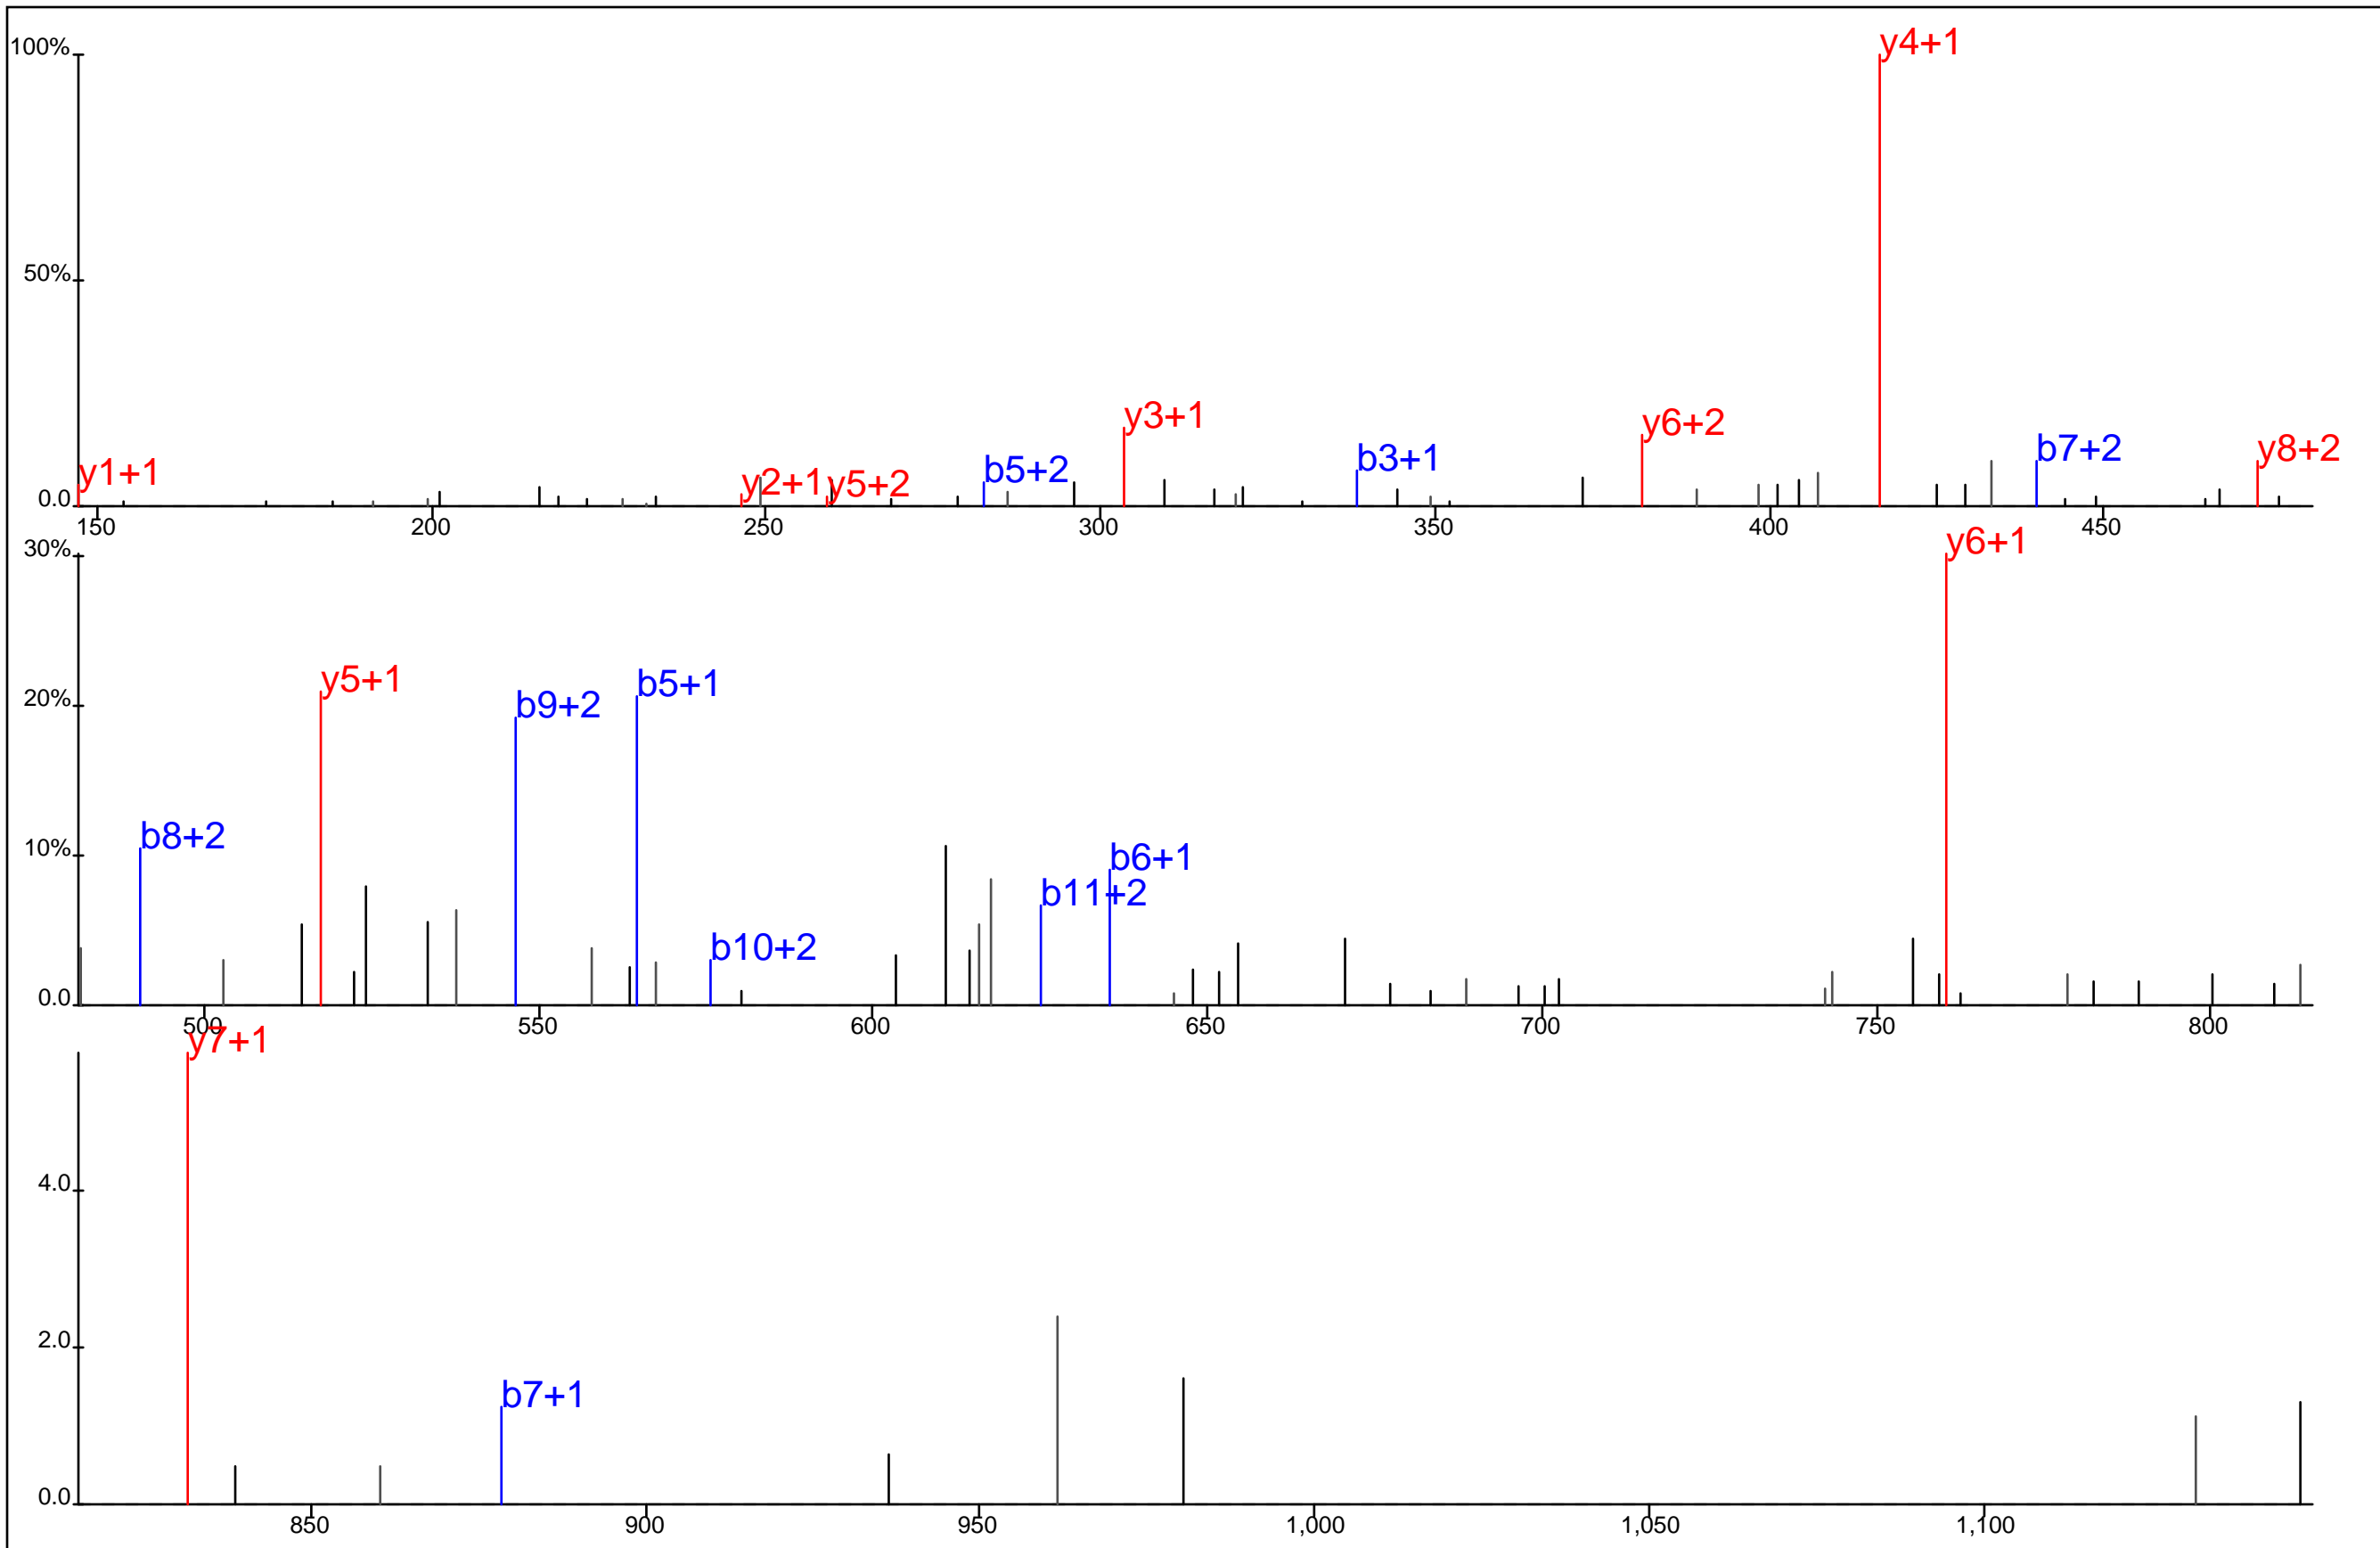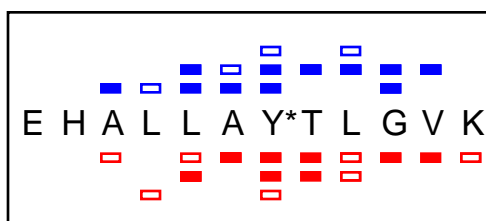

Protein Name: Elongation factor 1 alpha 1  
 gi Accession: 0  
 Precursor Mass: 465.5742+3  
 Delta Mass: 0.203 ppm  
 XCorr: 46.59

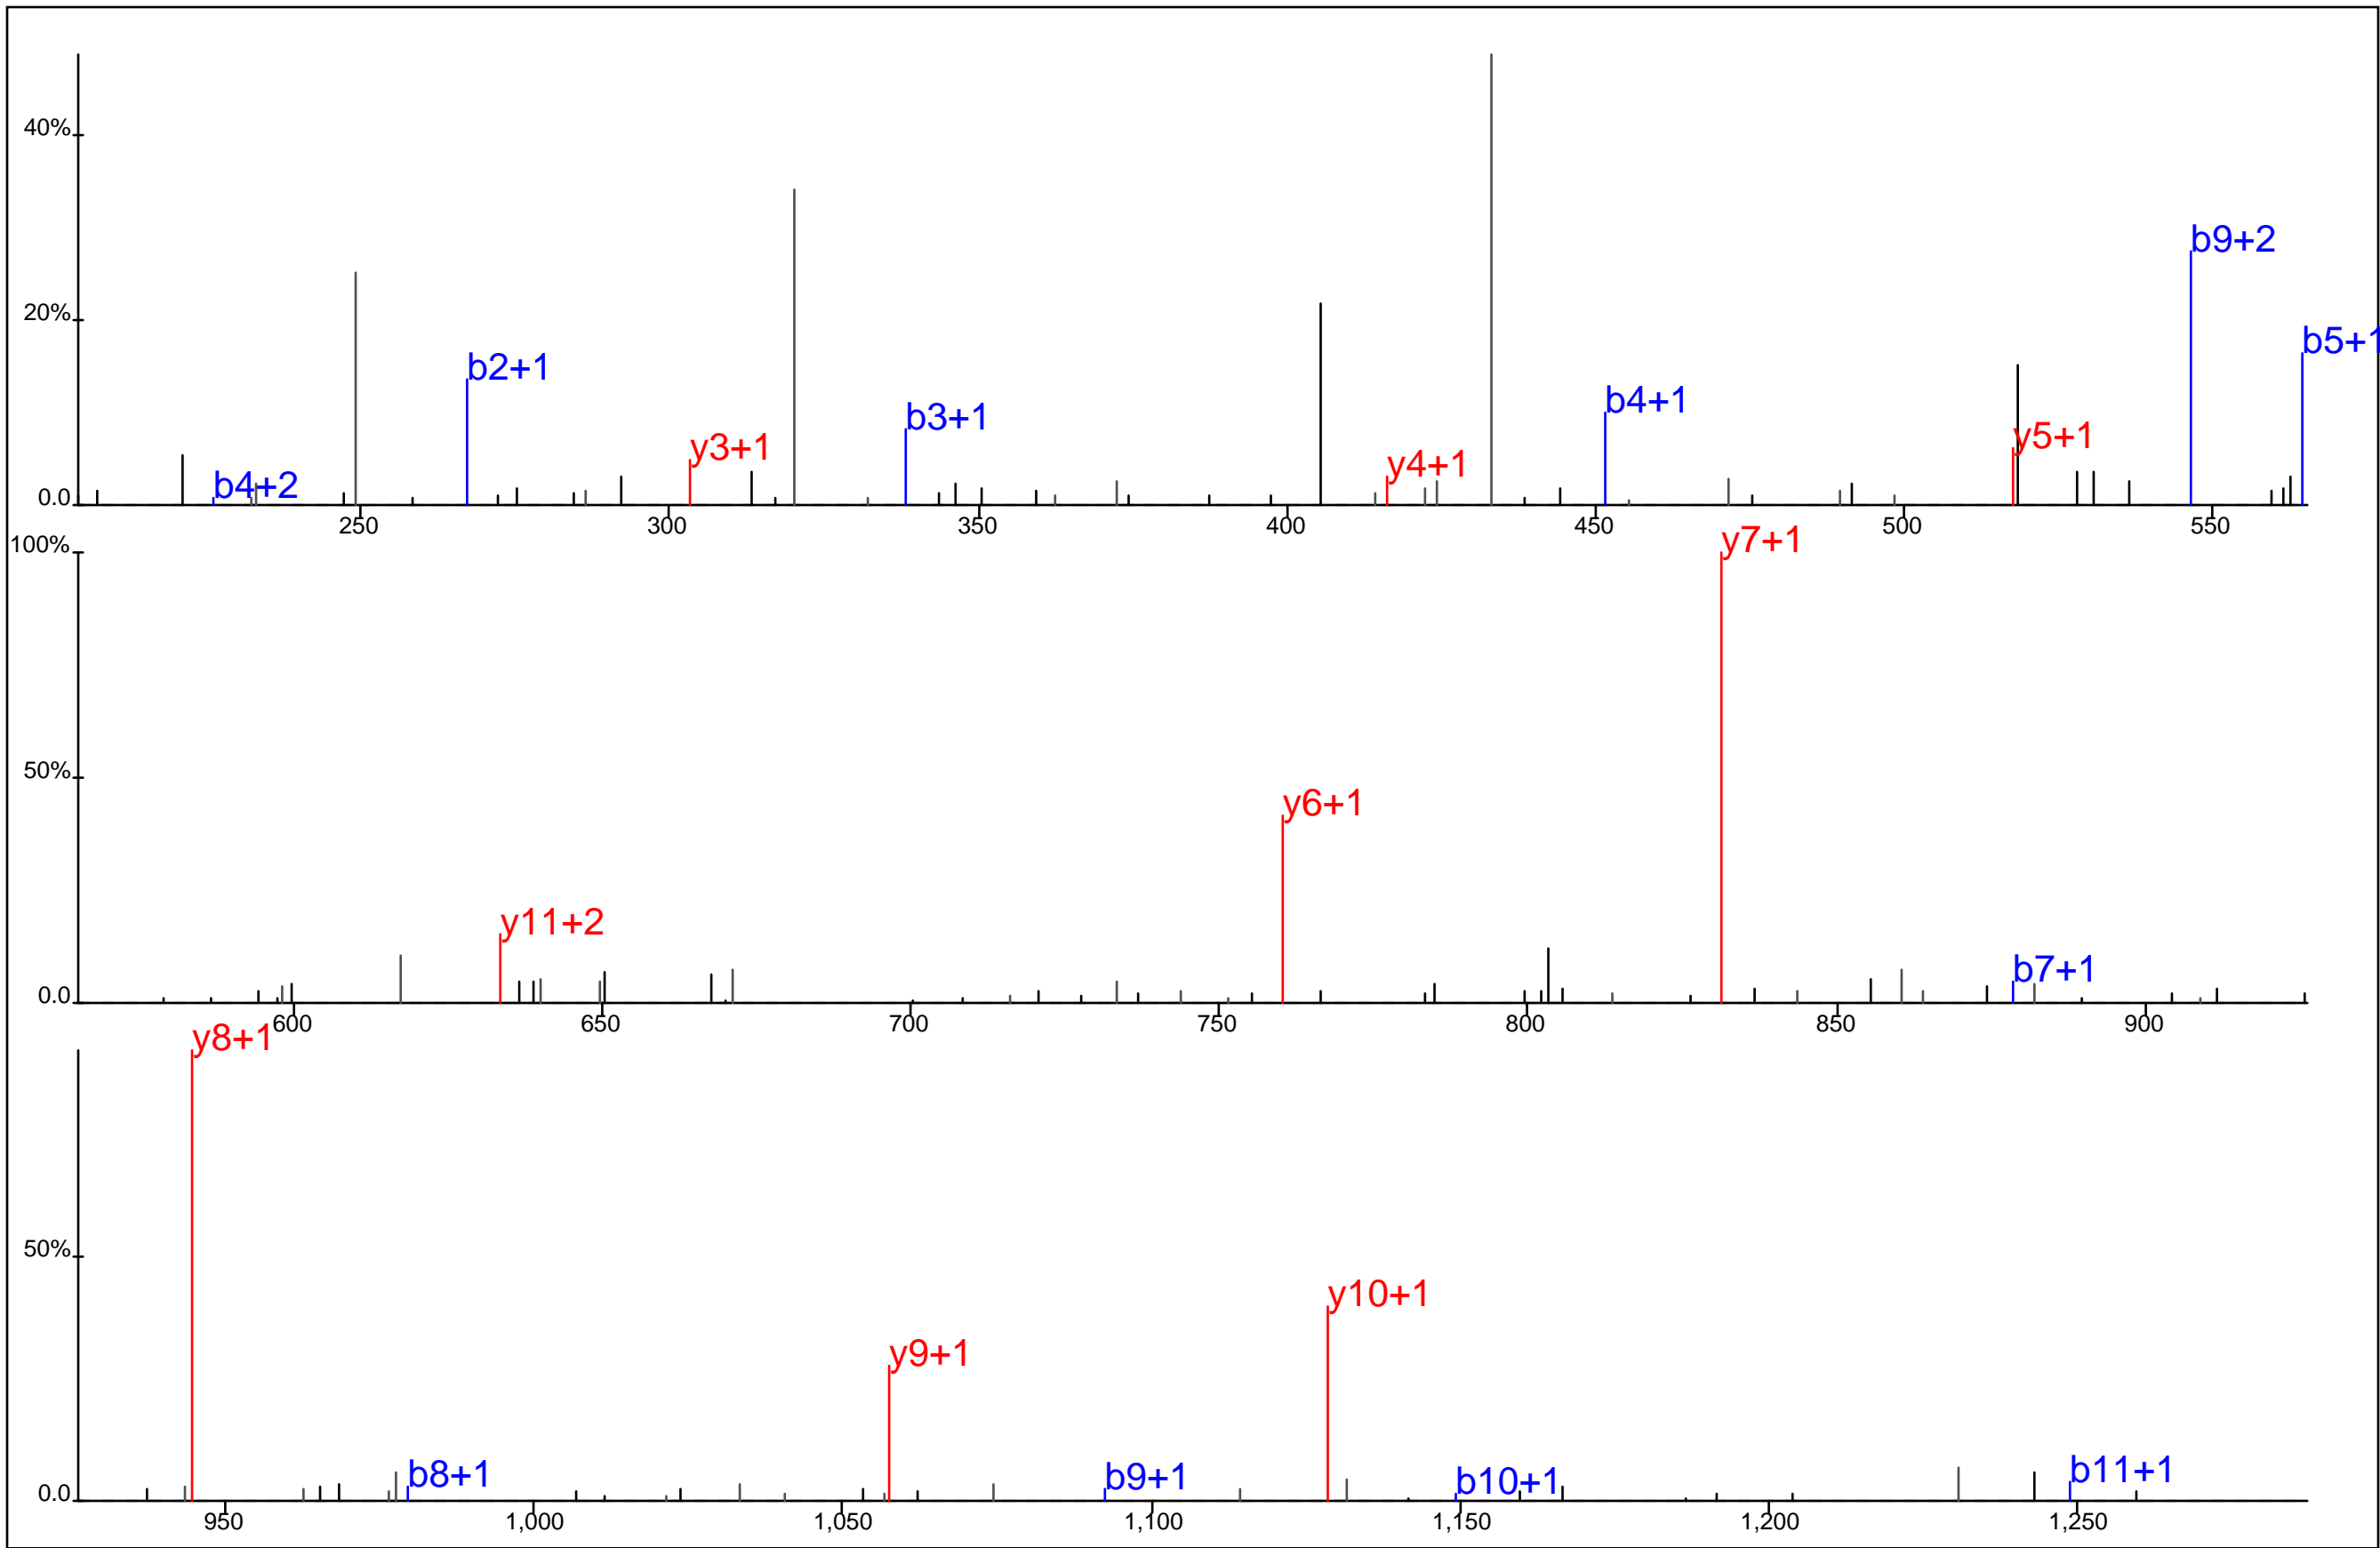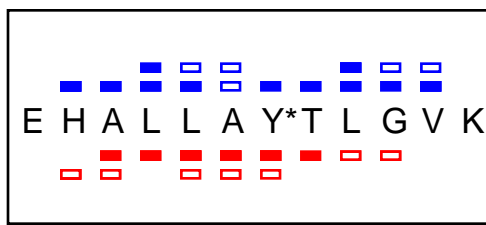

Protein Name: Elongation factor 1 alpha 1  
 gi Accession: 0  
 Precursor Mass: 697.8593+2  
 Delta Mass: 2.379 ppm  
 XCorr: 53.21

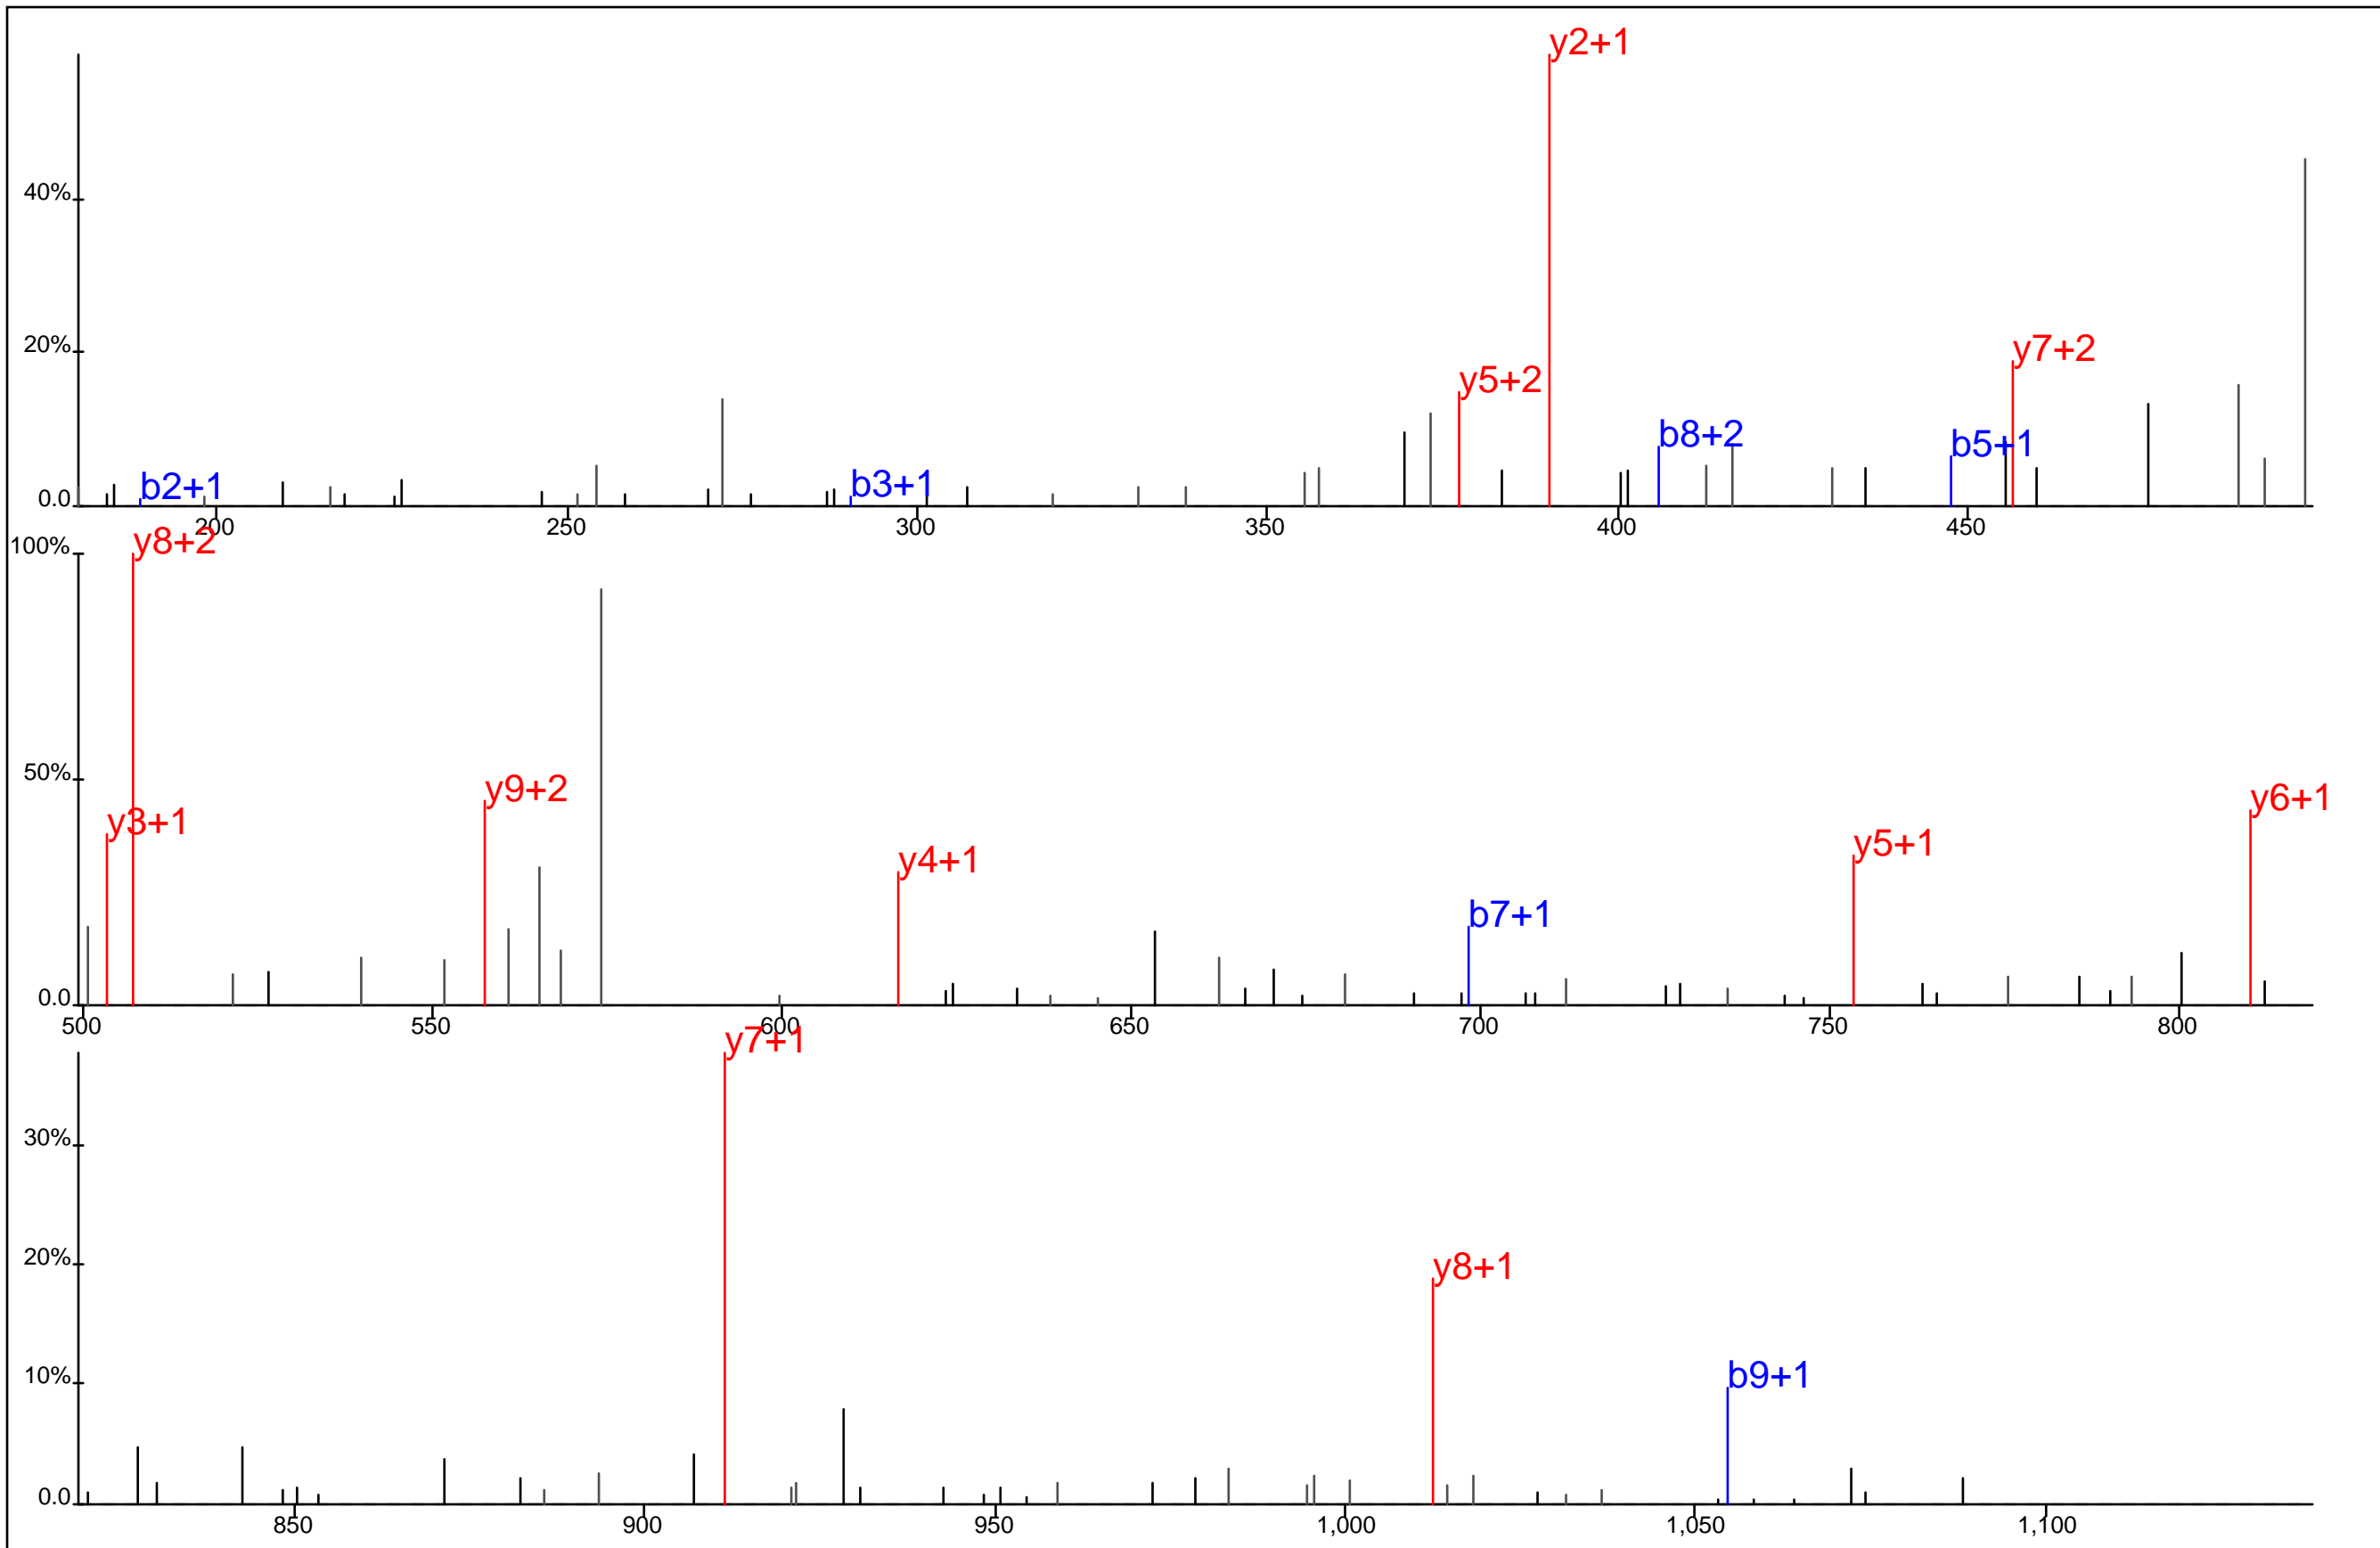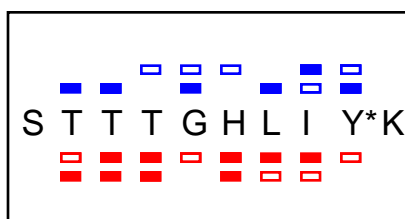

Protein Name: Elongation factor 1 alpha 1  
 gi Accession: 0  
 Precursor Mass: 600.7858+2  
 Delta Mass: 1.469 ppm  
 XCorr: 50.52



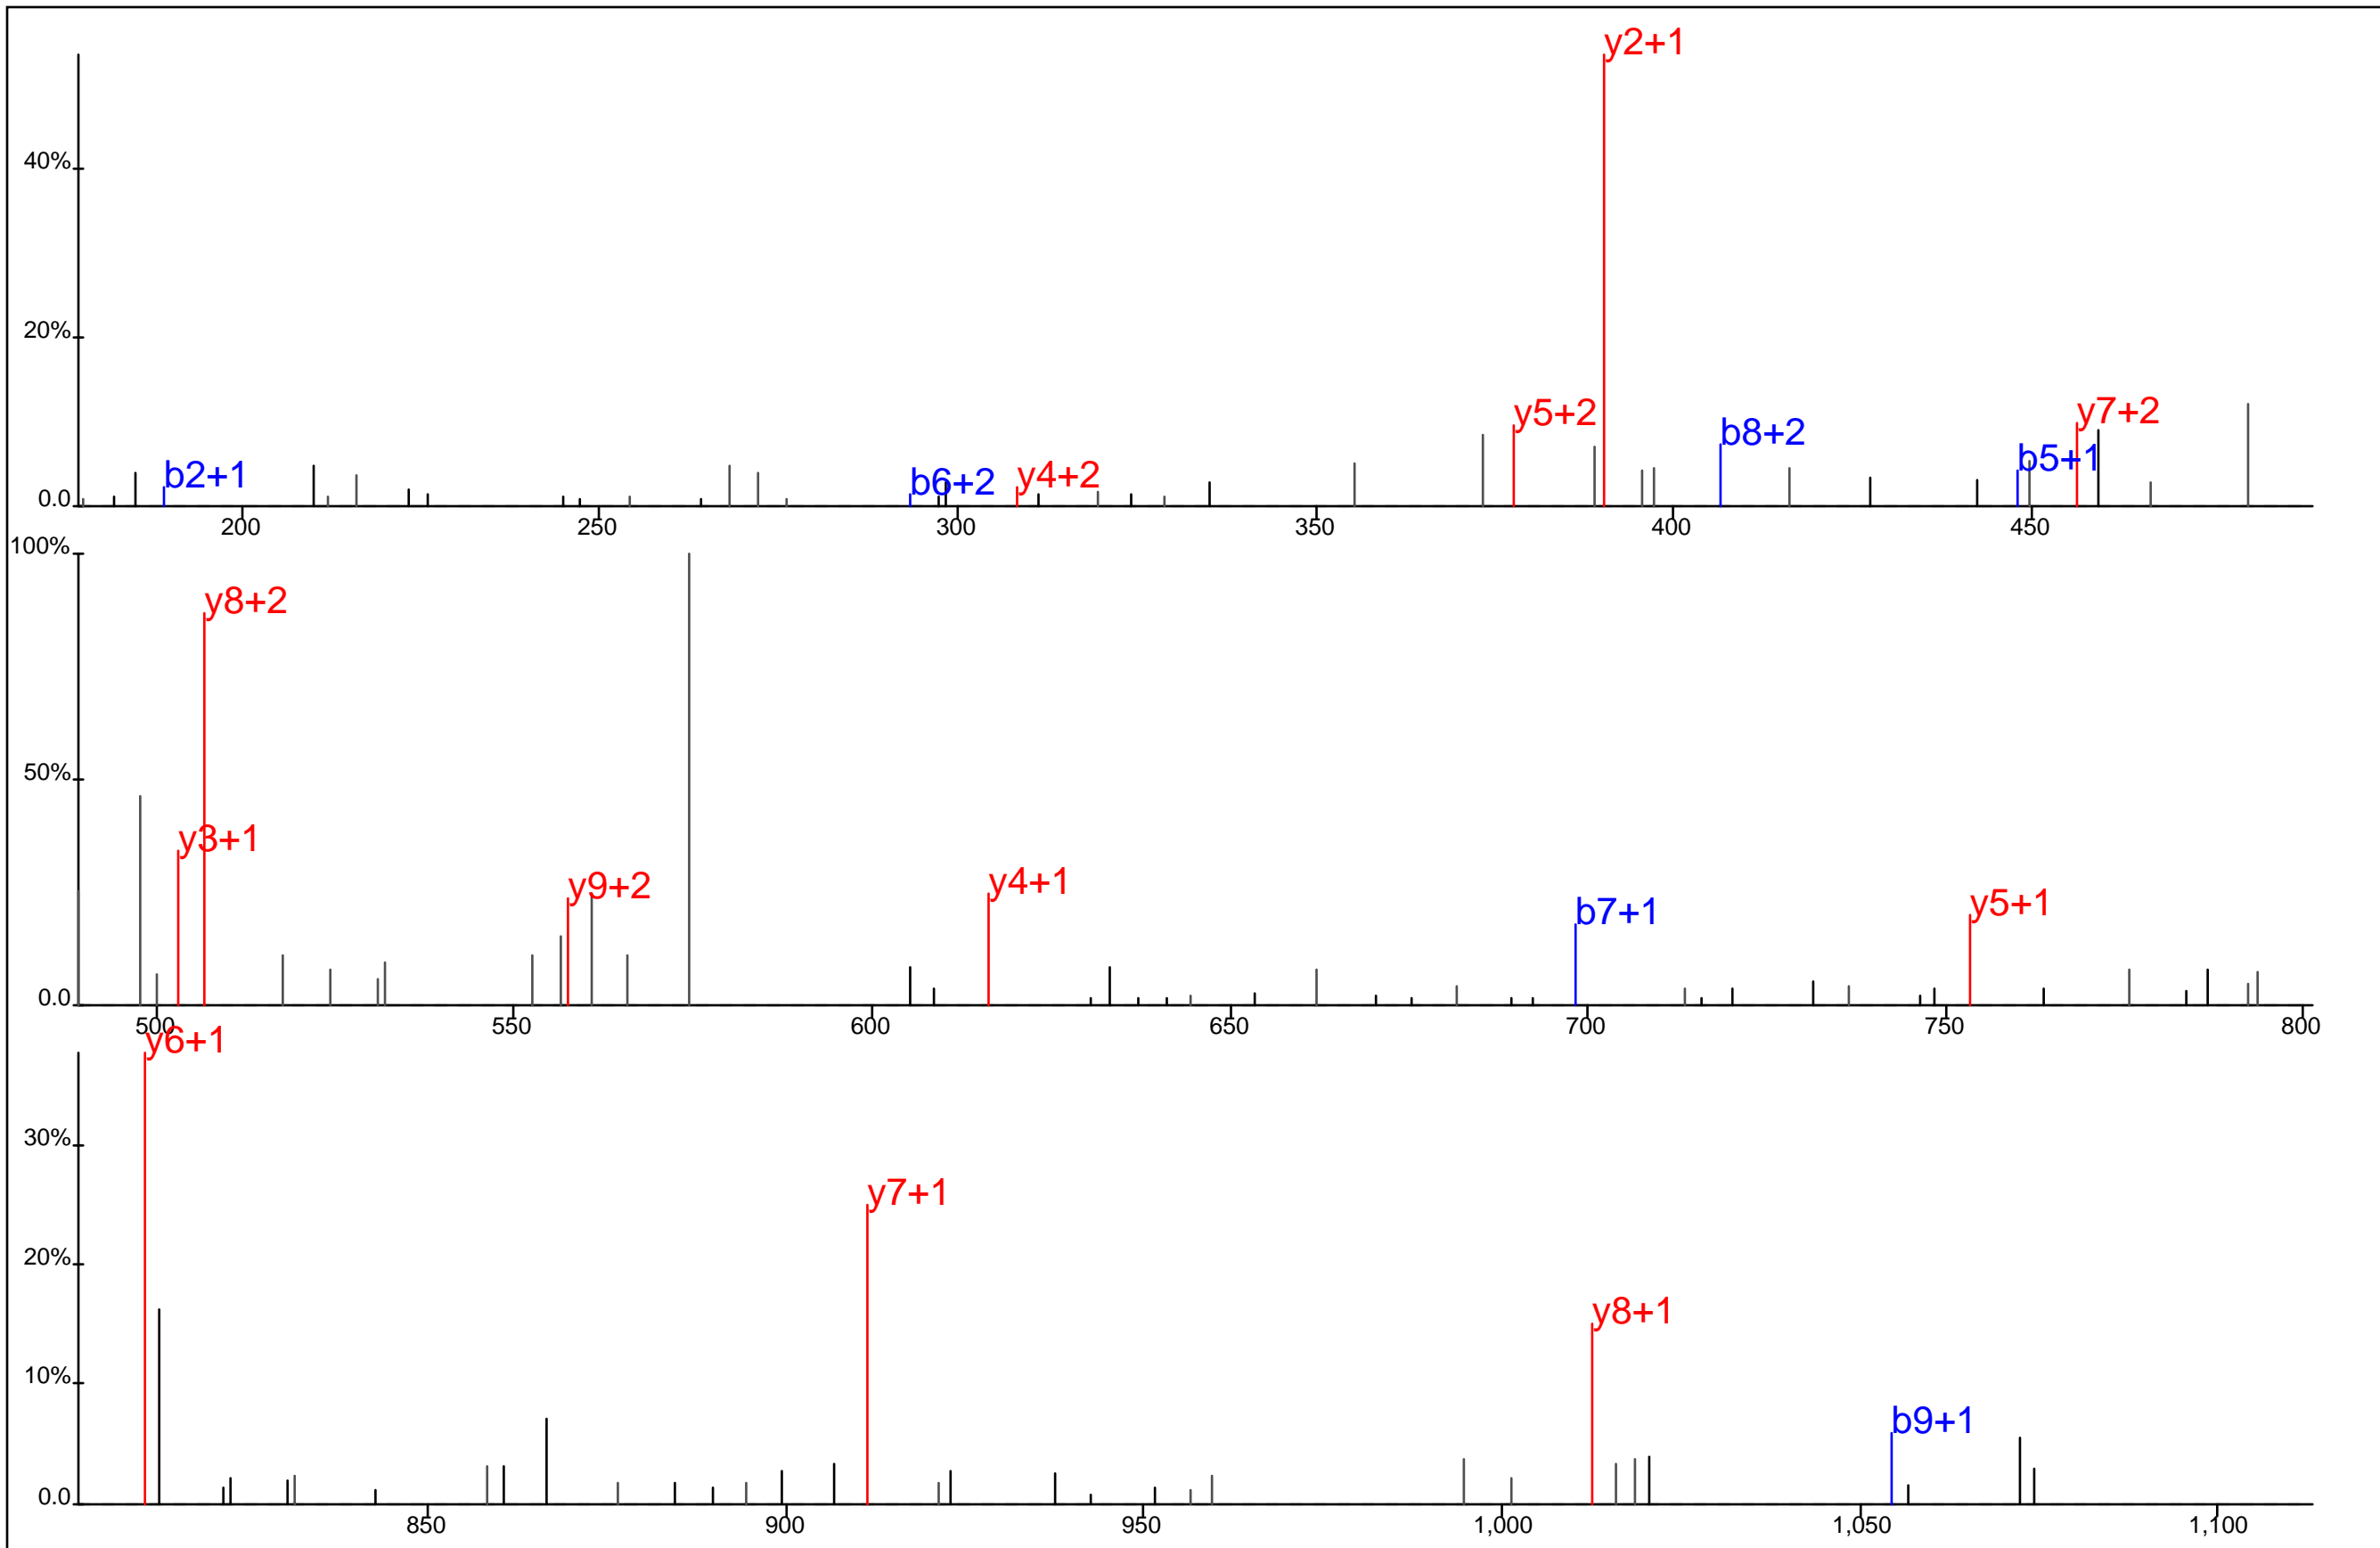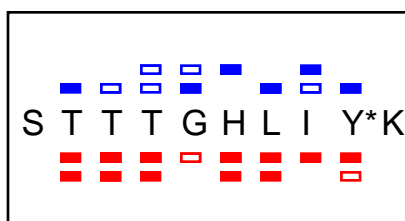

Protein Name: Elongation factor 1 alpha 1  
 gi Accession: 0  
 Precursor Mass: 600.7867+2  
 Delta Mass: 0.157 ppm  
 XCorr: 56.54

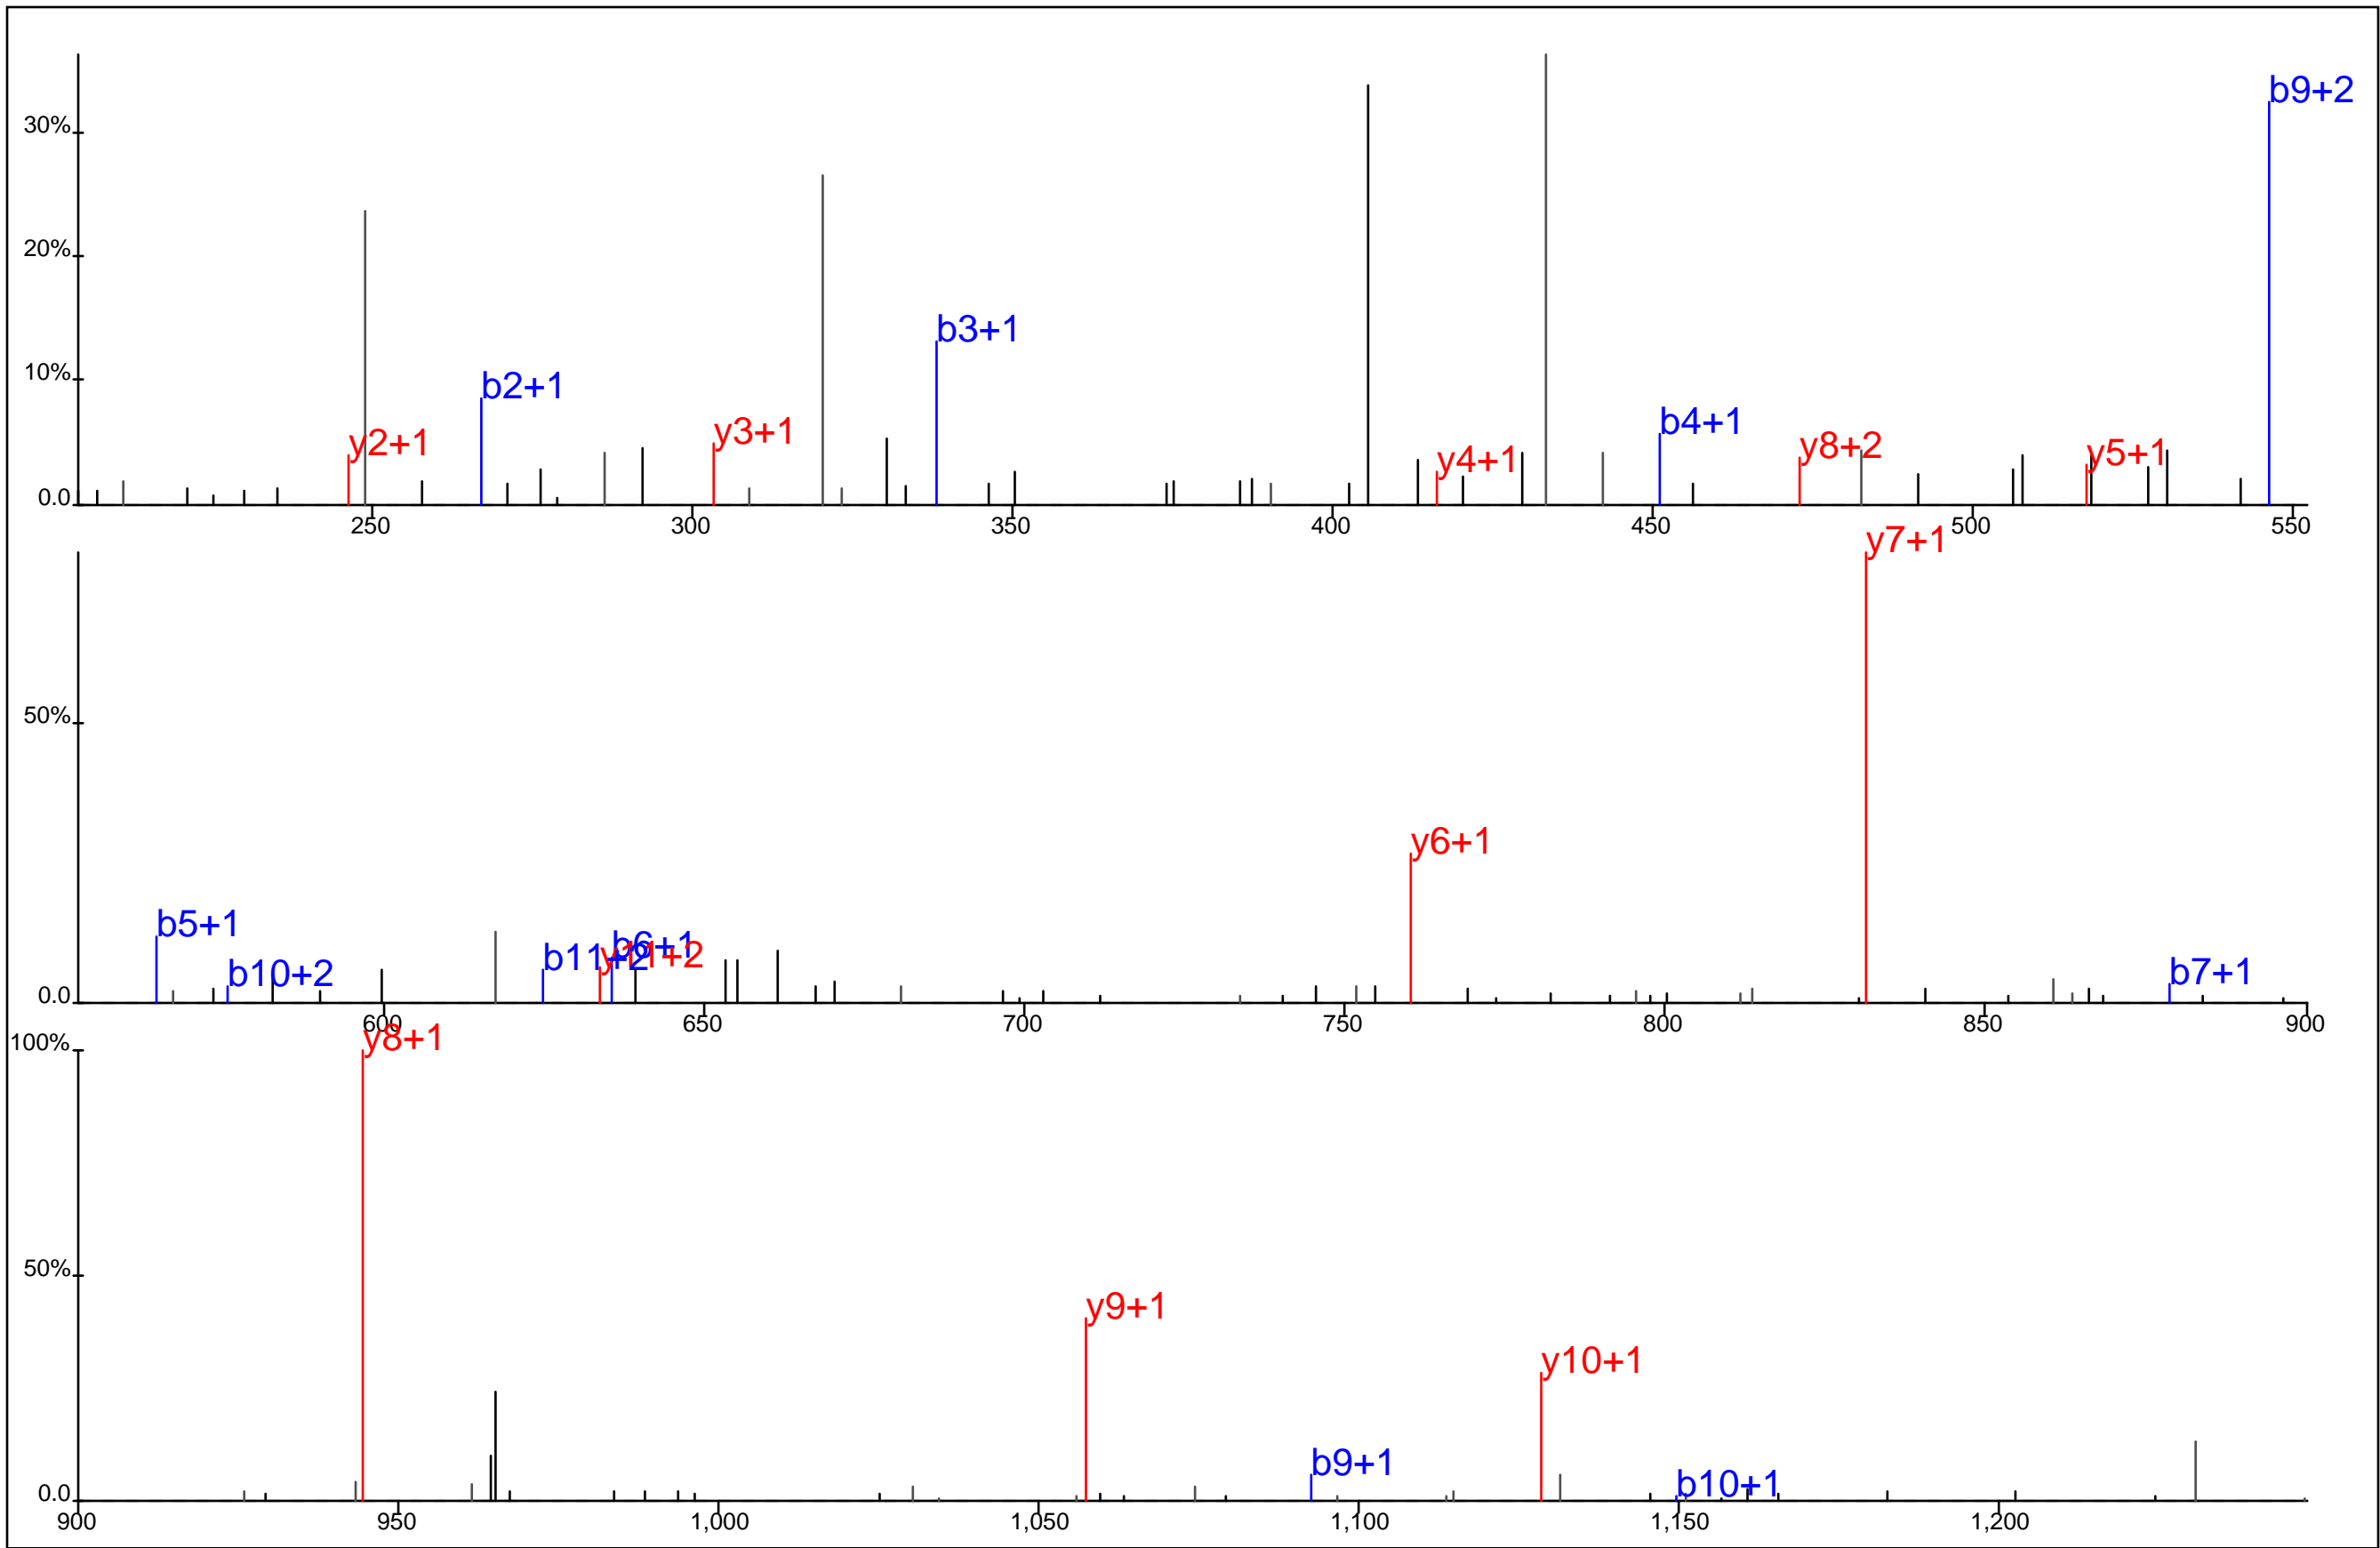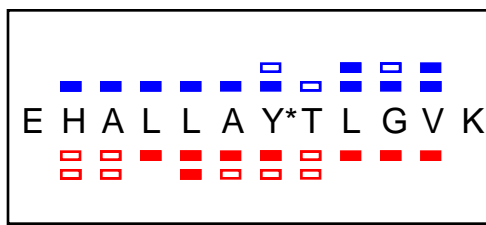

Protein Name: Elongation factor 1 alpha 1  
 gi Accession: 0  
 Precursor Mass: 697.8574+2  
 Delta Mass: 0.334 ppm  
 XCorr: 56.69

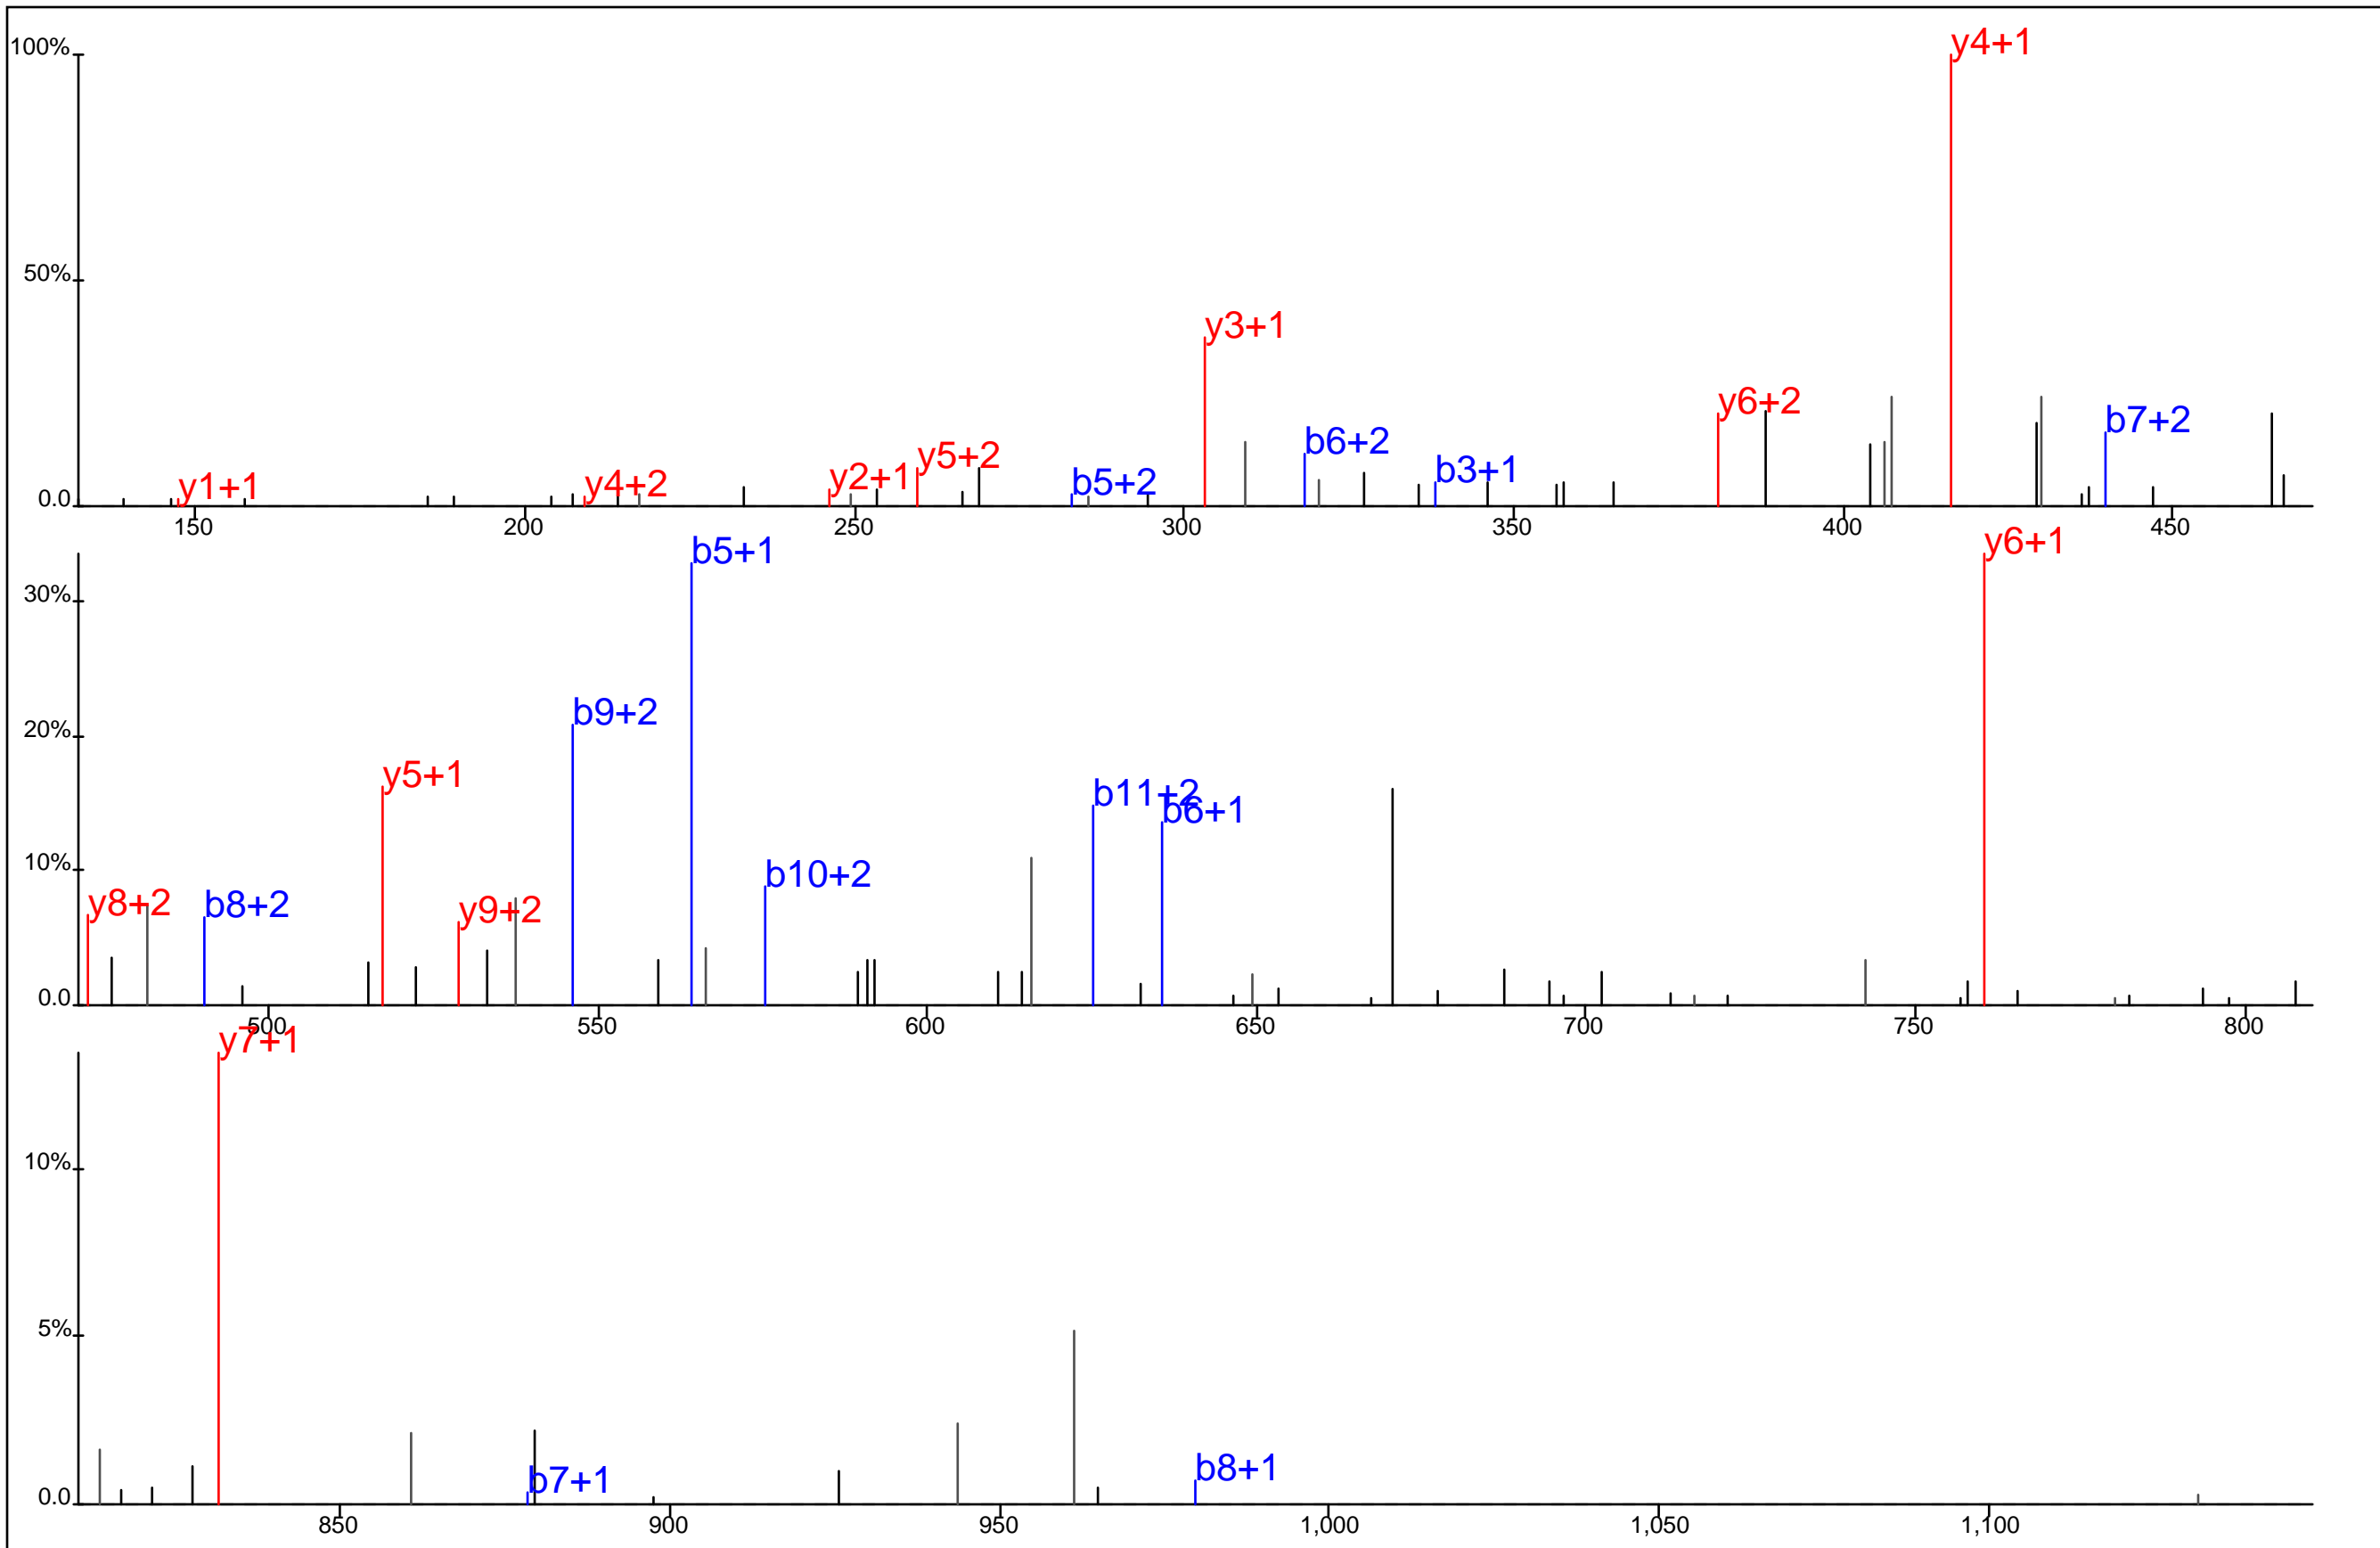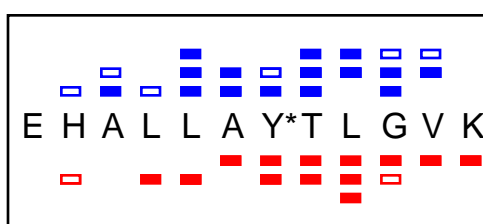

Protein Name: Elongation factor 1 alpha 1  
 gi Accession: 0  
 Precursor Mass: 465.5738+3  
 Delta Mass: 0.847 ppm  
 XCorr: 39.84

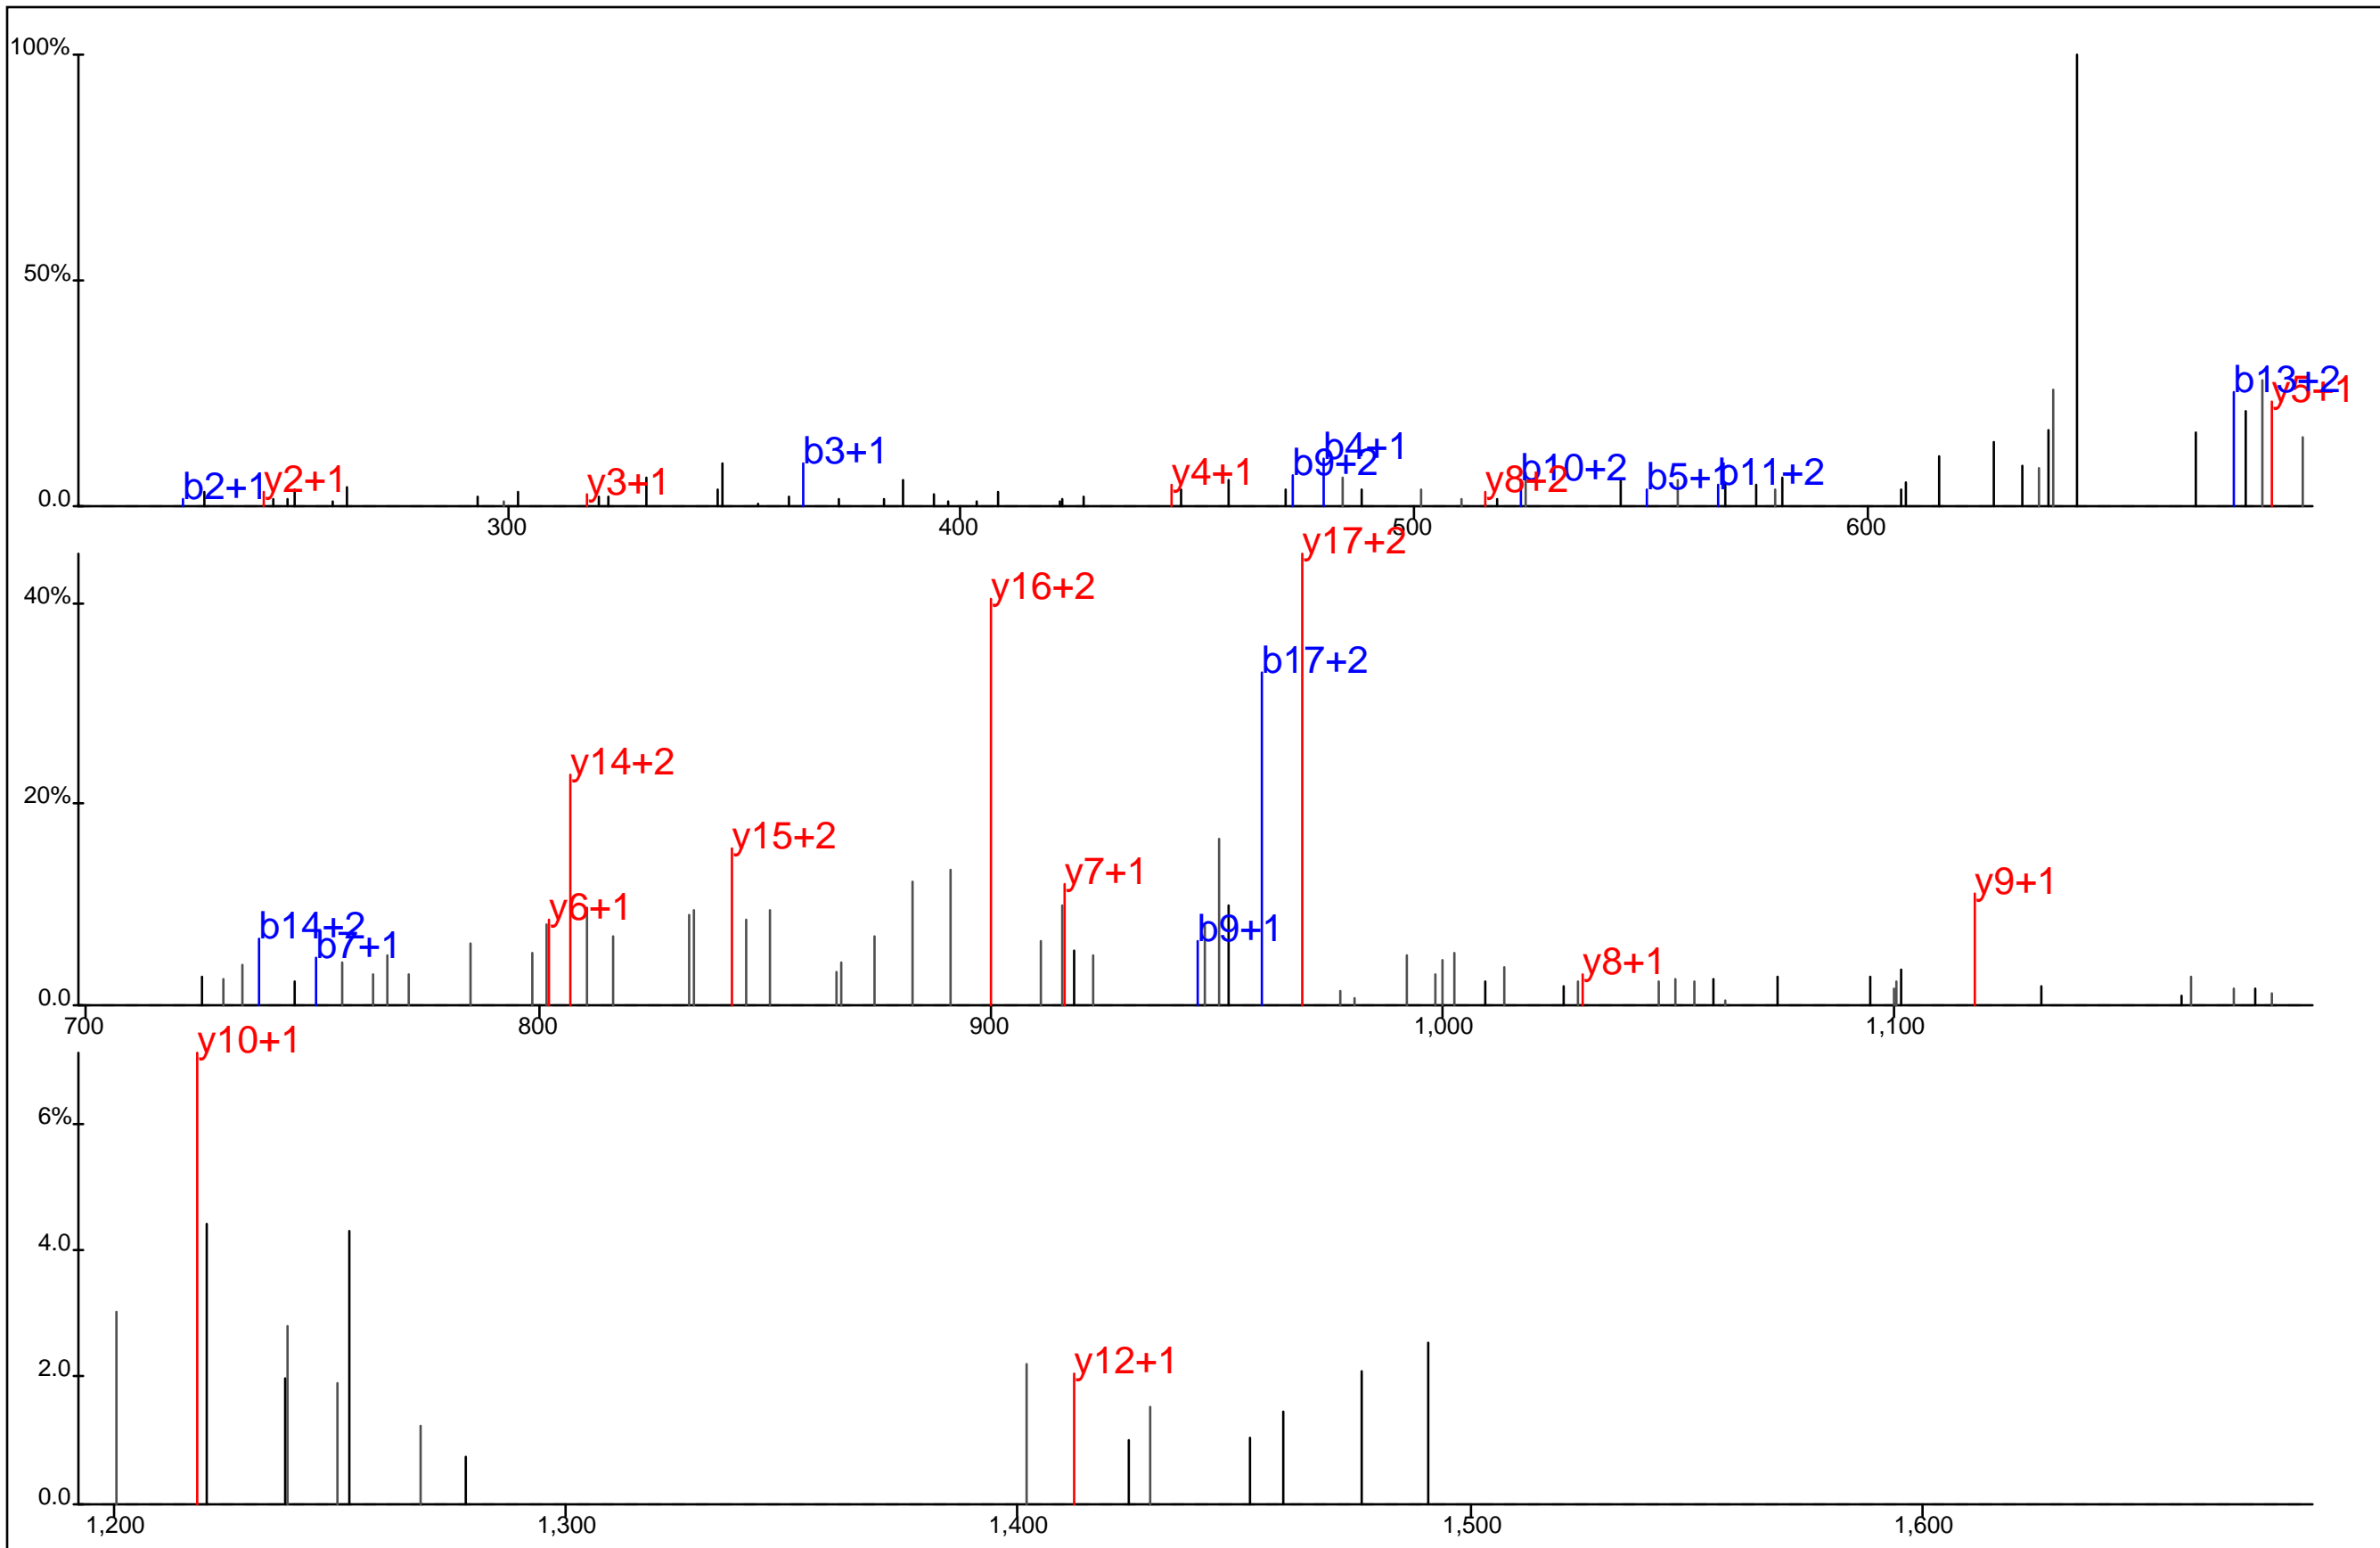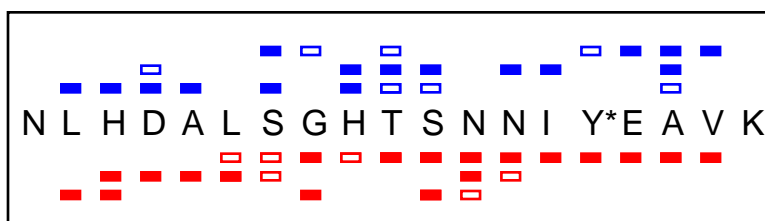

Protein Name: Elongation protein 3  
 gi Accession: 0  
 Precursor Mass: 721.6680+3  
 Delta Mass: 1.273 ppm  
 XCorr: 36.9

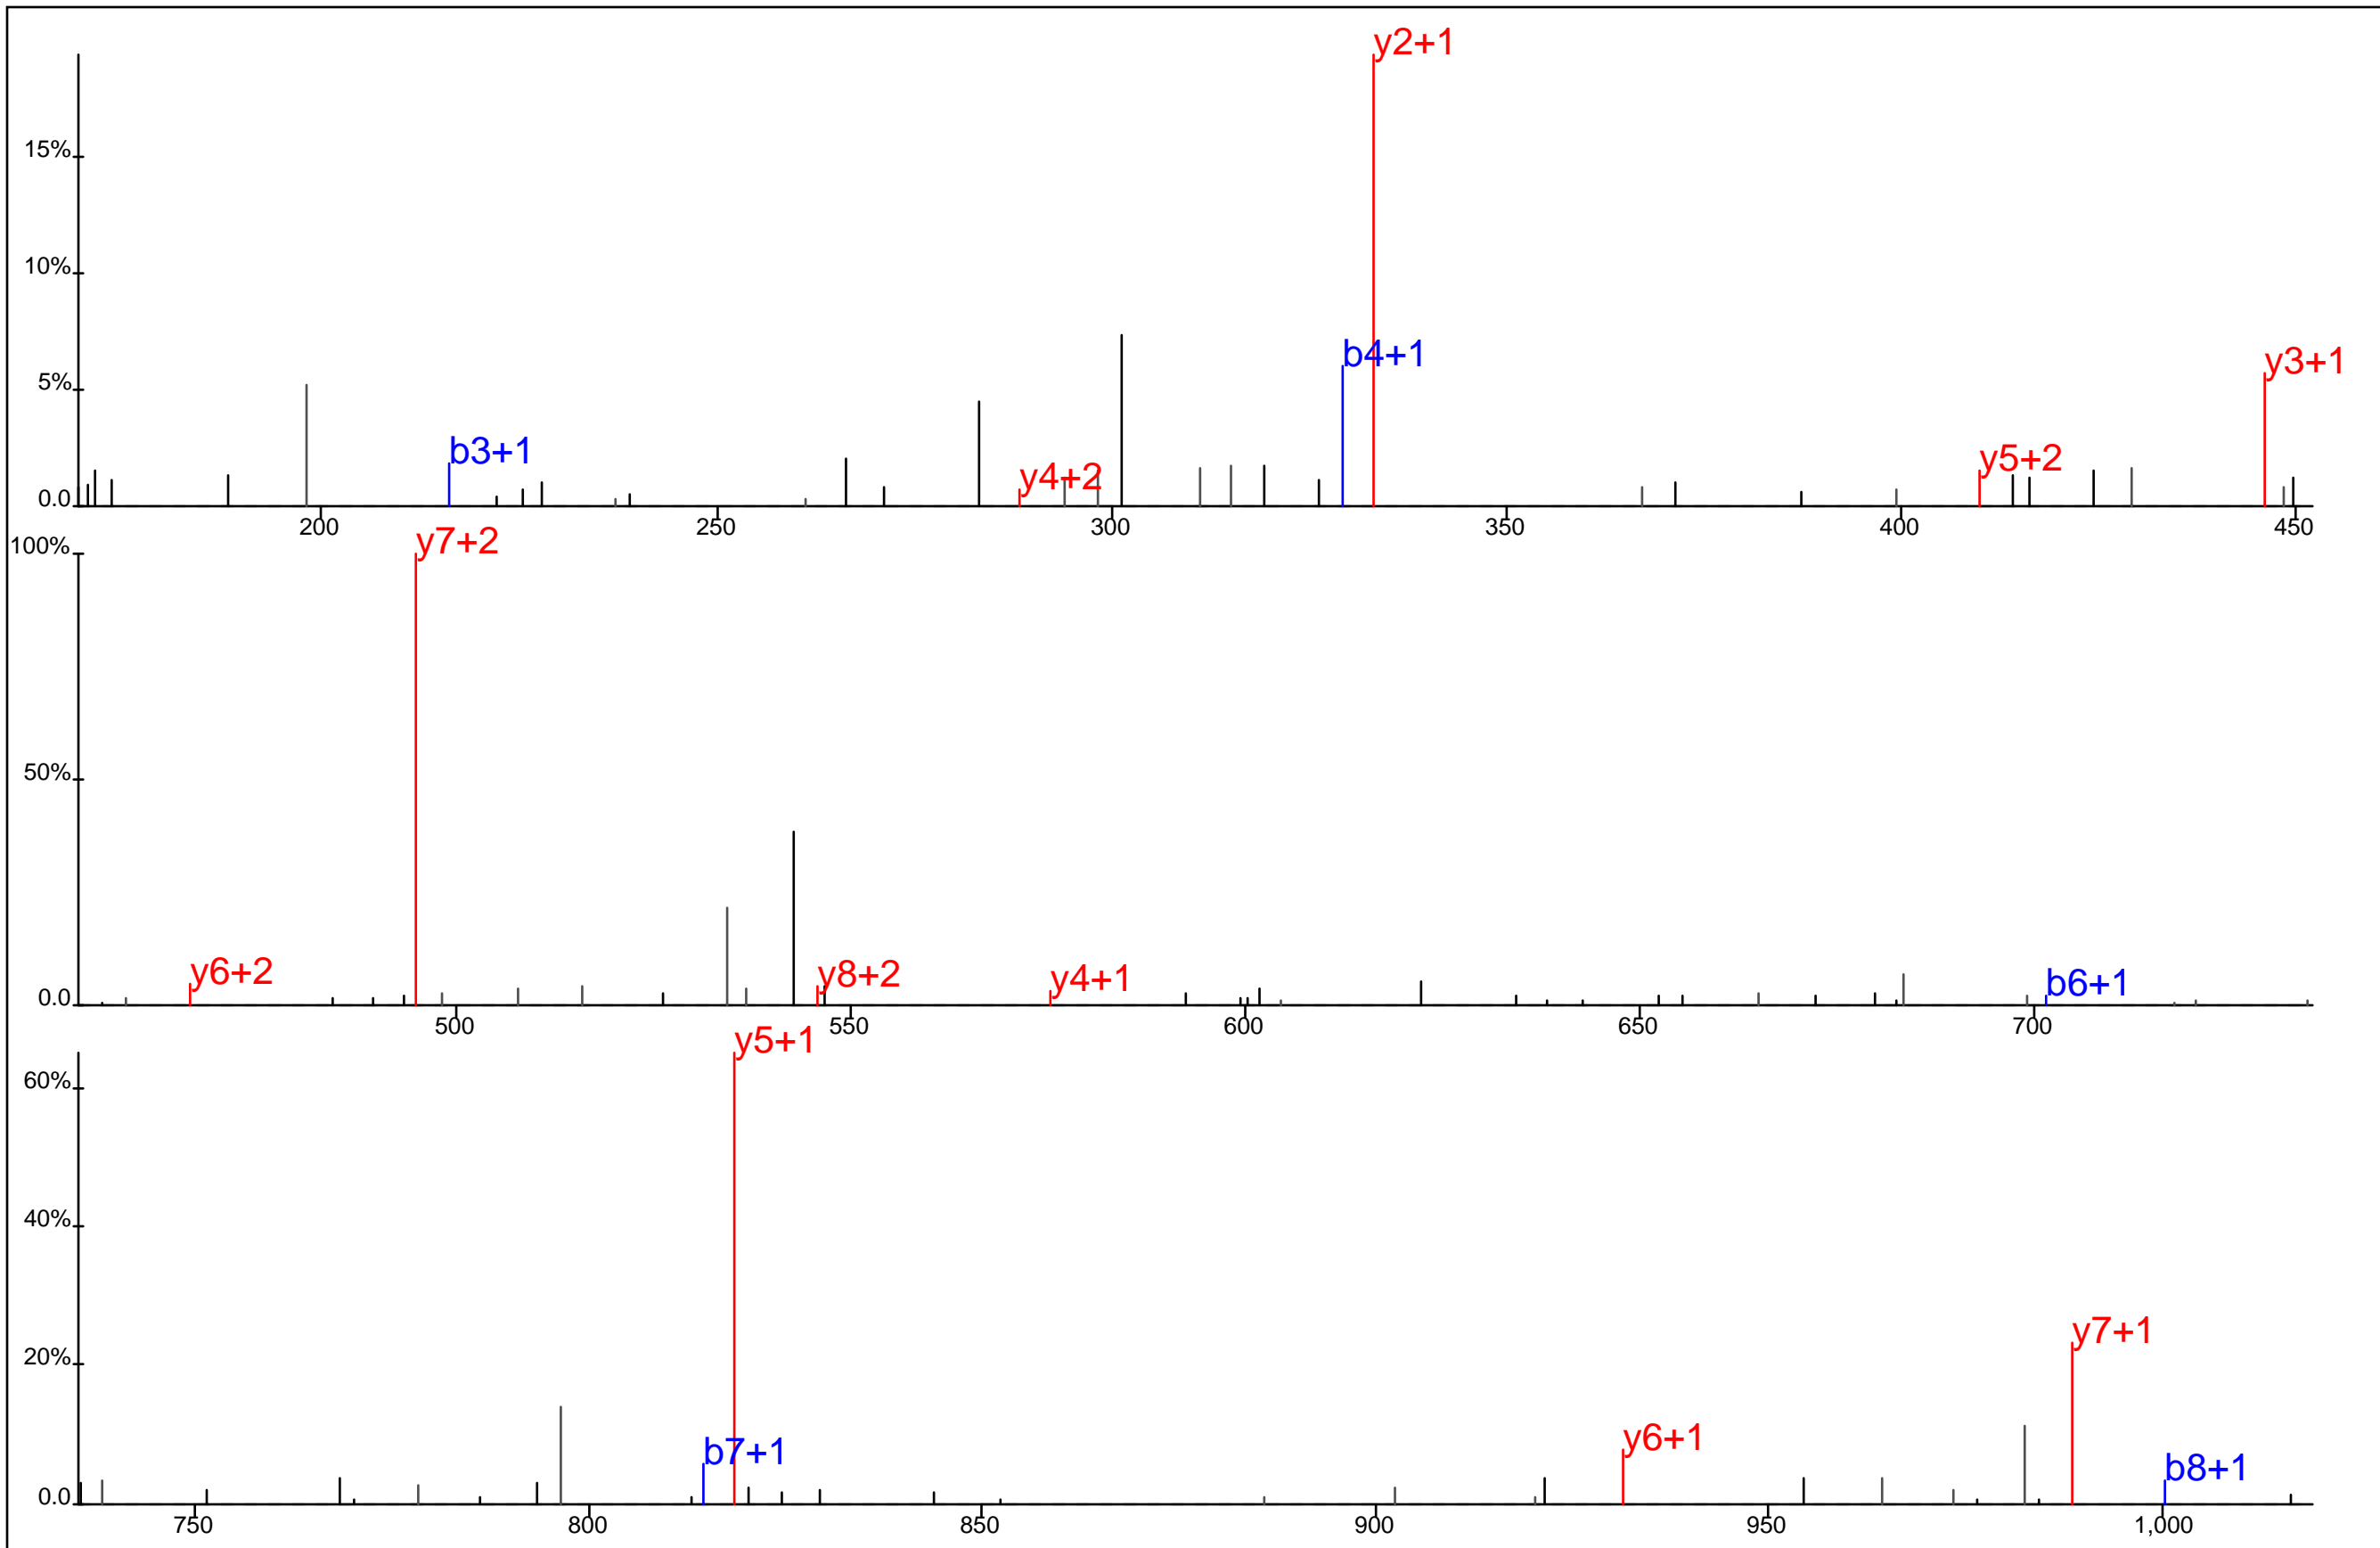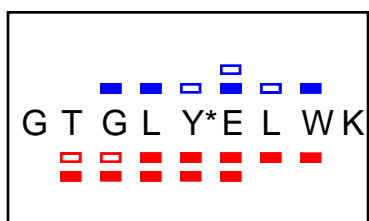

Protein Name: Elongation protein 3  
 gi Accession: 0  
 Precursor Mass: 573.7642+2  
 Delta Mass: 1.778 ppm  
 XCorr: 33.08

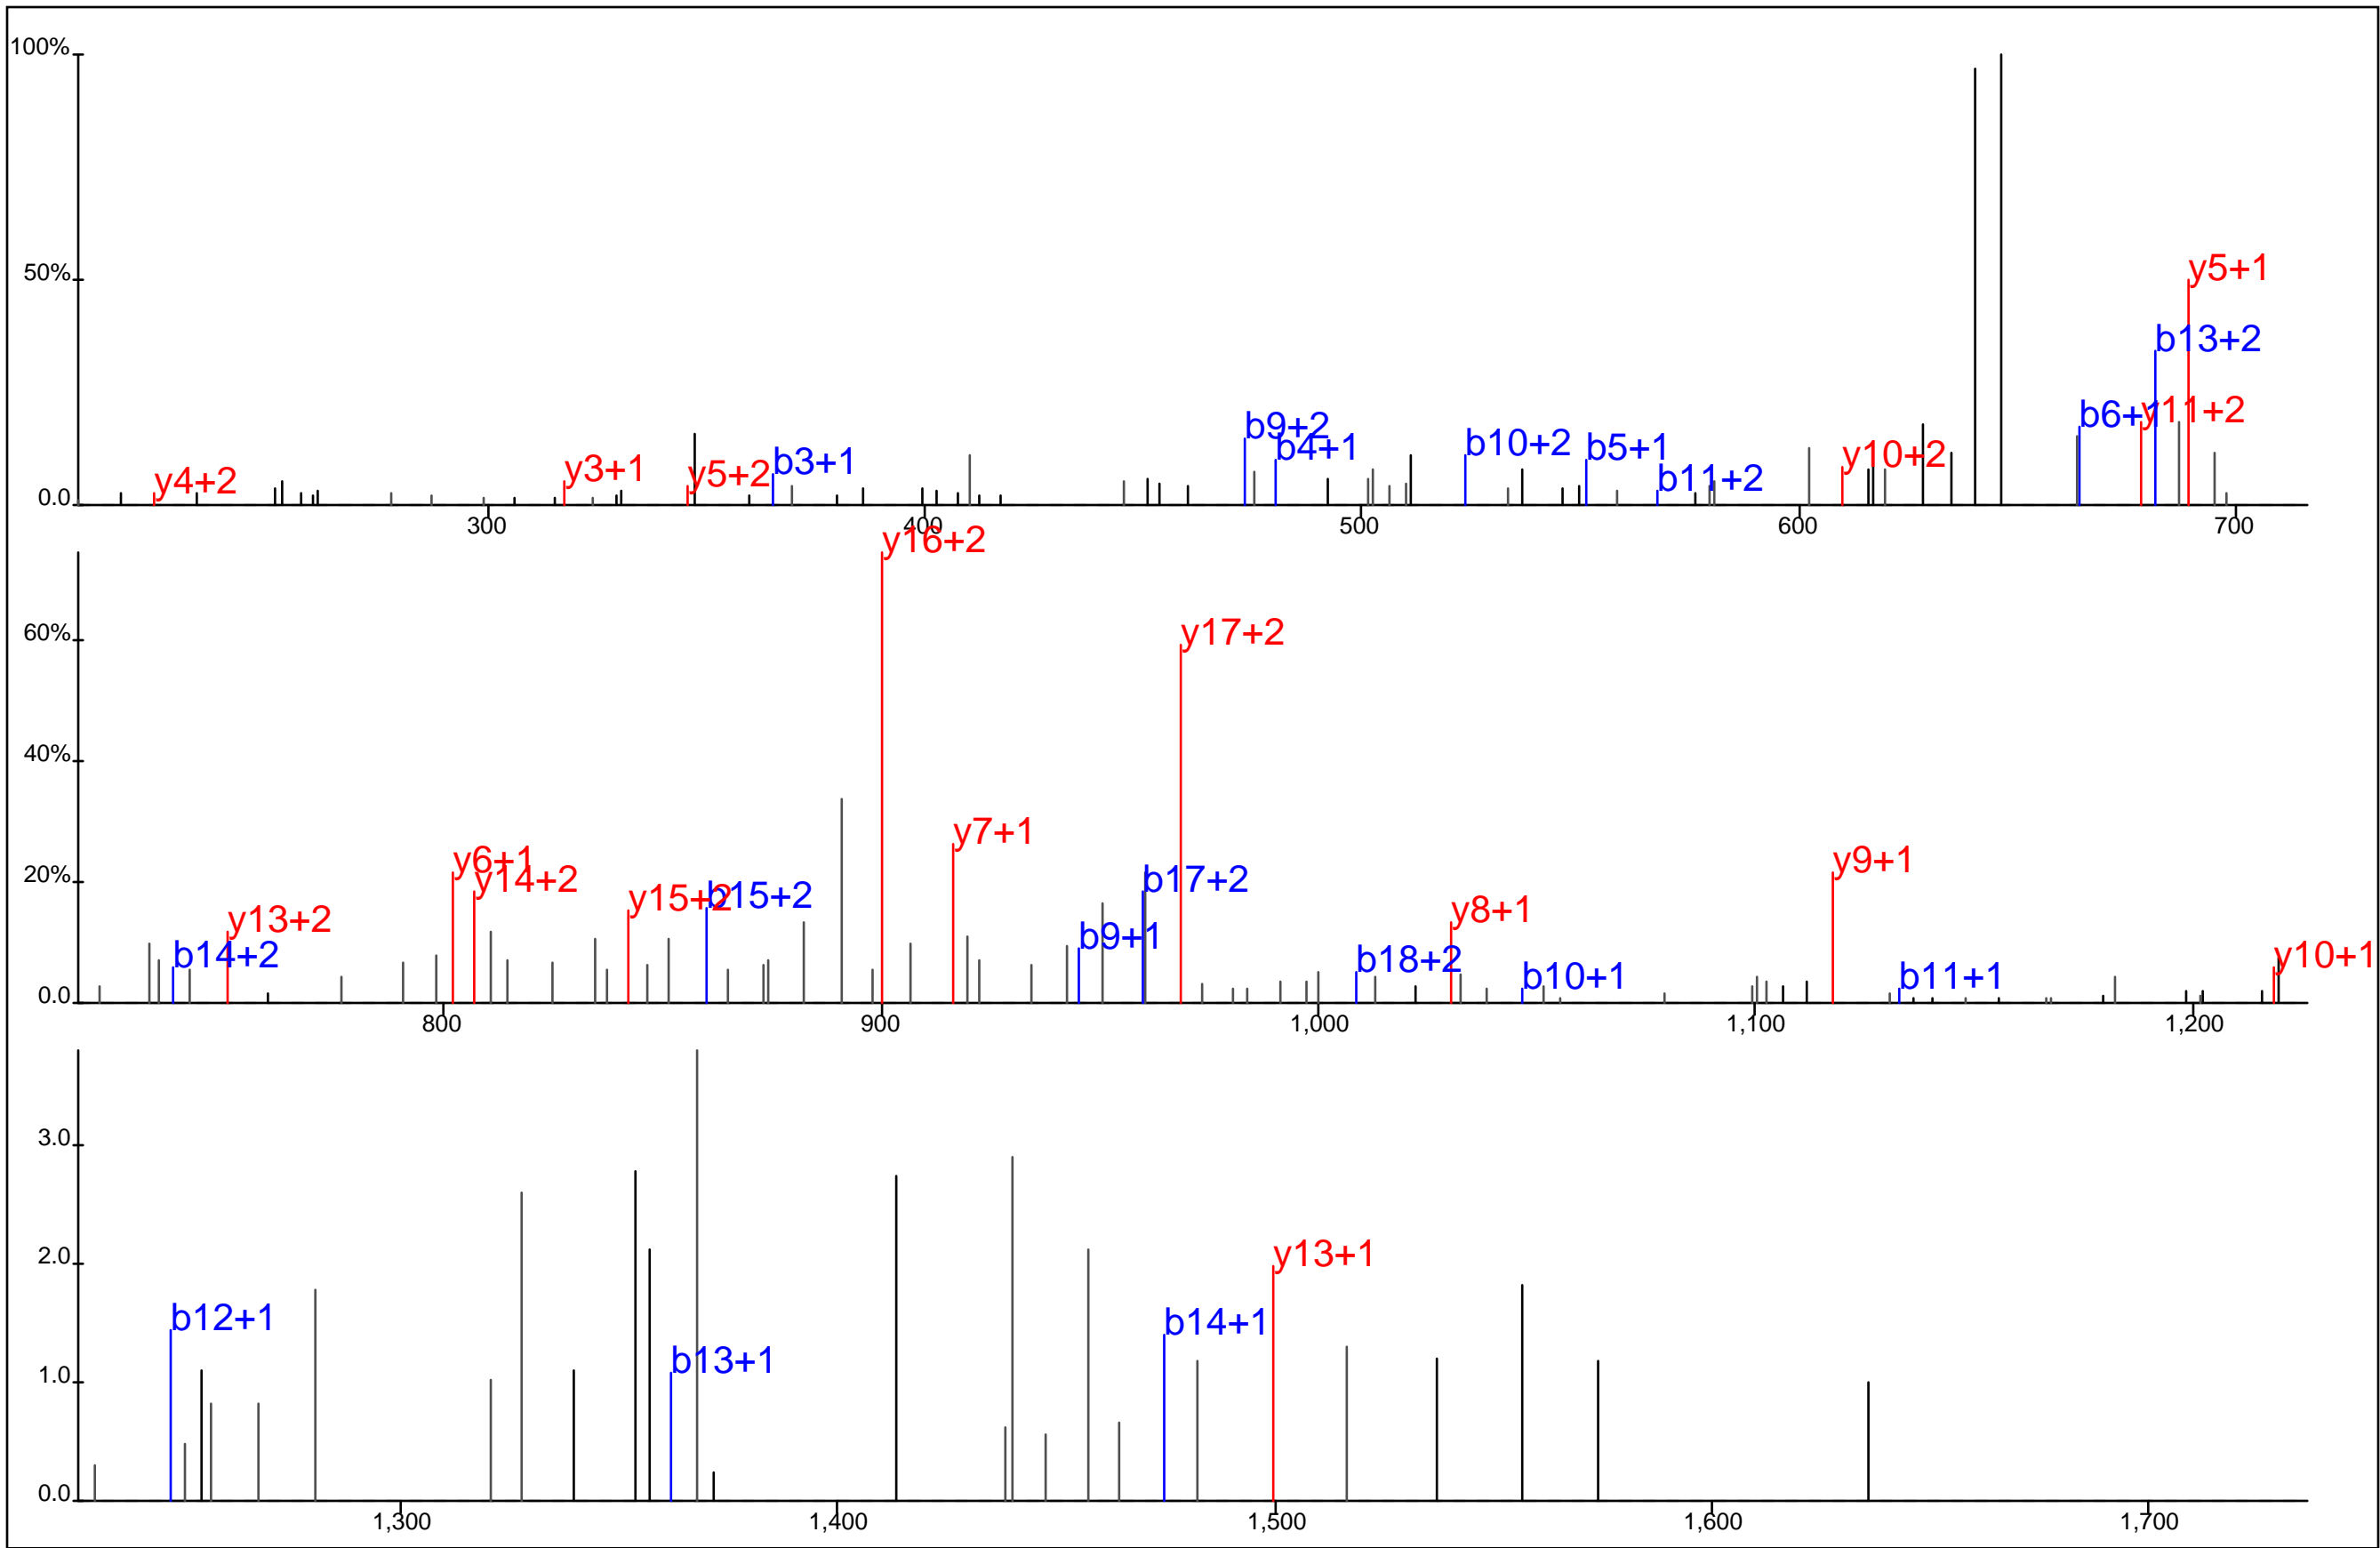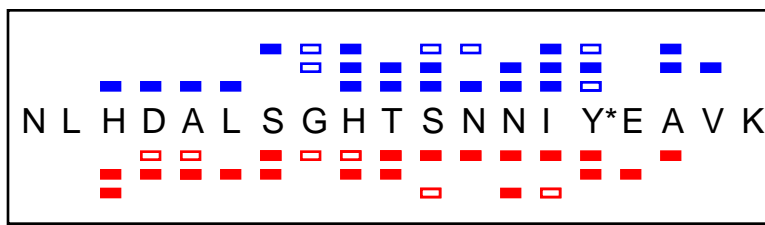

Protein Name: Elongation protein 3  
 gi Accession: 0  
 Precursor Mass: 721.6675+3  
 Delta Mass: 0.595 ppm  
 XCorr: 41.07

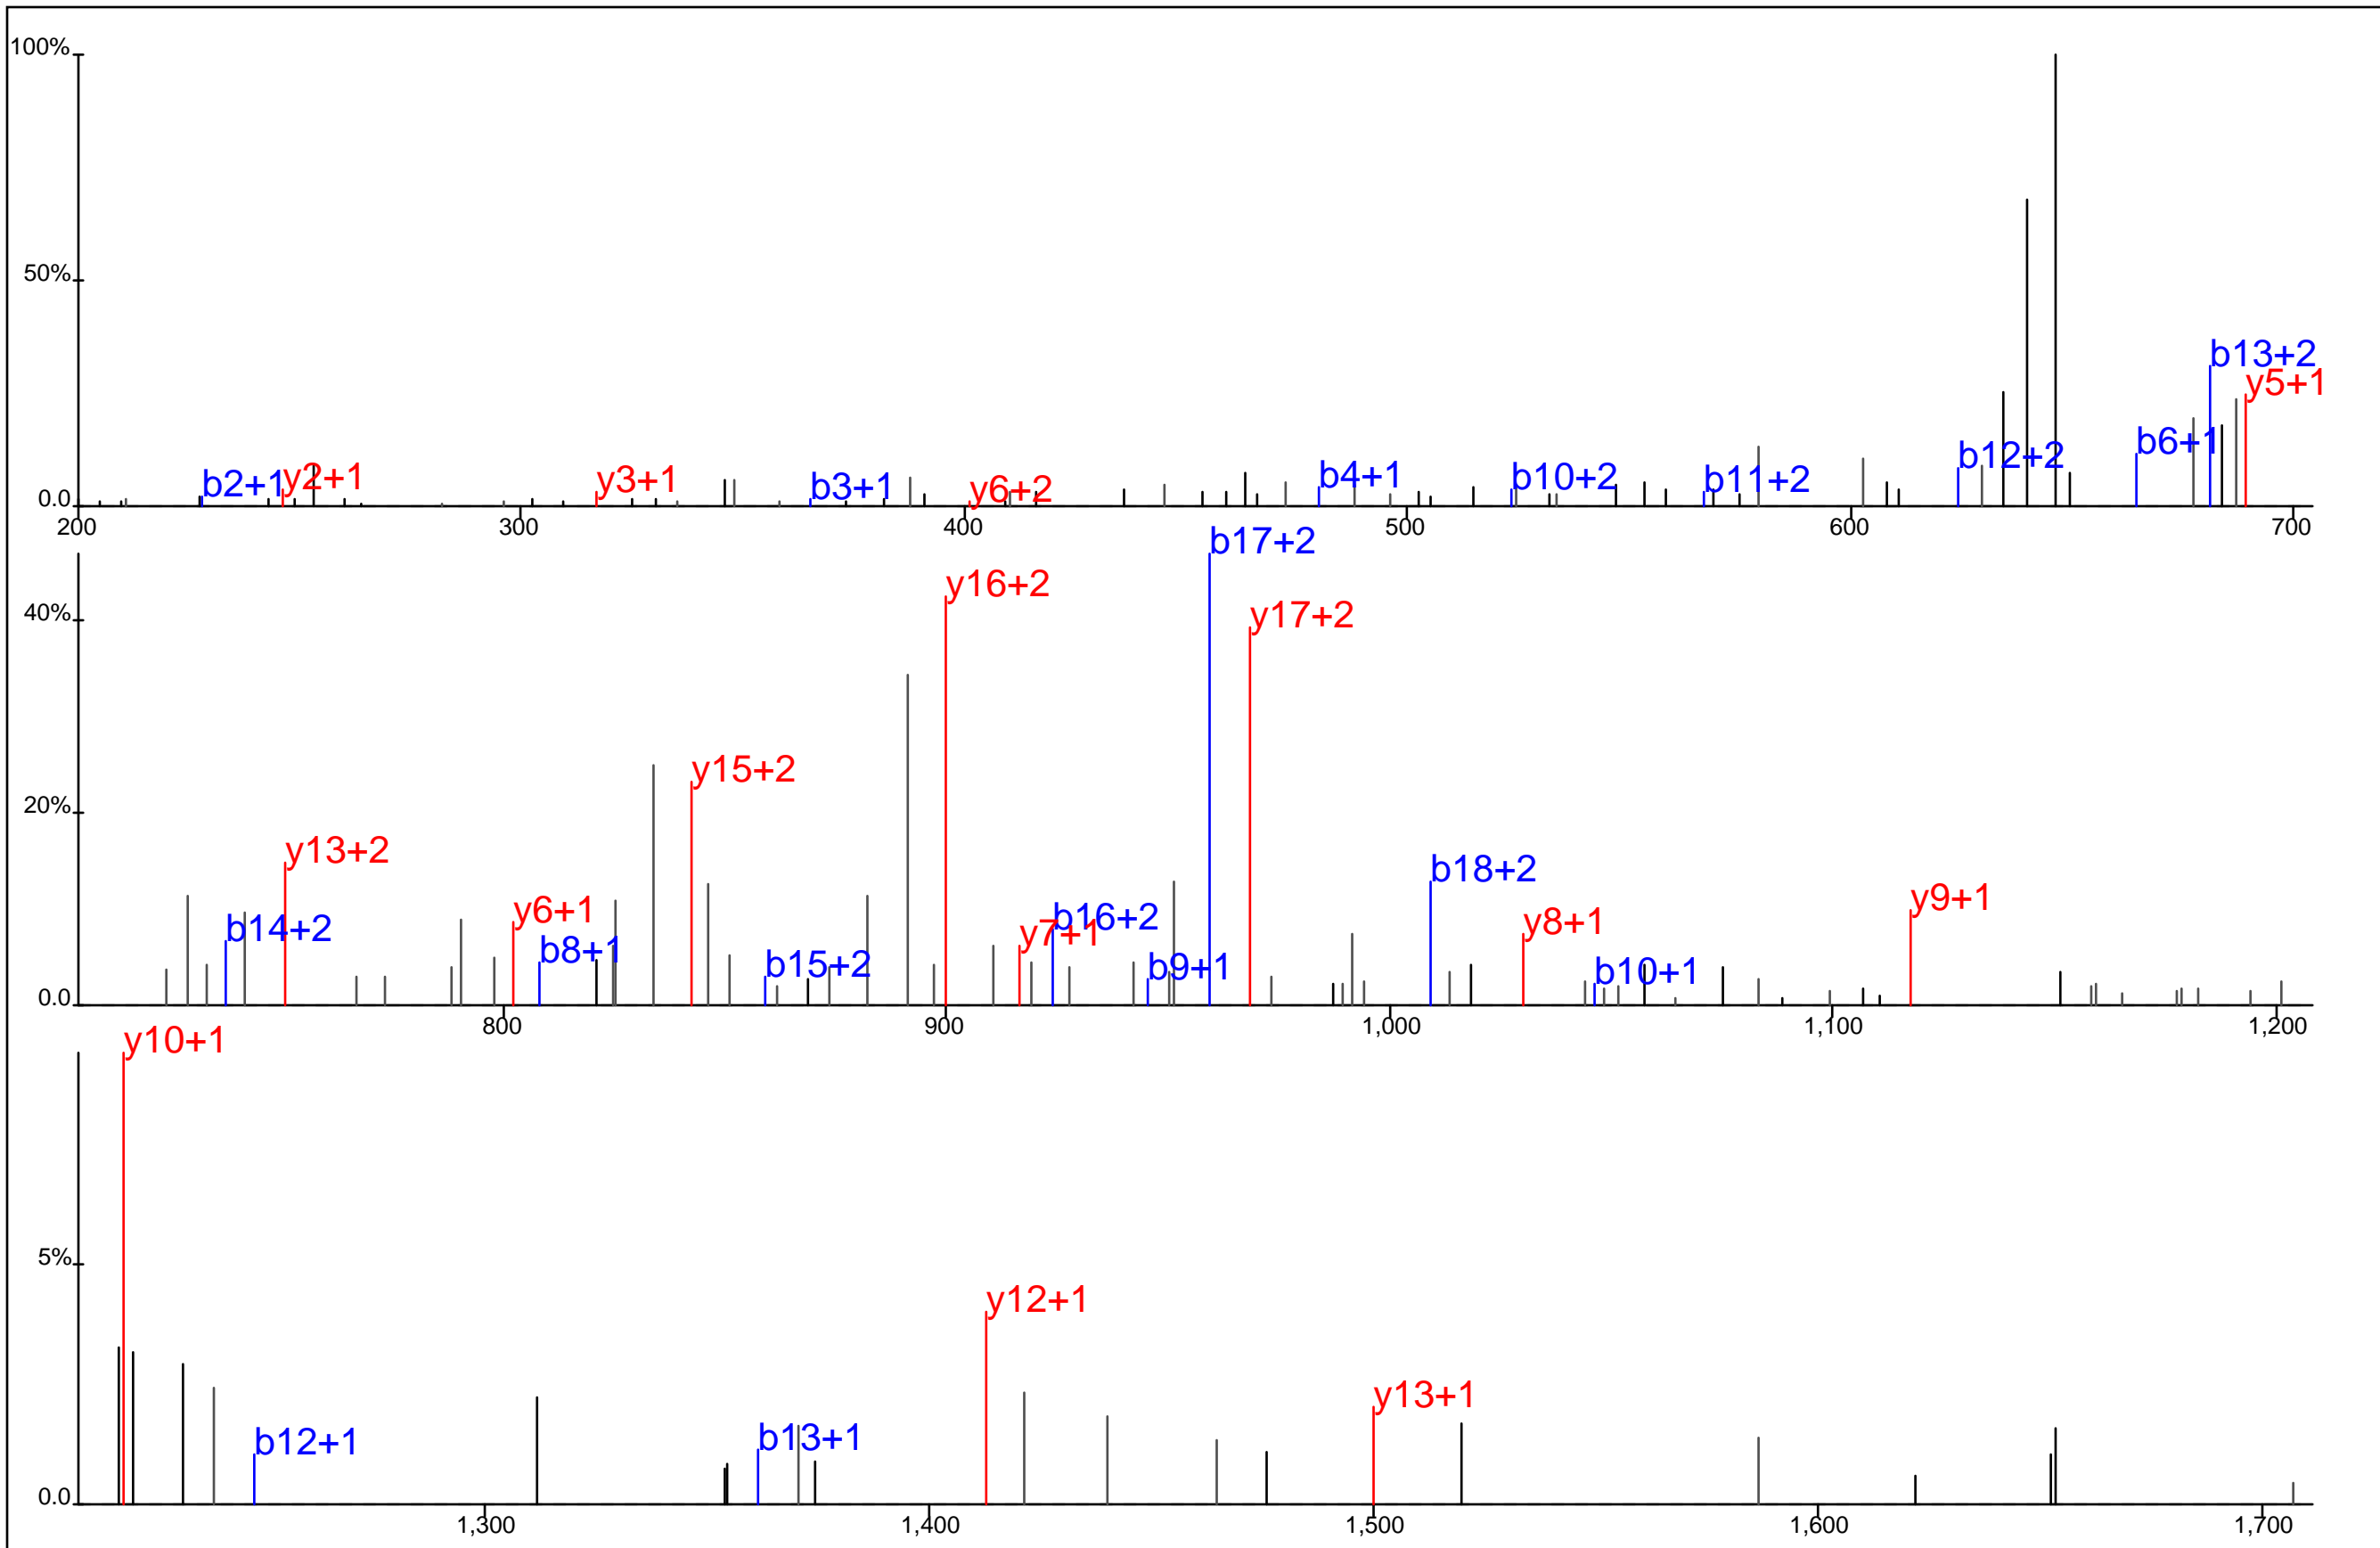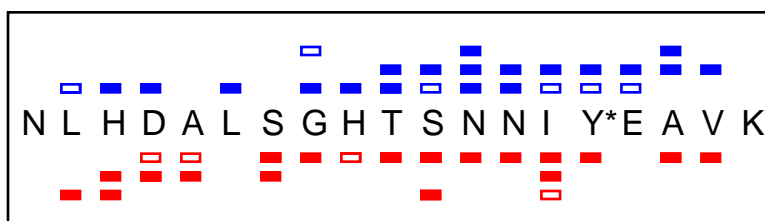

Protein Name: Elongation protein 3  
 gi Accession: 0  
 Precursor Mass: 721.6672+3  
 Delta Mass: 0.172 ppm  
 XCorr: 32.19

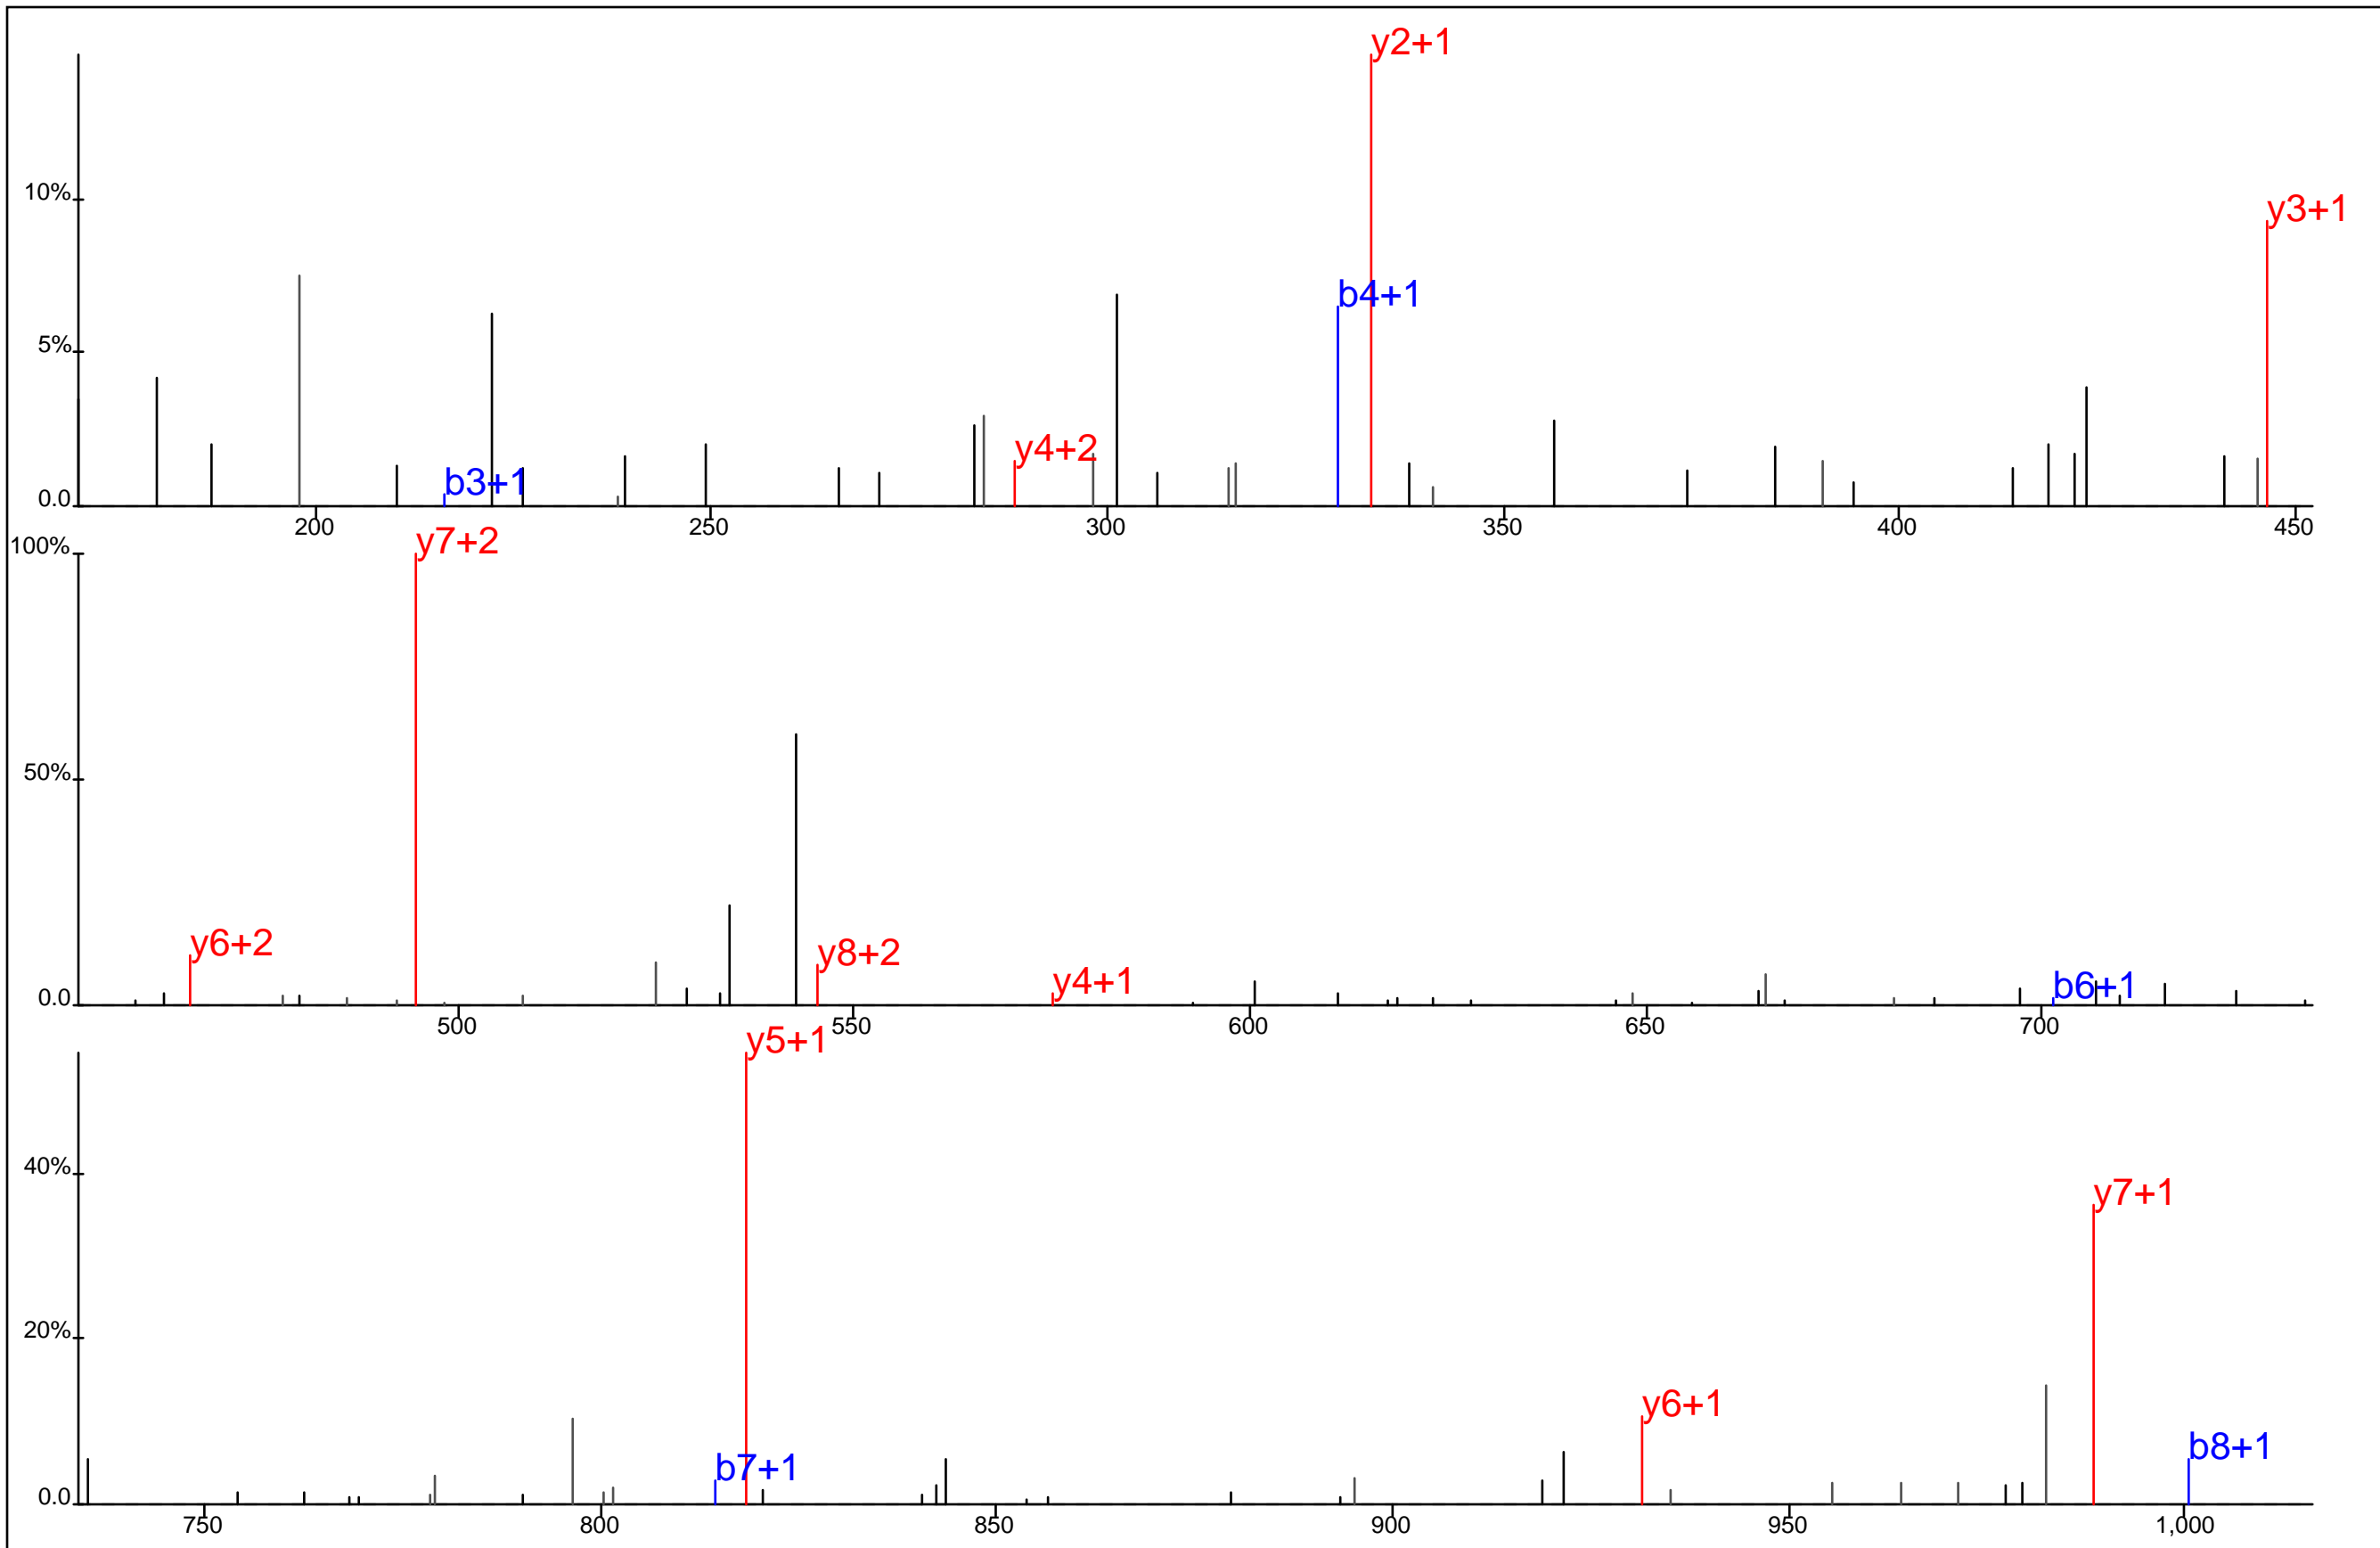

■ ■ ■ ■ ■ ■ ■  
 G T G L Y\* E L W K  
■ ■ ■ ■ ■ ■ ■

Protein Name: Elongation protein 3  
 gi Accession: 0  
 Precursor Mass: 573.7655+2  
 Delta Mass: 0.565 ppm  
 XCorr: 25.72



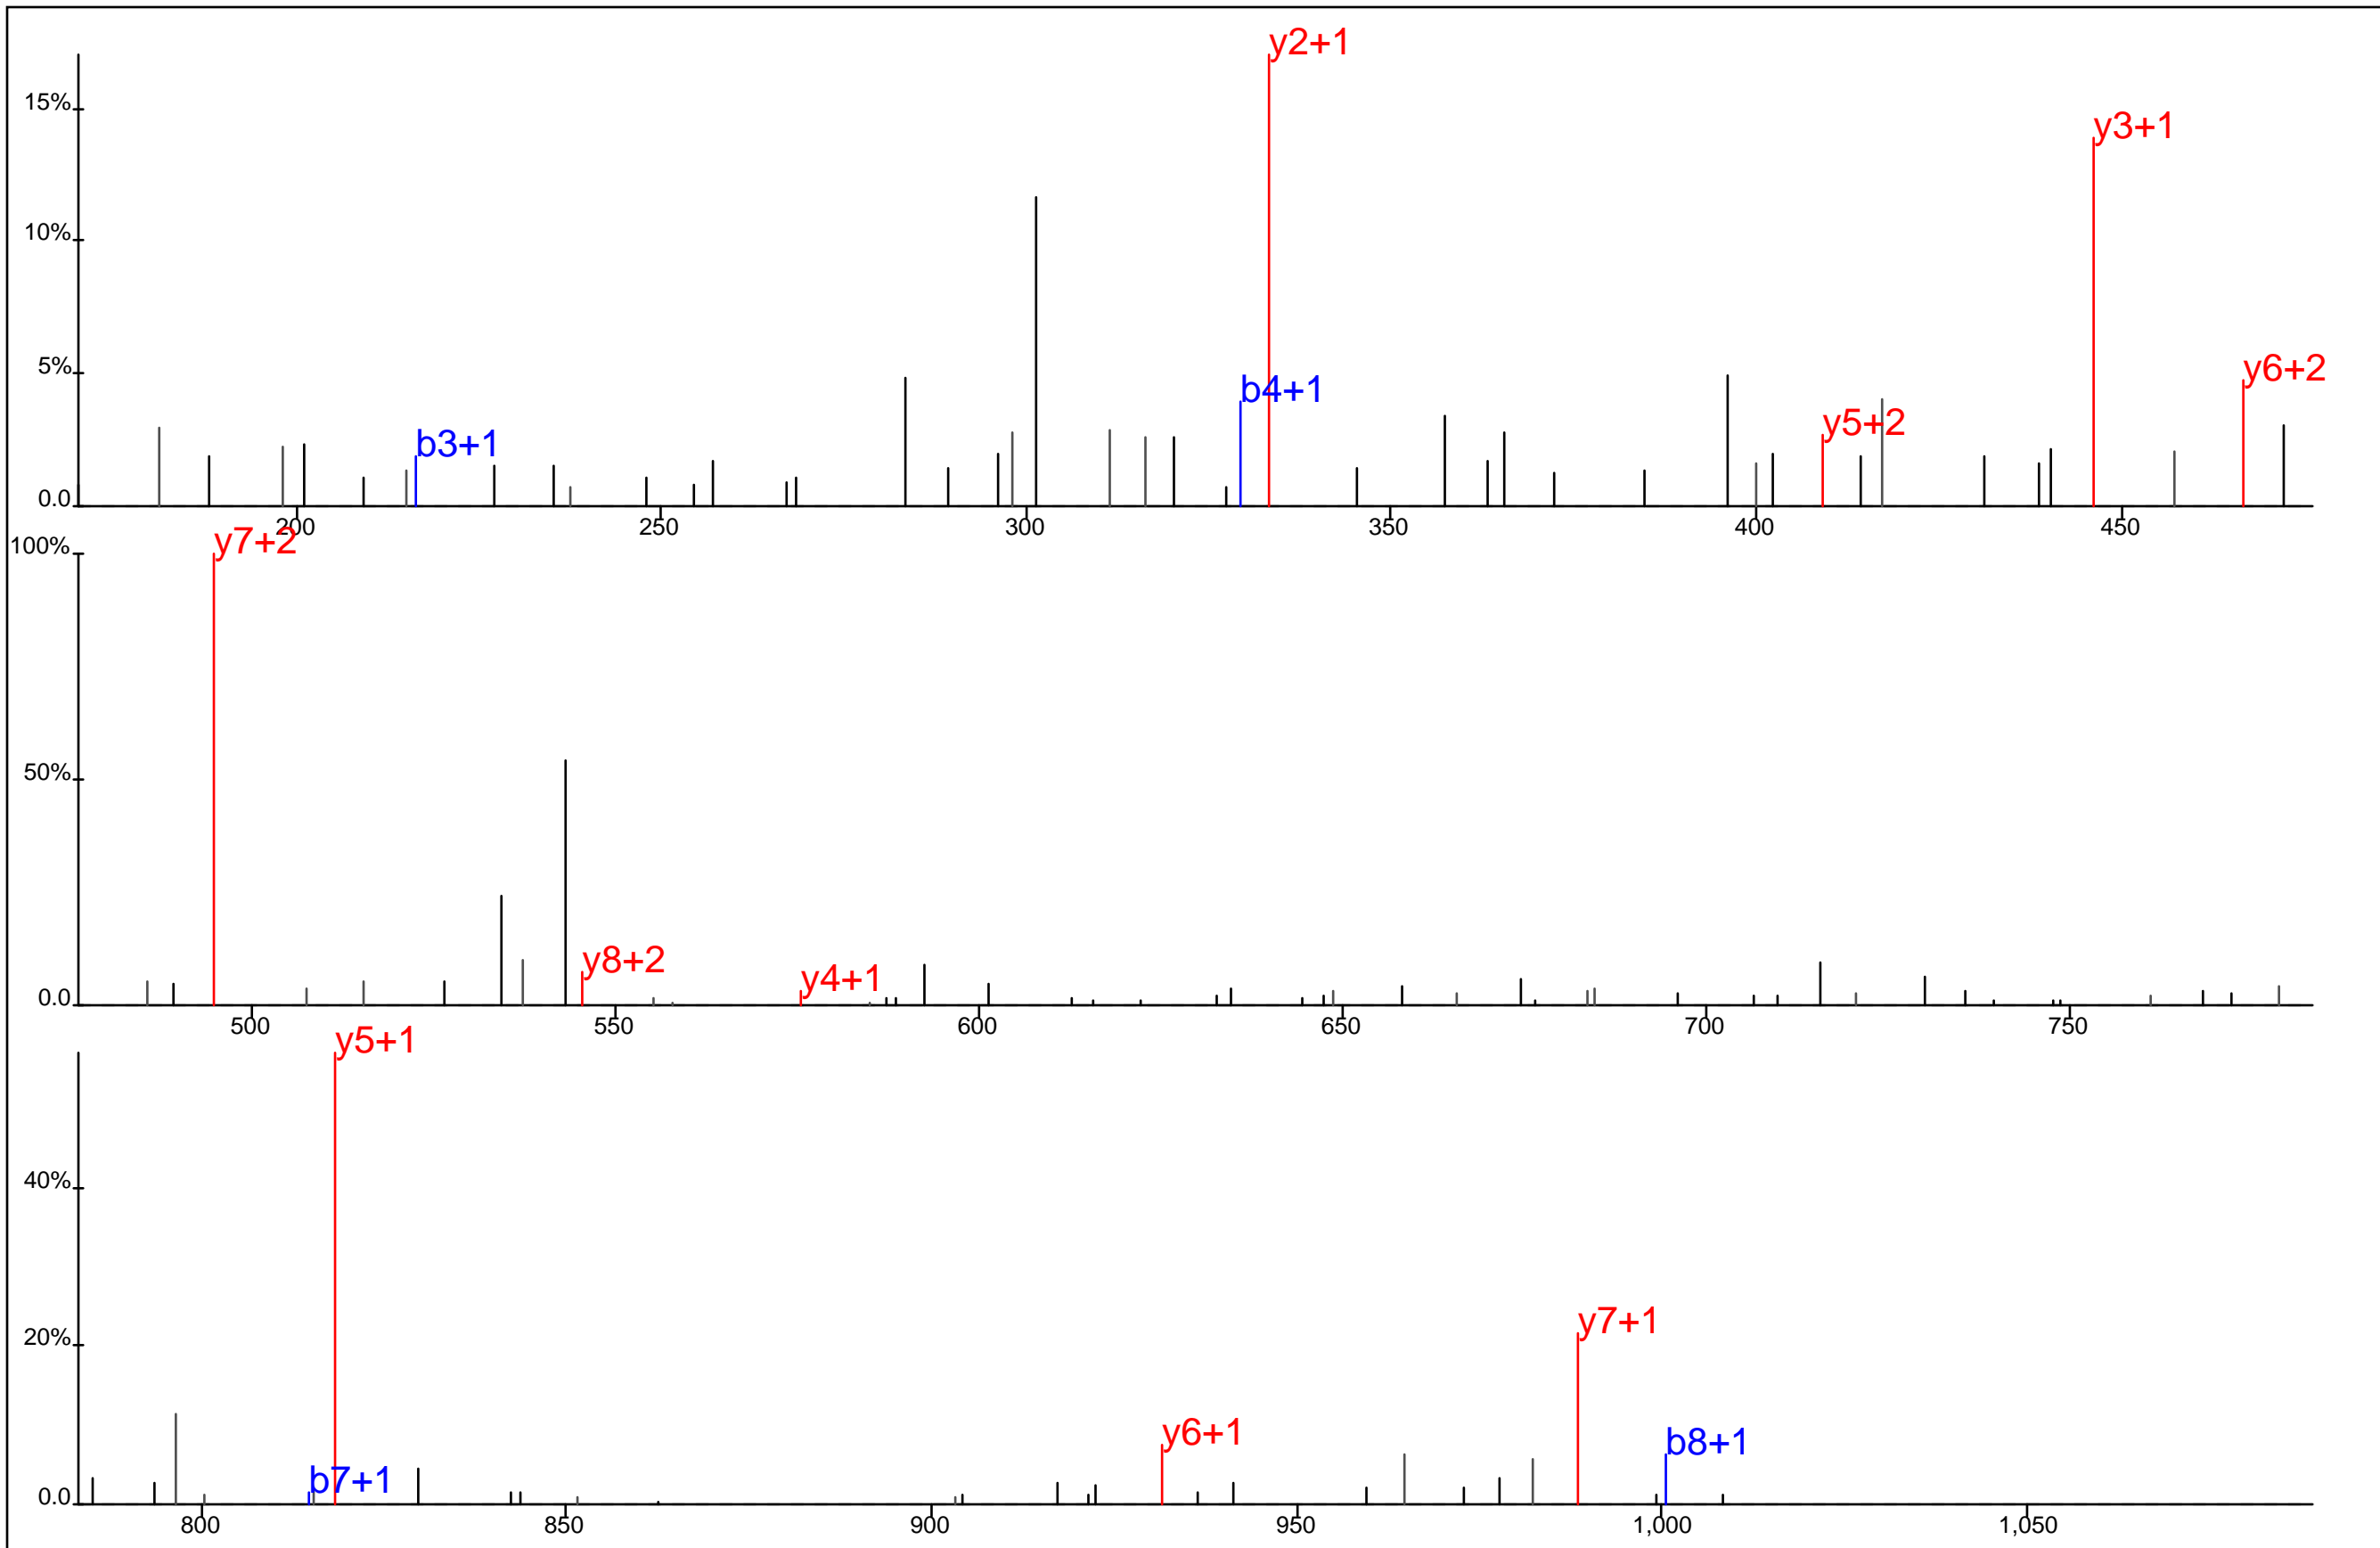

■ ■ □ □ □ ■  
 G T G L Y\* E L W K  
■ □ □ □ □ ■

Protein Name: Elongation protein 3  
 gi Accession: 0  
 Precursor Mass: 573.7659+2  
 Delta Mass: 1.310 ppm  
 XCorr: 43.37

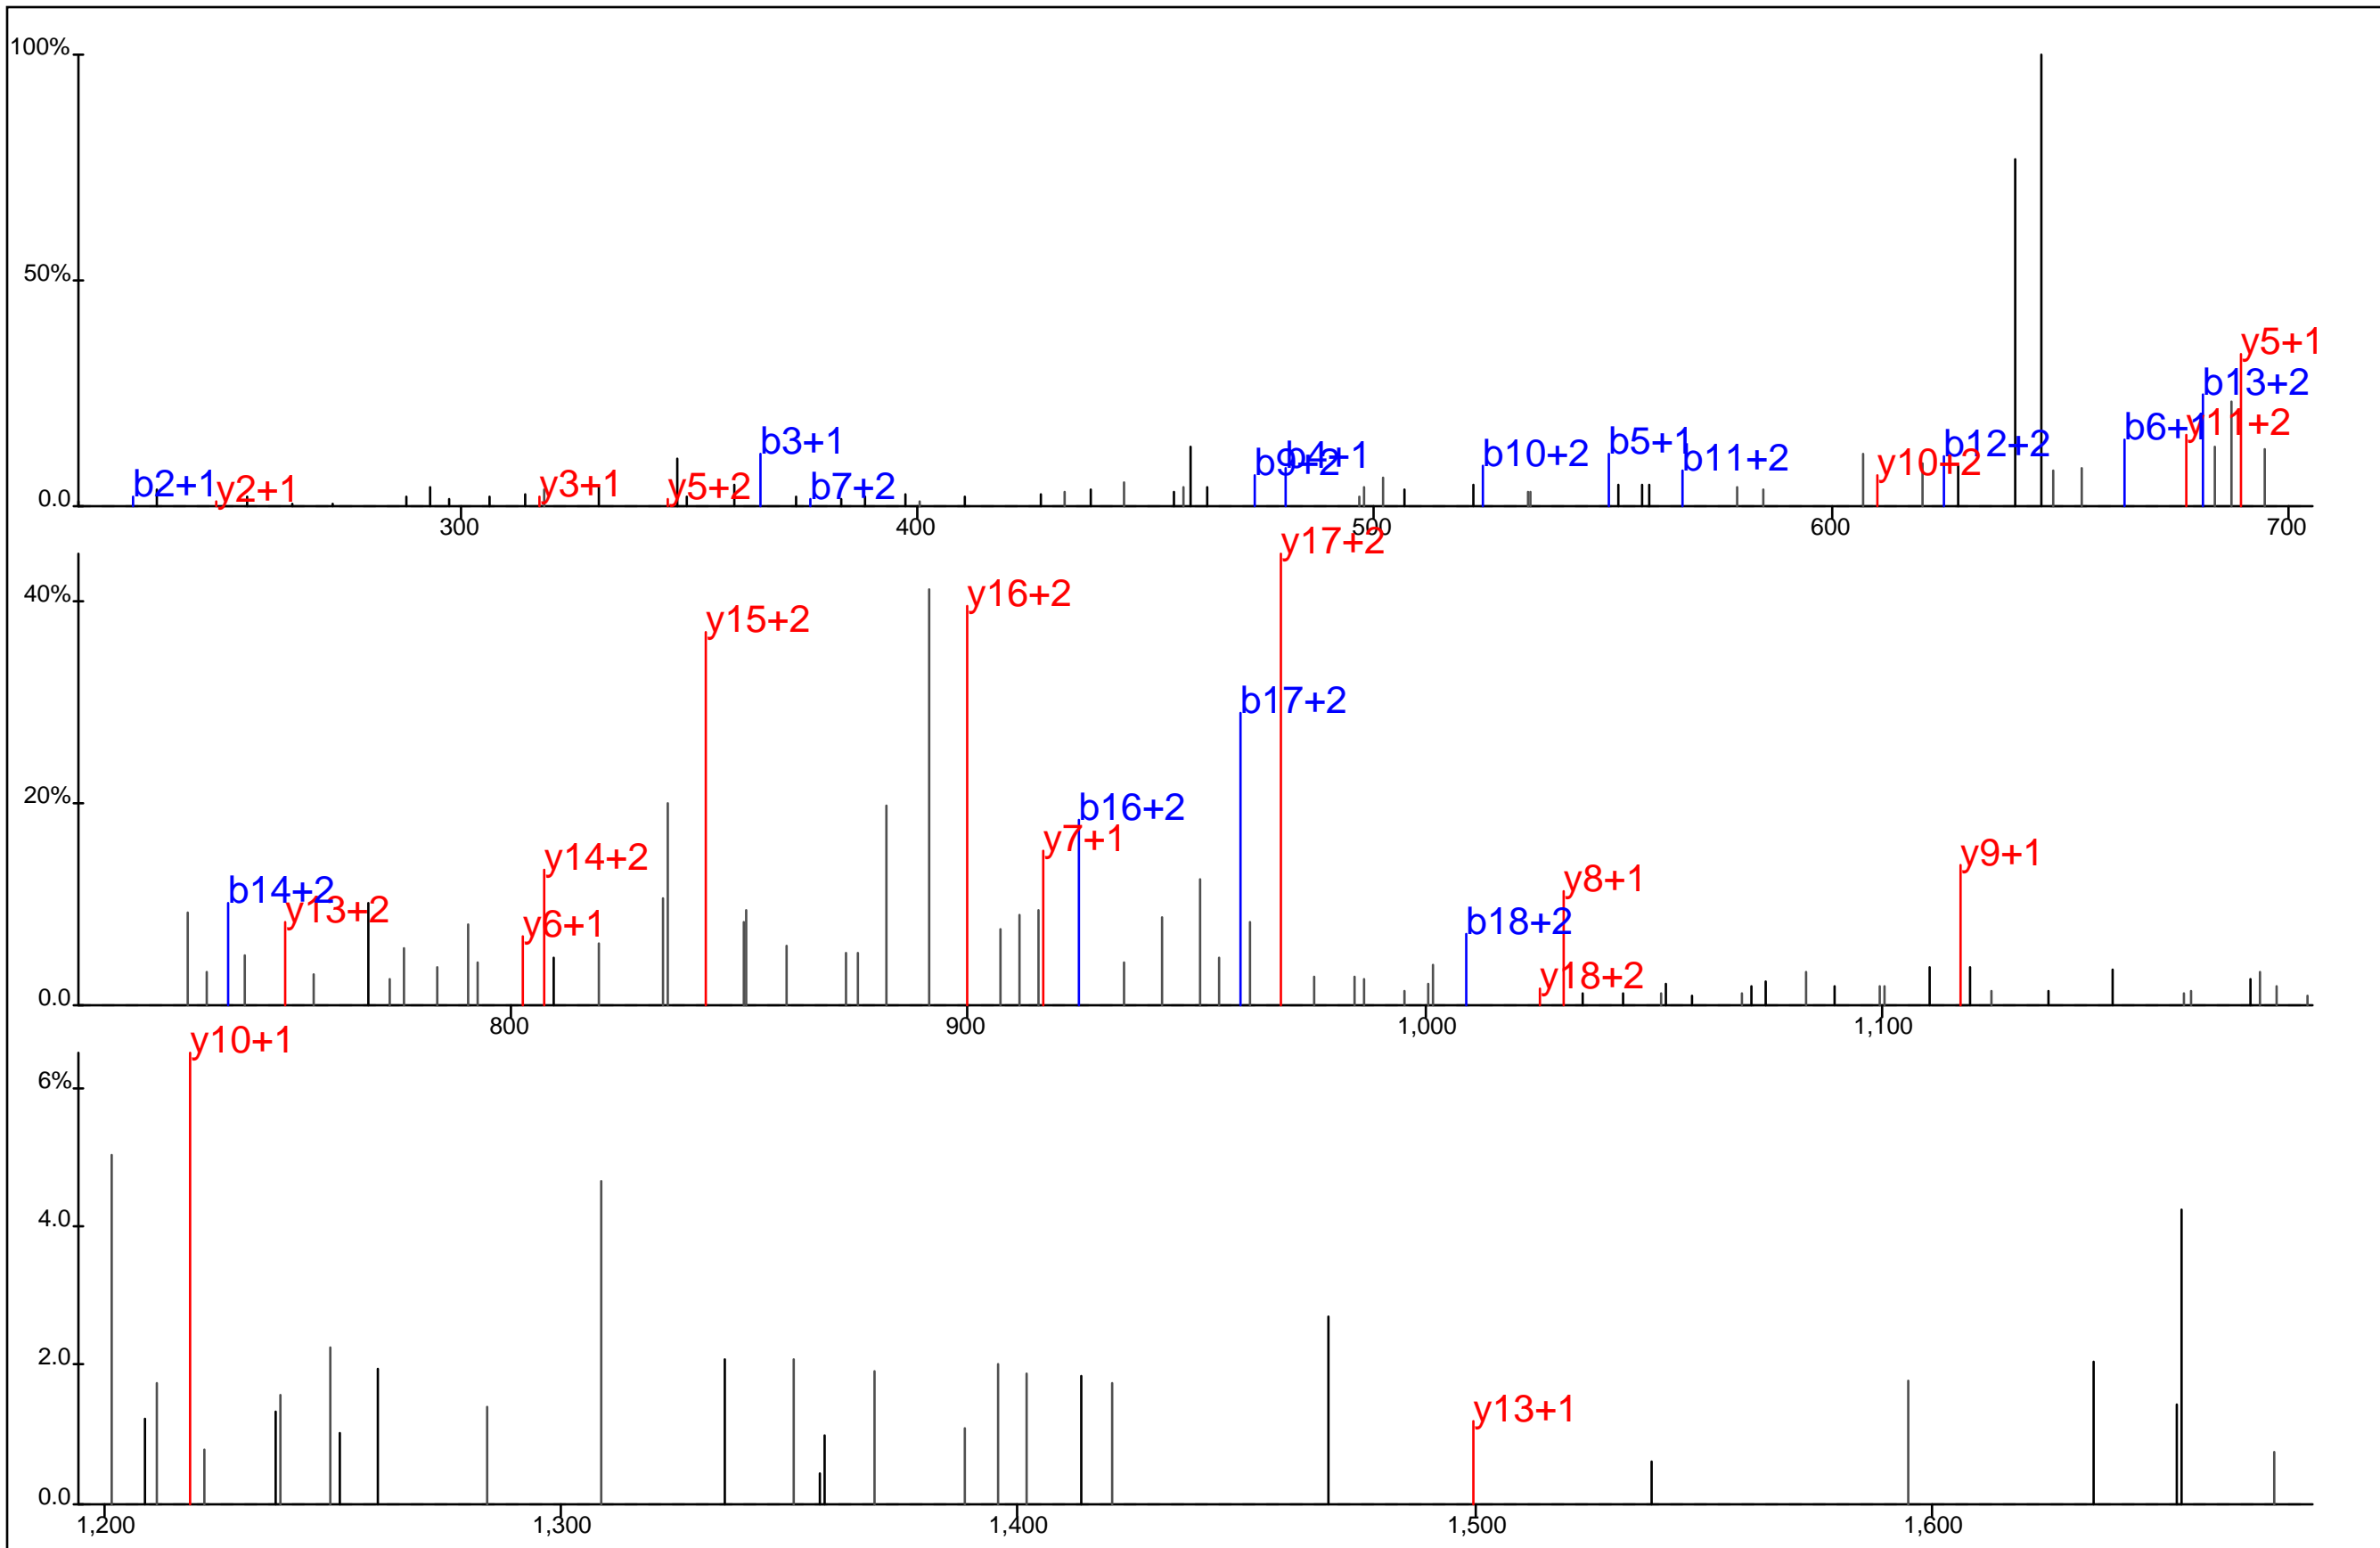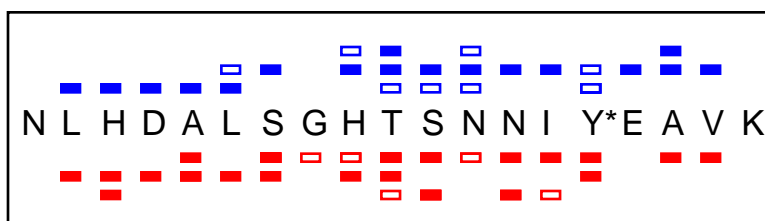

Protein Name: Elongation protein 3  
 gi Accession: 0  
 Precursor Mass: 721.6685+3  
 Delta Mass: 1.950 ppm  
 XCorr: 44.09

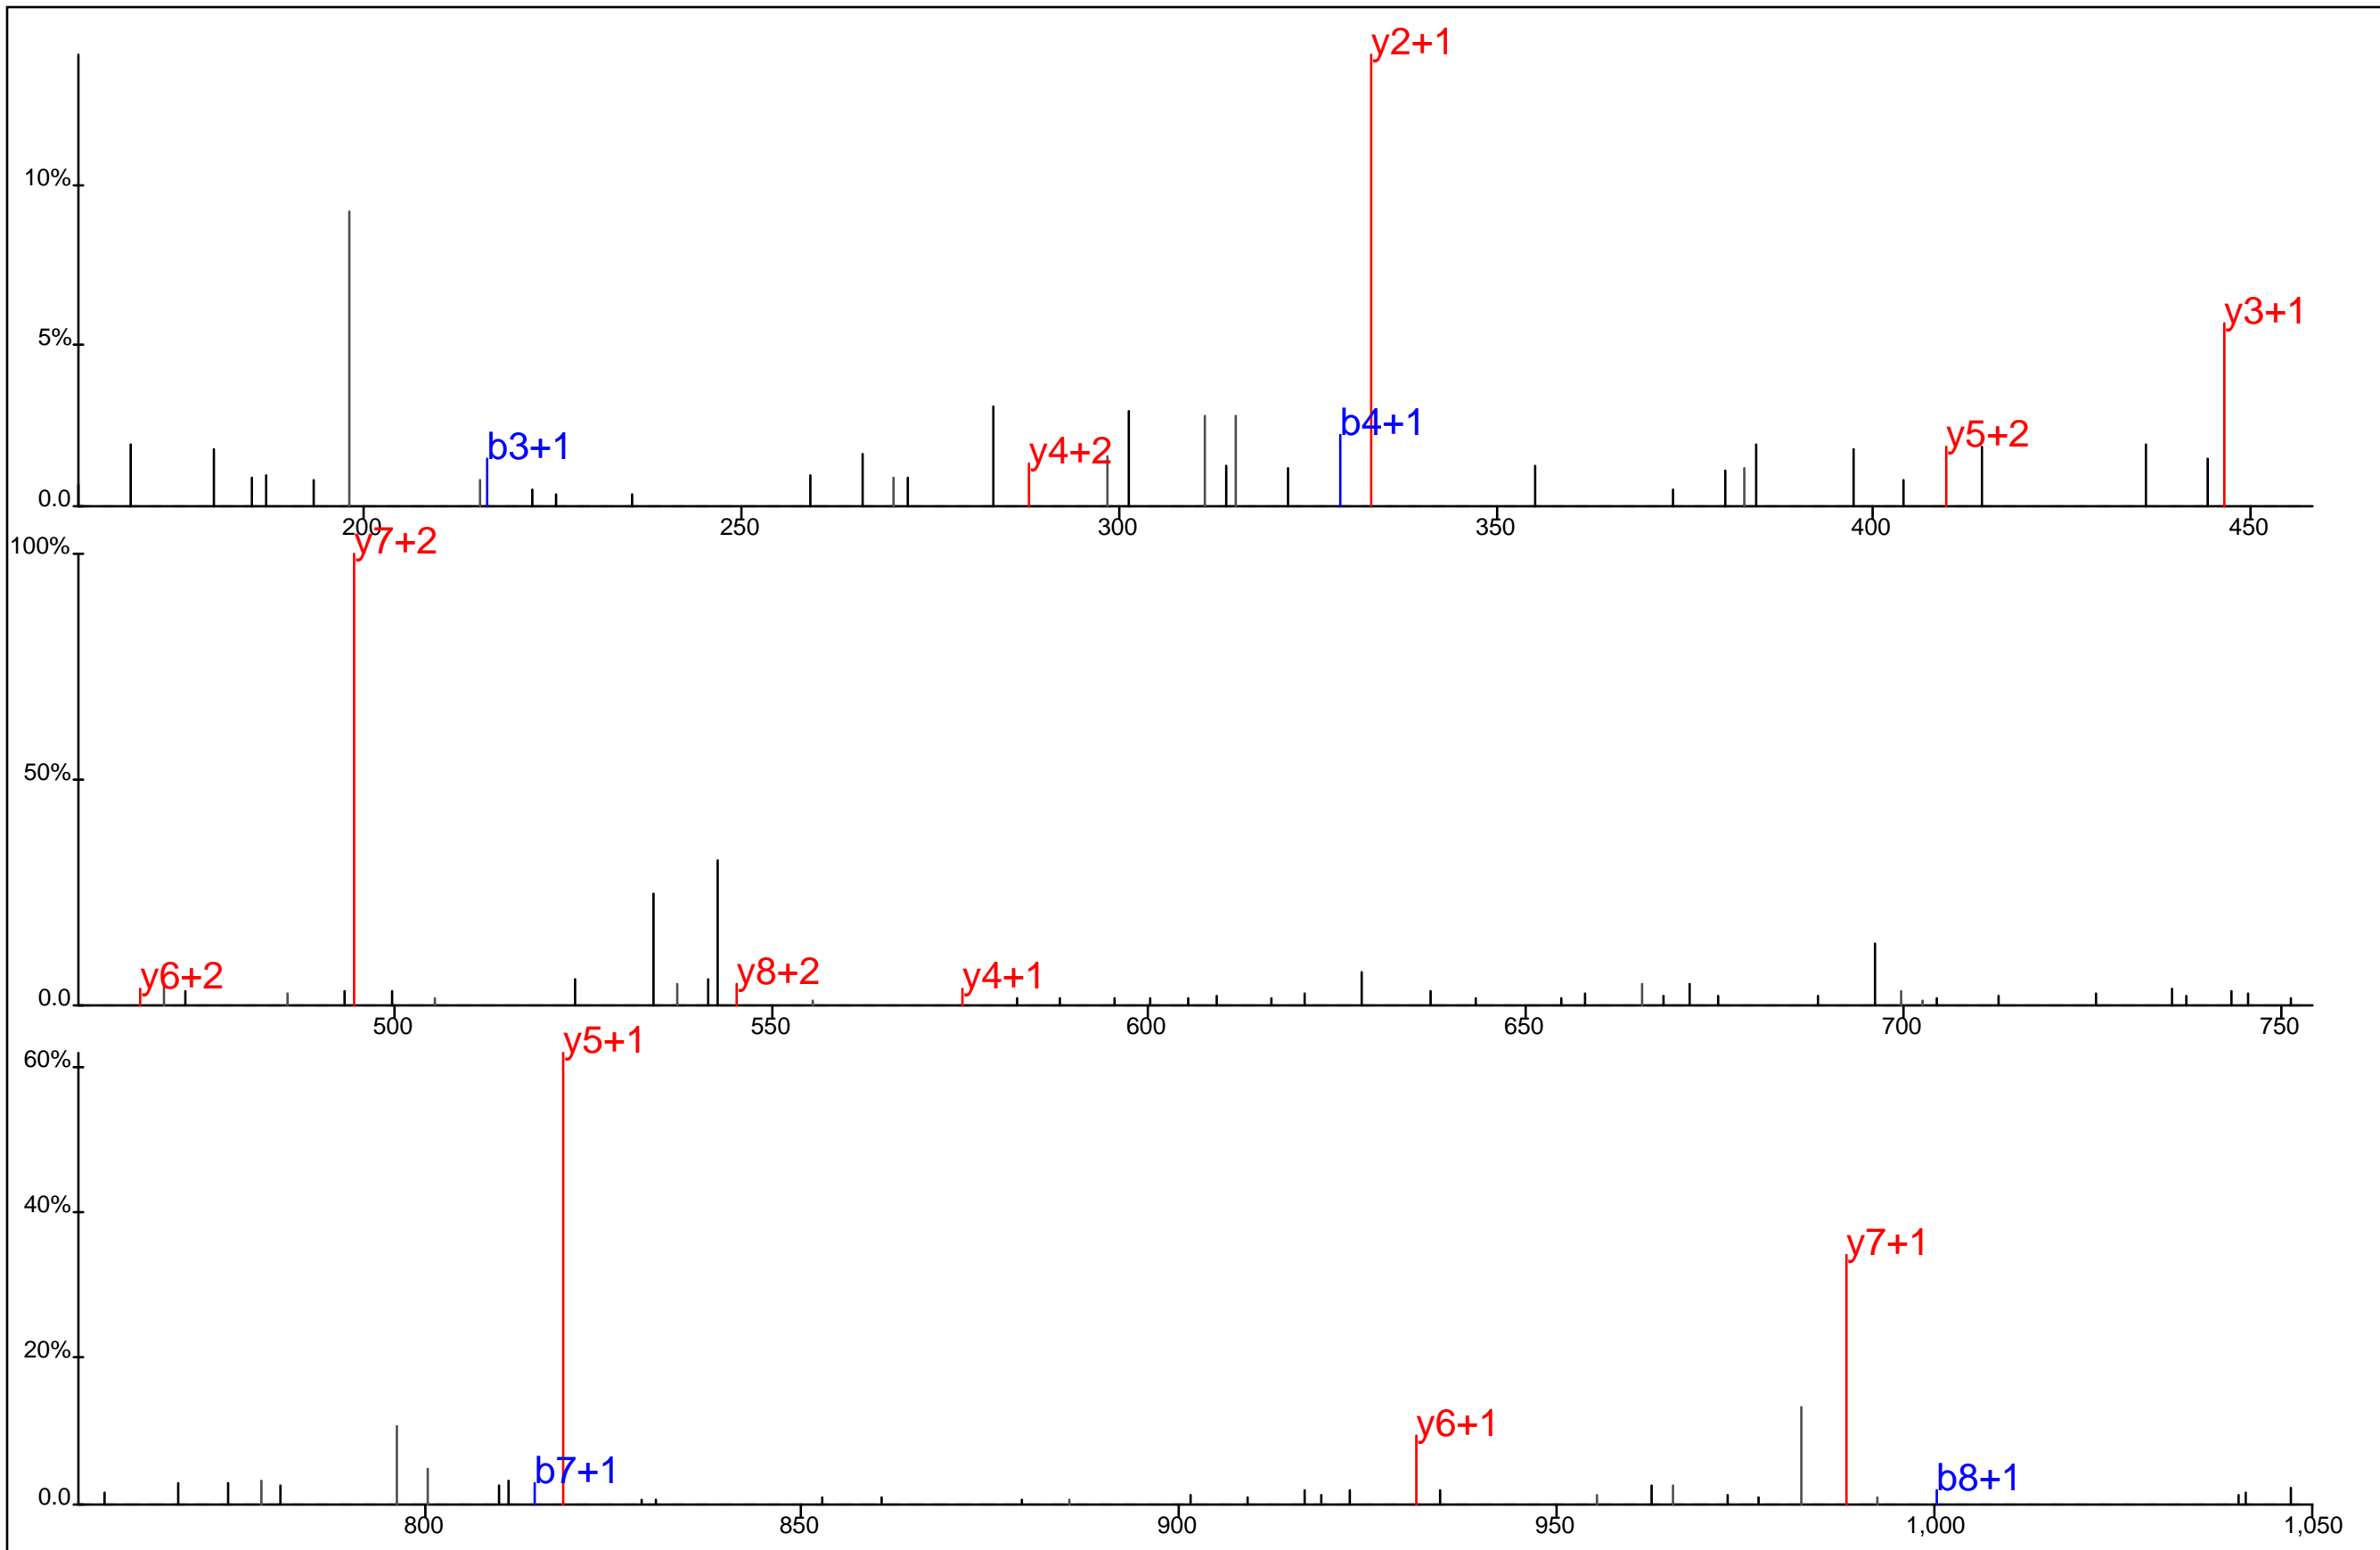

GTGLY\*ELWK

Protein Name: Elongation protein 3  
 gi Accession: 0  
 Precursor Mass: 573.7656+2  
 Delta Mass: 0.672 ppm  
 XCorr: 32.92



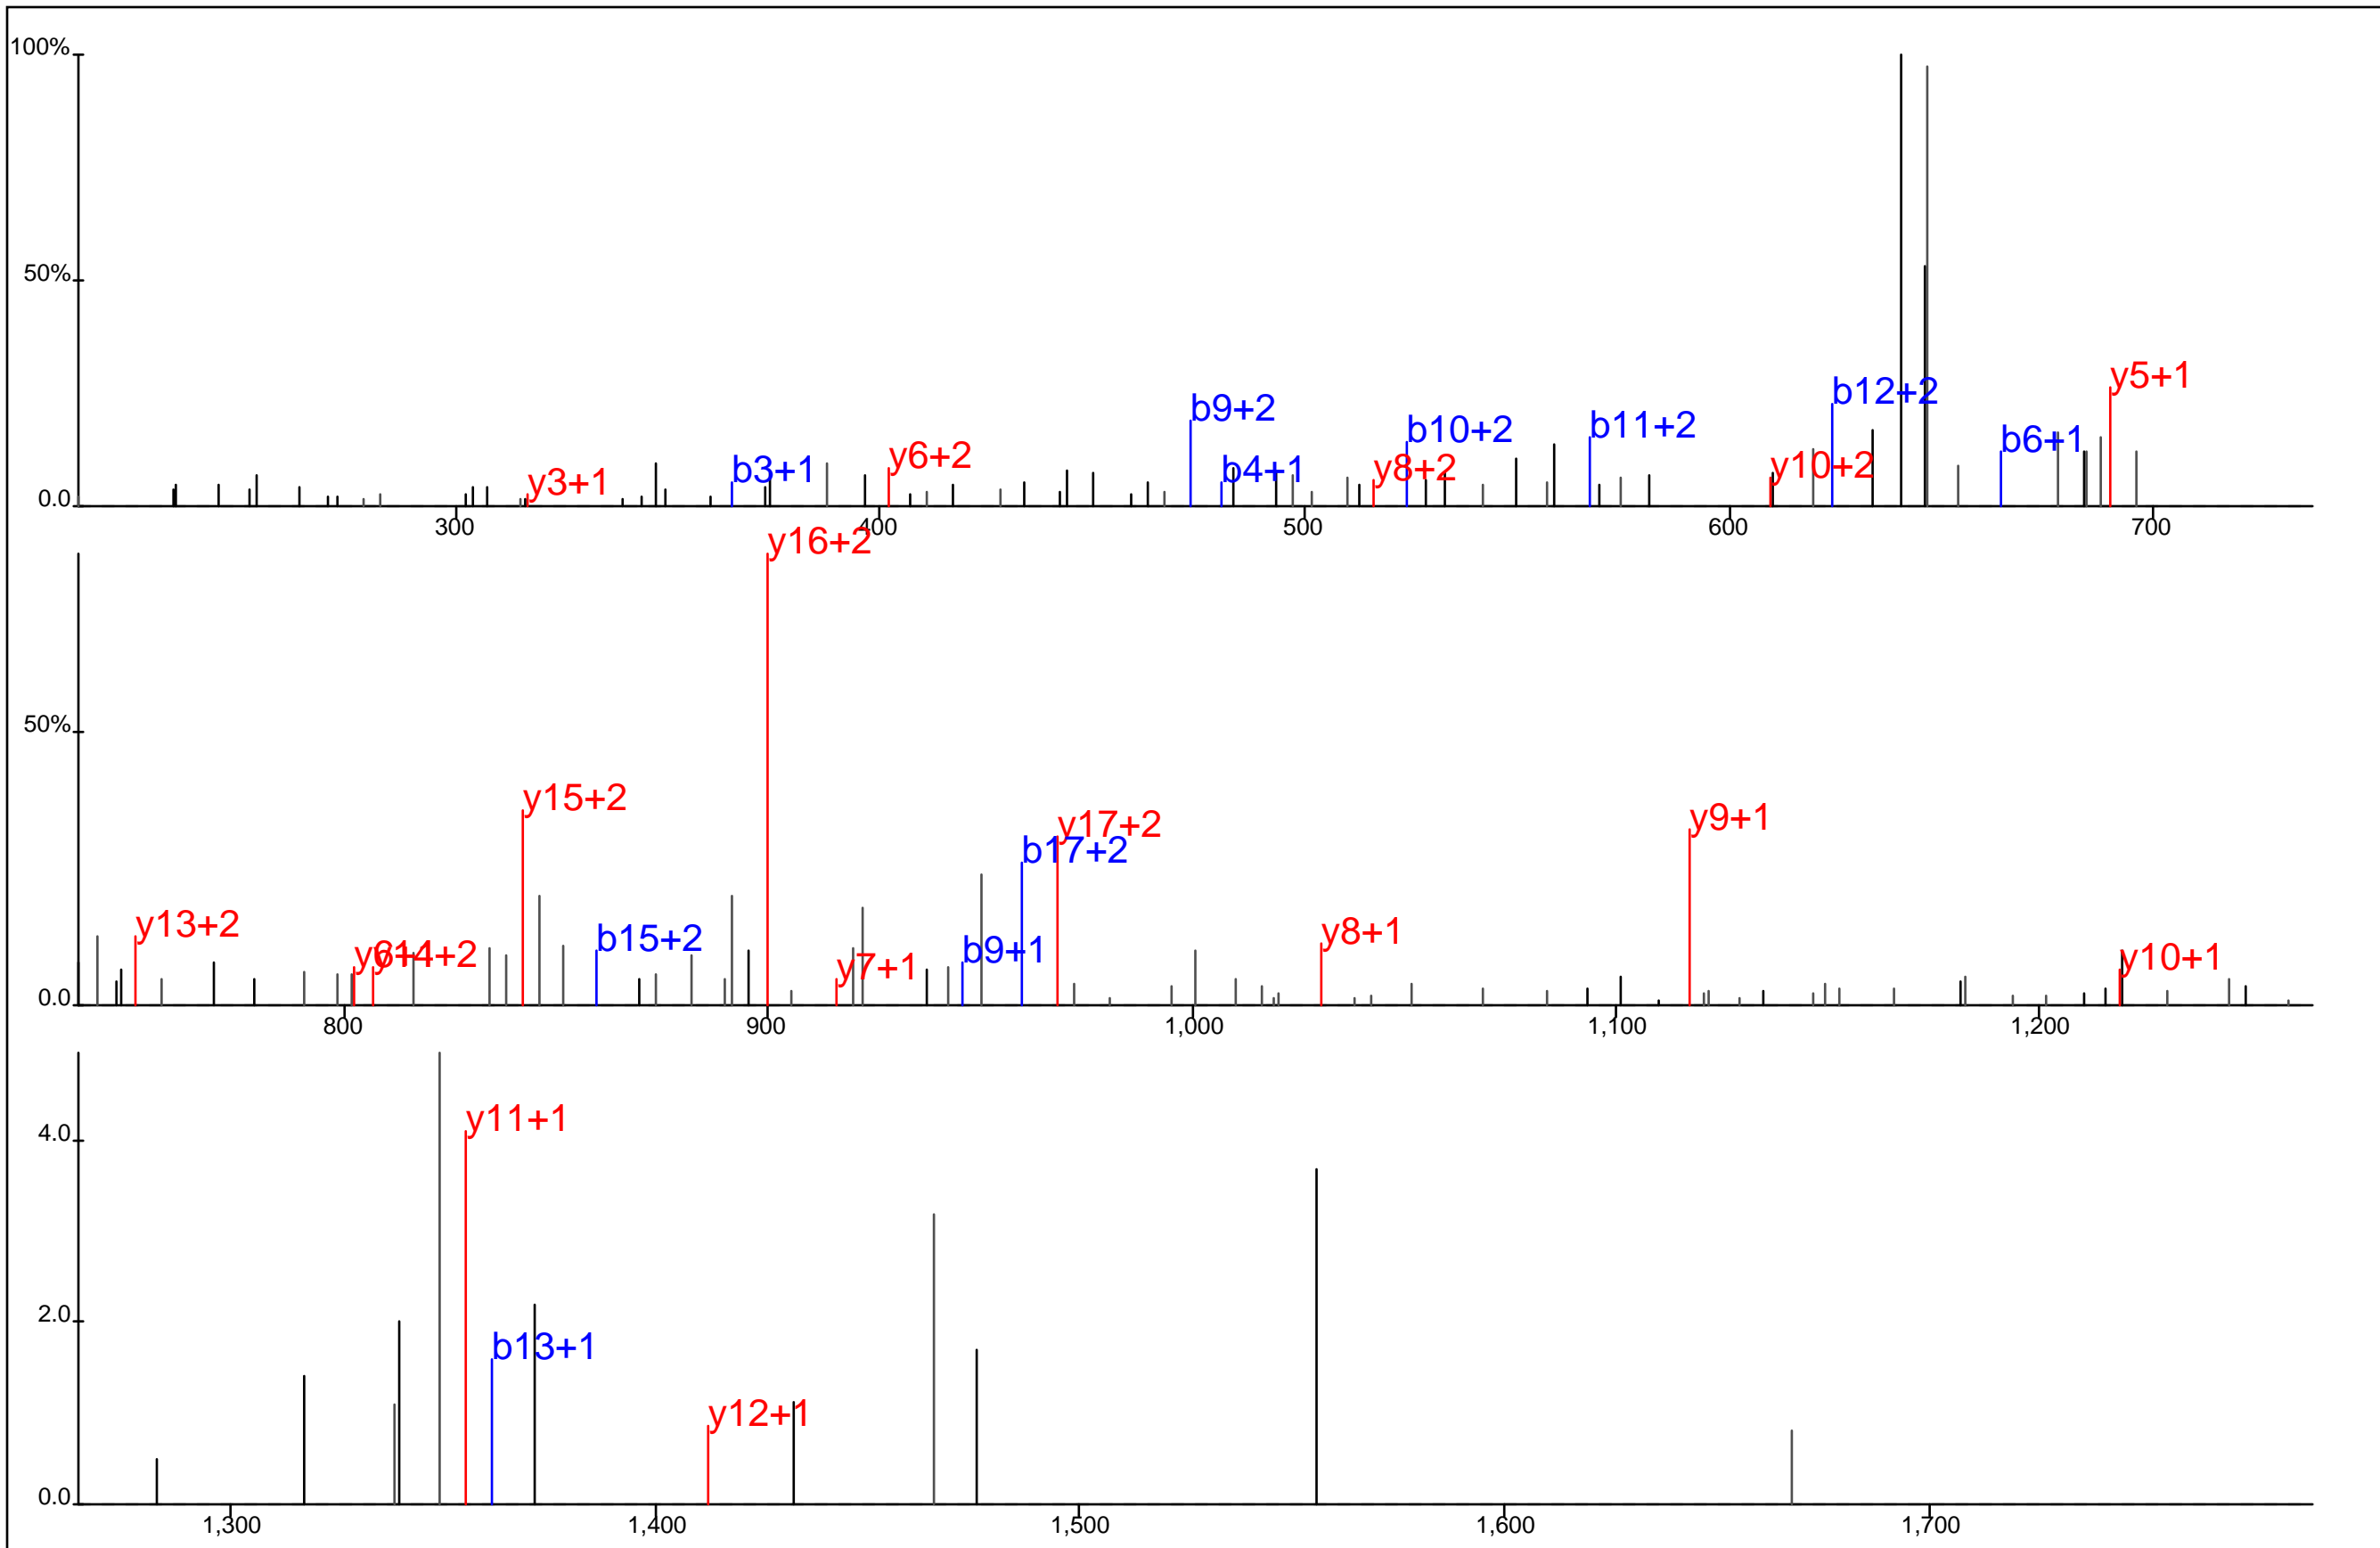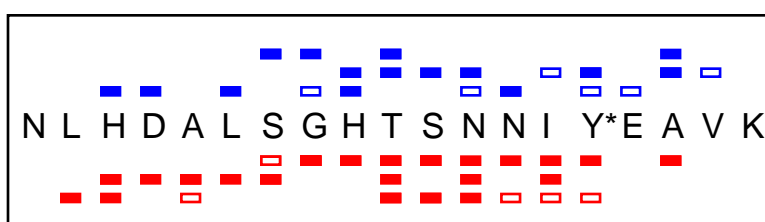

Protein Name: Elongation protein 3  
 gi Accession: 0  
 Precursor Mass: 721.6669+3  
 Delta Mass: 0.252 ppm  
 XCorr: 33.19

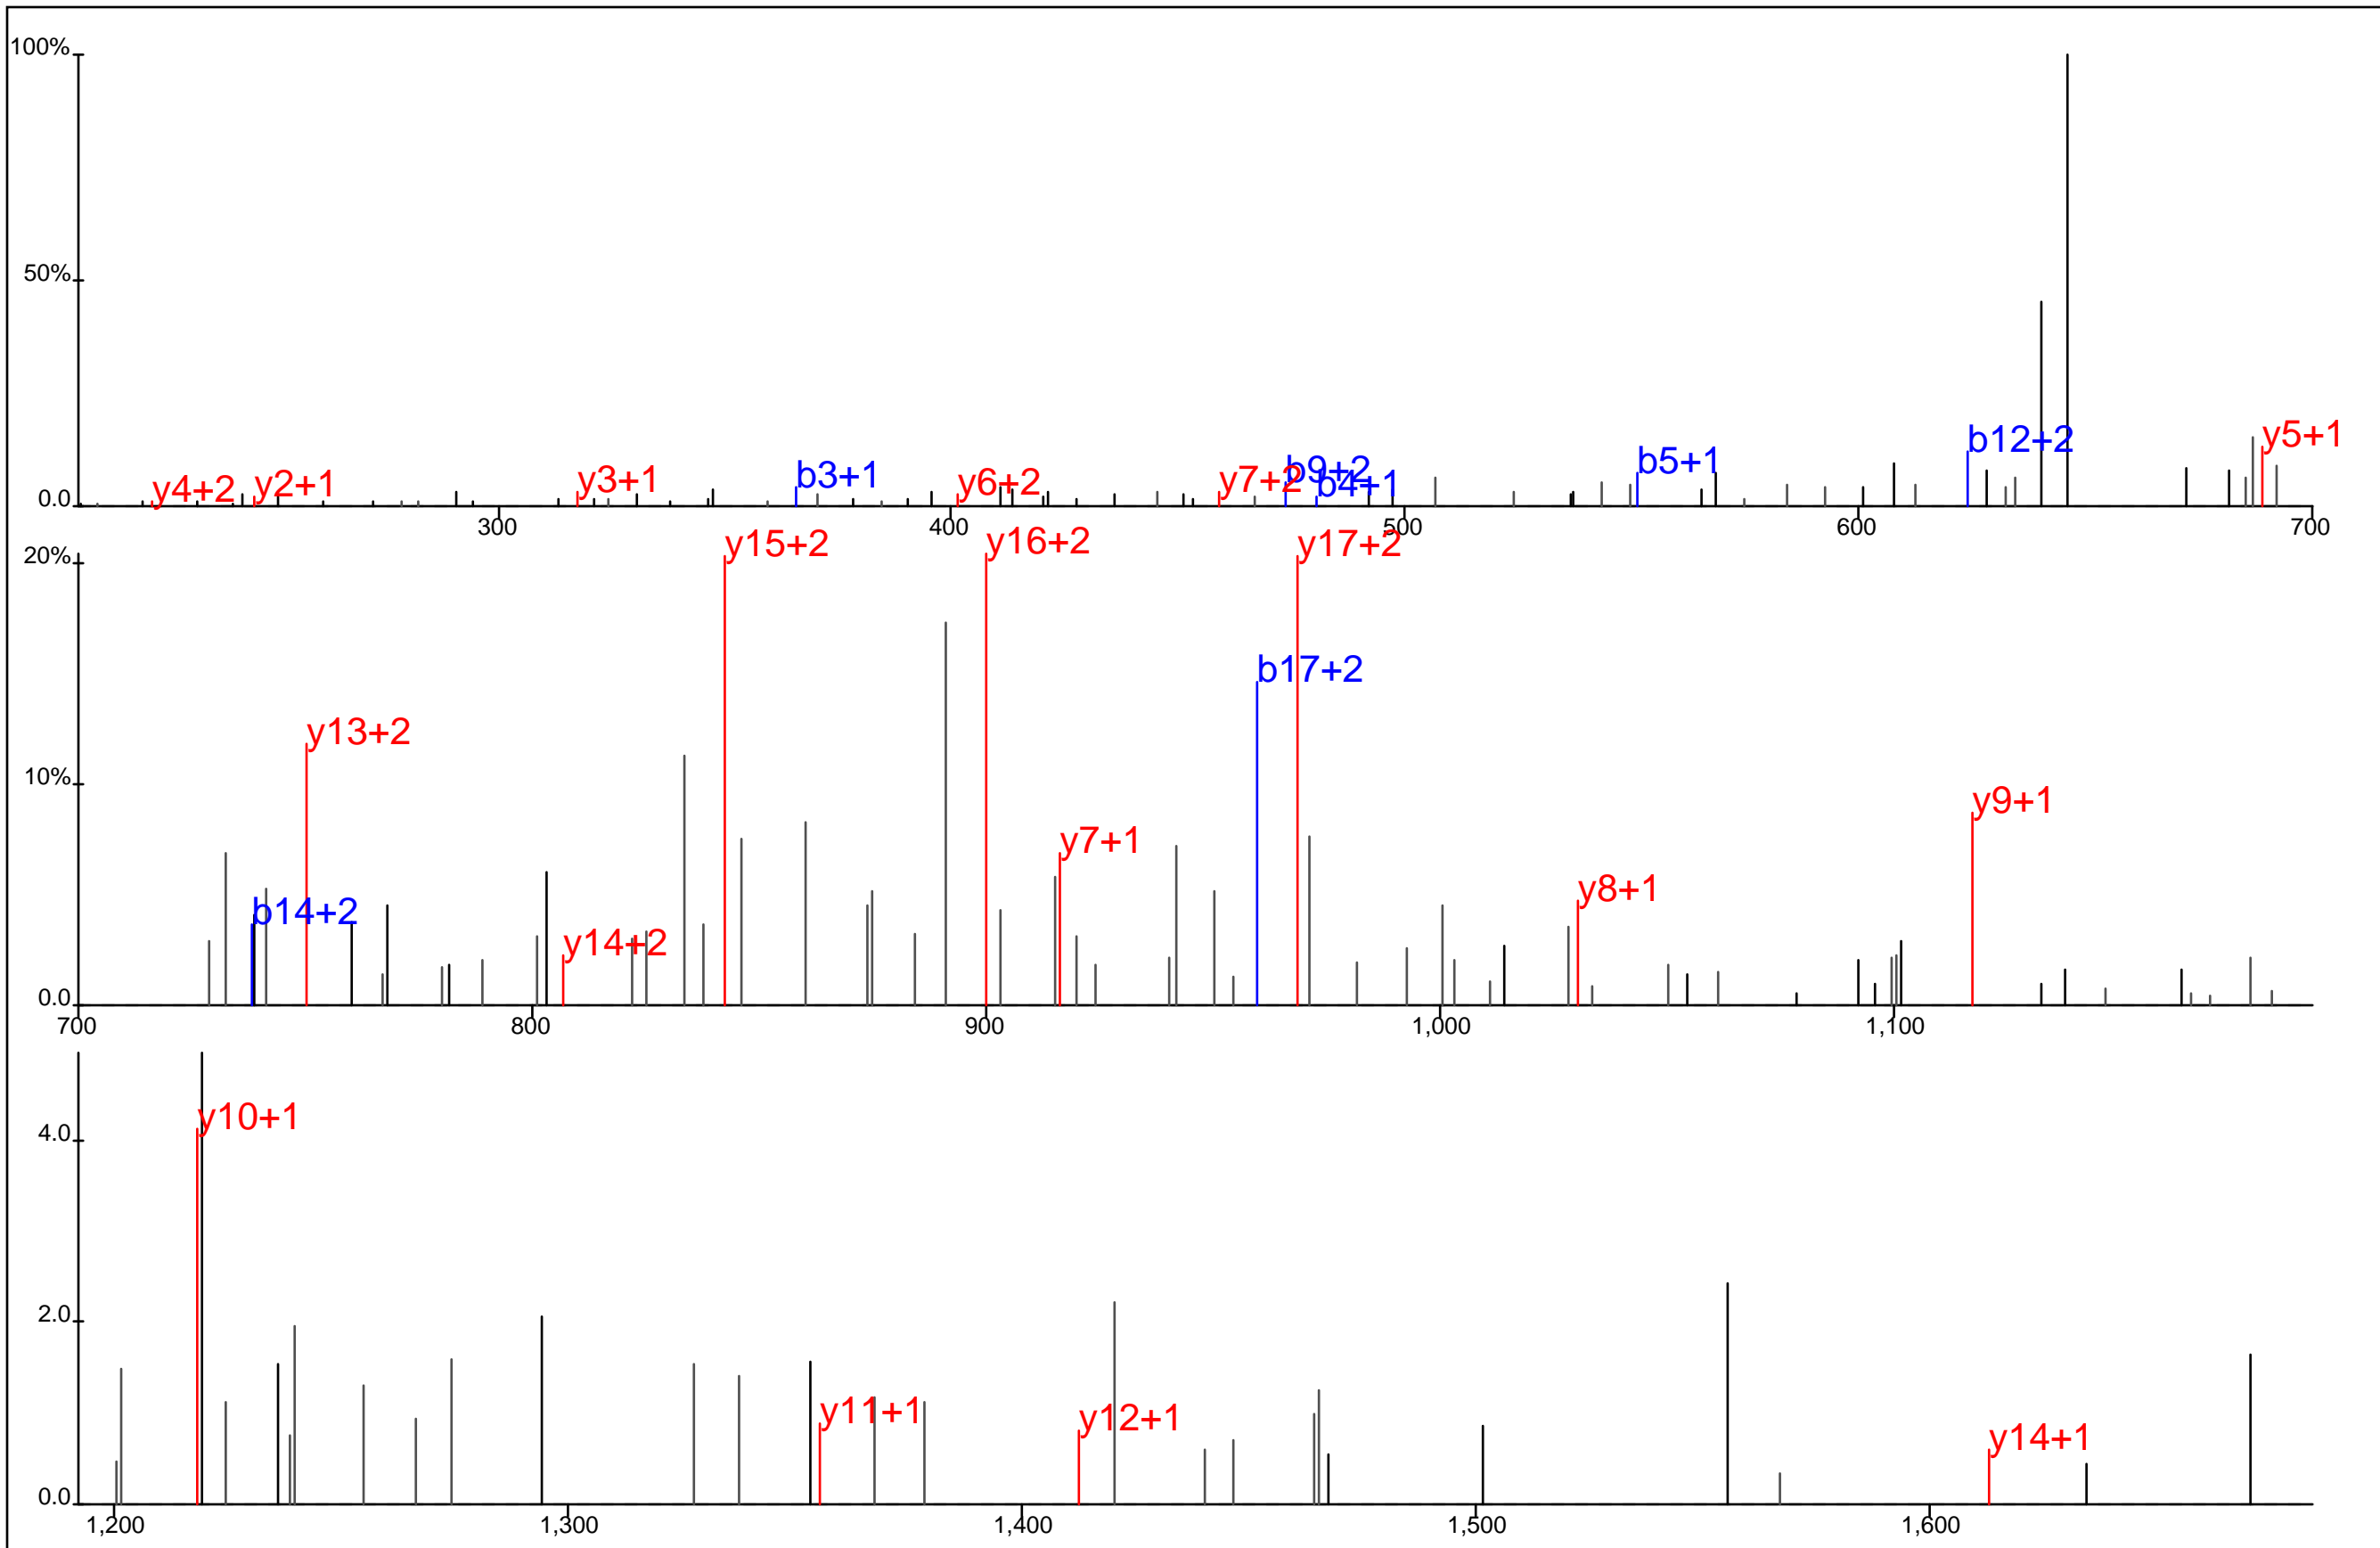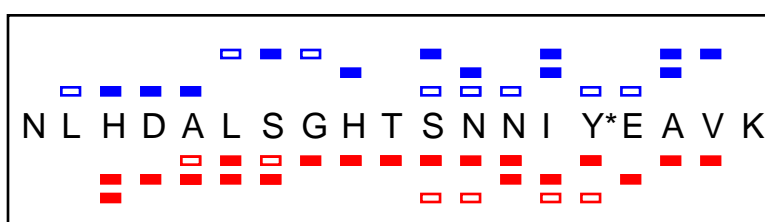

Protein Name: Elongation protein 3  
 gi Accession: 0  
 Precursor Mass: 721.6673+3  
 Delta Mass: 0.341 ppm  
 XCorr: 33.97



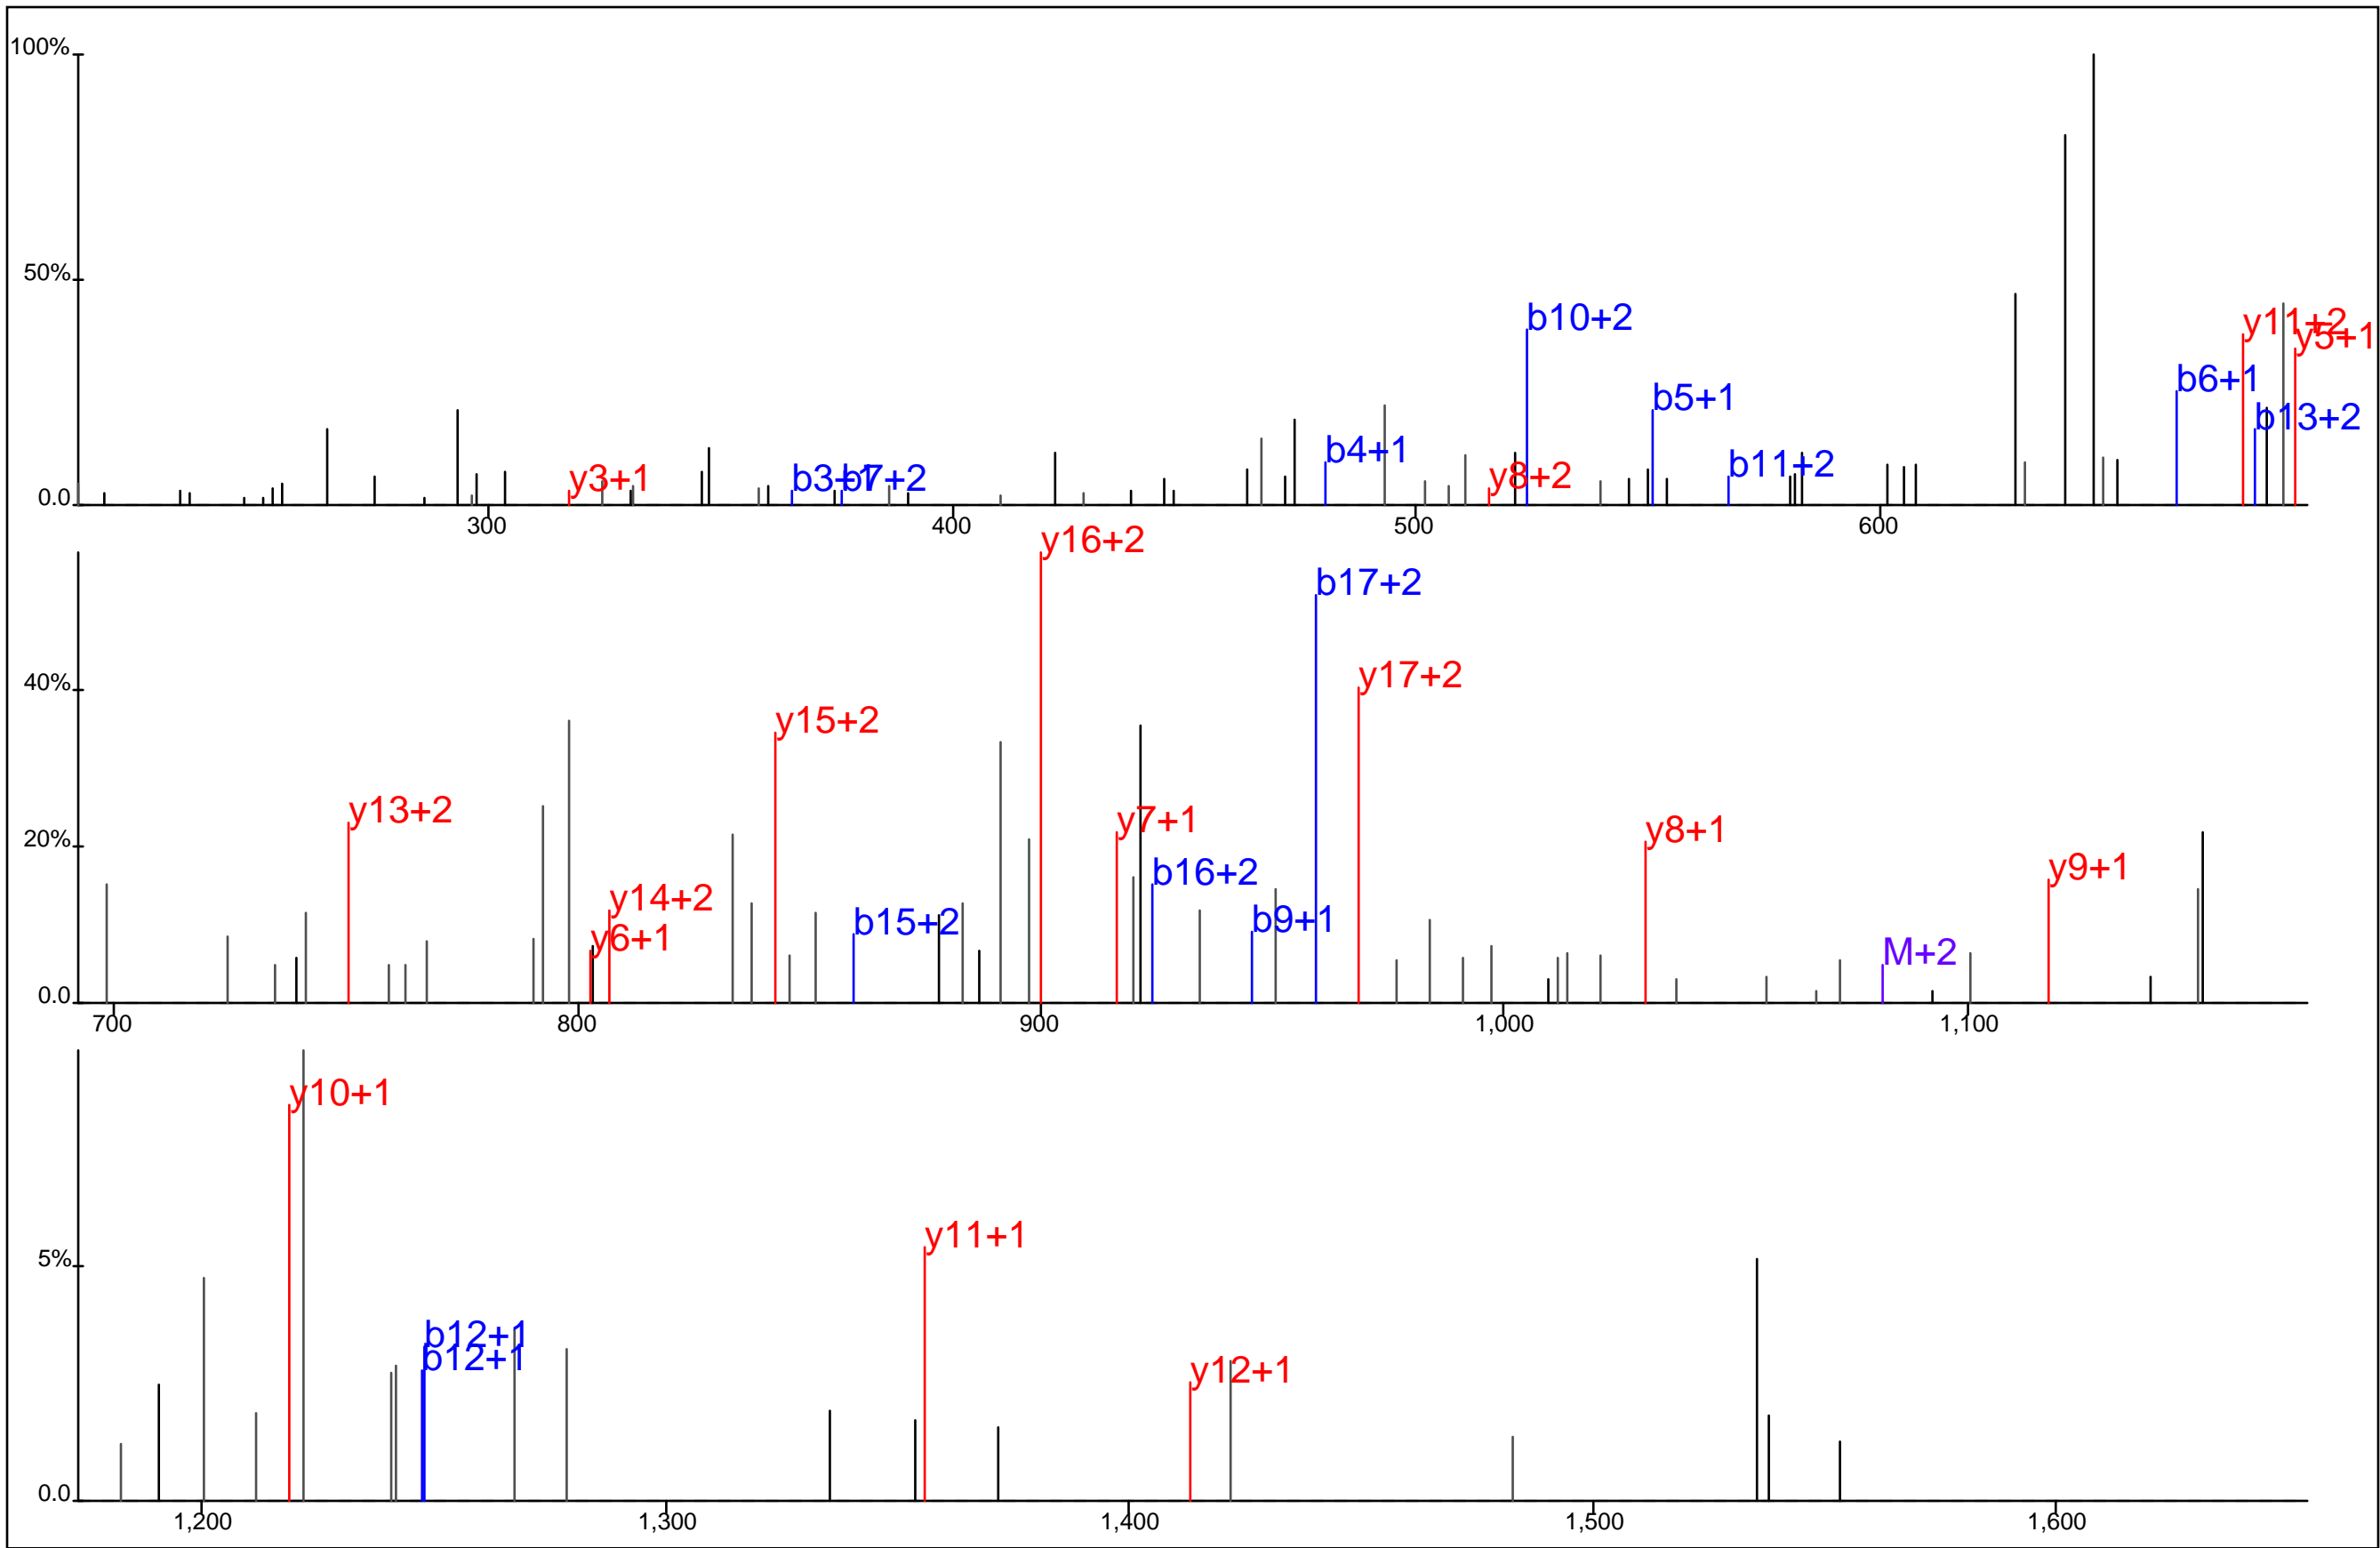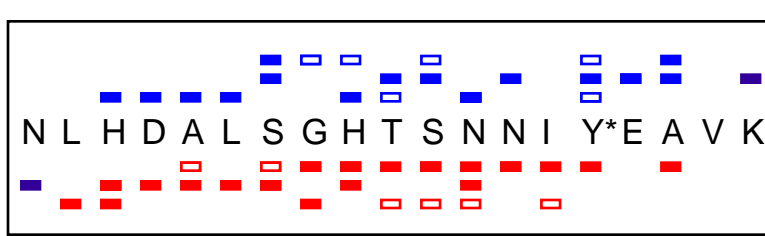

Protein Name: Elongation protein 3  
 gi Accession: 0  
 Precursor Mass: 721.6678+3  
 Delta Mass: 1.104 ppm  
 XCorr: 33.54



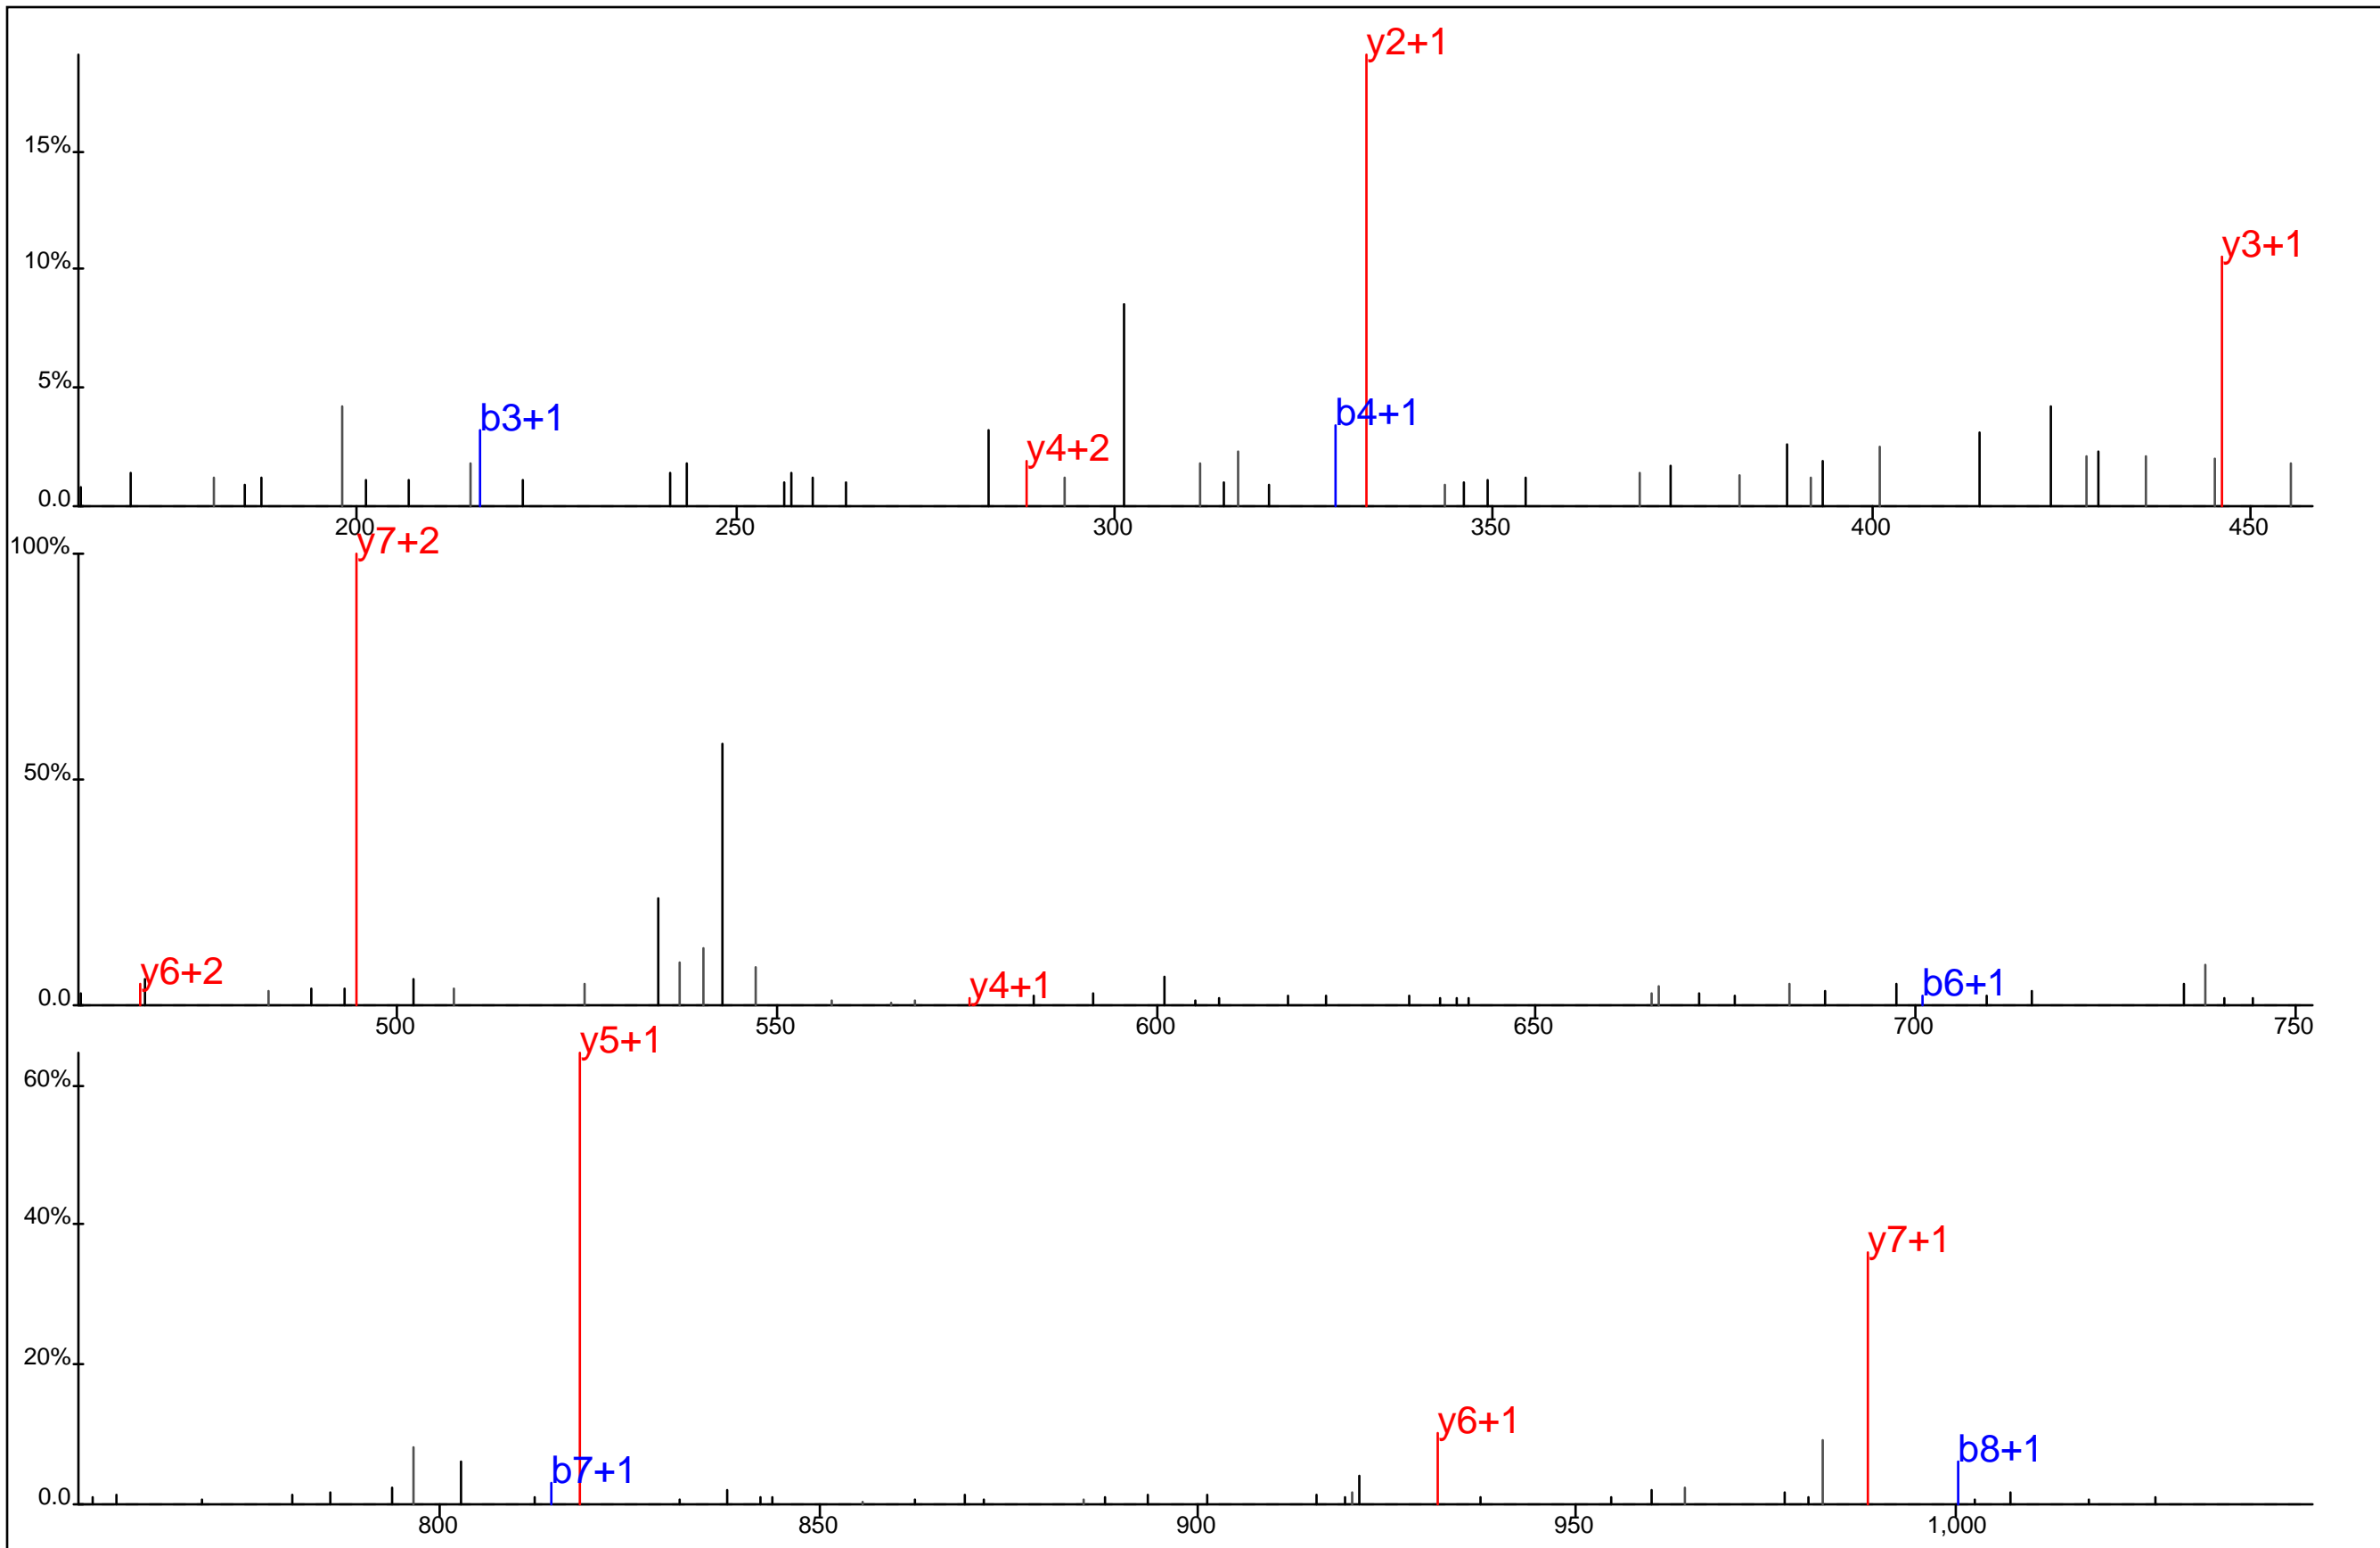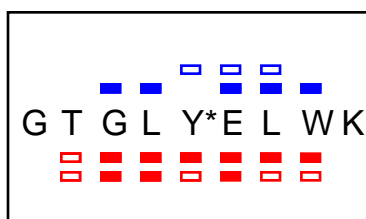

Protein Name: Elongation protein 3  
 gi Accession: 0  
 Precursor Mass: 573.7649+2  
 Delta Mass: 0.499 ppm  
 XCorr: 32.62

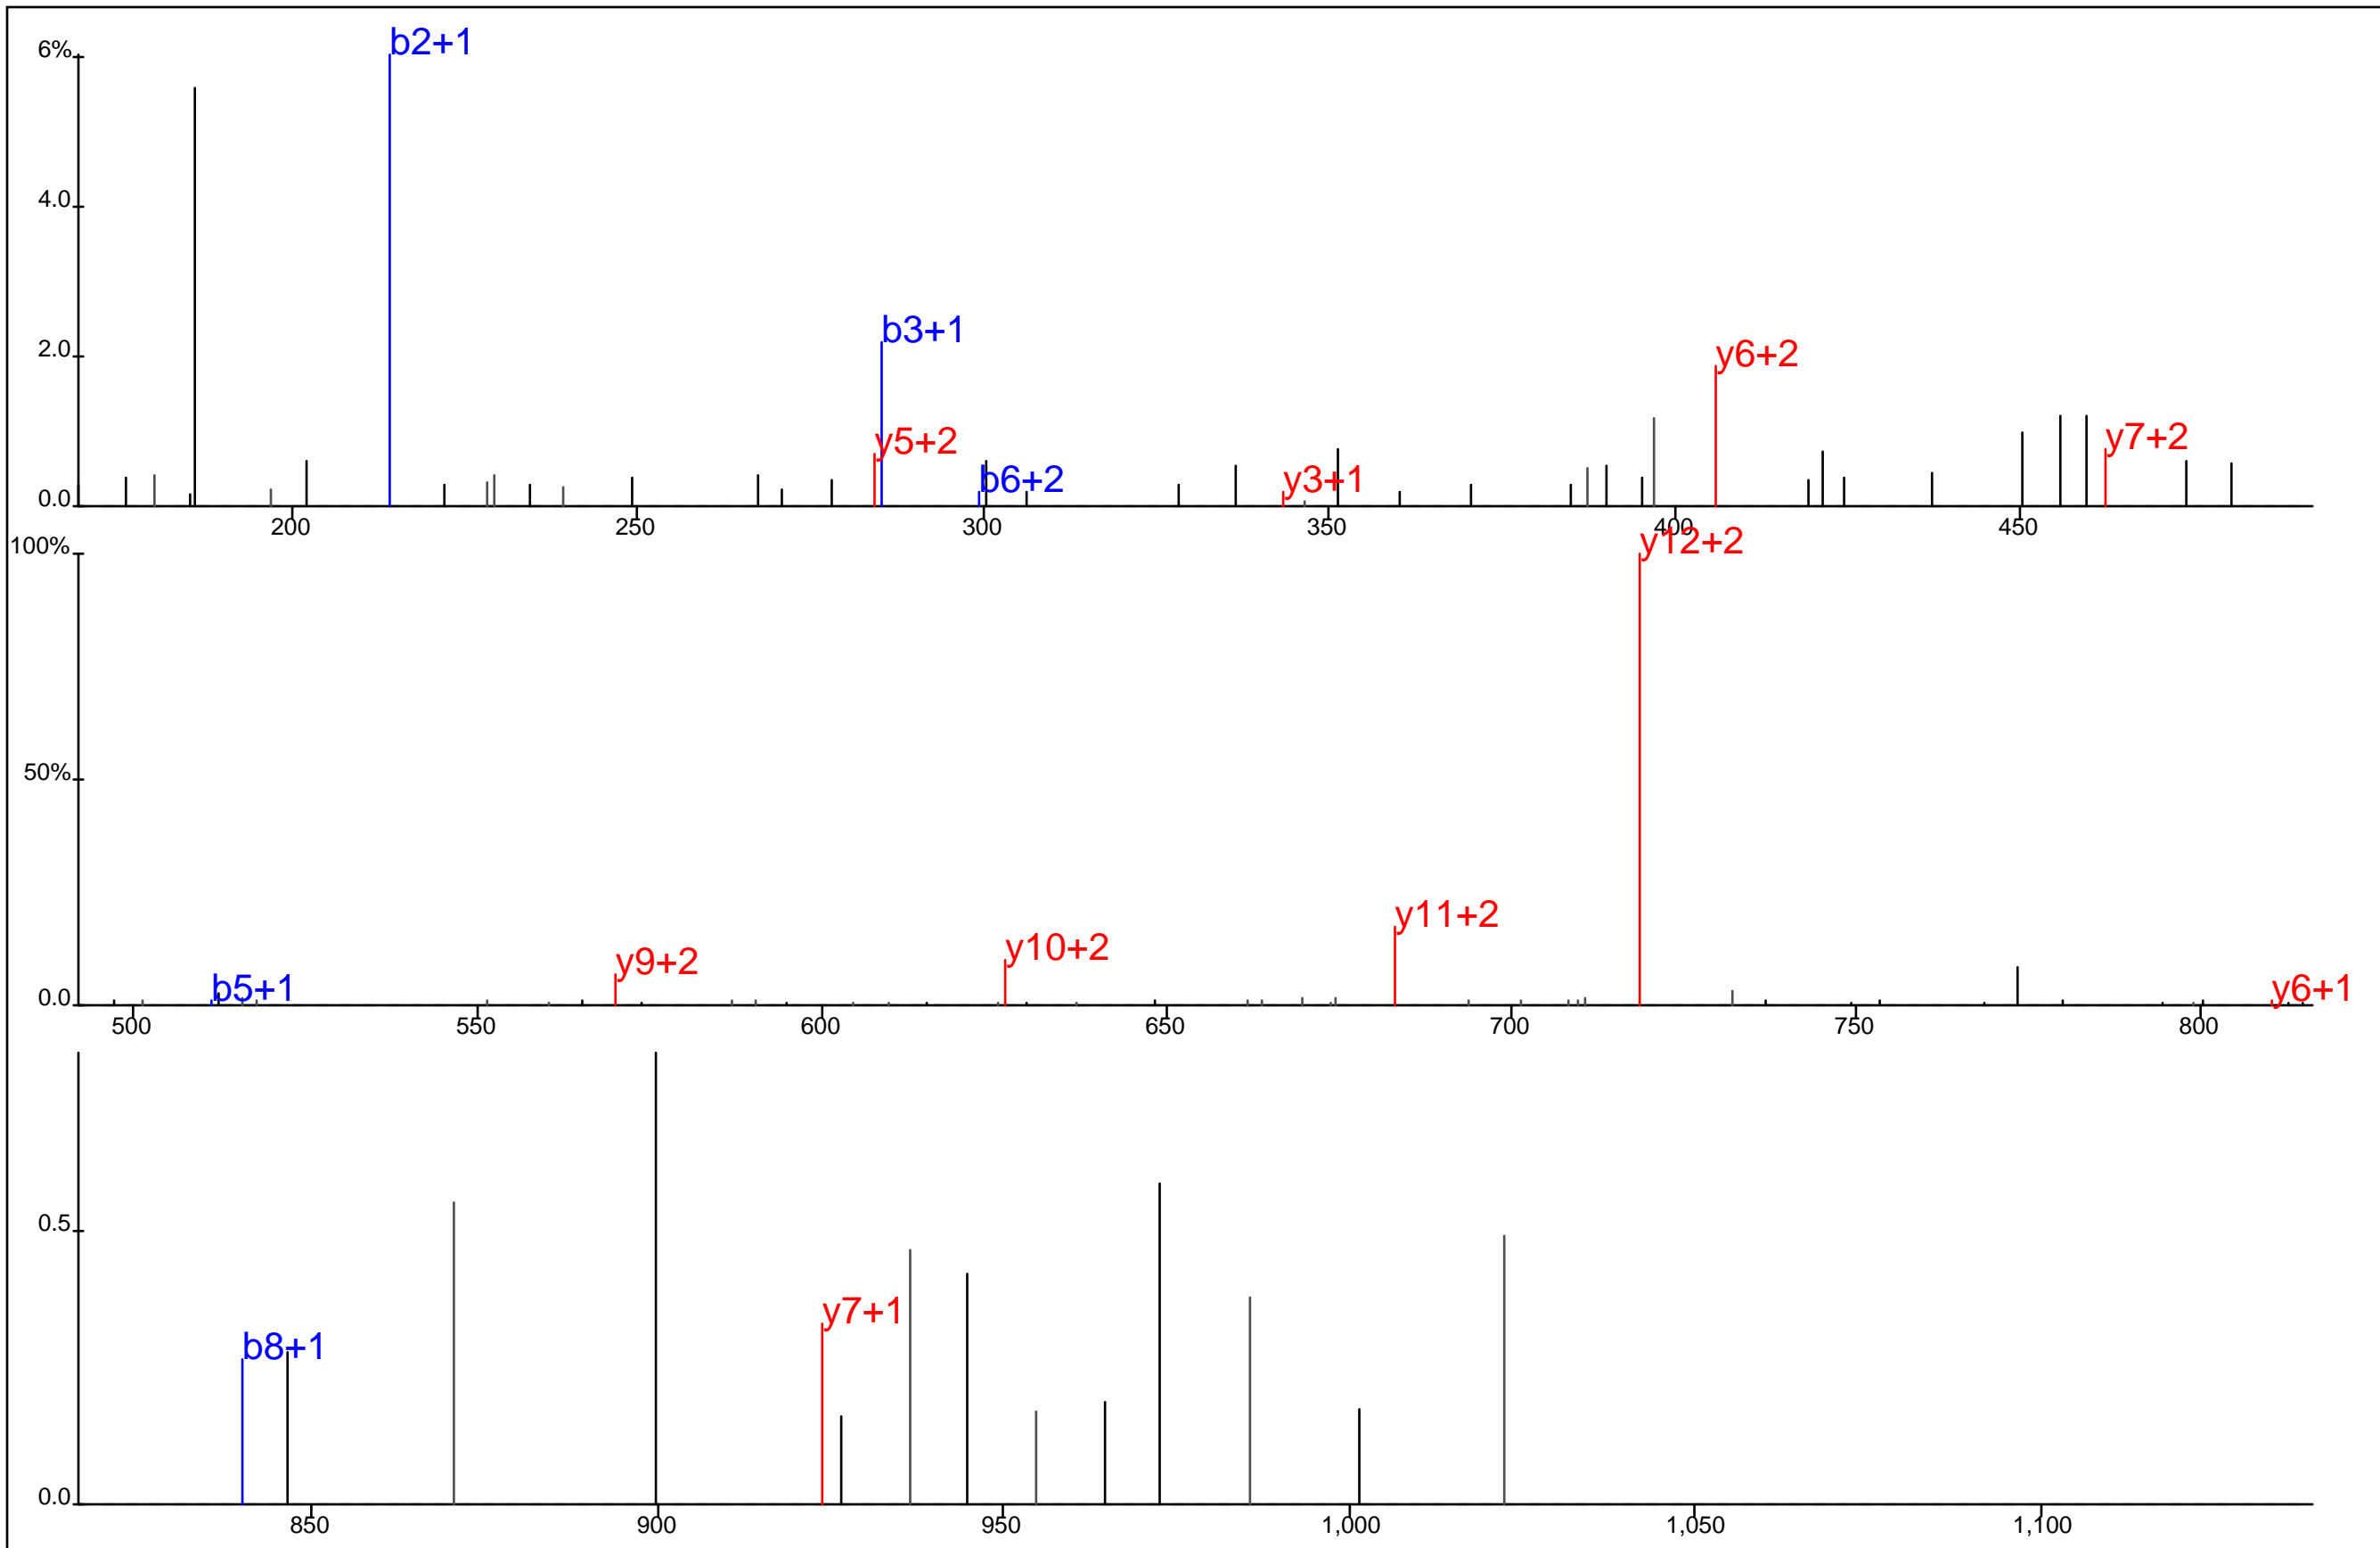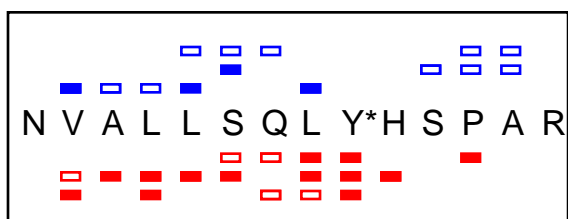

Protein Name: Embryonic lethal abnormal vision like 1  
 gi Accession: 0  
 Precursor Mass: 550.2797+3  
 Delta Mass: 2.302 ppm  
 XCorr: 22.23



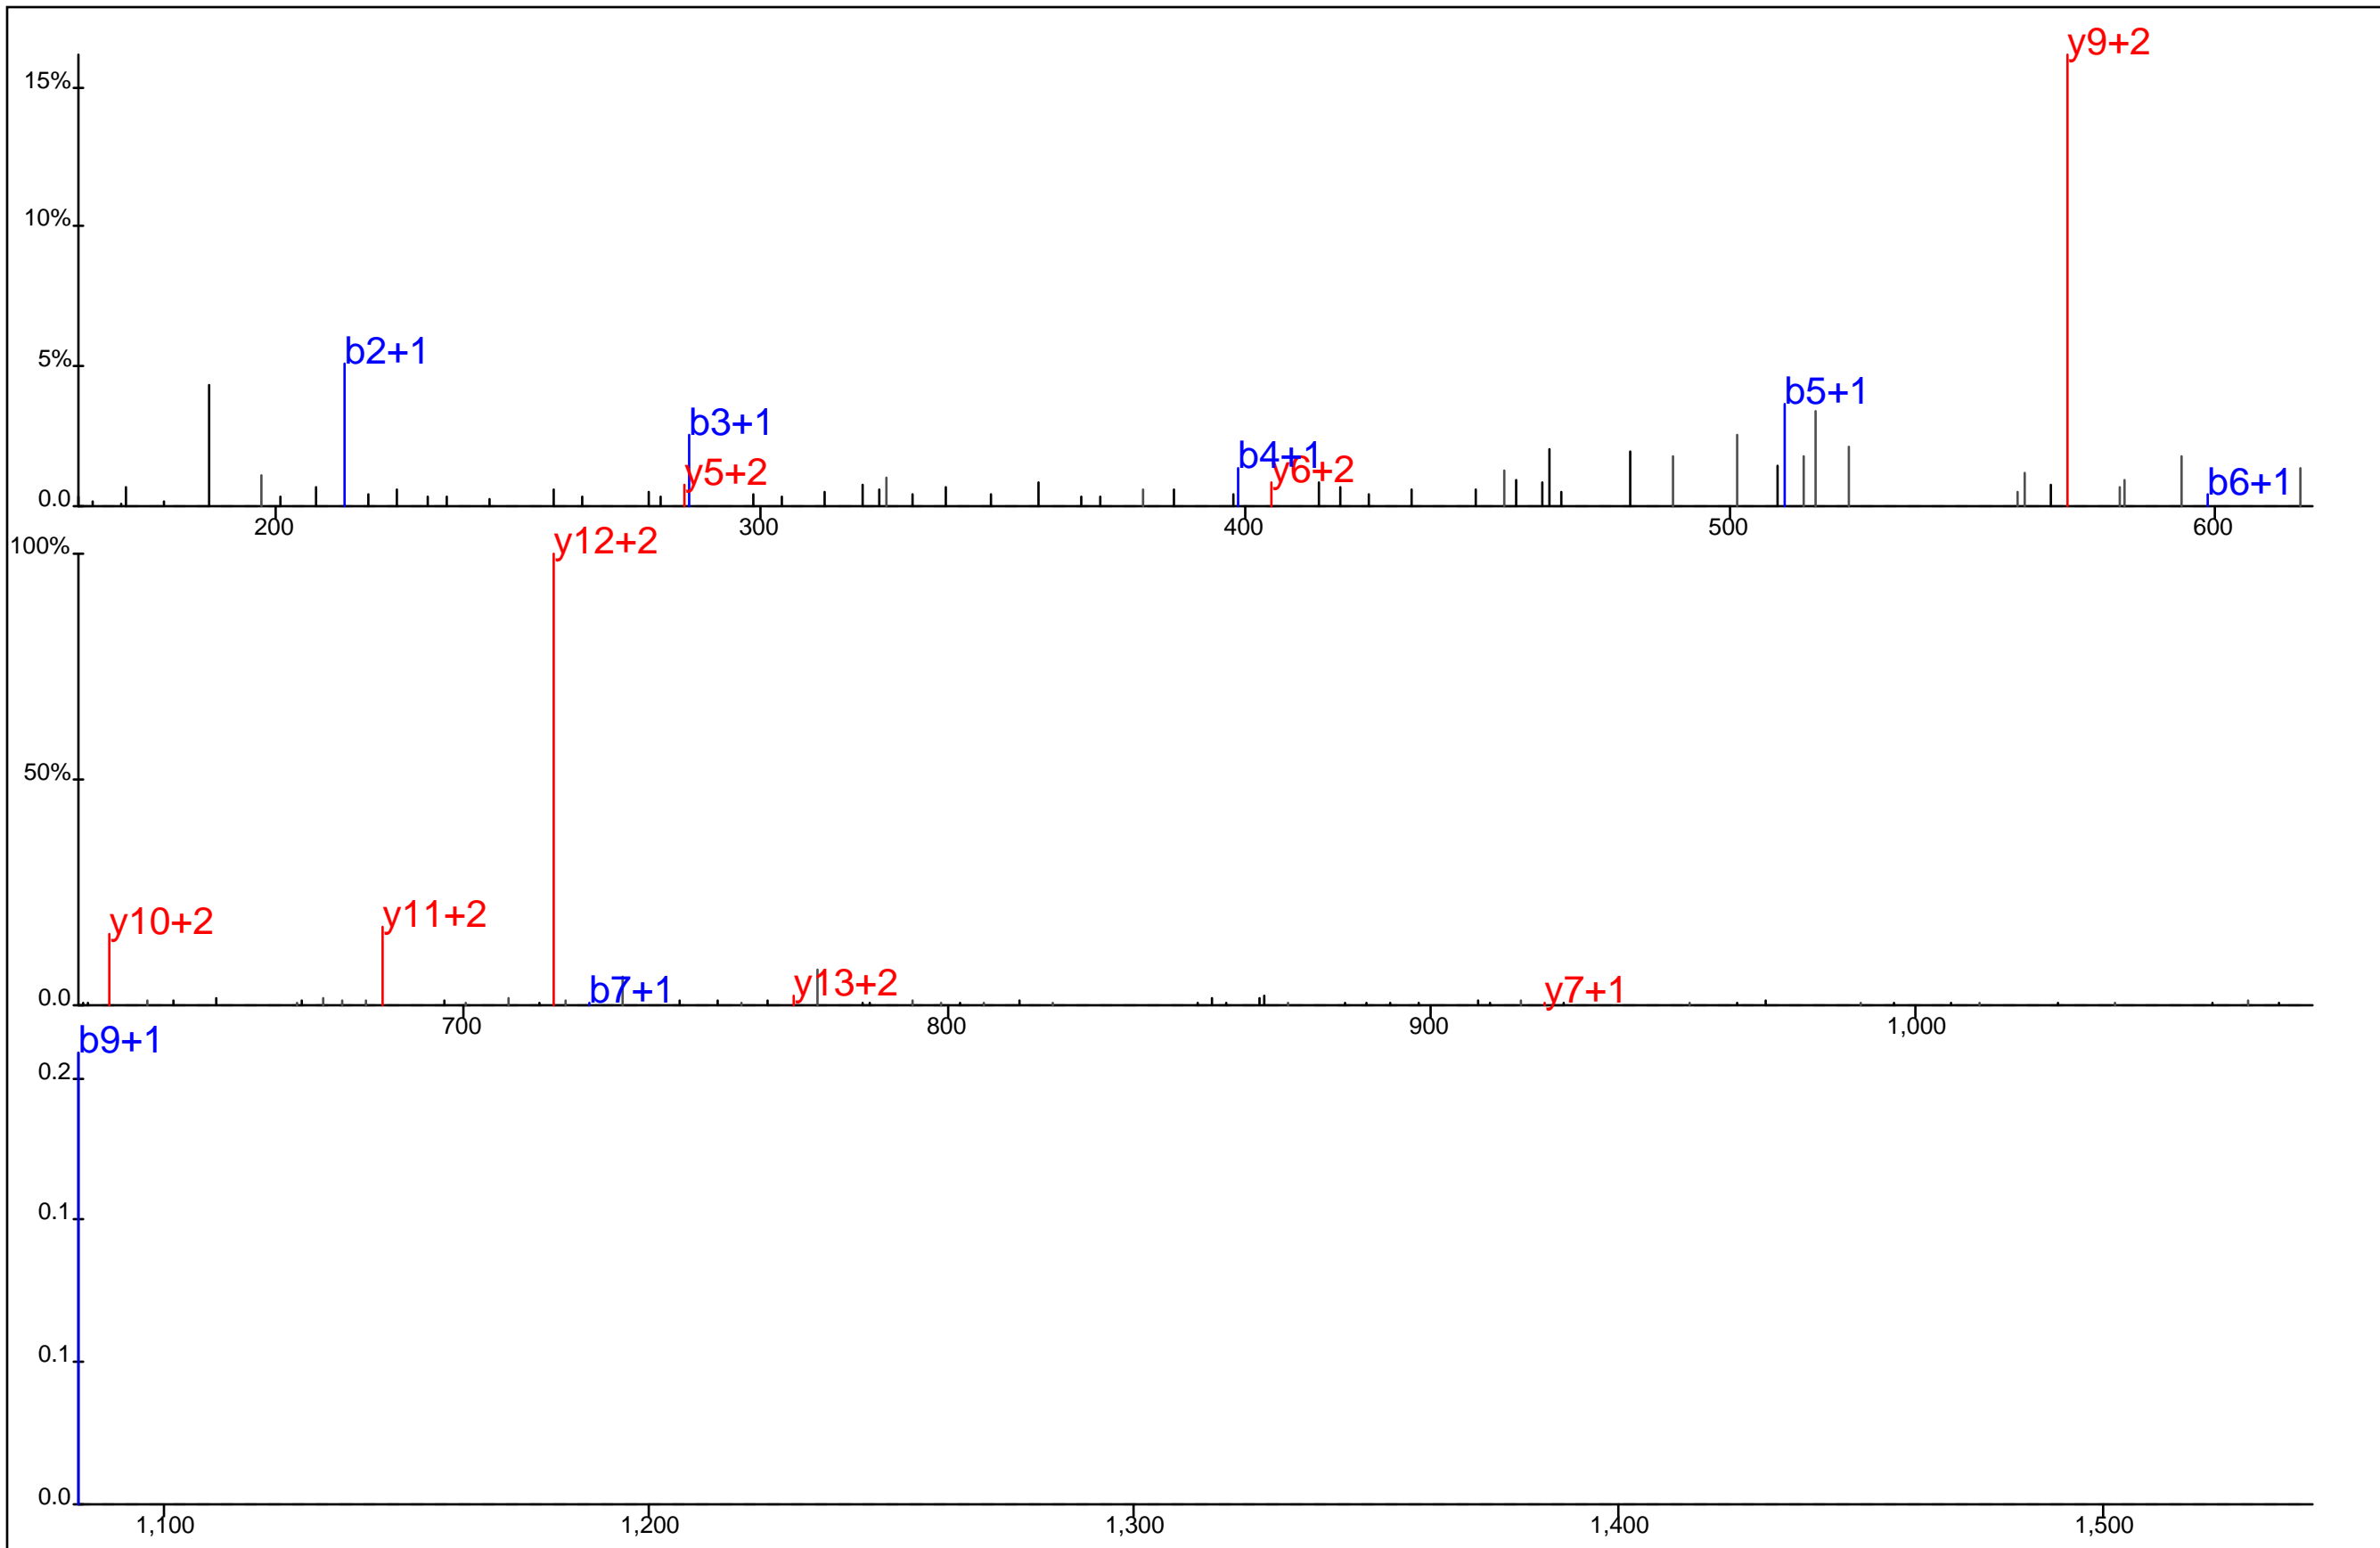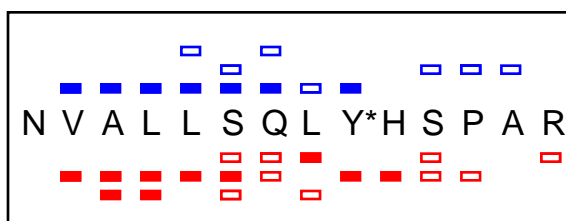

Protein Name: Embryonic lethal abnormal vision like 1  
 gi Accession: 0  
 Precursor Mass: 550.2791+3  
 Delta Mass: 1.192 ppm  
 XCorr: 21.49

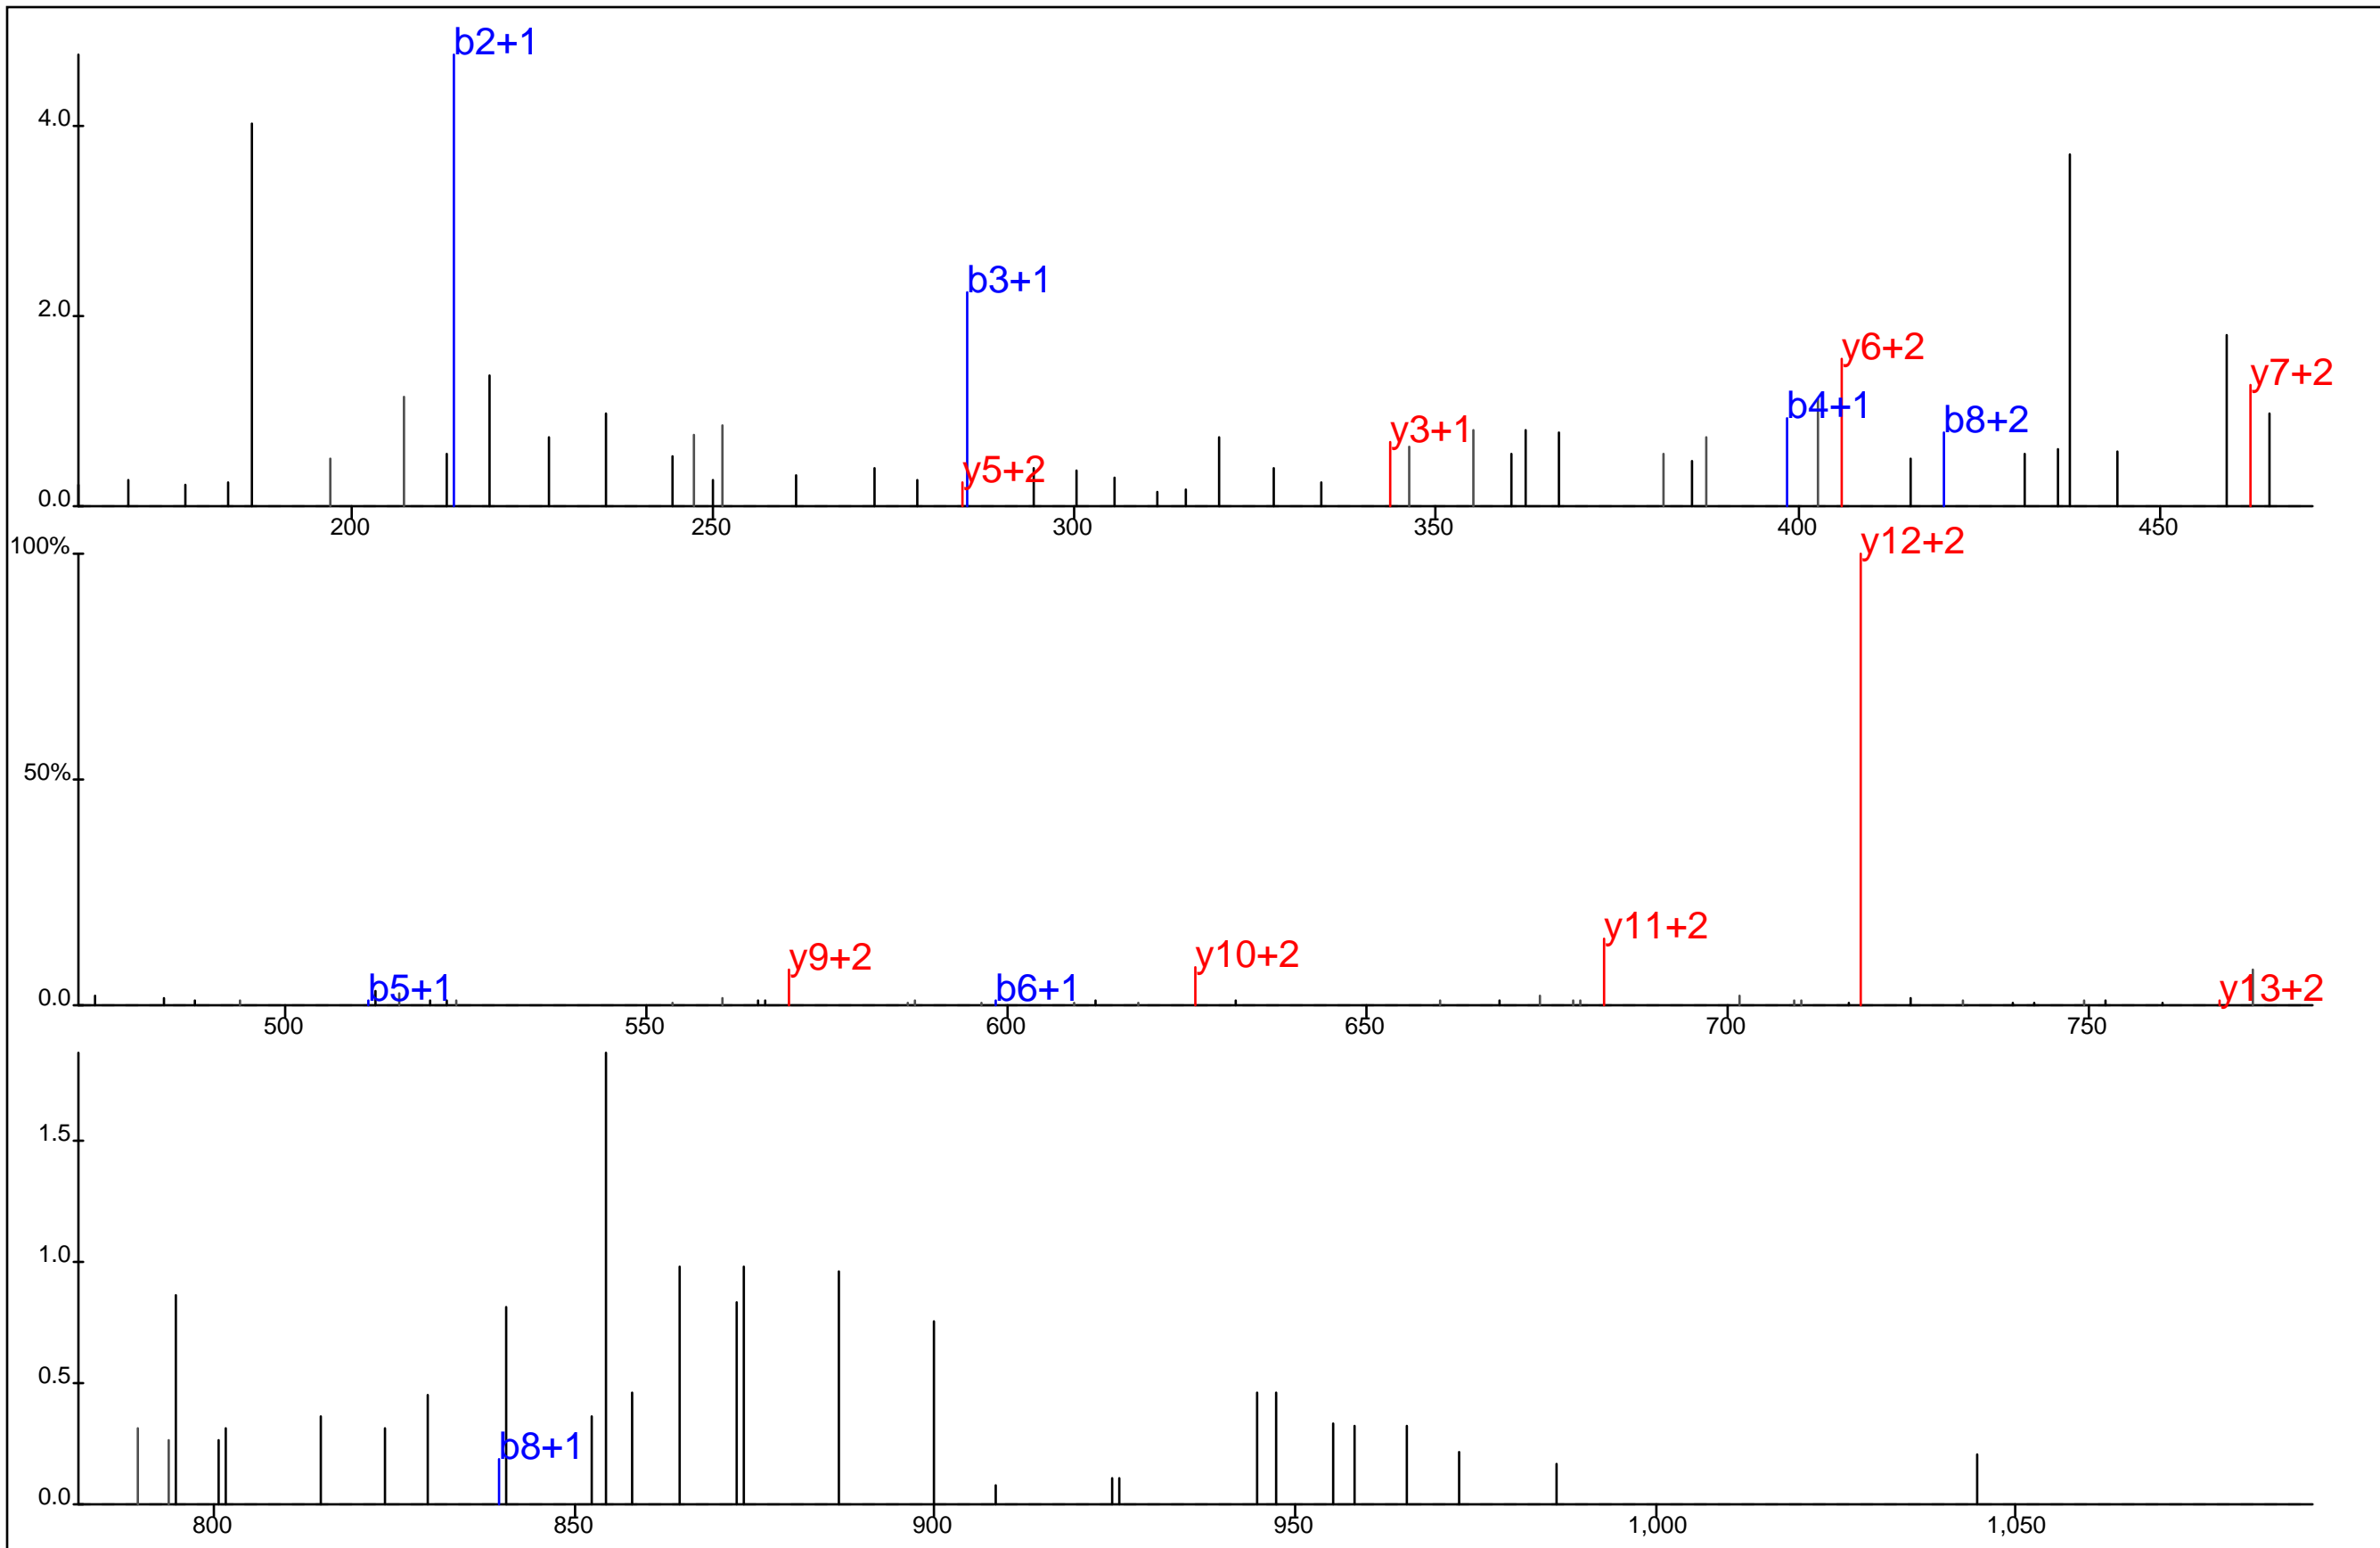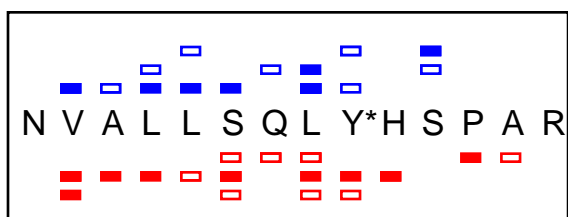

Protein Name: Embryonic lethal abnormal vision like 1  
 gi Accession: 0  
 Precursor Mass: 550.2764+3  
 Delta Mass: 3.695 ppm  
 XCorr: 21.72

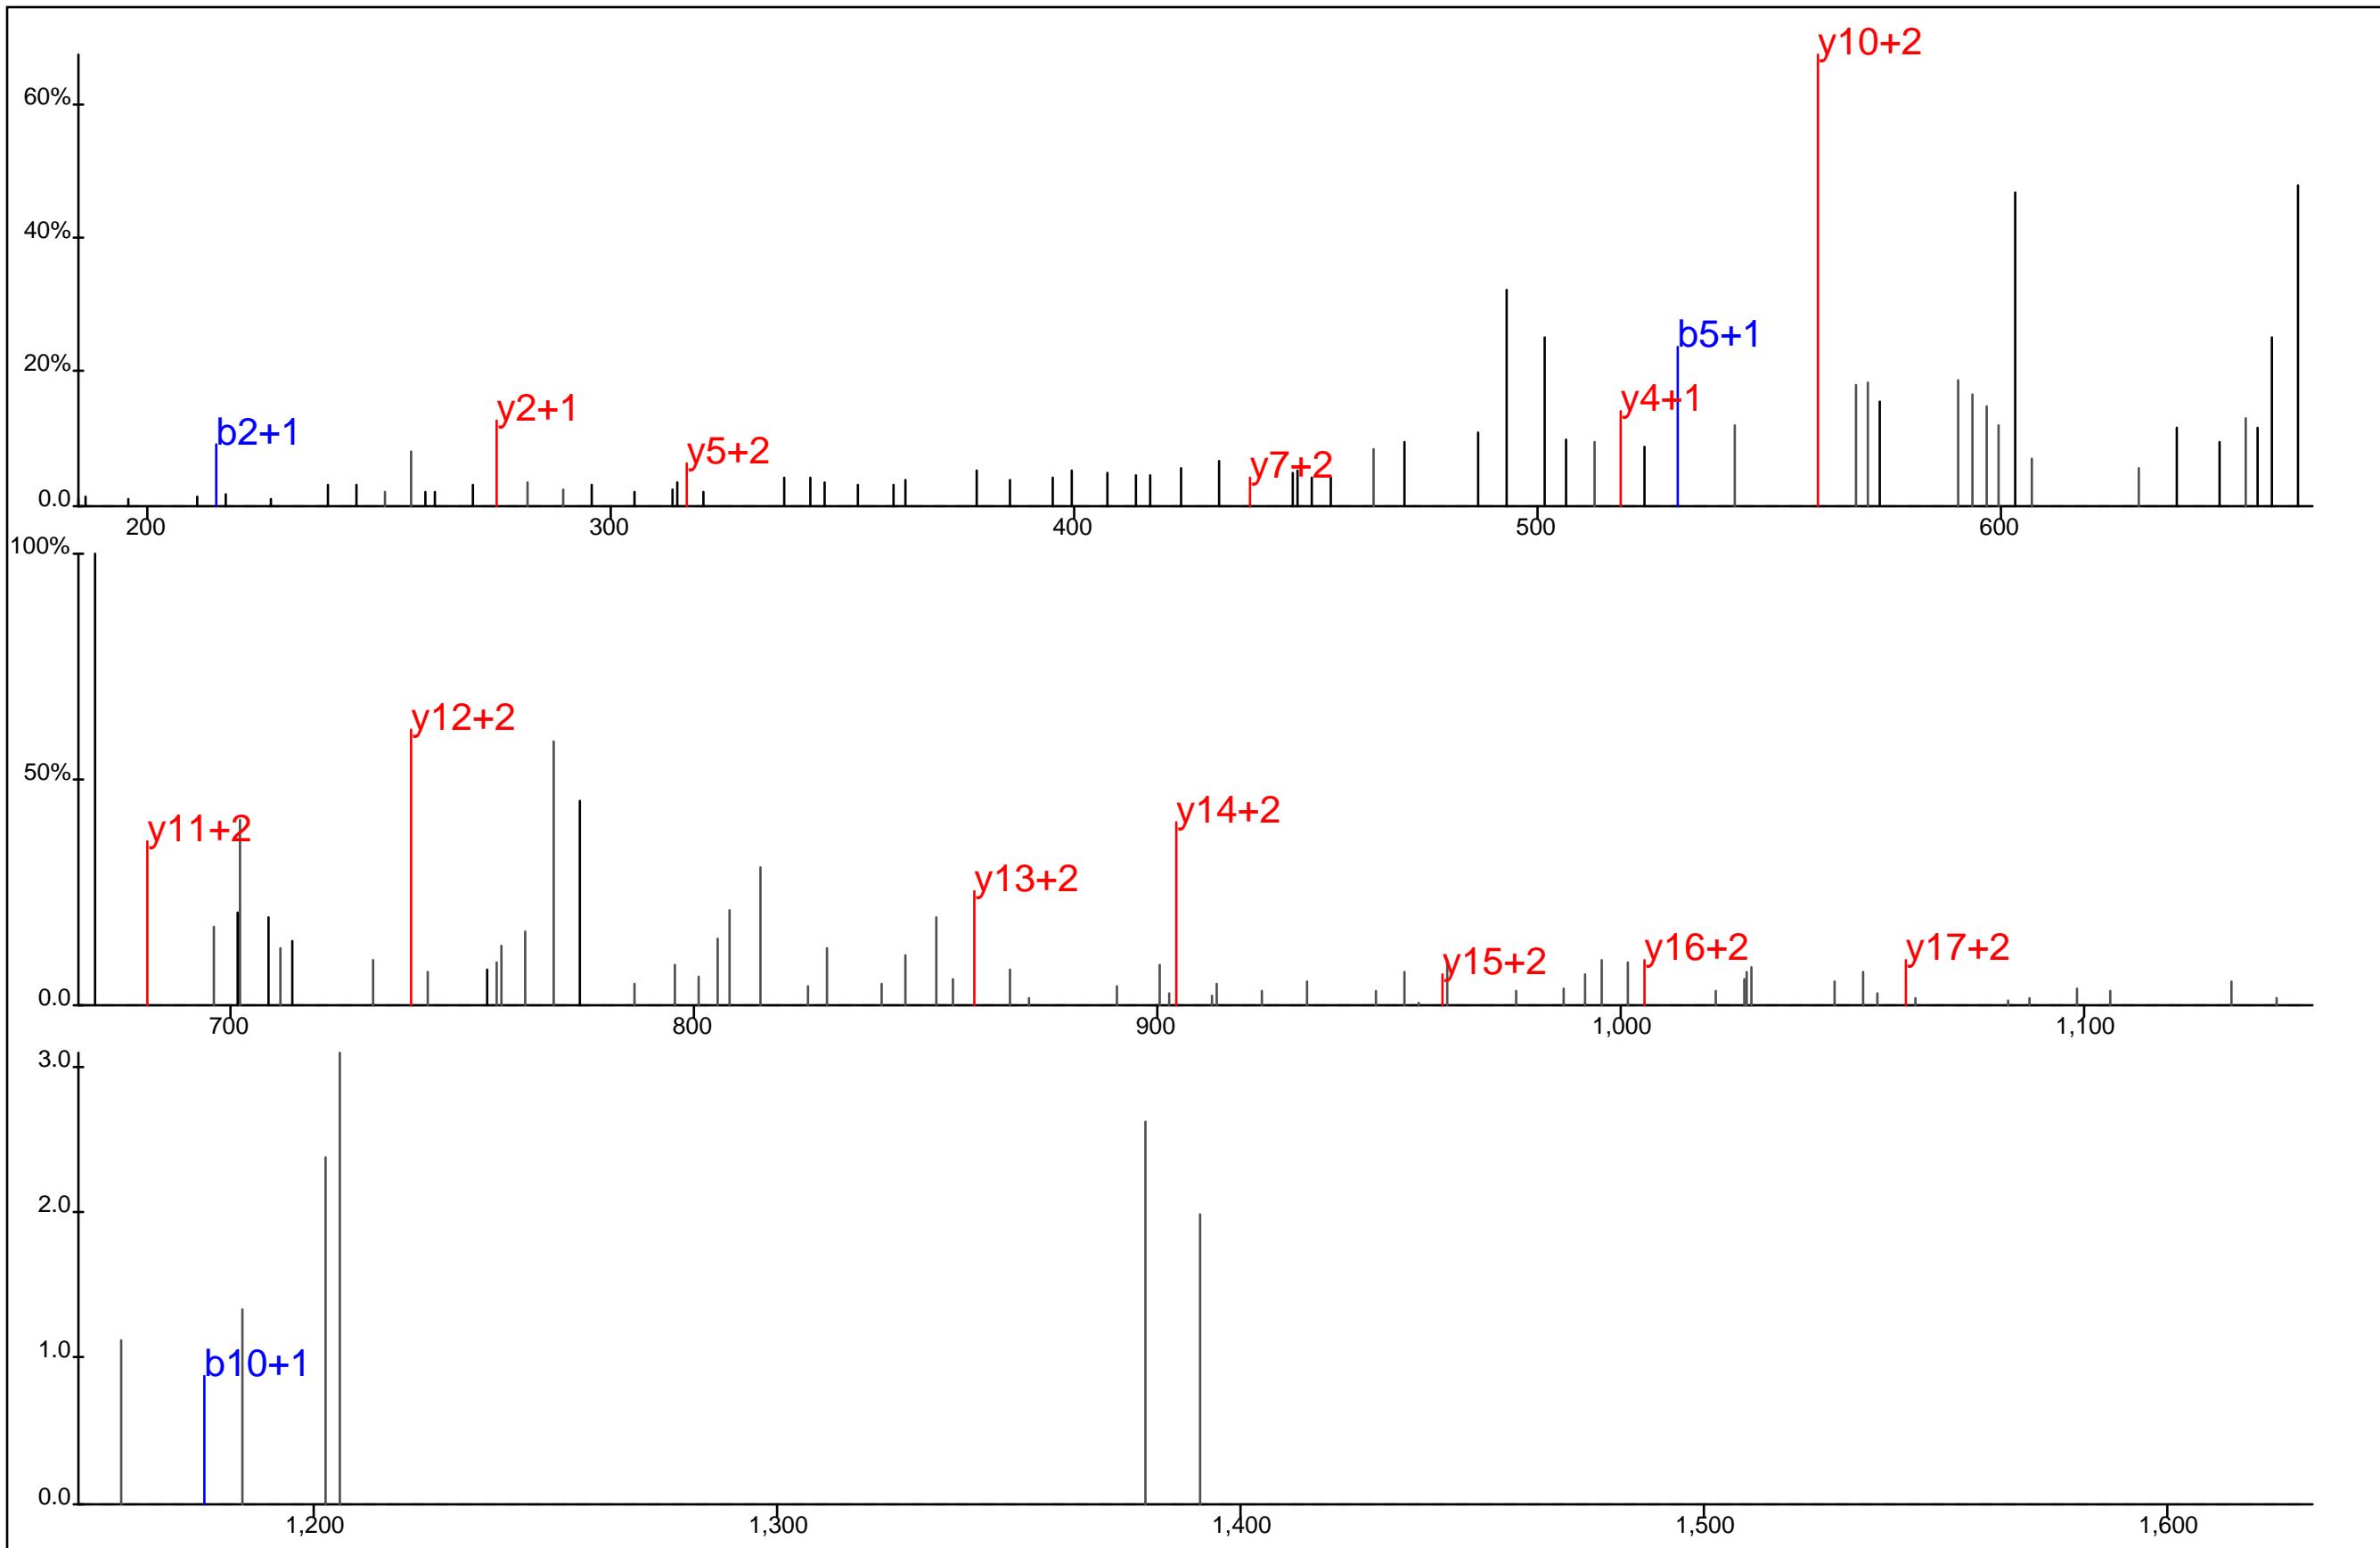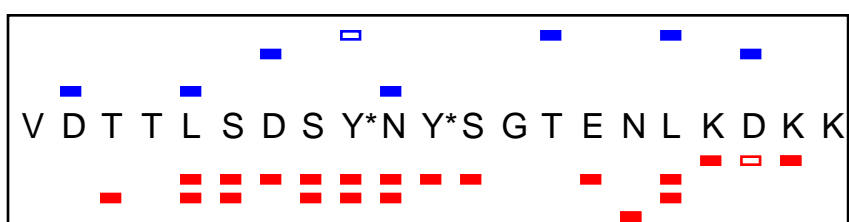

Protein Name: Endofin  
 gi Accession: 0  
 Precursor Mass: 635.2733+4  
 Delta Mass: 1.186 ppm  
 XCorr: 20.19

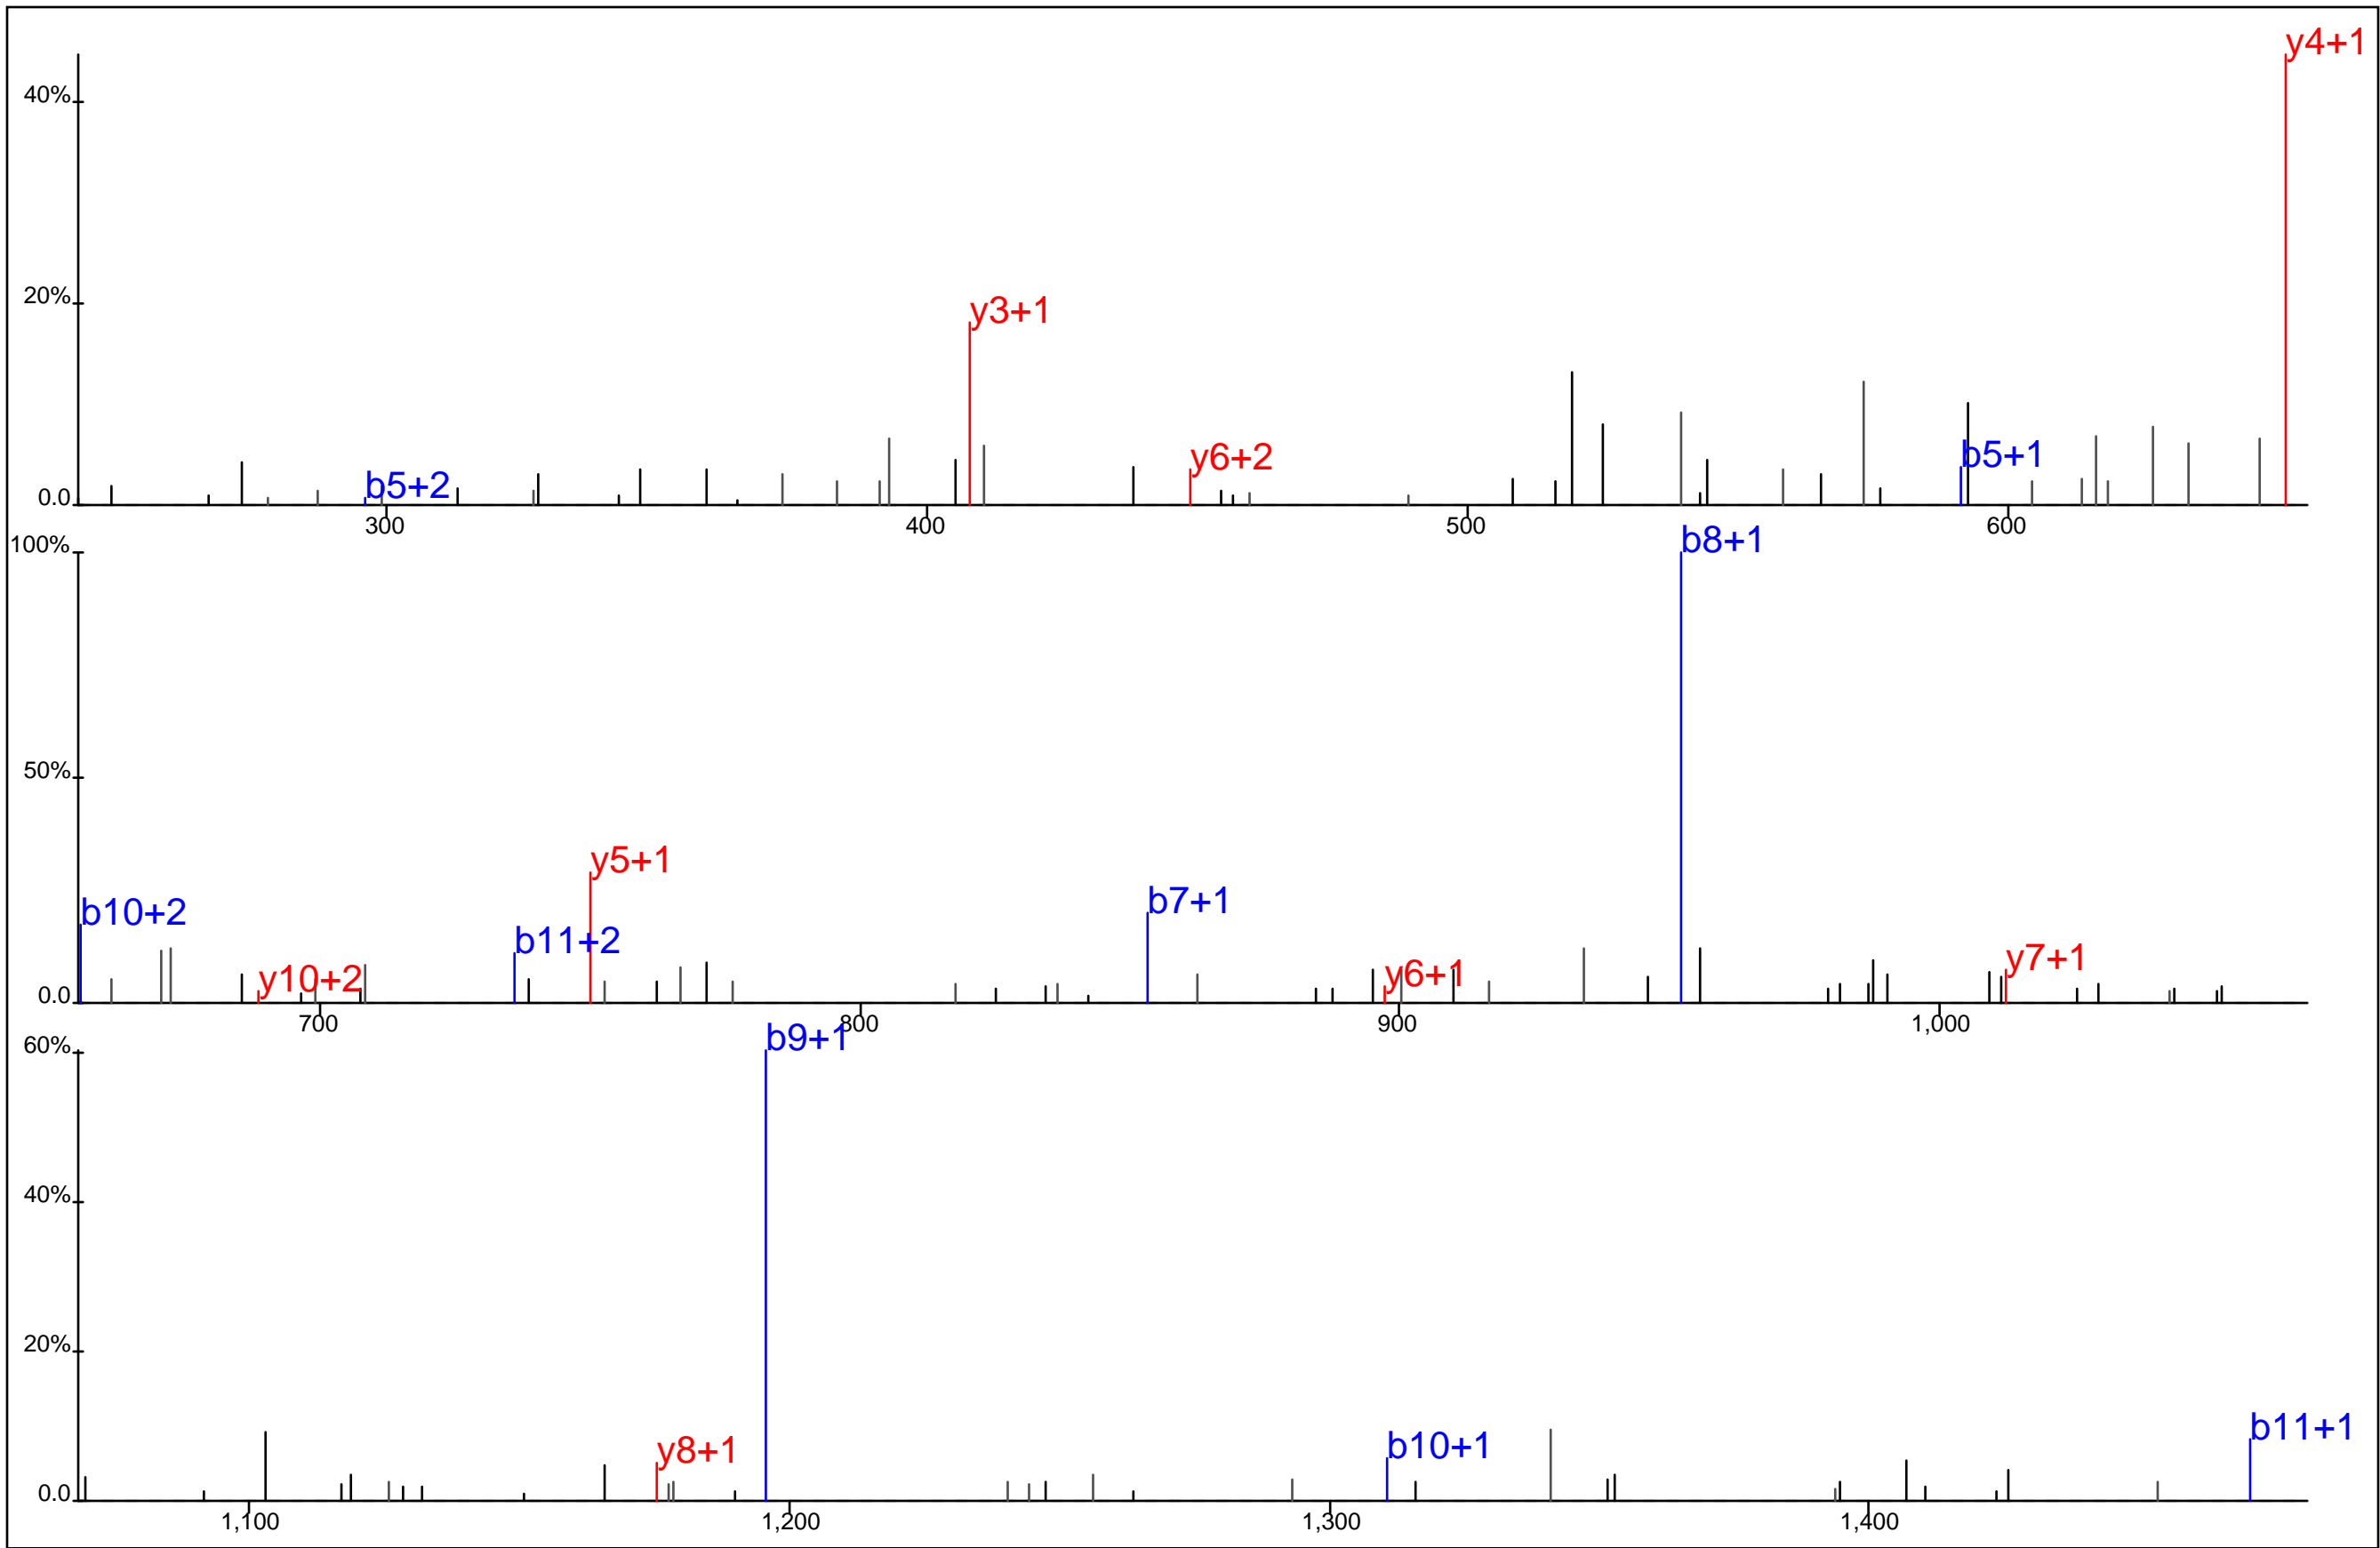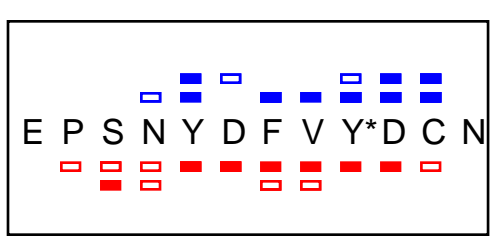

Protein Name: Engulfment and cell motility 1  
 gi Accession: 0  
 Precursor Mass: 801.7758+2  
 Delta Mass: 0.663 ppm  
 XCorr: 20.45





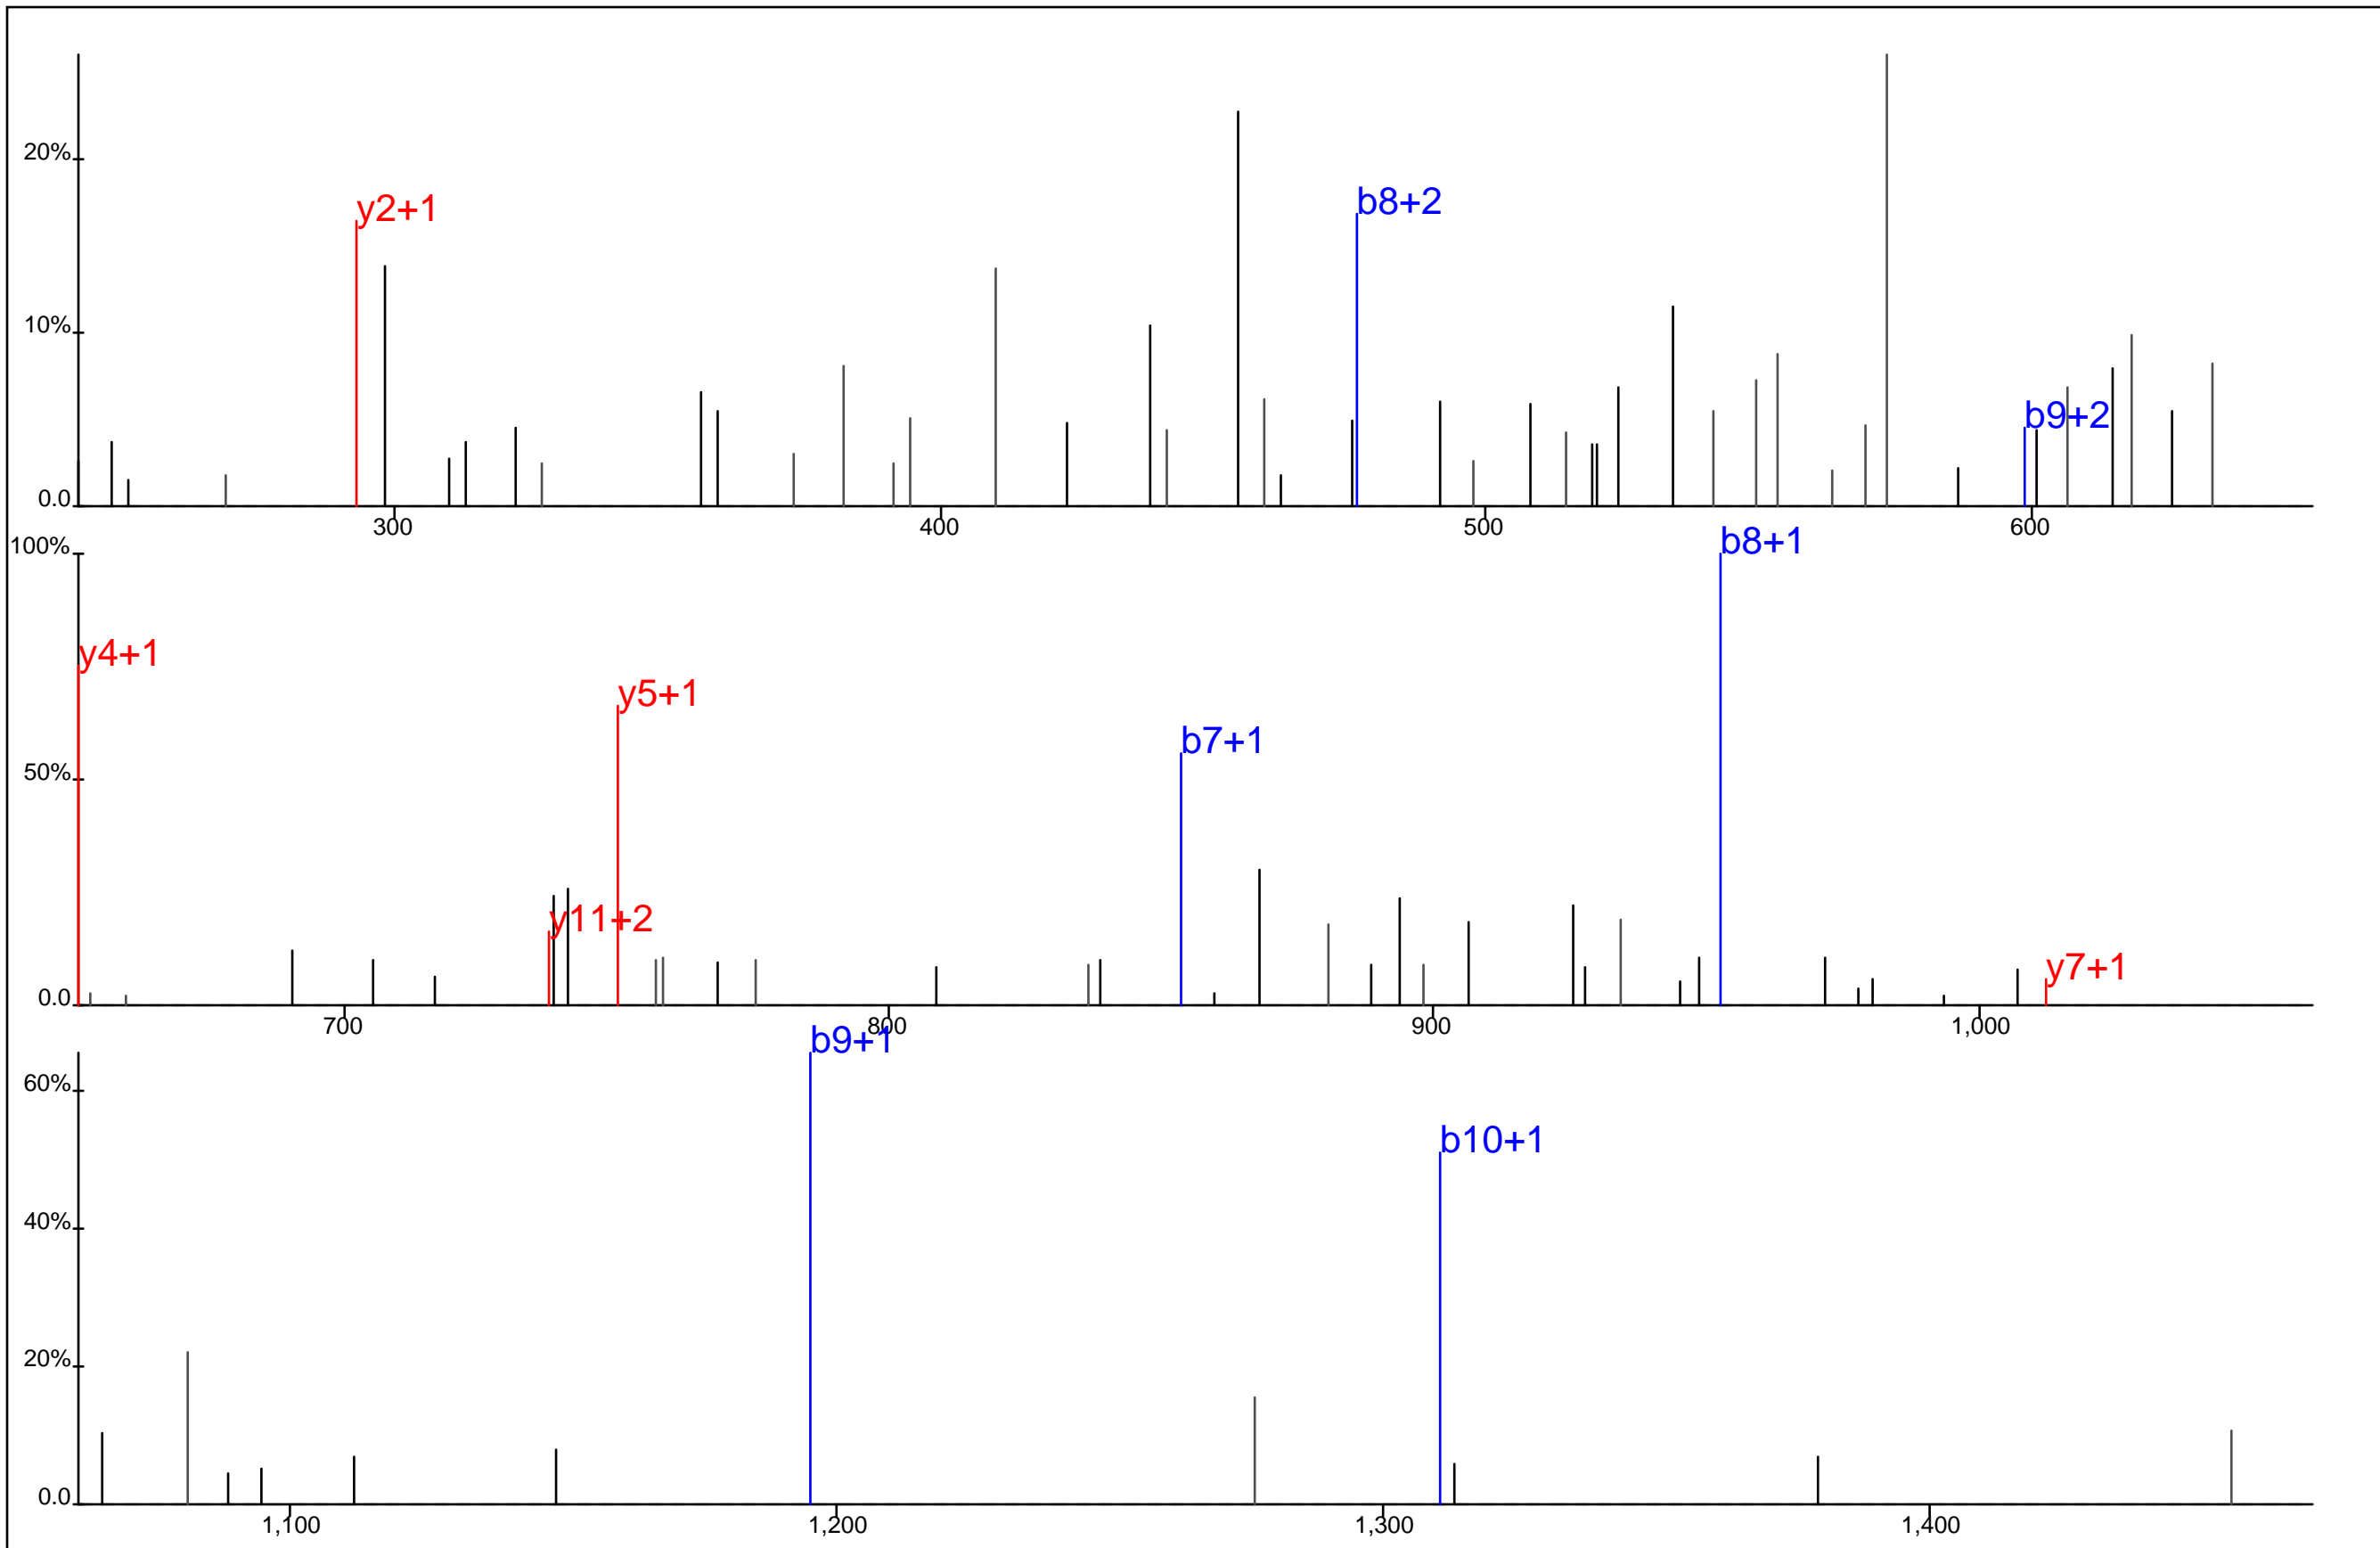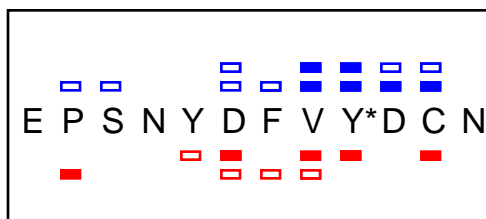

Protein Name: Engulfment and cell motility 1  
 gi Accession: 0  
 Precursor Mass: 801.7765+2  
 Delta Mass: 0.175 ppm  
 XCorr: 33.72

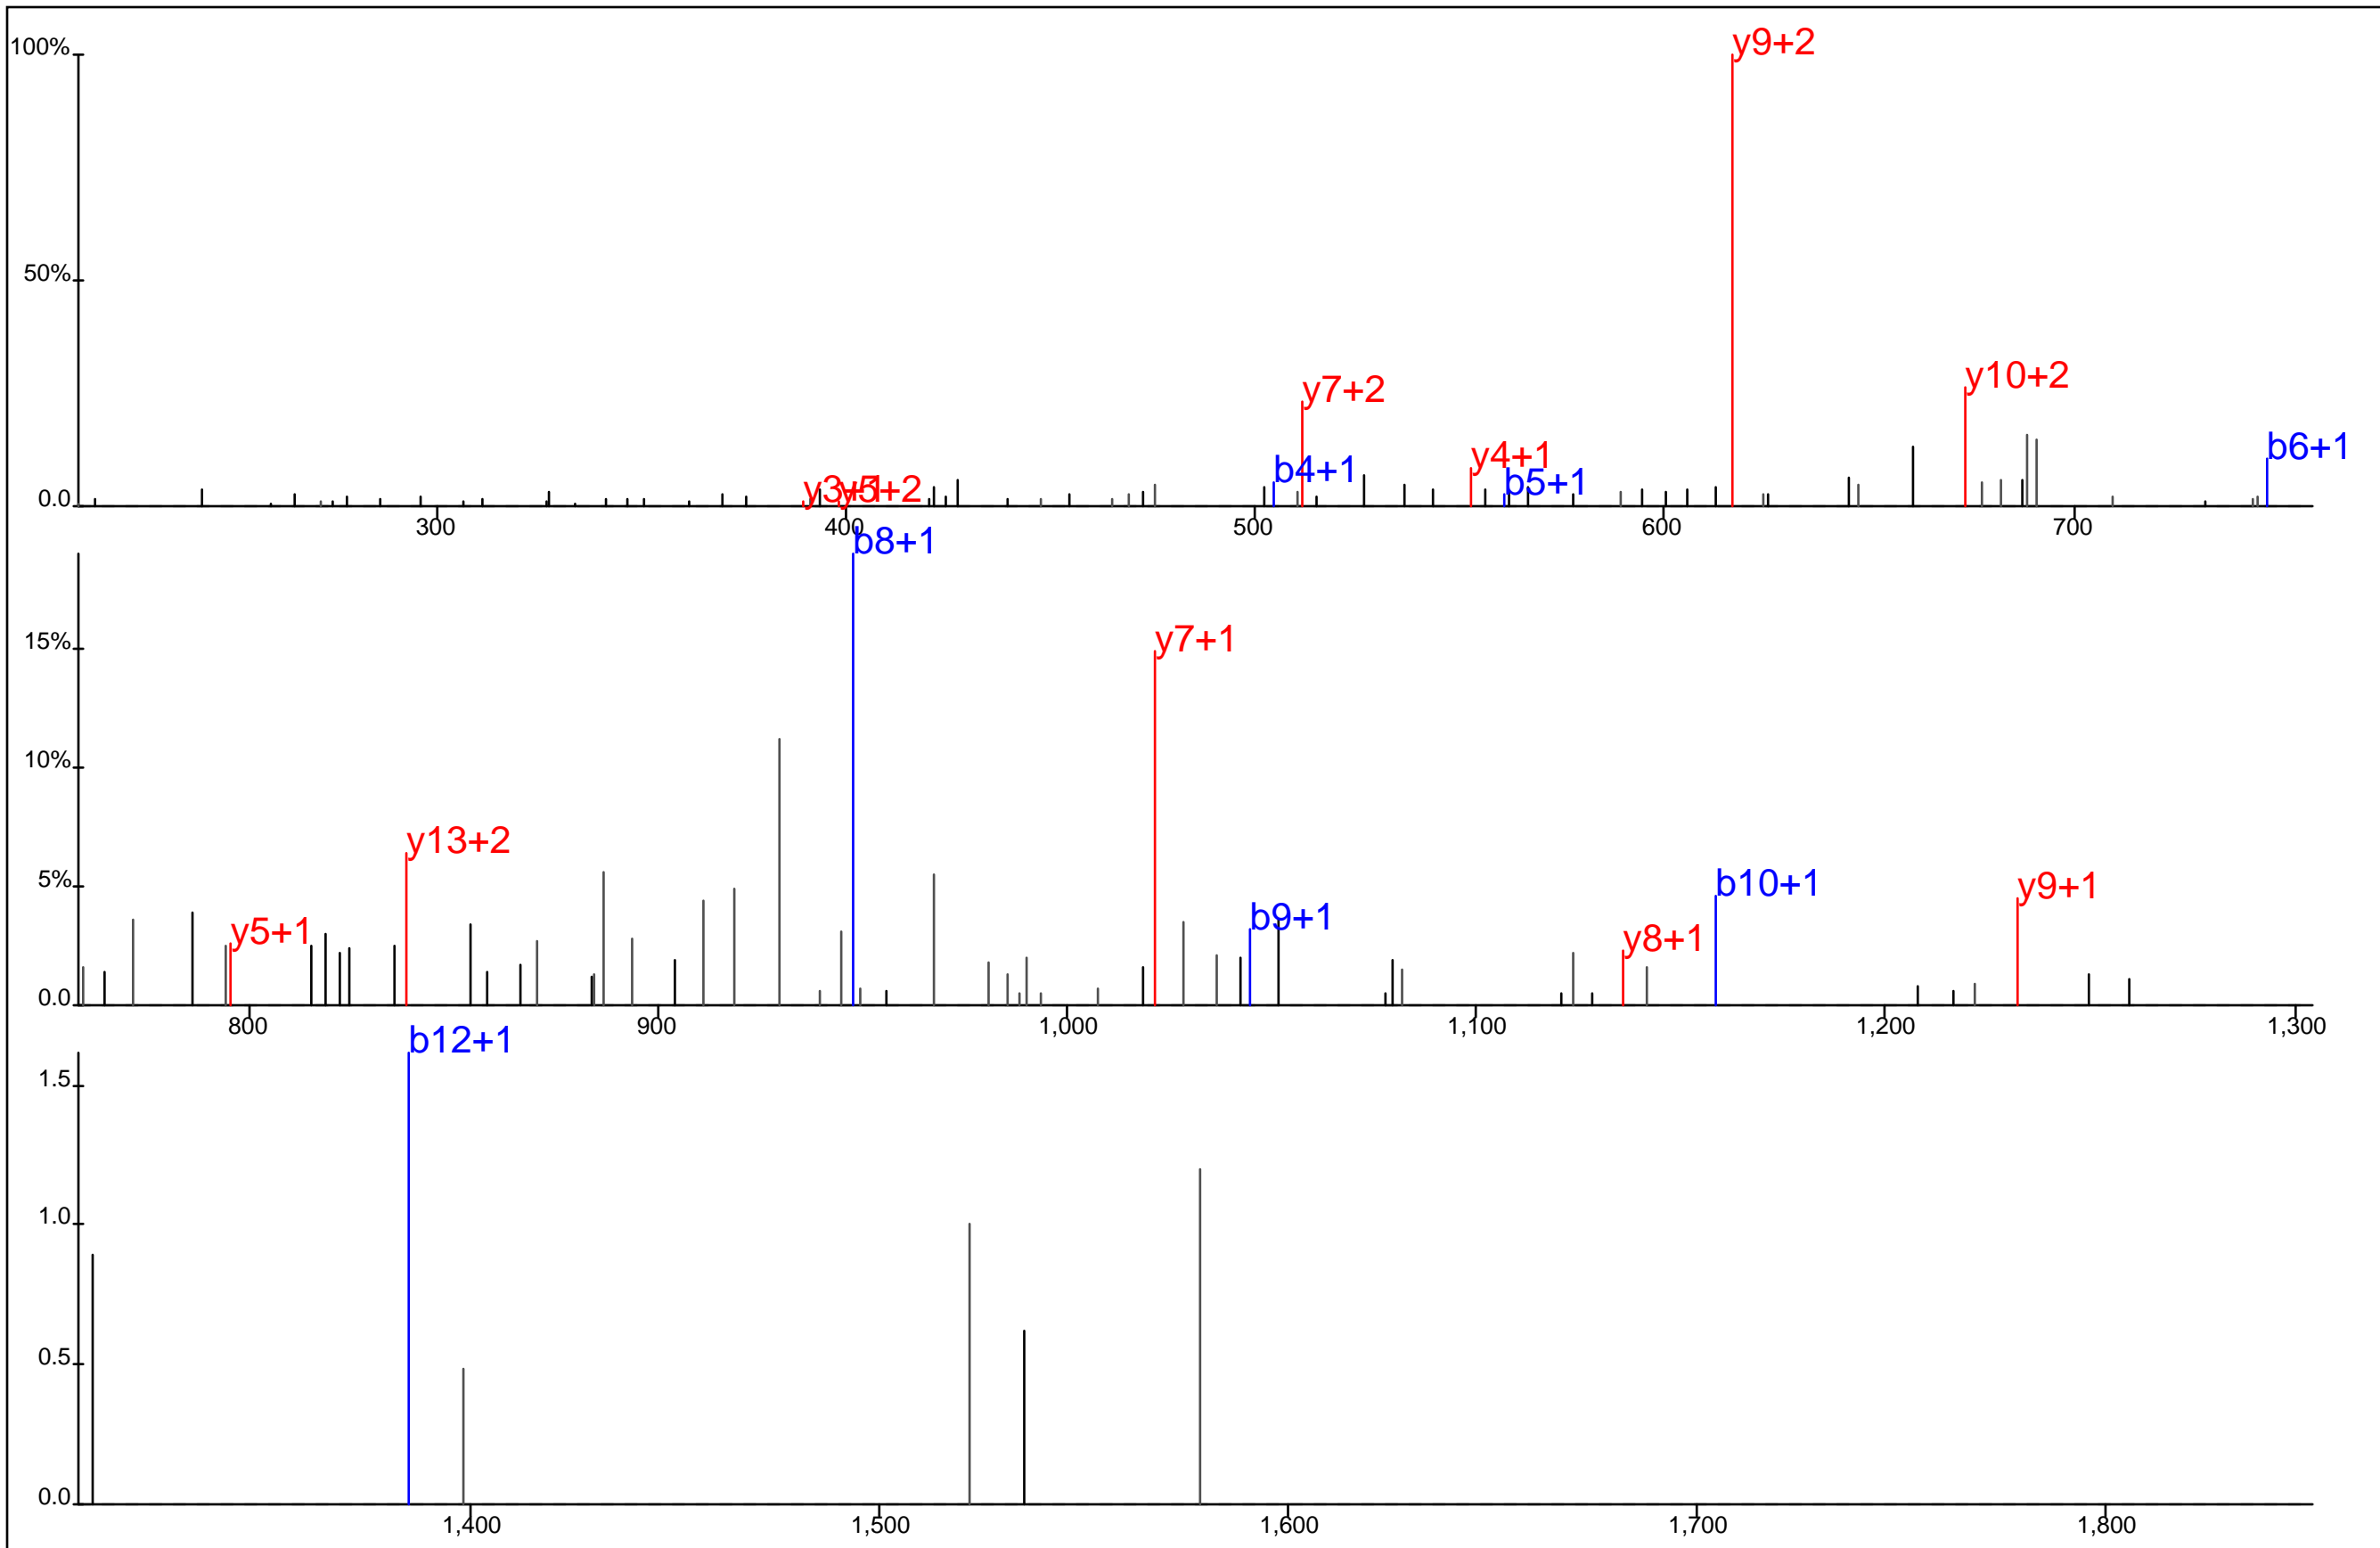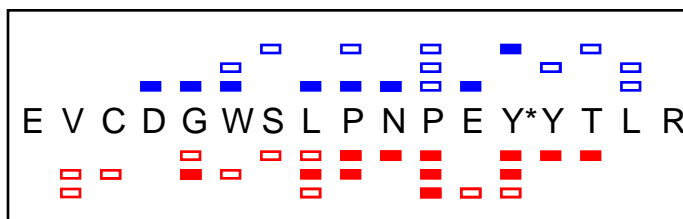

Protein Name: Engulfment and cell motility 2  
 gi Accession: 0  
 Precursor Mass: 726.9809+3  
 Delta Mass: 3.650 ppm  
 XCorr: 23.4

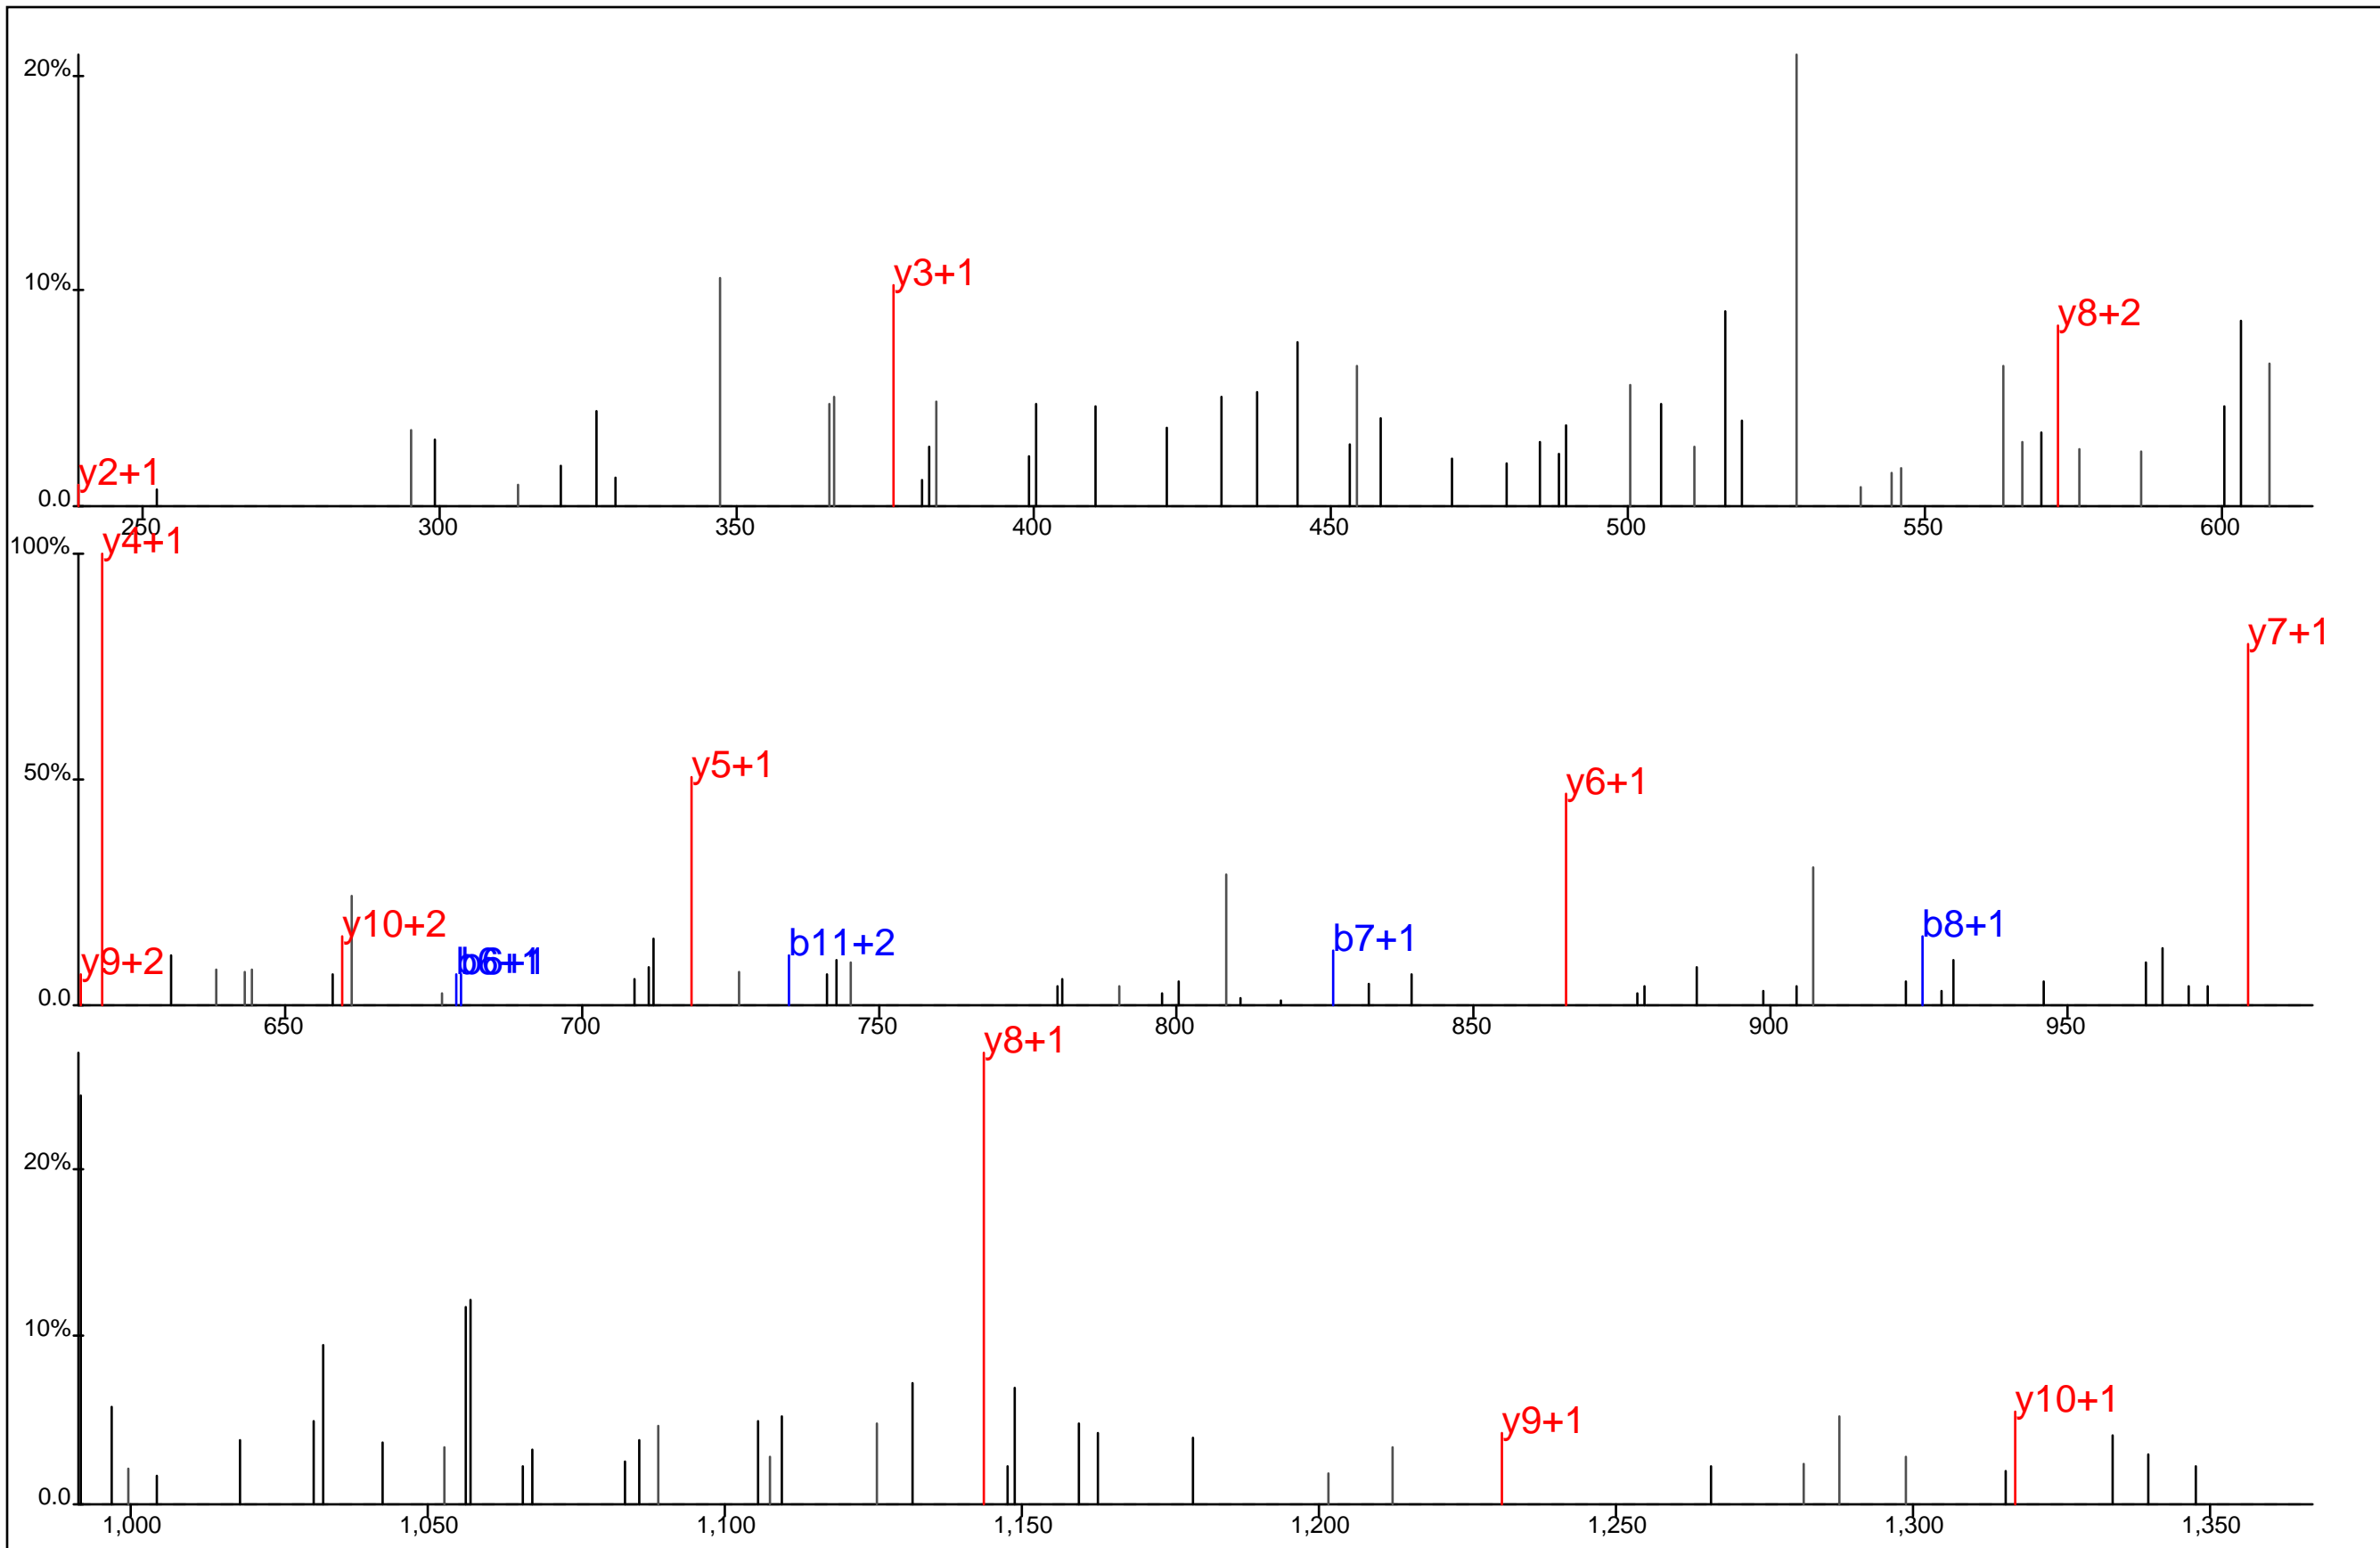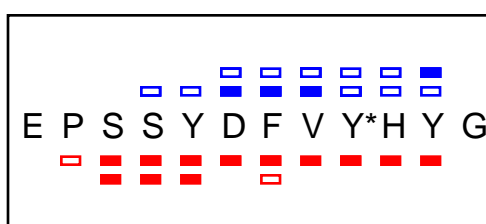

Protein Name: Engulfment and cell motility 2  
 gi Accession: 0  
 Precursor Mass: 772.2898+2  
 Delta Mass: 3.497 ppm  
 XCorr: 34.27

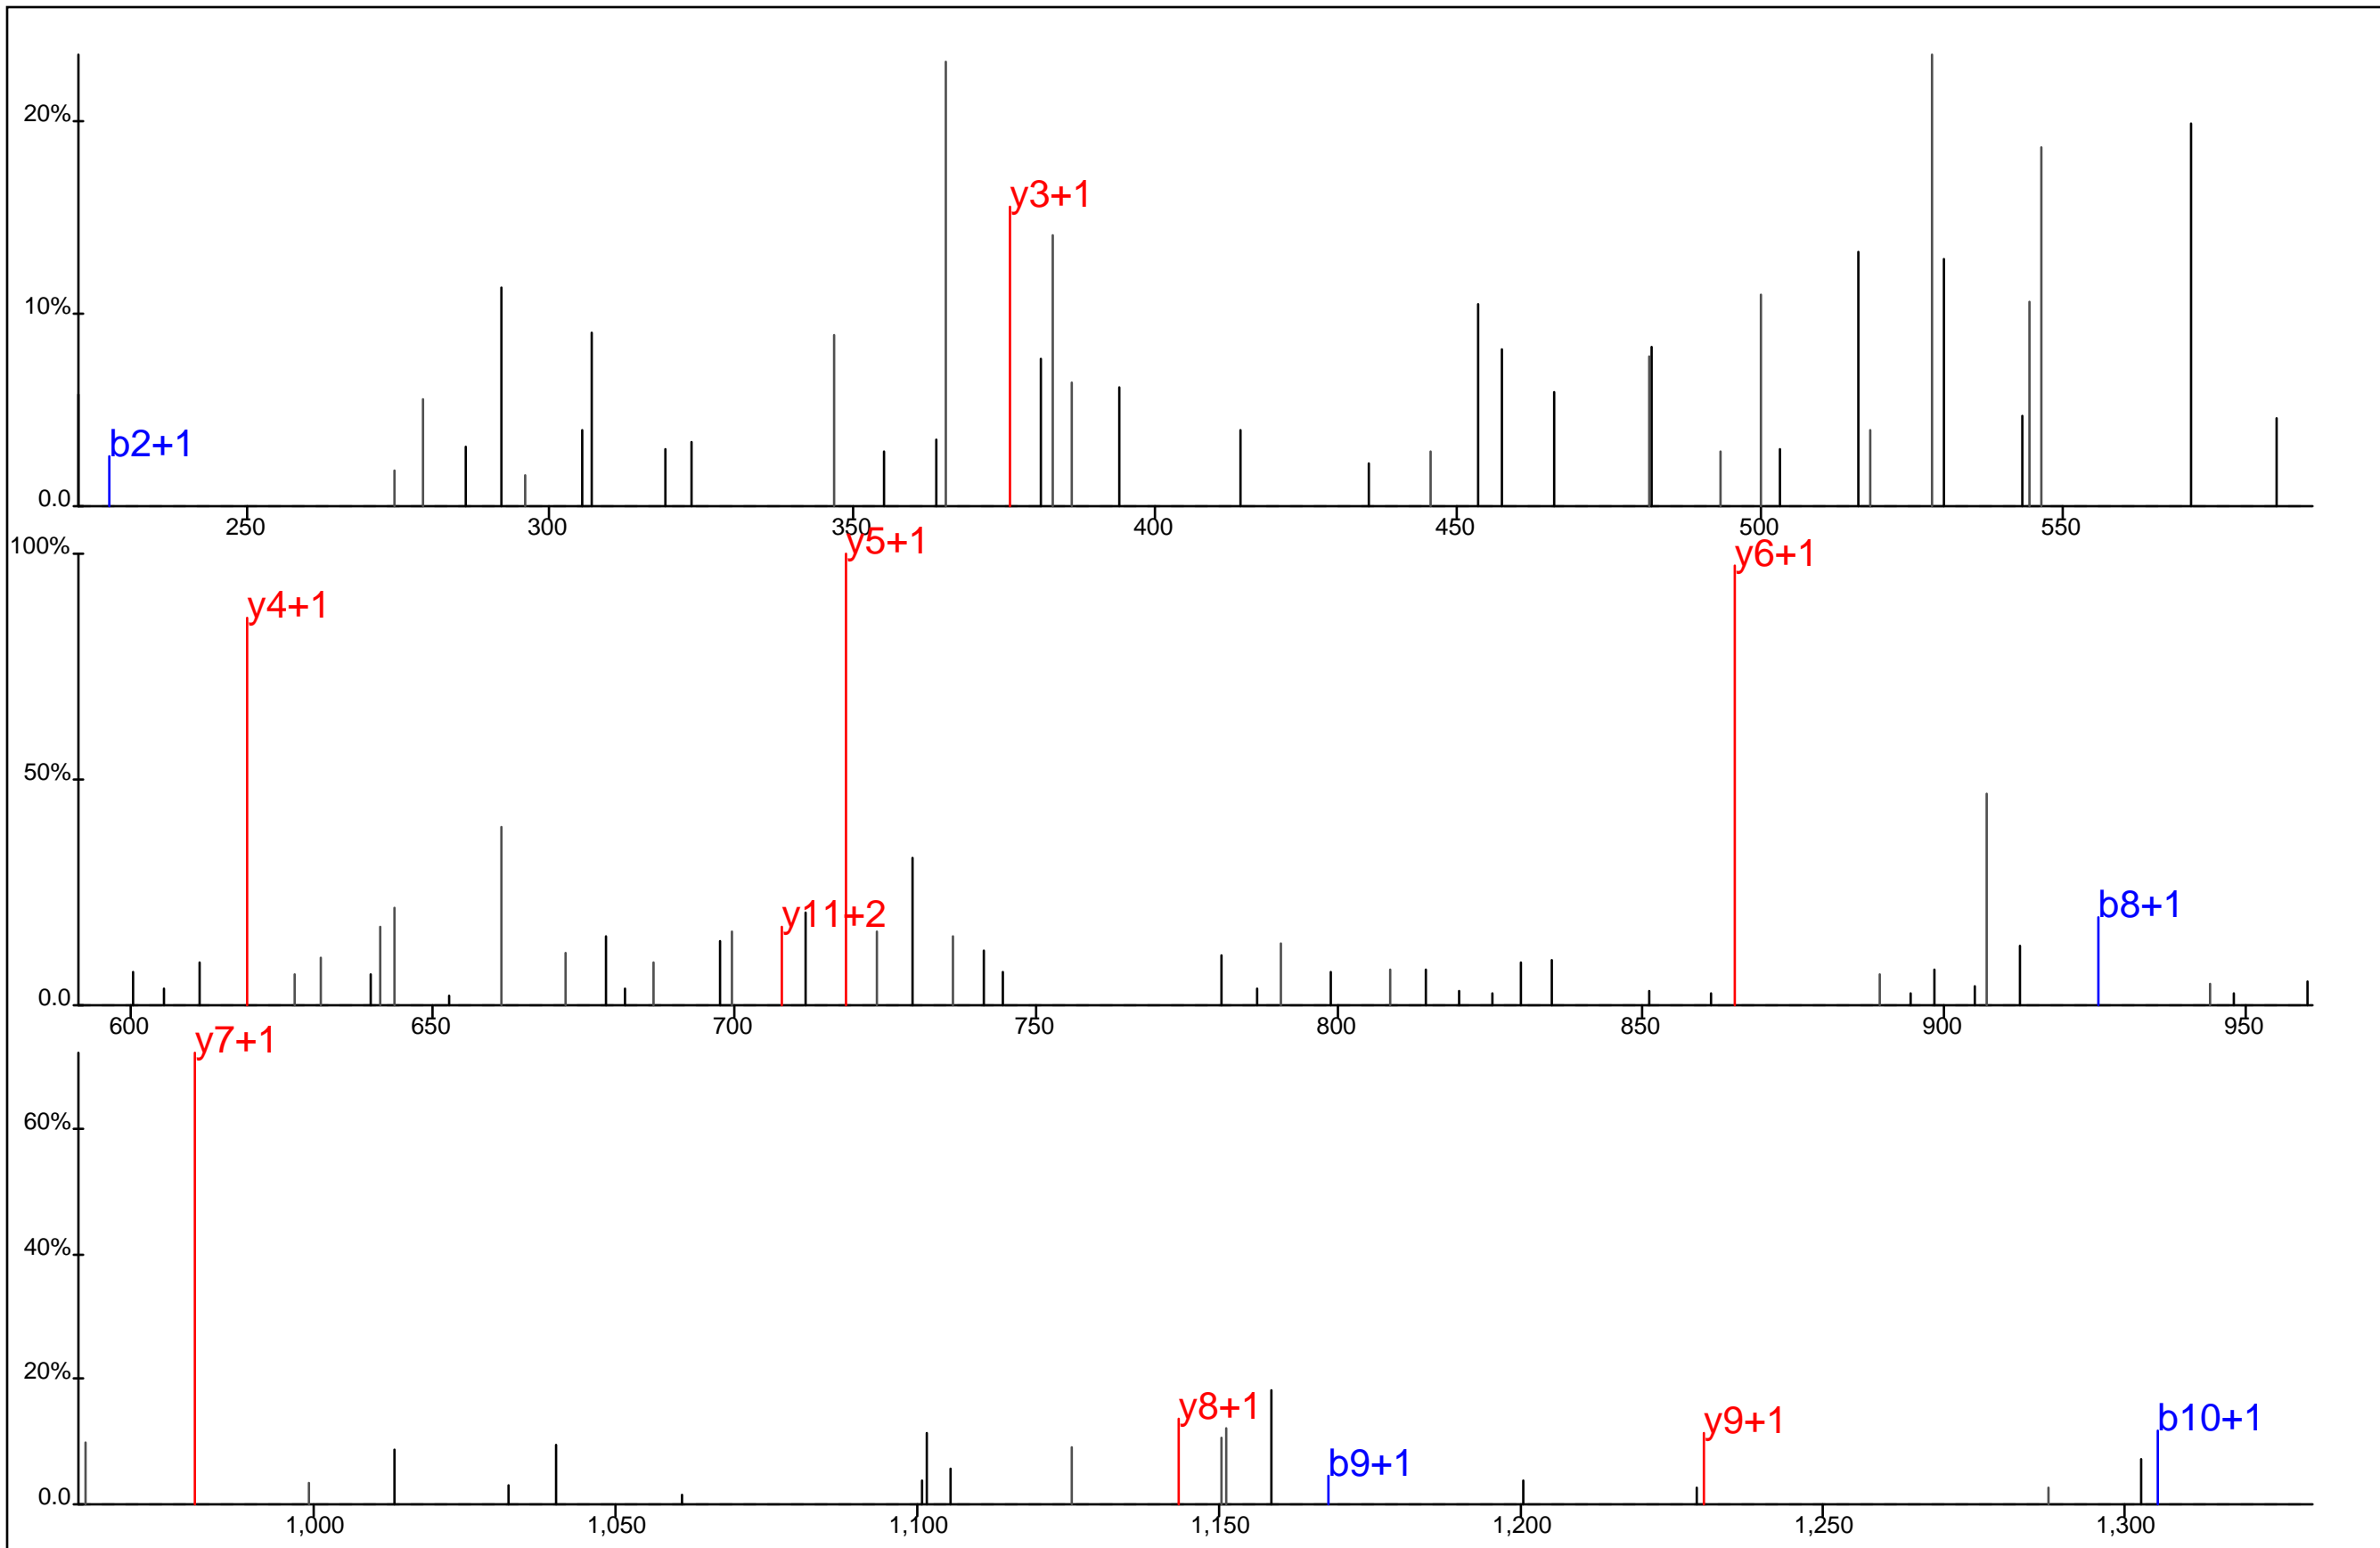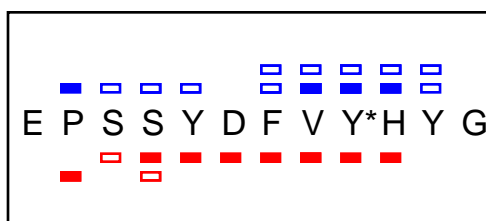

Protein Name: Engulfment and cell motility 2  
 gi Accession: 0  
 Precursor Mass: 772.2926+2  
 Delta Mass: 0.141 ppm  
 XCorr: 37.24

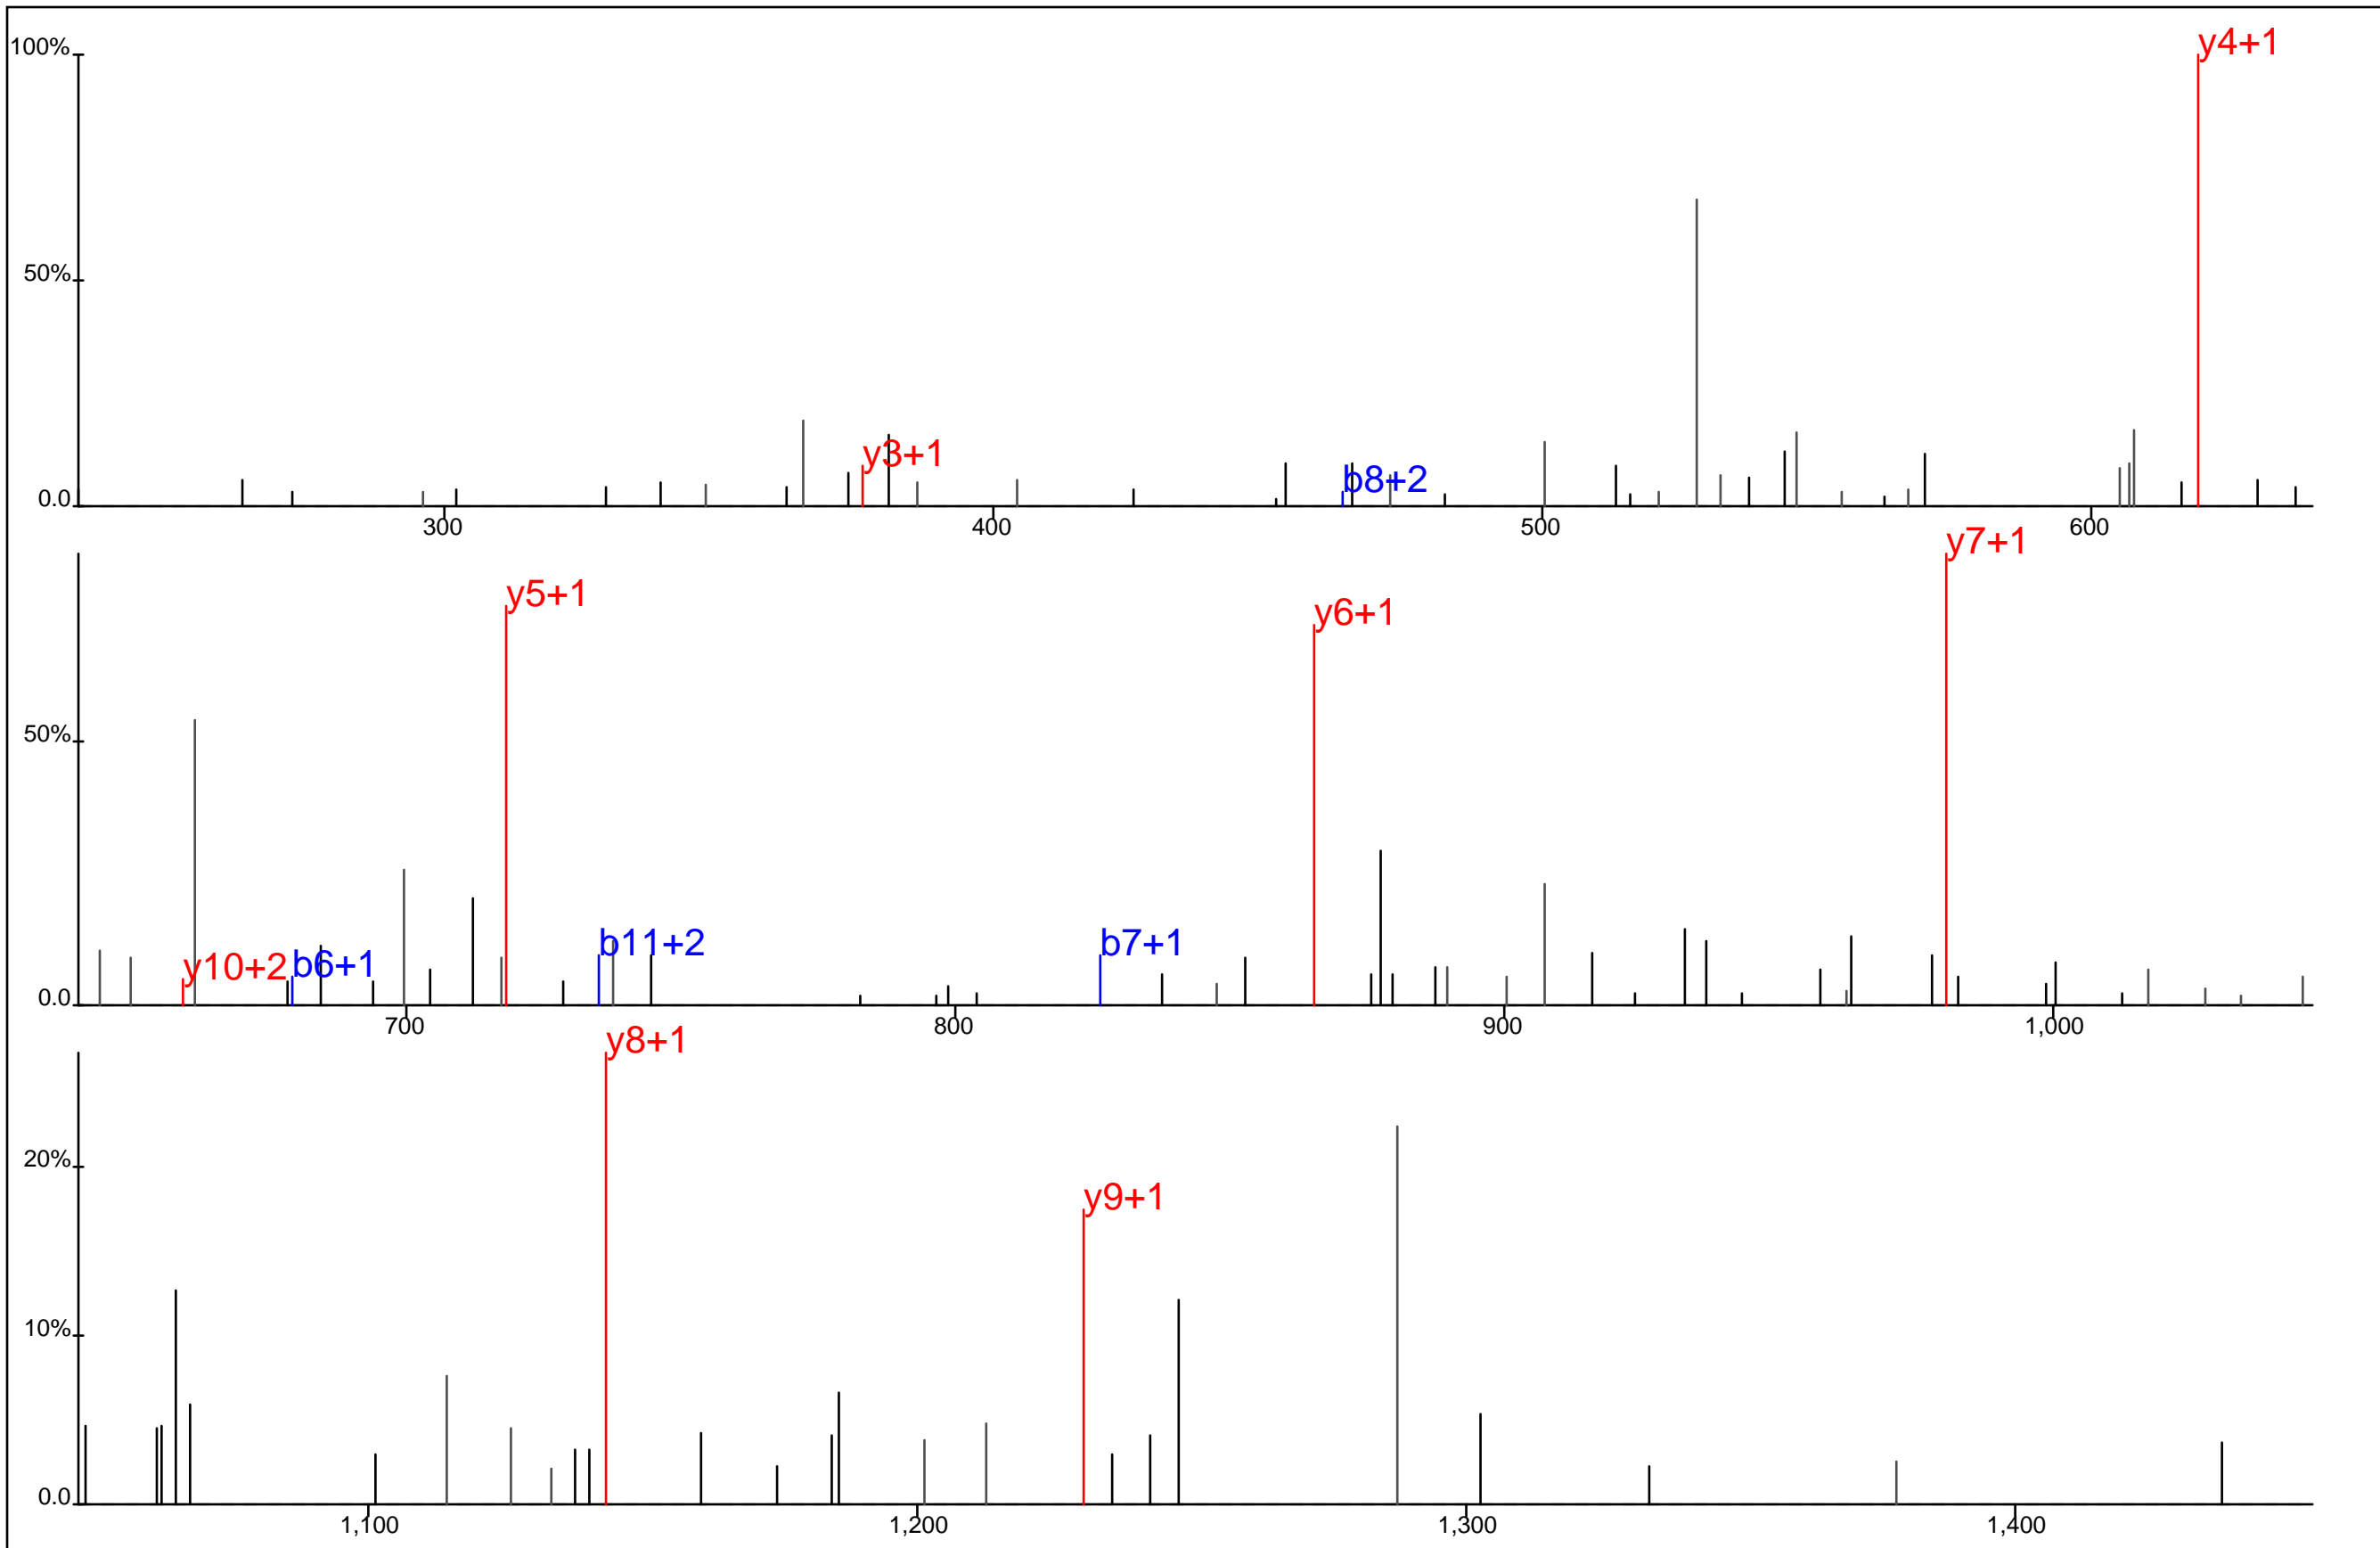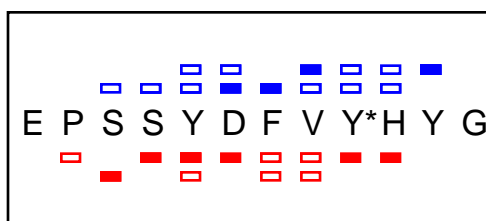

Protein Name: Engulfment and cell motility 2  
 gi Accession: 0  
 Precursor Mass: 772.2921+2  
 Delta Mass: 0.492 ppm  
 XCorr: 20.64

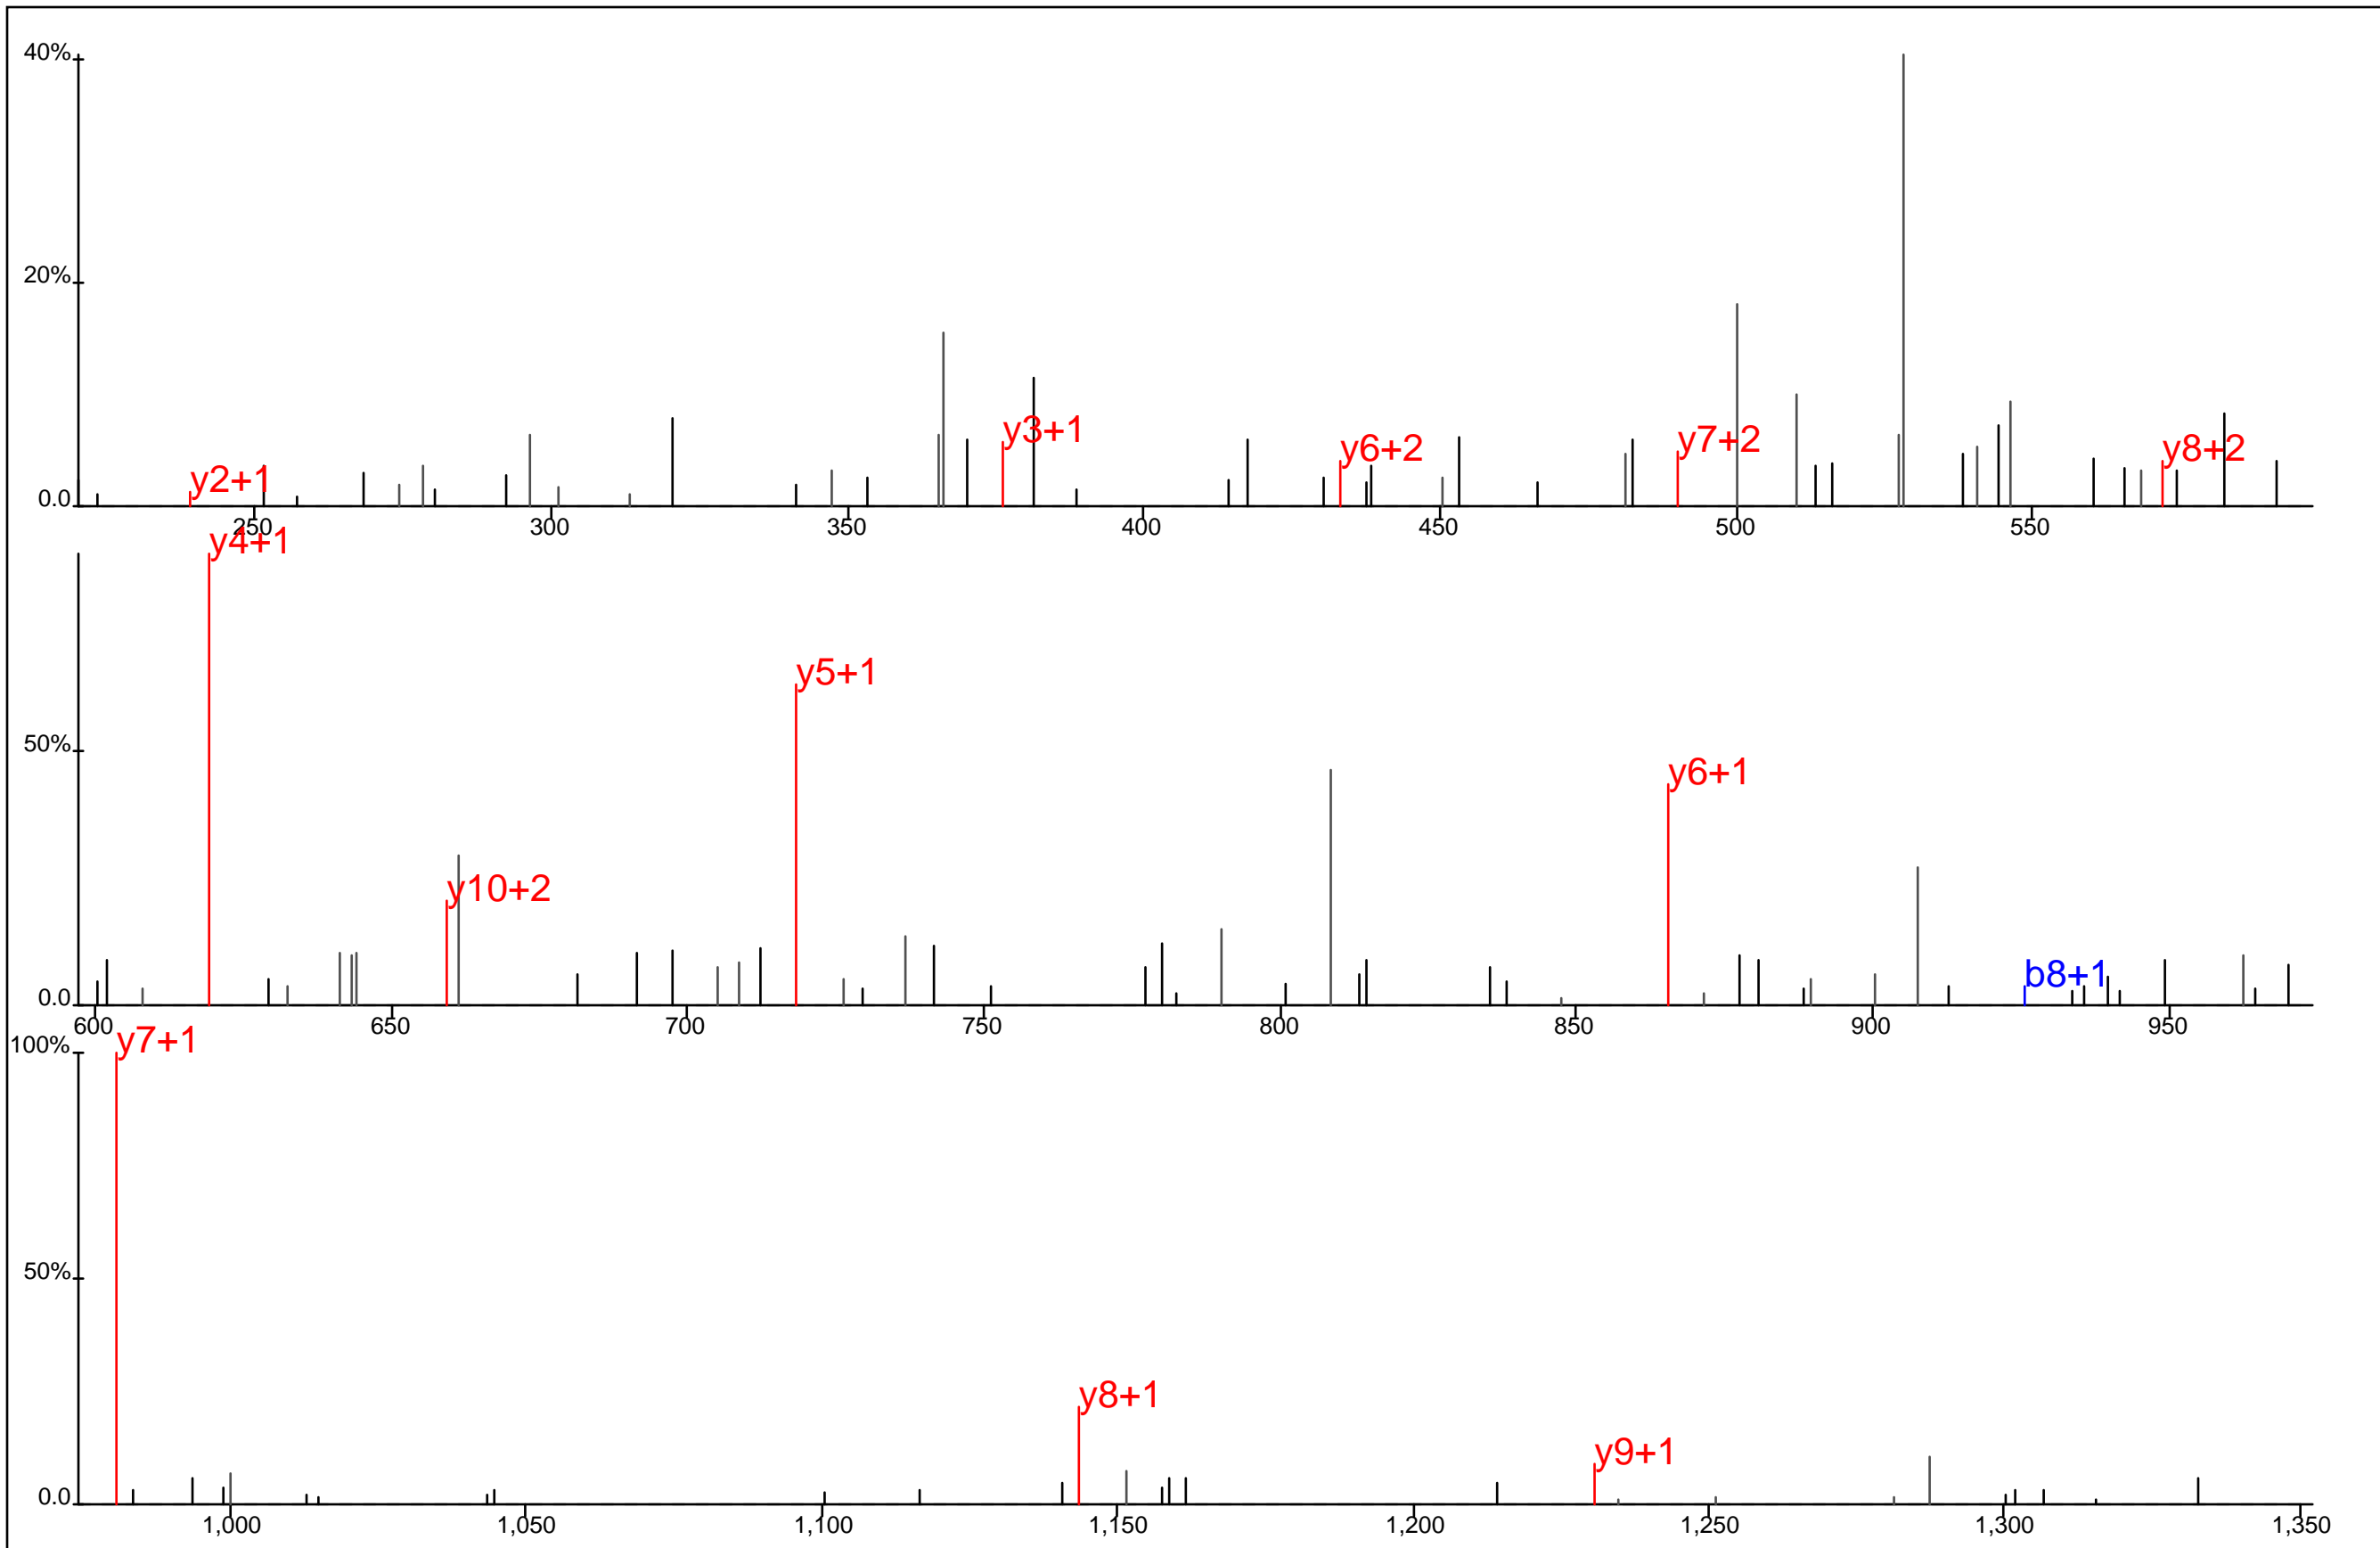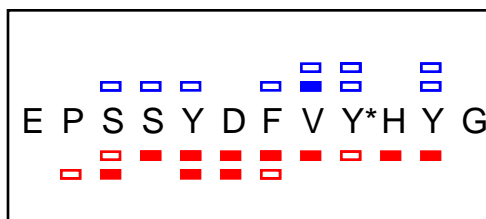

Protein Name: Engulfment and cell motility 2  
 gi Accession: 0  
 Precursor Mass: 772.2940+2  
 Delta Mass: 1.959 ppm  
 XCorr: 22.45

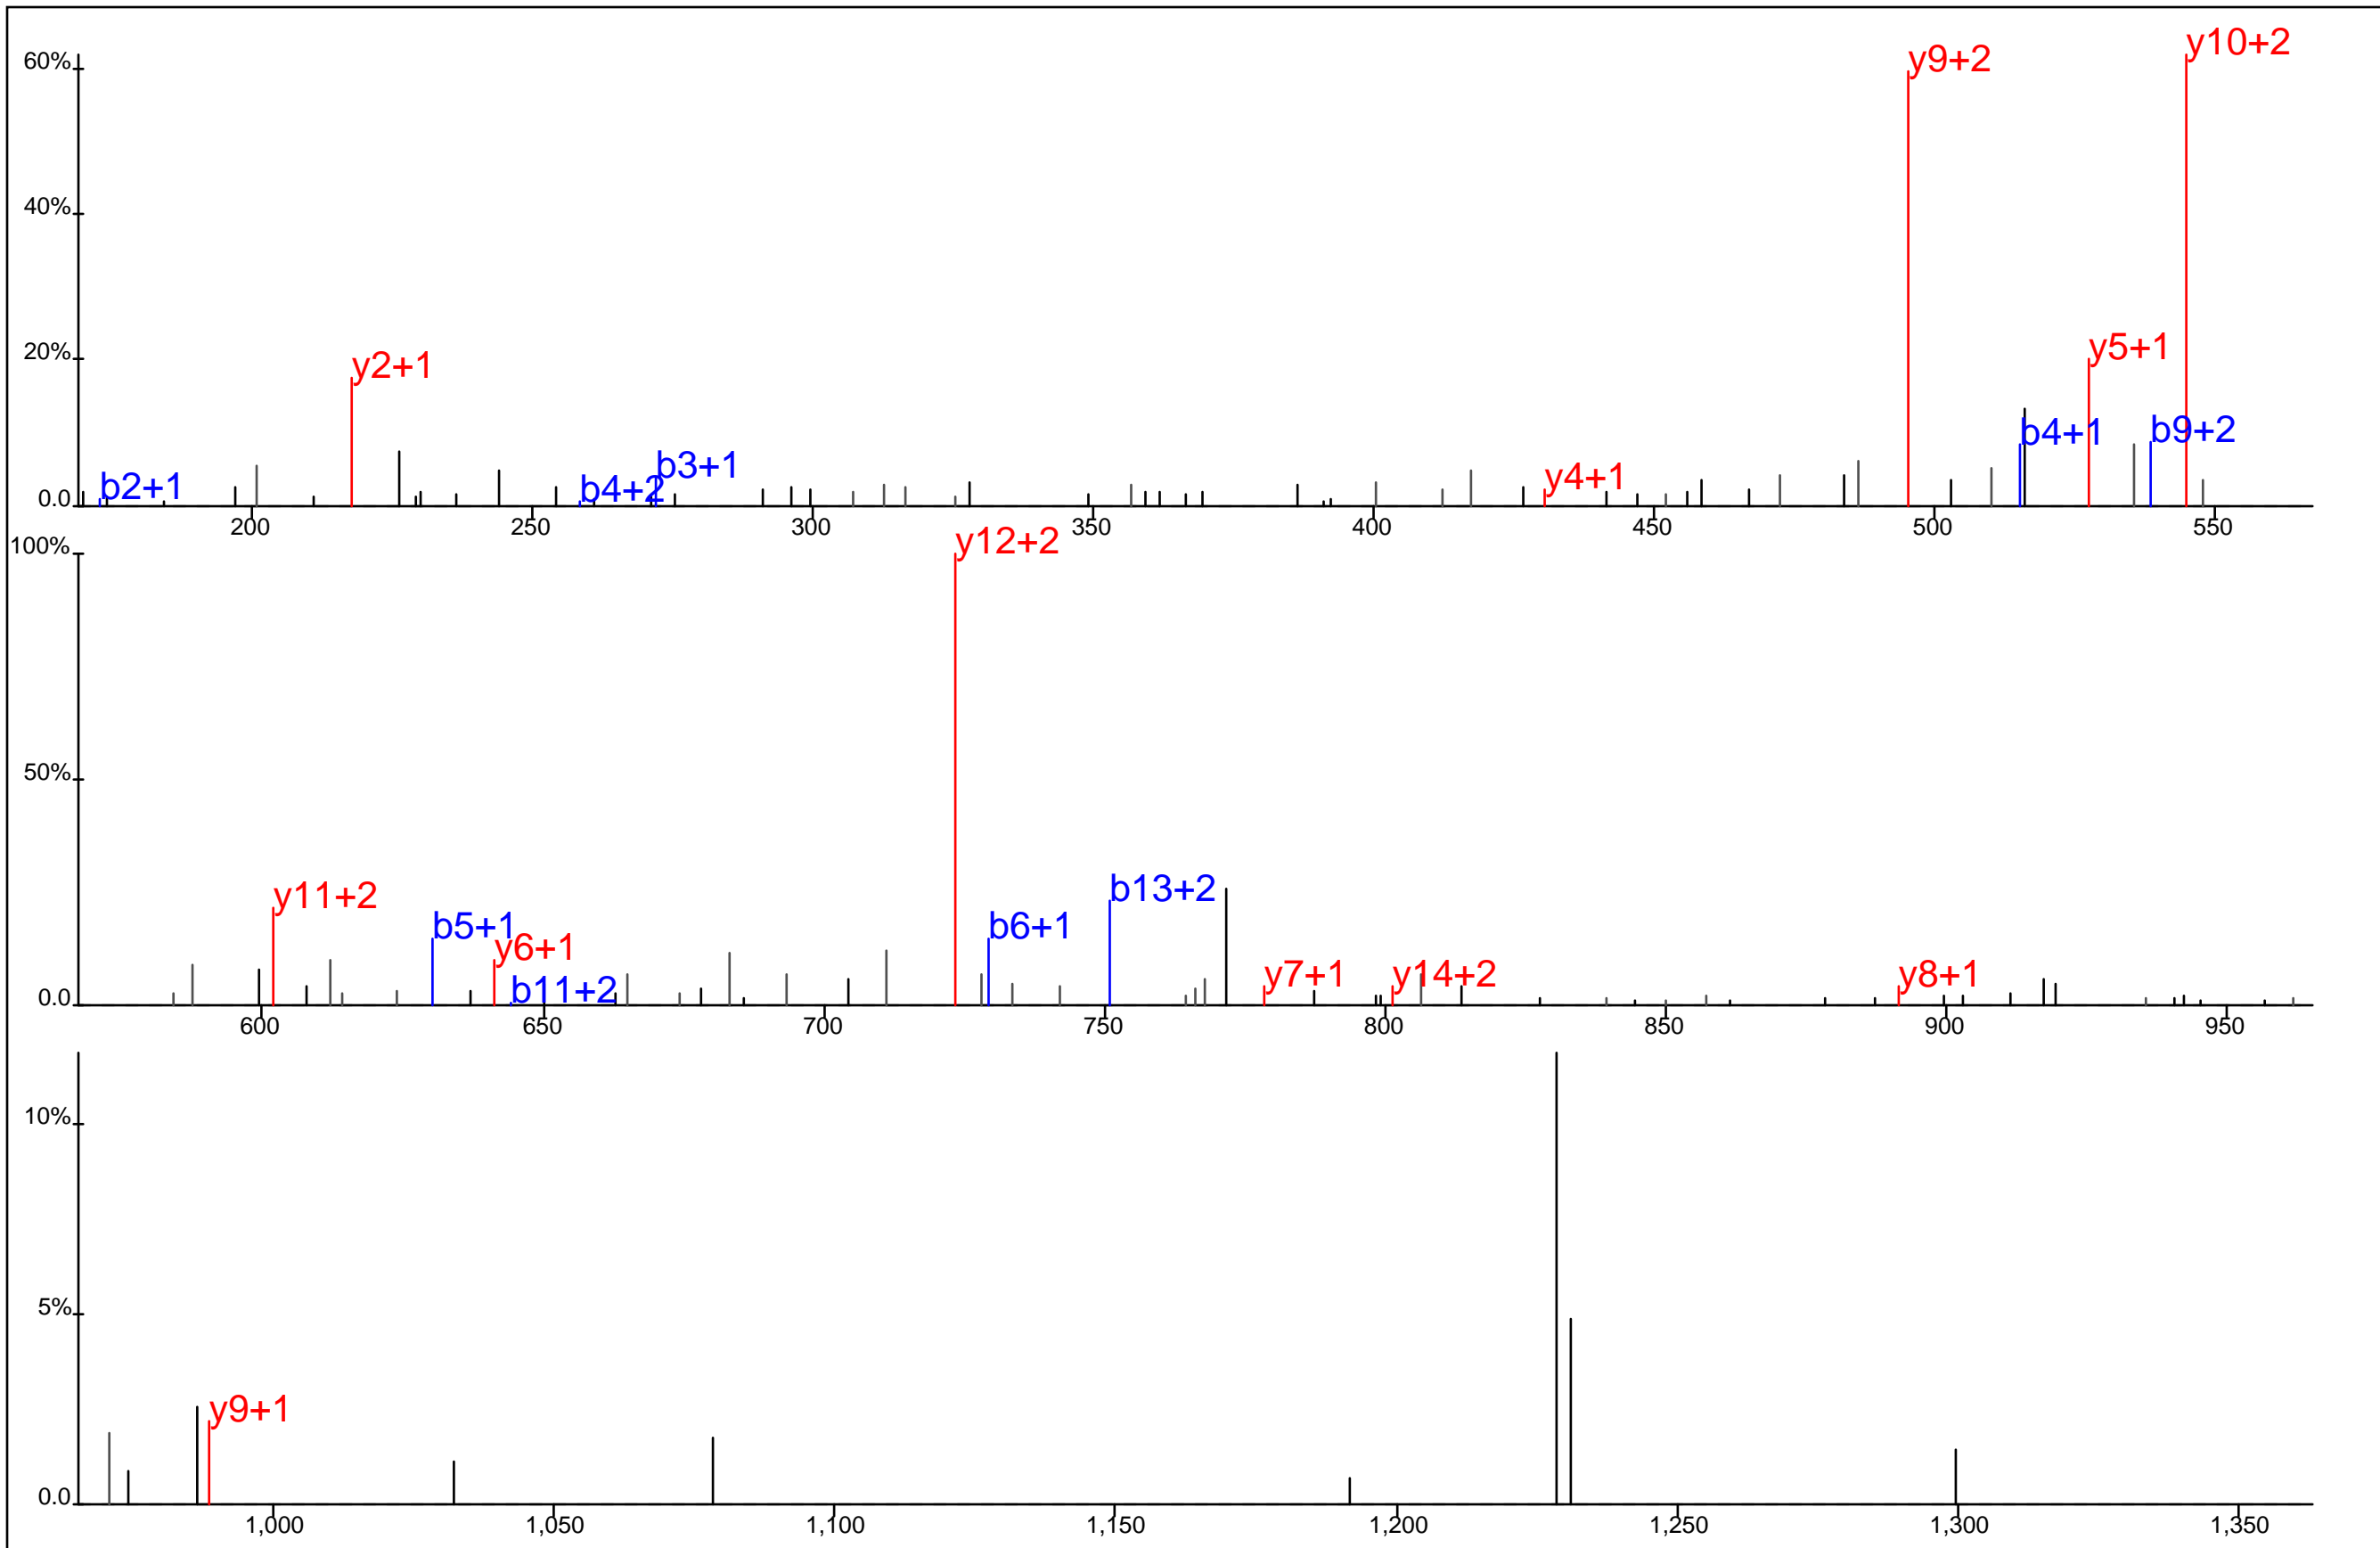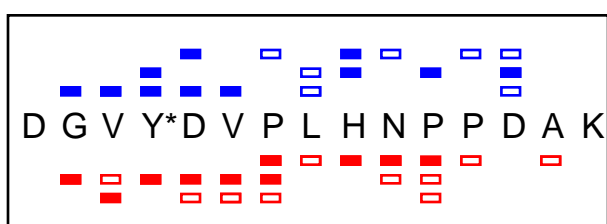

Protein Name: Enhancer of filamentation 1  
 gi Accession: 0  
 Precursor Mass: 572.9259+3  
 Delta Mass: 0.154 ppm  
 XCorr: 31.49

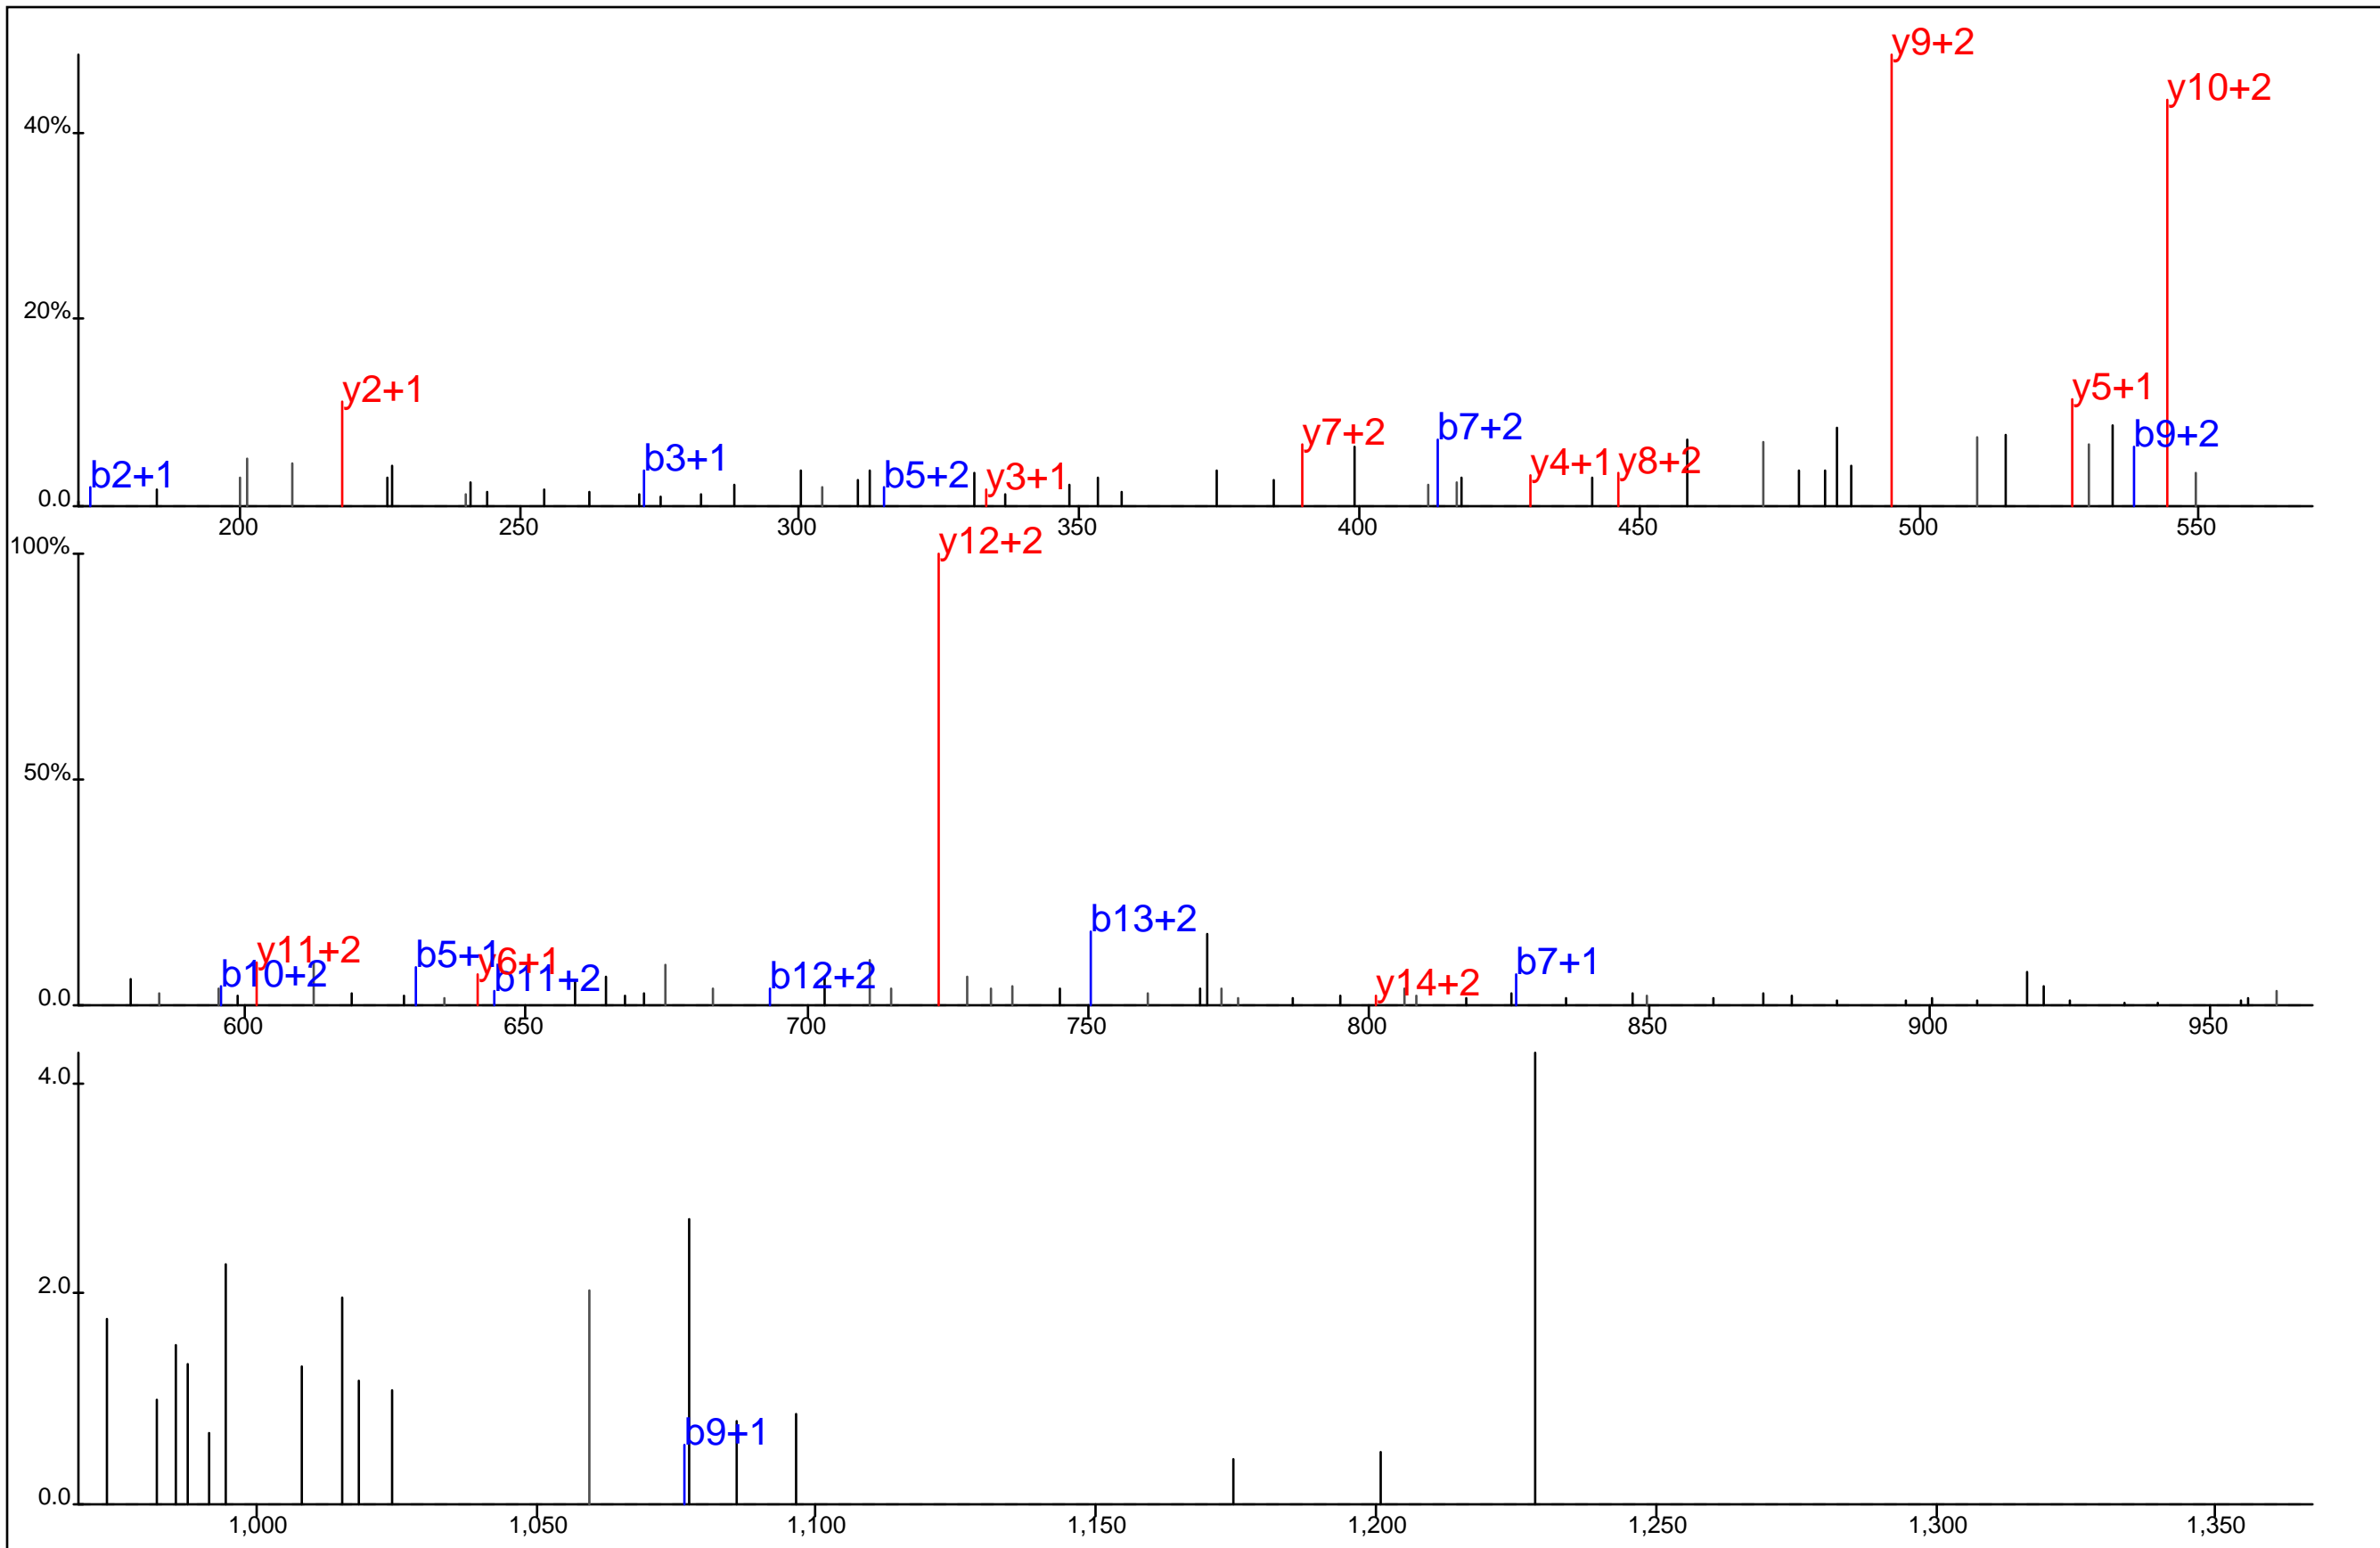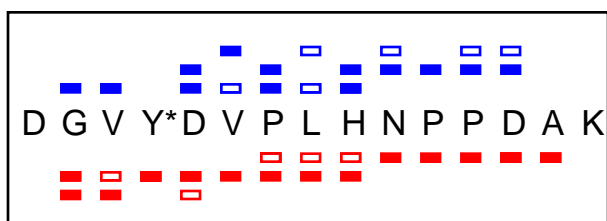

Protein Name: Enhancer of filamentation 1  
 gi Accession: 0  
 Precursor Mass: 572.9265+3  
 Delta Mass: 1.115 ppm  
 XCorr: 25.9



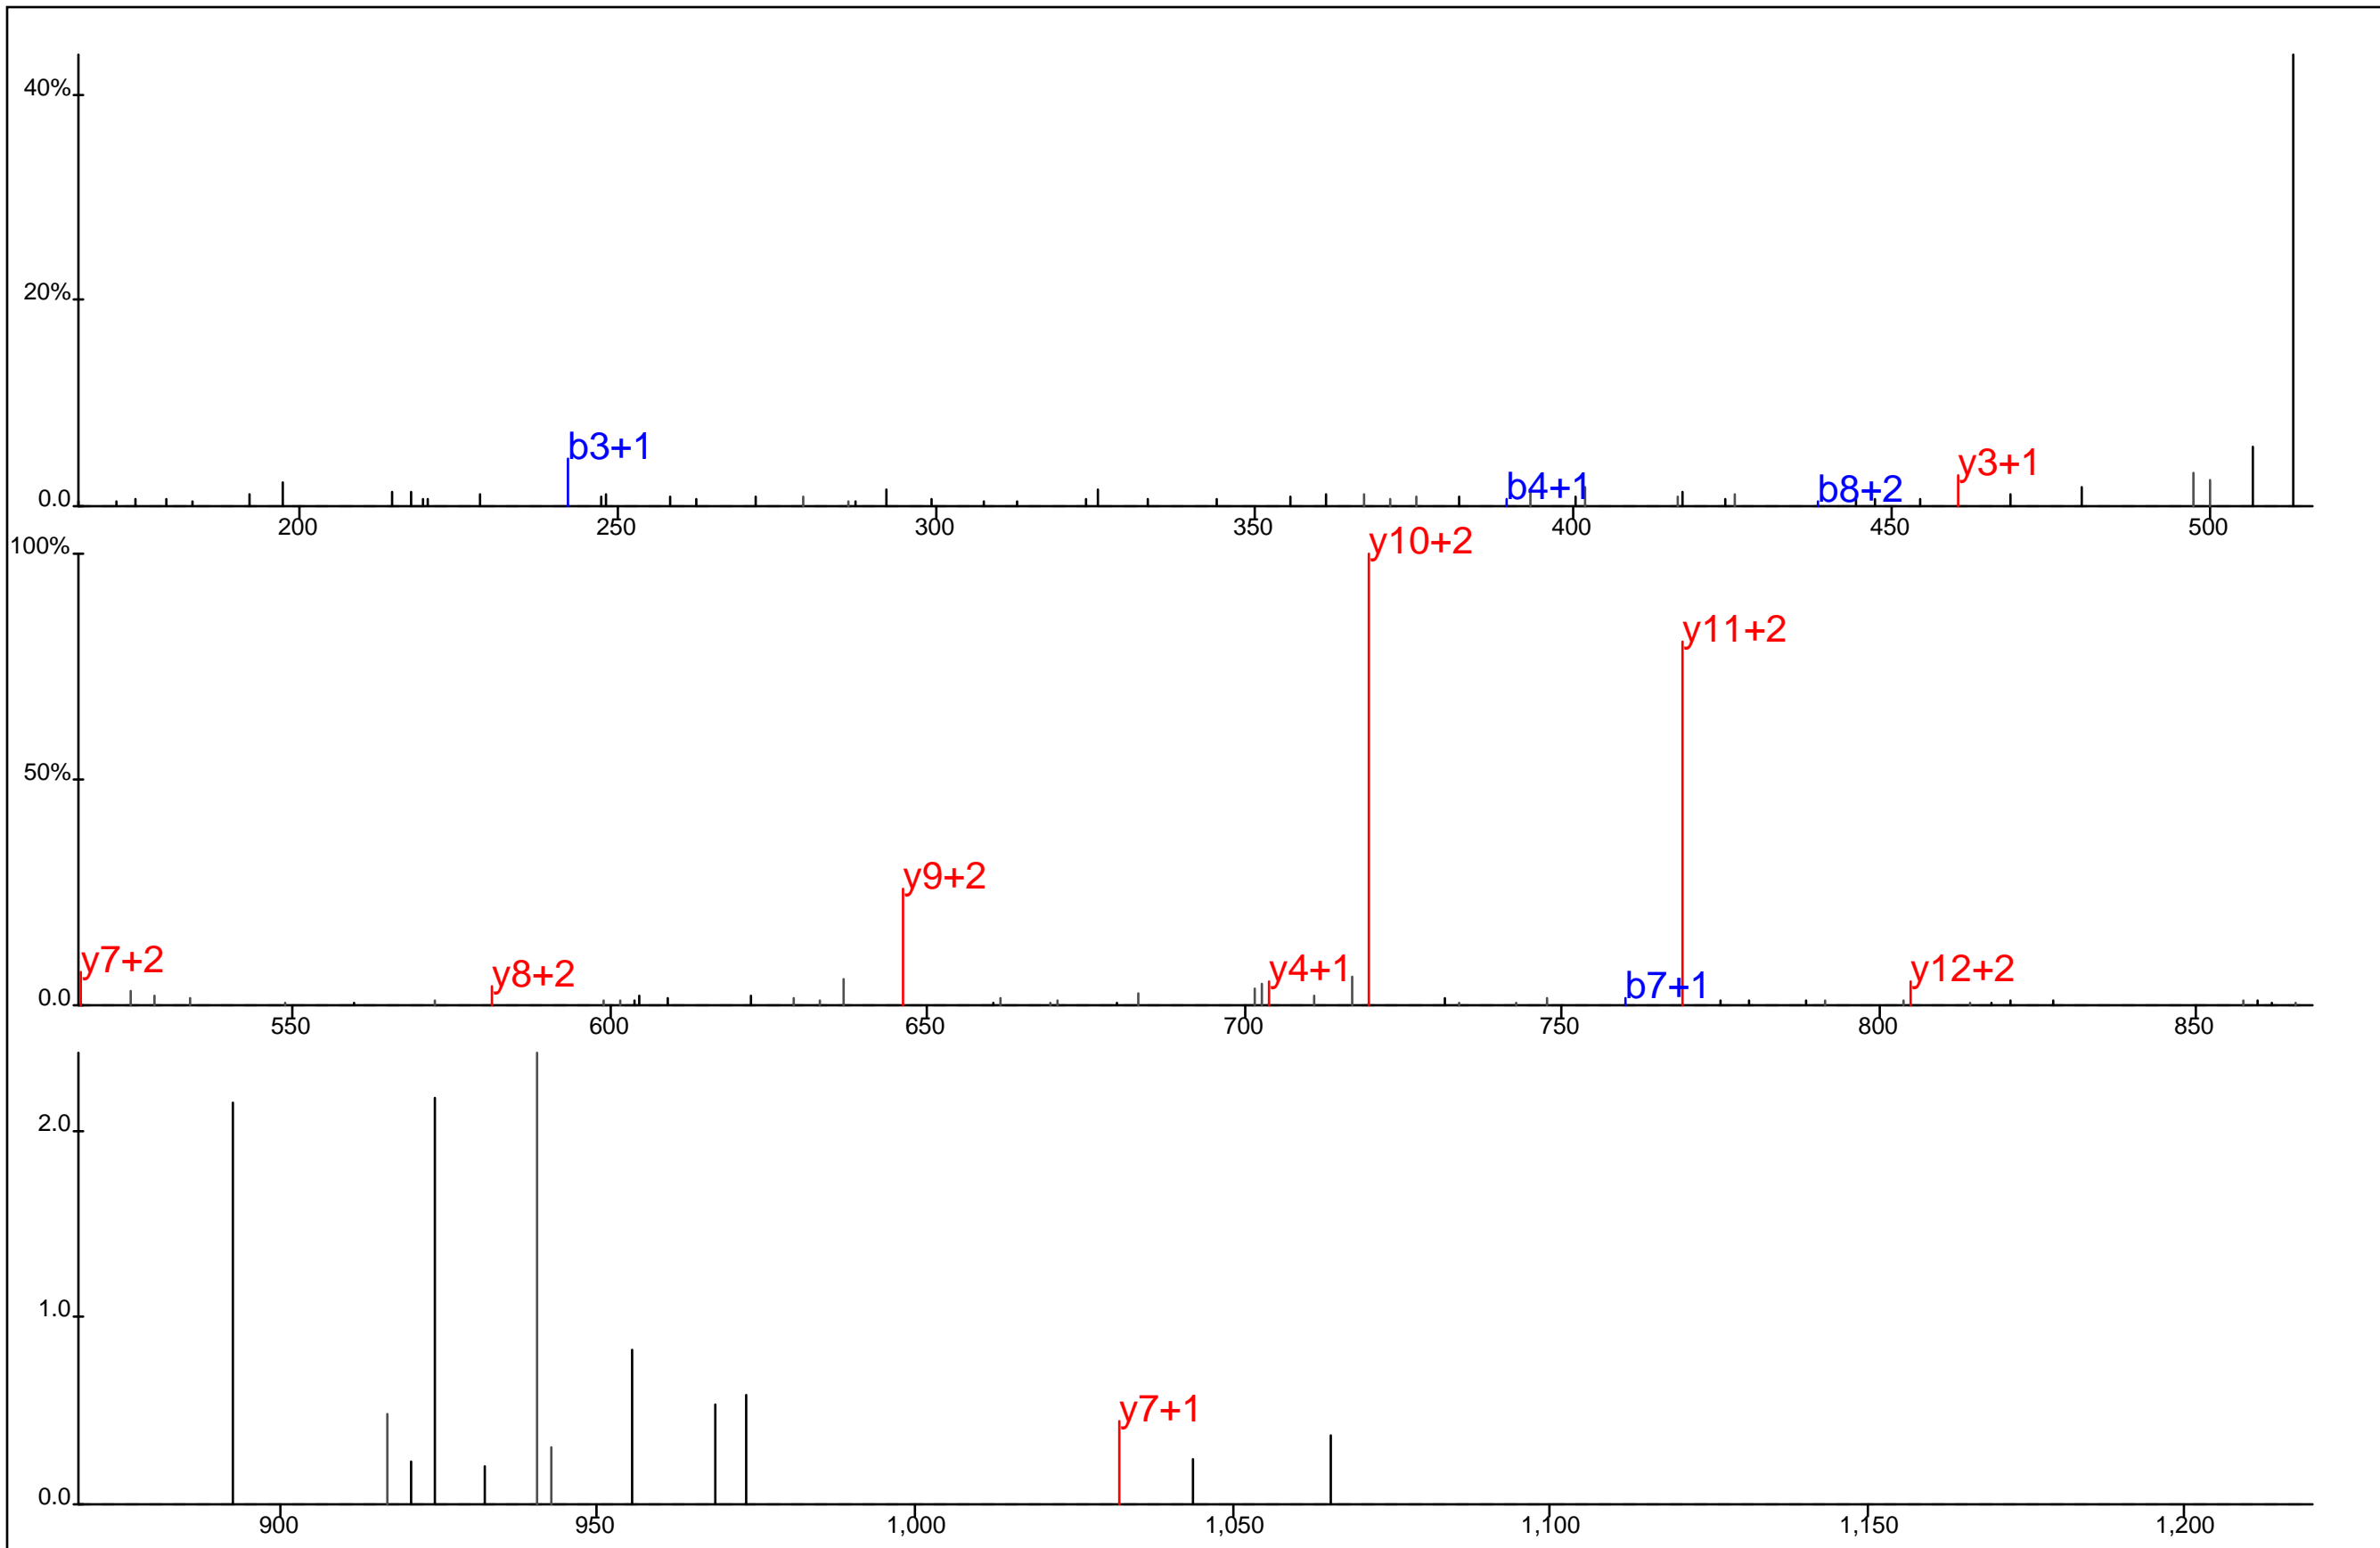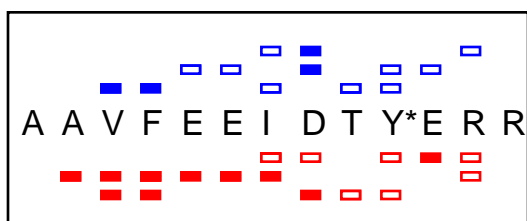

Protein Name: Enhancer of mRNA decapping 3 homolog  
 gi Accession: 0  
 Precursor Mass: 560.2538+3  
 Delta Mass: 0.239 ppm  
 XCorr: 28.28

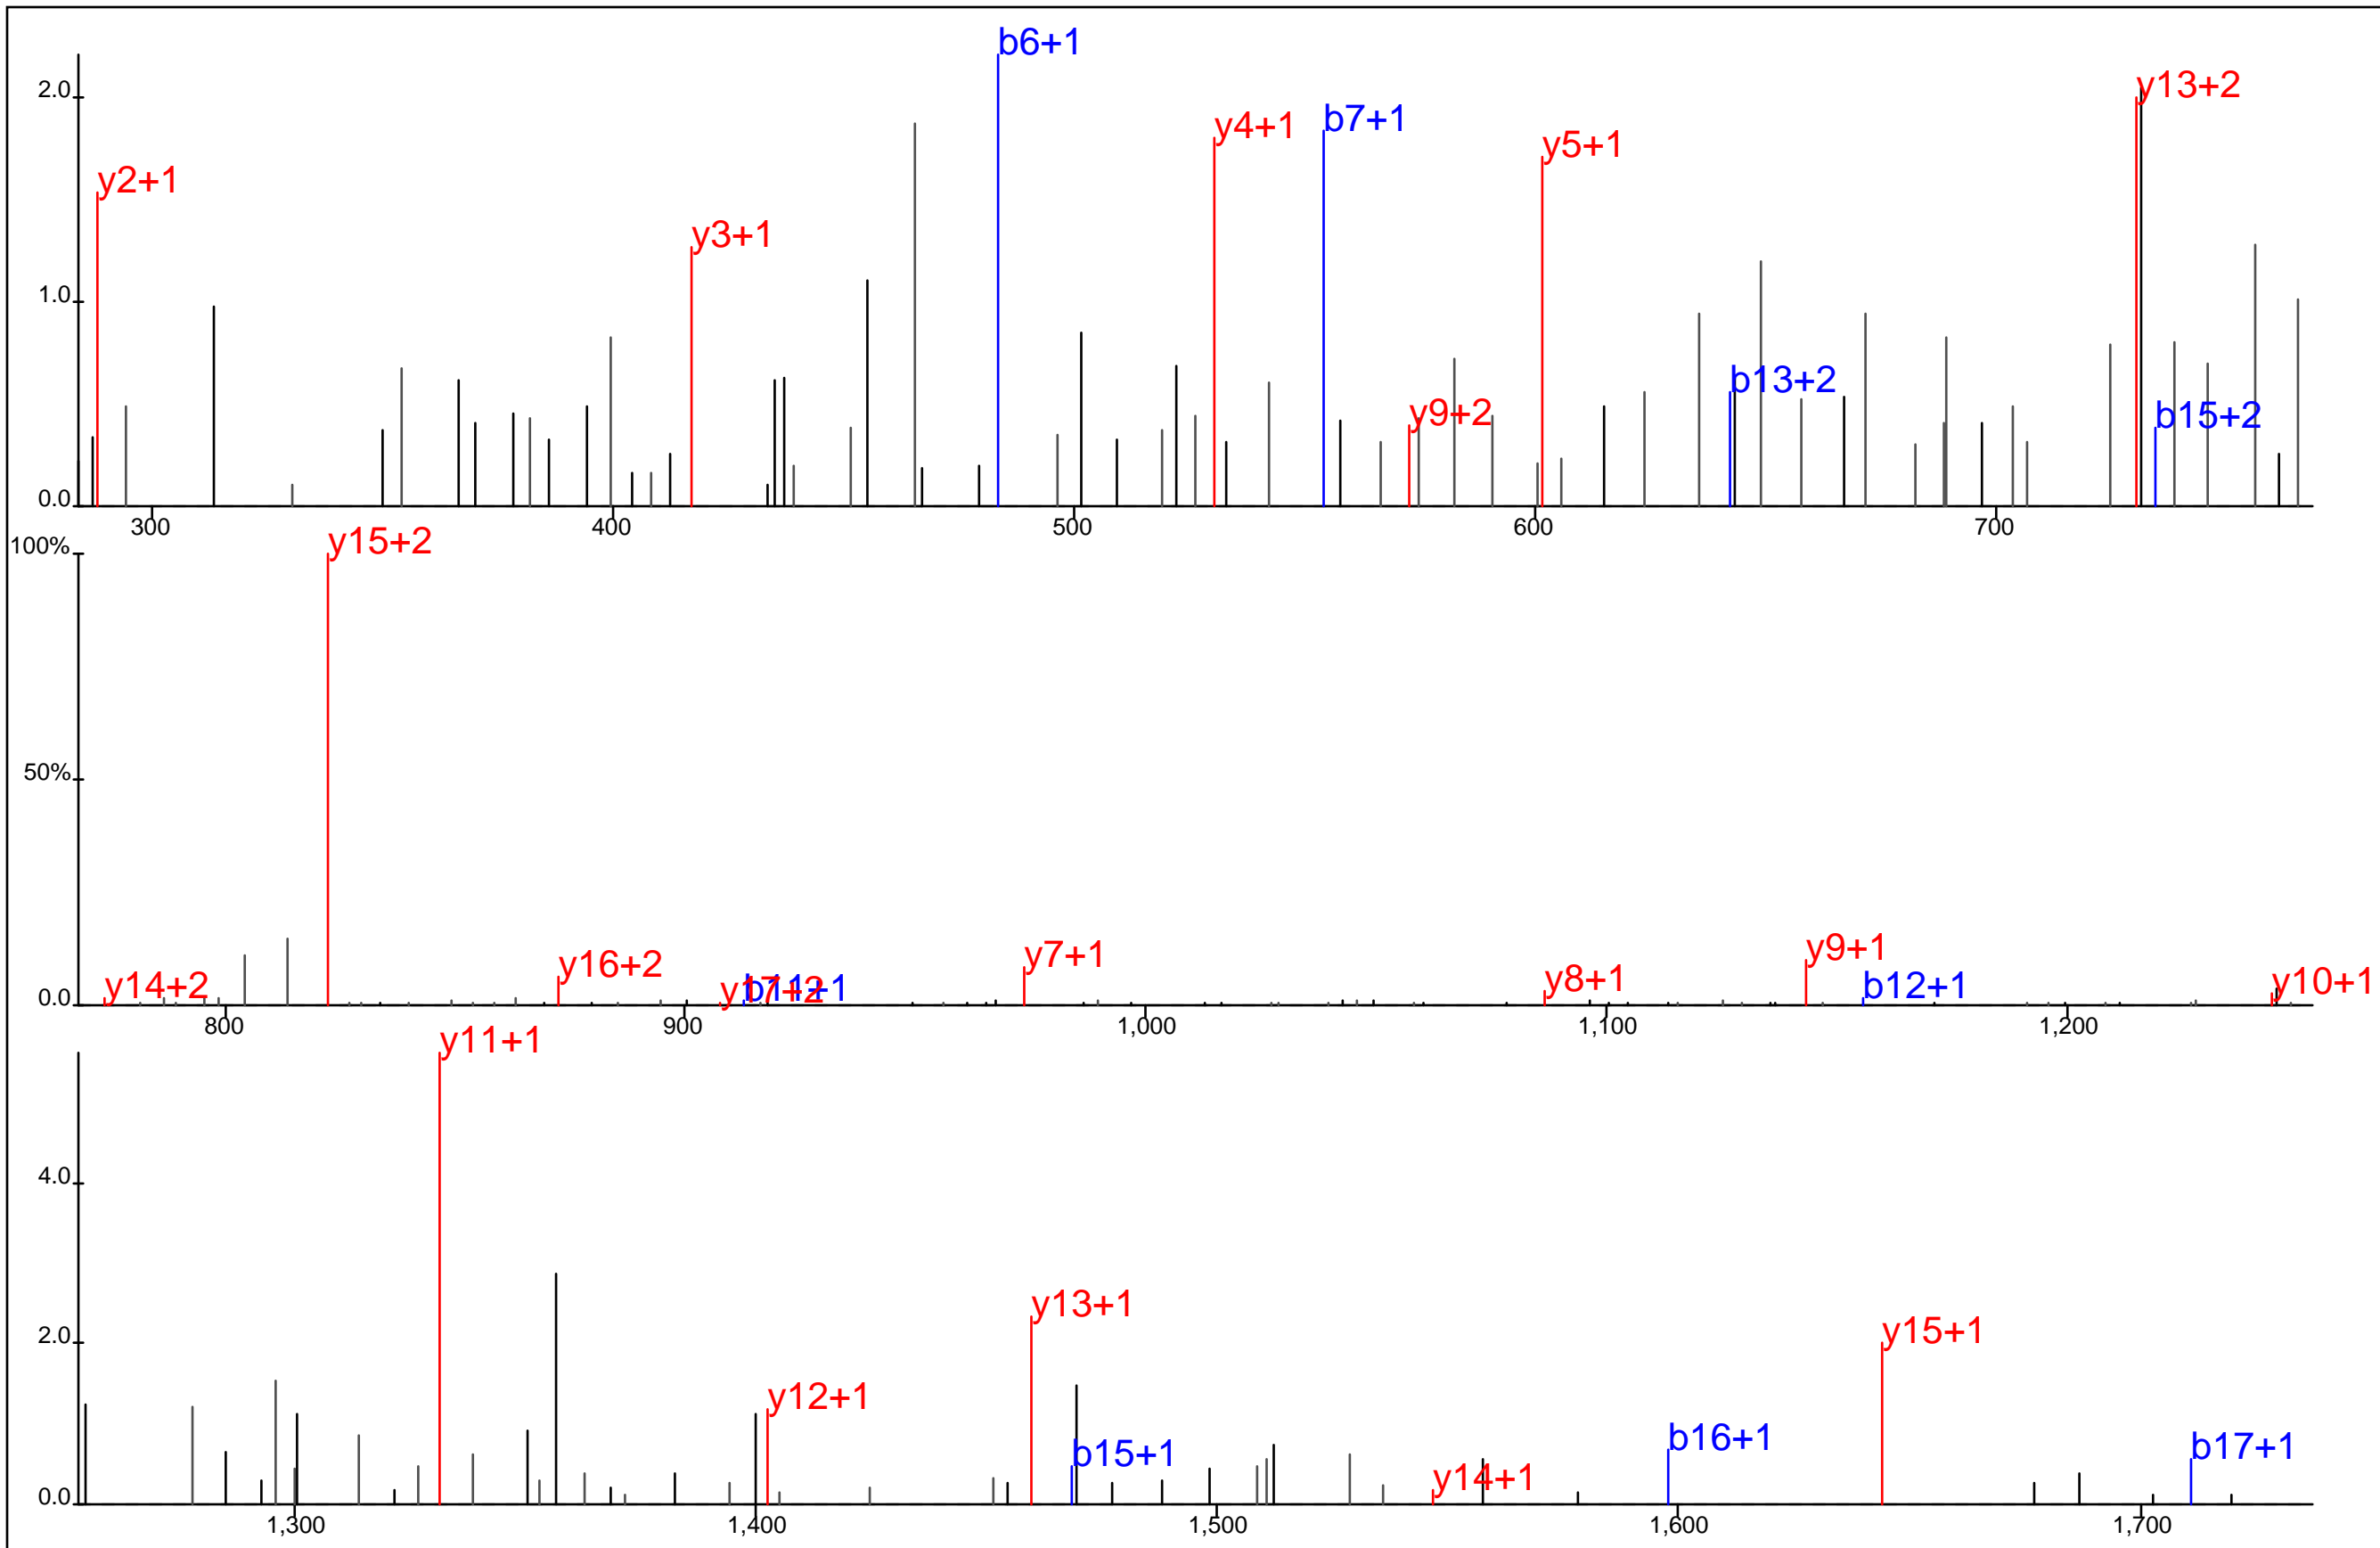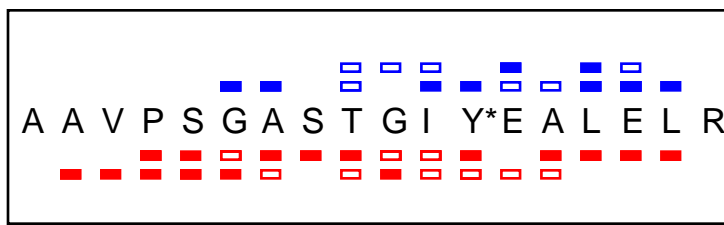

Protein Name: Enolase 2  
 gi Accession: 0  
 Precursor Mass: 942.9596+2  
 Delta Mass: 0.887 ppm  
 XCorr: 87.6

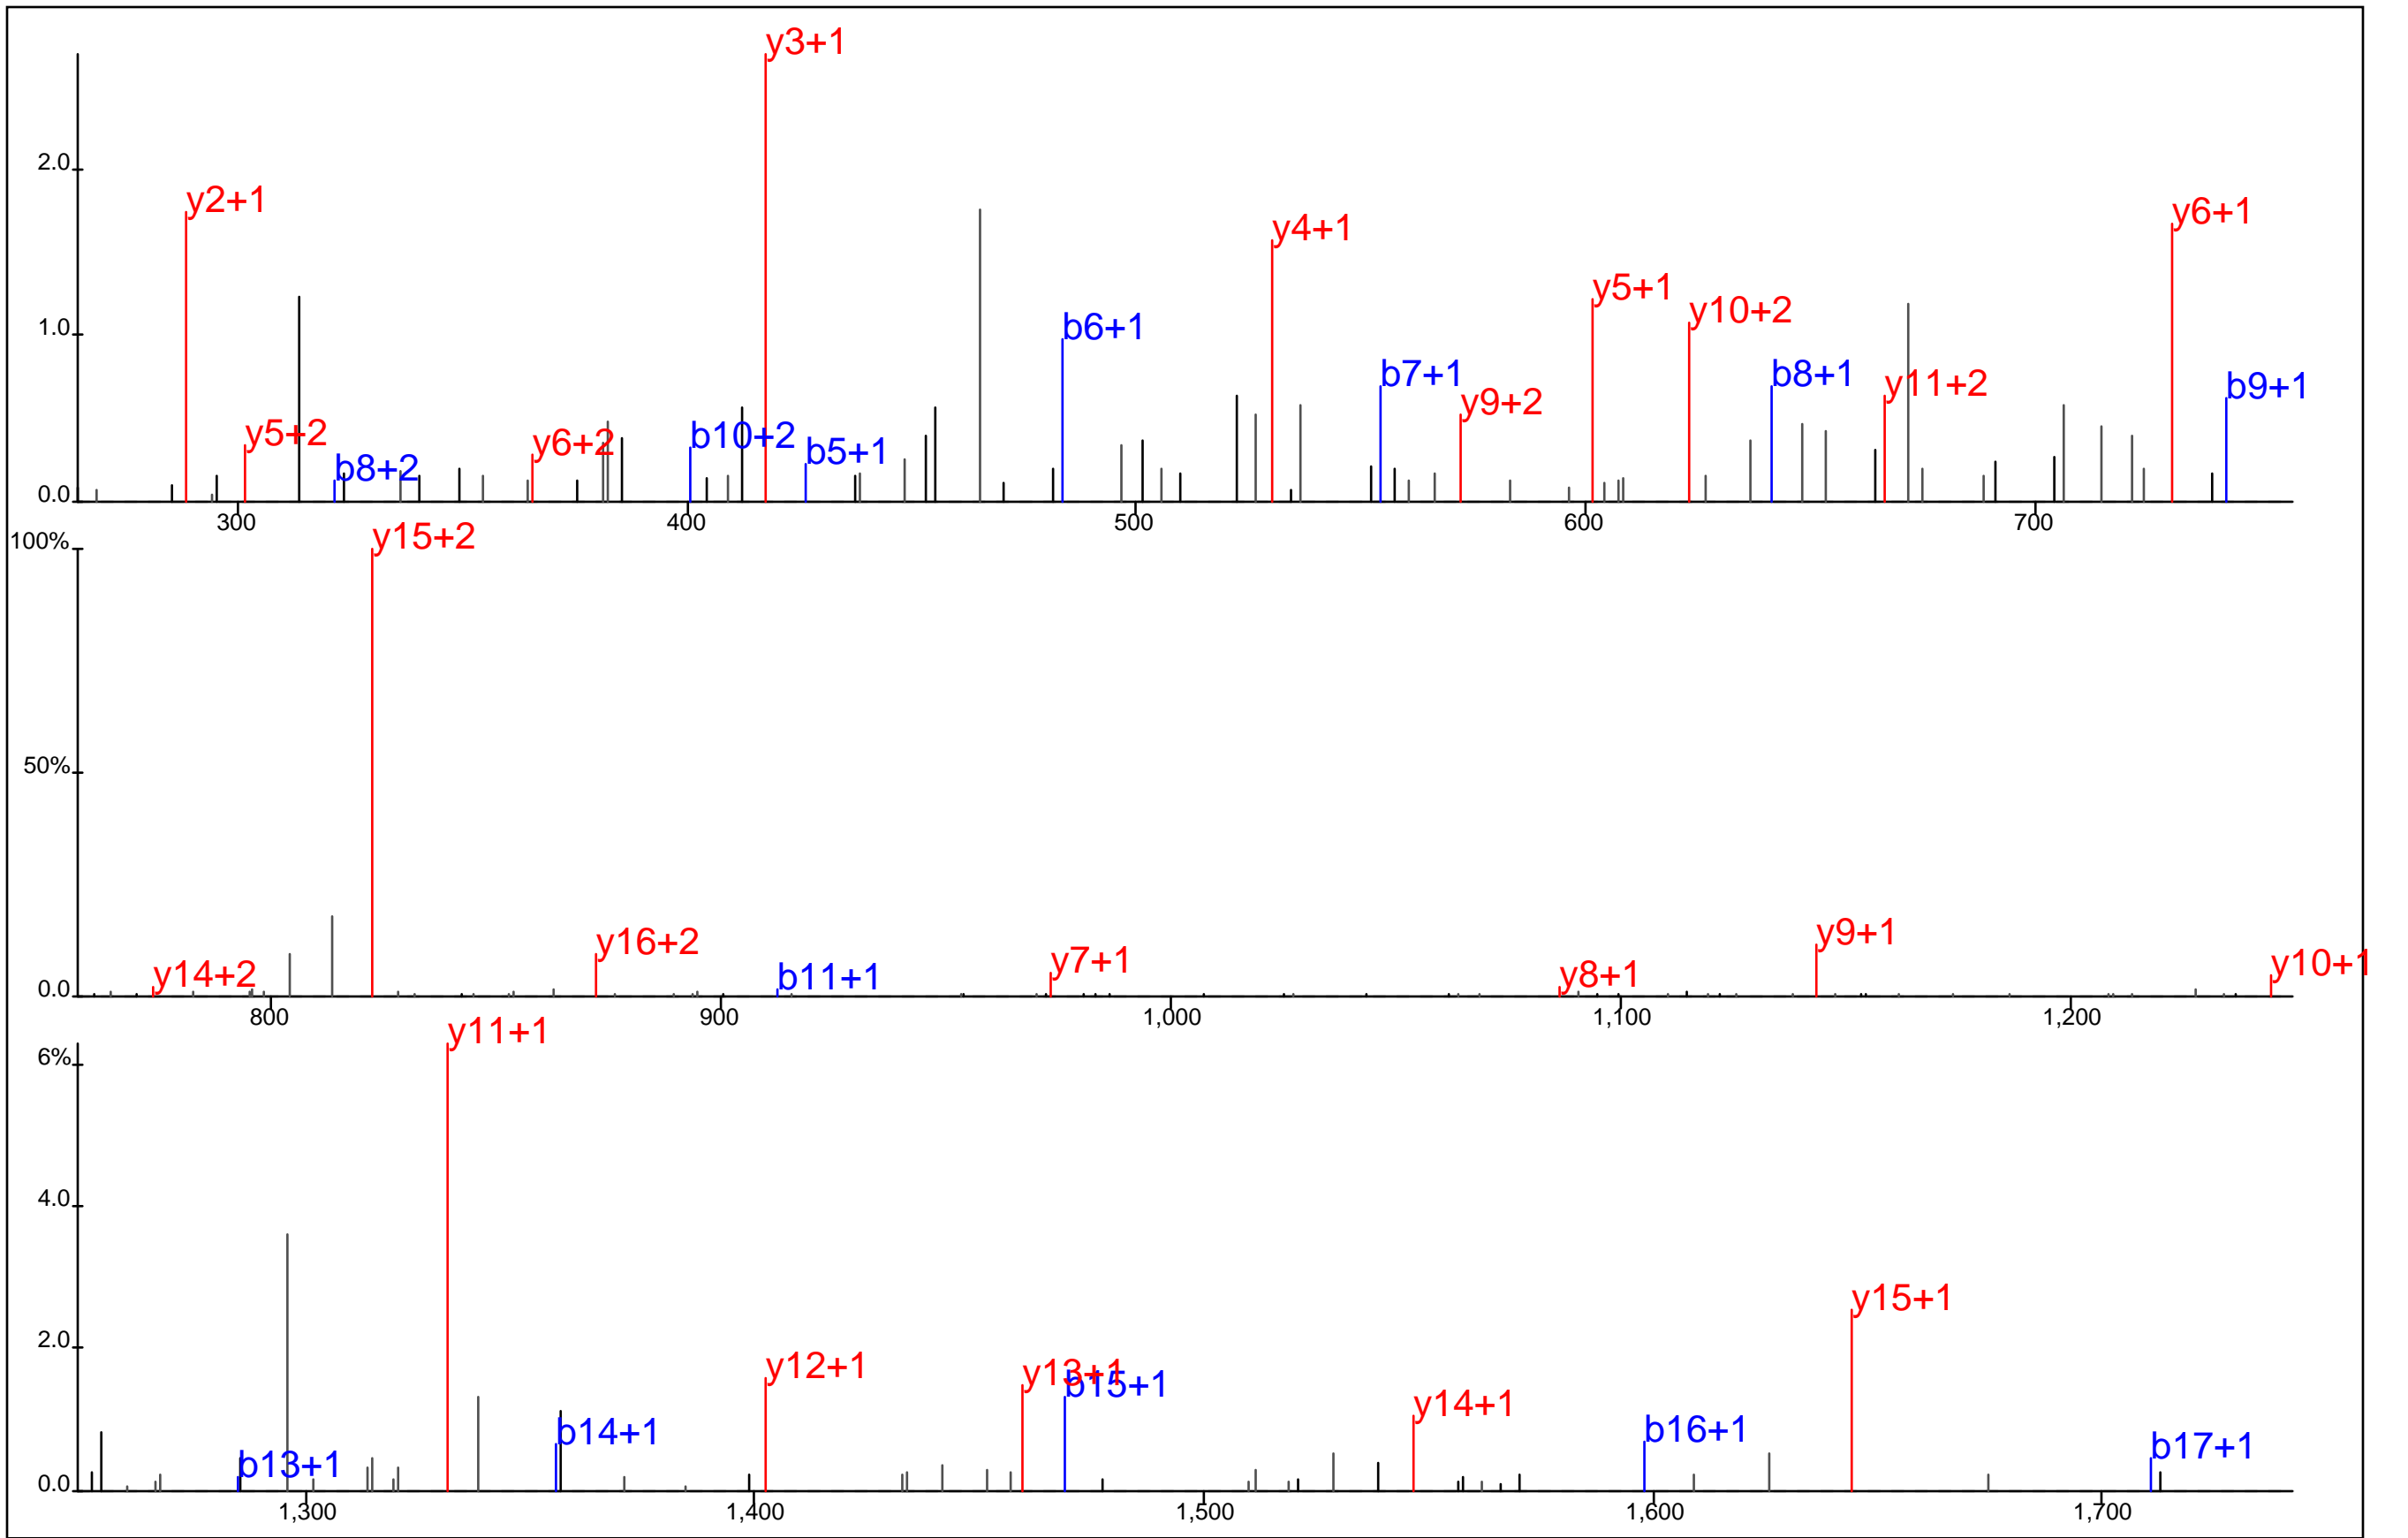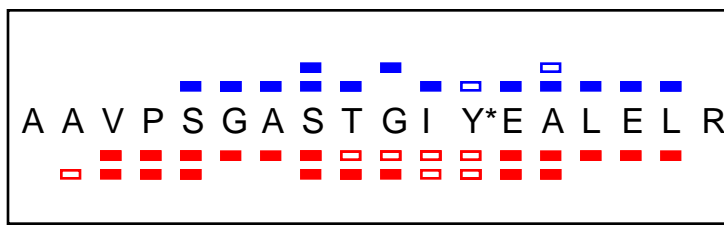

Protein Name: Enolase 2  
 gi Accession: 0  
 Precursor Mass: 942.9592+2  
 Delta Mass: 0.433 ppm  
 XCorr: 134.01

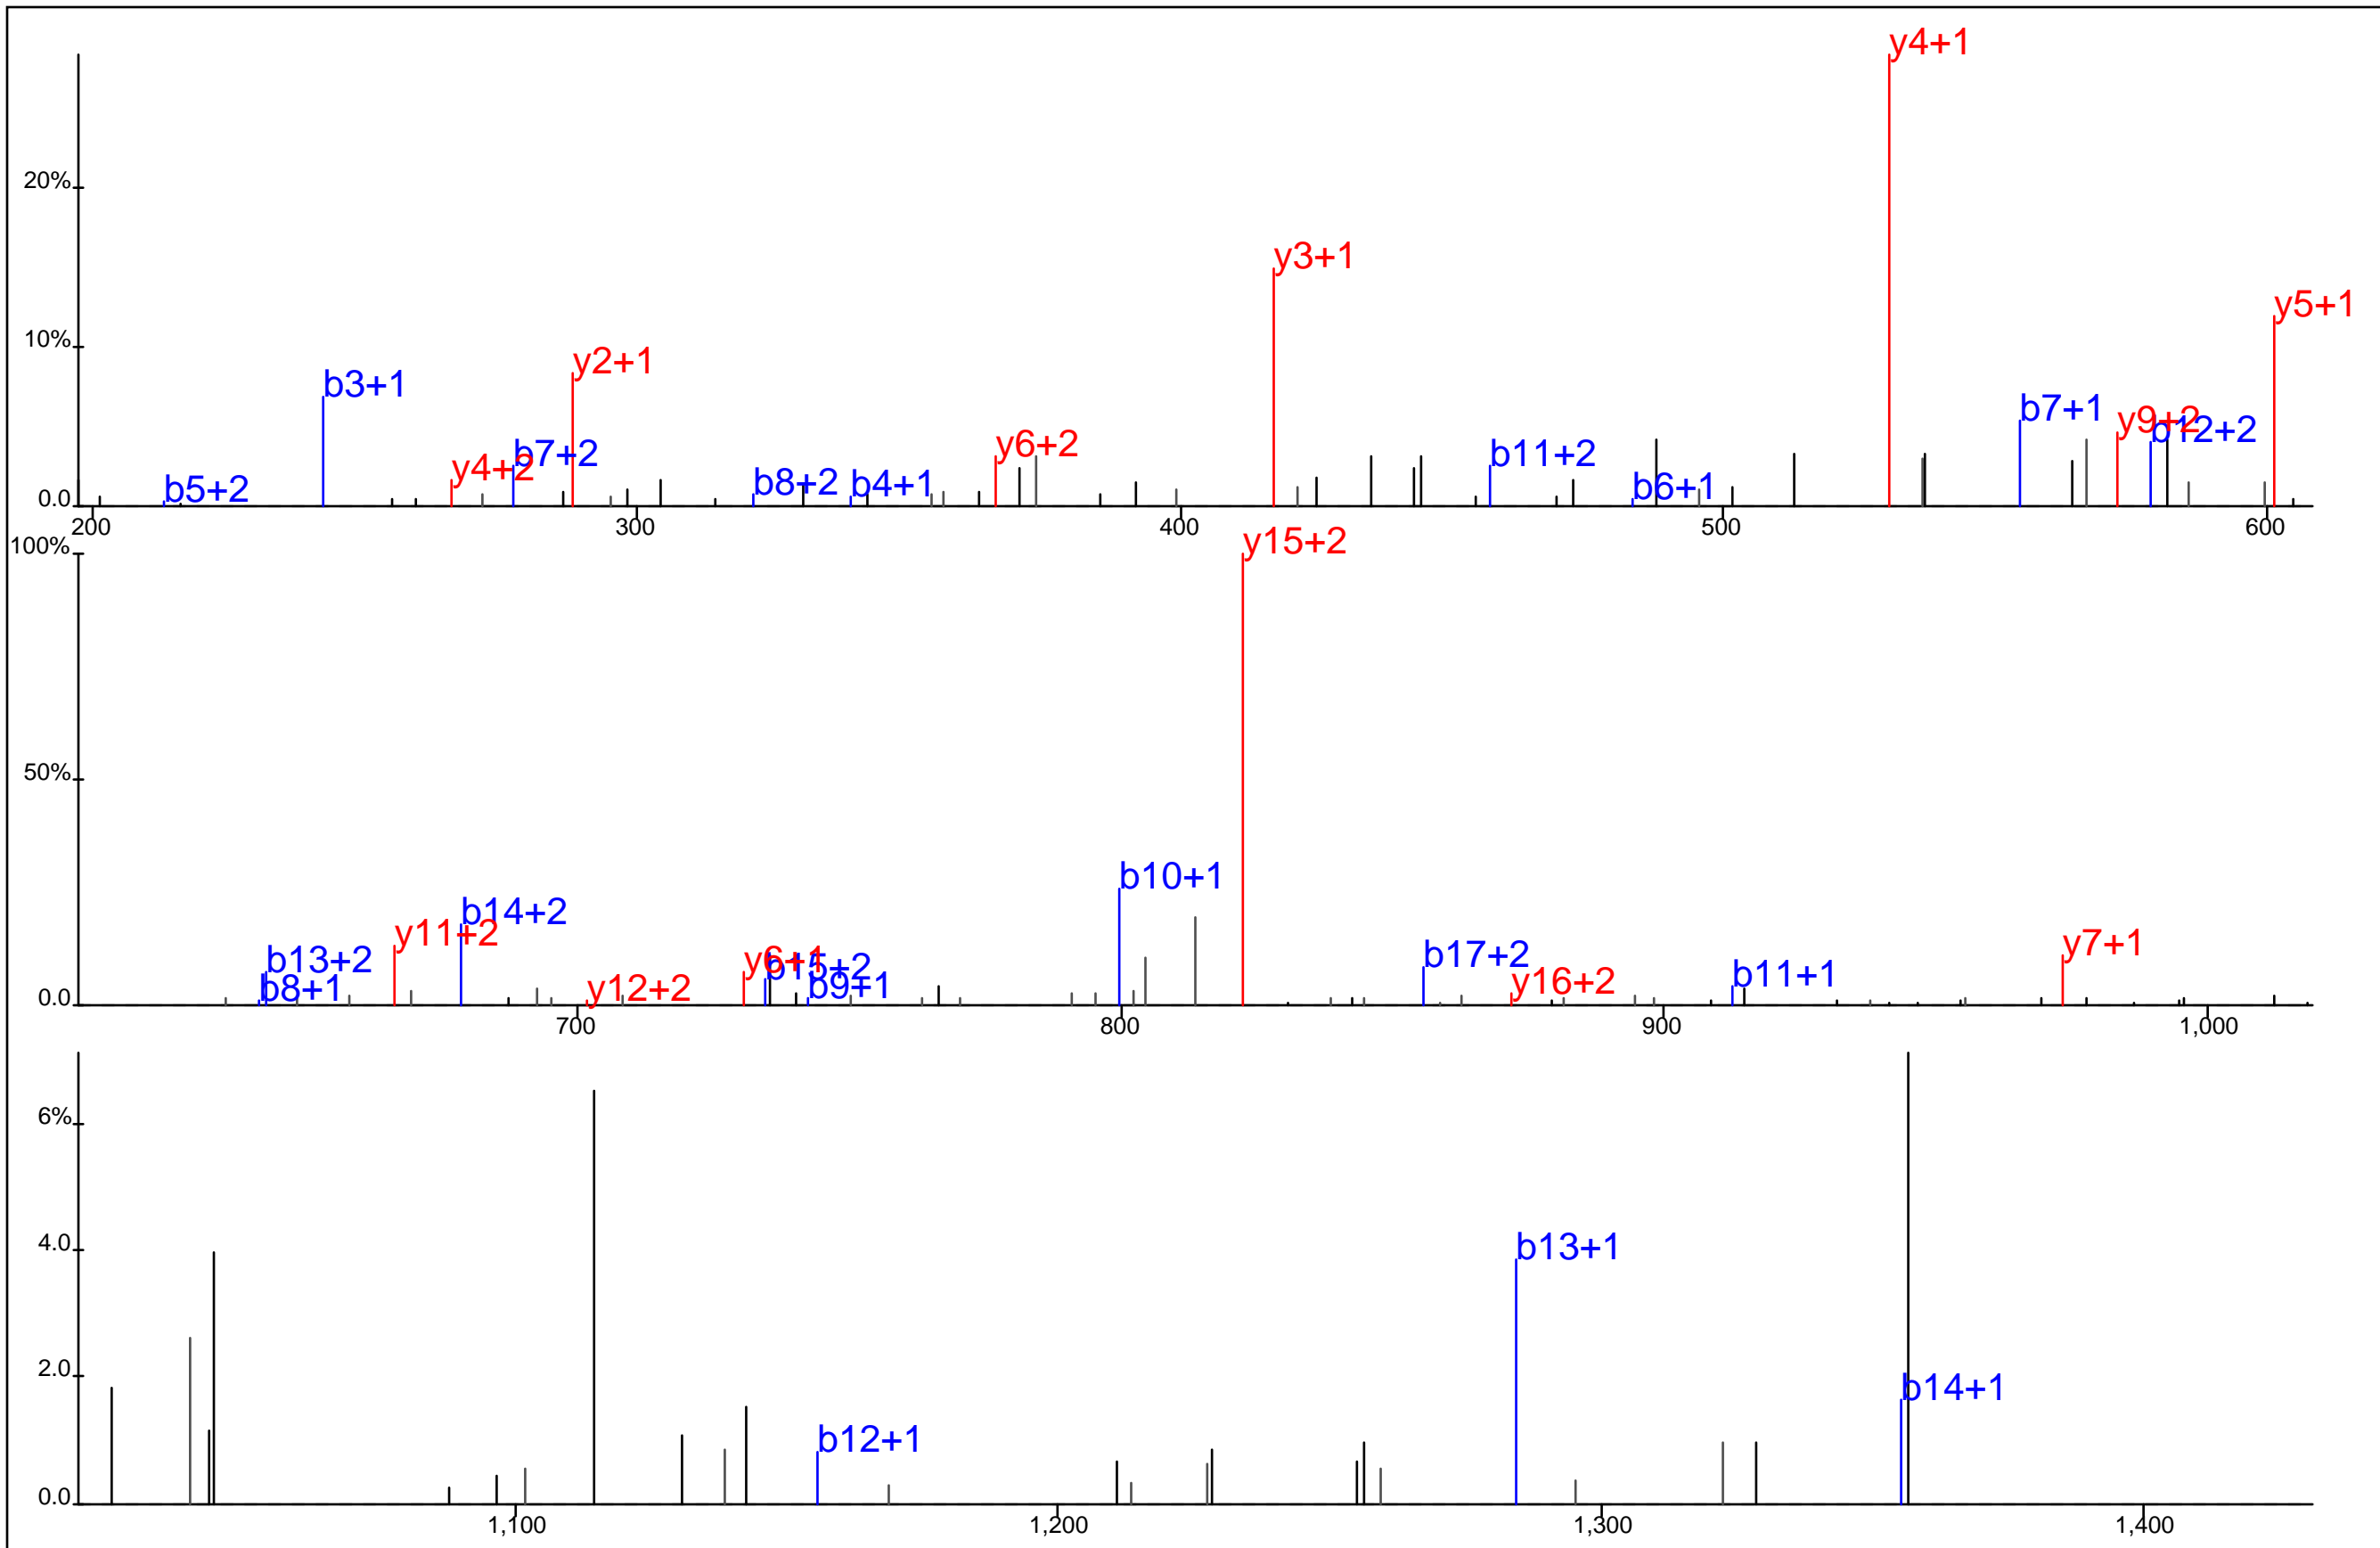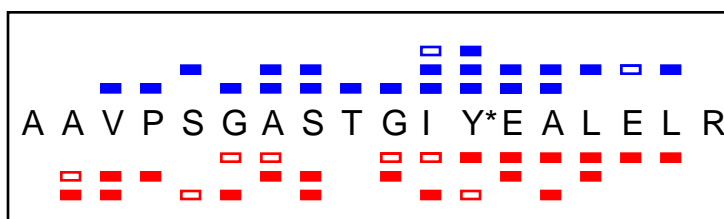

Protein Name: Enolase 2  
 gi Accession: 0  
 Precursor Mass: 628.9756+3  
 Delta Mass: 1.139 ppm  
 XCorr: 40.31



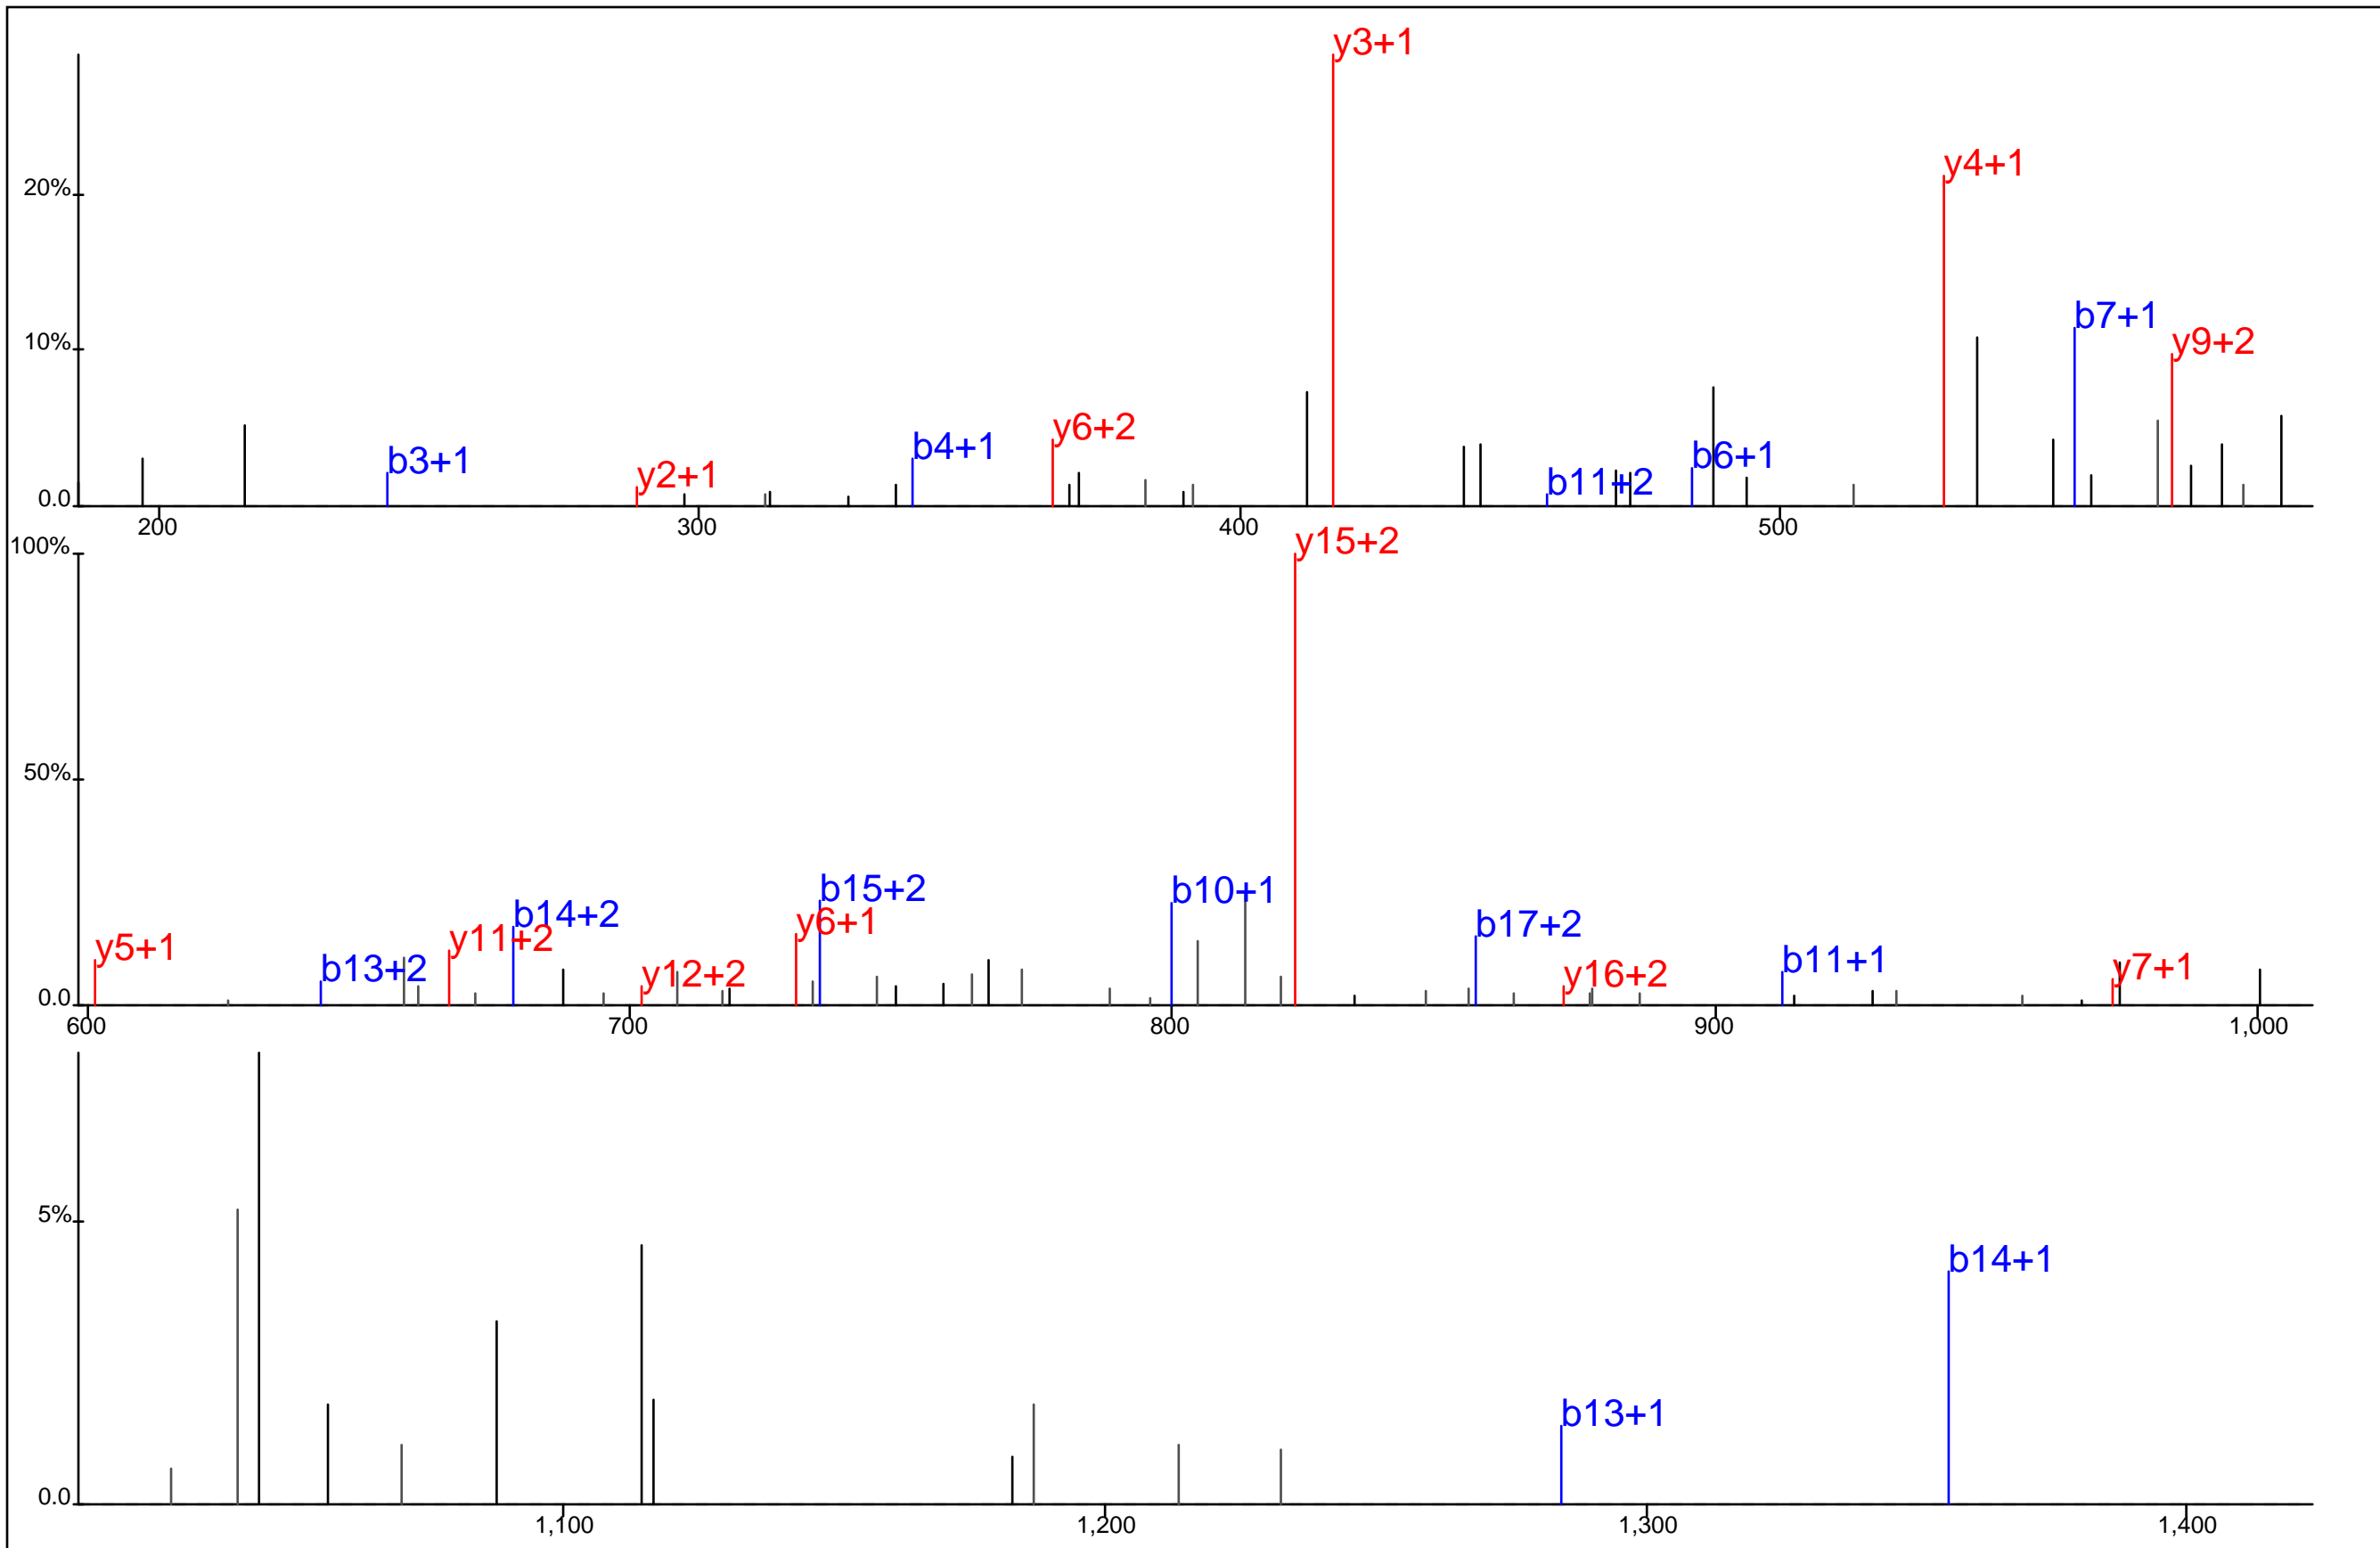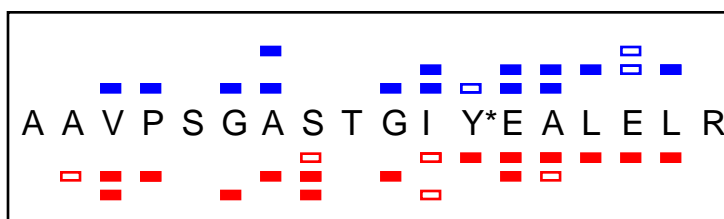

Protein Name: Enolase 2  
 gi Accession: 0  
 Precursor Mass: 628.9764+3  
 Delta Mass: 2.401 ppm  
 XCorr: 40.41

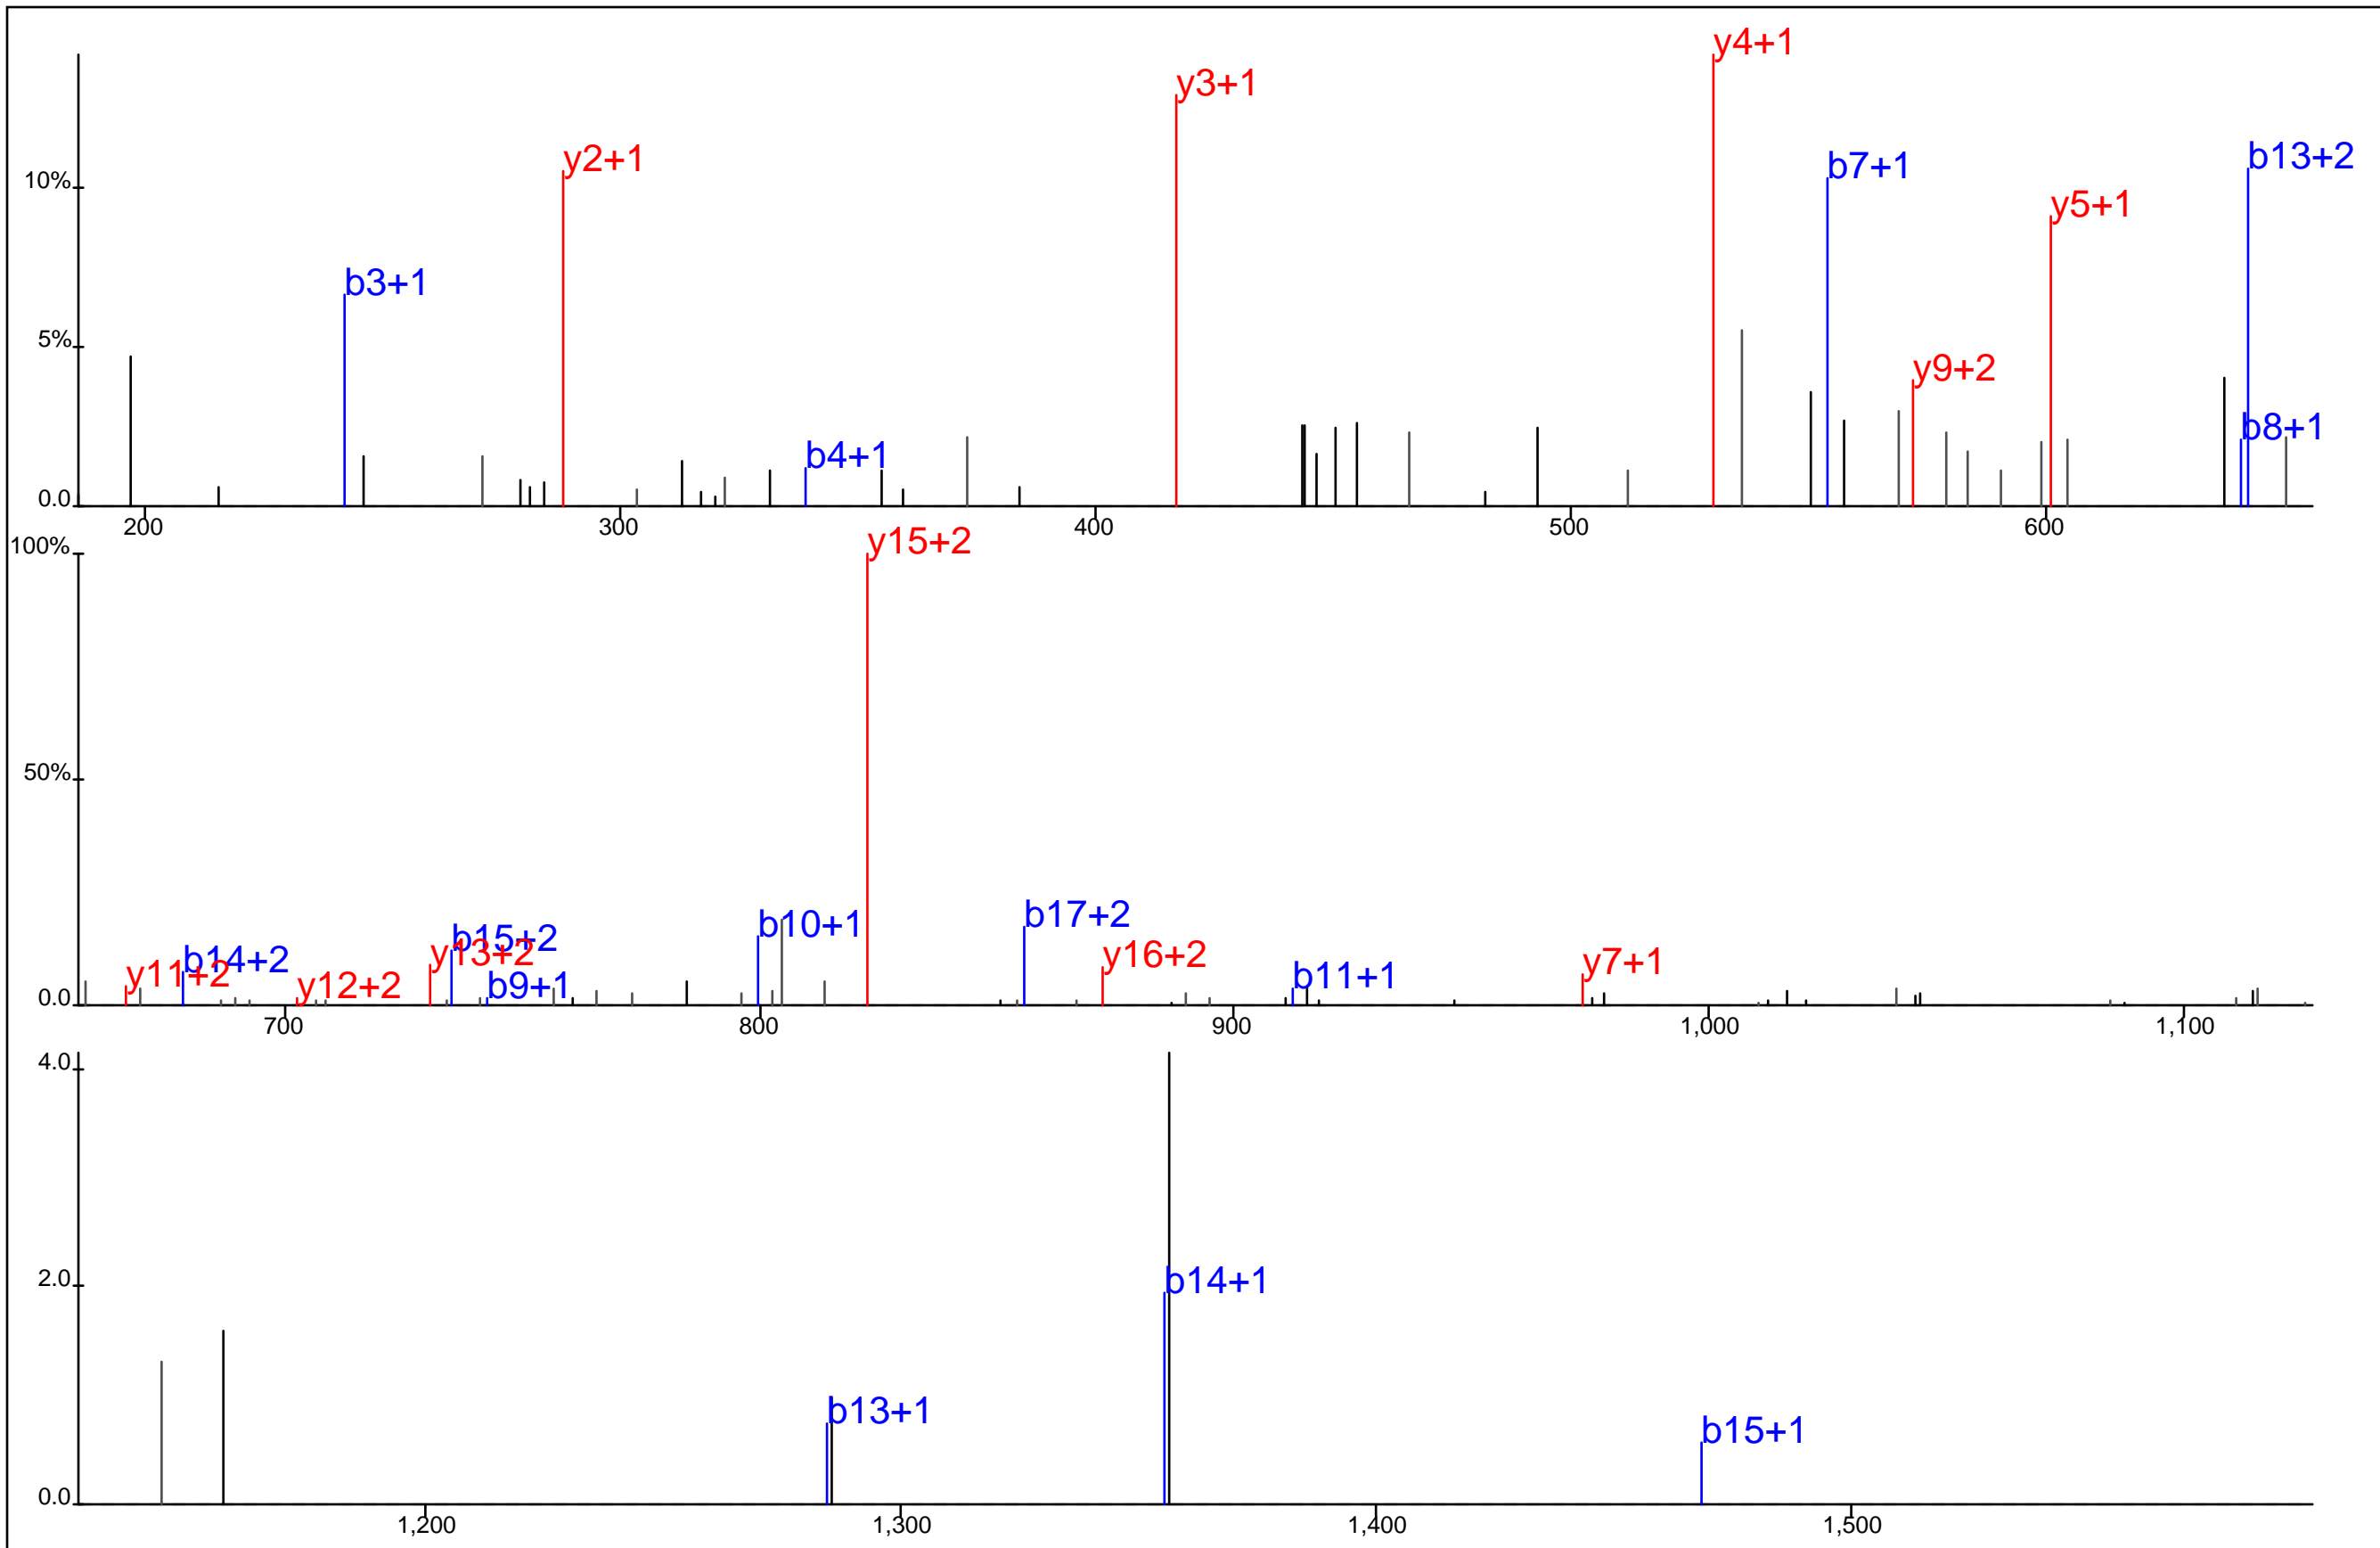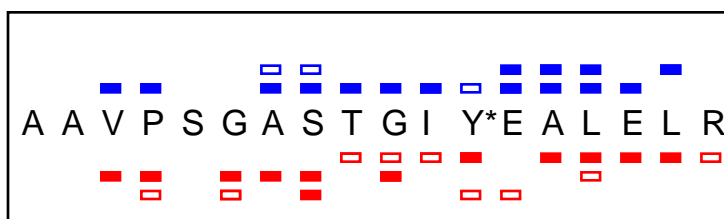

Protein Name: Enolase 2  
 gi Accession: 0  
 Precursor Mass: 628.9756+3  
 Delta Mass: 1.042 ppm  
 XCorr: 46.19

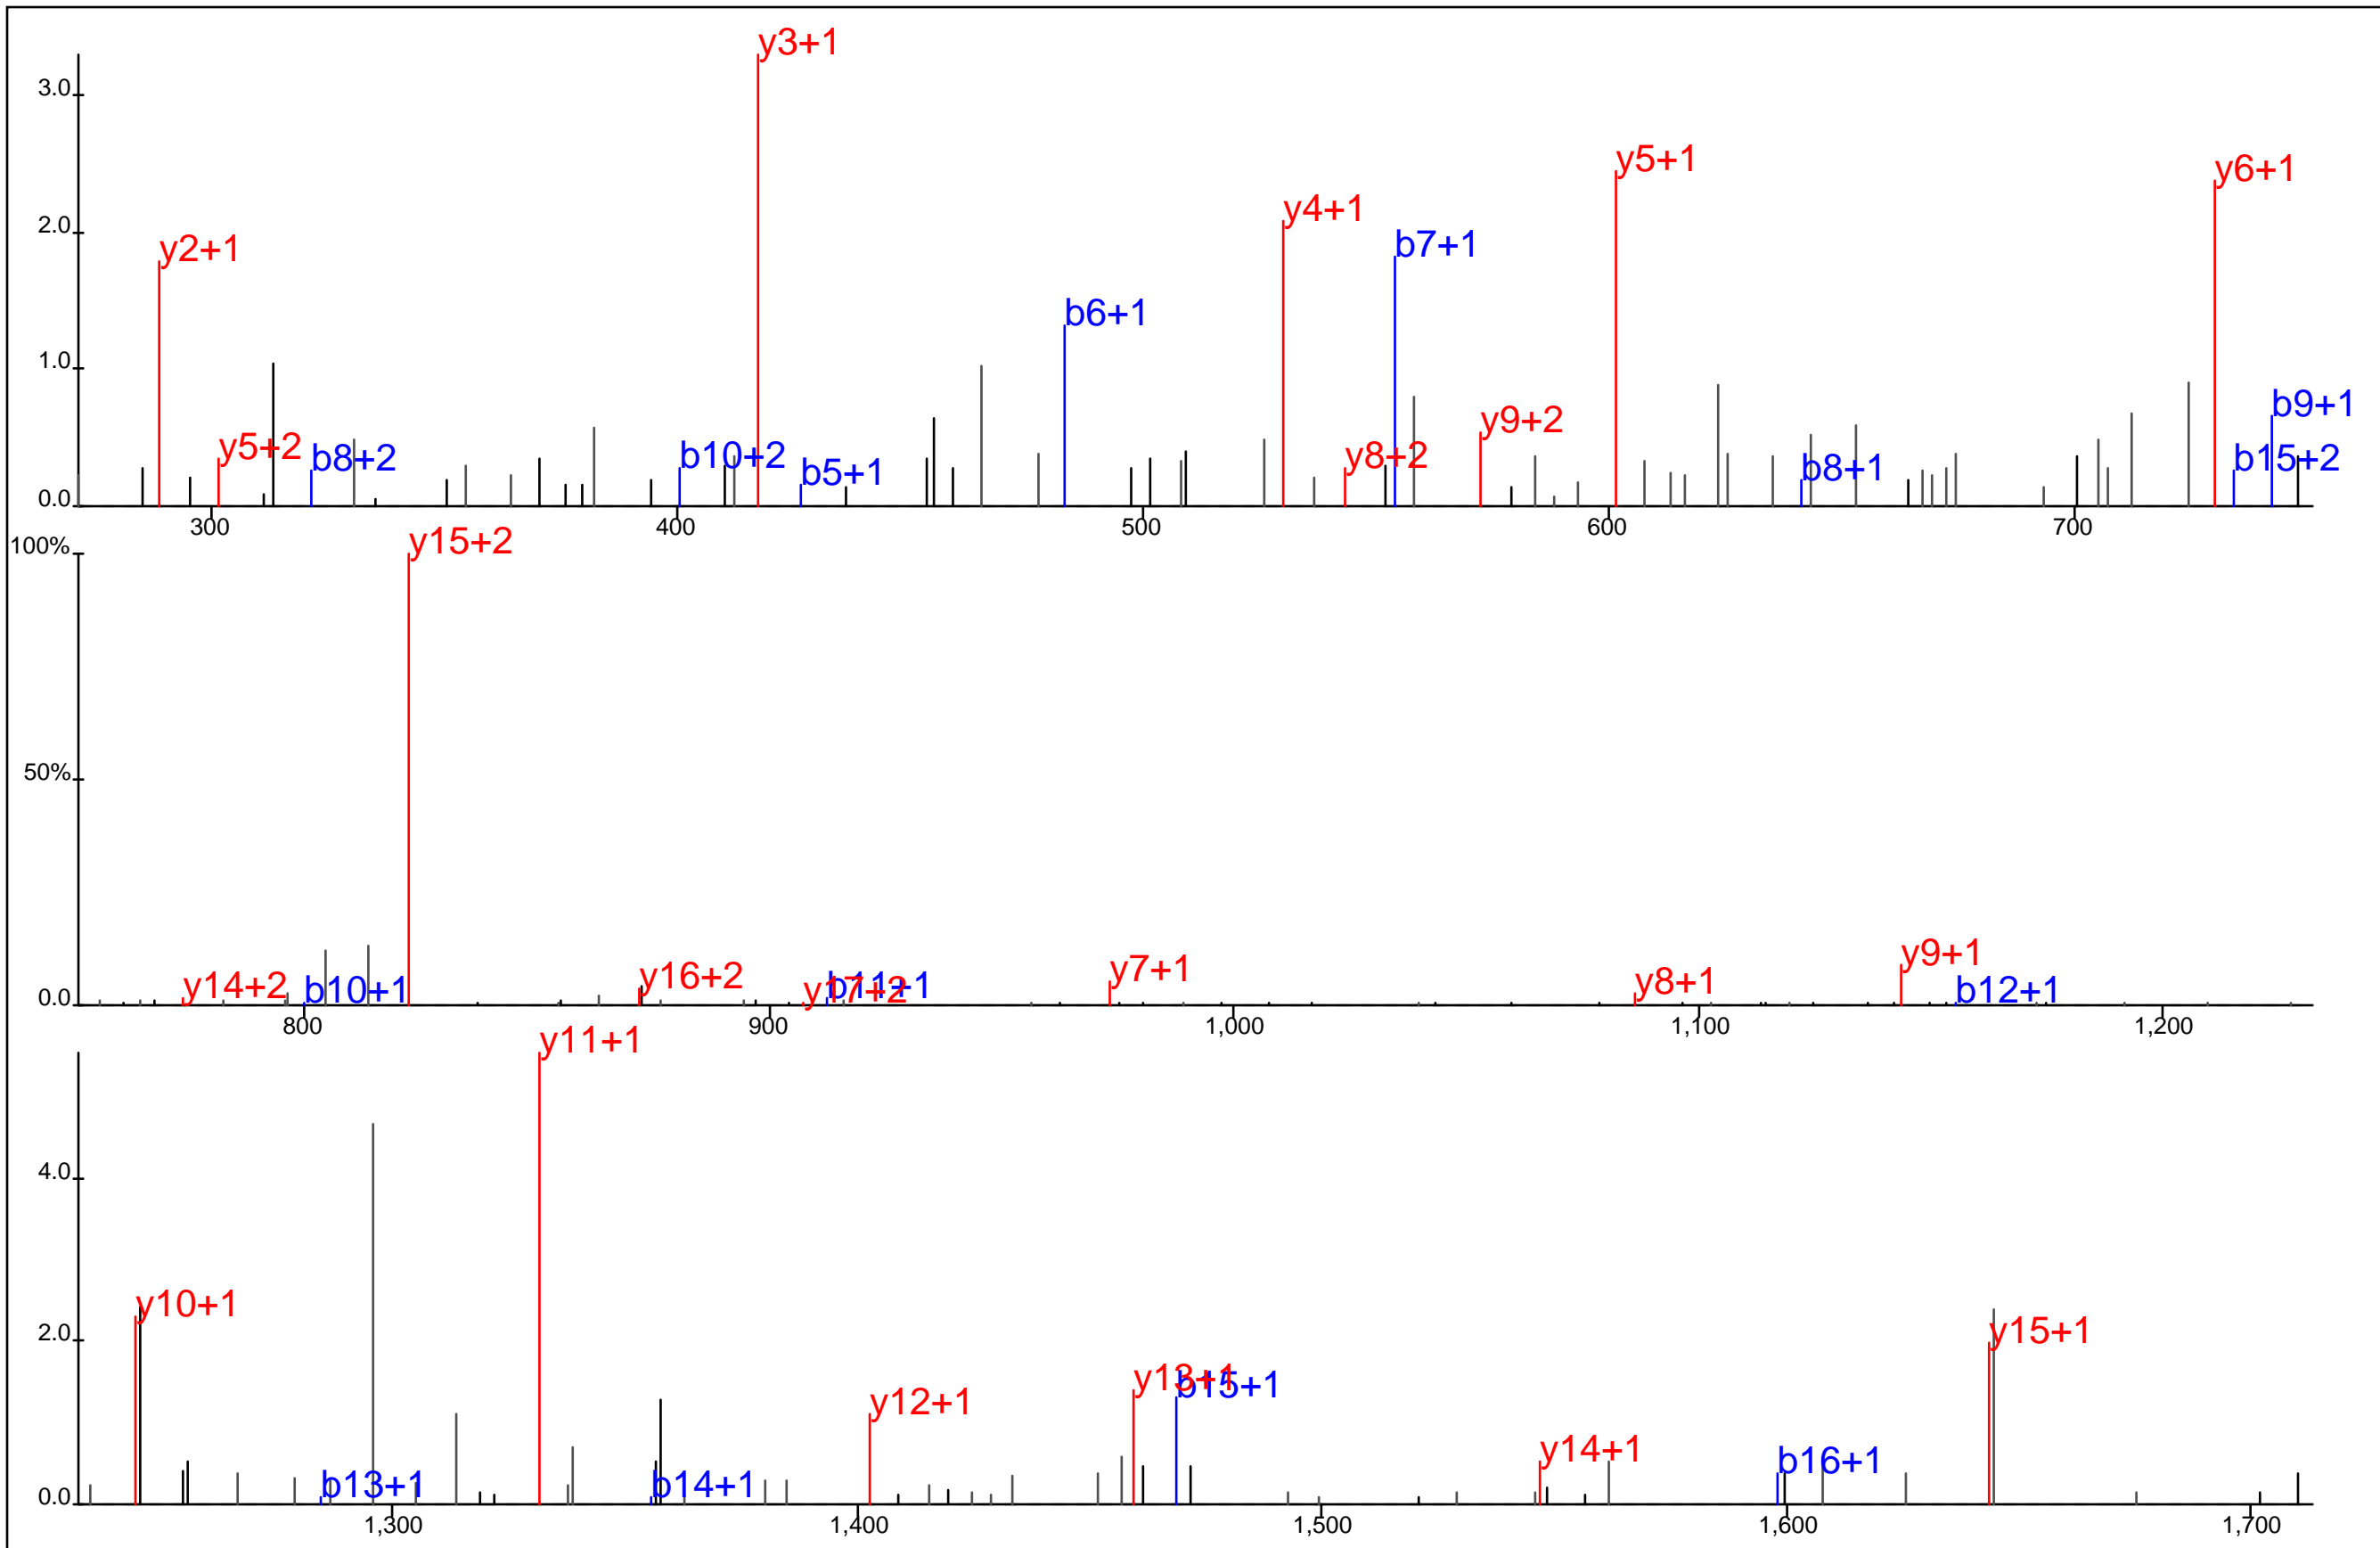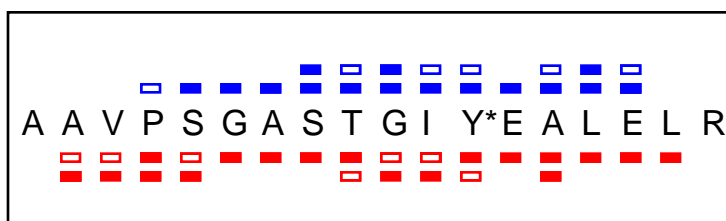

Protein Name: Enolase 2  
 gi Accession: 0  
 Precursor Mass: 942.9572+2  
 Delta Mass: 1.704 ppm  
 XCorr: 110.19



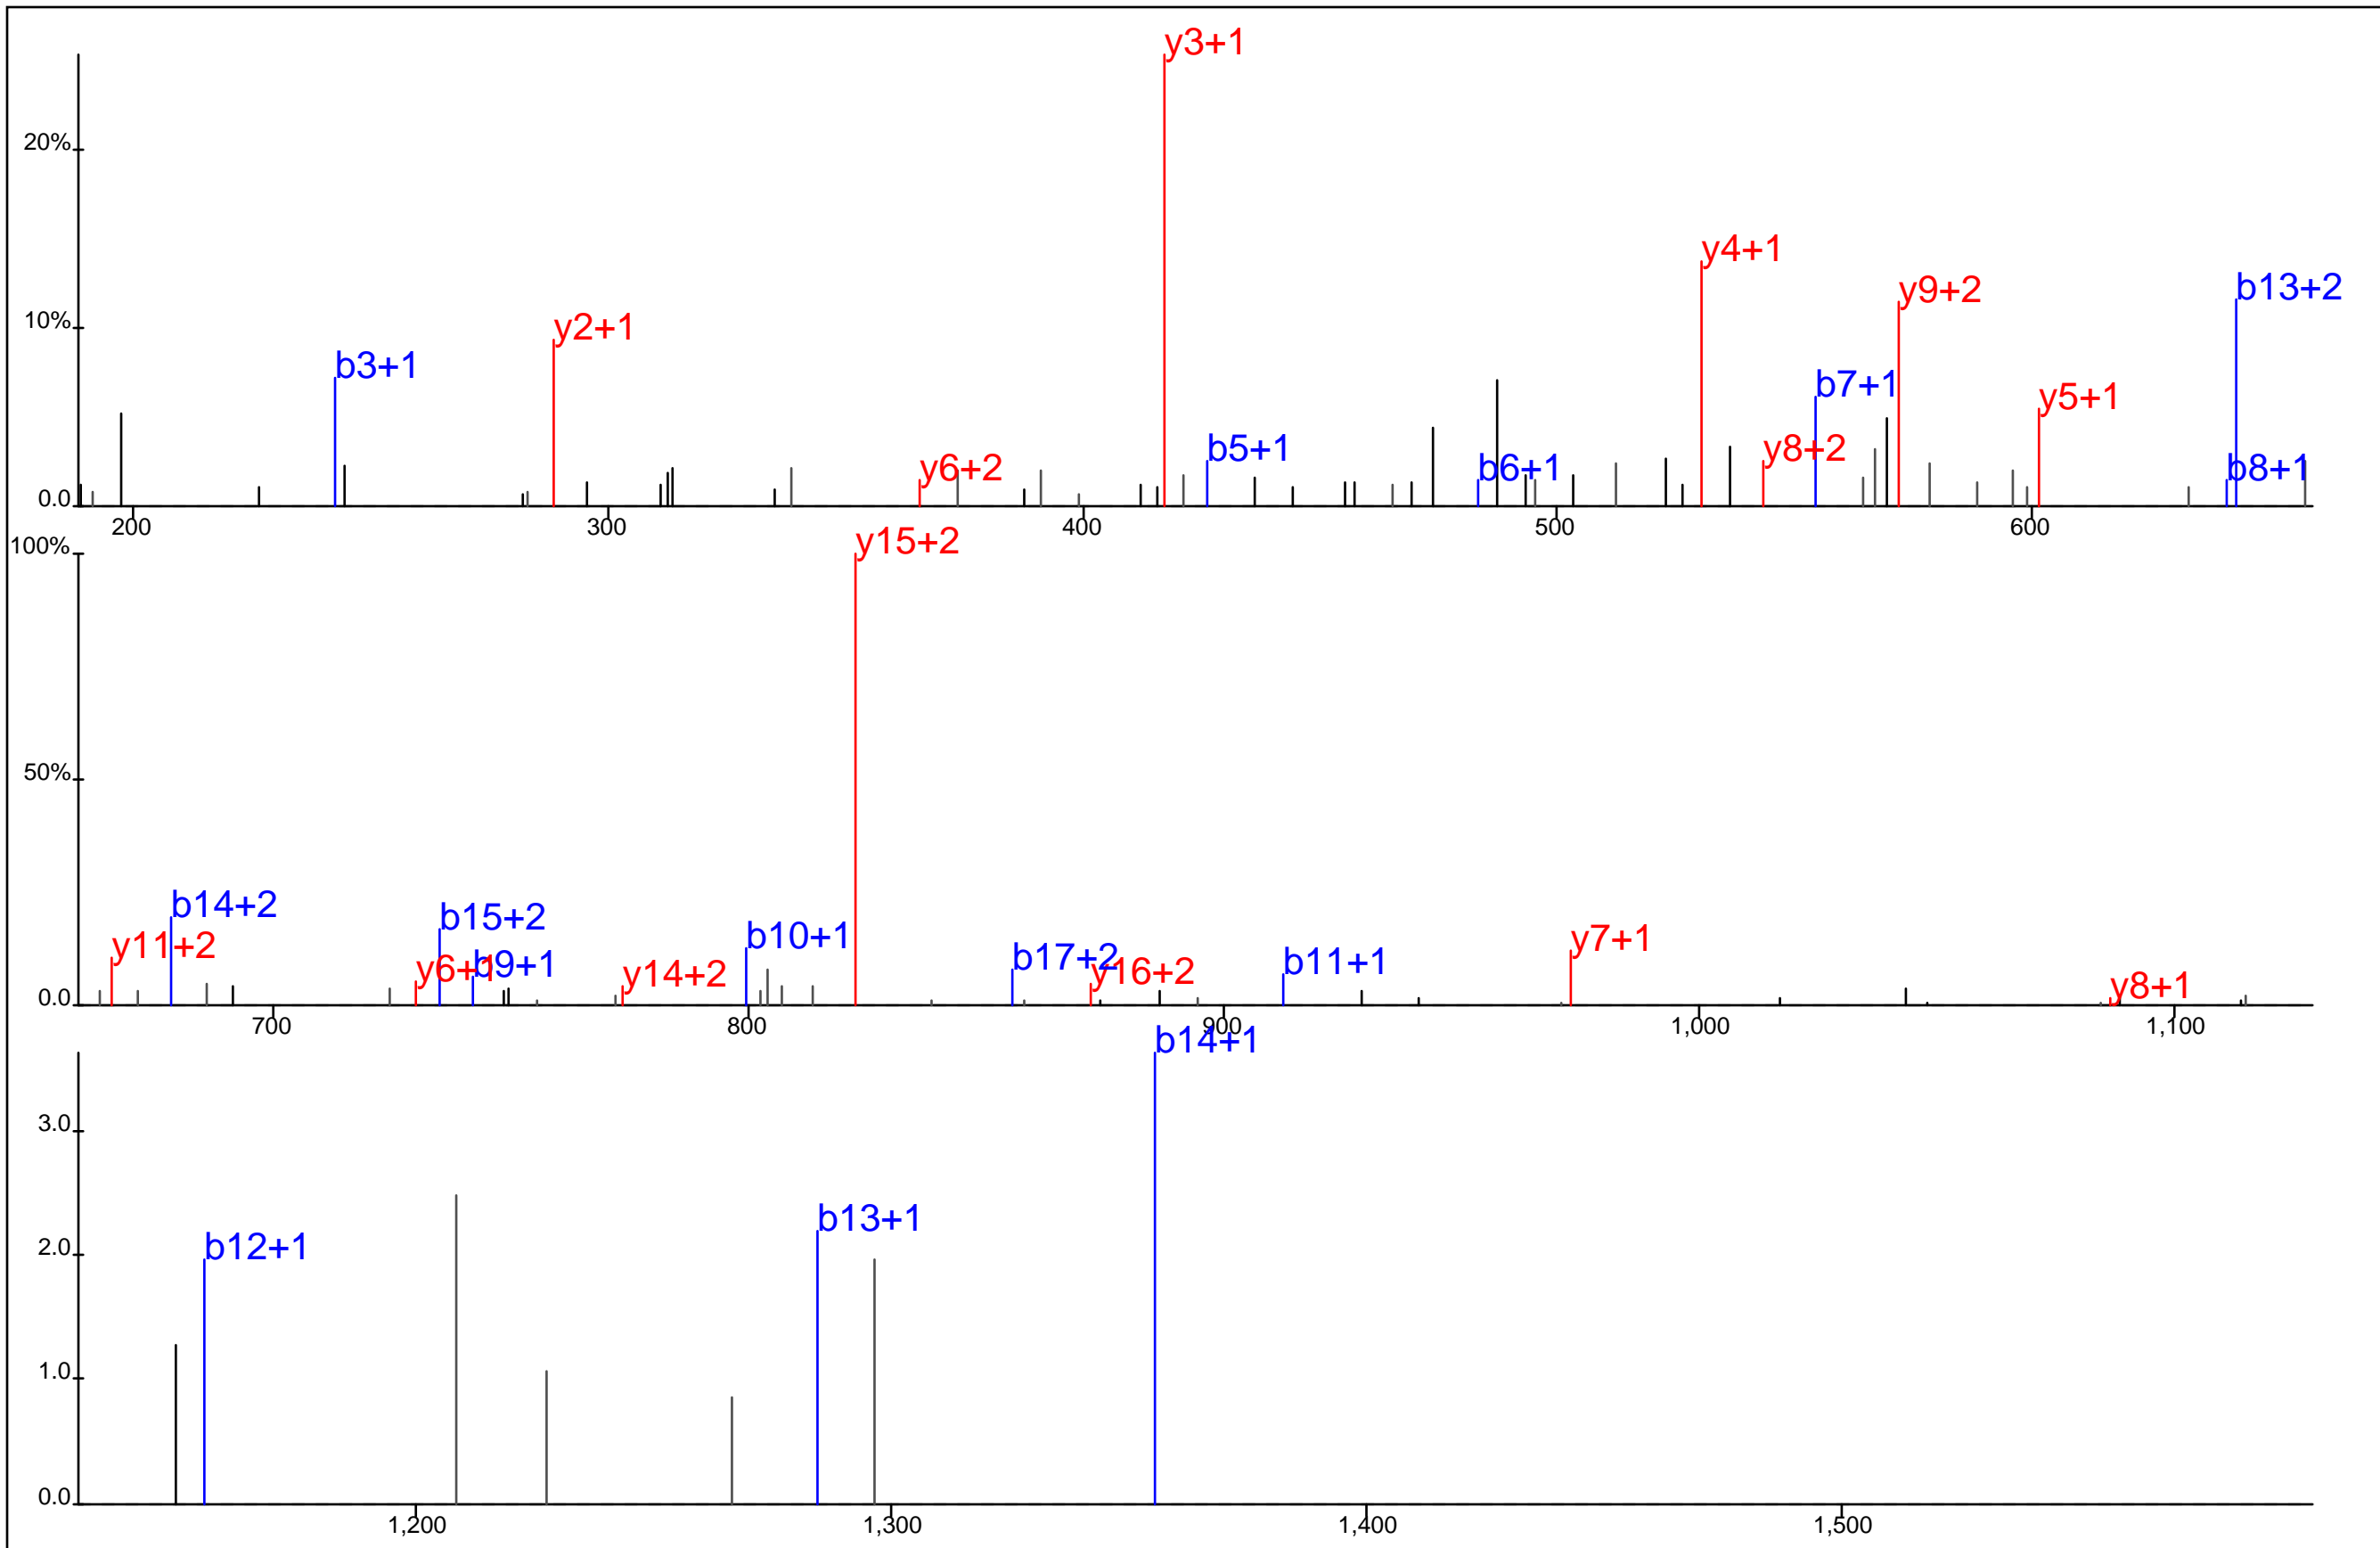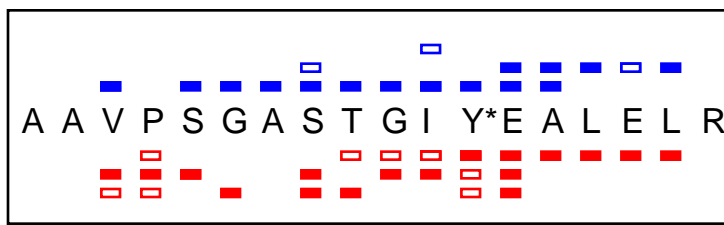

Protein Name: Enolase 2  
 gi Accession: 0  
 Precursor Mass: 628.9761+3  
 Delta Mass: 1.916 ppm  
 XCorr: 57.67

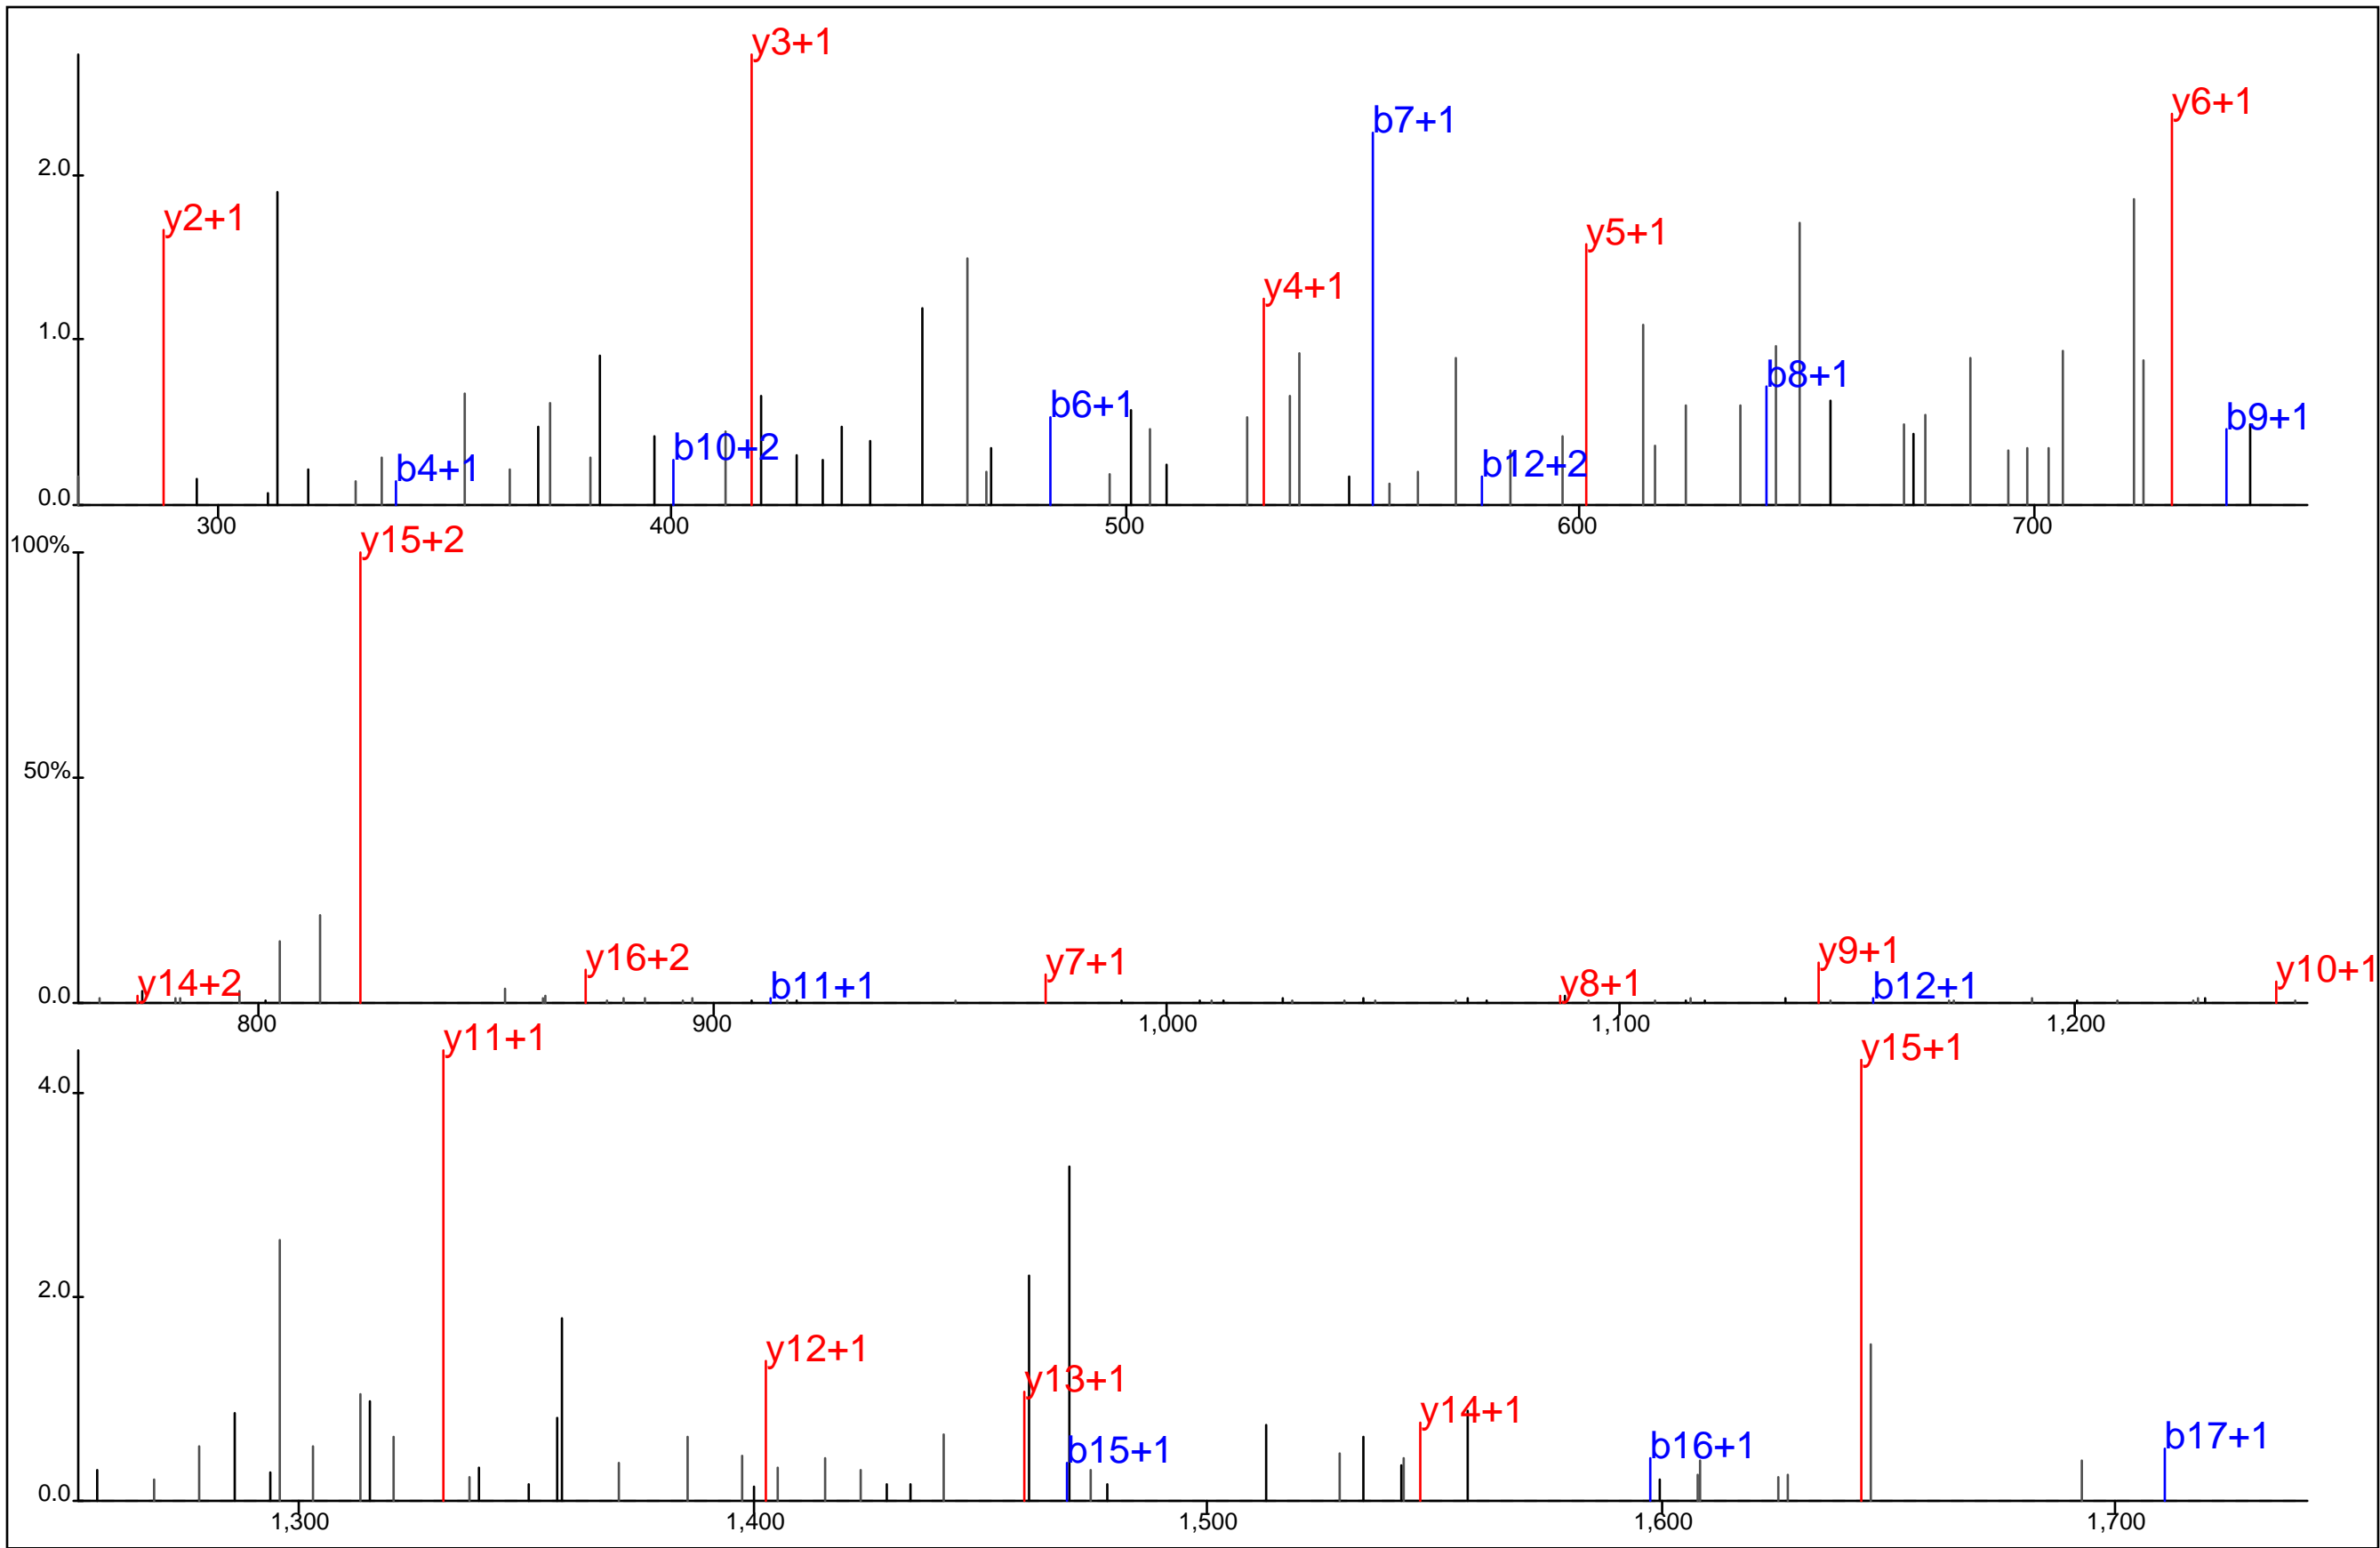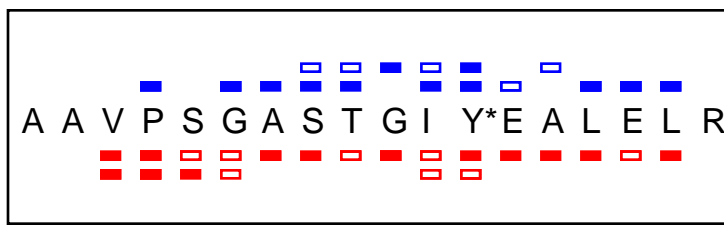

Protein Name: Enolase 2  
 gi Accession: 0  
 Precursor Mass: 942.9585+2  
 Delta Mass: 0.279 ppm  
 XCorr: 118.68



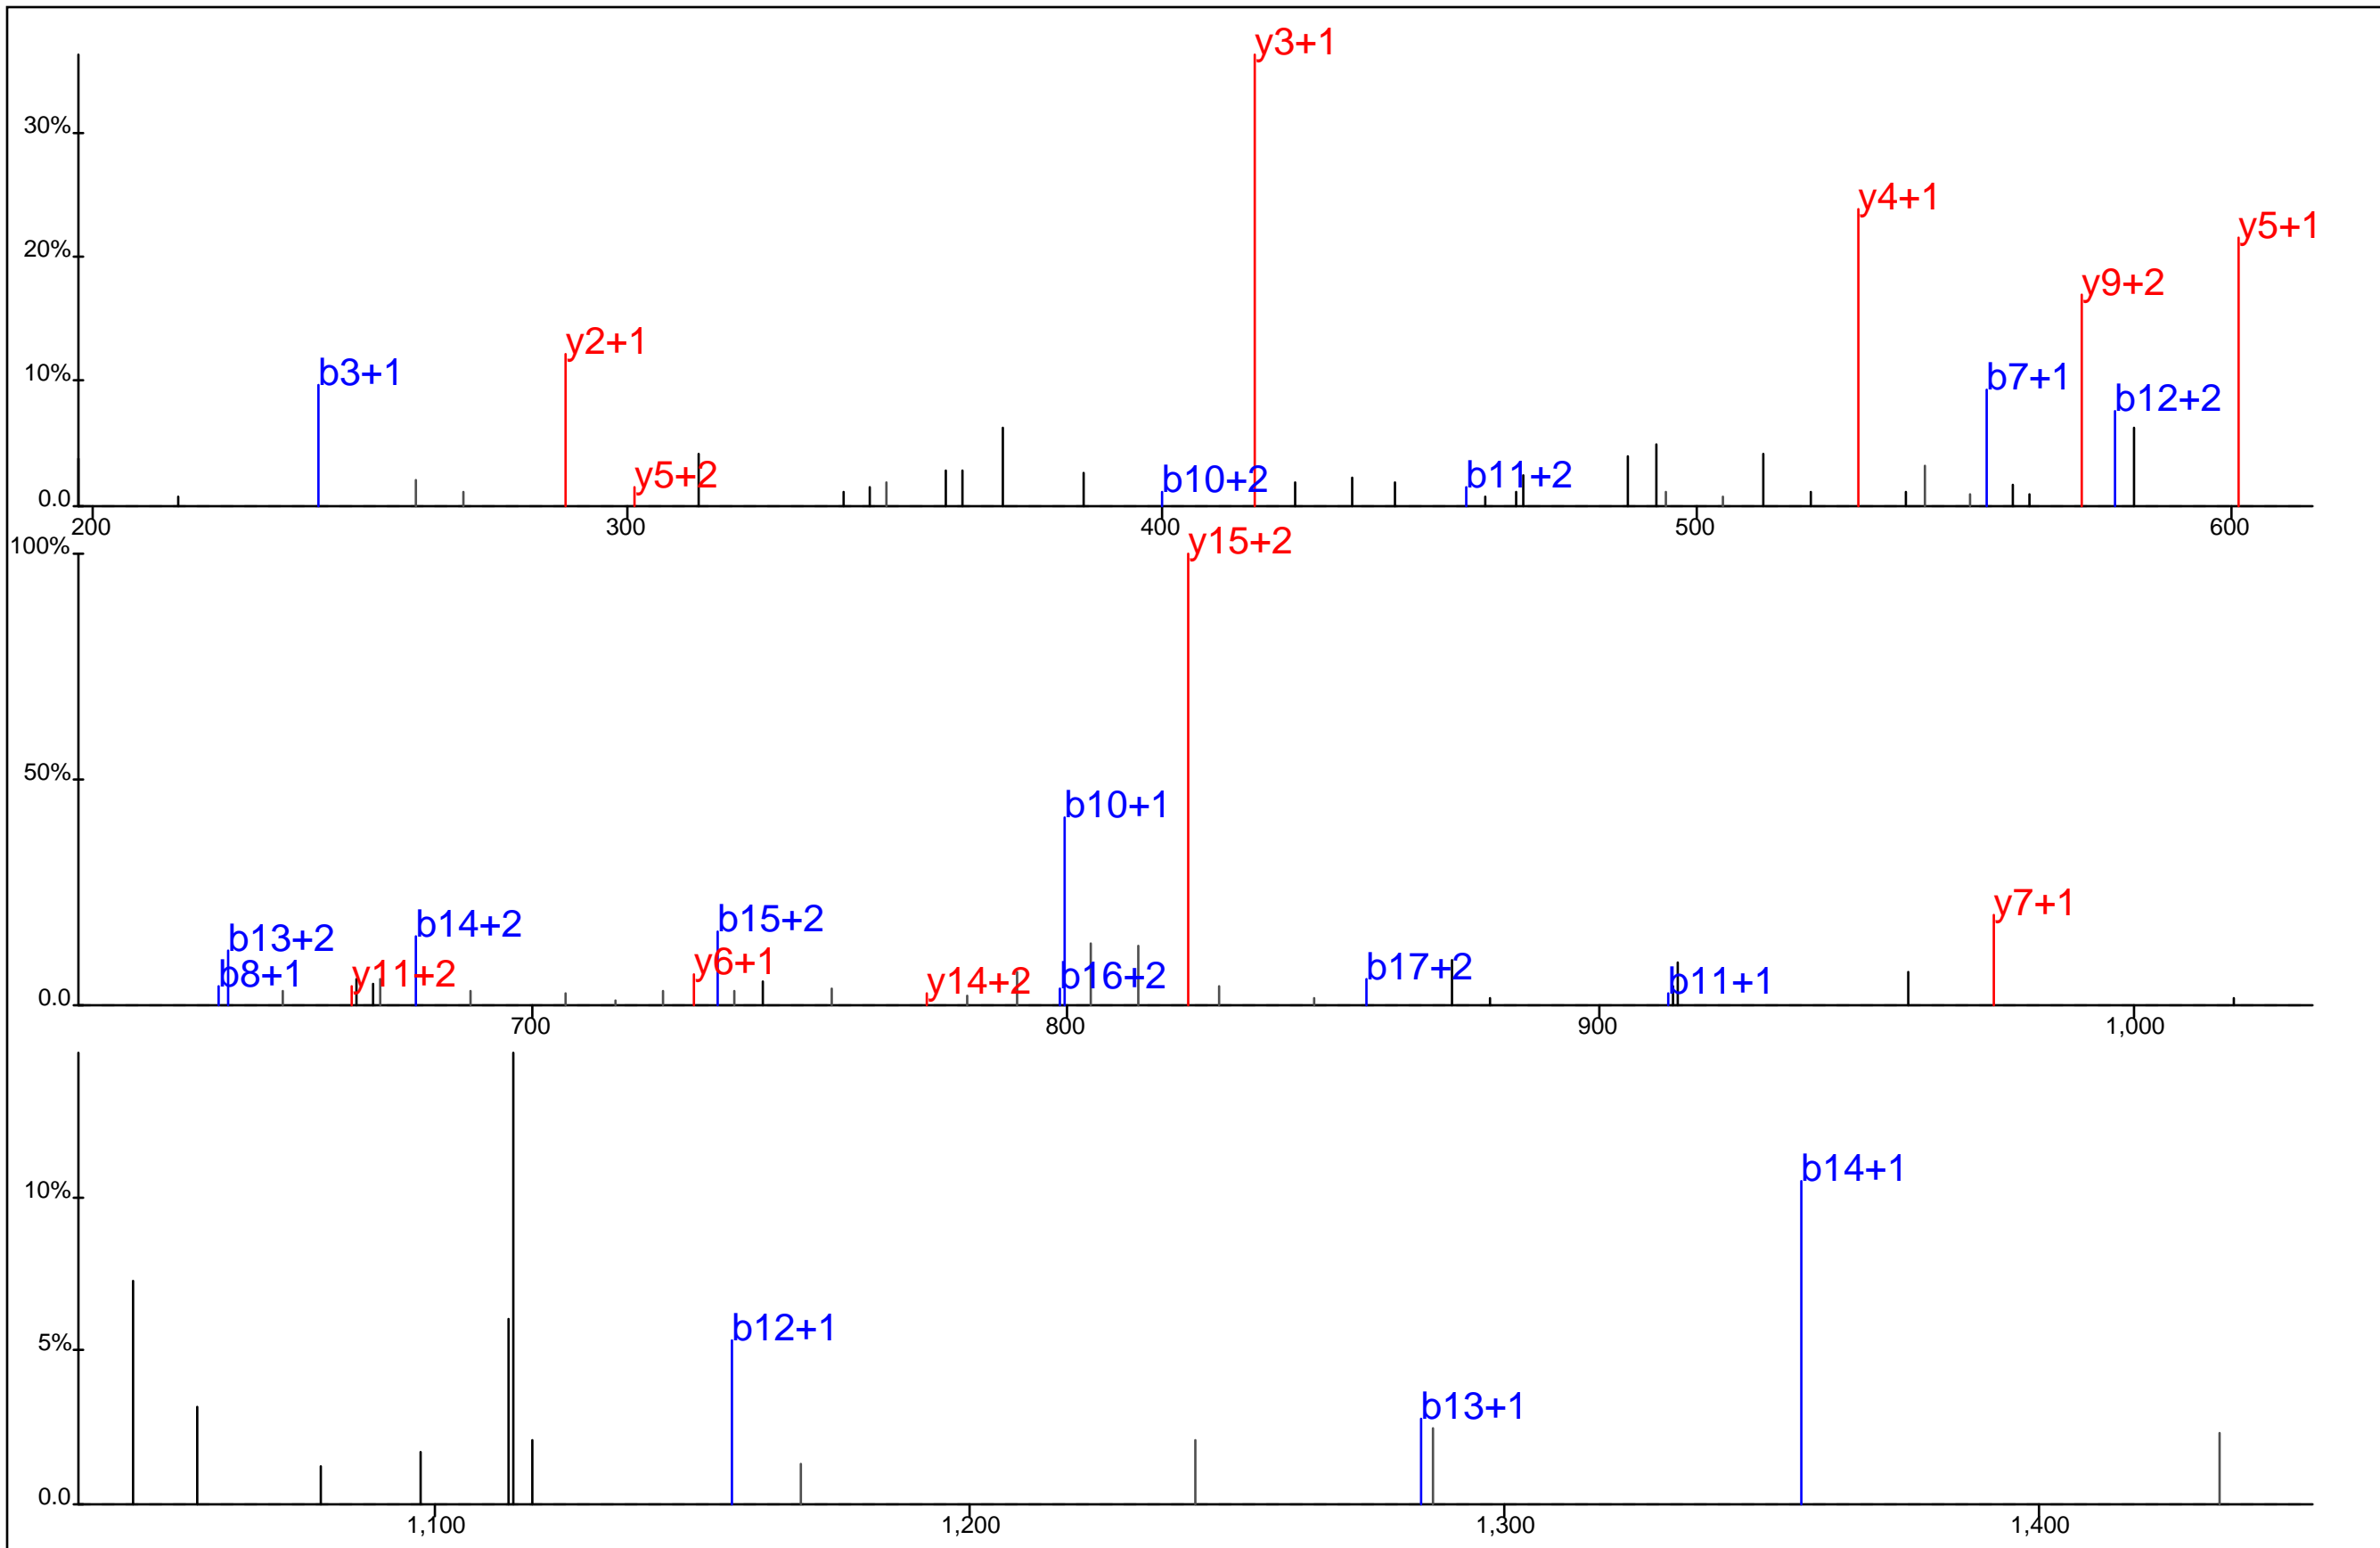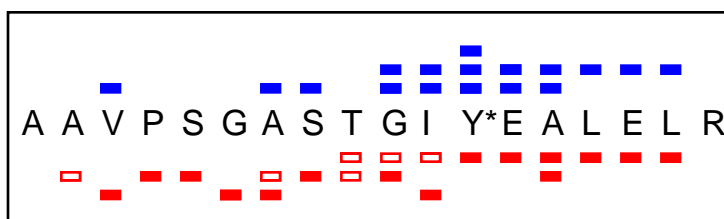

Protein Name: Enolase 2  
 gi Accession: 0  
 Precursor Mass: 628.9748+3  
 Delta Mass: 0.222 ppm  
 XCorr: 39.15

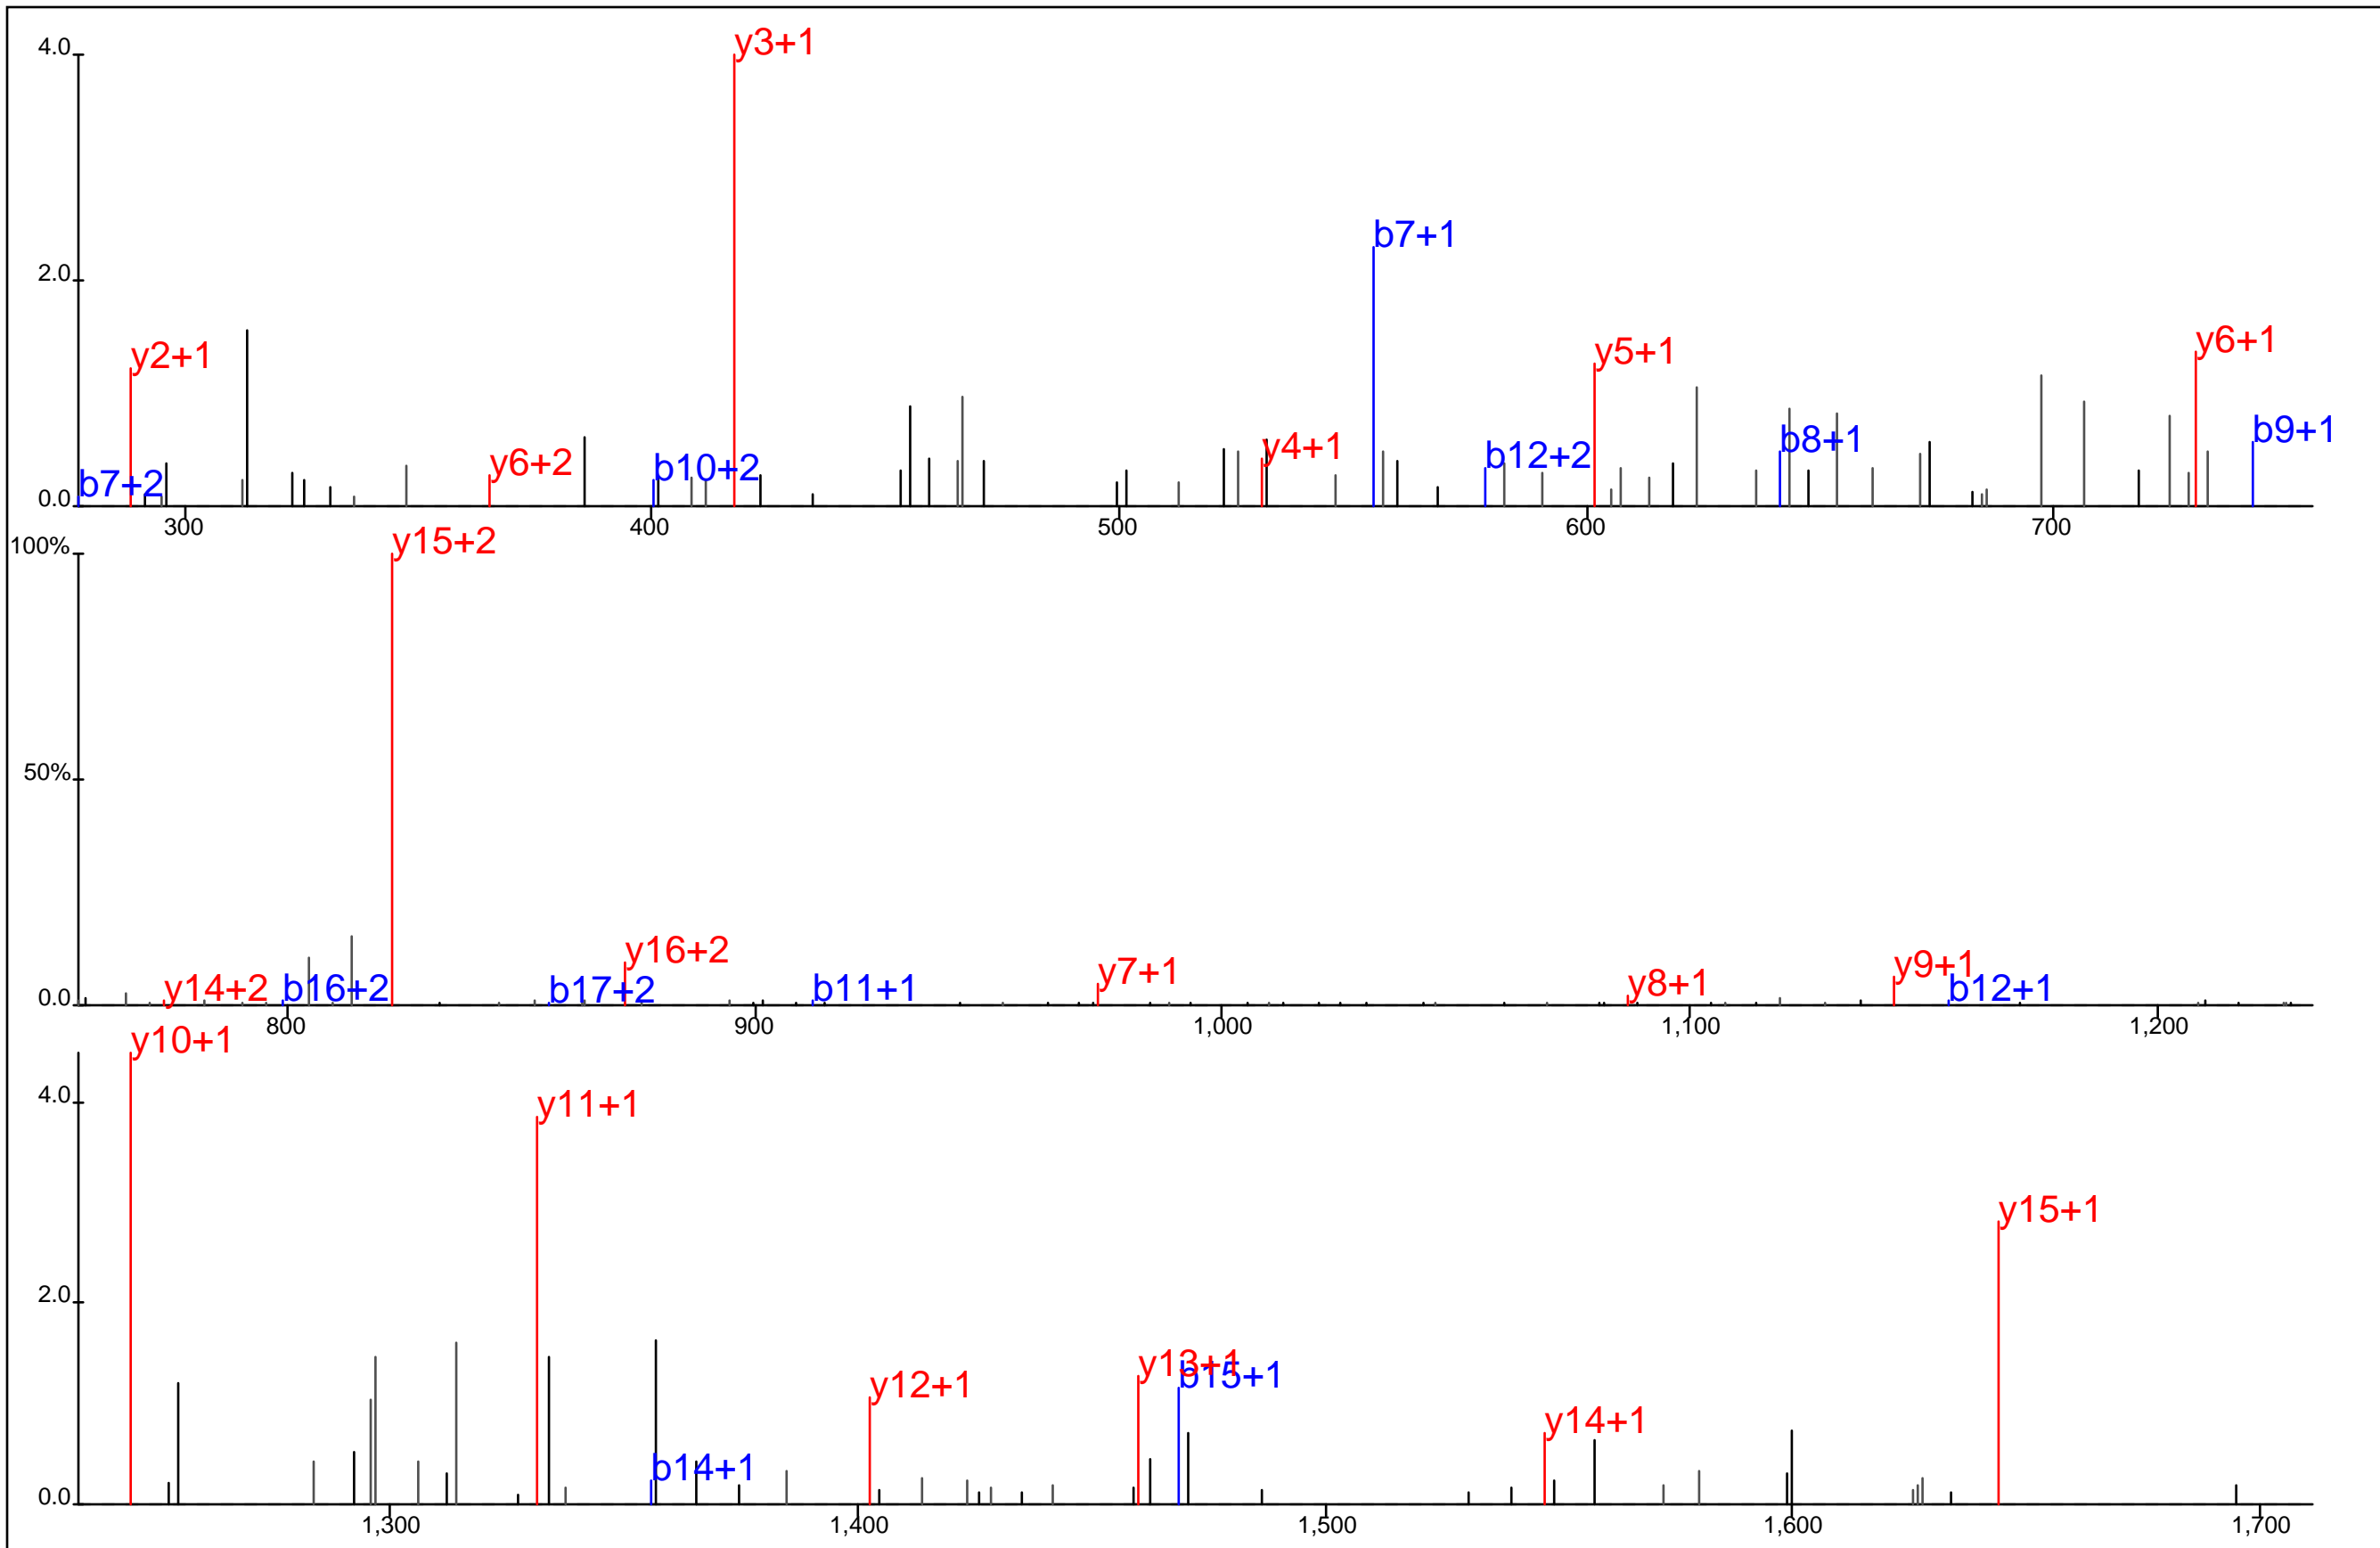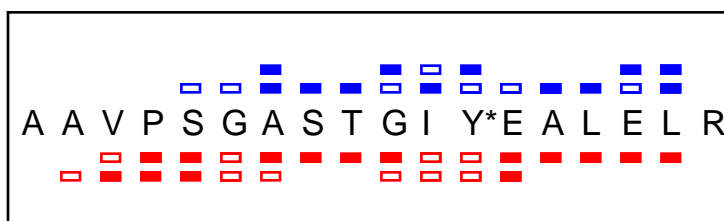

Protein Name: Enolase 2  
 gi Accession: 0  
 Precursor Mass: 942.9587+2  
 Delta Mass: 0.020 ppm  
 XCorr: 94.76

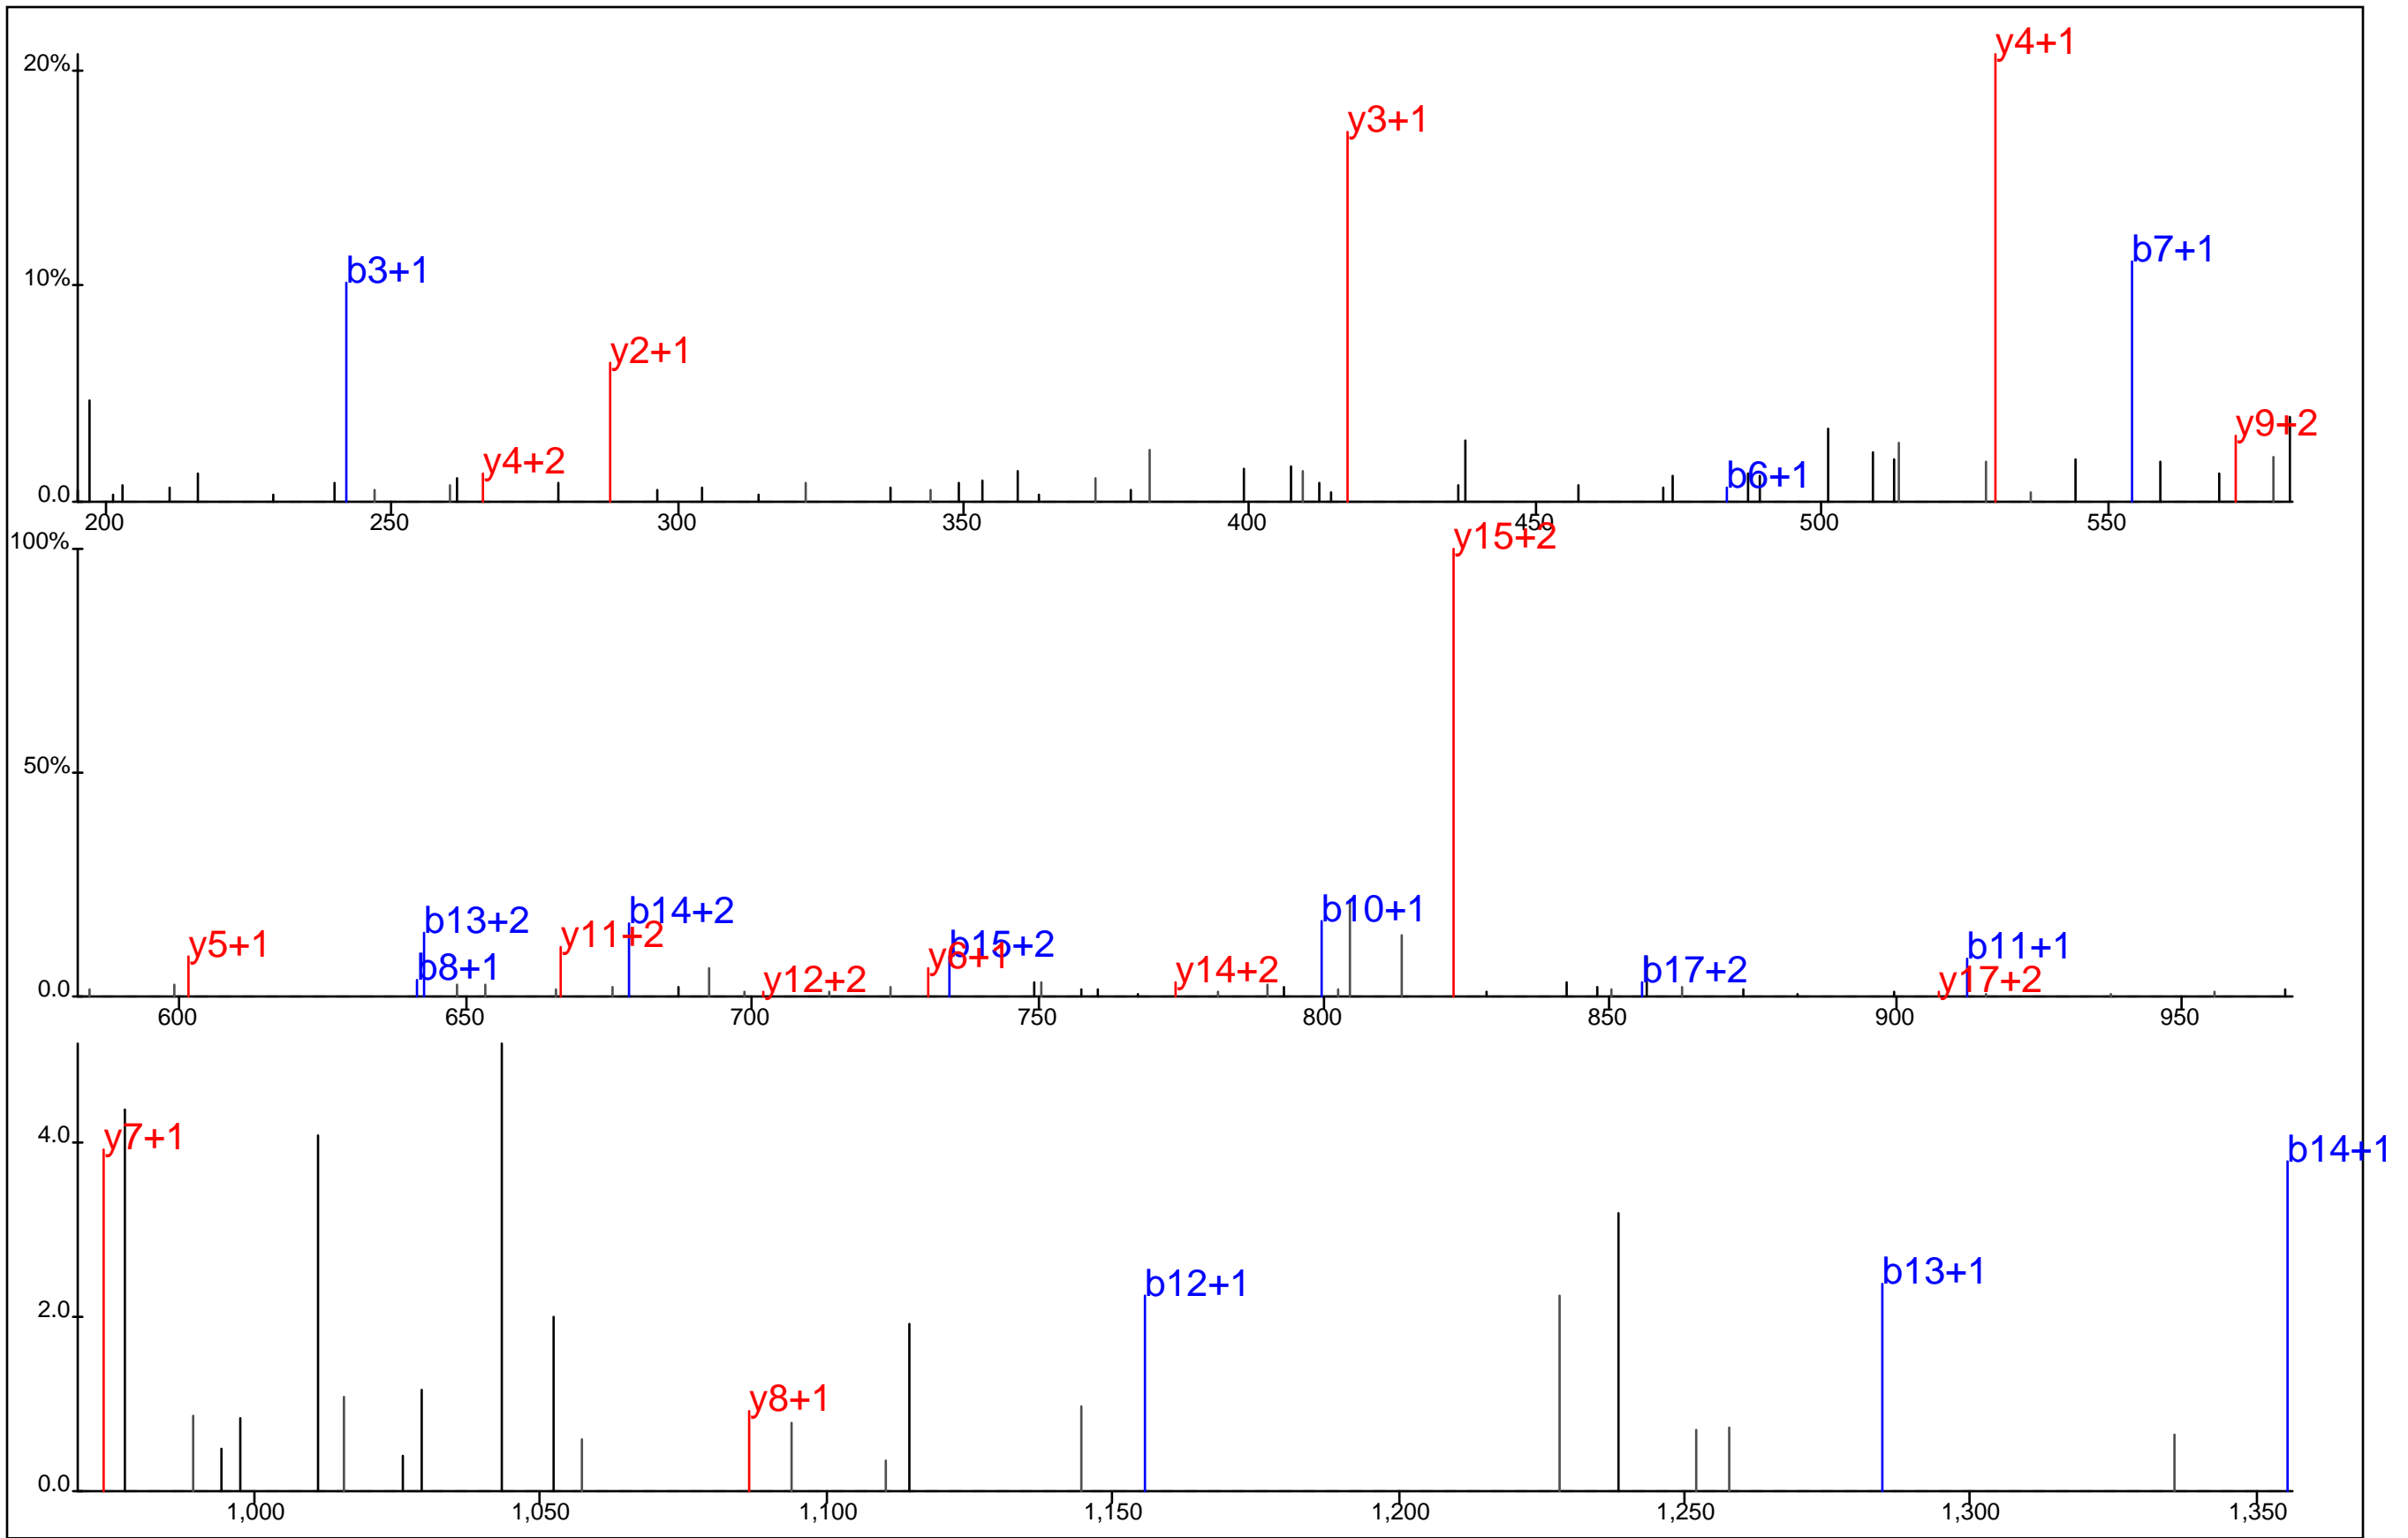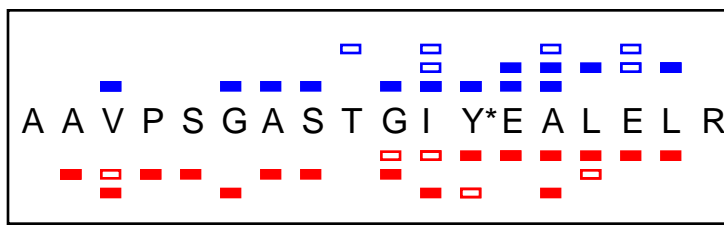

Protein Name: Enolase 2  
 gi Accession: 0  
 Precursor Mass: 628.9763+3  
 Delta Mass: 2.110 ppm  
 XCorr: 42.7

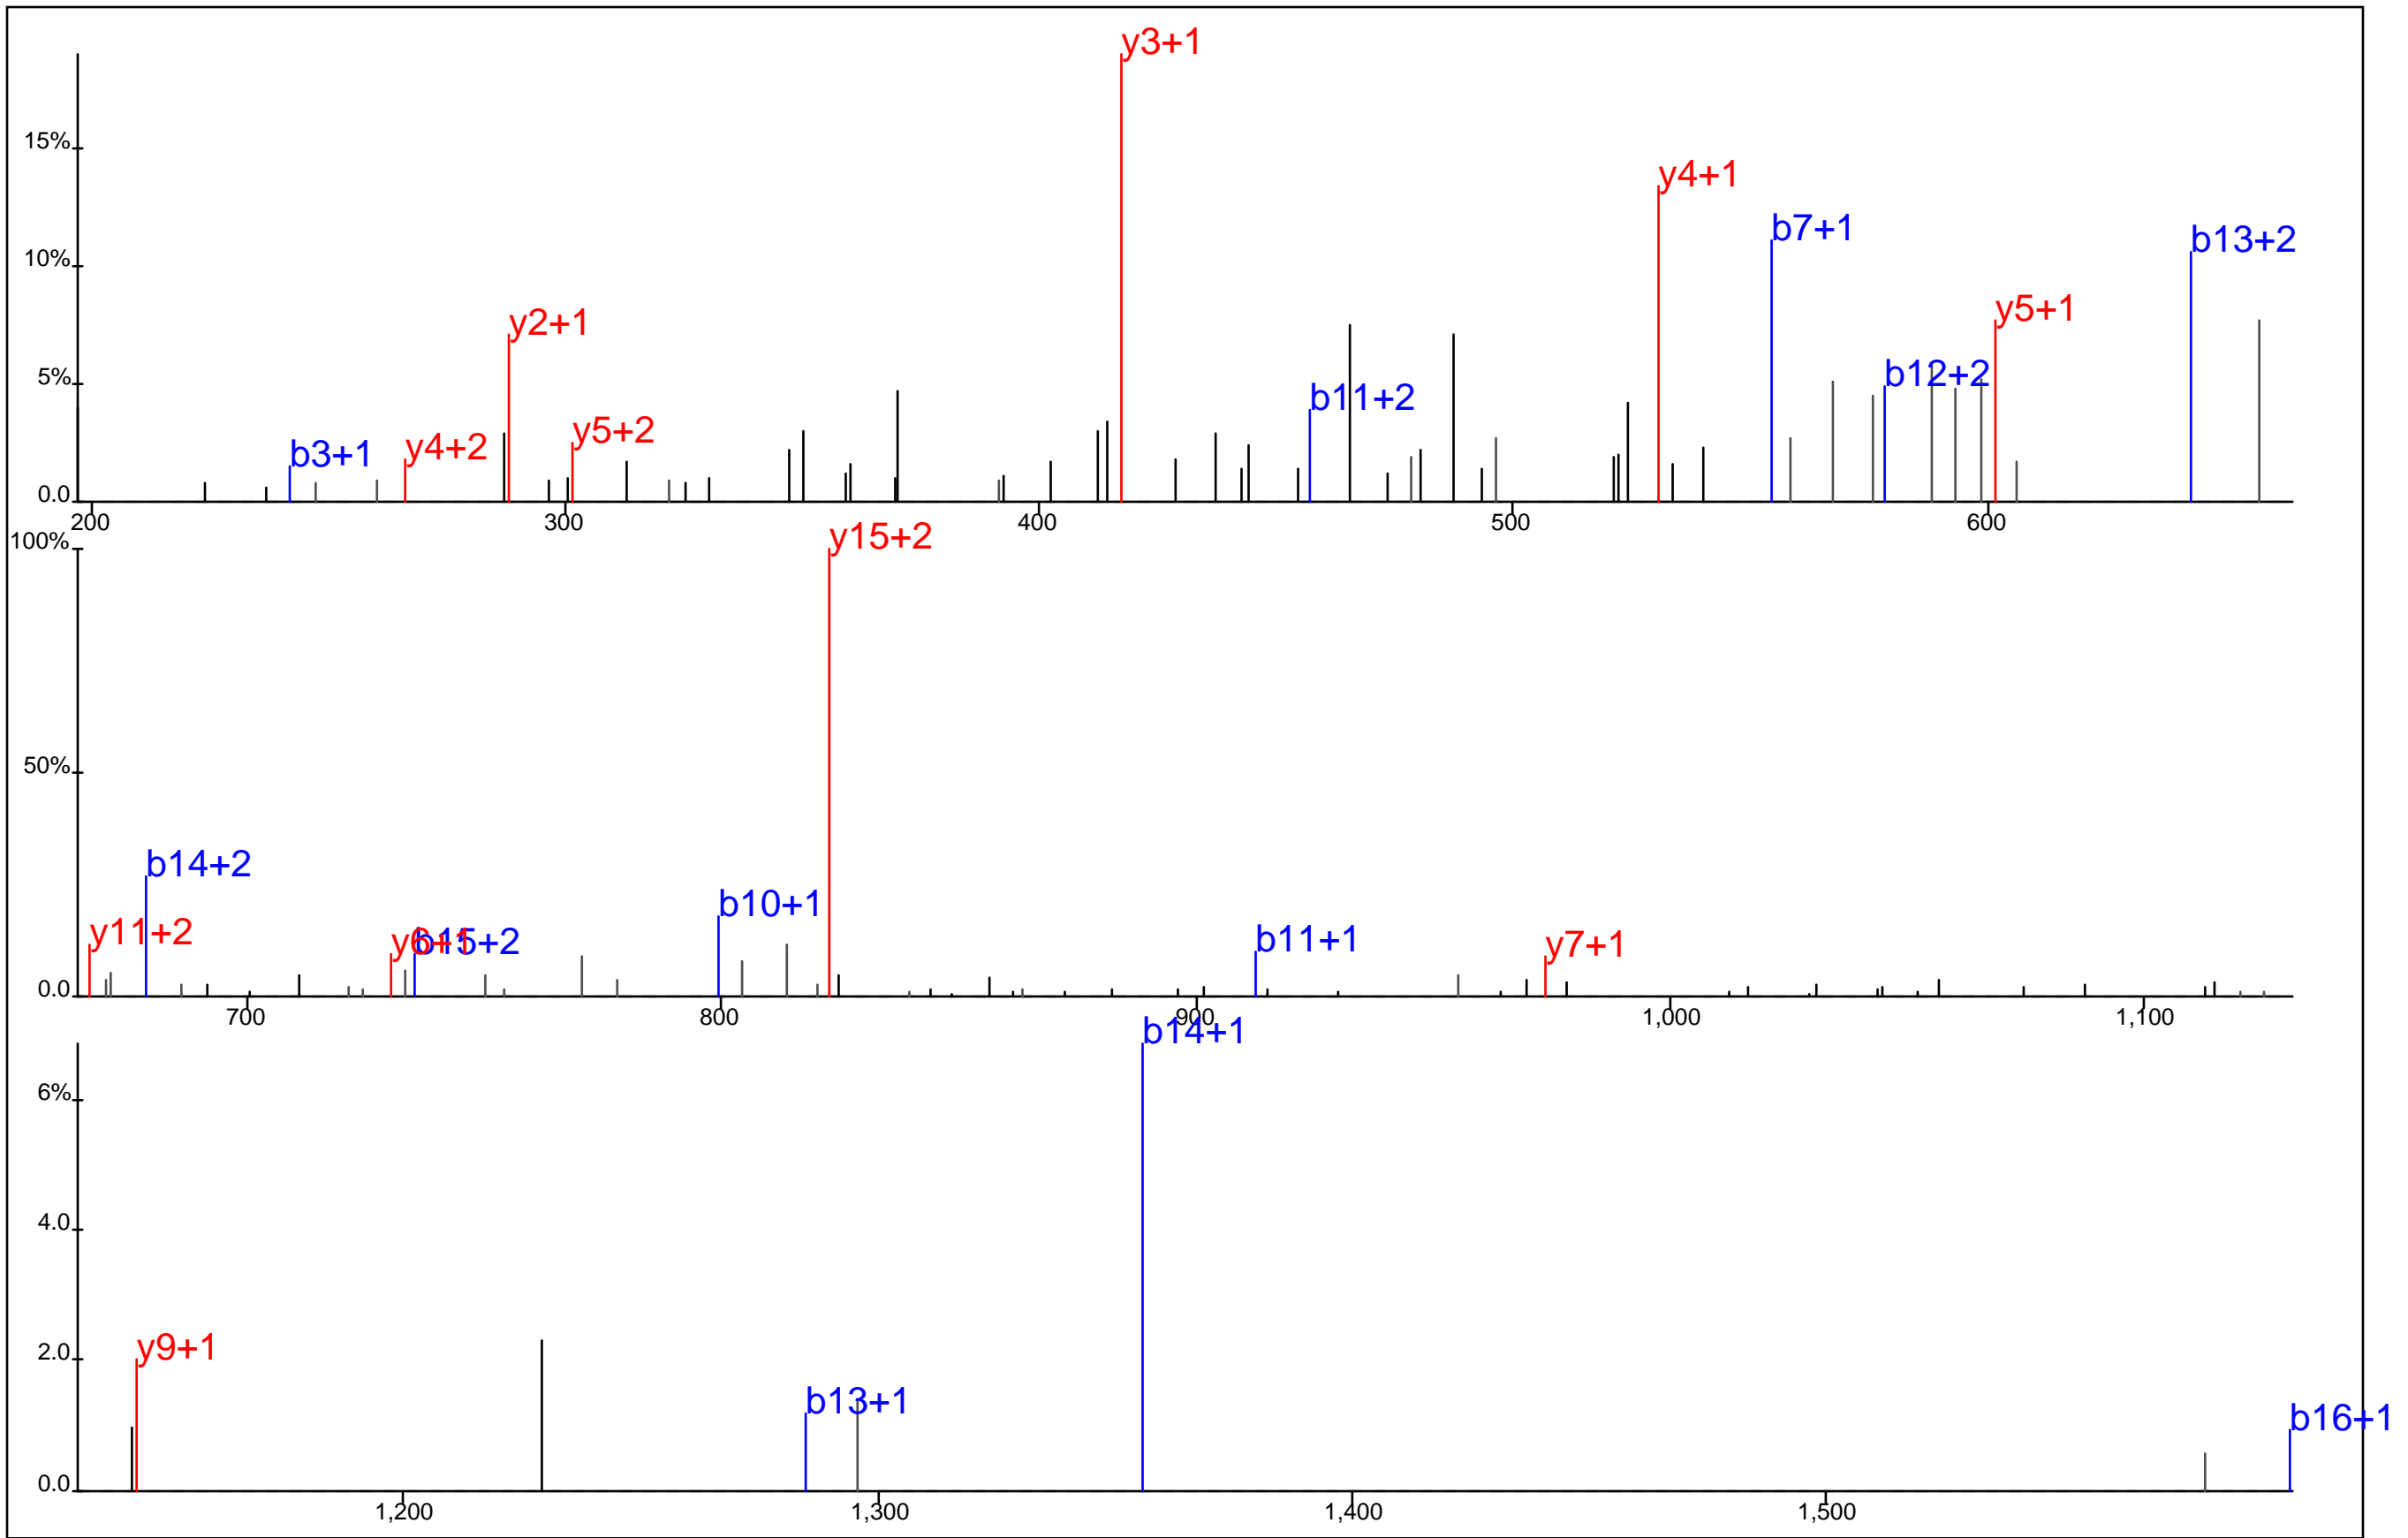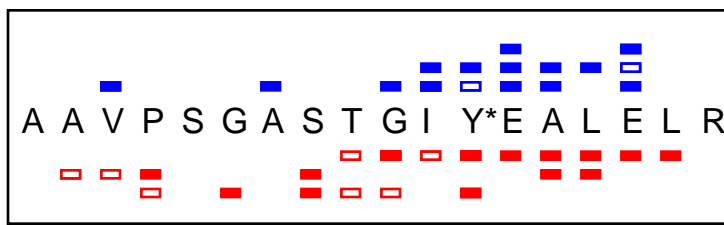

Protein Name: Enolase 2  
 gi Accession: 0  
 Precursor Mass: 628.9751+3  
 Delta Mass: 0.265 ppm  
 XCorr: 36.5

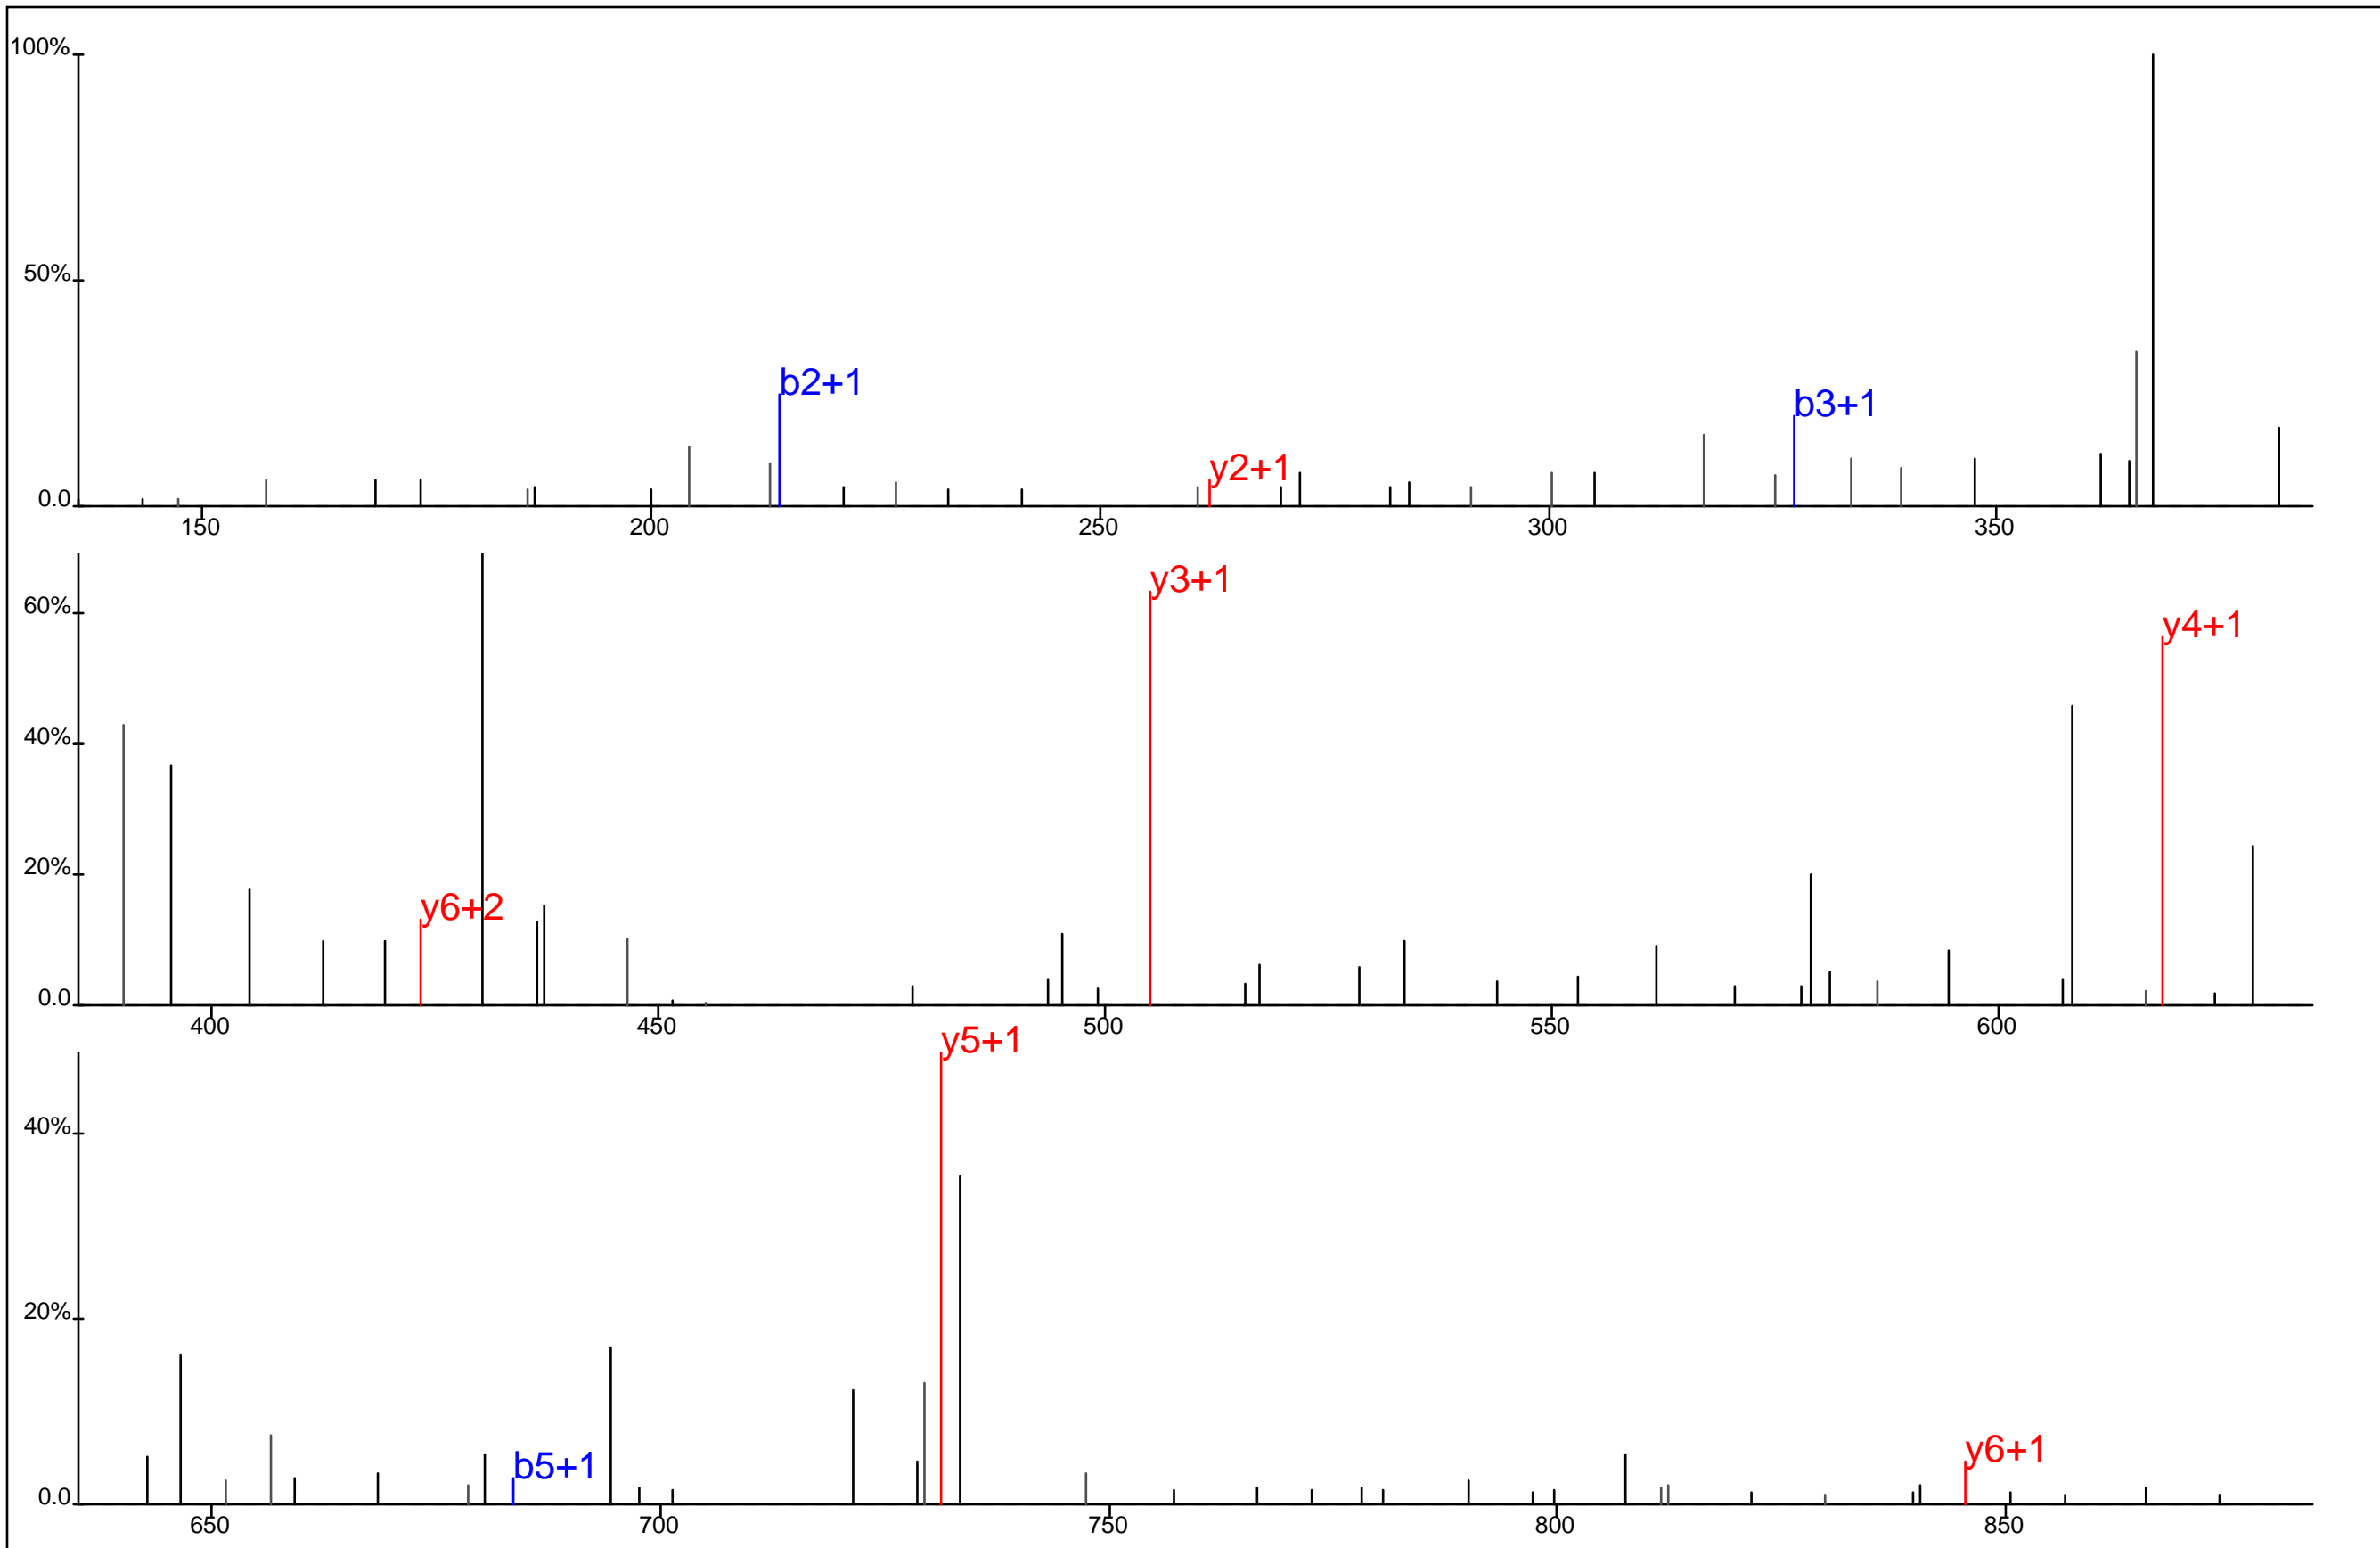

■ ■ □ ■ □  
 V N L L Y\* S R  
□ ■ □ □ □

Protein Name: Enoyl CoA hydratase, peroxisomal  
 gi Accession: 0  
 Precursor Mass: 472.7337+2  
 Delta Mass: 0.013 ppm  
 XCorr: 27.08



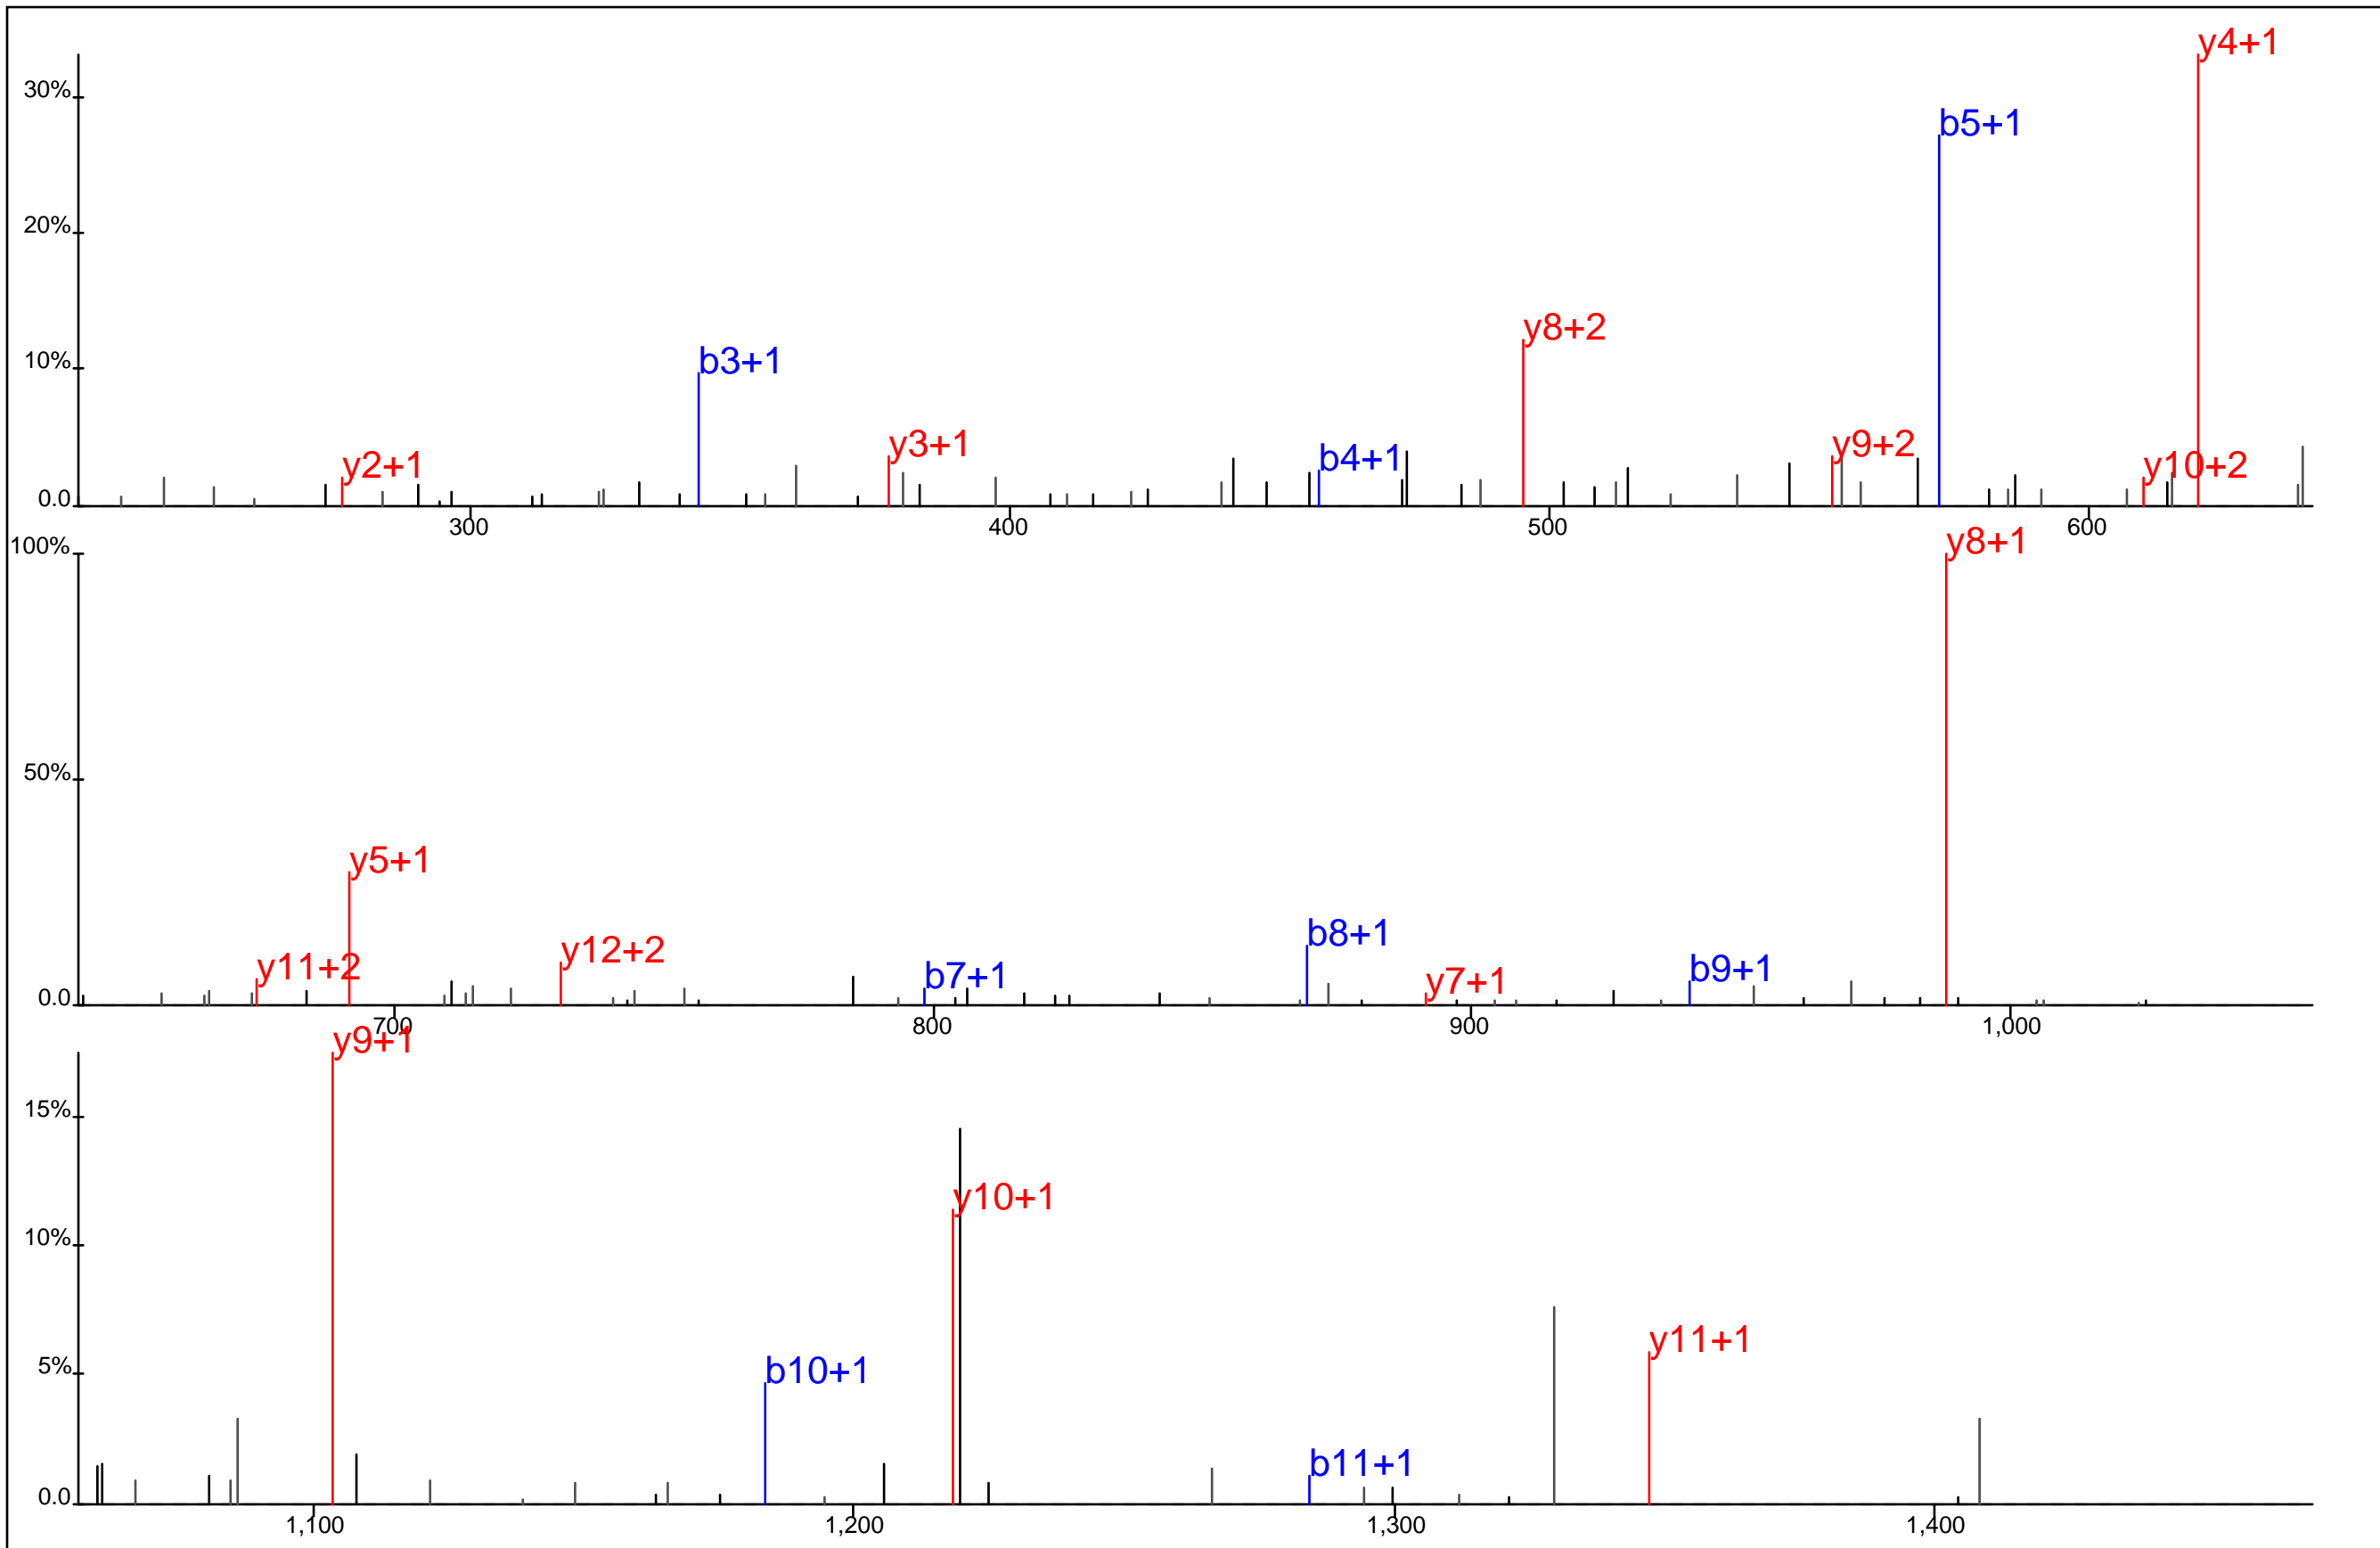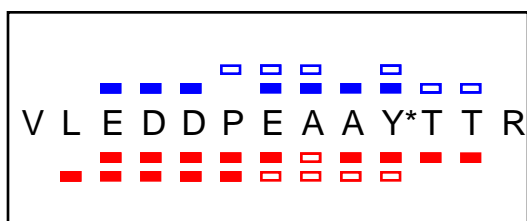

Protein Name: EphA3  
 gi Accession: 0  
 Precursor Mass: 780.3347+2  
 Delta Mass: 0.292 ppm  
 XCorr: 64.5



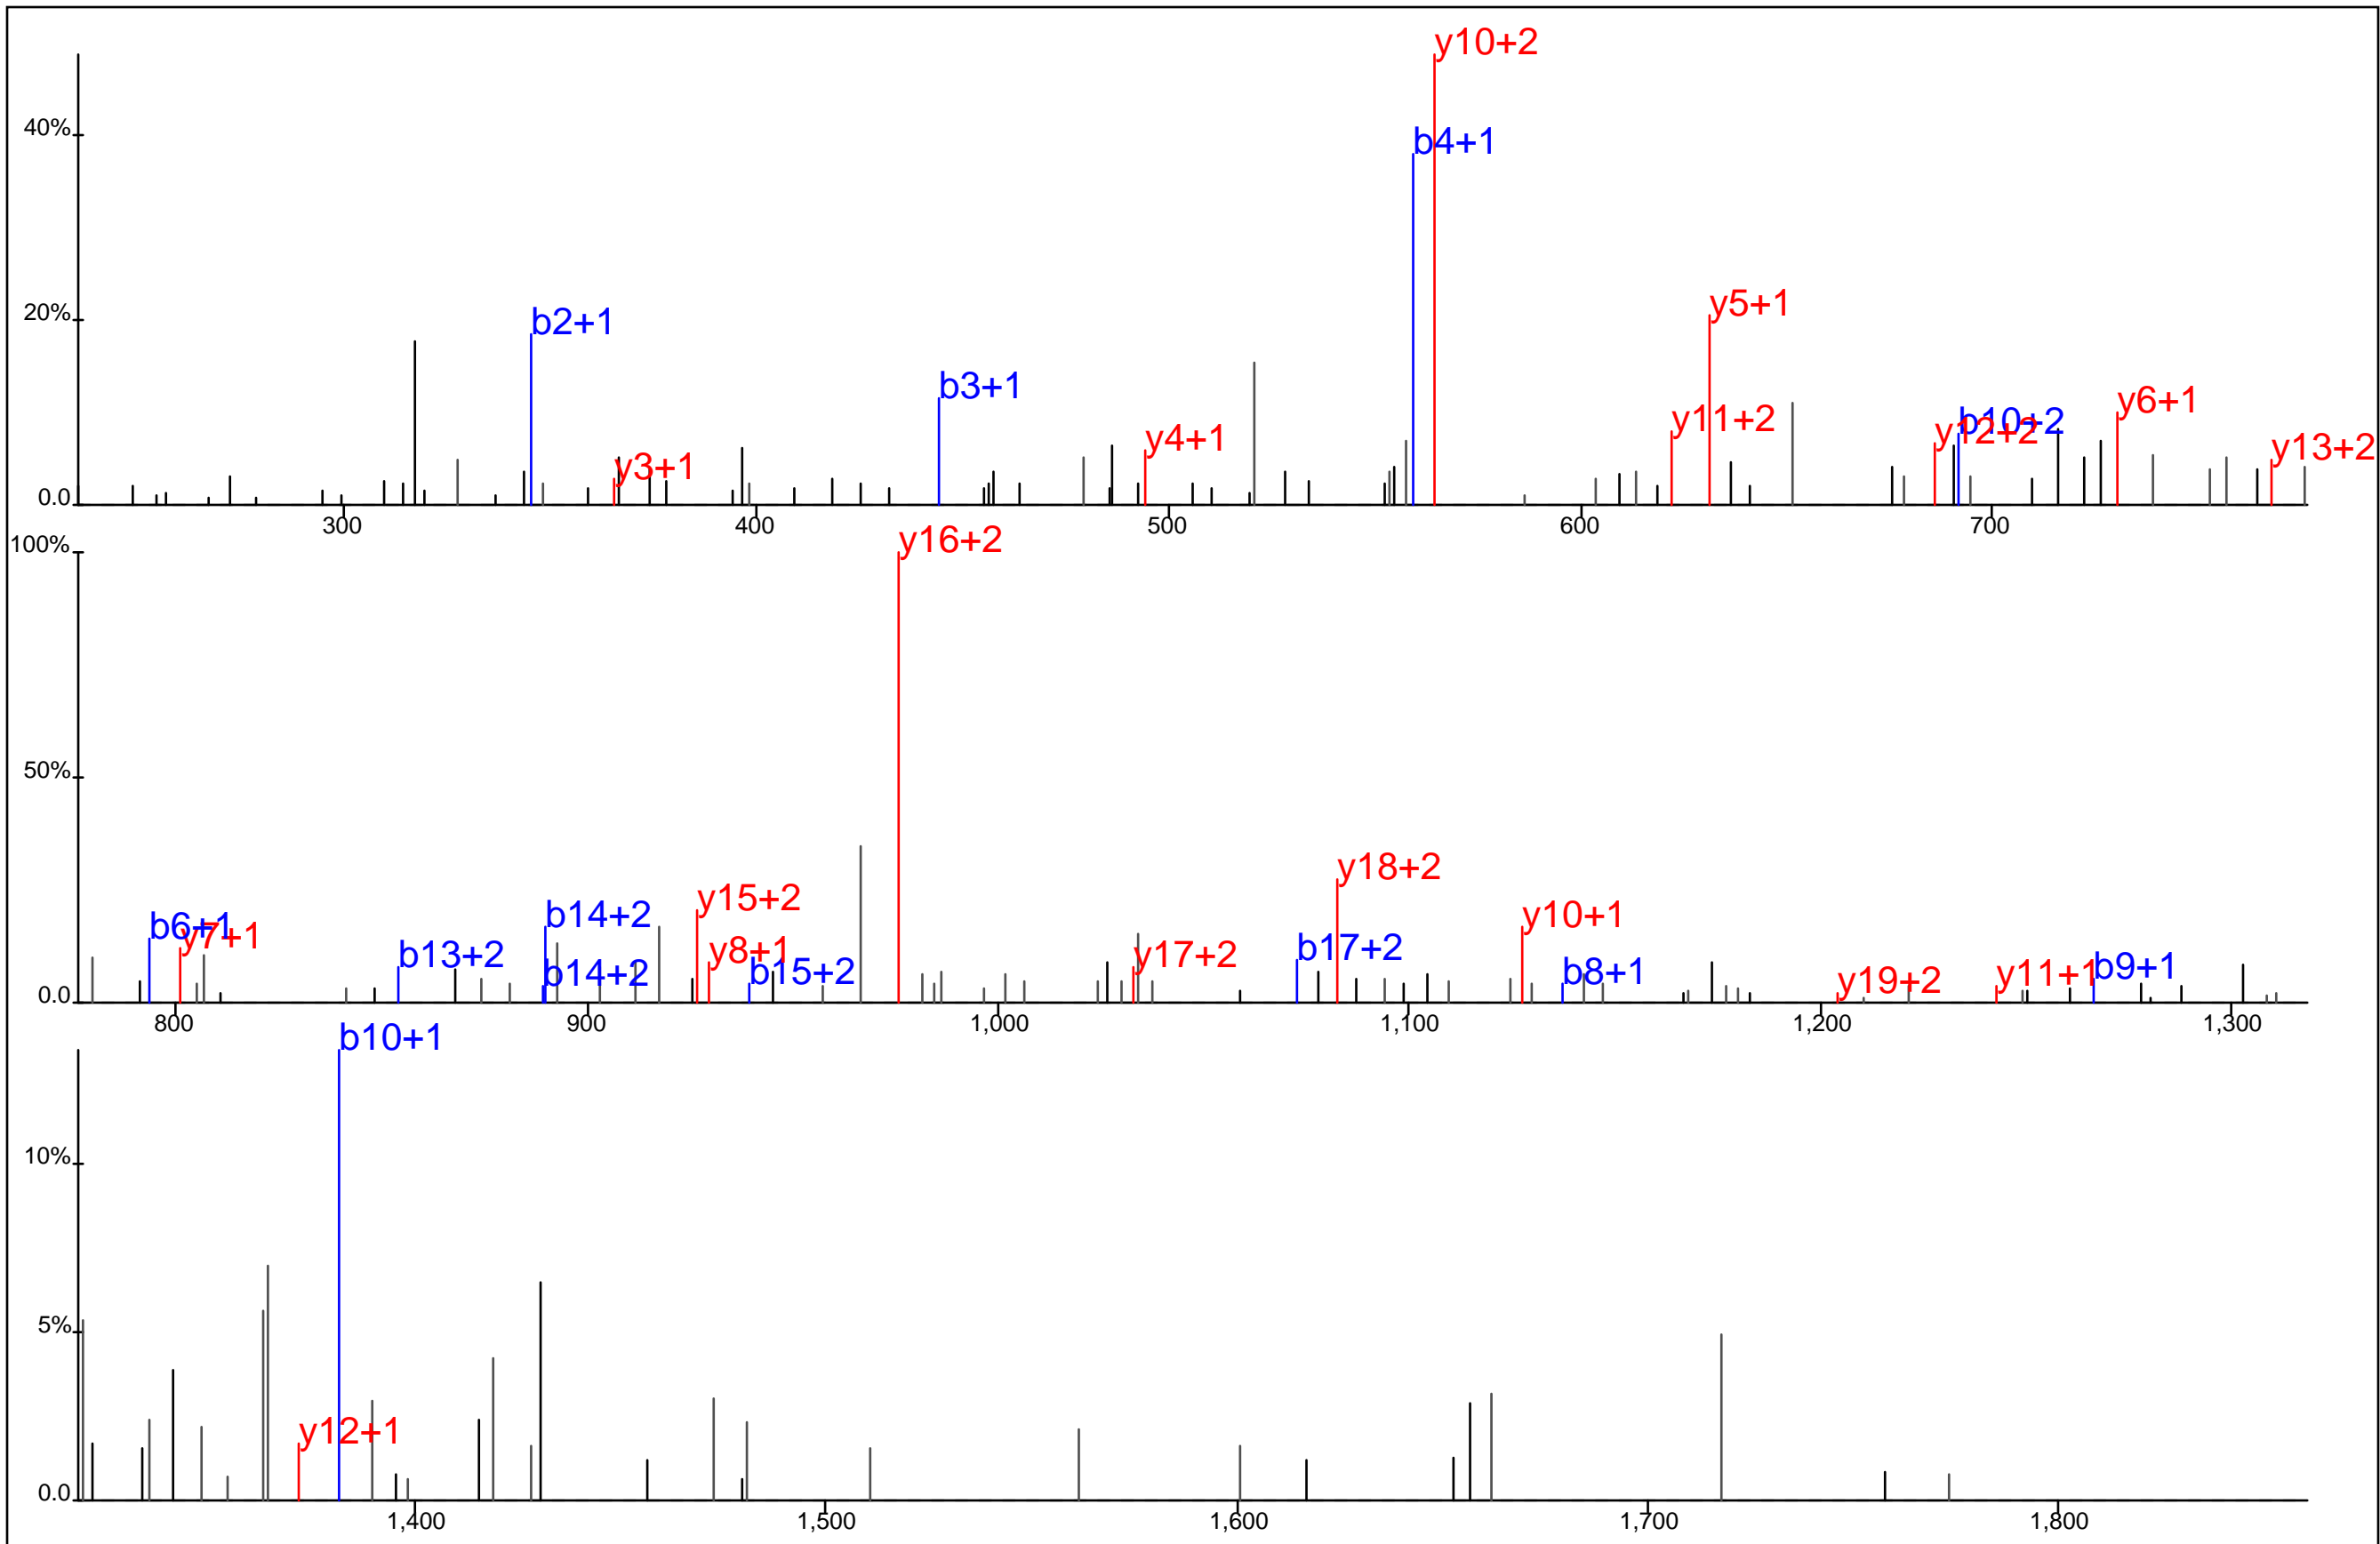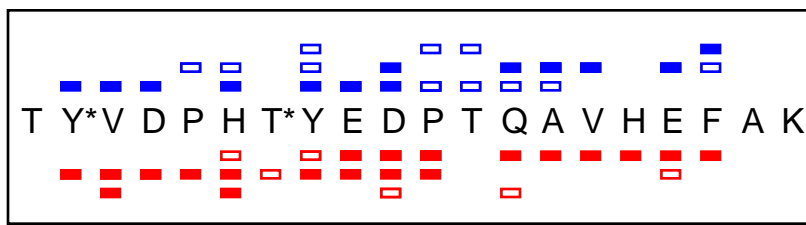

Protein Name: EphA3  
 gi Accession: 0  
 Precursor Mass: 836.6789+3  
 Delta Mass: 2.595 ppm  
 XCorr: 30.94

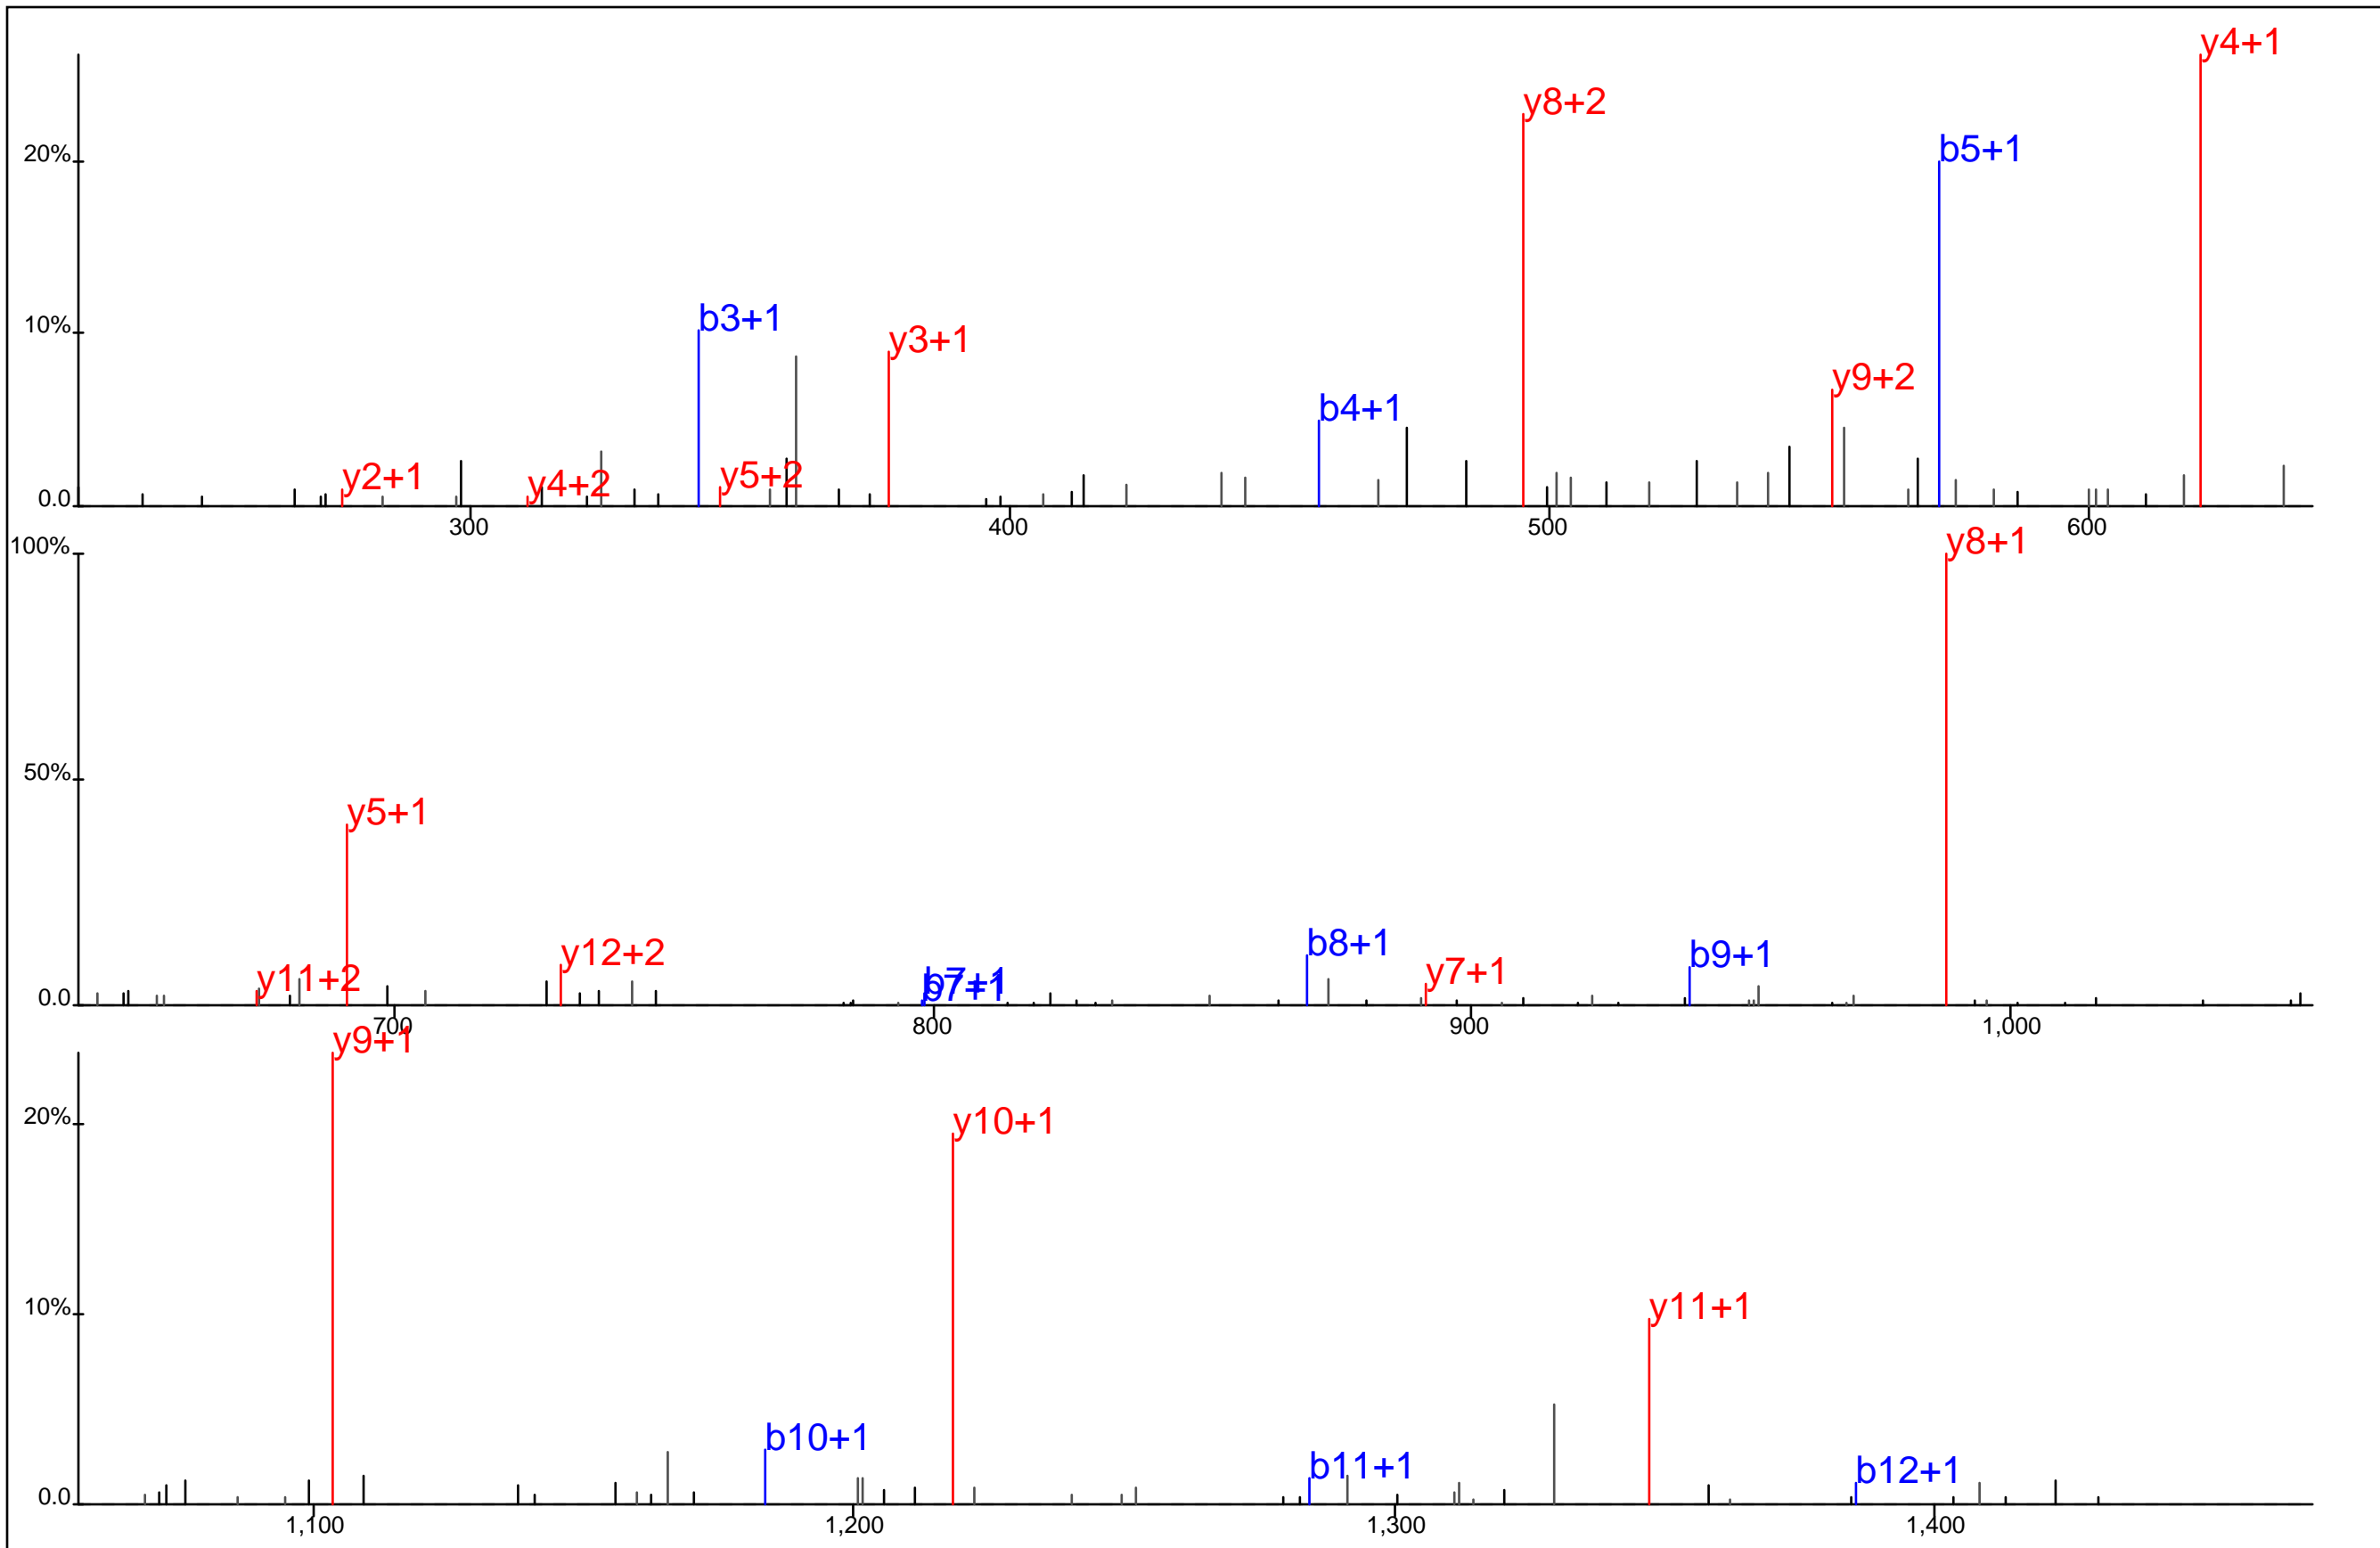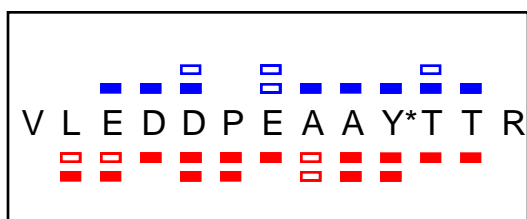

Protein Name: EphA3  
 gi Accession: 0  
 Precursor Mass: 780.3349+2  
 Delta Mass: 0.021 ppm  
 XCorr: 57.41

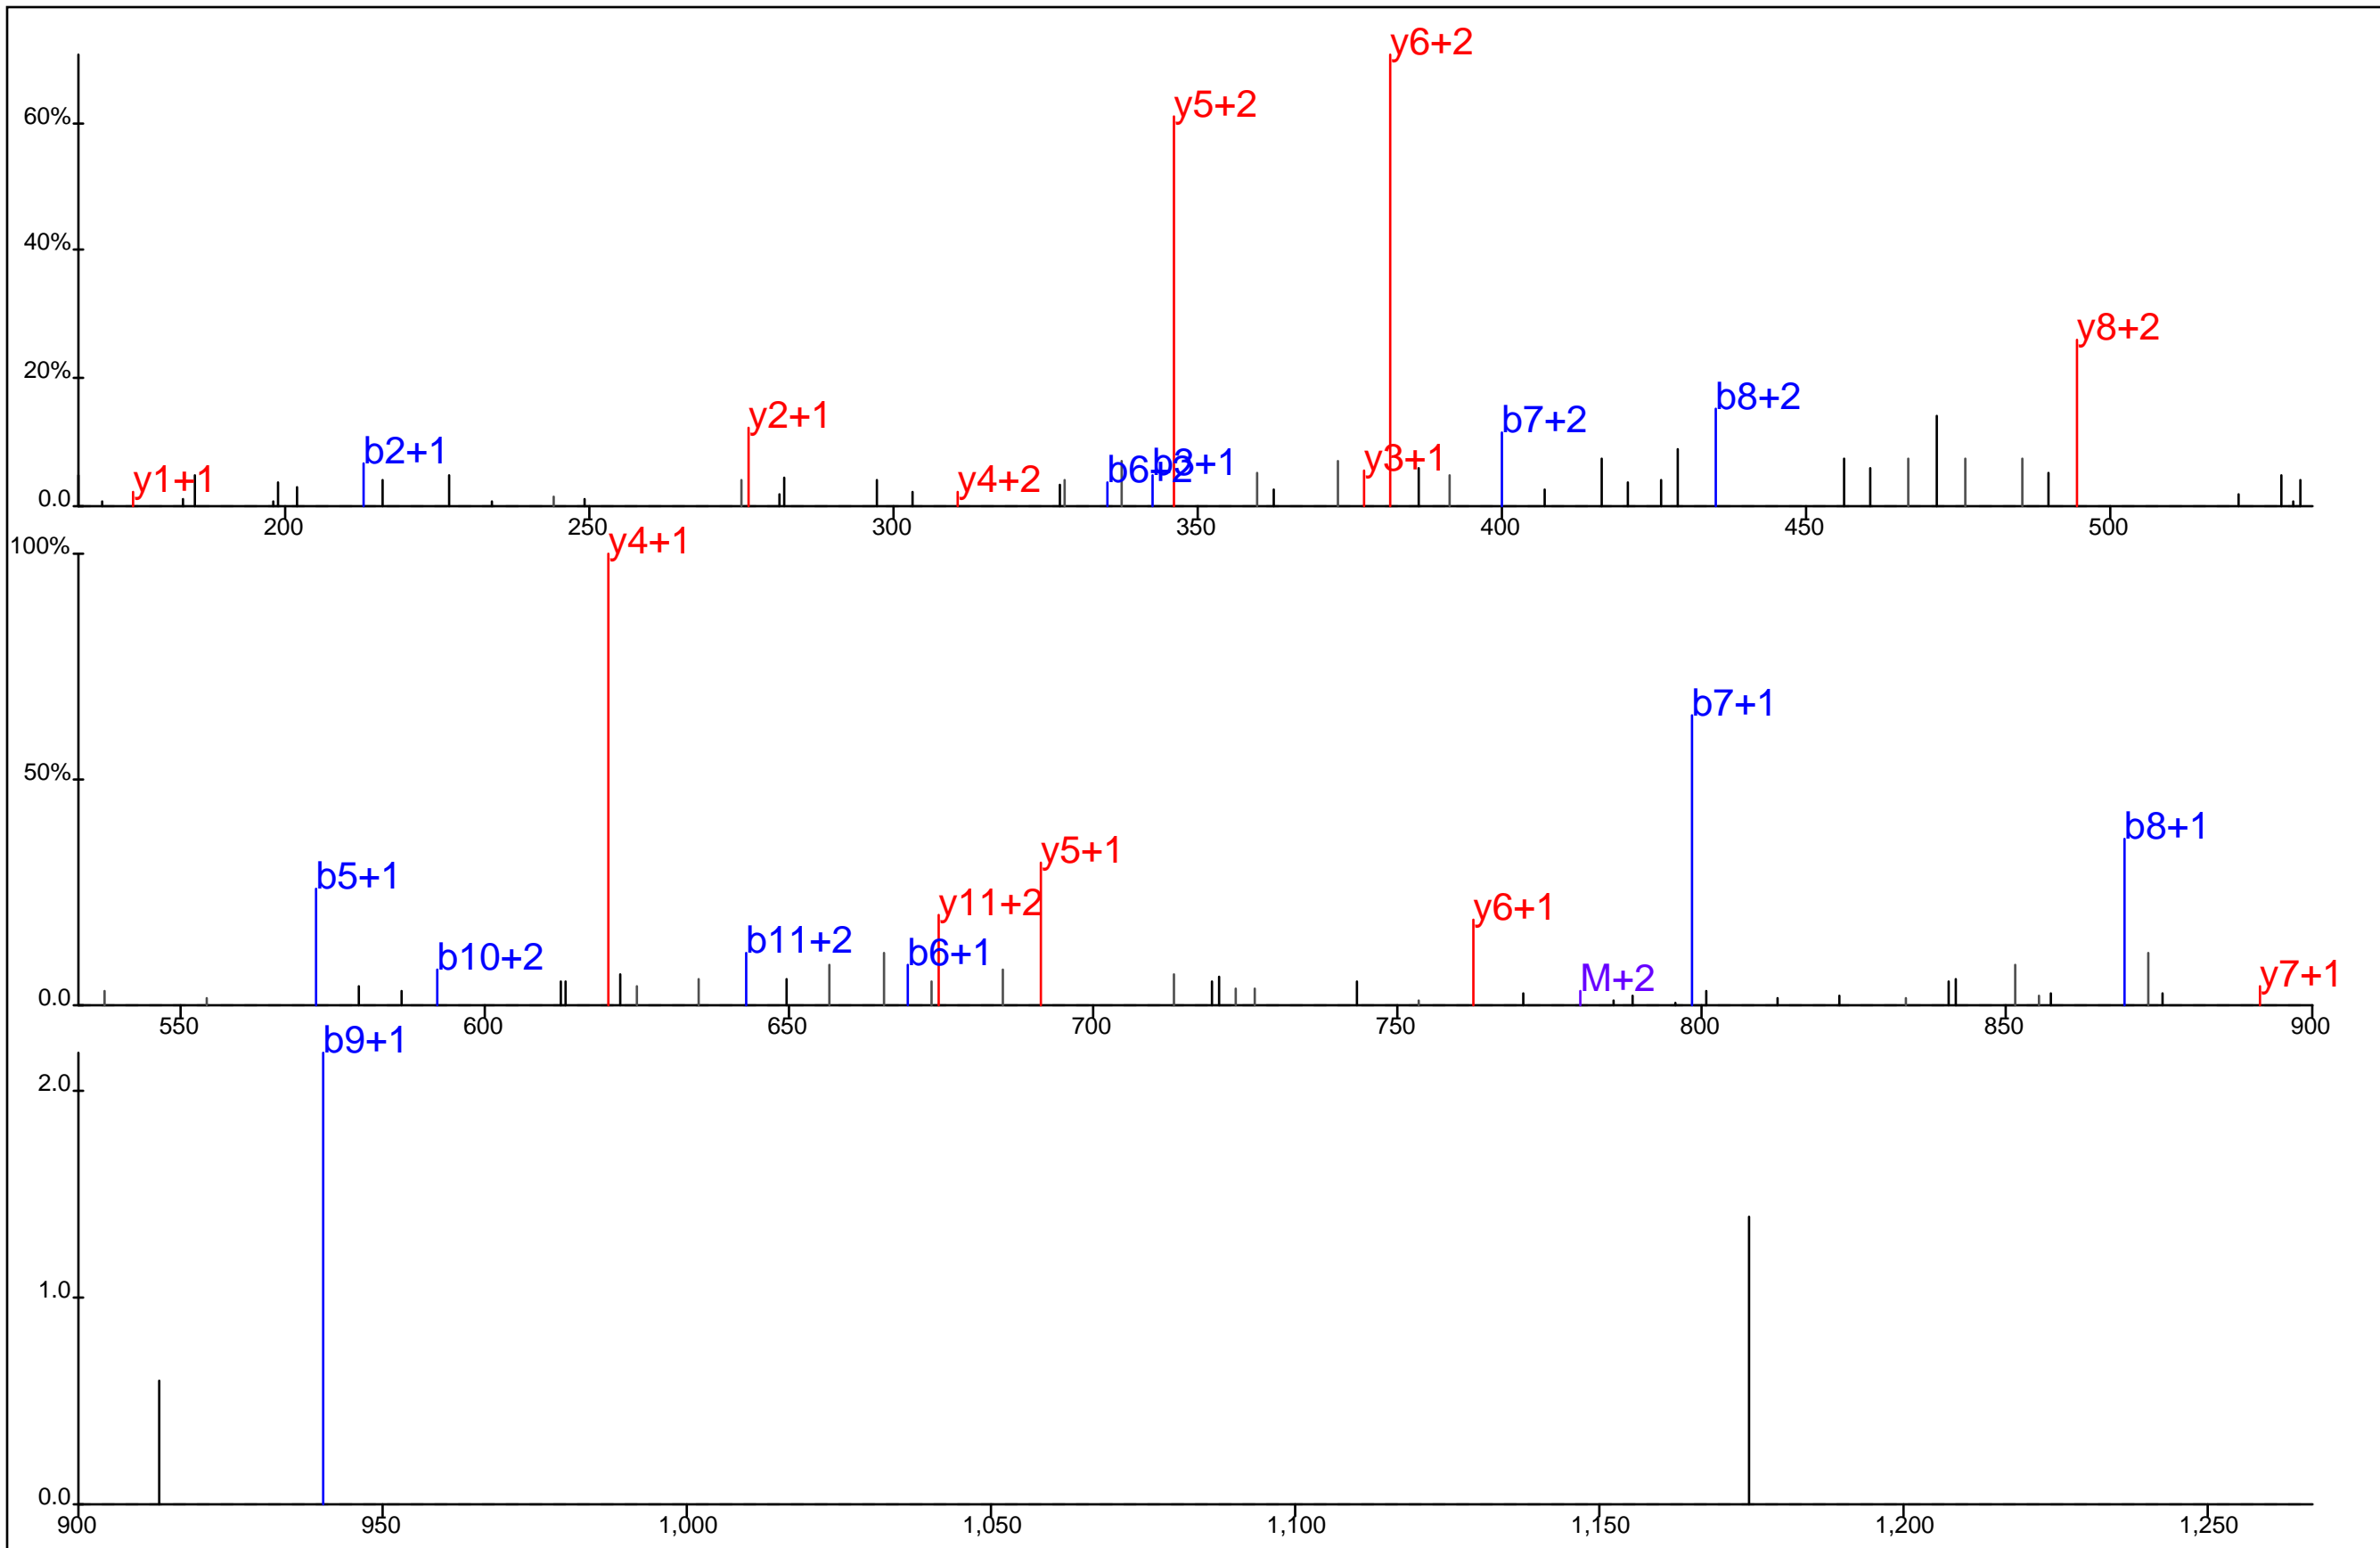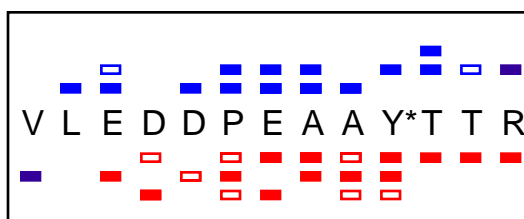

Protein Name: EphA3  
 gi Accession: 0  
 Precursor Mass: 520.5587+3  
 Delta Mass: 0.692 ppm  
 XCorr: 37.89

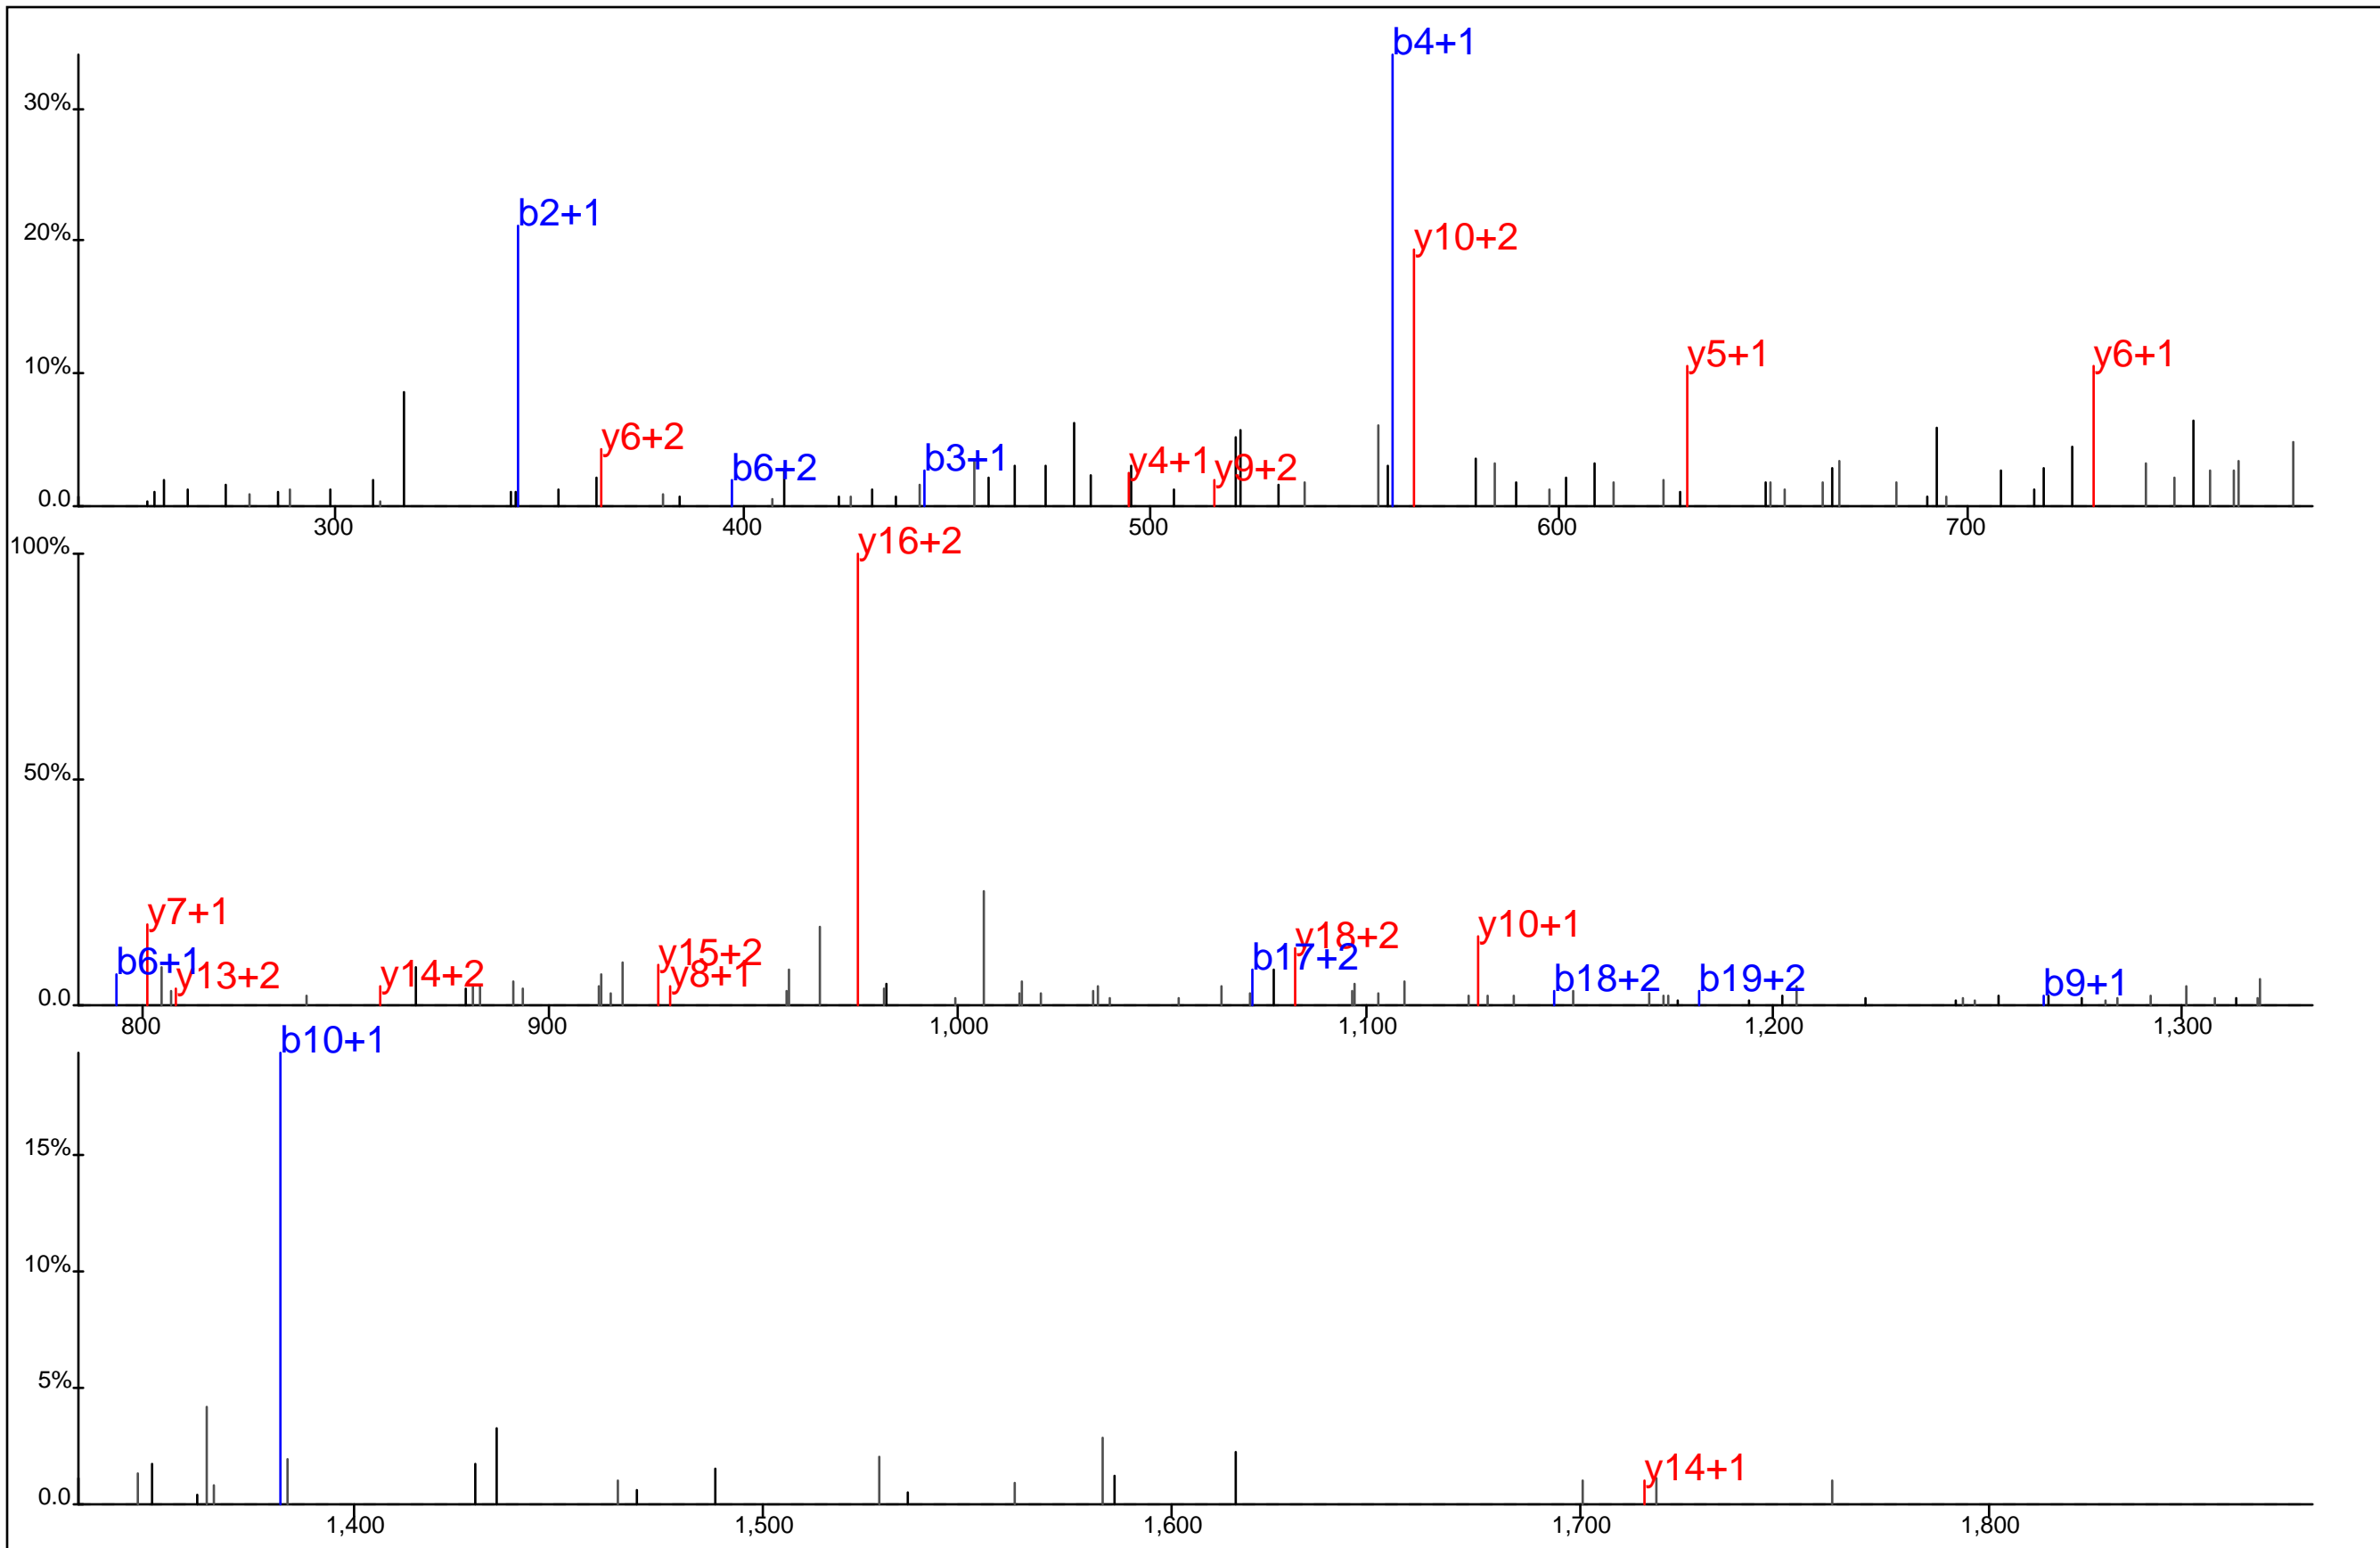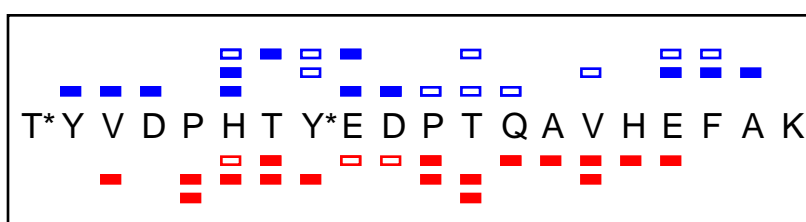

Protein Name: EphA3  
 gi Accession: 0  
 Precursor Mass: 836.6752+3  
 Delta Mass: 1.858 ppm  
 XCorr: 21.14

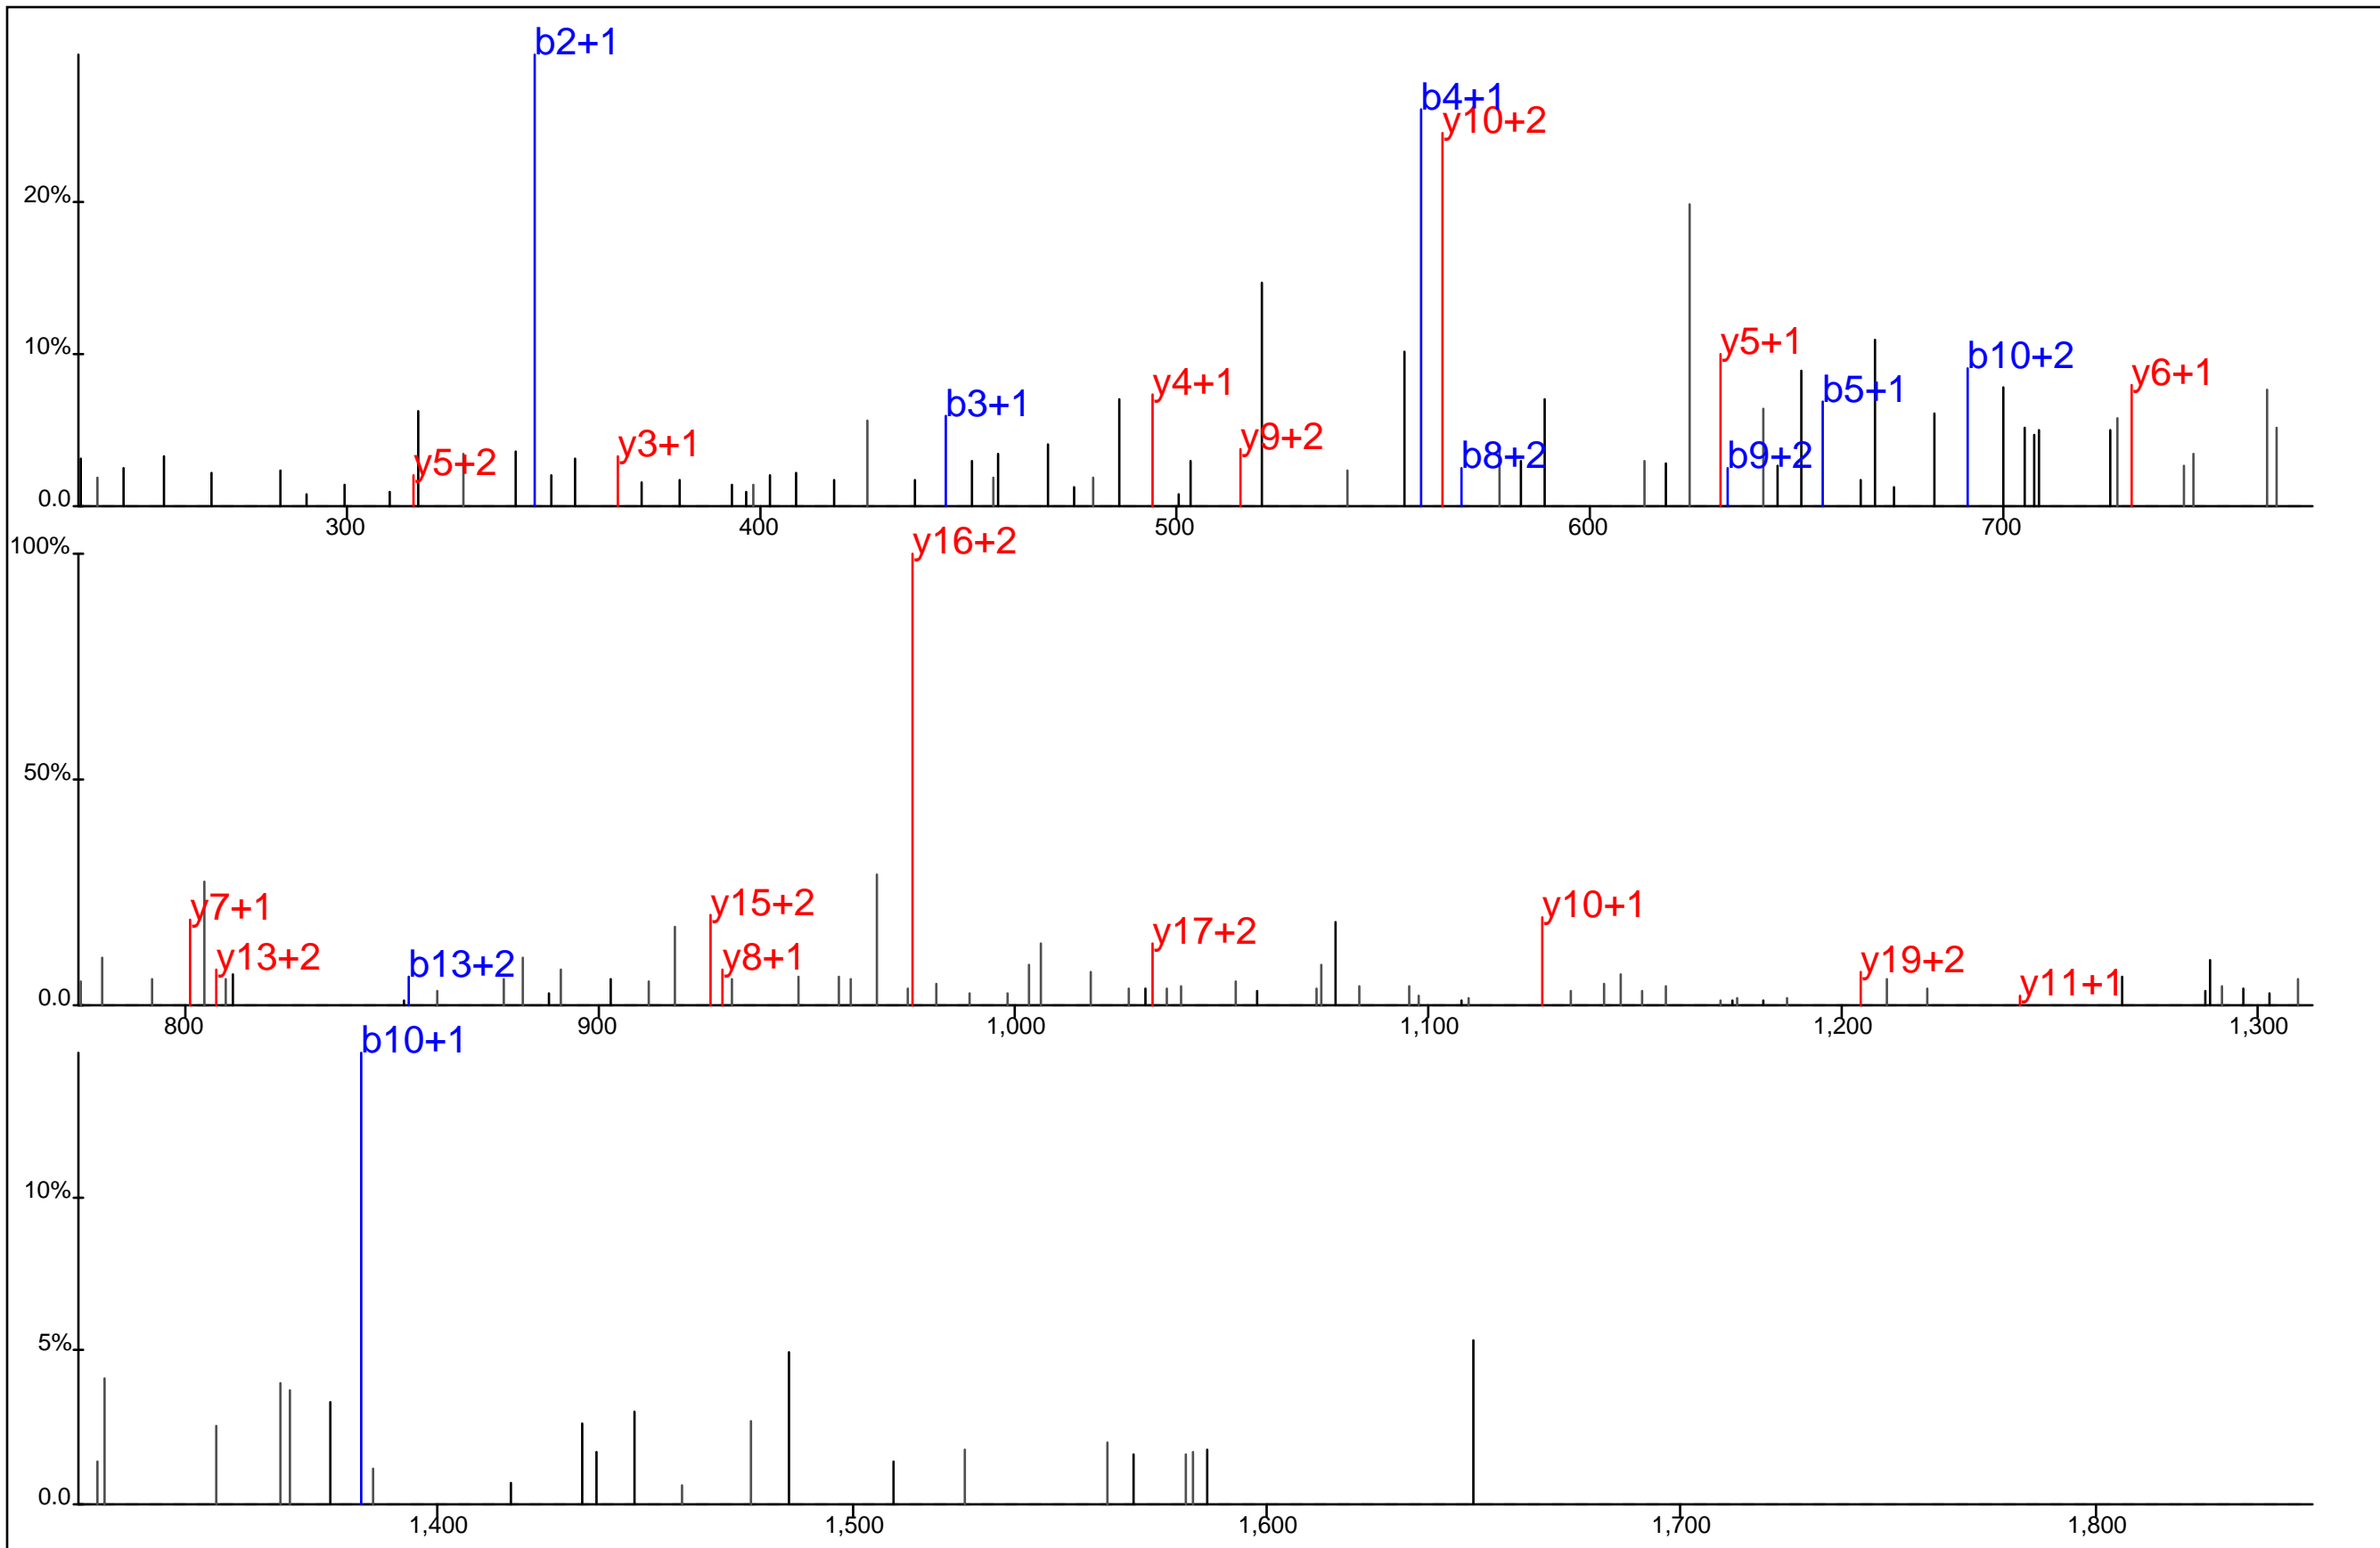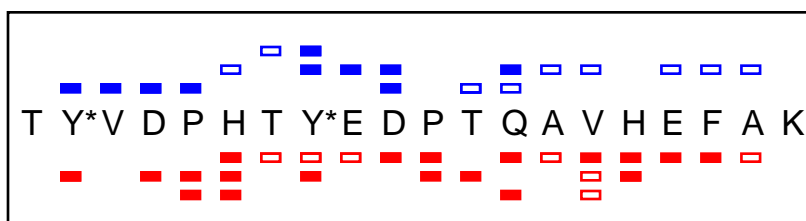

Protein Name: EphA3  
 gi Accession: 0  
 Precursor Mass: 836.6760+3  
 Delta Mass: 0.837 ppm  
 XCorr: 26.29

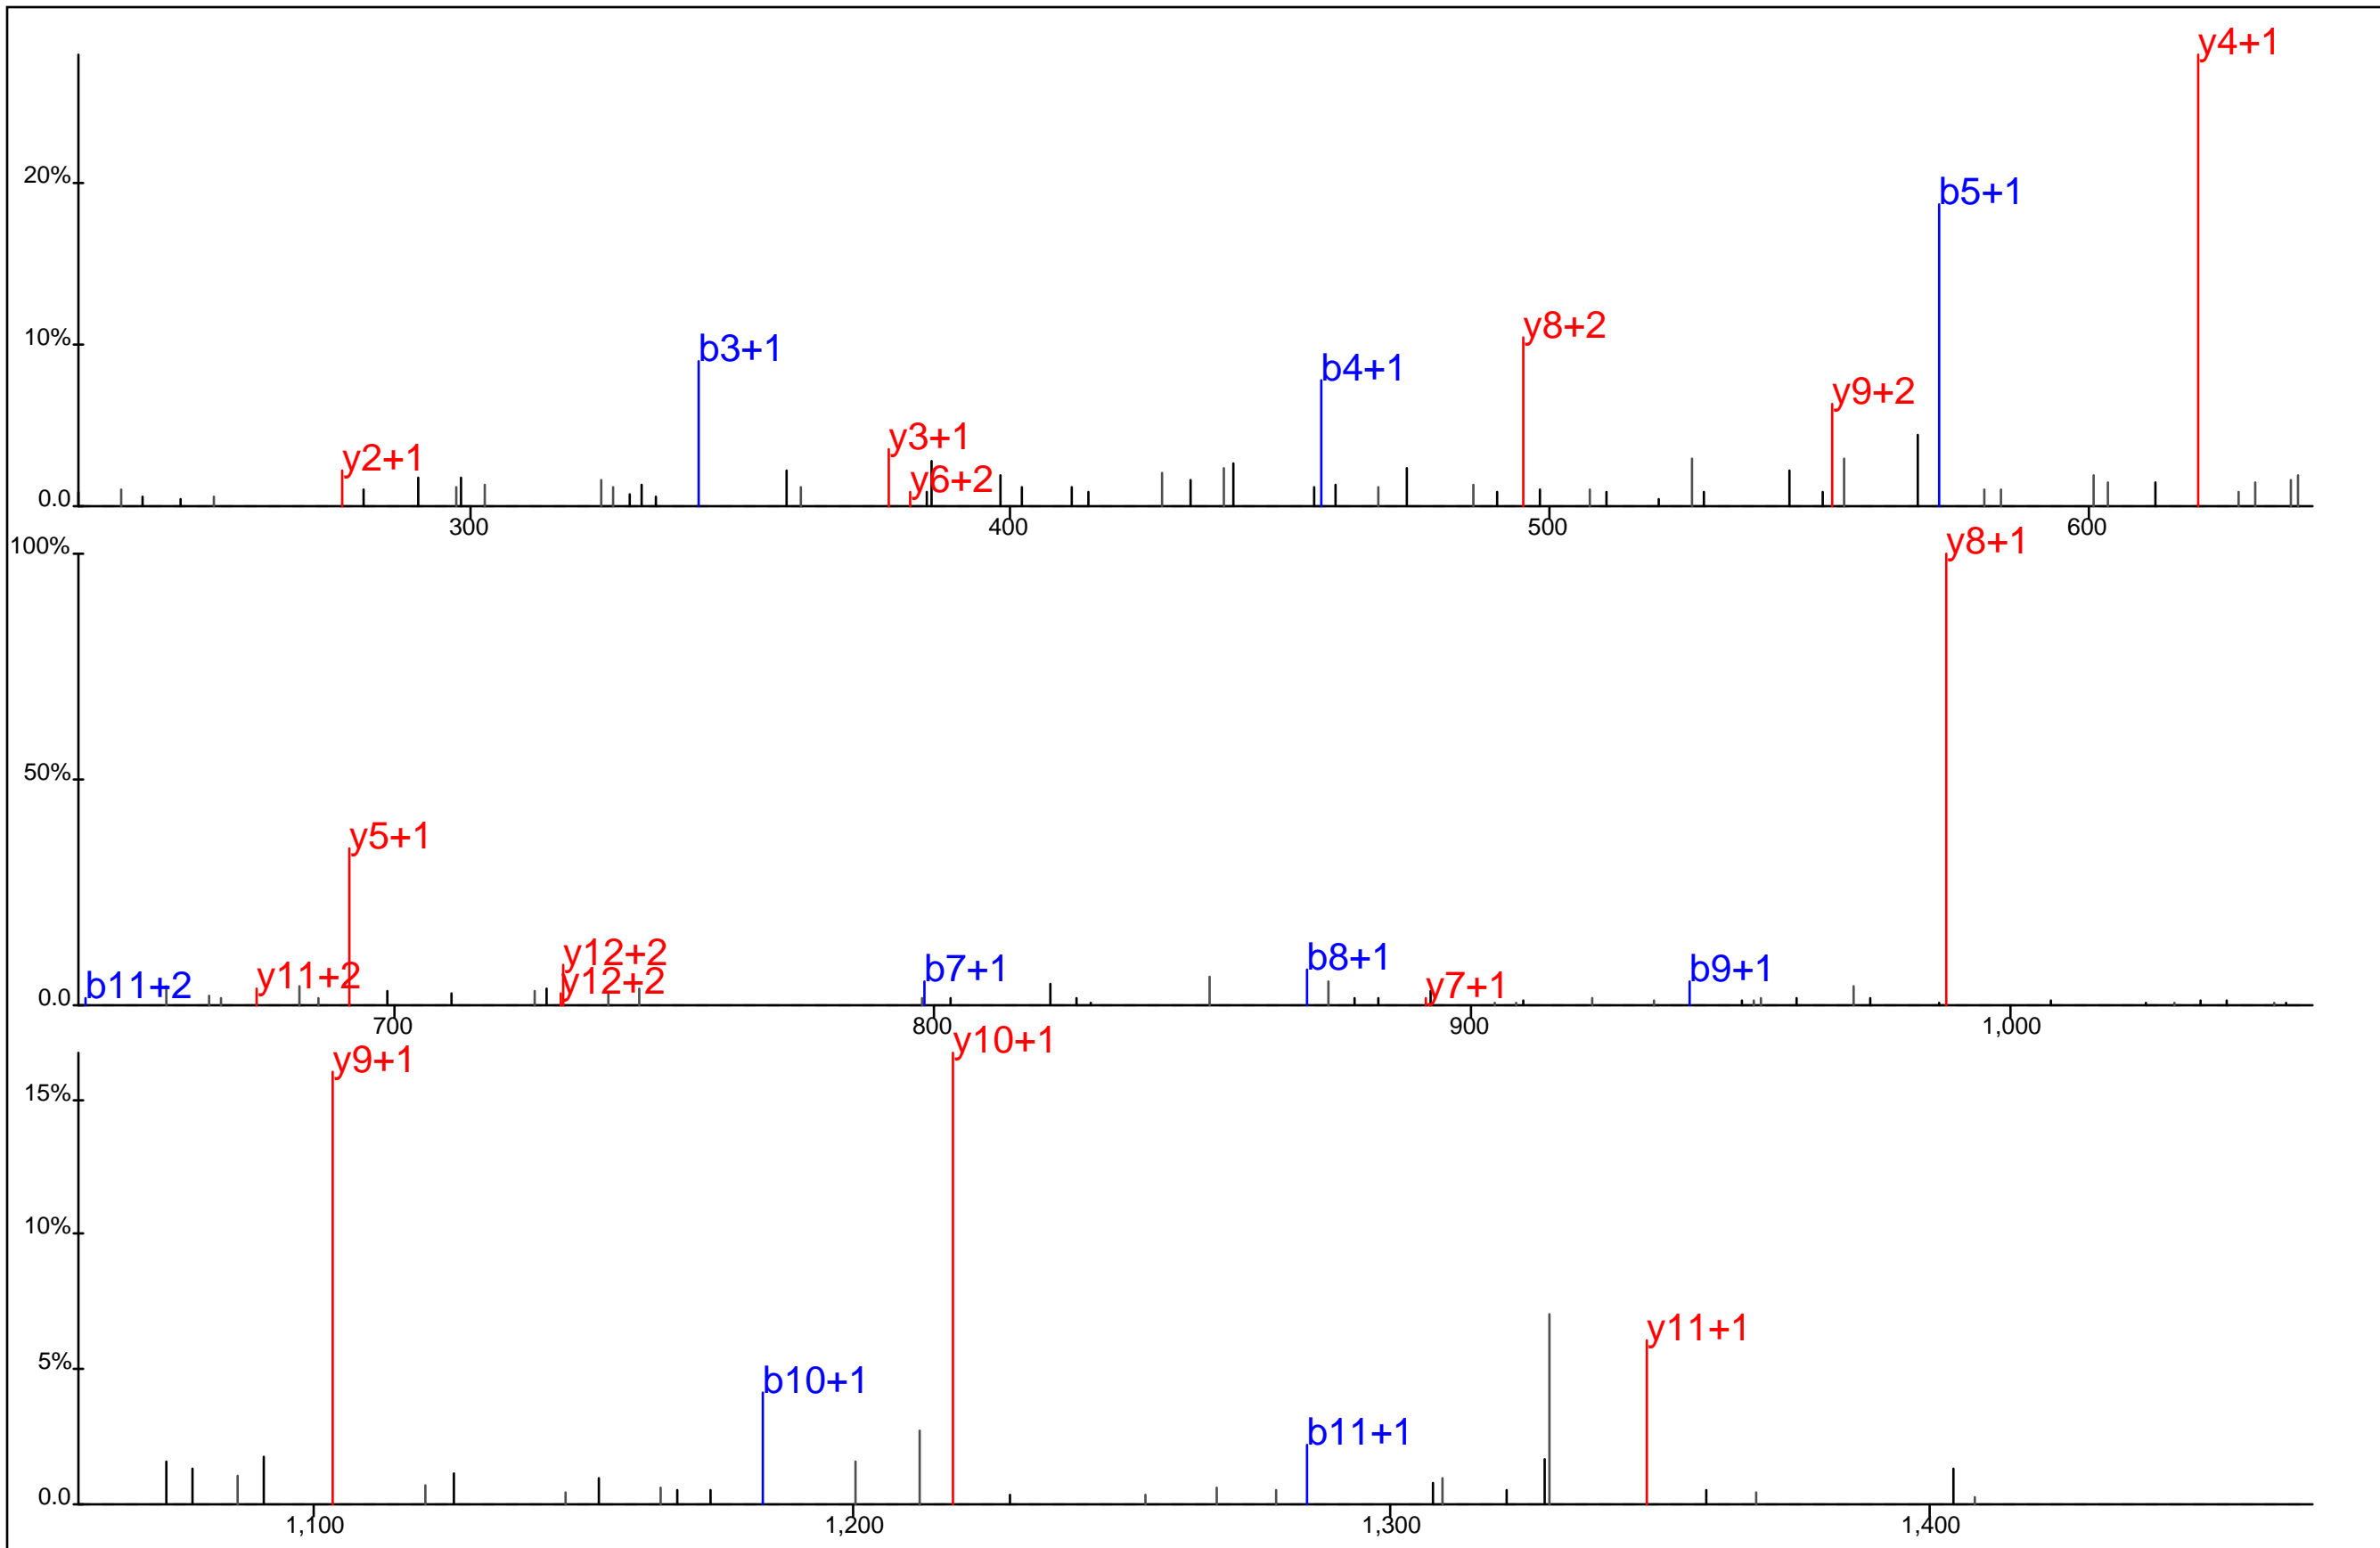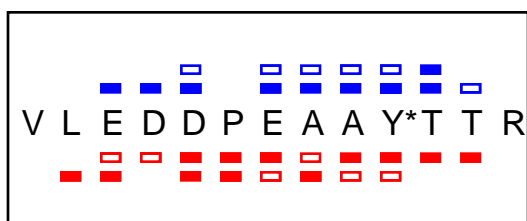

Protein Name: EphA3  
 gi Accession: 0  
 Precursor Mass: 780.3351+2  
 Delta Mass: 0.255 ppm  
 XCorr: 71.35



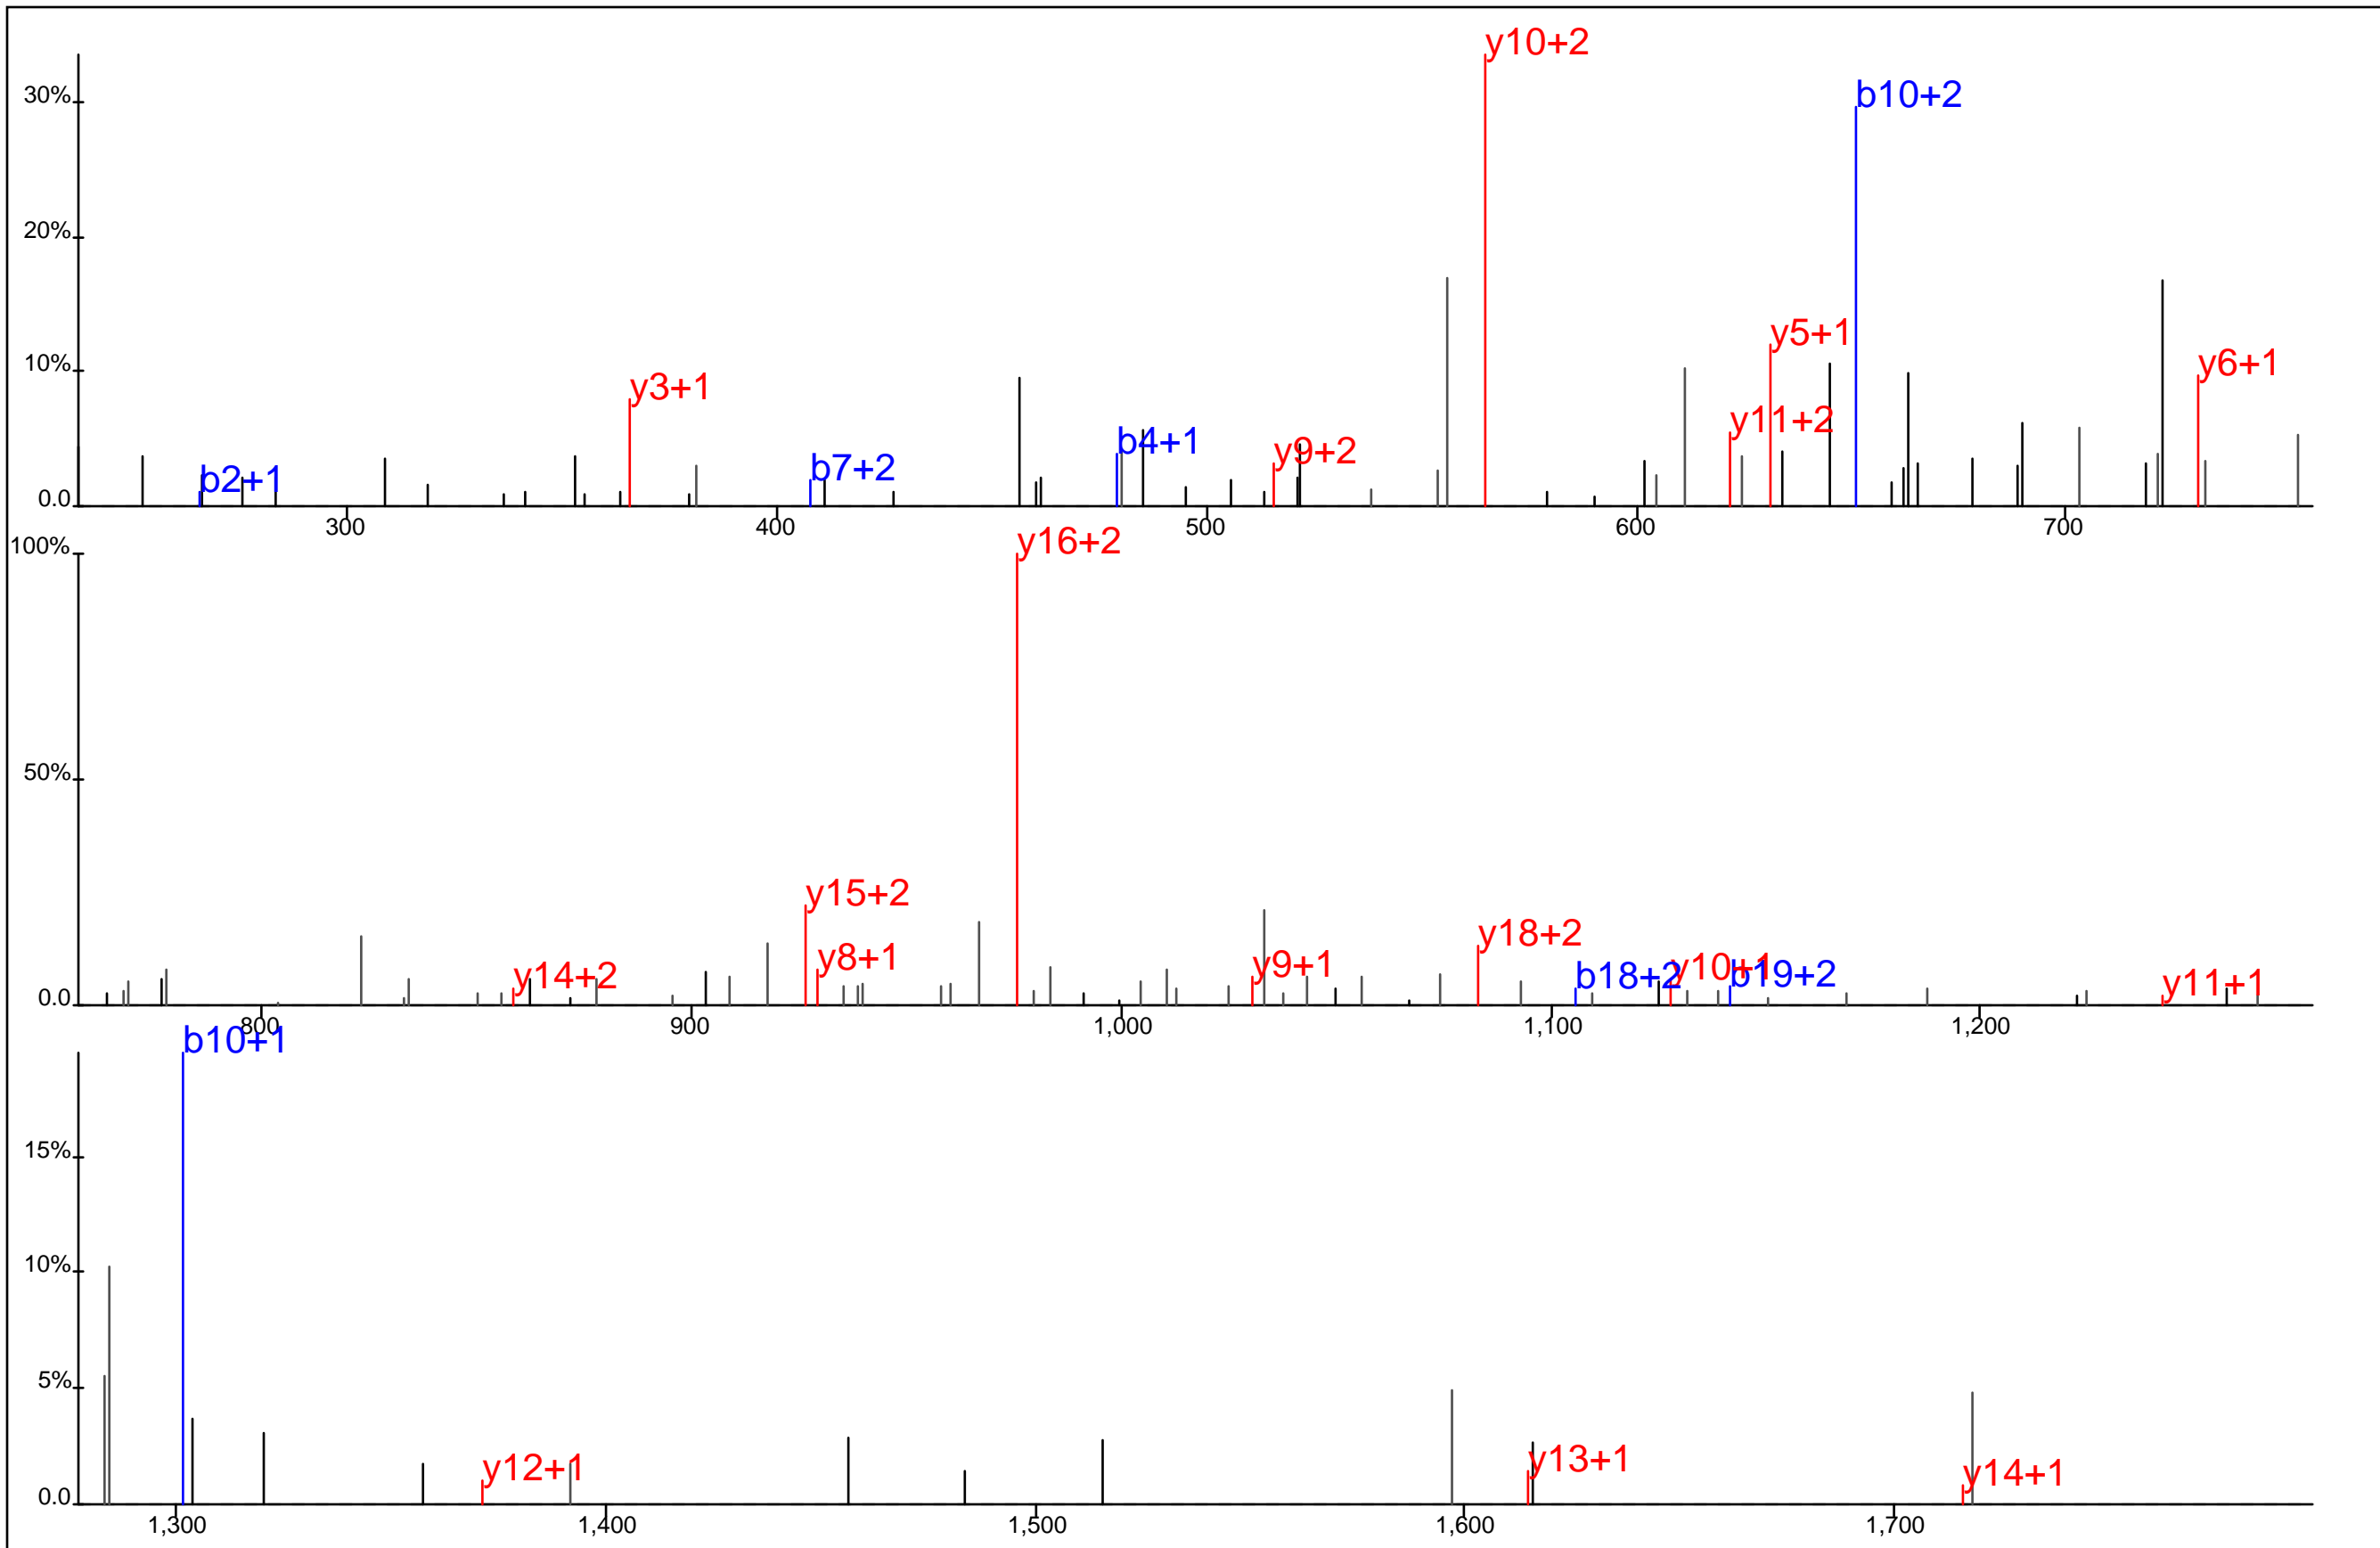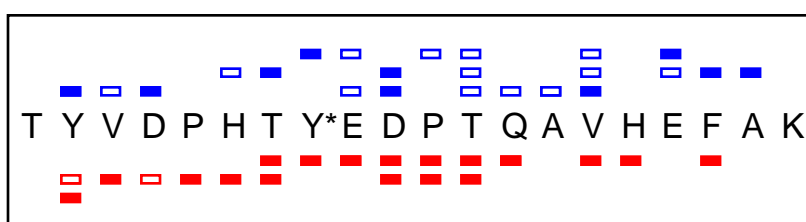

Protein Name: EphA3  
 gi Accession: 0  
 Precursor Mass: 810.0211+3  
 Delta Mass: 0.281 ppm  
 XCorr: 33.37

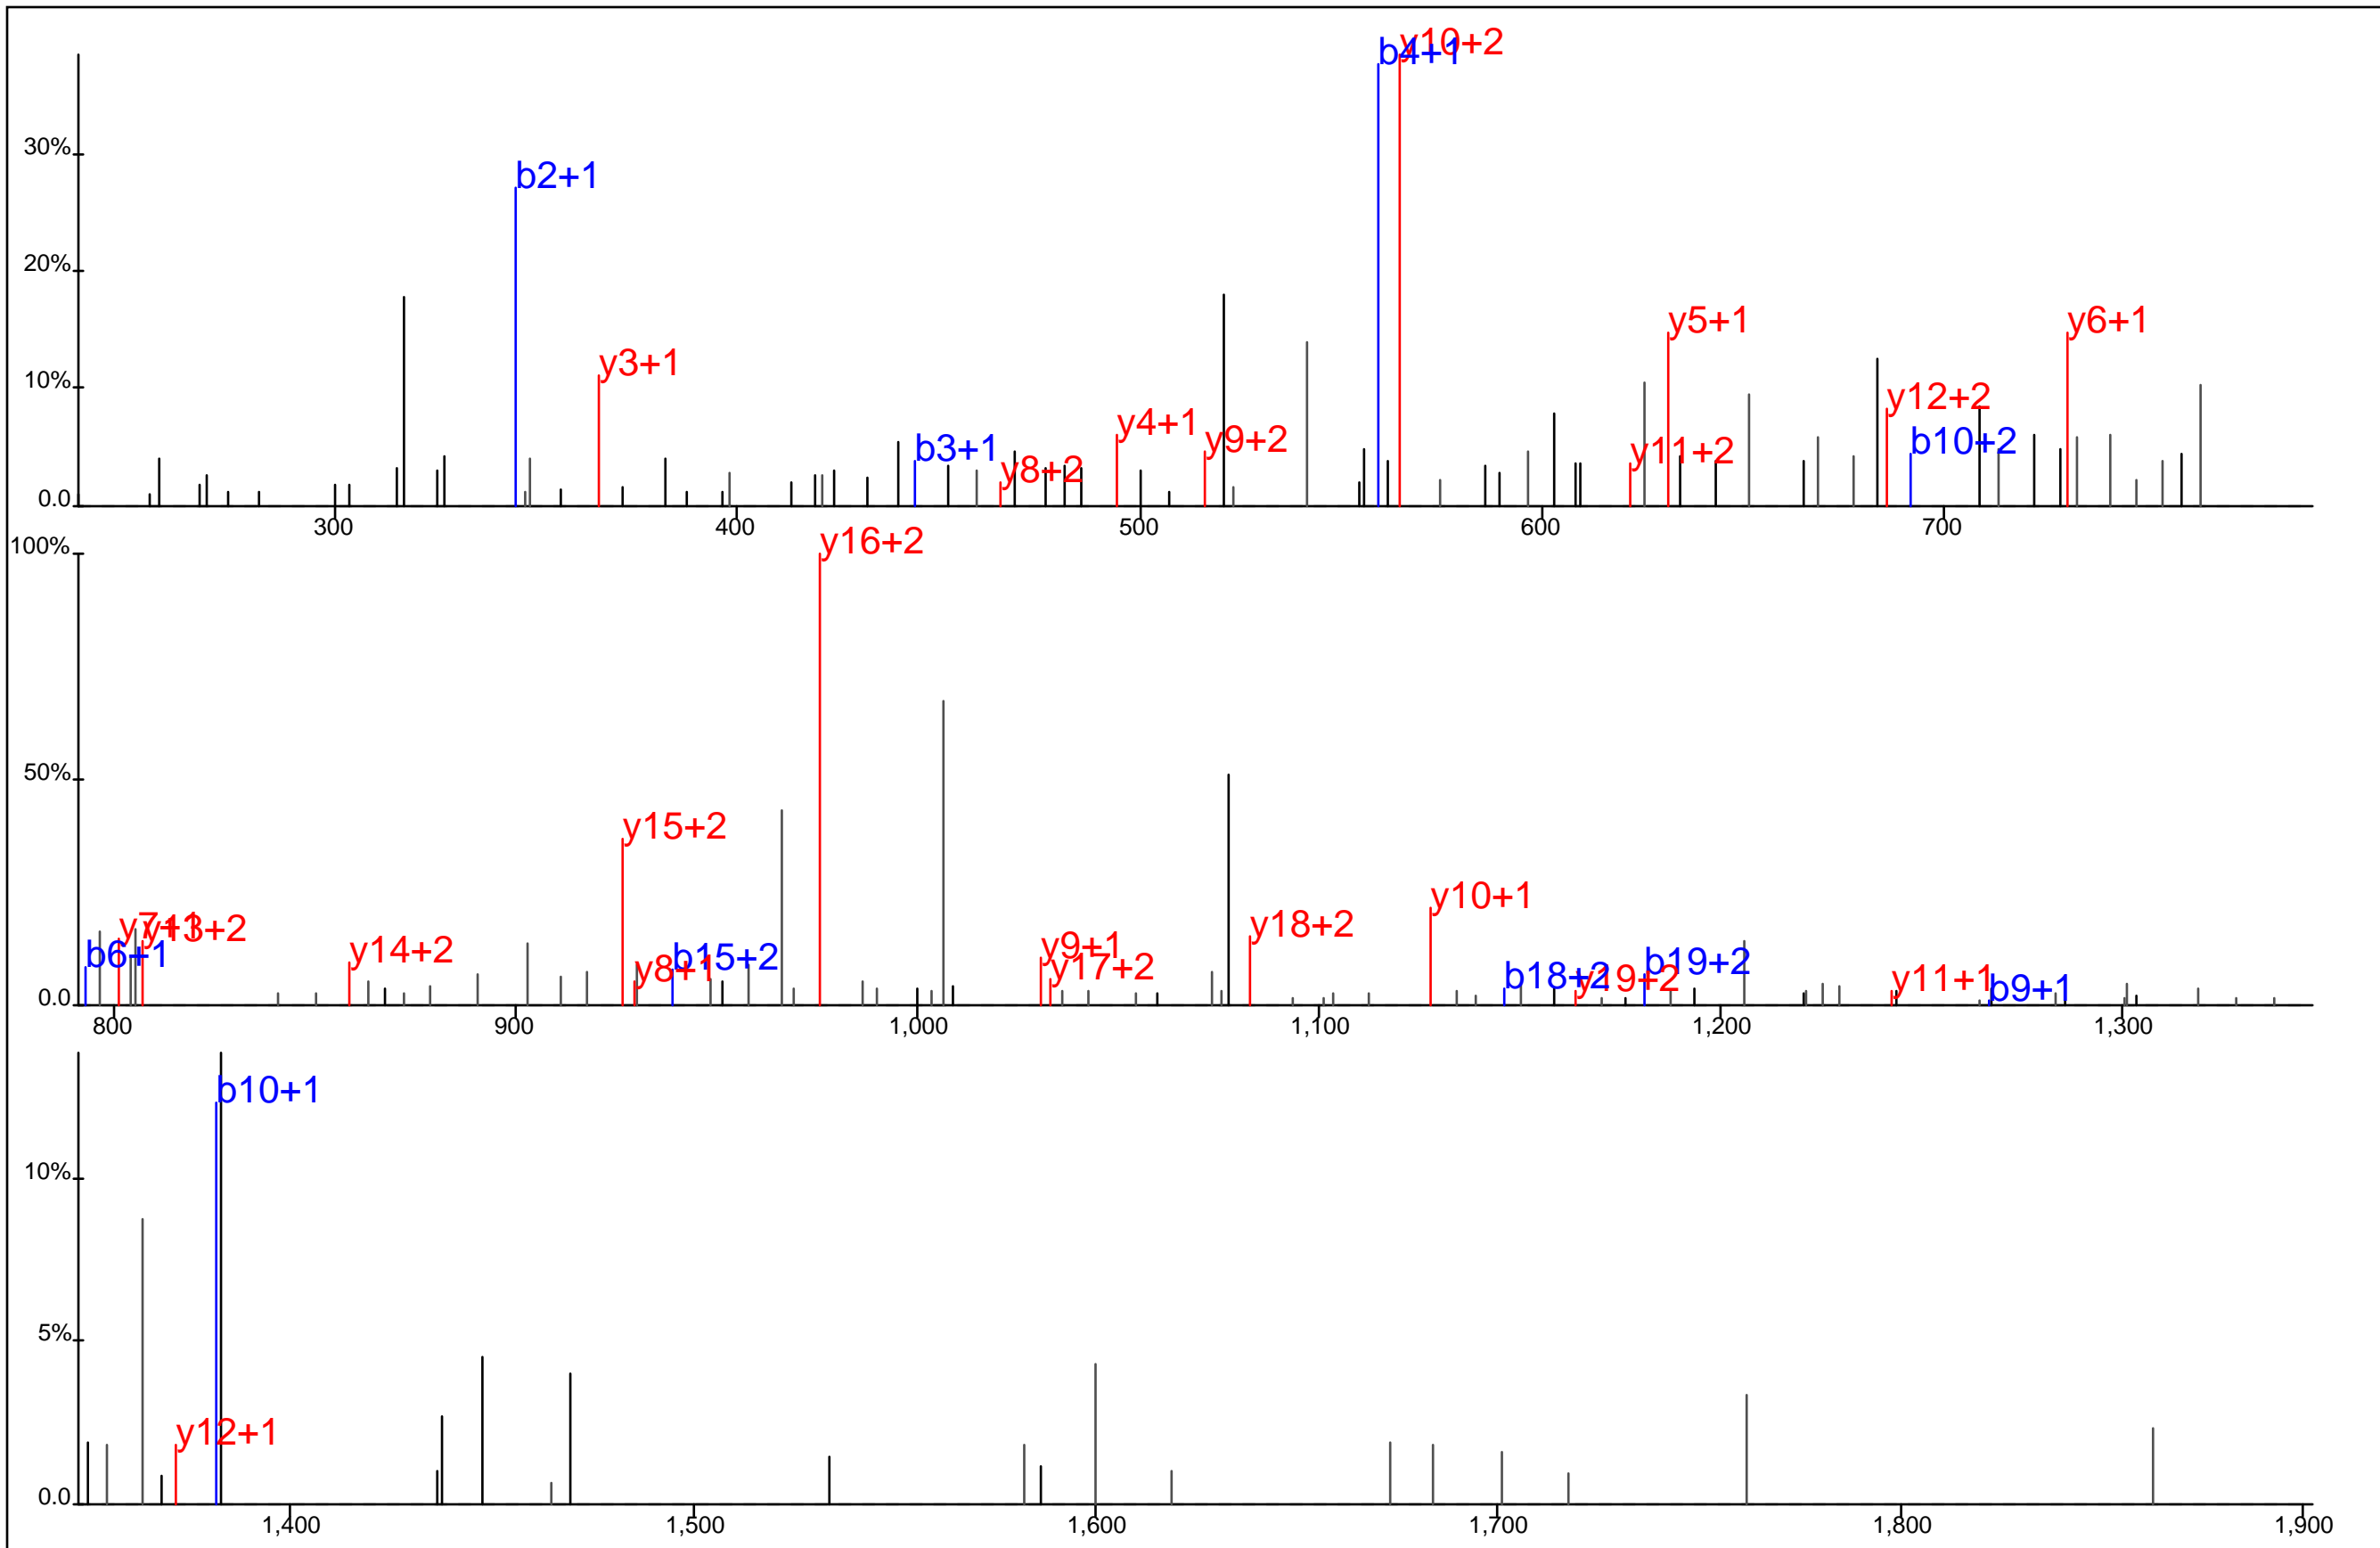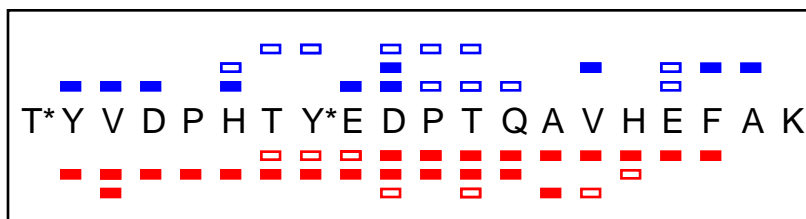

Protein Name: EphA3  
 gi Accession: 0  
 Precursor Mass: 836.6718+3  
 Delta Mass: 5.874 ppm  
 XCorr: 43.83

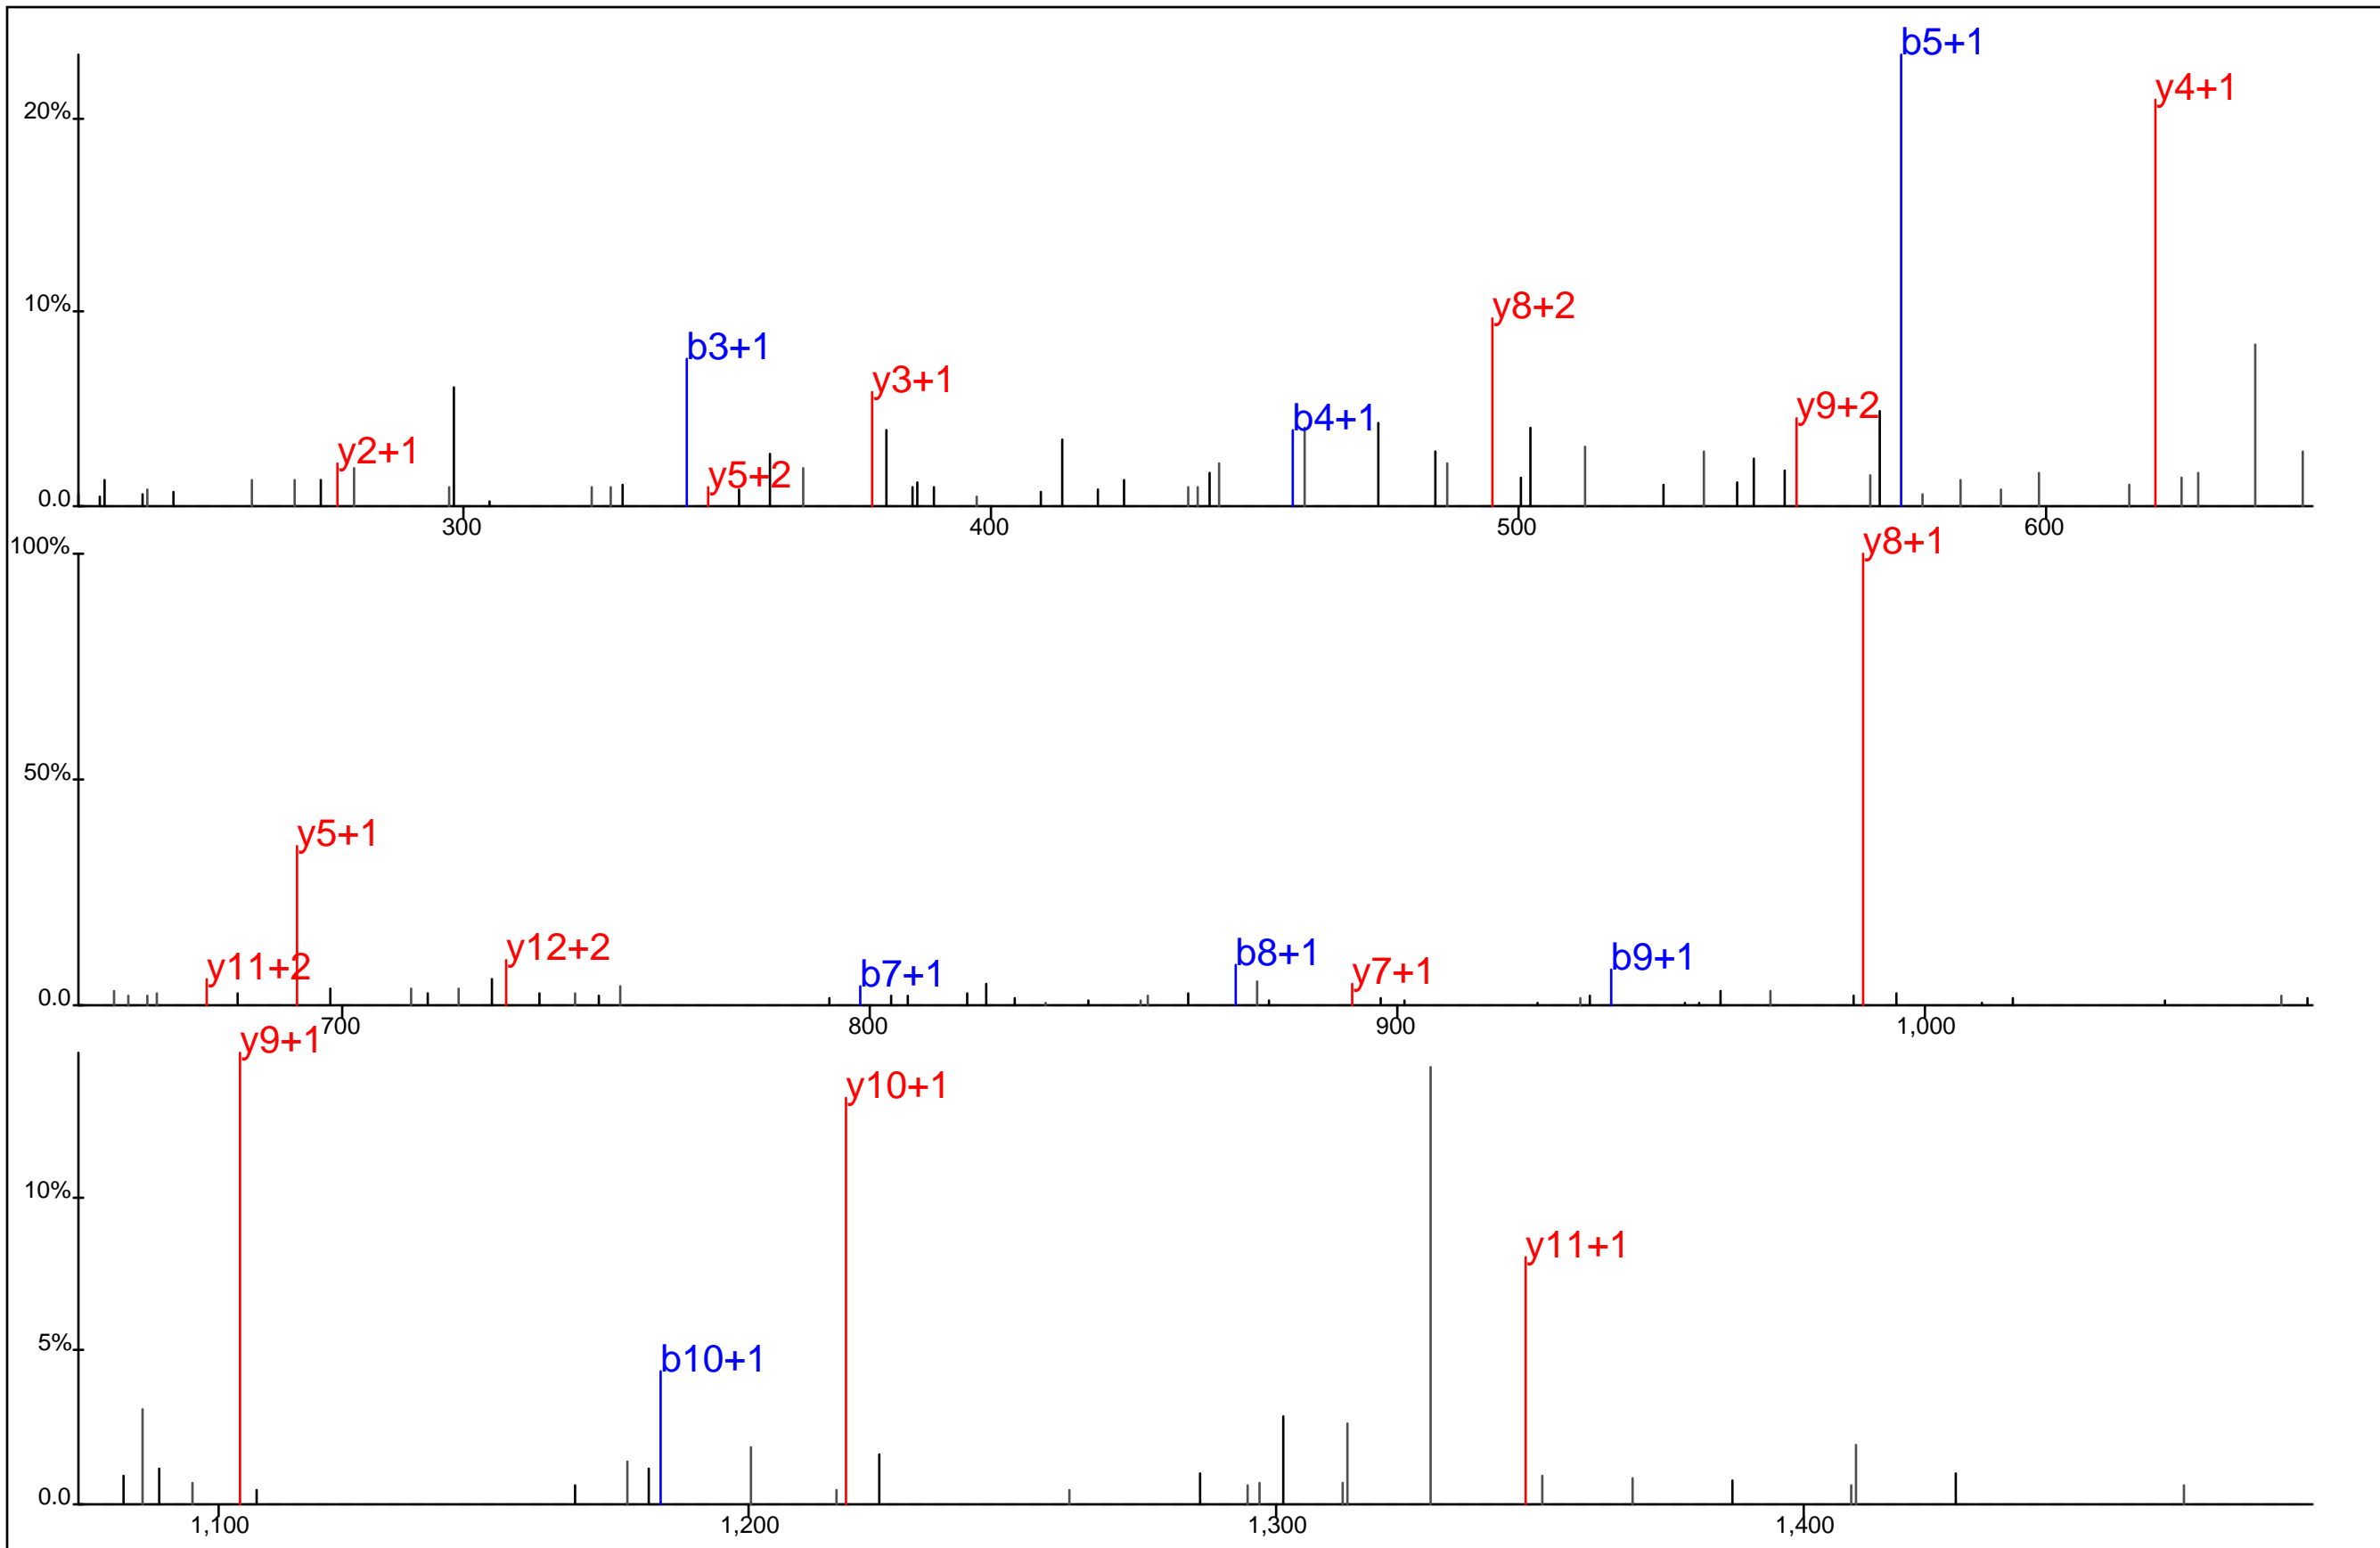

V L E D D P E A A Y\* T T R

Red boxes highlight the sequence: V L E D D P E A A Y\* T T R

Protein Name: EphA3  
 gi Accession: 0  
 Precursor Mass: 780.3358+2  
 Delta Mass: 1.116 ppm  
 XCorr: 57.33

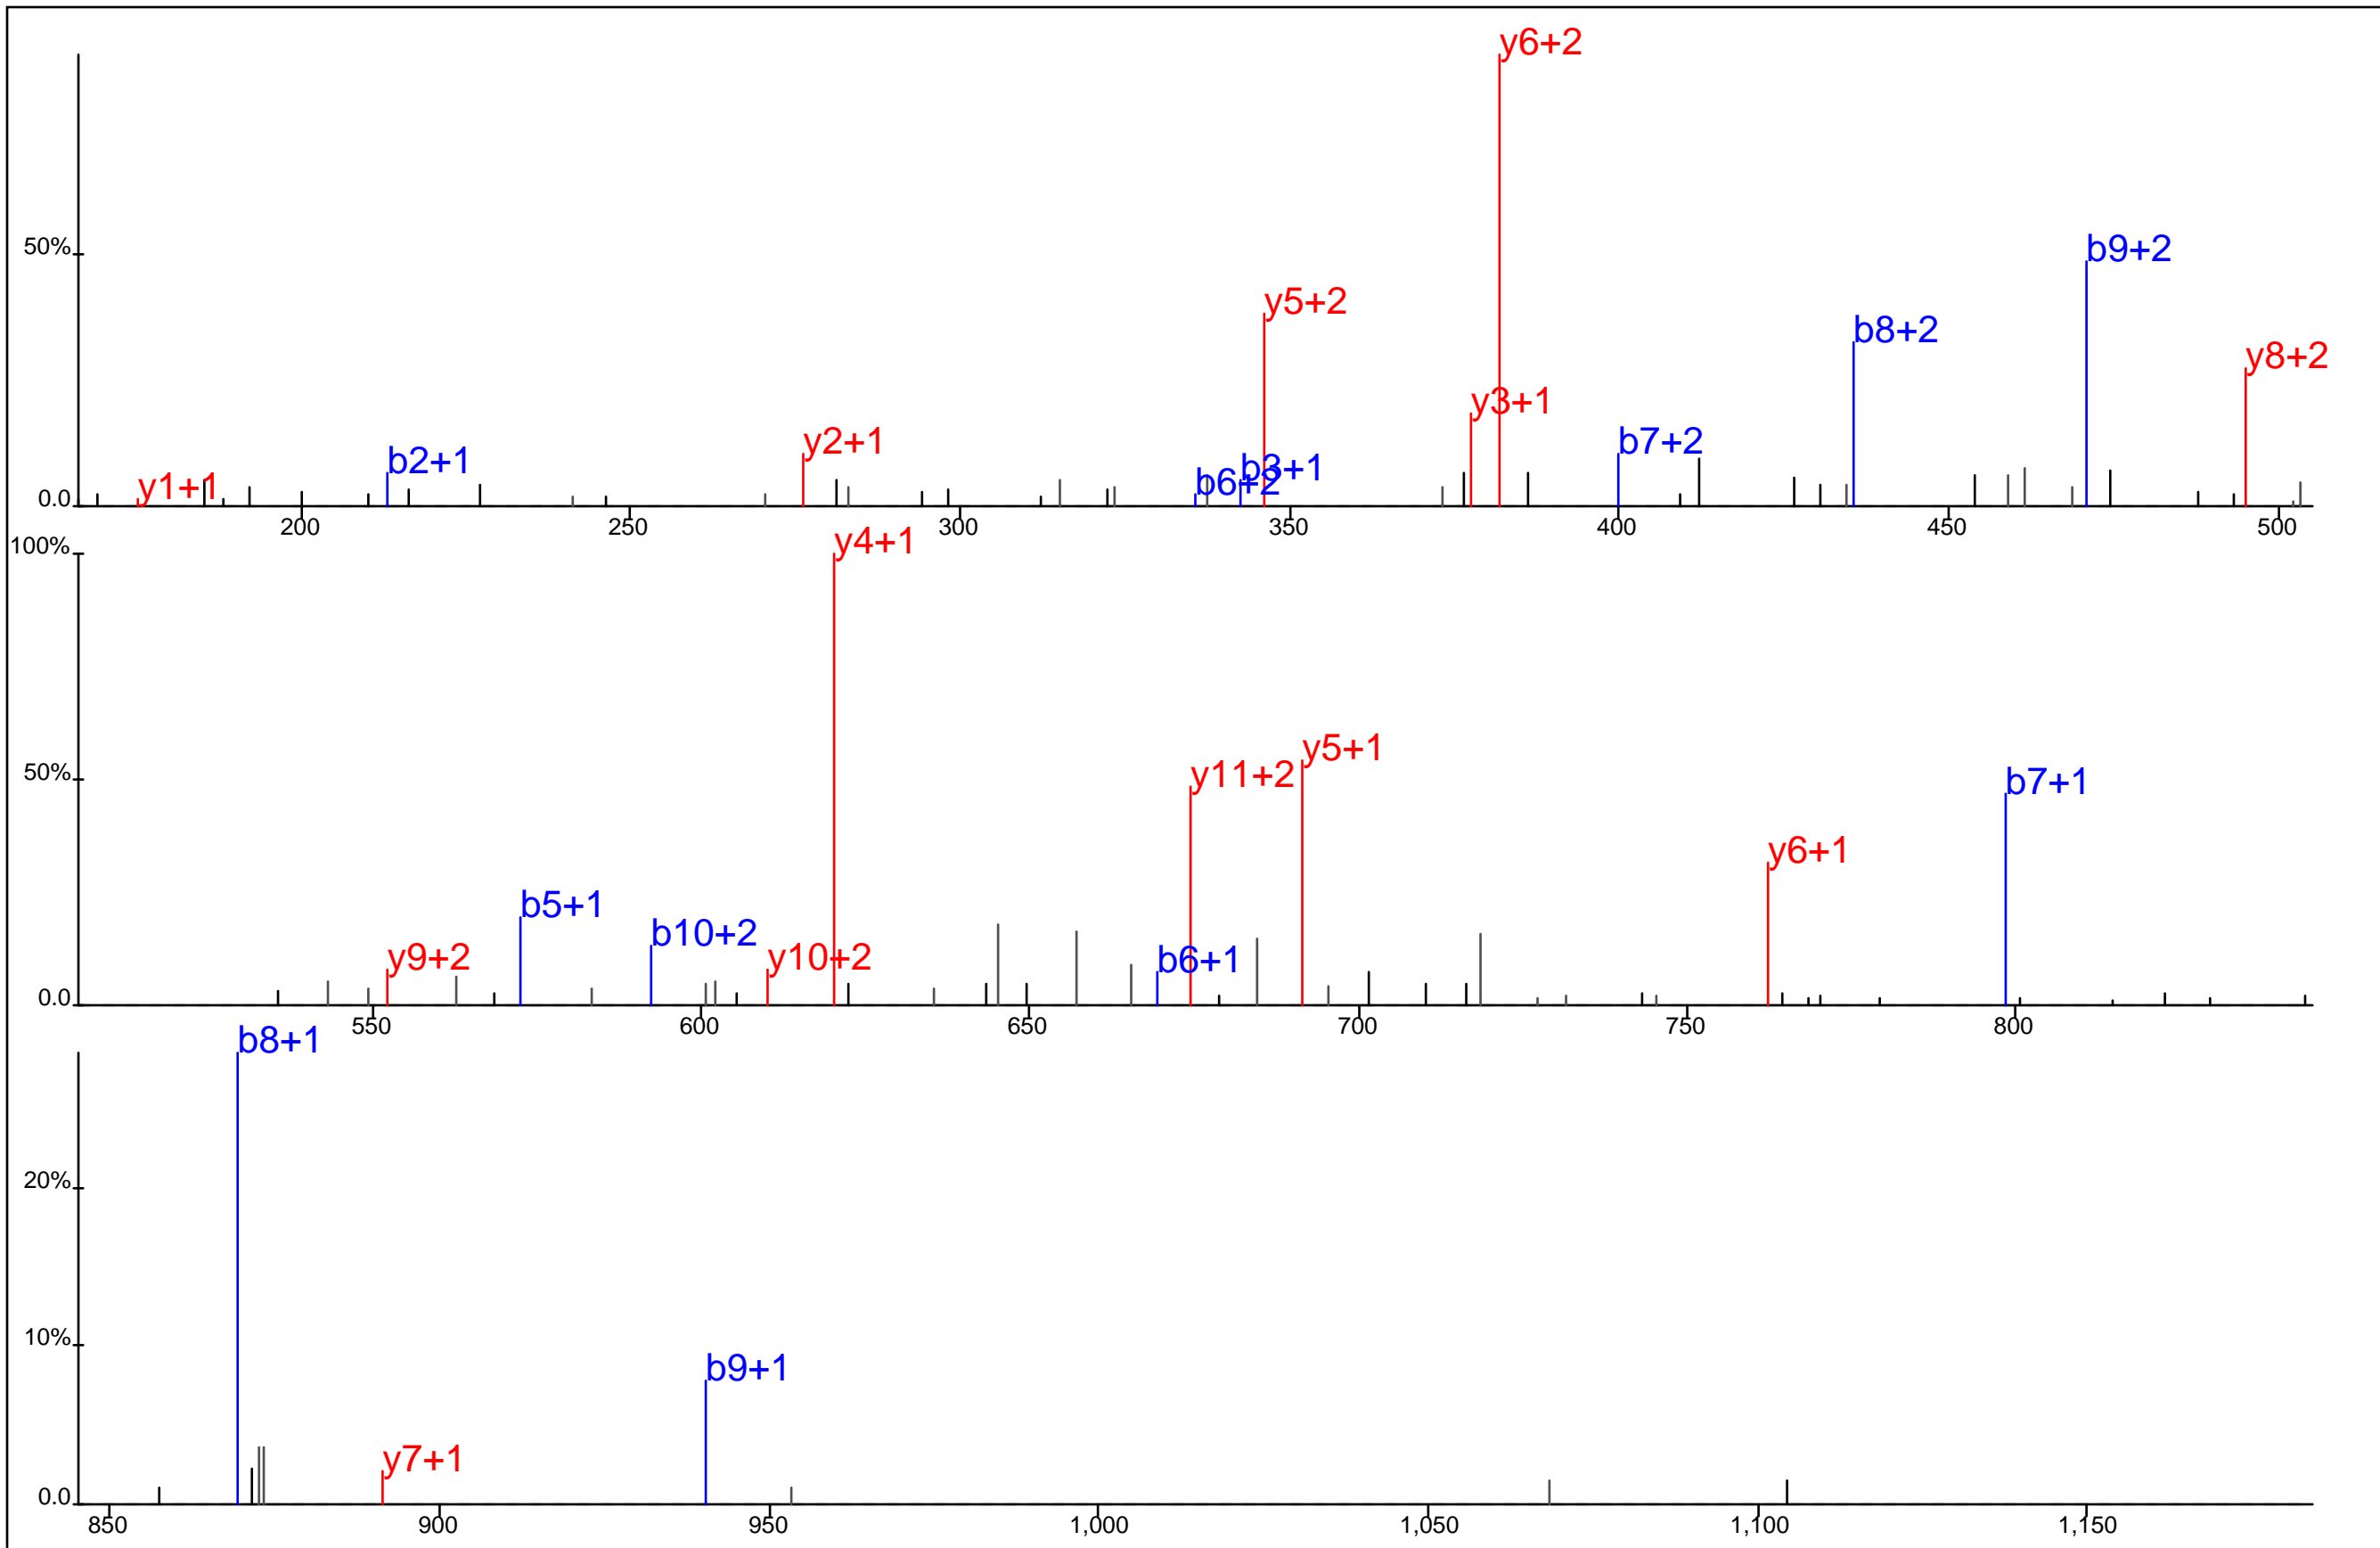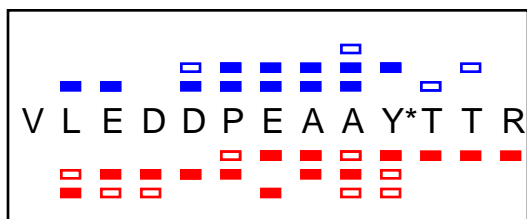

Protein Name: EphA3  
 gi Accession: 0  
 Precursor Mass: 520.5593+3  
 Delta Mass: 0.482 ppm  
 XCorr: 40.42

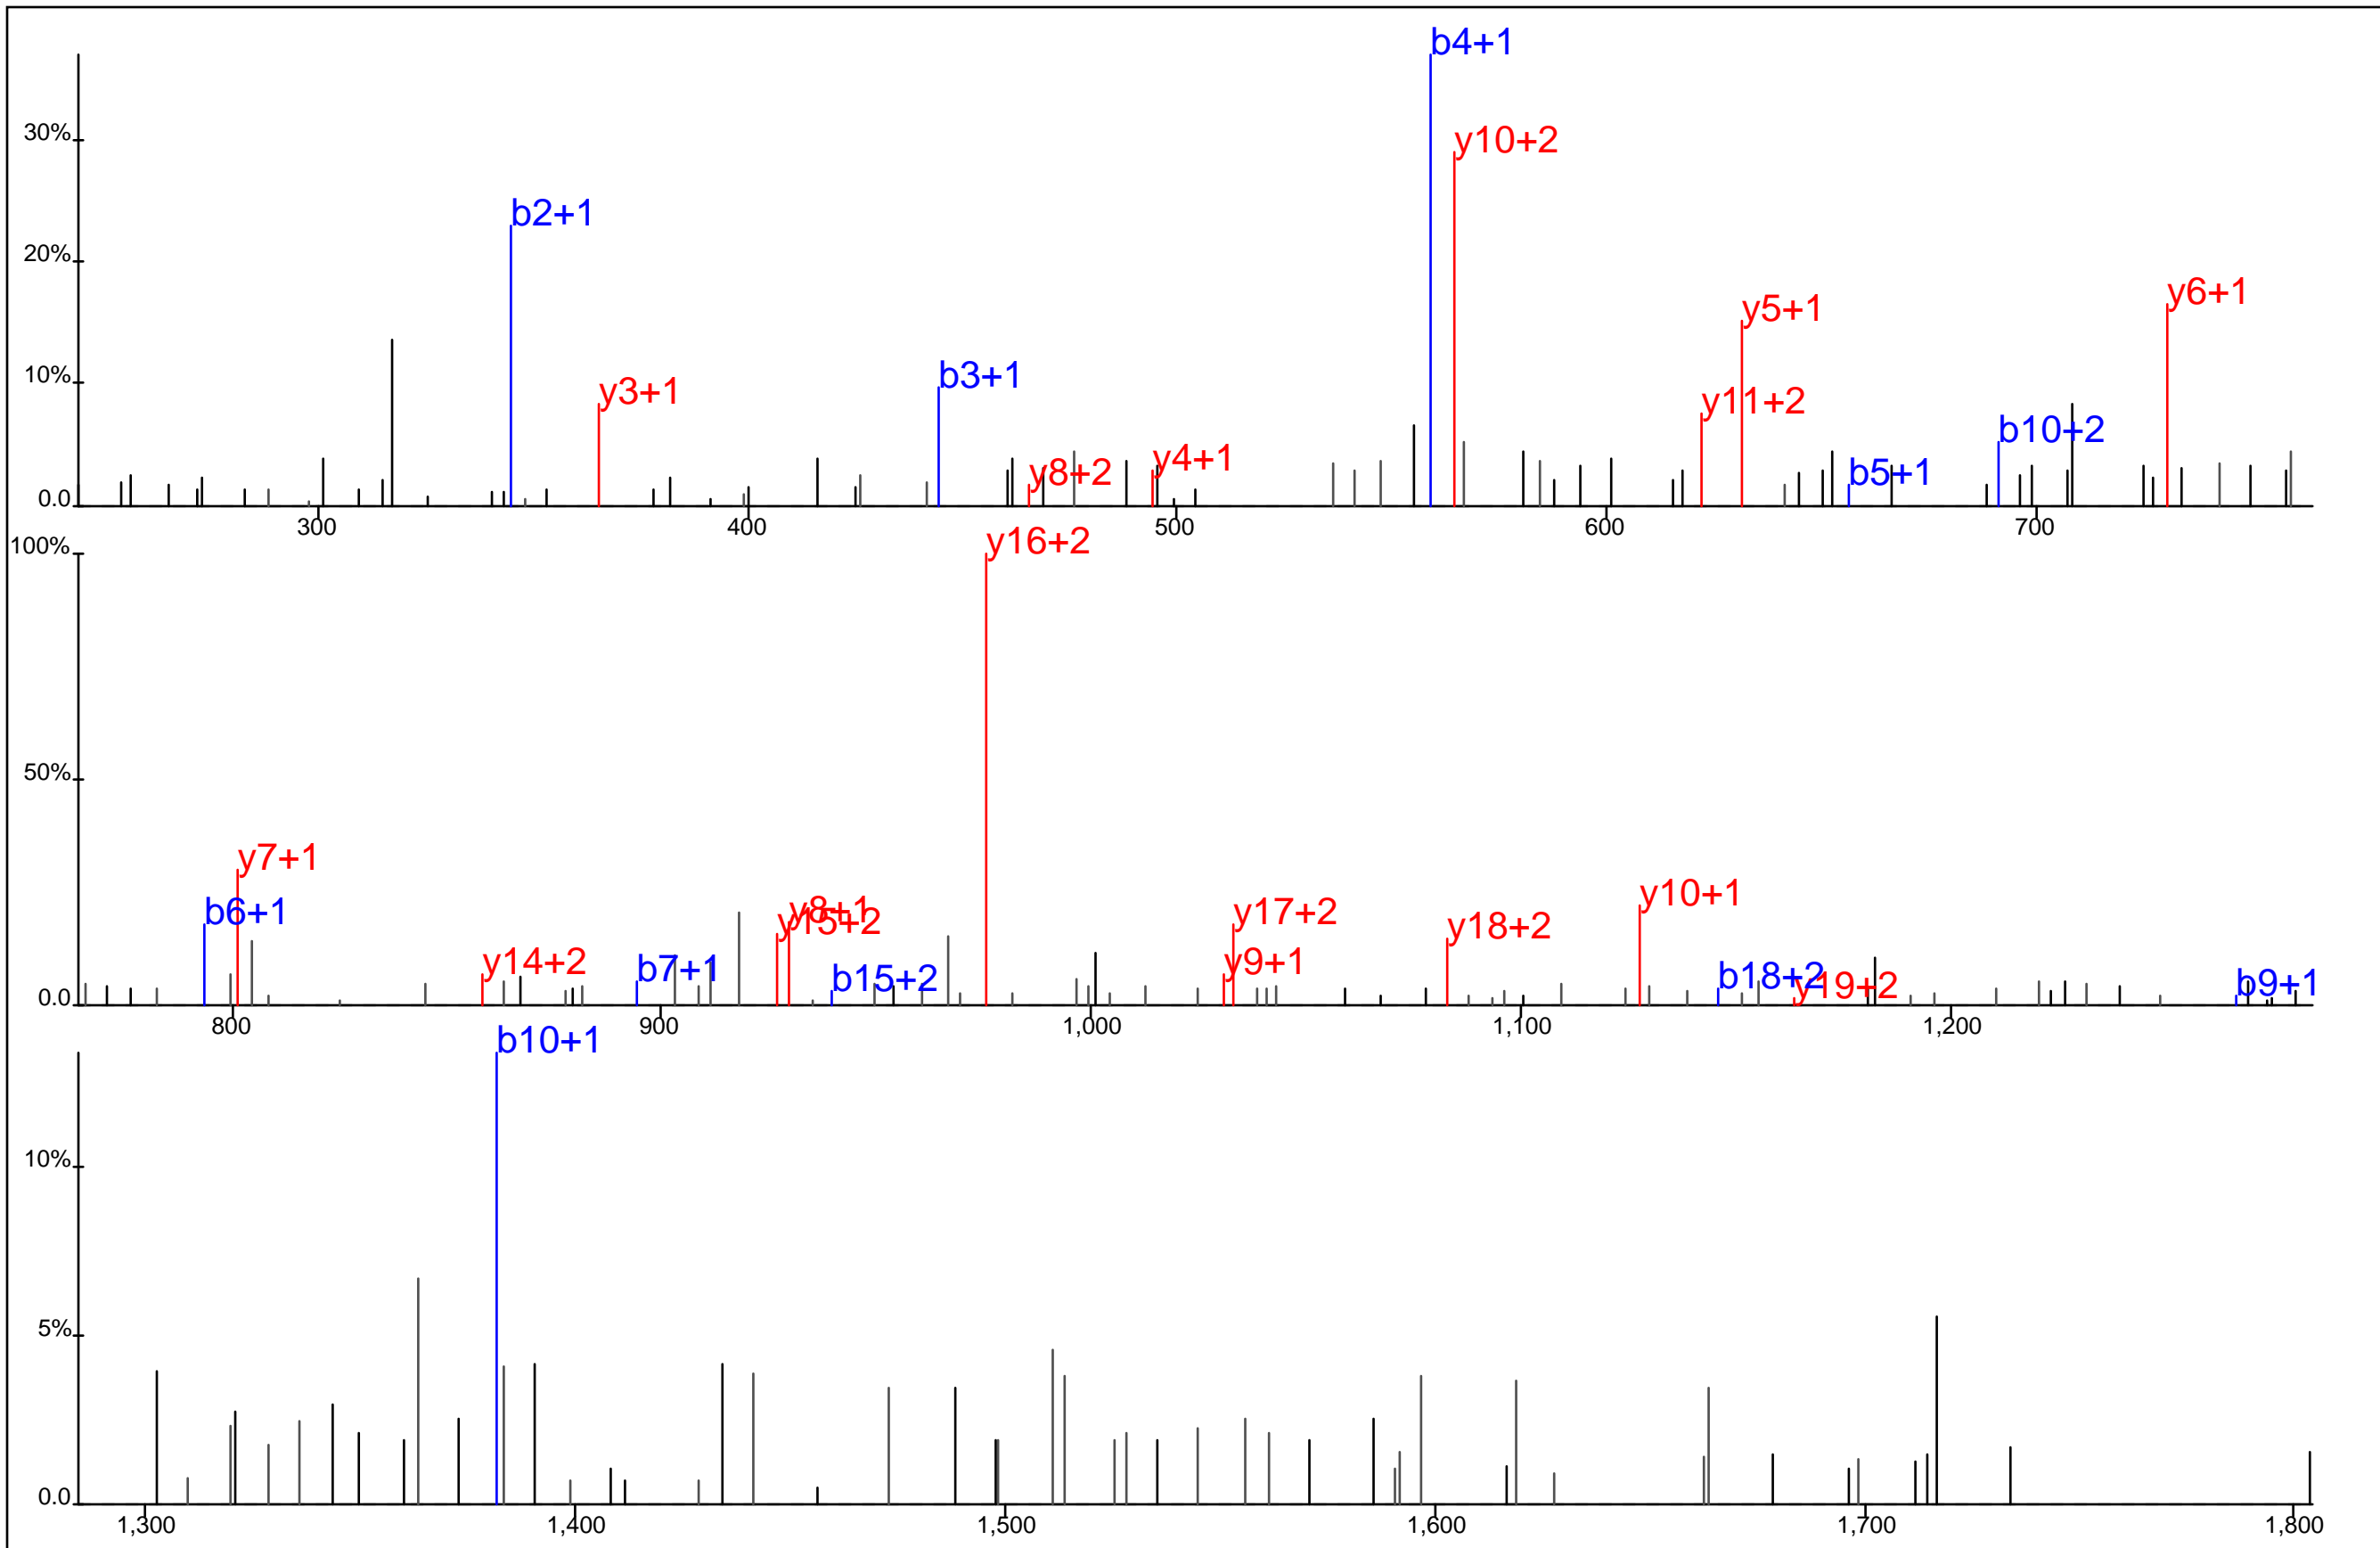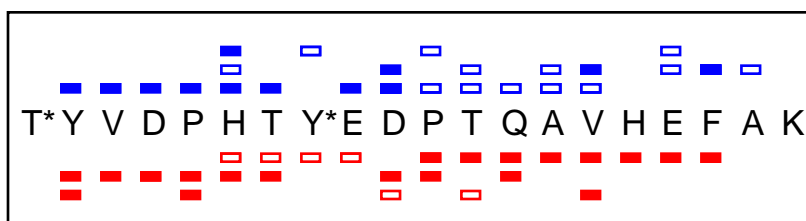

Protein Name: EphA3  
 gi Accession: 0  
 Precursor Mass: 836.6758+3  
 Delta Mass: 1.129 ppm  
 XCorr: 28.05

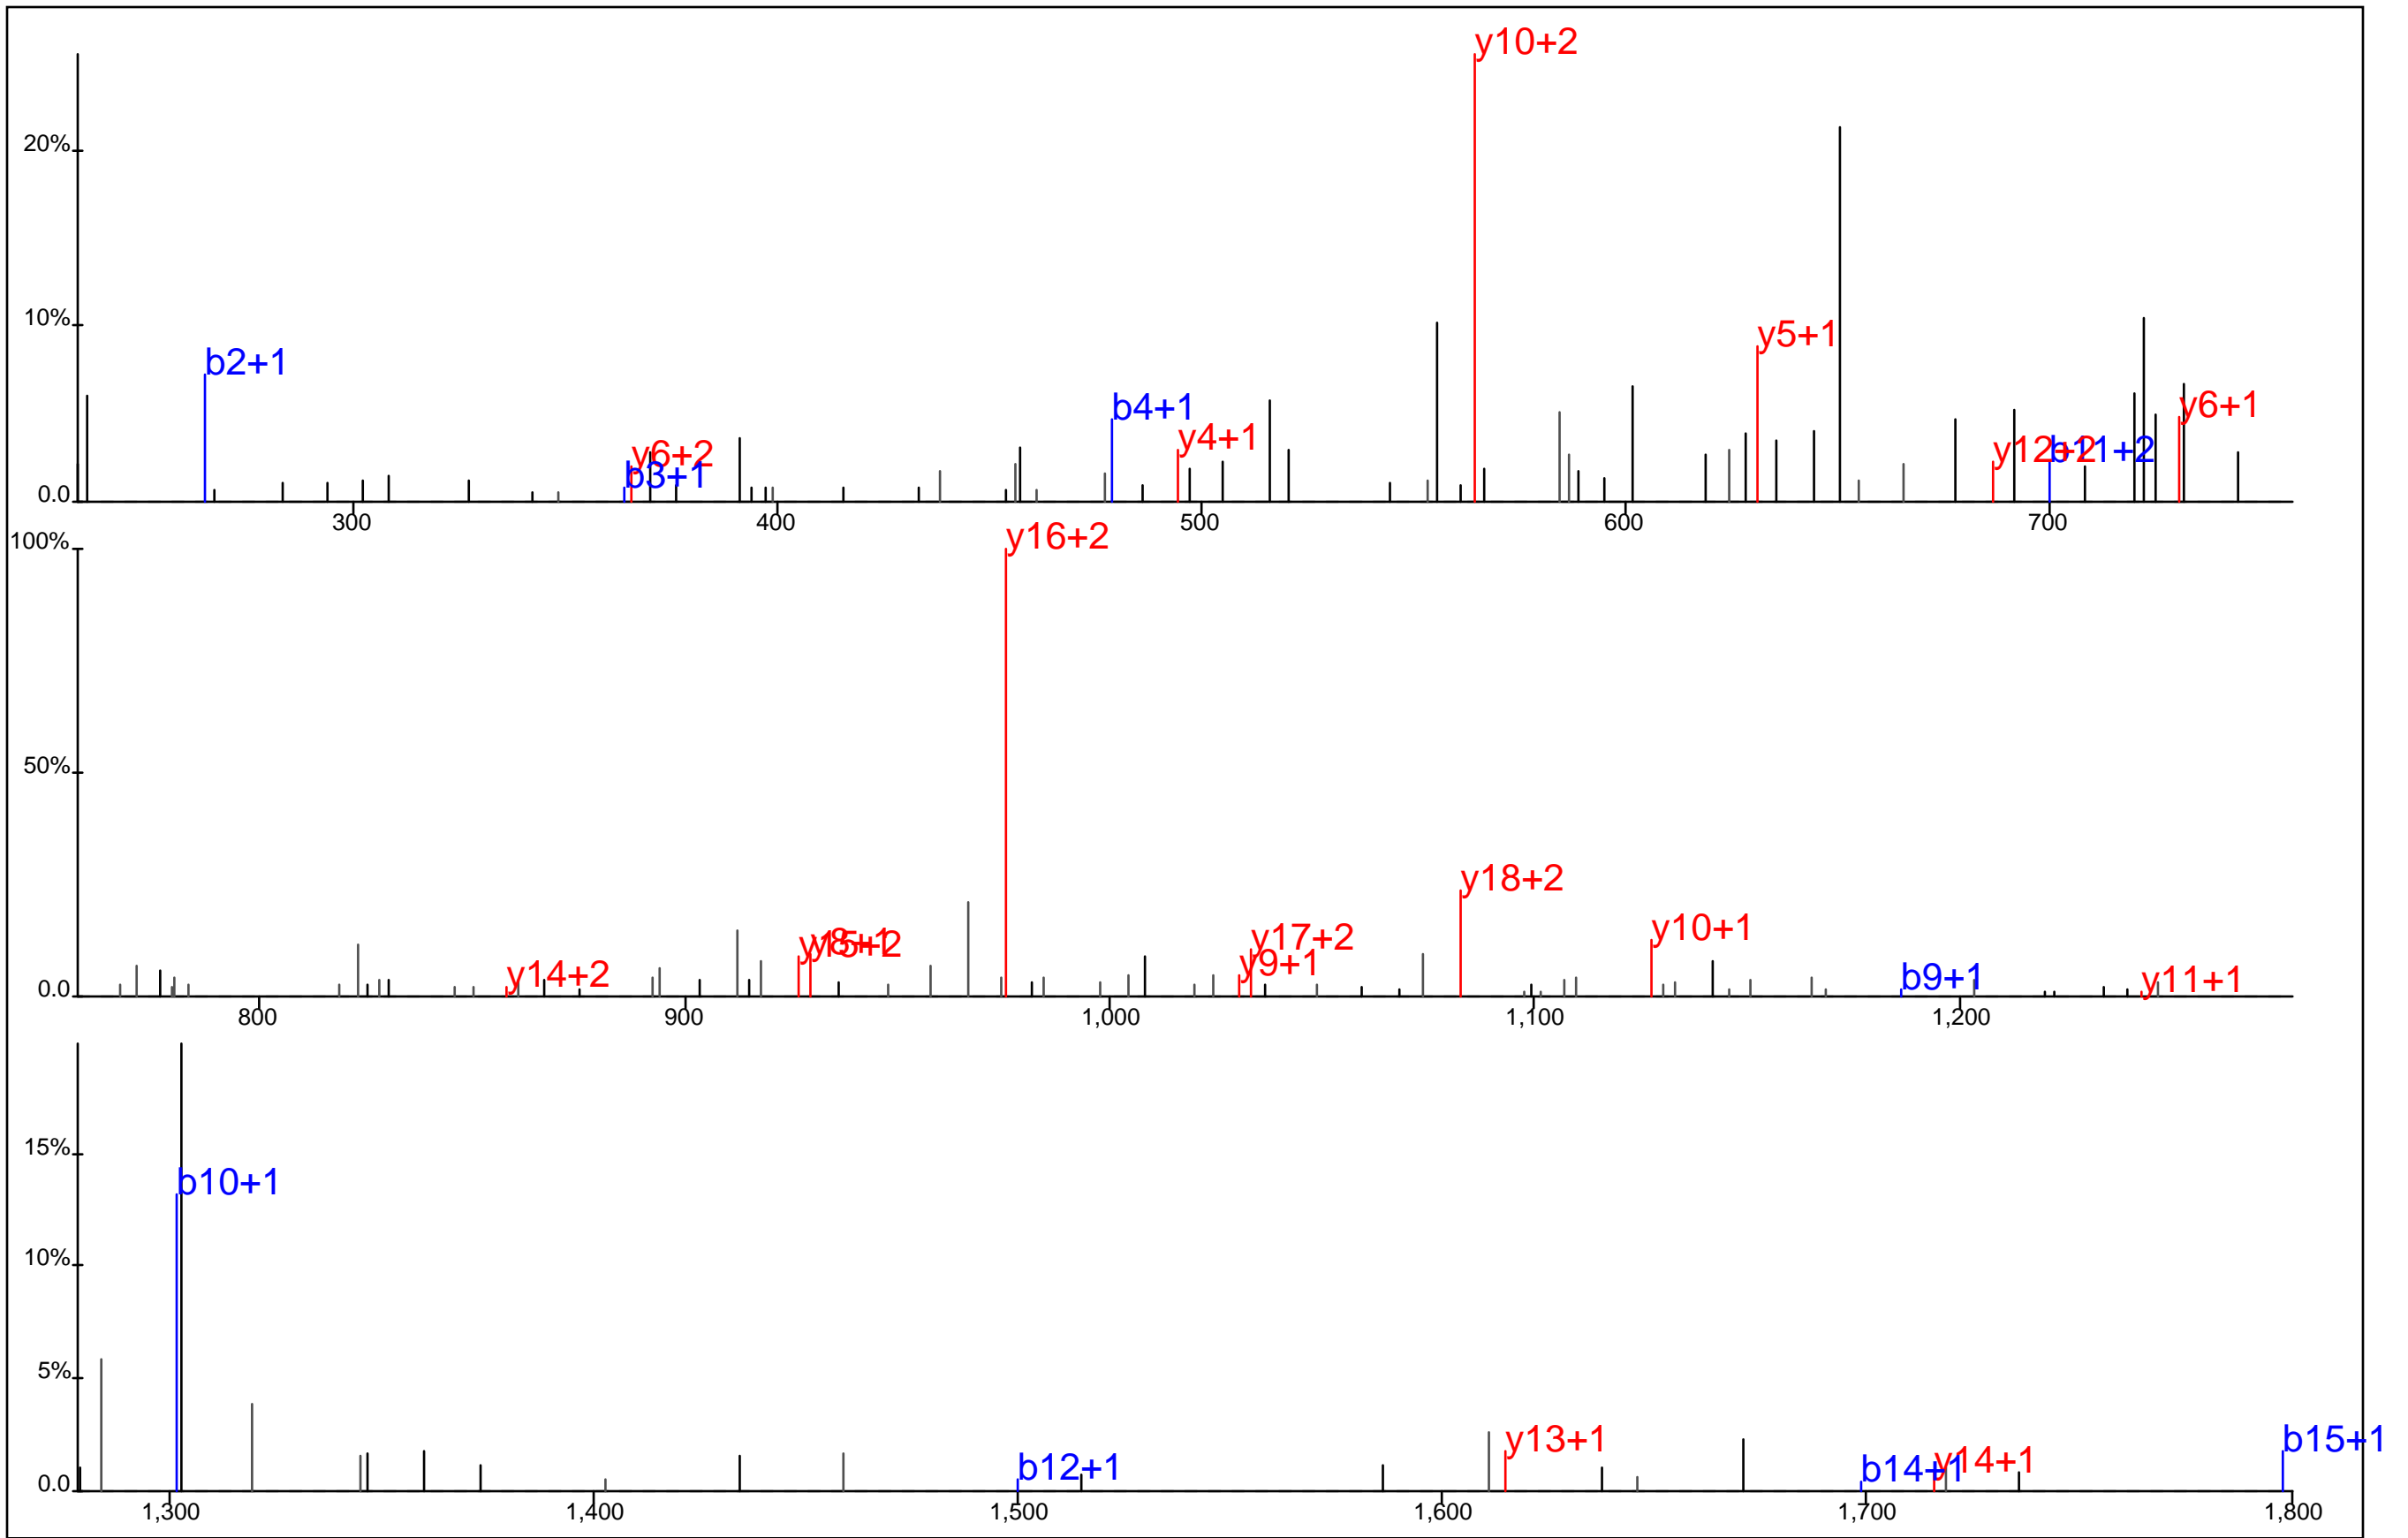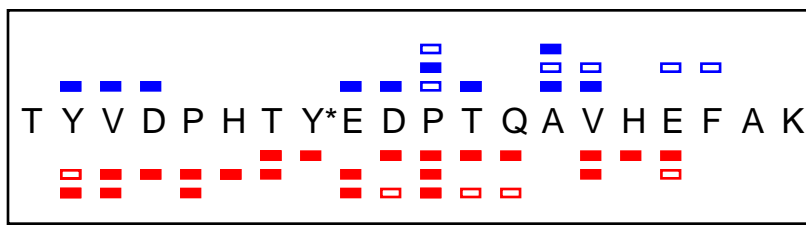

Protein Name: EphA3  
 gi Accession: 0  
 Precursor Mass: 810.0203+3  
 Delta Mass: 1.186 ppm  
 XCorr: 32.1

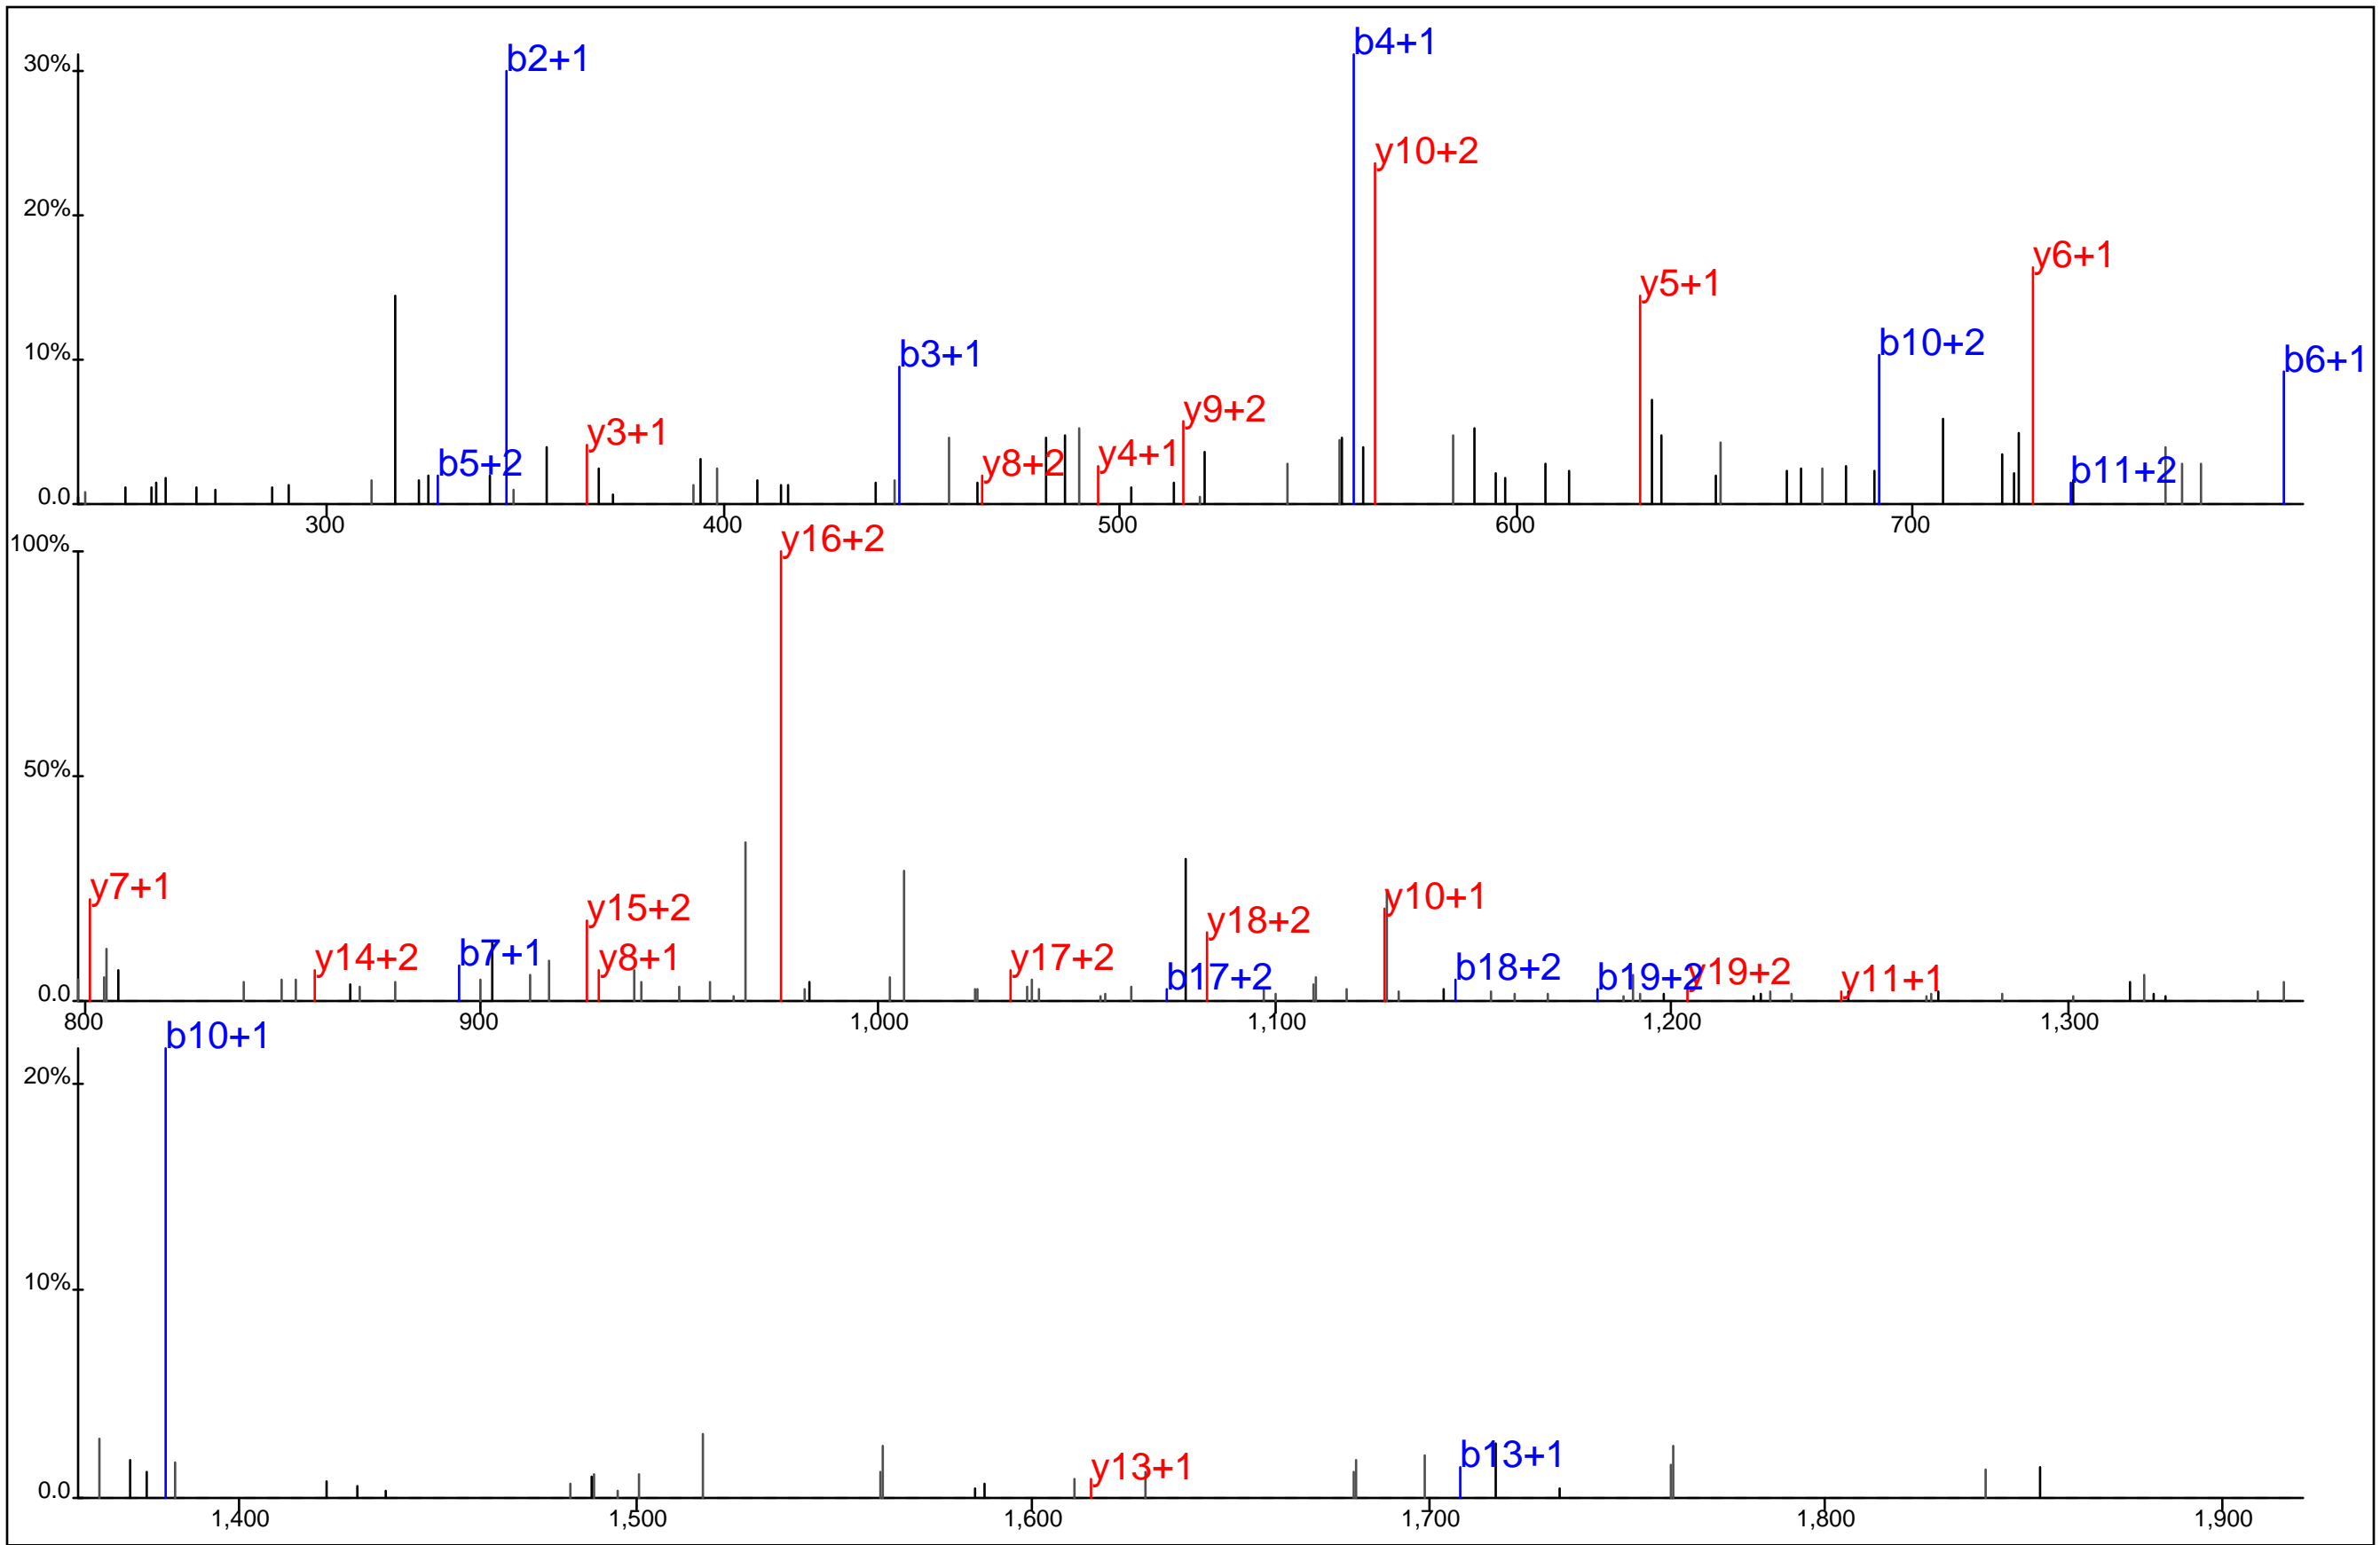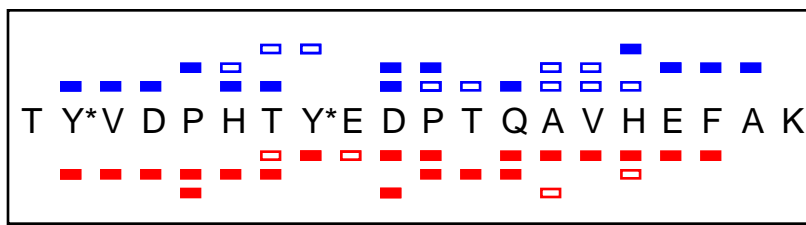

Protein Name: EphA3  
 gi Accession: 0  
 Precursor Mass: 836.6772+3  
 Delta Mass: 0.624 ppm  
 XCorr: 39.8

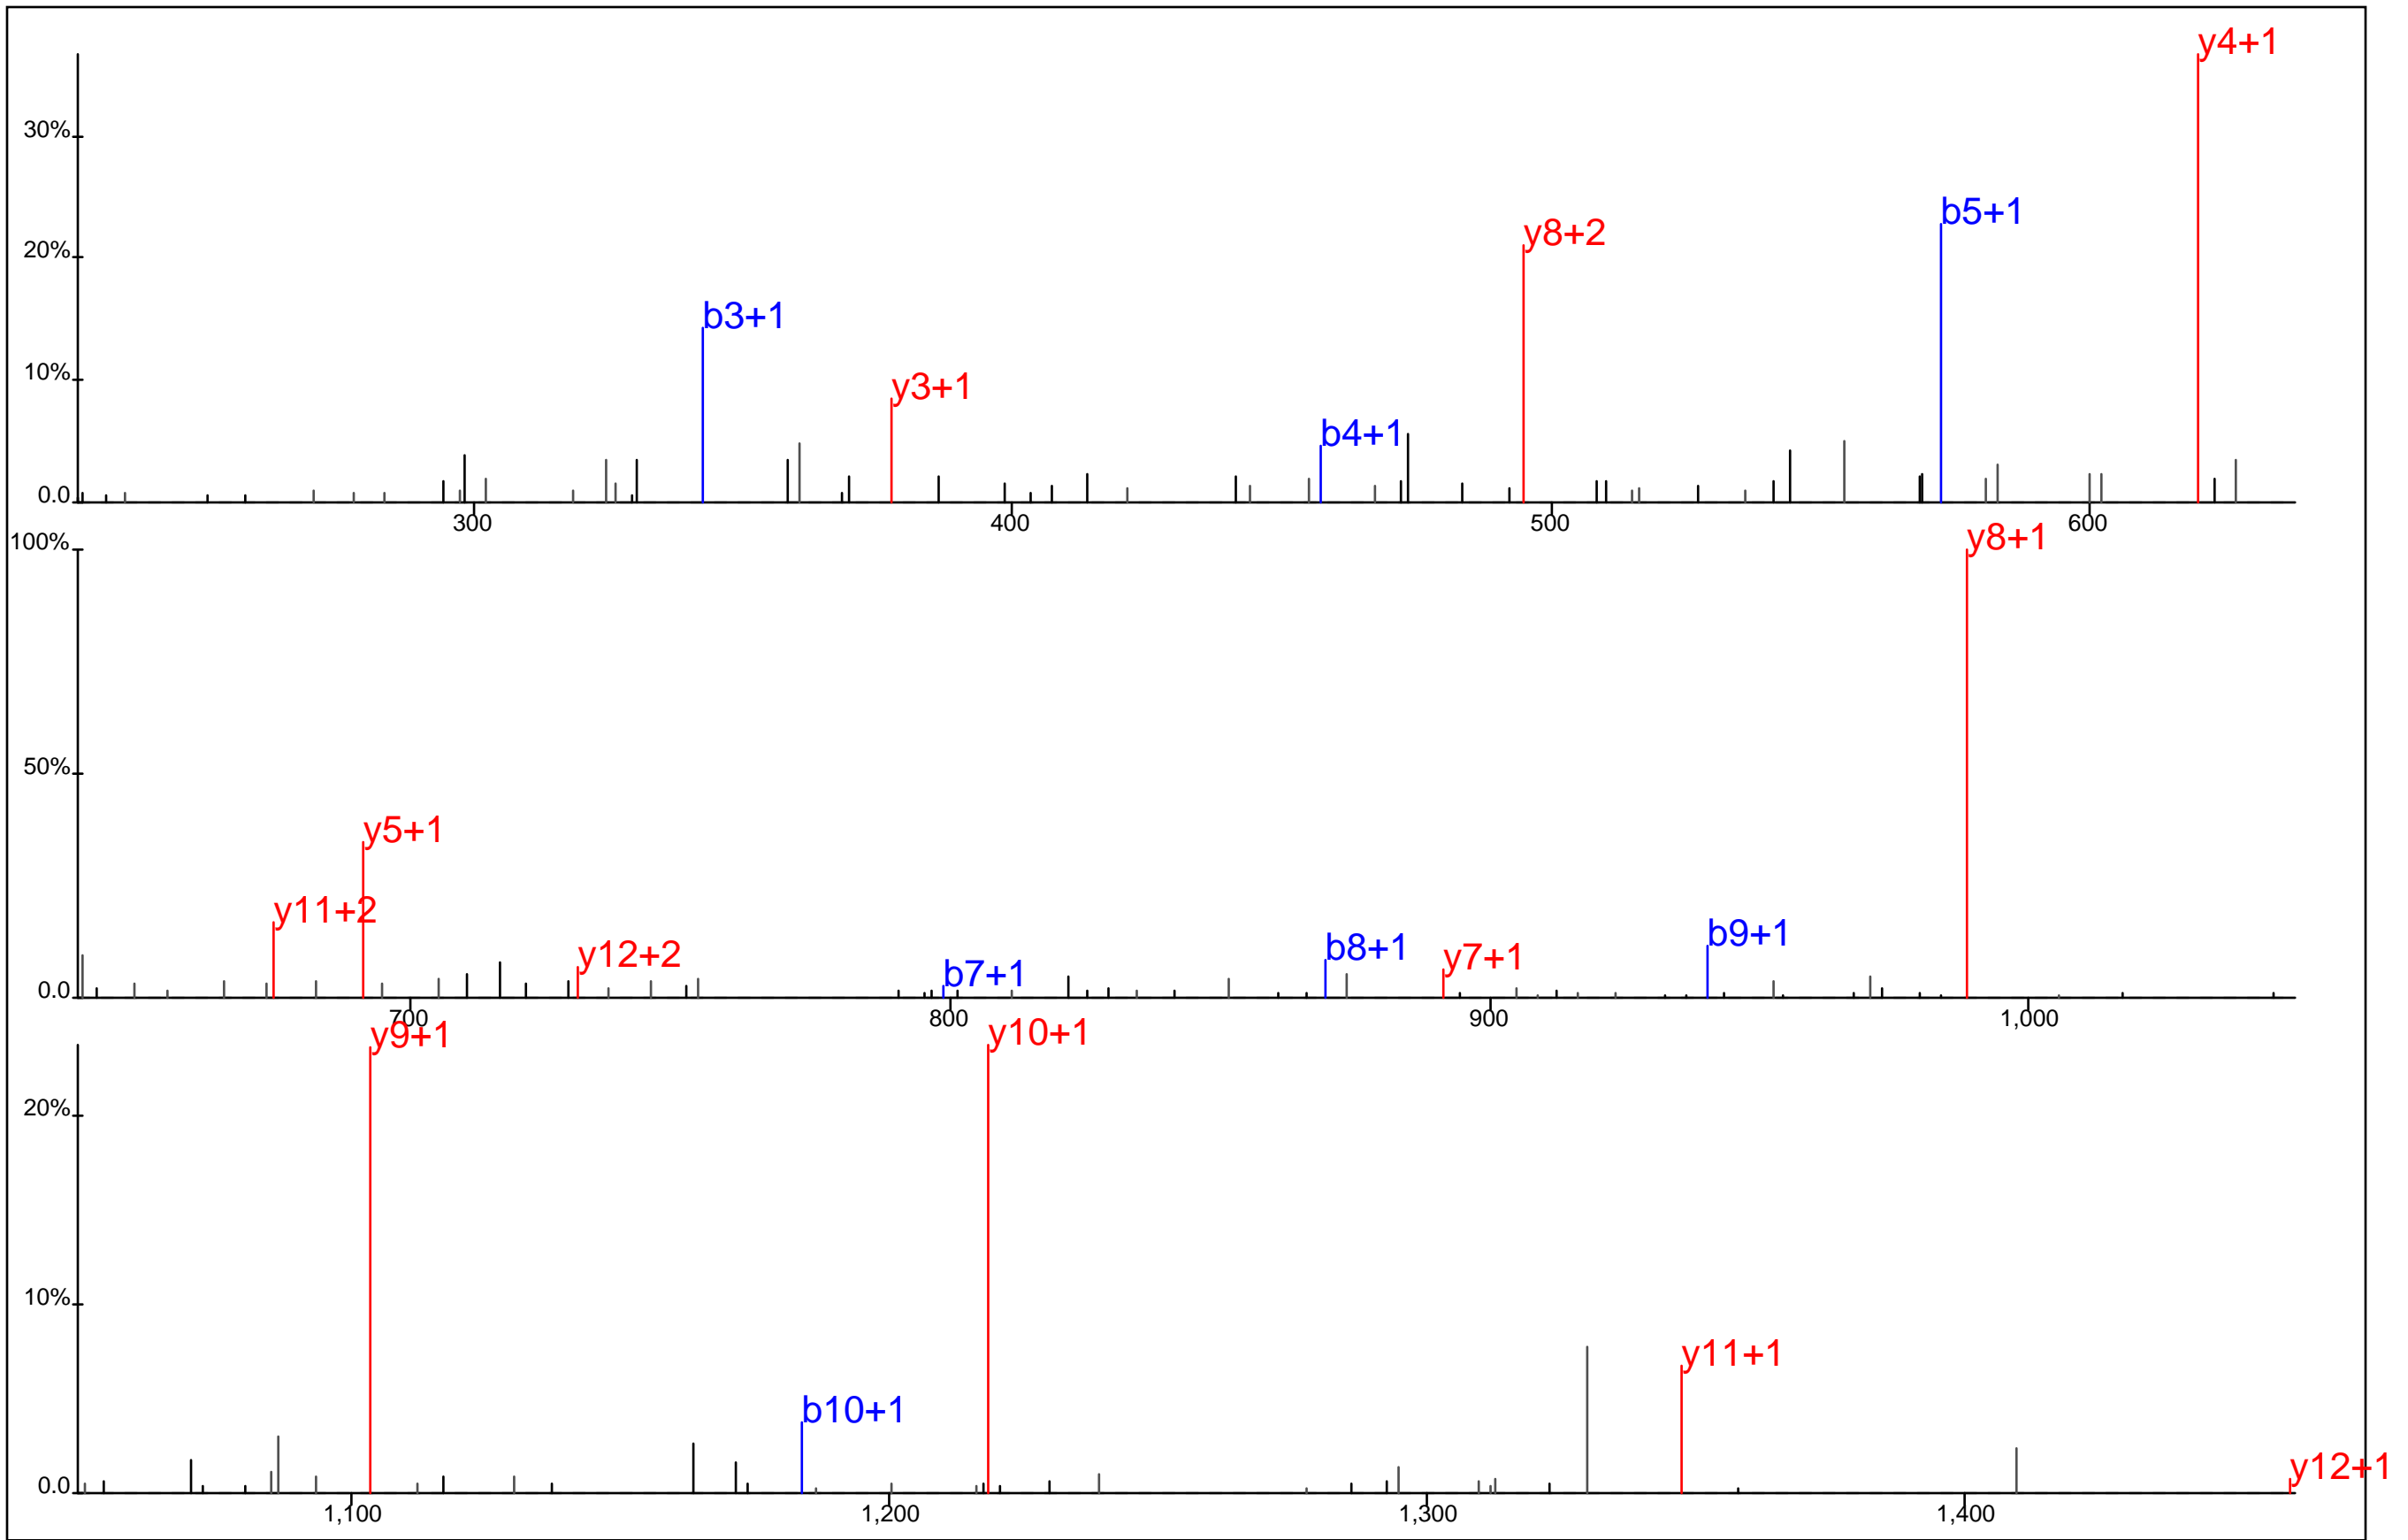

V L E D D P E A A Y\* T T R

Protein Name: EphA3  
gi Accession: 0  
Precursor Mass: 780.3361+2  
Delta Mass: 1.508 ppm  
XCorr: 74.04



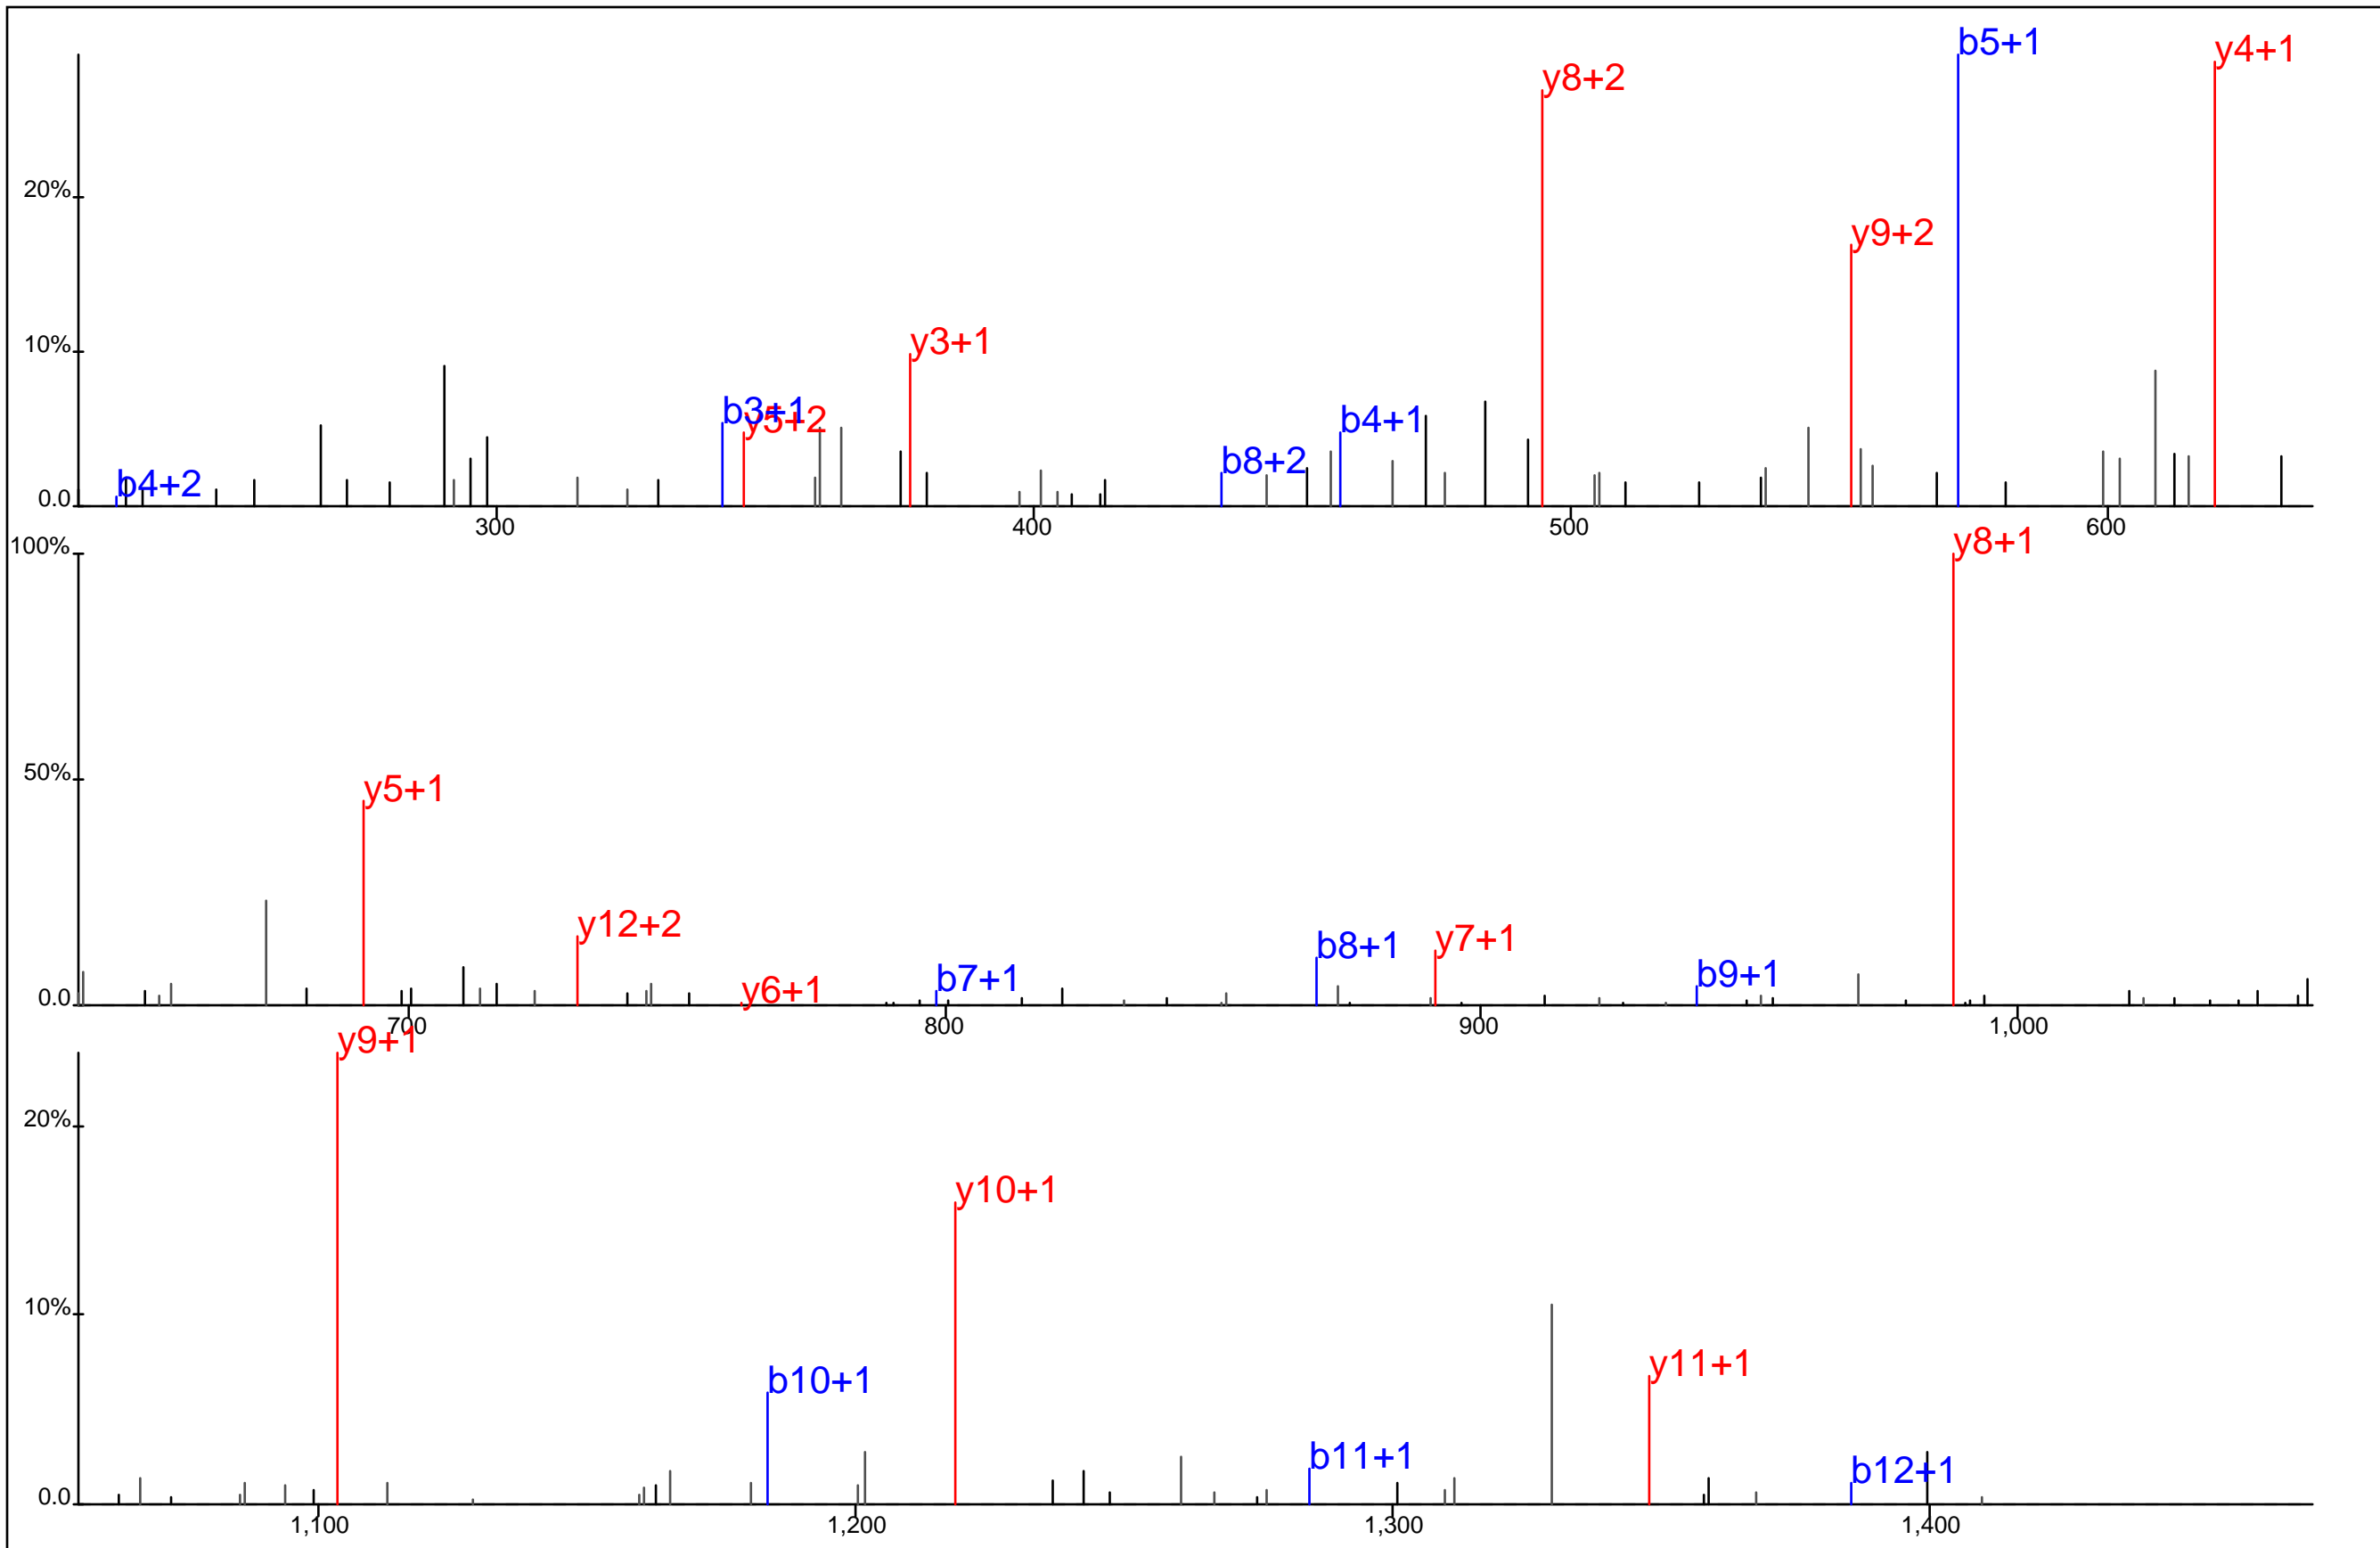

■ ■ ■    ■ ■ ■ ■ ■ ■ ■ ■  
 V L E D D P E A A Y\* T T R  
■ ■ ■ ■ ■ ■ ■ ■ ■ ■

Protein Name: EphA3  
 gi Accession: 0  
 Precursor Mass: 780.3360+2  
 Delta Mass: 1.430 ppm  
 XCorr: 61.76

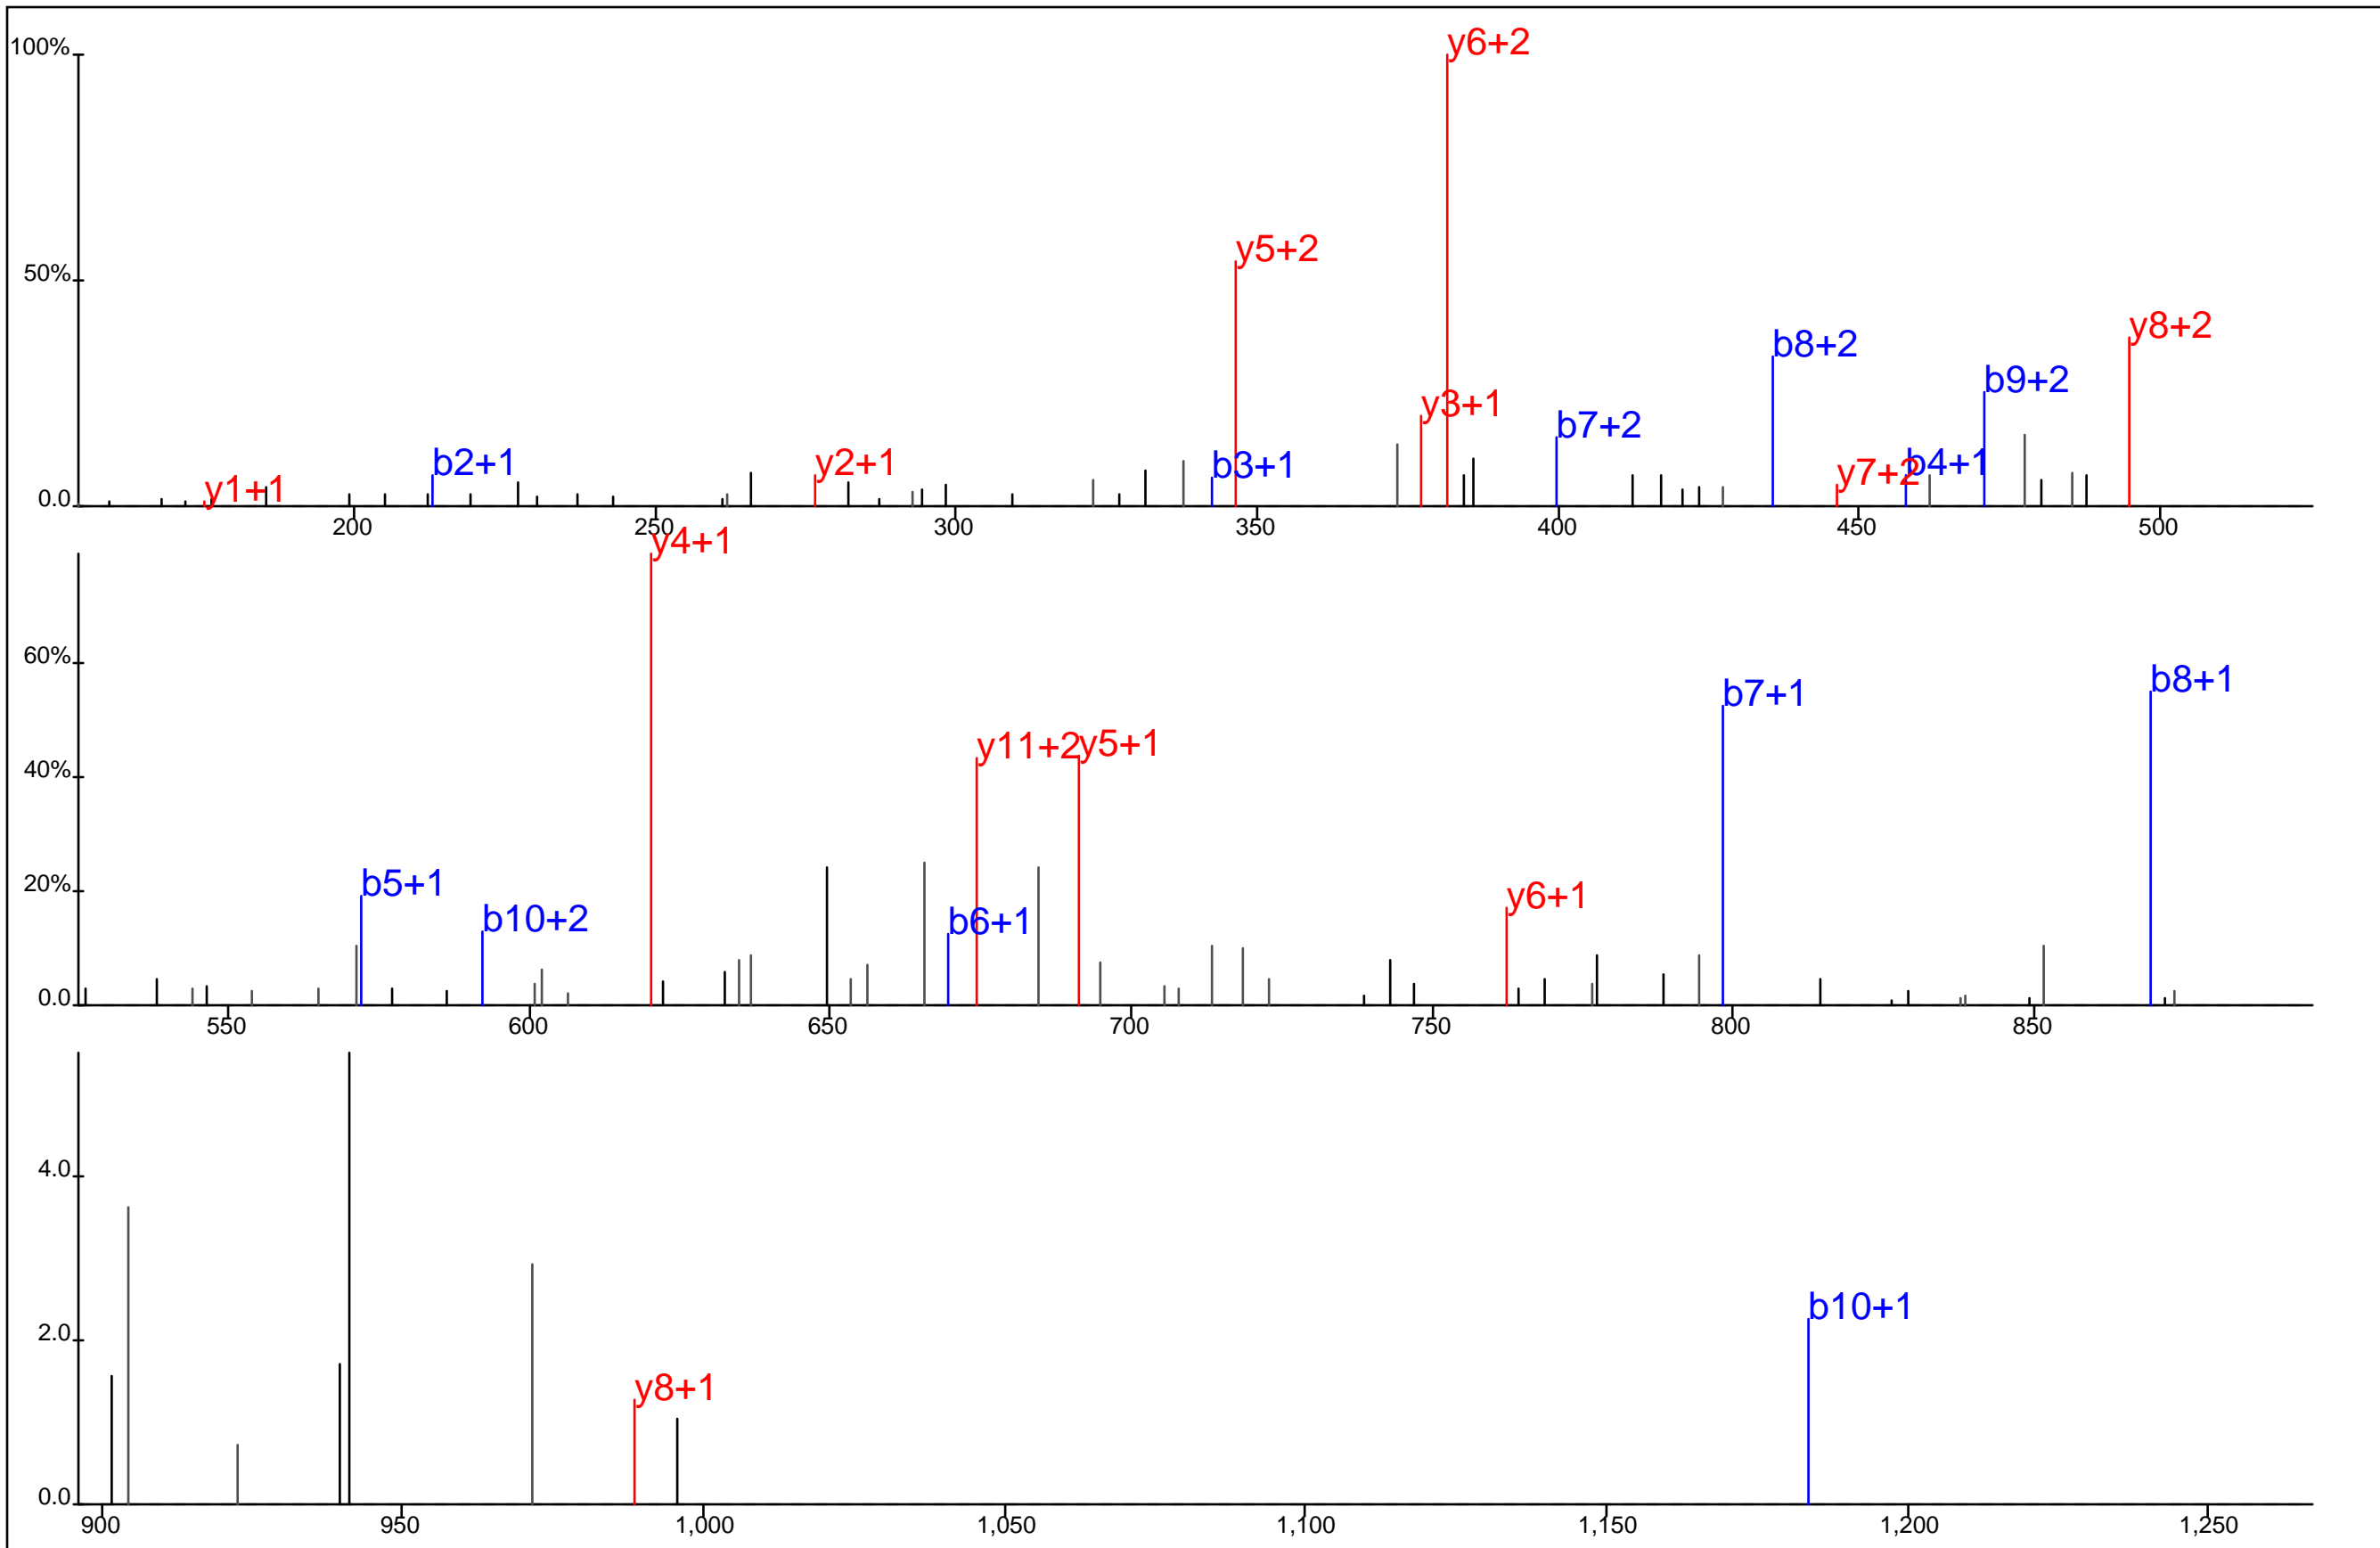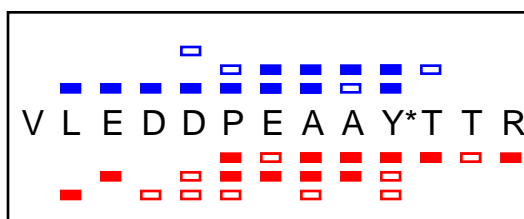

Protein Name: EphA3  
 gi Accession: 0  
 Precursor Mass: 520.5595+3  
 Delta Mass: 0.951 ppm  
 XCorr: 44.37

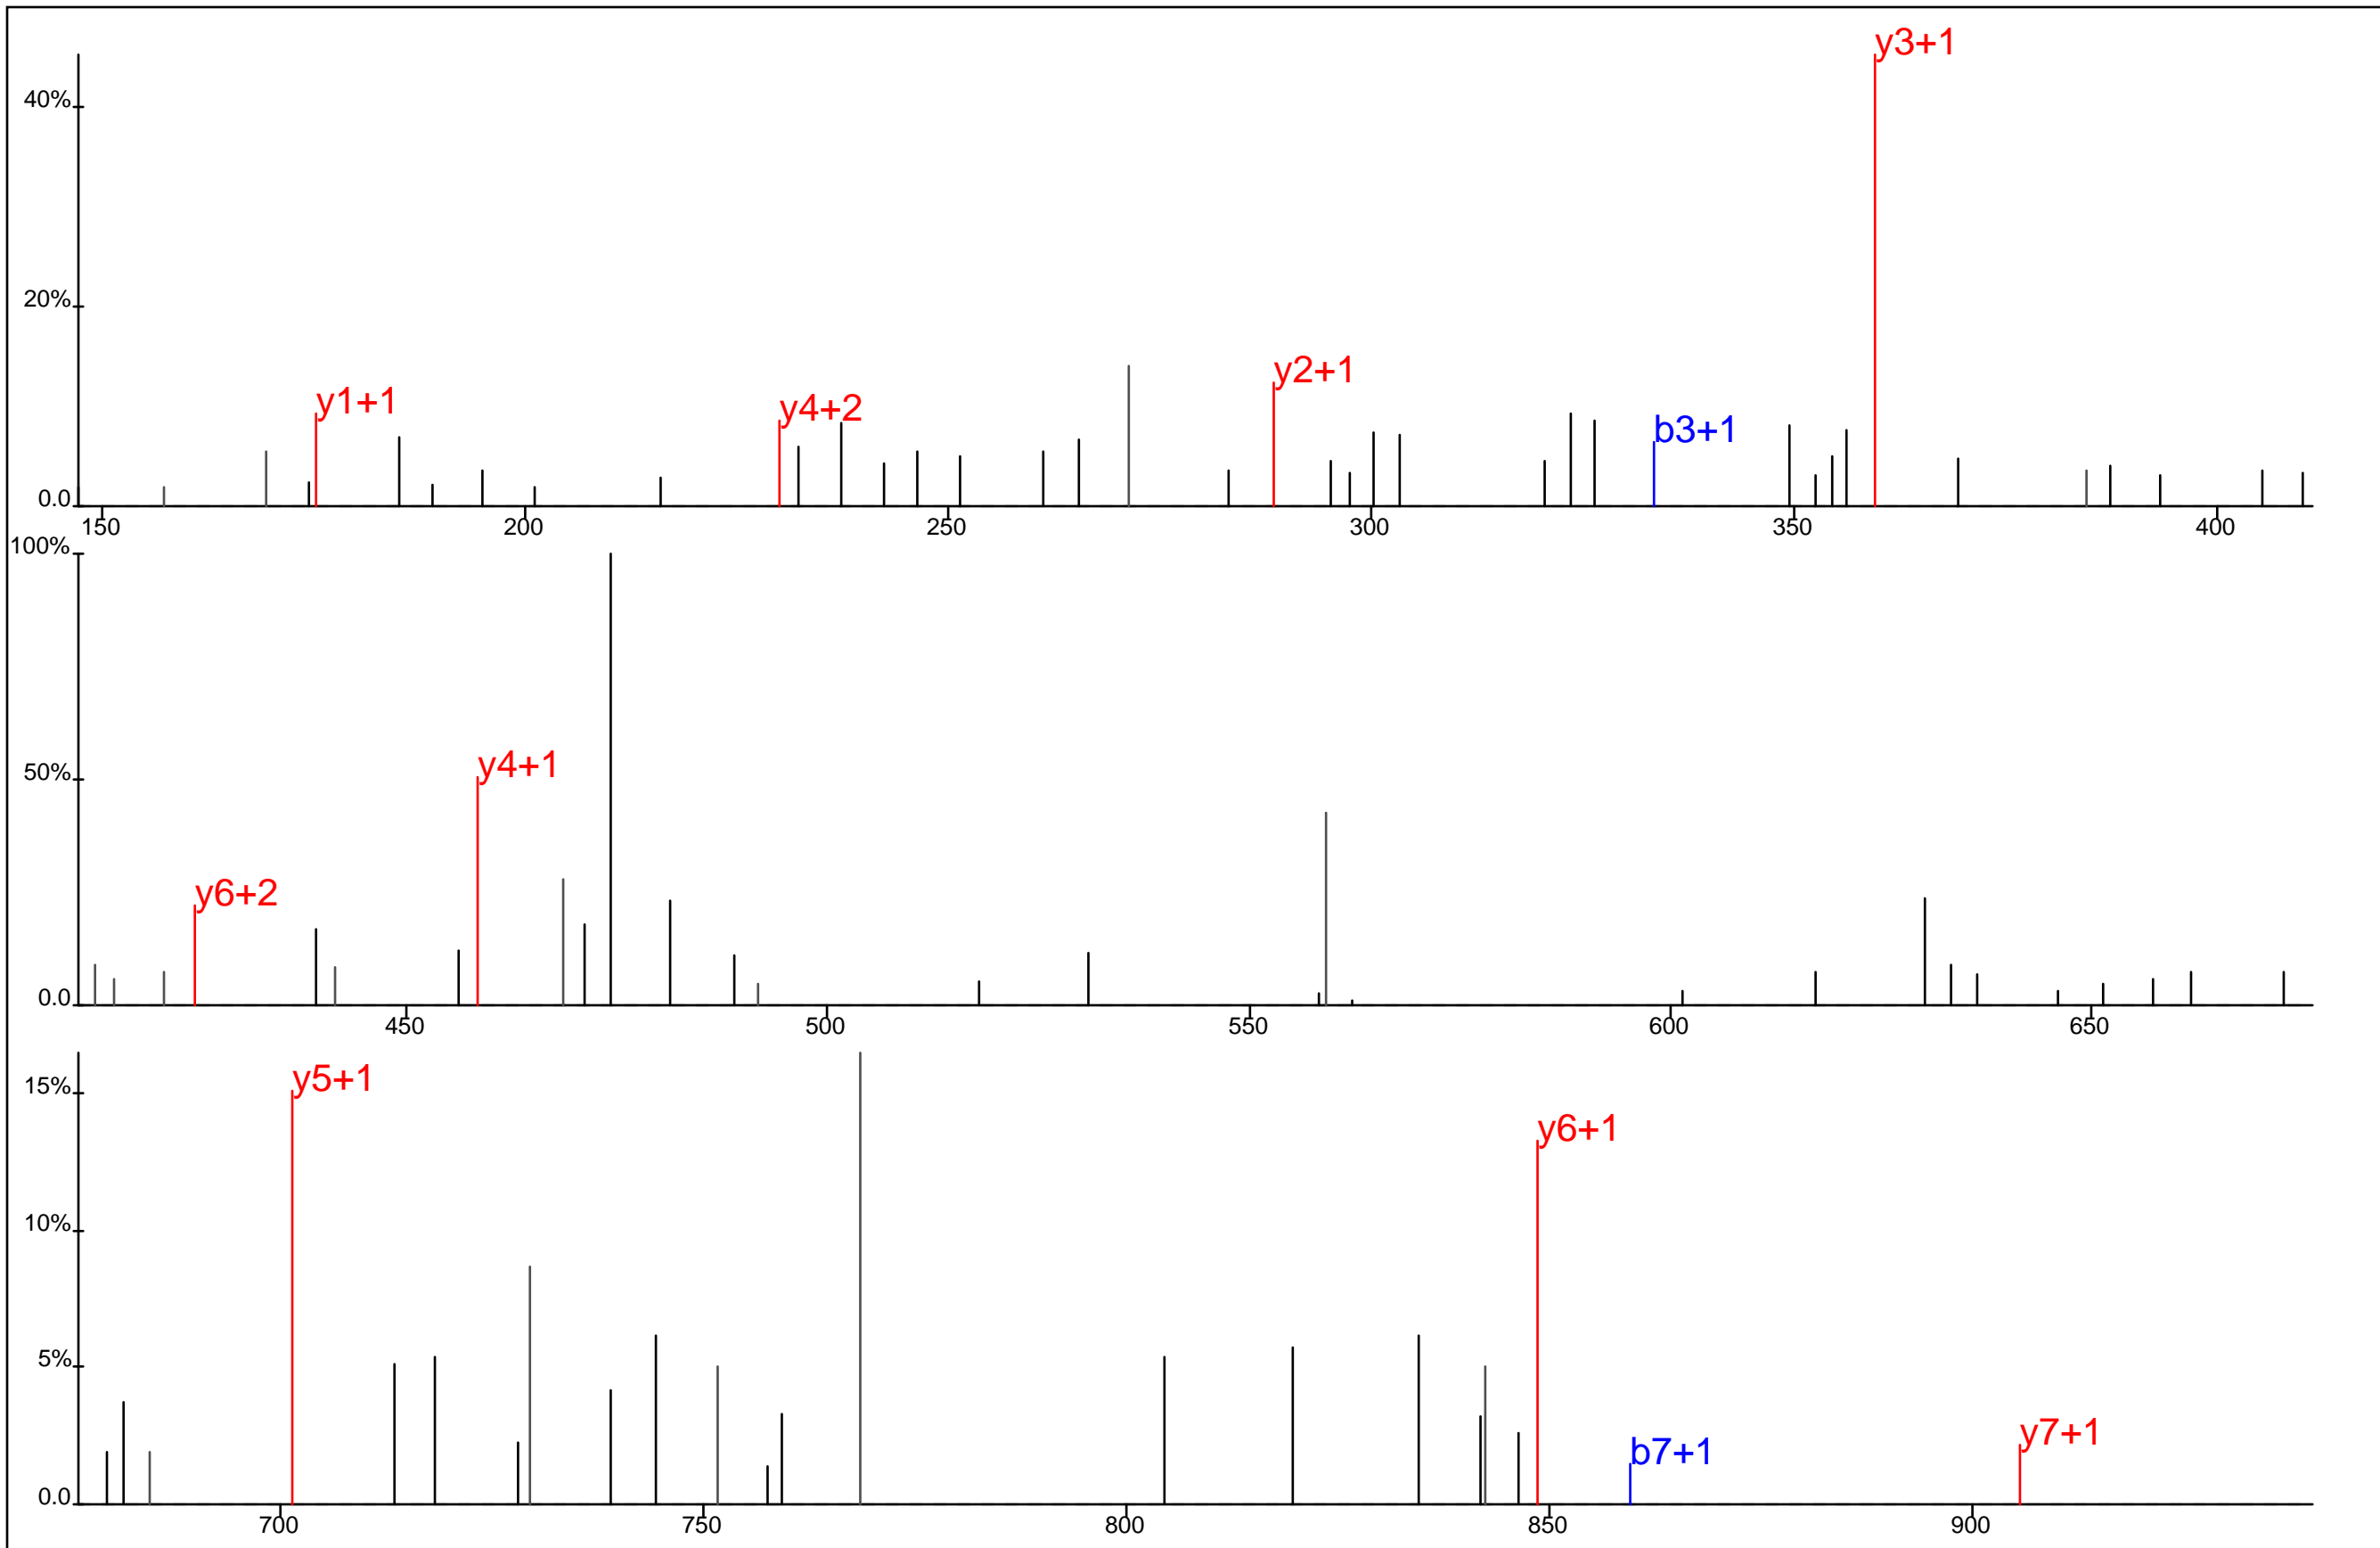

Q G F Y\*V A L R

Protein Name: EPS15R  
 gi Accession: 0  
 Precursor Mass: 517.2481+2  
 Delta Mass: 2.224 ppm  
 XCorr: 37.93

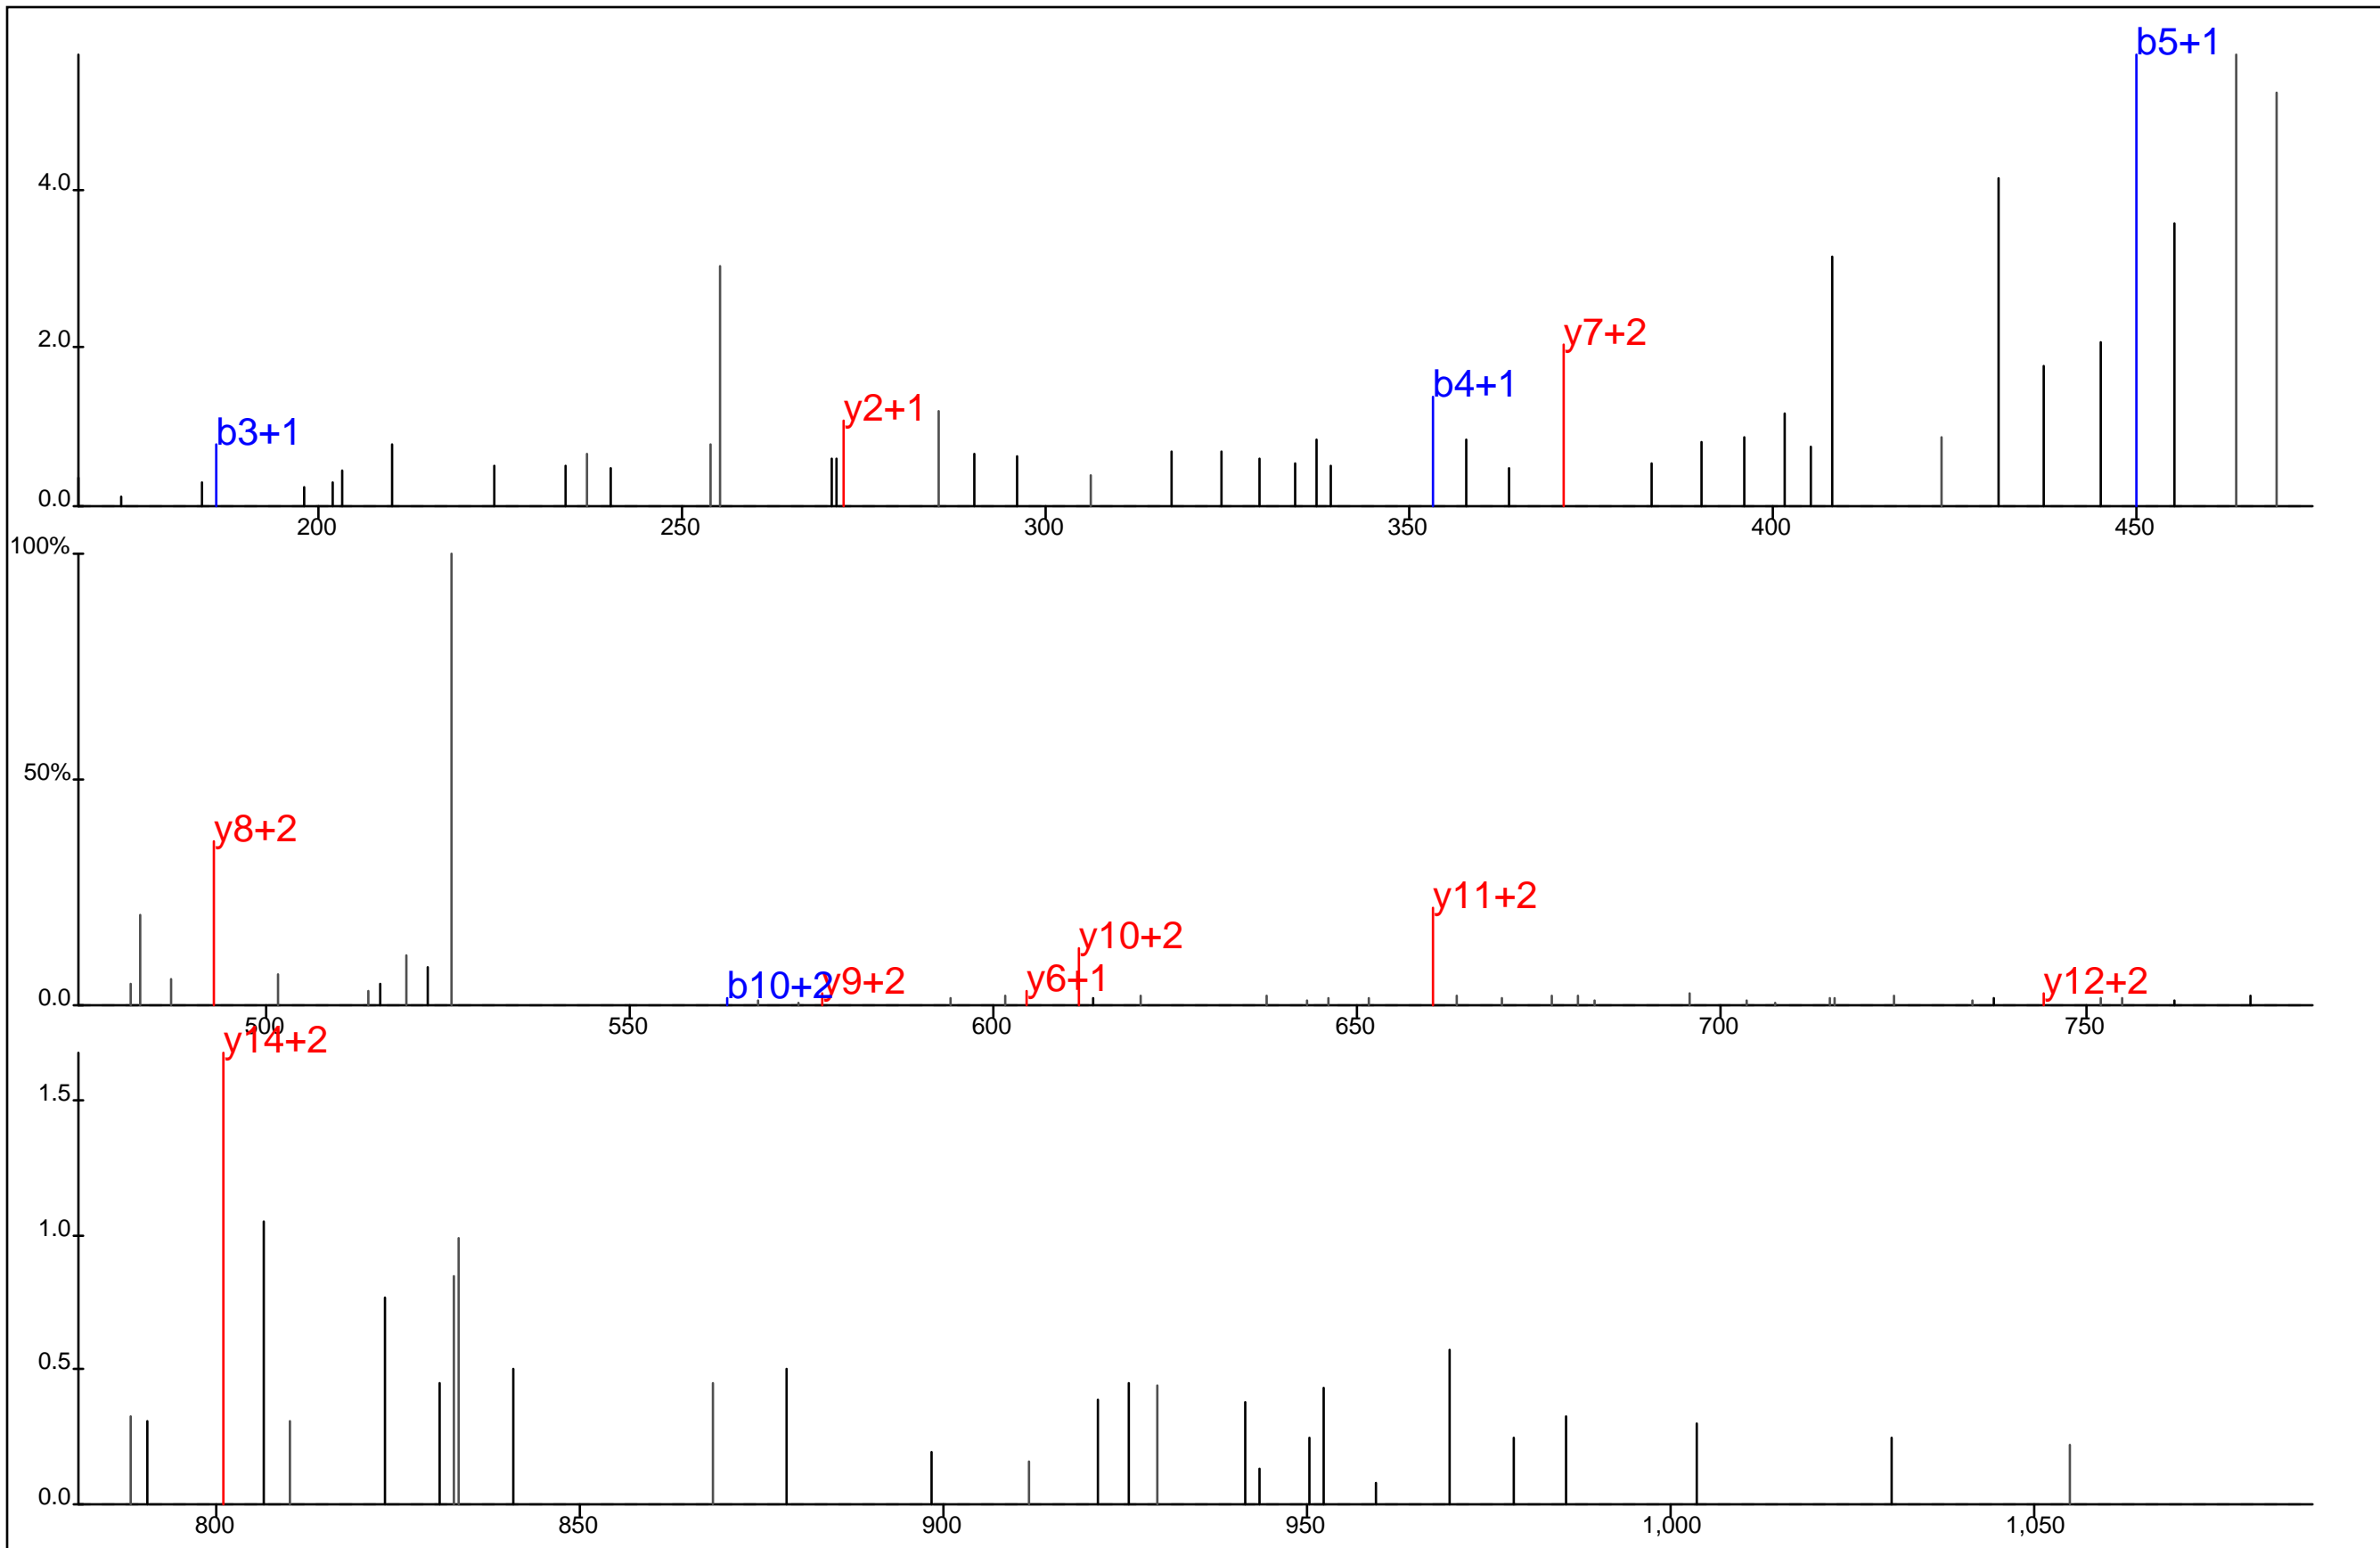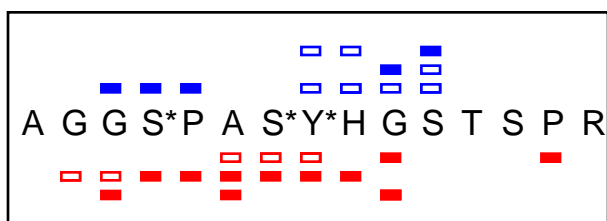

Protein Name: Epsin 2  
 gi Accession: 0  
 Precursor Mass: 557.8576+3  
 Delta Mass: 1.100 ppm  
 XCorr: 23.97



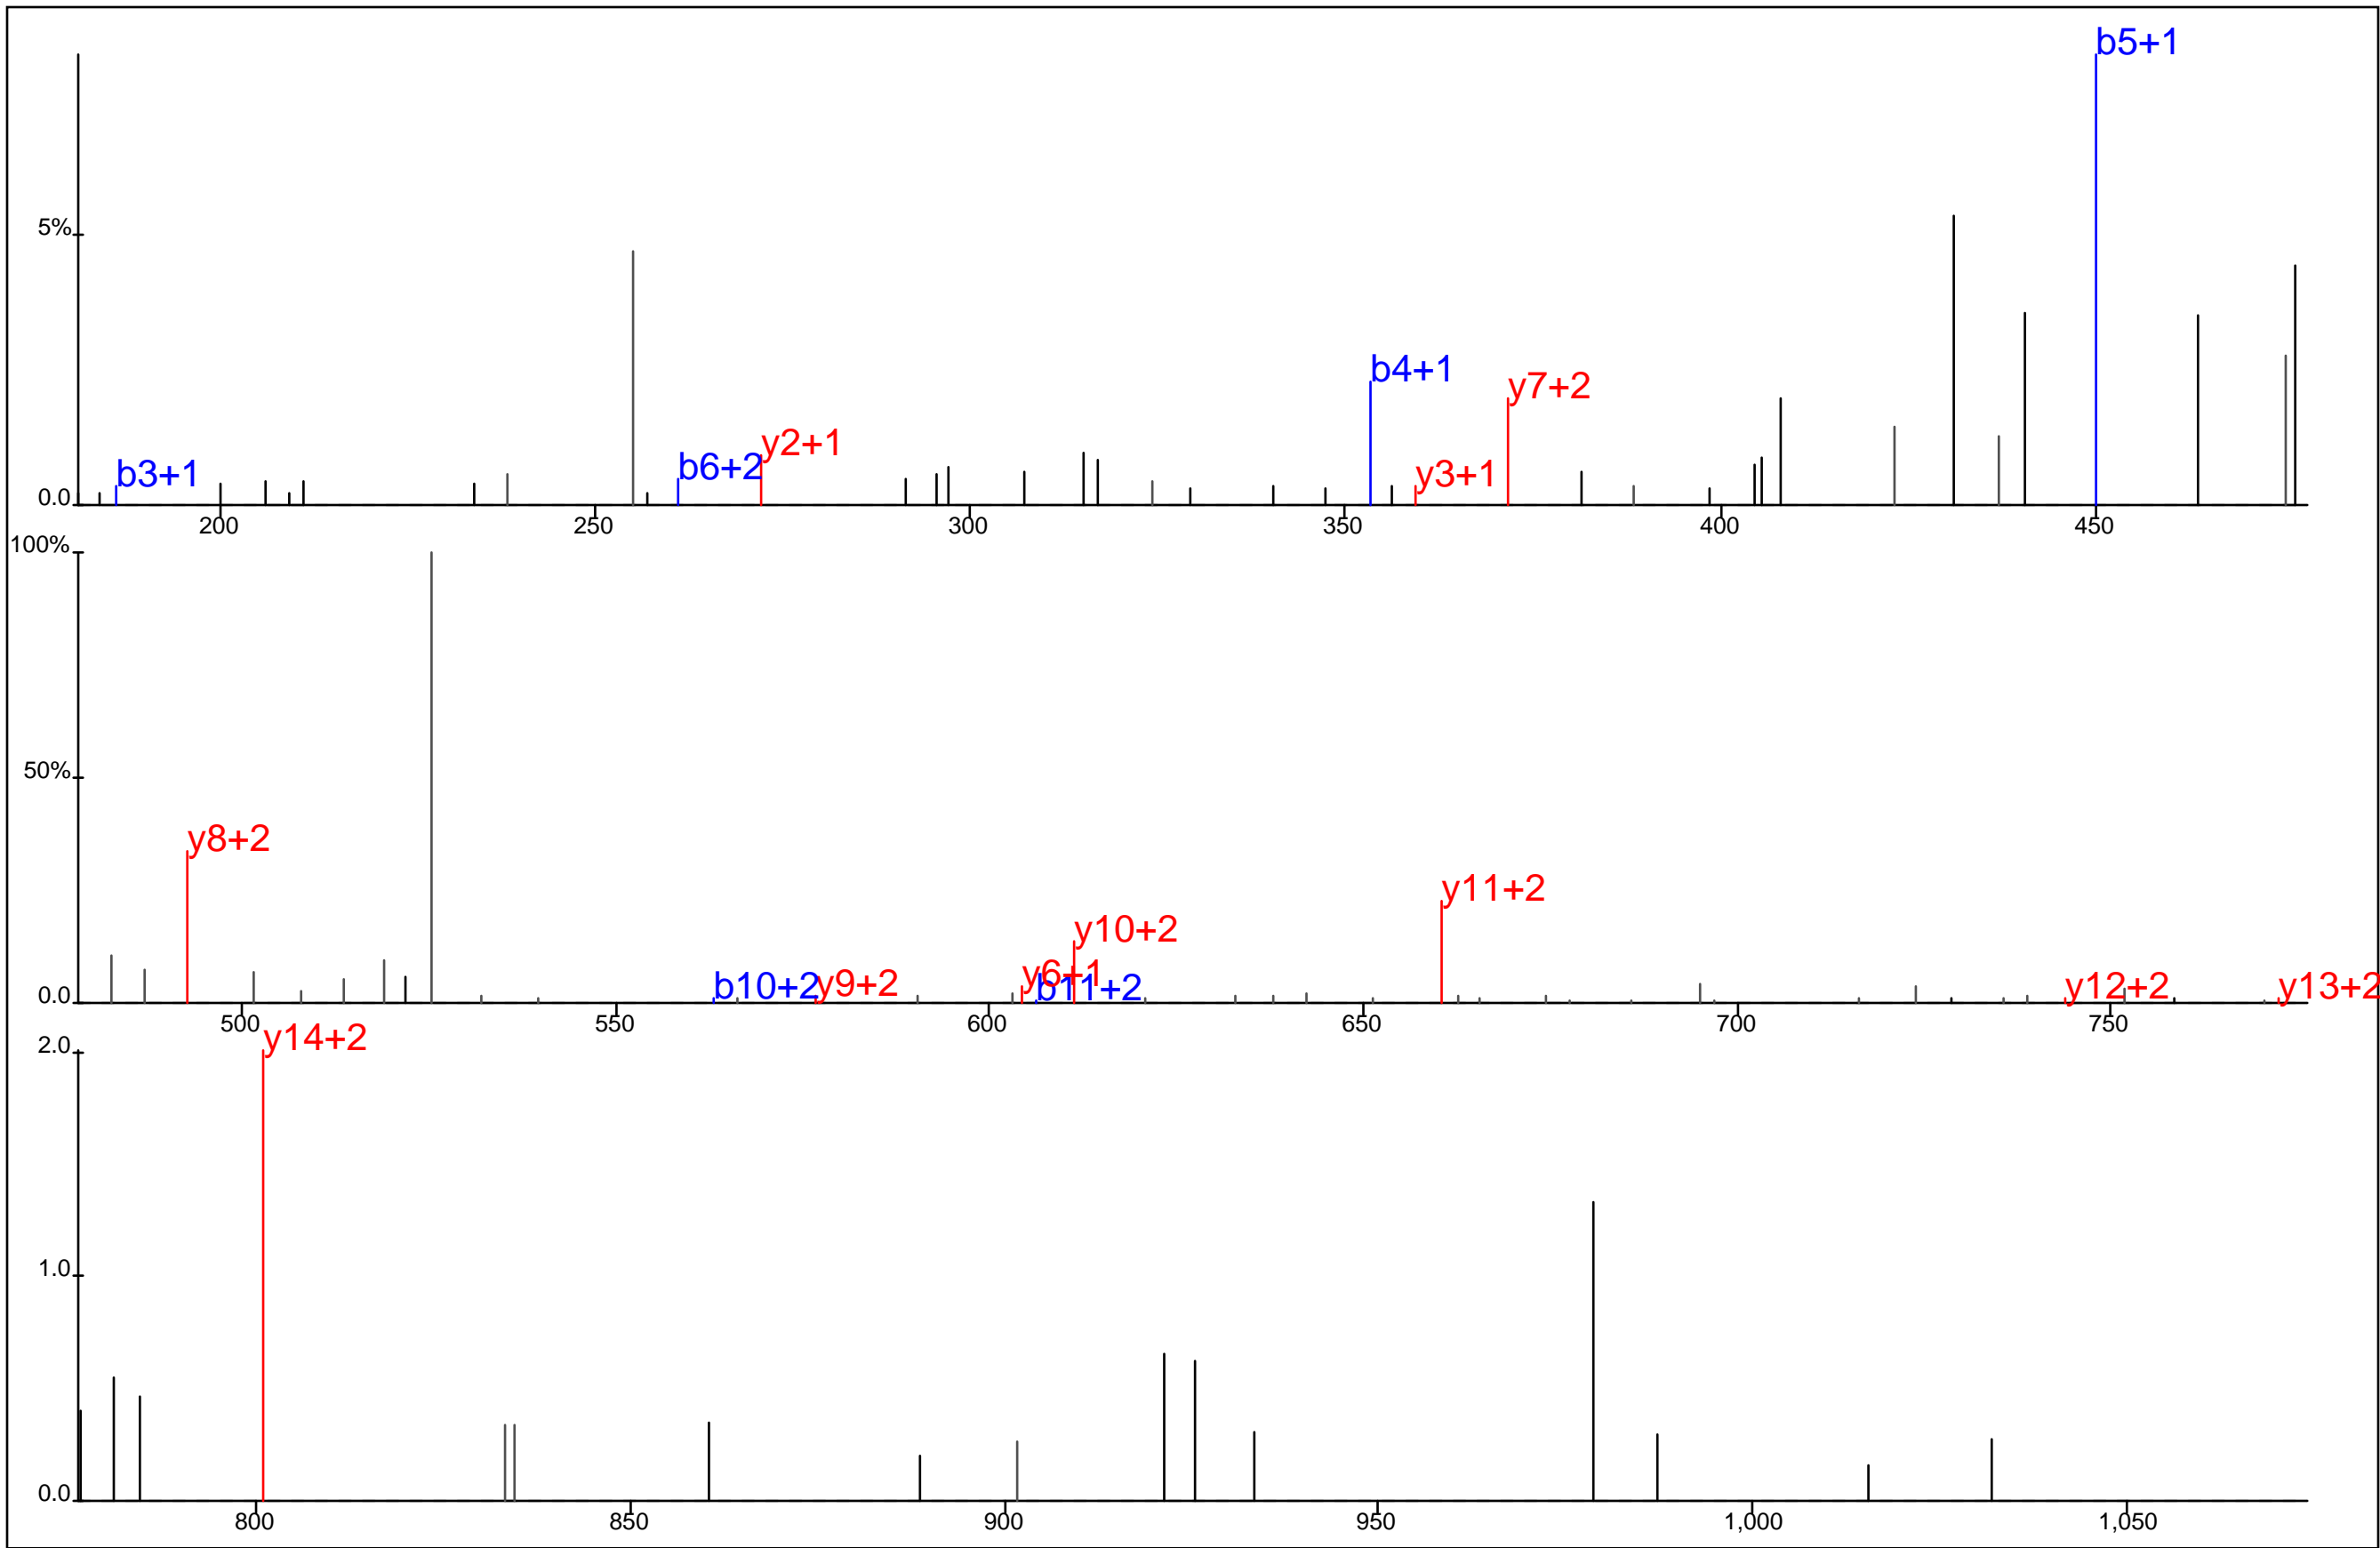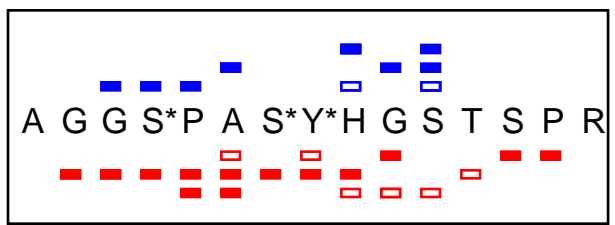

Protein Name: Epsin 2  
 gi Accession: 0  
 Precursor Mass: 557.8575+3  
 Delta Mass: 1.210 ppm  
 XCorr: 24.07



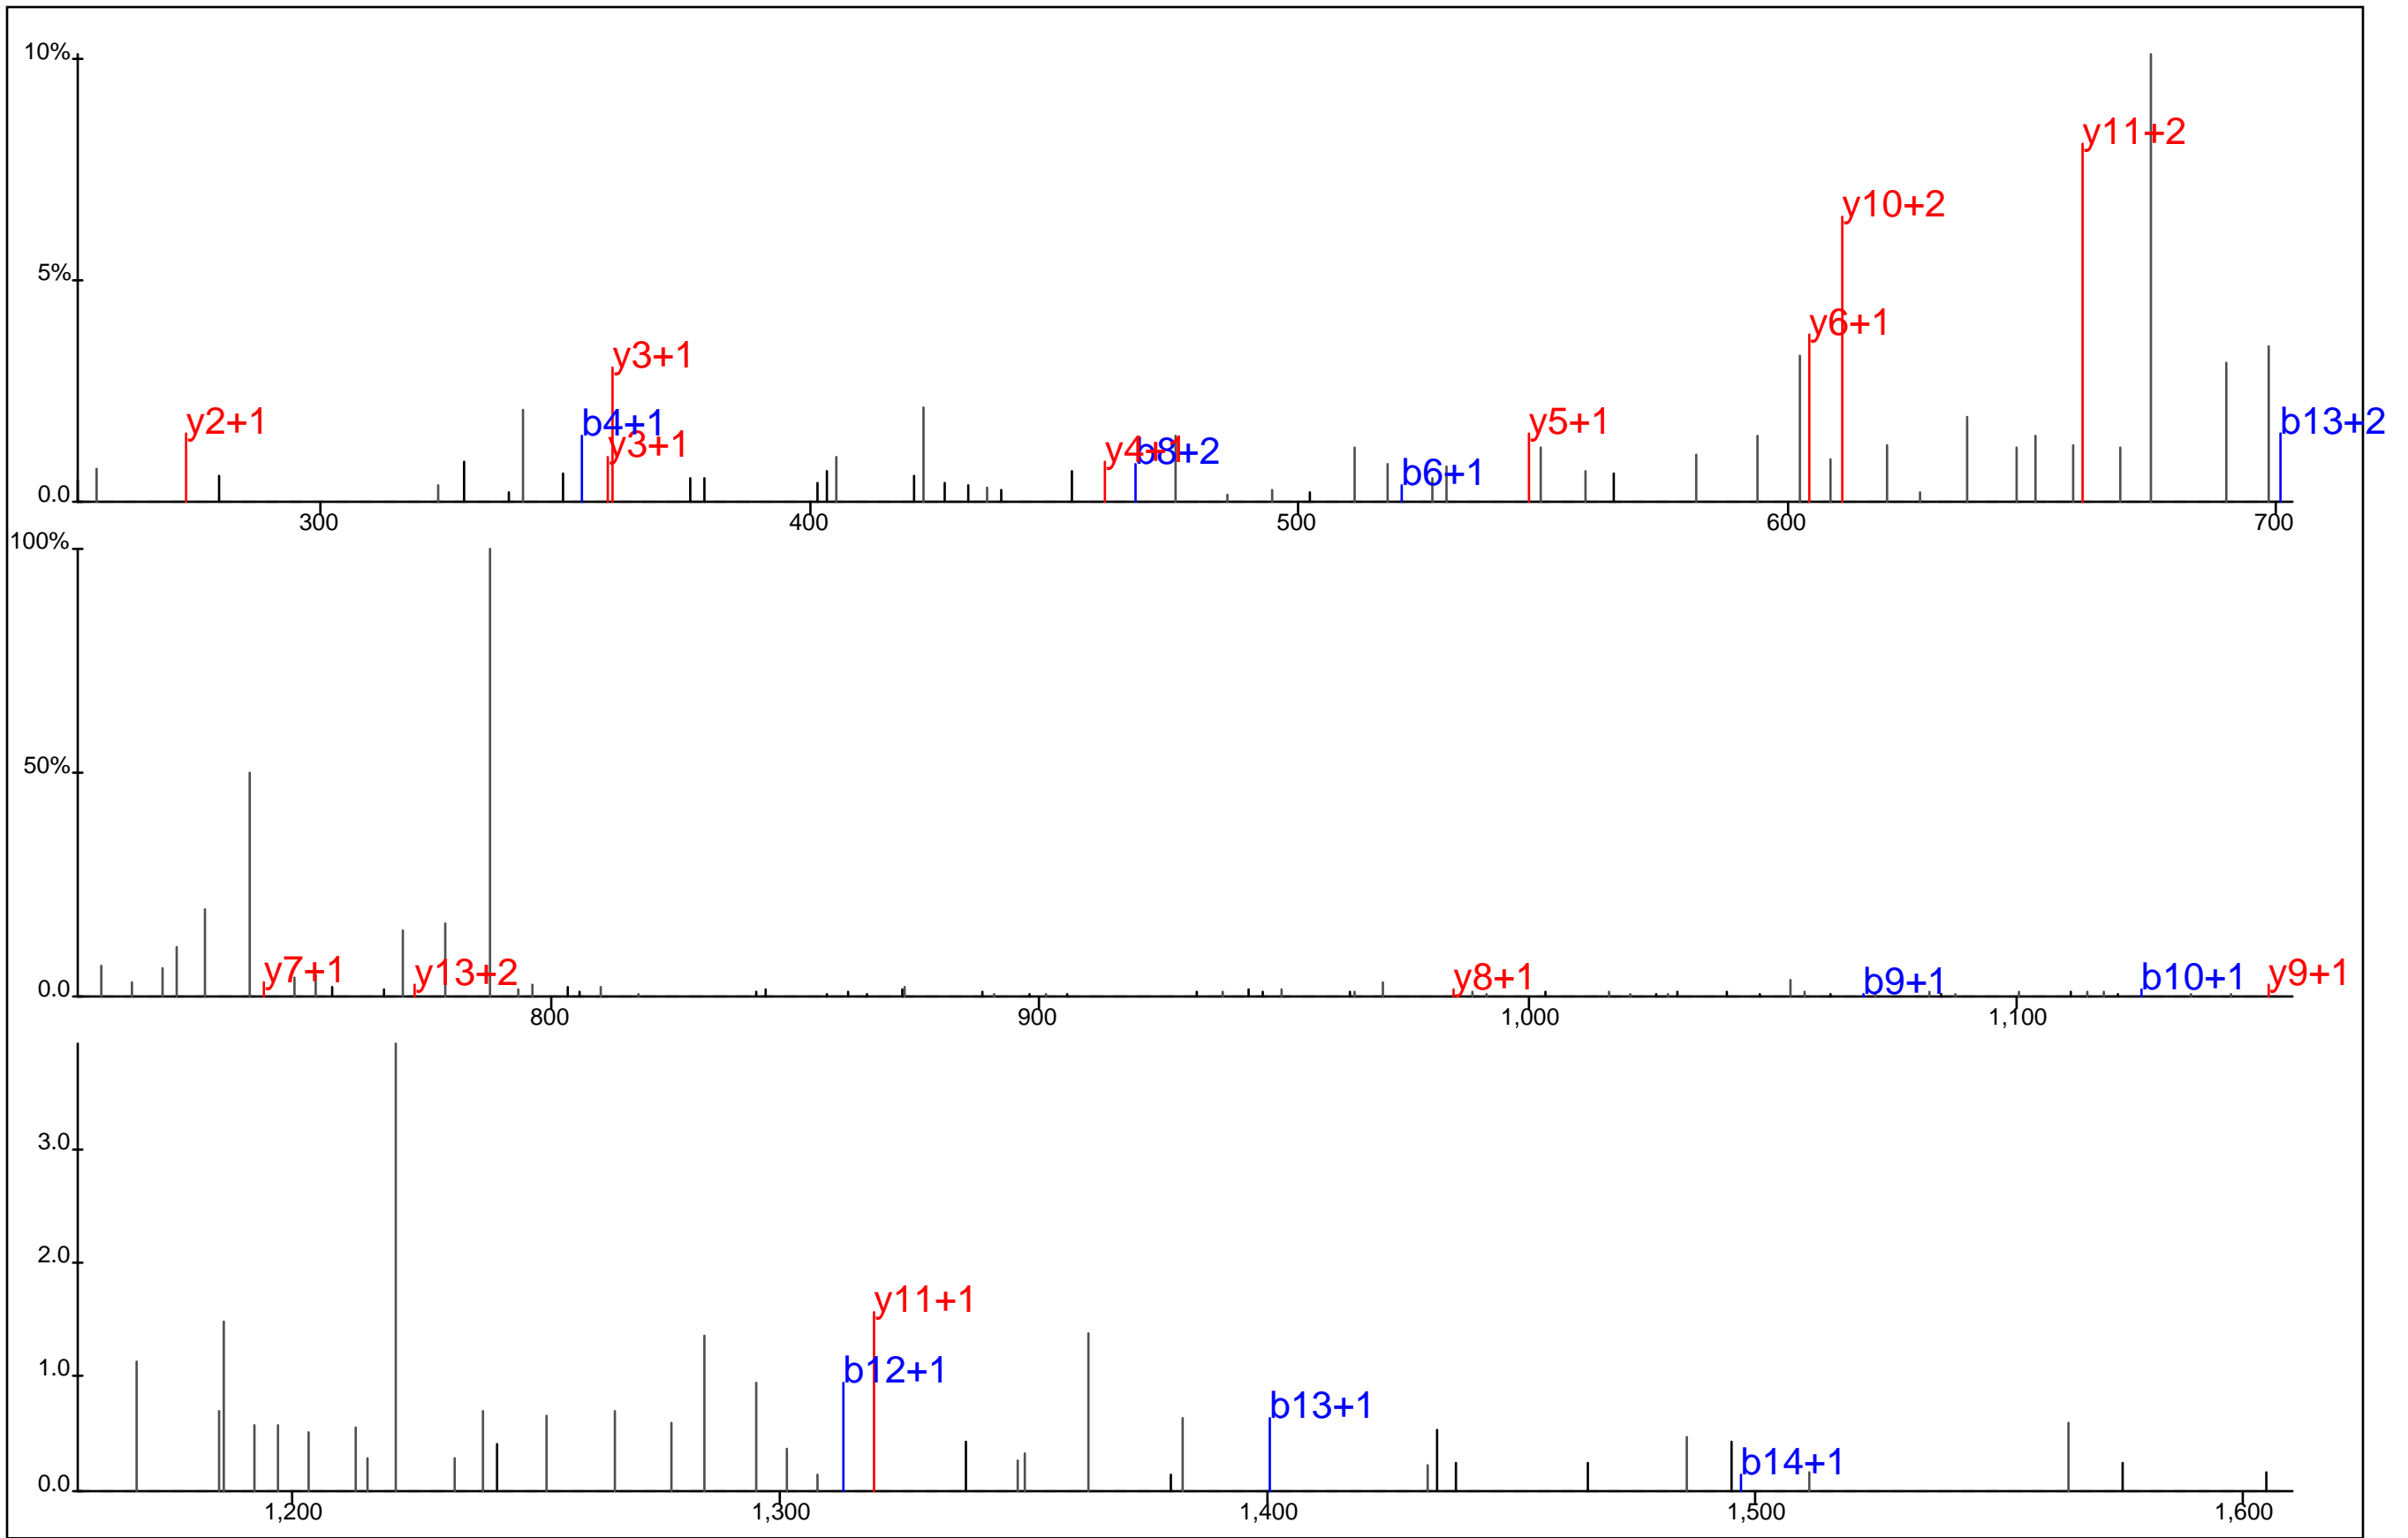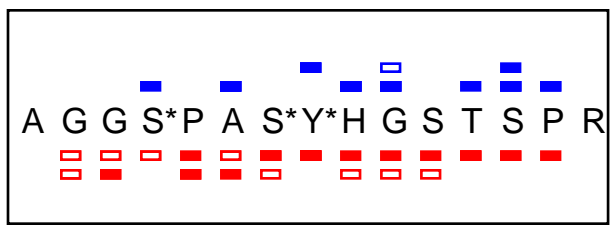

Protein Name: Epsin 2  
 gi Accession: 0  
 Precursor Mass: 836.2785+2  
 Delta Mass: 6.205 ppm  
 XCorr: 31.28



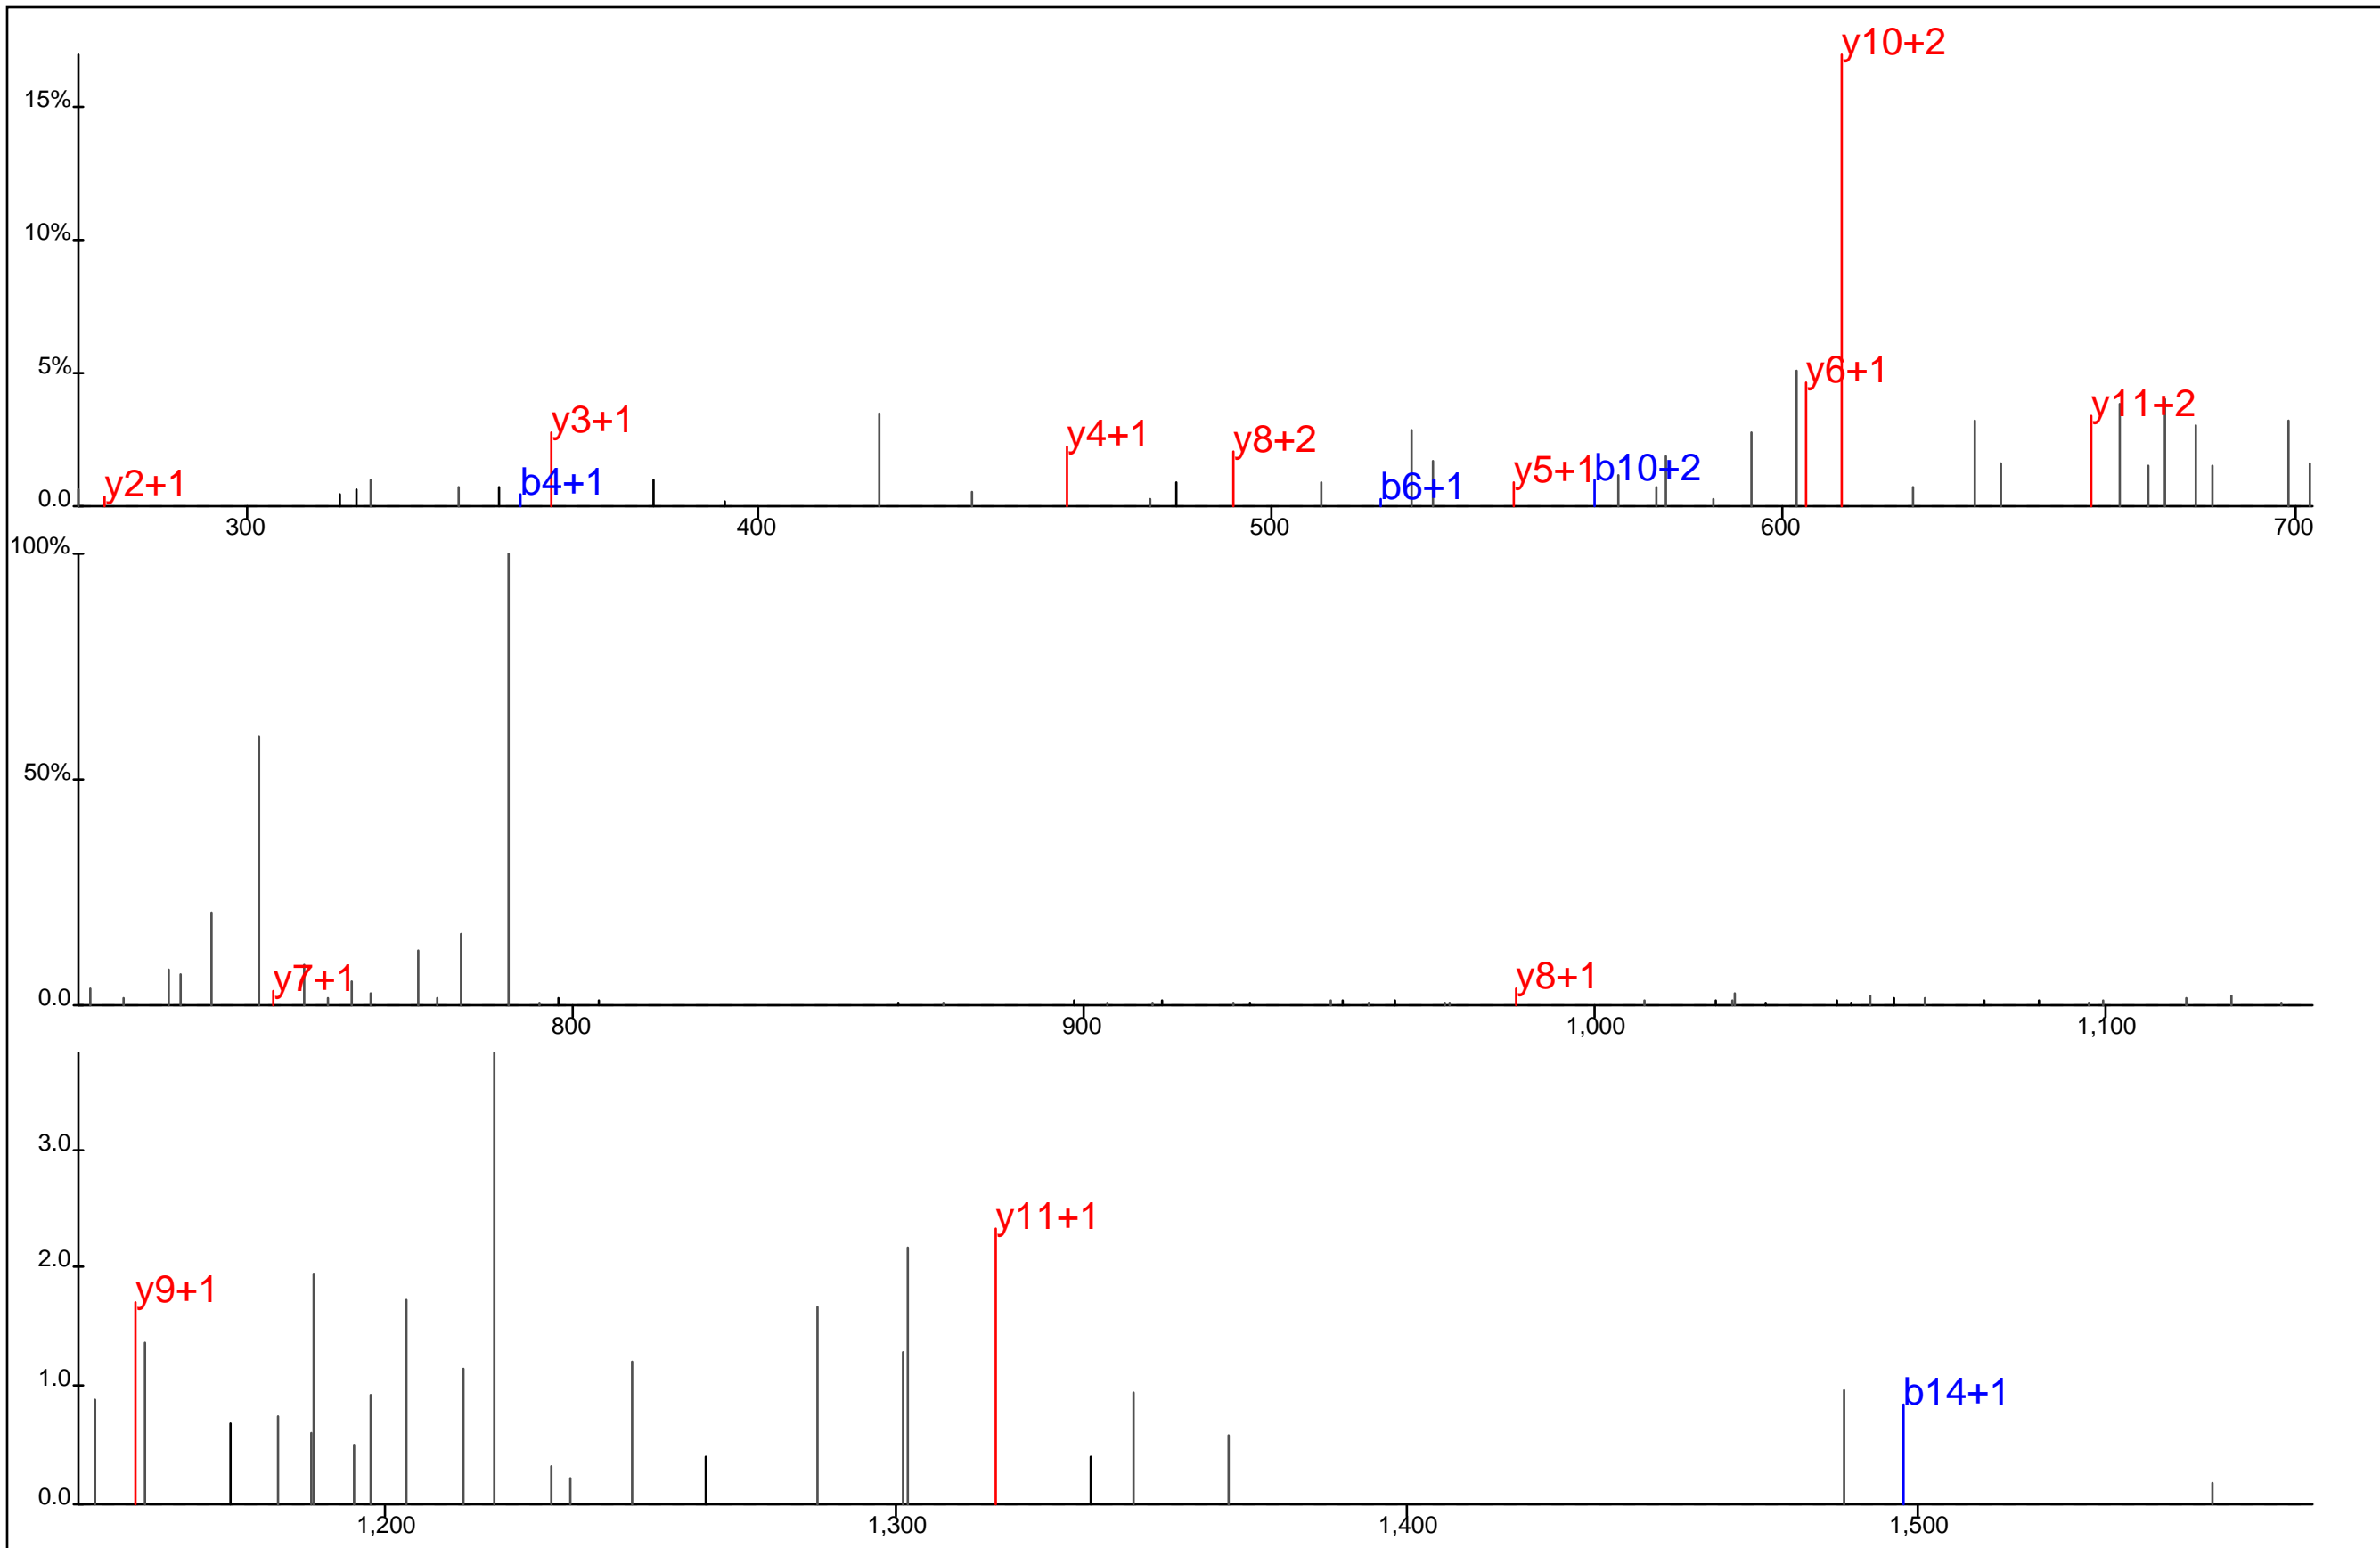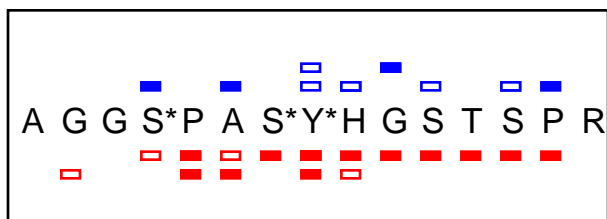

Protein Name: Epsin 2  
 gi Accession: 0  
 Precursor Mass: 836.2836+2  
 Delta Mass: 0.071 ppm  
 XCorr: 28.06

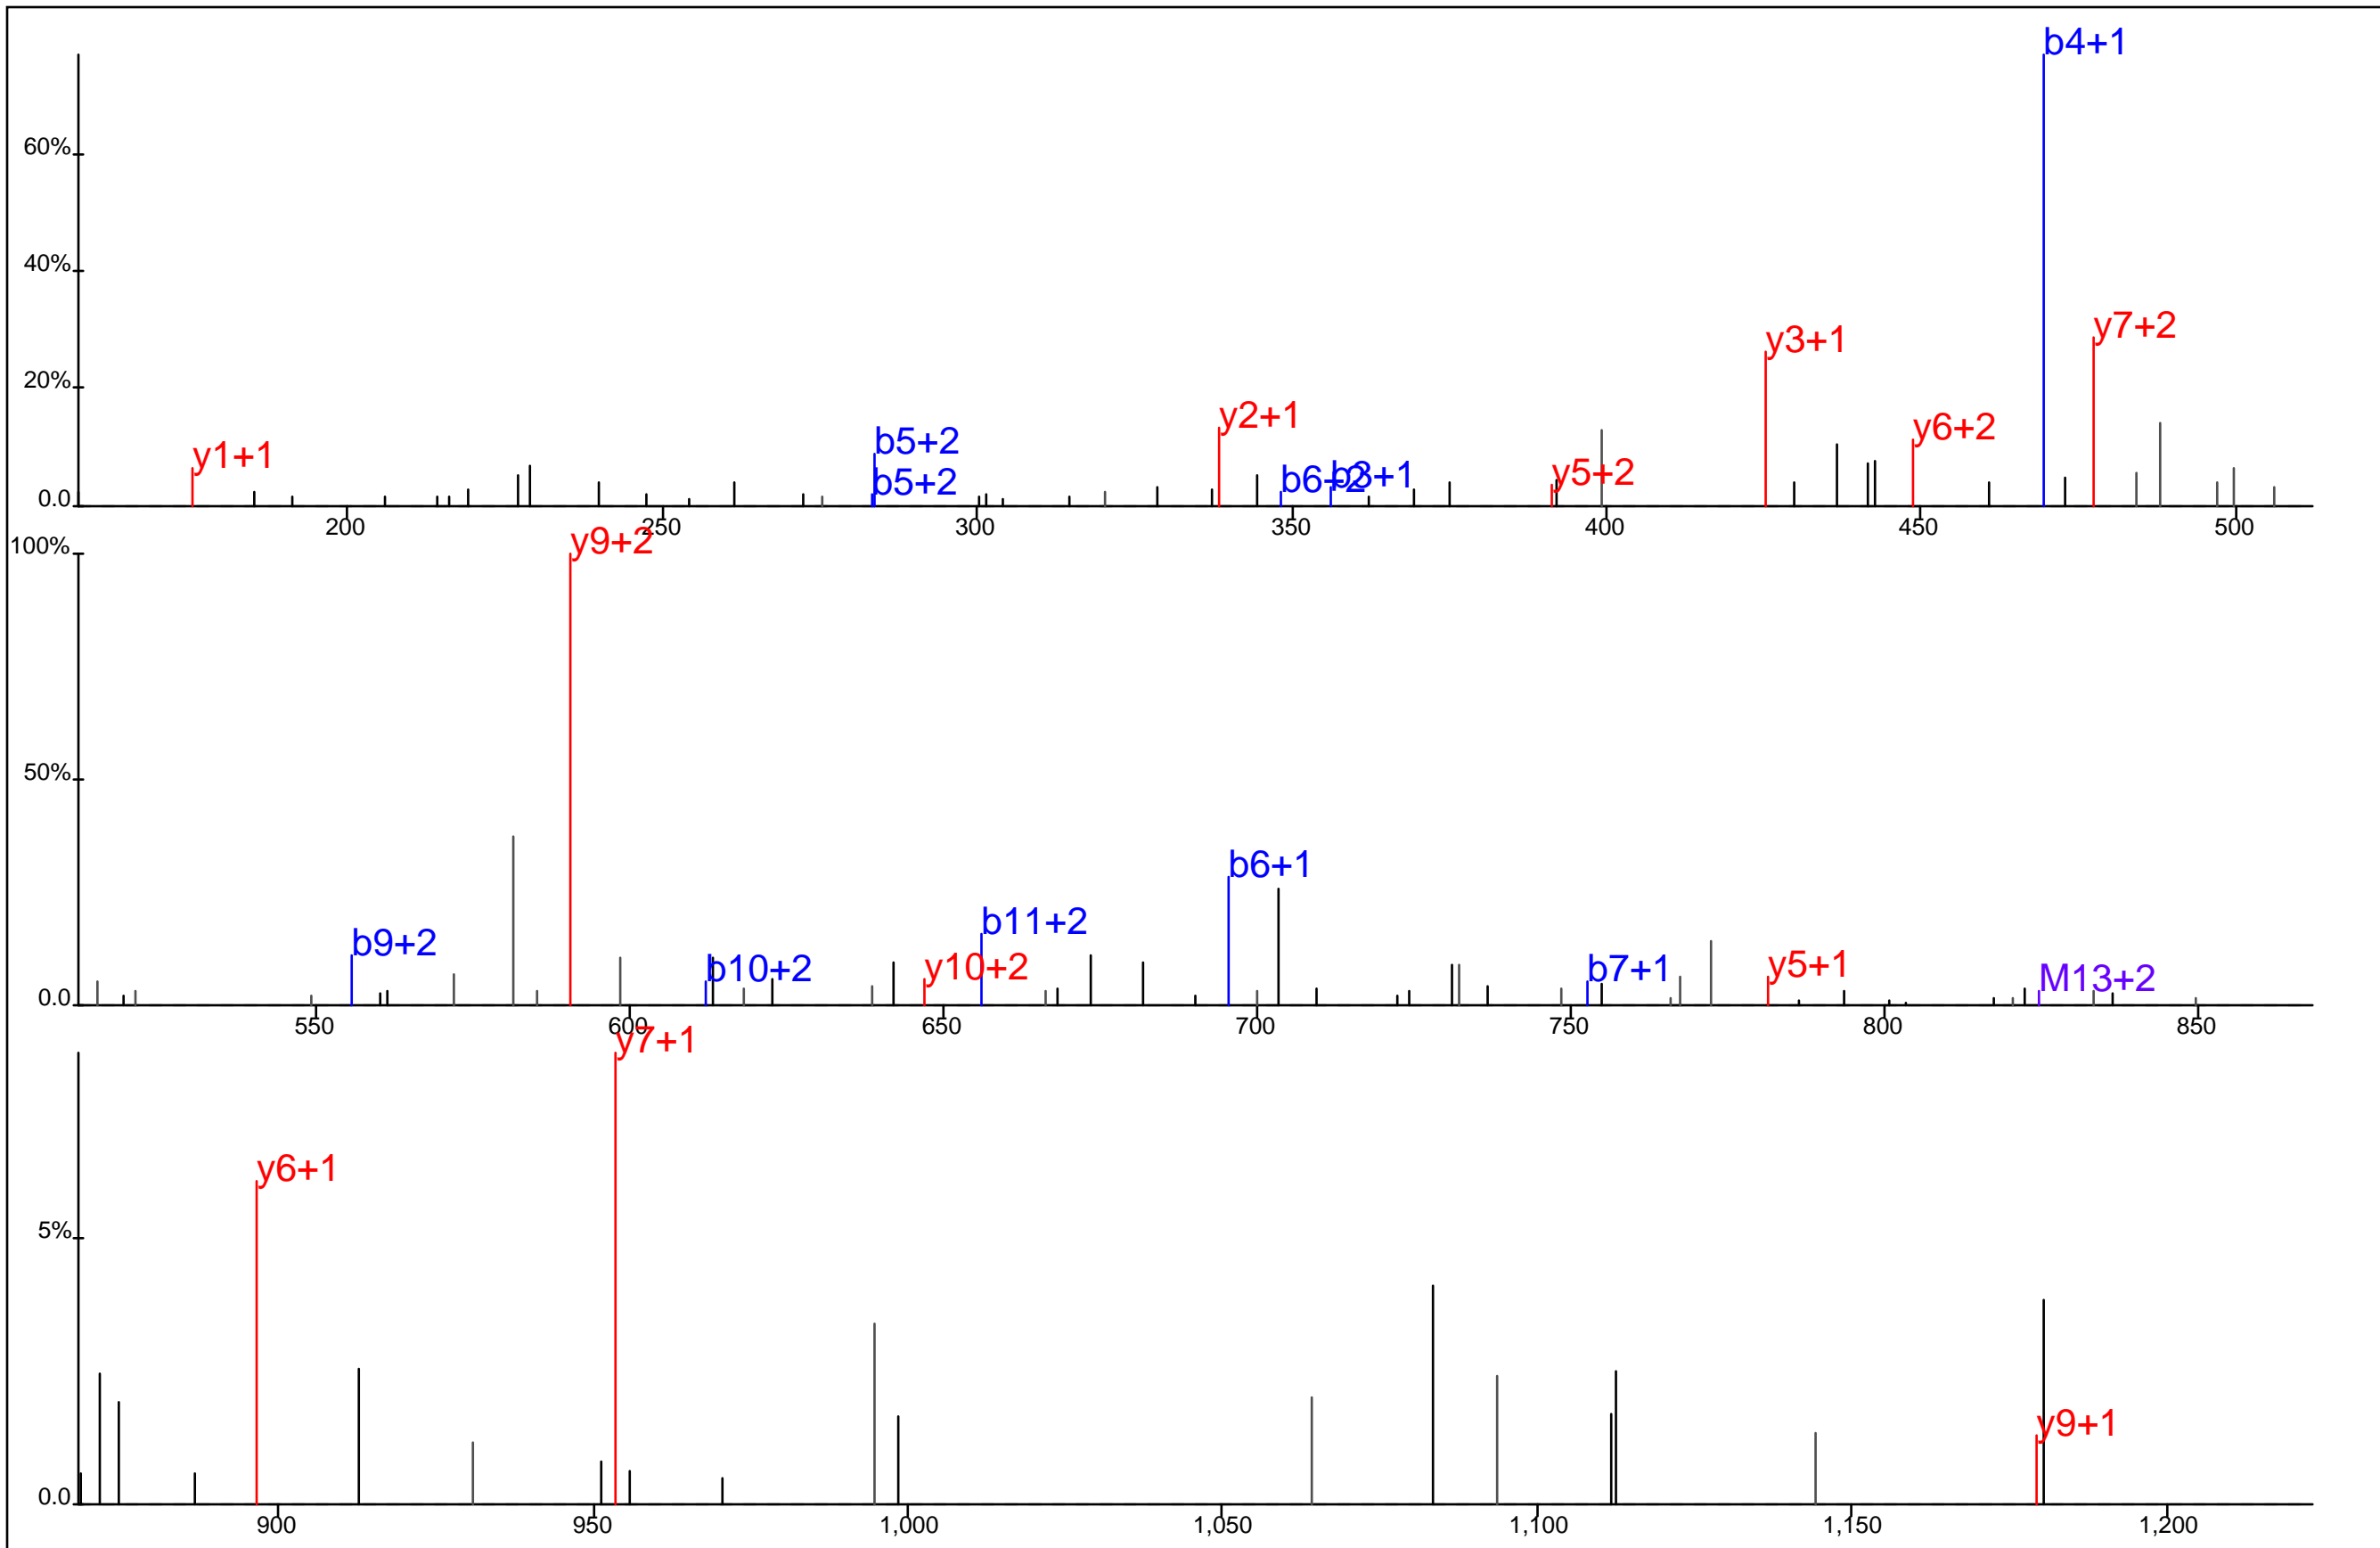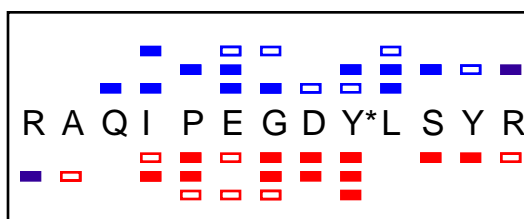

Protein Name: Erbin  
 gi Accession: 0  
 Precursor Mass: 549.9238+3  
 Delta Mass: 2.505 ppm  
 XCorr: 35.22

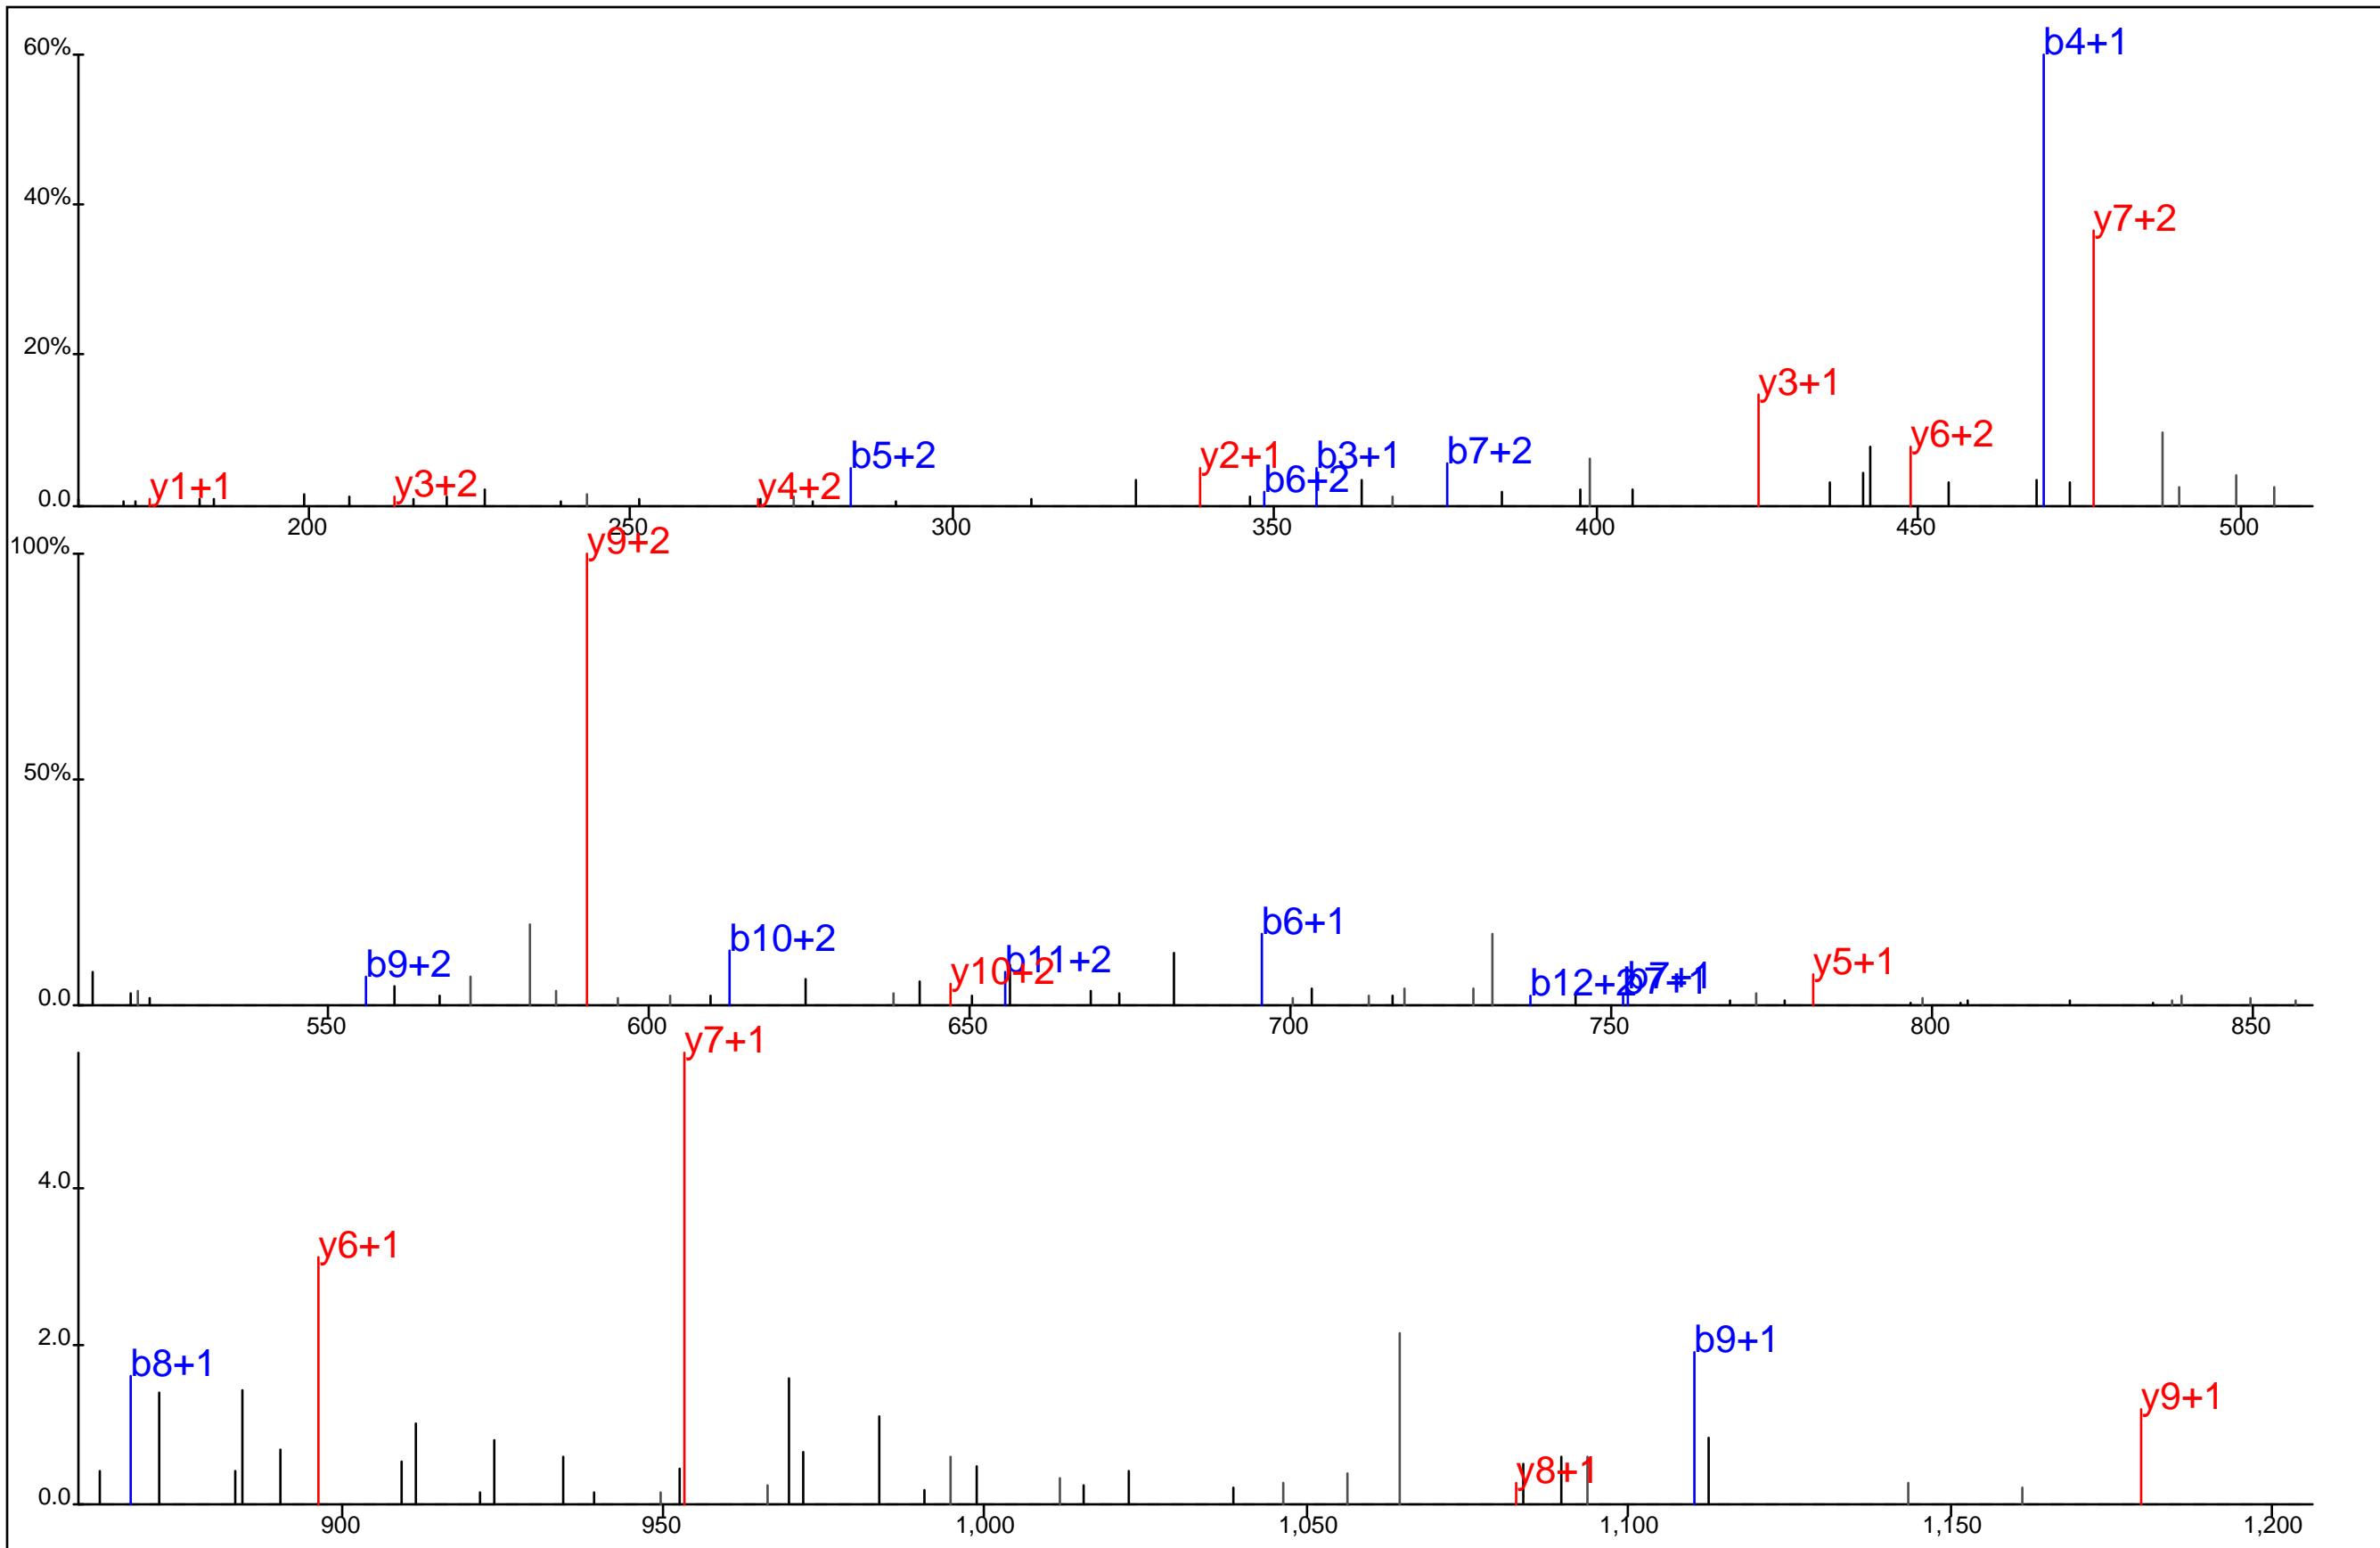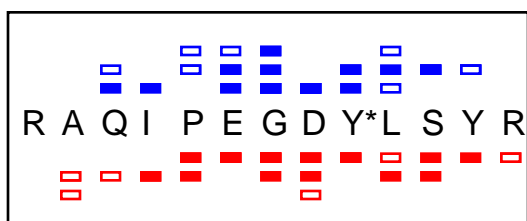

Protein Name: Erbin  
 gi Accession: 0  
 Precursor Mass: 549.9219+3  
 Delta Mass: 0.940 ppm  
 XCorr: 40.49

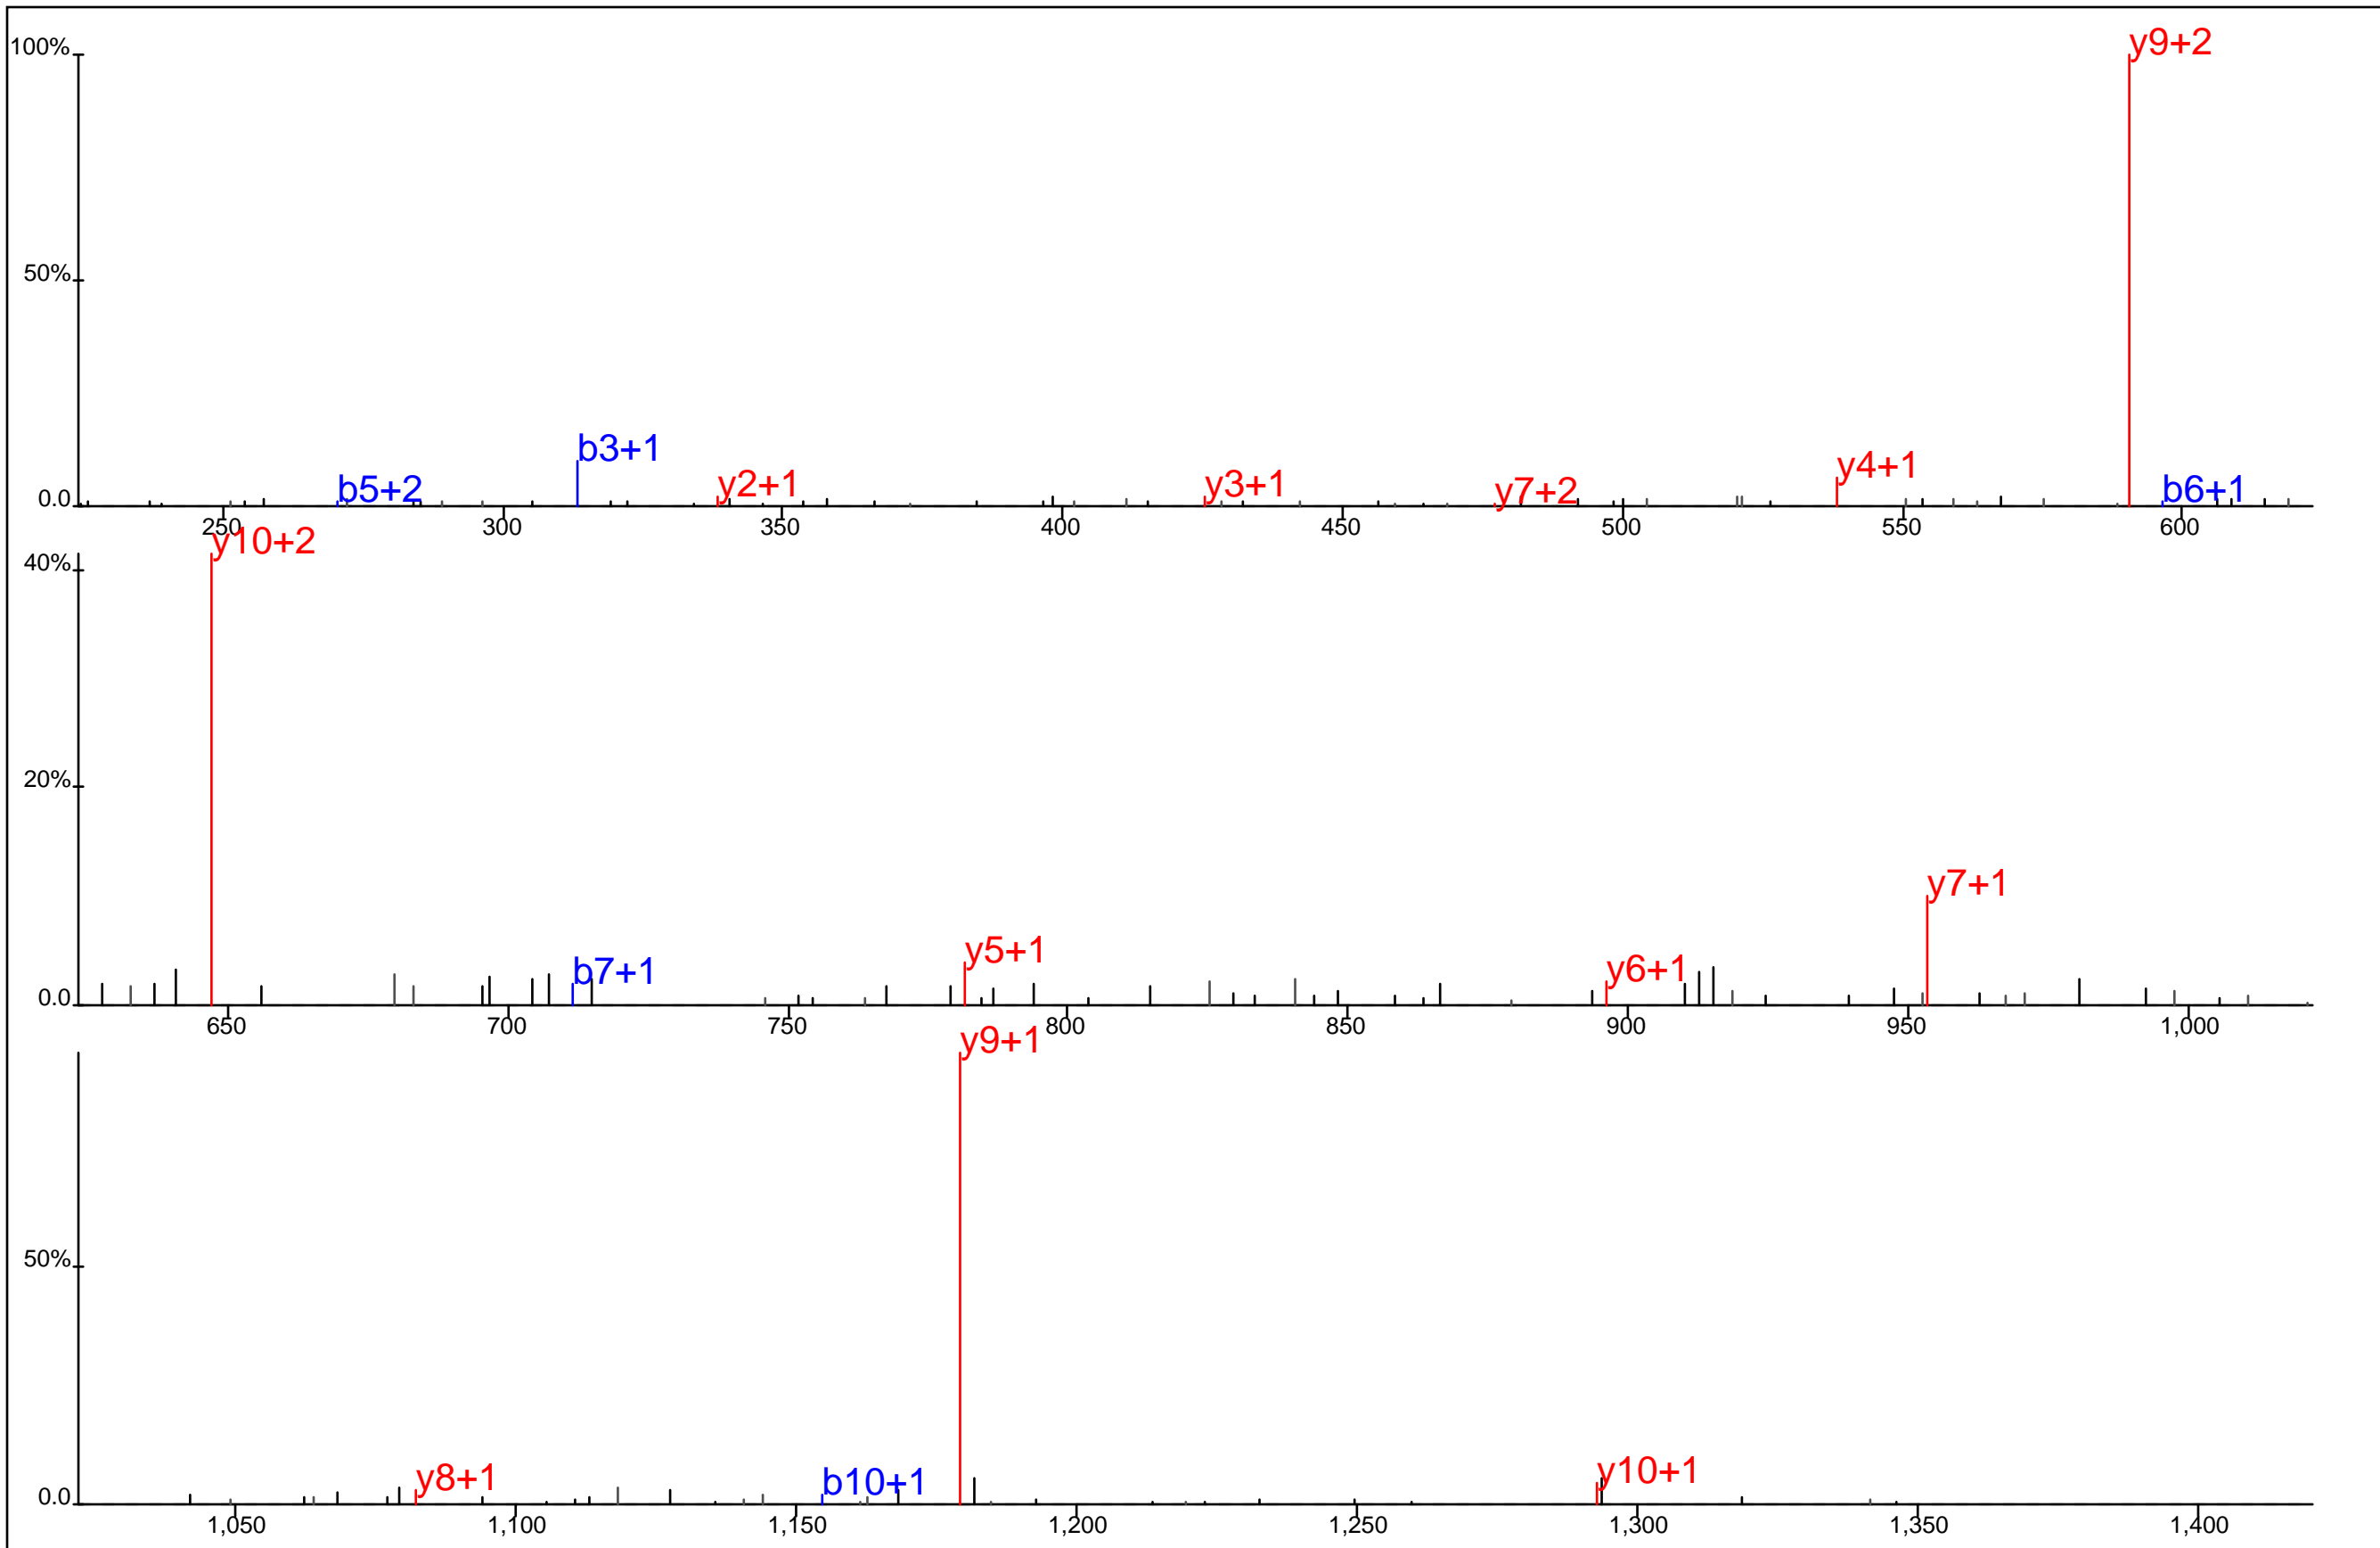

A Q I P E G D Y\* L S Y R

Protein Name: Erbin  
 gi Accession: 0  
 Precursor Mass: 746.3292+2  
 Delta Mass: 0.235 ppm  
 XCorr: 44.8

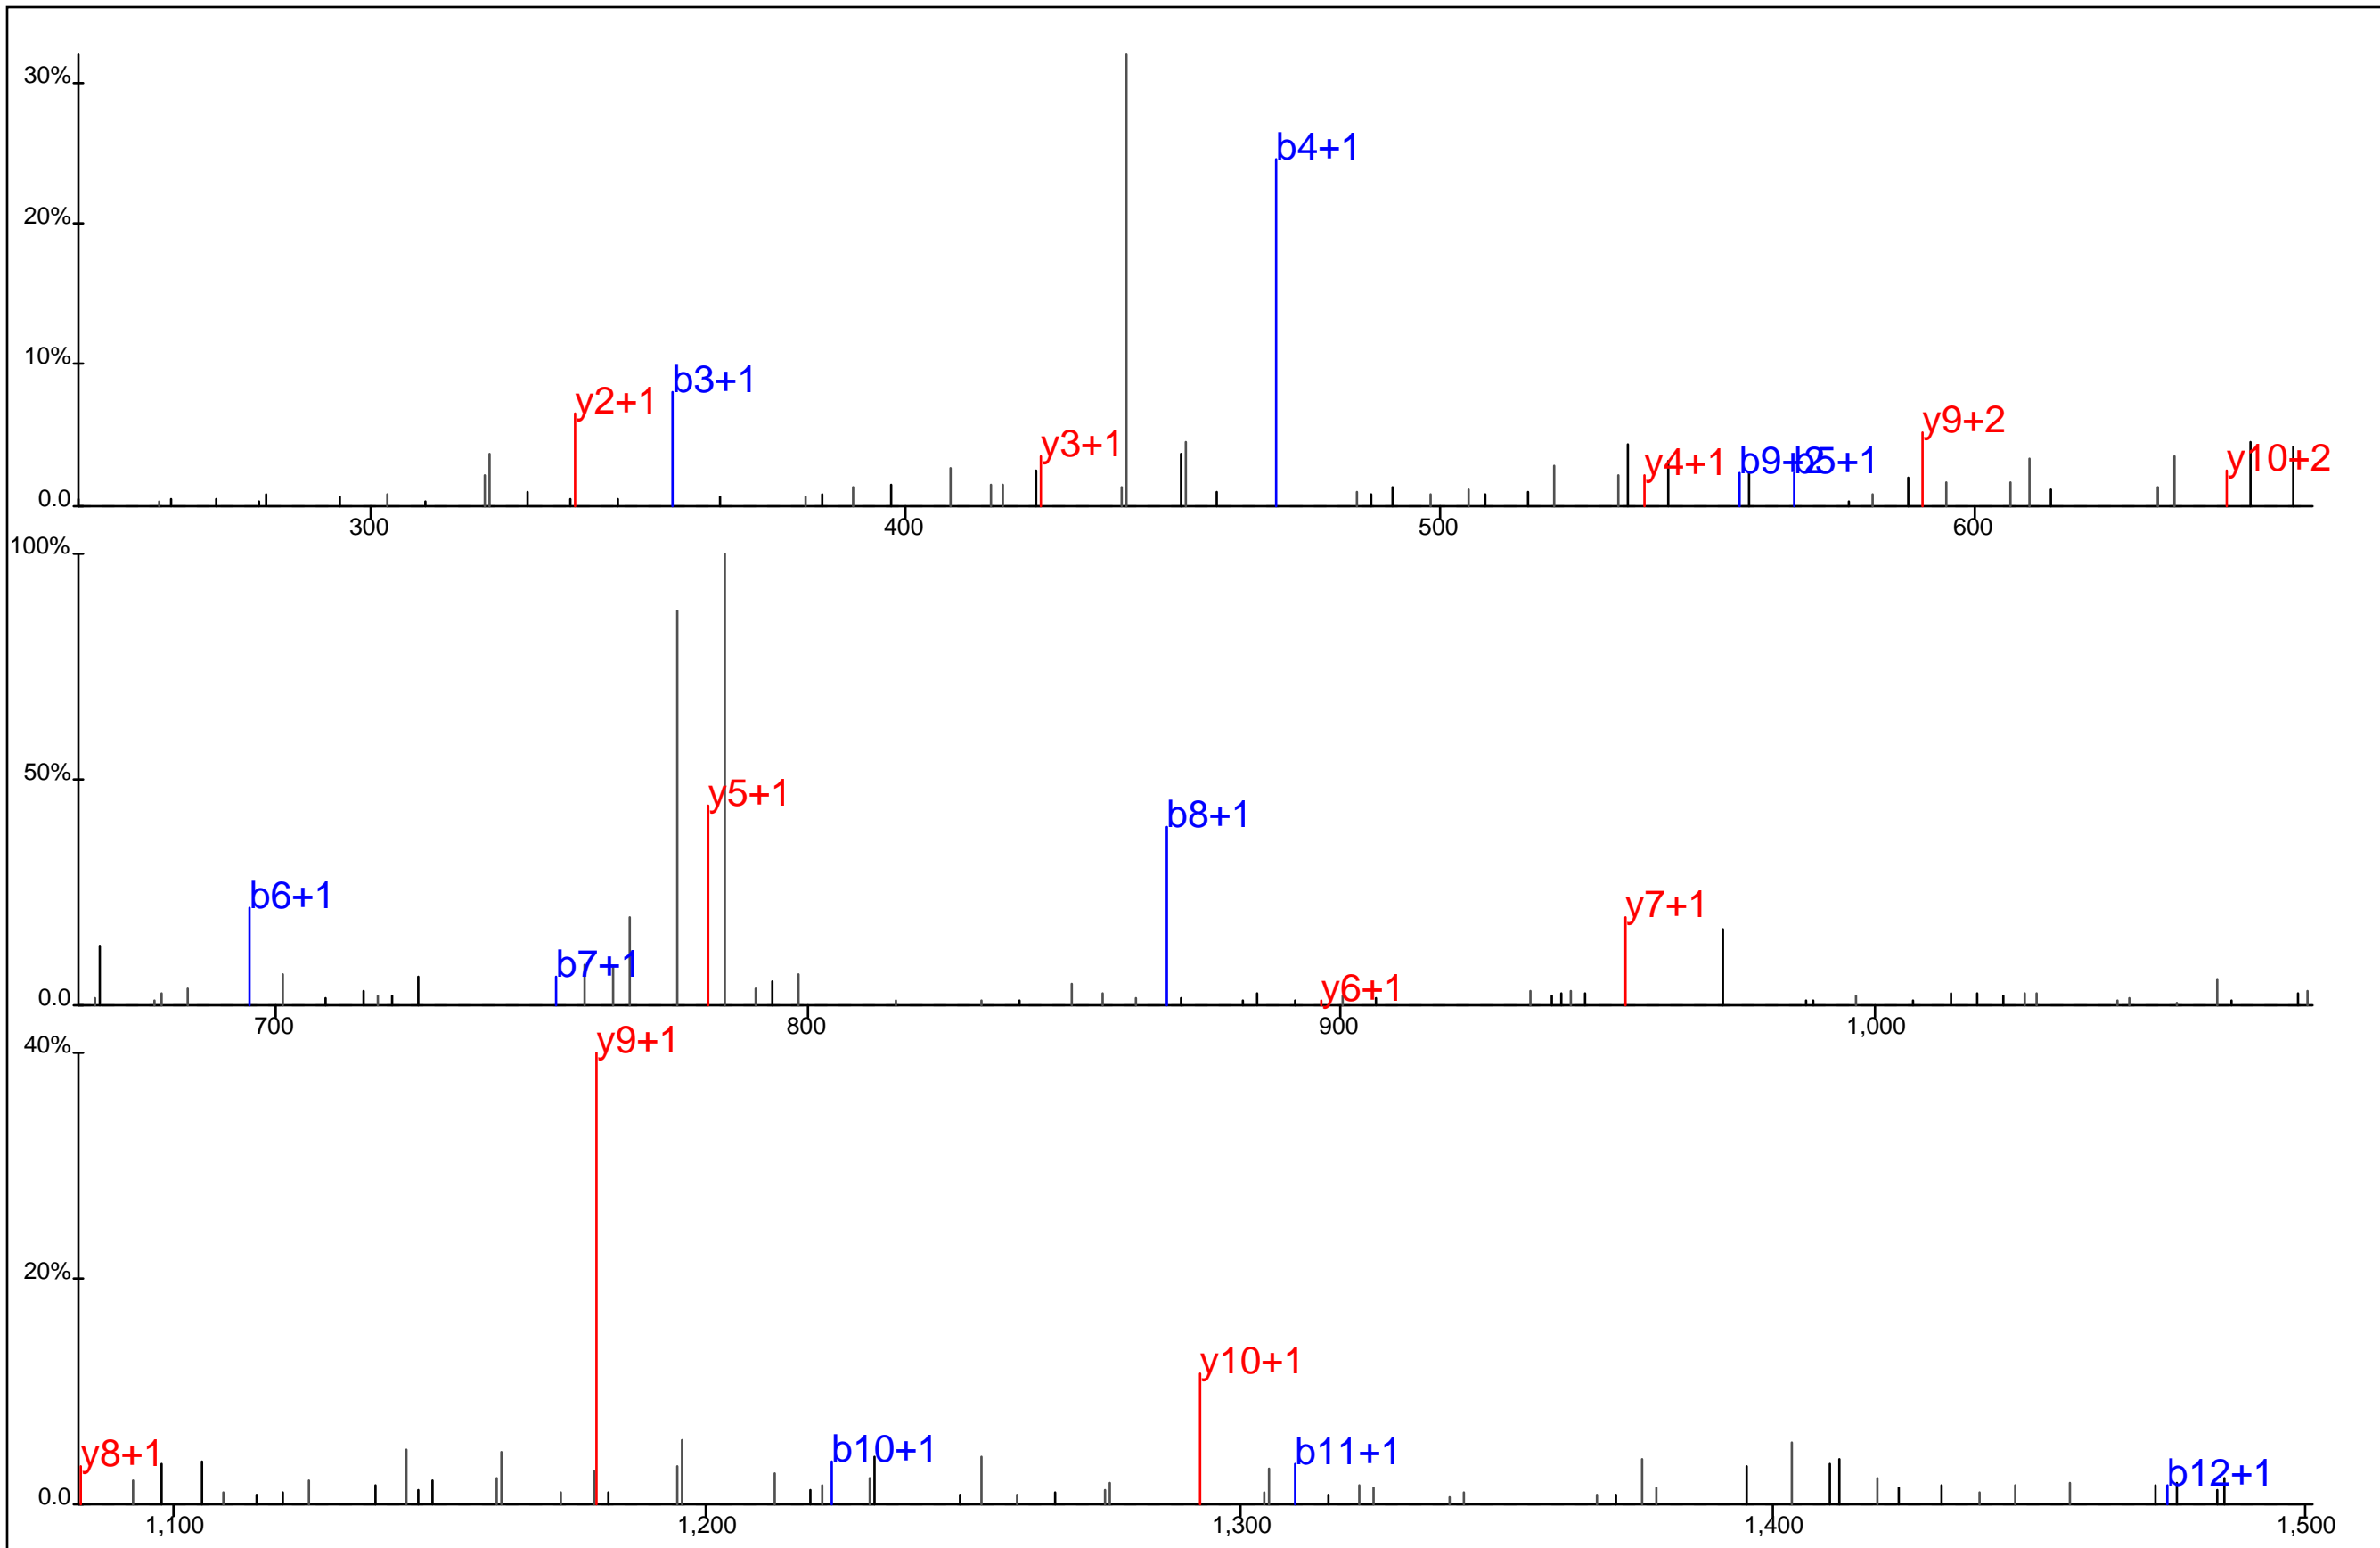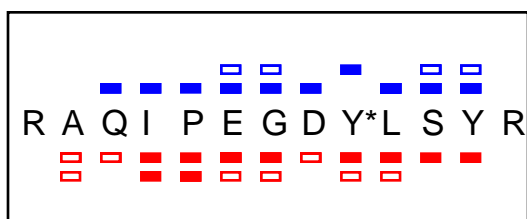

Protein Name: Erbin  
 gi Accession: 0  
 Precursor Mass: 824.3784+2  
 Delta Mass: 1.858 ppm  
 XCorr: 39.59

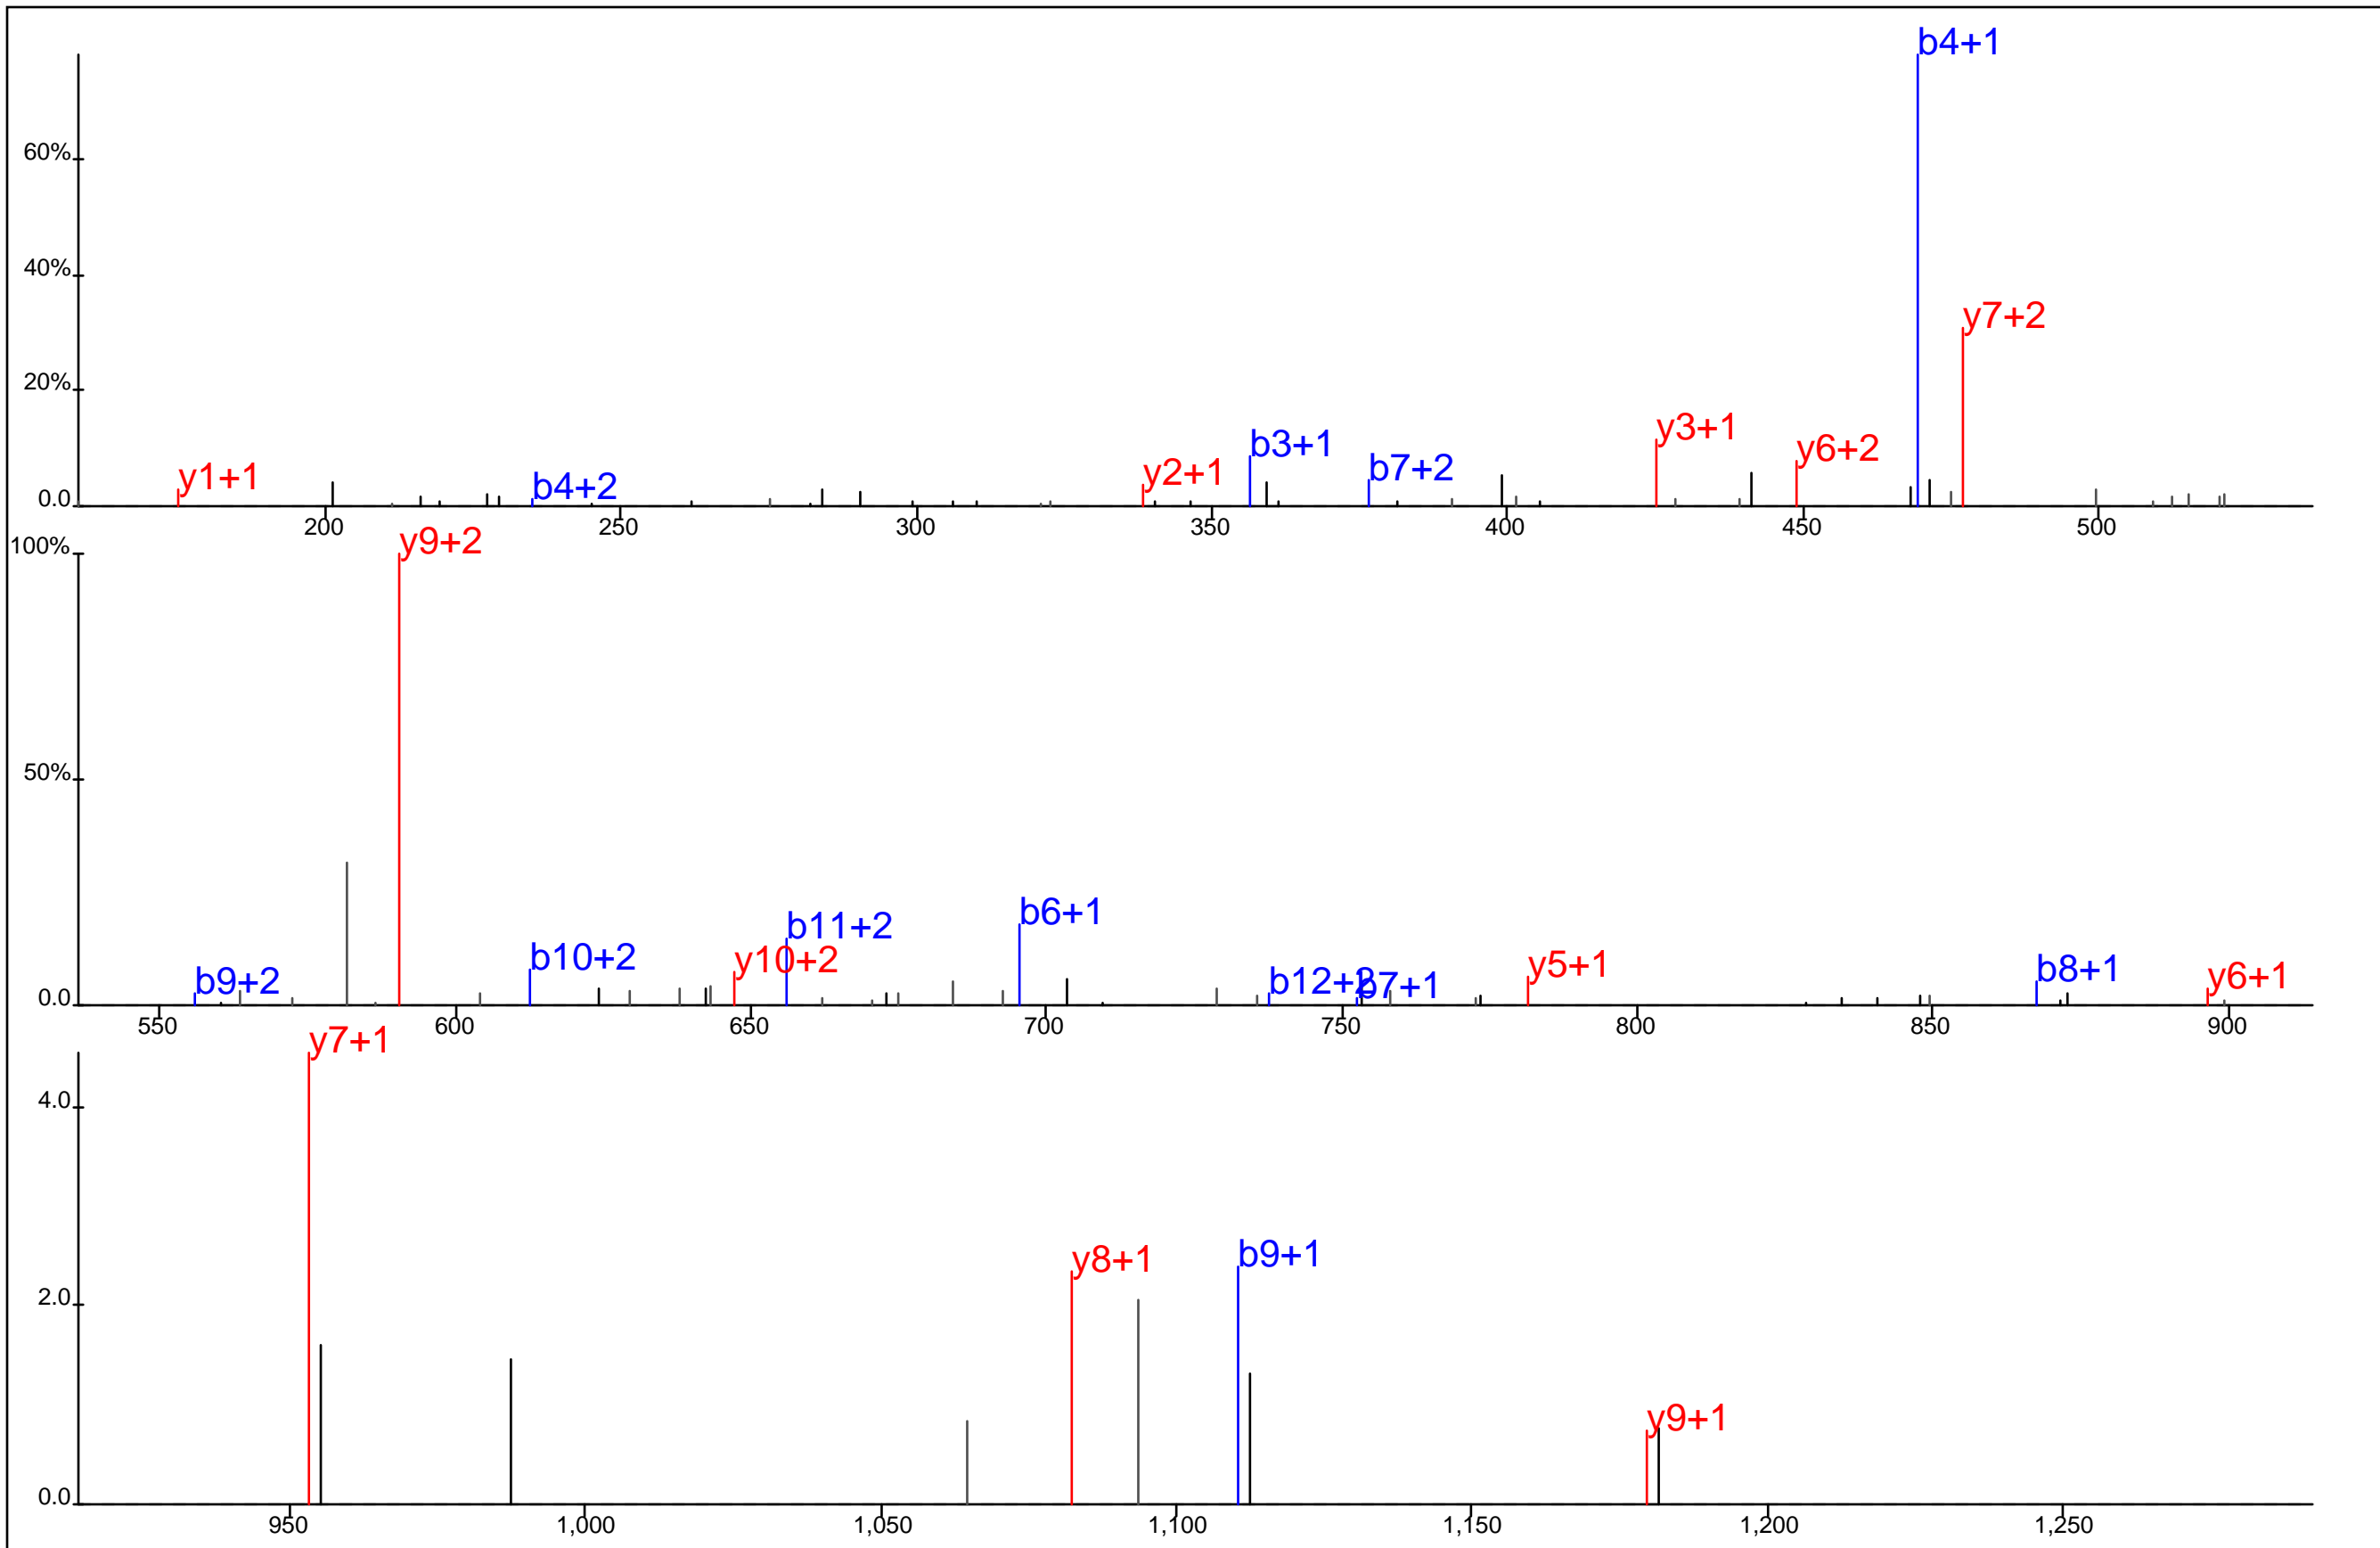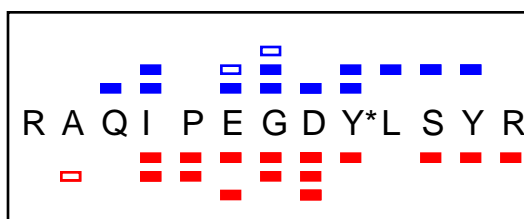

Protein Name: Erbin  
 gi Accession: 0  
 Precursor Mass: 549.9229+3  
 Delta Mass: 0.950 ppm  
 XCorr: 67.13

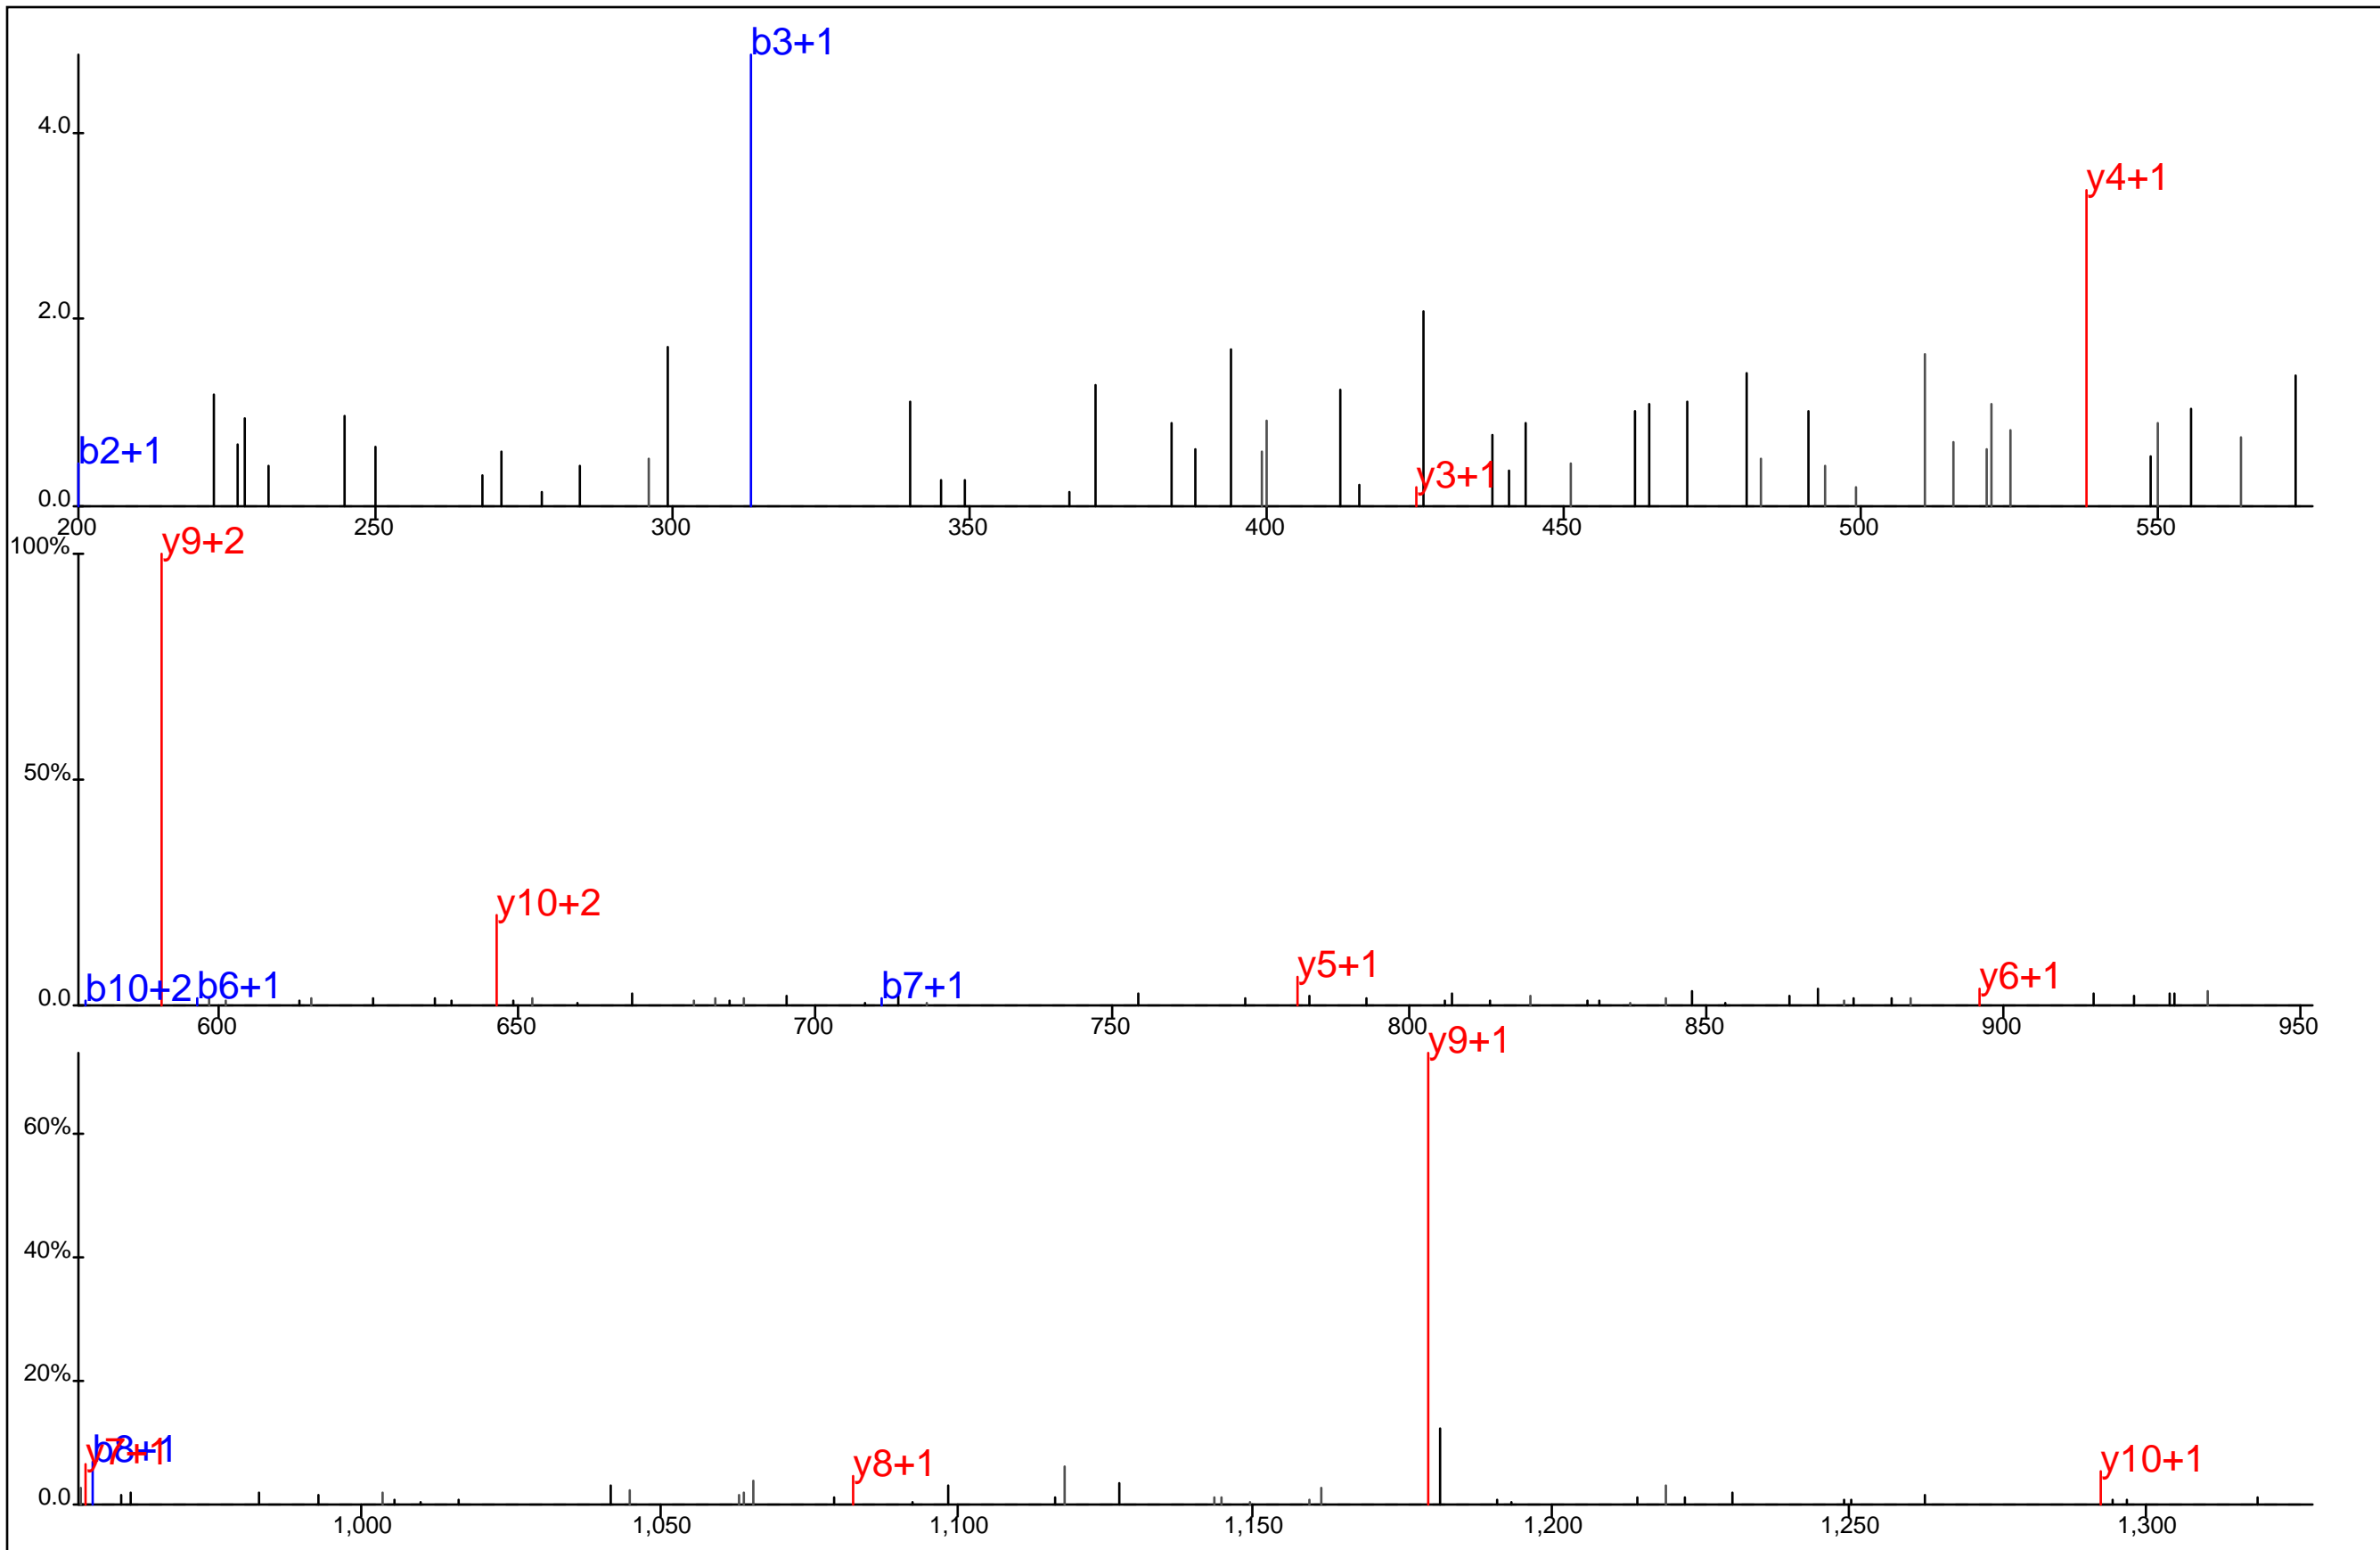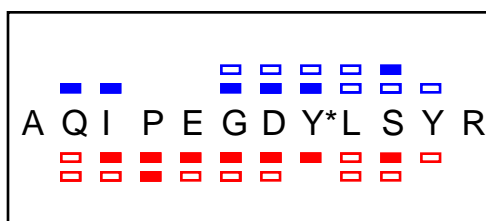

Protein Name: Erbin  
 gi Accession: 0  
 Precursor Mass: 746.3310+2  
 Delta Mass: 2.139 ppm  
 XCorr: 39.71





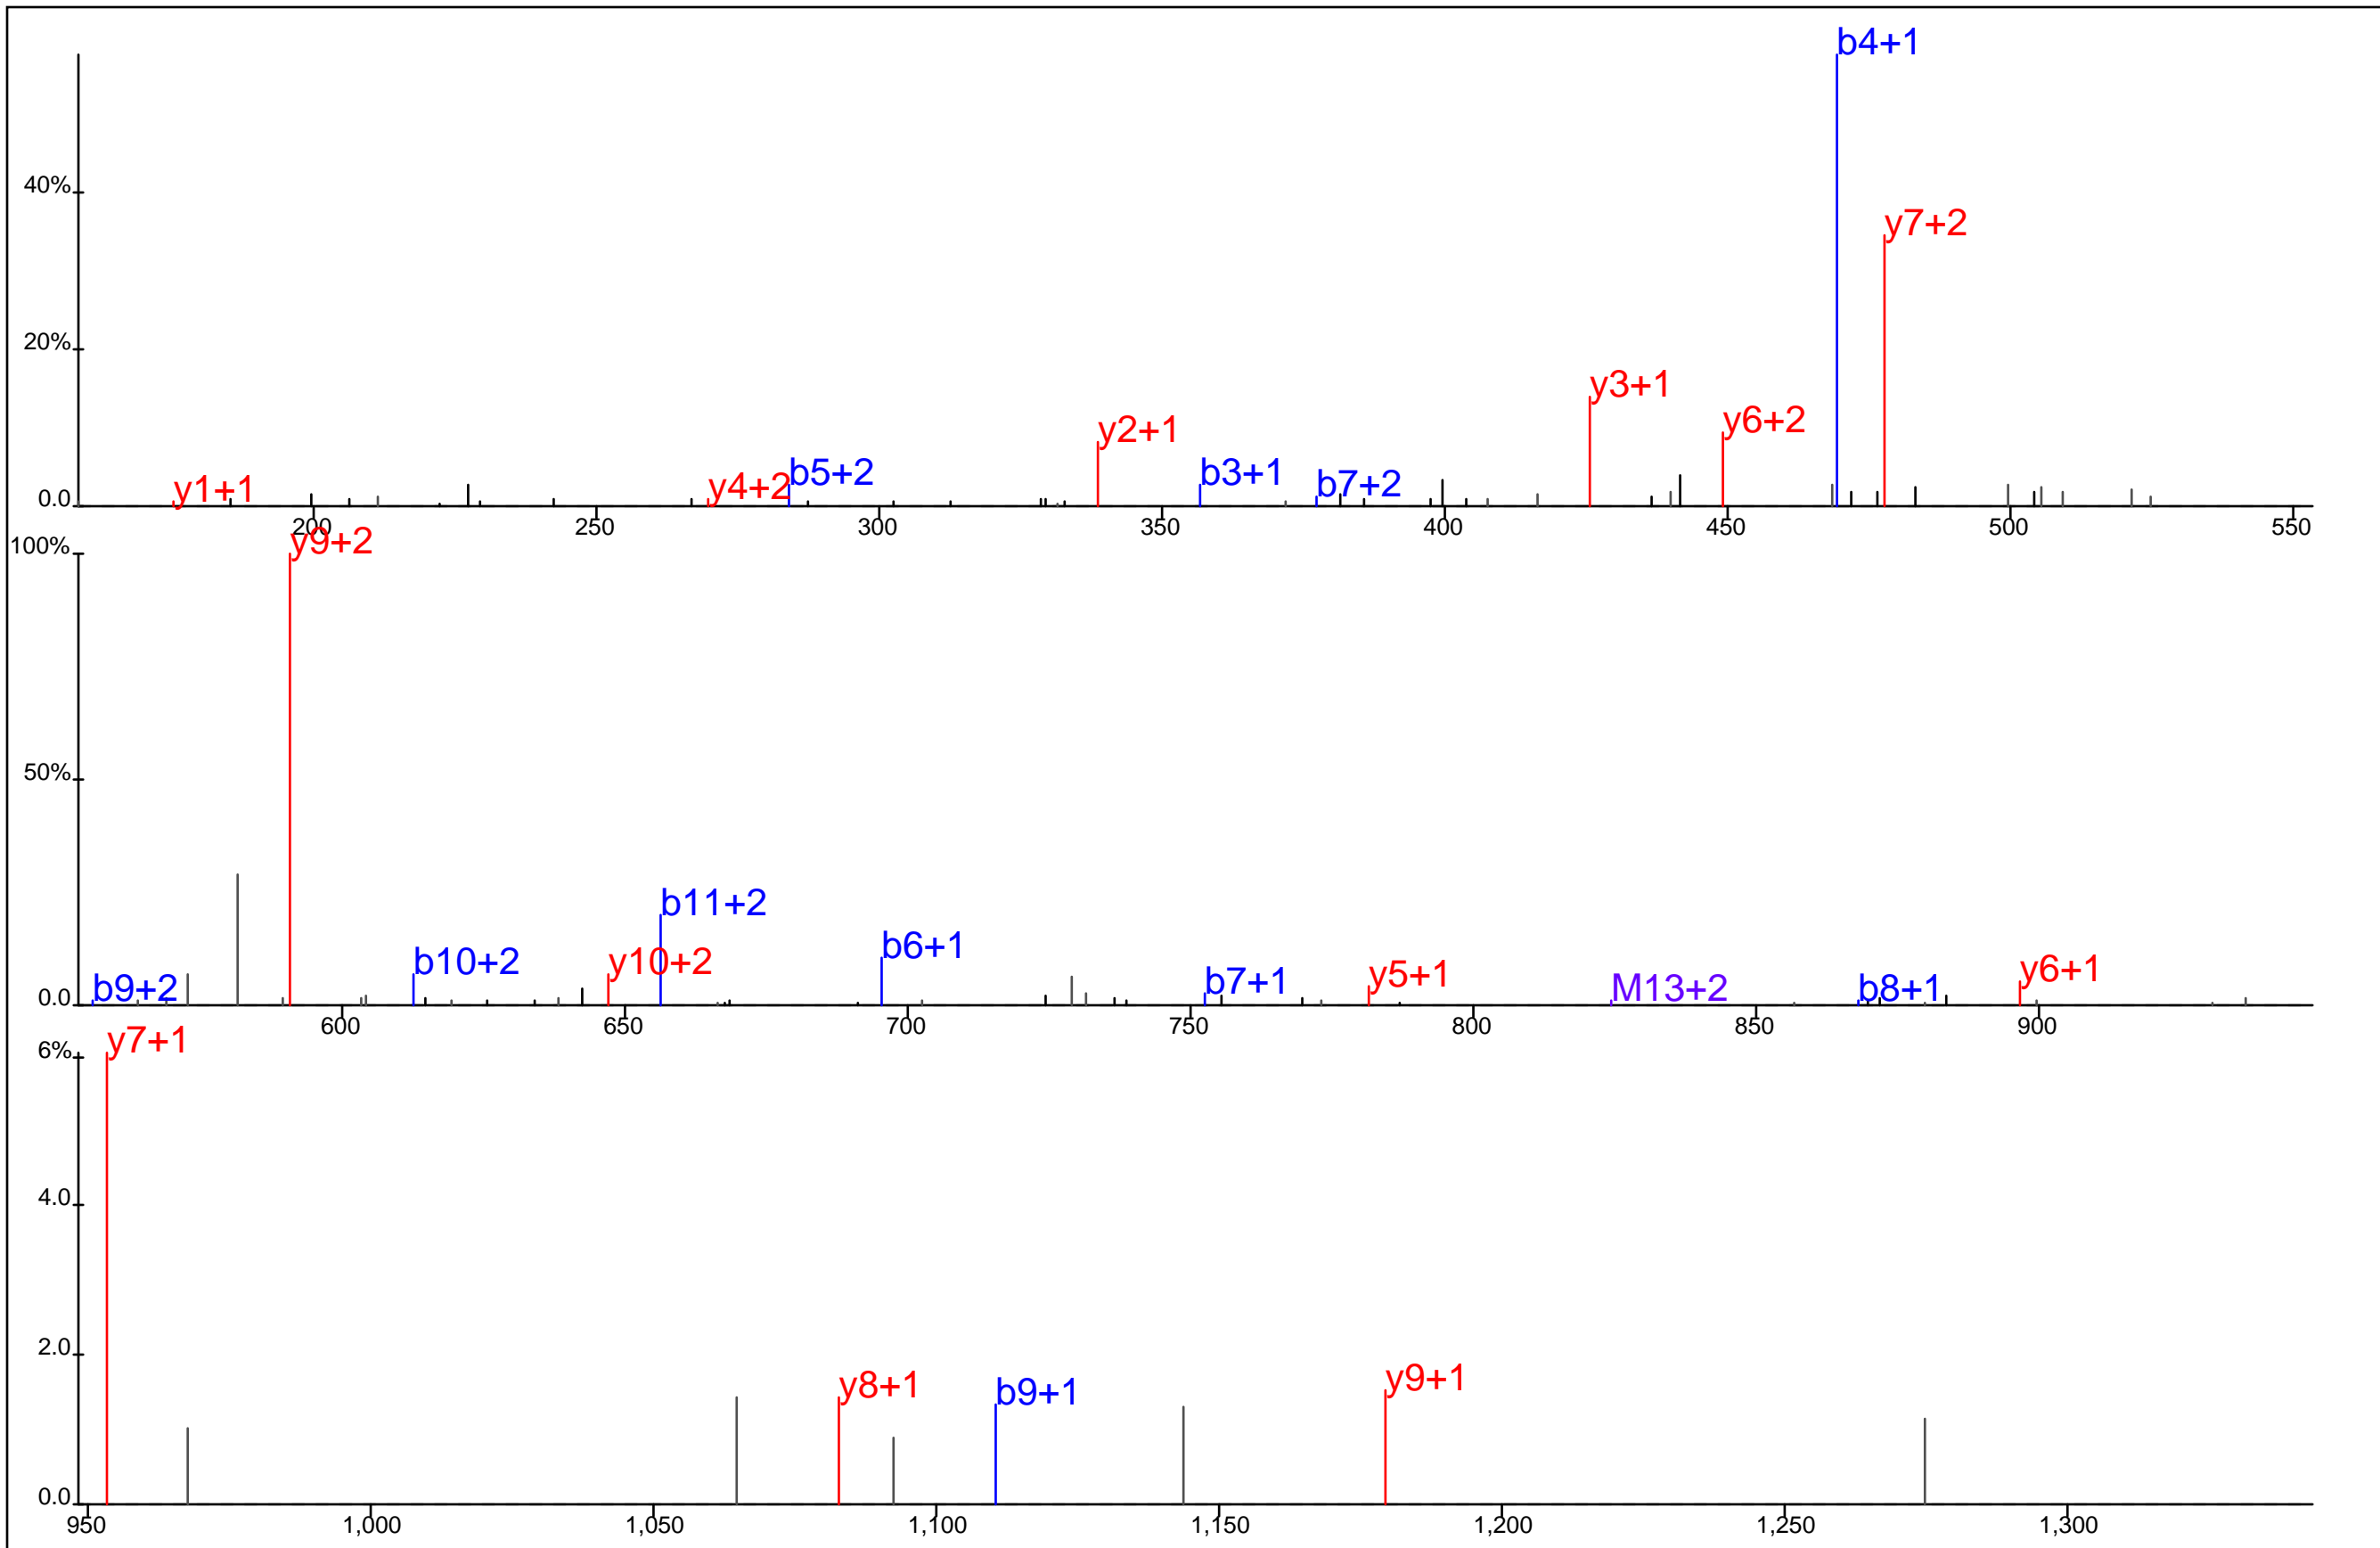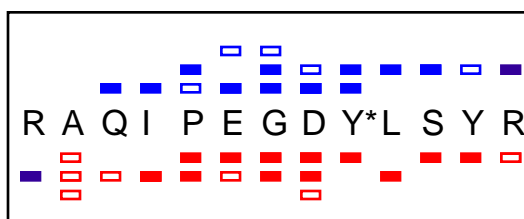

Protein Name: Erbin  
 gi Accession: 0  
 Precursor Mass: 549.9229+3  
 Delta Mass: 0.839 ppm  
 XCorr: 55.97

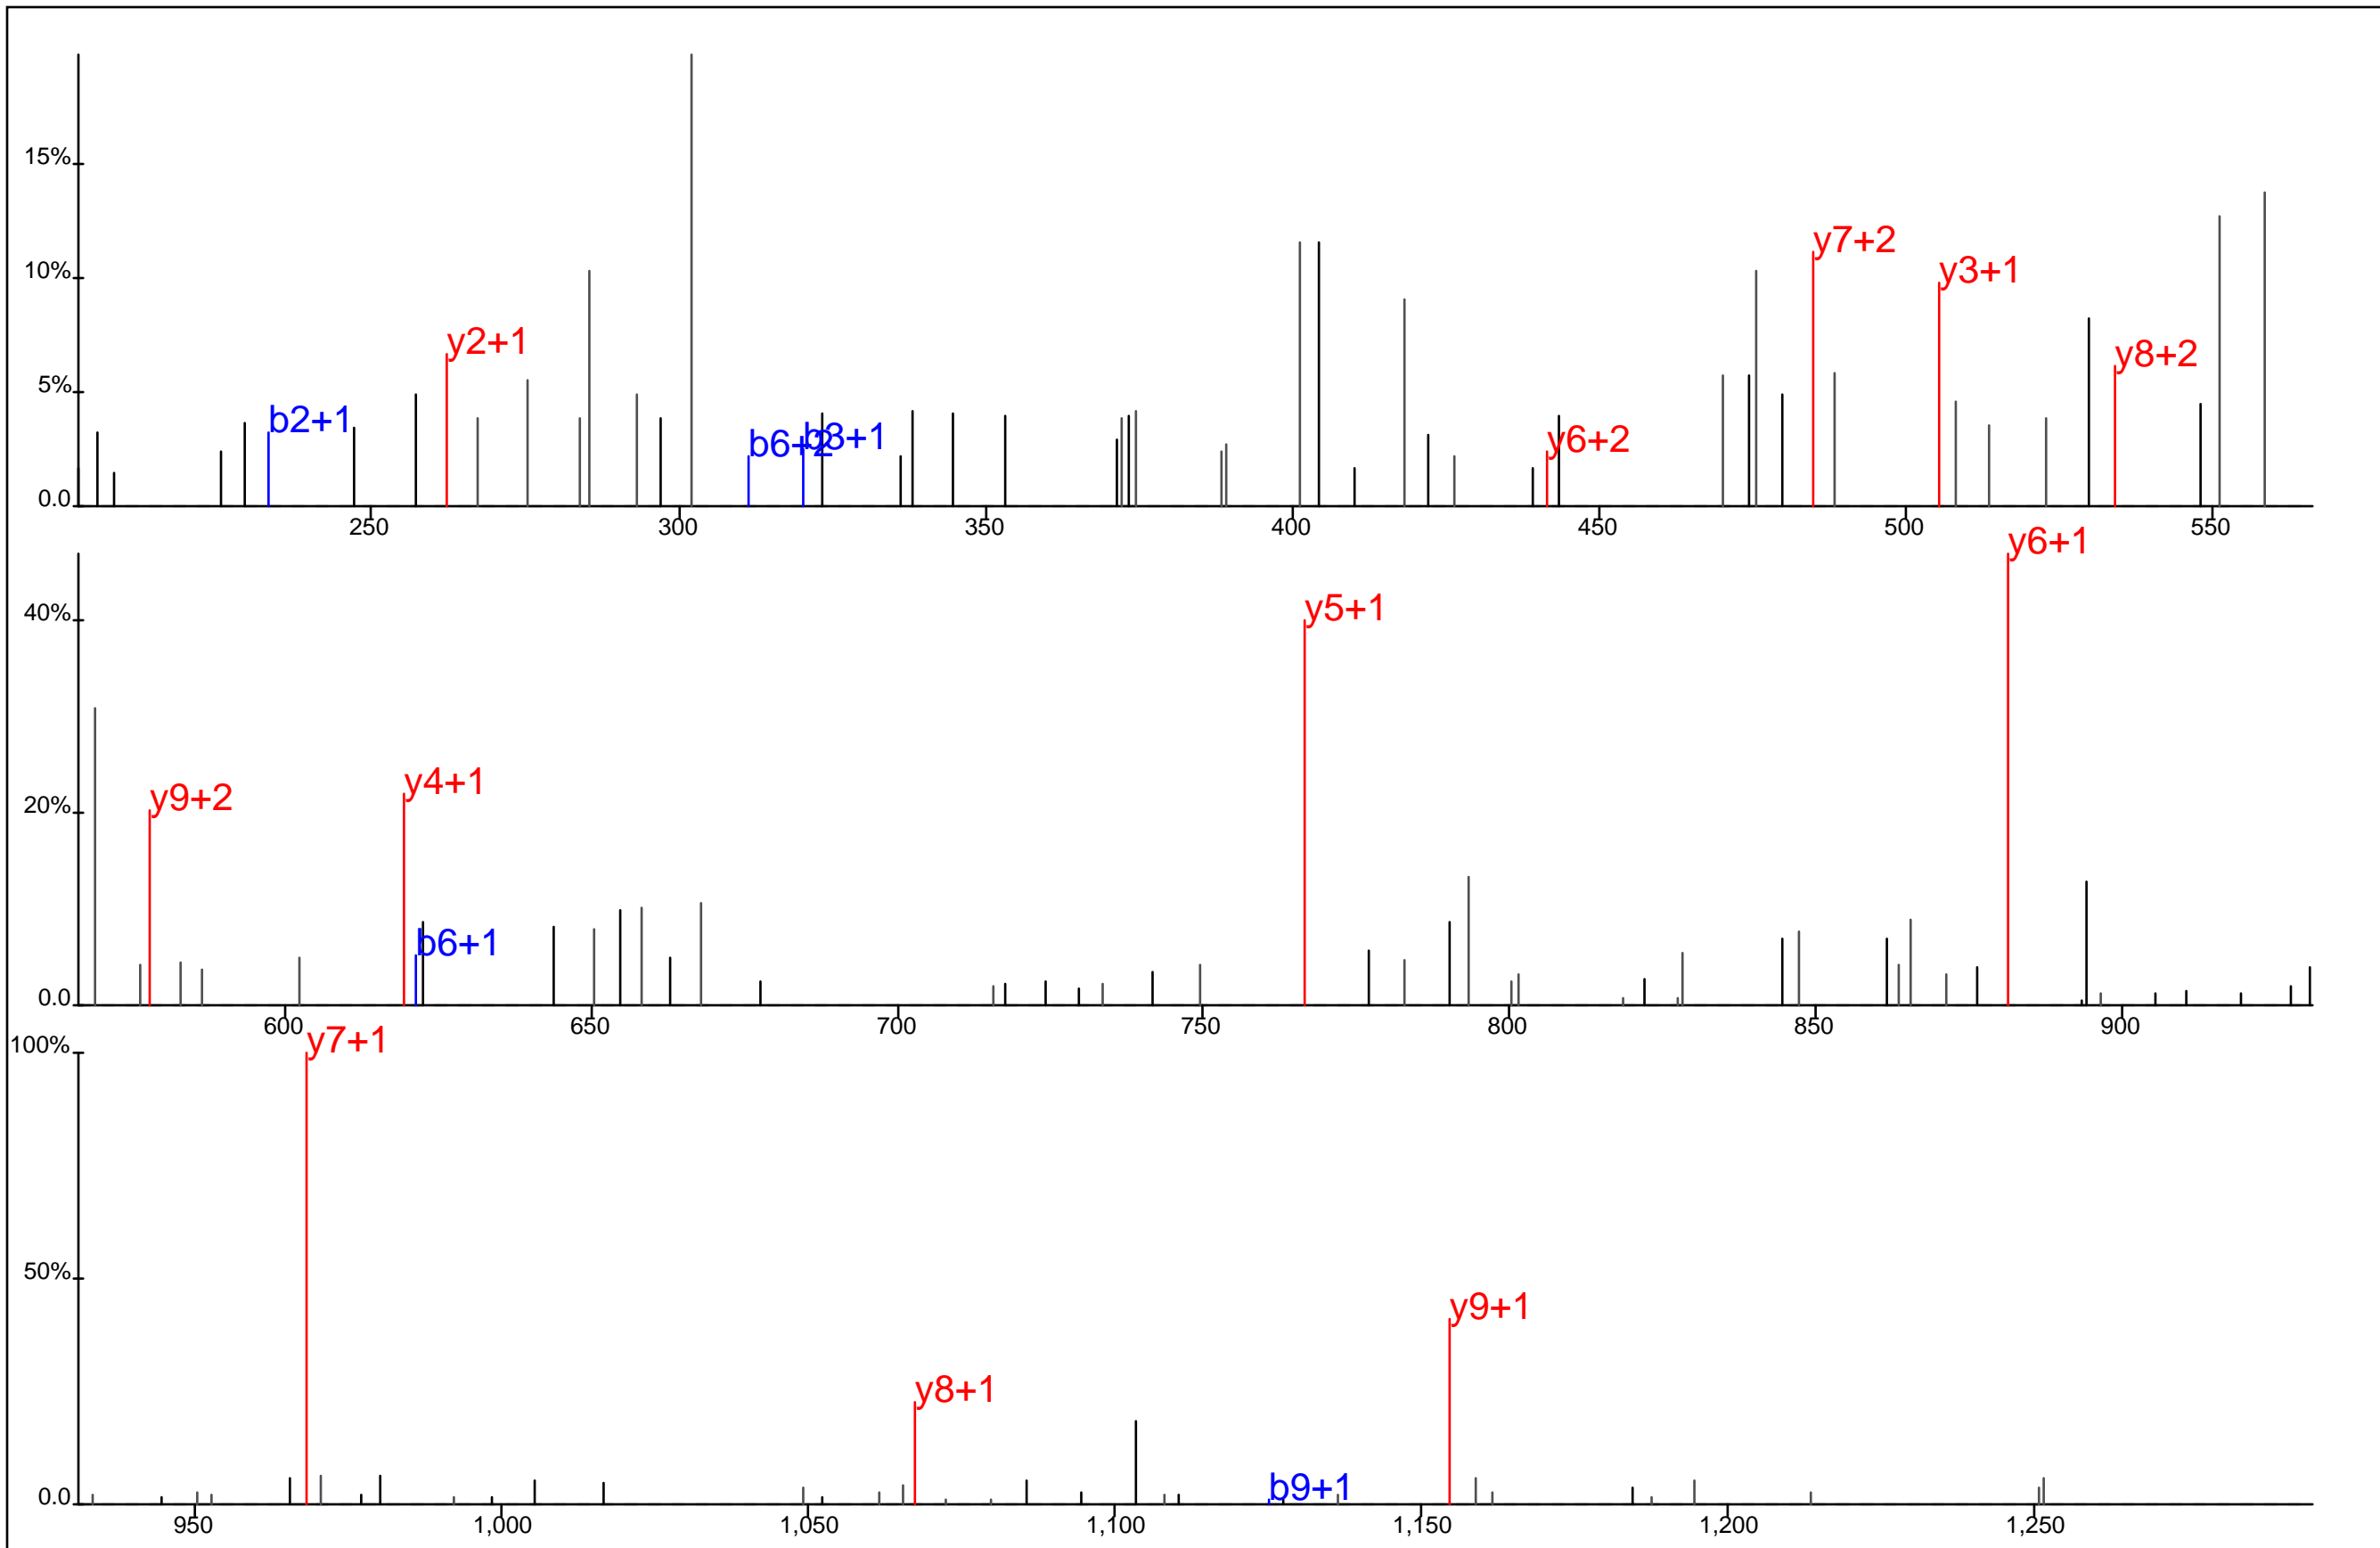

■ ■ ■ ■ ■ ■ ■ ■  
 T M S V S D F N Y\* S R  
■ ■ ■ ■ ■ ■ ■ ■

Protein Name: Erbin  
 gi Accession: 0  
 Precursor Mass: 693.7750+2  
 Delta Mass: 2.322 ppm  
 XCorr: 41.15



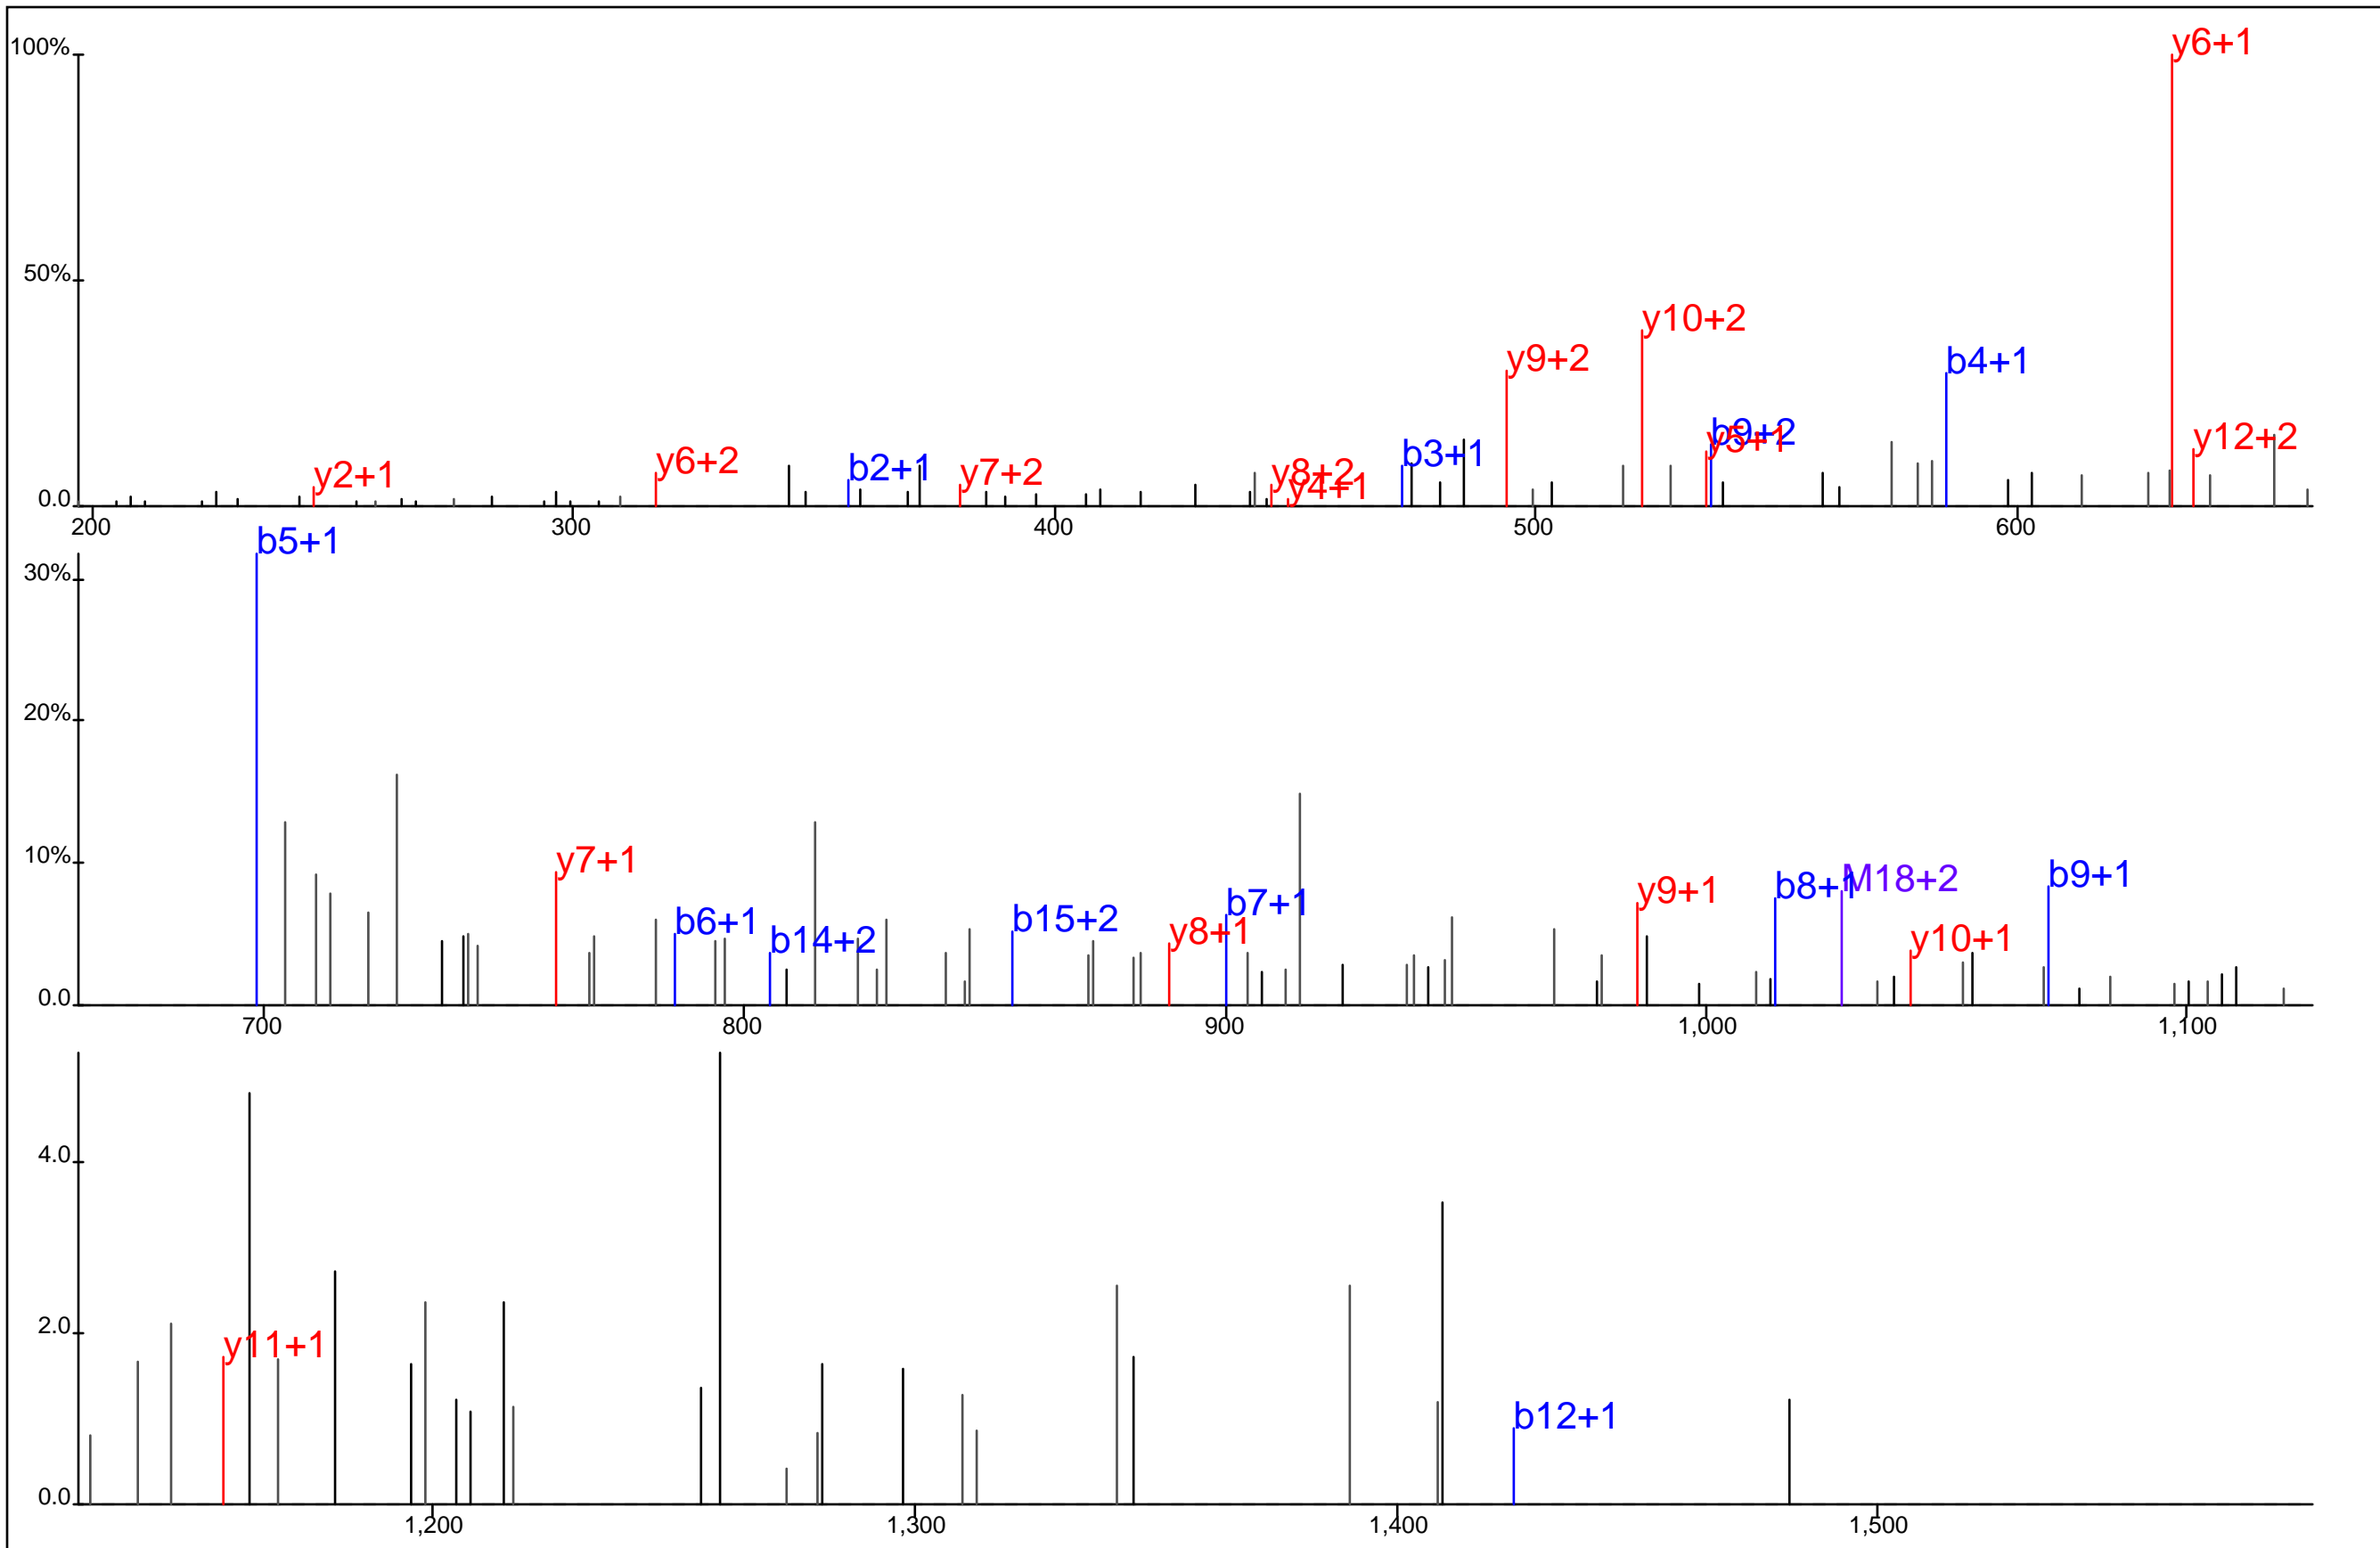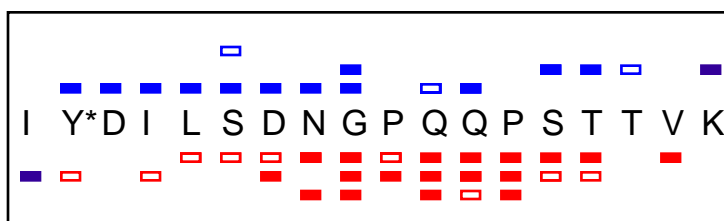

Protein Name: Erbin  
 gi Accession: 0  
 Precursor Mass: 685.9926+3  
 Delta Mass: 0.161 ppm  
 XCorr: 34.22





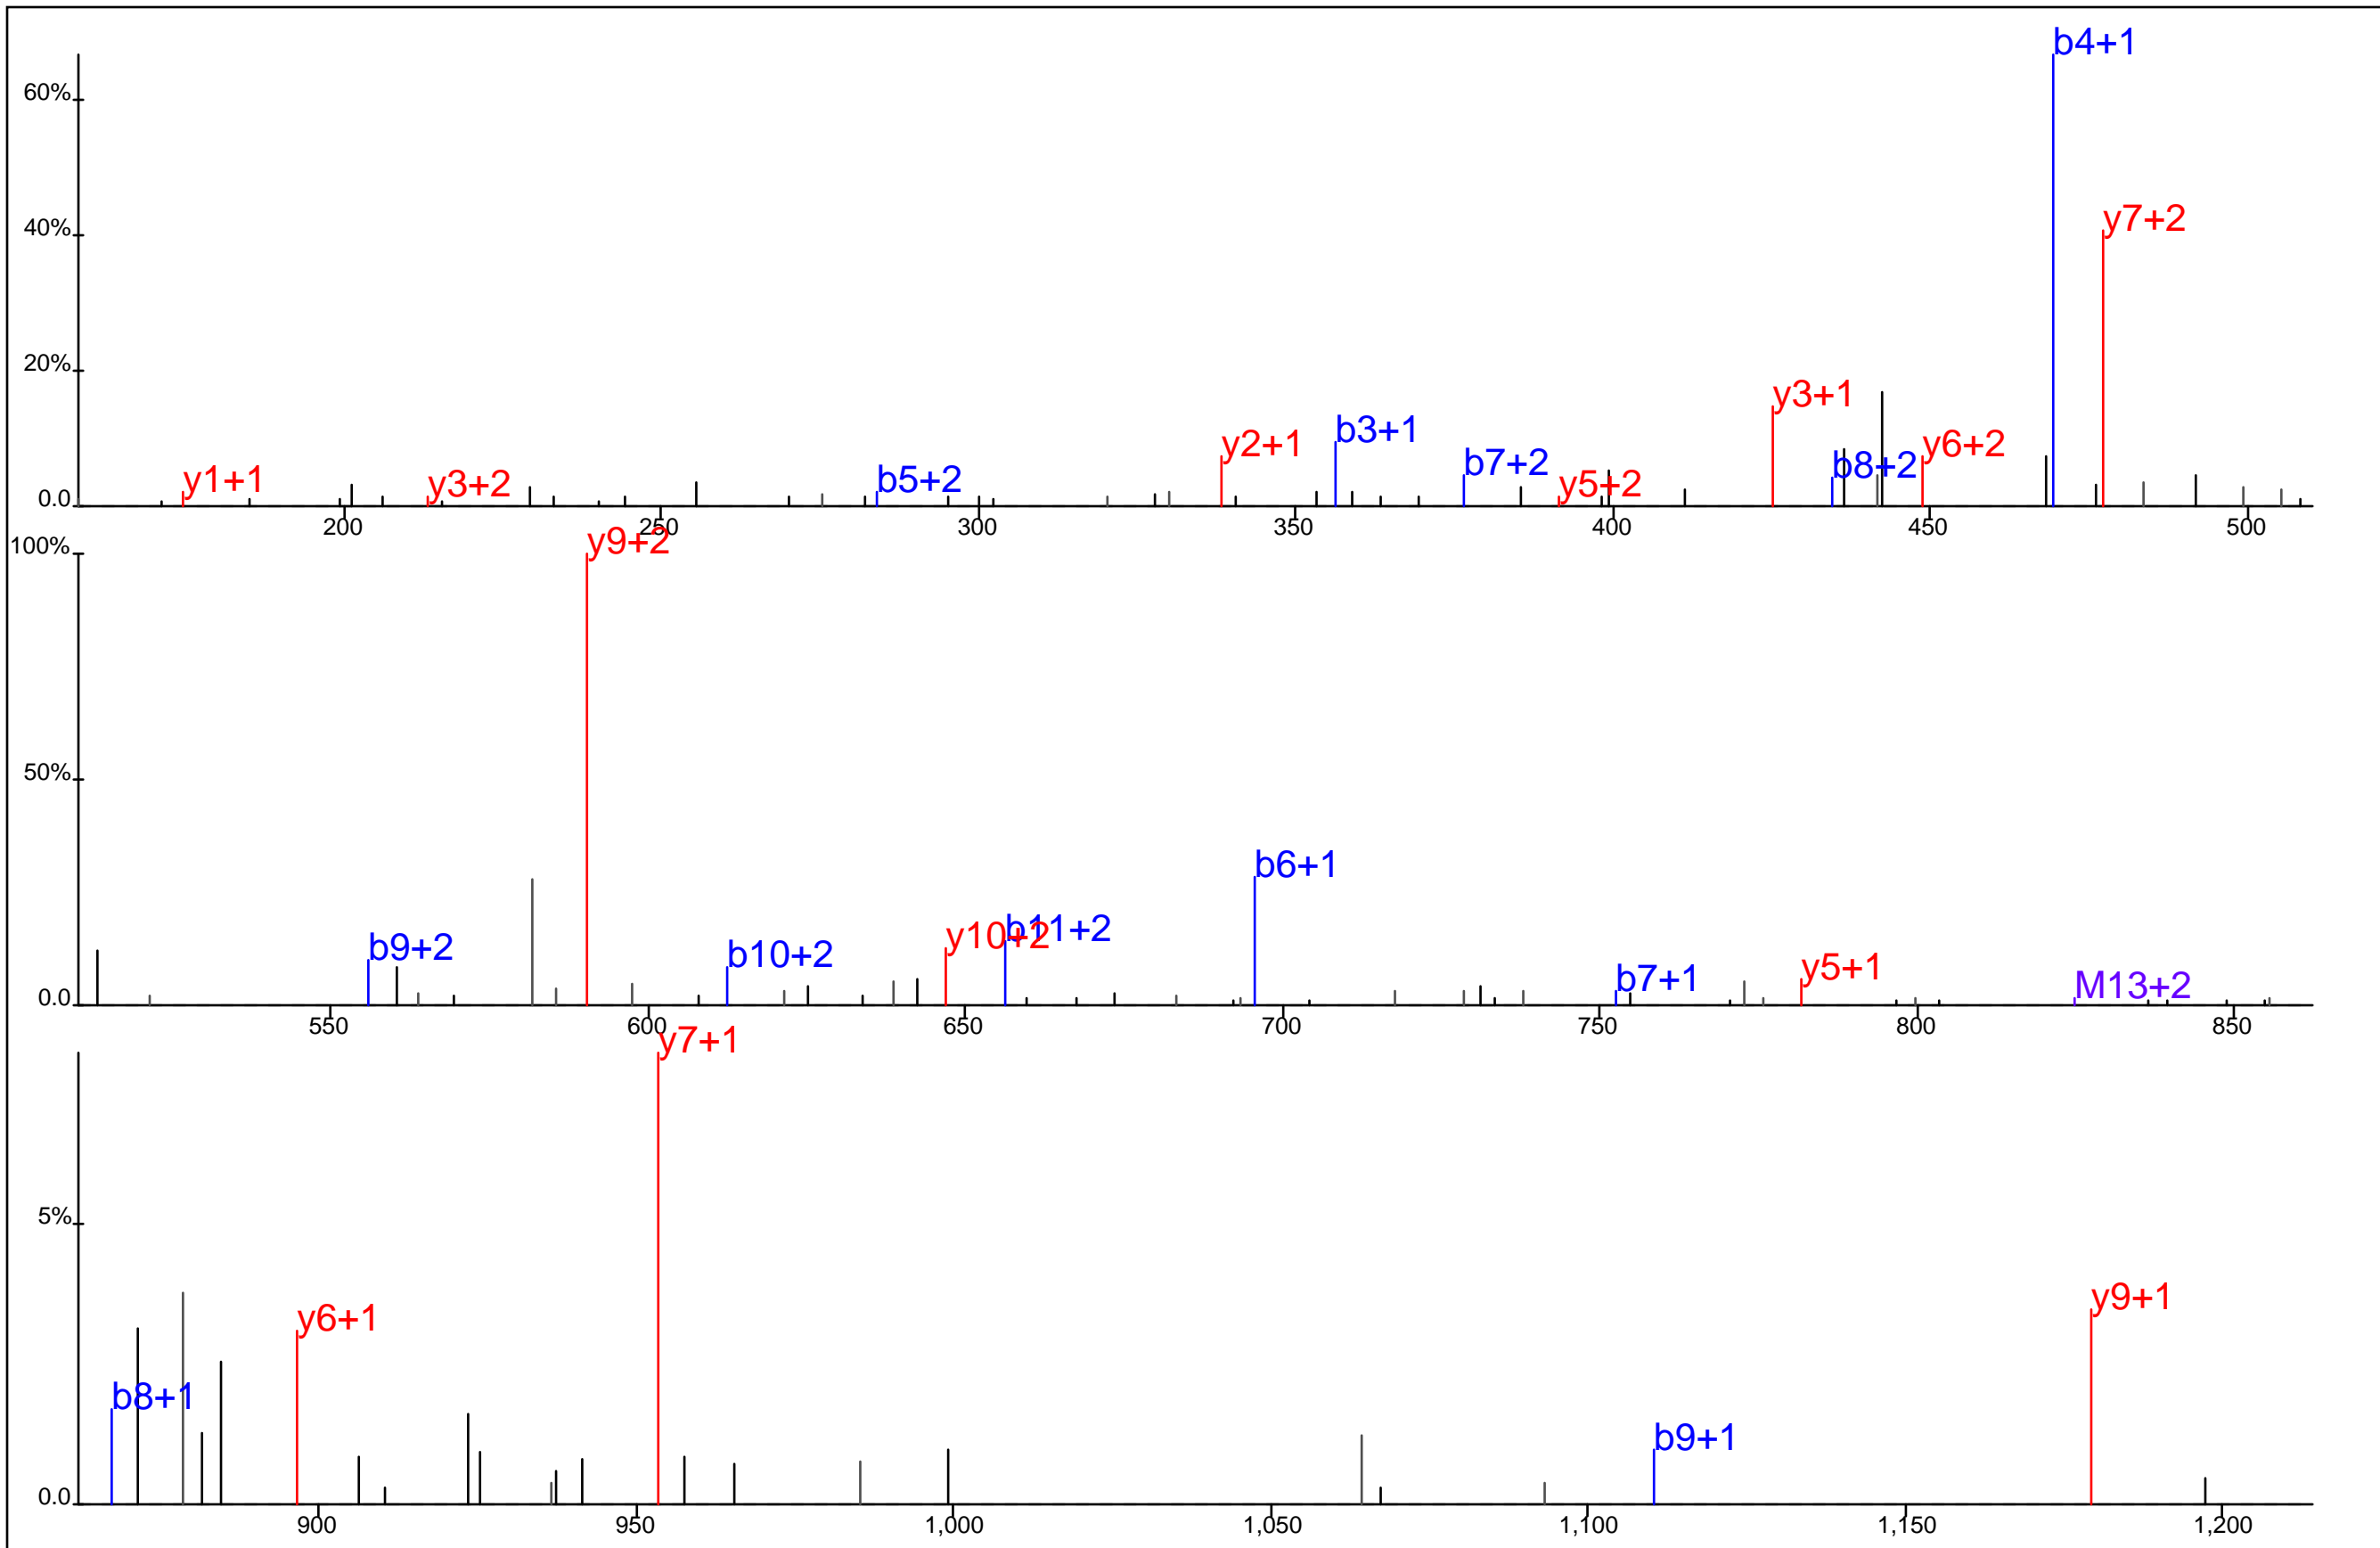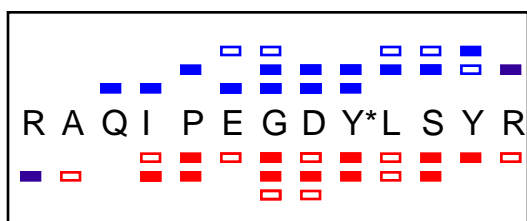

Protein Name: Erbin  
 gi Accession: 0  
 Precursor Mass: 549.9228+3  
 Delta Mass: 0.728 ppm  
 XCorr: 38.65





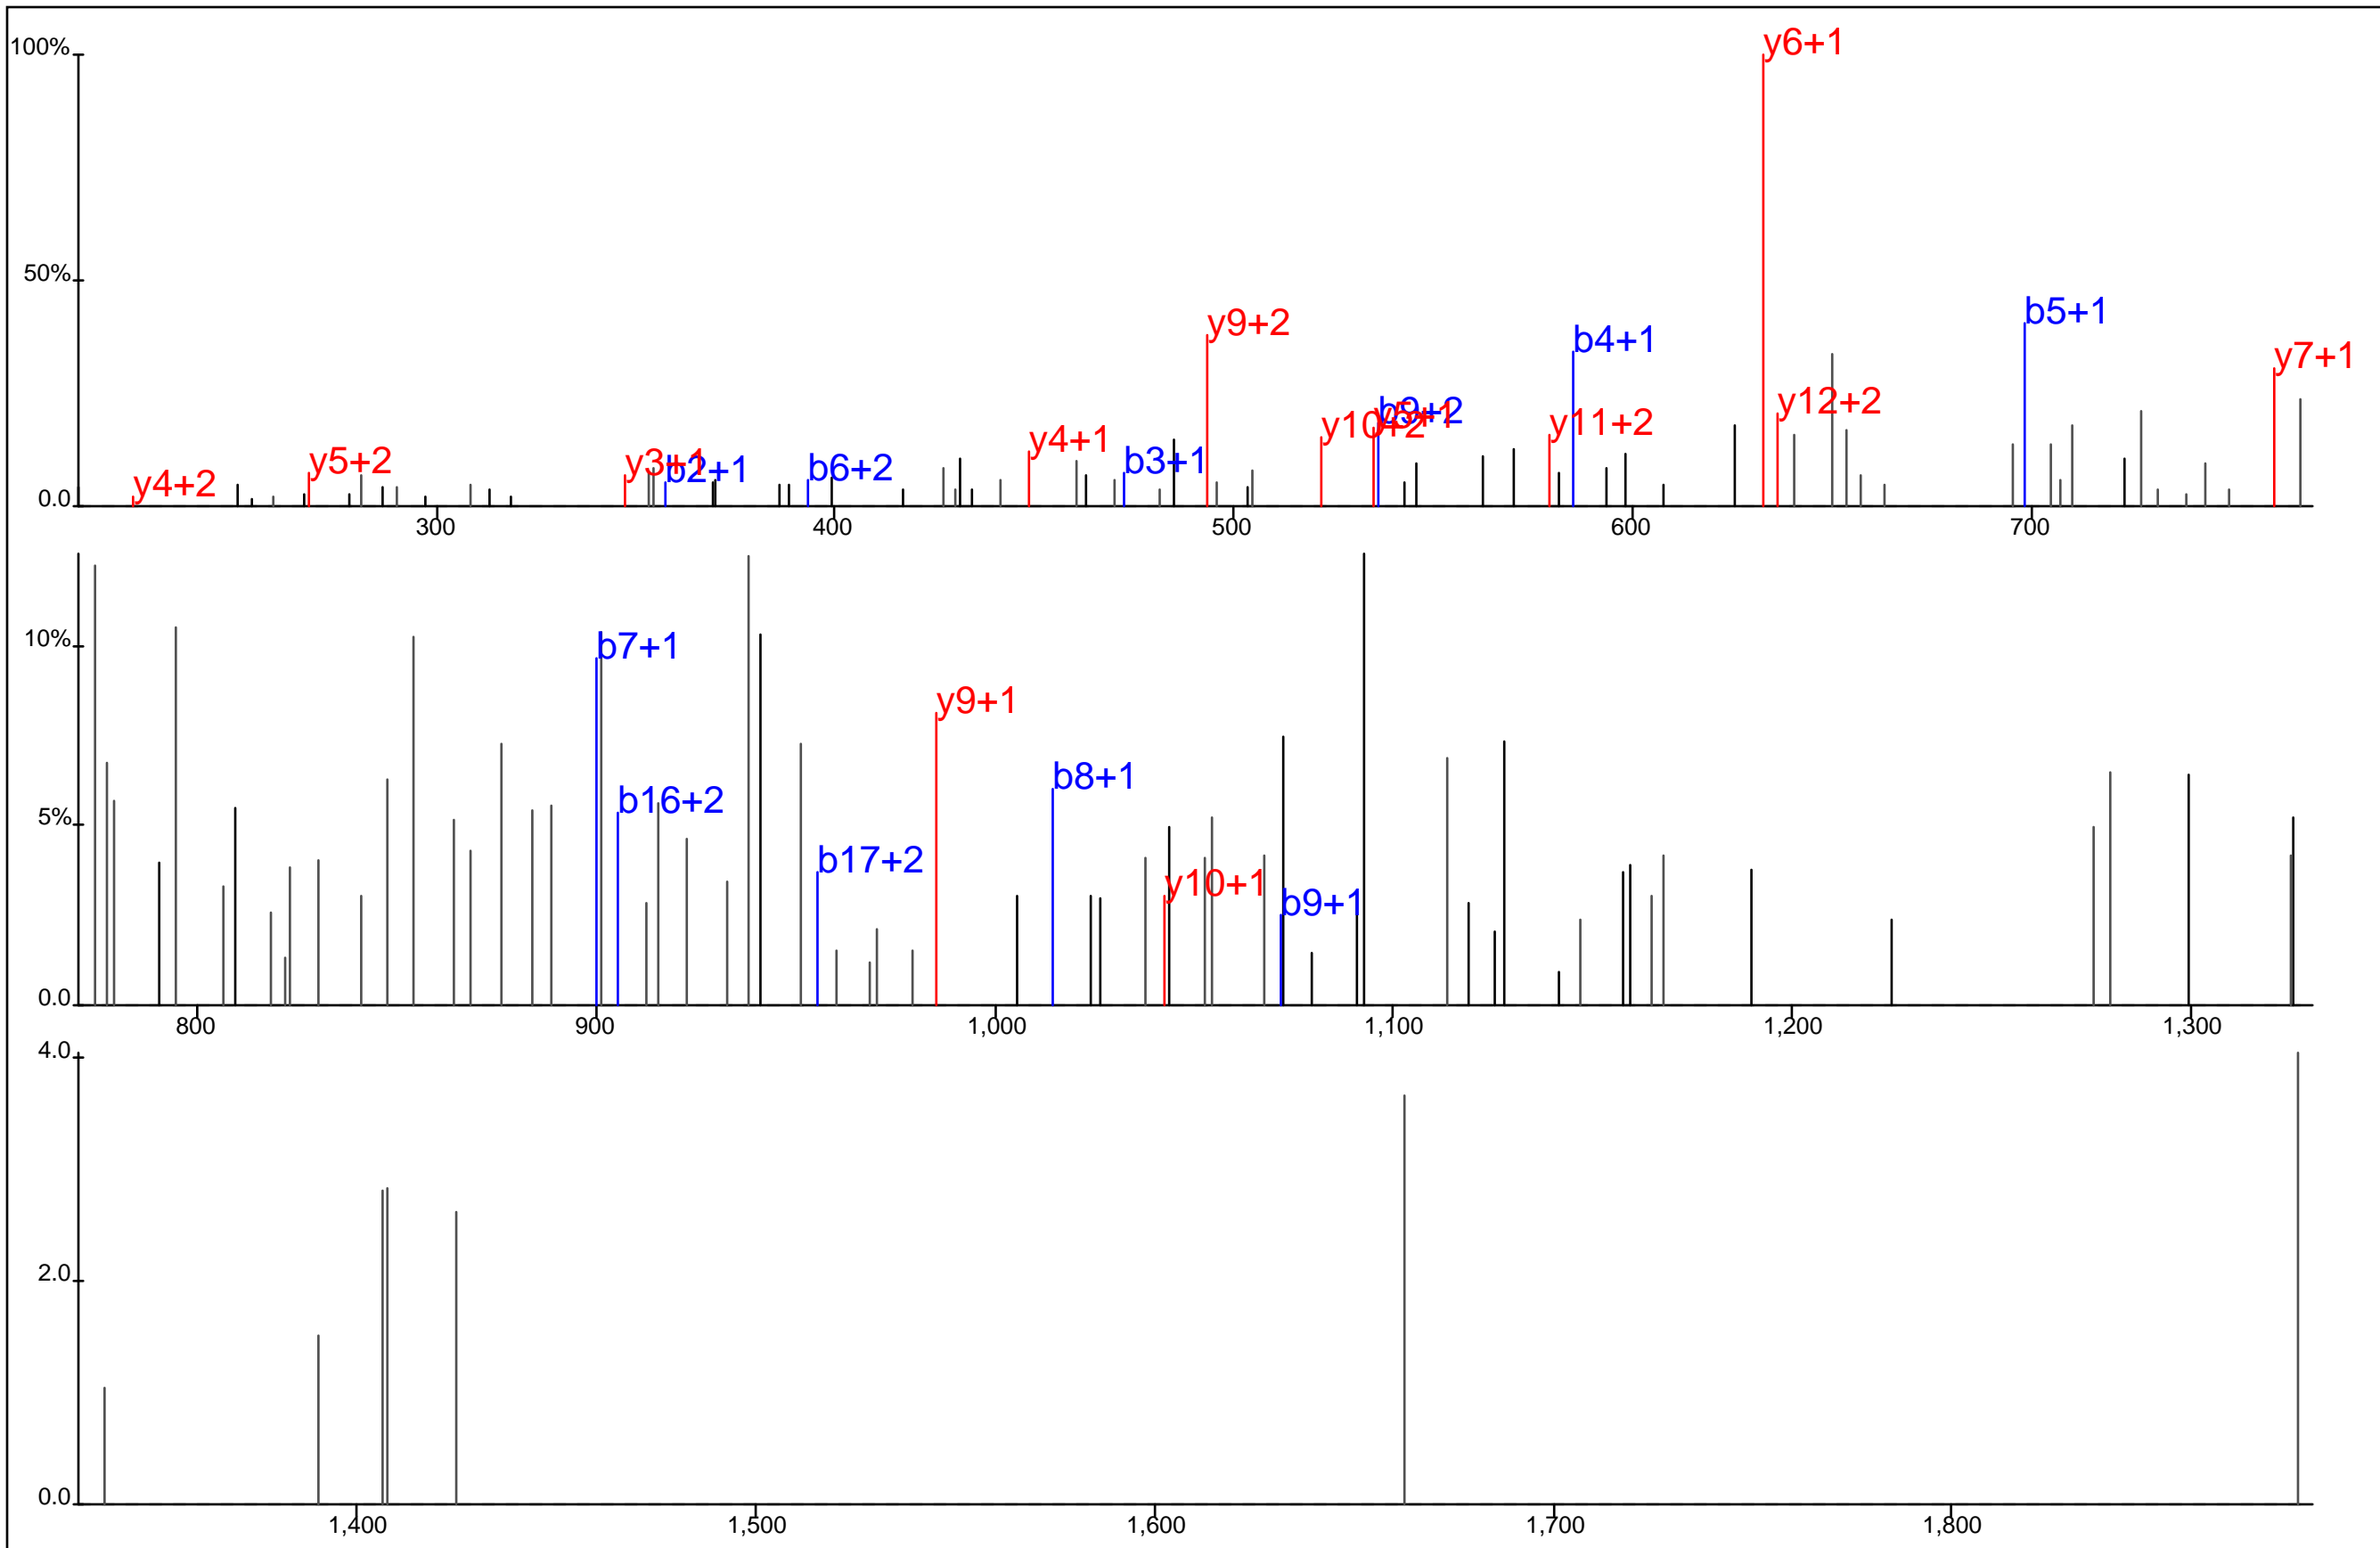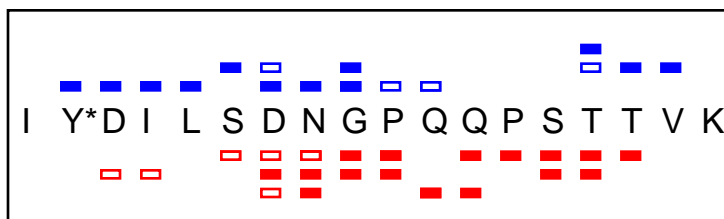

Protein Name: Erbin  
 gi Accession: 0  
 Precursor Mass: 685.9910+3  
 Delta Mass: 2.477 ppm  
 XCorr: 28.83

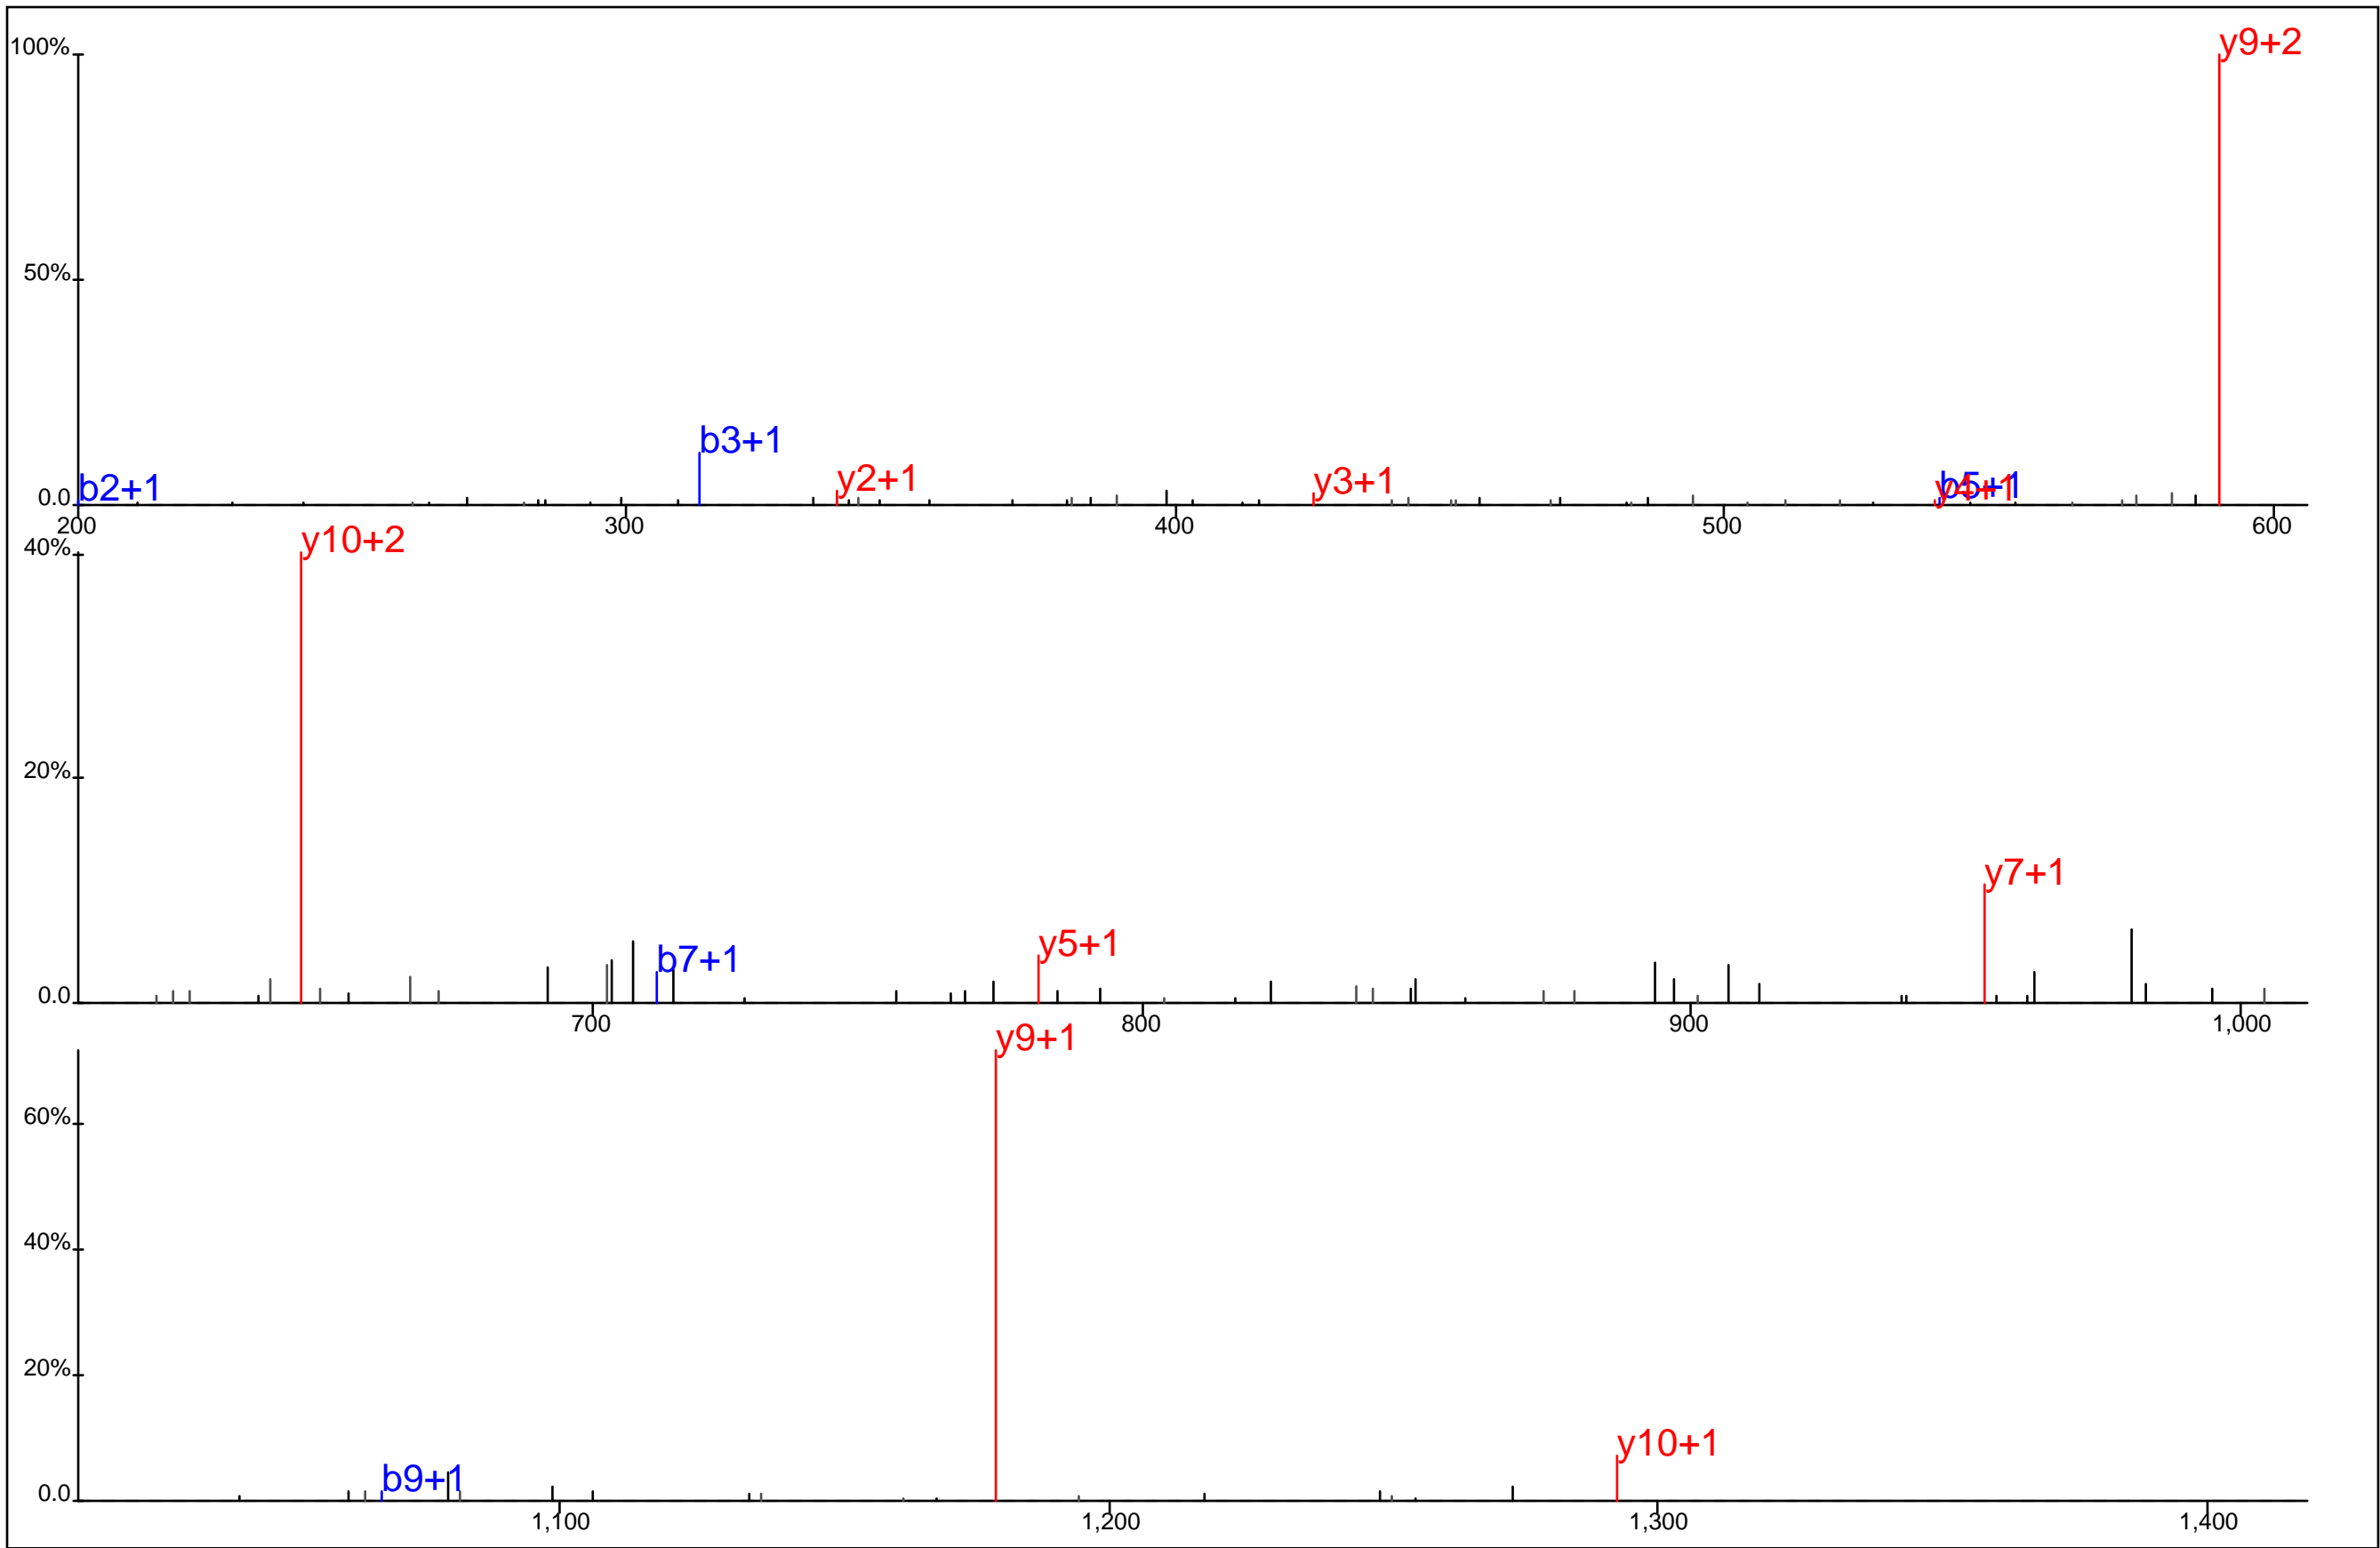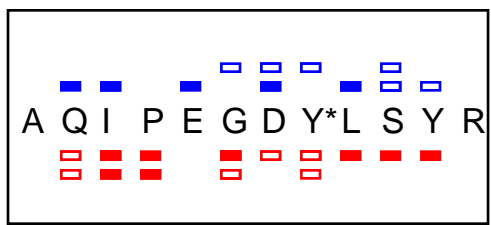

Protein Name: Erbin  
 gi Accession: 0  
 Precursor Mass: 746.3301+2  
 Delta Mass: 0.992 ppm  
 XCorr: 27.28

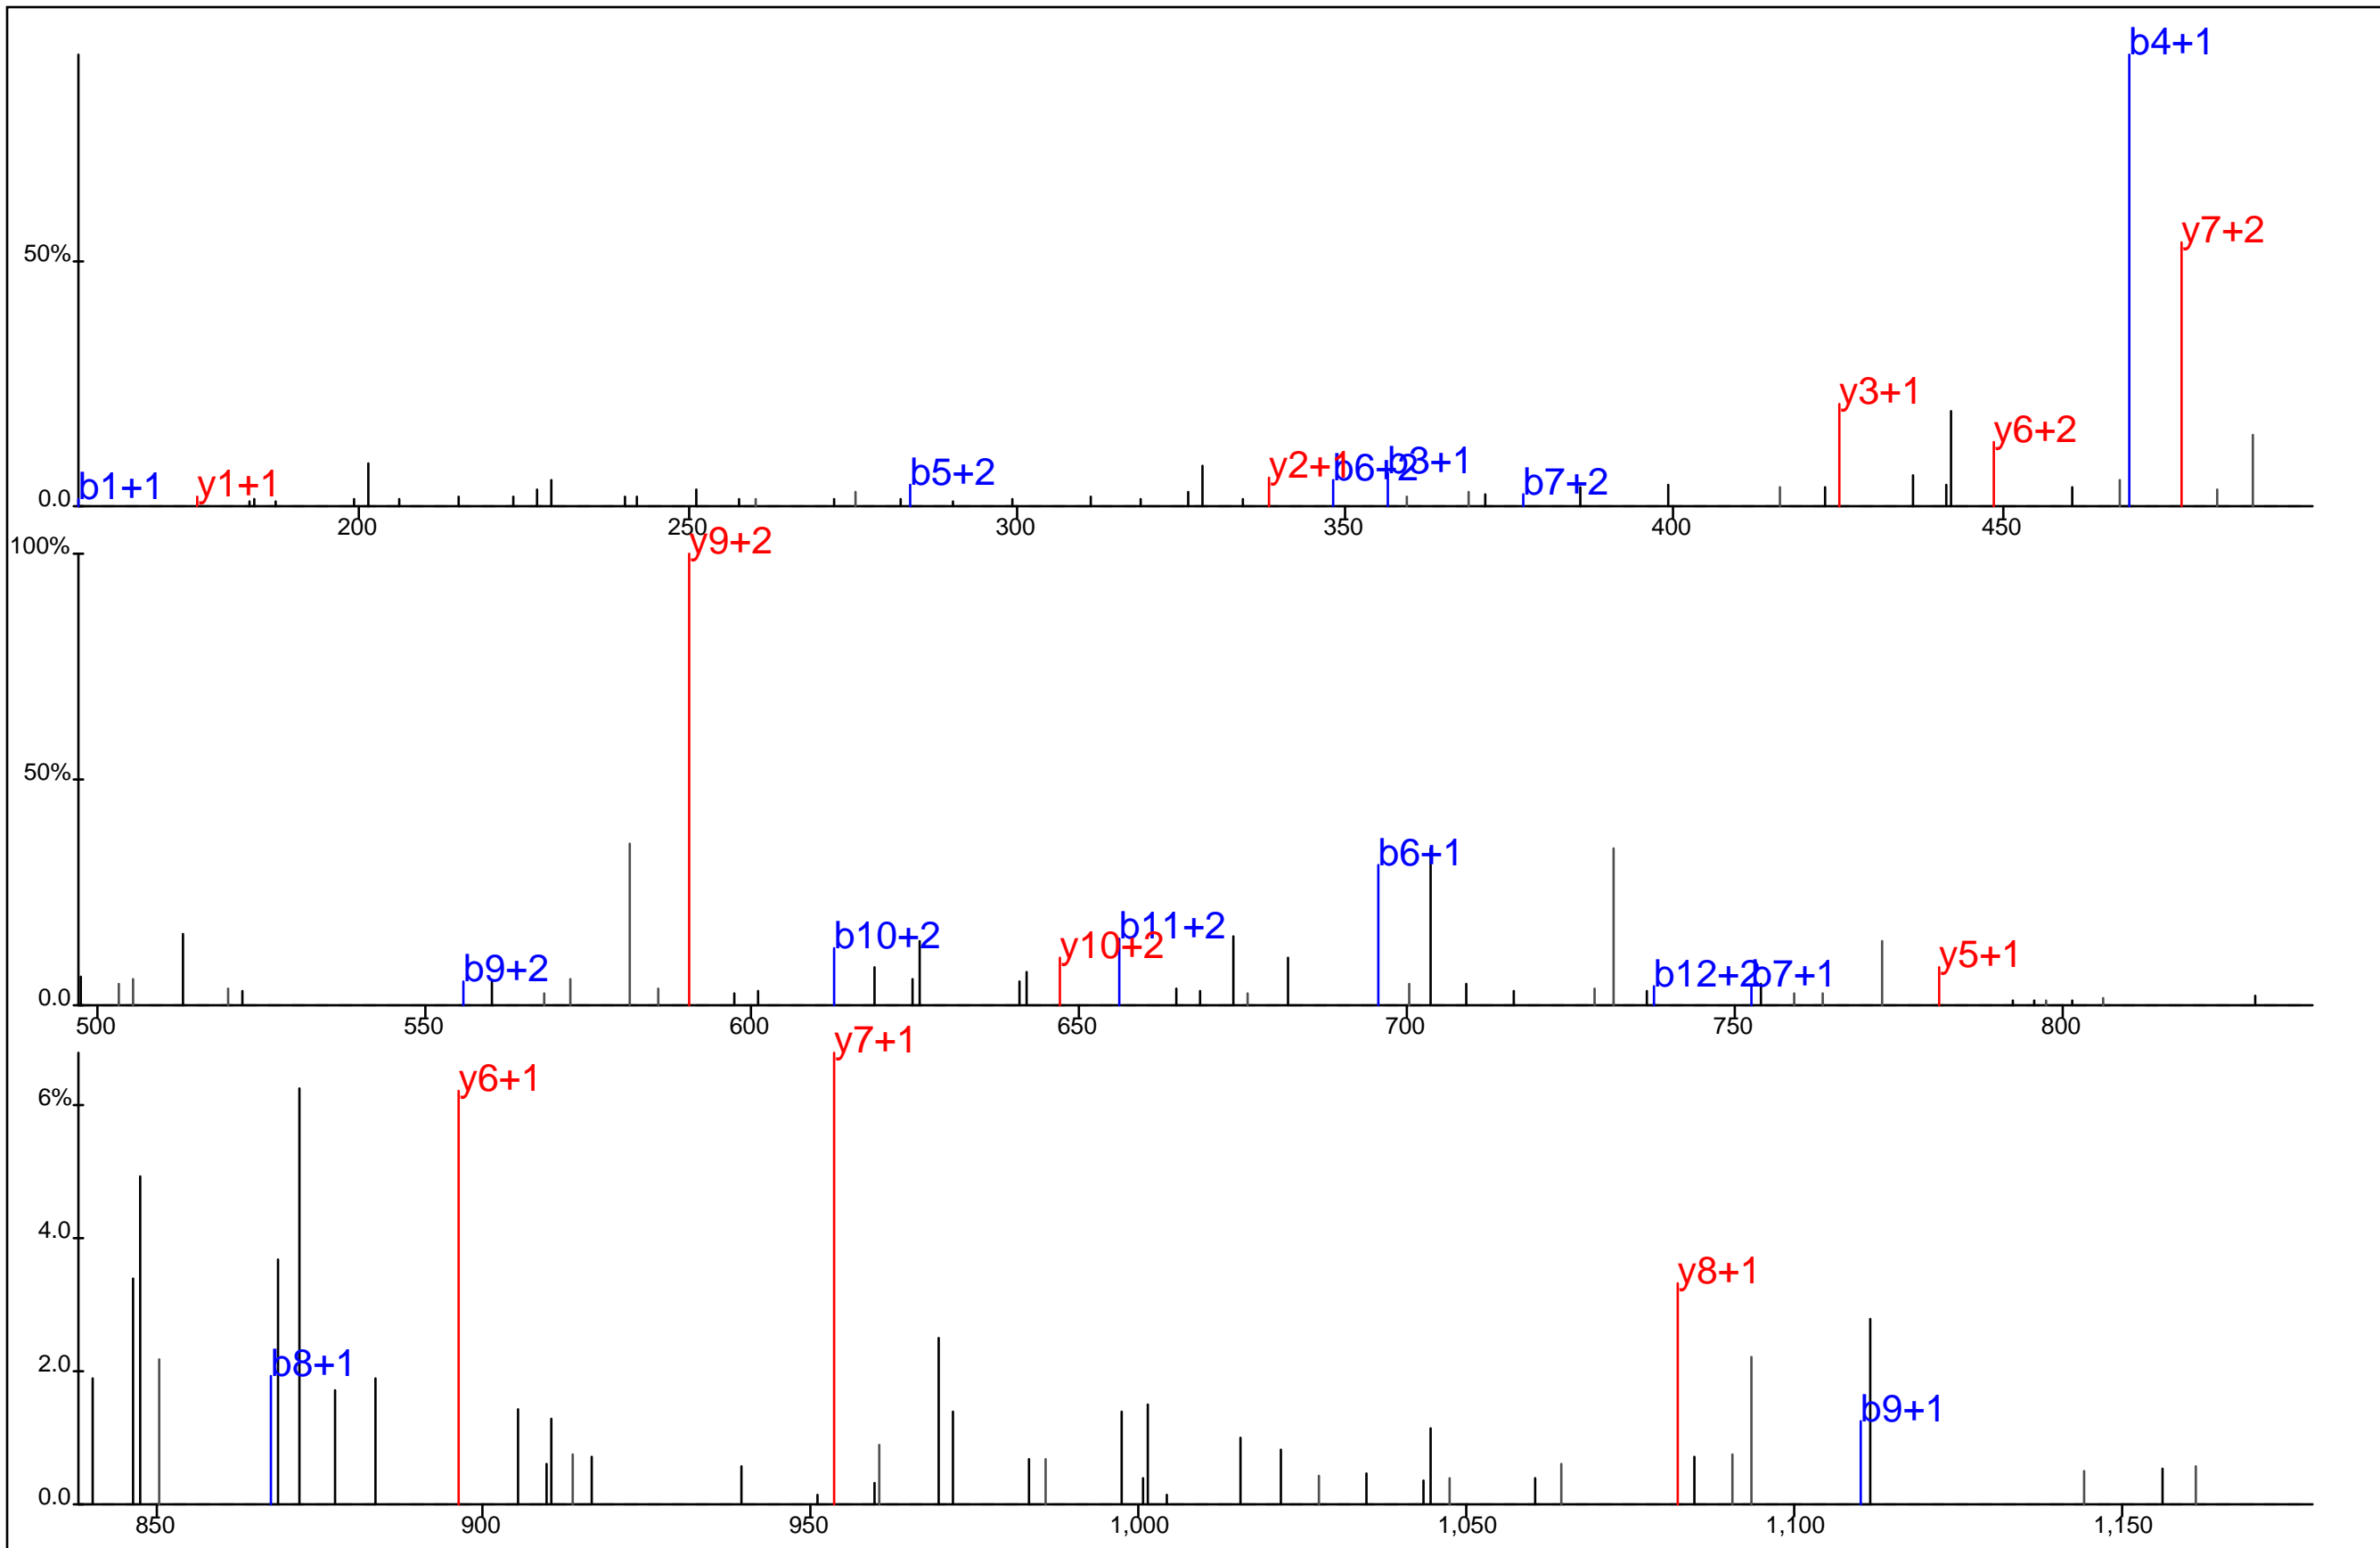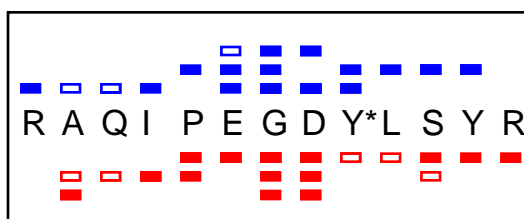

Protein Name: Erbin  
 gi Accession: 0  
 Precursor Mass: 549.9208+3  
 Delta Mass: 2.830 ppm  
 XCorr: 36.17

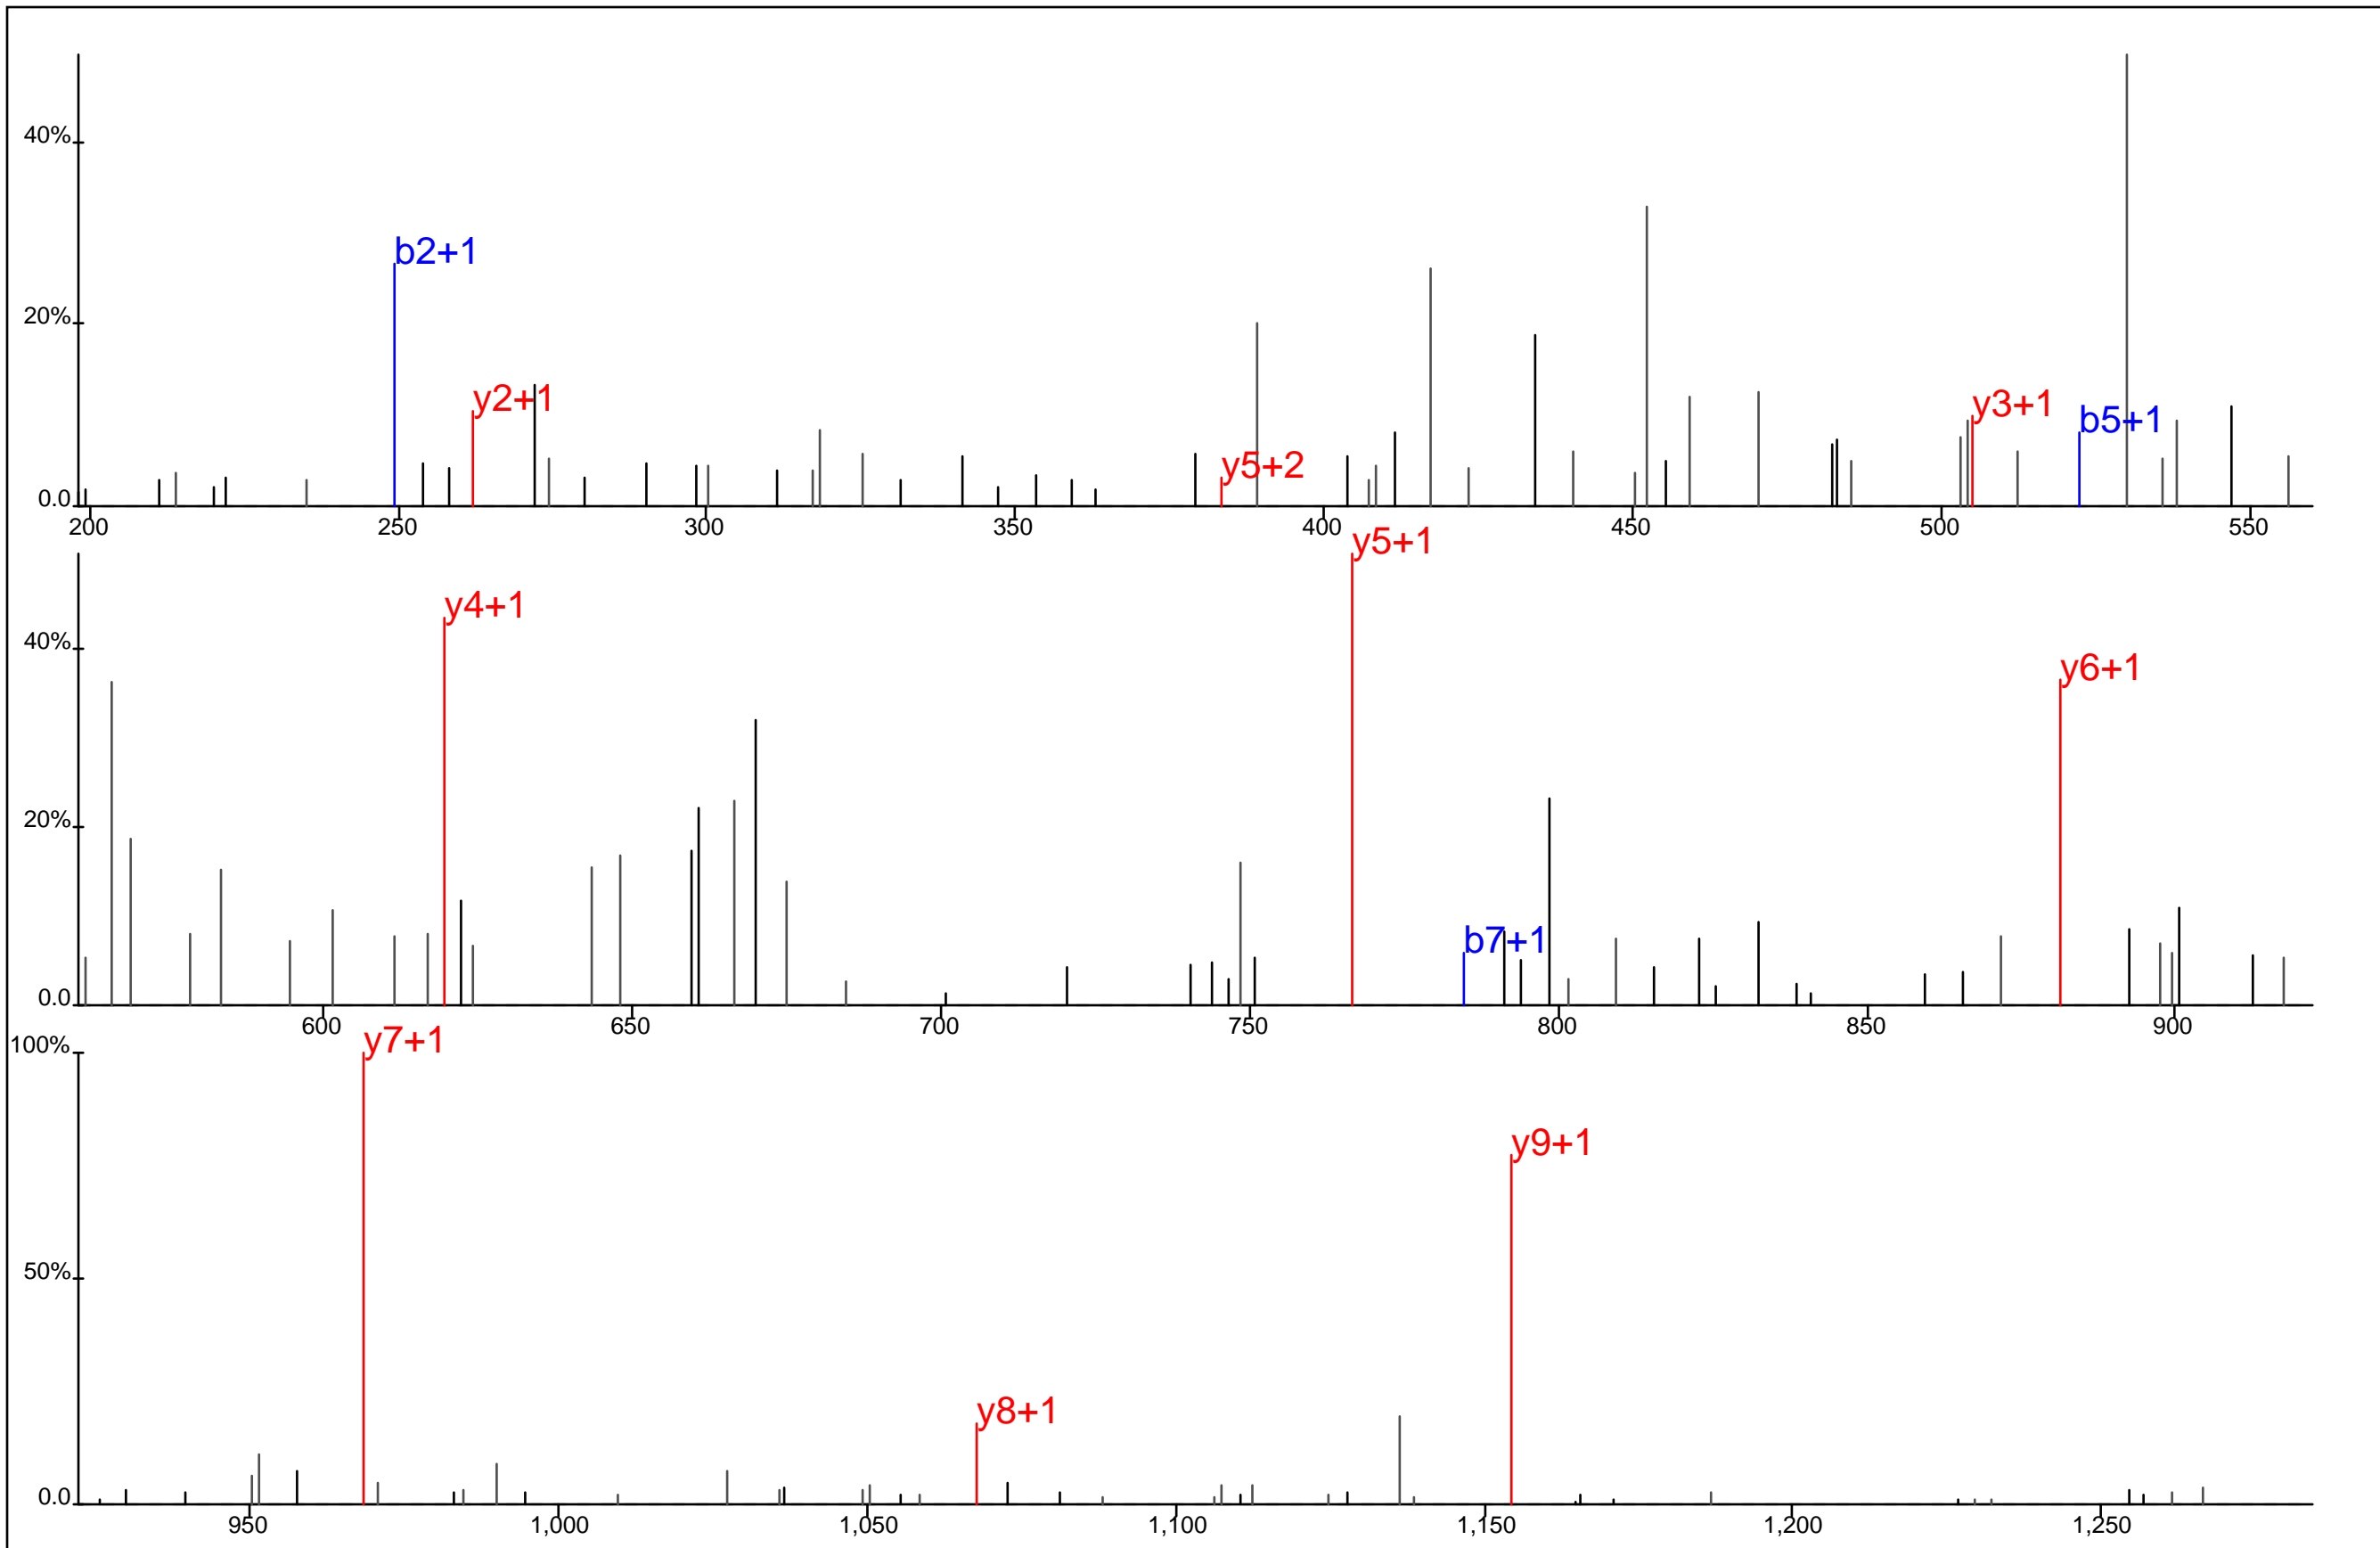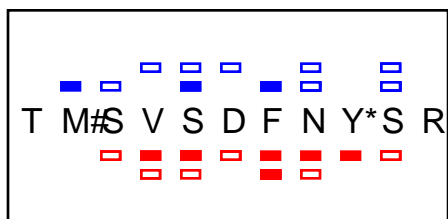

Protein Name: Erbin  
 gi Accession: 0  
 Precursor Mass: 701.7689+2  
 Delta Mass: 2.778 ppm  
 XCorr: 36.9



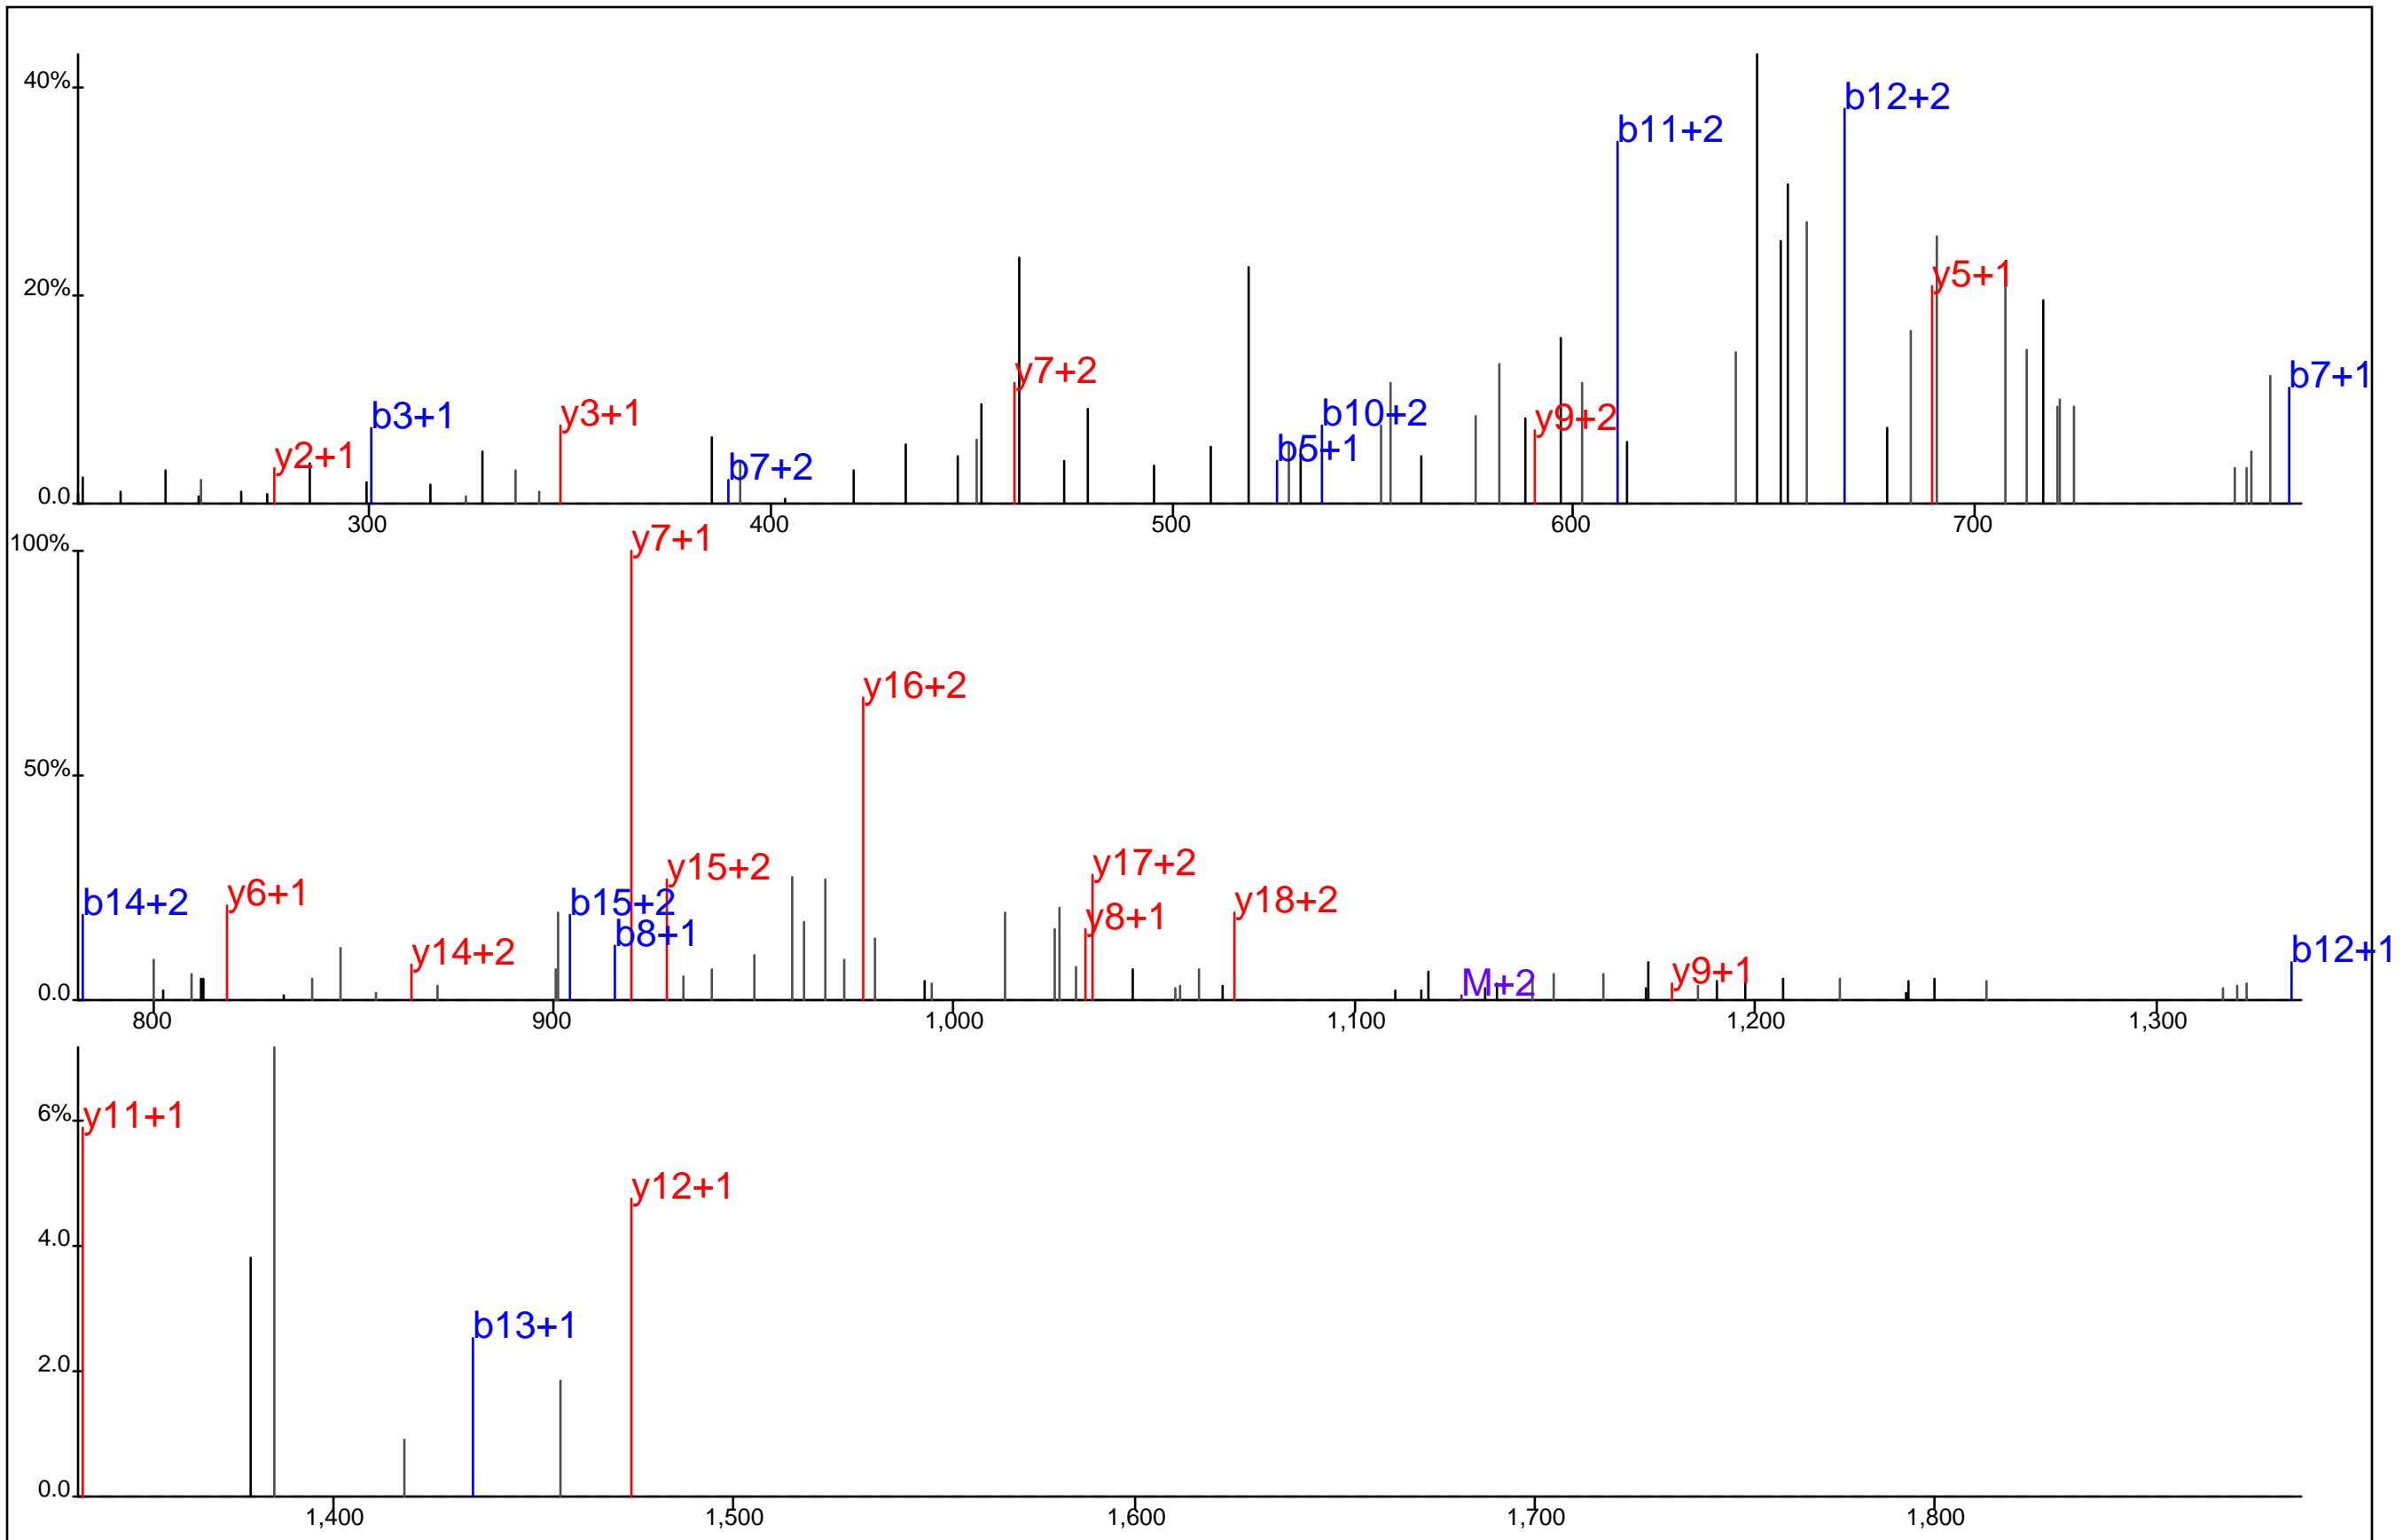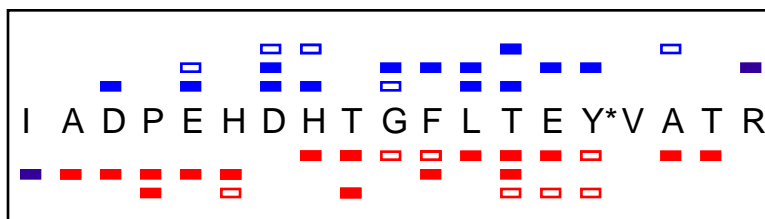

Protein Name: ERK1  
 gi Accession: 0  
 Precursor Mass: 751.3359+3  
 Delta Mass: 3.859 ppm  
 XCorr: 41.72

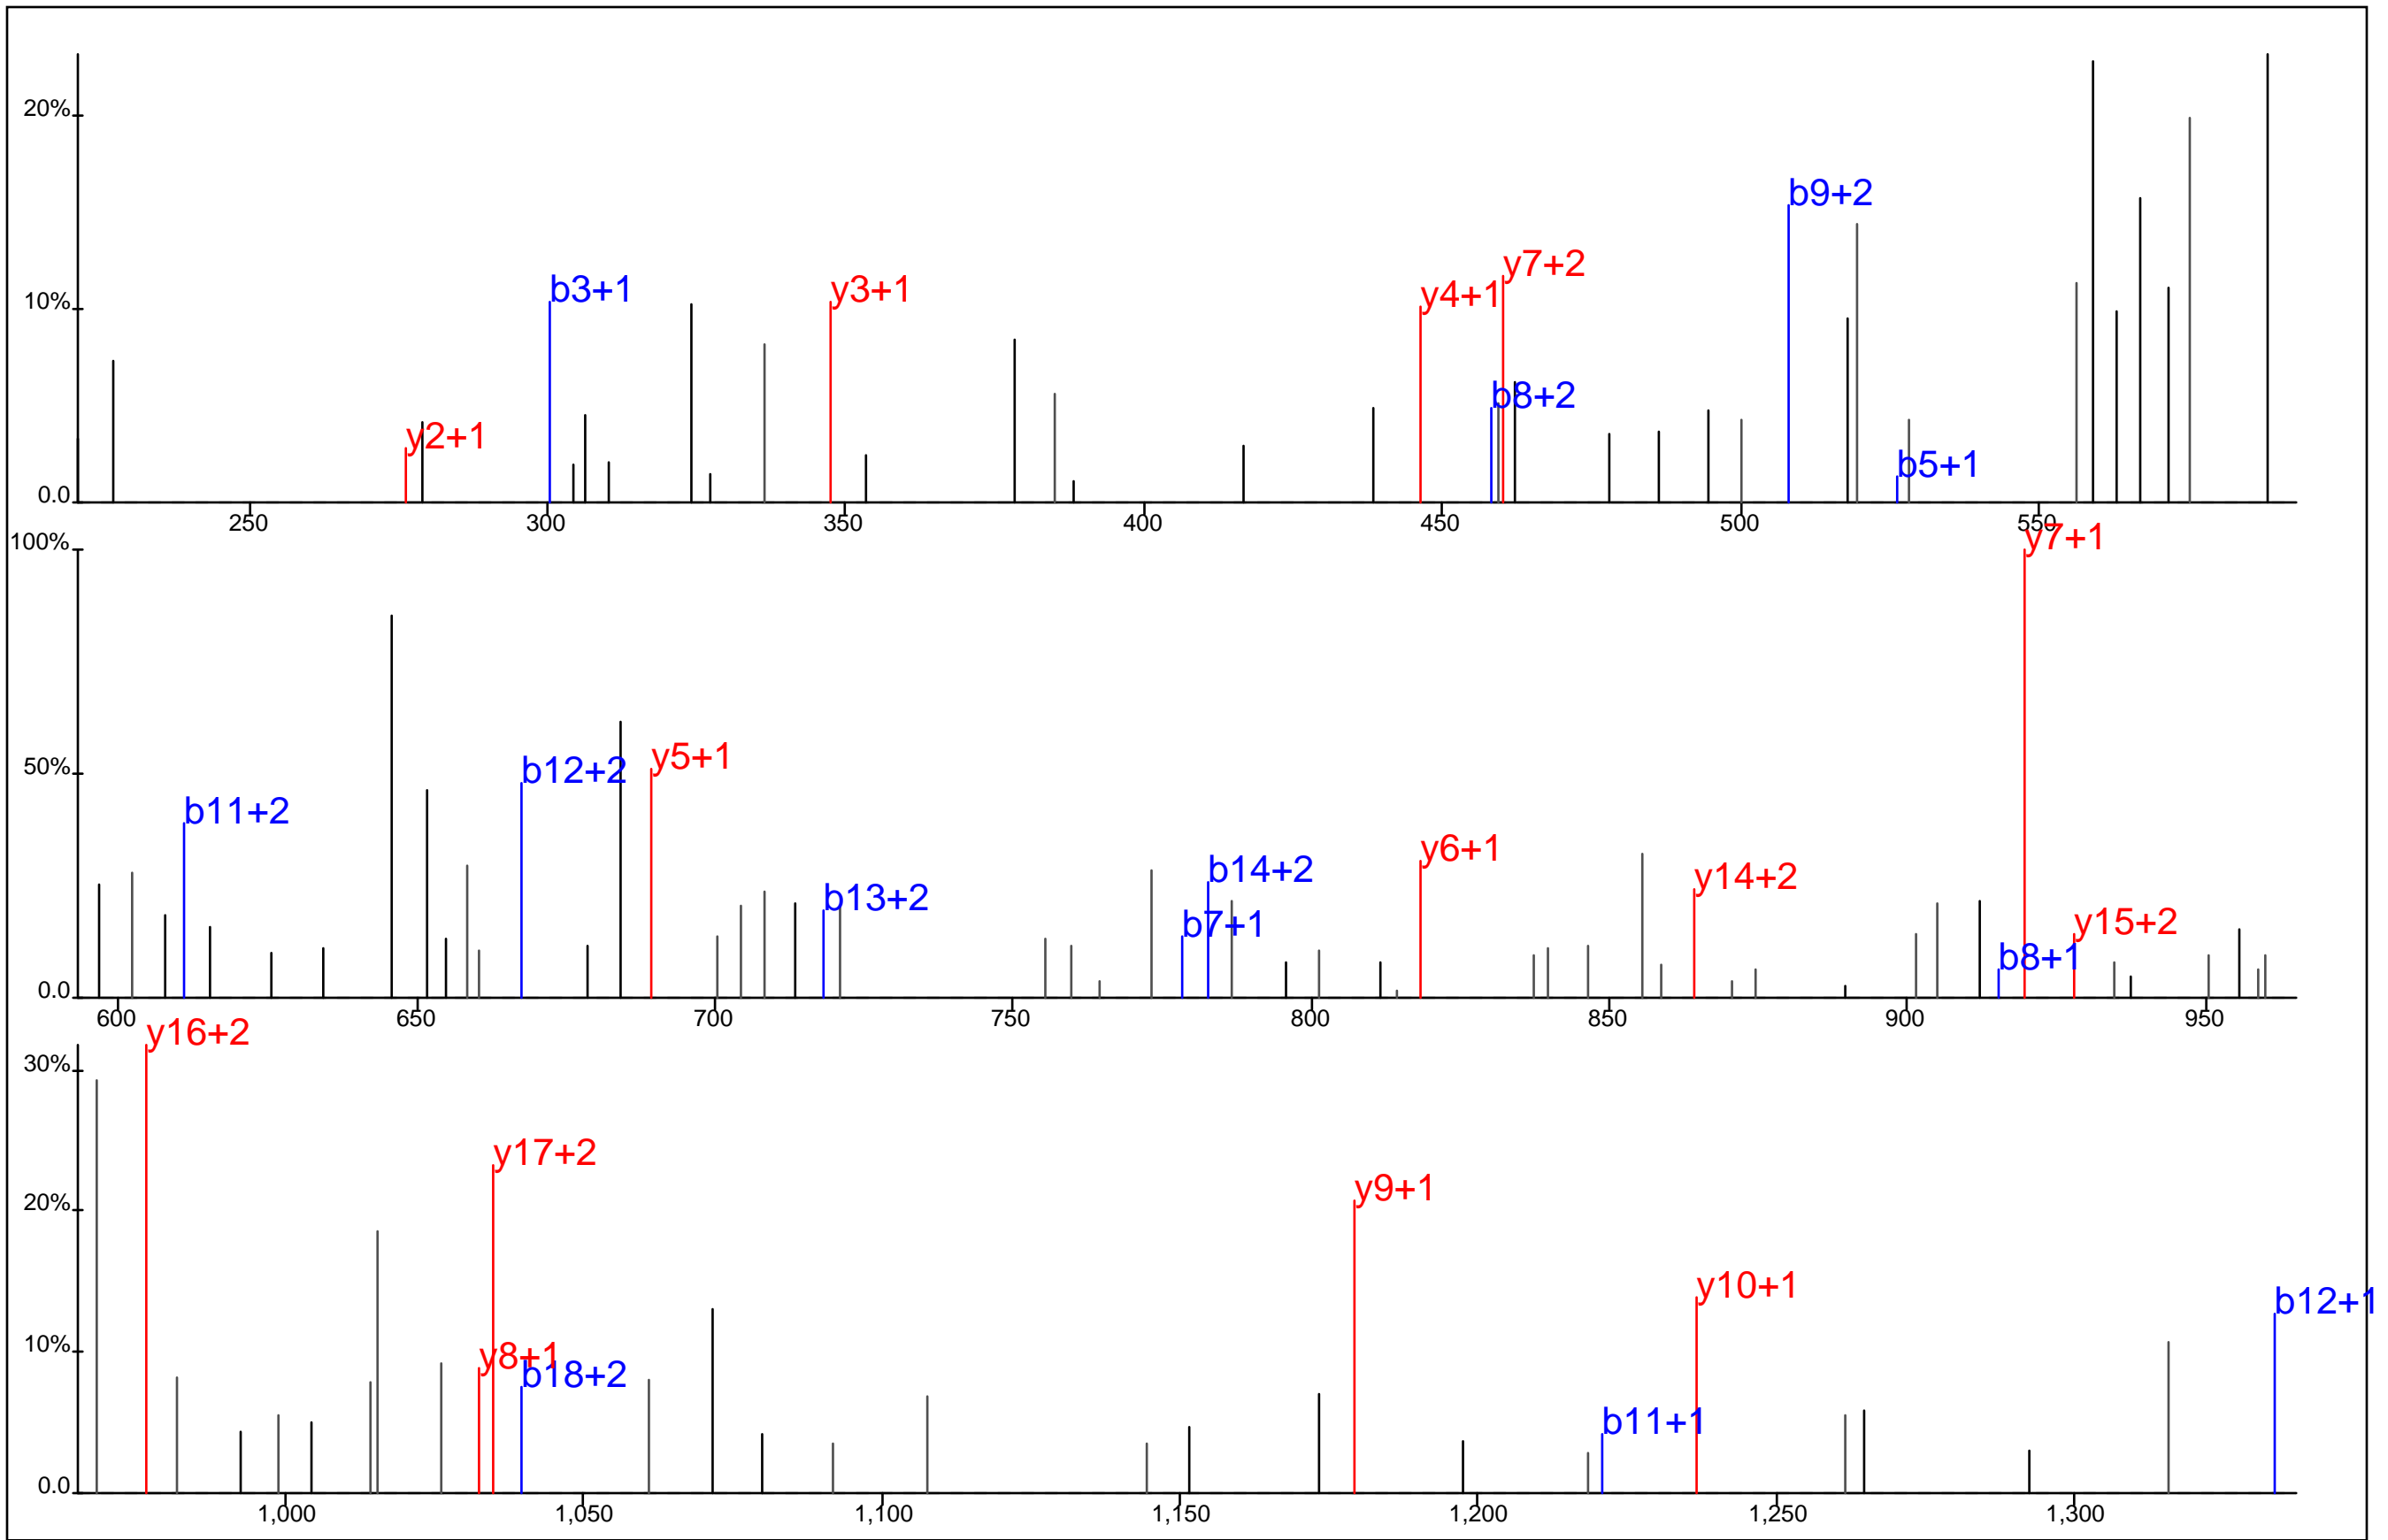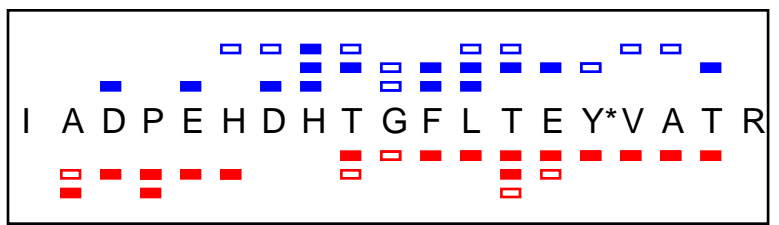

Protein Name: ERK1  
 gi Accession: 0  
 Precursor Mass: 751.3357+3  
 Delta Mass: 4.185 ppm  
 XCorr: 50.95

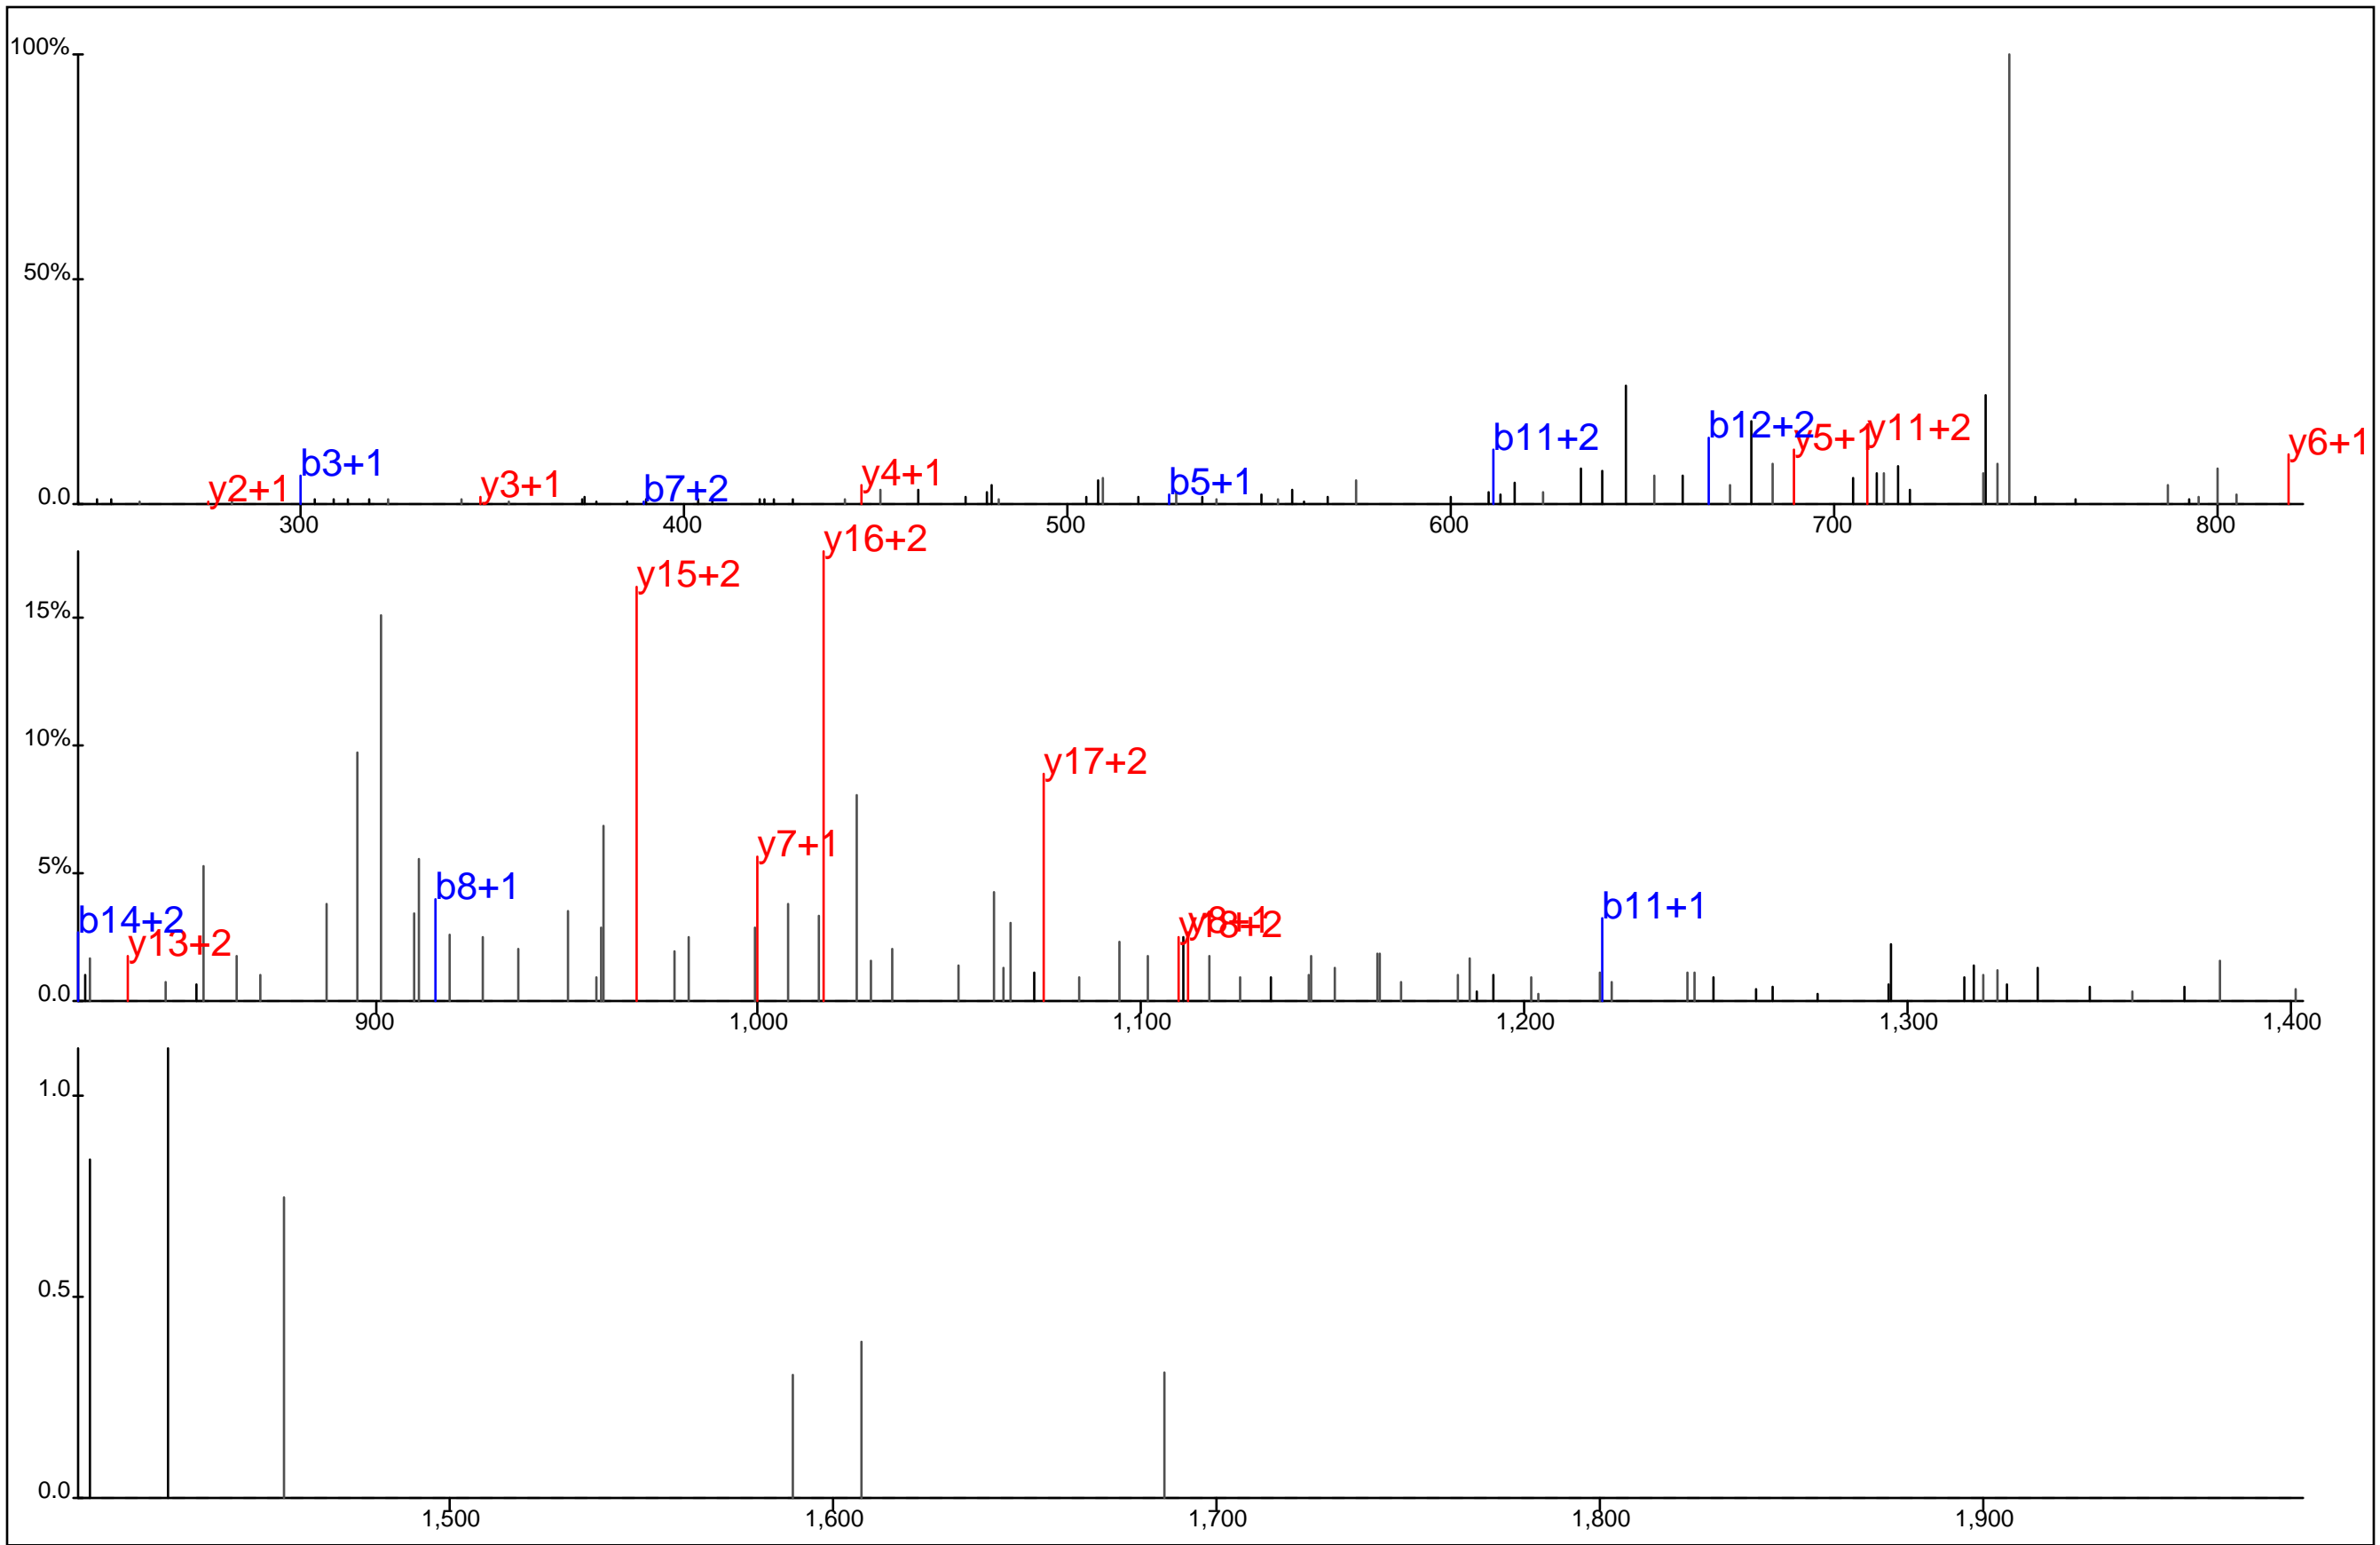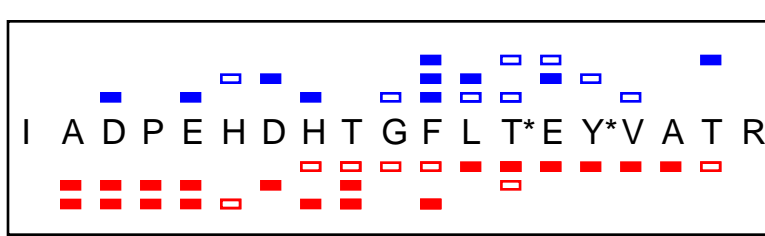

Protein Name: ERK1  
 gi Accession: 0  
 Precursor Mass: 777.9956+3  
 Delta Mass: 1.711 ppm  
 XCorr: 32.8



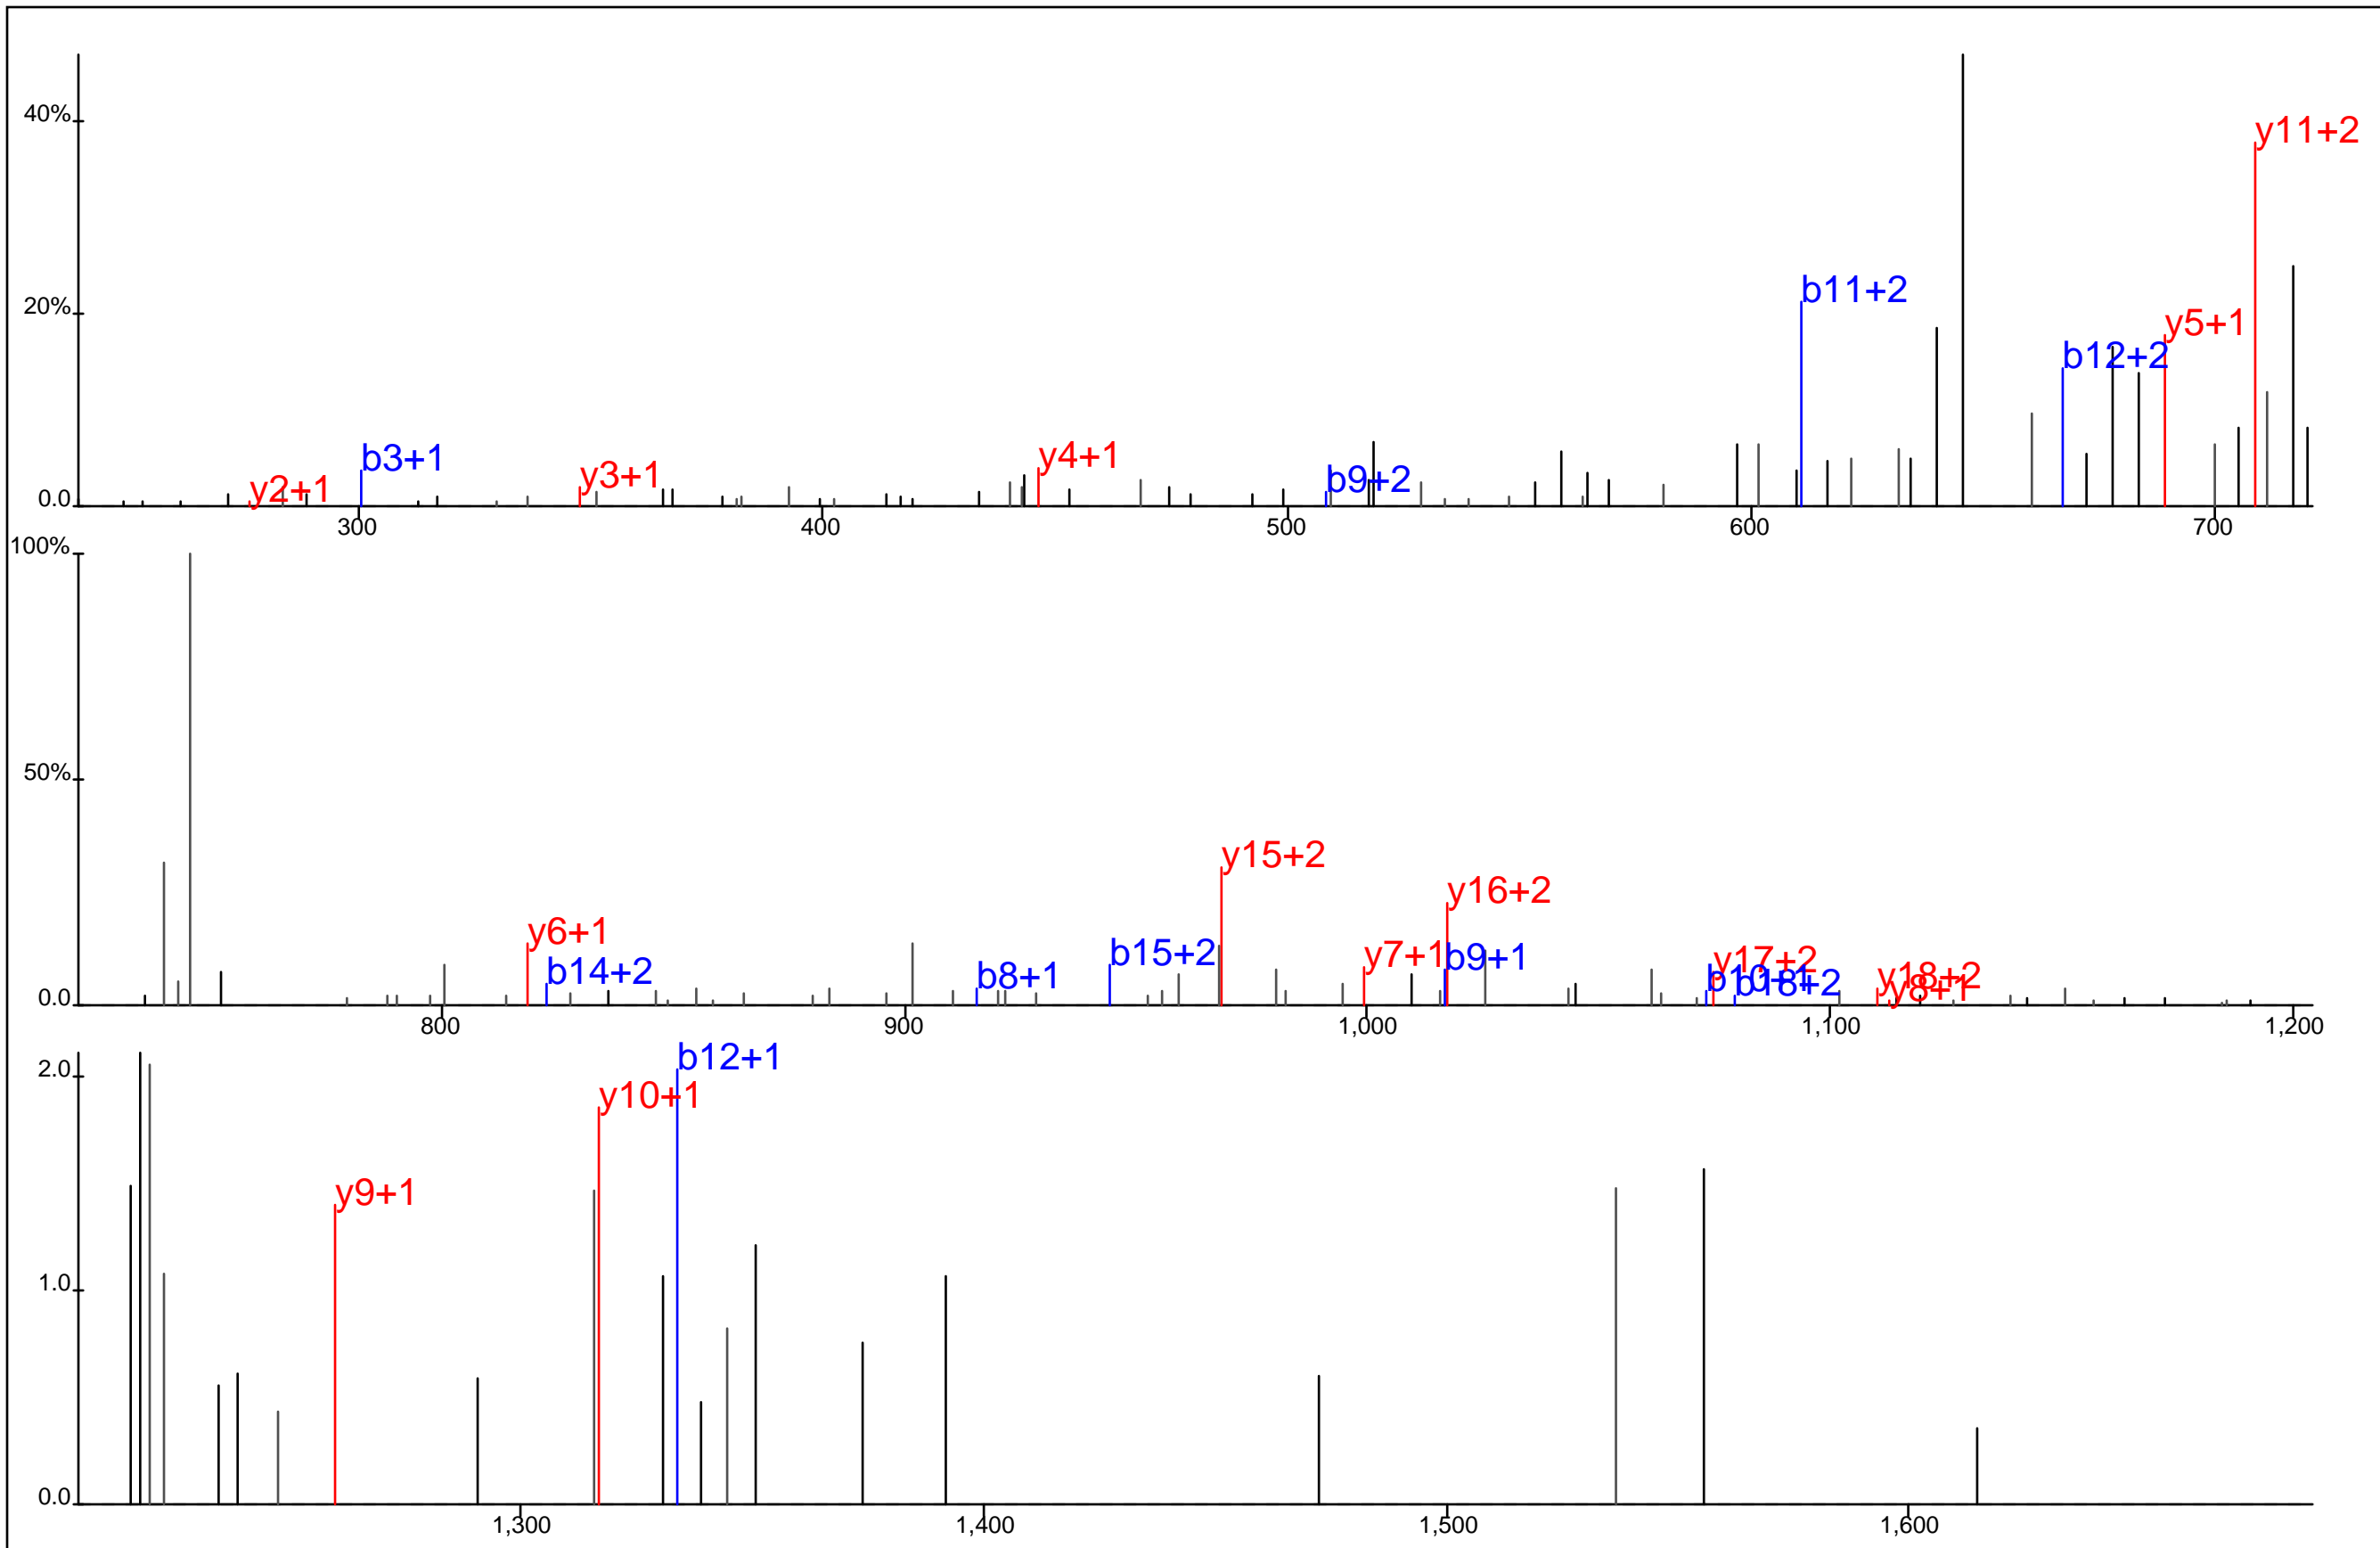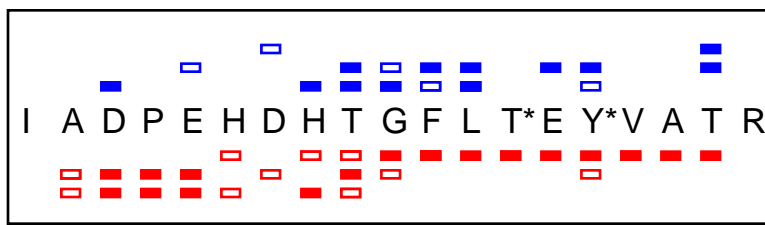

Protein Name: ERK1  
 gi Accession: 0  
 Precursor Mass: 777.9941+3  
 Delta Mass: 0.250 ppm  
 XCorr: 23.64

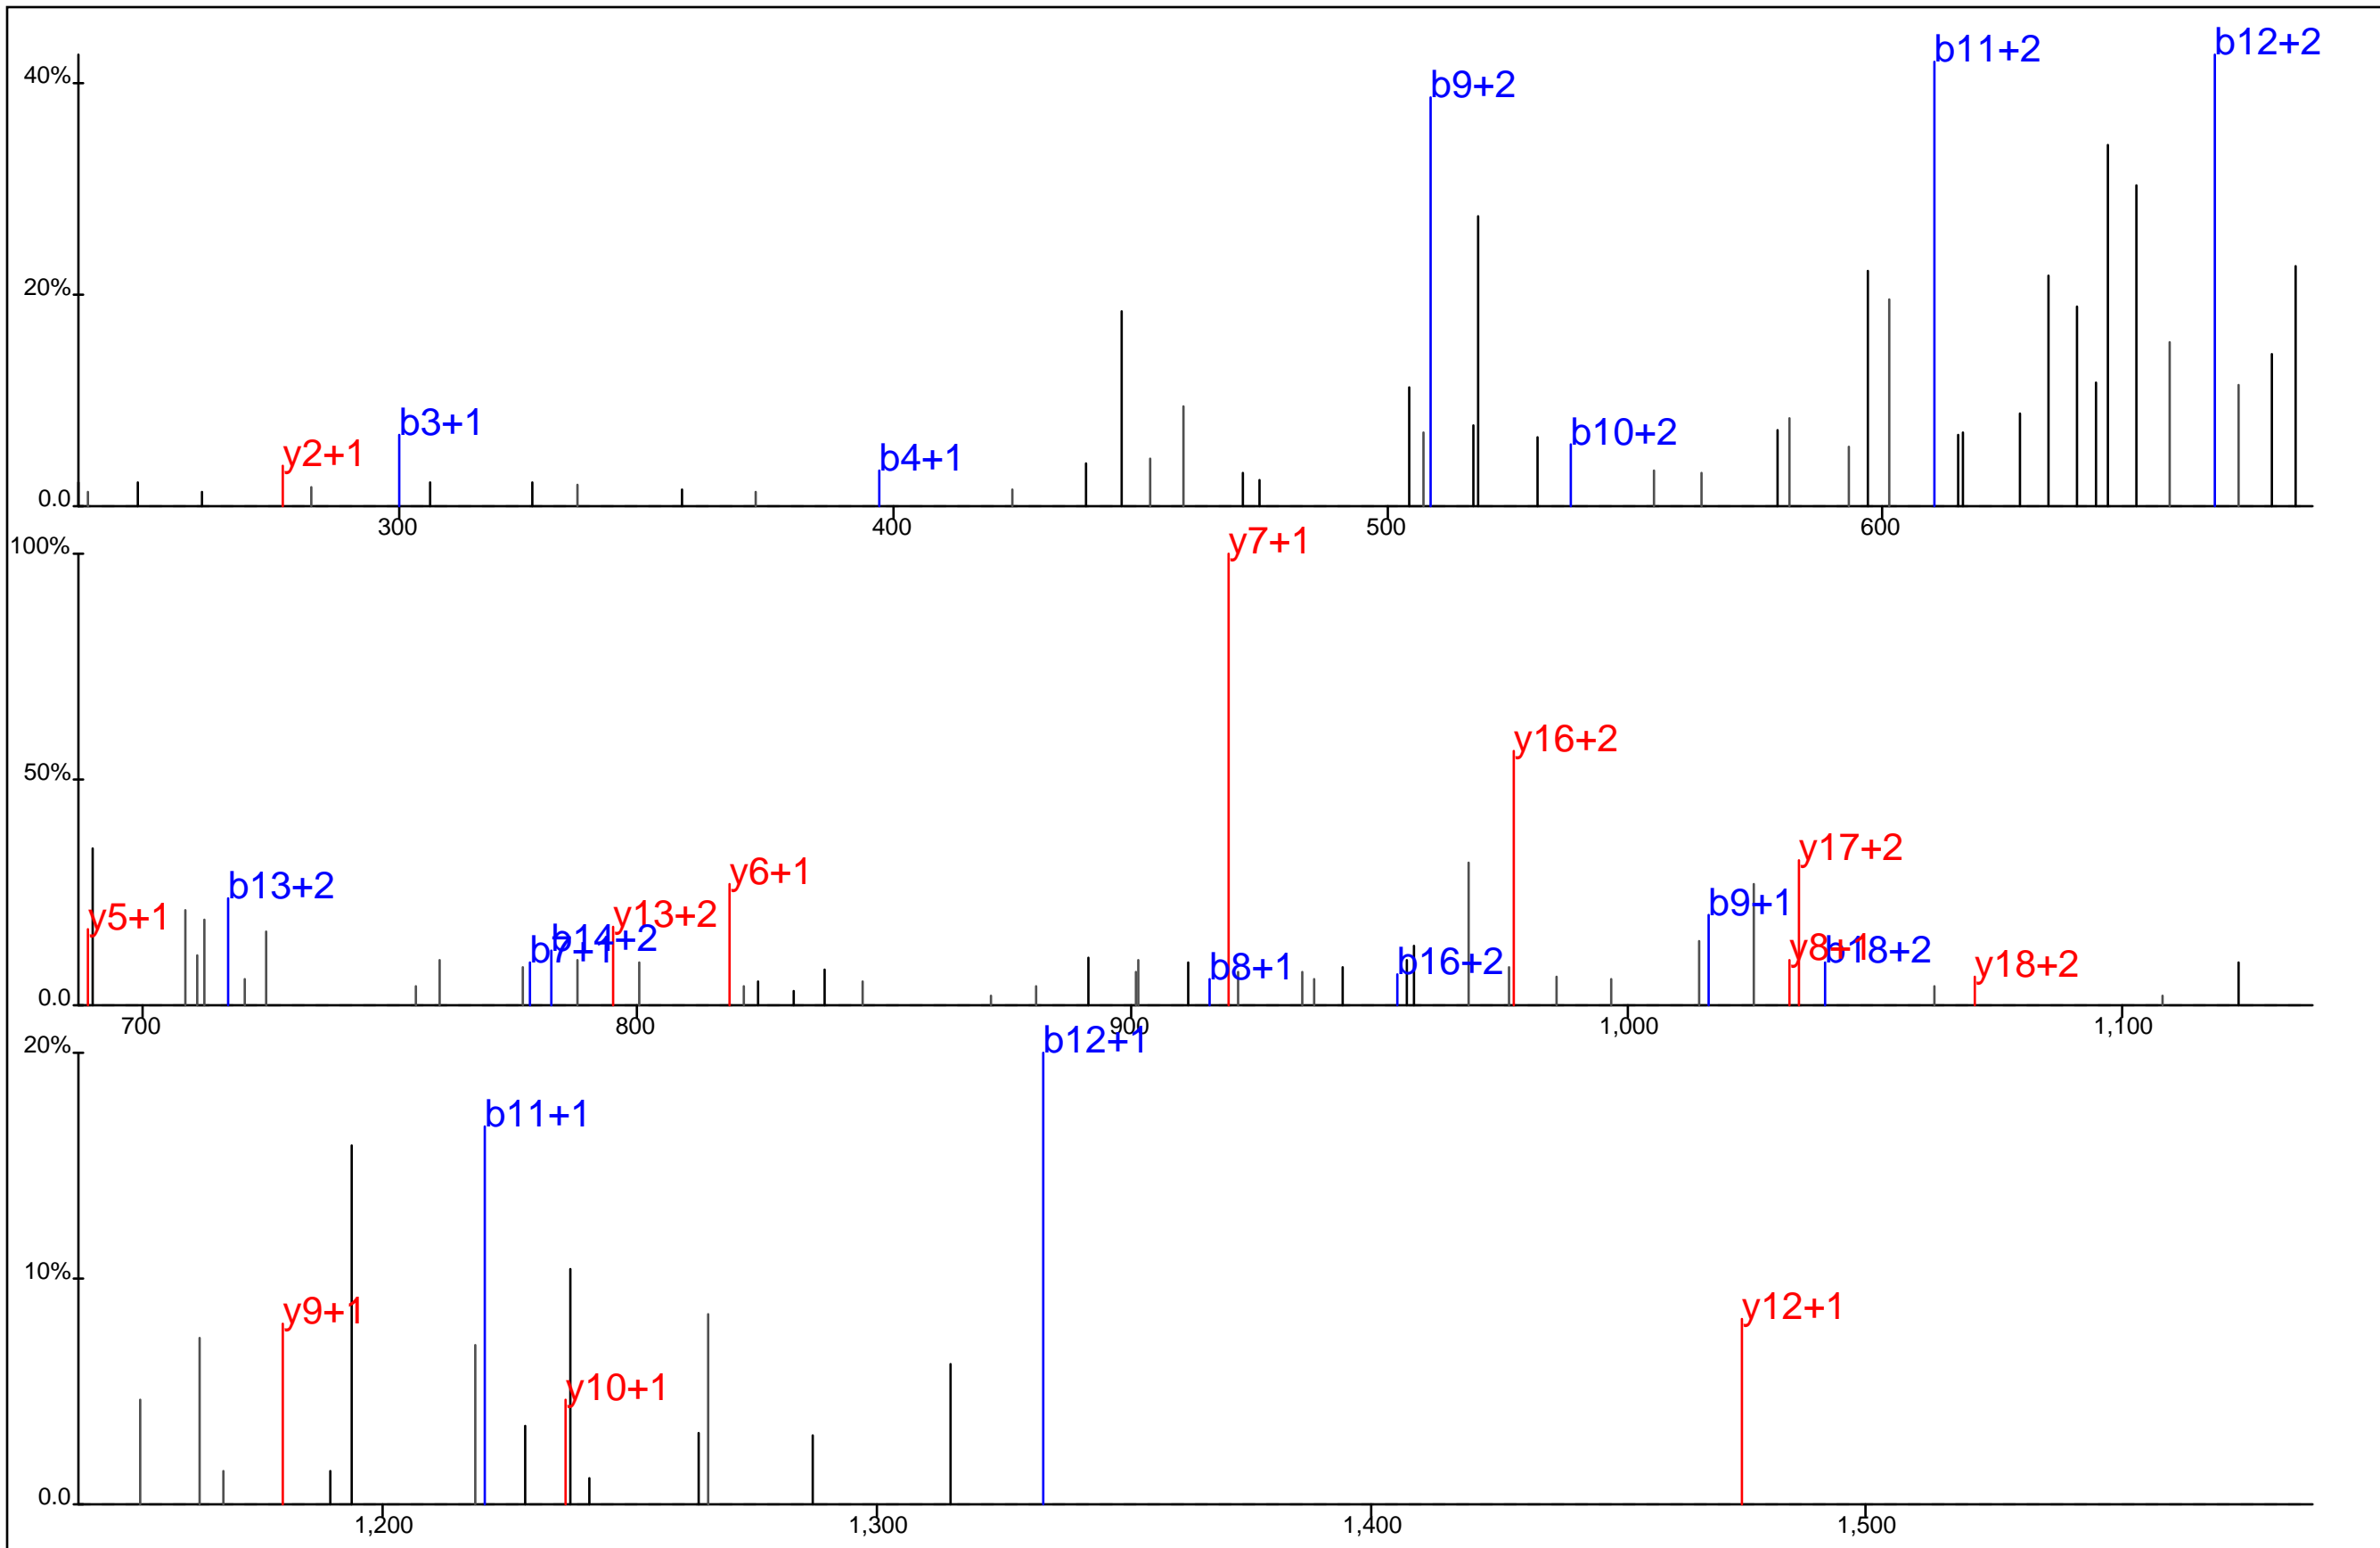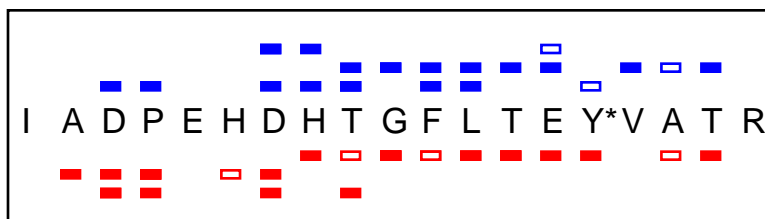

Protein Name: ERK1  
 gi Accession: 0  
 Precursor Mass: 751.3398+3  
 Delta Mass: 1.263 ppm  
 XCorr: 43.74

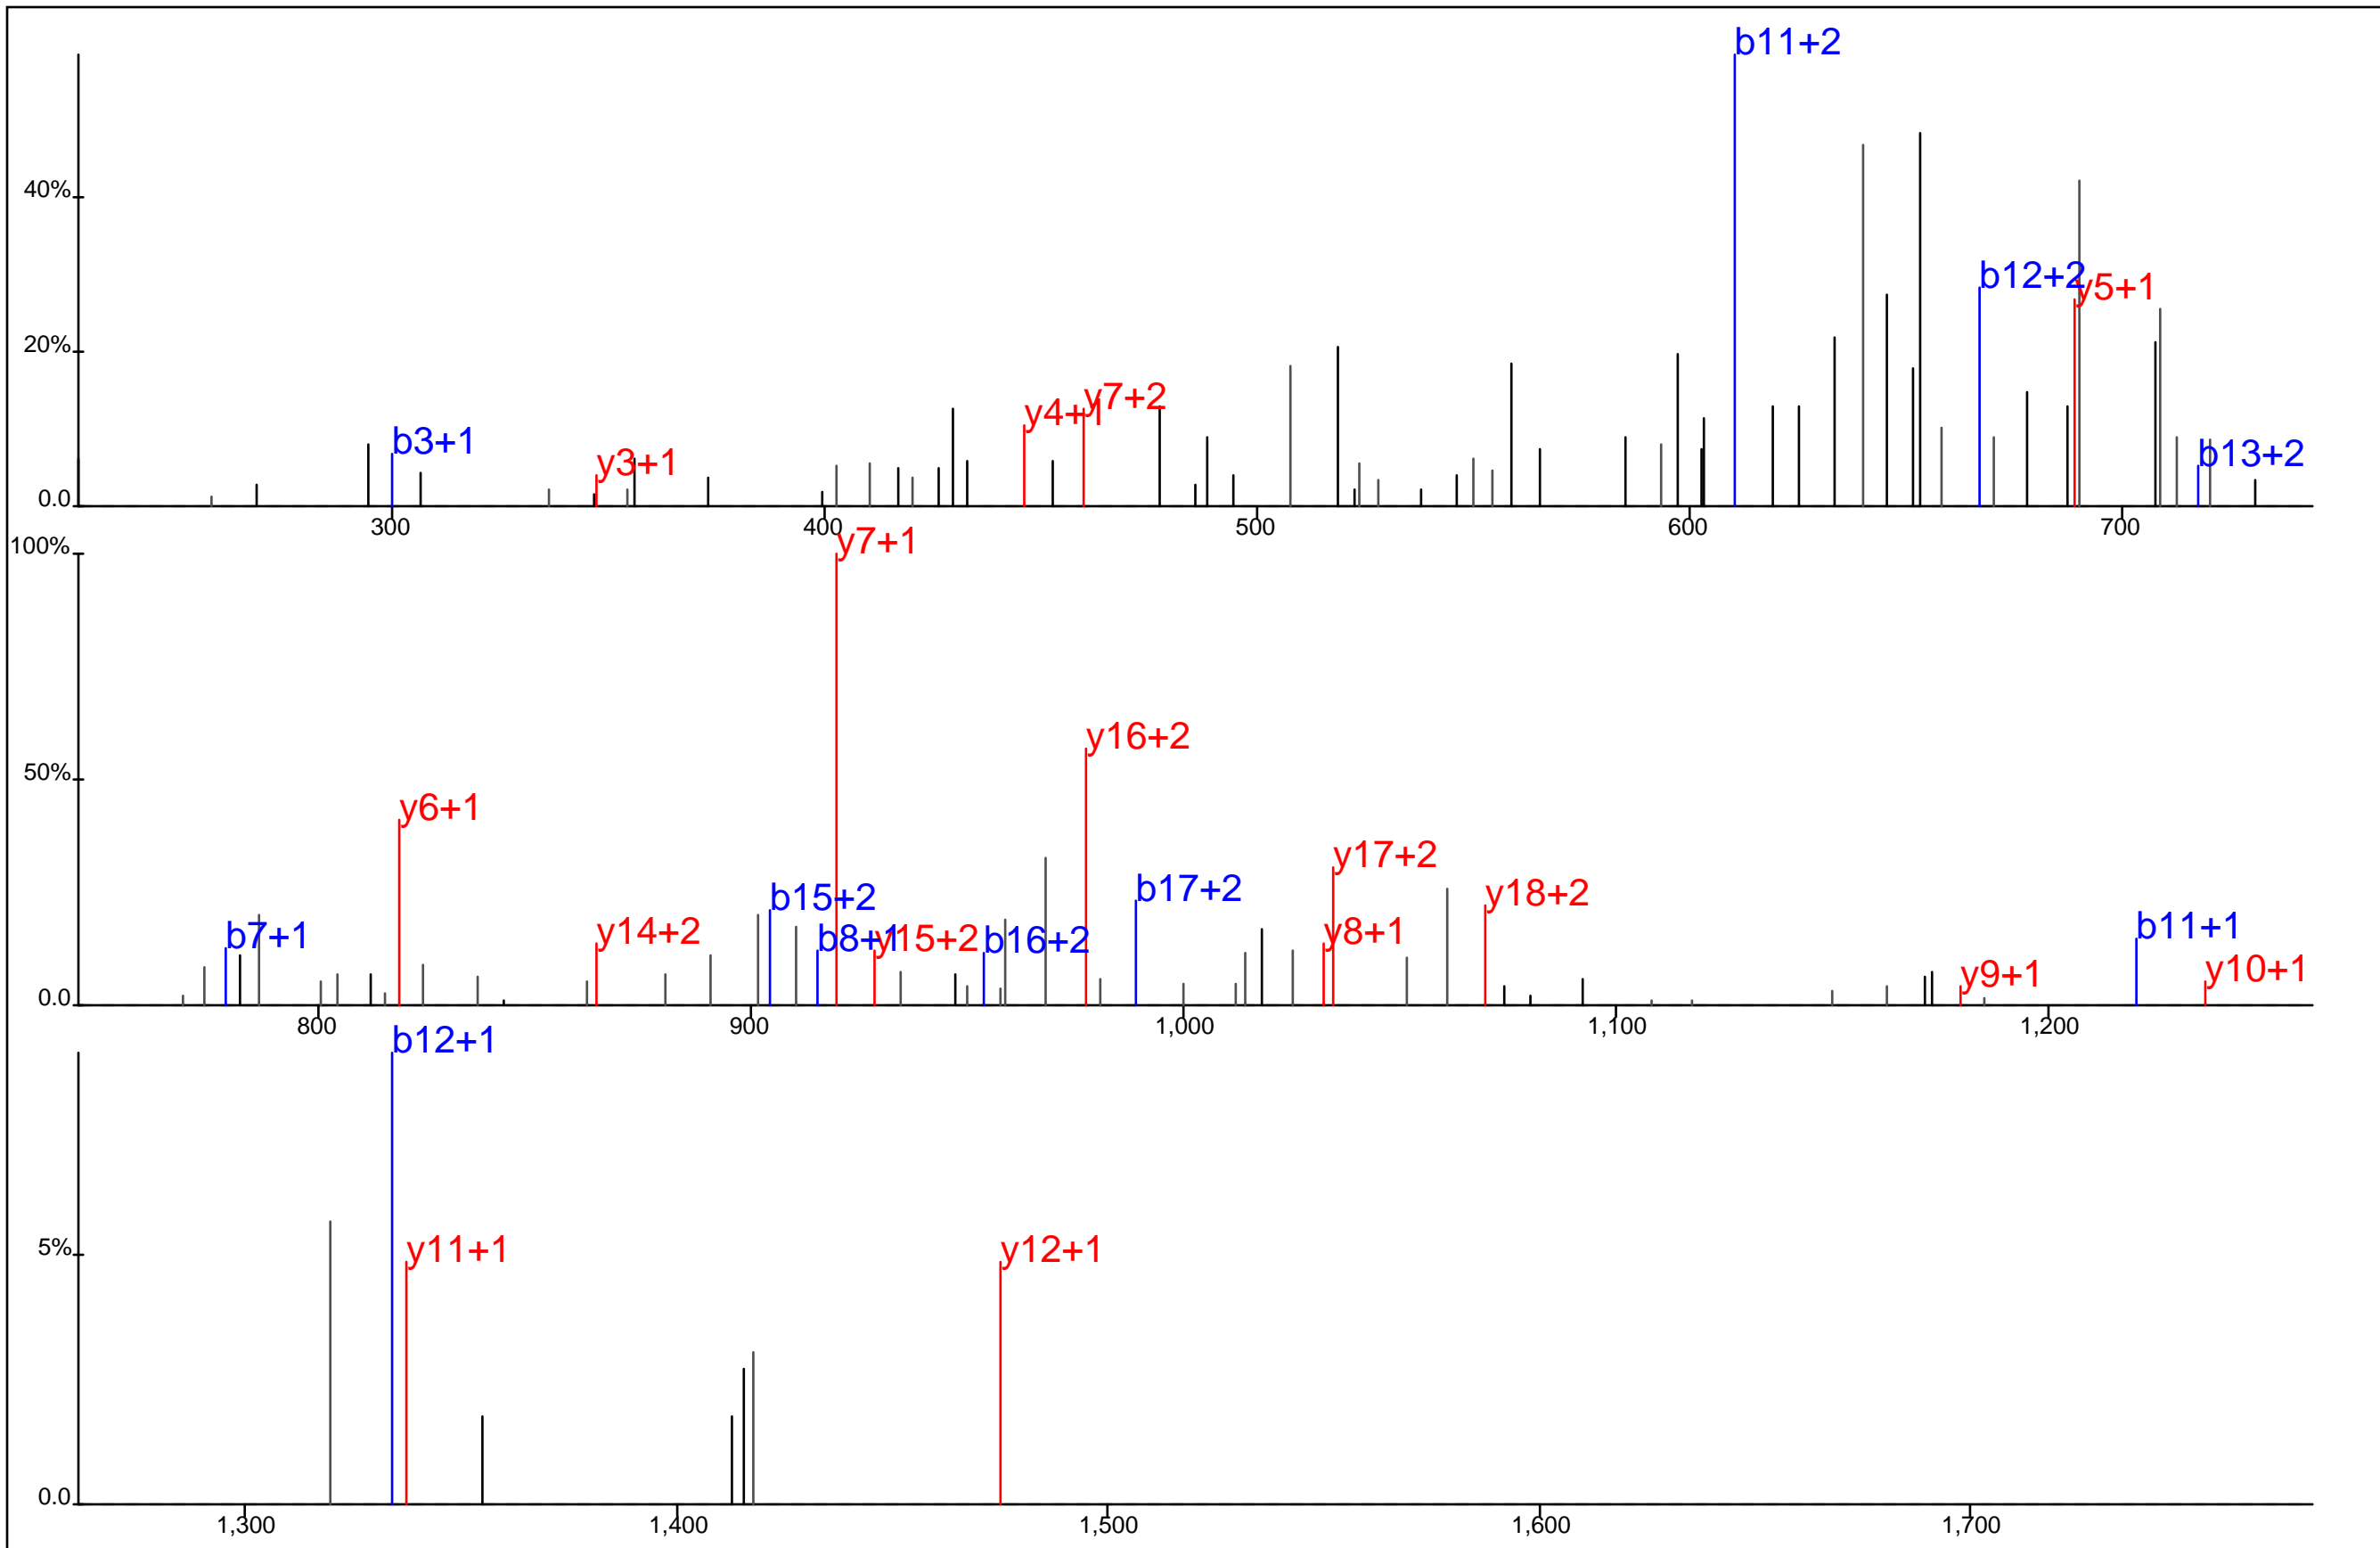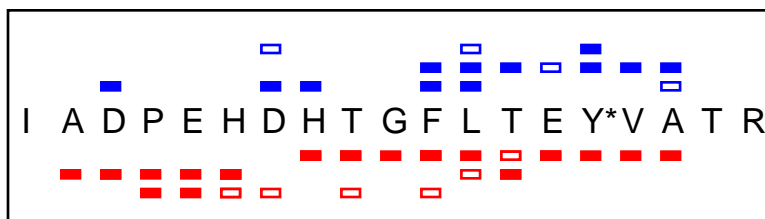

Protein Name: ERK1  
 gi Accession: 0  
 Precursor Mass: 751.3379+3  
 Delta Mass: 1.257 ppm  
 XCorr: 50.92

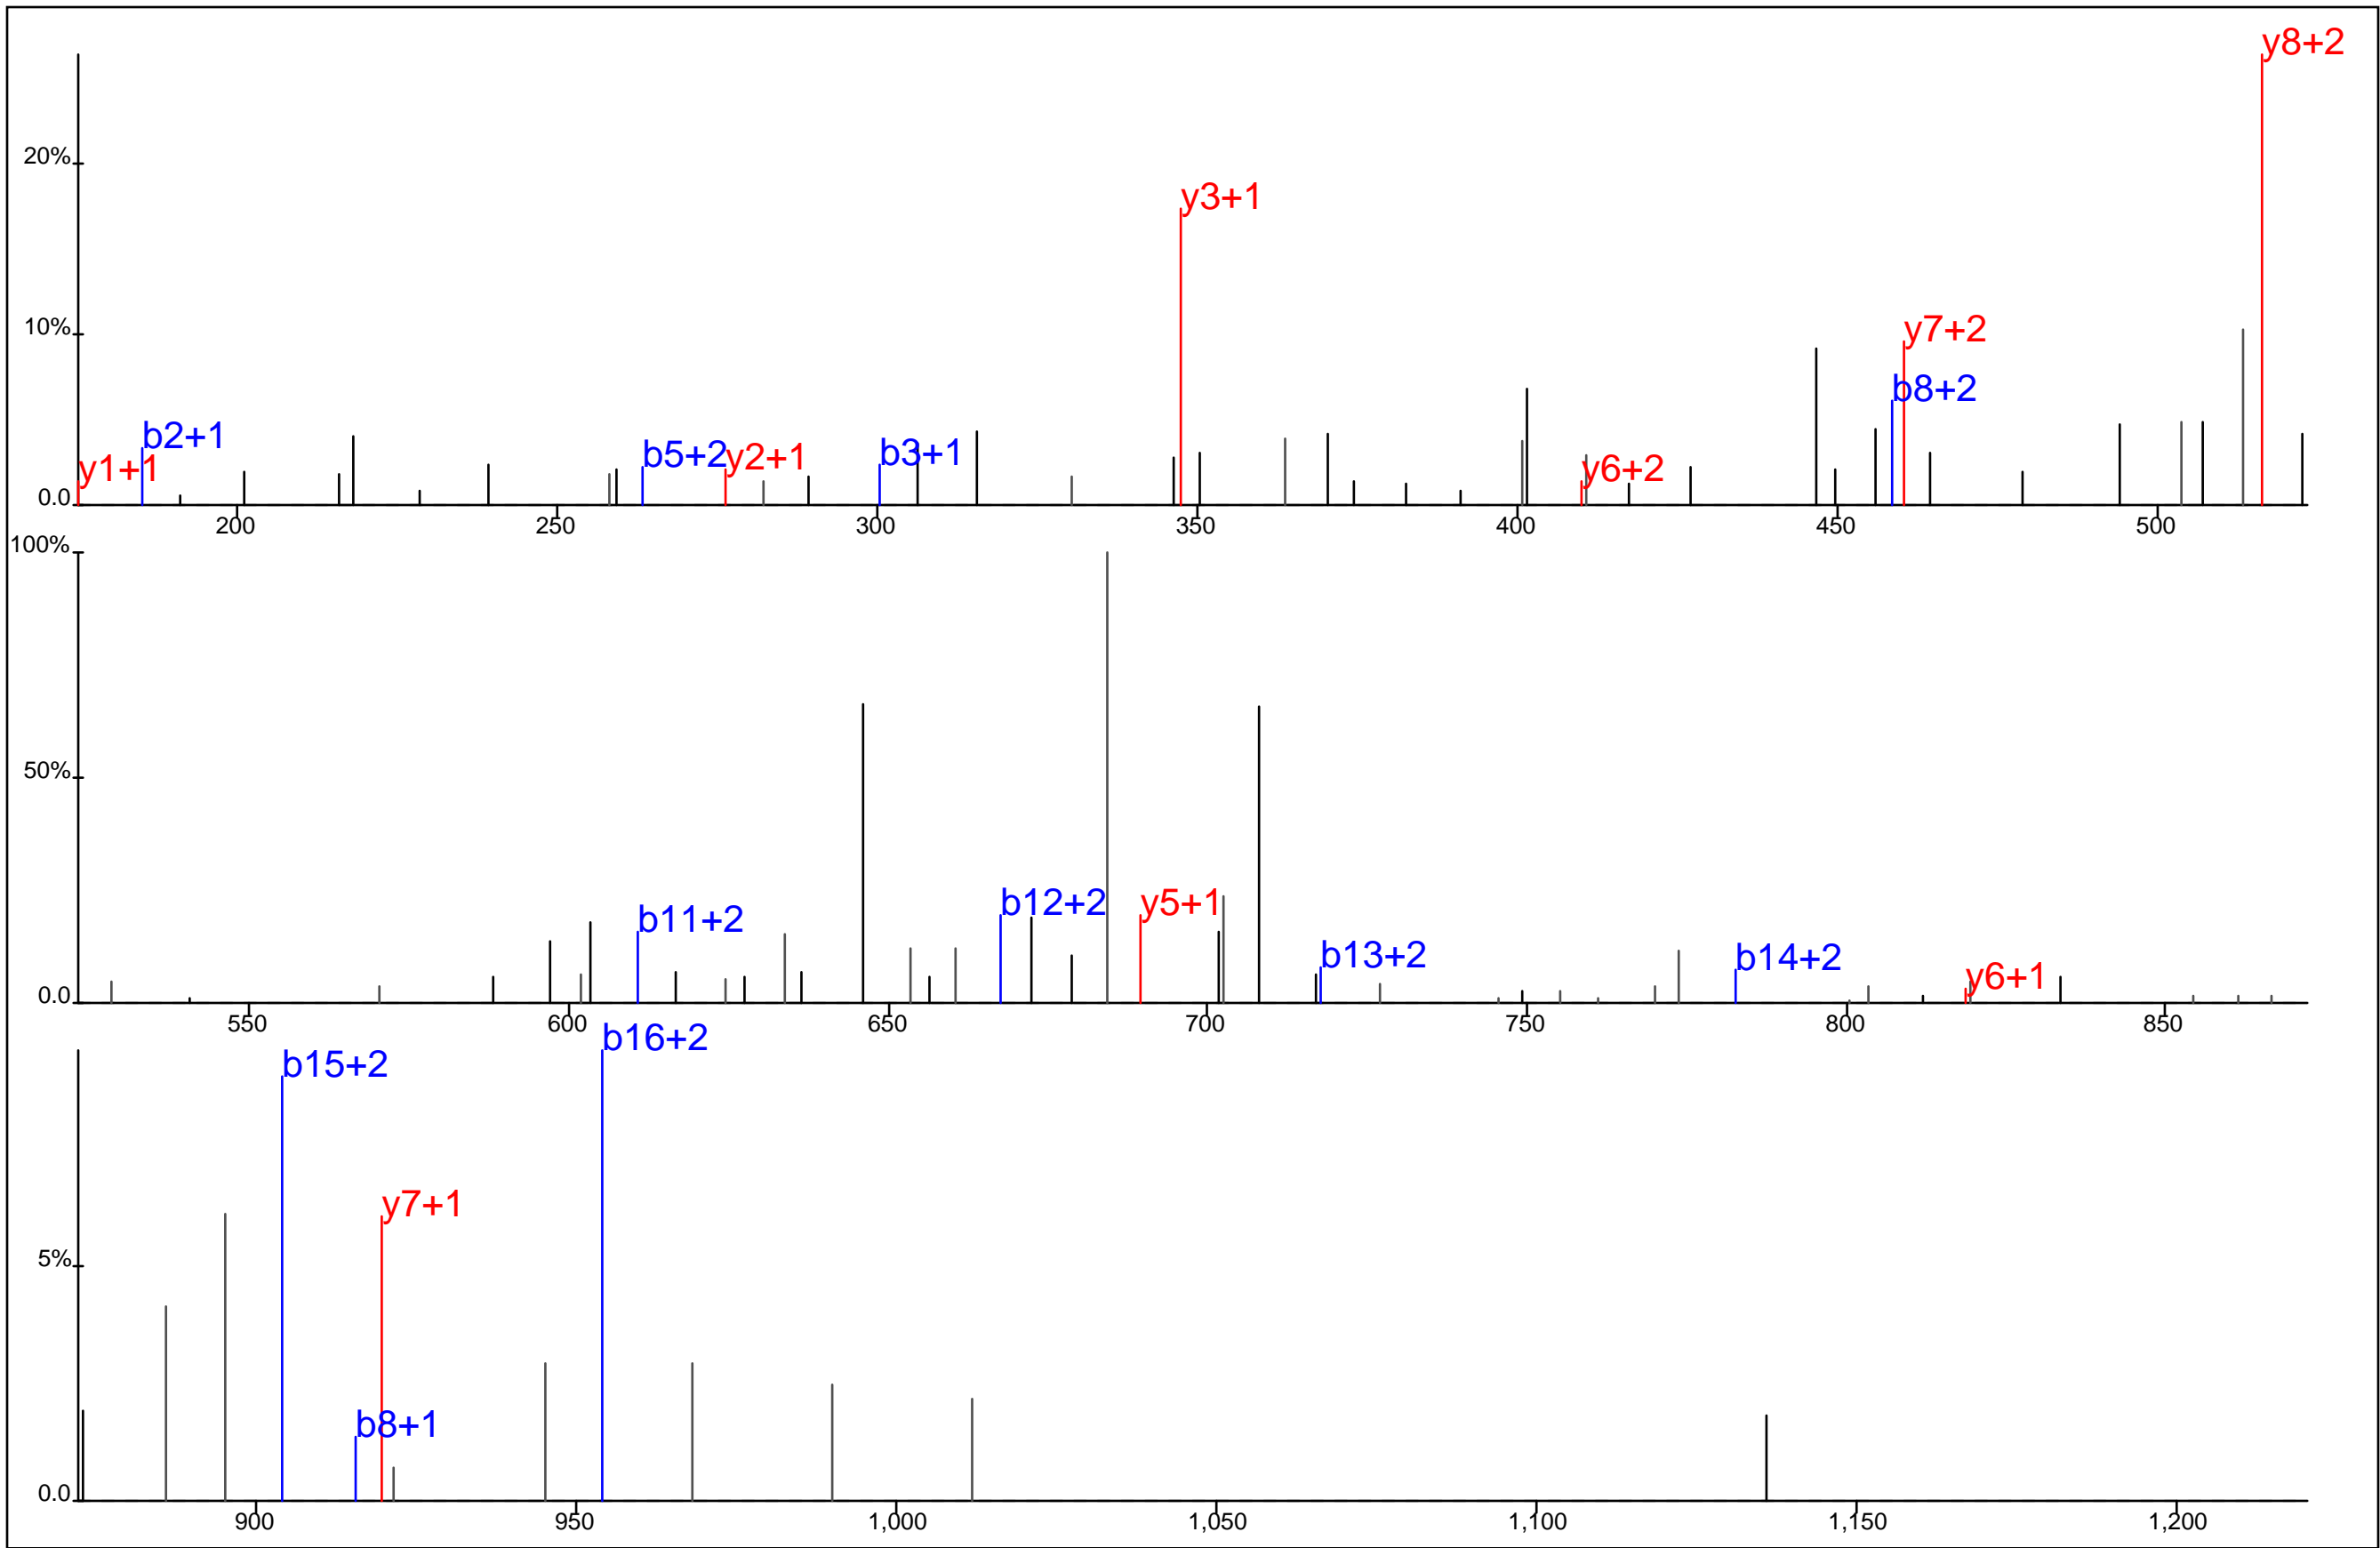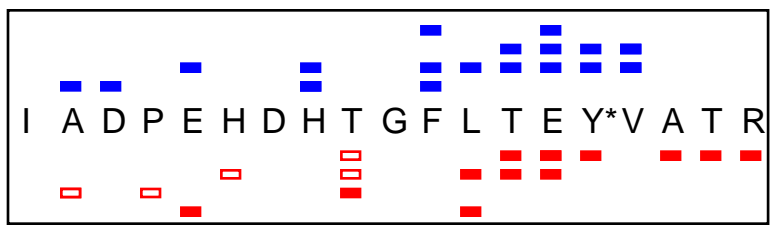

Protein Name: ERK1  
 gi Accession: 0  
 Precursor Mass: 563.7559+4  
 Delta Mass: 0.044 ppm  
 XCorr: 22.16

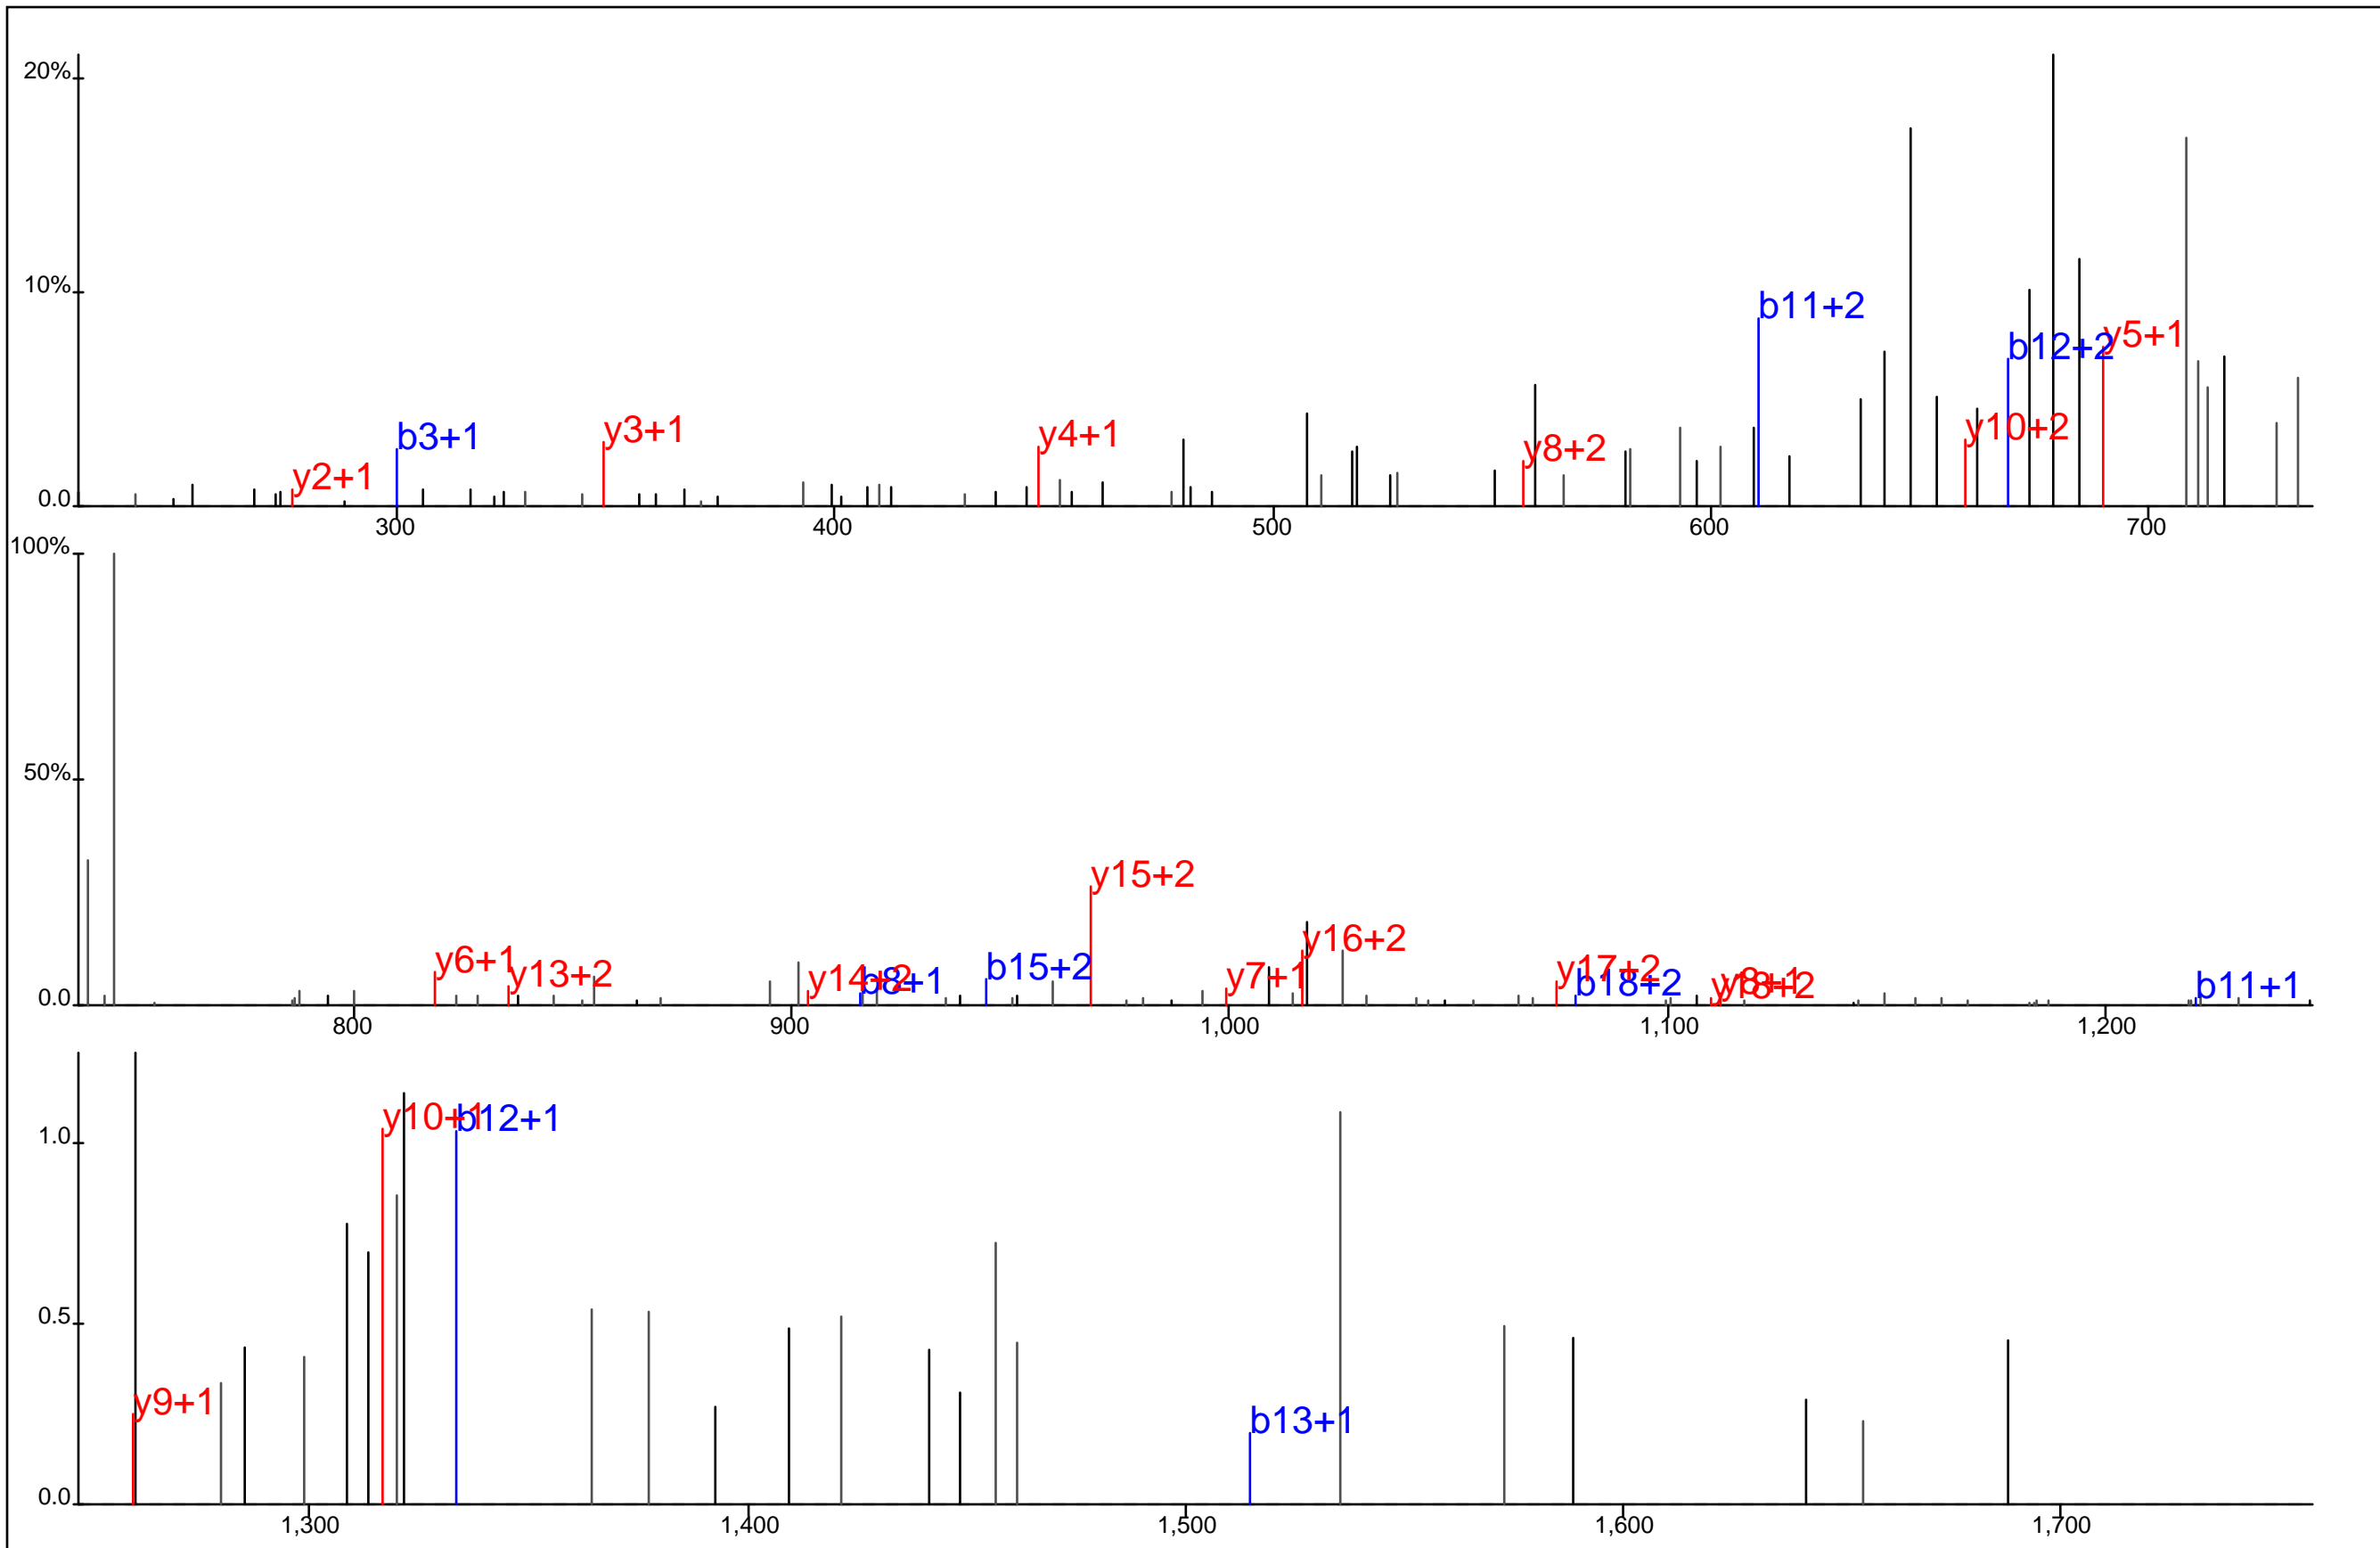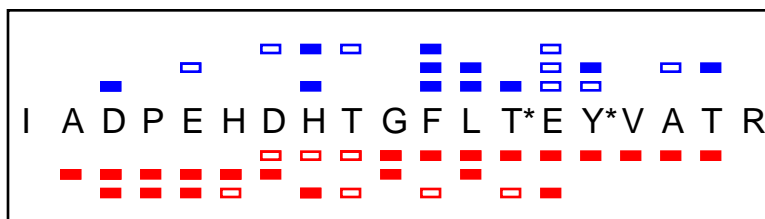

Protein Name: ERK1  
 gi Accession: 0  
 Precursor Mass: 777.9930+3  
 Delta Mass: 1.586 ppm  
 XCorr: 34.96

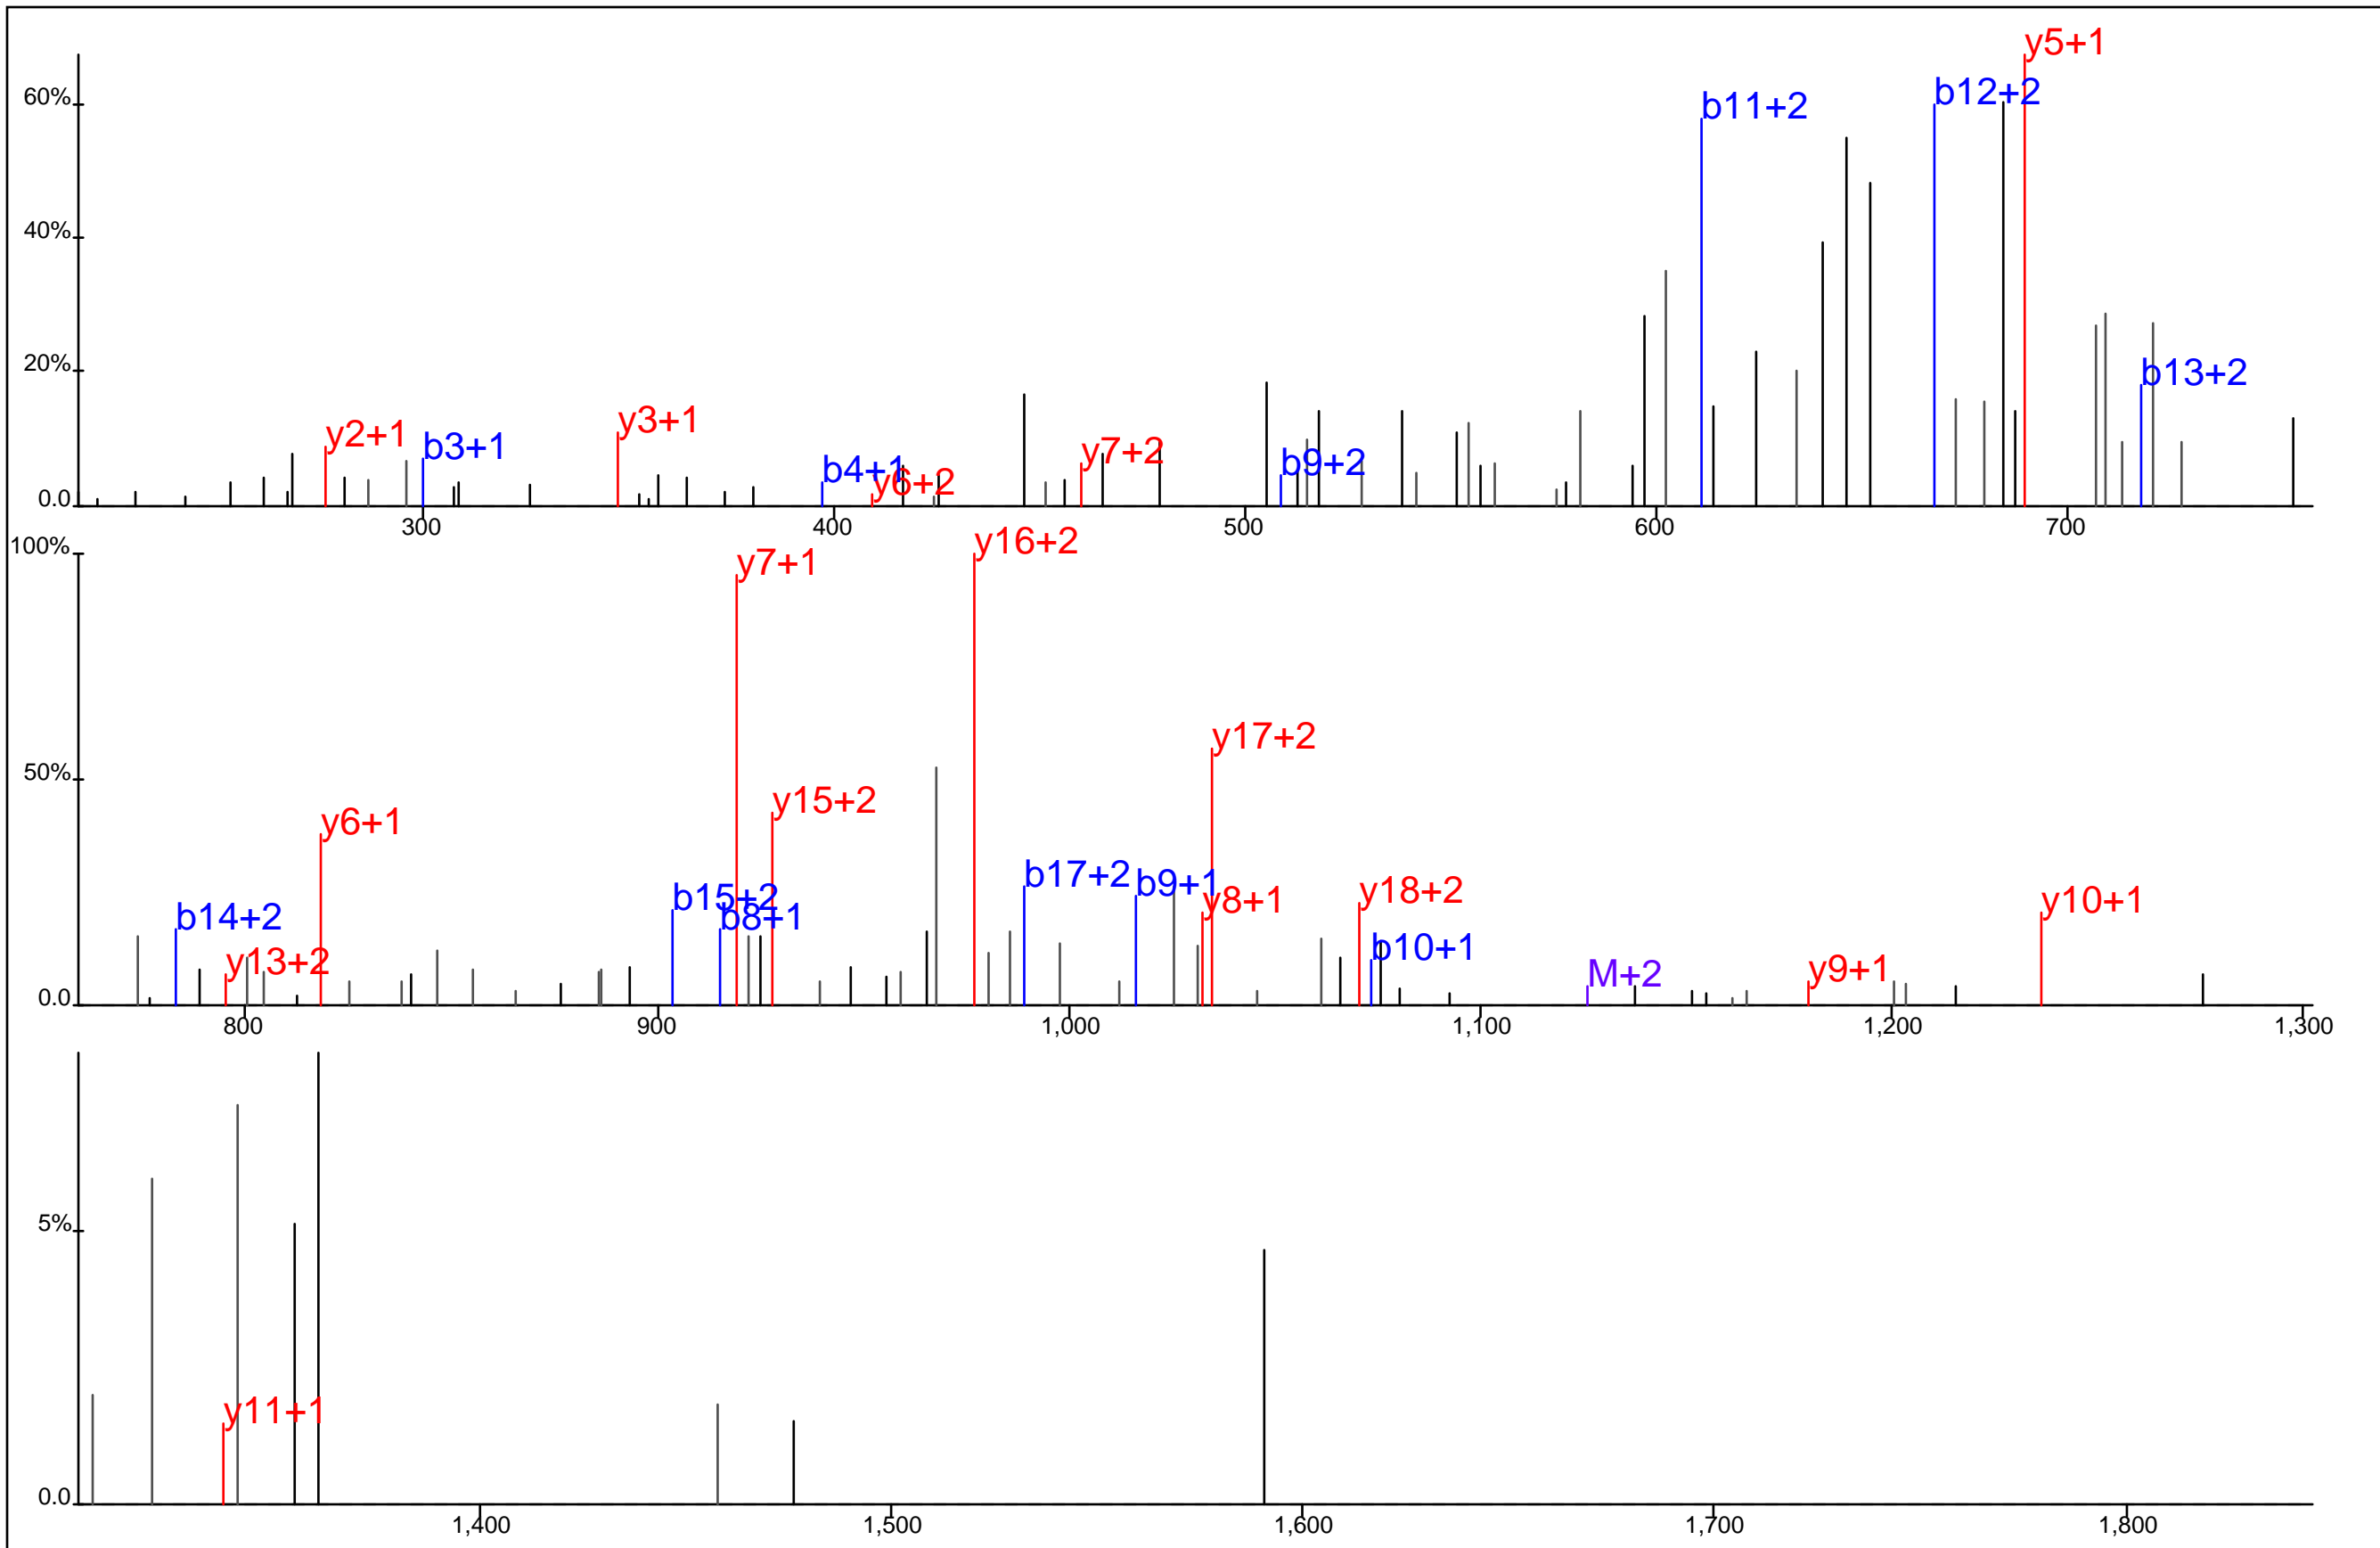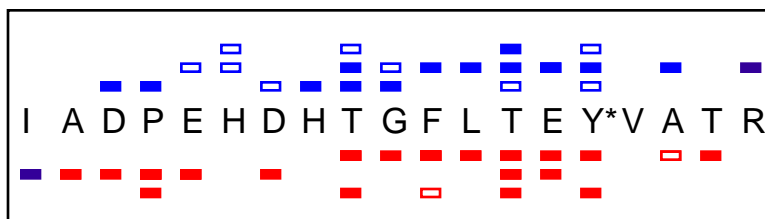

Protein Name: ERK1  
 gi Accession: 0  
 Precursor Mass: 751.3386+3  
 Delta Mass: 0.282 ppm  
 XCorr: 47.26

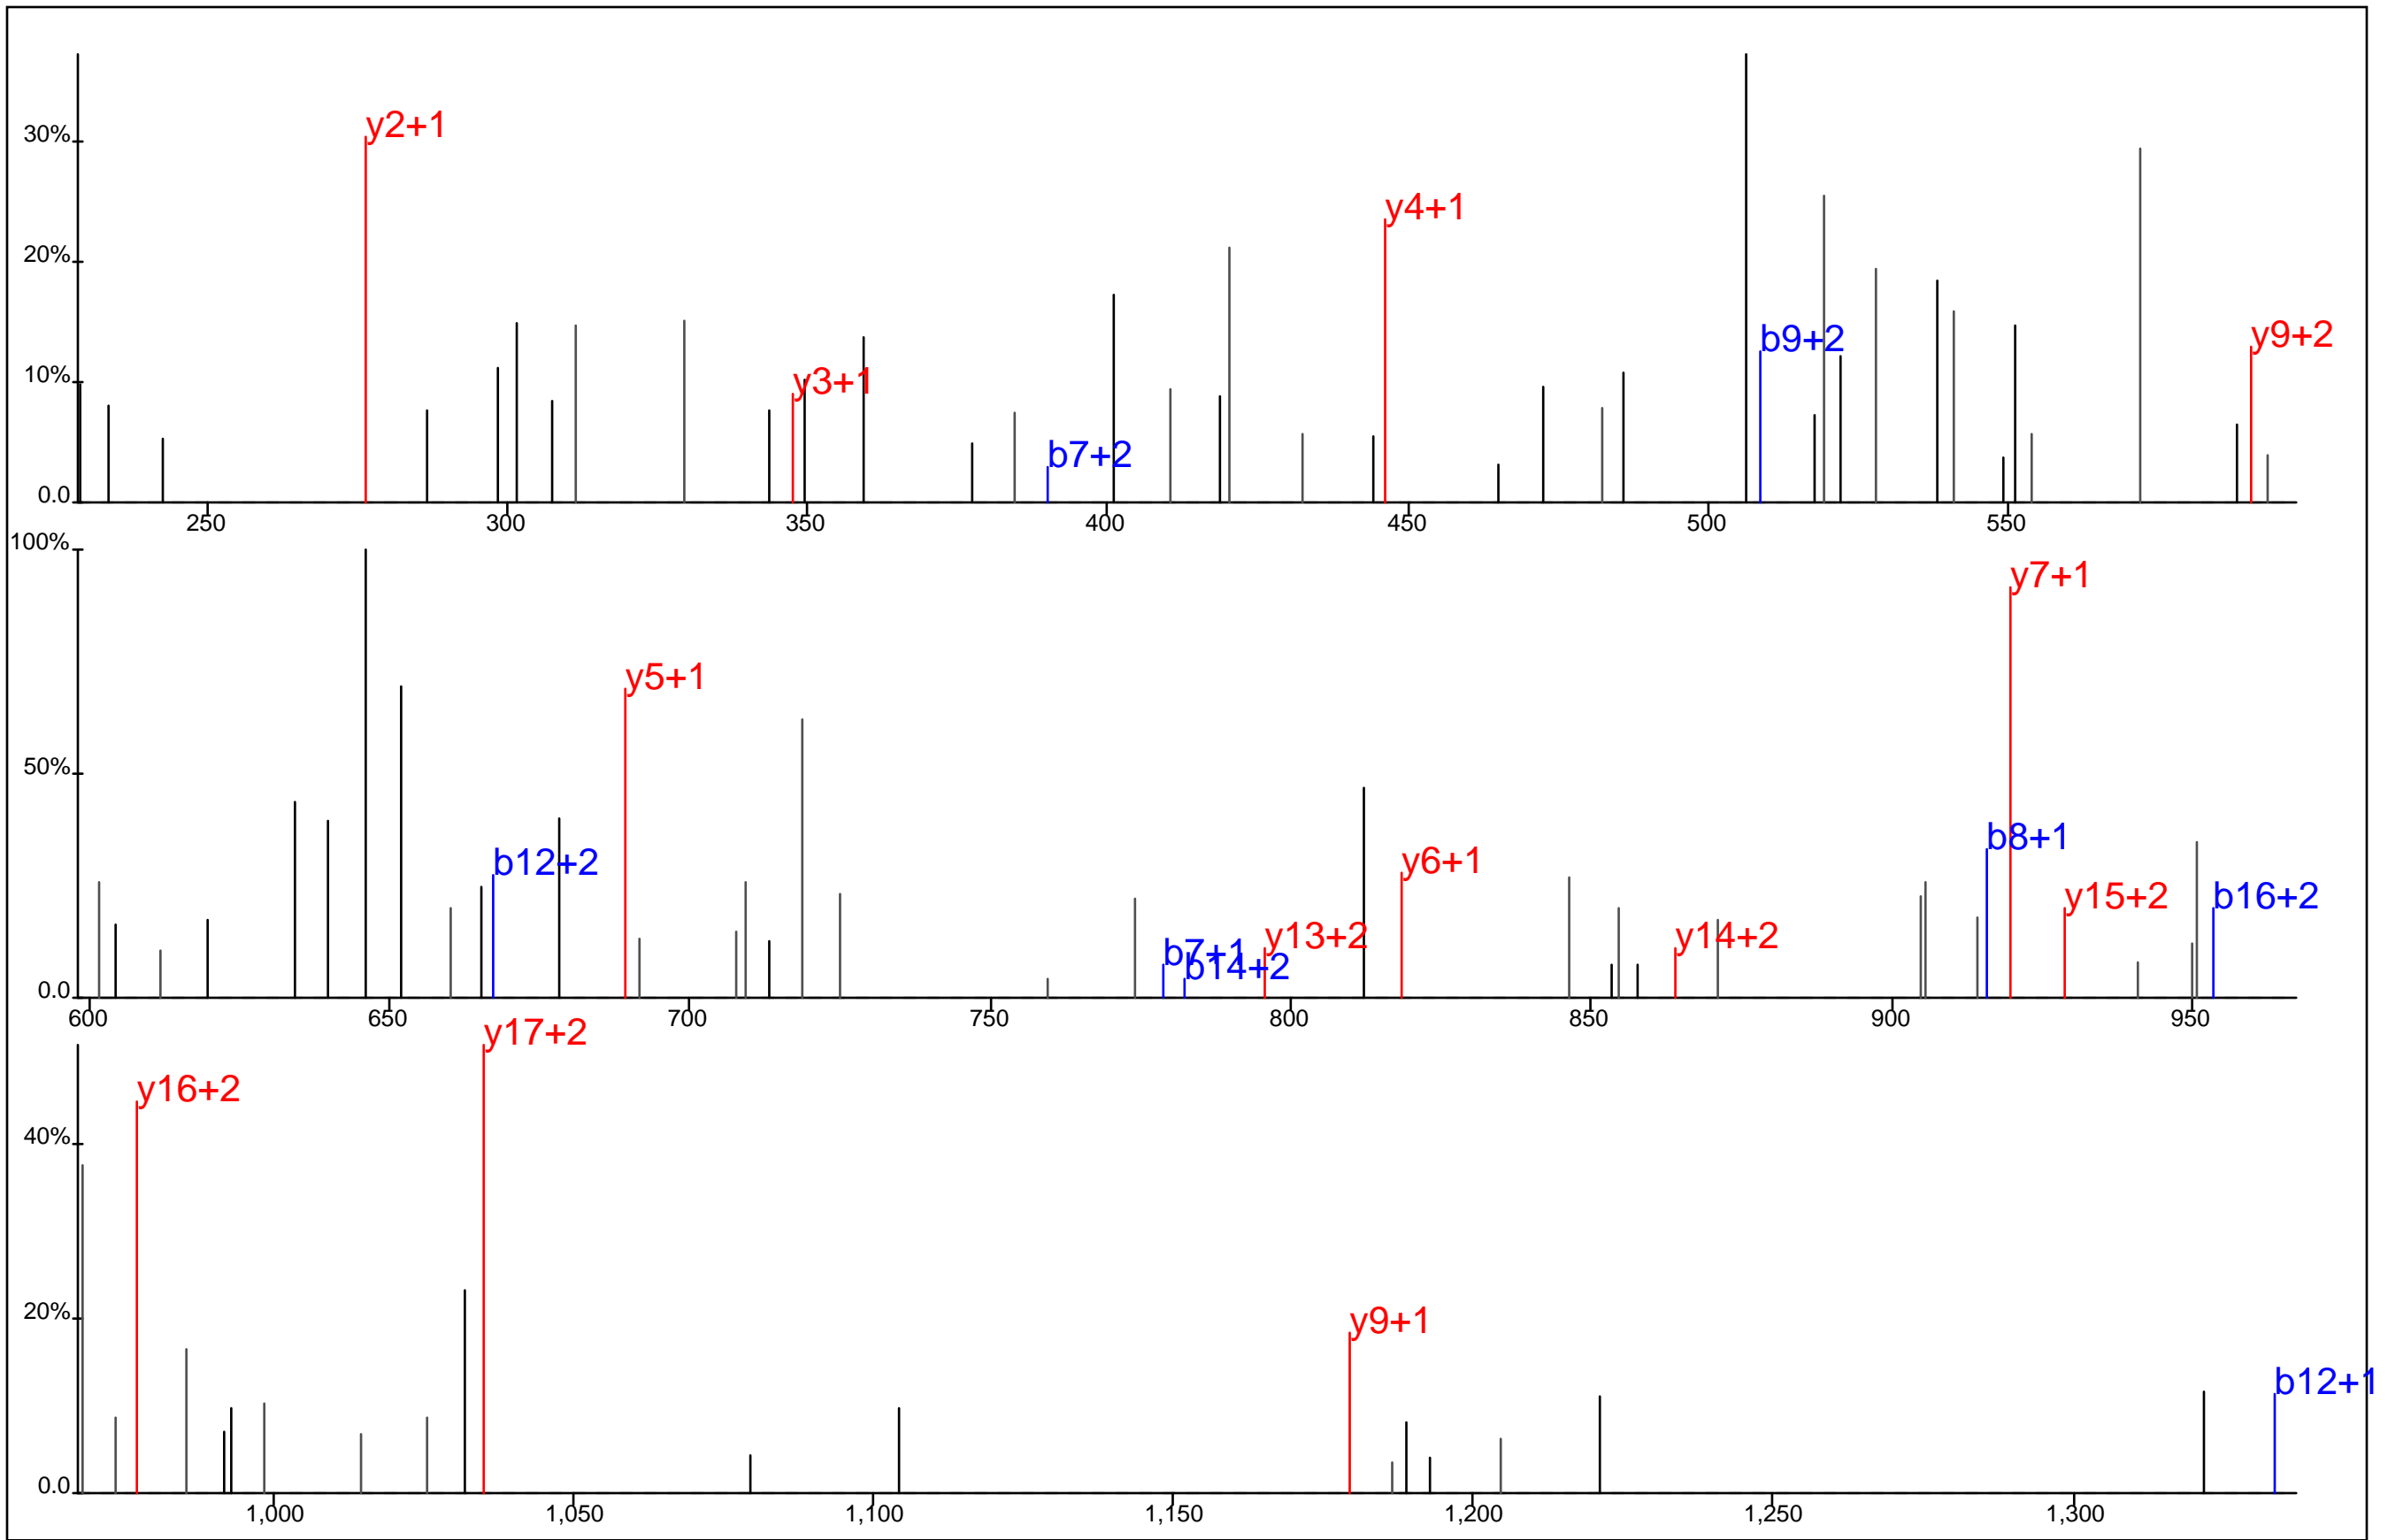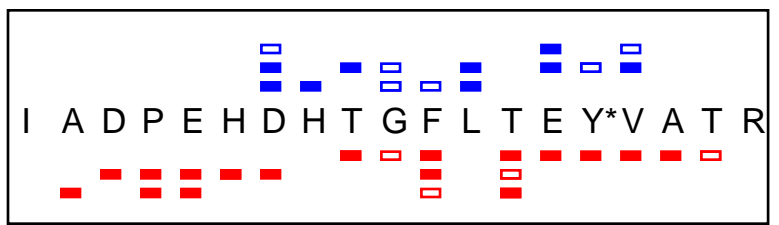

Protein Name: ERK1  
 gi Accession: 0  
 Precursor Mass: 751.3355+3  
 Delta Mass: 4.429 ppm  
 XCorr: 25.03





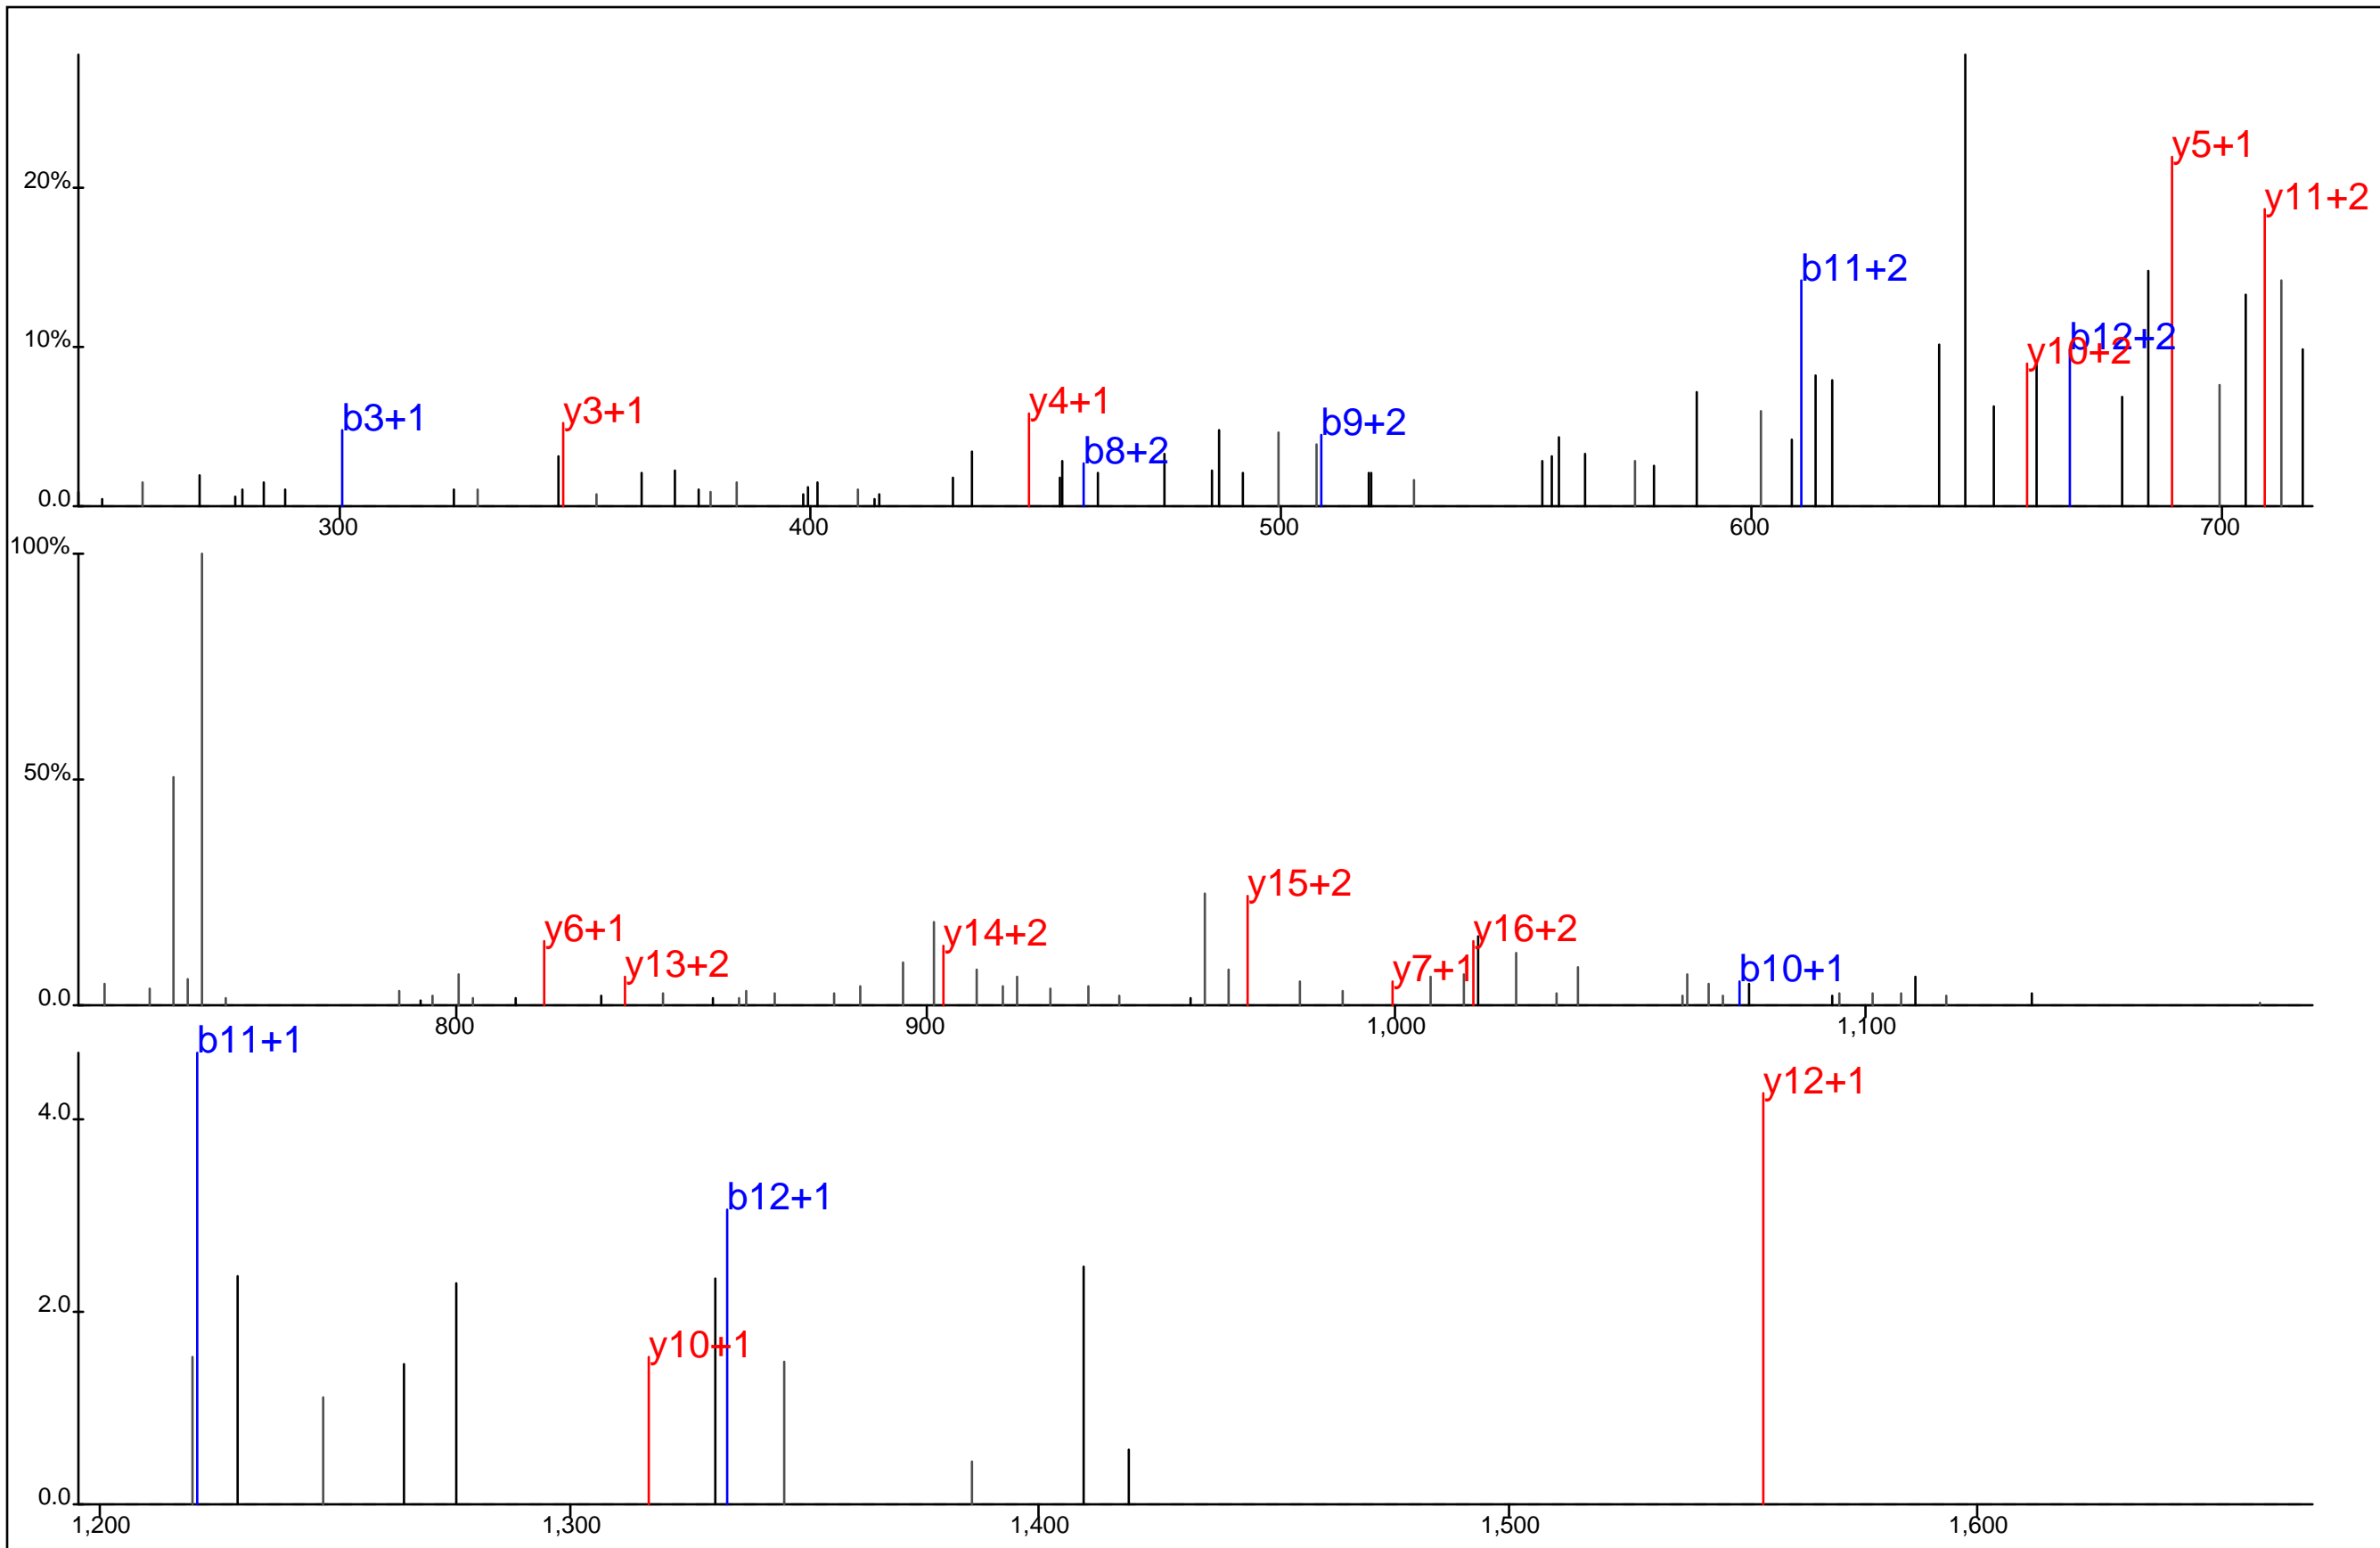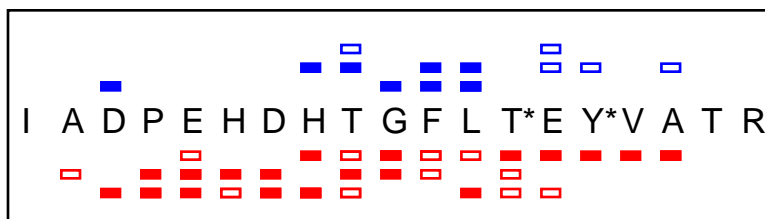

Protein Name: ERK1  
 gi Accession: 0  
 Precursor Mass: 777.9949+3  
 Delta Mass: 0.848 ppm  
 XCorr: 32.98

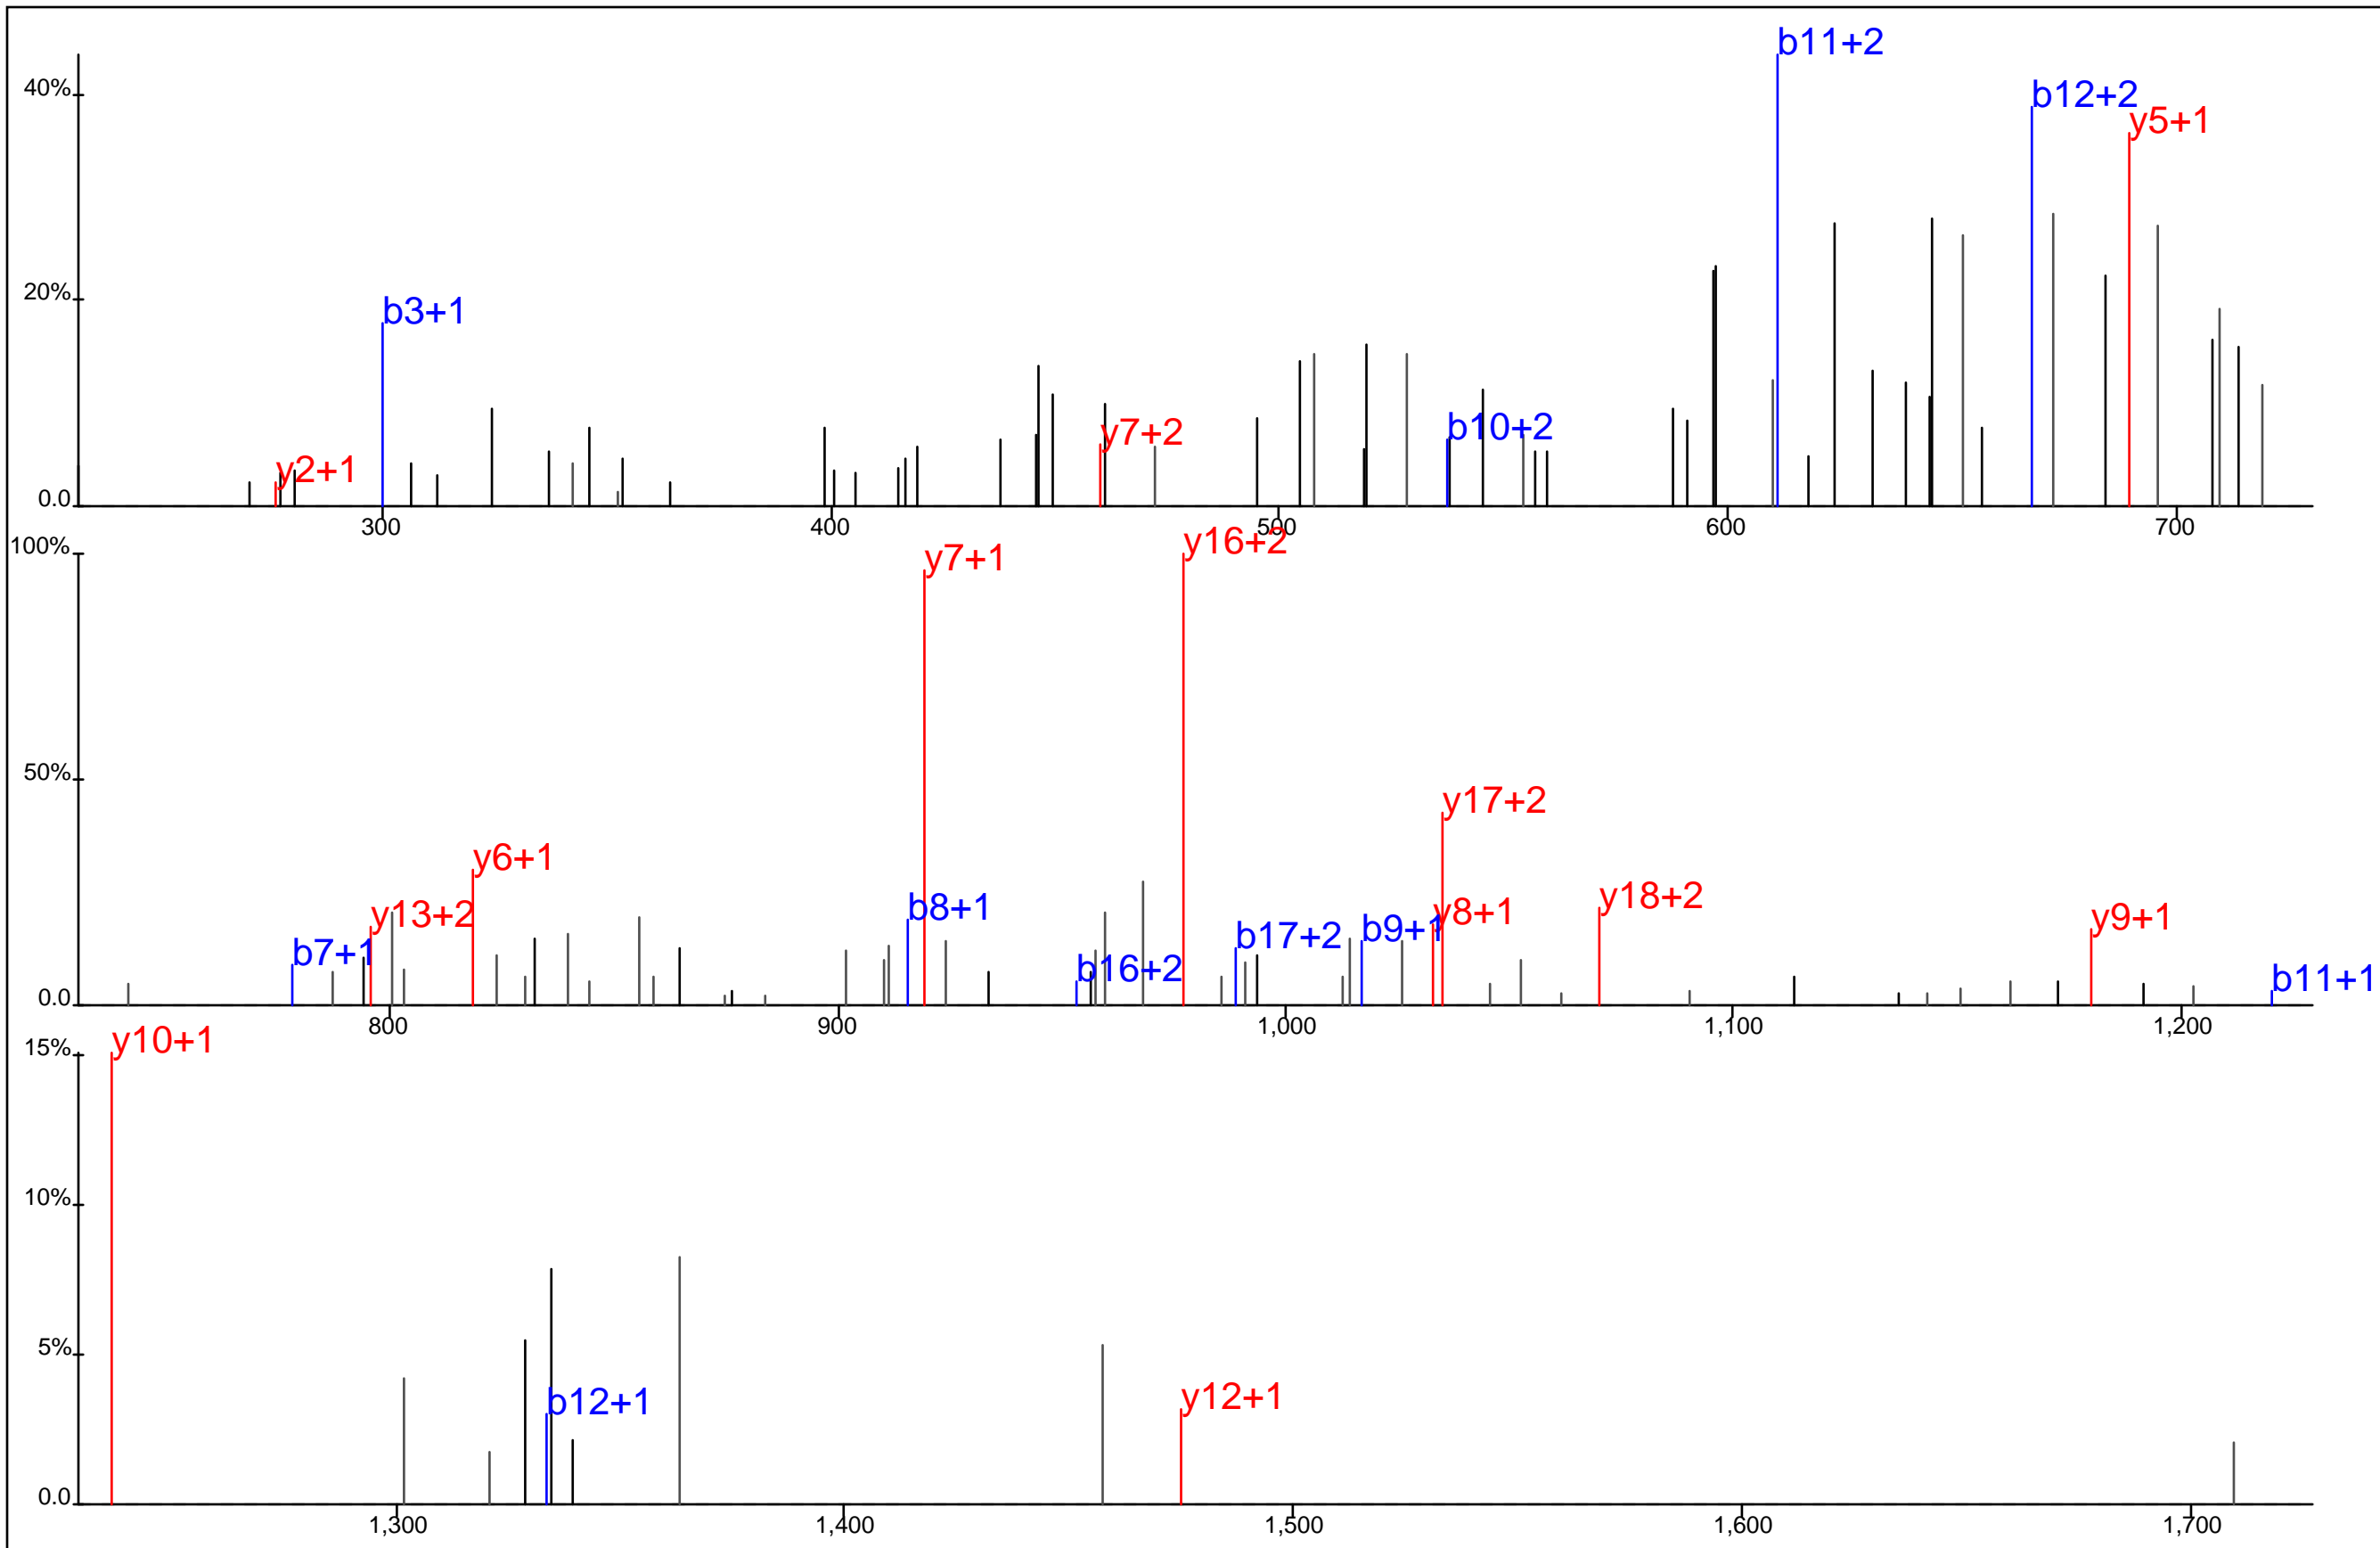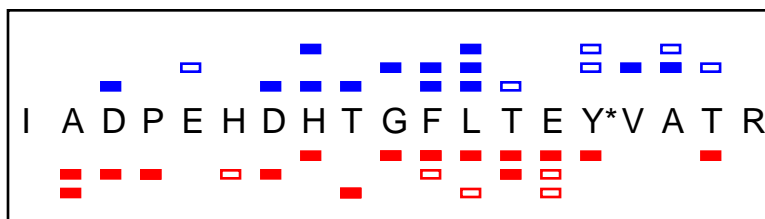

Protein Name: ERK1  
 gi Accession: 0  
 Precursor Mass: 751.3374+3  
 Delta Mass: 1.909 ppm  
 XCorr: 39.57



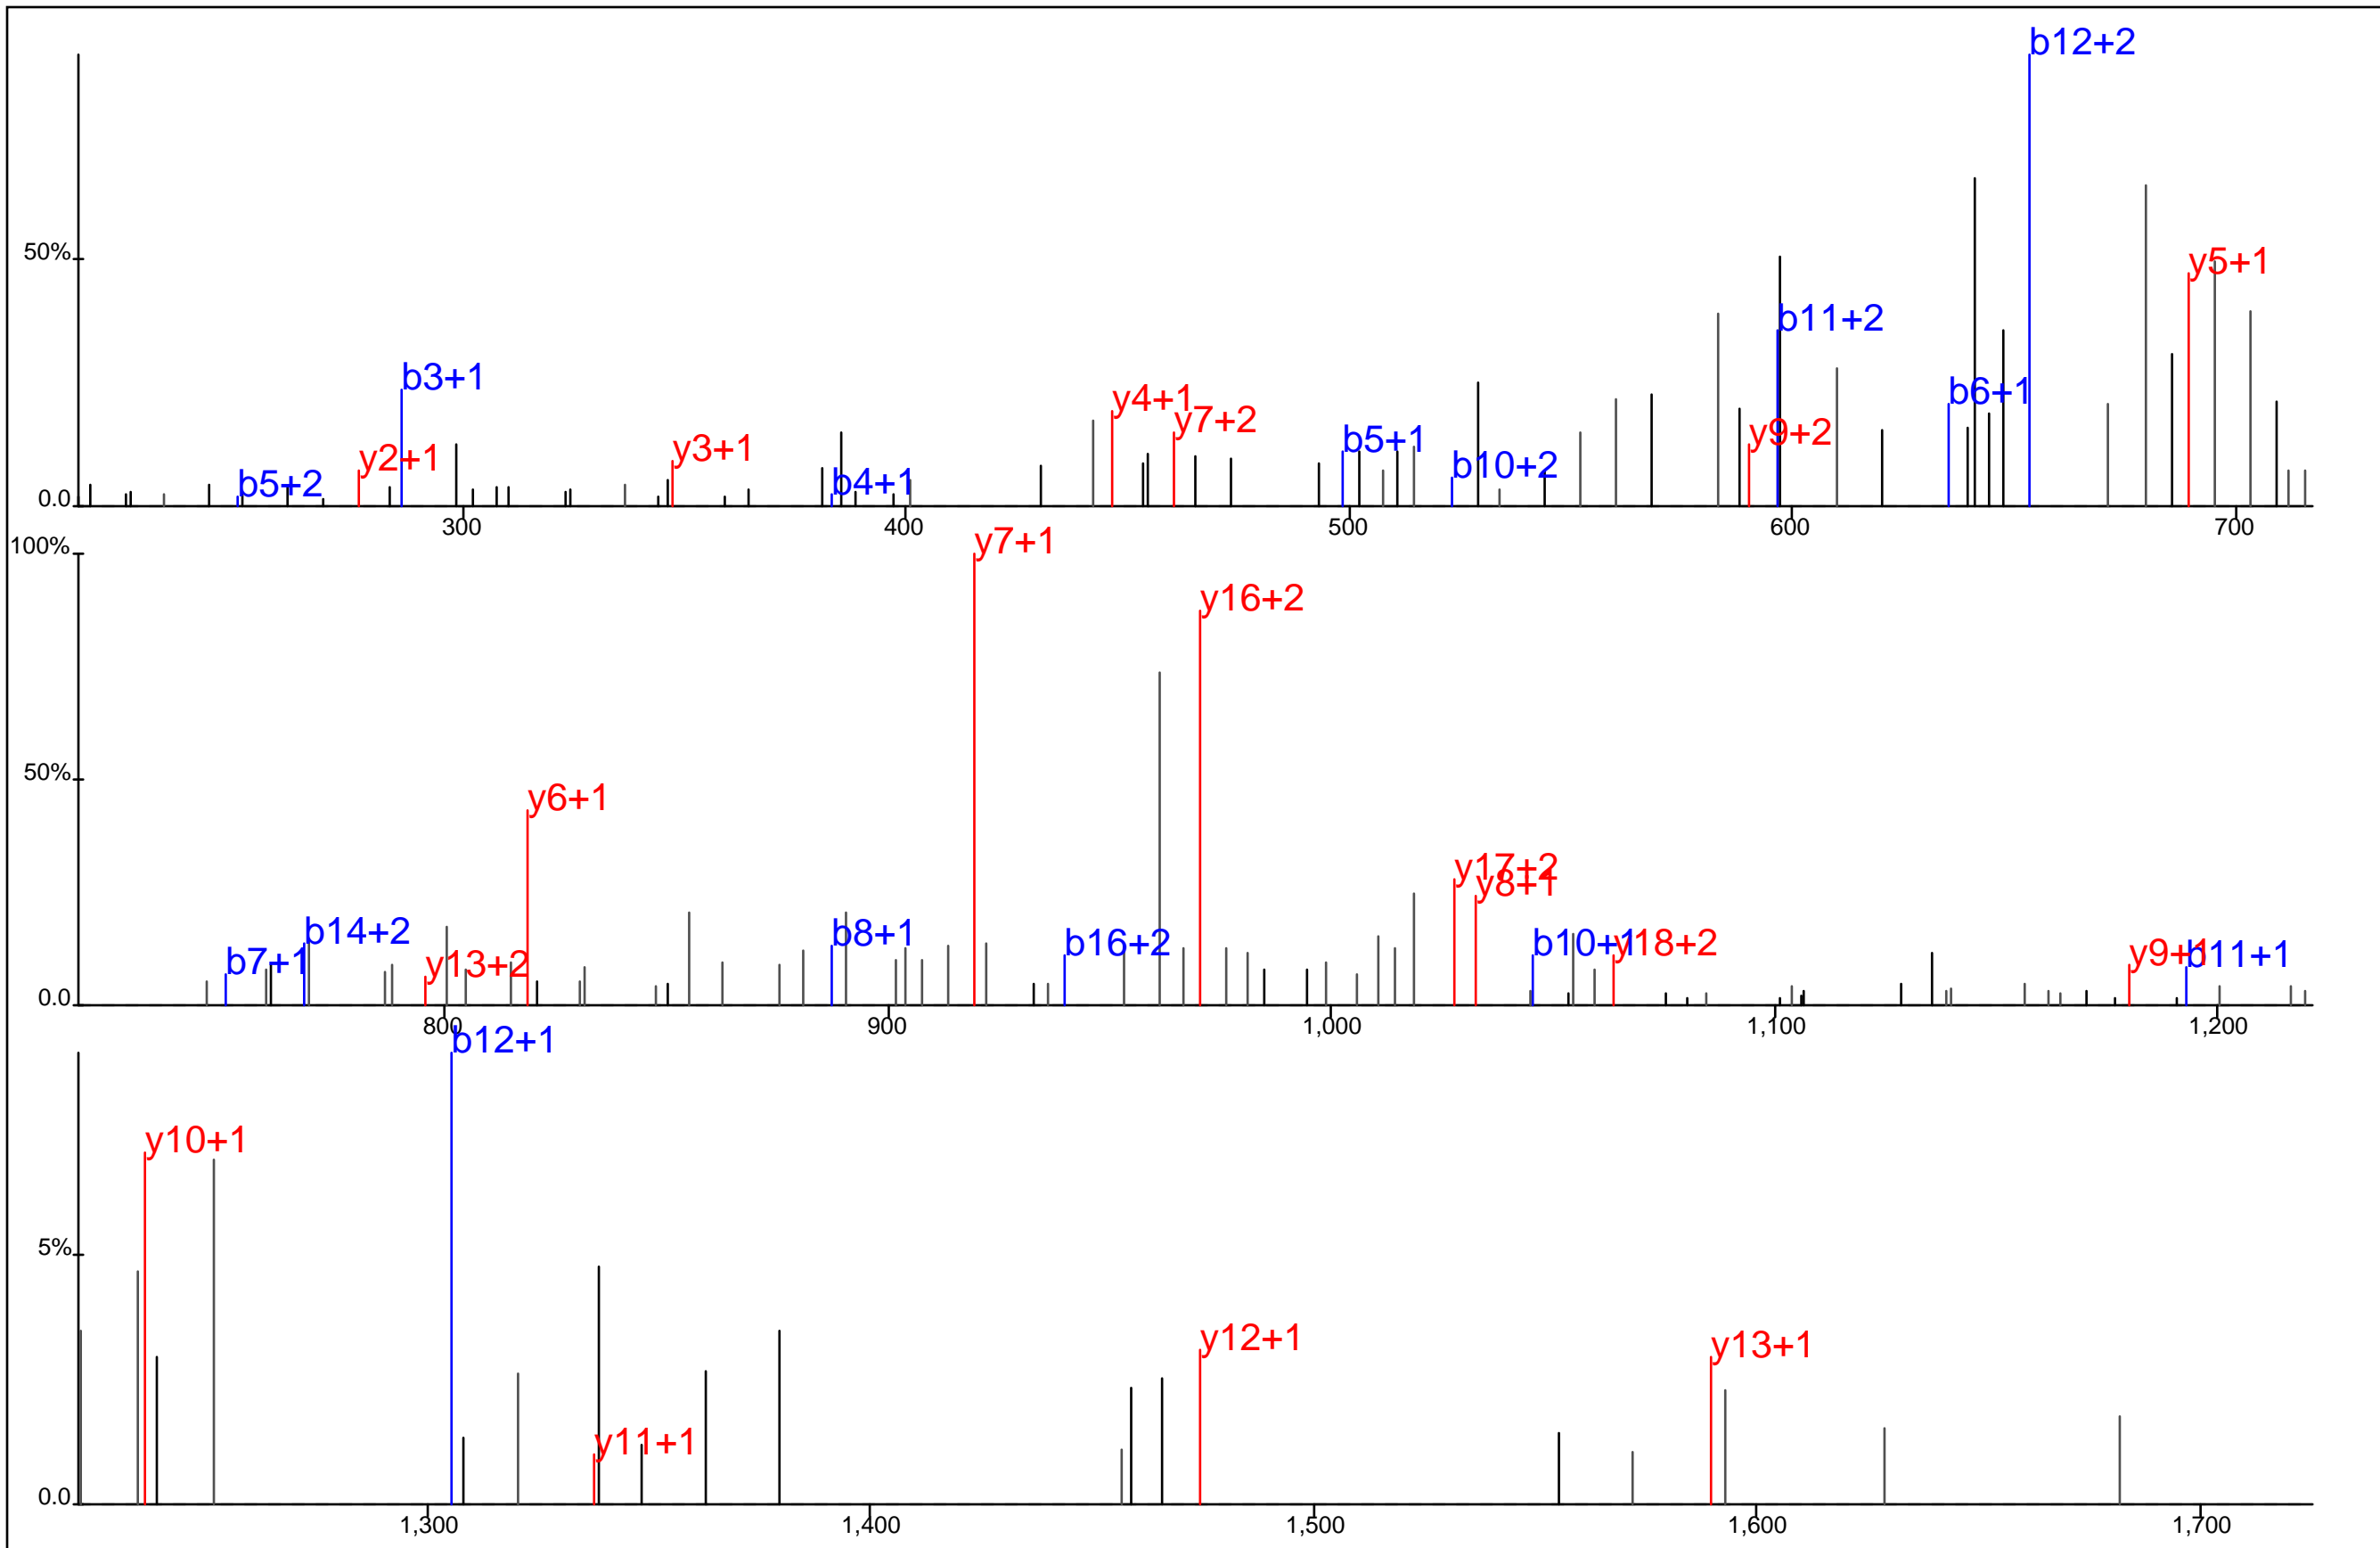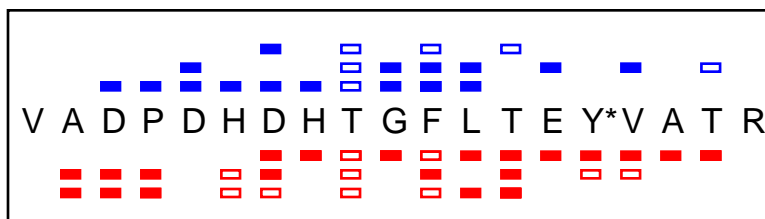

Protein Name: ERK2  
 gi Accession: 0  
 Precursor Mass: 741.9956+3  
 Delta Mass: 0.715 ppm  
 XCorr: 54.63

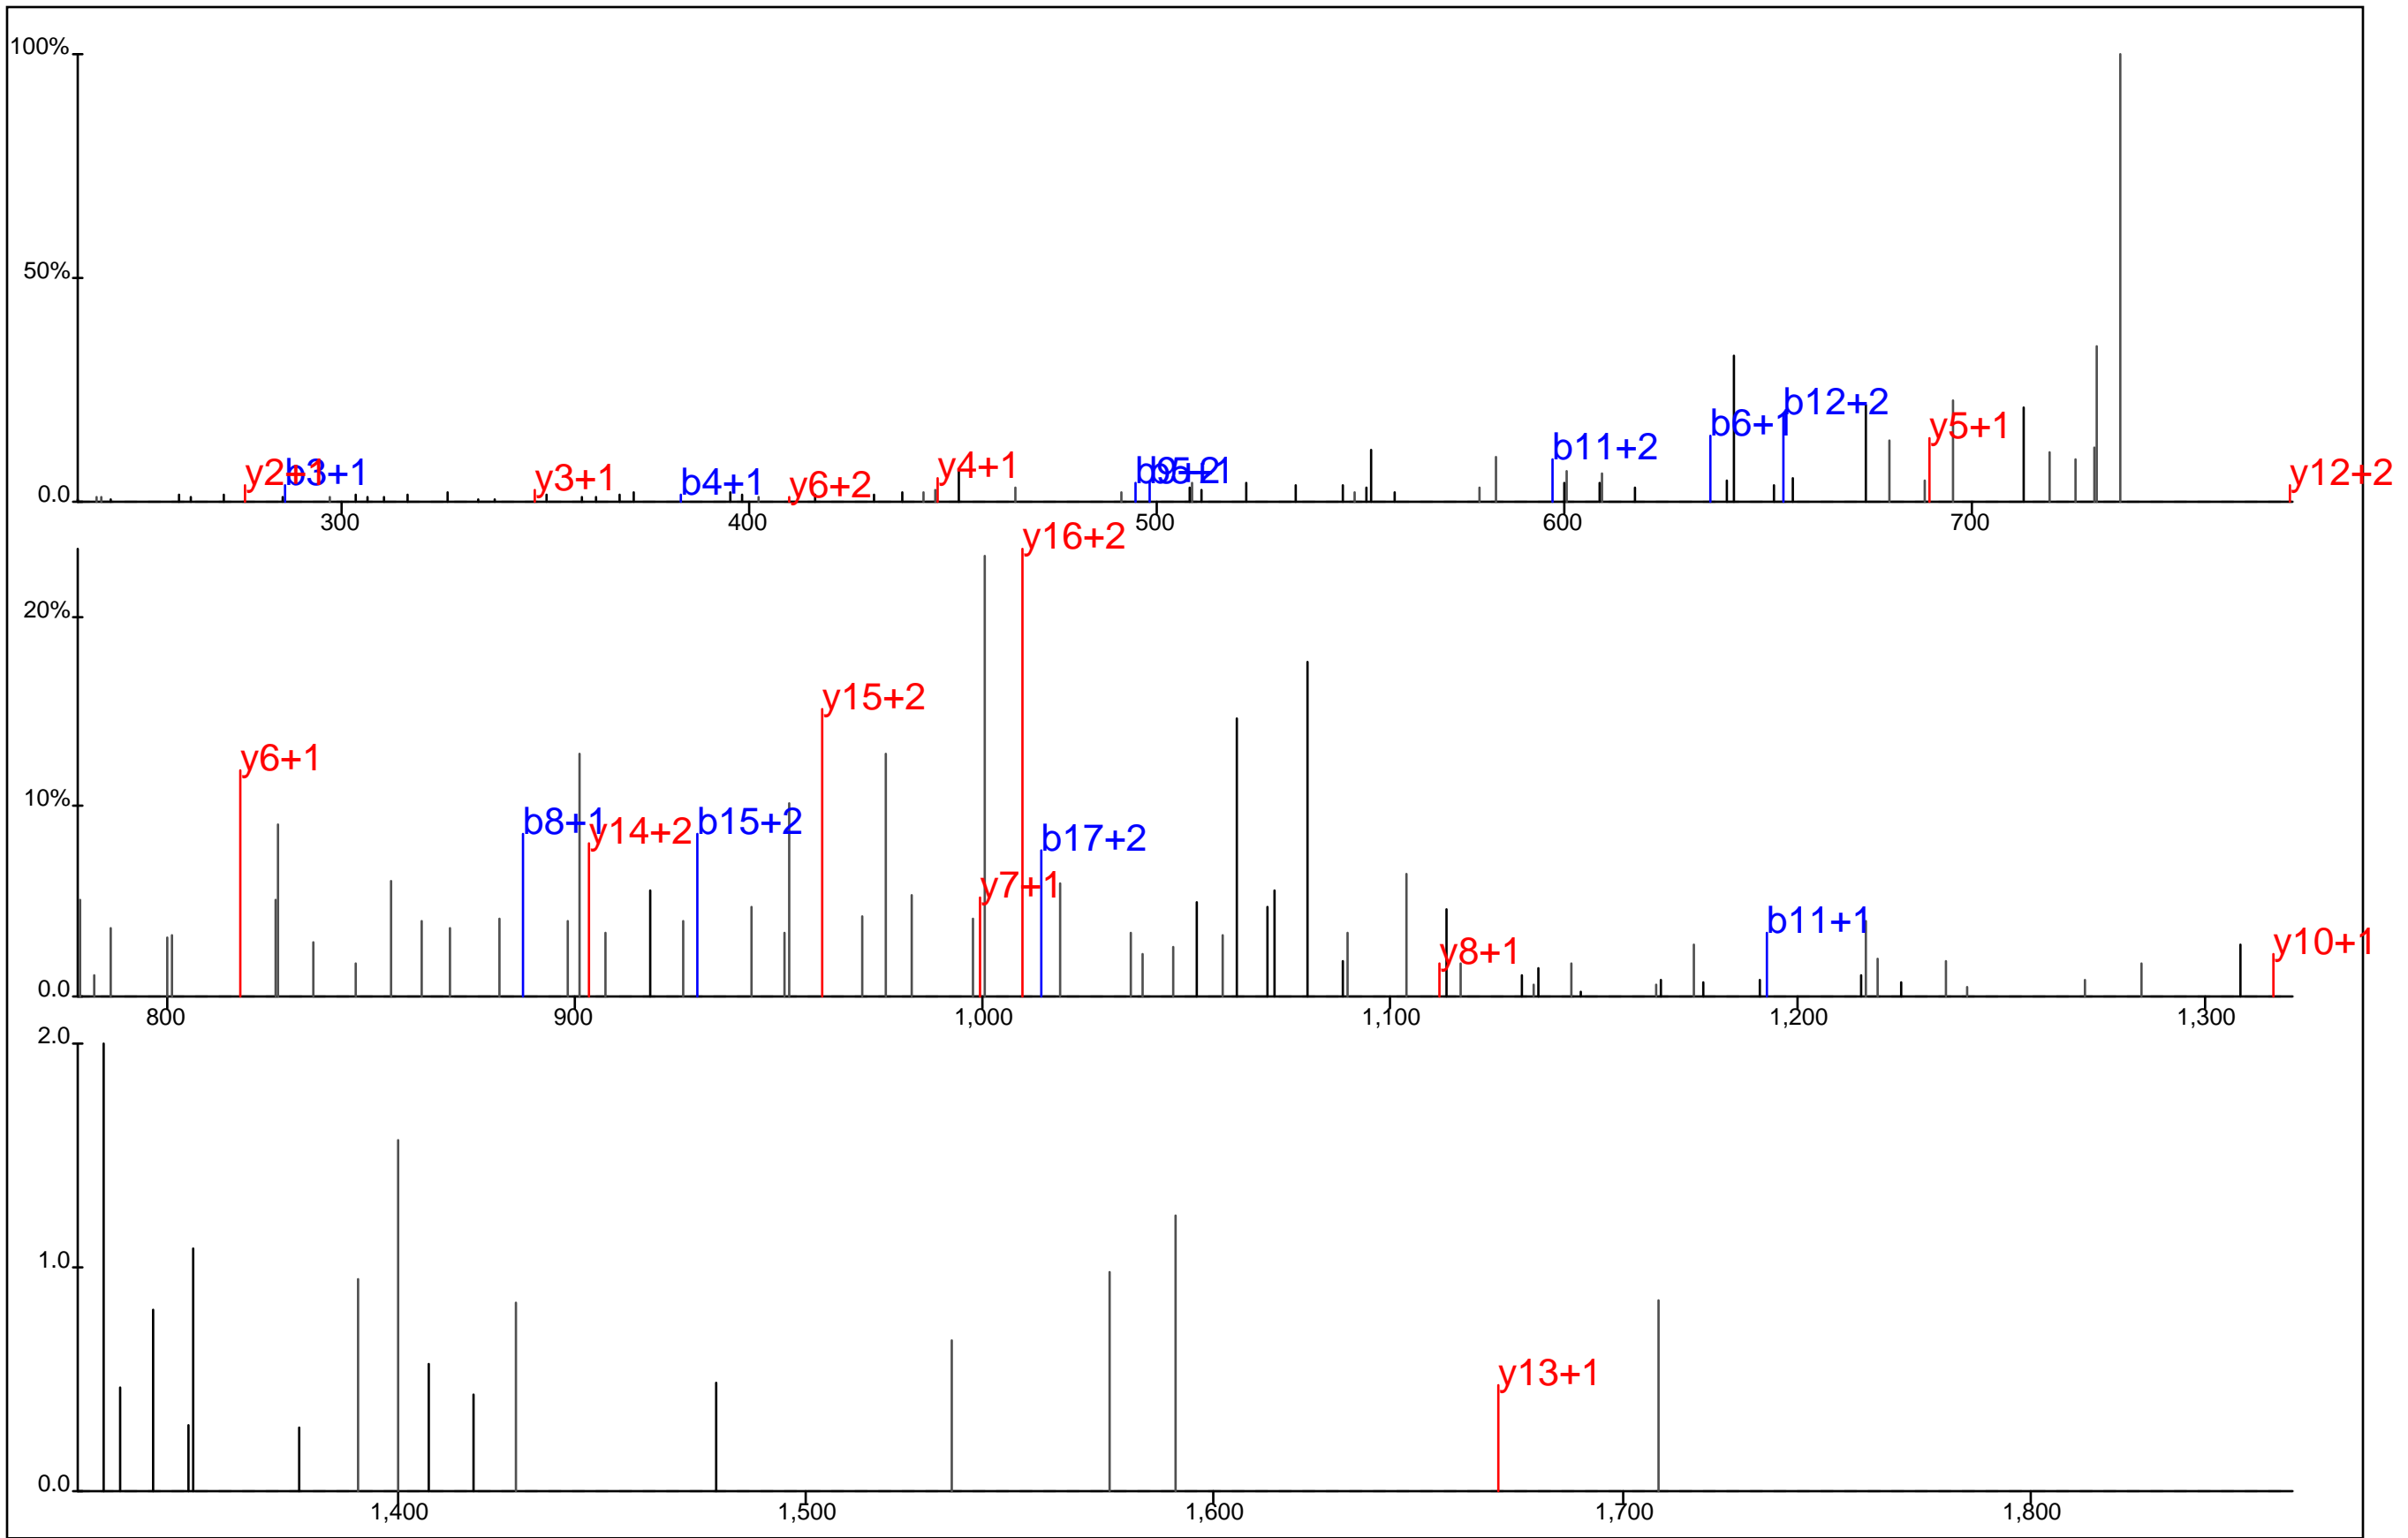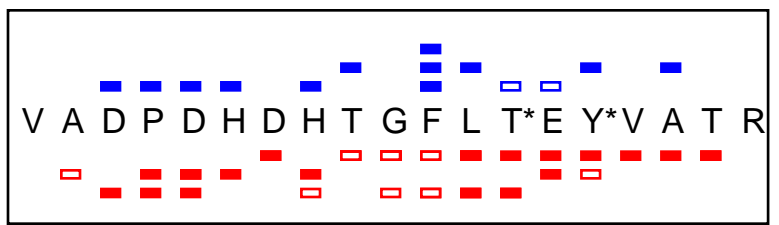

Protein Name: ERK2  
 gi Accession: 0  
 Precursor Mass: 768.6517+3  
 Delta Mass: 1.507 ppm  
 XCorr: 27.65

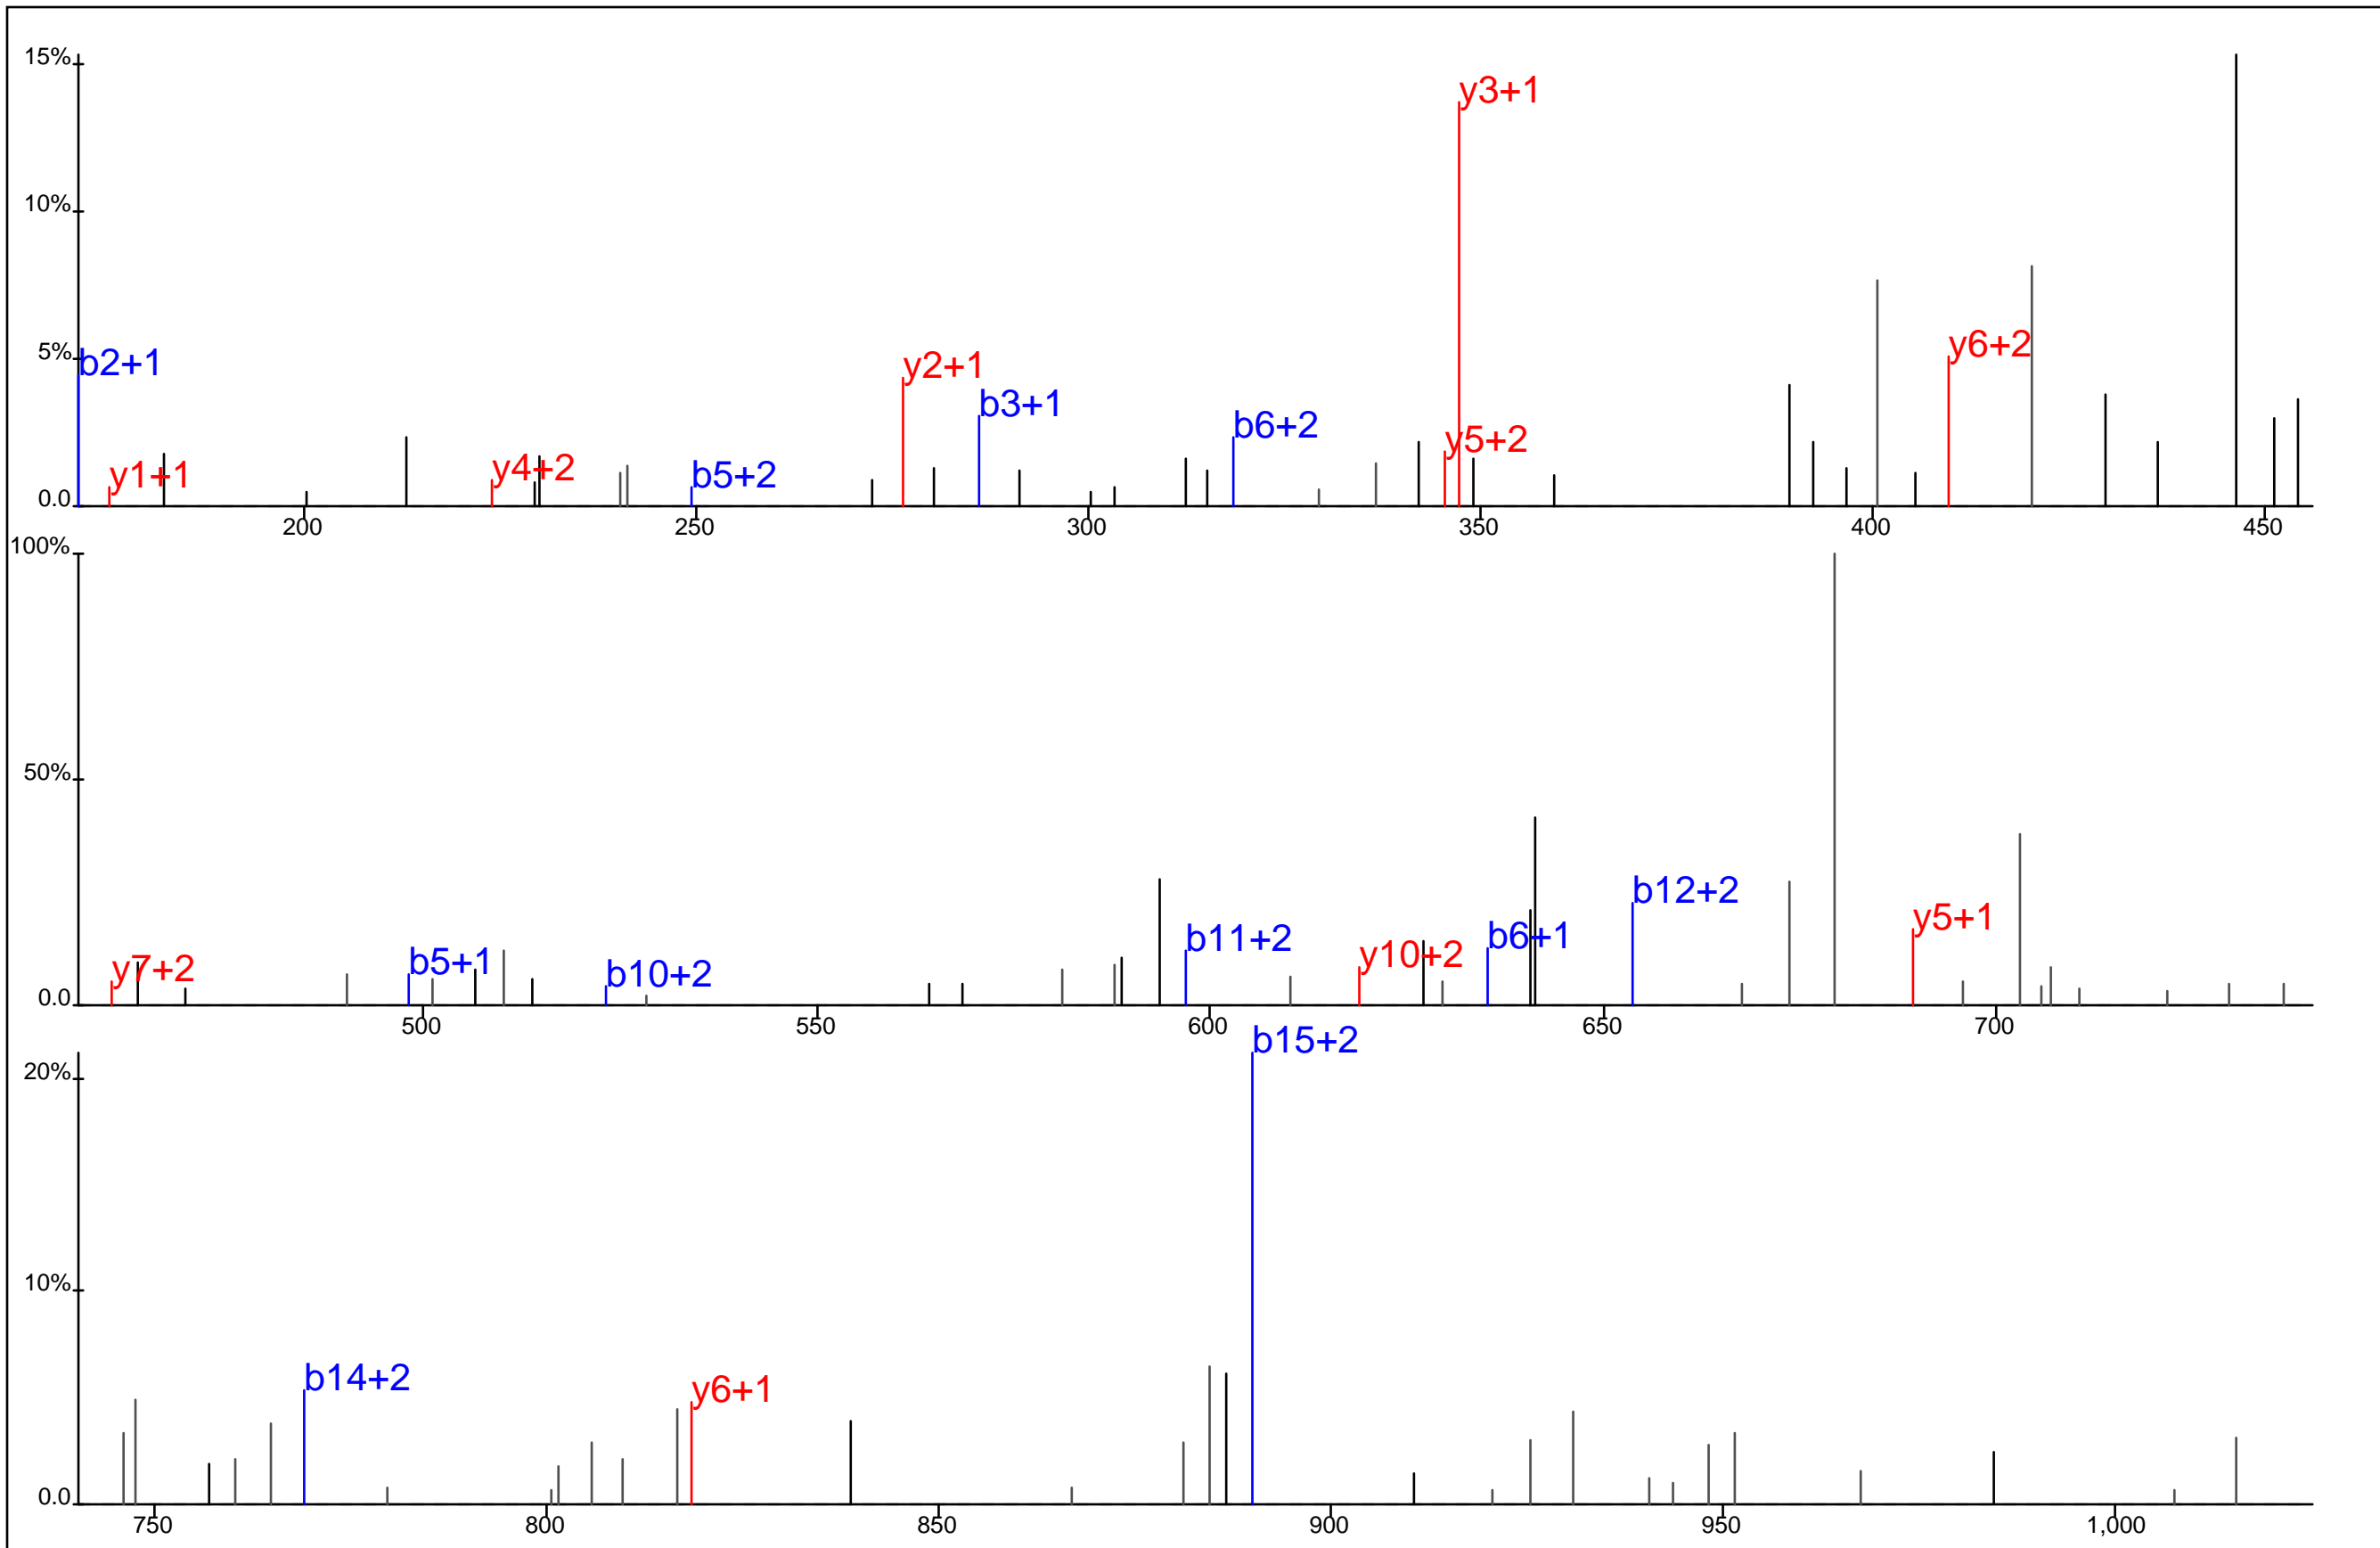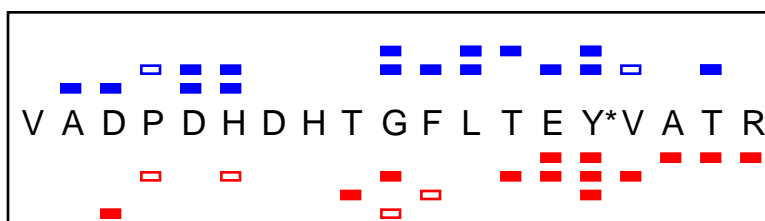

Protein Name: ERK2  
 gi Accession: 0  
 Precursor Mass: 556.7487+4  
 Delta Mass: 1.067 ppm  
 XCorr: 23.32

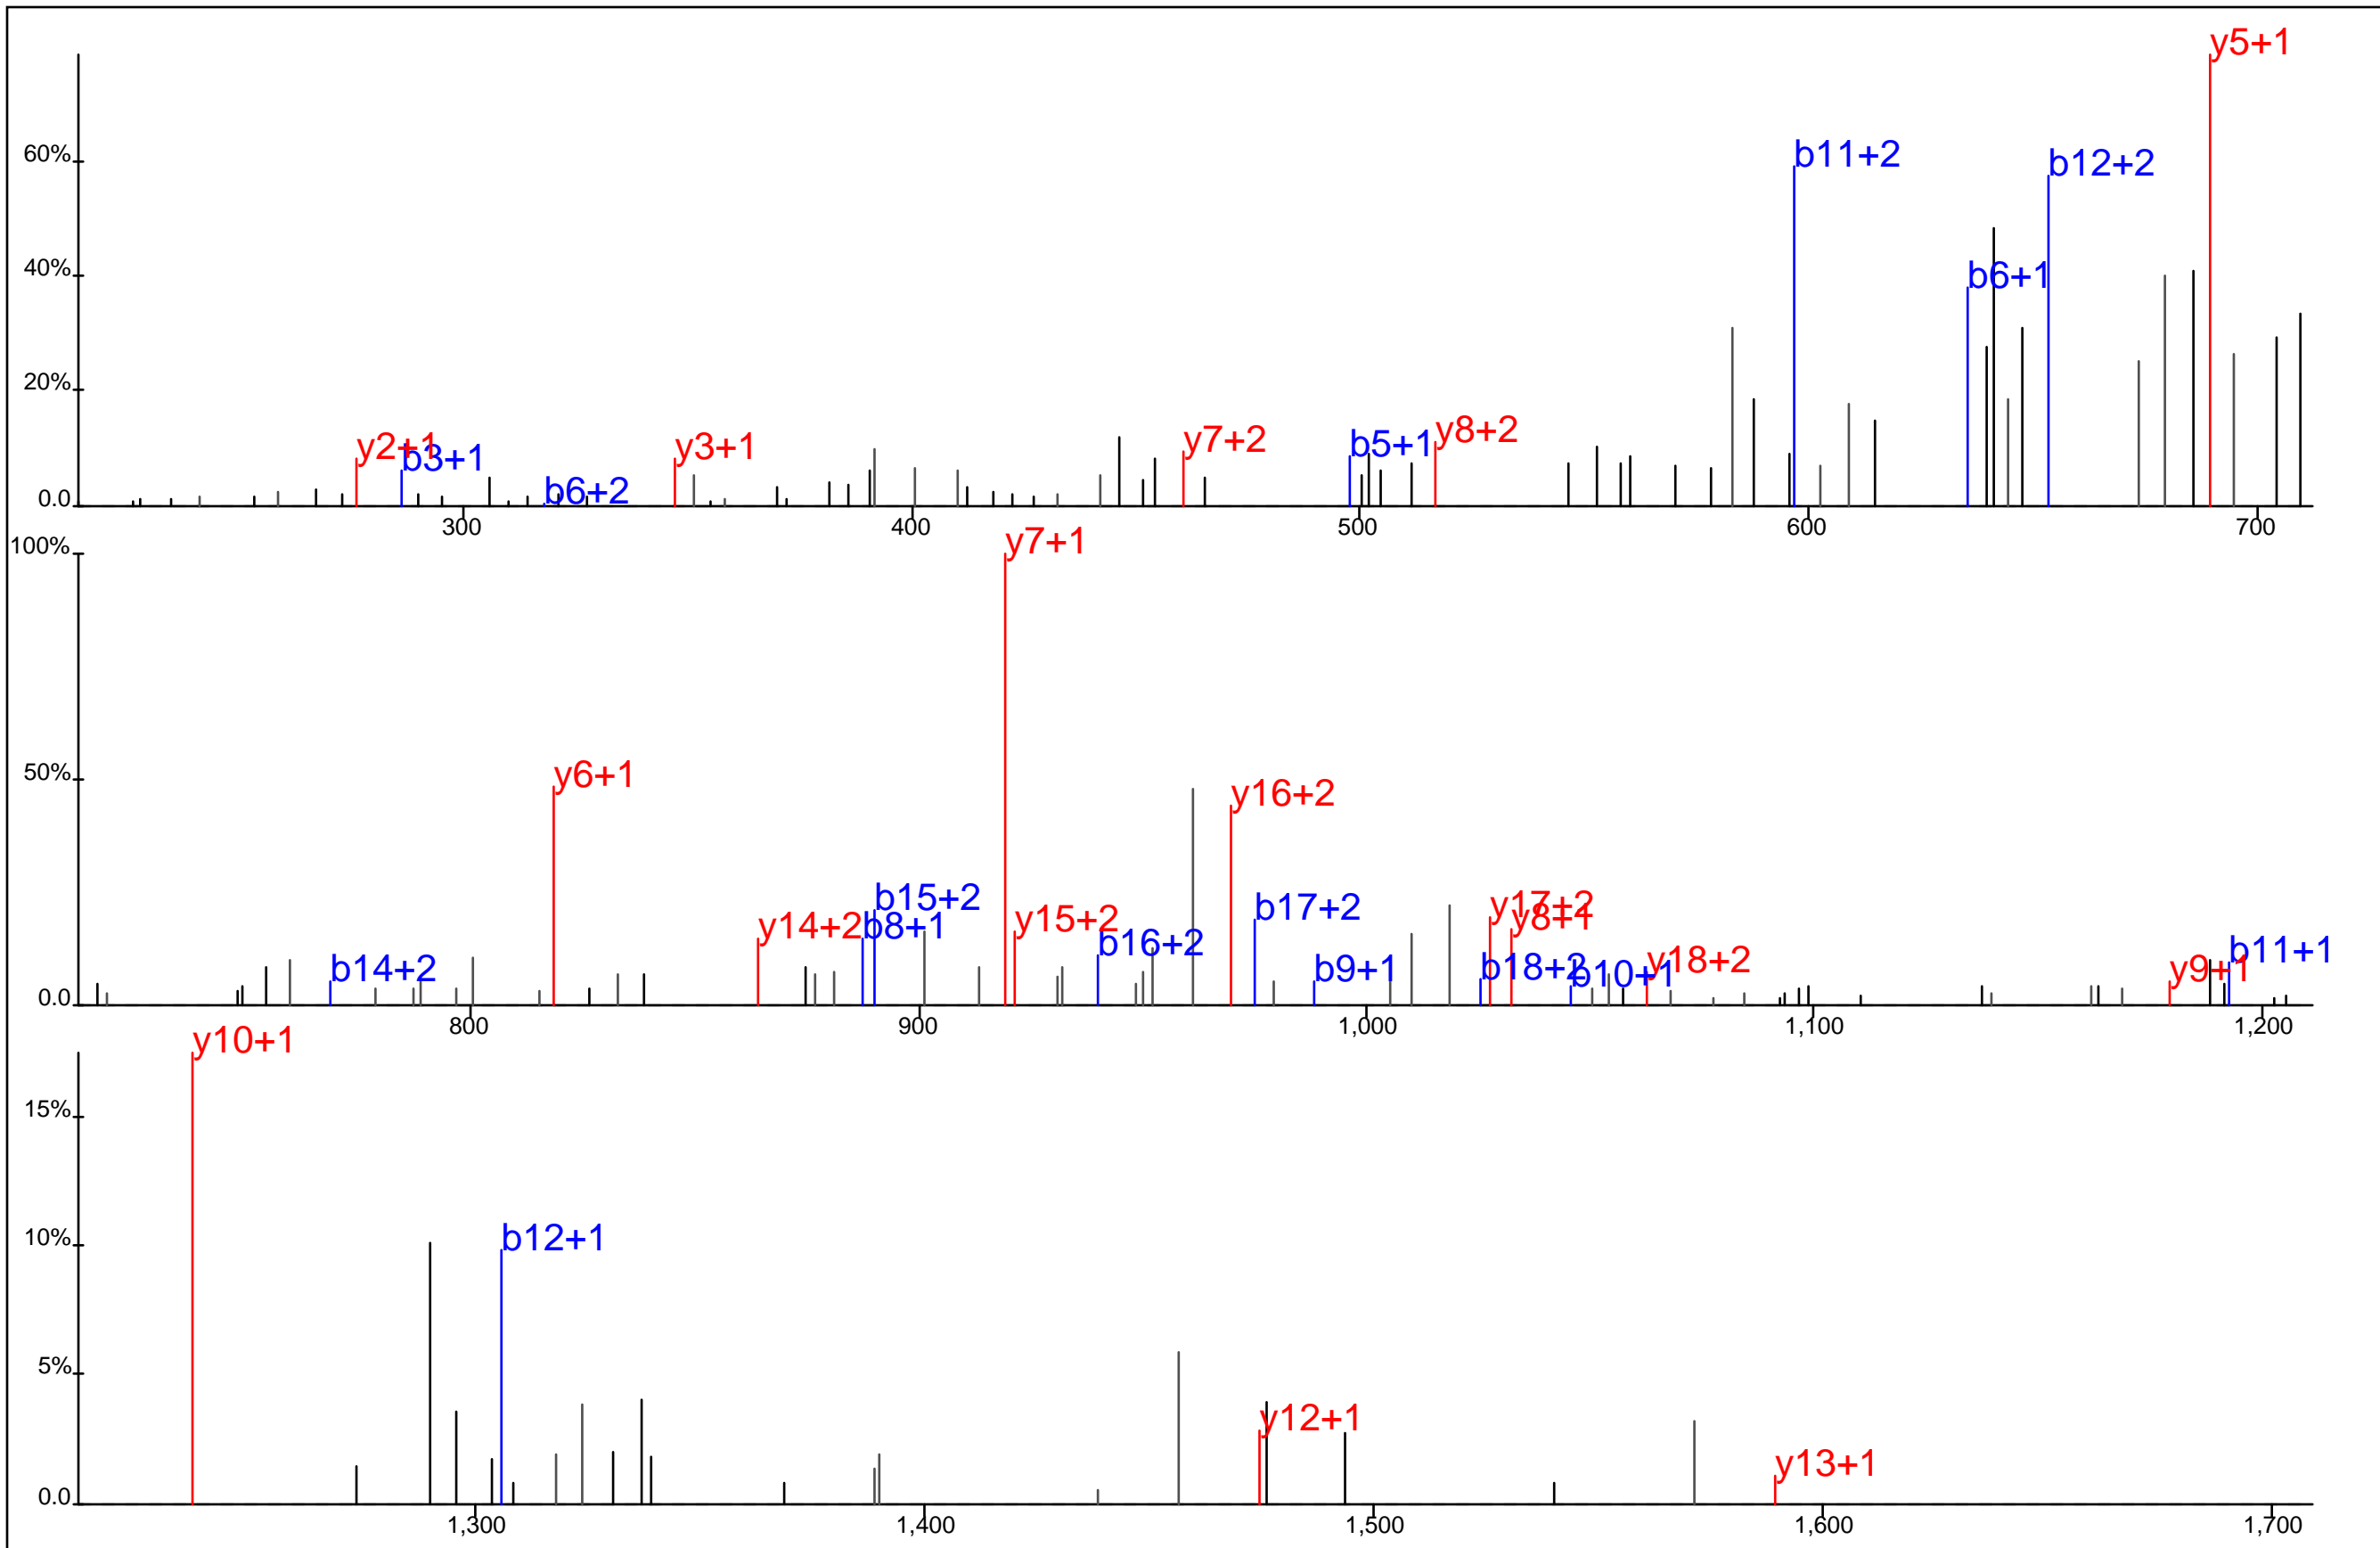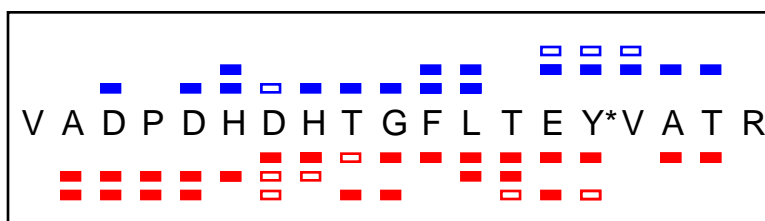

Protein Name: ERK2  
 gi Accession: 0  
 Precursor Mass: 741.9963+3  
 Delta Mass: 1.704 ppm  
 XCorr: 73.73

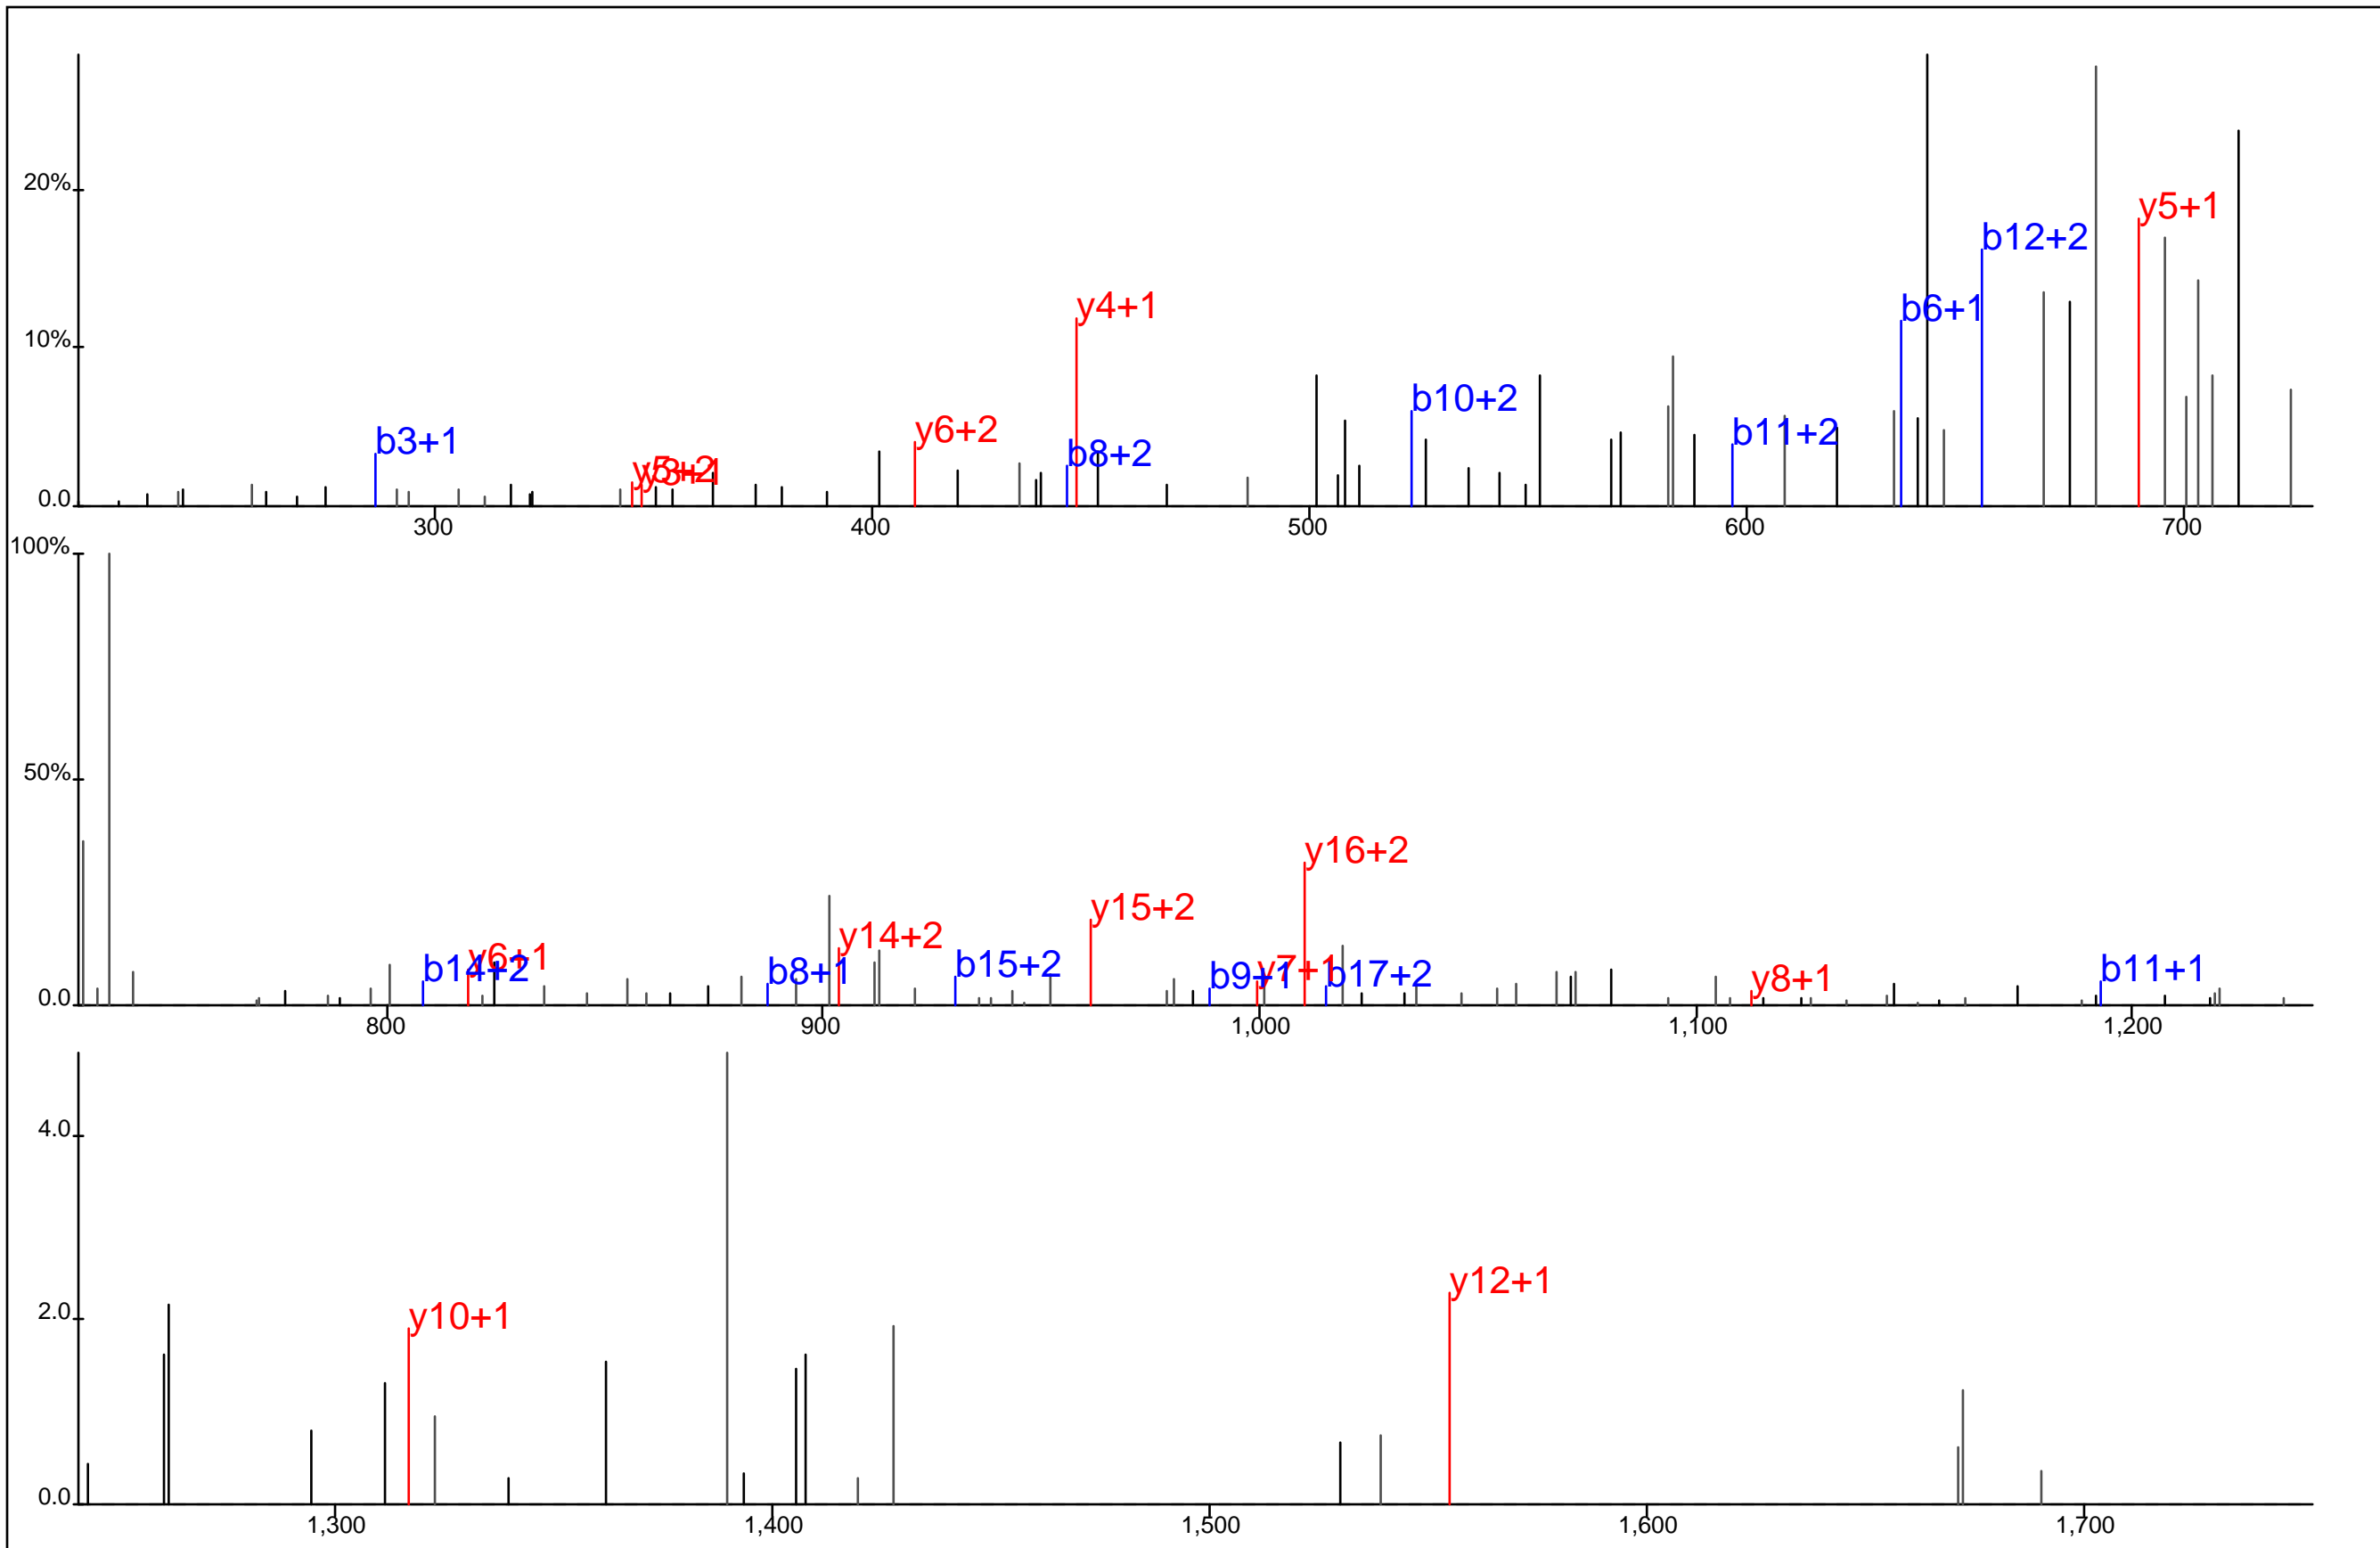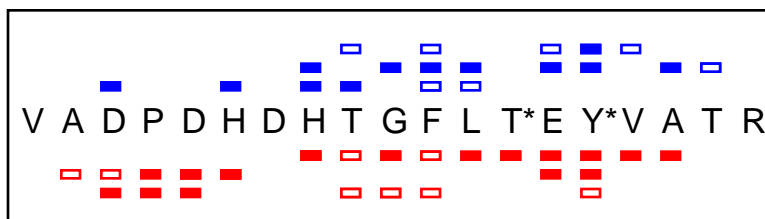

Protein Name: ERK2  
 gi Accession: 0  
 Precursor Mass: 768.6496+3  
 Delta Mass: 1.195 ppm  
 XCorr: 23.56



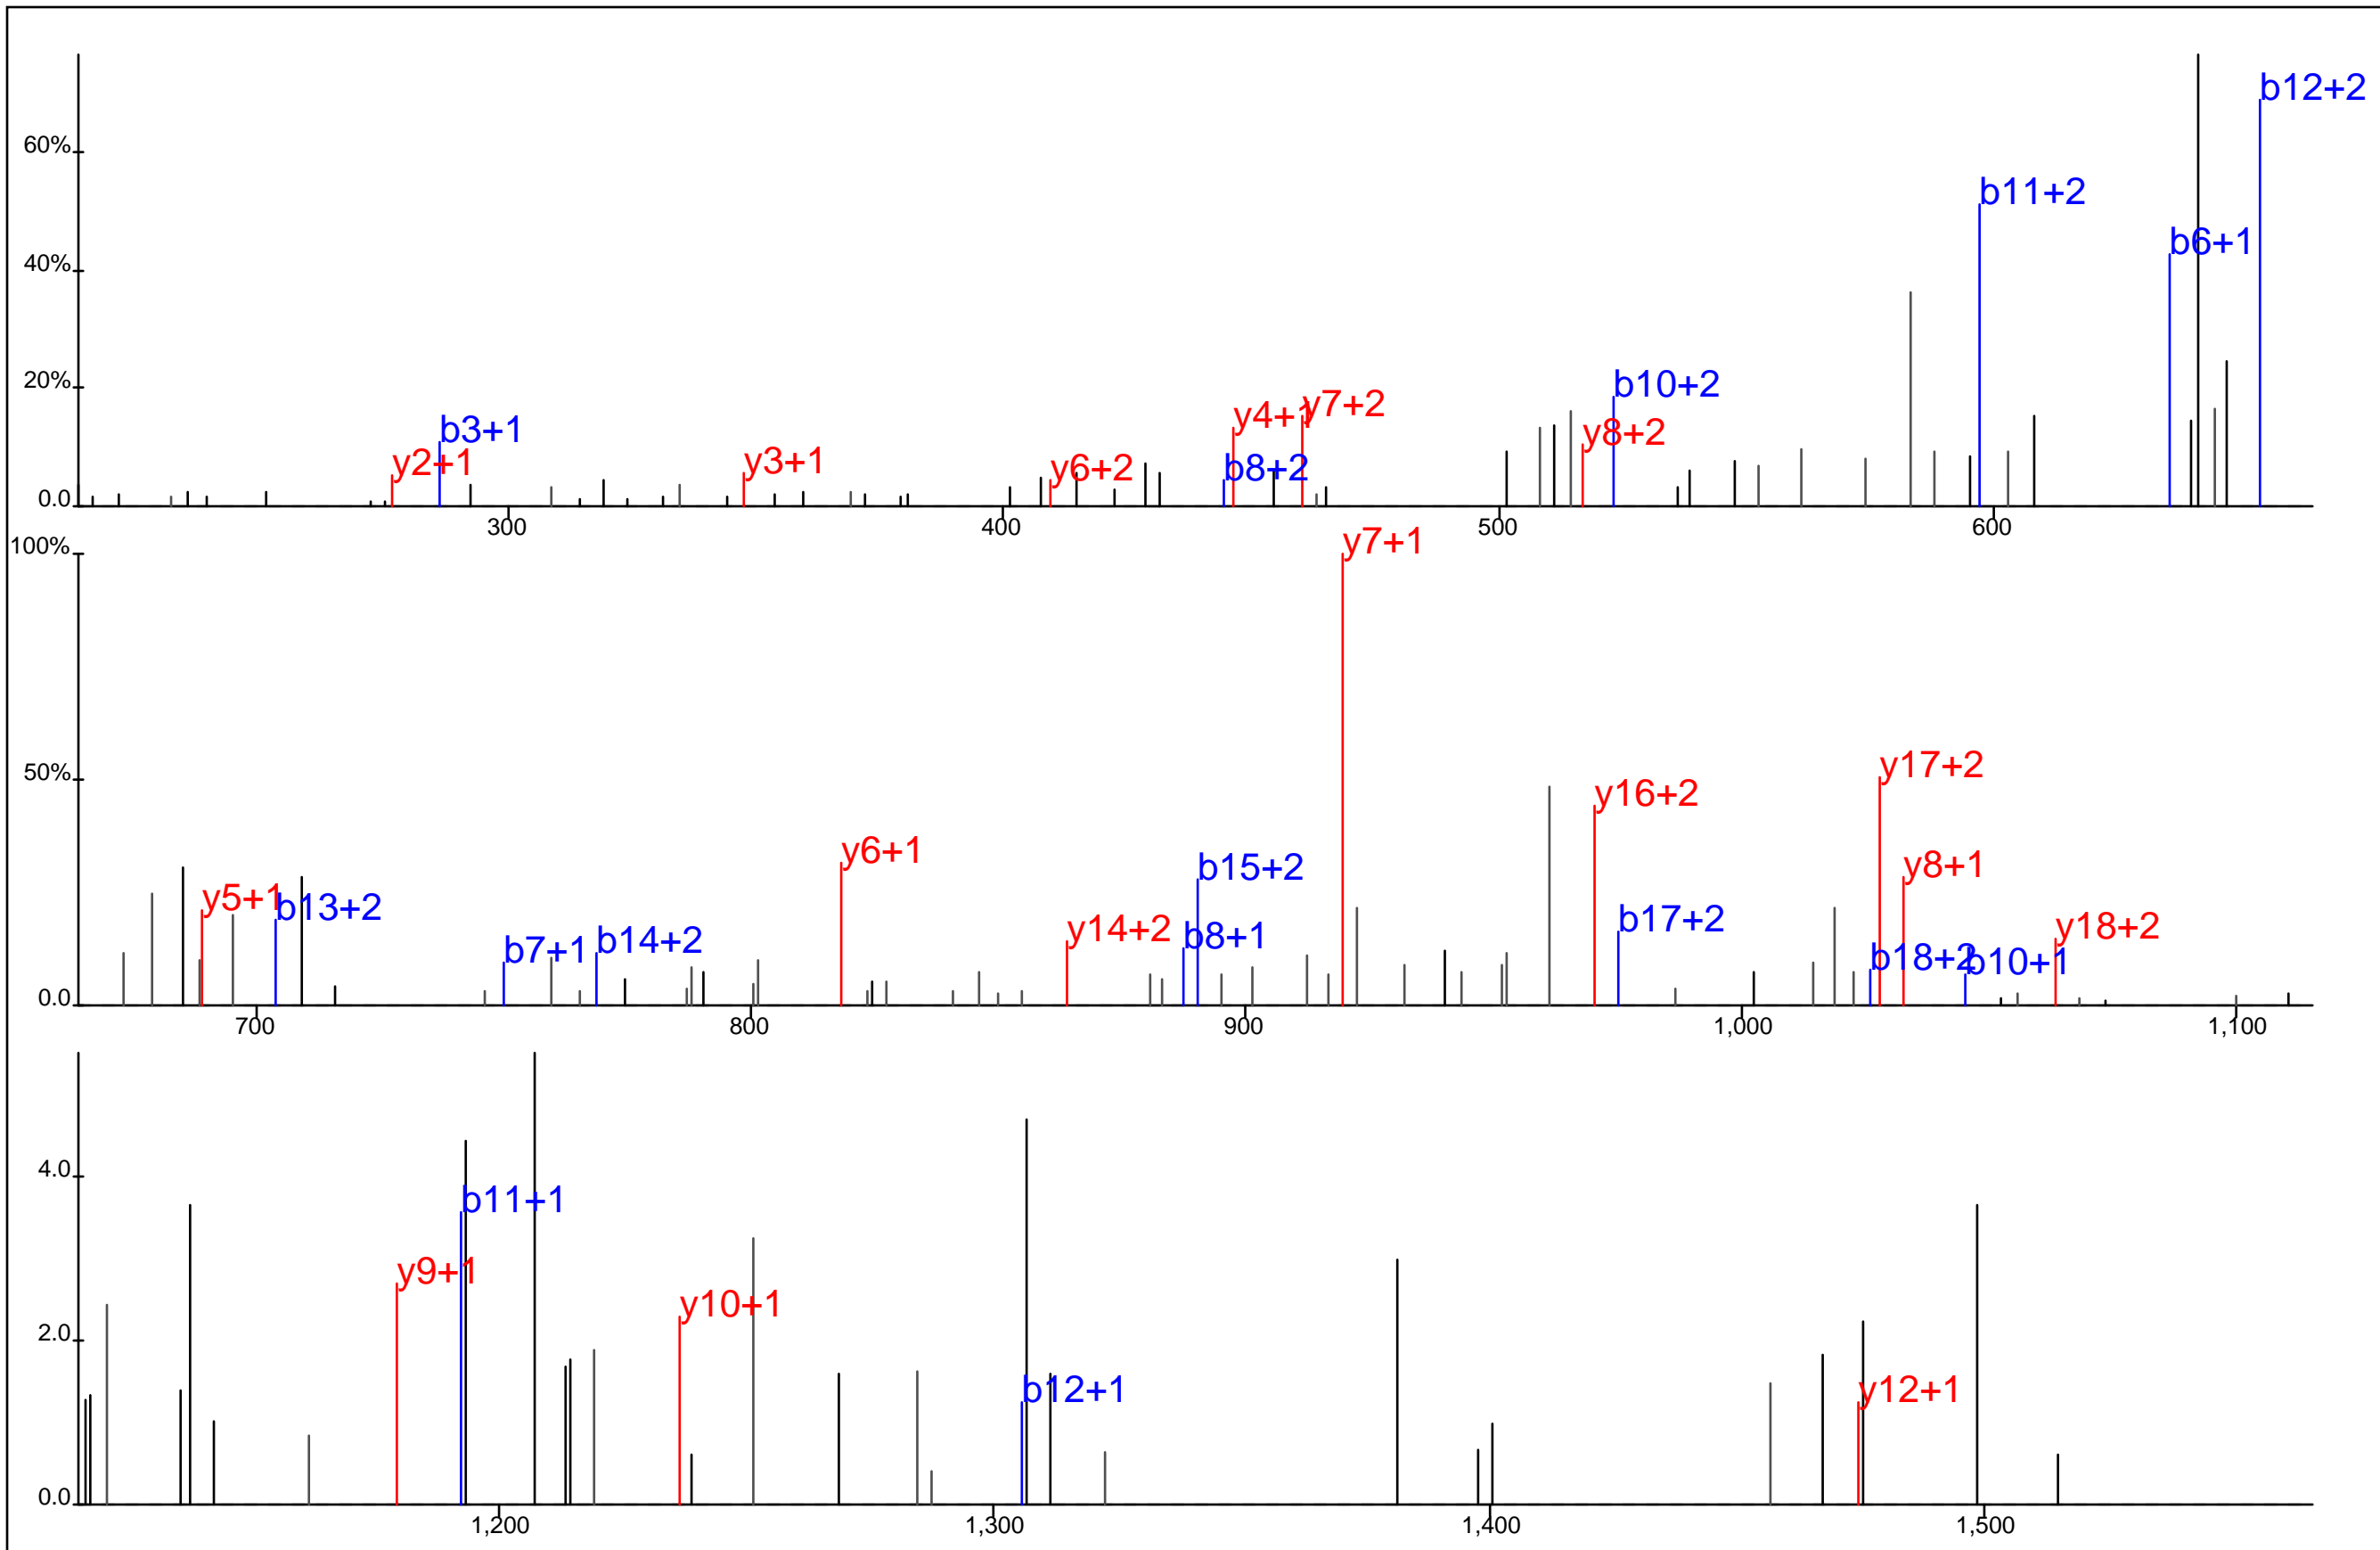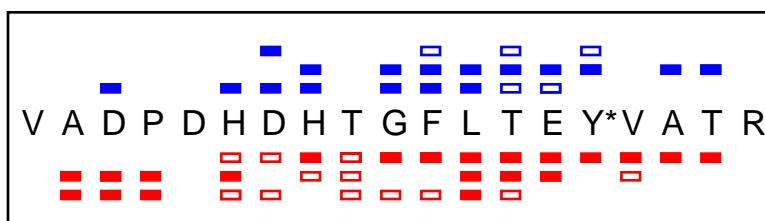

Protein Name: ERK2  
 gi Accession: 0  
 Precursor Mass: 741.9949+3  
 Delta Mass: 0.190 ppm  
 XCorr: 46.9

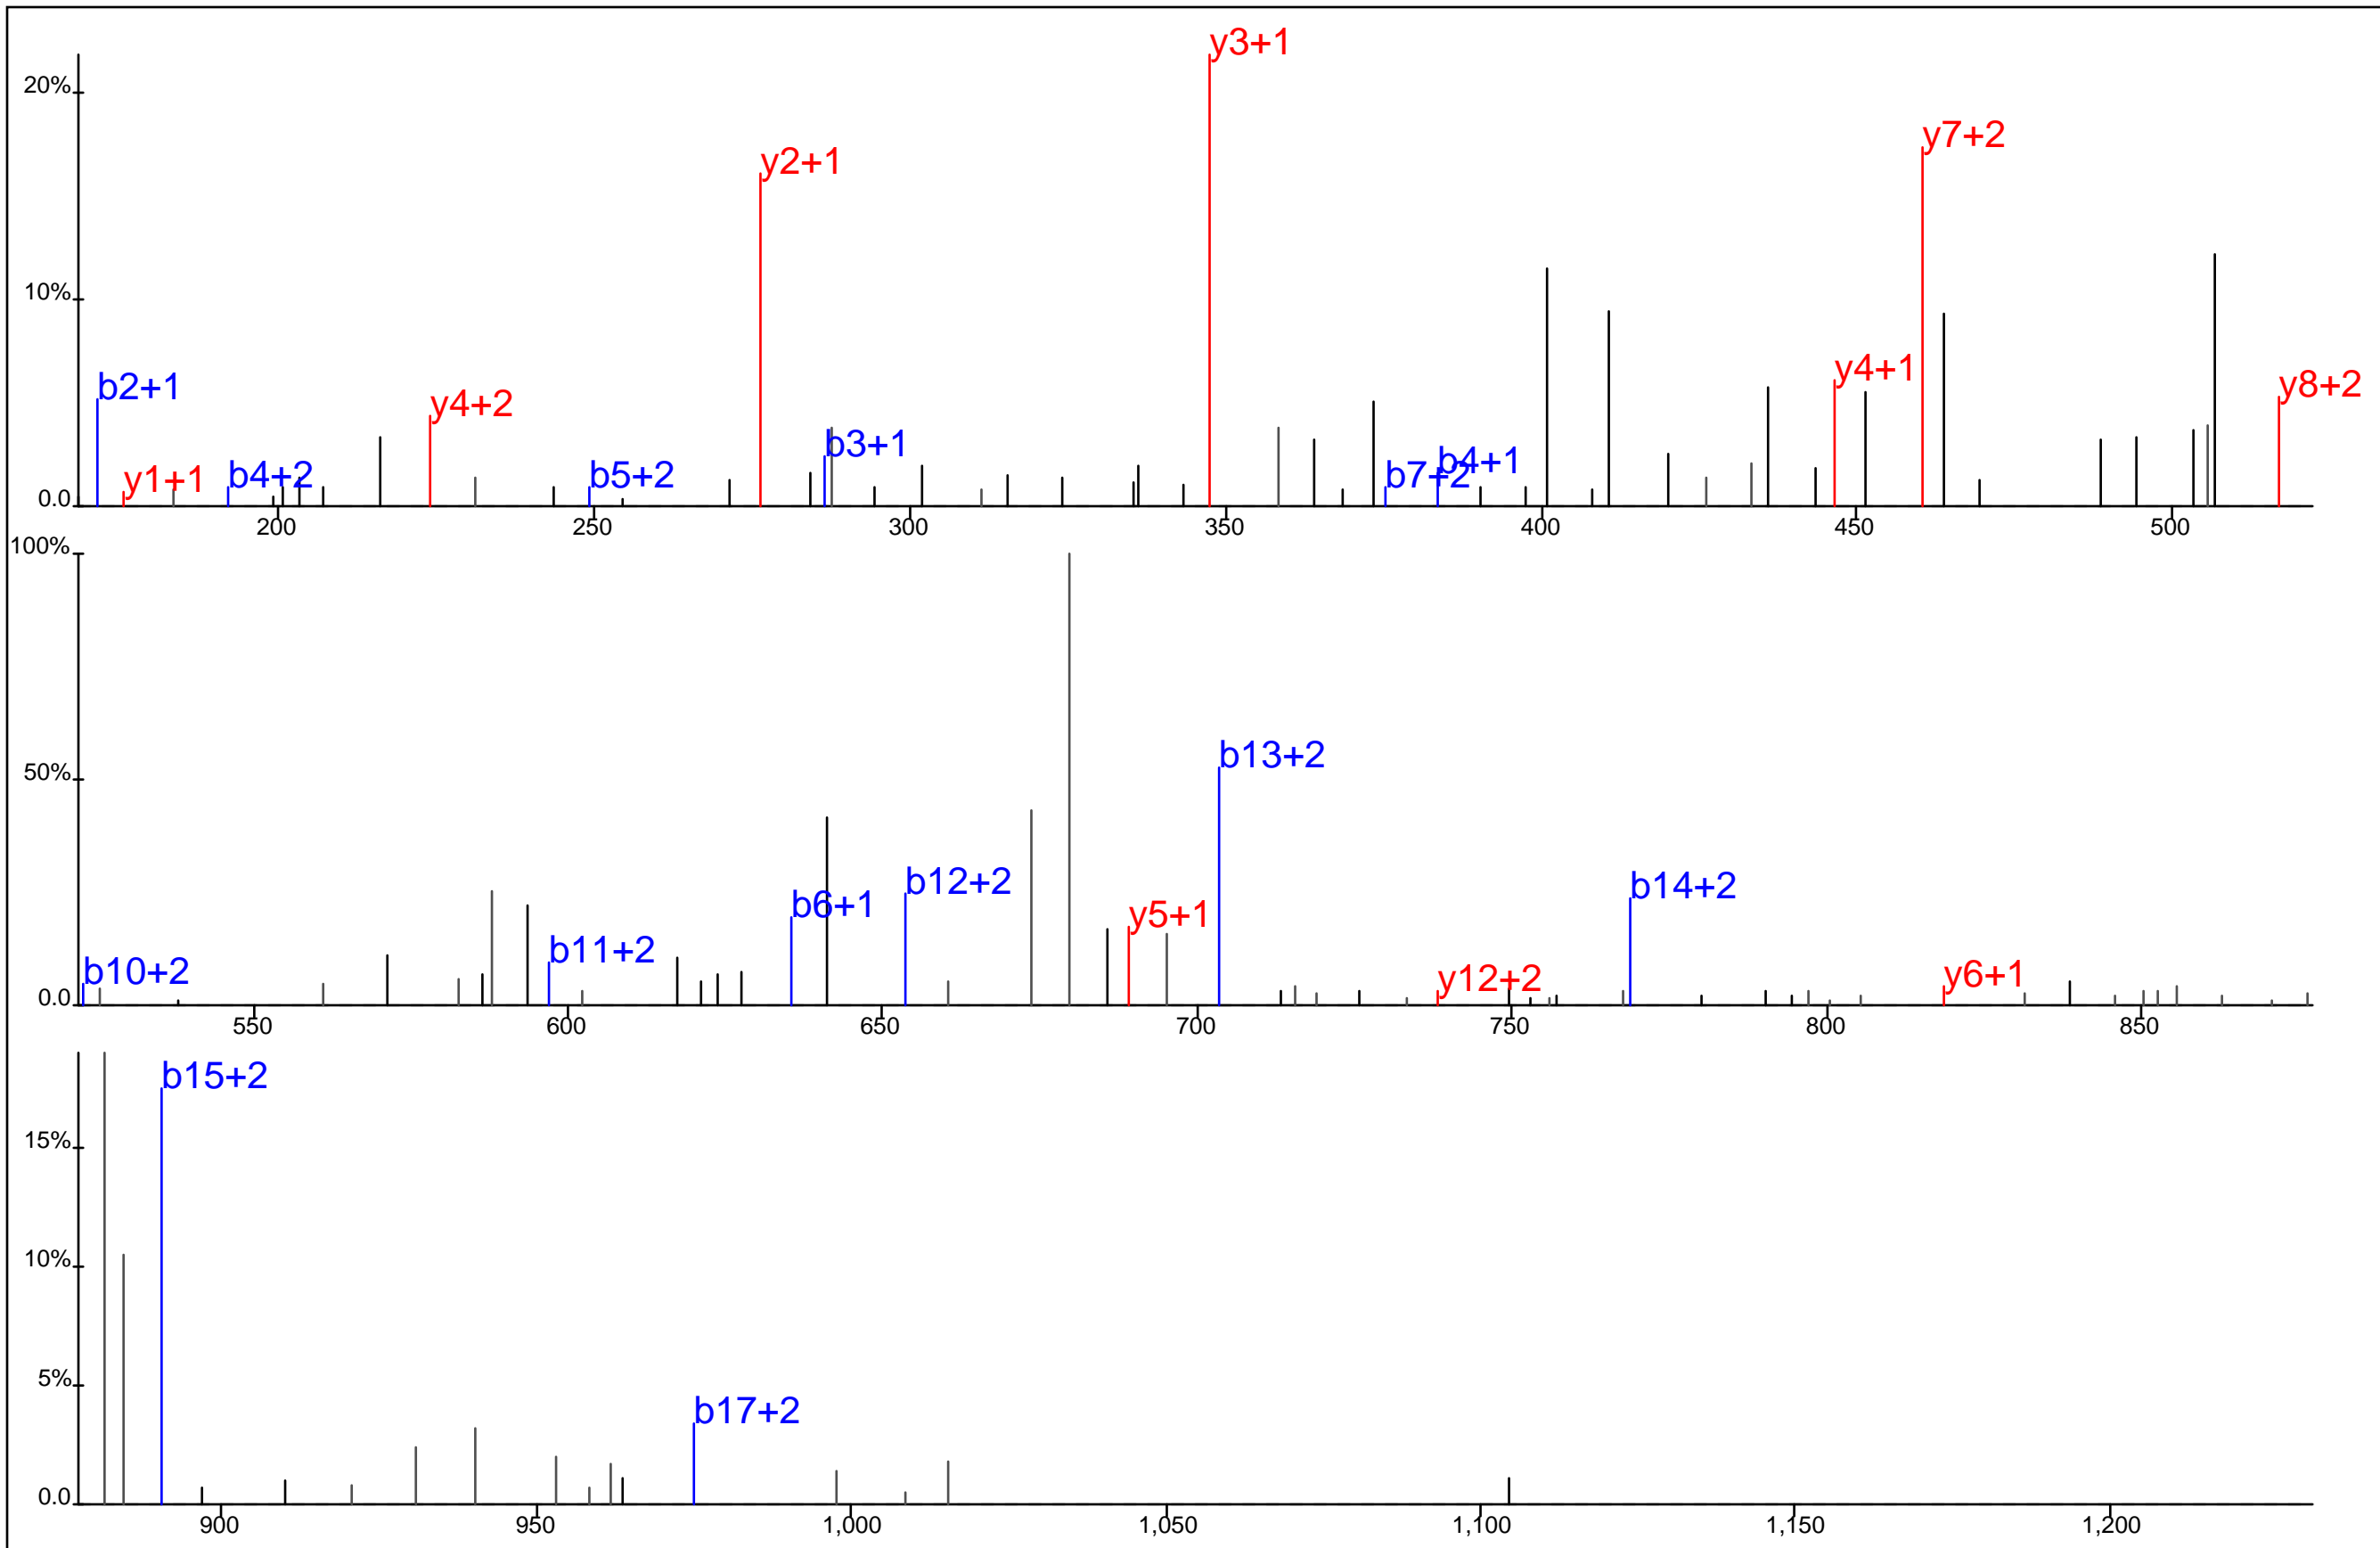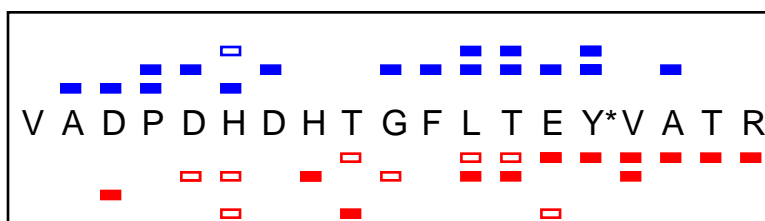

Protein Name: ERK2  
 gi Accession: 0  
 Precursor Mass: 556.7493+4  
 Delta Mass: 2.056 ppm  
 XCorr: 31.41

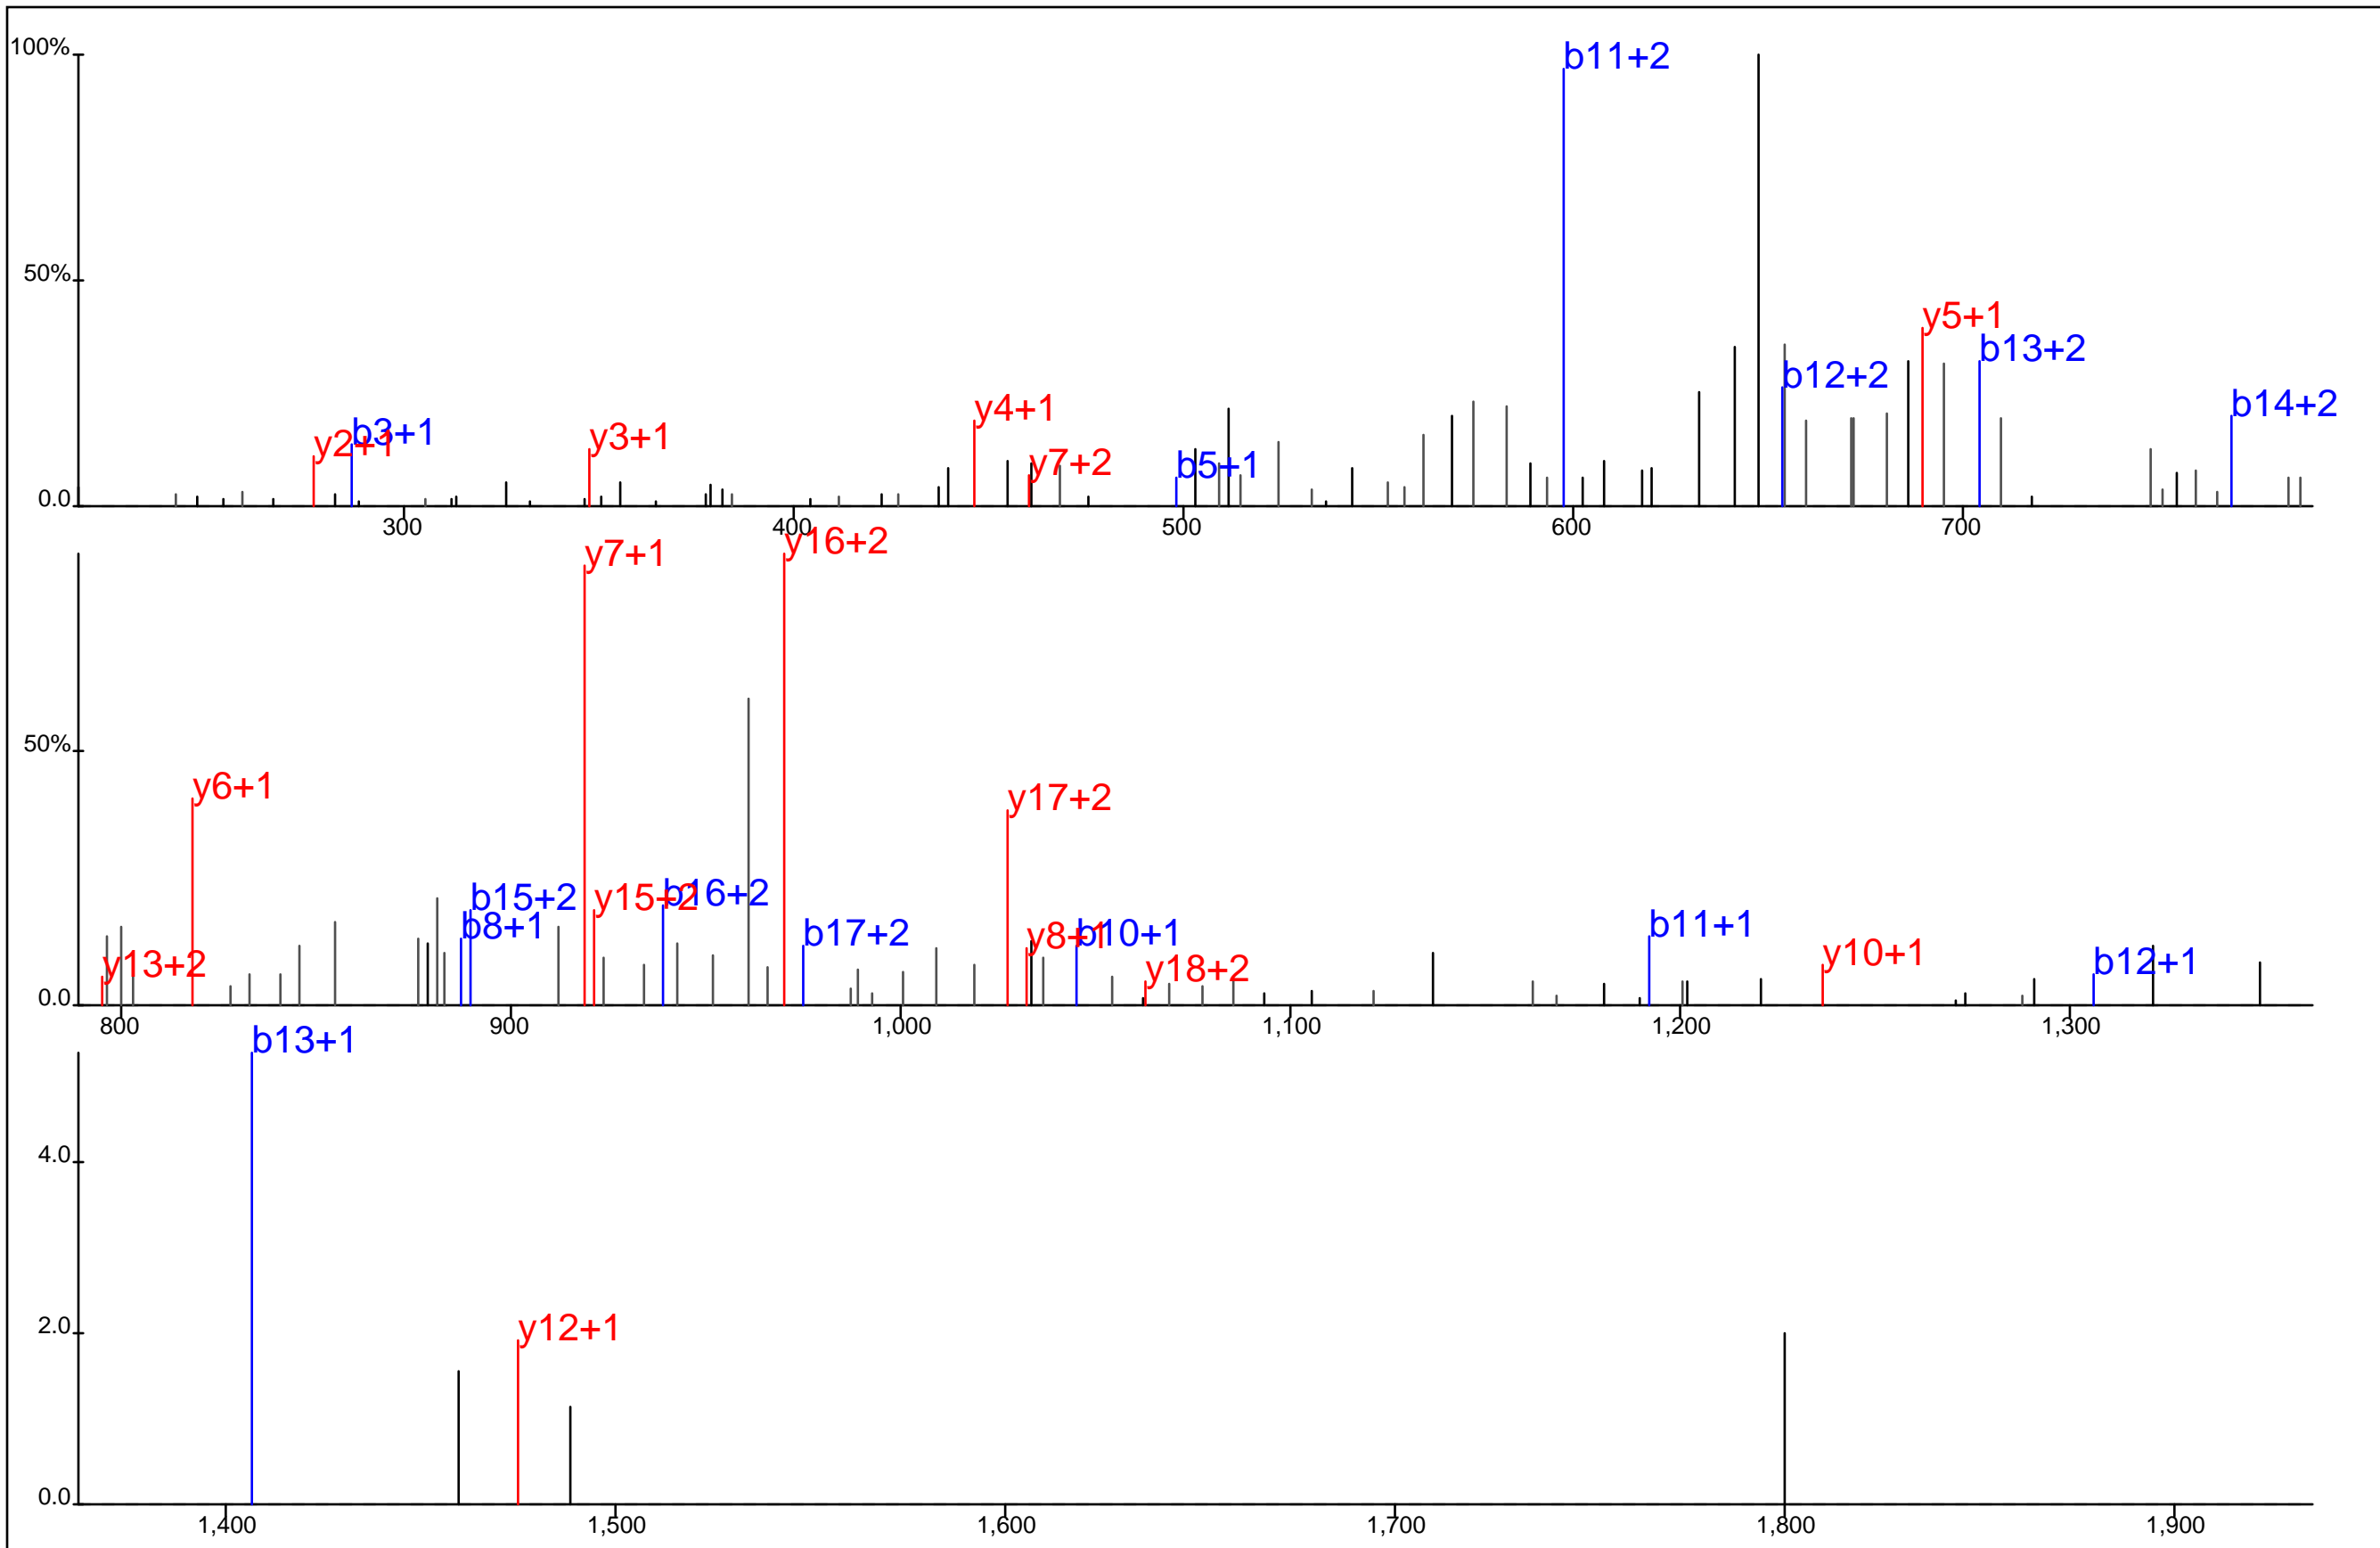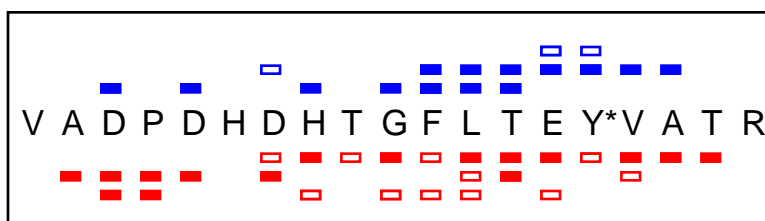

Protein Name: ERK2  
 gi Accession: 0  
 Precursor Mass: 741.9952+3  
 Delta Mass: 0.222 ppm  
 XCorr: 42.82

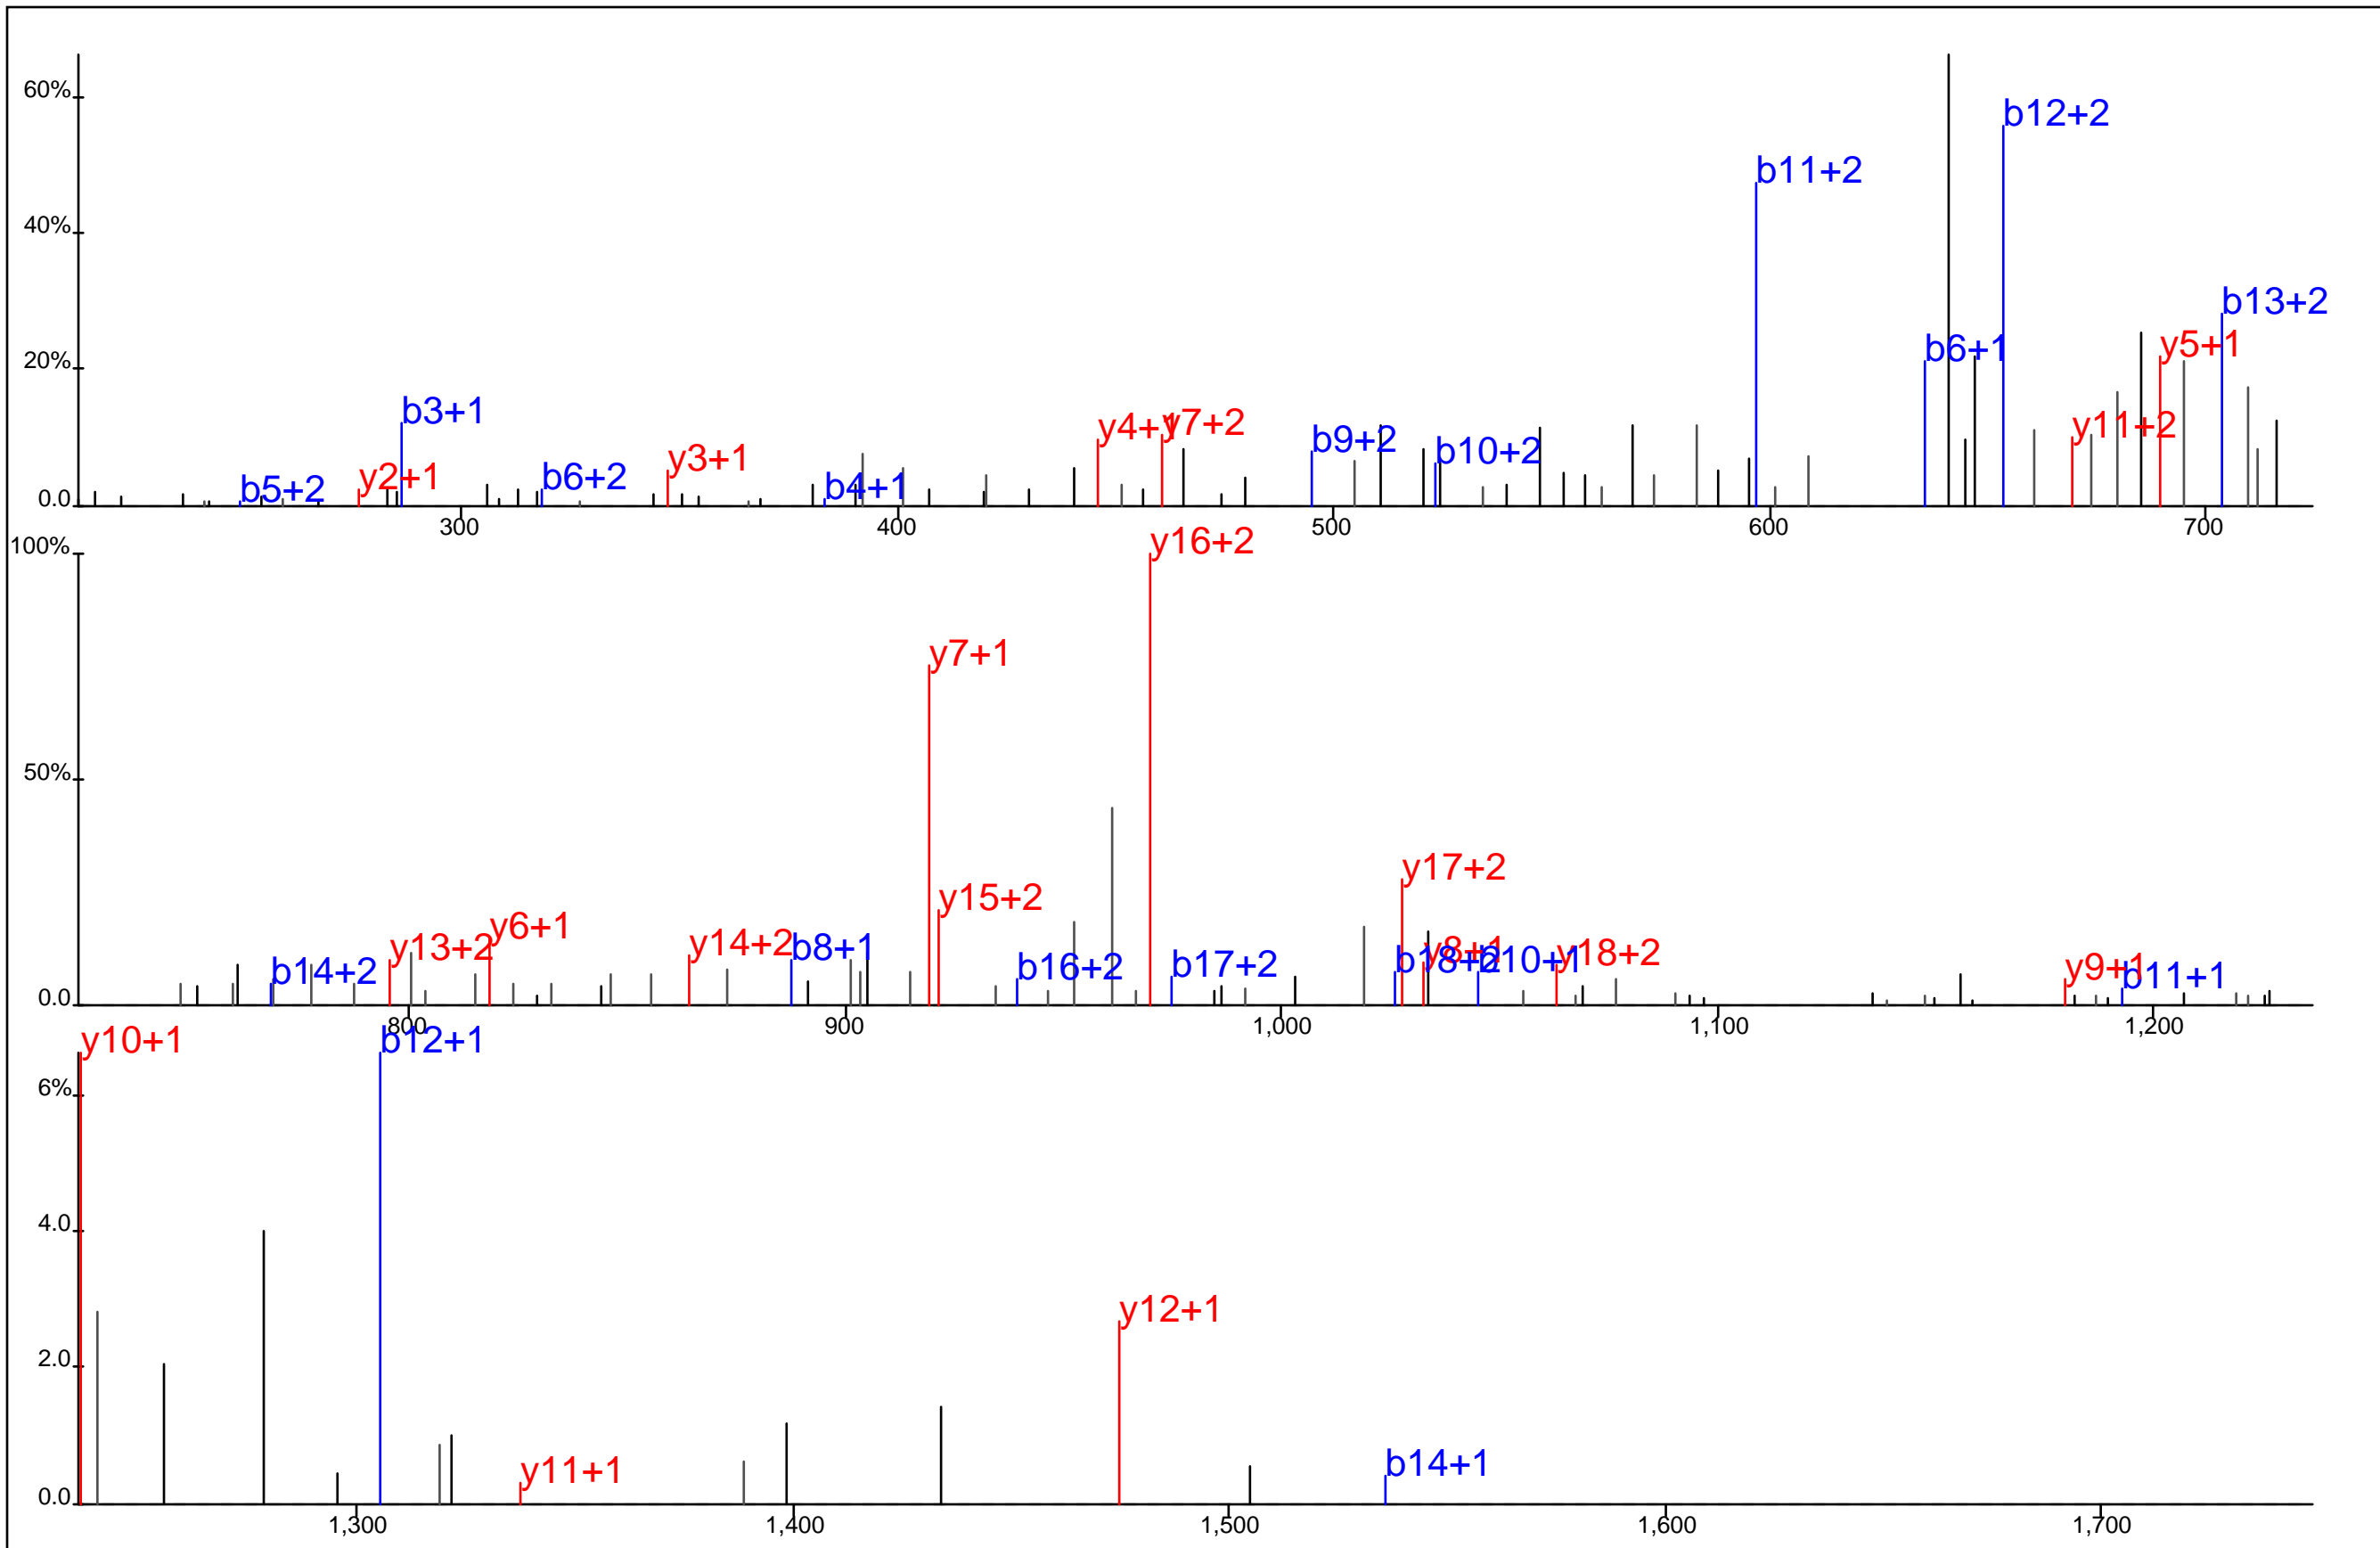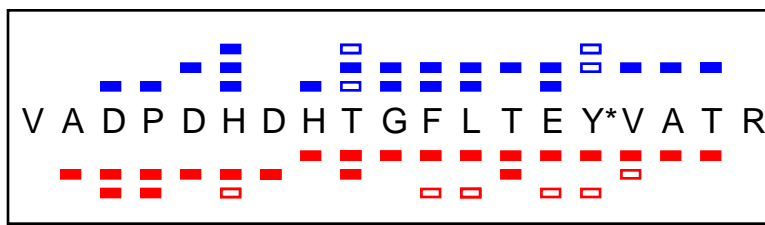

Protein Name: ERK2  
 gi Accession: 0  
 Precursor Mass: 741.9940+3  
 Delta Mass: 1.424 ppm  
 XCorr: 62.25

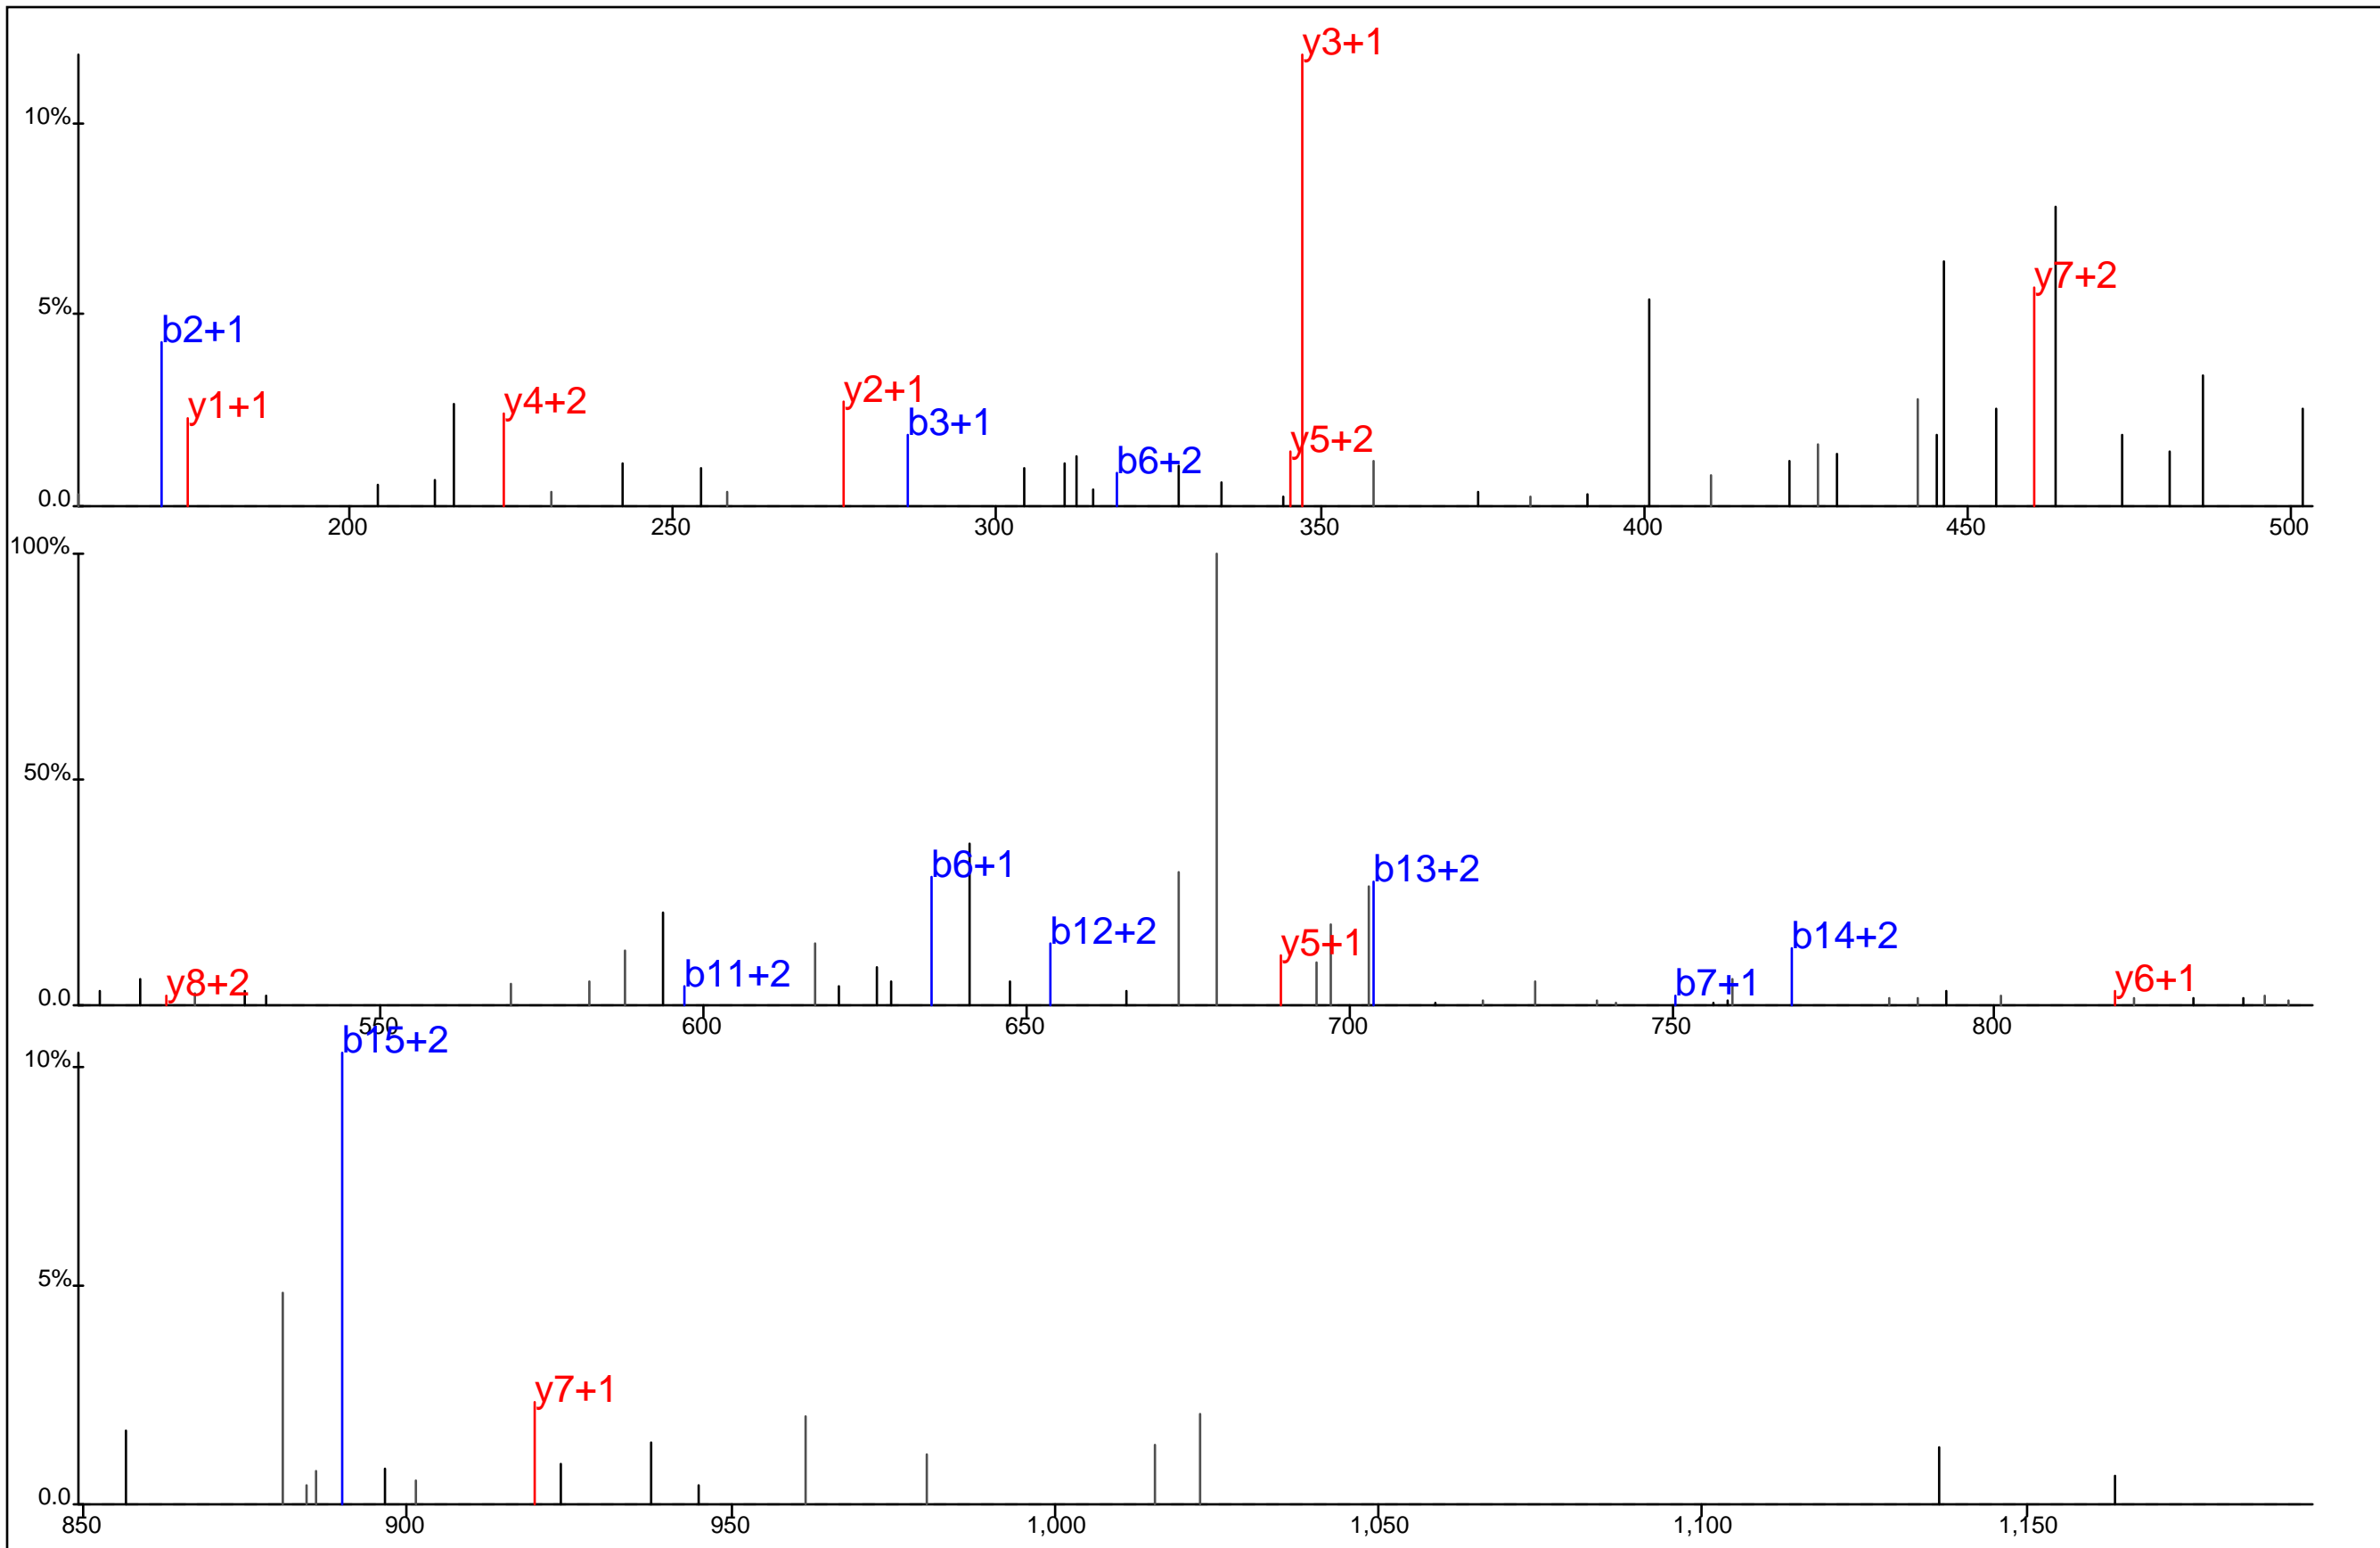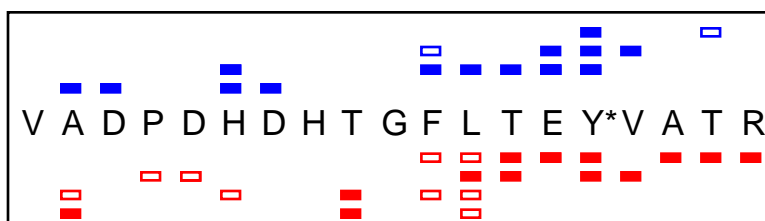

Protein Name: ERK2  
 gi Accession: 0  
 Precursor Mass: 556.7479+4  
 Delta Mass: 0.469 ppm  
 XCorr: 22.82

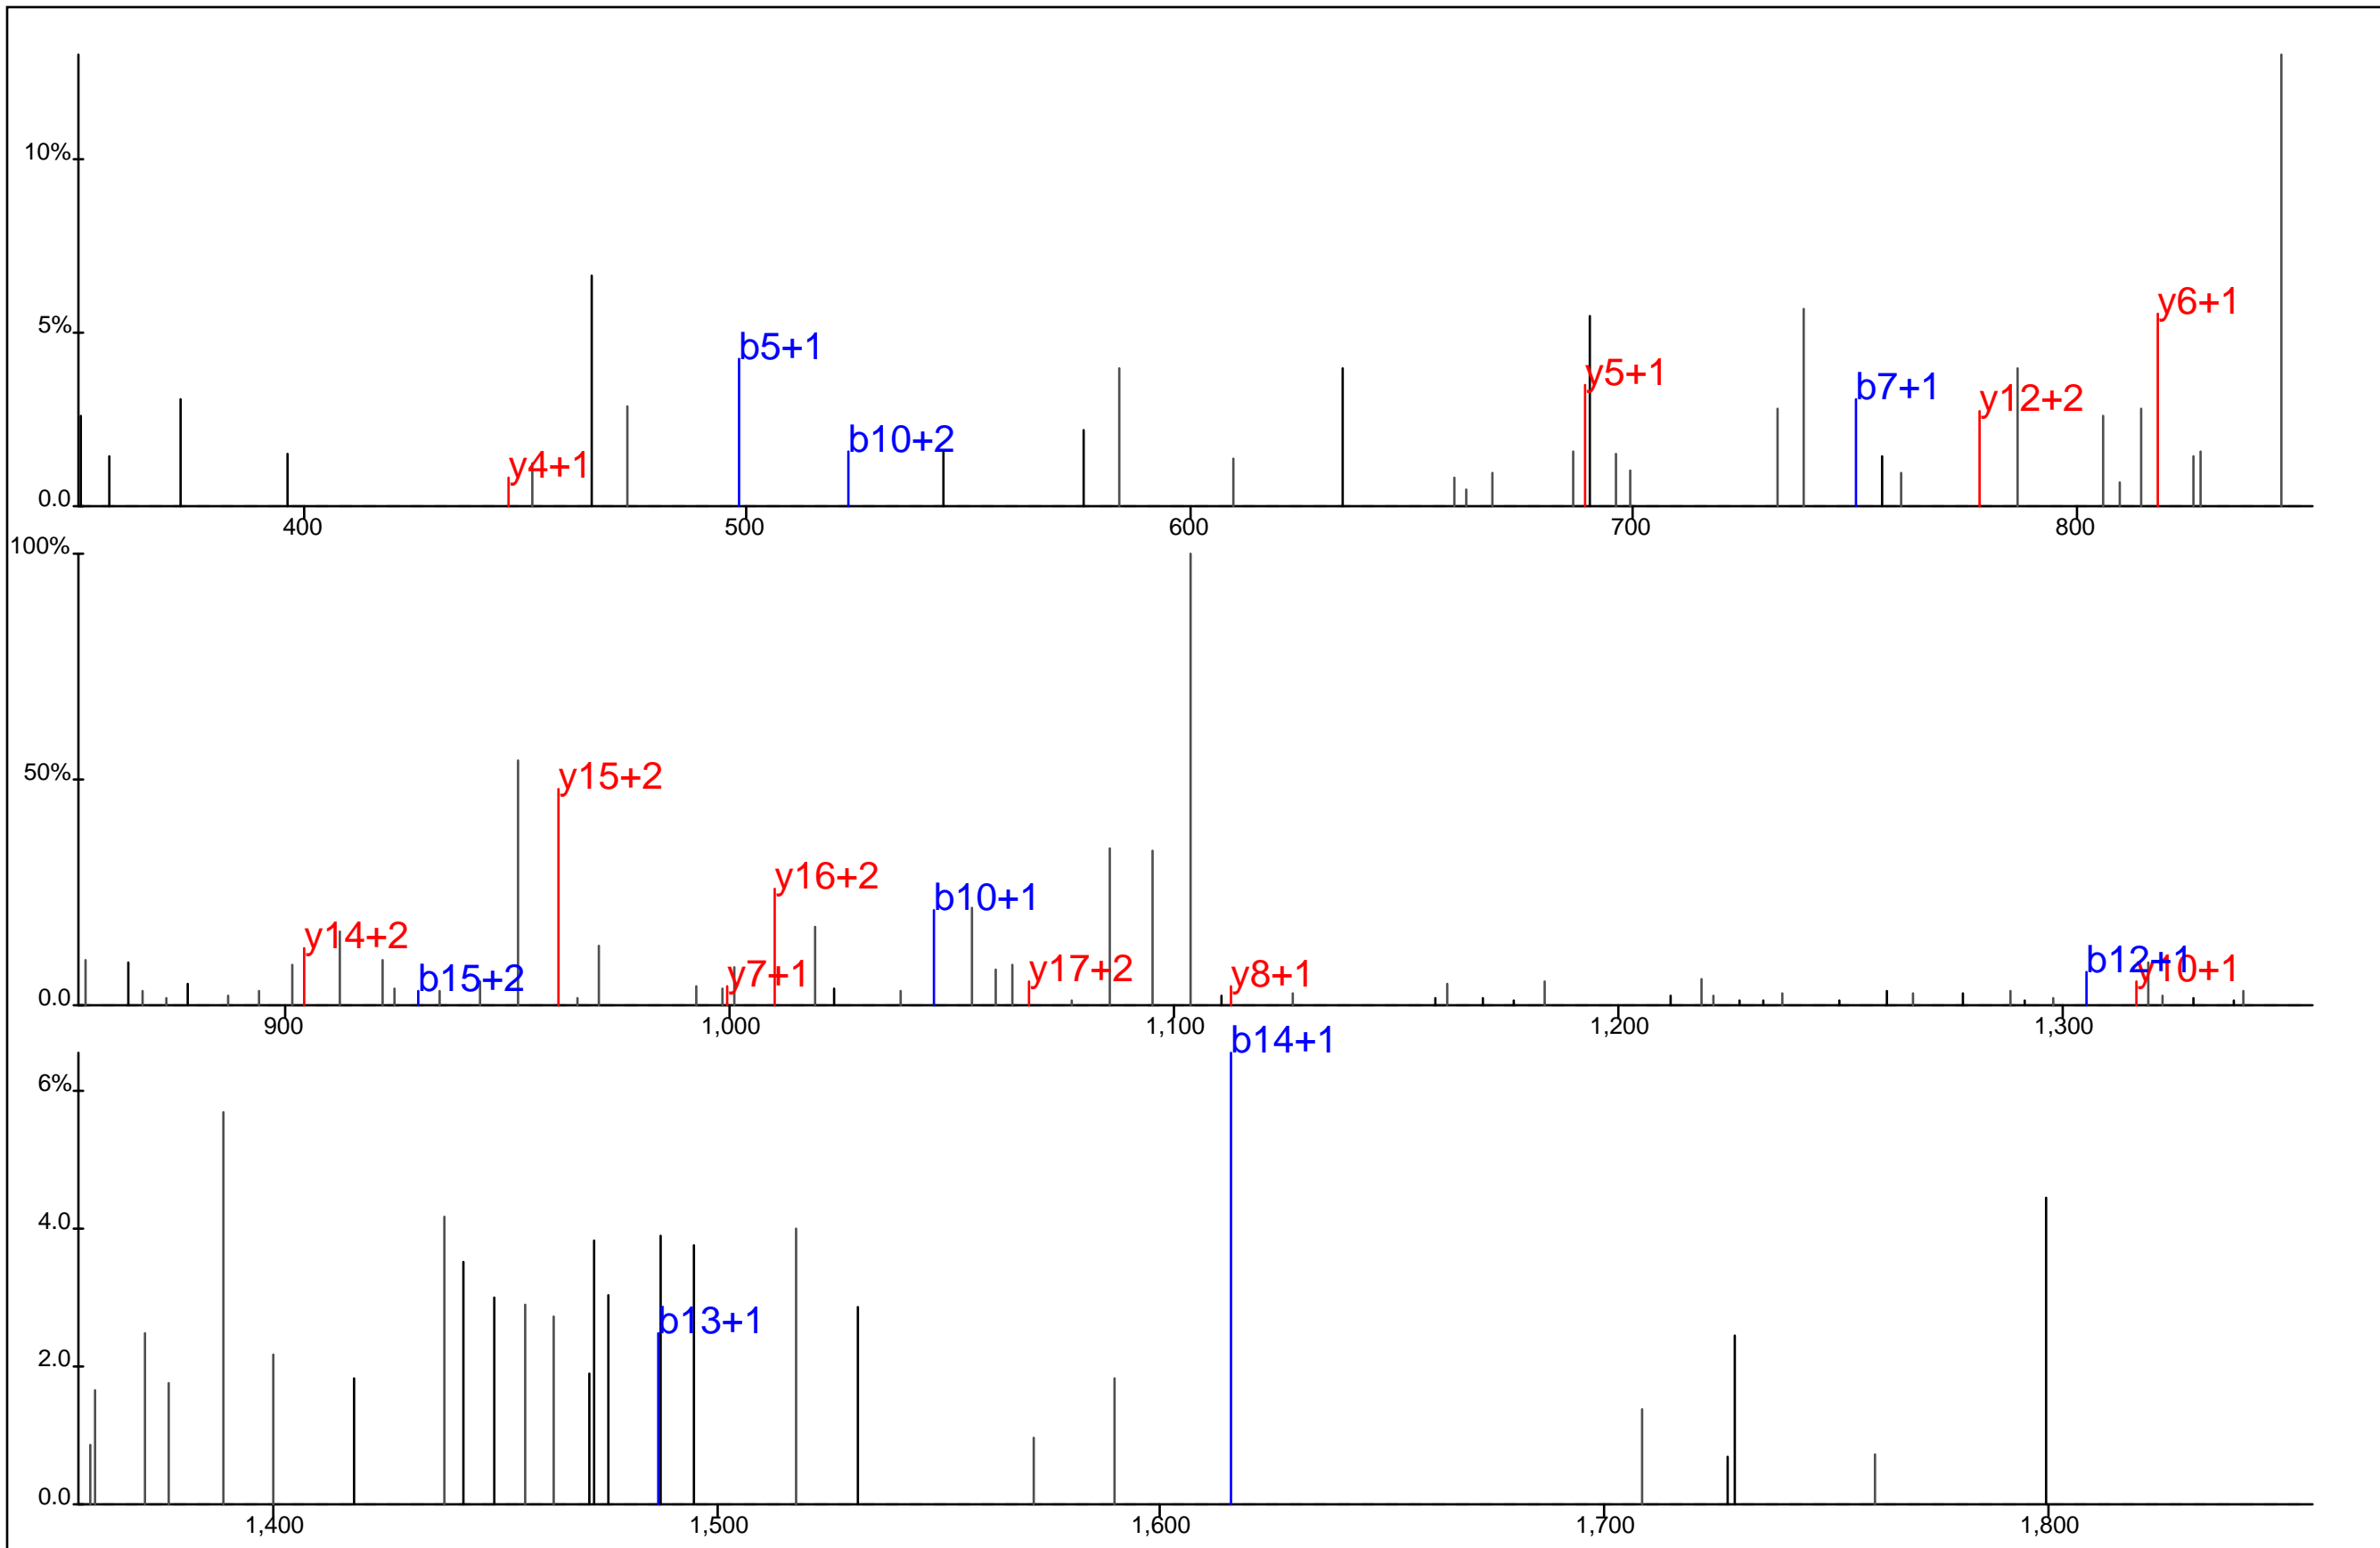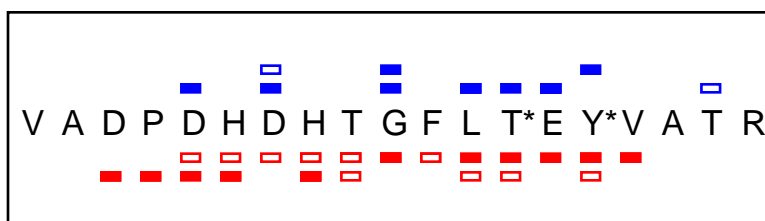

Protein Name: ERK2  
 gi Accession: 0  
 Precursor Mass: 1,152.4719+2  
 Delta Mass: 0.182 ppm  
 XCorr: 39.79

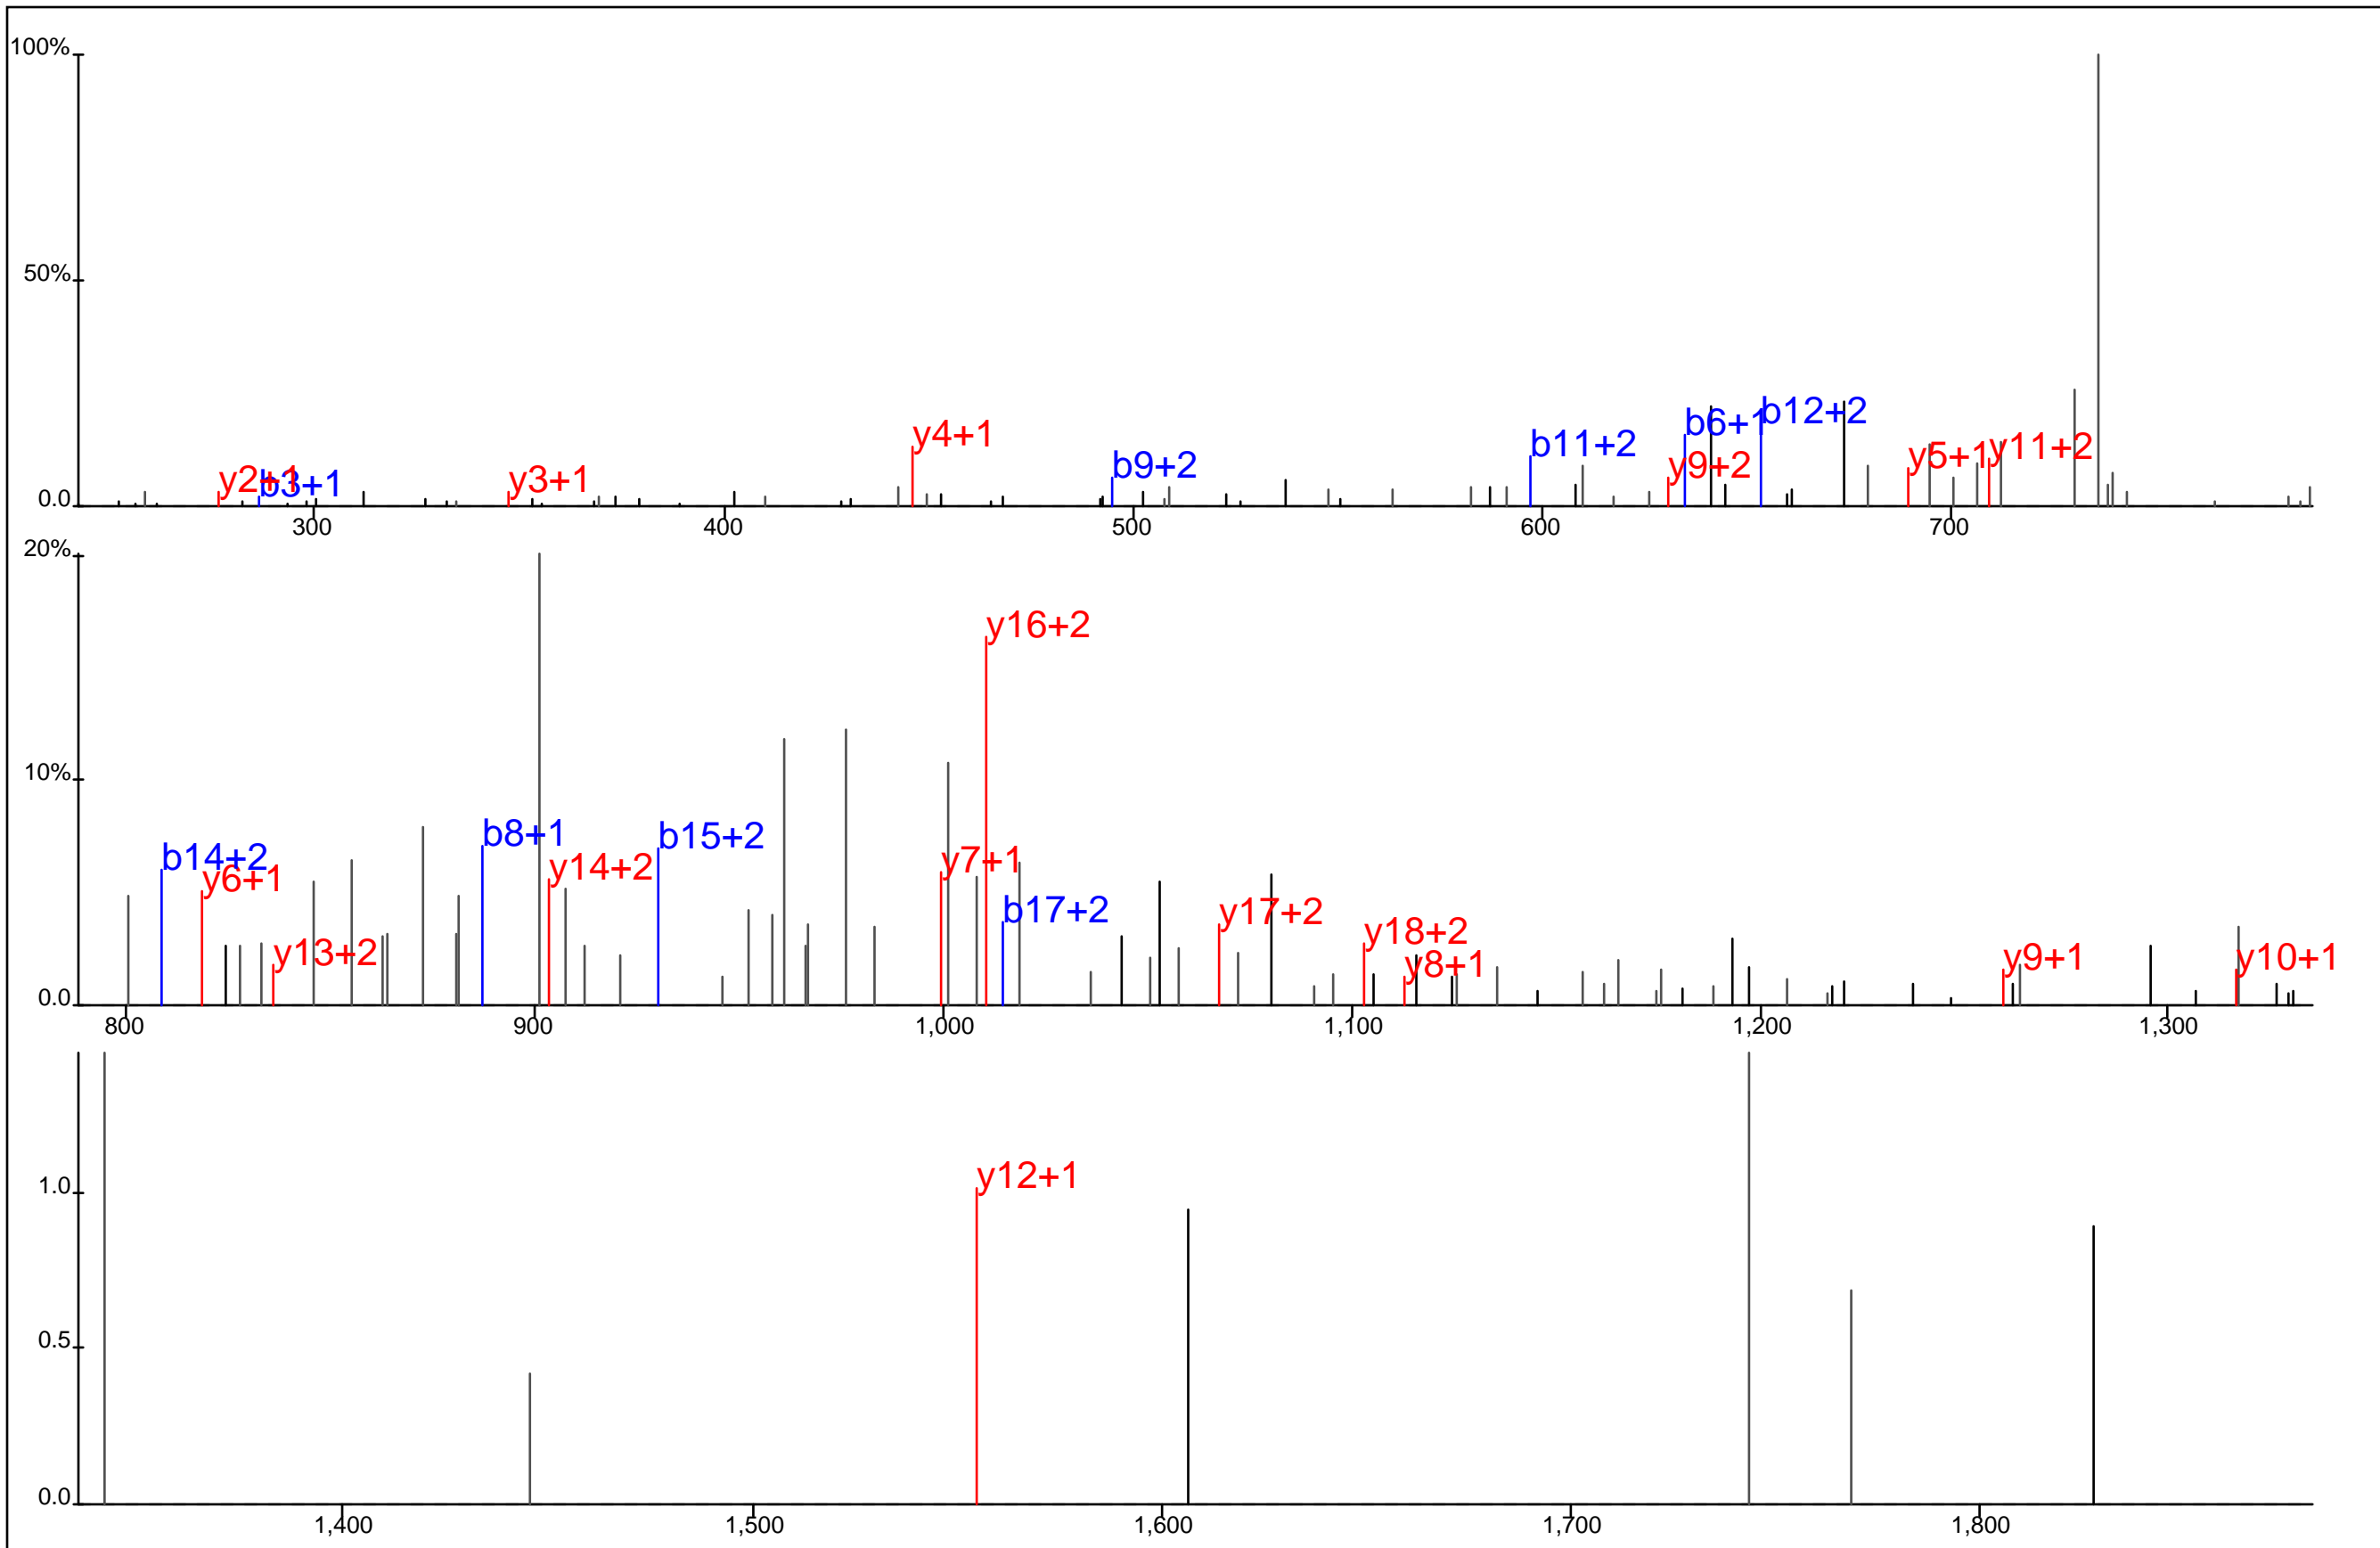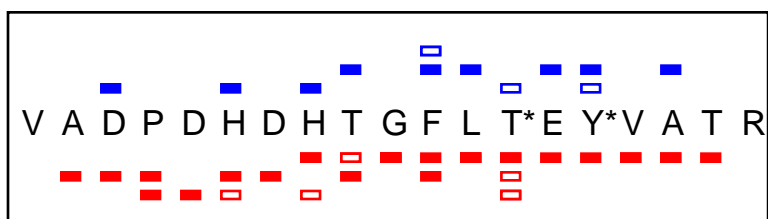

Protein Name: ERK2  
 gi Accession: 0  
 Precursor Mass: 768.6508+3  
 Delta Mass: 0.395 ppm  
 XCorr: 27.87

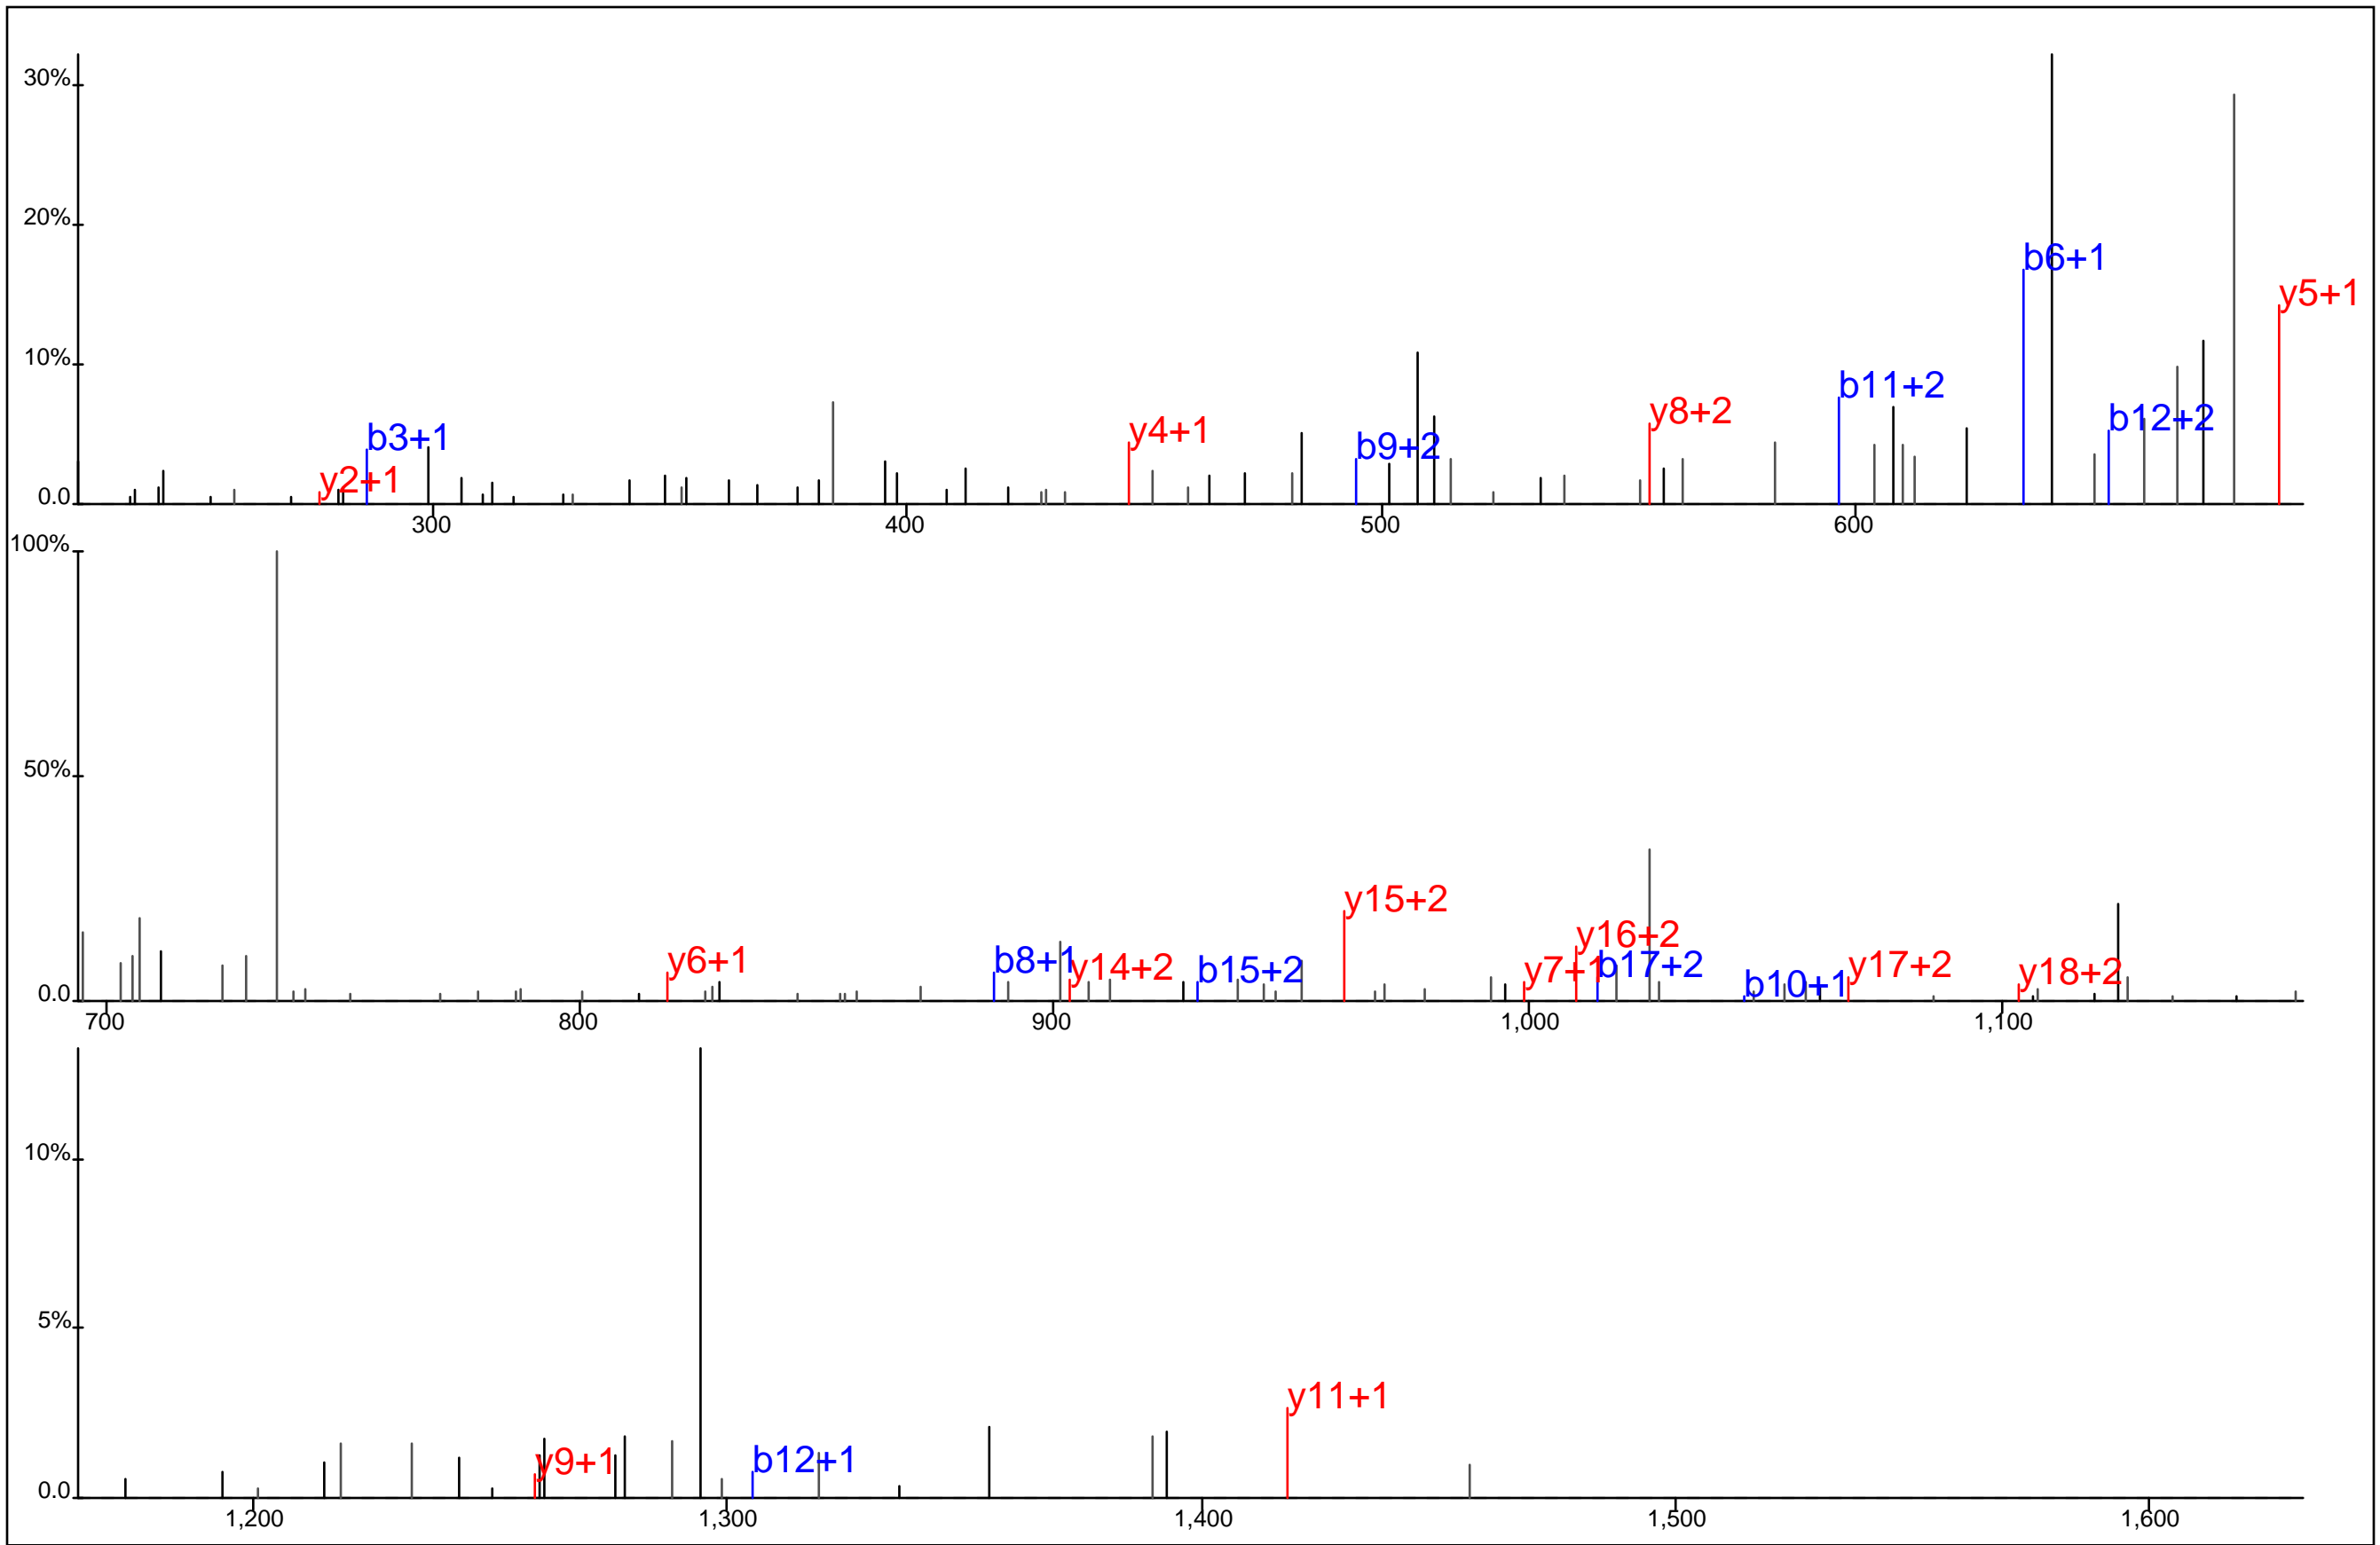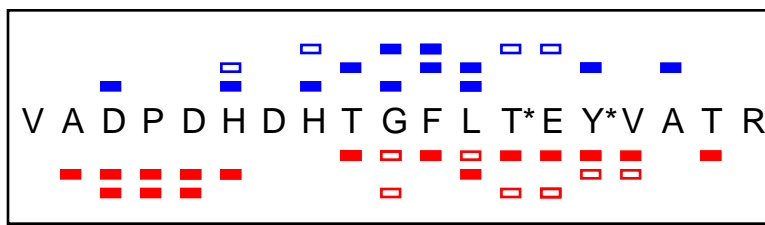

Protein Name: ERK2  
 gi Accession: 0  
 Precursor Mass: 768.6511+3  
 Delta Mass: 0.713 ppm  
 XCorr: 26.21



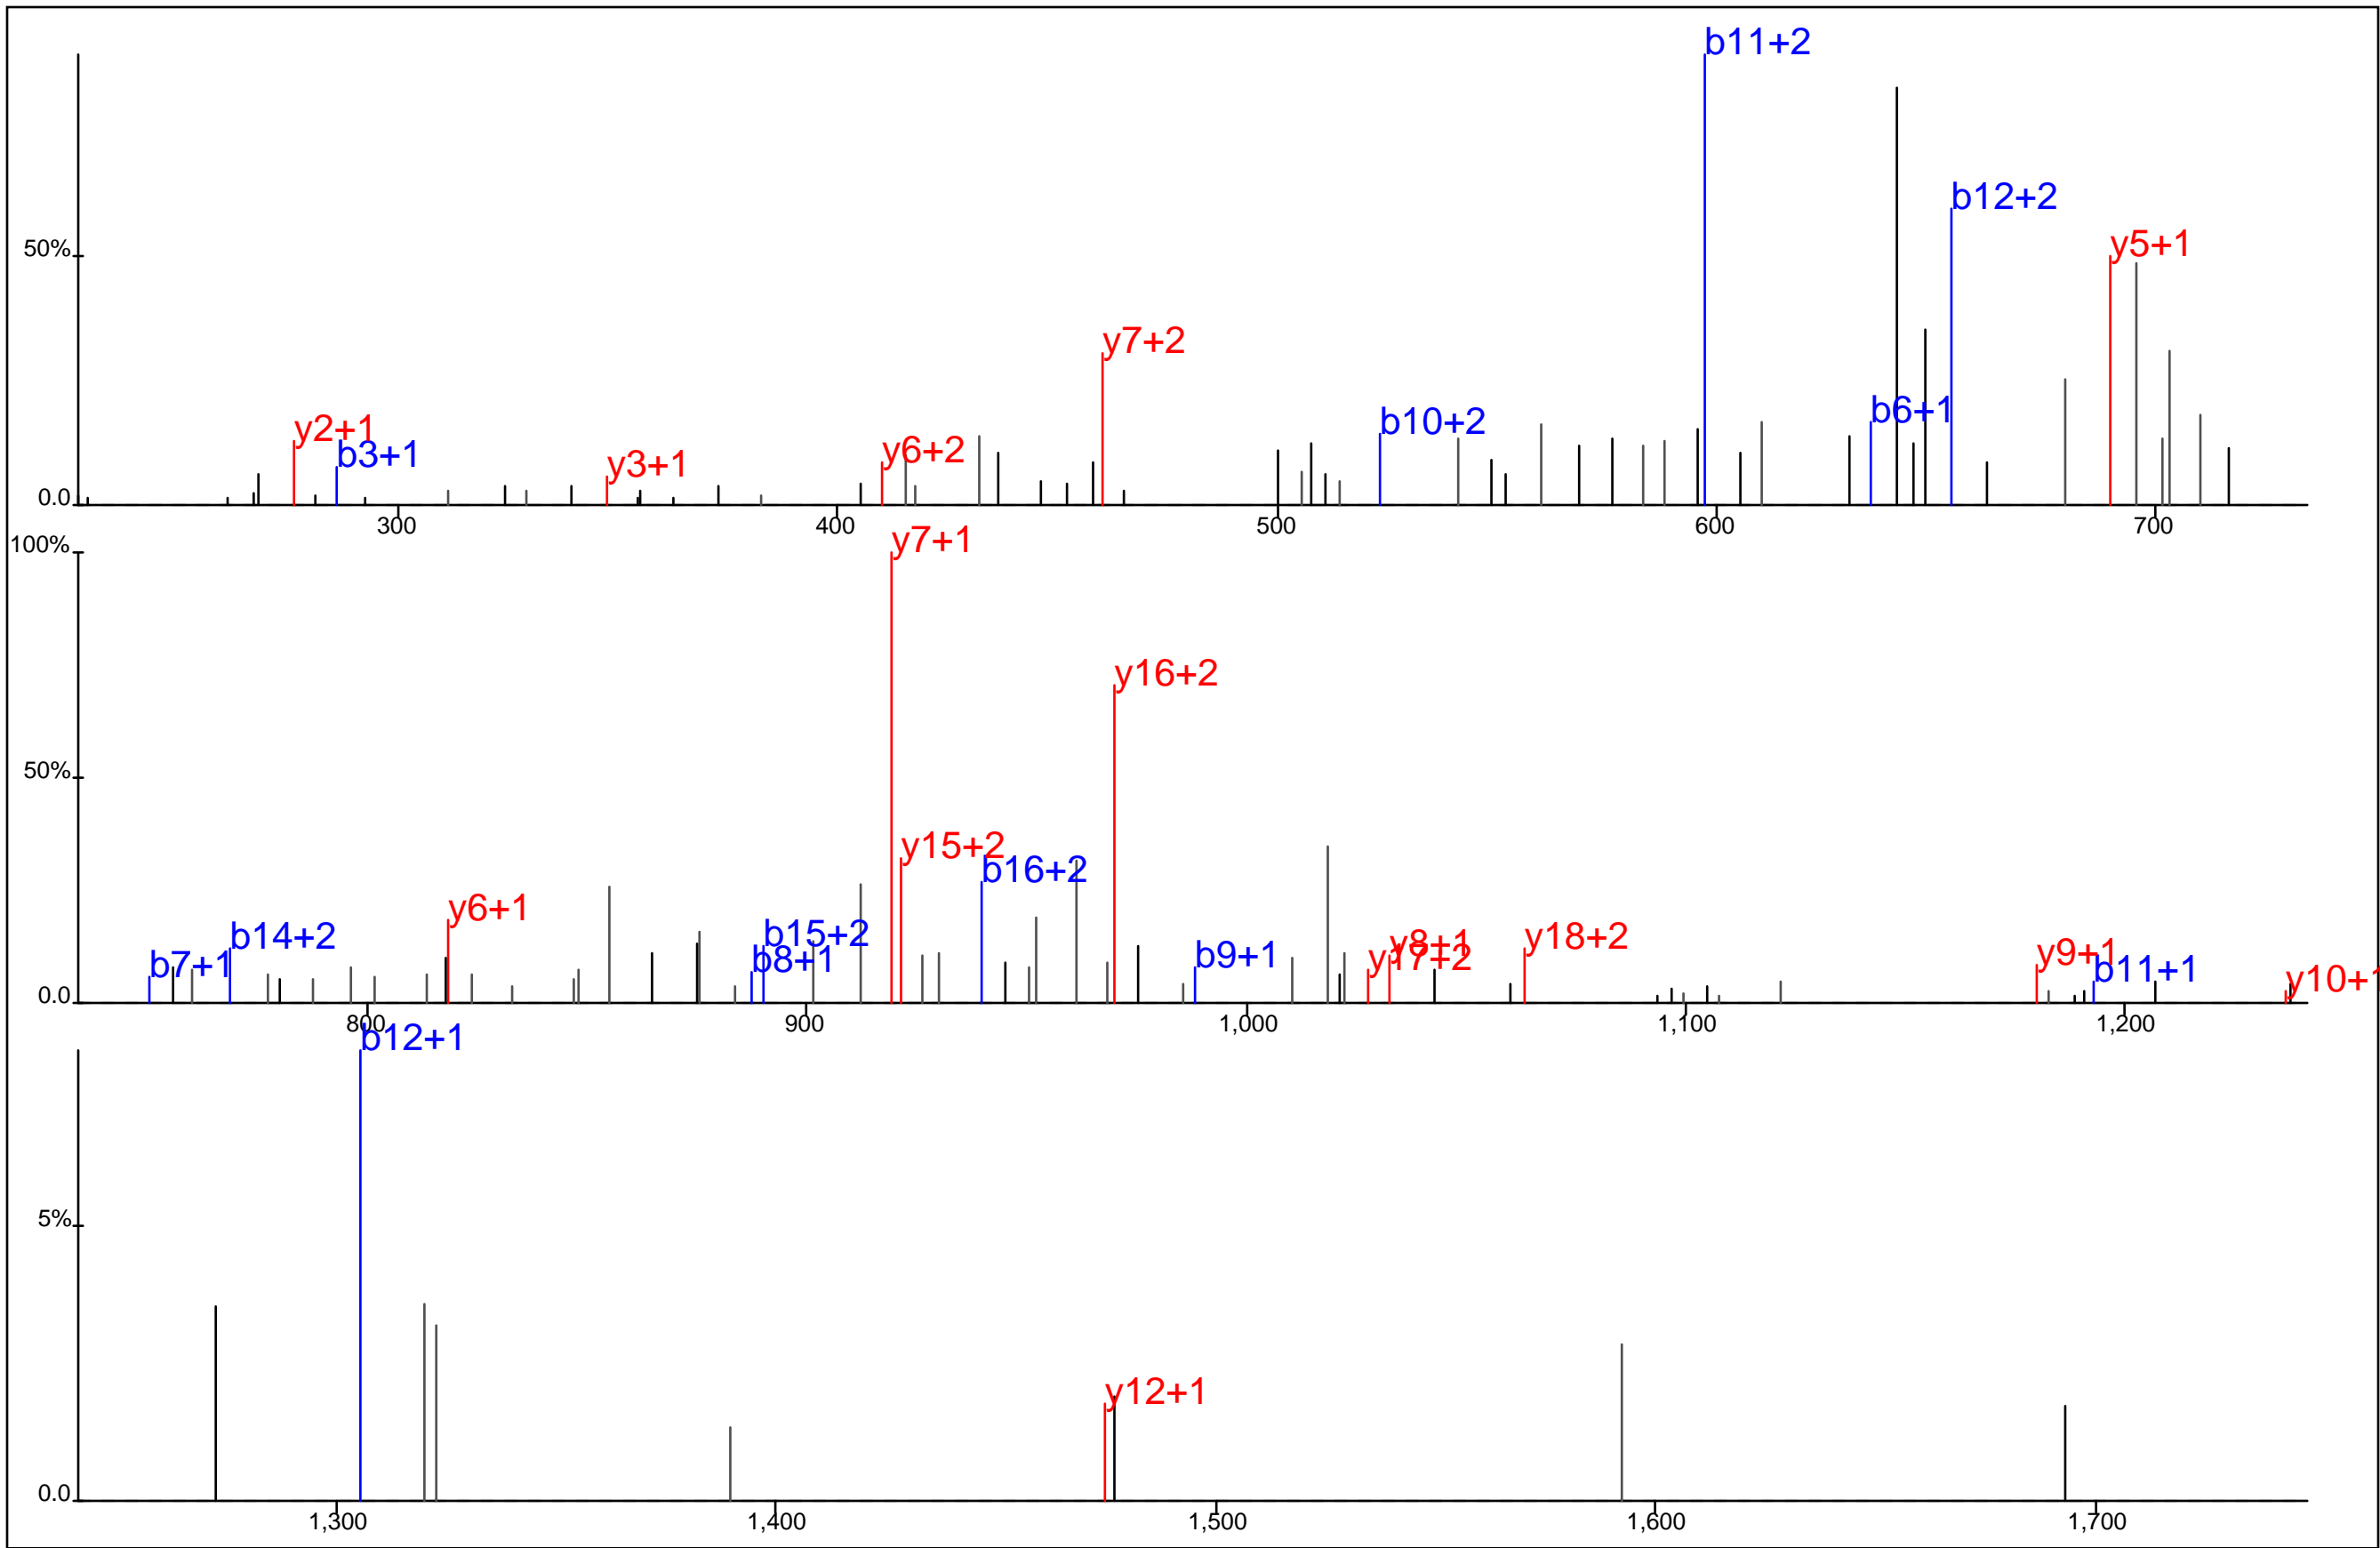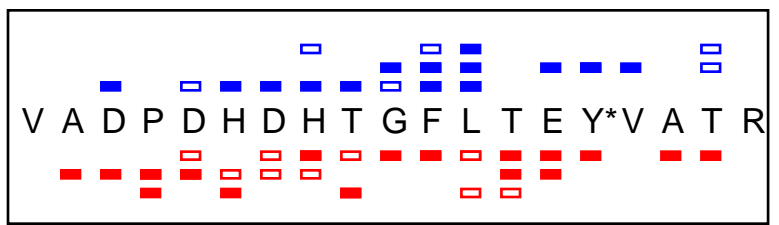

Protein Name: ERK2  
 gi Accession: 0  
 Precursor Mass: 741.9944+3  
 Delta Mass: 0.930 ppm  
 XCorr: 55.72

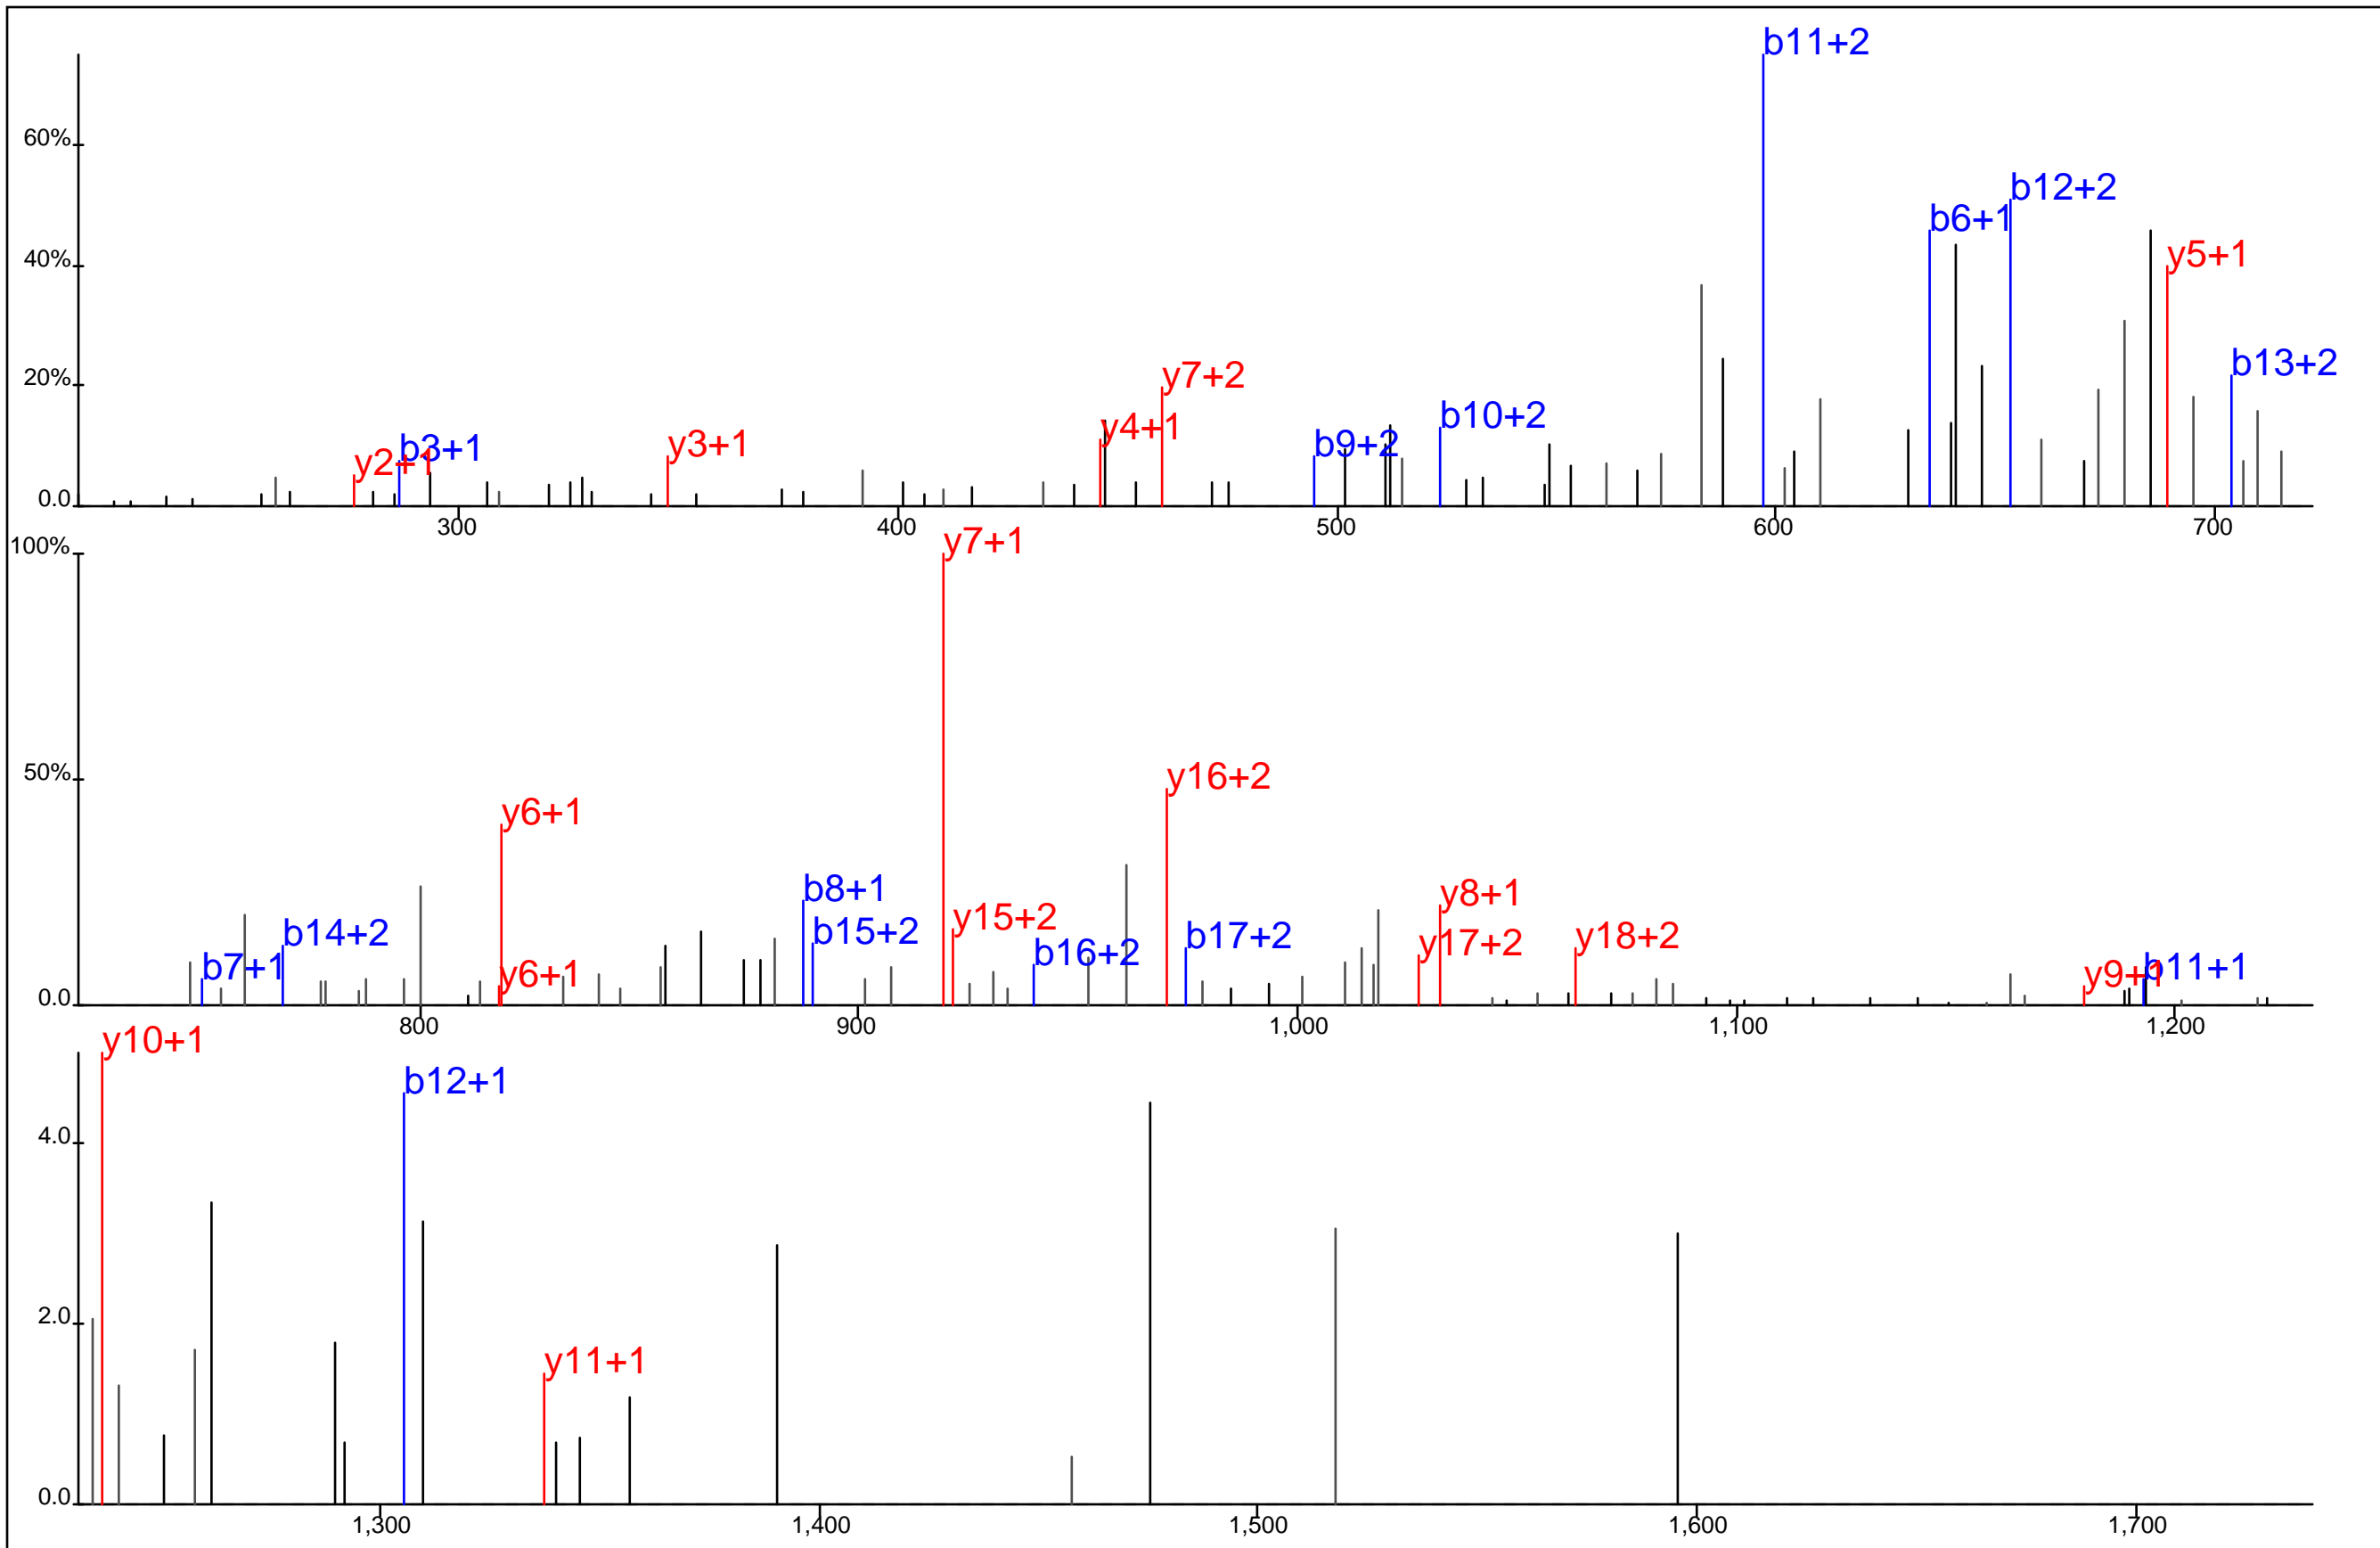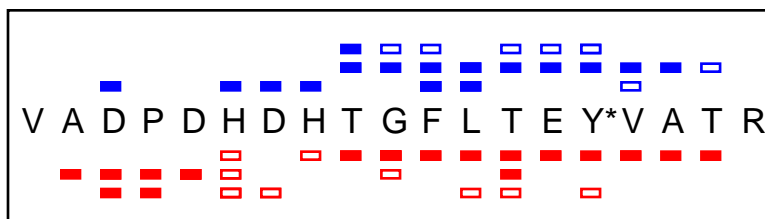

Protein Name: ERK2  
 gi Accession: 0  
 Precursor Mass: 741.9944+3  
 Delta Mass: 0.848 ppm  
 XCorr: 53.55

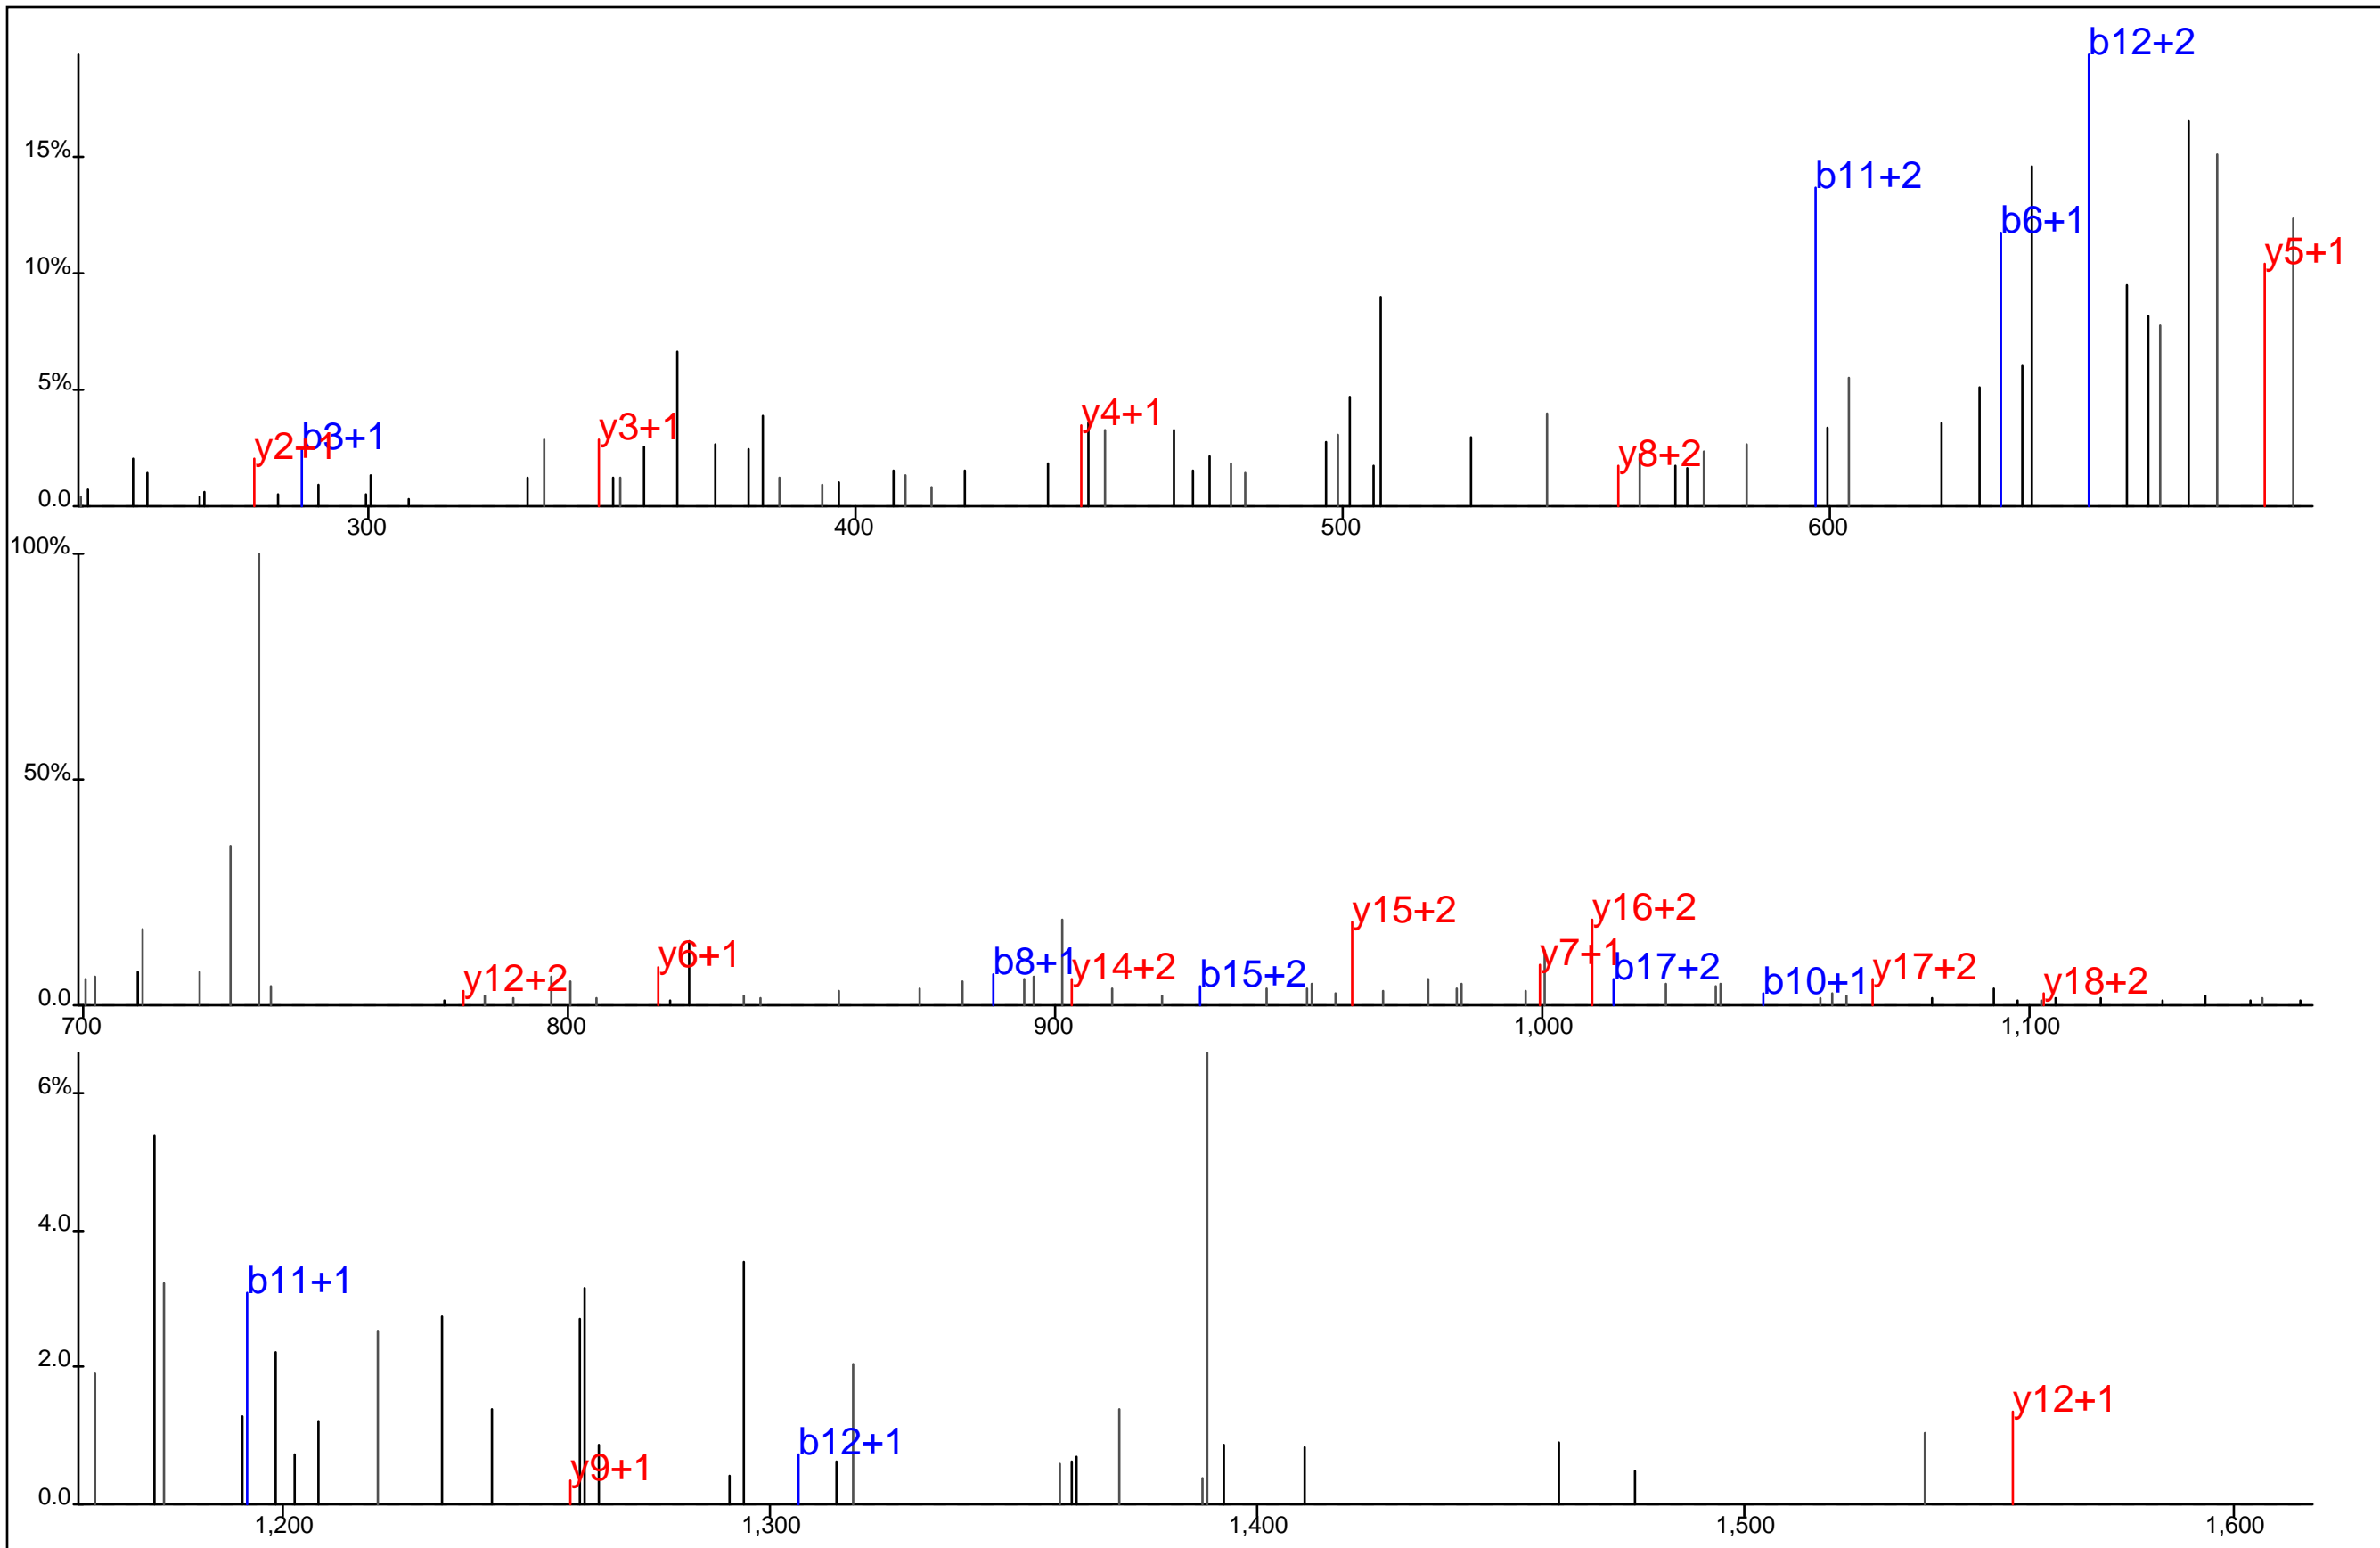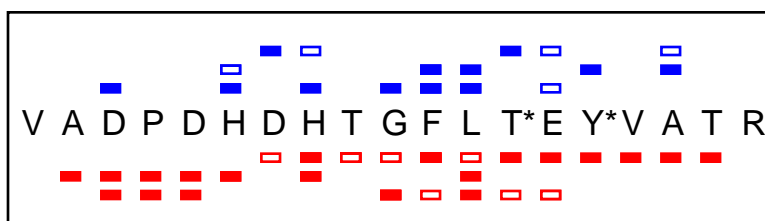

Protein Name: ERK2  
 gi Accession: 0  
 Precursor Mass: 768.6523+3  
 Delta Mass: 2.382 ppm  
 XCorr: 32.09

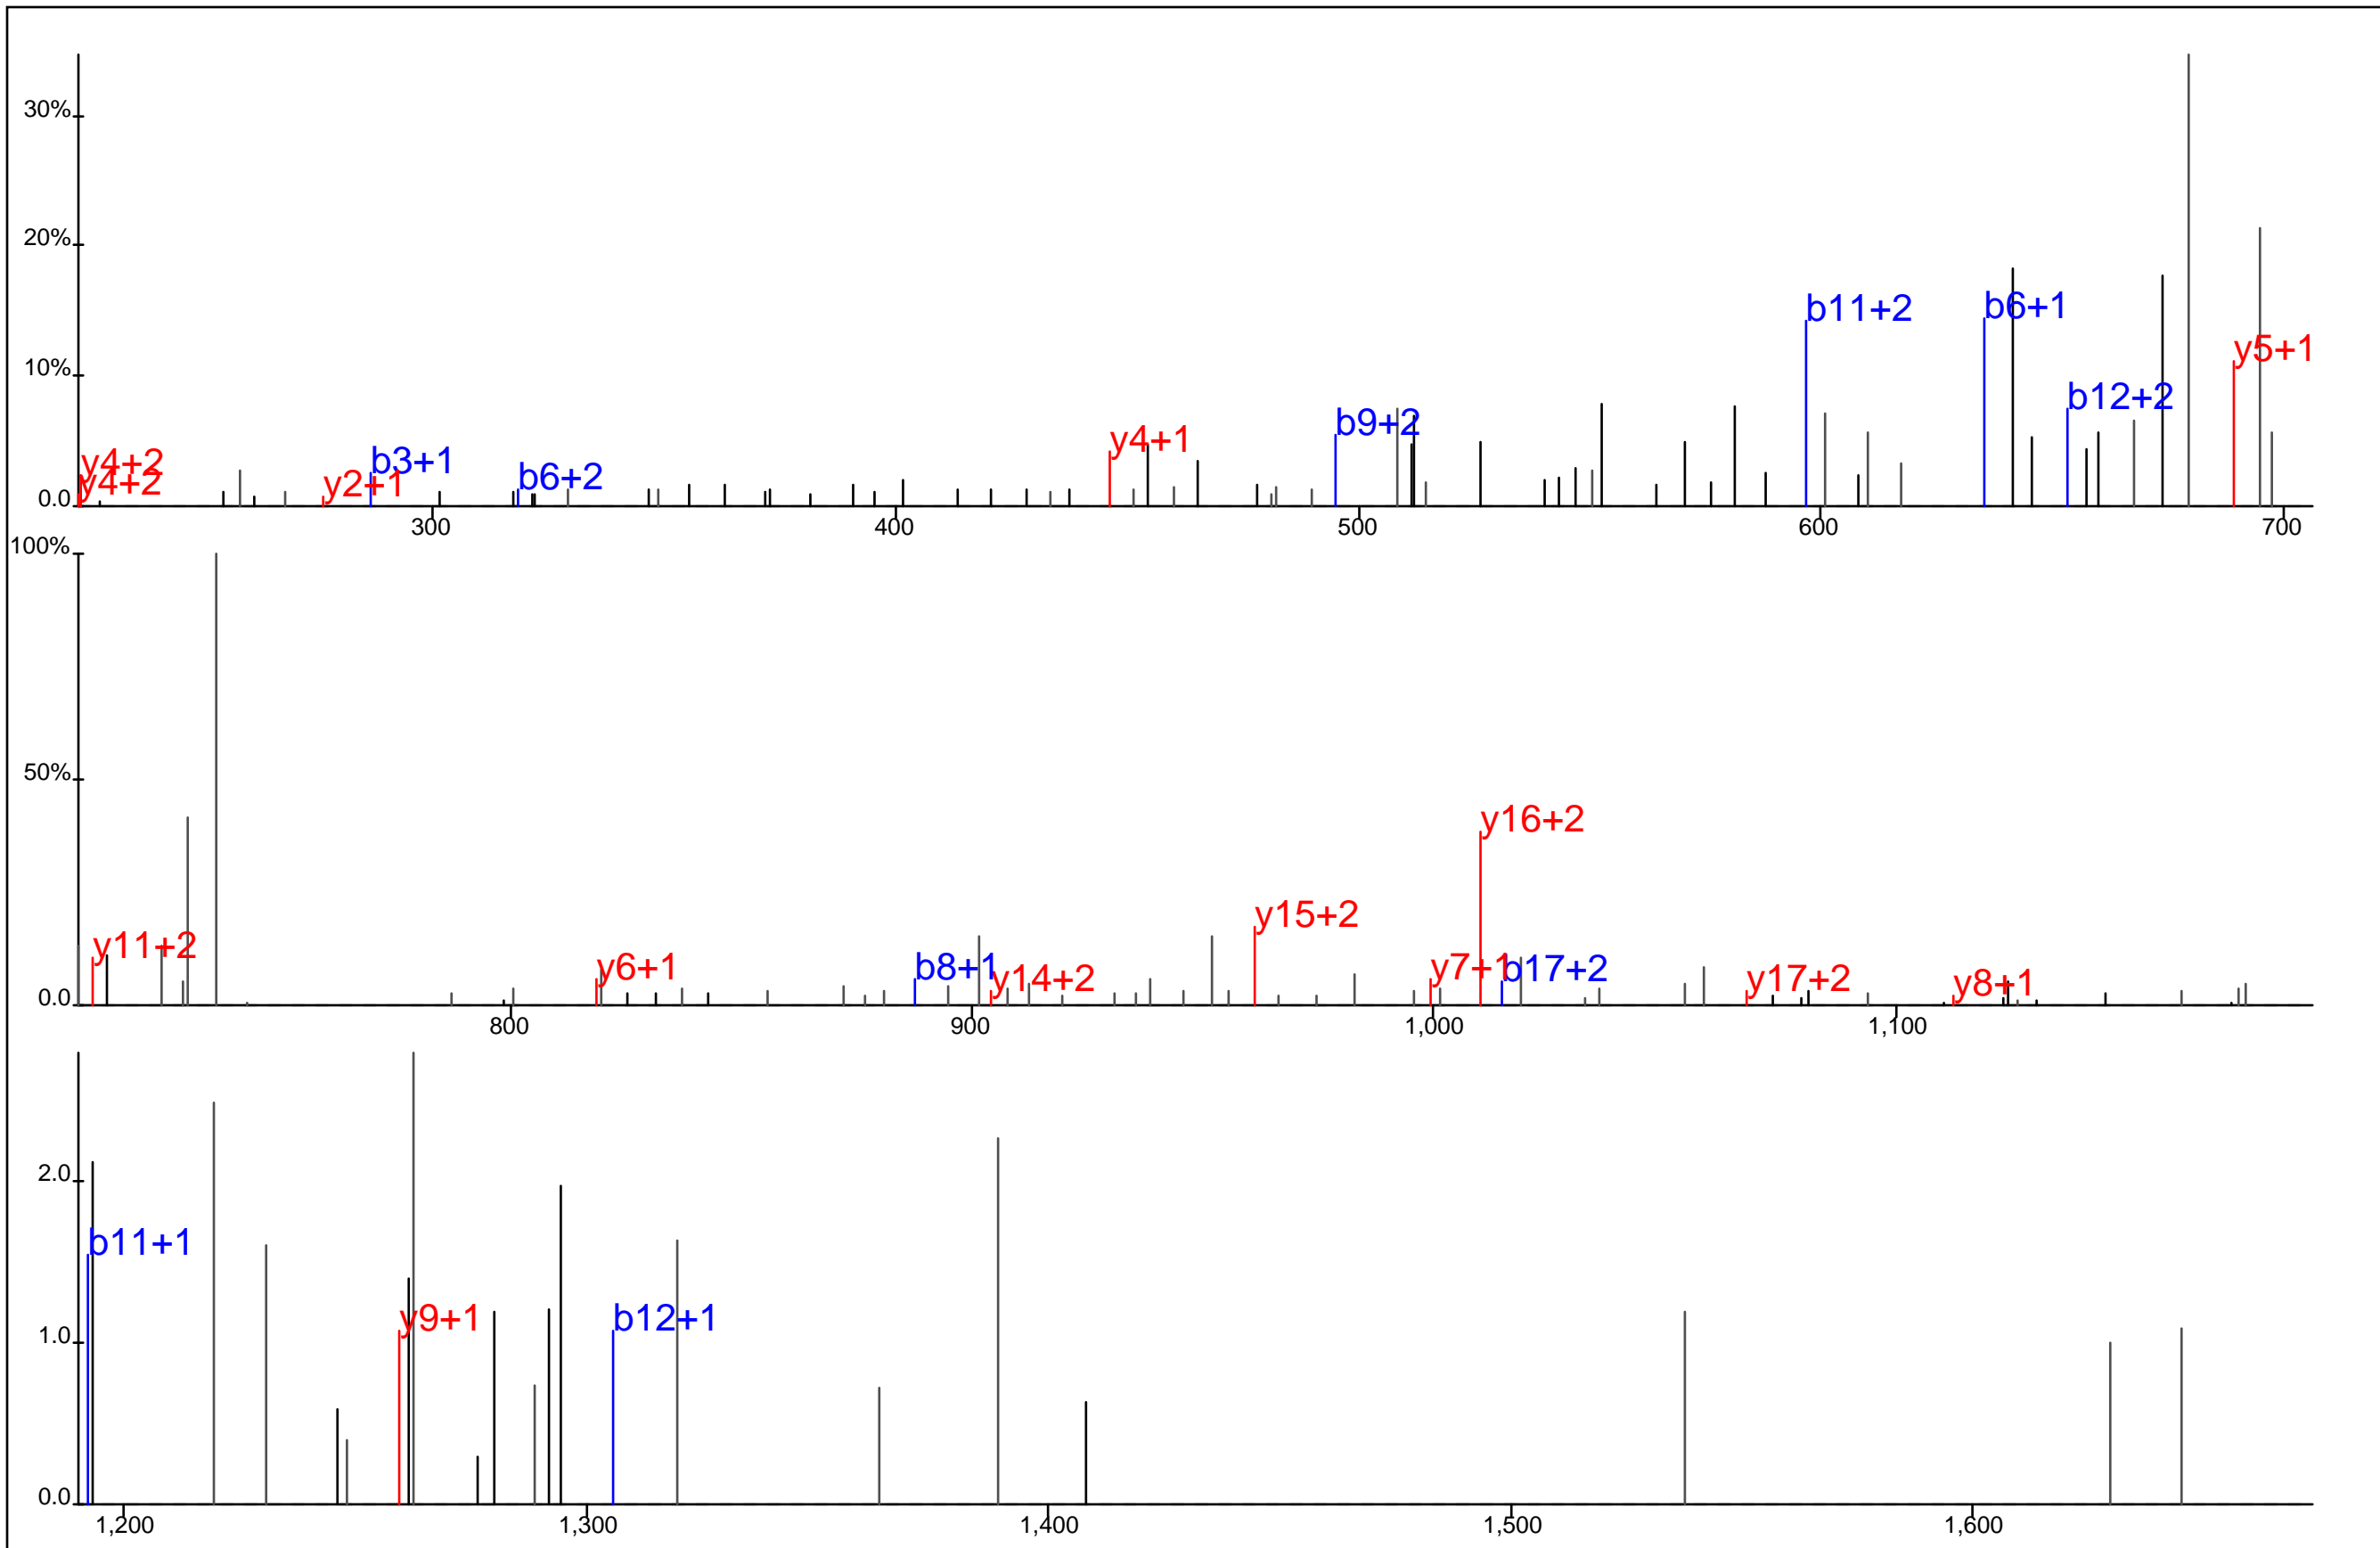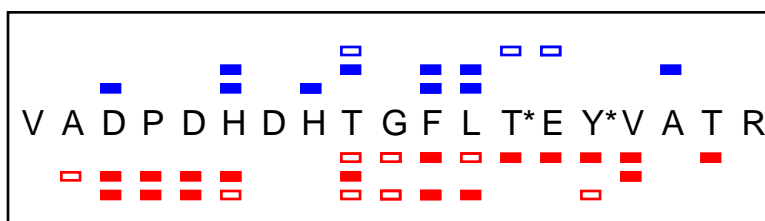

Protein Name: ERK2  
 gi Accession: 0  
 Precursor Mass: 768.6516+3  
 Delta Mass: 1.348 ppm  
 XCorr: 30.84

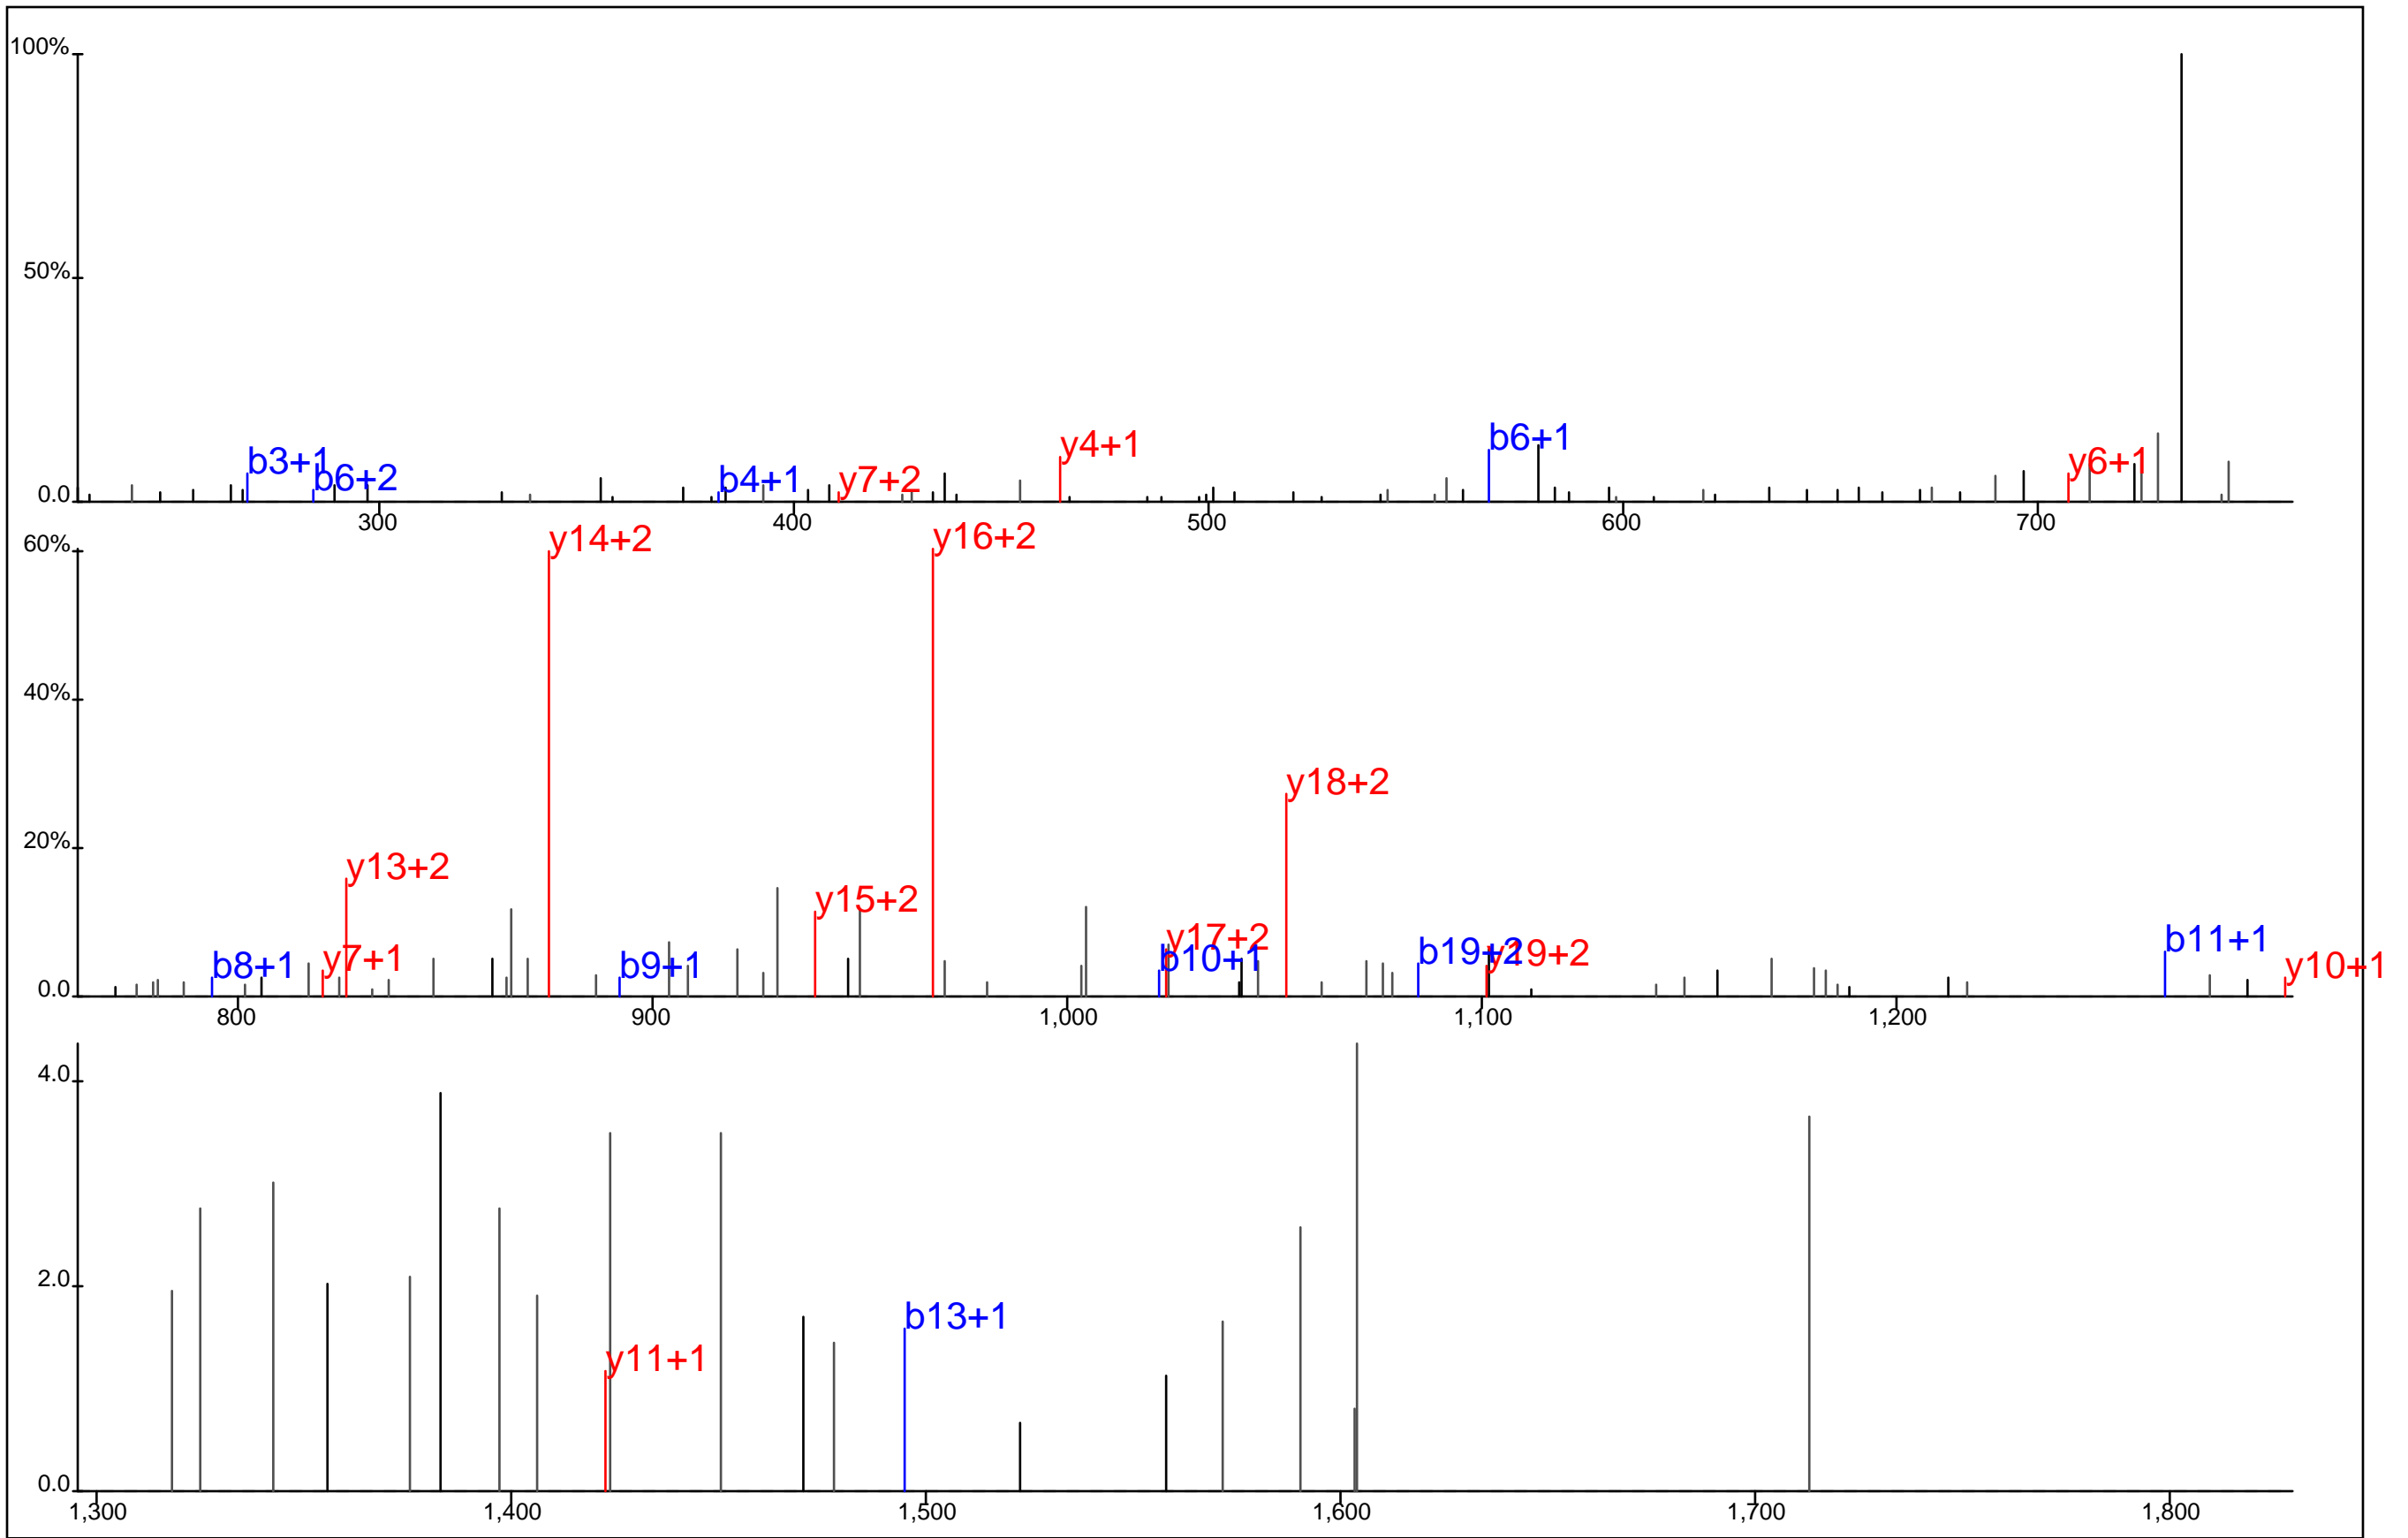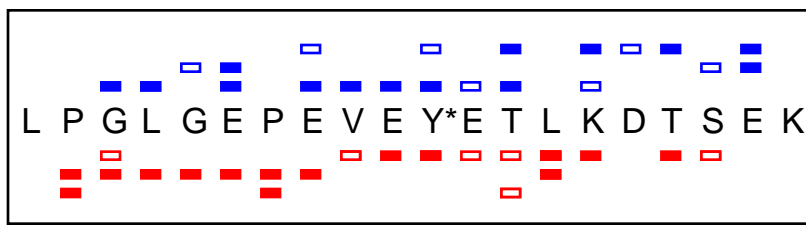

Protein Name: Erythrocyte membrane protein band 4.1 like 5  
 gi Accession: 0  
 Precursor Mass: 772.0300+3  
 Delta Mass: 0.696 ppm  
 XCorr: 26.62

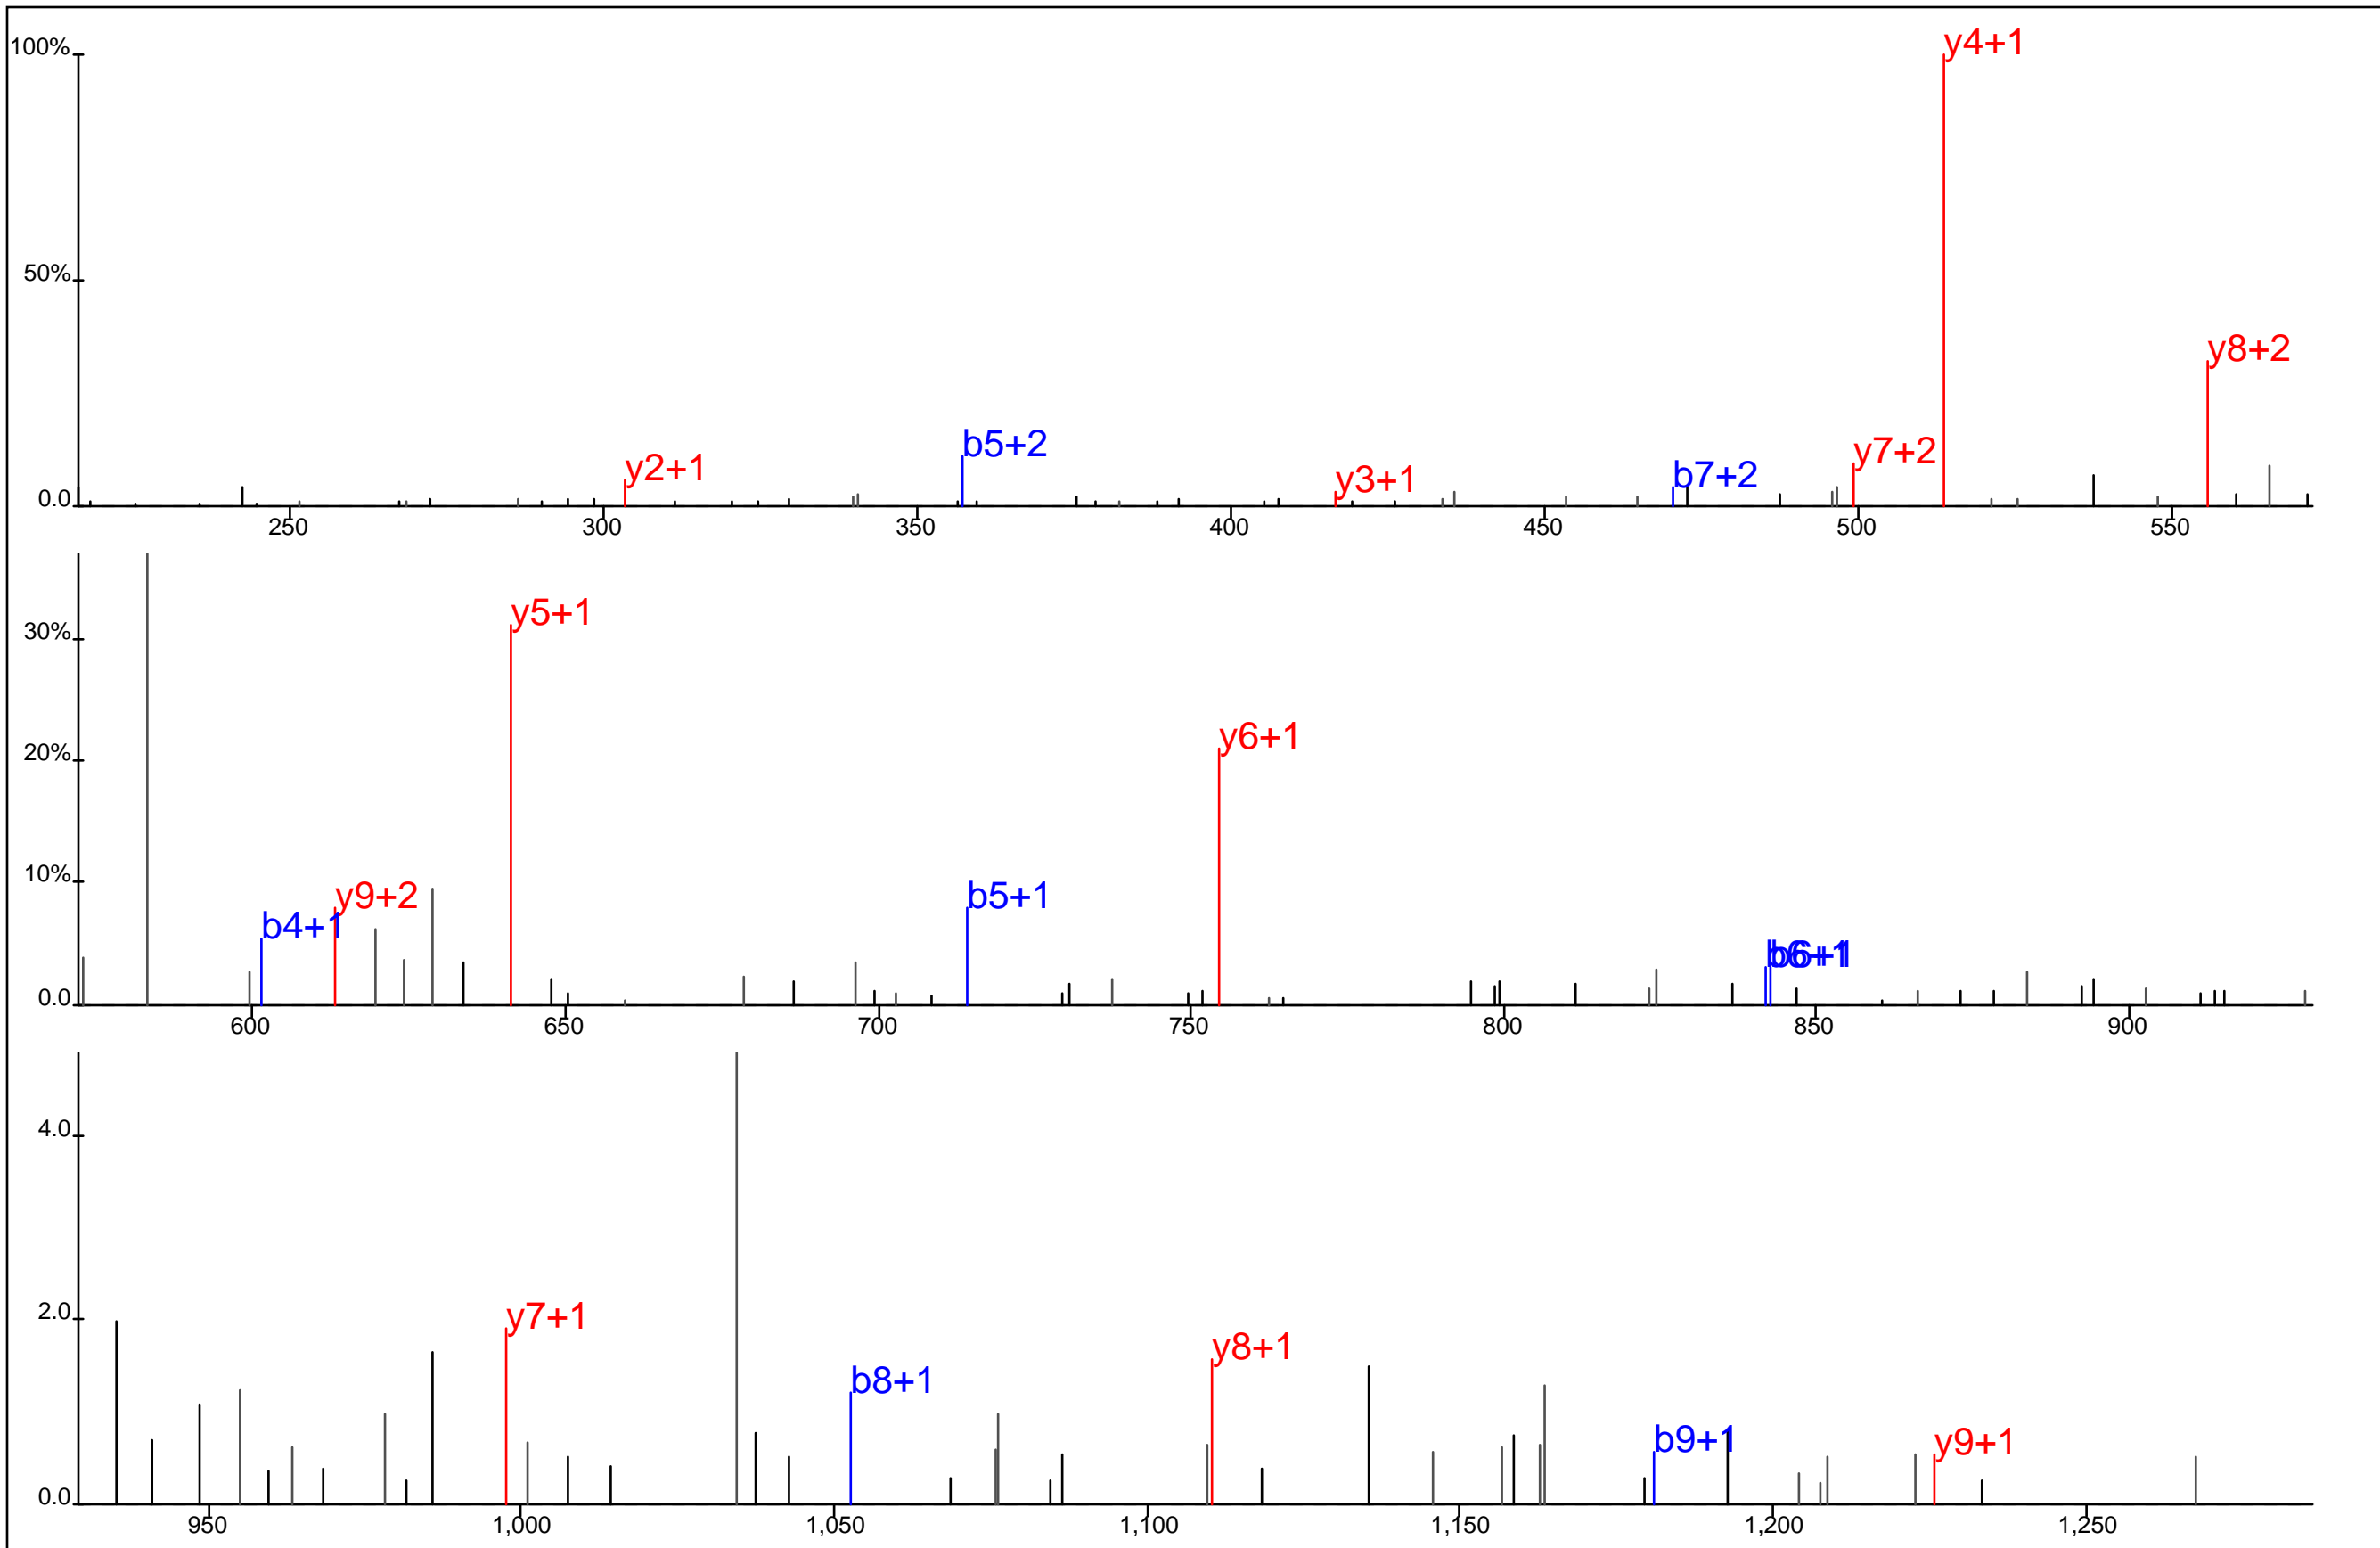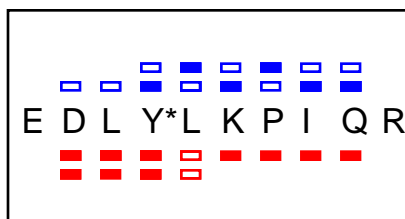

Protein Name: Eukaryotic translation elongation factor 2  
 gi Accession: 0  
 Precursor Mass: 677.8427+2  
 Delta Mass: 1.141 ppm  
 XCorr: 44.51

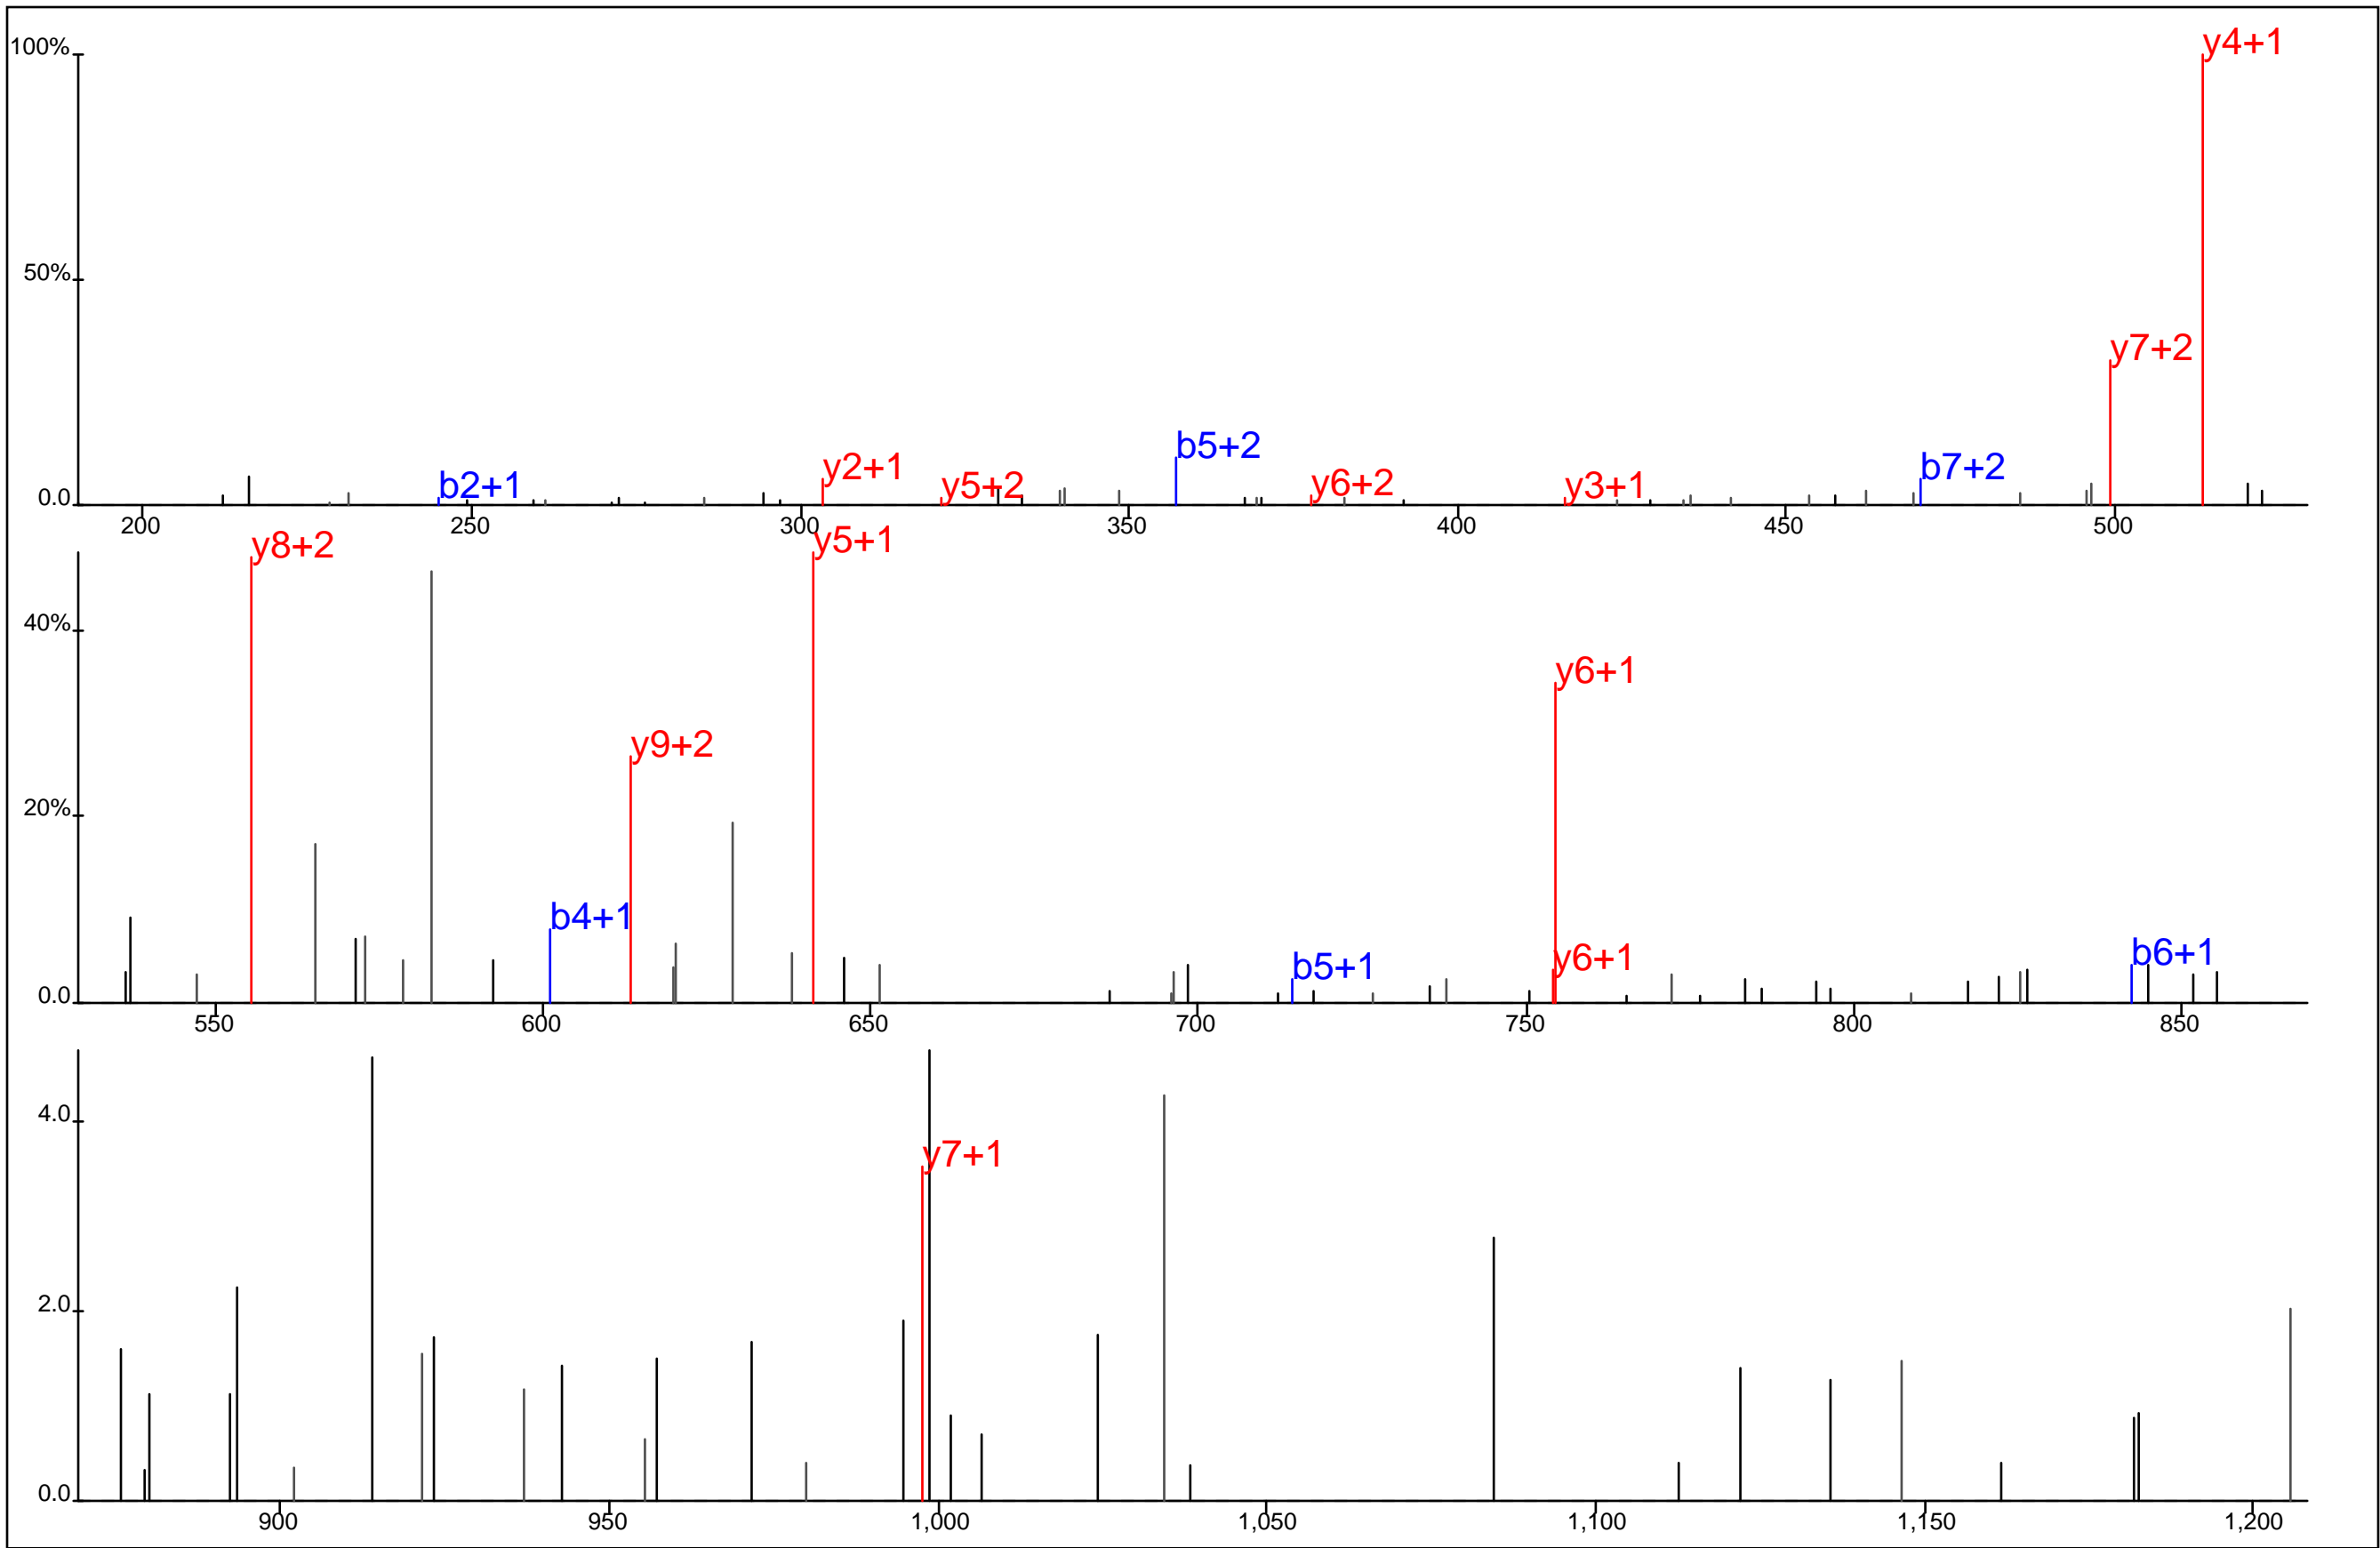

■ ▢ ▣ ▤ ▥ ▦ ▧ ▨  
 E D L Y\*L K P I Q R  
▩ ▪ ▫ ▬ ▭ ▮ ▯ ▰

Protein Name: Eukaryotic translation elongation factor 2  
 gi Accession: 0  
 Precursor Mass: 677.8420+2  
 Delta Mass: 0.151 ppm  
 XCorr: 21.18

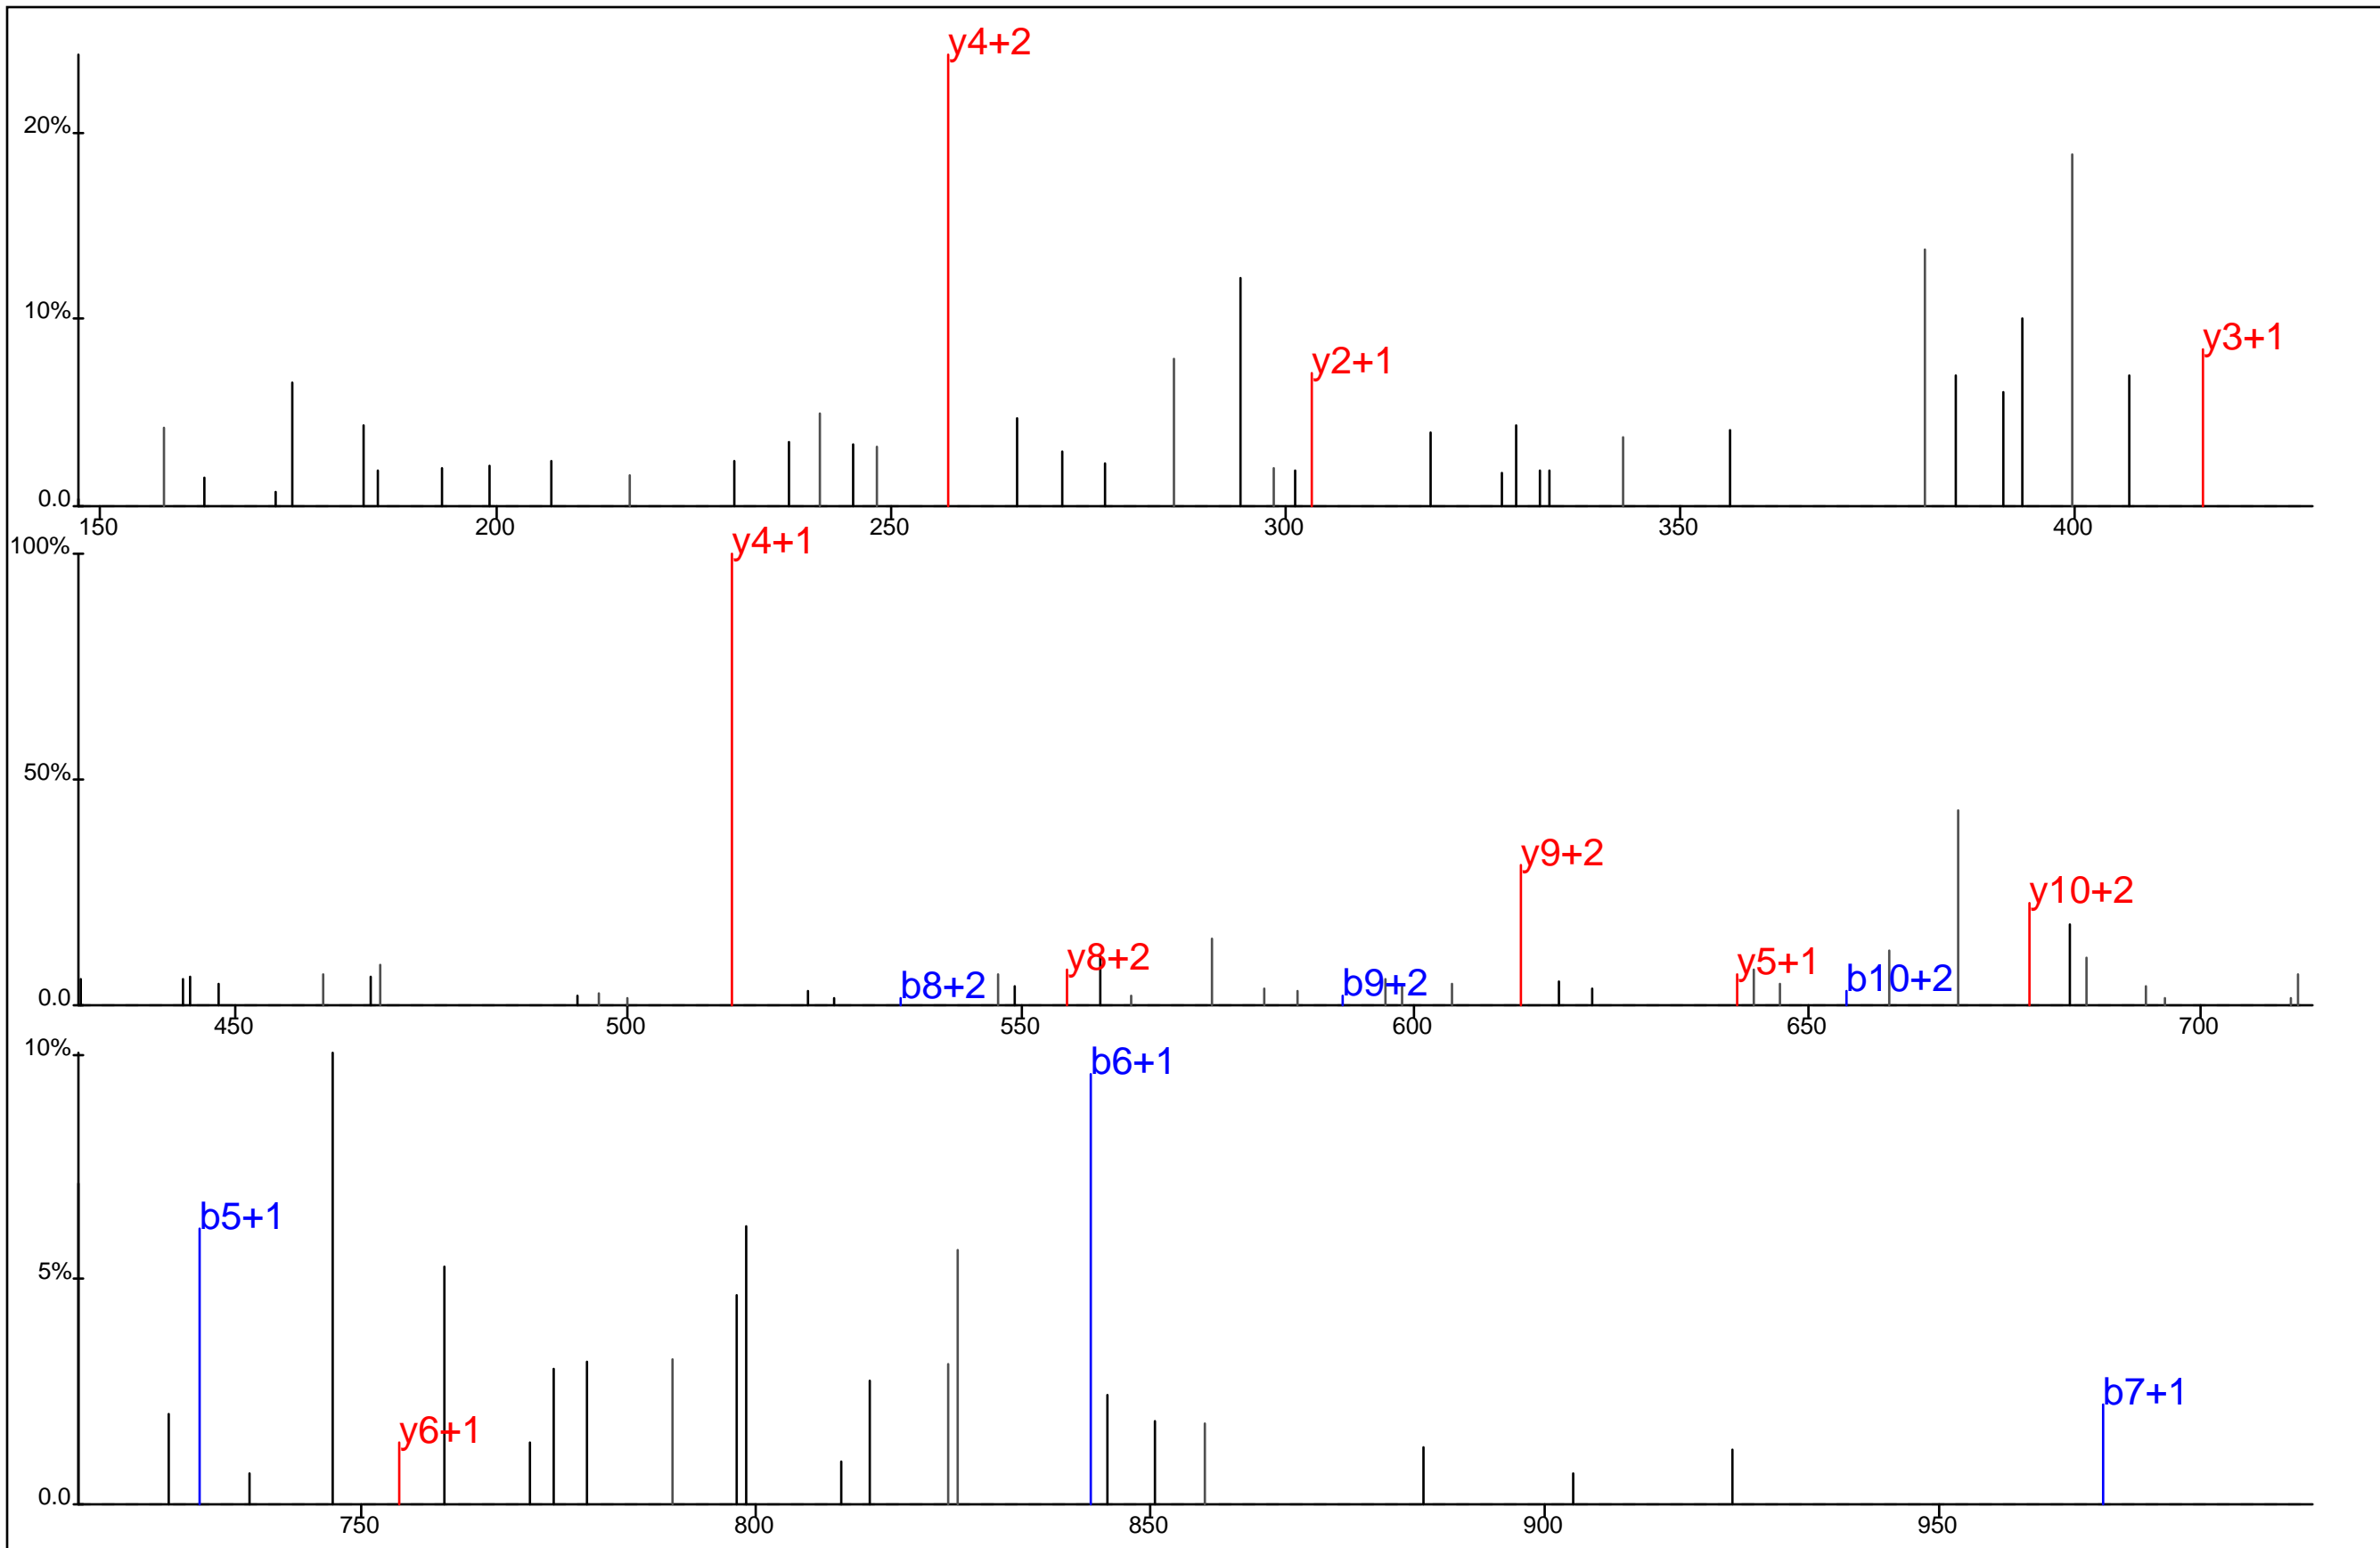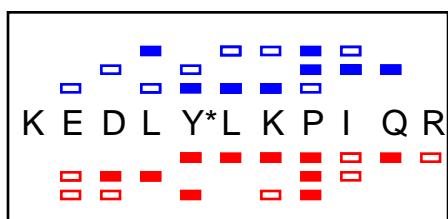

Protein Name: Eukaryotic translation elongation factor 2  
 gi Accession: 0  
 Precursor Mass: 494.9305+3  
 Delta Mass: 3.531 ppm  
 XCorr: 22.31



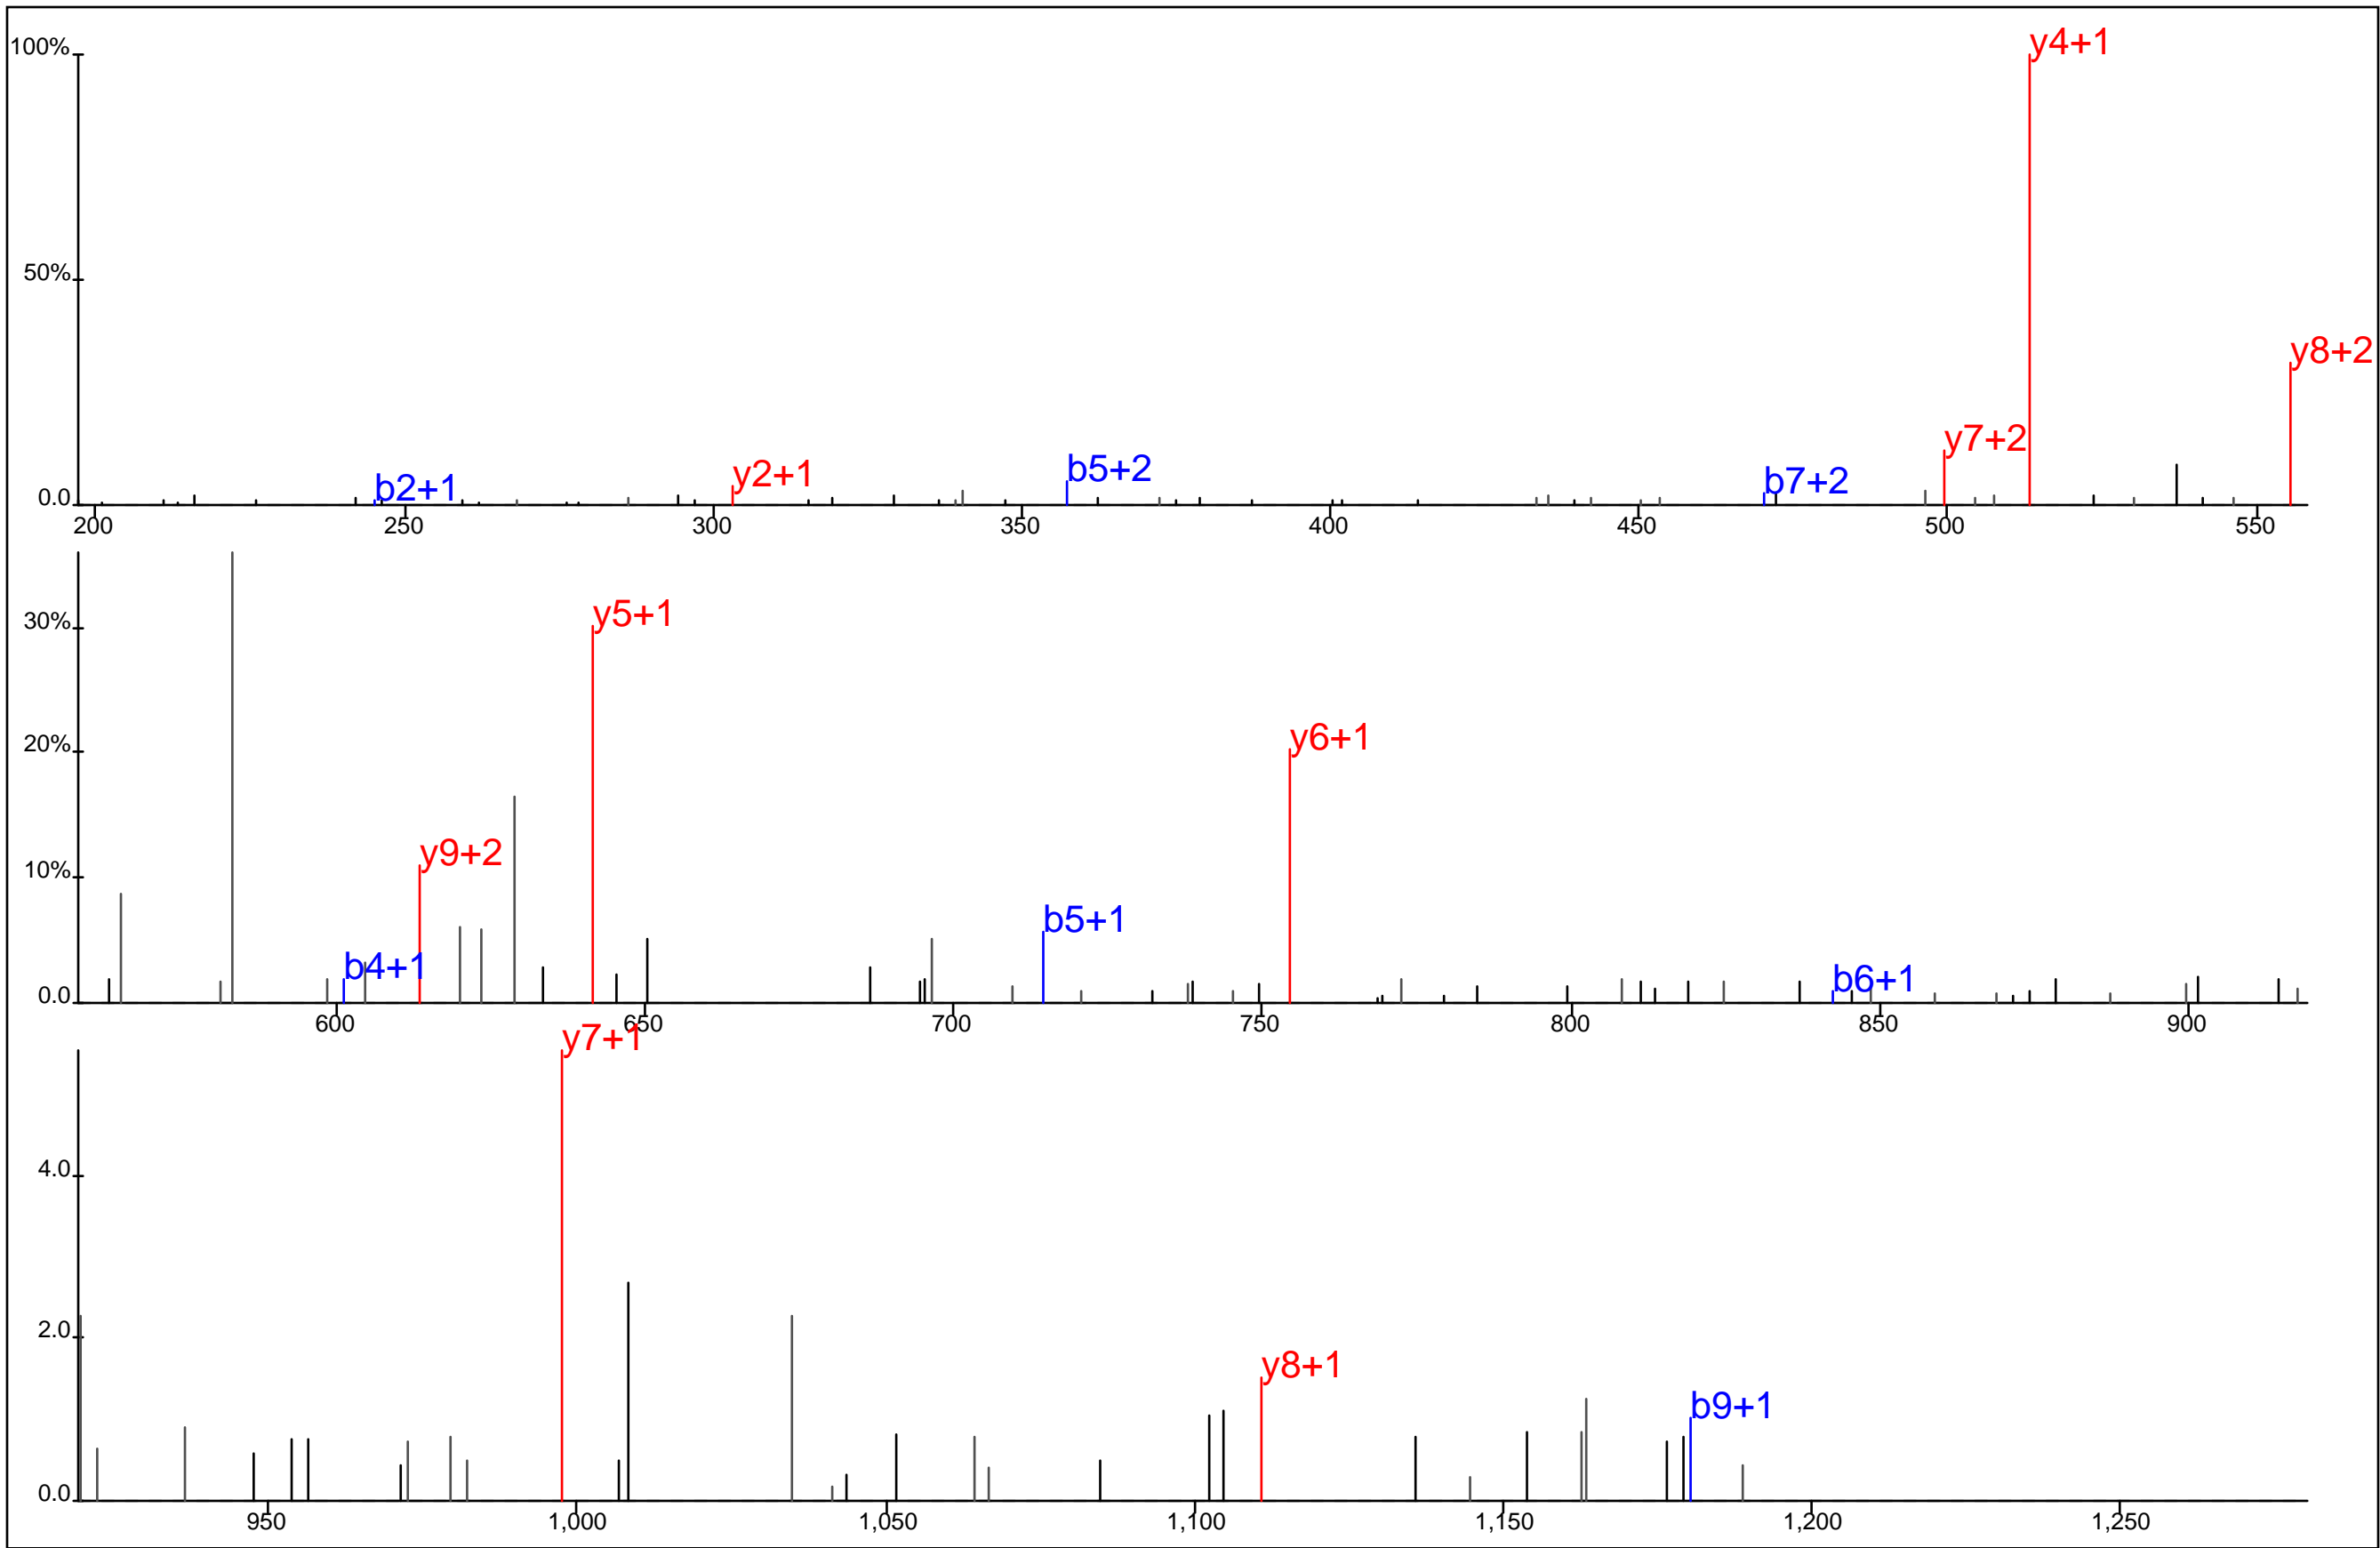

|   |   |   |     |   |   |   |   |   |
|---|---|---|-----|---|---|---|---|---|
| ■ | □ | ■ | ■   | ■ | ■ | ■ |   |   |
| E | D | L | Y*L | K | P | I | Q | R |
| ■ | ■ | ■ | ■   | ■ | ■ | ■ | ■ | ■ |

Protein Name: Eukaryotic translation elongation factor 2  
 gi Accession: 0  
 Precursor Mass: 677.8430+2  
 Delta Mass: 1.593 ppm  
 XCorr: 29.39

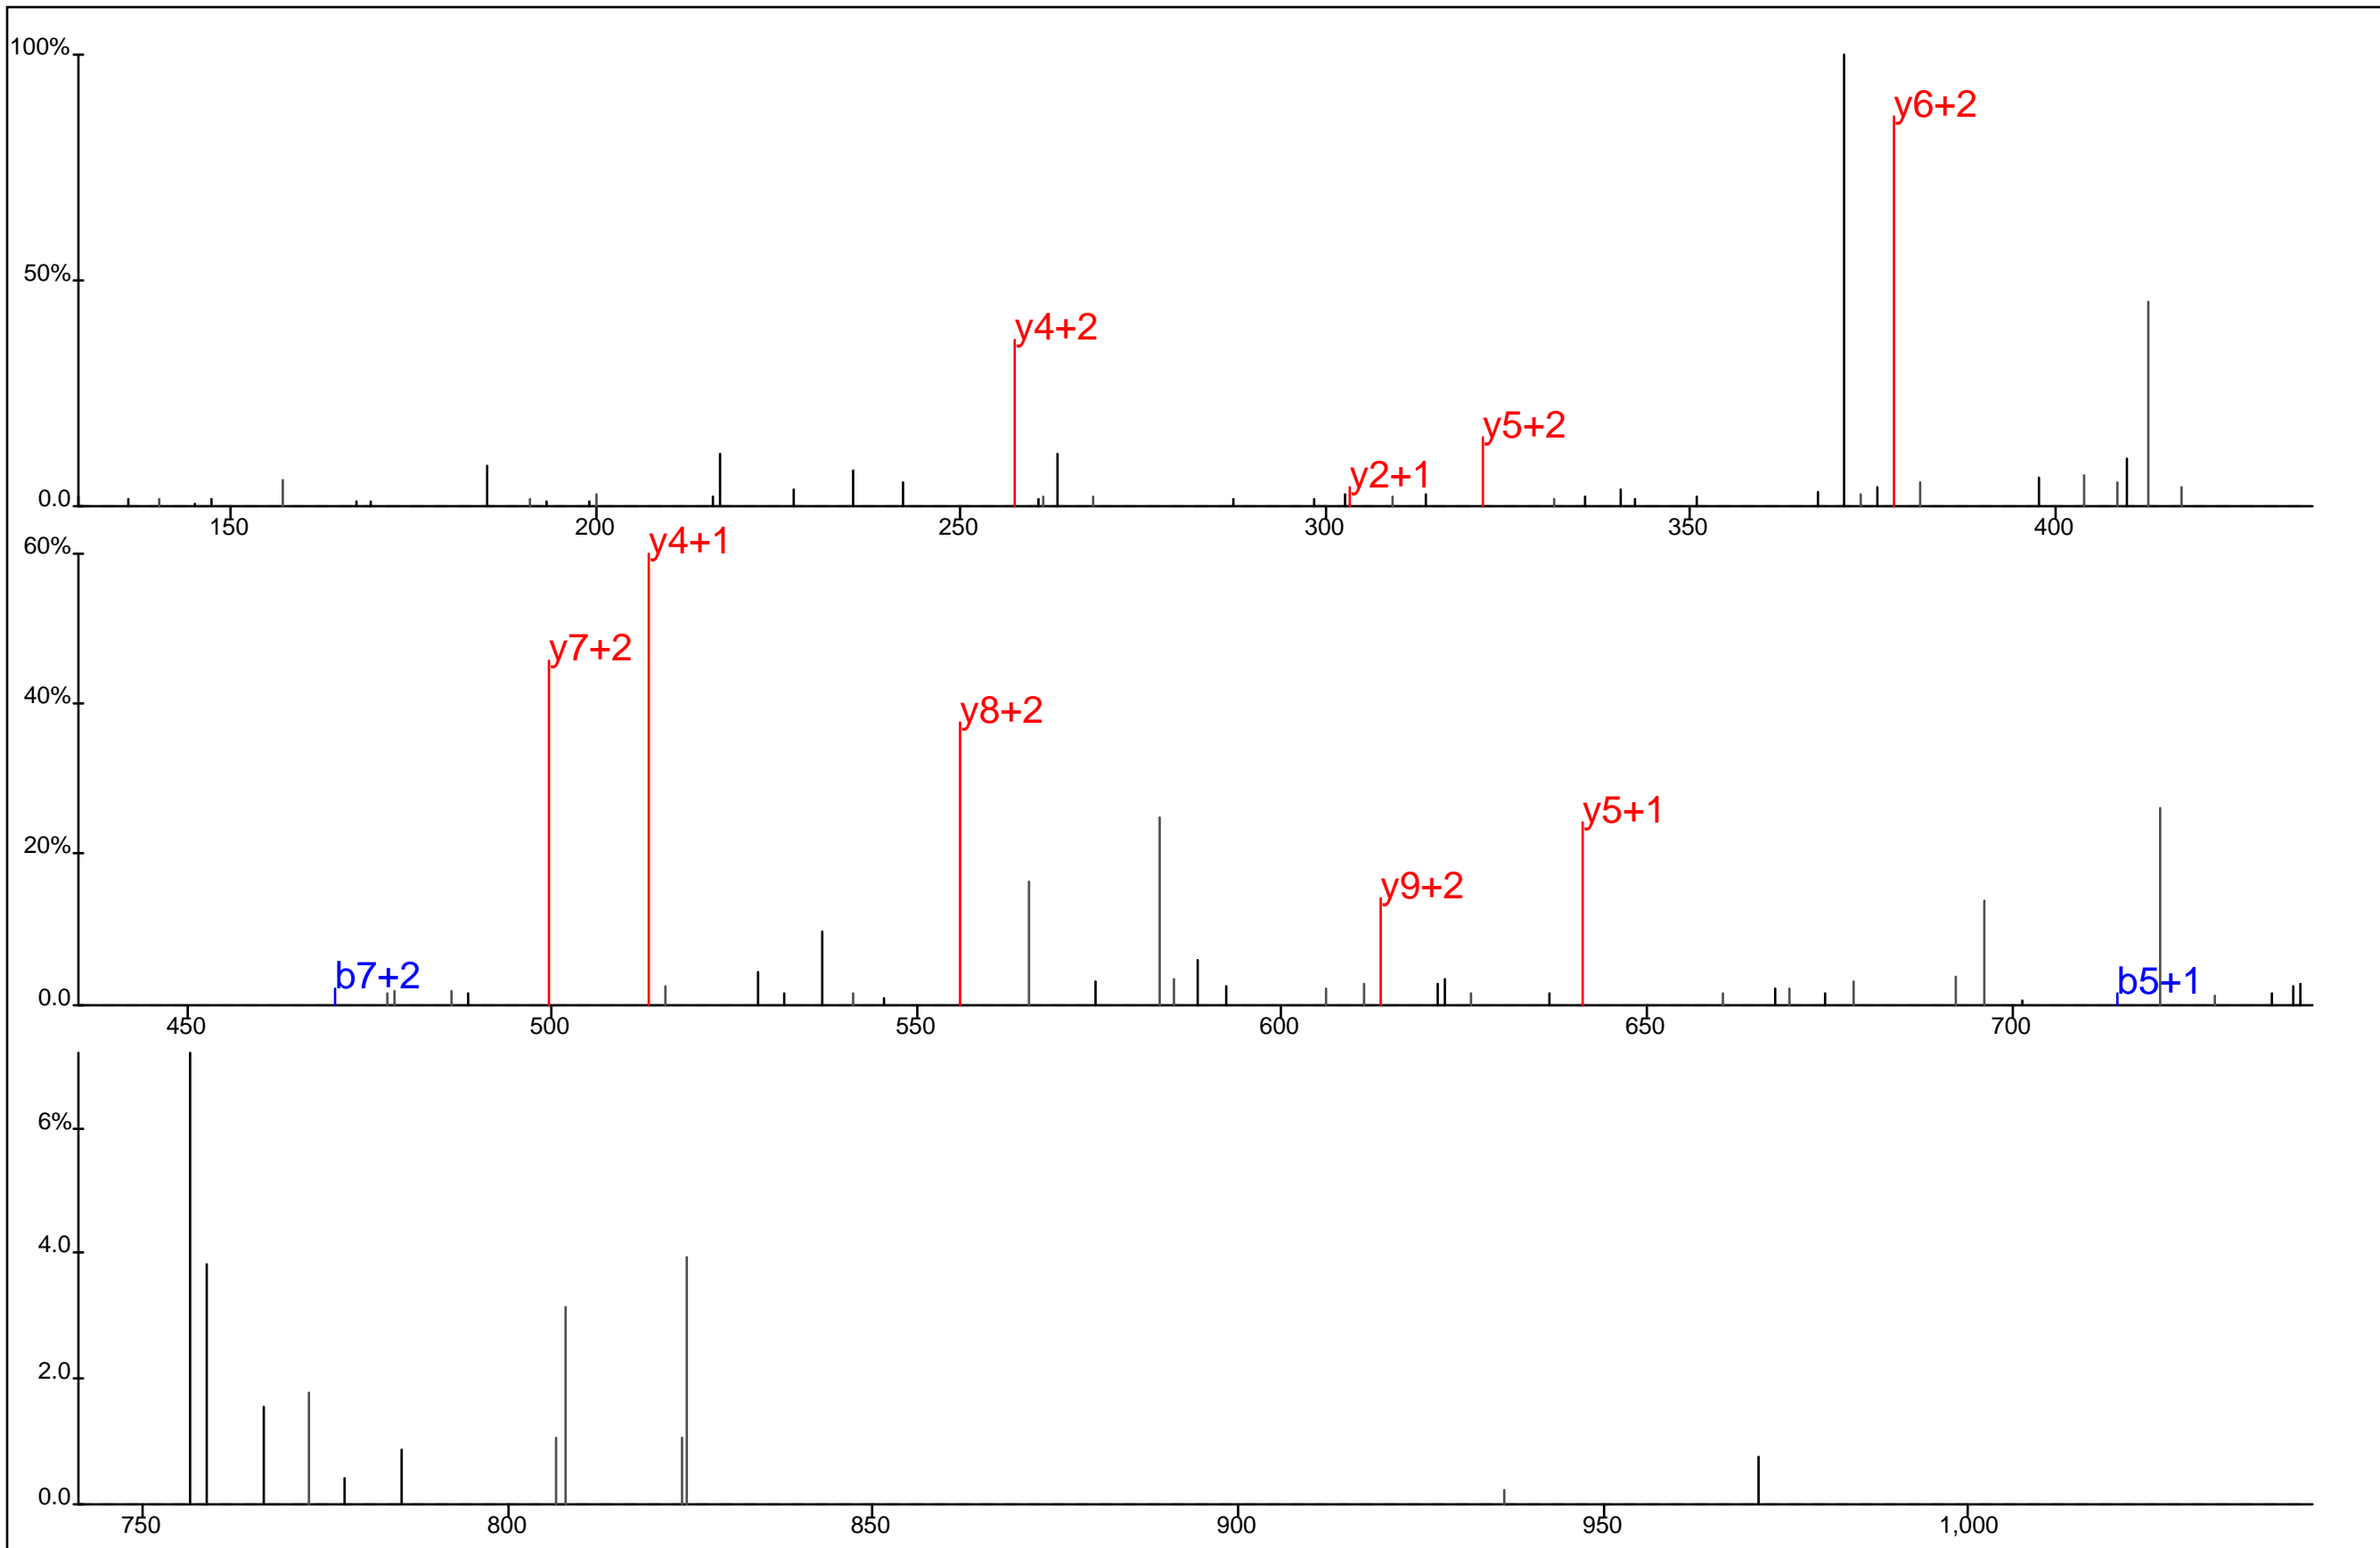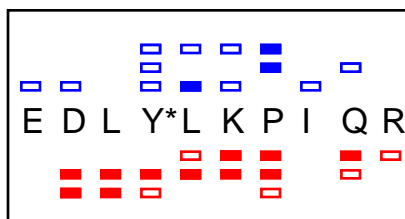

Protein Name: Eukaryotic translation elongation factor 2  
 gi Accession: 0  
 Precursor Mass: 452.2316+3  
 Delta Mass: 2.618 ppm  
 XCorr: 21.65

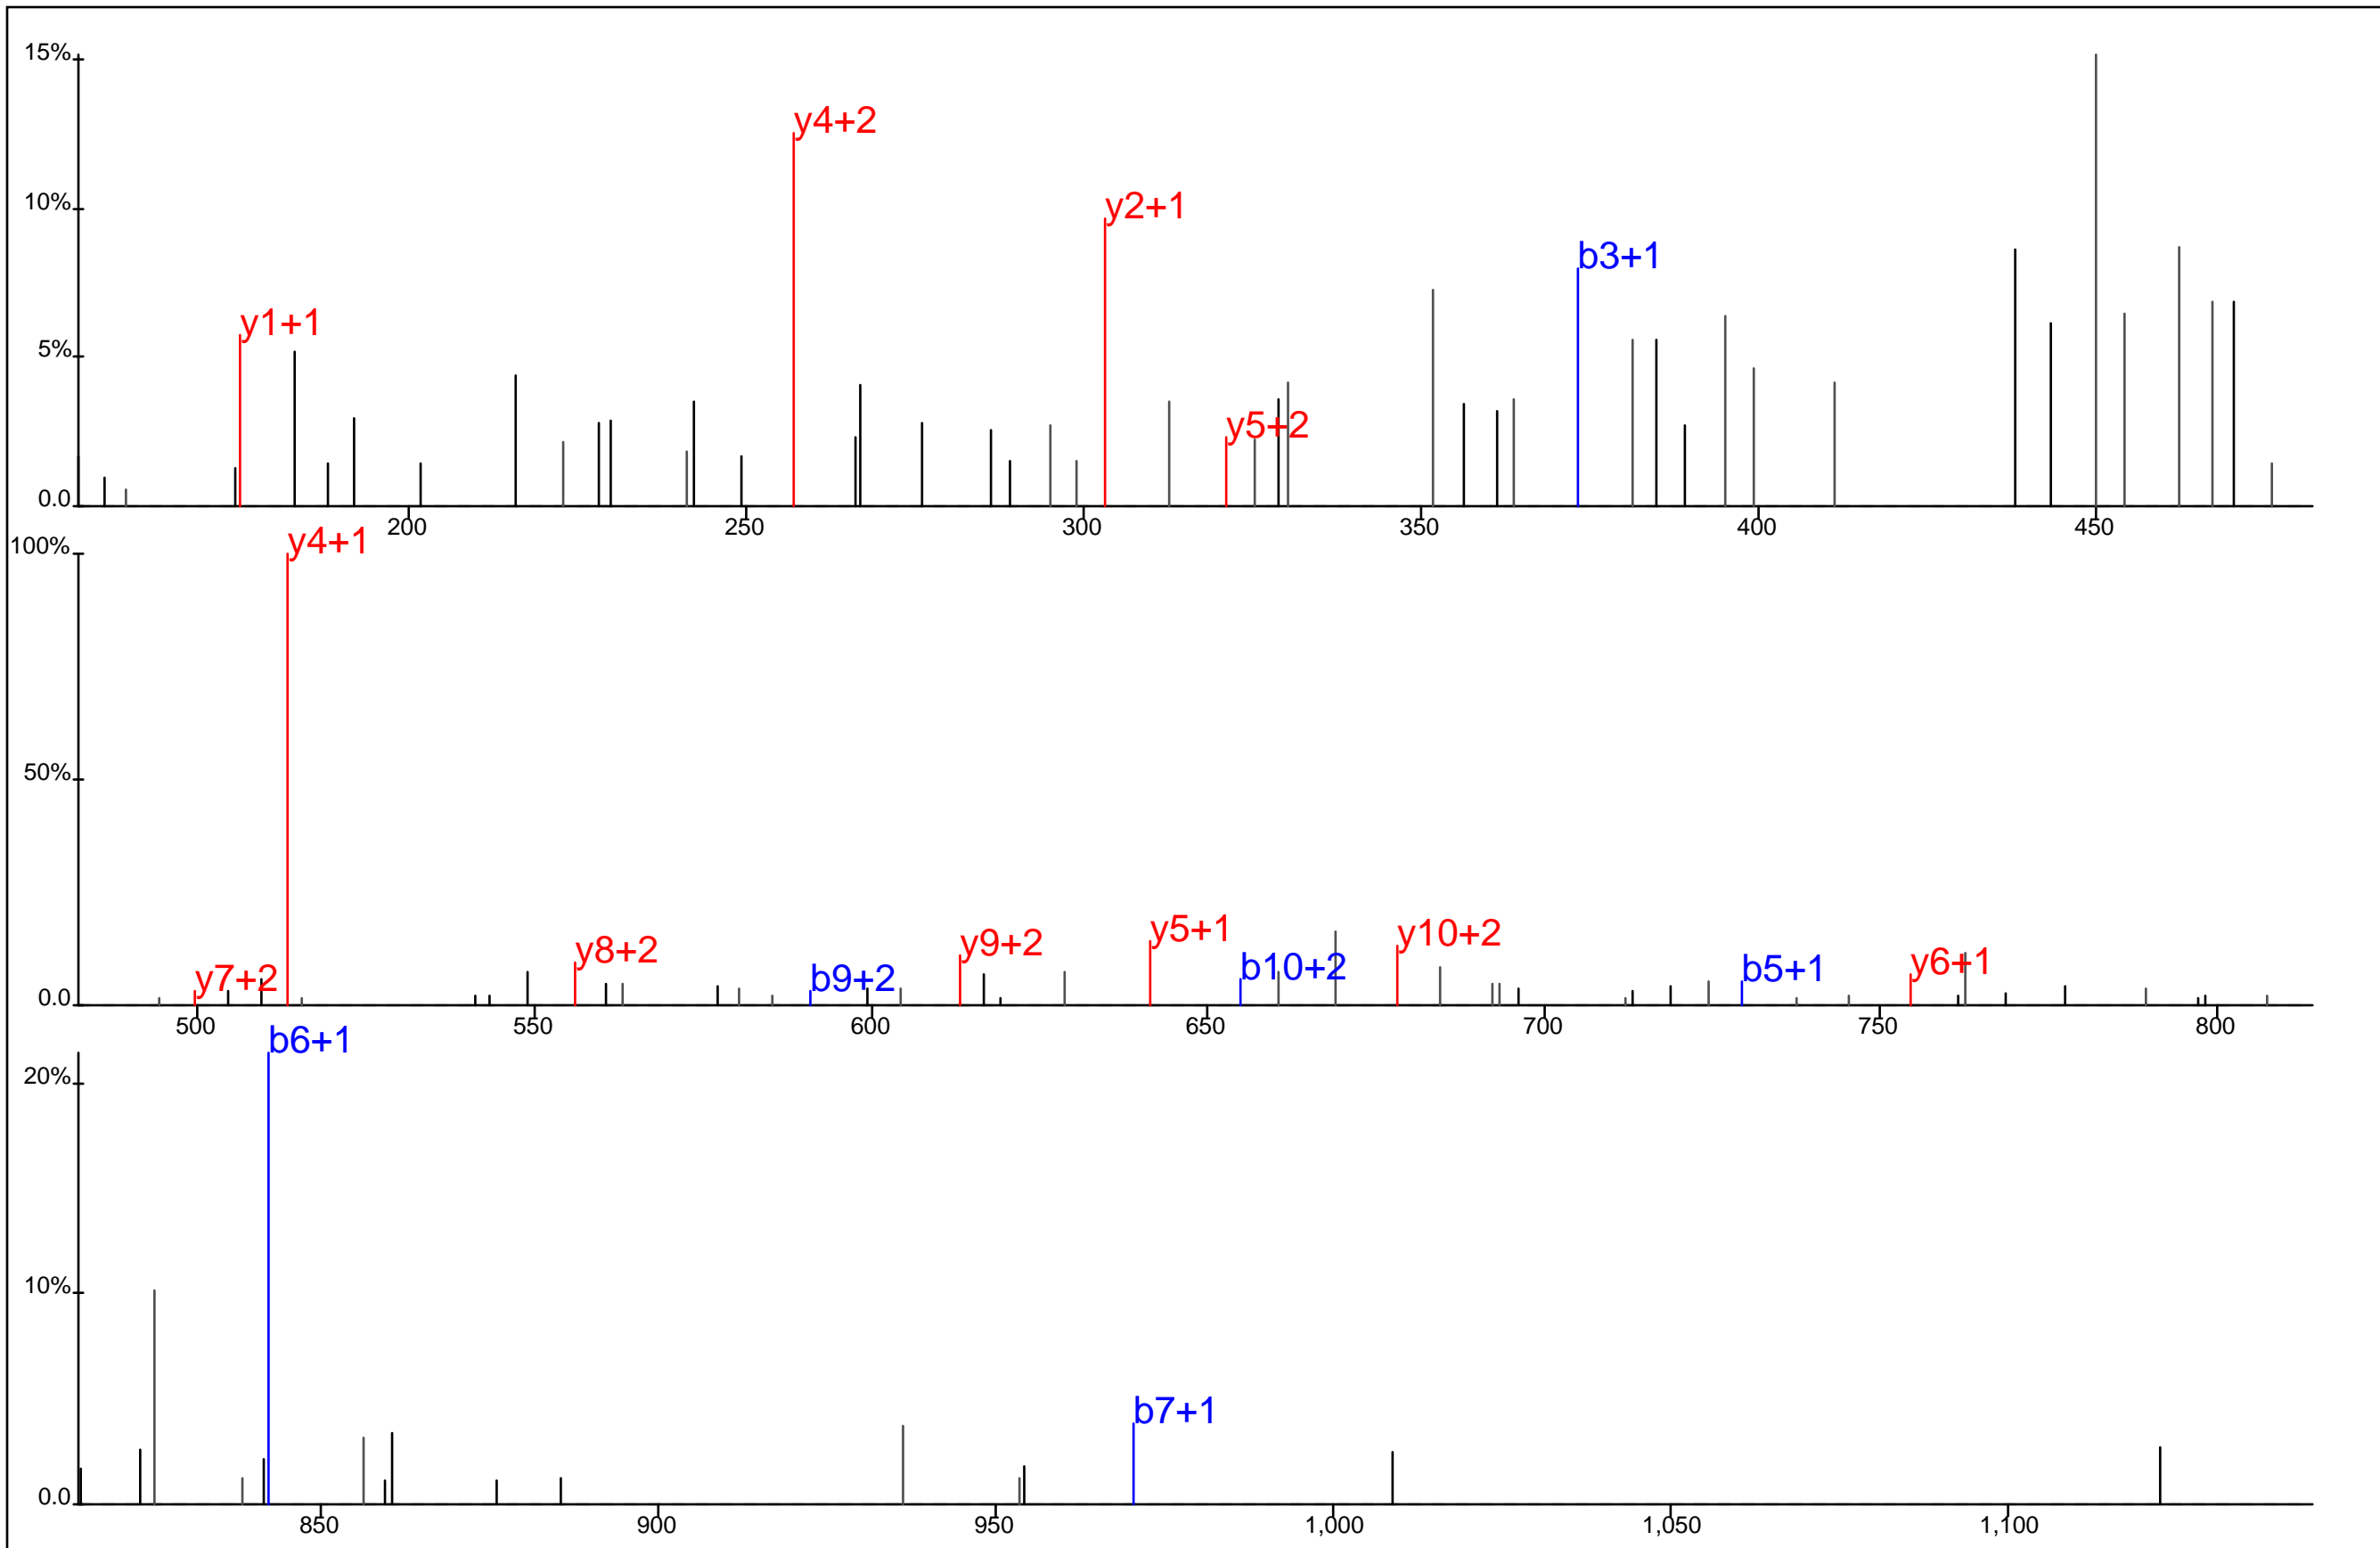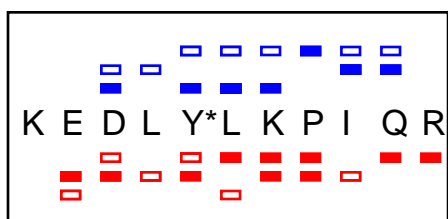

Protein Name: Eukaryotic translation elongation factor 2  
 gi Accession: 0  
 Precursor Mass: 494.9295+3  
 Delta Mass: 1.680 ppm  
 XCorr: 21.41

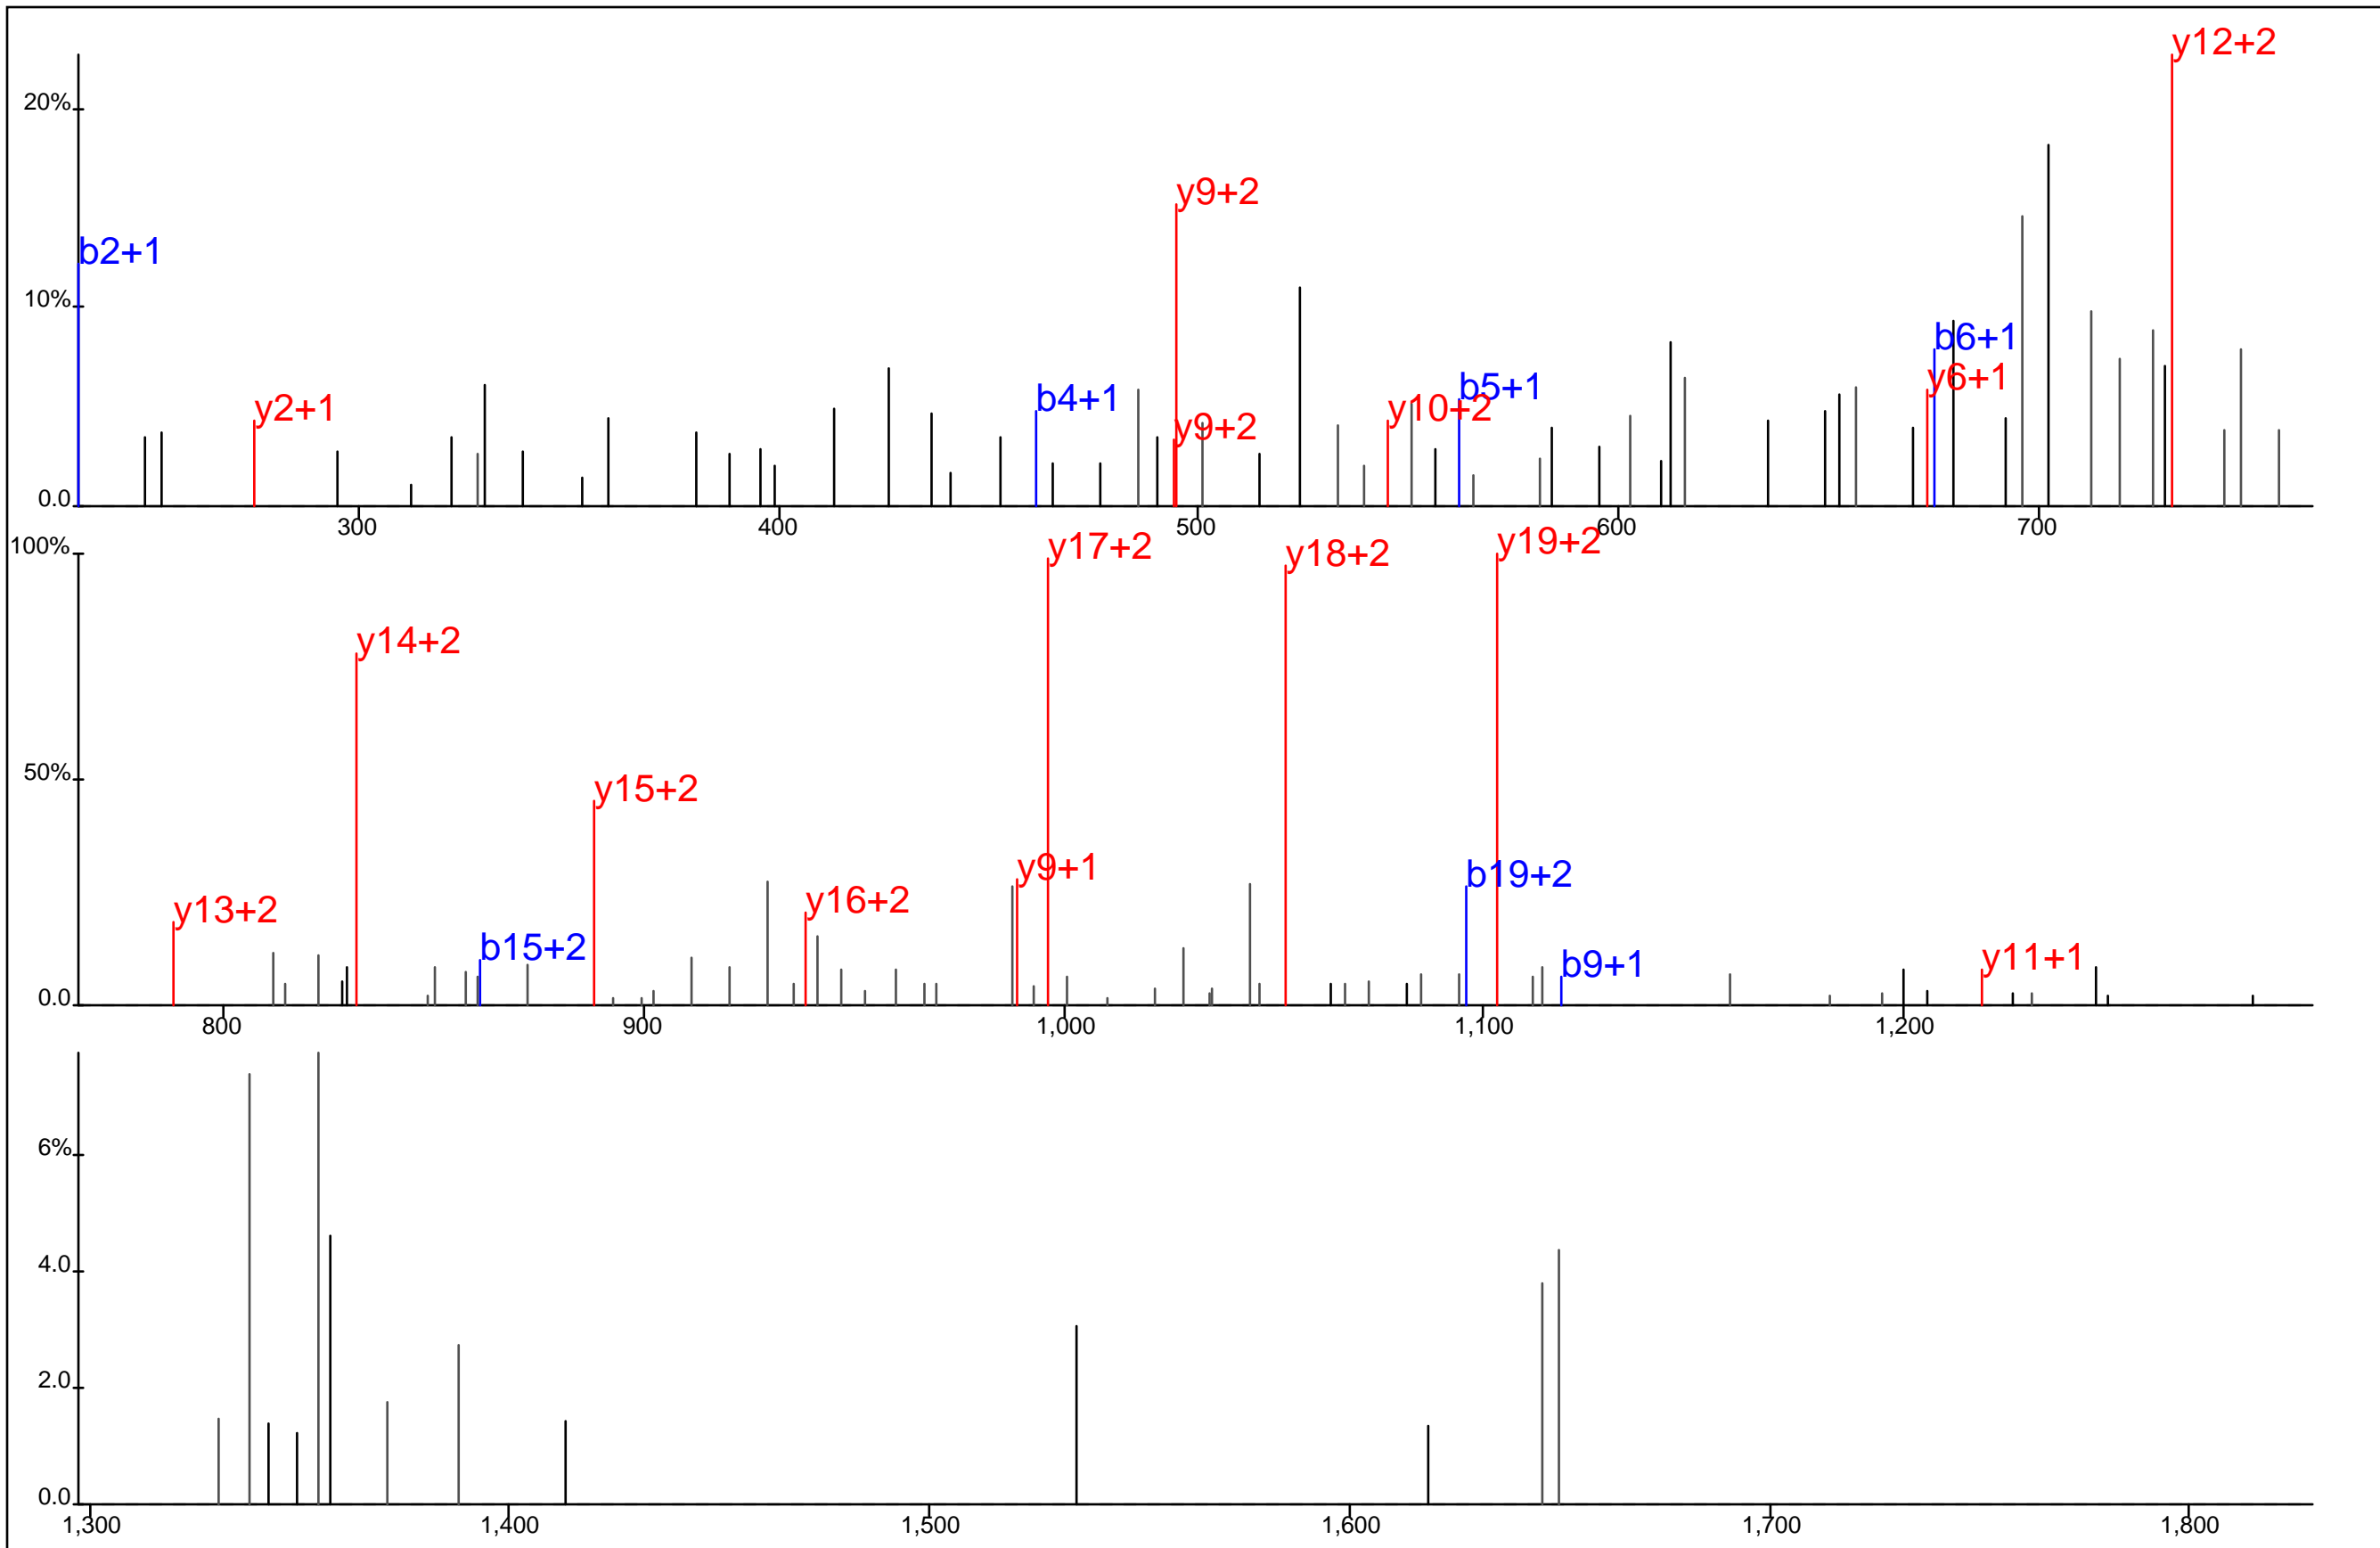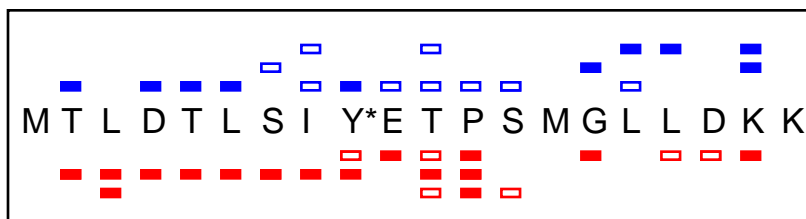

Protein Name: Eukaryotic translation initiation factor 3, subunit 9 eta, 116kDa  
 gi Accession: 0  
 Precursor Mass: 779.3748+3  
 Delta Mass: 2.896 ppm  
 XCorr: 33.53

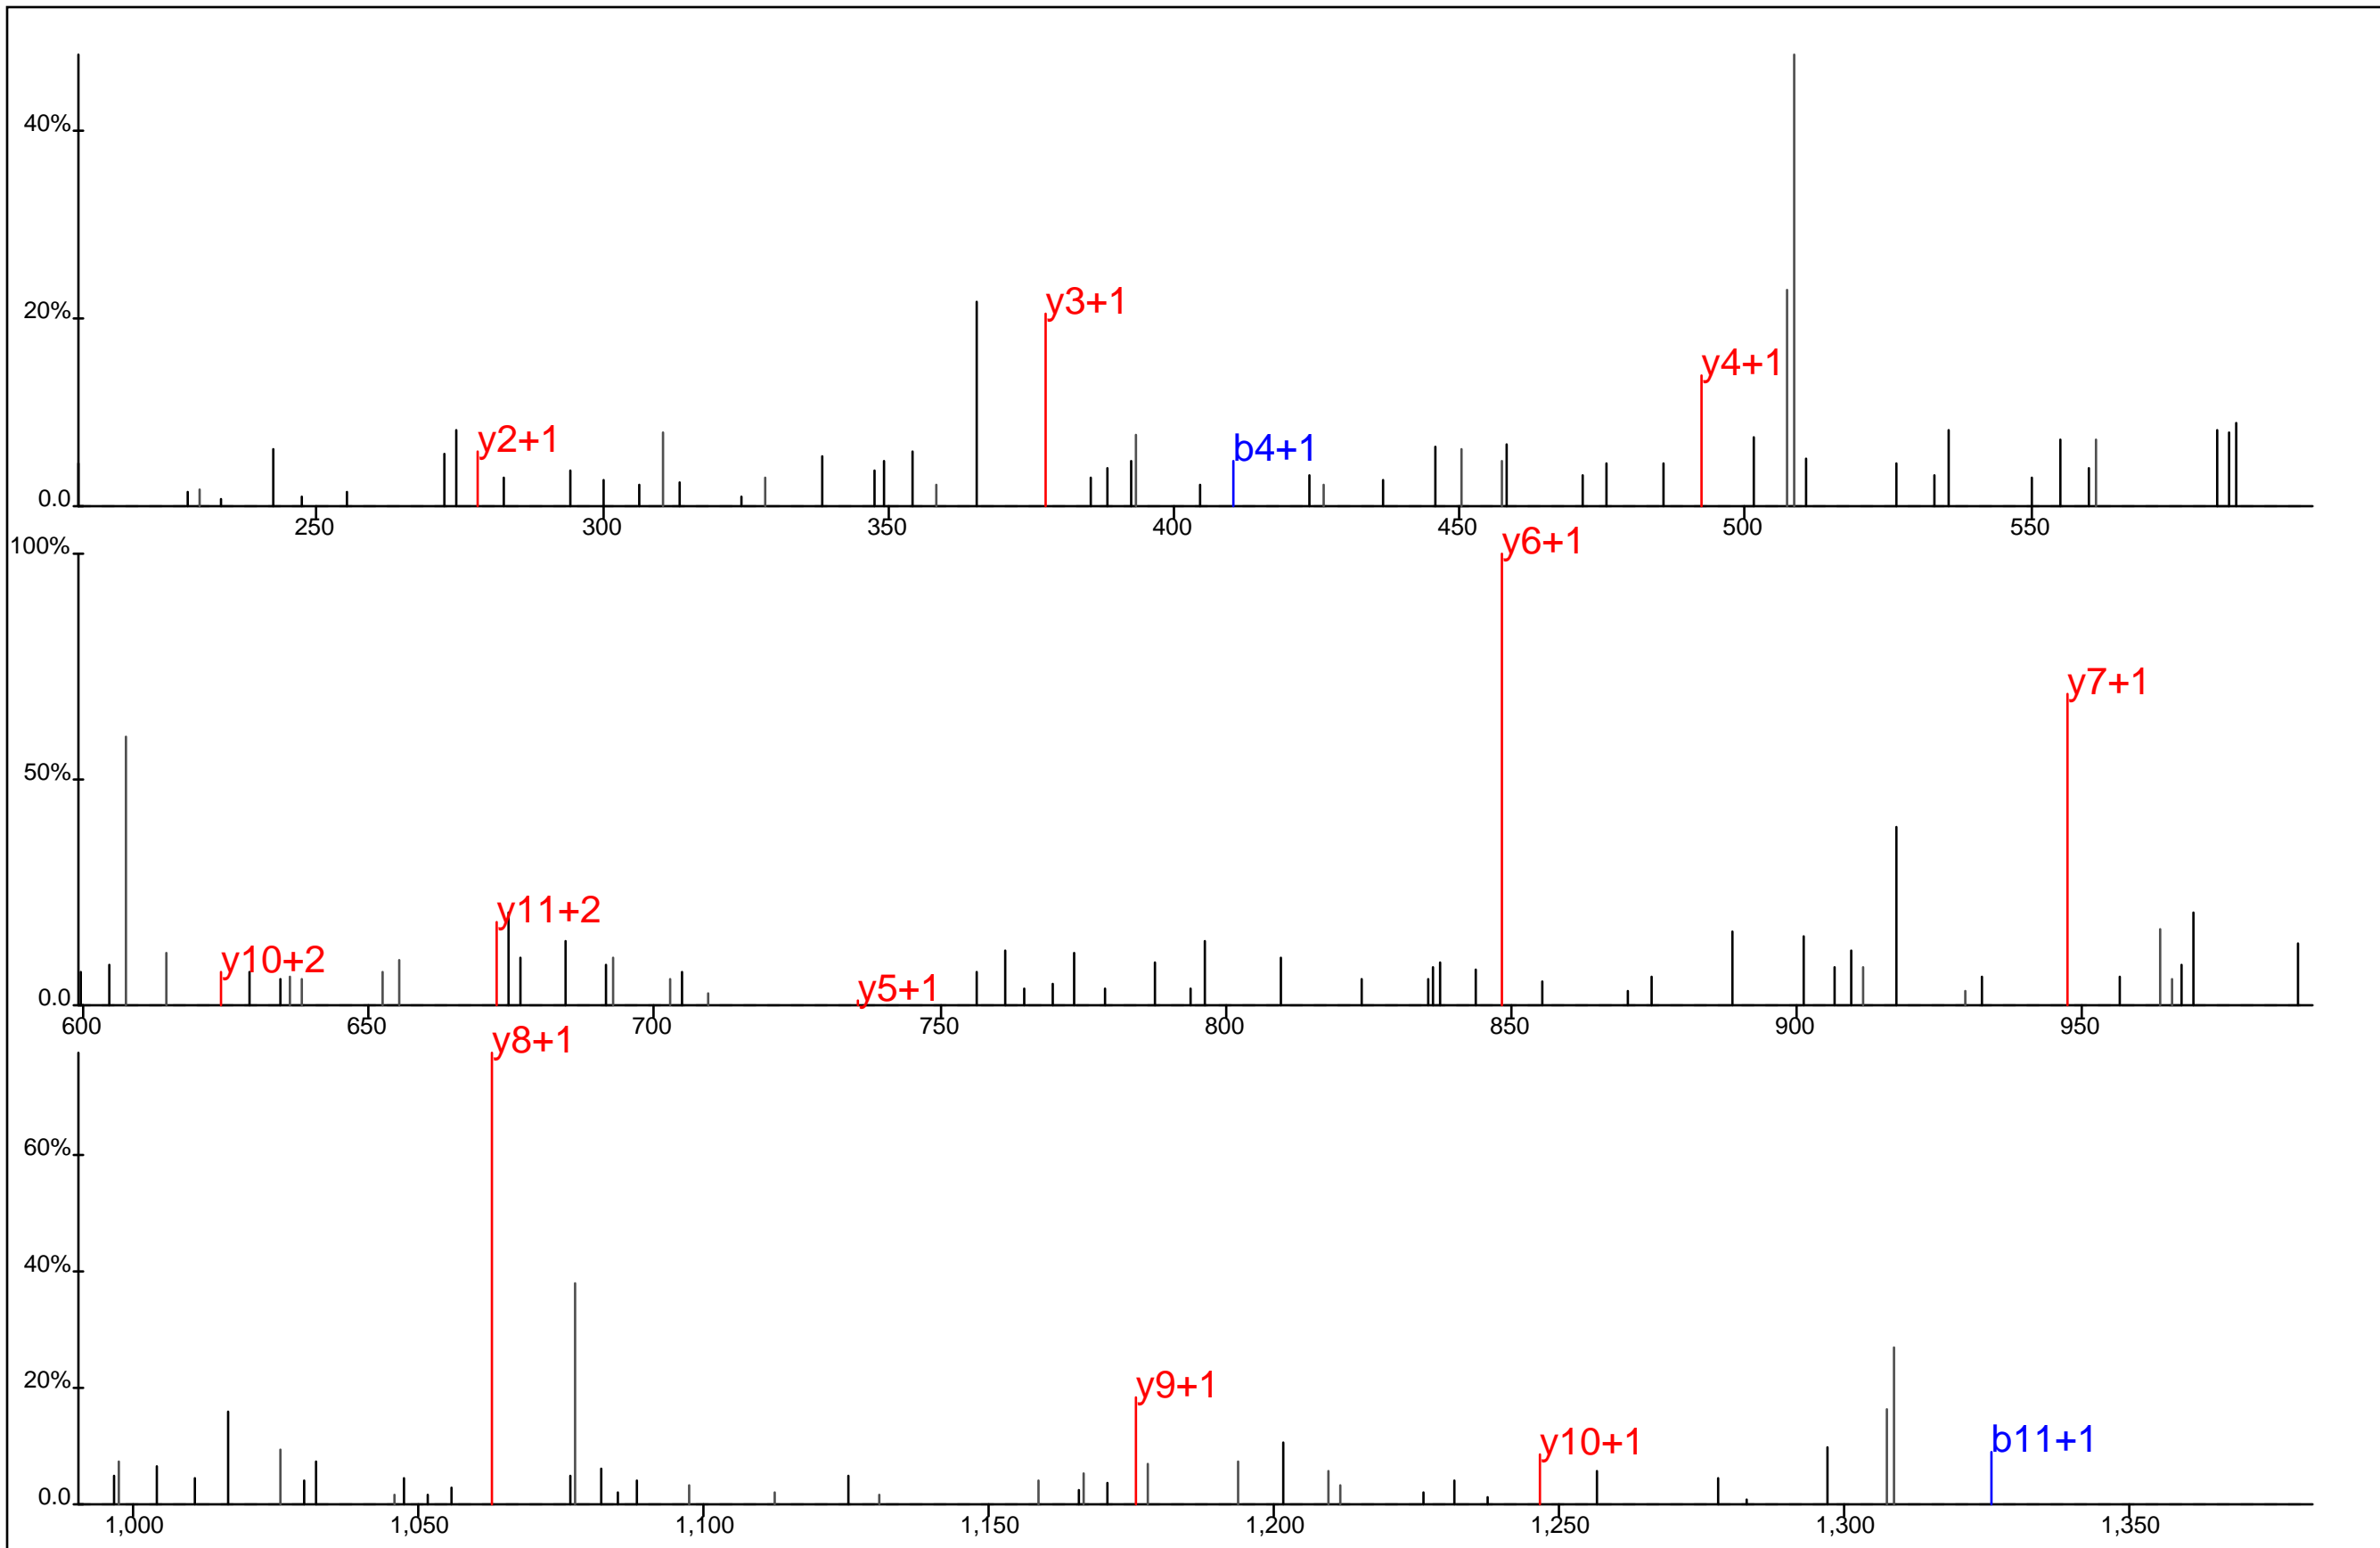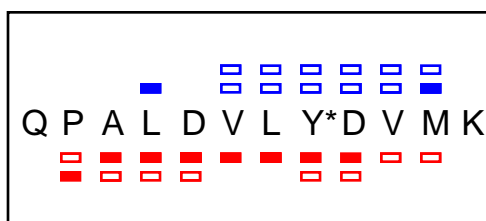

Protein Name: Eukaryotic translation initiation factor 3, subunit 10  
 gi Accession: 0  
 Precursor Mass: 736.3477+2  
 Delta Mass: 1.492 ppm  
 XCorr: 25.44

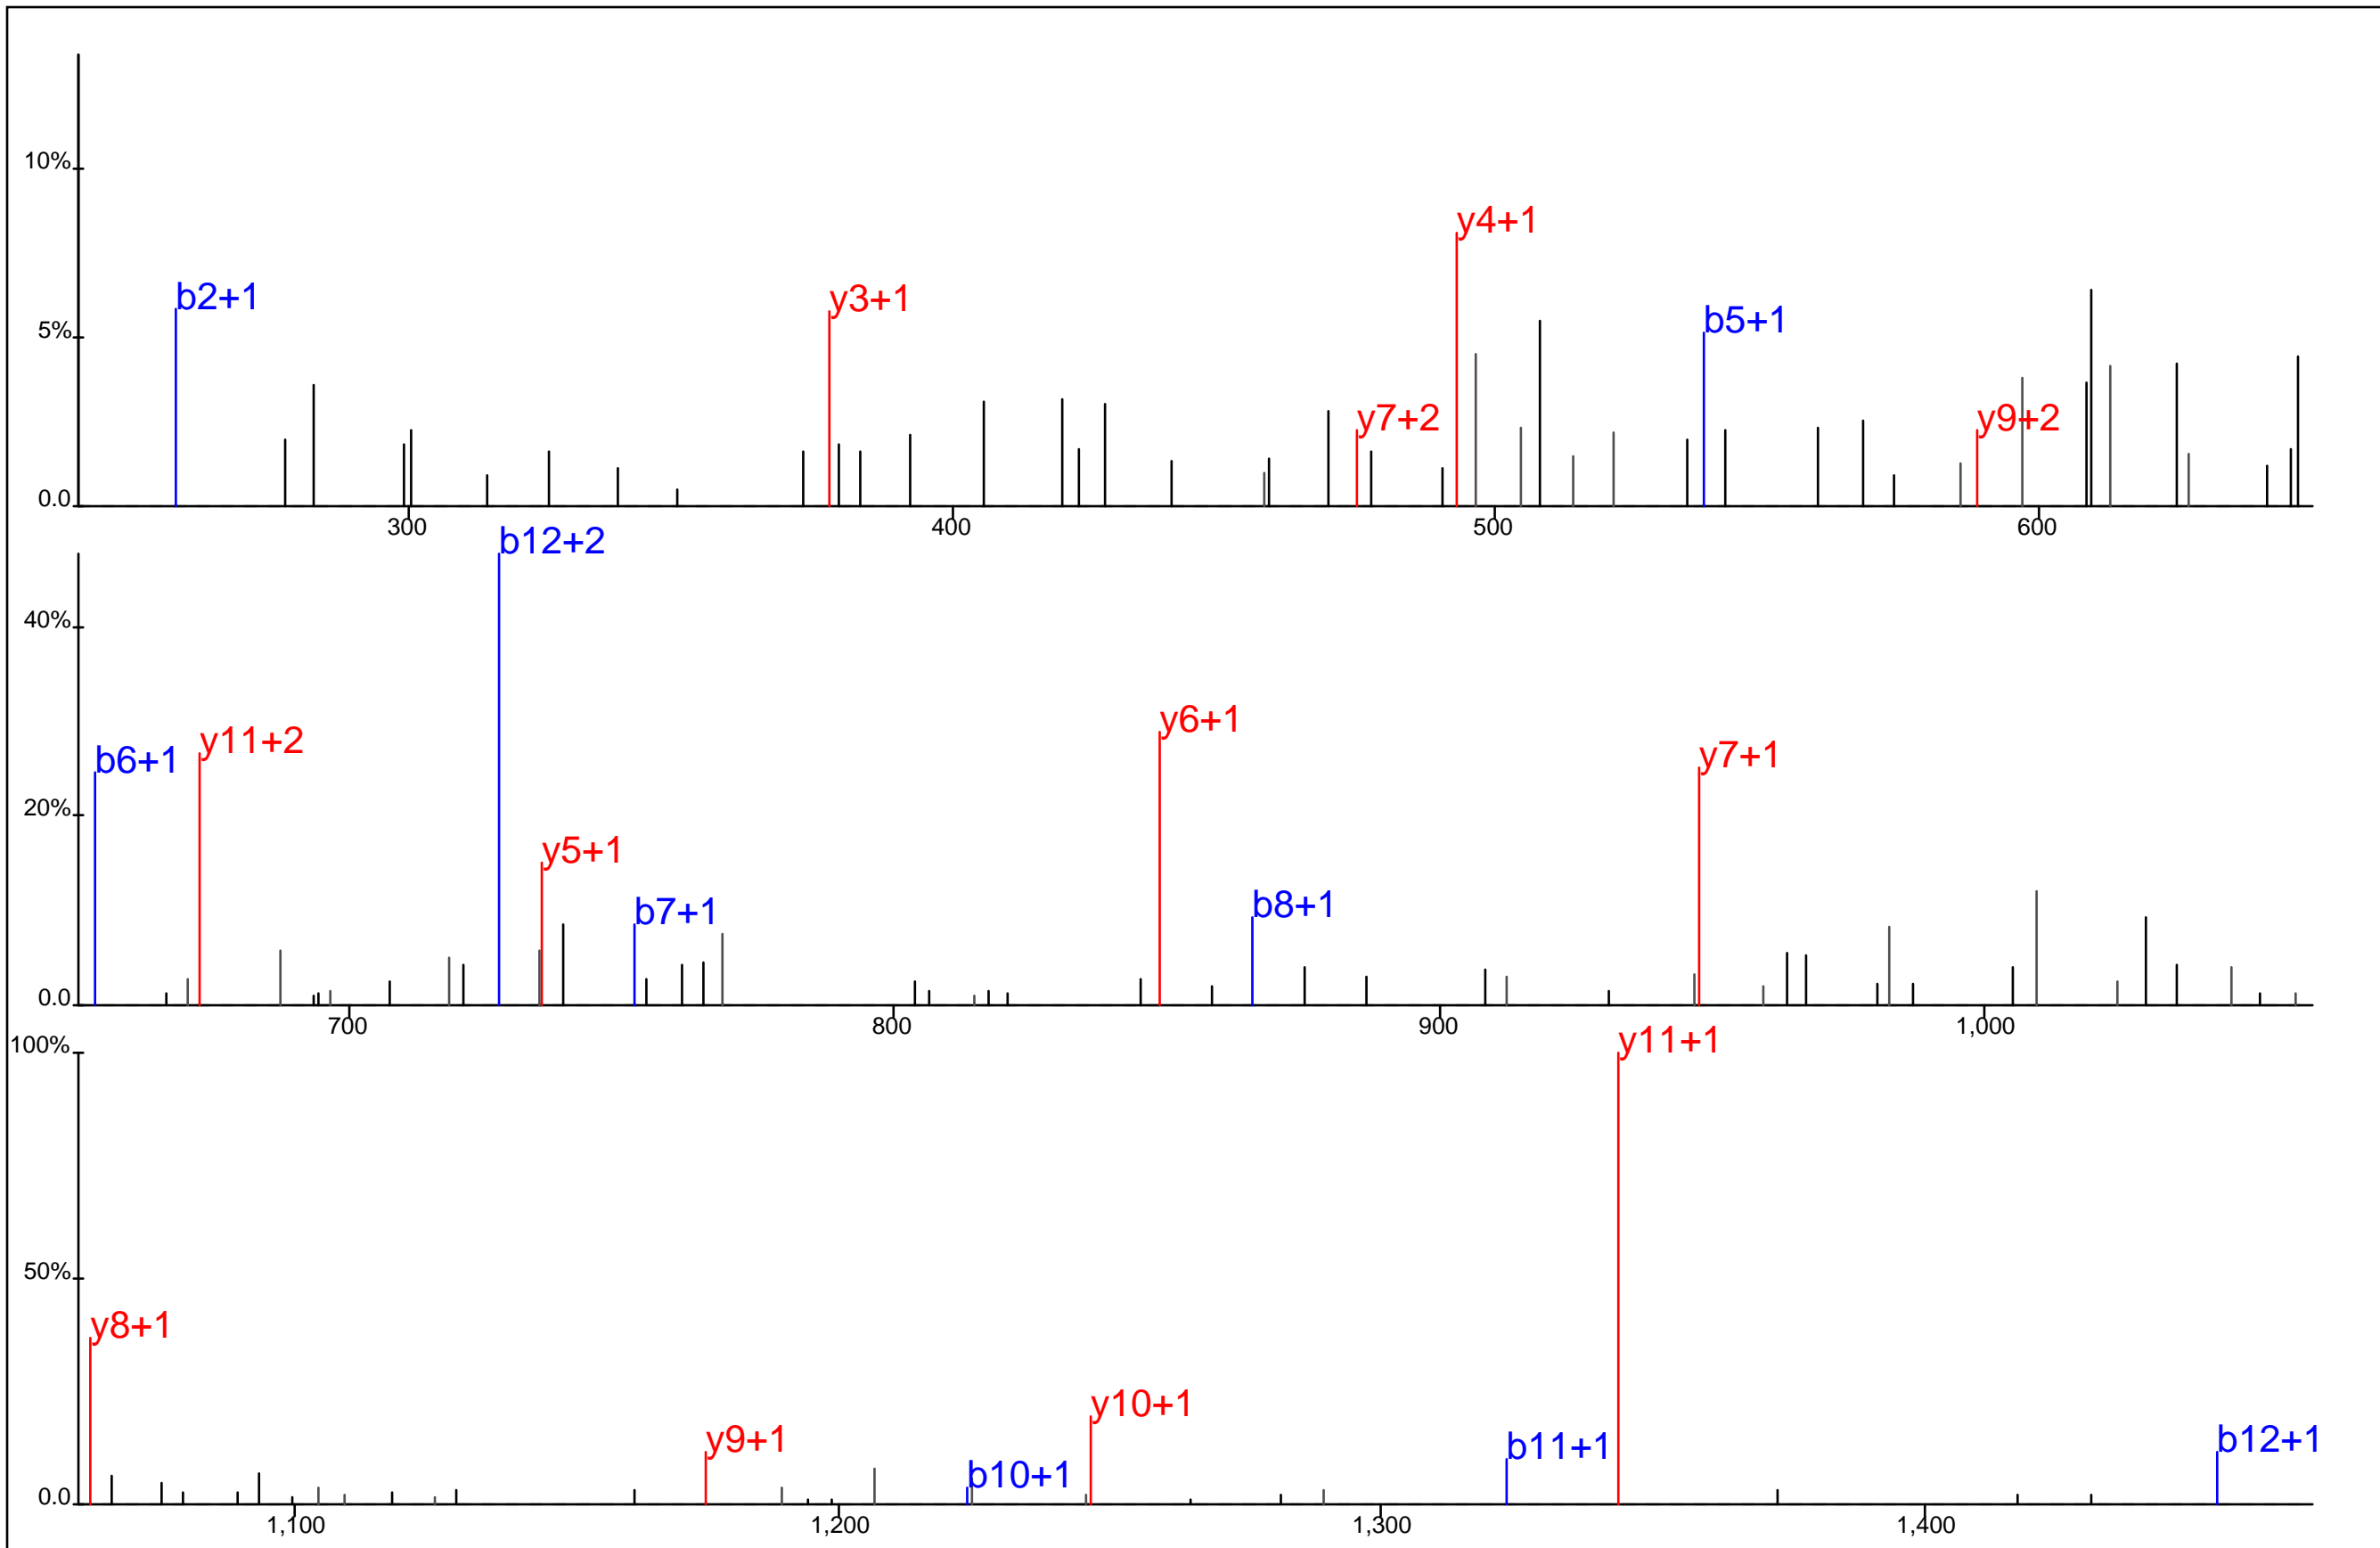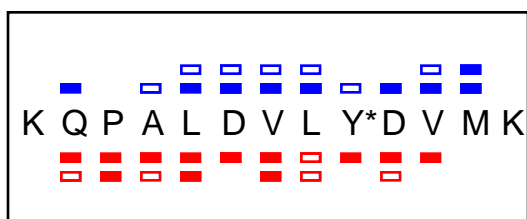

Protein Name: Eukaryotic translation initiation factor 3, subunit 10  
 gi Accession: 0  
 Precursor Mass: 800.3958+2  
 Delta Mass: 0.596 ppm  
 XCorr: 70.79

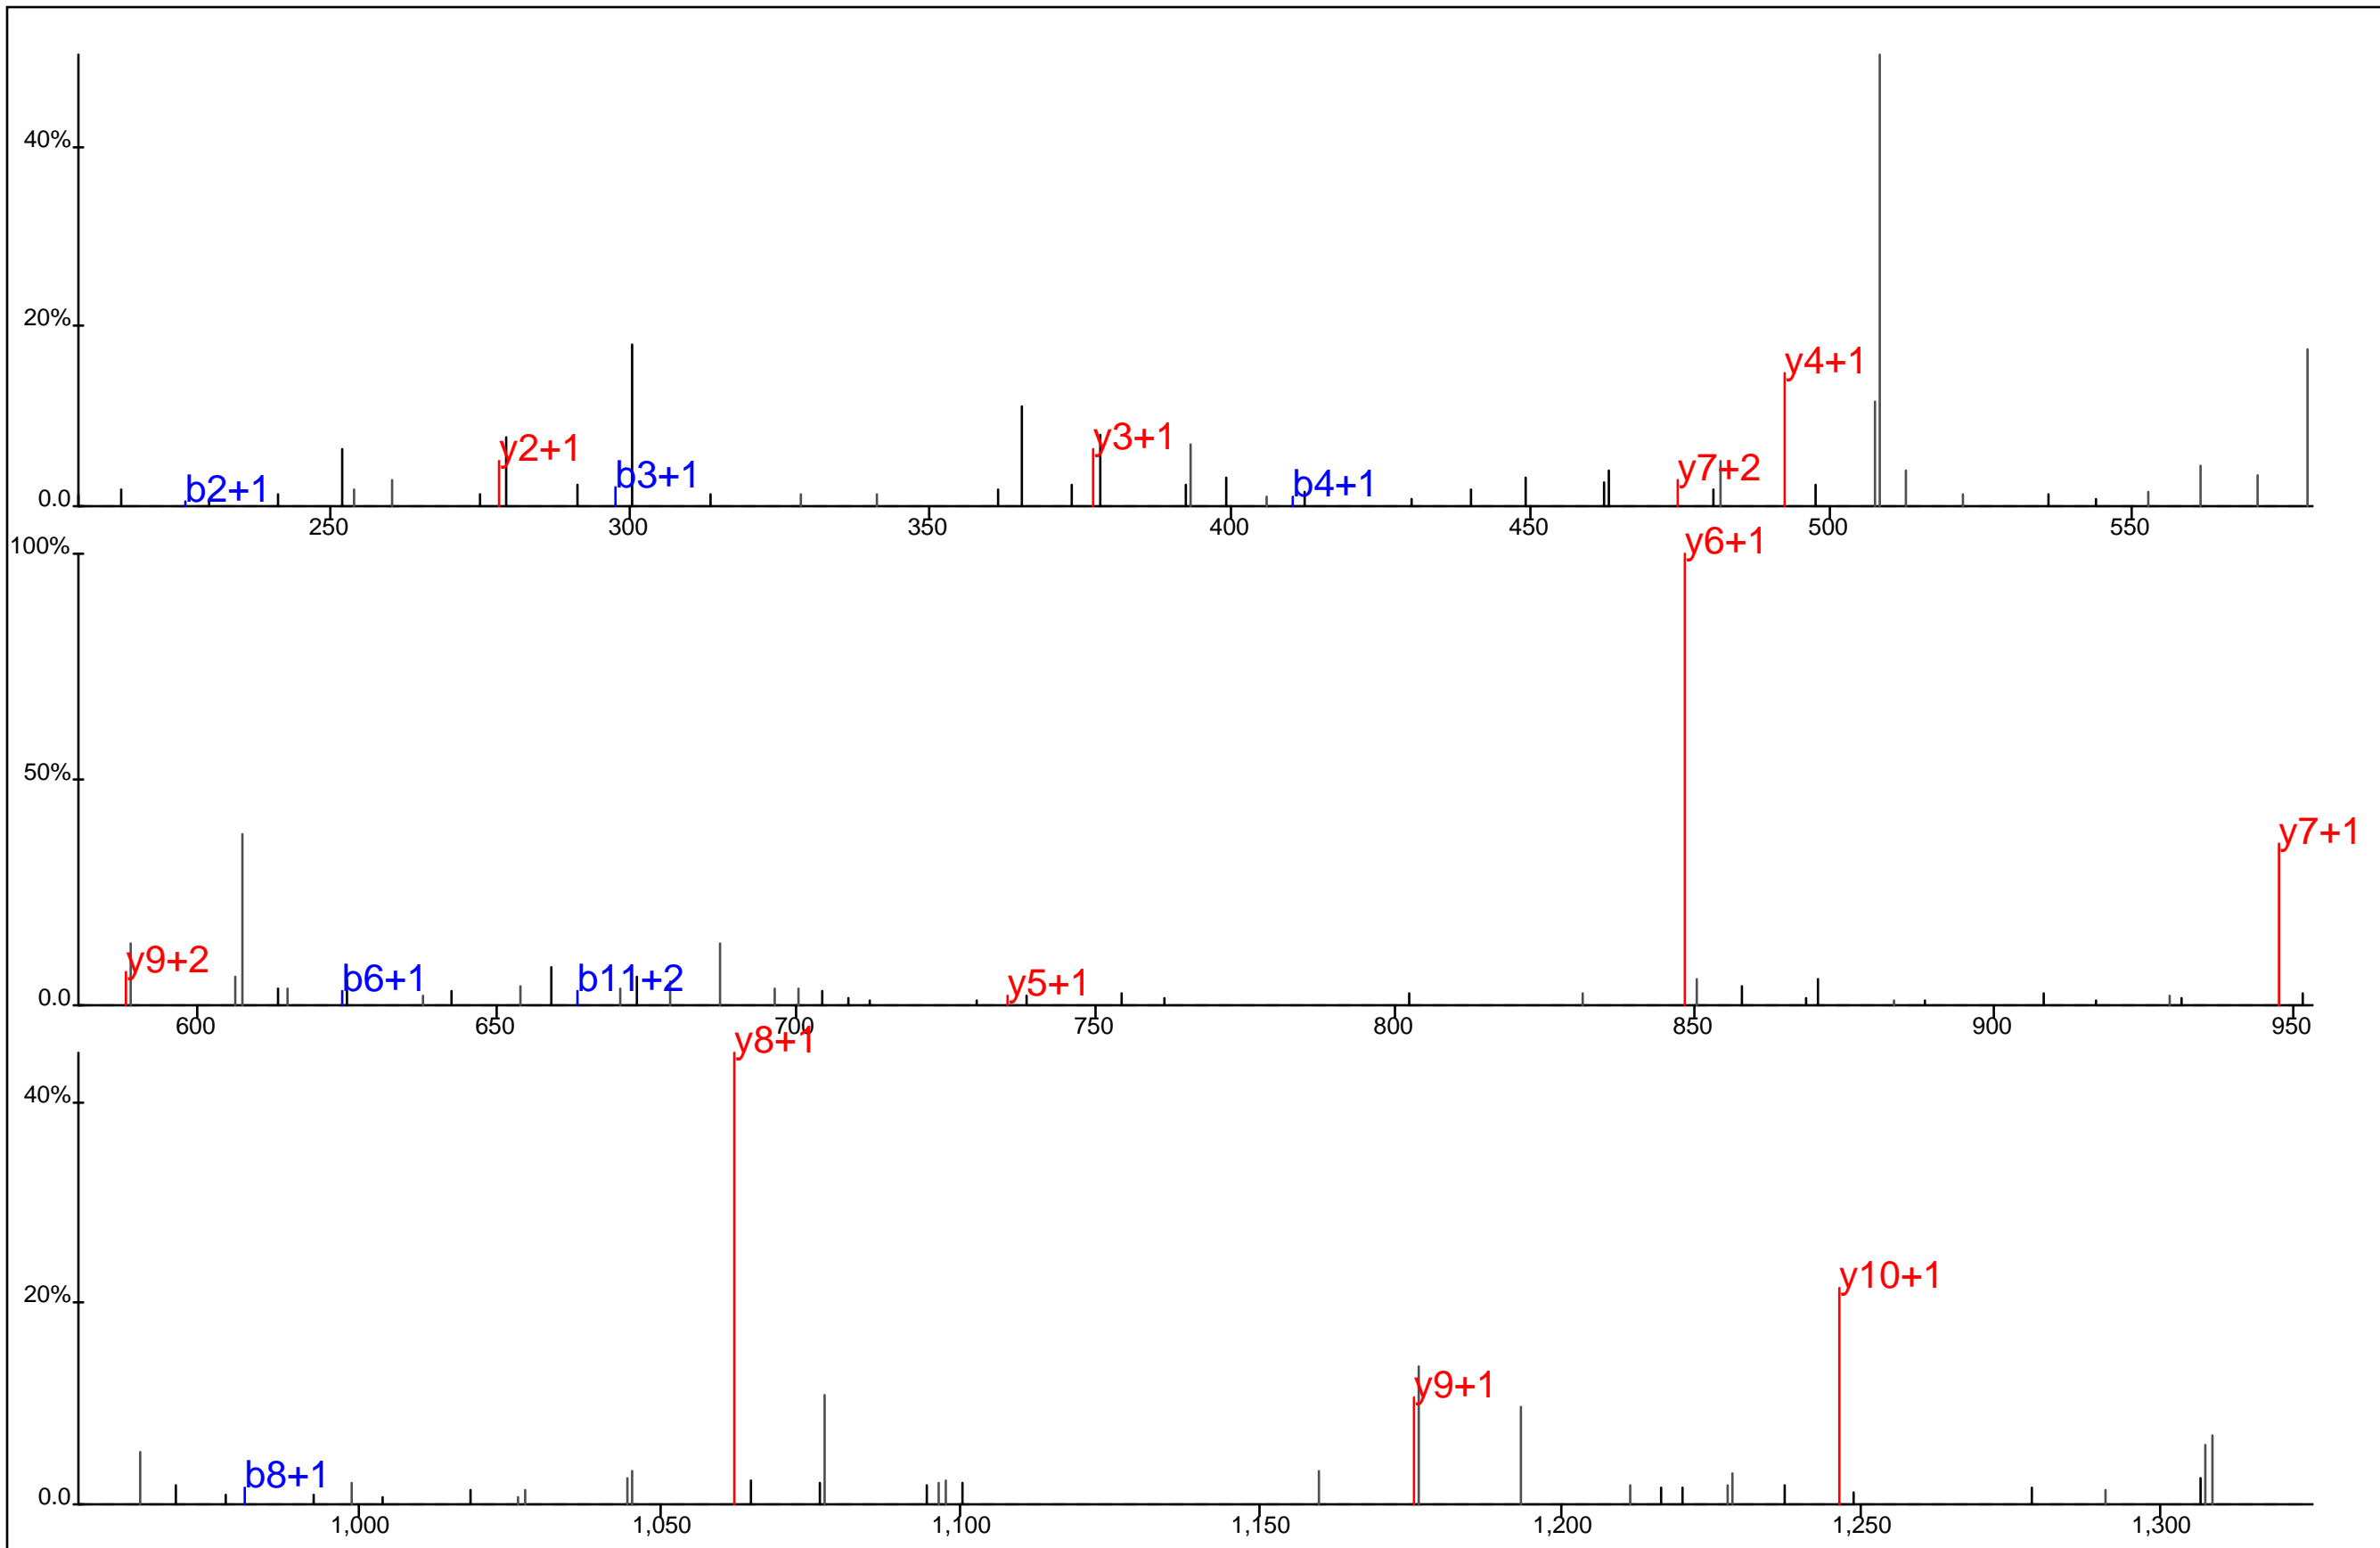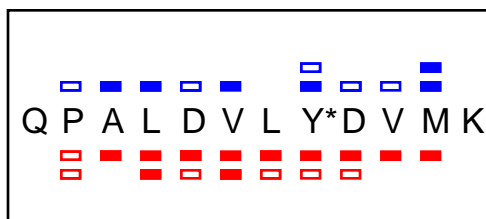

Protein Name: Eukaryotic translation initiation factor 3, subunit 10  
 gi Accession: 0  
 Precursor Mass: 736.3486+2  
 Delta Mass: 0.247 ppm  
 XCorr: 37.57

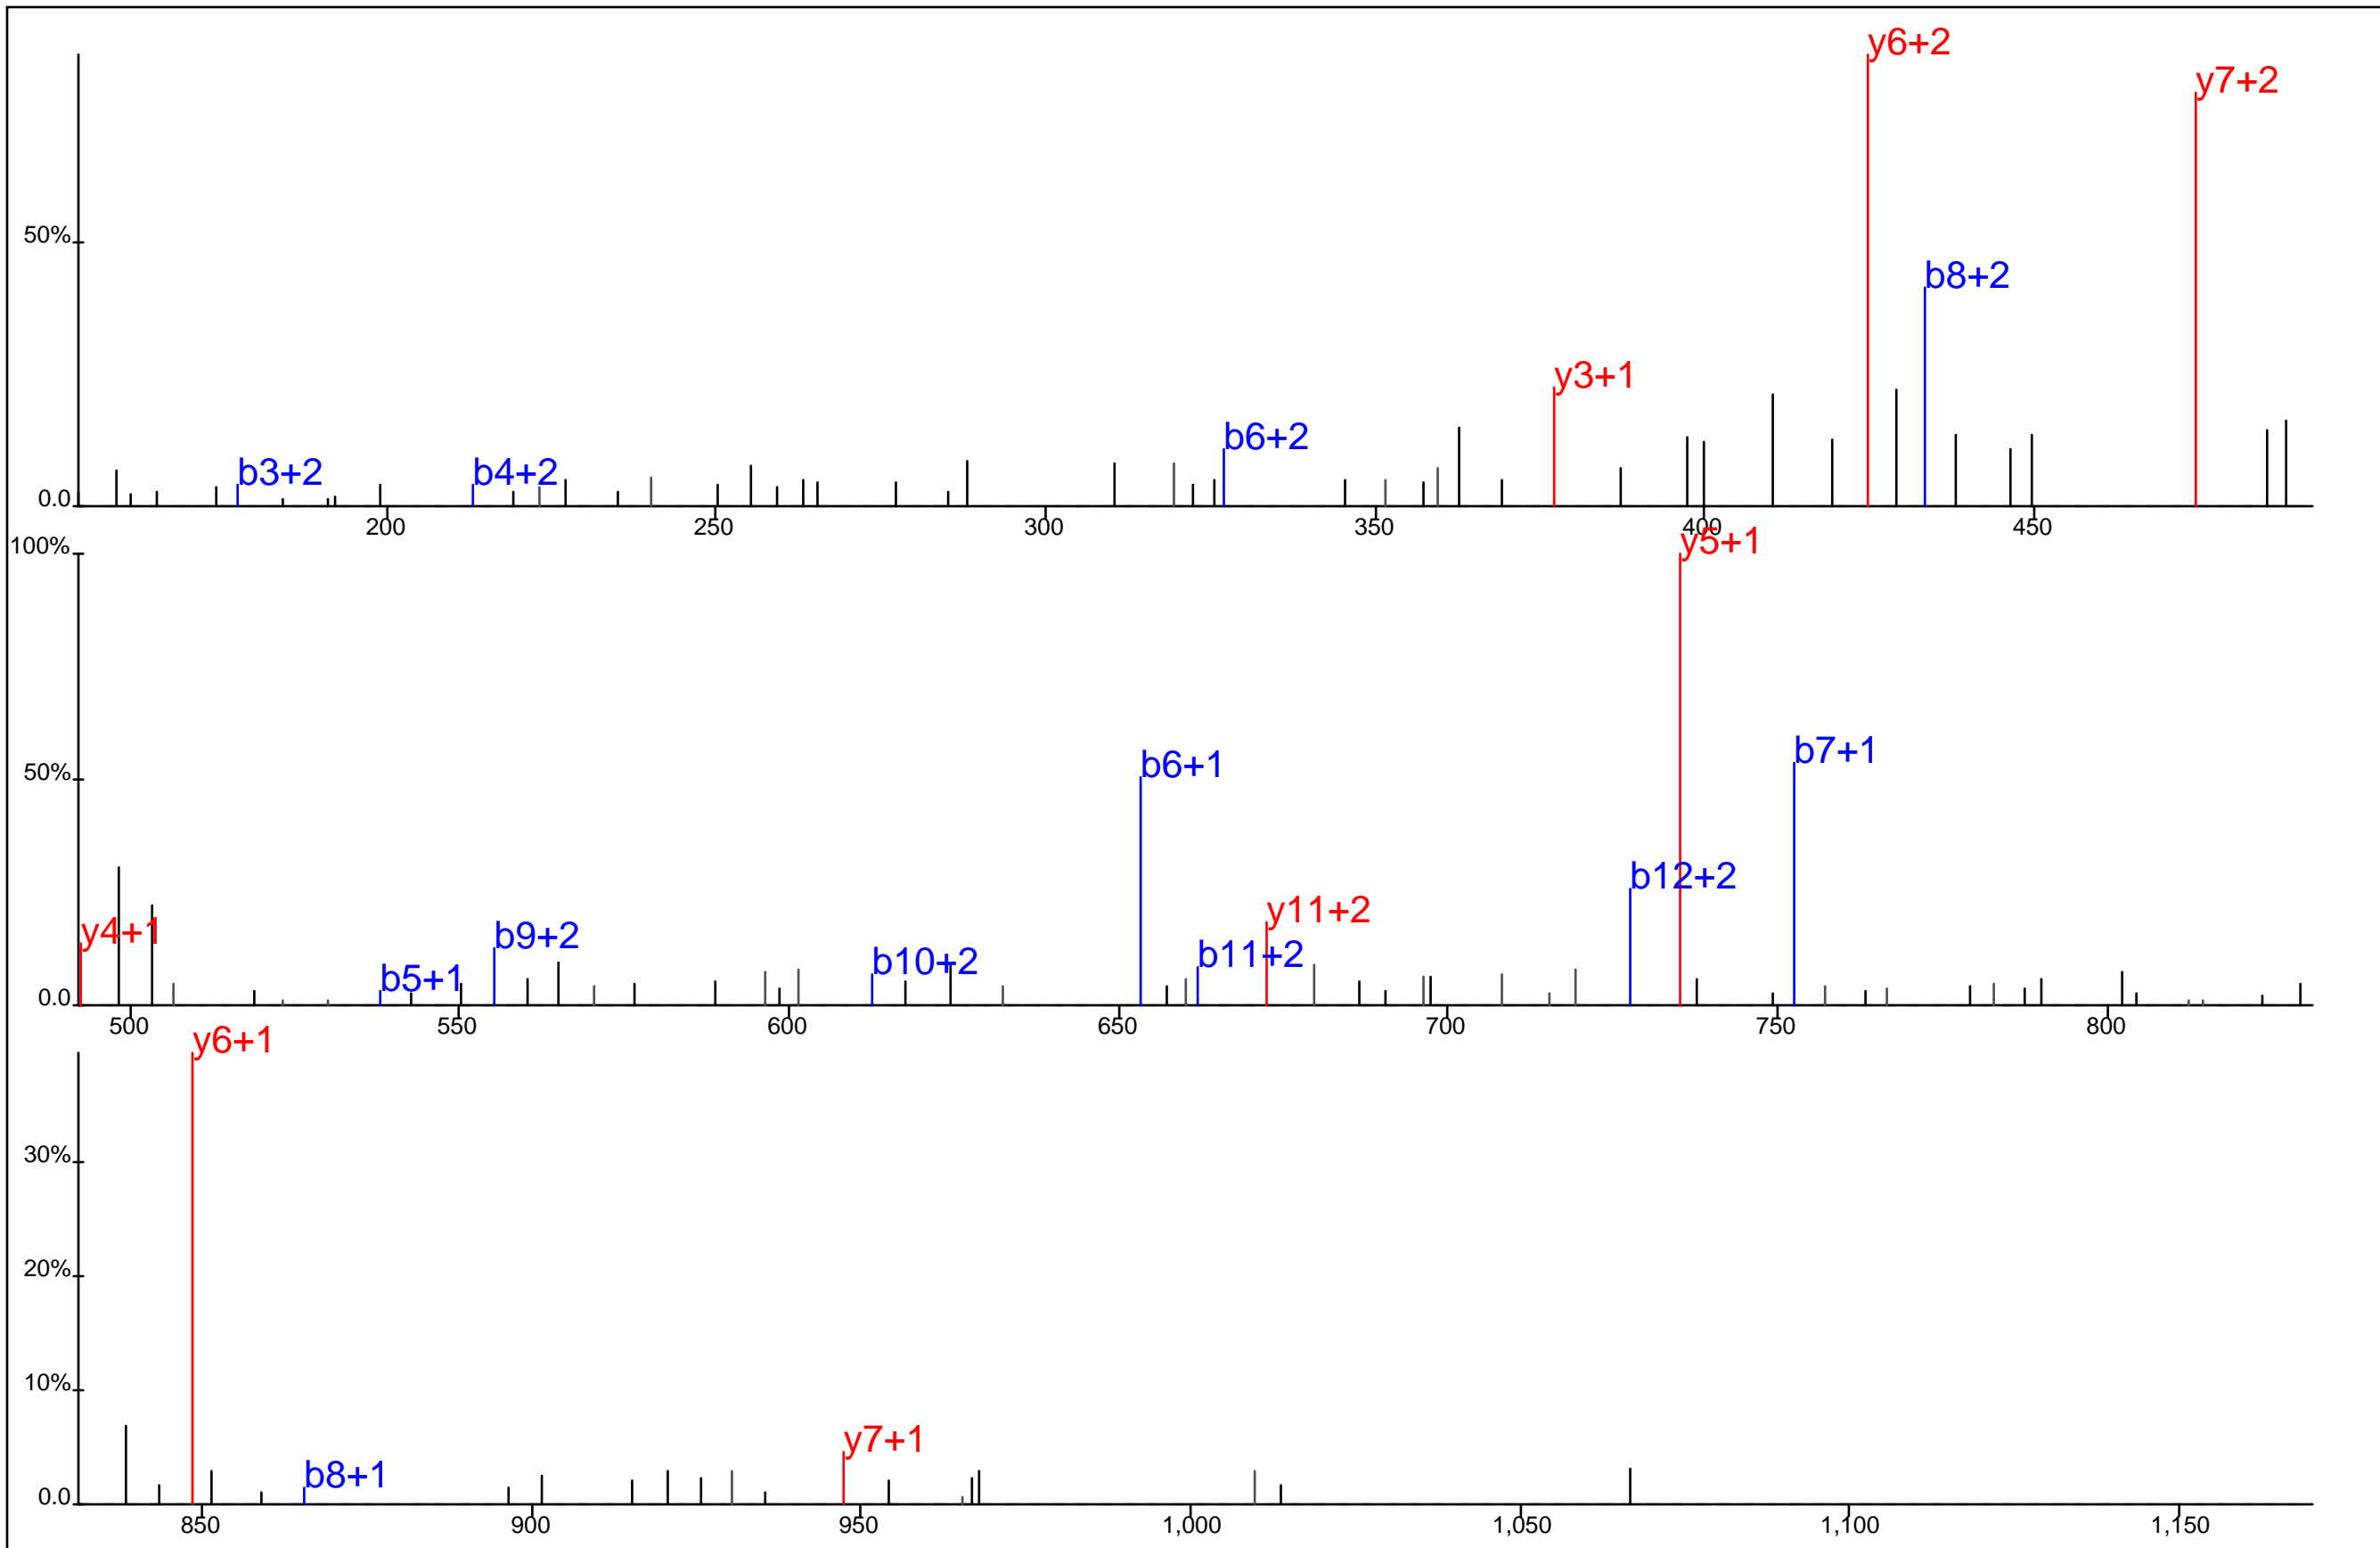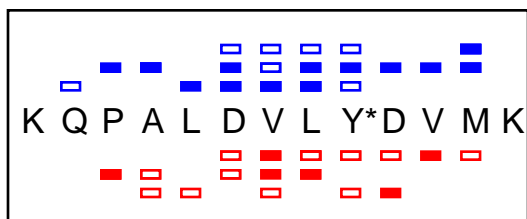

Protein Name: Eukaryotic translation initiation factor 3, subunit 10  
 gi Accession: 0  
 Precursor Mass: 533.9349+3  
 Delta Mass: 3.057 ppm  
 XCorr: 34.1



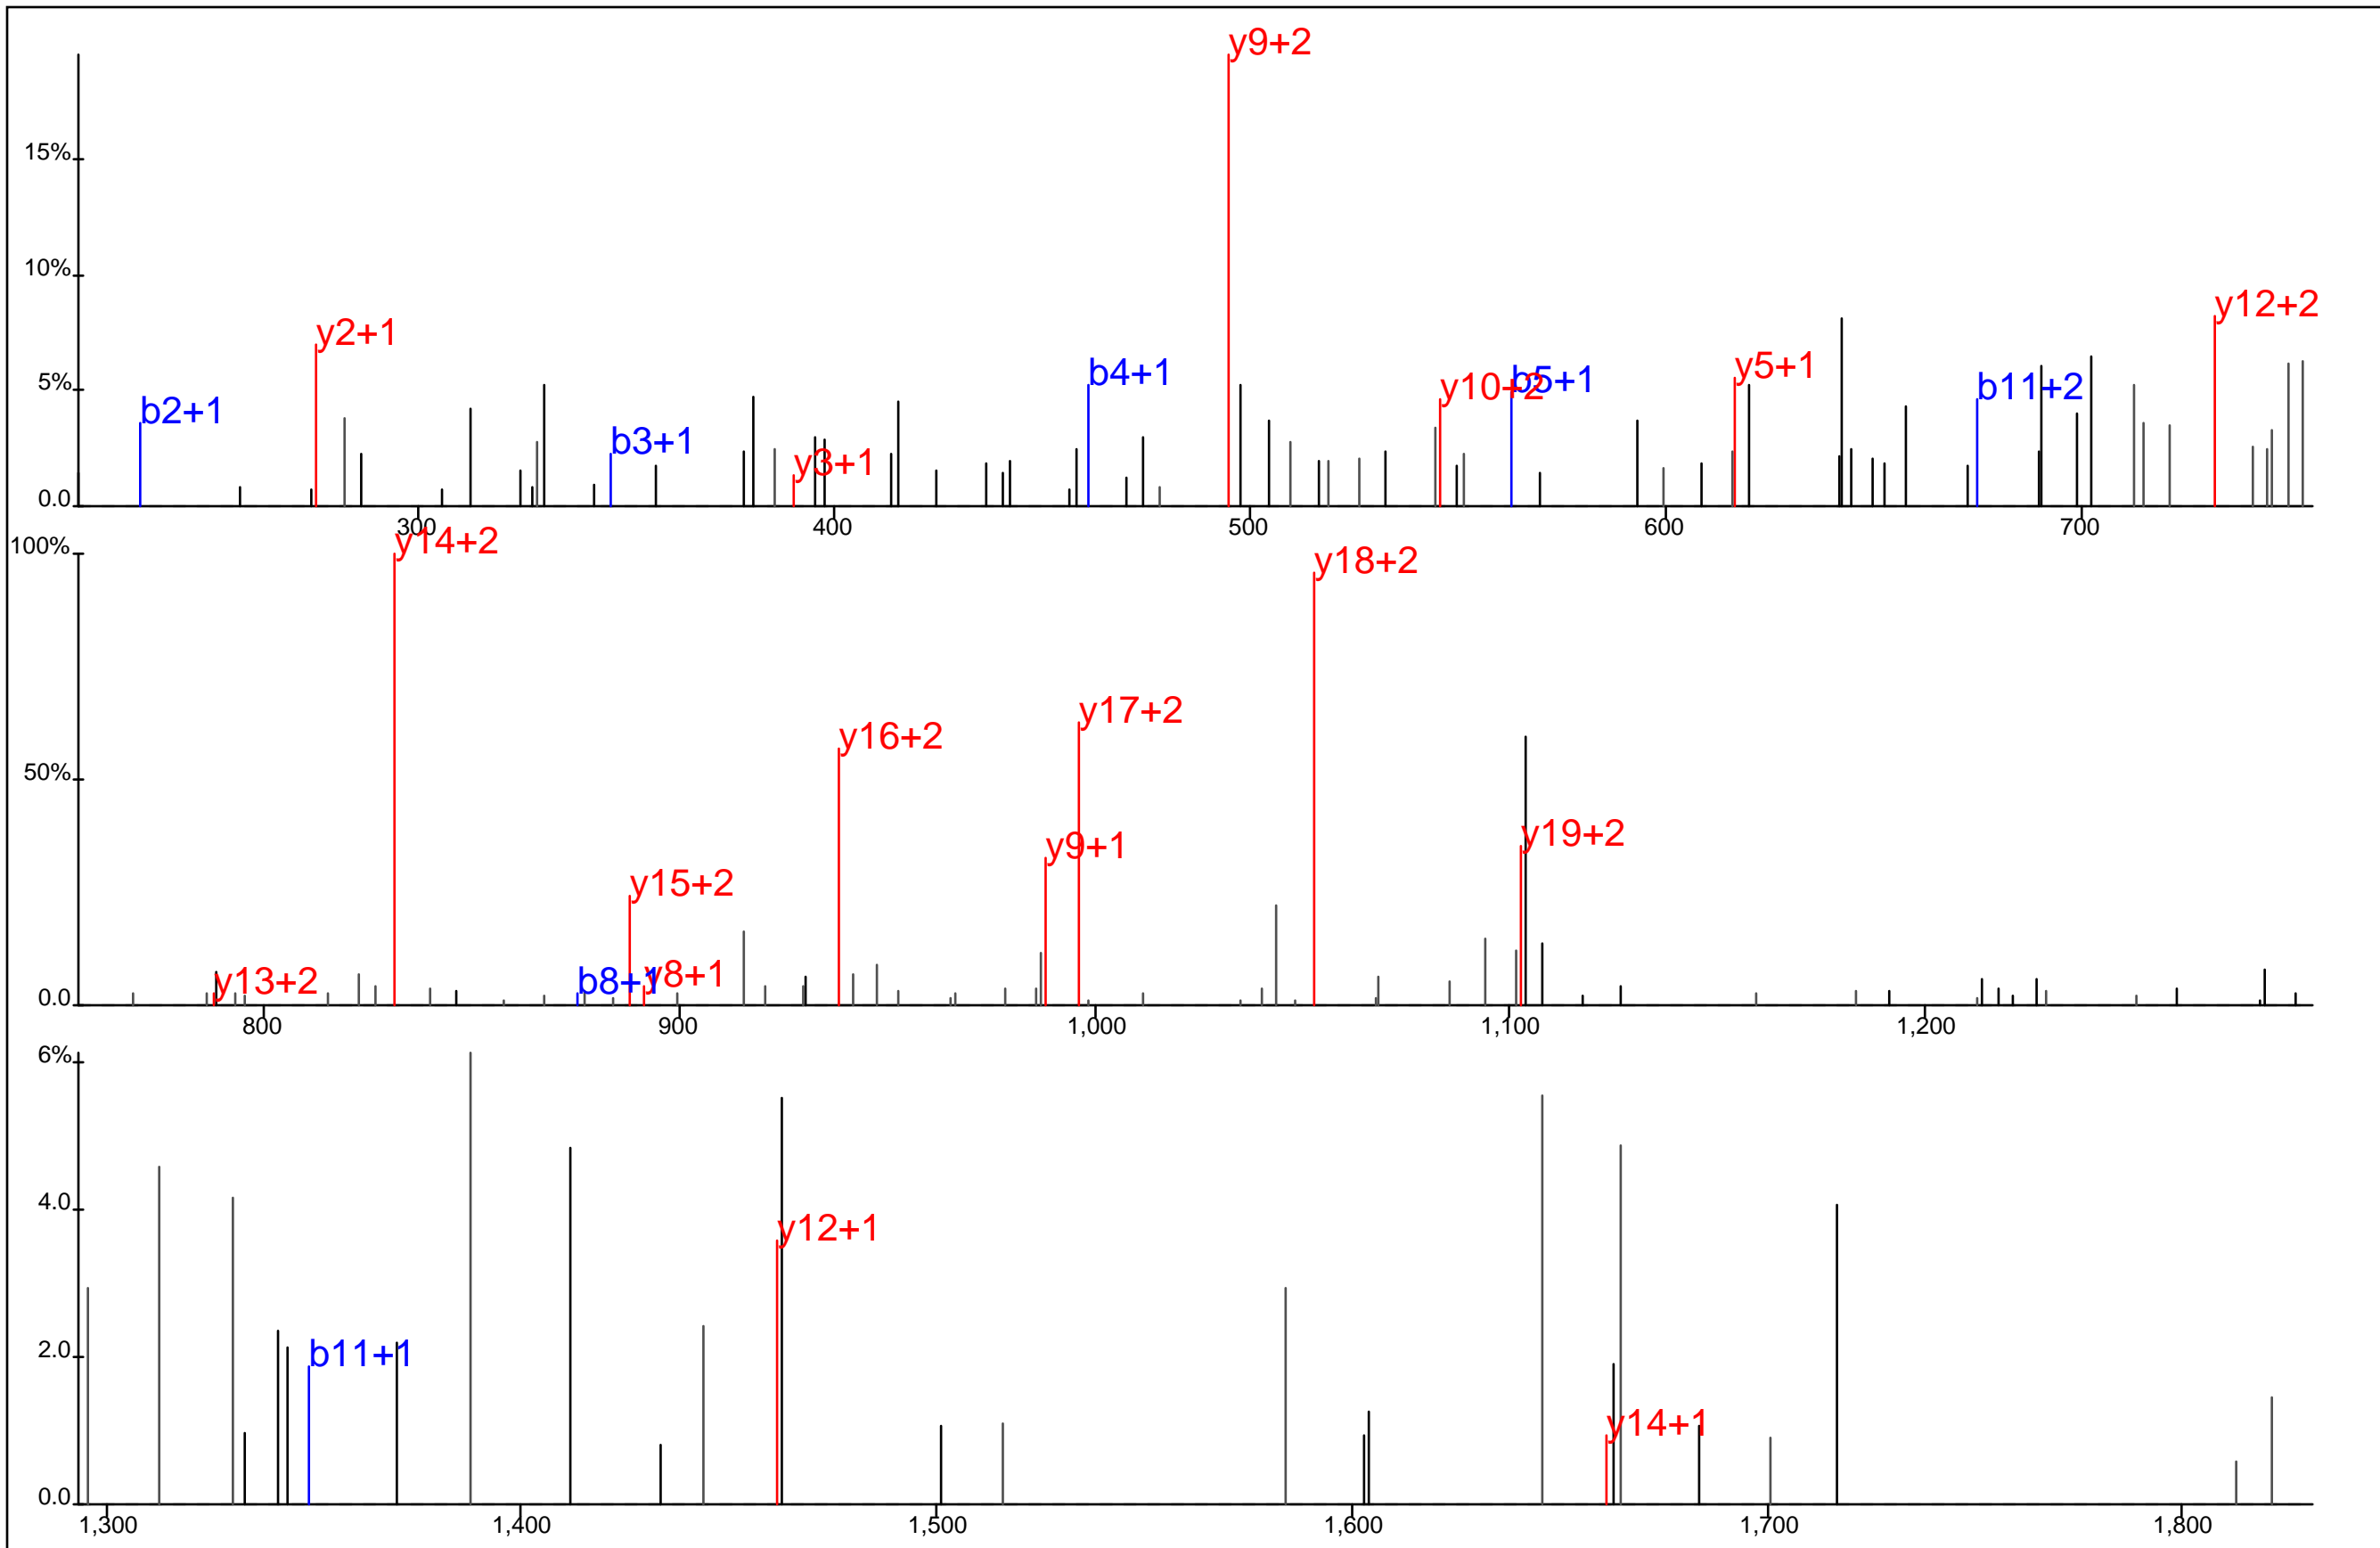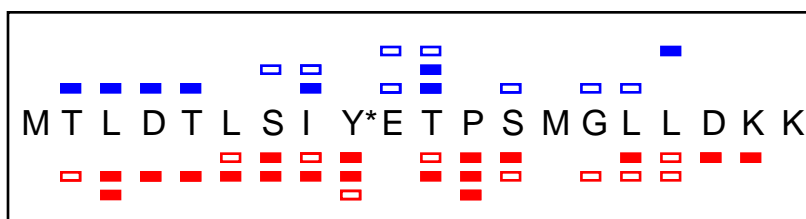

Protein Name: Eukaryotic translation initiation factor 3, subunit 9 eta, 116kDa  
 gi Accession: 0  
 Precursor Mass: 779.3768+3  
 Delta Mass: 0.232 ppm  
 XCorr: 27.31



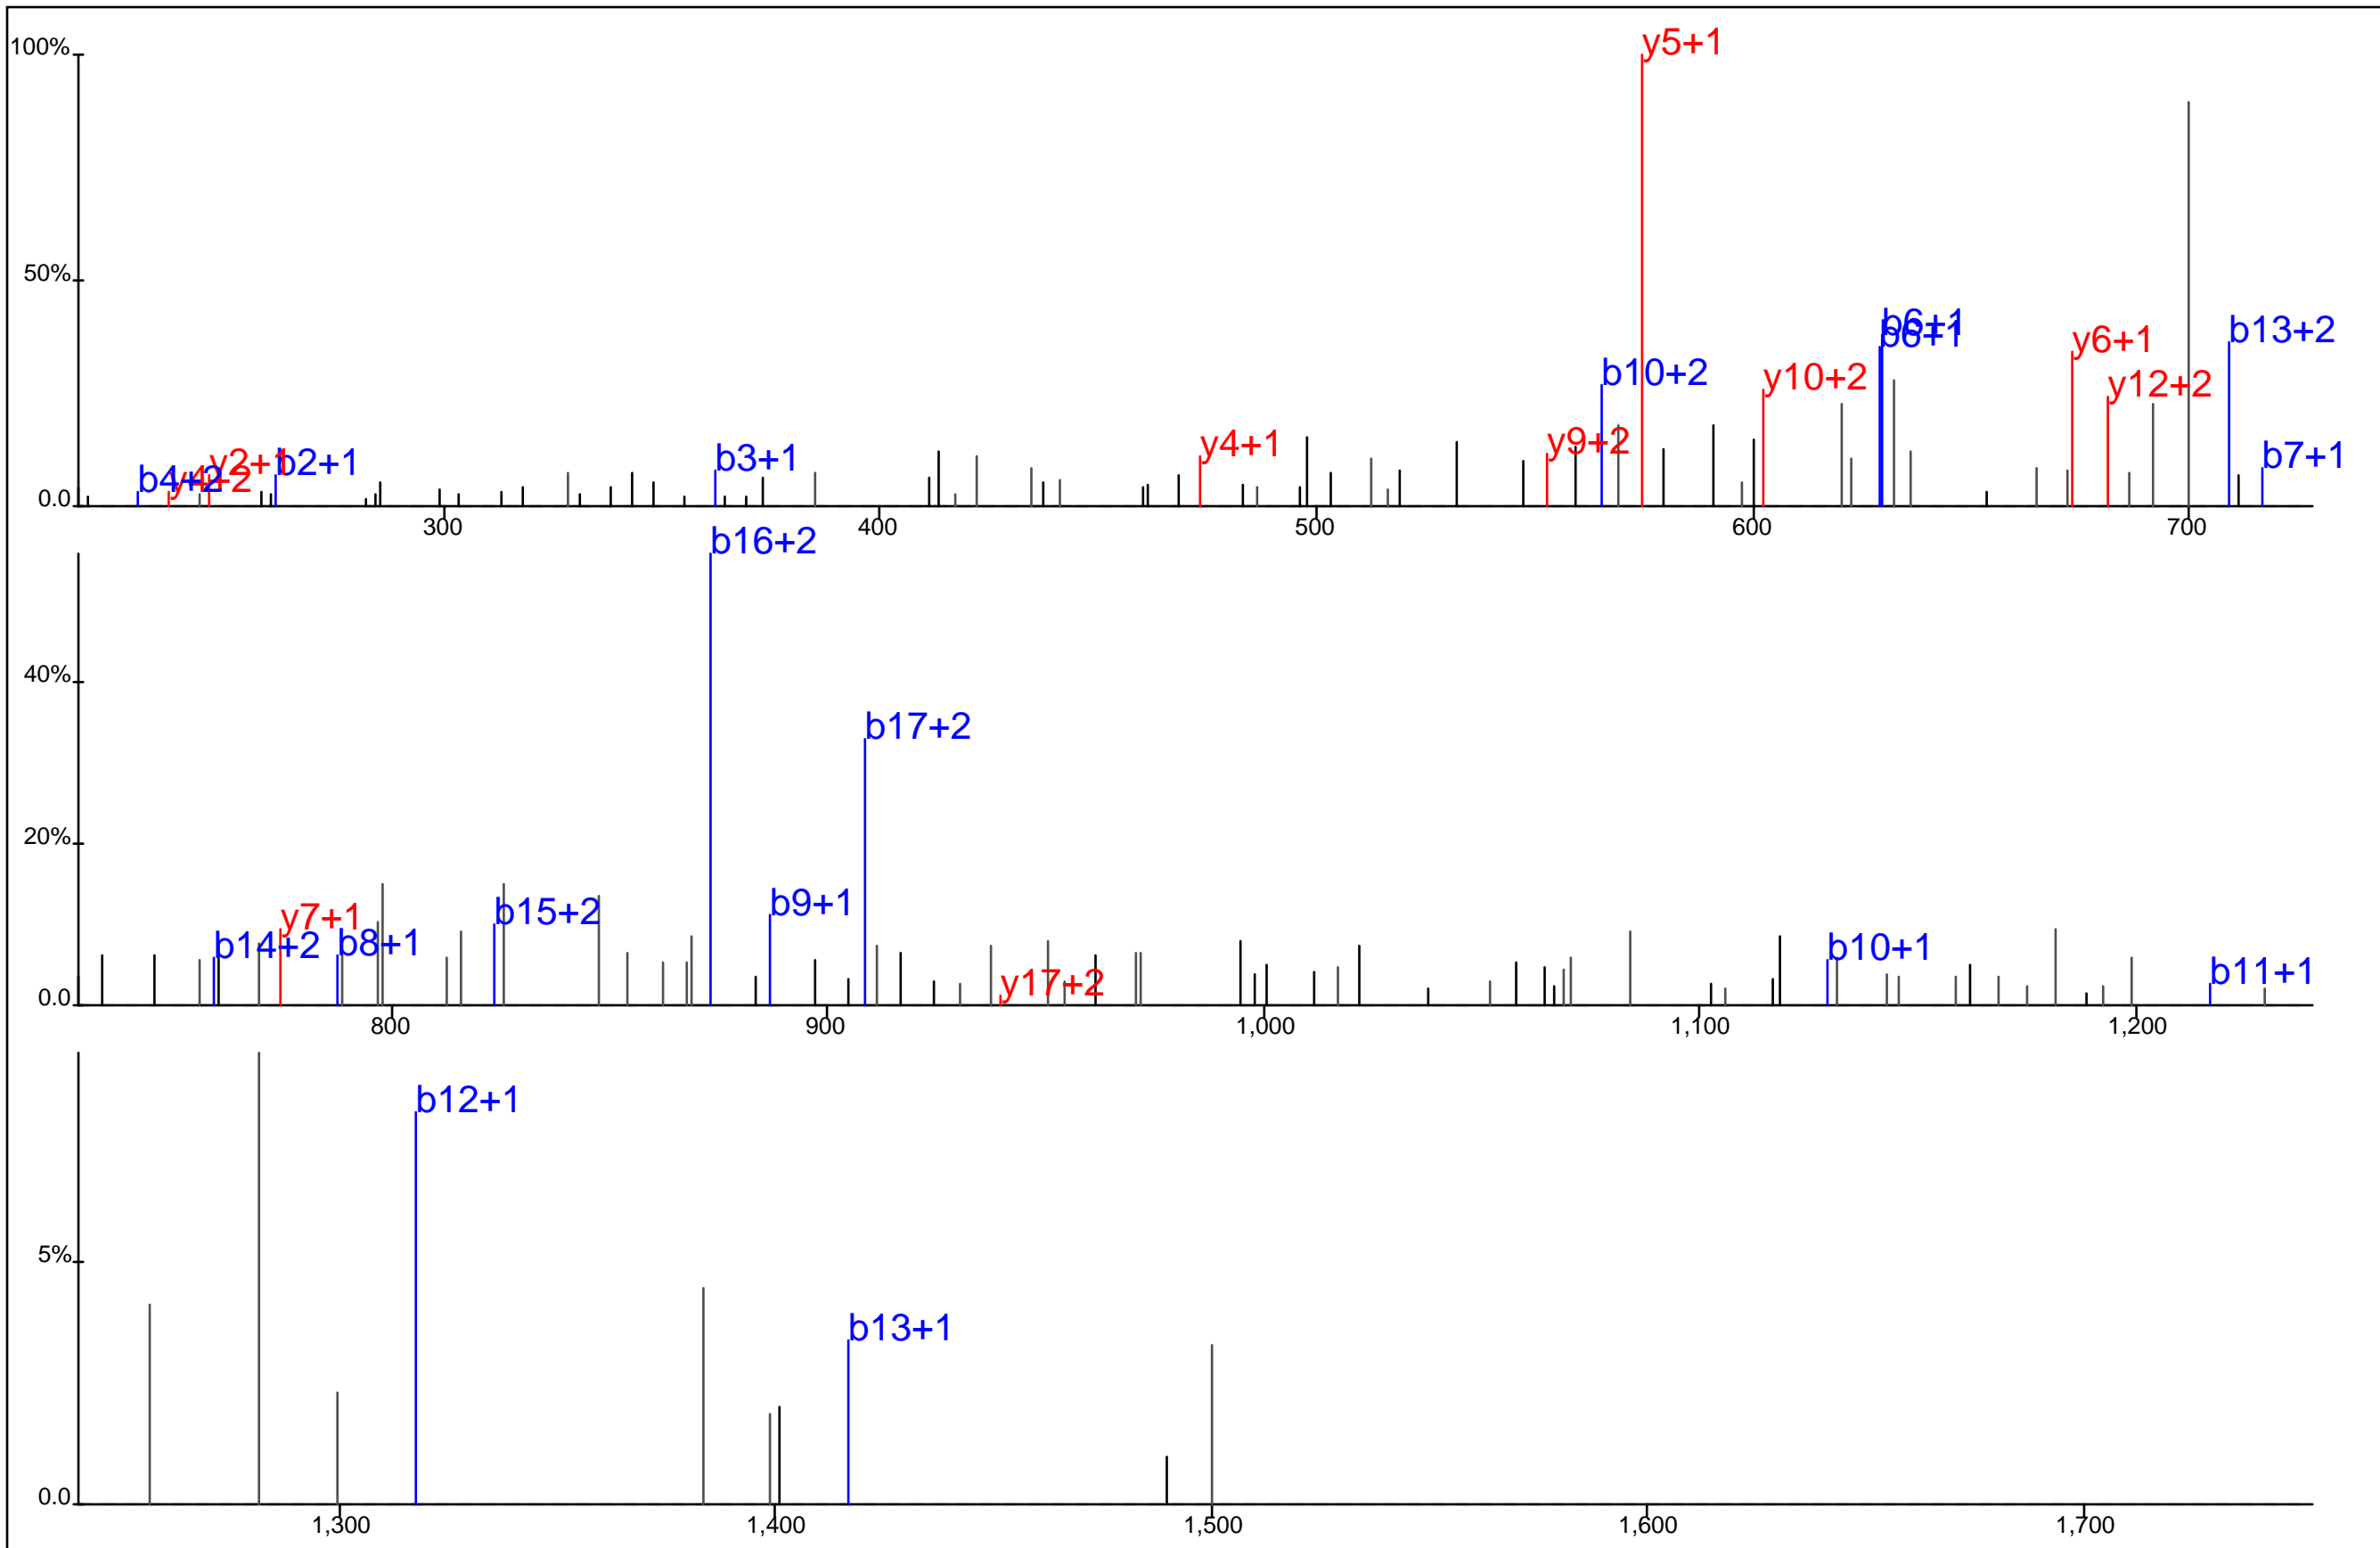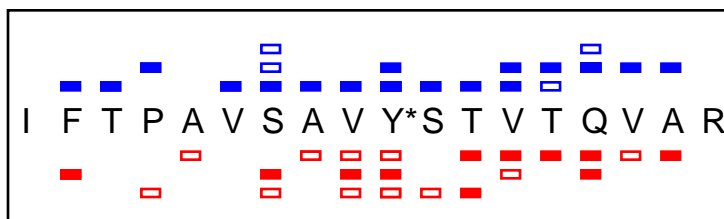

Protein Name: Eukaryotic translation initiation factor 4 gamma 3  
 gi Accession: 0  
 Precursor Mass: 664.0040+3  
 Delta Mass: 3.518 ppm  
 XCorr: 40.6

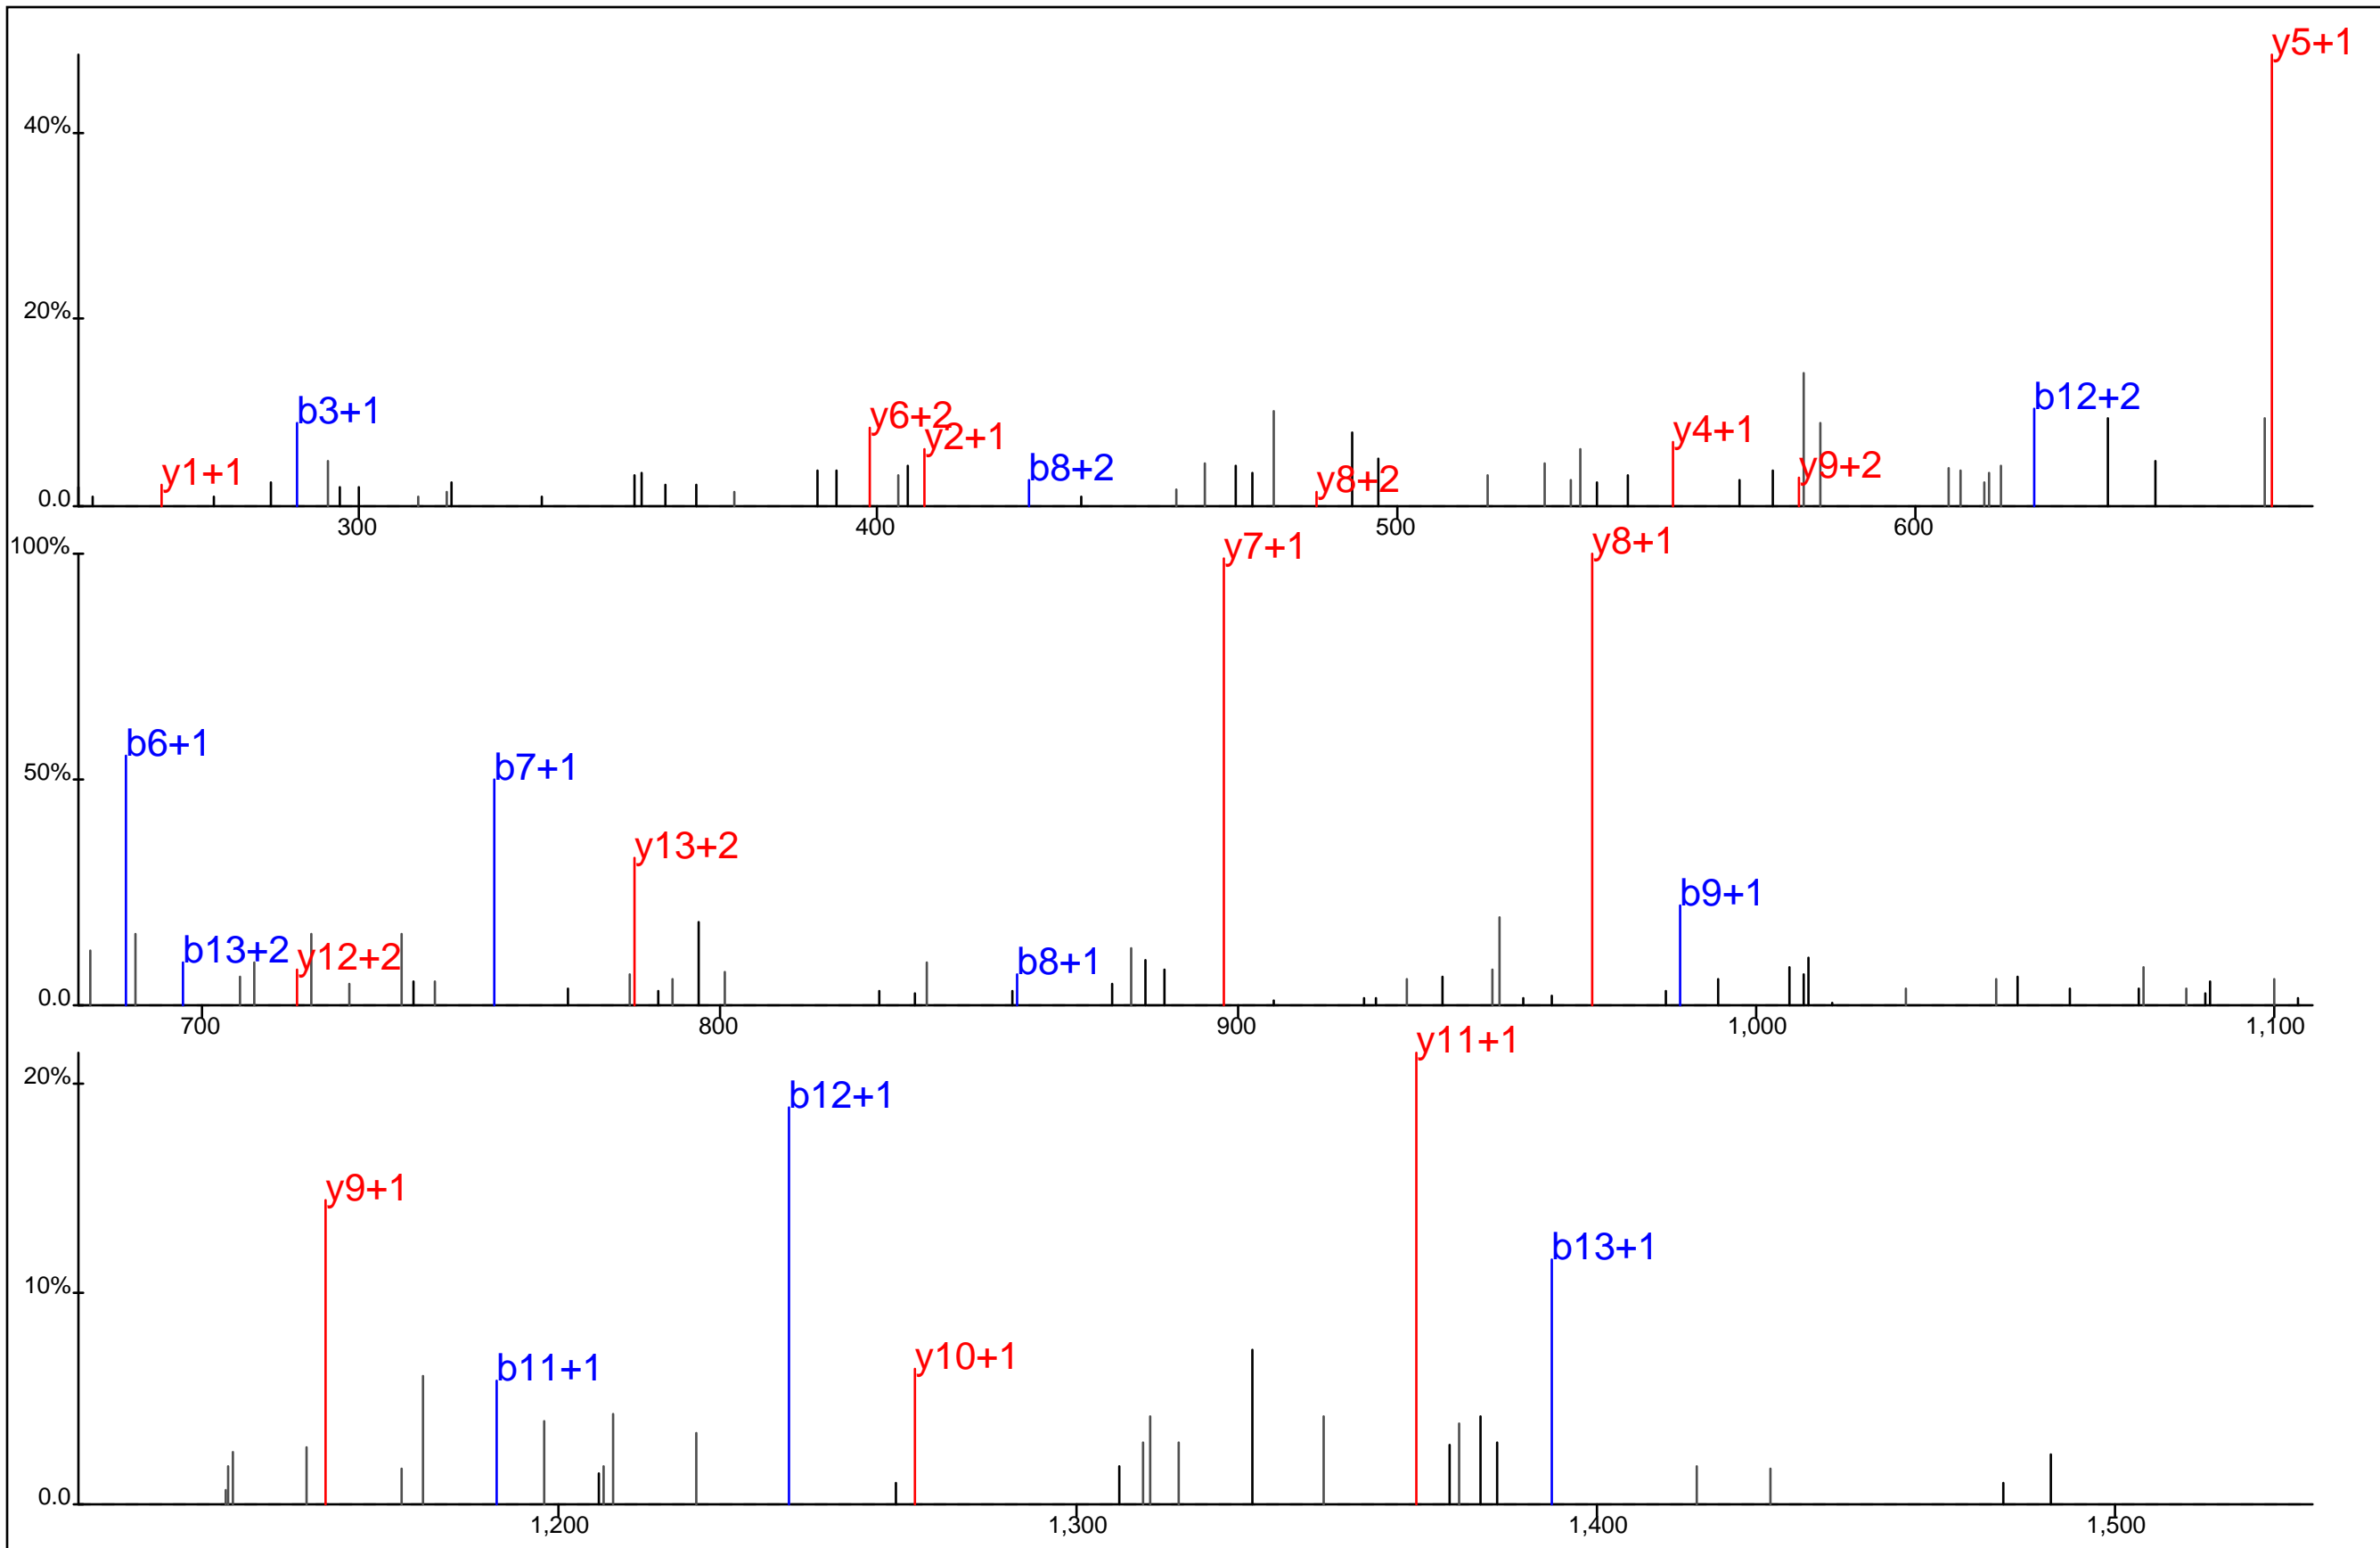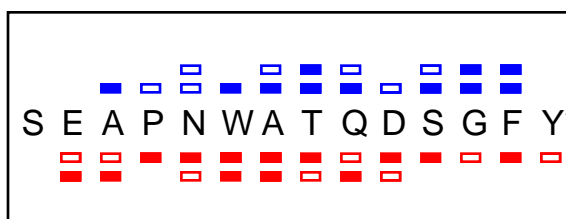

Protein Name: Eukaryotic translation initiation factor 3, subunit 6 48kDa  
 gi Accession: 0  
 Precursor Mass: 826.8167+2  
 Delta Mass: 0.253 ppm  
 XCorr: 46.31

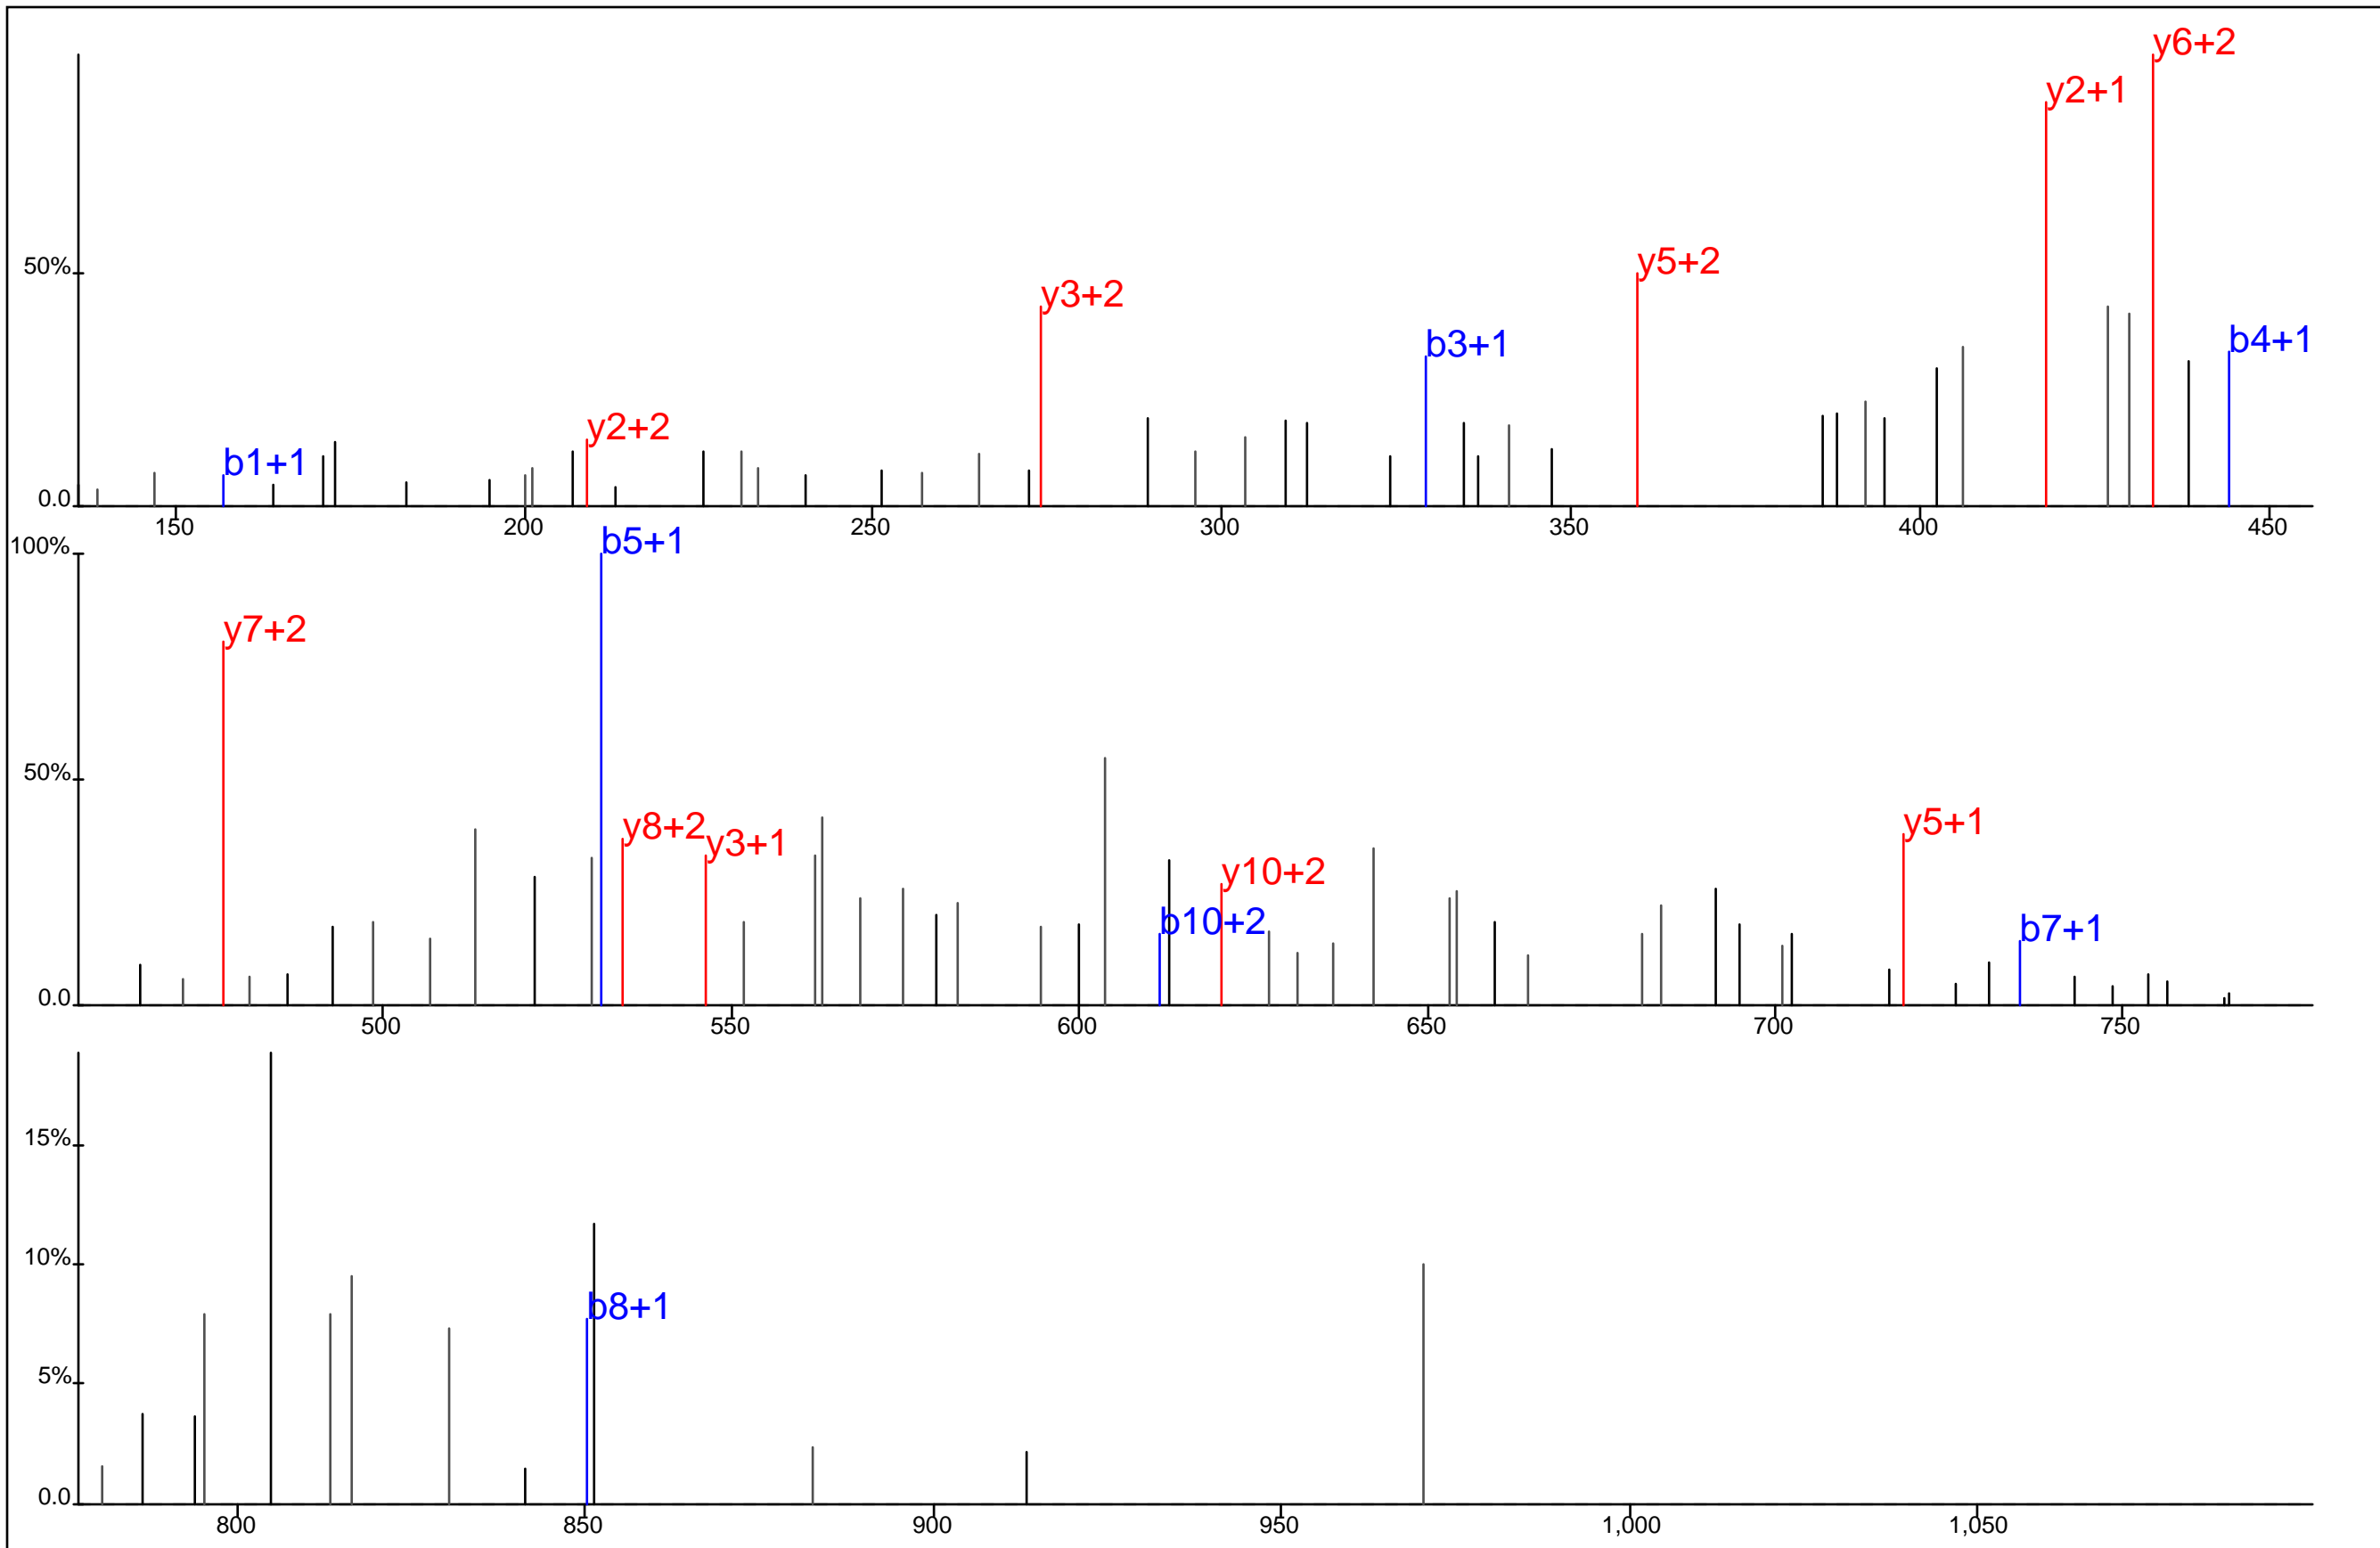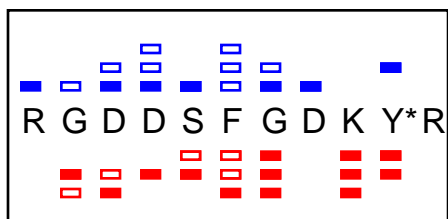

Protein Name: Eukaryotic translation initiation factor 4B  
 gi Accession: 0  
 Precursor Mass: 465.8616+3  
 Delta Mass: 0.926 ppm  
 XCorr: 24.38

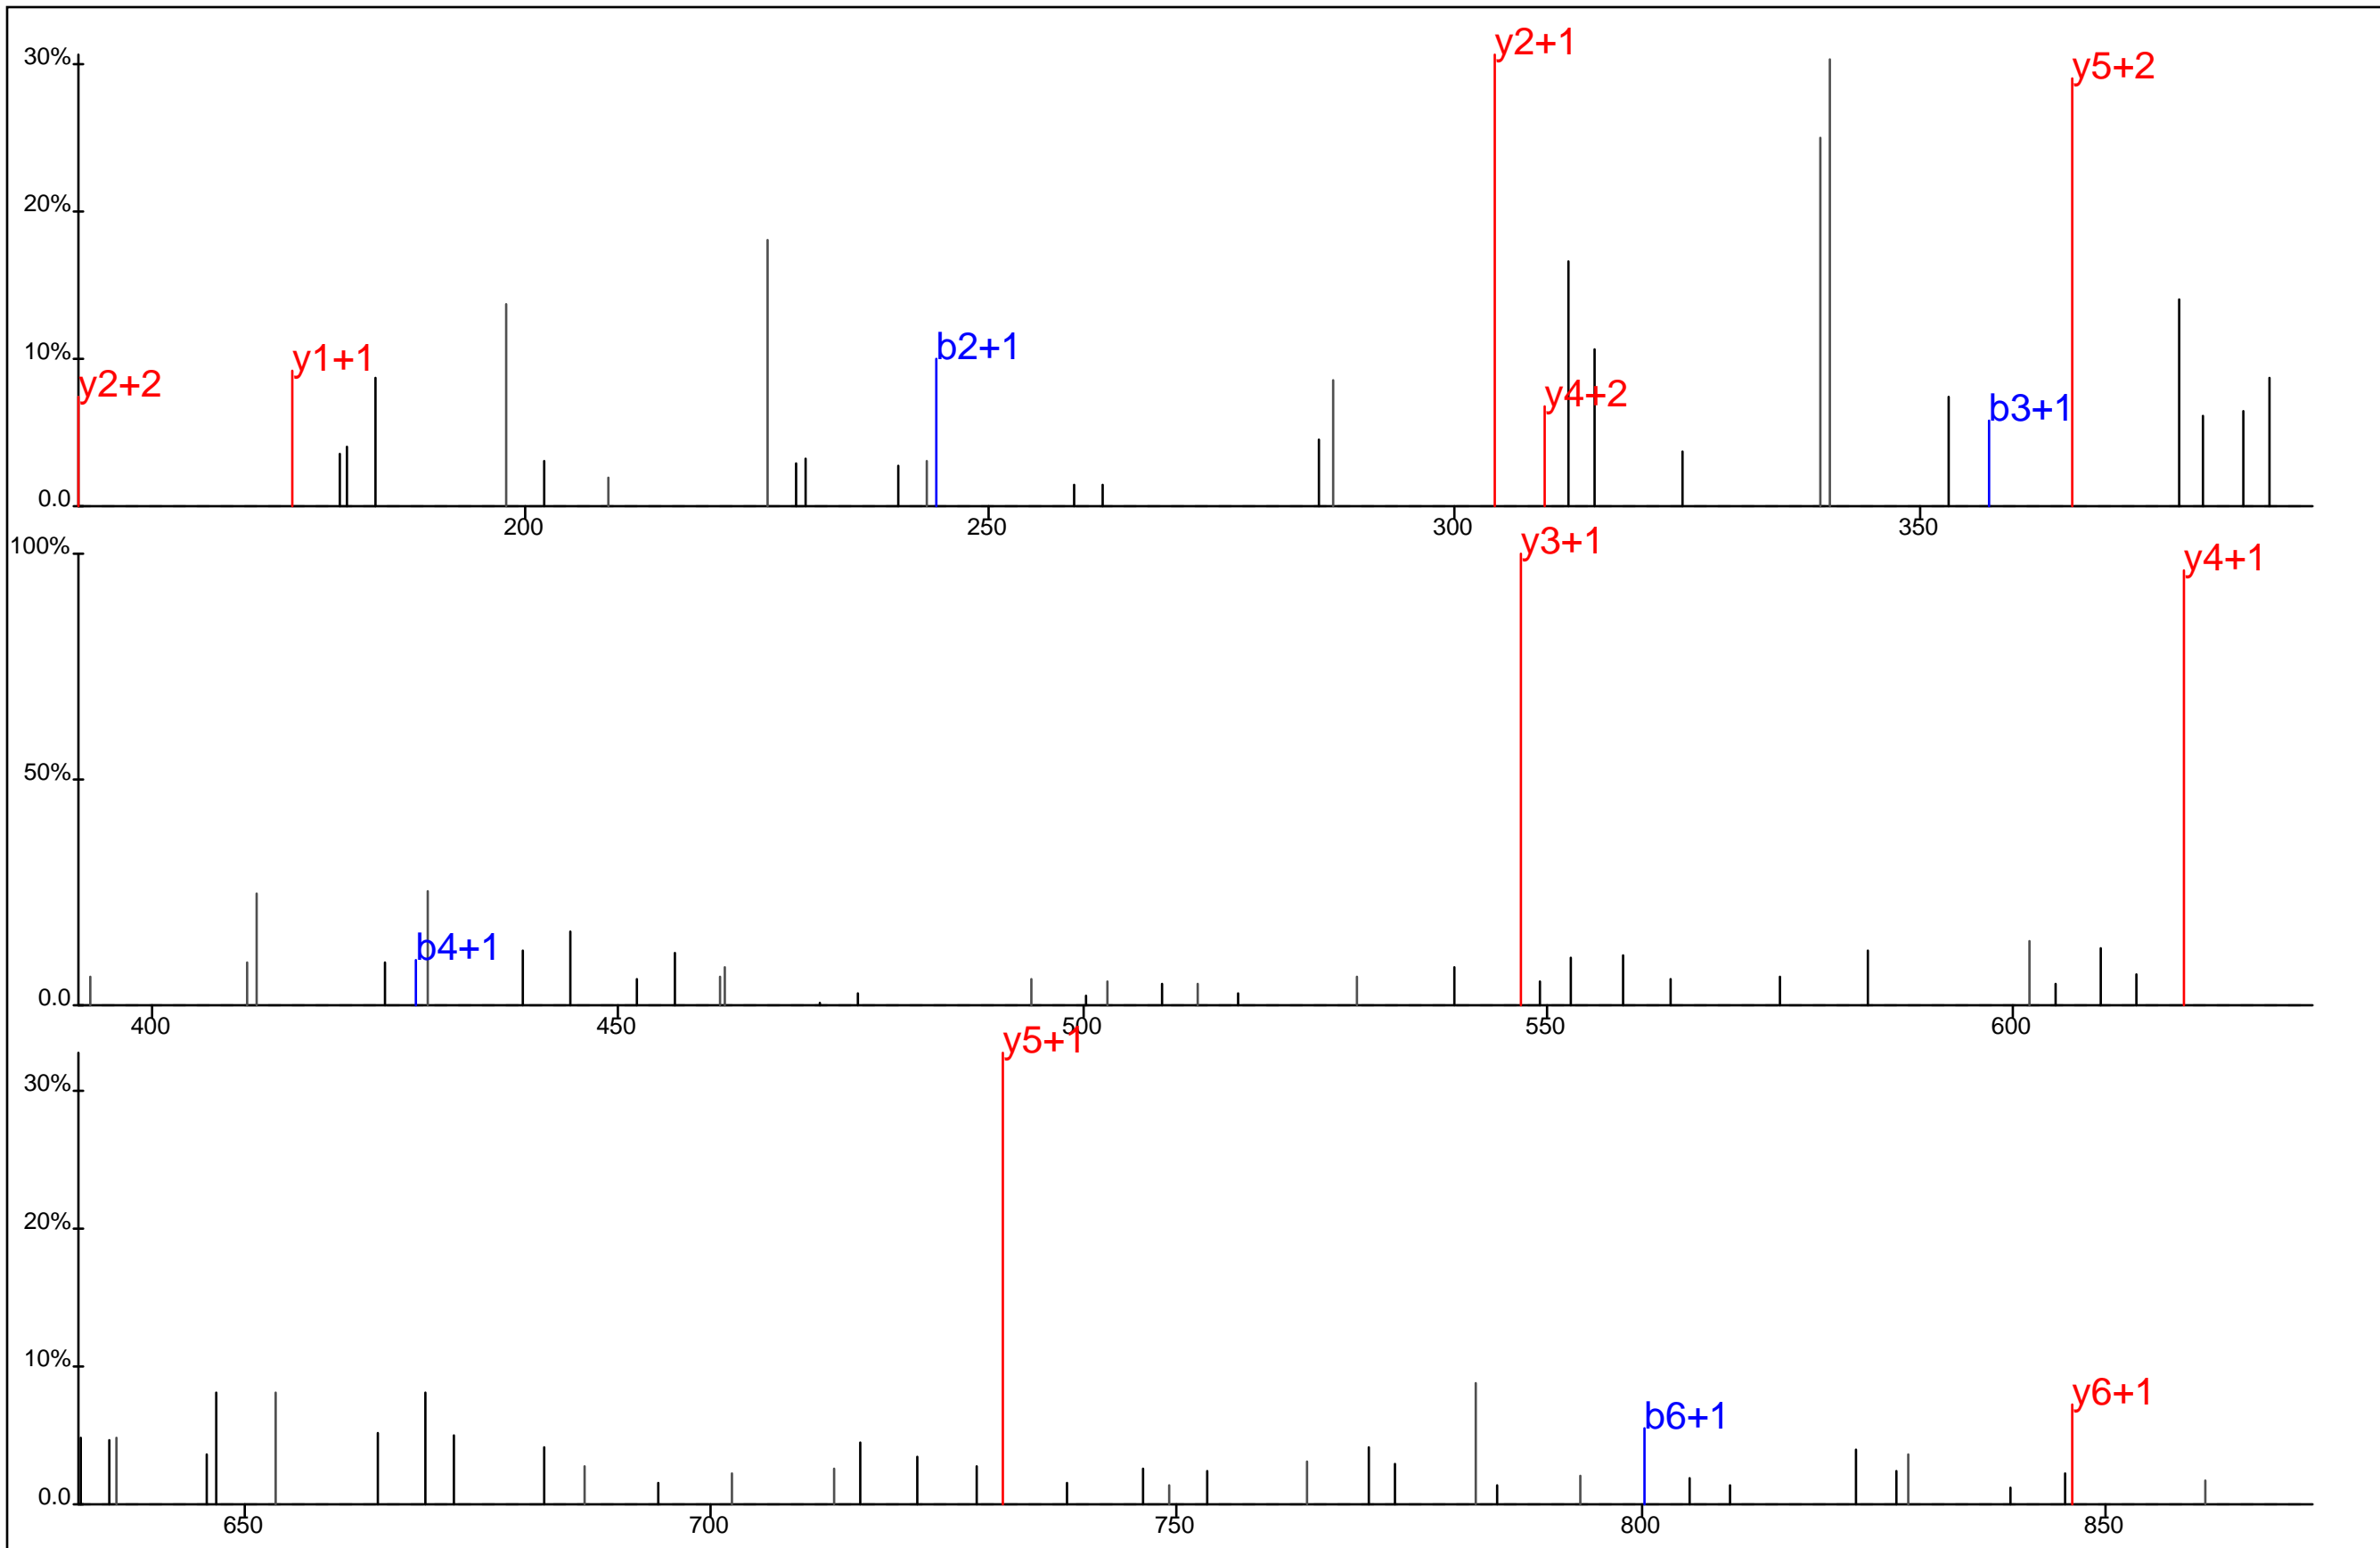

Q D L A Y\* E R

Protein Name: Eukaryotic translation initiation factor 3, subunit 6 interacting protein  
 gi Accession: 0  
 Precursor Mass: 487.7027+2  
 Delta Mass: 0.191 ppm  
 XCorr: 35.0

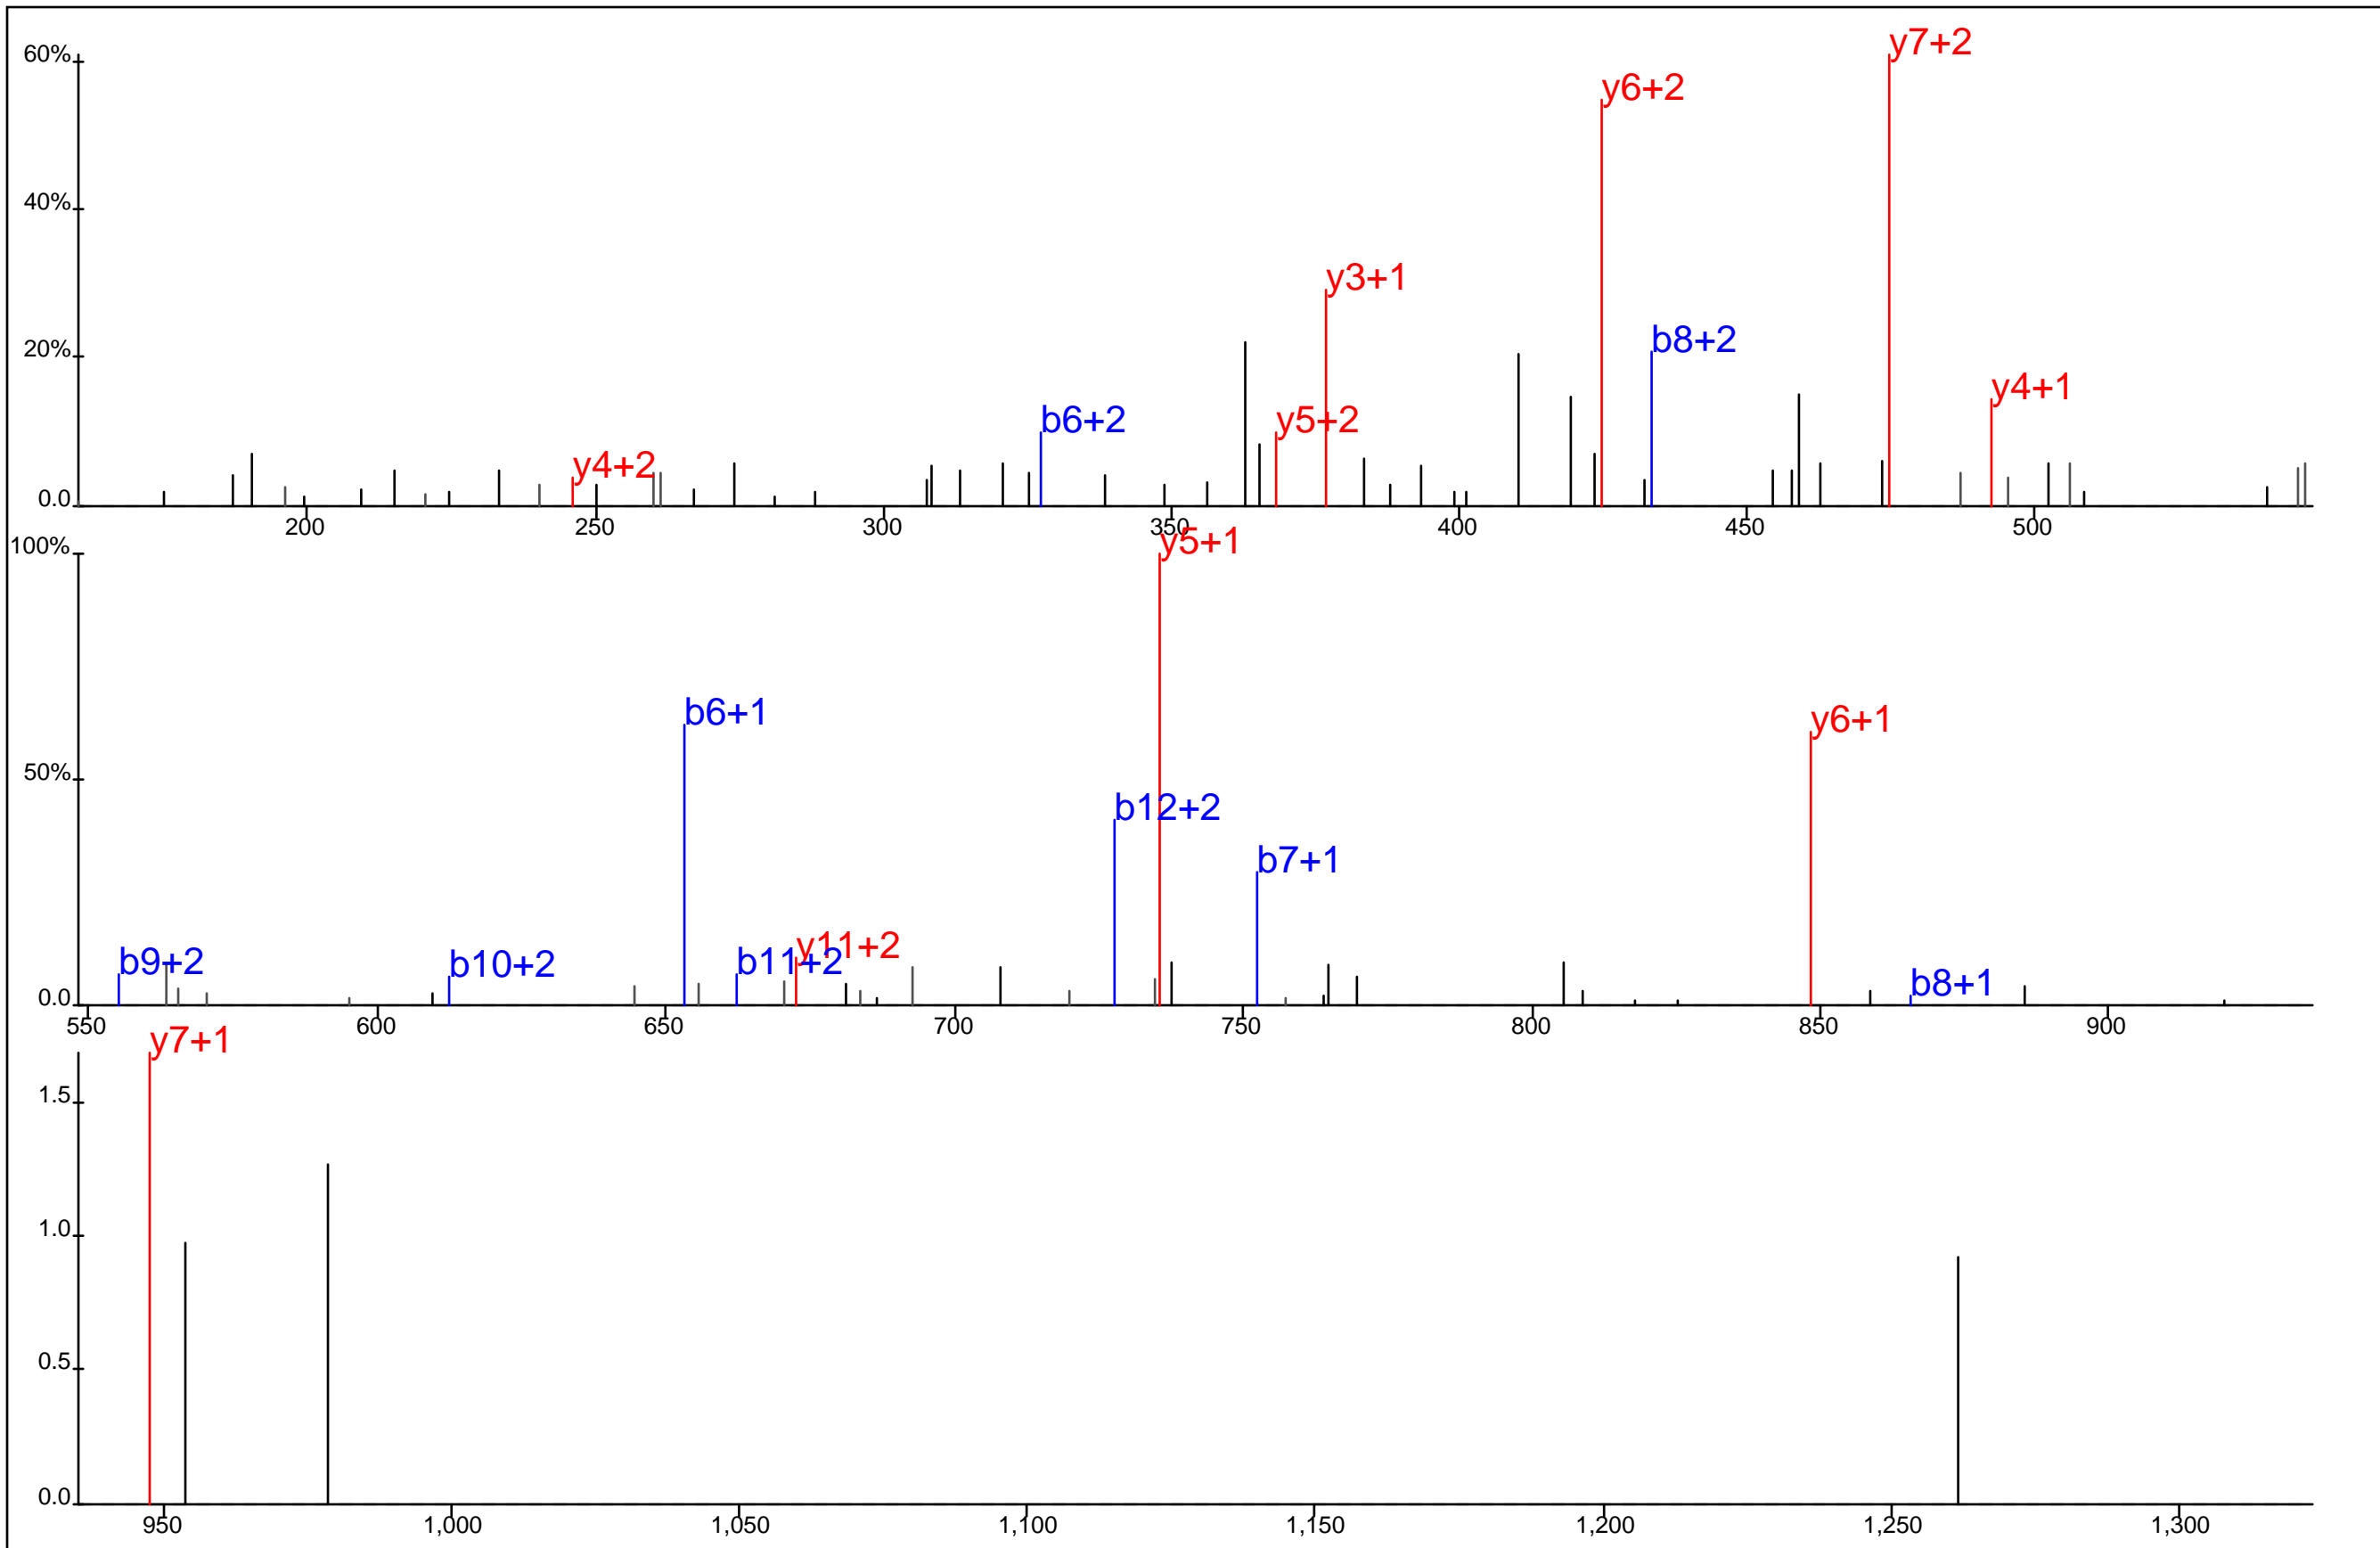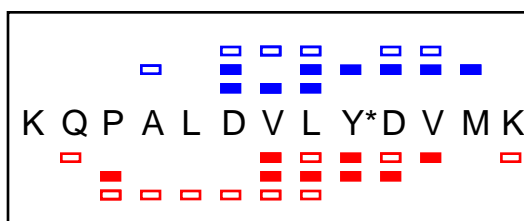

Protein Name: Eukaryotic translation initiation factor 3, subunit 10  
 gi Accession: 0  
 Precursor Mass: 533.9347+3  
 Delta Mass: 2.714 ppm  
 XCorr: 25.64

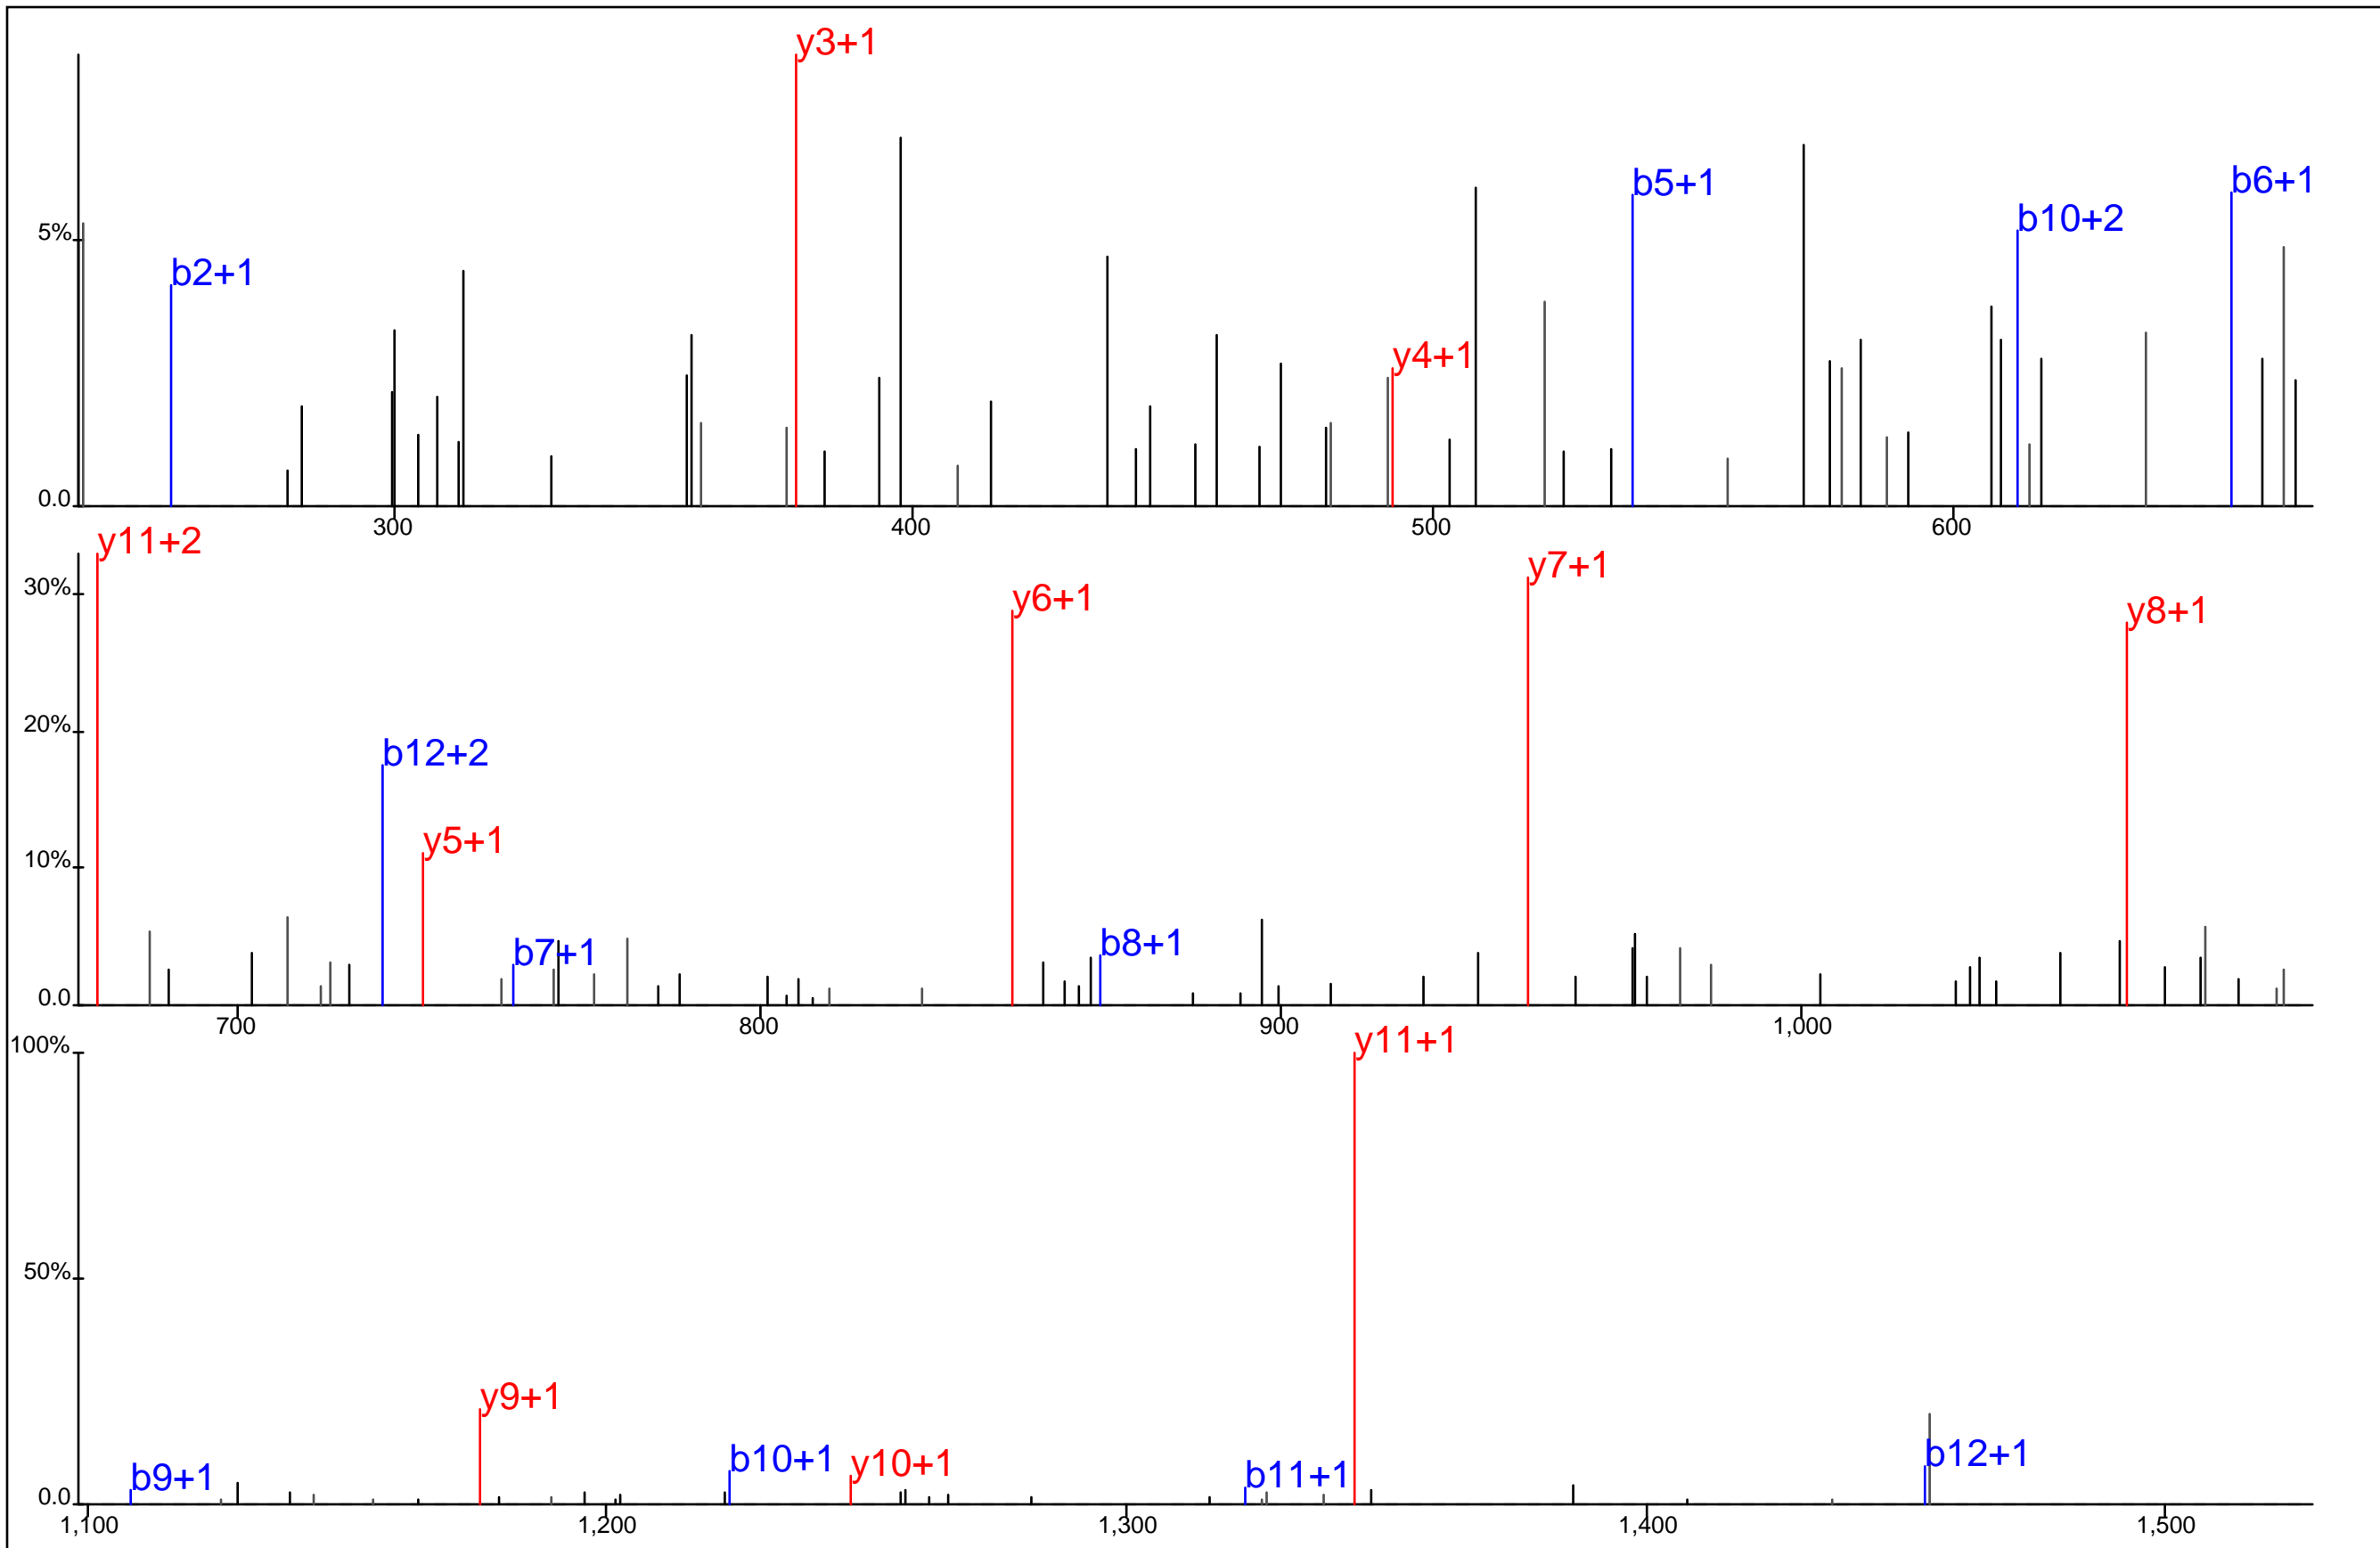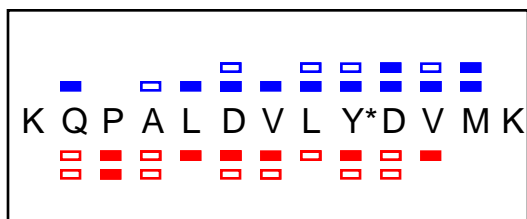

Protein Name: Eukaryotic translation initiation factor 3, subunit 10  
 gi Accession: 0  
 Precursor Mass: 800.3959+2  
 Delta Mass: 0.368 ppm  
 XCorr: 48.23



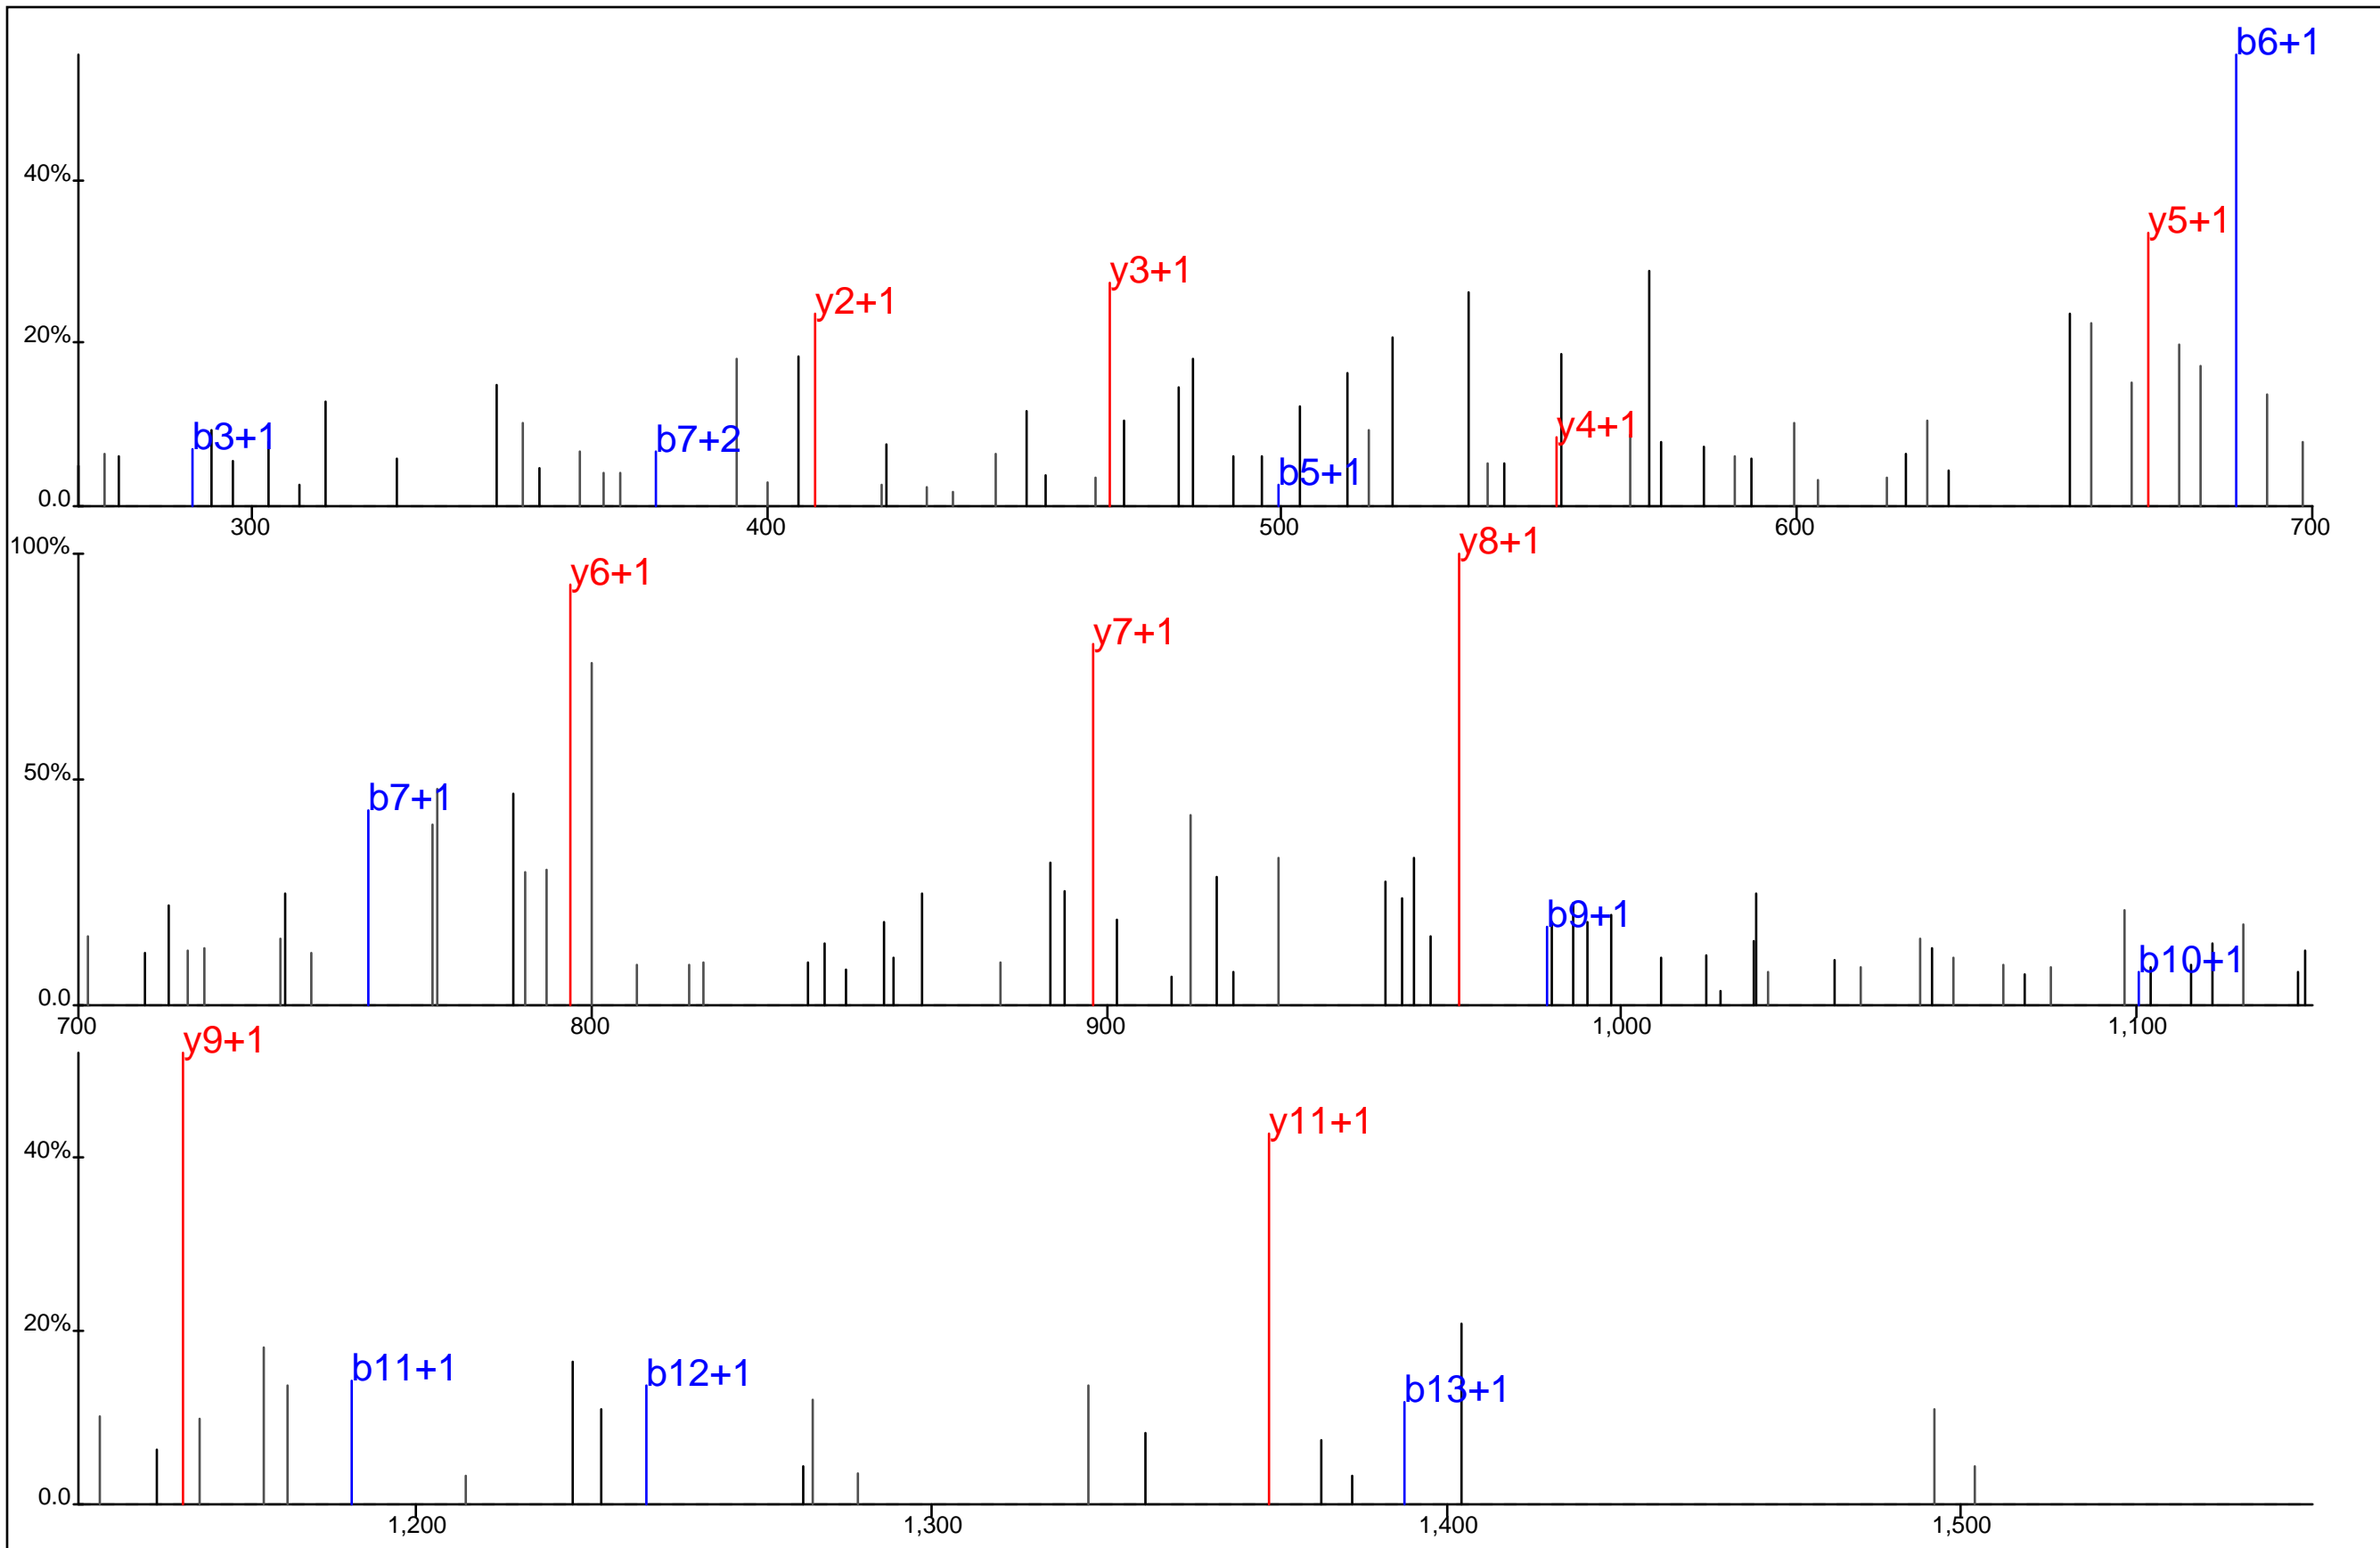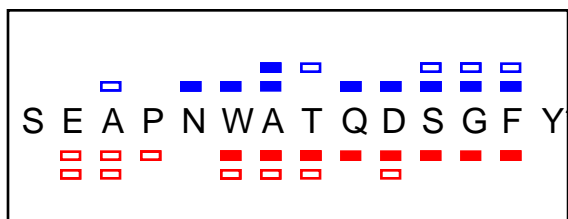

Protein Name: Eukaryotic translation initiation factor 3, subunit 6 48kDa  
 gi Accession: 0  
 Precursor Mass: 826.8162+2  
 Delta Mass: 0.770 ppm  
 XCorr: 39.52

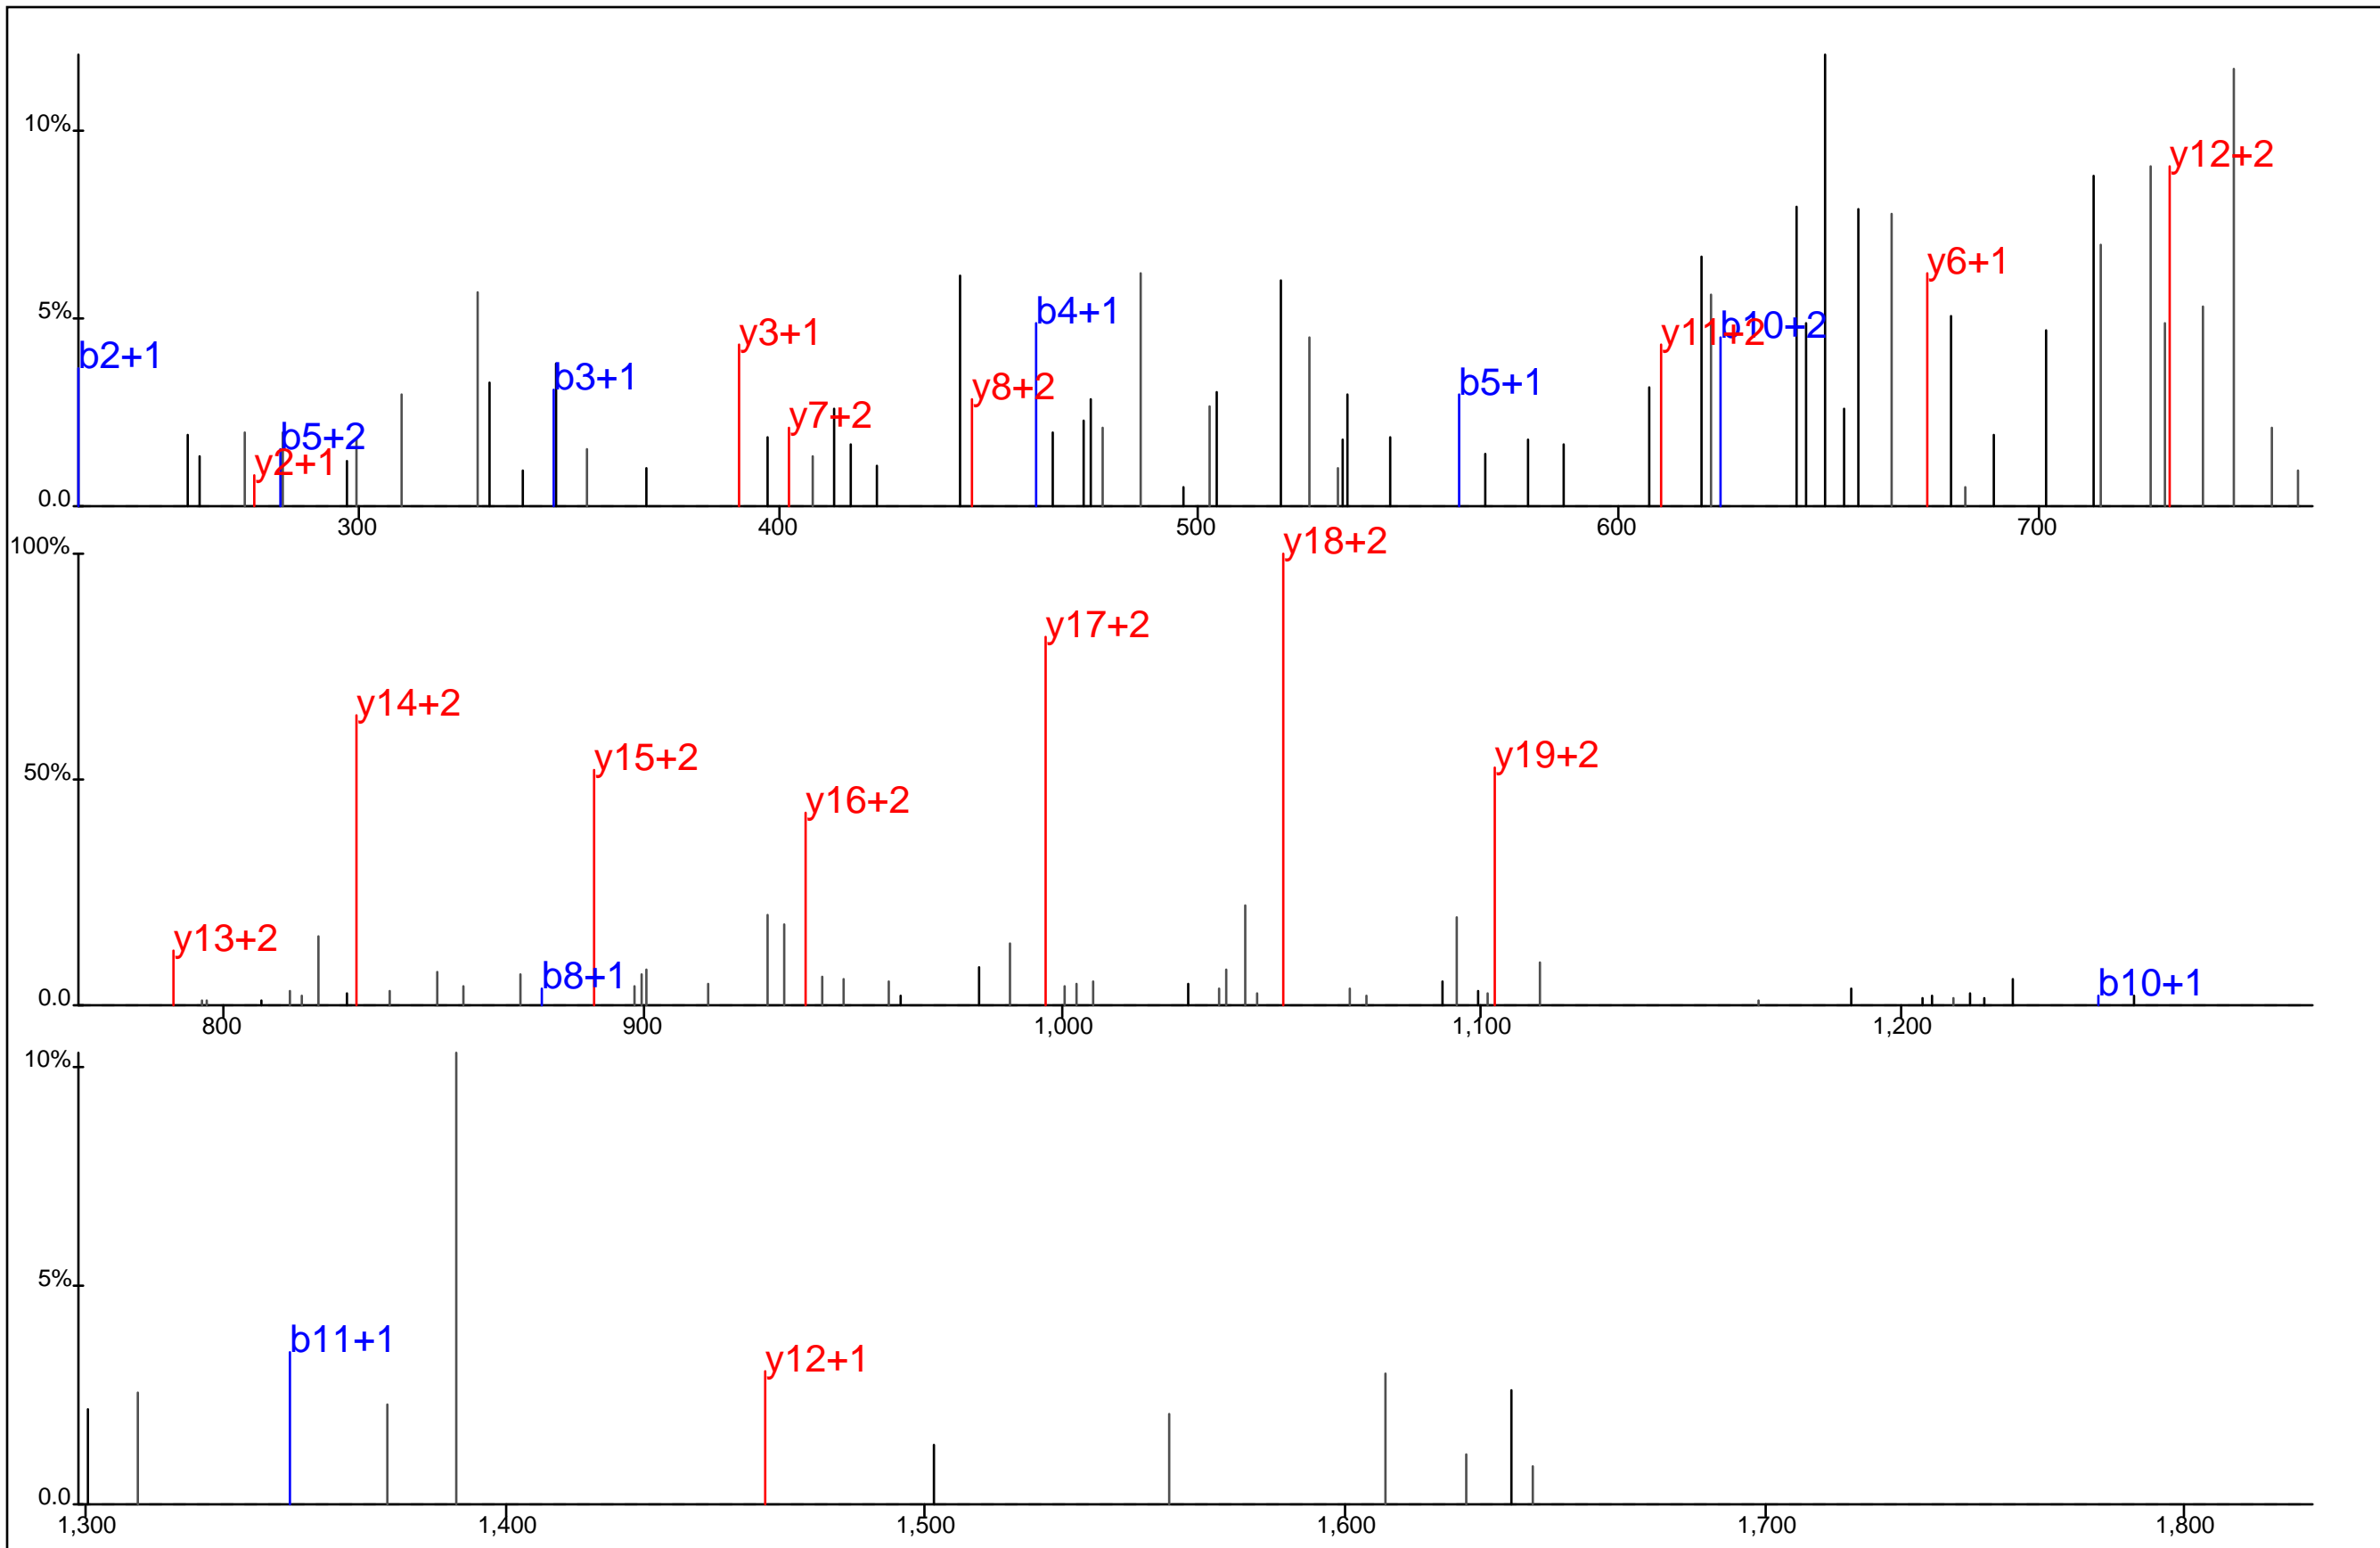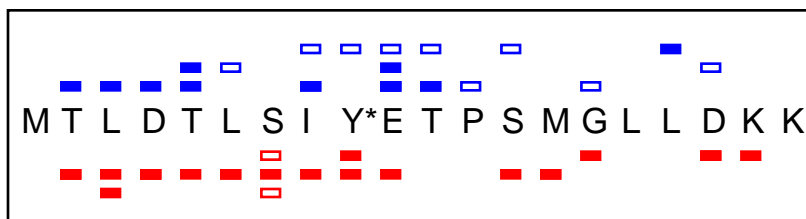

Protein Name: Eukaryotic translation initiation factor 3, subunit 9 eta, 116kDa  
 gi Accession: 0  
 Precursor Mass: 779.3790+3  
 Delta Mass: 2.590 ppm  
 XCorr: 36.34

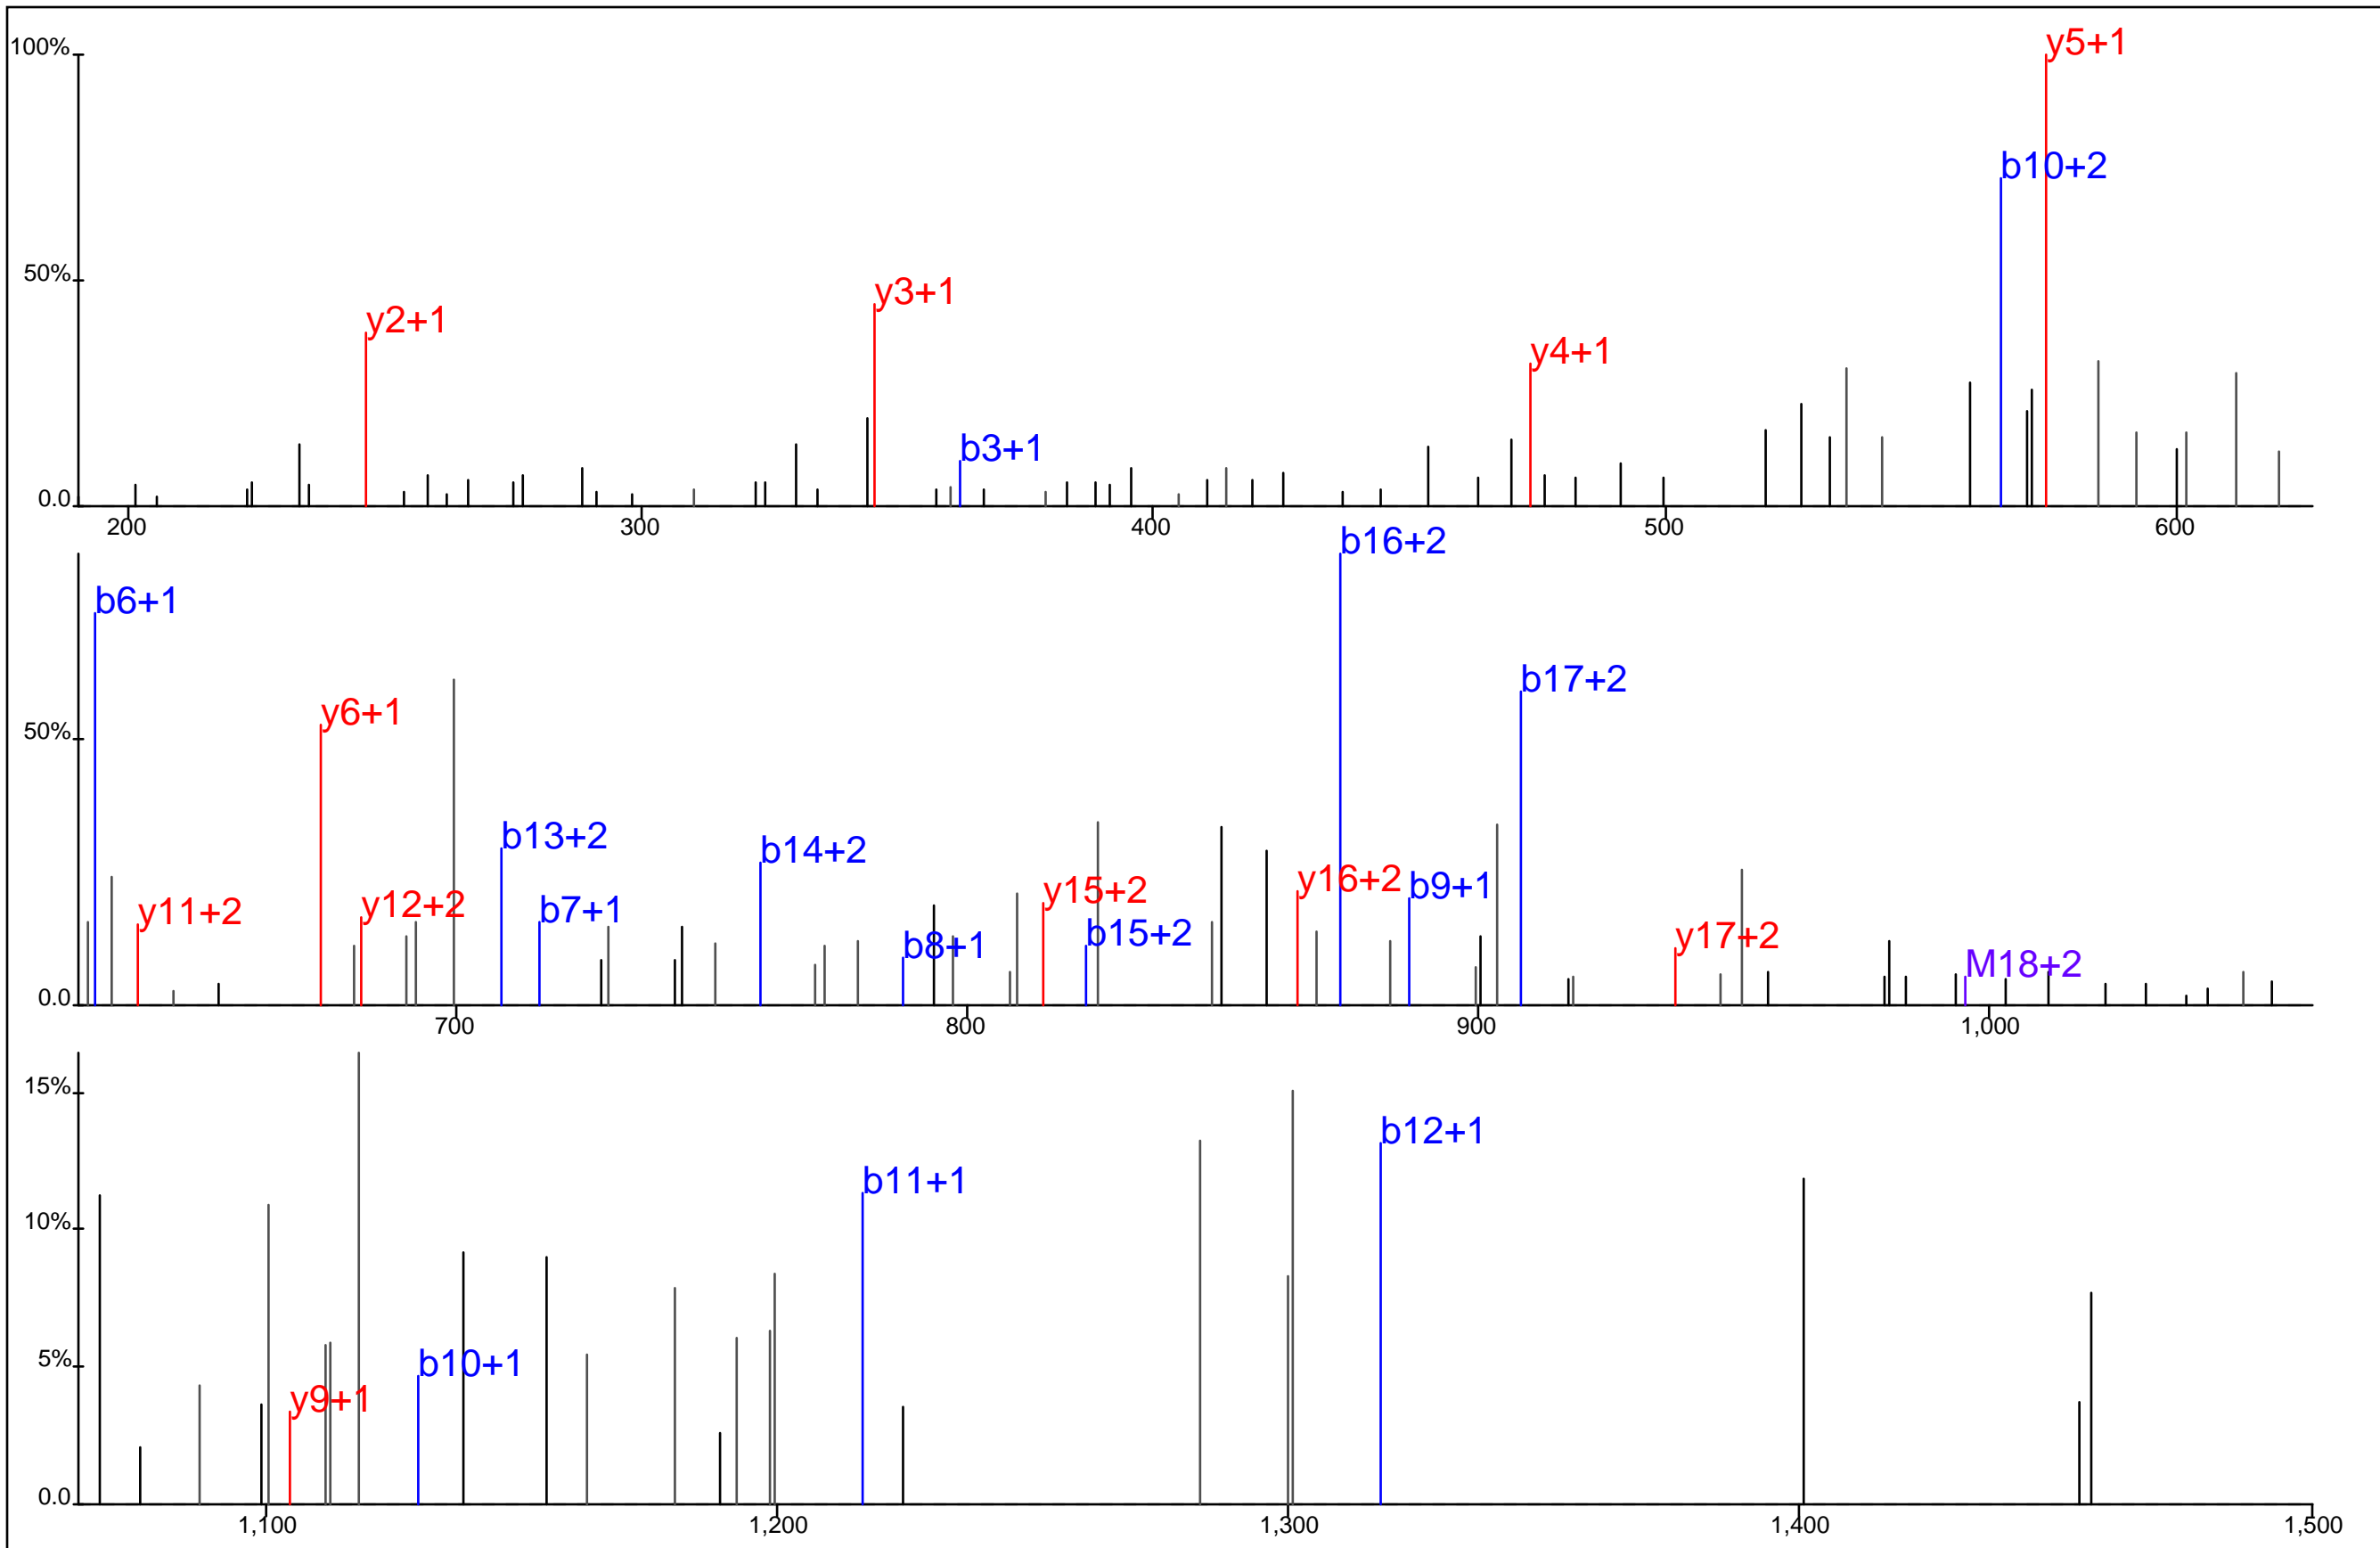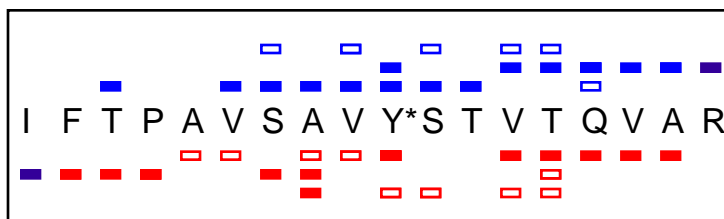

Protein Name: Eukaryotic translation initiation factor 4 gamma 3  
 gi Accession: 0  
 Precursor Mass: 664.0064+3  
 Delta Mass: 0.072 ppm  
 XCorr: 26.06



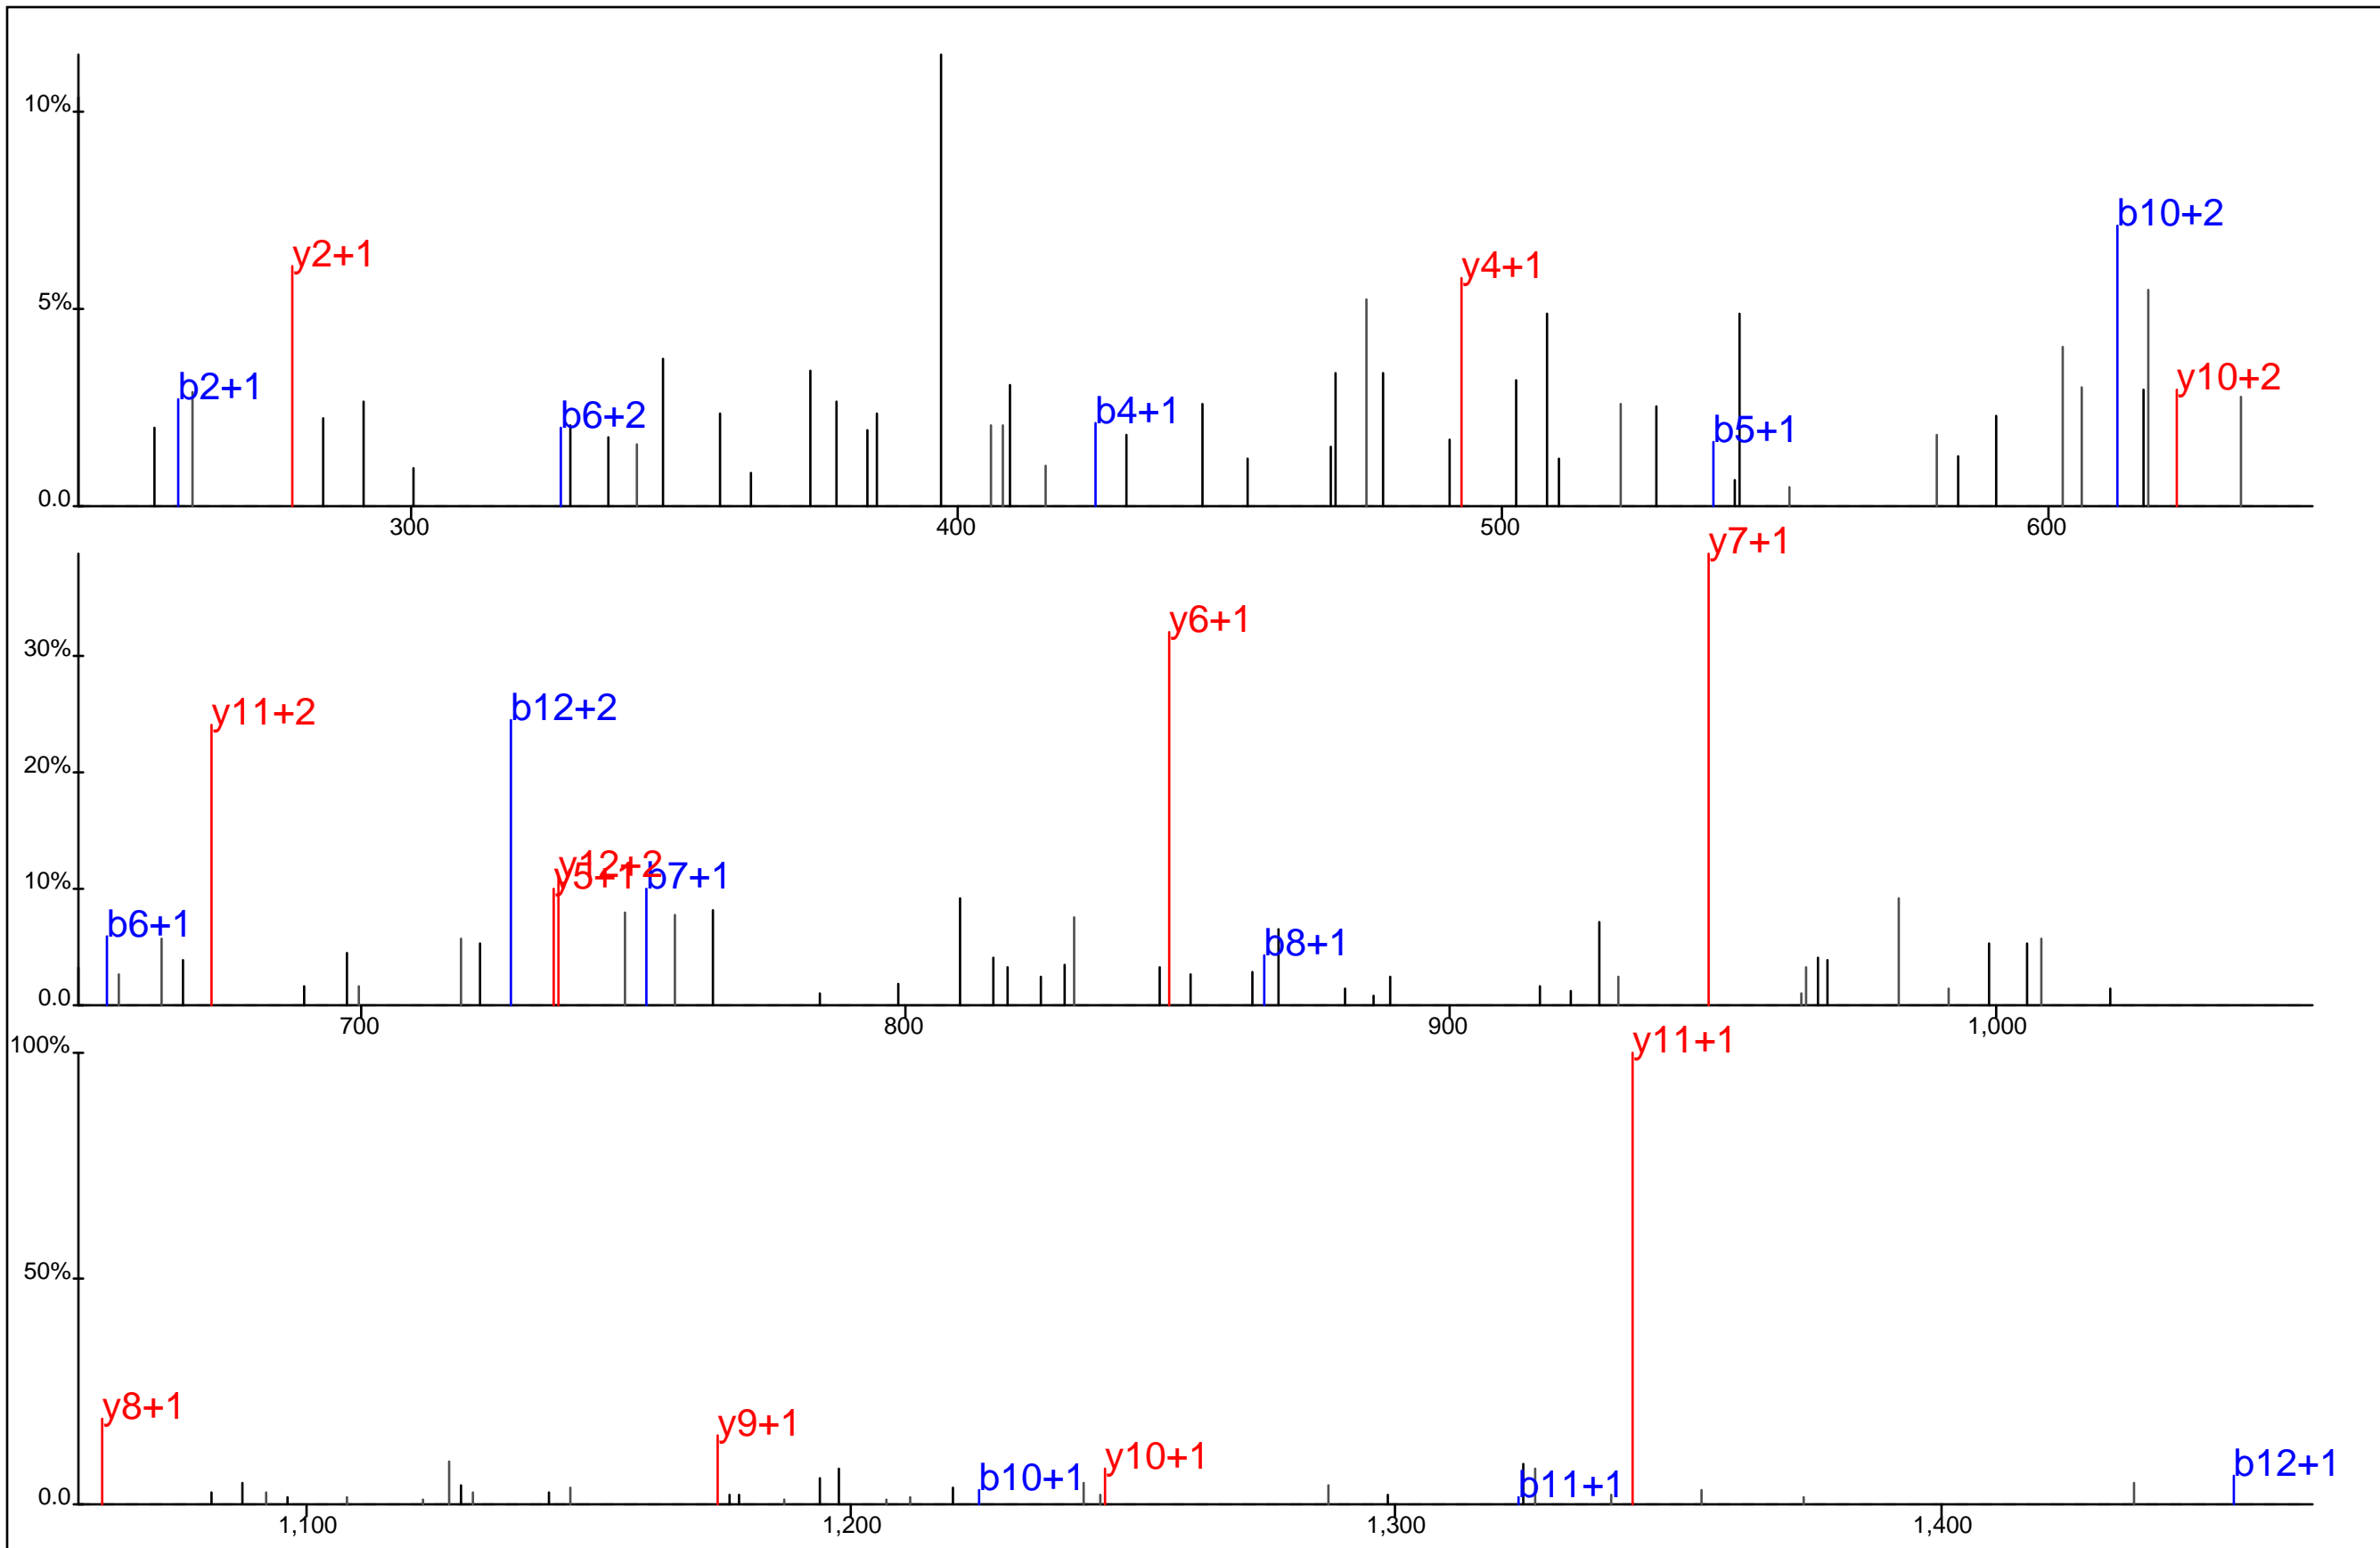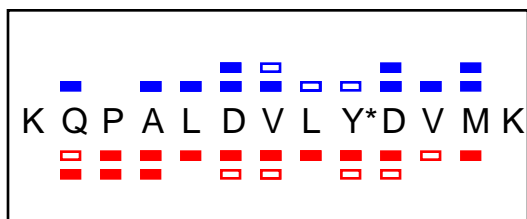

Protein Name: Eukaryotic translation initiation factor 3, subunit 10  
 gi Accession: 0  
 Precursor Mass: 800.3962+2  
 Delta Mass: 0.014 ppm  
 XCorr: 47.52

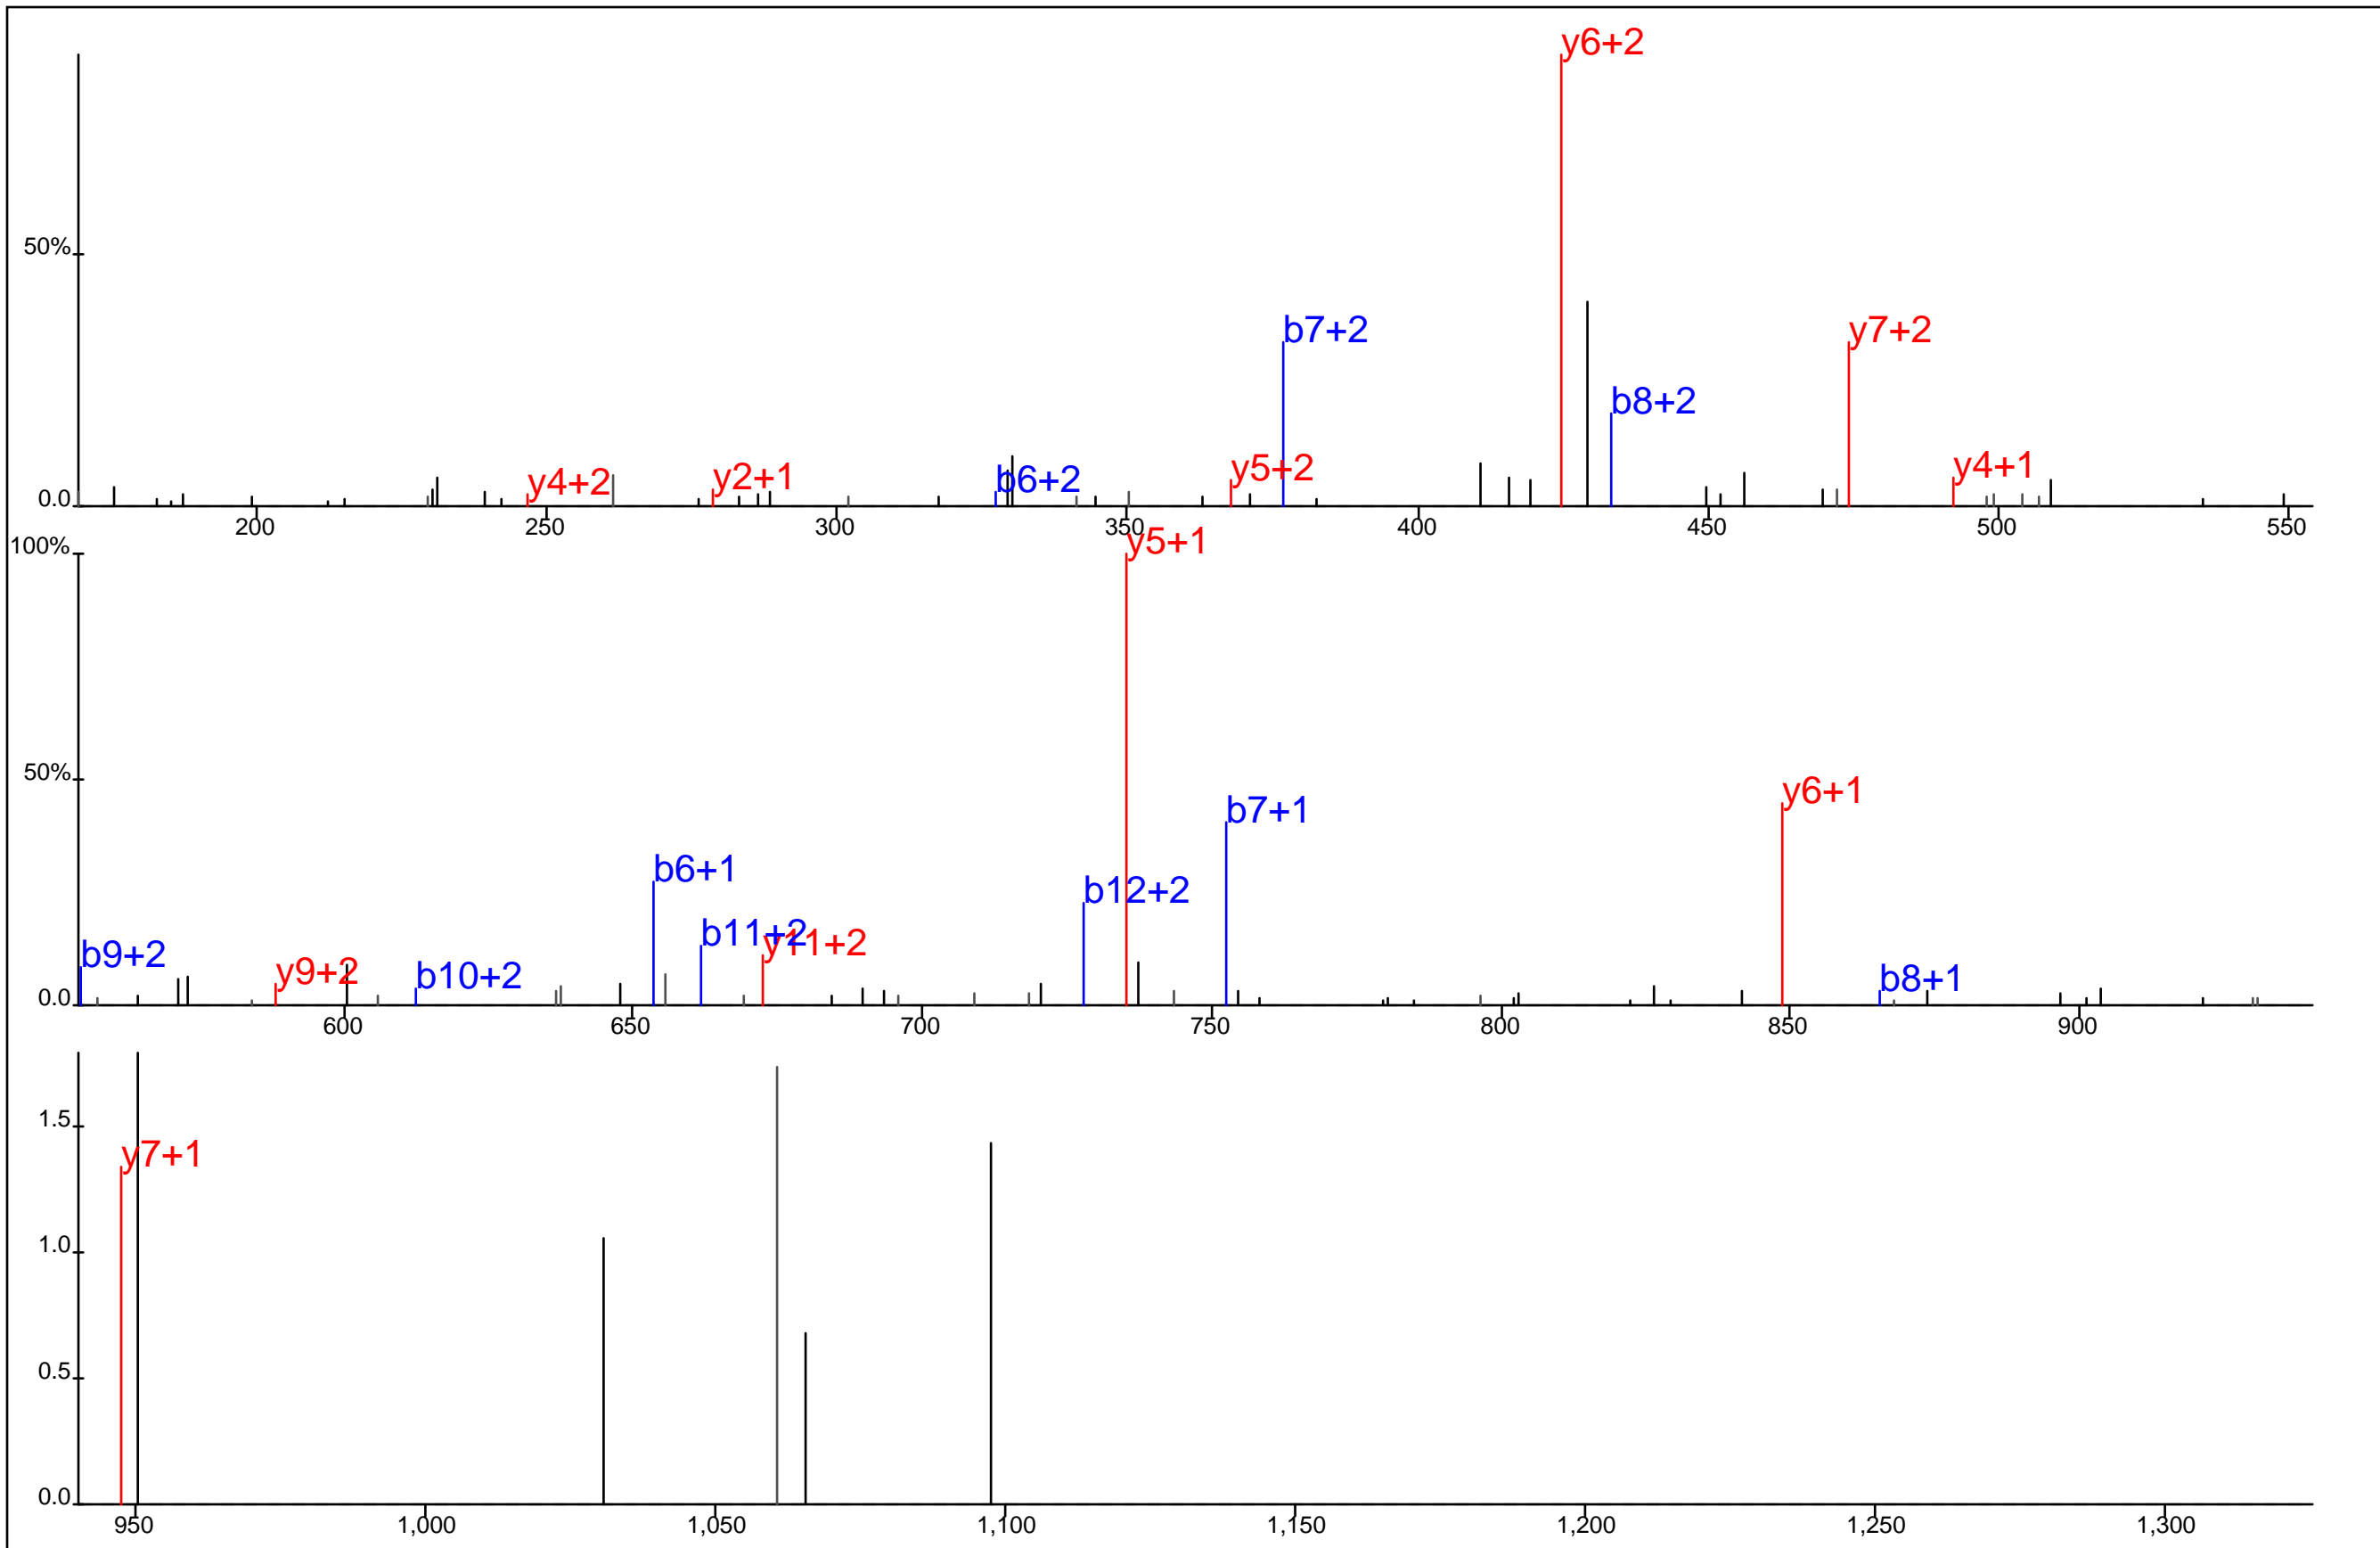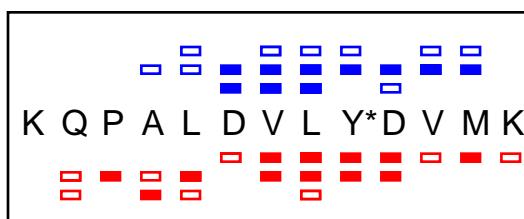

Protein Name: Eukaryotic translation initiation factor 3, subunit 10  
 gi Accession: 0  
 Precursor Mass: 533.9319+3  
 Delta Mass: 2.435 ppm  
 XCorr: 23.52



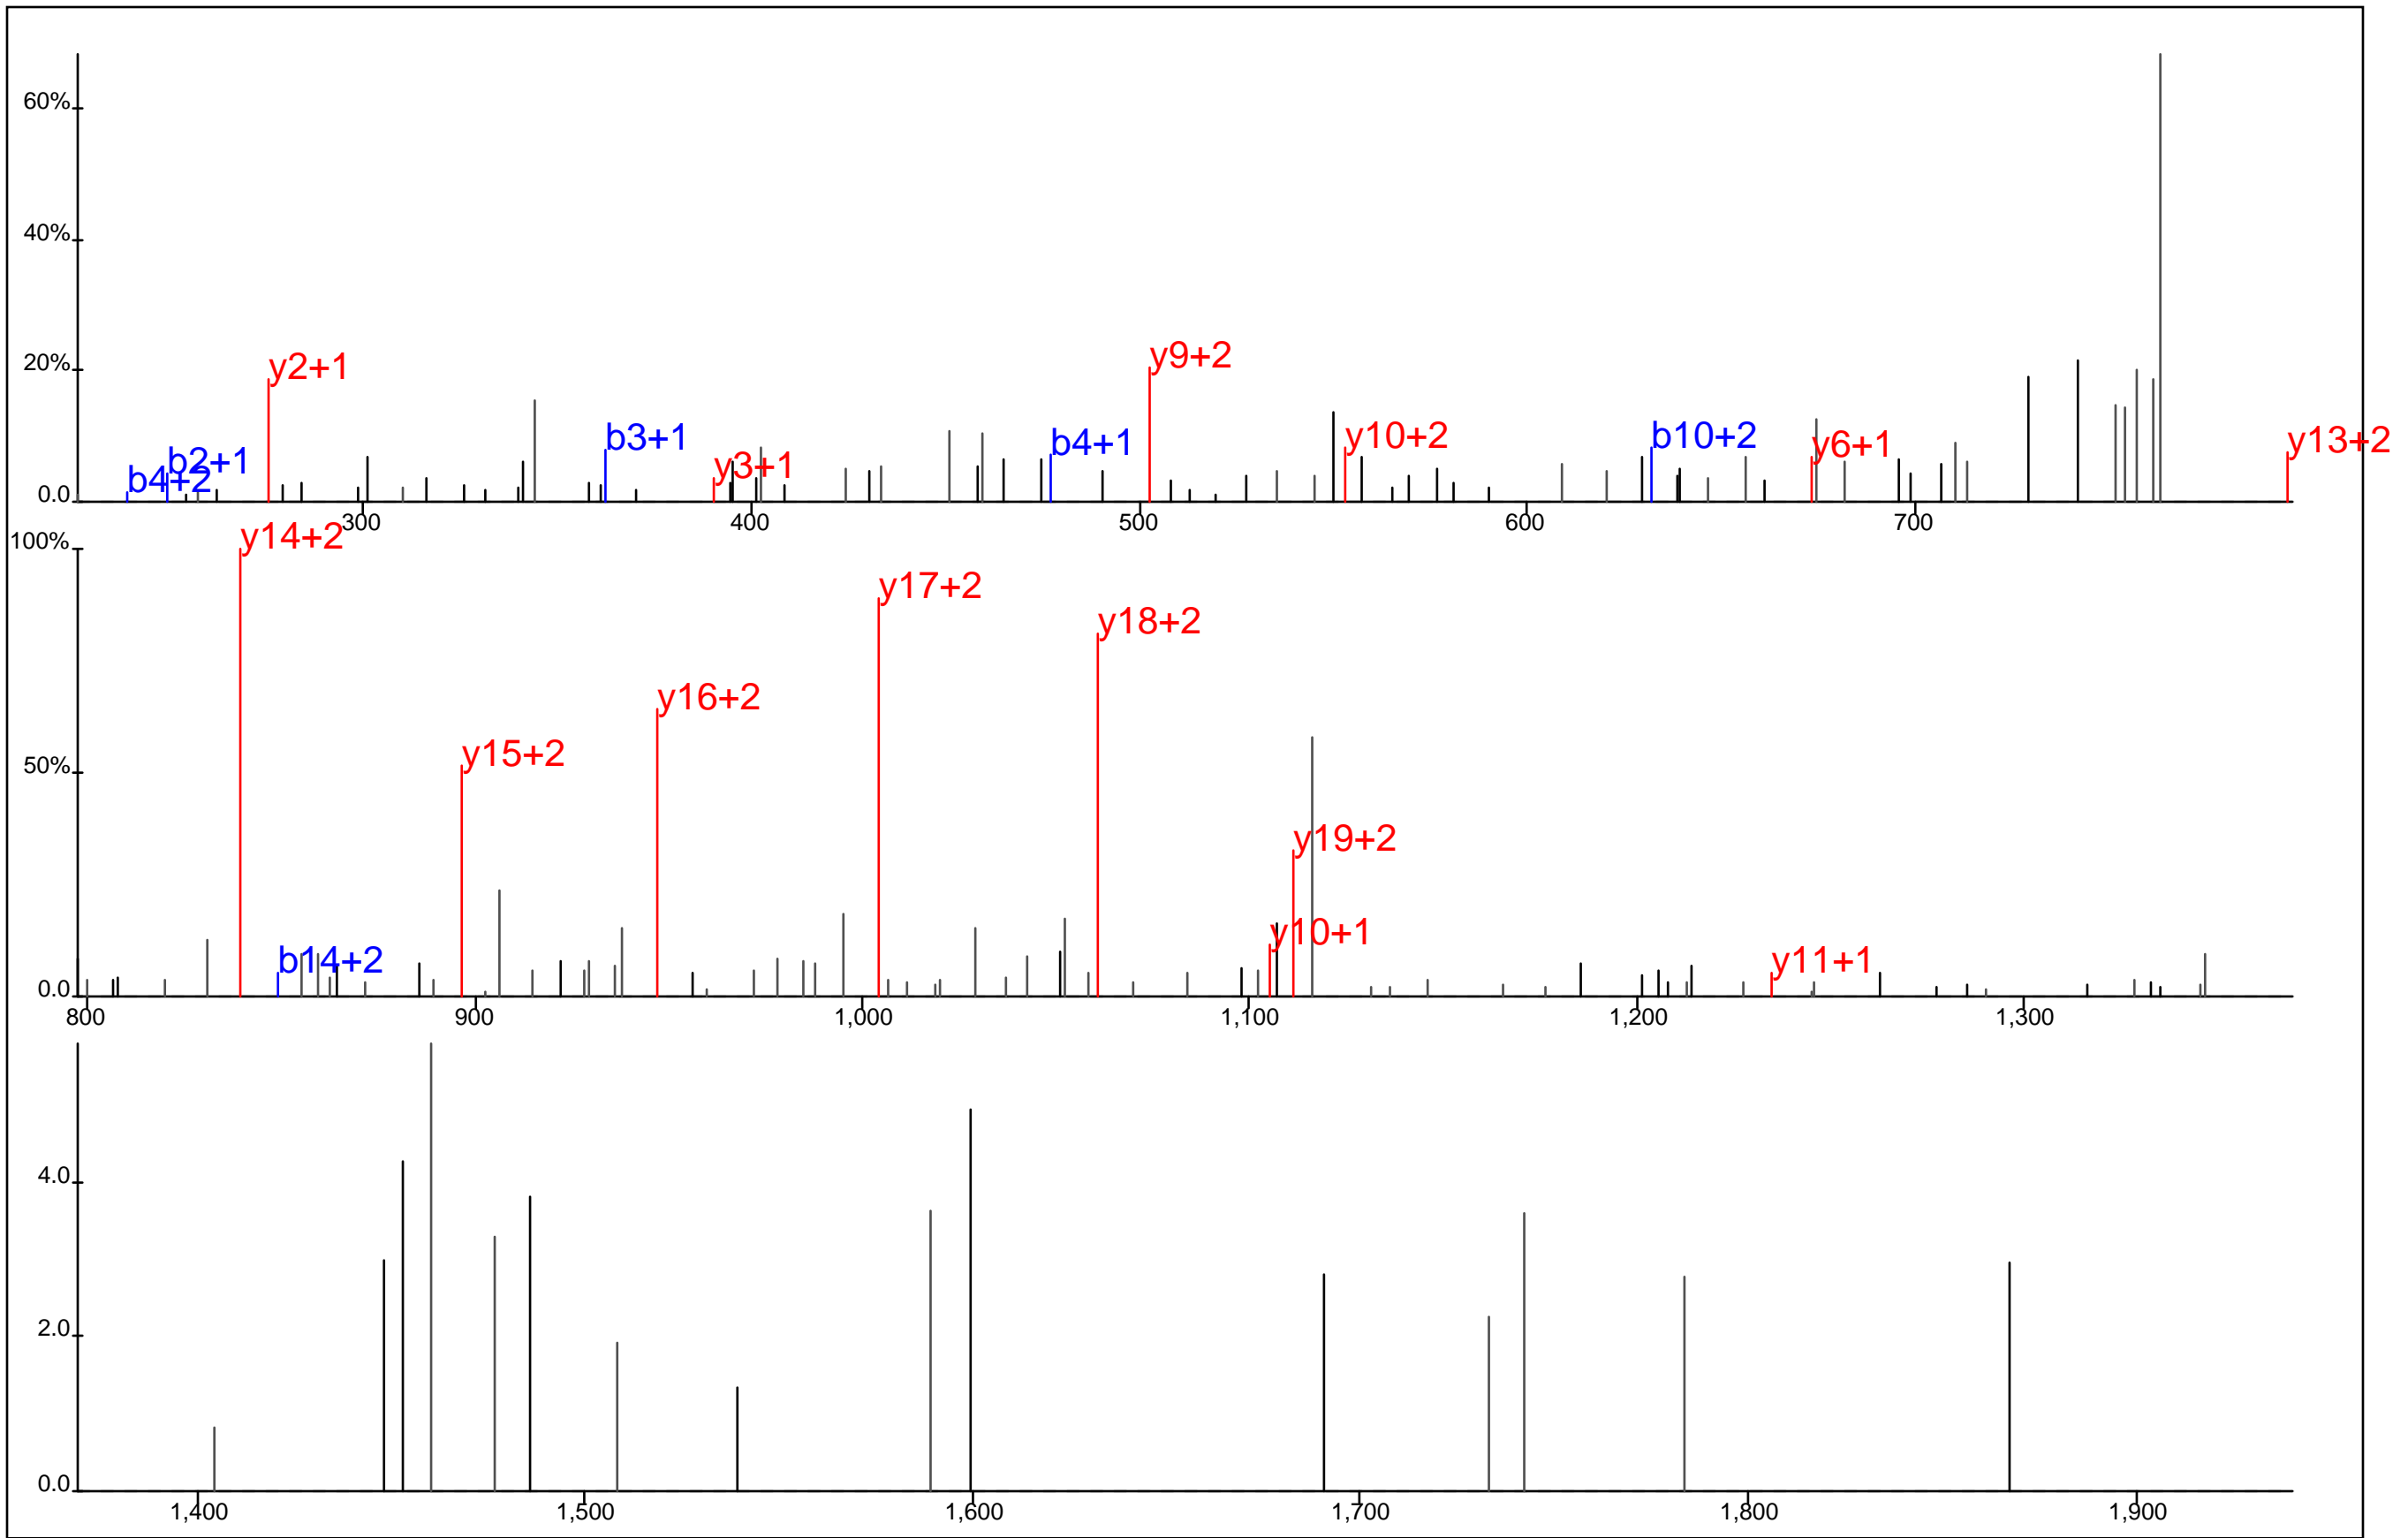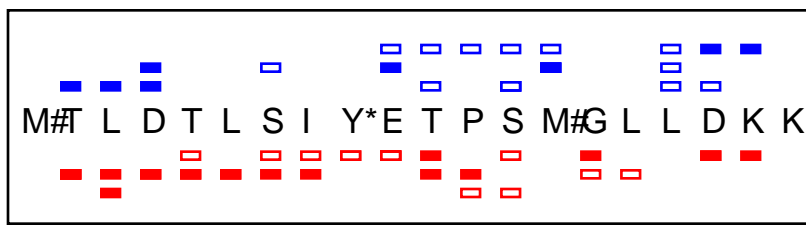

Protein Name: Eukaryotic translation initiation factor 3, subunit 9 eta, 116kDa  
 gi Accession: 0  
 Precursor Mass: 790.0413+3  
 Delta Mass: 1.227 ppm  
 XCorr: 28.11



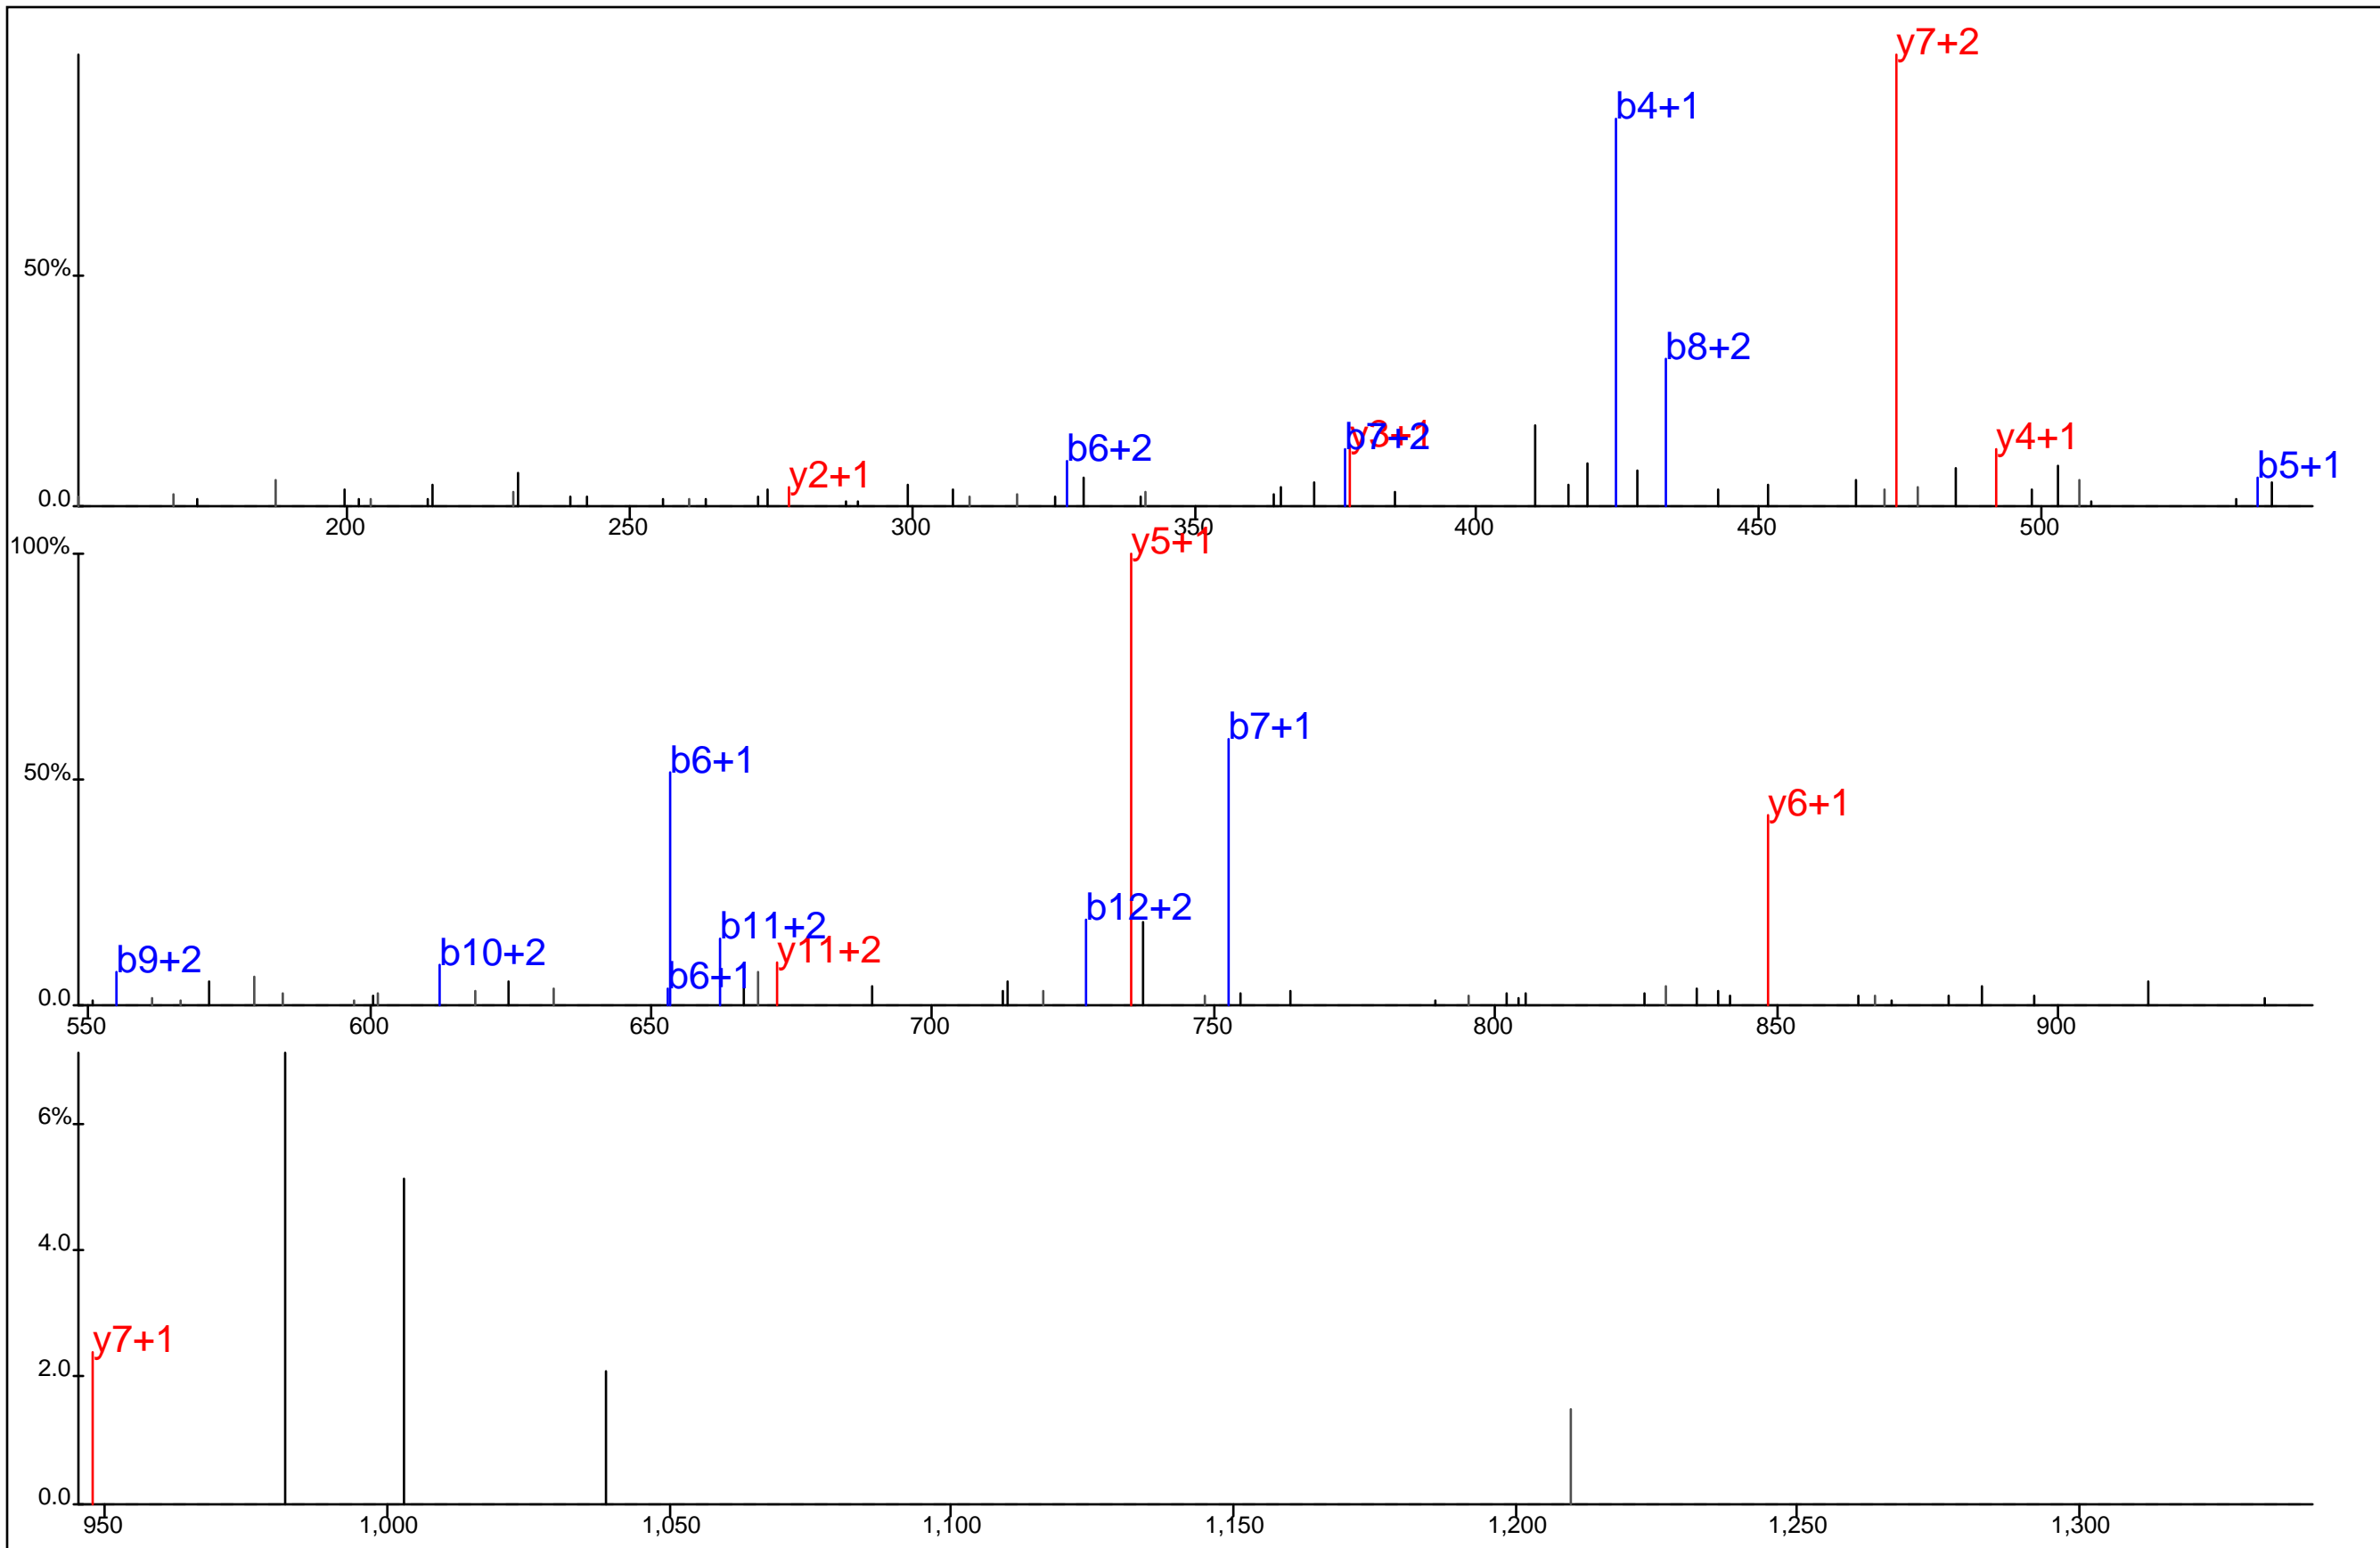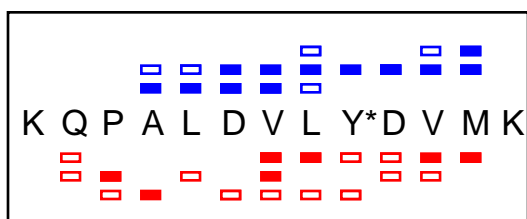

Protein Name: Eukaryotic translation initiation factor 3, subunit 10  
 gi Accession: 0  
 Precursor Mass: 533.9327+3  
 Delta Mass: 1.063 ppm  
 XCorr: 29.86

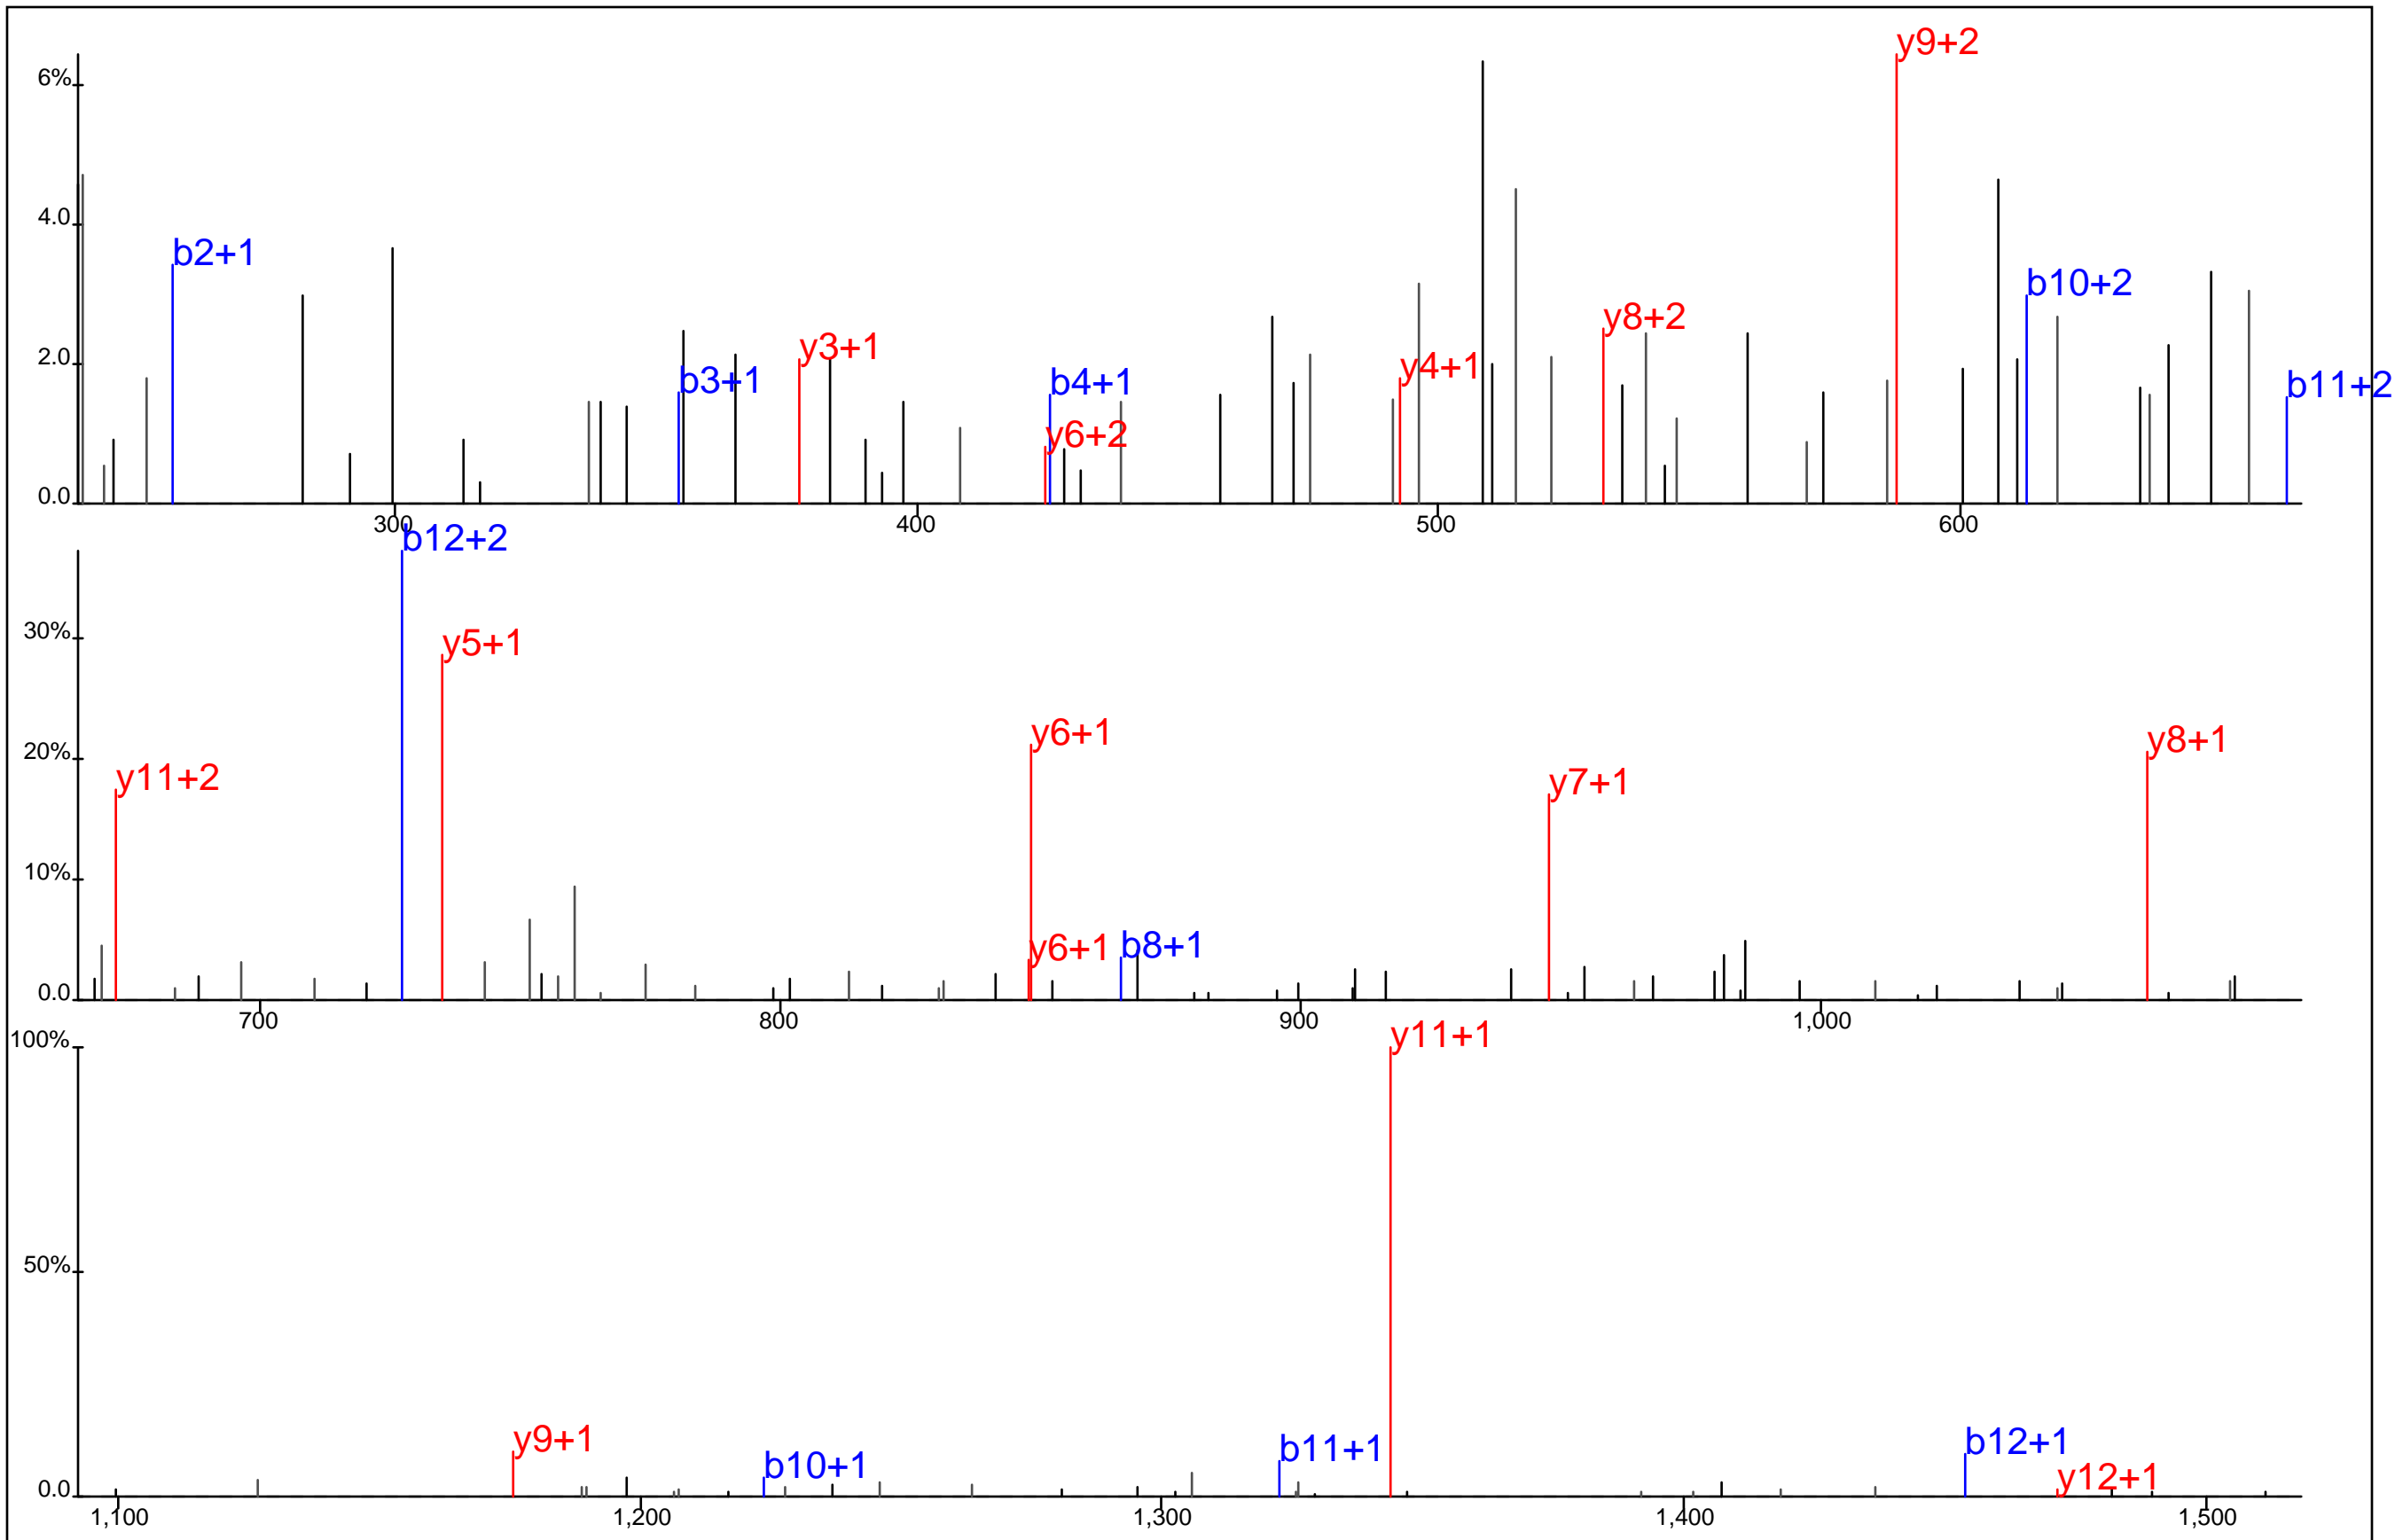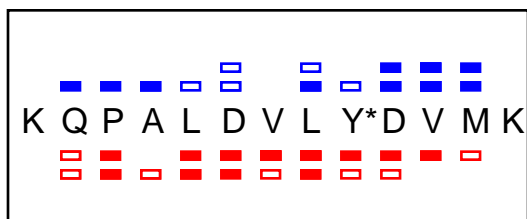

Protein Name: Eukaryotic translation initiation factor 3, subunit 10  
 gi Accession: 0  
 Precursor Mass: 800.3997+2  
 Delta Mass: 4.287 ppm  
 XCorr: 33.13

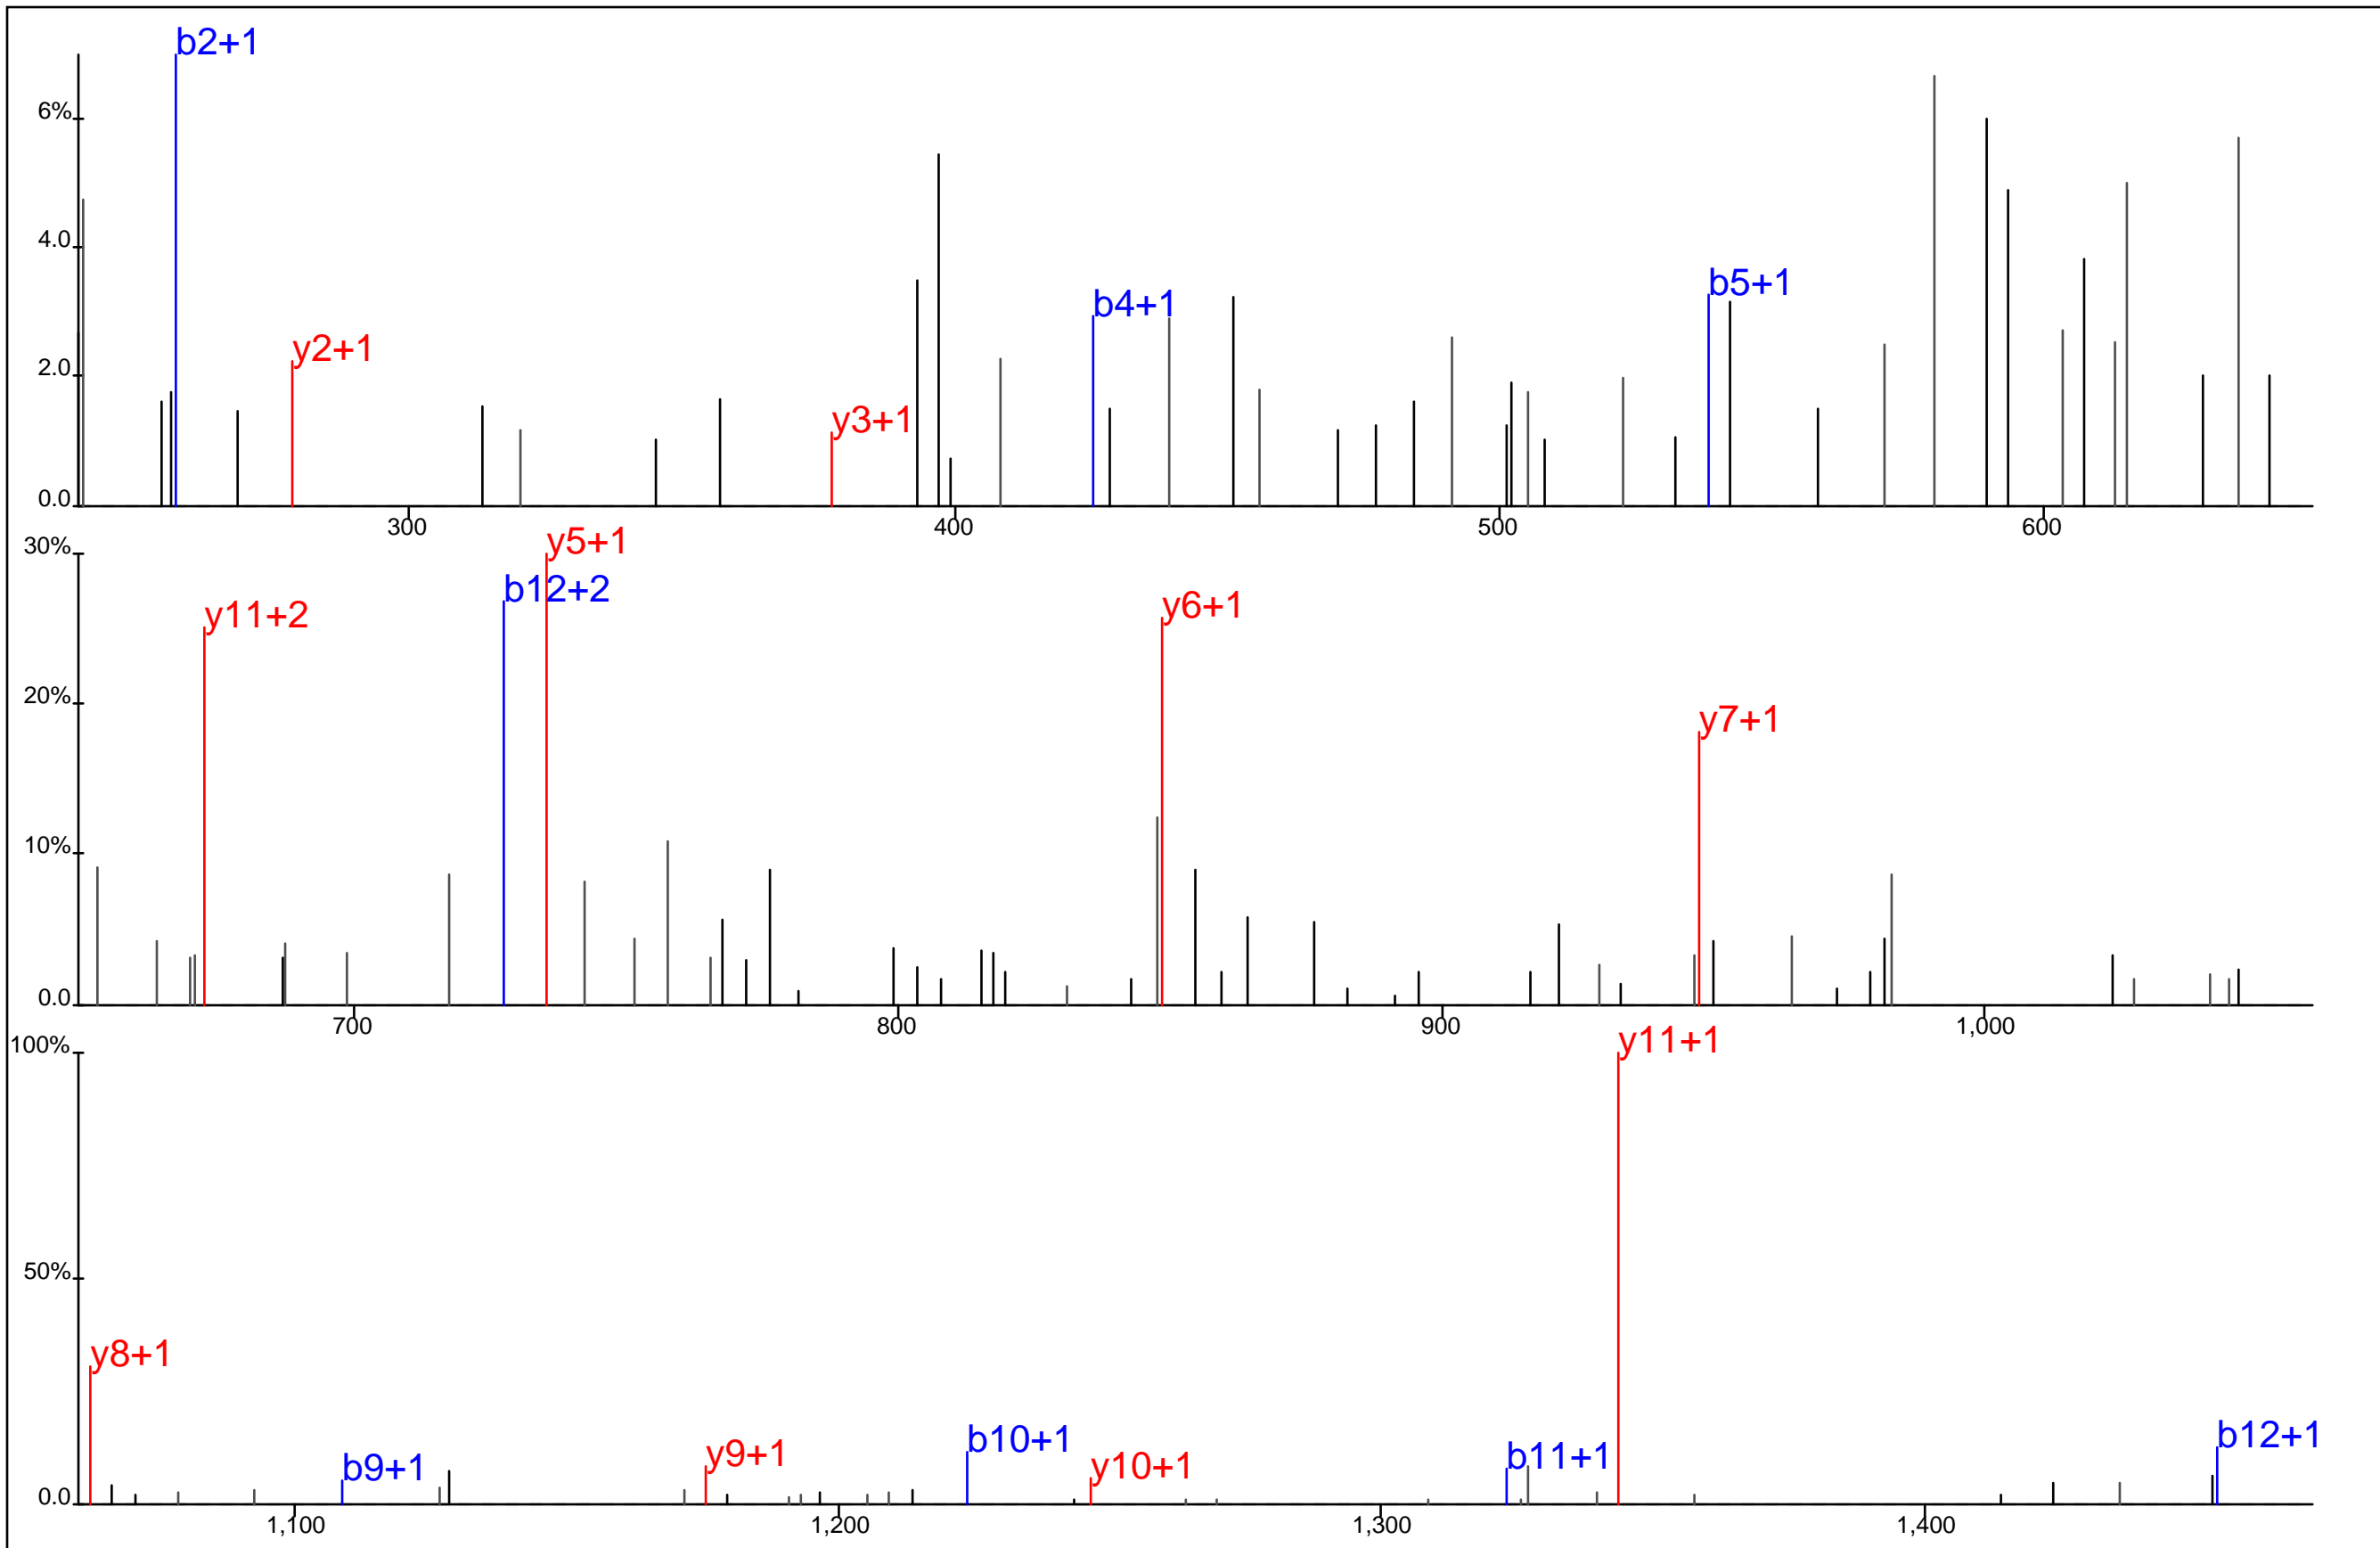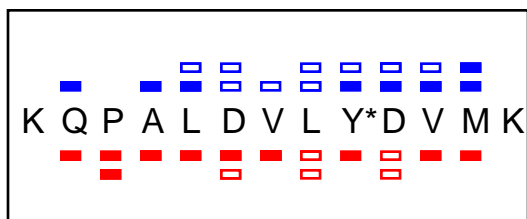

Protein Name: Eukaryotic translation initiation factor 3, subunit 10  
 gi Accession: 0  
 Precursor Mass: 800.3992+2  
 Delta Mass: 3.753 ppm  
 XCorr: 59.44

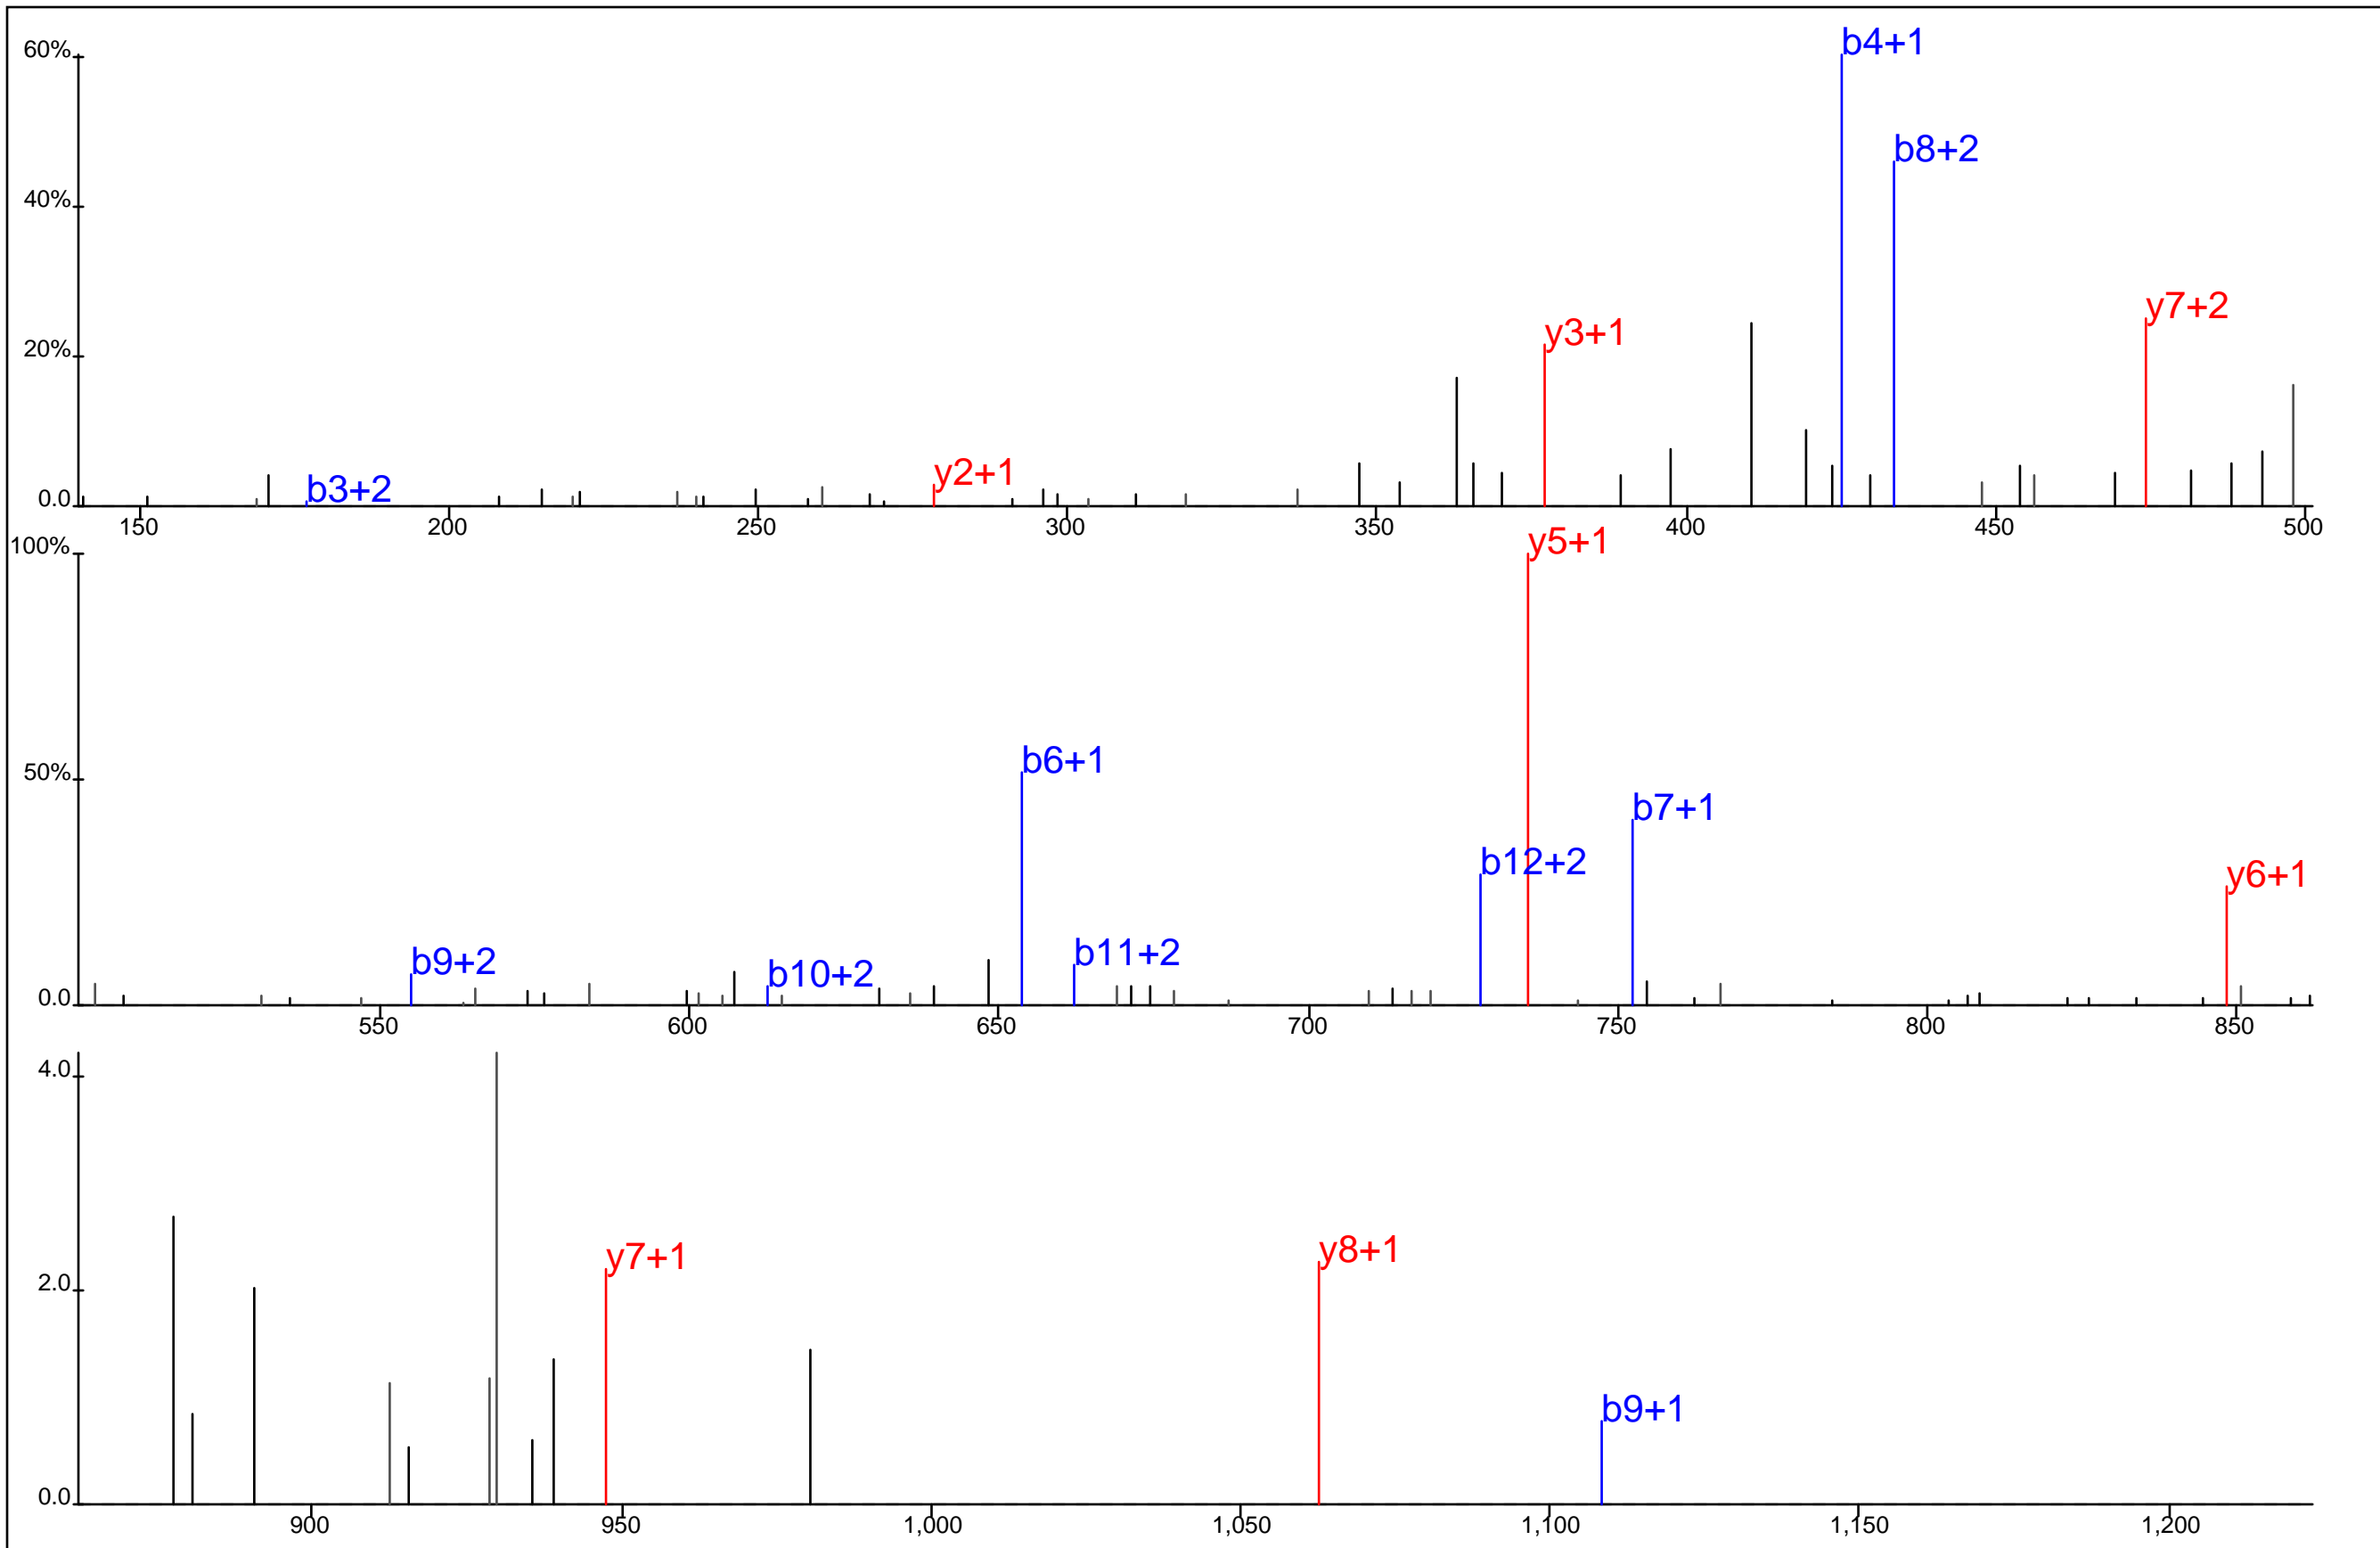

K Q P A L D V L Y\* D V M K

Protein Name: Eukaryotic translation initiation factor 3, subunit 10  
 gi Accession: 0  
 Precursor Mass: 533.9341+3  
 Delta Mass: 1.570 ppm  
 XCorr: 36.46

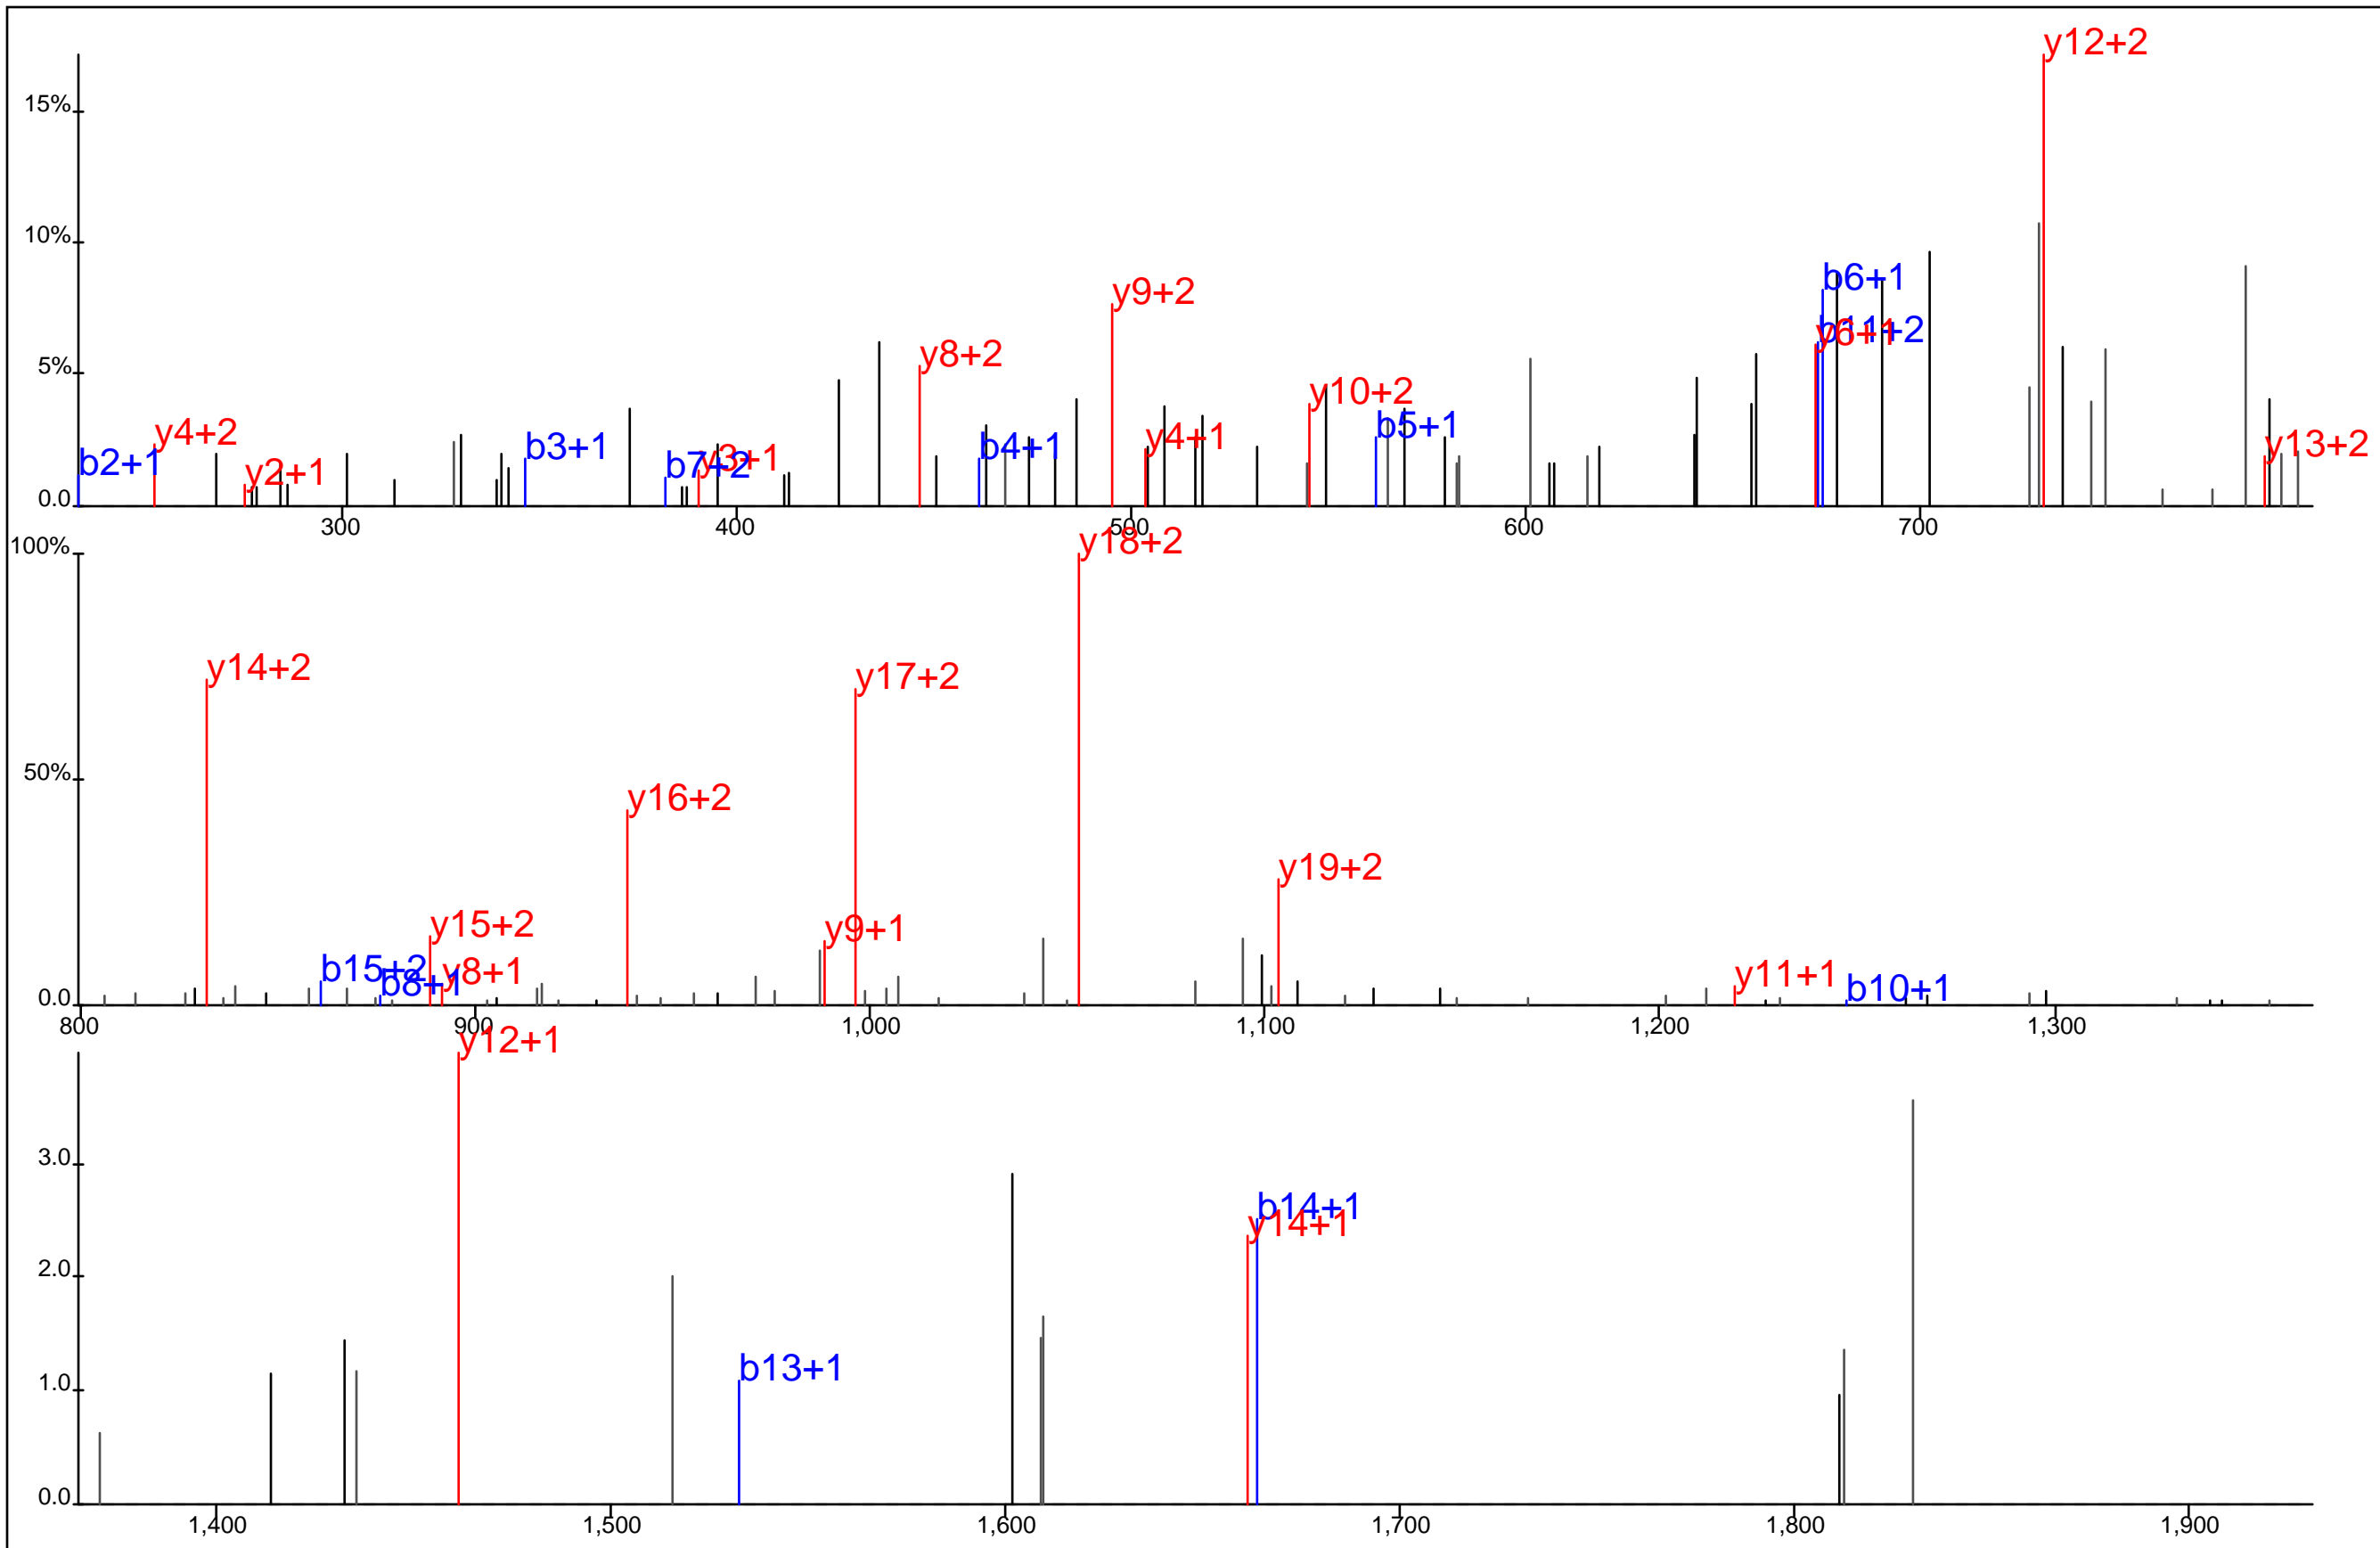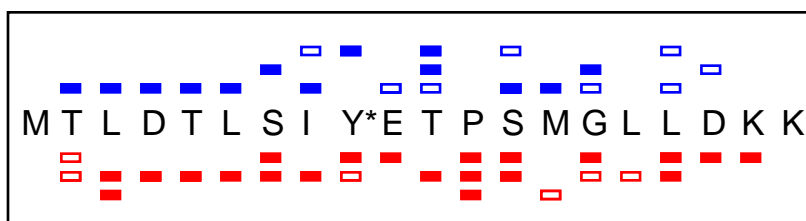

Protein Name: Eukaryotic translation initiation factor 3, subunit 9 eta, 116kDa  
 gi Accession: 0  
 Precursor Mass: 779.3760+3  
 Delta Mass: 1.328 ppm  
 XCorr: 48.13

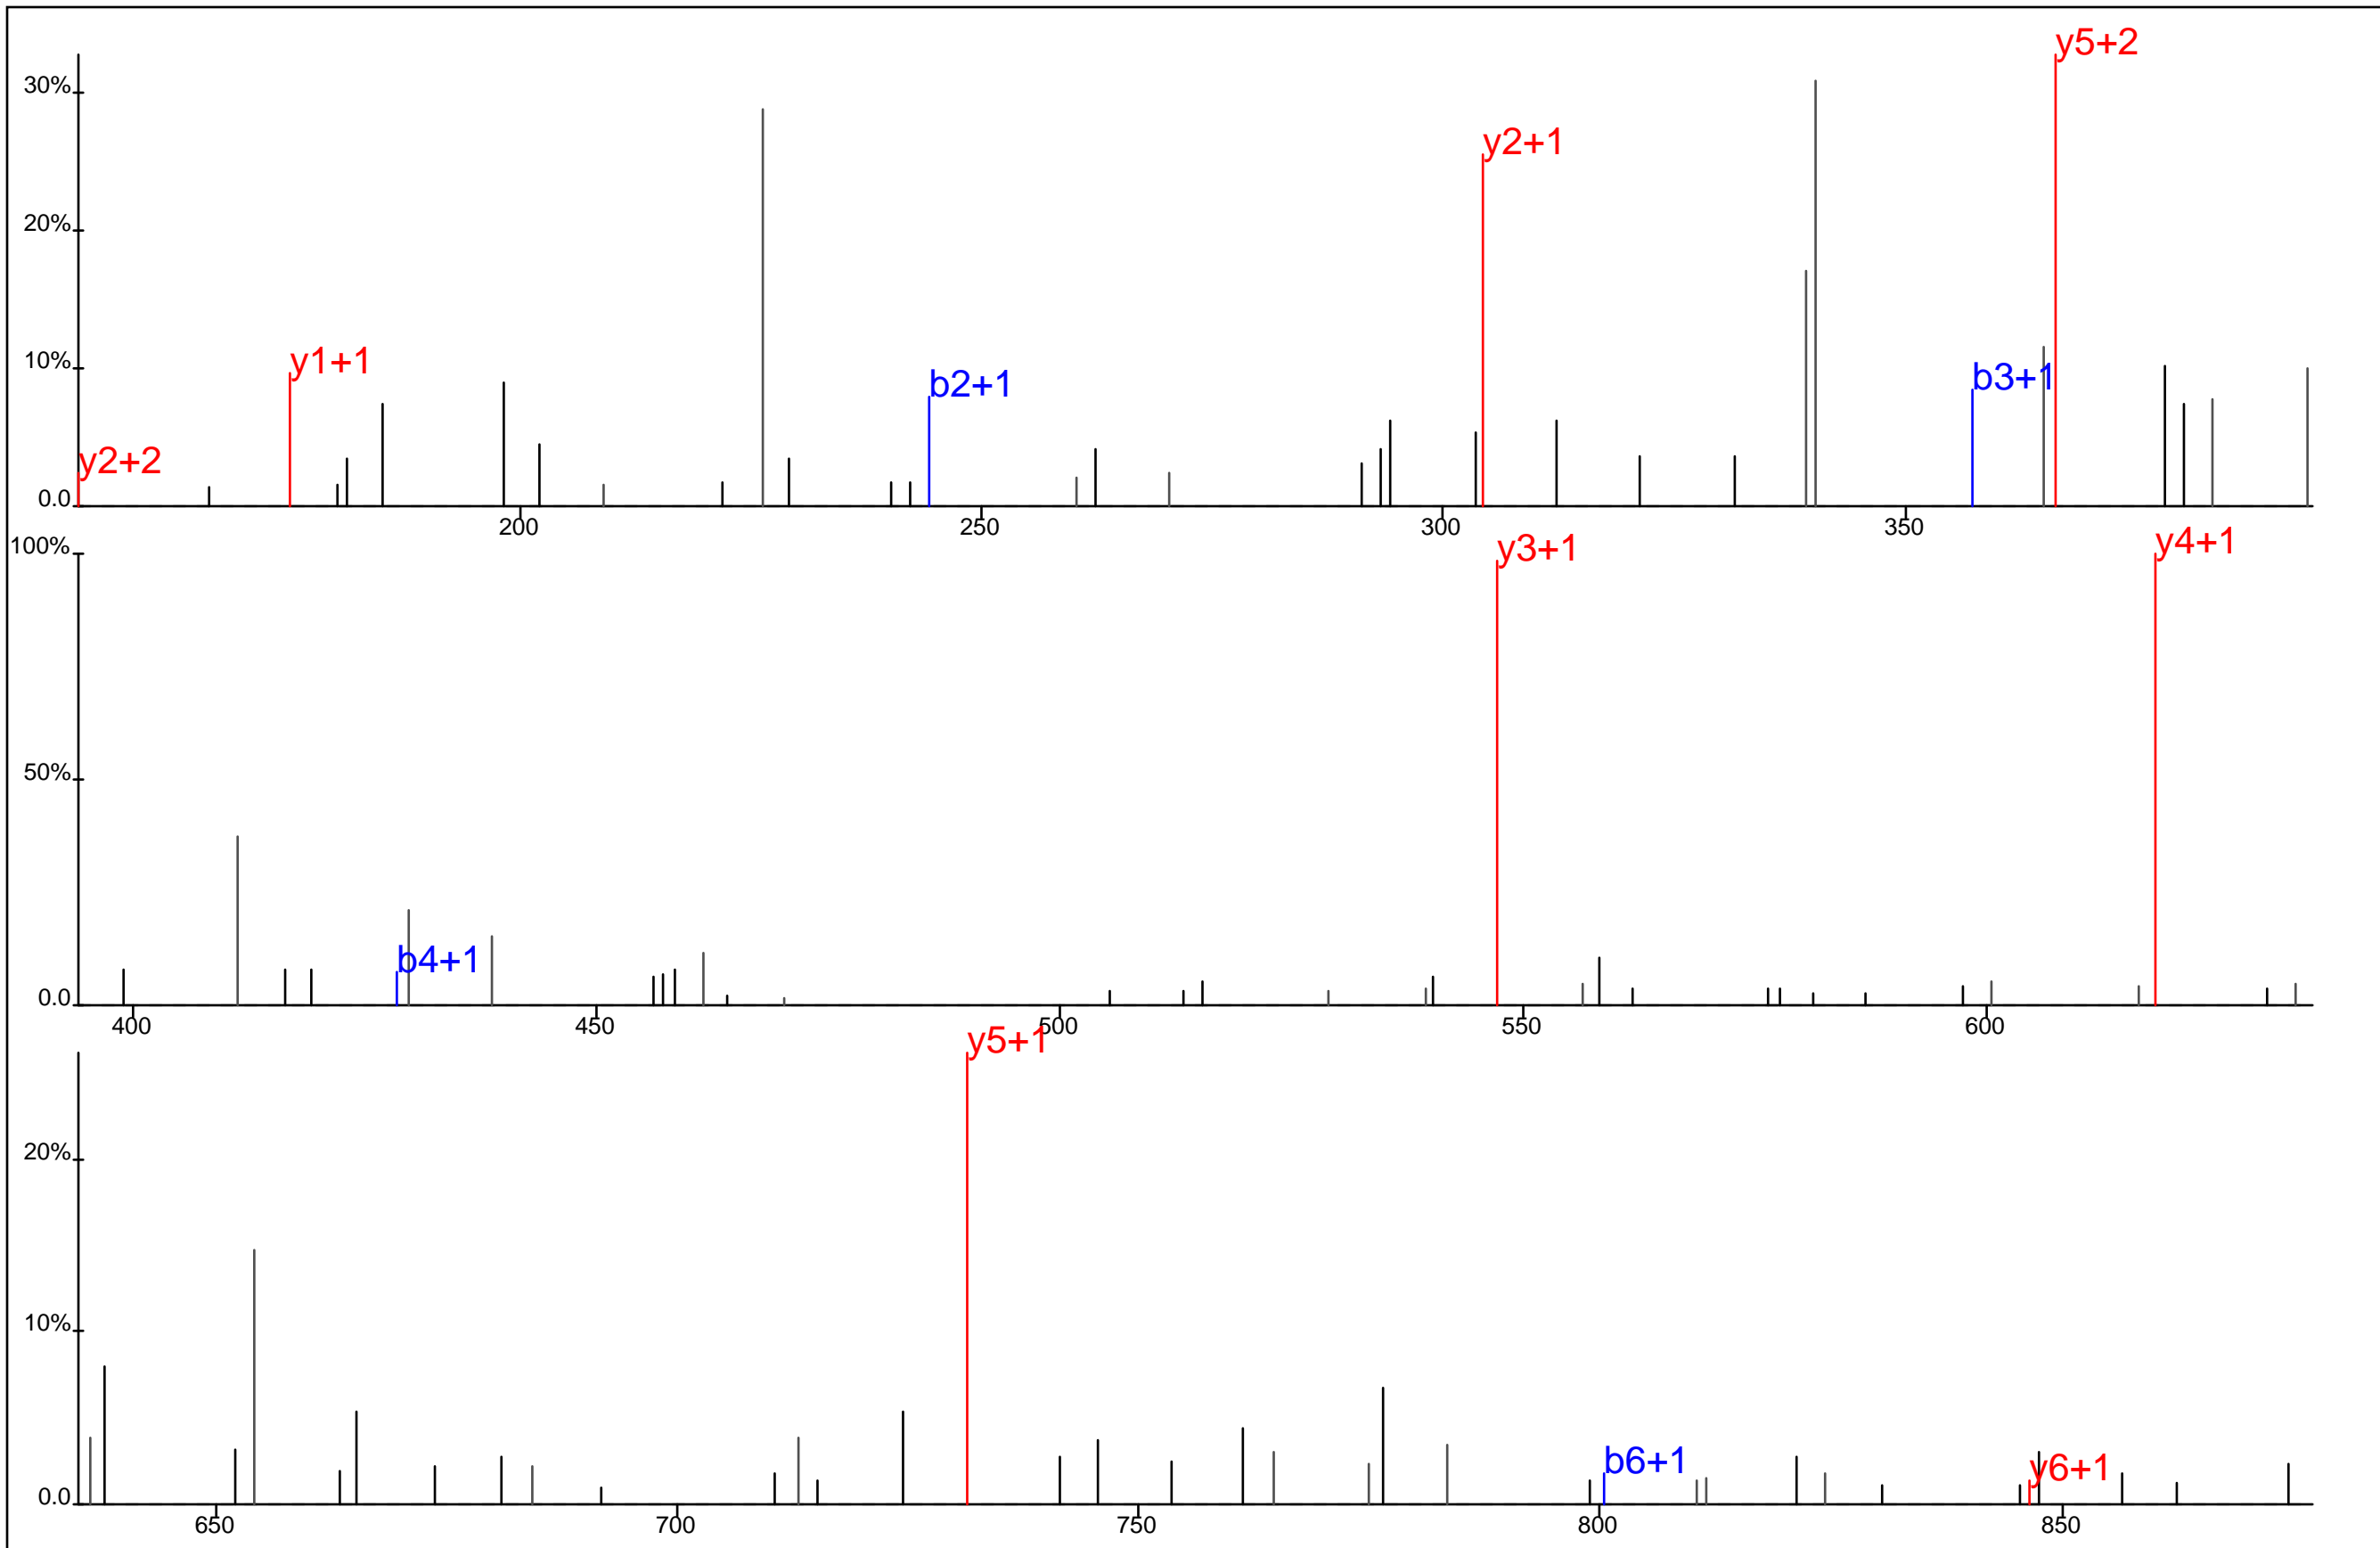

■ ■ ■ ■ ■  
 Q D L A Y\* E R  
 ■ ■ ■ ■ ■  
 ■ ■ ■ ■ ■

Protein Name: Eukaryotic translation initiation factor 3, subunit 6 interacting protein  
 gi Accession: 0  
 Precursor Mass: 487.7026+2  
 Delta Mass: 0.004 ppm  
 XCorr: 23.47

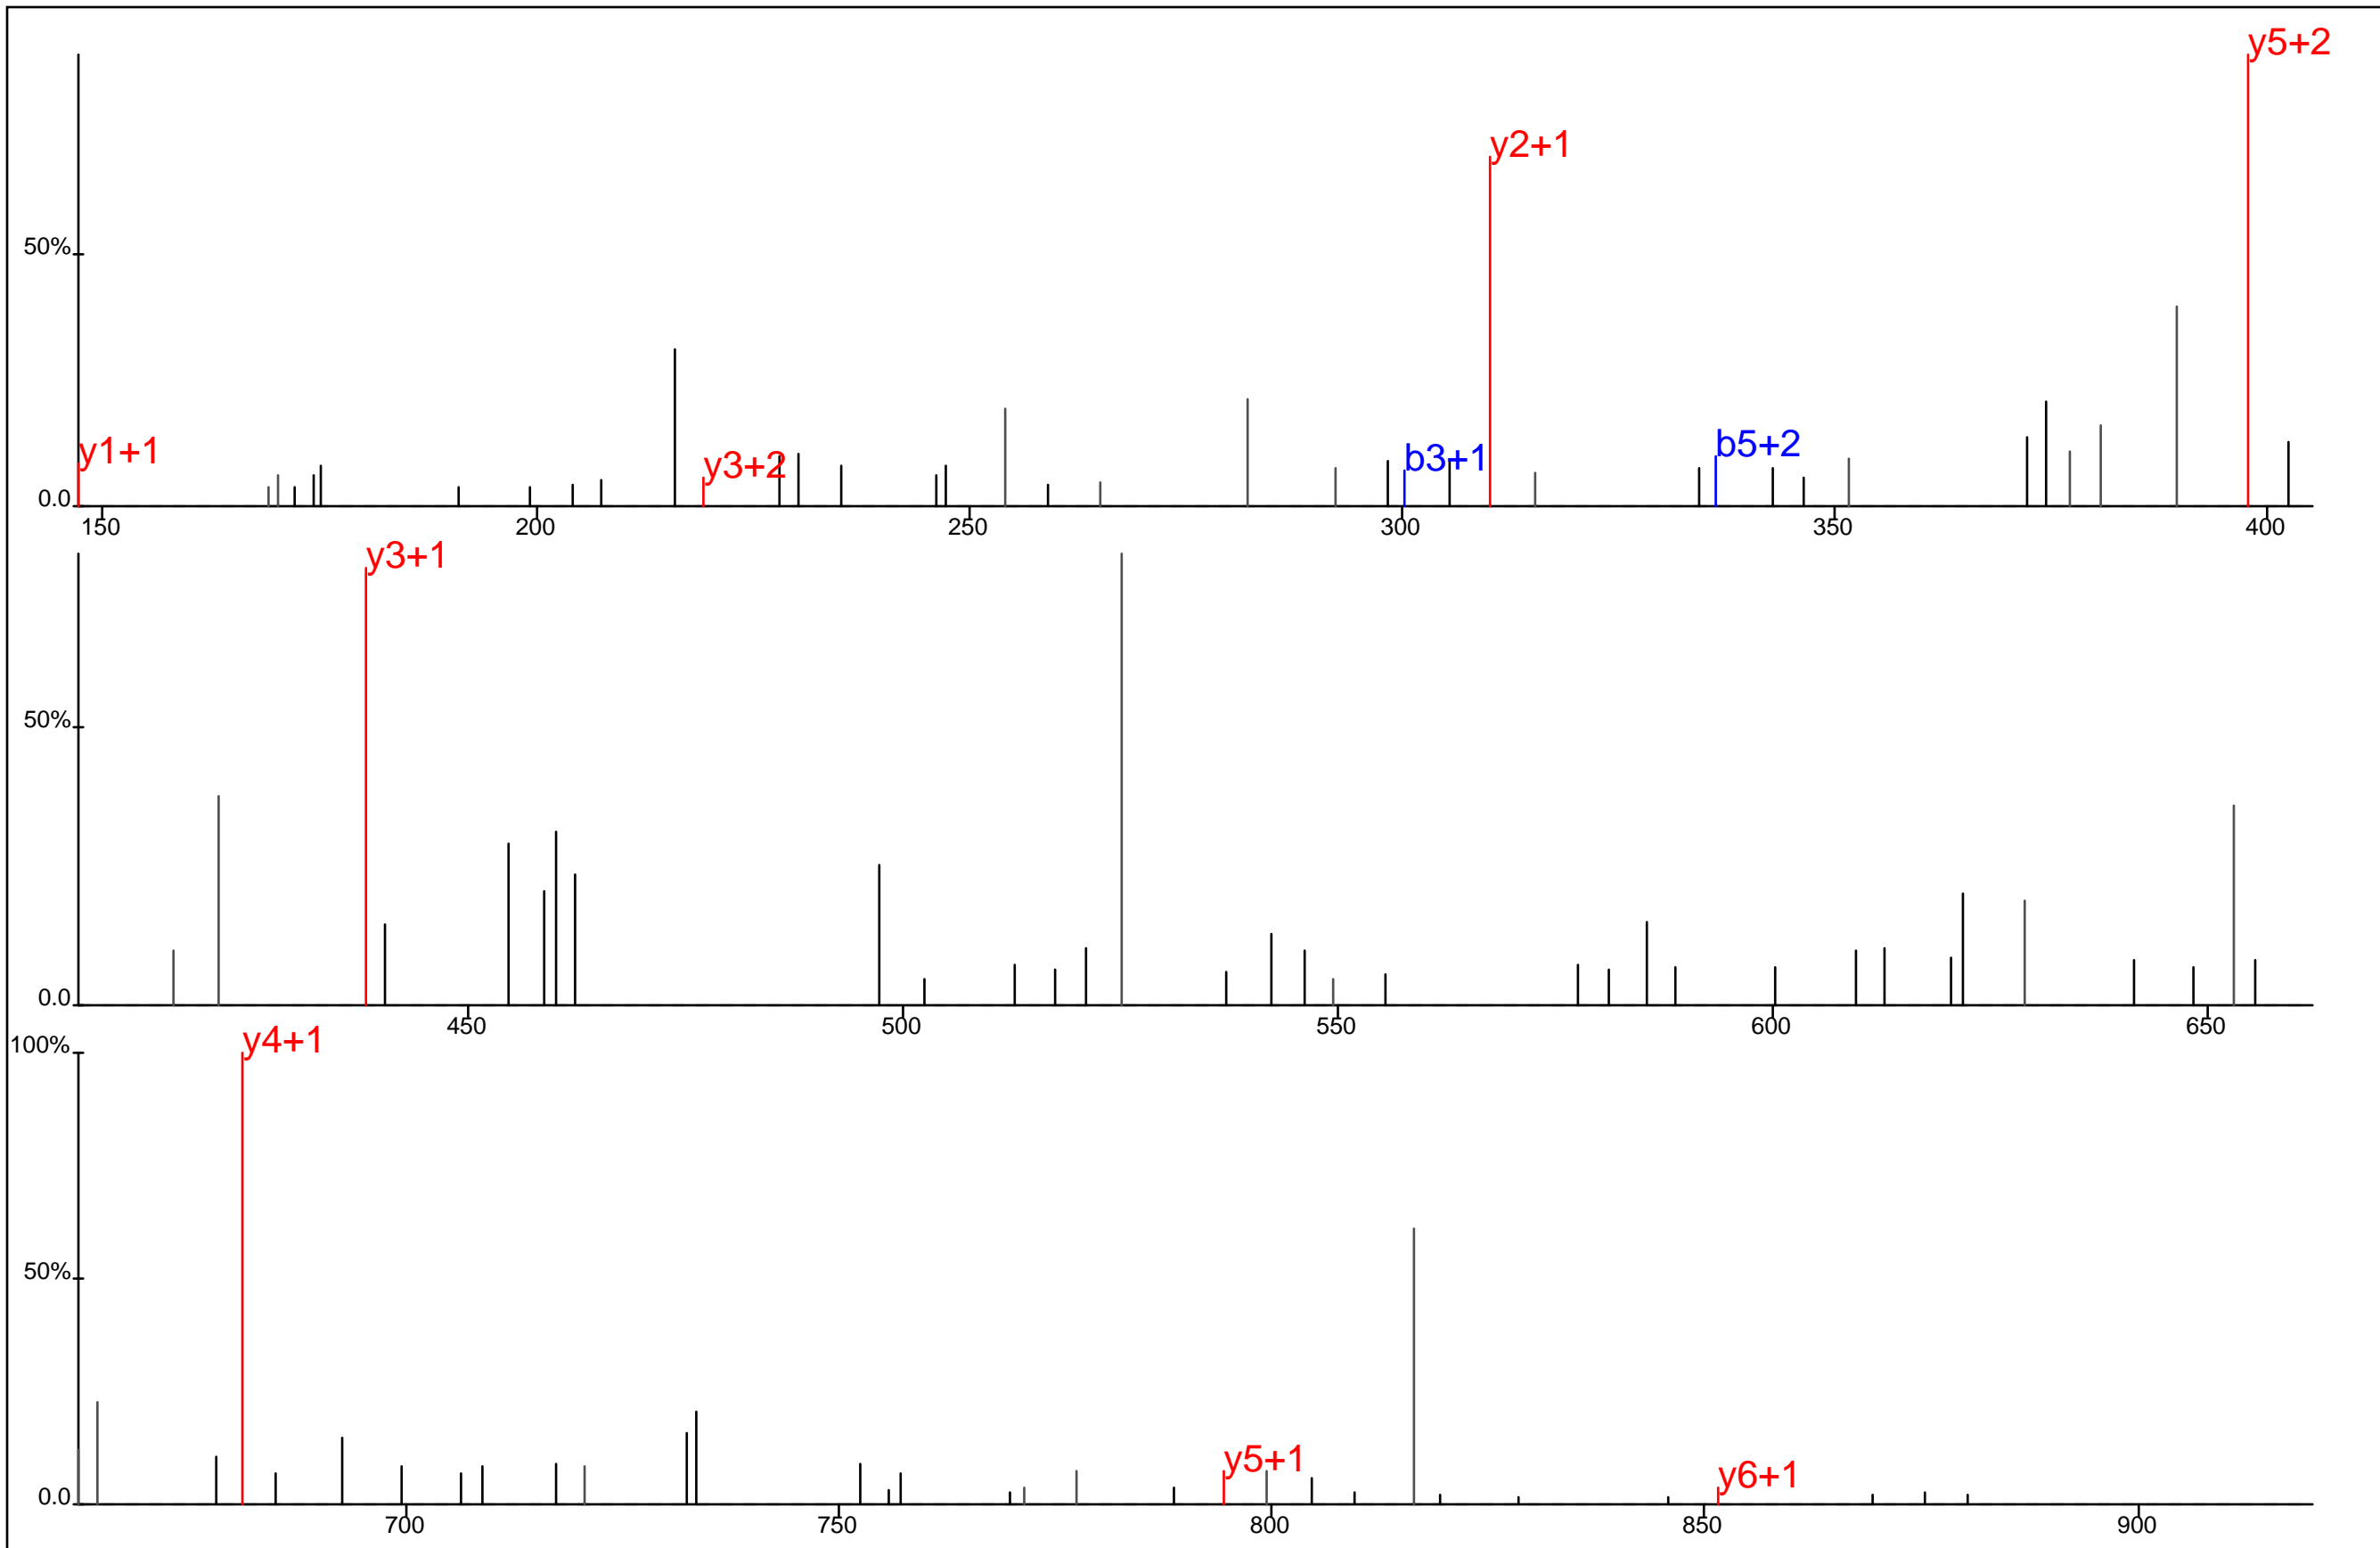

■ ■ ■ ■  
 E G L Y\*Q Y K  
■ ■ ■ ■ ■

Protein Name: Eukaryotic translation initiation factor 3, subunit 10  
 gi Accession: 0  
 Precursor Mass: 490.7090+2  
 Delta Mass: 1.805 ppm  
 XCorr: 24.13

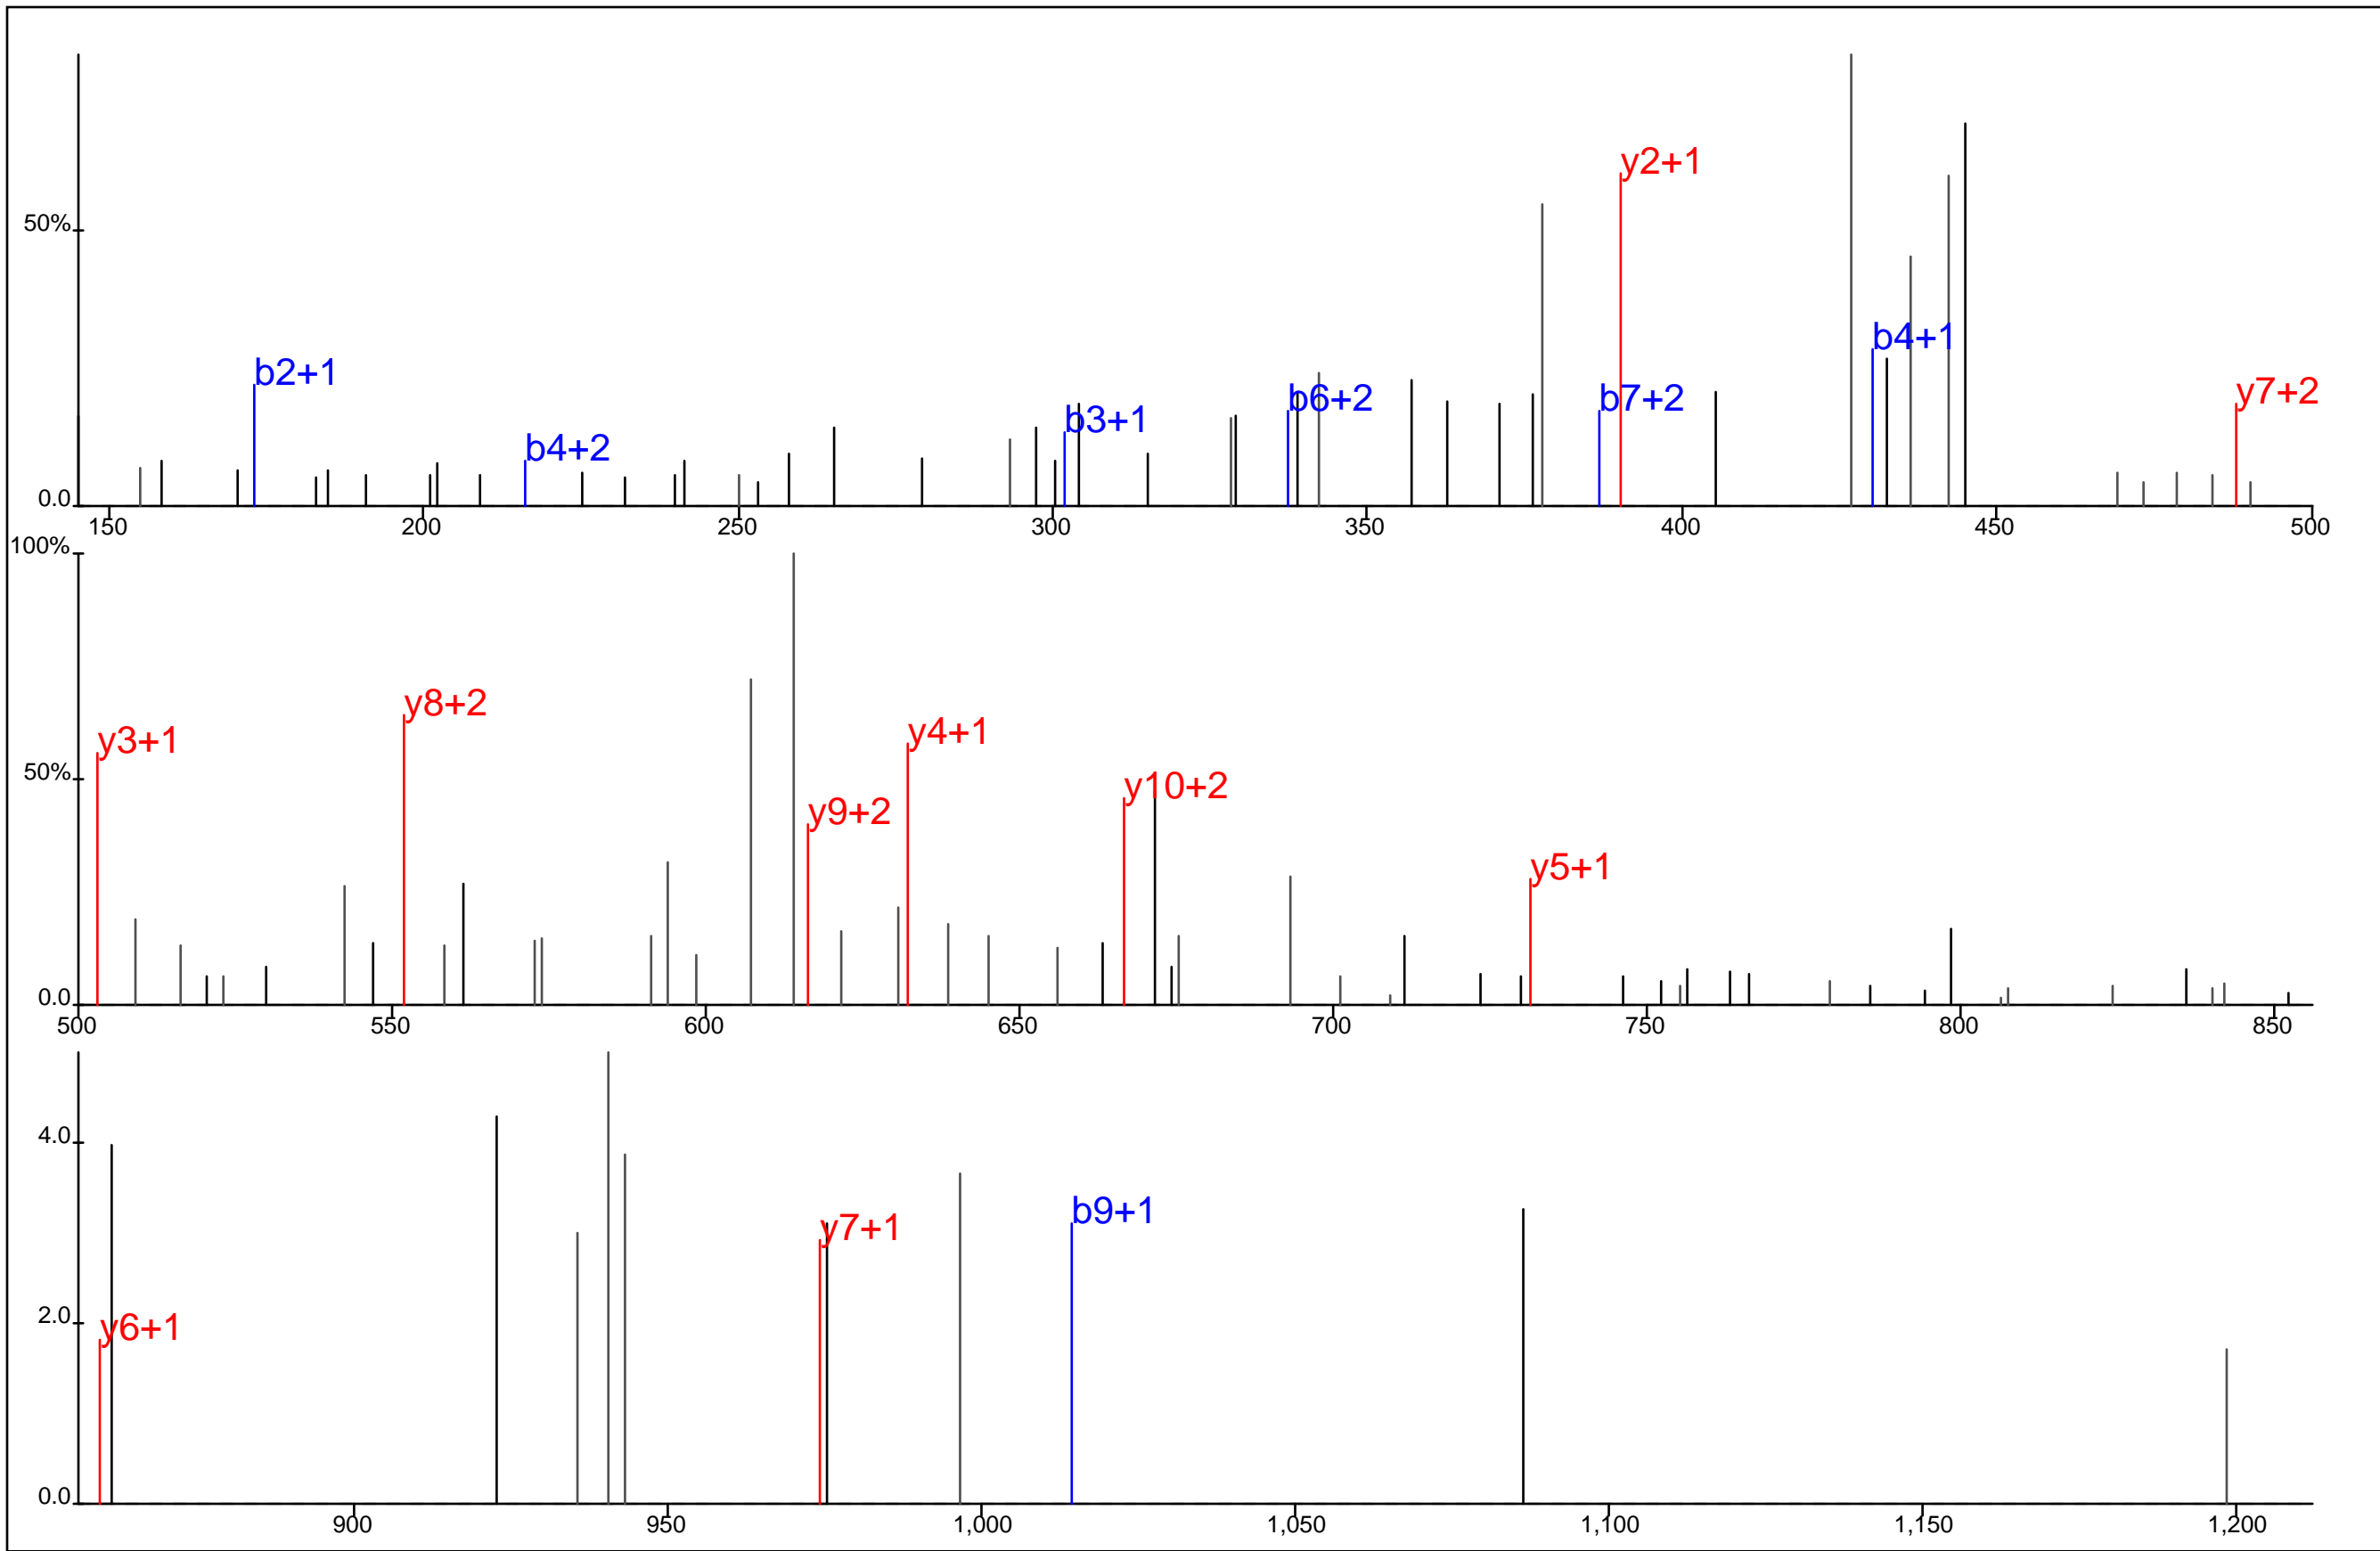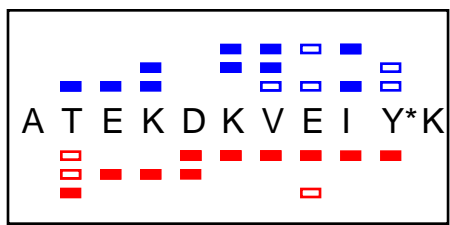

Protein Name: Exosomal core protein CSL4  
 gi Accession: 0  
 Precursor Mass: 468.5659+3  
 Delta Mass: 1.040 ppm  
 XCorr: 23.14



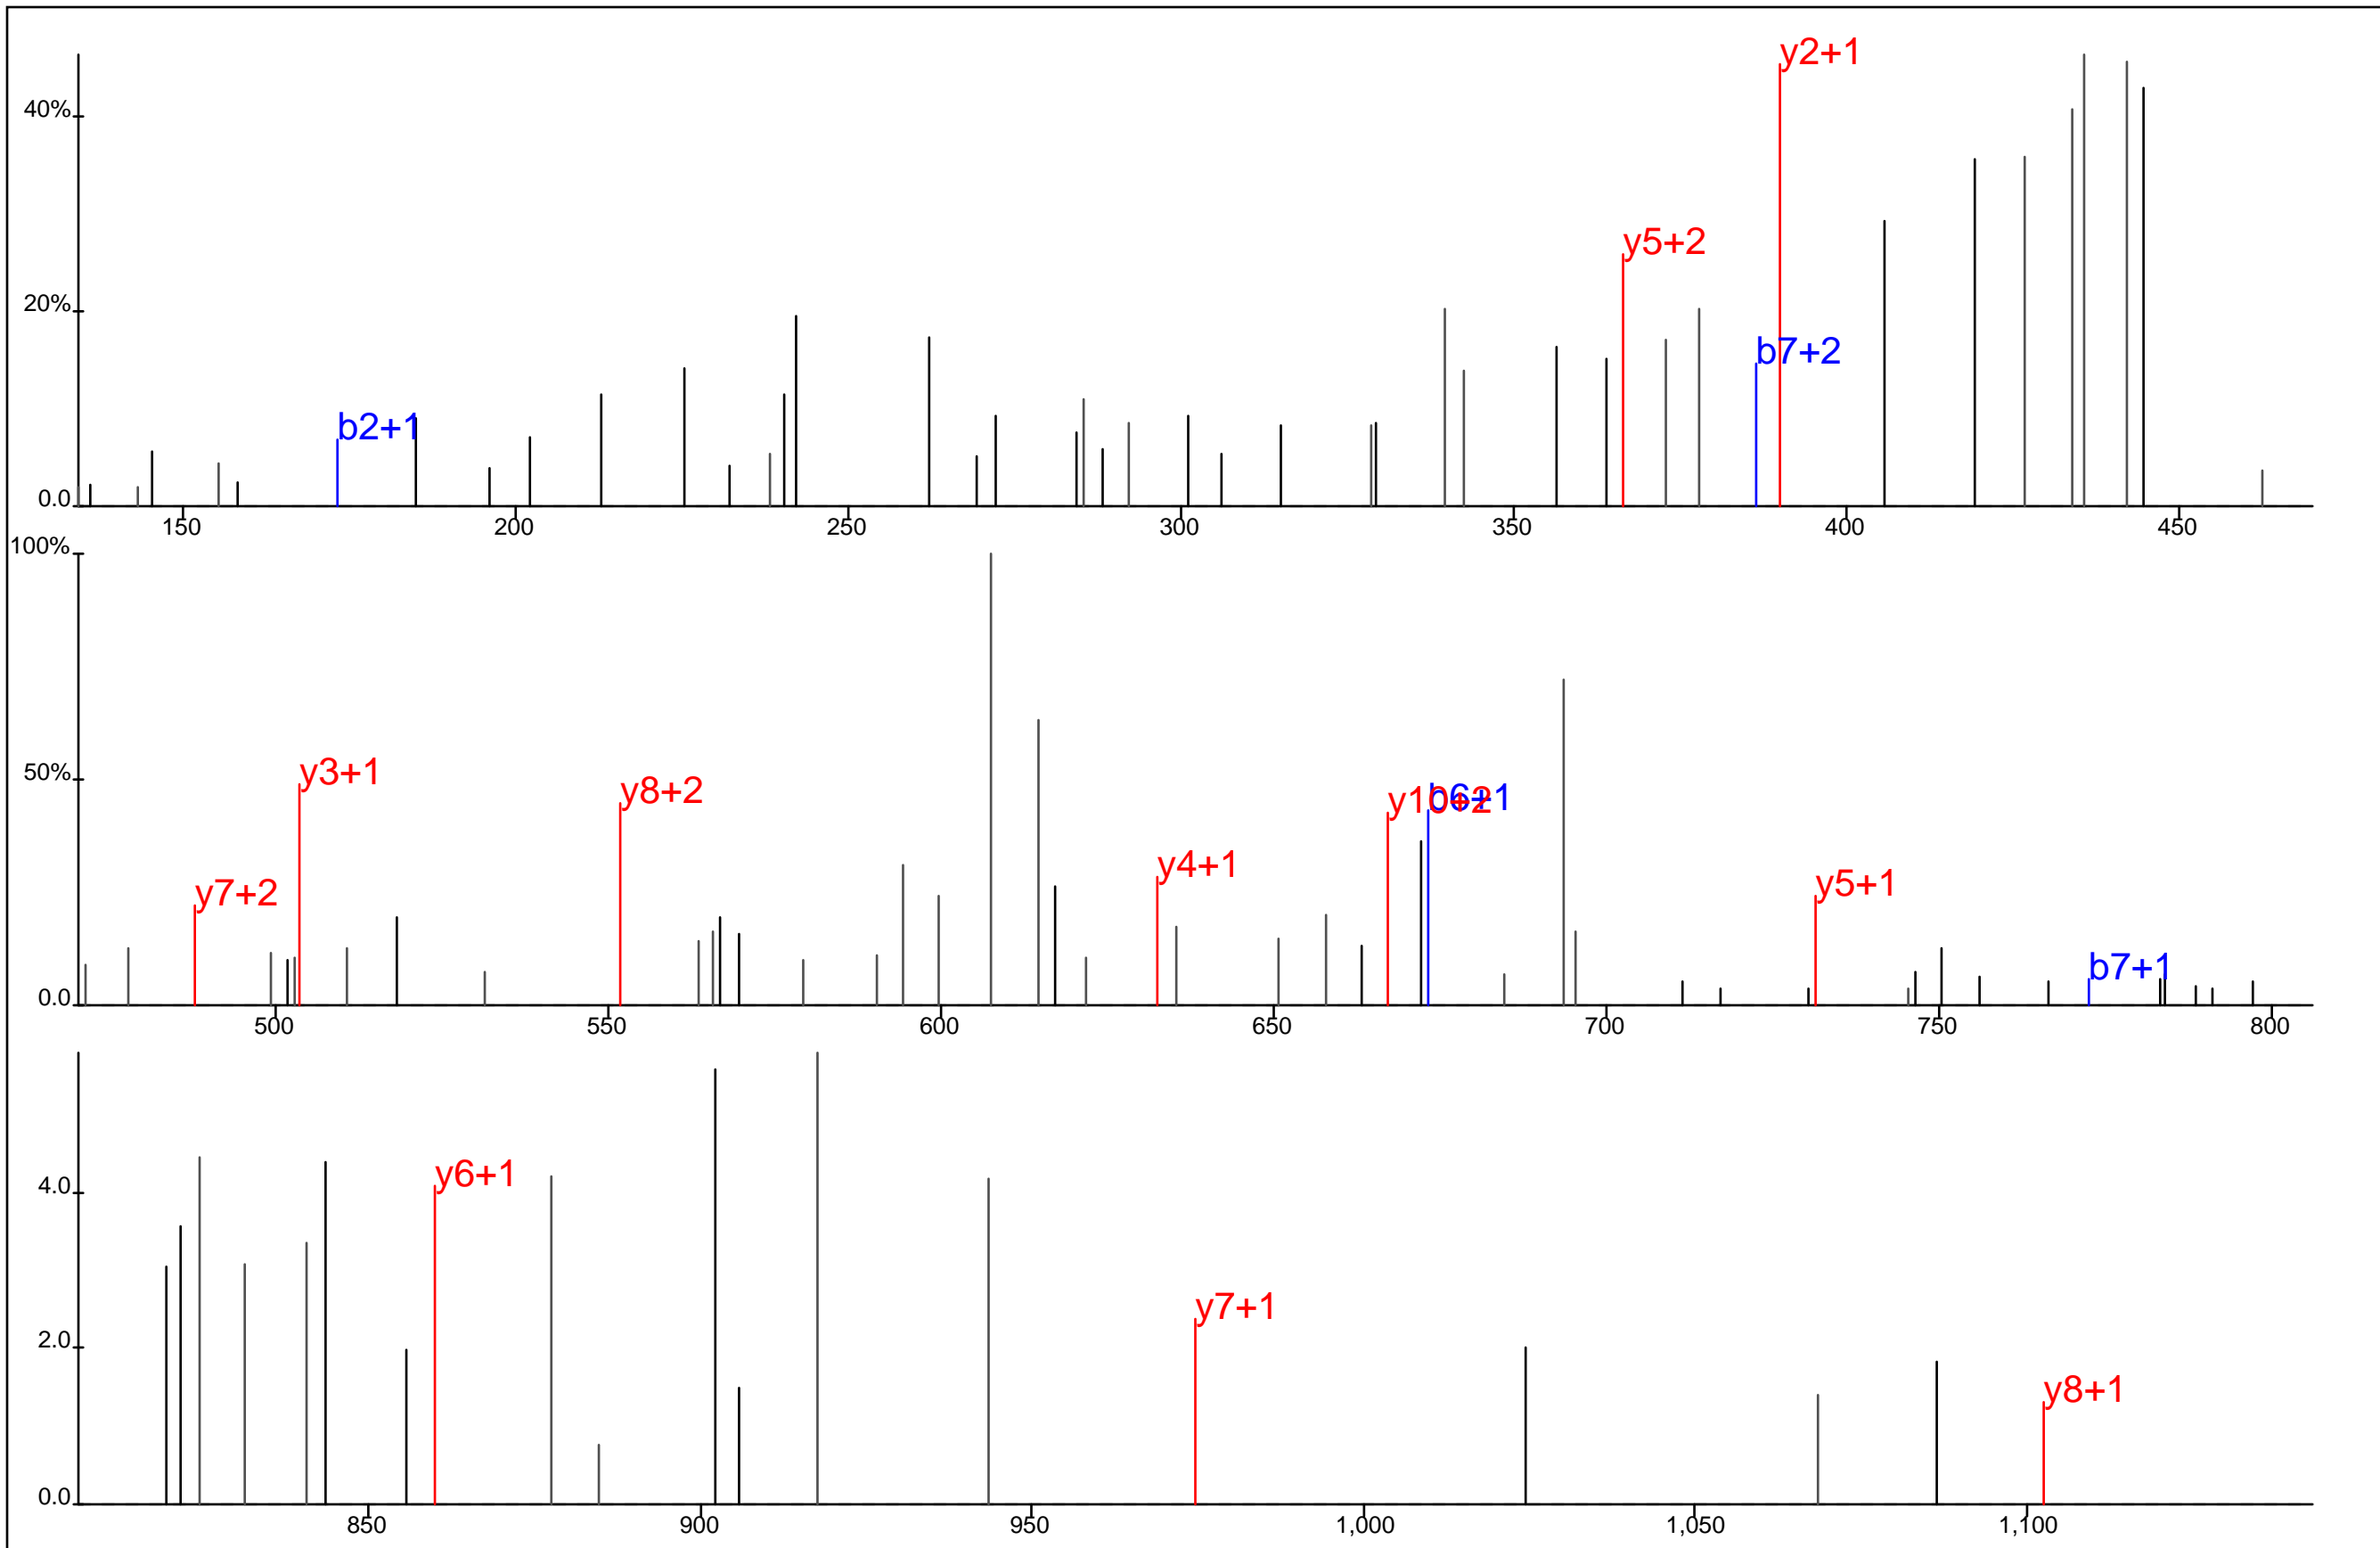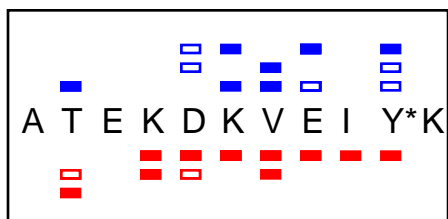

Protein Name: Exosomal core protein CSL4  
 gi Accession: 0  
 Precursor Mass: 468.5651+3  
 Delta Mass: 0.787 ppm  
 XCorr: 25.25

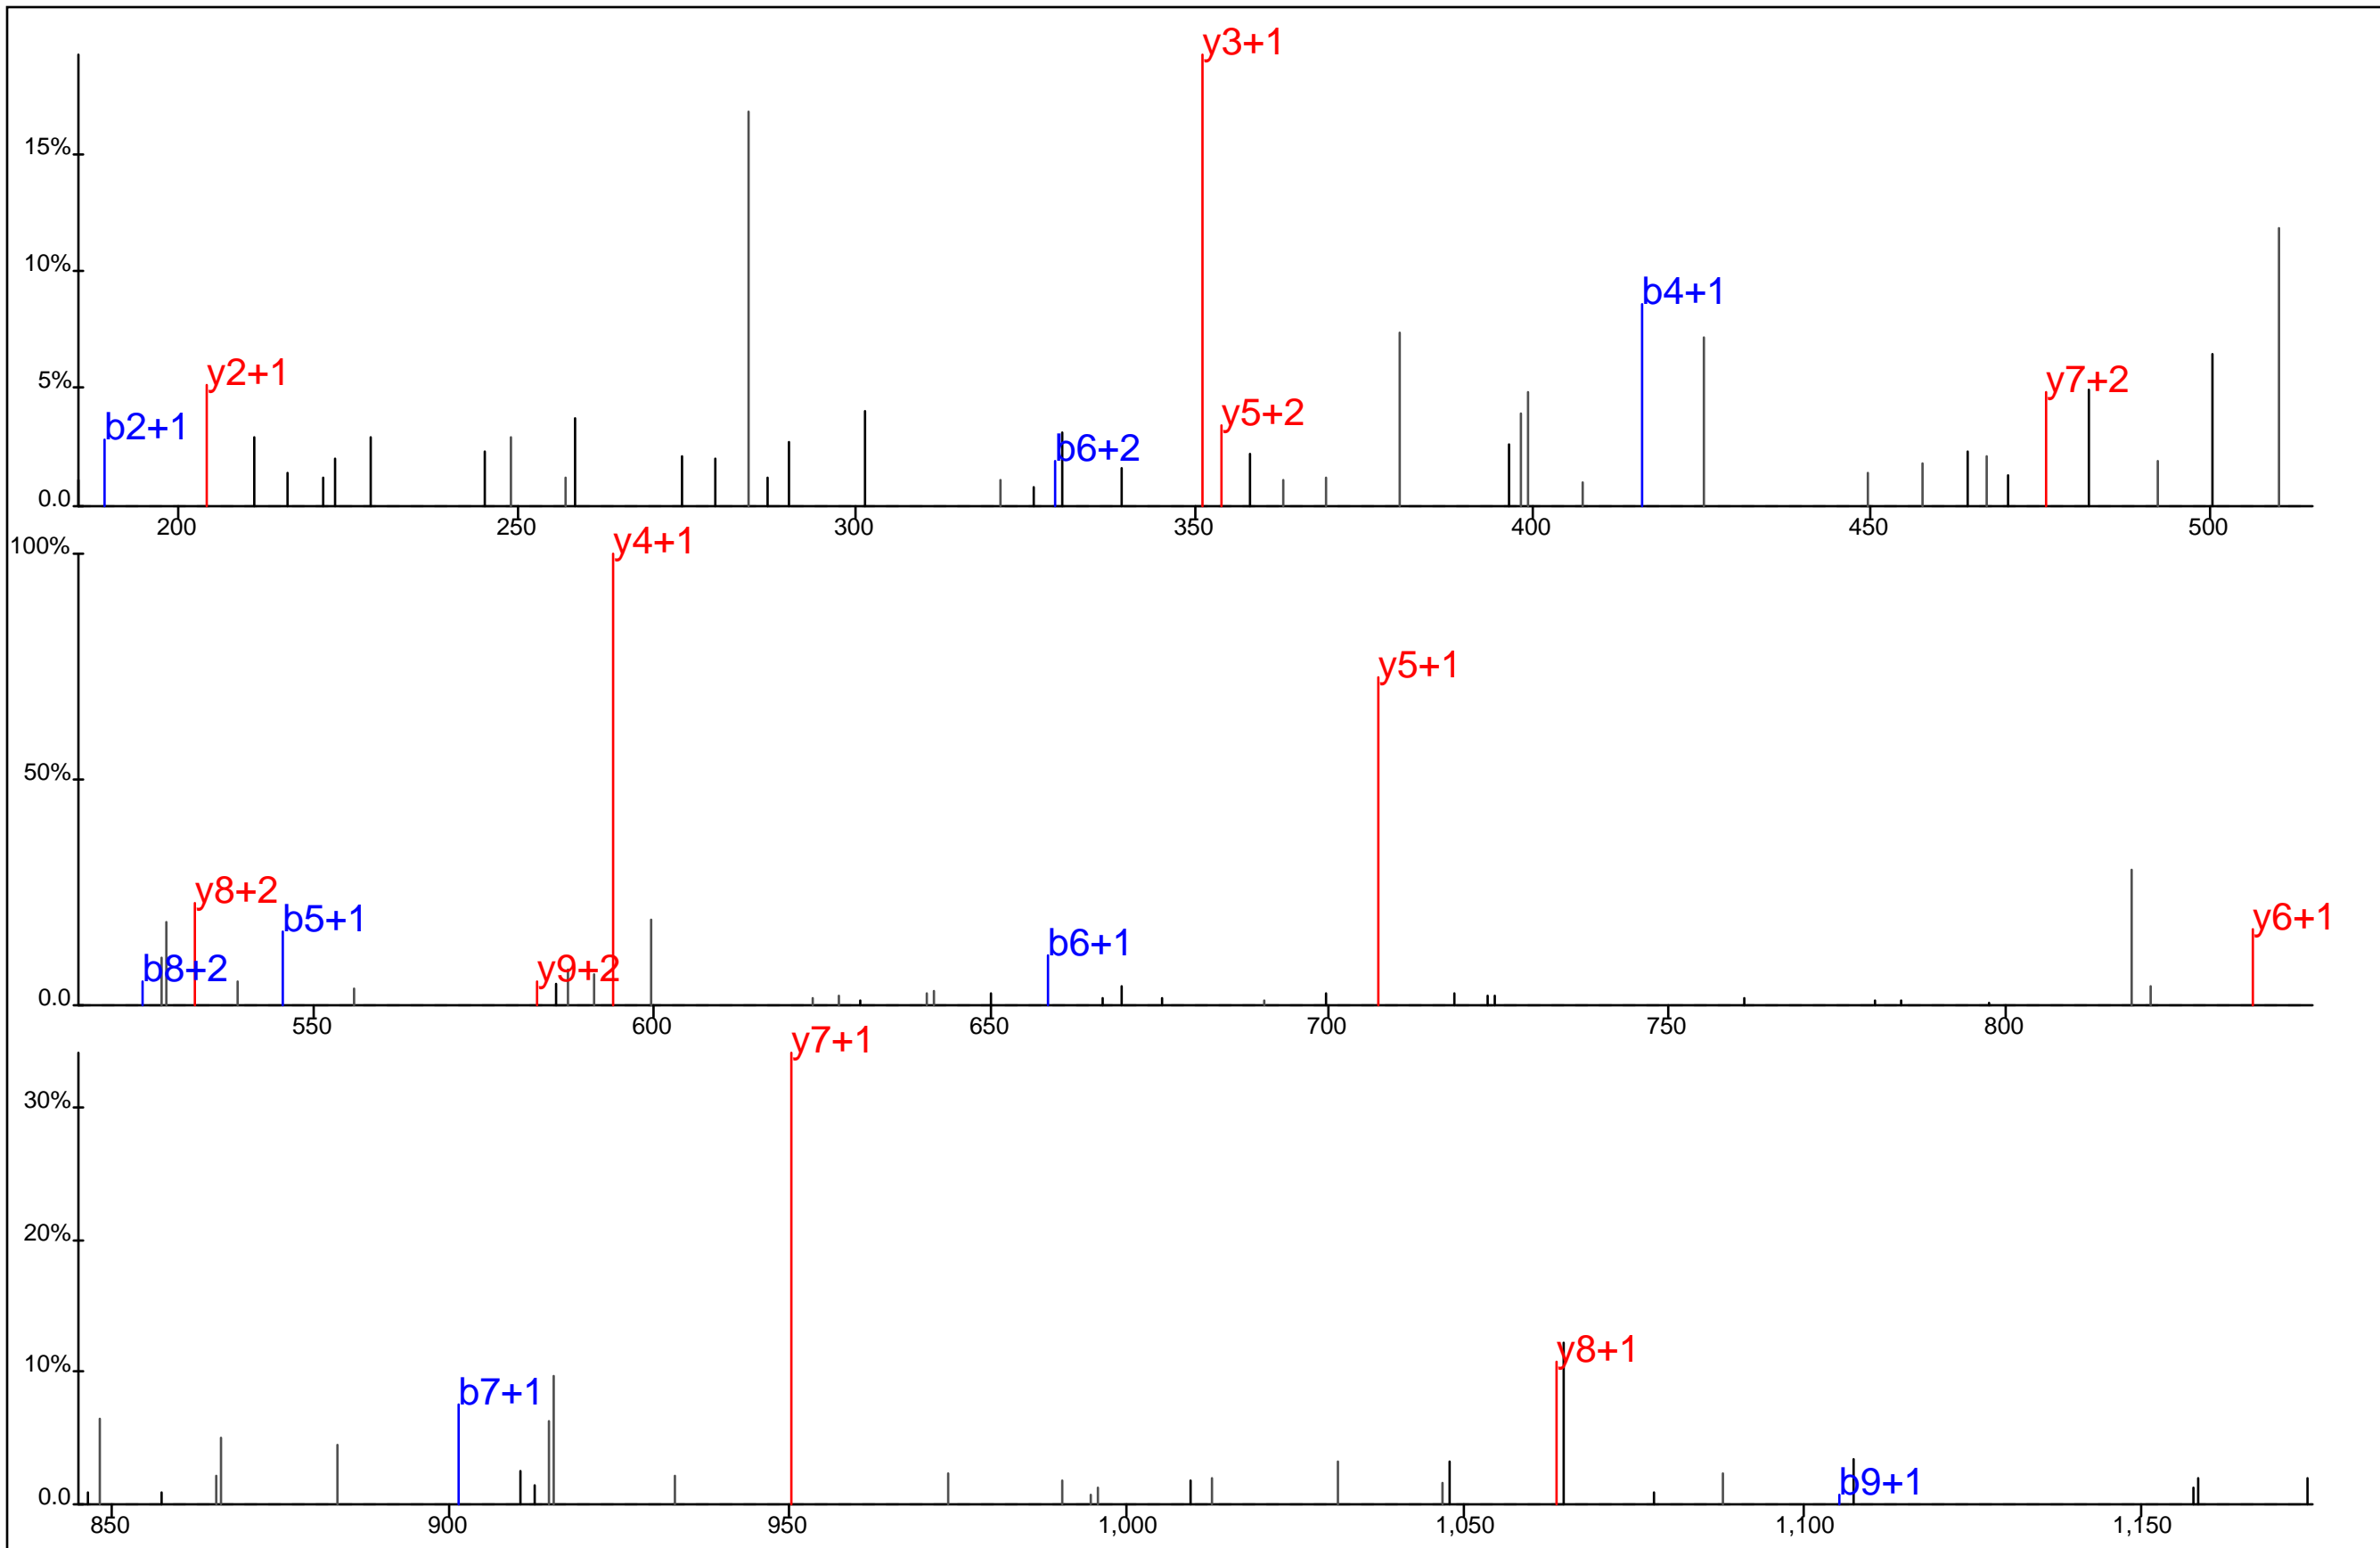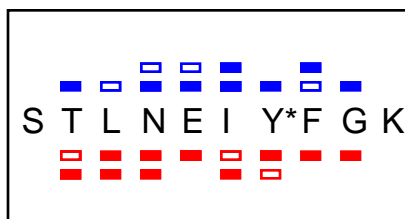

Protein Name: F actin capping protein beta subunit  
 gi Accession: 0  
 Precursor Mass: 626.2865+2  
 Delta Mass: 0.040 ppm  
 XCorr: 41.57

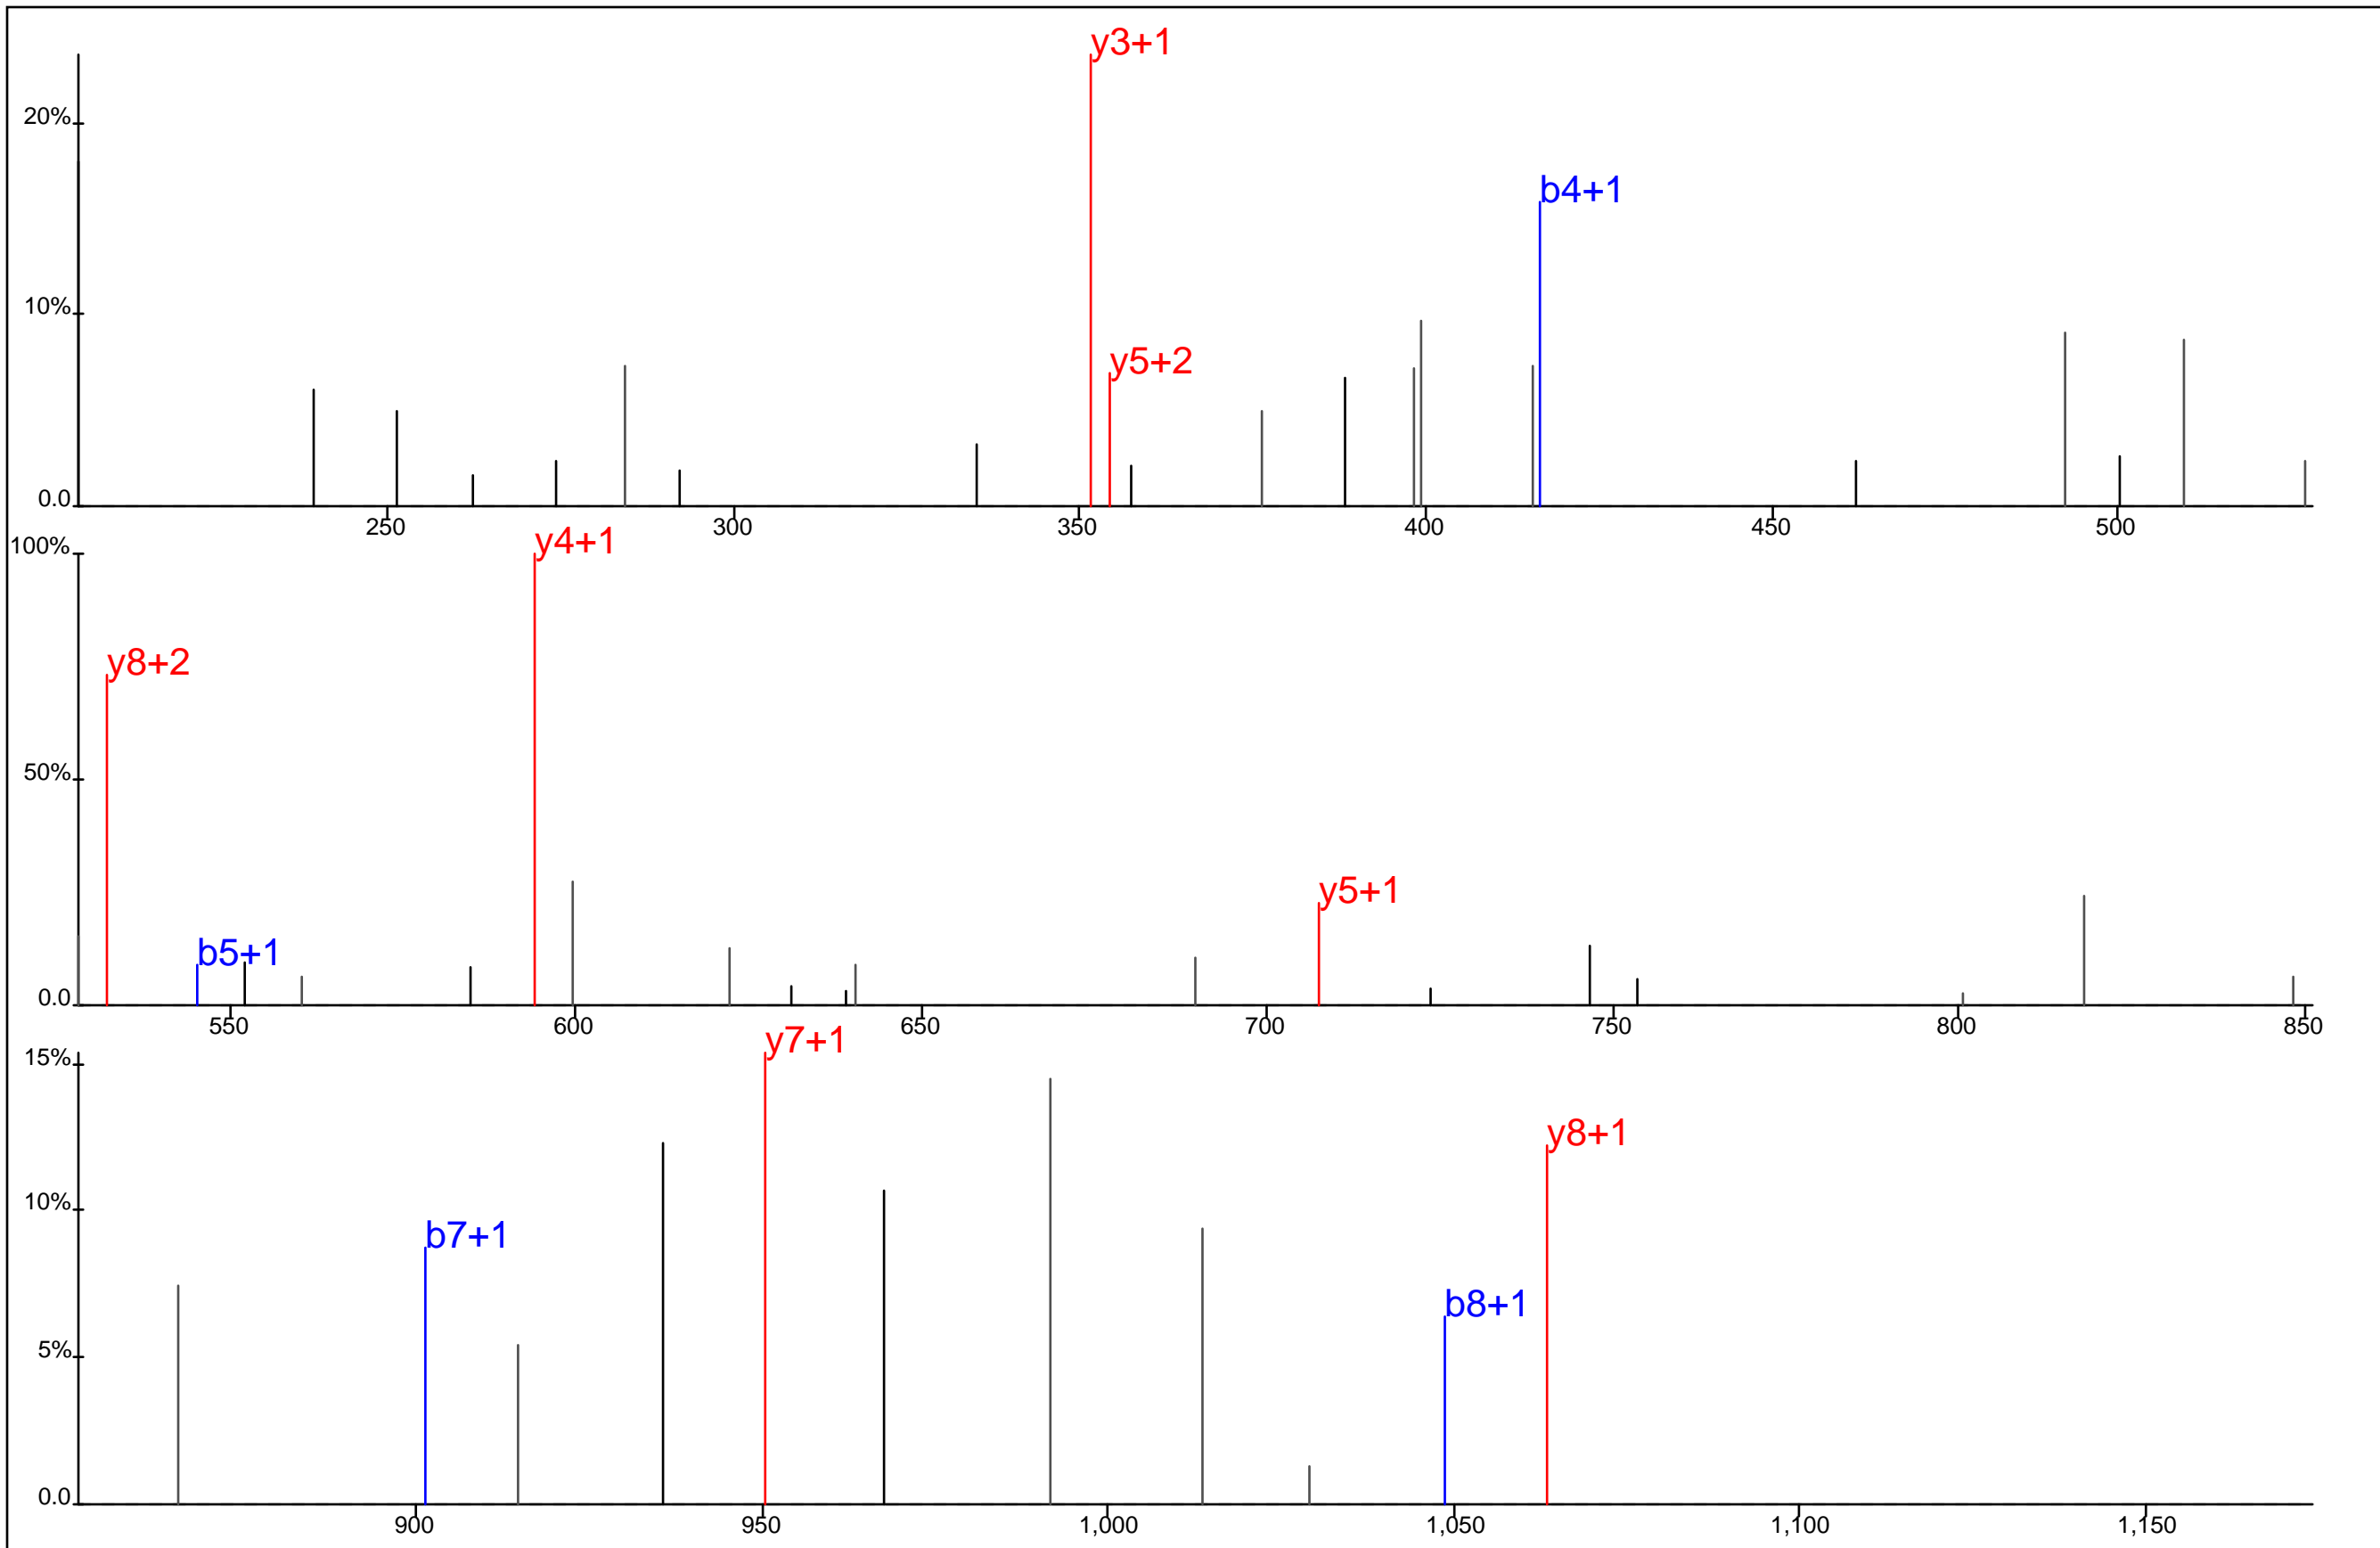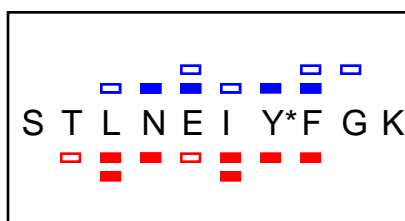

Protein Name: F actin capping protein beta subunit  
 gi Accession: 0  
 Precursor Mass: 626.2854+2  
 Delta Mass: 1.716 ppm  
 XCorr: 31.3

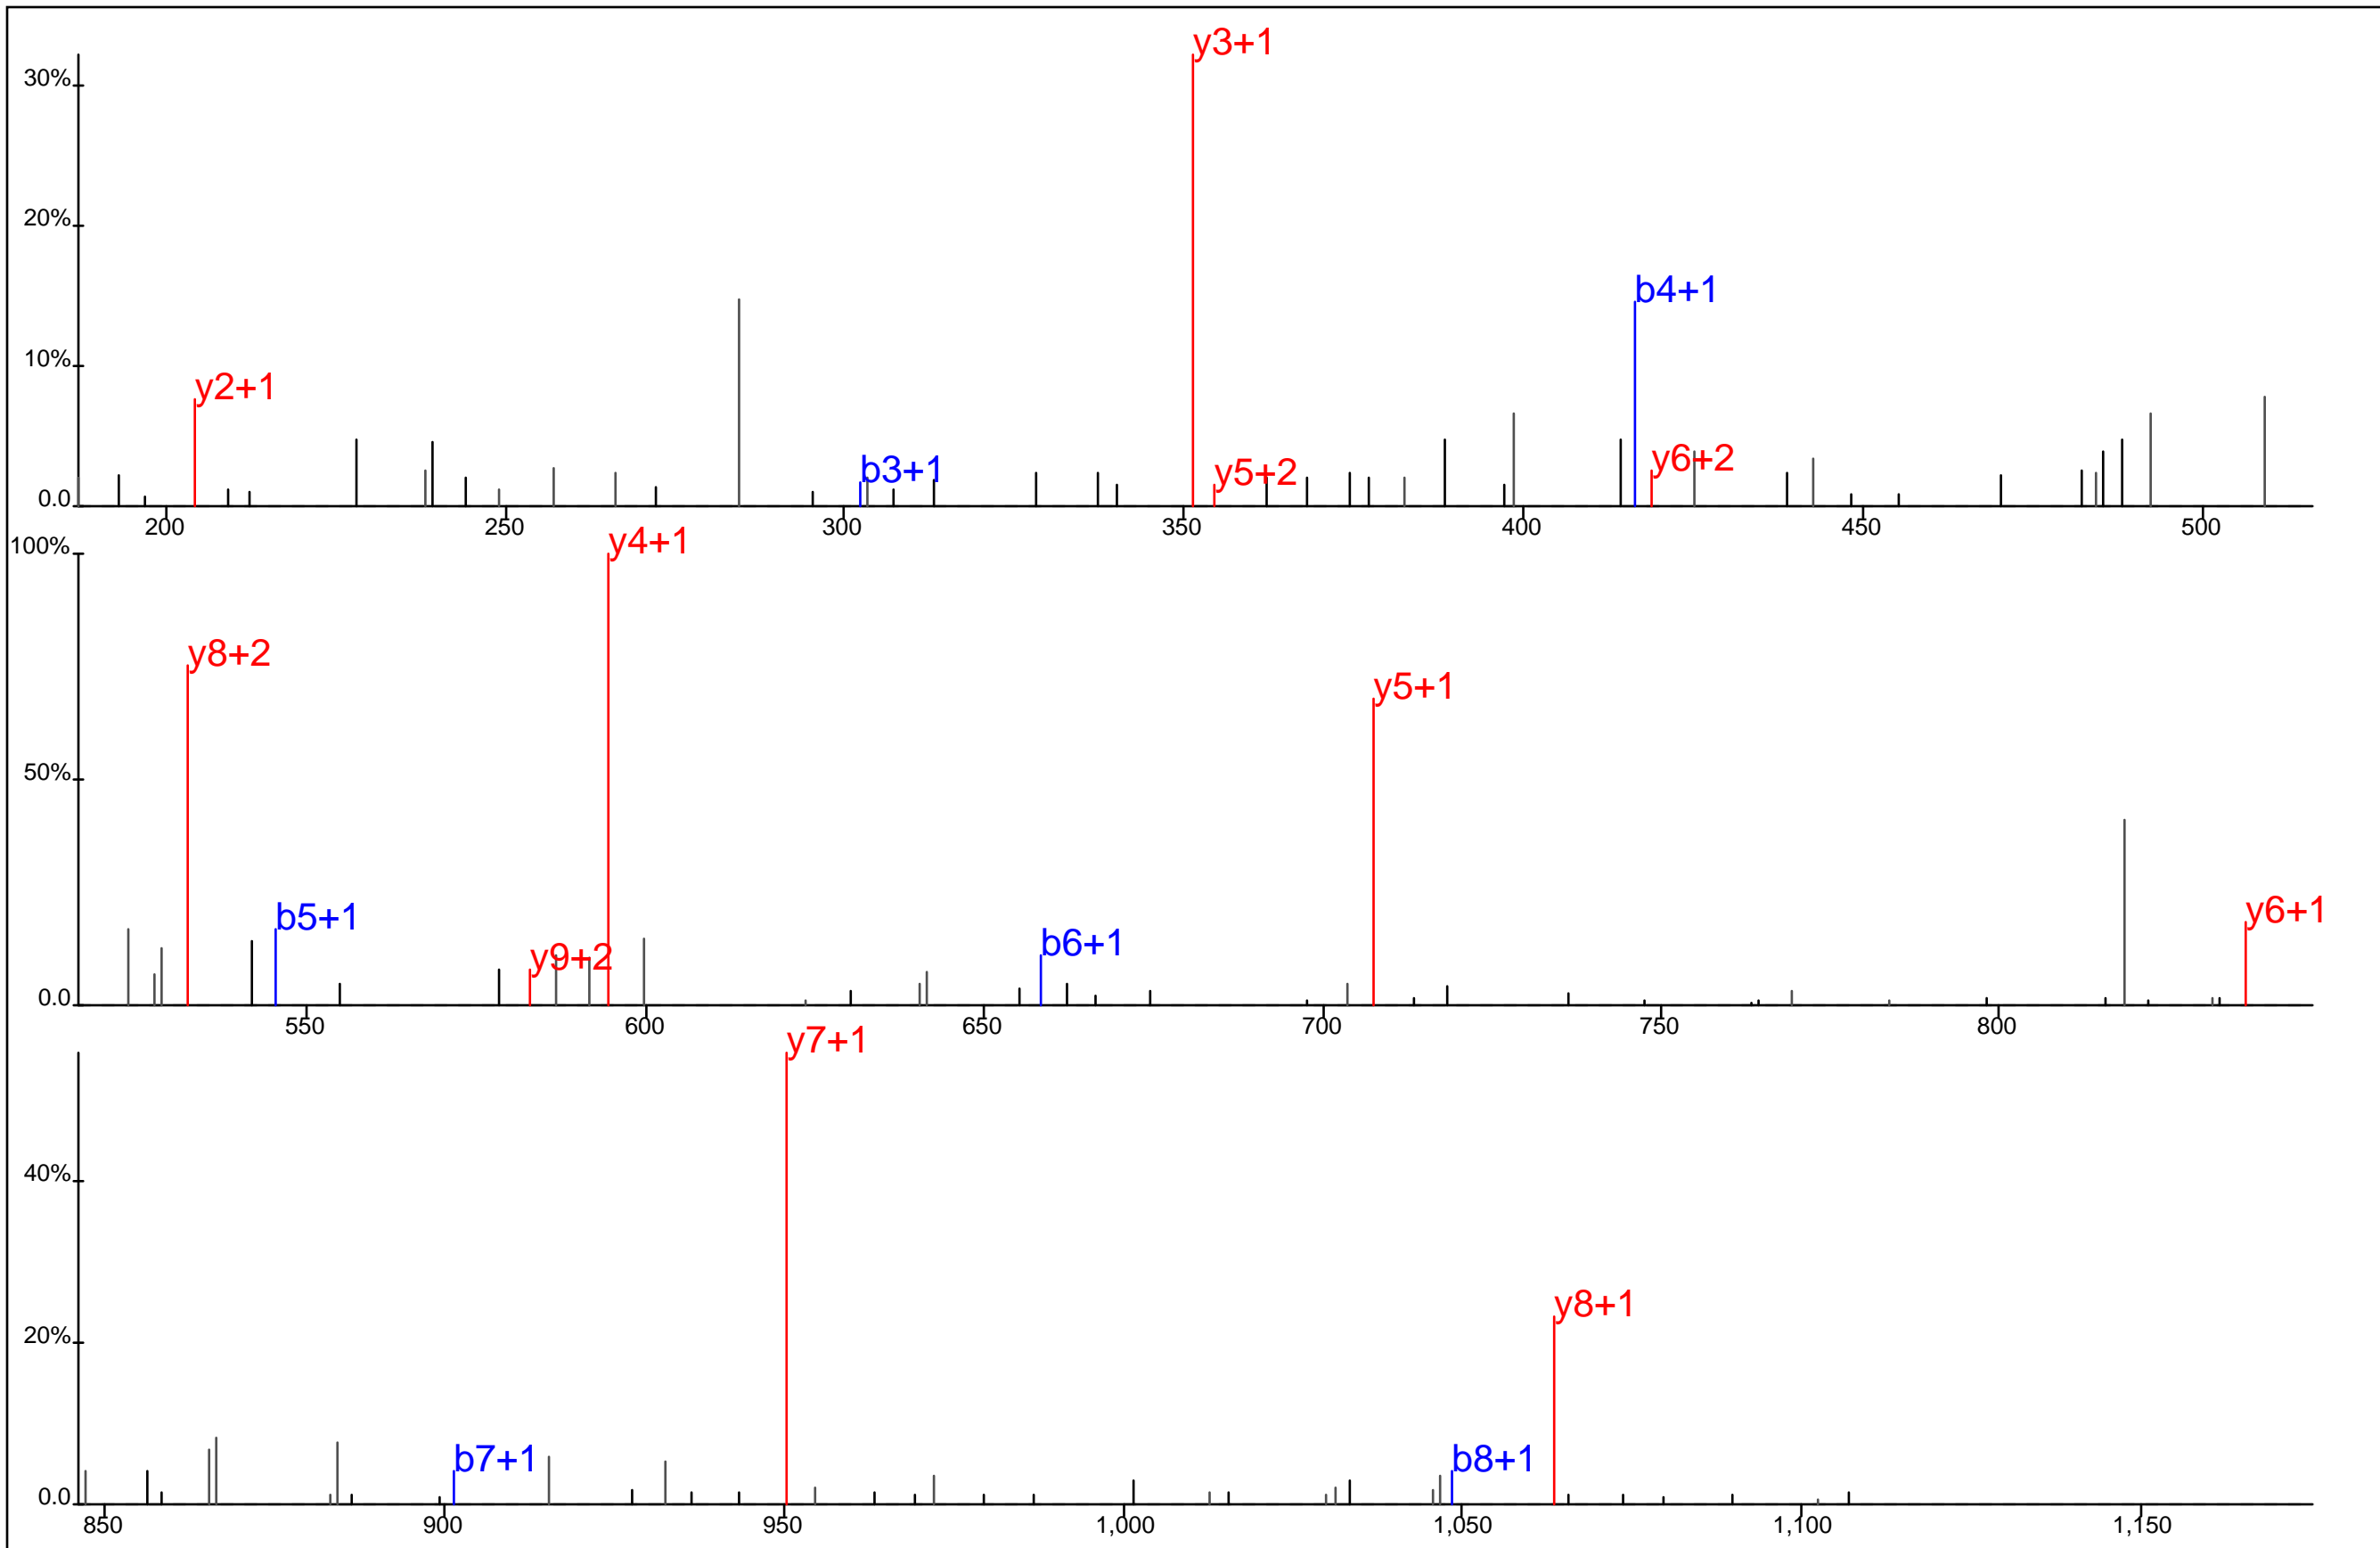

■ ■ ■ ■ ■ ■  
**S T L N E I Y\* F G K**  
■ ■ ■ ■ ■ ■ ■

Protein Name: F actin capping protein beta subunit  
 gi Accession: 0  
 Precursor Mass: 626.2866+2  
 Delta Mass: 0.137 ppm  
 XCorr: 51.36



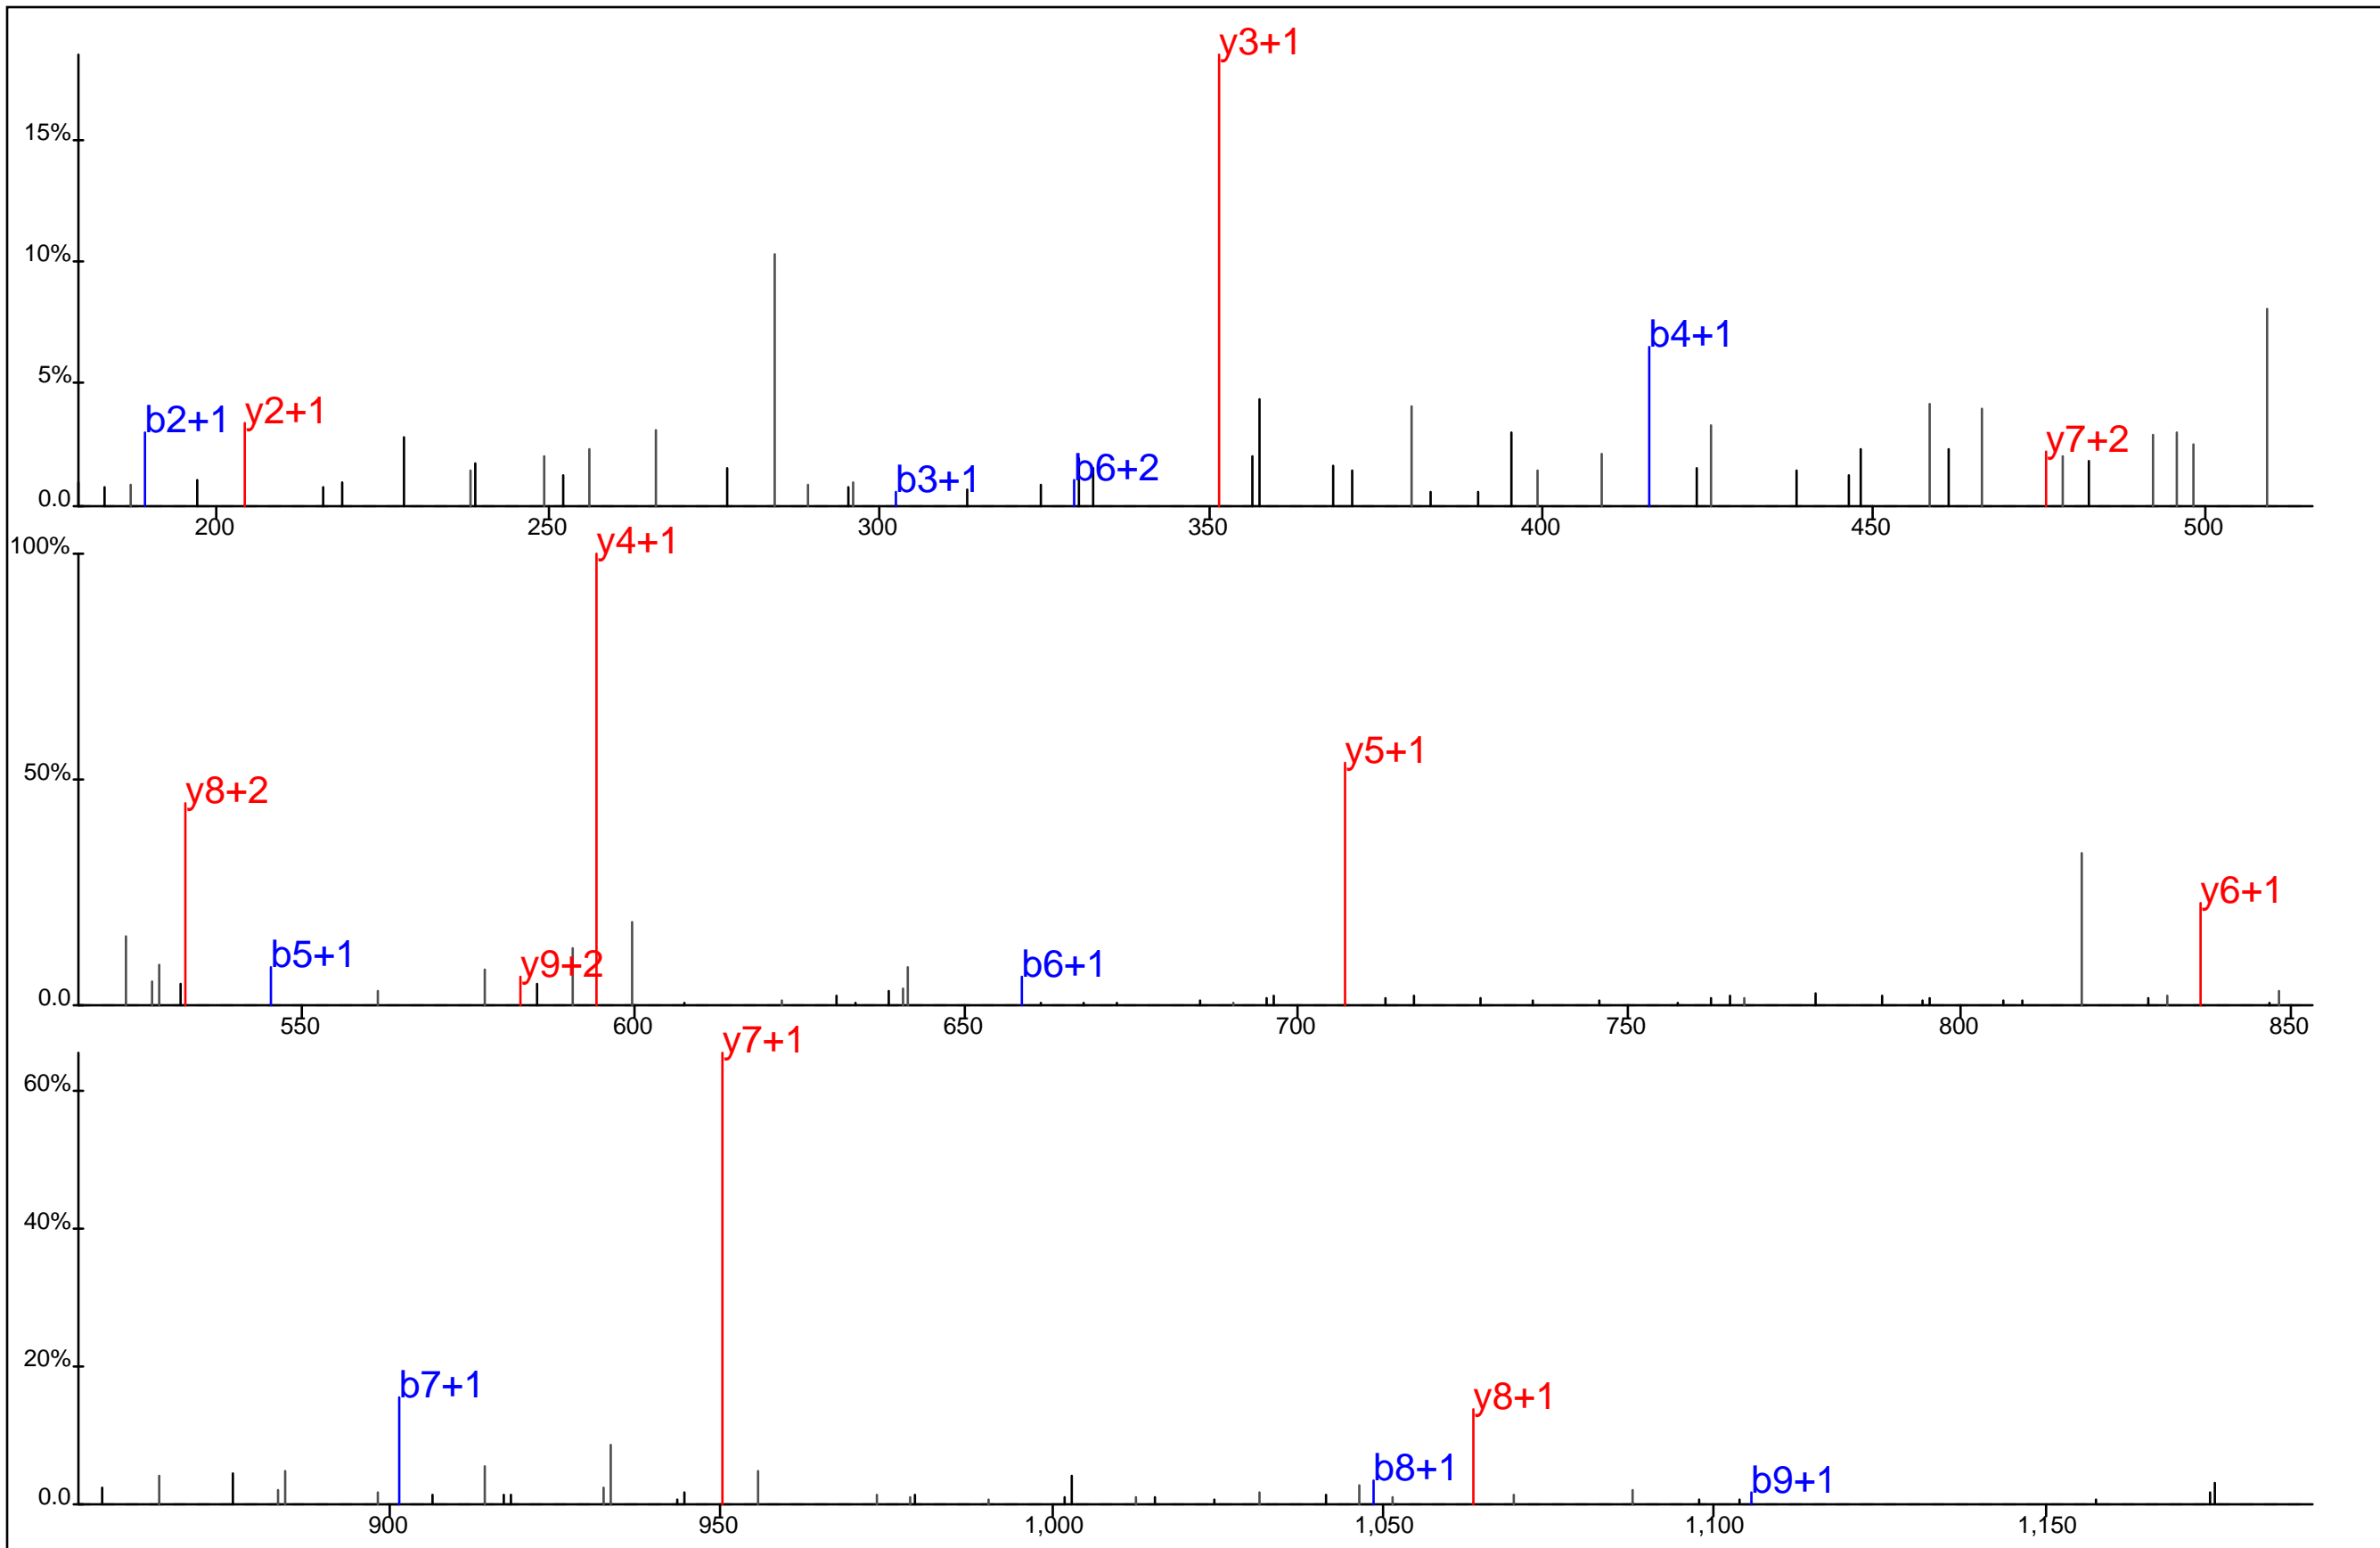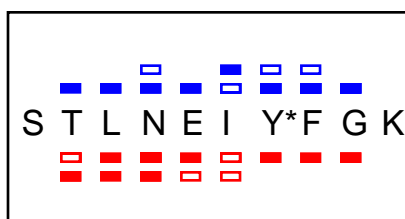

Protein Name: F actin capping protein beta subunit  
 gi Accession: 0  
 Precursor Mass: 626.2847+2  
 Delta Mass: 2.886 ppm  
 XCorr: 49.43

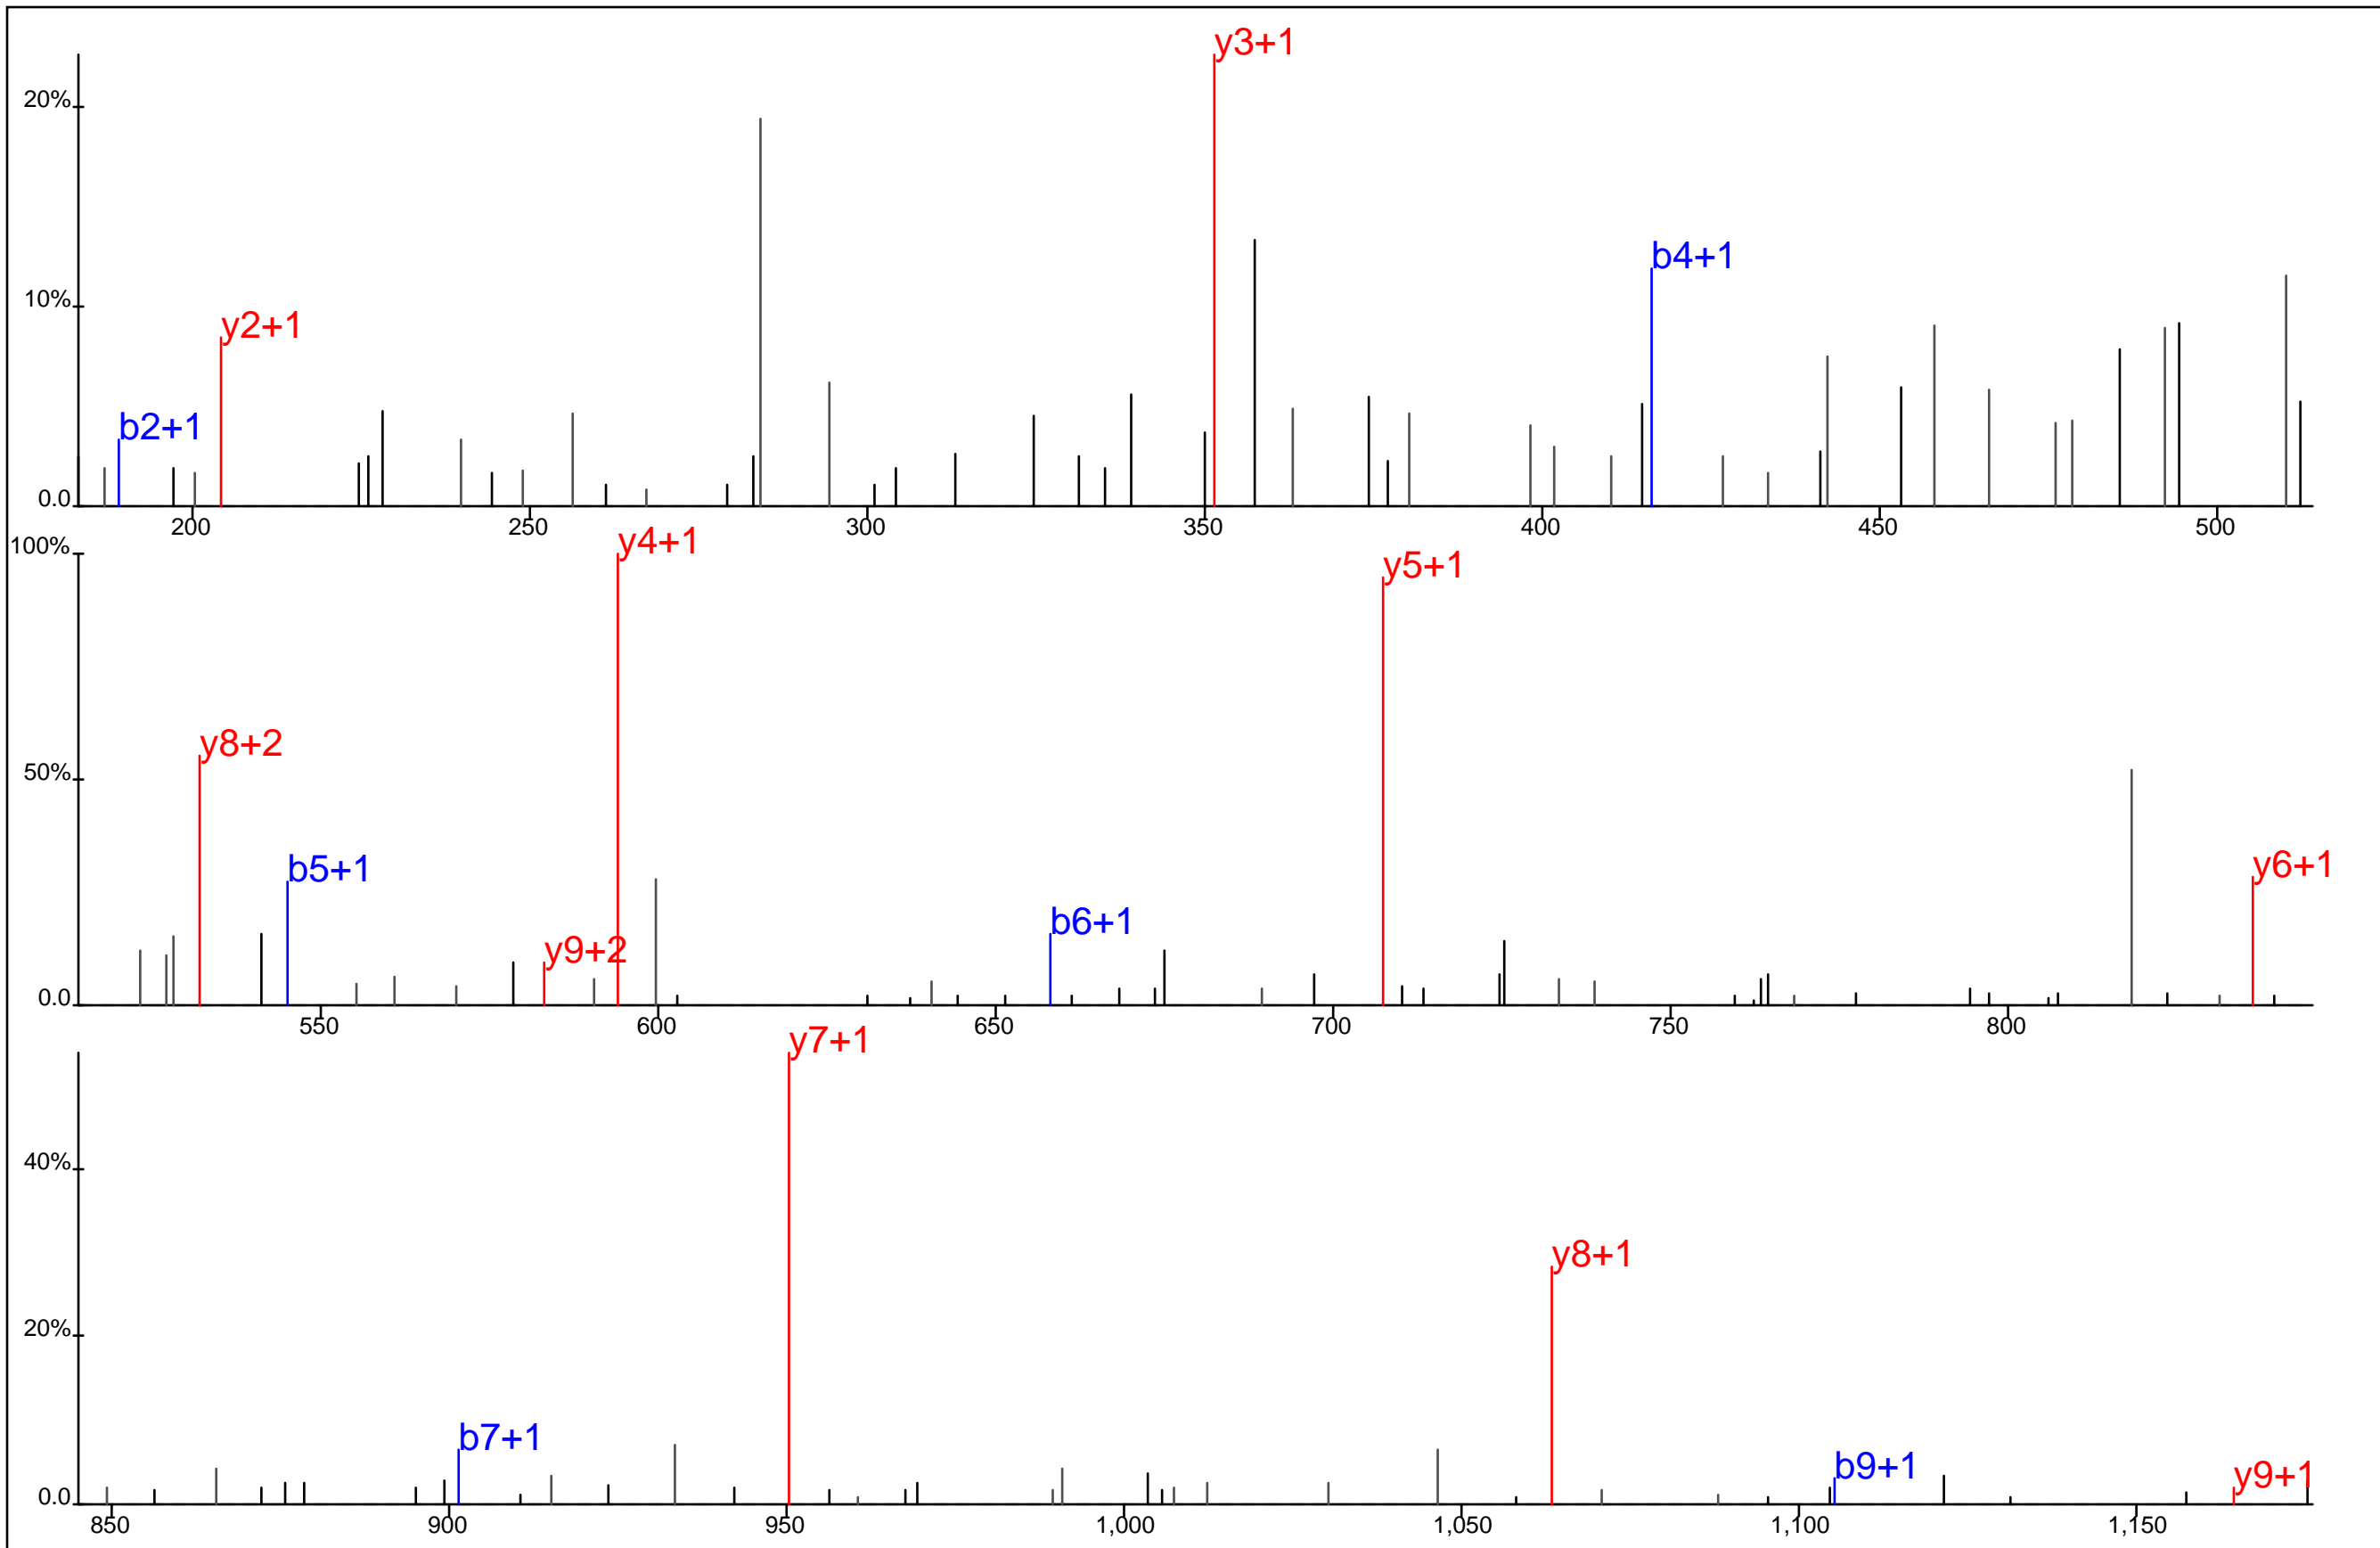

■ ■ ■ ■ ■ ■ ■  
■ ■ ■ ■ ■ ■ ■  
**S T L N E I Y\*F G K**

Protein Name: F actin capping protein beta subunit  
 gi Accession: 0  
 Precursor Mass: 626.2841+2  
 Delta Mass: 3.861 ppm  
 XCorr: 50.9





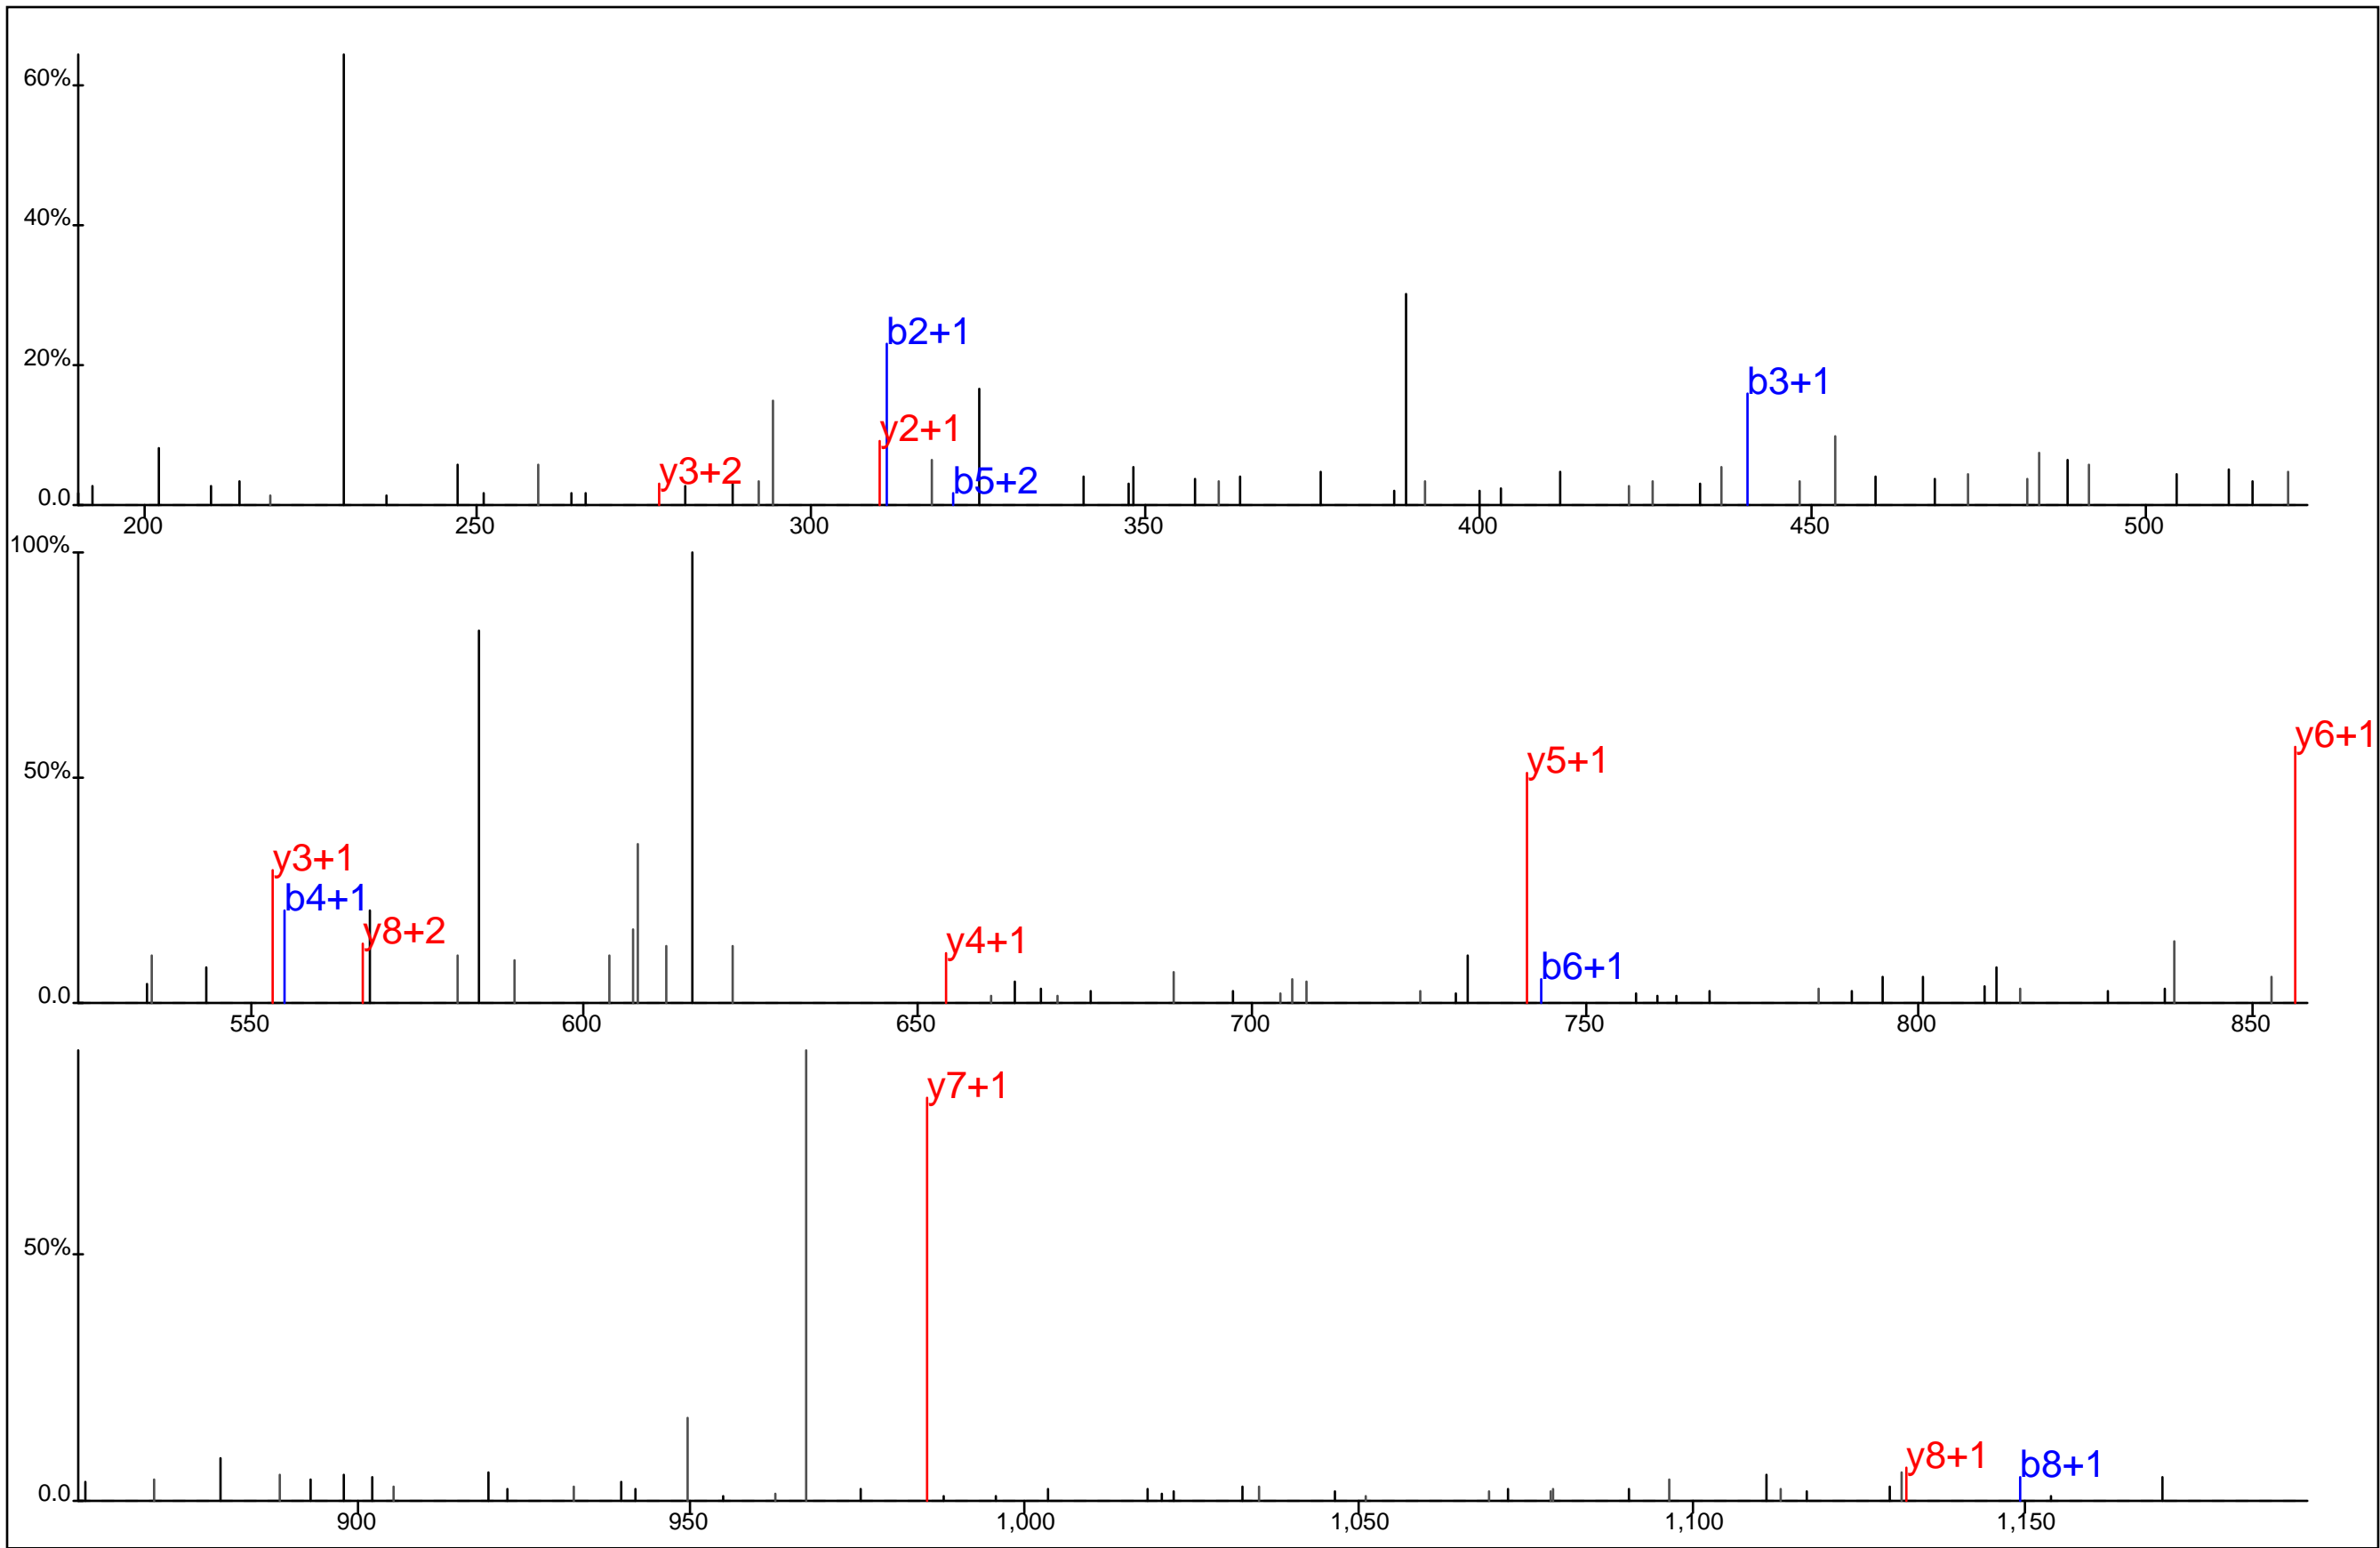

■ ▢ ▢ ■ ▢ ▢ ▢  
 Y M E D S T Y\* Y K  
■ ▢ ▢ ▢ ▢ ▢ ▢

Protein Name: FAK  
 gi Accession: 0  
 Precursor Mass: 648.2327+2  
 Delta Mass: 3.338 ppm  
 XCorr: 24.6

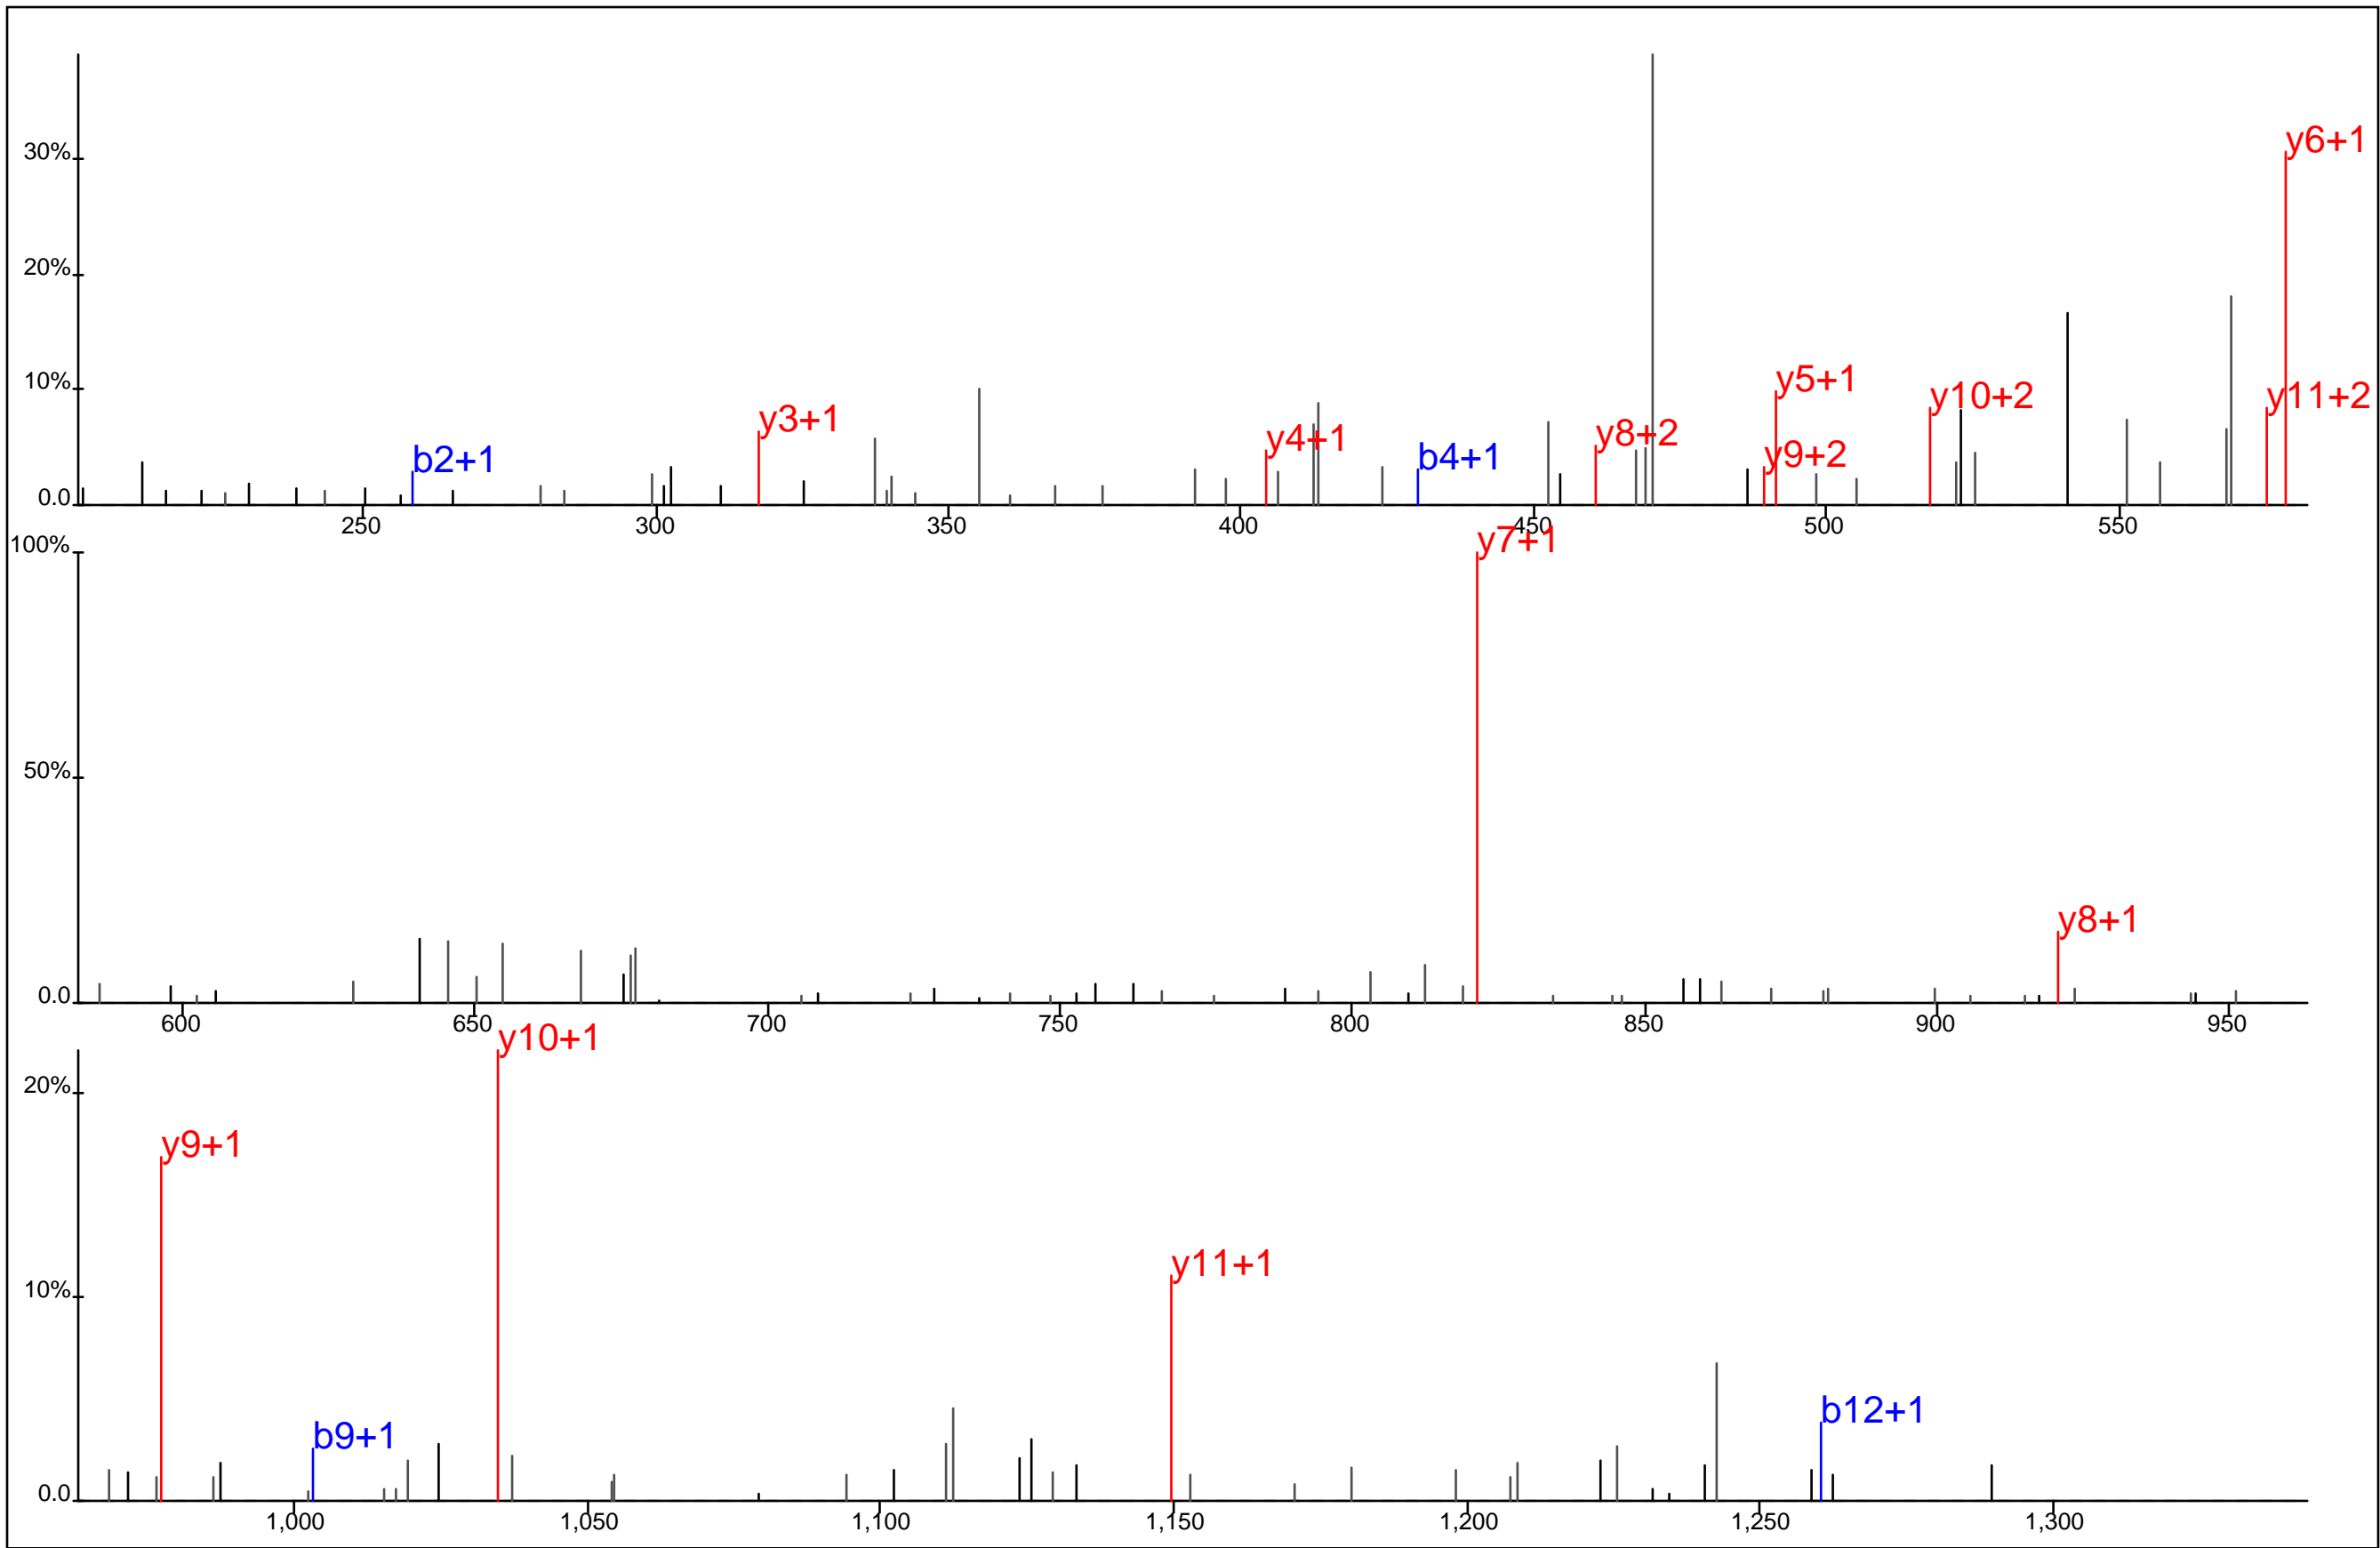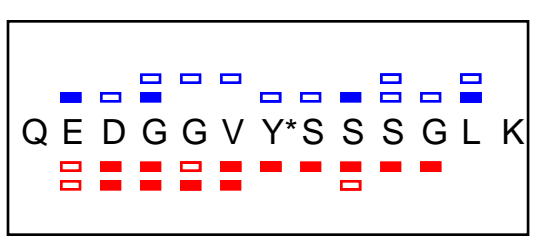

Protein Name: FER  
 gi Accession: 0  
 Precursor Mass: 703.7957+2  
 Delta Mass: 0.363 ppm  
 XCorr: 58.36

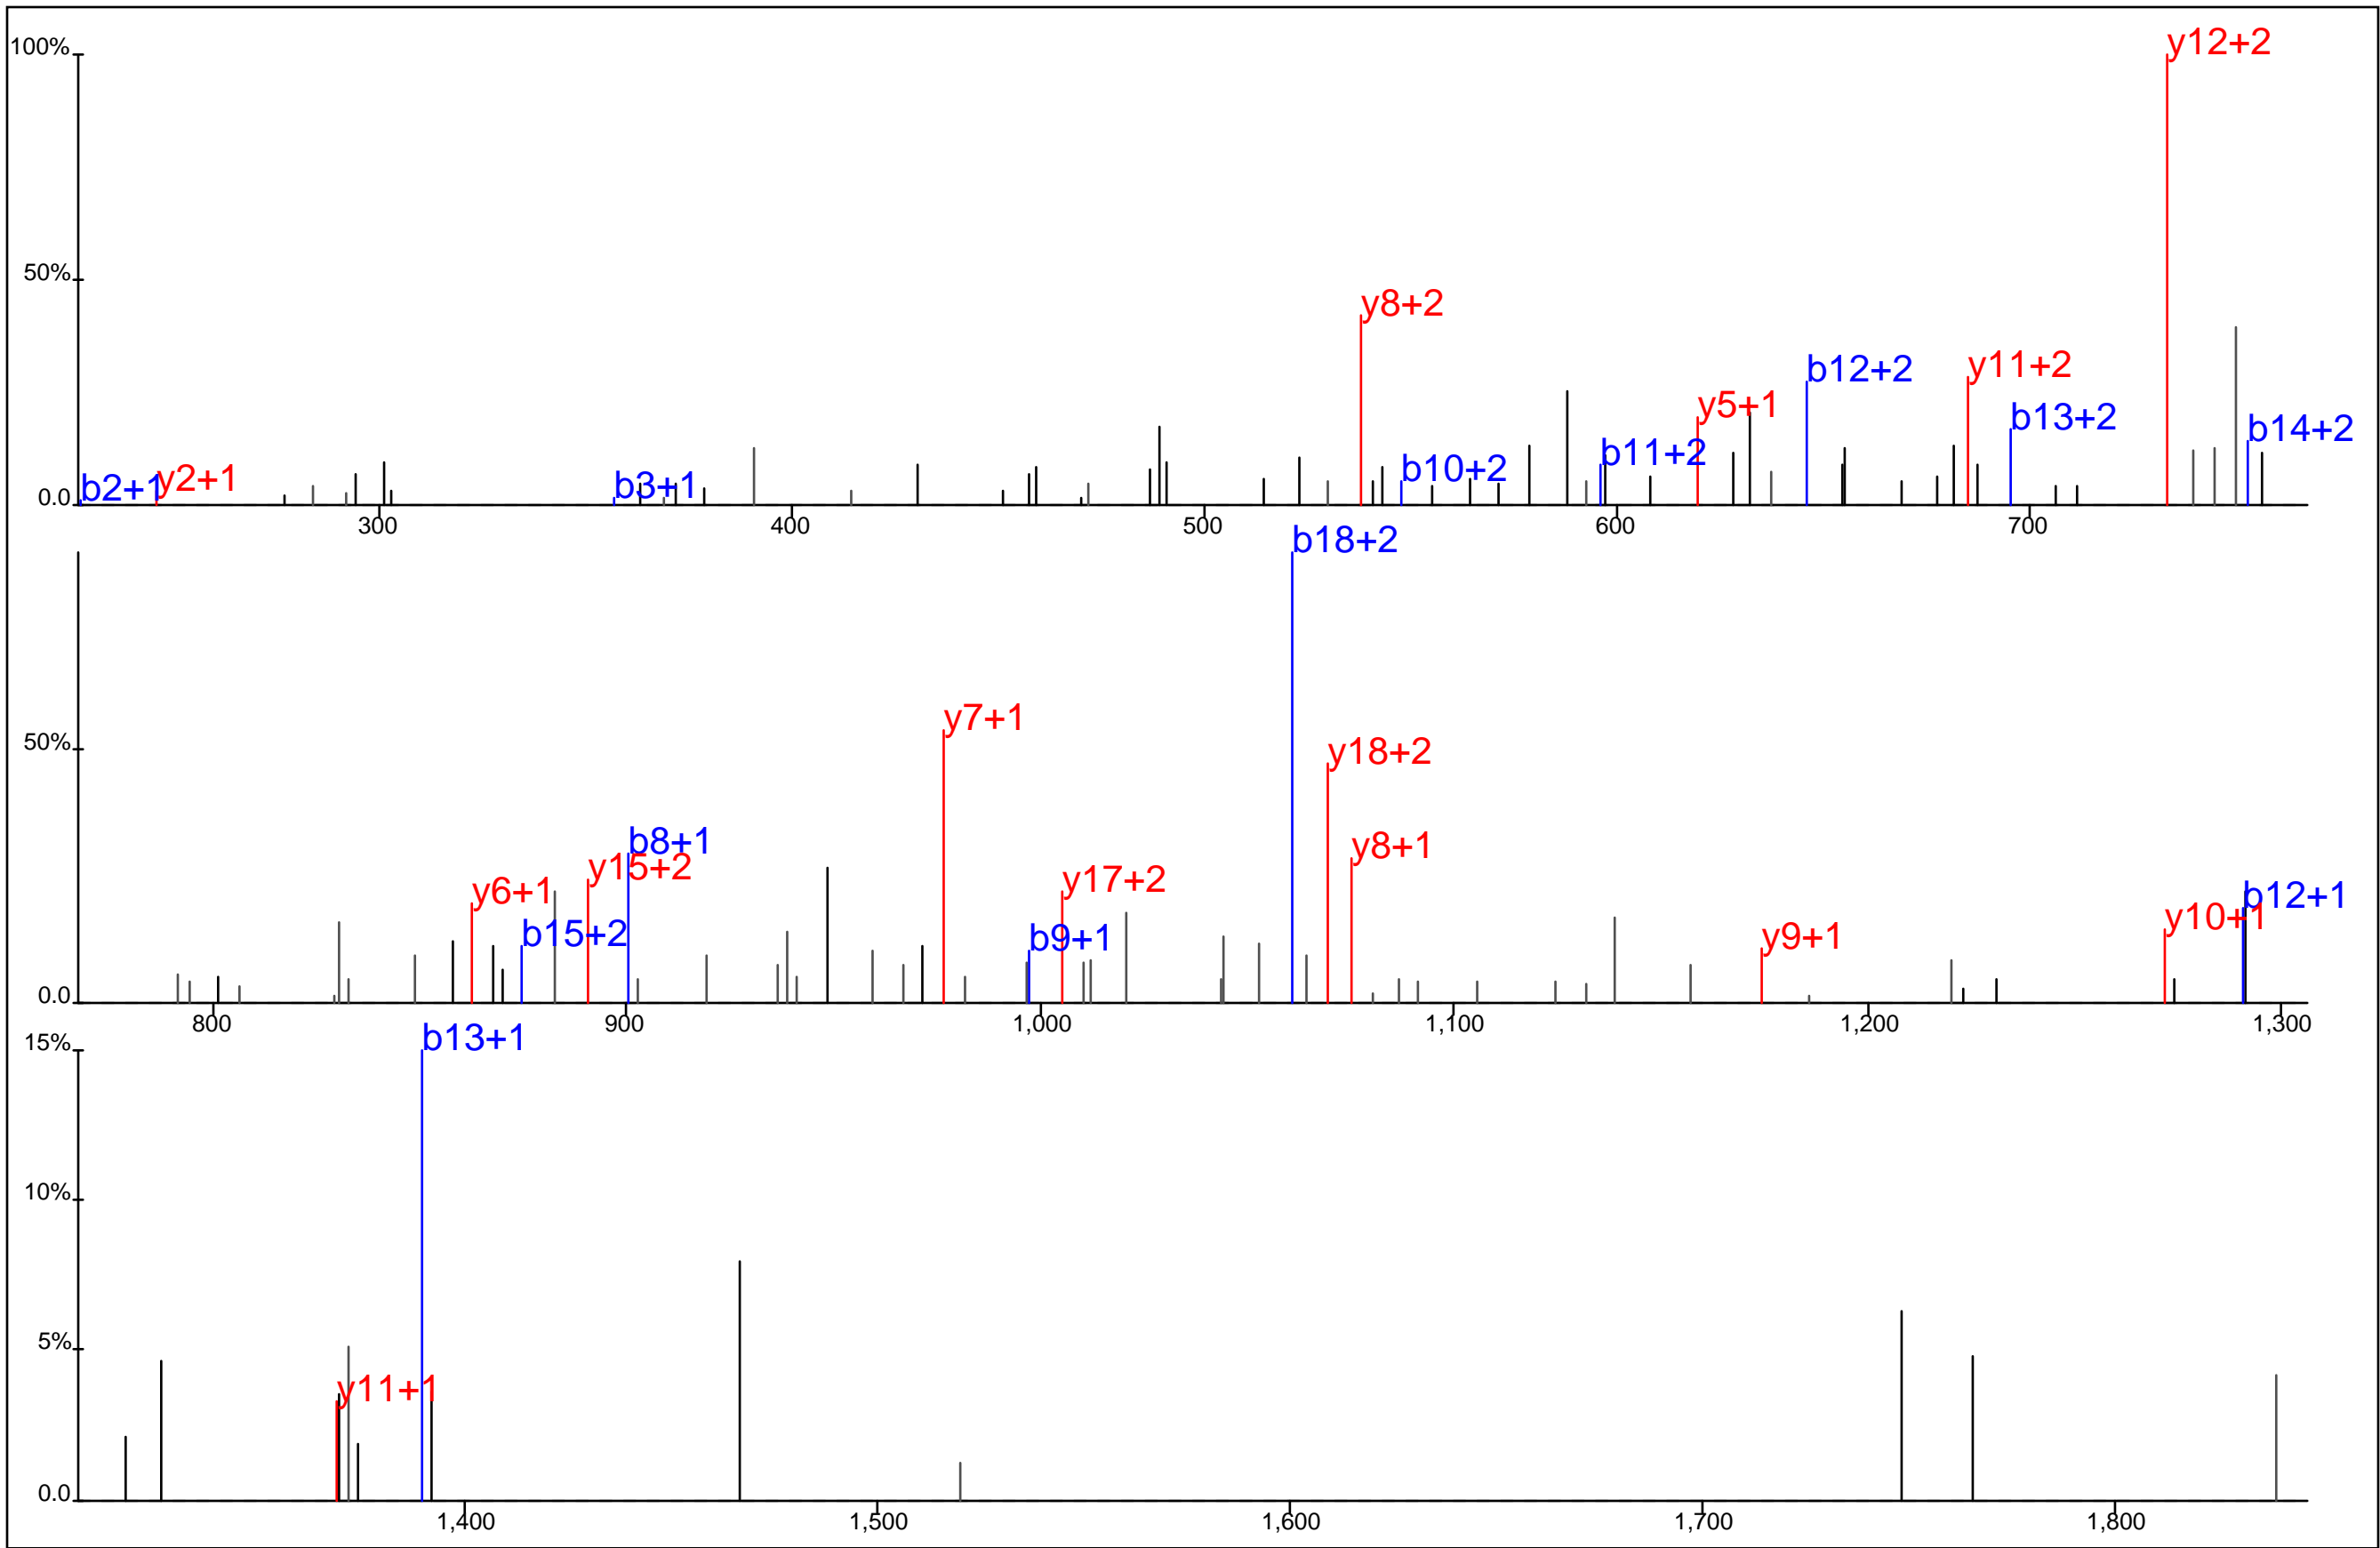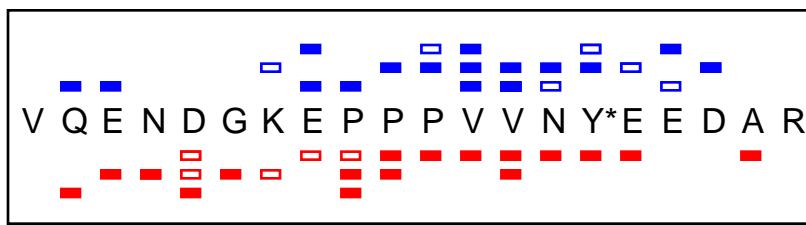

Protein Name: FER  
 gi Accession: 0  
 Precursor Mass: 789.0153+3  
 Delta Mass: 1.241 ppm  
 XCorr: 31.17

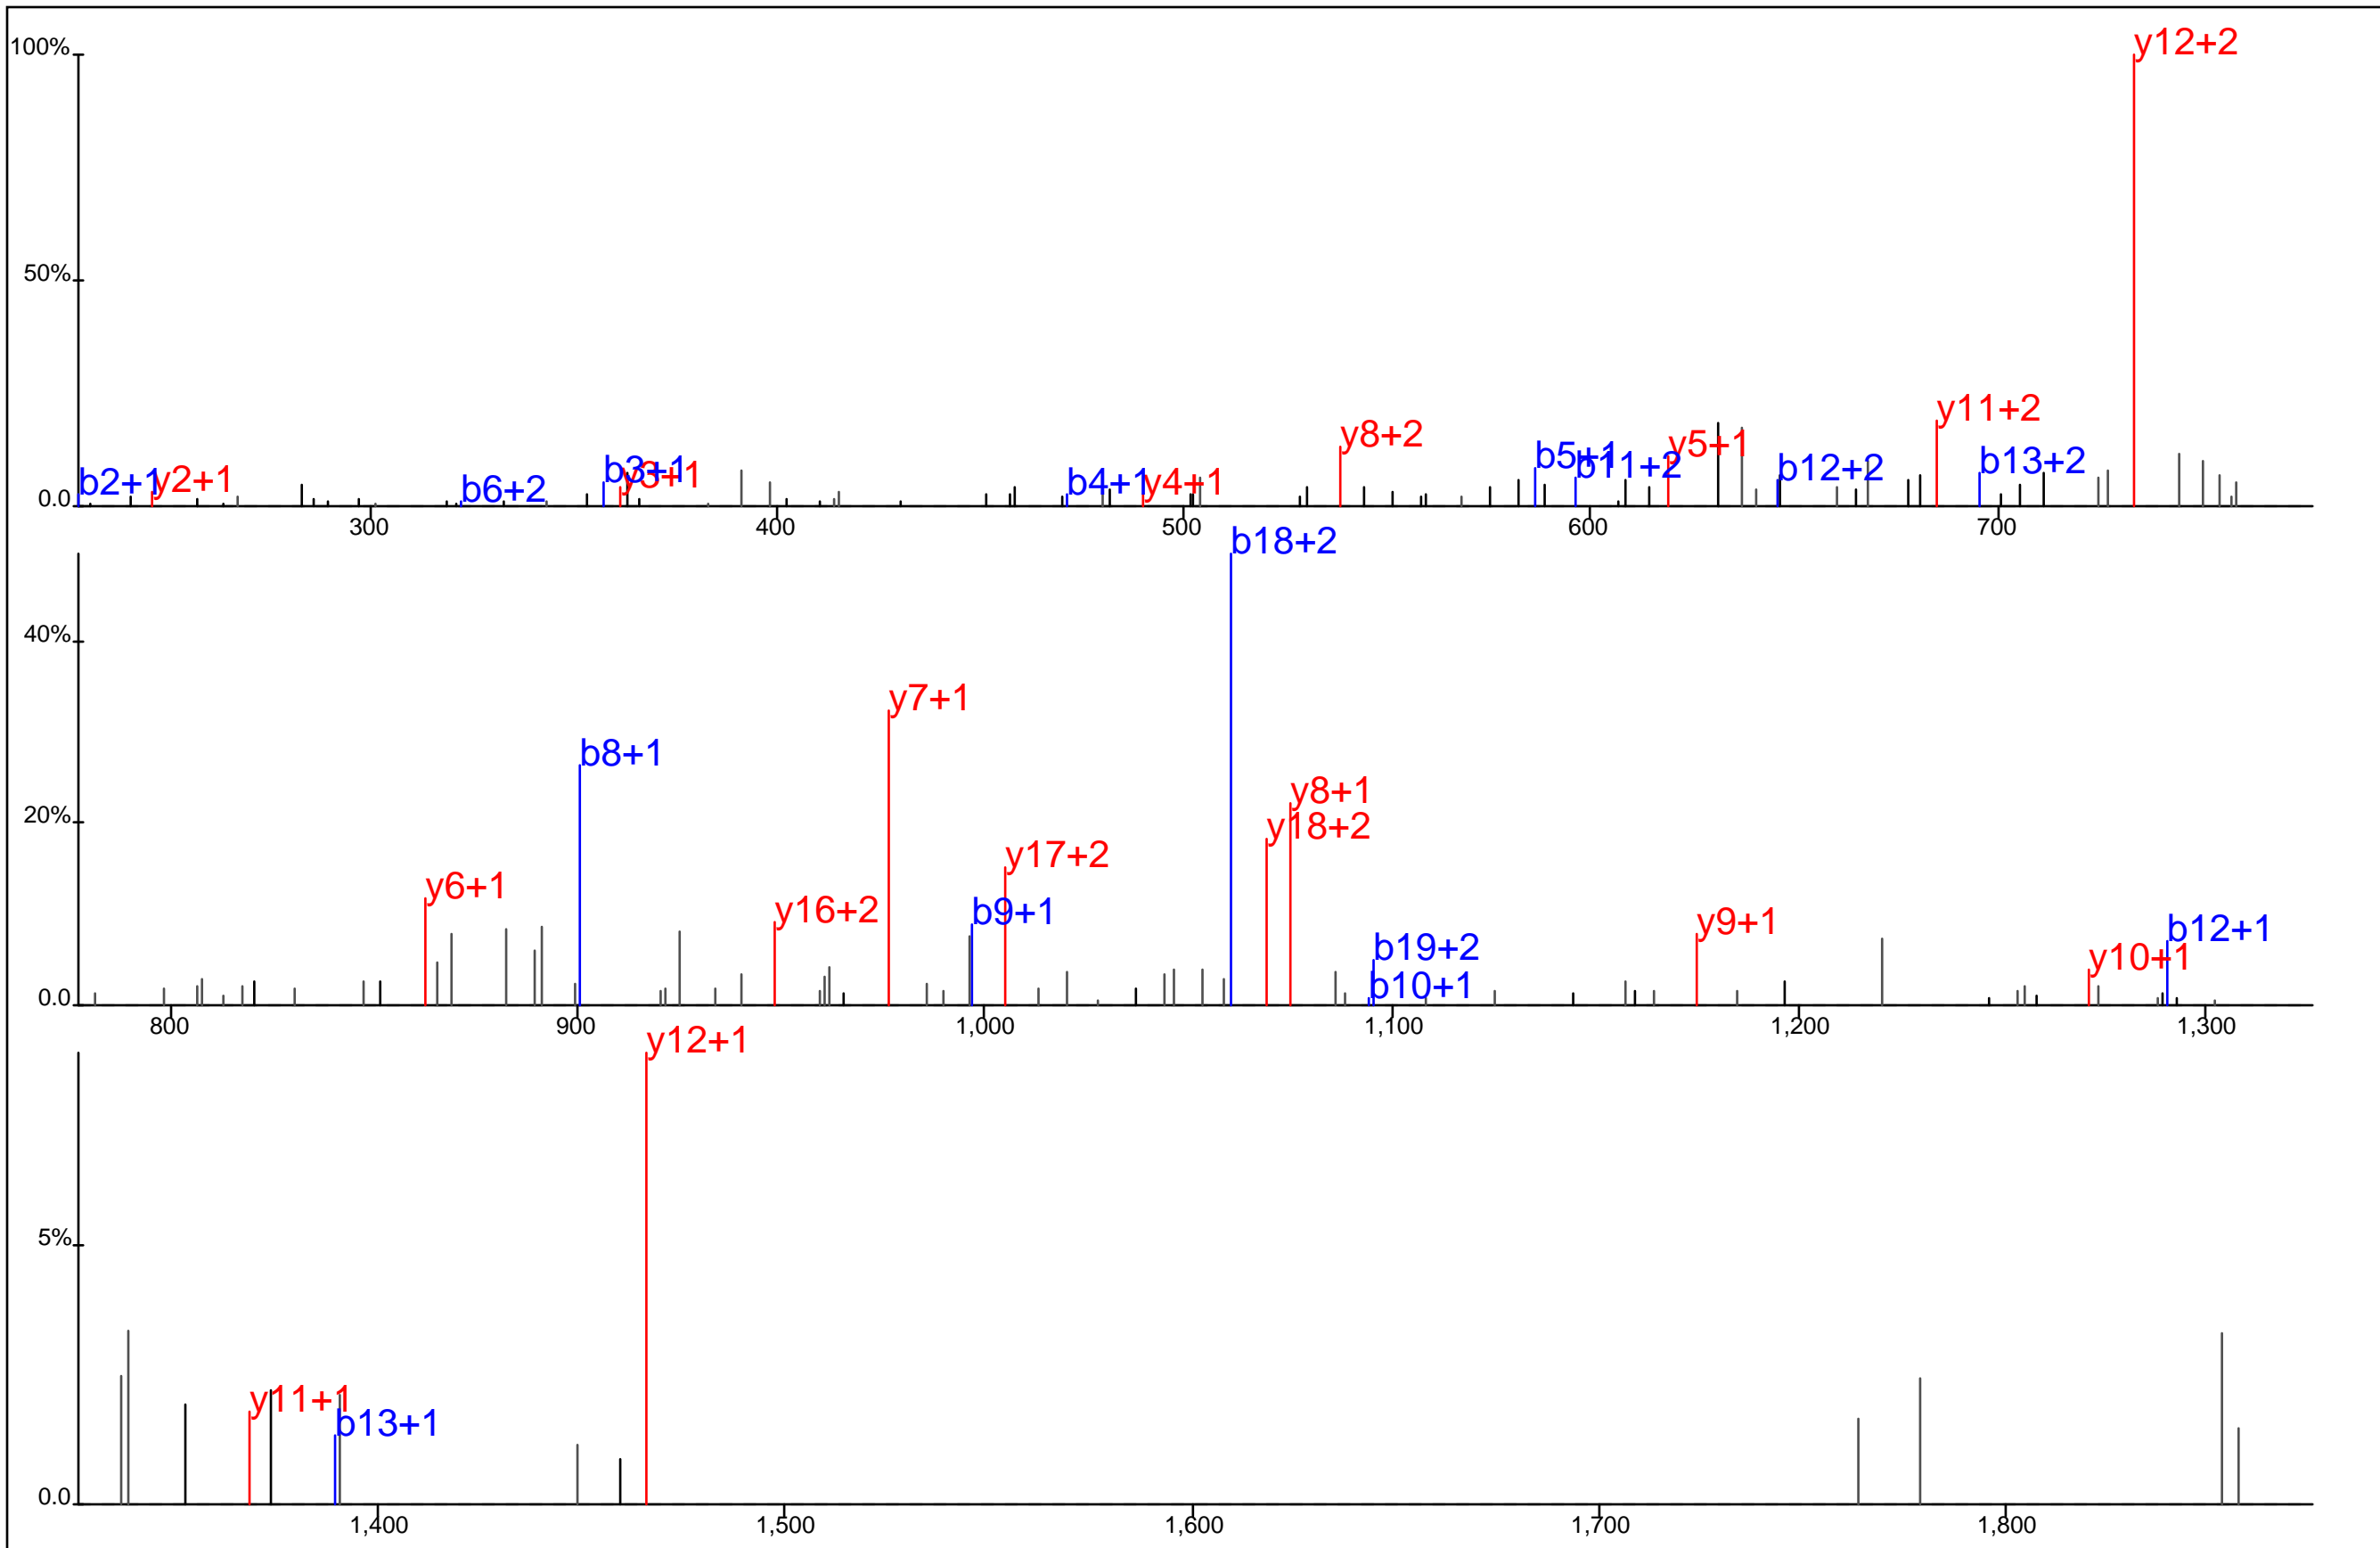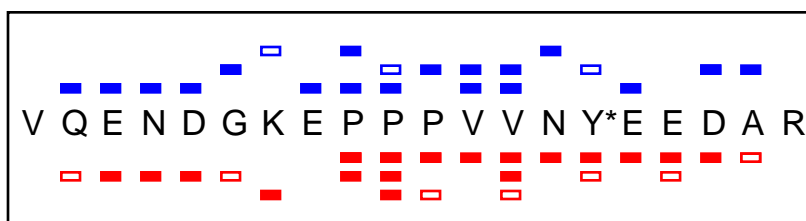

Protein Name: FER  
 gi Accession: 0  
 Precursor Mass: 789.0164+3  
 Delta Mass: 0.152 ppm  
 XCorr: 50.89

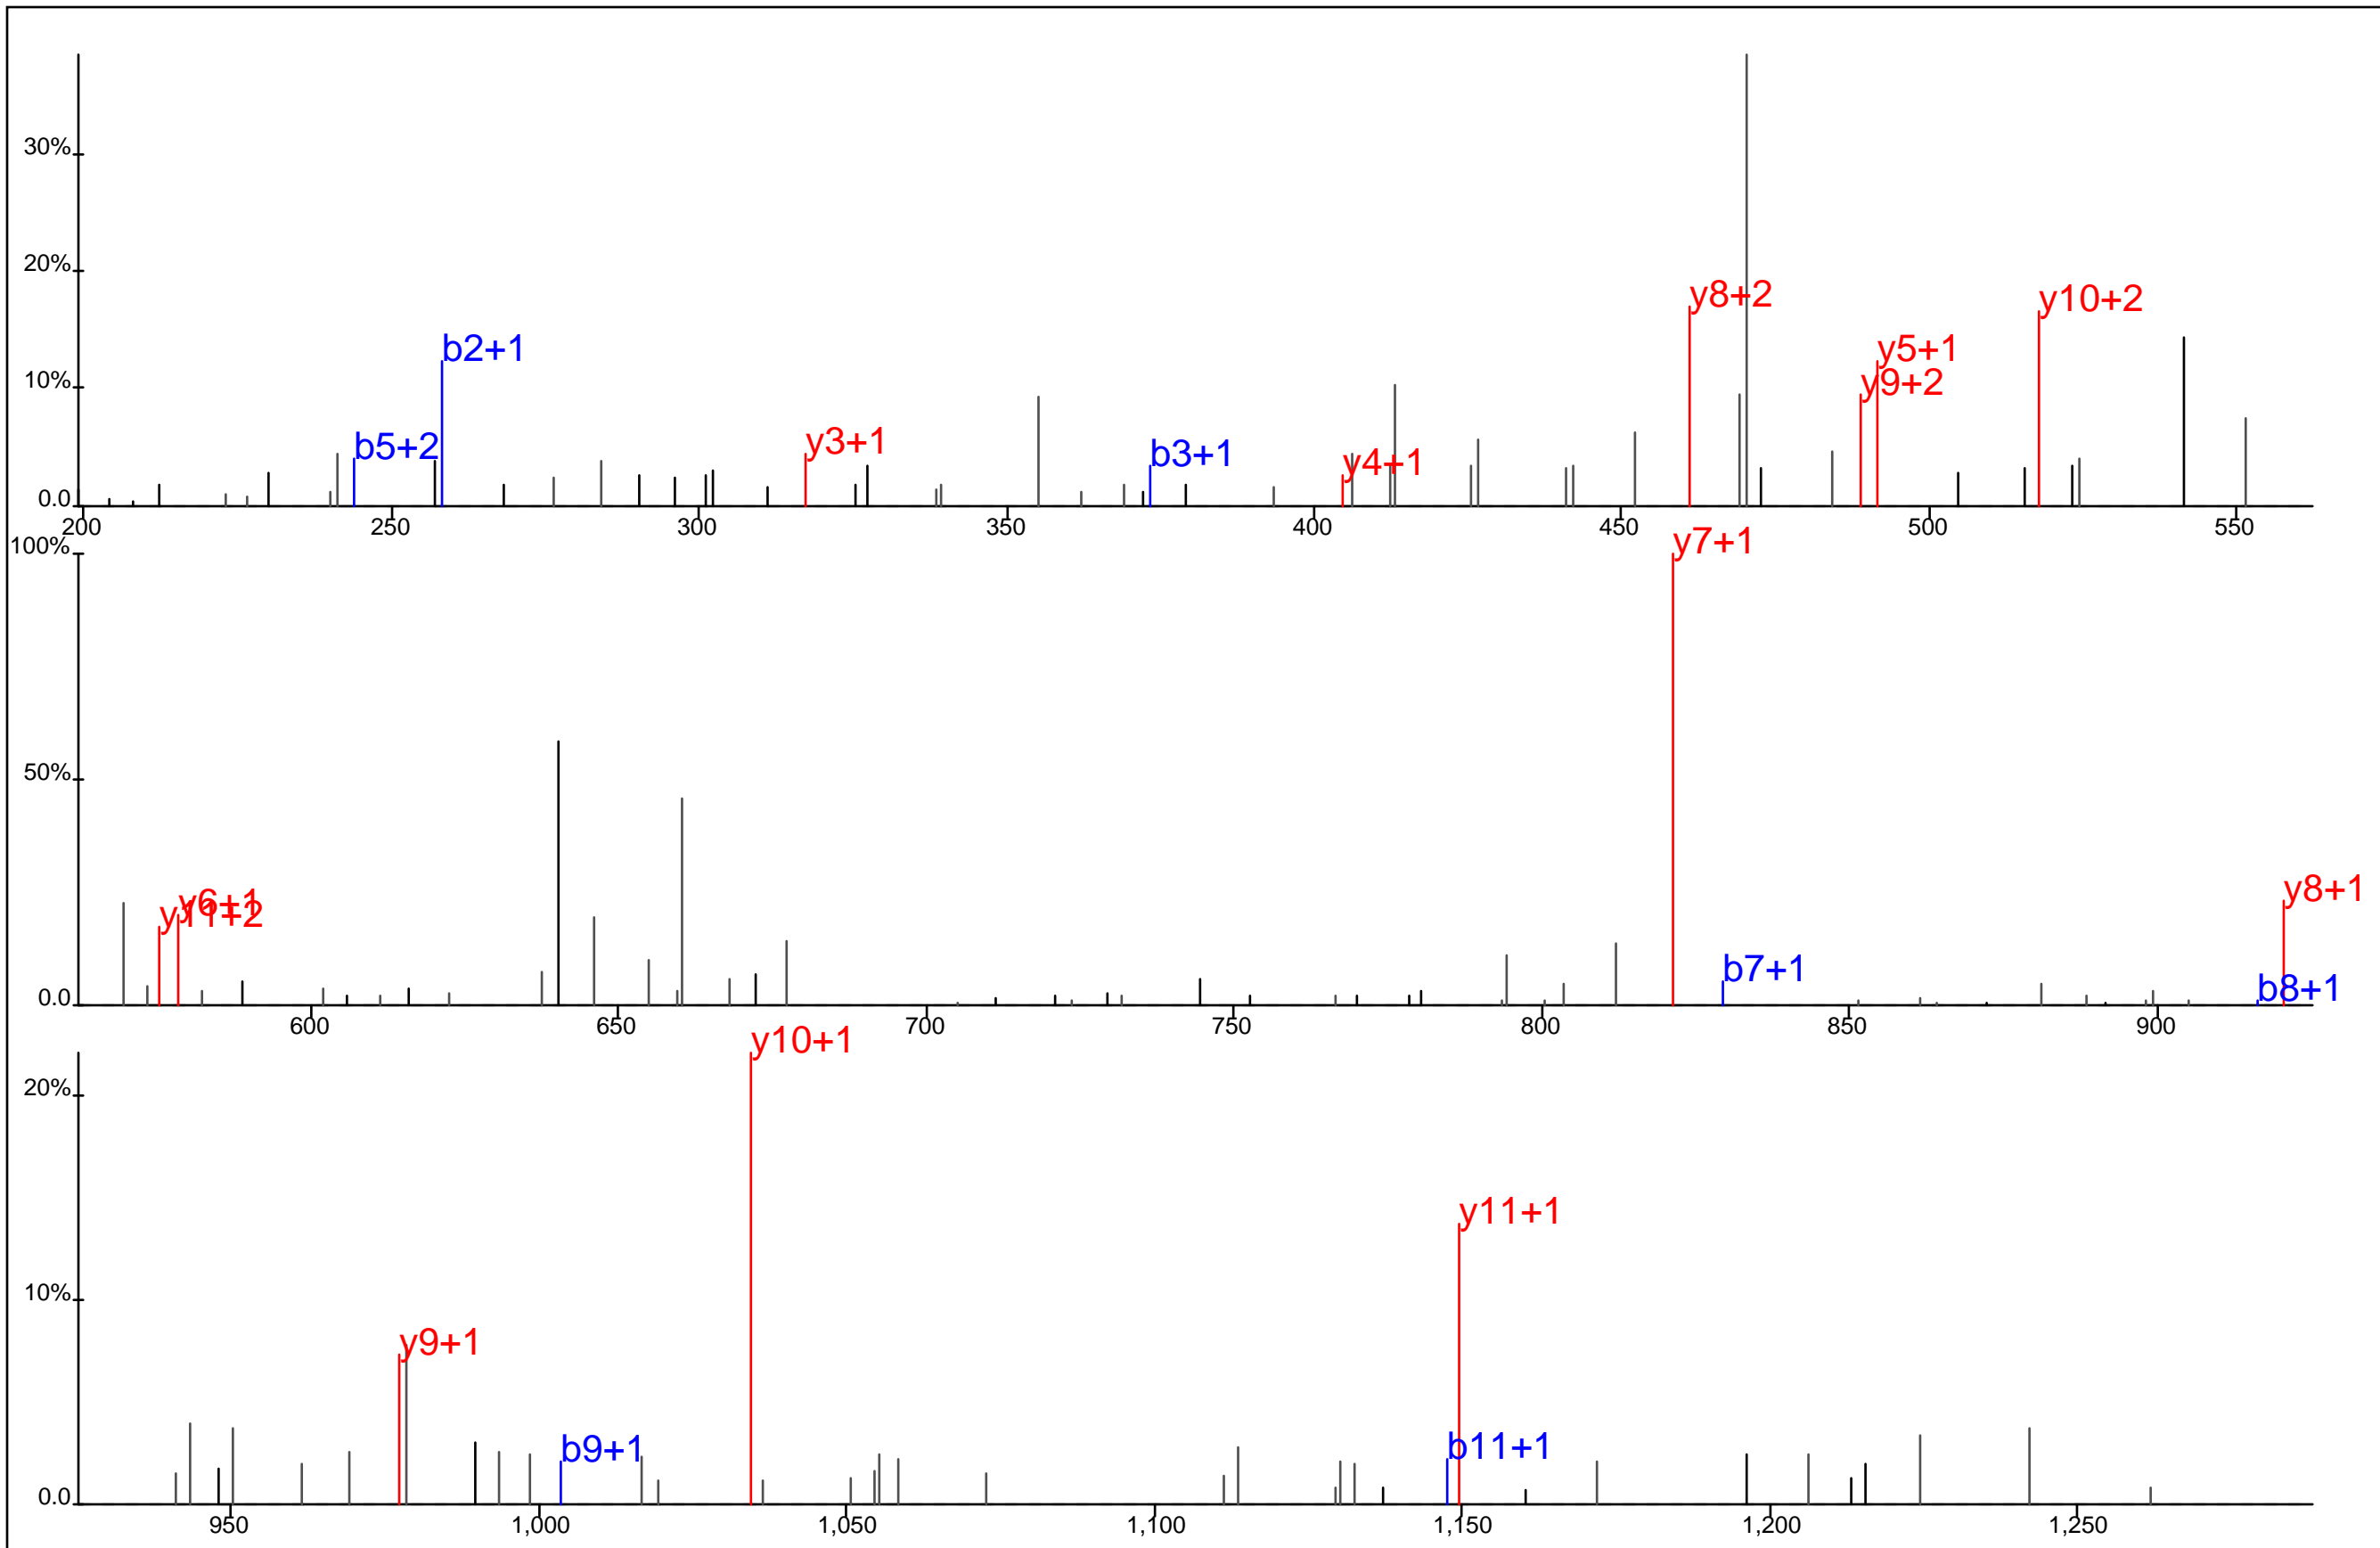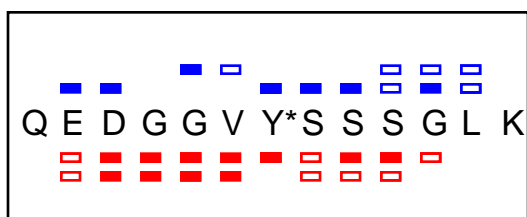

Protein Name: FER  
 gi Accession: 0  
 Precursor Mass: 703.7964+2  
 Delta Mass: 1.492 ppm  
 XCorr: 51.72

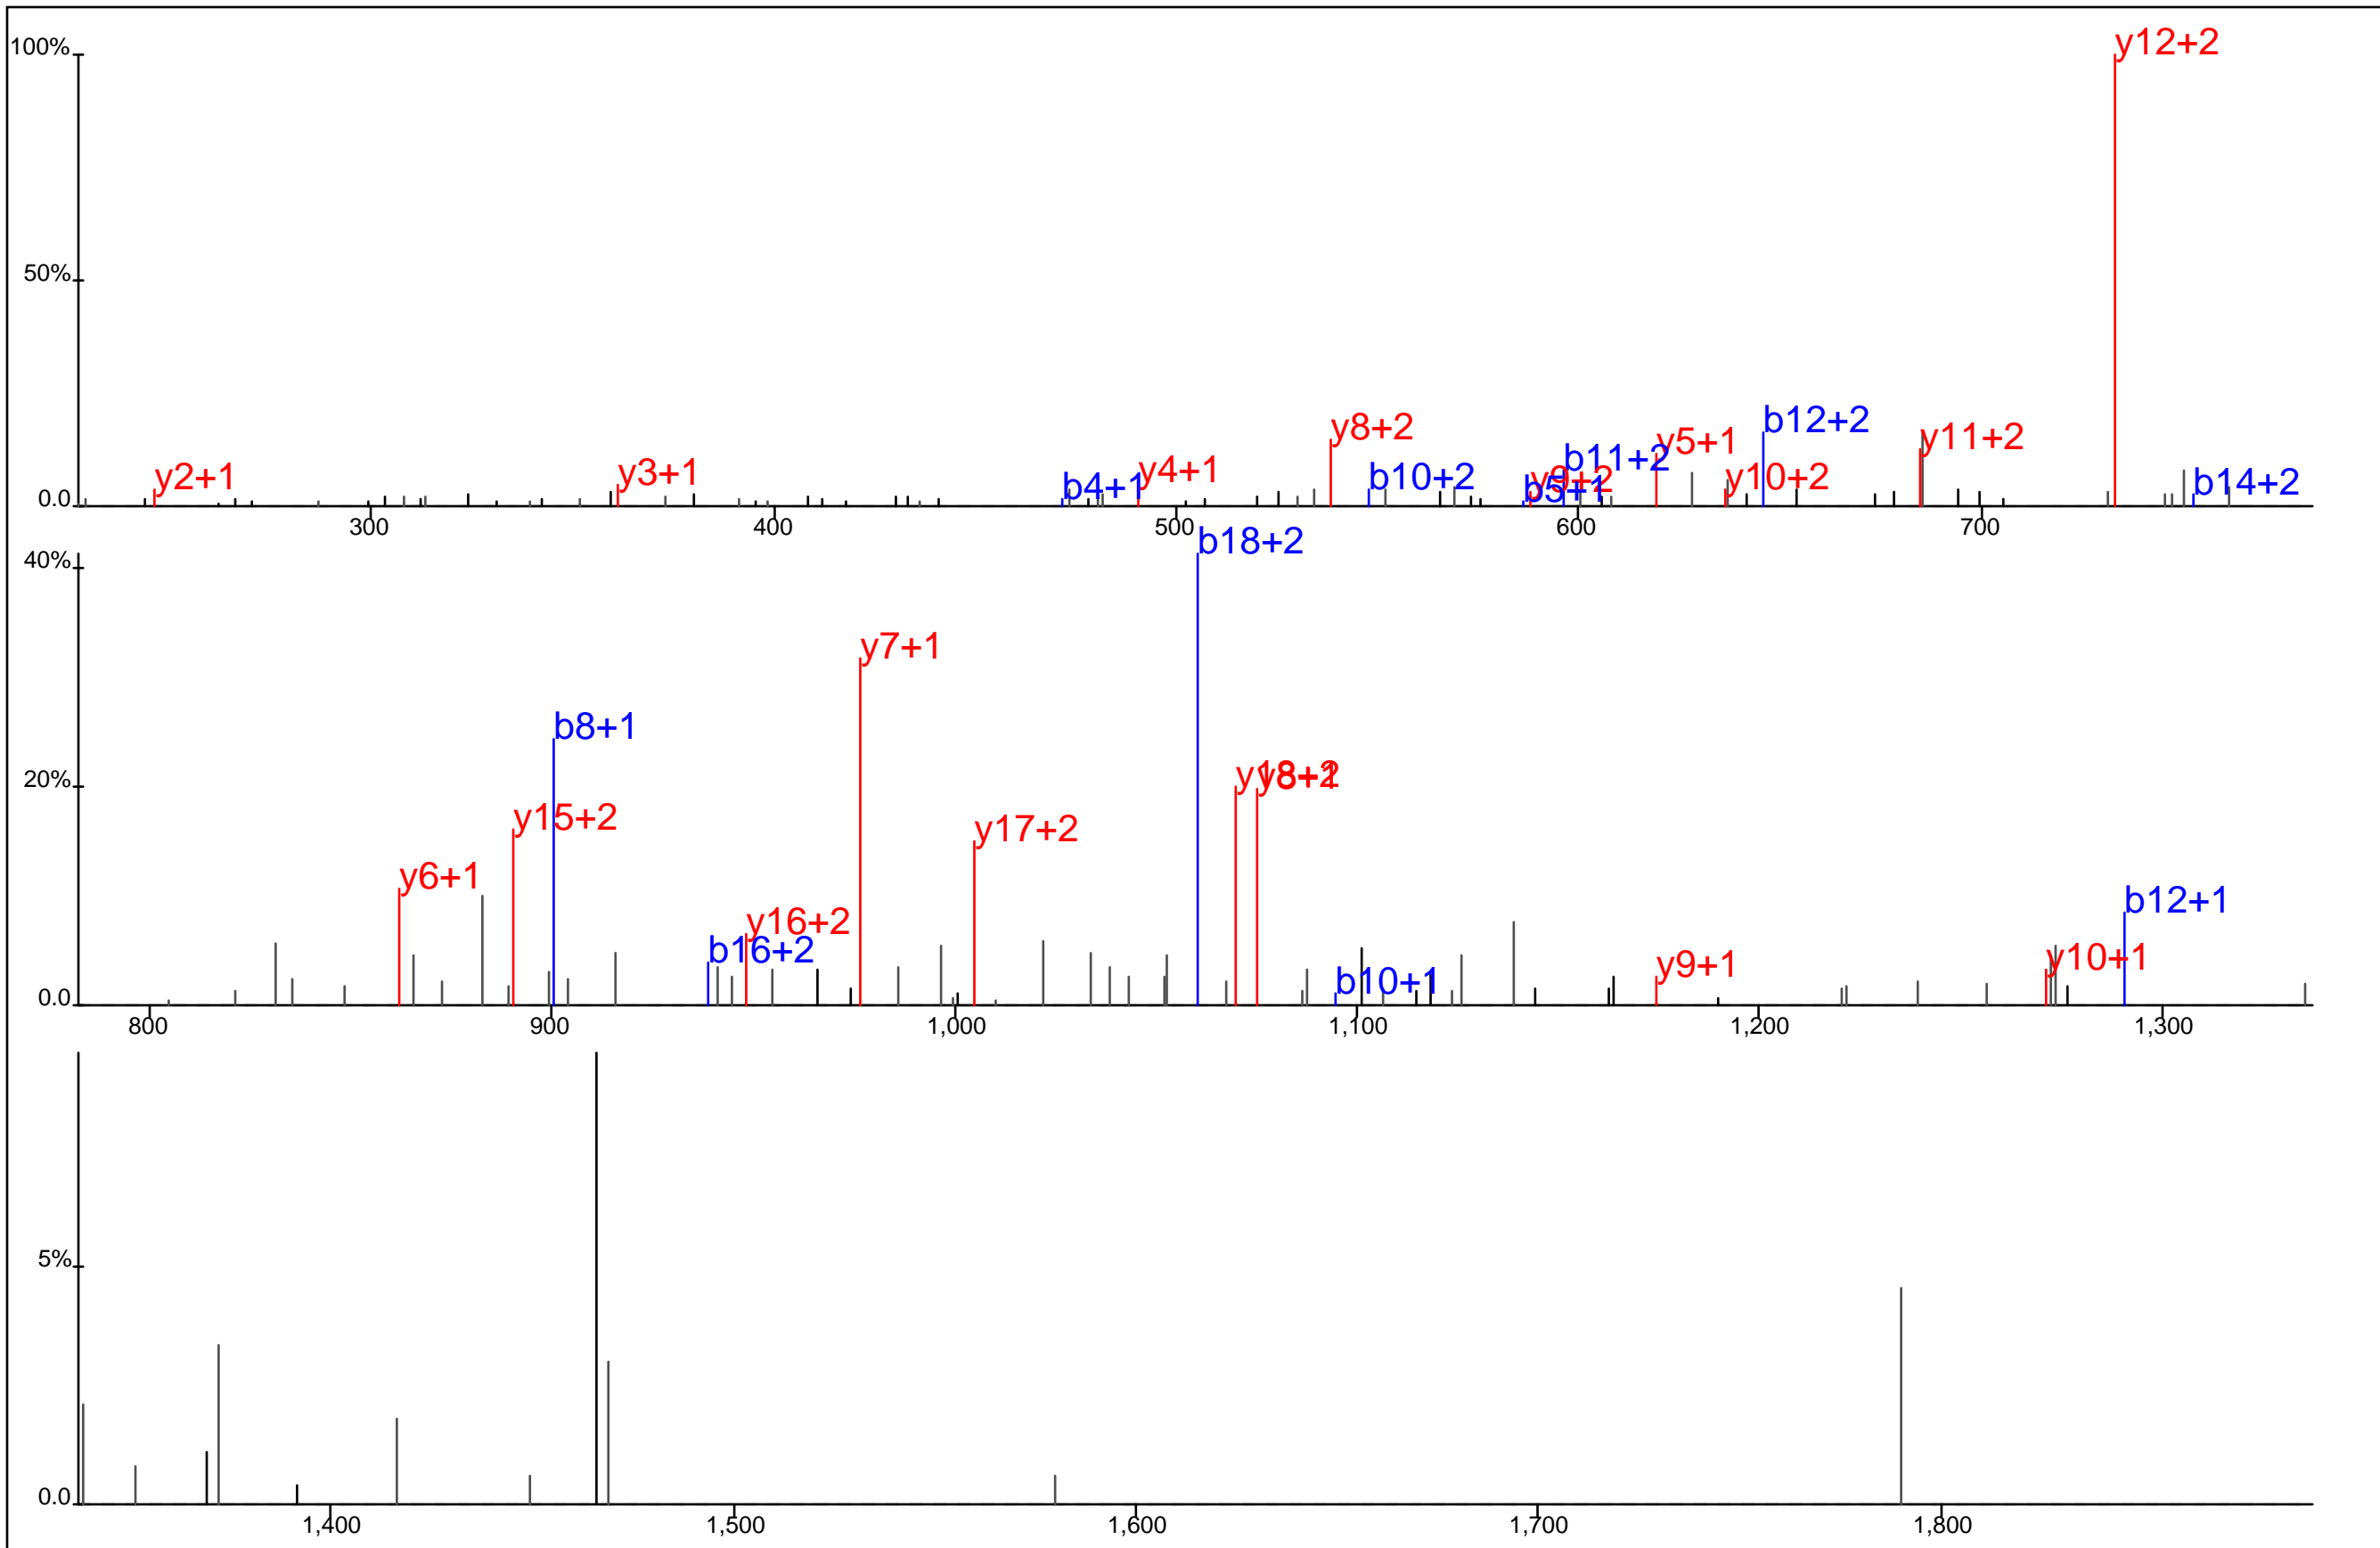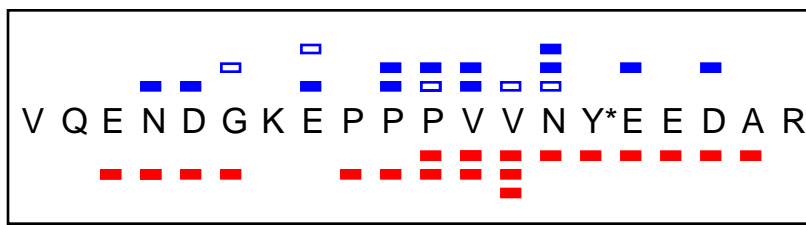

Protein Name: FER  
 gi Accession: 0  
 Precursor Mass: 789.0169+3  
 Delta Mass: 0.773 ppm  
 XCorr: 58.14

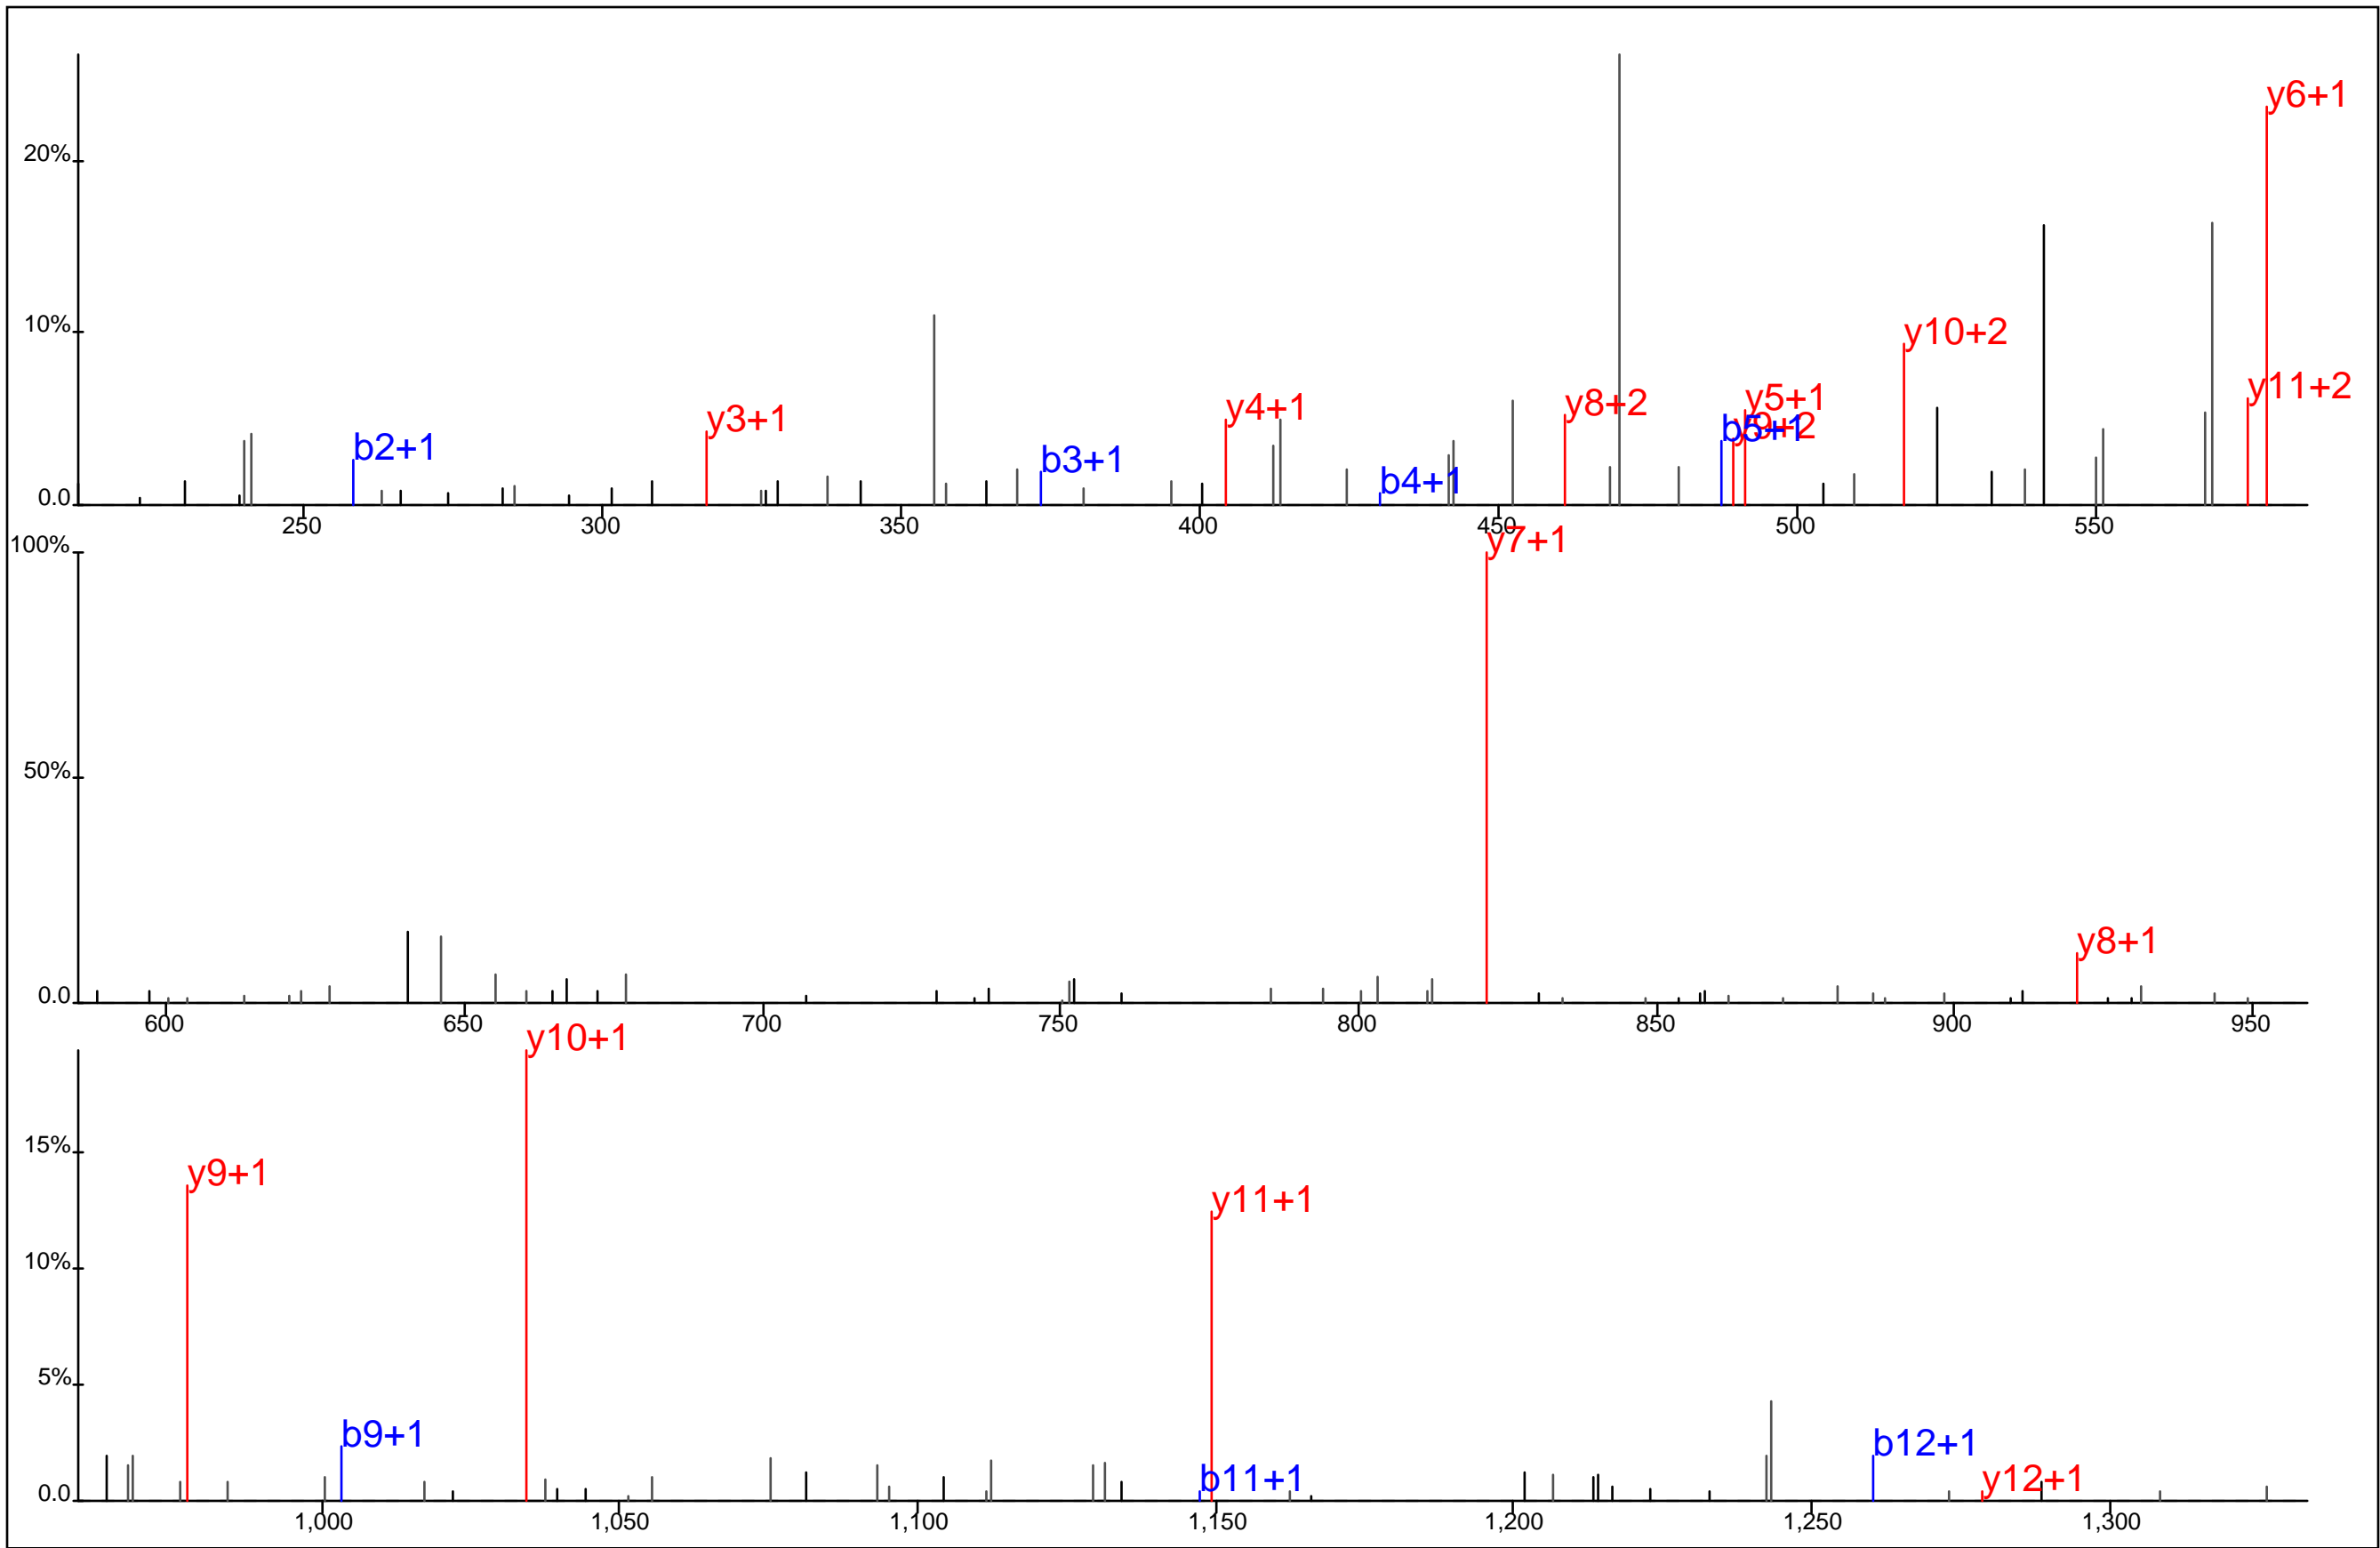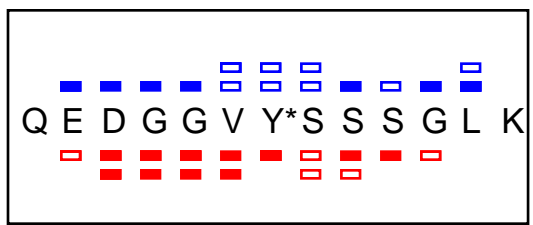

Protein Name: FER  
 gi Accession: 0  
 Precursor Mass: 703.7975+2  
 Delta Mass: 3.053 ppm  
 XCorr: 64.2





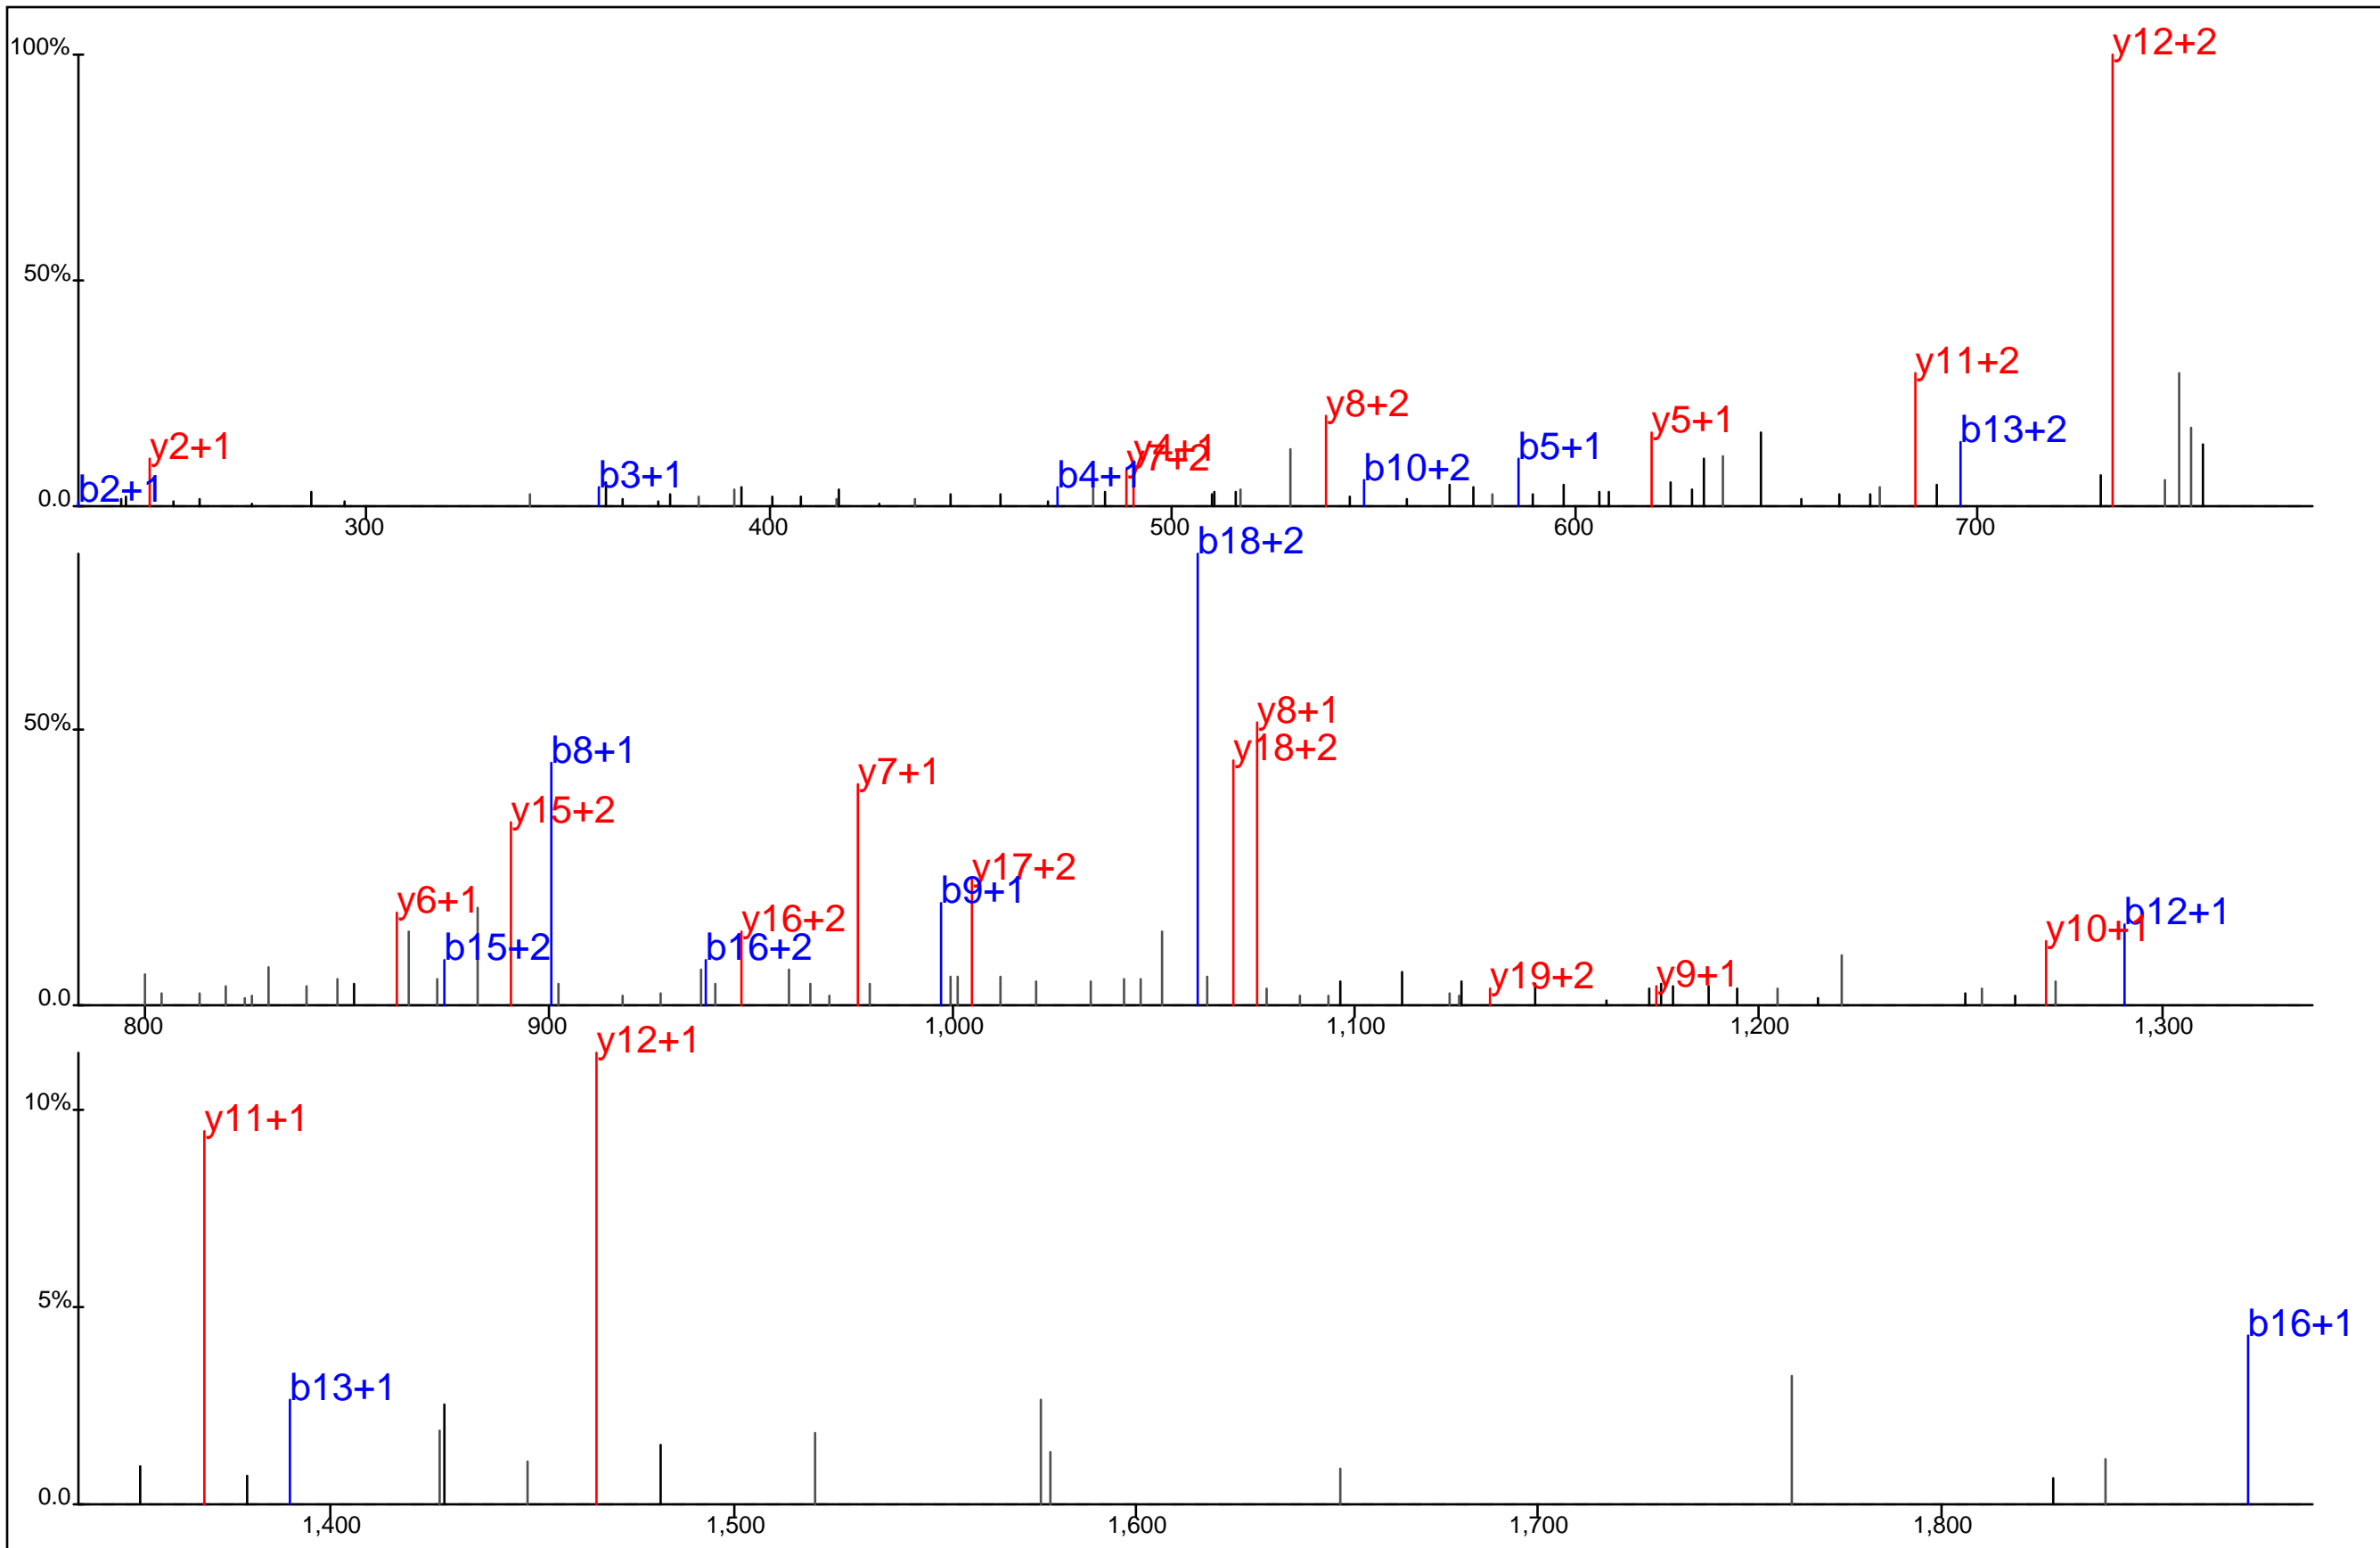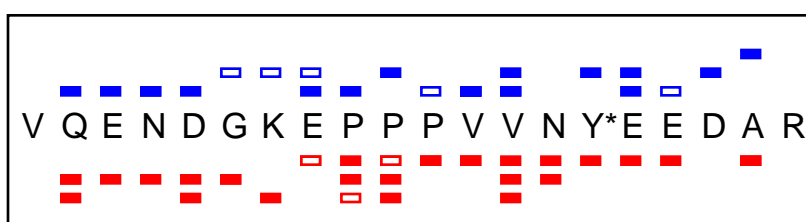

Protein Name: FER  
 gi Accession: 0  
 Precursor Mass: 789.0156+3  
 Delta Mass: 0.854 ppm  
 XCorr: 56.37

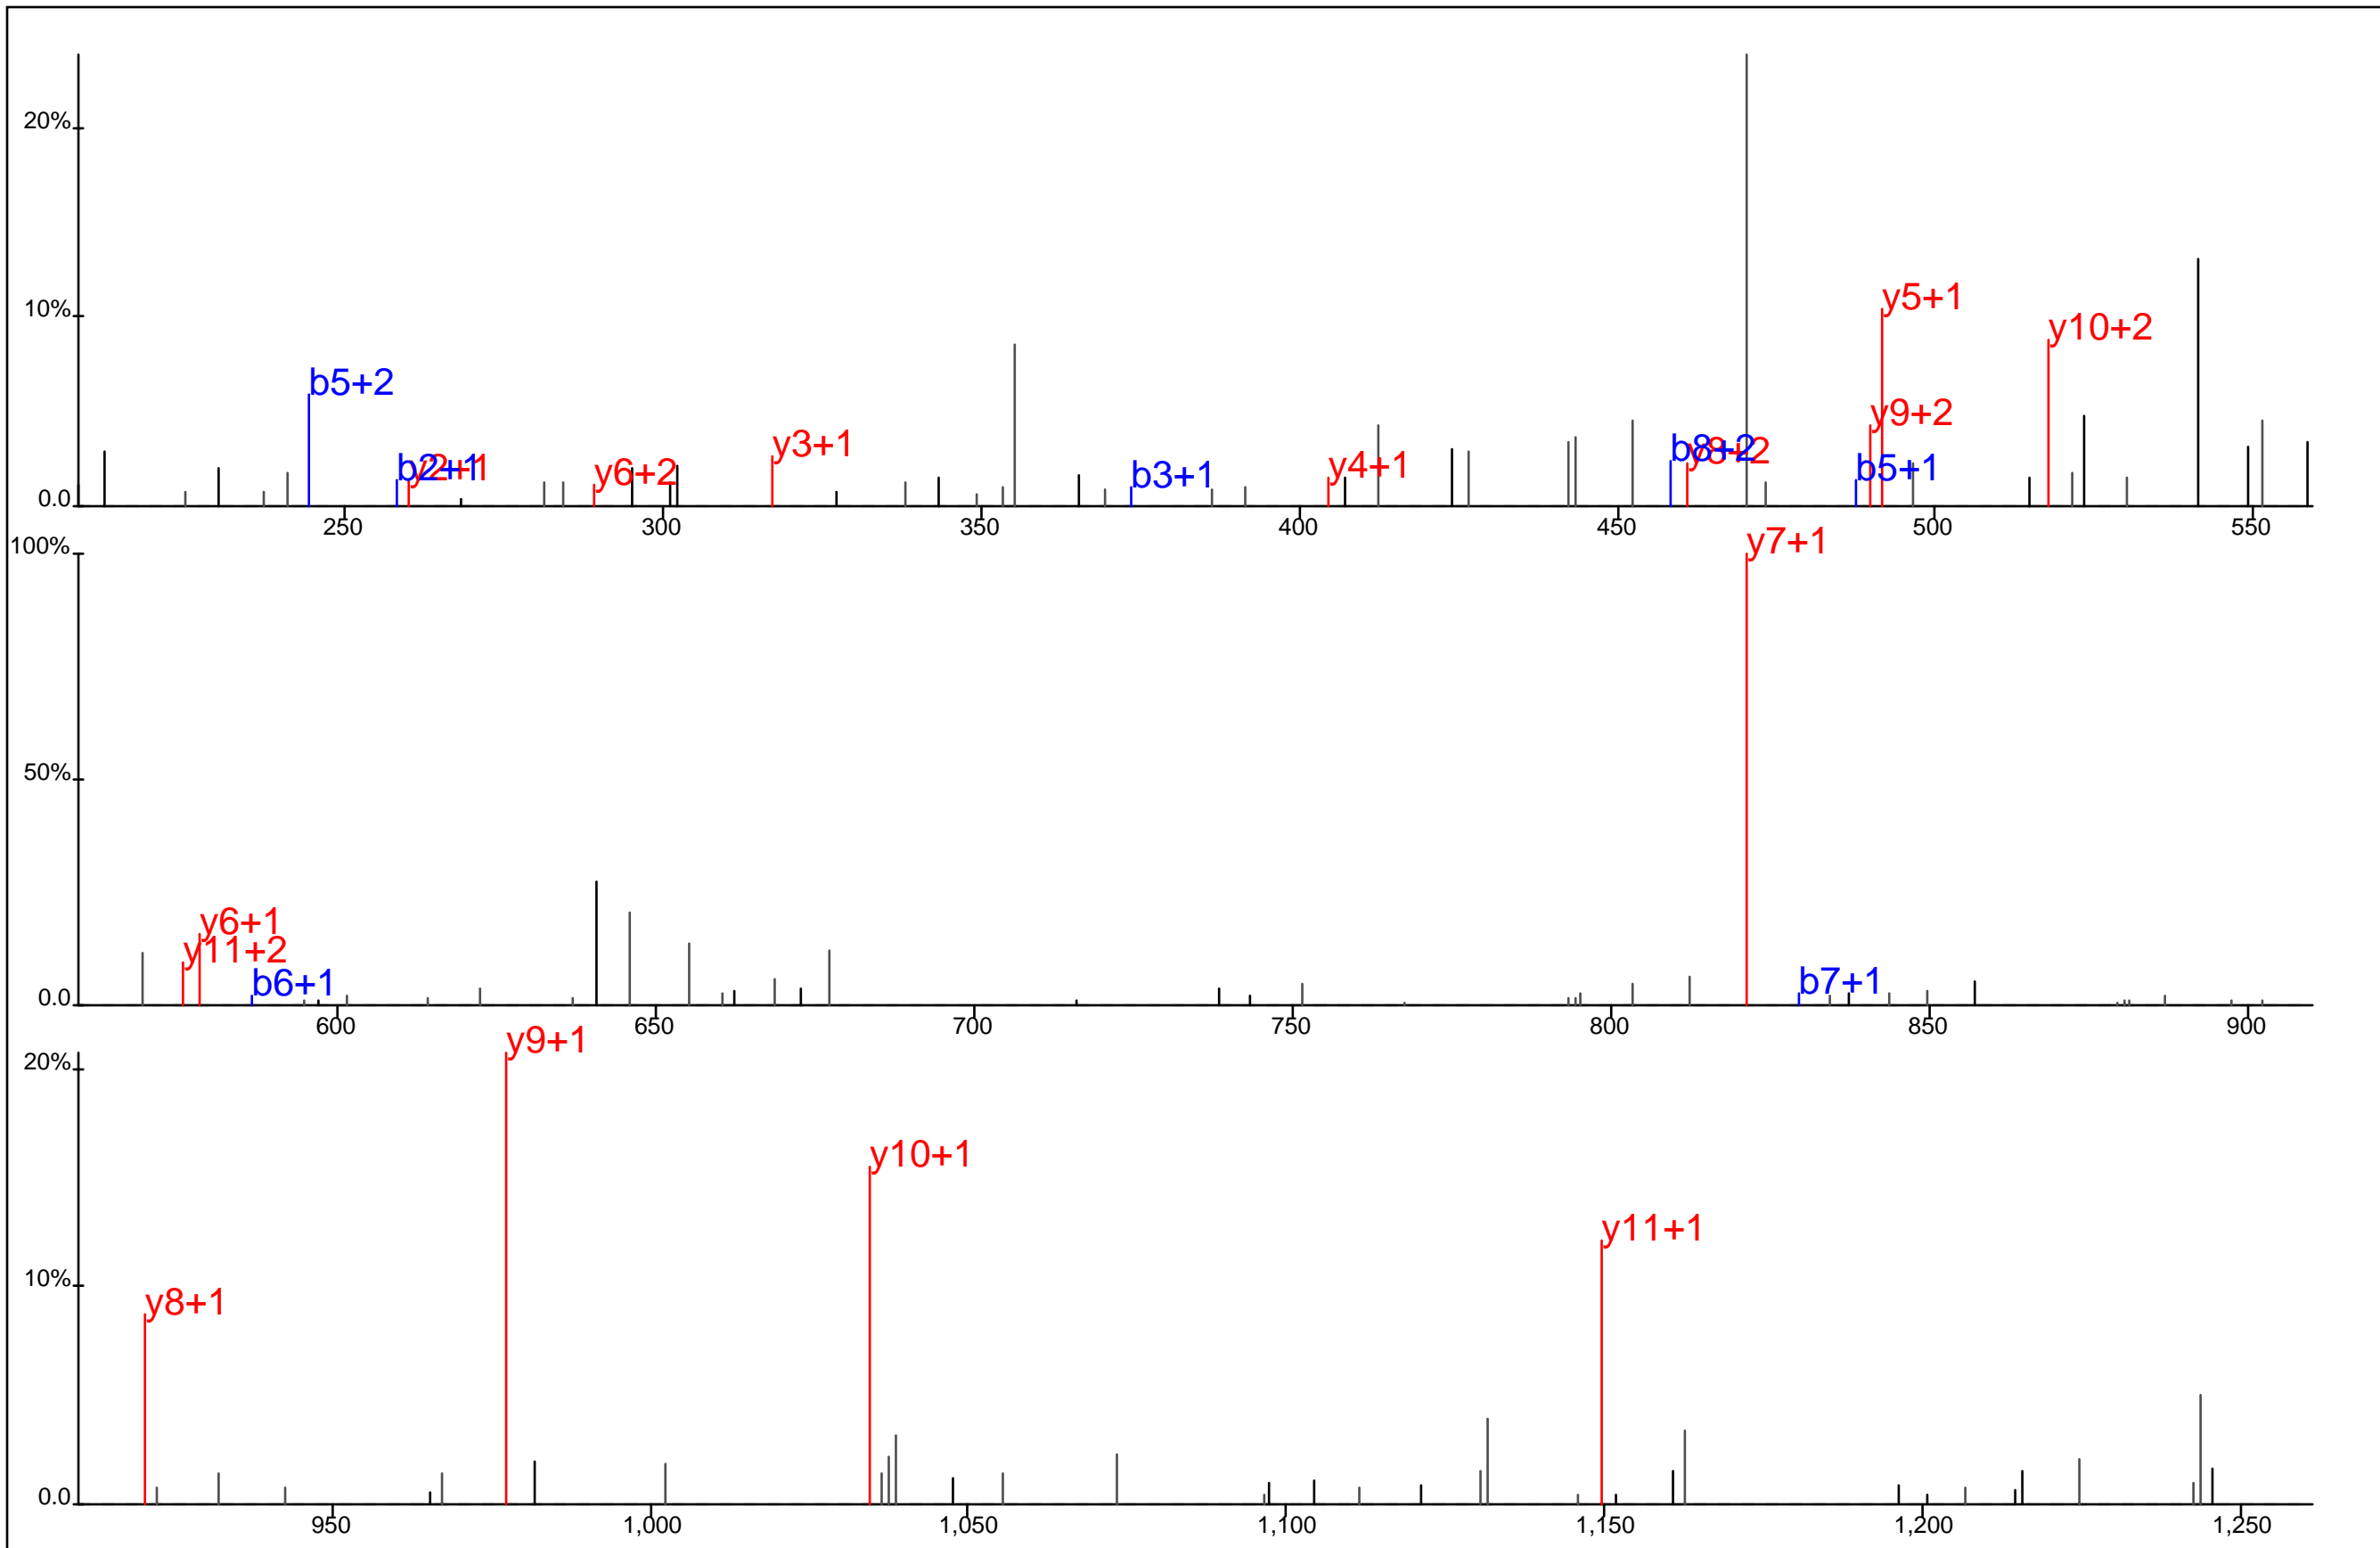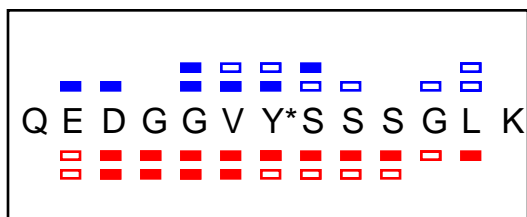

Protein Name: FER  
 gi Accession: 0  
 Precursor Mass: 703.7940+2  
 Delta Mass: 1.981 ppm  
 XCorr: 48.1

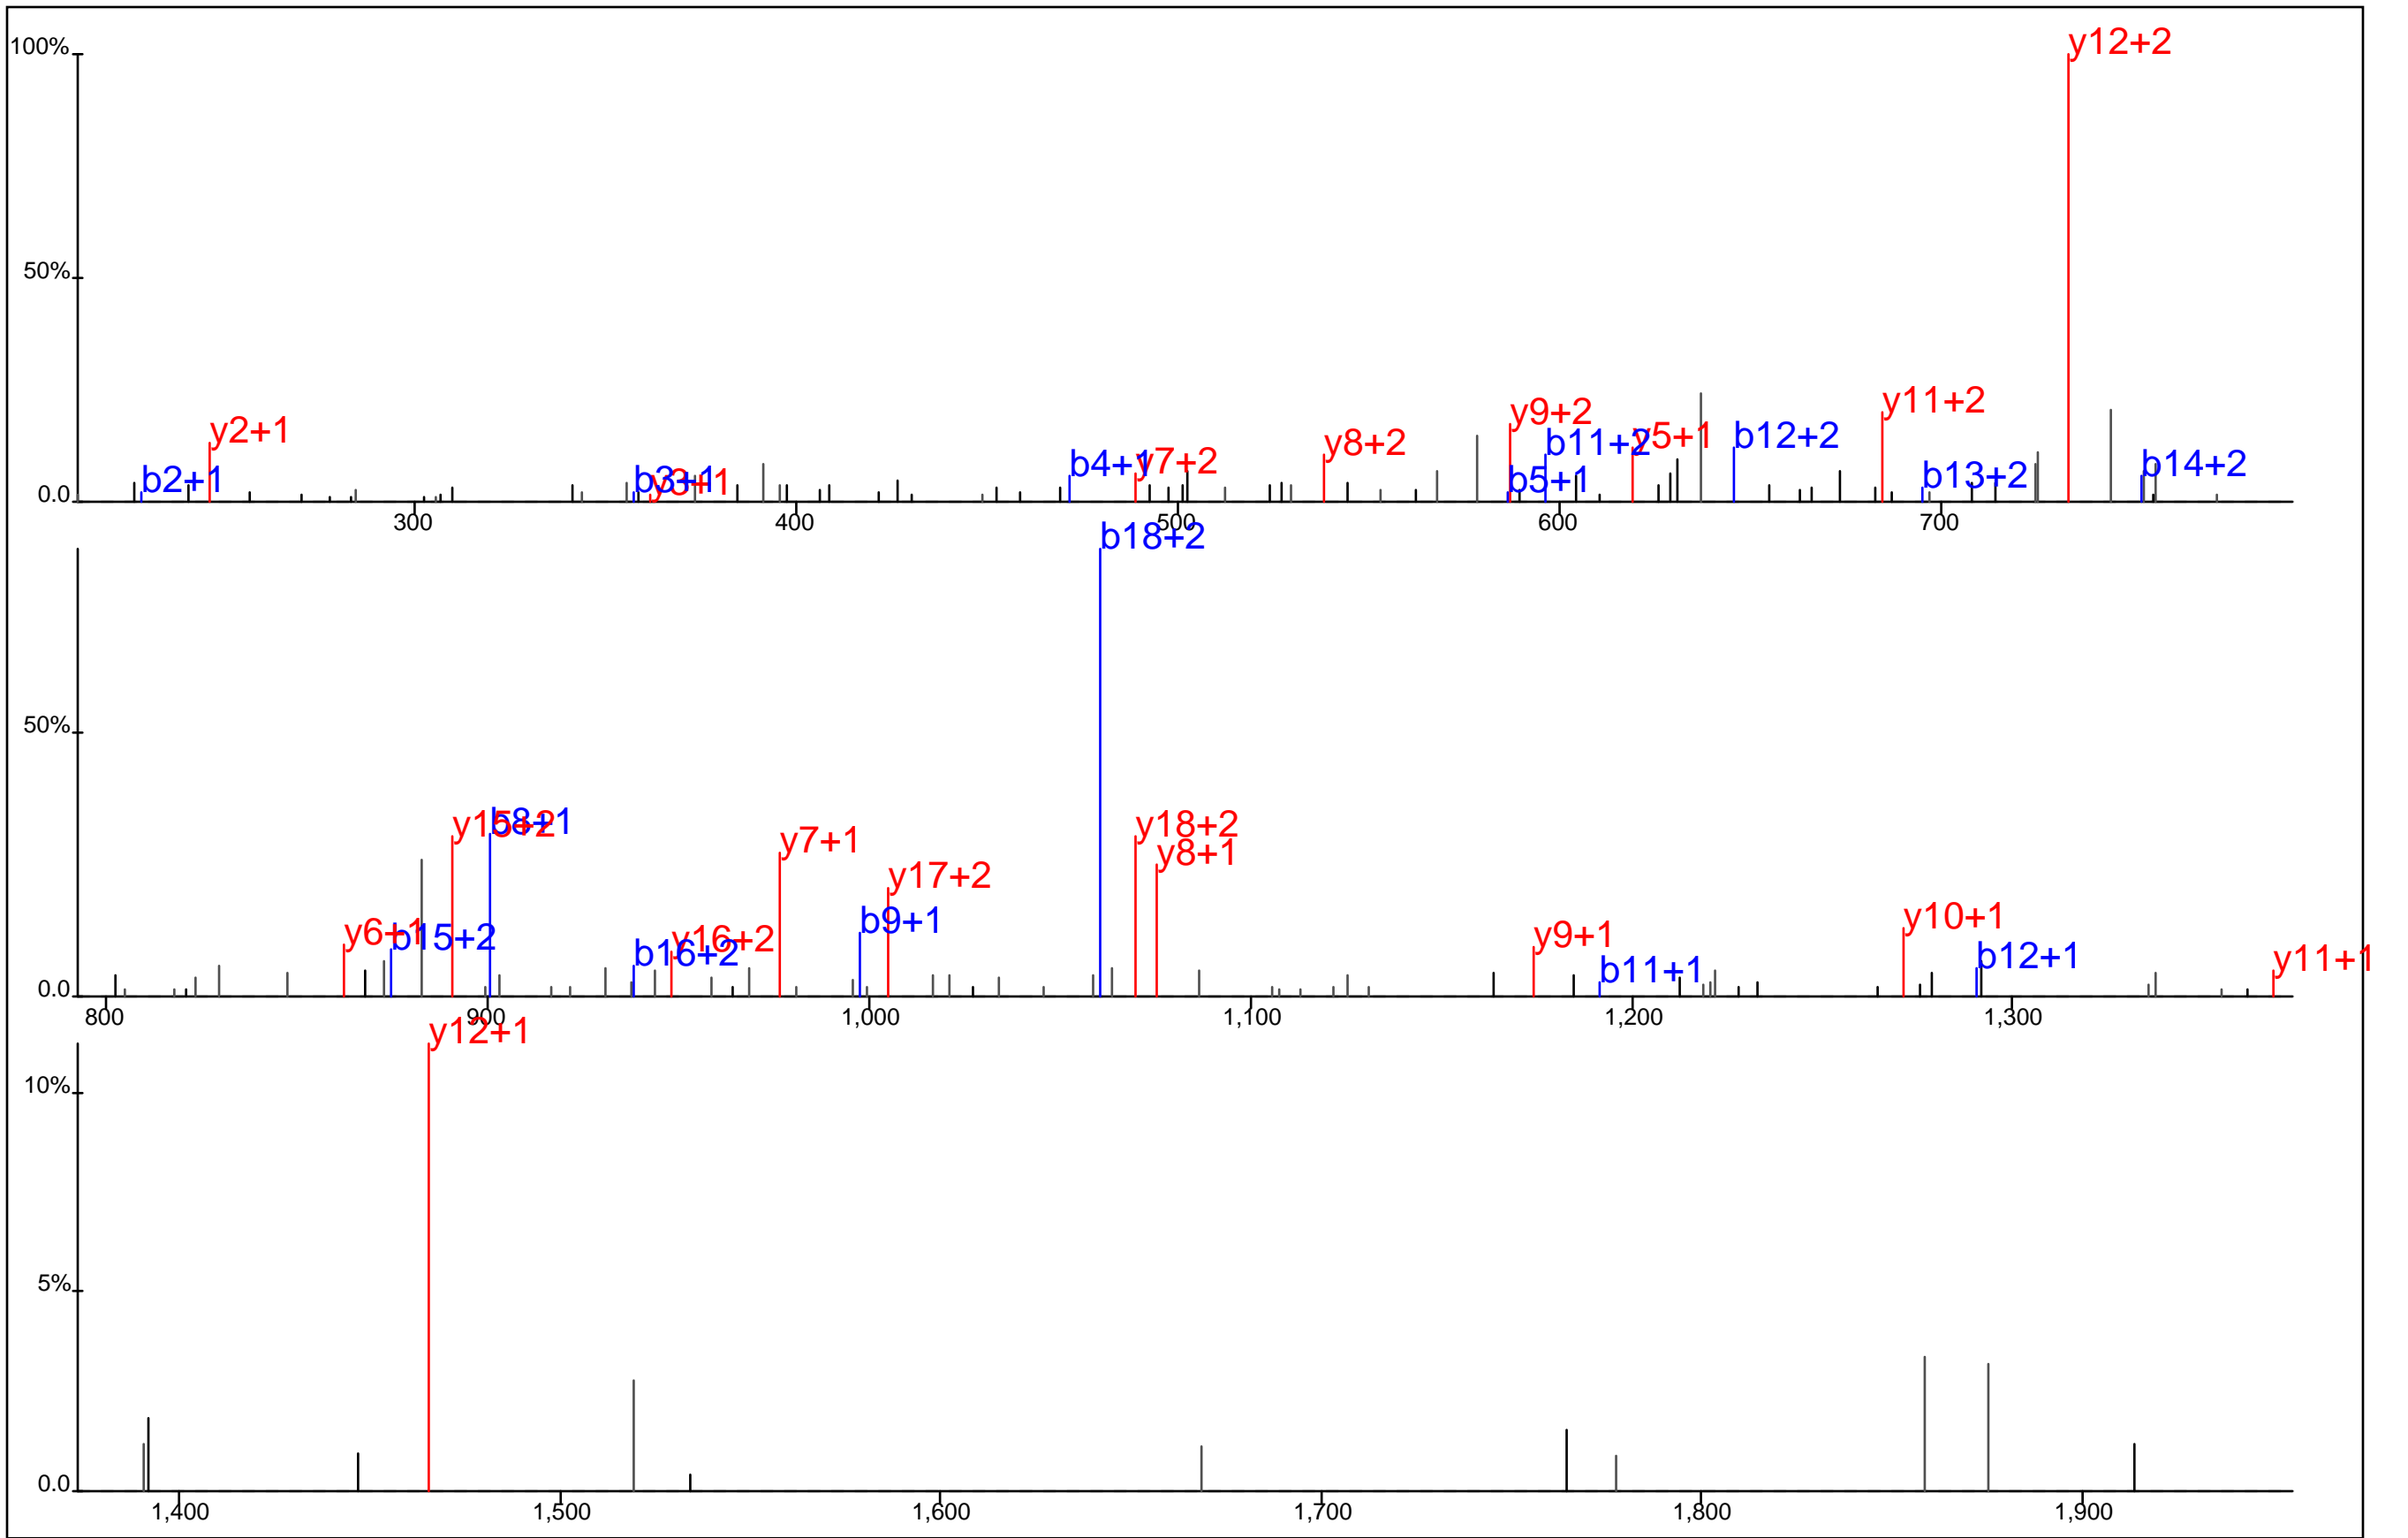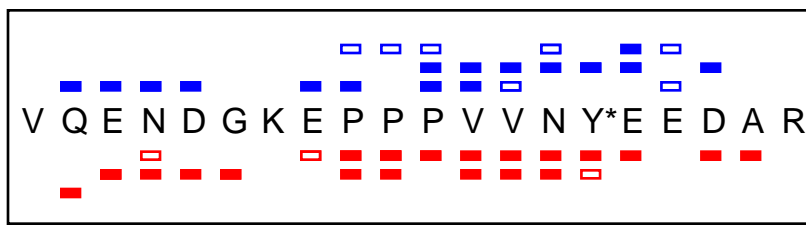

Protein Name: FER  
 gi Accession: 0  
 Precursor Mass: 789.0170+3  
 Delta Mass: 0.850 ppm  
 XCorr: 53.28

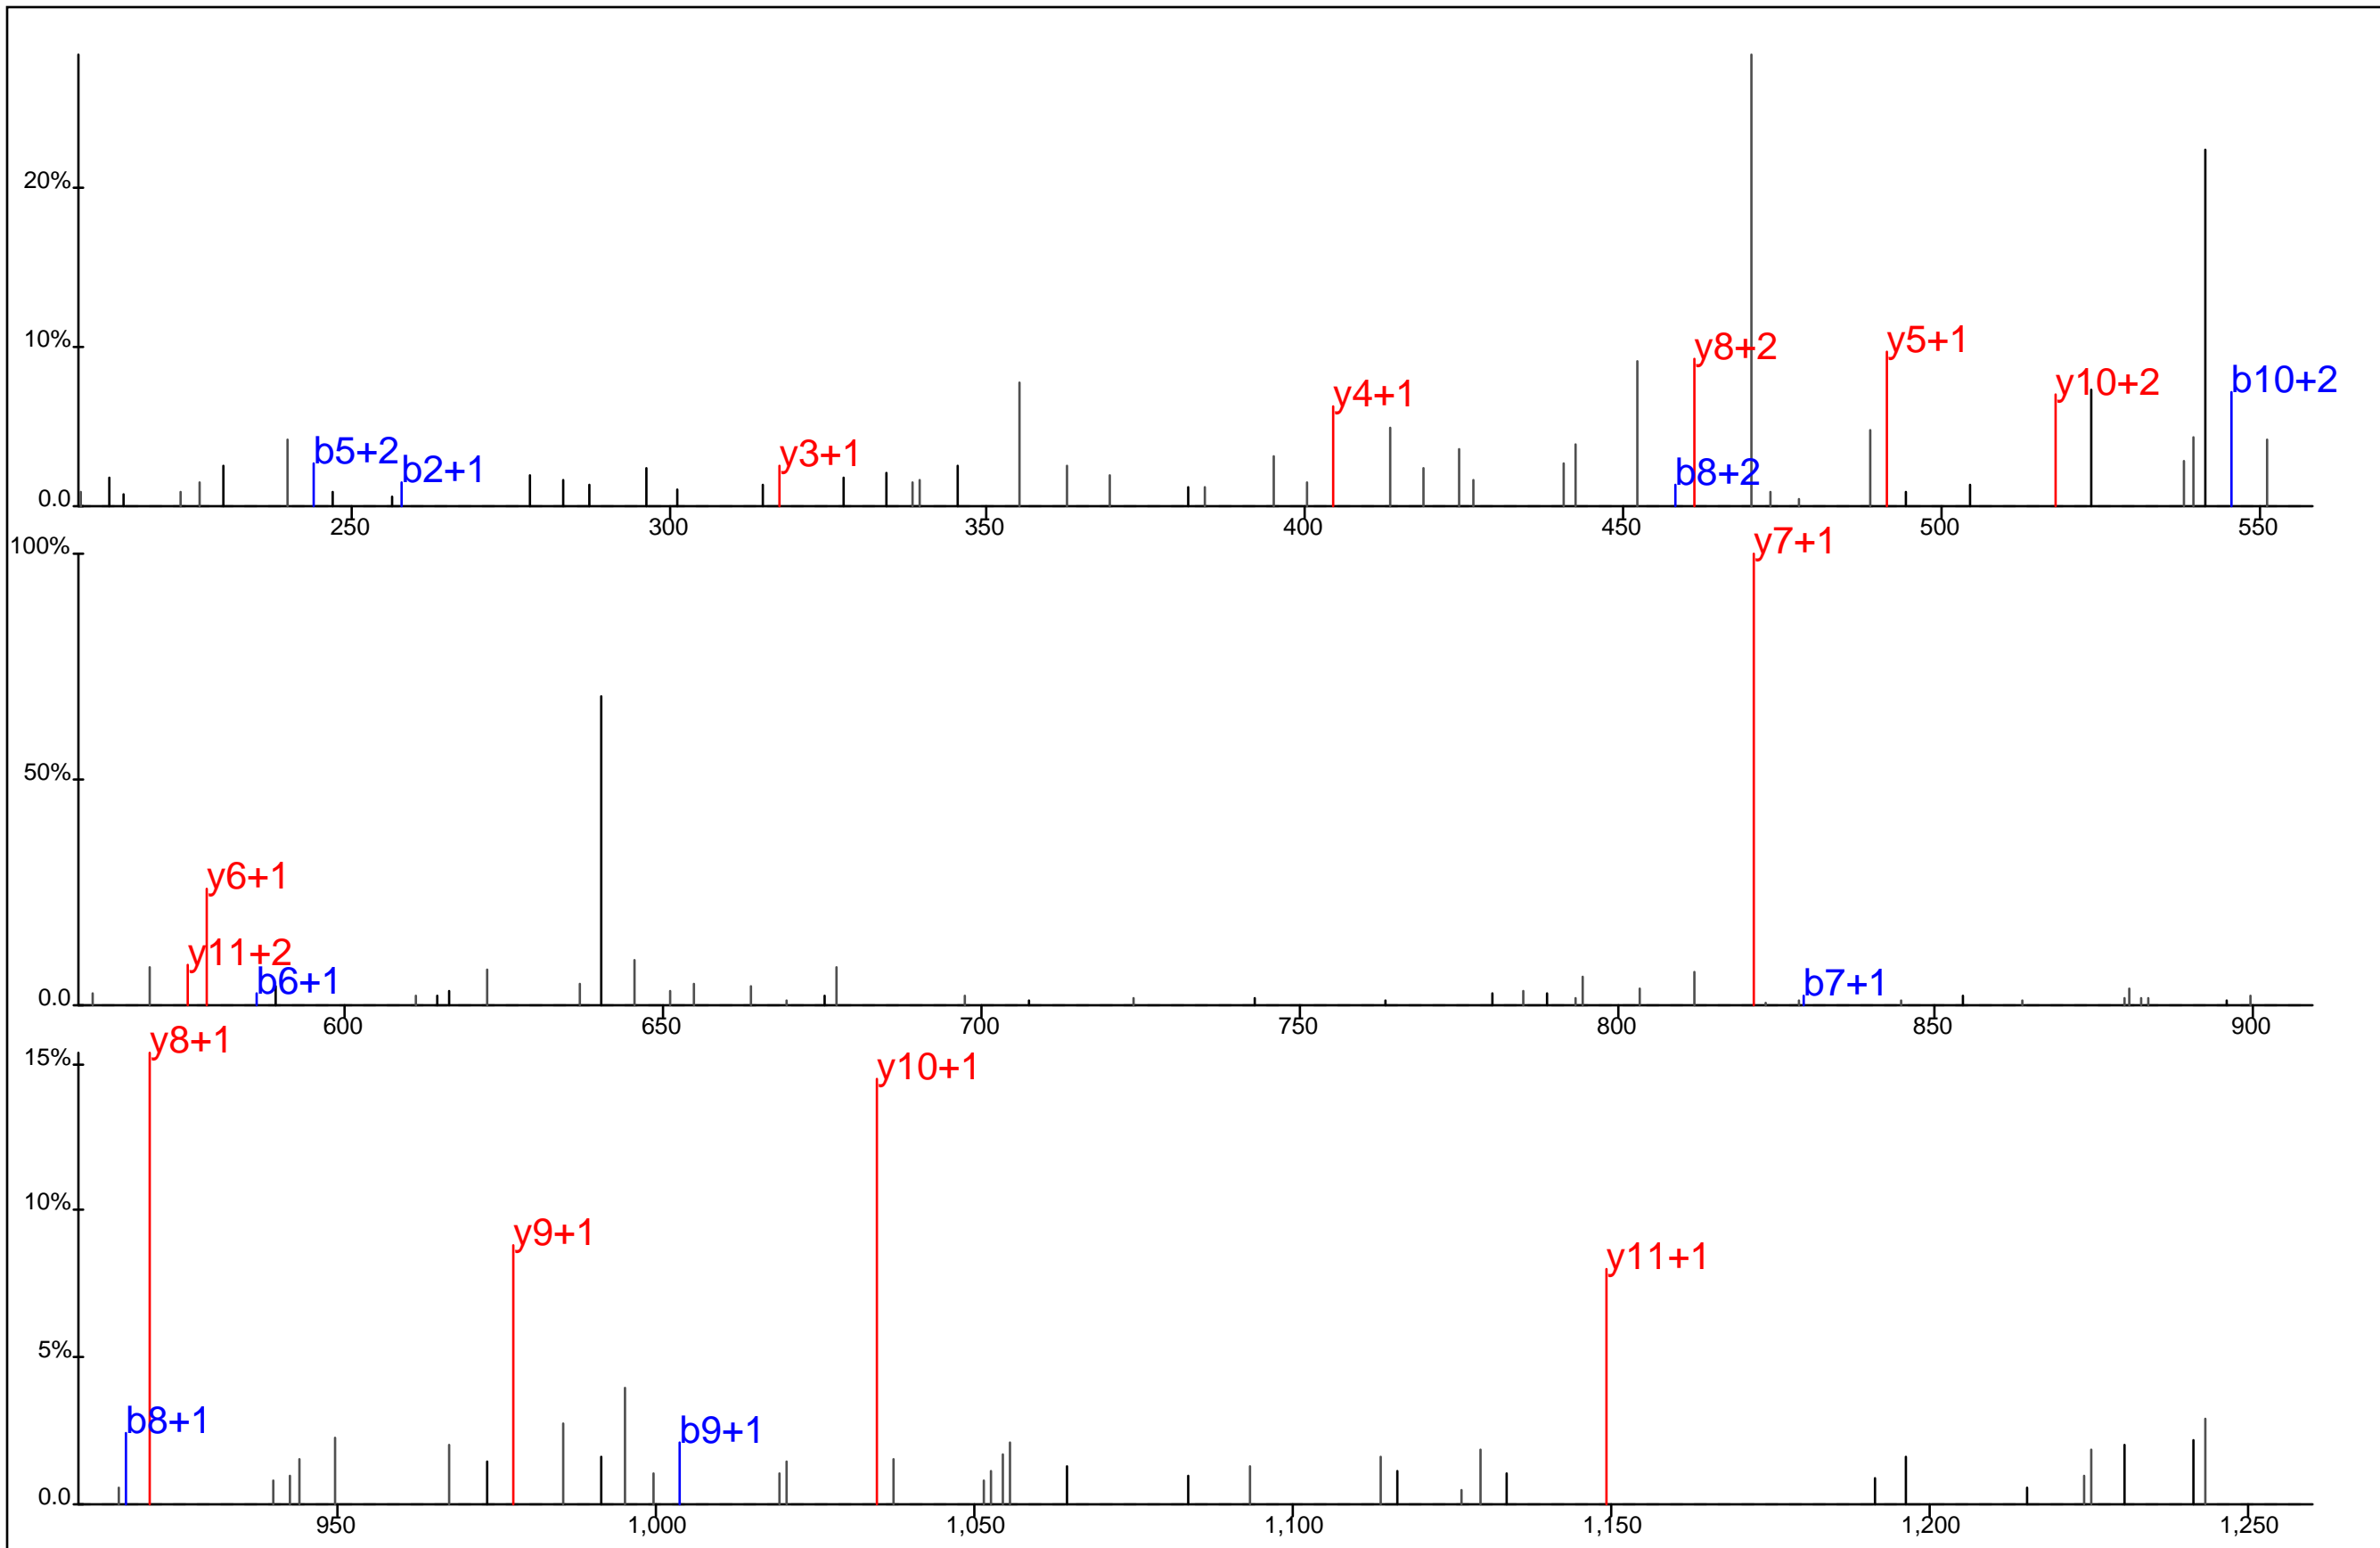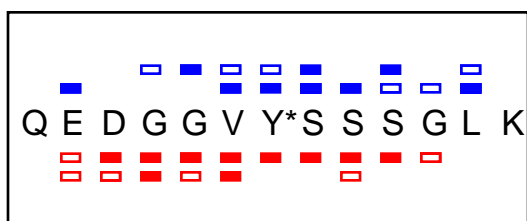

Protein Name: FER  
 gi Accession: 0  
 Precursor Mass: 703.7982+2  
 Delta Mass: 3.922 ppm  
 XCorr: 45.07

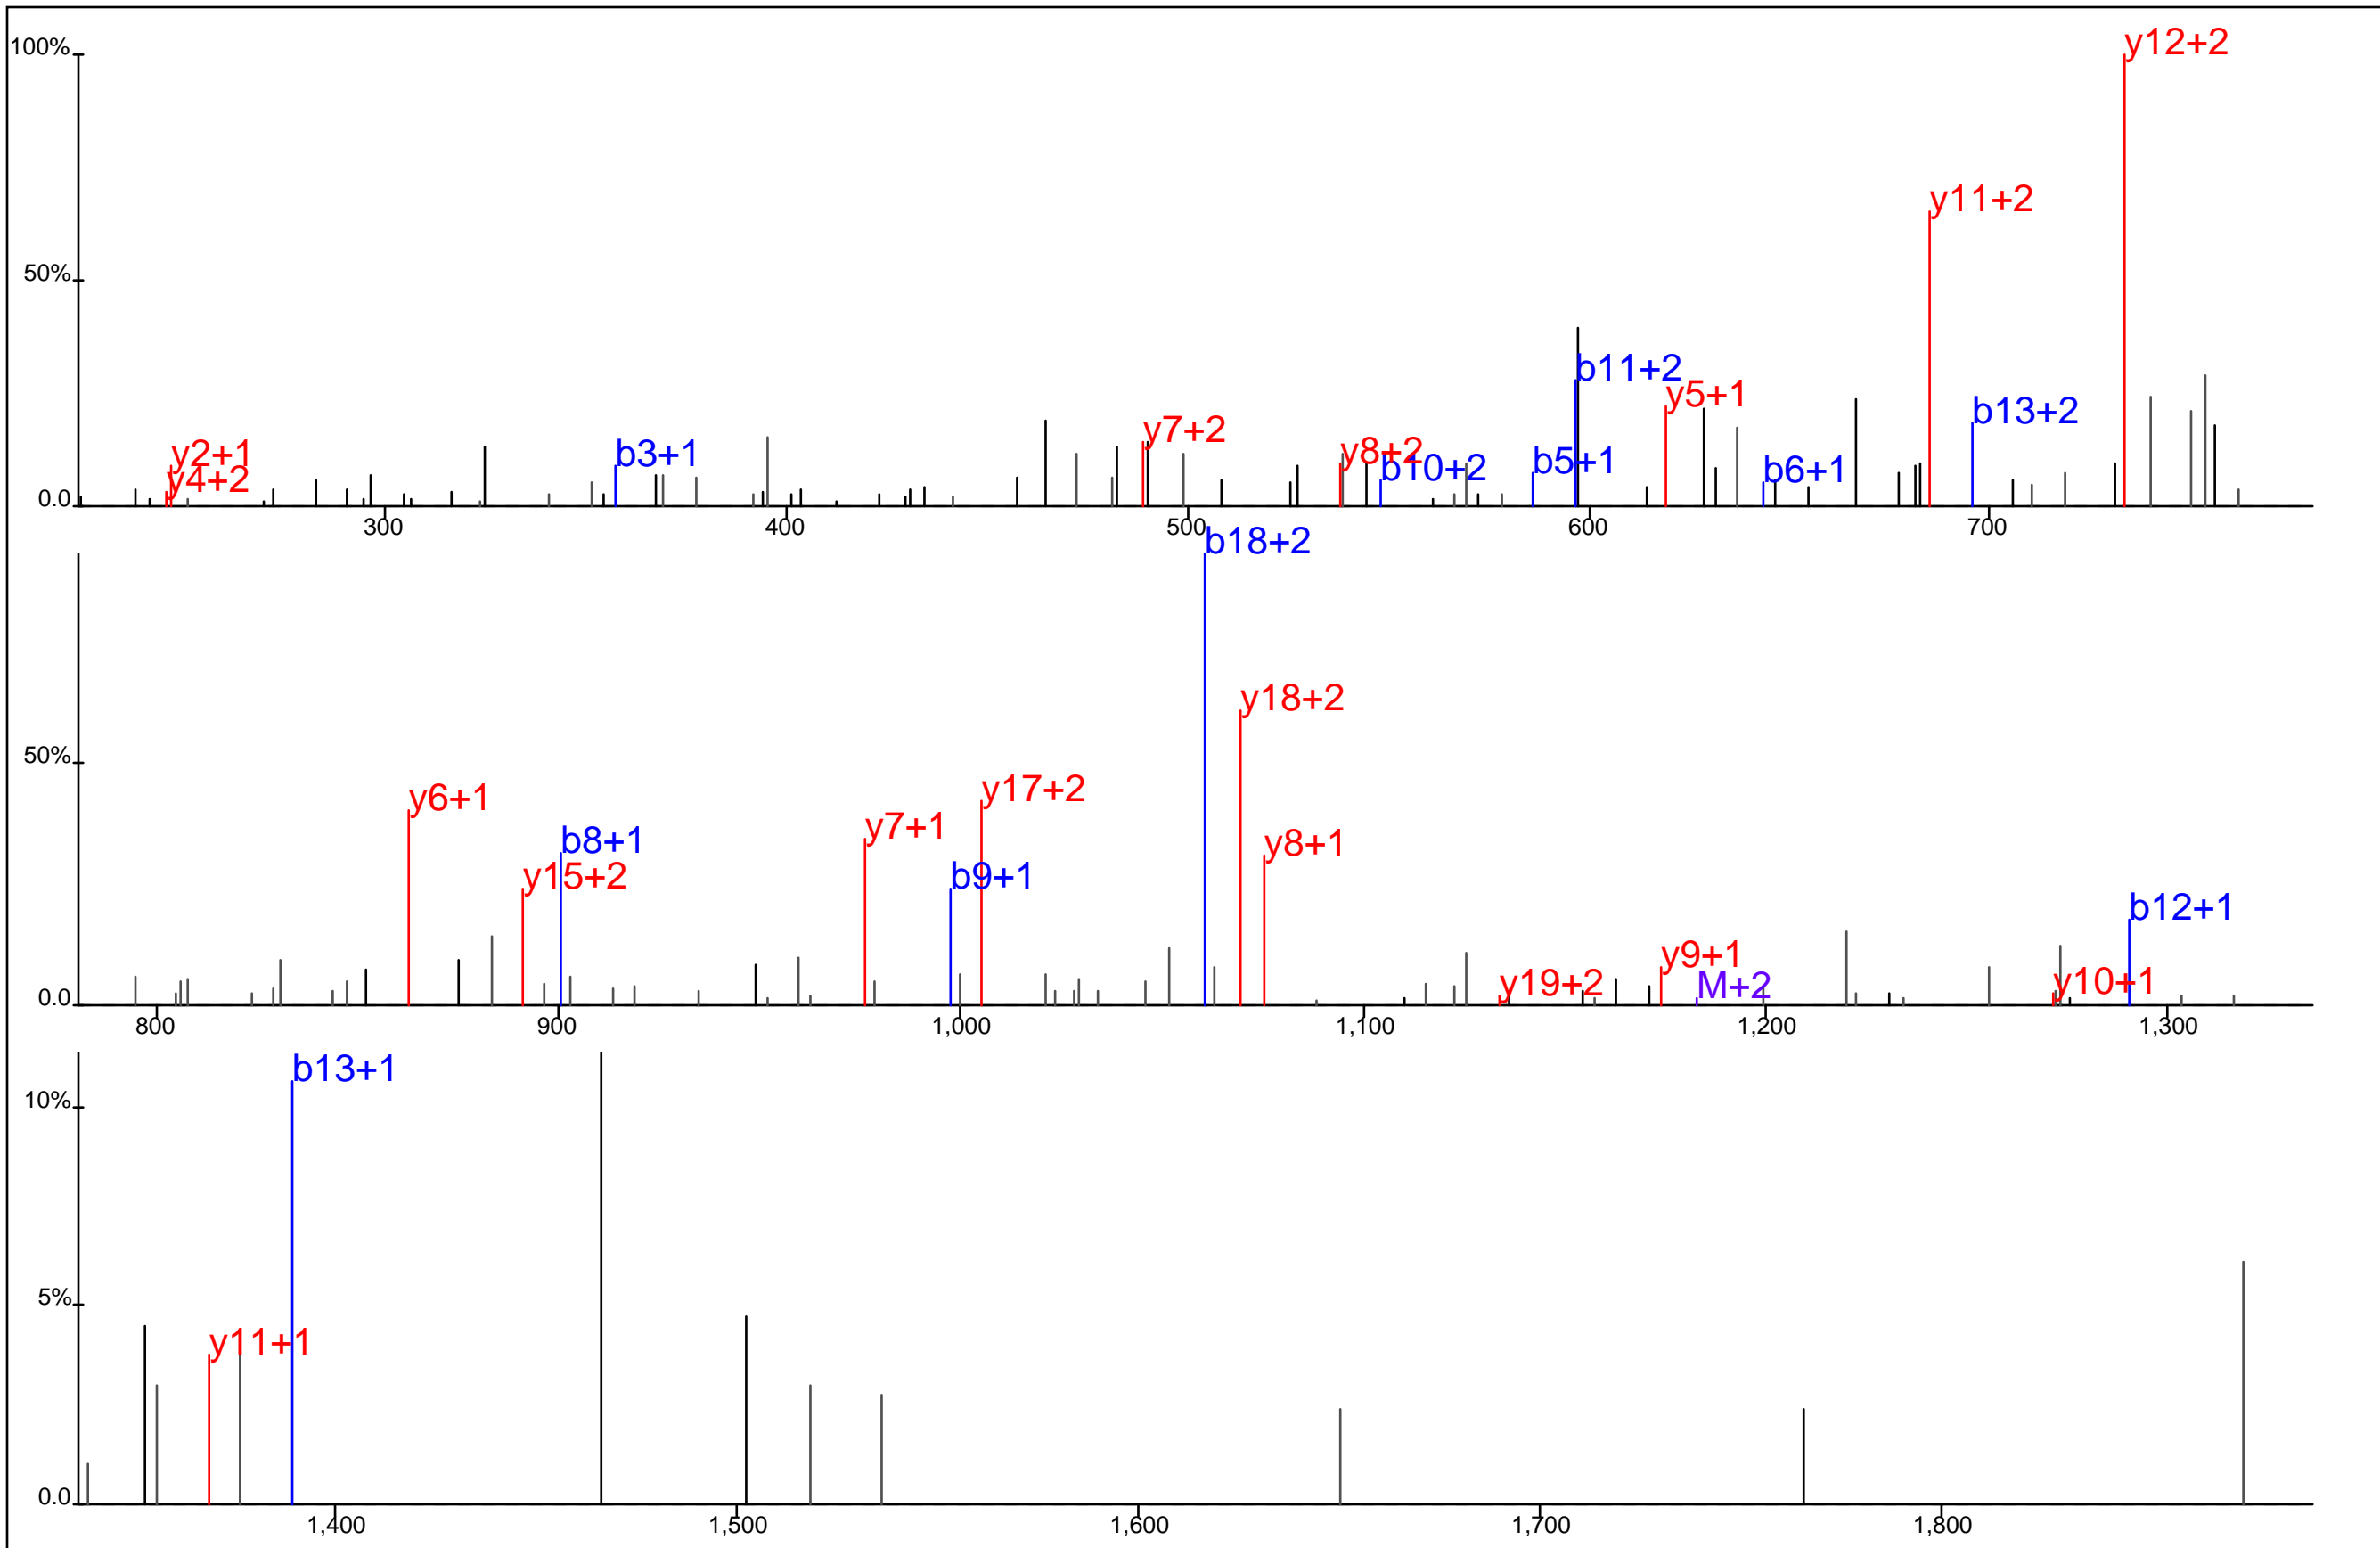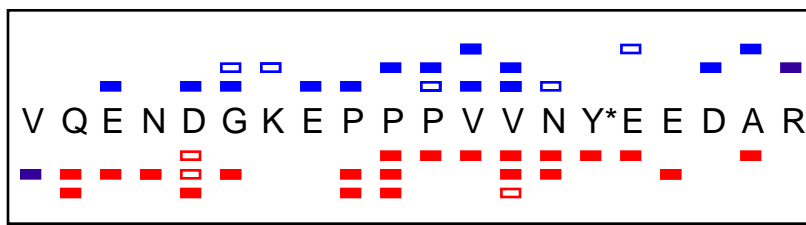

Protein Name: FER  
 gi Accession: 0  
 Precursor Mass: 789.0175+3  
 Delta Mass: 1.546 ppm  
 XCorr: 30.88

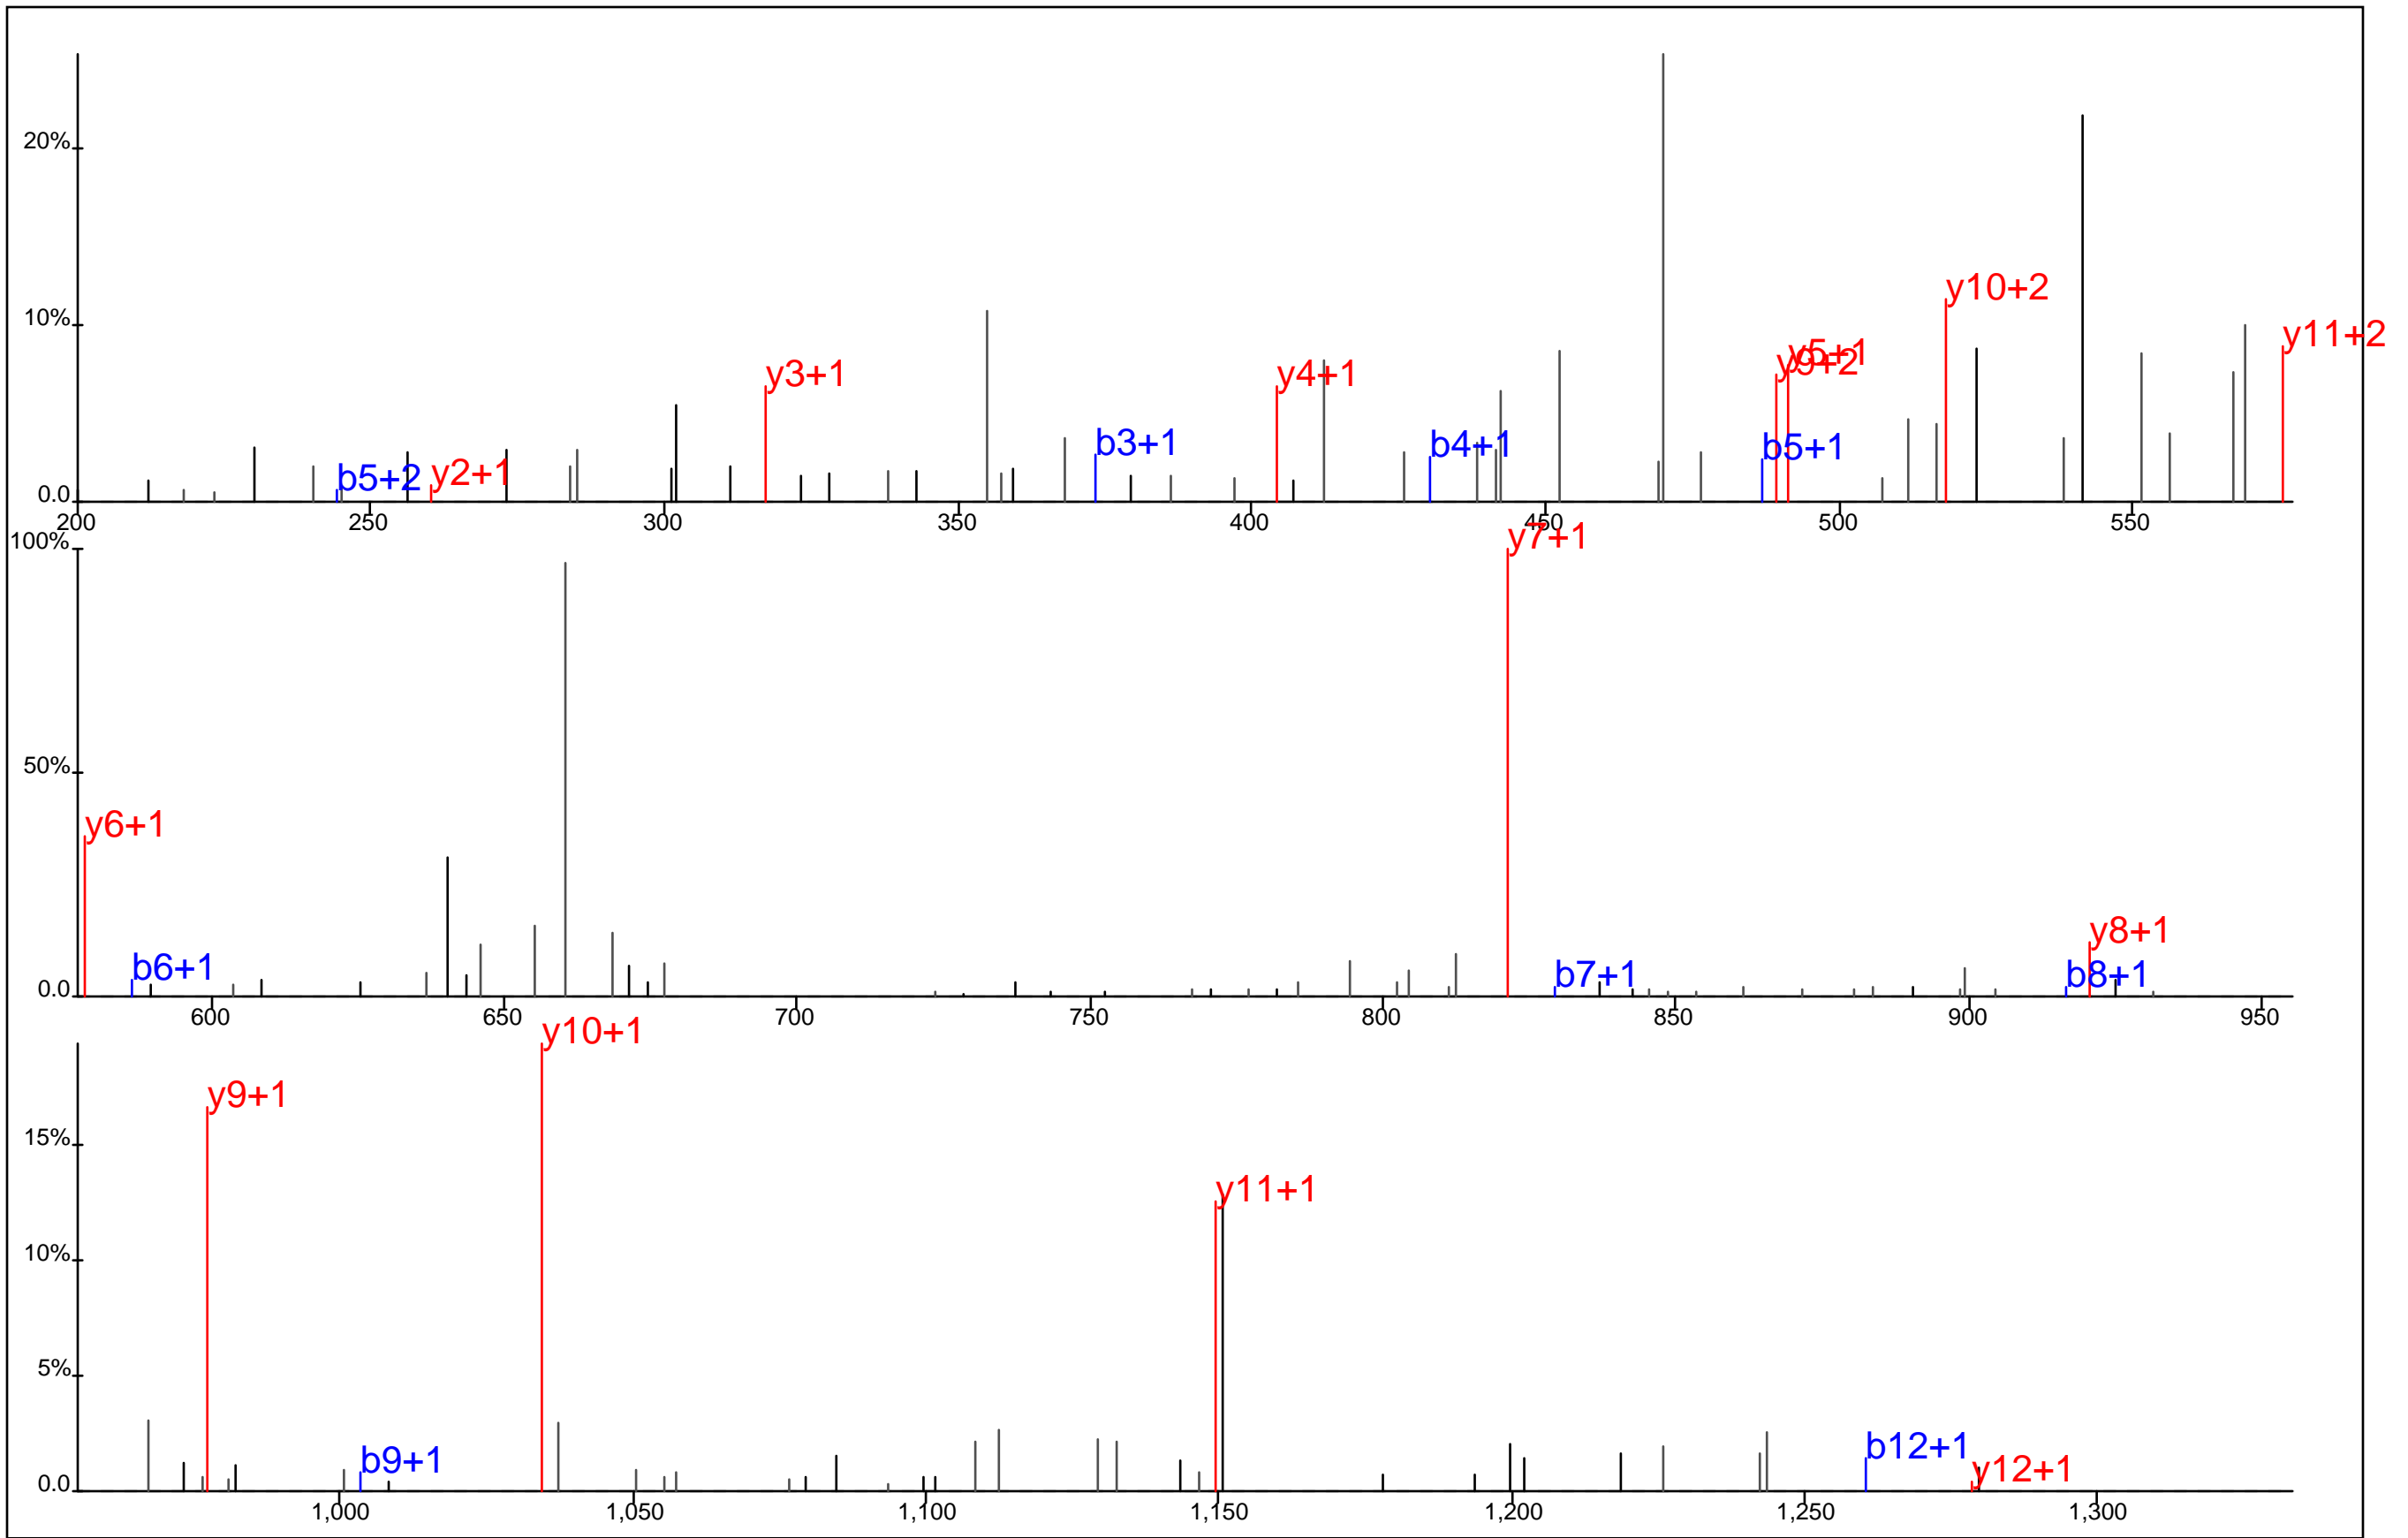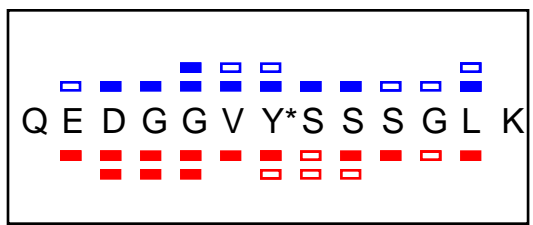

Protein Name: FER  
 gi Accession: 0  
 Precursor Mass: 703.7965+2  
 Delta Mass: 1.578 ppm  
 XCorr: 54.49

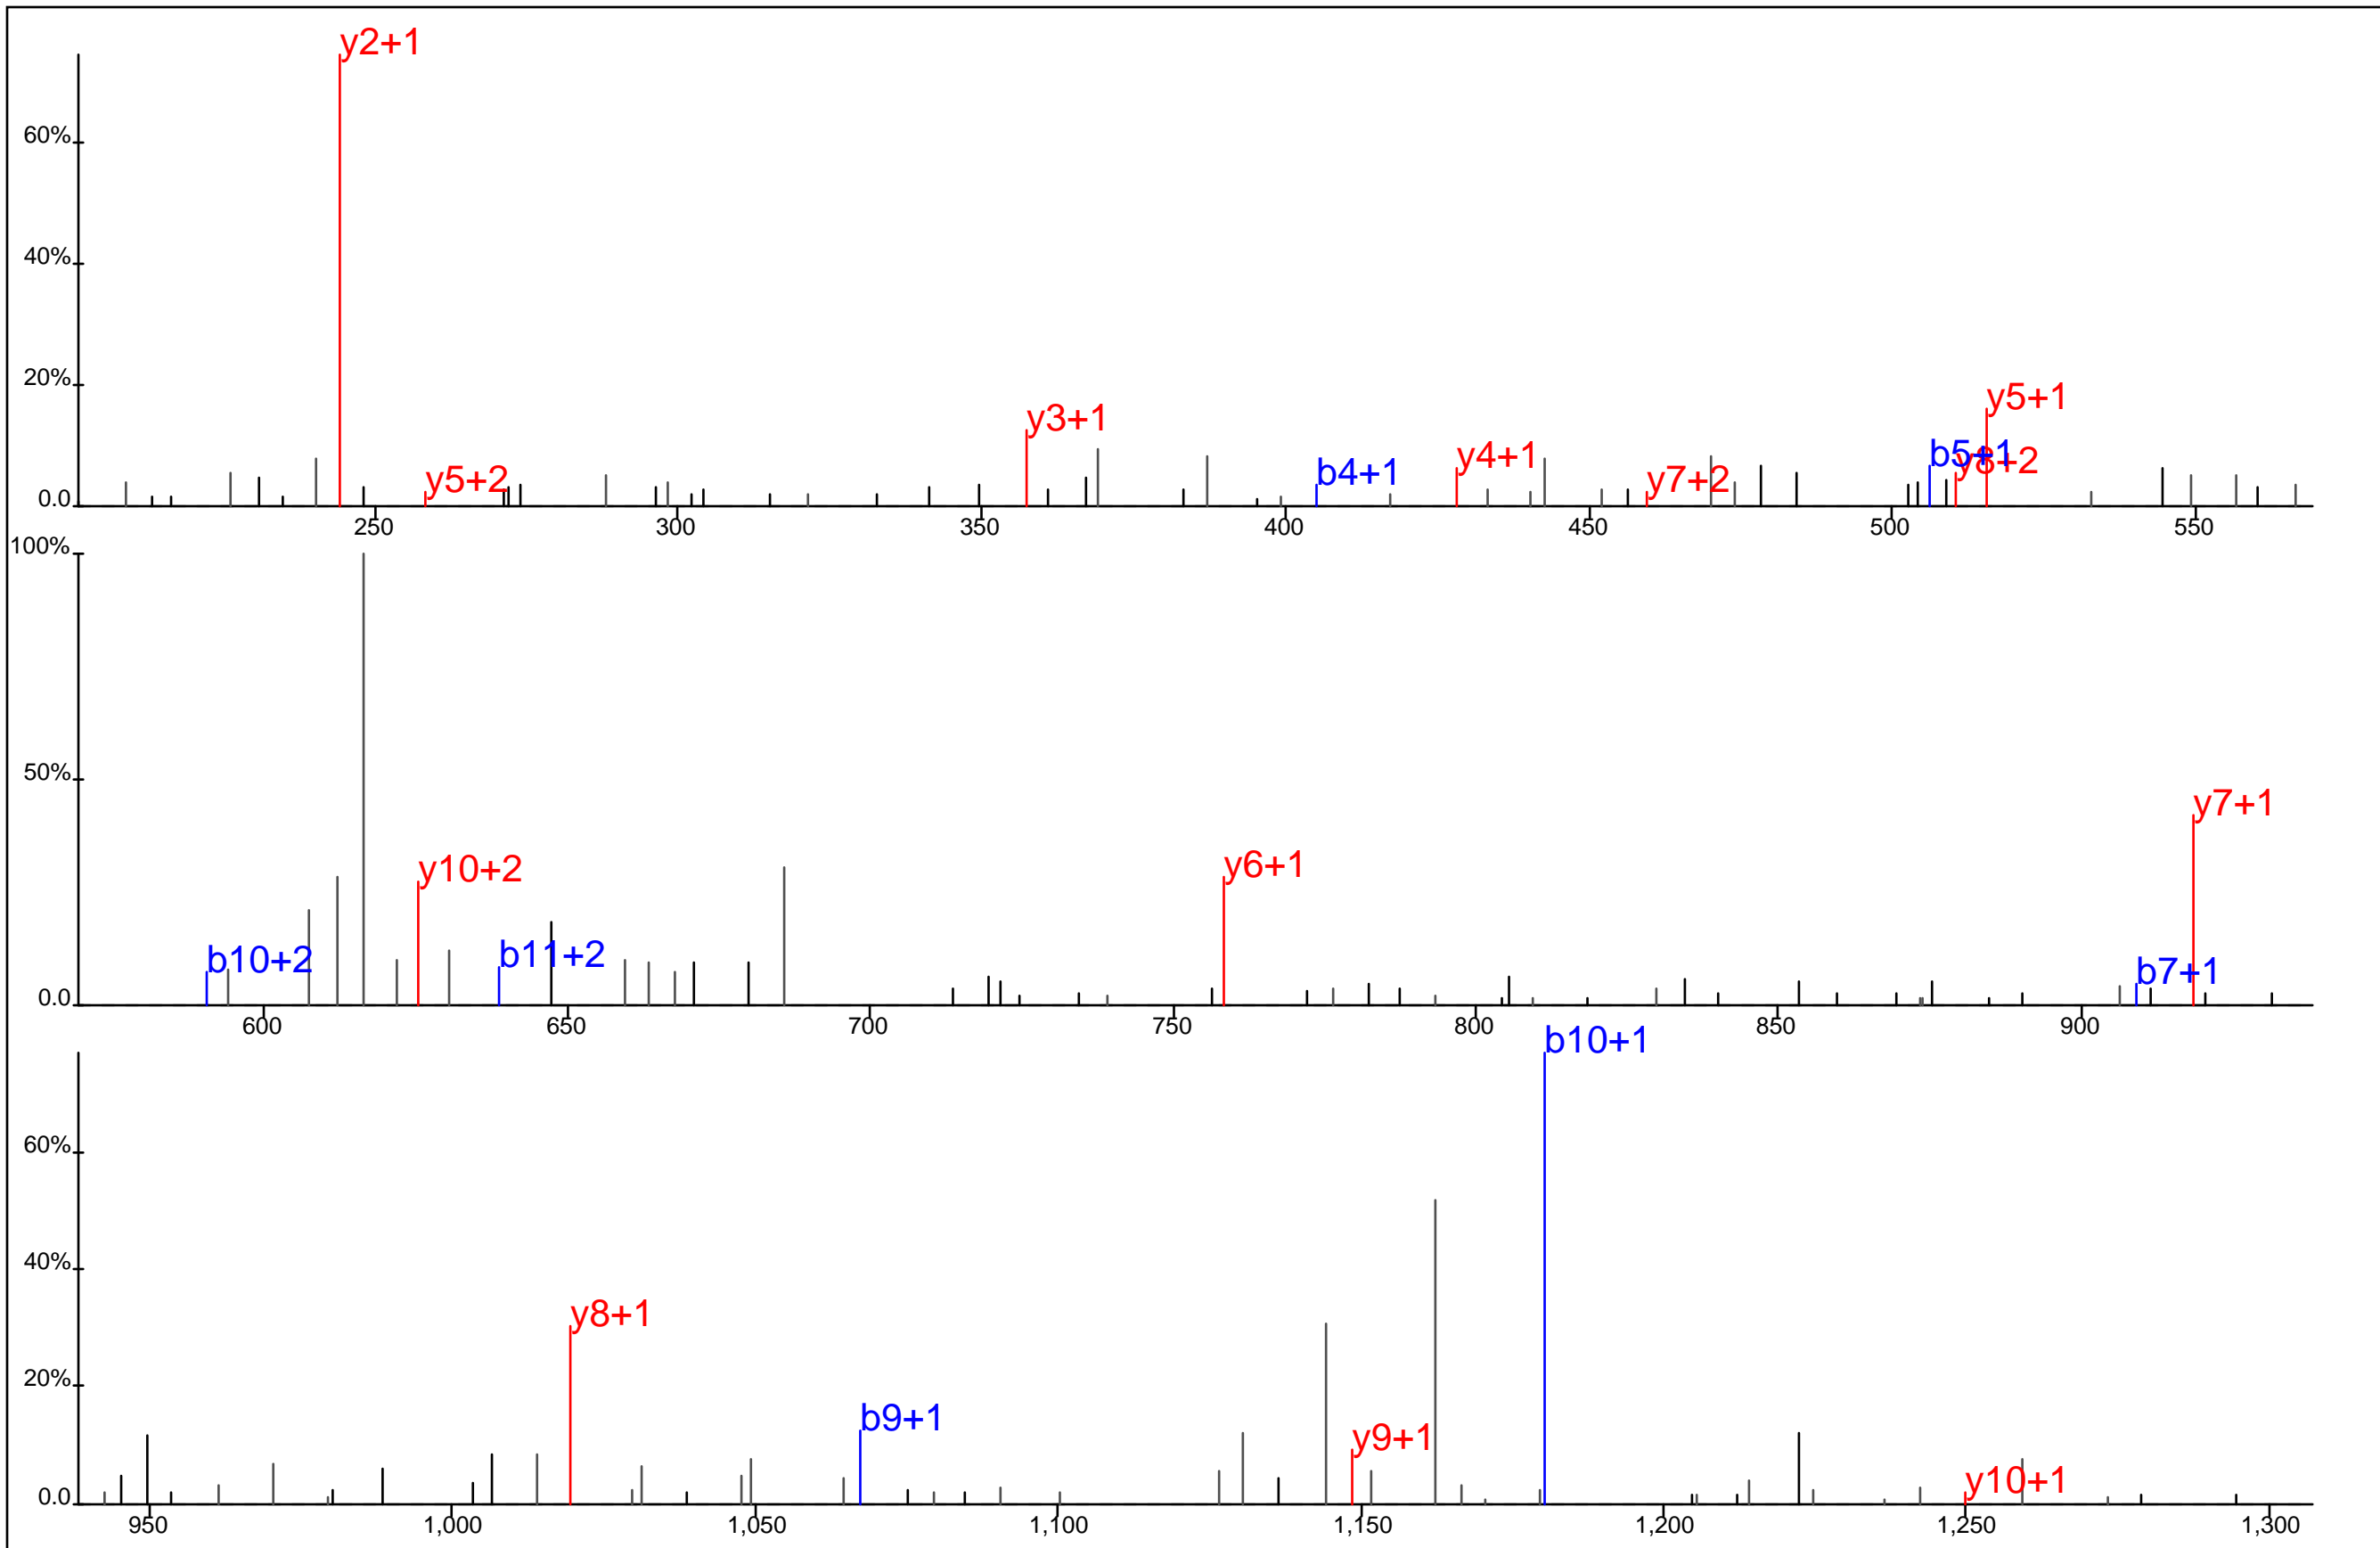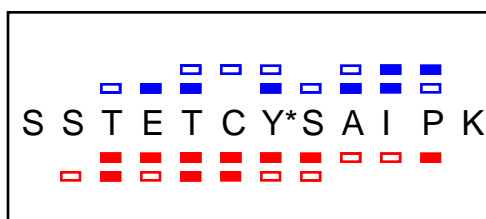

Protein Name: Filamin B  
 gi Accession: 0  
 Precursor Mass: 712.2945+2  
 Delta Mass: 0.451 ppm  
 XCorr: 38.64











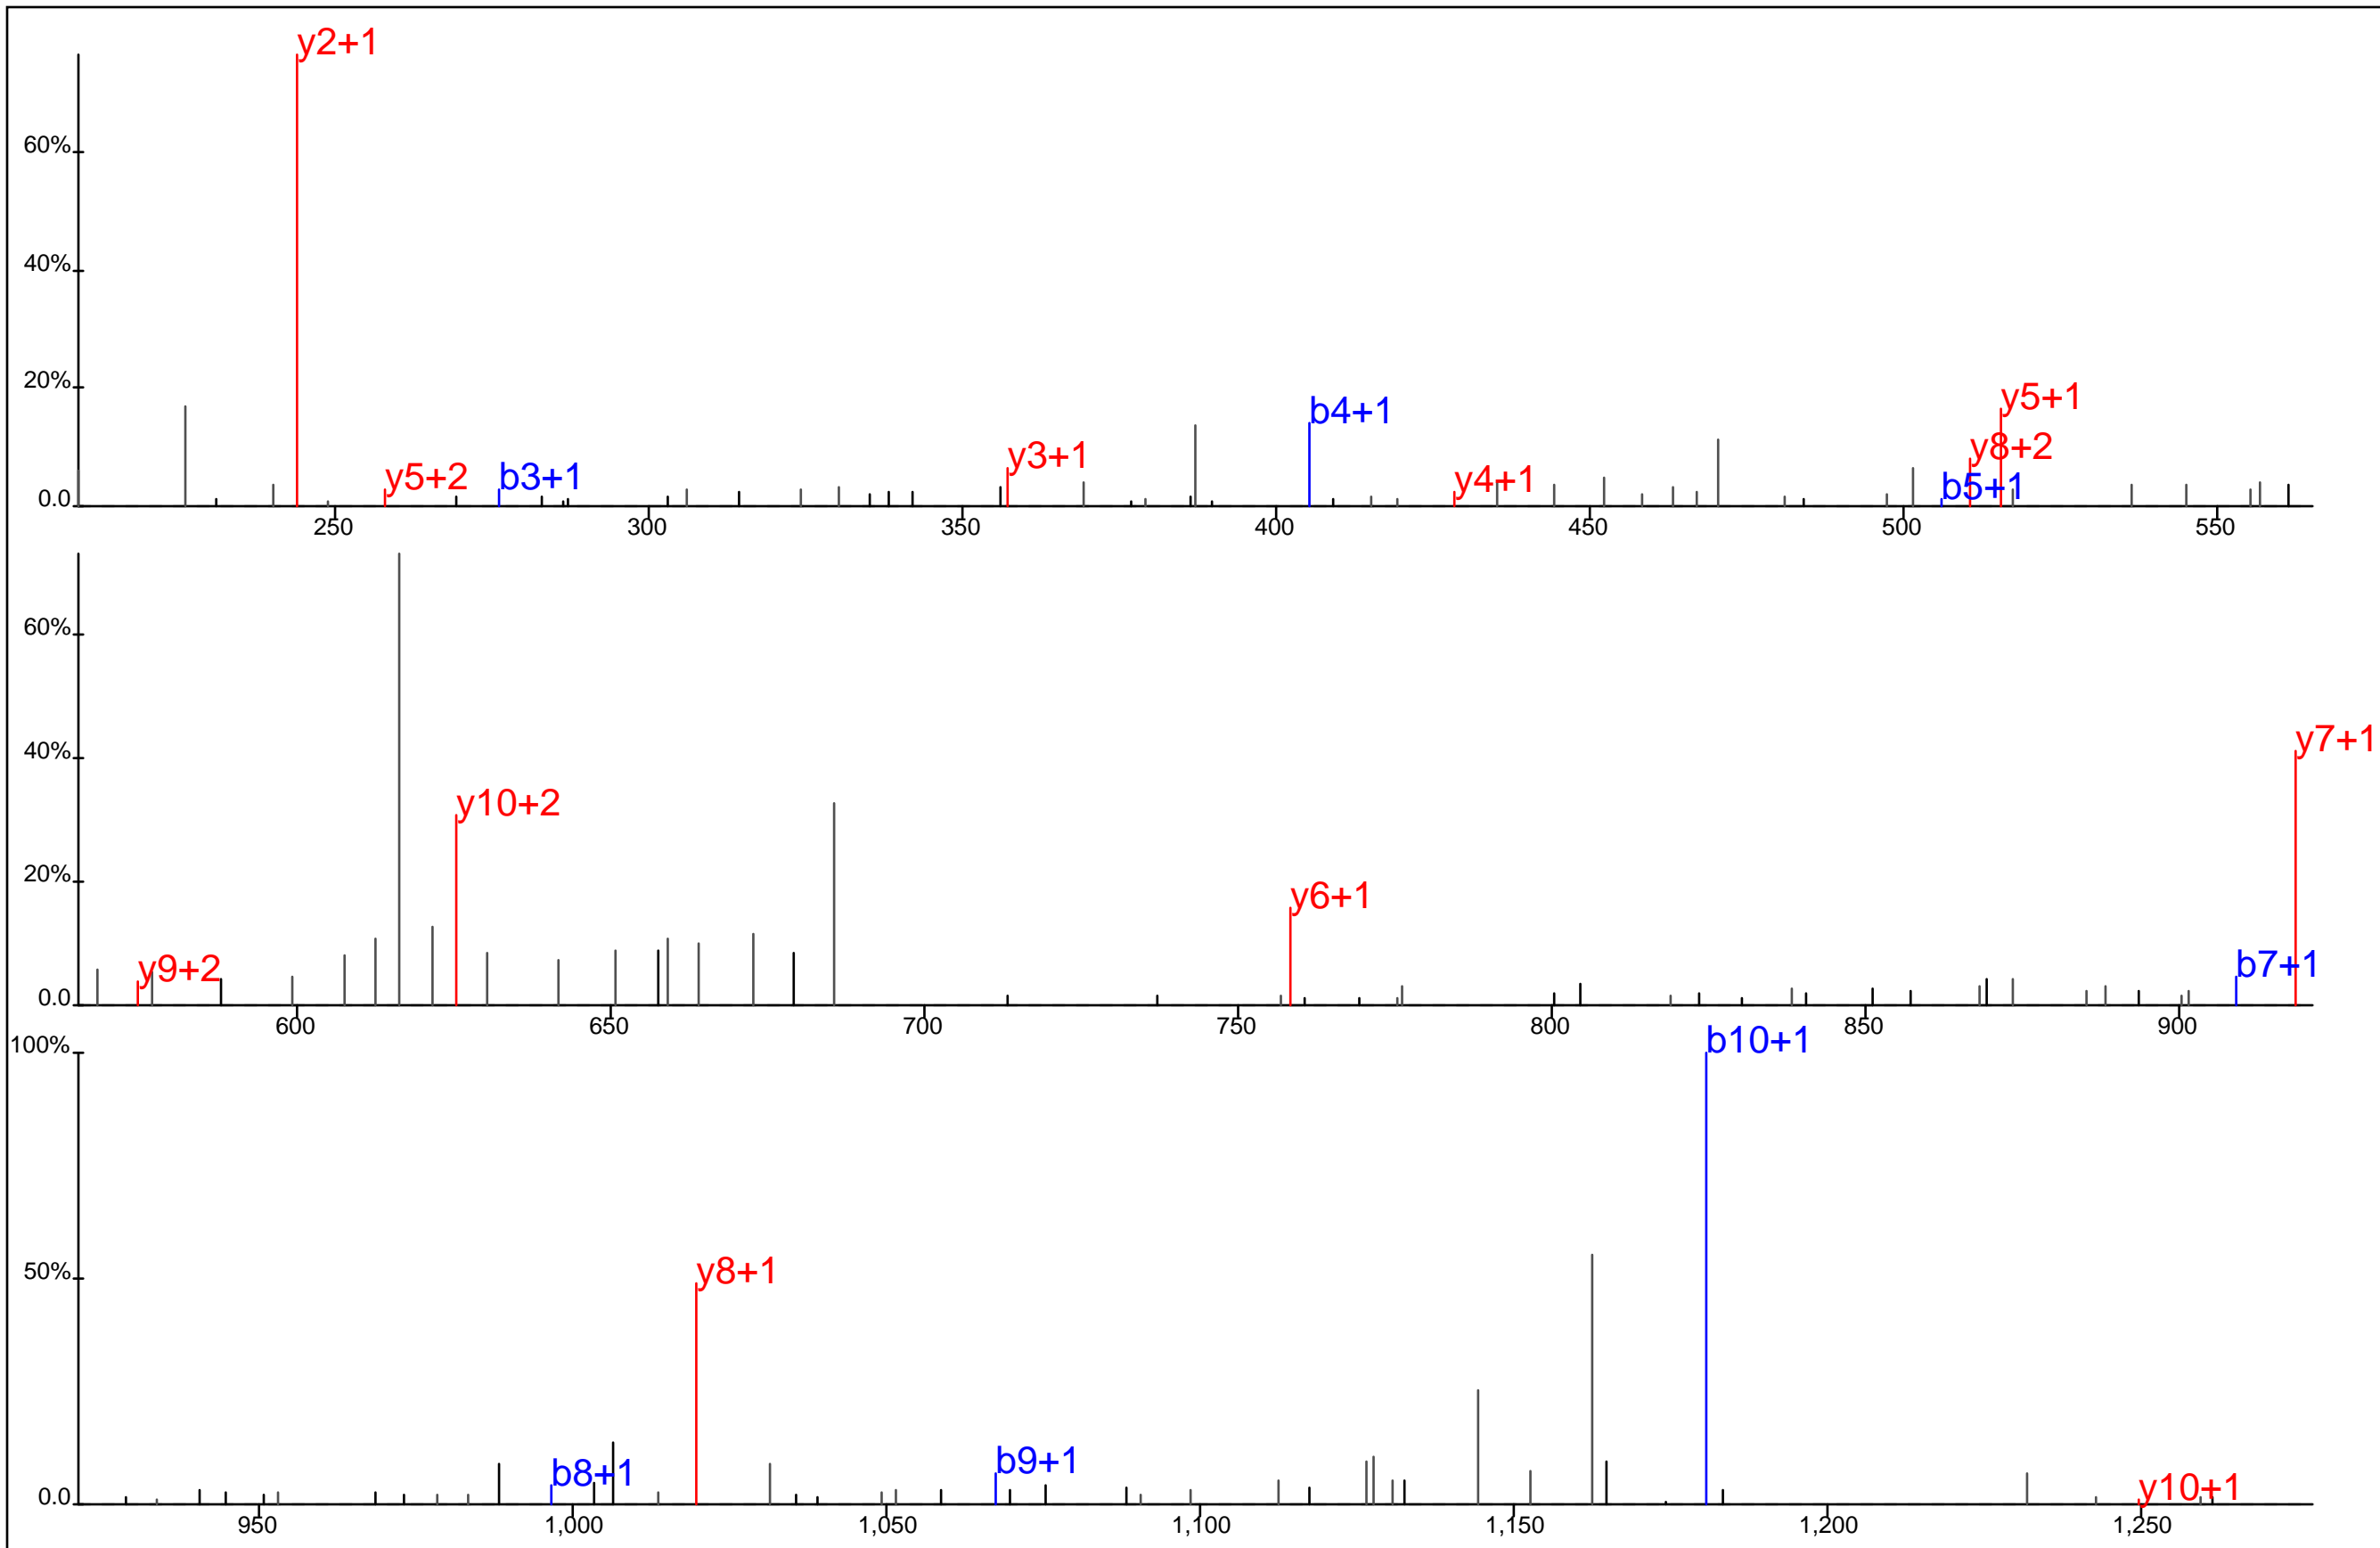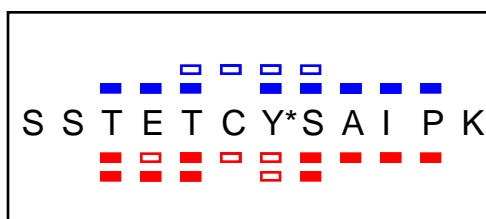

Protein Name: Filamin B  
 gi Accession: 0  
 Precursor Mass: 712.2968+2  
 Delta Mass: 3.623 ppm  
 XCorr: 41.53



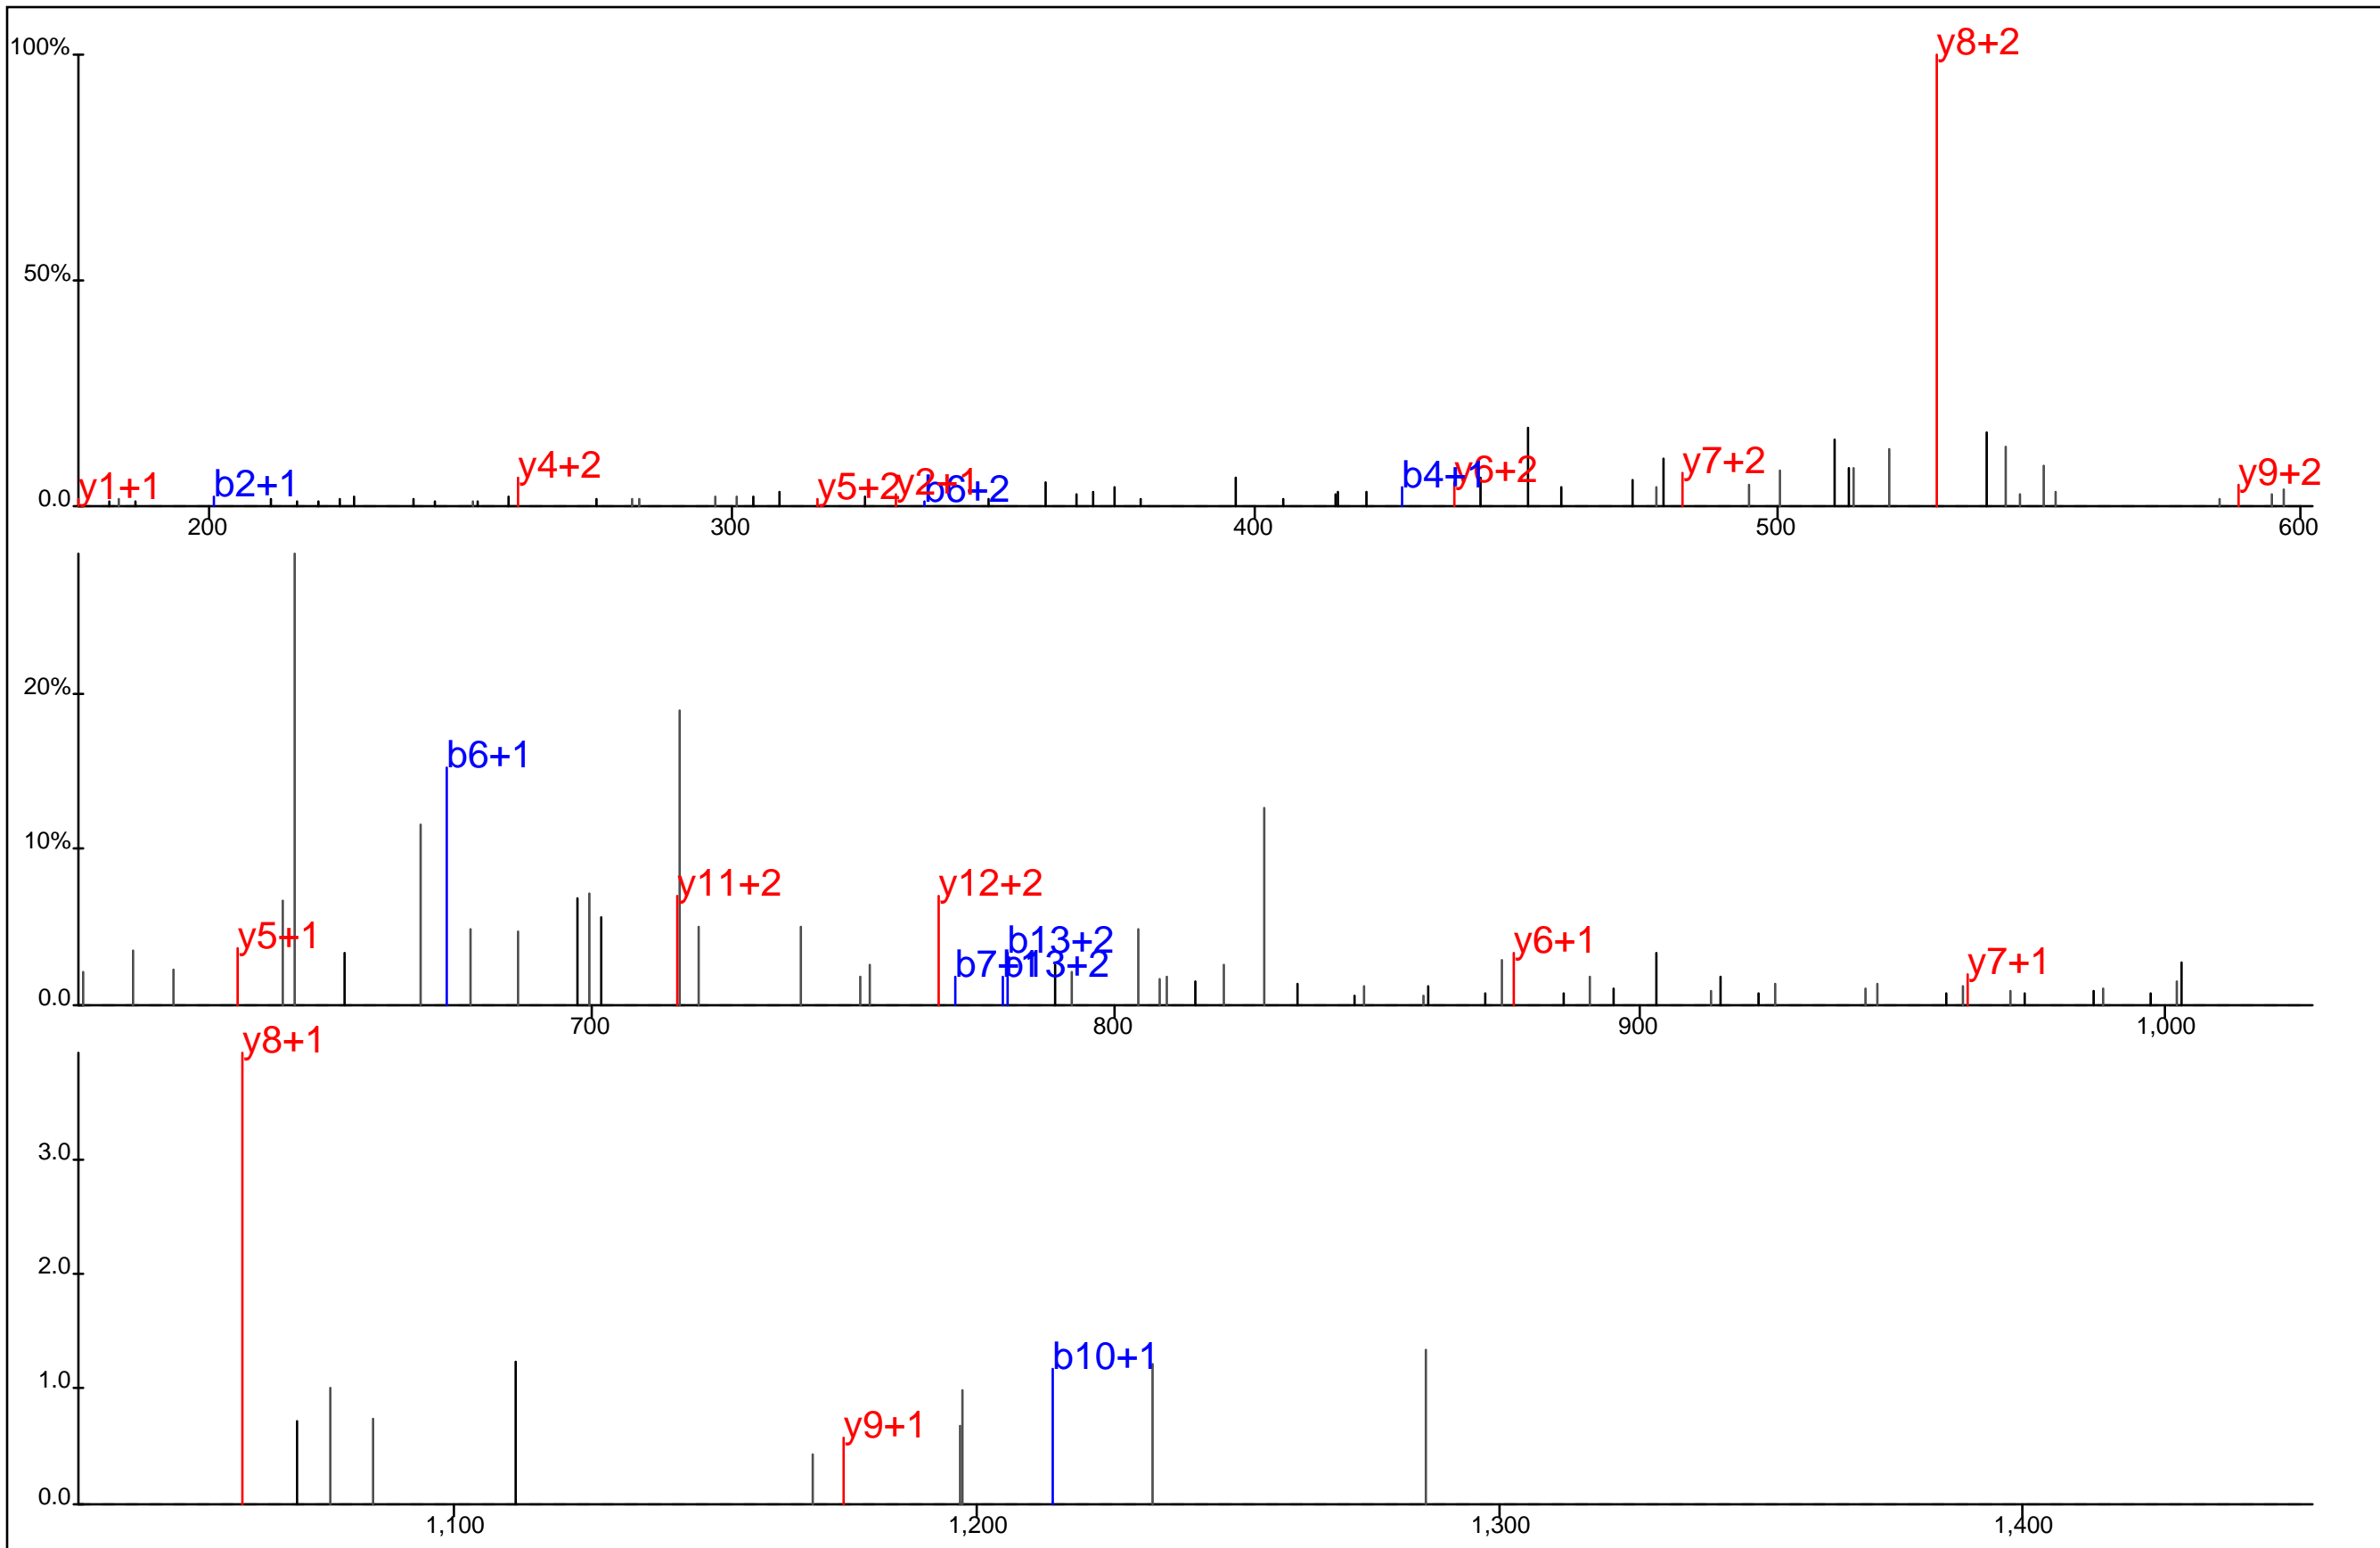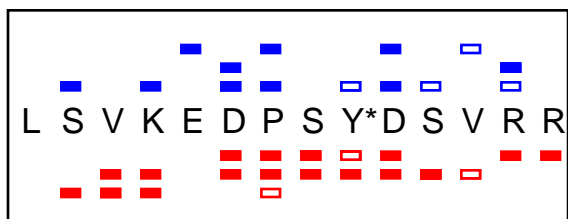

Protein Name: FLI1  
 gi Accession: 0  
 Precursor Mass: 577.6085+3  
 Delta Mass: 0.033 ppm  
 XCorr: 20.6

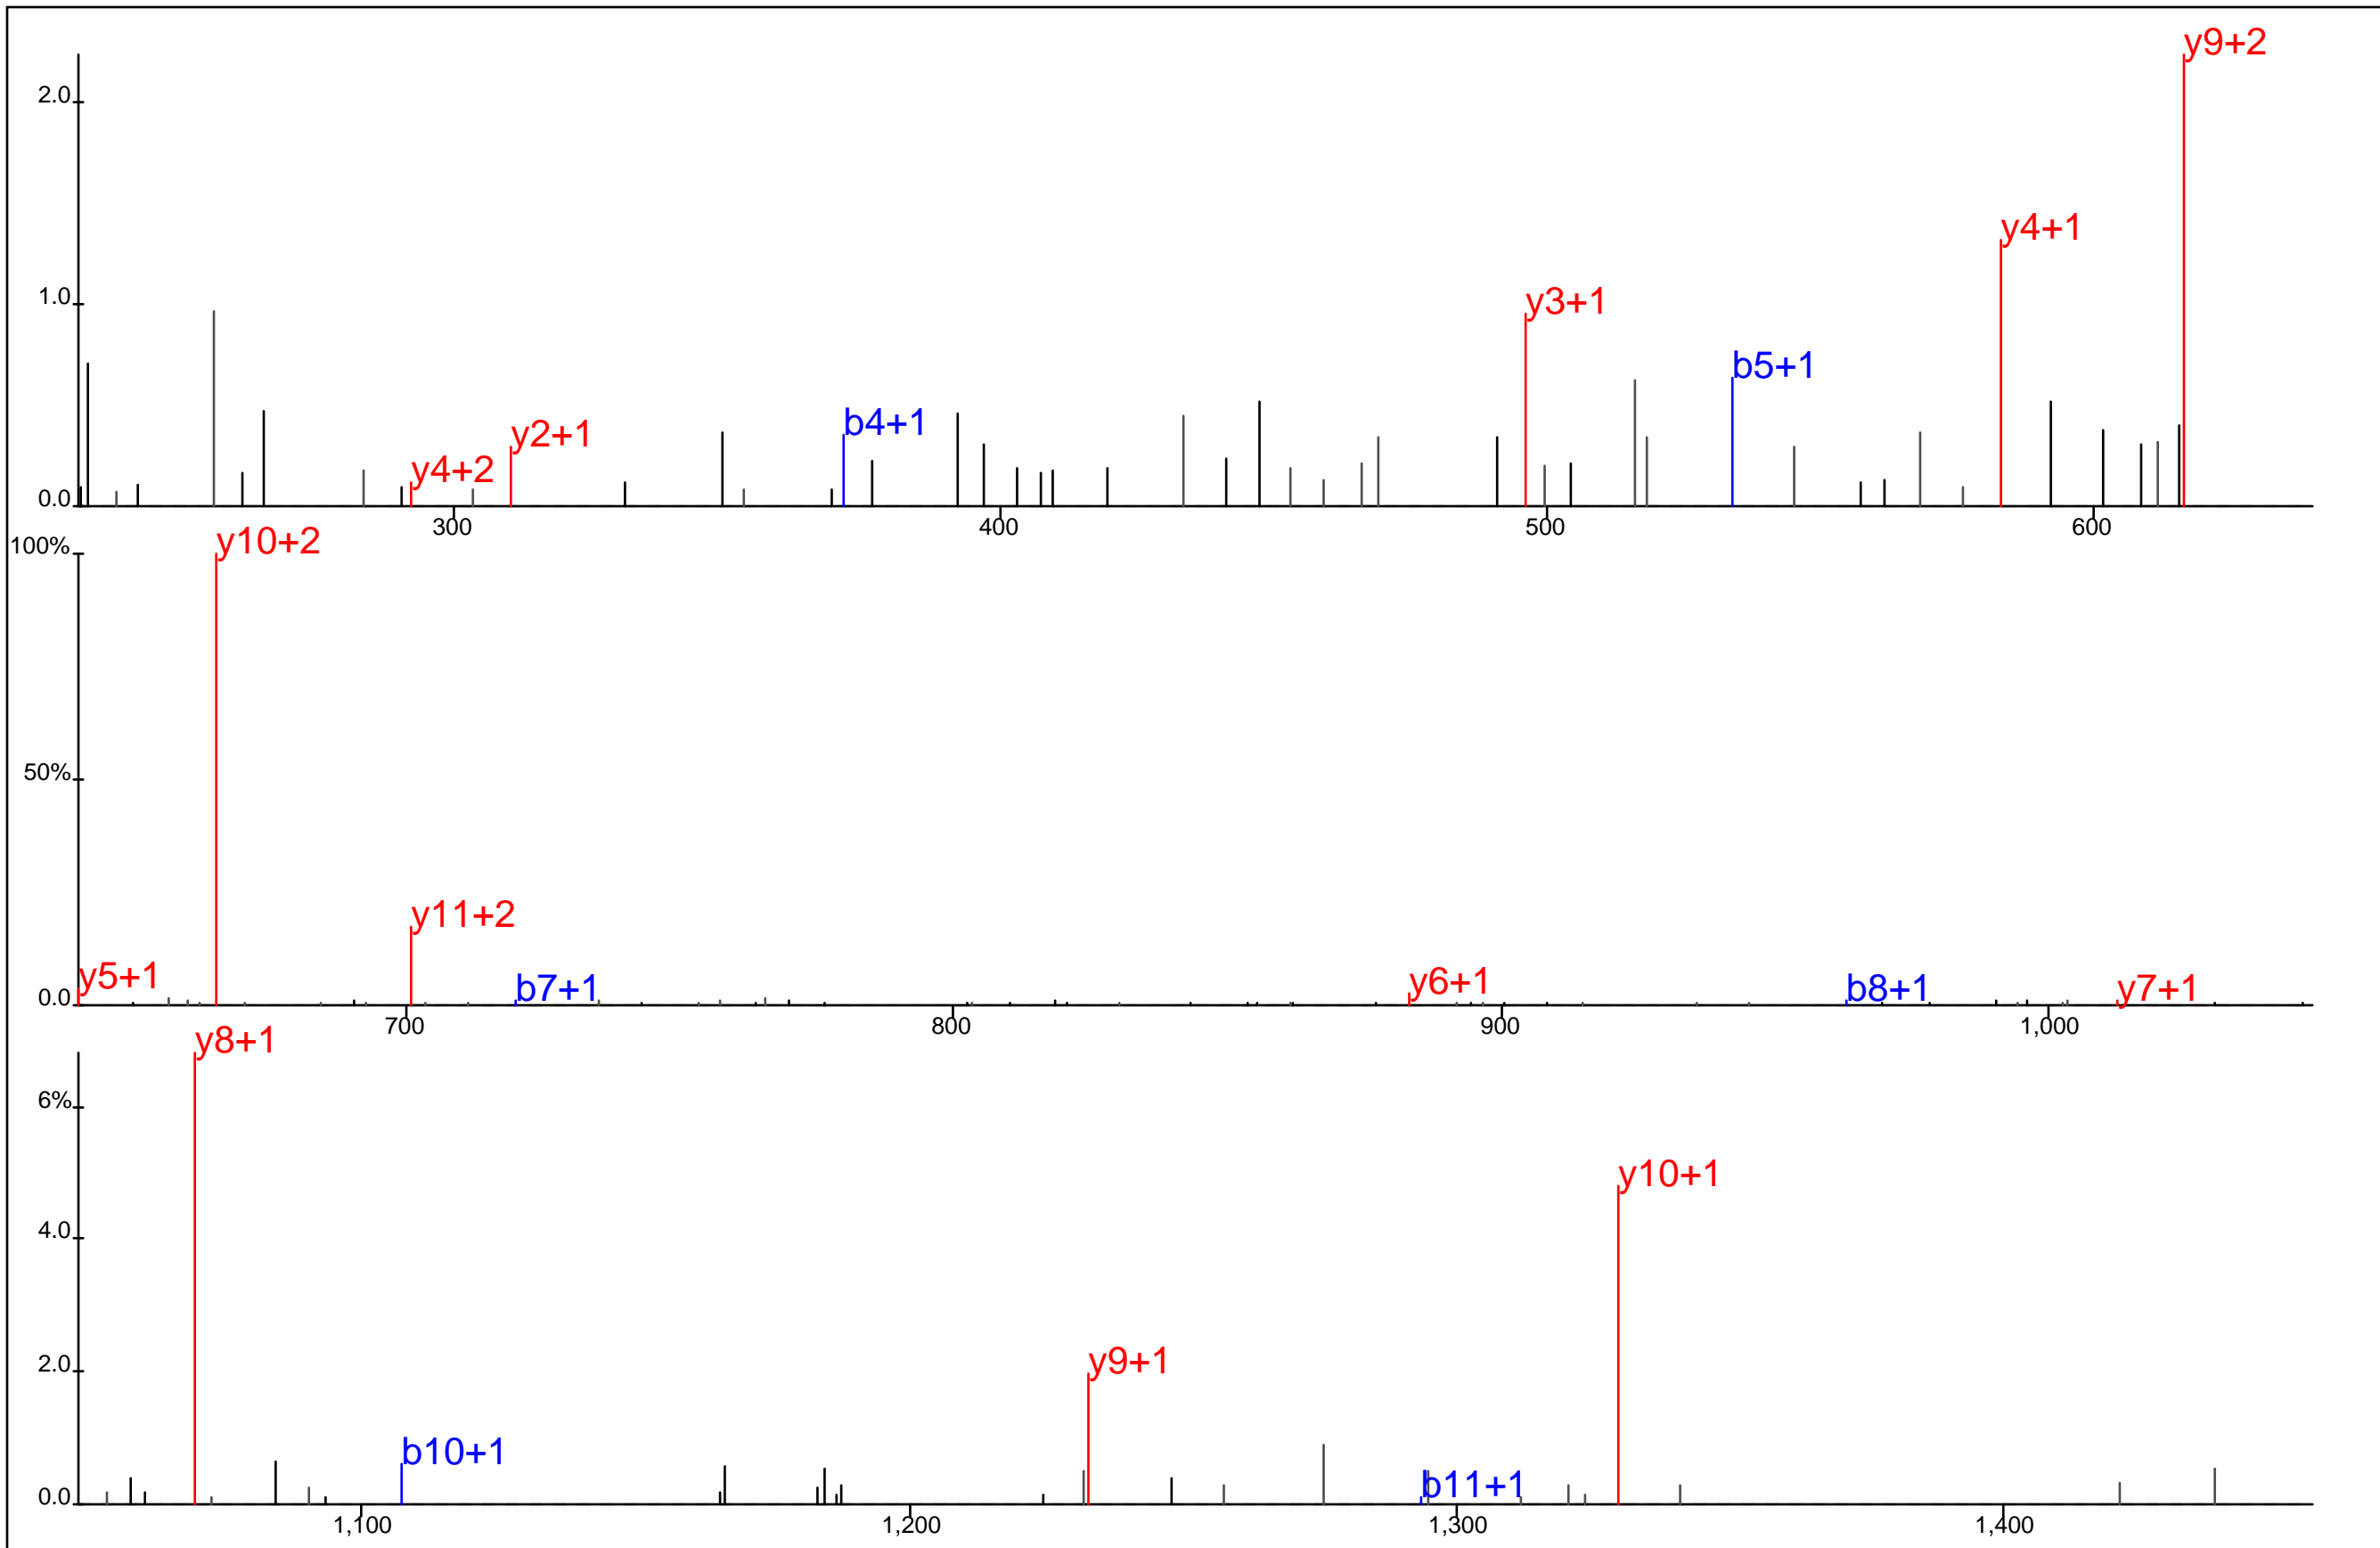

D S A P Y G E Y\*G S W Y K

Protein Name: FLJ12387  
 gi Accession: 0  
 Precursor Mass: 801.8116+2  
 Delta Mass: 0.758 ppm  
 XCorr: 49.83

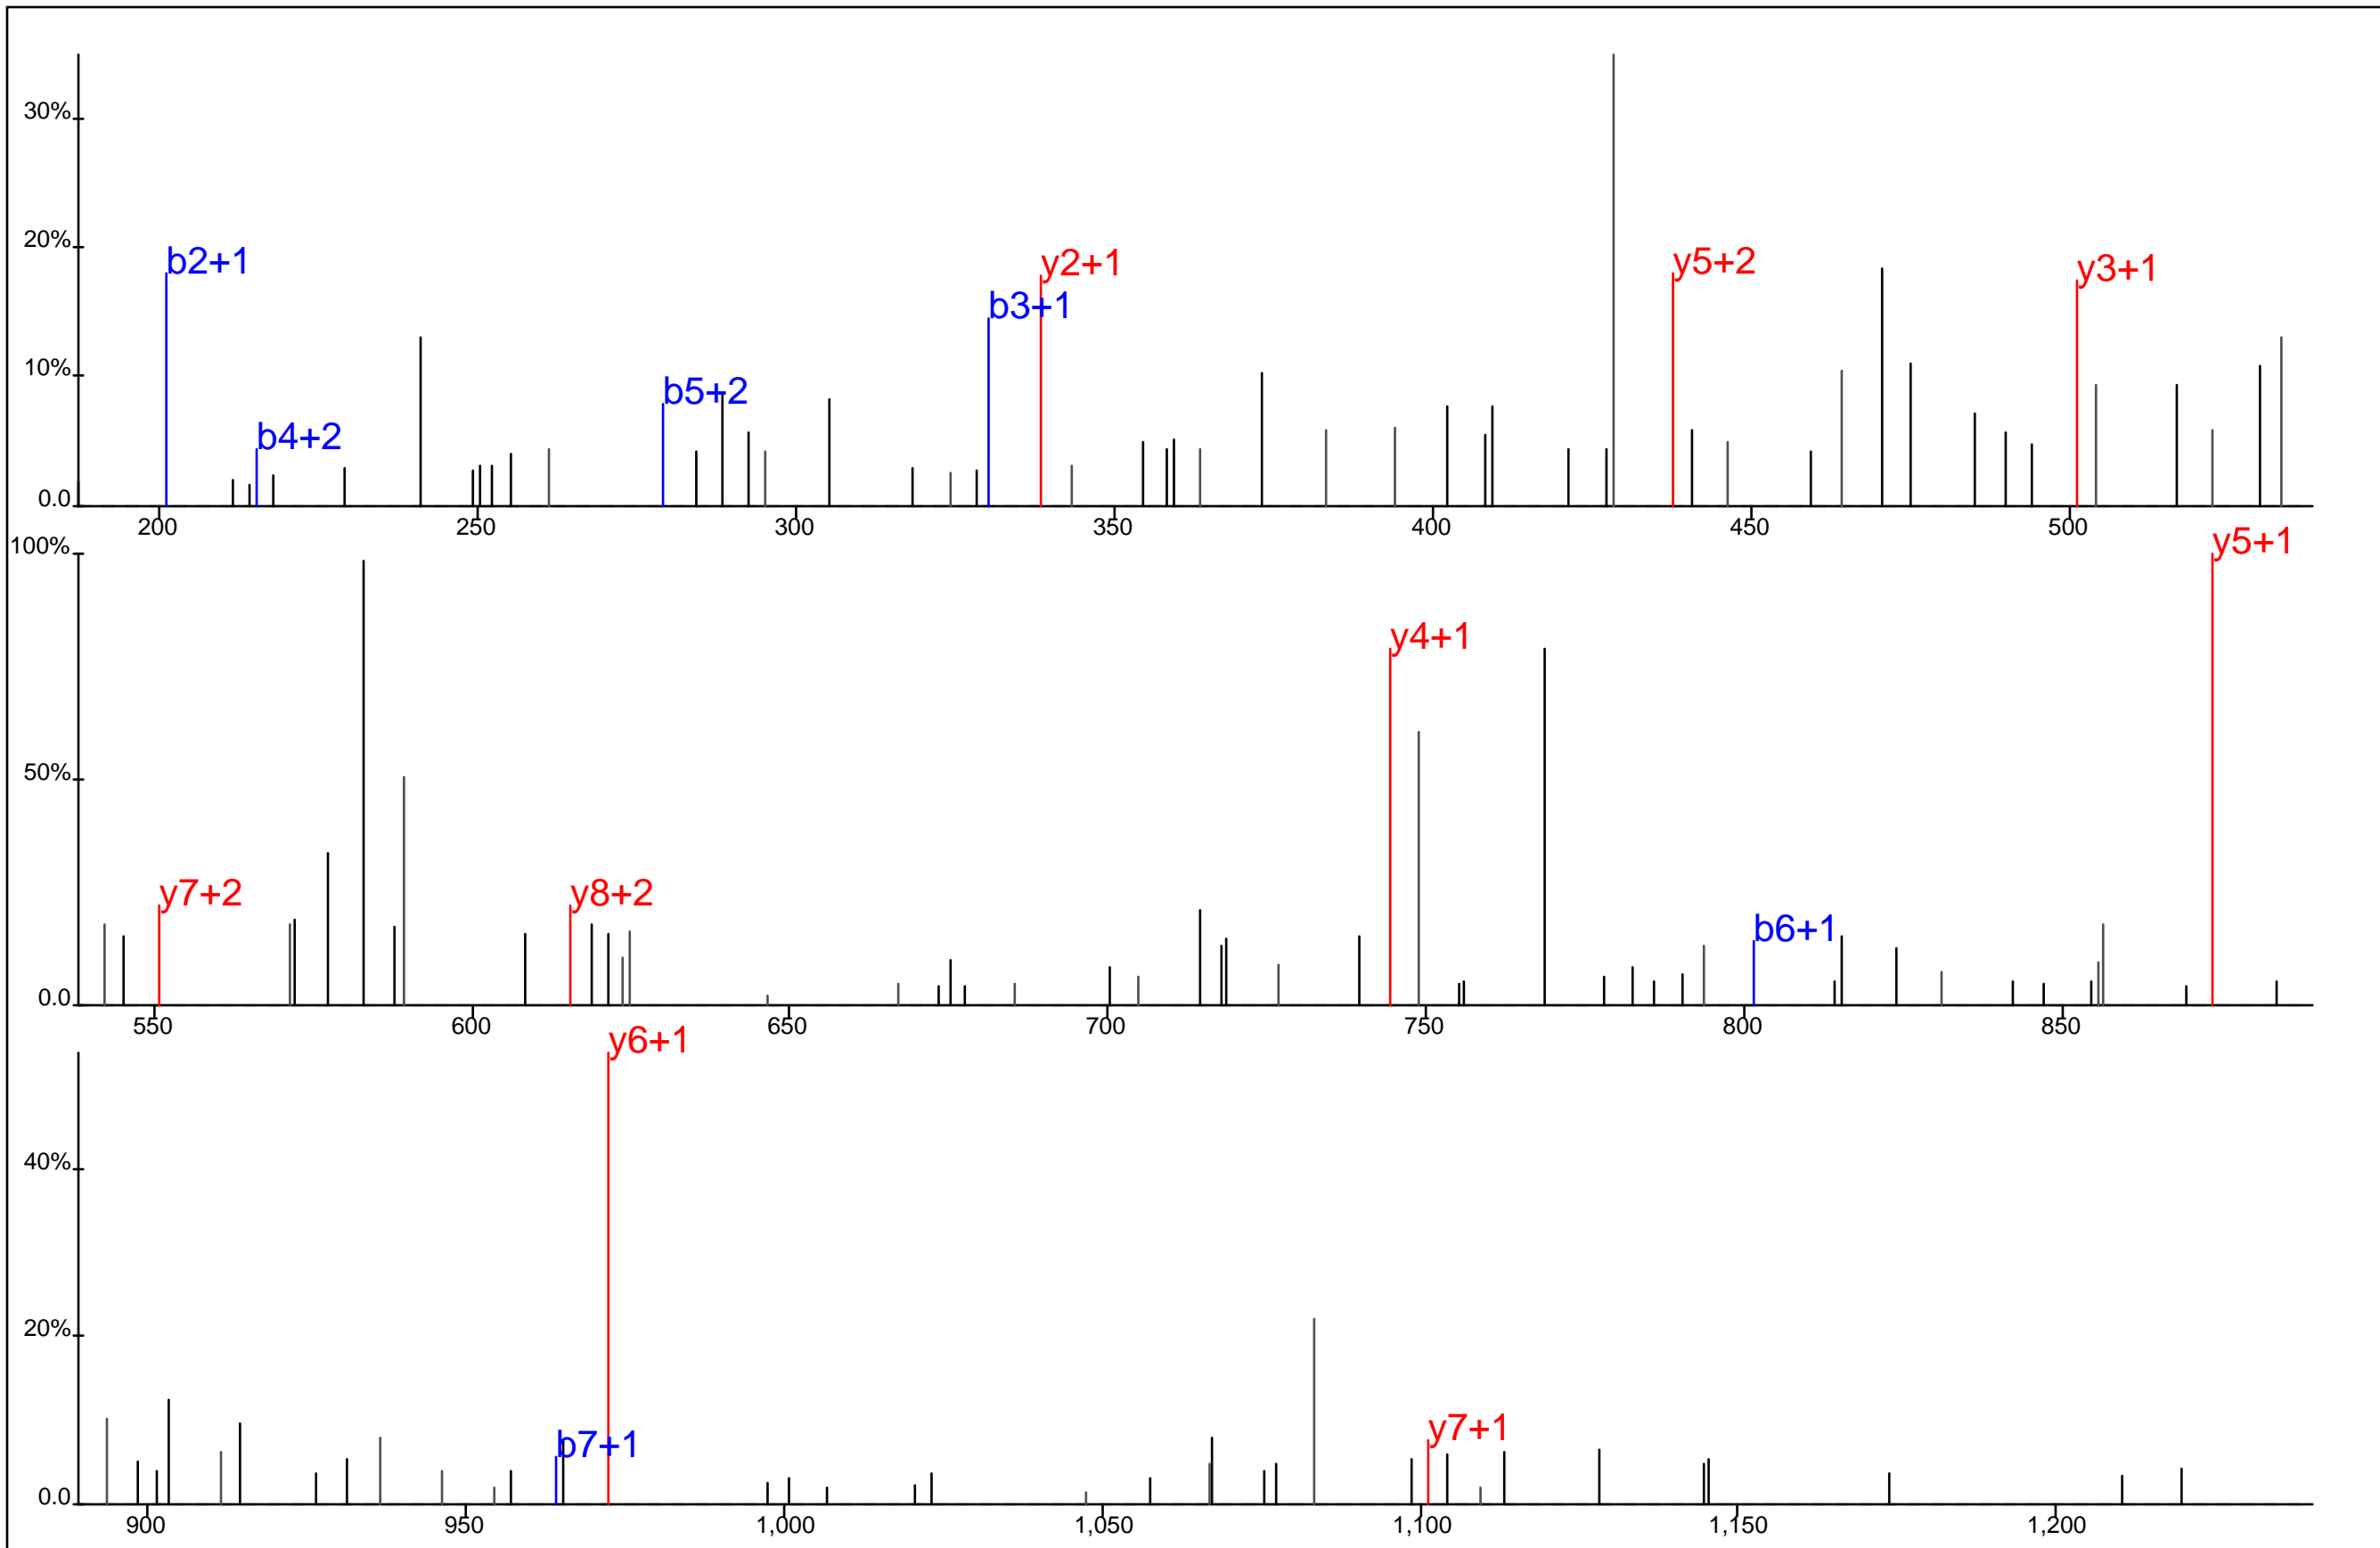

■ ■ ■ ■ ■ ■  
 A E E V E Y\*Y Y R  
□ □ □ □ □ □

Protein Name: FLJ12387  
 gi Accession: 0  
 Precursor Mass: 651.2577+2  
 Delta Mass: 0.321 ppm  
 XCorr: 30.1





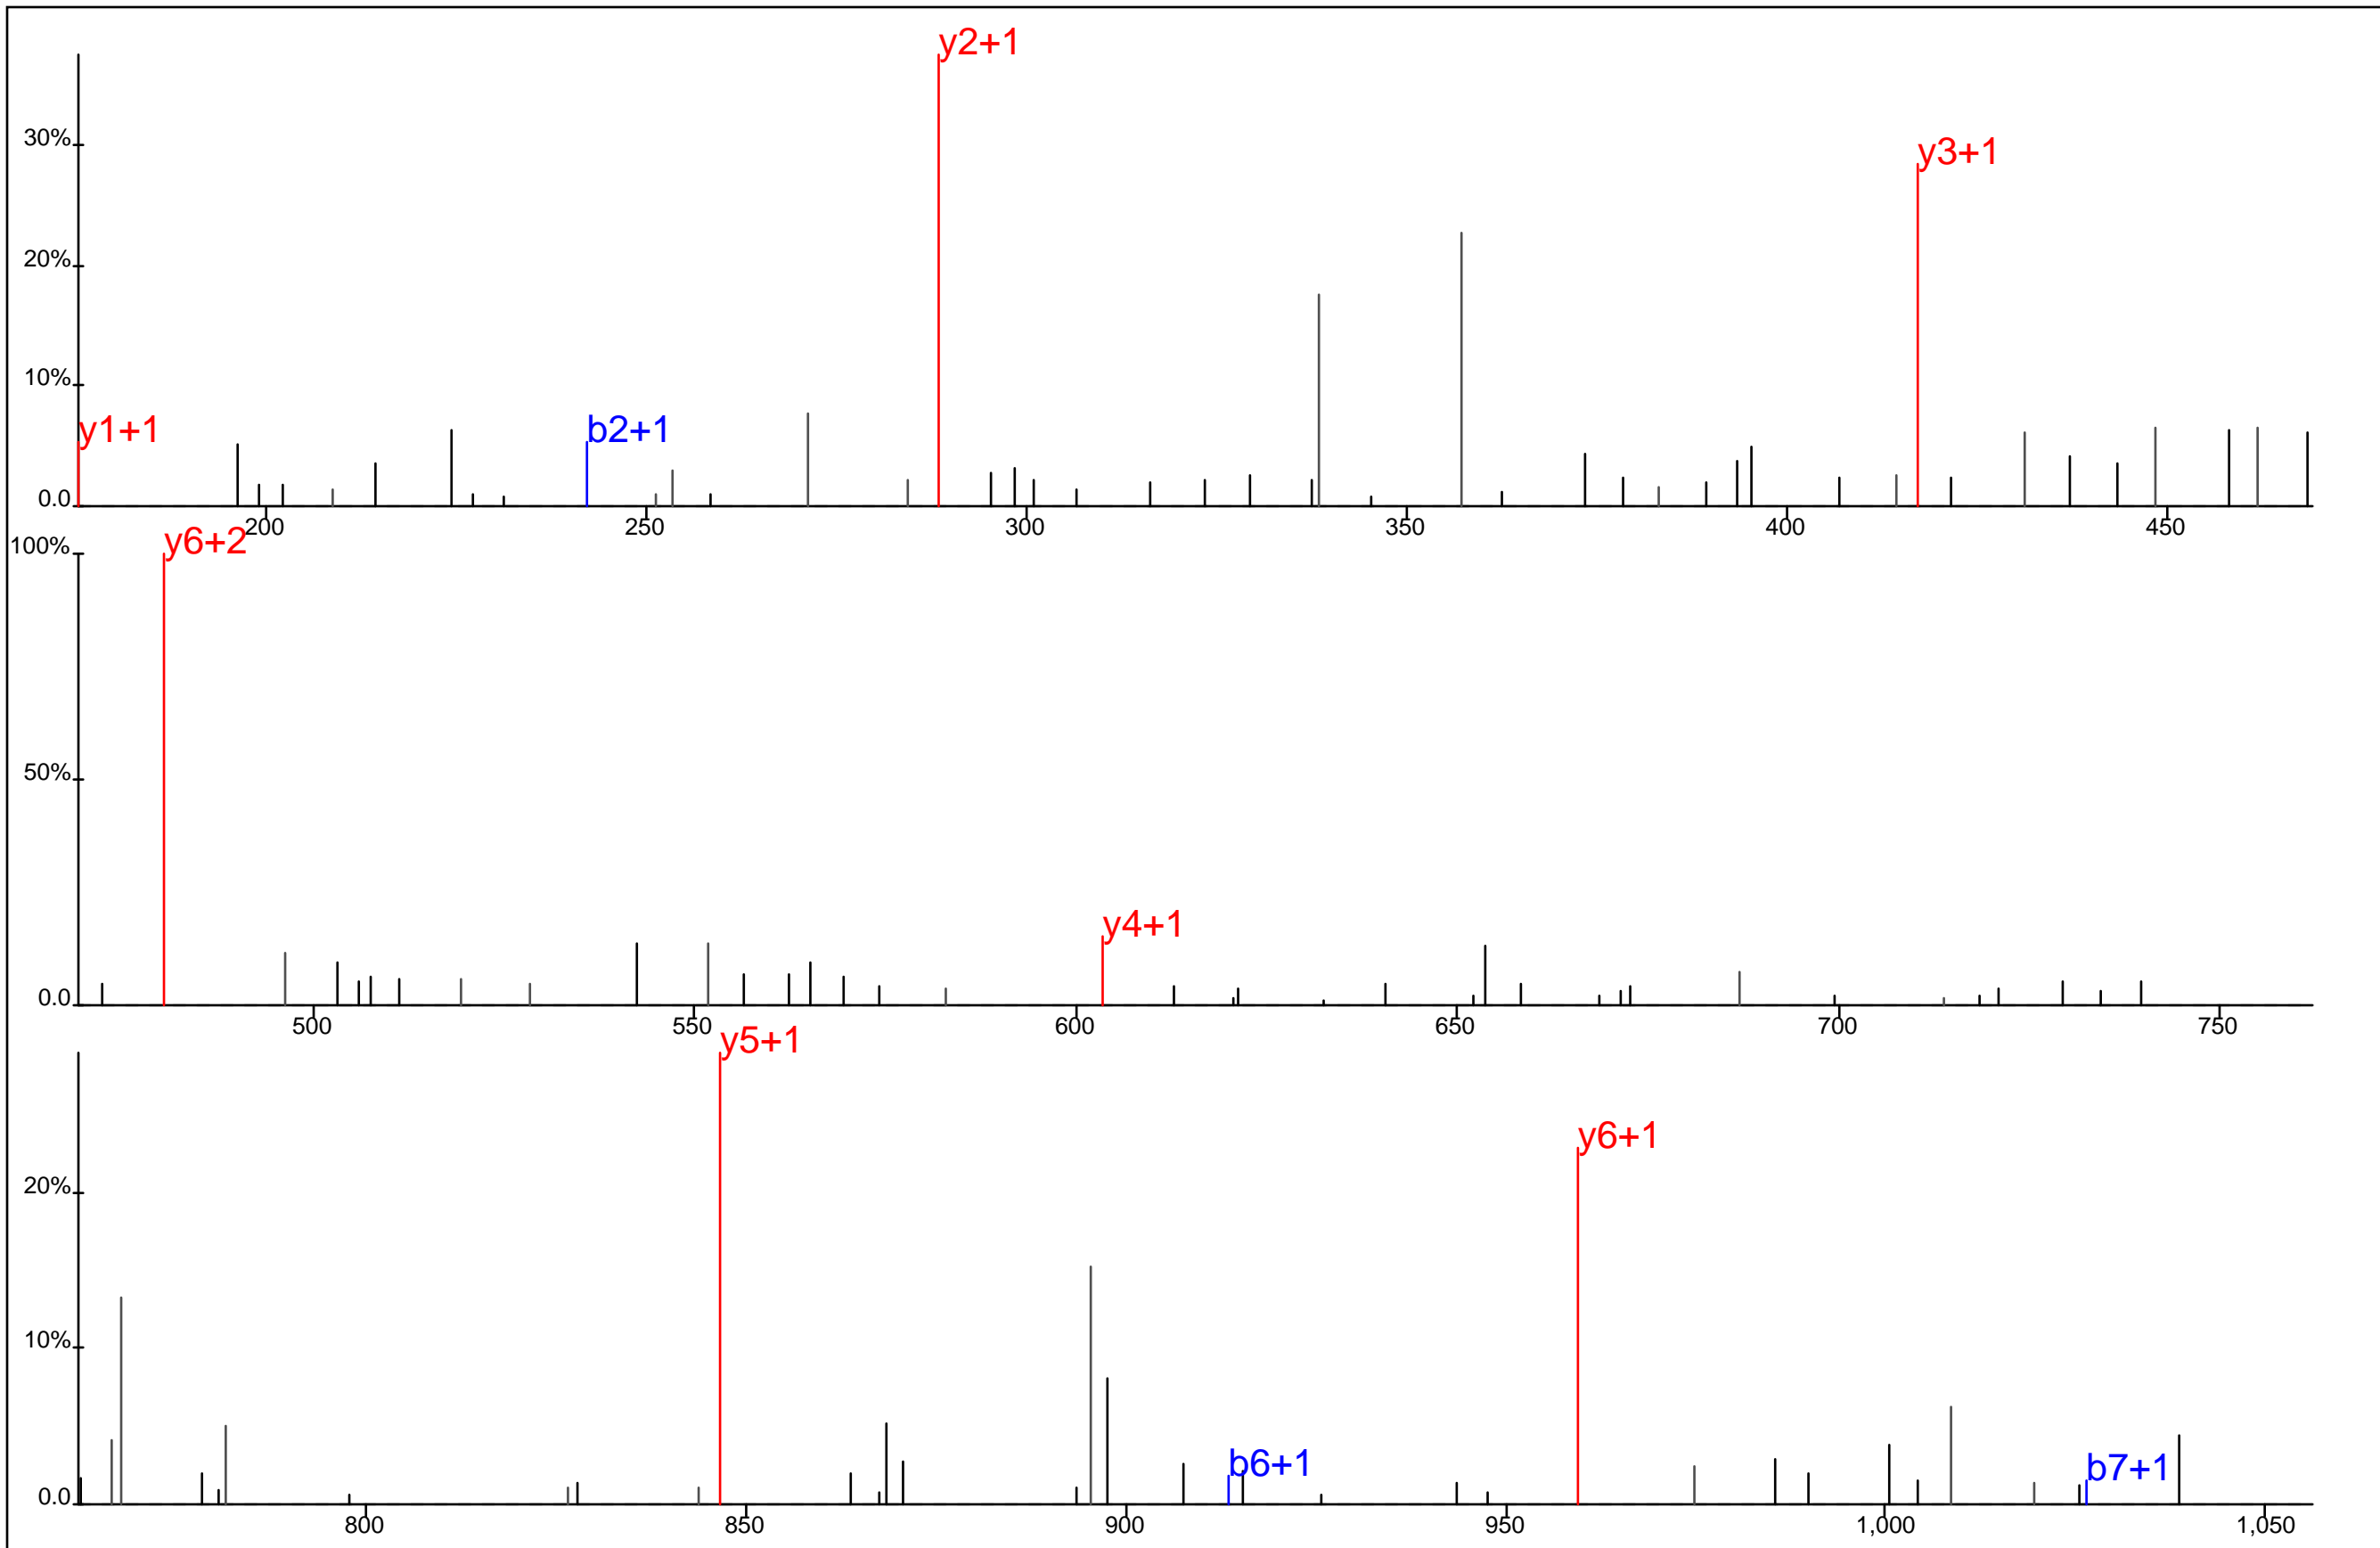

■ ▢ ▢ ▢ ▢  
 Q L L Y\*W E L R  
▢ ▢ ▢ ▢ ▢ ▢

Protein Name: FLJ39827  
 gi Accession: 0  
 Precursor Mass: 600.7943+2  
 Delta Mass: 0.023 ppm  
 XCorr: 35.76

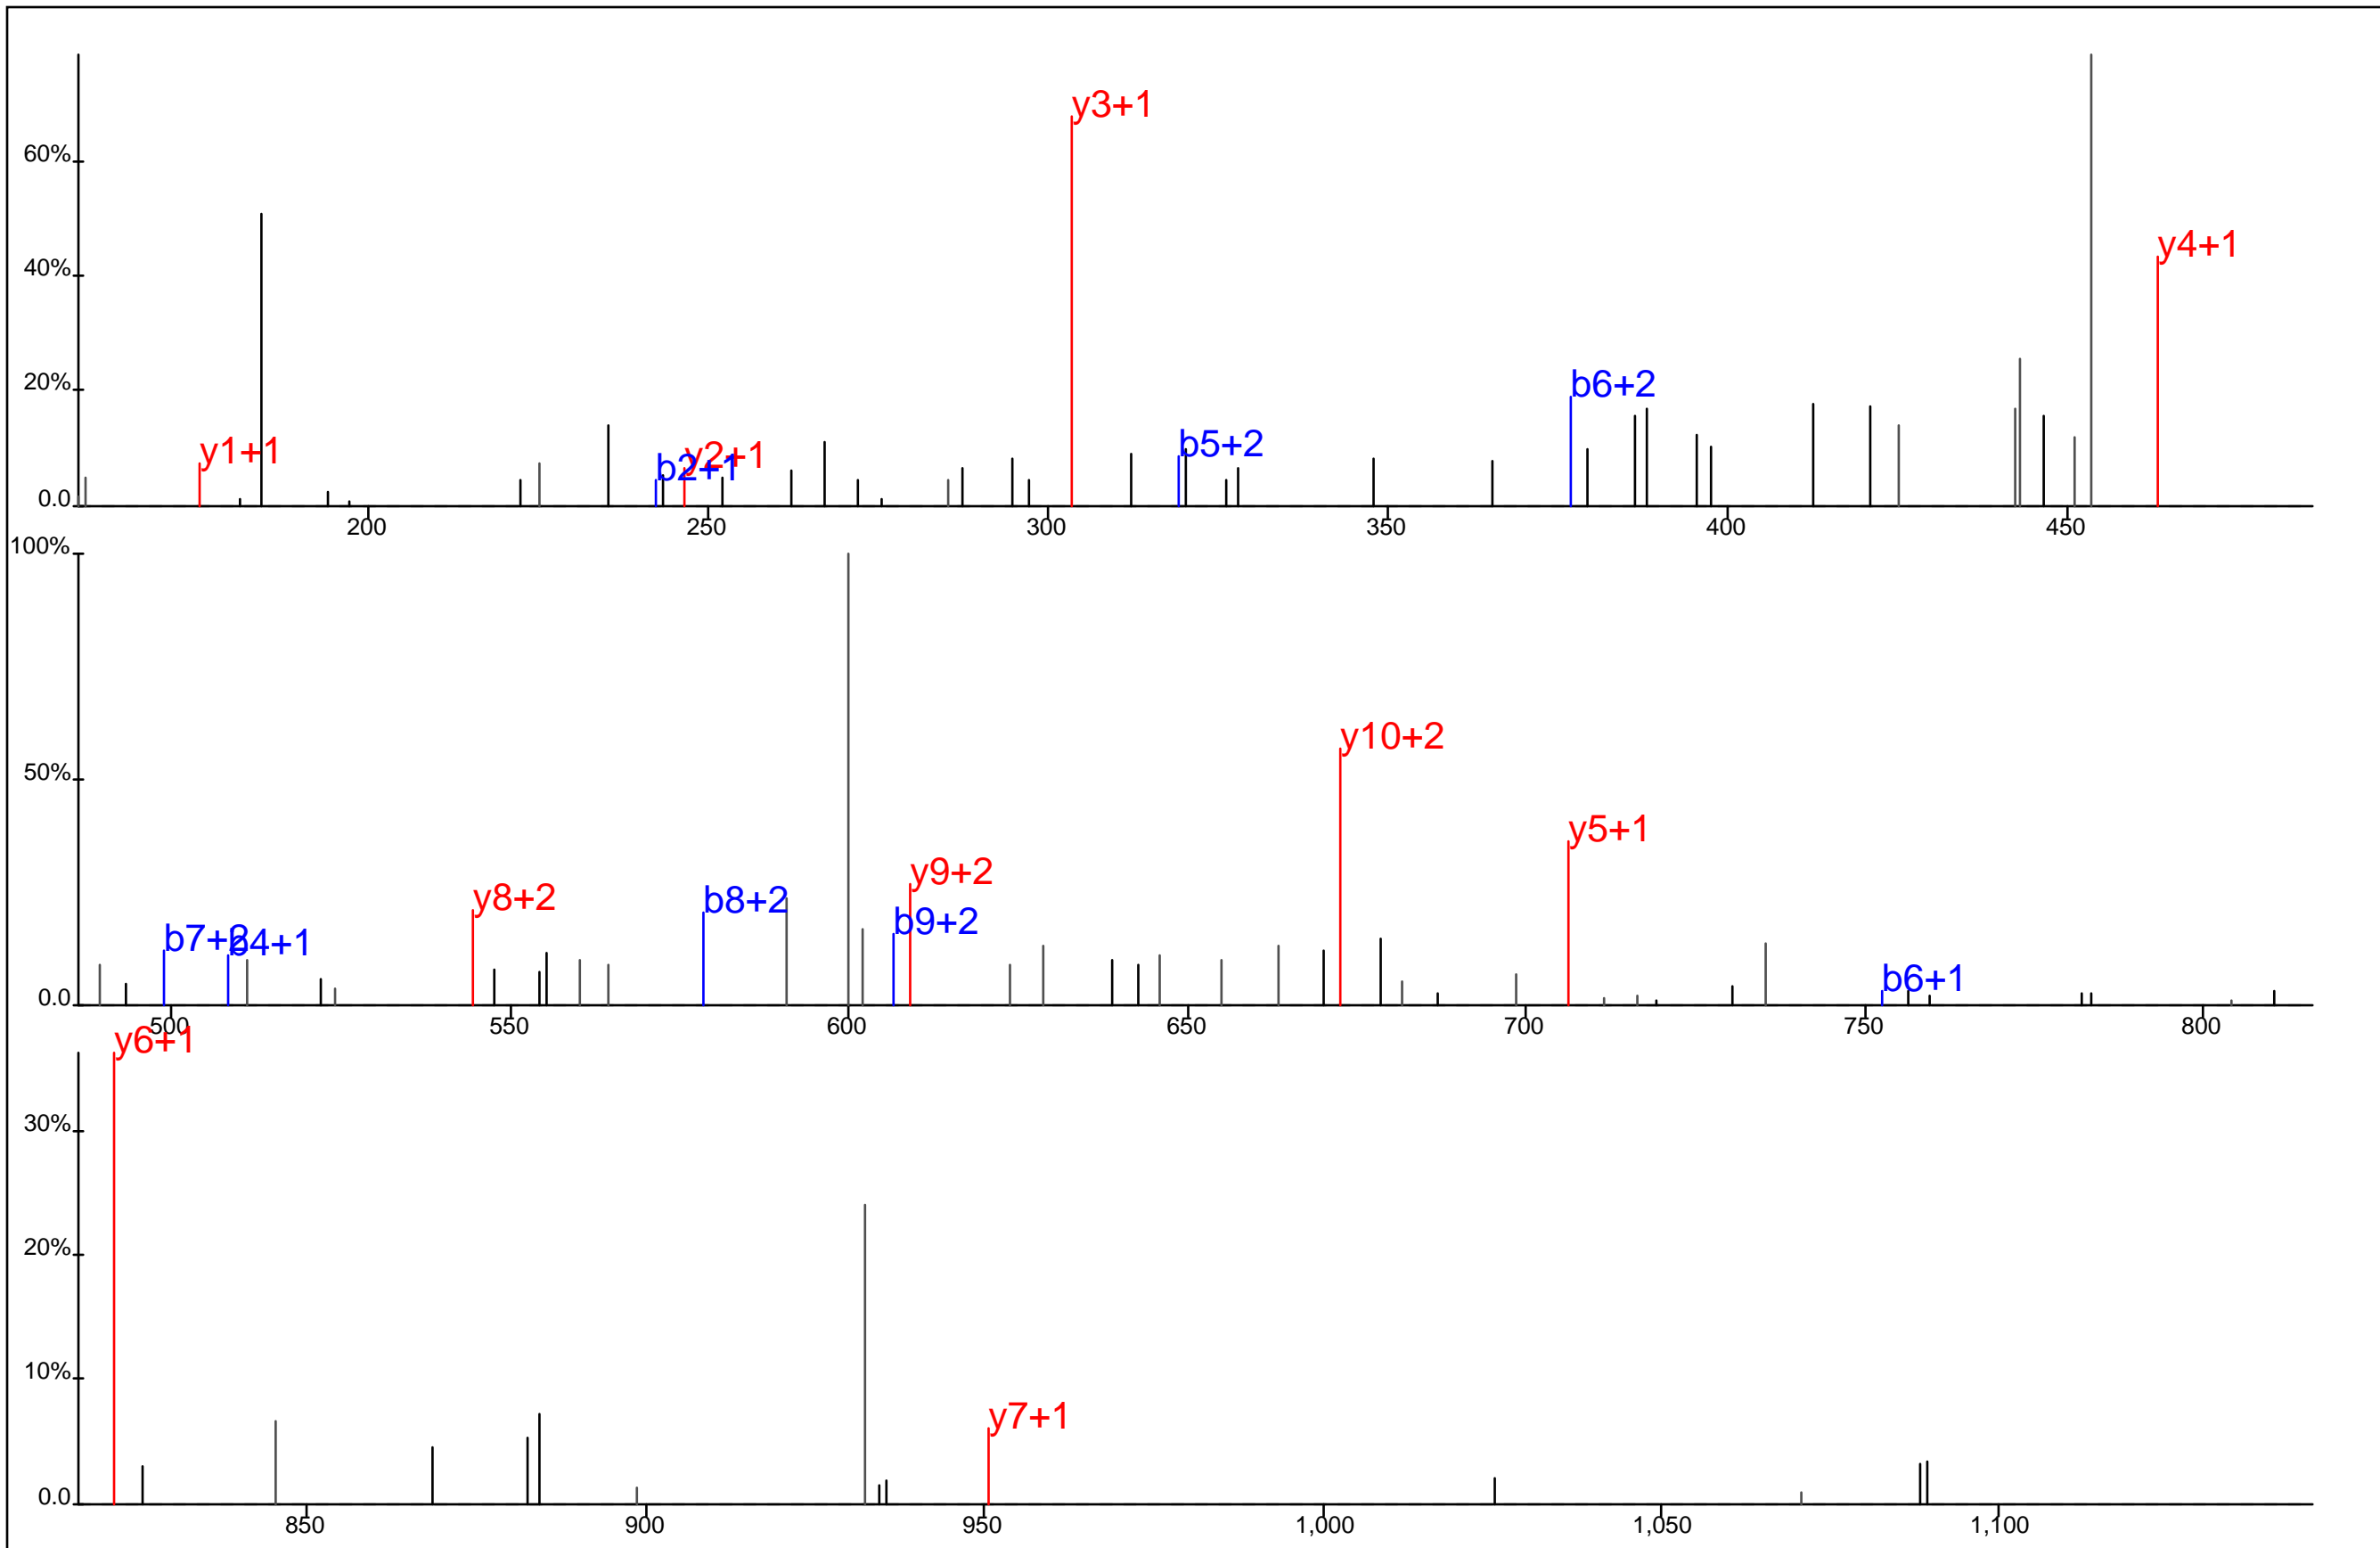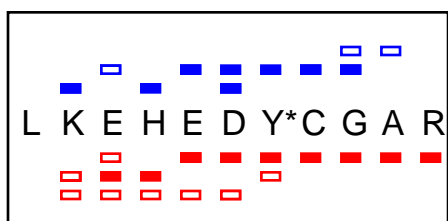

Protein Name: FLN29 protein  
 gi Accession: 0  
 Precursor Mass: 486.5341+3  
 Delta Mass: 0.110 ppm  
 XCorr: 30.07

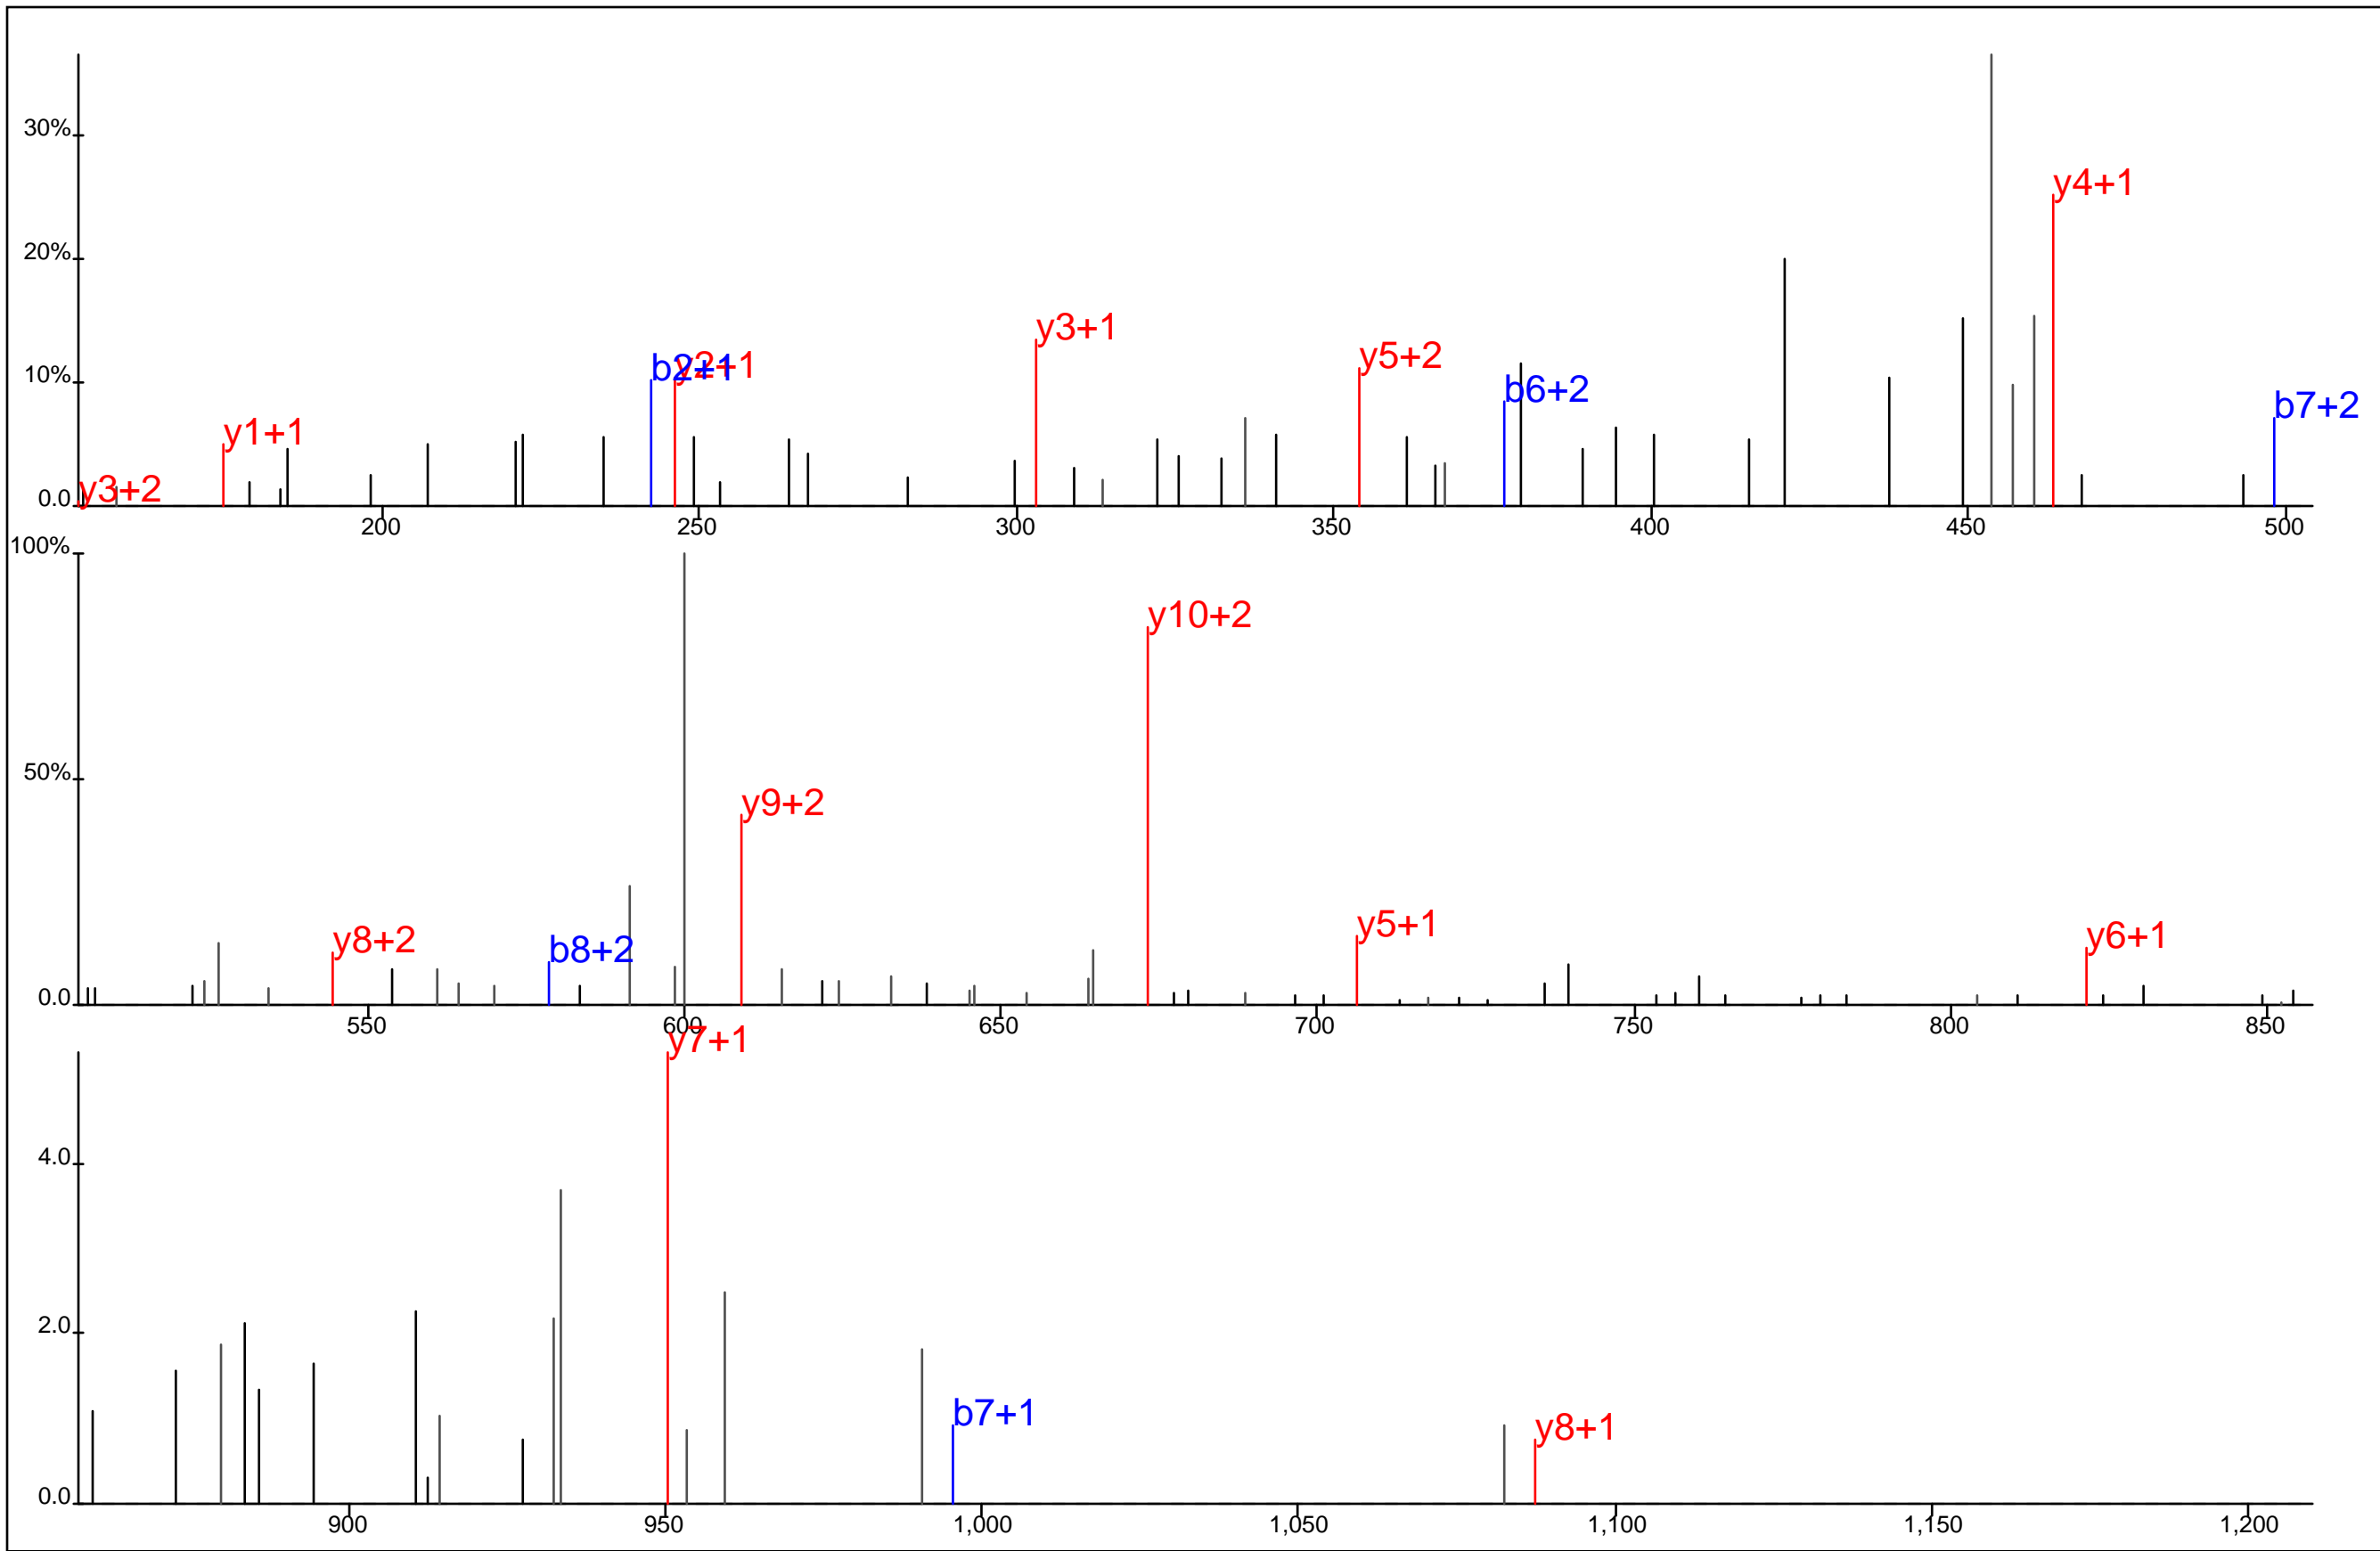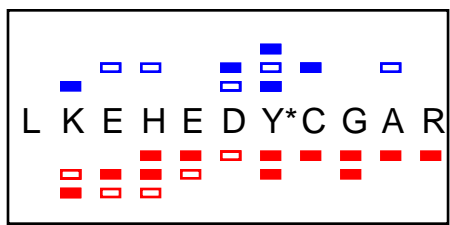

Protein Name: FLN29 protein  
 gi Accession: 0  
 Precursor Mass: 486.5343+3  
 Delta Mass: 0.392 ppm  
 XCorr: 40.52

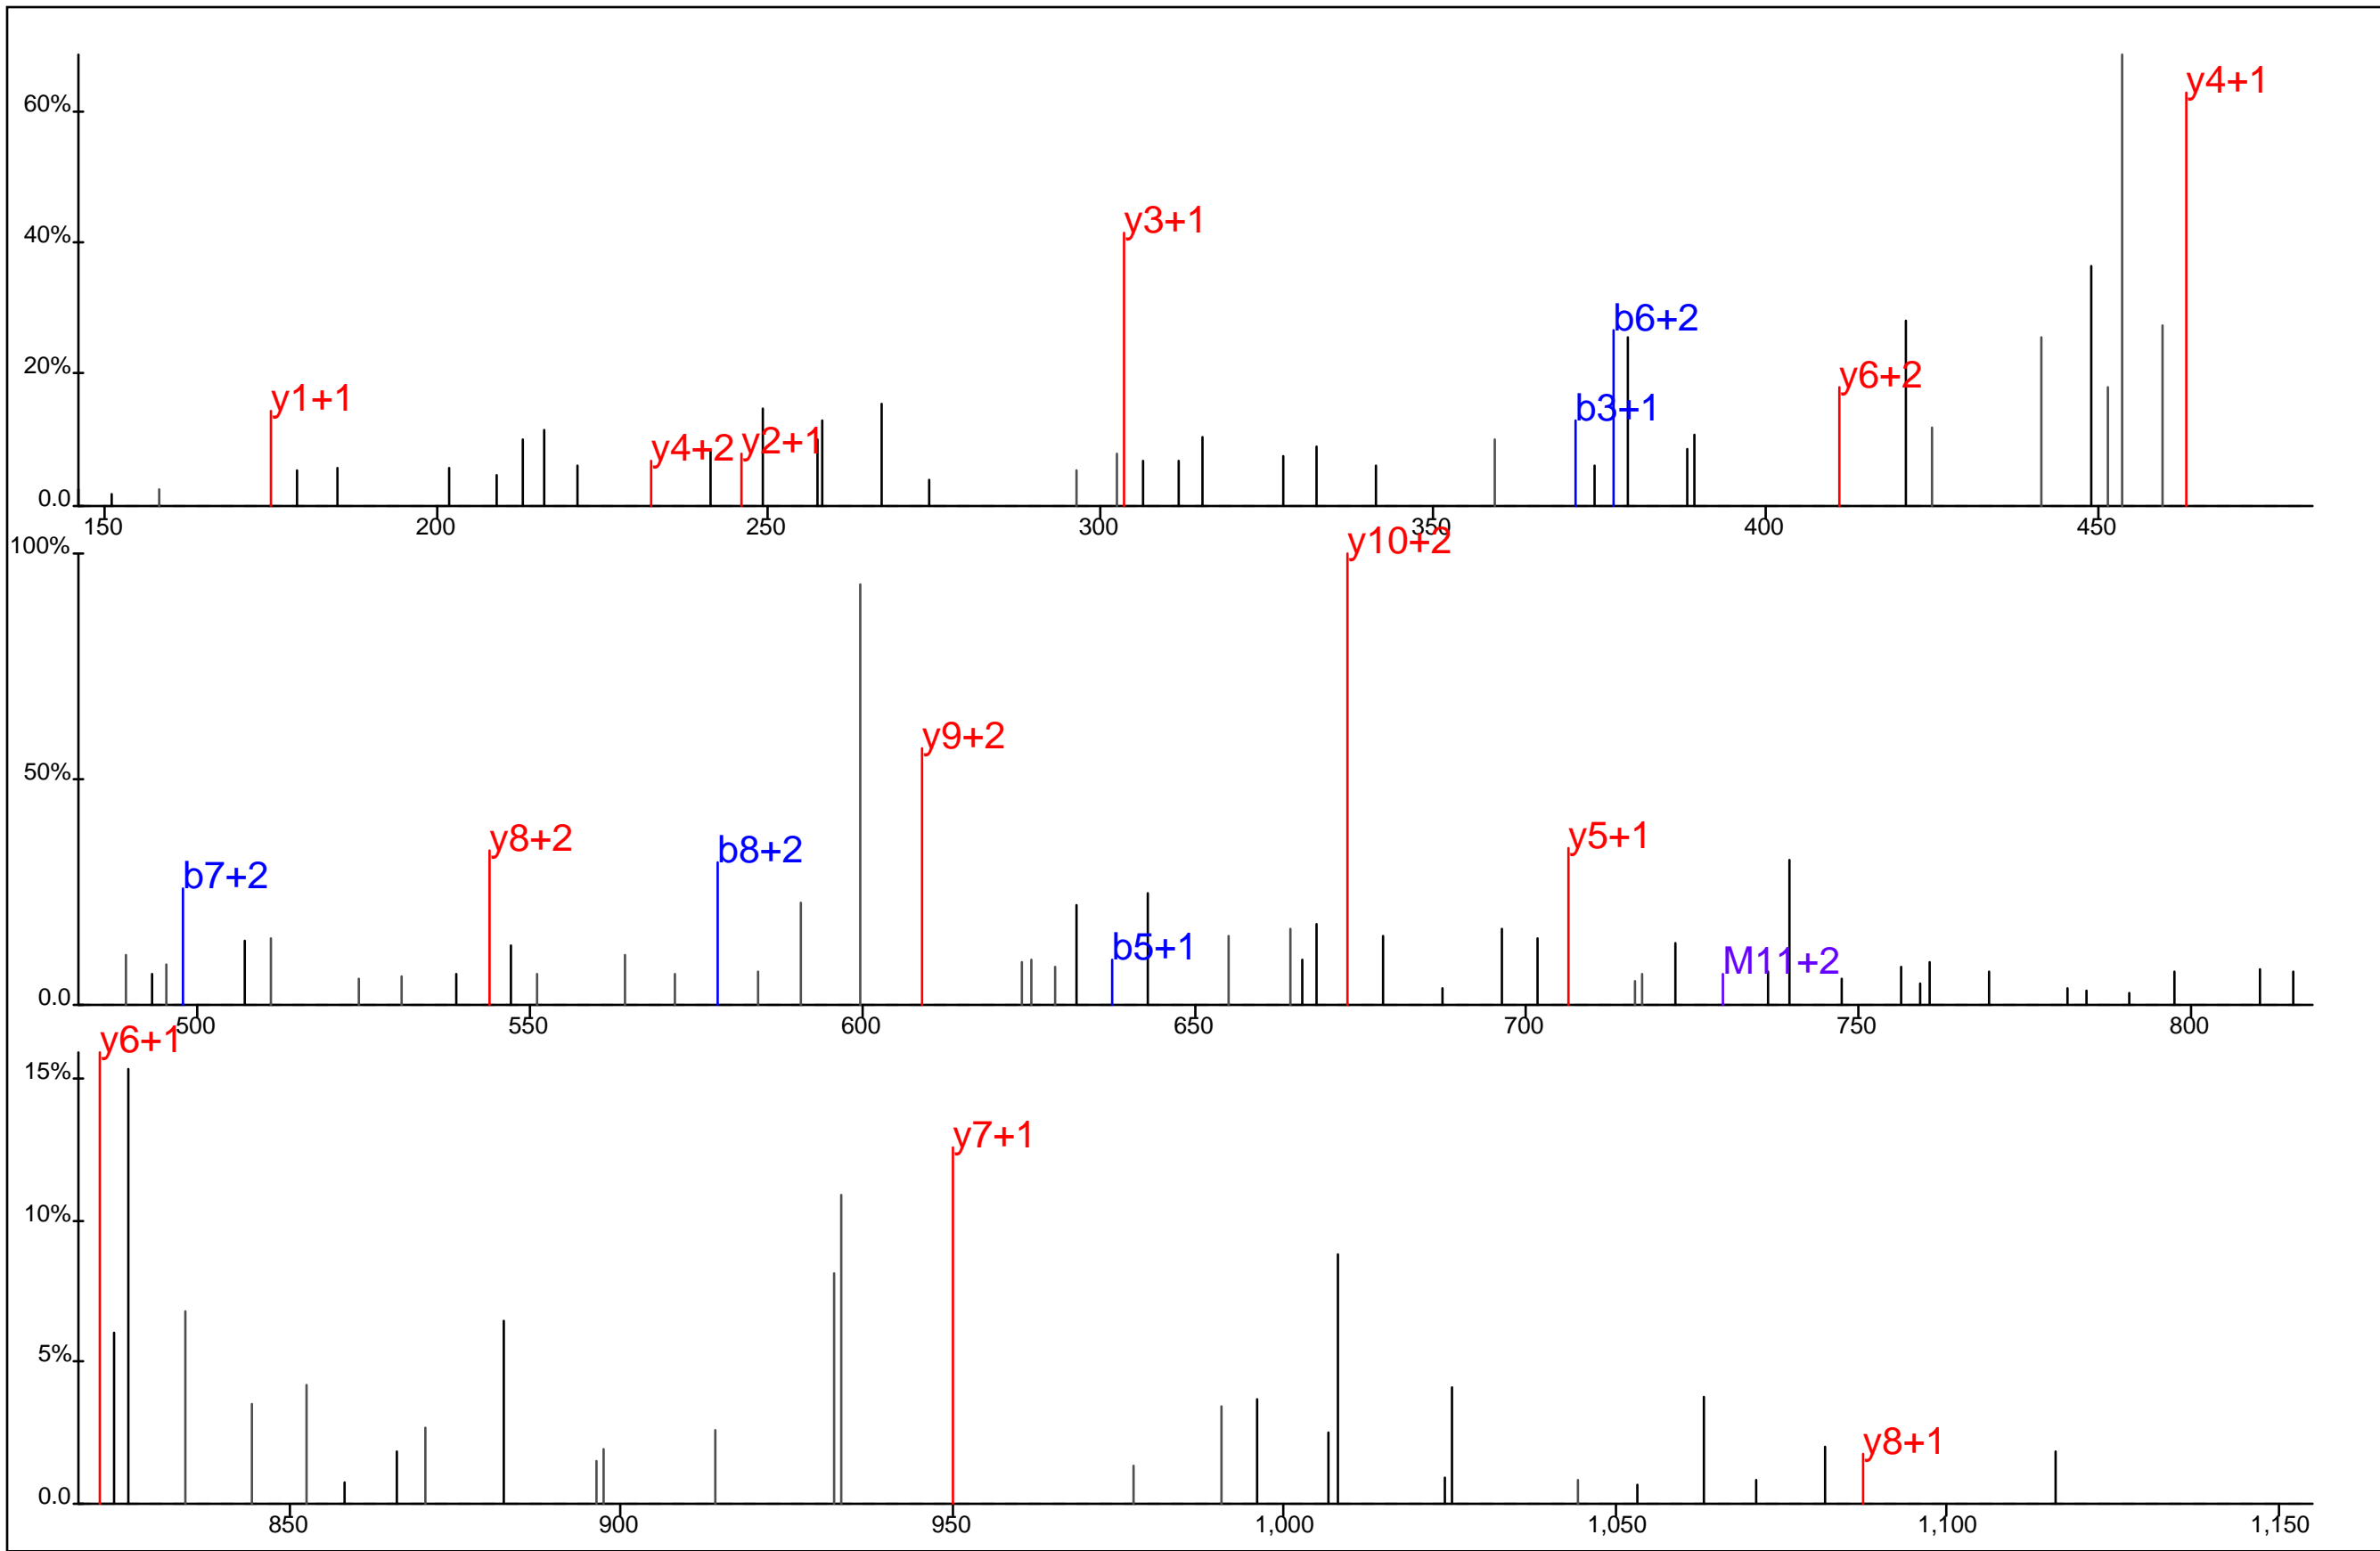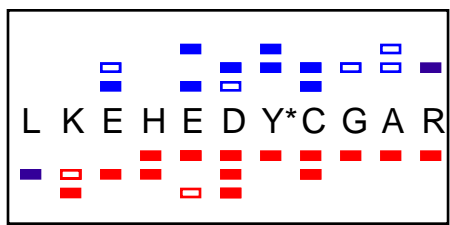

Protein Name: FLN29 protein  
 gi Accession: 0  
 Precursor Mass: 486.5342+3  
 Delta Mass: 0.080 ppm  
 XCorr: 30.38

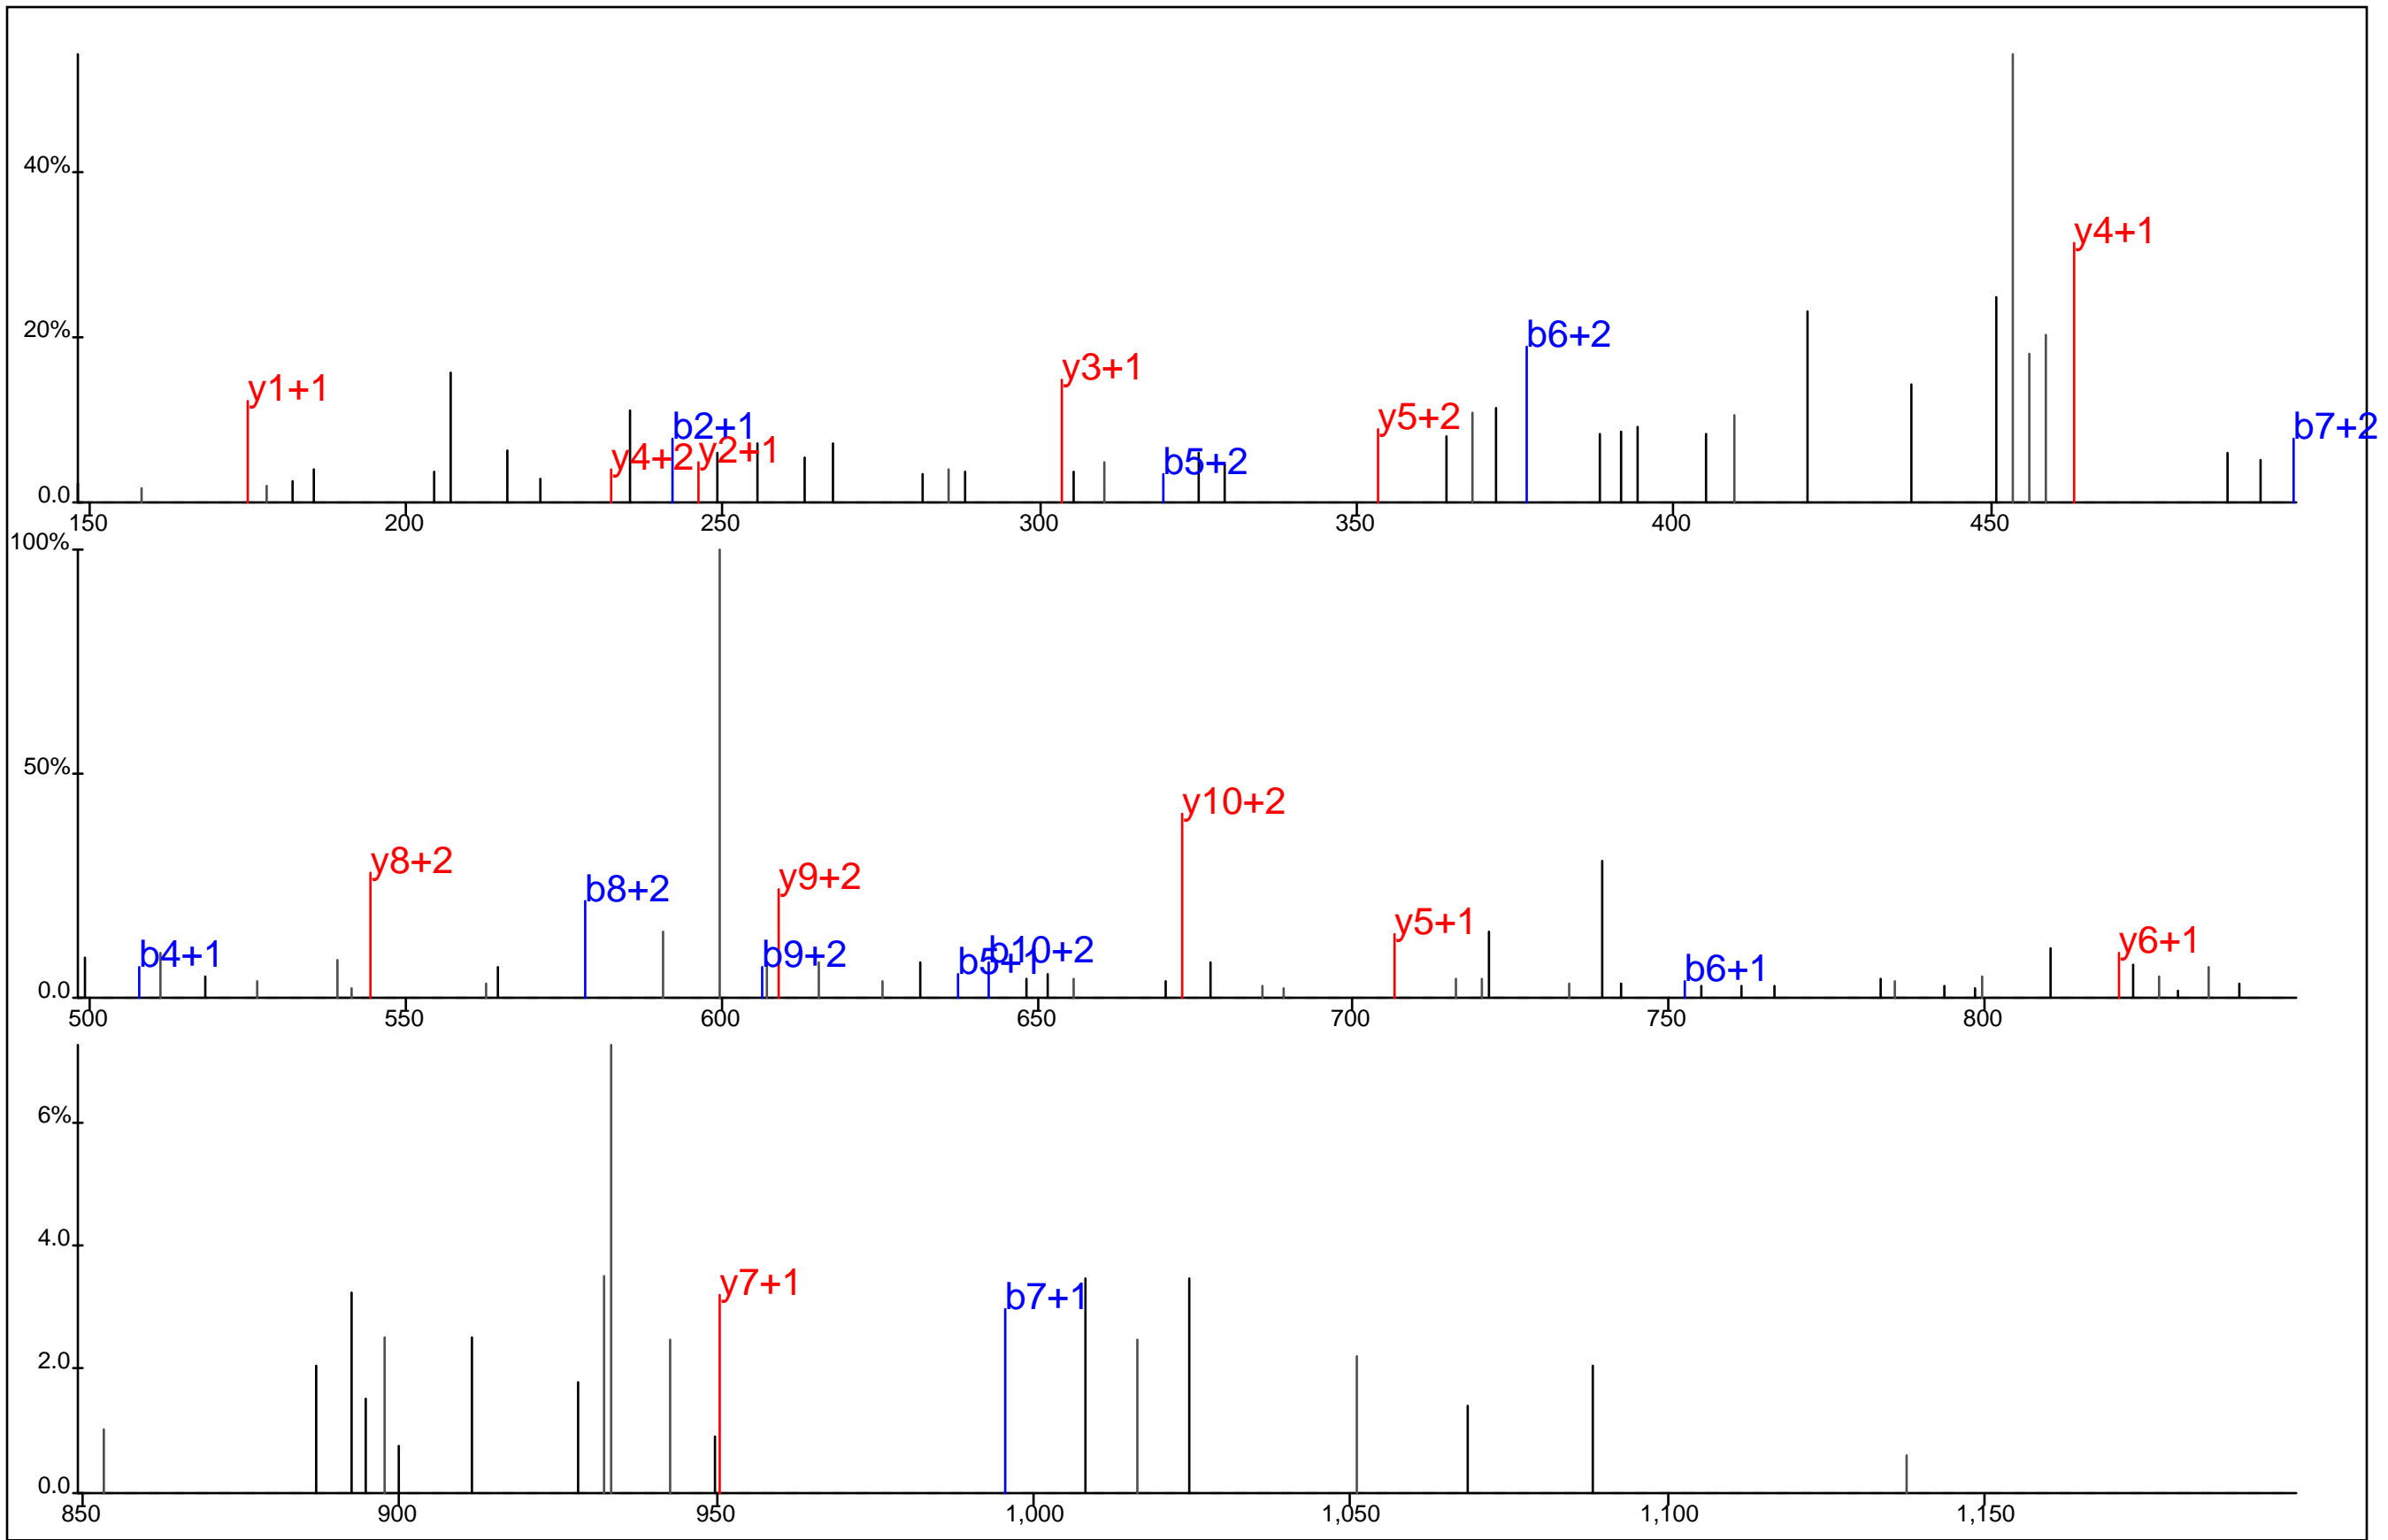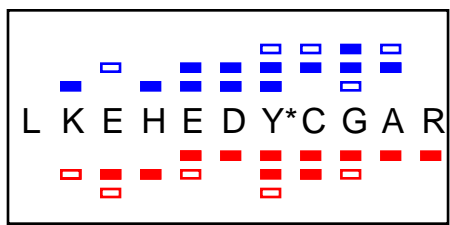

Protein Name: FLN29 protein  
 gi Accession: 0  
 Precursor Mass: 486.5369+3  
 Delta Mass: 5.670 ppm  
 XCorr: 25.71



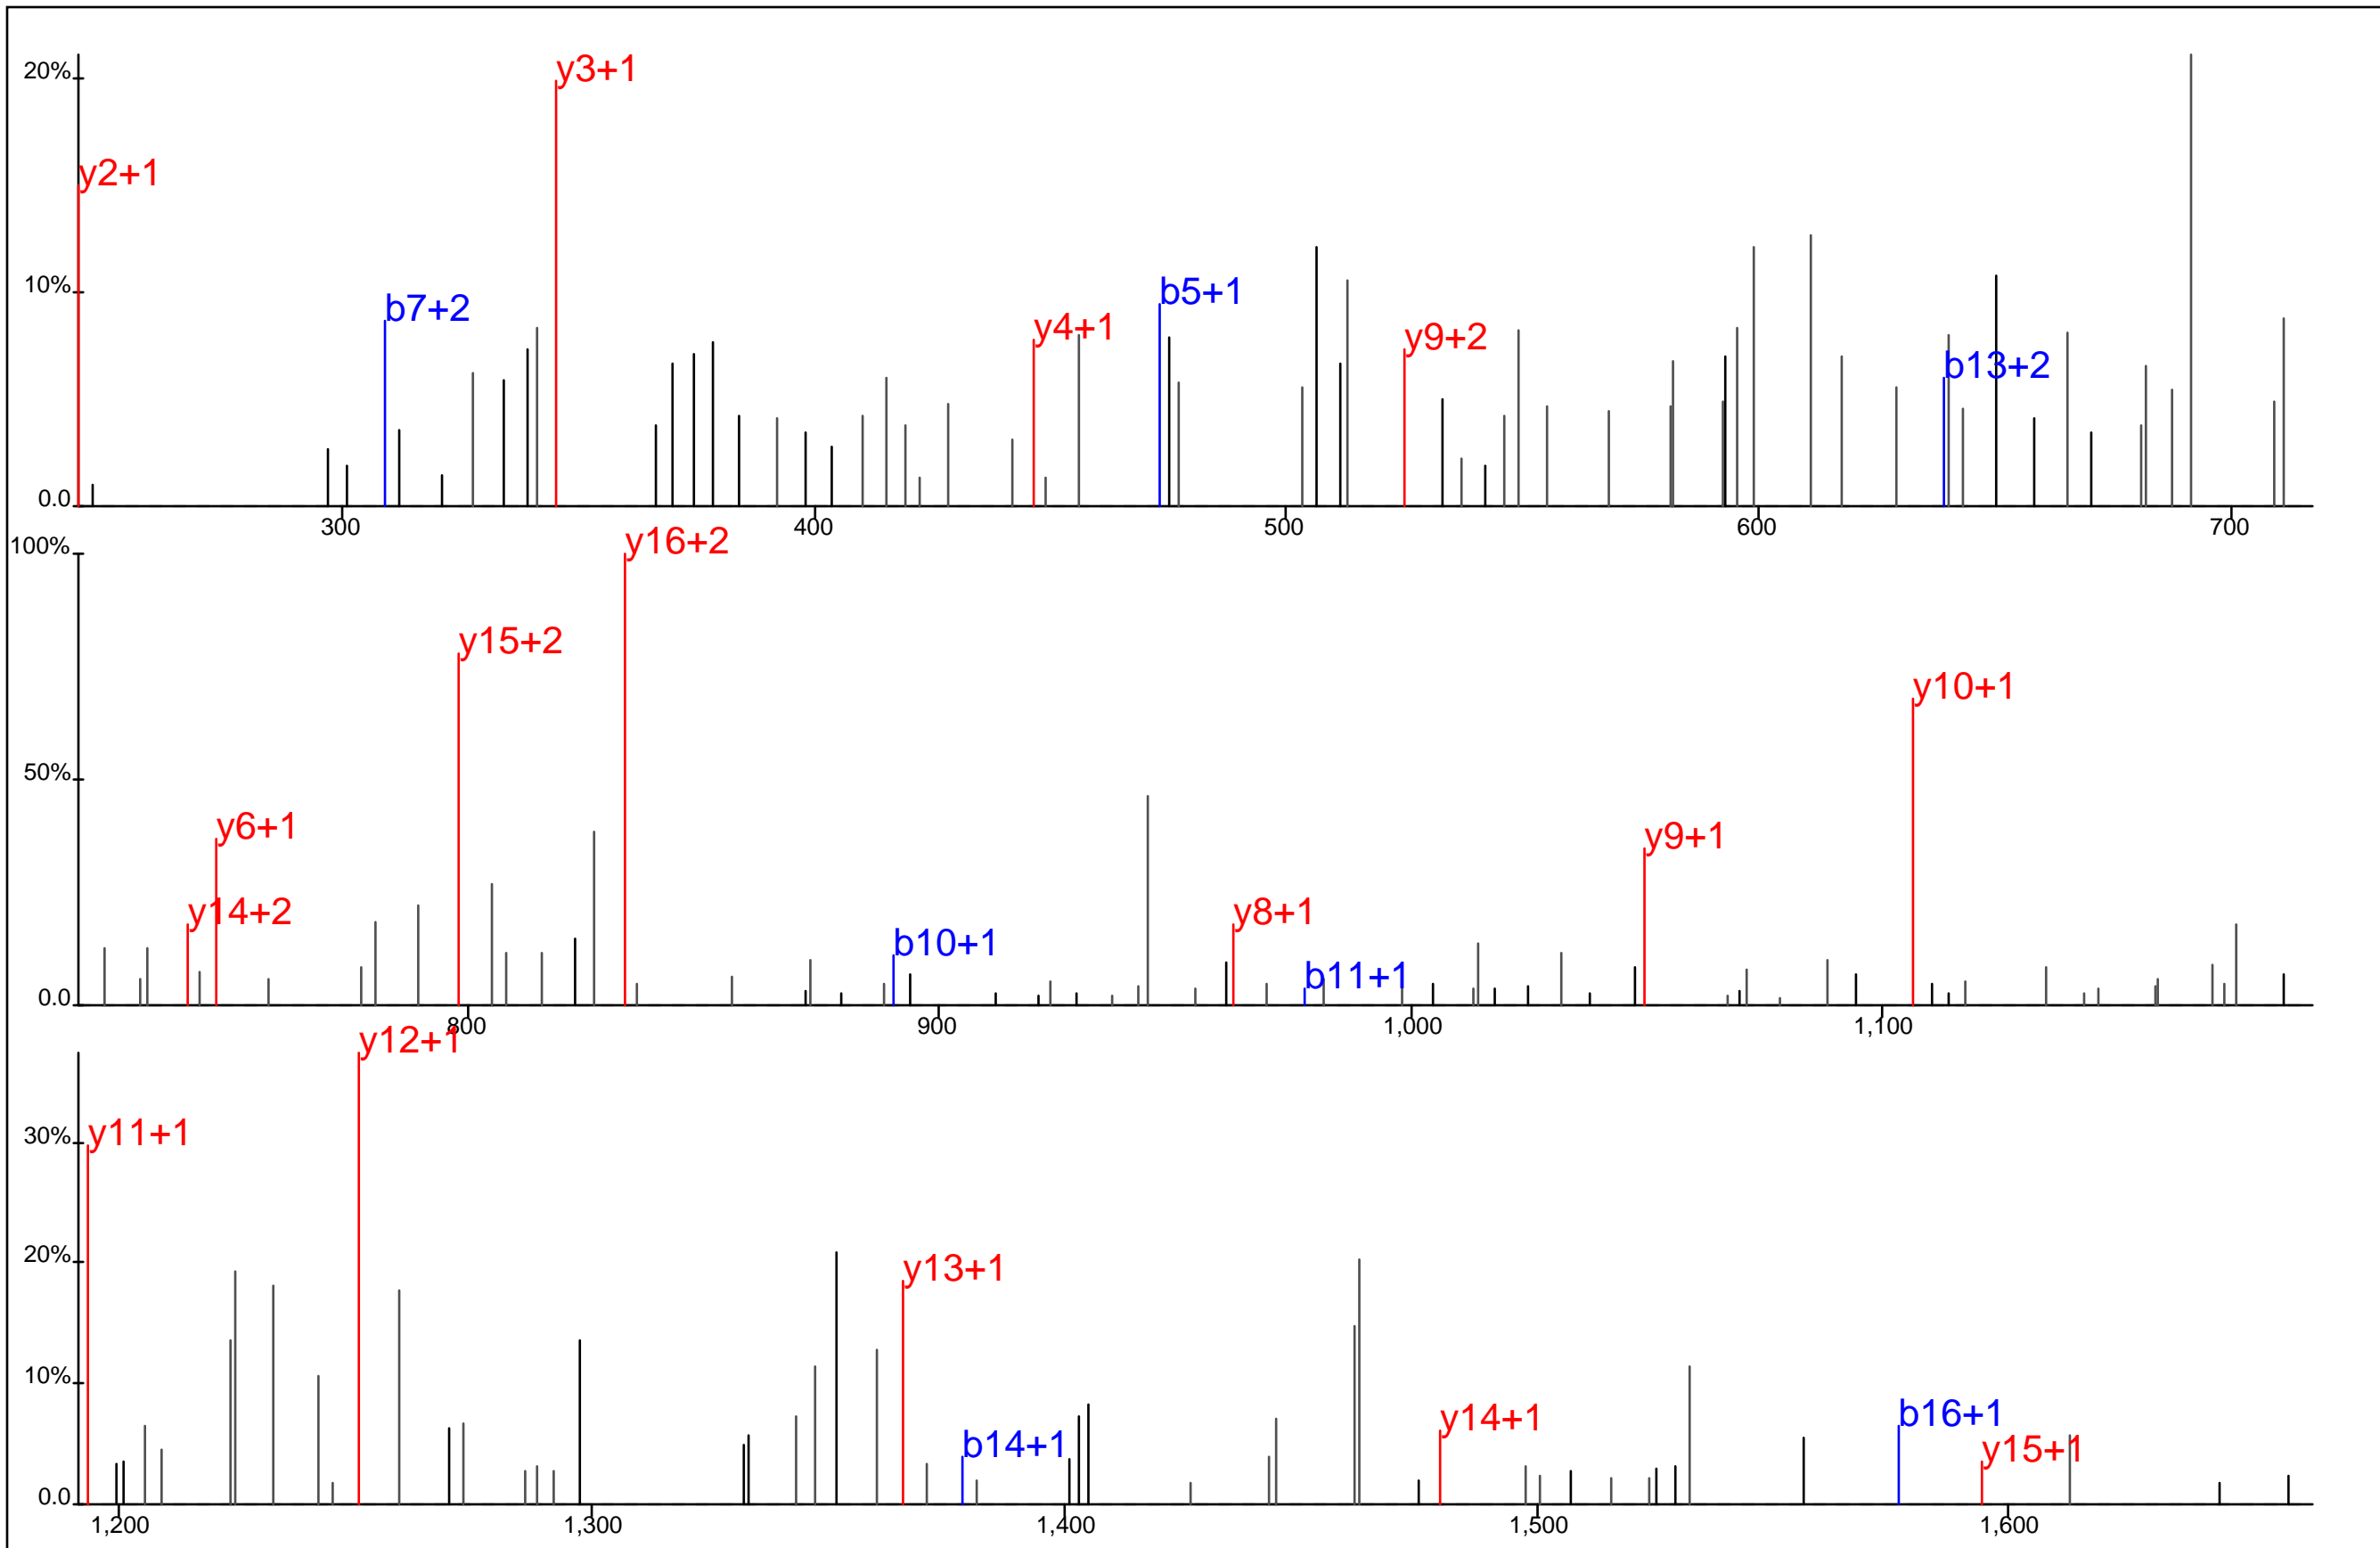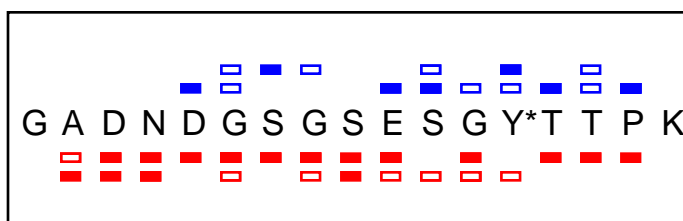

Protein Name: FMRP interacting protein, 82-kD  
 gi Accession: 0  
 Precursor Mass: 861.8302+2  
 Delta Mass: 2.370 ppm  
 XCorr: 67.49



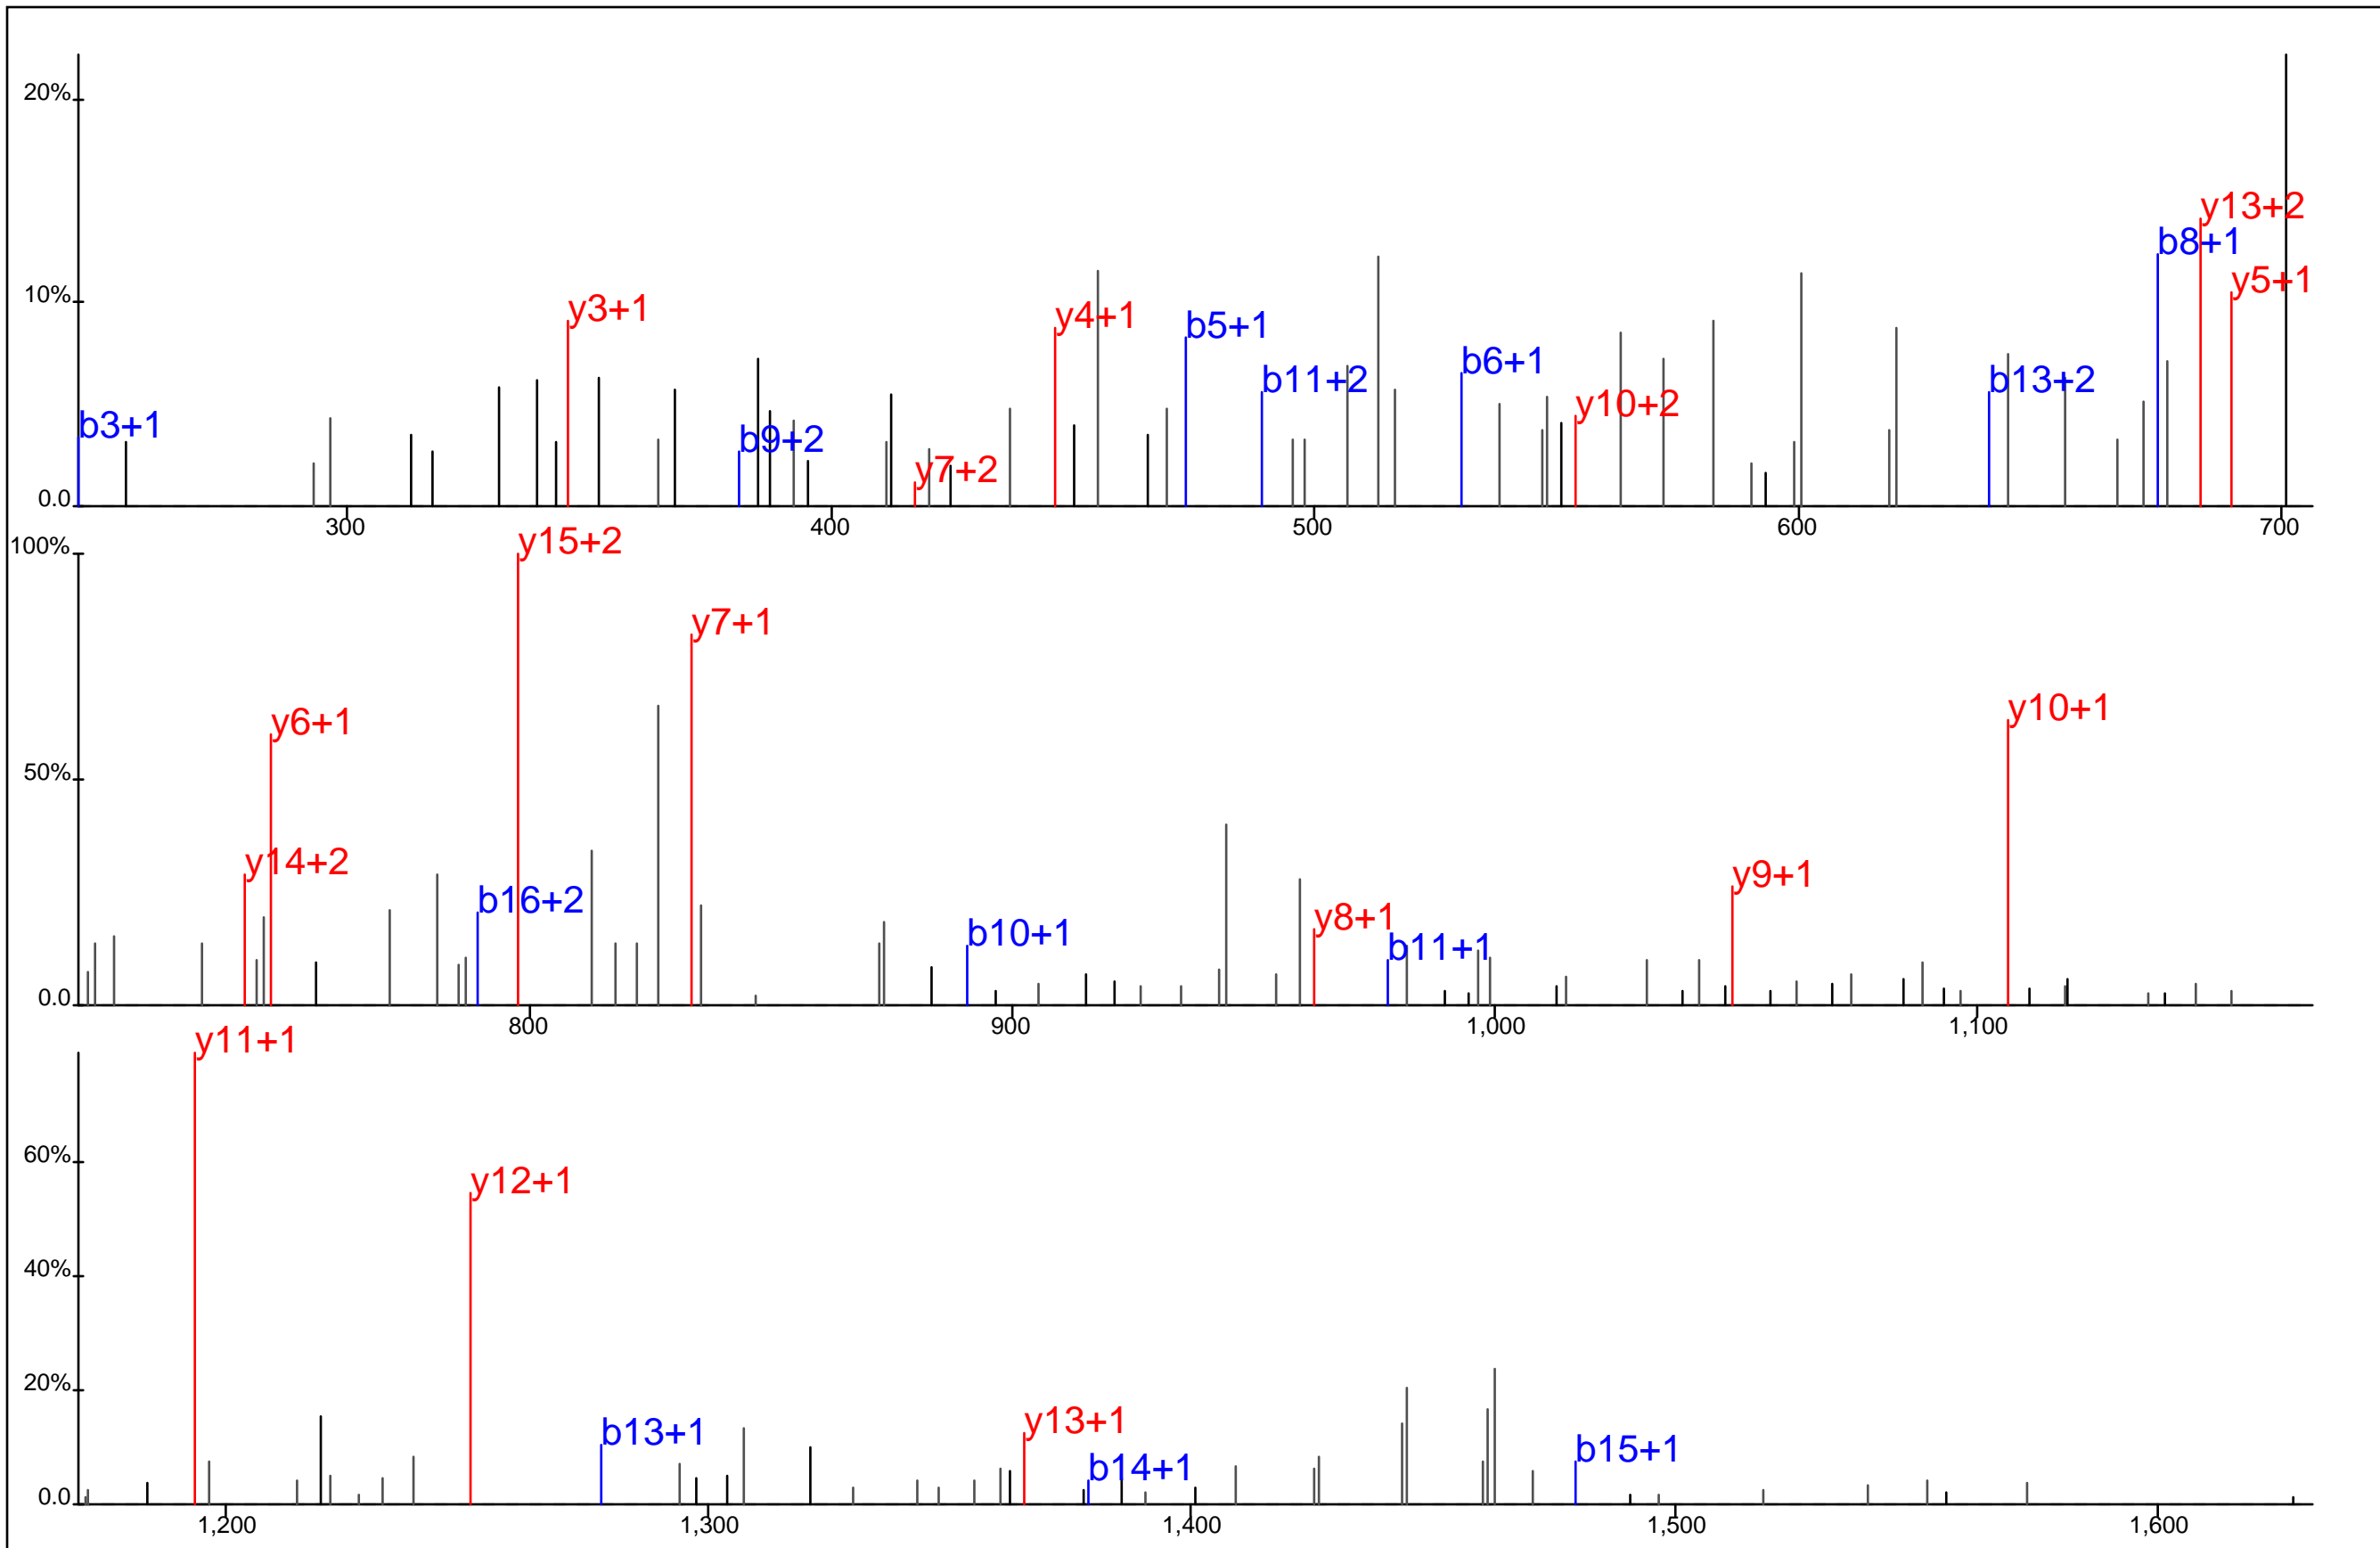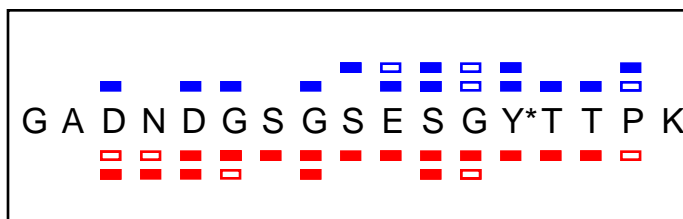

Protein Name: FMRP interacting protein, 82-kD  
 gi Accession: 0  
 Precursor Mass: 861.8317+2  
 Delta Mass: 4.070 ppm  
 XCorr: 59.19

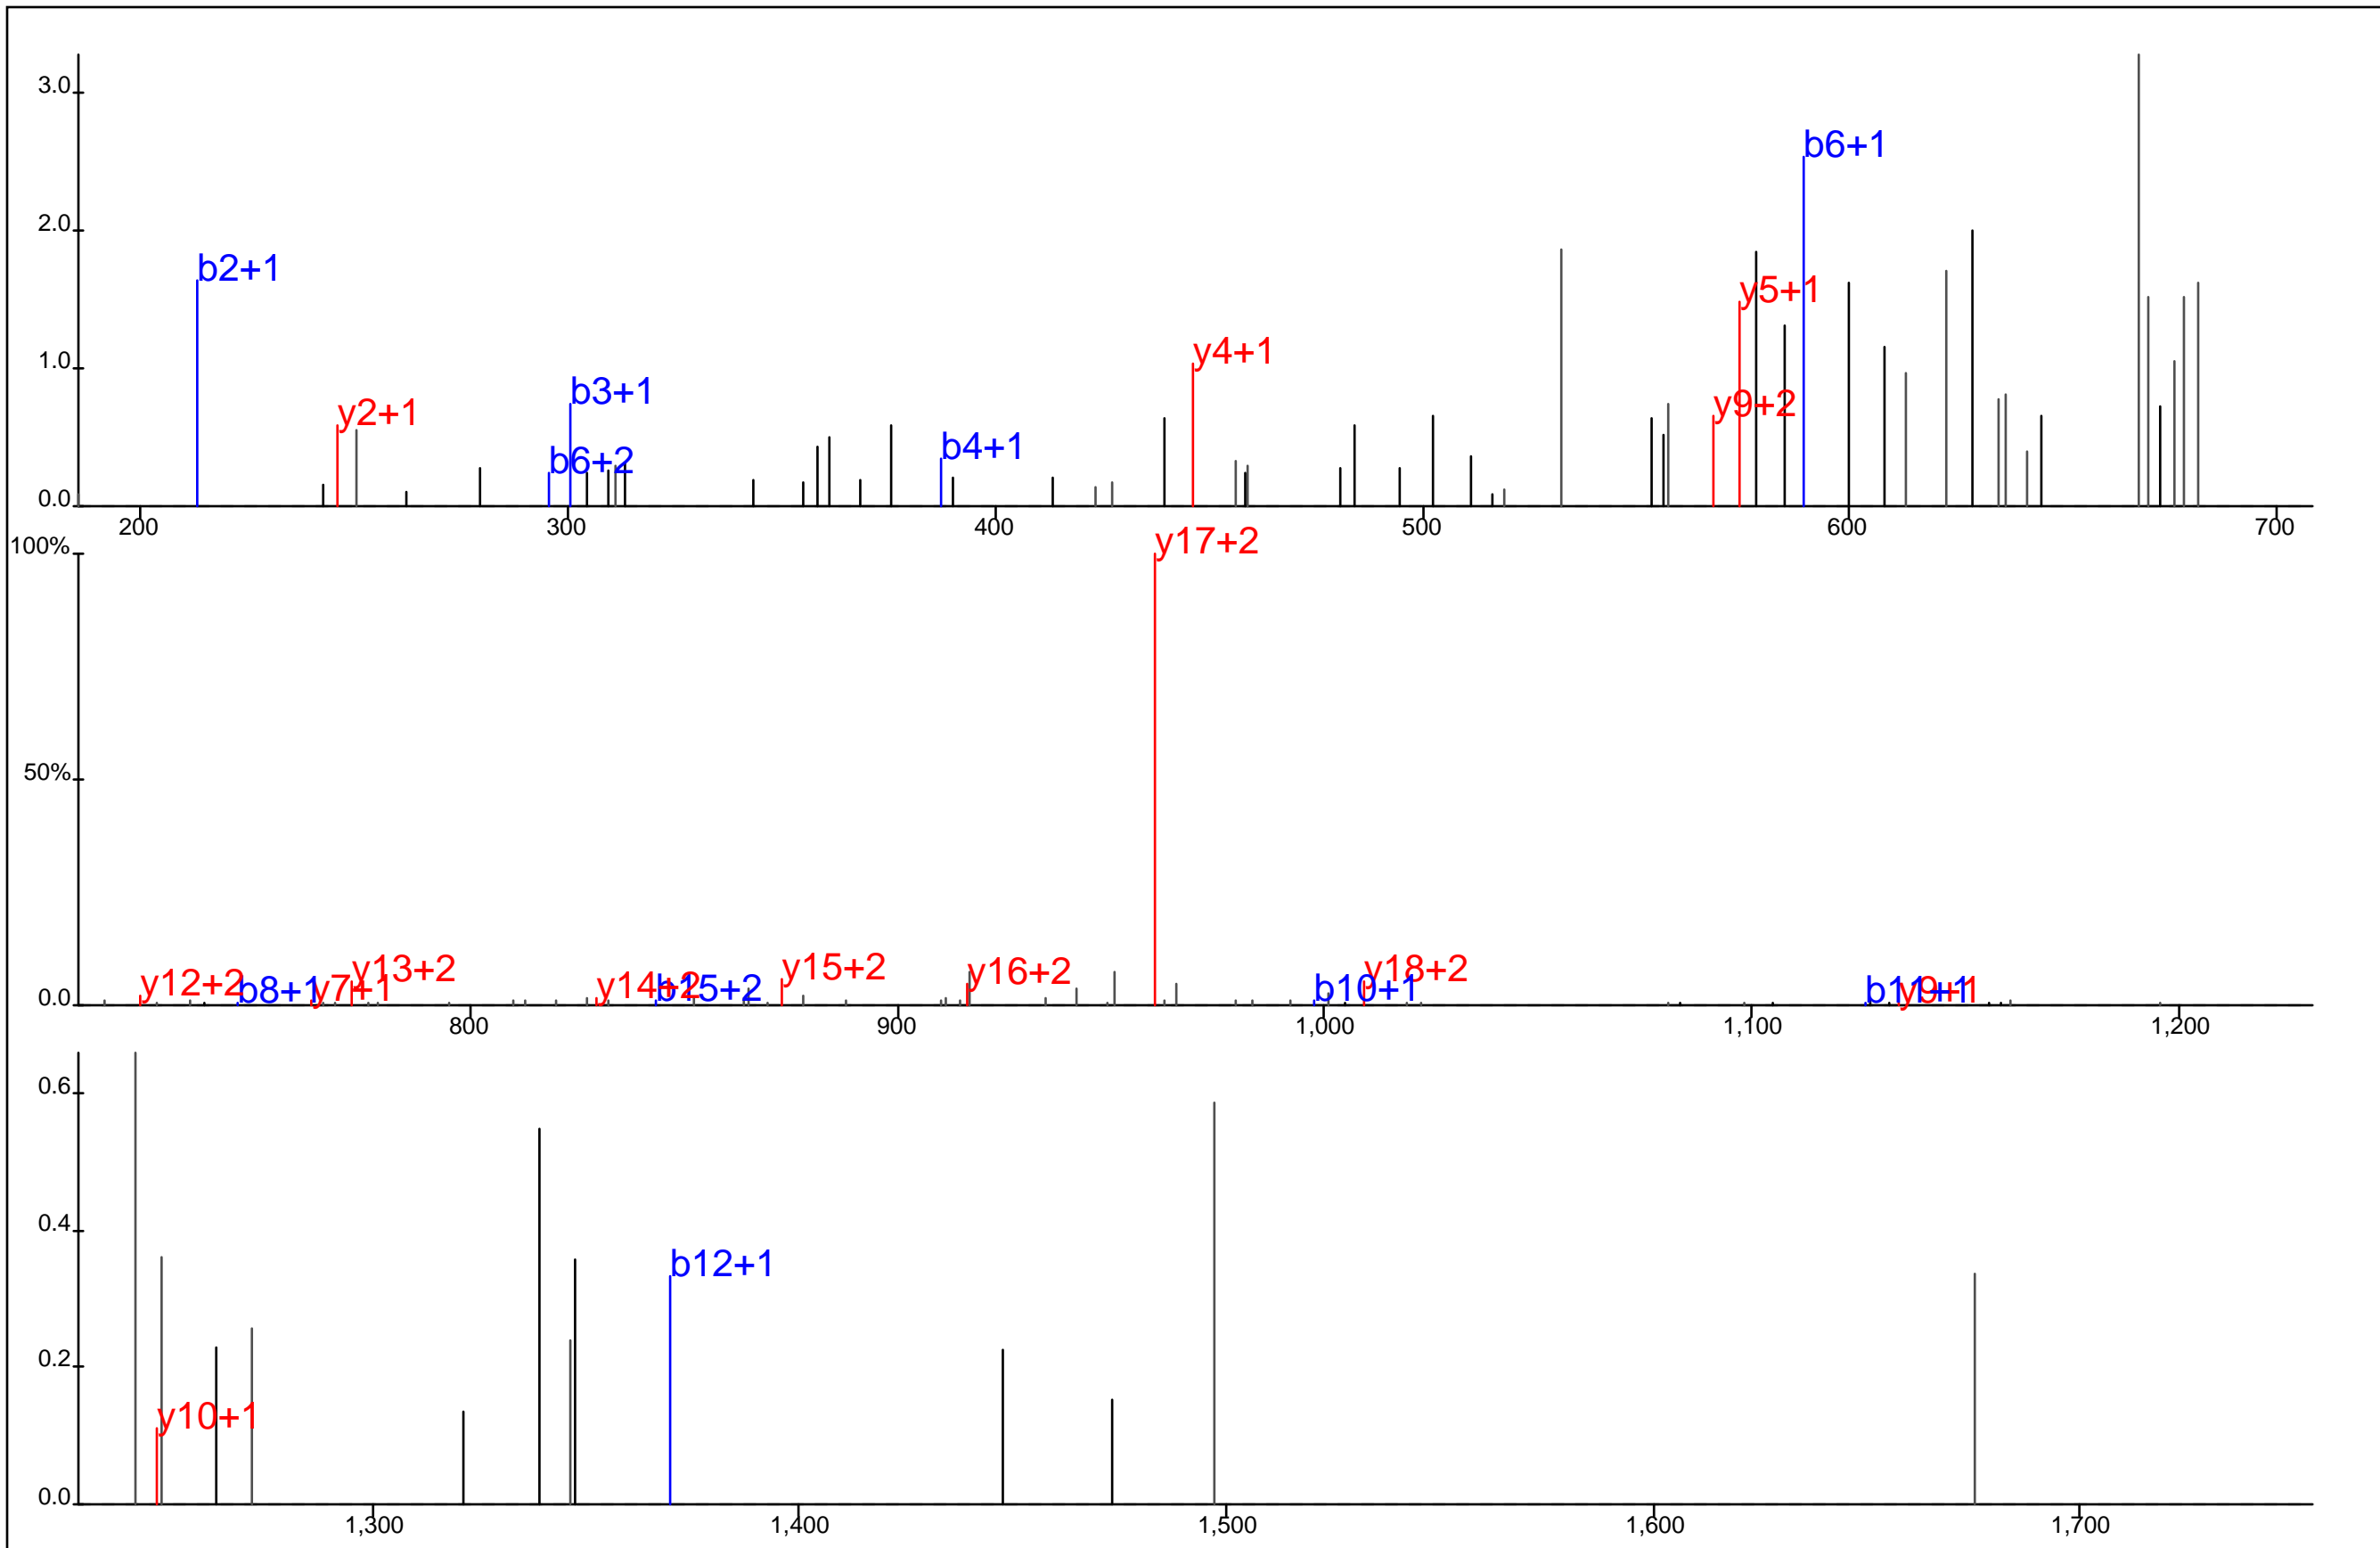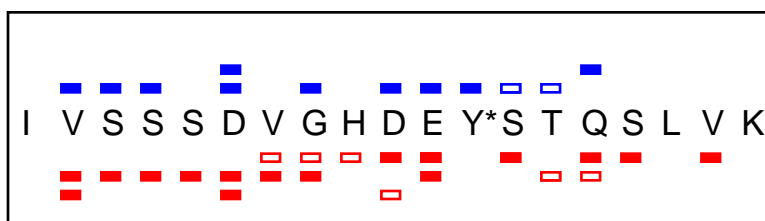

Protein Name: Fodrin beta  
 gi Accession: 0  
 Precursor Mass: 710.9918+3  
 Delta Mass: 0.768 ppm  
 XCorr: 34.58

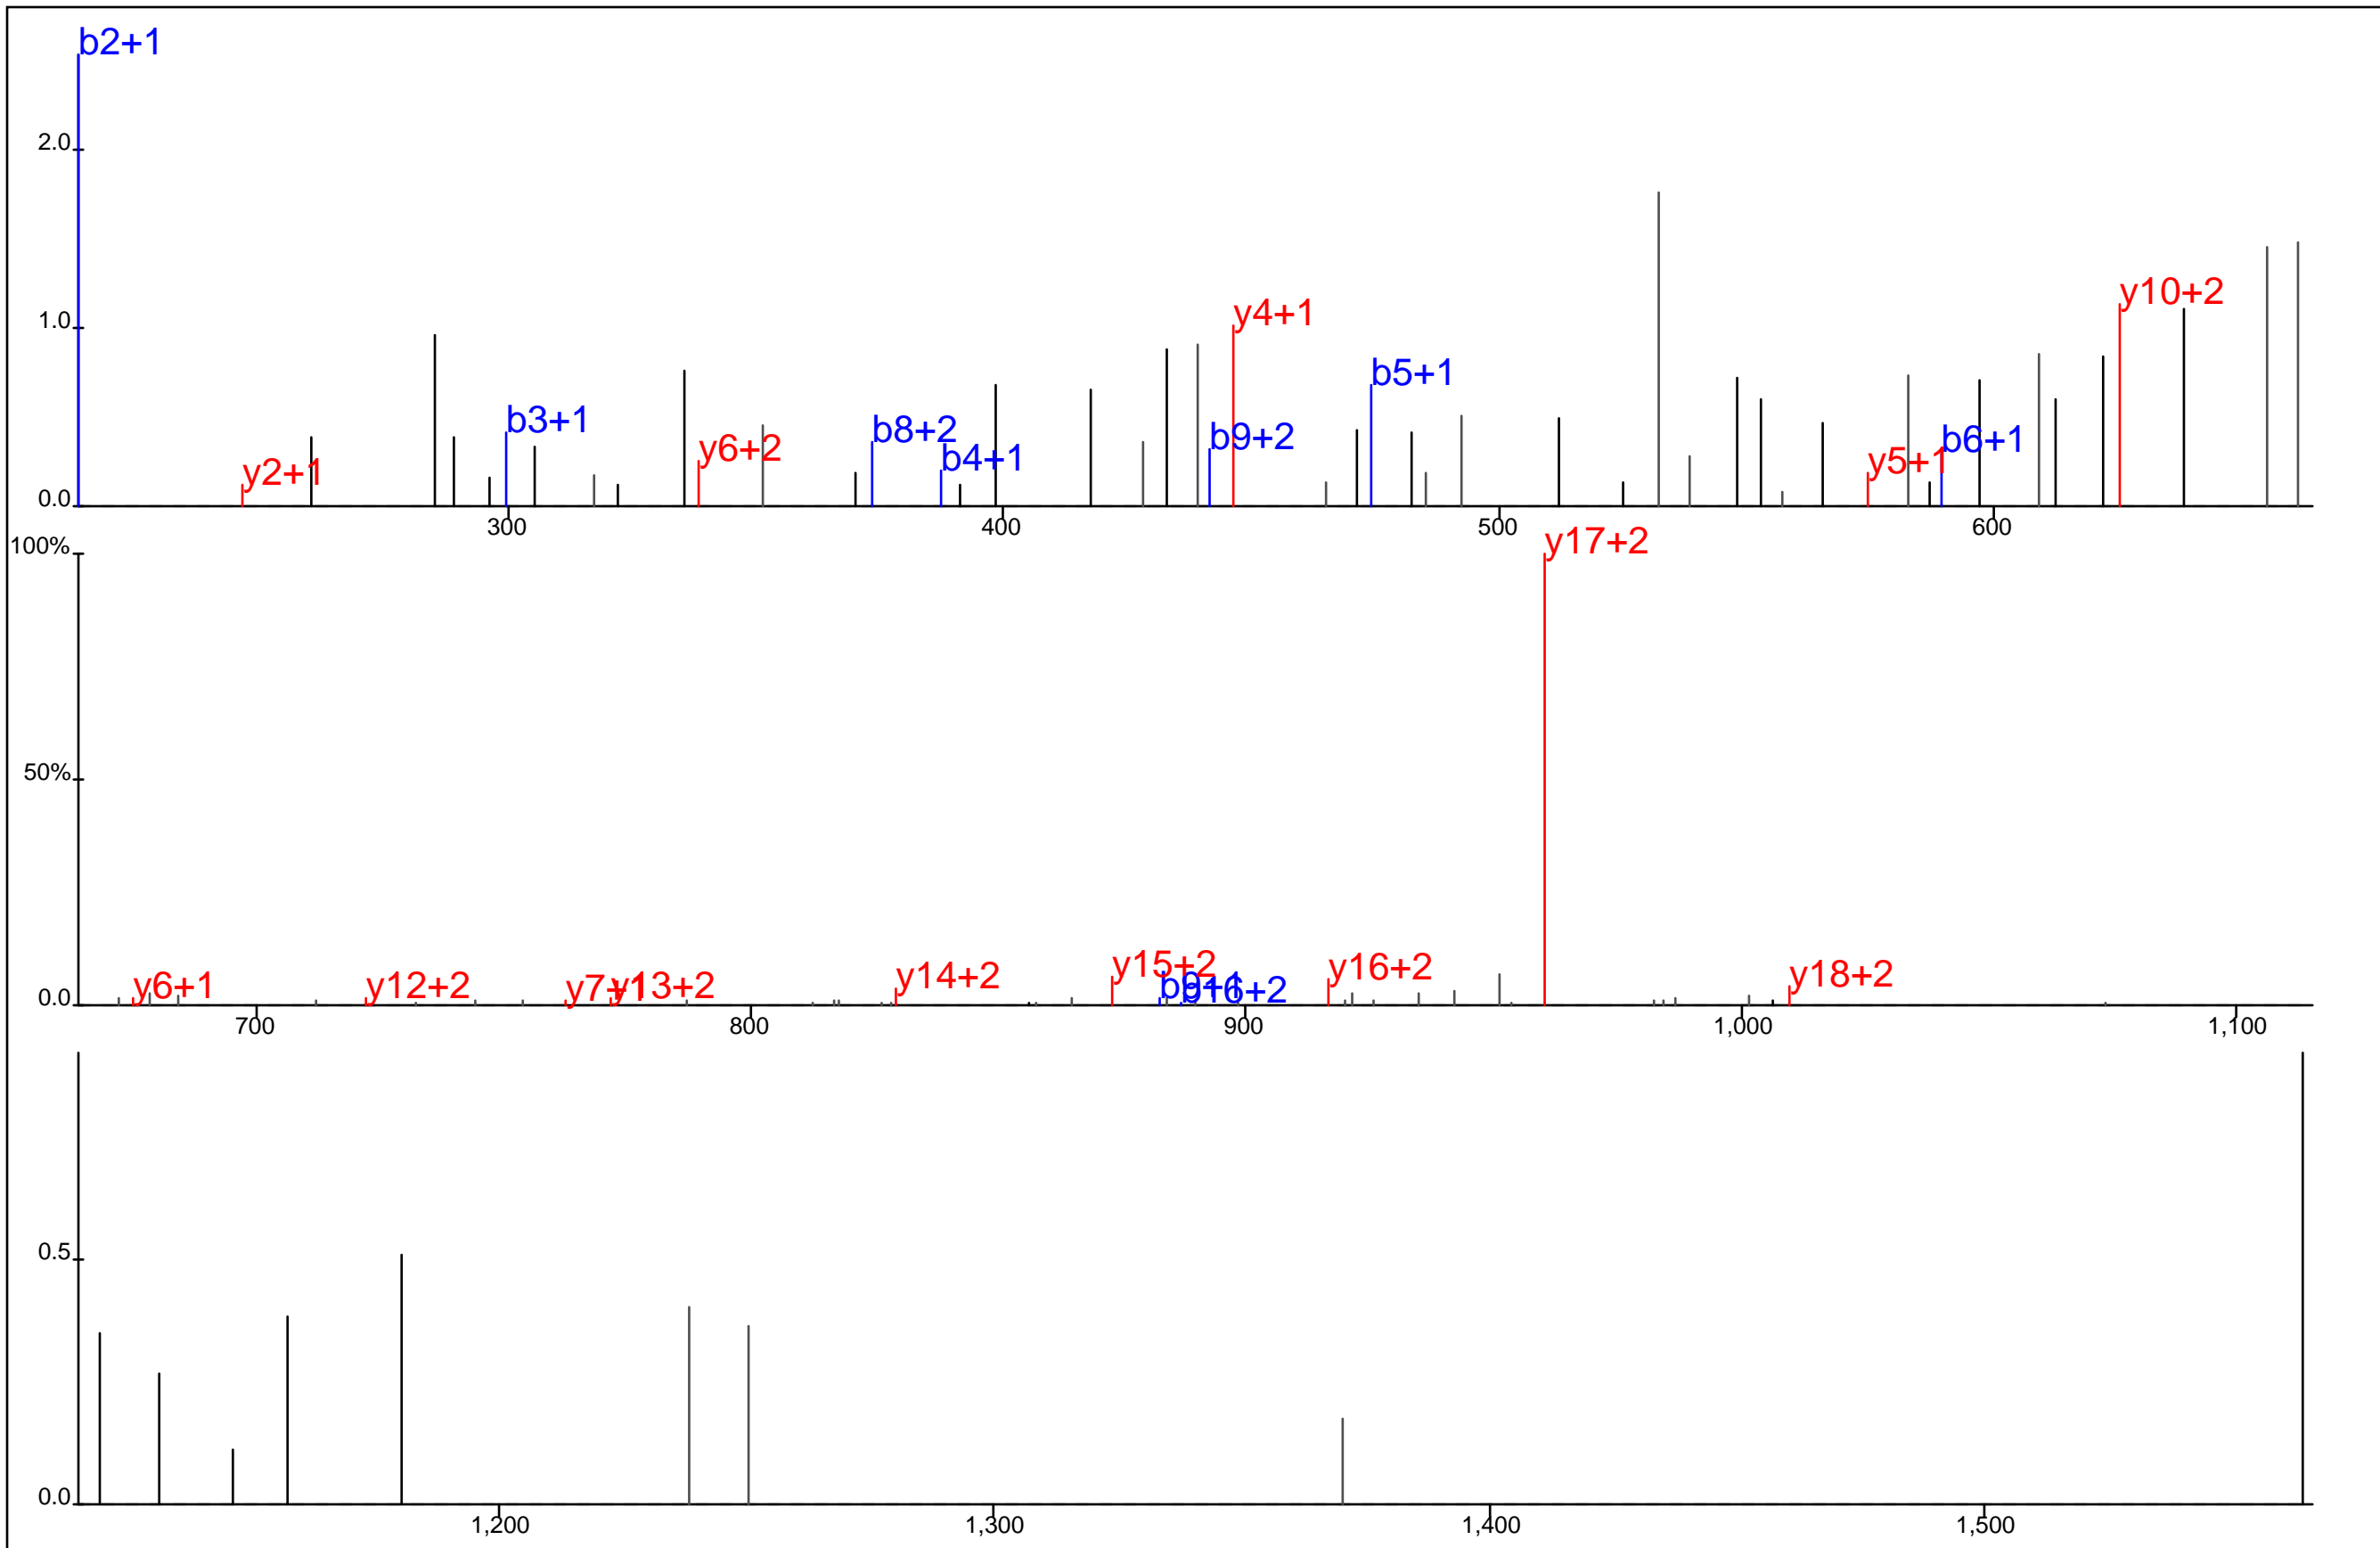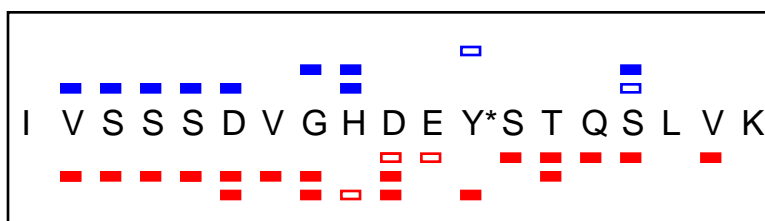

Protein Name: Fodrin beta  
 gi Accession: 0  
 Precursor Mass: 710.9910+3  
 Delta Mass: 0.263 ppm  
 XCorr: 34.49

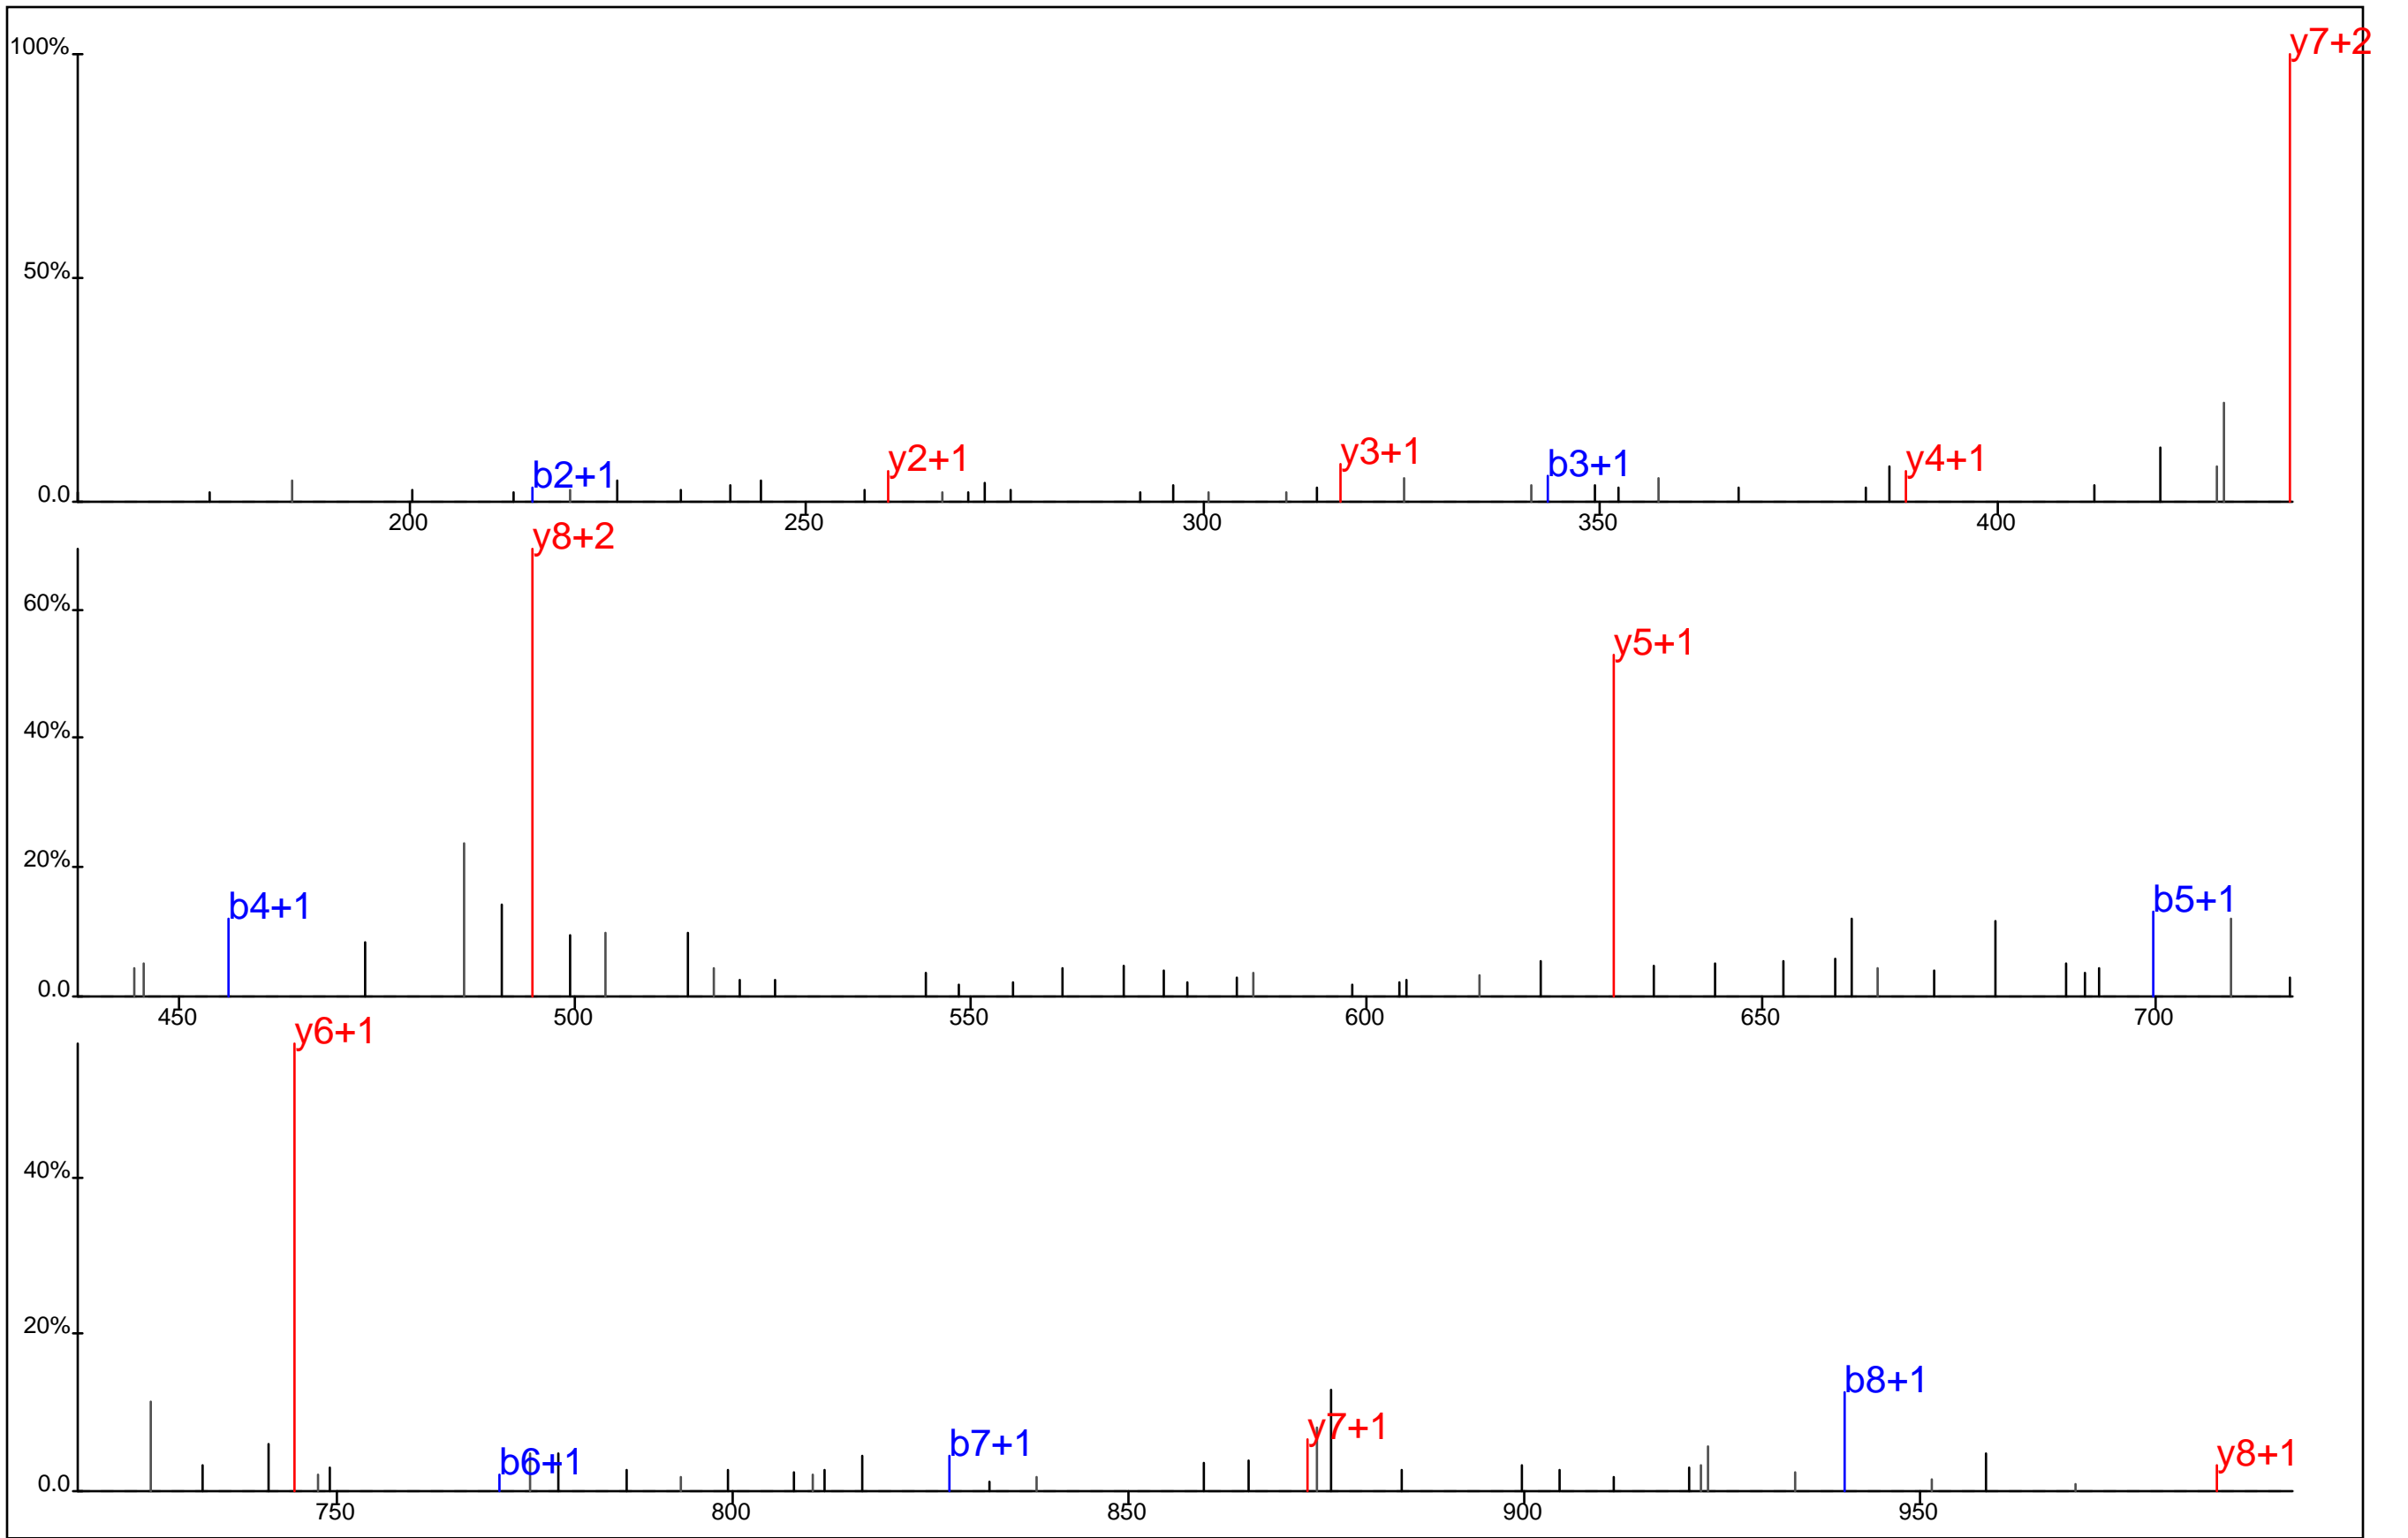

|  |                                                                                                                                                                    |
|--|--------------------------------------------------------------------------------------------------------------------------------------------------------------------|
|  | <p>Protein Name: Fodrin beta<br/>         gi Accession: 0<br/>         Precursor Mass: 543.7839+2<br/>         Delta Mass: 0.931 ppm<br/>         XCorr: 35.36</p> |
|--|--------------------------------------------------------------------------------------------------------------------------------------------------------------------|

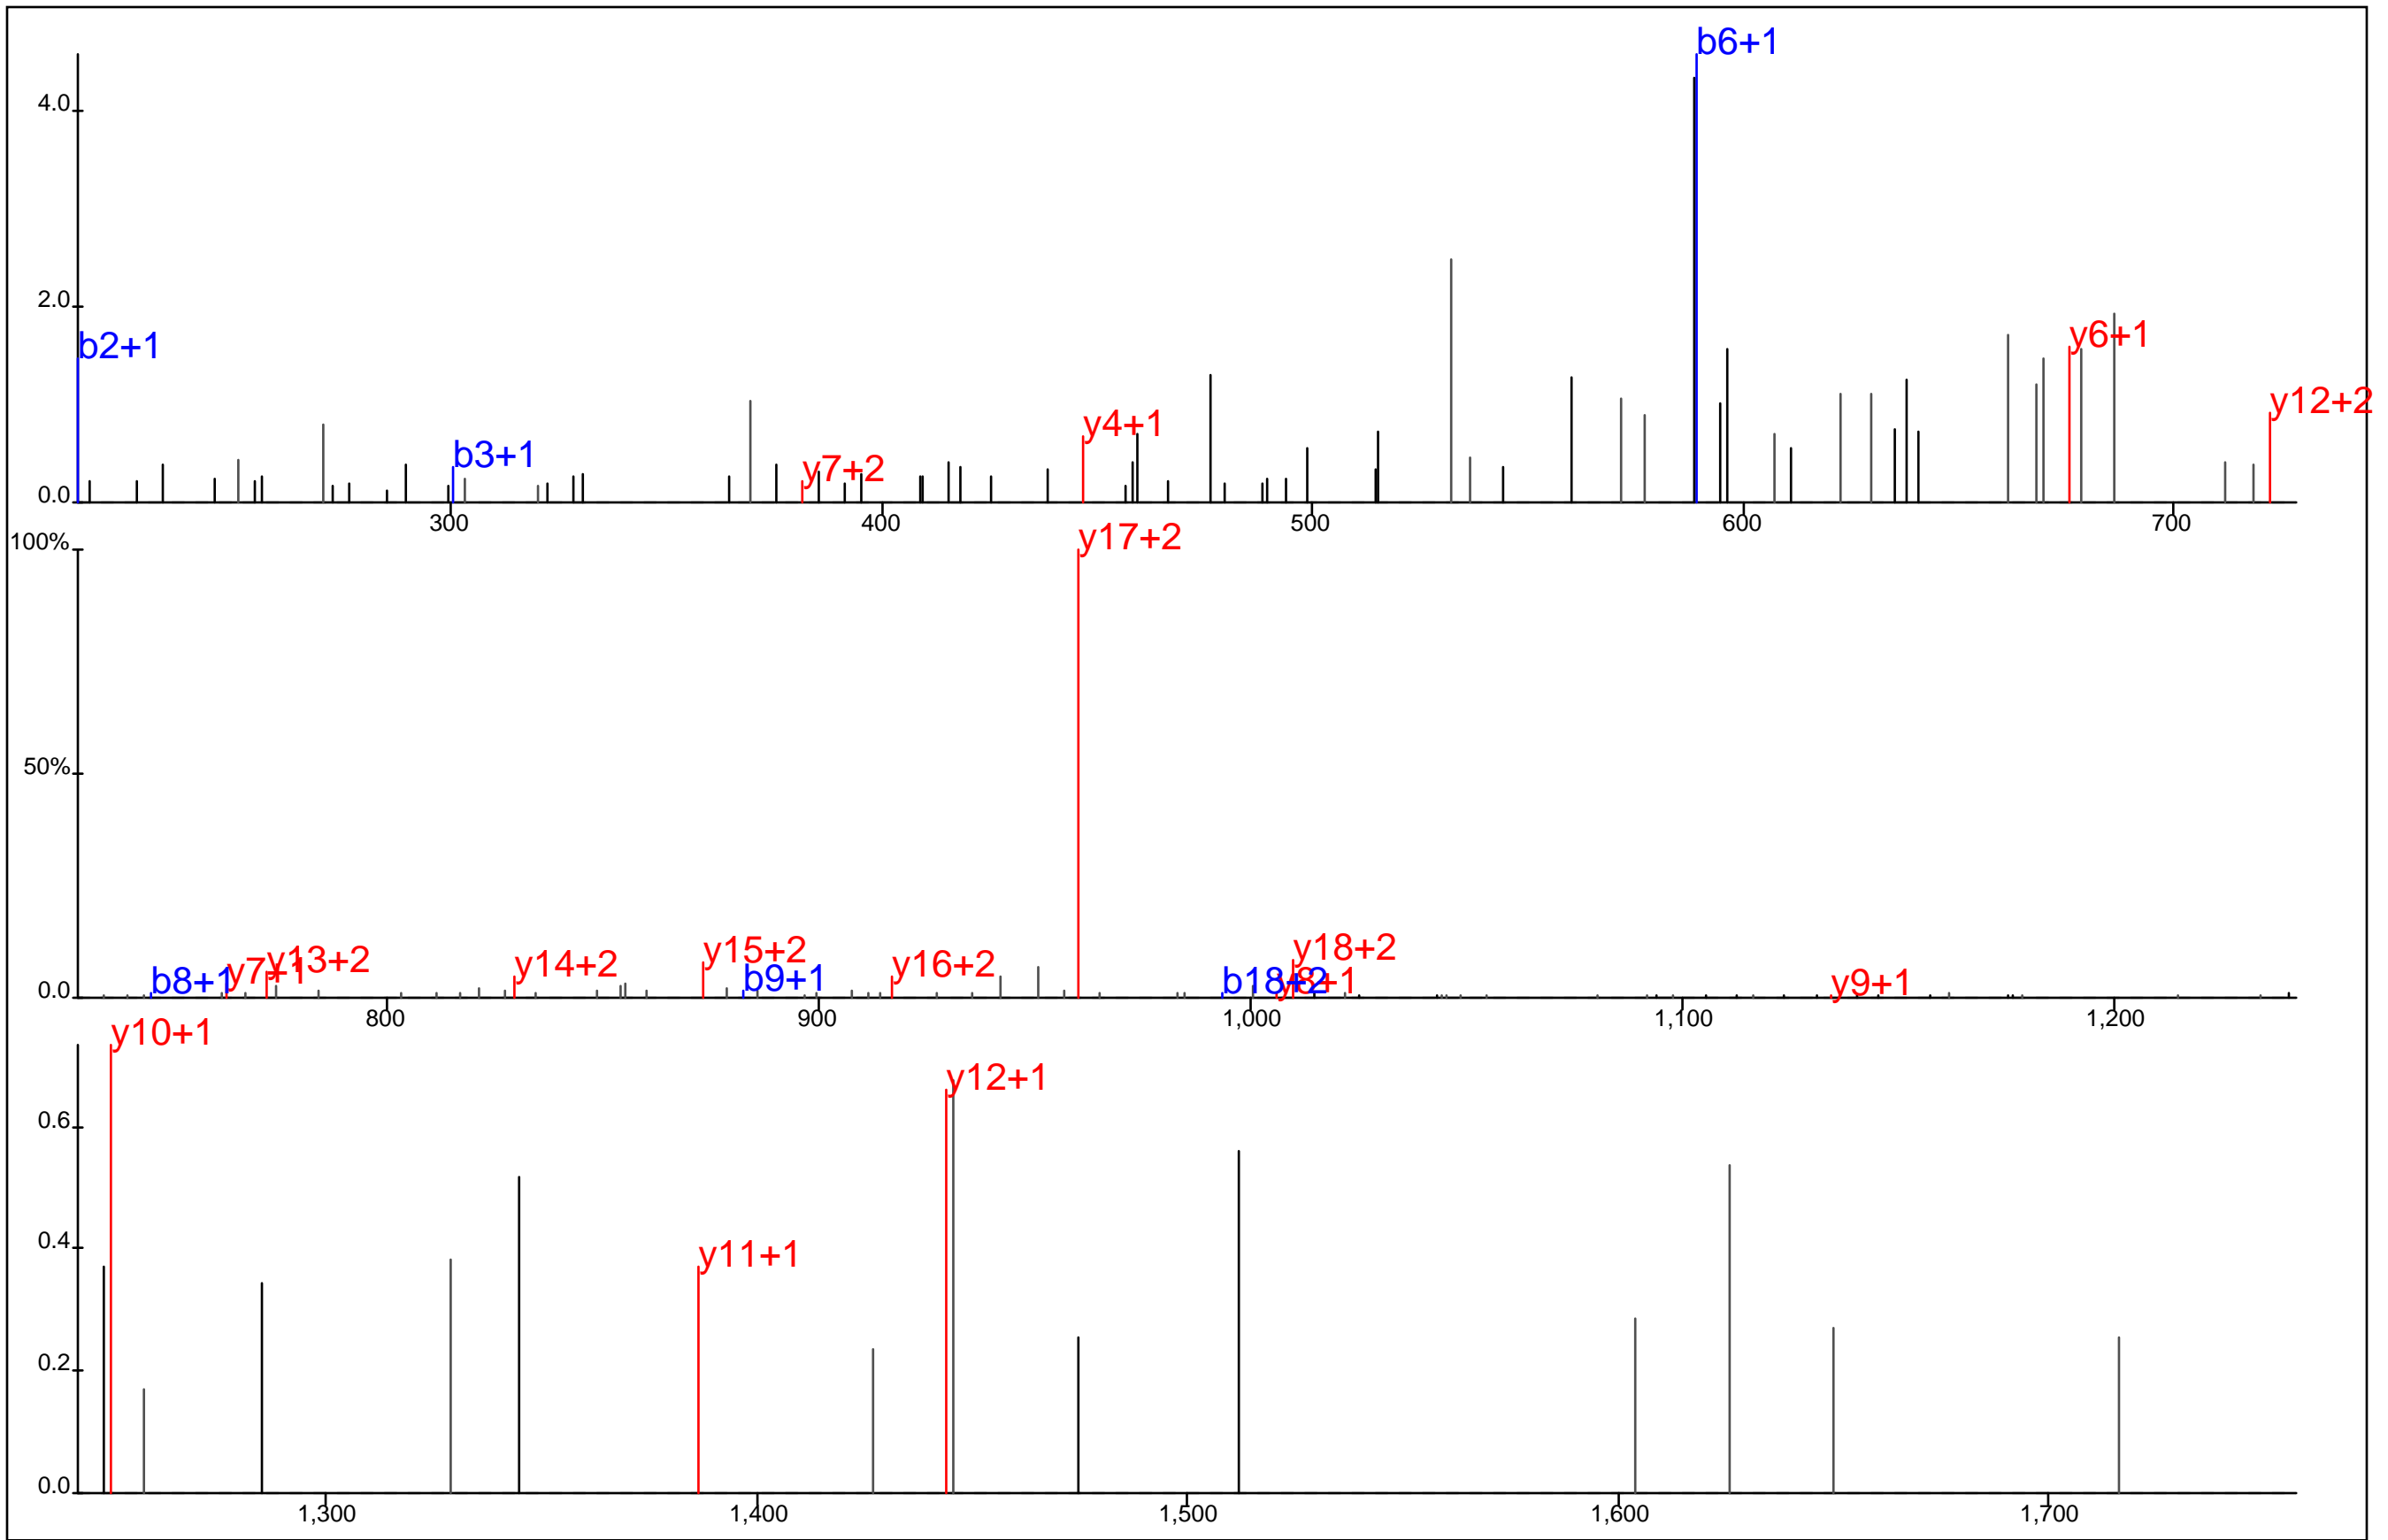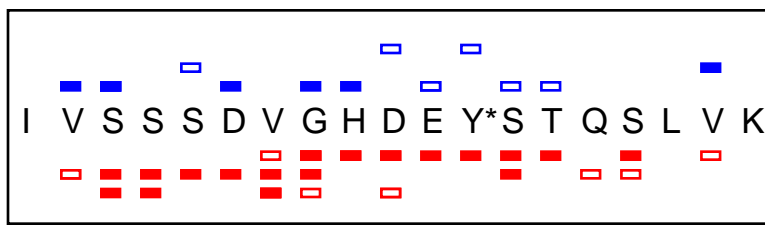

Protein Name: Fodrin beta  
 gi Accession: 0  
 Precursor Mass: 710.9900+3  
 Delta Mass: 1.724 ppm  
 XCorr: 28.64

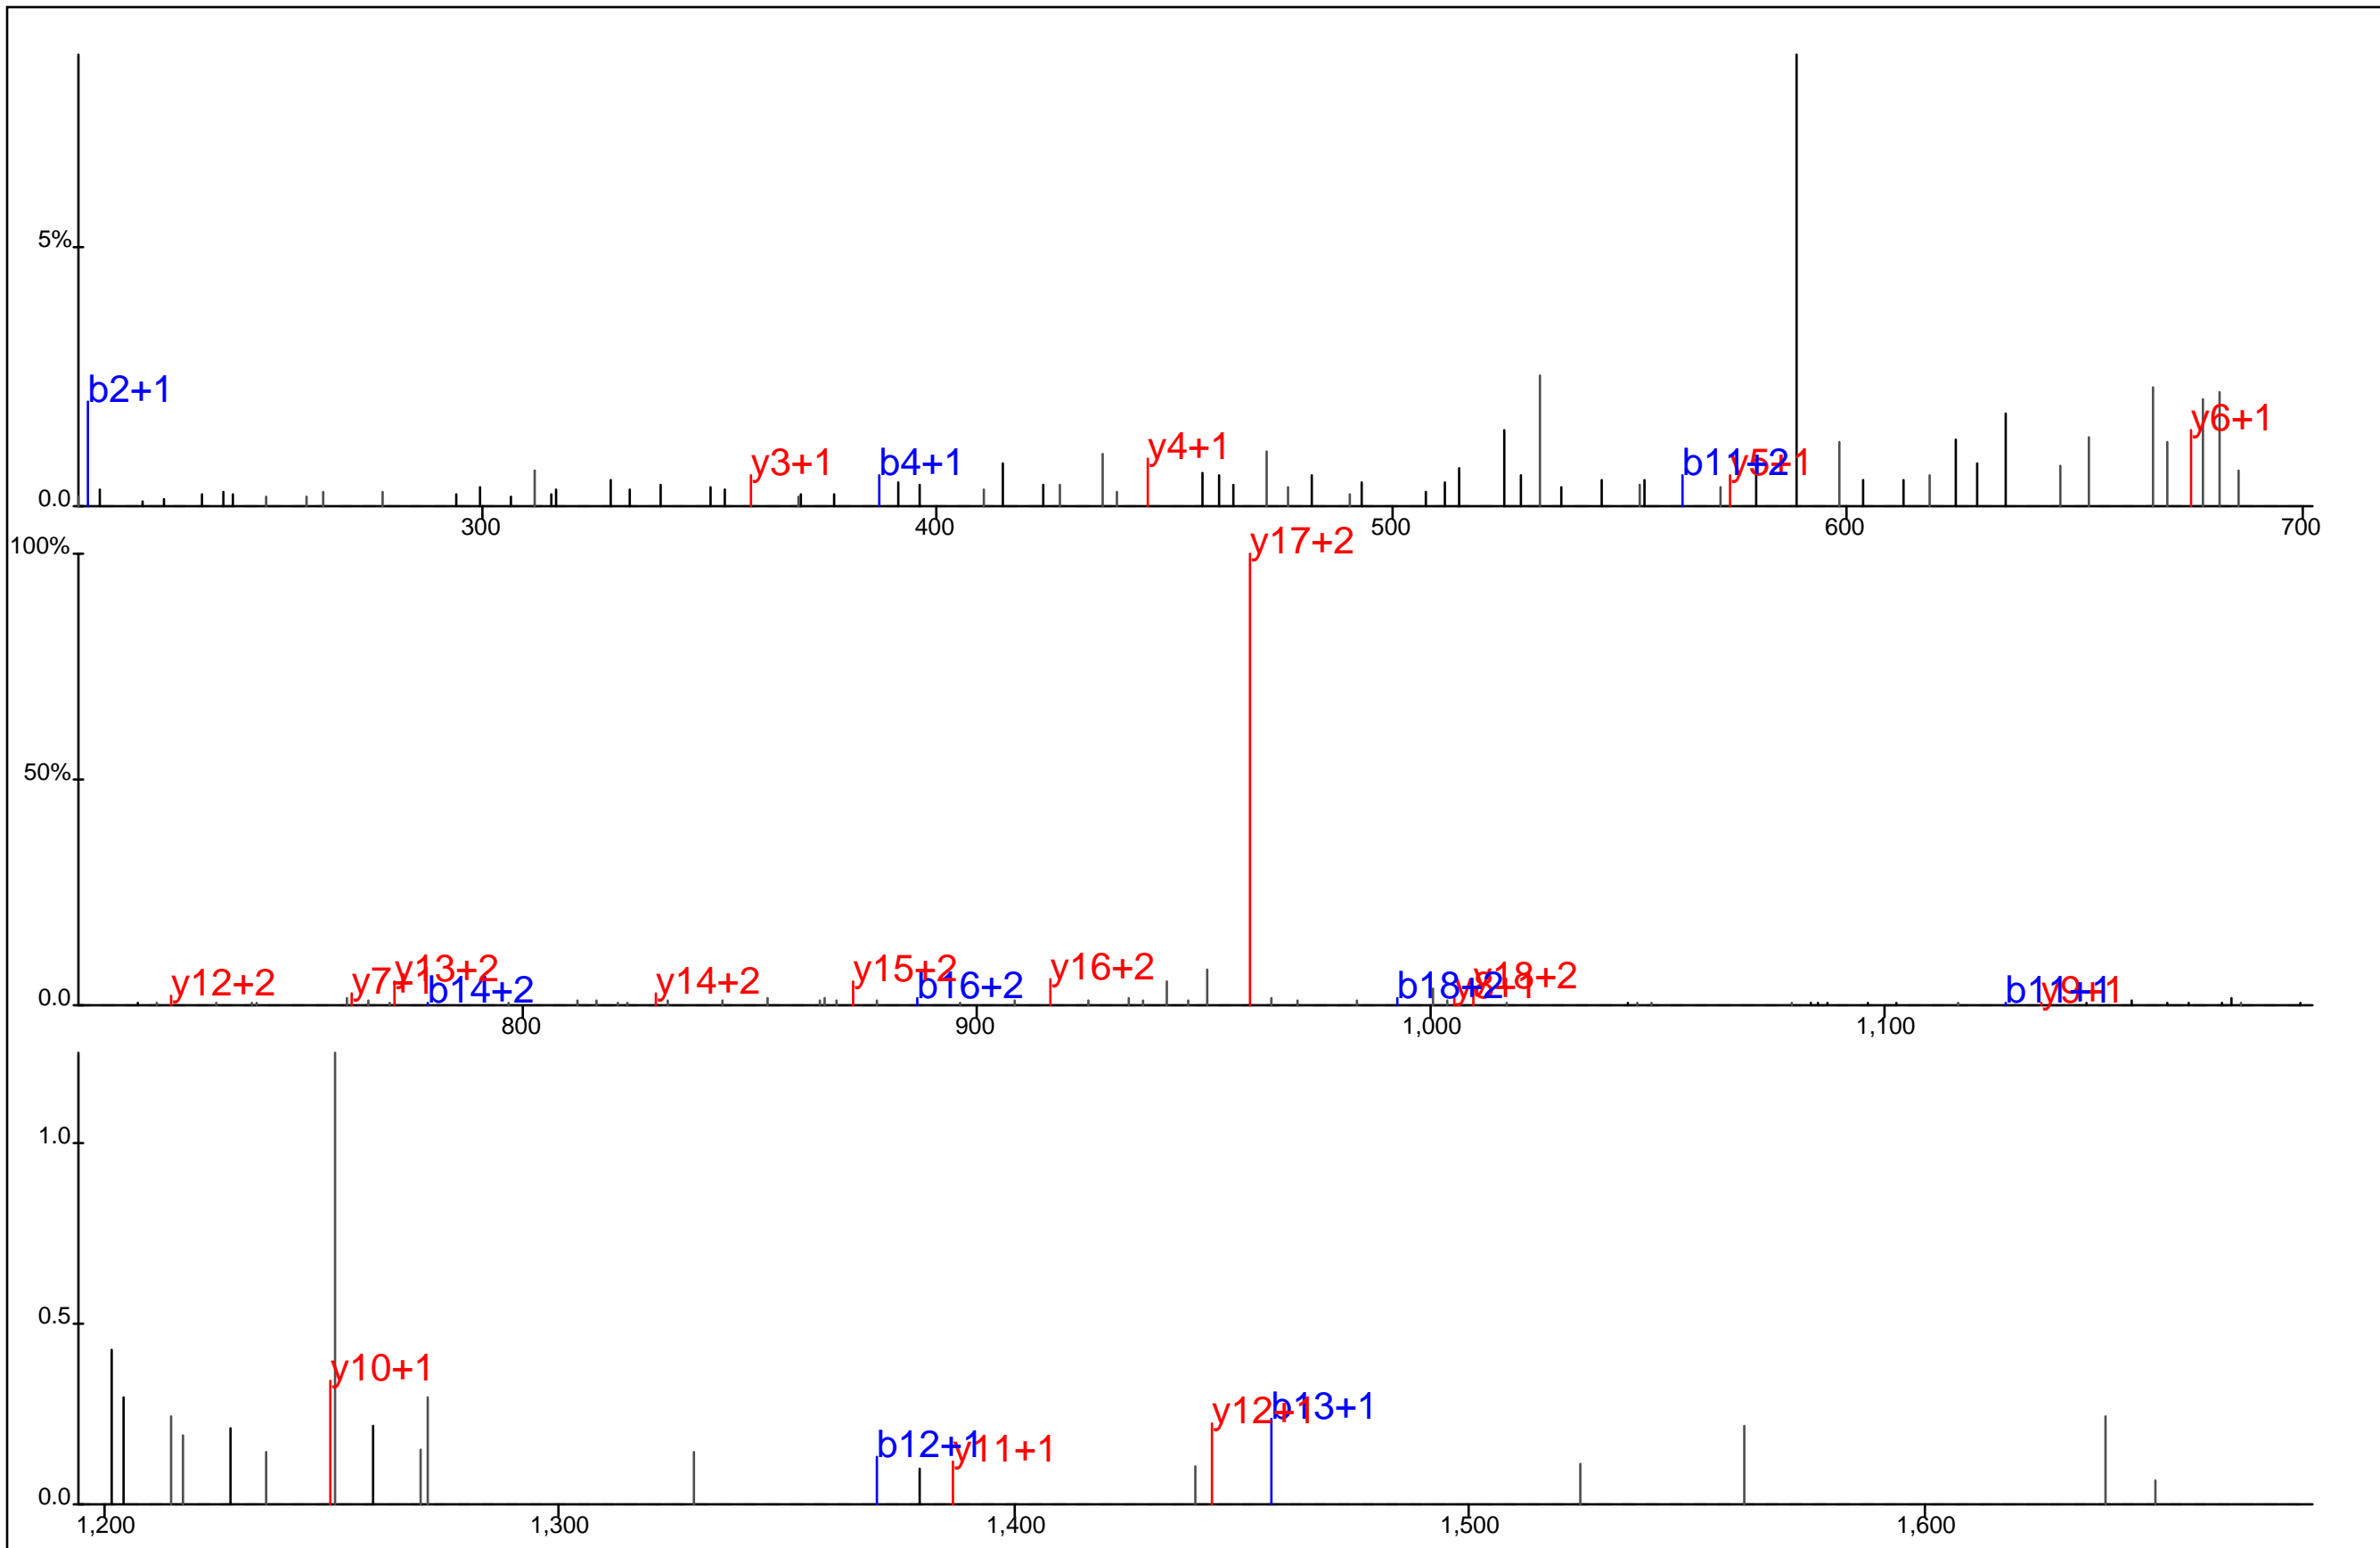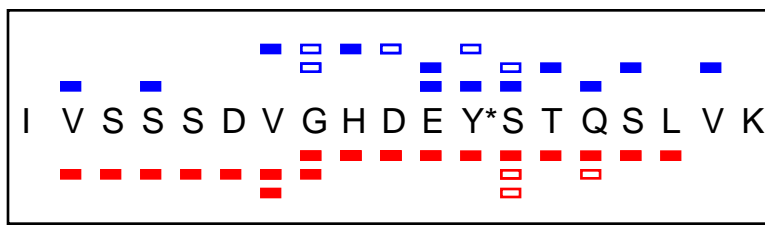

Protein Name: Fodrin beta  
 gi Accession: 0  
 Precursor Mass: 710.9932+3  
 Delta Mass: 2.744 ppm  
 XCorr: 33.8

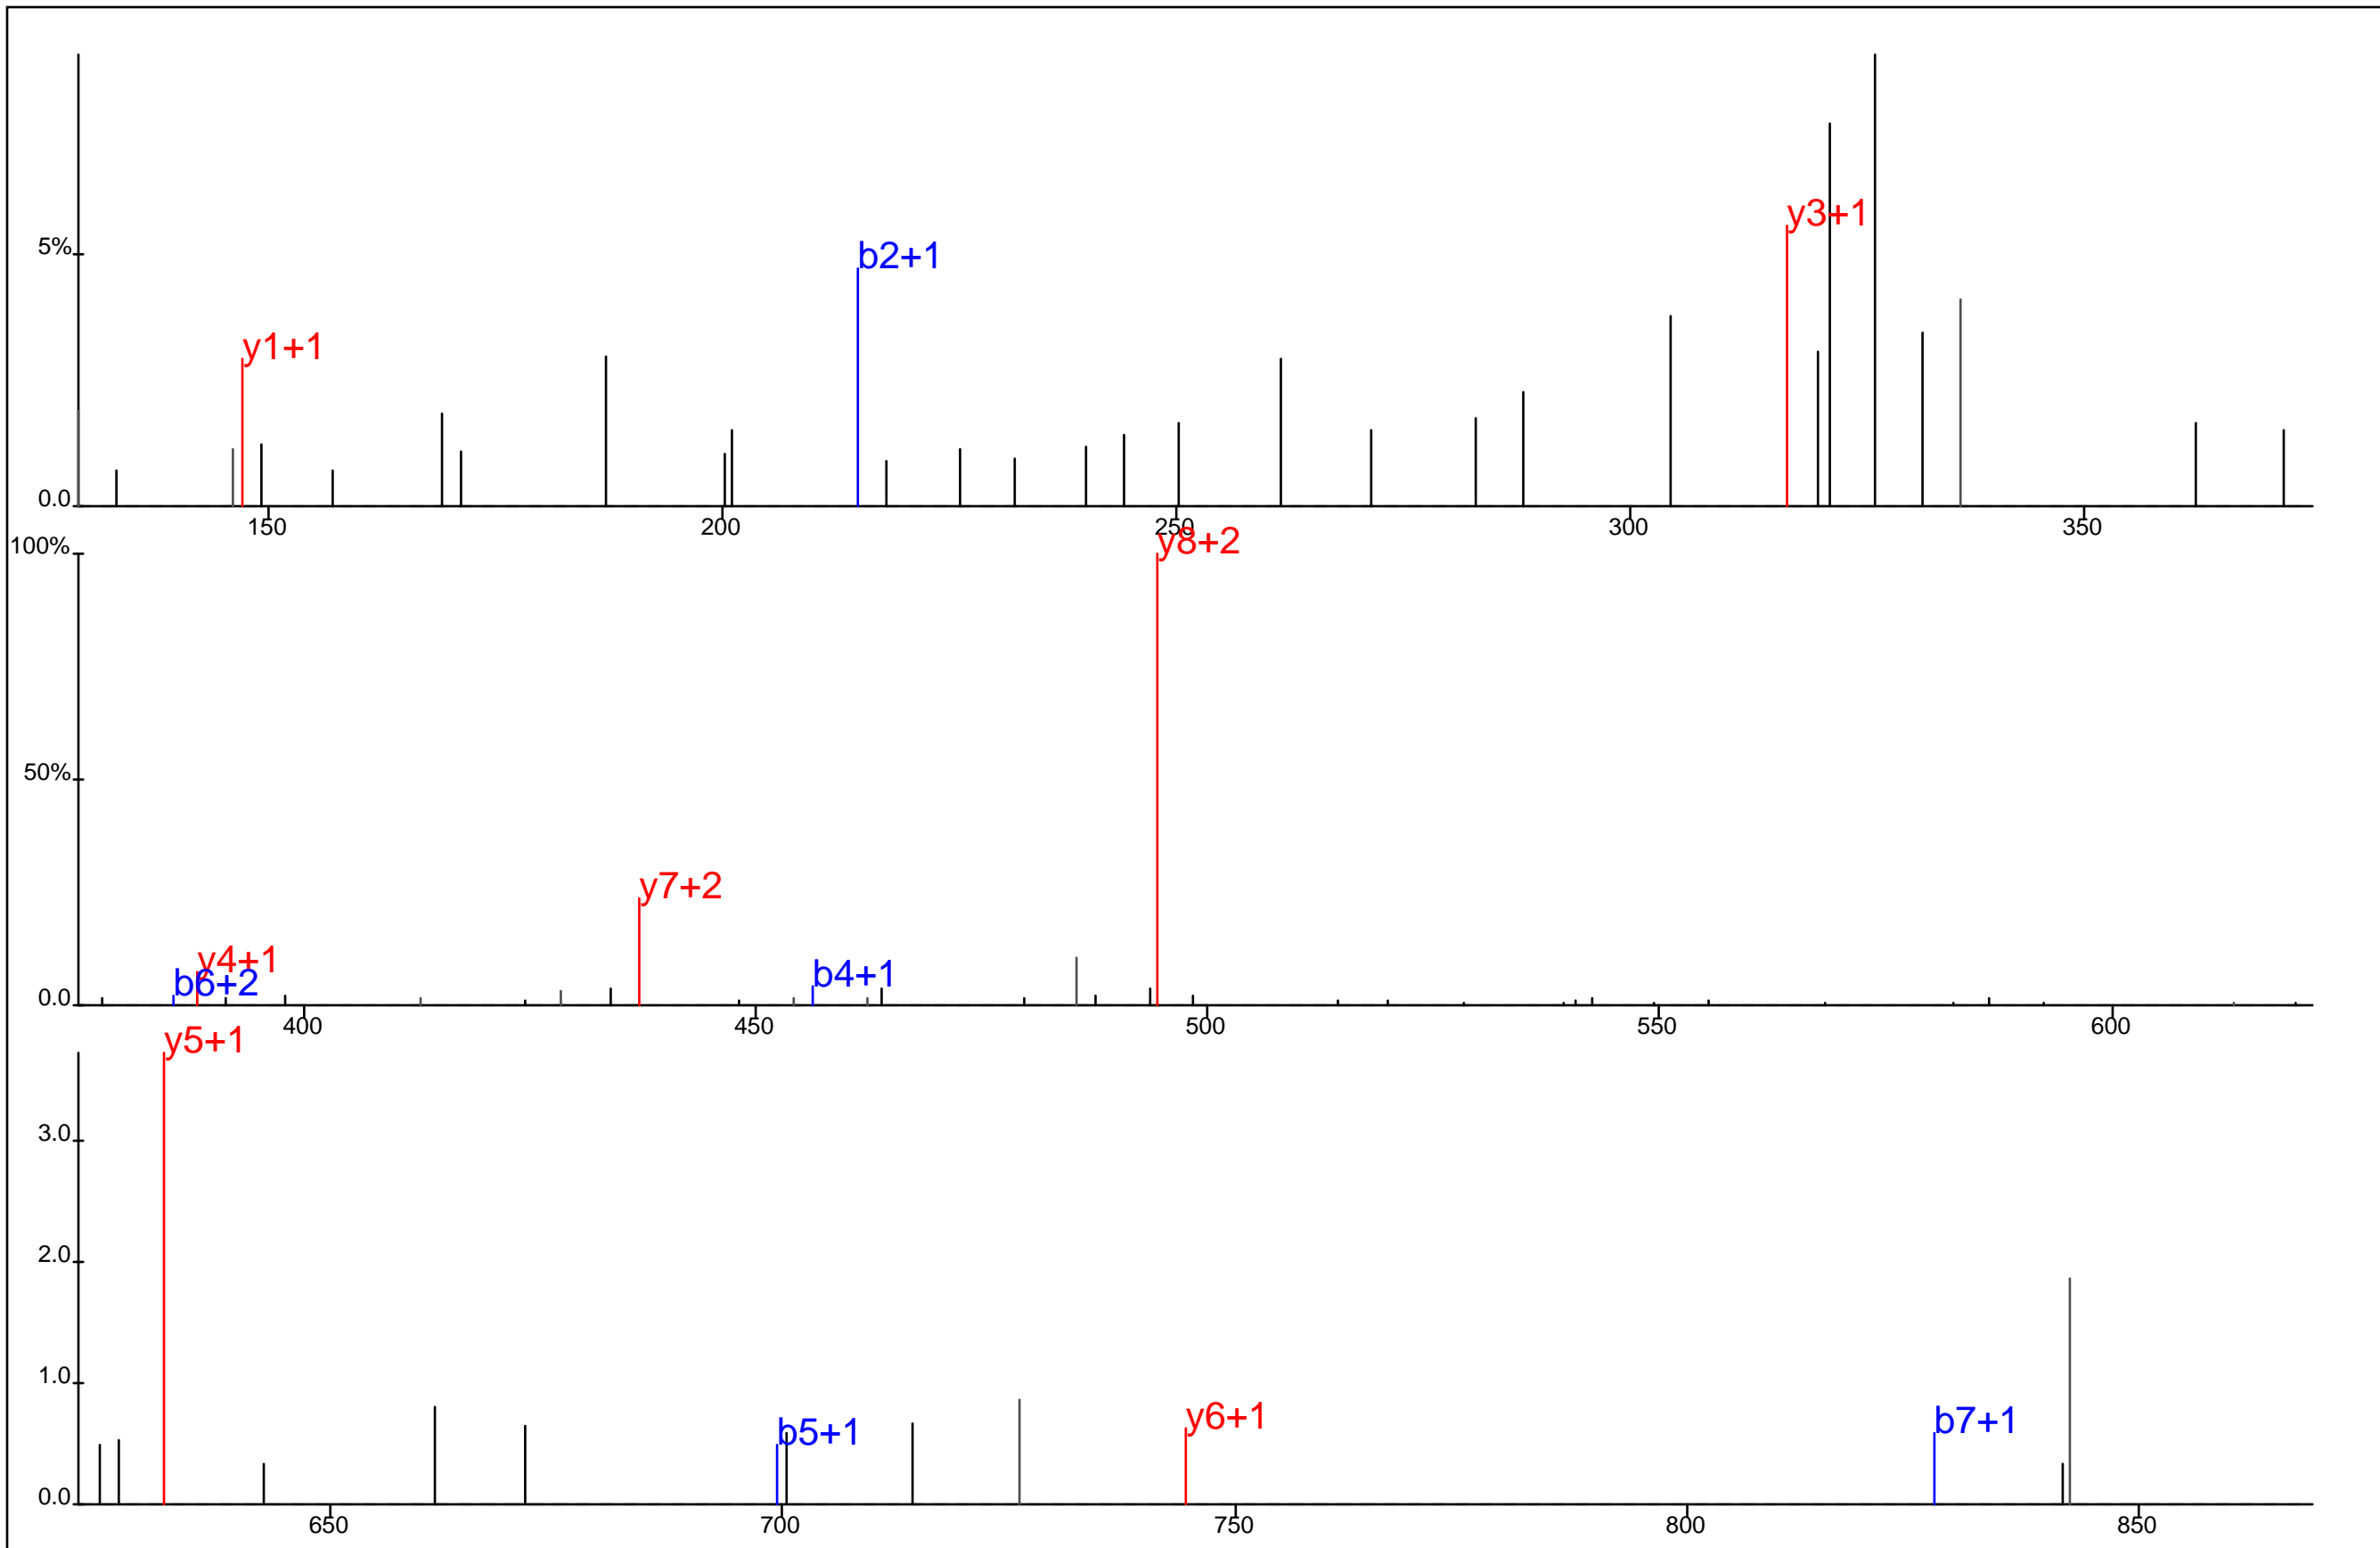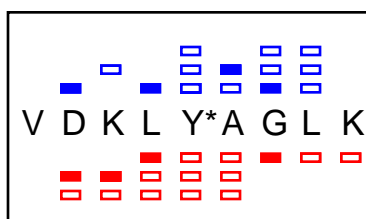

Protein Name: Fodrin beta  
 gi Accession: 0  
 Precursor Mass: 362.8582+3  
 Delta Mass: 0.666 ppm  
 XCorr: 25.59

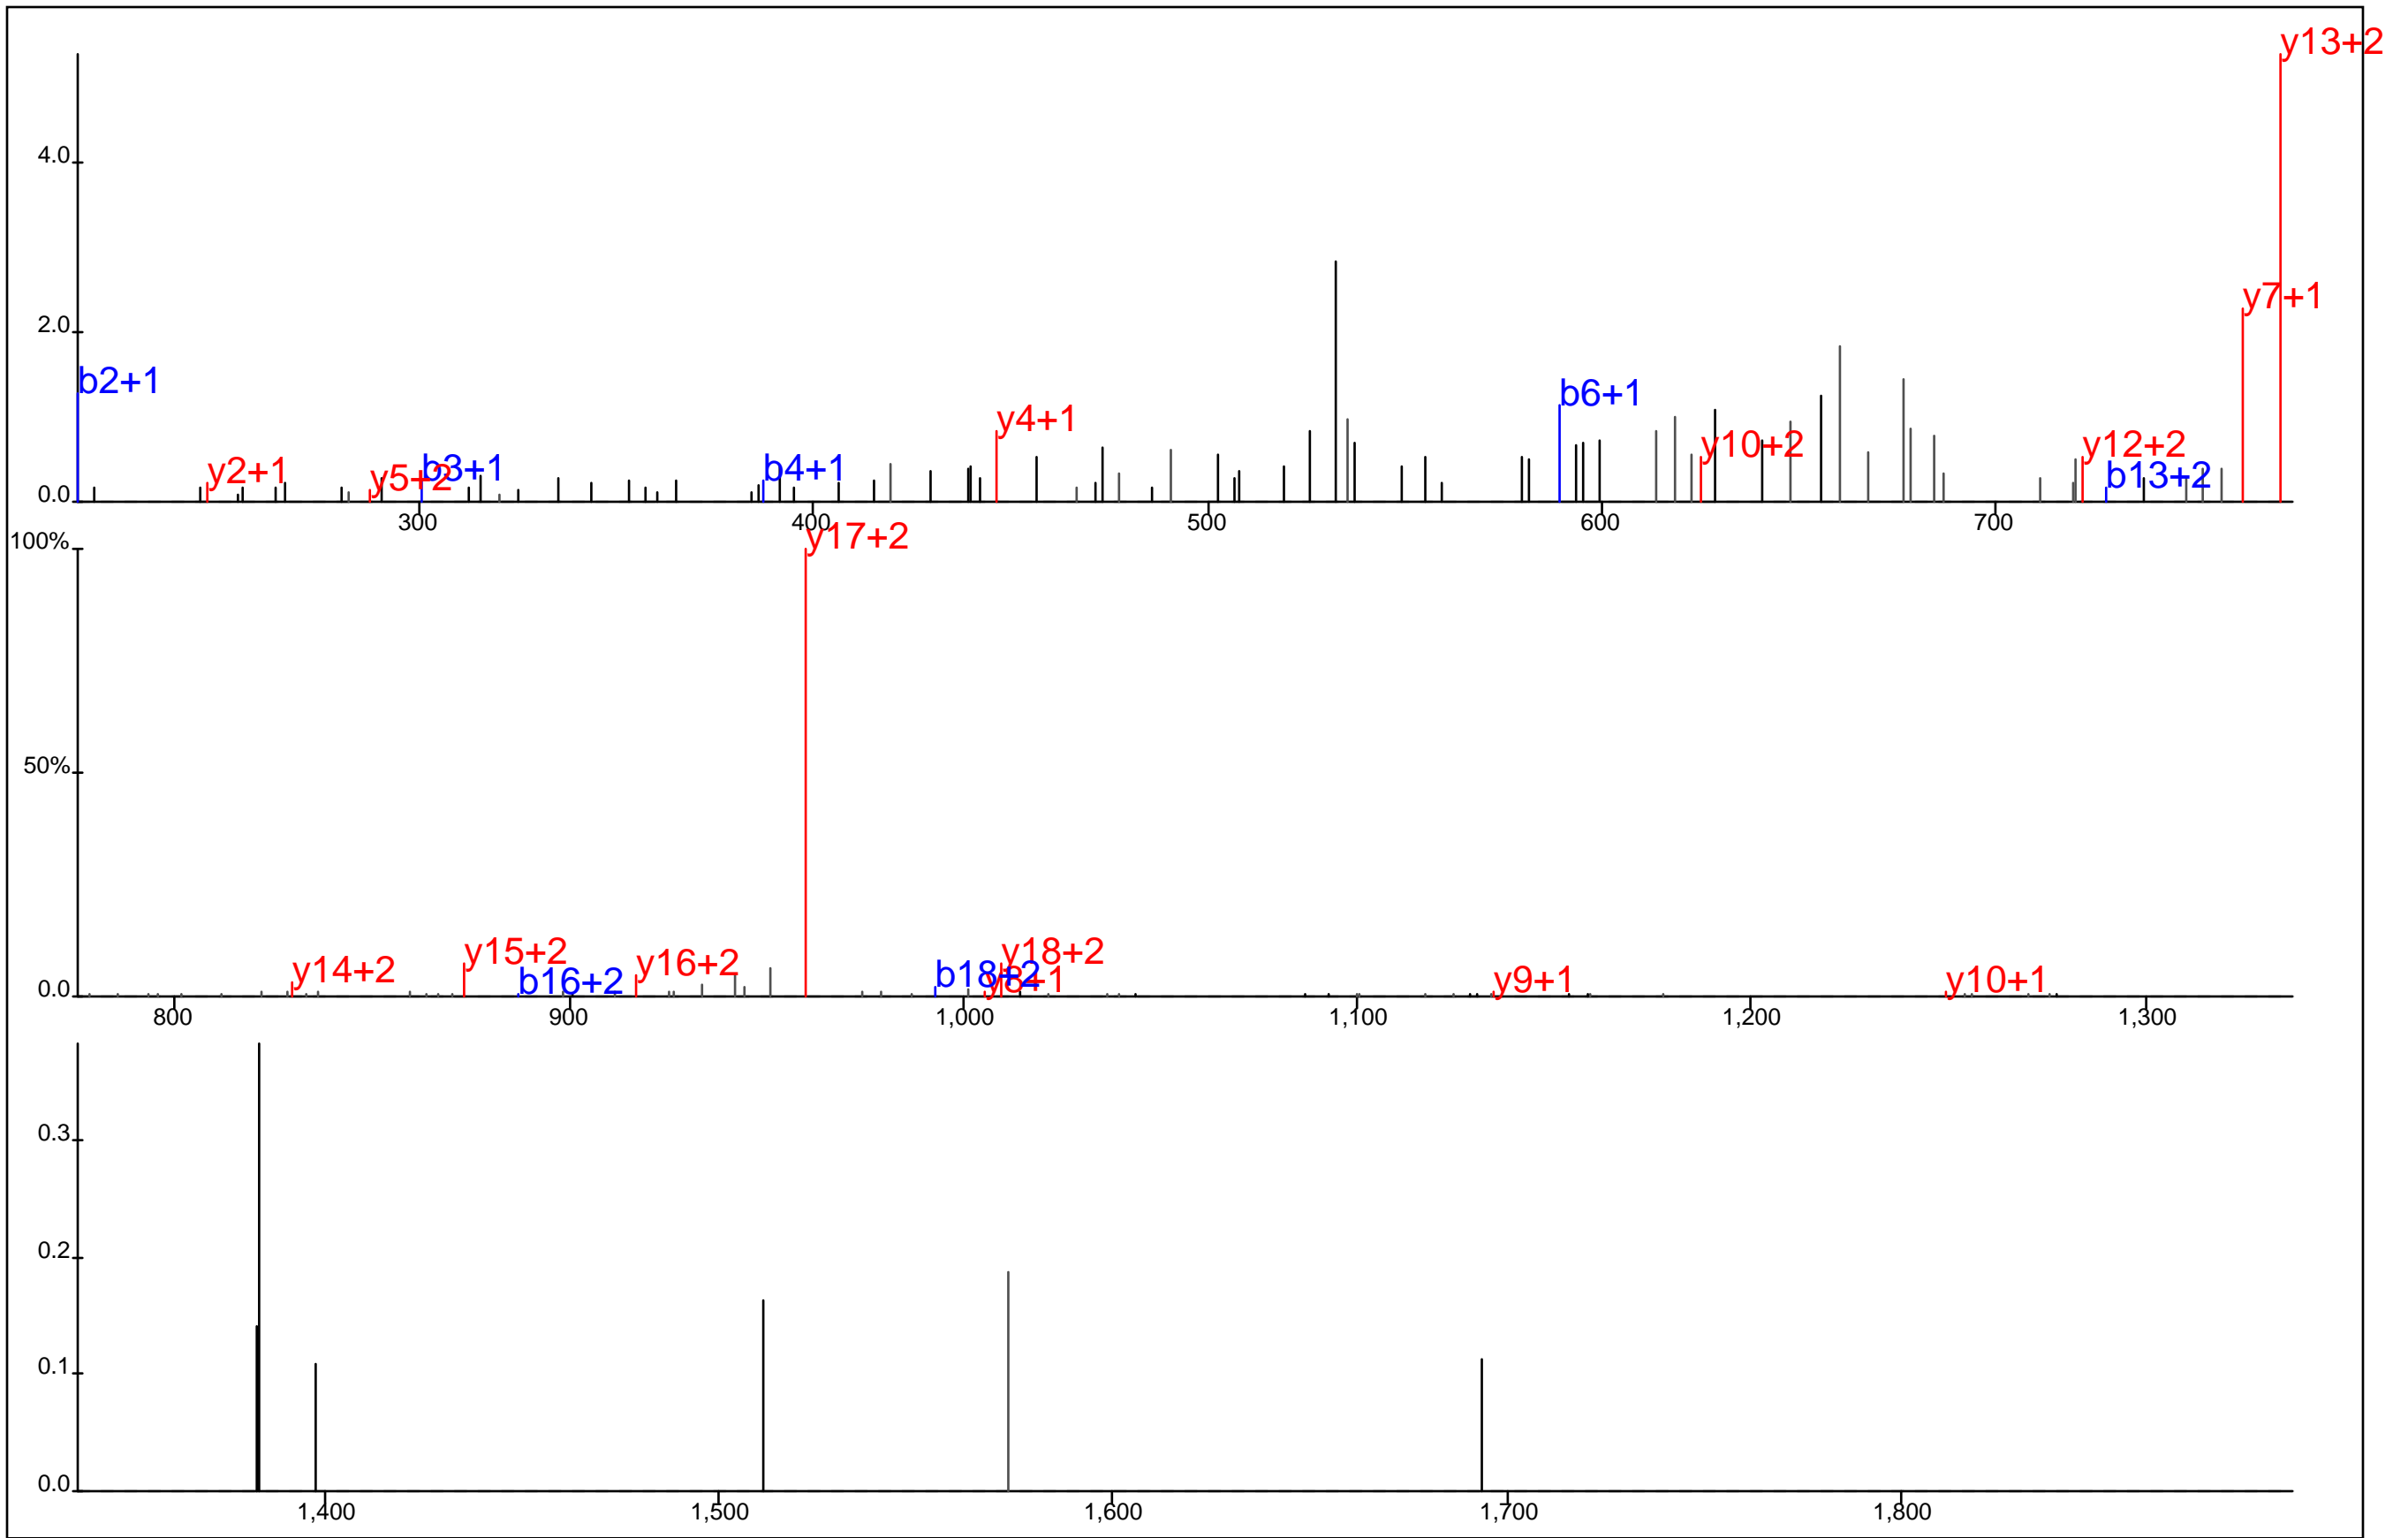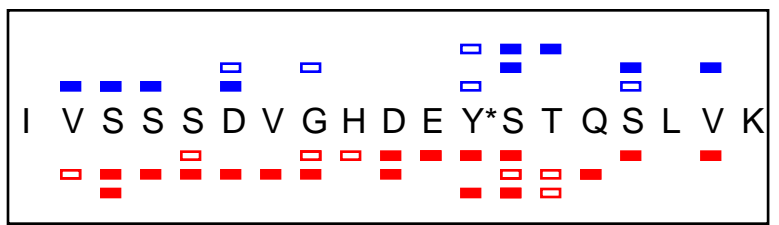

Protein Name: Fodrin beta  
 gi Accession: 0  
 Precursor Mass: 710.9932+3  
 Delta Mass: 2.744 ppm  
 XCorr: 29.72



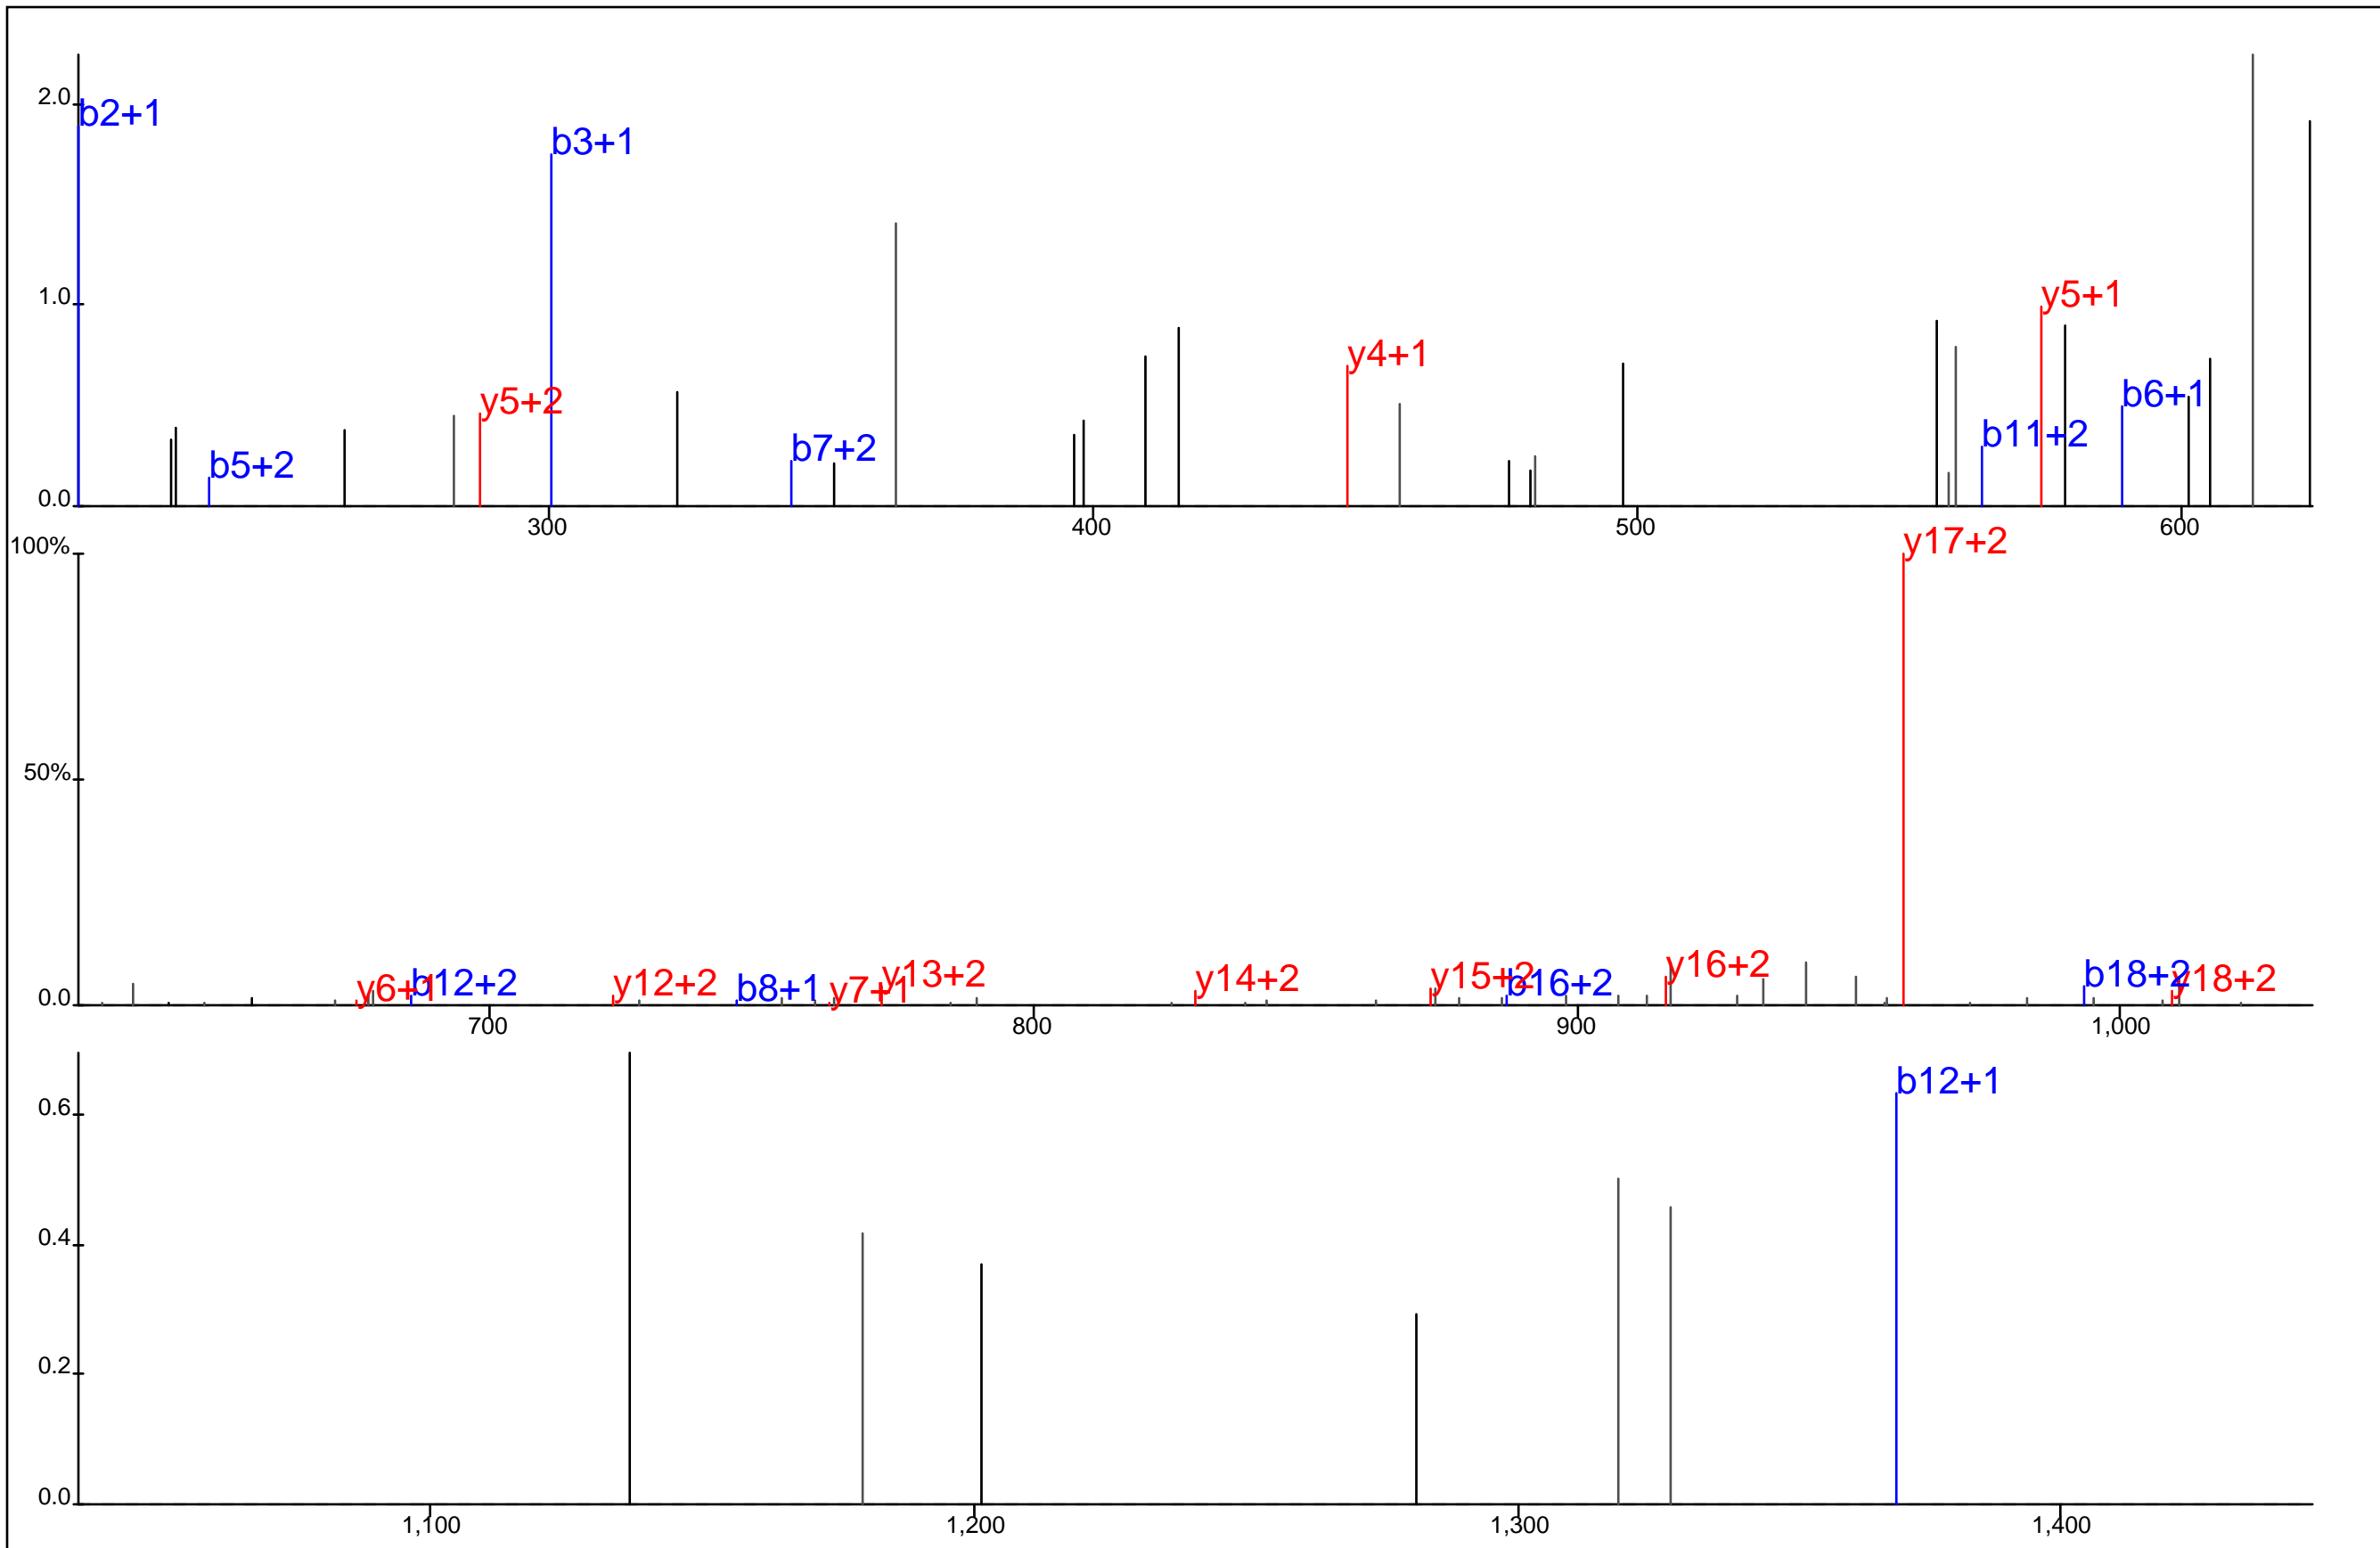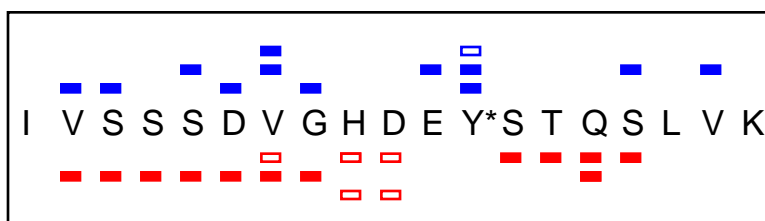

Protein Name: Fodrin beta  
 gi Accession: 0  
 Precursor Mass: 710.9910+3  
 Delta Mass: 0.349 ppm  
 XCorr: 35.44

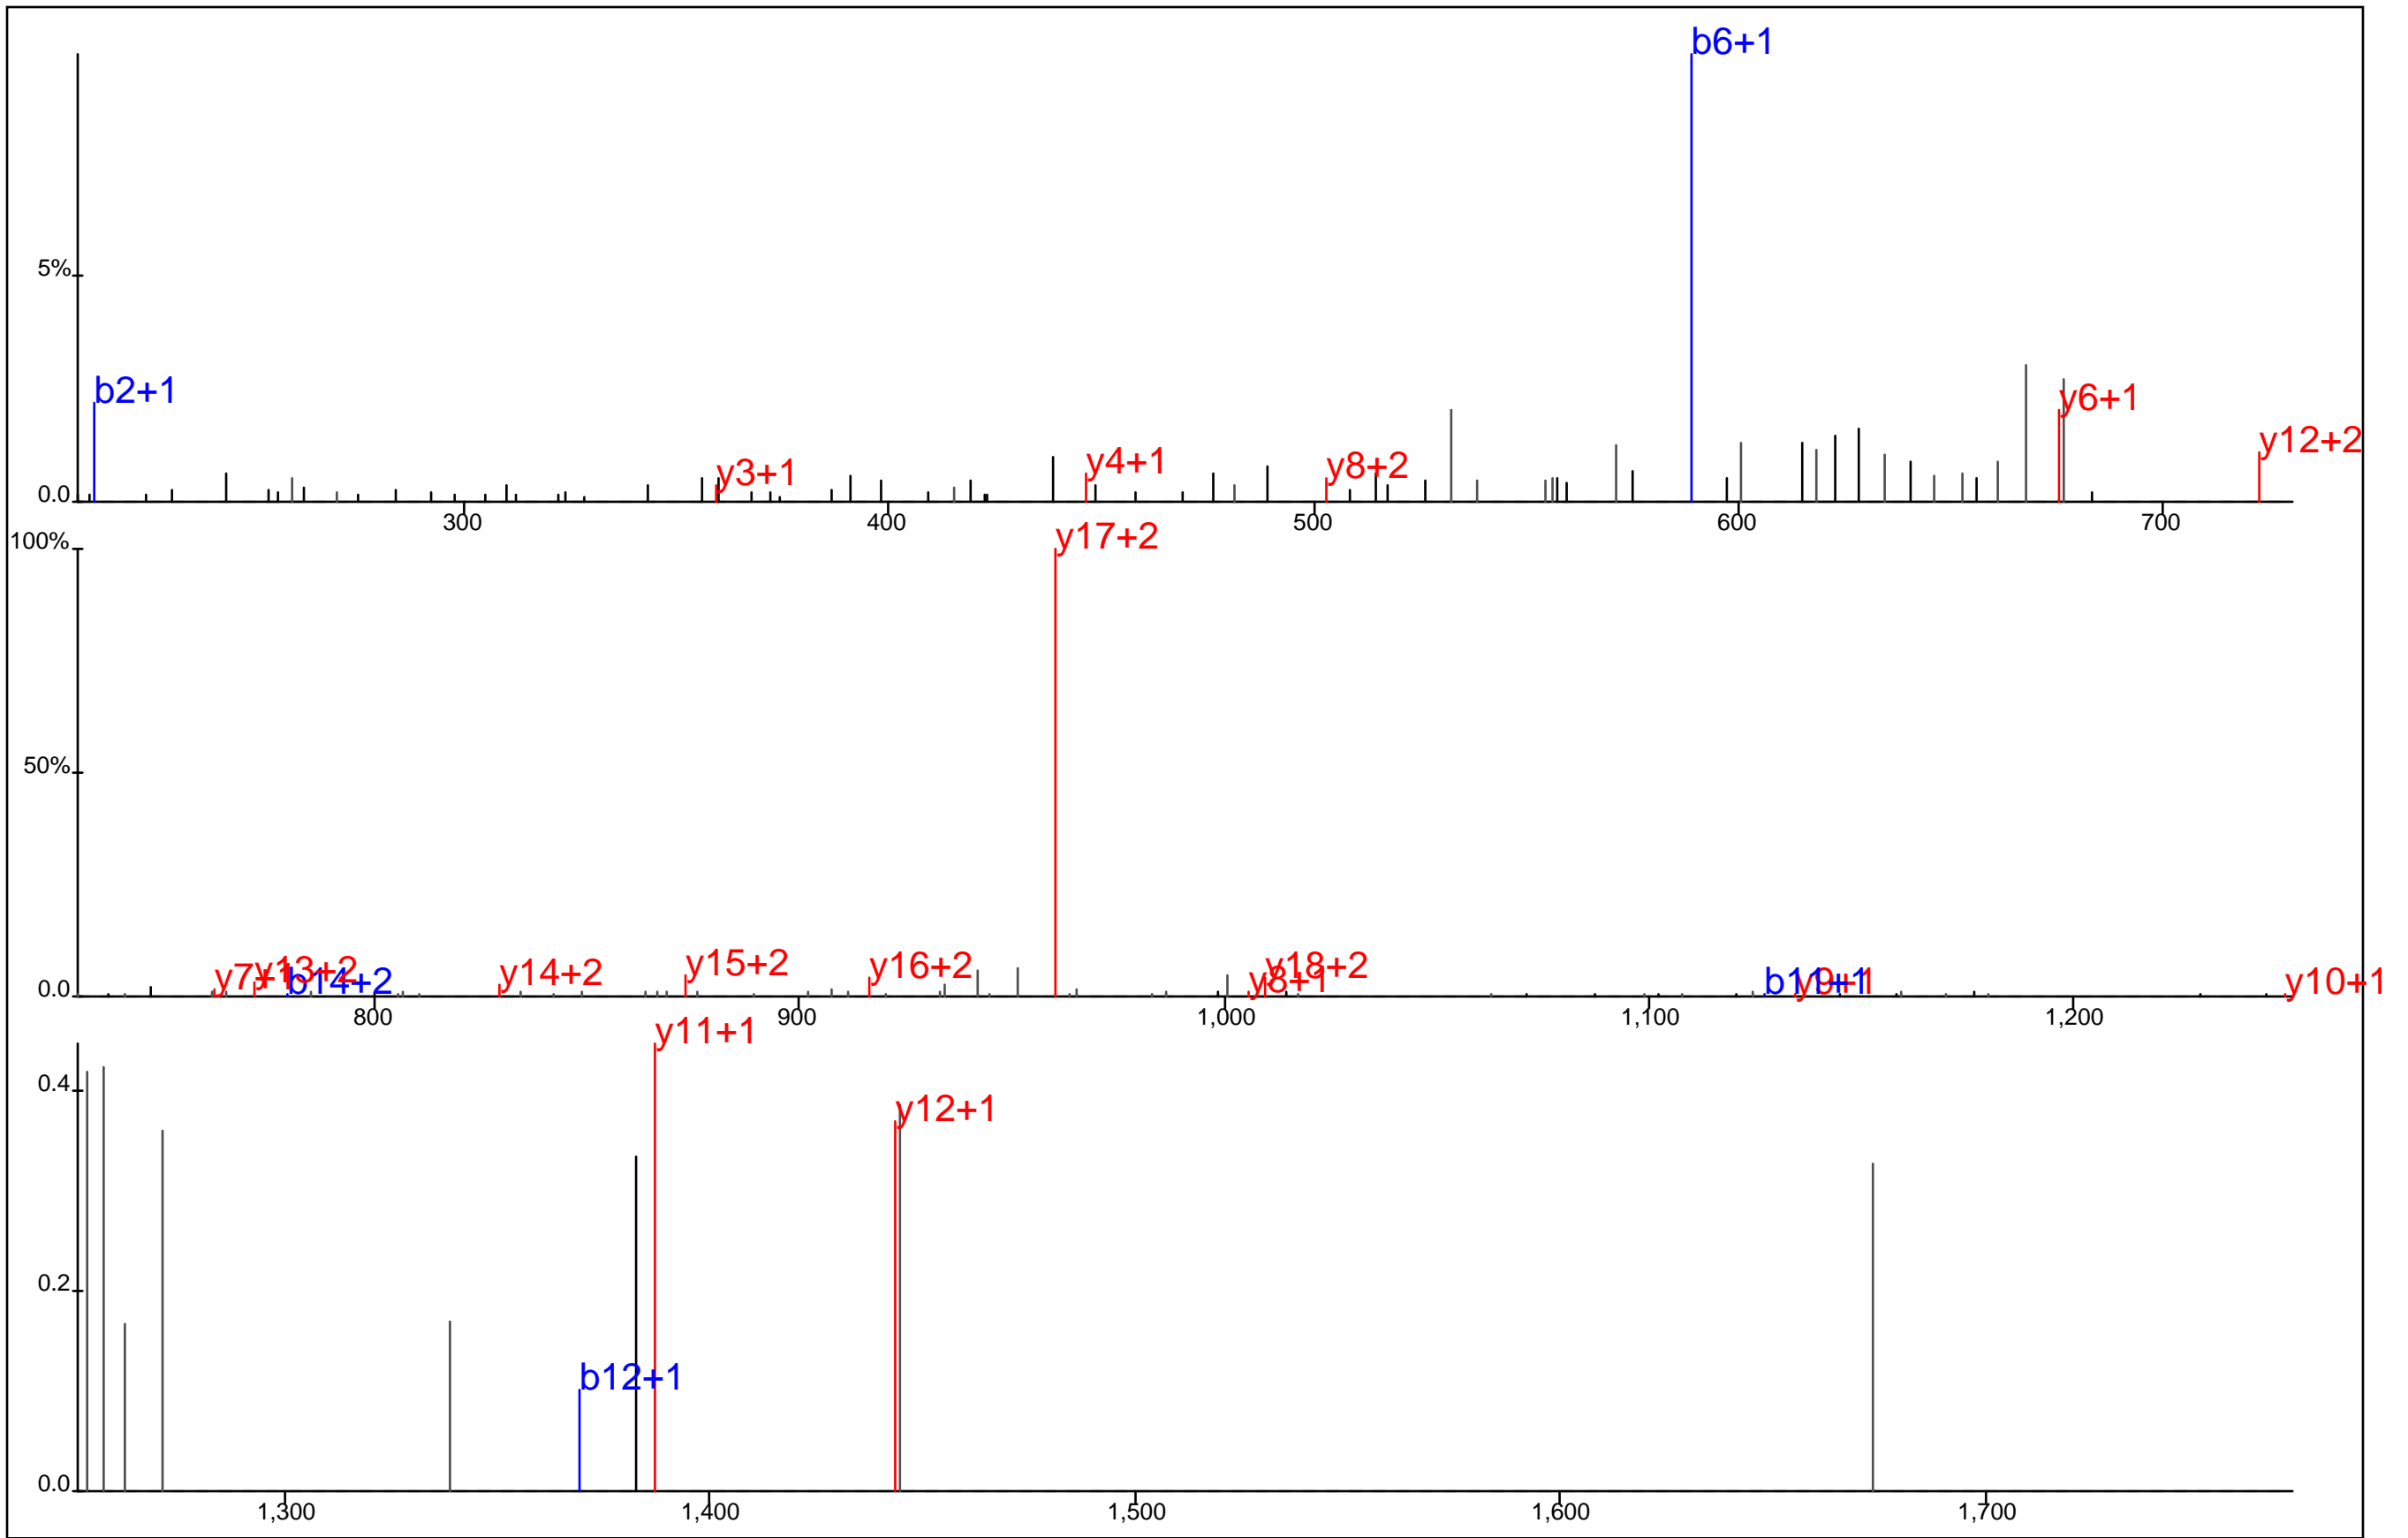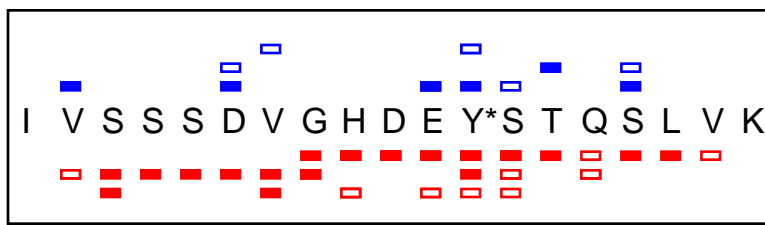

Protein Name: Fodrin beta  
 gi Accession: 0  
 Precursor Mass: 710.9915+3  
 Delta Mass: 0.424 ppm  
 XCorr: 50.12

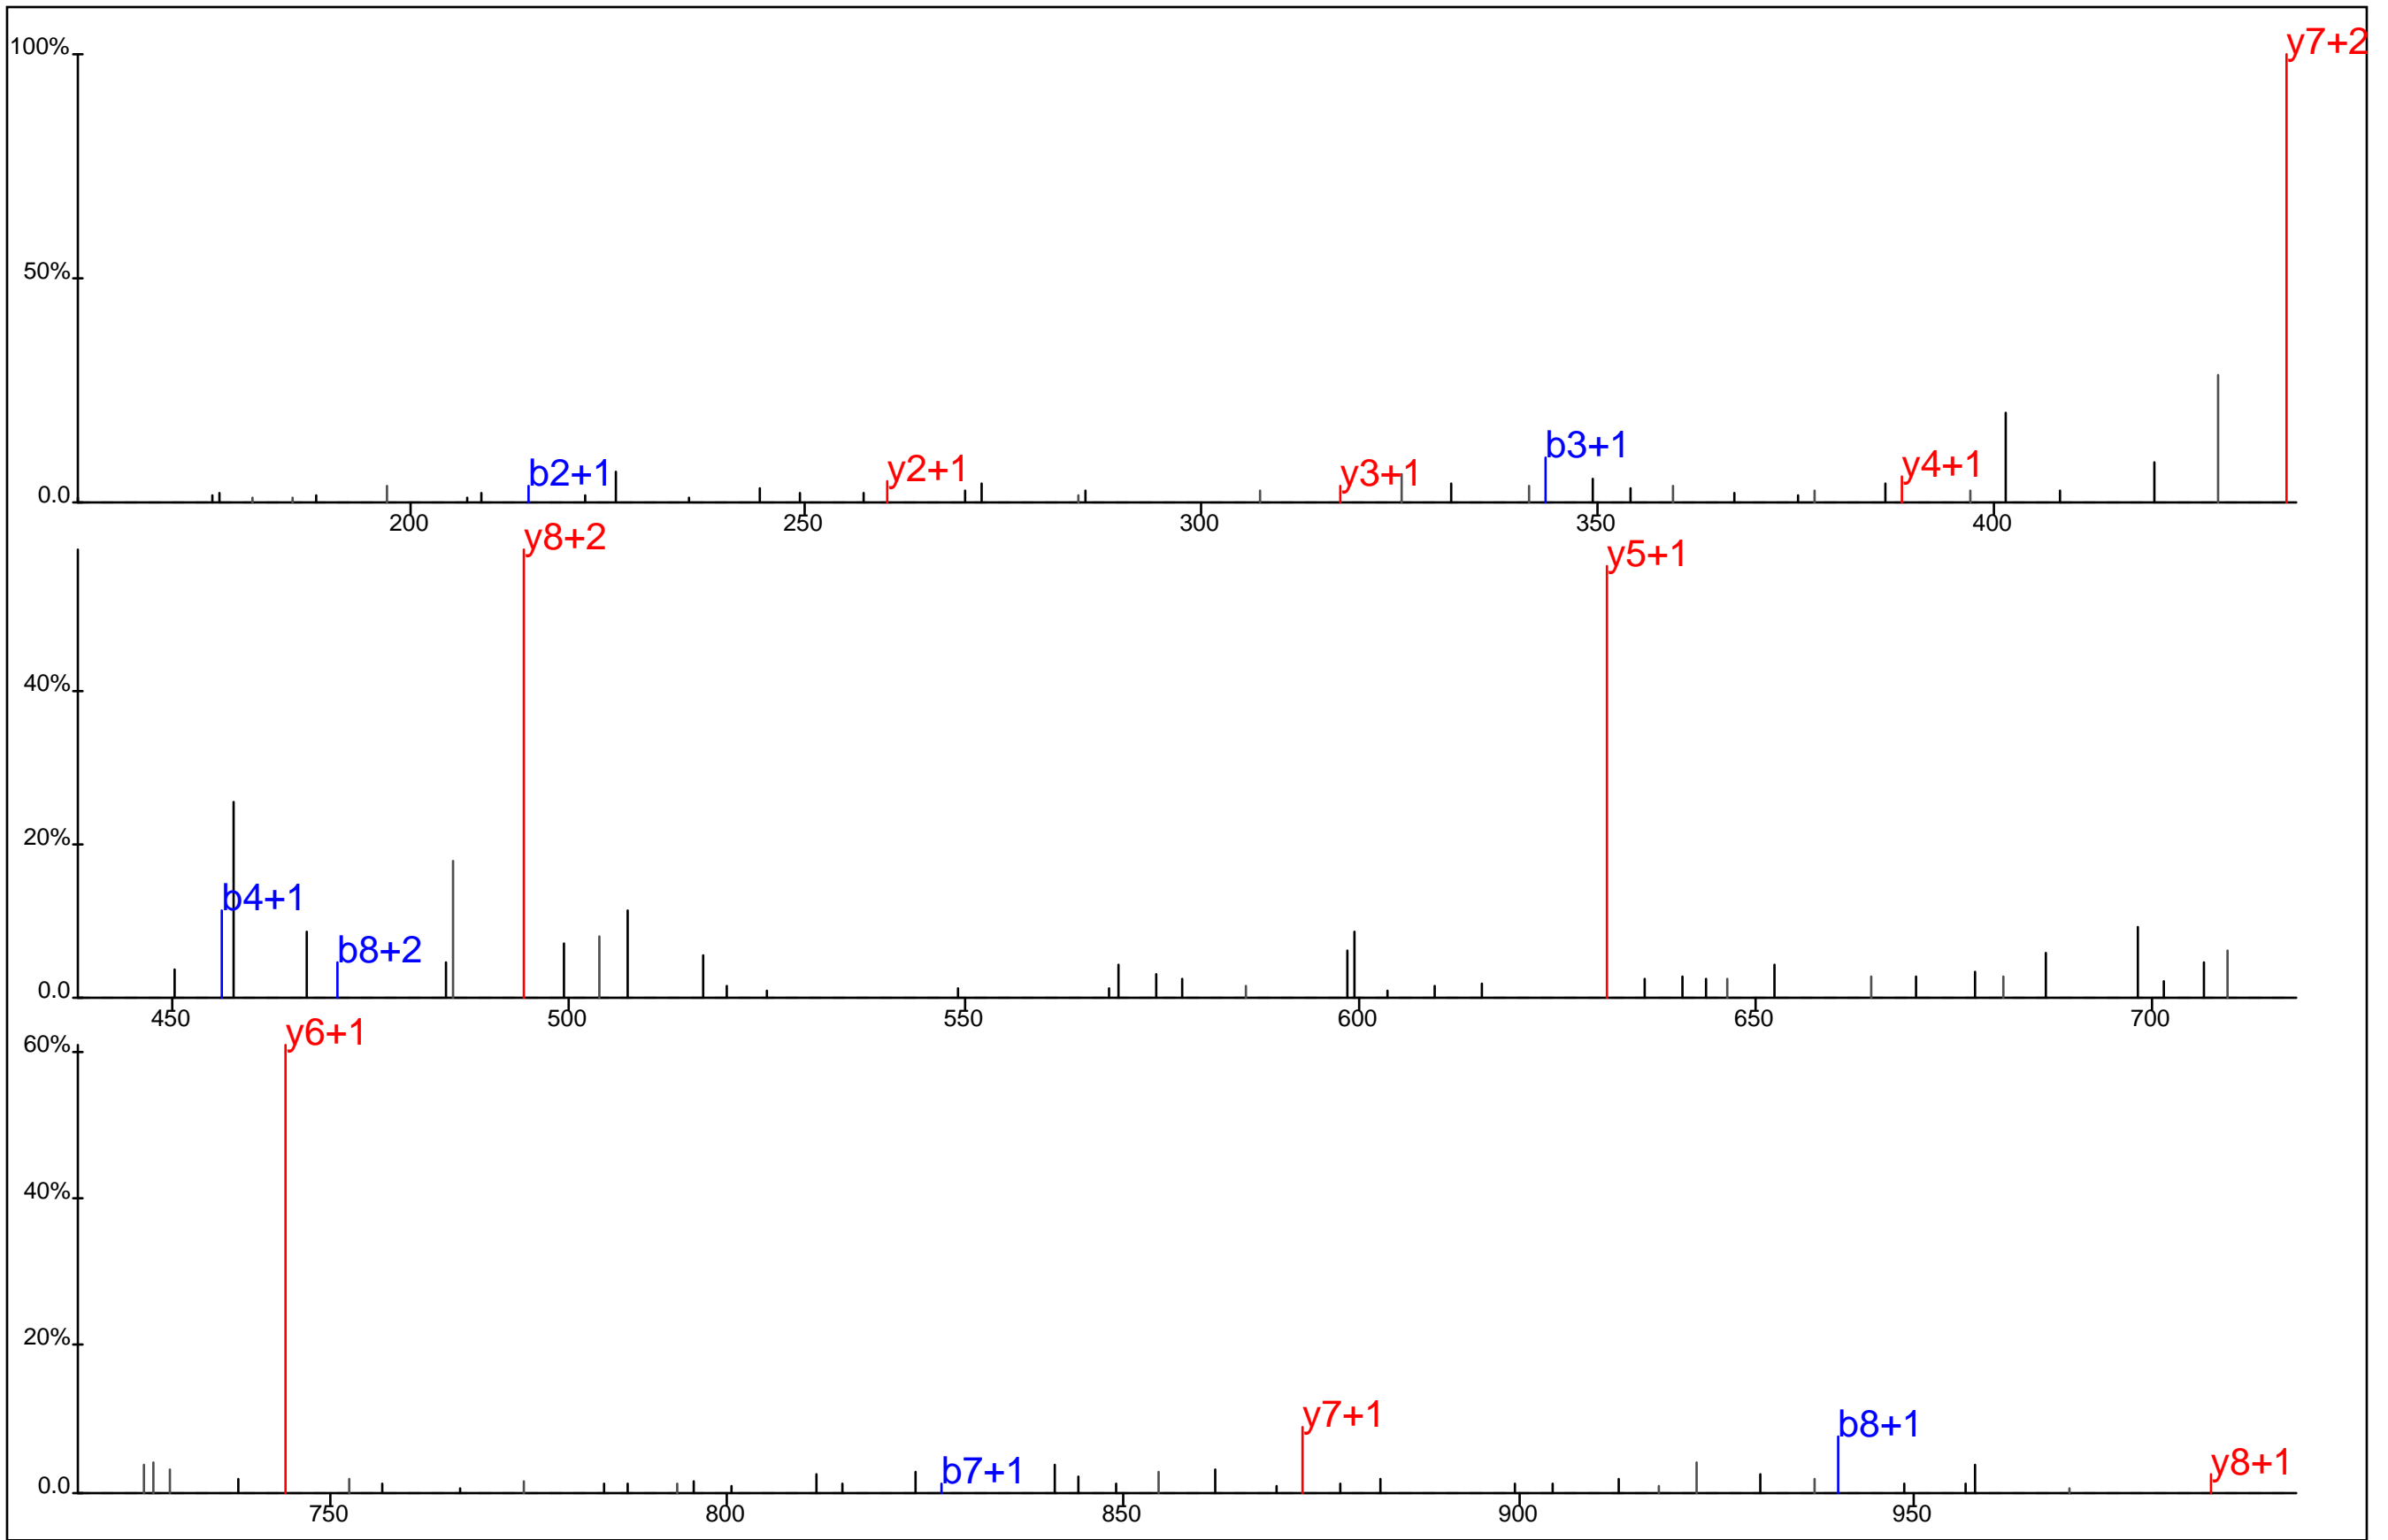

|  |                                                                                                                     |
|--|---------------------------------------------------------------------------------------------------------------------|
|  | Protein Name: Fodrin beta<br>gi Accession: 0<br>Precursor Mass: 543.7843+2<br>Delta Mass: 1.717 ppm<br>XCorr: 27.22 |
|--|---------------------------------------------------------------------------------------------------------------------|

V D K L Y\* A G L K

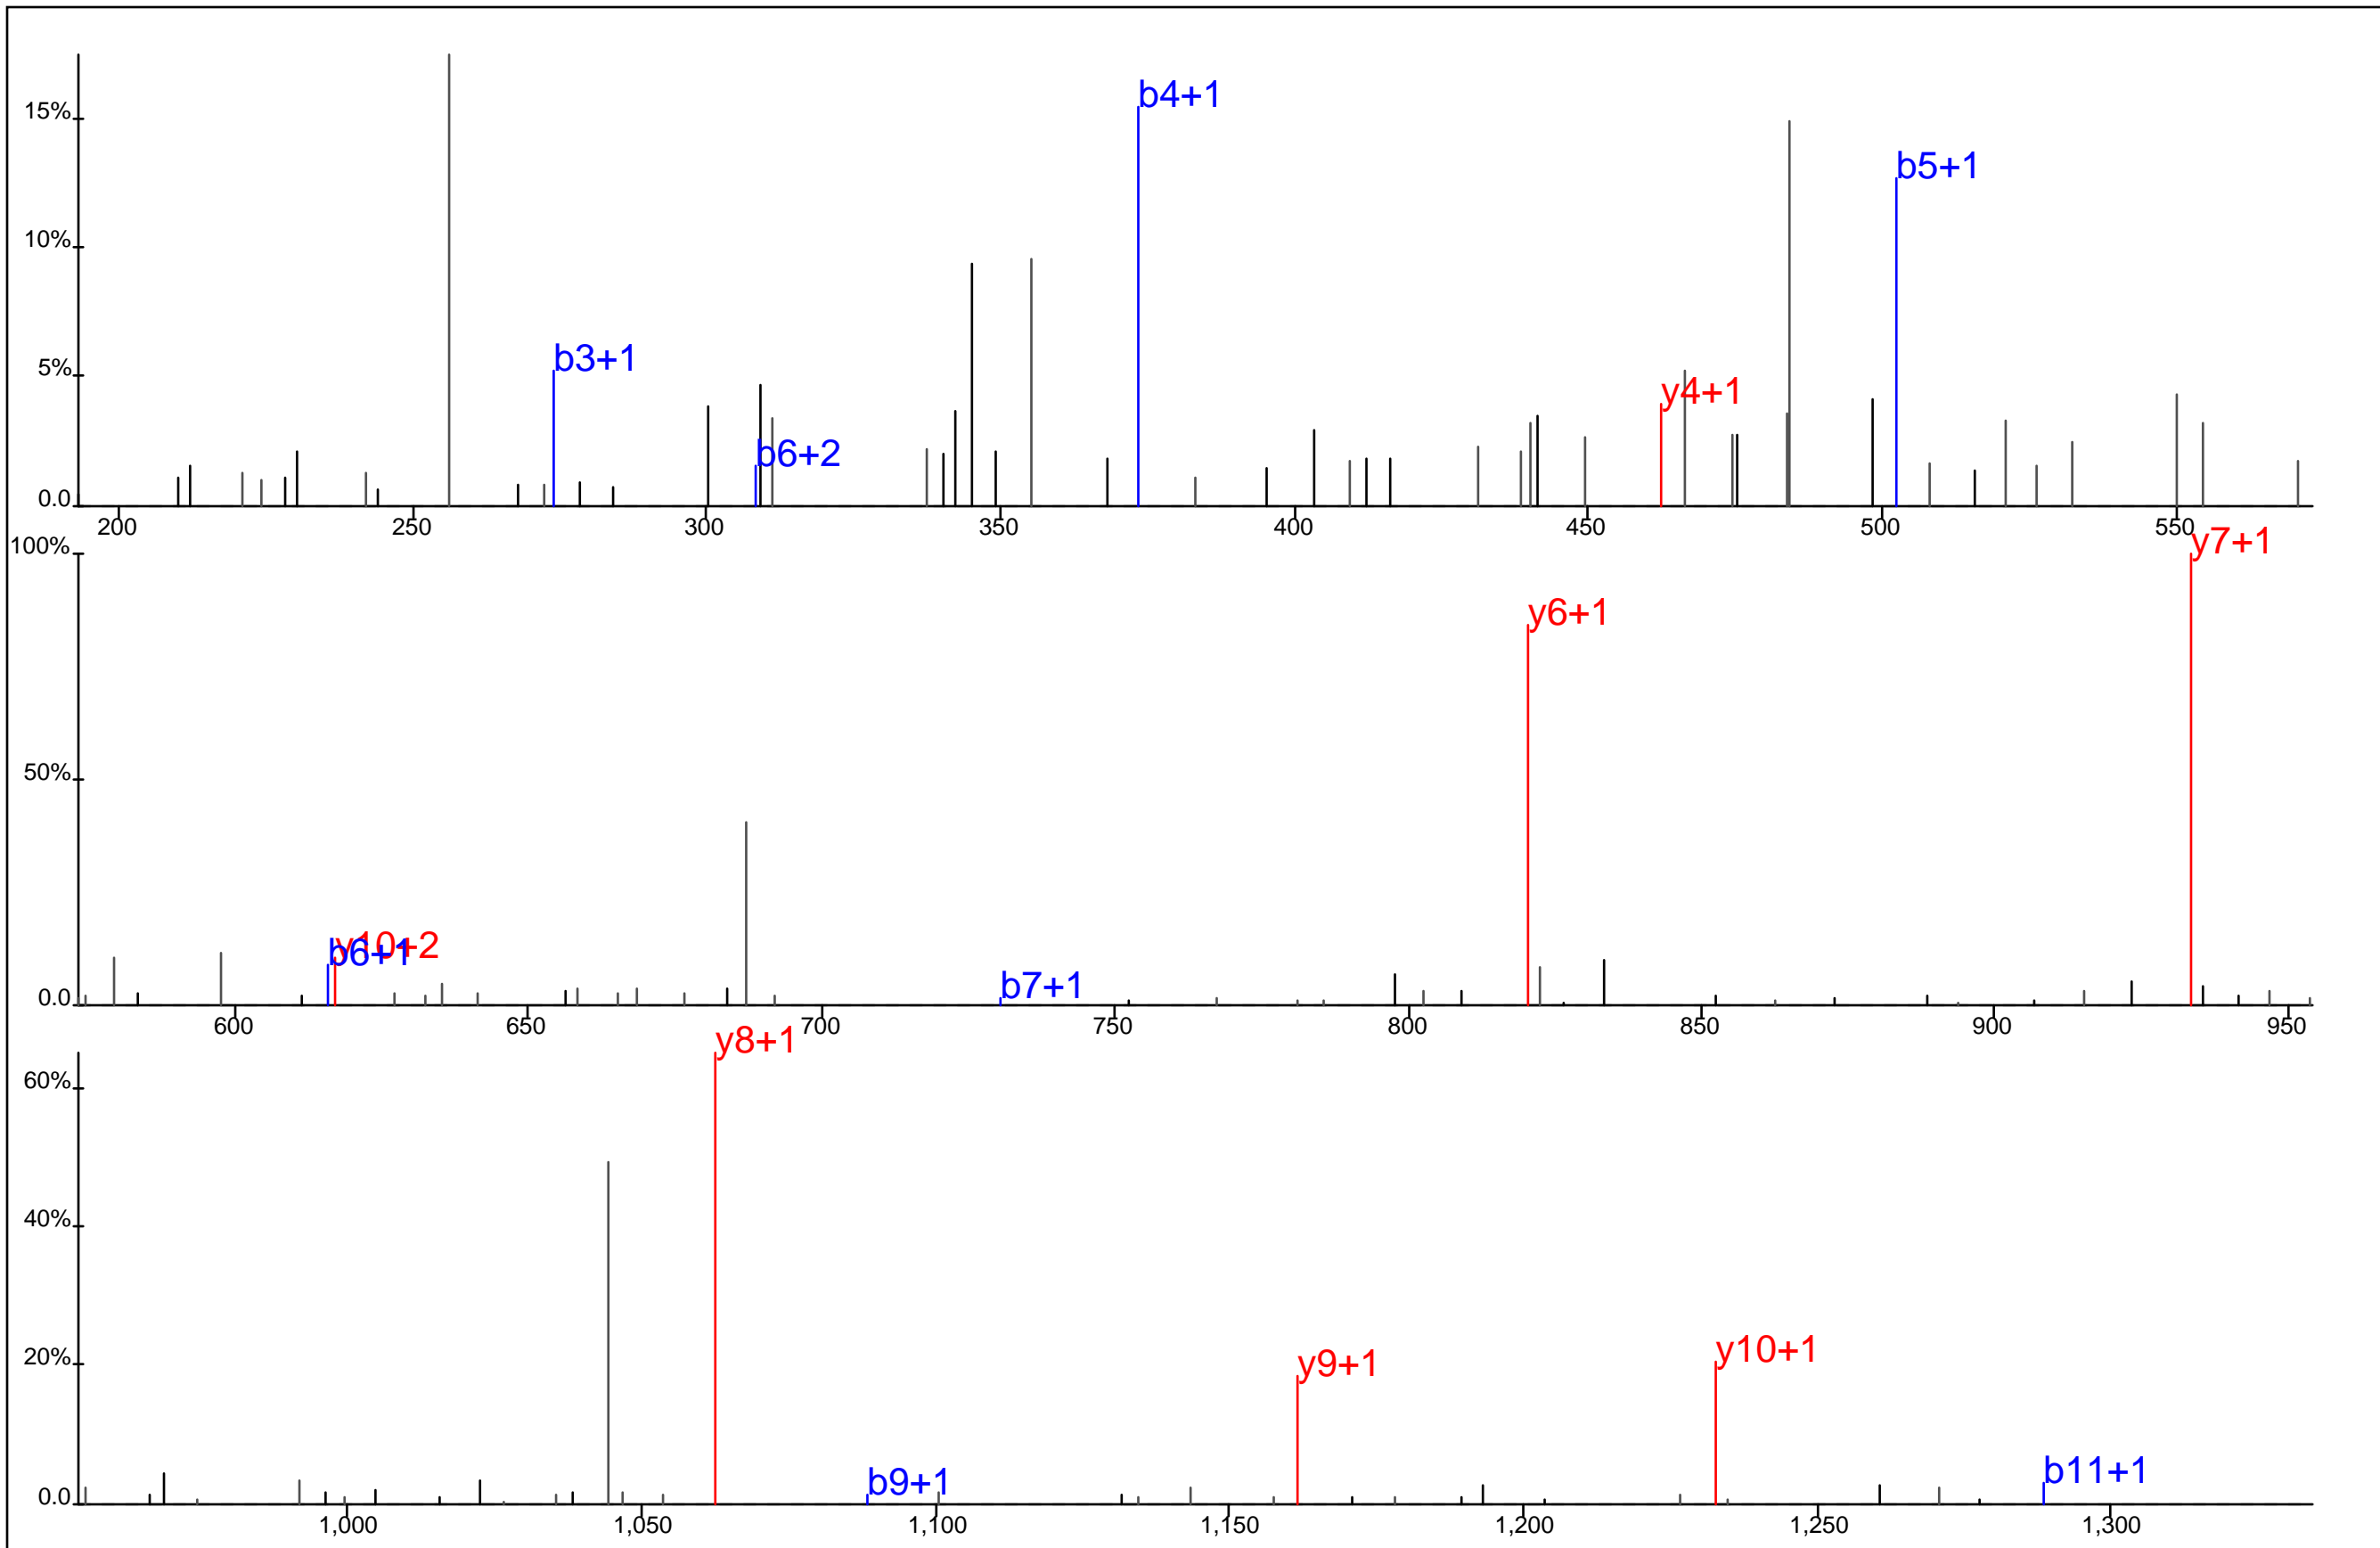

■ ■ ■ ■ ■ ■ ■ ■
  
■ ■ ■ ■ ■ ■ ■ ■
  
**T T A V E I D Y\* D S L K**
  
□ □ □ □ □ □ □ □
  
□ □ □ □ □ □ □ □

Protein Name: FYB  
 gi Accession: 0  
 Precursor Mass: 717.8231+2  
 Delta Mass: 0.781 ppm  
 XCorr: 43.68

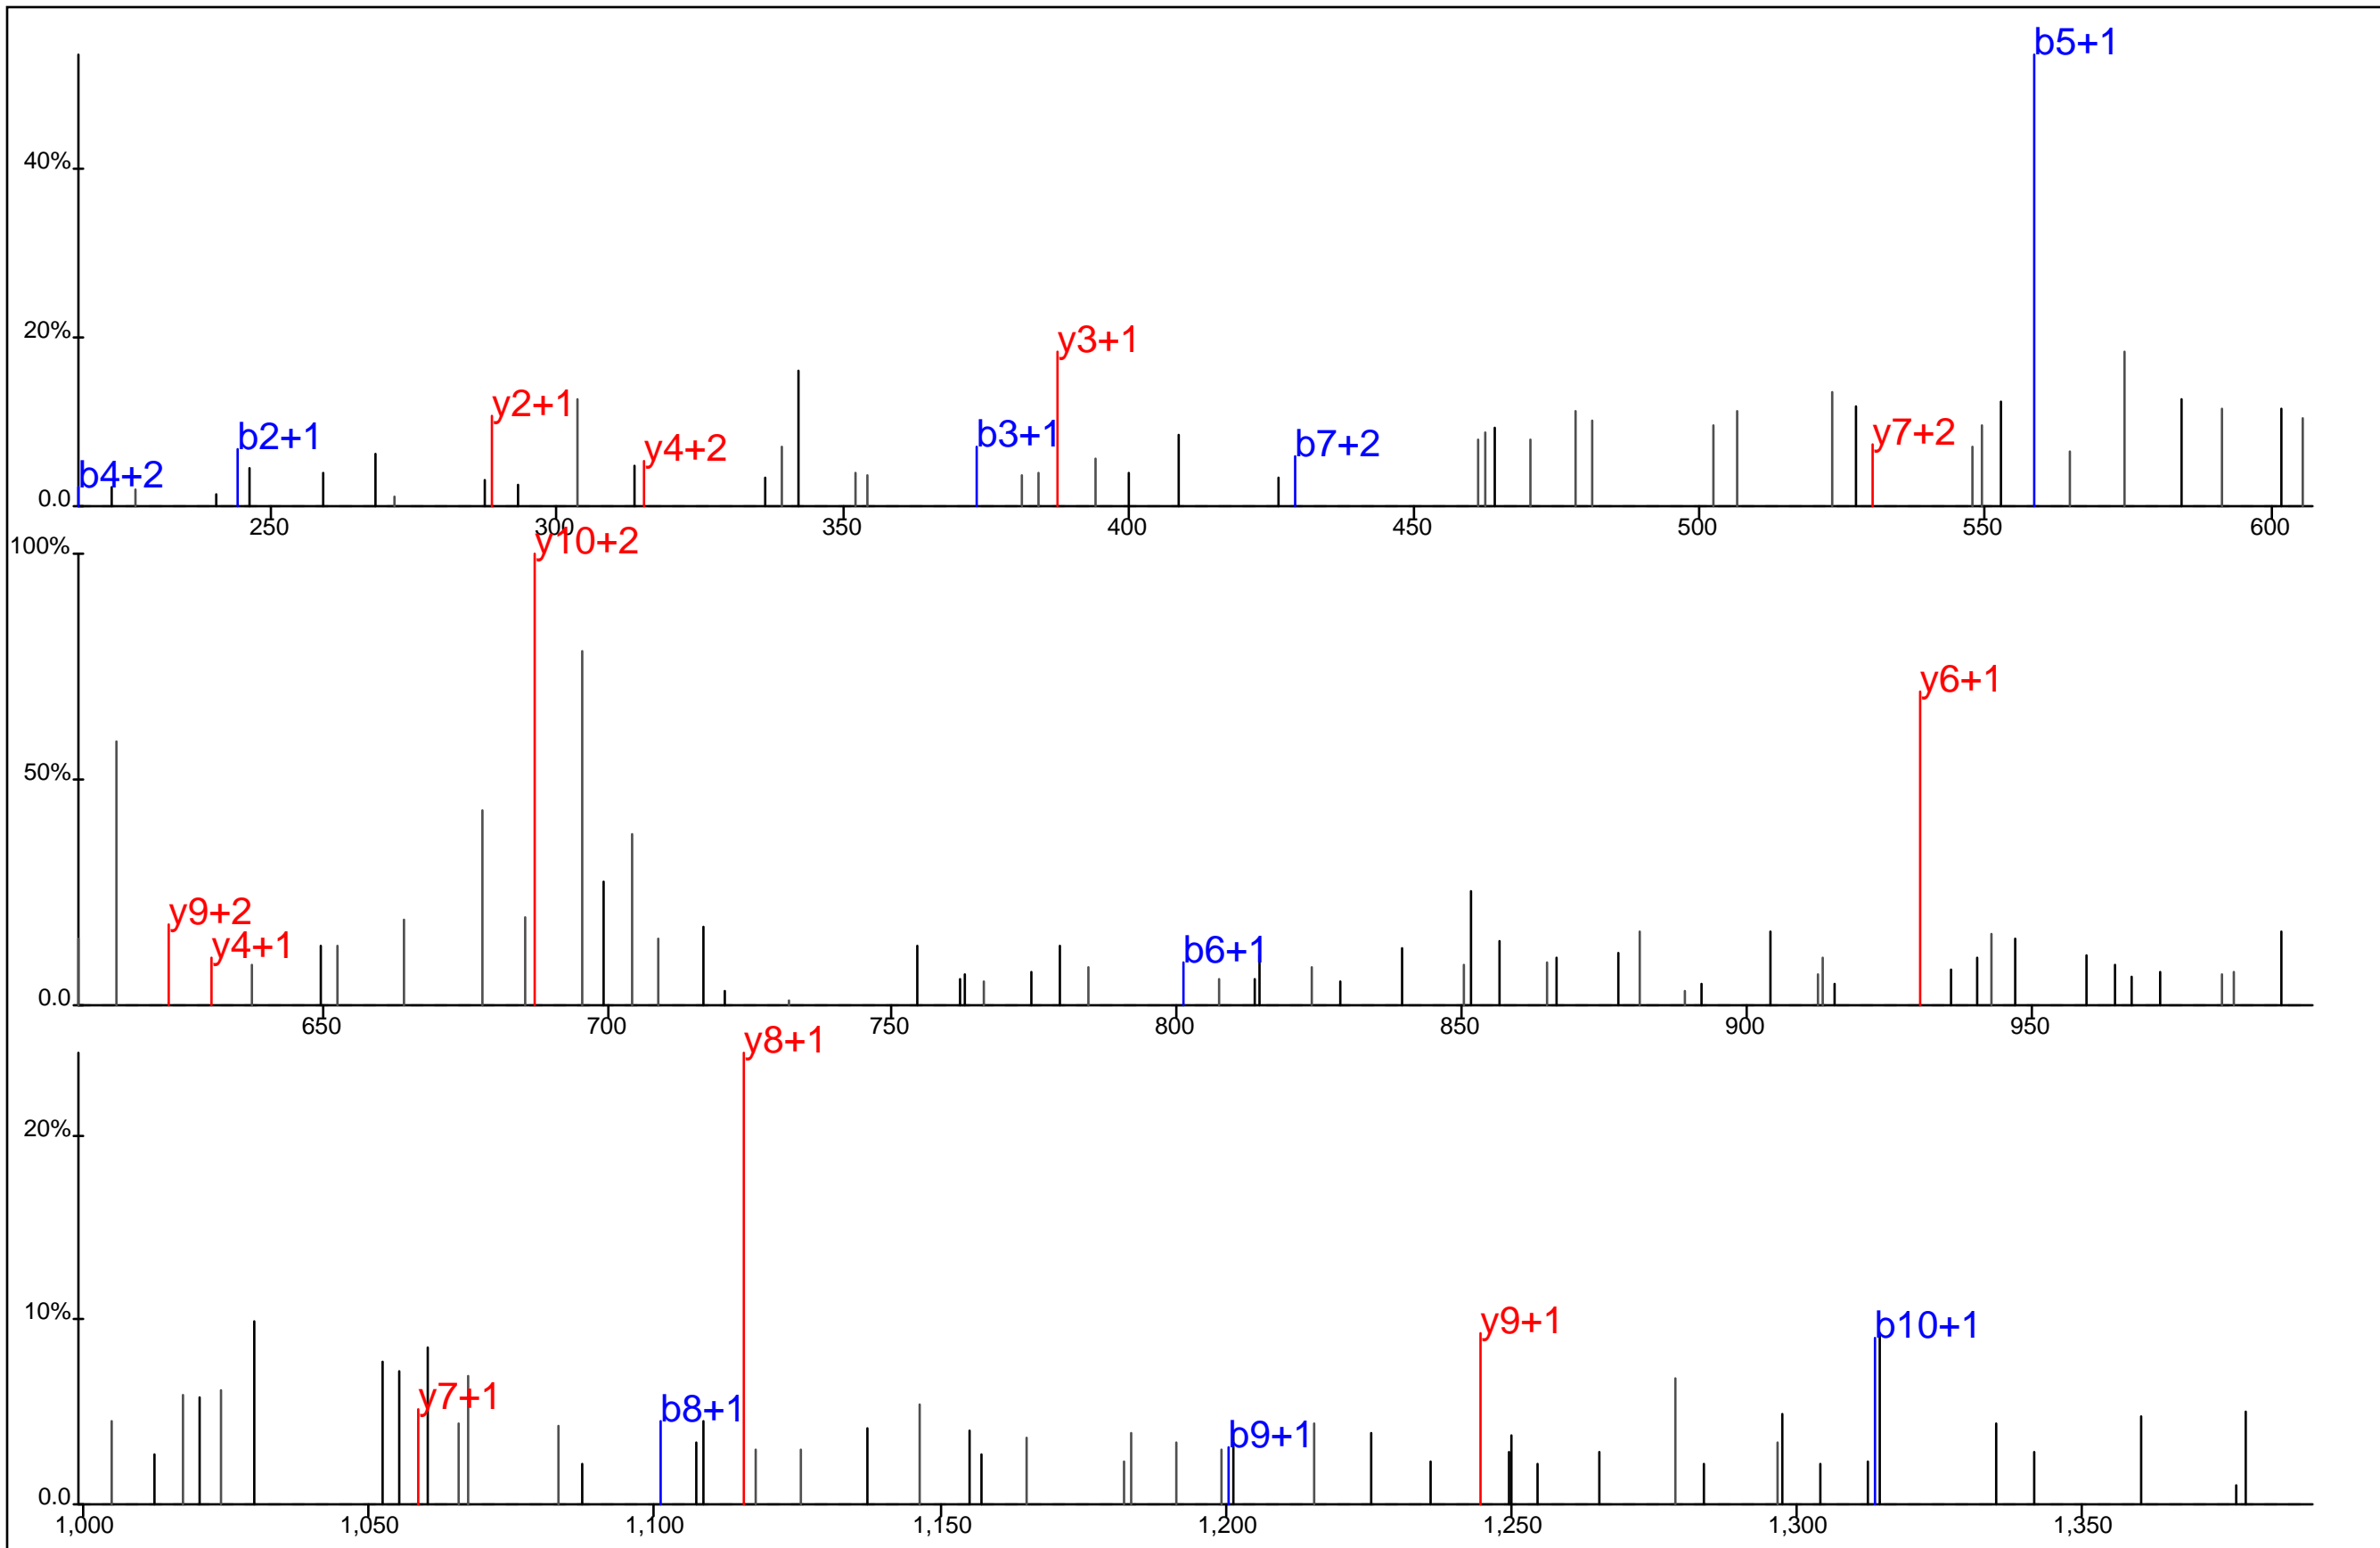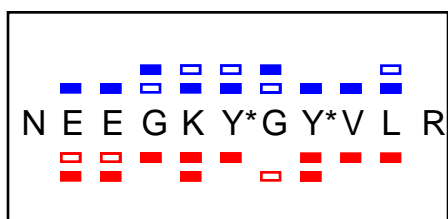

Protein Name: FYB  
 gi Accession: 0  
 Precursor Mass: 744.3016+2  
 Delta Mass: 0.481 ppm  
 XCorr: 23.11

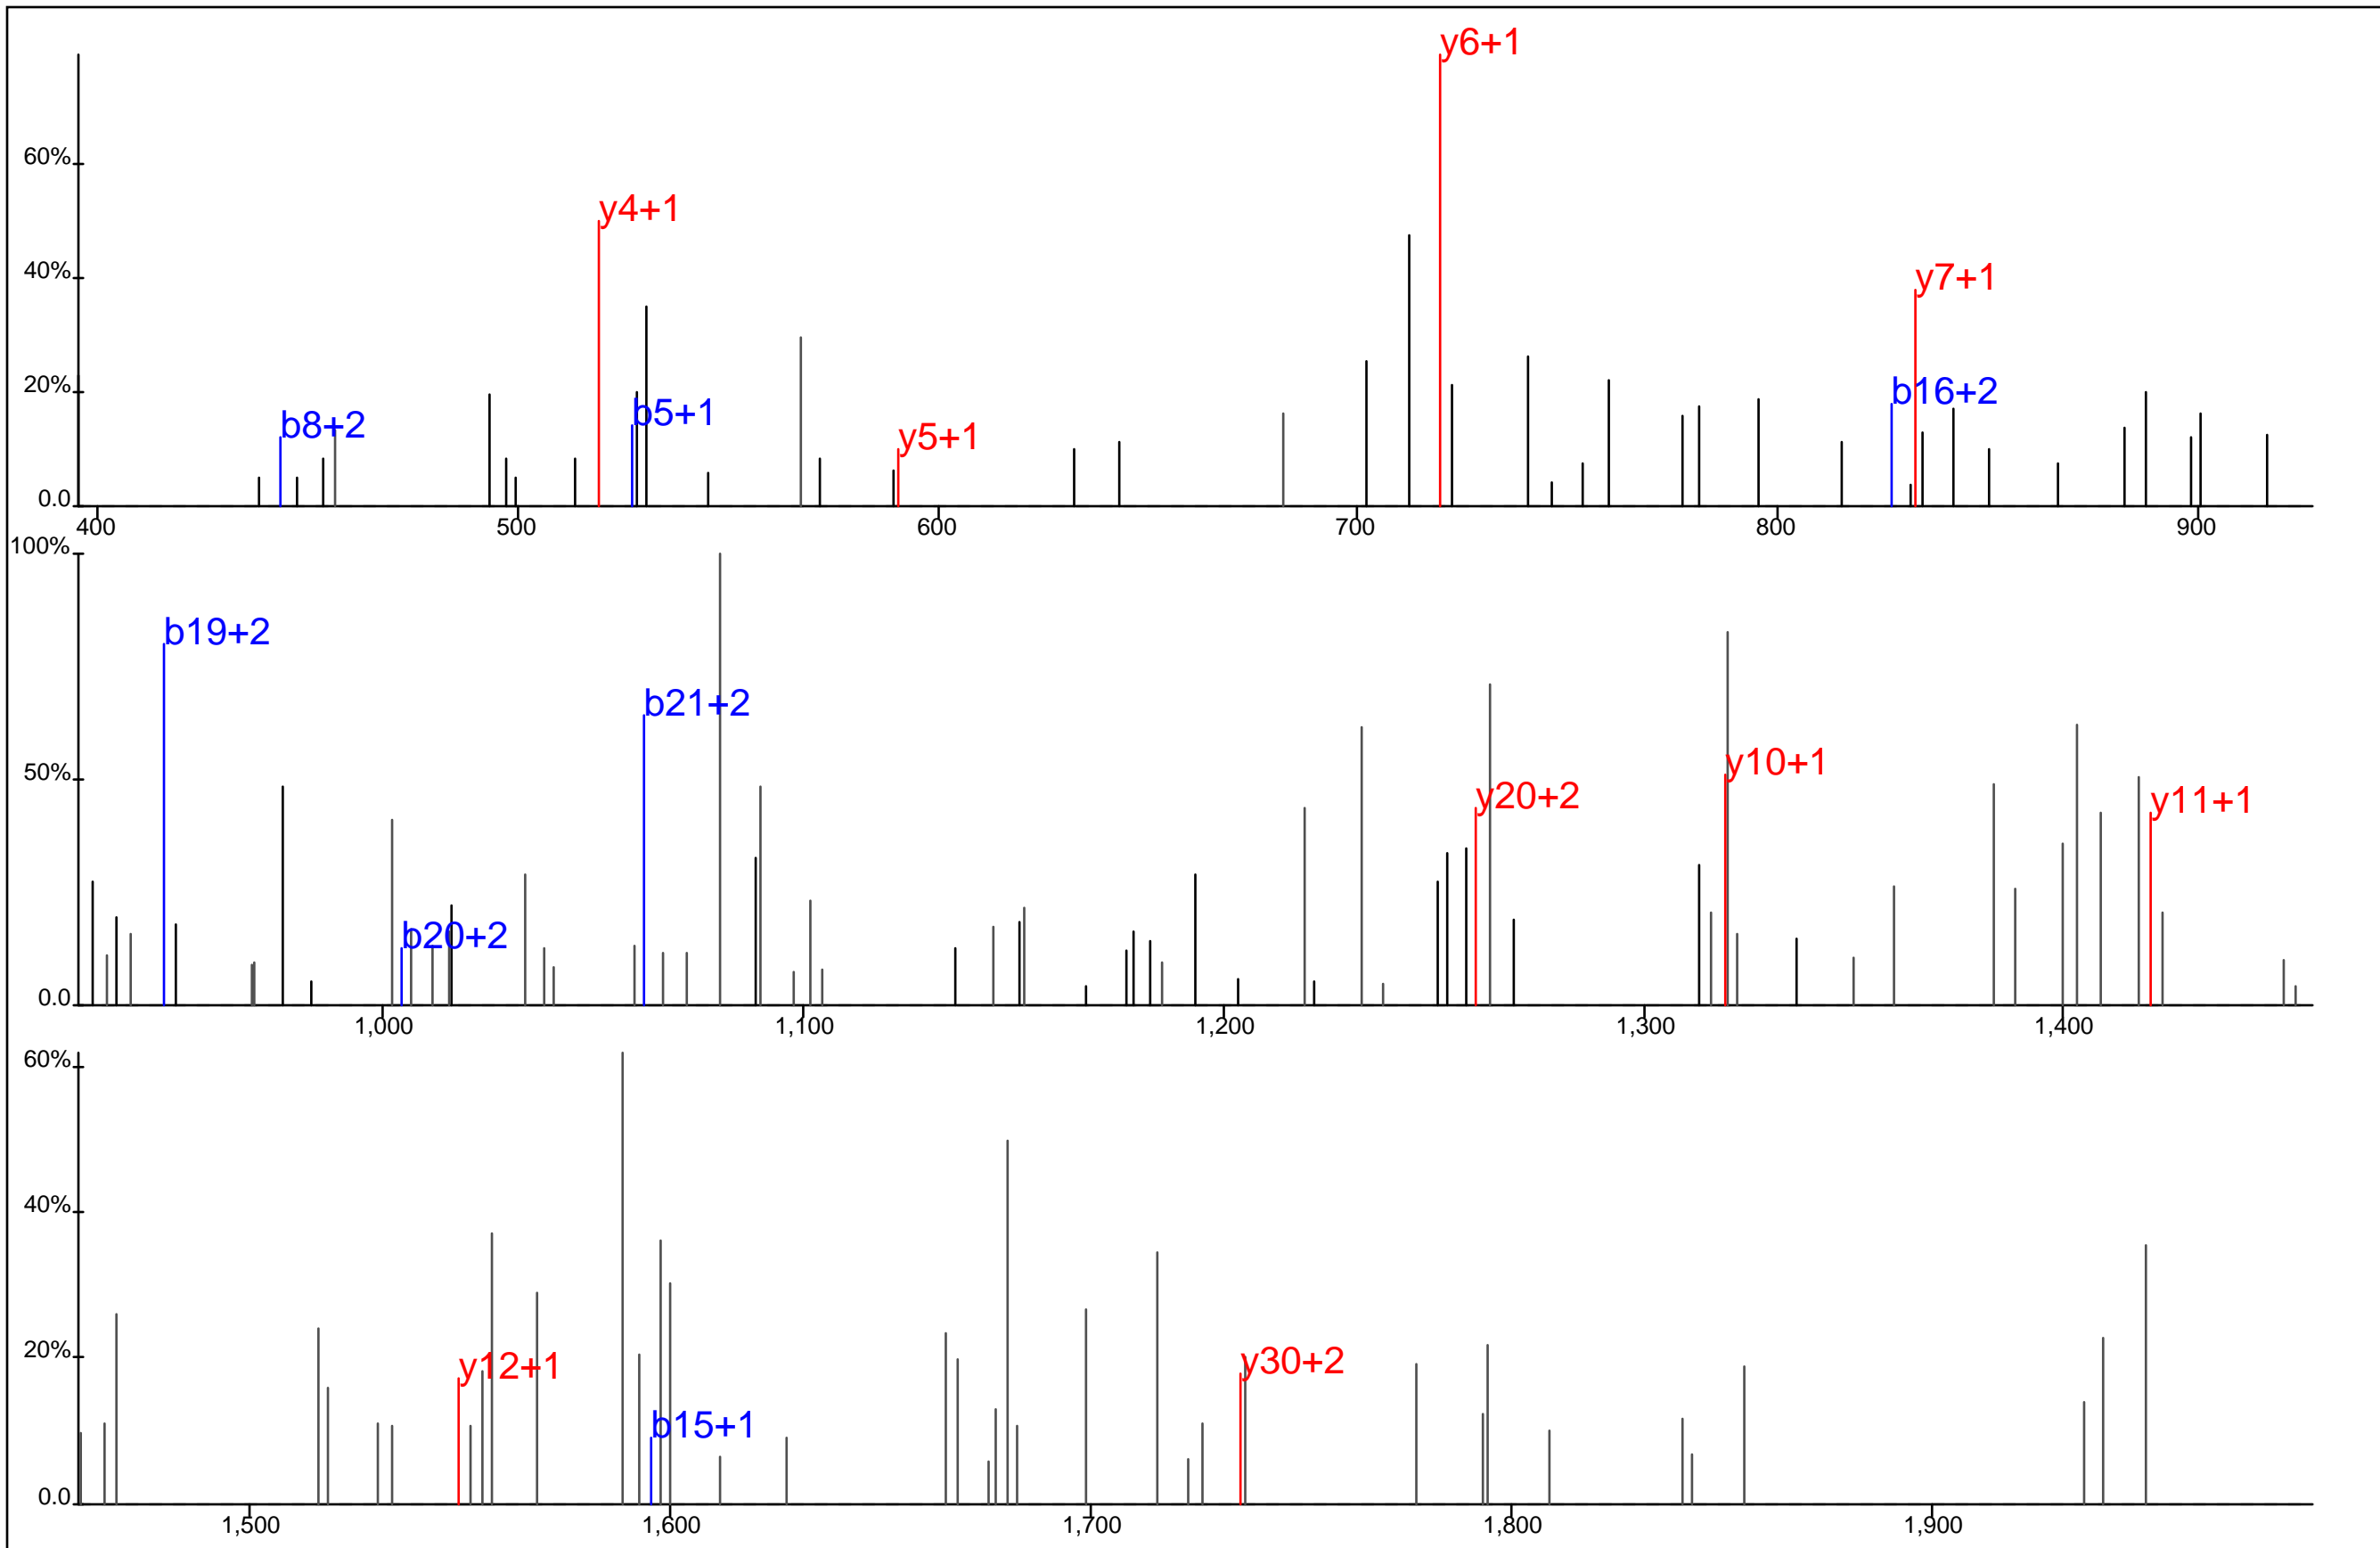

S P V N E D N Q D G V T H S D G A G N L D E E Q D S \* E G E T Y \* E D I E A S K E R

Protein Name: FYB  
 gi Accession: 0  
 Precursor Mass: 1,132.1931+4  
 Delta Mass: 1.715 ppm  
 XCorr: 20.76

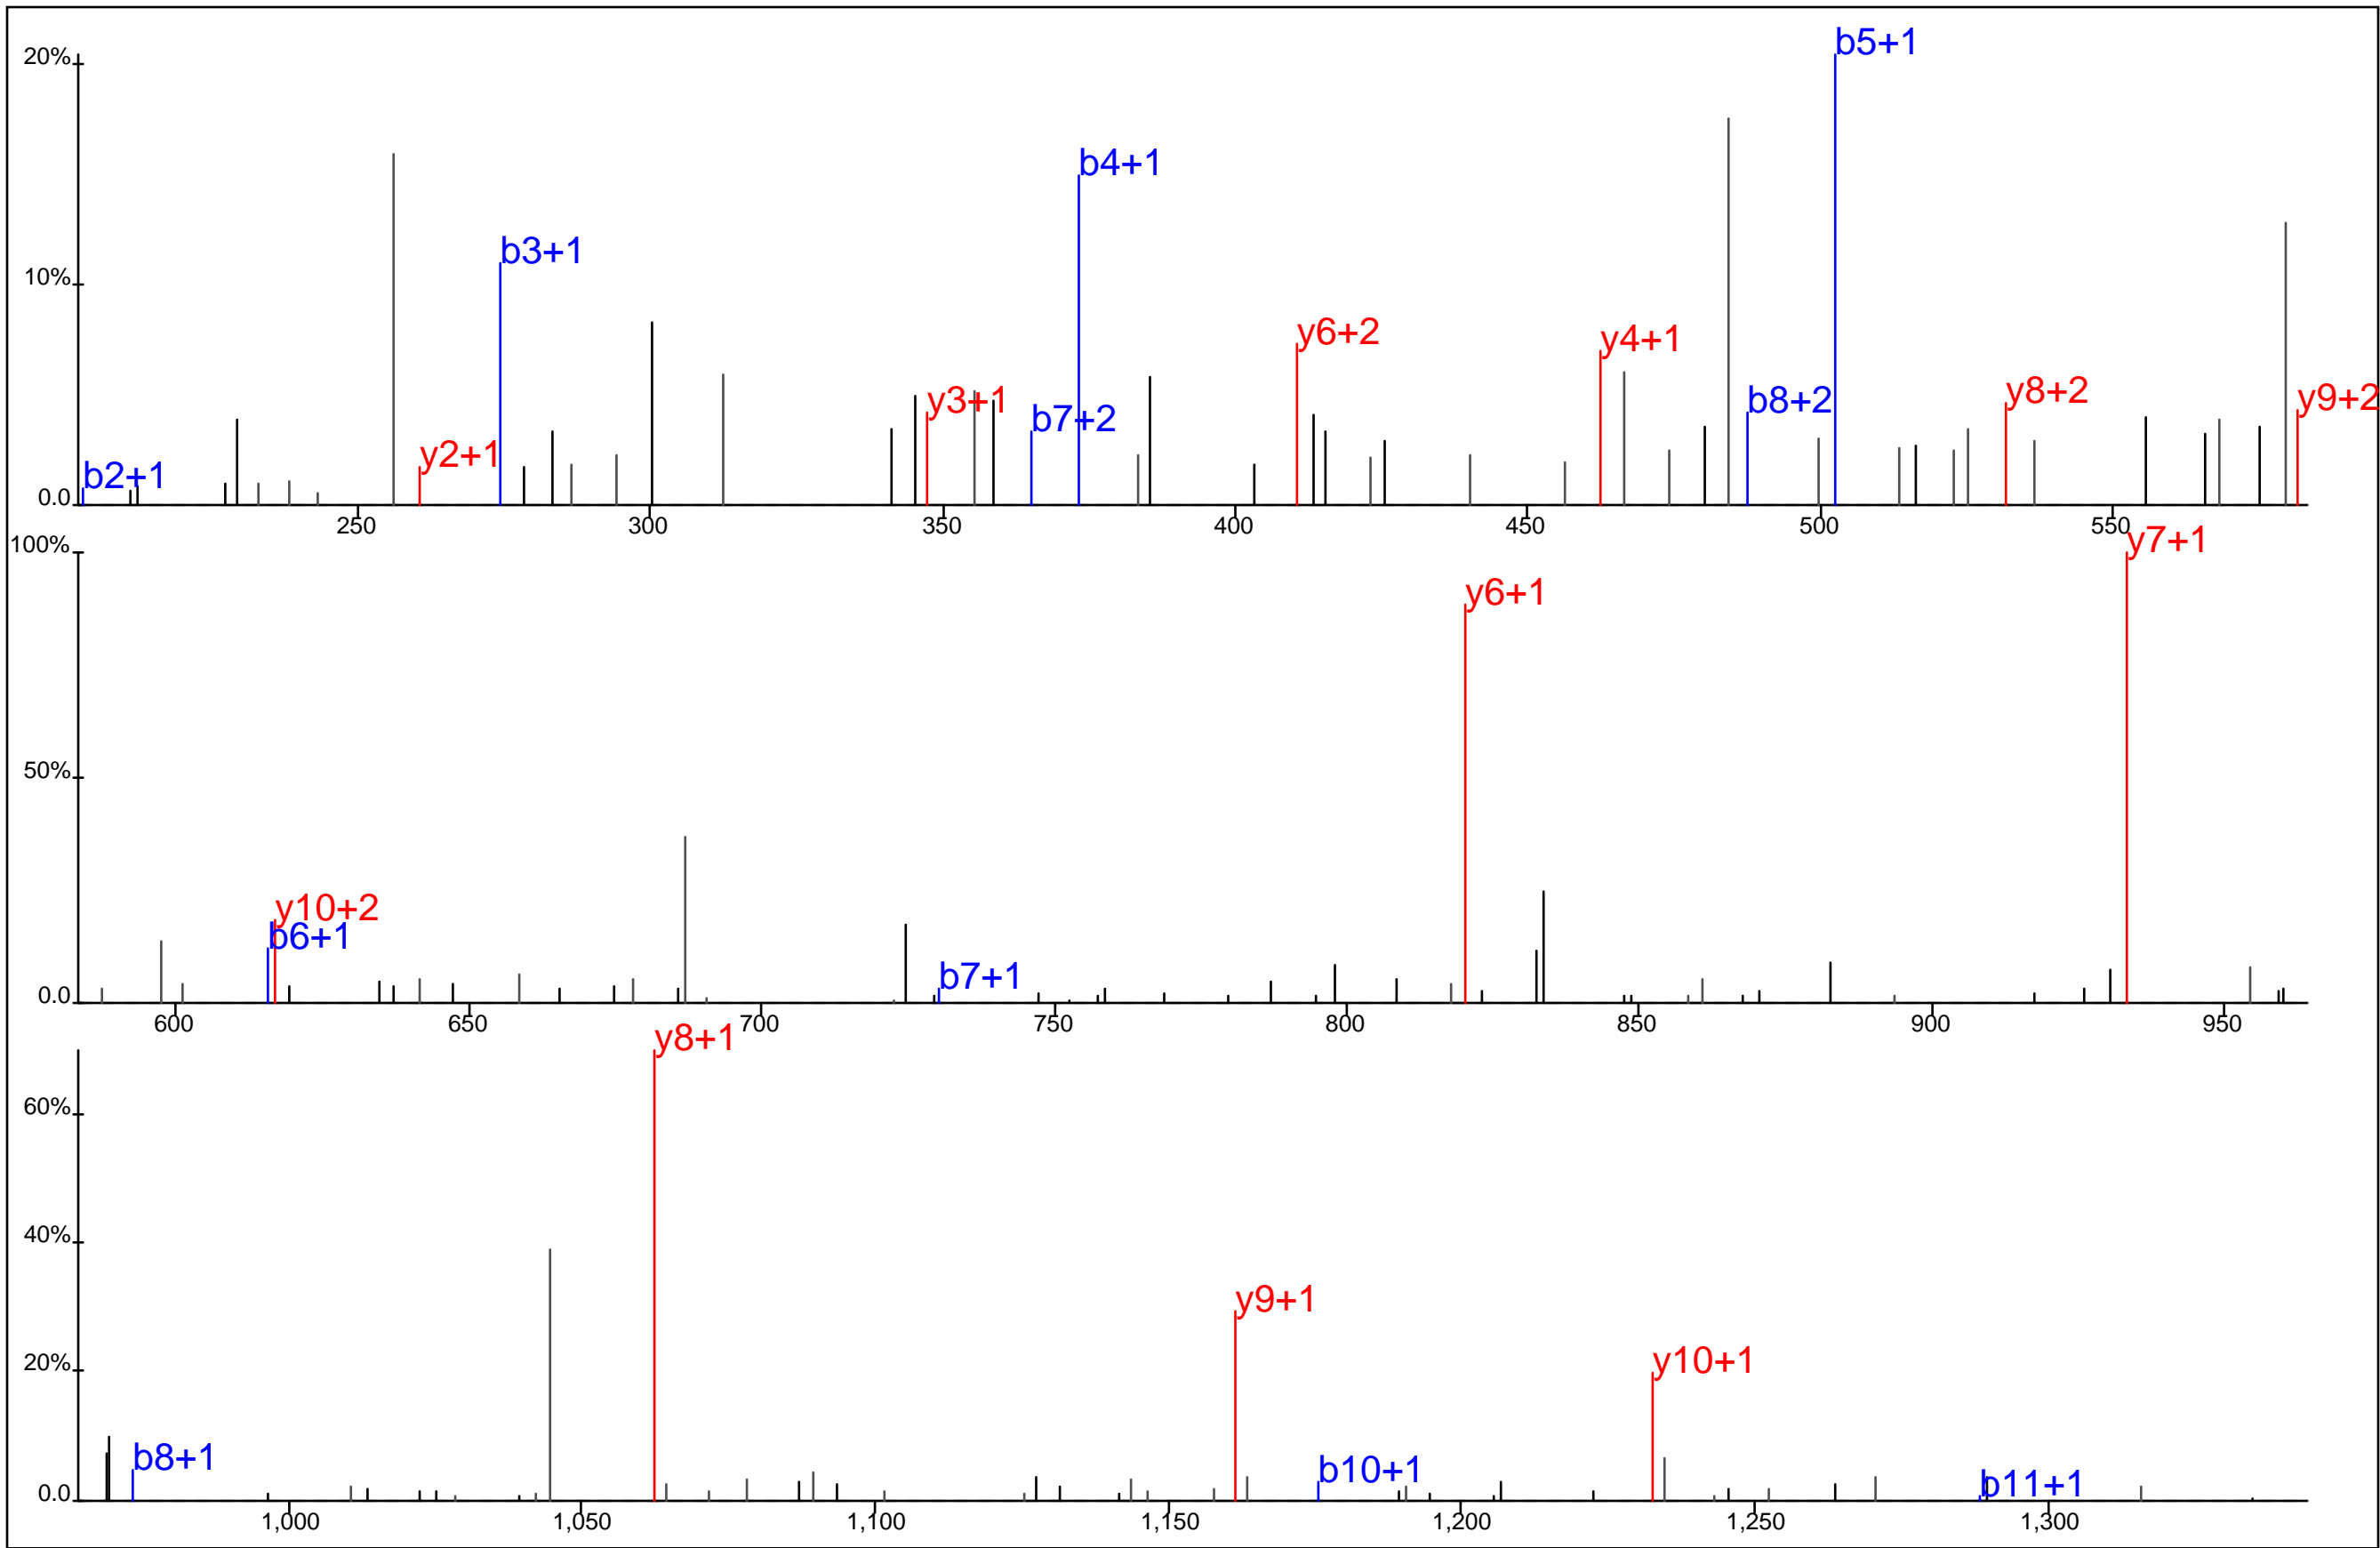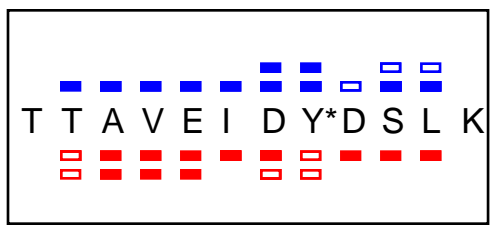

Protein Name: FYB  
 gi Accession: 0  
 Precursor Mass: 717.8237+2  
 Delta Mass: 0.070 ppm  
 XCorr: 42.0

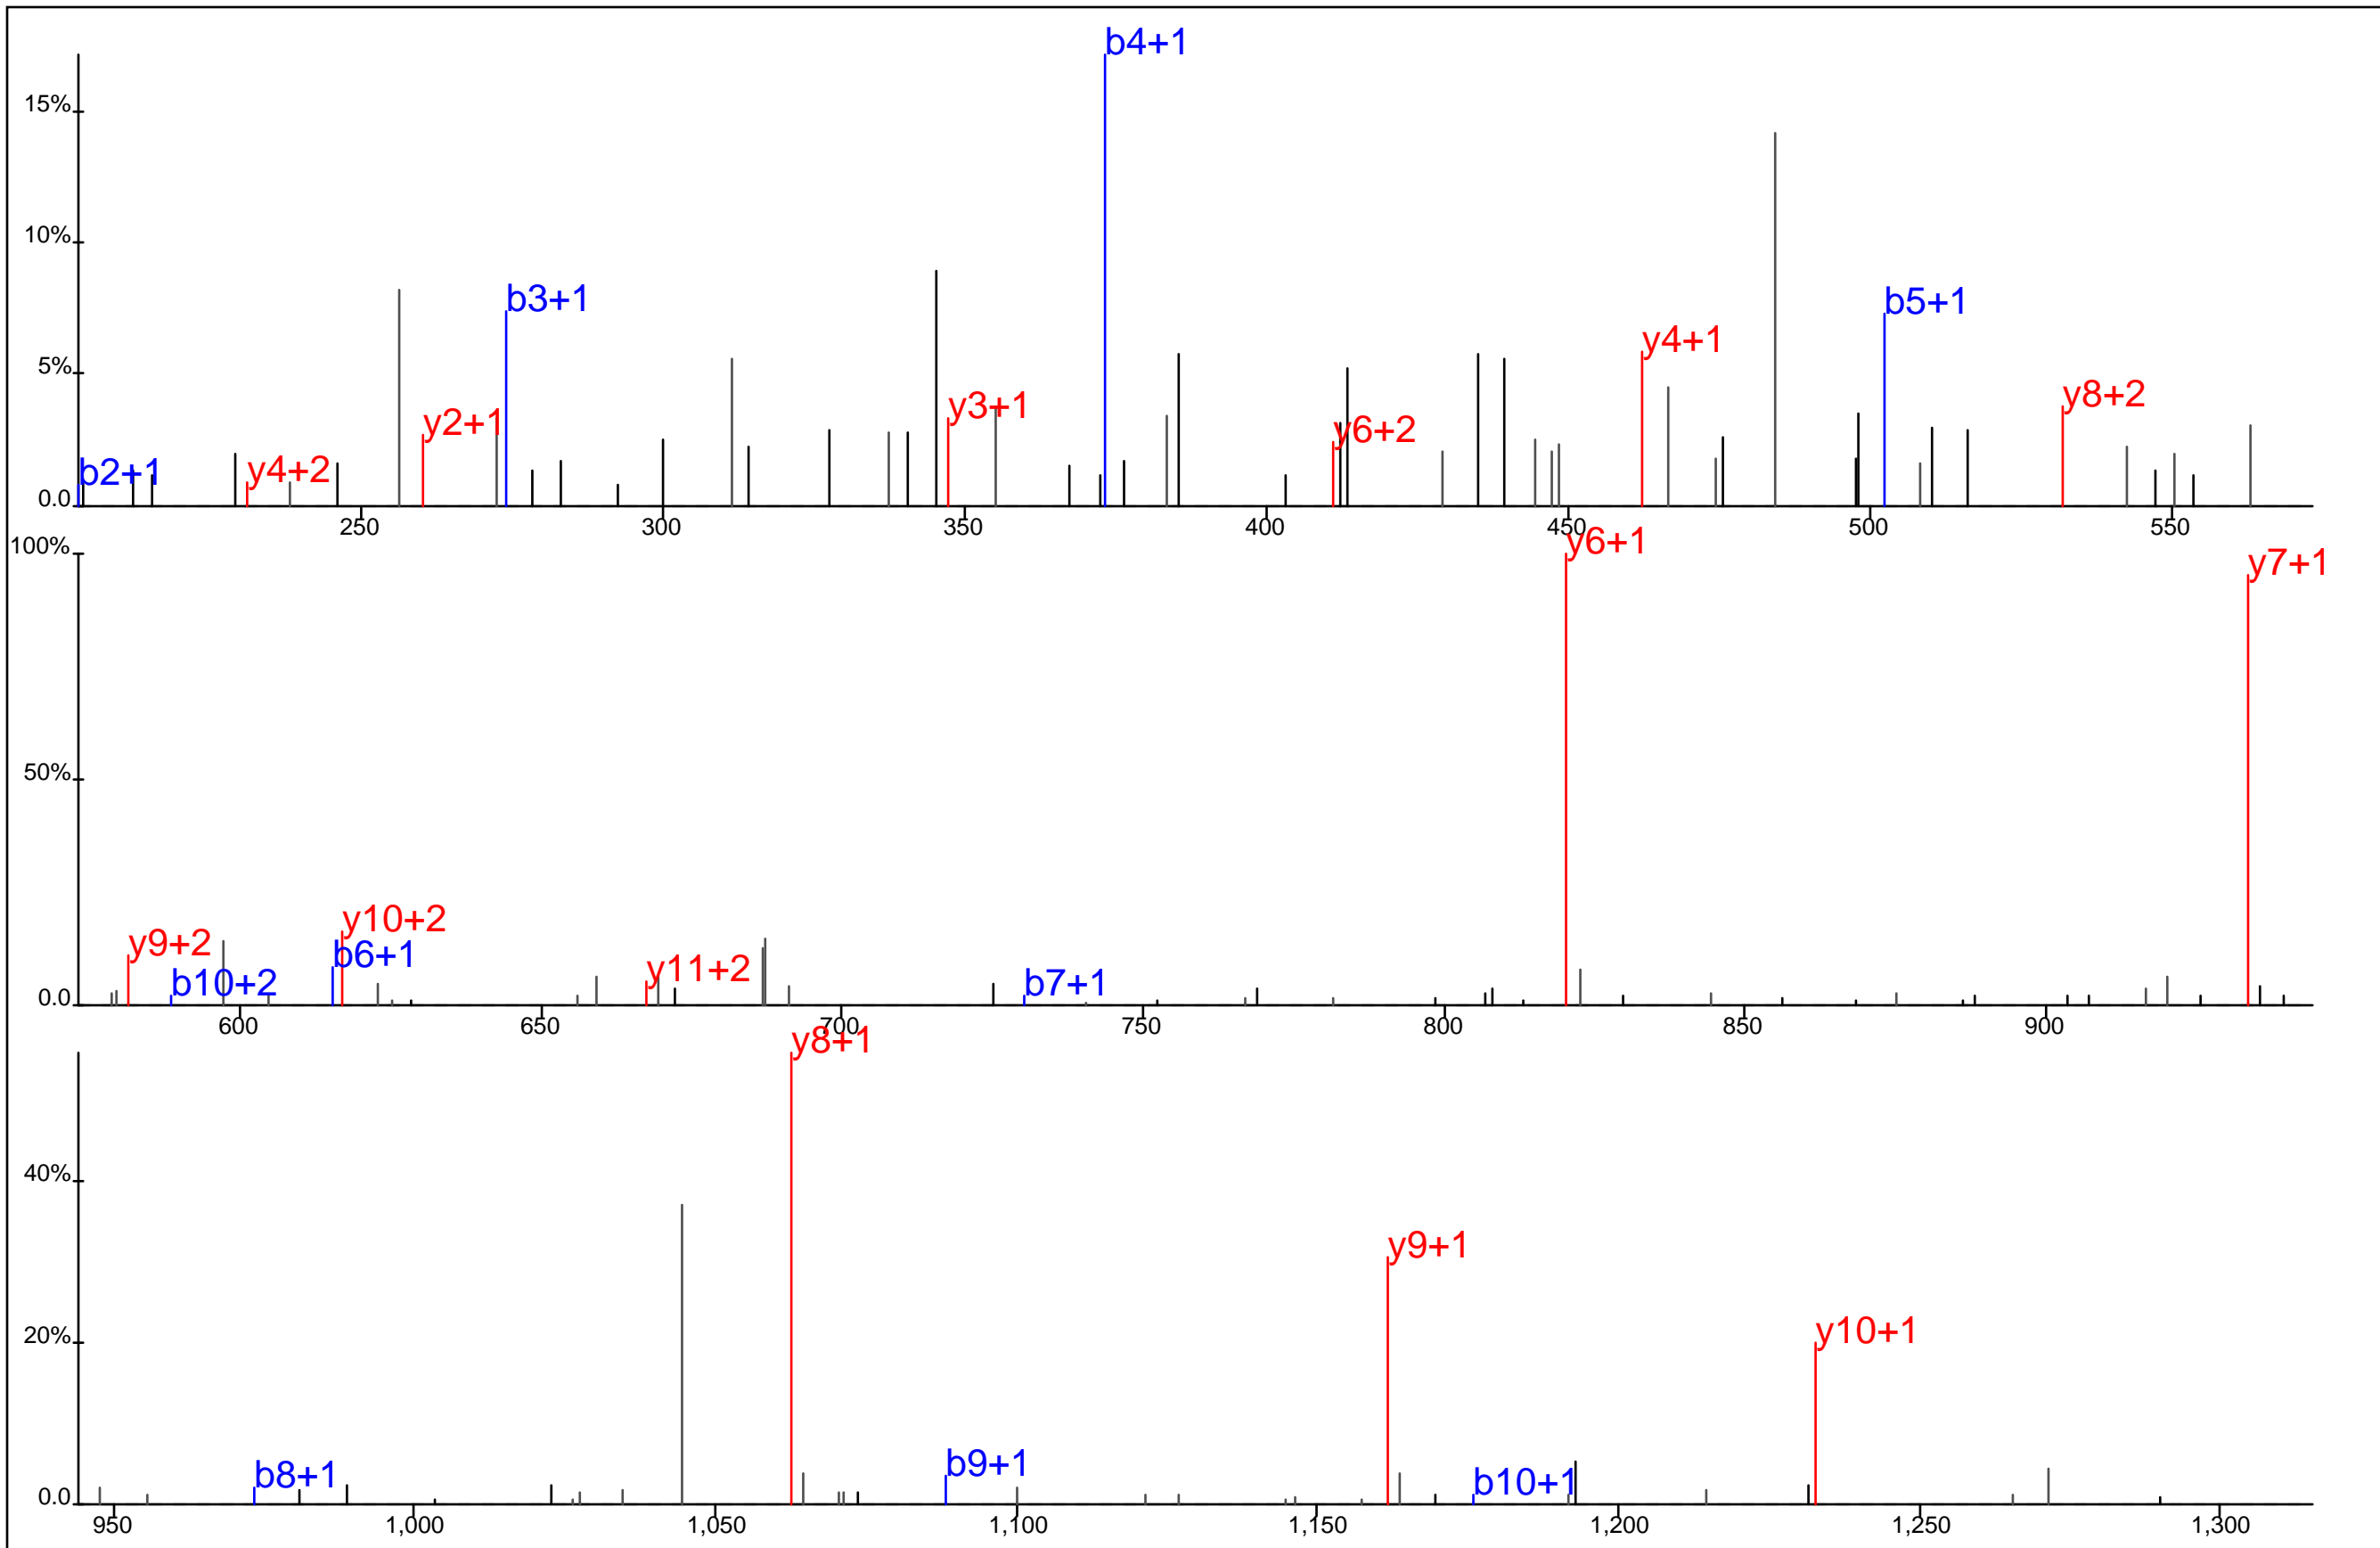

■ ■  
■ ■ ■ ■ ■ ■ ■ ■ ■ ■ ■ ■ ■ ■ ■ ■ ■ ■  
 T T A V E I D Y\* D S L K

Protein Name: FYB  
 gi Accession: 0  
 Precursor Mass: 717.8235+2  
 Delta Mass: 0.100 ppm  
 XCorr: 41.87







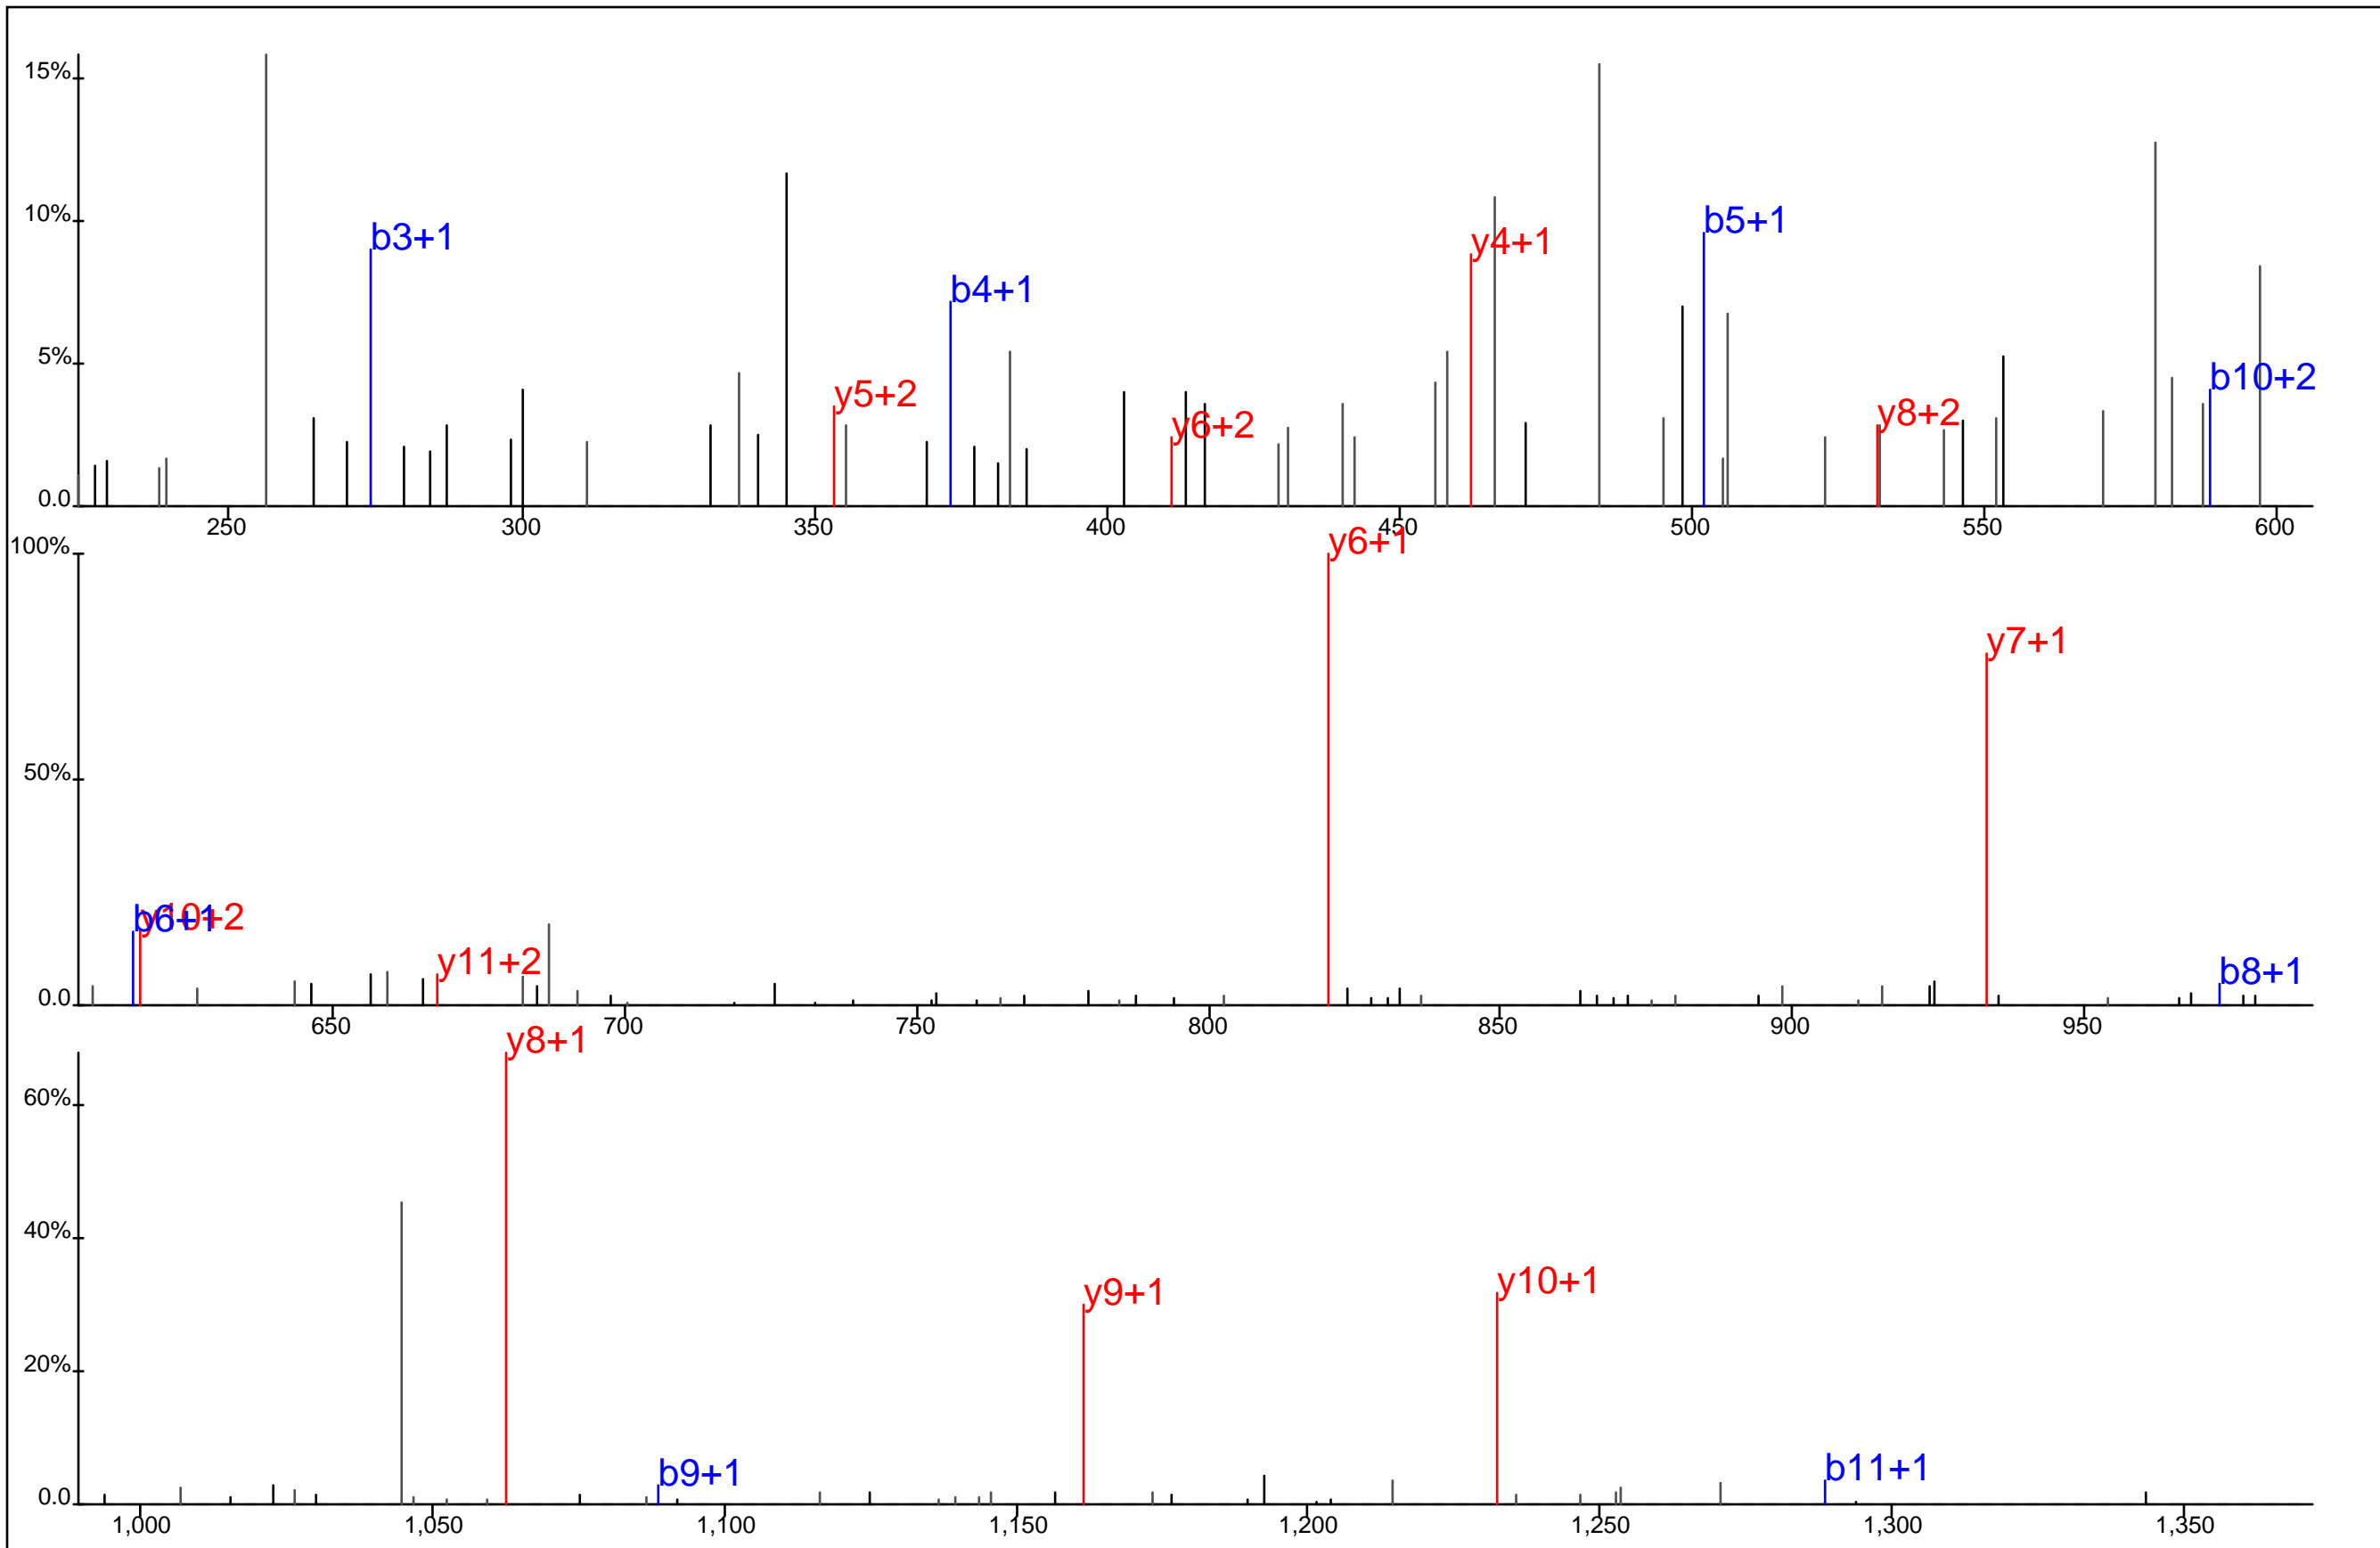

■ ■  
■ ■ ■ ■ ■ ■ ■ ■ ■ ■  
**T T A V E I D Y\* D S L K**  
■ ■ ■ ■ ■ ■ ■ ■ ■ ■

Protein Name: FYB  
 gi Accession: 0  
 Precursor Mass: 717.8234+2  
 Delta Mass: 0.355 ppm  
 XCorr: 39.11



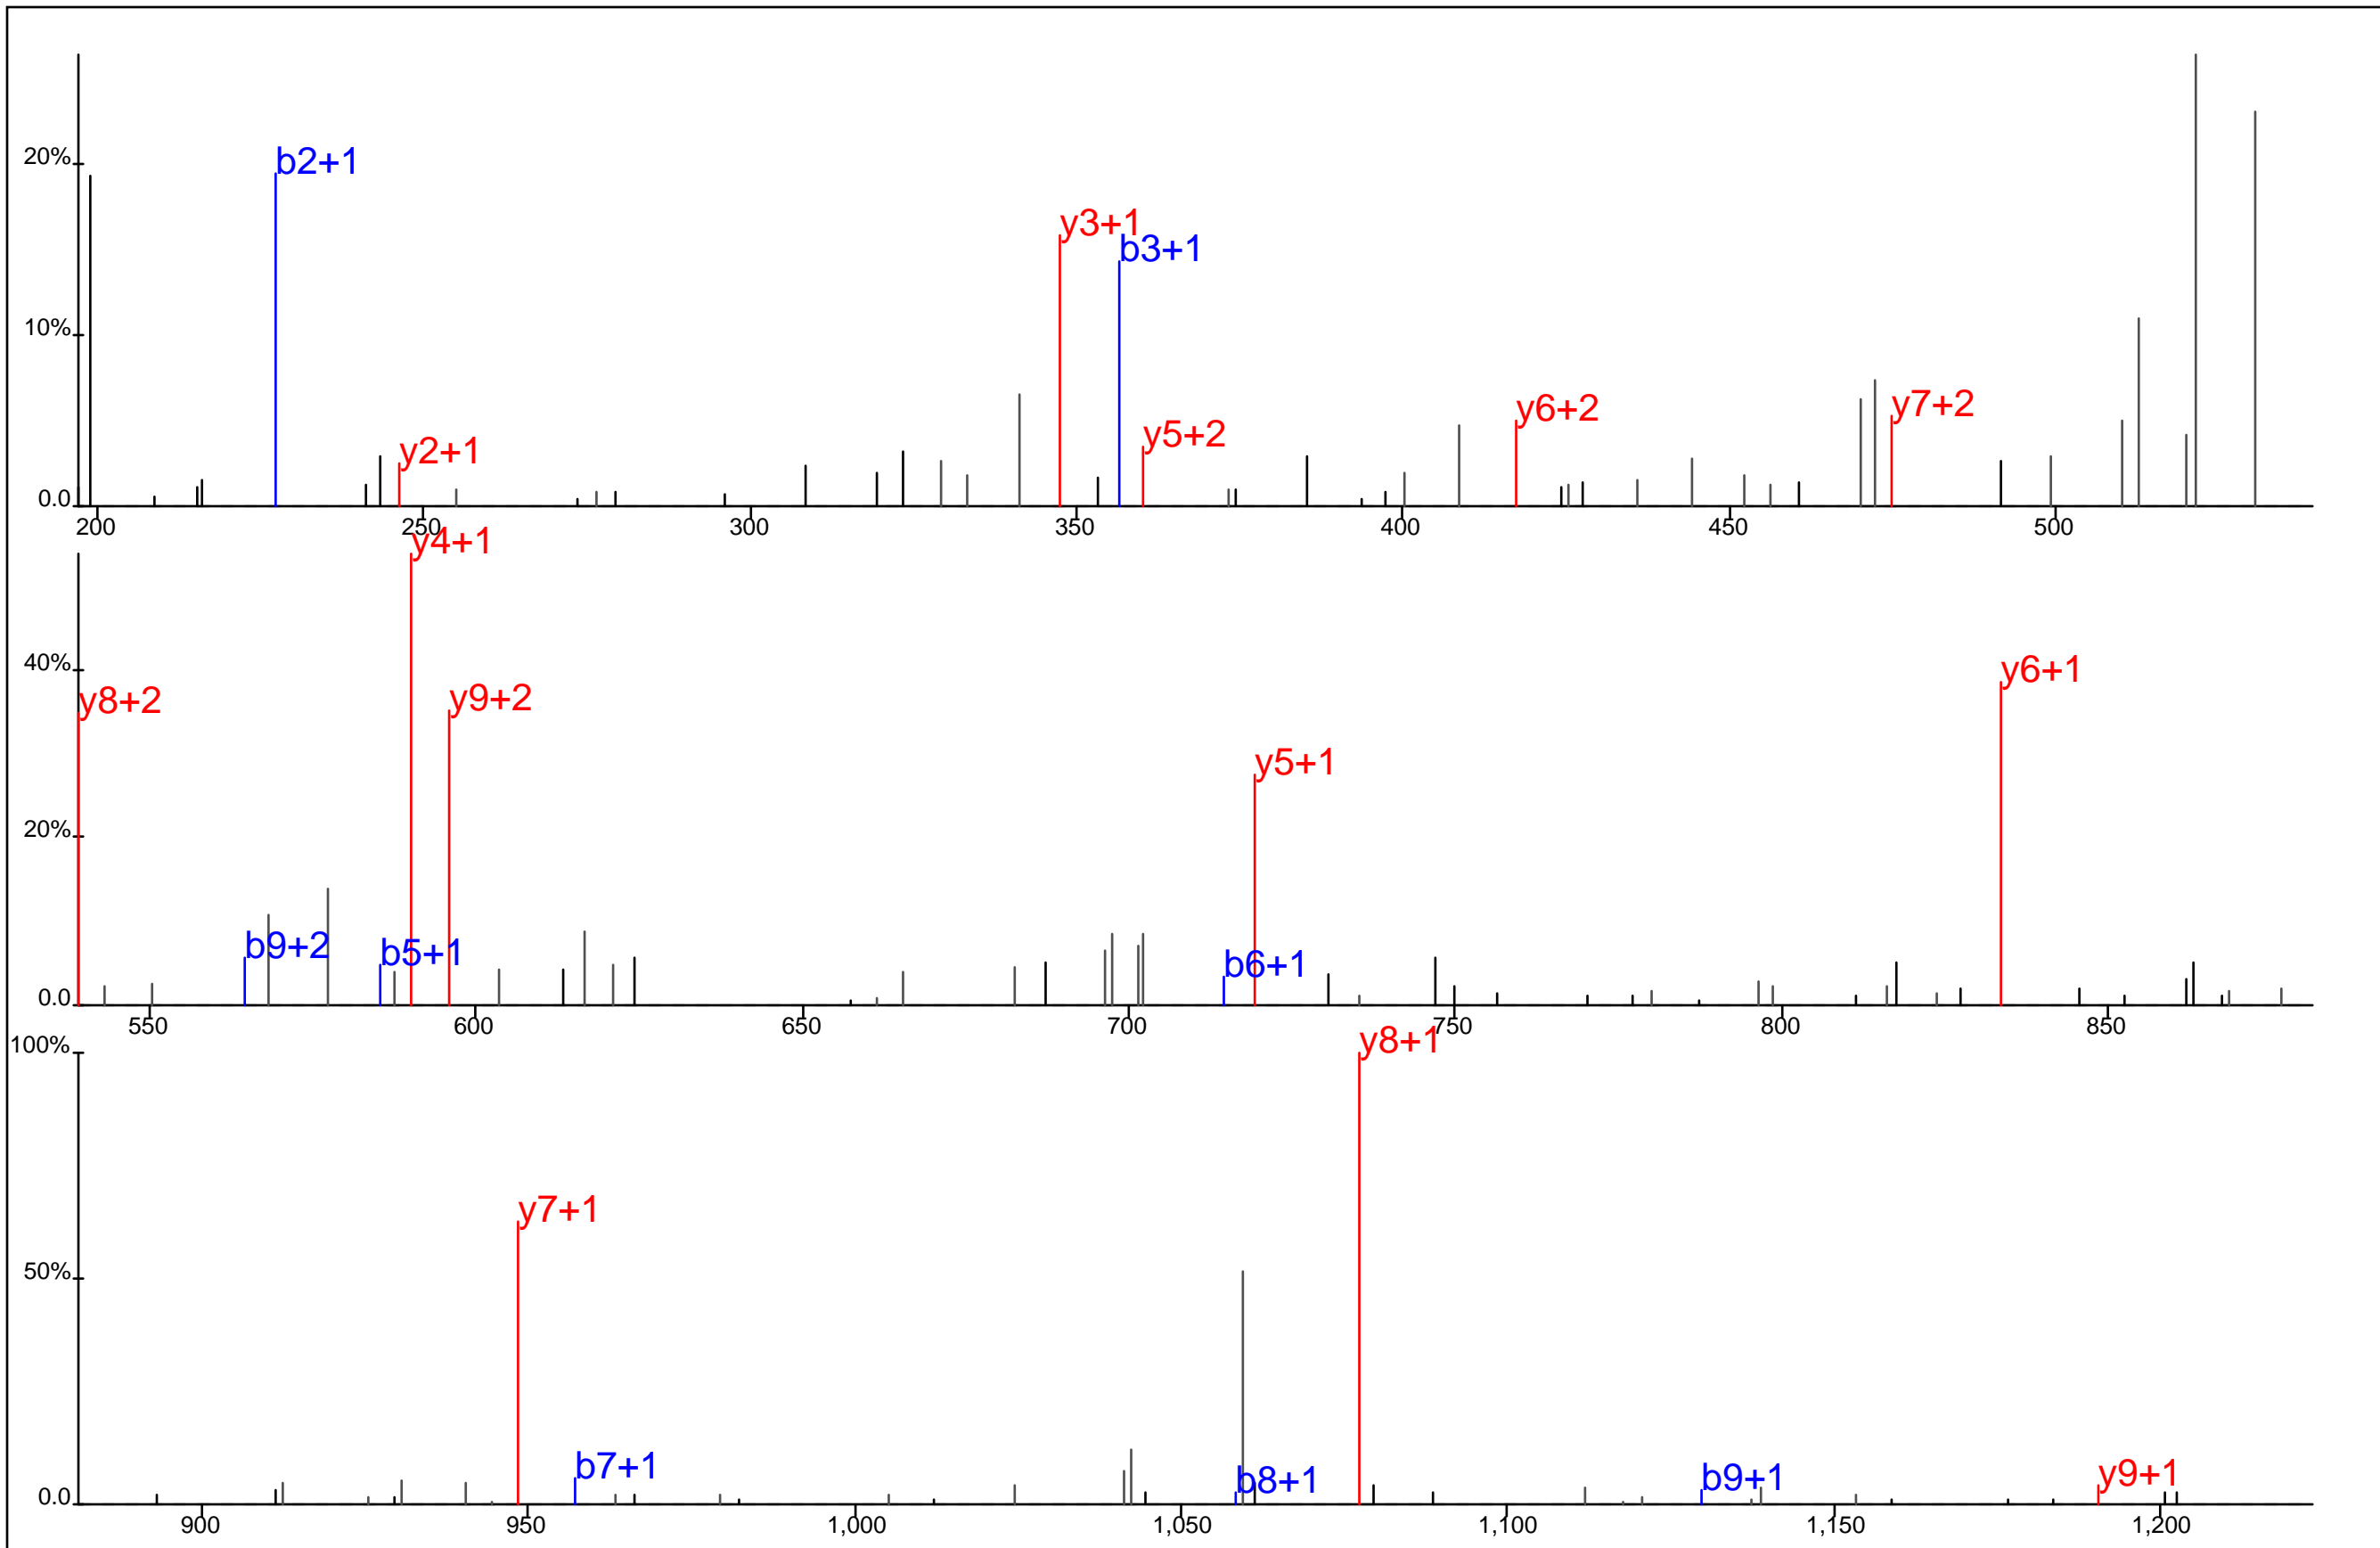

■ ■    ■ ■    ■ ■ ■ ■ ■  
 L I E D N E Y\* T A R  
■ ■ ■ ■ ■ ■ ■ ■ ■

Protein Name: Fyn  
 gi Accession: 0  
 Precursor Mass: 652.2822+2  
 Delta Mass: 0.387 ppm  
 XCorr: 53.75

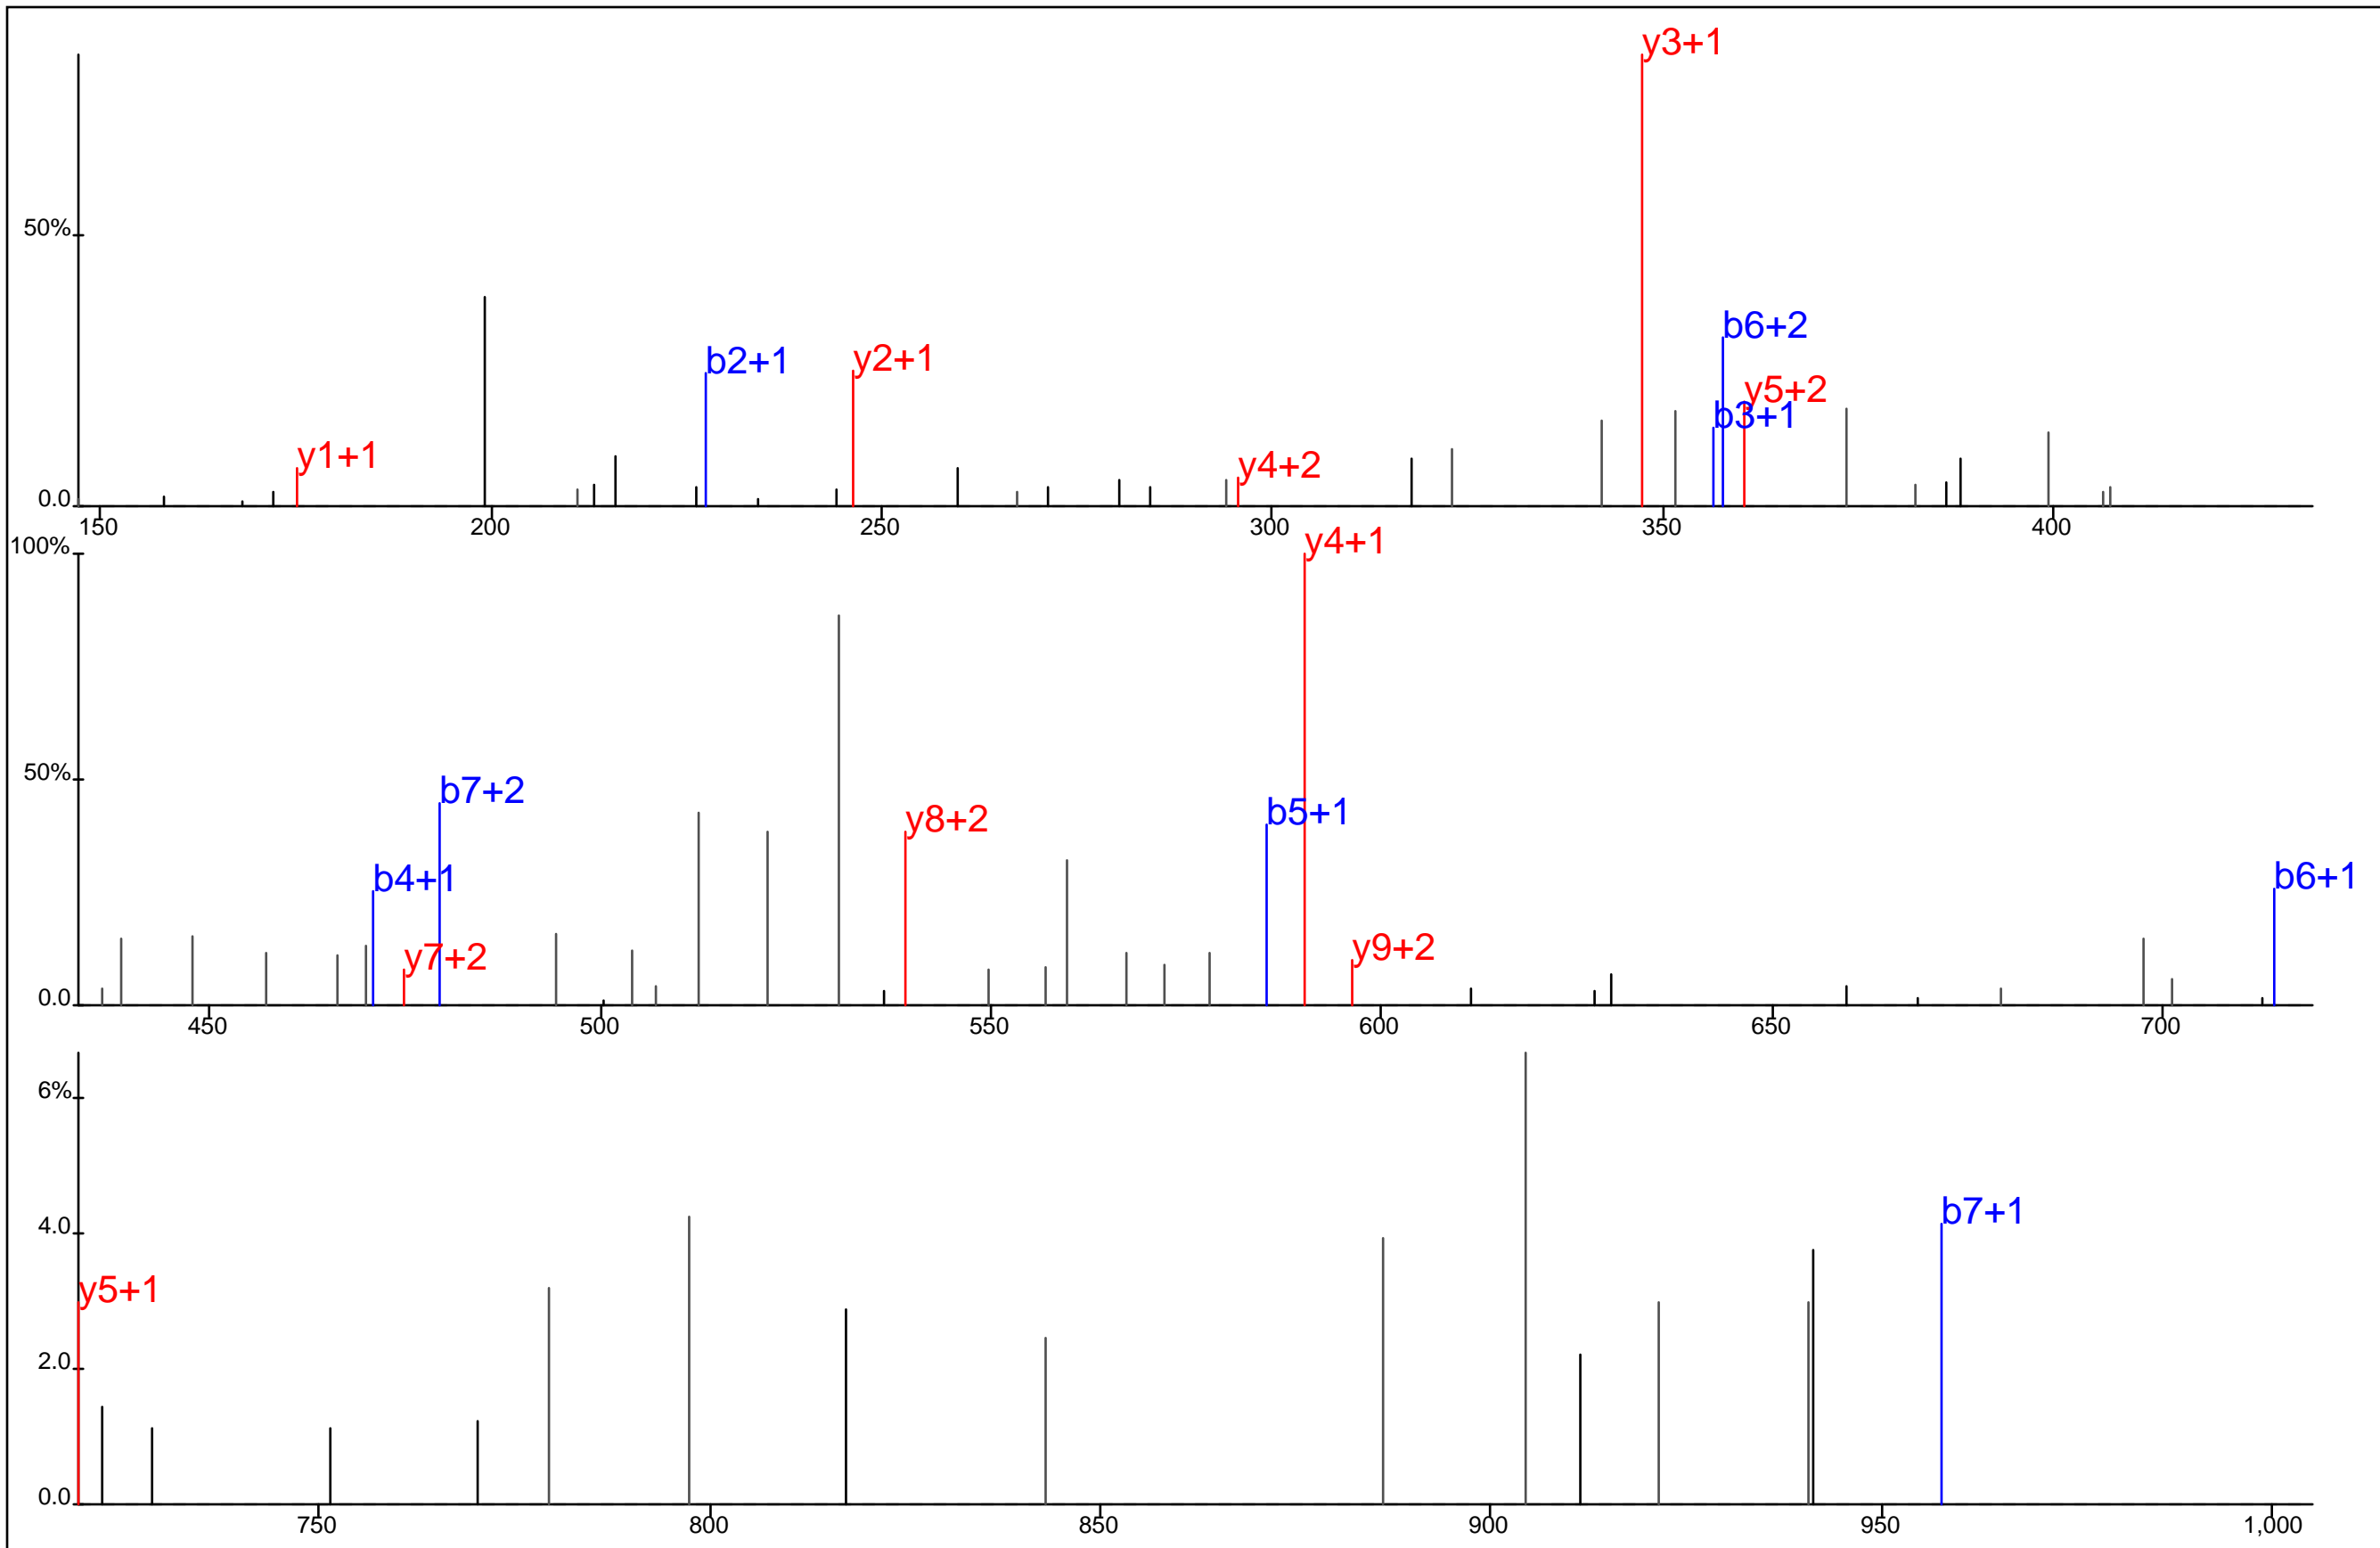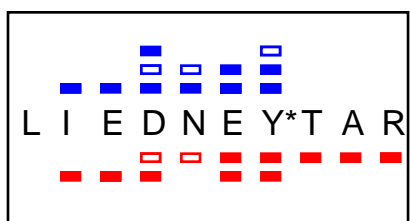

Protein Name: Fyn  
 gi Accession: 0  
 Precursor Mass: 435.1901+3  
 Delta Mass: 0.631 ppm  
 XCorr: 25.73



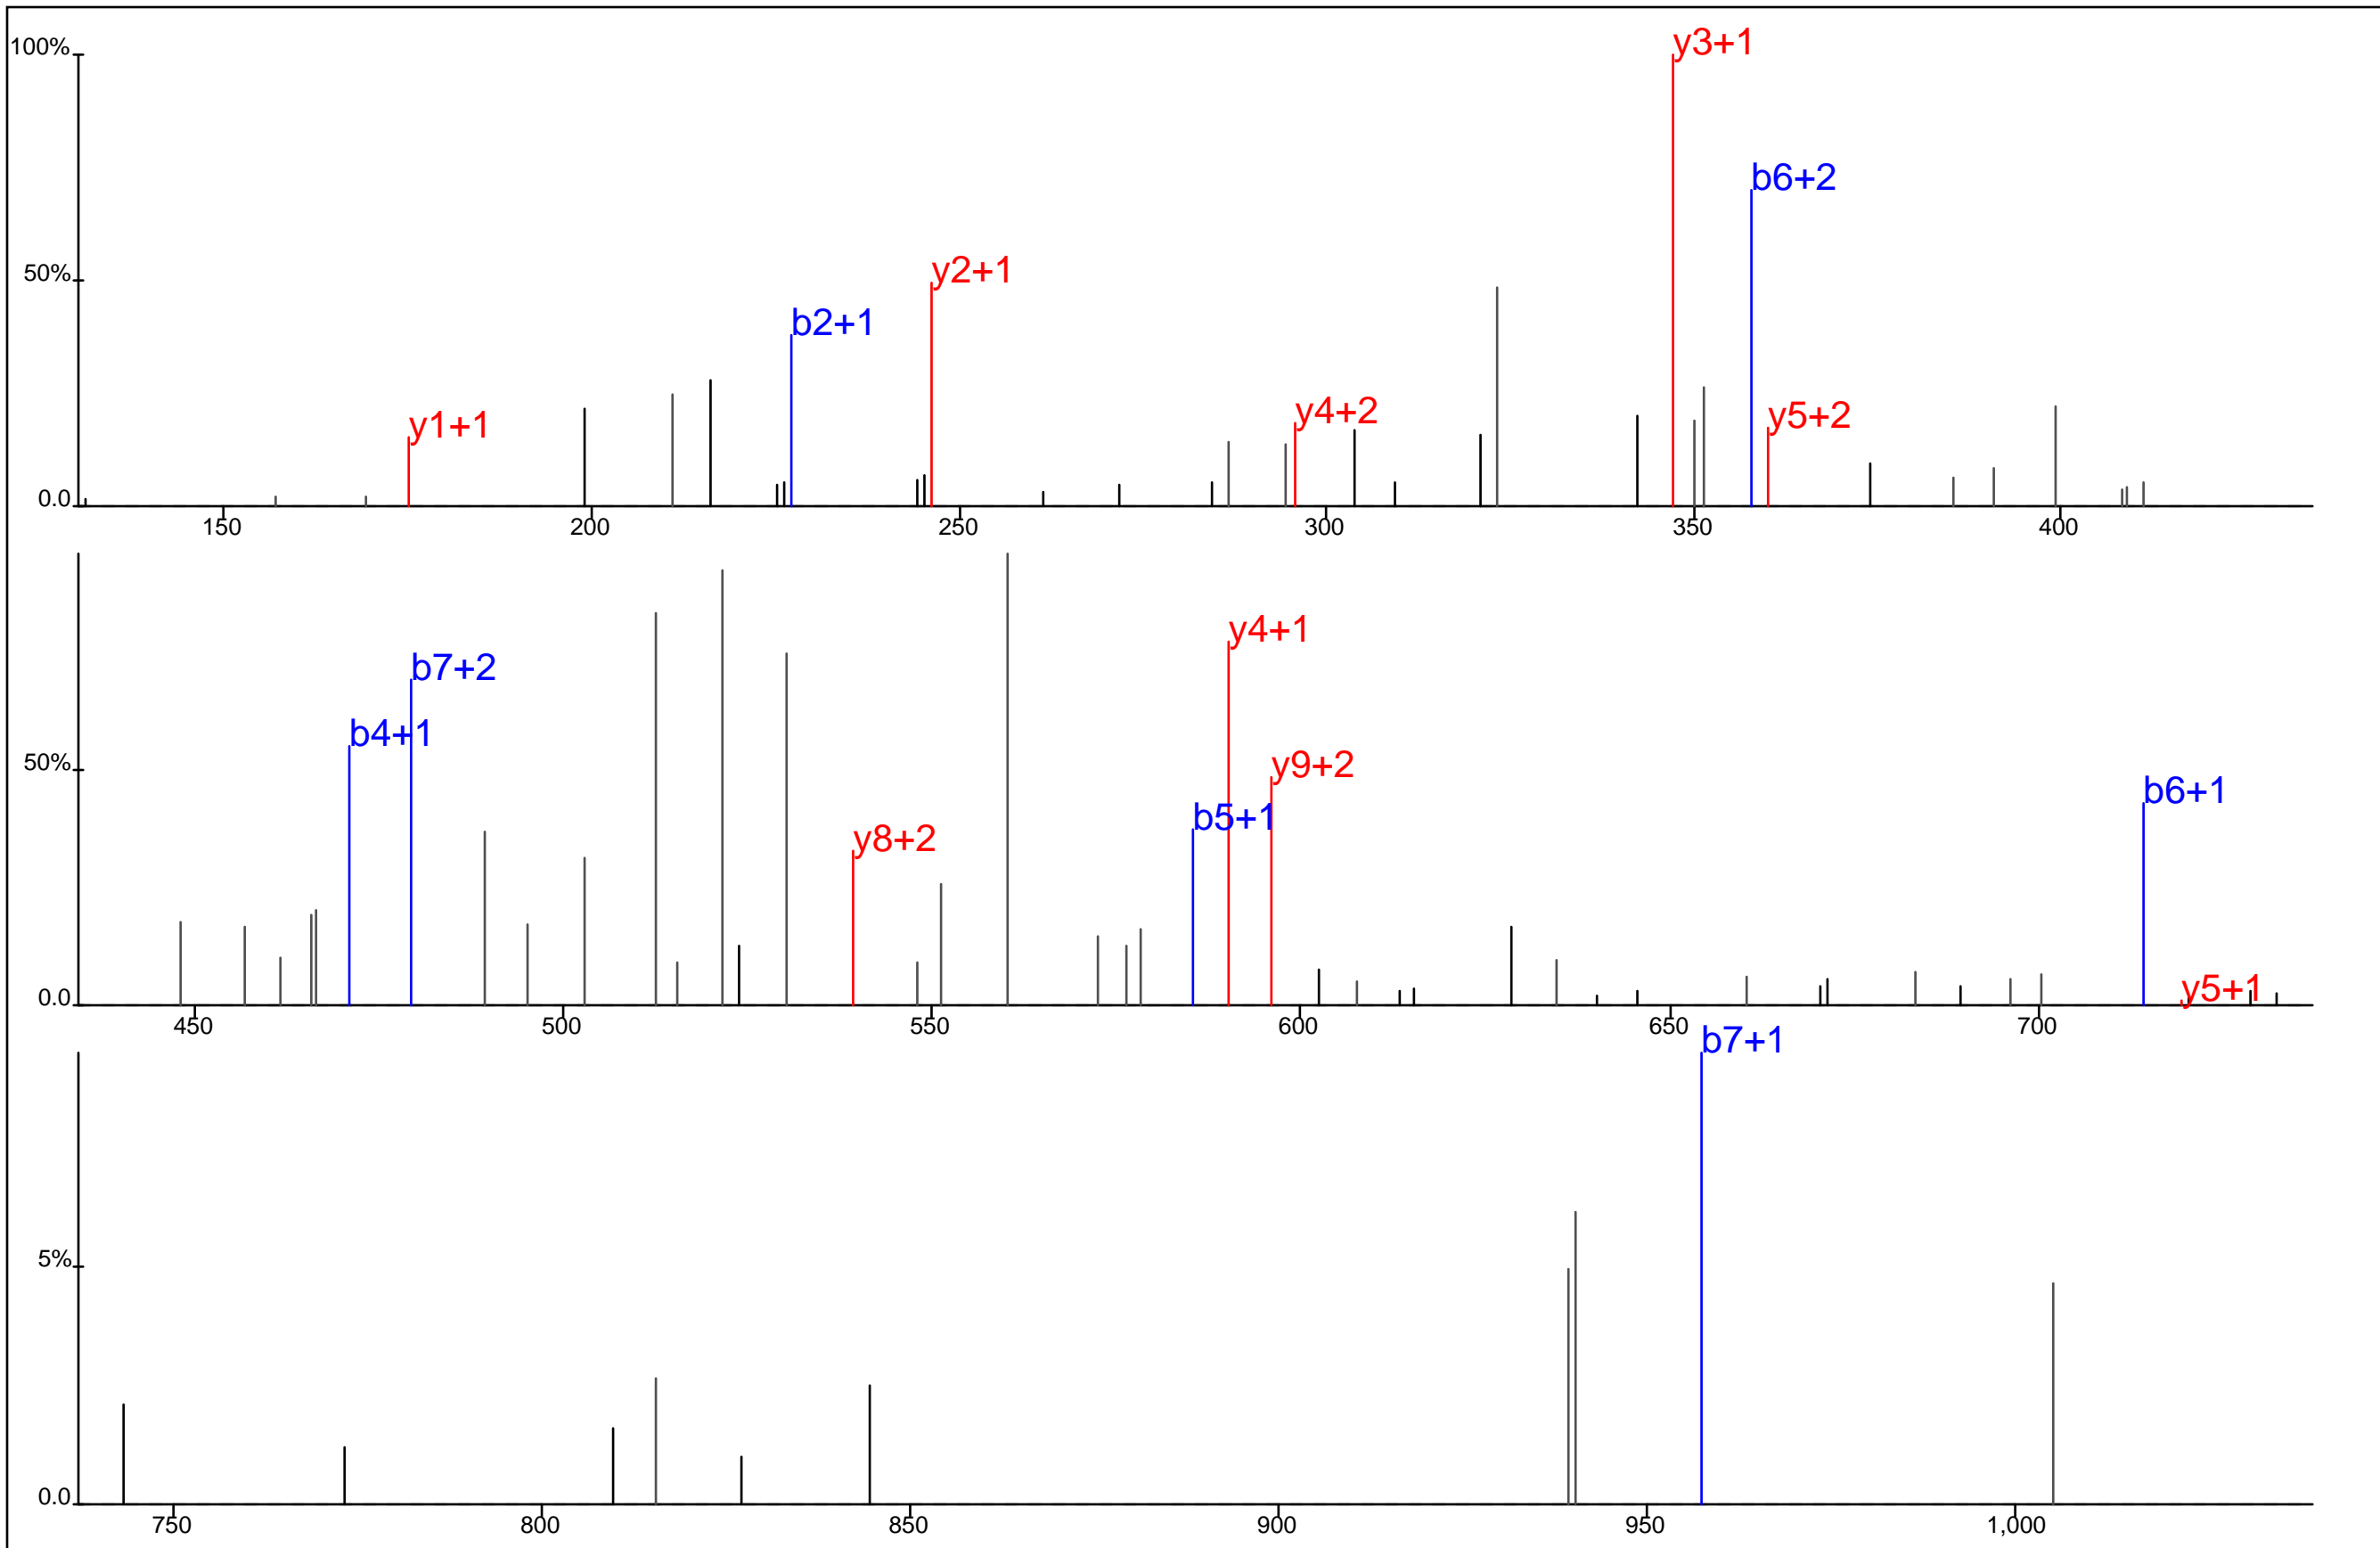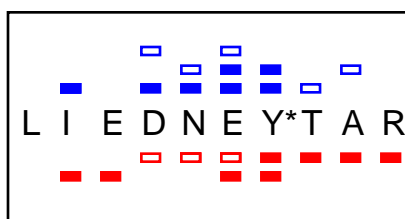

Protein Name: Fyn  
 gi Accession: 0  
 Precursor Mass: 435.1910+3  
 Delta Mass: 1.477 ppm  
 XCorr: 25.36







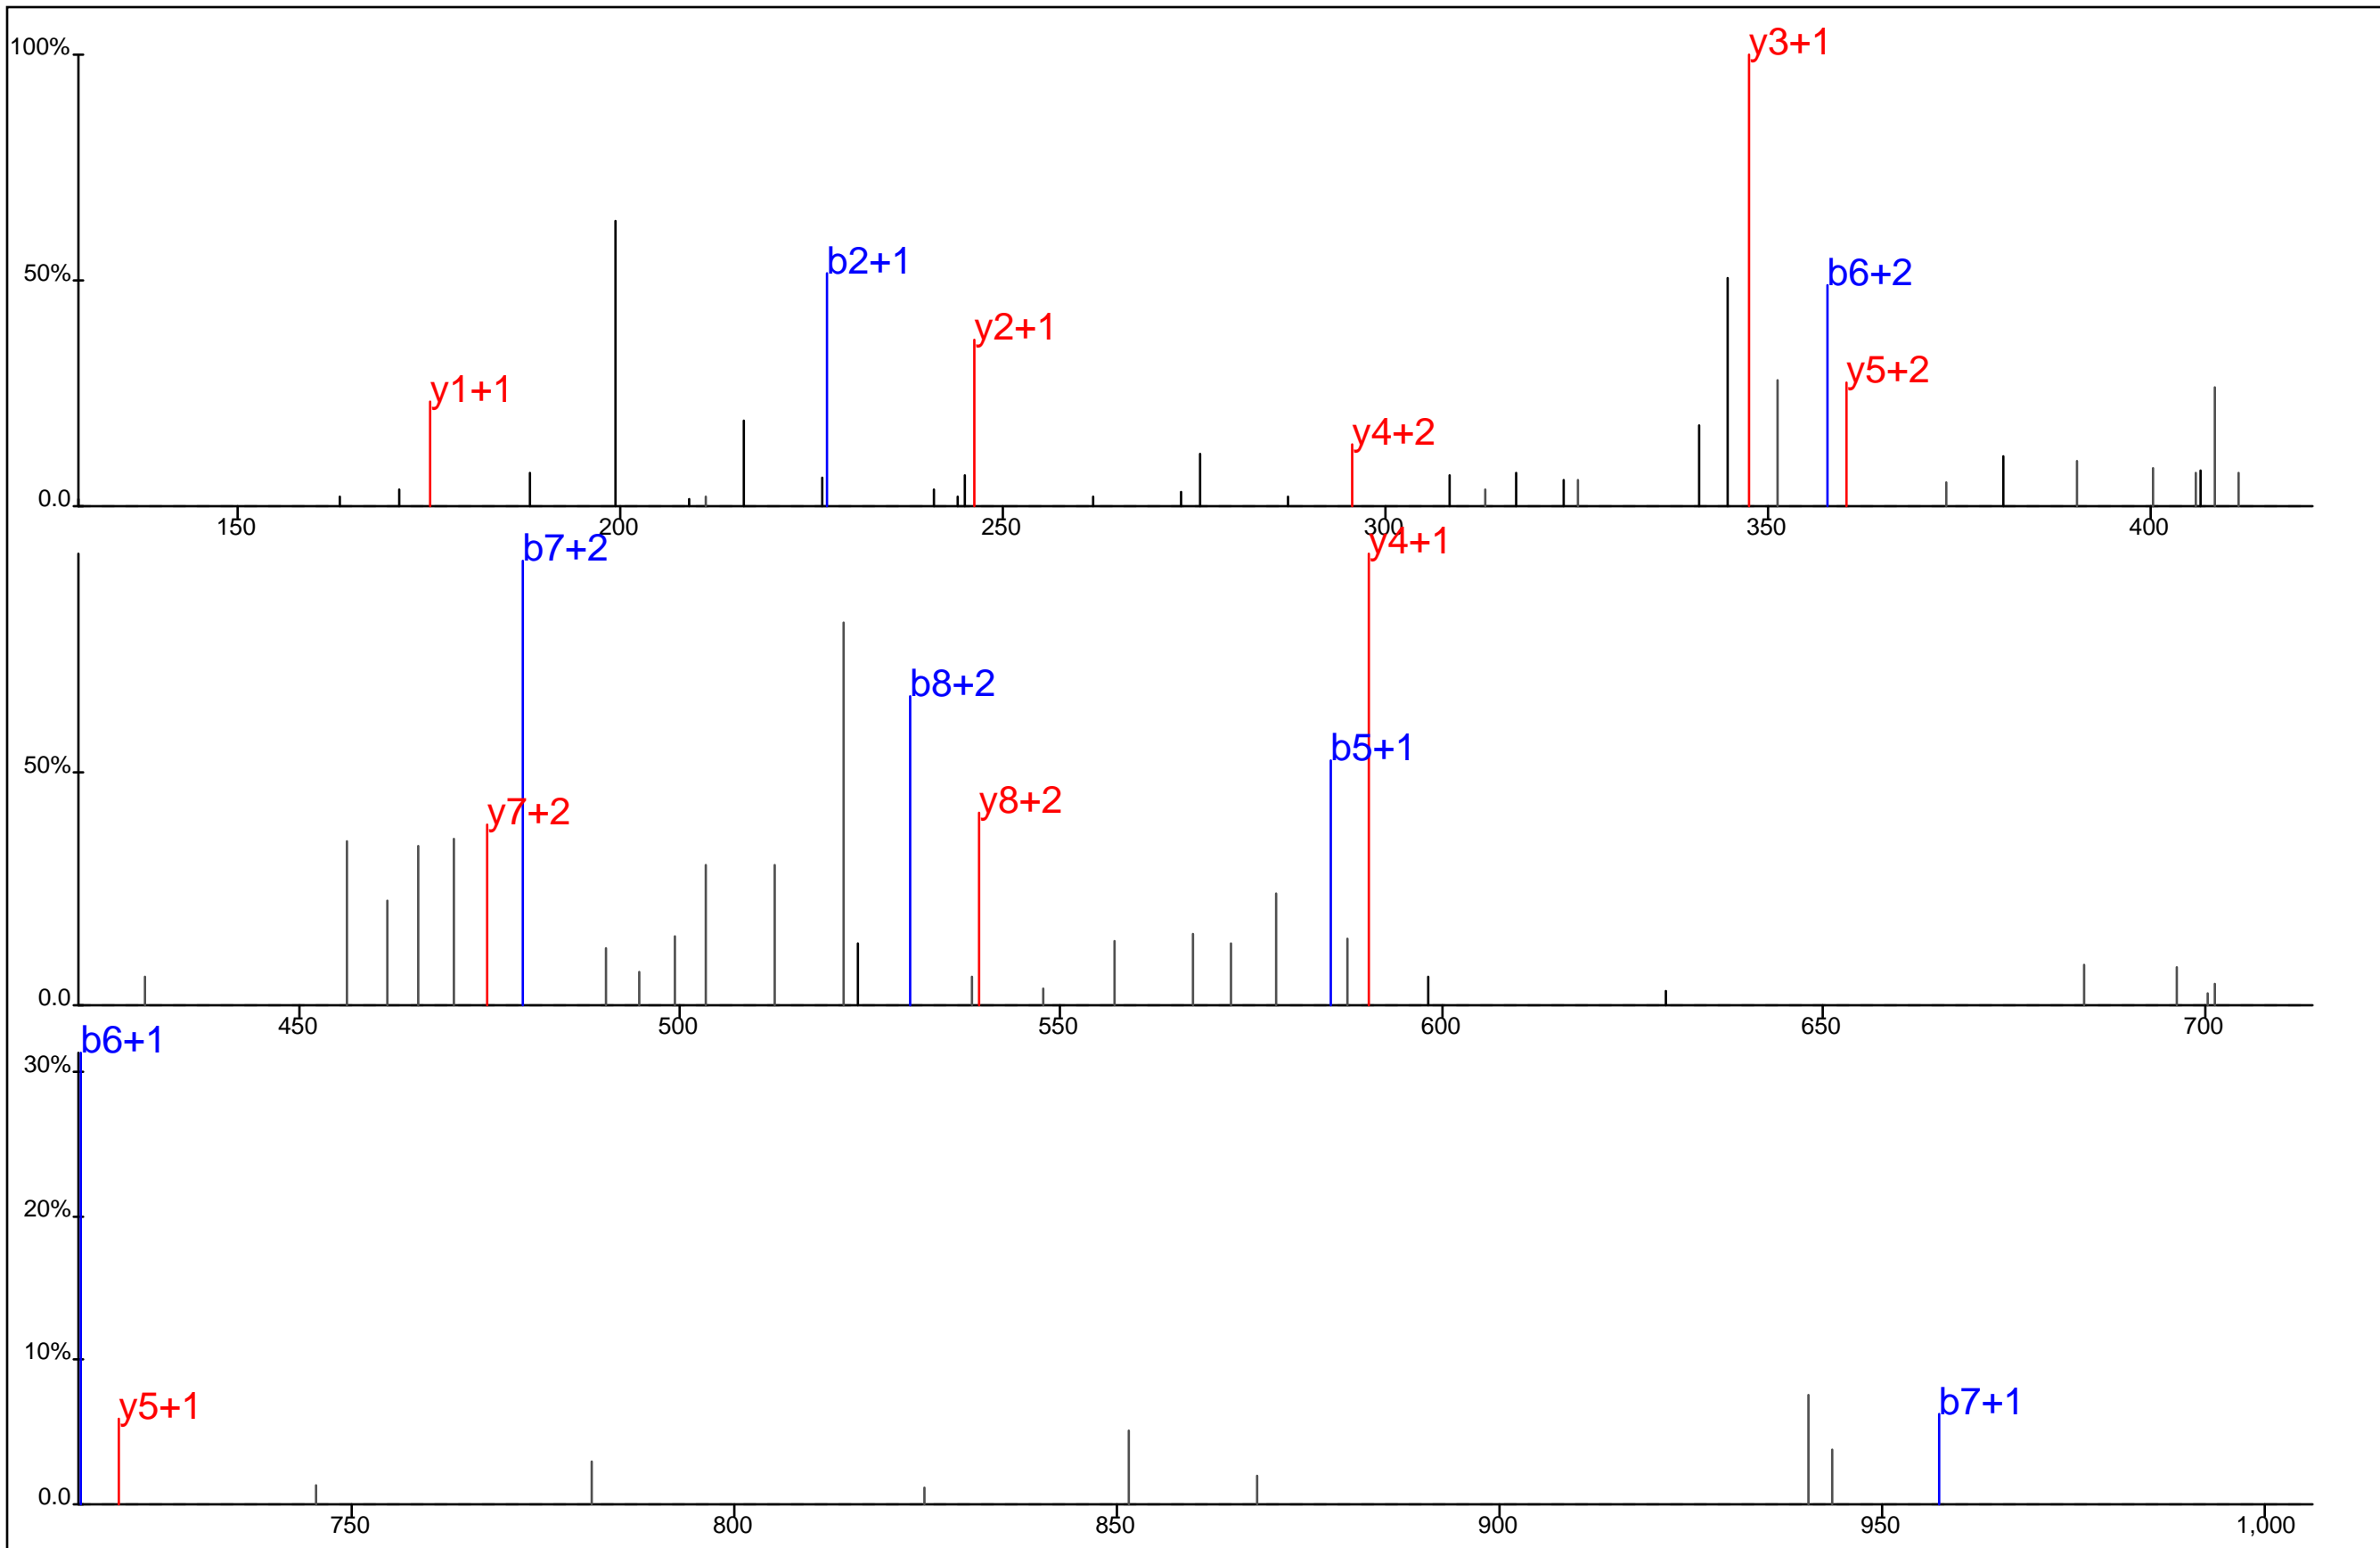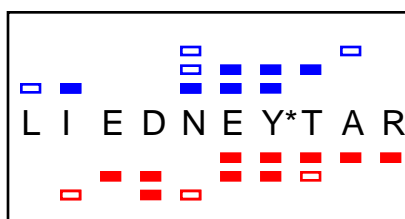

Protein Name: Fyn  
 gi Accession: 0  
 Precursor Mass: 435.1905+3  
 Delta Mass: 0.352 ppm  
 XCorr: 28.03

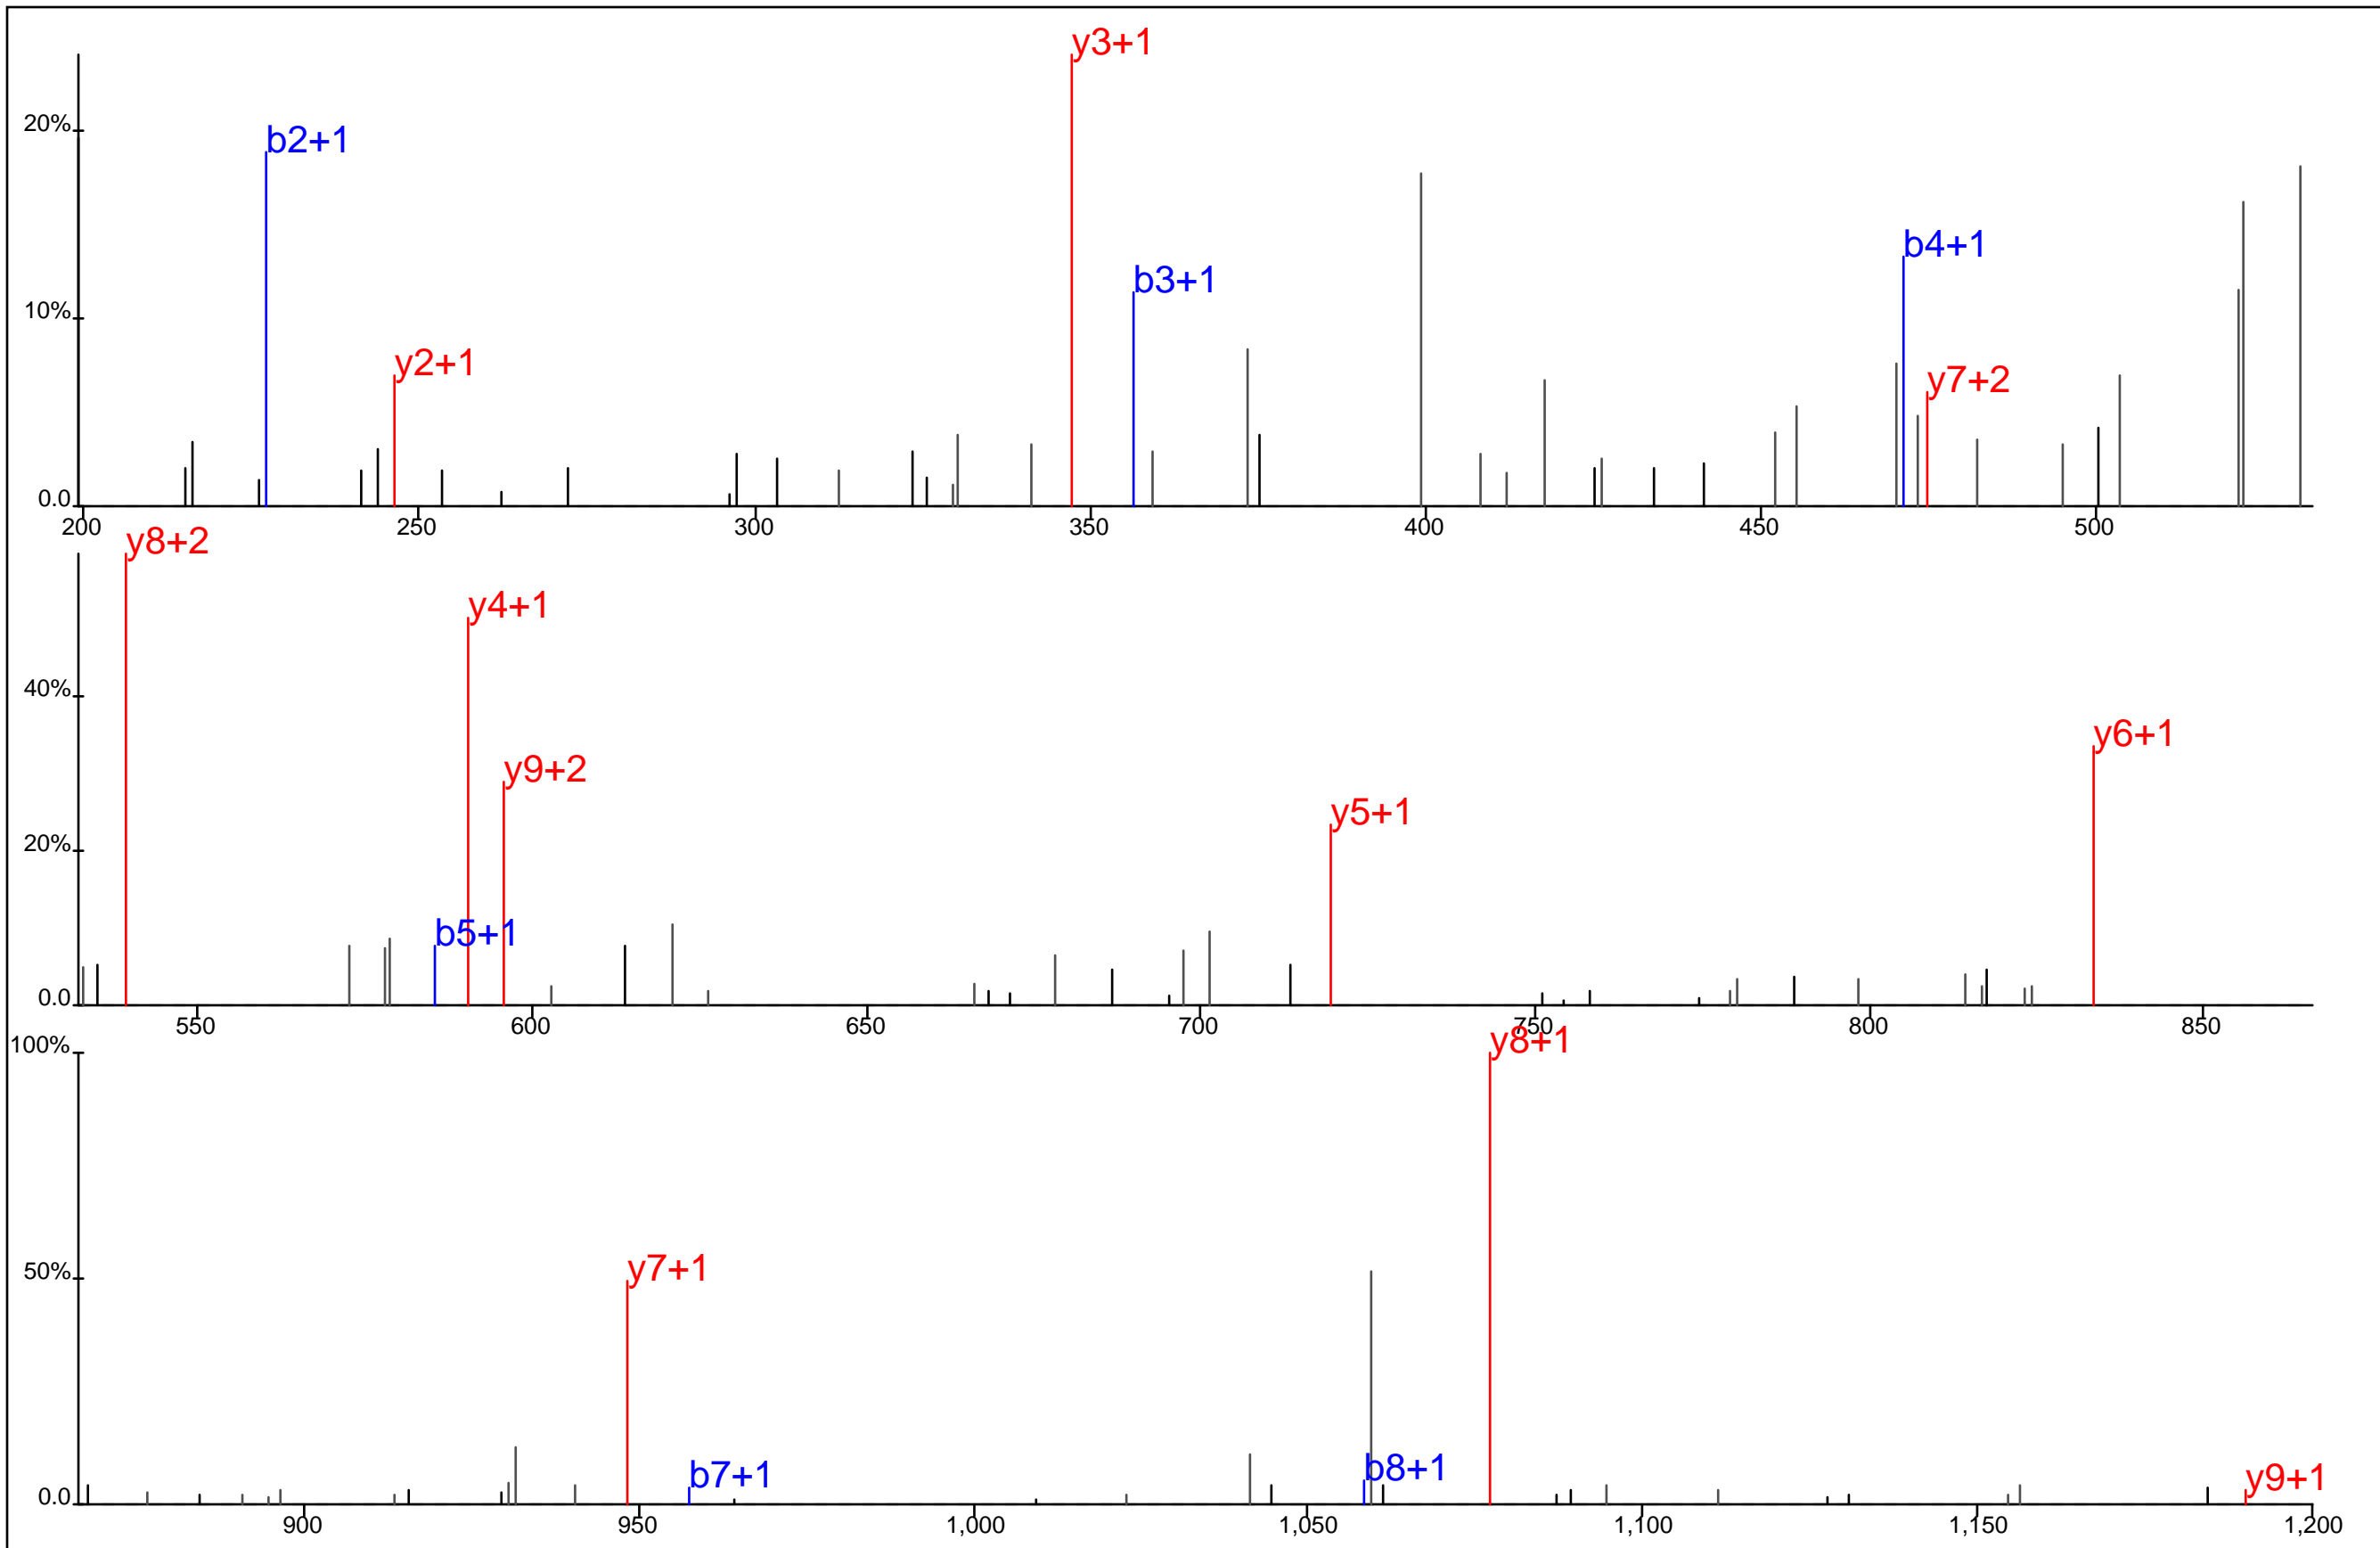

L I E D N E Y\* T A R

Protein Name: Fyn  
 gi Accession: 0  
 Precursor Mass: 652.2805+2  
 Delta Mass: 2.142 ppm  
 XCorr: 57.85

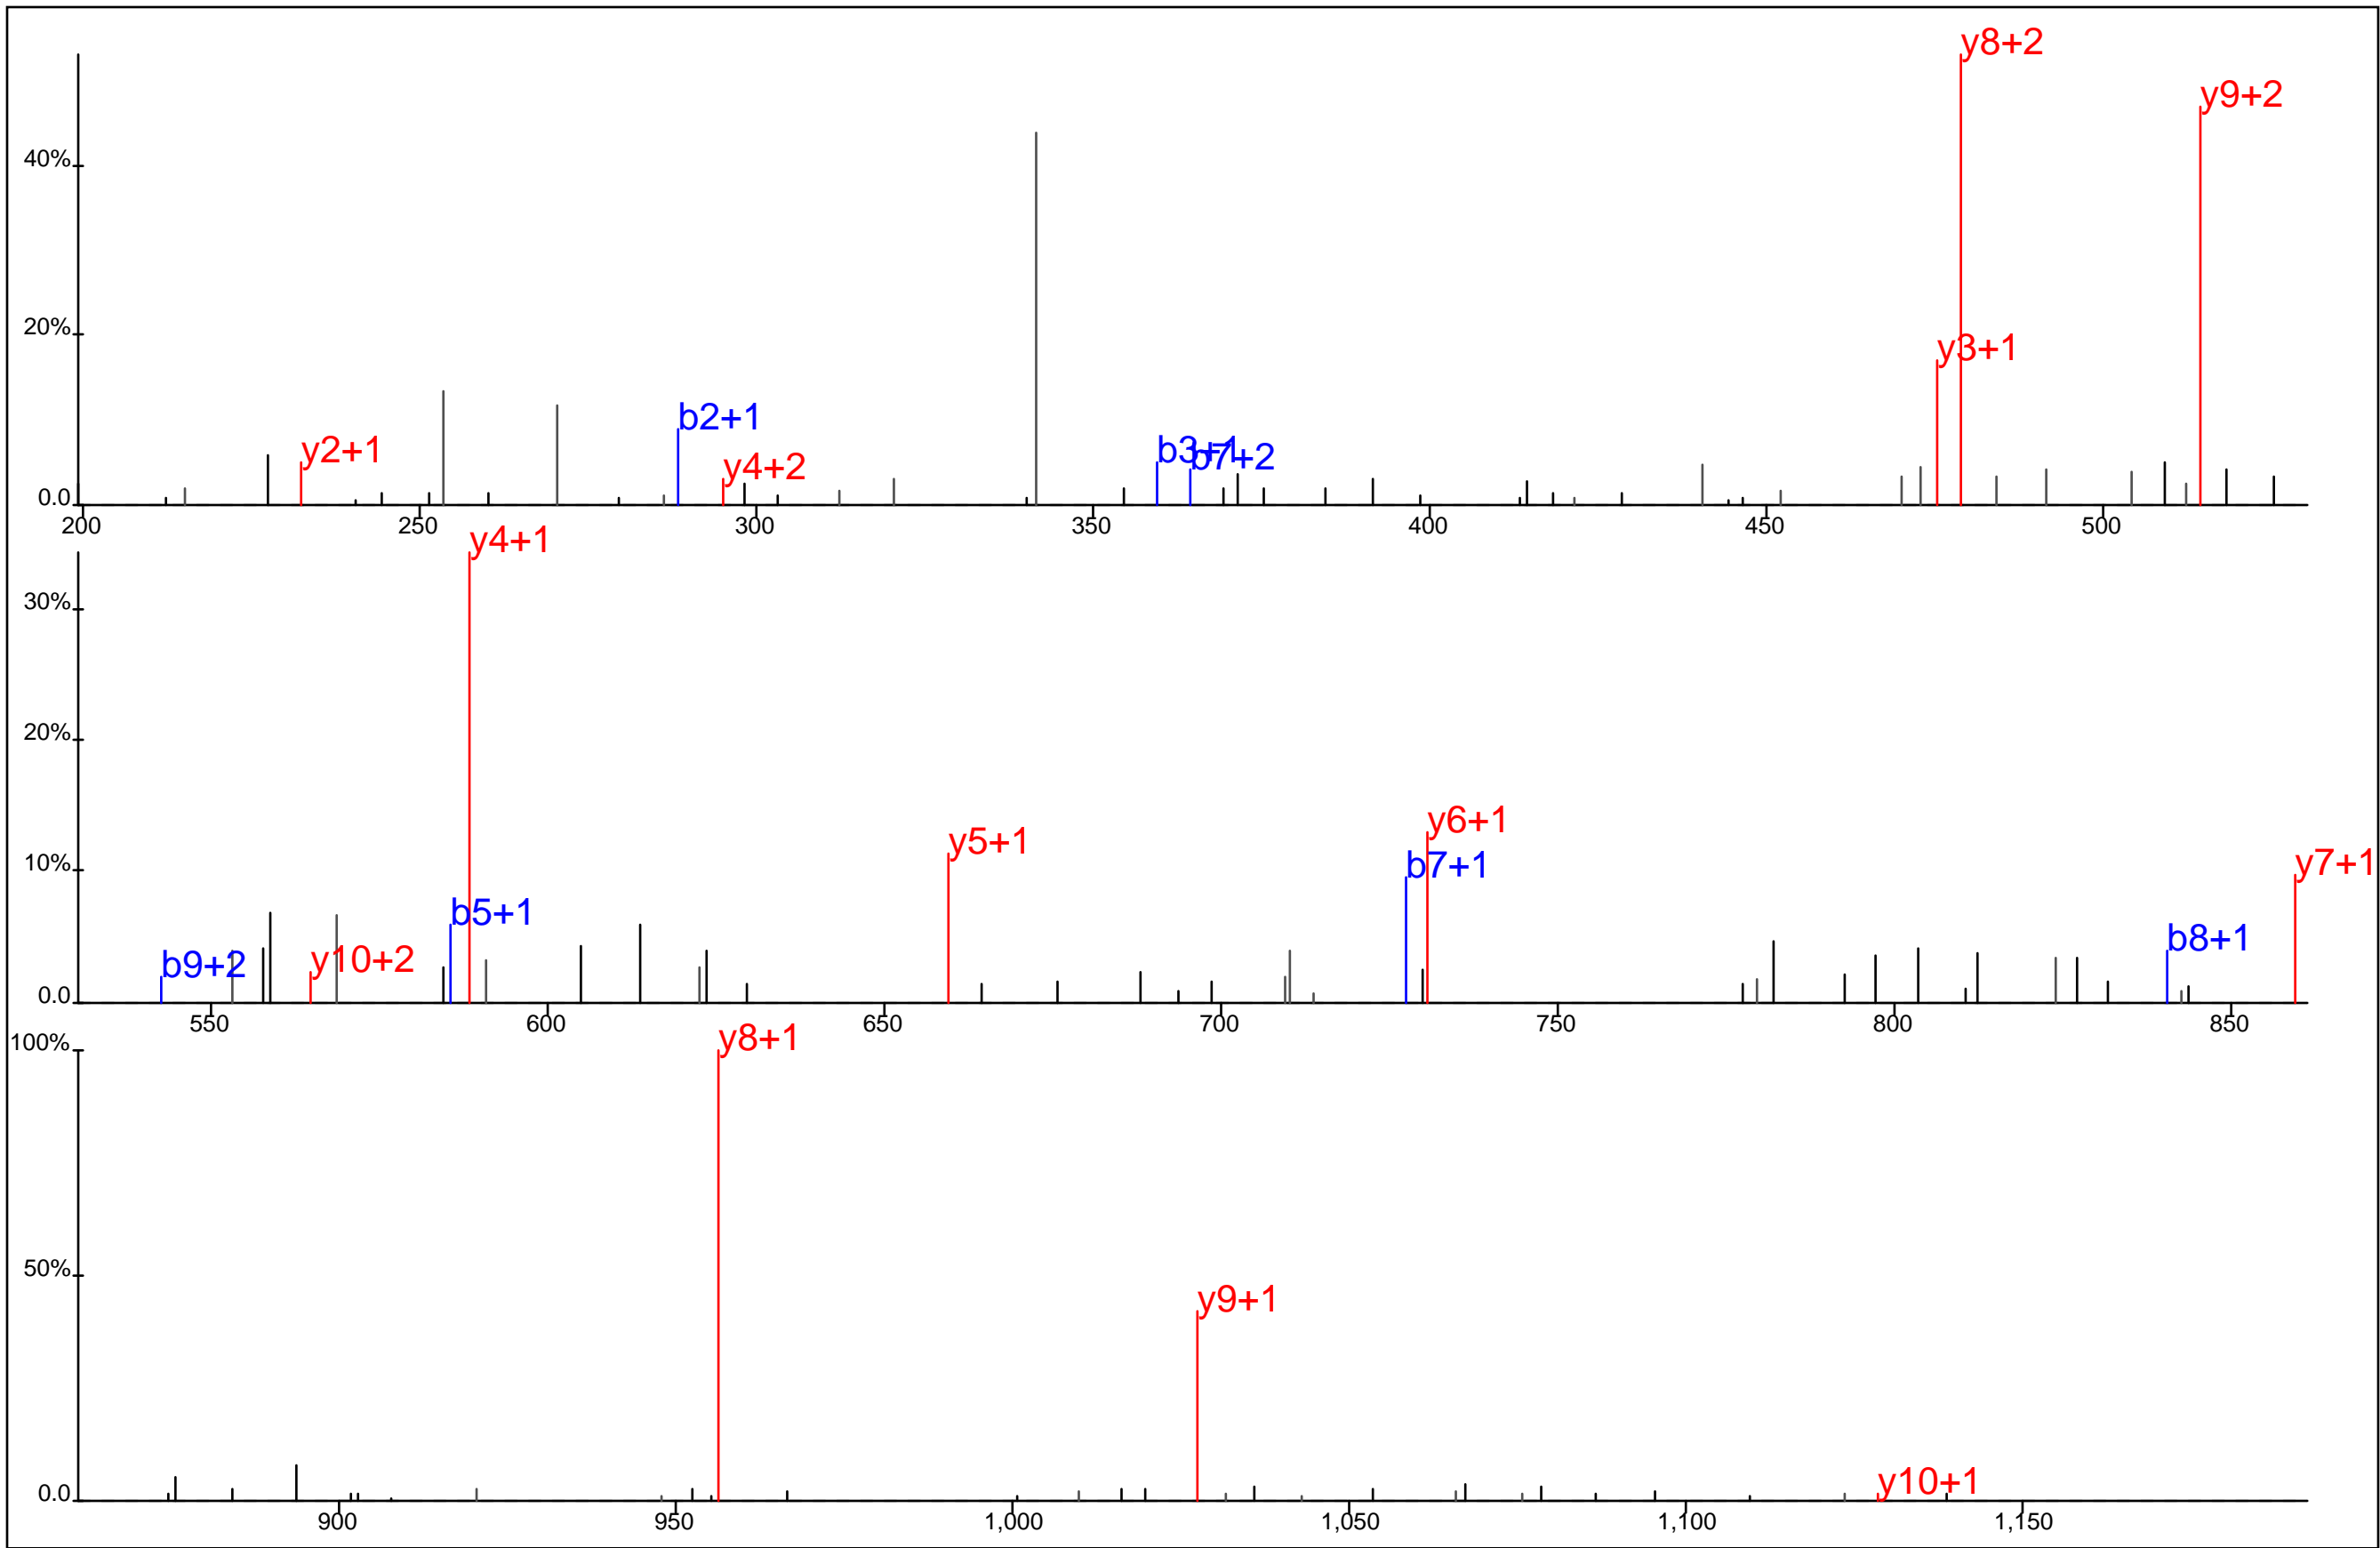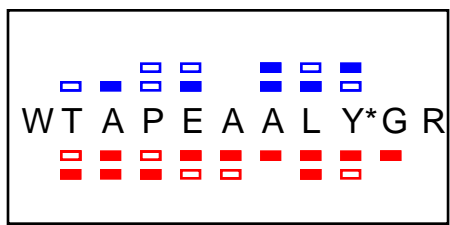

Protein Name: Fyn  
 gi Accession: 0  
 Precursor Mass: 657.7981+2  
 Delta Mass: 0.847 ppm  
 XCorr: 51.39

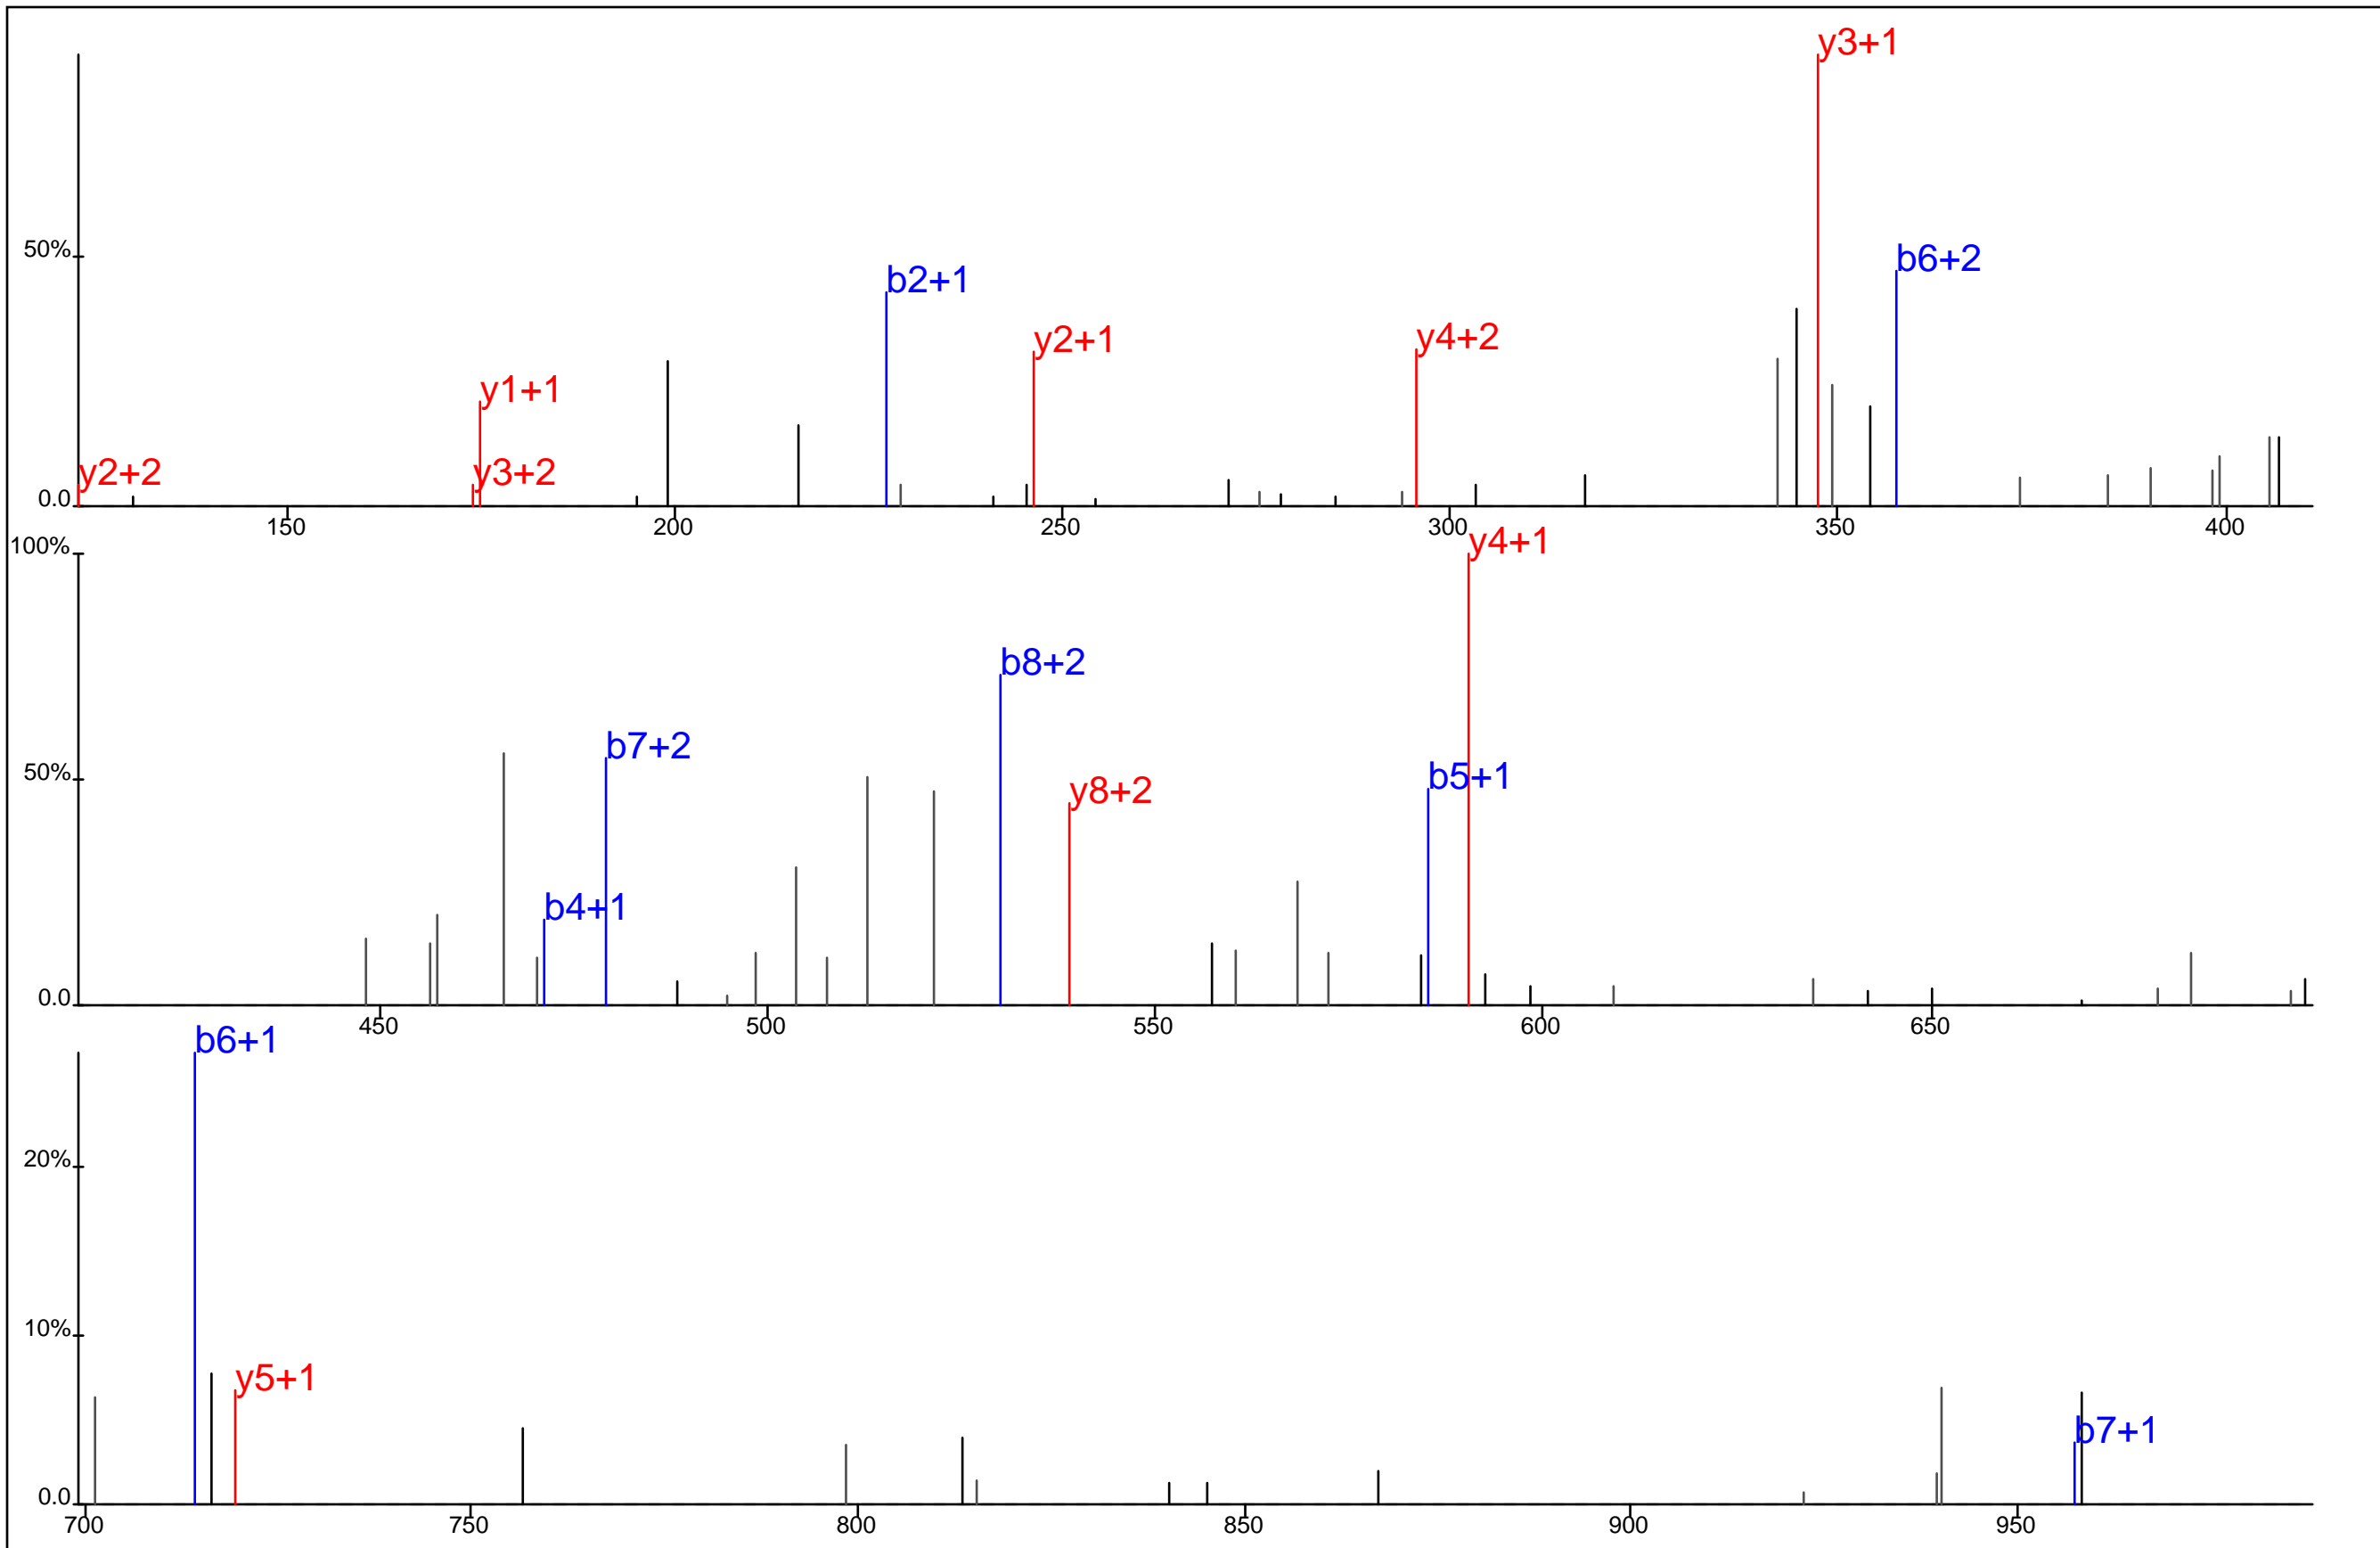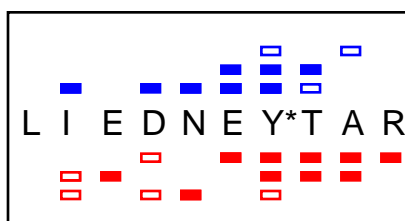

Protein Name: Fyn  
 gi Accession: 0  
 Precursor Mass: 435.1903+3  
 Delta Mass: 0.138 ppm  
 XCorr: 23.9

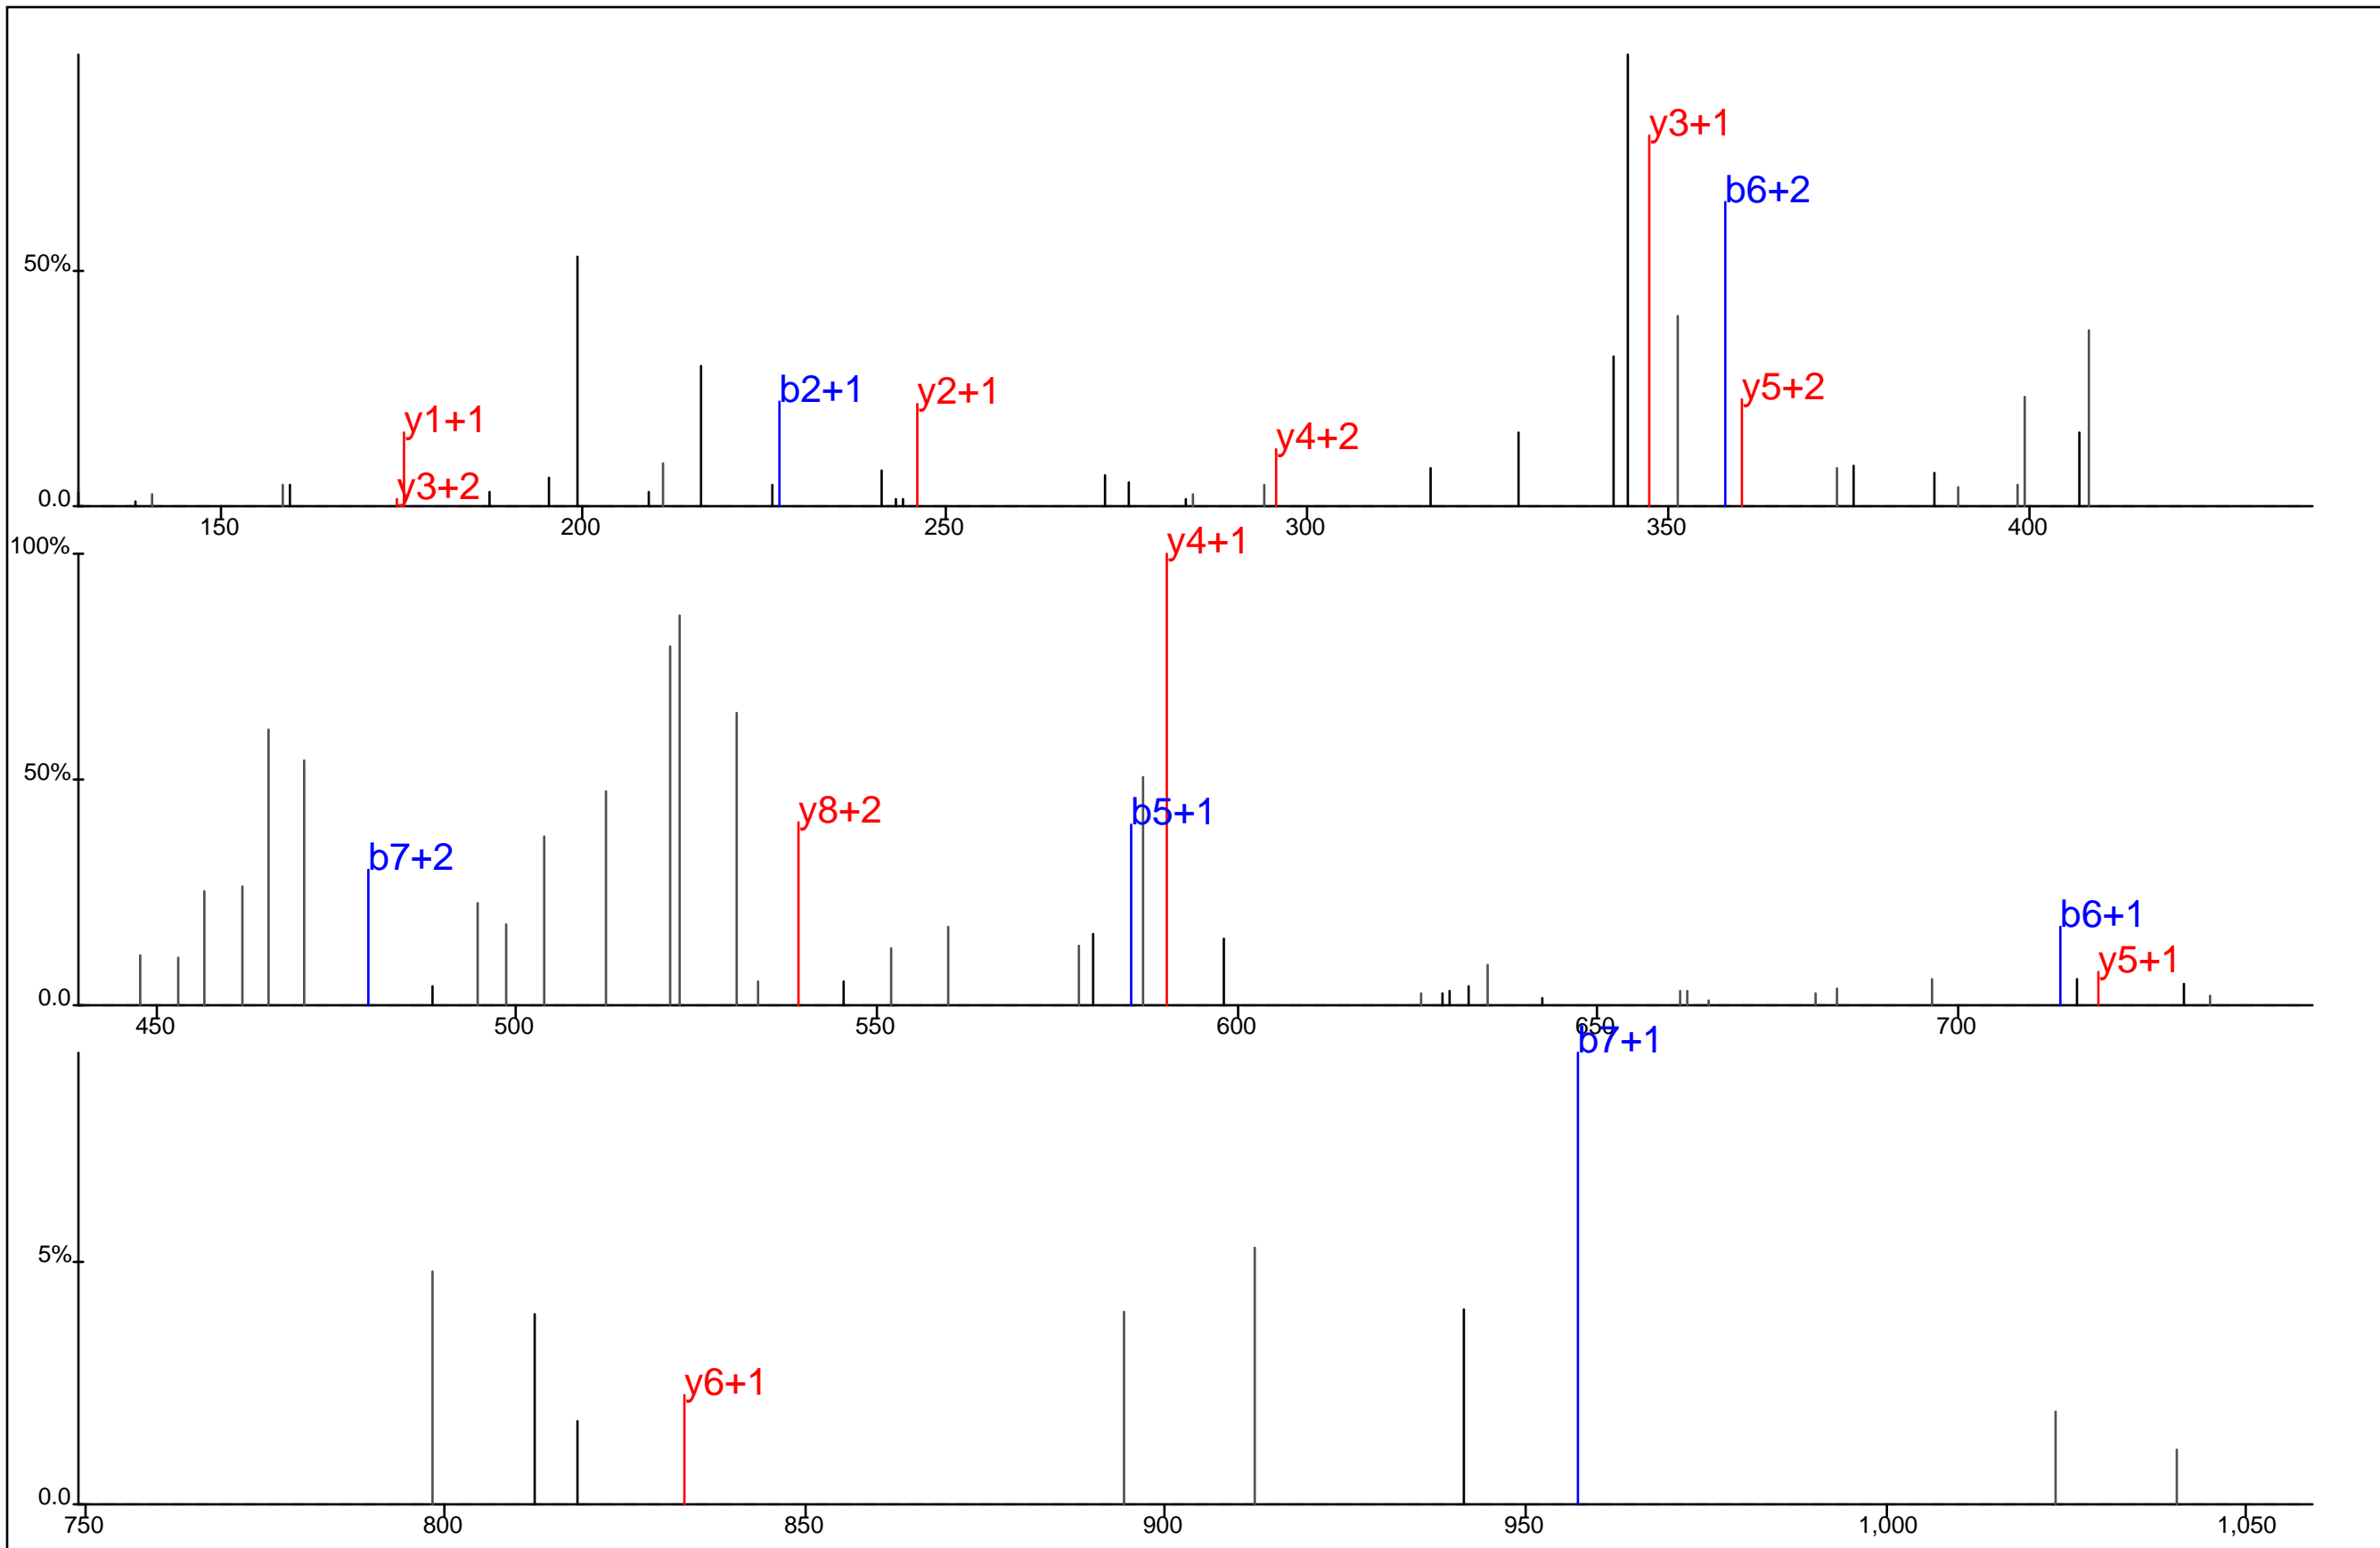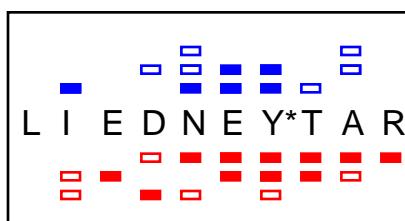

Protein Name: Fyn  
 gi Accession: 0  
 Precursor Mass: 435.1907+3  
 Delta Mass: 0.845 ppm  
 XCorr: 33.04

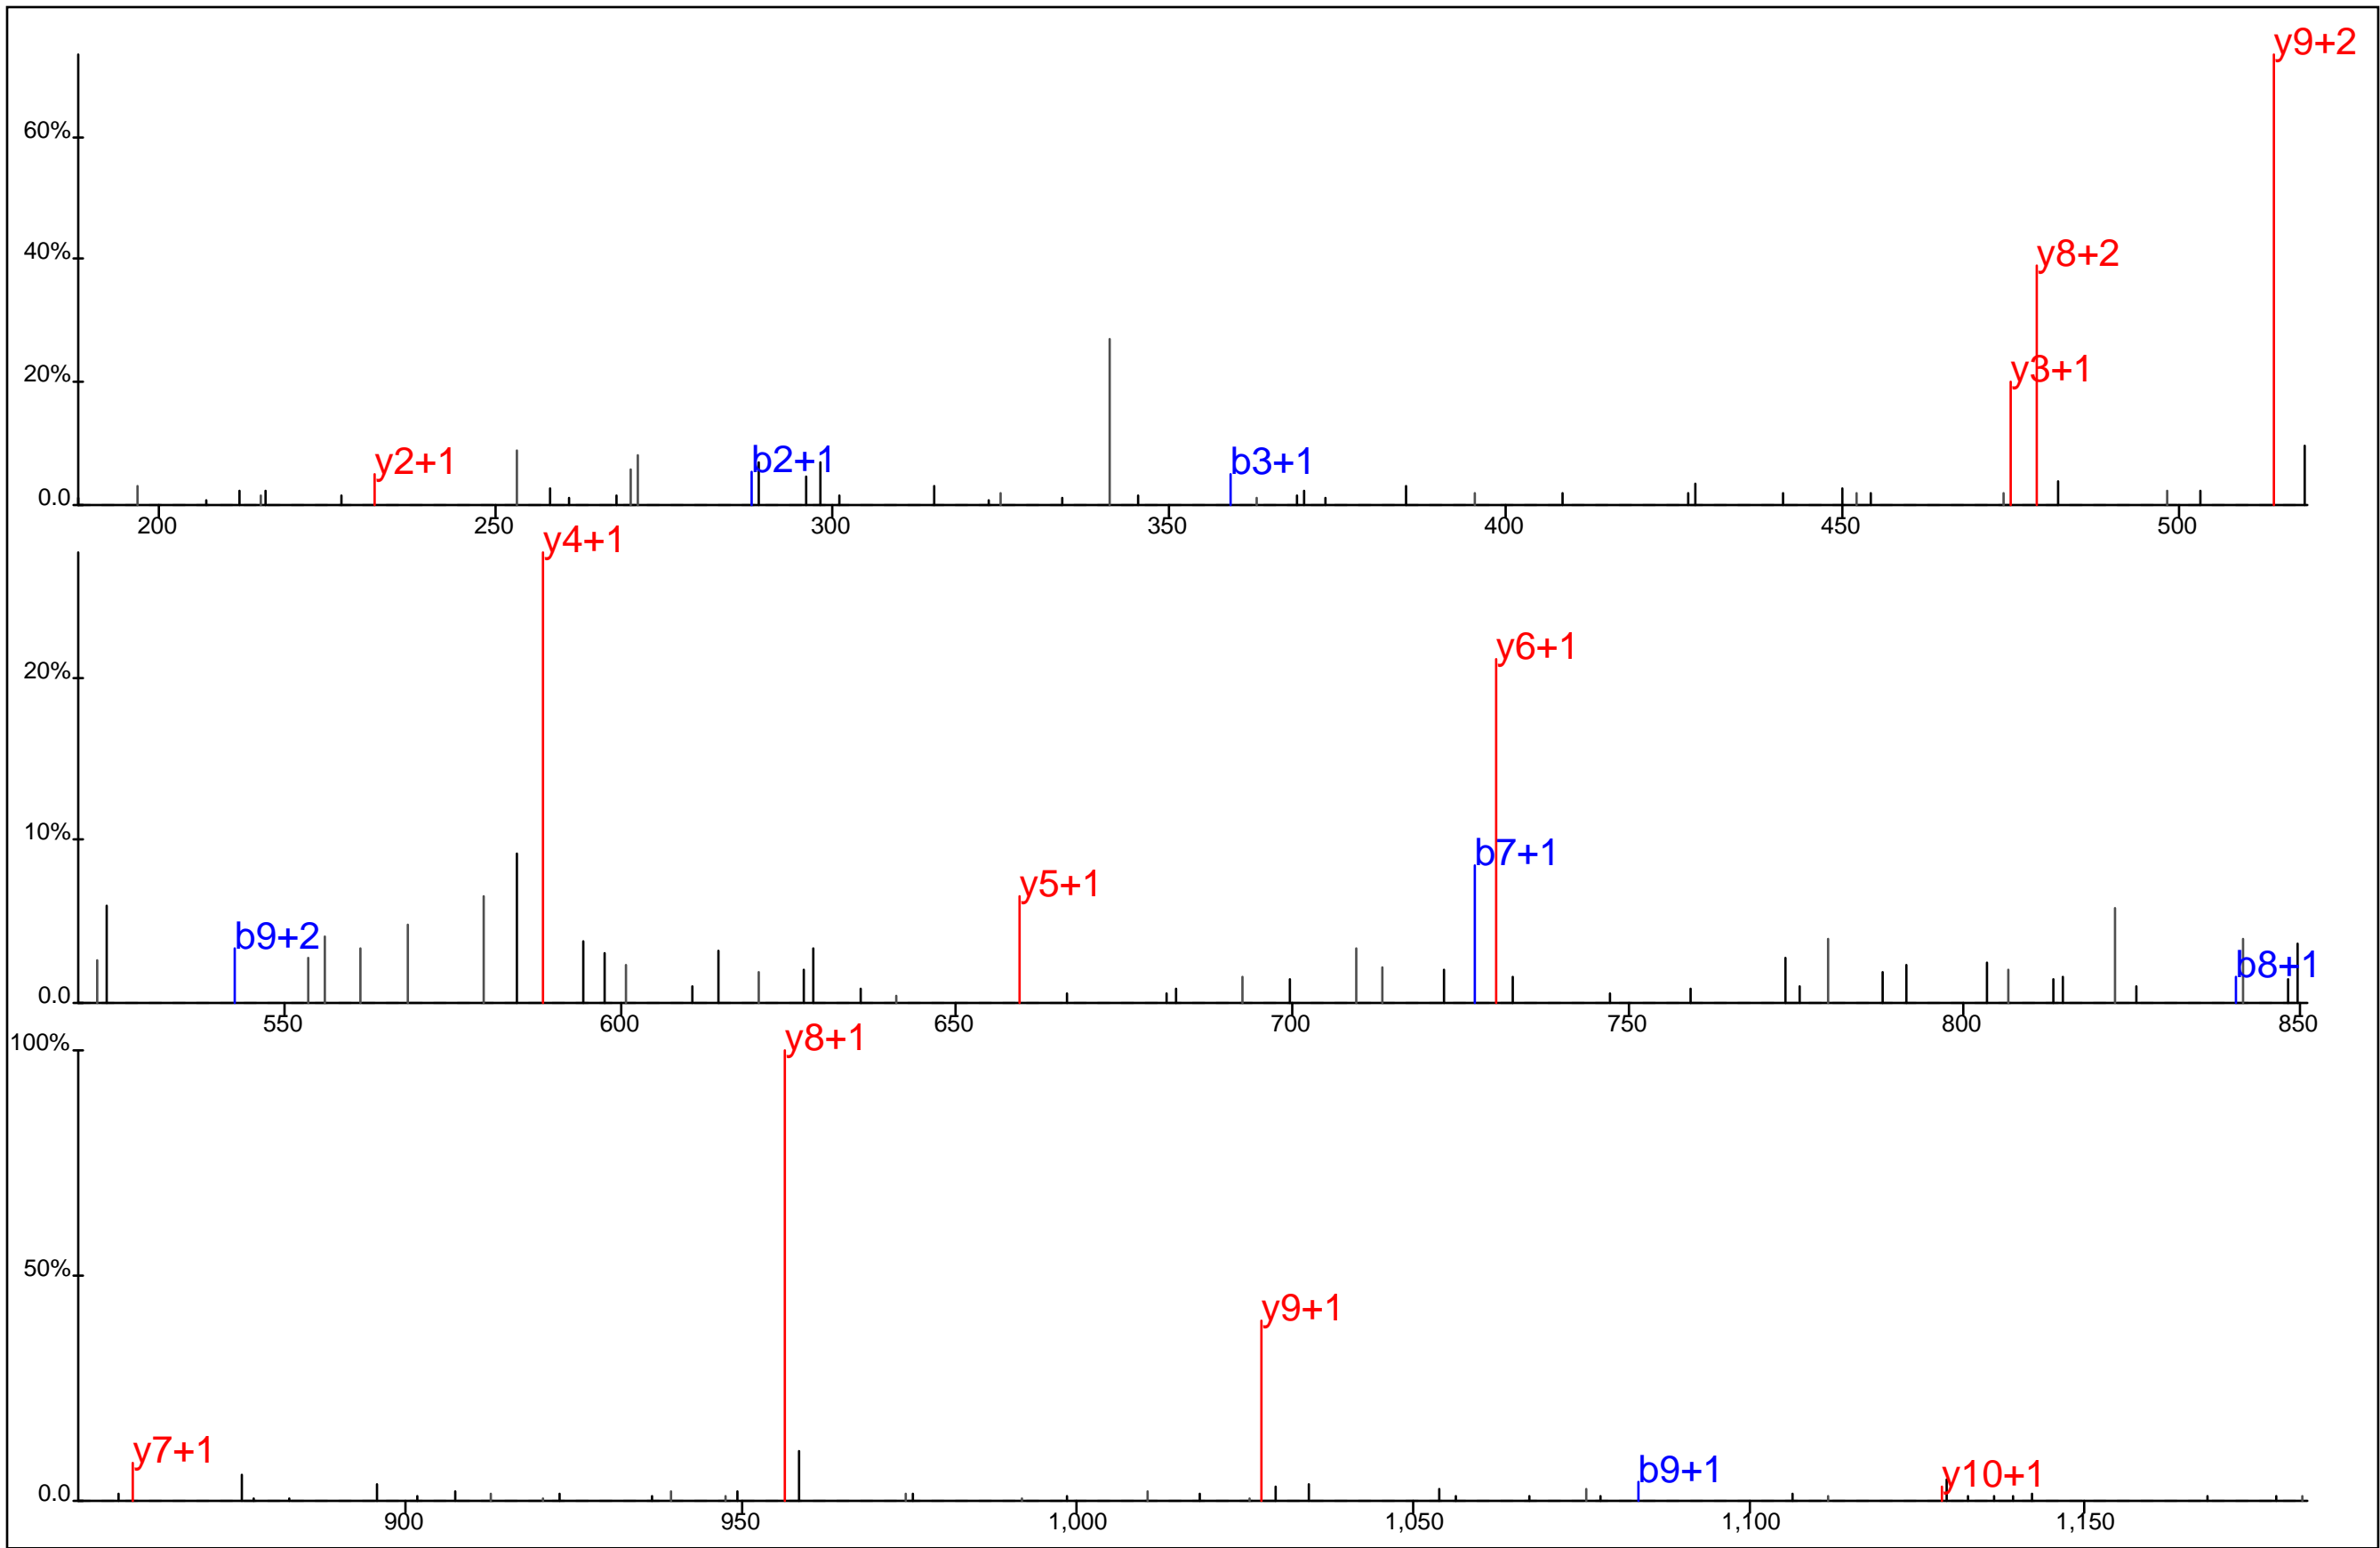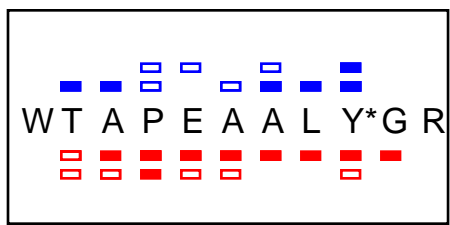

Protein Name: Fyn  
 gi Accession: 0  
 Precursor Mass: 657.7996+2  
 Delta Mass: 3.169 ppm  
 XCorr: 51.27



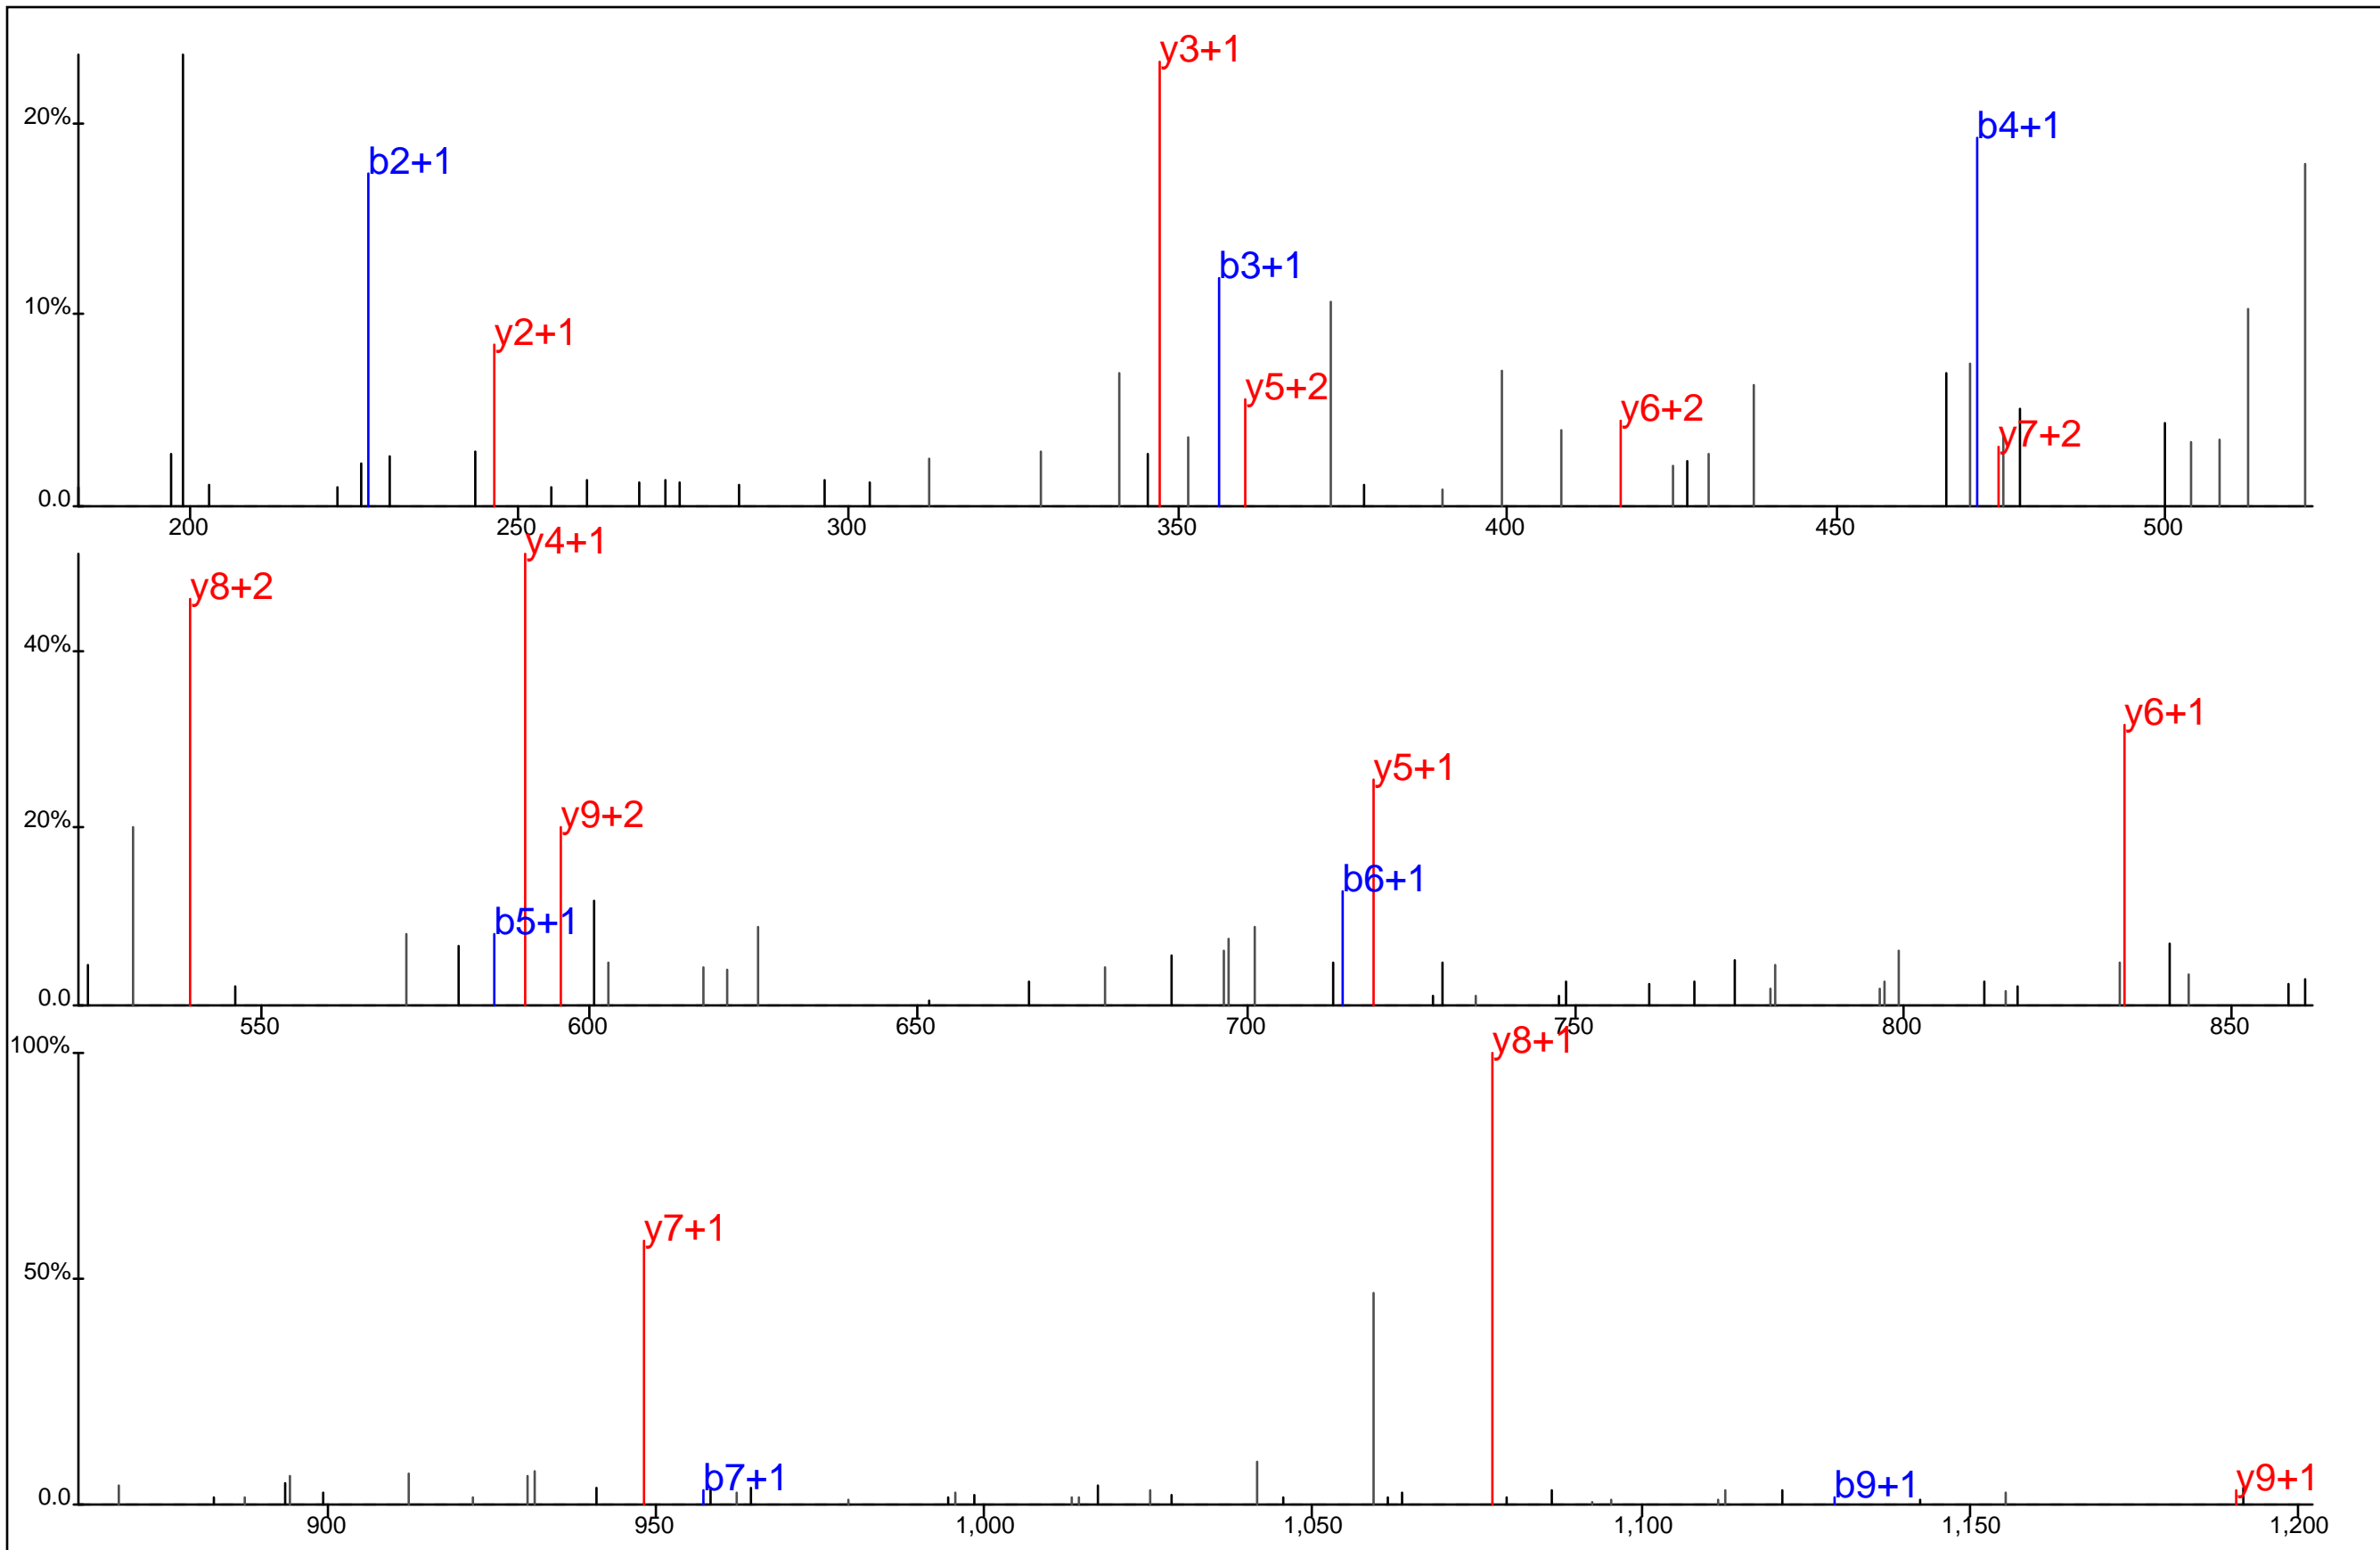

■ ■ ■ ■ ■ ■ ■ ■  
 L I E D N E Y\* T A R  
■ ■ ■ ■ ■ ■ ■ ■

Protein Name: Fyn  
 gi Accession: 0  
 Precursor Mass: 652.2812+2  
 Delta Mass: 1.112 ppm  
 XCorr: 58.44

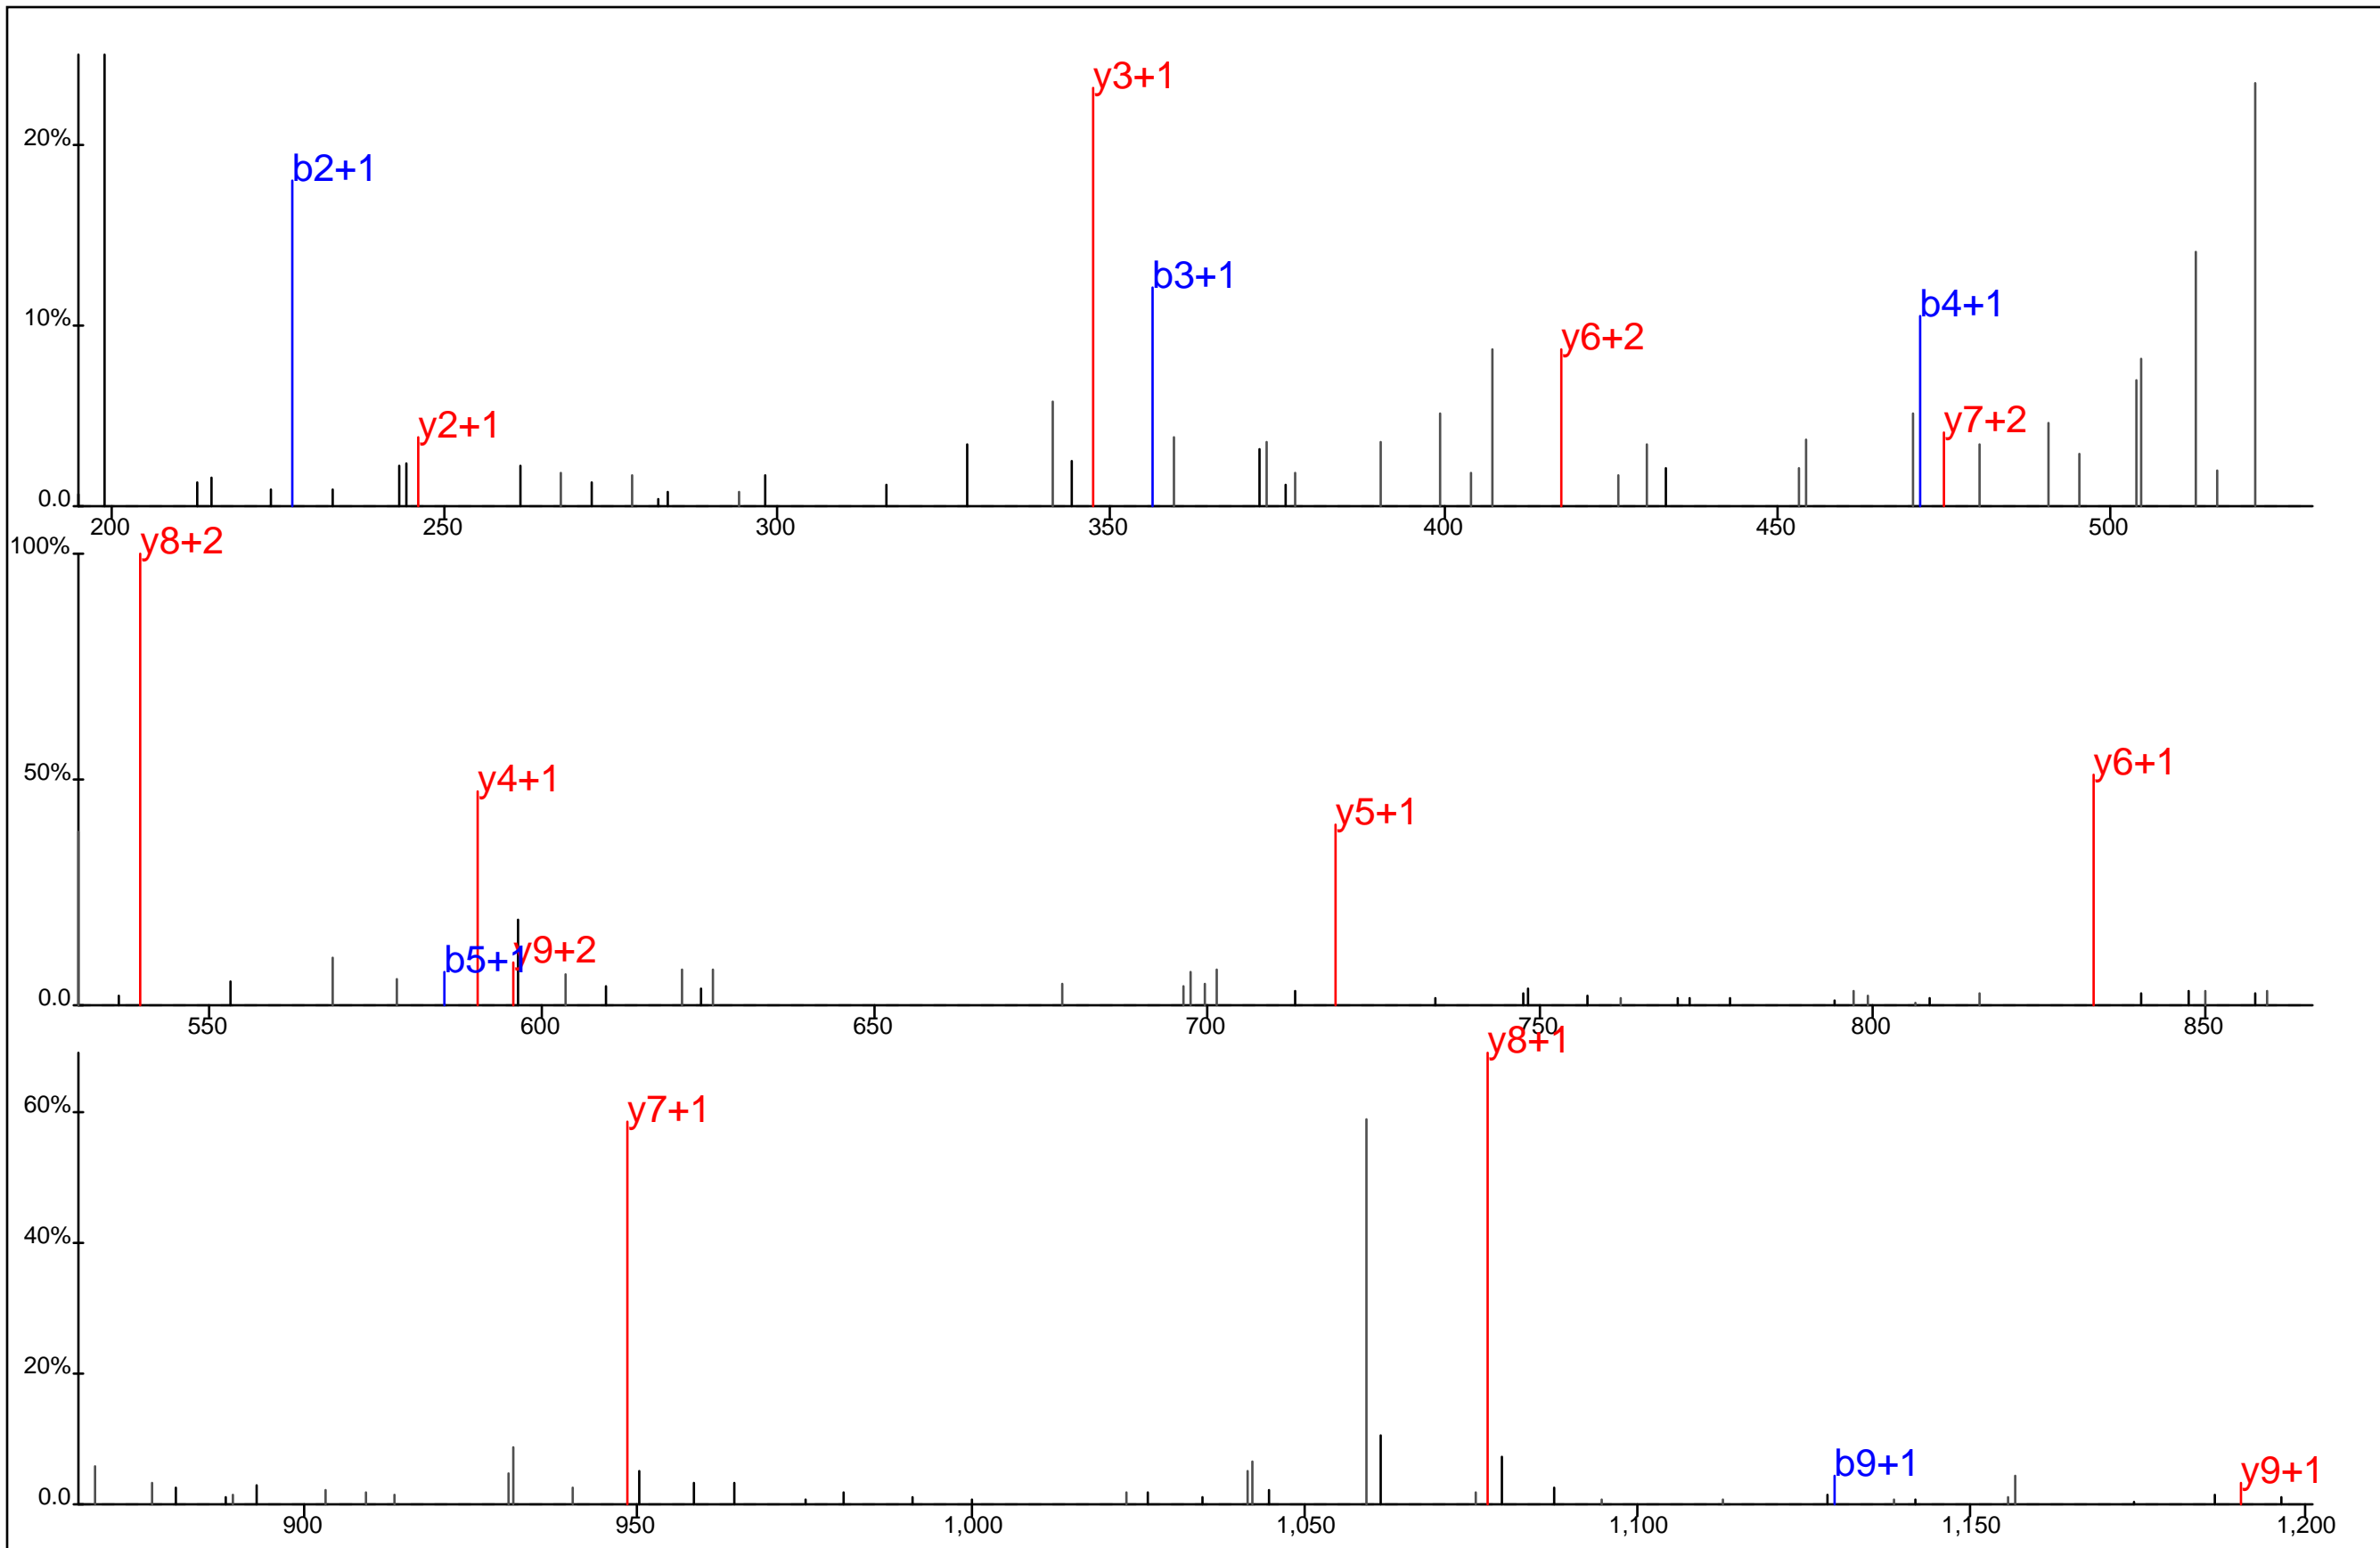

■ ■ ■ ■ ■ ■ ■ ■  
 L I E D N E Y\* T A R  
□ □ □ □ □ □ □ □

Protein Name: Fyn  
 gi Accession: 0  
 Precursor Mass: 652.2855+2  
 Delta Mass: 5.442 ppm  
 XCorr: 56.42

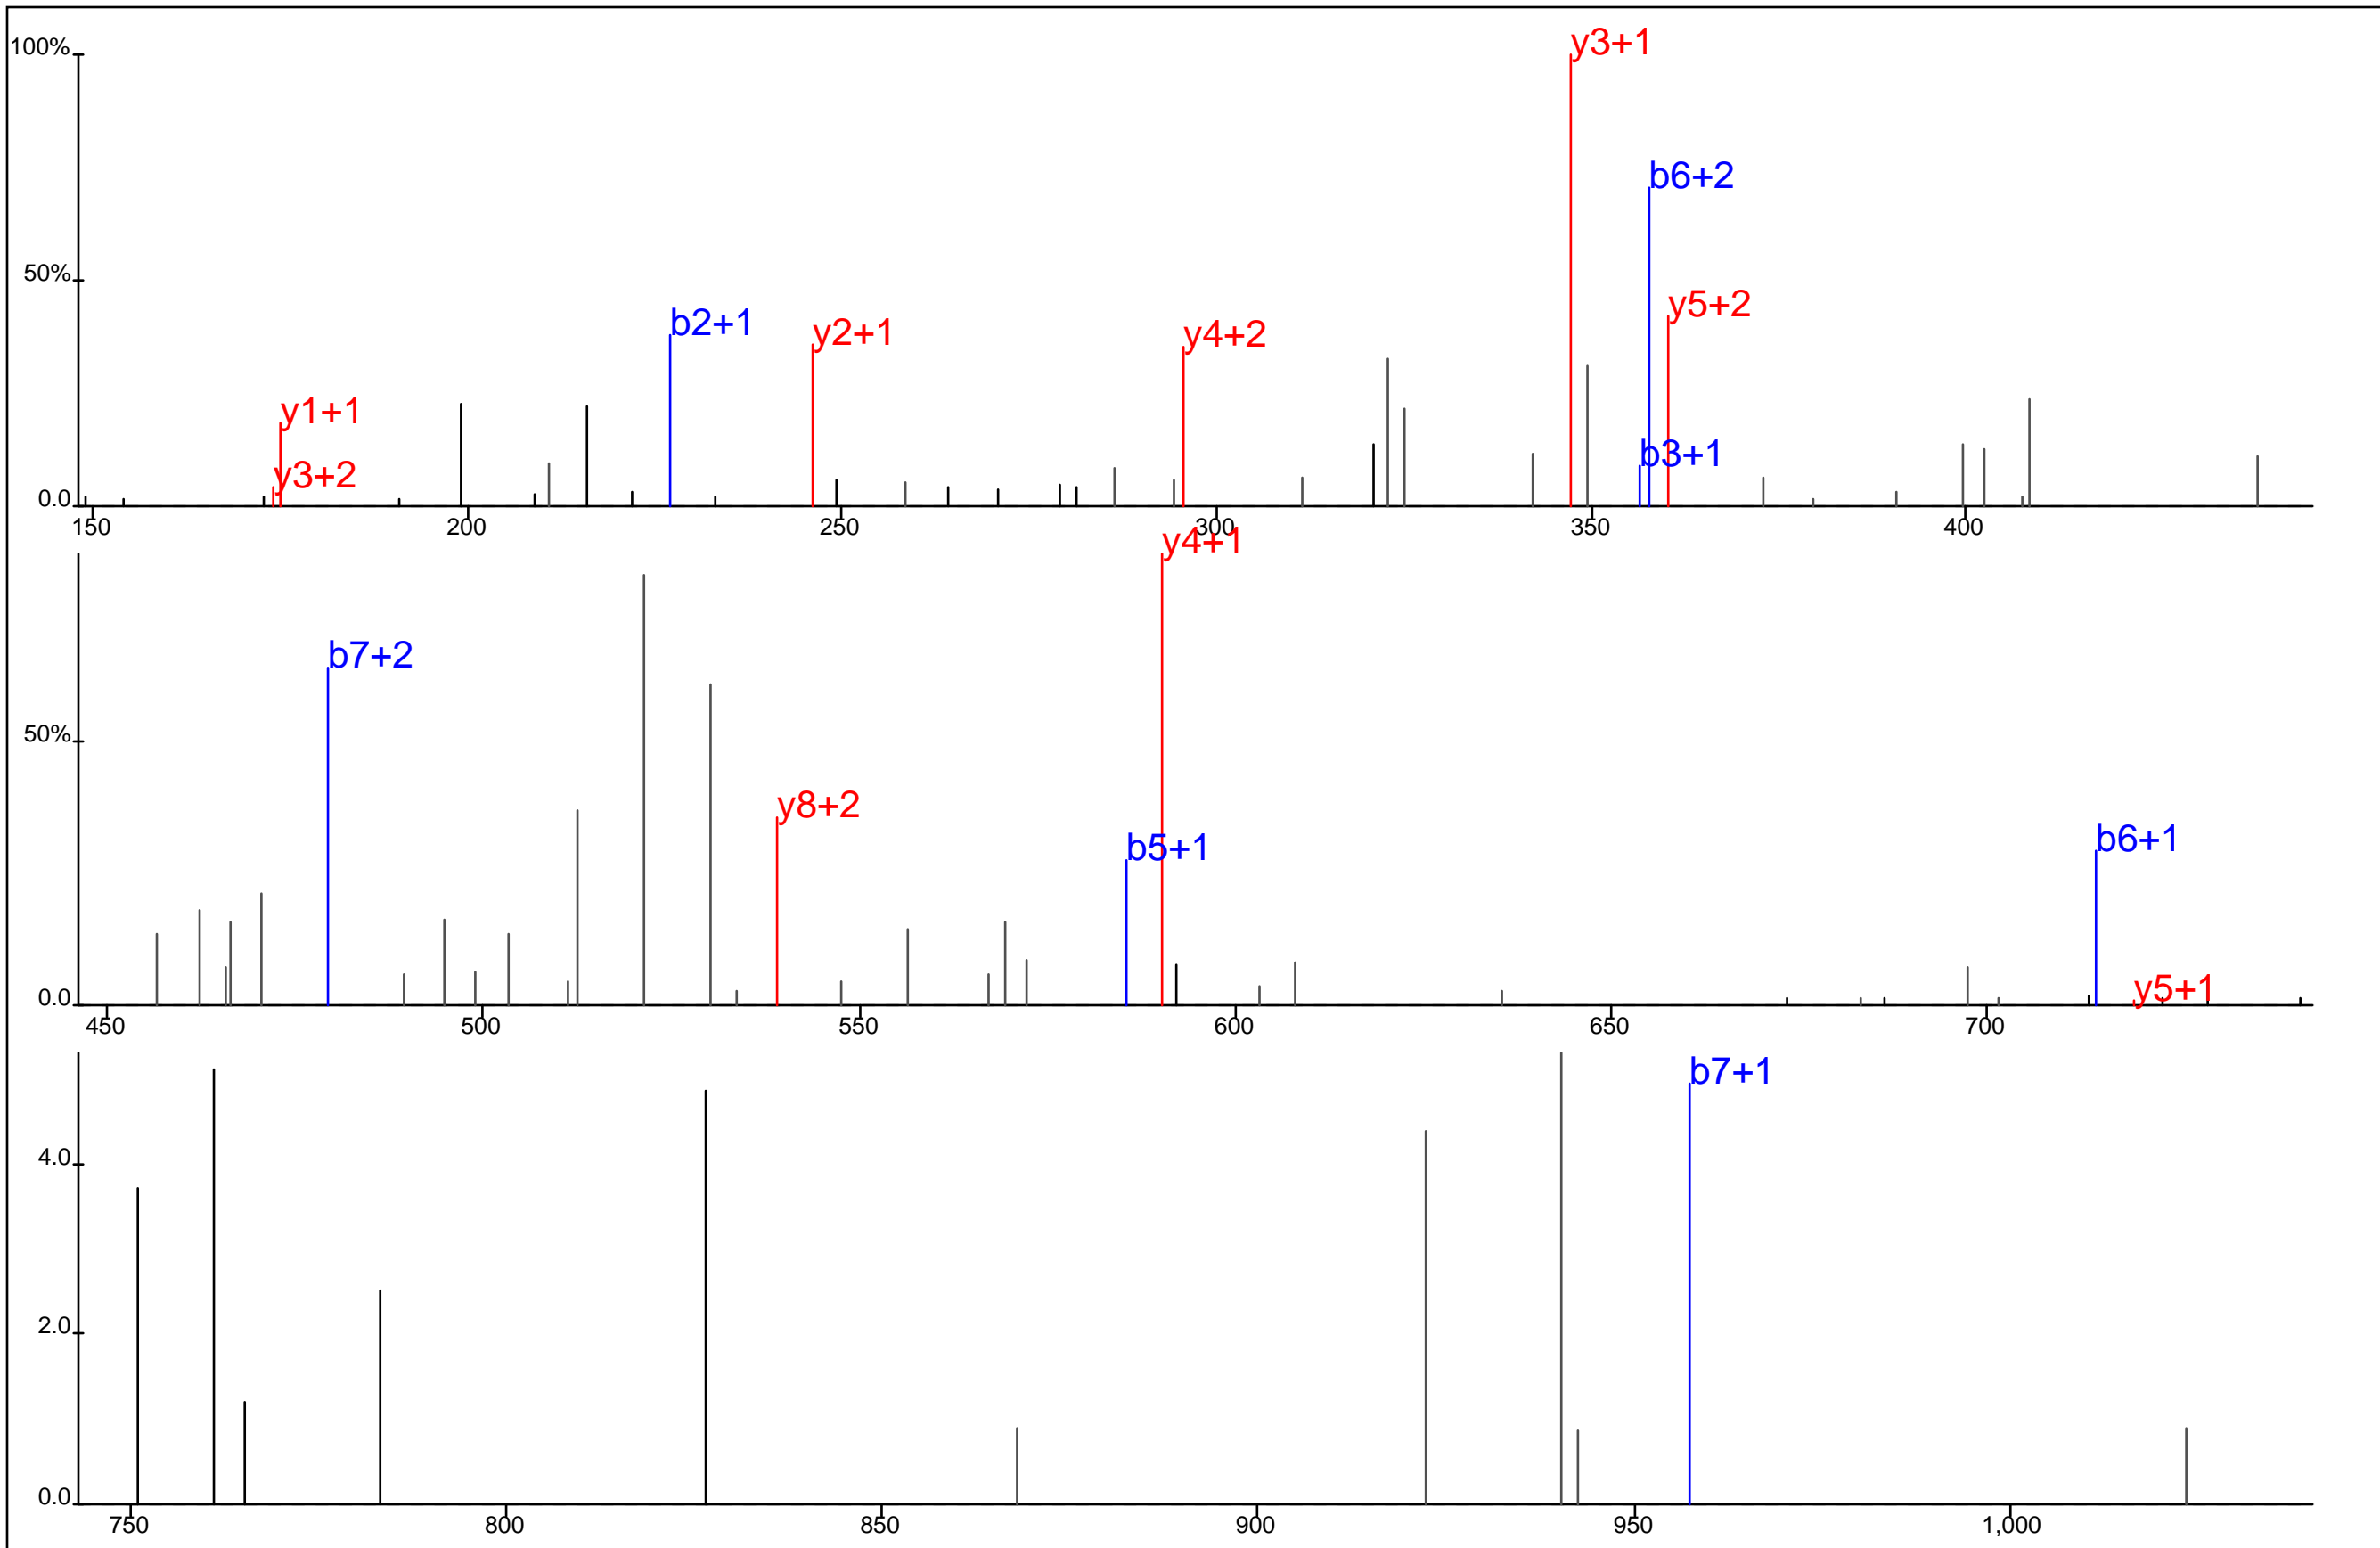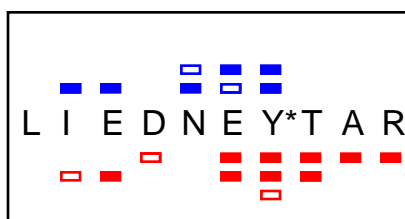

Protein Name: Fyn  
 gi Accession: 0  
 Precursor Mass: 435.1898+3  
 Delta Mass: 1.263 ppm  
 XCorr: 29.43

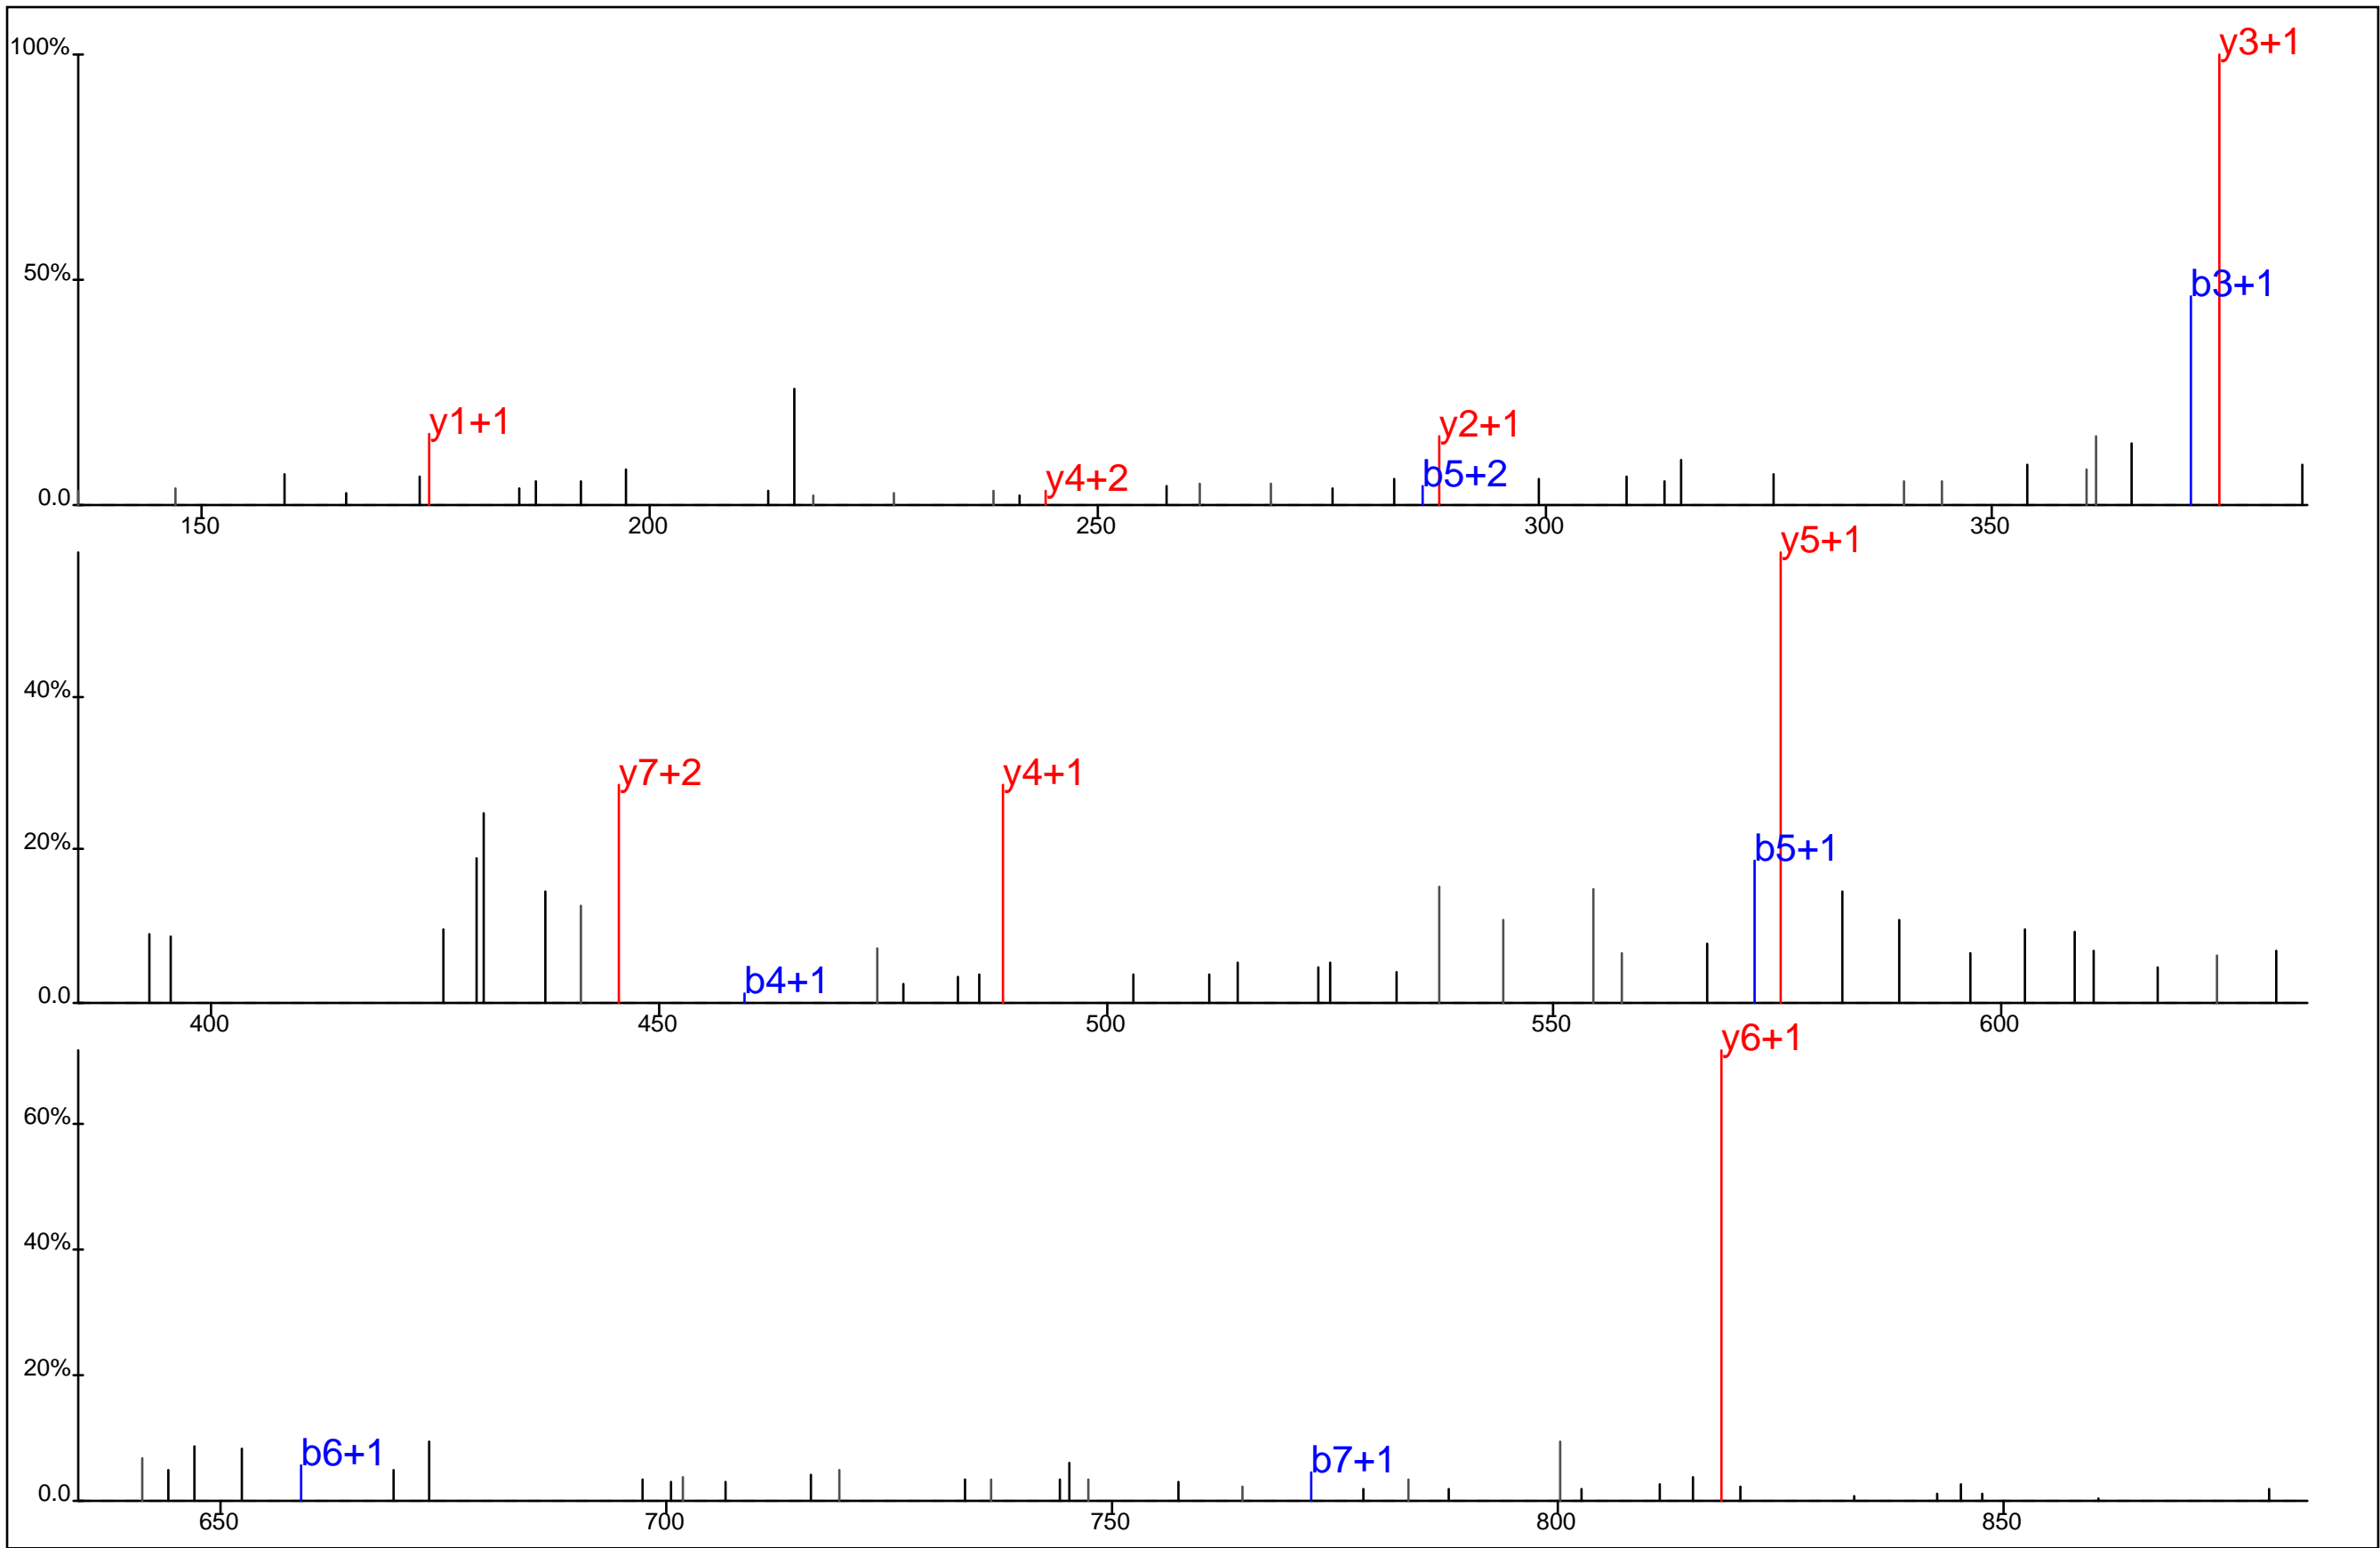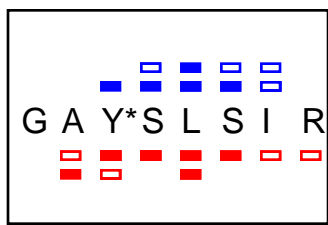

Protein Name: Fyn  
 gi Accession: 0  
 Precursor Mass: 473.7265+2  
 Delta Mass: 6.745 ppm  
 XCorr: 44.89

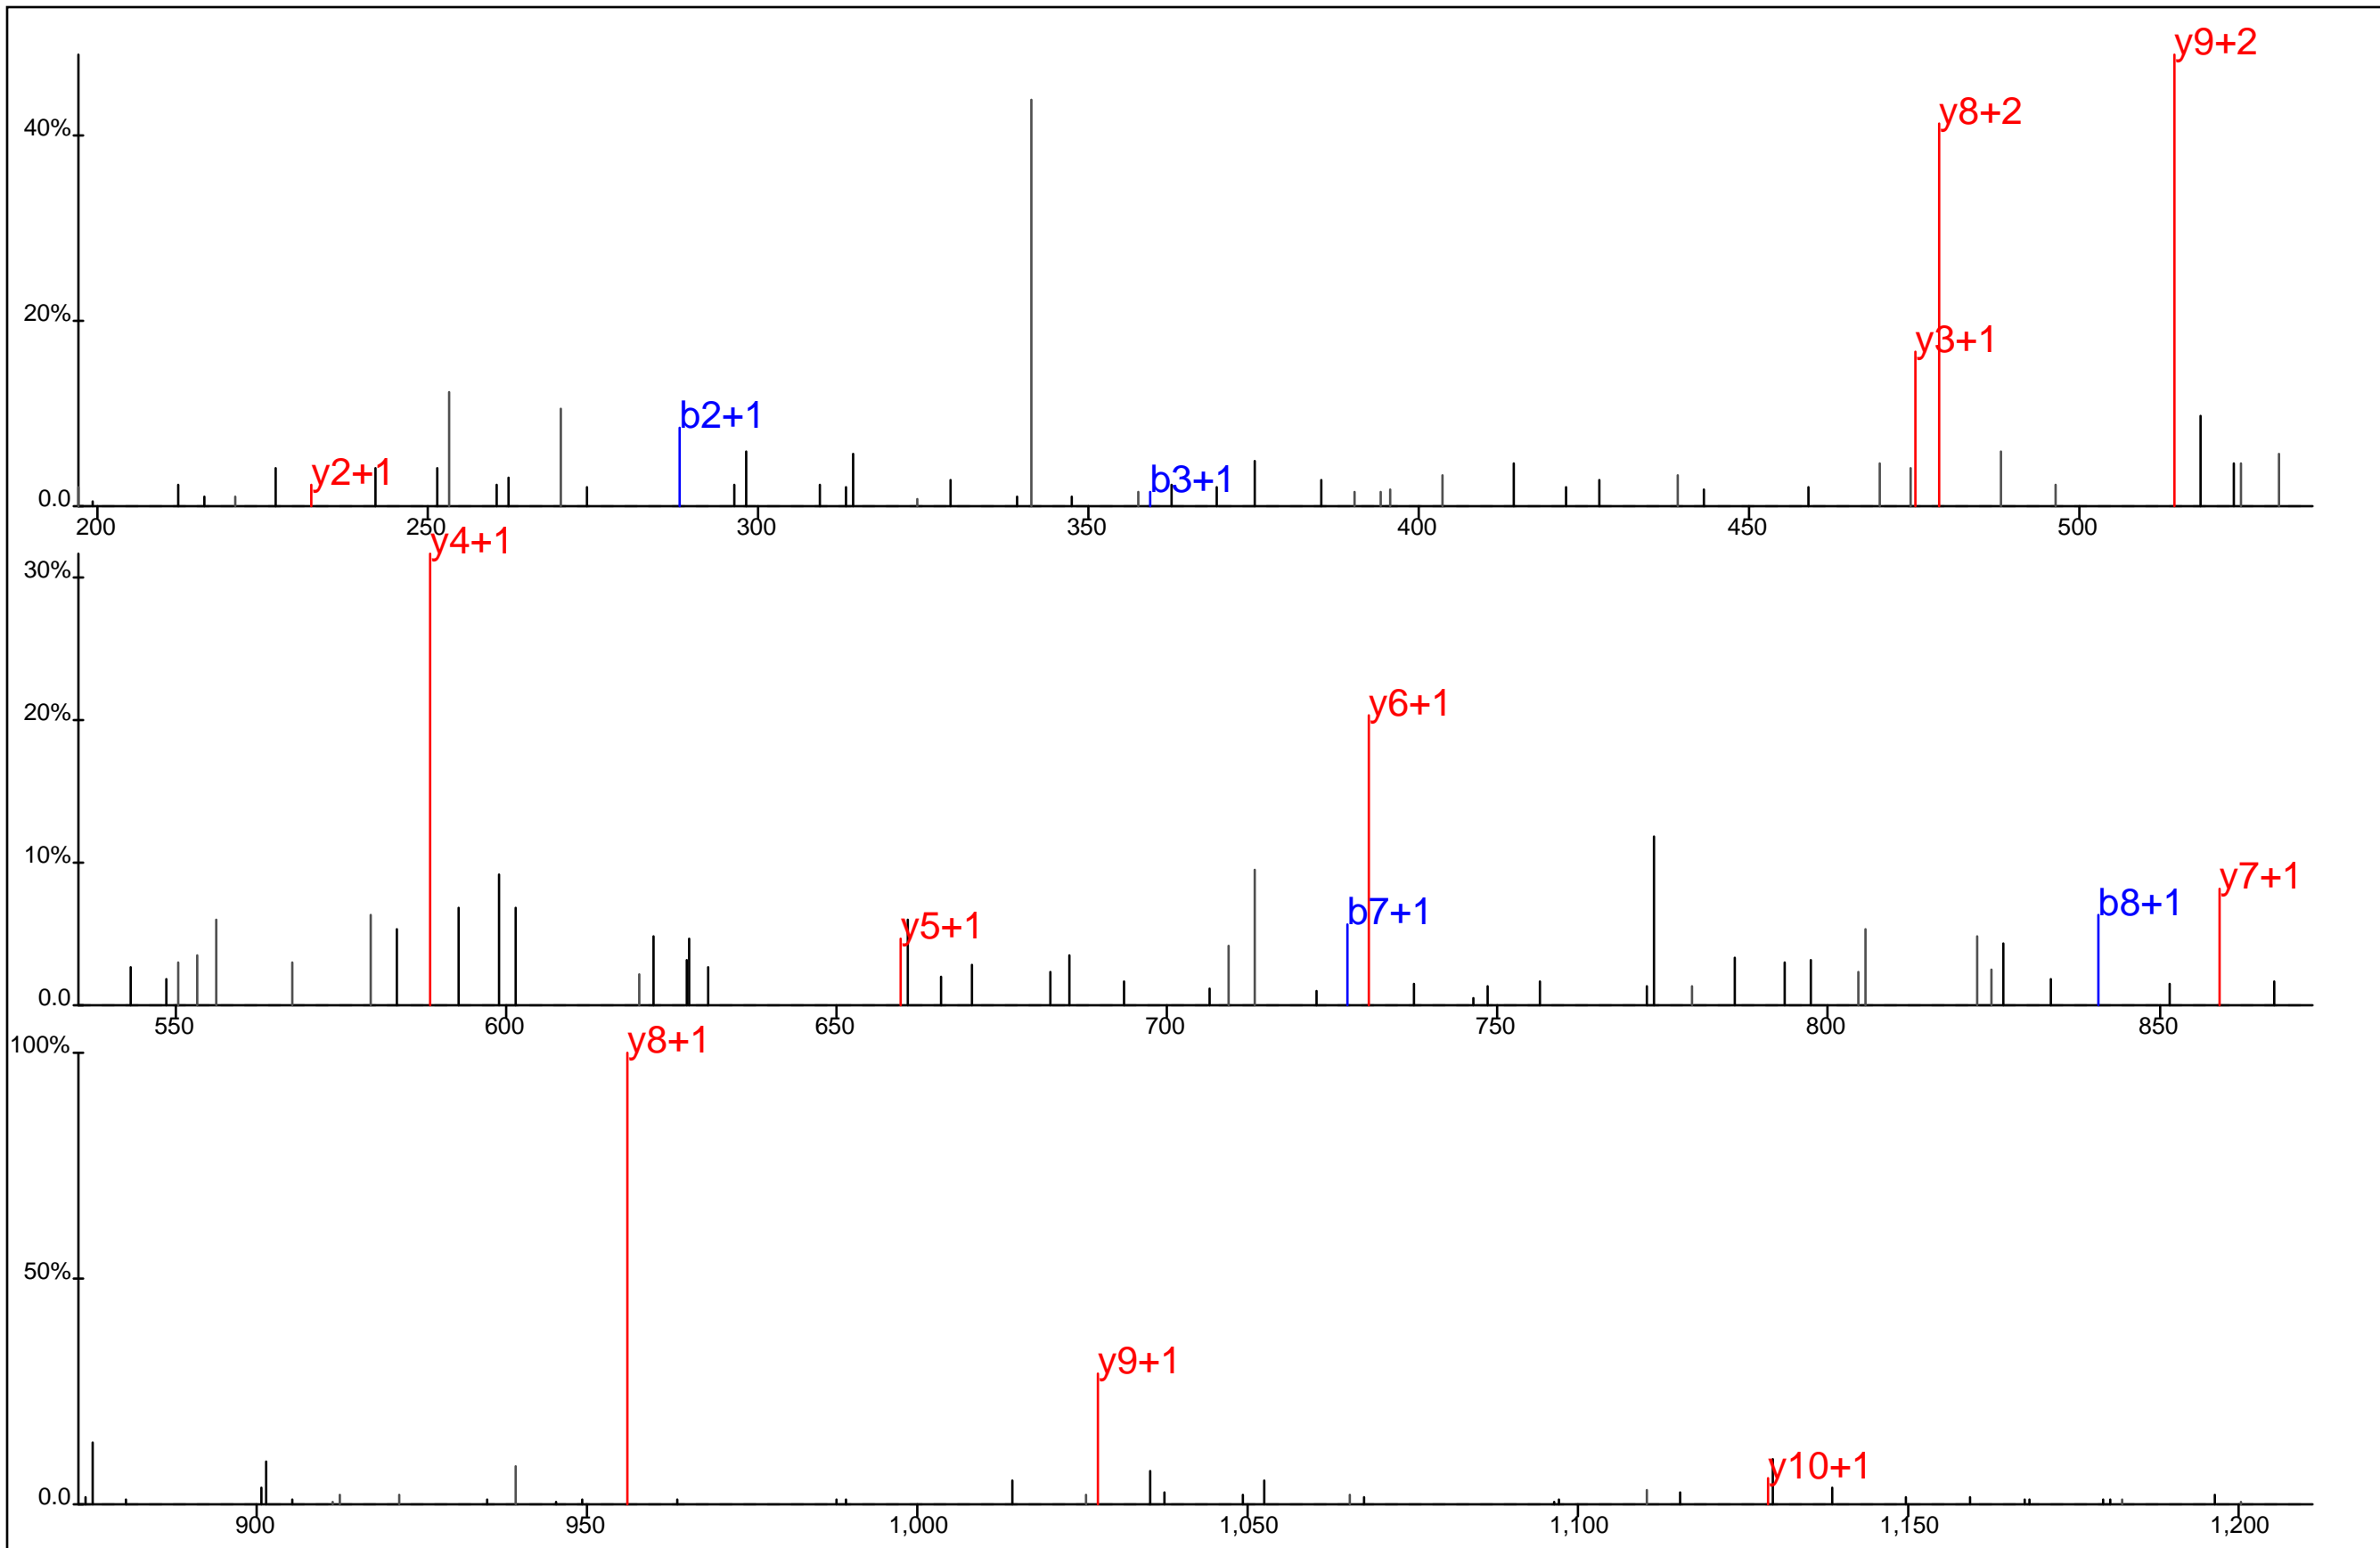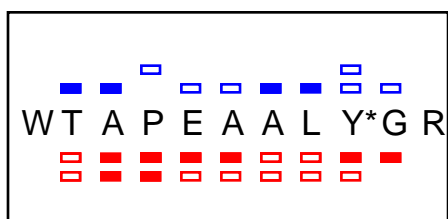

Protein Name: Fyn  
 gi Accession: 0  
 Precursor Mass: 657.7986+2  
 Delta Mass: 1.683 ppm  
 XCorr: 37.93

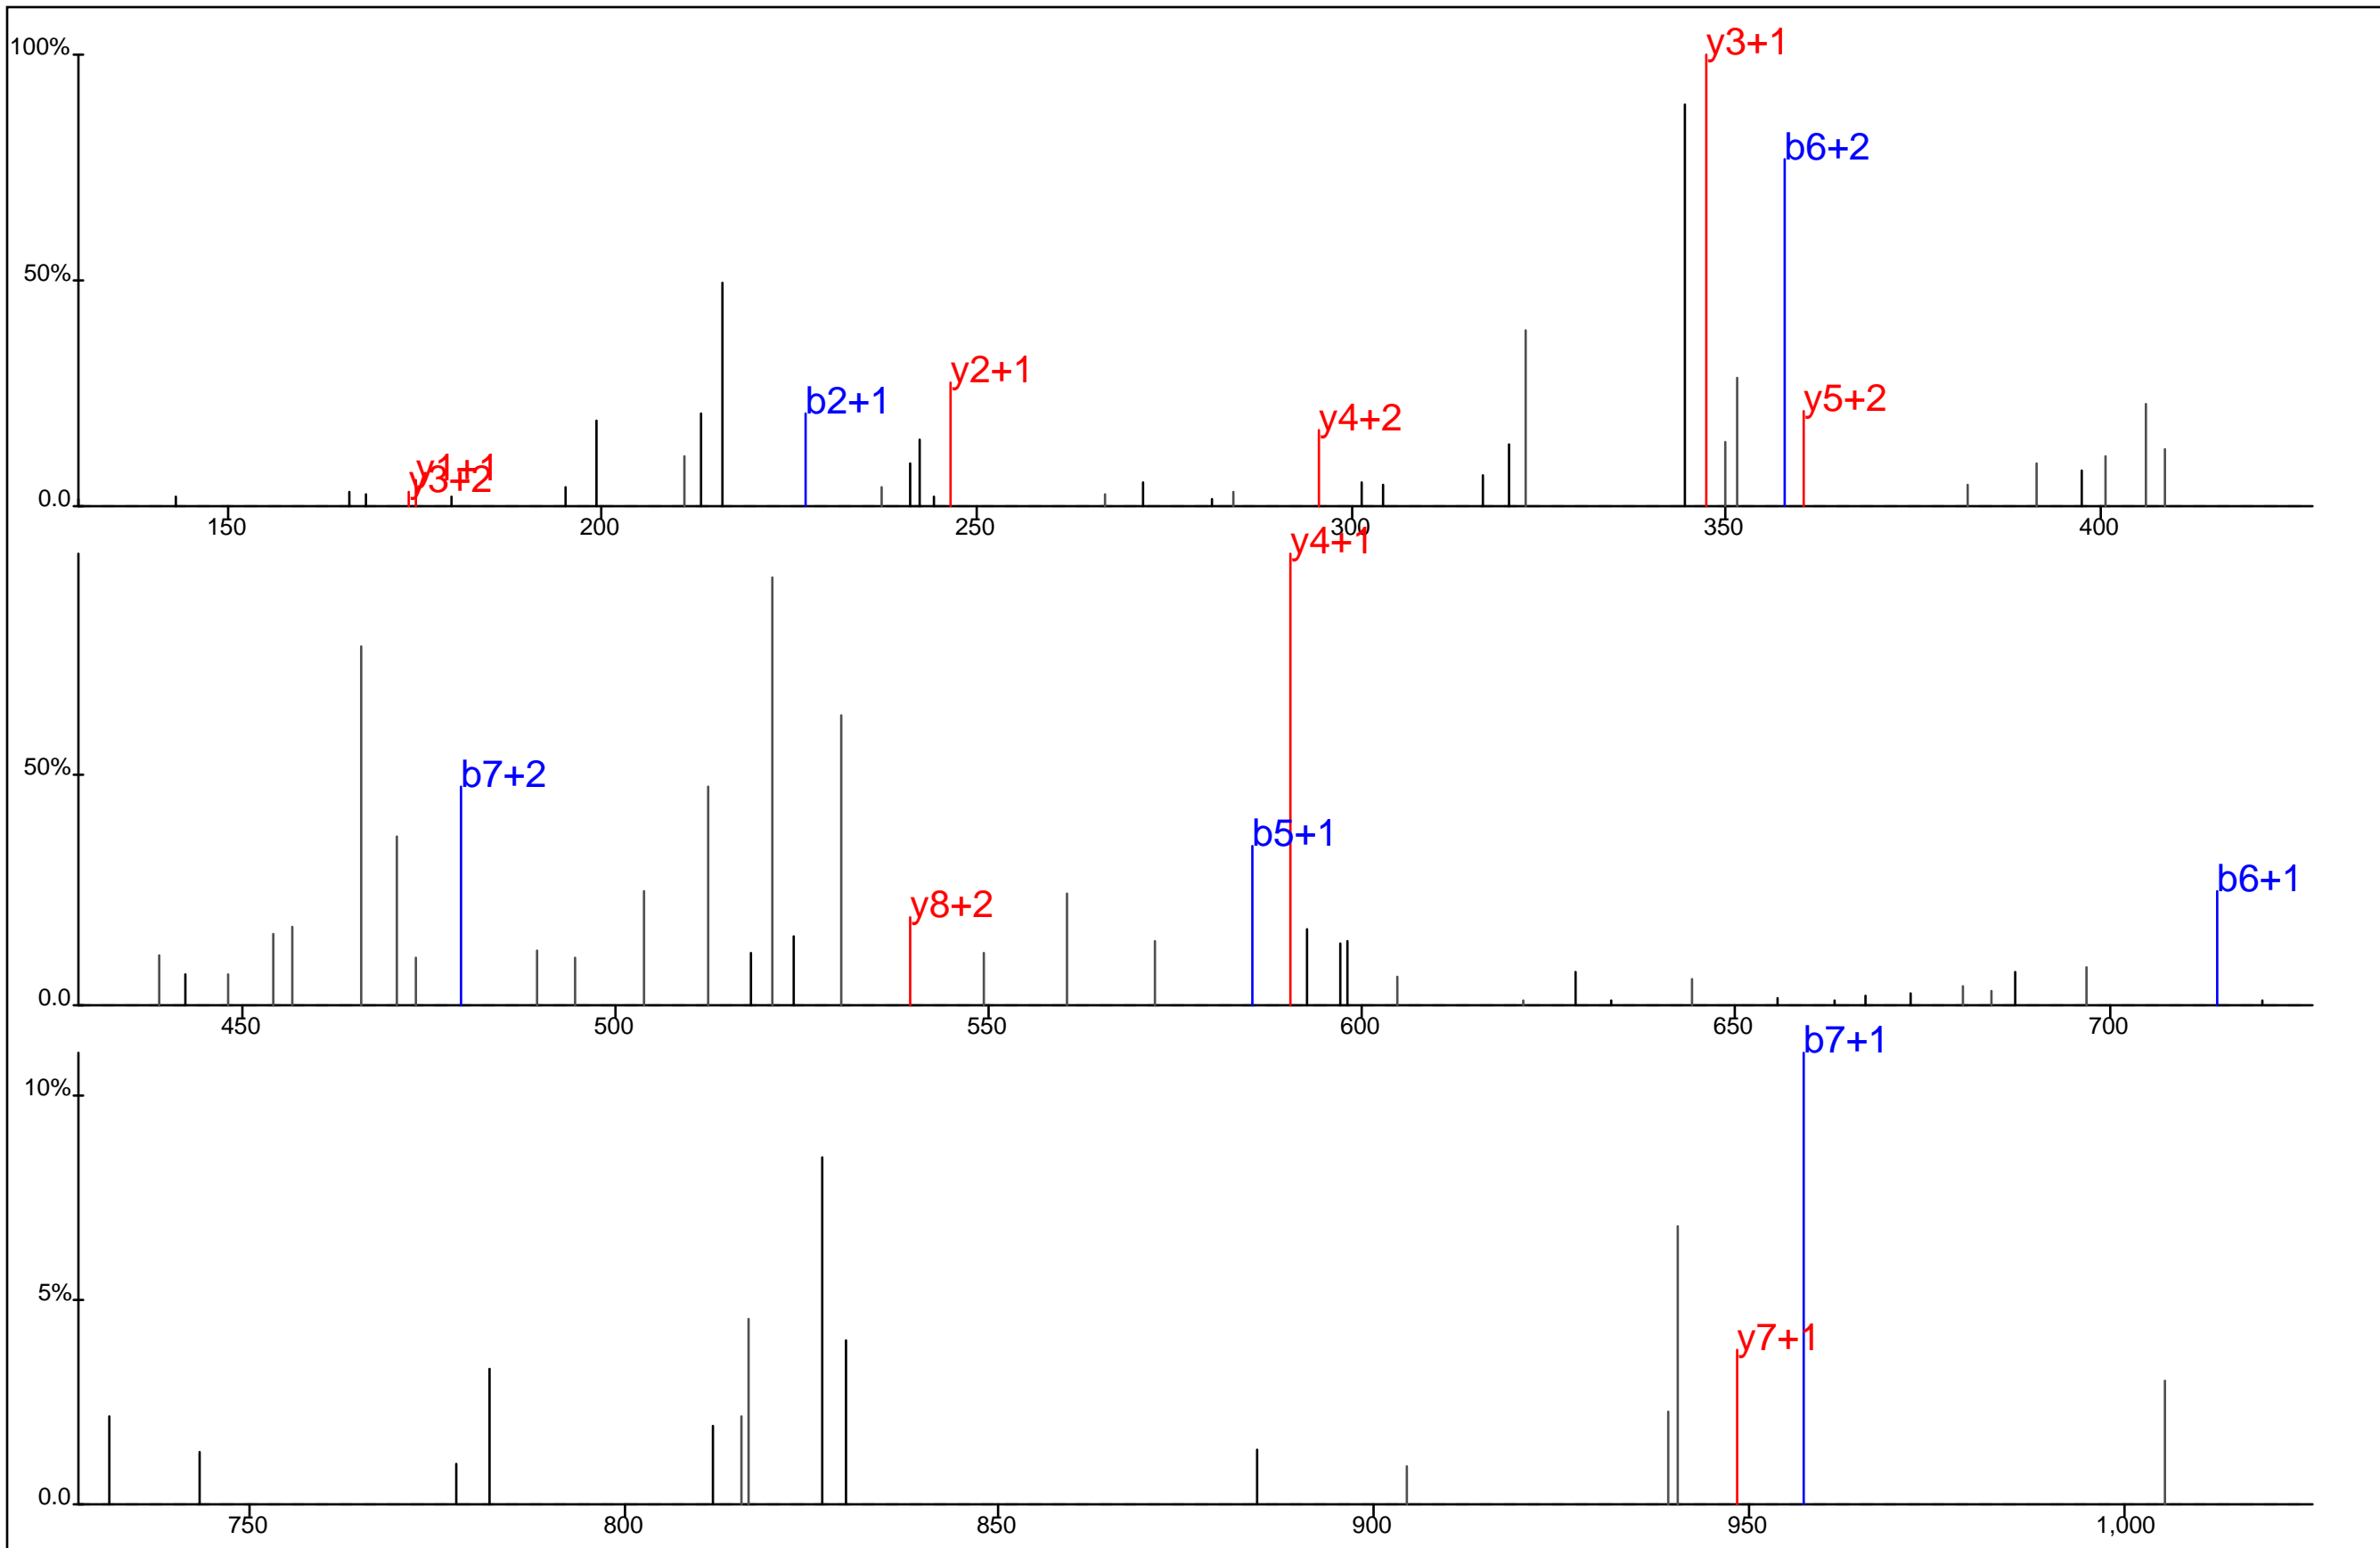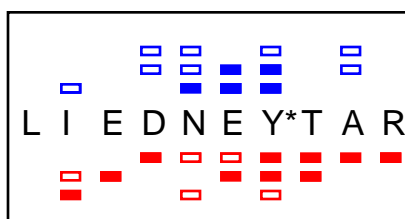

Protein Name: Fyn  
 gi Accession: 0  
 Precursor Mass: 435.1907+3  
 Delta Mass: 0.773 ppm  
 XCorr: 25.41

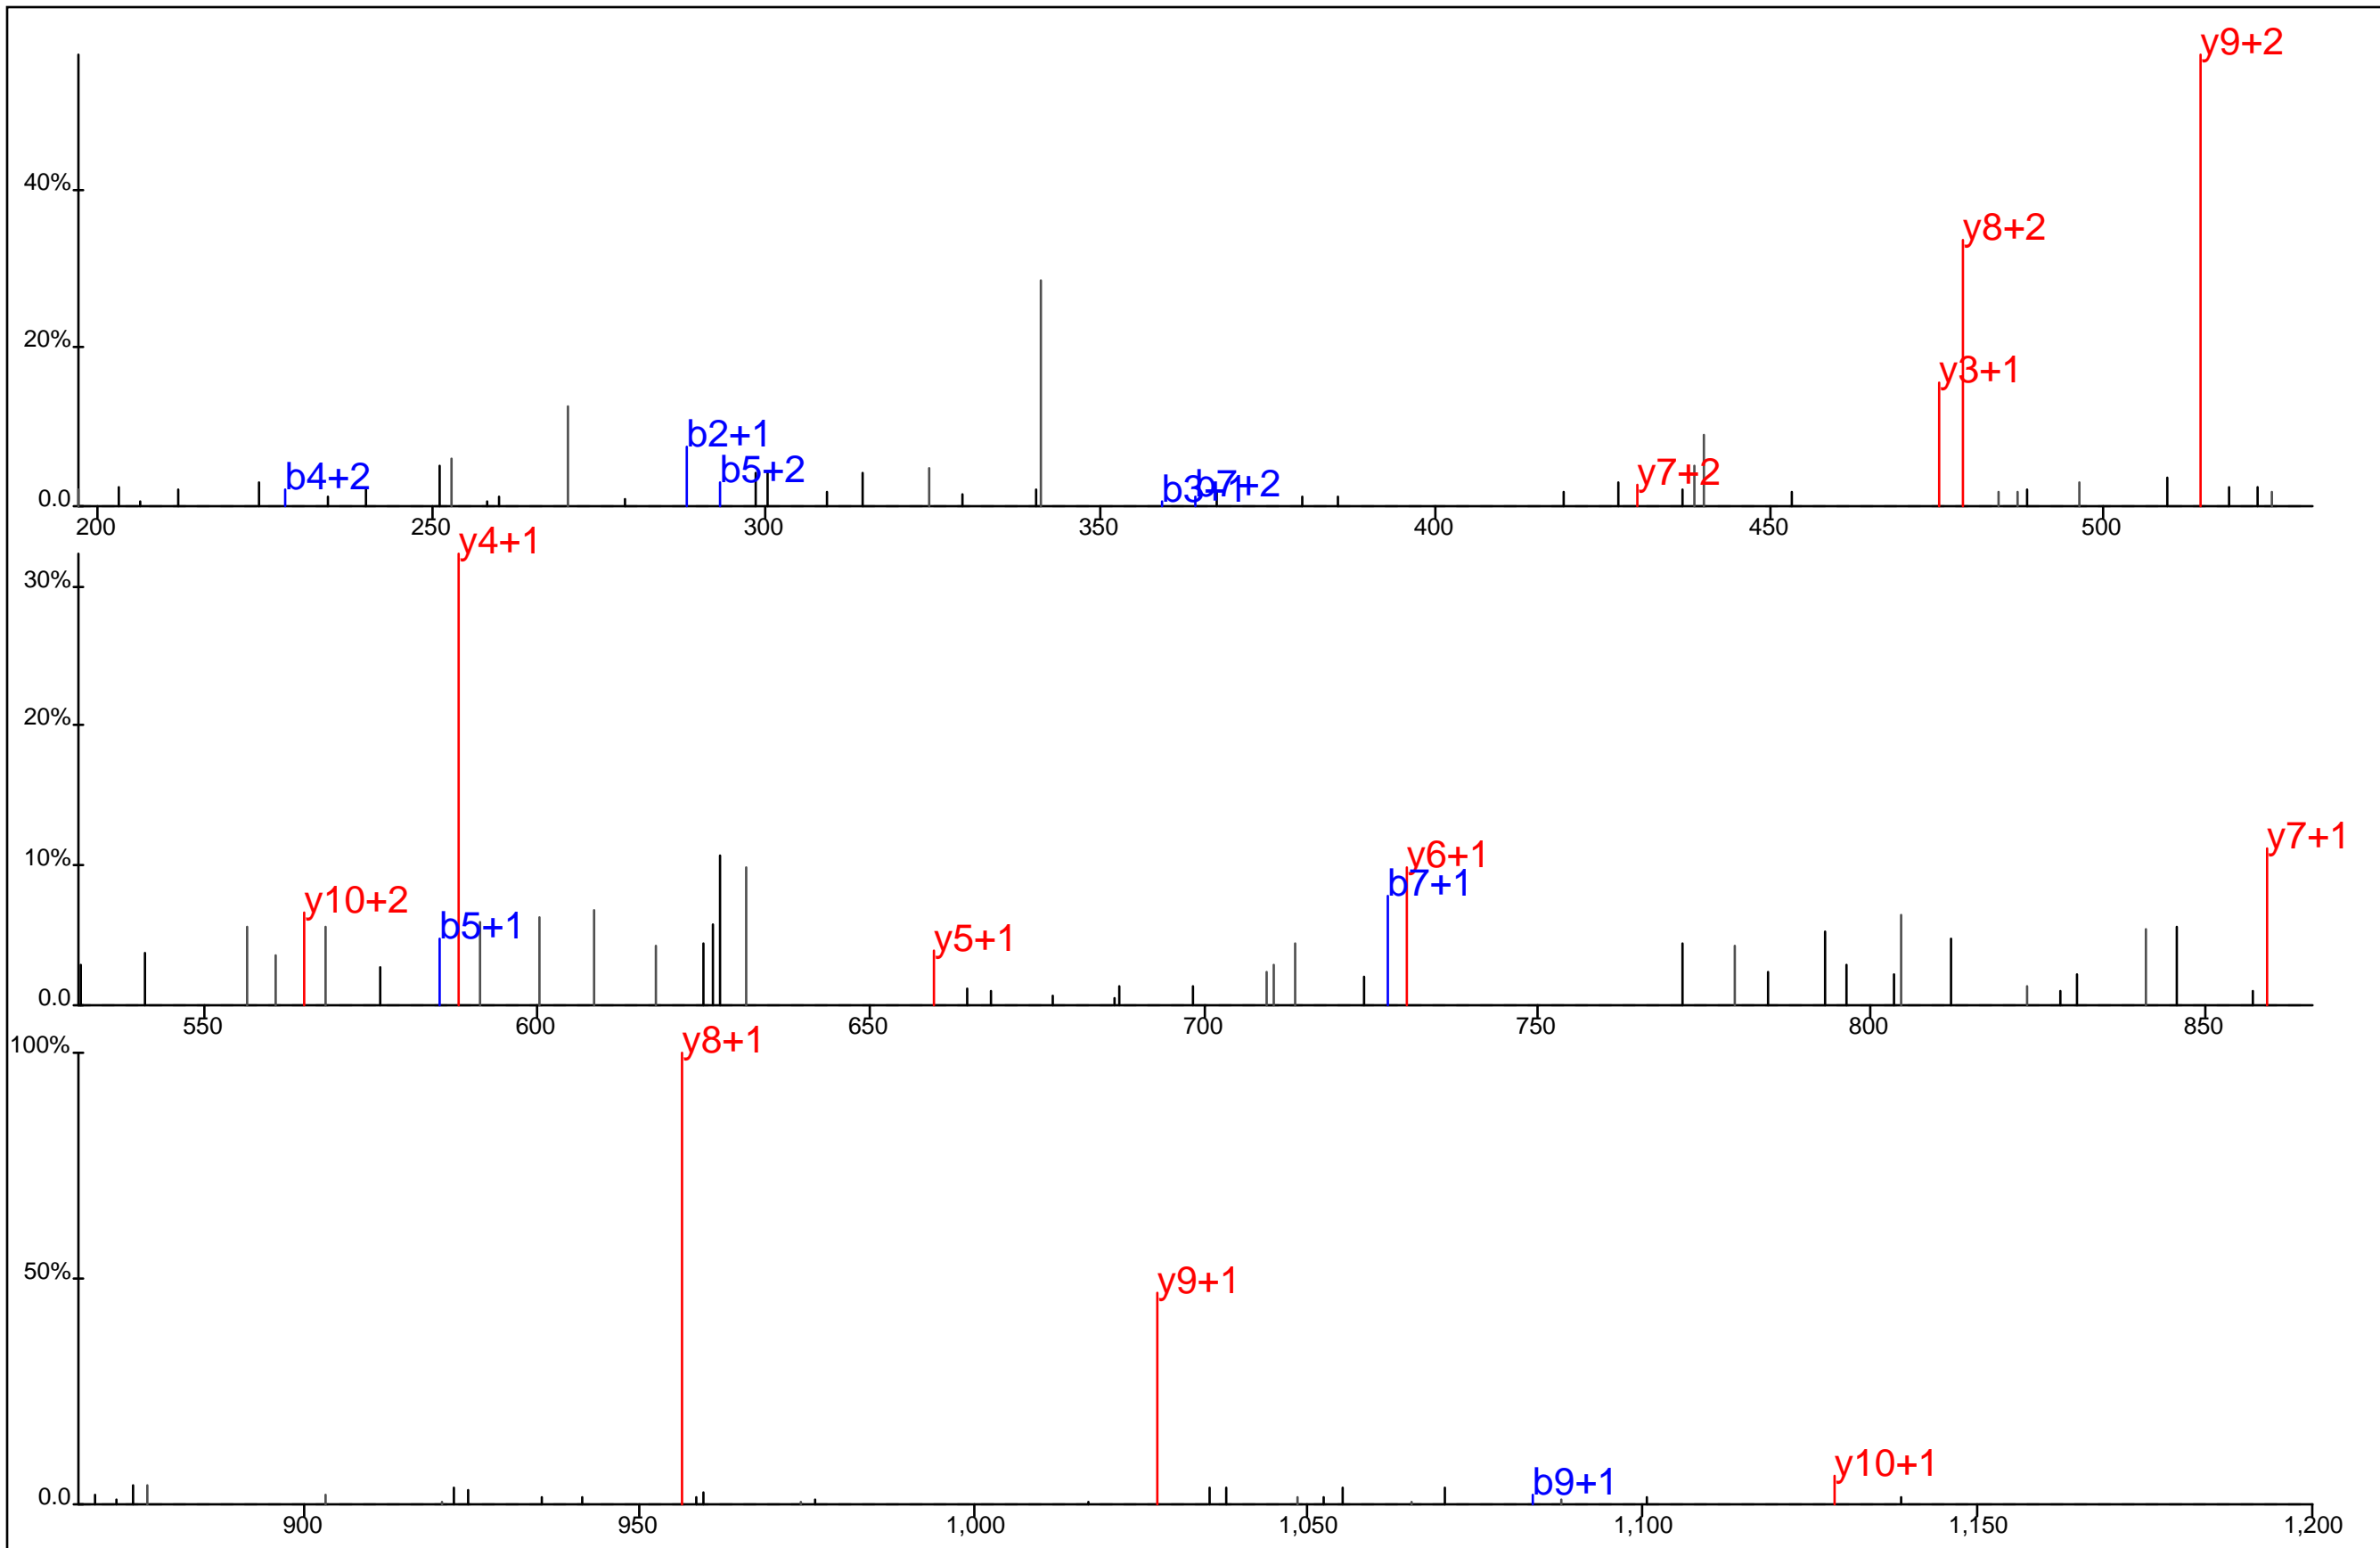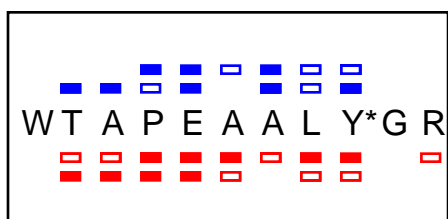

Protein Name: Fyn  
 gi Accession: 0  
 Precursor Mass: 657.7966+2  
 Delta Mass: 1.381 ppm  
 XCorr: 49.21

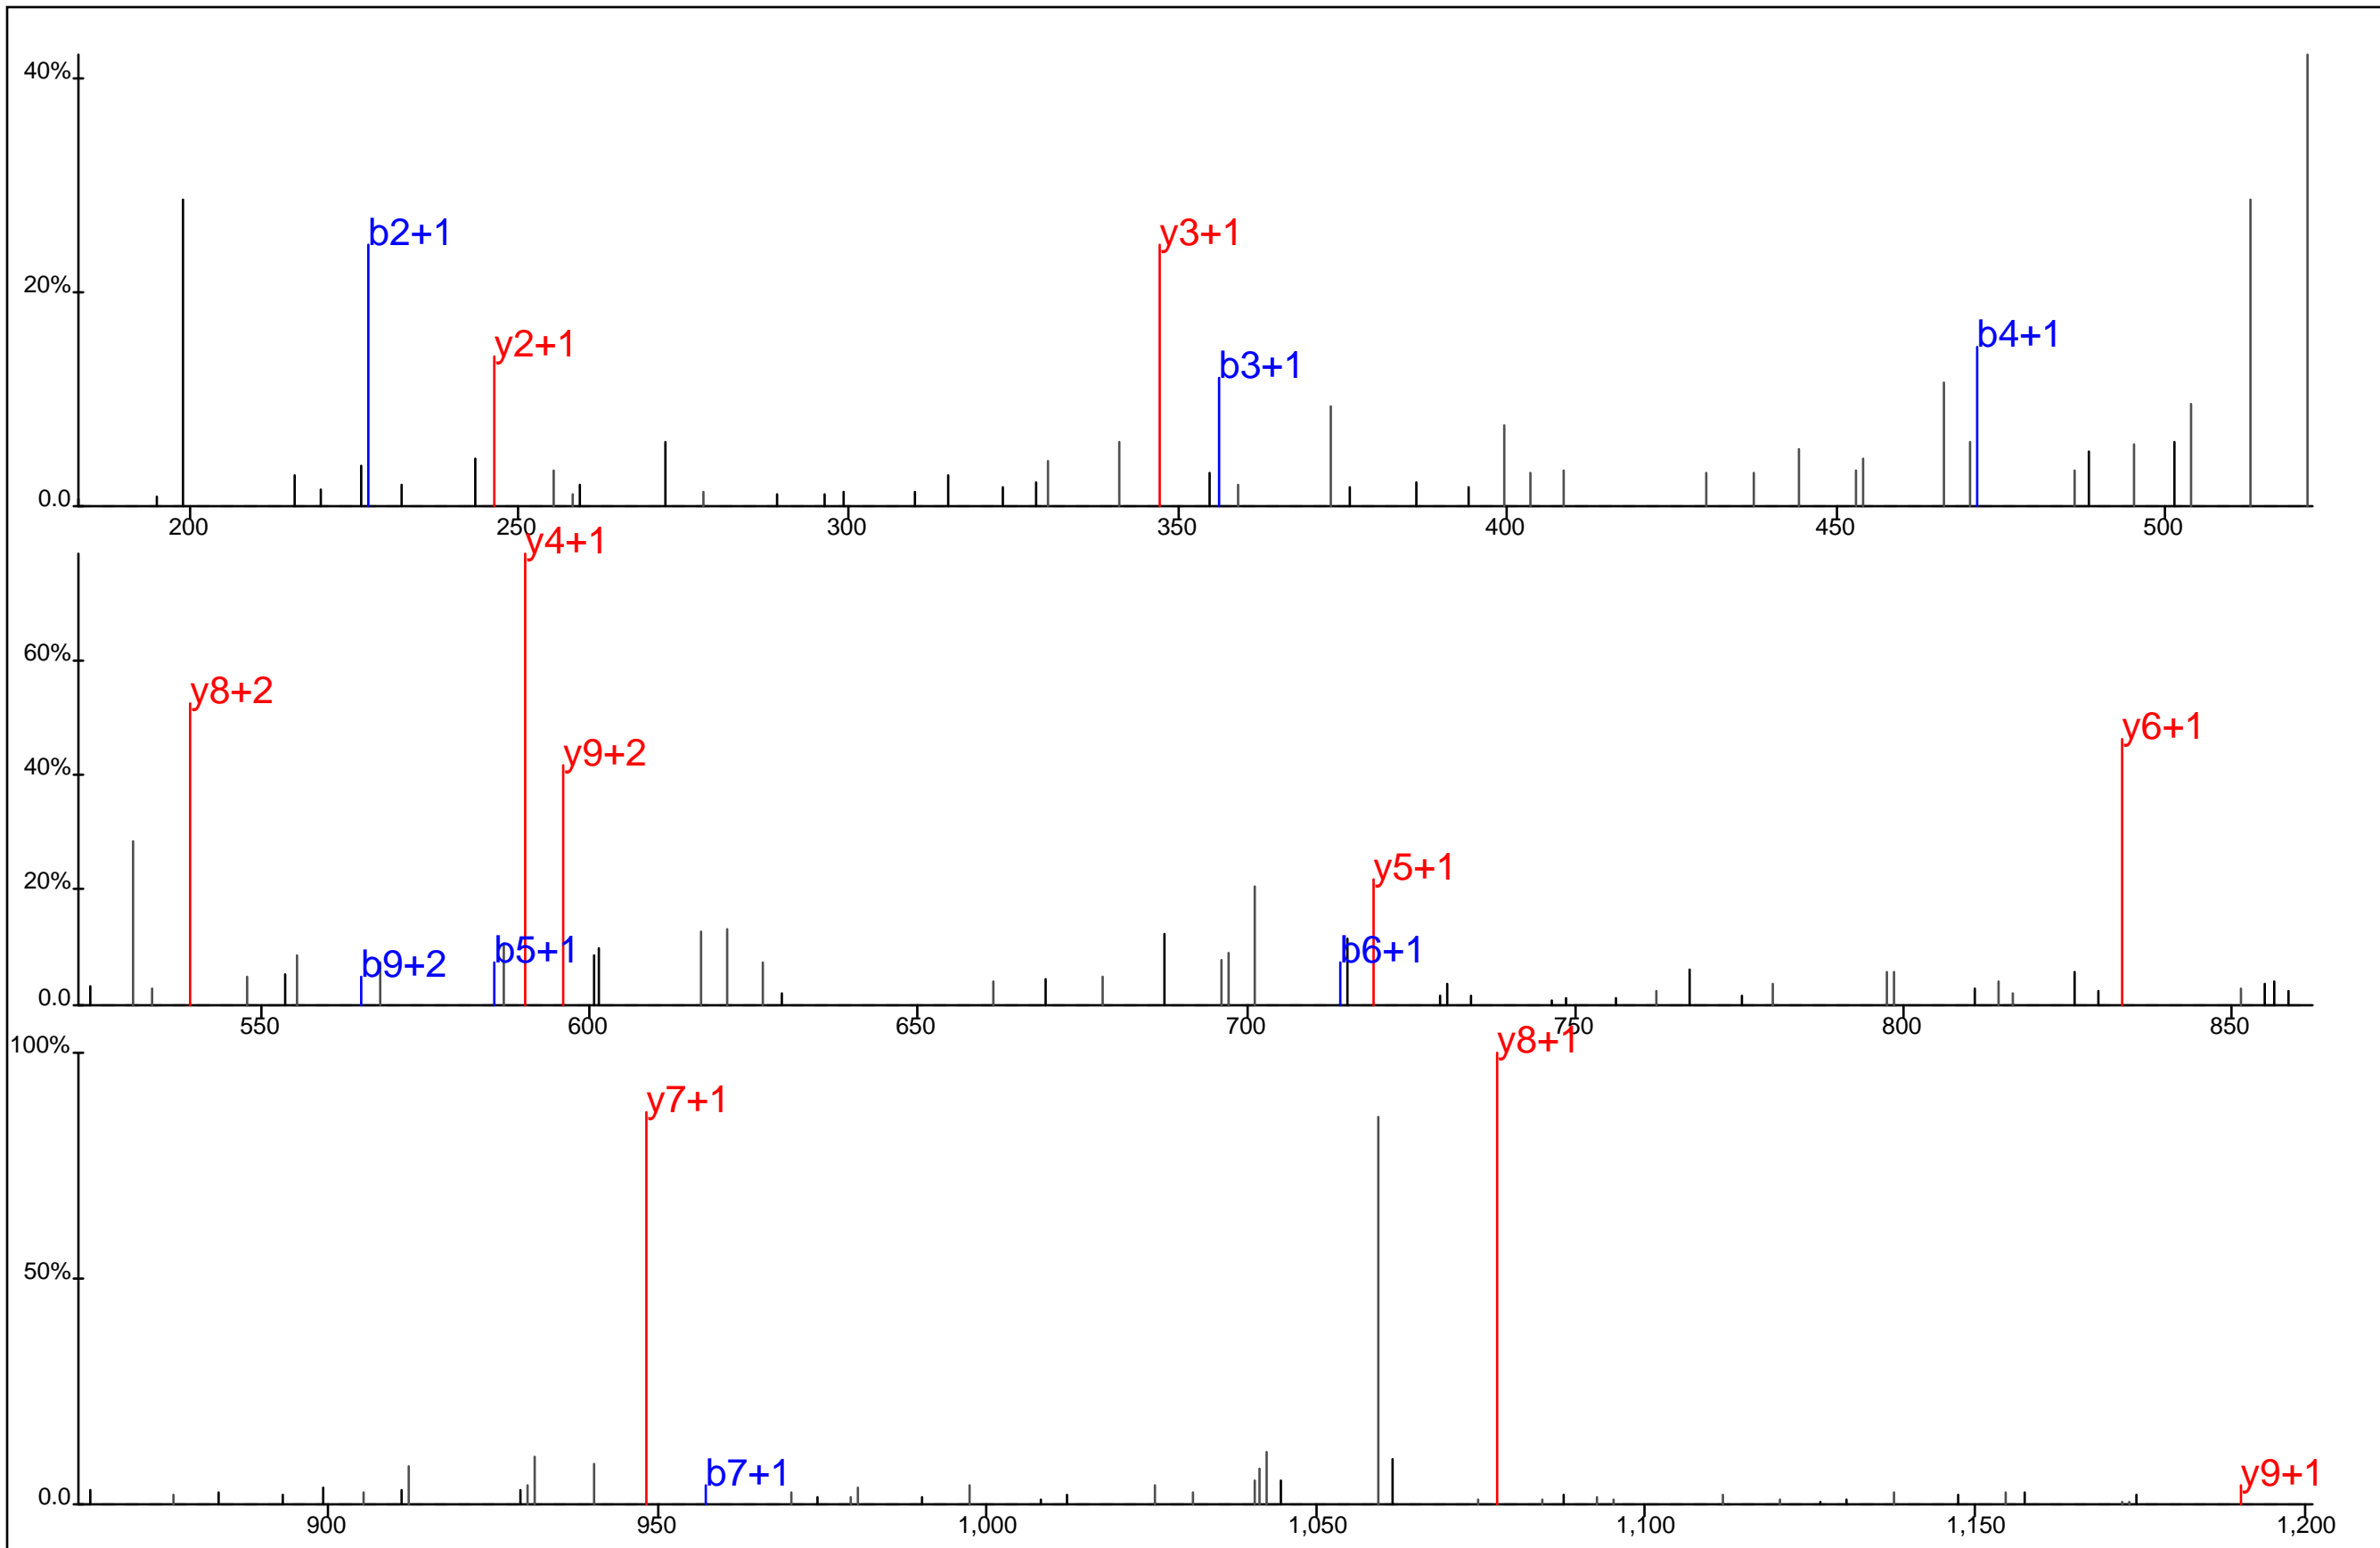

L I E D N E Y\* T A R

Protein Name: Fyn  
 gi Accession: 0  
 Precursor Mass: 652.2798+2  
 Delta Mass: 3.173 ppm  
 XCorr: 56.55



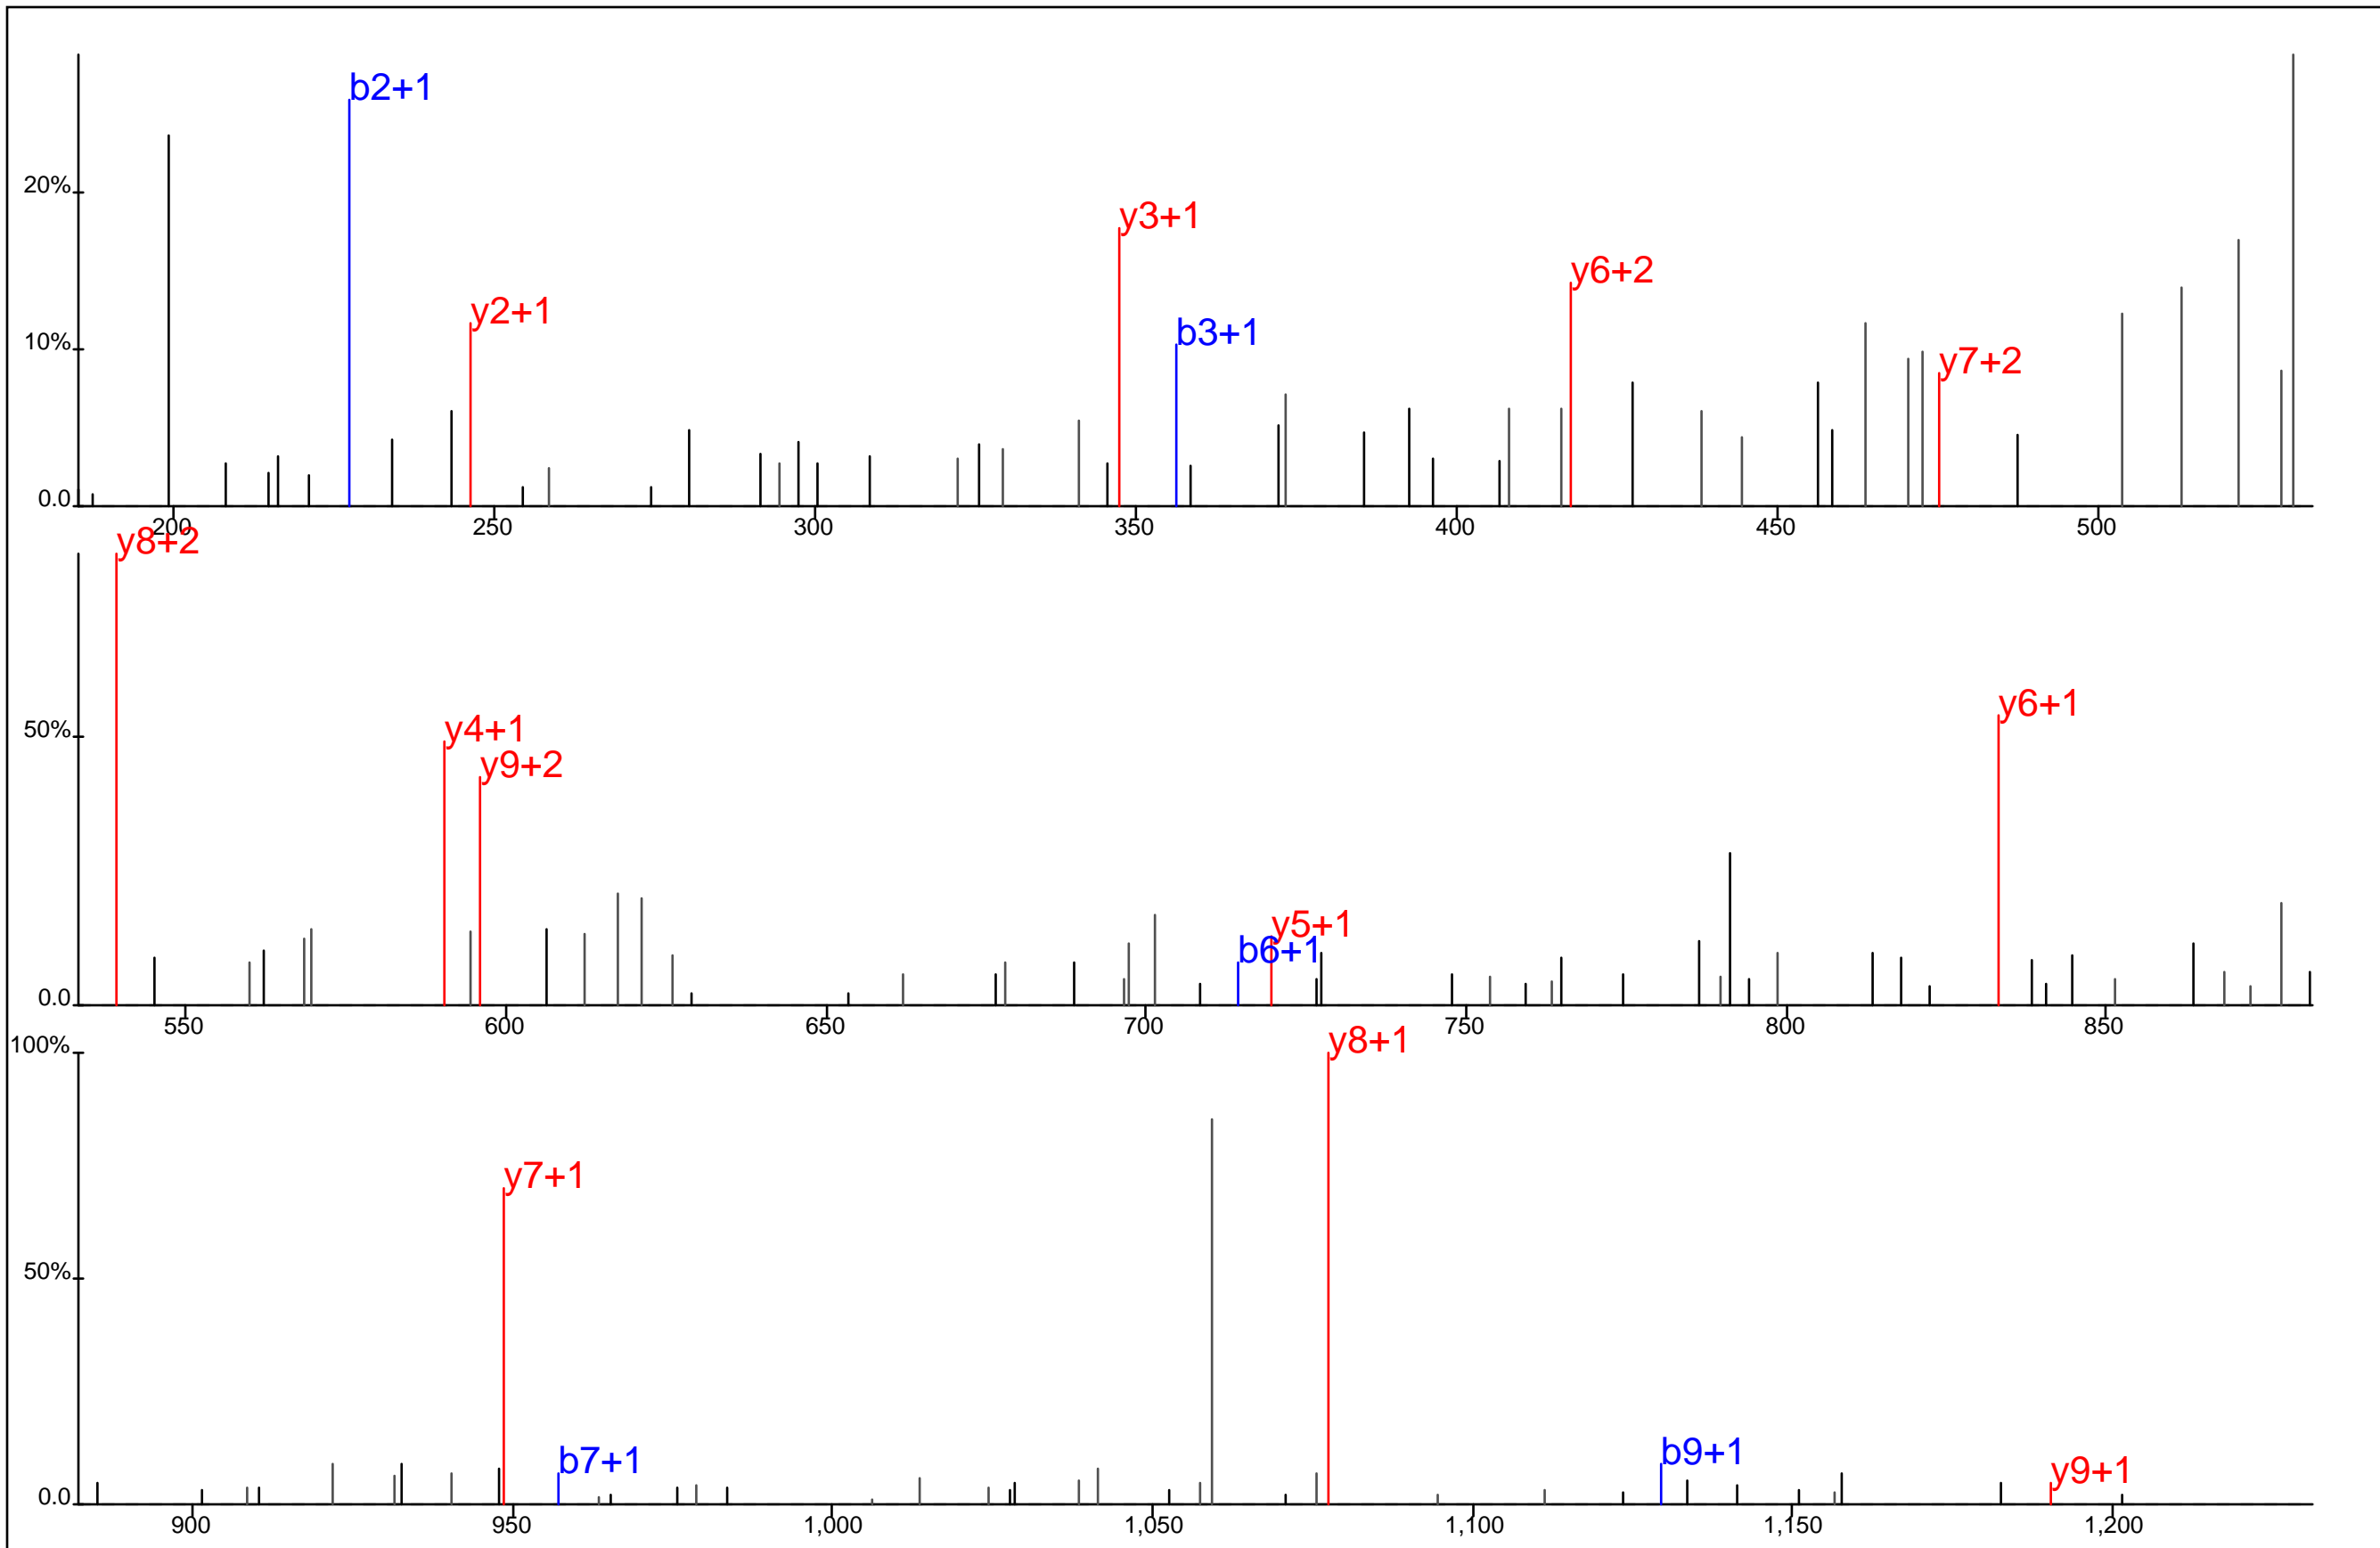

■ ■ ■ ■ ■ ■ ■ ■  
 L I E D N E Y\* T A R  
■ ■ ■ ■ ■ ■ ■ ■

Protein Name: Fyn  
 gi Accession: 0  
 Precursor Mass: 652.2789+2  
 Delta Mass: 4.577 ppm  
 XCorr: 54.17

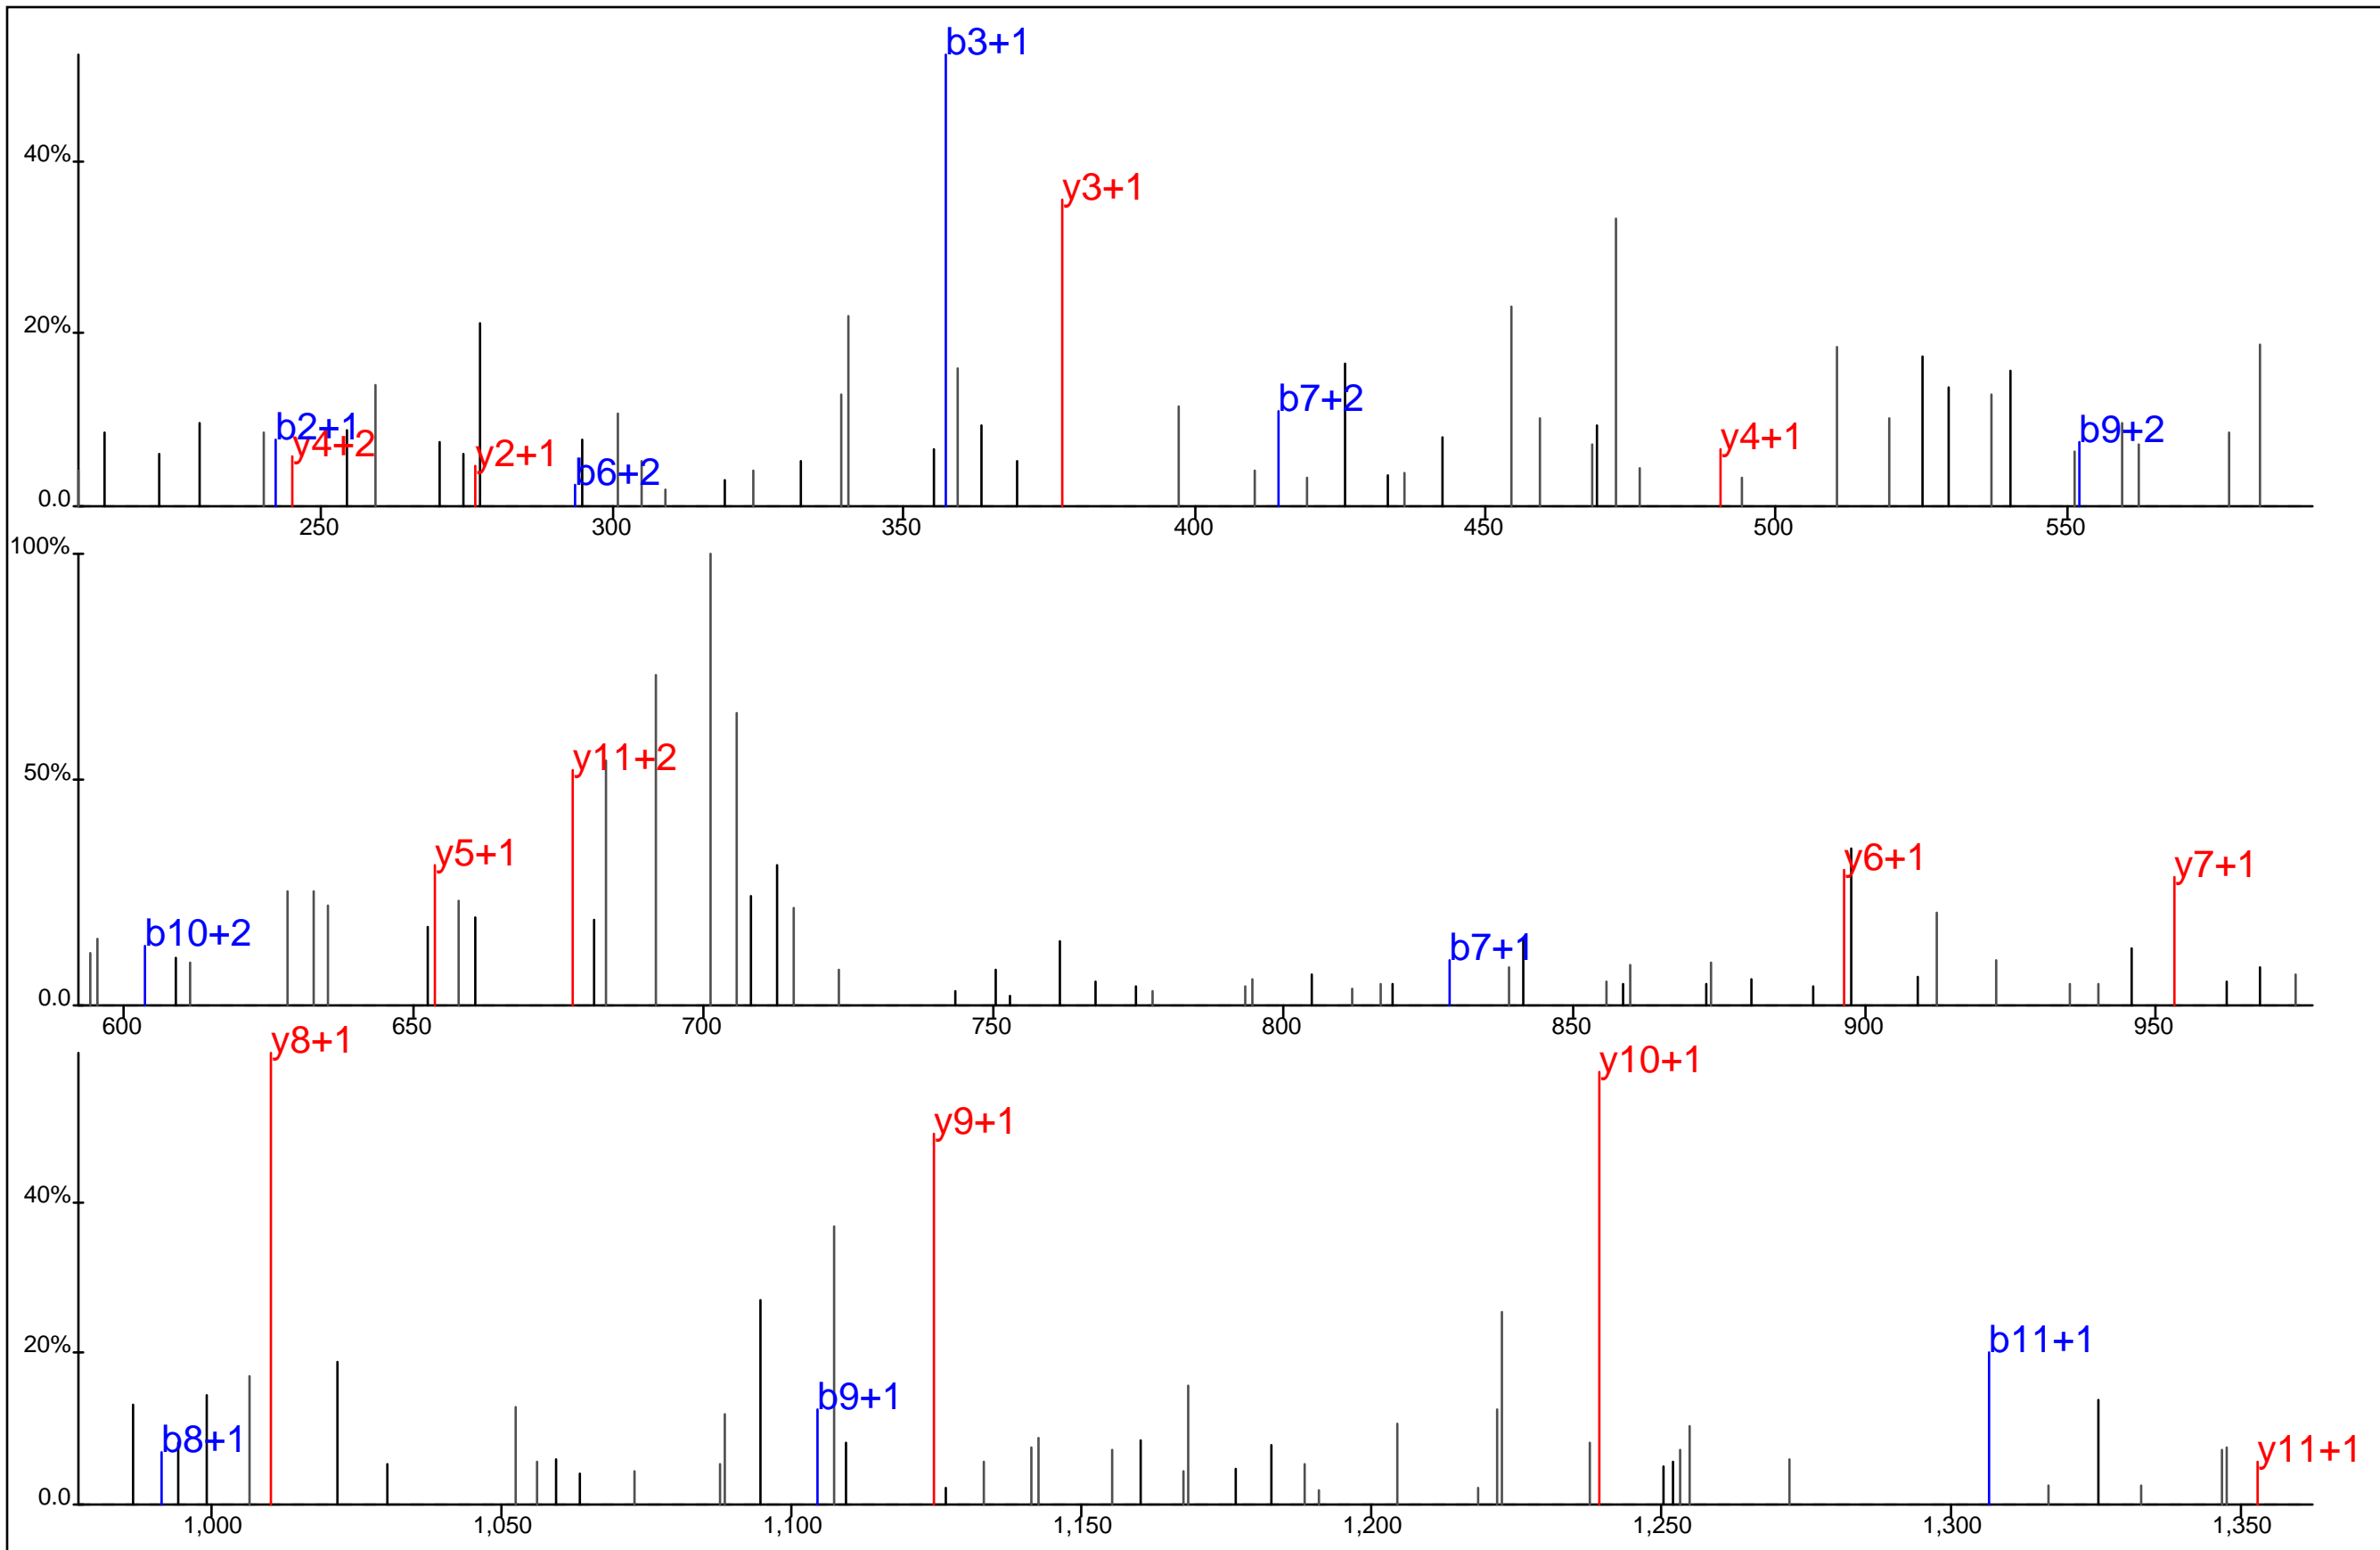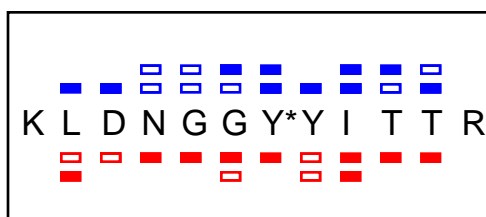

Protein Name: Fyn  
 gi Accession: 0  
 Precursor Mass: 740.8439+2  
 Delta Mass: 1.819 ppm  
 XCorr: 24.18

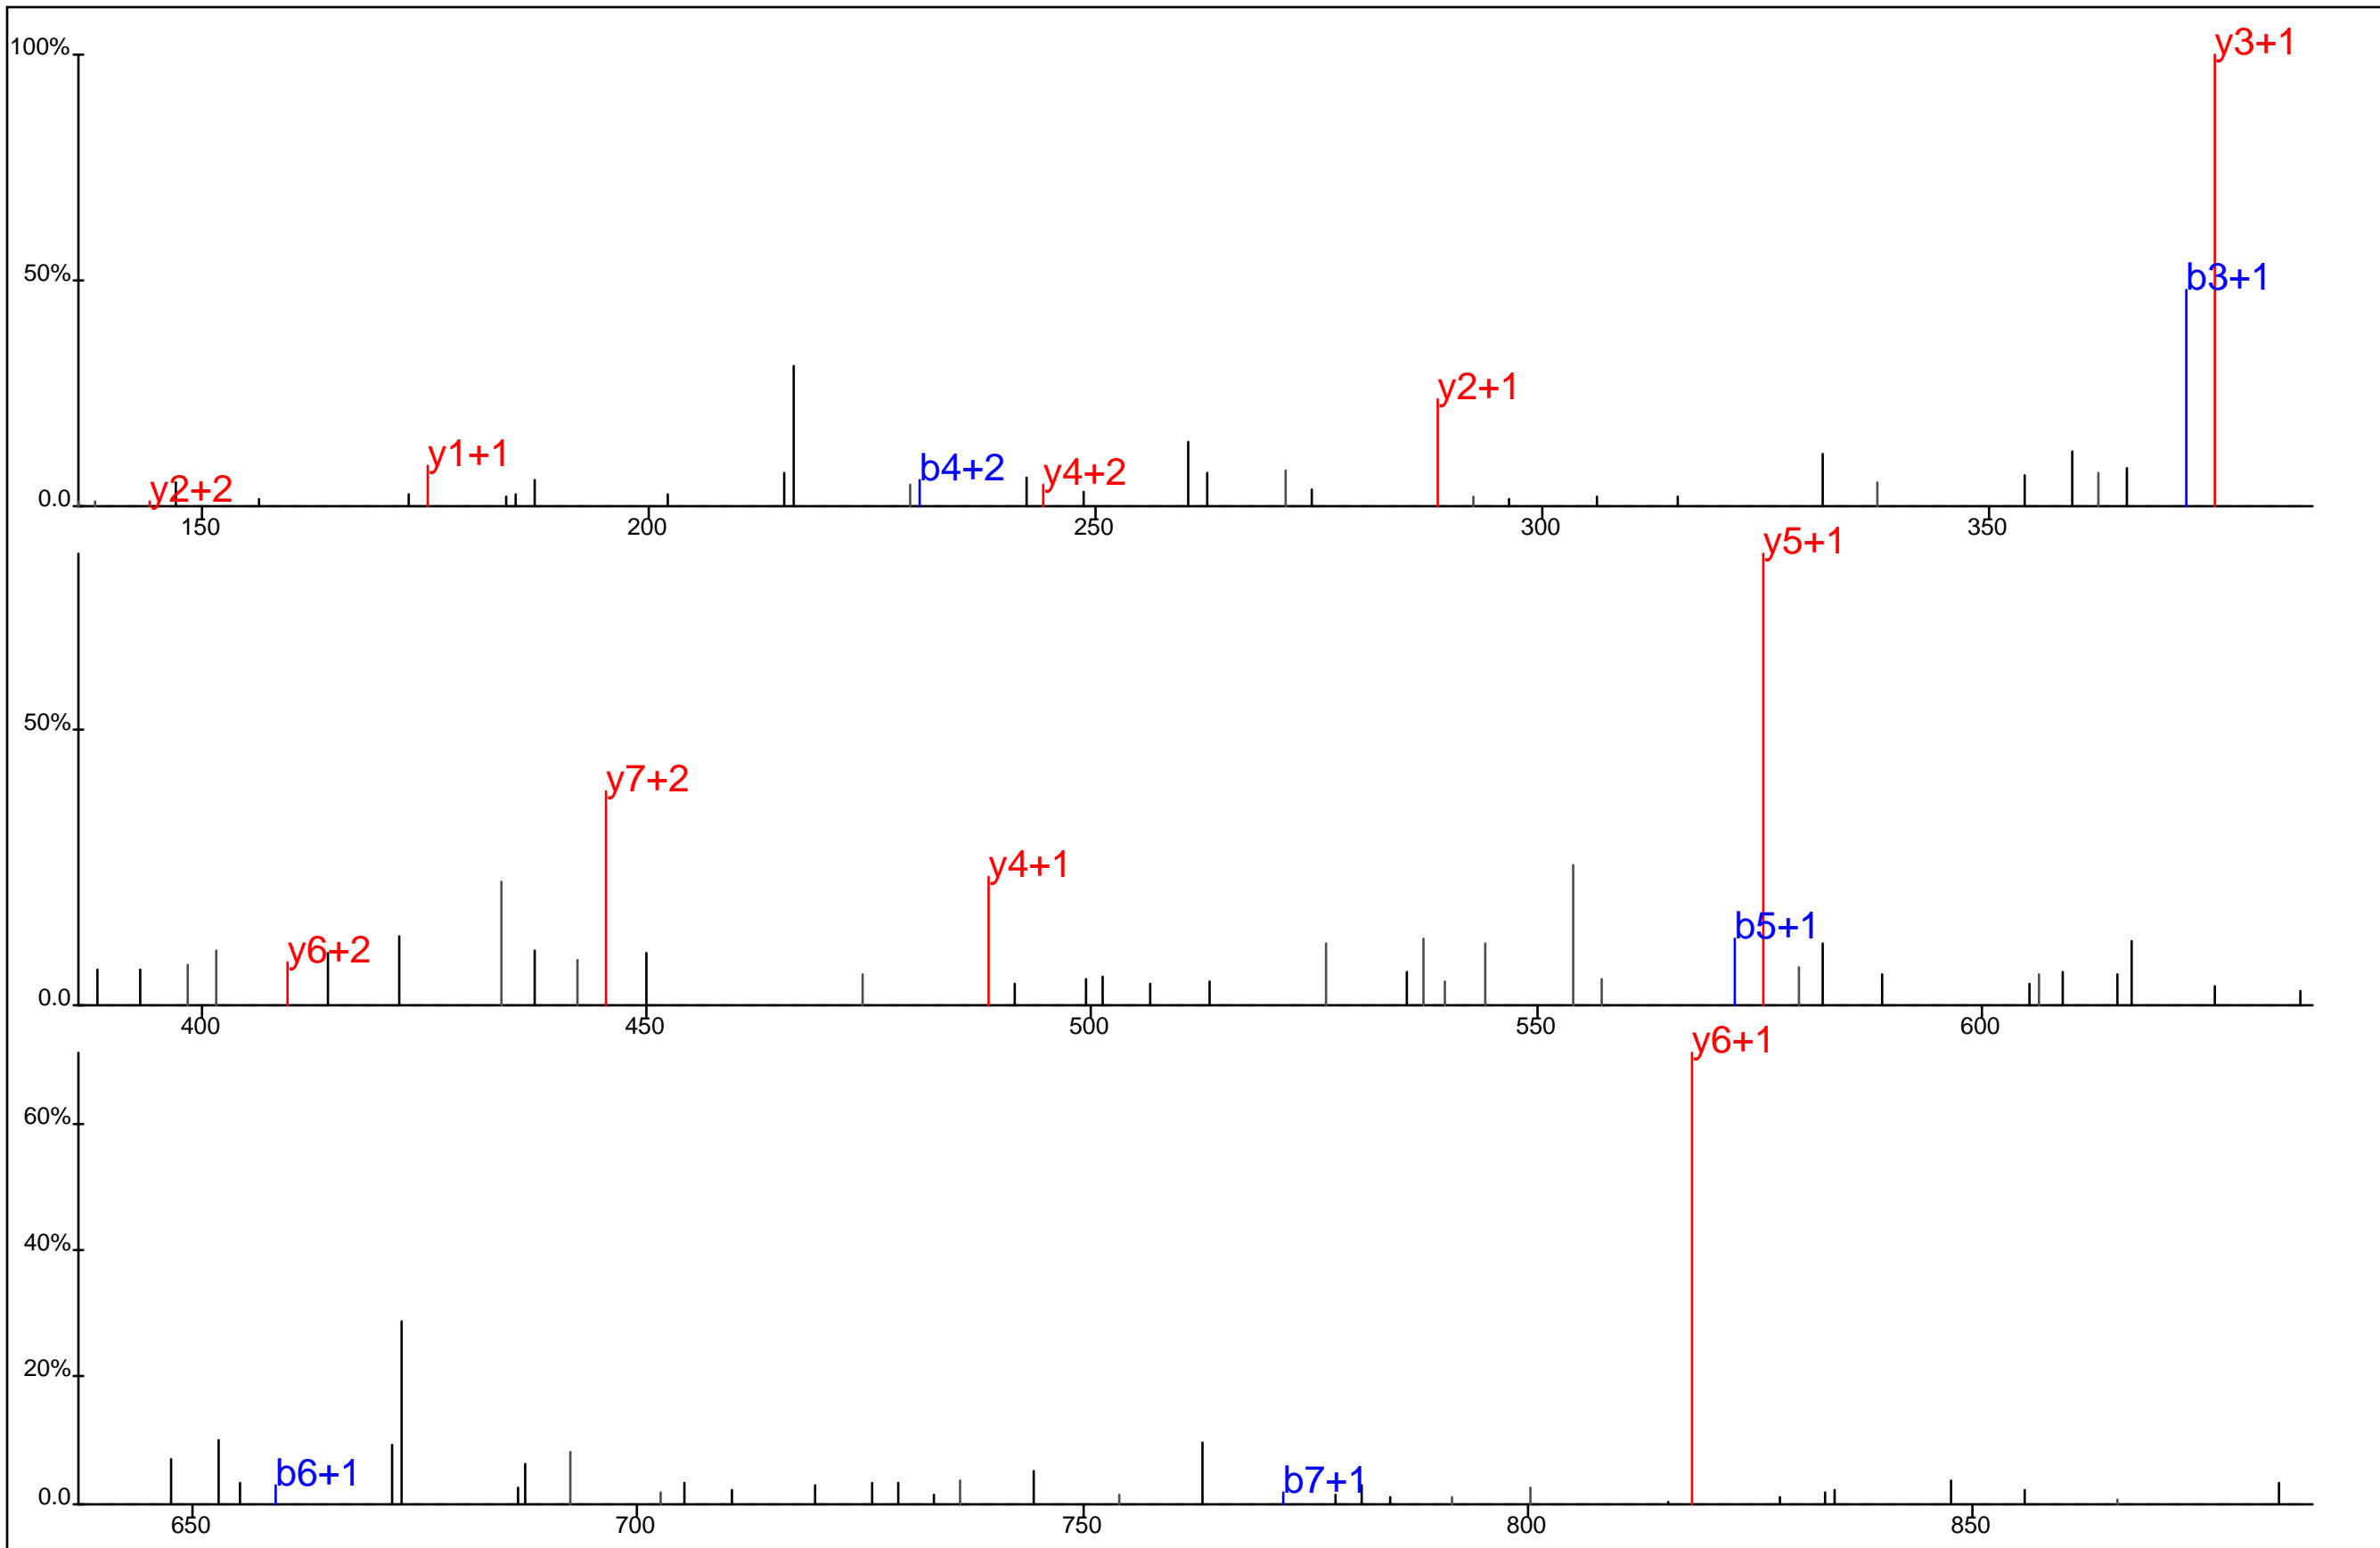

G A Y\* S L S I R

Protein Name: Fyn  
 gi Accession: 0  
 Precursor Mass: 473.7244+2  
 Delta Mass: 2.360 ppm  
 XCorr: 37.32

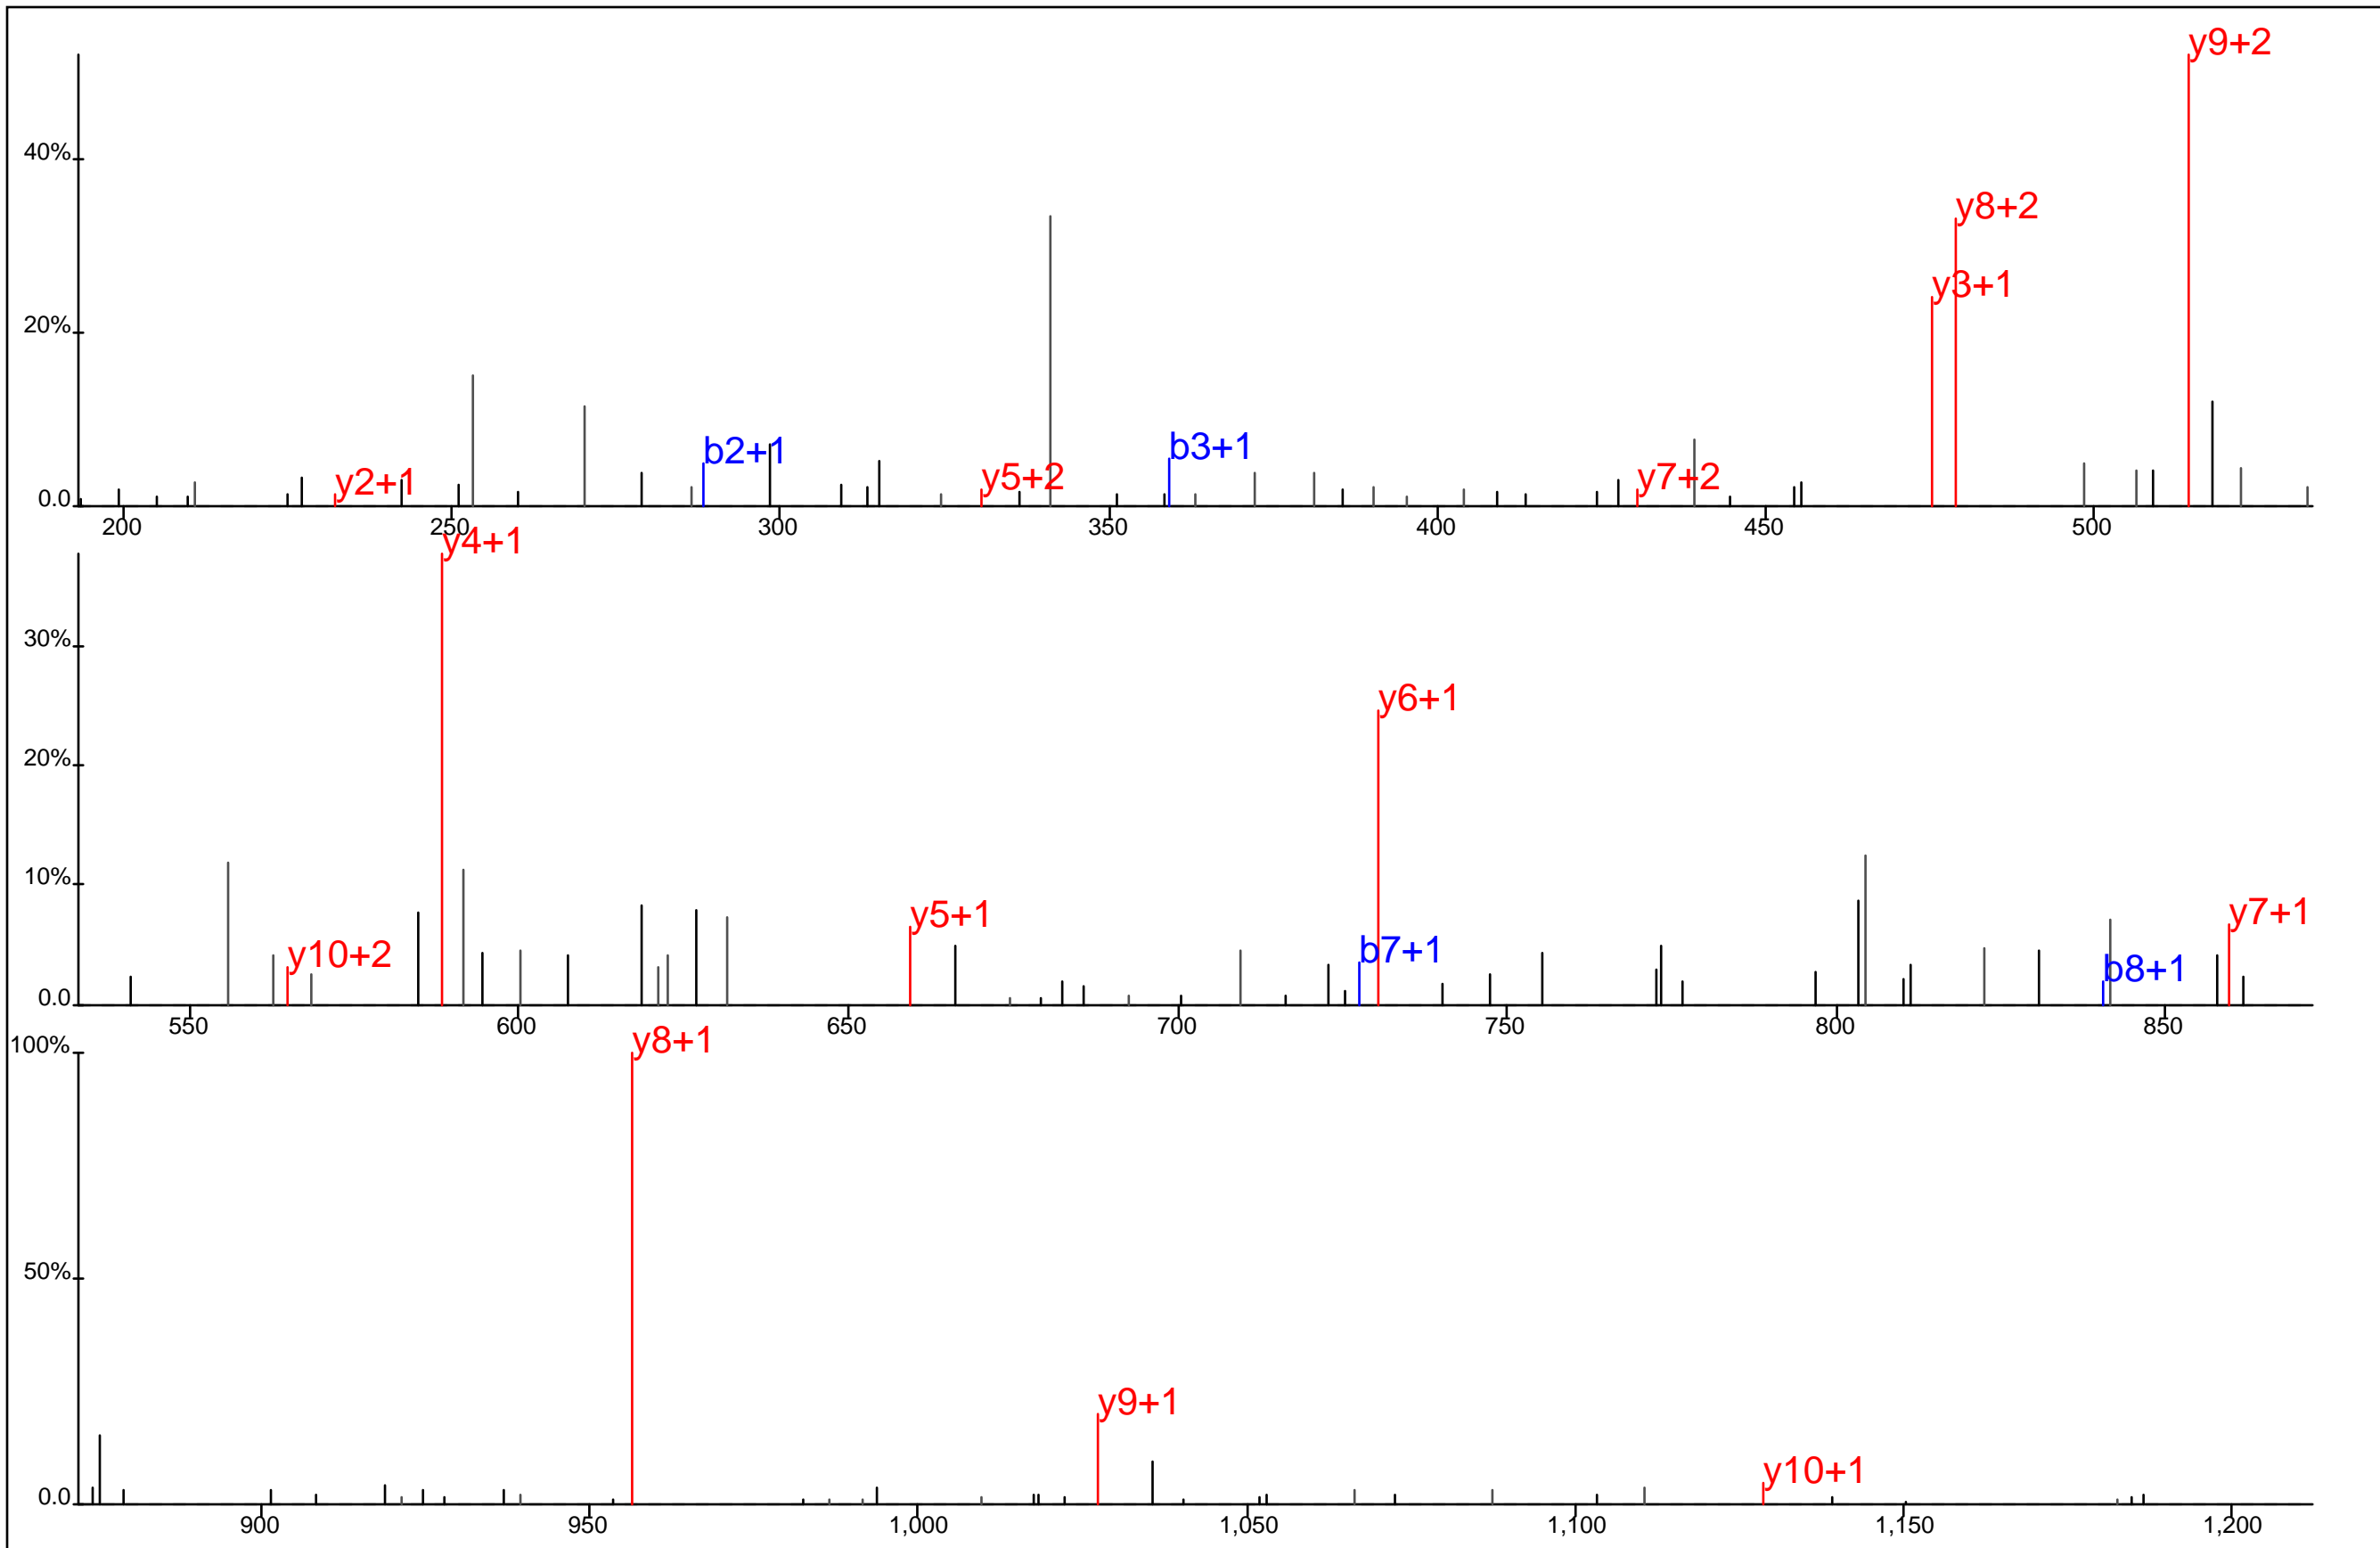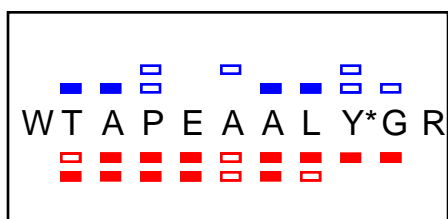

Protein Name: Fyn  
 gi Accession: 0  
 Precursor Mass: 657.7971+2  
 Delta Mass: 0.639 ppm  
 XCorr: 30.34

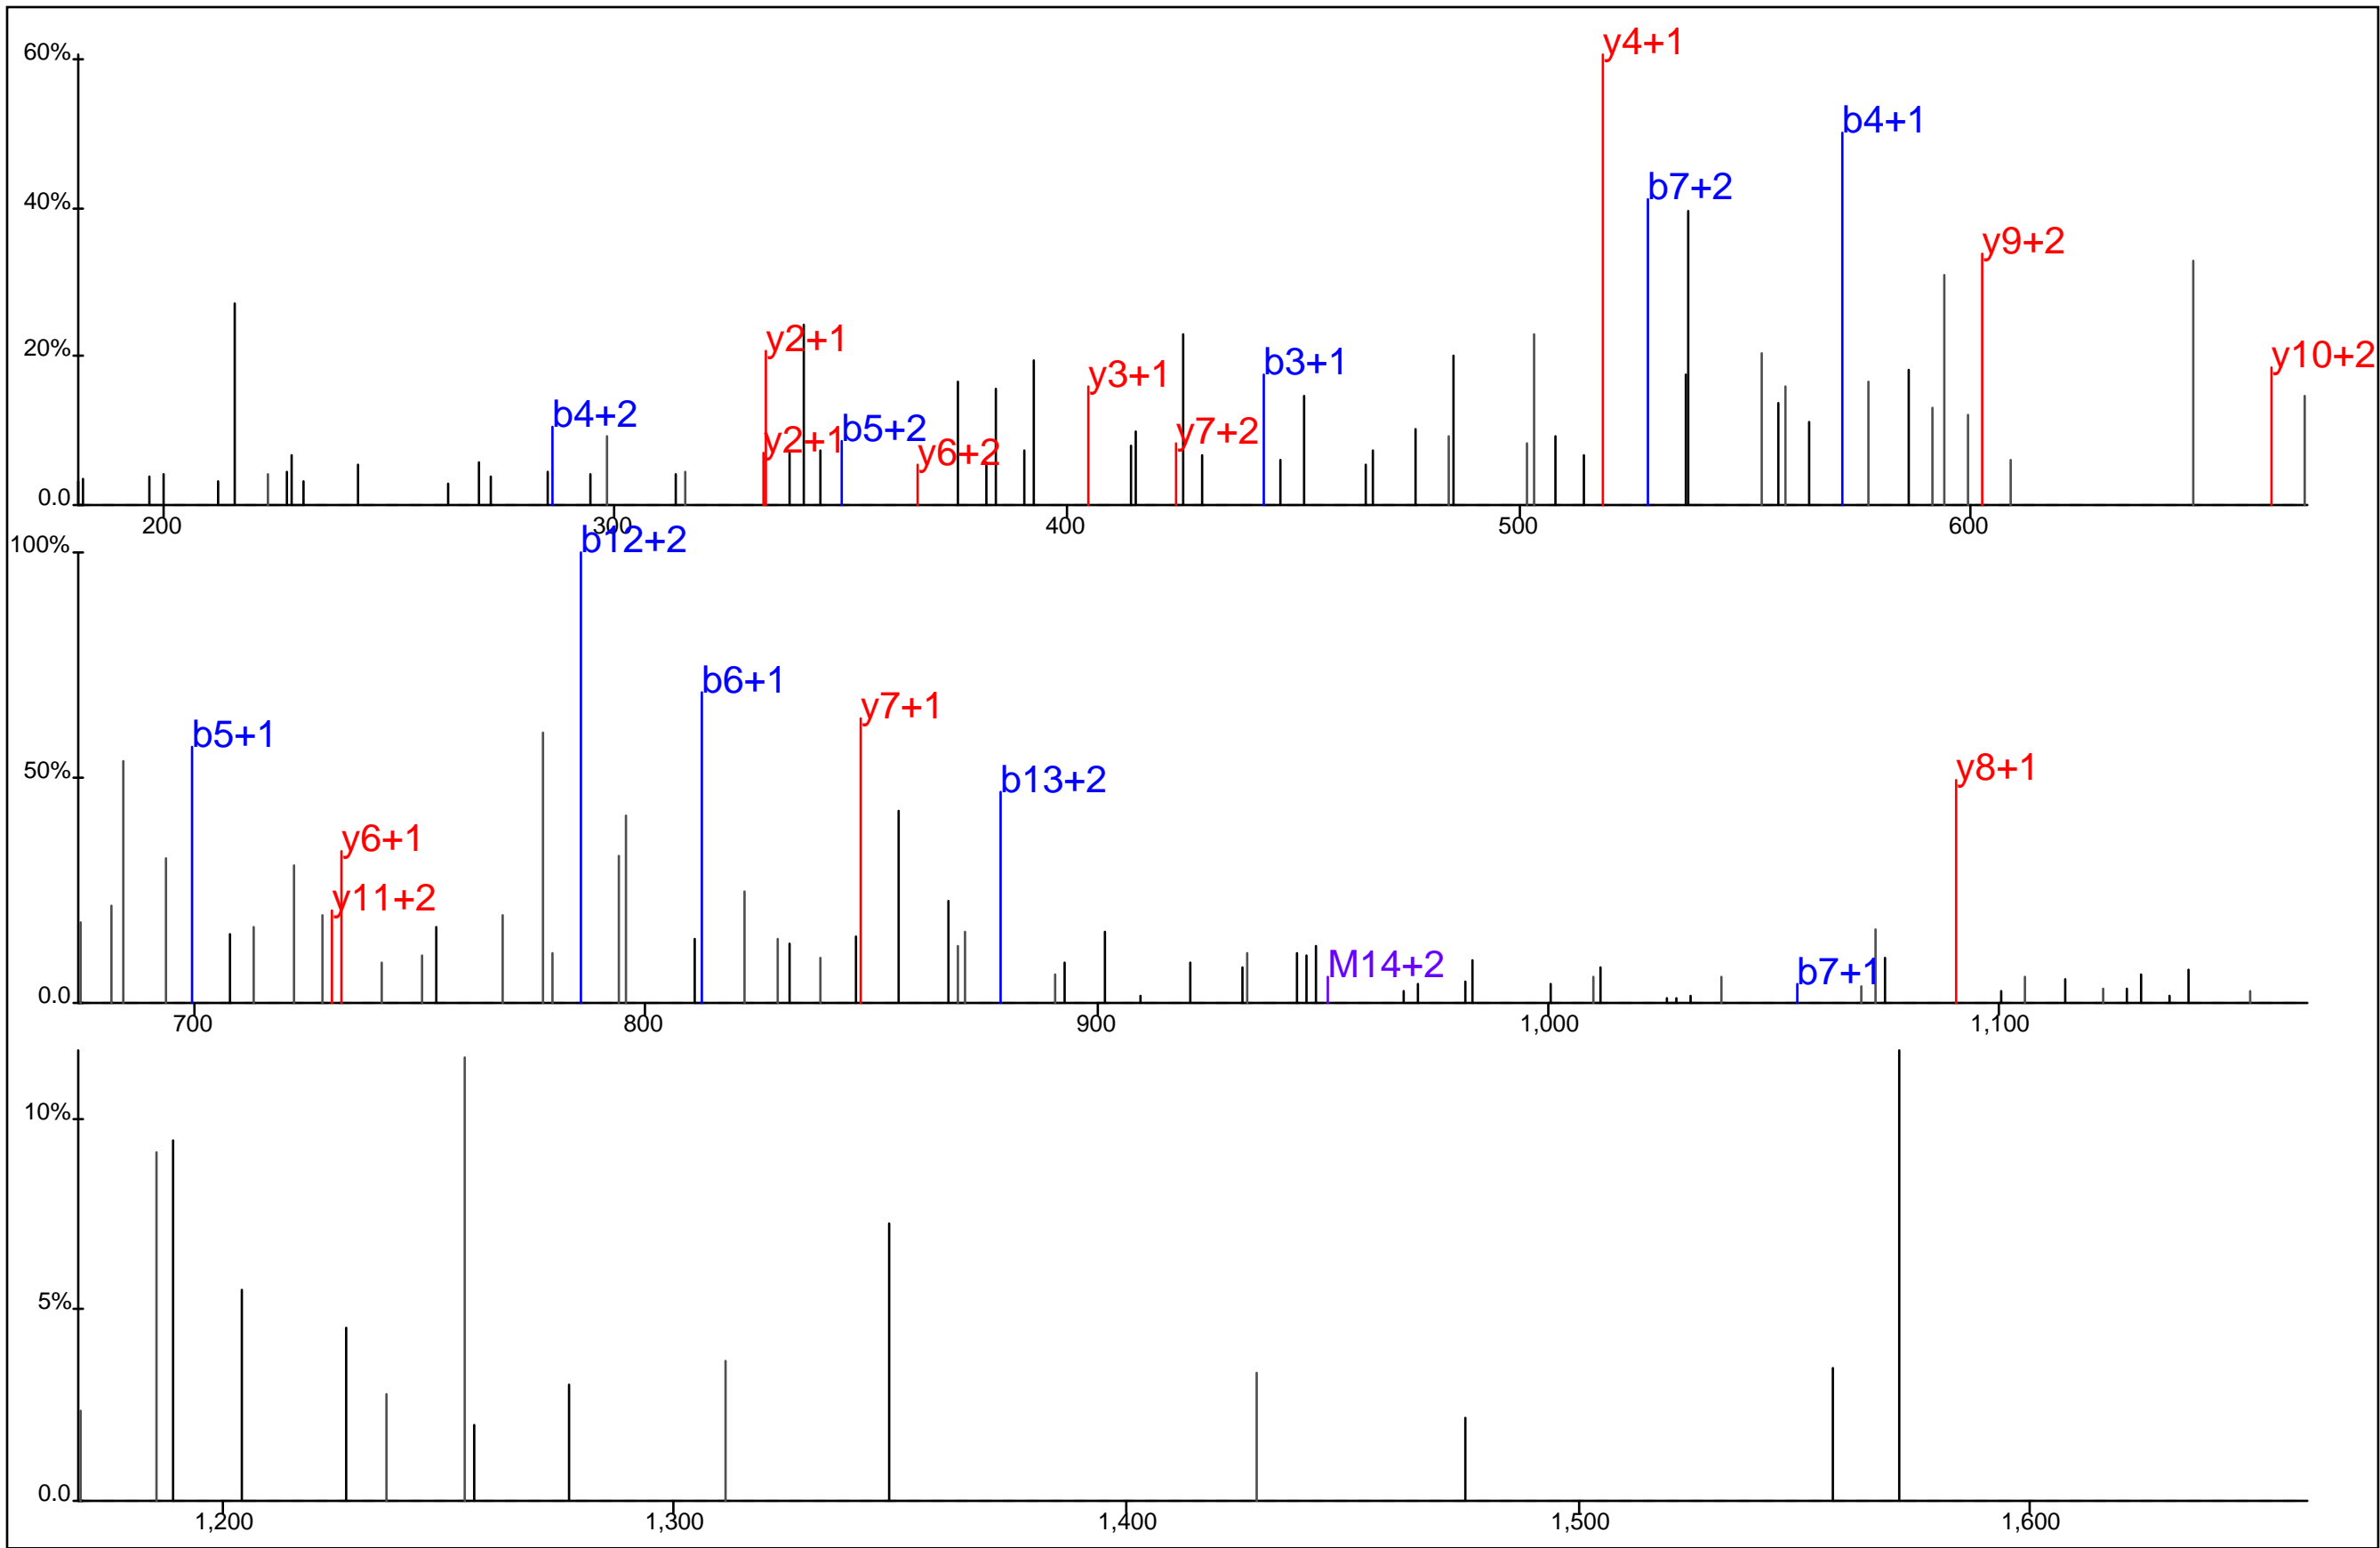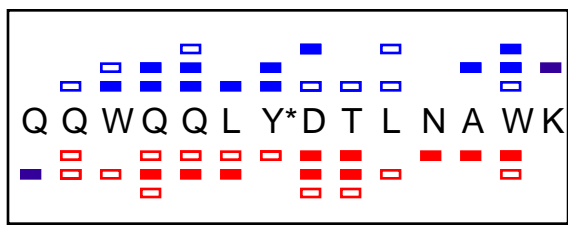

Protein Name: GA17  
 gi Accession: 0  
 Precursor Mass: 634.6251+3  
 Delta Mass: 1.298 ppm  
 XCorr: 22.94



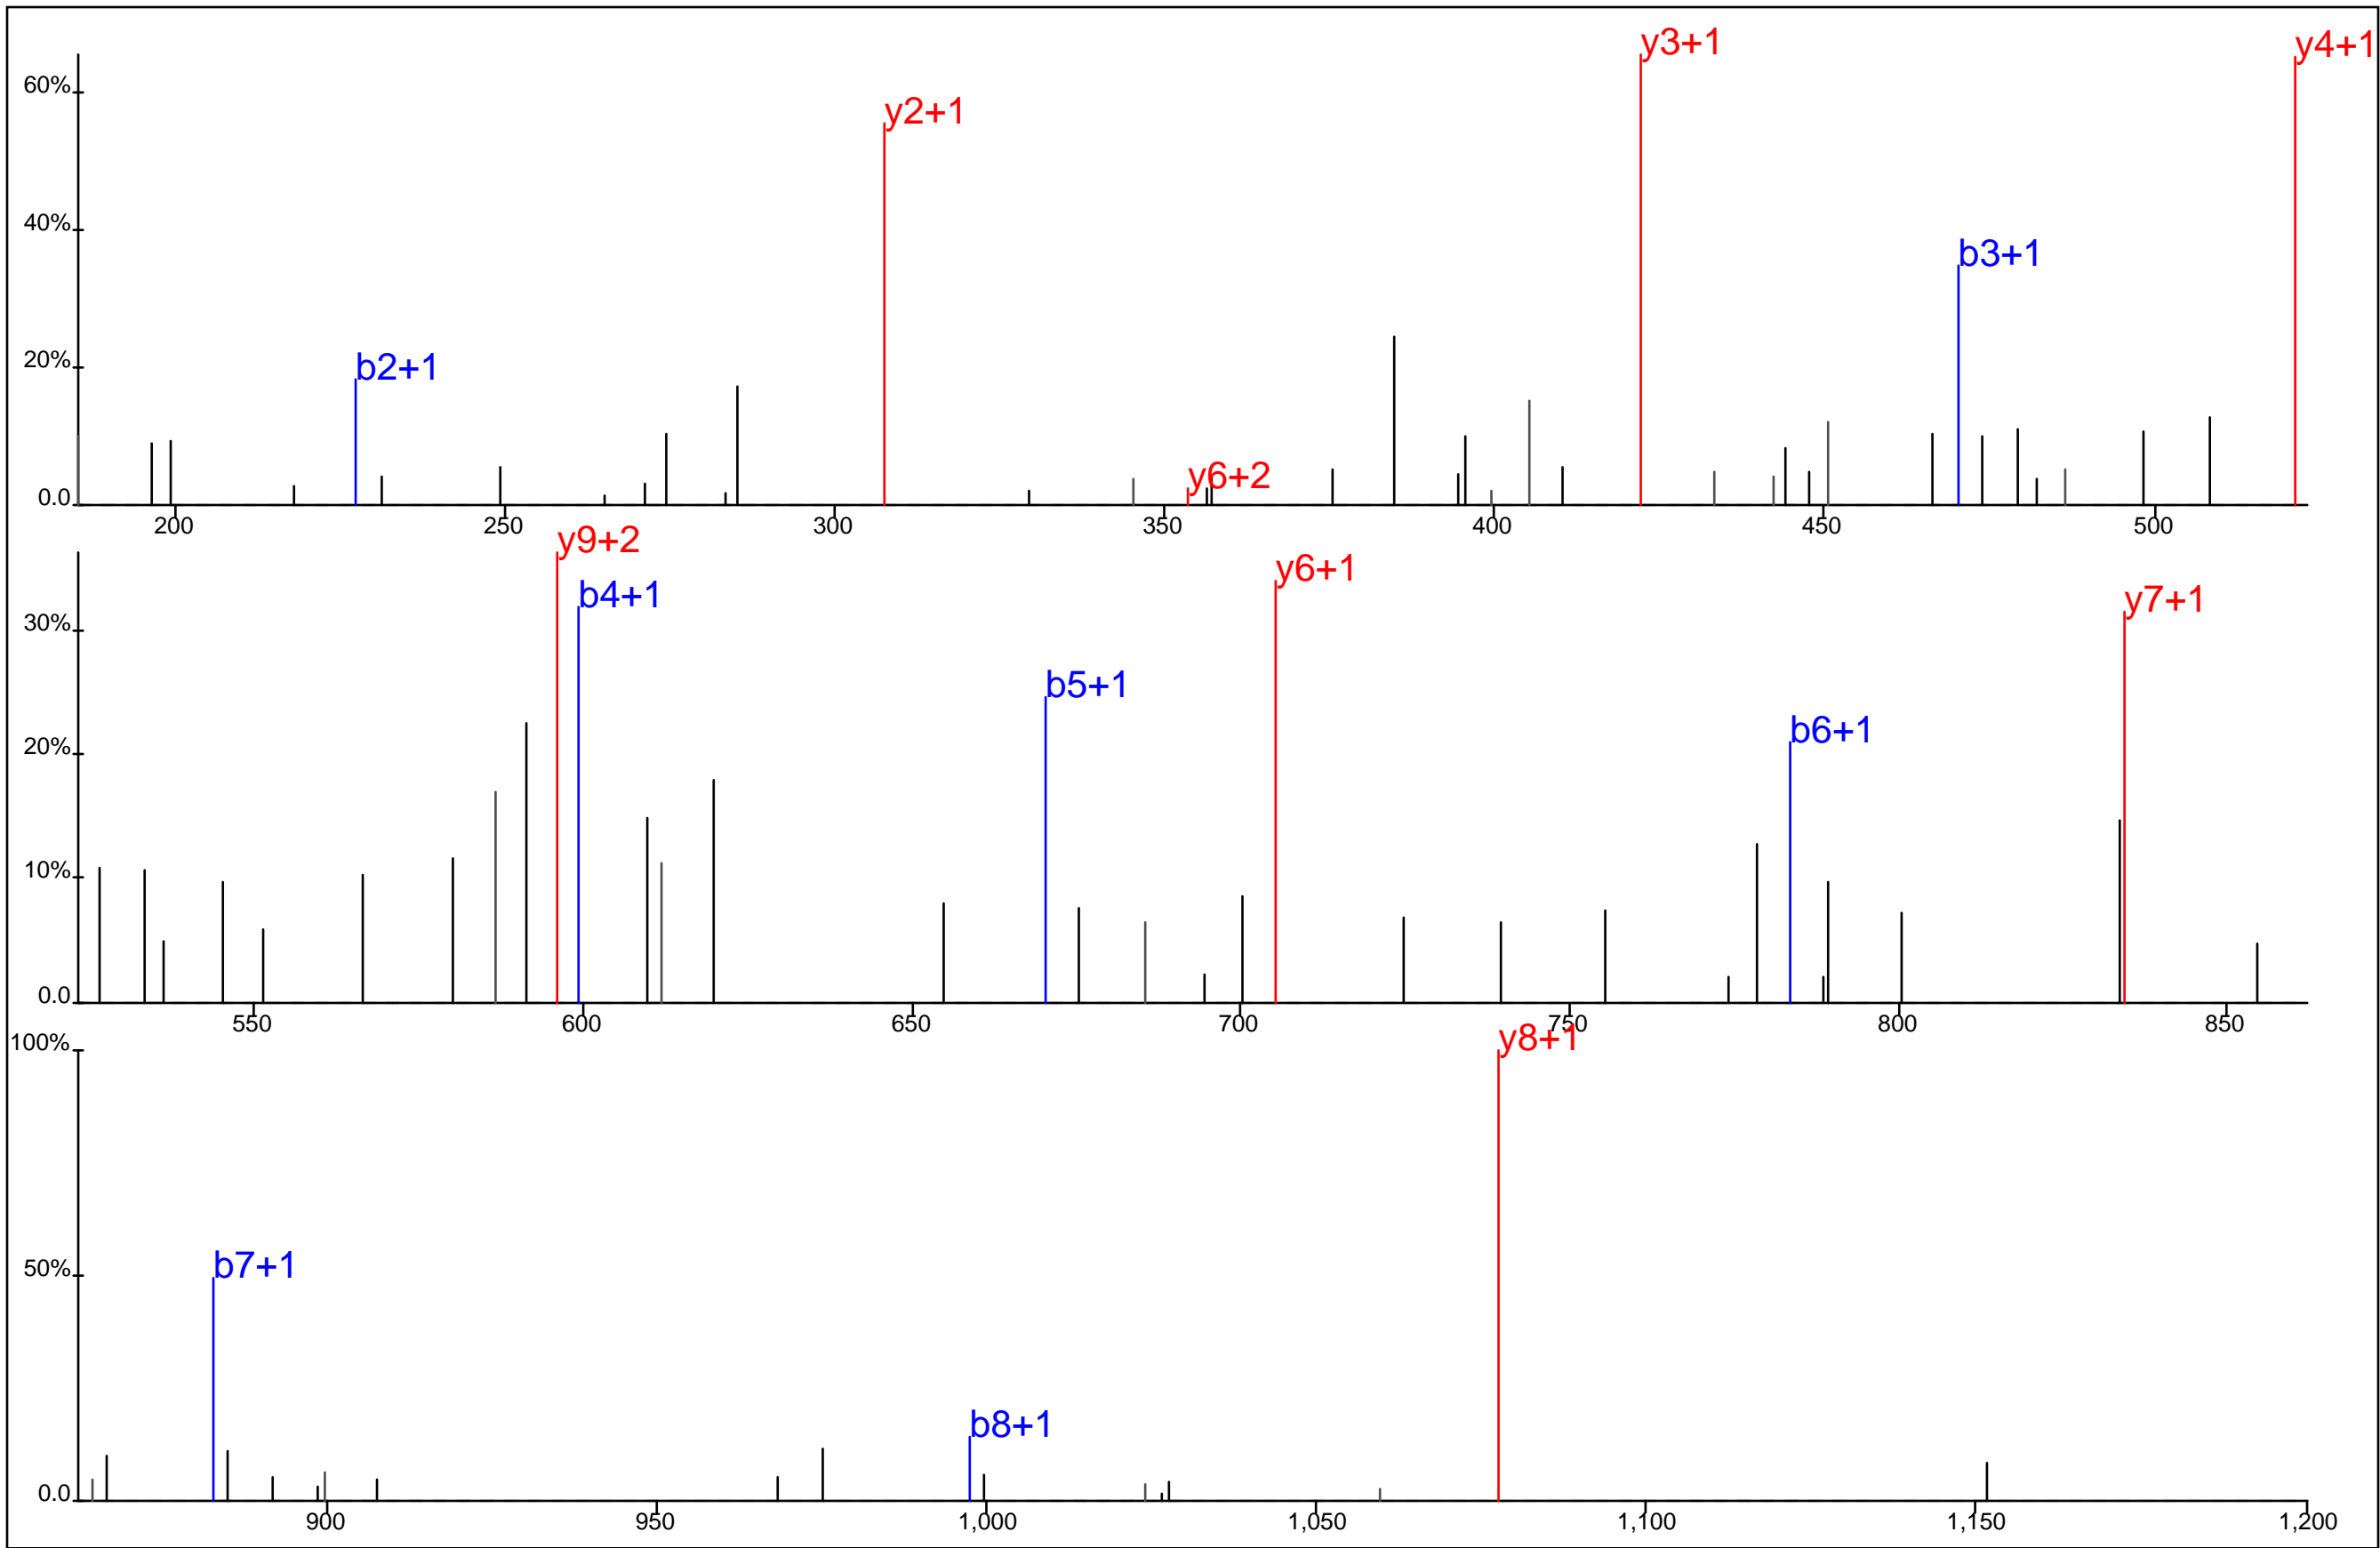

■ ■ ■ ■ ■ ■ ■ ■  
 L L Y\* E A L V D C K  
□ □ □ □ □ □ □ □

Protein Name: GA17  
 gi Accession: 0  
 Precursor Mass: 652.3040+2  
 Delta Mass: 0.318 ppm  
 XCorr: 39.0

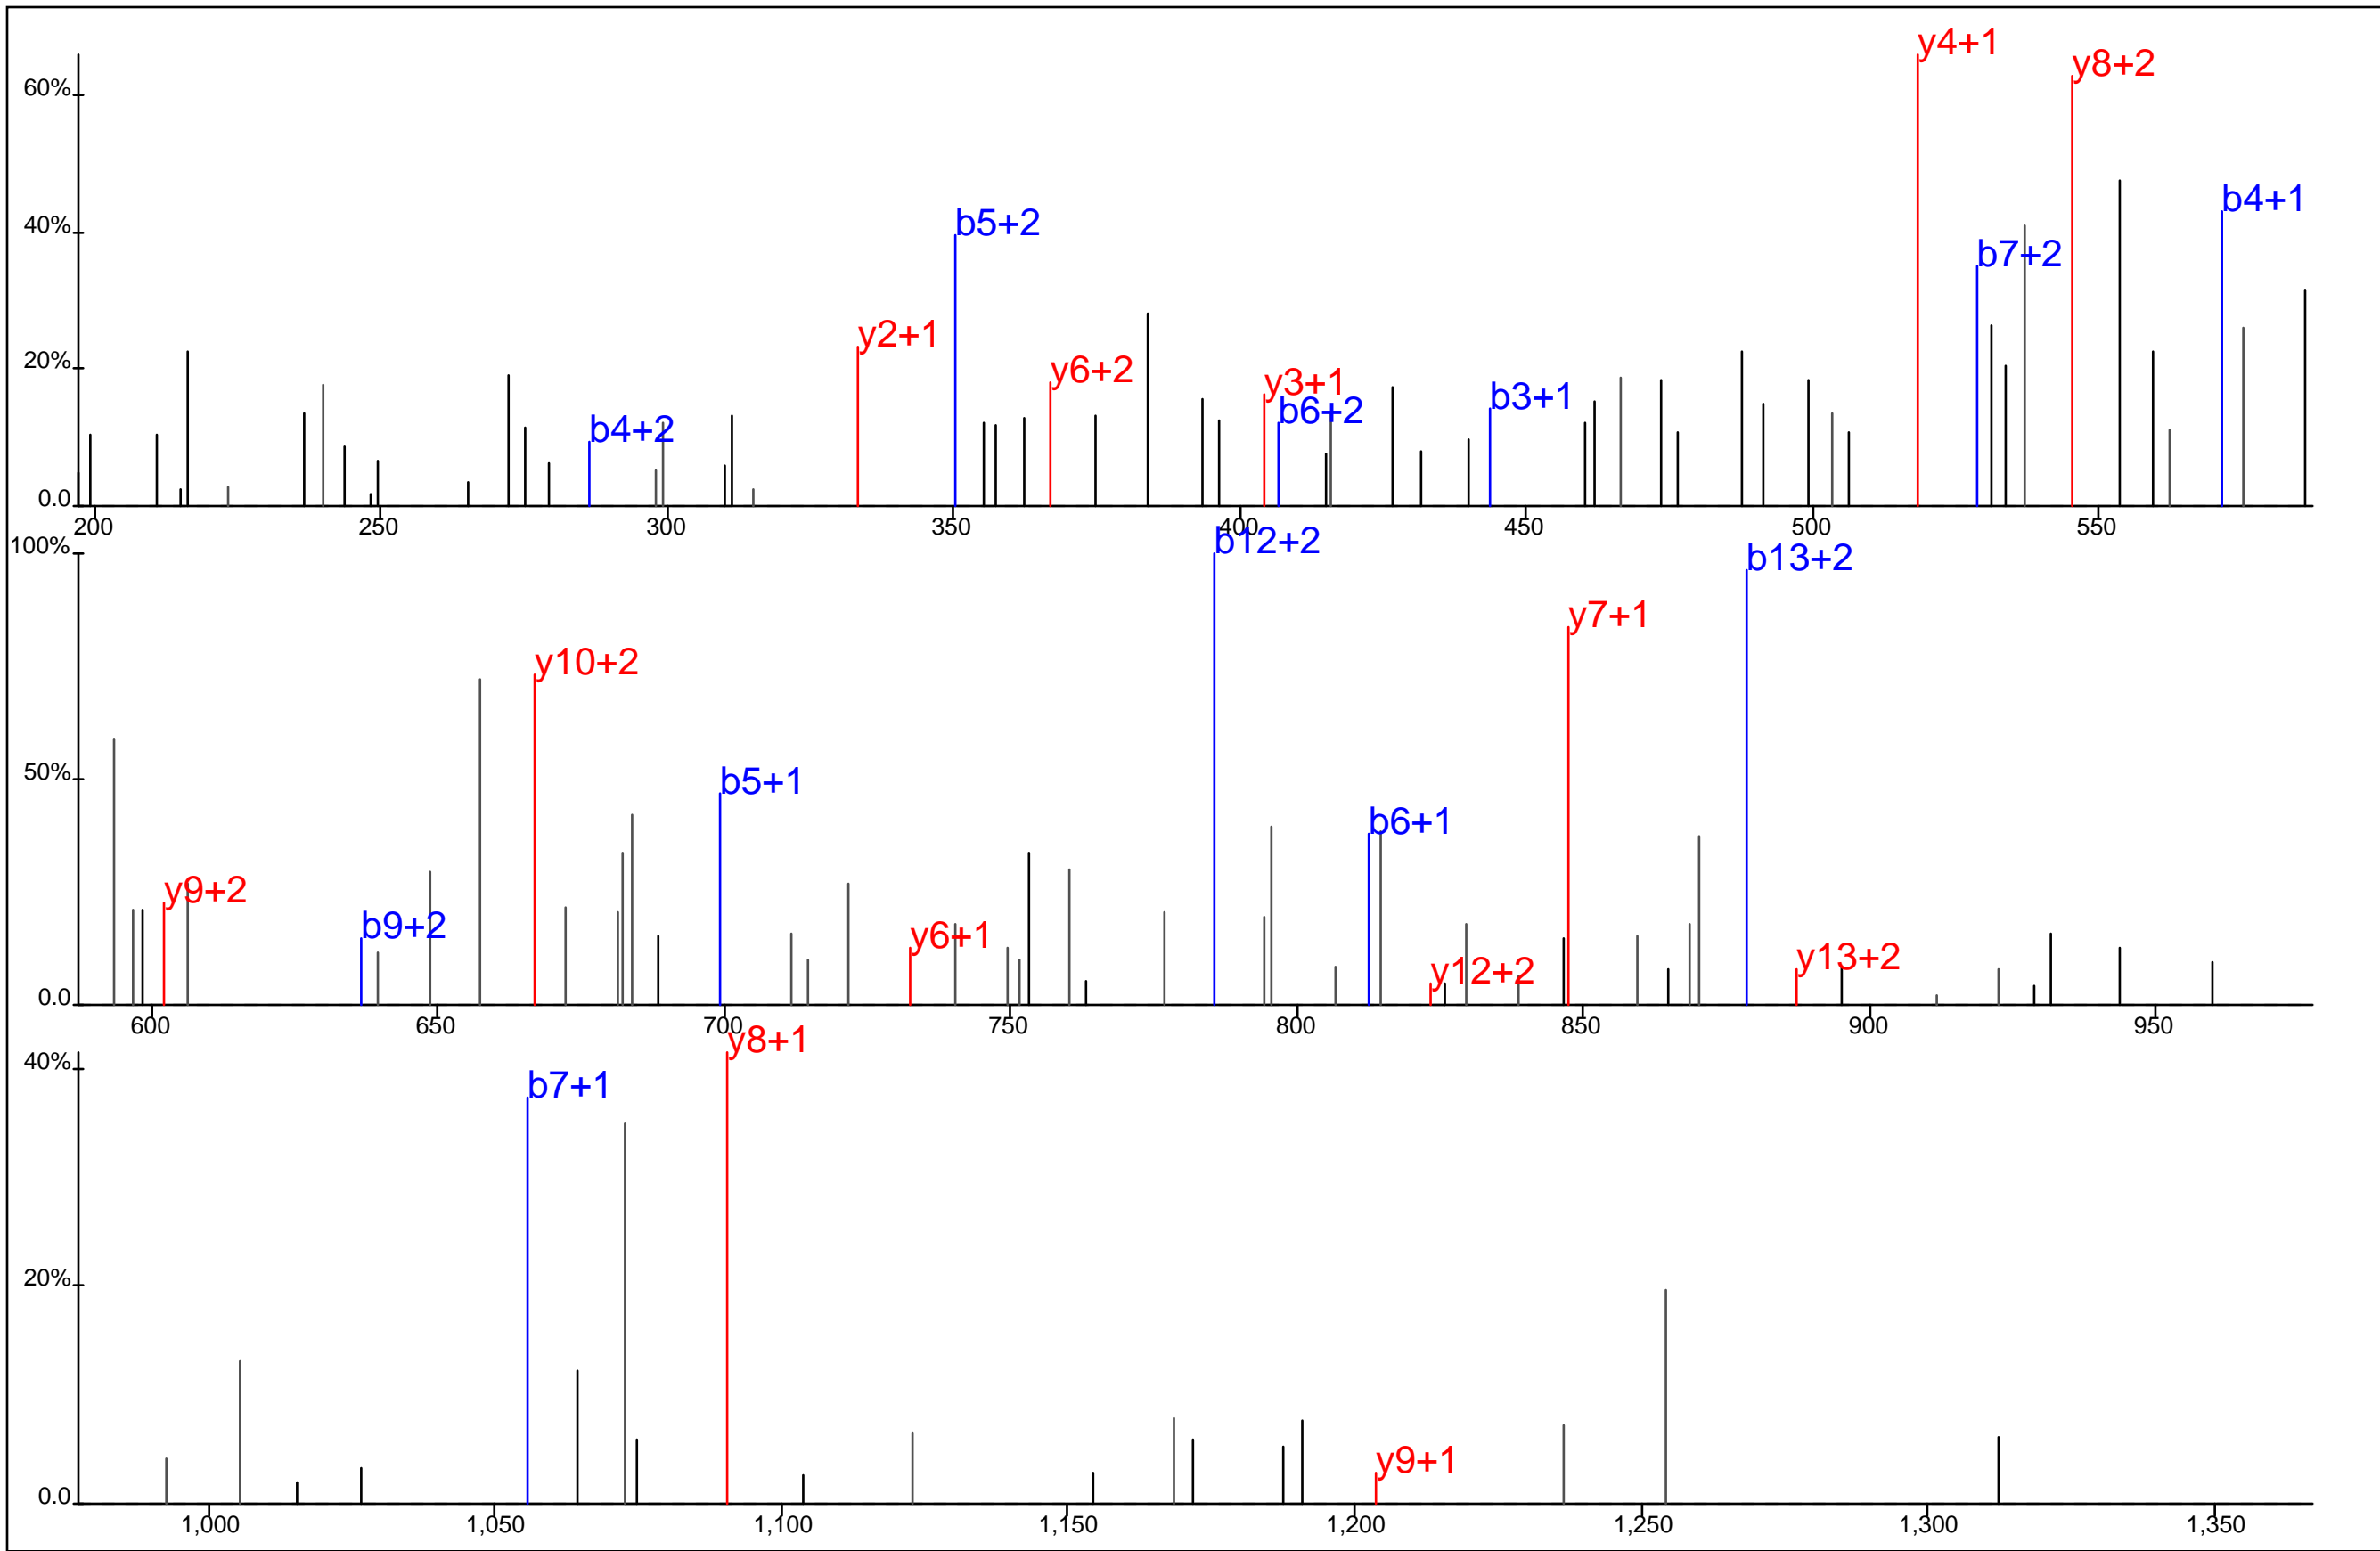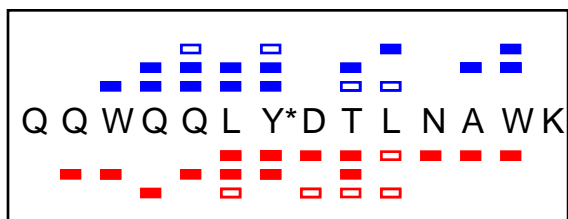

Protein Name: GA17  
 gi Accession: 0  
 Precursor Mass: 634.6262+3  
 Delta Mass: 3.032 ppm  
 XCorr: 22.19



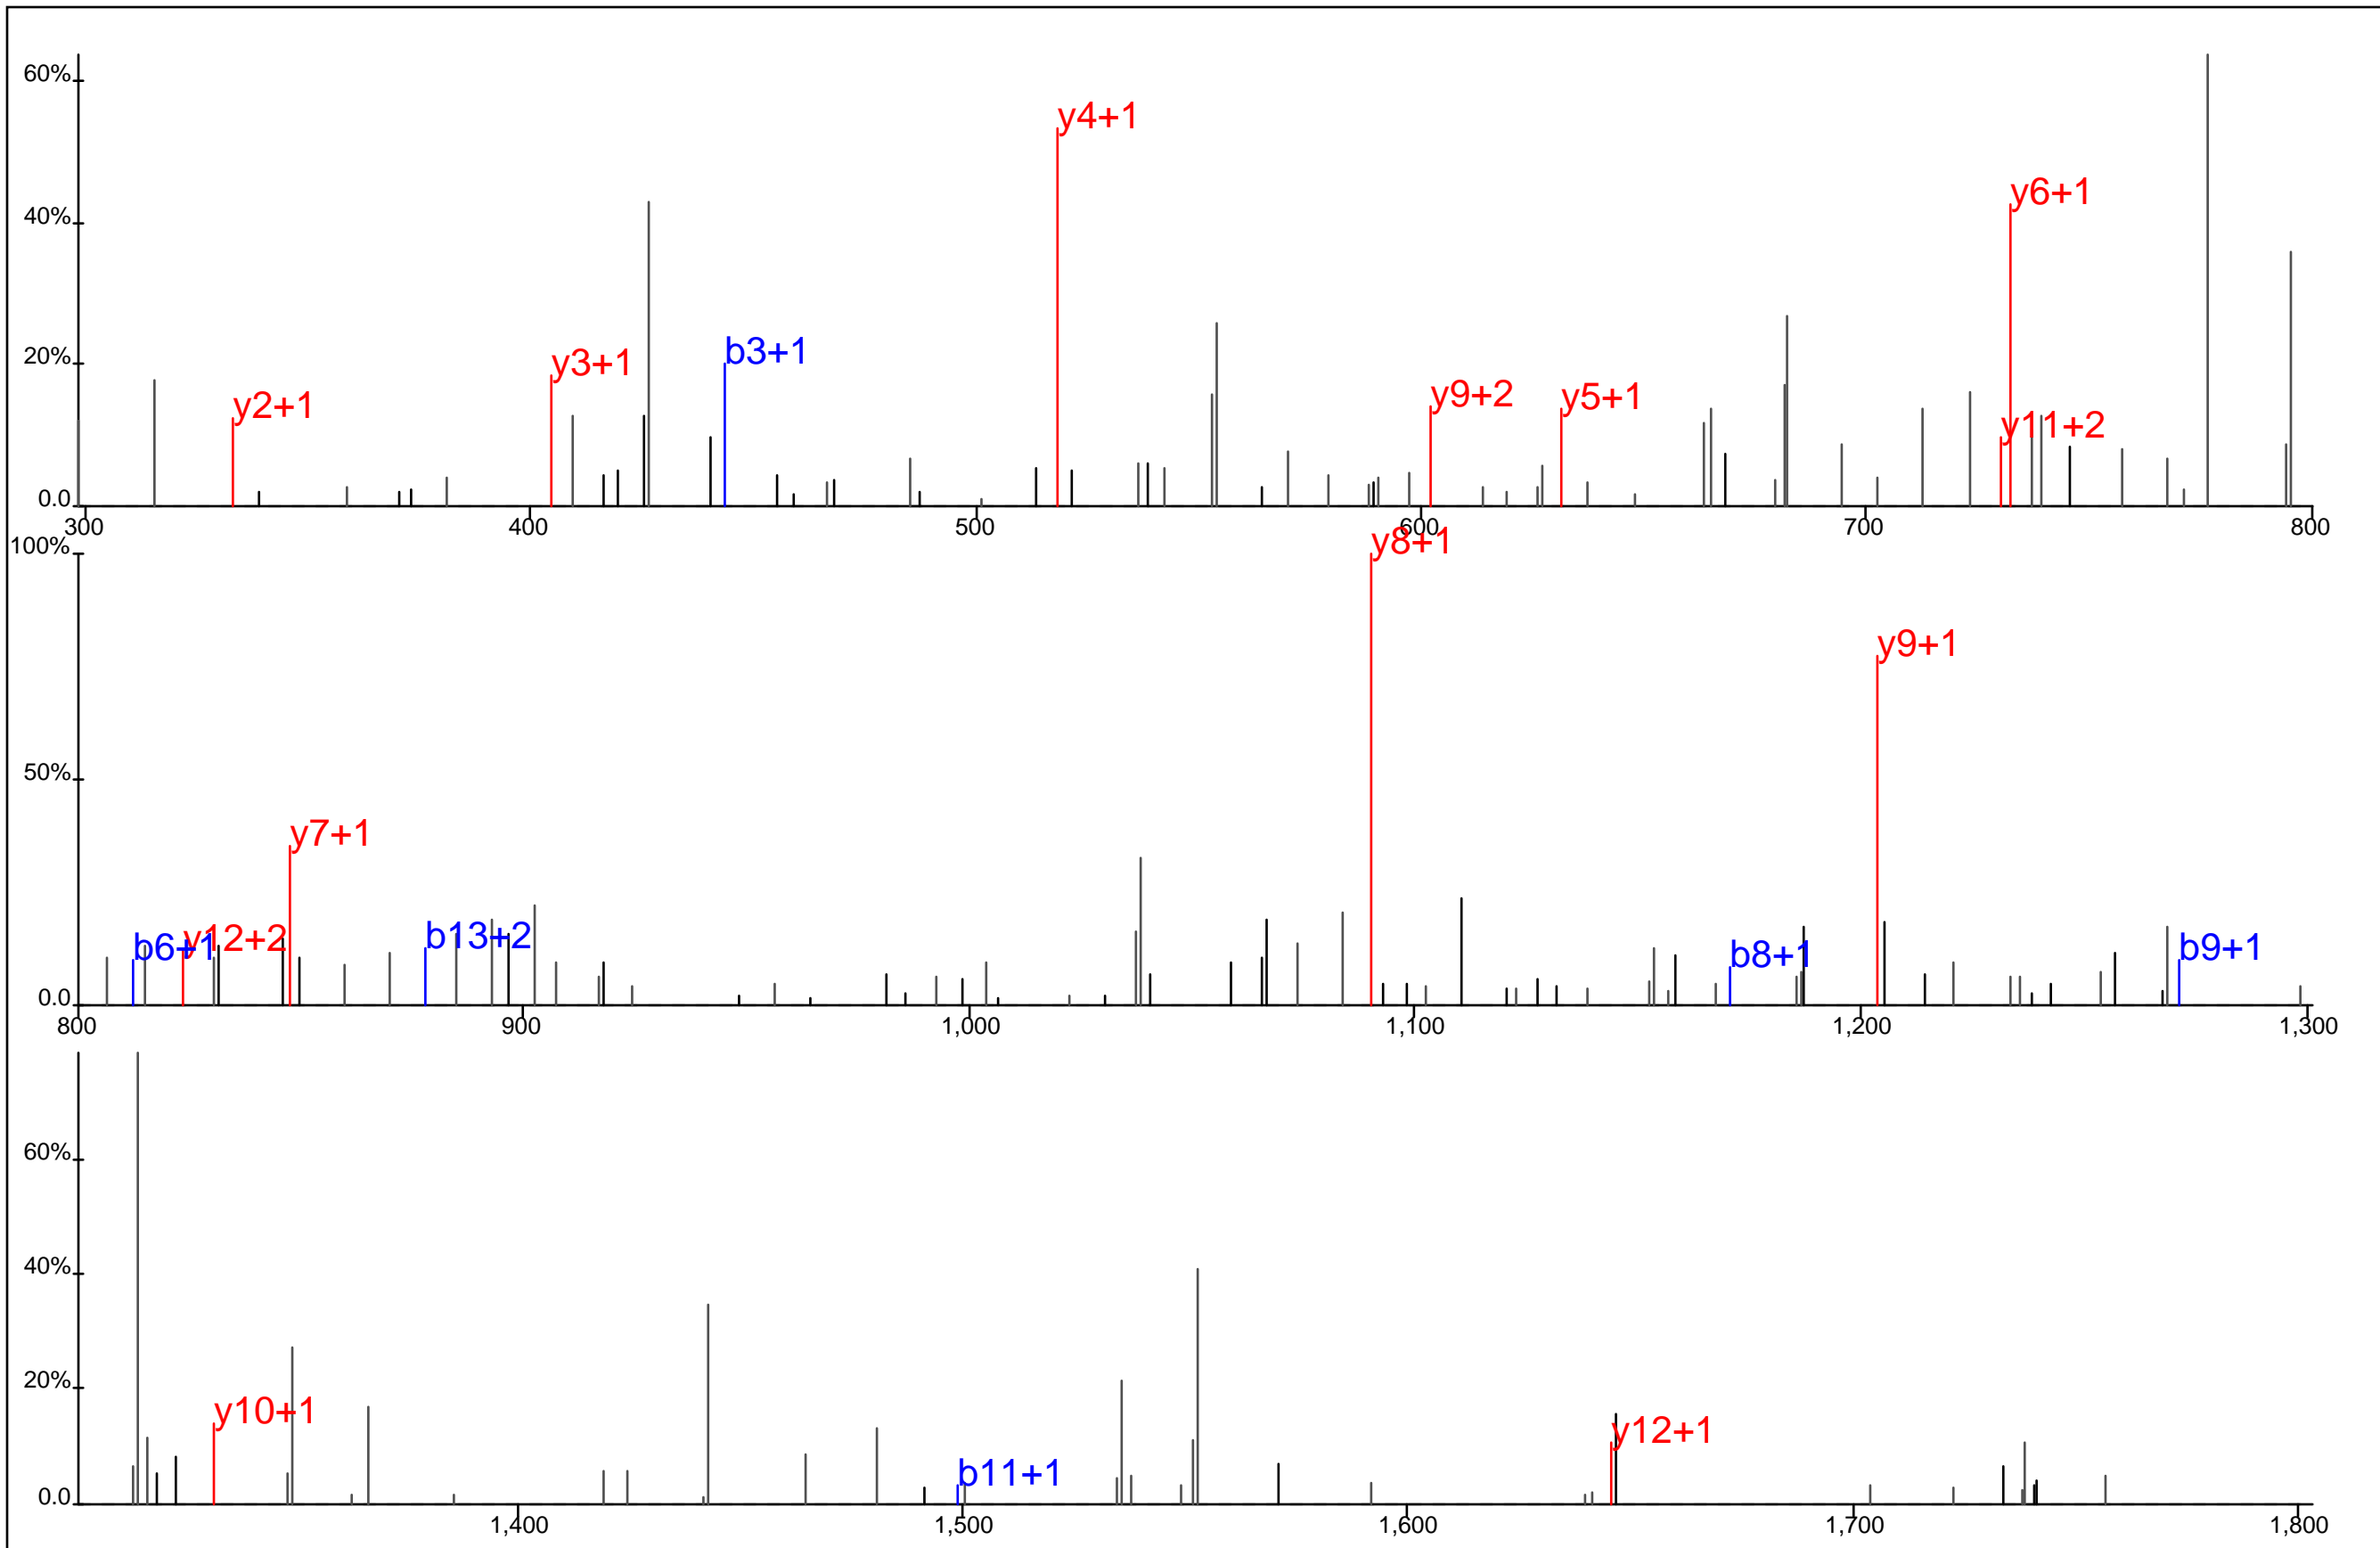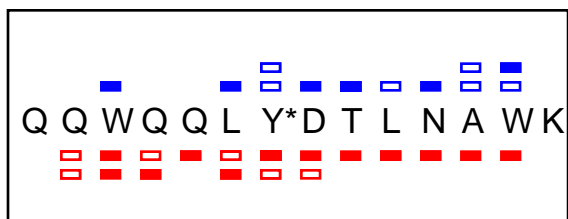

Protein Name: GA17  
 gi Accession: 0  
 Precursor Mass: 951.4346+2  
 Delta Mass: 1.947 ppm  
 XCorr: 38.3



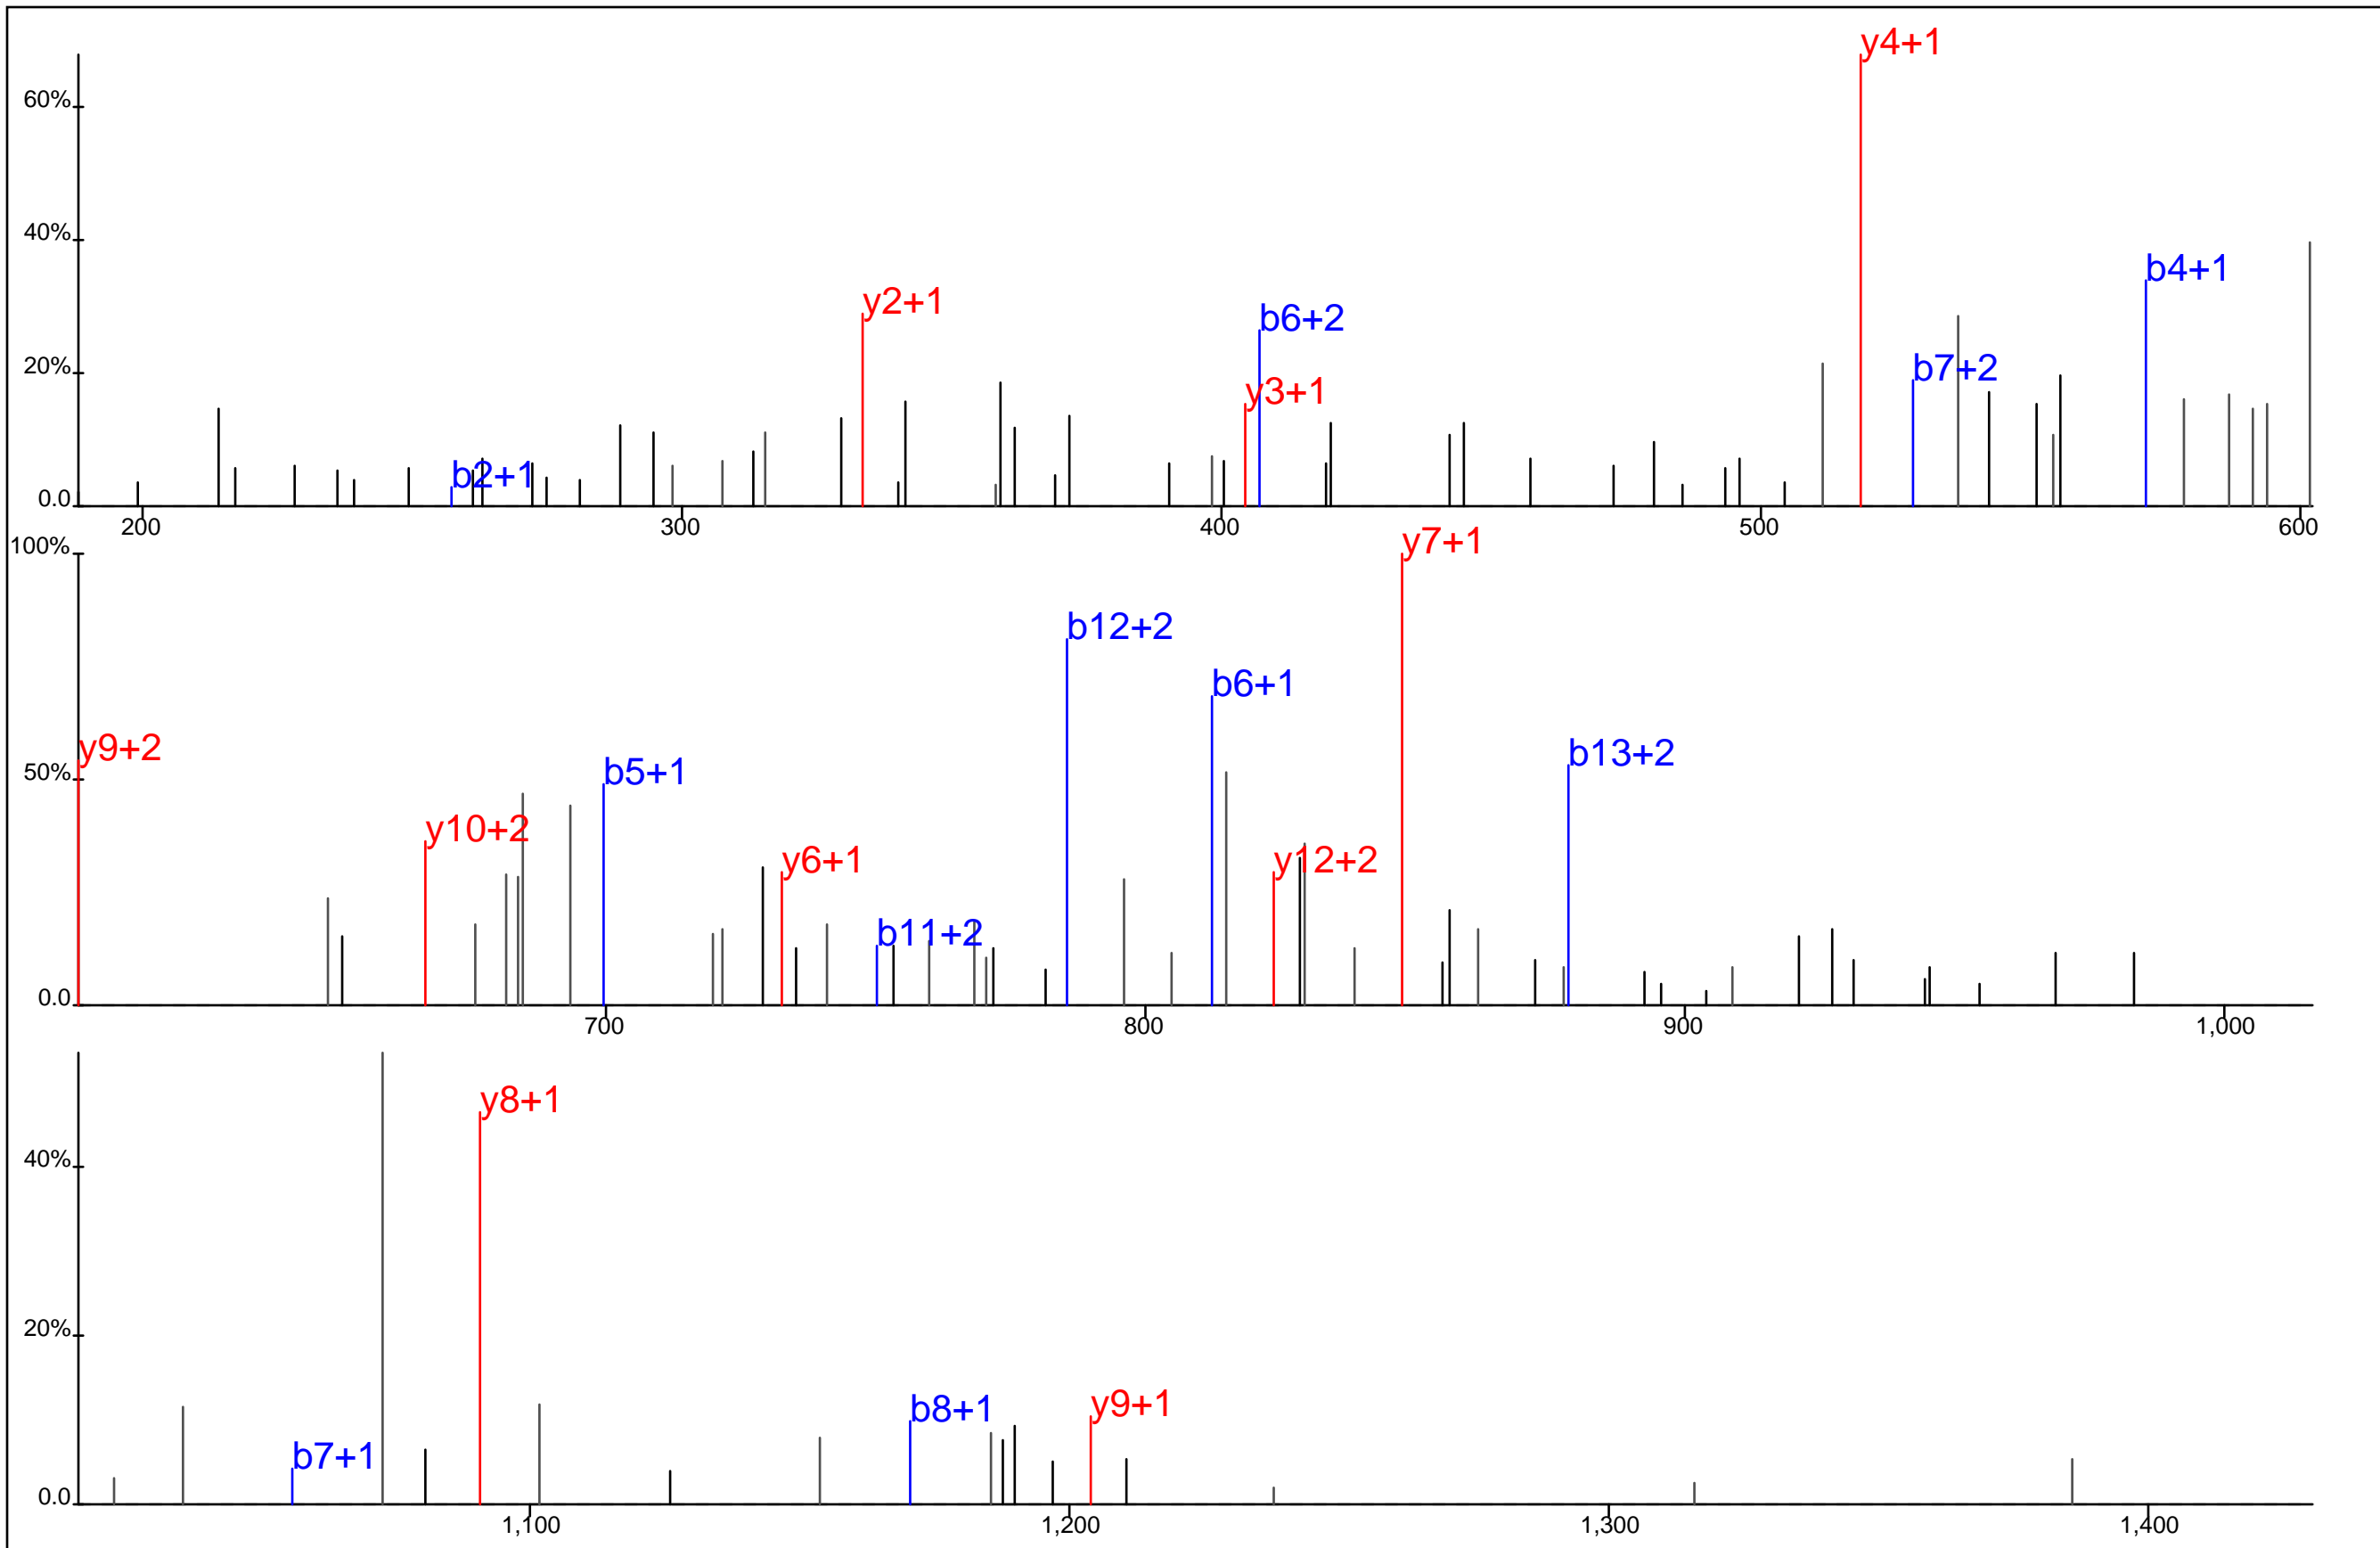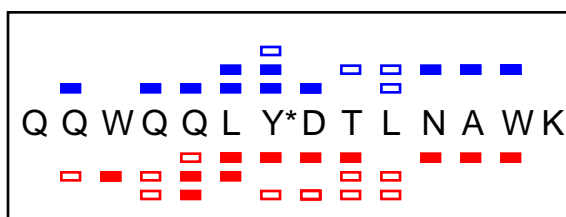

Protein Name: GA17  
 gi Accession: 0  
 Precursor Mass: 634.6257+3  
 Delta Mass: 2.357 ppm  
 XCorr: 35.12

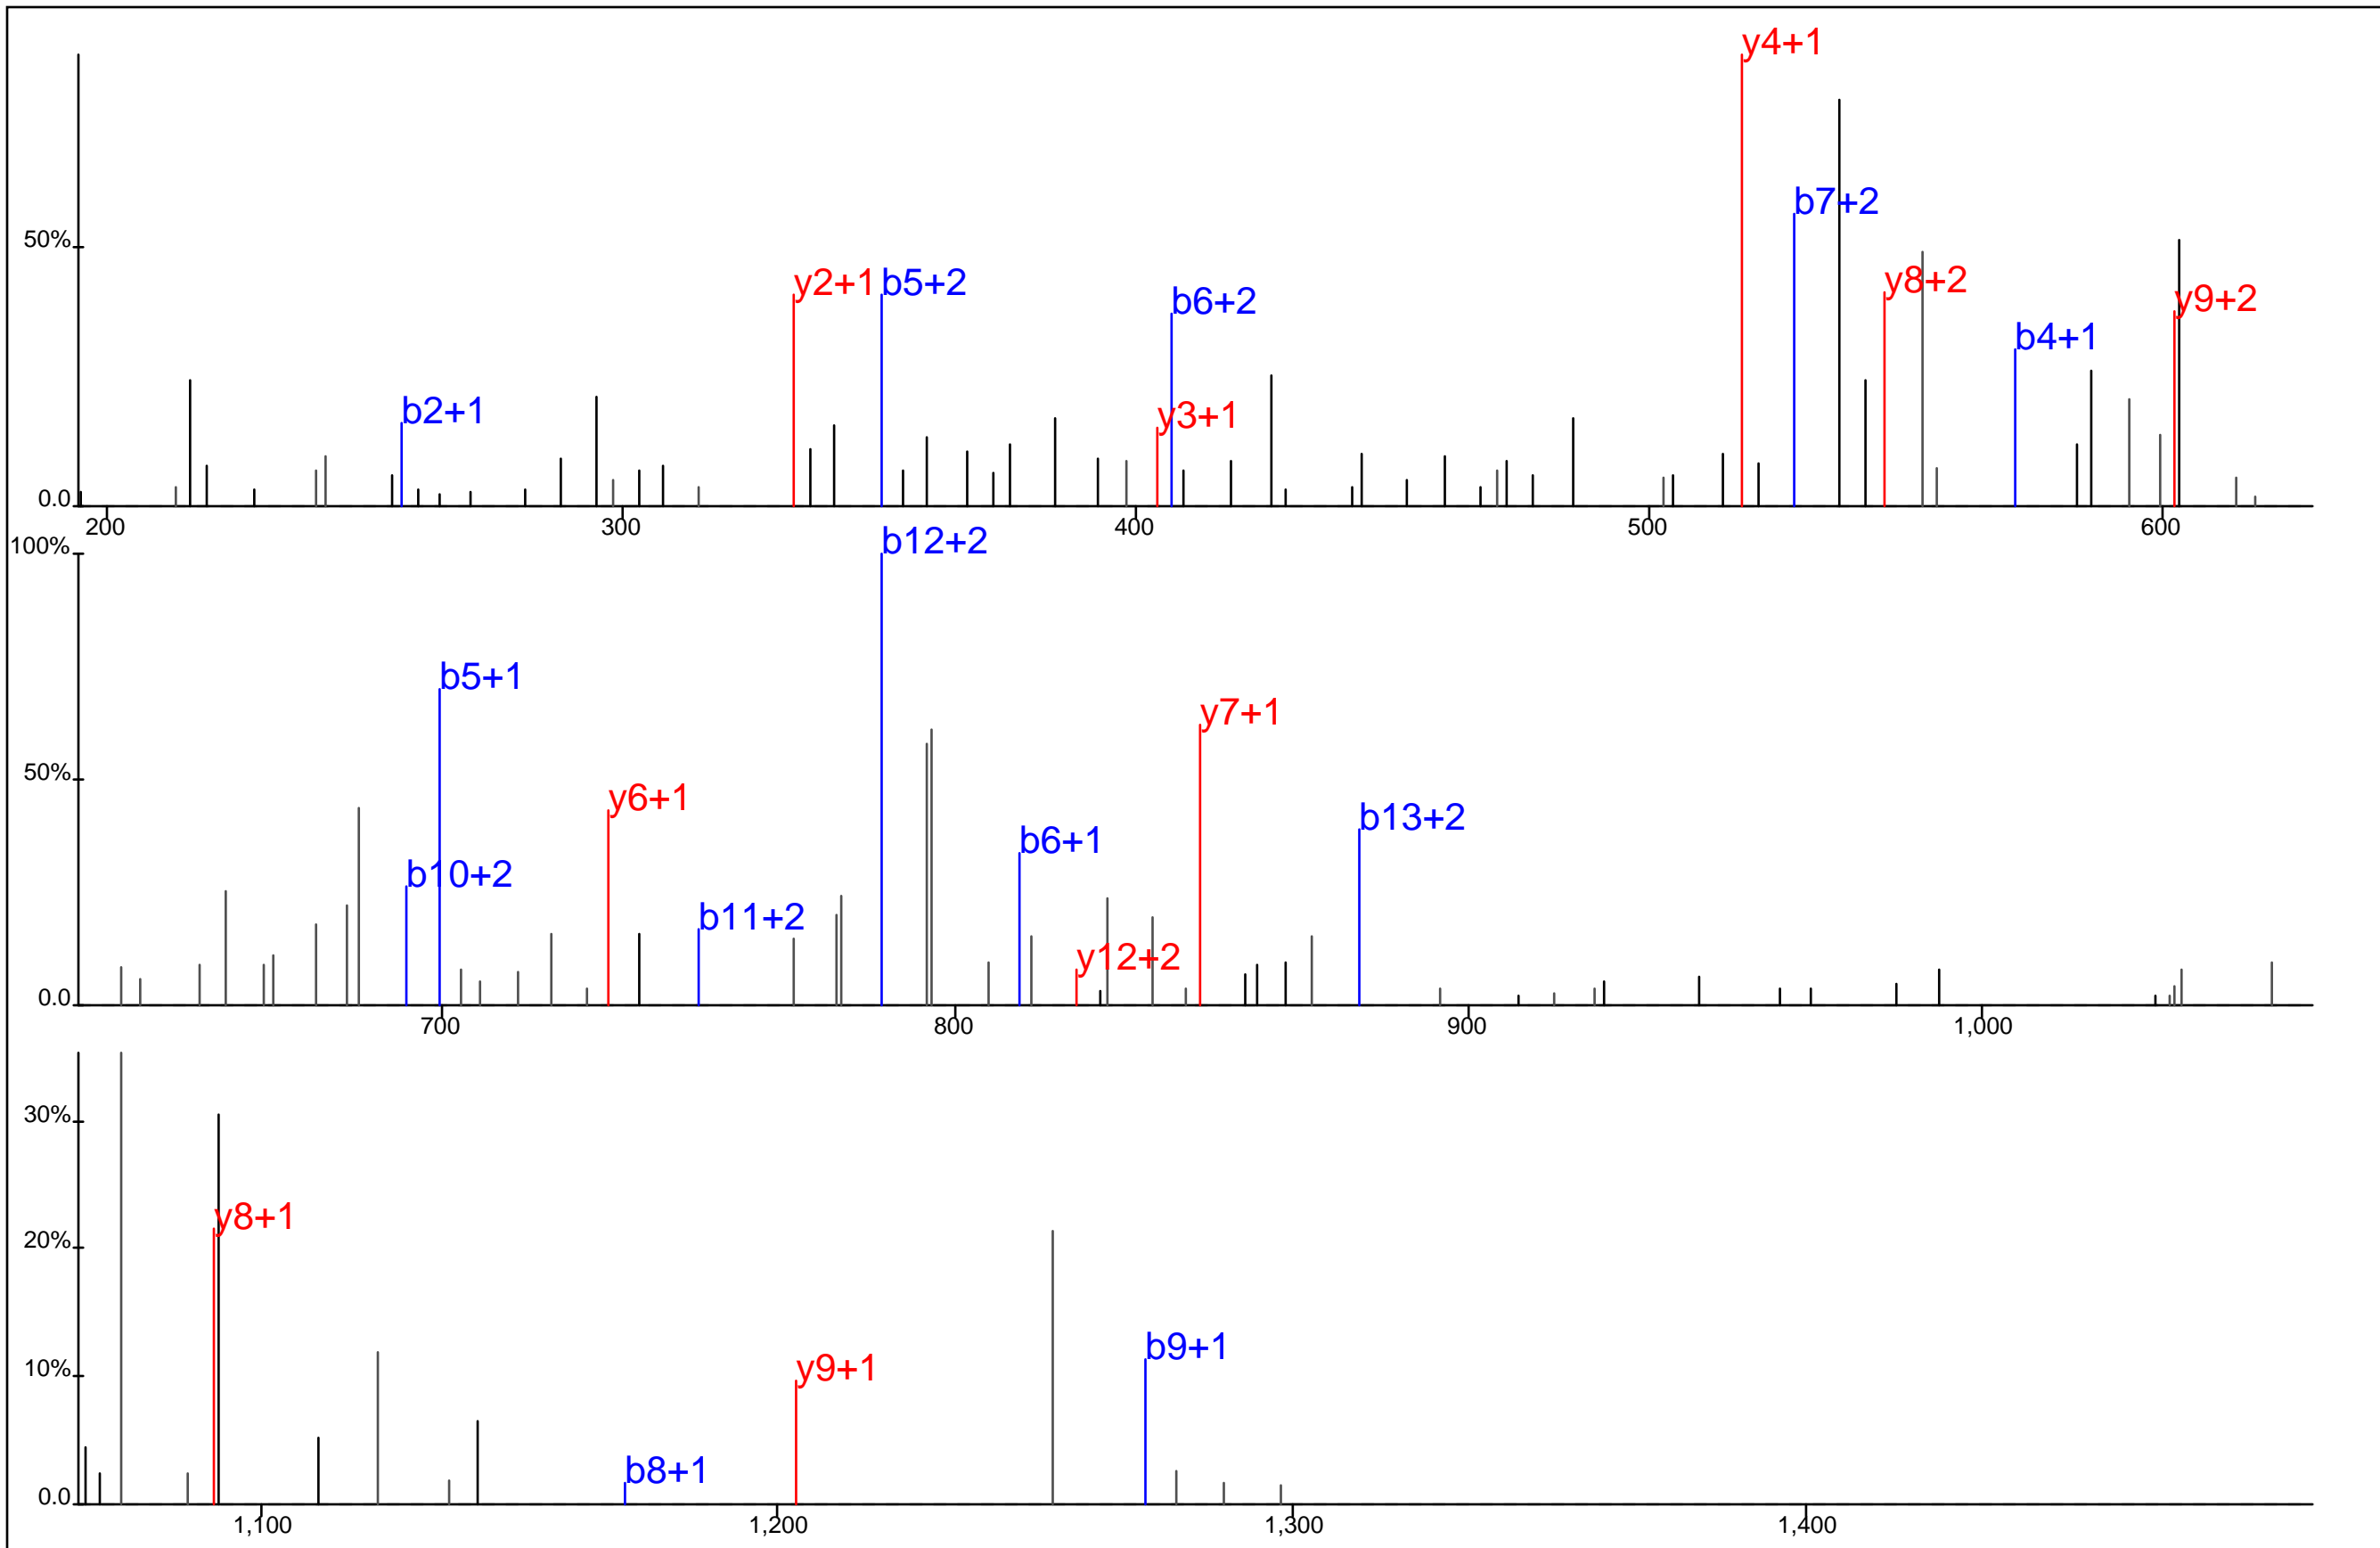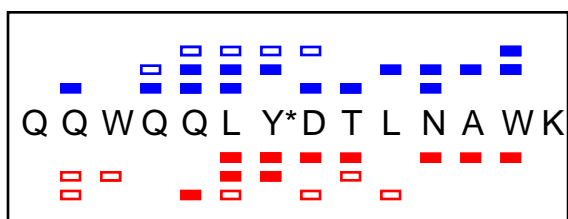

Protein Name: GA17  
 gi Accession: 0  
 Precursor Mass: 634.6238+3  
 Delta Mass: 0.724 ppm  
 XCorr: 35.55

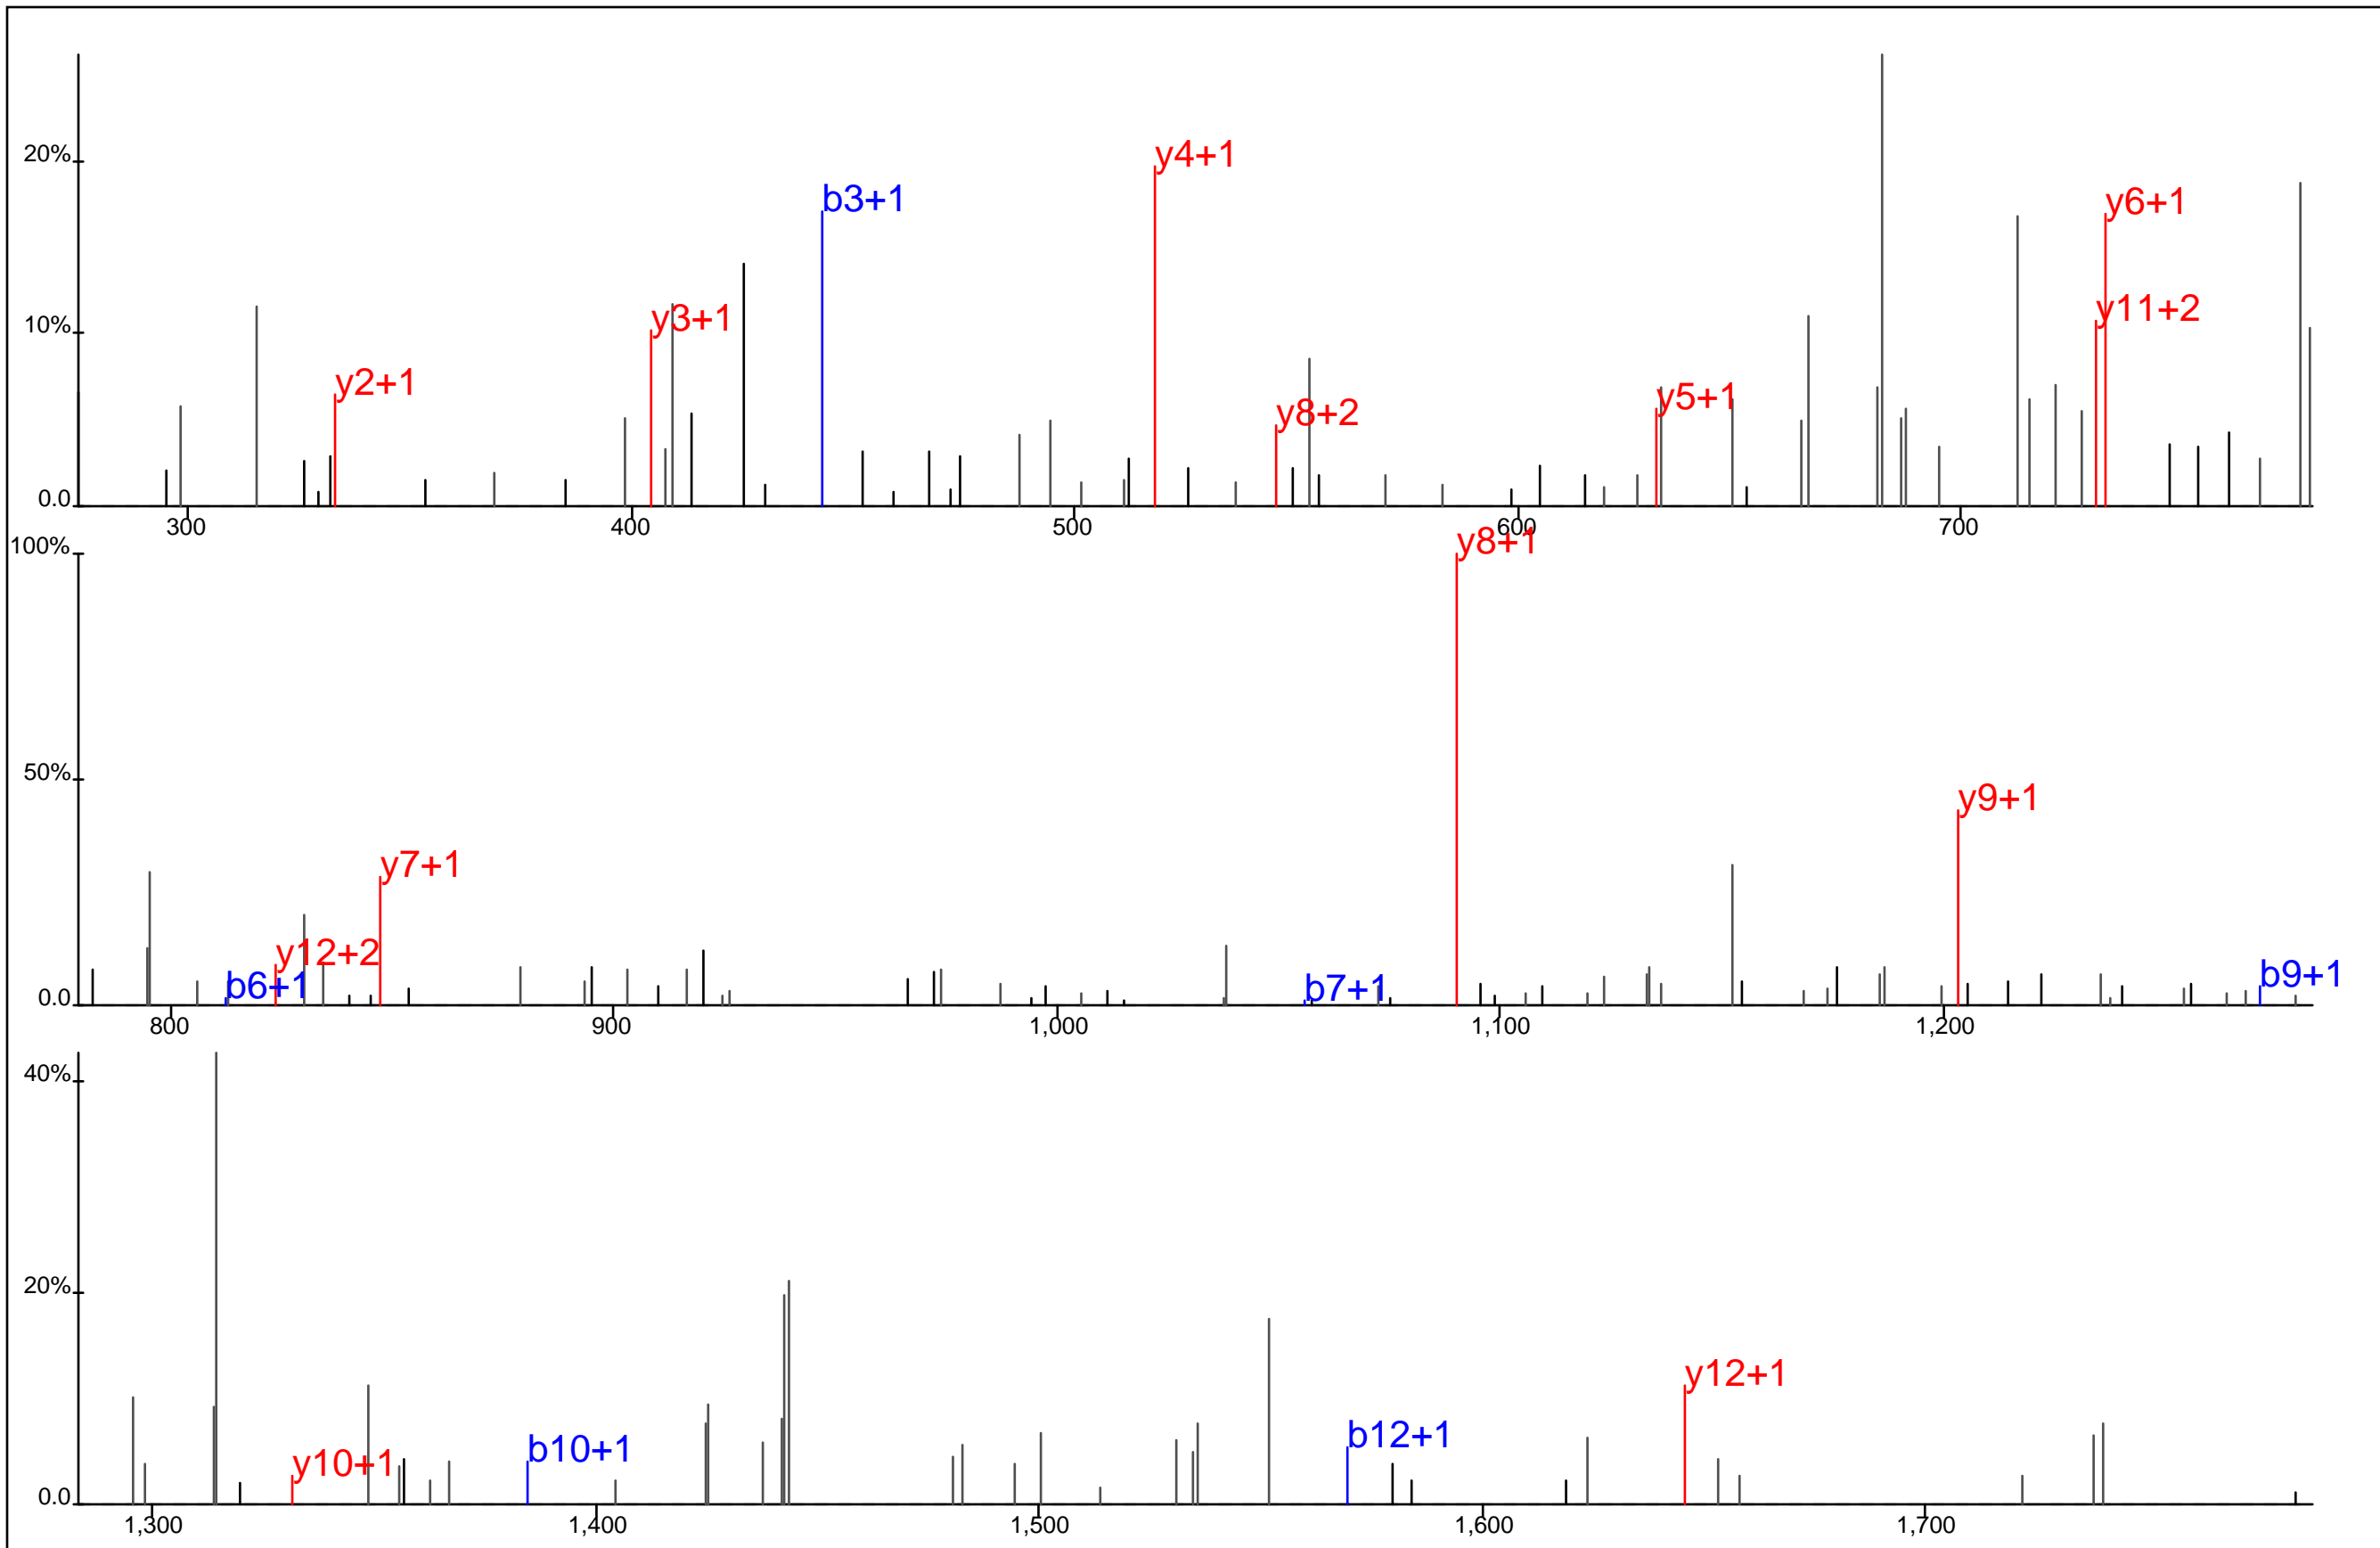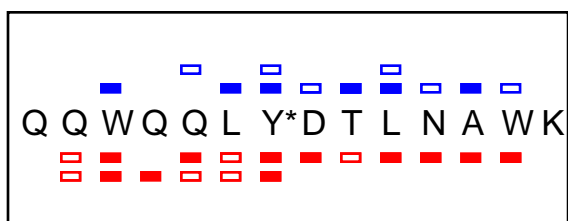

Protein Name: GA17  
 gi Accession: 0  
 Precursor Mass: 951.4319+2  
 Delta Mass: 0.813 ppm  
 XCorr: 25.48

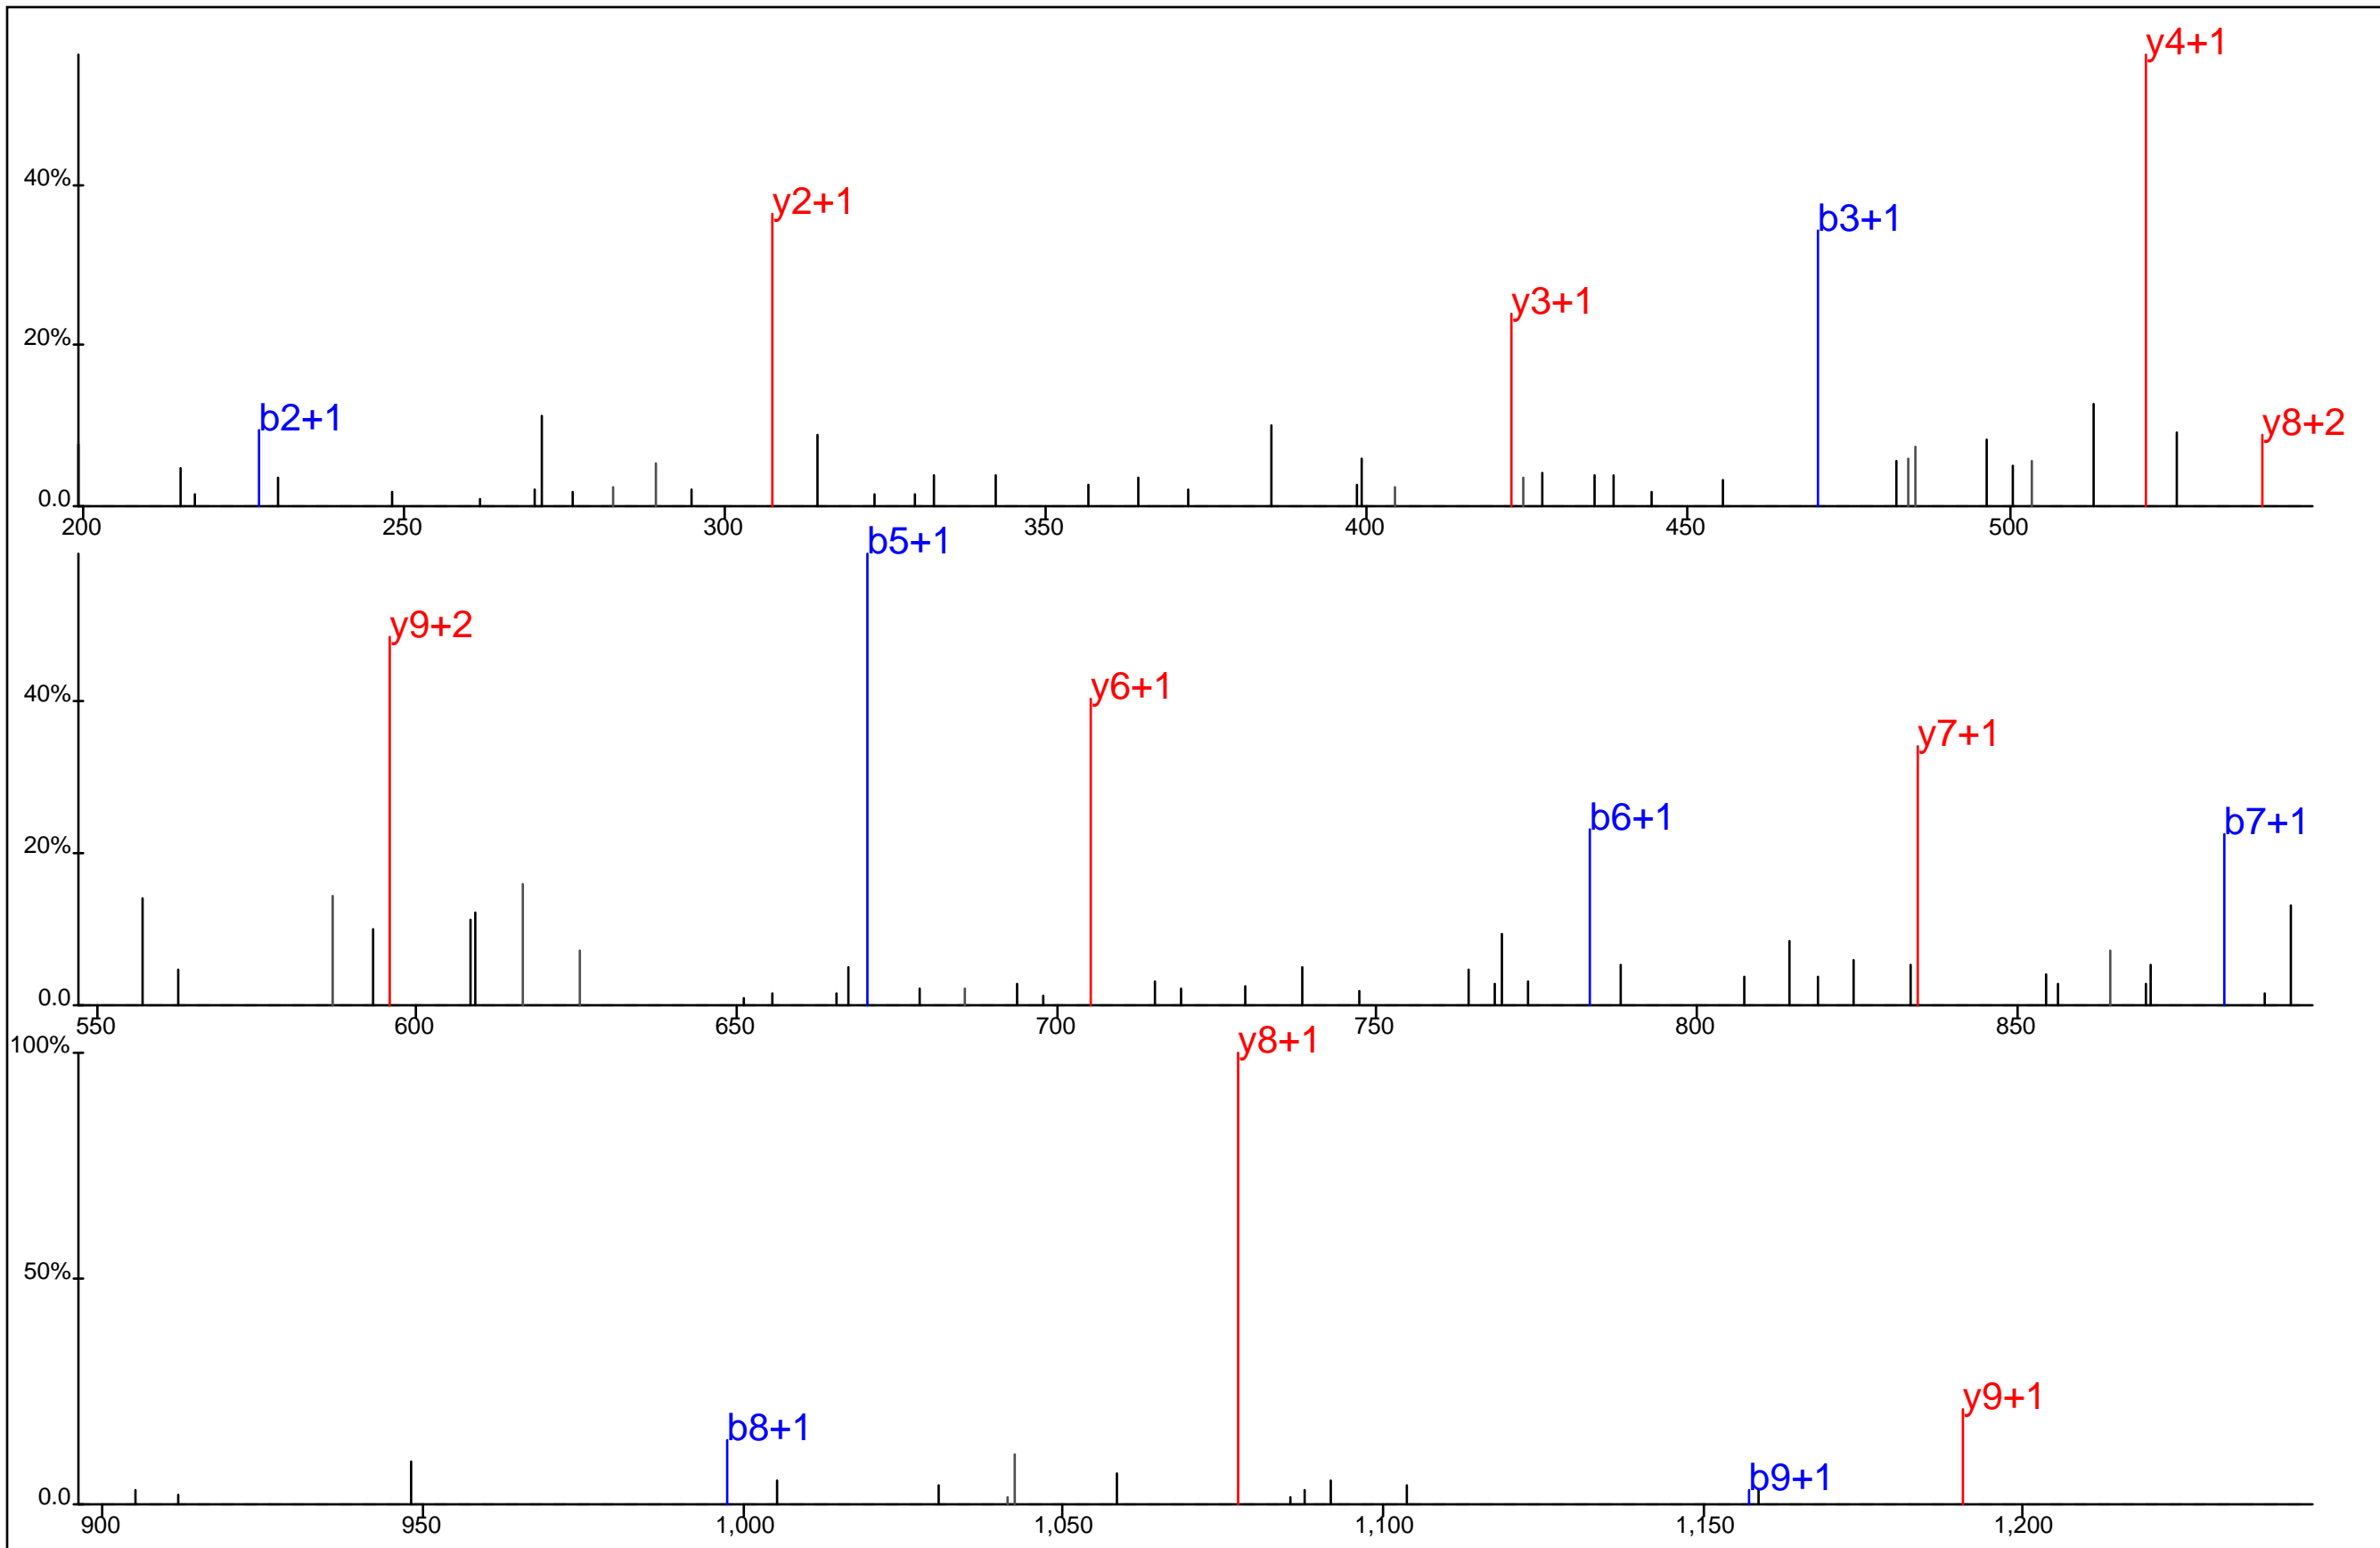

■ ■    □ □    ■ ■ ■ ■  
 L L Y\* E A L V D C K  
■ ■ ■ ■    □ □    ■ ■    □ □

Protein Name: GA17  
 gi Accession: 0  
 Precursor Mass: 652.3058+2  
 Delta Mass: 3.127 ppm  
 XCorr: 53.46

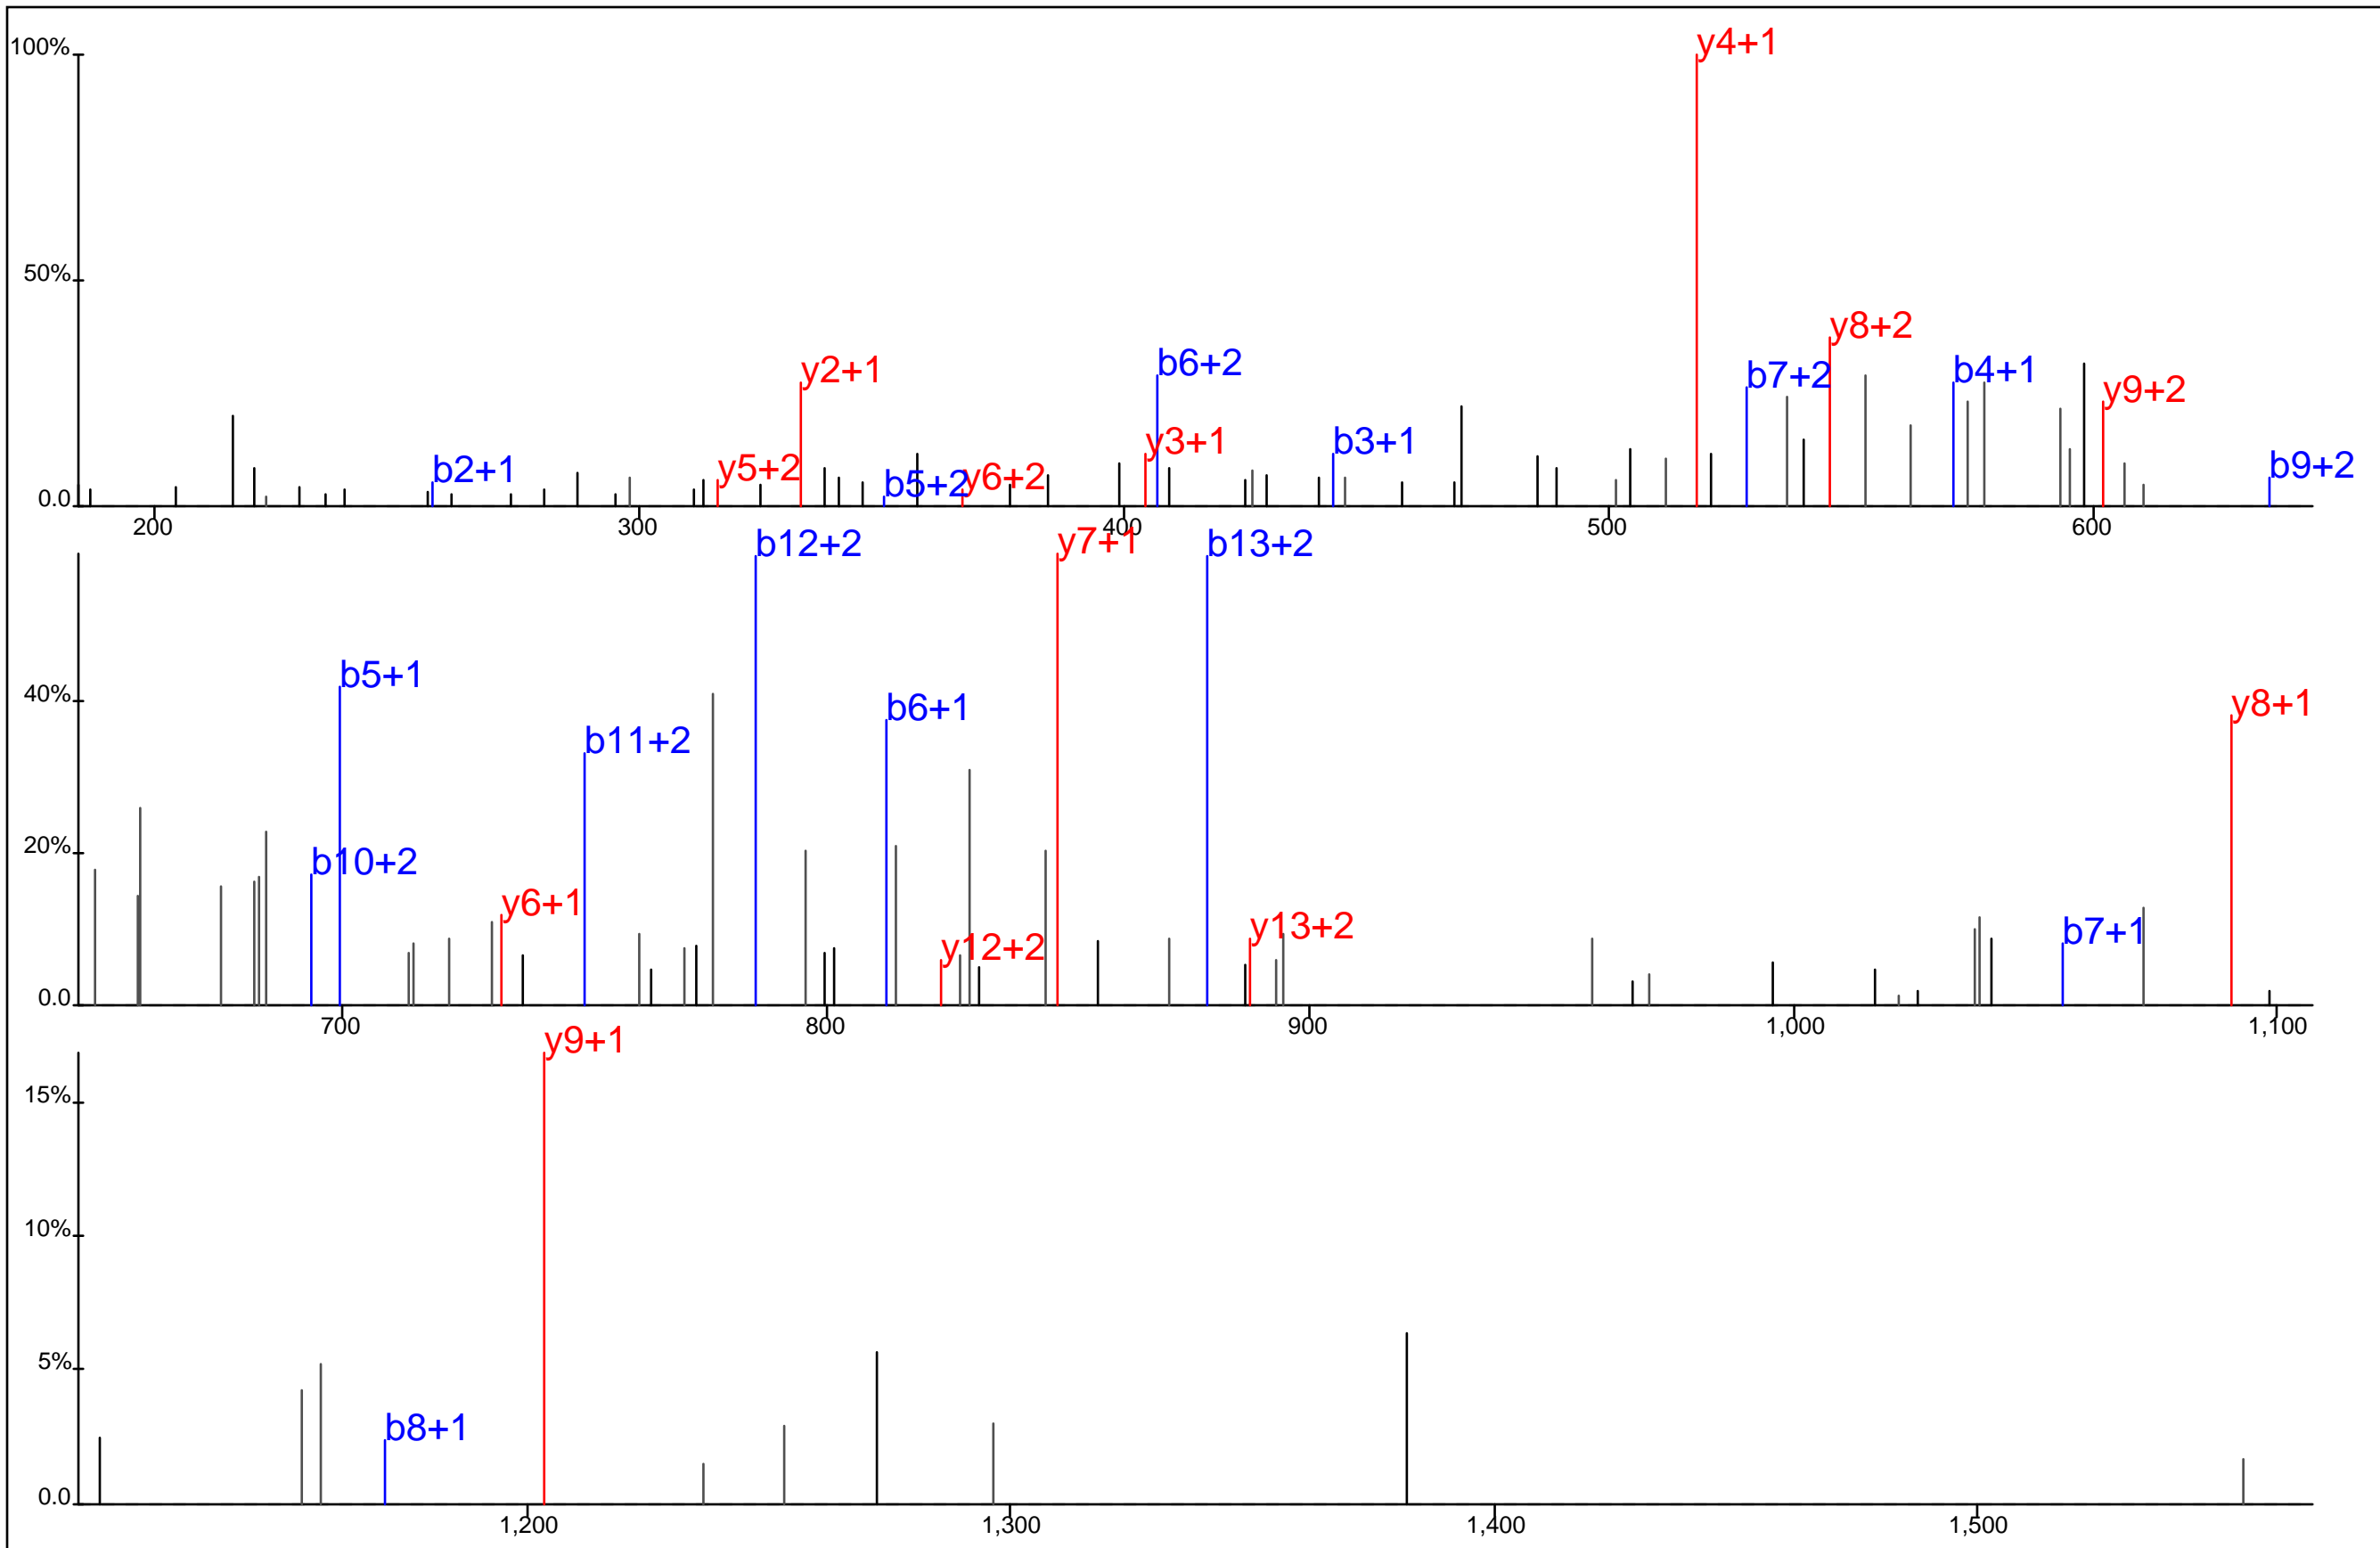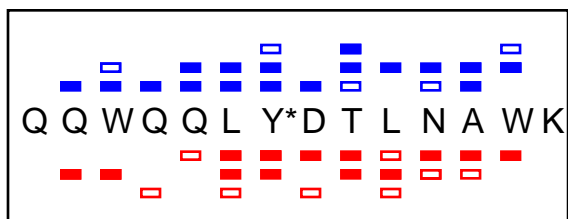

Protein Name: GA17  
 gi Accession: 0  
 Precursor Mass: 634.6234+3  
 Delta Mass: 1.301 ppm  
 XCorr: 43.21

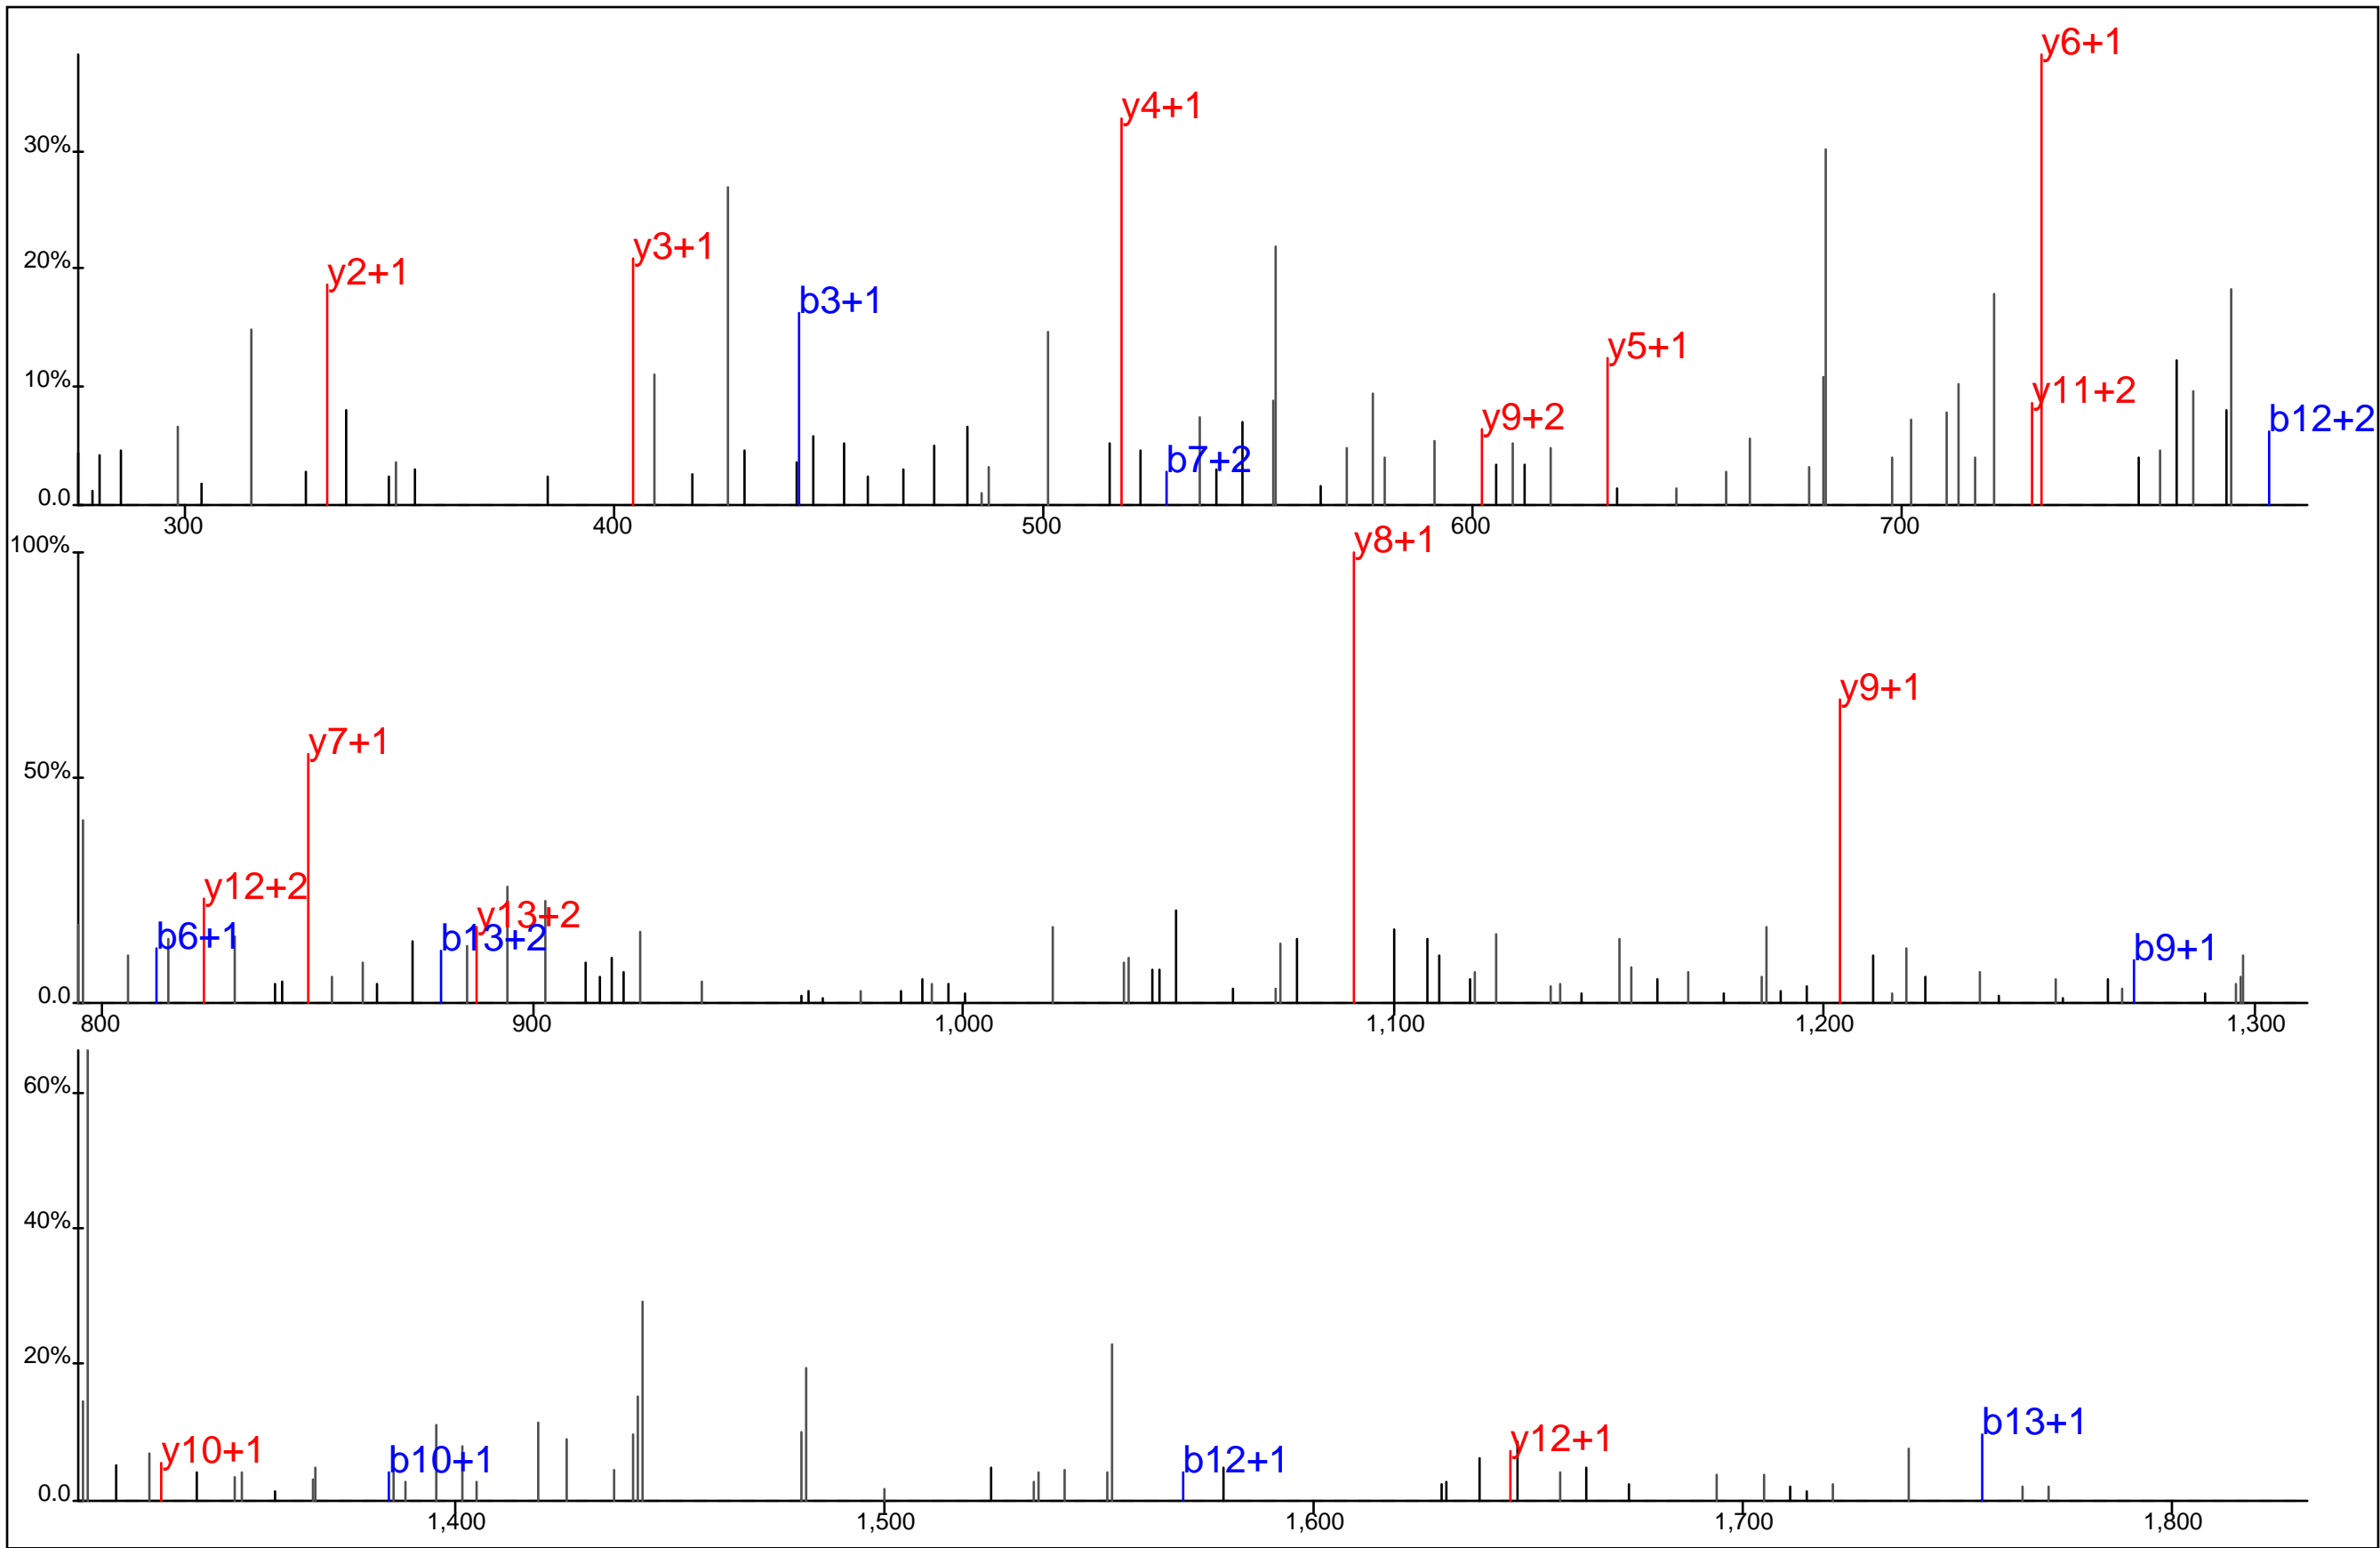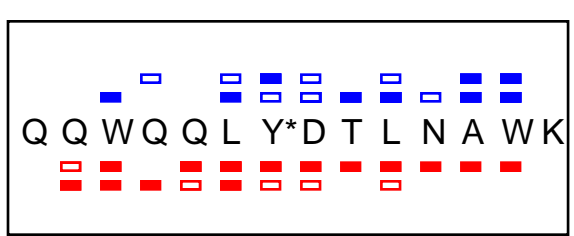

Protein Name: GA17  
 gi Accession: 0  
 Precursor Mass: 951.4319+2  
 Delta Mass: 0.877 ppm  
 XCorr: 45.17



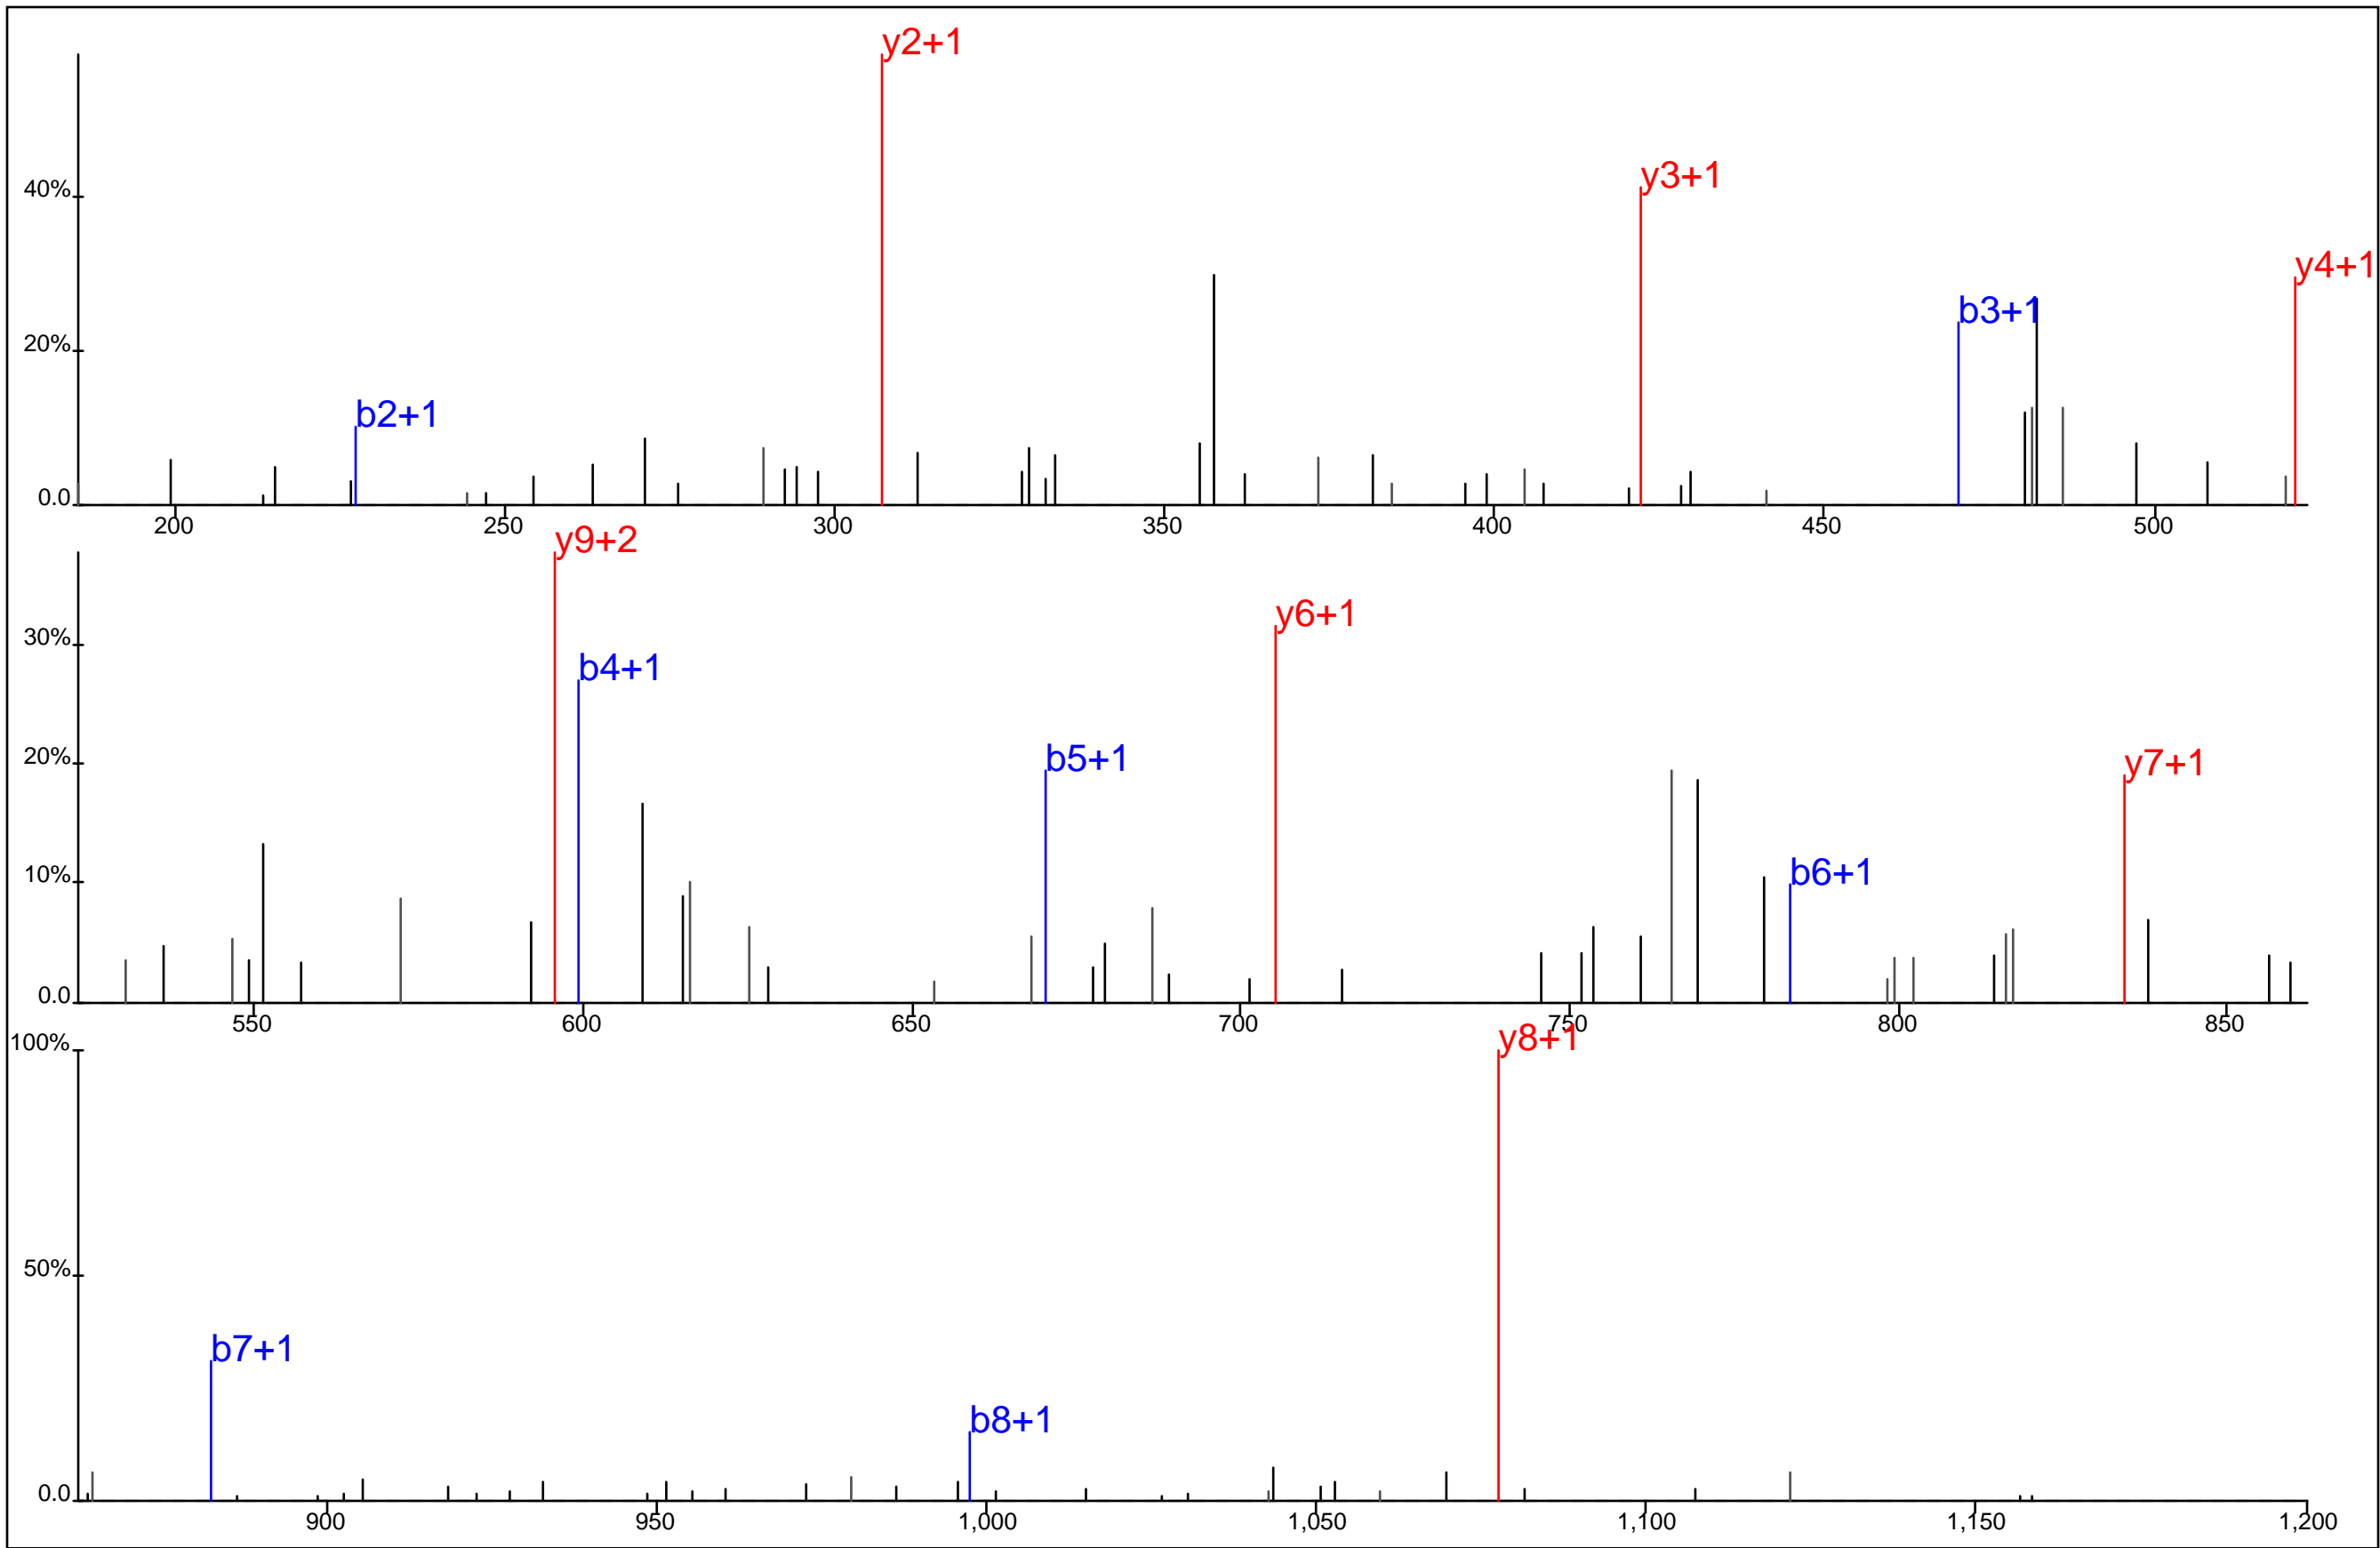

■ □ ■ □ ■ □ ■ □  
**L L Y\* E A L V D C K**  
■ □ ■ □ ■ □ ■ □

Protein Name: GA17  
 gi Accession: 0  
 Precursor Mass: 652.3061+2  
 Delta Mass: 3.501 ppm  
 XCorr: 35.73

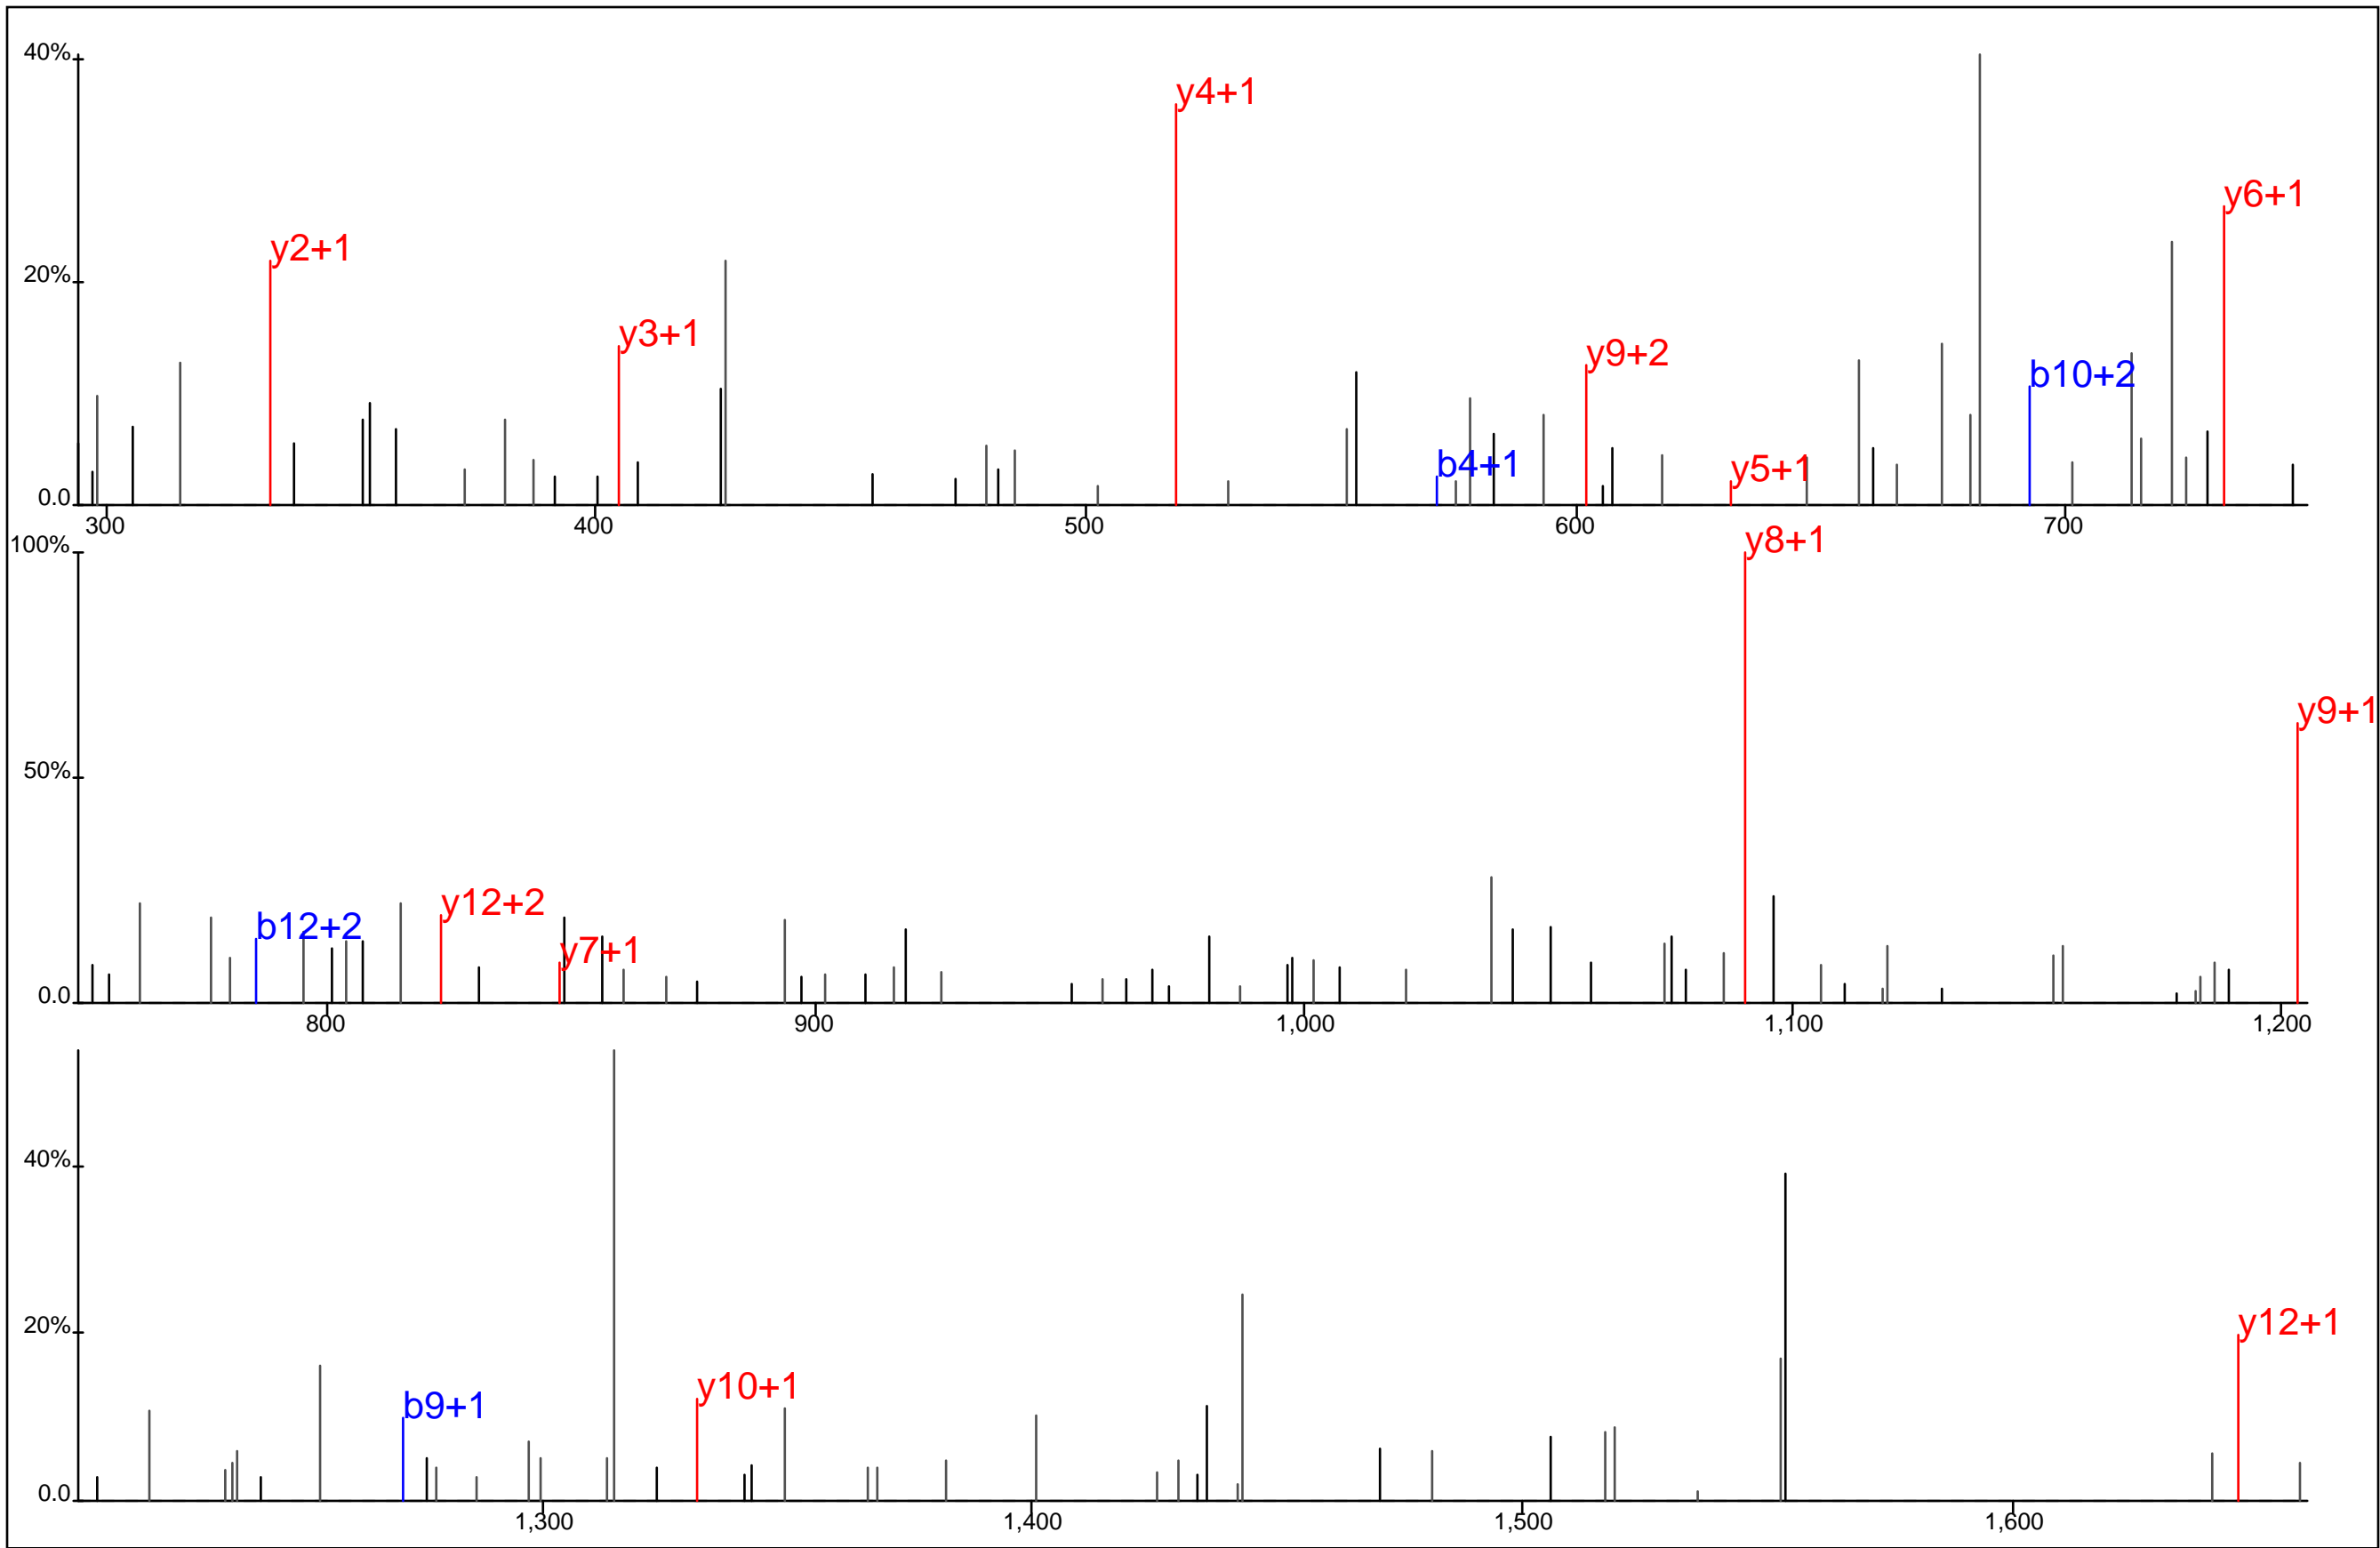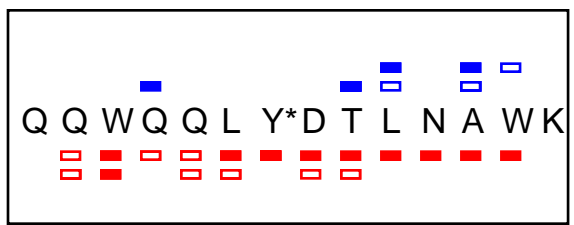

Protein Name: GA17  
 gi Accession: 0  
 Precursor Mass: 951.4324+2  
 Delta Mass: 0.364 ppm  
 XCorr: 35.46

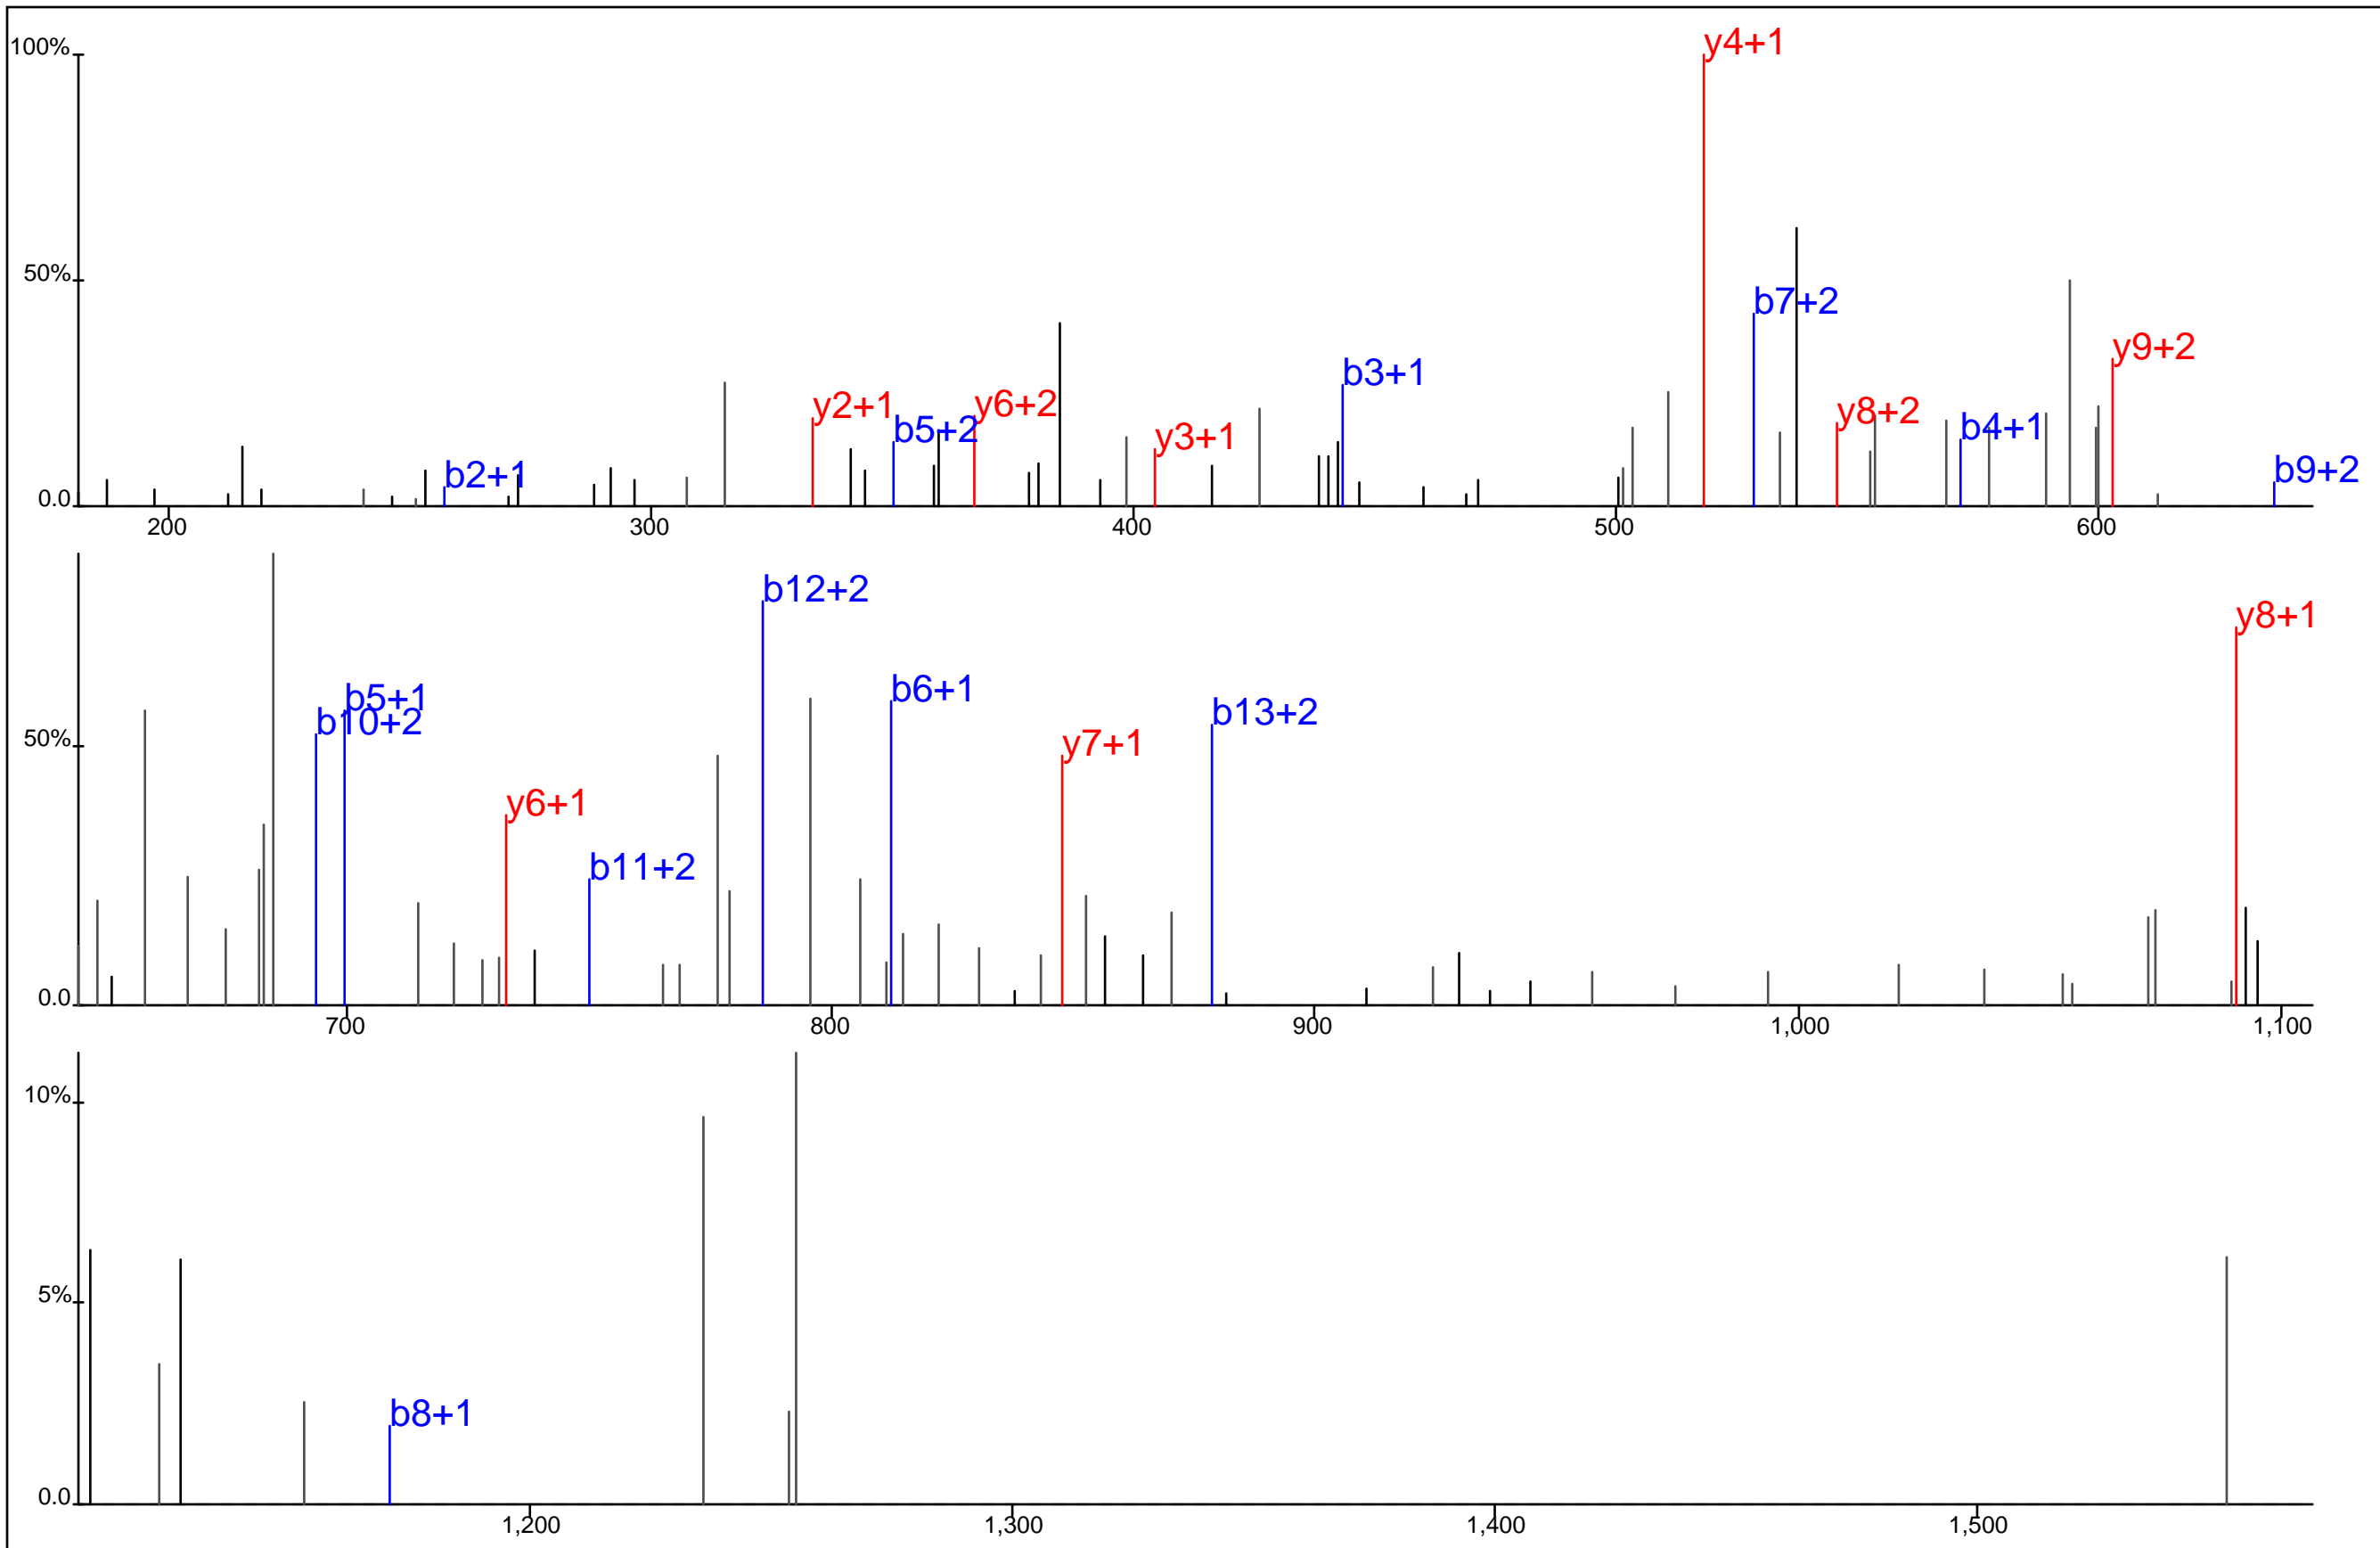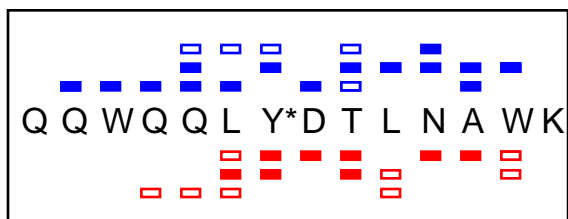

Protein Name: GA17  
 gi Accession: 0  
 Precursor Mass: 634.6225+3  
 Delta Mass: 2.745 ppm  
 XCorr: 25.63



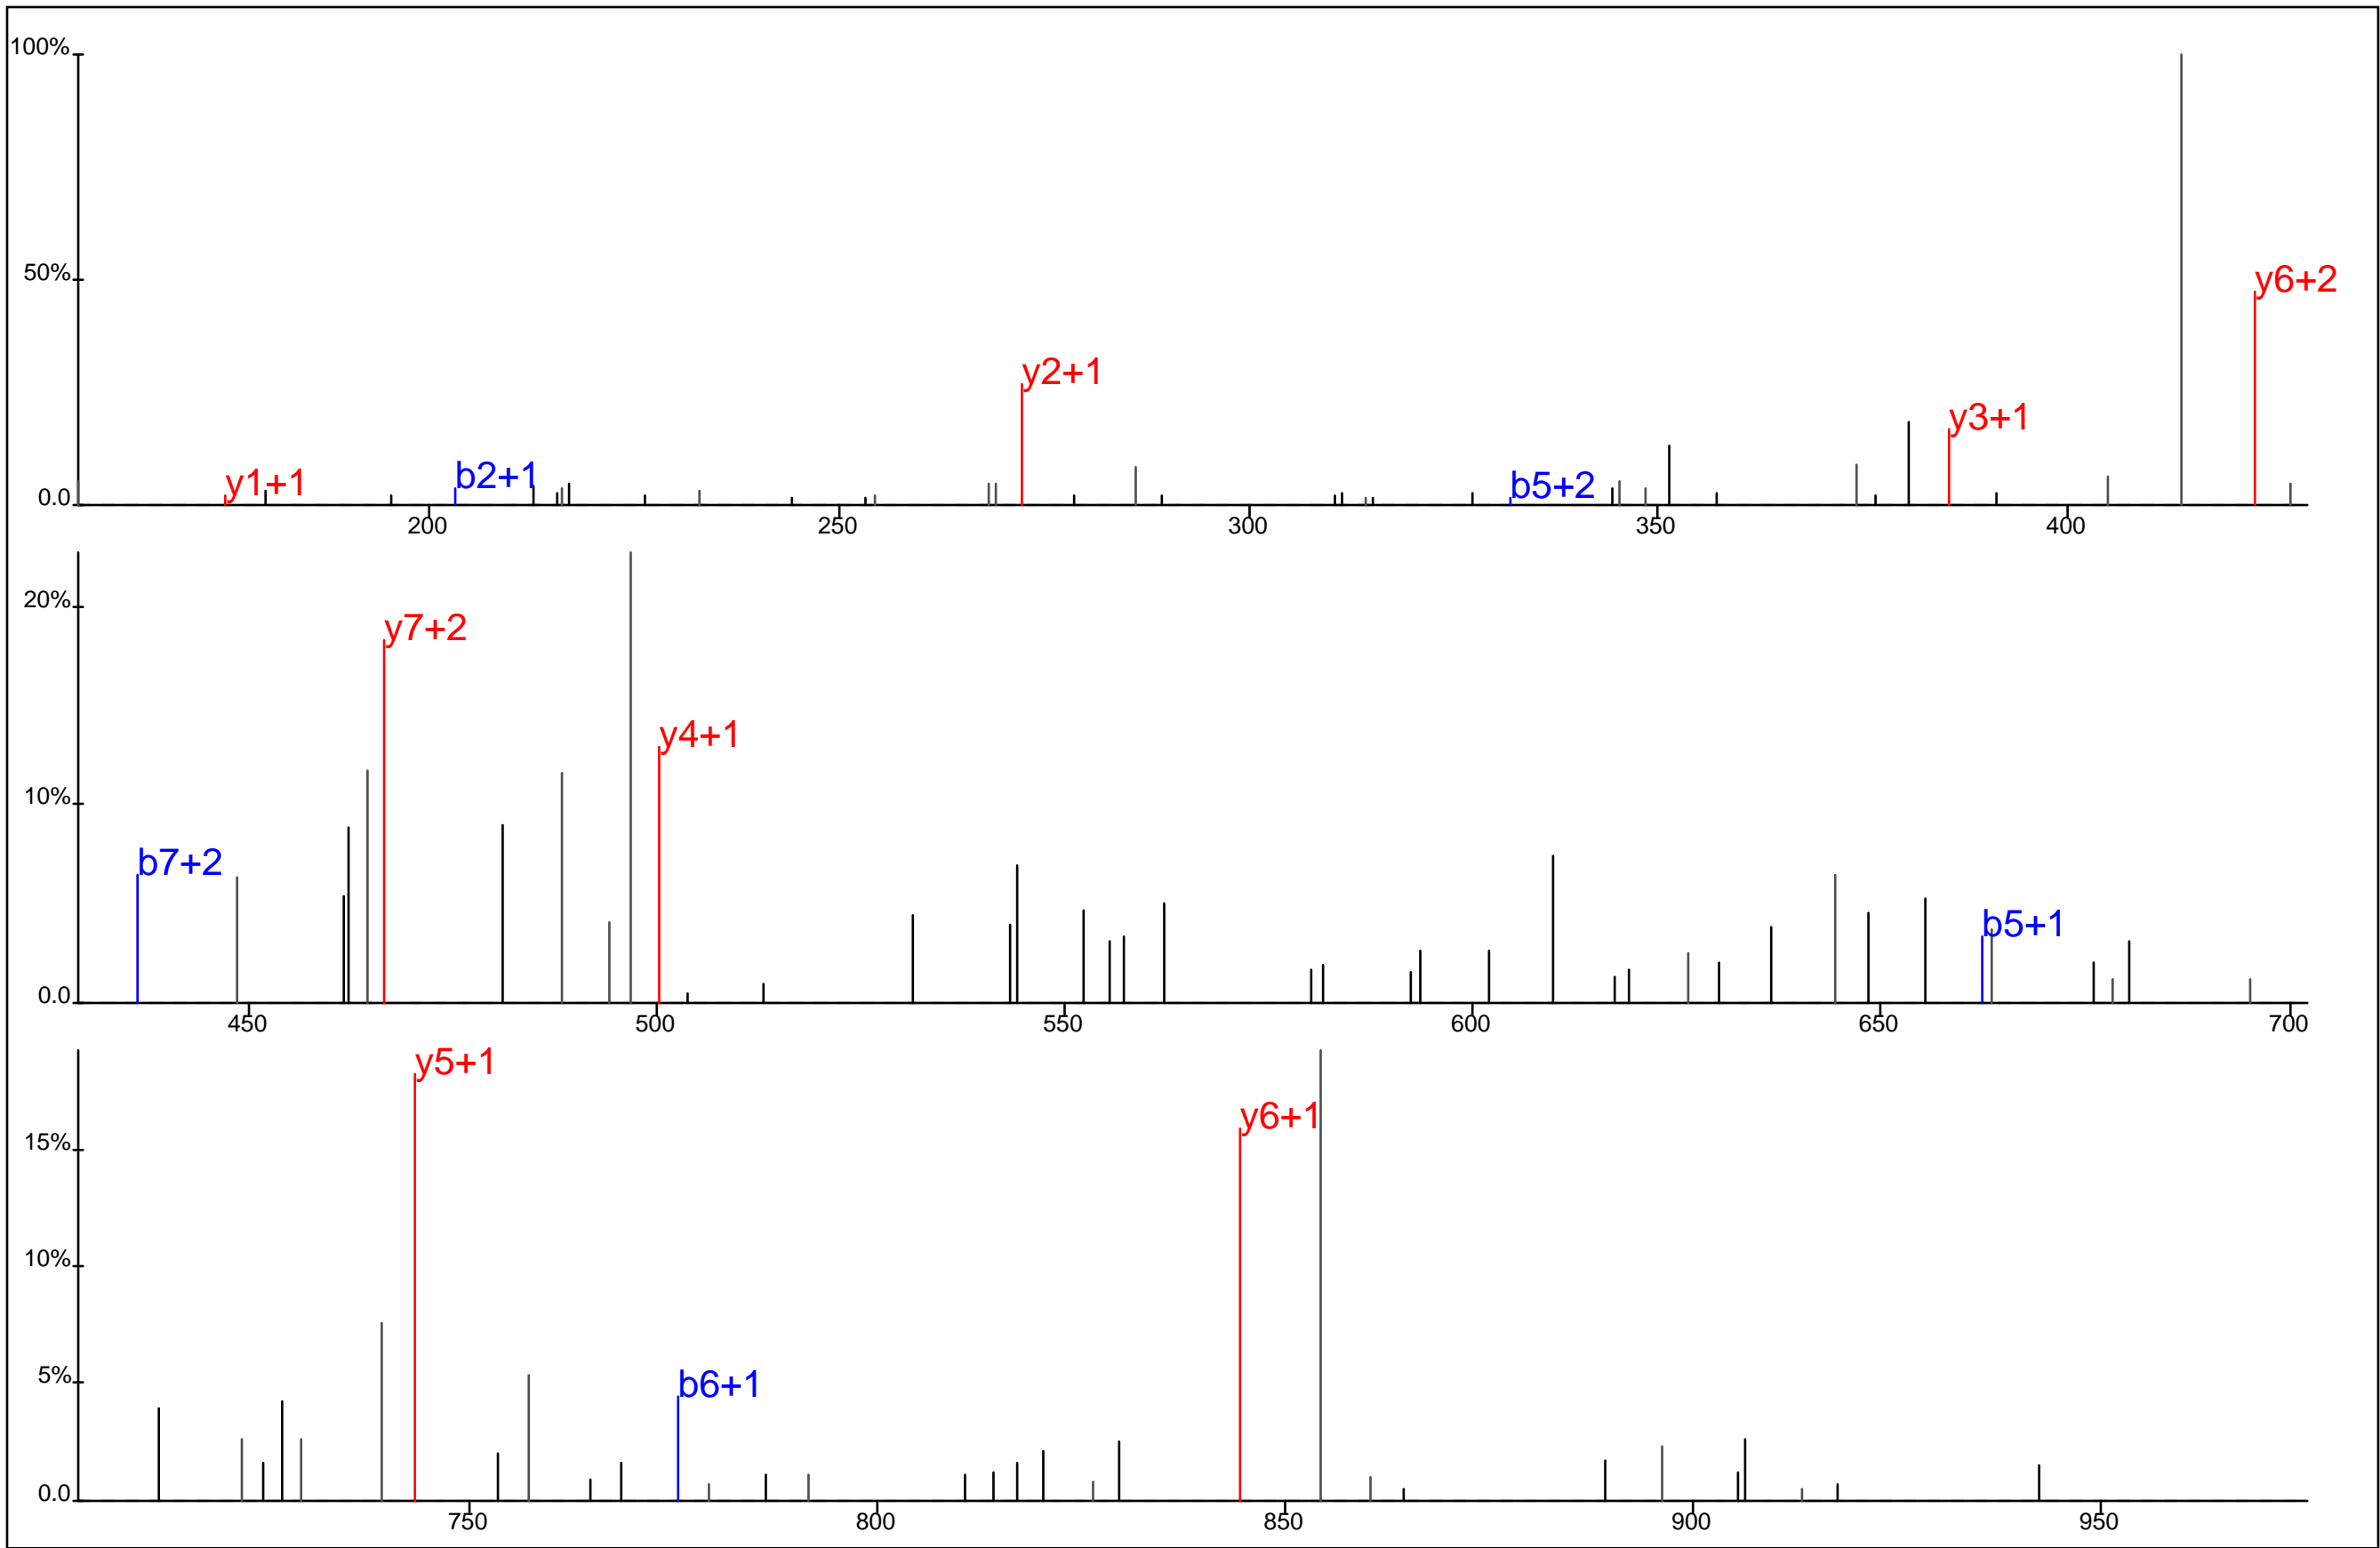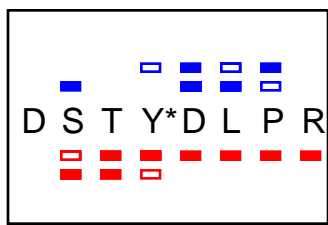

Protein Name: GAB2  
 gi Accession: 0  
 Precursor Mass: 523.7141+2  
 Delta Mass: 1.722 ppm  
 XCorr: 20.84

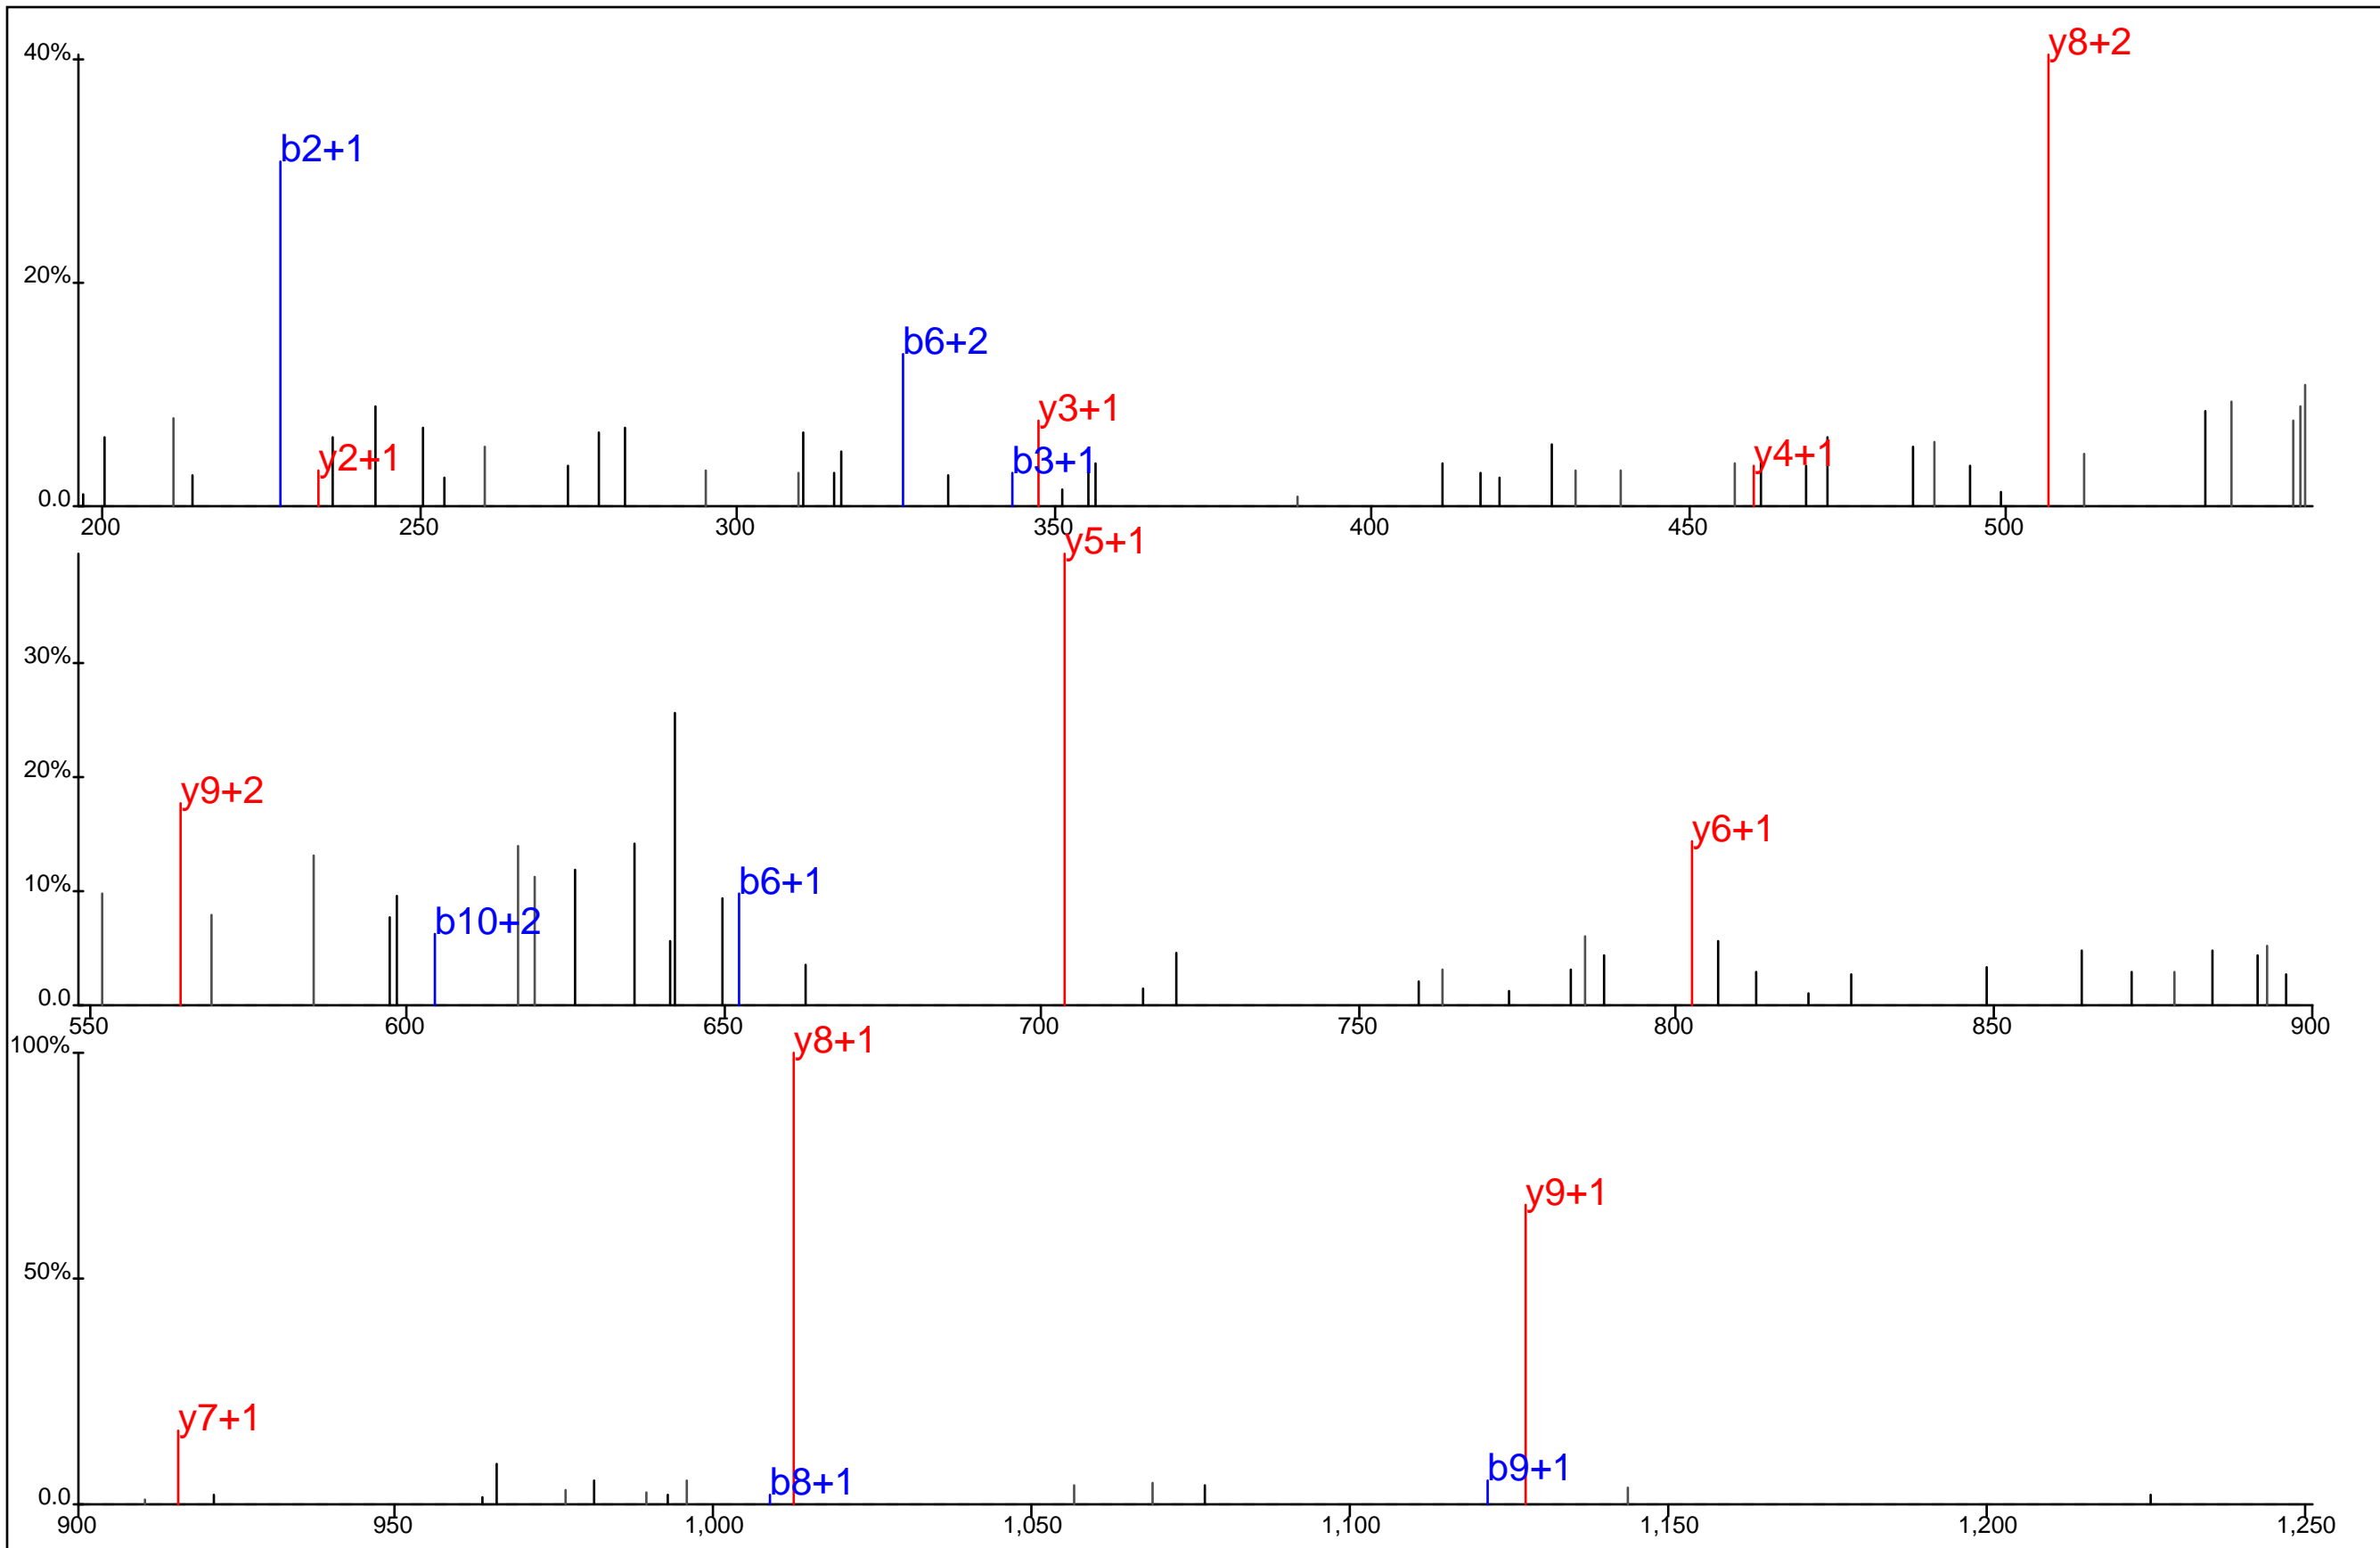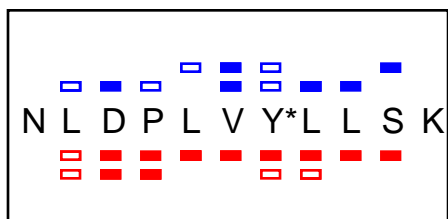

Protein Name: Gamma tubulin complex protein 2  
 gi Accession: 0  
 Precursor Mass: 677.8511+2  
 Delta Mass: 4.996 ppm  
 XCorr: 33.22

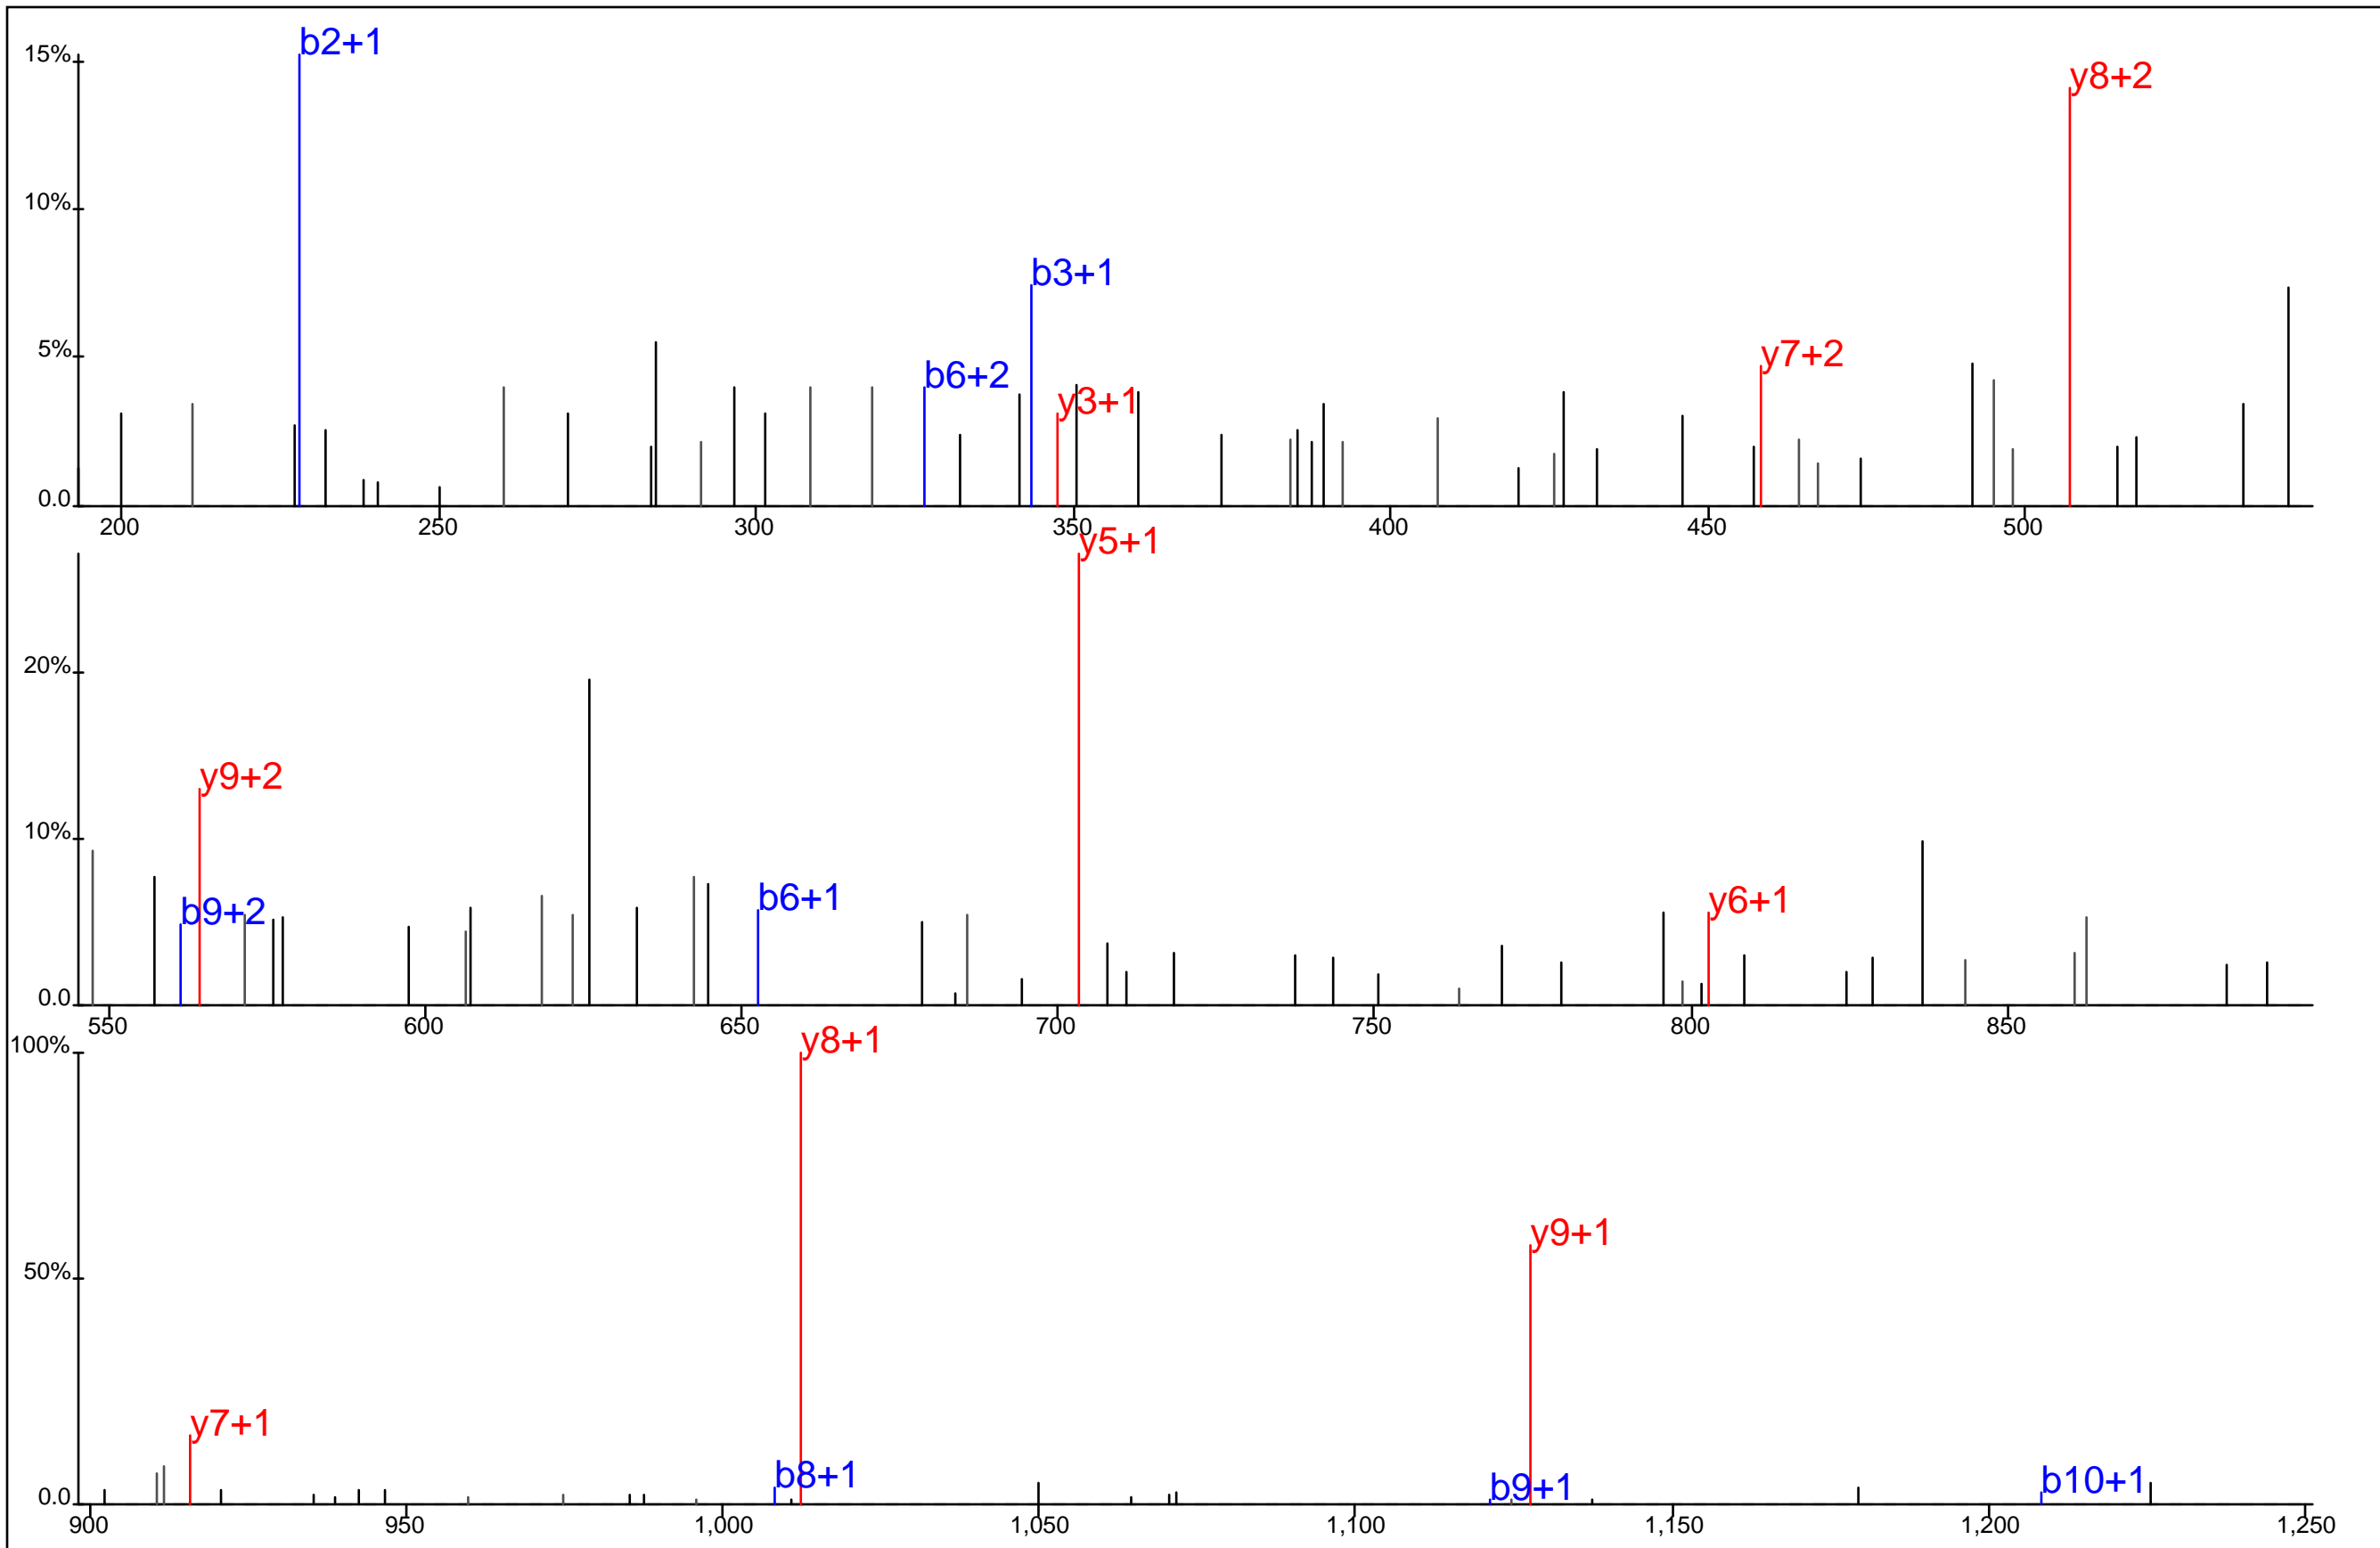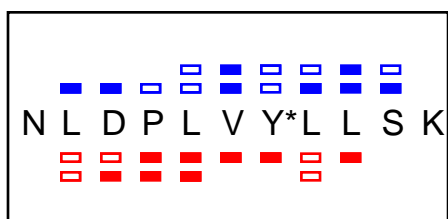

Protein Name: Gamma tubulin complex protein 2  
 gi Accession: 0  
 Precursor Mass: 677.8544+2  
 Delta Mass: 0.130 ppm  
 XCorr: 24.92

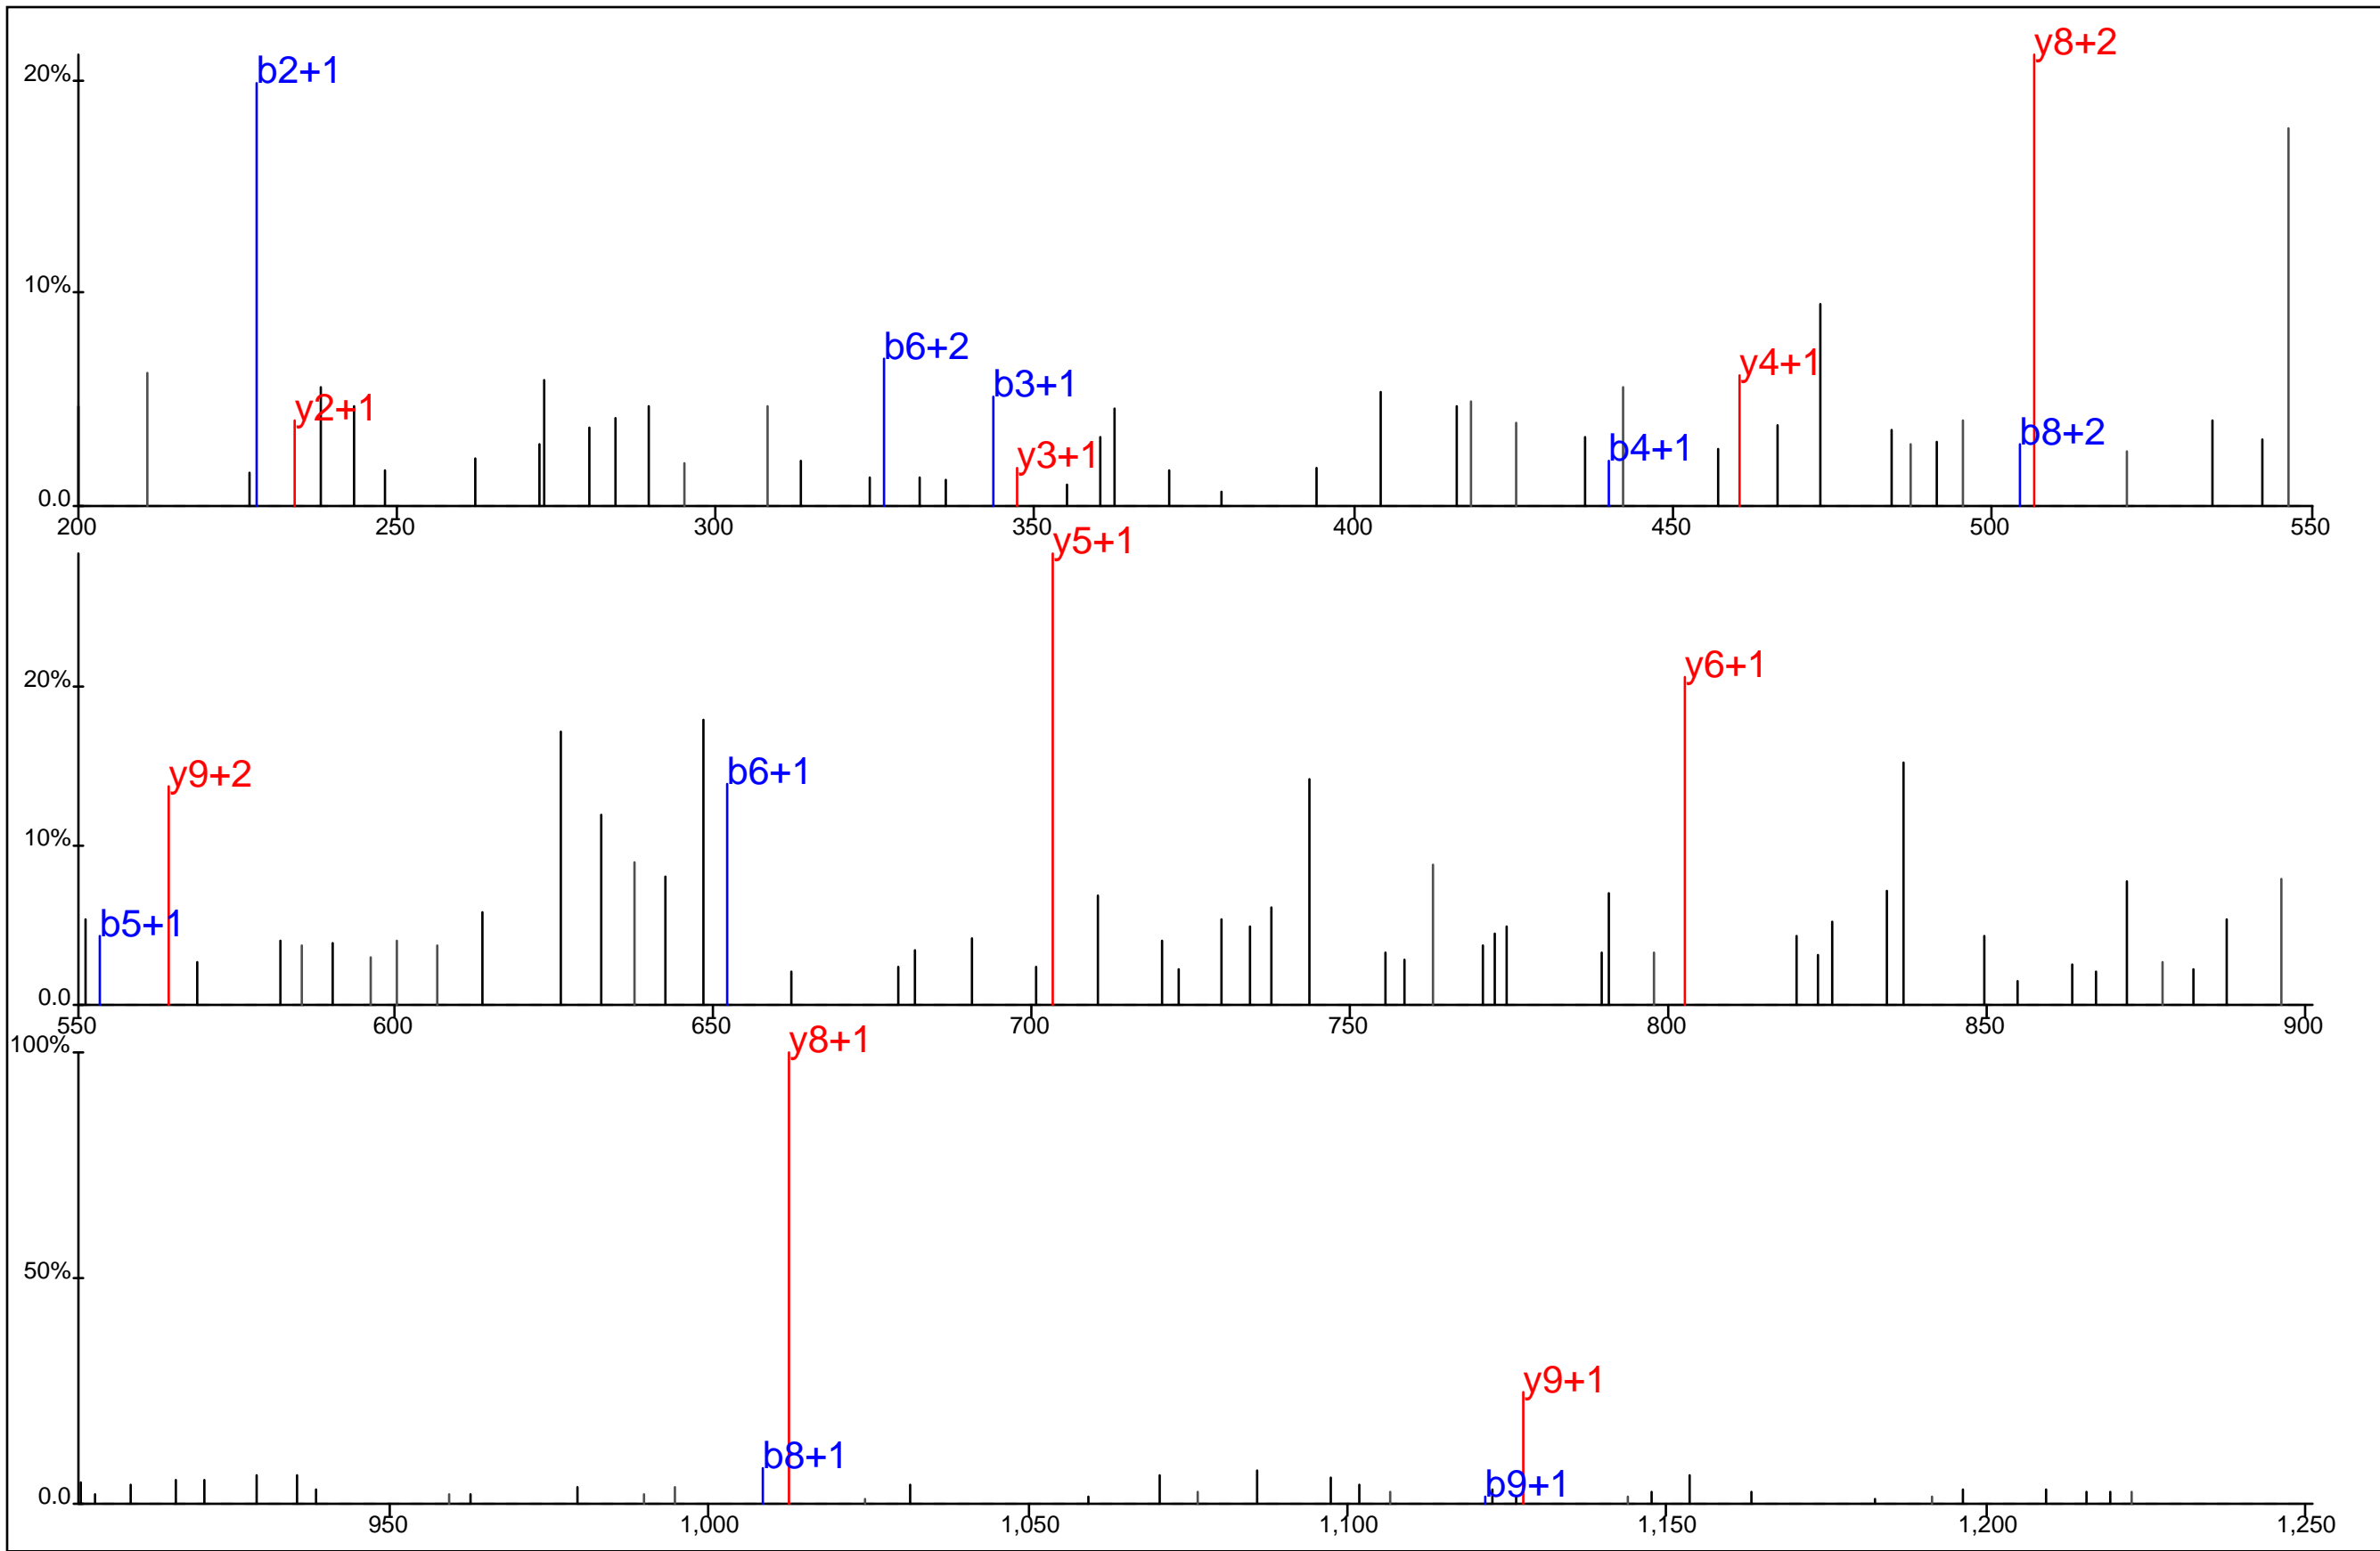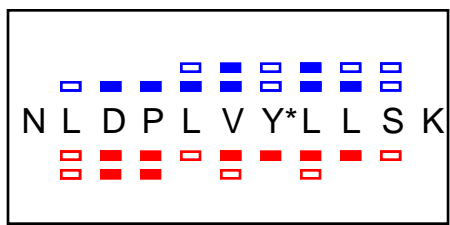

Protein Name: Gamma tubulin complex protein 2  
 gi Accession: 0  
 Precursor Mass: 677.8514+2  
 Delta Mass: 4.546 ppm  
 XCorr: 20.31



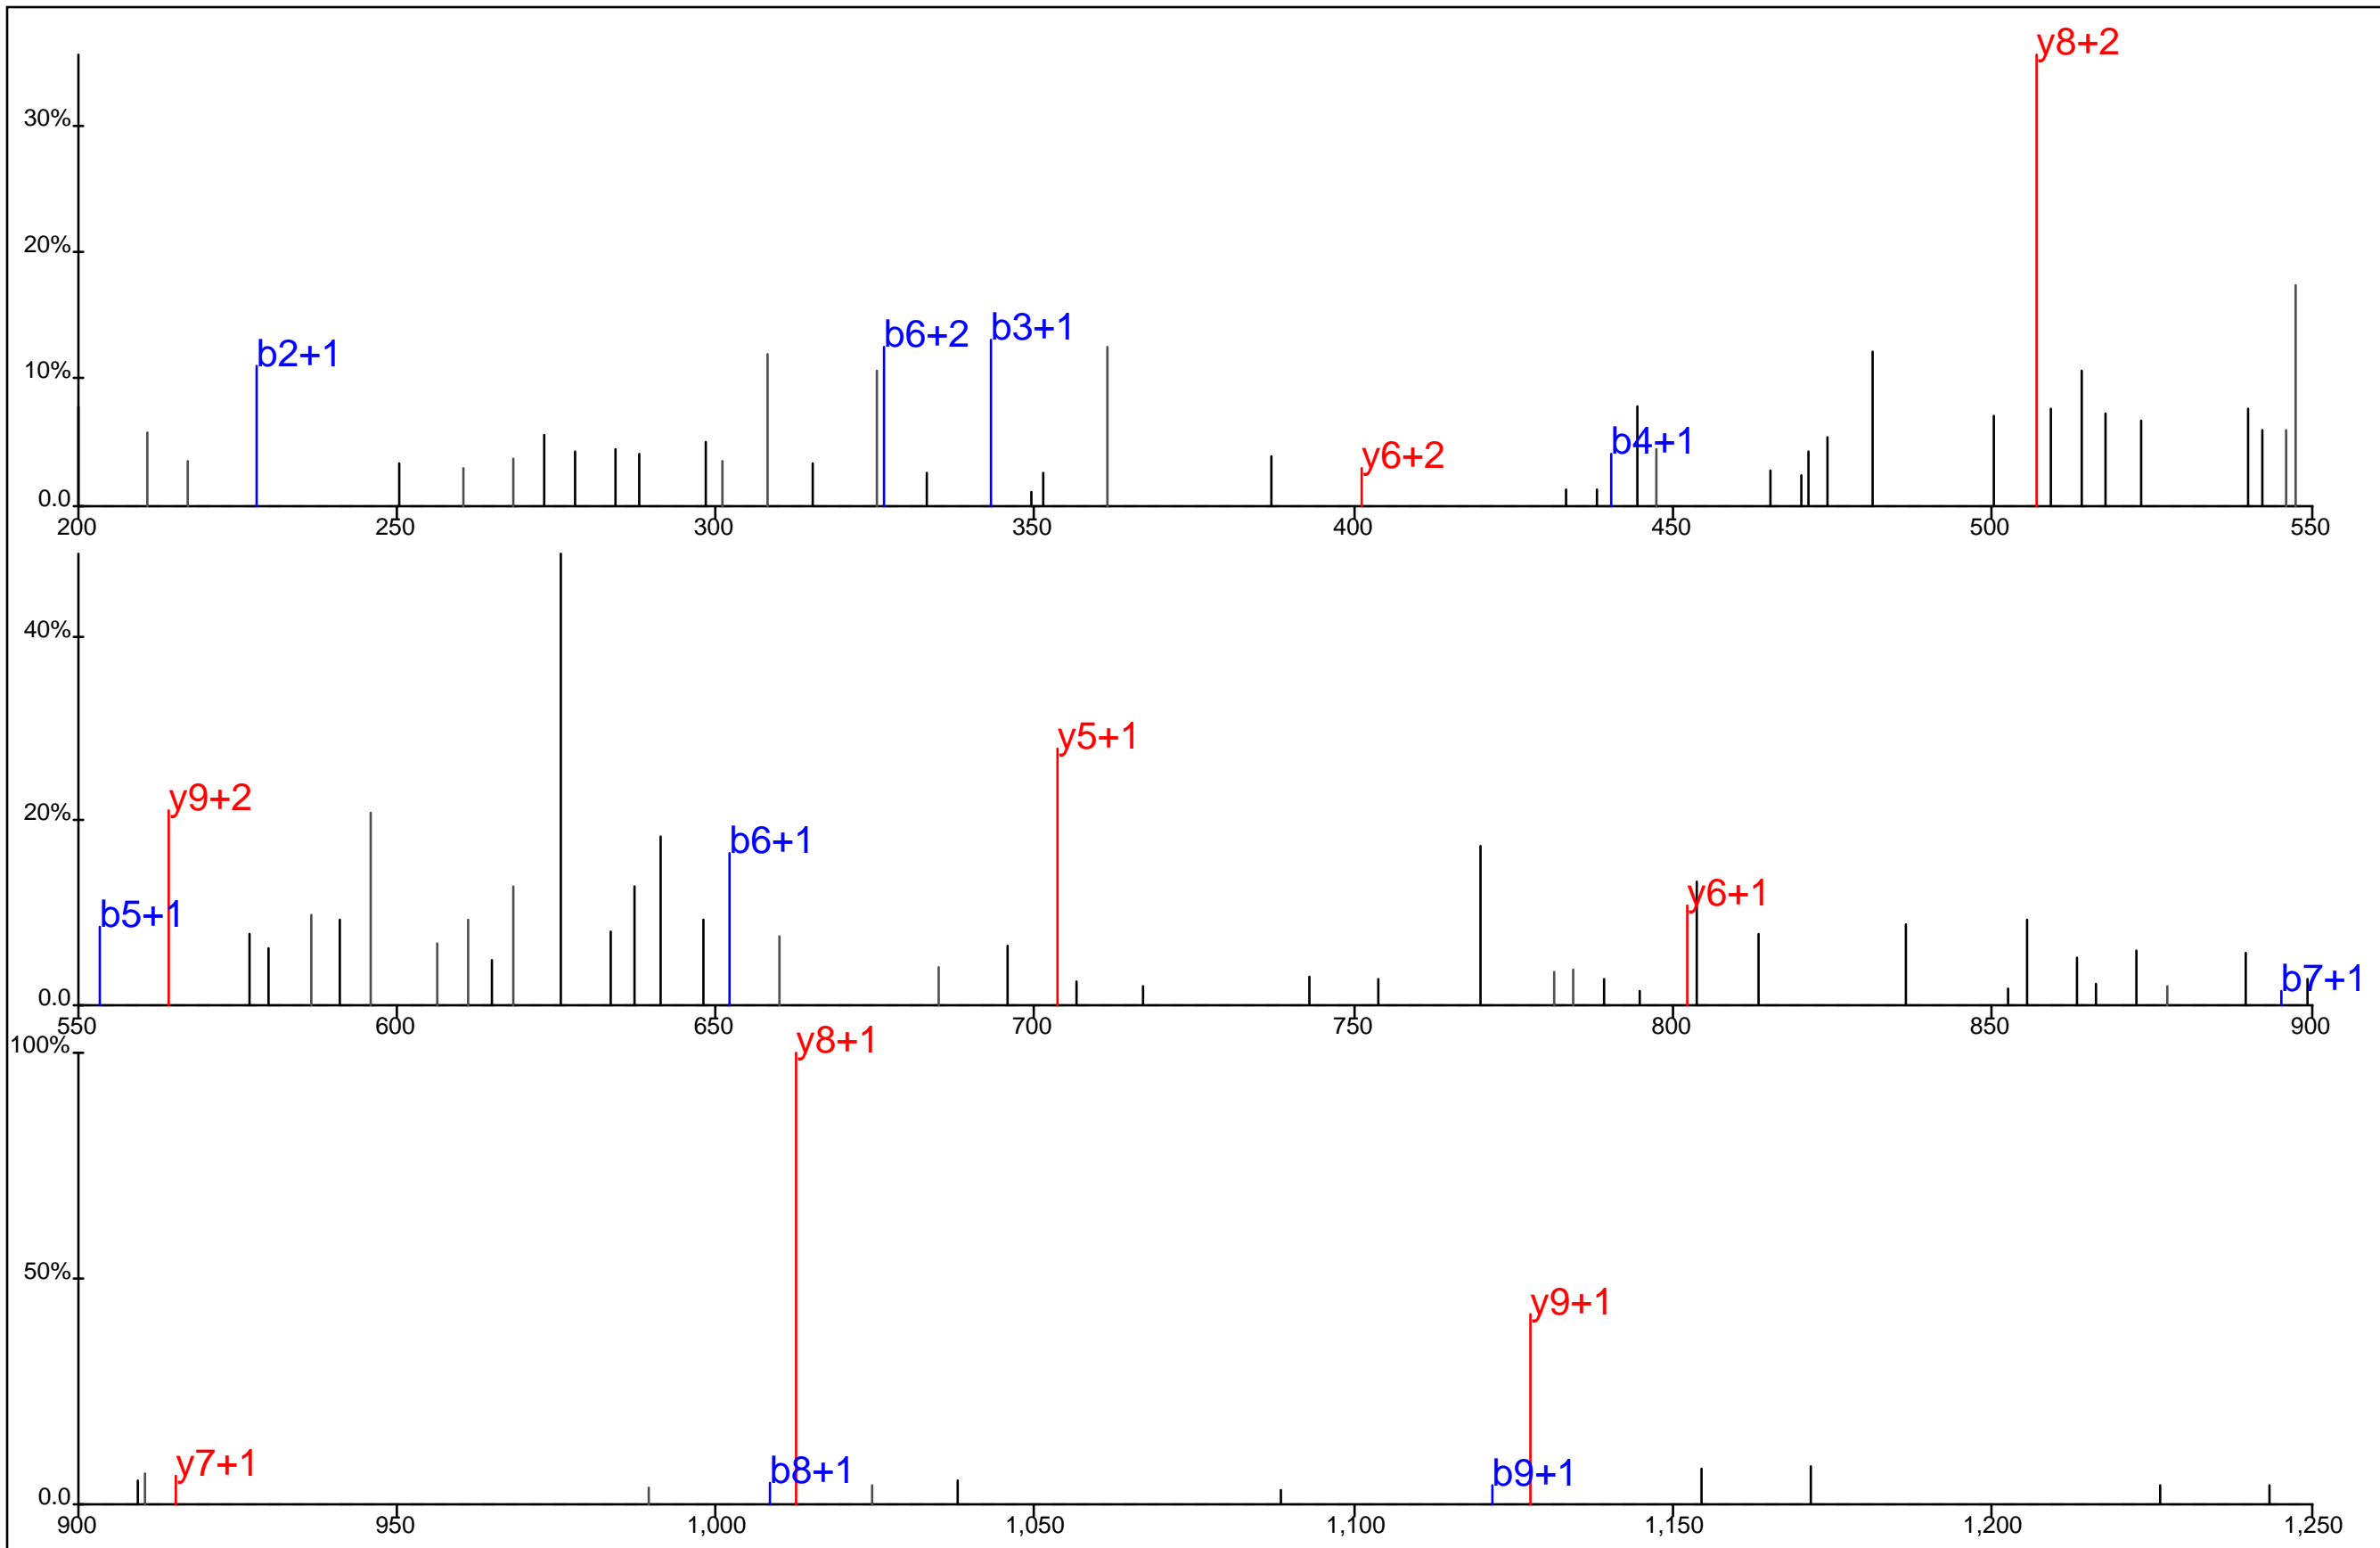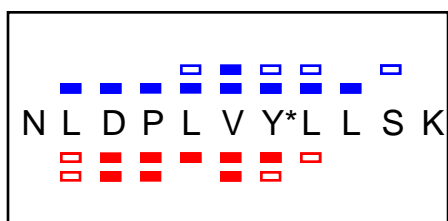

Protein Name: Gamma tubulin complex protein 2  
 gi Accession: 0  
 Precursor Mass: 677.8535+2  
 Delta Mass: 1.481 ppm  
 XCorr: 21.96

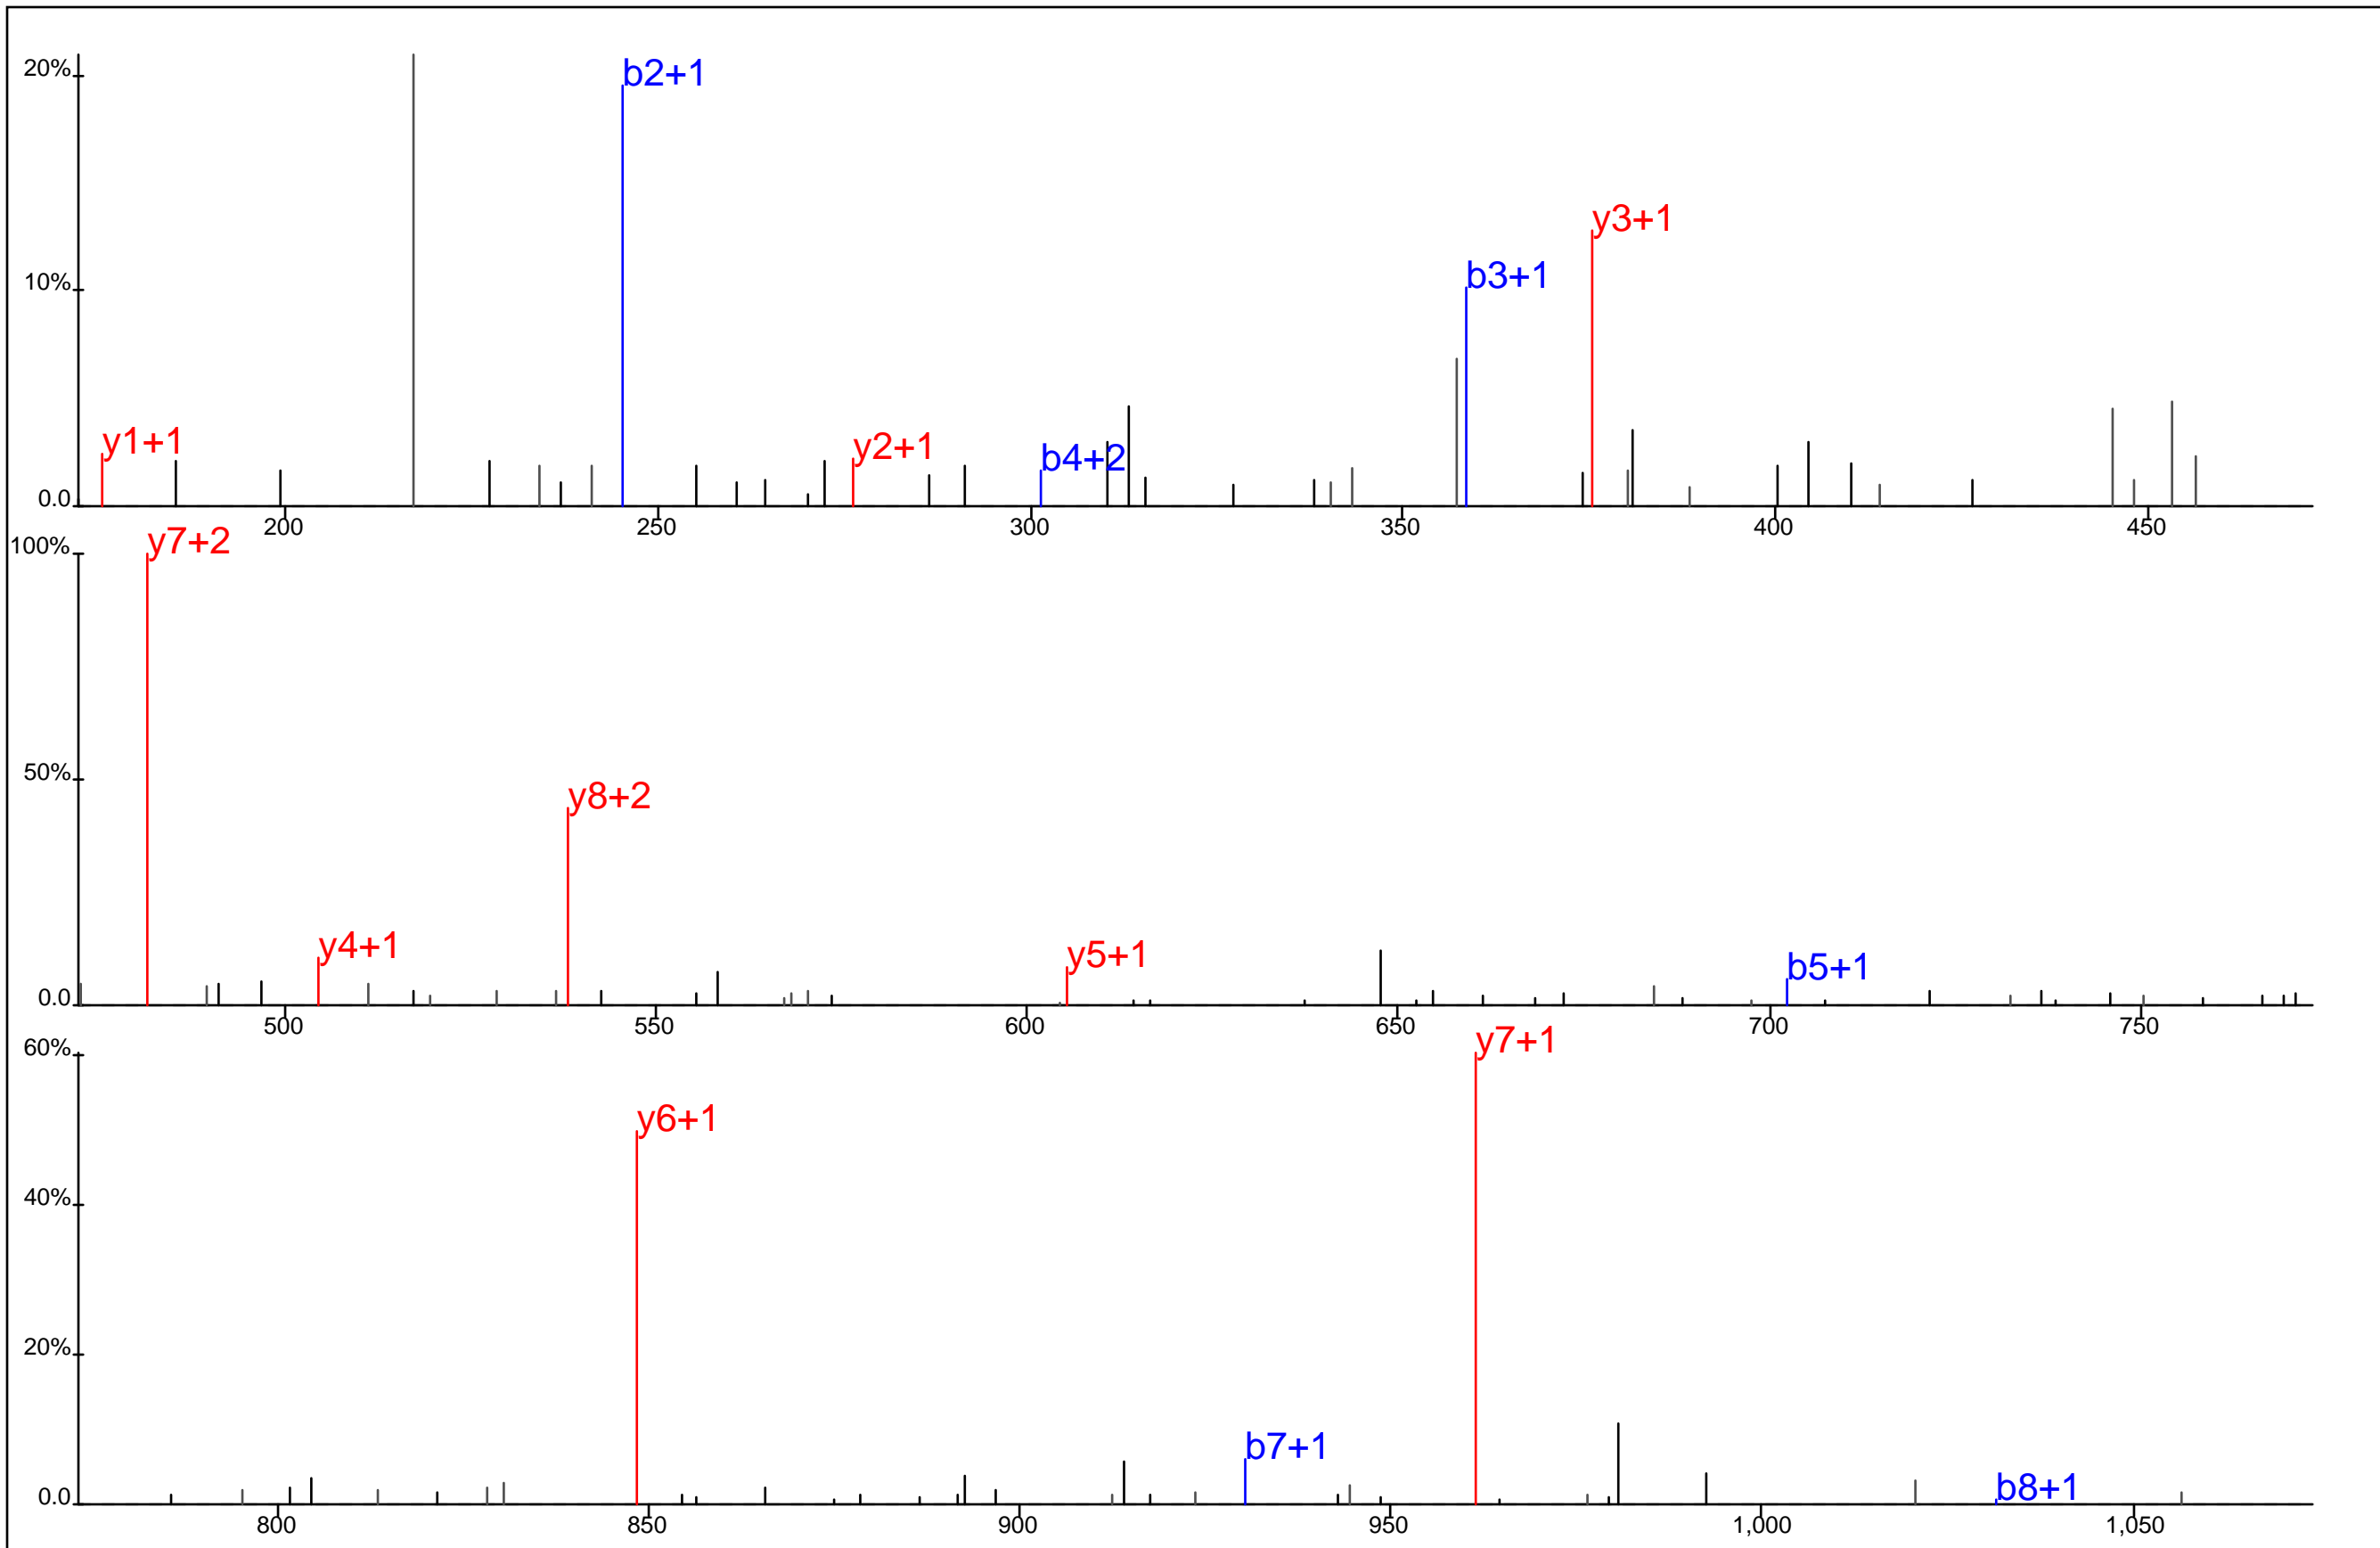

▢ ▢ ▢ ▢ ▢ ▢ ▢  
 M L L Y\* T E V T R  
▢ ▢ ▢ ▢ ▢ ▢ ▢

Protein Name: GDP dissociation inhibitor 1  
 gi Accession: 0  
 Precursor Mass: 603.2855+2  
 Delta Mass: 0.171 ppm  
 XCorr: 46.09



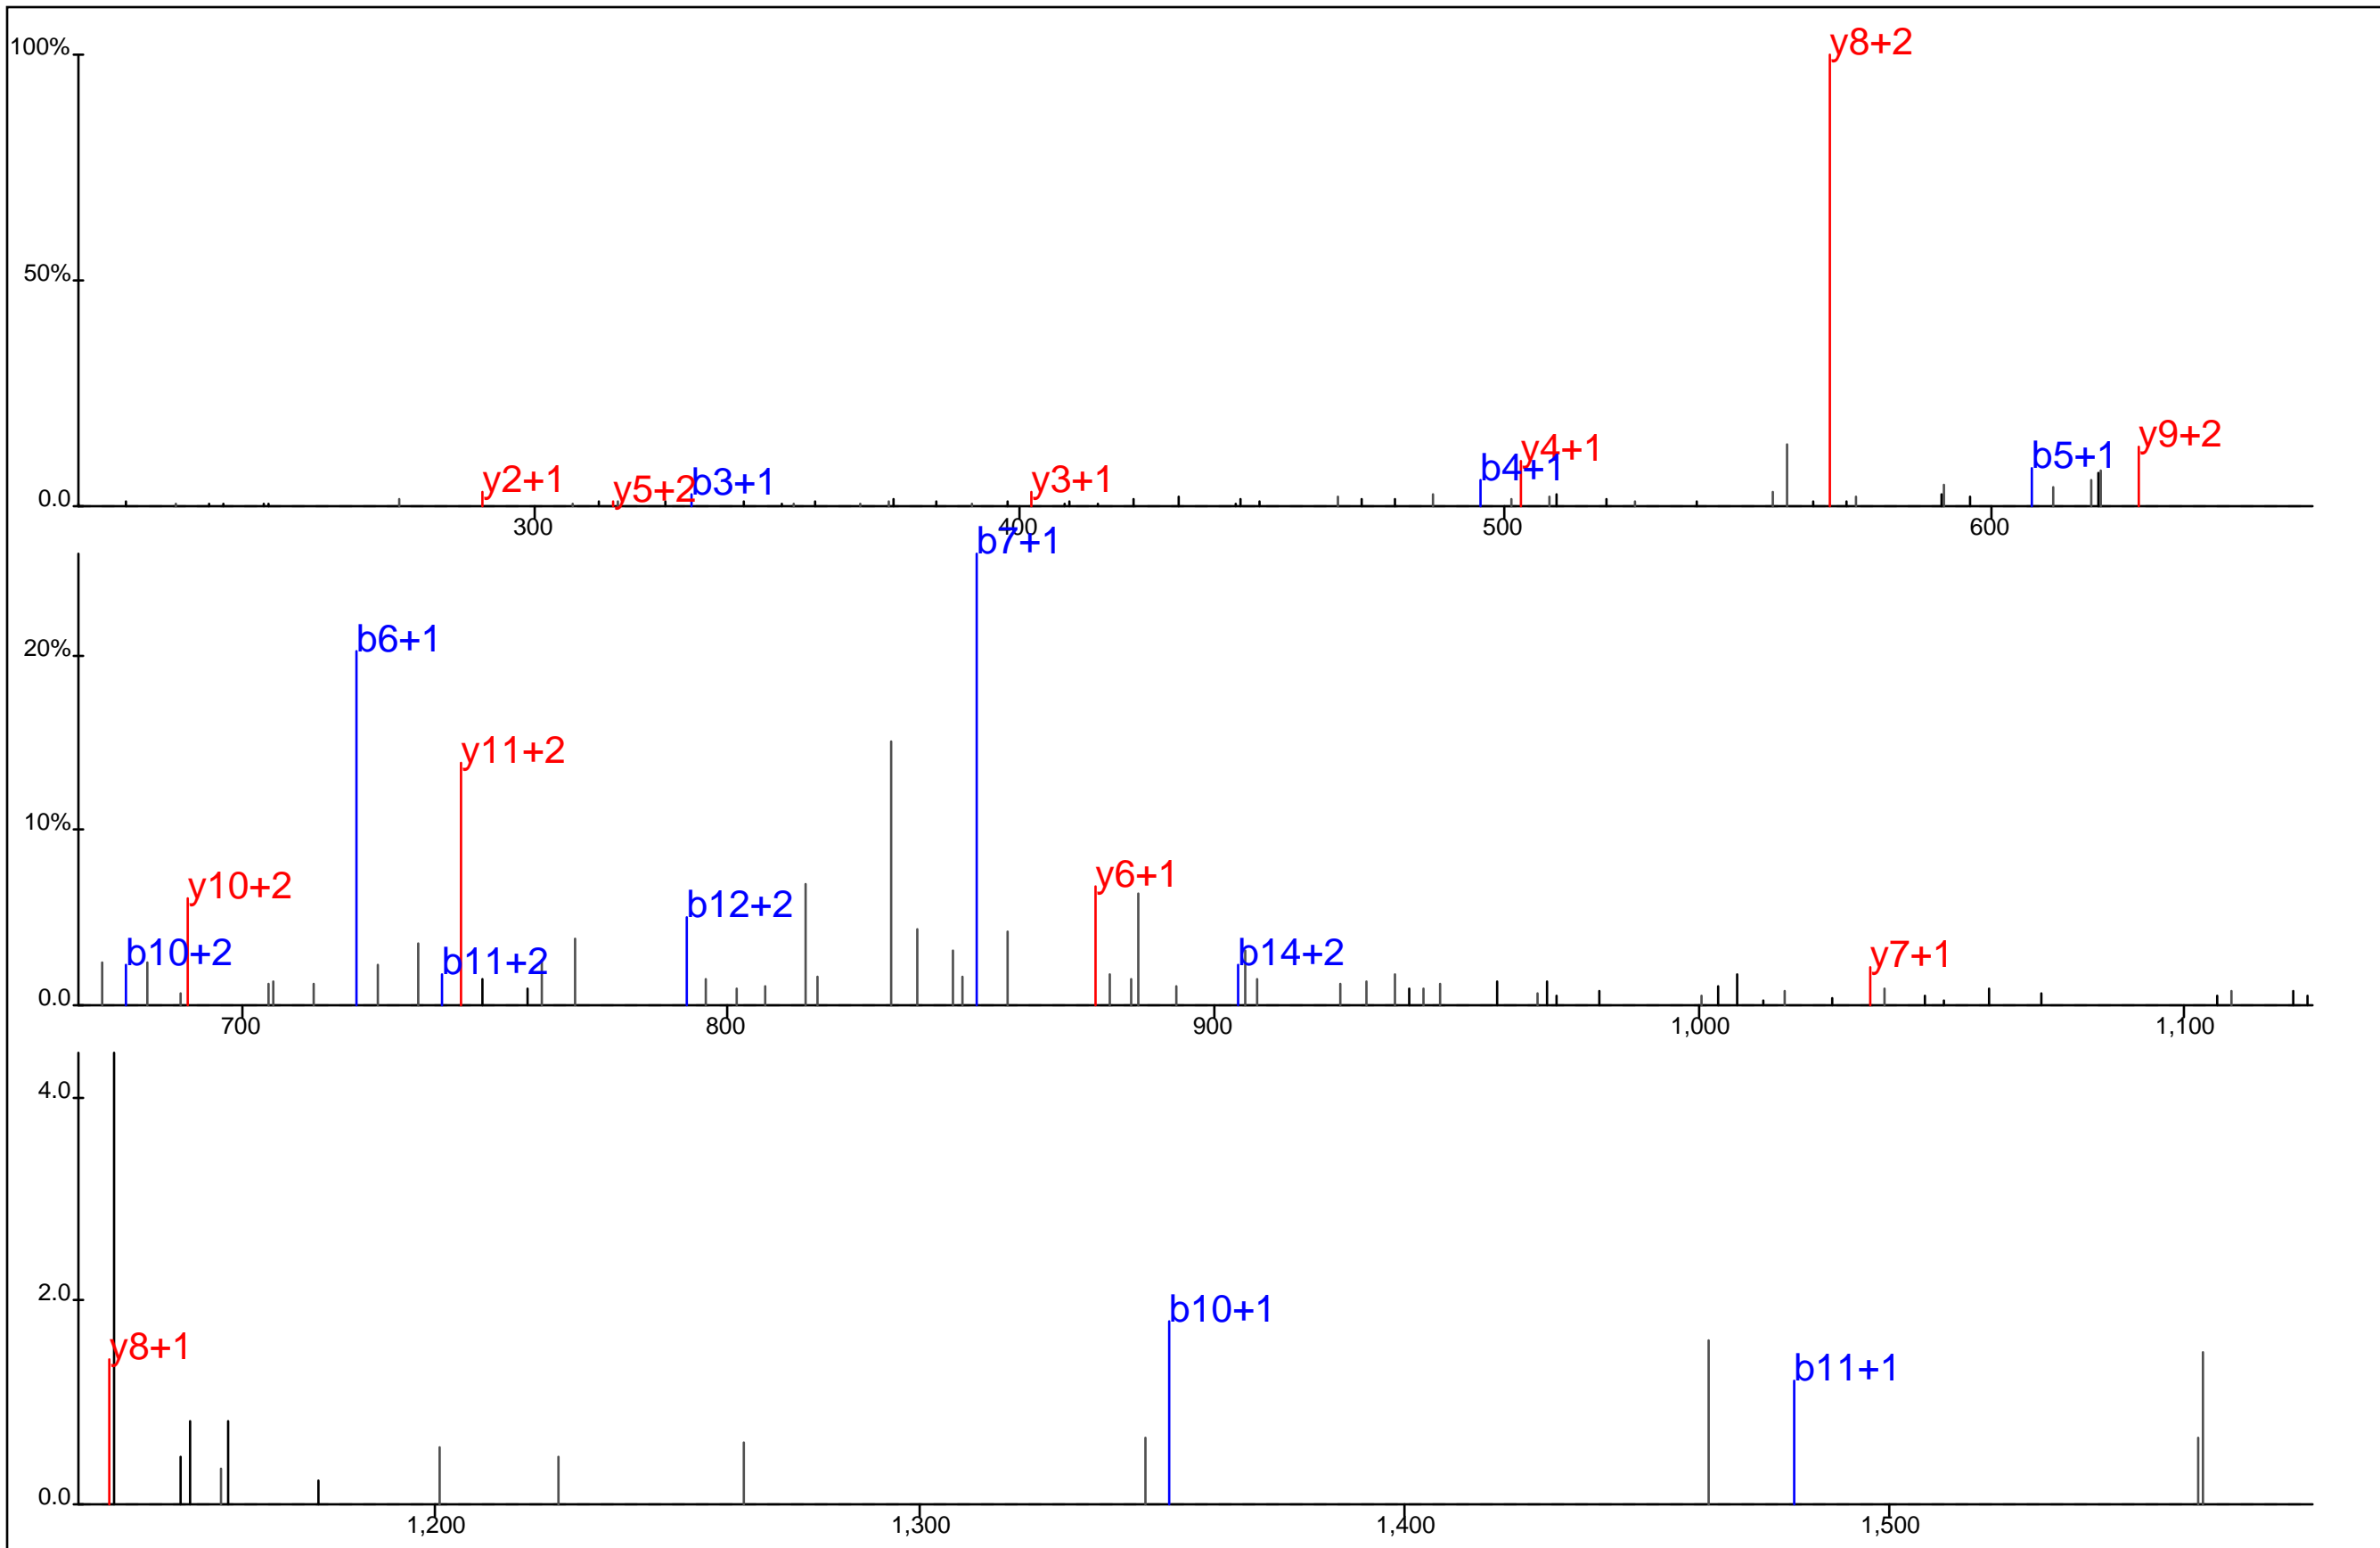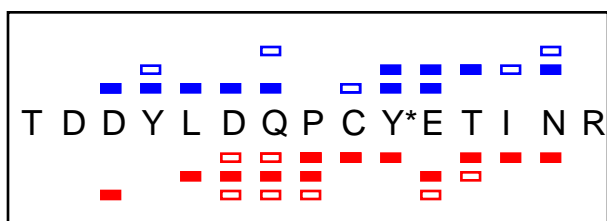

Protein Name: GDP dissociation inhibitor 2  
 gi Accession: 0  
 Precursor Mass: 661.6006+3  
 Delta Mass: 1.742 ppm  
 XCorr: 53.4



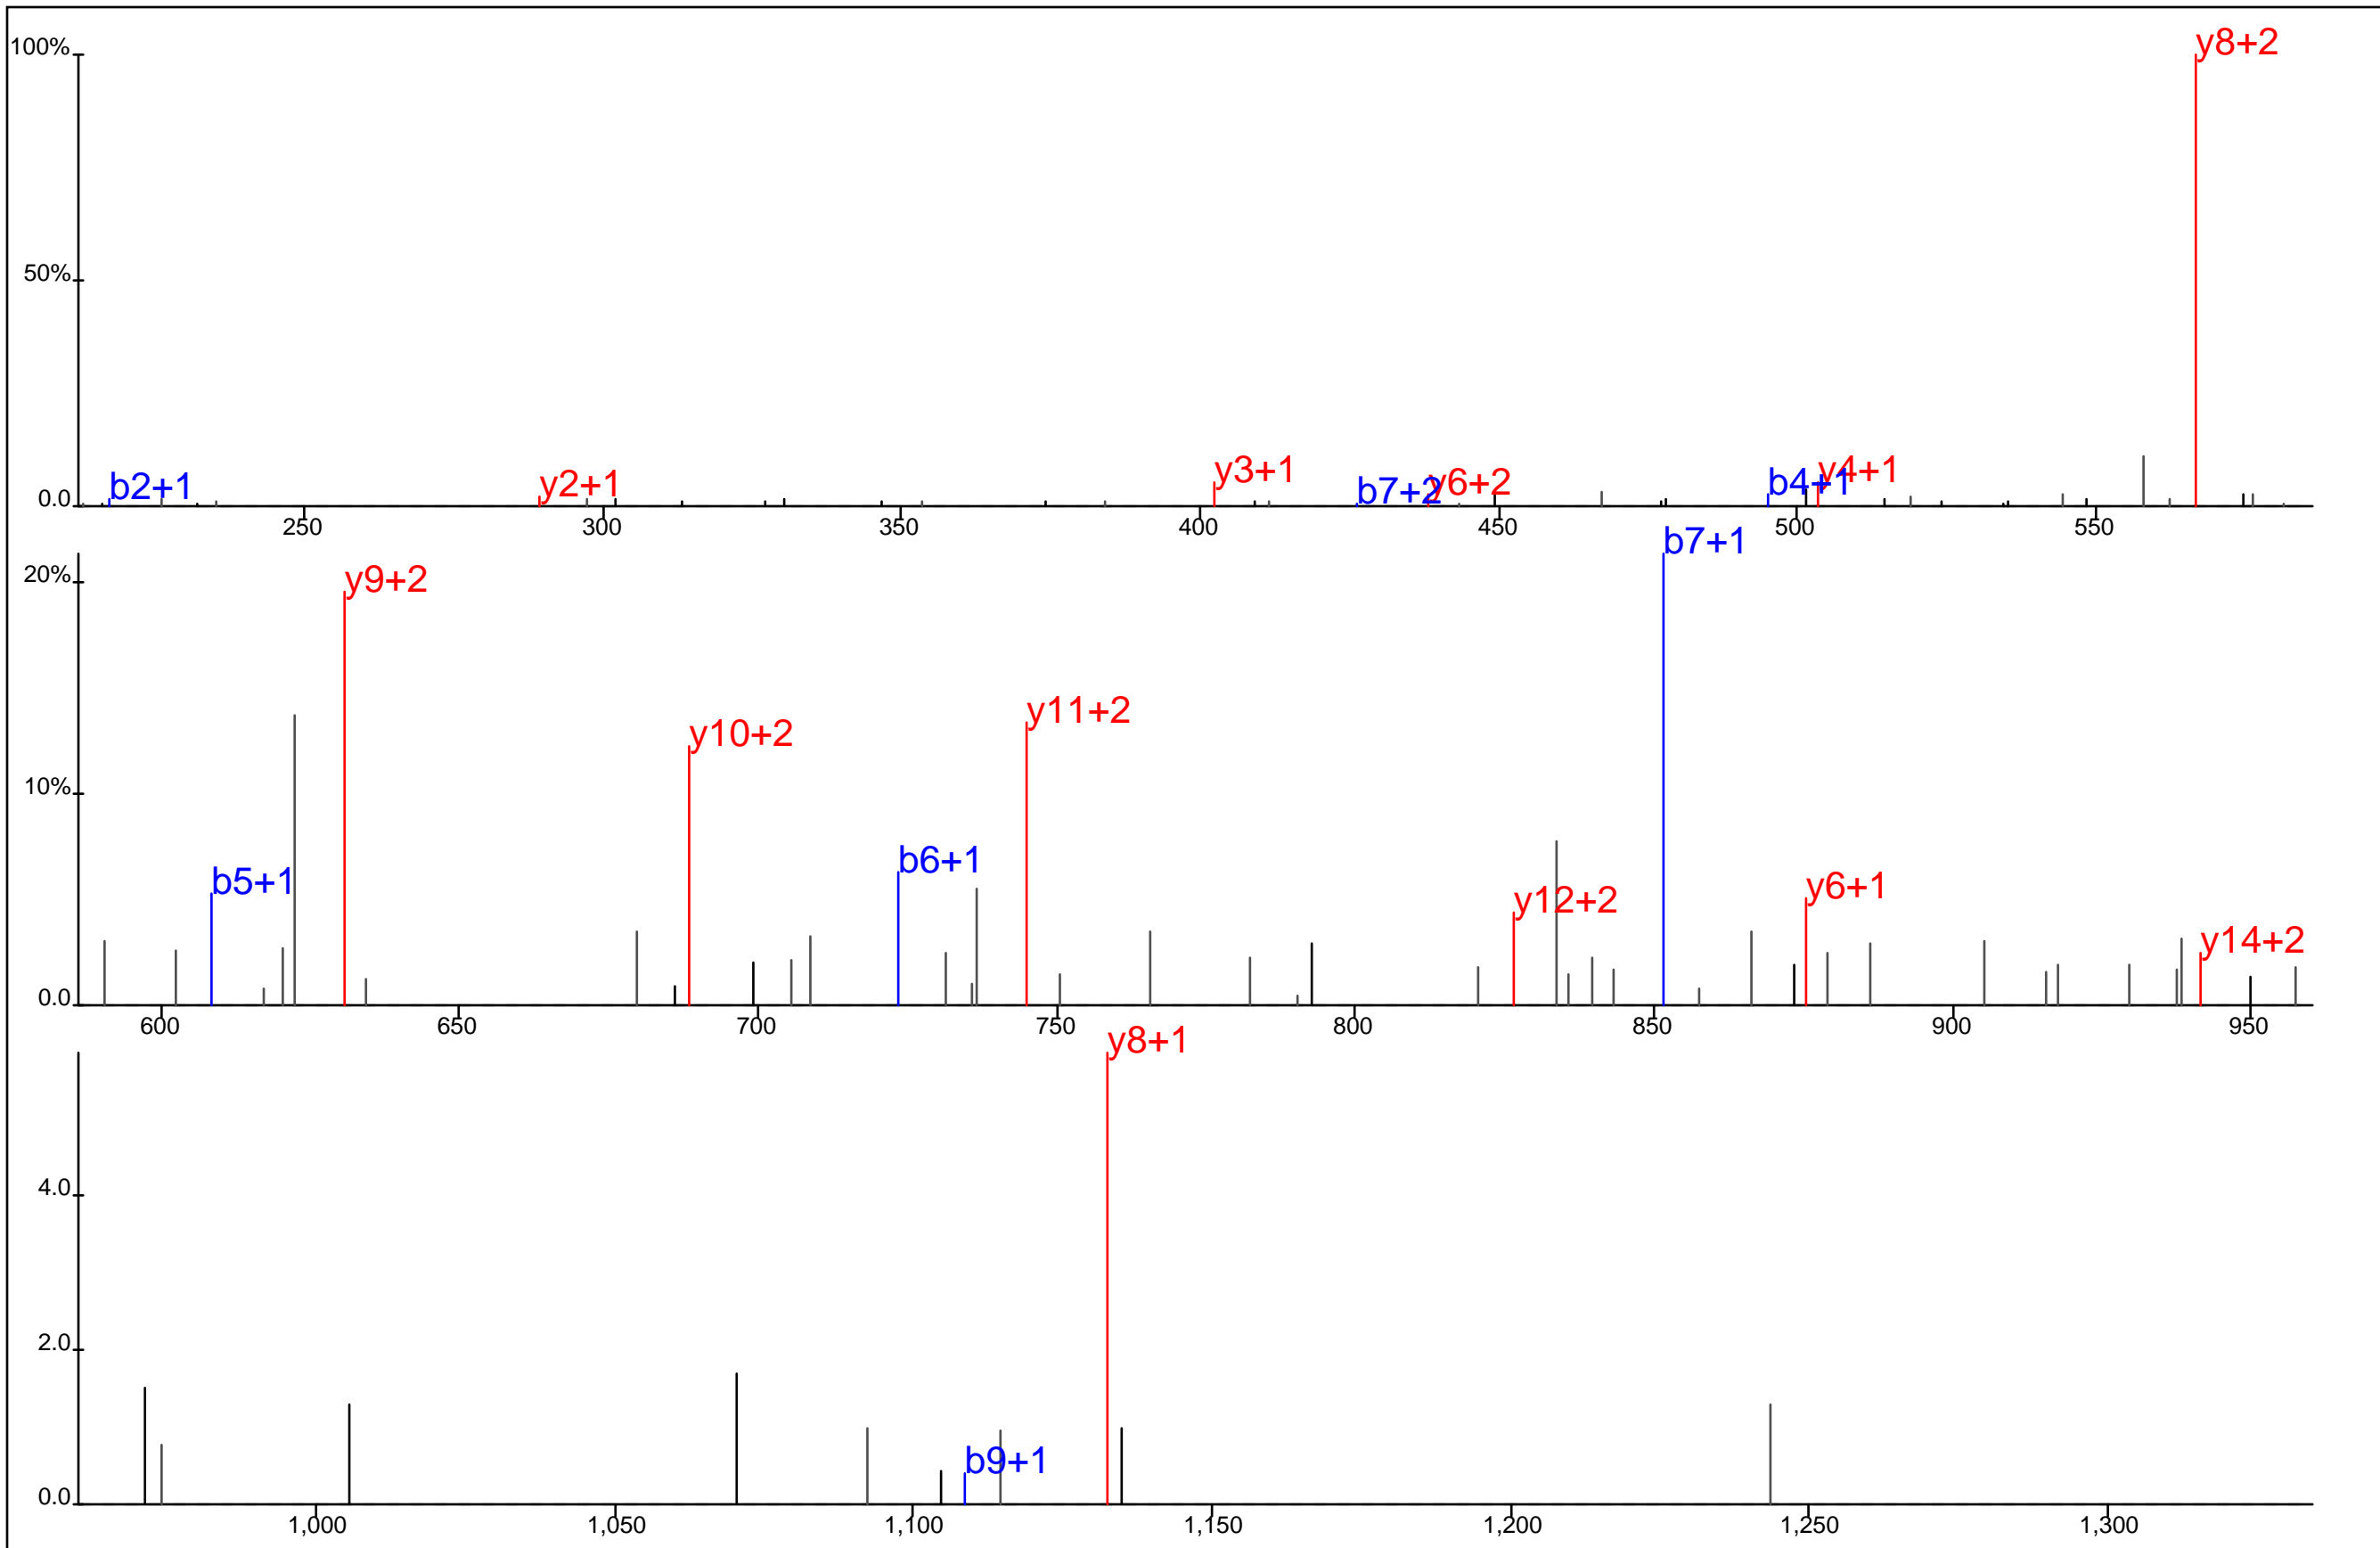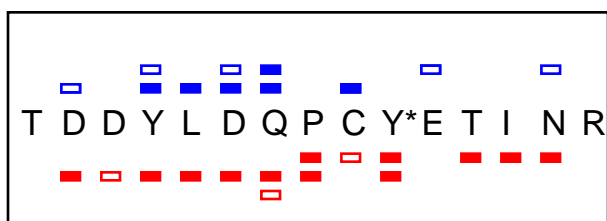

Protein Name: GDP dissociation inhibitor 2  
 gi Accession: 0  
 Precursor Mass: 661.6002+3  
 Delta Mass: 1.188 ppm  
 XCorr: 43.22



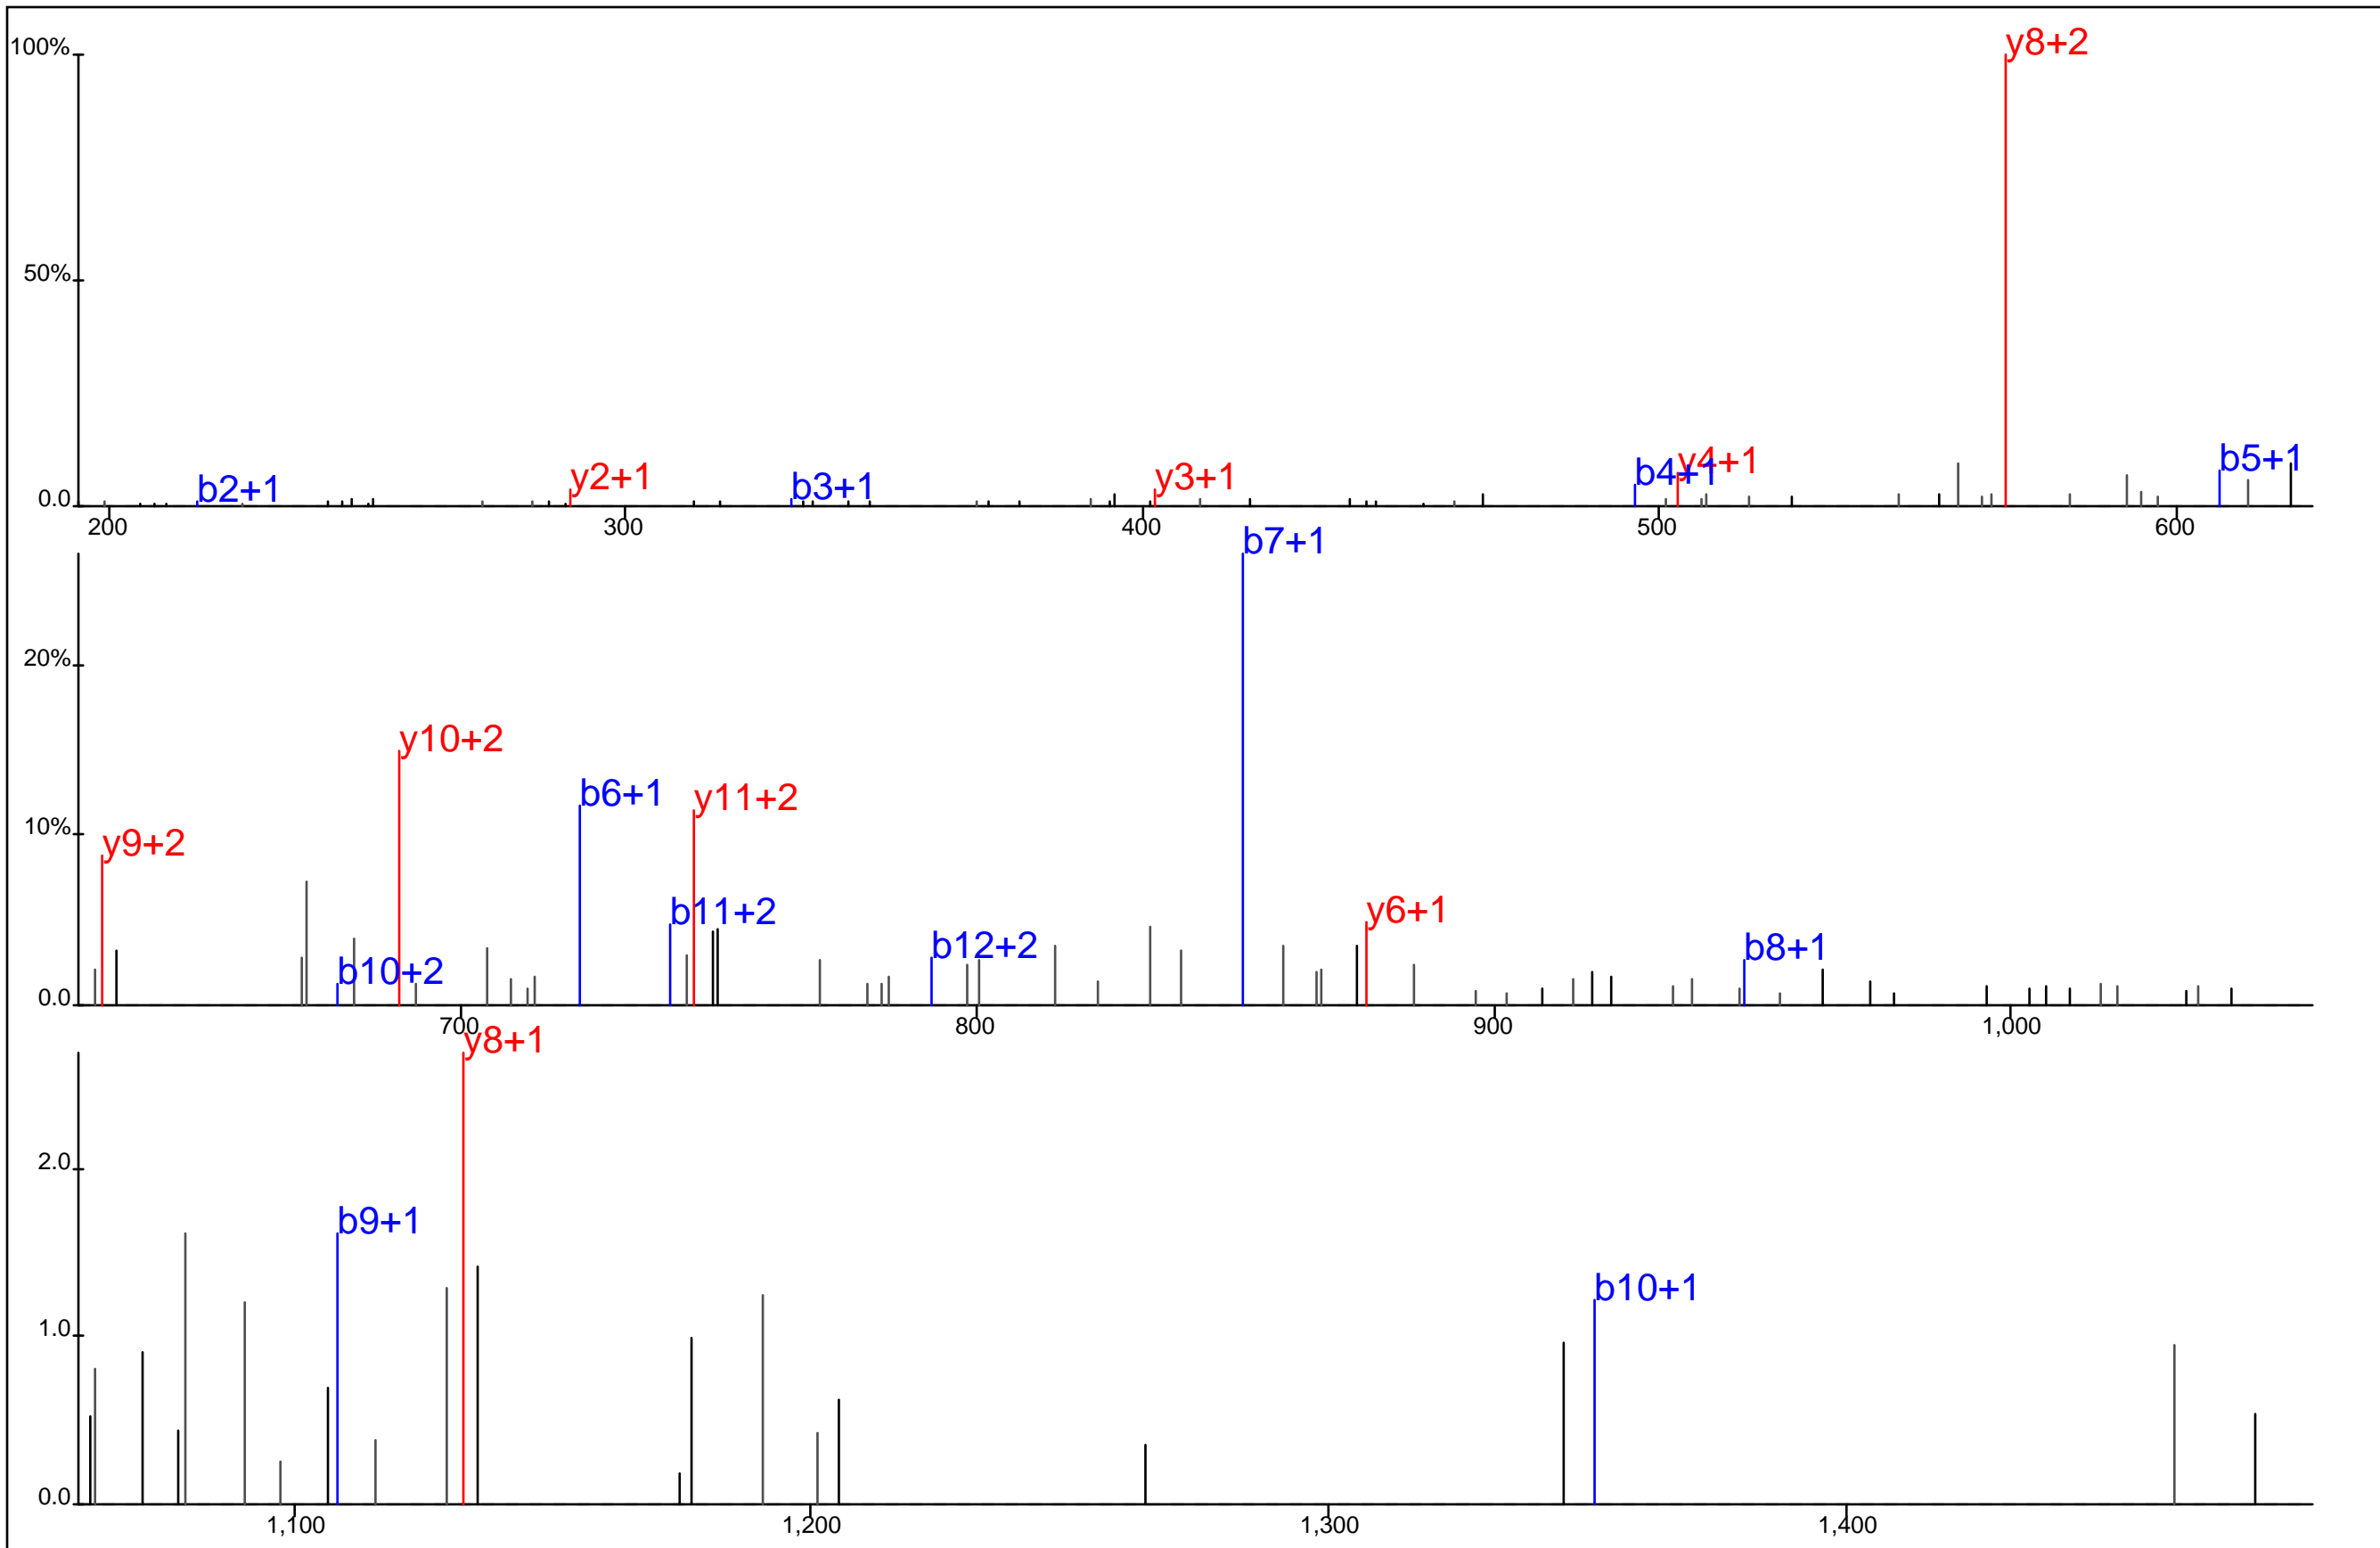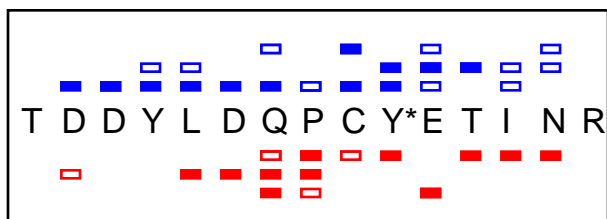

Protein Name: GDP dissociation inhibitor 2  
 gi Accession: 0  
 Precursor Mass: 661.5992+3  
 Delta Mass: 0.290 ppm  
 XCorr: 41.1



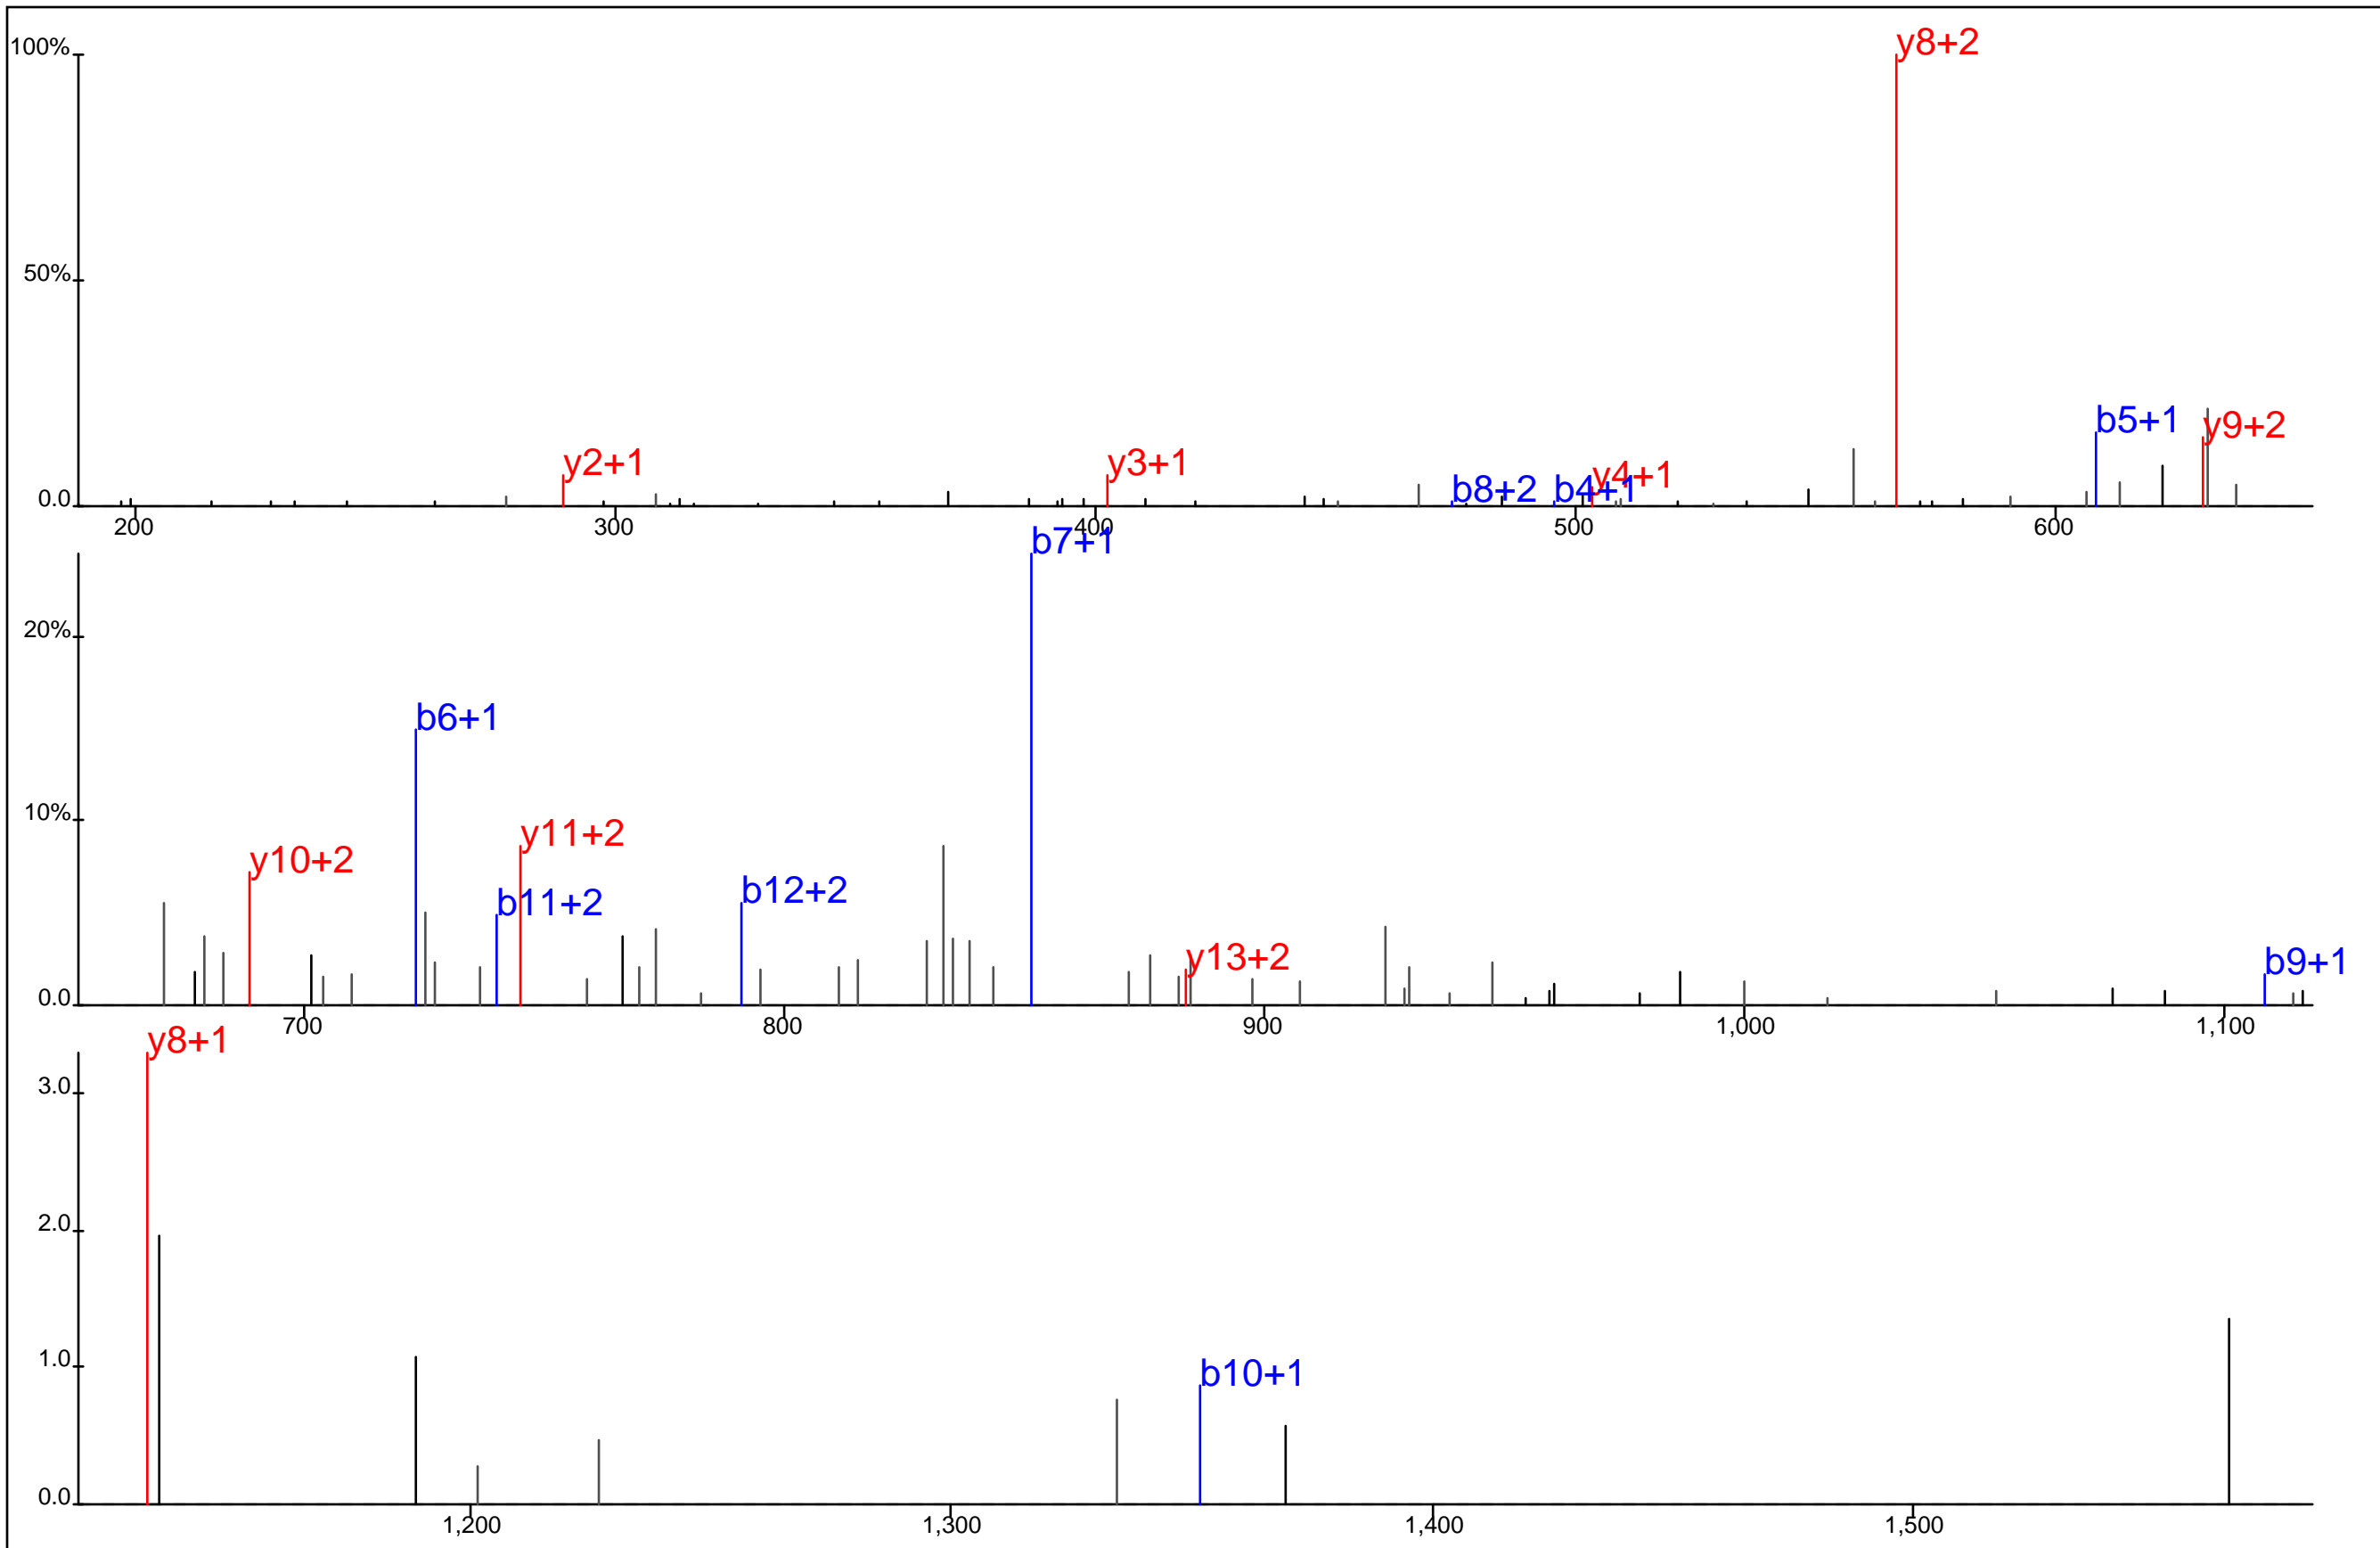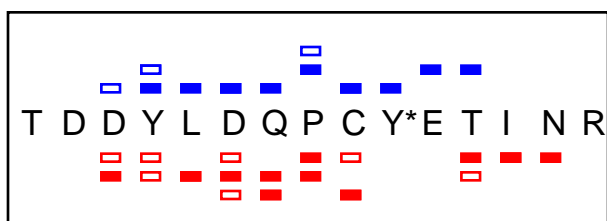

Protein Name: GDP dissociation inhibitor 2  
 gi Accession: 0  
 Precursor Mass: 661.5998+3  
 Delta Mass: 0.541 ppm  
 XCorr: 23.38

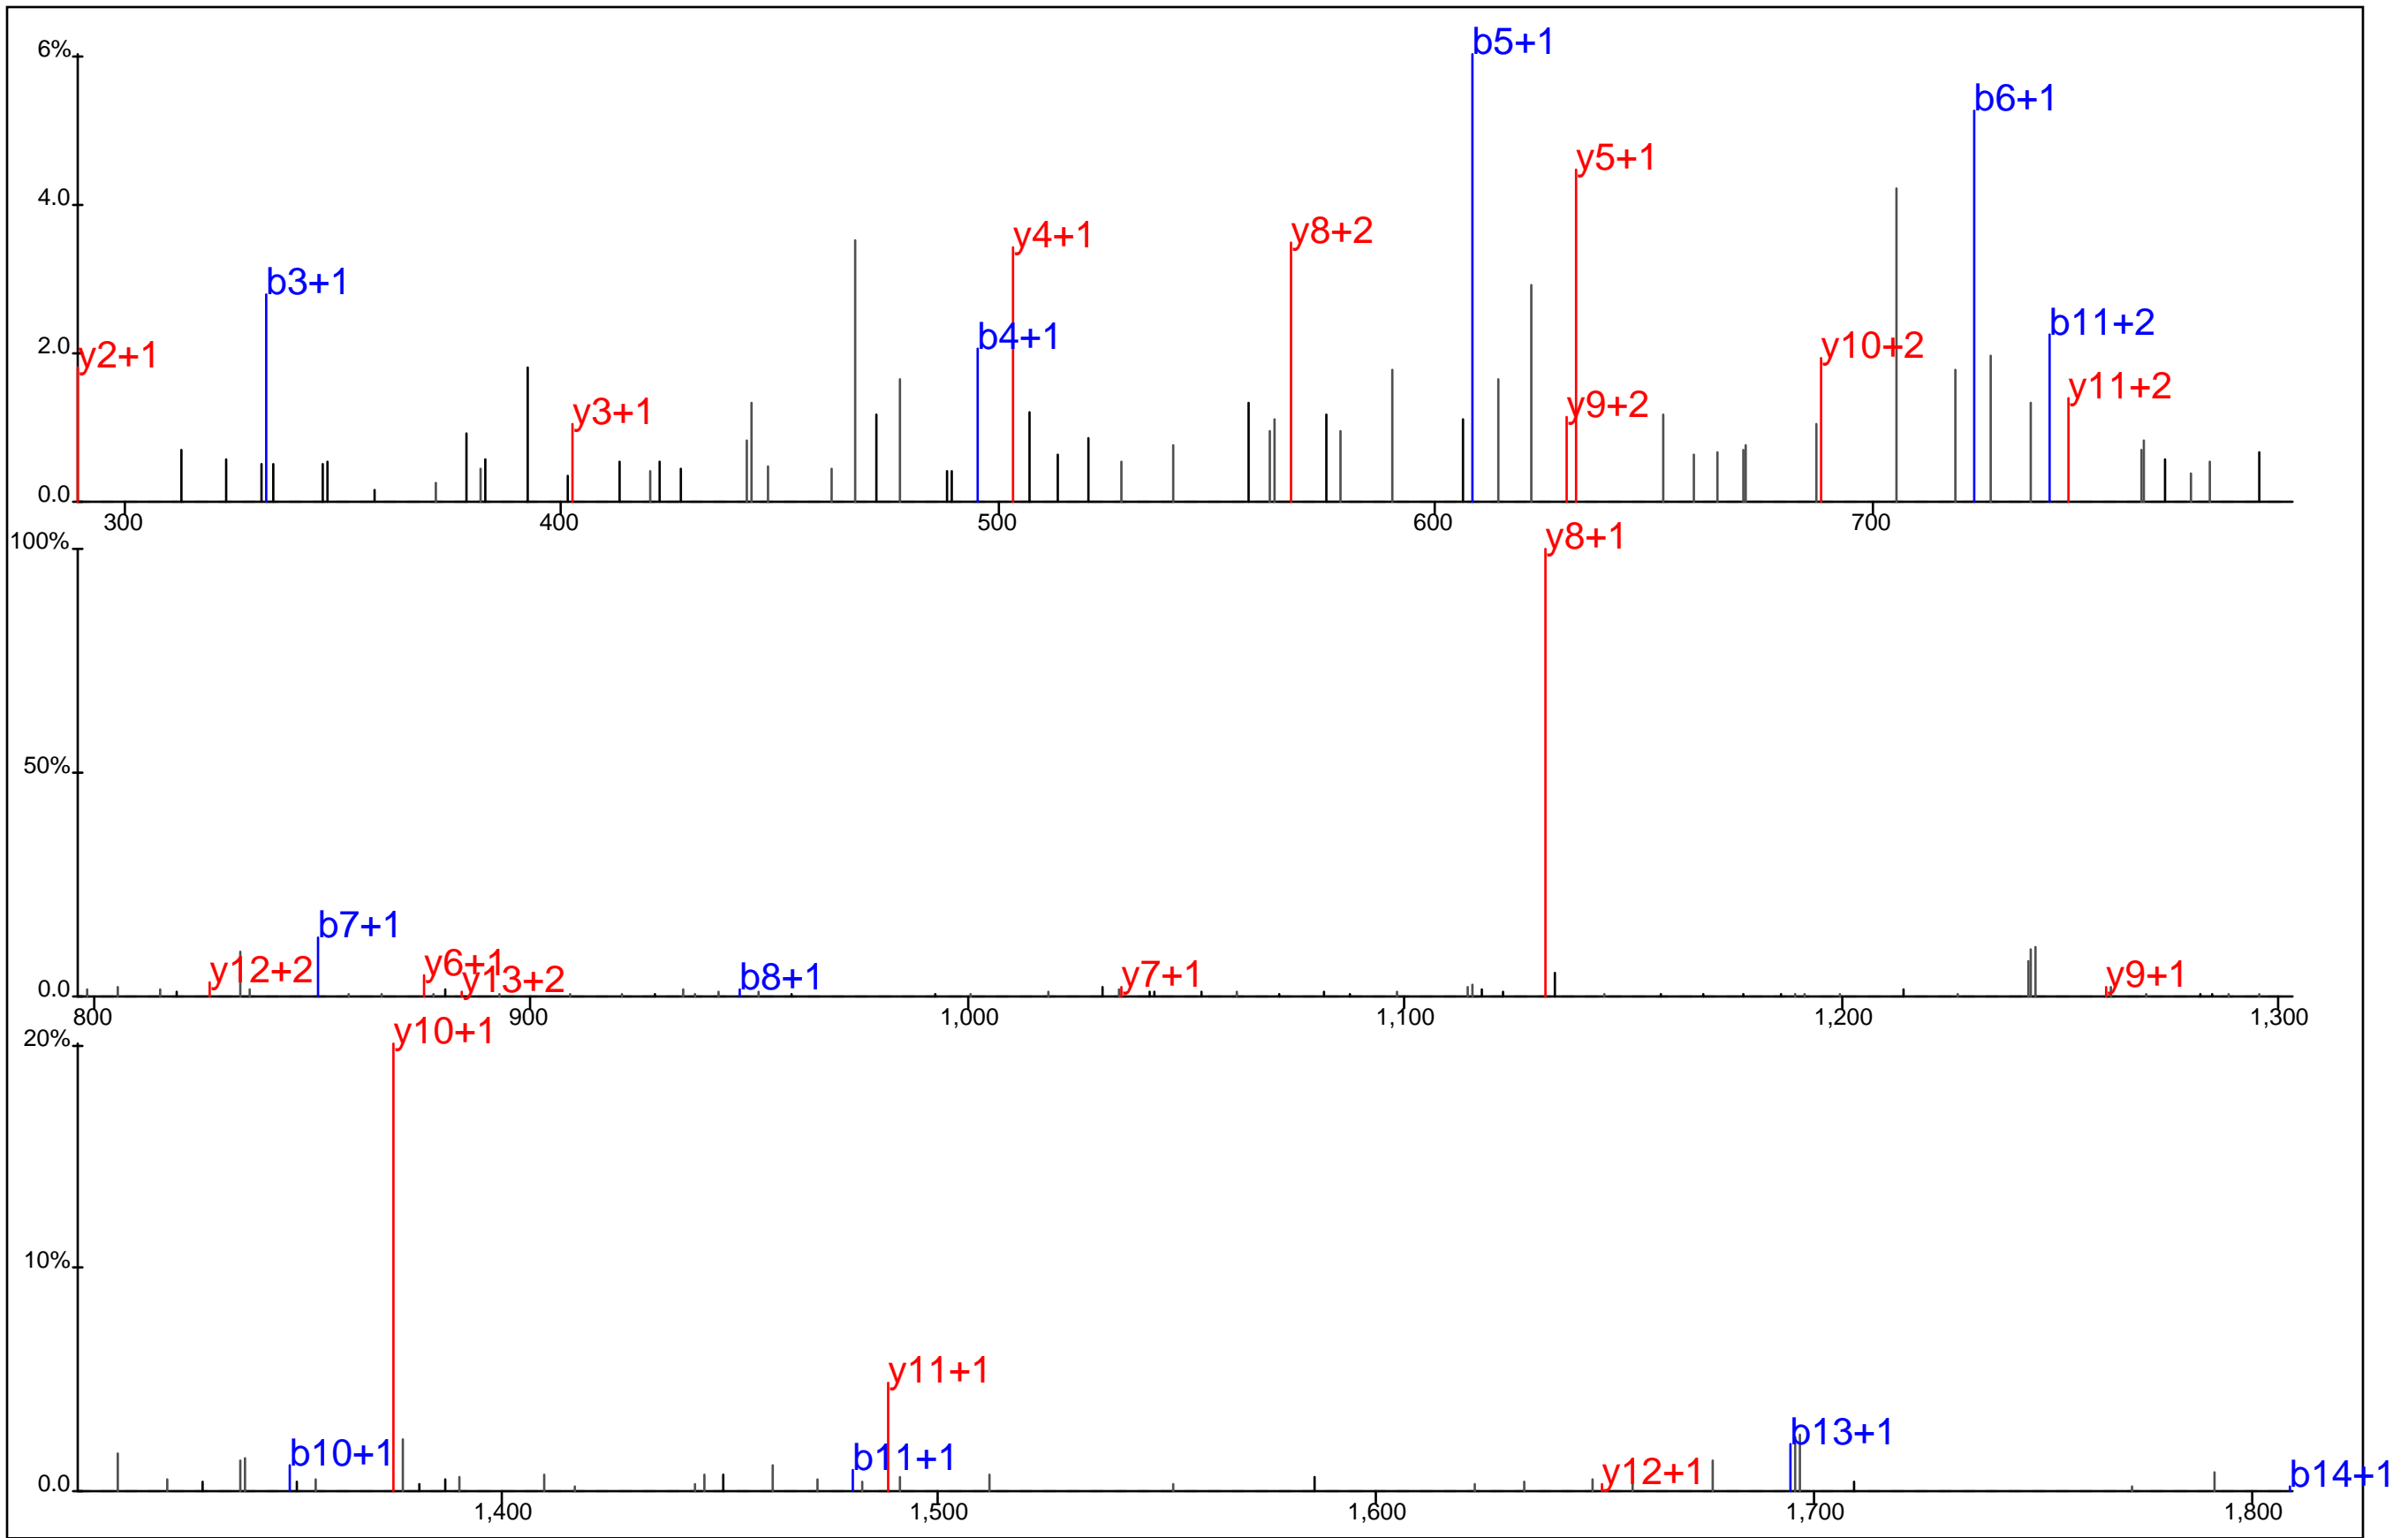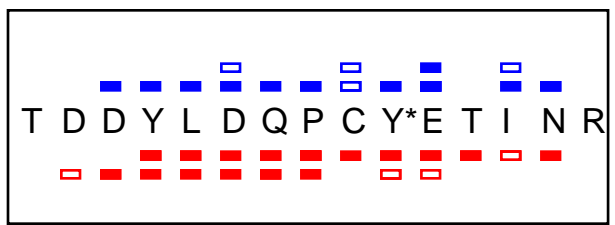

Protein Name: GDP dissociation inhibitor 2  
 gi Accession: 0  
 Precursor Mass: 991.8967+2  
 Delta Mass: 1.163 ppm  
 XCorr: 54.3

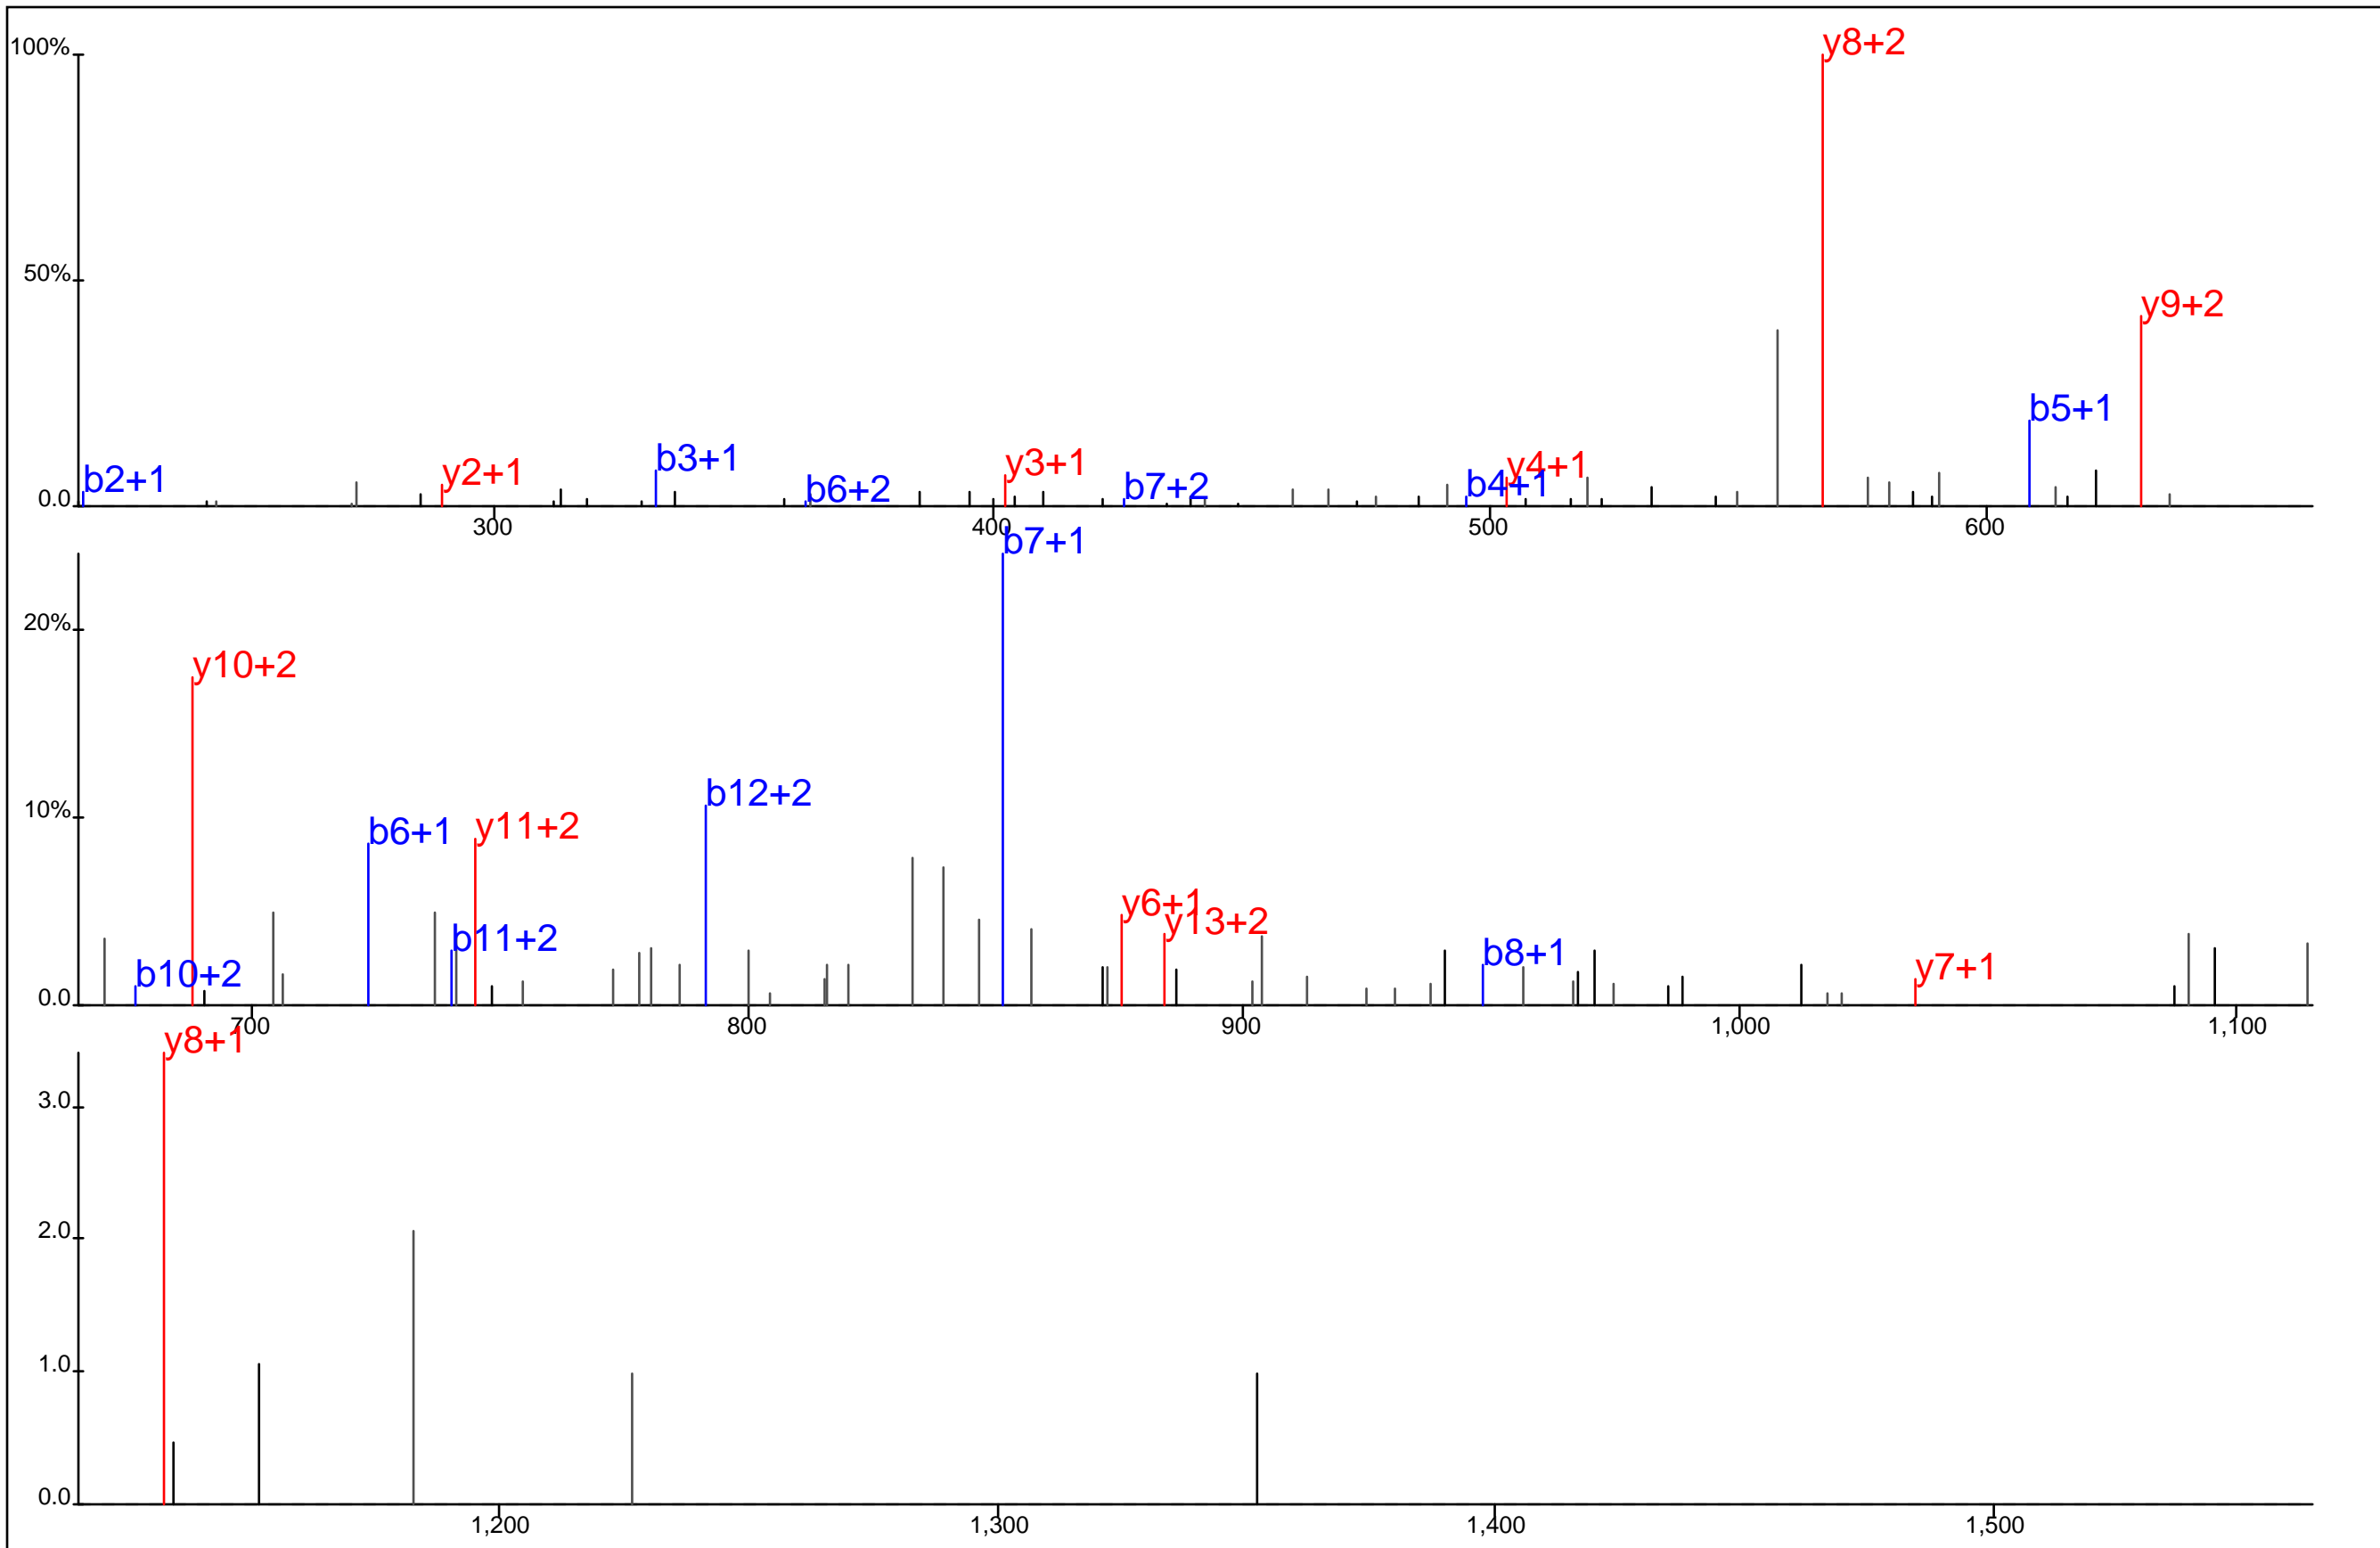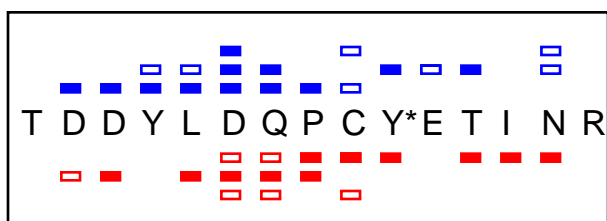

Protein Name: GDP dissociation inhibitor 2  
 gi Accession: 0  
 Precursor Mass: 661.5991+3  
 Delta Mass: 0.567 ppm  
 XCorr: 40.78

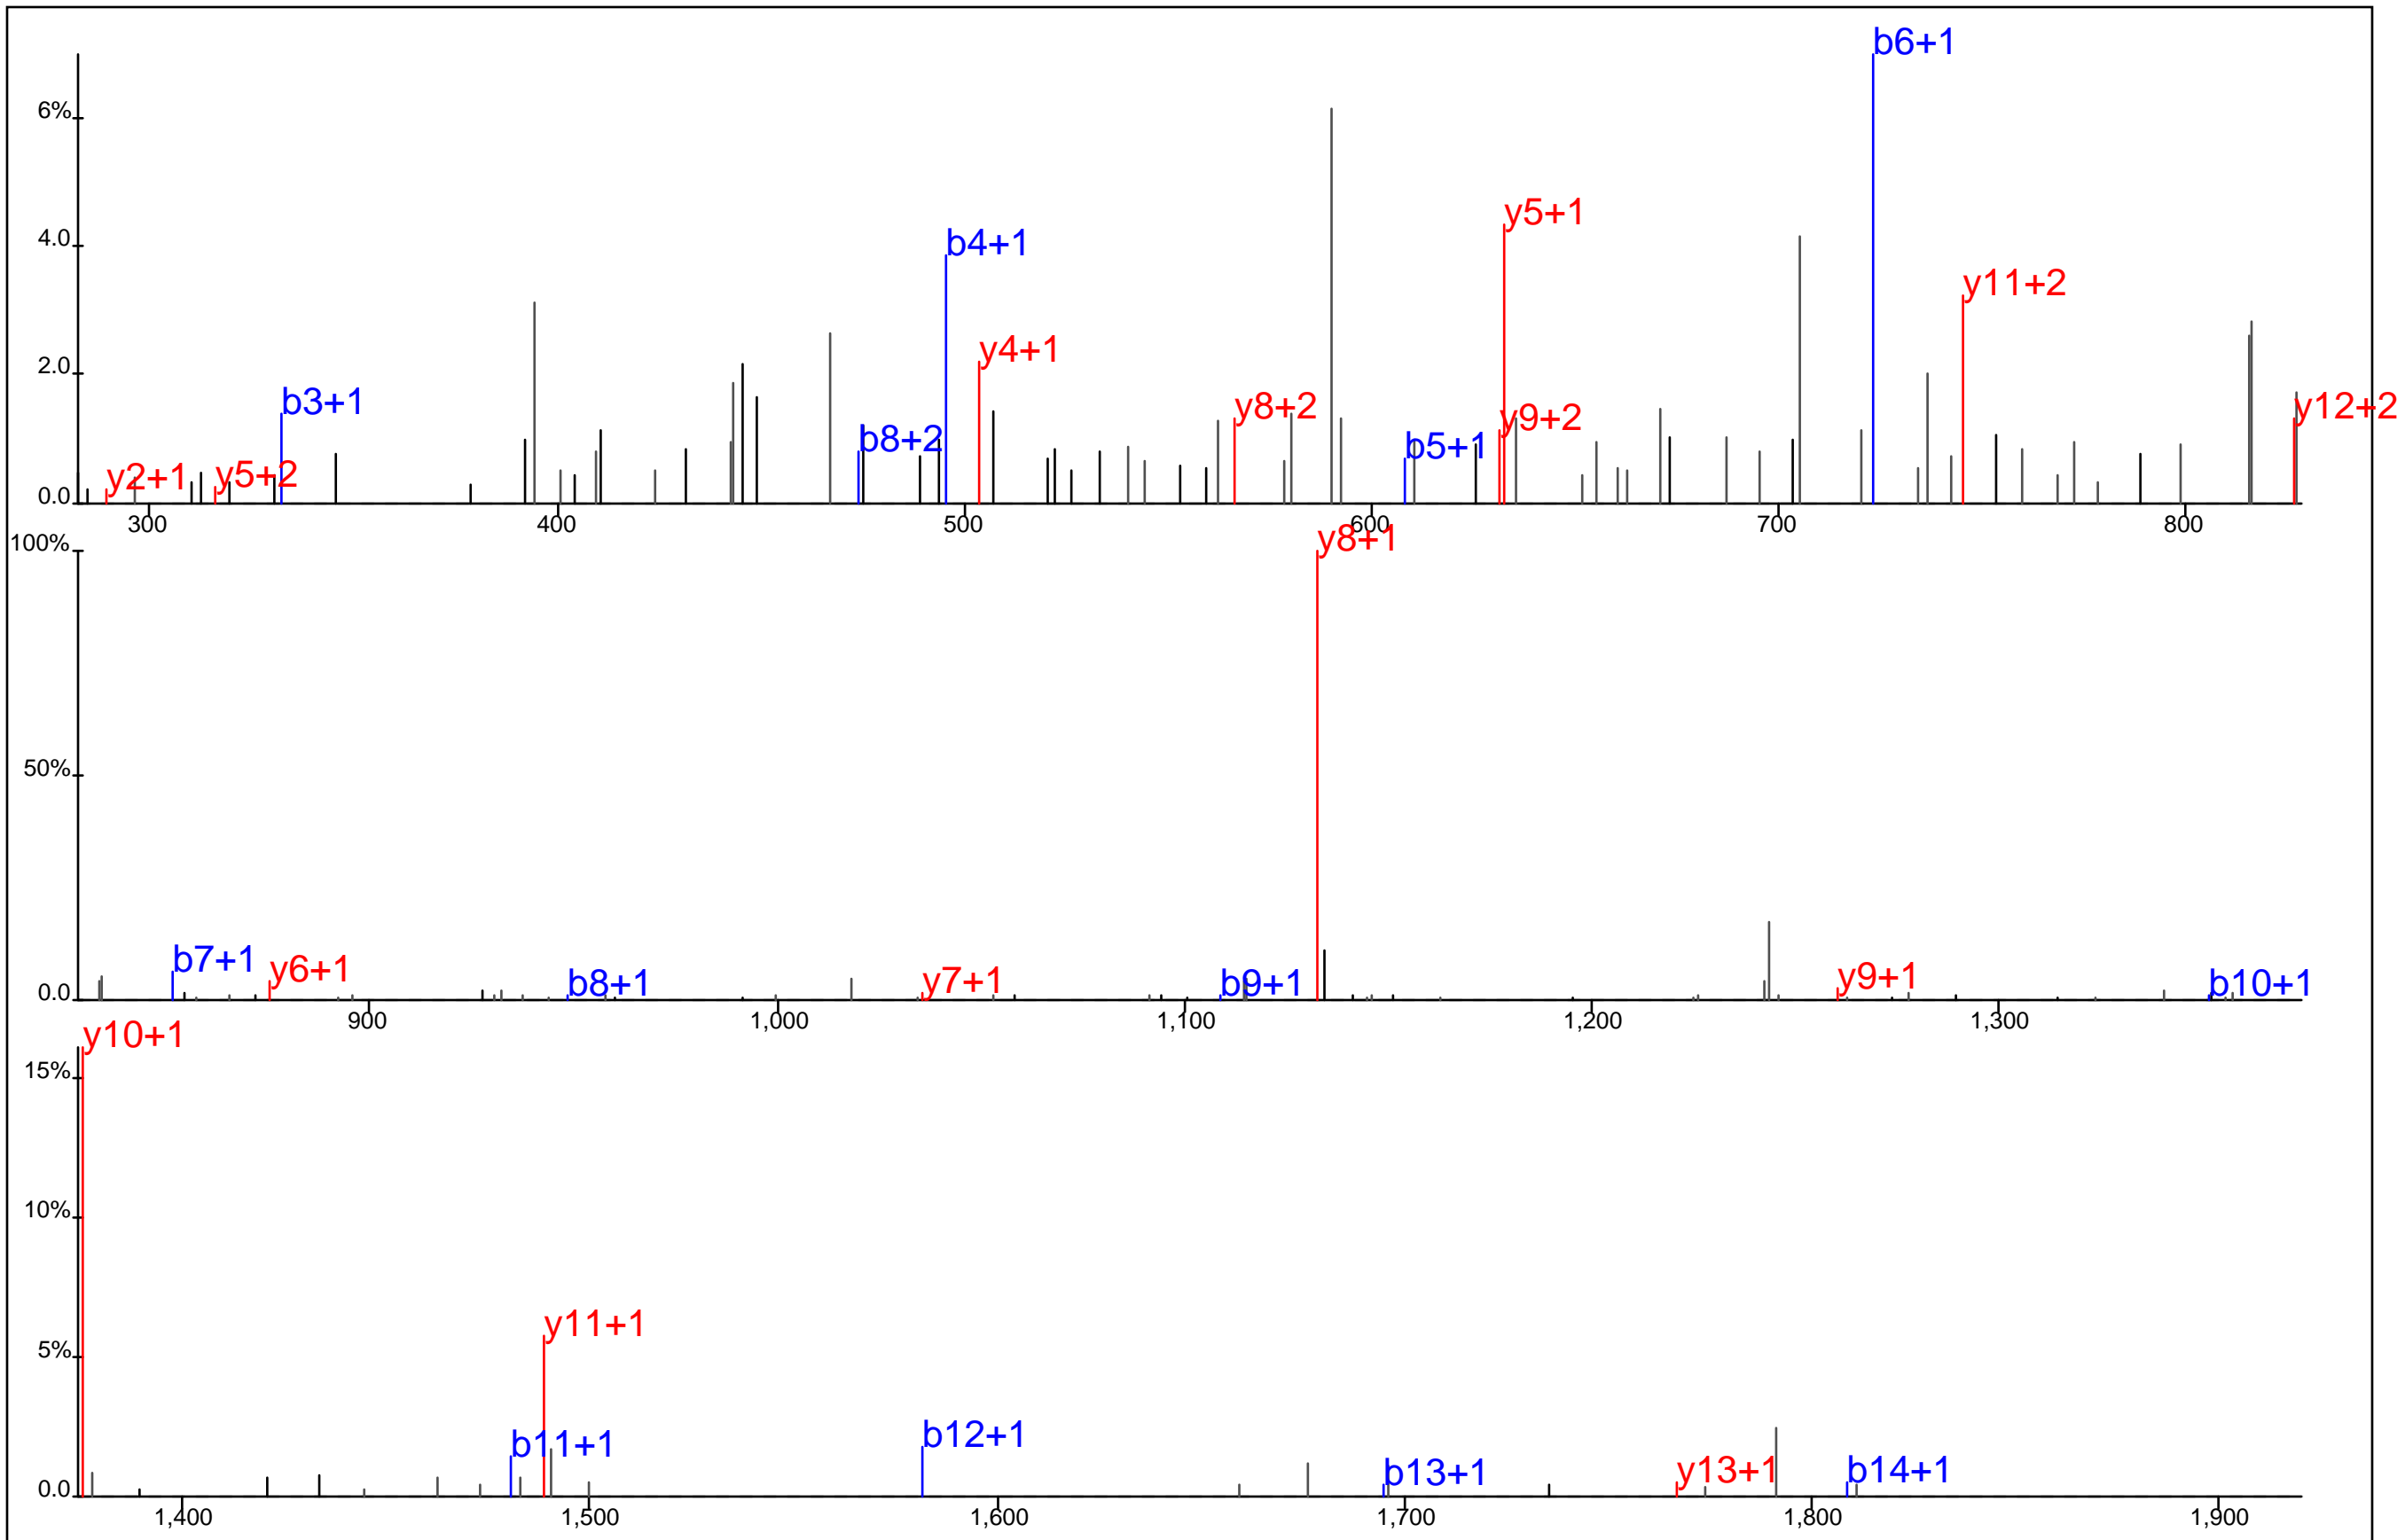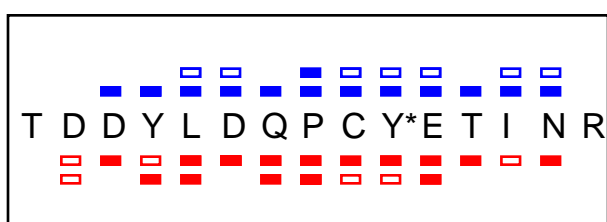

Protein Name: GDP dissociation inhibitor 2  
 gi Accession: 0  
 Precursor Mass: 991.8955+2  
 Delta Mass: 0.006 ppm  
 XCorr: 60.04

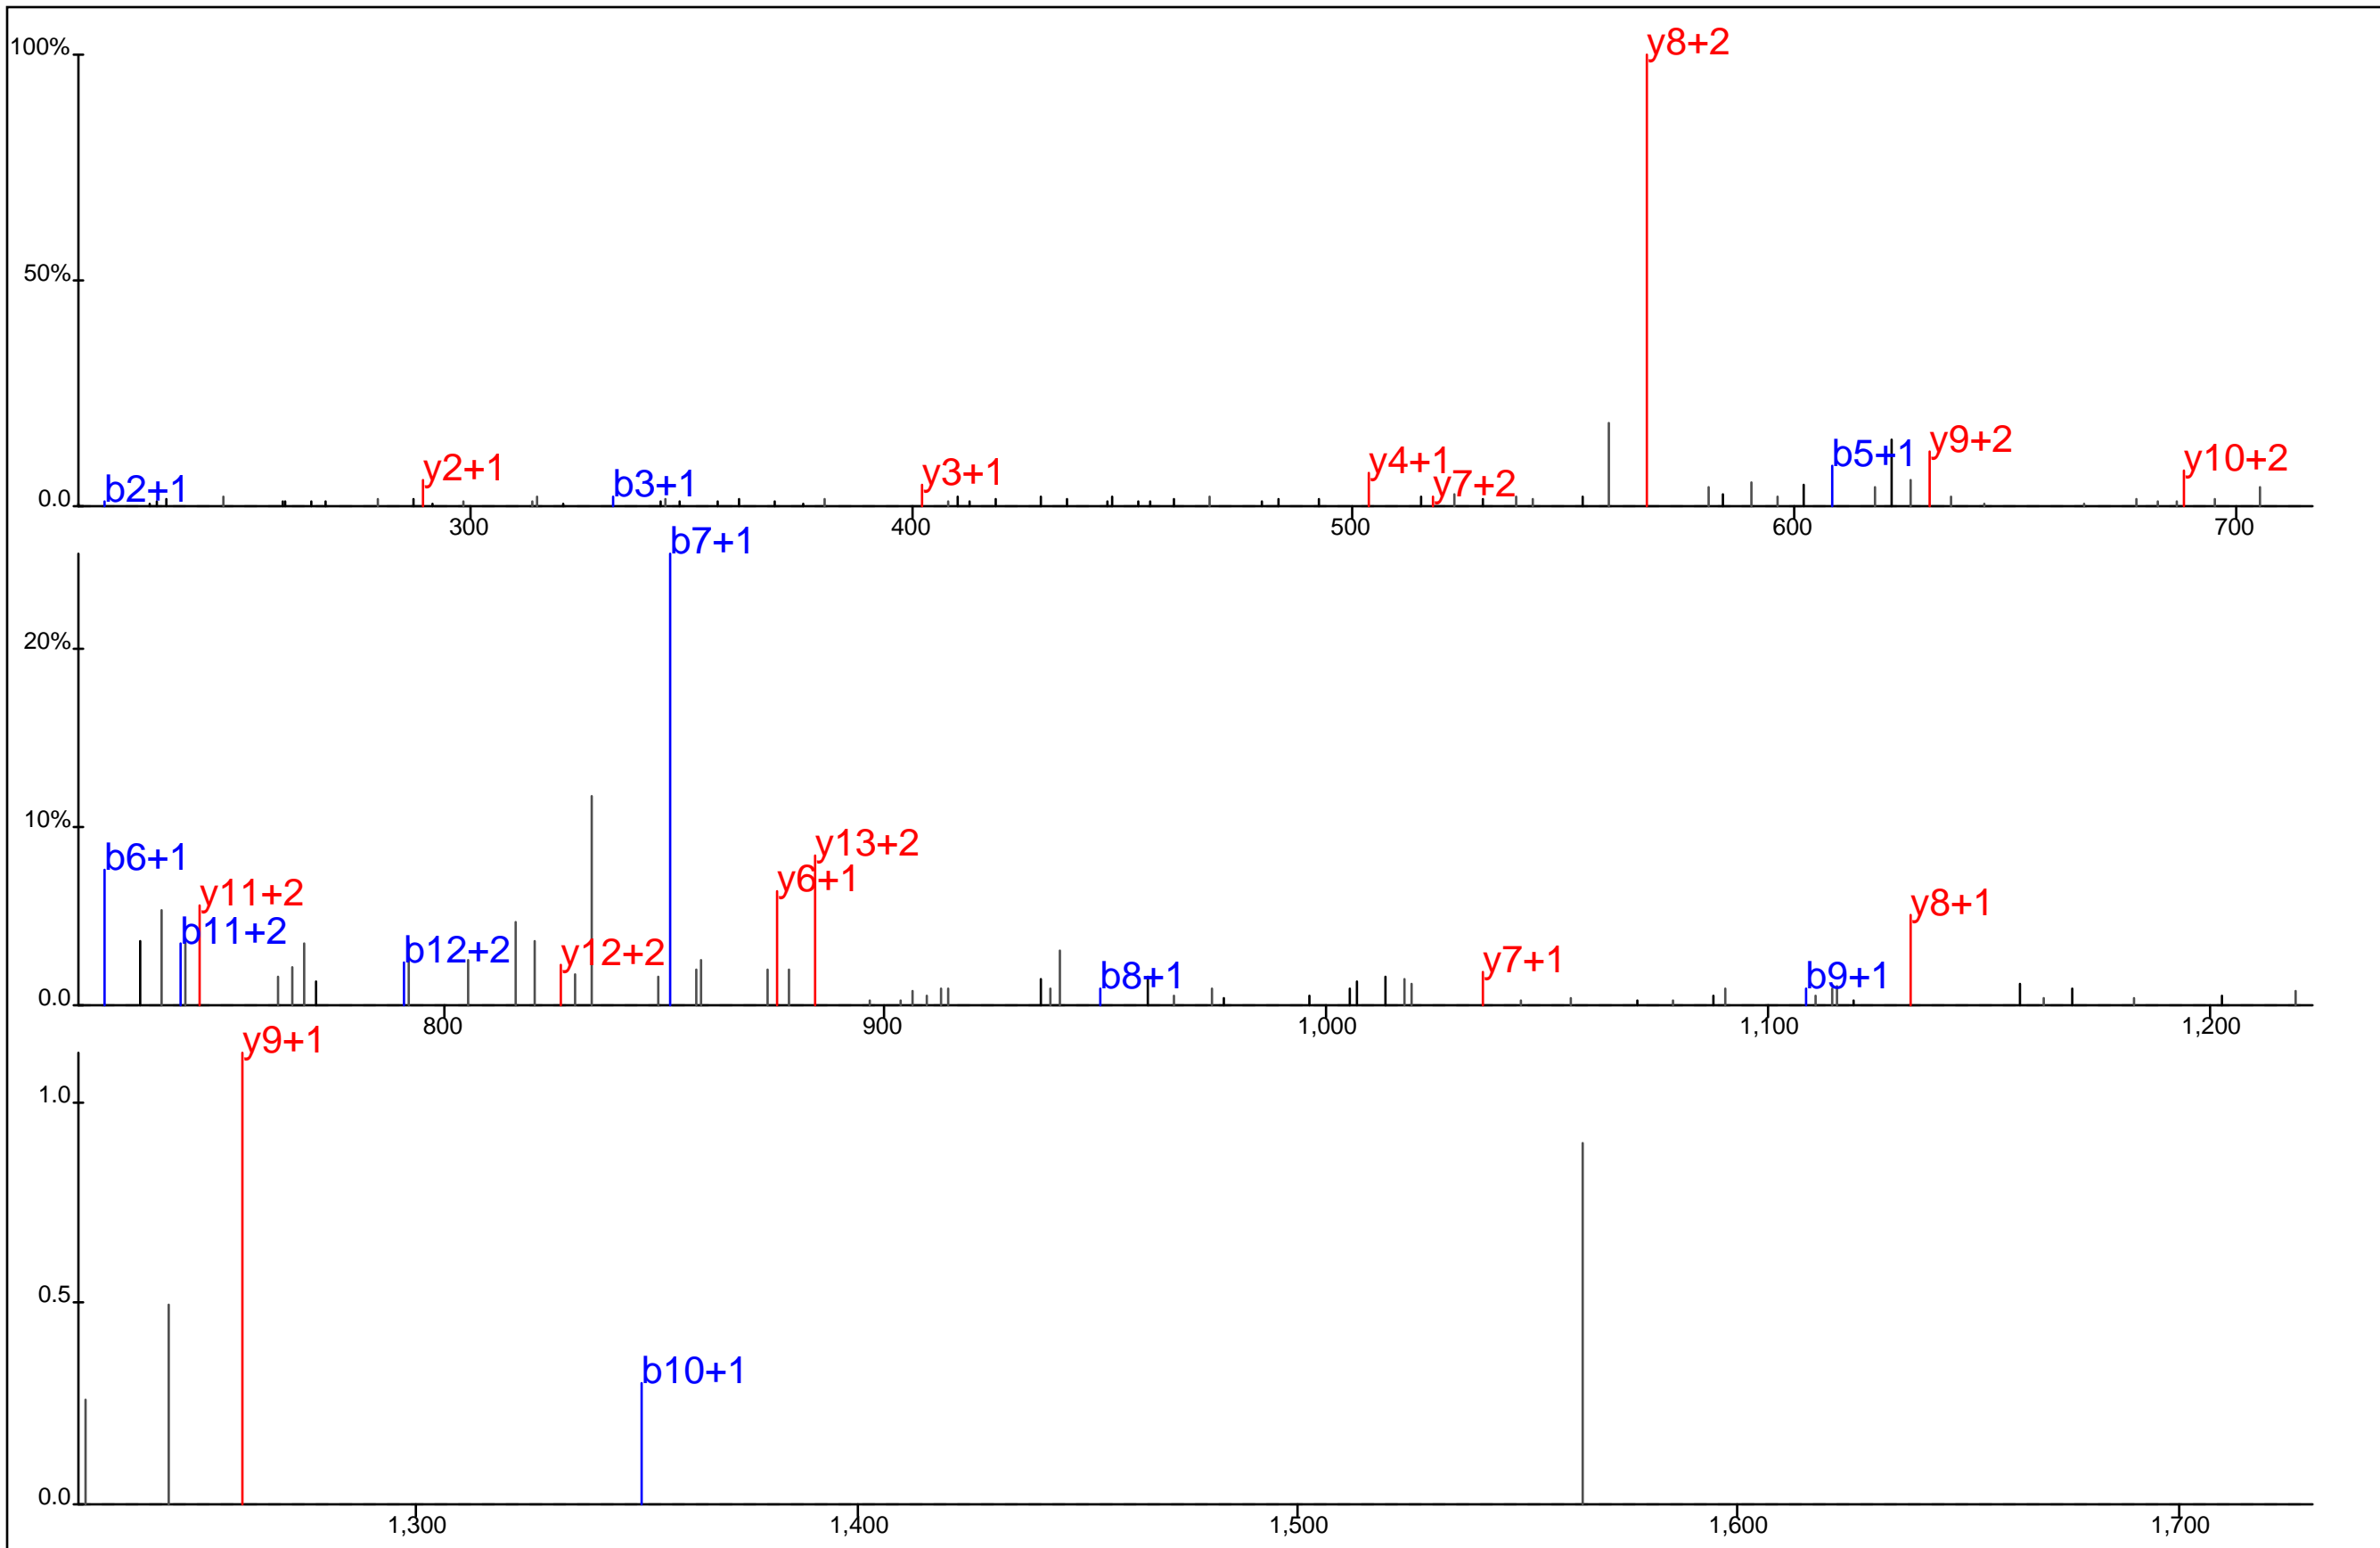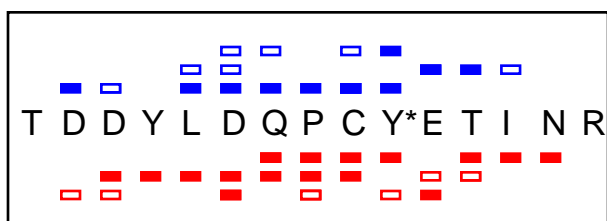

Protein Name: GDP dissociation inhibitor 2  
 gi Accession: 0  
 Precursor Mass: 661.5969+3  
 Delta Mass: 3.799 ppm  
 XCorr: 45.46

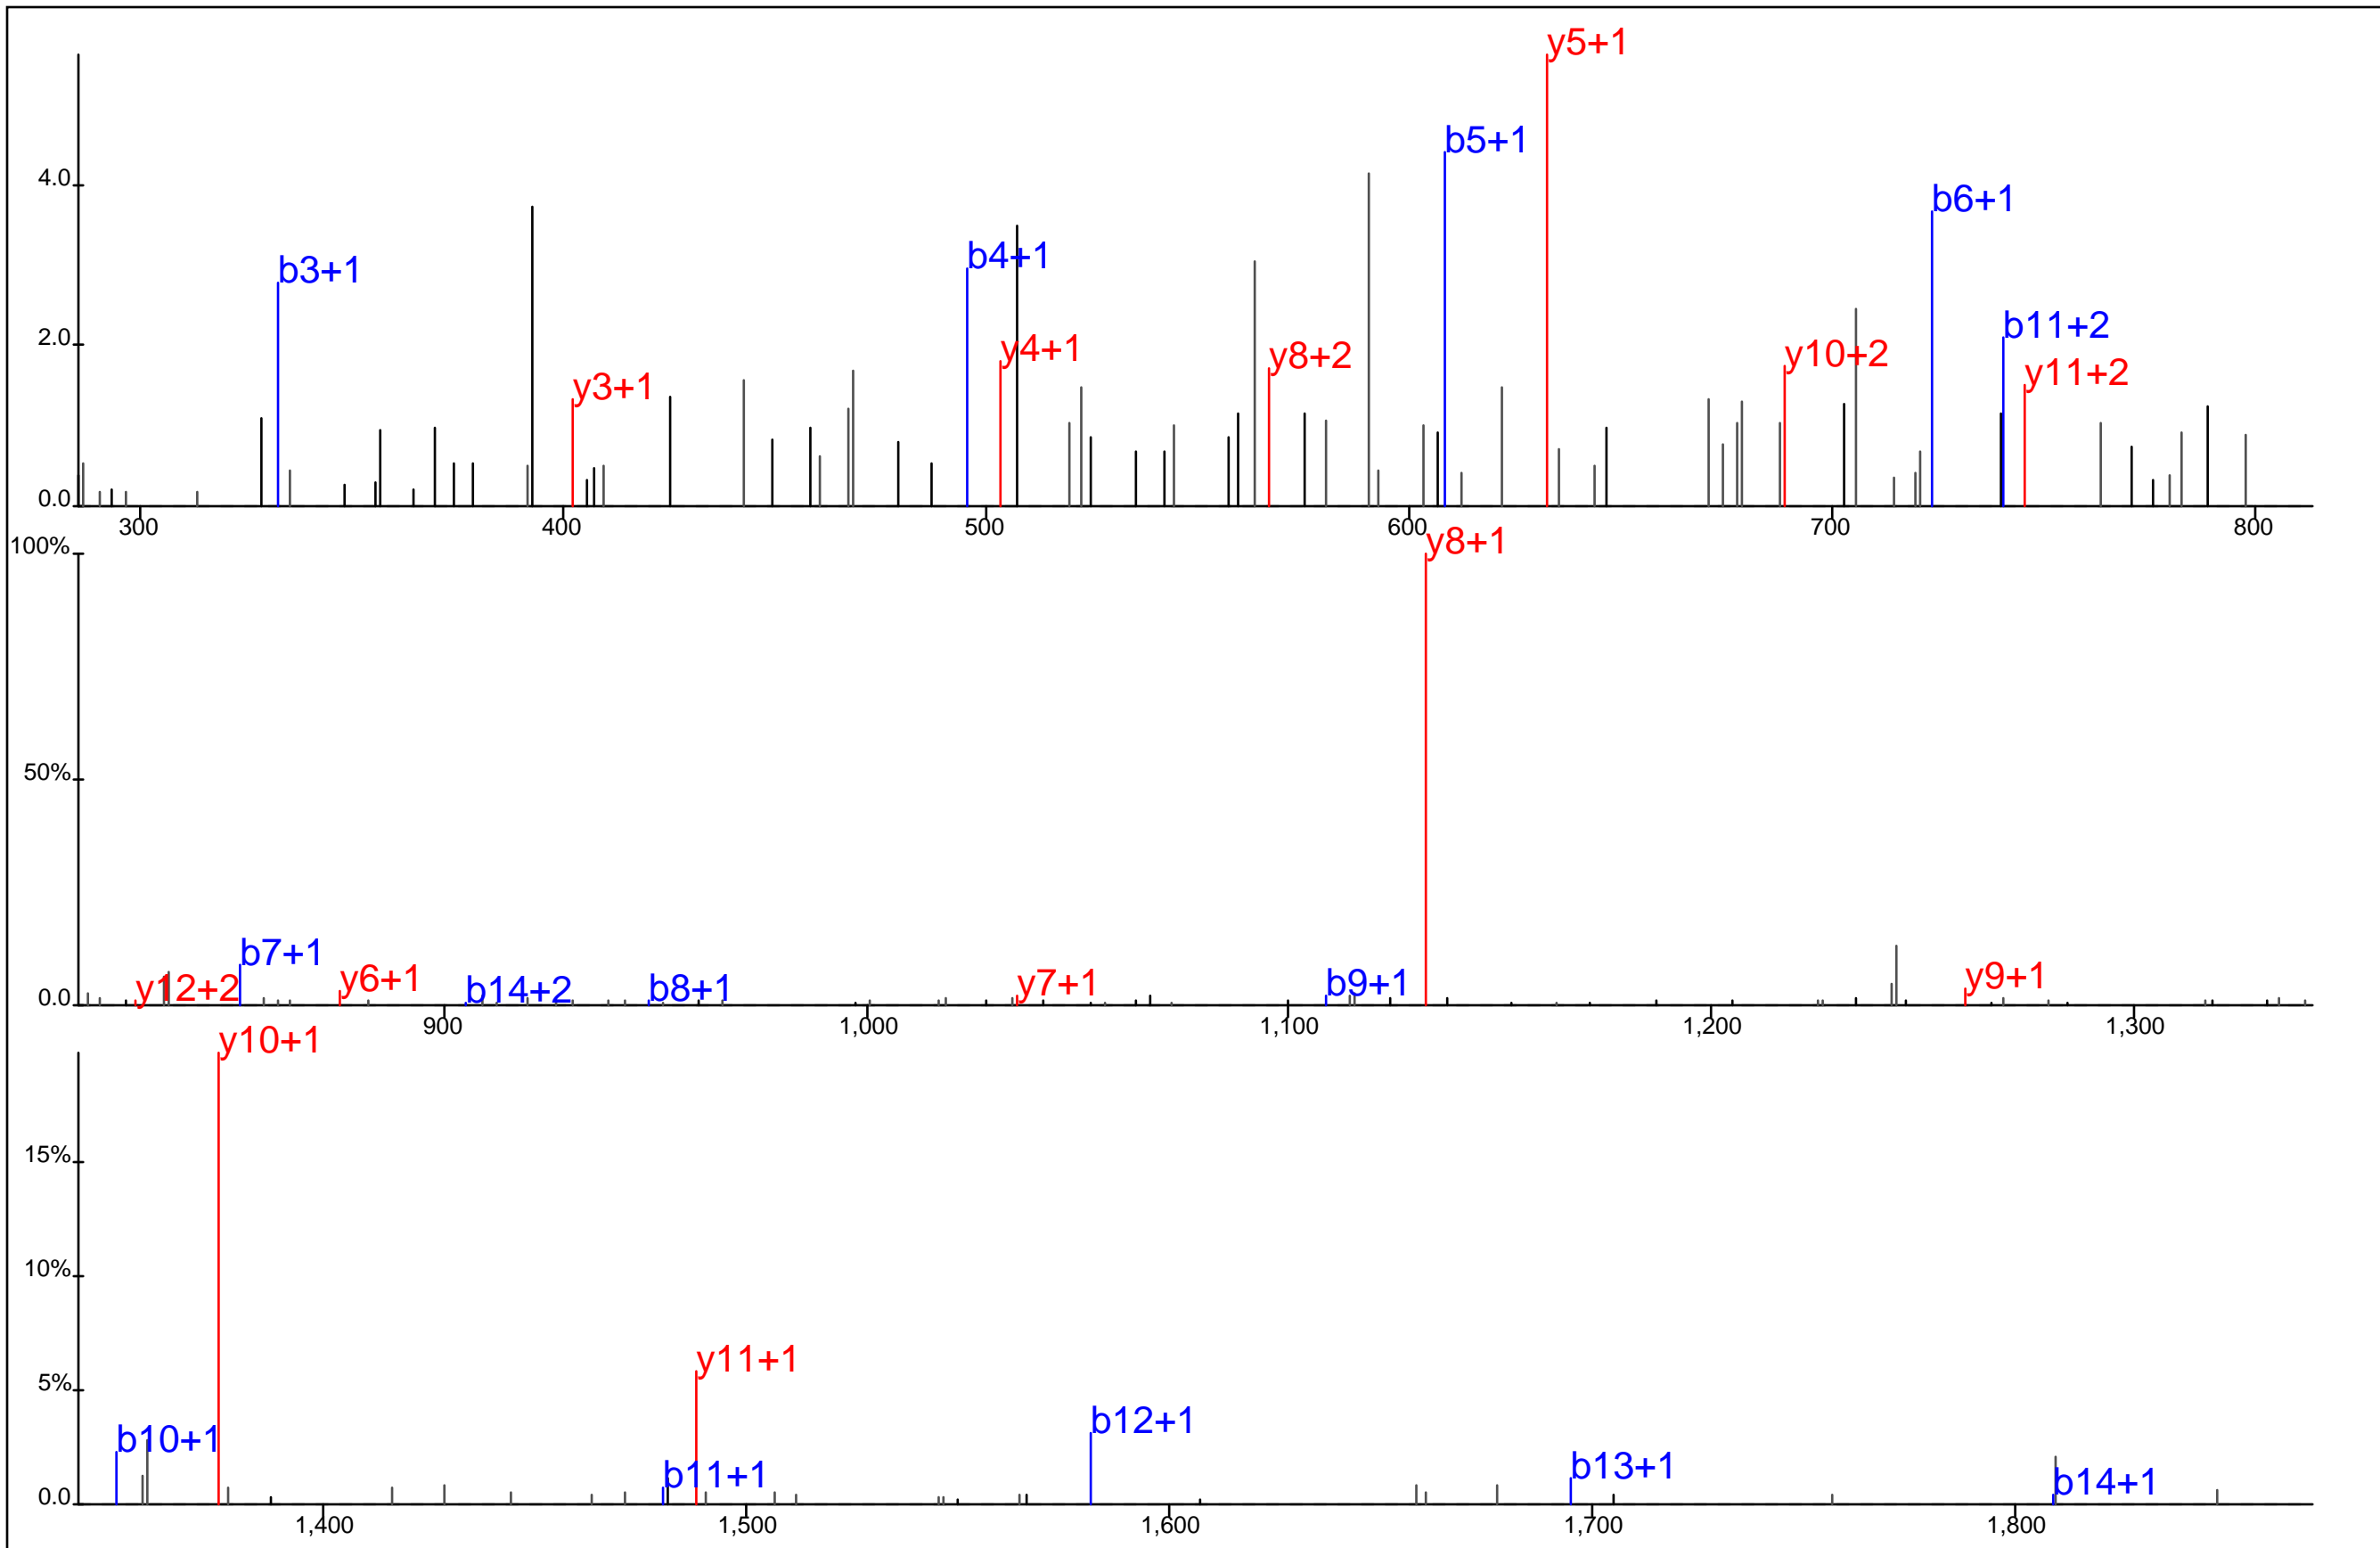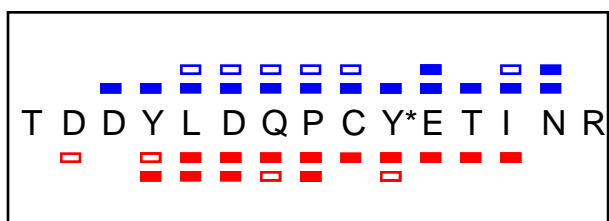

Protein Name: GDP dissociation inhibitor 2  
 gi Accession: 0  
 Precursor Mass: 991.8895+2  
 Delta Mass: 6.102 ppm  
 XCorr: 78.02

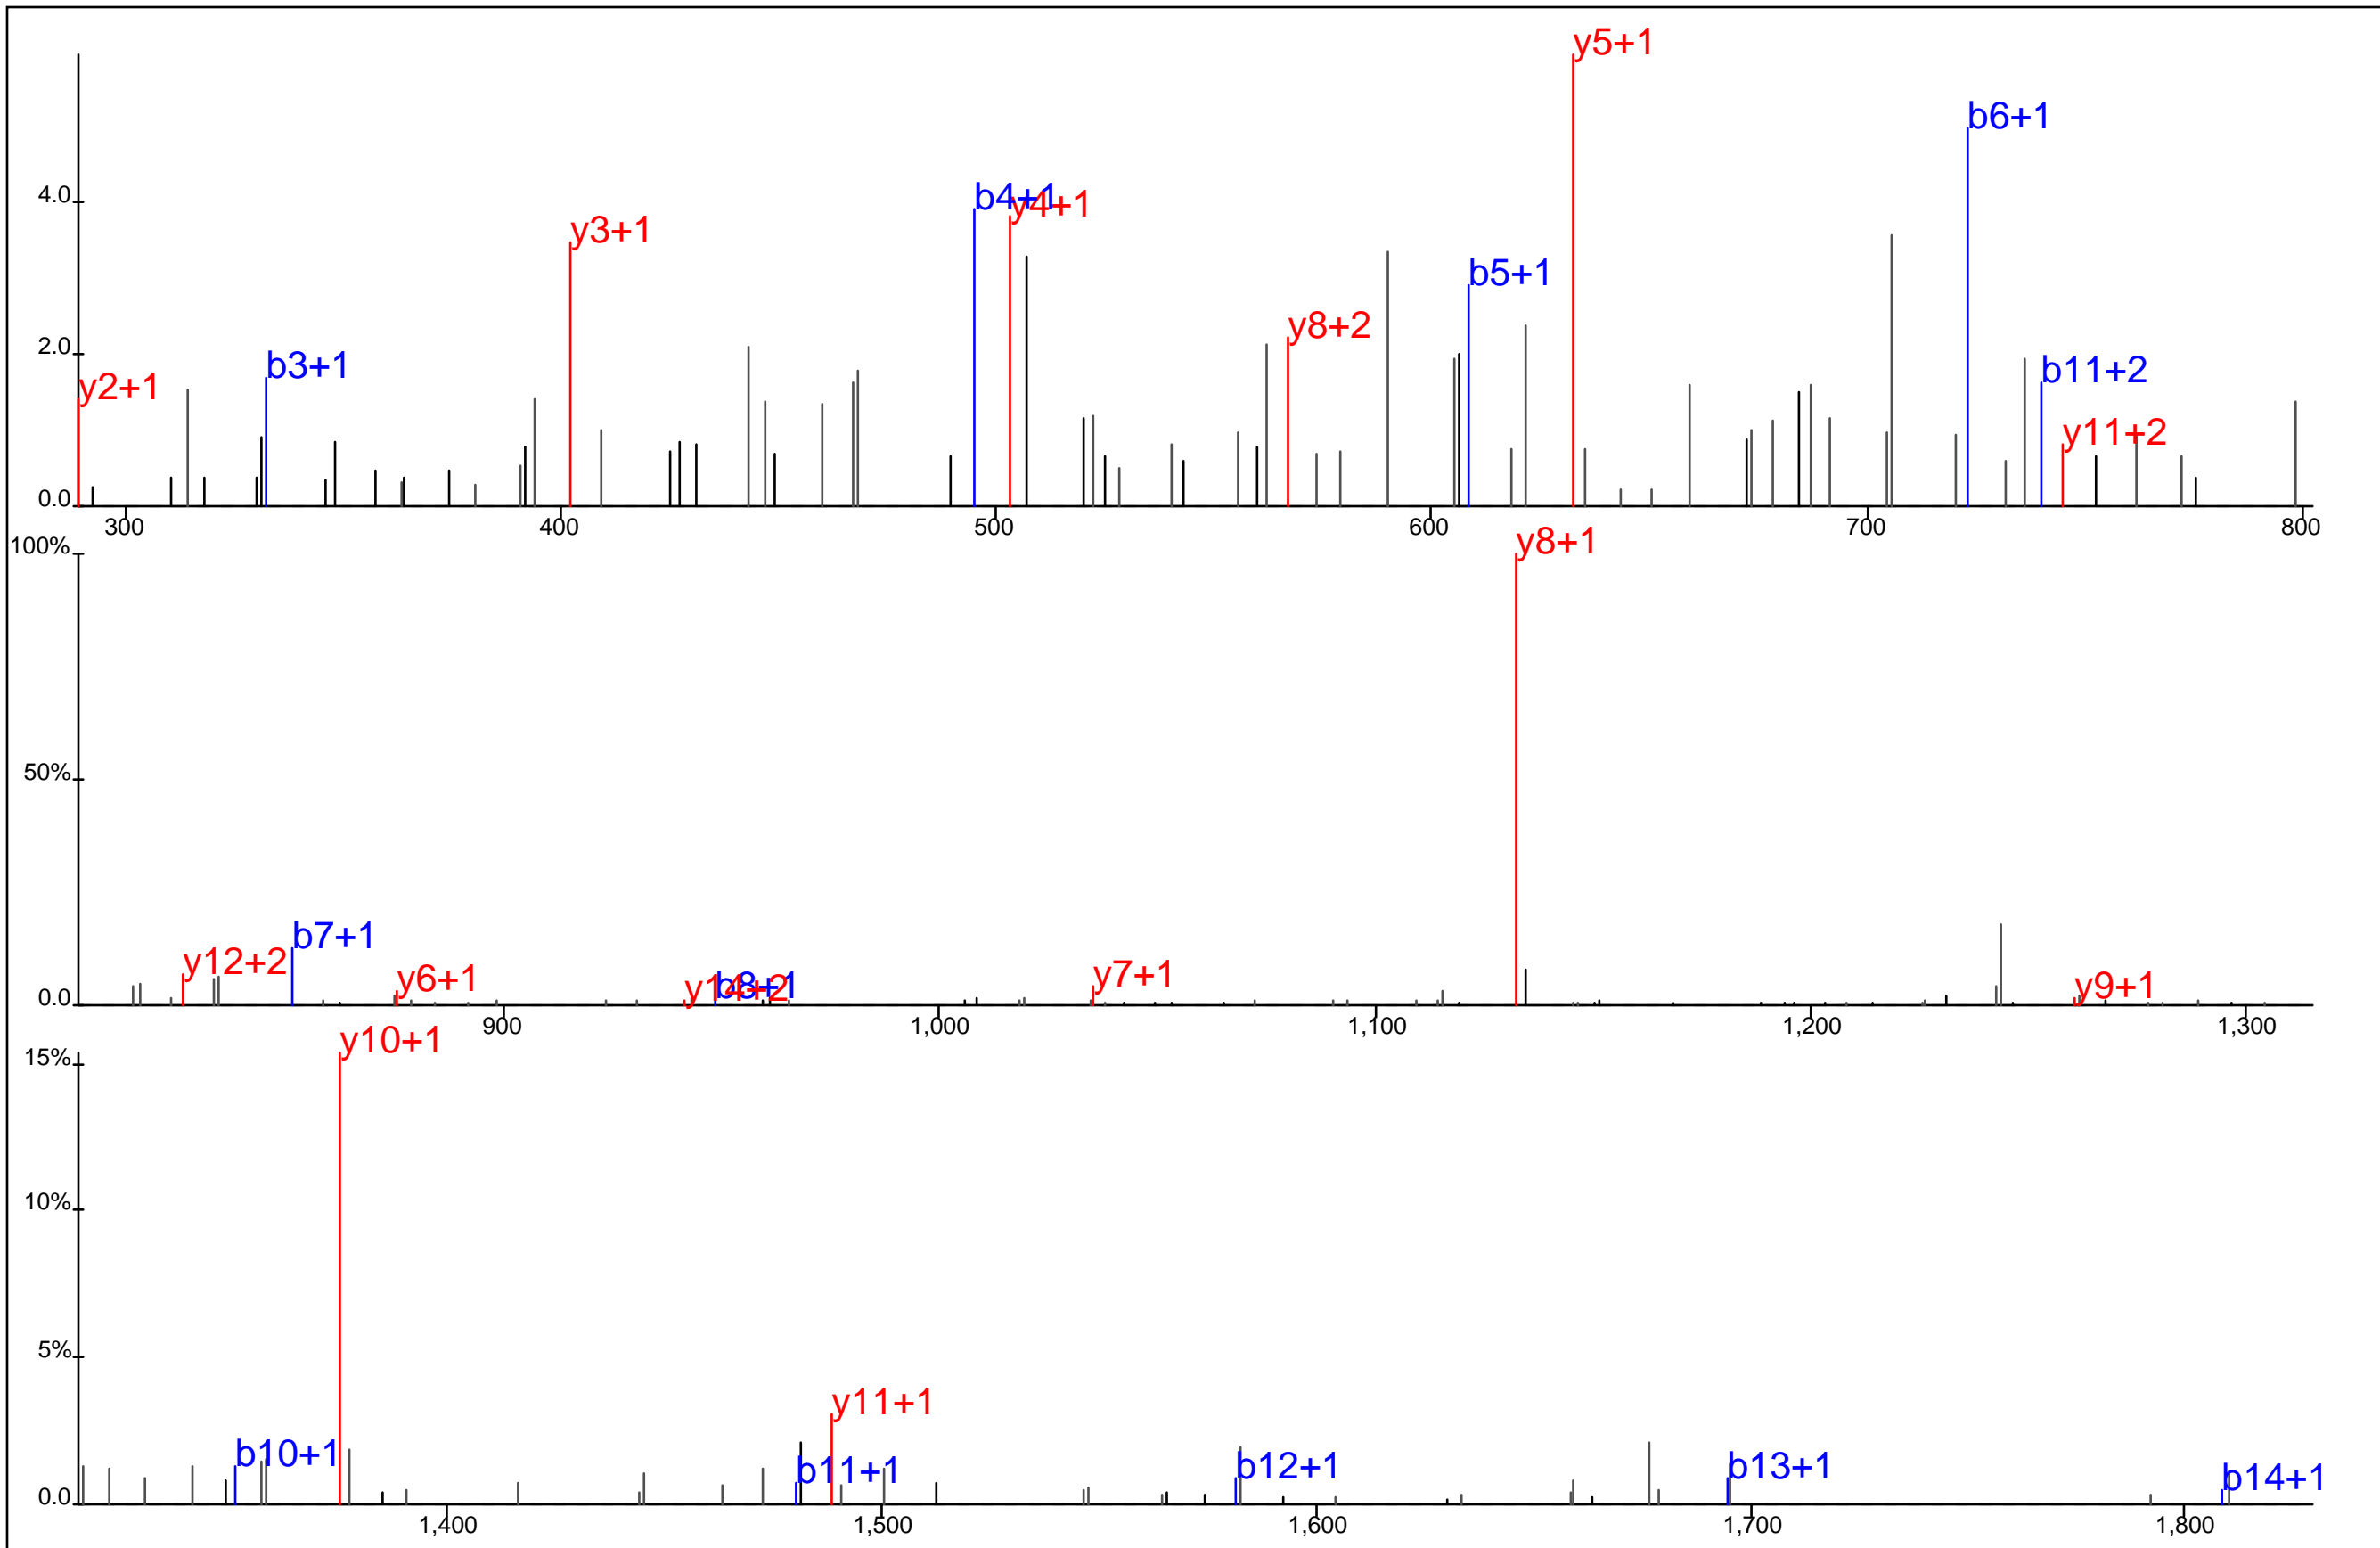

T D D Y L D Q P C Y\* E T I N R

Fragmentation map showing the protein sequence T D D Y L D Q P C Y\* E T I N R. Blue dashed boxes indicate b-ion fragments, and red dashed boxes indicate y-ion fragments. The asterisk (\*) is located under the Y residue.

Protein Name: GDP dissociation inhibitor 2  
 gi Accession: 0  
 Precursor Mass: 991.8945+2  
 Delta Mass: 0.992 ppm  
 XCorr: 53.86

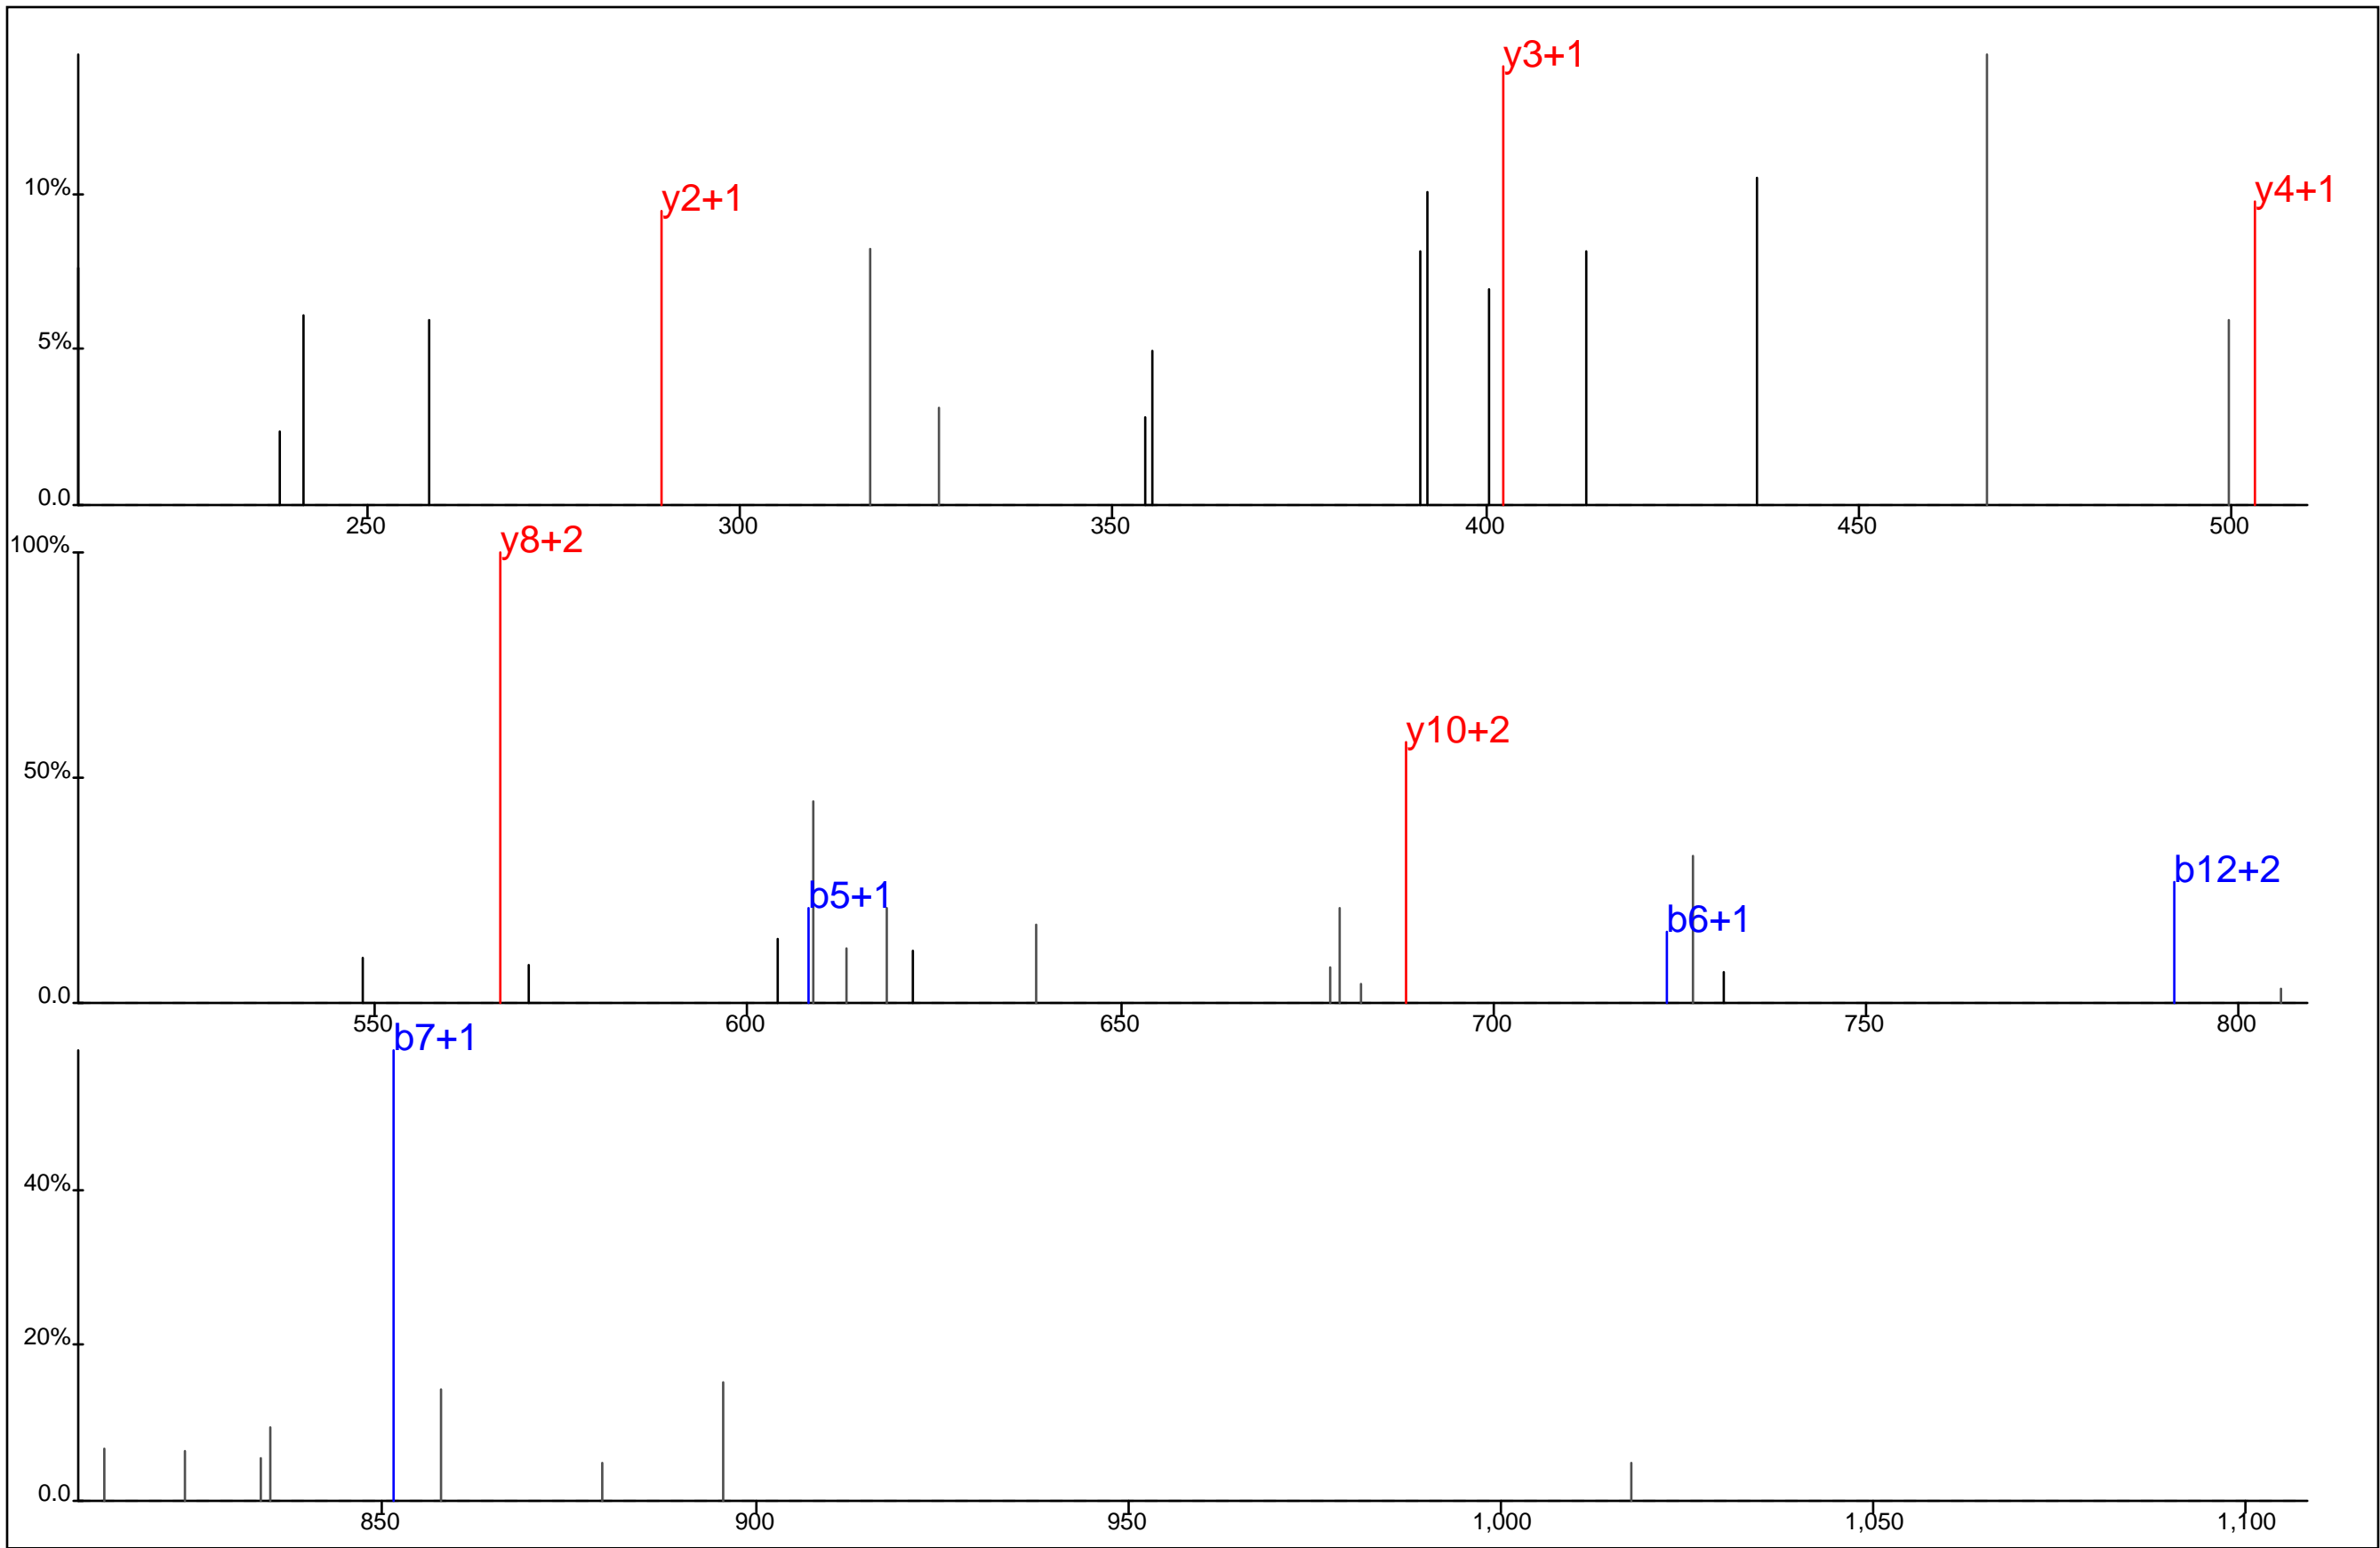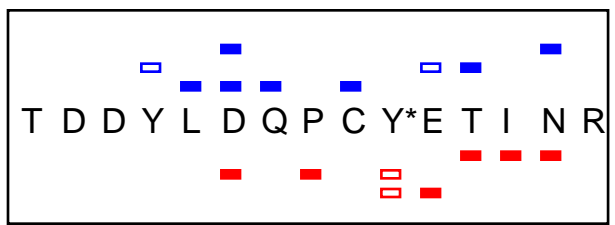

Protein Name: GDP dissociation inhibitor 2  
 gi Accession: 0  
 Precursor Mass: 661.6016+3  
 Delta Mass: 3.313 ppm  
 XCorr: 21.69



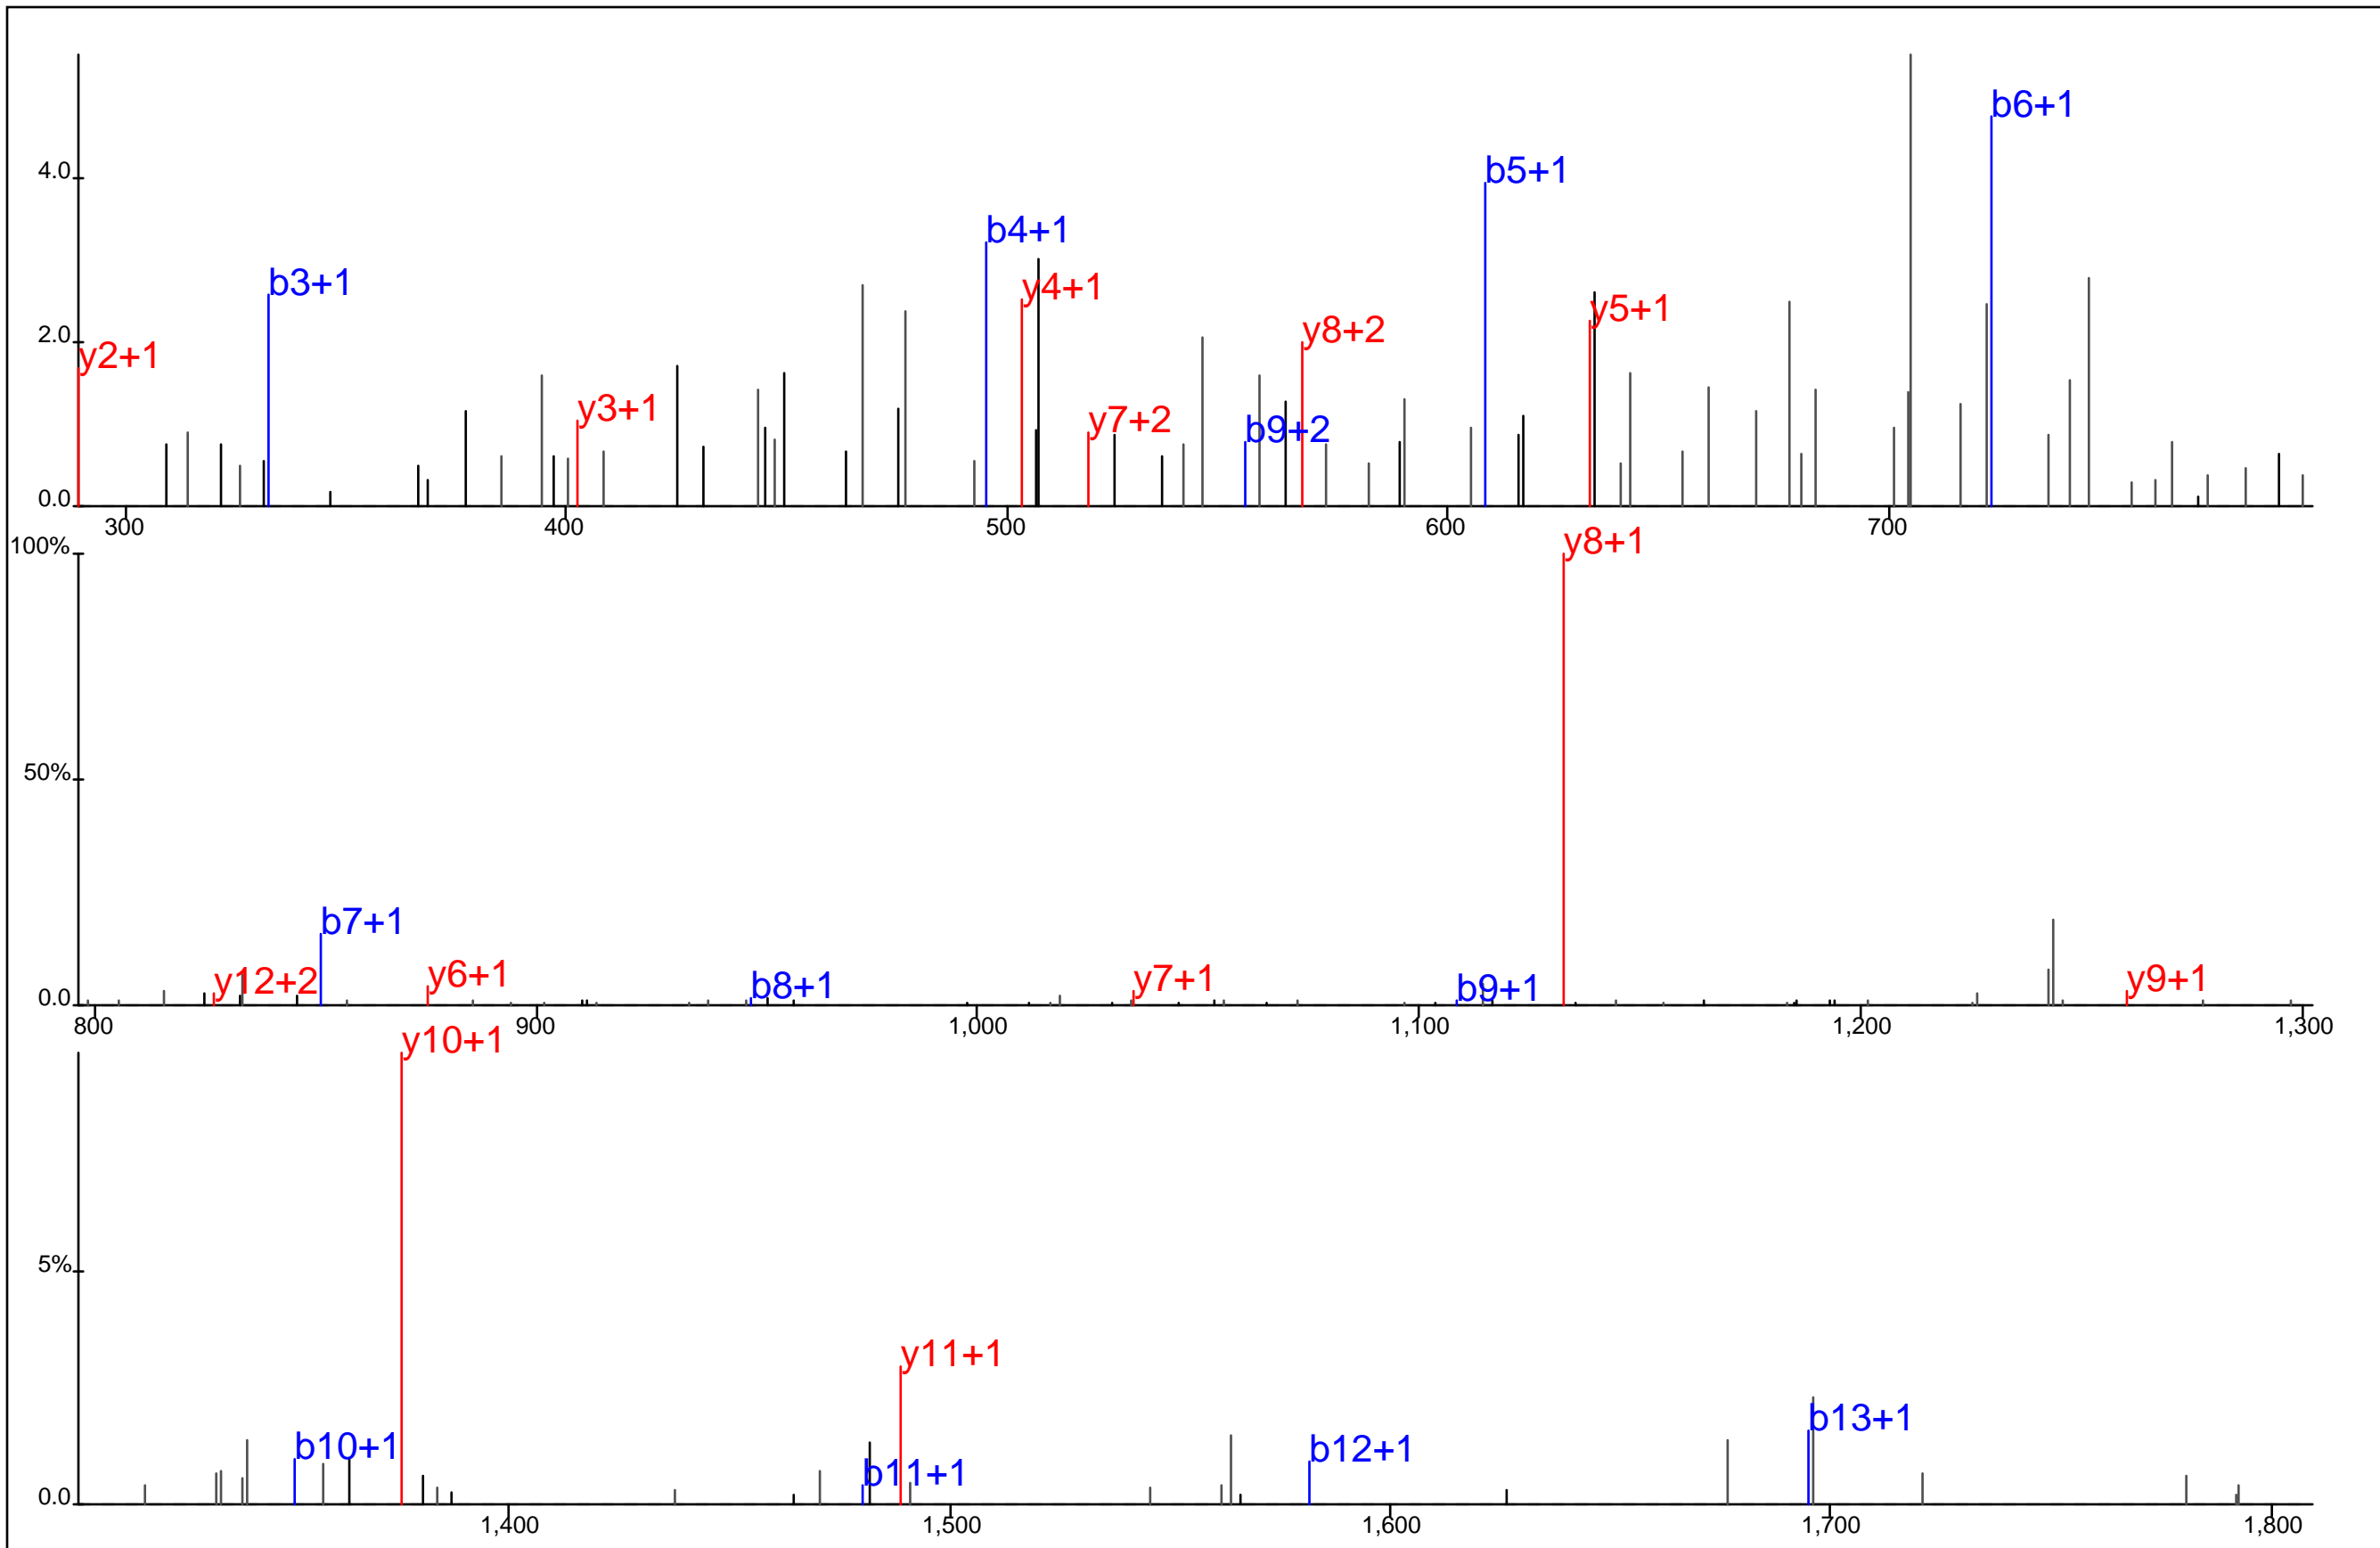

T D D Y L D Q P C Y\* E T I N R

Protein Name: GDP dissociation inhibitor 2  
 gi Accession: 0  
 Precursor Mass: 991.8967+2  
 Delta Mass: 1.226 ppm  
 XCorr: 60.76

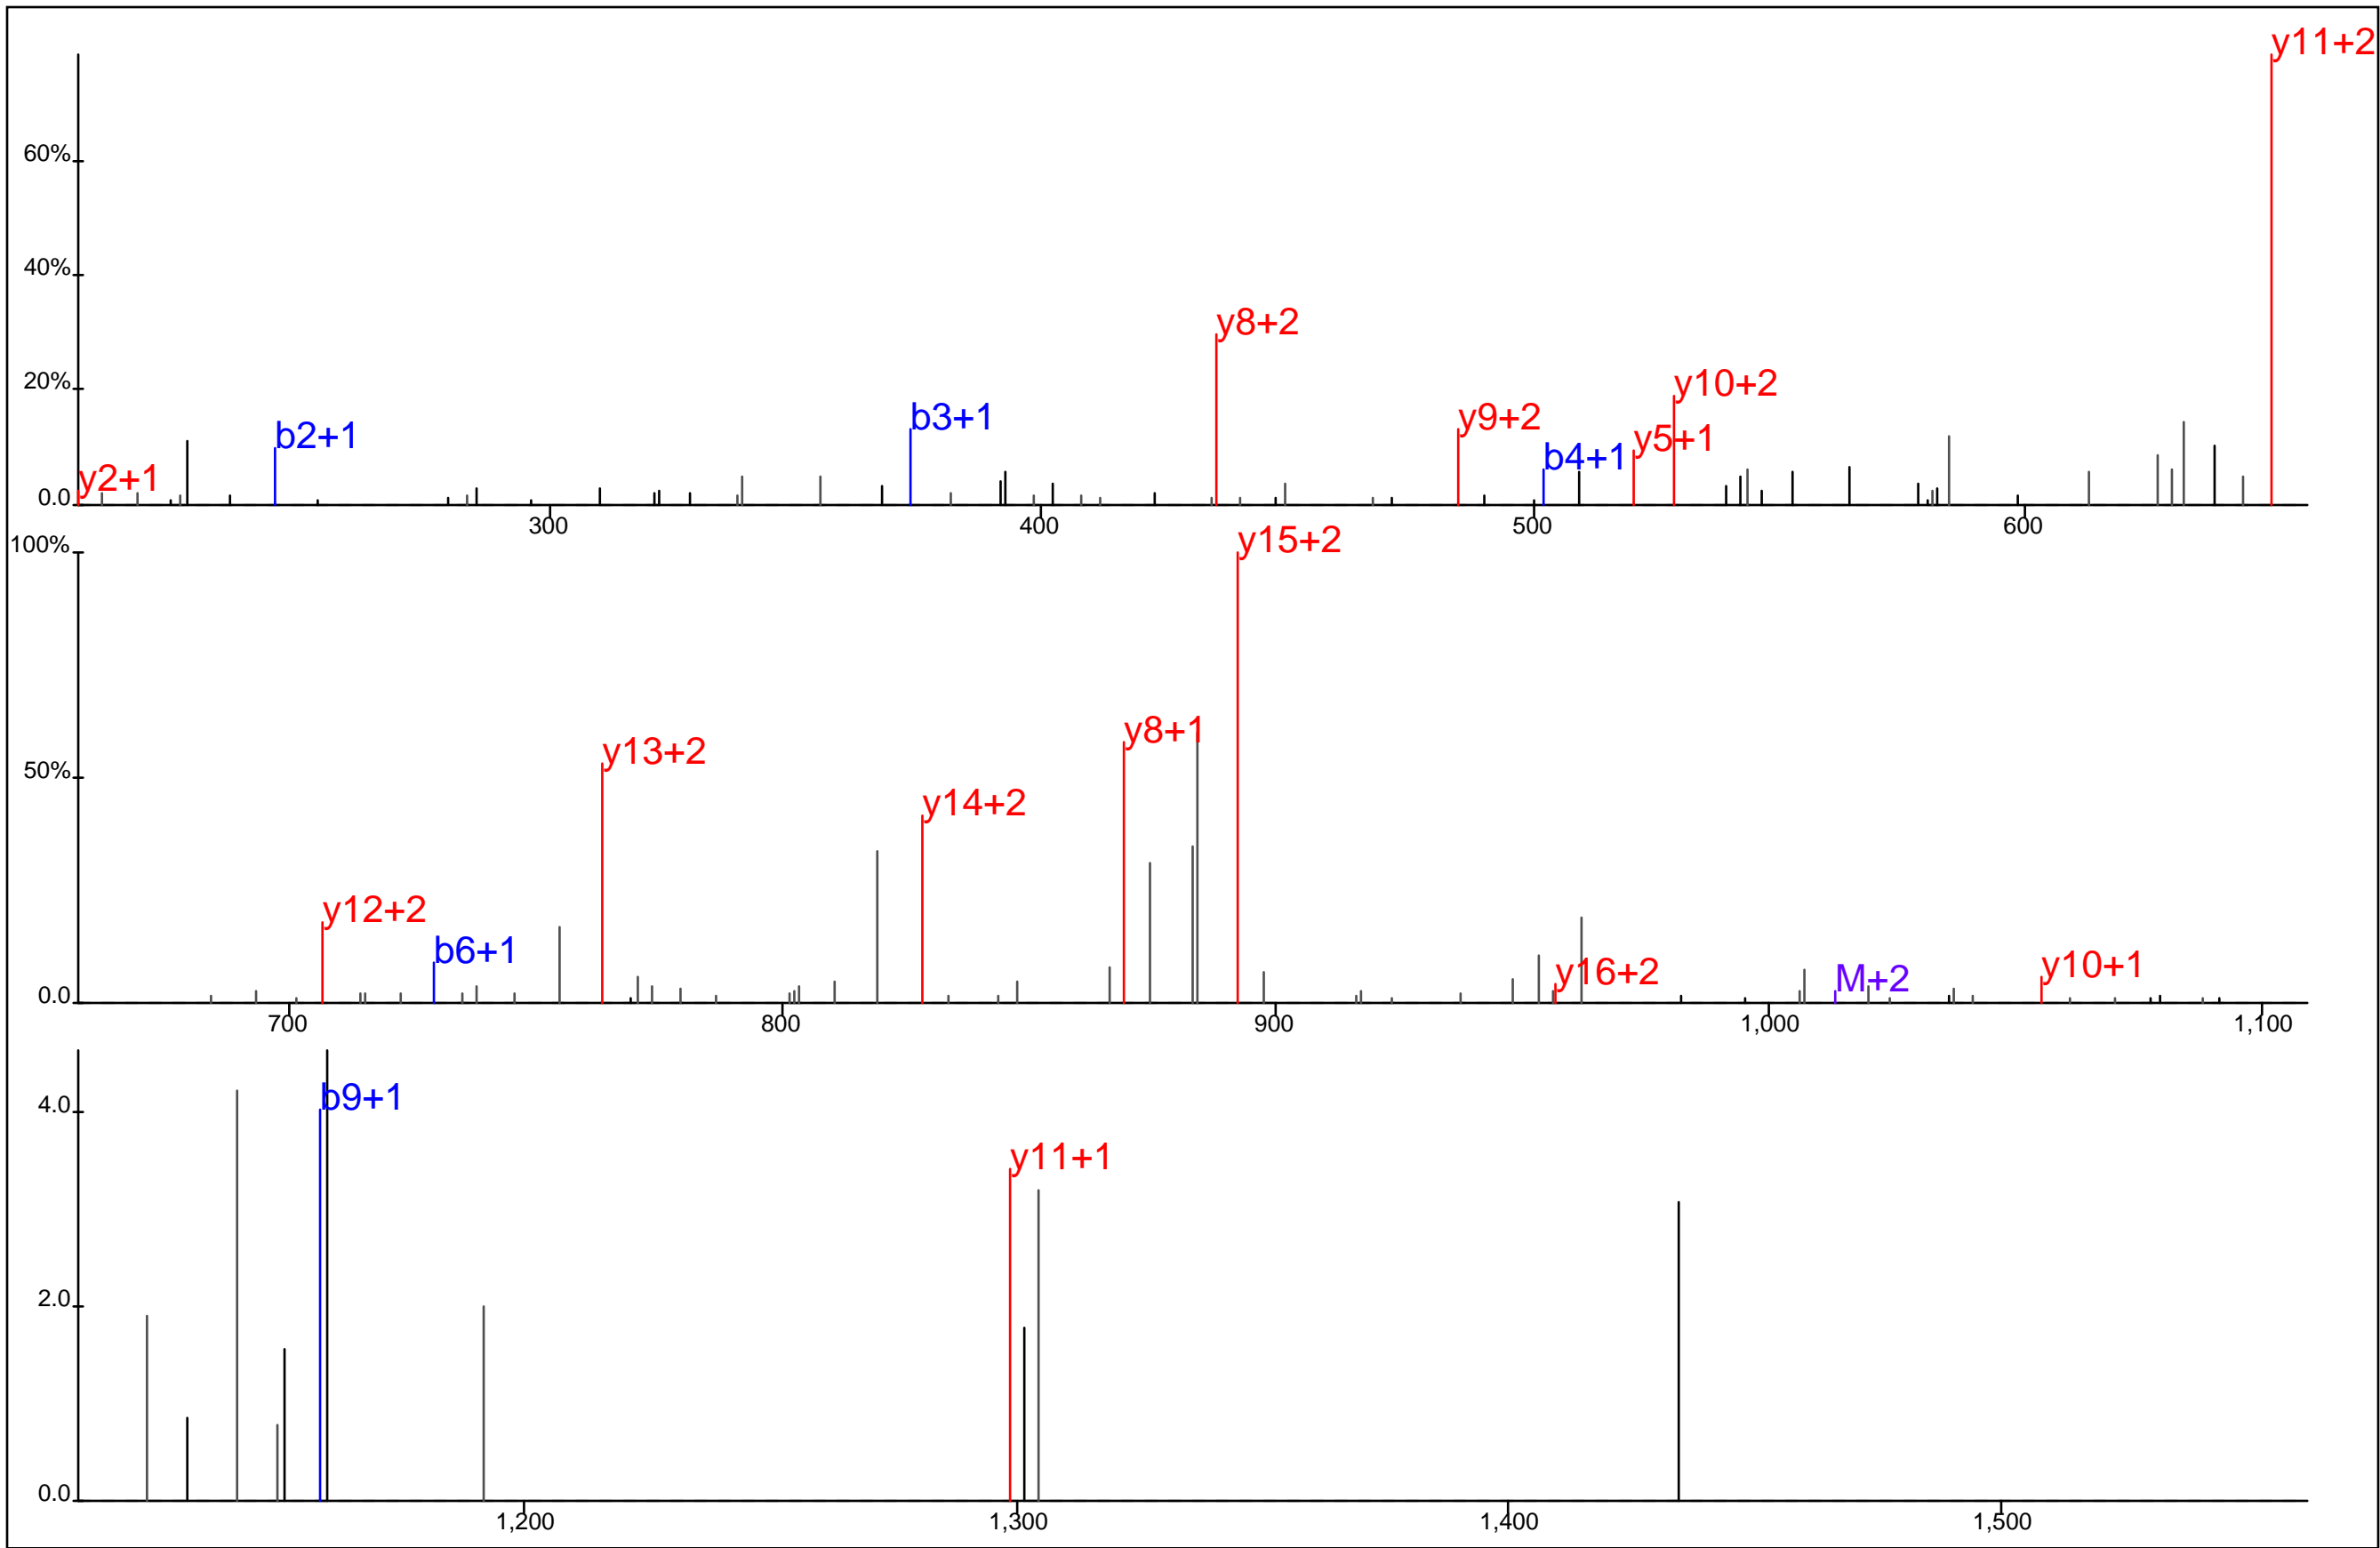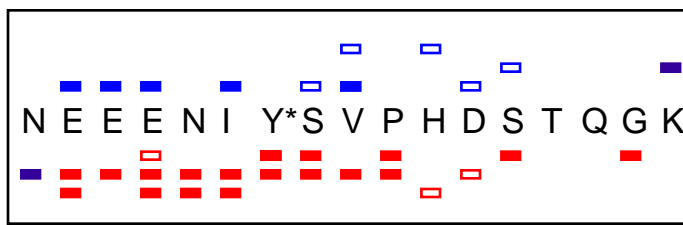

Protein Name: Glucocorticoid receptor DNA binding factor 1  
 gi Accession: 0  
 Precursor Mass: 676.2853+3  
 Delta Mass: 1.155 ppm  
 XCorr: 48.73

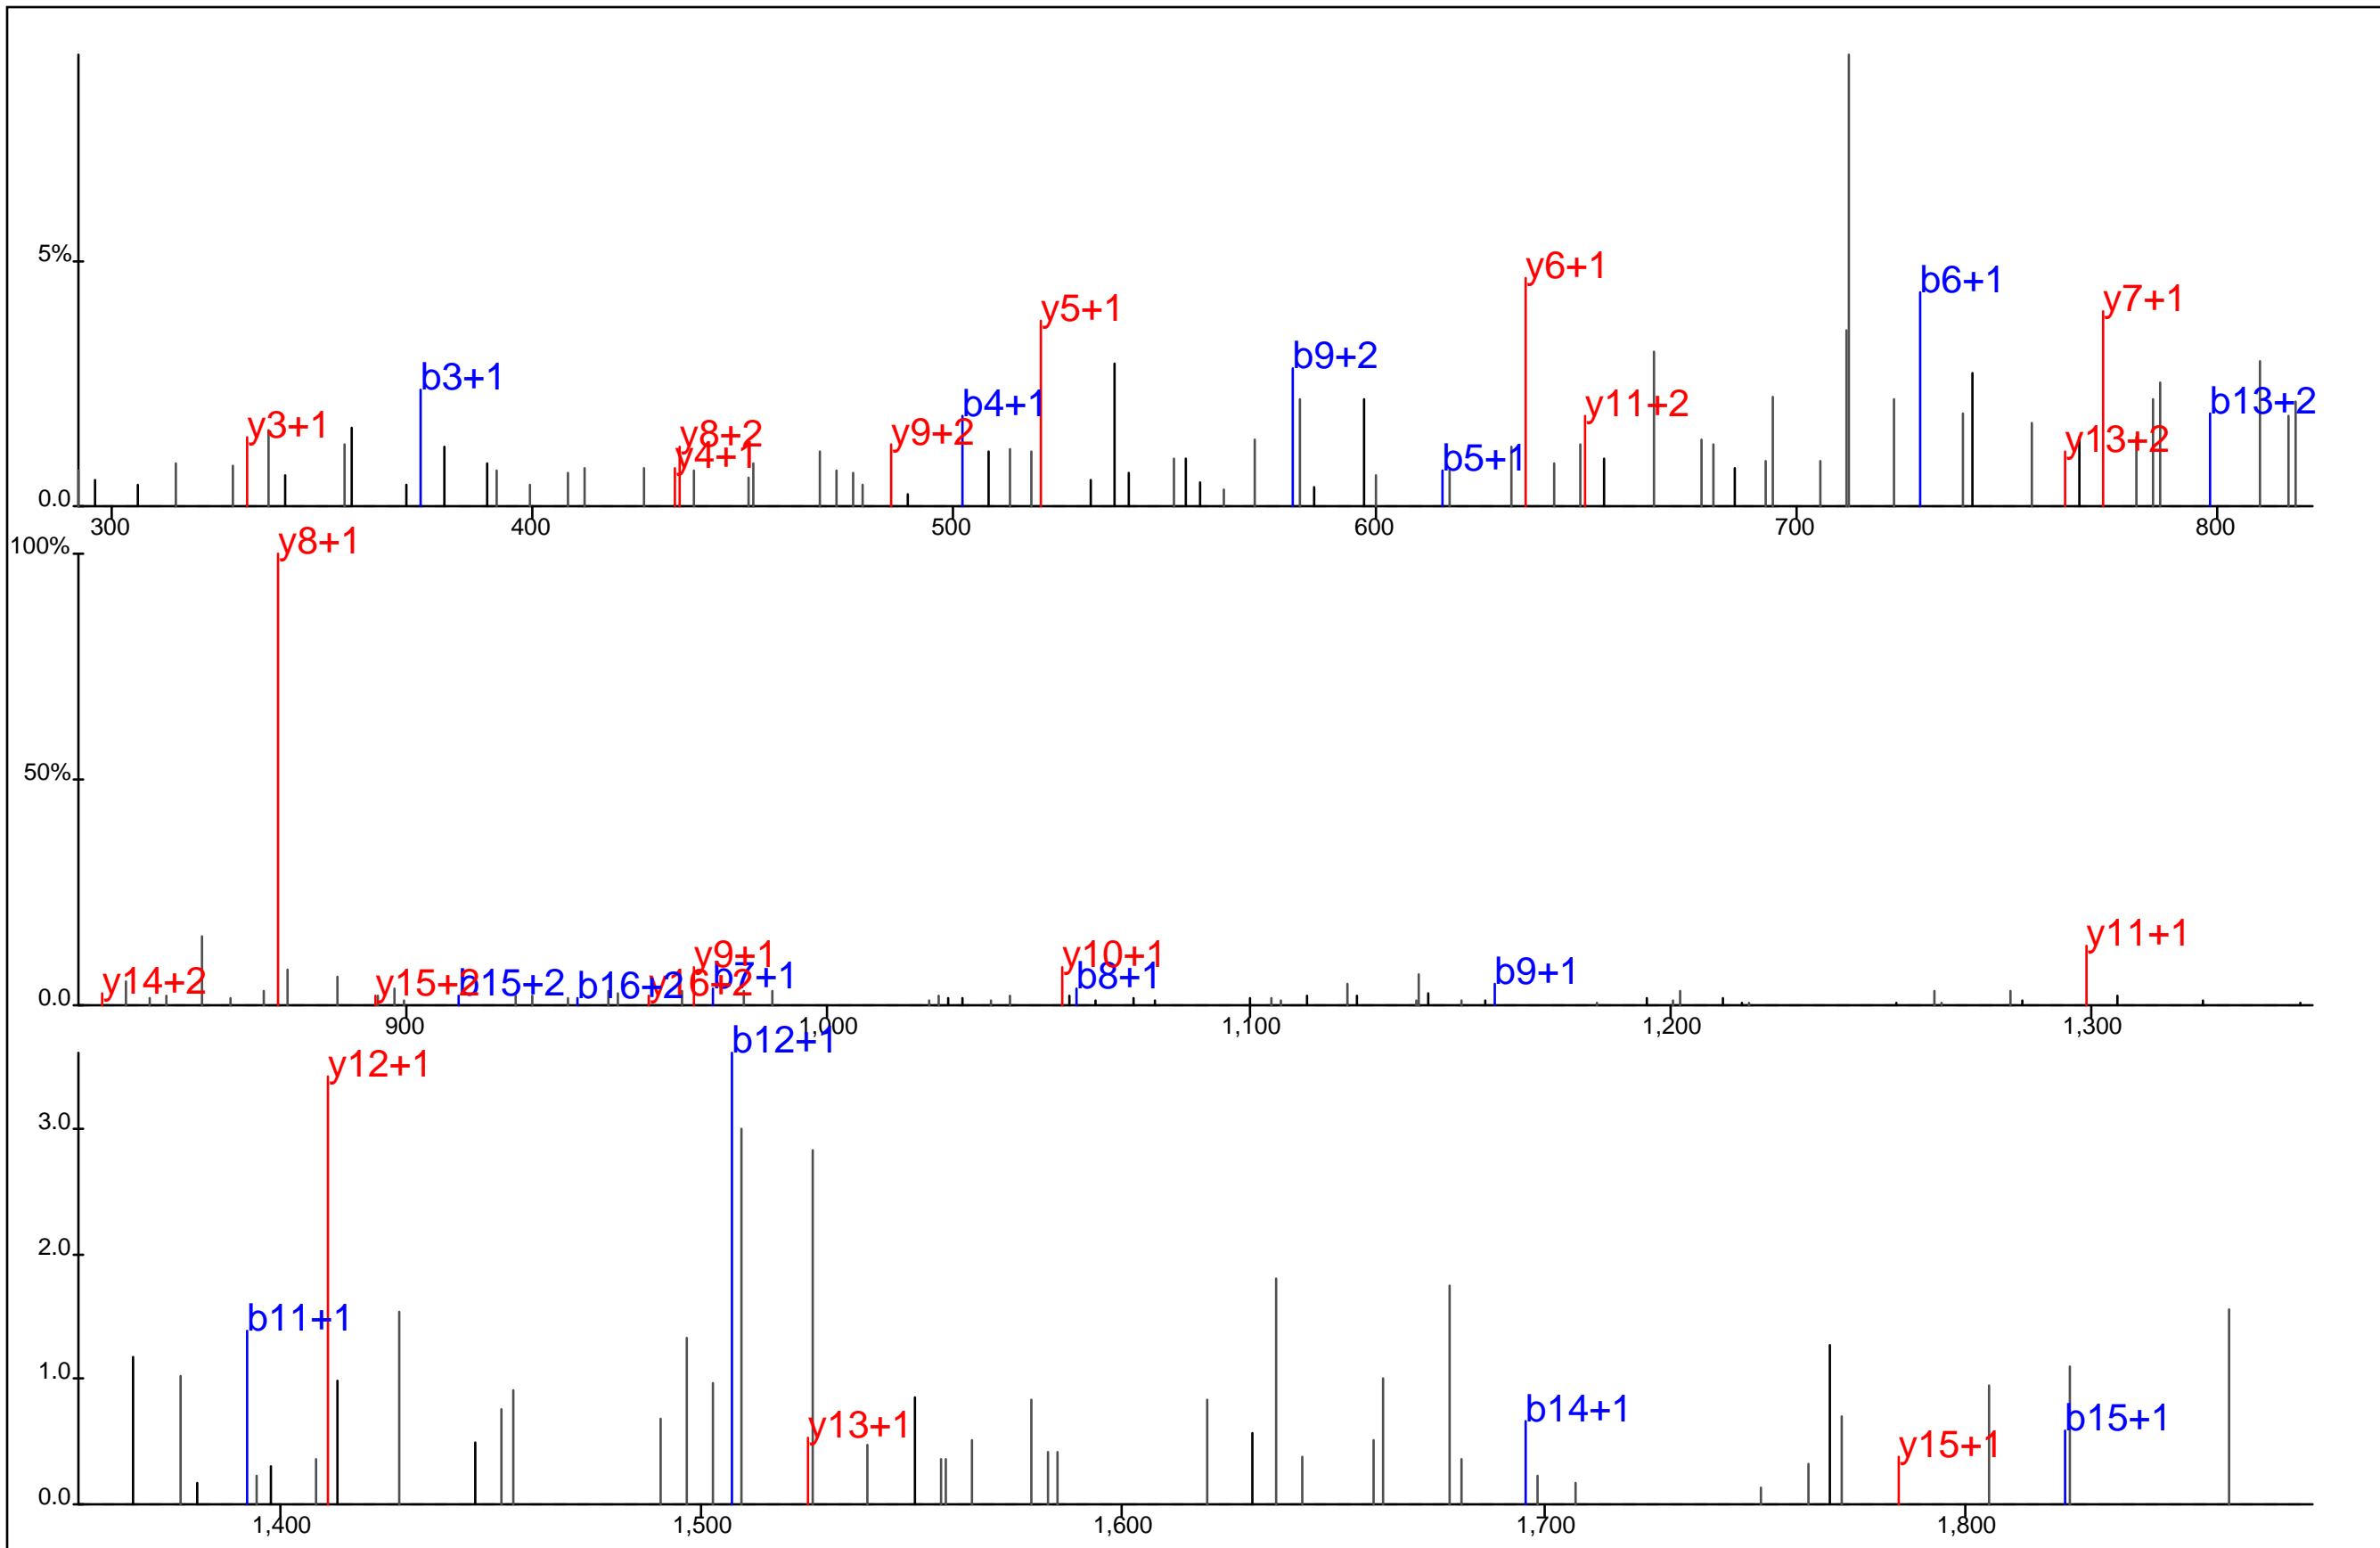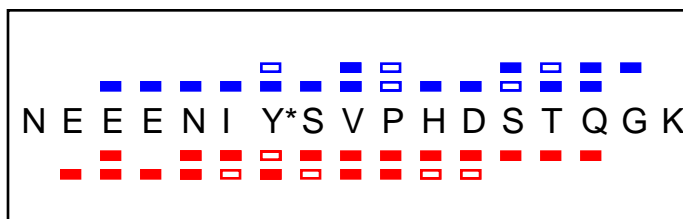

Protein Name: Glucocorticoid receptor DNA binding factor 1  
 gi Accession: 0  
 Precursor Mass: 1,013.9226+2  
 Delta Mass: 0.495 ppm  
 XCorr: 59.48

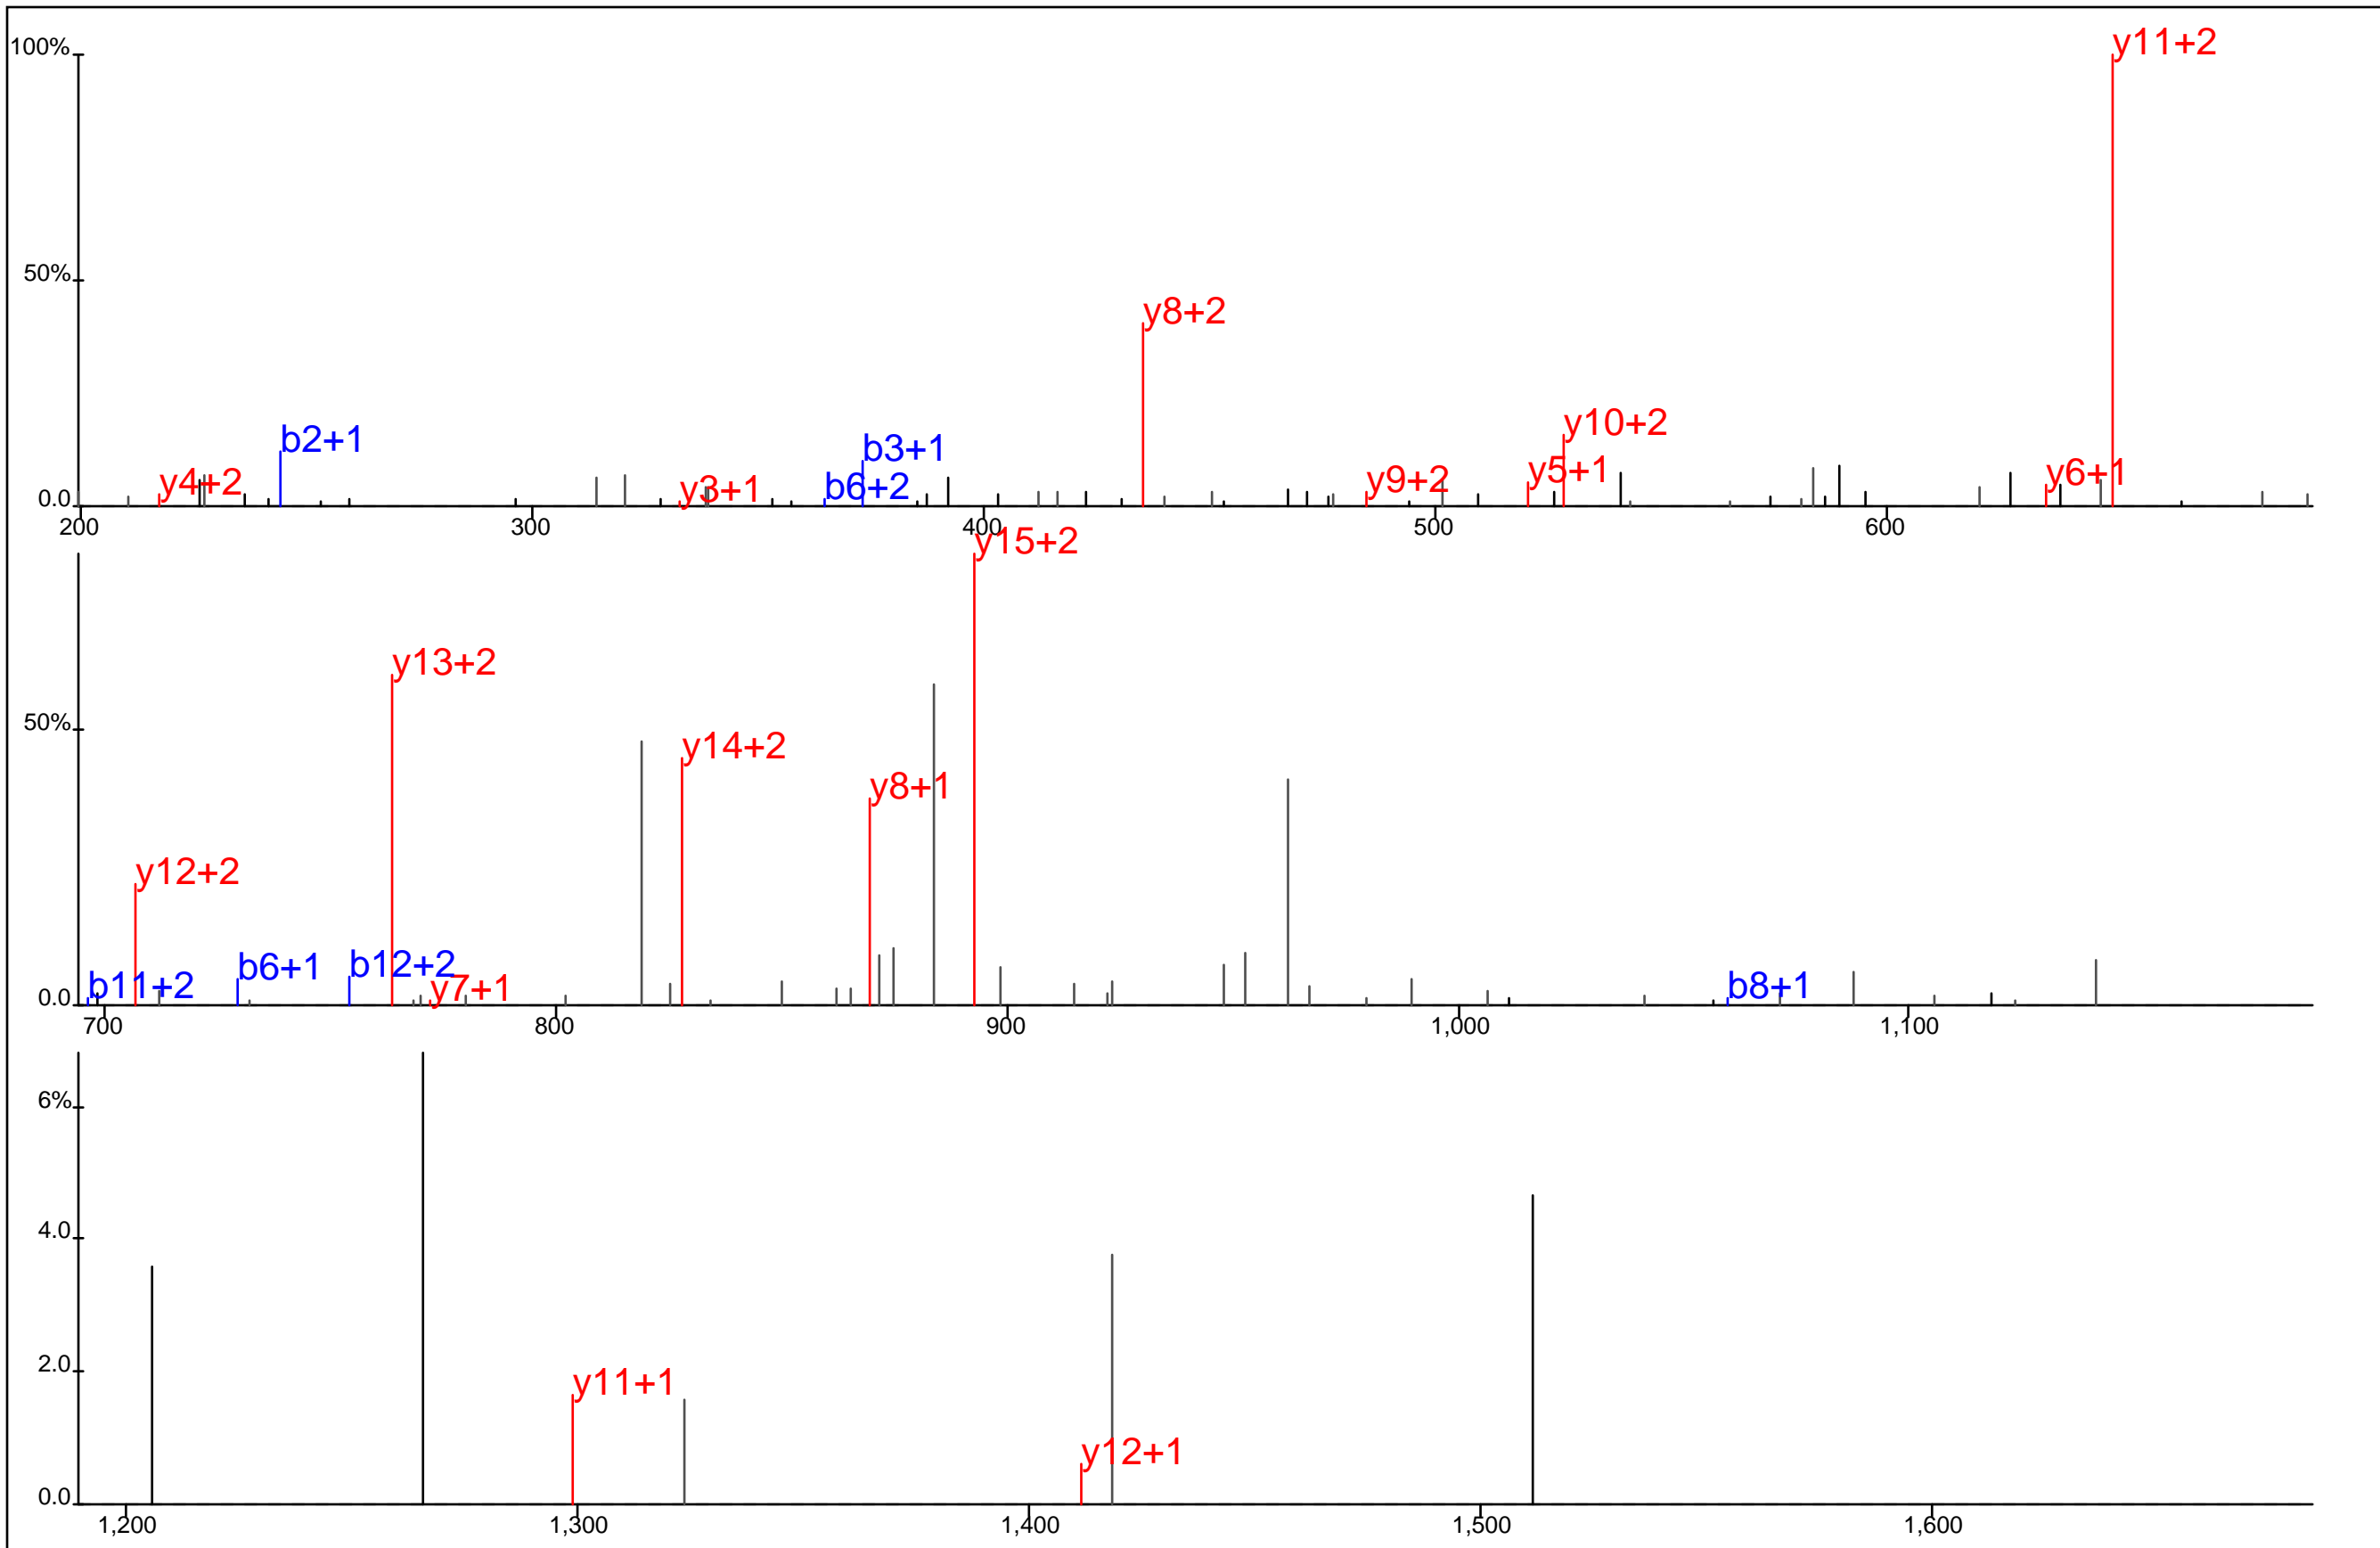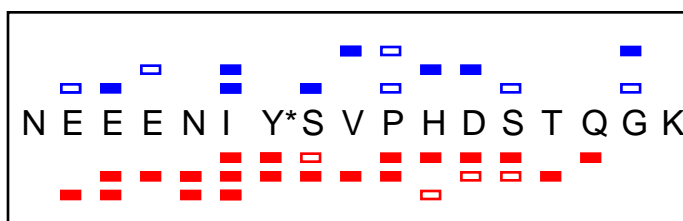

Protein Name: Glucocorticoid receptor DNA binding factor 1  
 gi Accession: 0  
 Precursor Mass: 676.2841+3  
 Delta Mass: 0.651 ppm  
 XCorr: 38.47

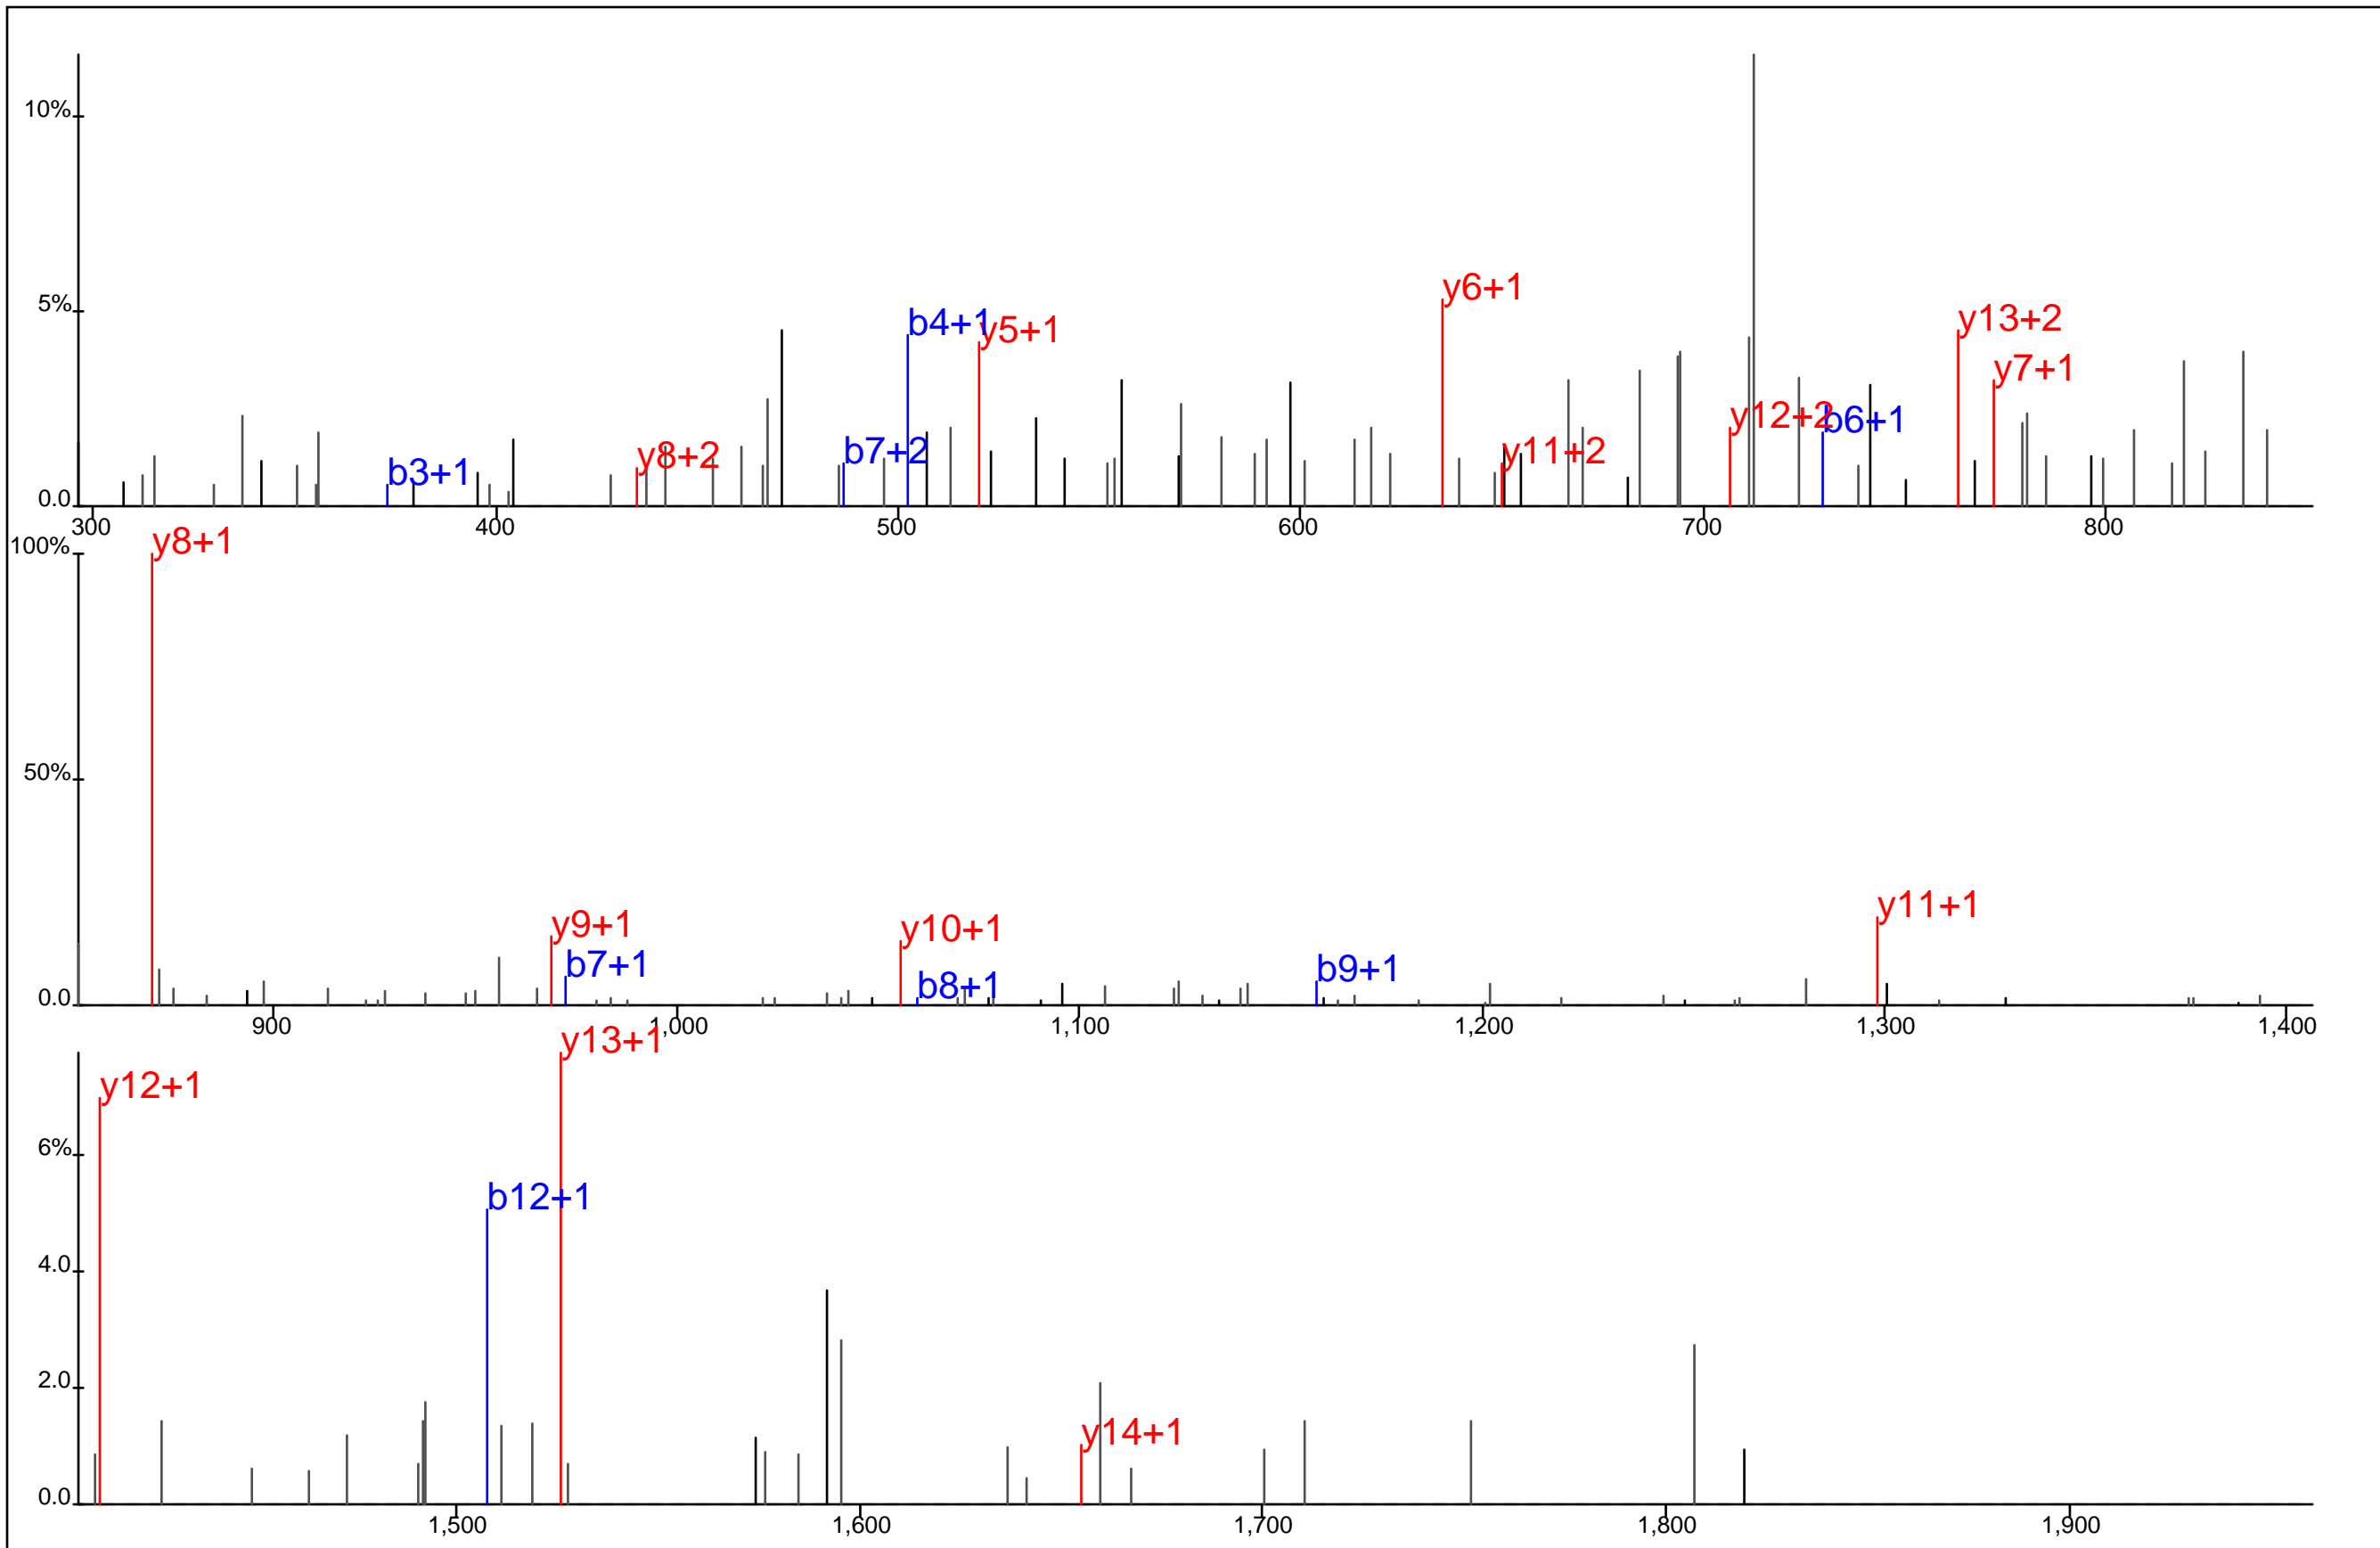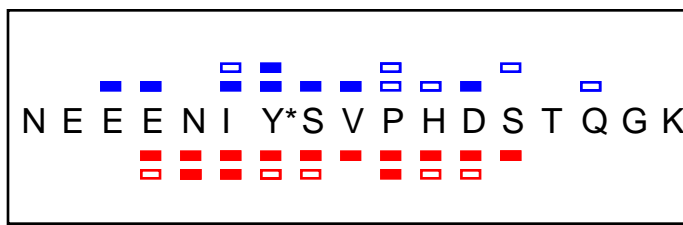

Protein Name: Glucocorticoid receptor DNA binding factor 1  
 gi Accession: 0  
 Precursor Mass: 1,013.9220+2  
 Delta Mass: 1.097 ppm  
 XCorr: 49.94

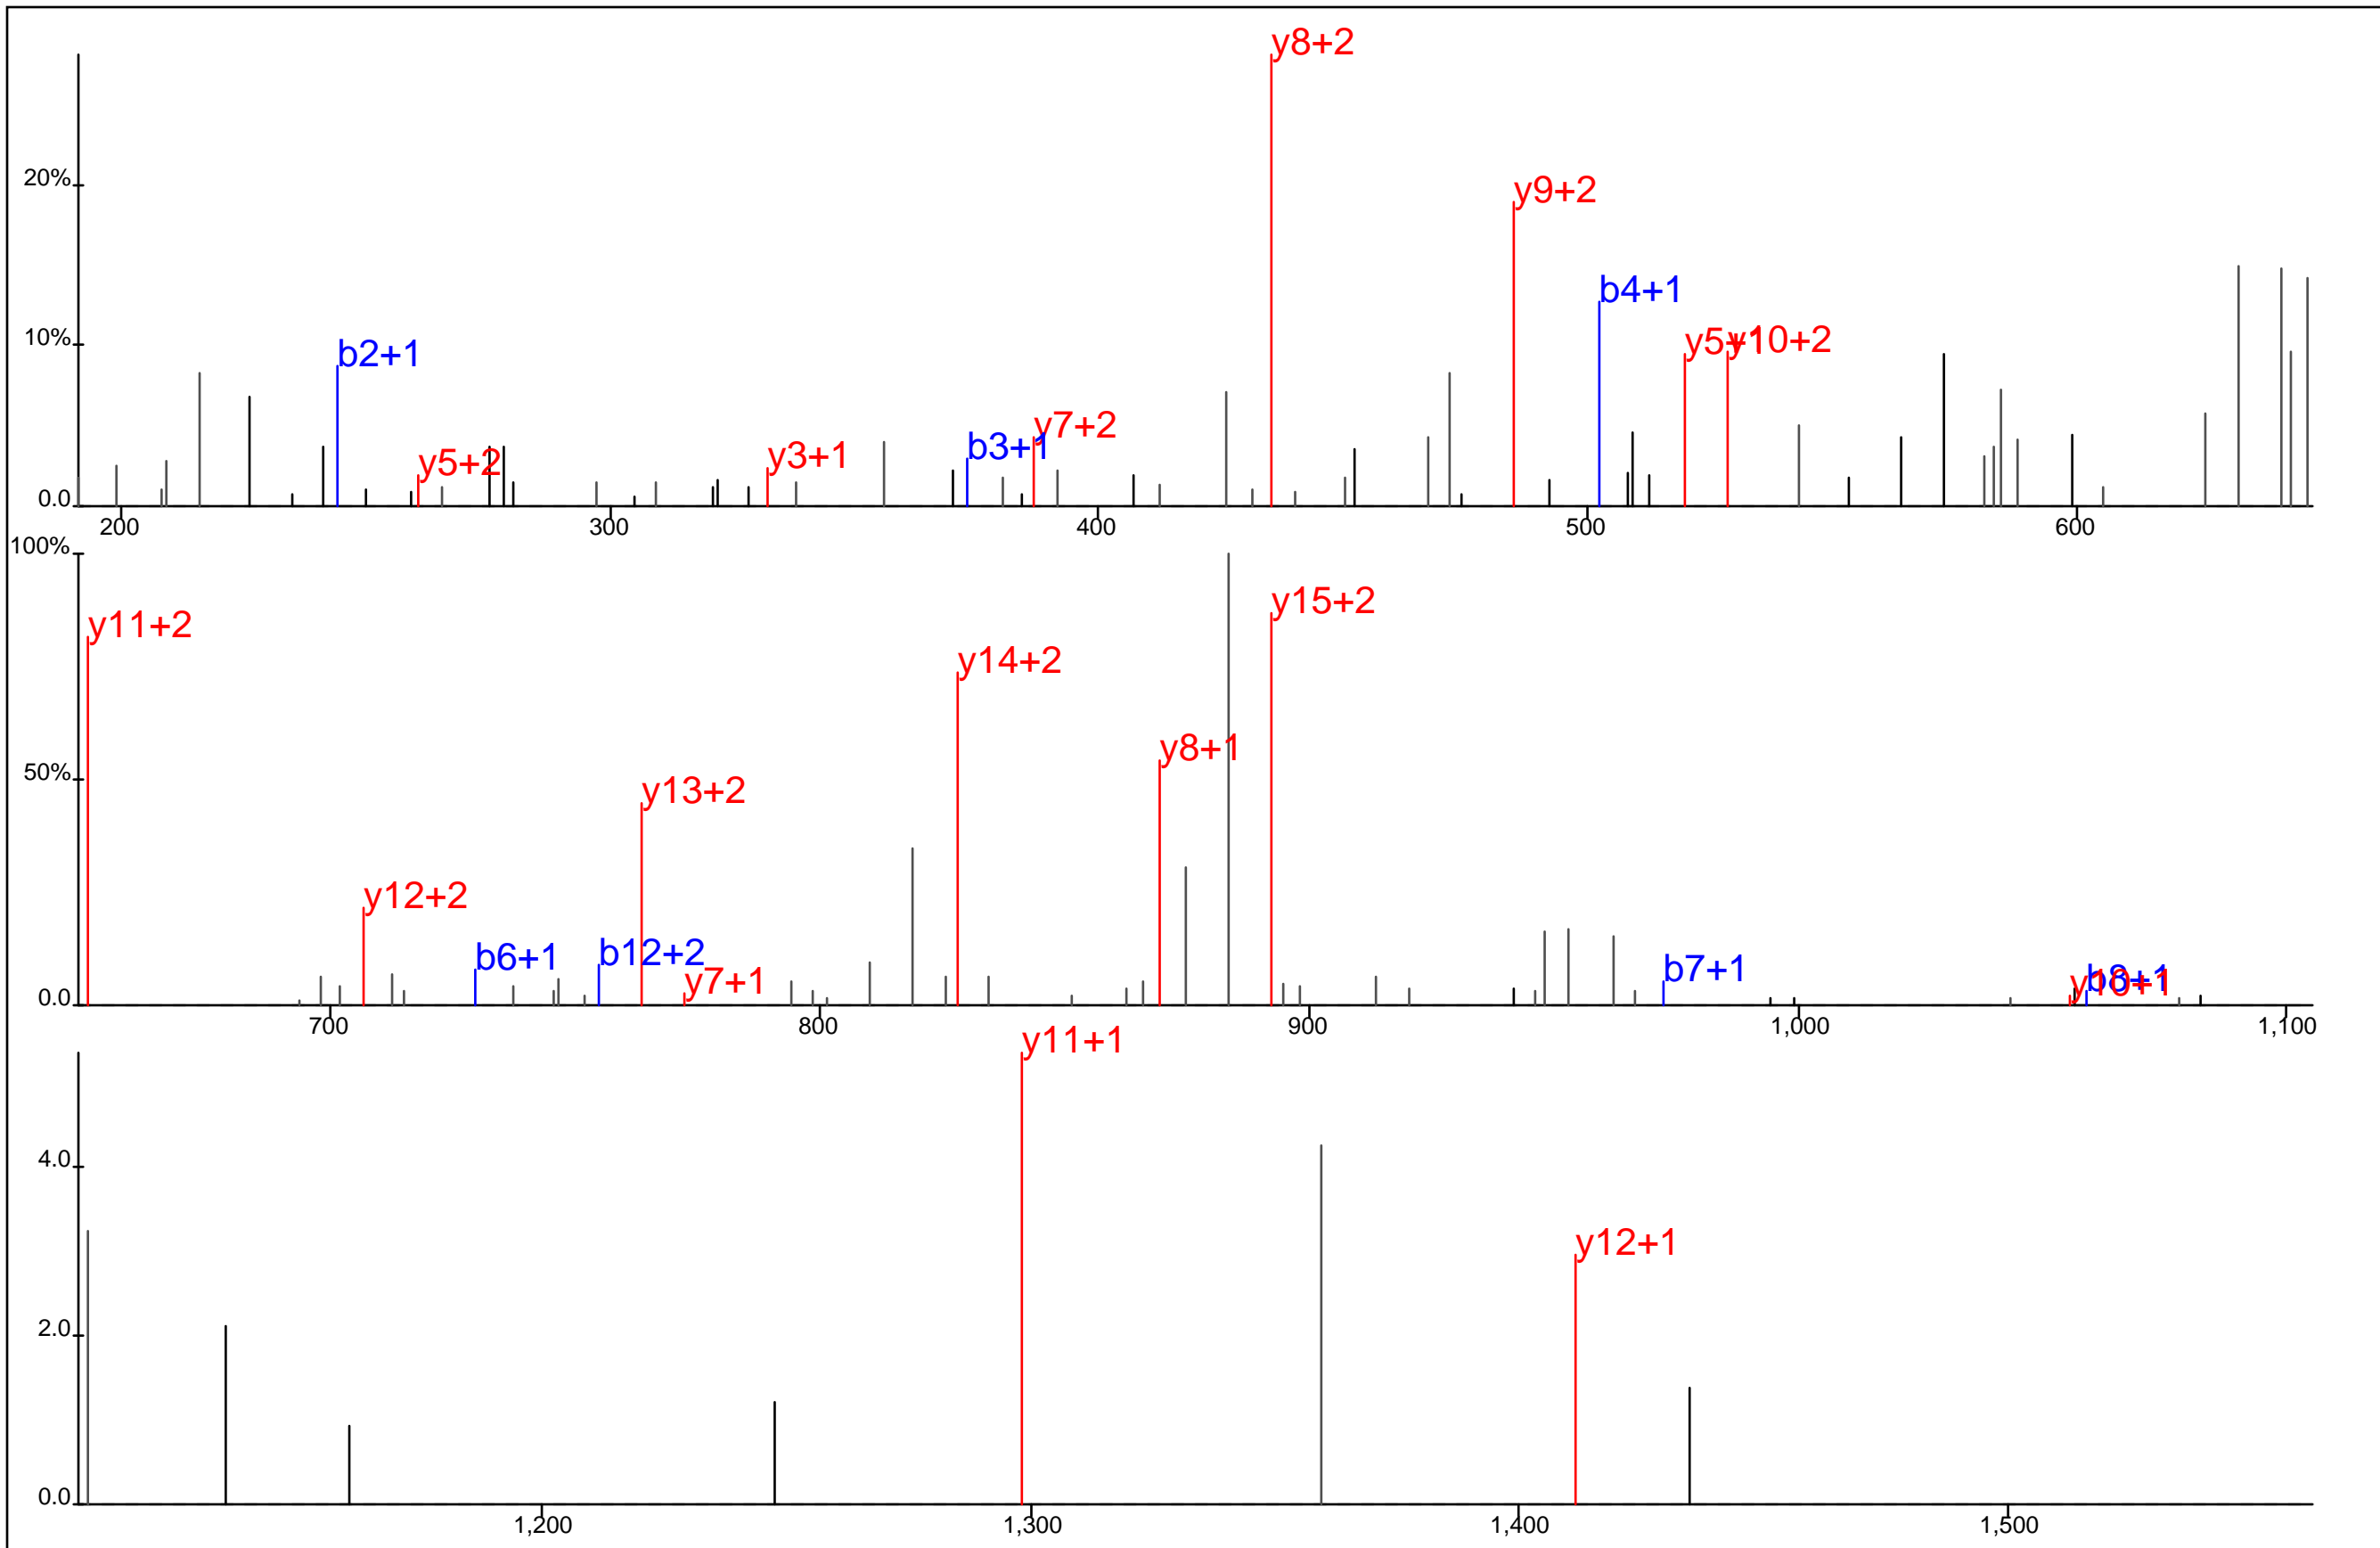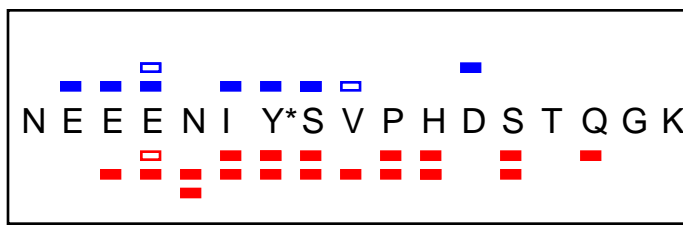

Protein Name: Glucocorticoid receptor DNA binding factor 1  
 gi Accession: 0  
 Precursor Mass: 676.2845+3  
 Delta Mass: 0.071 ppm  
 XCorr: 57.39

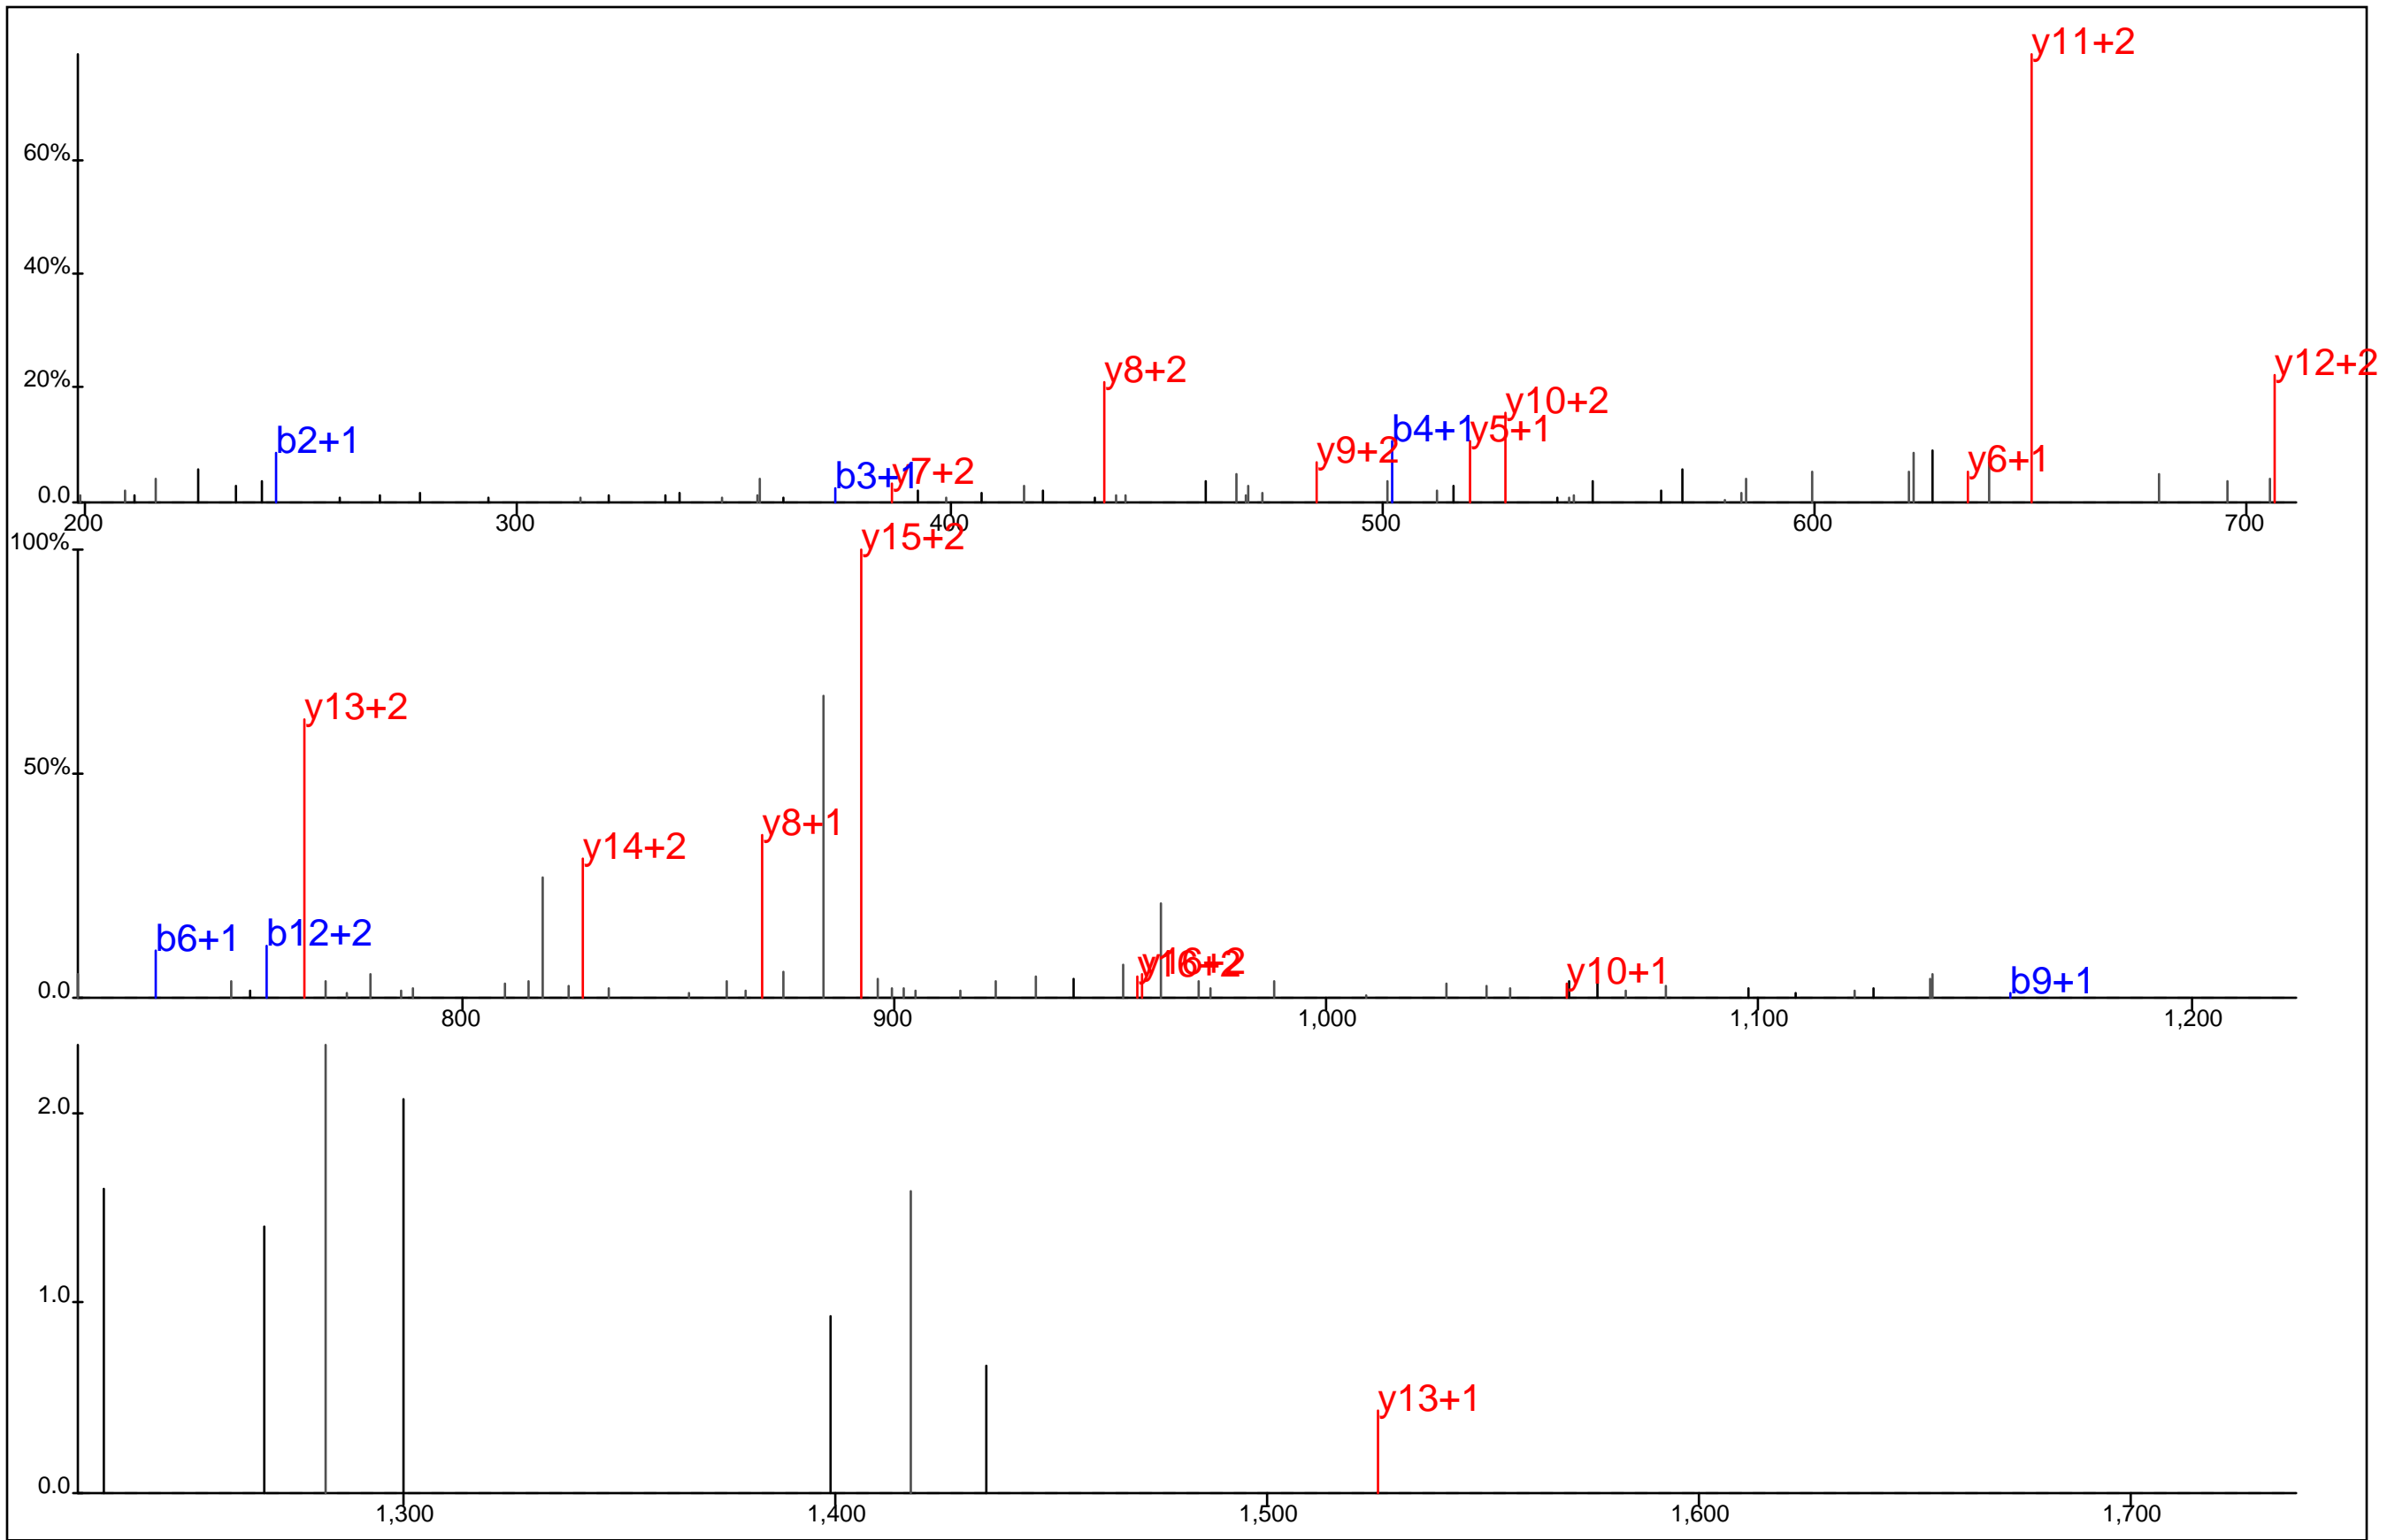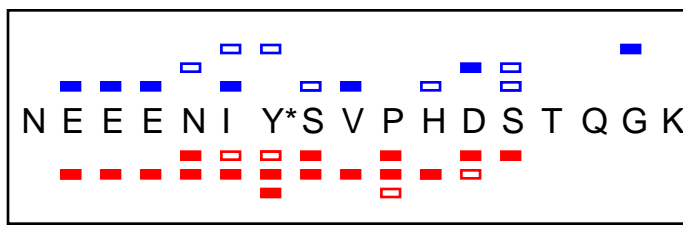

Protein Name: Glucocorticoid receptor DNA binding factor 1  
 gi Accession: 0  
 Precursor Mass: 676.2861+3  
 Delta Mass: 2.420 ppm  
 XCorr: 52.38

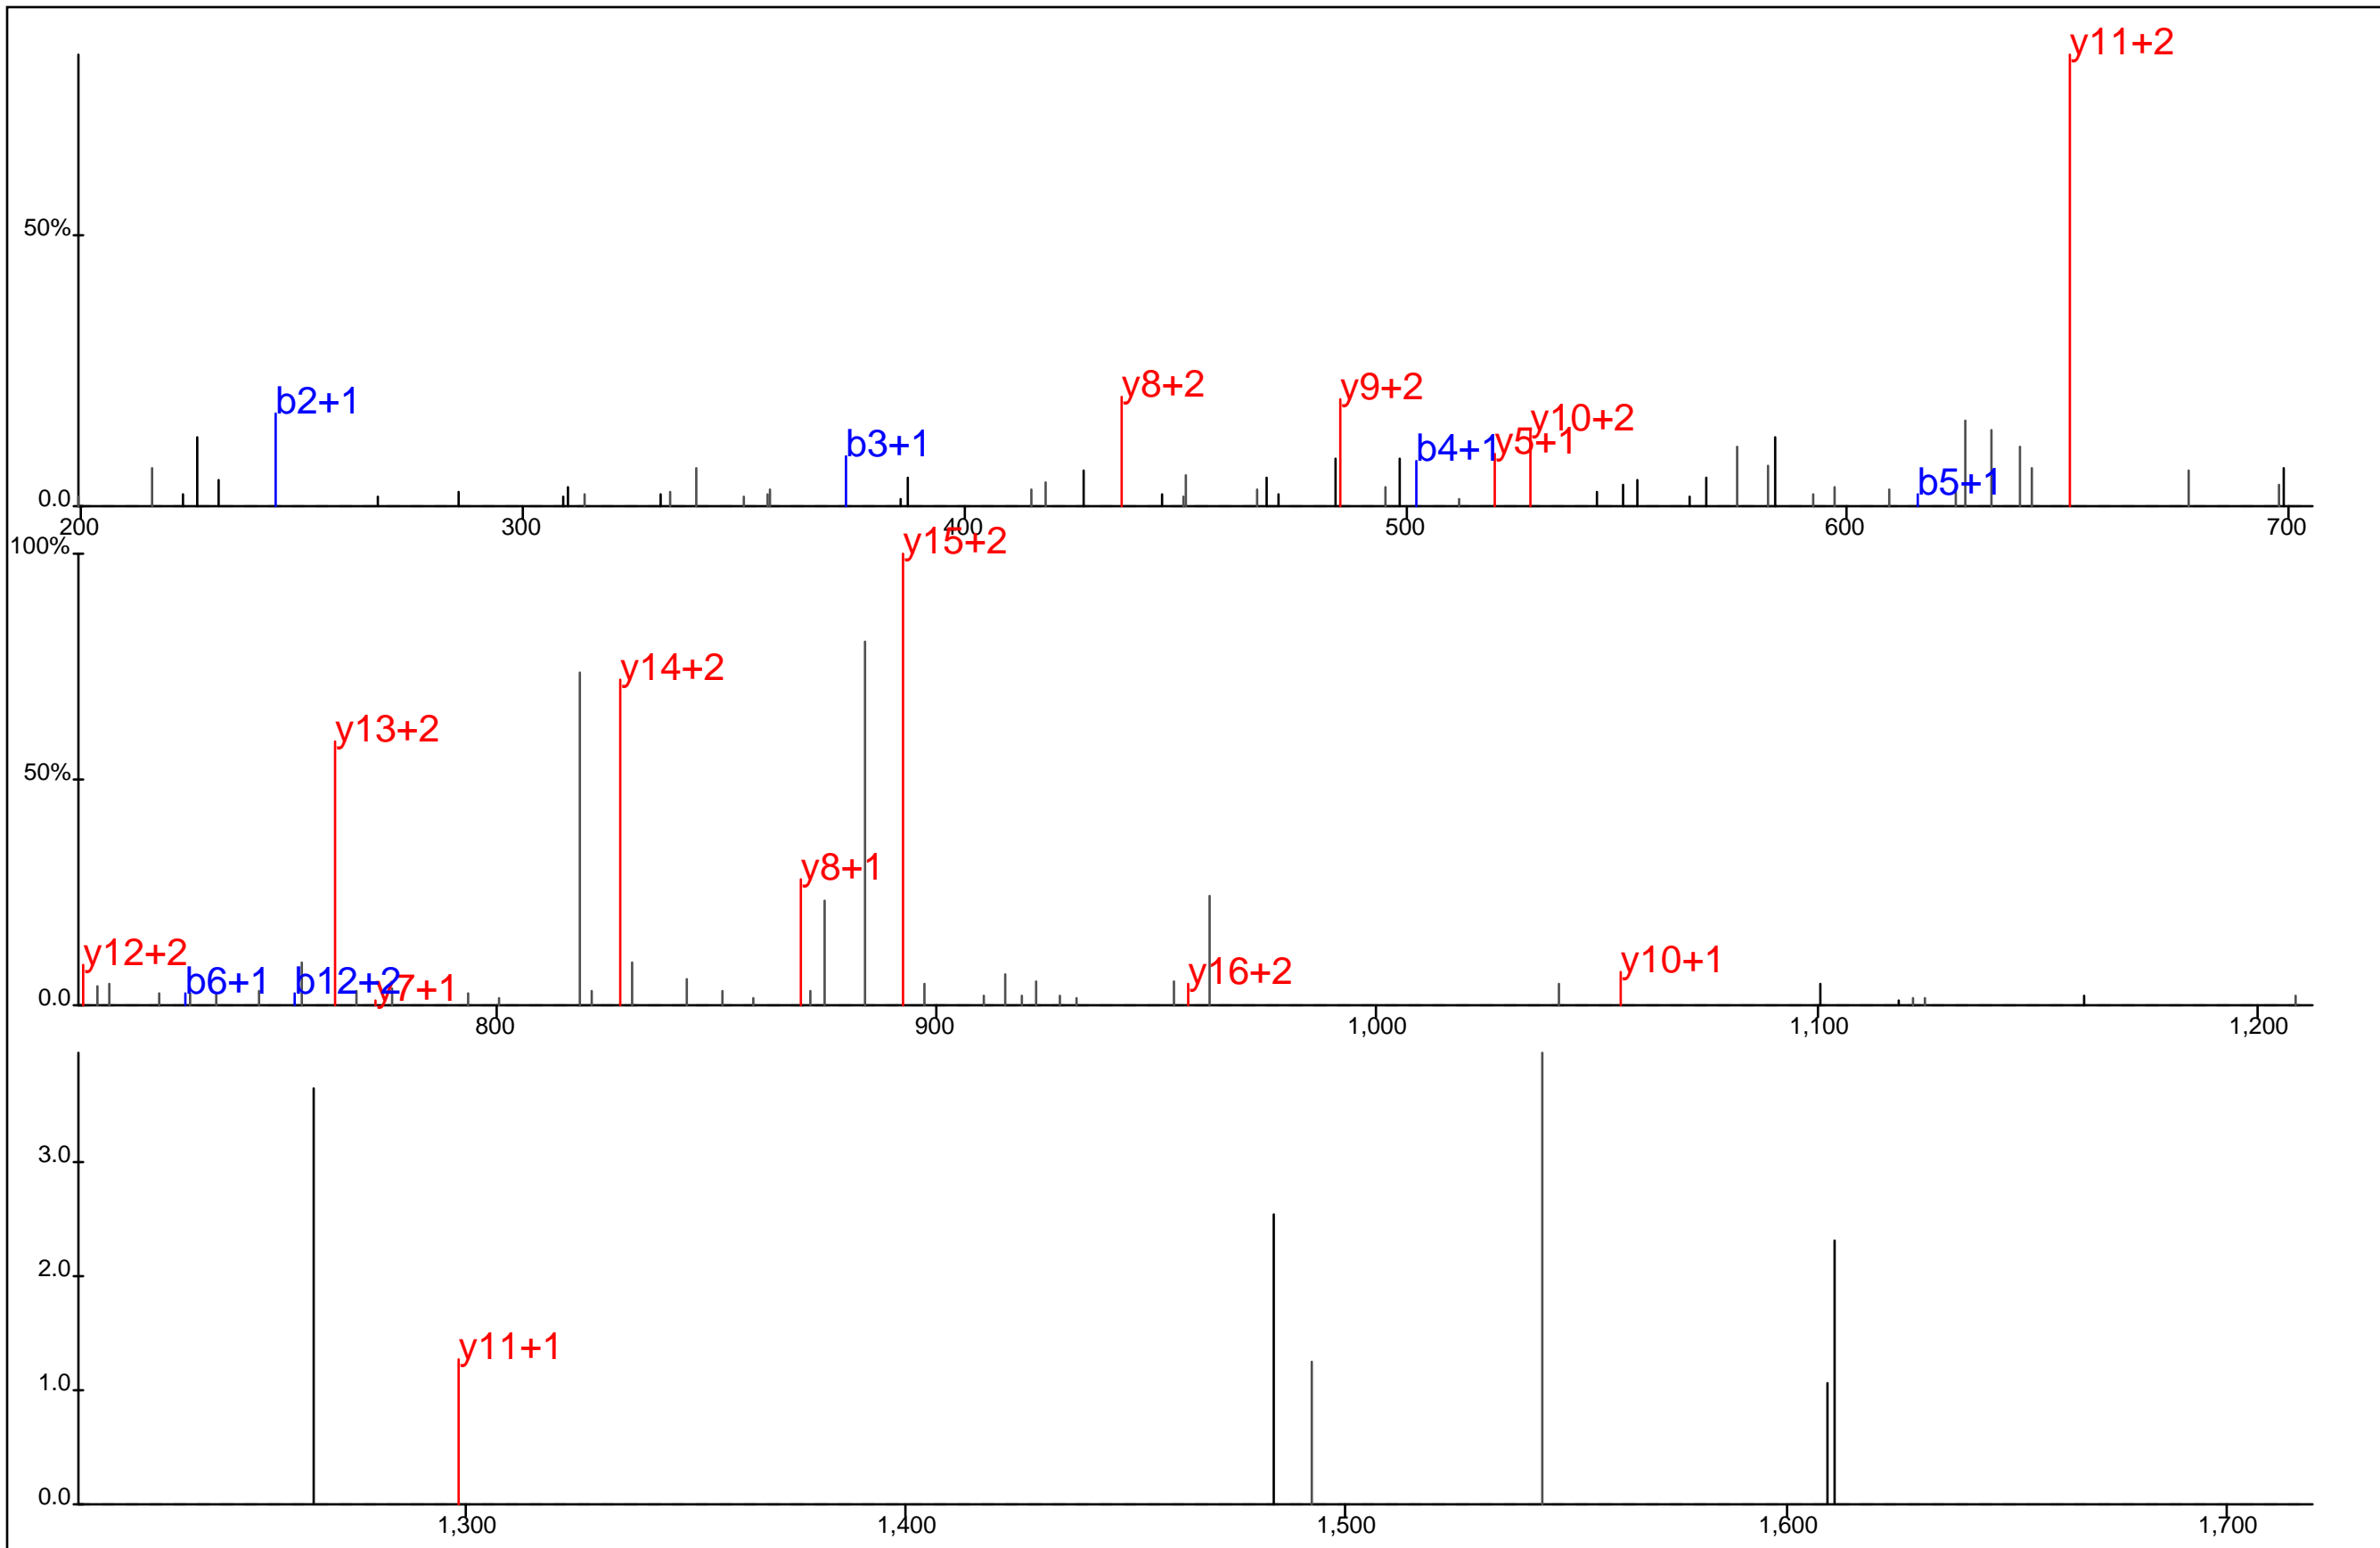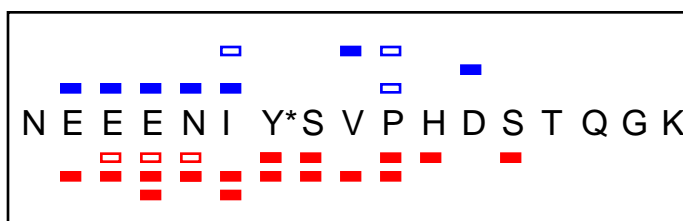

Protein Name: Glucocorticoid receptor DNA binding factor 1  
 gi Accession: 0  
 Precursor Mass: 676.2845+3  
 Delta Mass: 0.071 ppm  
 XCorr: 36.92





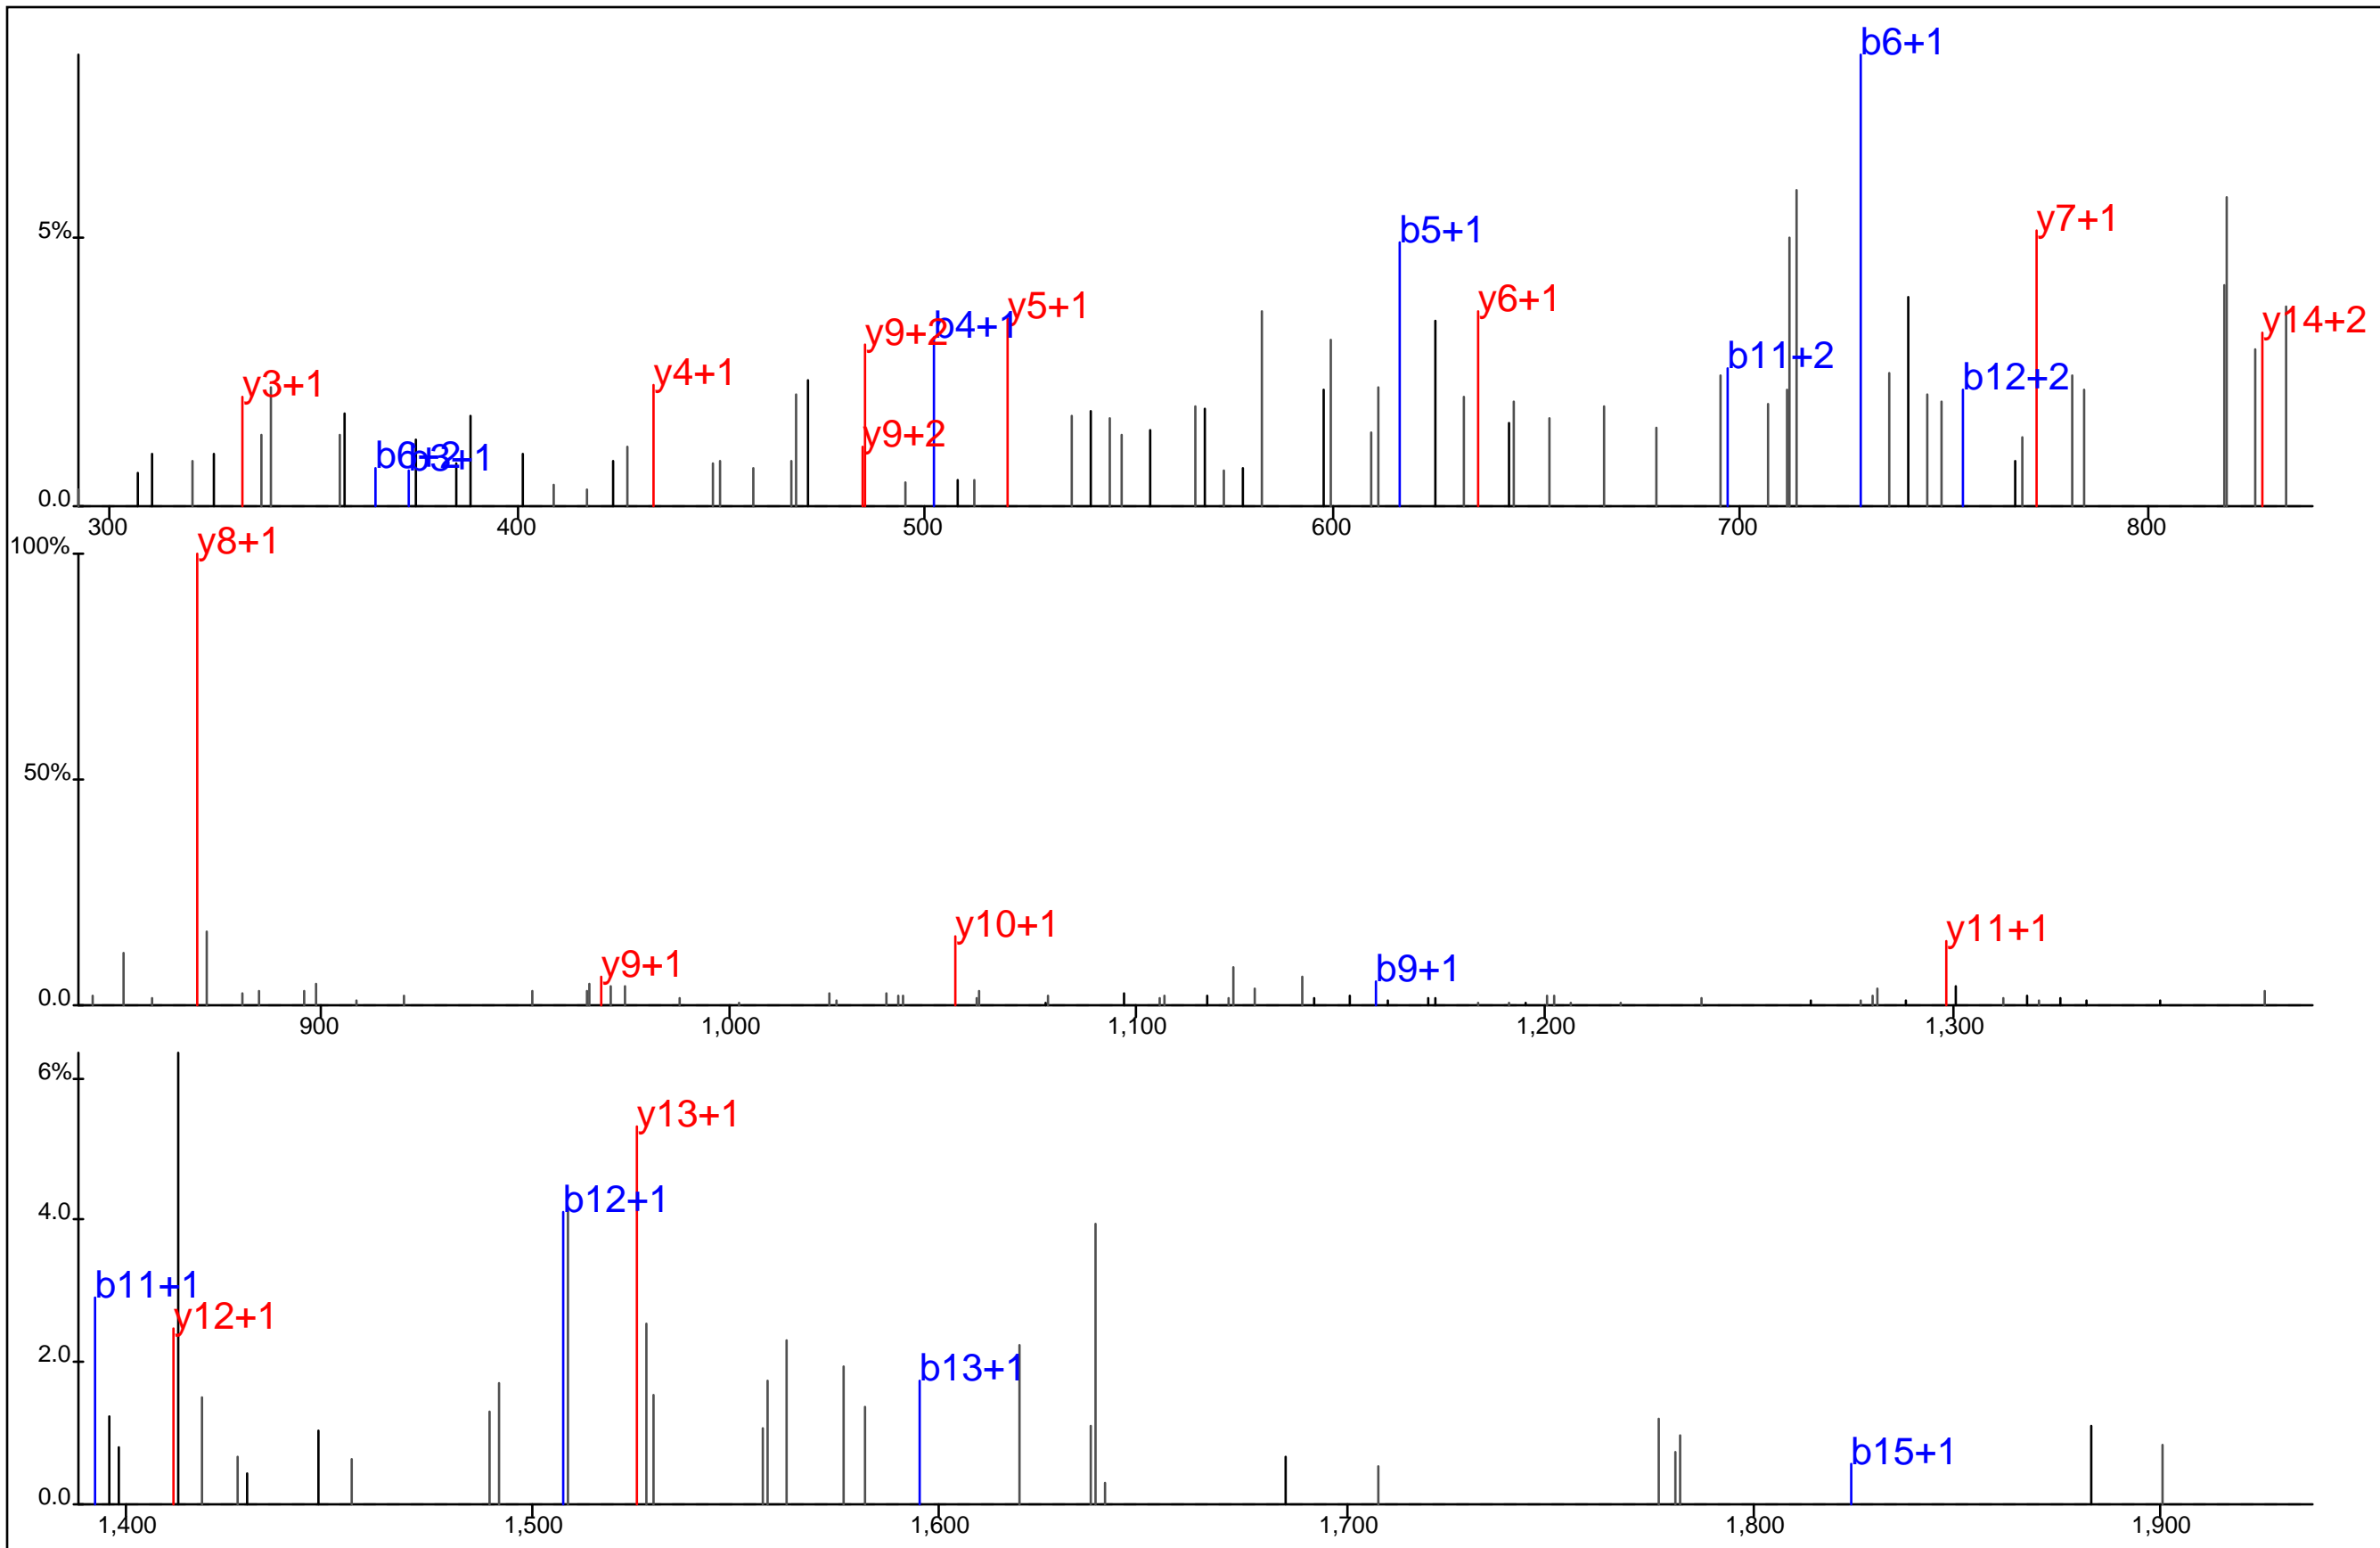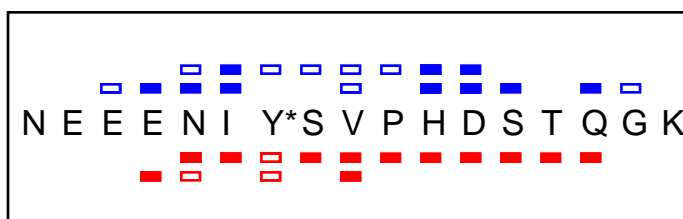

Protein Name: Glucocorticoid receptor DNA binding factor 1  
 gi Accession: 0  
 Precursor Mass: 1,013.9242+2  
 Delta Mass: 1.071 ppm  
 XCorr: 61.63

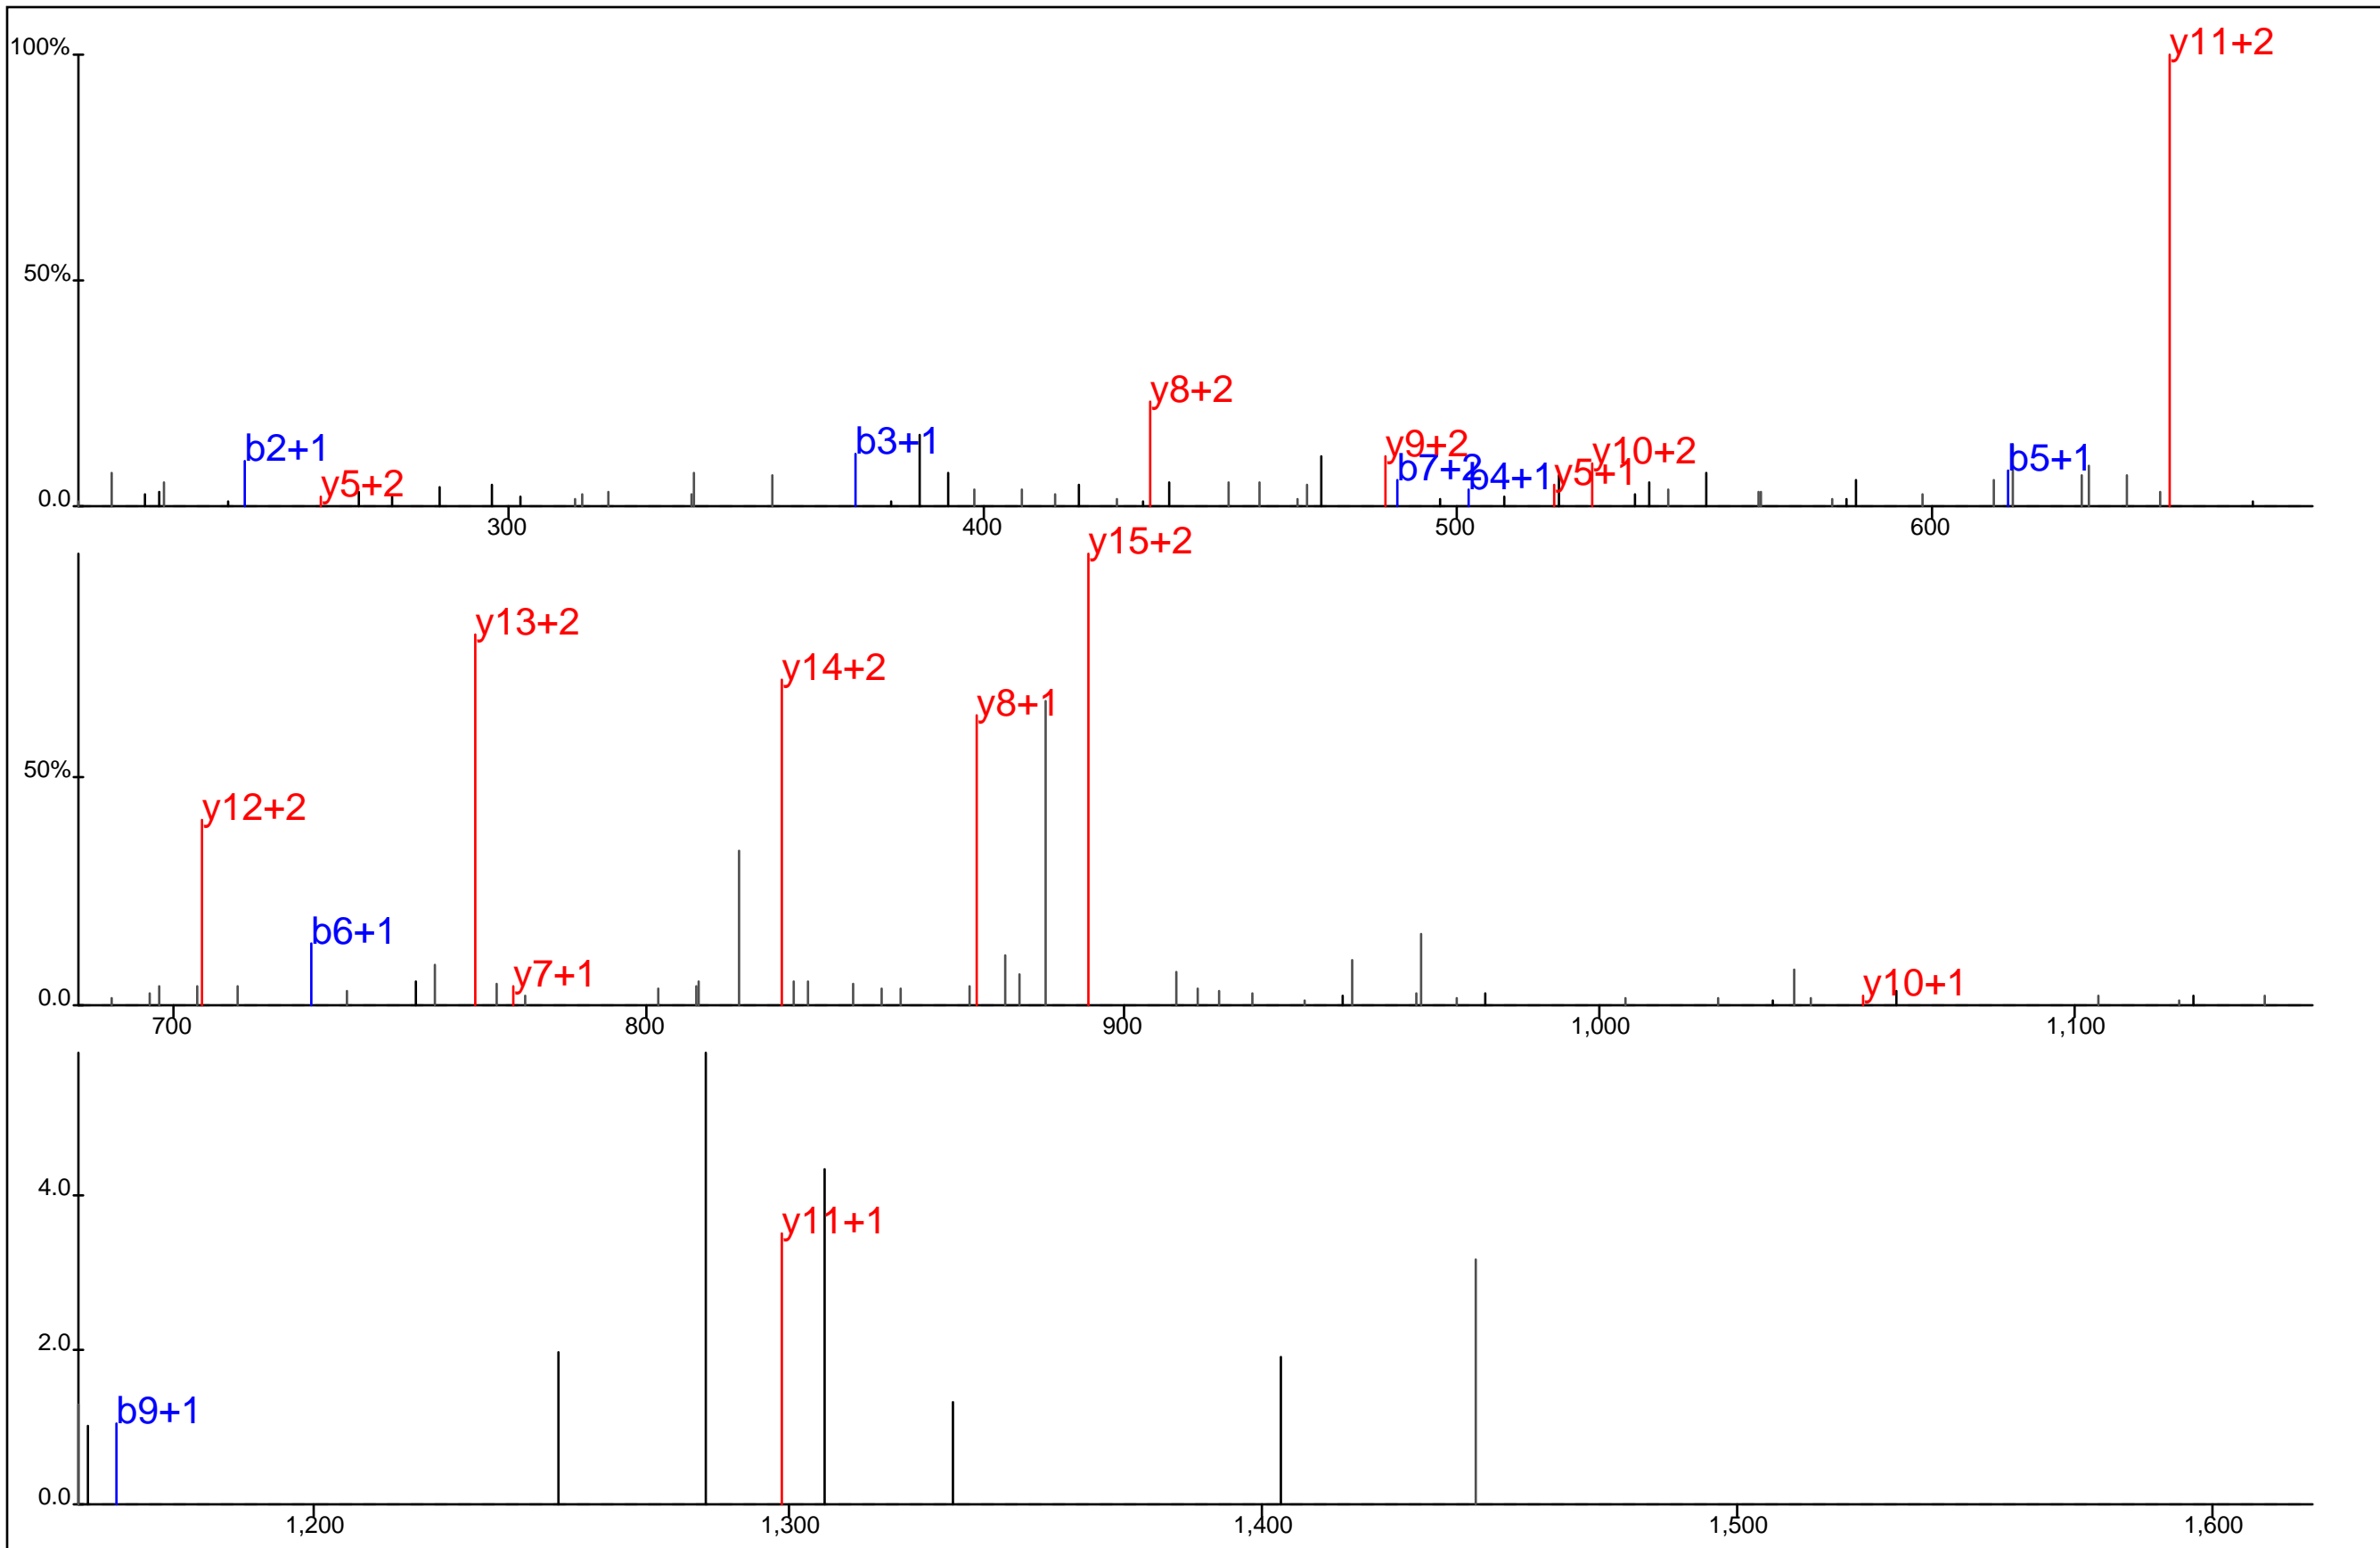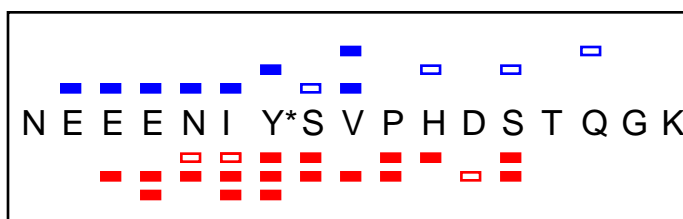

Protein Name: Glucocorticoid receptor DNA binding factor 1  
 gi Accession: 0  
 Precursor Mass: 676.2849+3  
 Delta Mass: 0.613 ppm  
 XCorr: 43.44

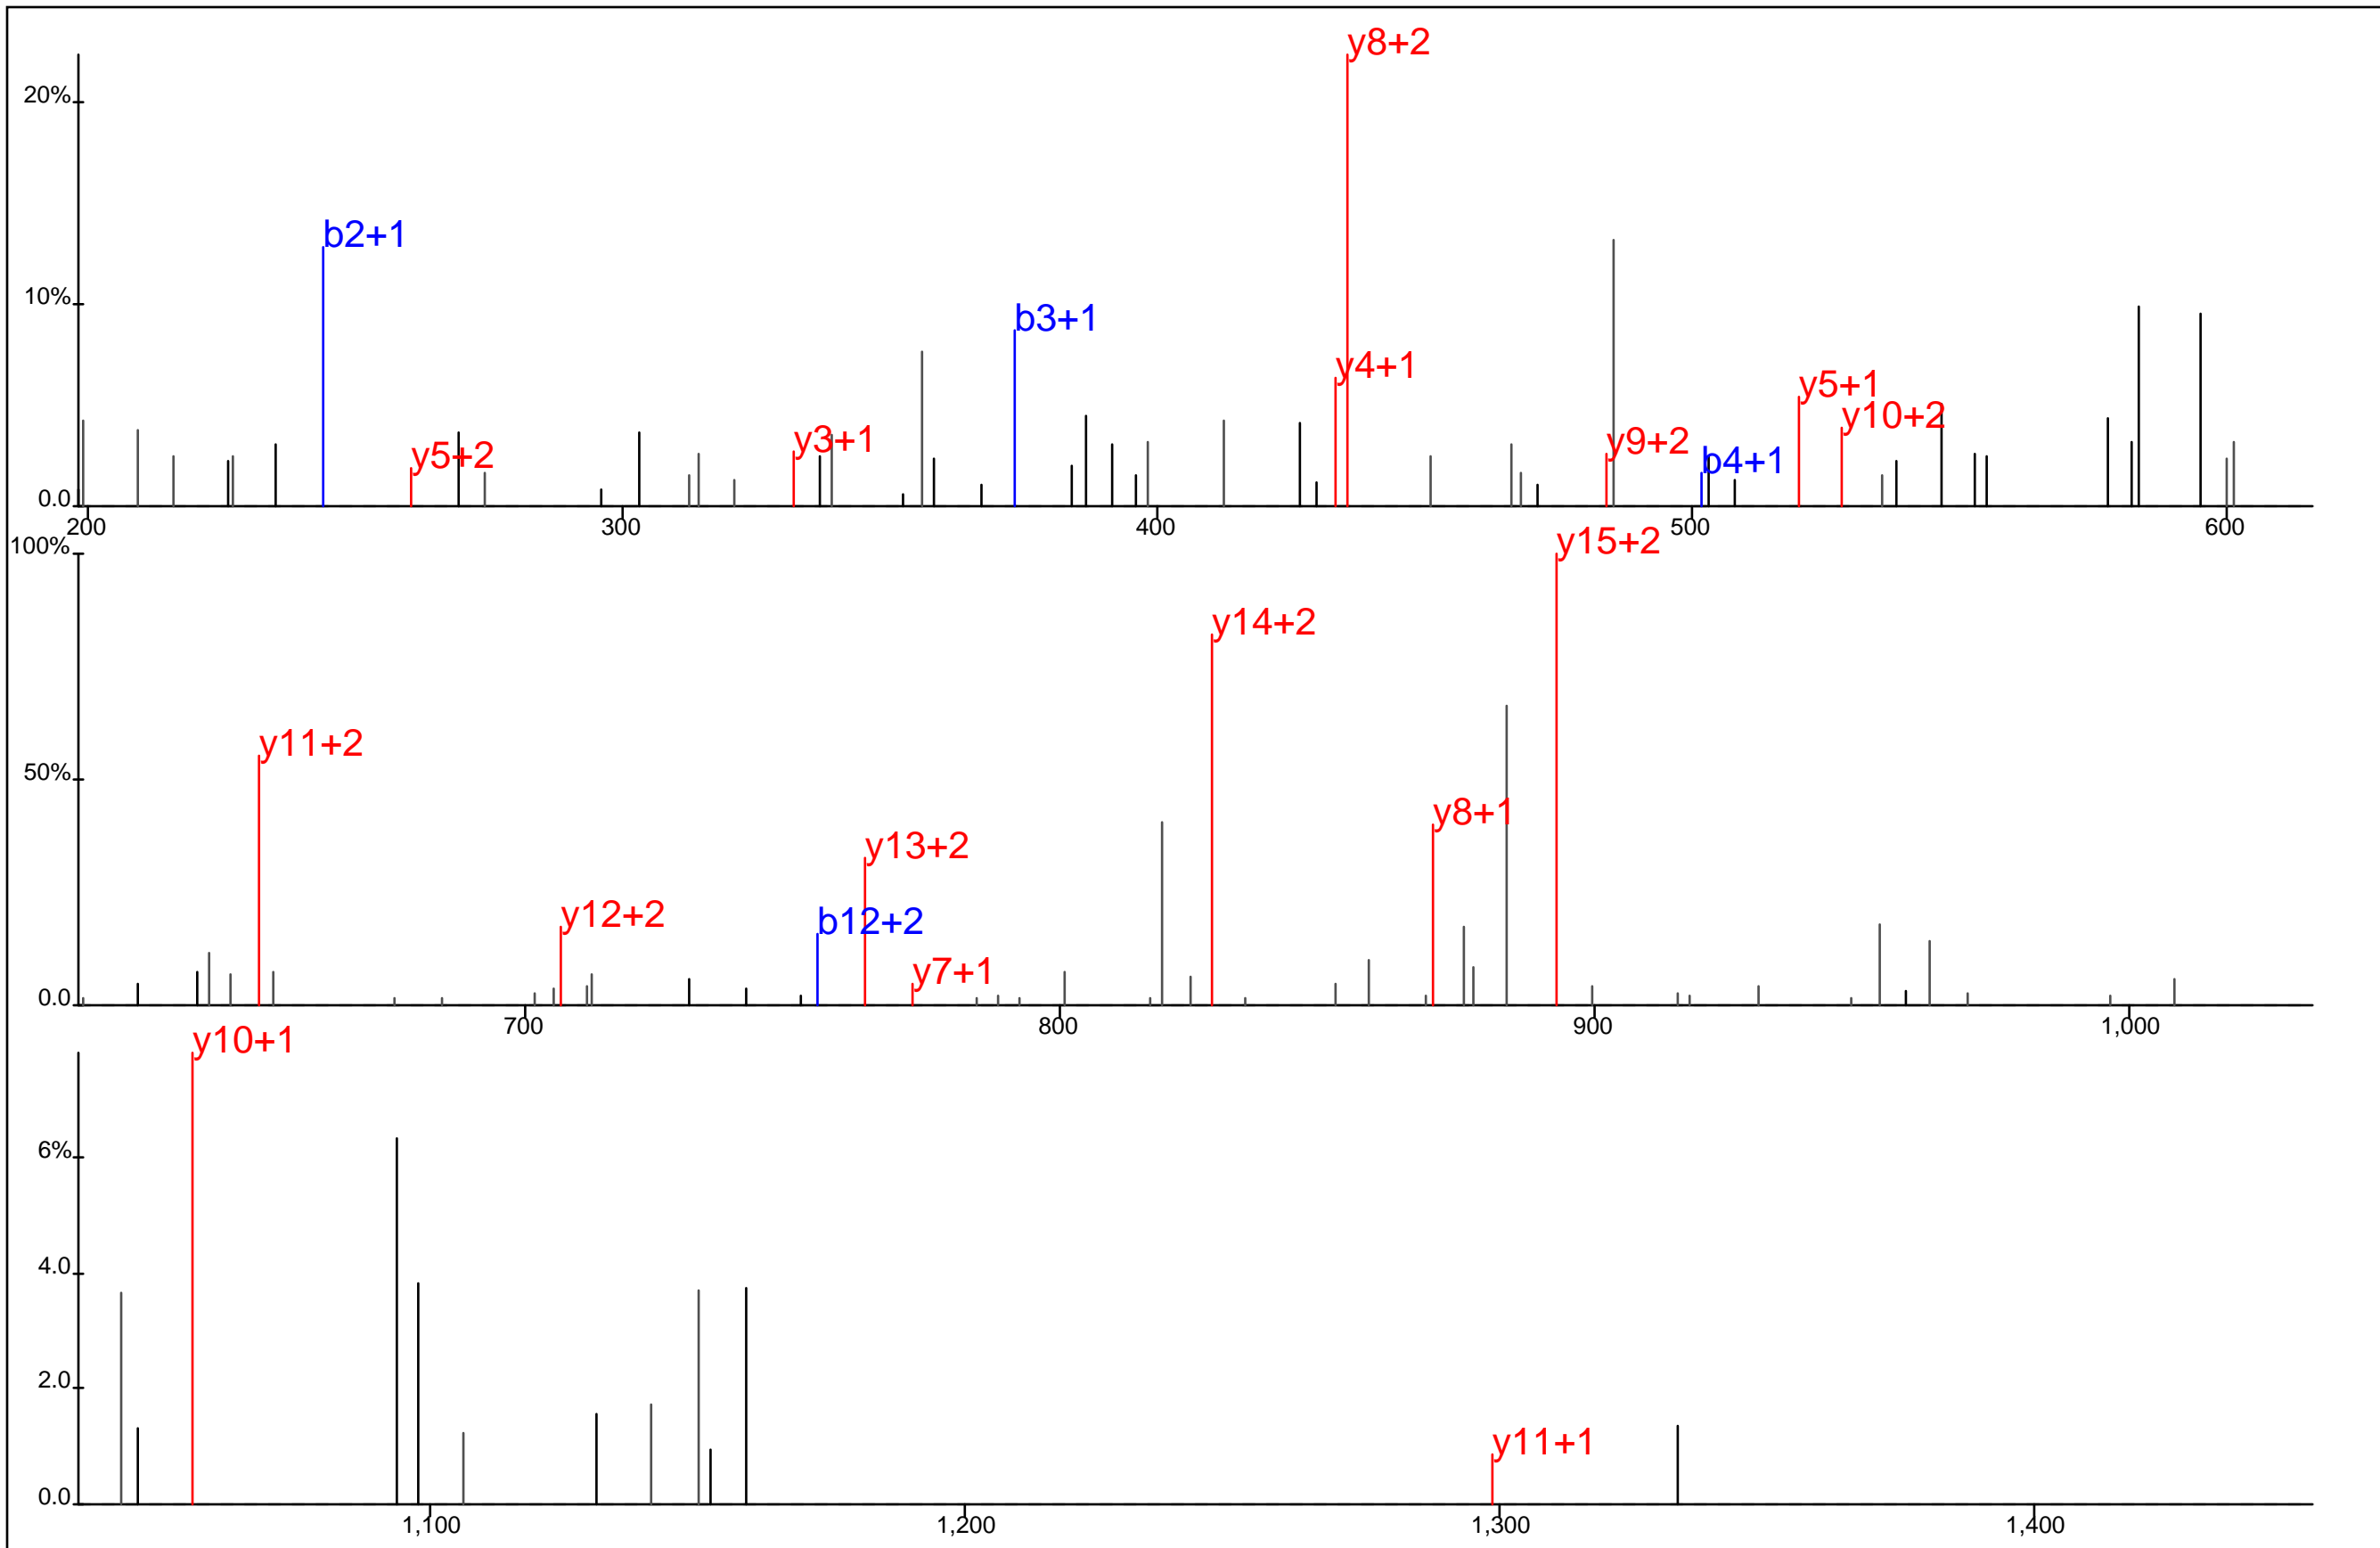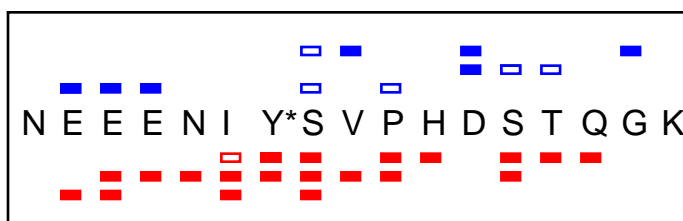

Protein Name: Glucocorticoid receptor DNA binding factor 1  
 gi Accession: 0  
 Precursor Mass: 676.2852+3  
 Delta Mass: 0.974 ppm  
 XCorr: 38.24





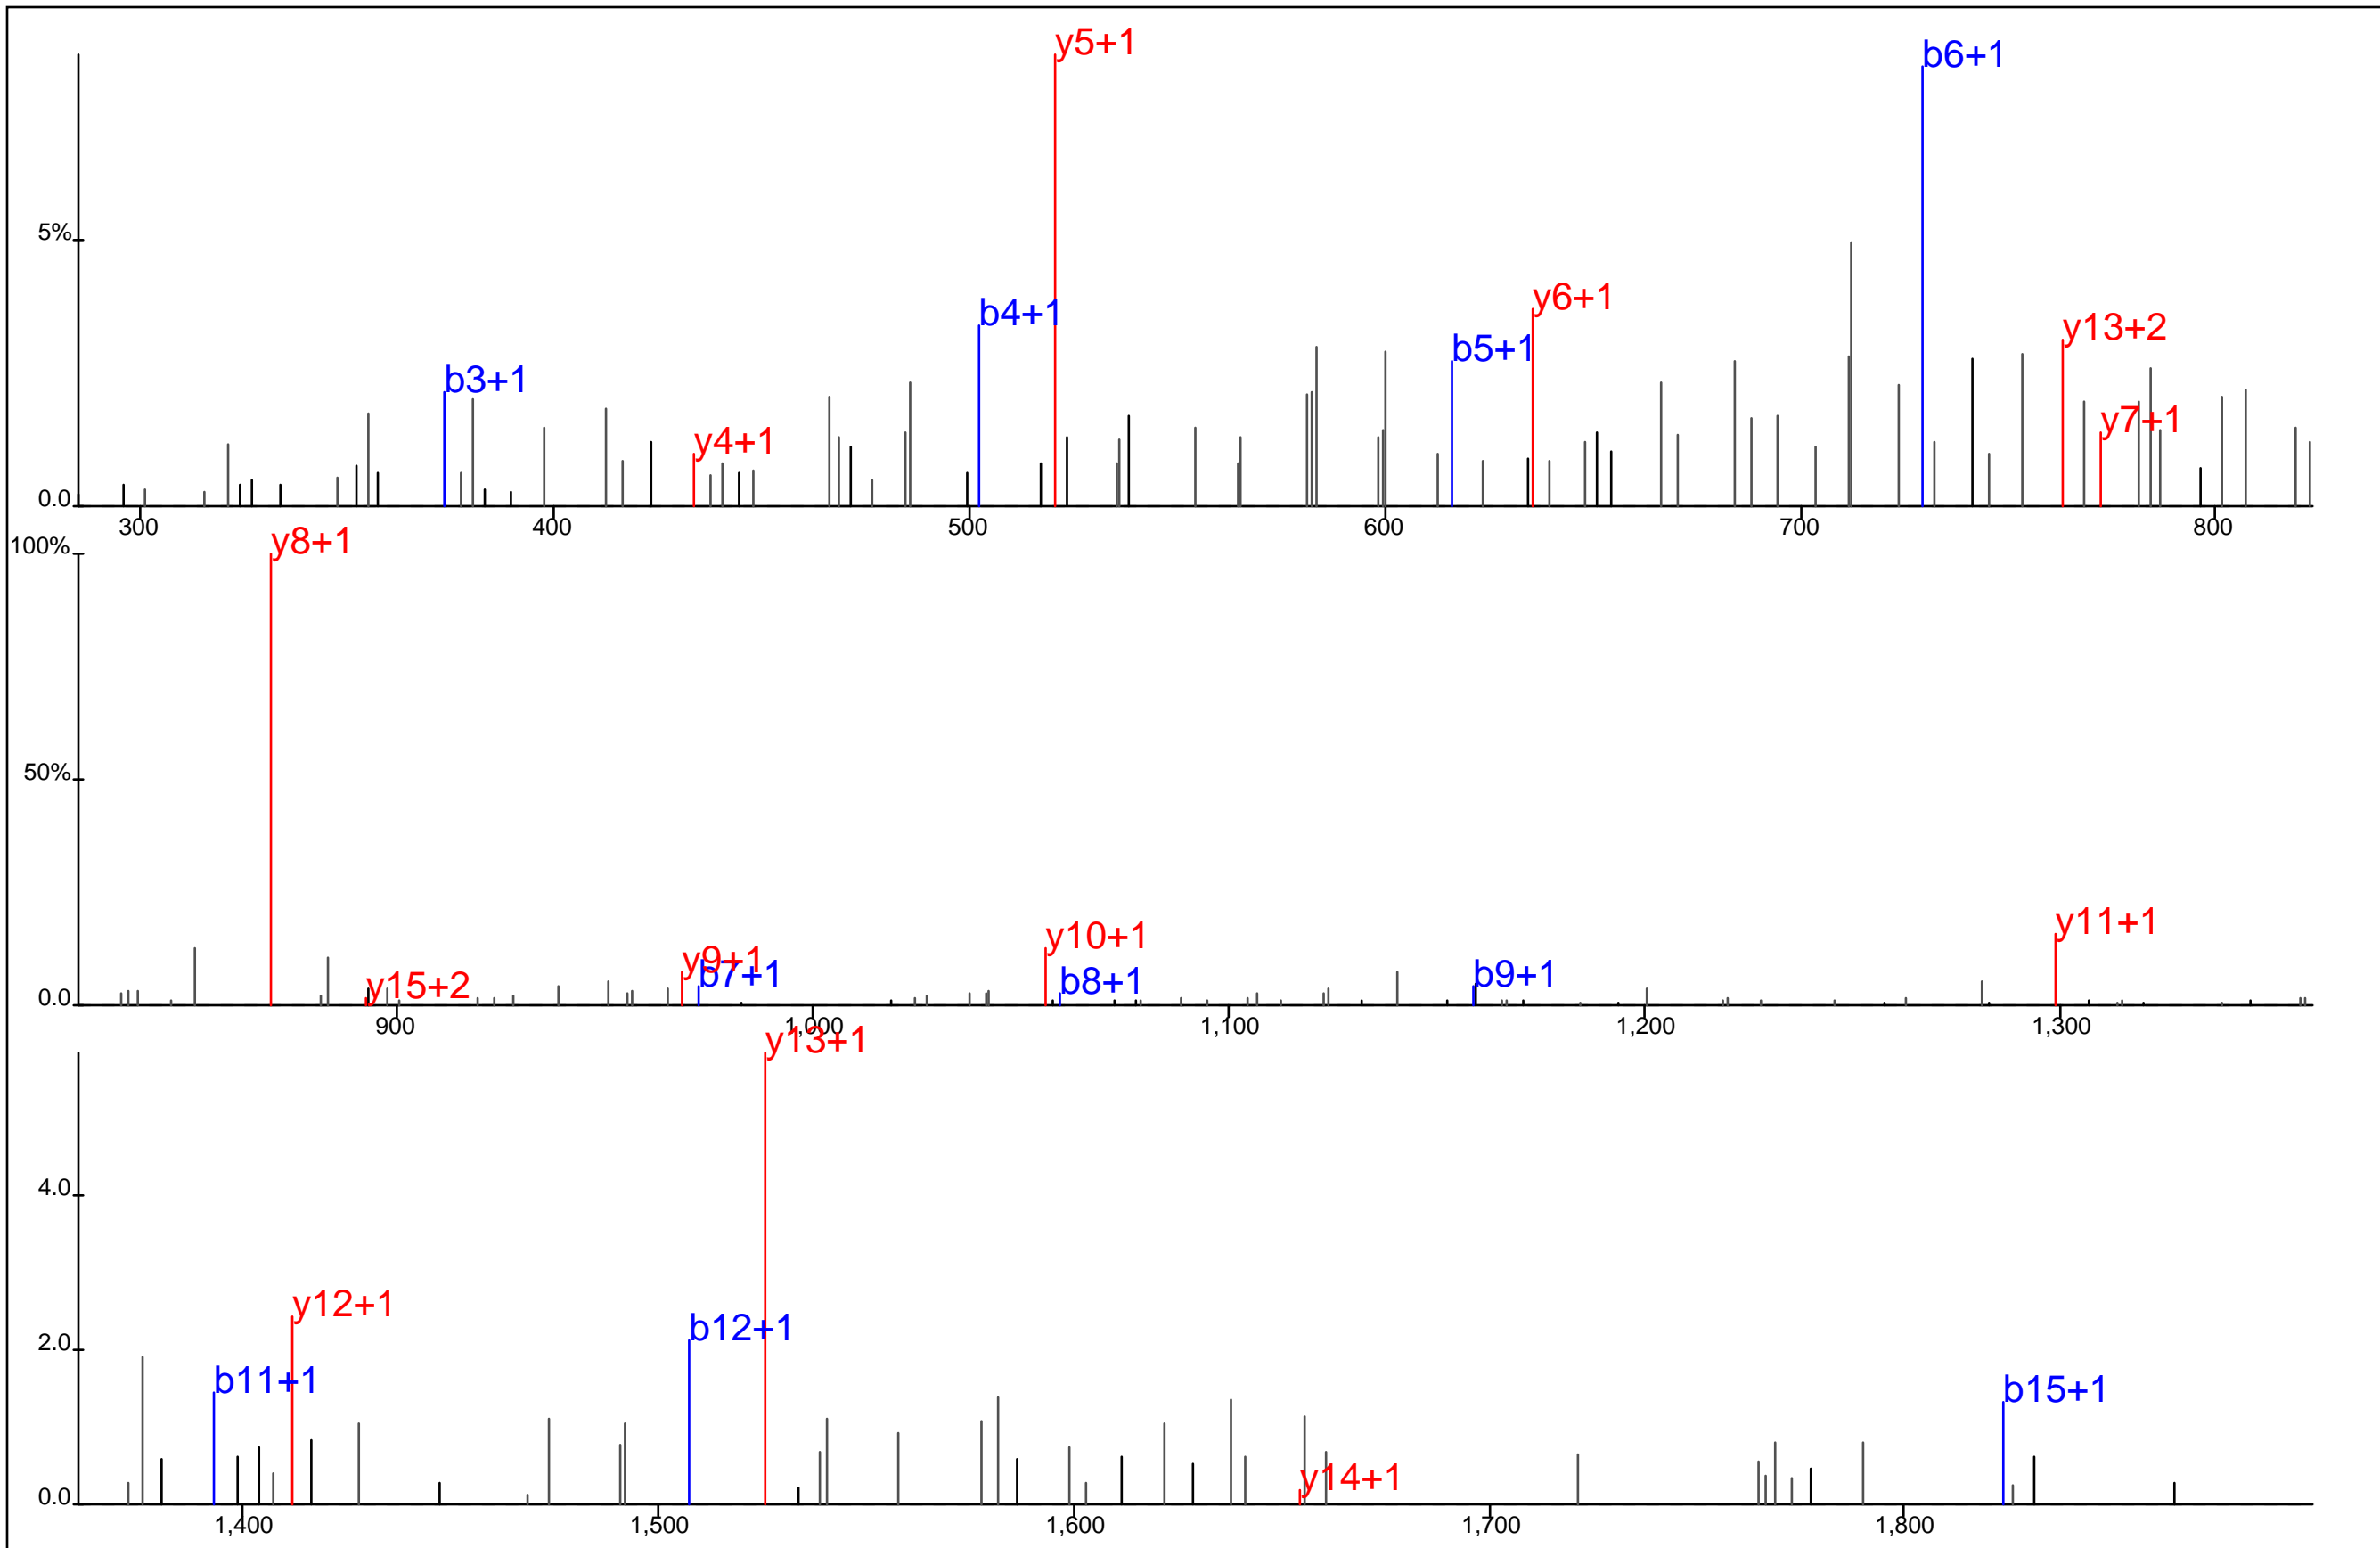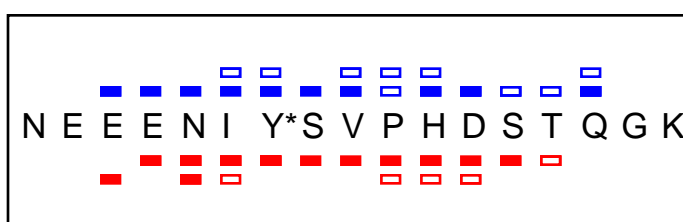

Protein Name: Glucocorticoid receptor DNA binding factor 1  
 gi Accession: 0  
 Precursor Mass: 1,013.9173+2  
 Delta Mass: 5.735 ppm  
 XCorr: 62.94

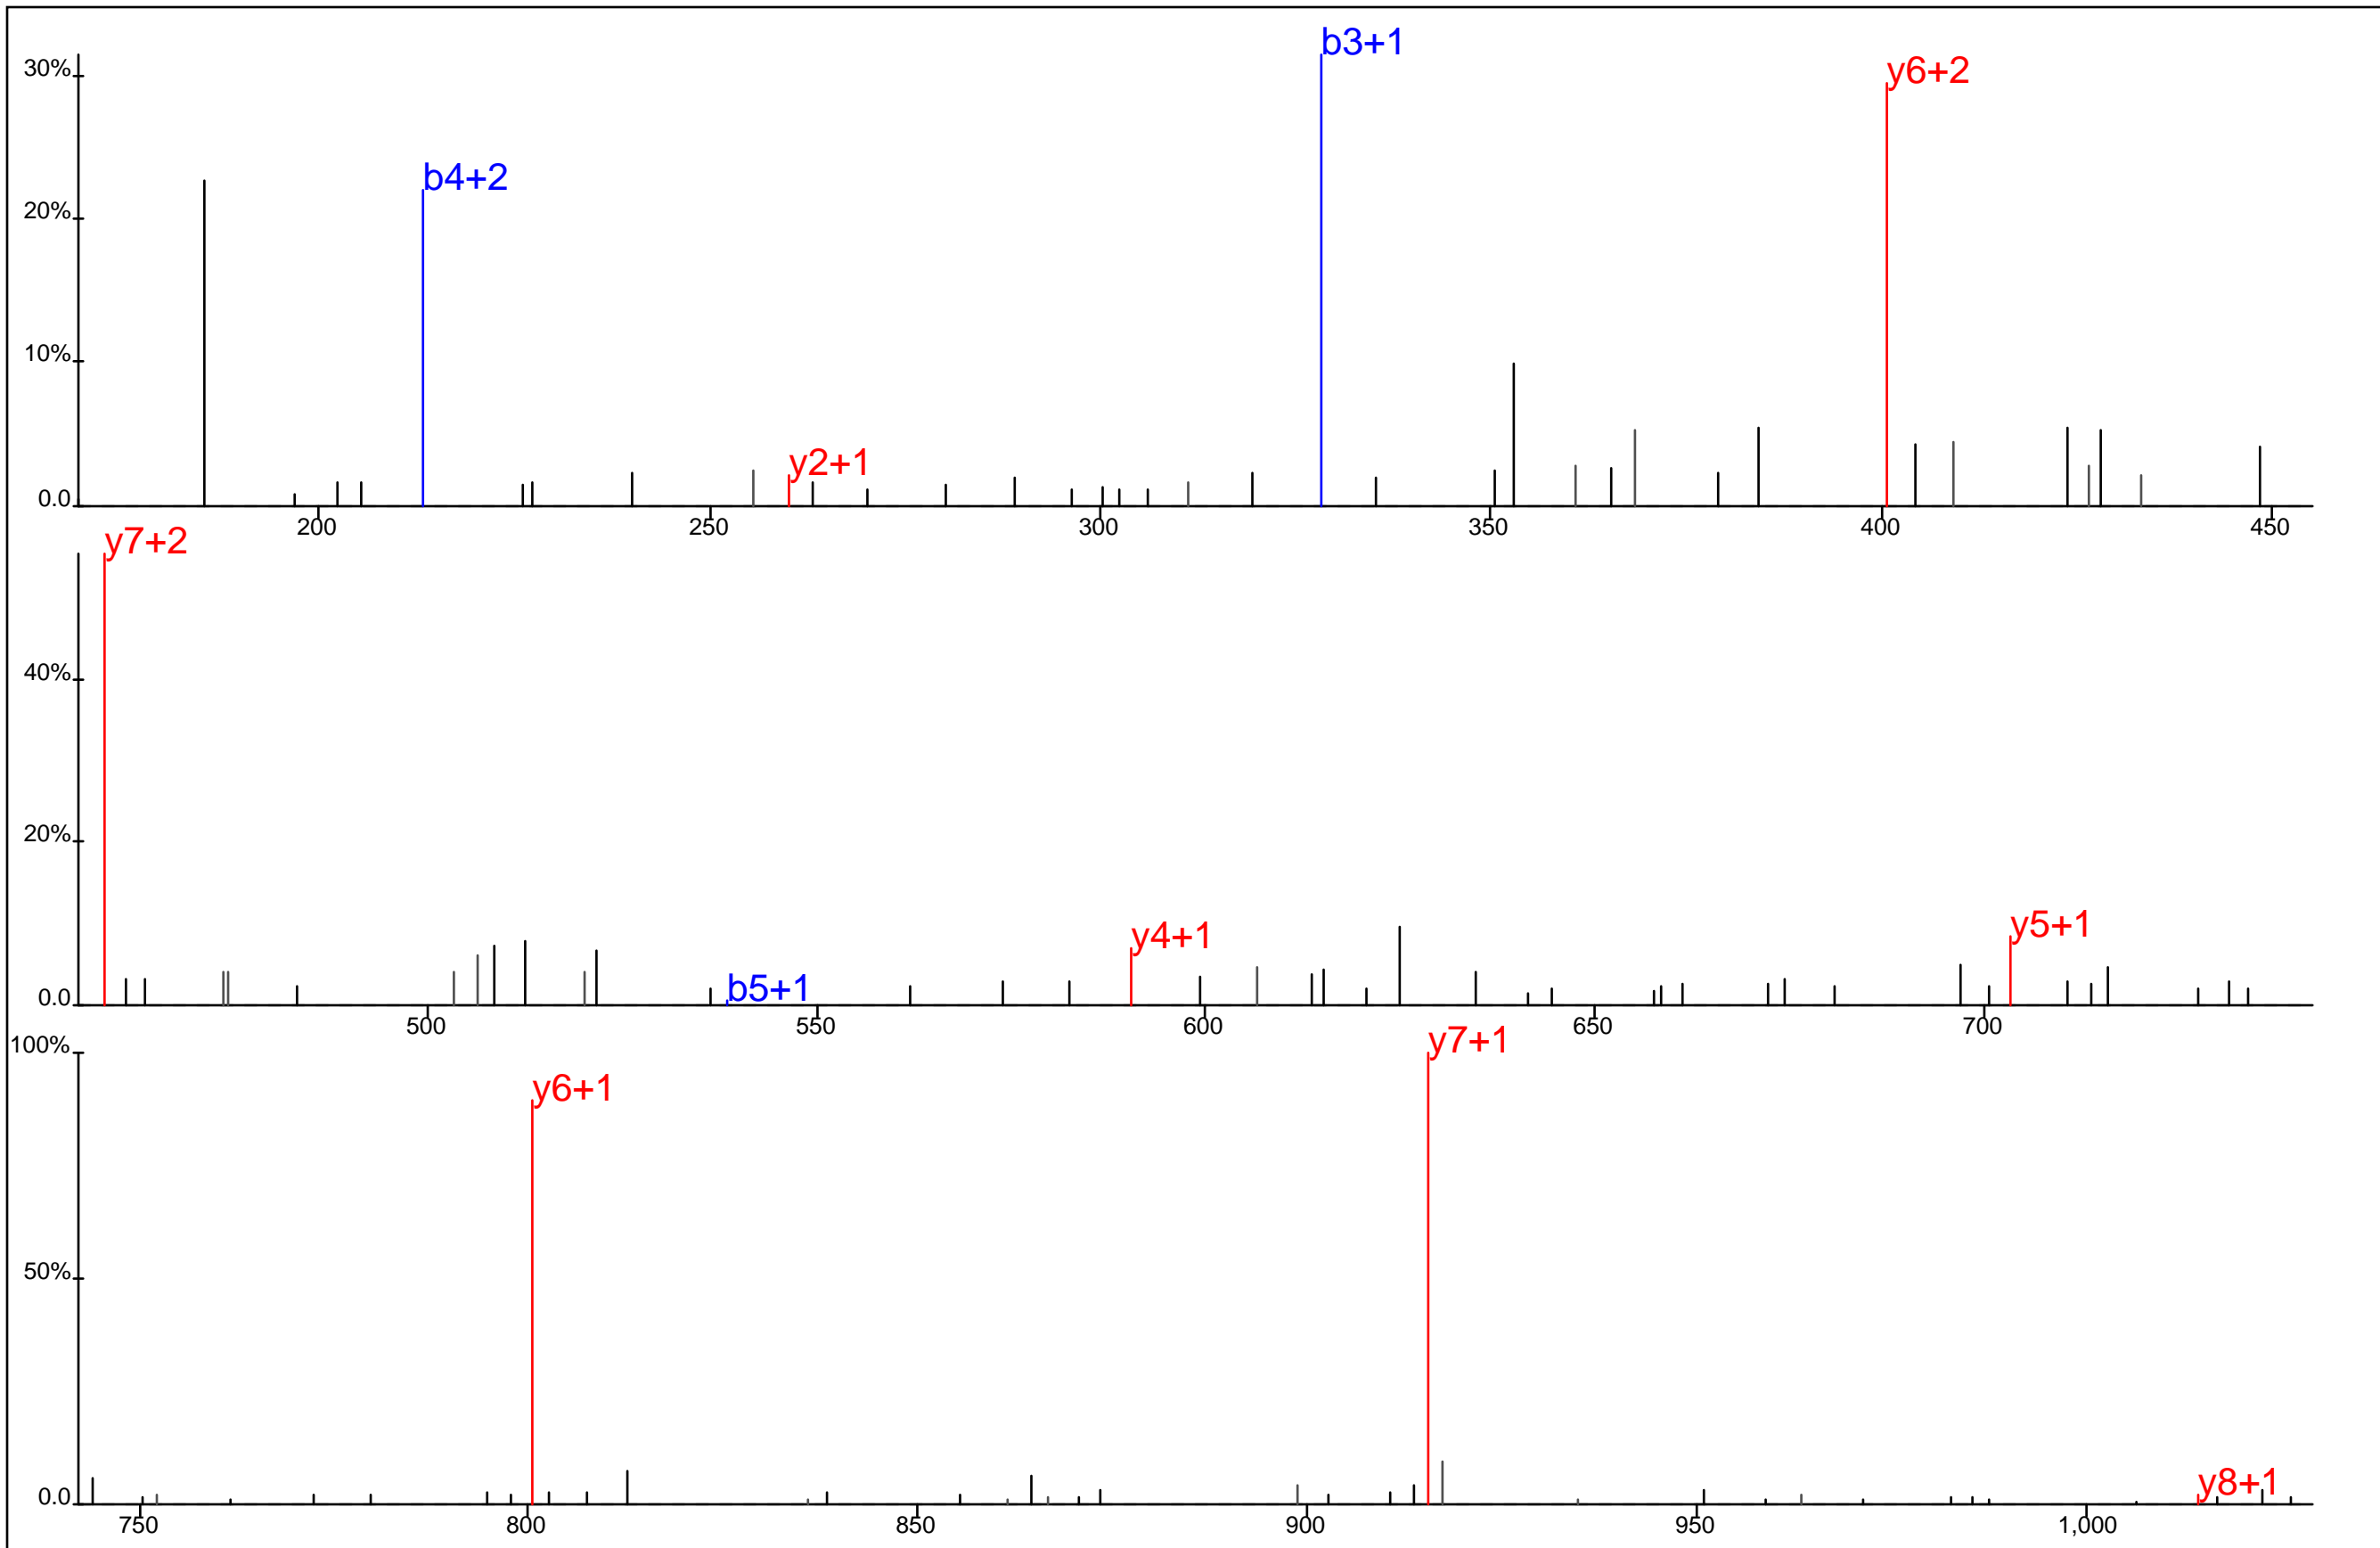

▣ ▣ ▣ ▣ ▣ ▣ ▣  
 L V D P L Y\* S I K  
▣ ▣ ▣ ▣ ▣ ▣ ▣

Protein Name: Glucosamine-6-phosphate deaminase 1  
 gi Accession: 0  
 Precursor Mass: 564.2908+2  
 Delta Mass: 0.348 ppm  
 XCorr: 27.13



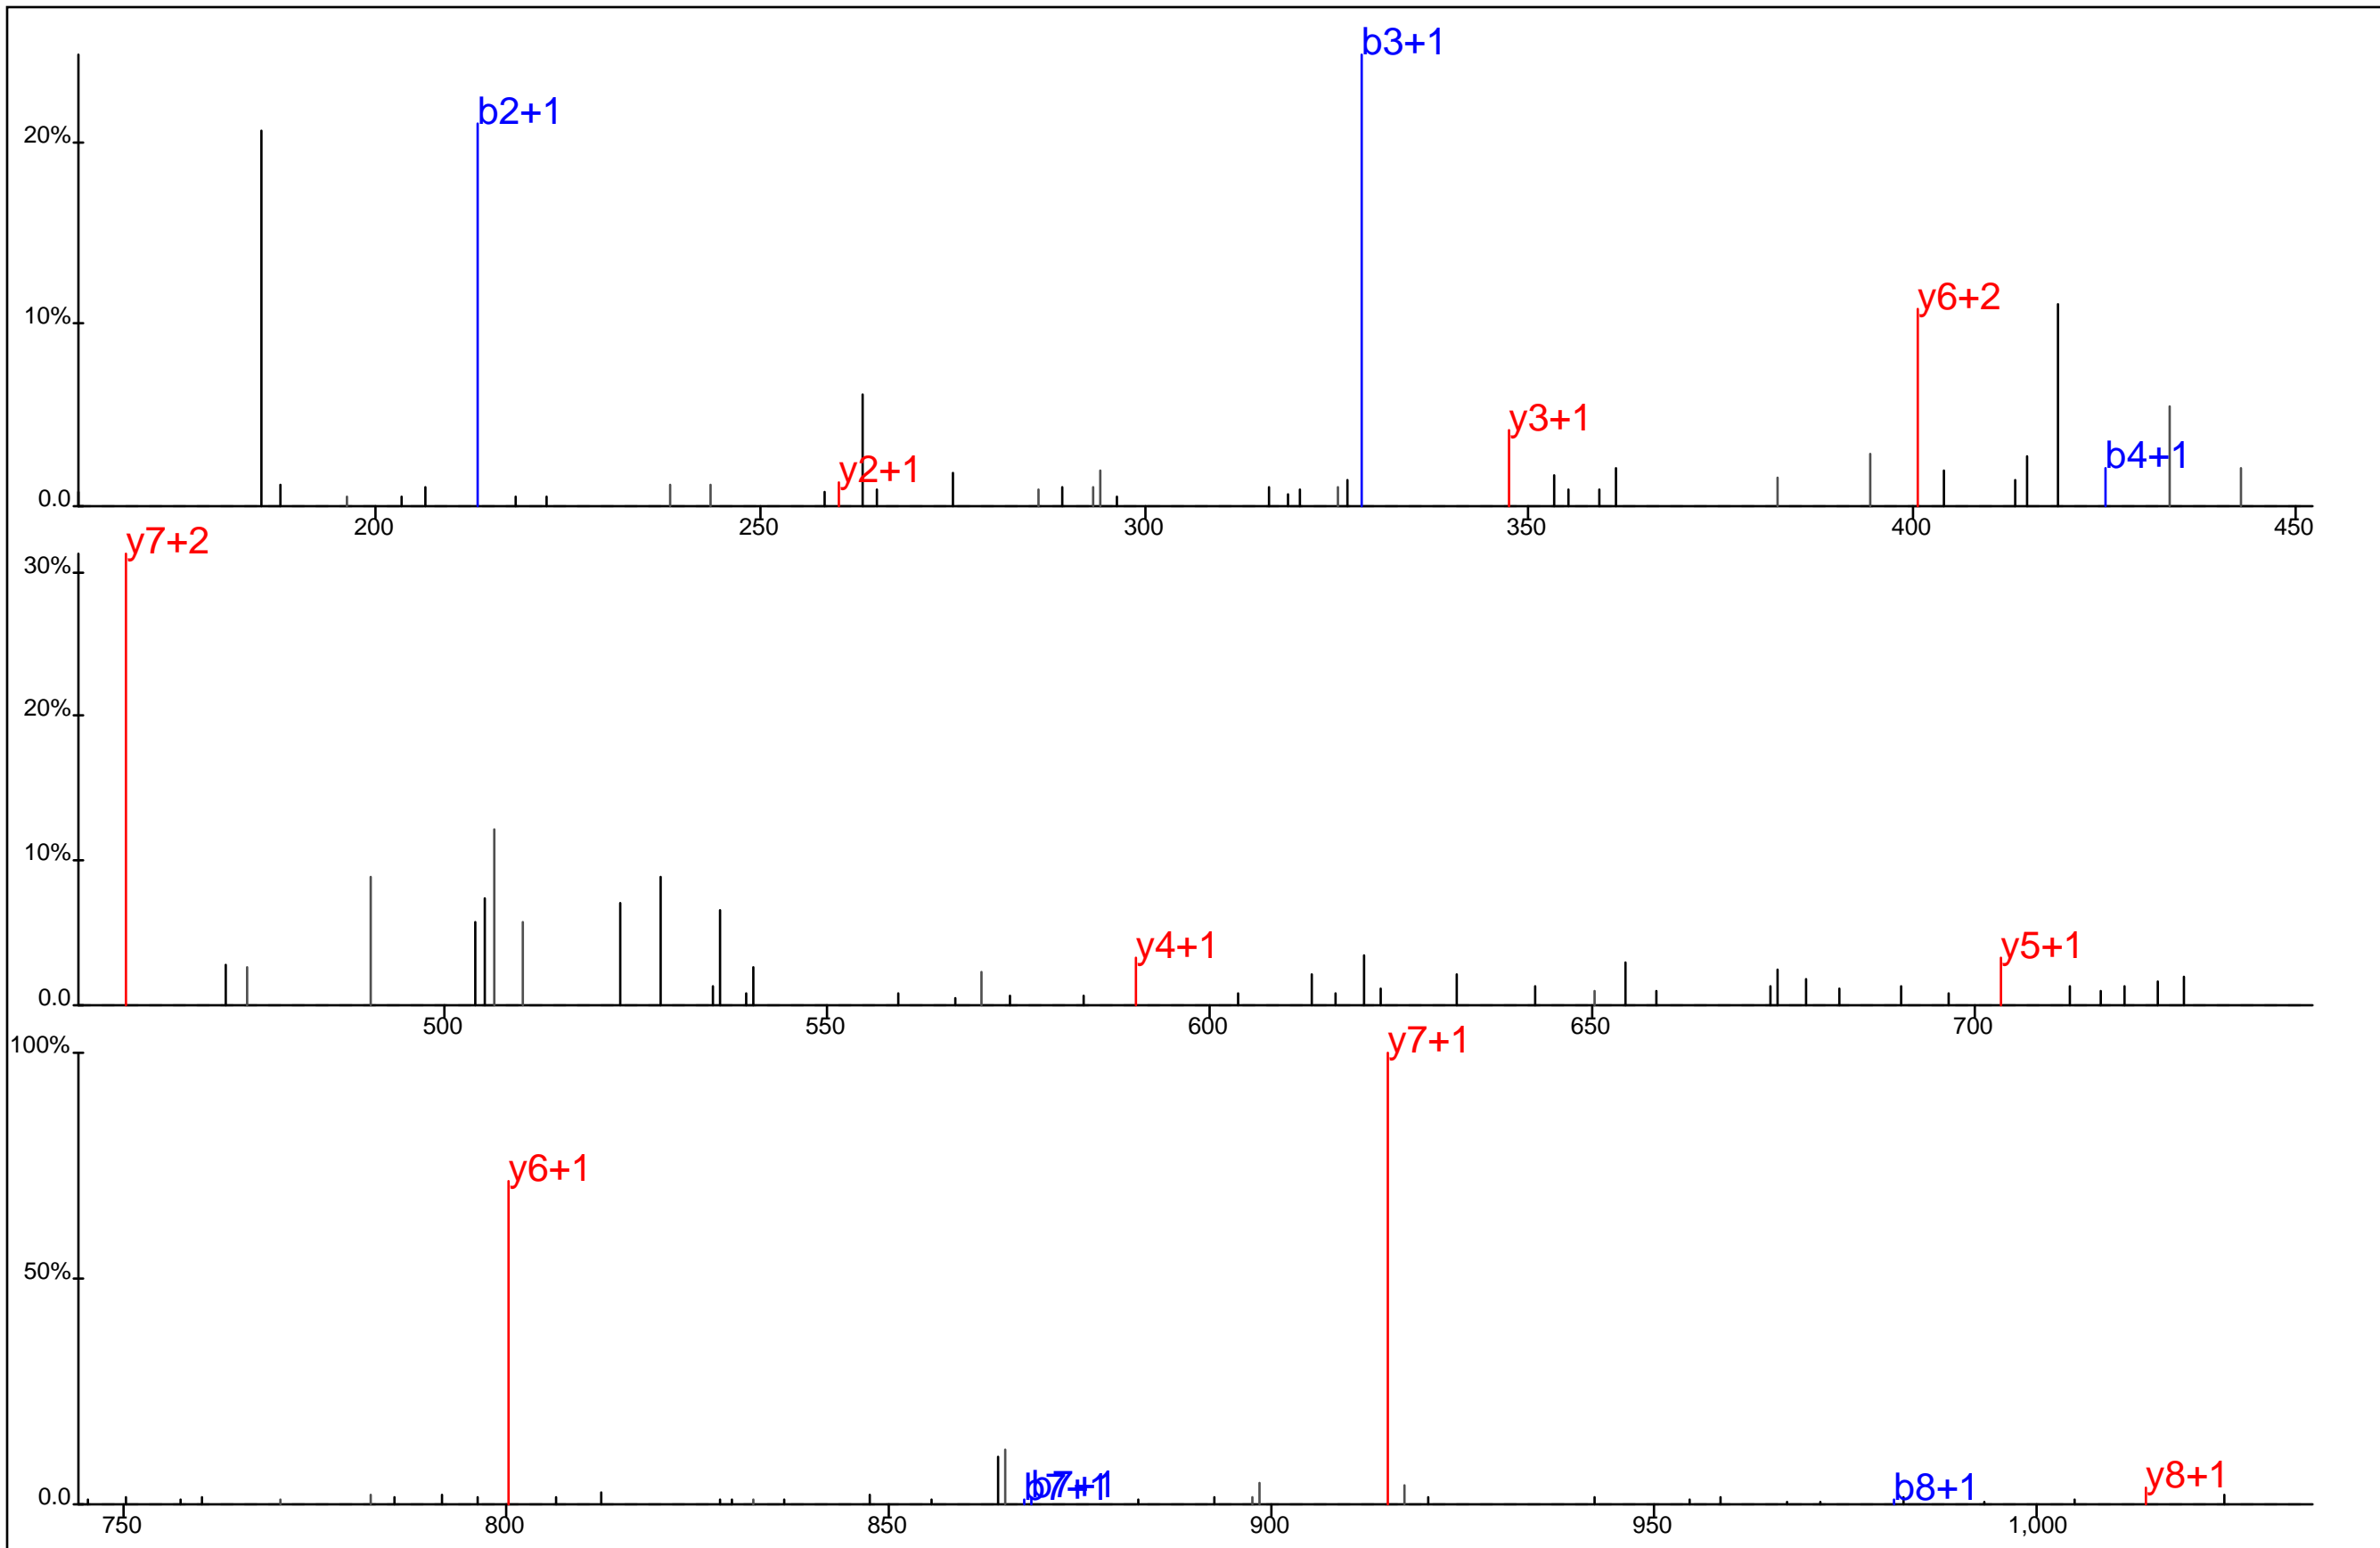

L V D P L Y\* S I K

Protein Name: Glucosamine-6-phosphate deaminase 1  
 gi Accession: 0  
 Precursor Mass: 564.2907+2  
 Delta Mass: 0.566 ppm  
 XCorr: 39.67

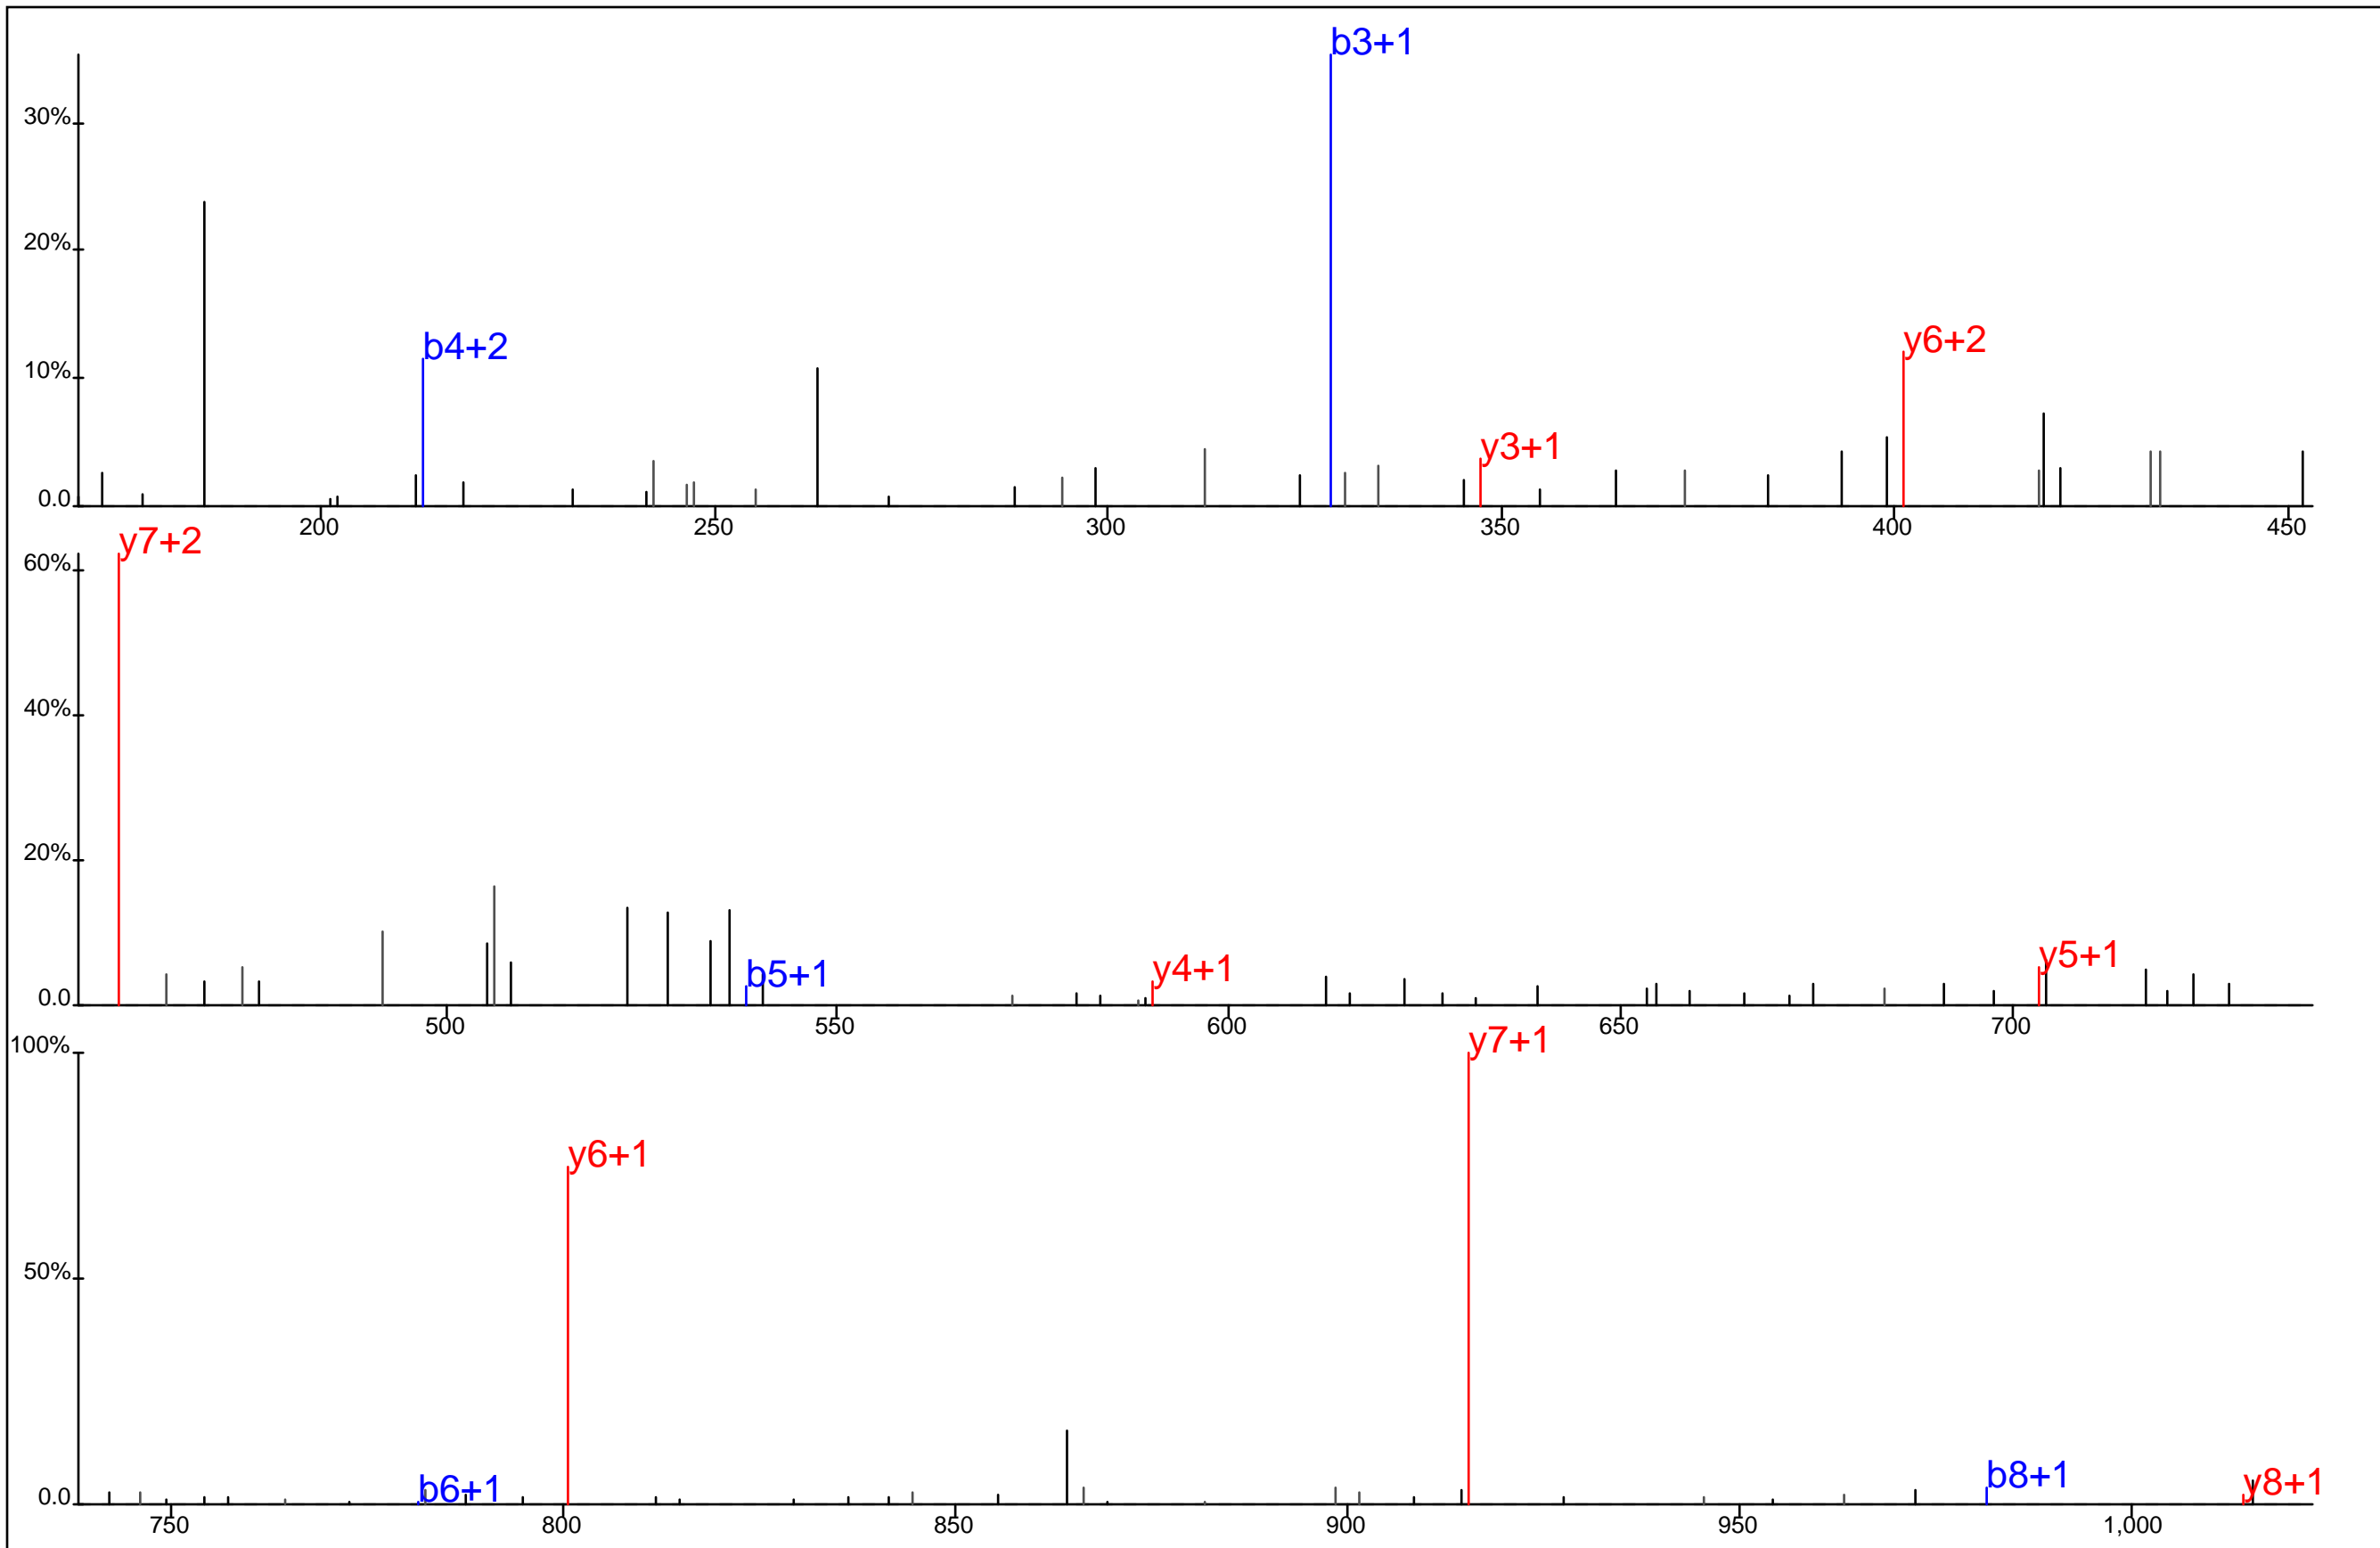

L V D P L Y\* S I K

Protein Name: Glucosamine-6-phosphate deaminase 1  
 gi Accession: 0  
 Precursor Mass: 564.2914+2  
 Delta Mass: 0.734 ppm  
 XCorr: 23.99

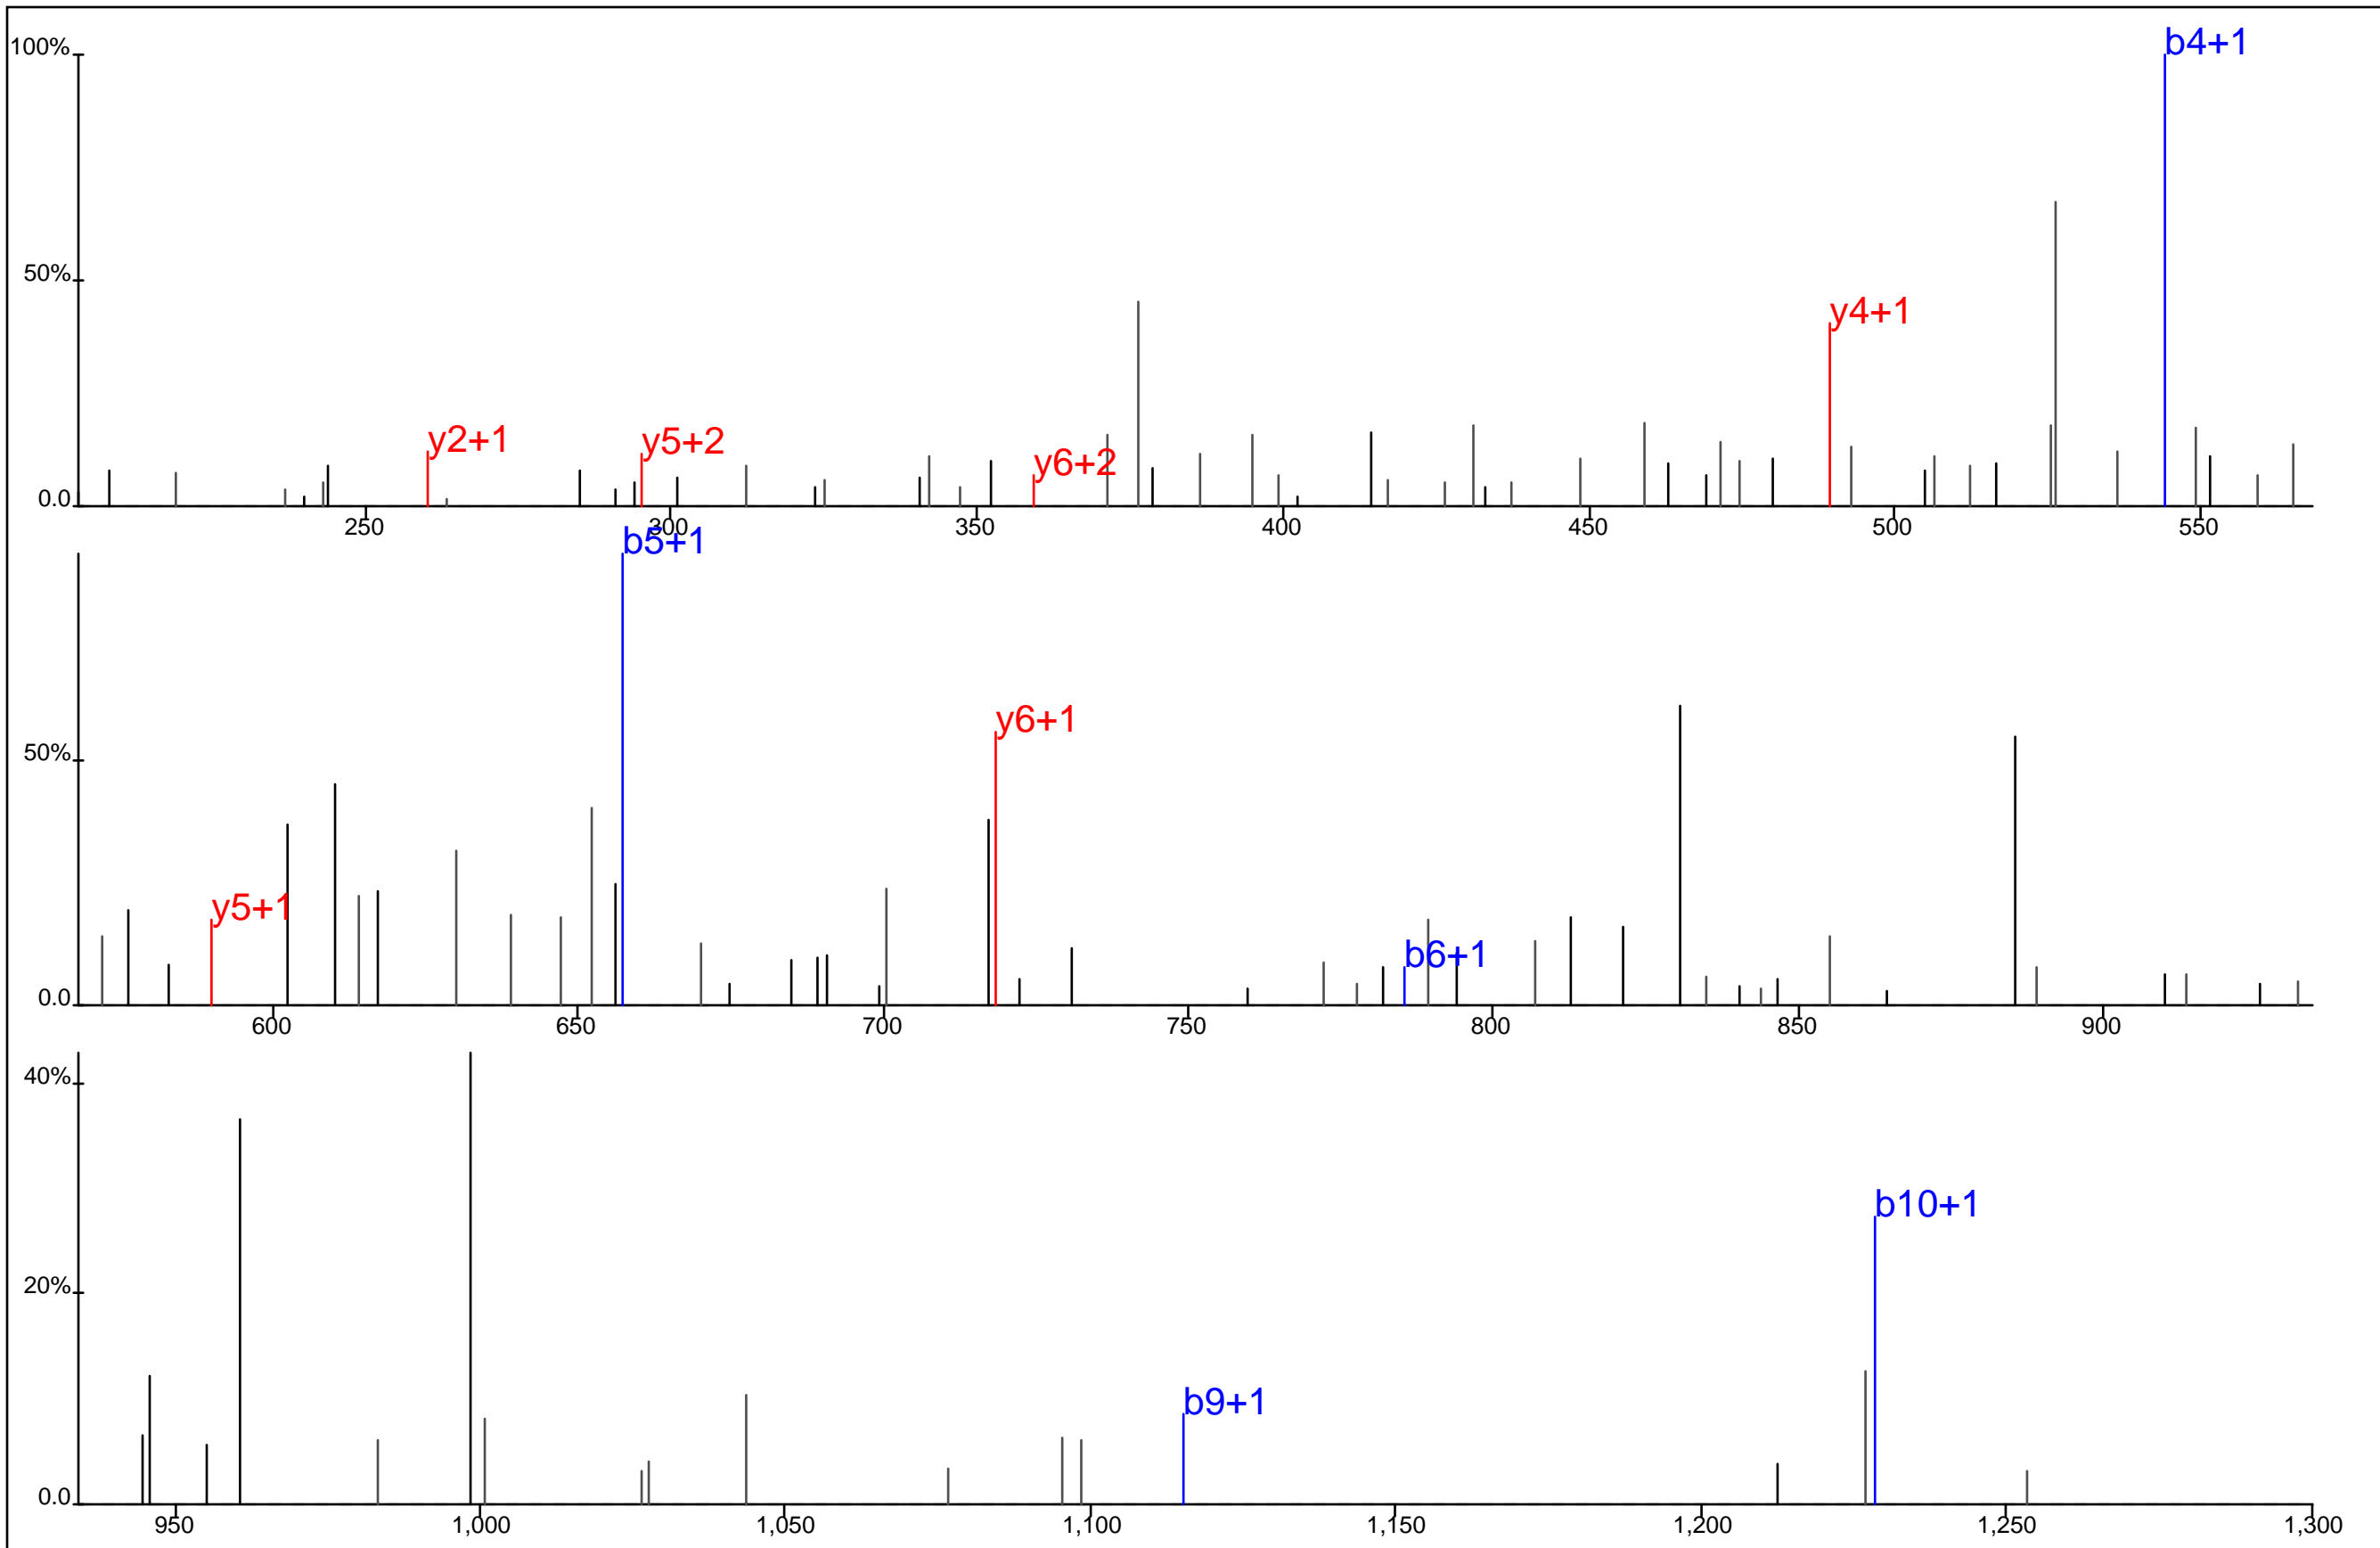

▢ ▢ ▢ ▢ ▢ ▢ ▢ ▢  
 N S Y\* V I K T T K L K  
▢ ▢ ▢ ▢ ▢ ▢ ▢ ▢

Protein Name: Glucosaminyl (N-acetyl) transferase 2, I-branching enzyme  
 gi Accession: 0  
 Precursor Mass: 687.8719+2  
 Delta Mass: 1.974 ppm  
 XCorr: 21.59

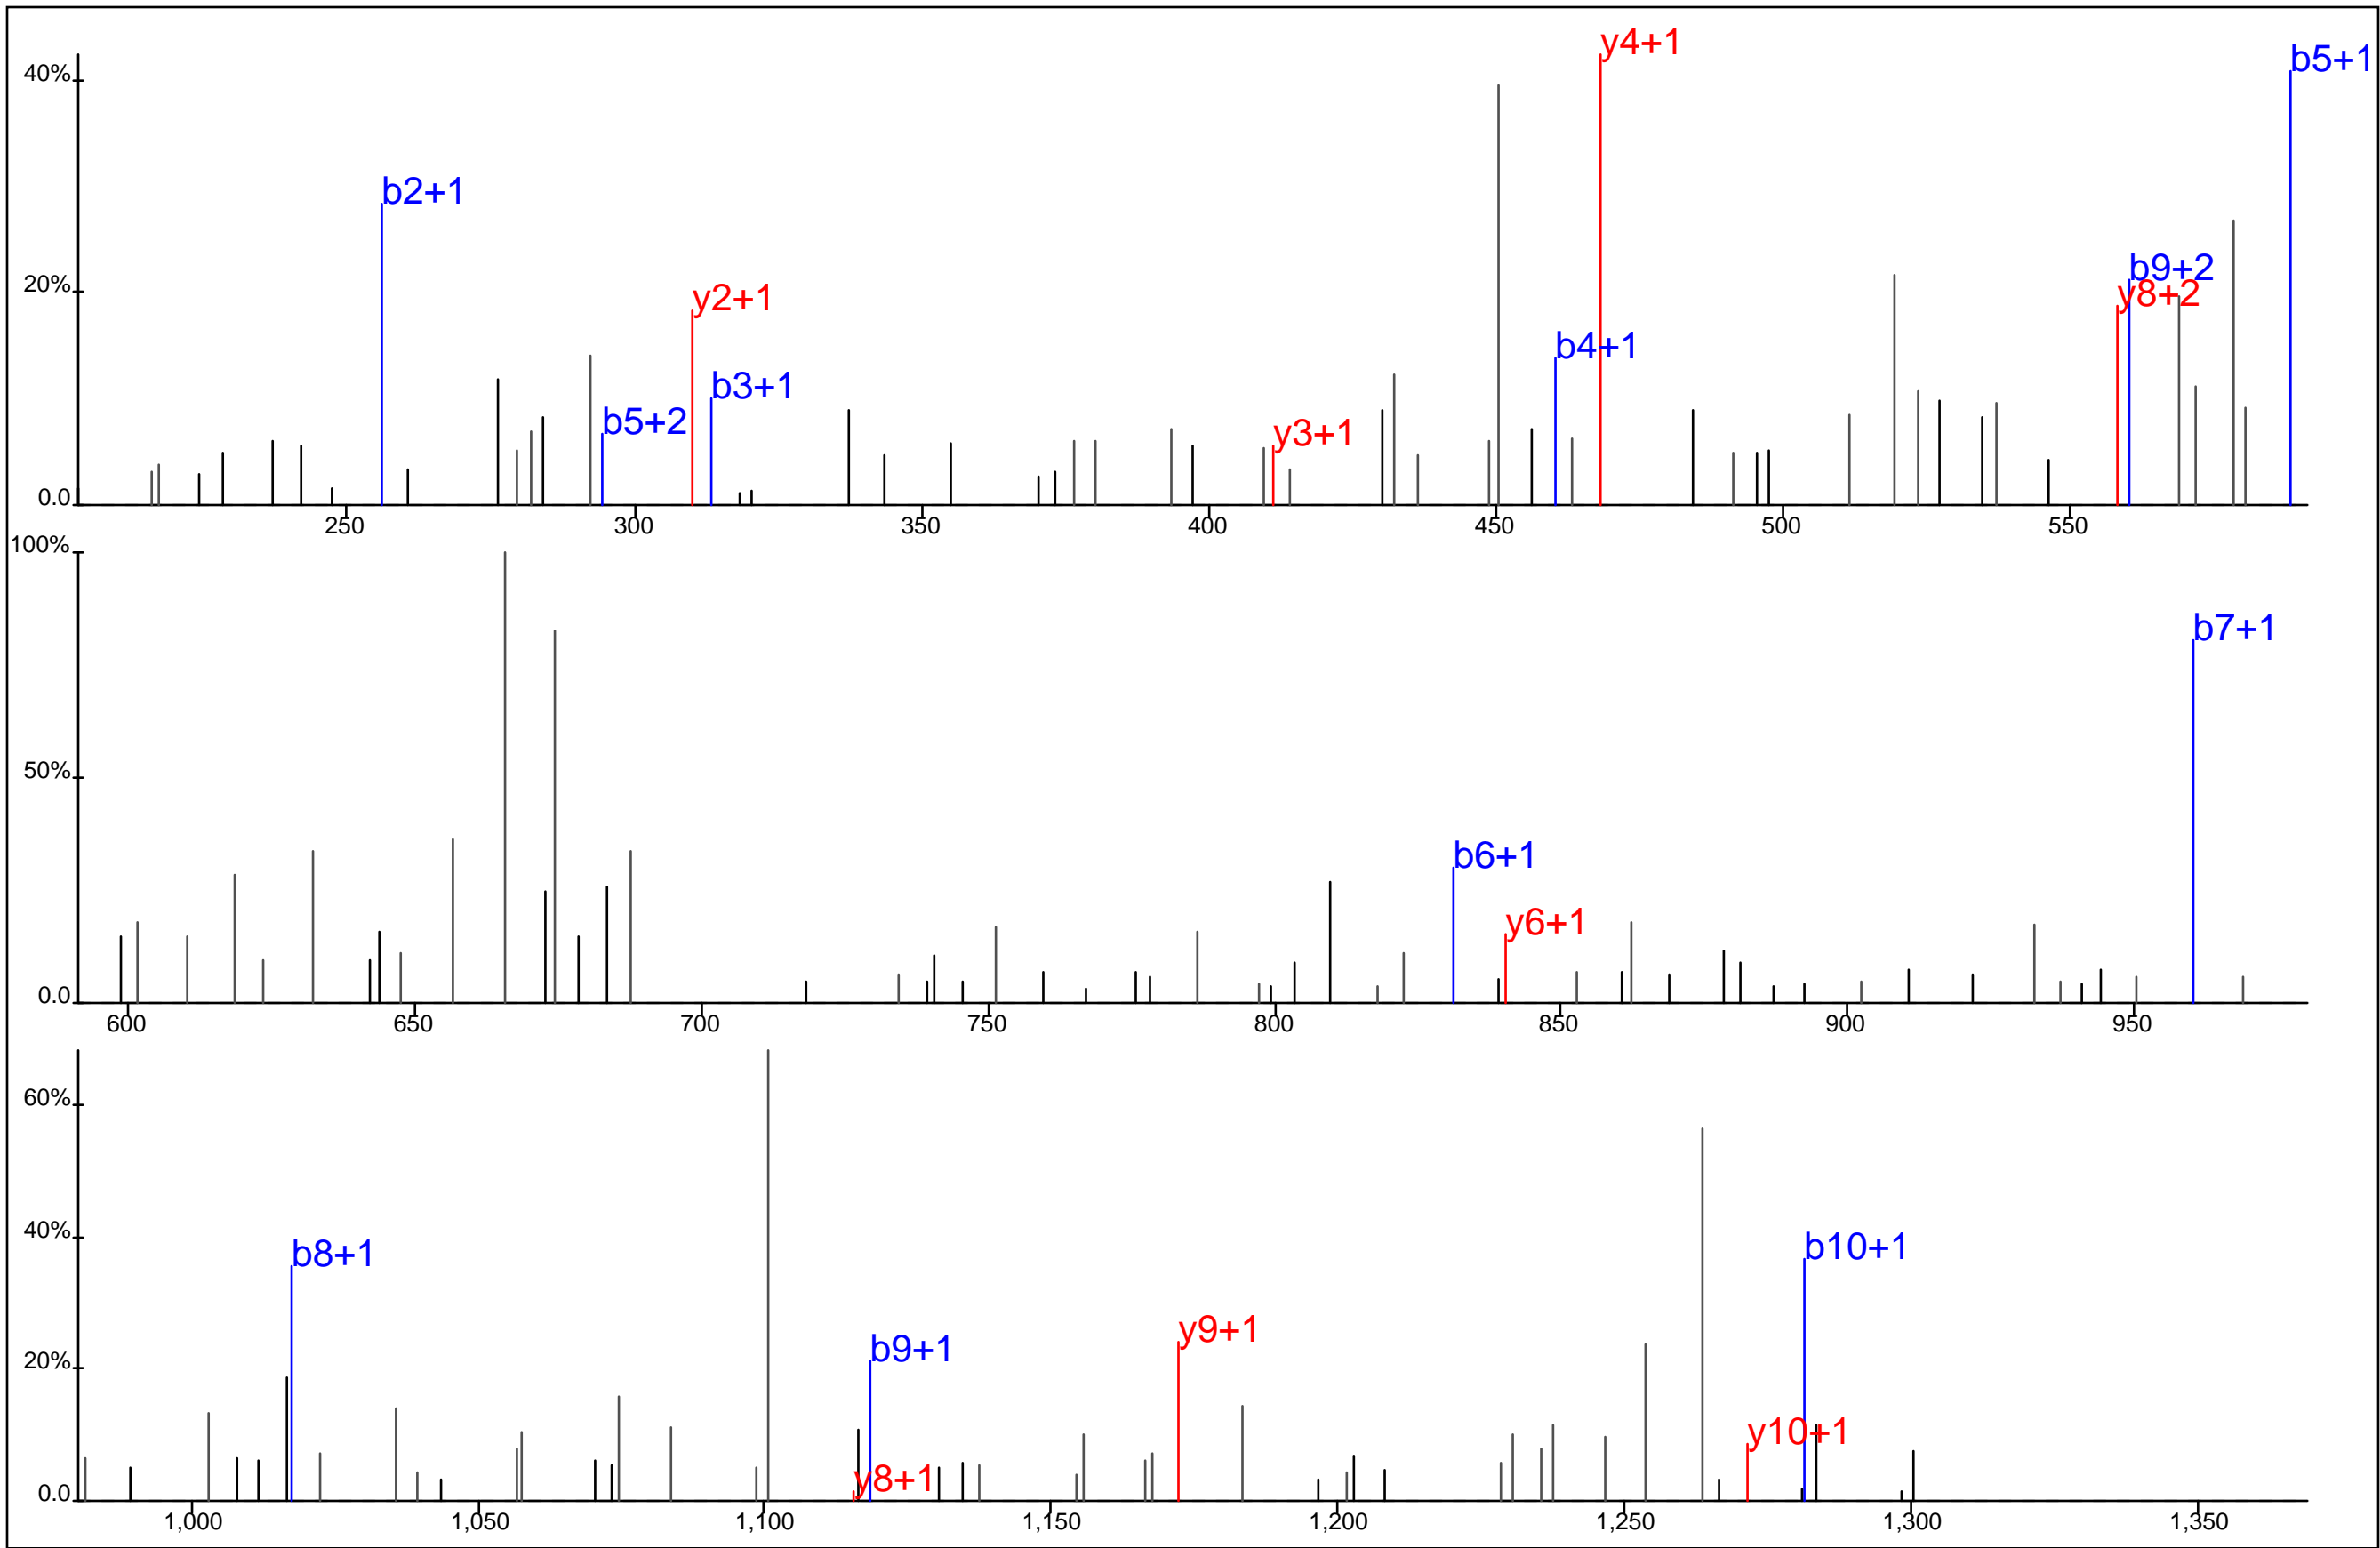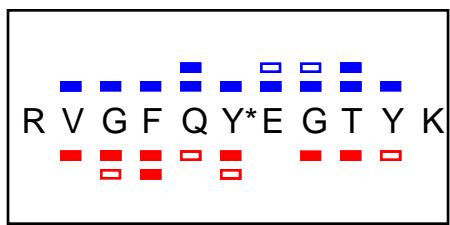

Protein Name: Glucose-6-phosphate dehydrogenase  
 gi Accession: 0  
 Precursor Mass: 714.3209+2  
 Delta Mass: 0.731 ppm  
 XCorr: 56.75

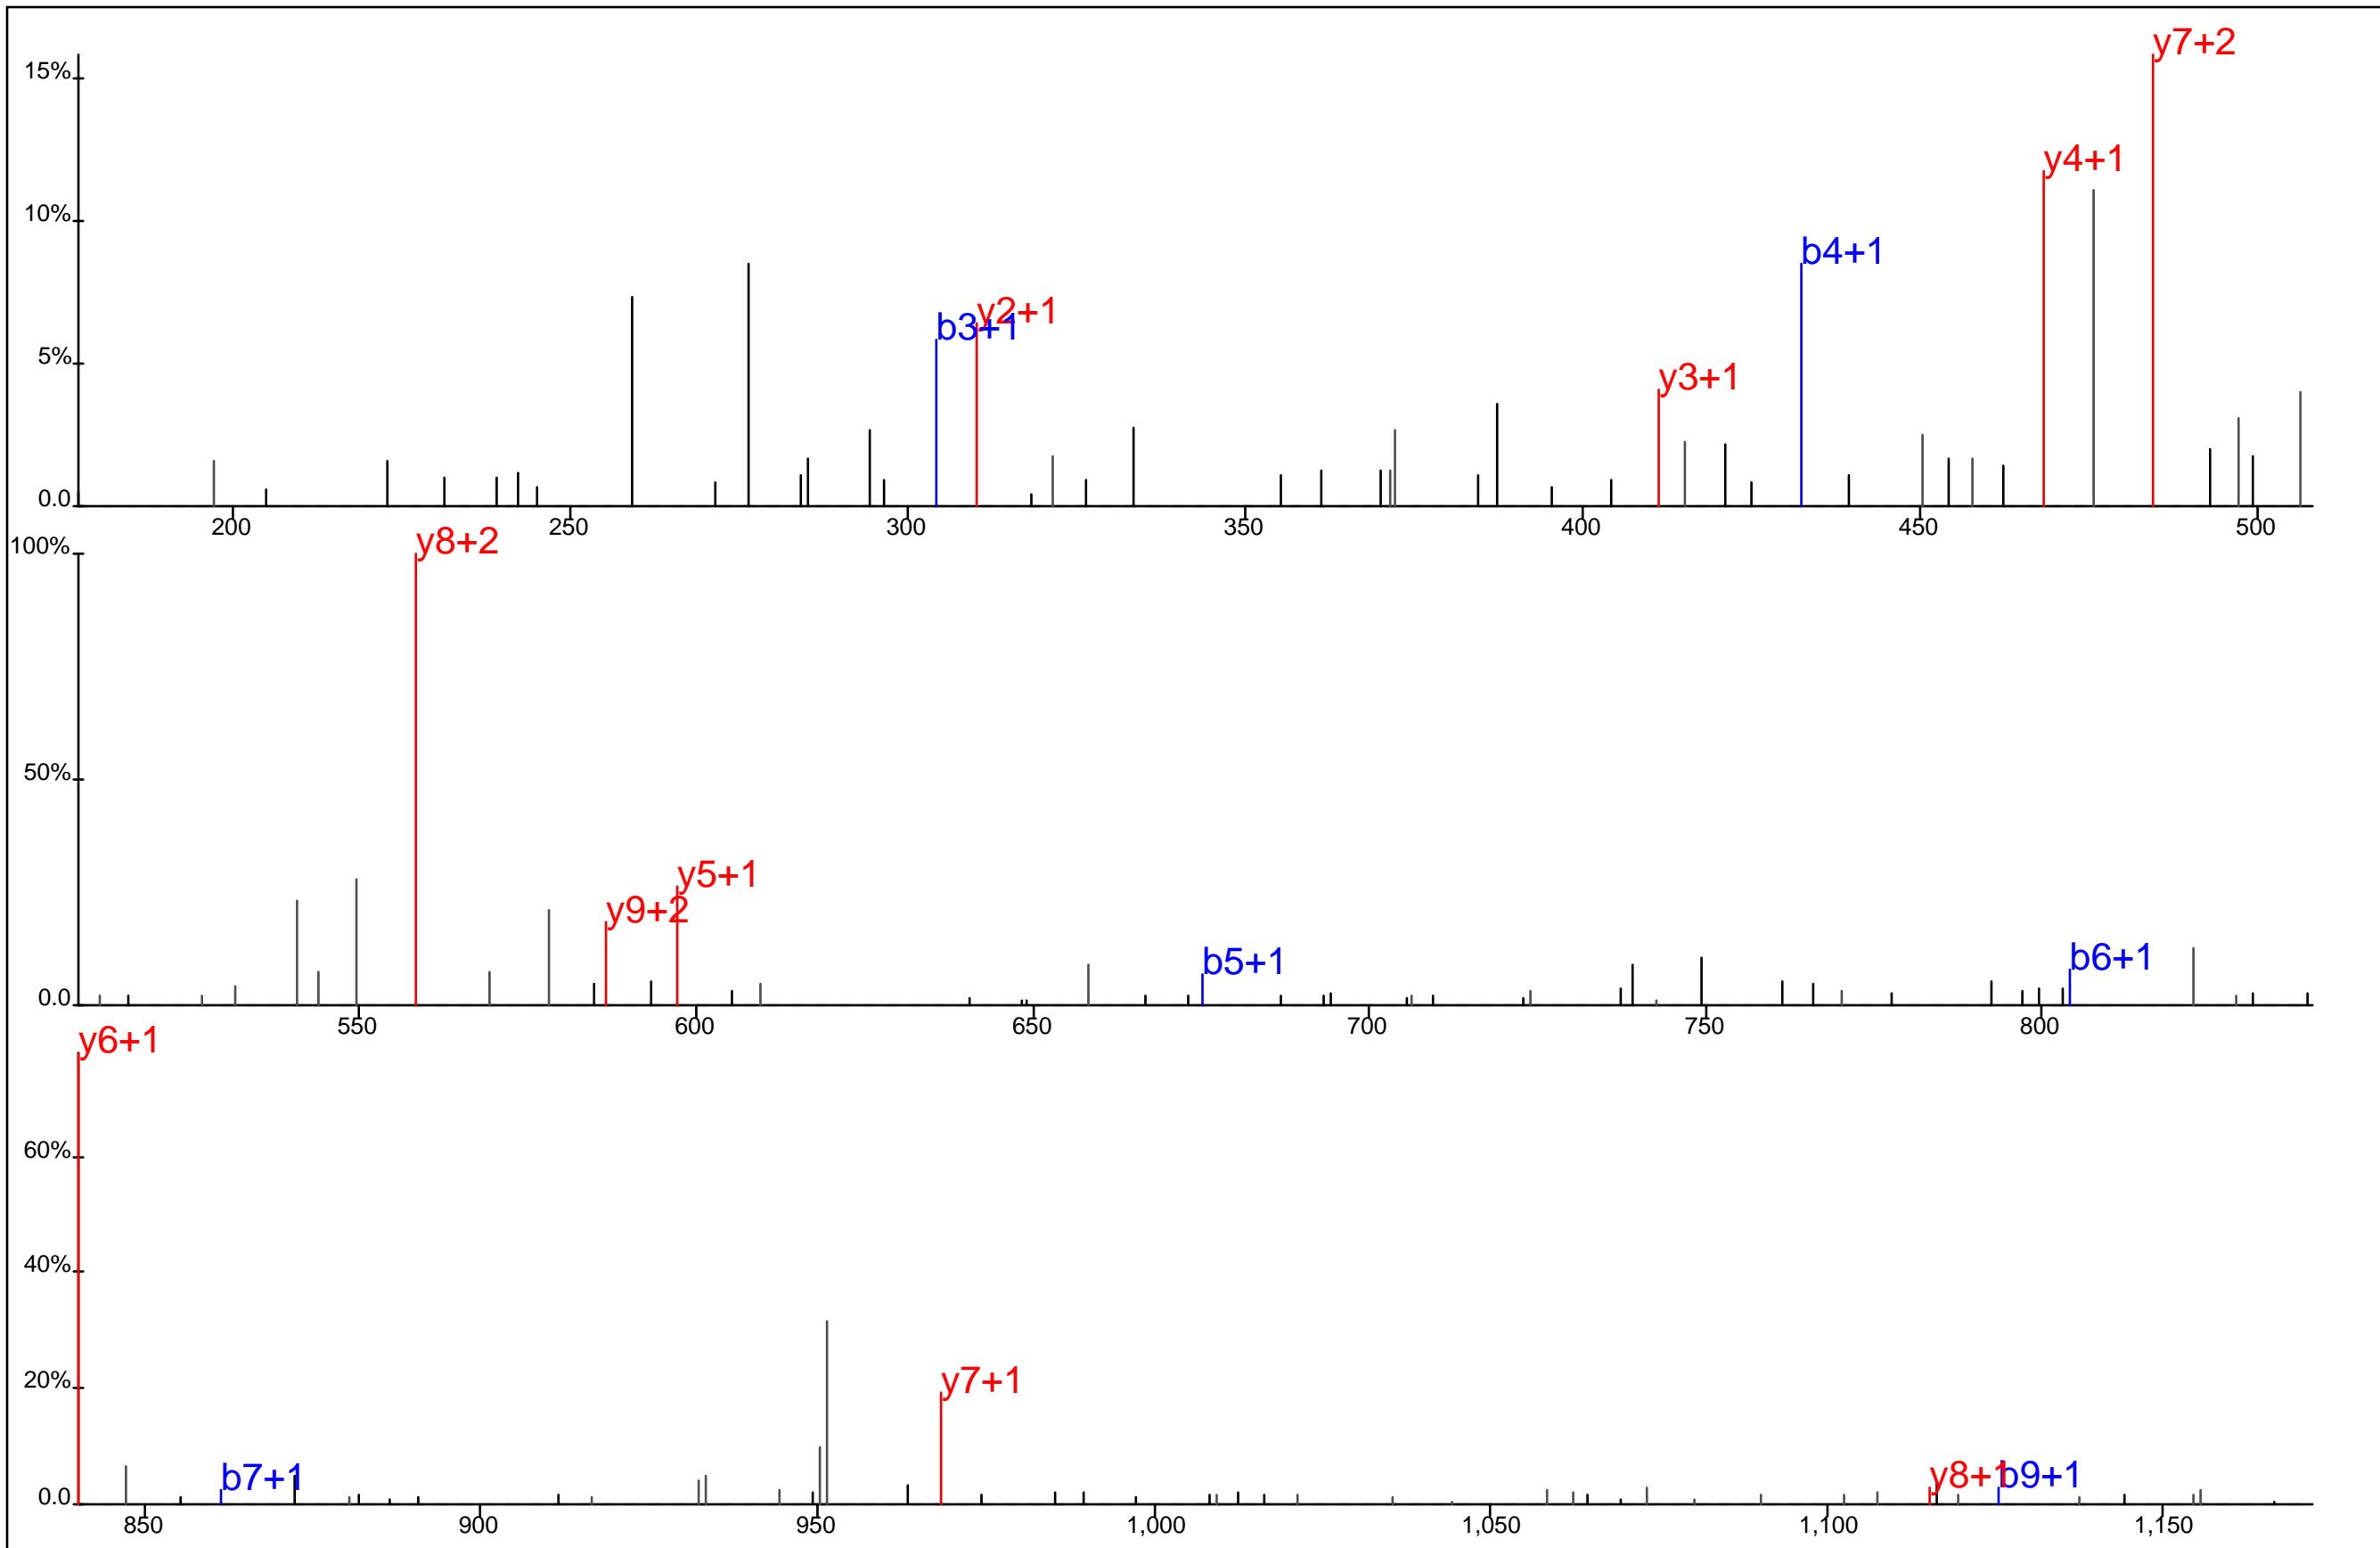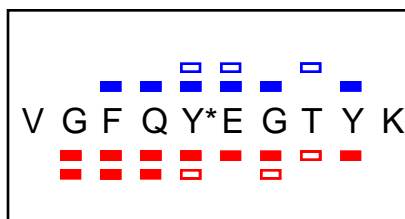

Protein Name: Glucose-6-phosphate dehydrogenase  
 gi Accession: 0  
 Precursor Mass: 636.2705+2  
 Delta Mass: 0.513 ppm  
 XCorr: 51.05

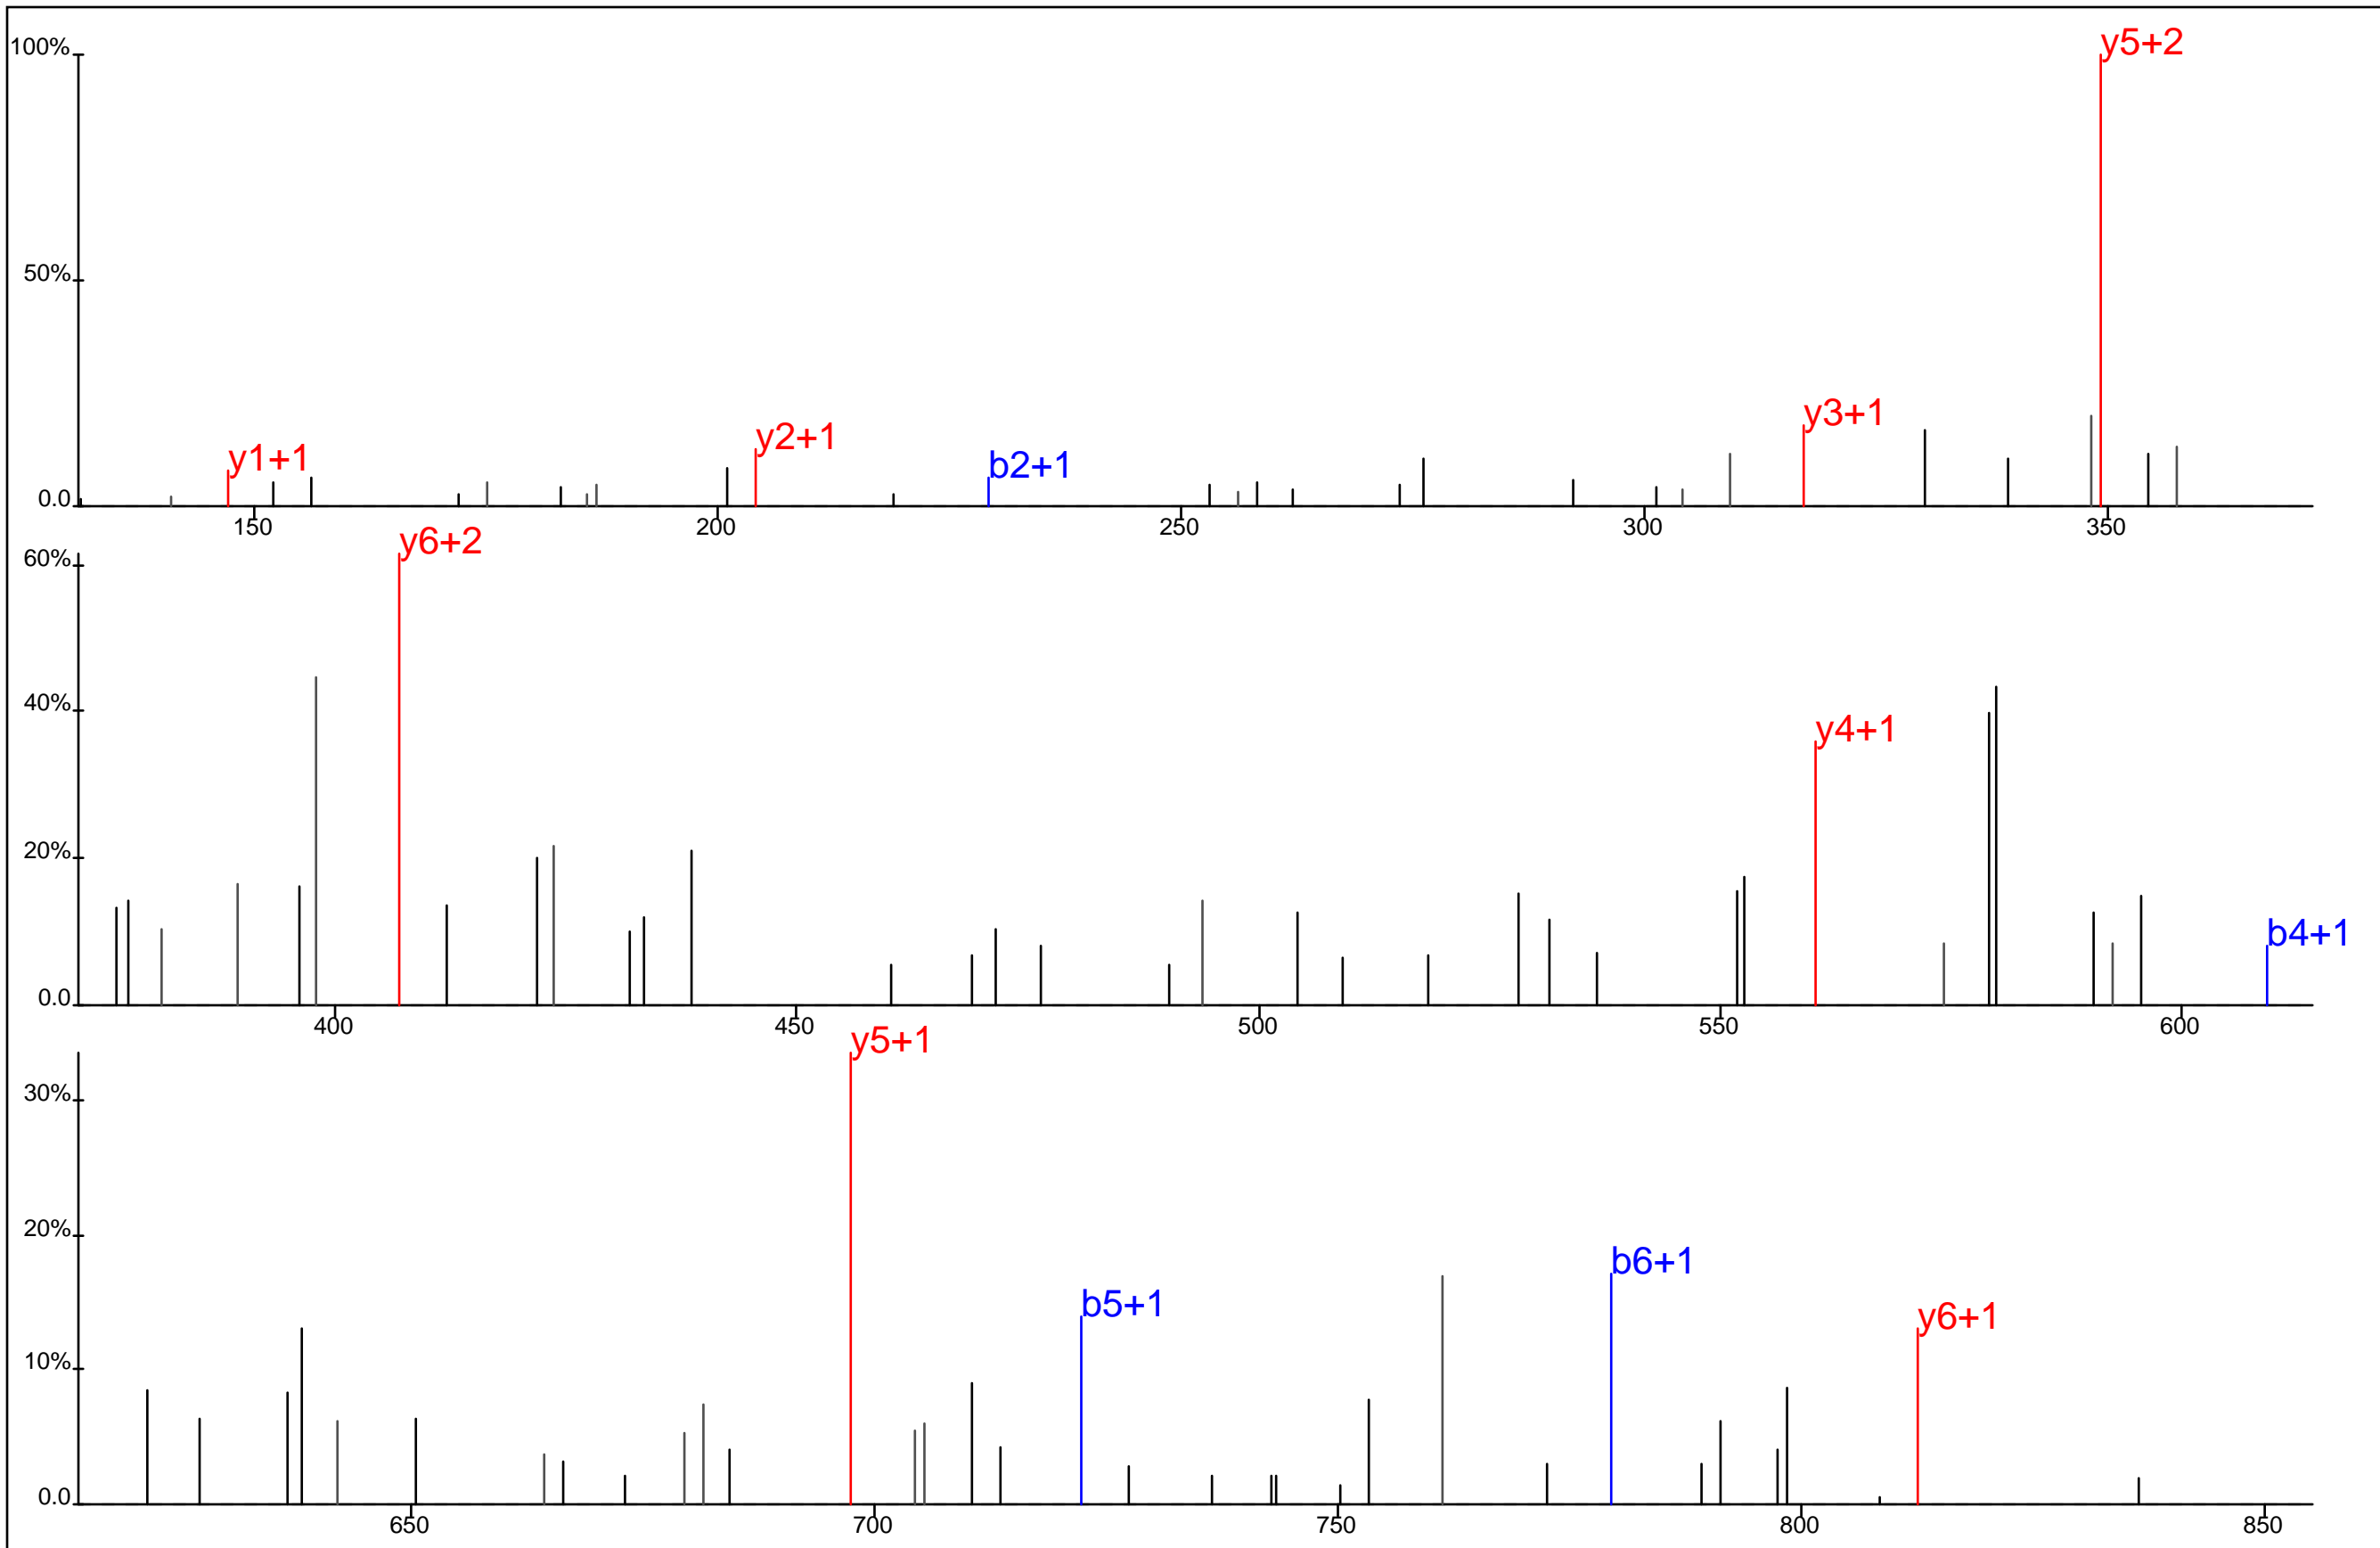

I D H Y\* L G K

Protein Name: Glucose-6-phosphate dehydrogenase  
 gi Accession: 0  
 Precursor Mass: 463.2129+2  
 Delta Mass: 0.663 ppm  
 XCorr: 36.77

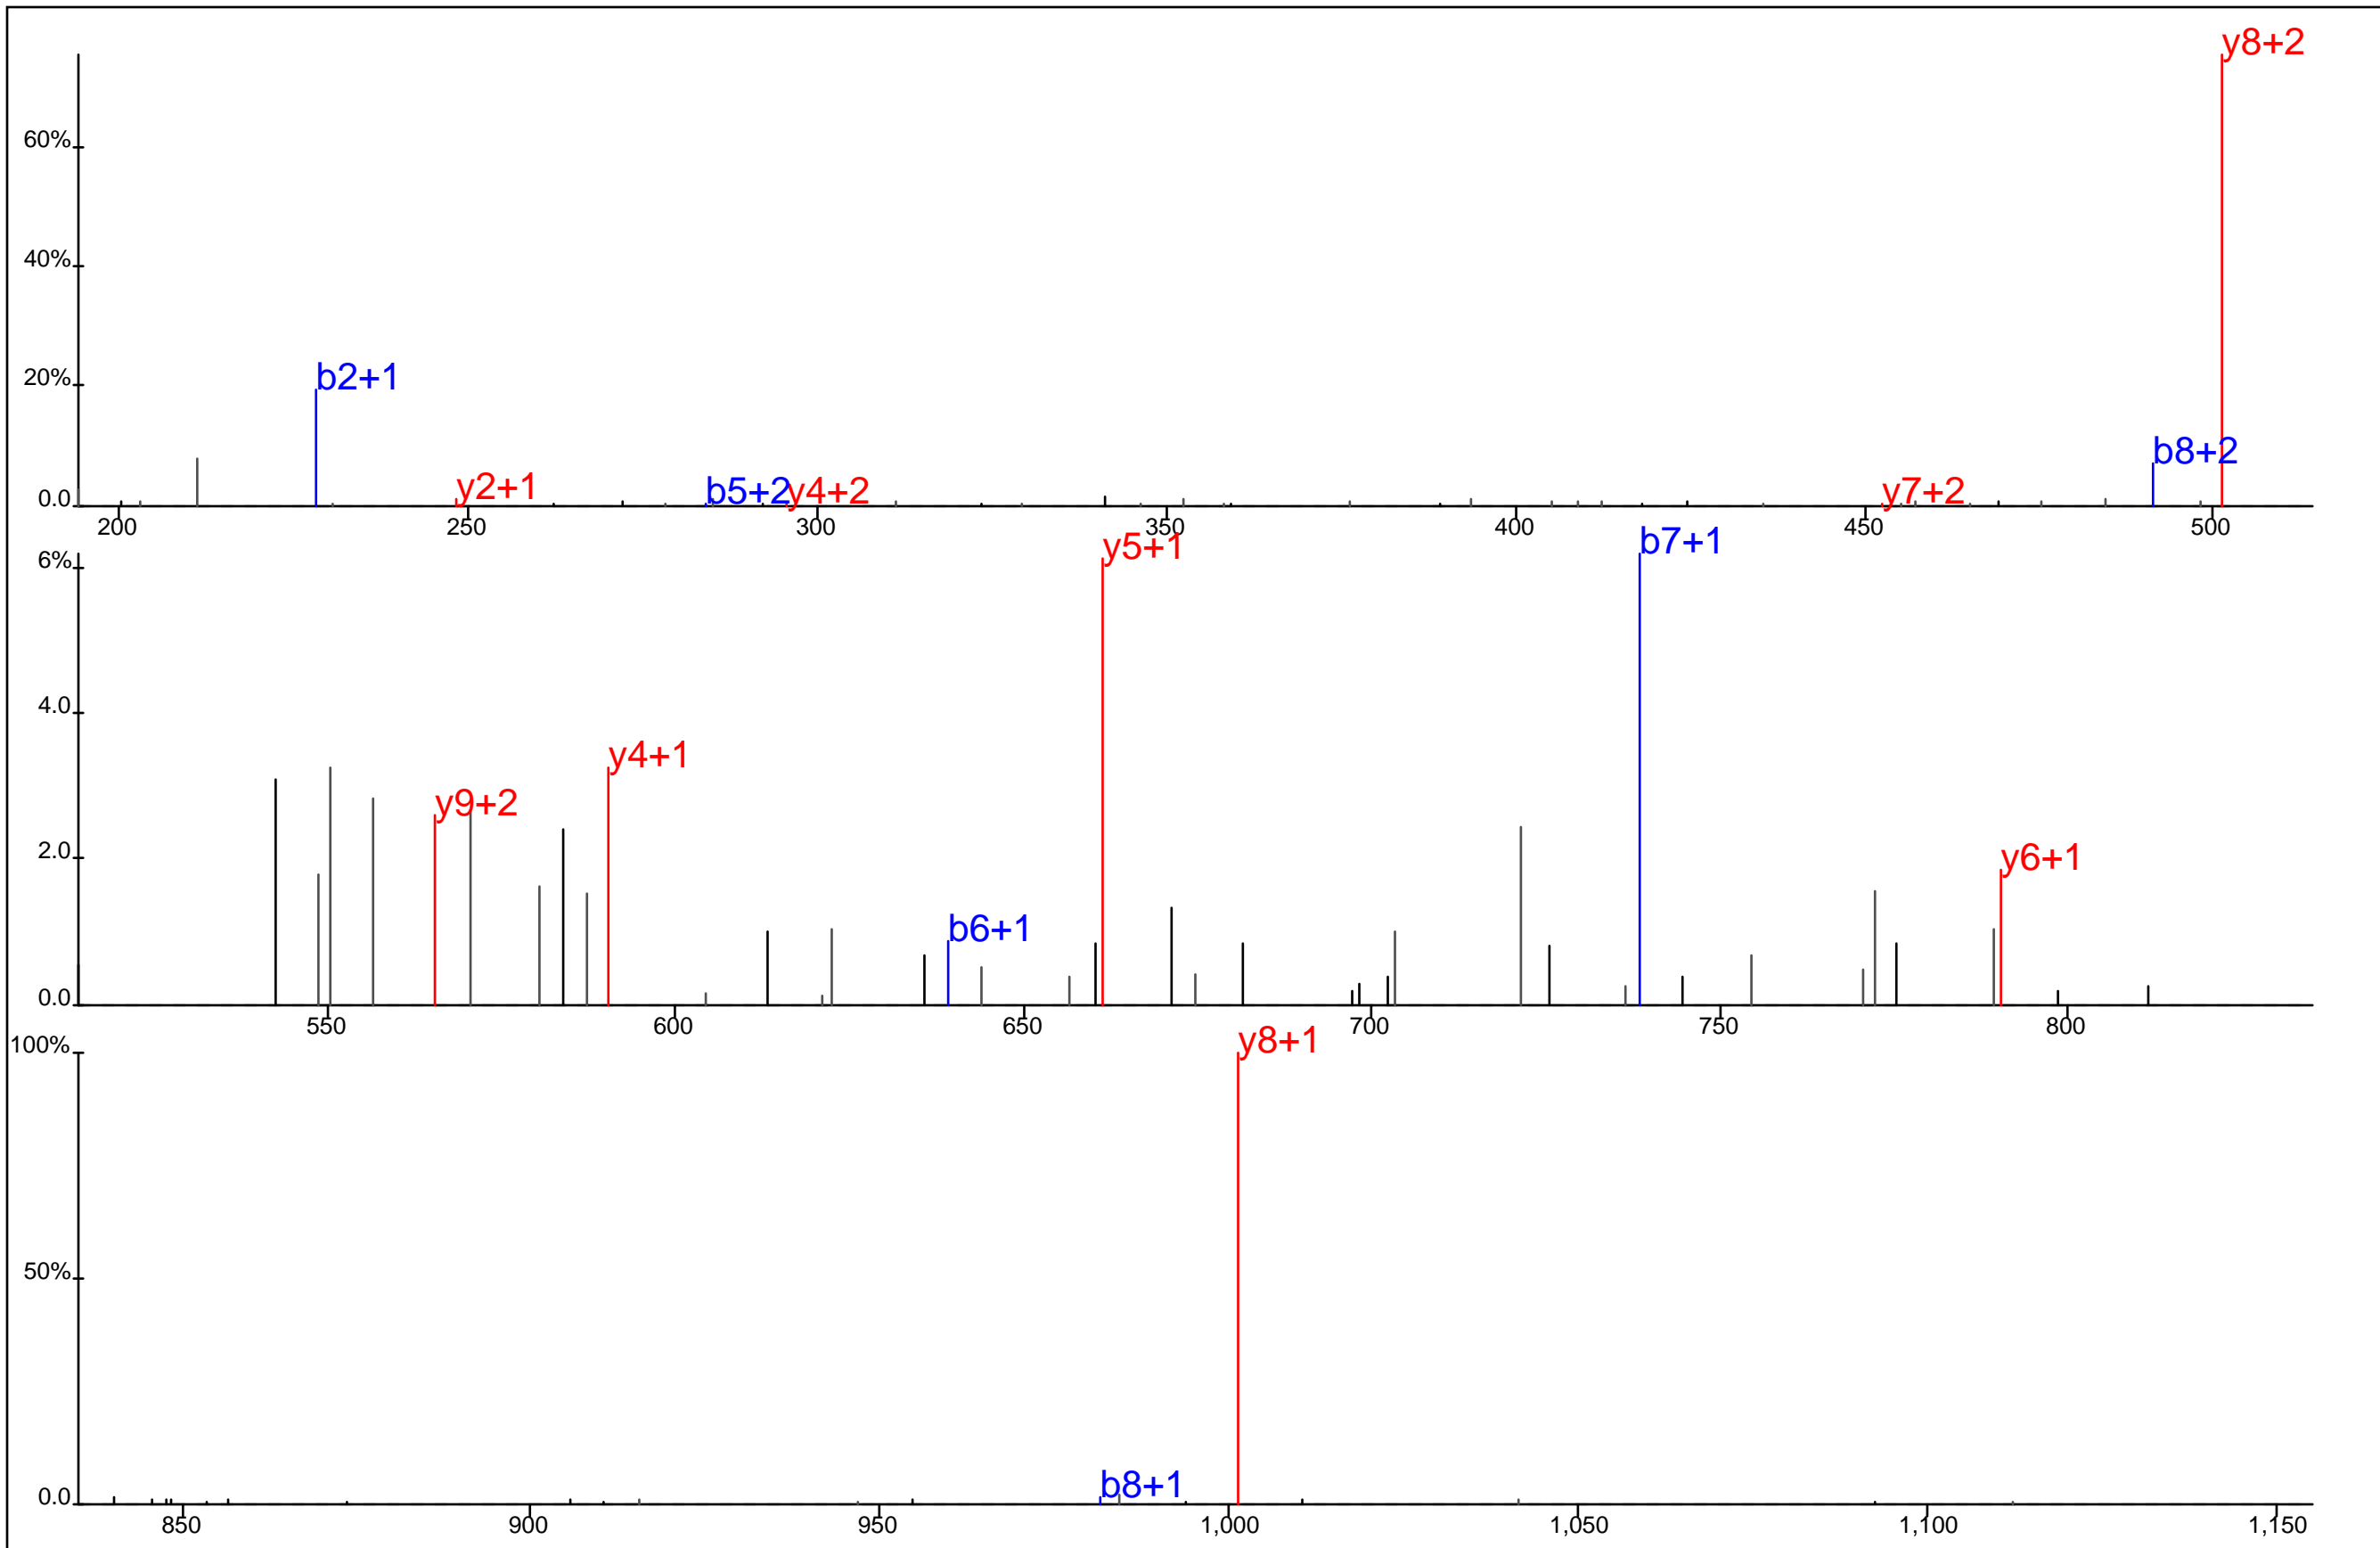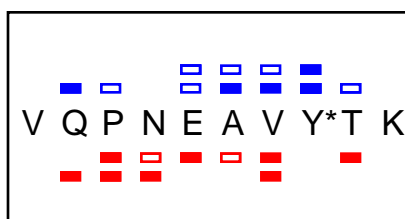

Protein Name: Glucose-6-phosphate dehydrogenase  
 gi Accession: 0  
 Precursor Mass: 614.7852+2  
 Delta Mass: 1.721 ppm  
 XCorr: 28.03

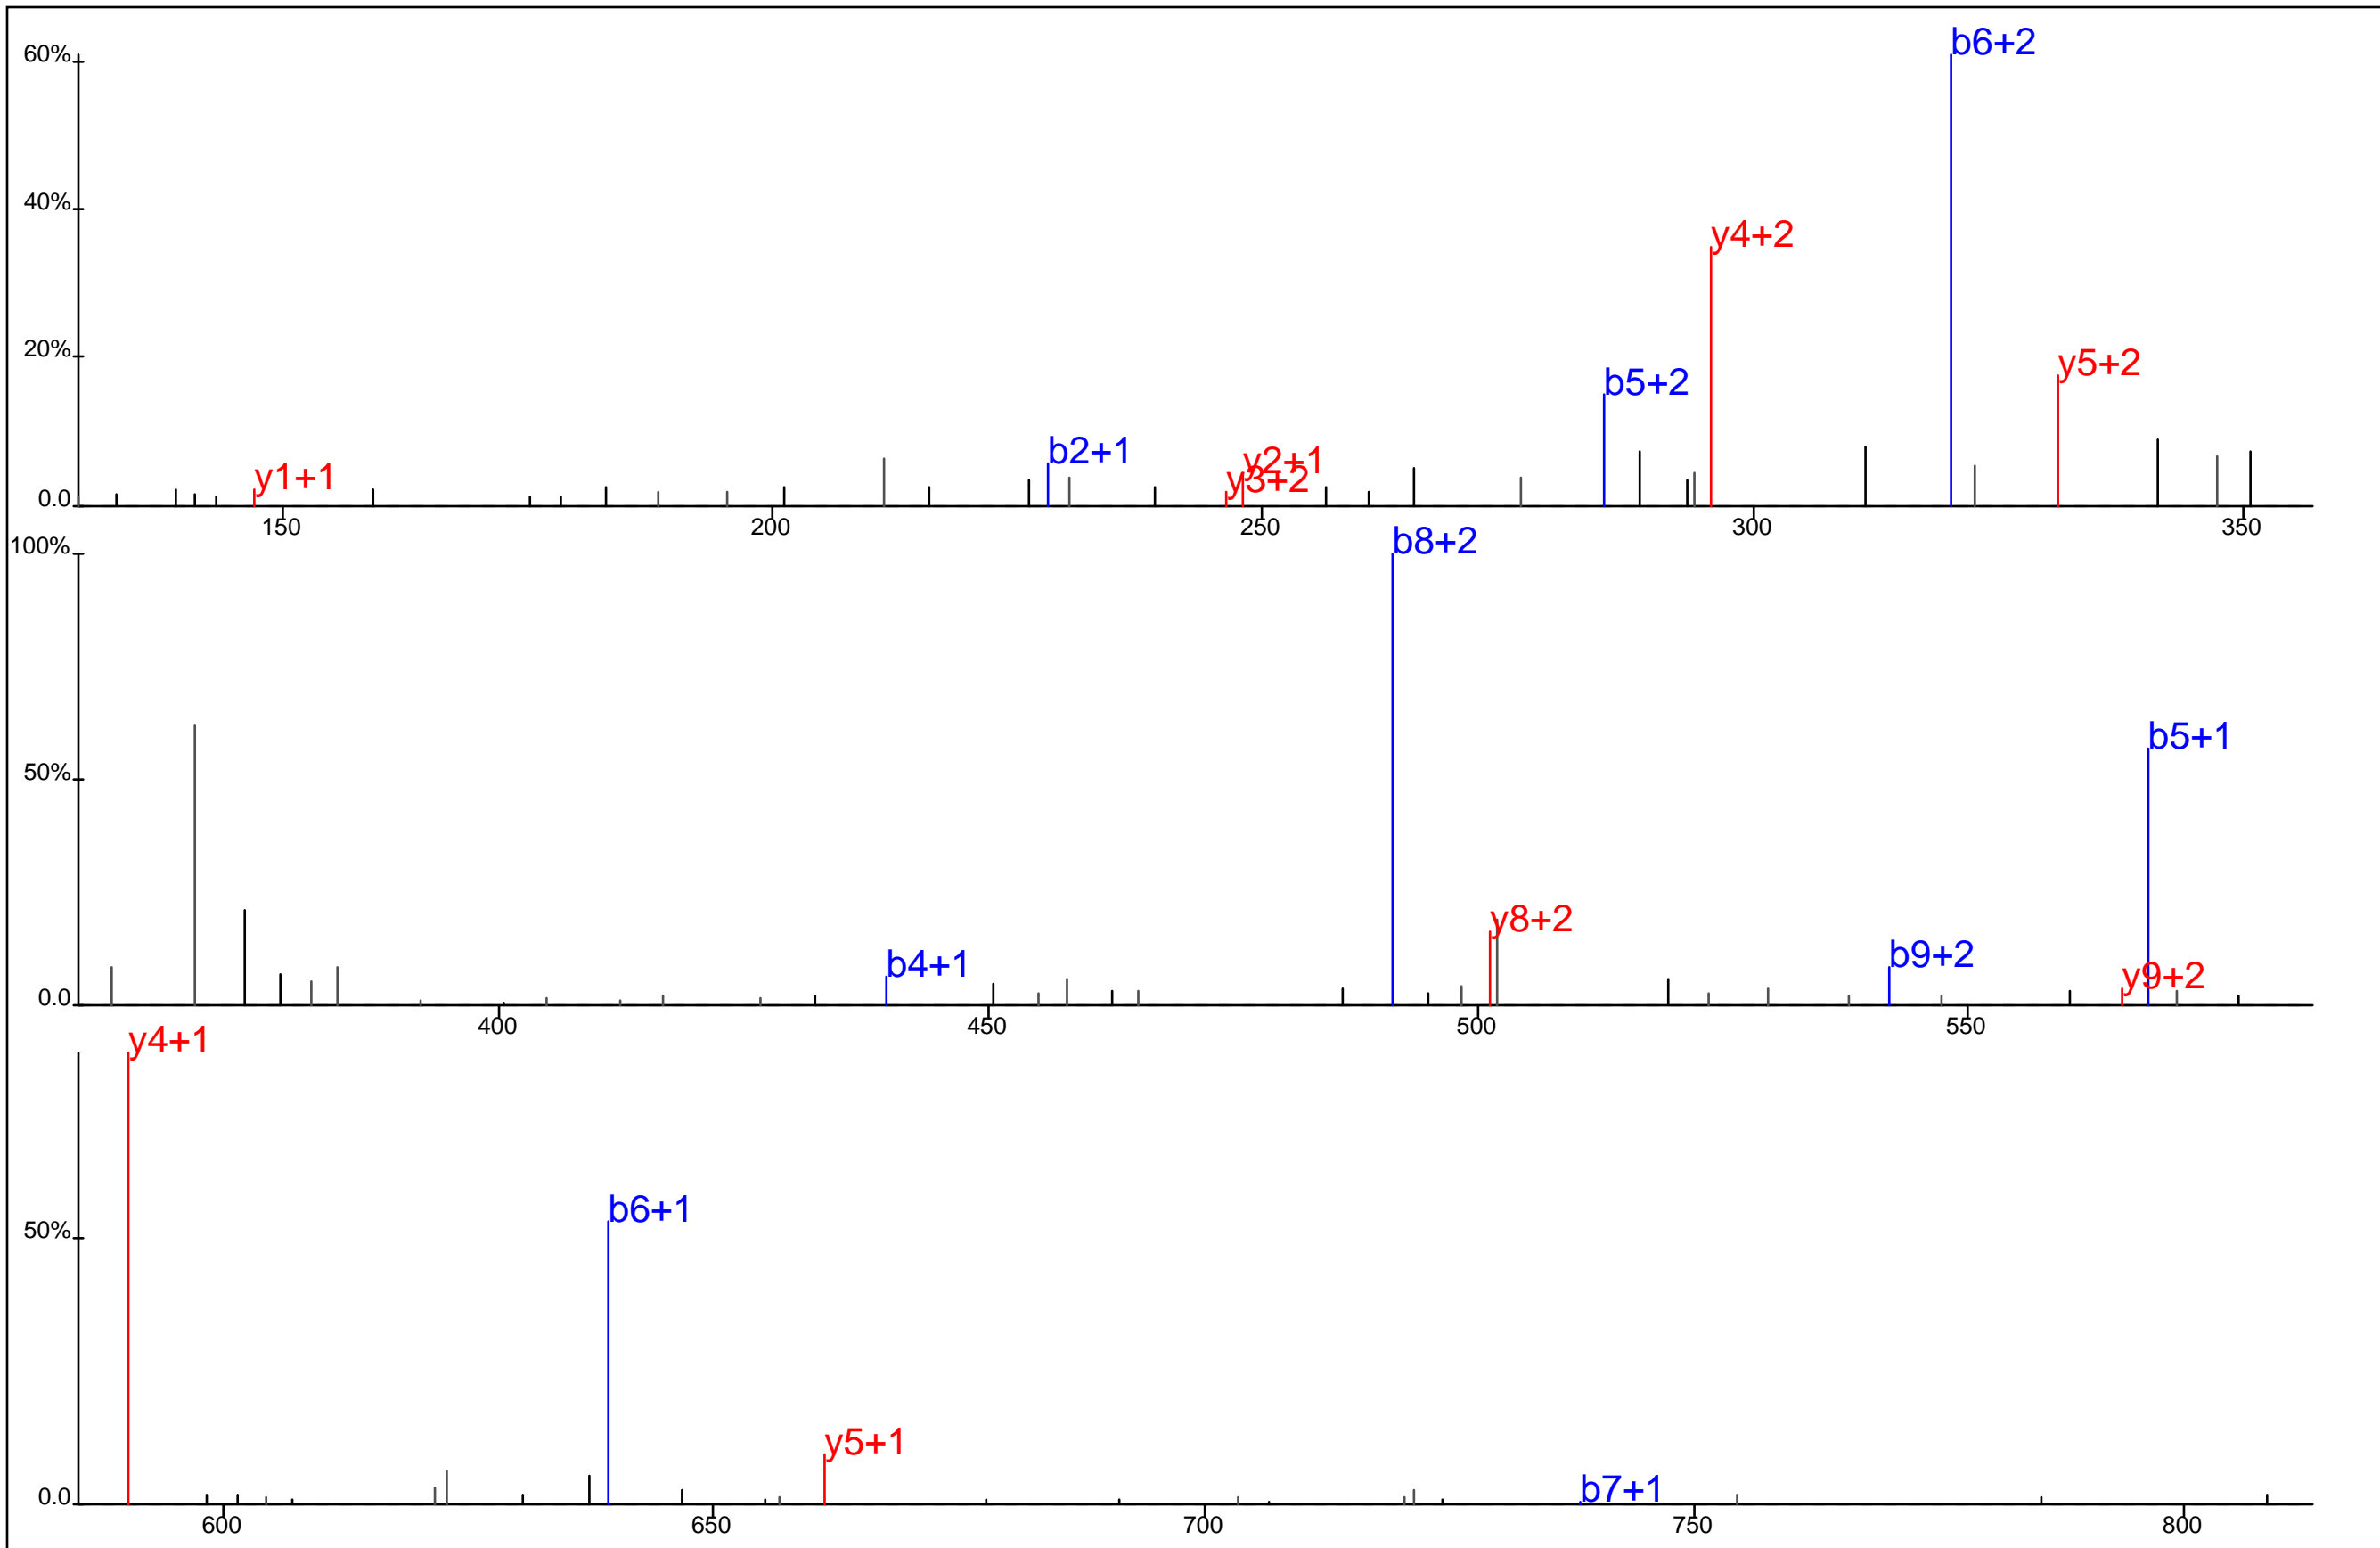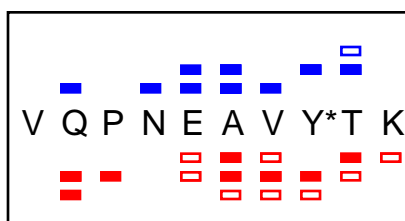

Protein Name: Glucose-6-phosphate dehydrogenase  
 gi Accession: 0  
 Precursor Mass: 410.1915+3  
 Delta Mass: 0.724 ppm  
 XCorr: 26.08



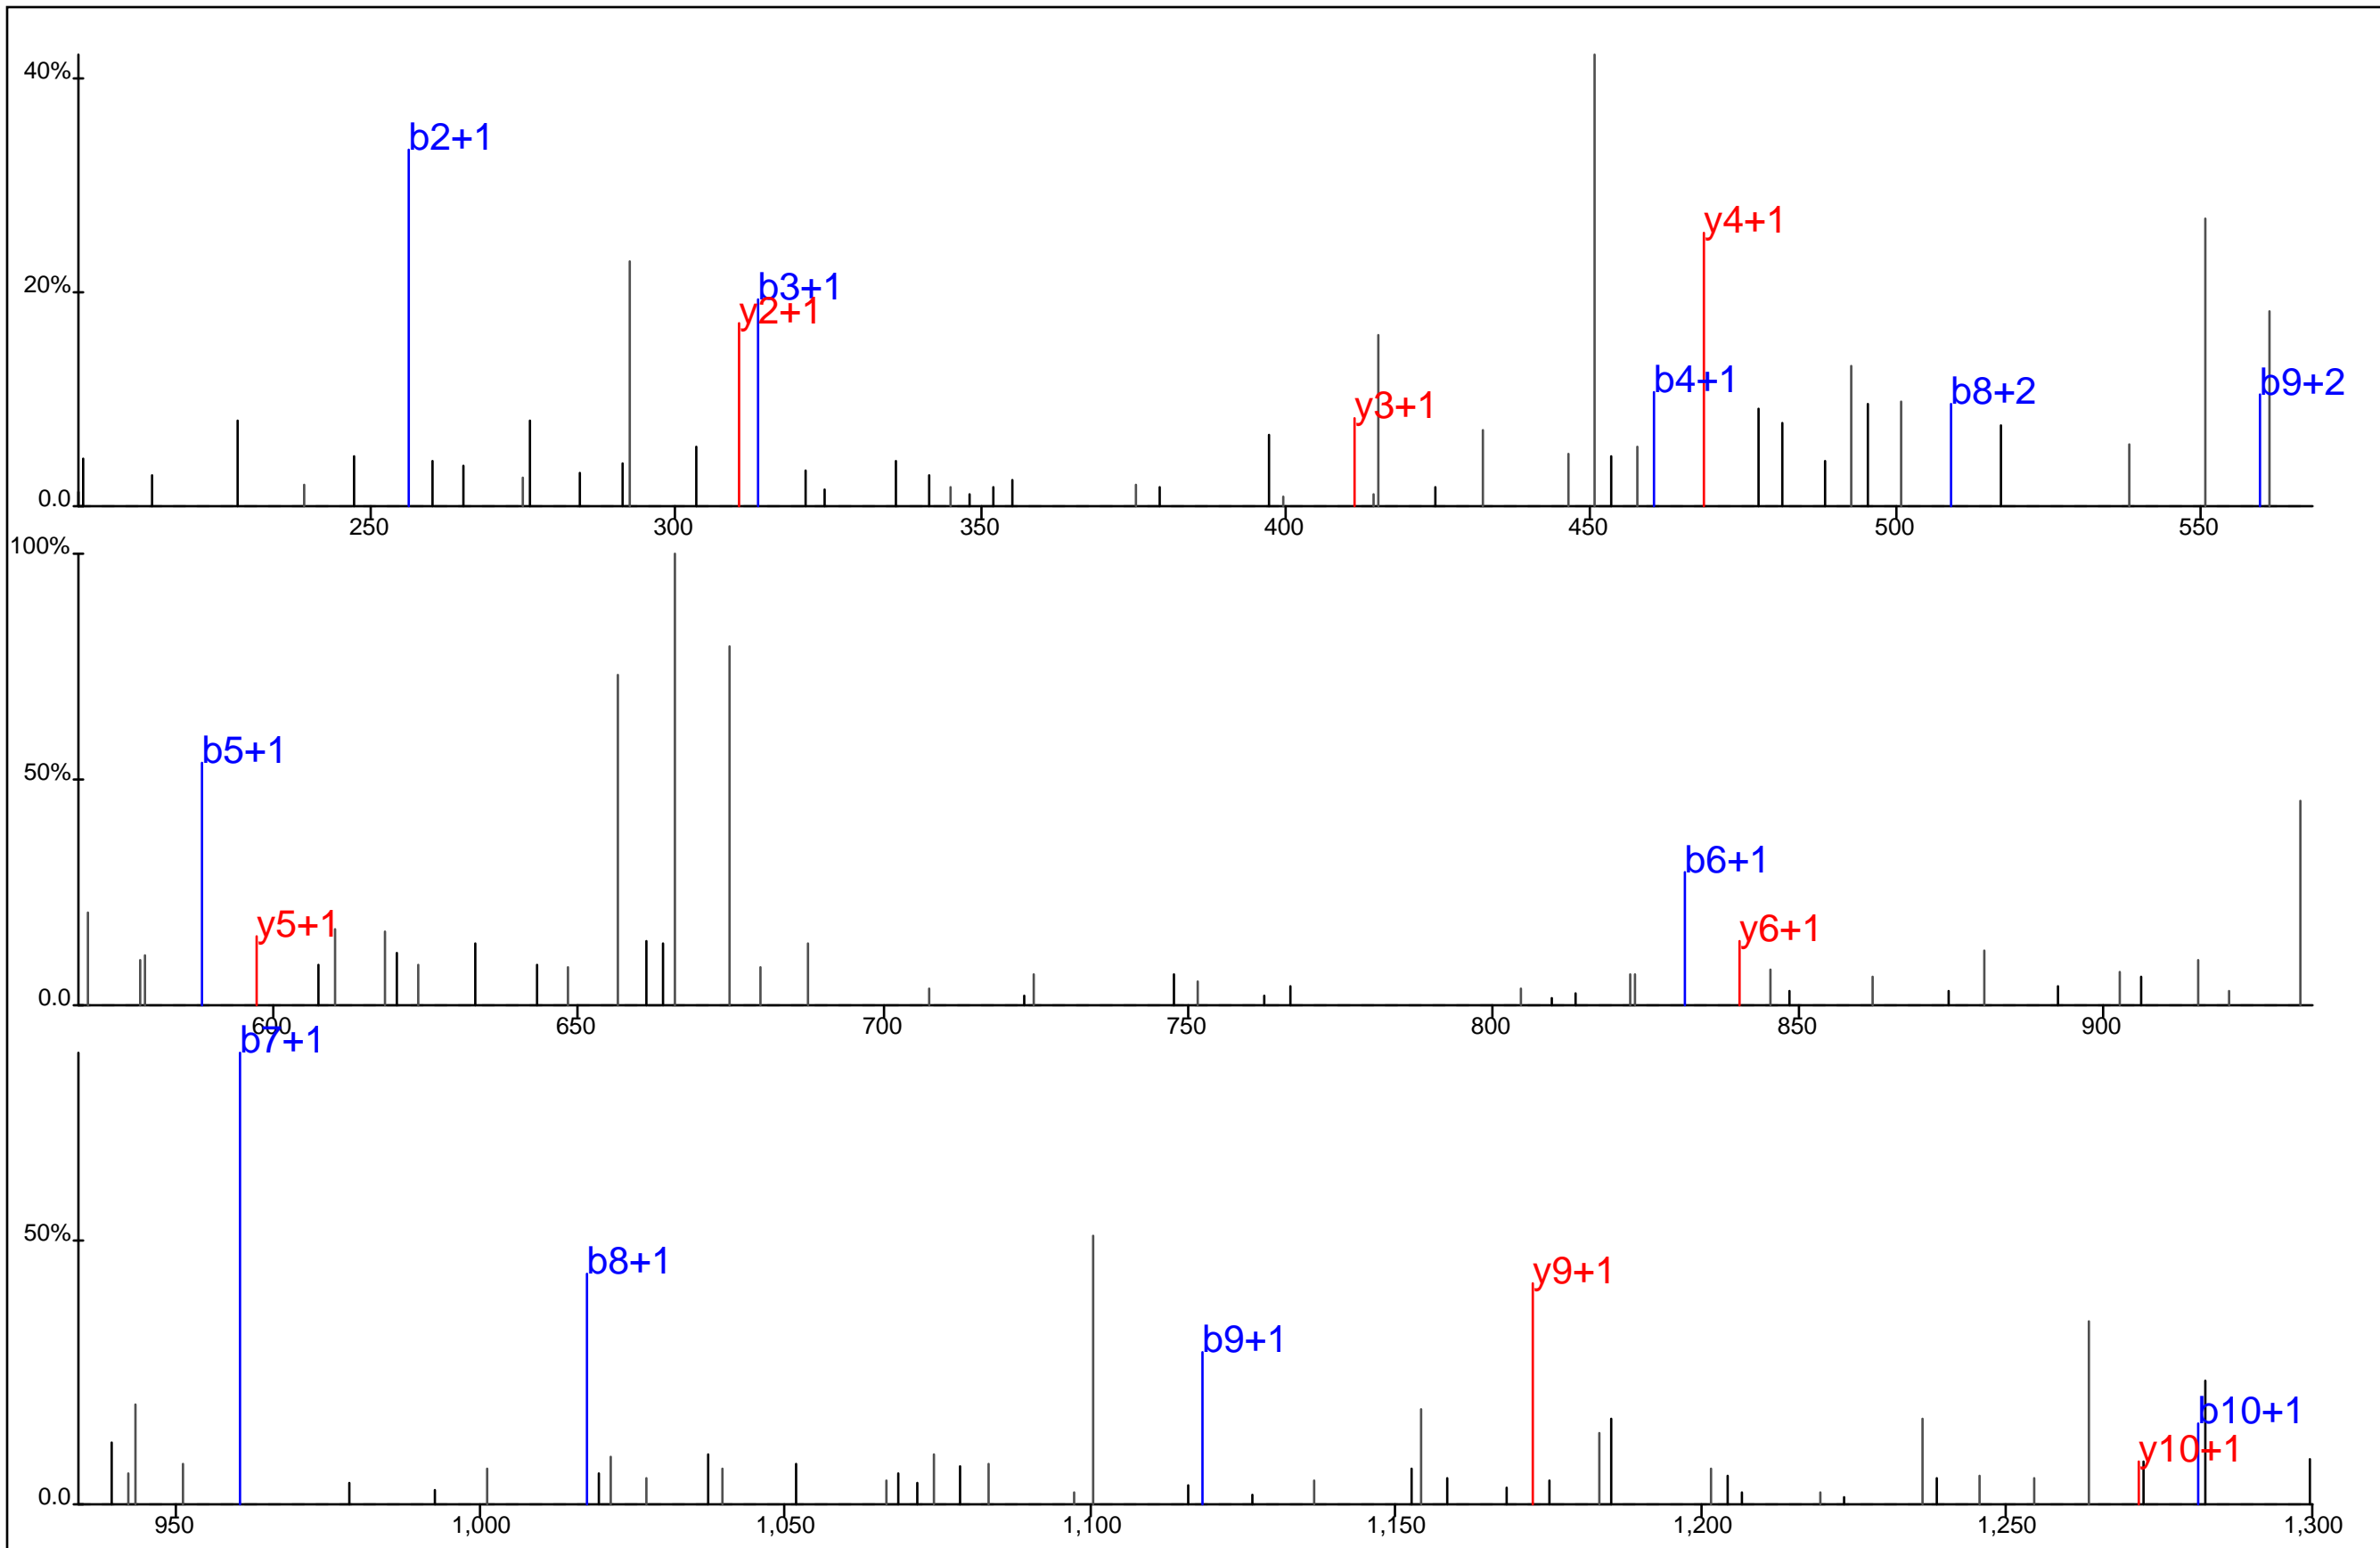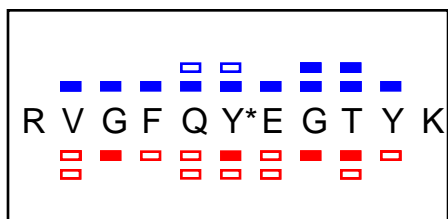

Protein Name: Glucose-6-phosphate dehydrogenase  
 gi Accession: 0  
 Precursor Mass: 714.3210+2  
 Delta Mass: 0.475 ppm  
 XCorr: 48.04

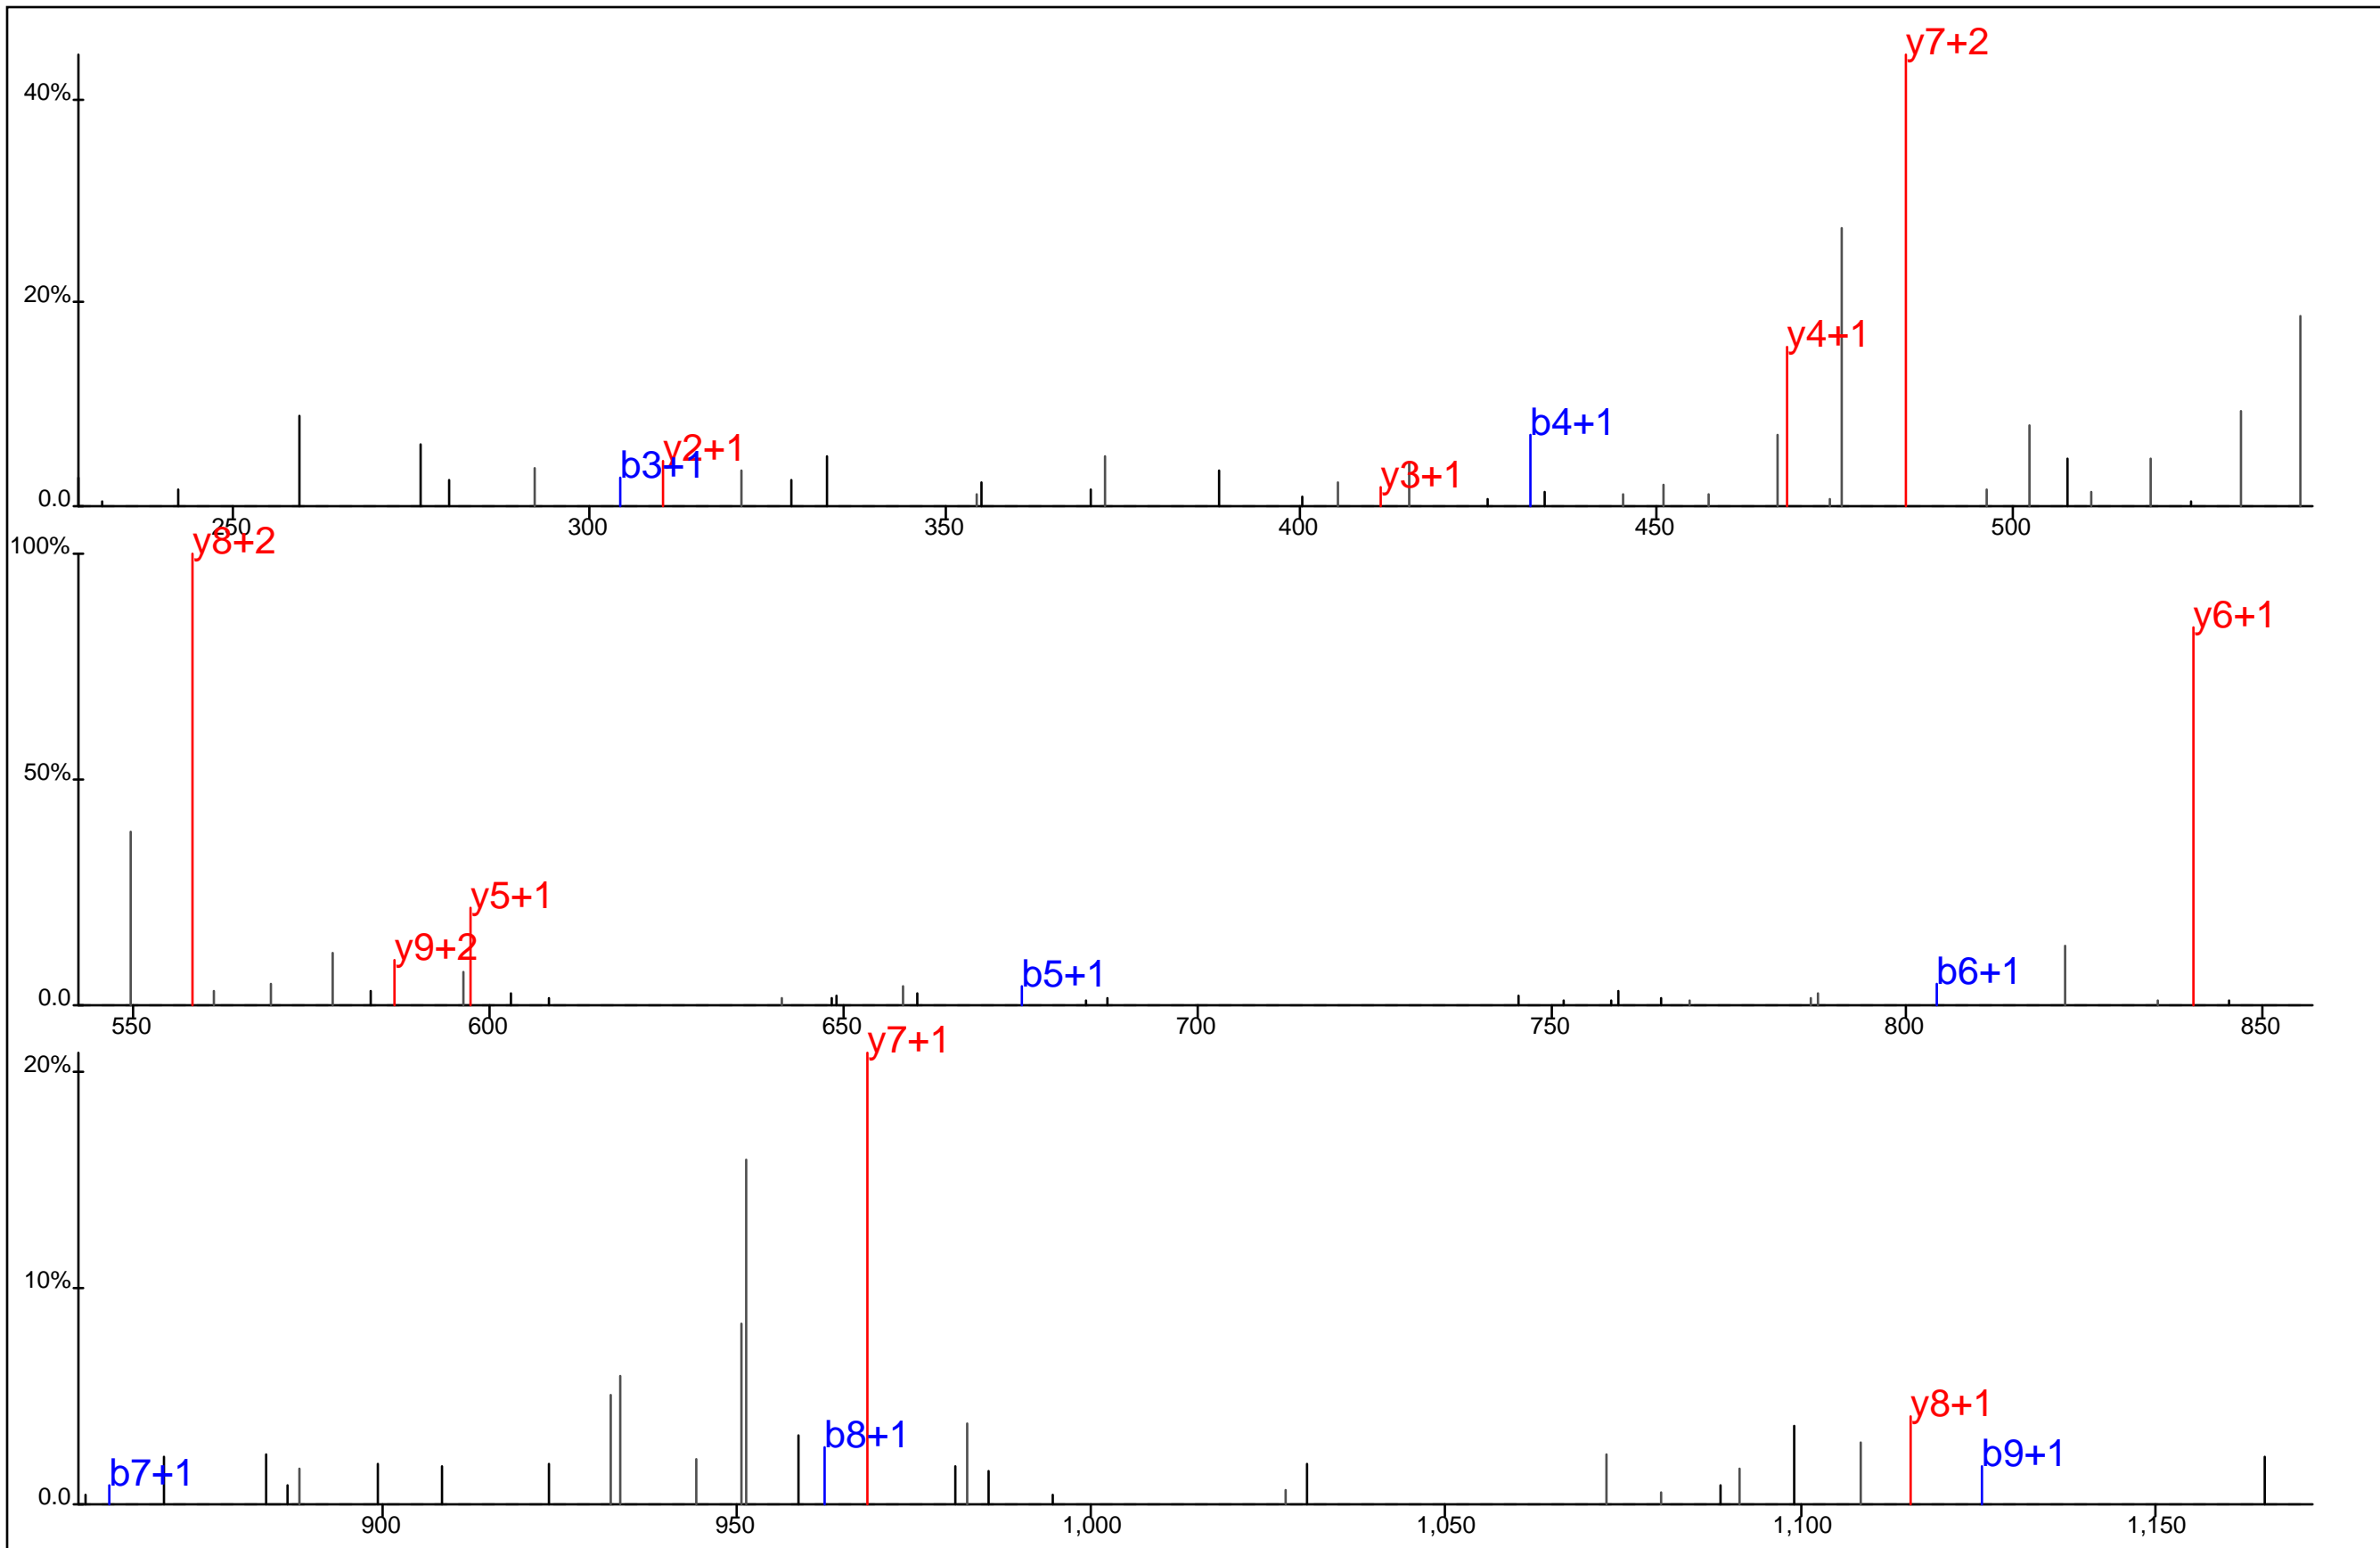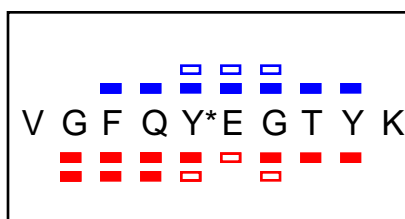

Protein Name: Glucose-6-phosphate dehydrogenase  
 gi Accession: 0  
 Precursor Mass: 636.2707+2  
 Delta Mass: 0.225 ppm  
 XCorr: 48.38



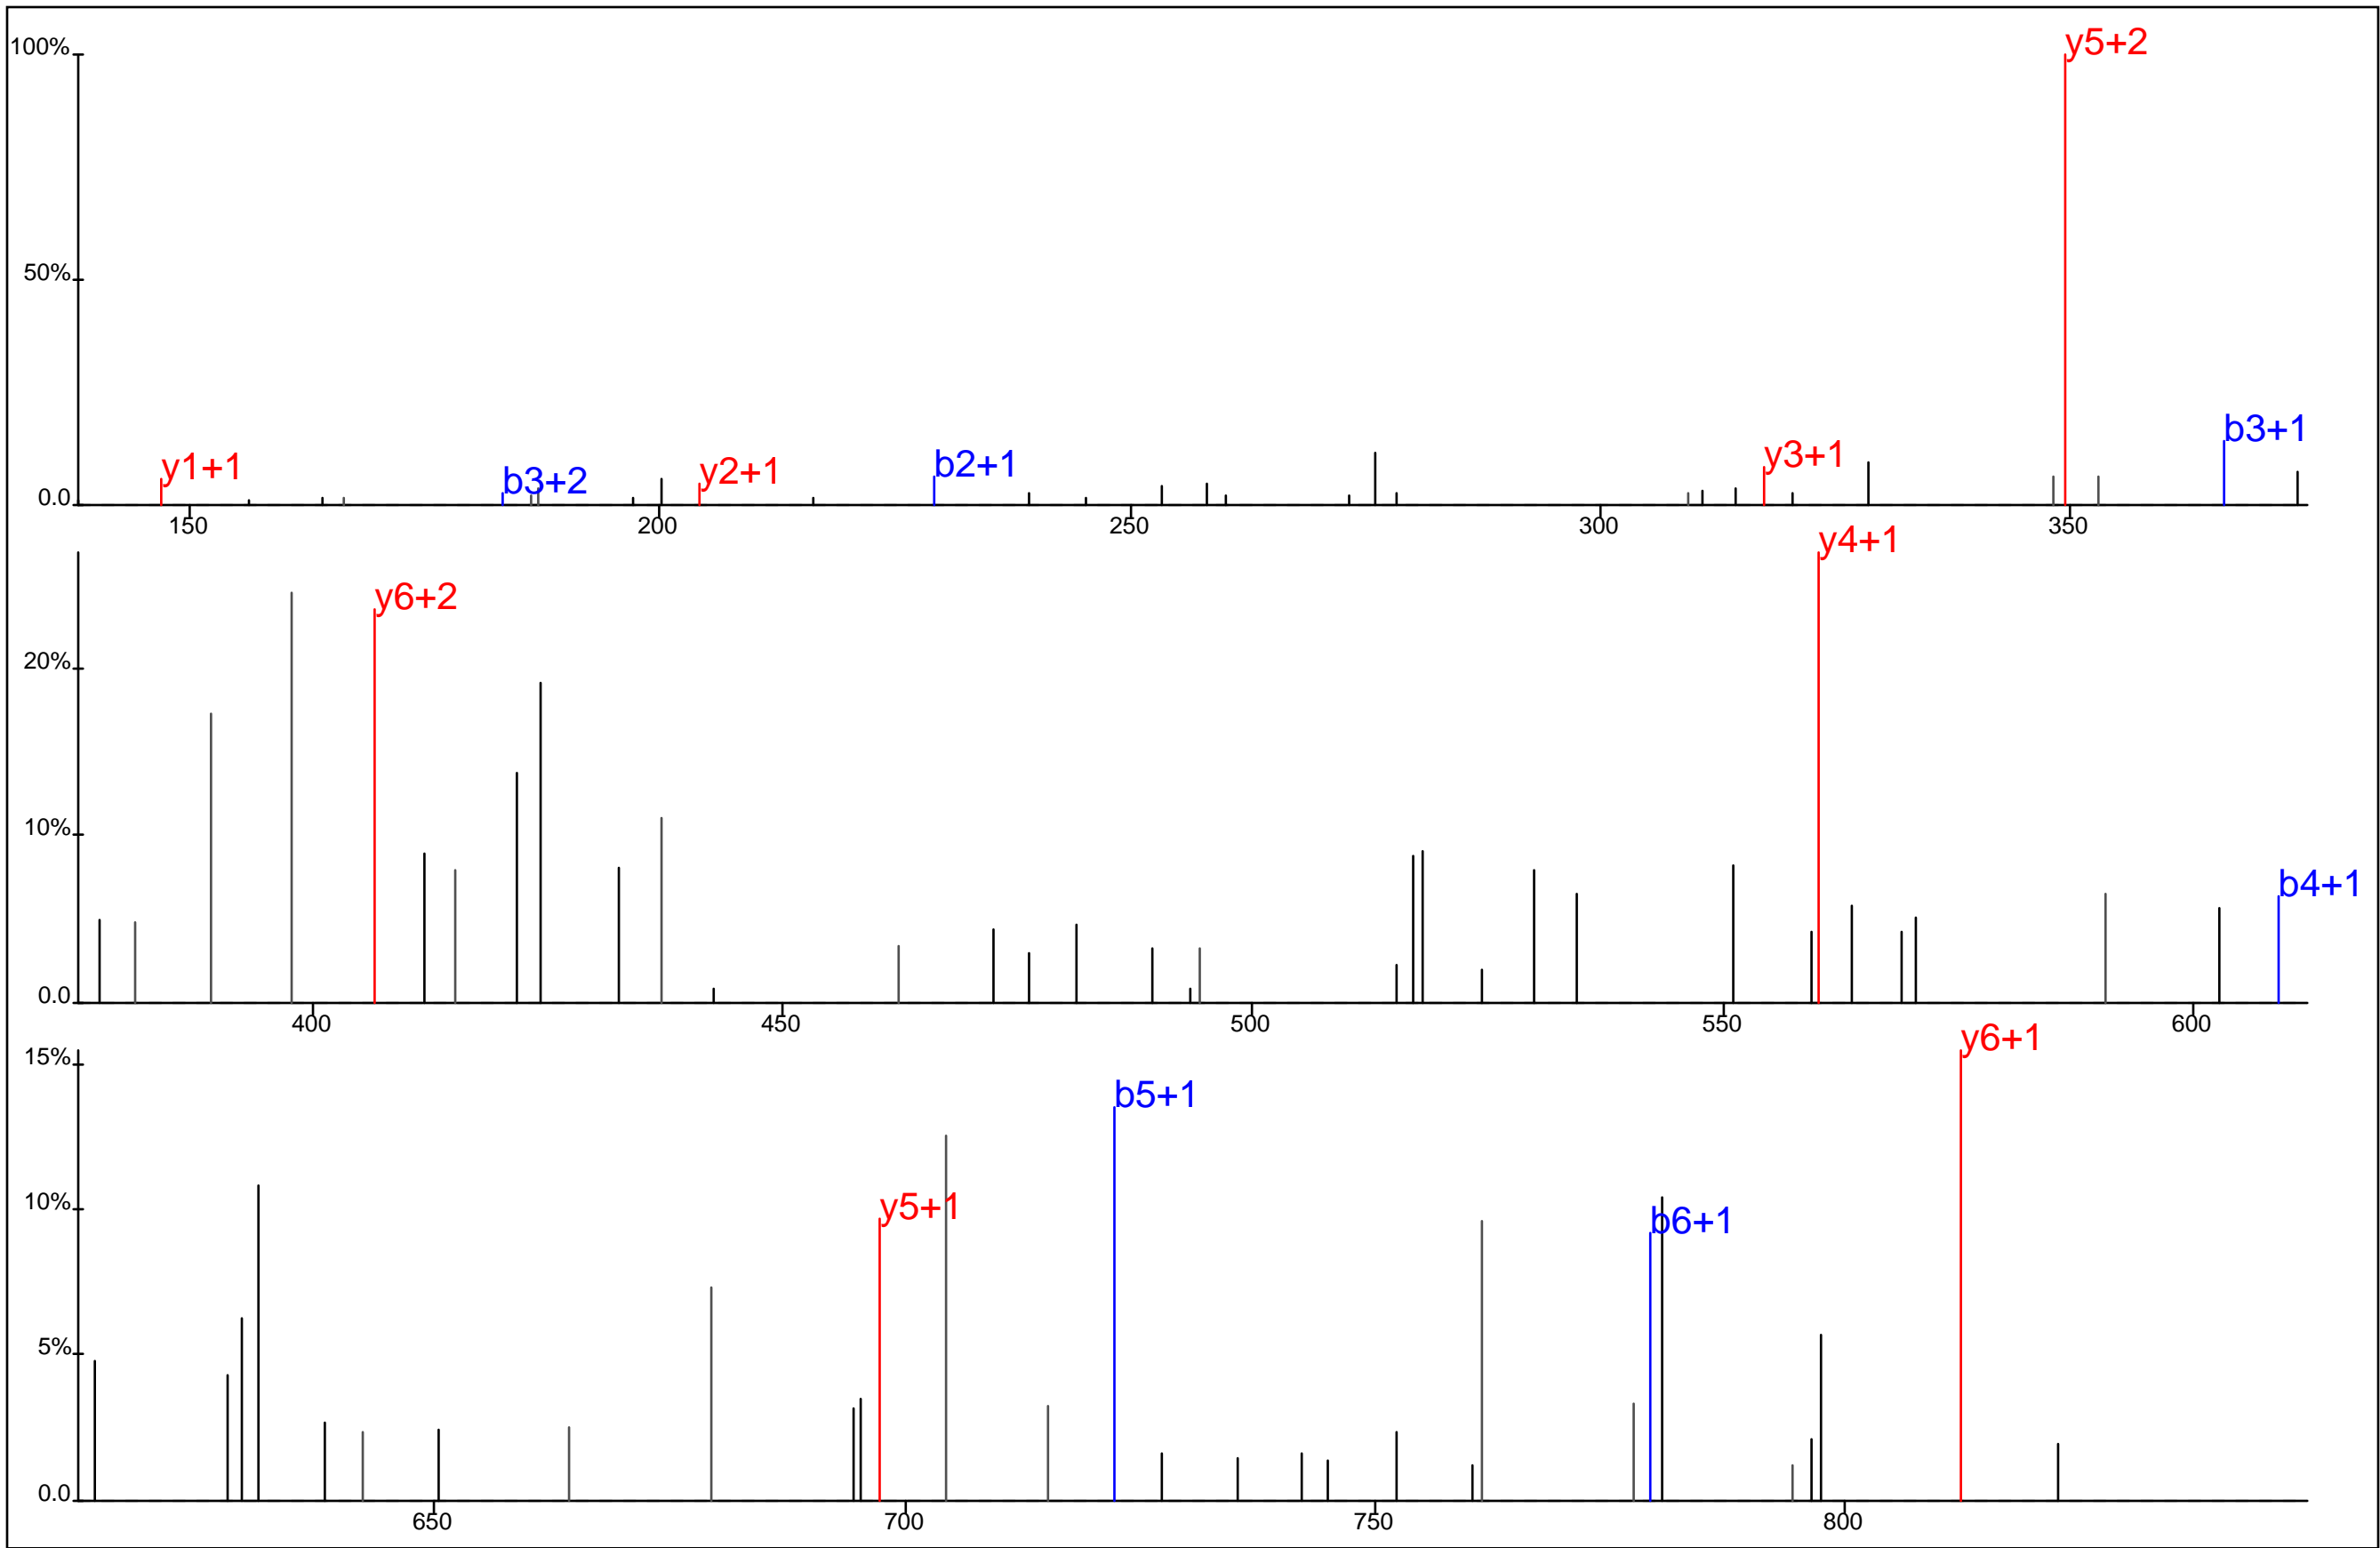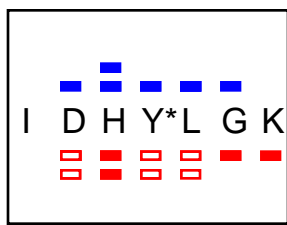

Protein Name: Glucose-6-phosphate dehydrogenase  
 gi Accession: 0  
 Precursor Mass: 463.2125+2  
 Delta Mass: 0.130 ppm  
 XCorr: 35.47



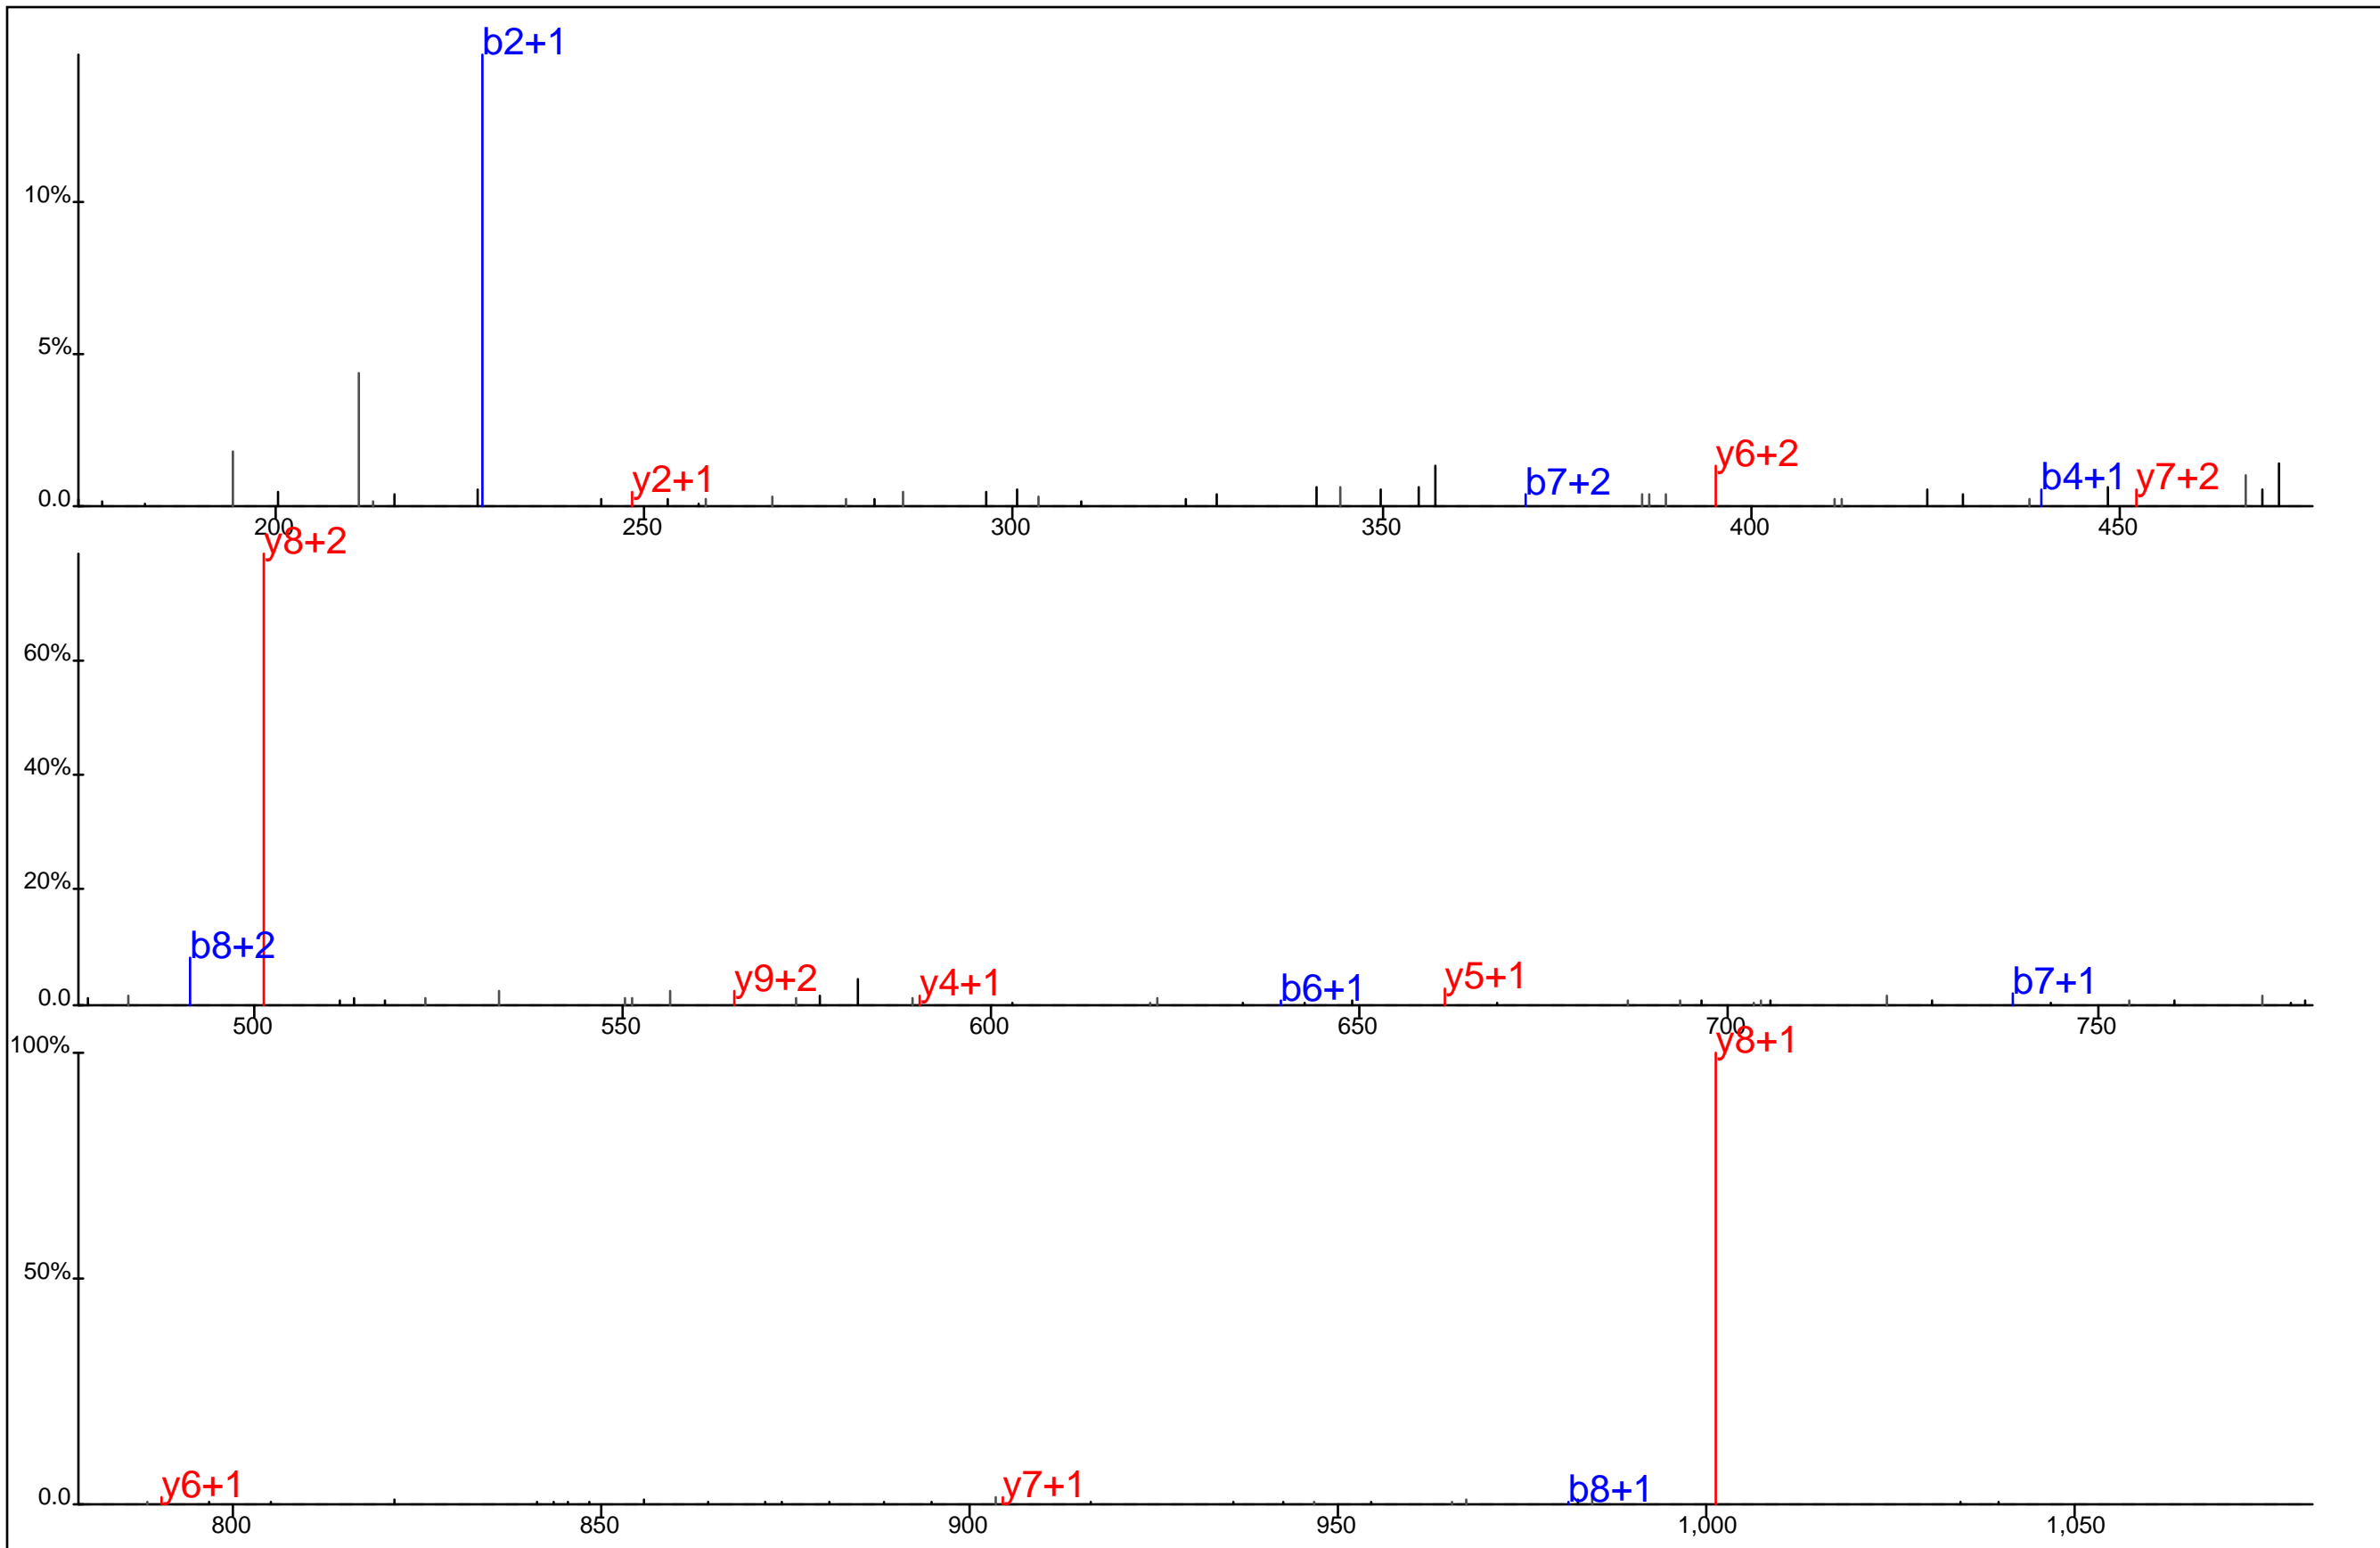

V Q P N E A V Y\* T K

Protein Name: Glucose-6-phosphate dehydrogenase  
 gi Accession: 0  
 Precursor Mass: 614.7856+2  
 Delta Mass: 2.517 ppm  
 XCorr: 37.39

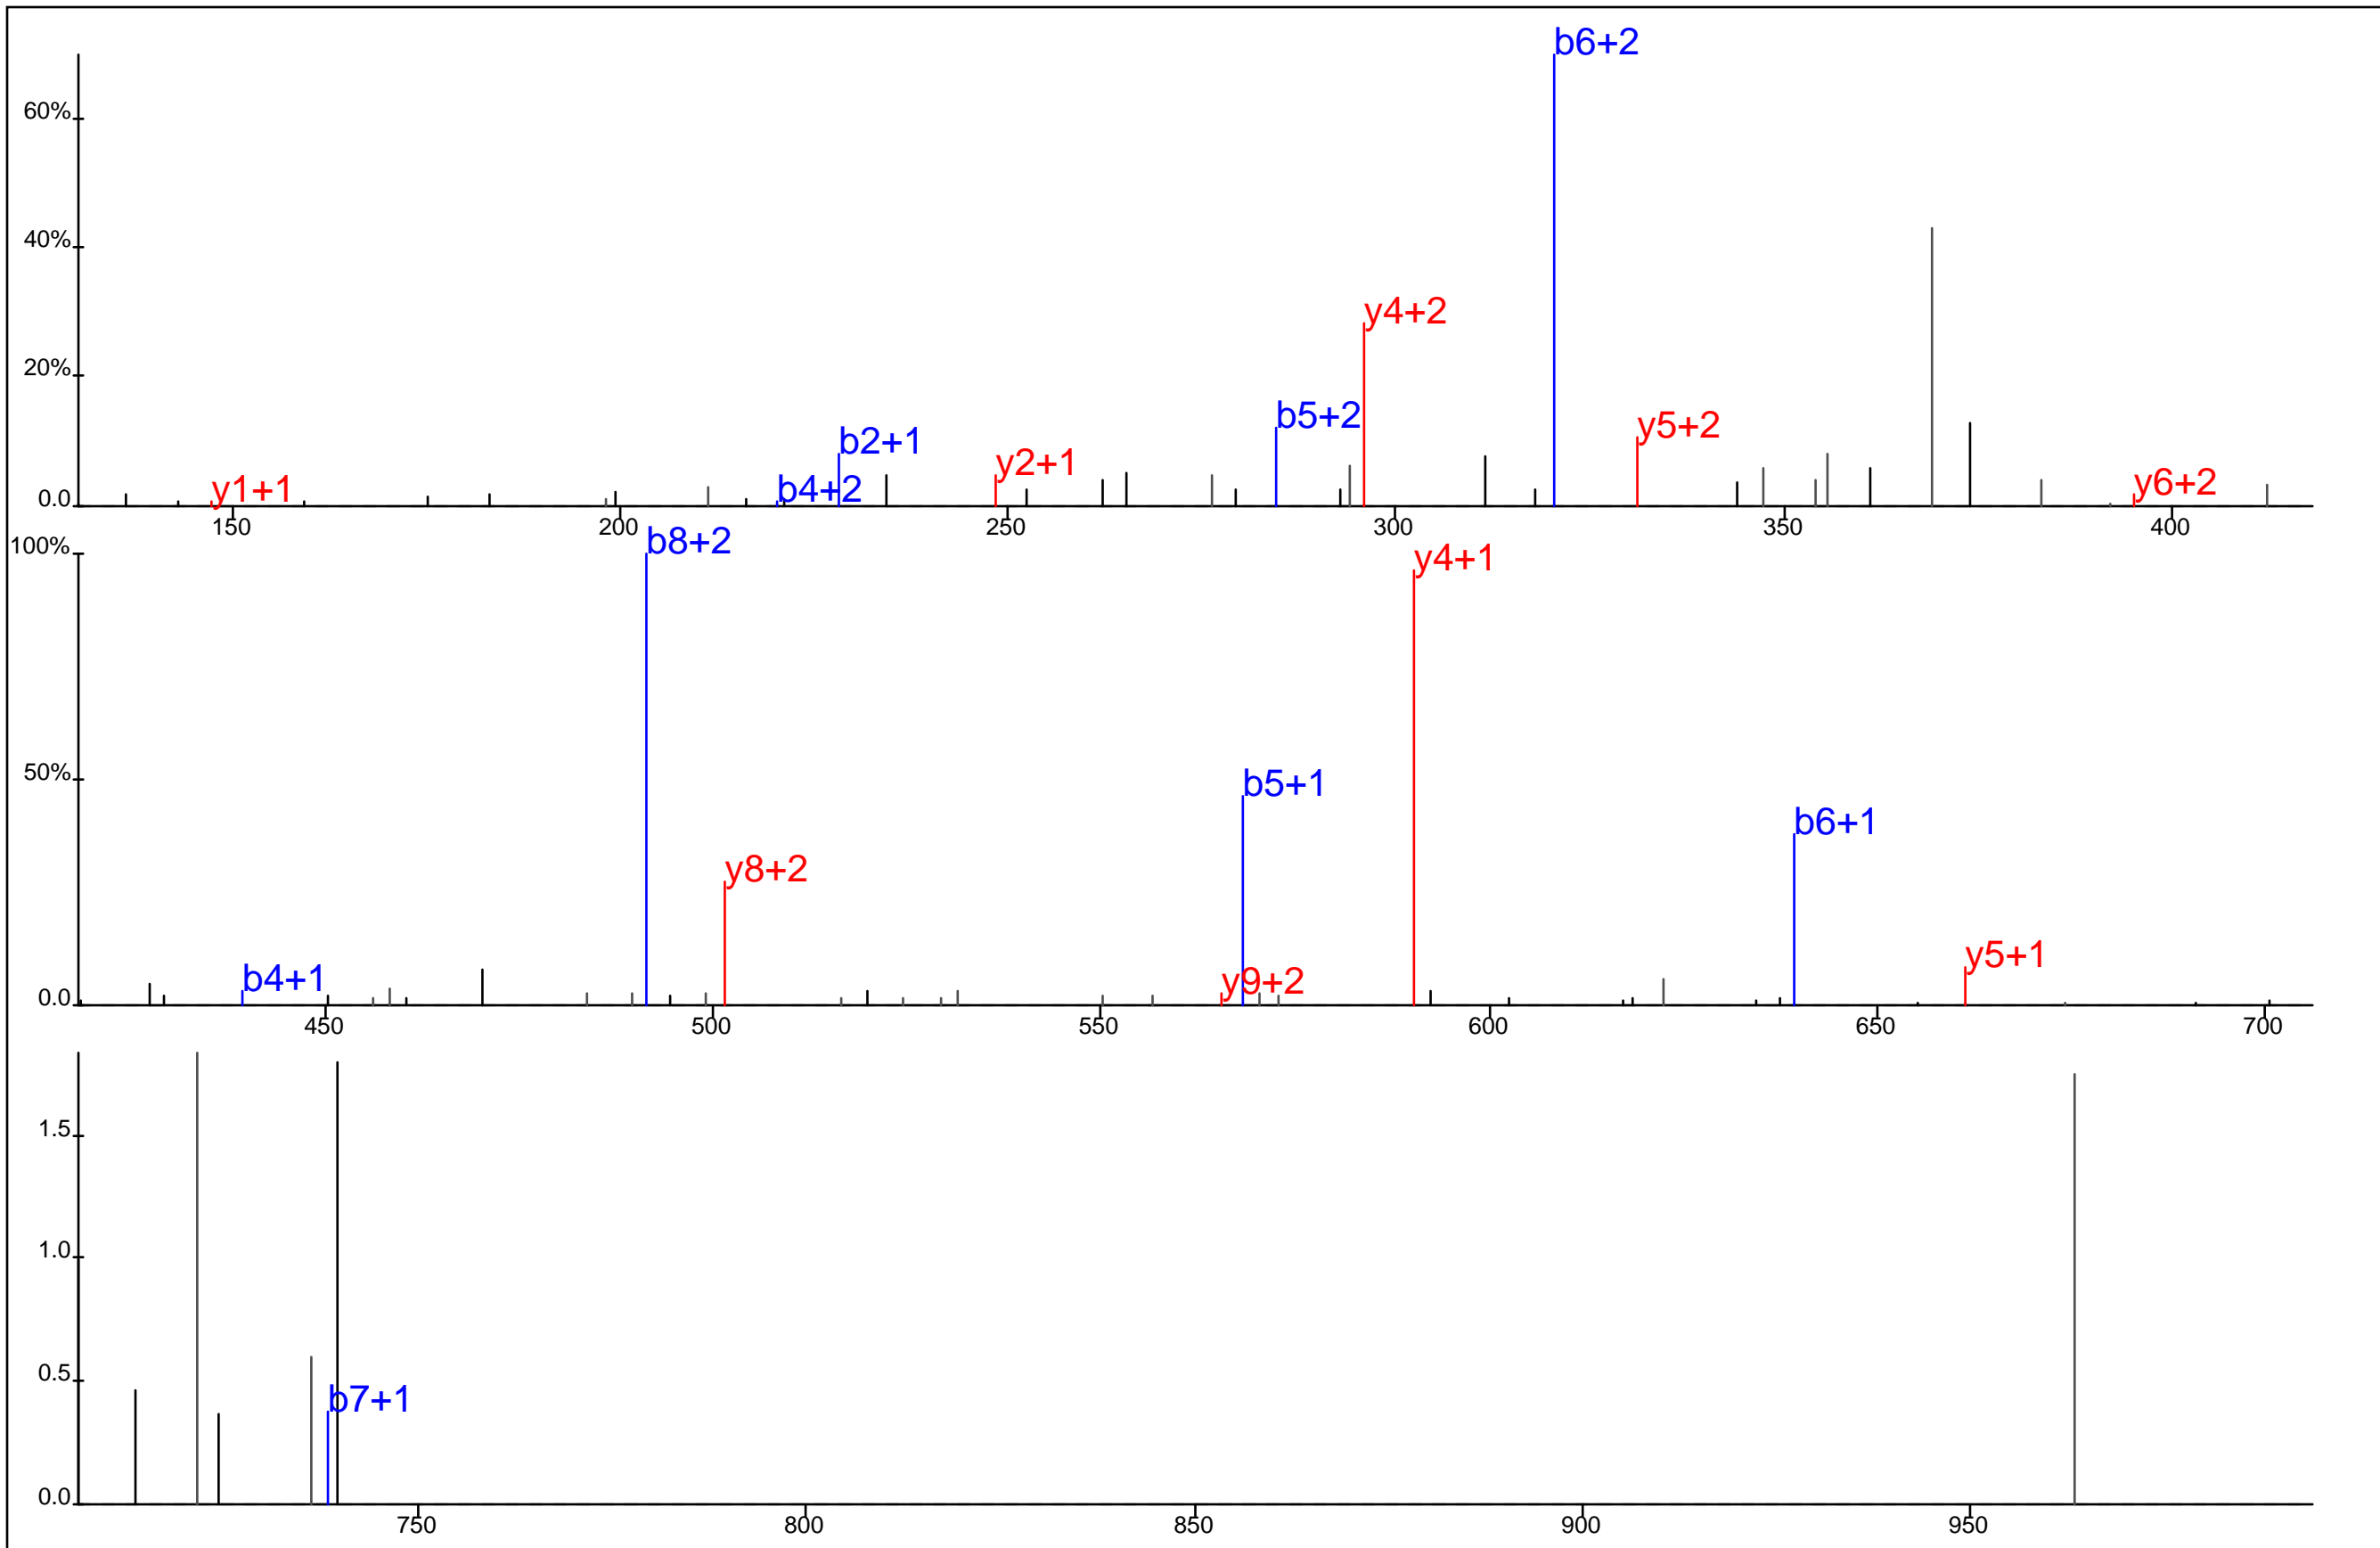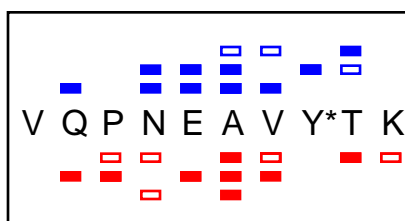

Protein Name: Glucose-6-phosphate dehydrogenase  
 gi Accession: 0  
 Precursor Mass: 410.1920+3  
 Delta Mass: 0.543 ppm  
 XCorr: 23.99

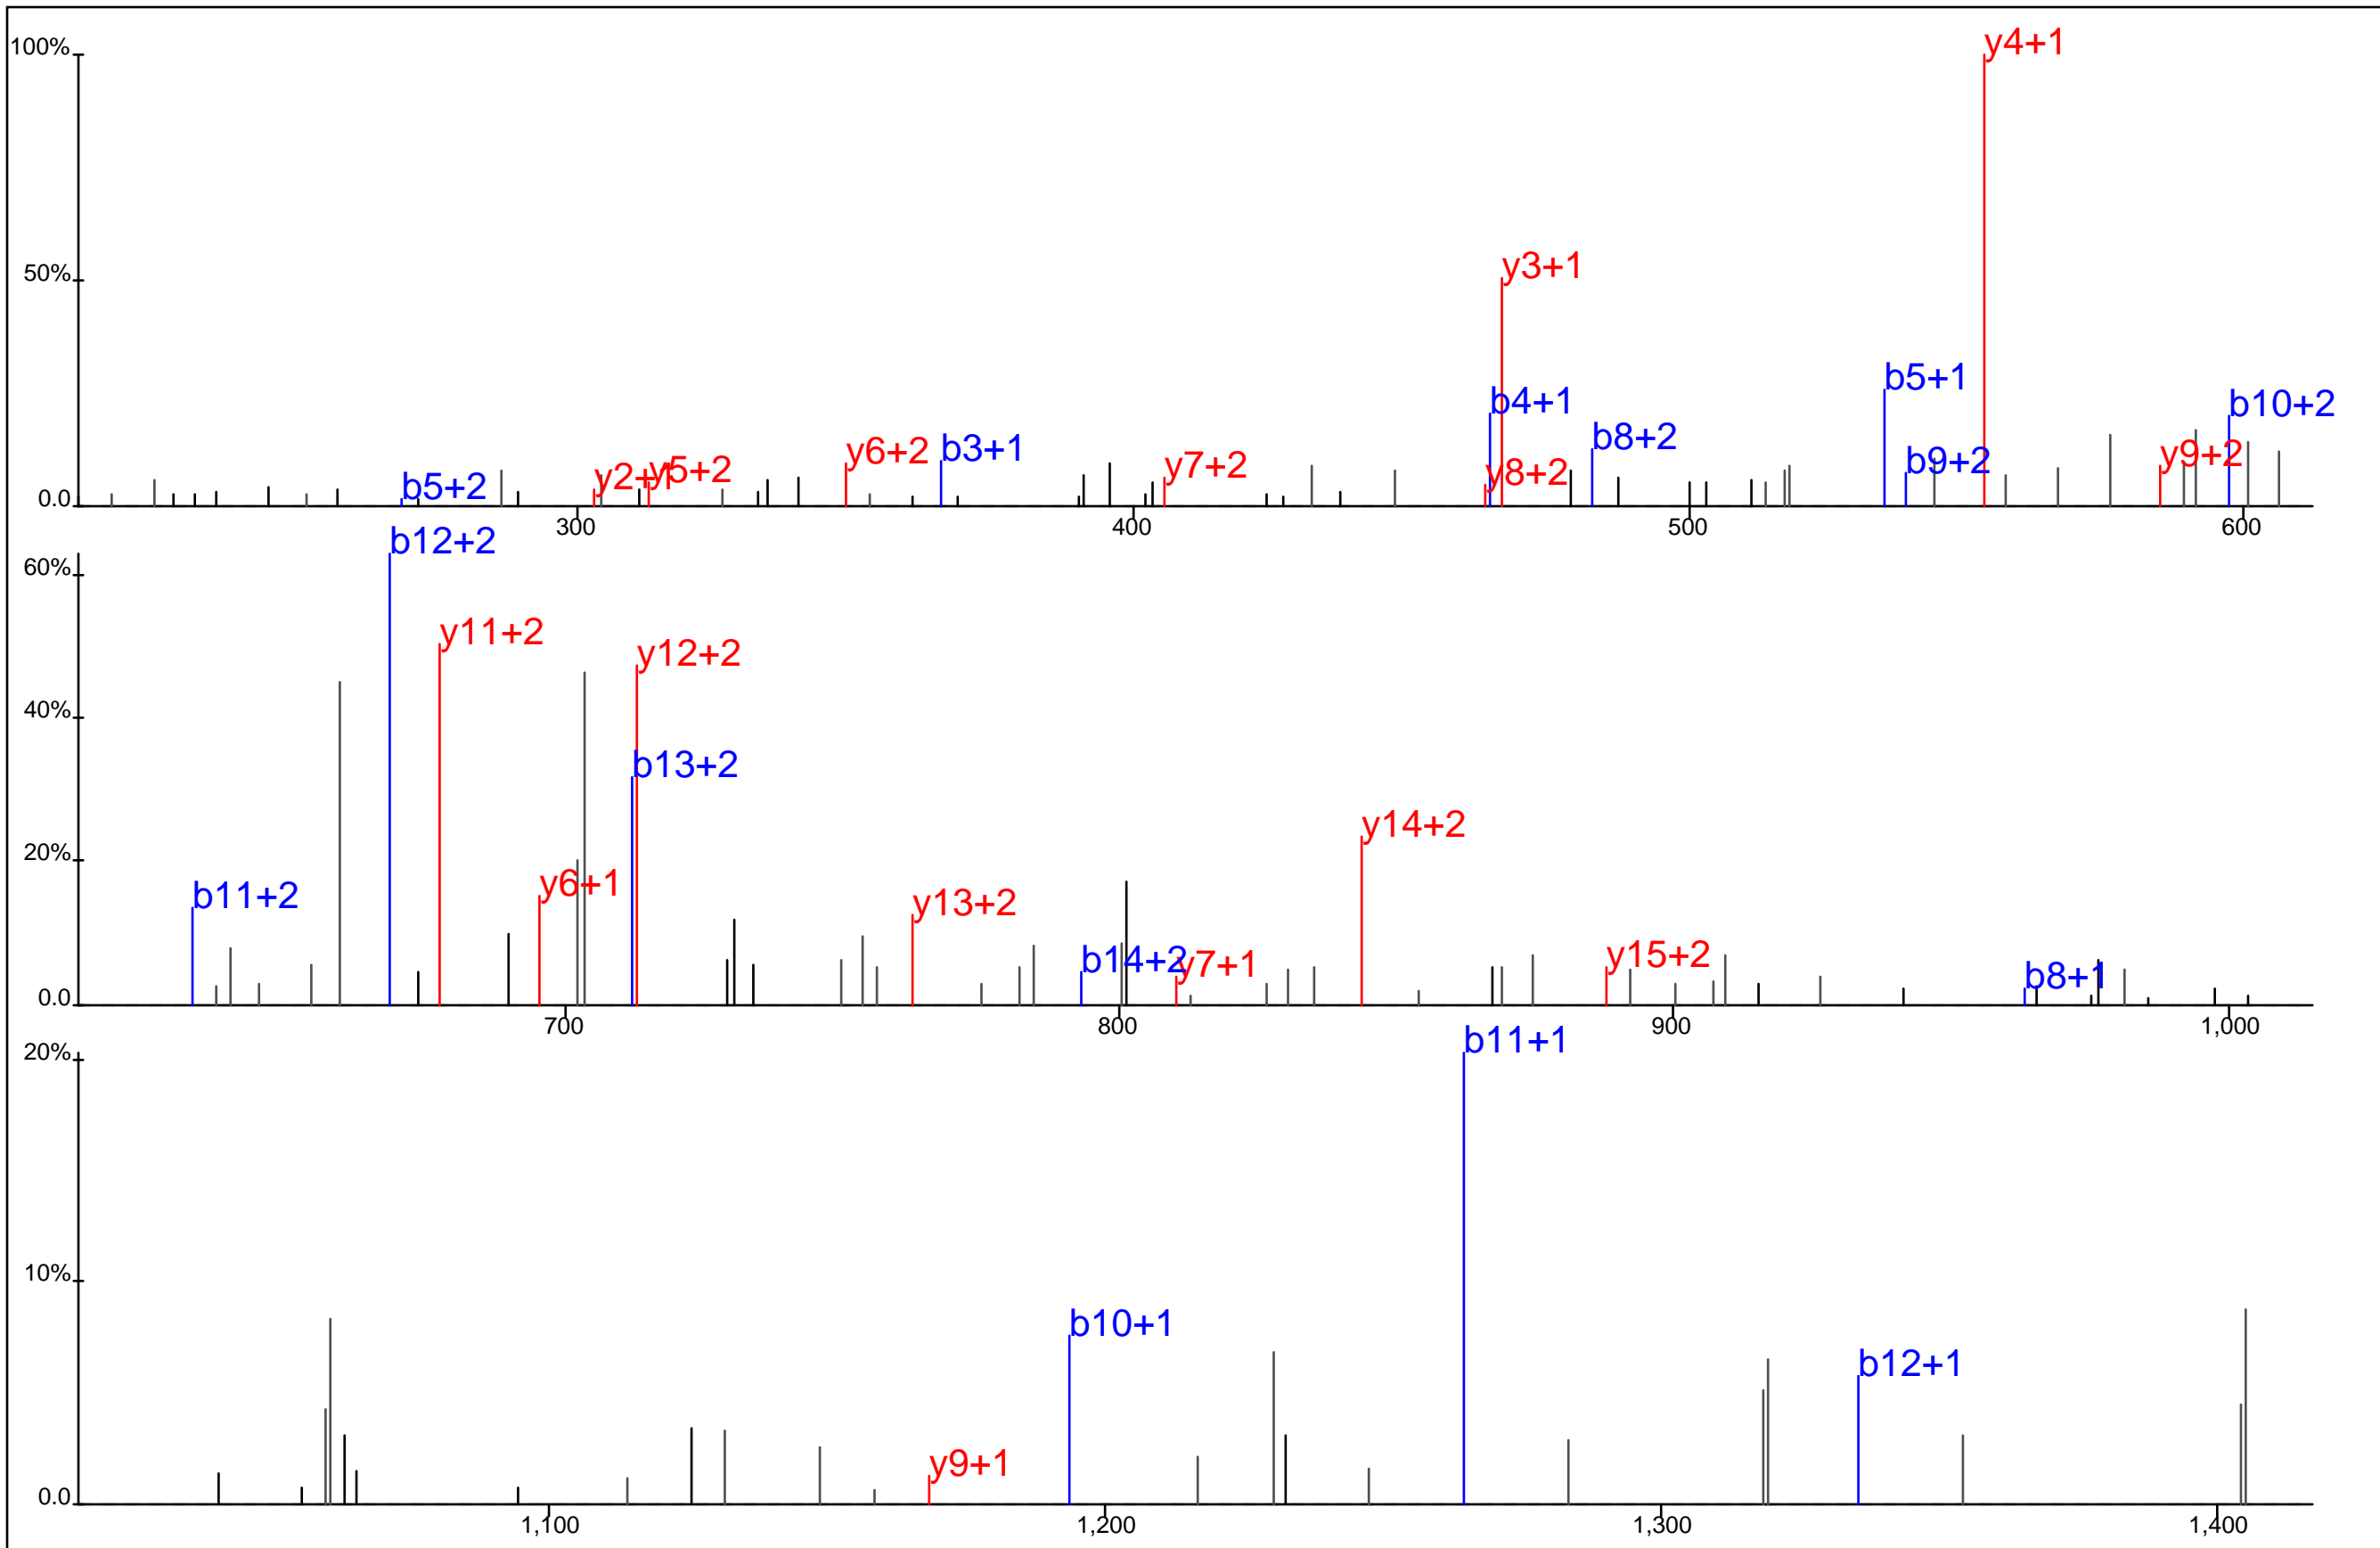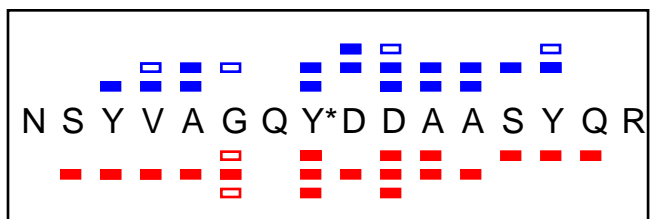

Protein Name: Glucose-6-phosphate dehydrogenase  
 gi Accession: 0  
 Precursor Mass: 629.9226+3  
 Delta Mass: 0.643 ppm  
 XCorr: 42.8



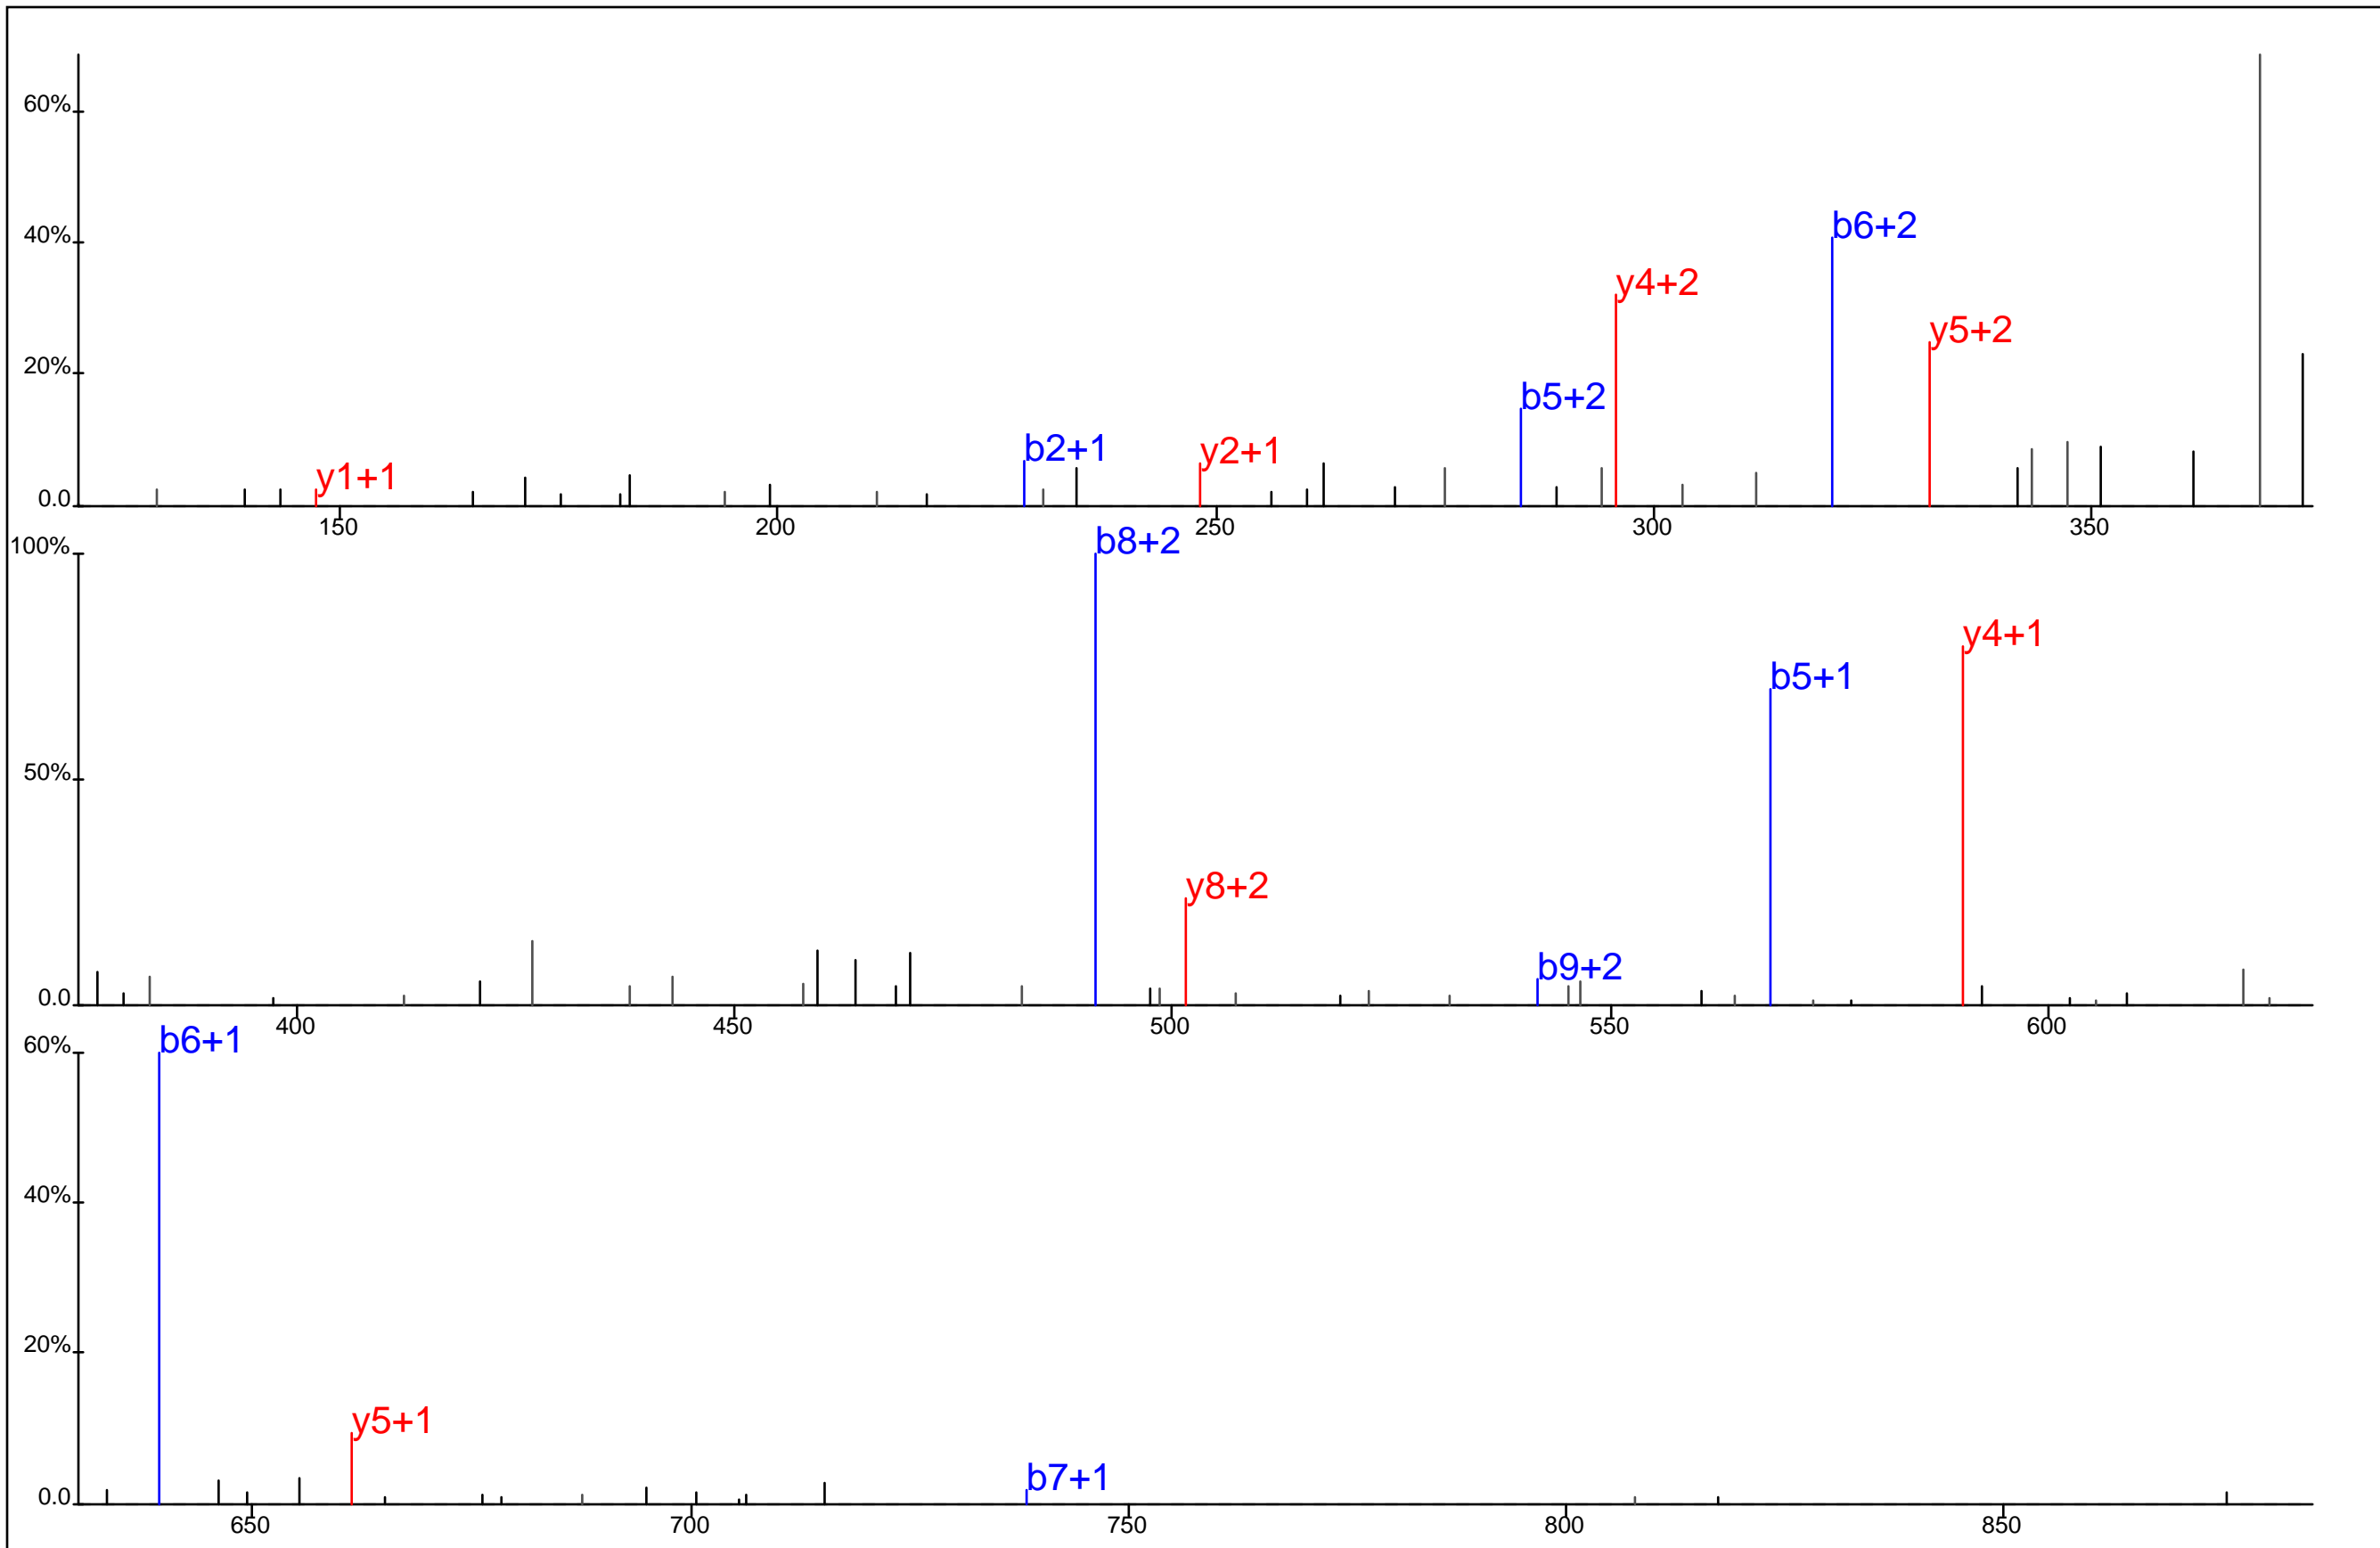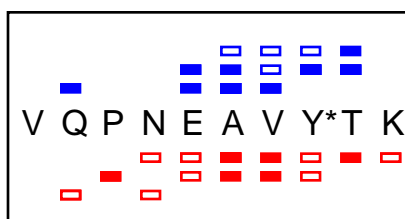

Protein Name: Glucose-6-phosphate dehydrogenase  
 gi Accession: 0  
 Precursor Mass: 410.1917+3  
 Delta Mass: 0.427 ppm  
 XCorr: 23.84

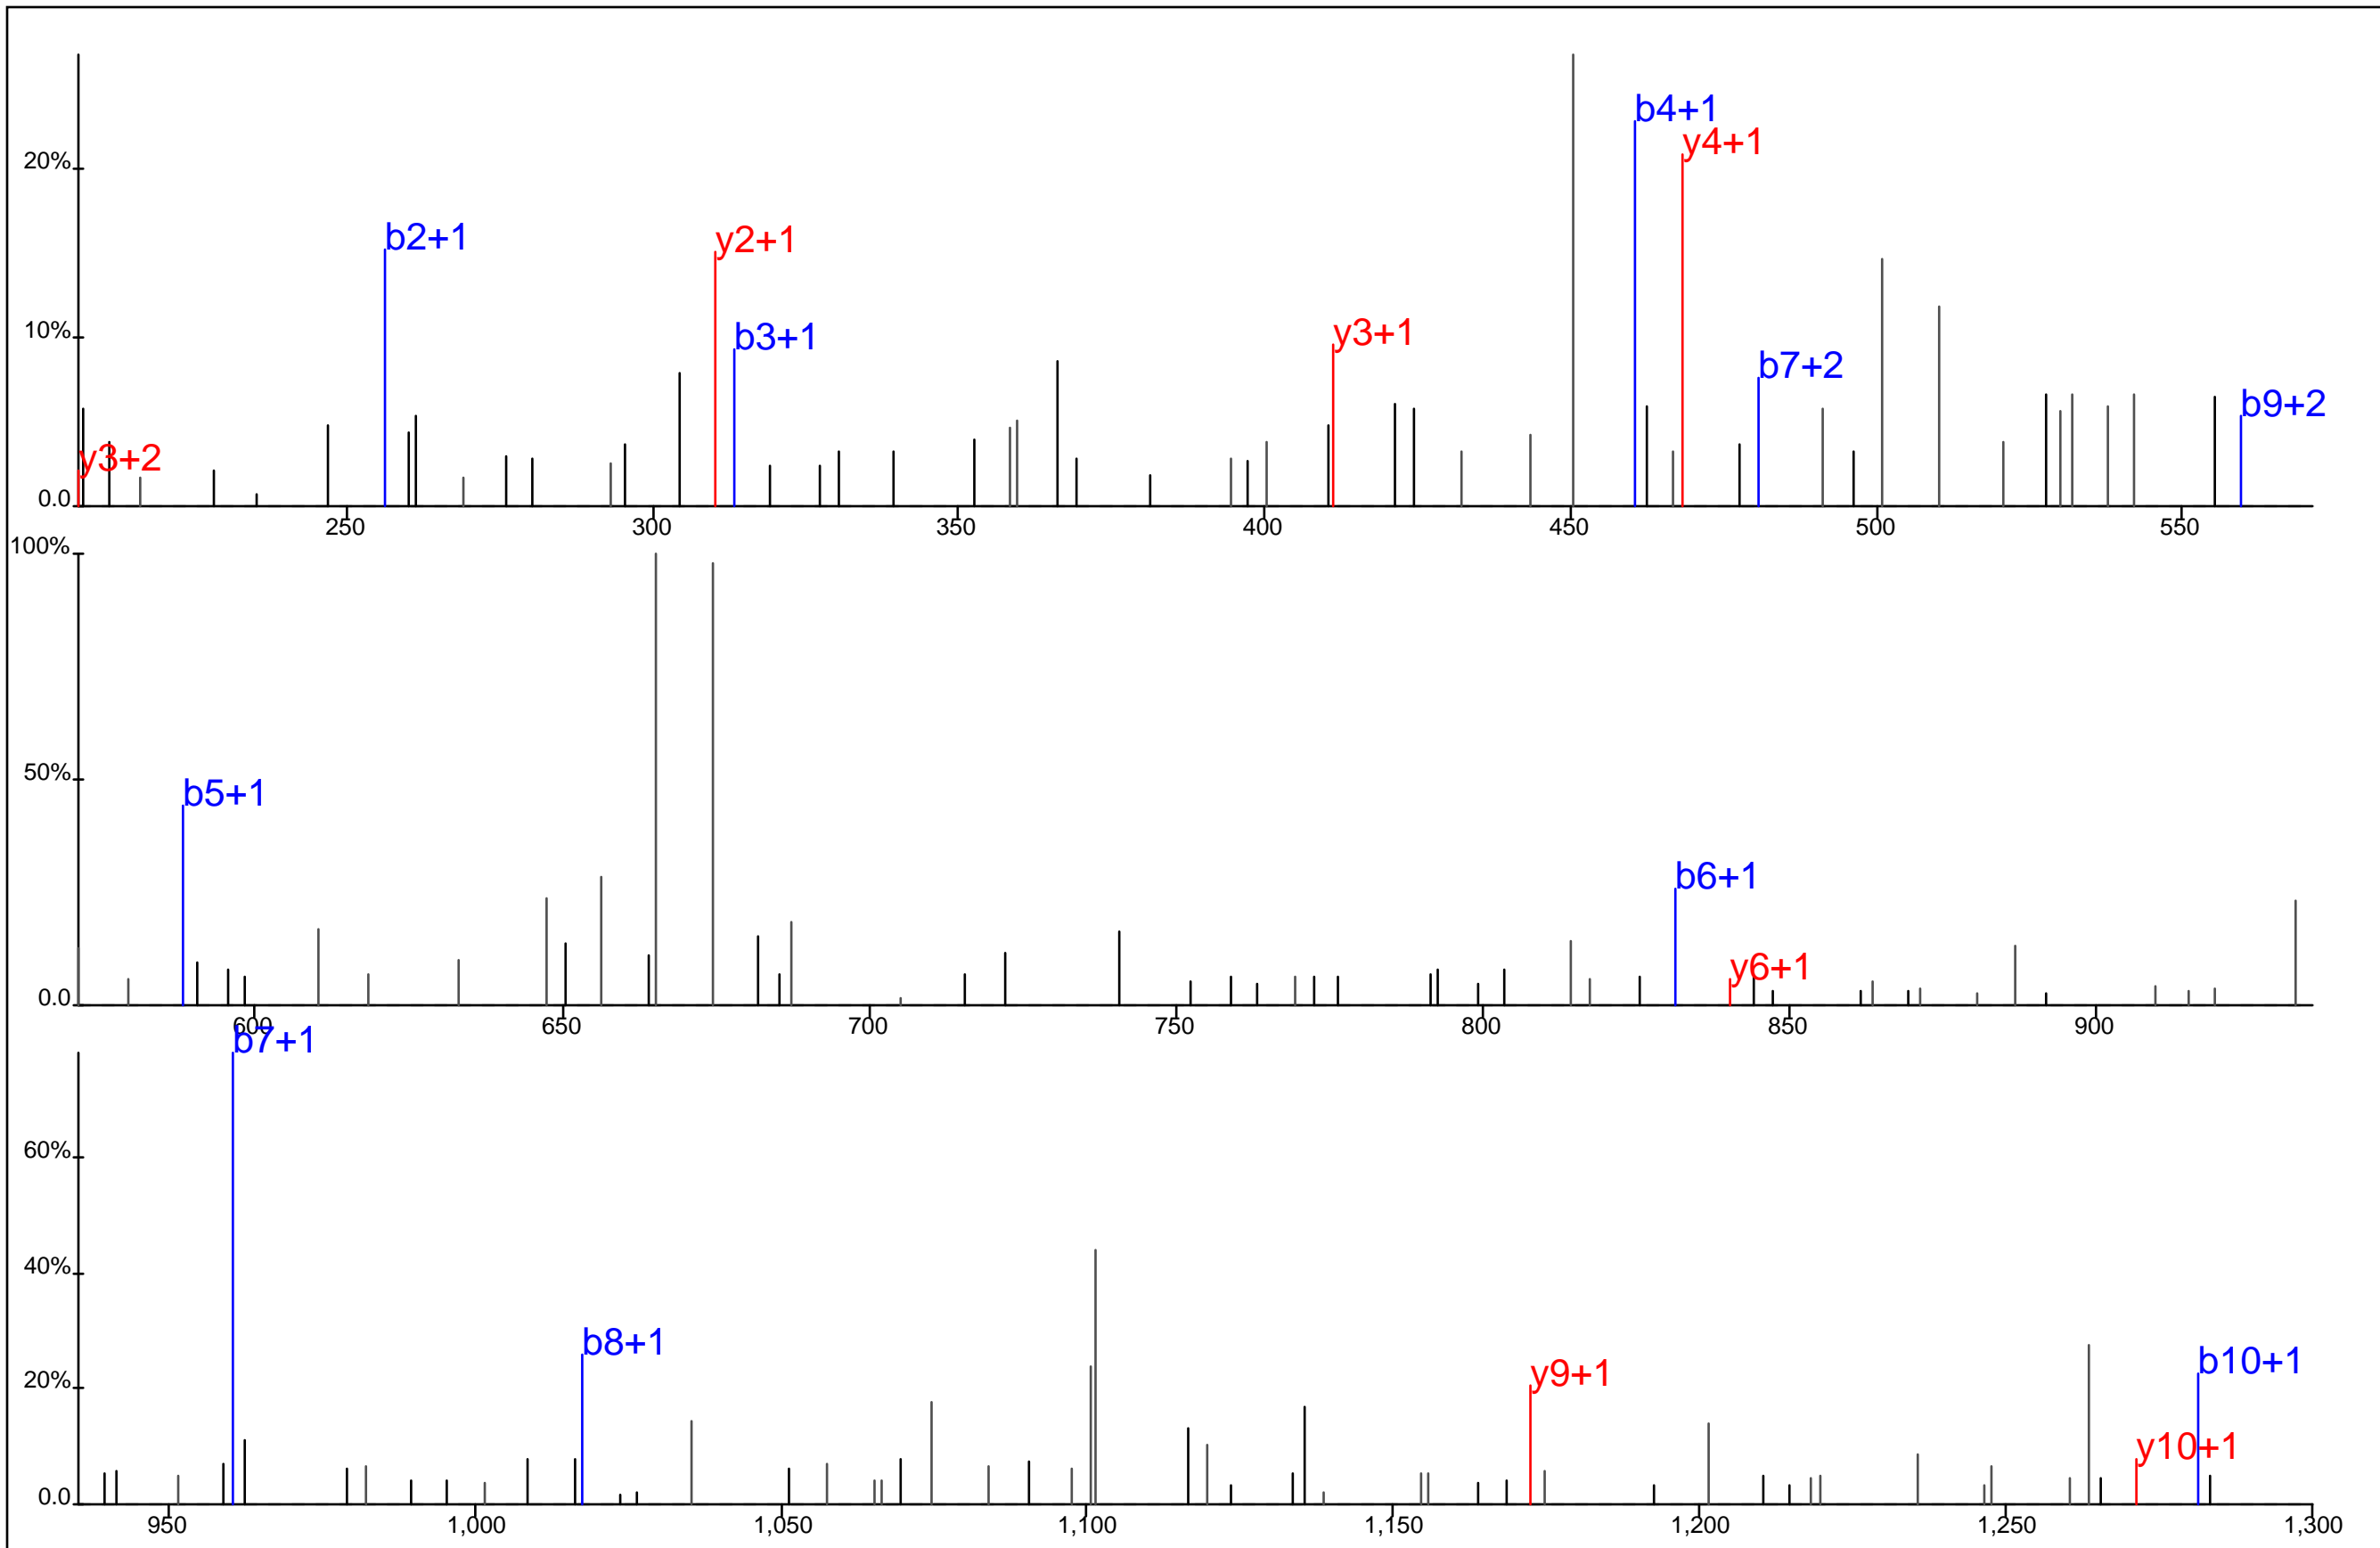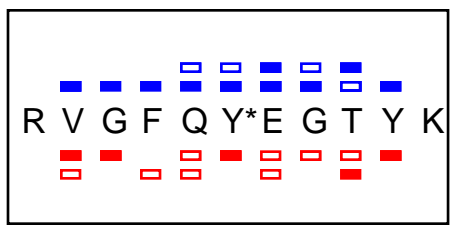

Protein Name: Glucose-6-phosphate dehydrogenase  
 gi Accession: 0  
 Precursor Mass: 714.3223+2  
 Delta Mass: 1.236 ppm  
 XCorr: 58.62

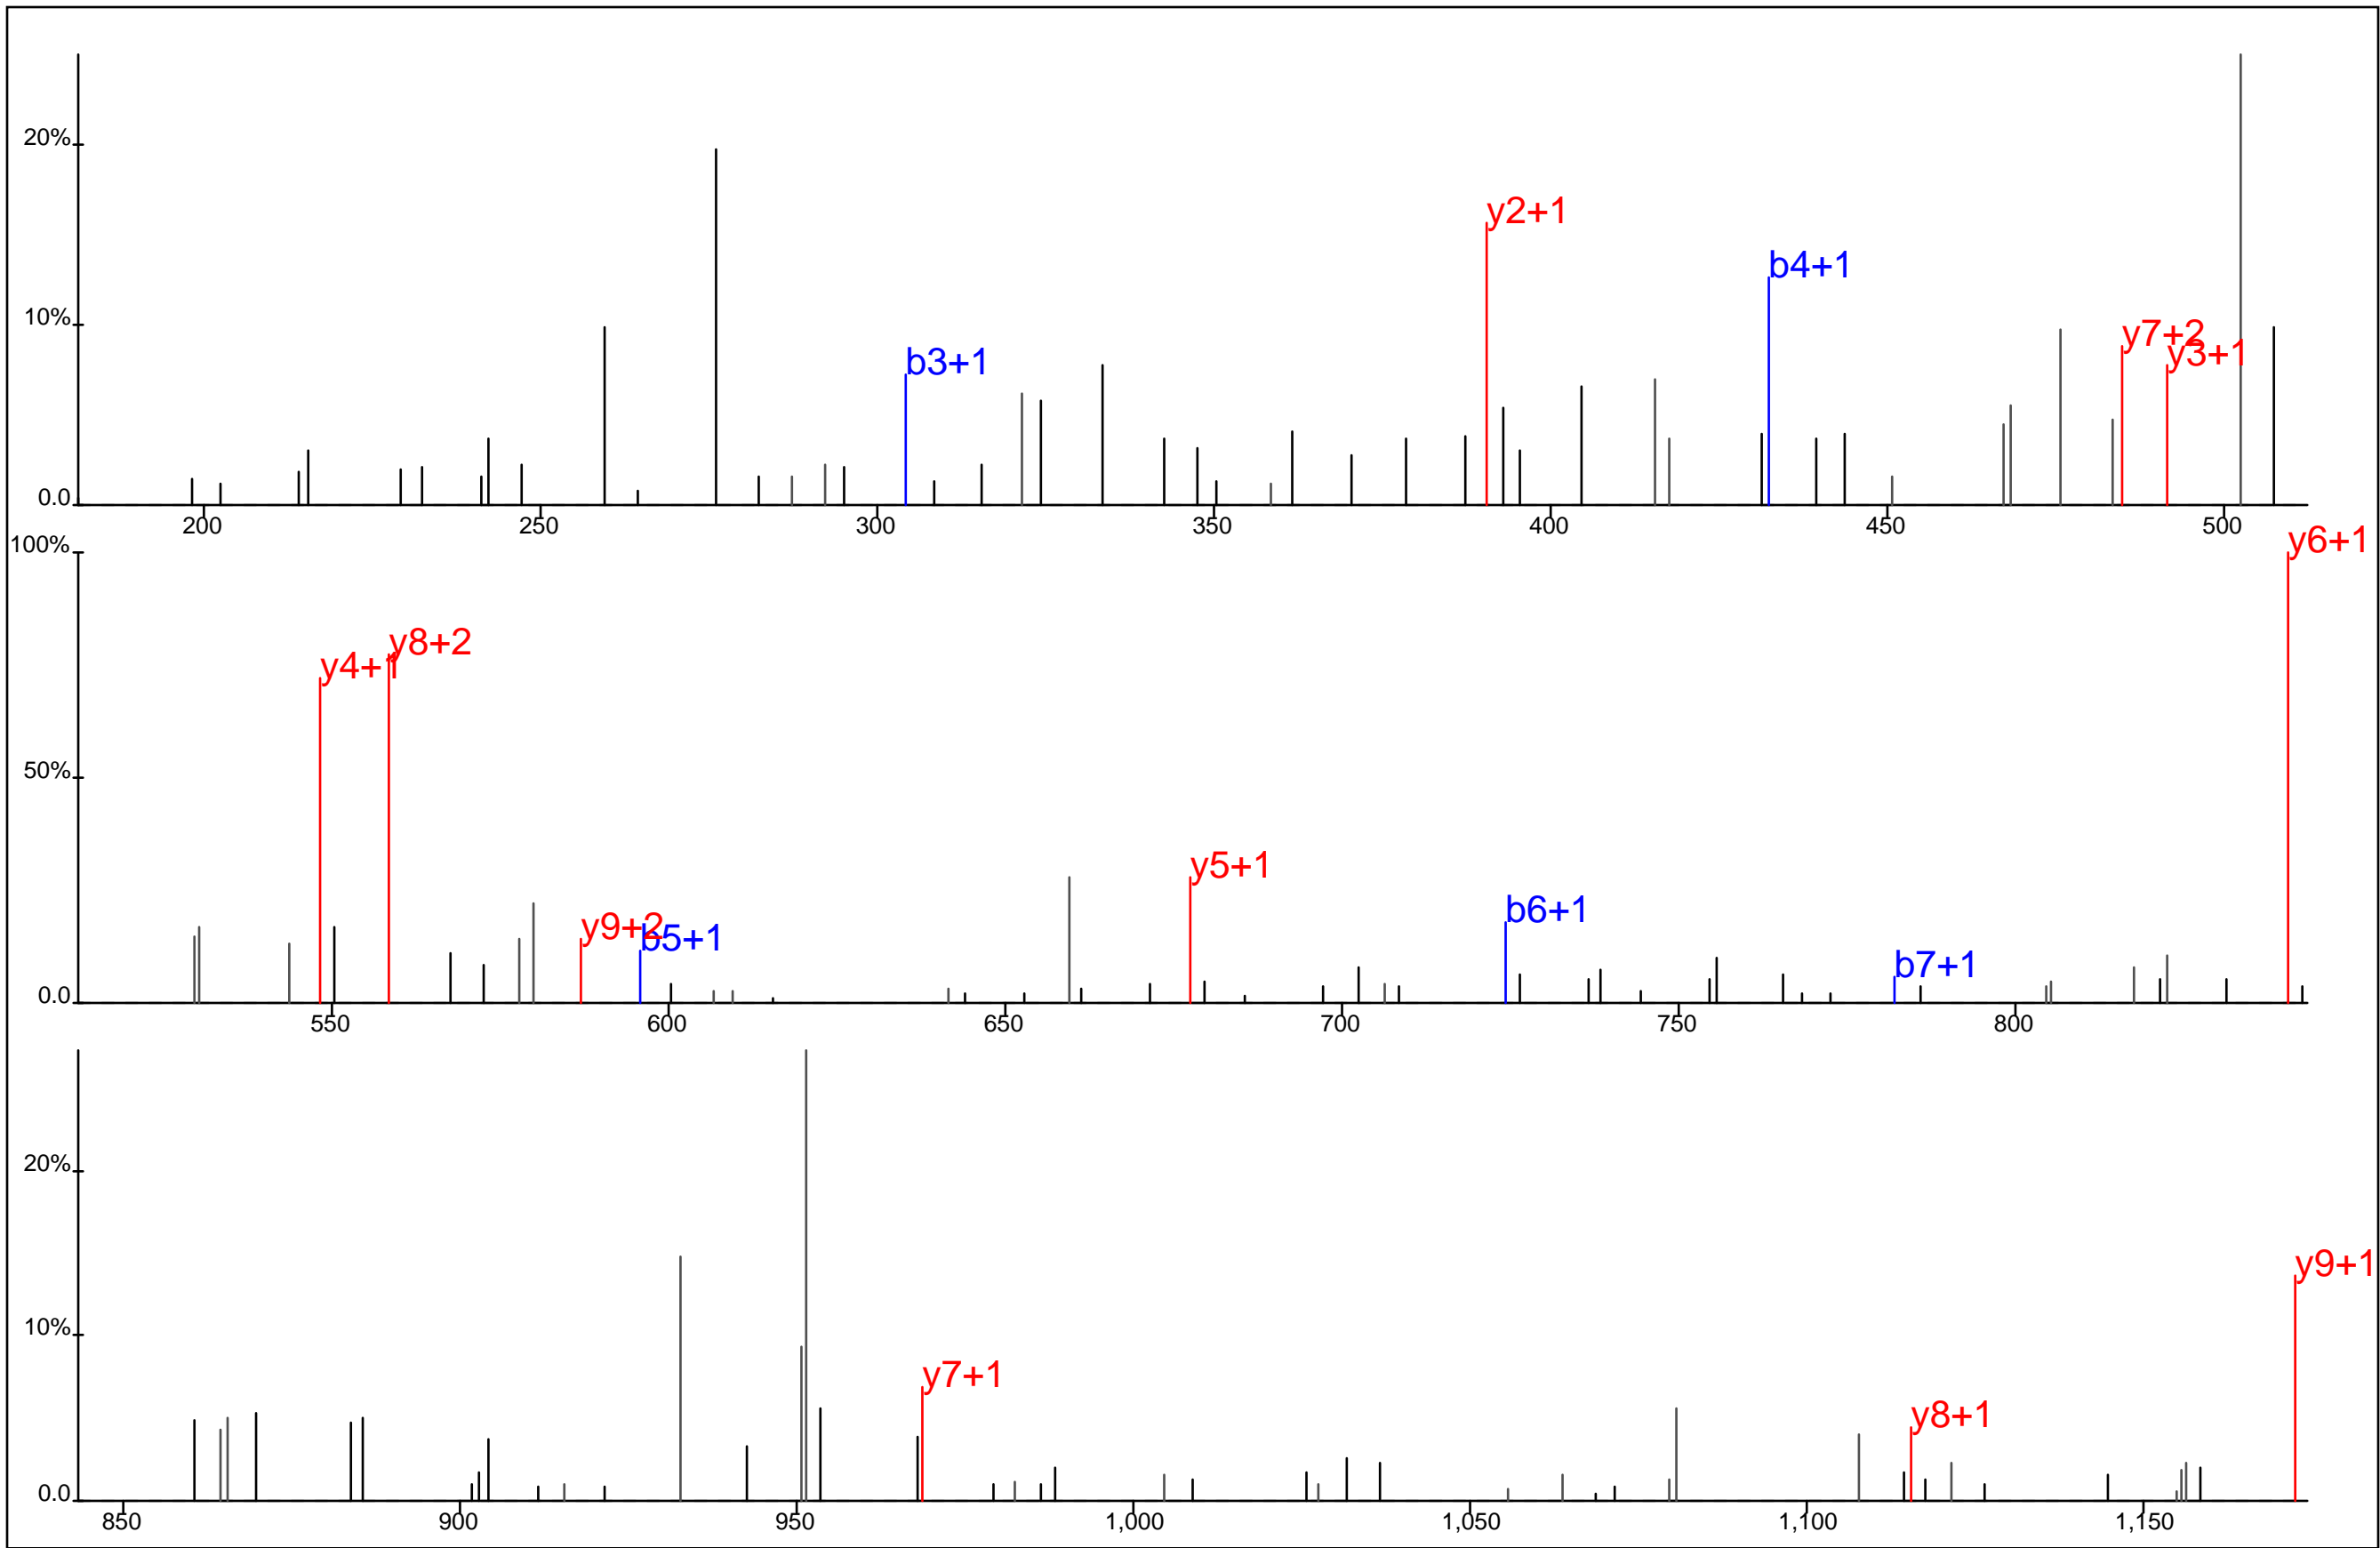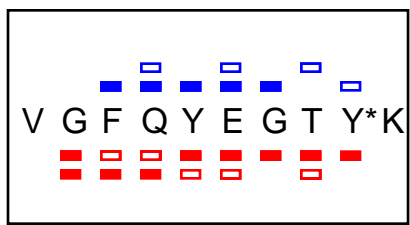

Protein Name: Glucose-6-phosphate dehydrogenase  
 gi Accession: 0  
 Precursor Mass: 636.2706+2  
 Delta Mass: 0.417 ppm  
 XCorr: 37.67

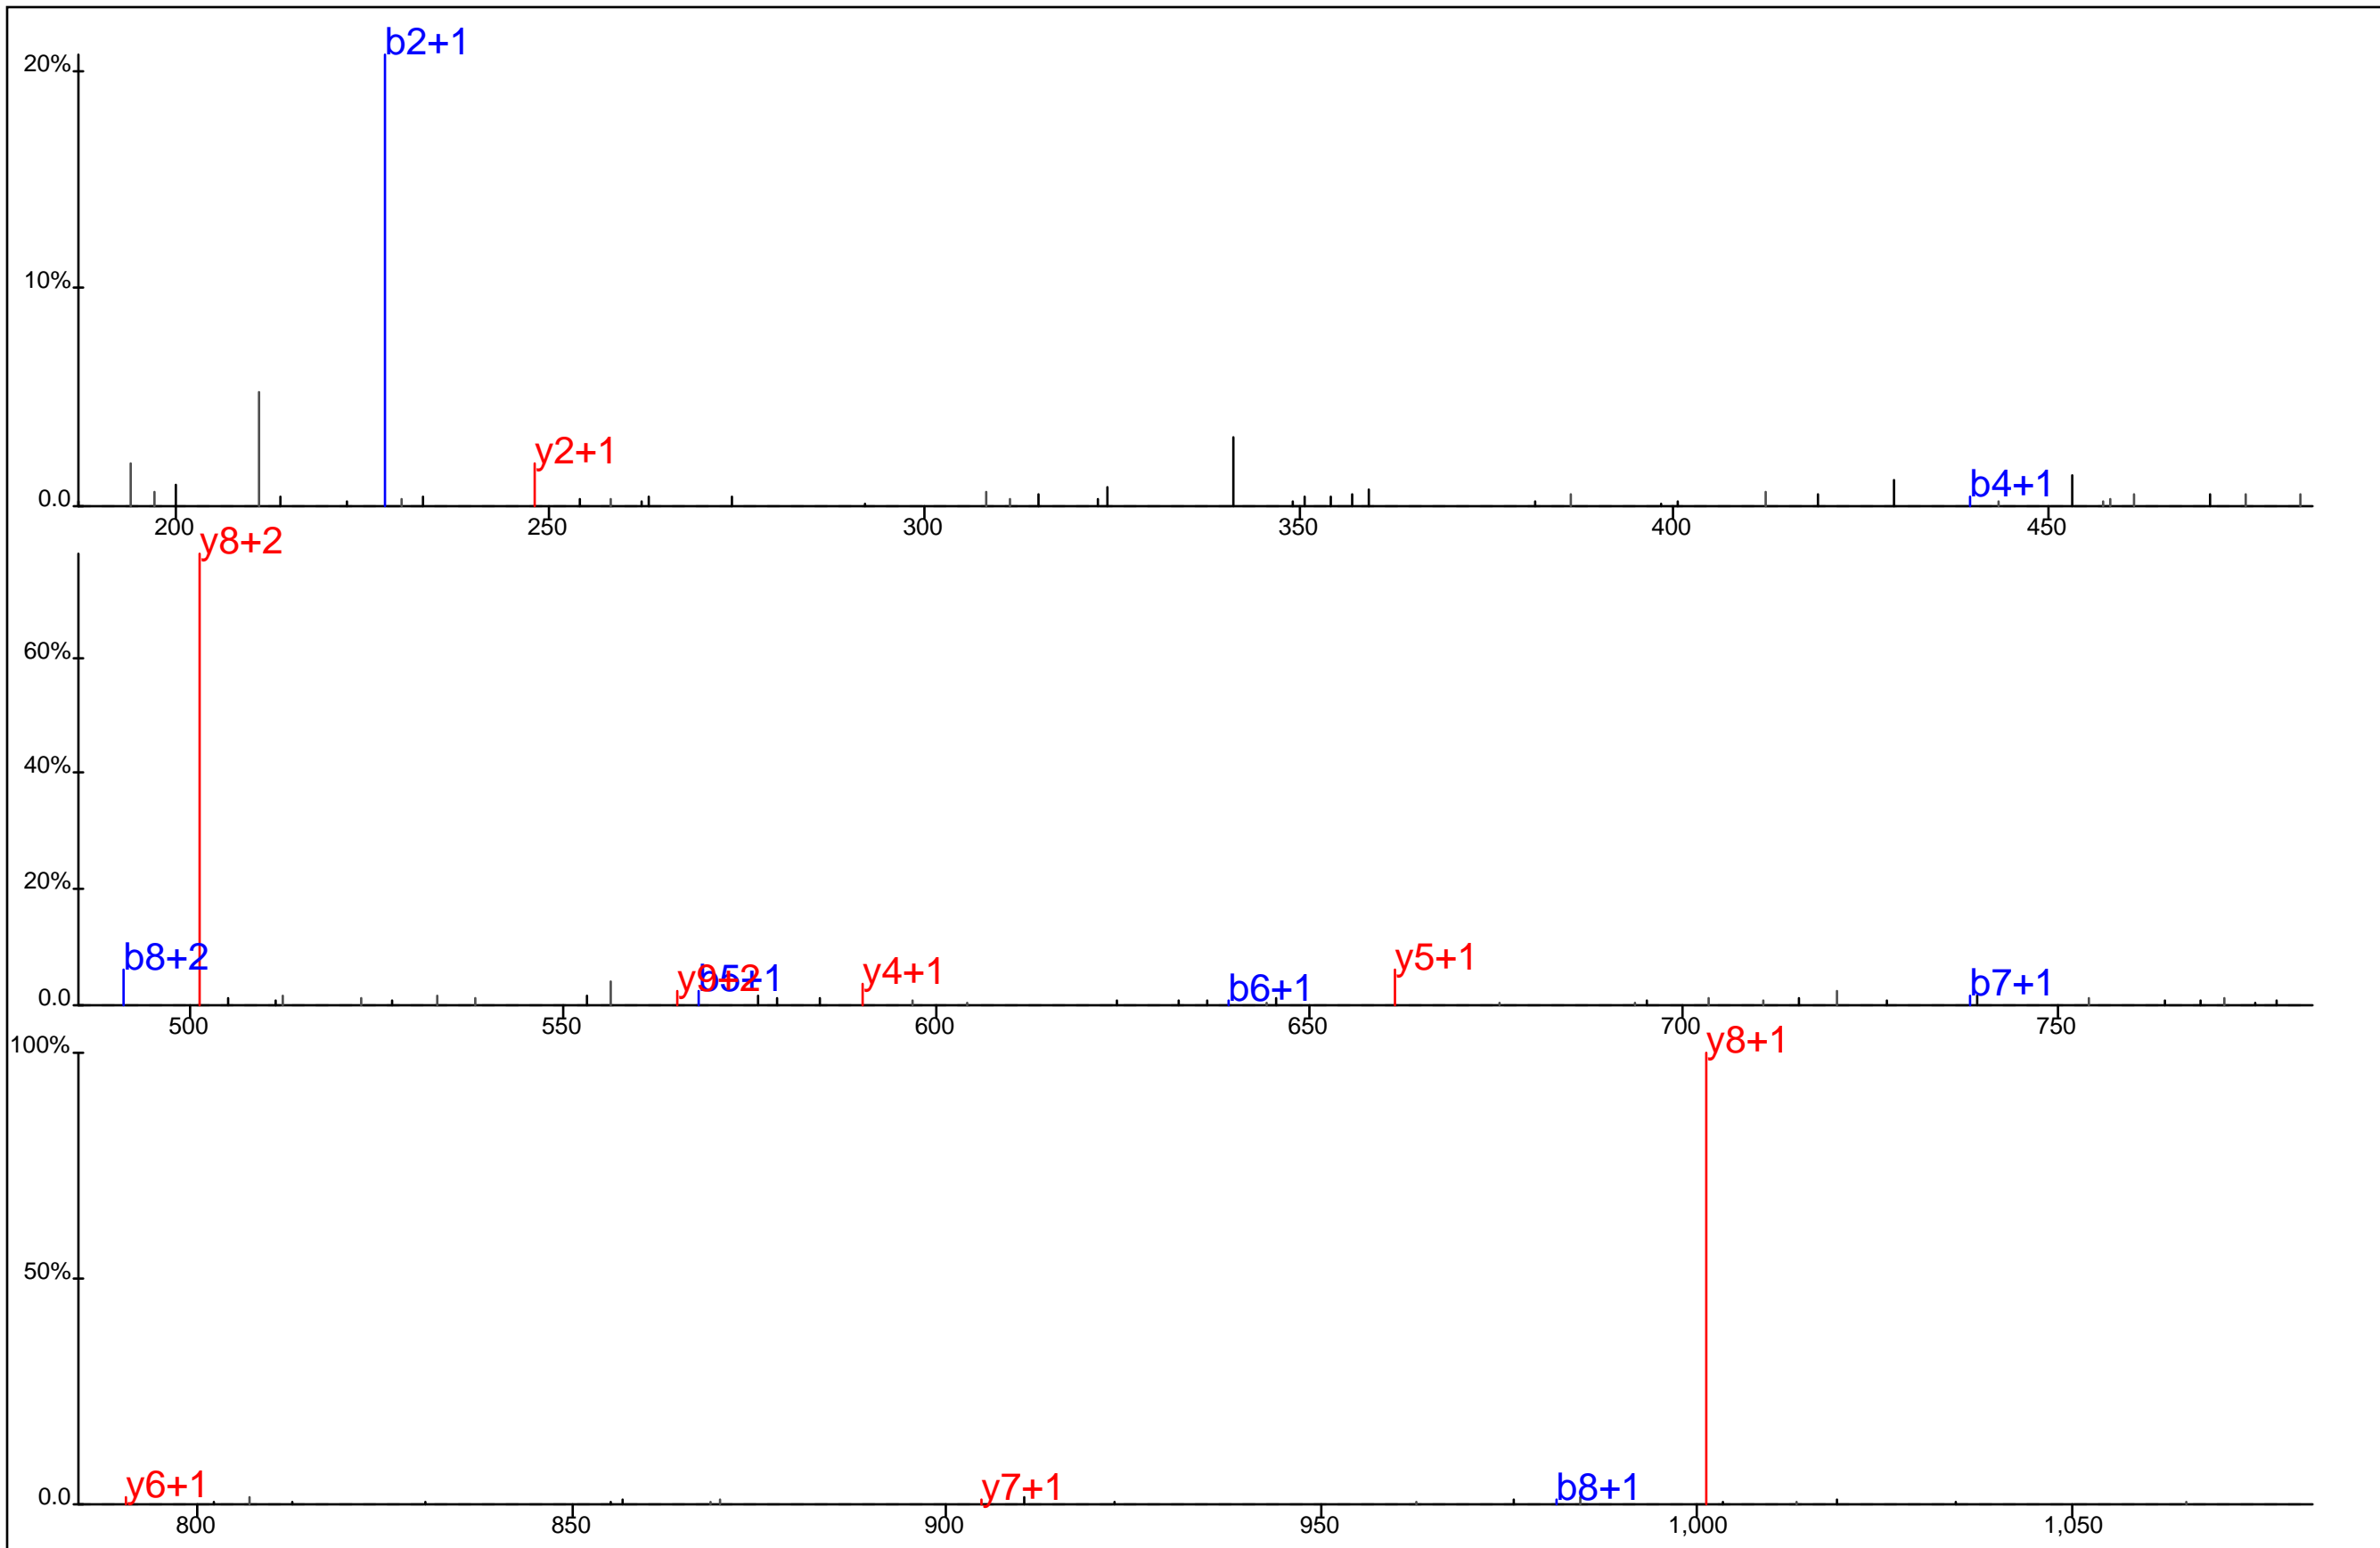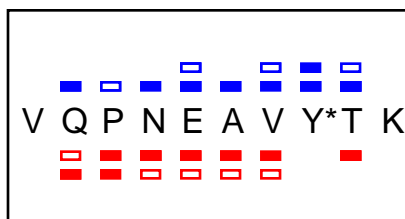

Protein Name: Glucose-6-phosphate dehydrogenase  
 gi Accession: 0  
 Precursor Mass: 614.7842+2  
 Delta Mass: 0.231 ppm  
 XCorr: 39.54

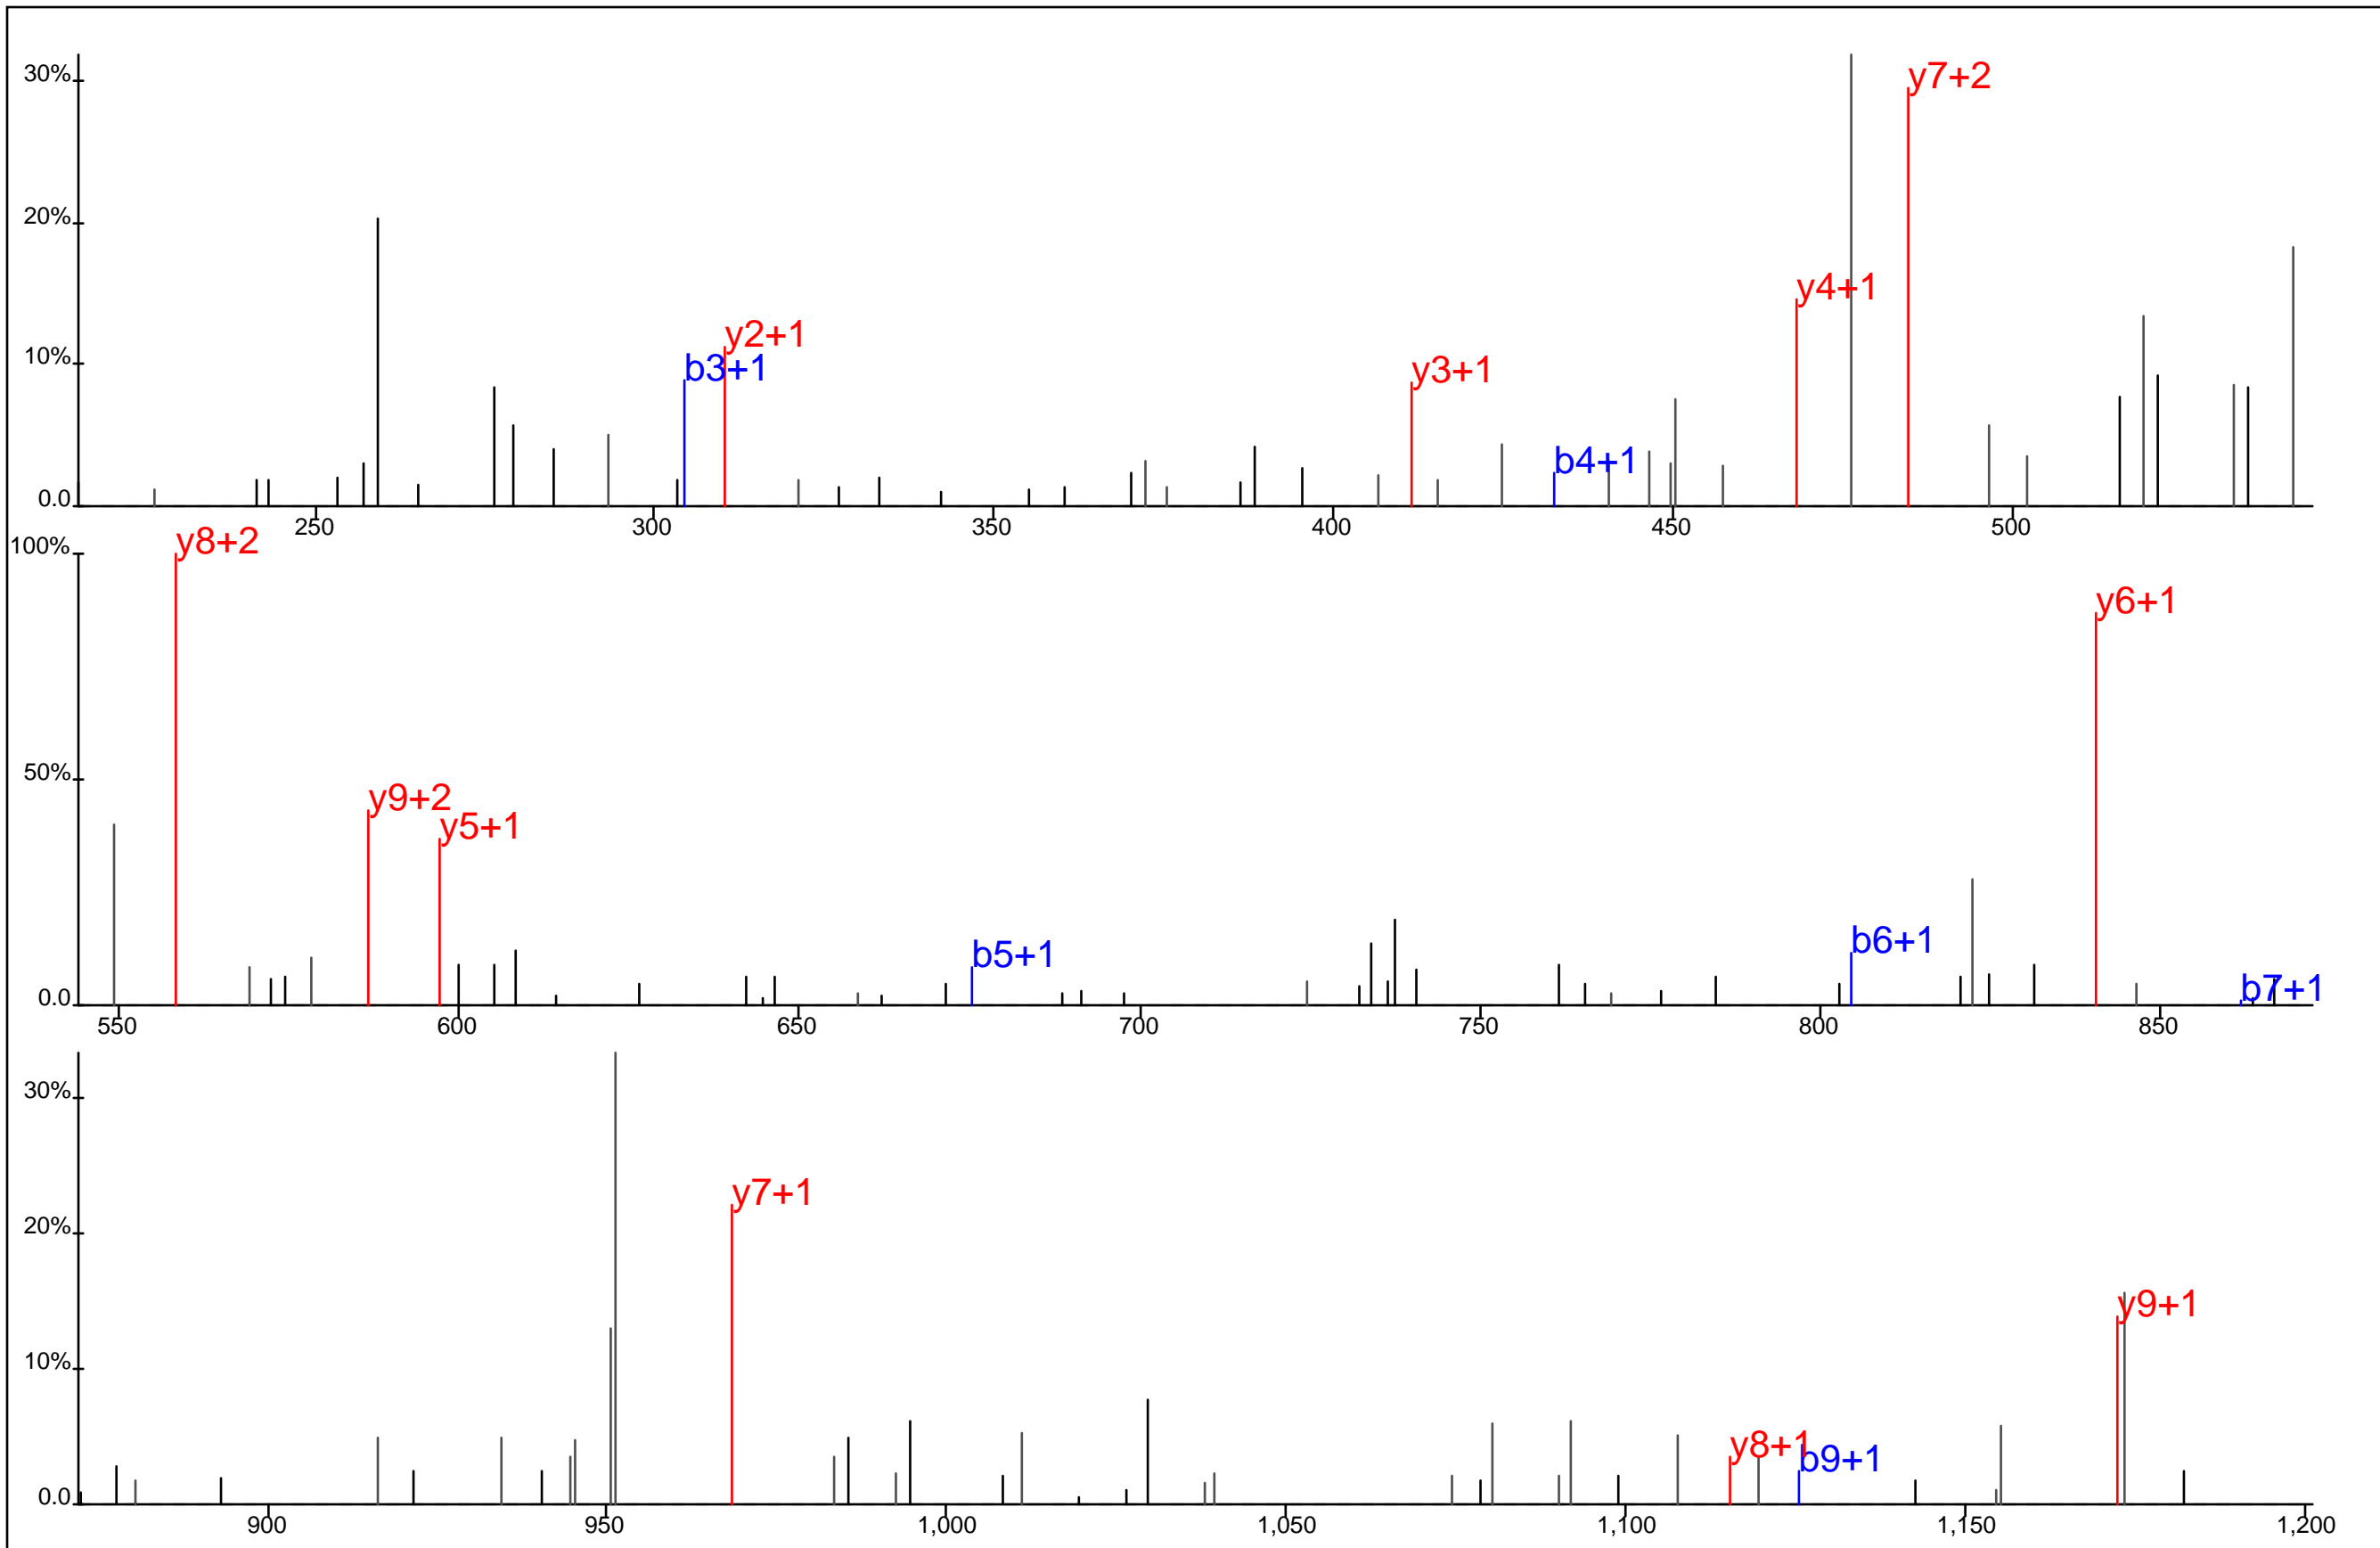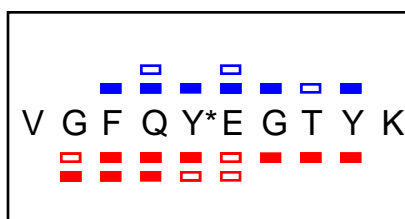

Protein Name: Glucose-6-phosphate dehydrogenase  
 gi Accession: 0  
 Precursor Mass: 636.2711+2  
 Delta Mass: 0.351 ppm  
 XCorr: 40.28

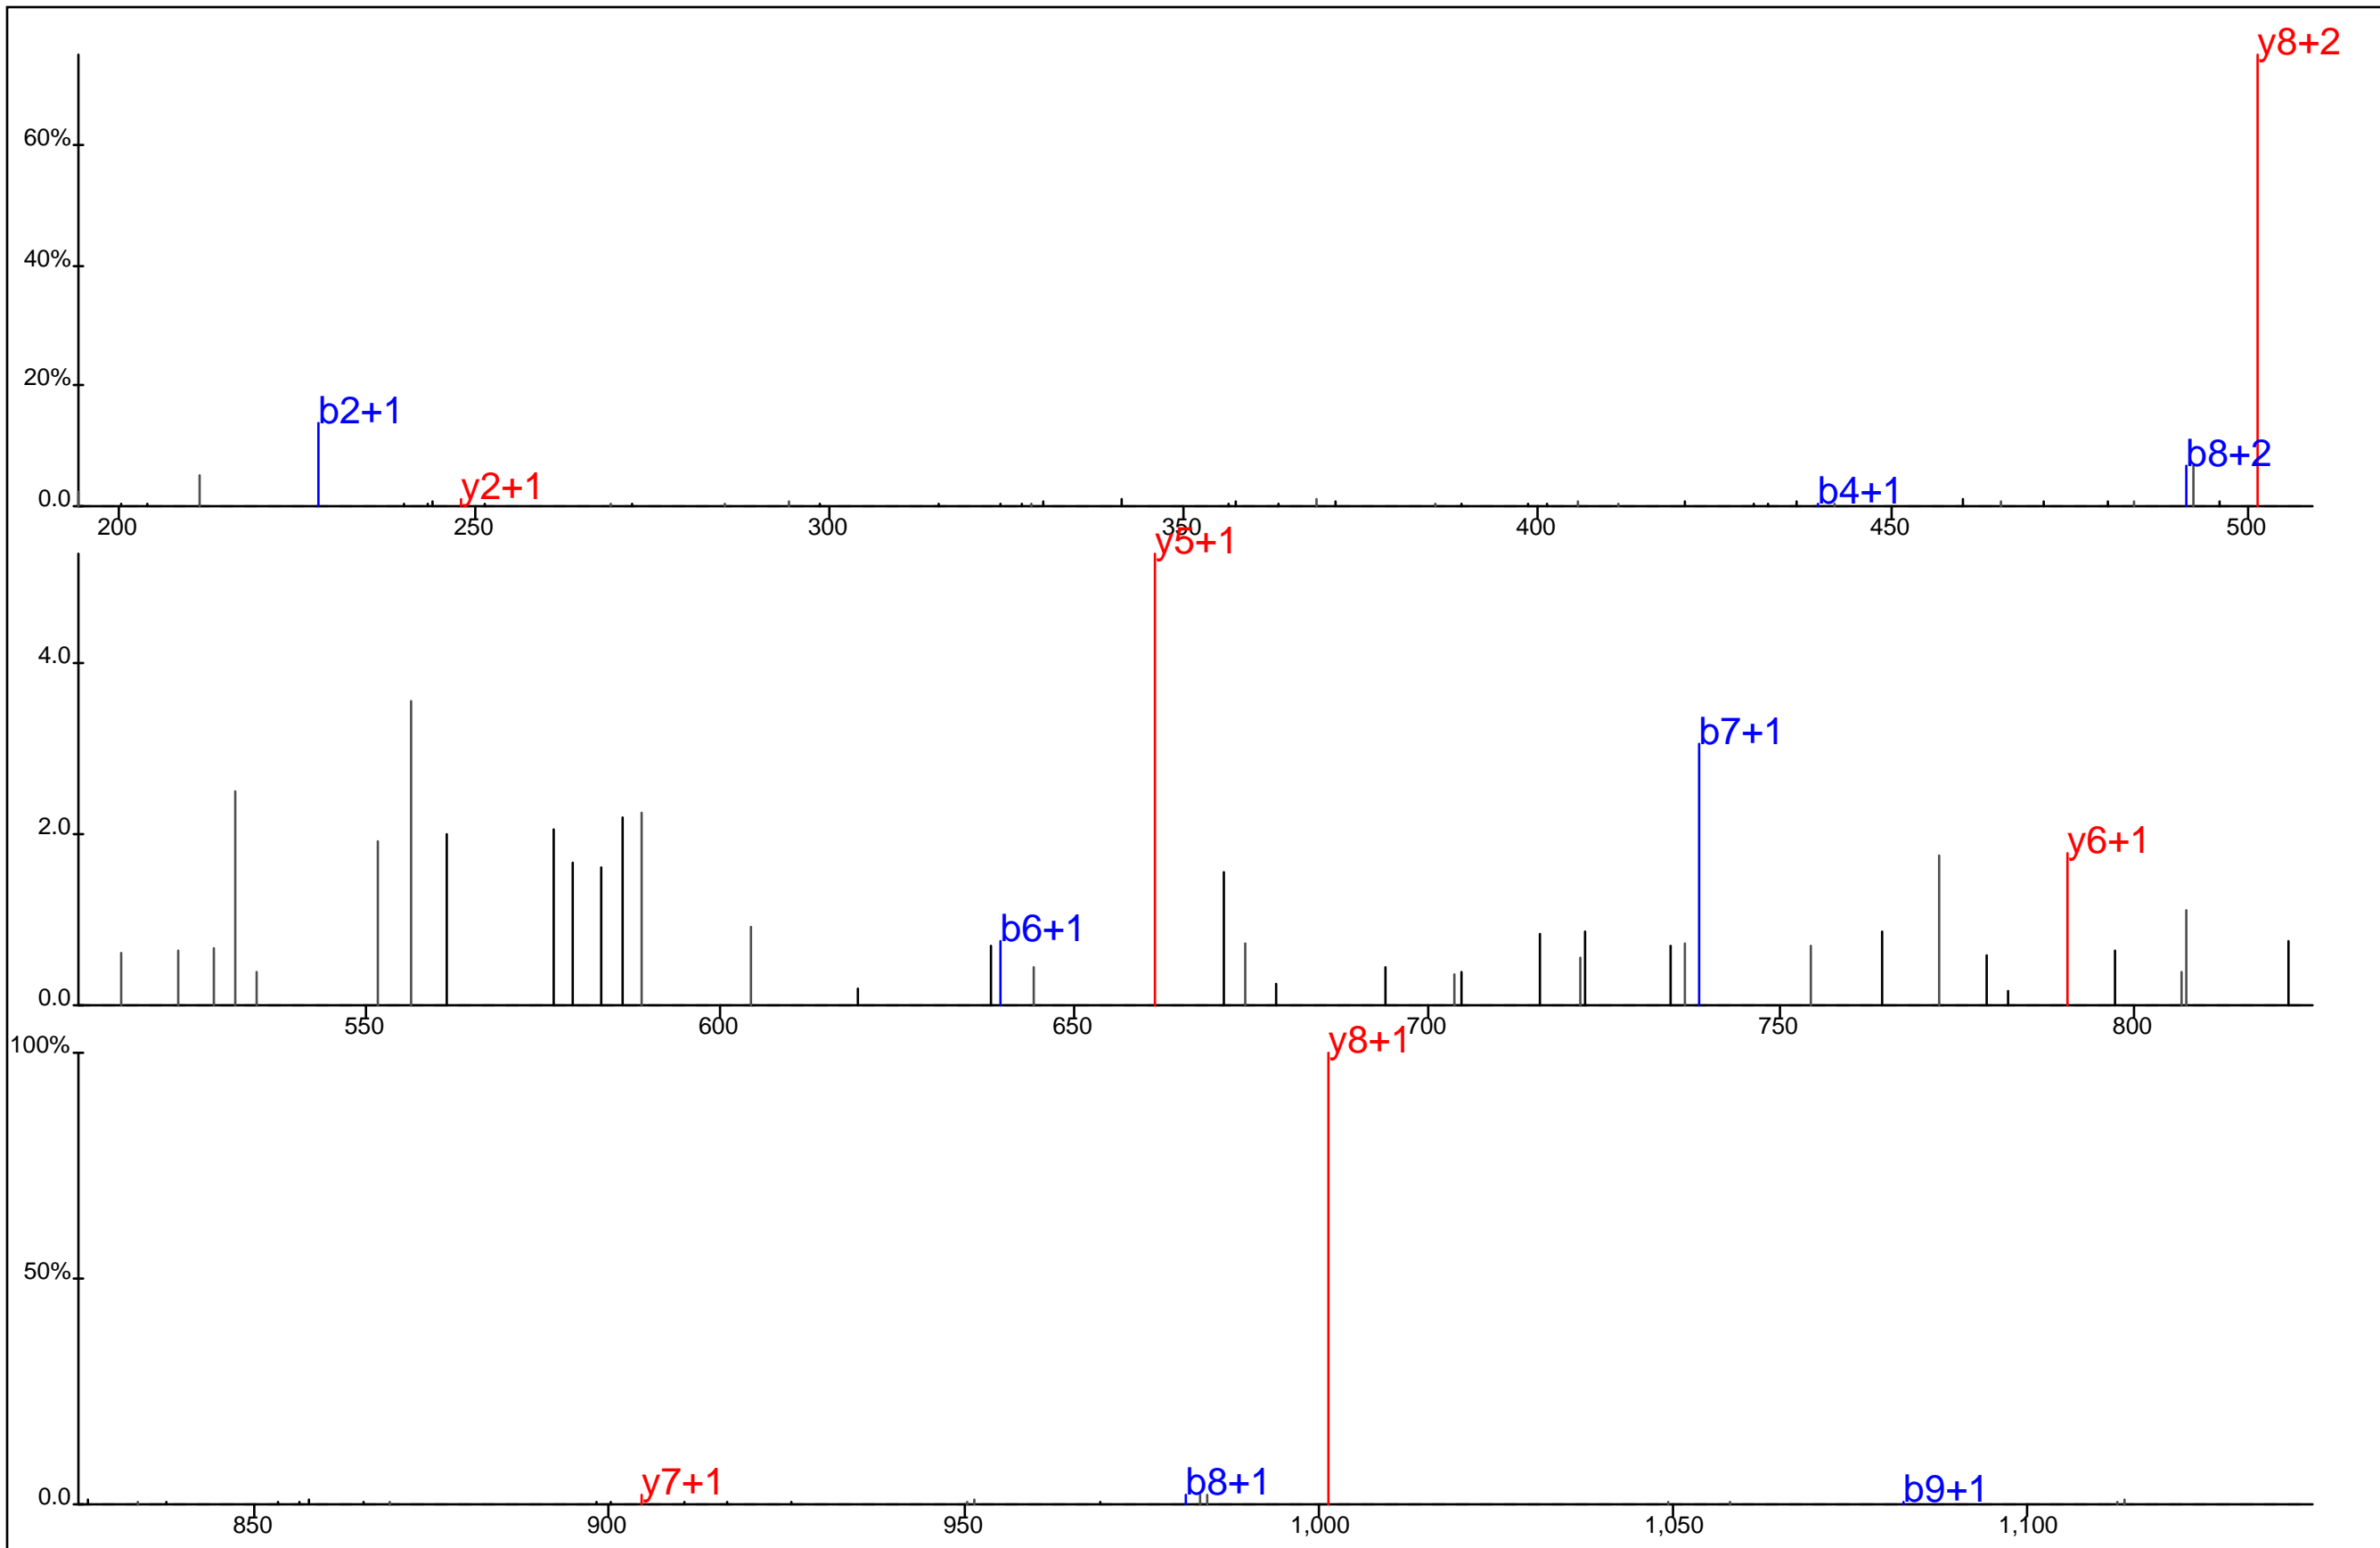

V Q P N E A V Y\* T K  
 (Fragmentation pattern diagram with blue and red boxes)

Protein Name: Glucose-6-phosphate dehydrogenase  
 gi Accession: 0  
 Precursor Mass: 614.7842+2  
 Delta Mass: 0.132 ppm  
 XCorr: 32.73

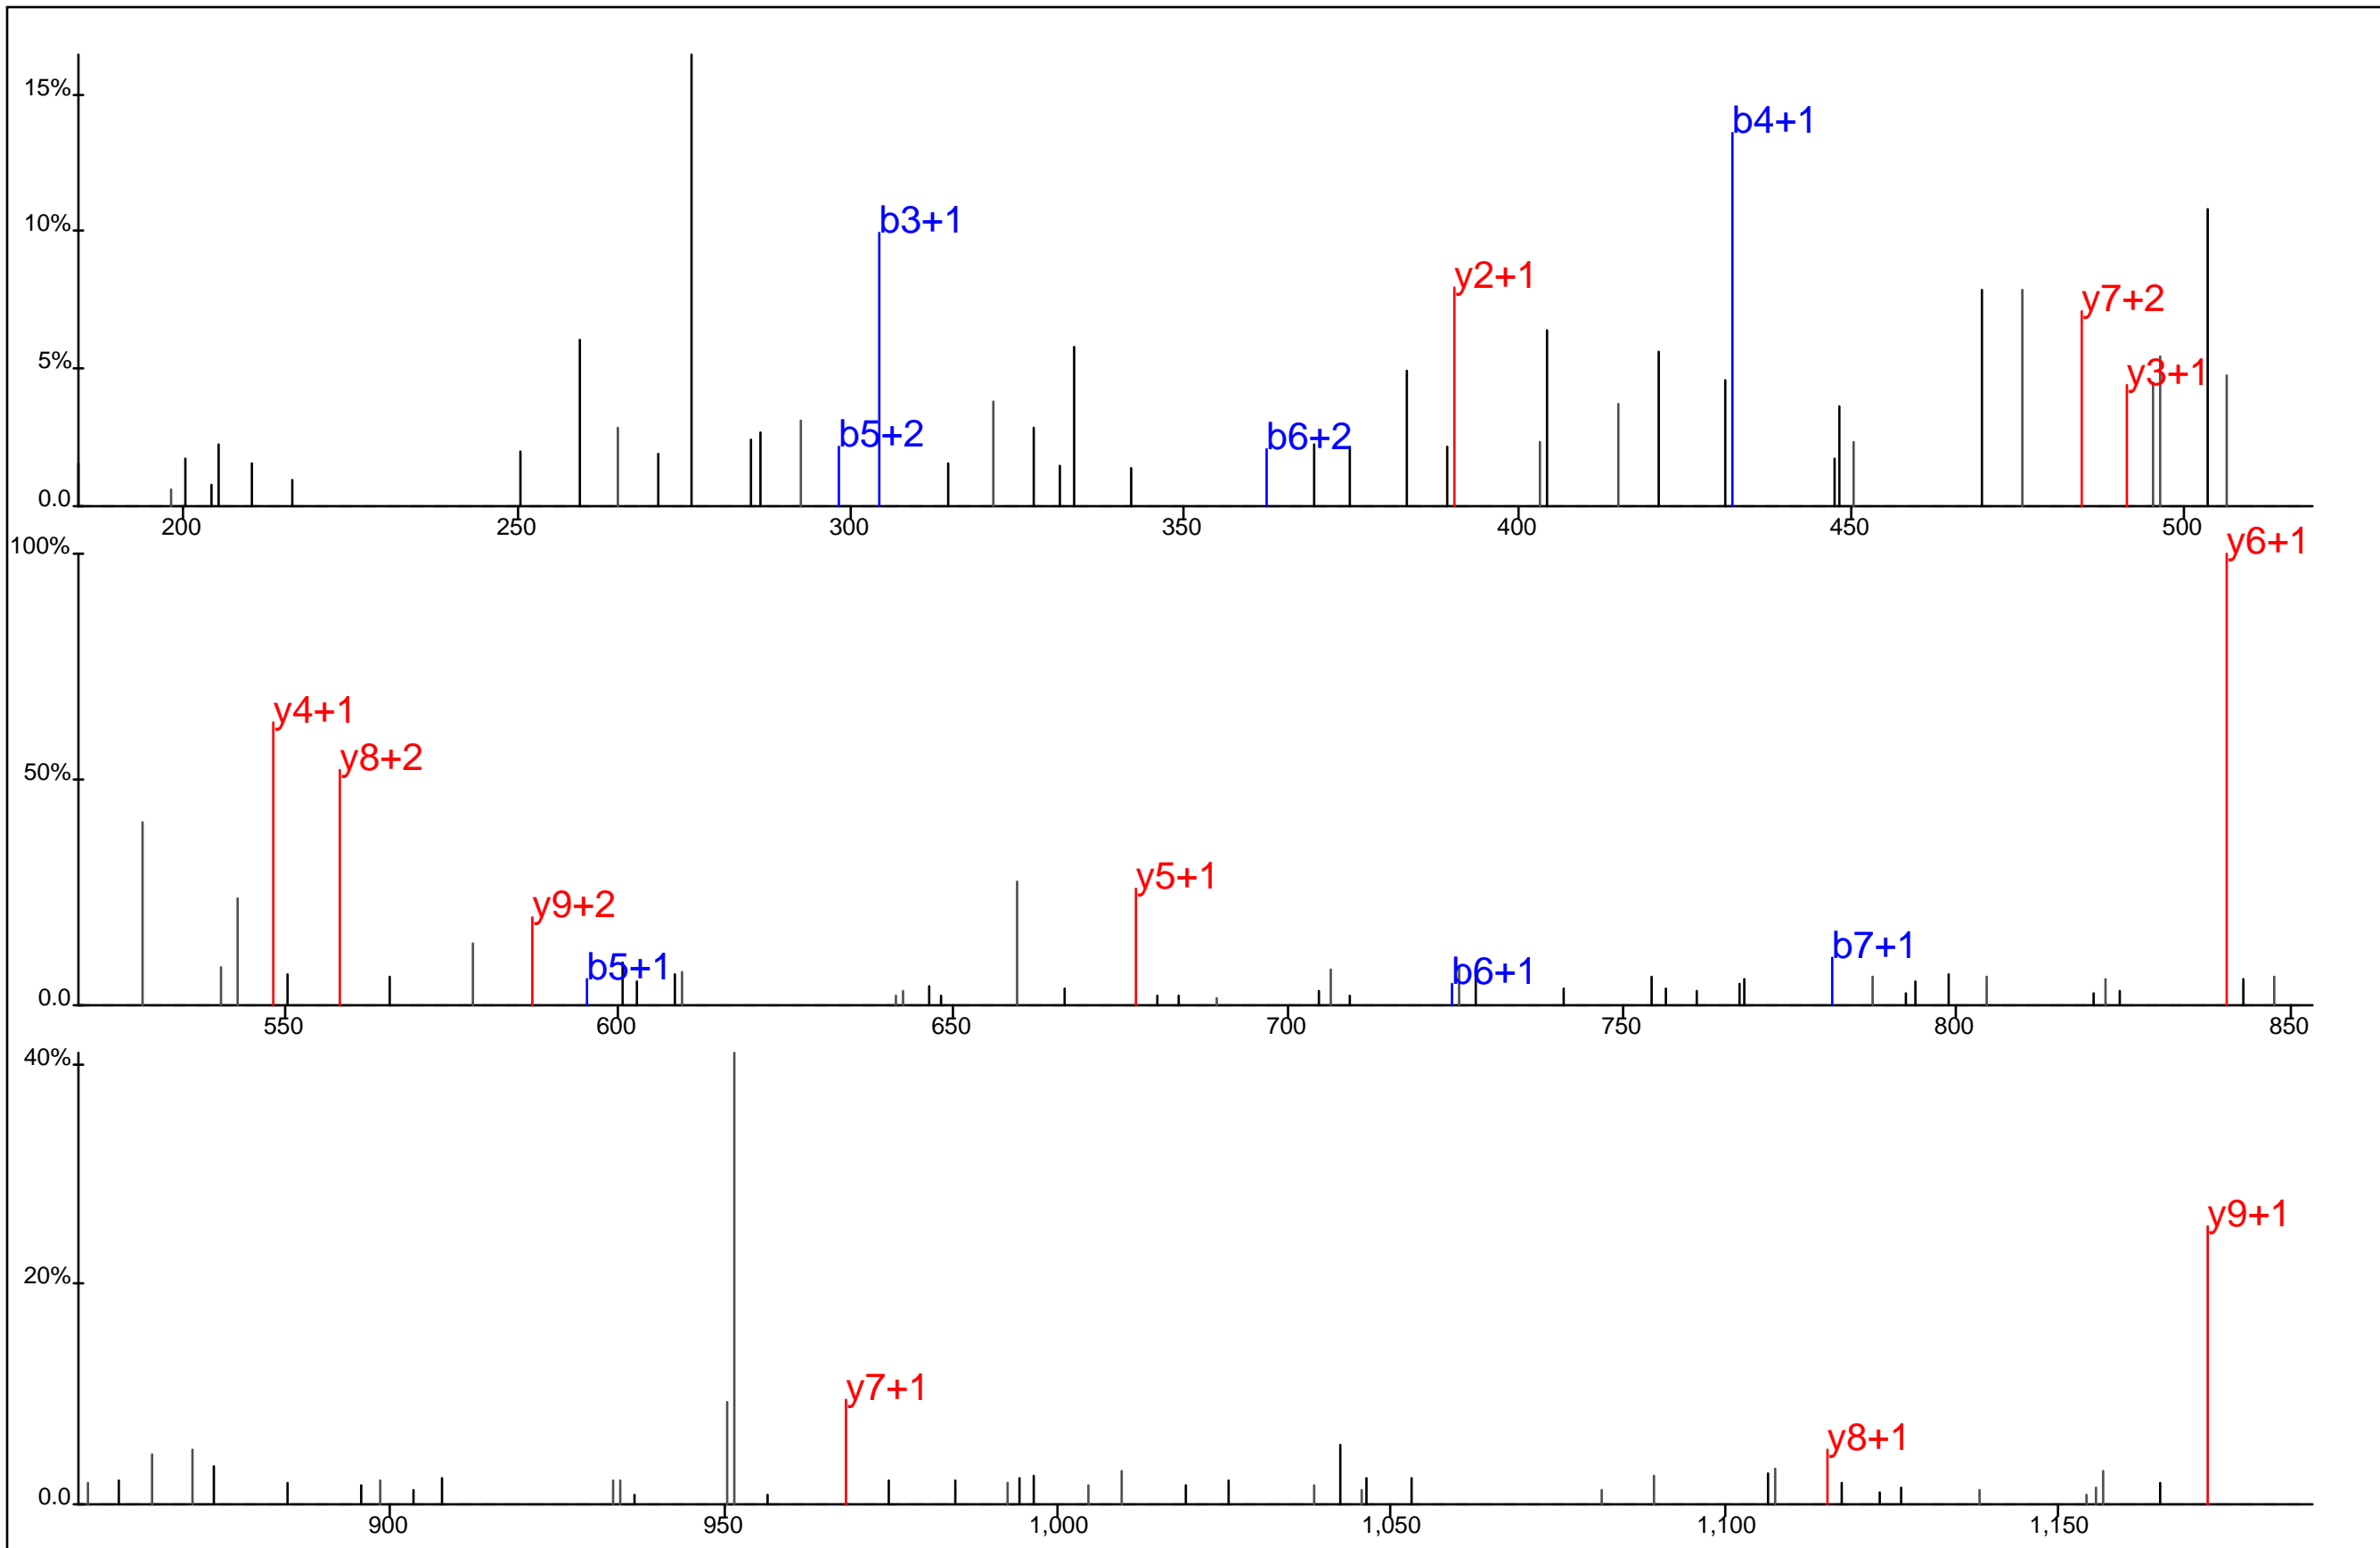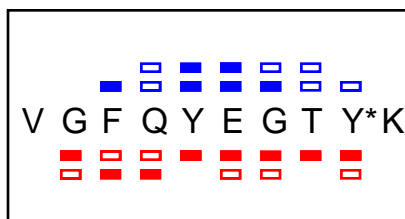

Protein Name: Glucose-6-phosphate dehydrogenase  
 gi Accession: 0  
 Precursor Mass: 636.2701+2  
 Delta Mass: 1.184 ppm  
 XCorr: 45.98

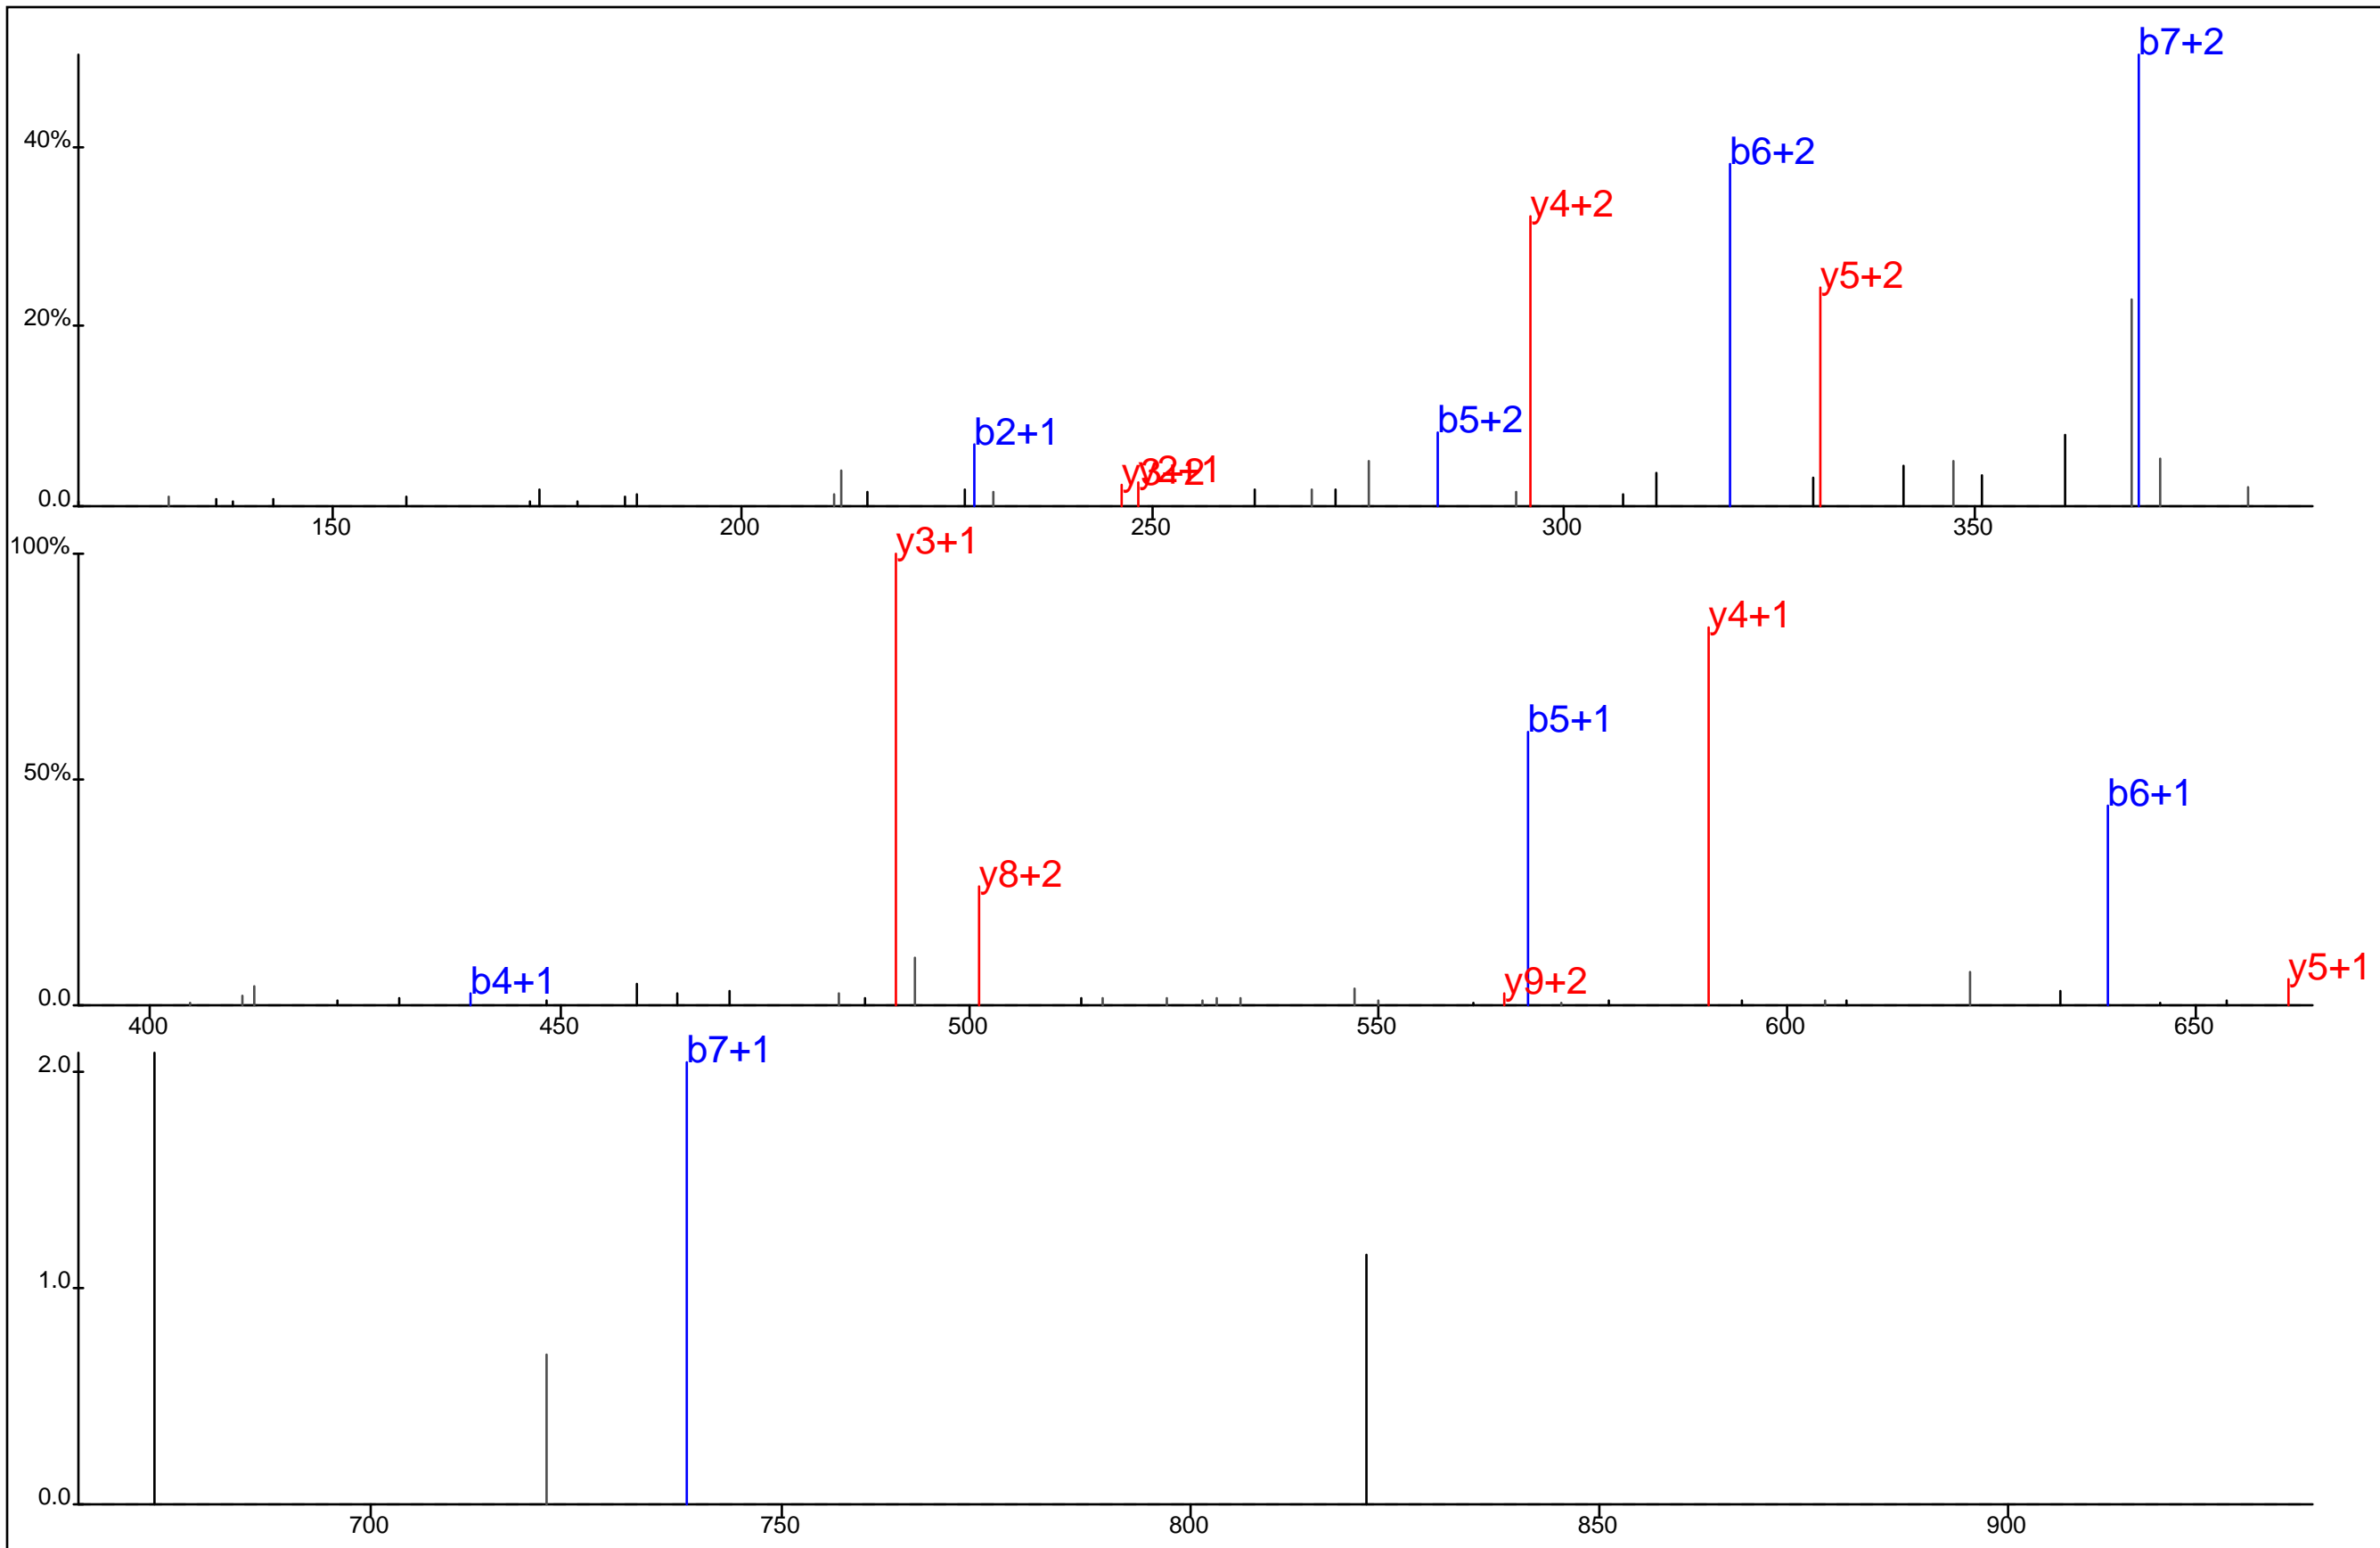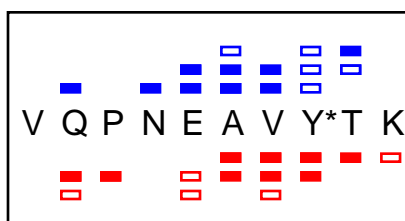

Protein Name: Glucose-6-phosphate dehydrogenase  
 gi Accession: 0  
 Precursor Mass: 410.1920+3  
 Delta Mass: 0.321 ppm  
 XCorr: 28.89



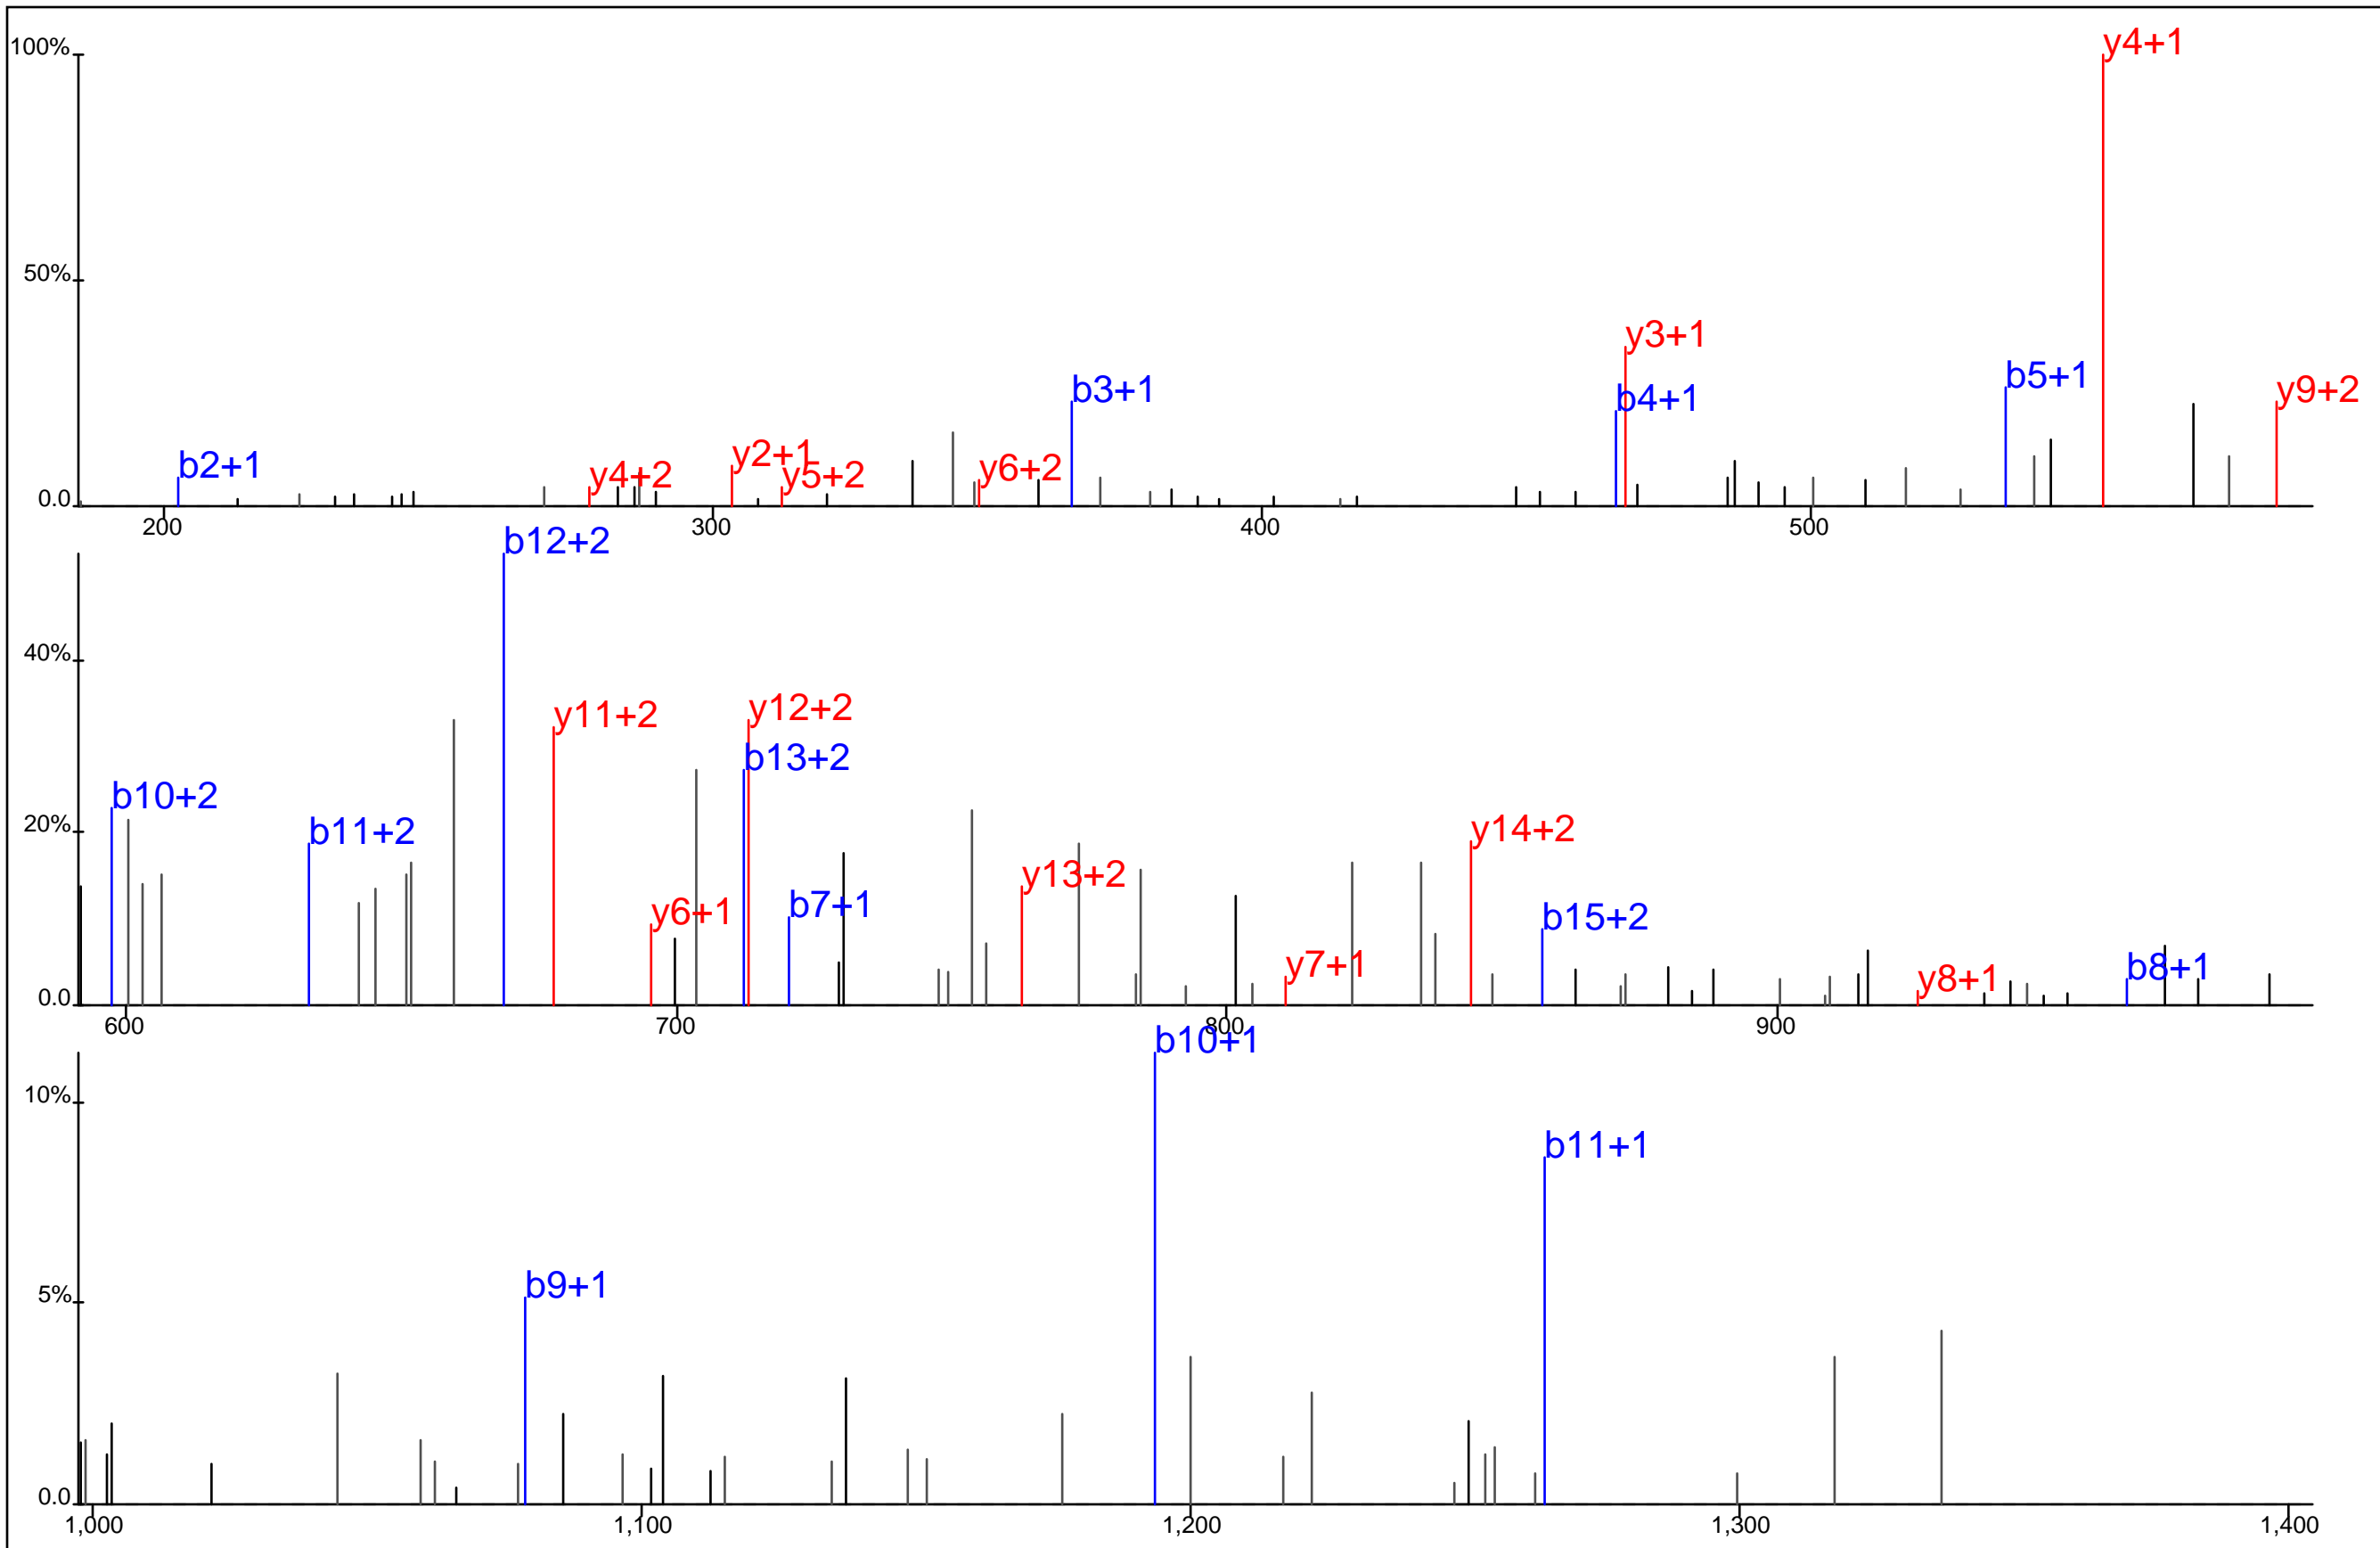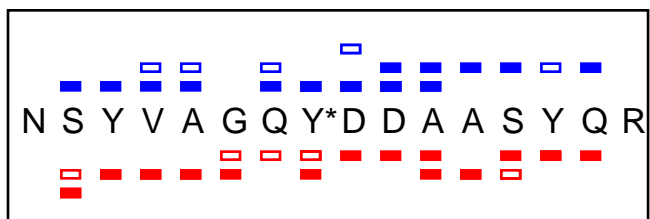

Protein Name: Glucose-6-phosphate dehydrogenase  
 gi Accession: 0  
 Precursor Mass: 629.9207+3  
 Delta Mass: 3.649 ppm  
 XCorr: 47.03

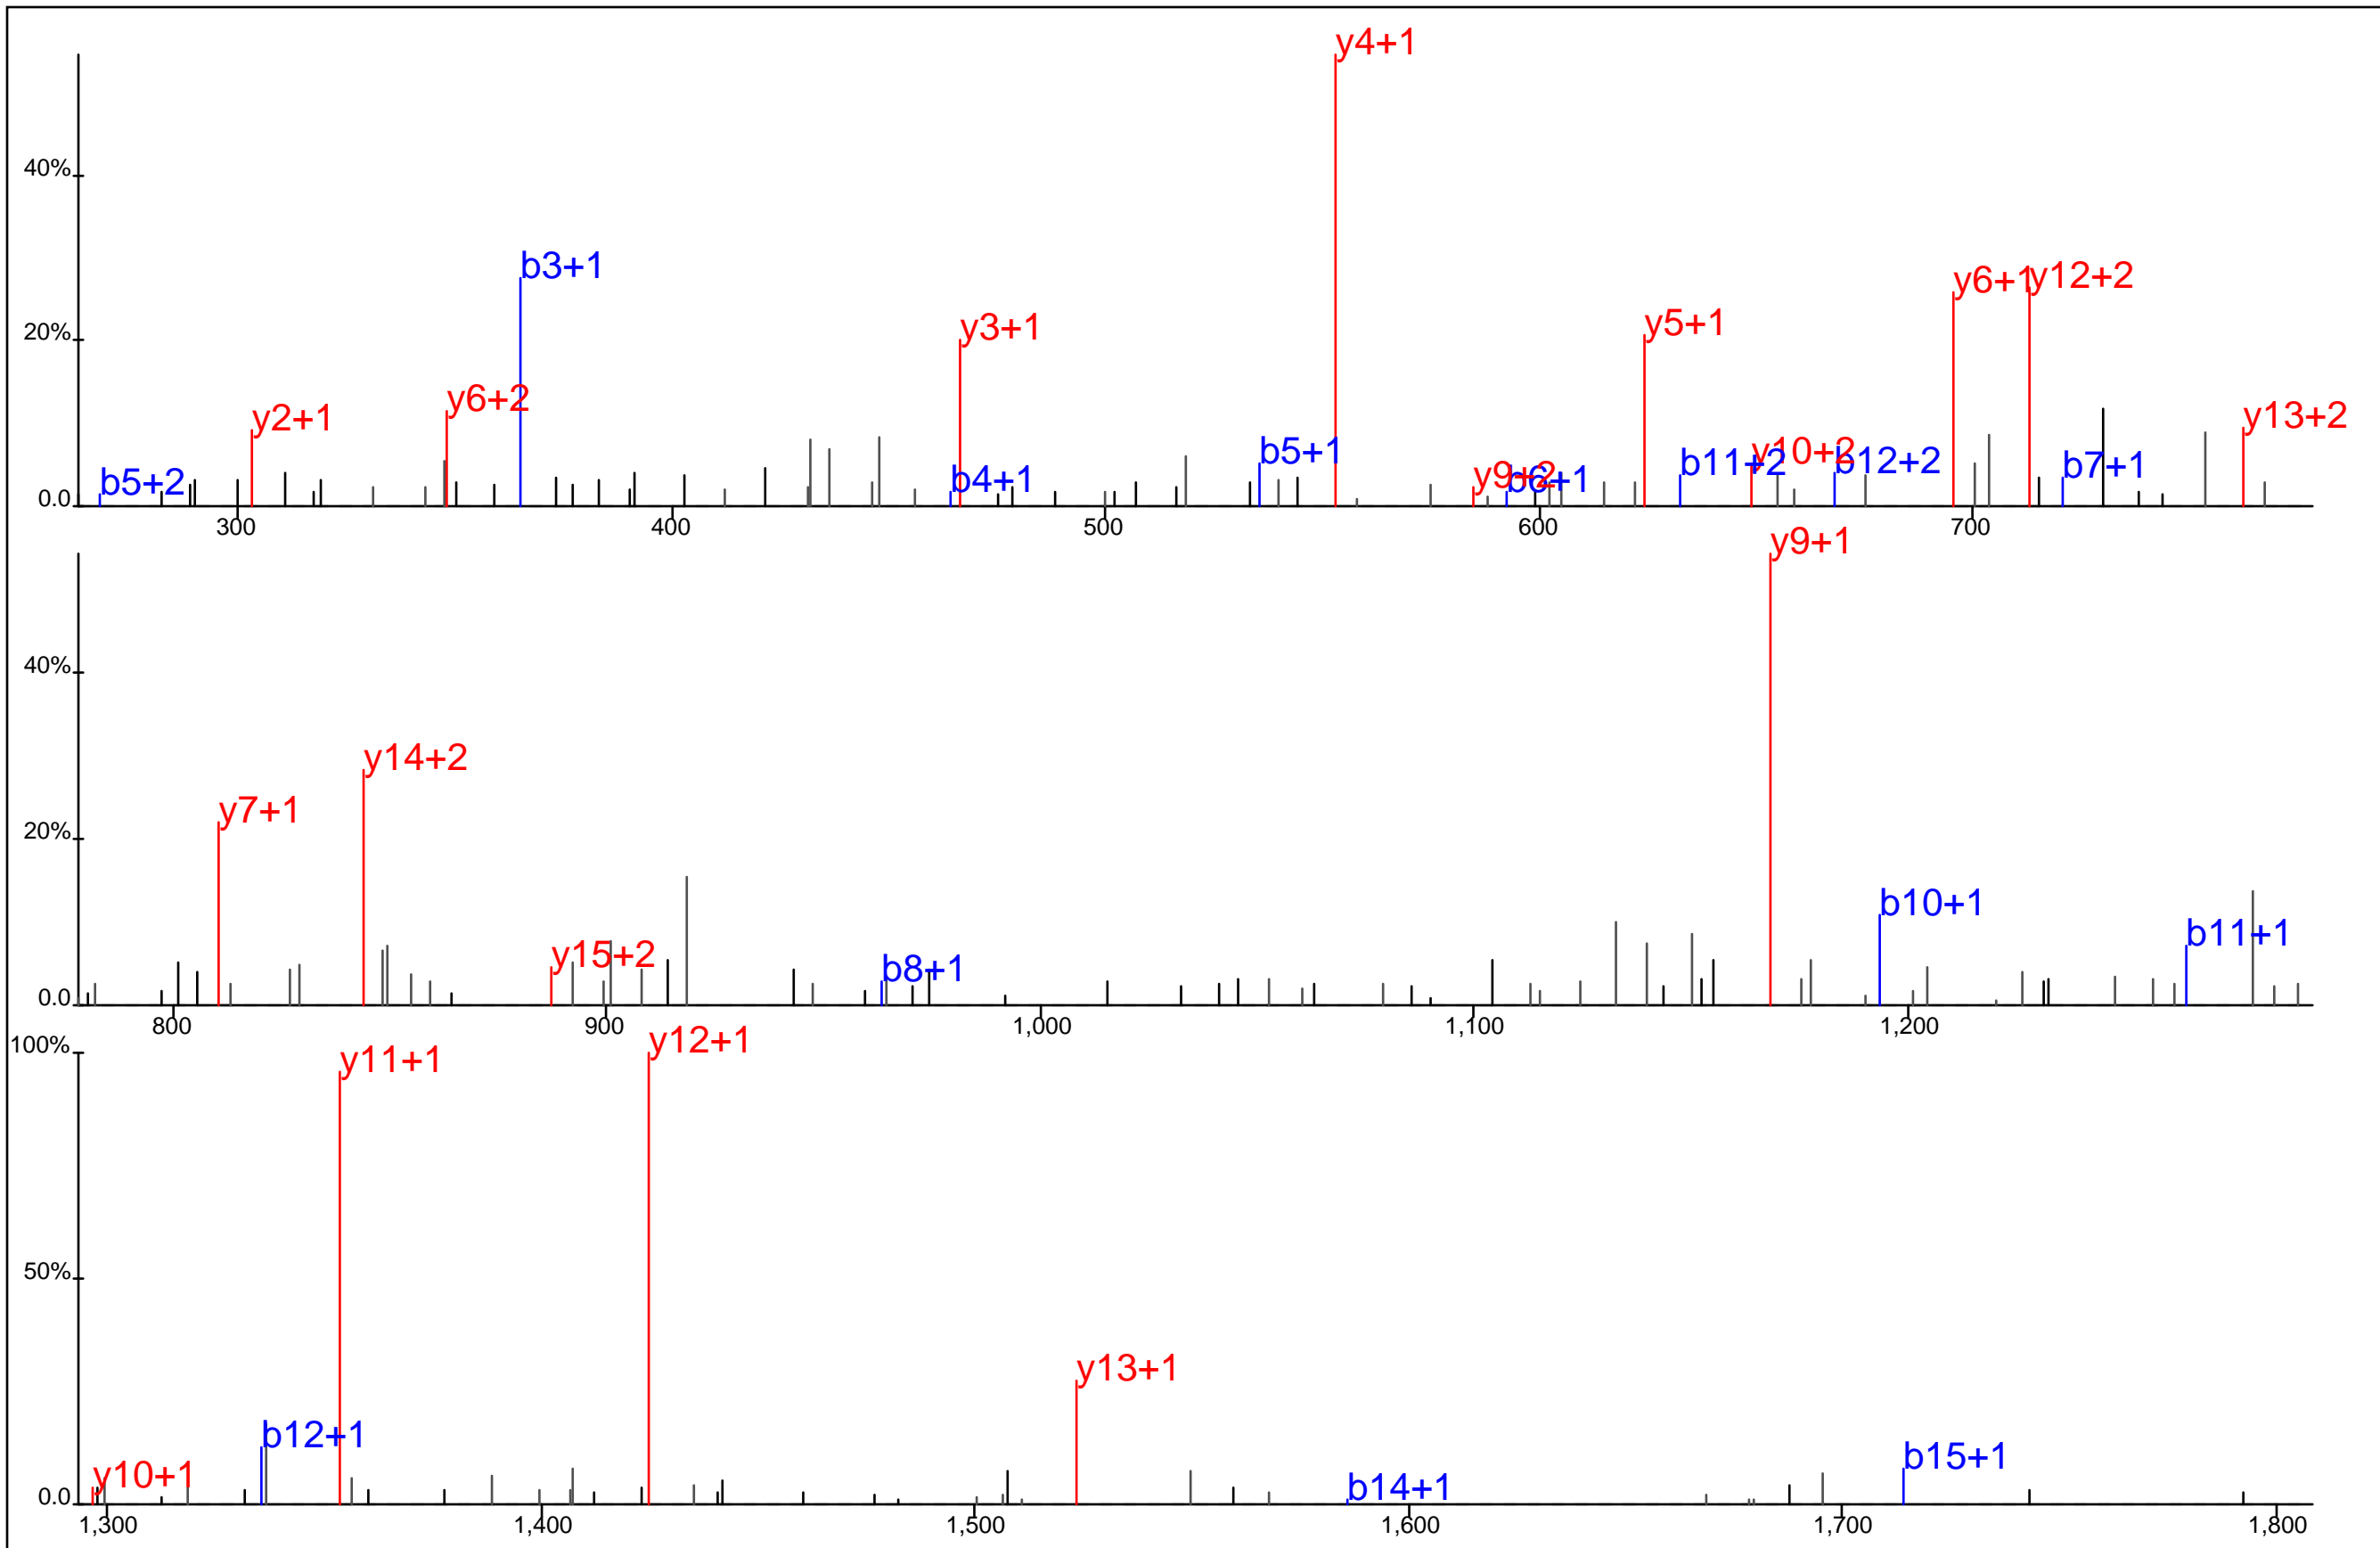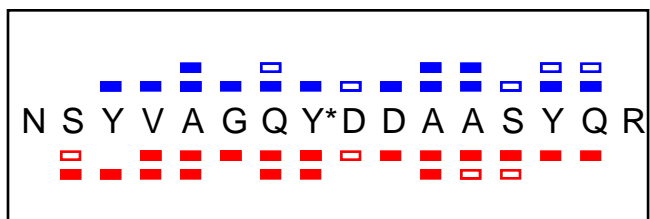

Protein Name: Glucose-6-phosphate dehydrogenase  
 gi Accession: 0  
 Precursor Mass: 944.3826+2  
 Delta Mass: 1.789 ppm  
 XCorr: 75.49

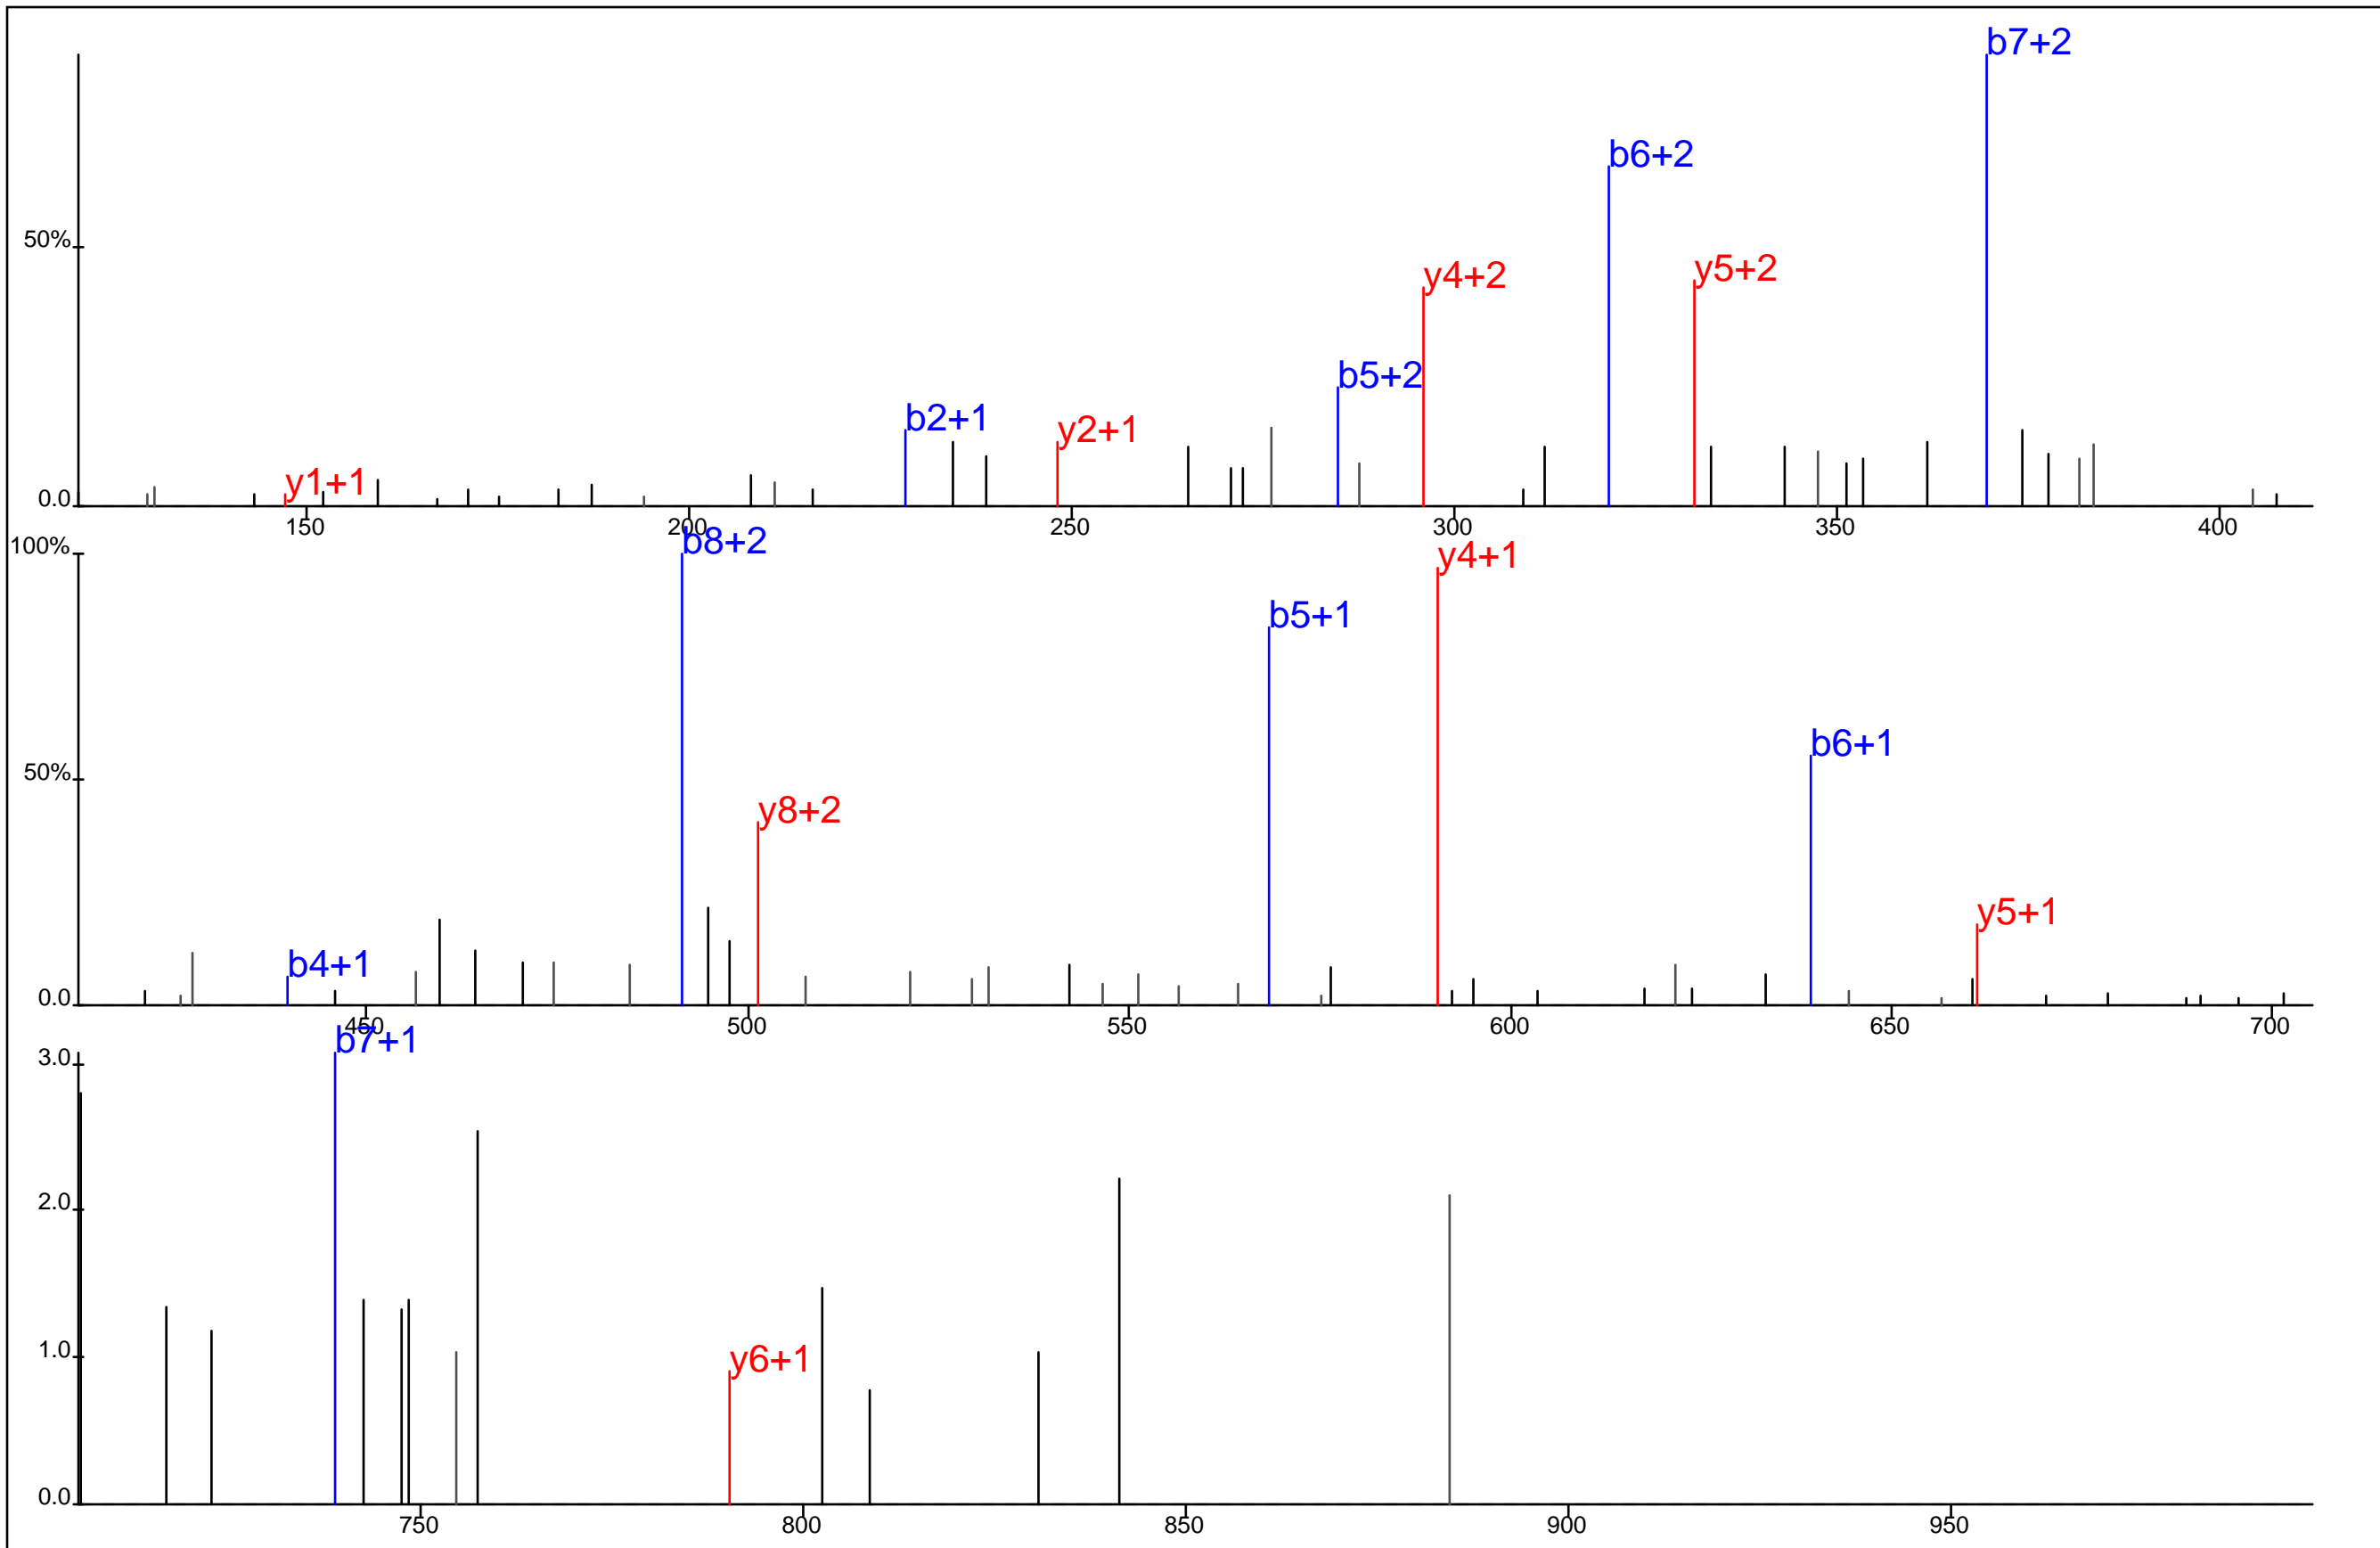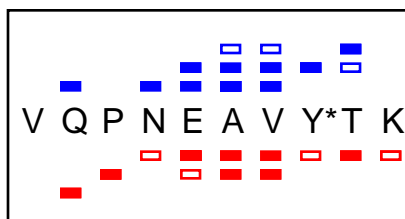

Protein Name: Glucose-6-phosphate dehydrogenase  
 gi Accession: 0  
 Precursor Mass: 410.1915+3  
 Delta Mass: 0.873 ppm  
 XCorr: 22.55

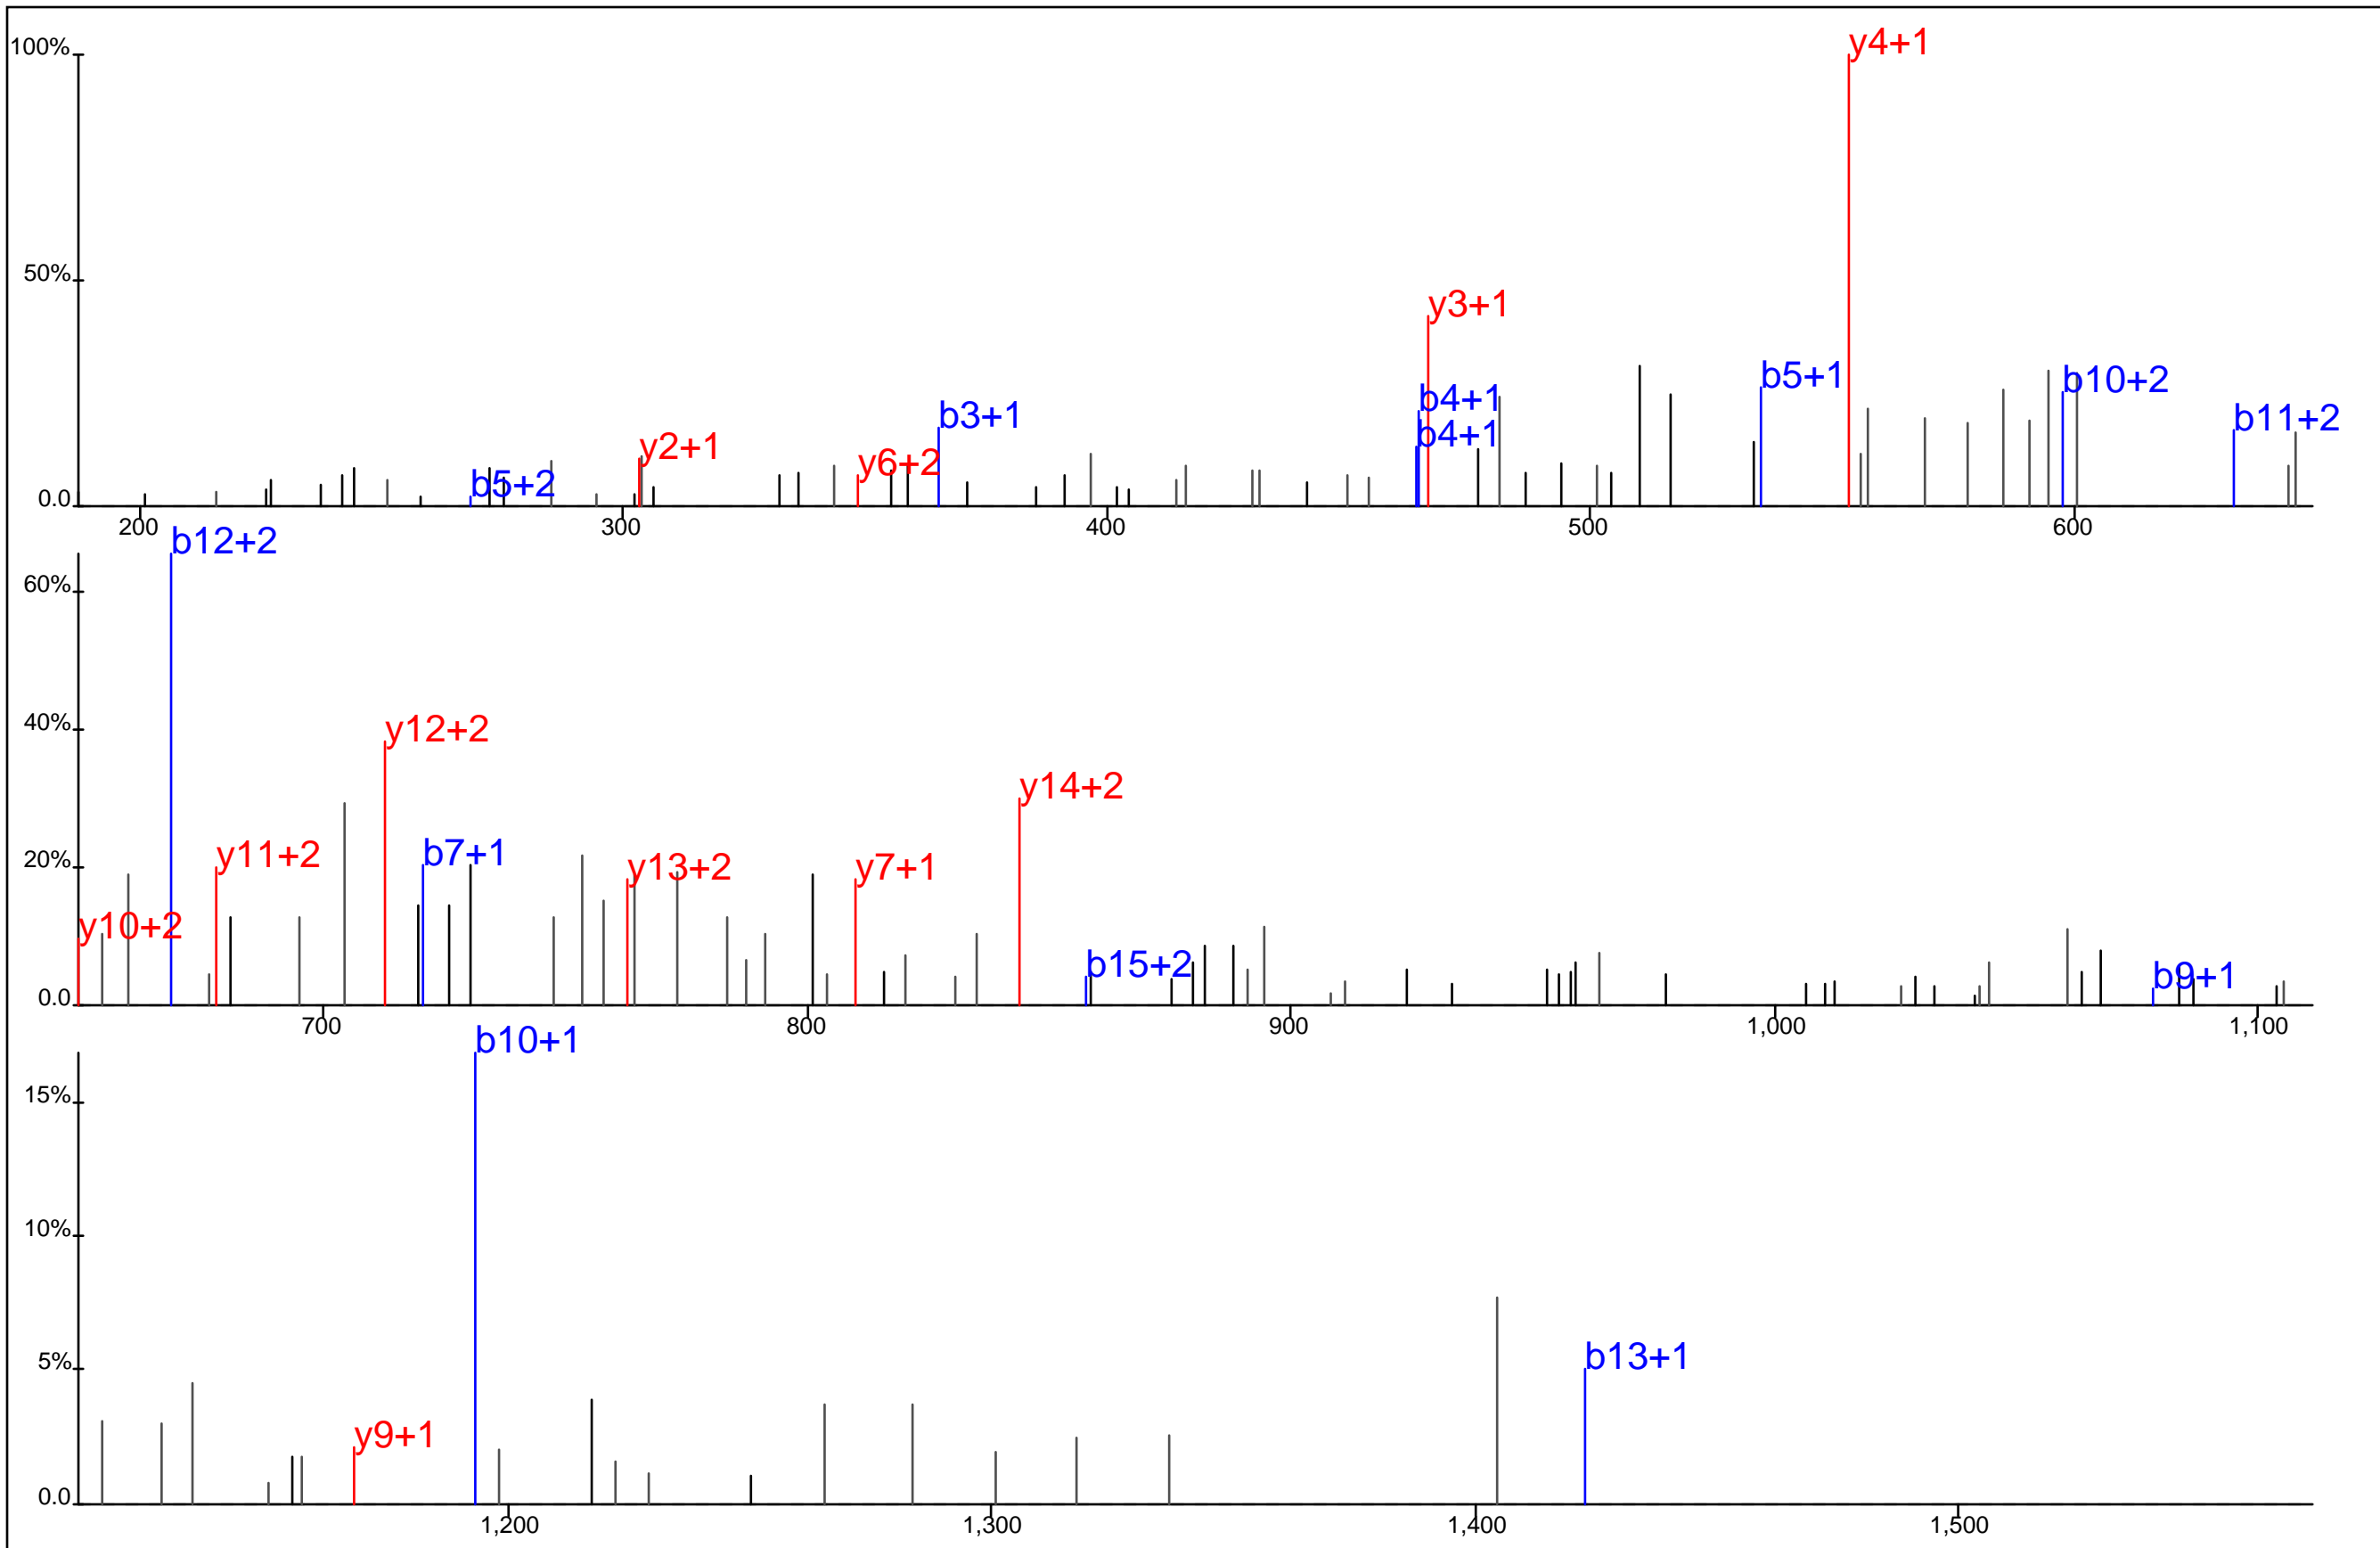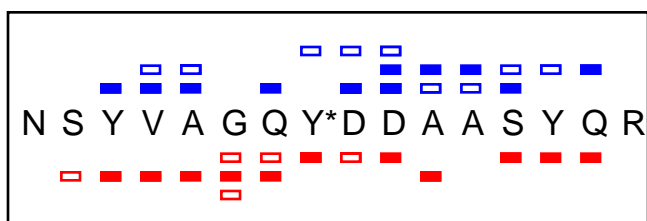

Protein Name: Glucose-6-phosphate dehydrogenase  
 gi Accession: 0  
 Precursor Mass: 629.9225+3  
 Delta Mass: 0.836 ppm  
 XCorr: 21.05

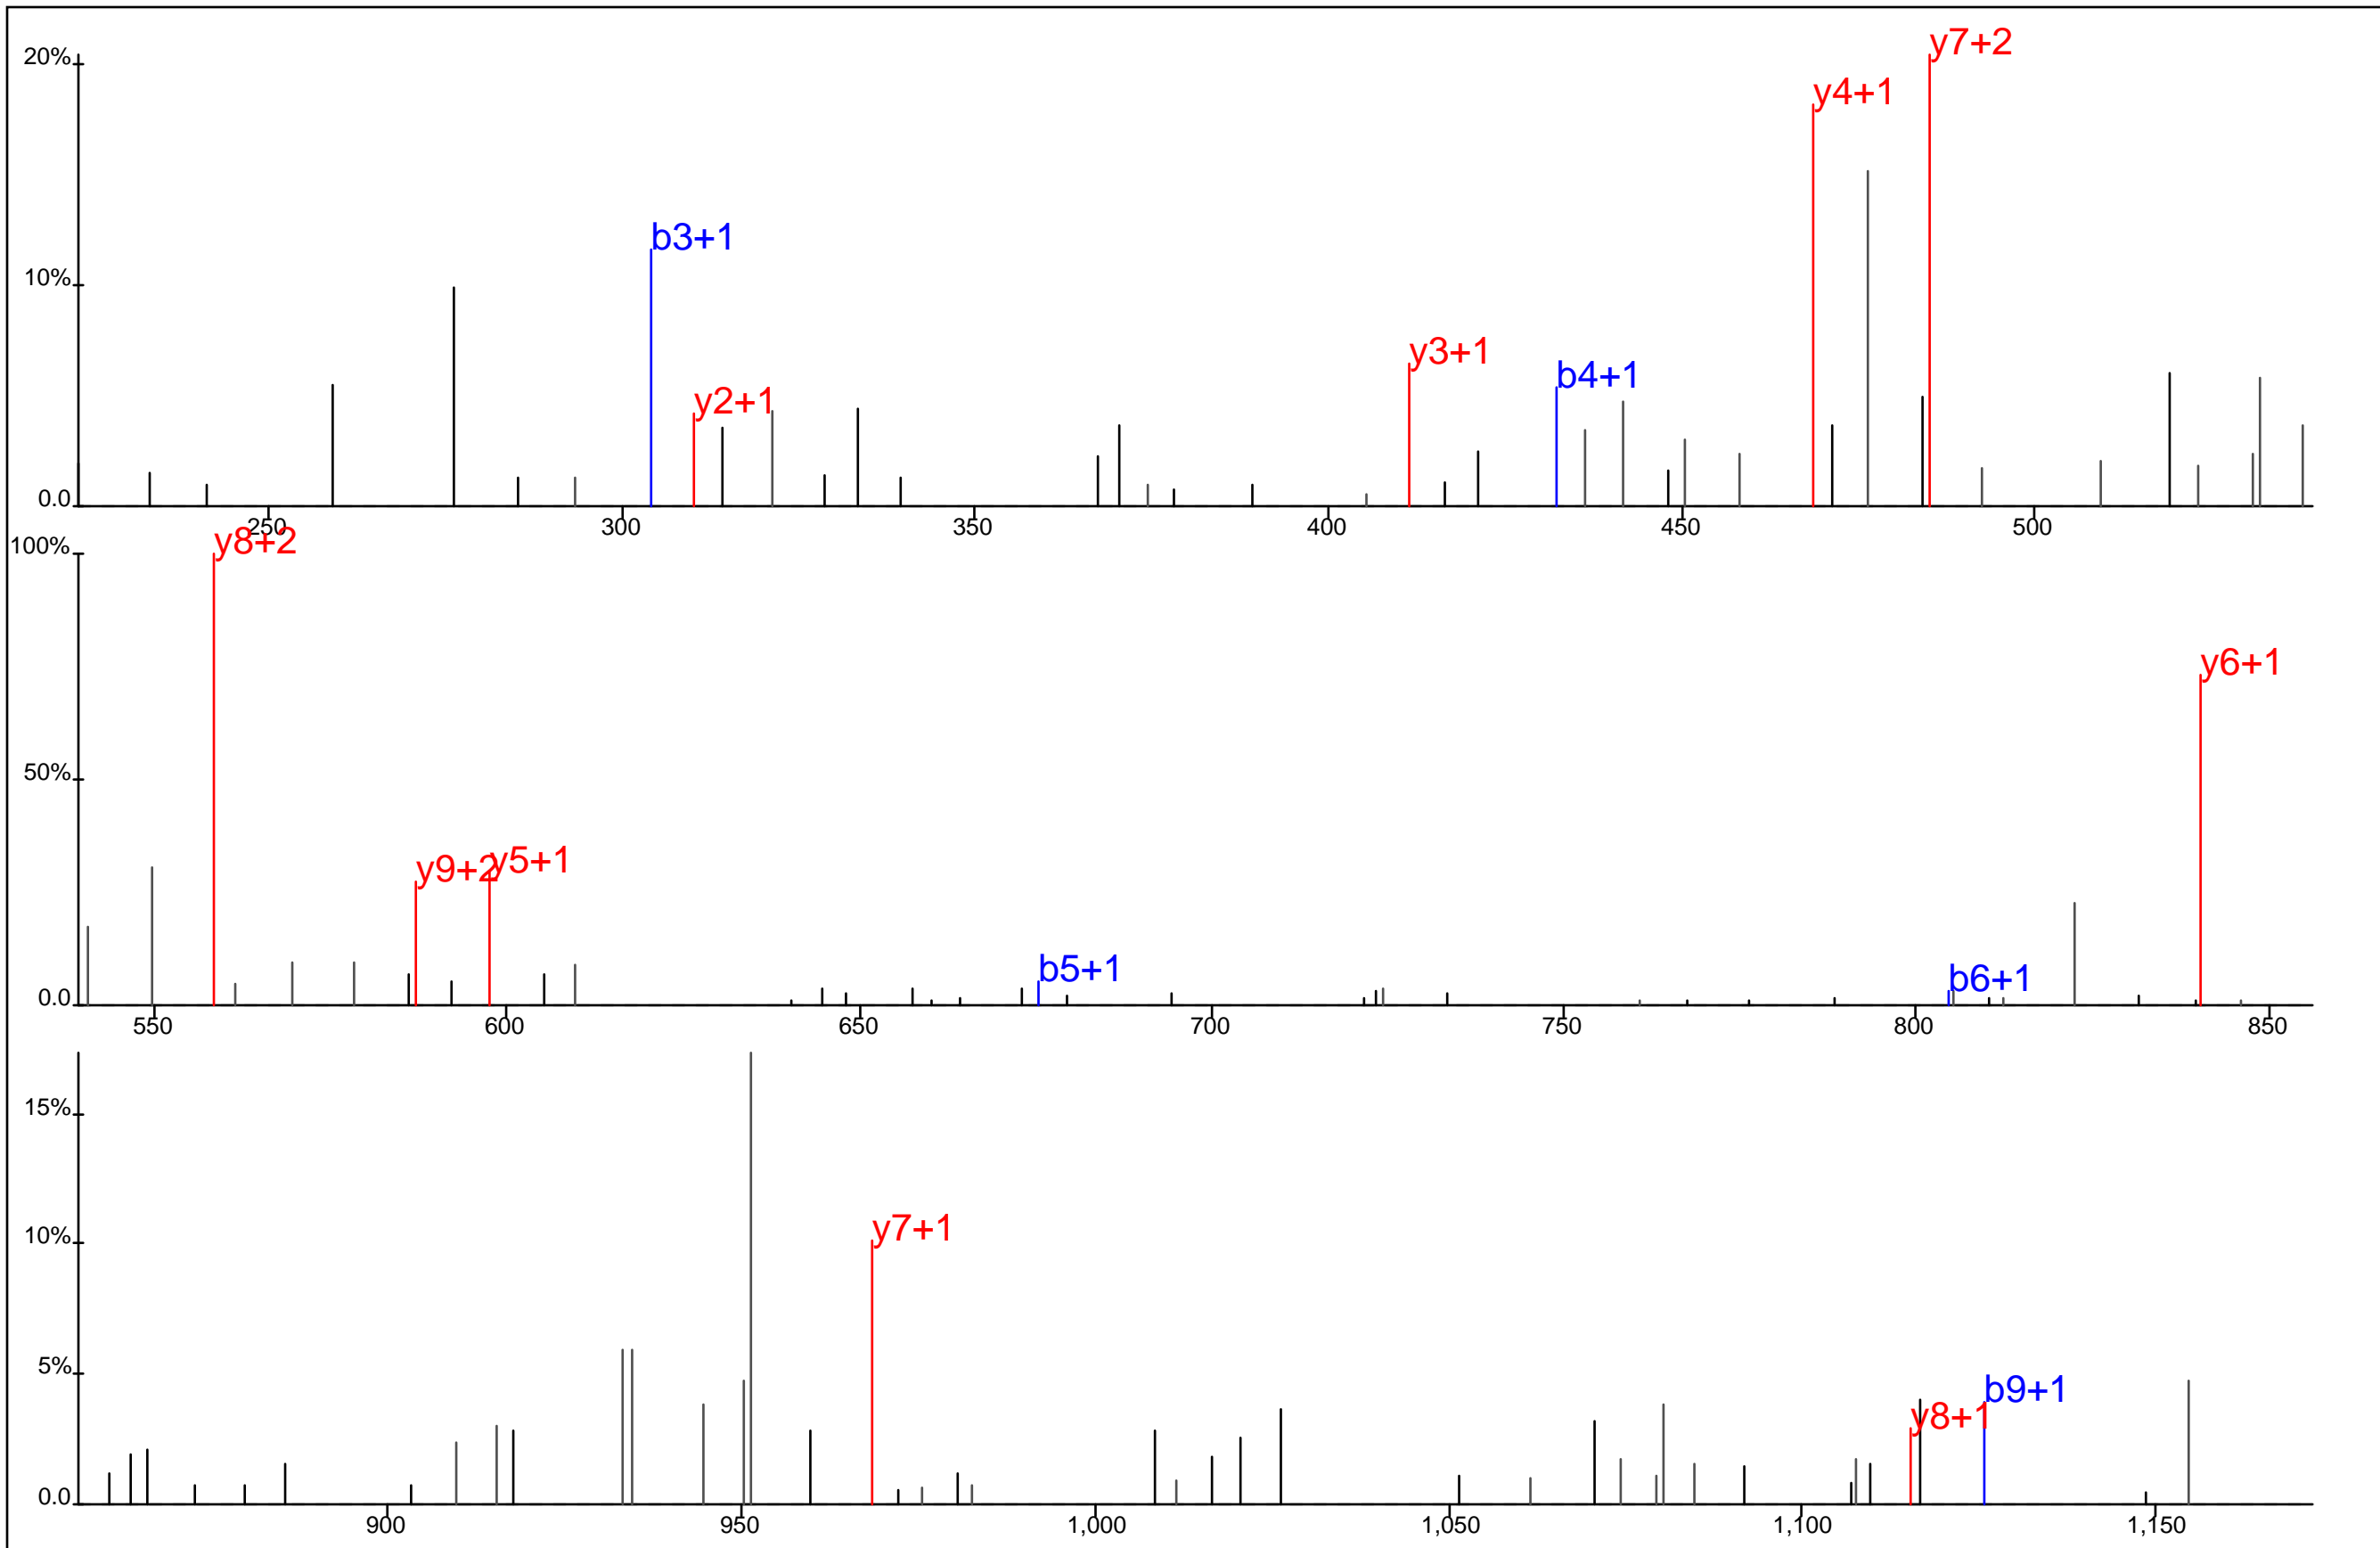

V G F Q Y\* E G T Y K

Red dashed boxes highlight the sequence: V G F Q Y\* E G T Y K

Protein Name: Glucose-6-phosphate dehydrogenase  
 gi Accession: 0  
 Precursor Mass: 636.2693+2  
 Delta Mass: 2.337 ppm  
 XCorr: 41.49

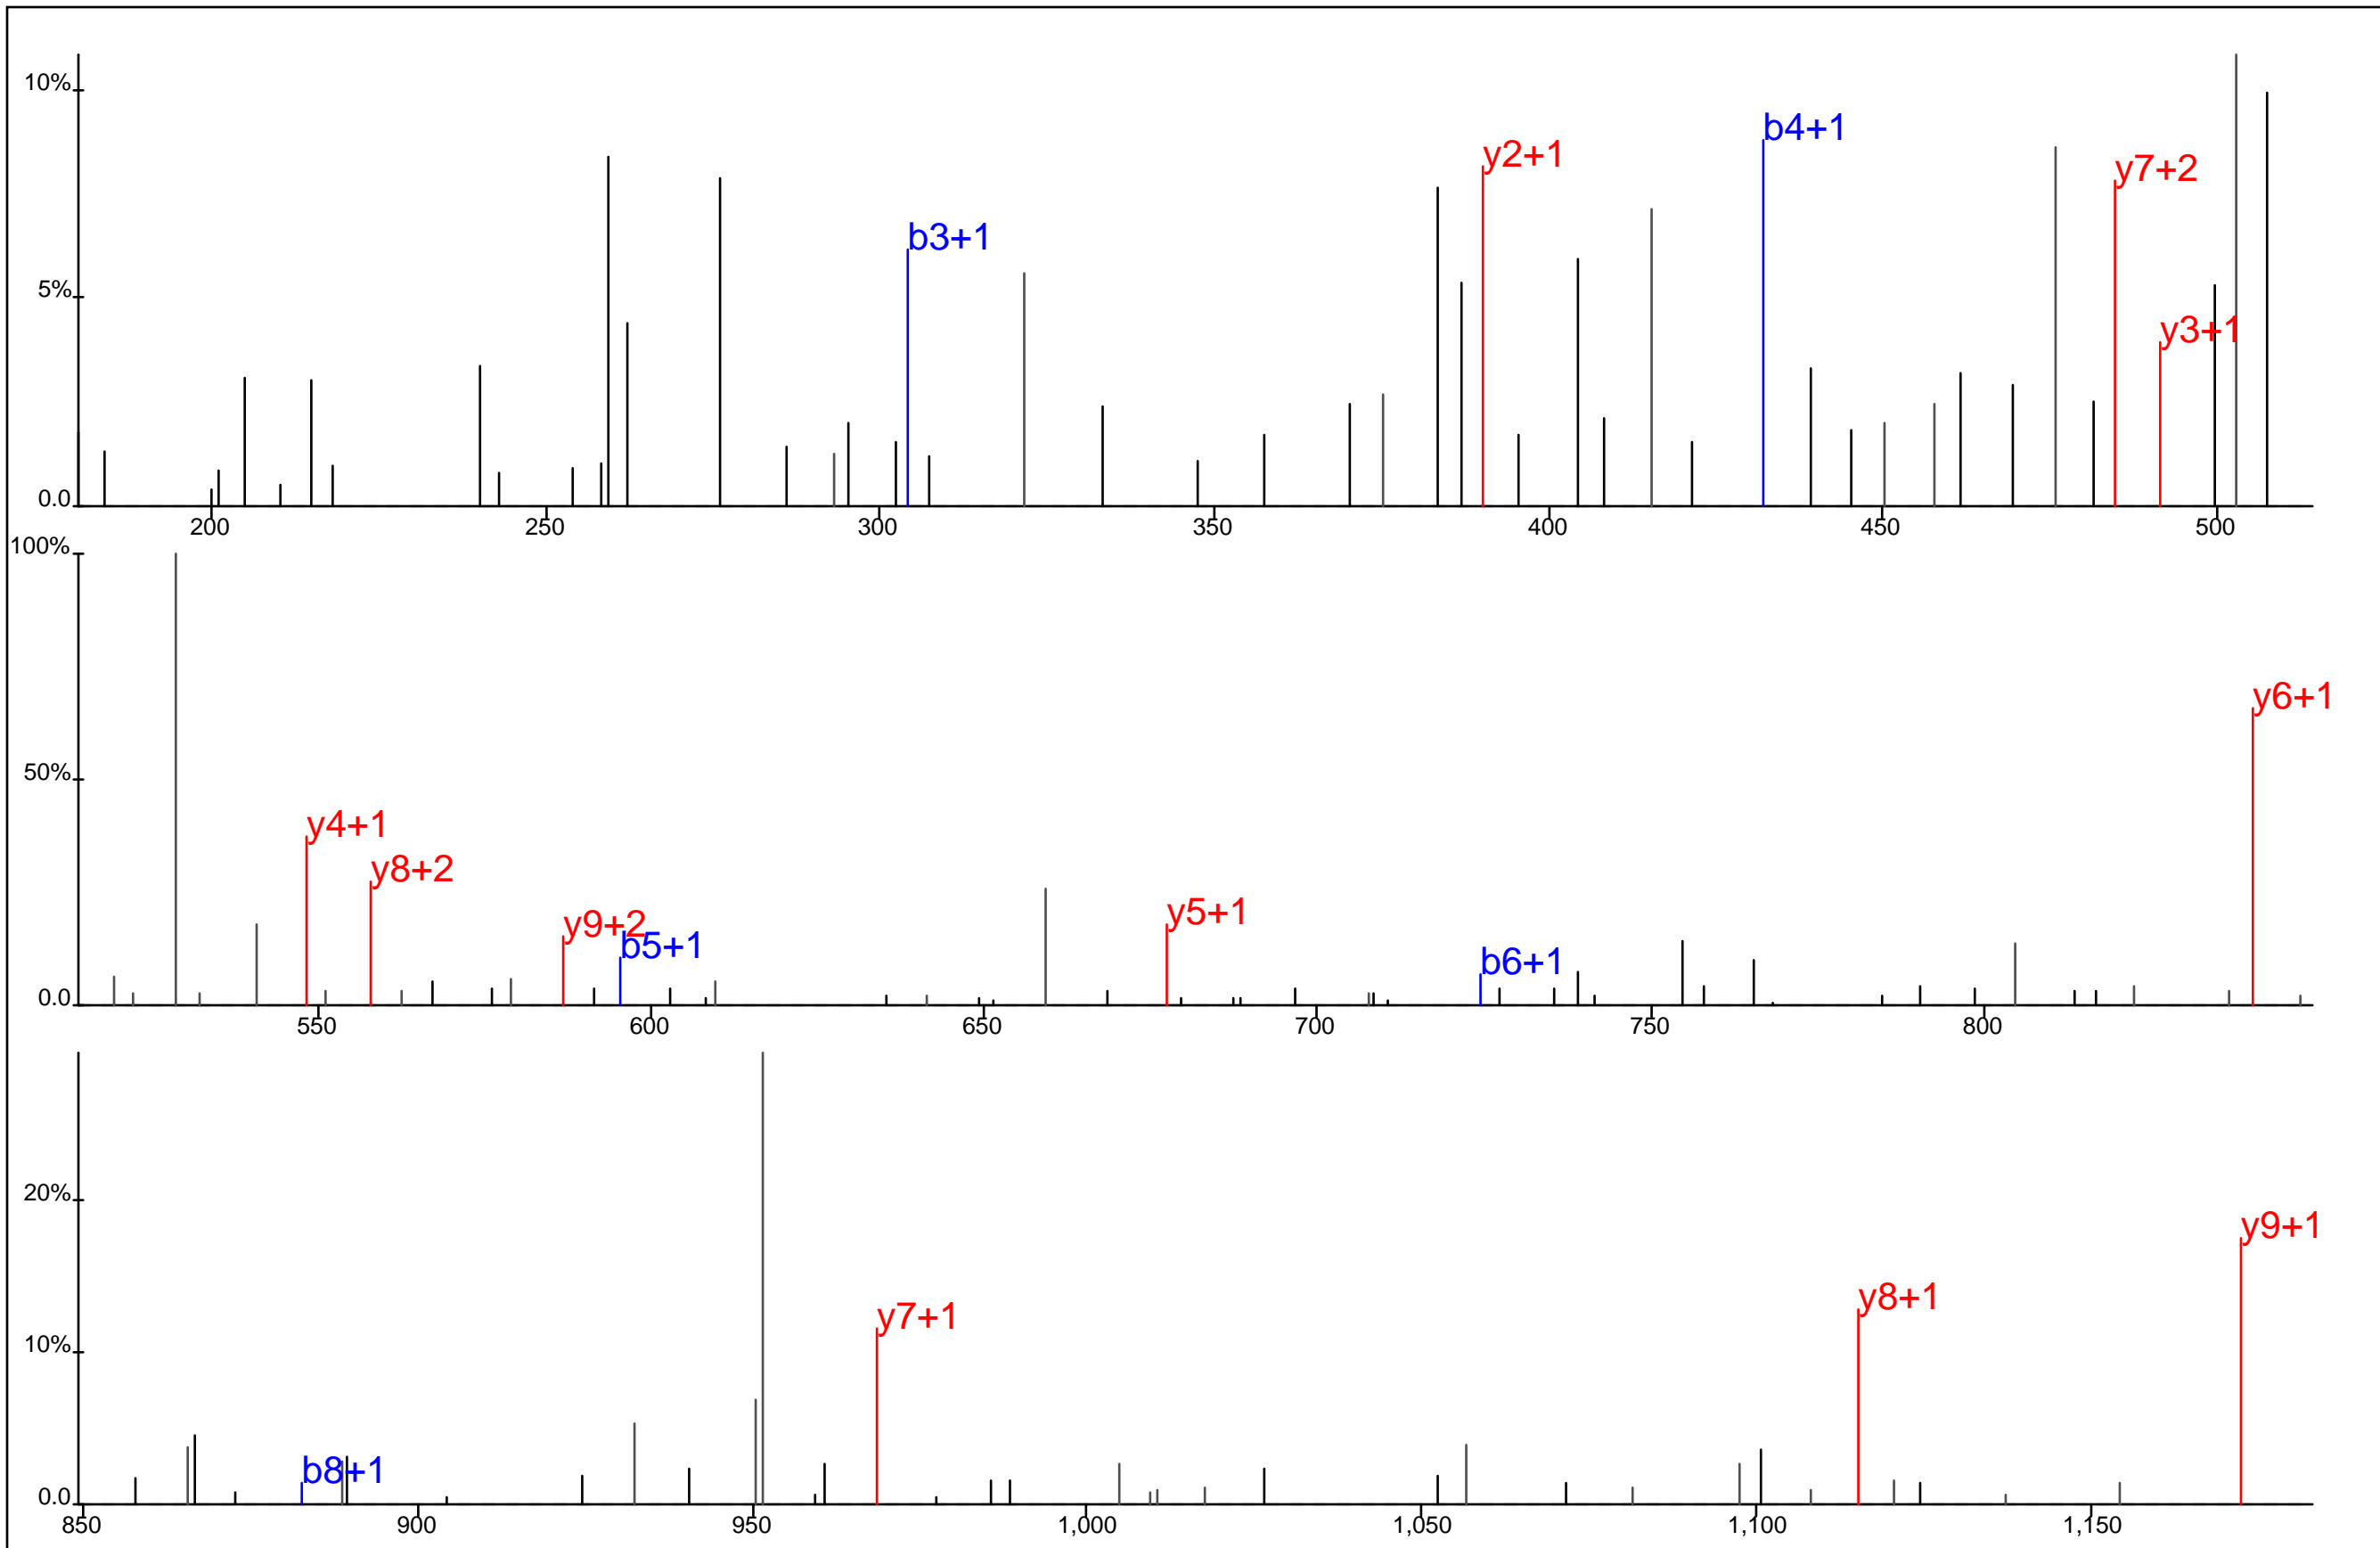

■ ■ ■ □ □ ■ □  
 V G F Q Y E G T Y\*K  
□ ■ ■ ■ □ □ ■ ■

Protein Name: Glucose-6-phosphate dehydrogenase  
 gi Accession: 0  
 Precursor Mass: 636.2703+2  
 Delta Mass: 0.897 ppm  
 XCorr: 37.24

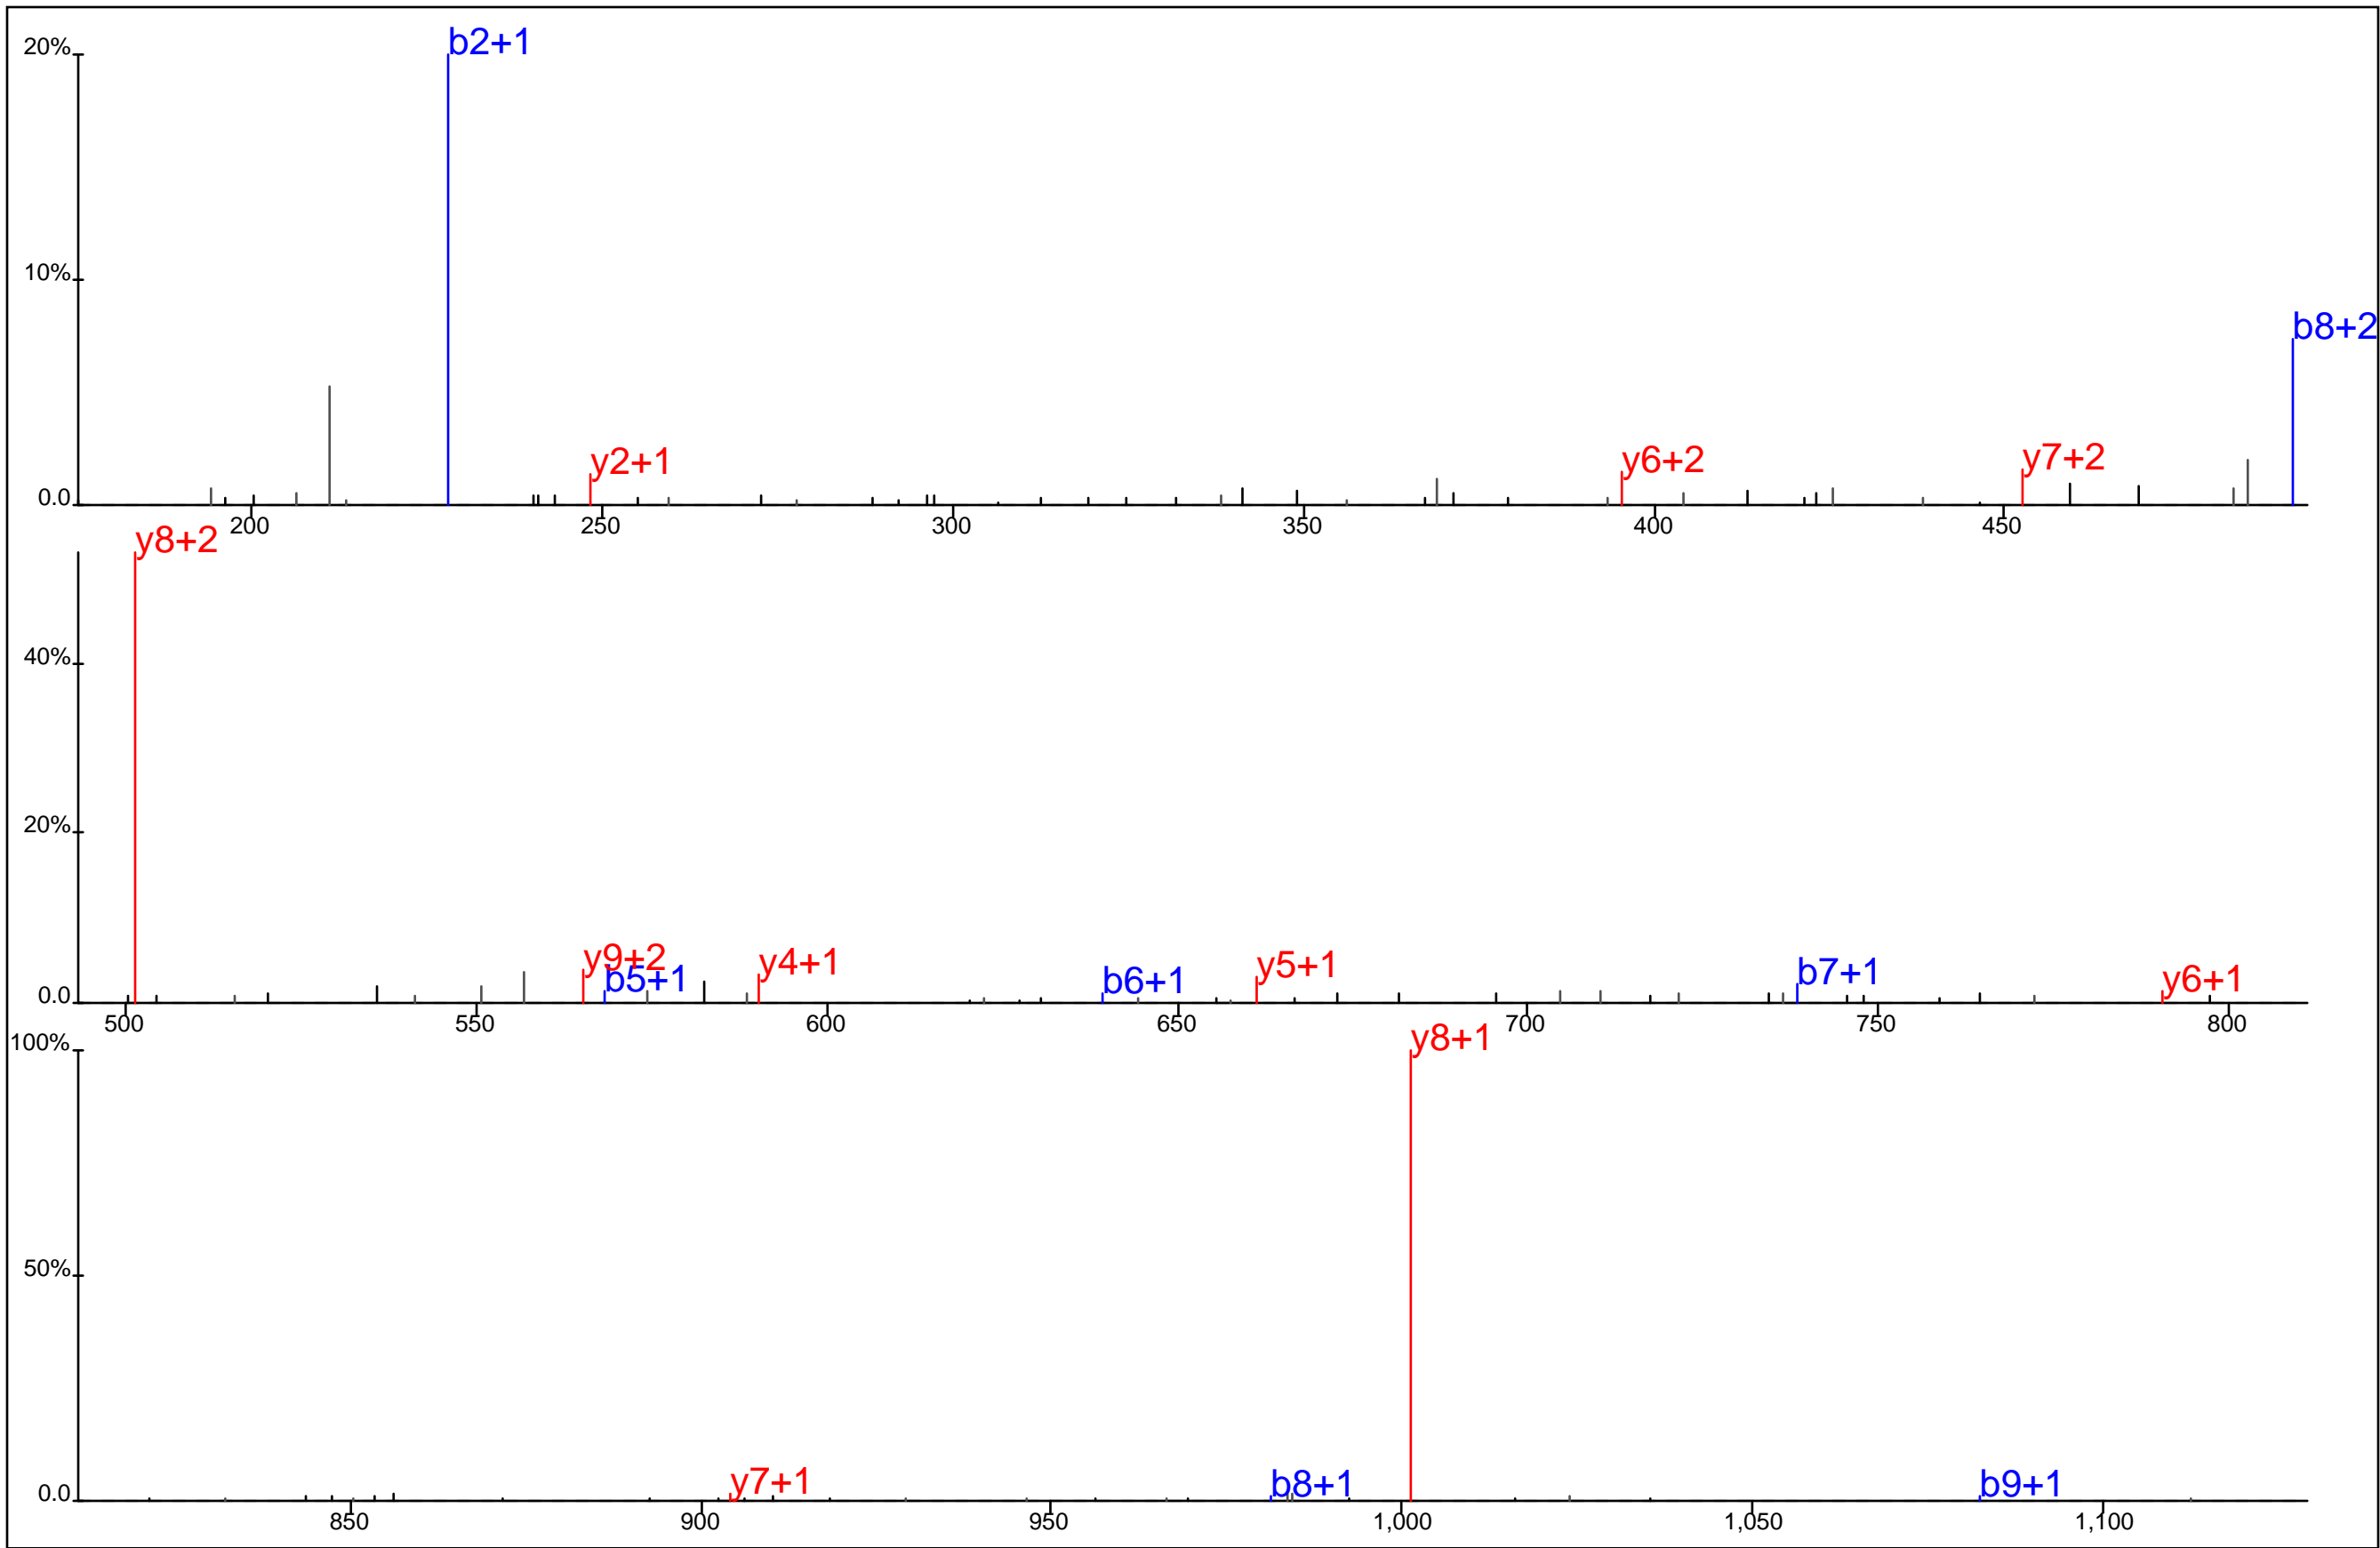

□ □ □ □ □ □ □ □  
 V Q P N E A V Y\* T K  
■ ■ ■ ■ ■ ■ ■ ■

Protein Name: Glucose-6-phosphate dehydrogenase  
 gi Accession: 0  
 Precursor Mass: 614.7856+2  
 Delta Mass: 2.416 ppm  
 XCorr: 58.73

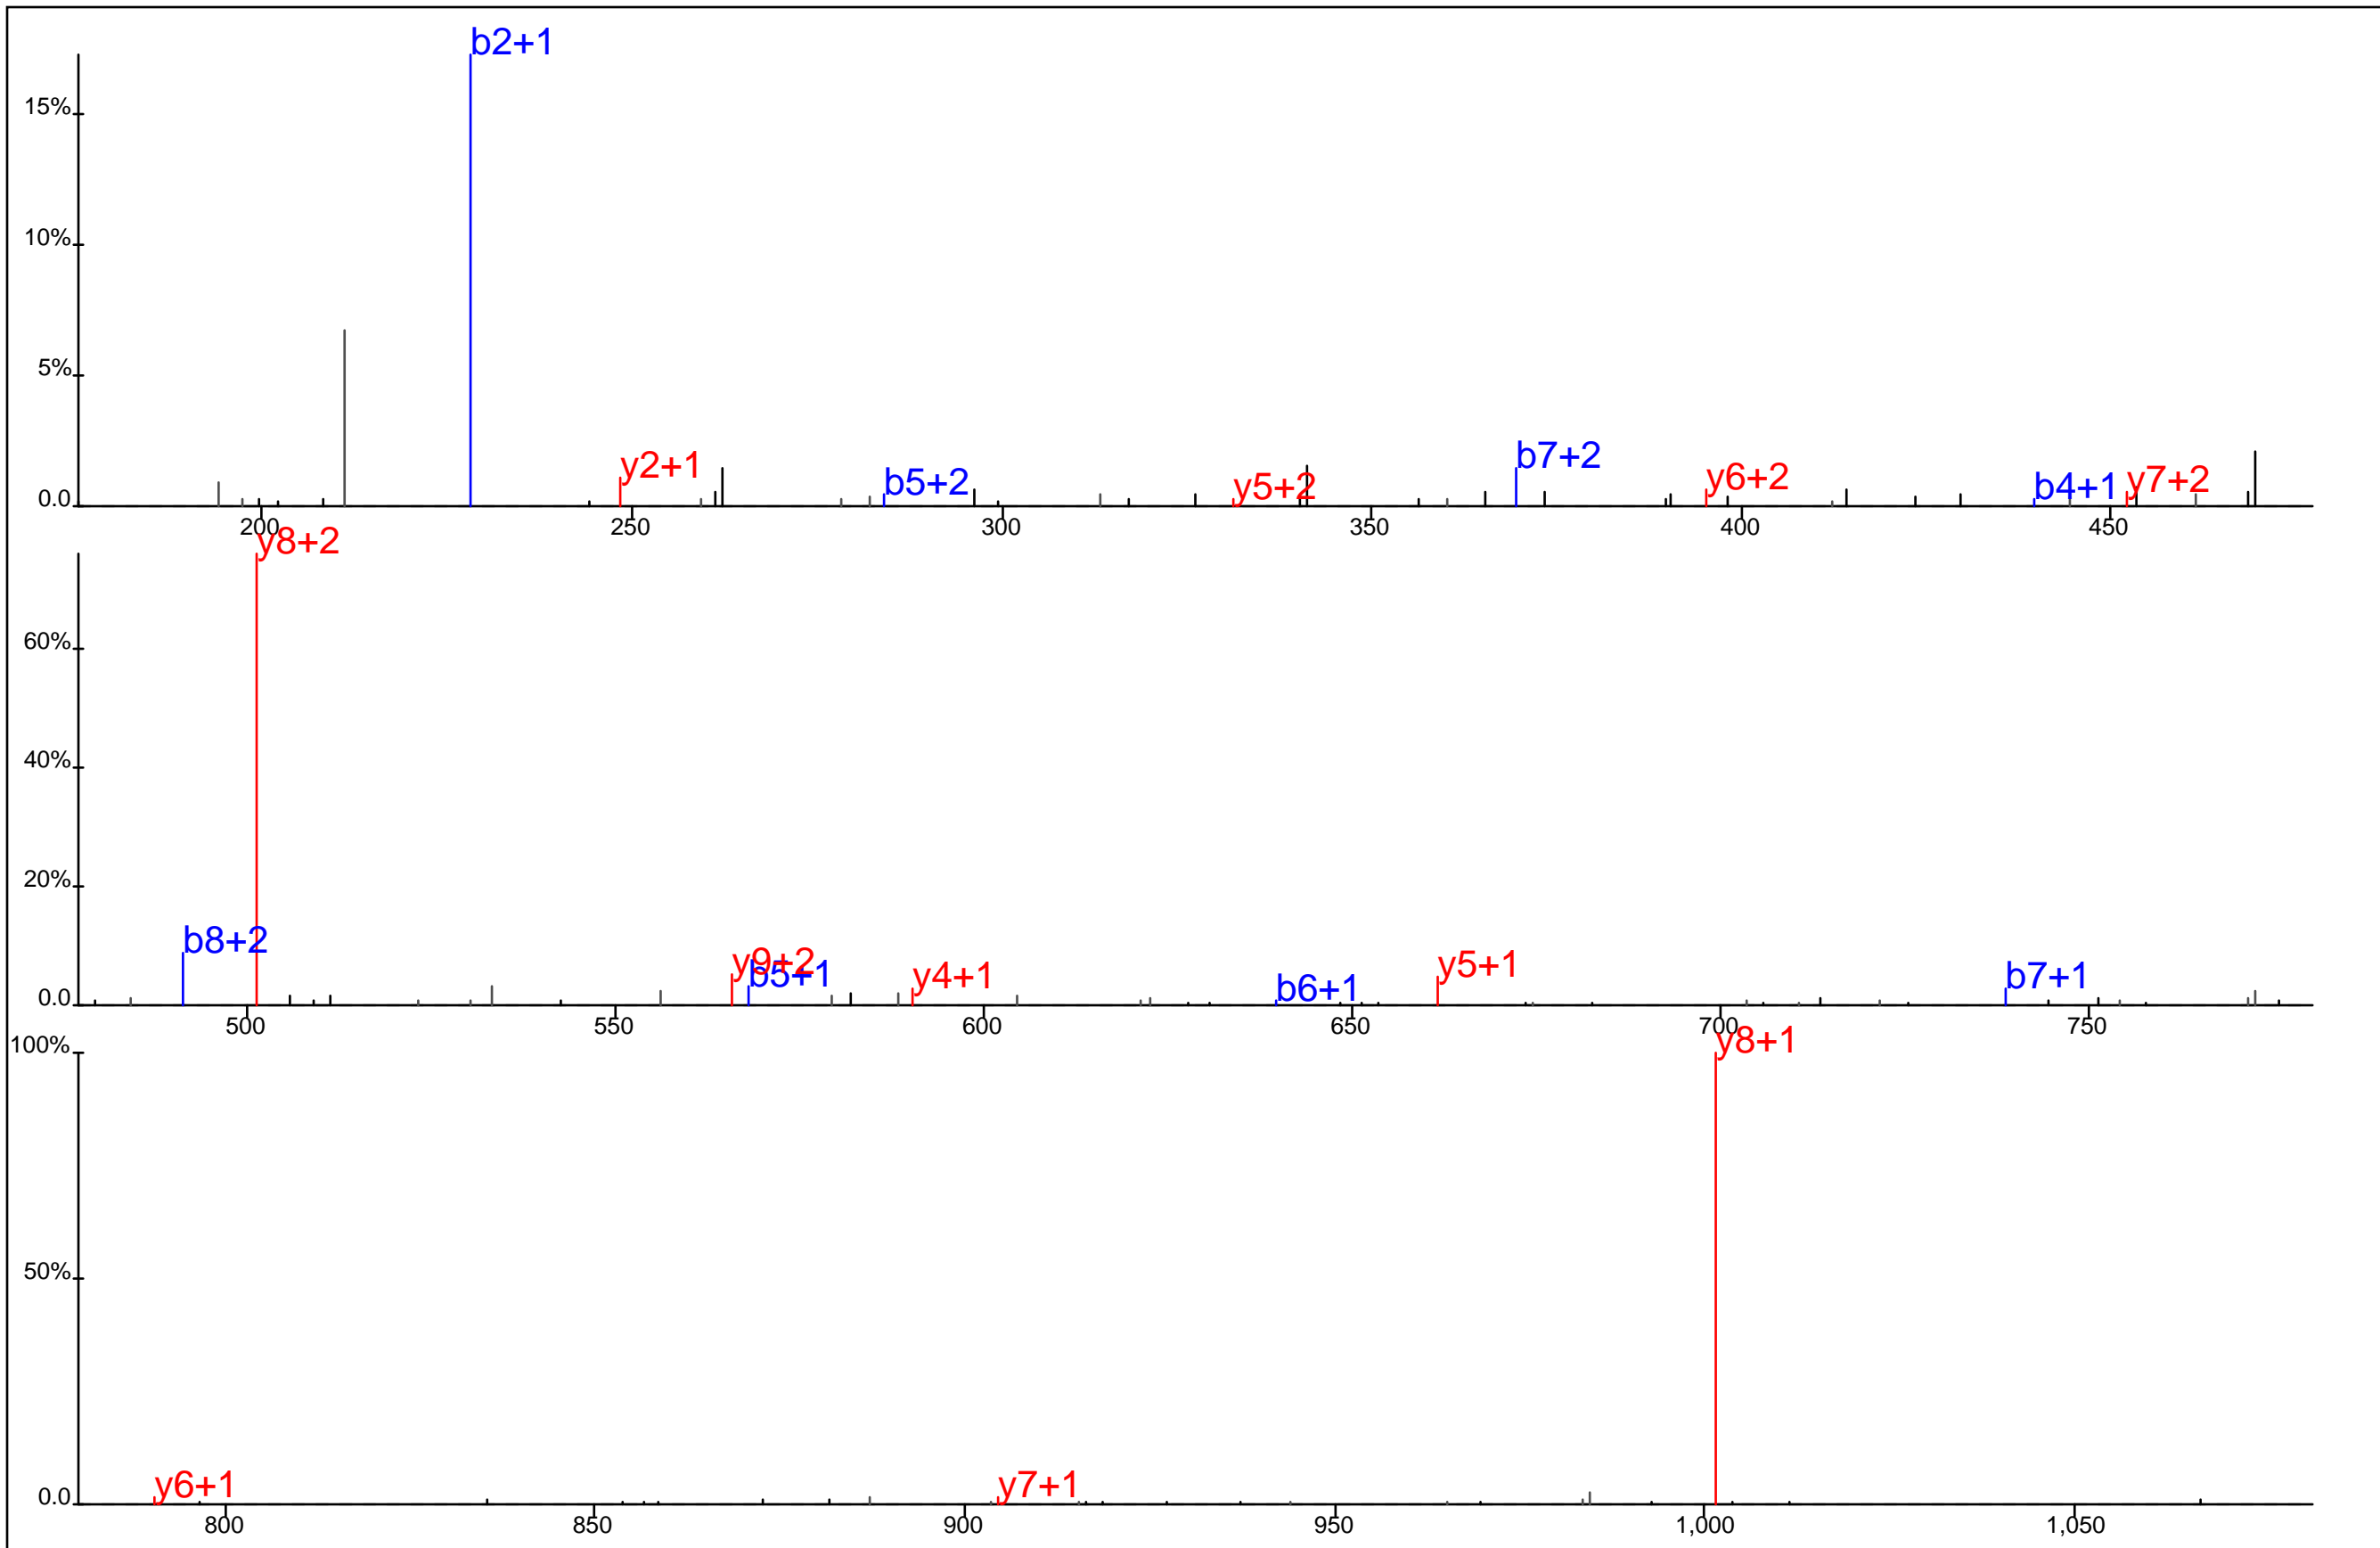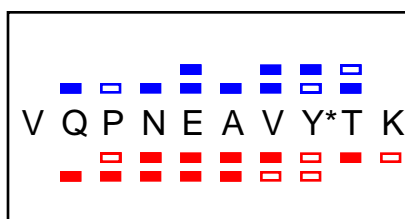

Protein Name: Glucose-6-phosphate dehydrogenase  
 gi Accession: 0  
 Precursor Mass: 614.7840+2  
 Delta Mass: 0.166 ppm  
 XCorr: 46.06



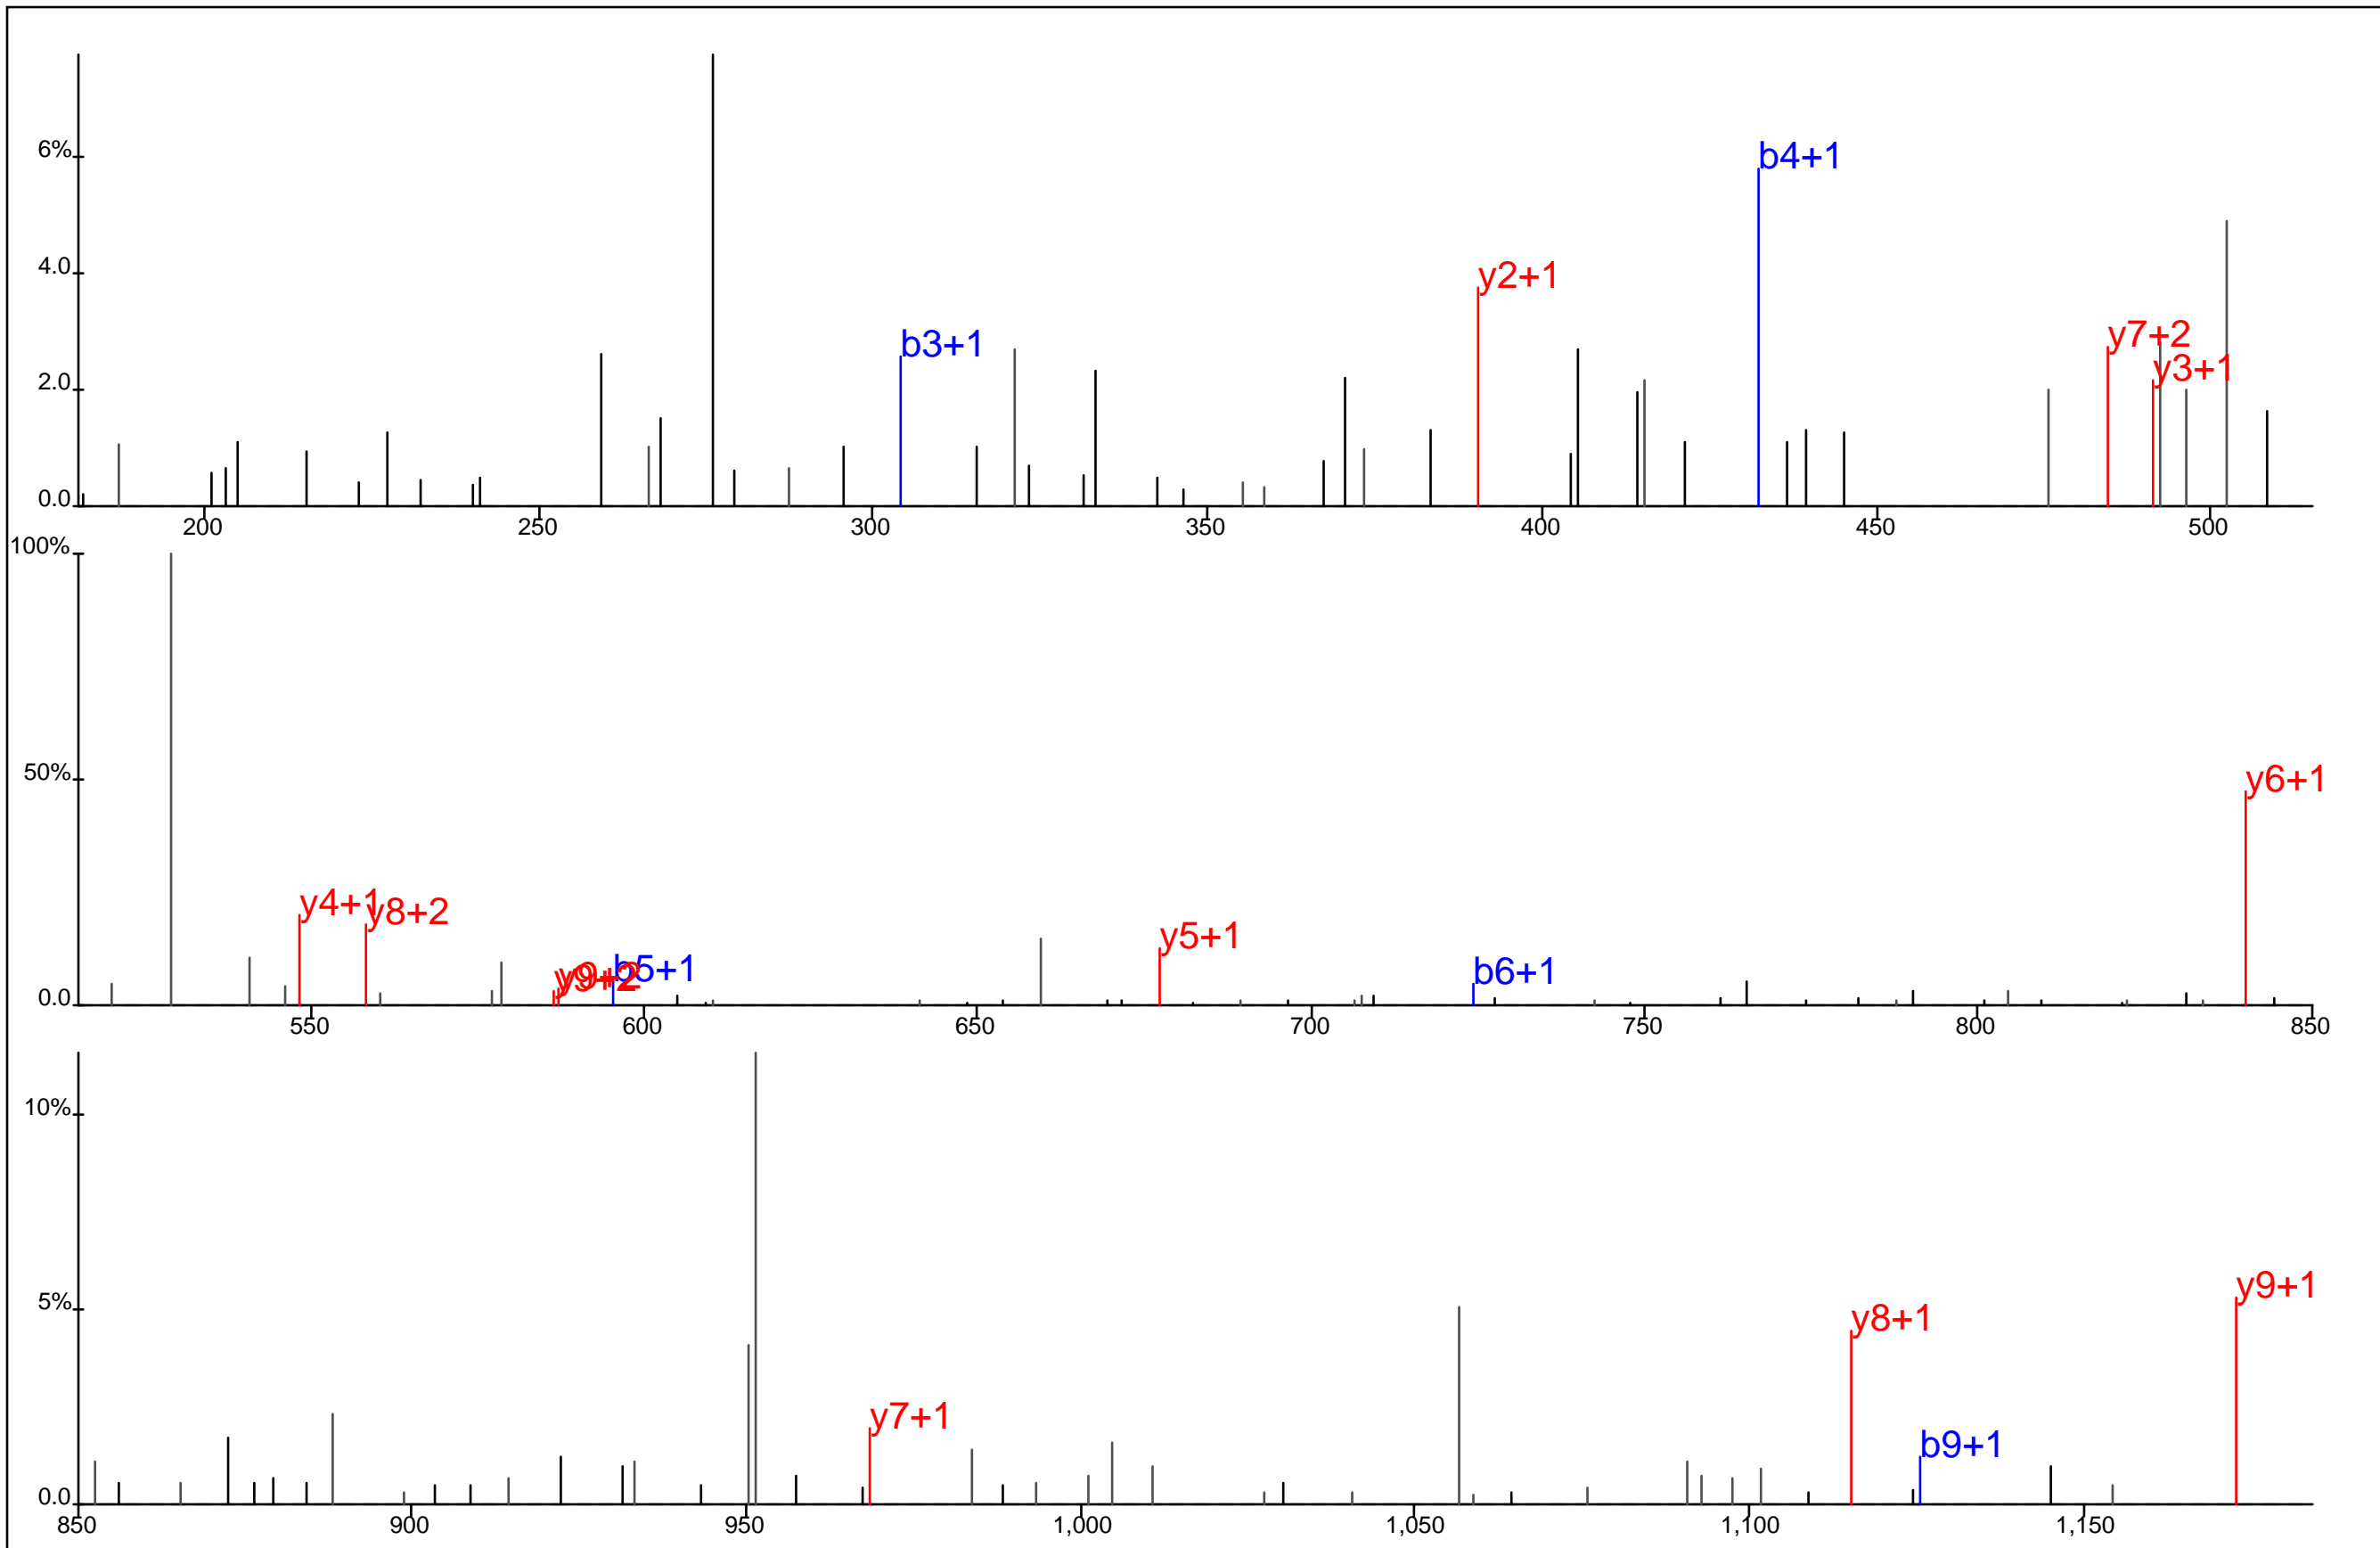

V G F Q Y E G T Y\* K  
 ■ ■ ■ ■ ■ ■ ■ ■  
 ■ ■ ■ ■ ■ ■ ■ ■

Protein Name: Glucose-6-phosphate dehydrogenase  
 gi Accession: 0  
 Precursor Mass: 636.2690+2  
 Delta Mass: 2.913 ppm  
 XCorr: 34.48

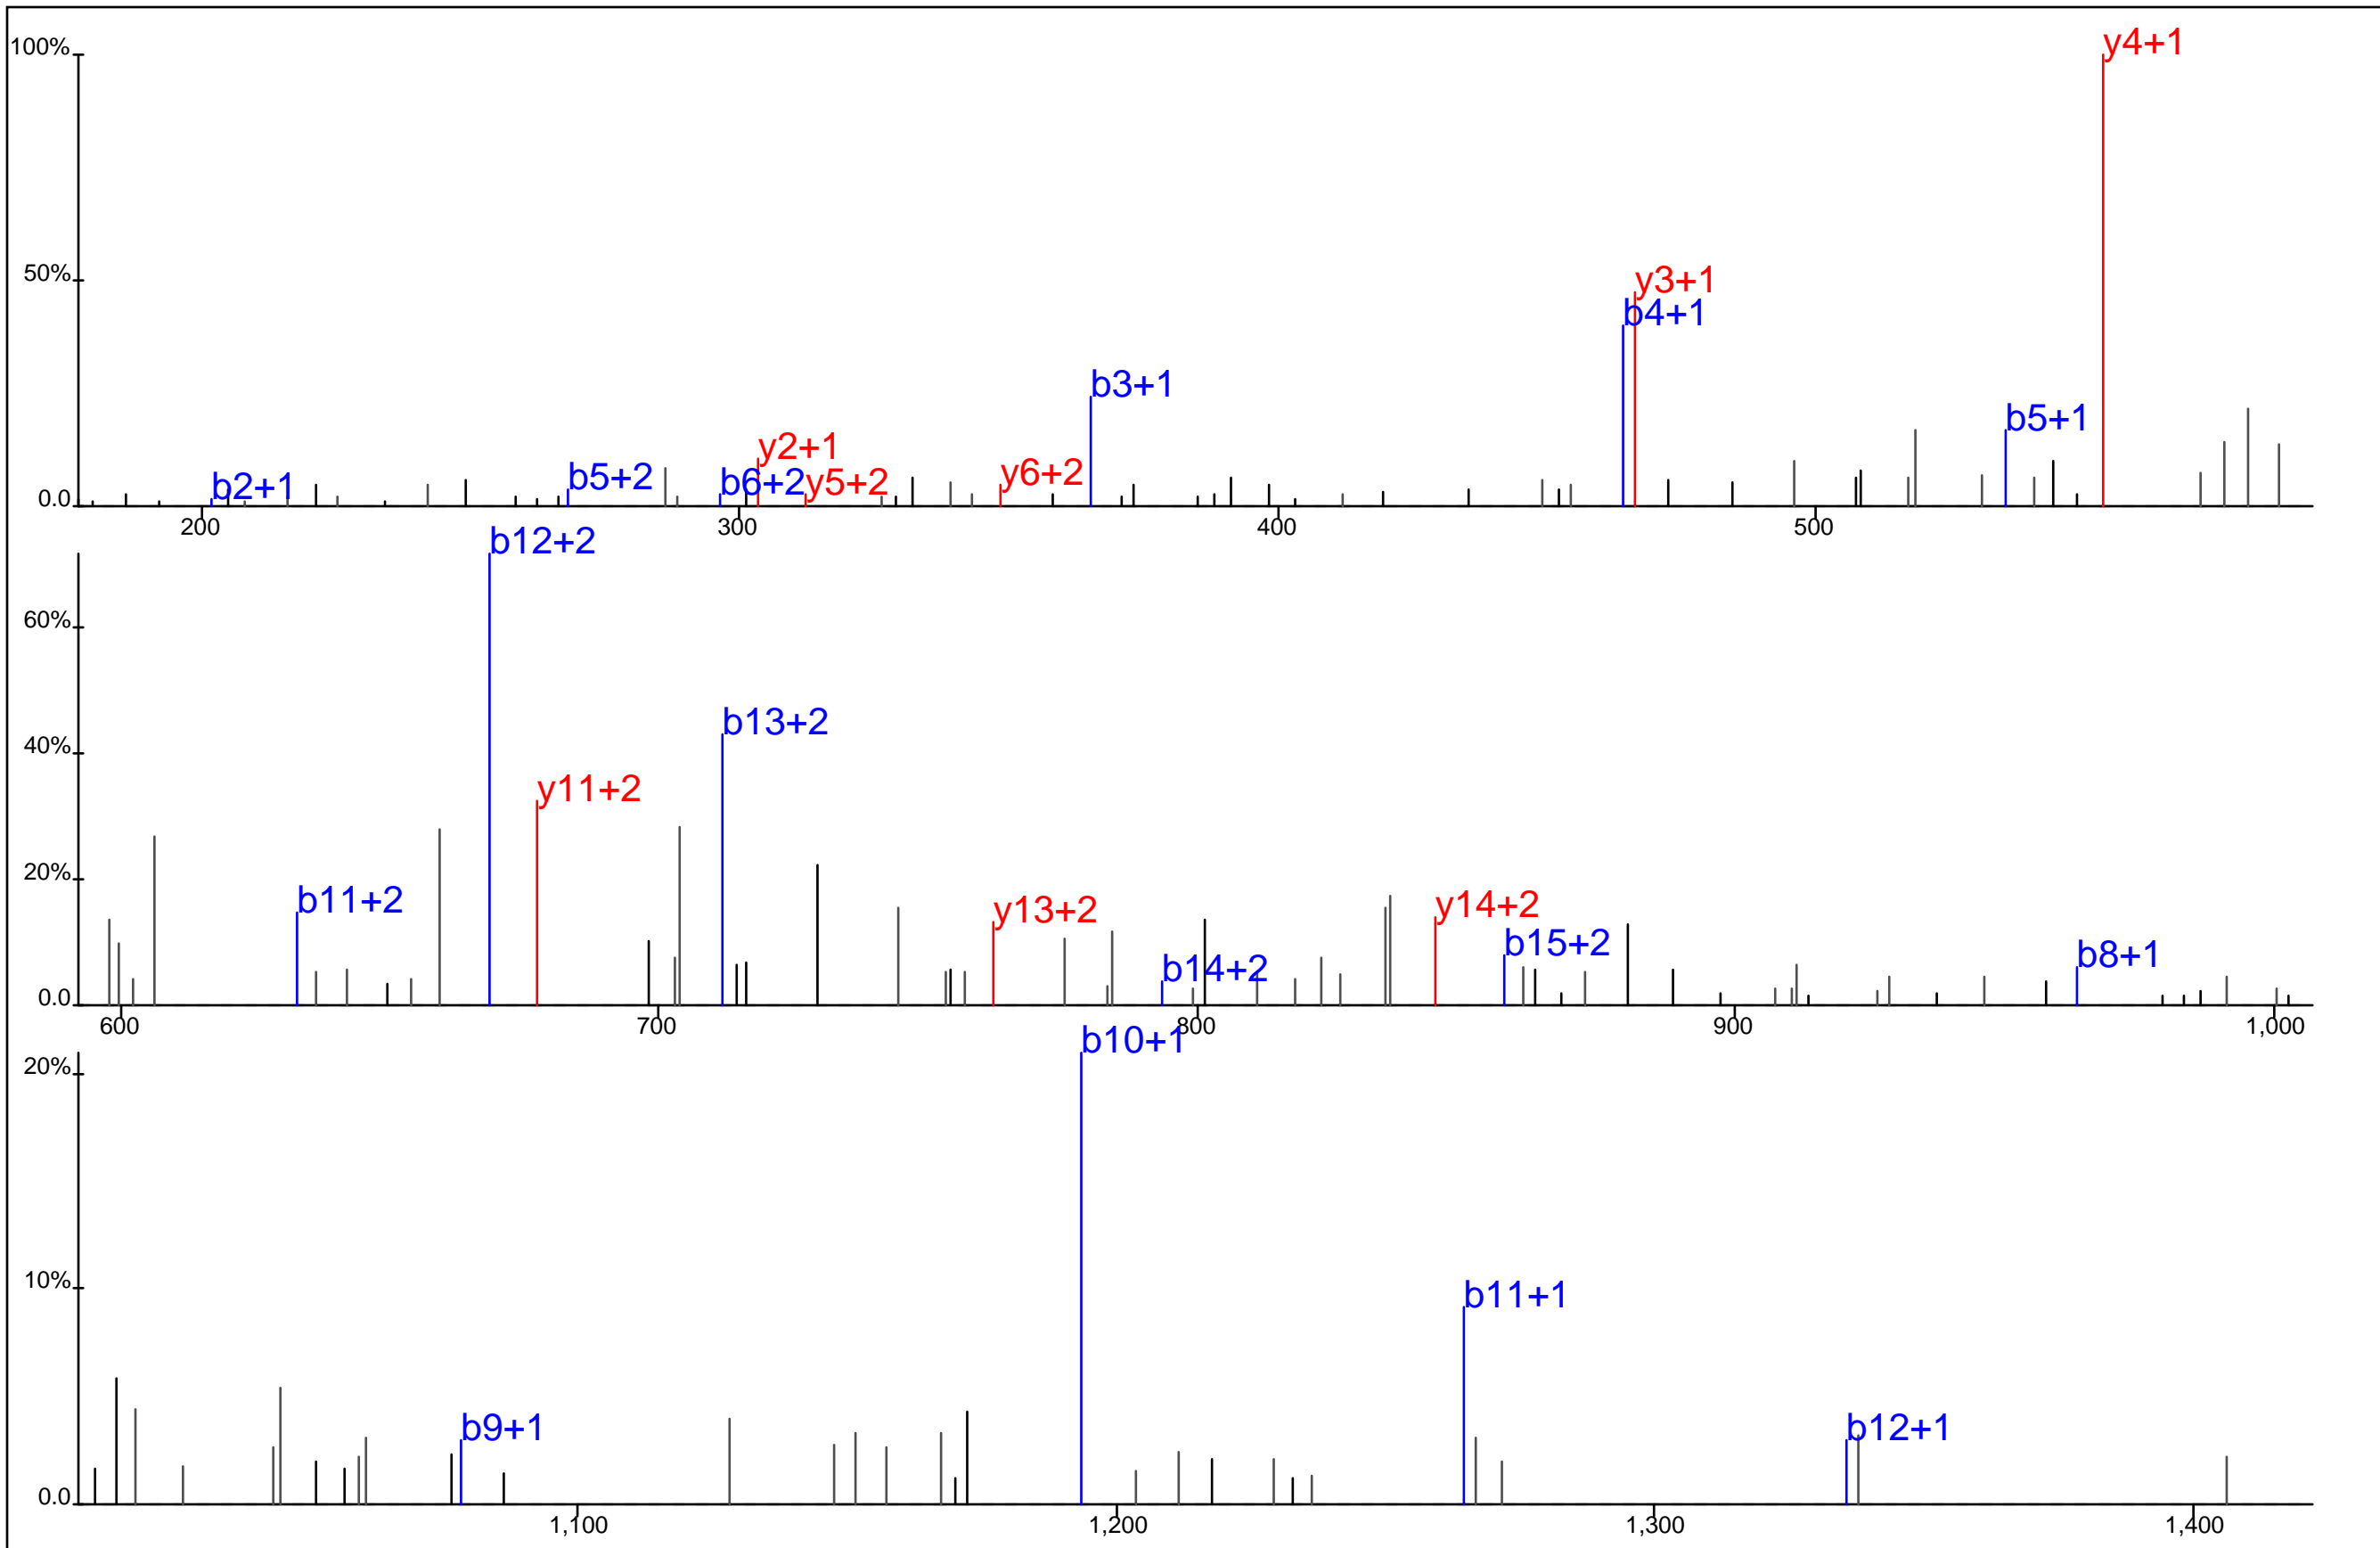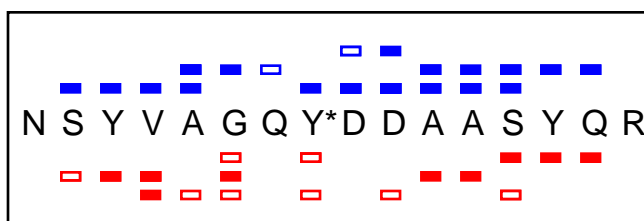

Protein Name: Glucose-6-phosphate dehydrogenase  
 gi Accession: 0  
 Precursor Mass: 629.9224+3  
 Delta Mass: 1.030 ppm  
 XCorr: 46.25

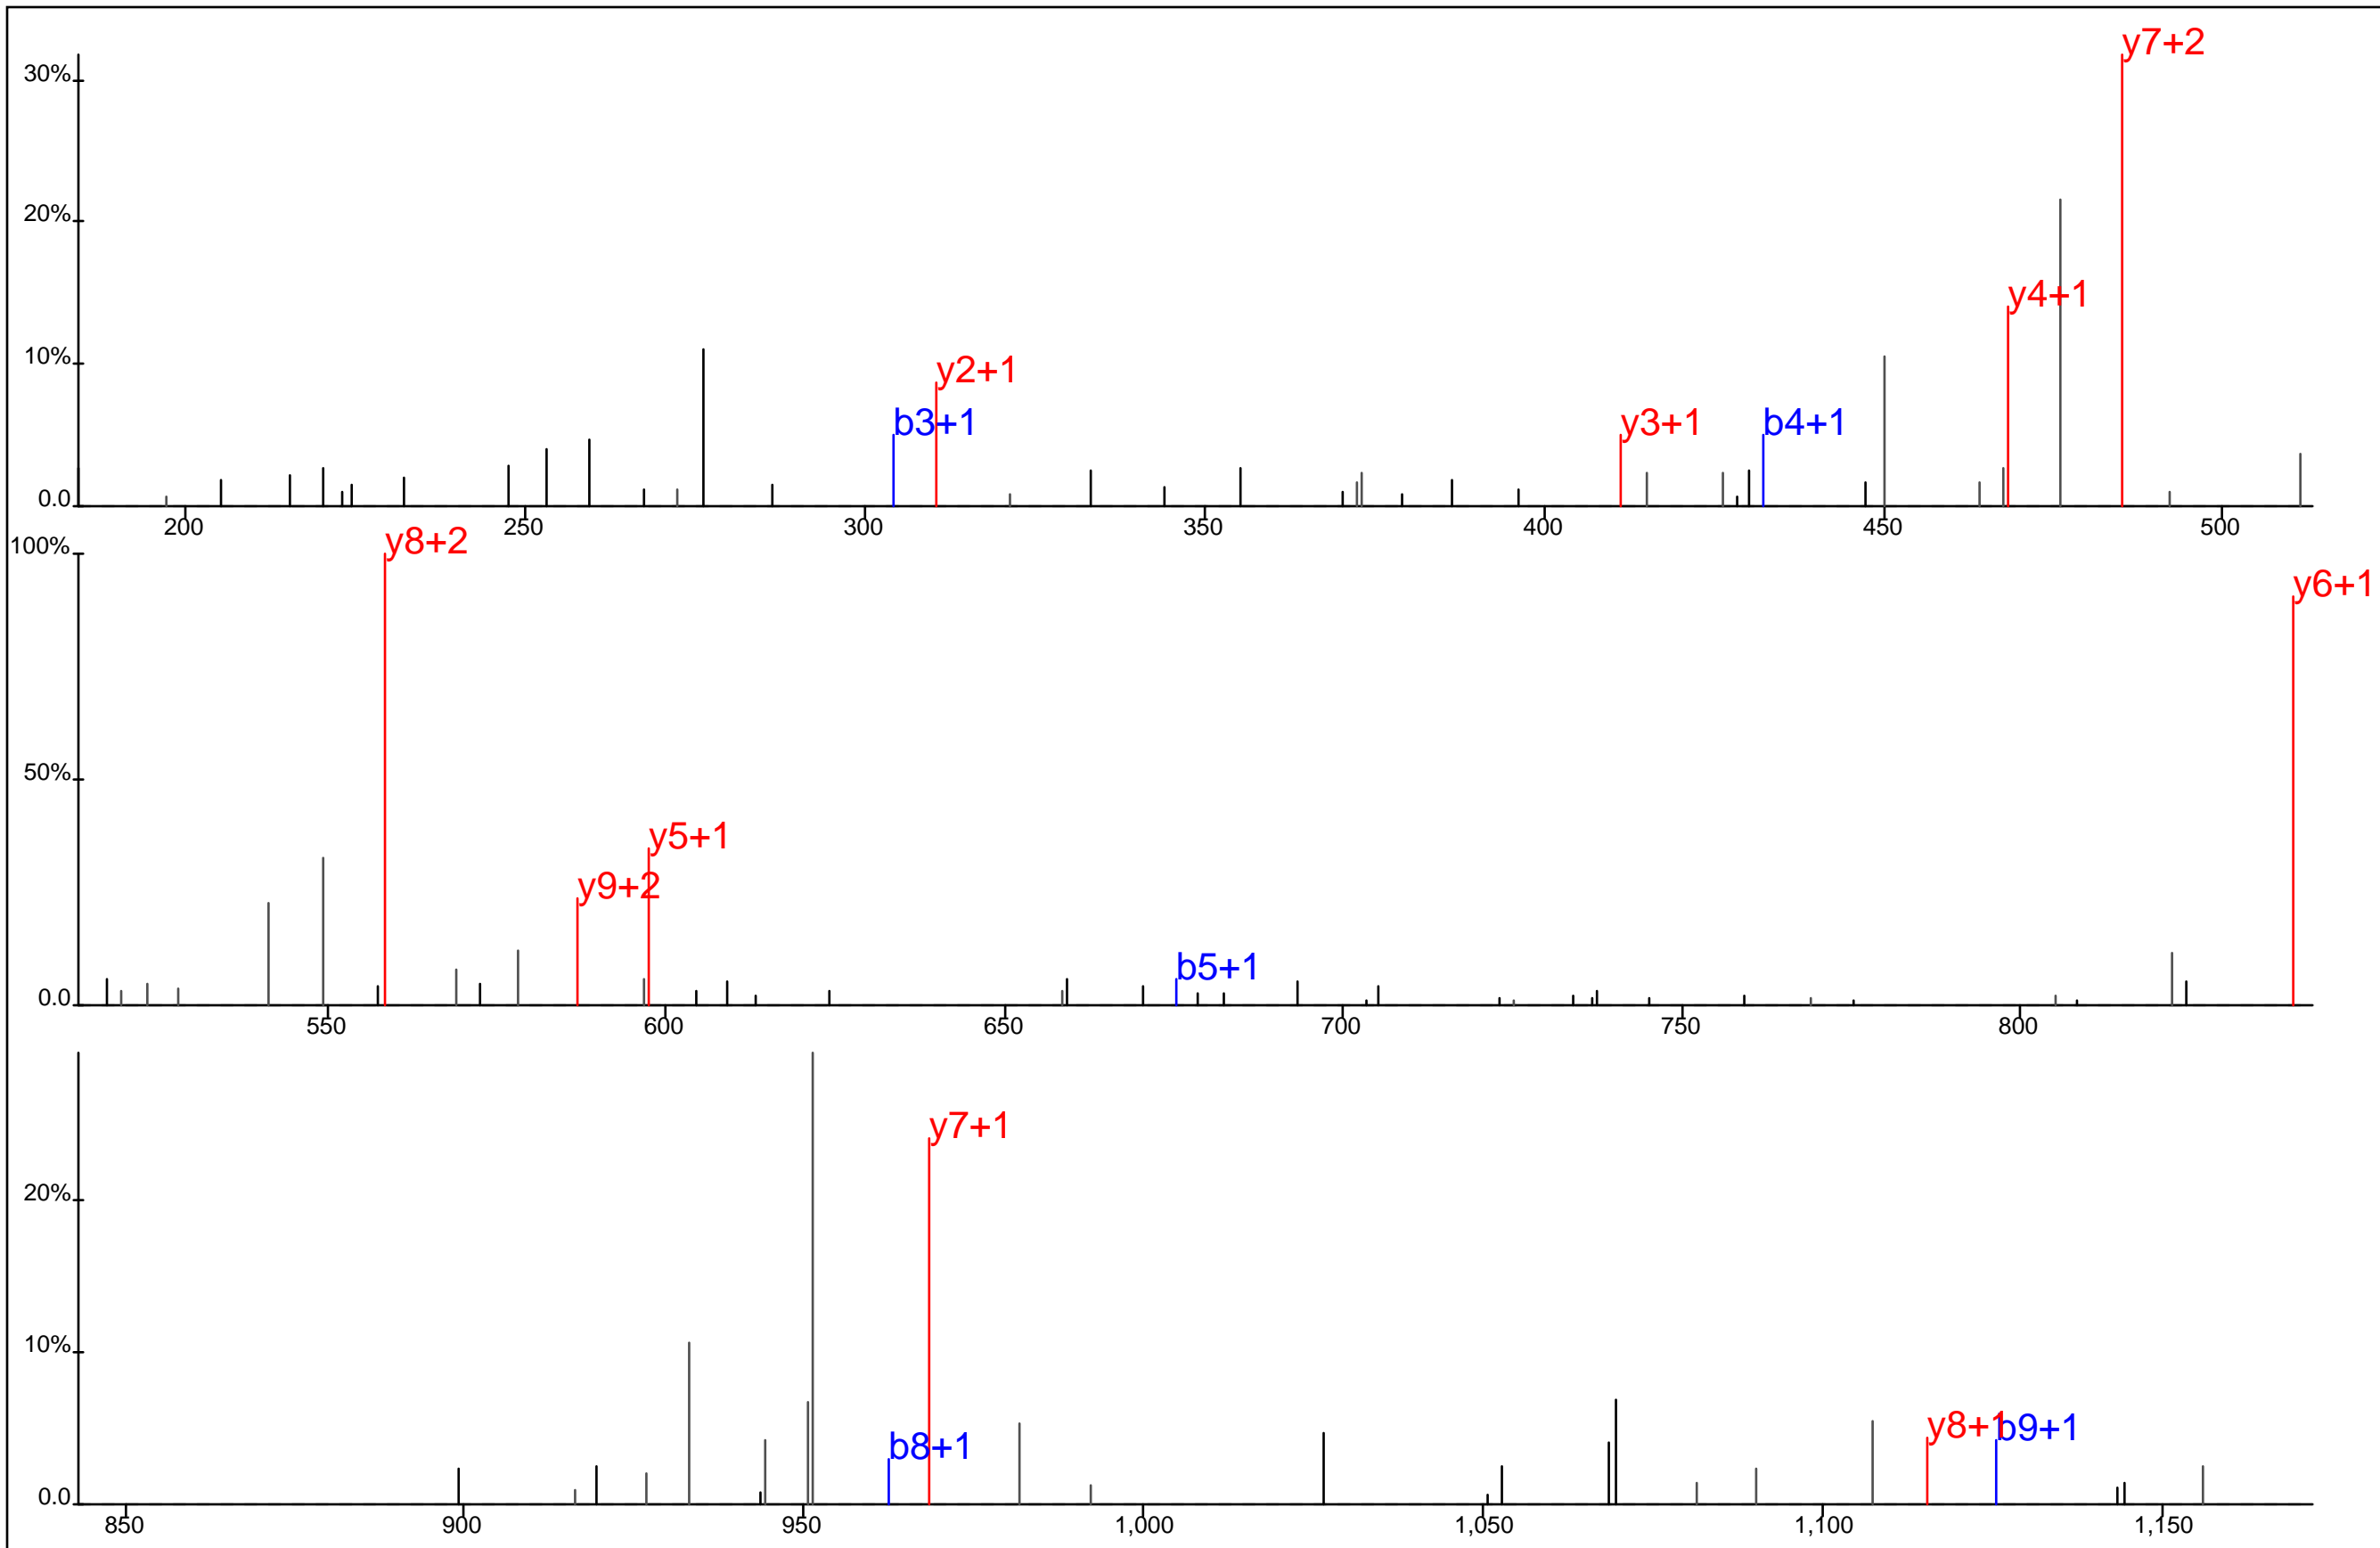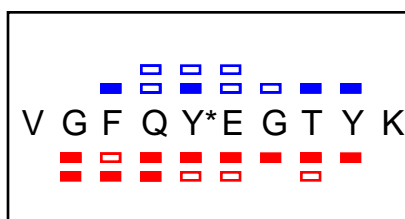

Protein Name: Glucose-6-phosphate dehydrogenase  
 gi Accession: 0  
 Precursor Mass: 636.2701+2  
 Delta Mass: 1.184 ppm  
 XCorr: 48.41

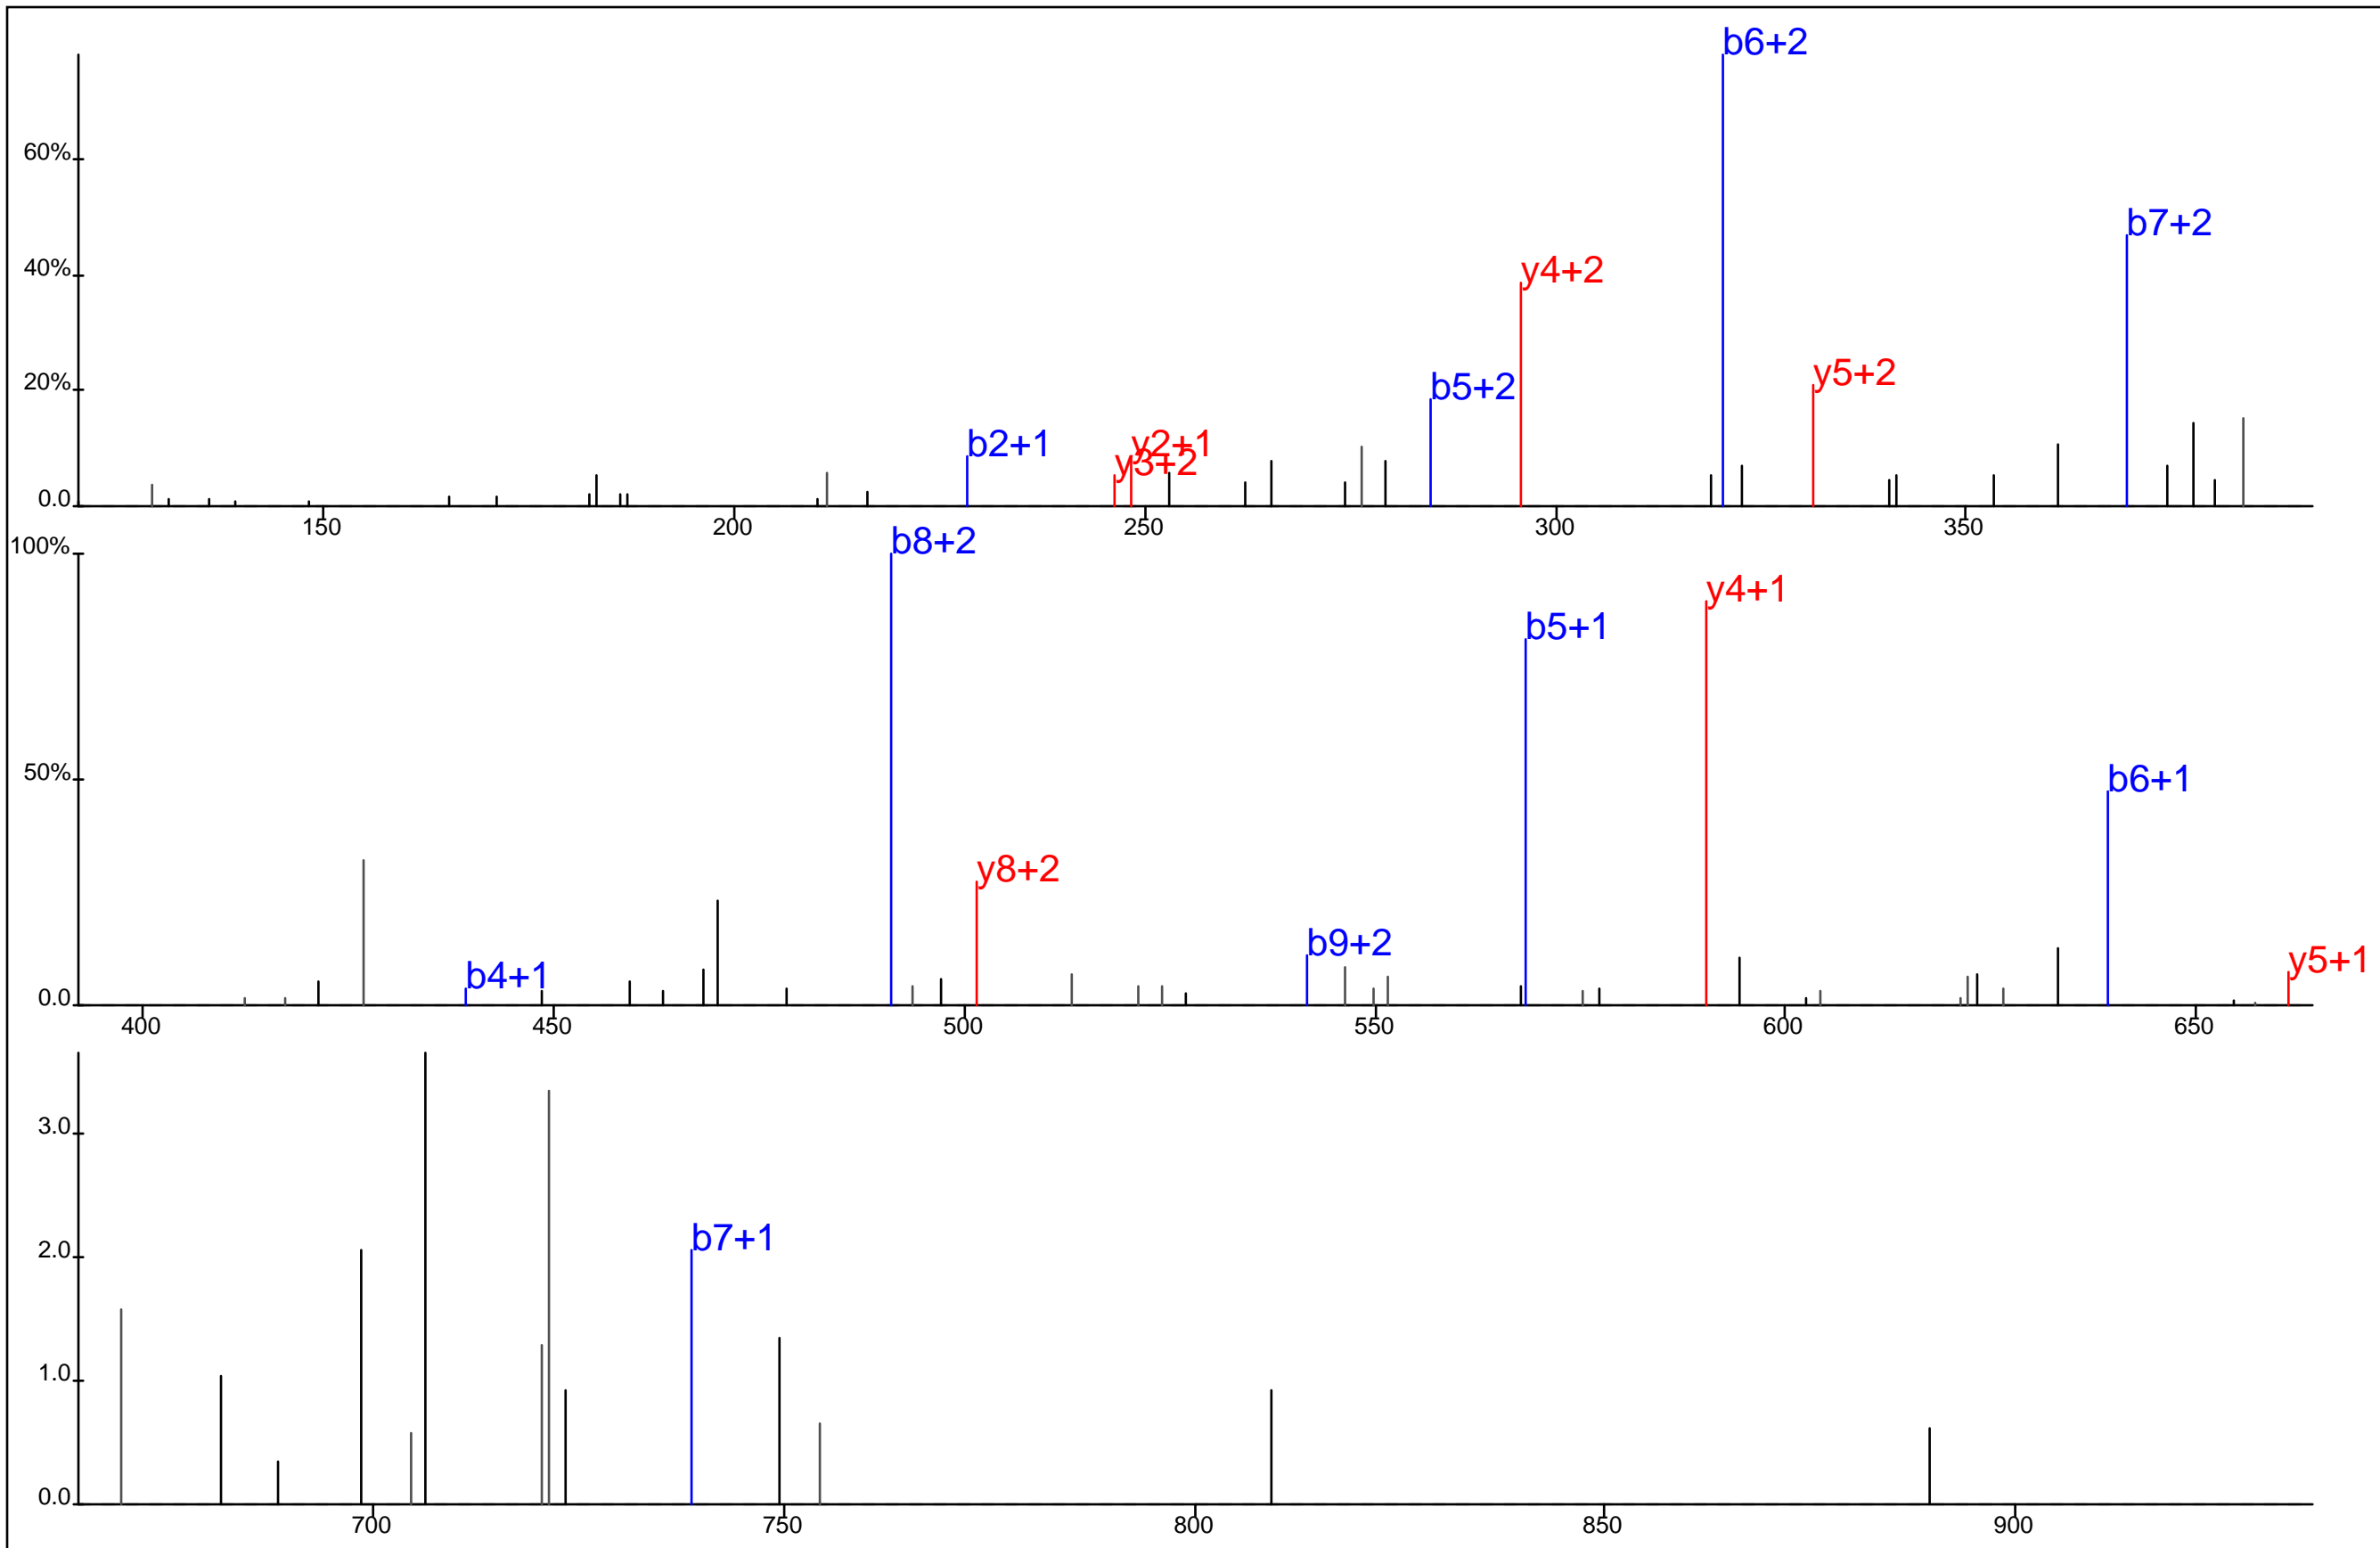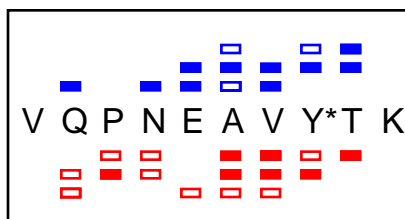

Protein Name: Glucose-6-phosphate dehydrogenase  
 gi Accession: 0  
 Precursor Mass: 410.1915+3  
 Delta Mass: 0.798 ppm  
 XCorr: 31.91

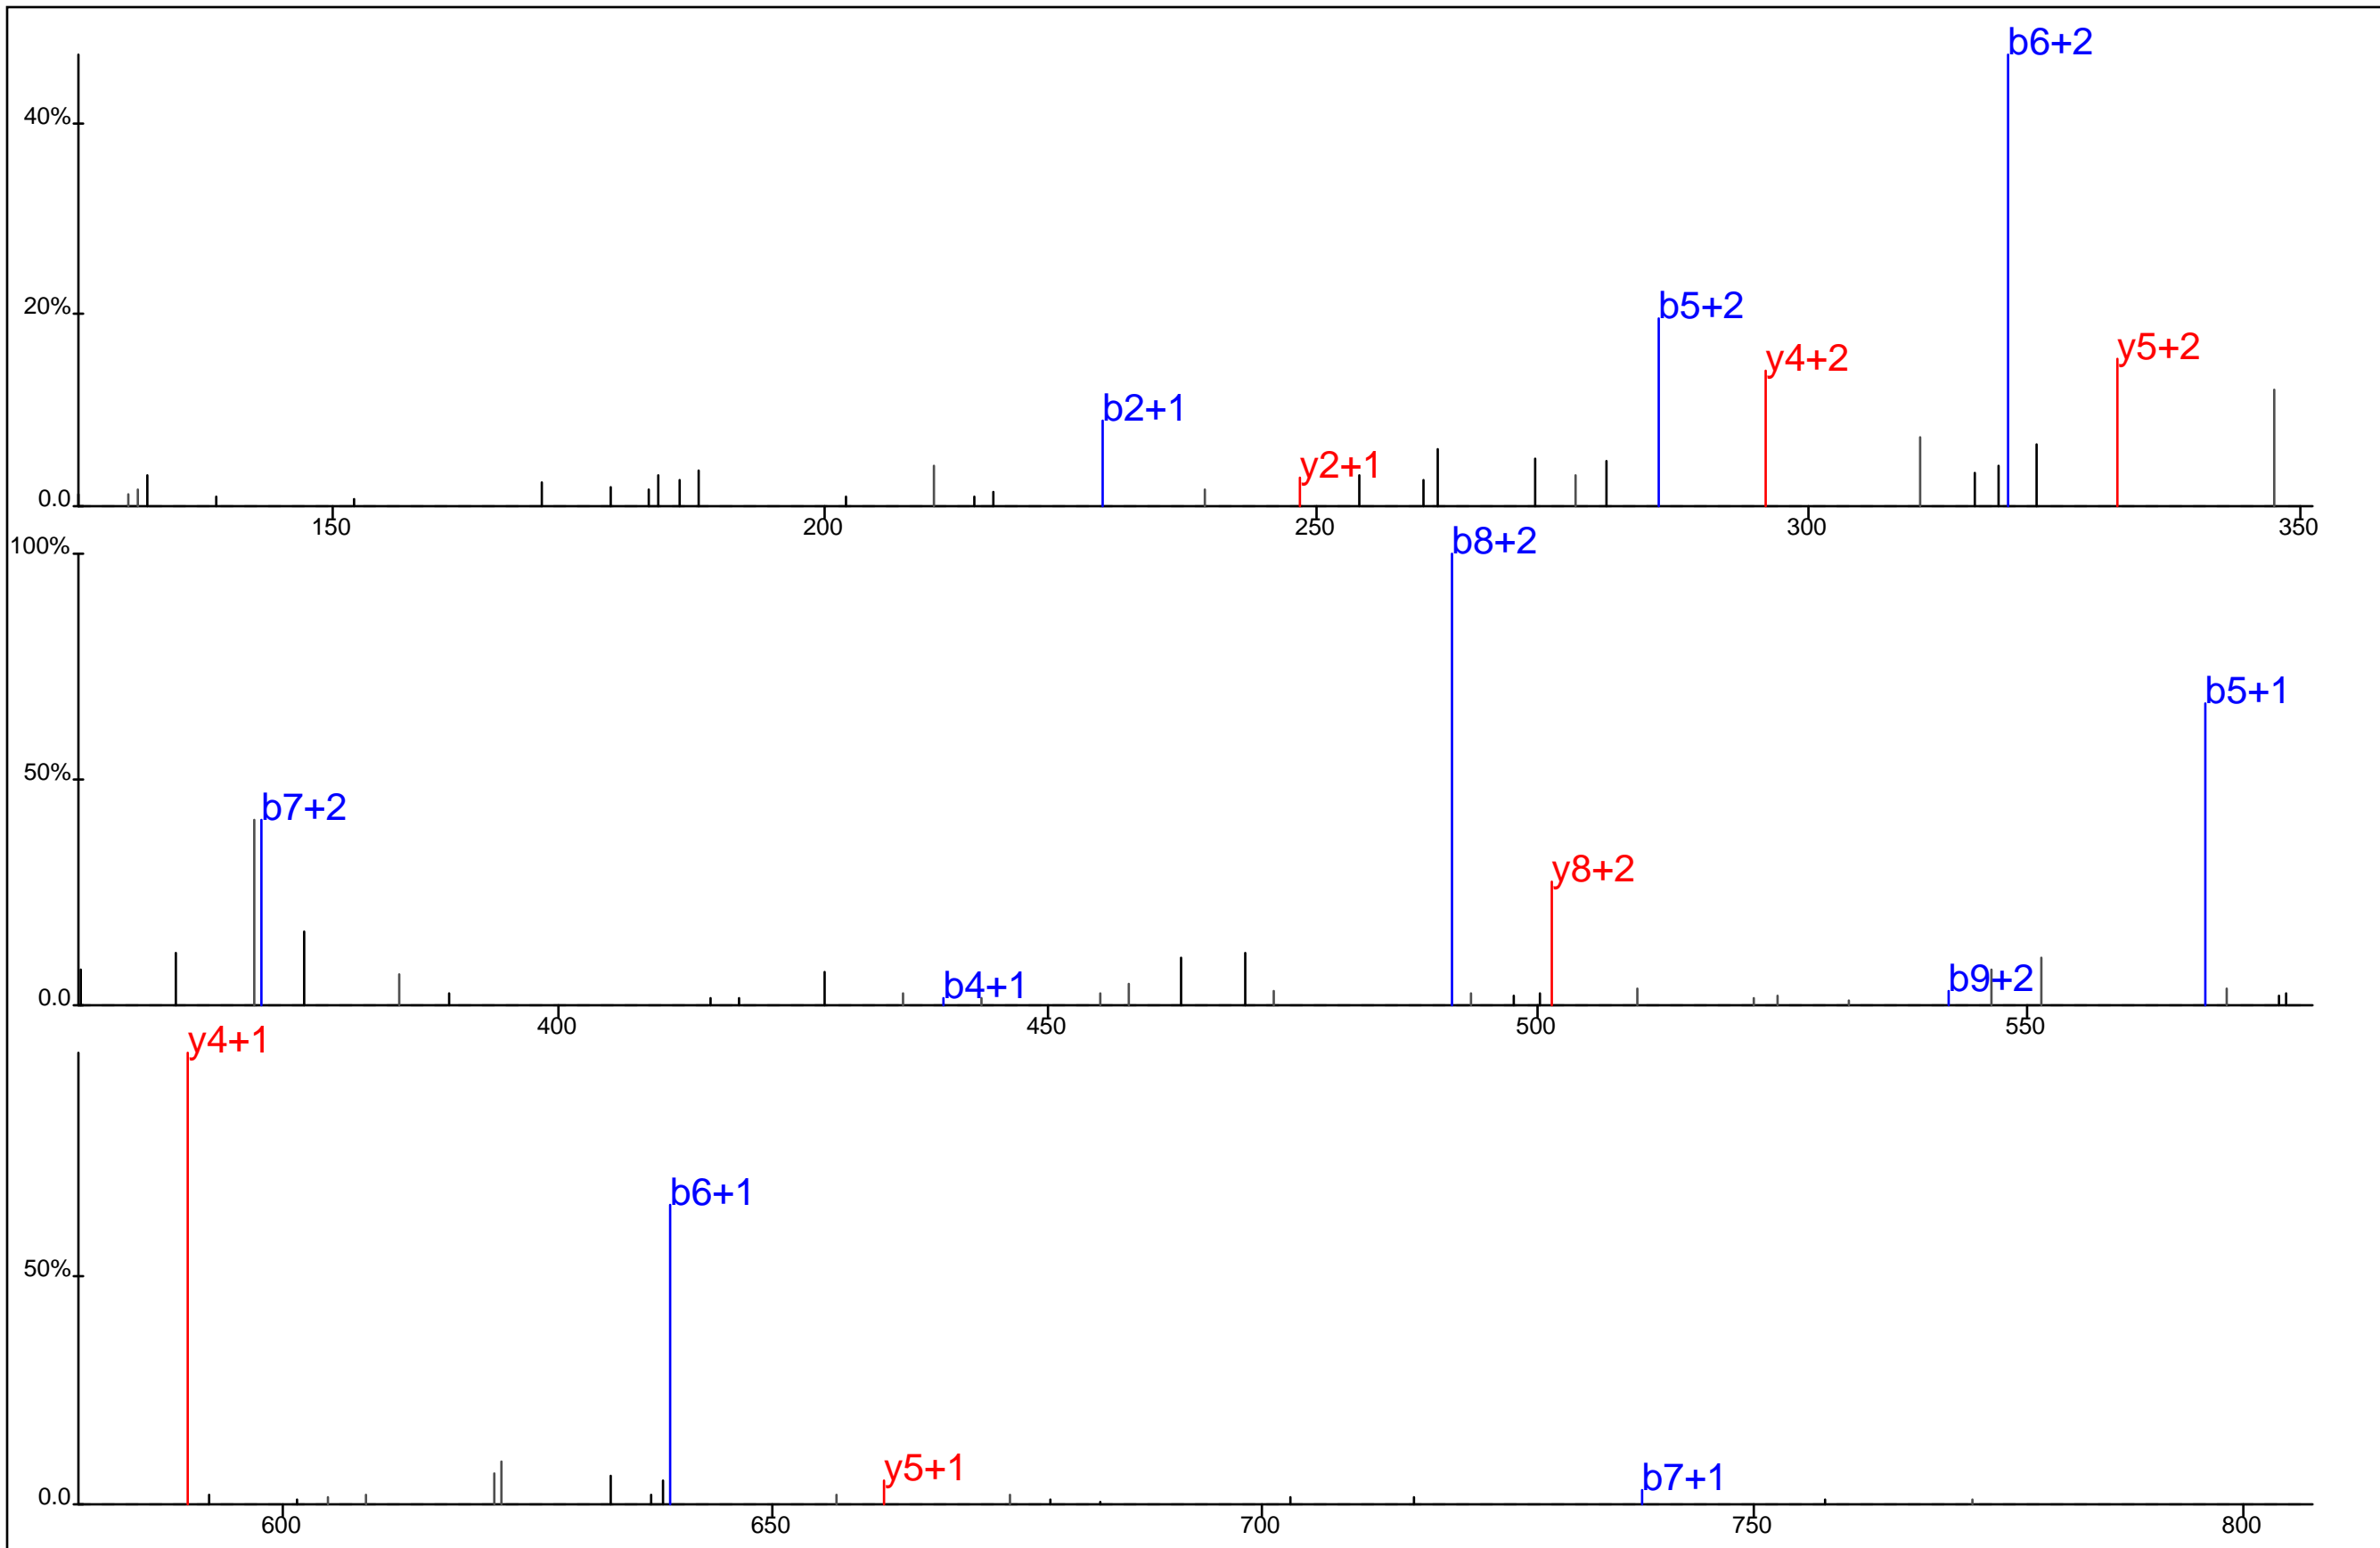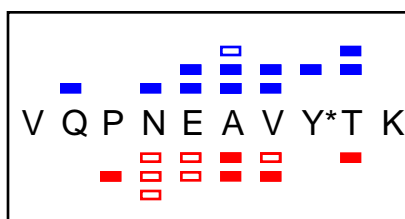

Protein Name: Glucose-6-phosphate dehydrogenase  
 gi Accession: 0  
 Precursor Mass: 410.1916+3  
 Delta Mass: 0.575 ppm  
 XCorr: 24.77

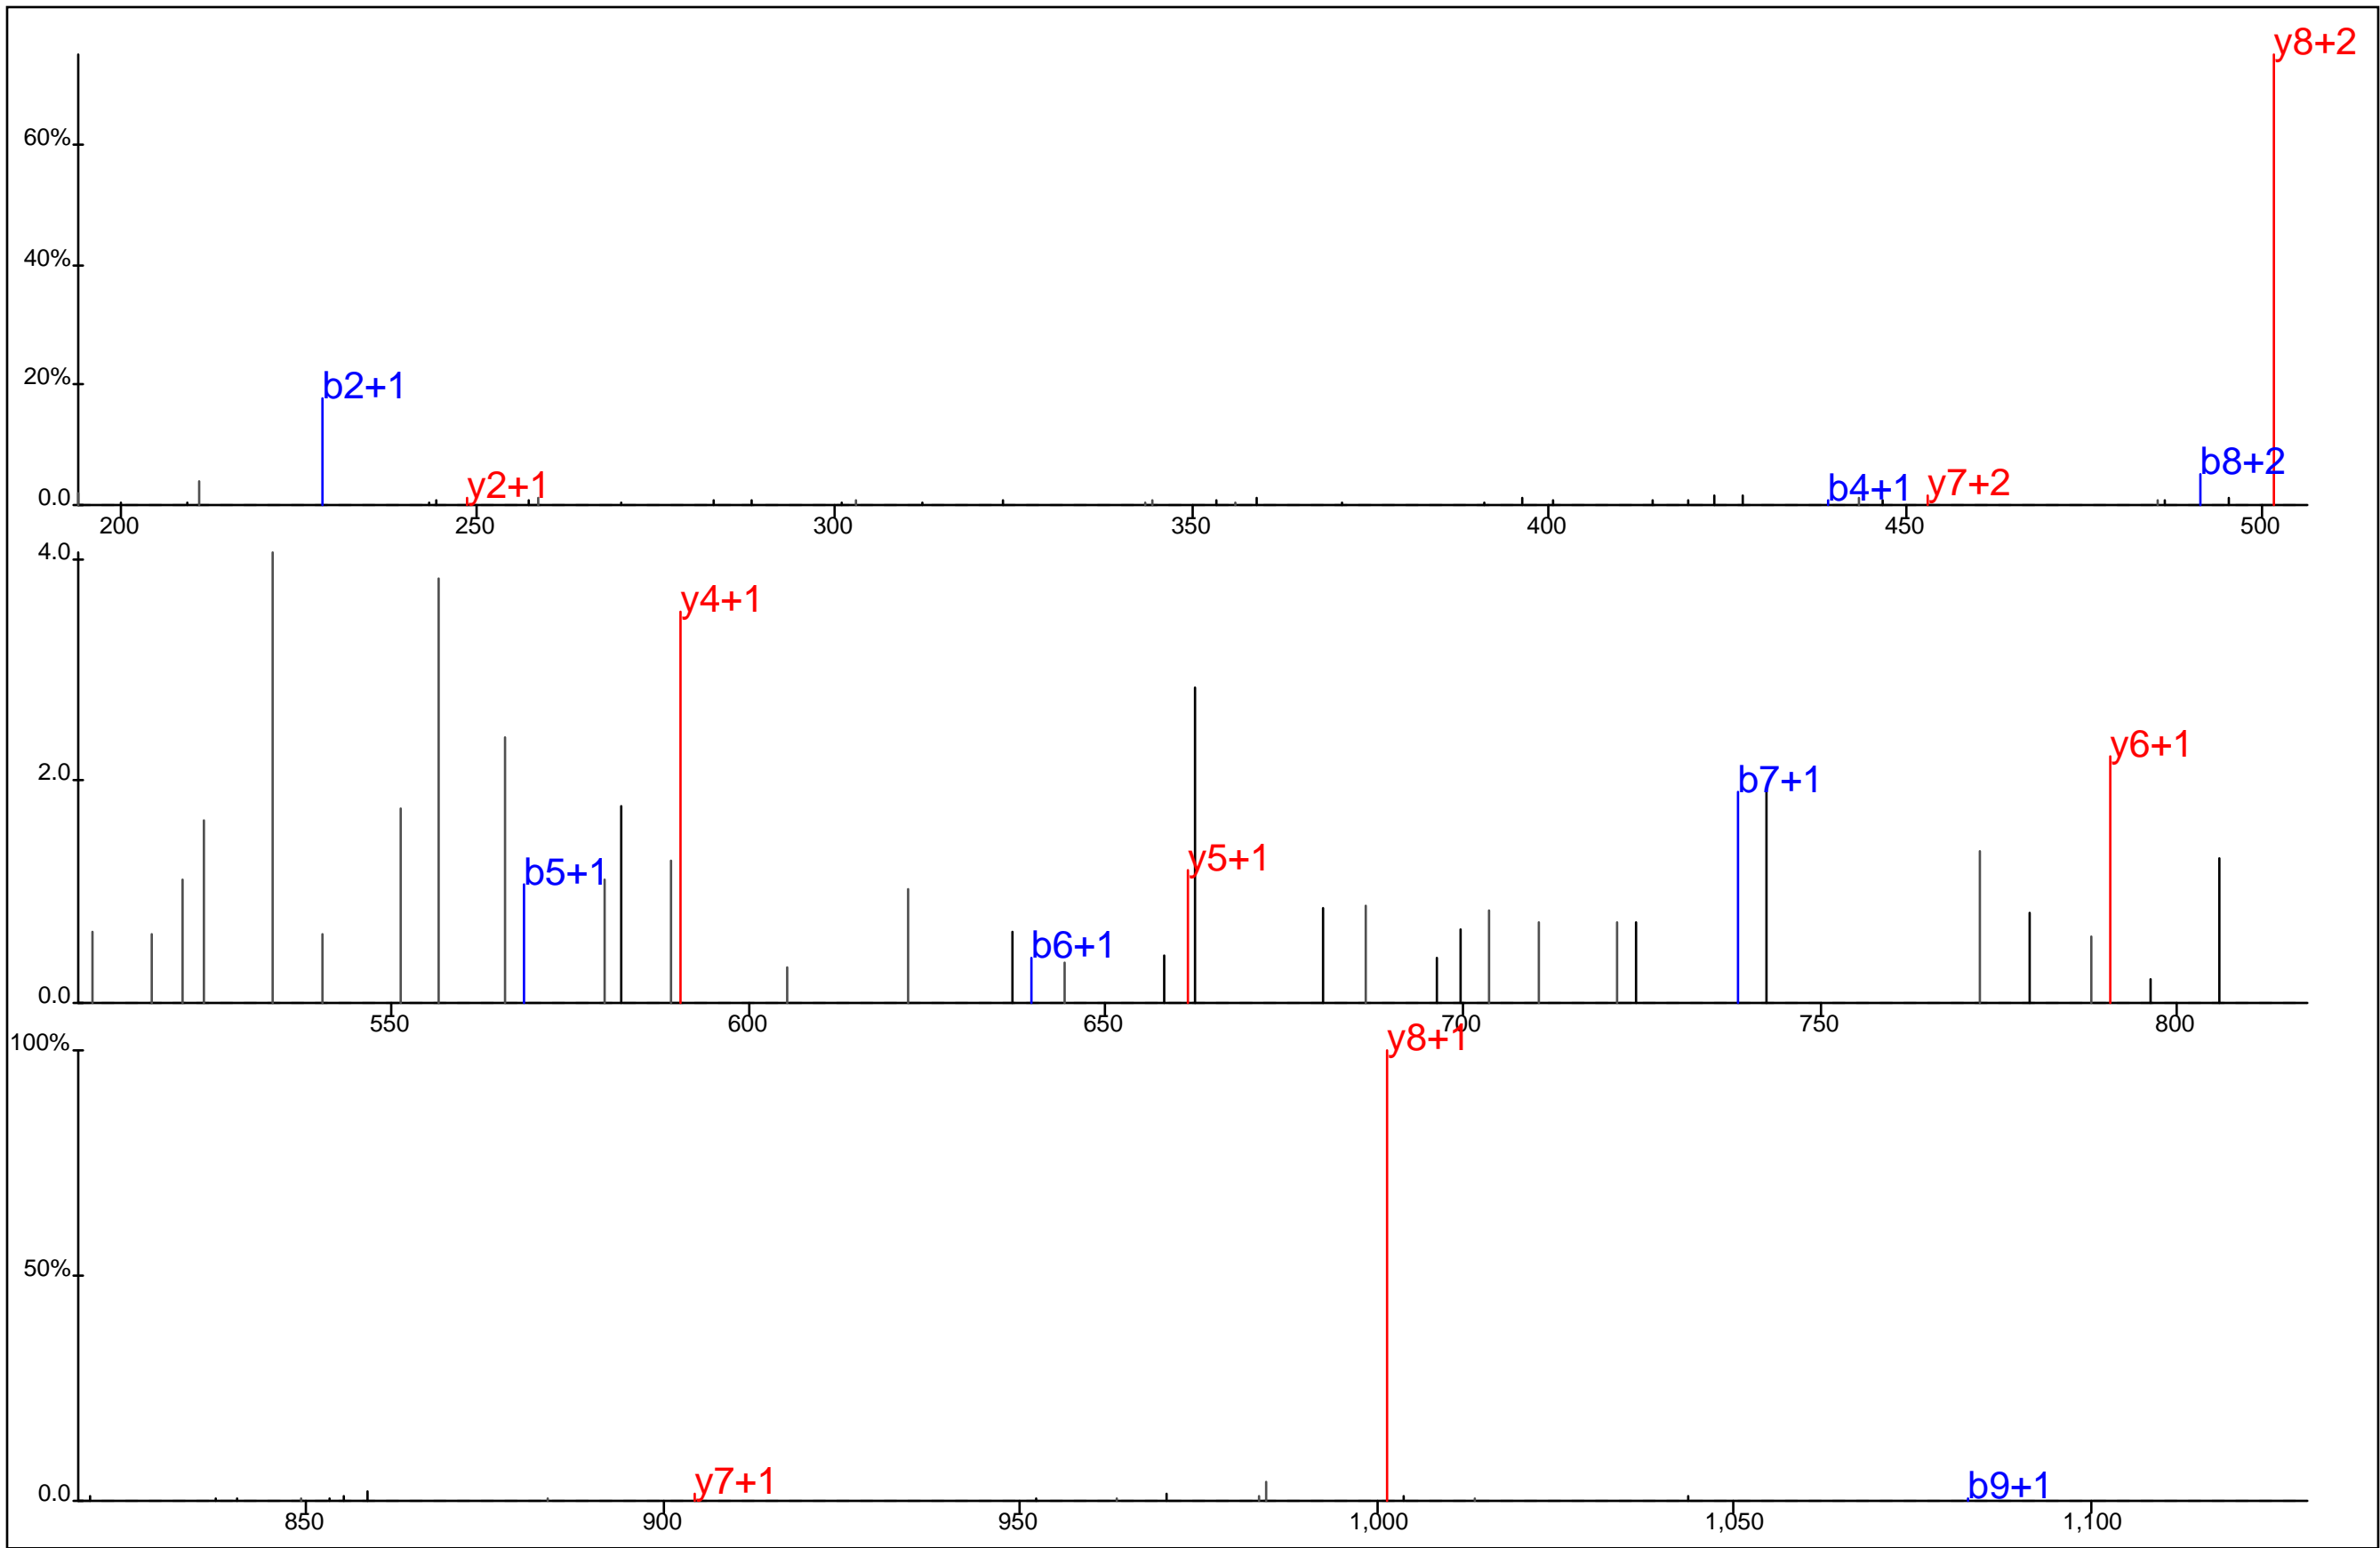

▢ ▢ ▢ ▢ ▢ ▢ ▢ ▢  
 V Q P N E A V Y\* T K  
▢ ▢ ▢ ▢ ▢ ▢ ▢ ▢

Protein Name: Glucose-6-phosphate dehydrogenase  
 gi Accession: 0  
 Precursor Mass: 614.7853+2  
 Delta Mass: 2.019 ppm  
 XCorr: 39.85

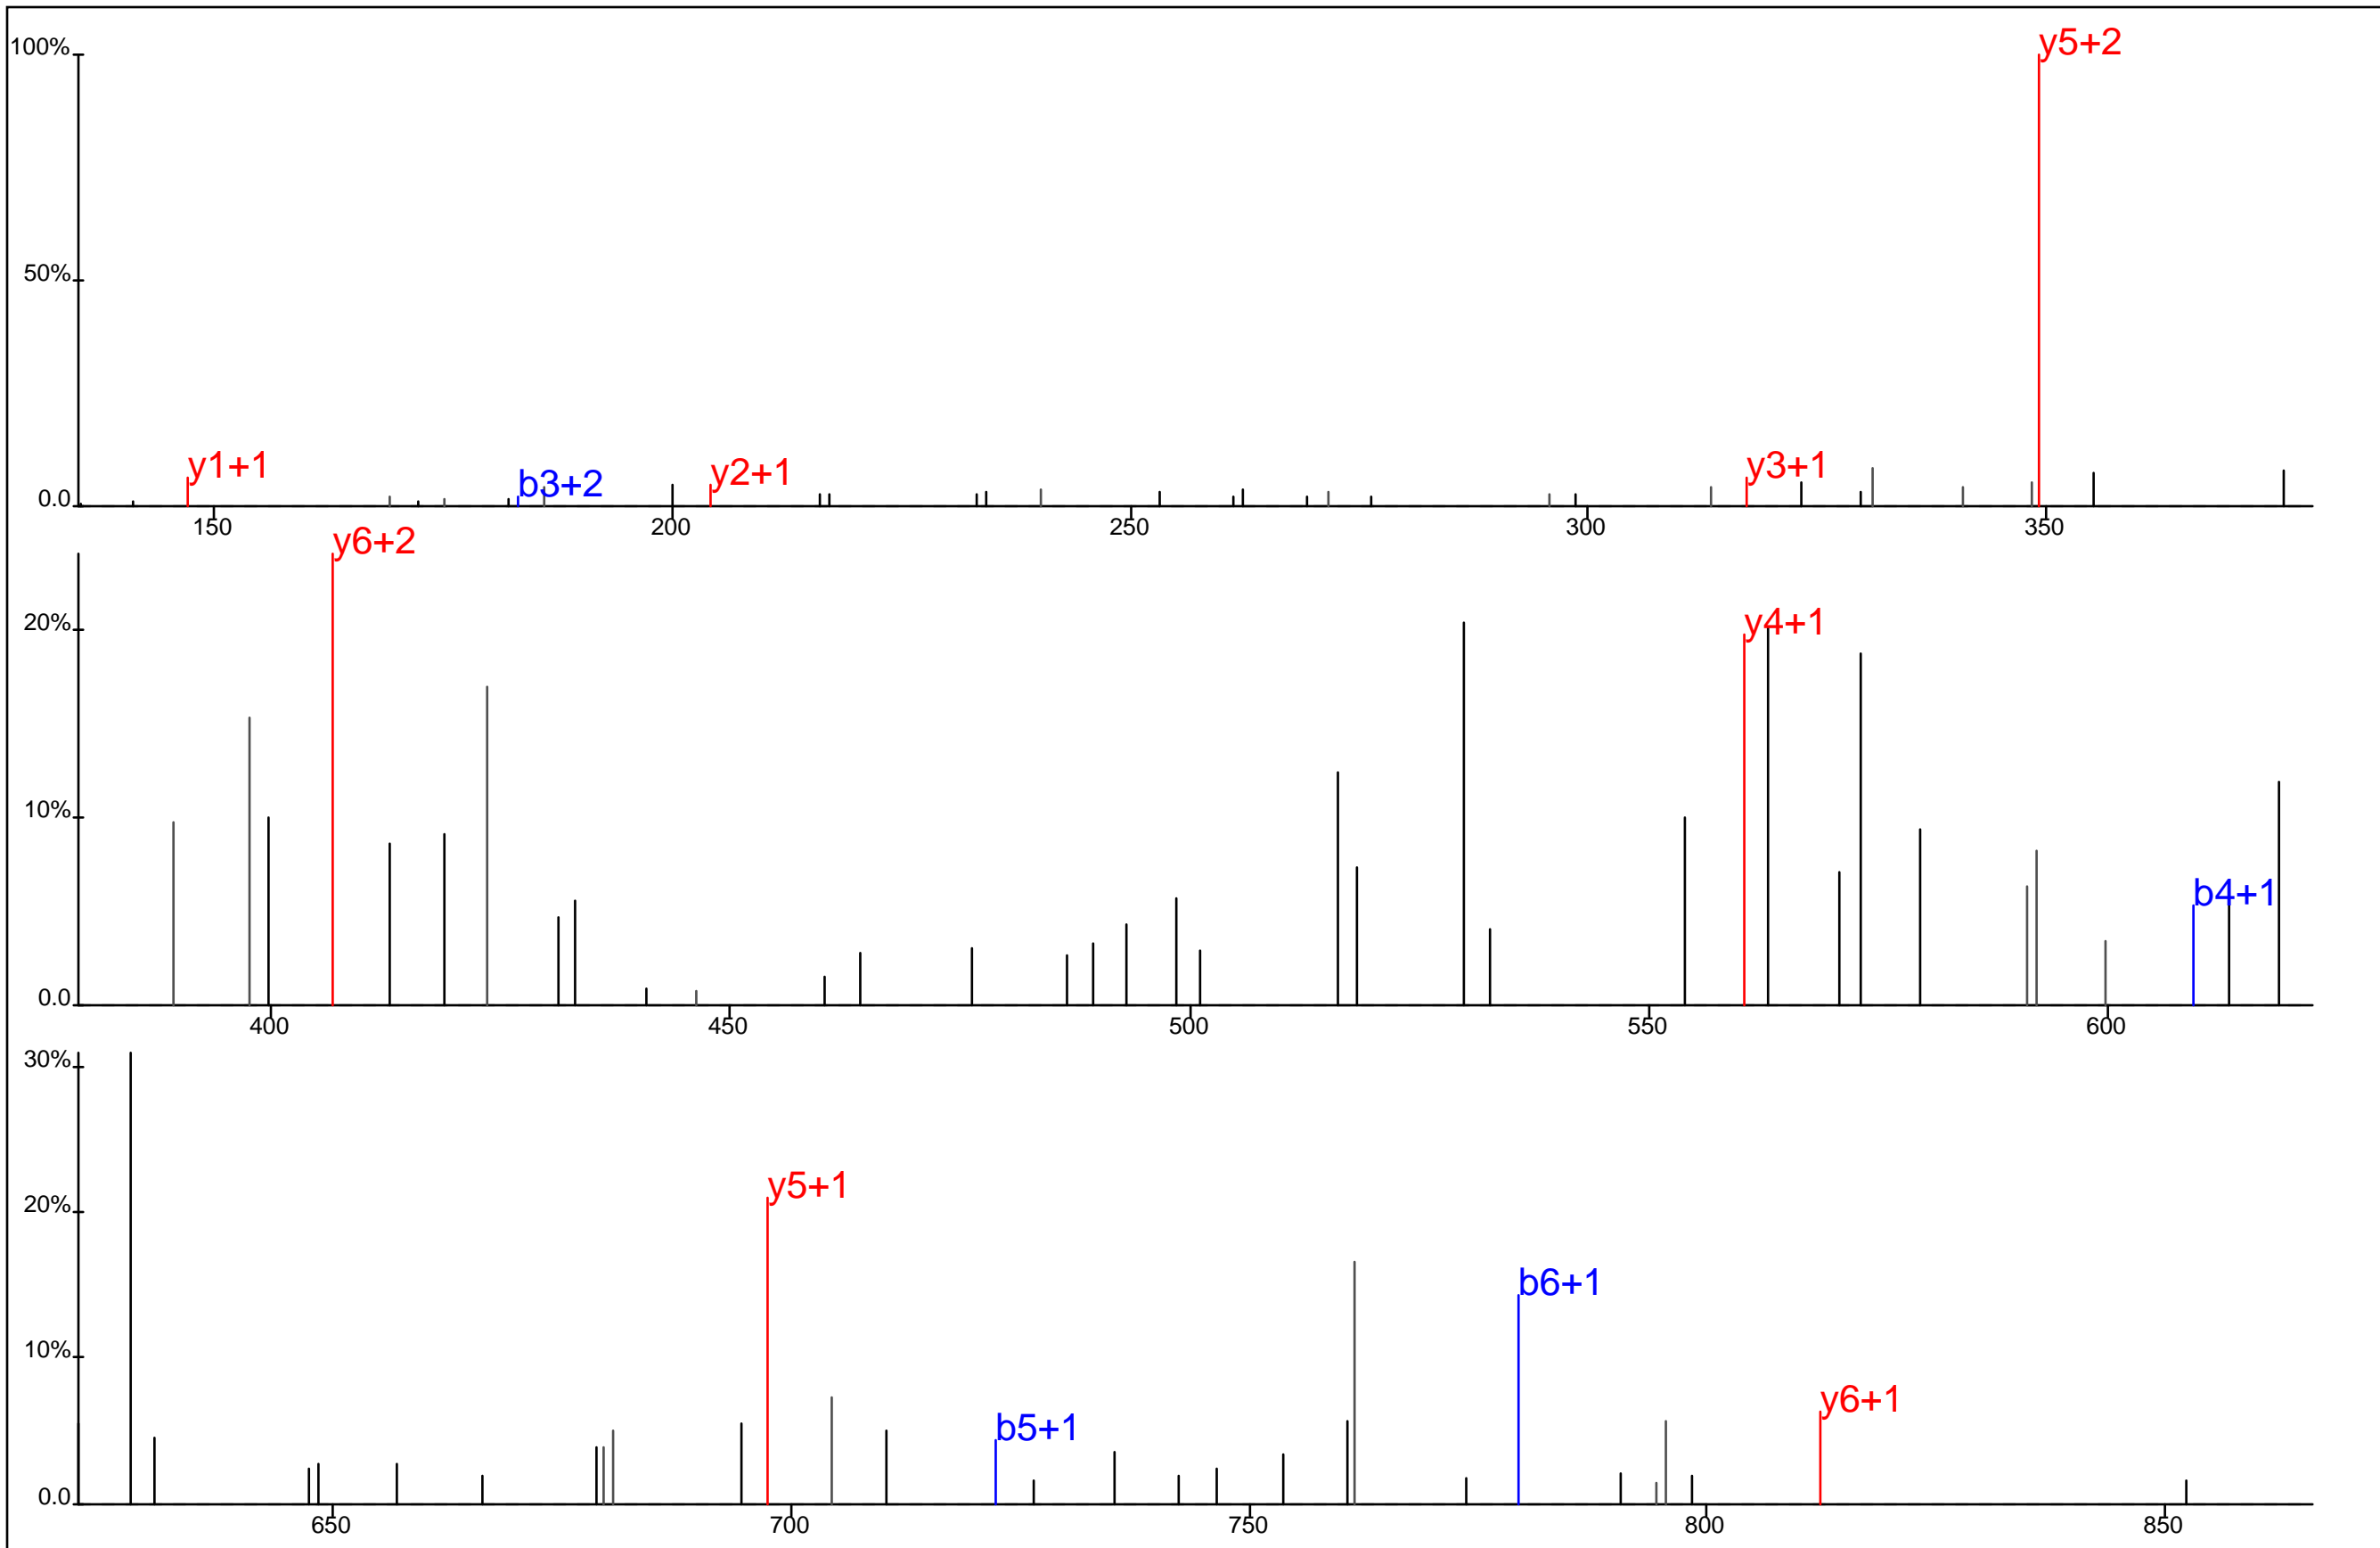

I D H Y\* L G K

Protein Name: Glucose-6-phosphate dehydrogenase  
 gi Accession: 0  
 Precursor Mass: 463.2120+2  
 Delta Mass: 1.249 ppm  
 XCorr: 28.49

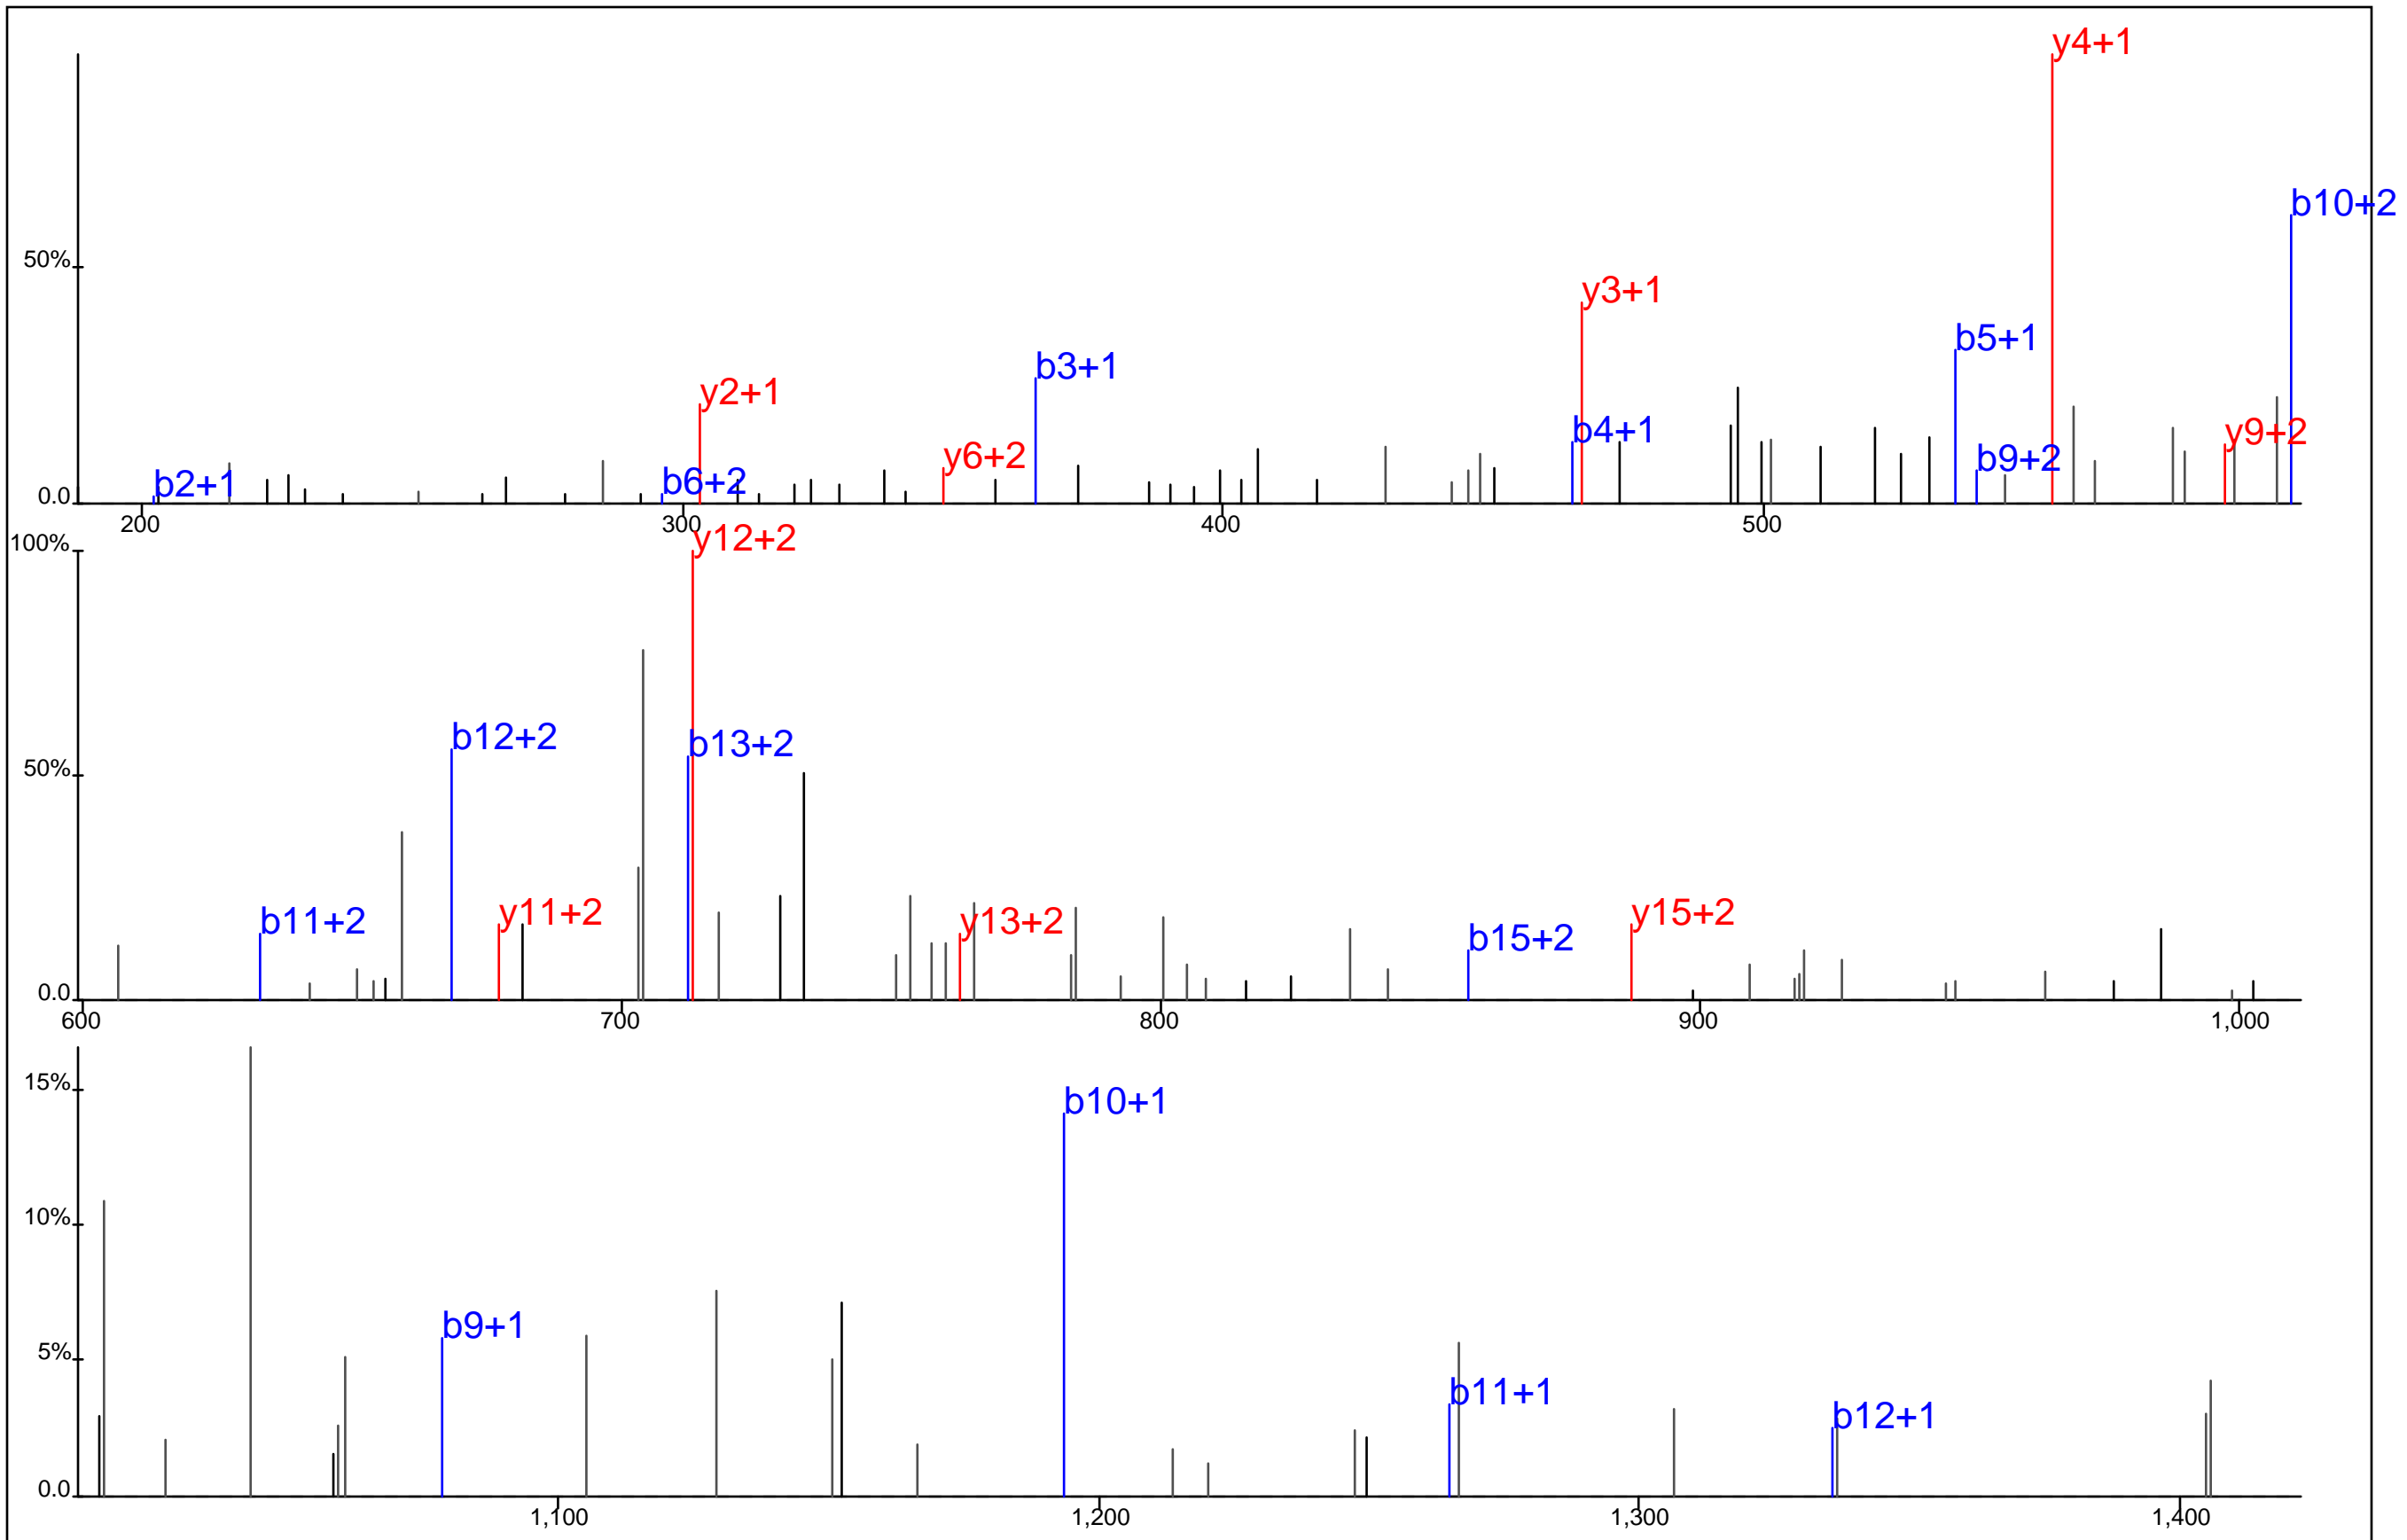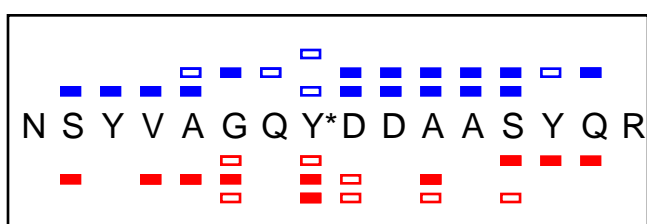

Protein Name: Glucose-6-phosphate dehydrogenase  
 gi Accession: 0  
 Precursor Mass: 629.9208+3  
 Delta Mass: 3.455 ppm  
 XCorr: 44.89



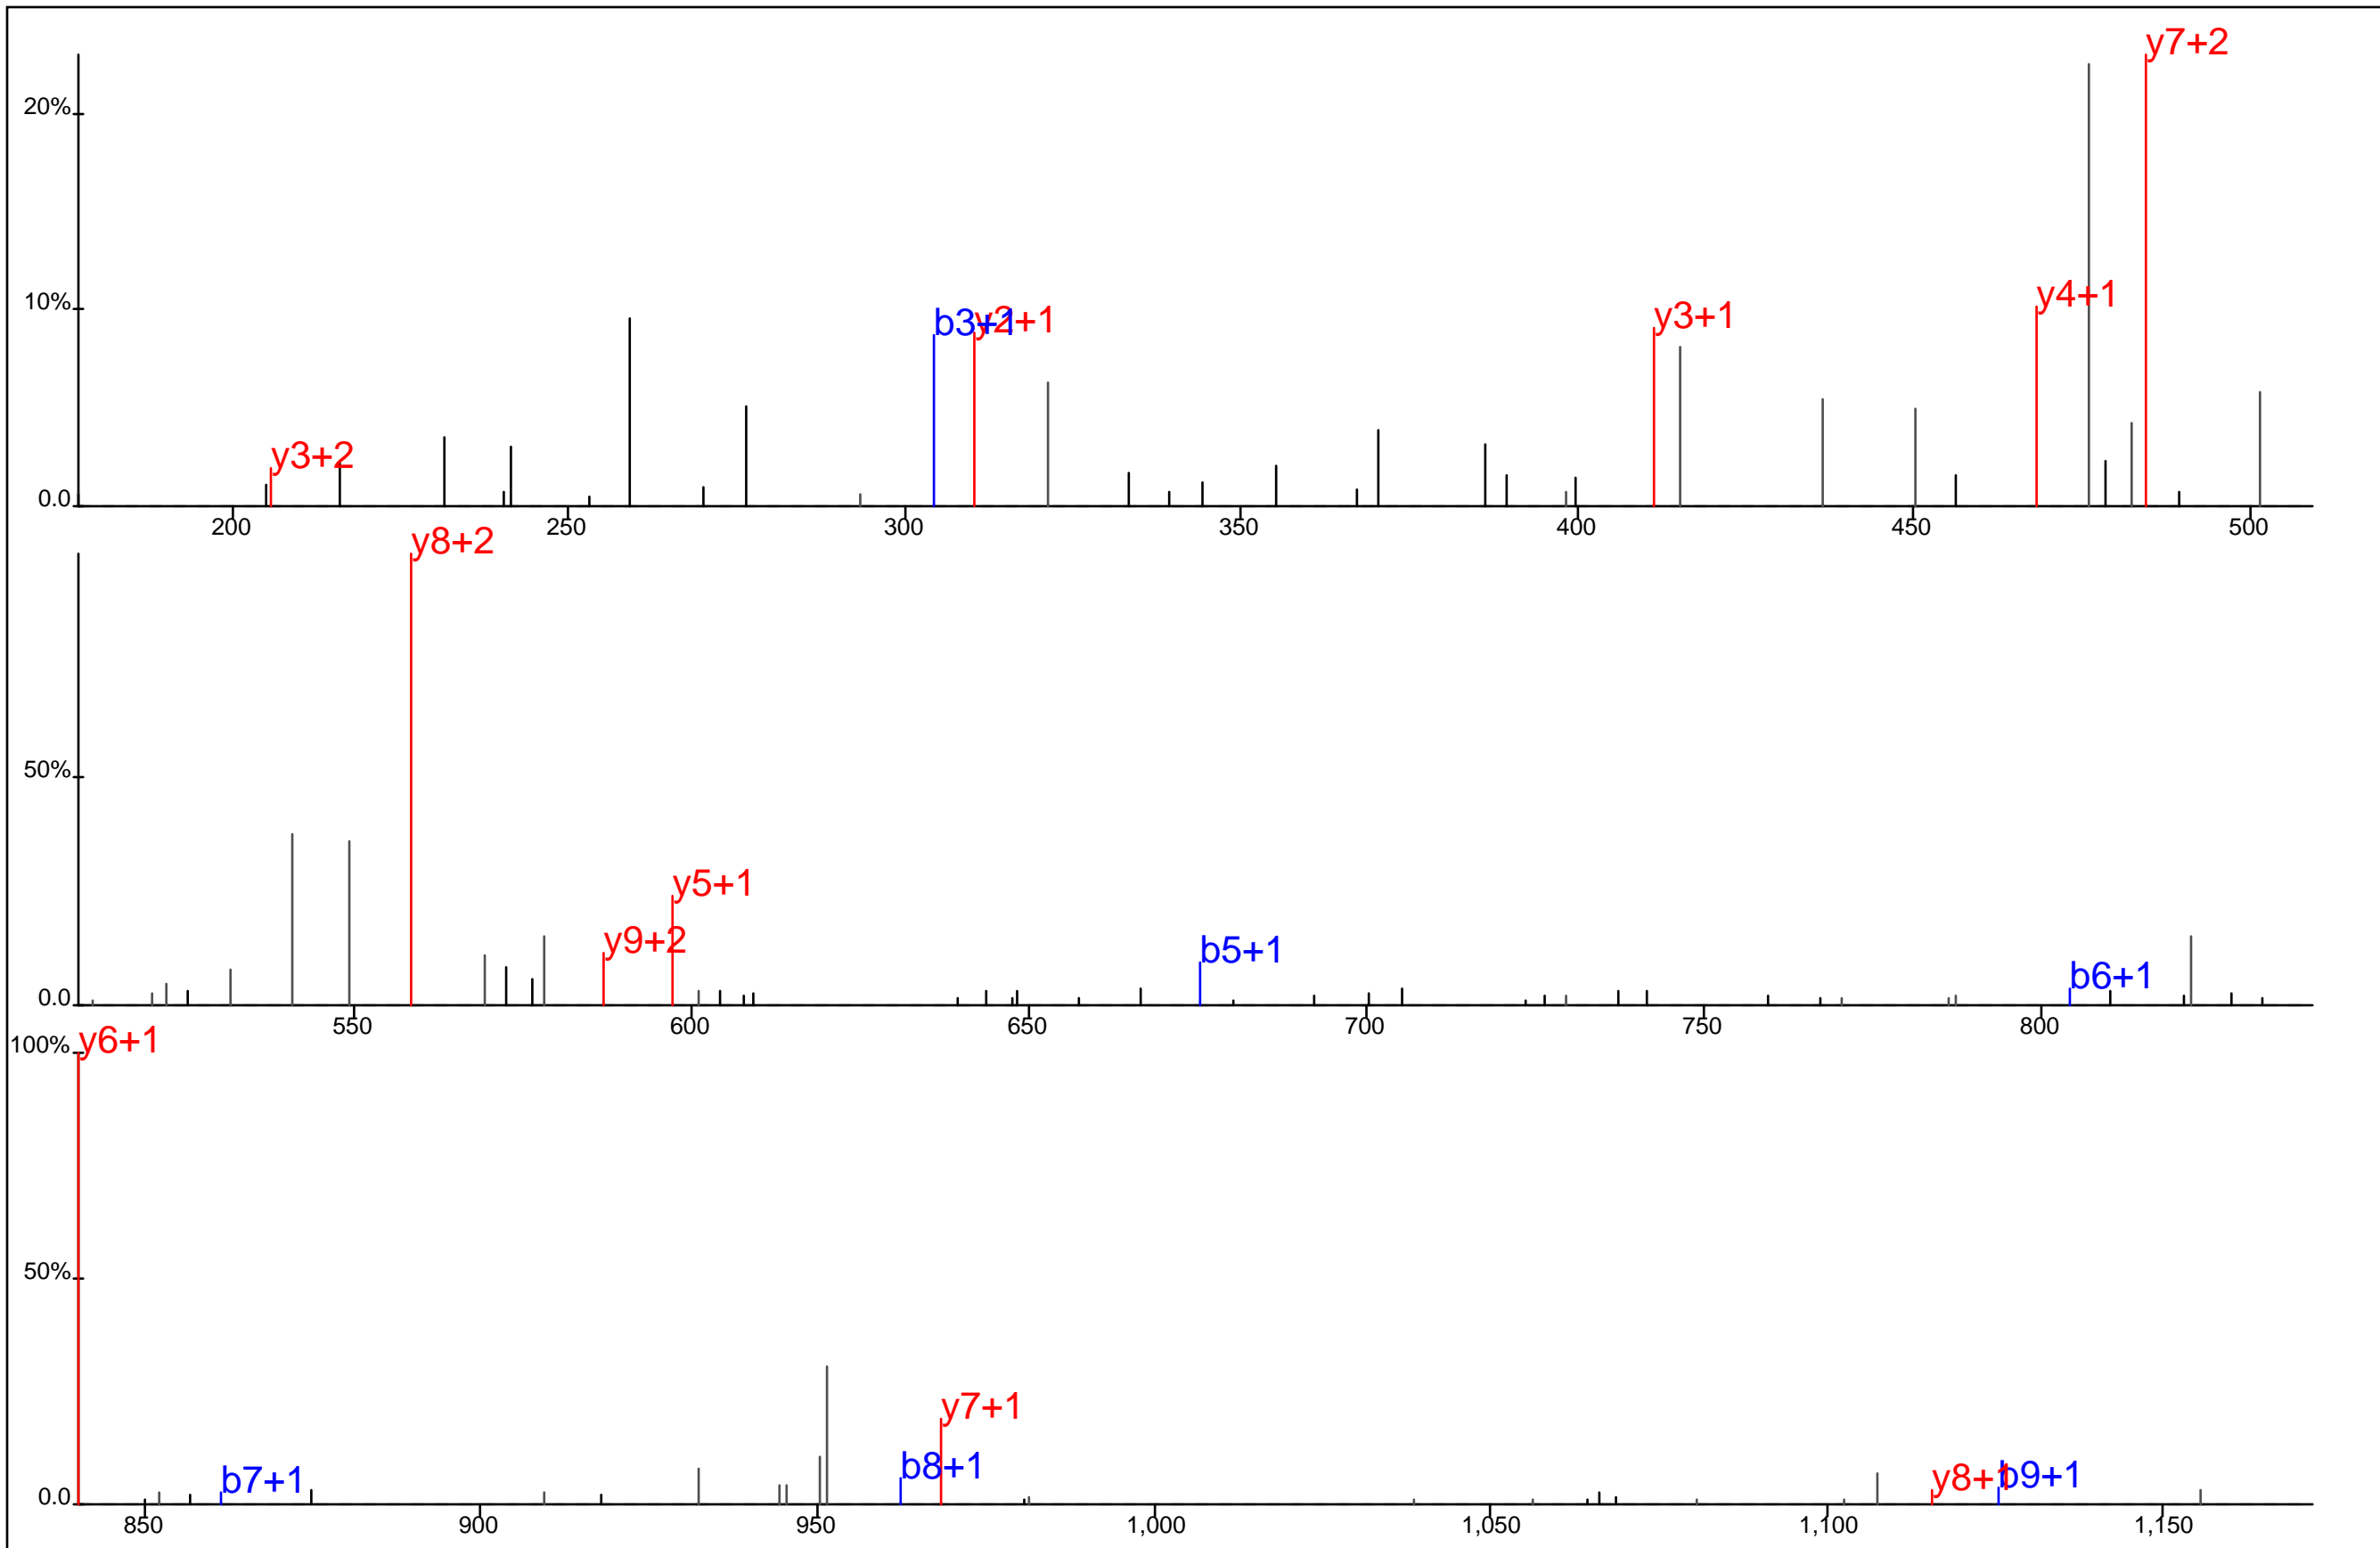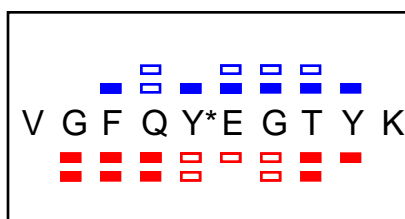

Protein Name: Glucose-6-phosphate dehydrogenase  
 gi Accession: 0  
 Precursor Mass: 636.2702+2  
 Delta Mass: 0.993 ppm  
 XCorr: 51.31

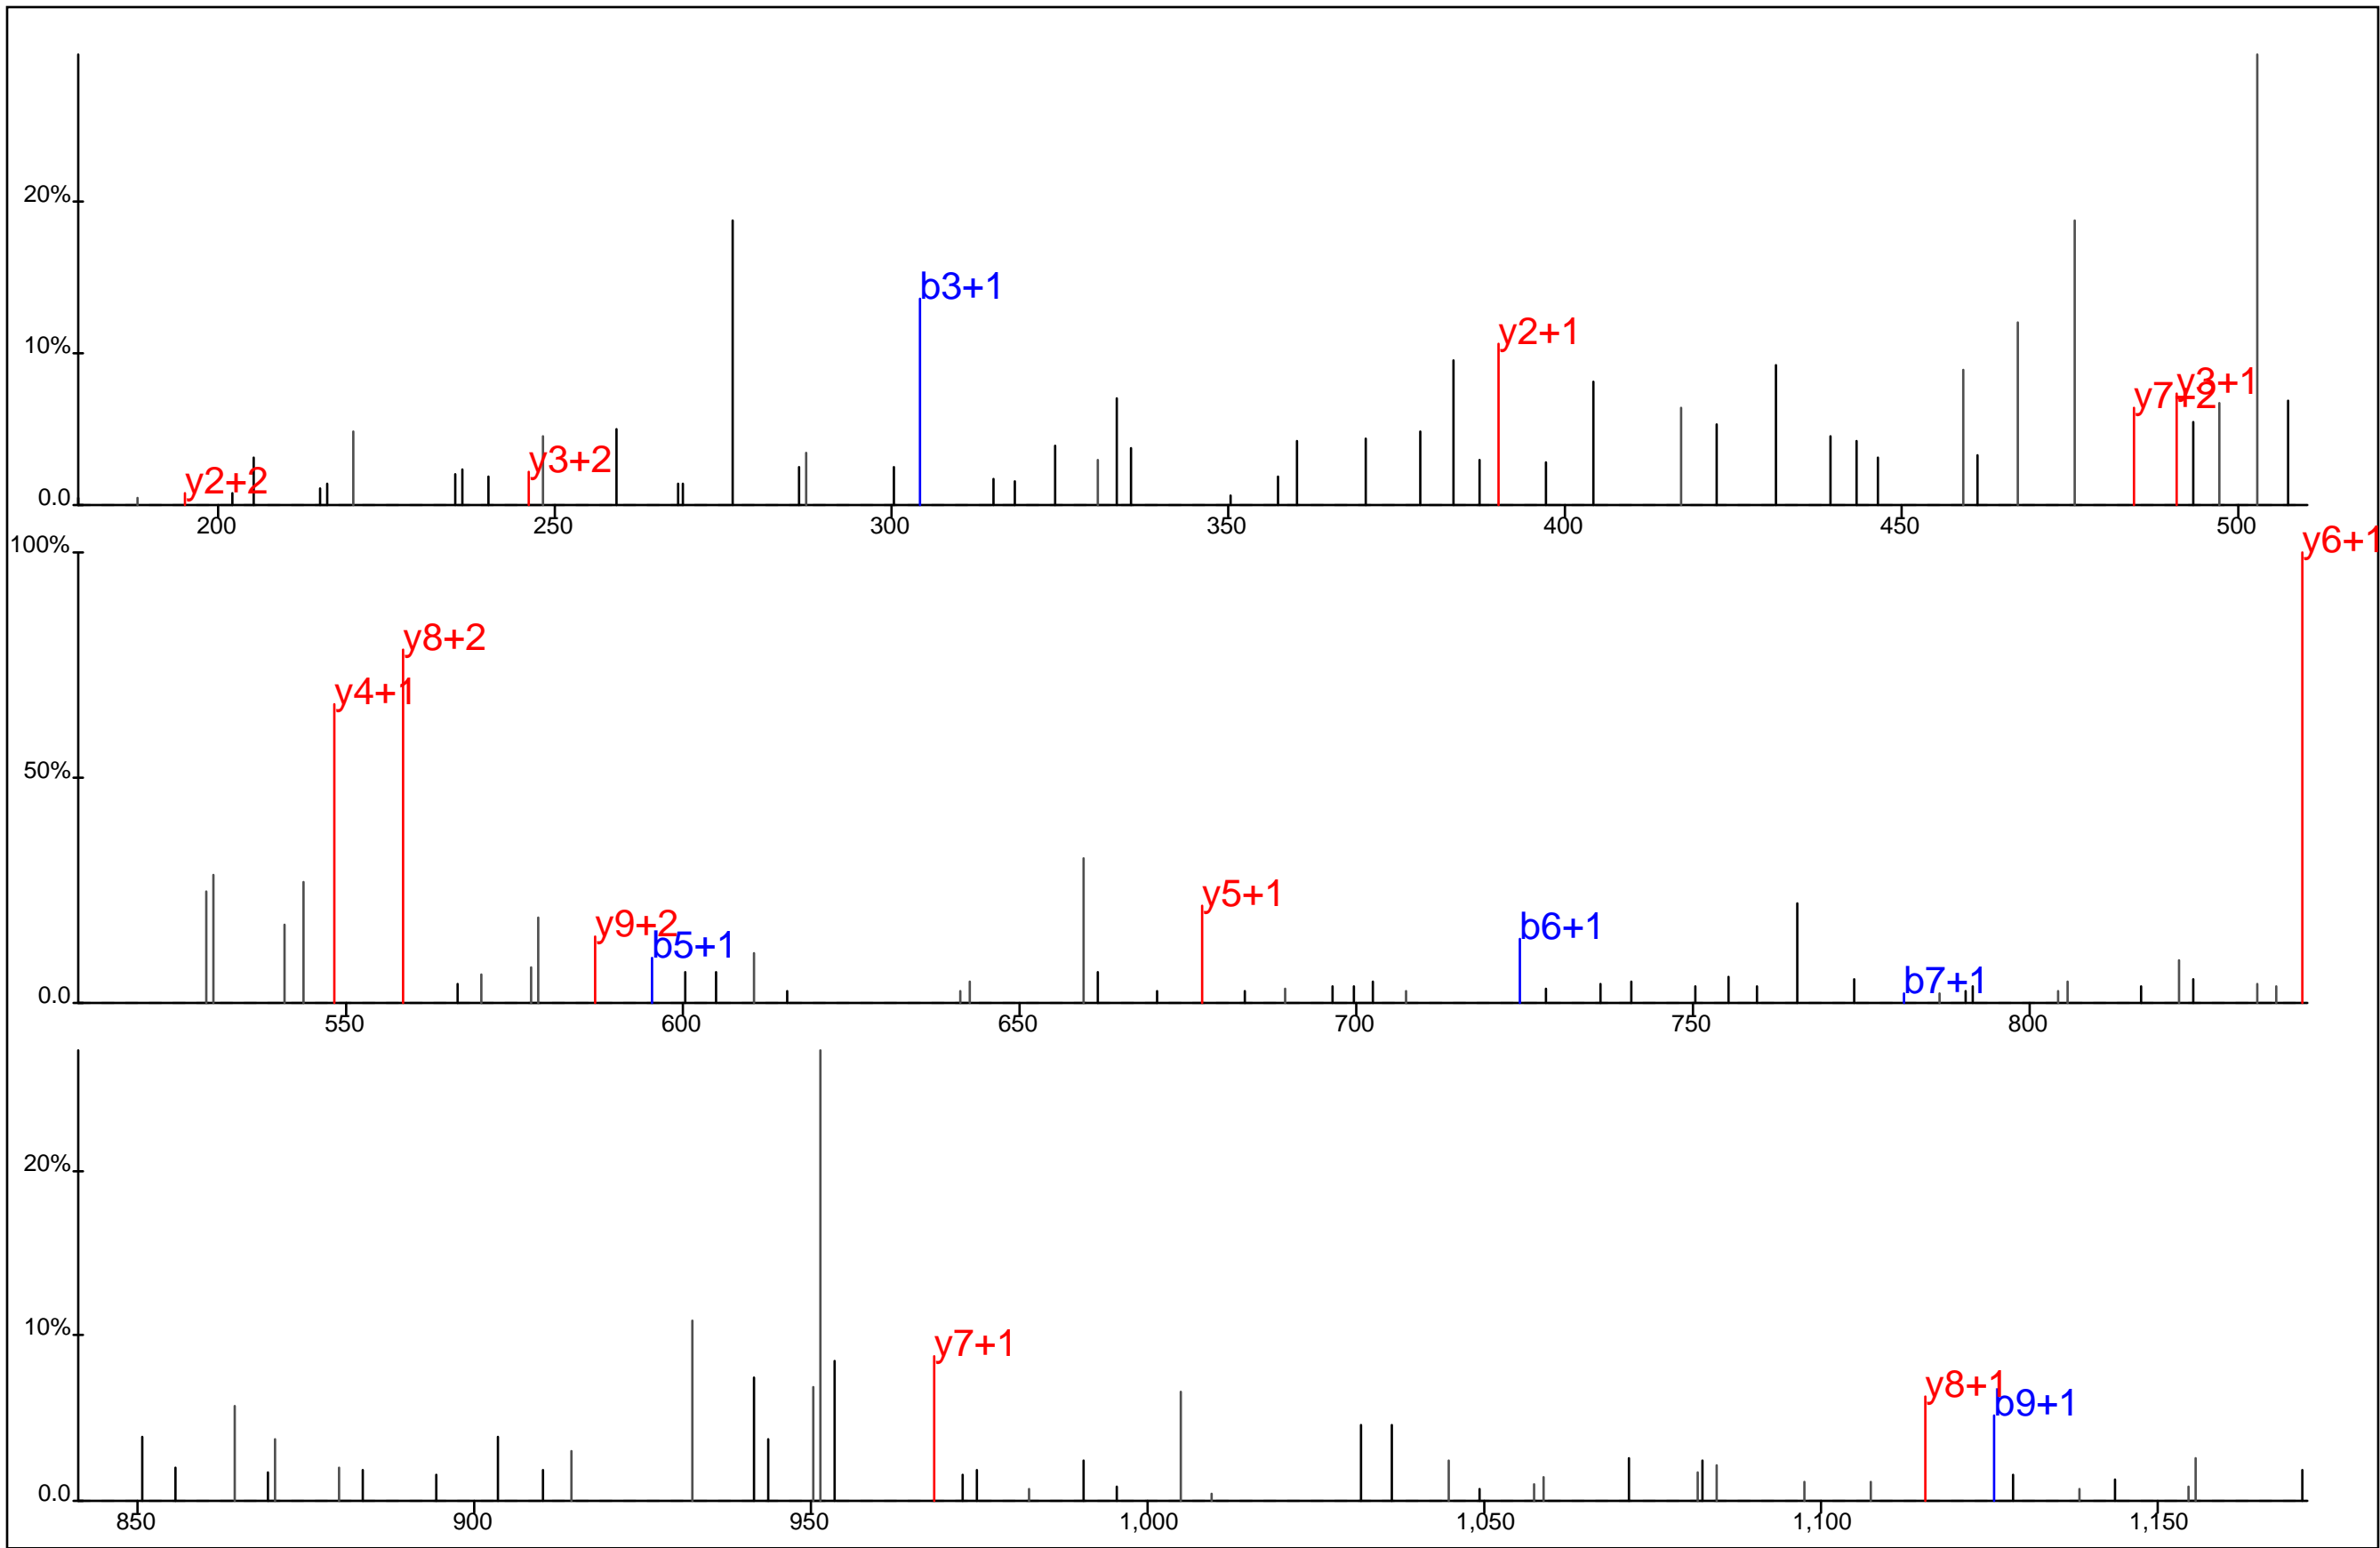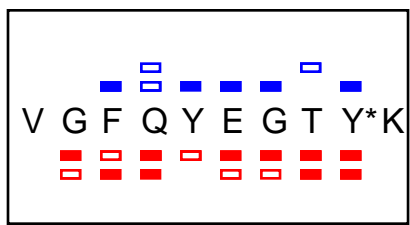

Protein Name: Glucose-6-phosphate dehydrogenase  
 gi Accession: 0  
 Precursor Mass: 636.2711+2  
 Delta Mass: 0.447 ppm  
 XCorr: 42.15

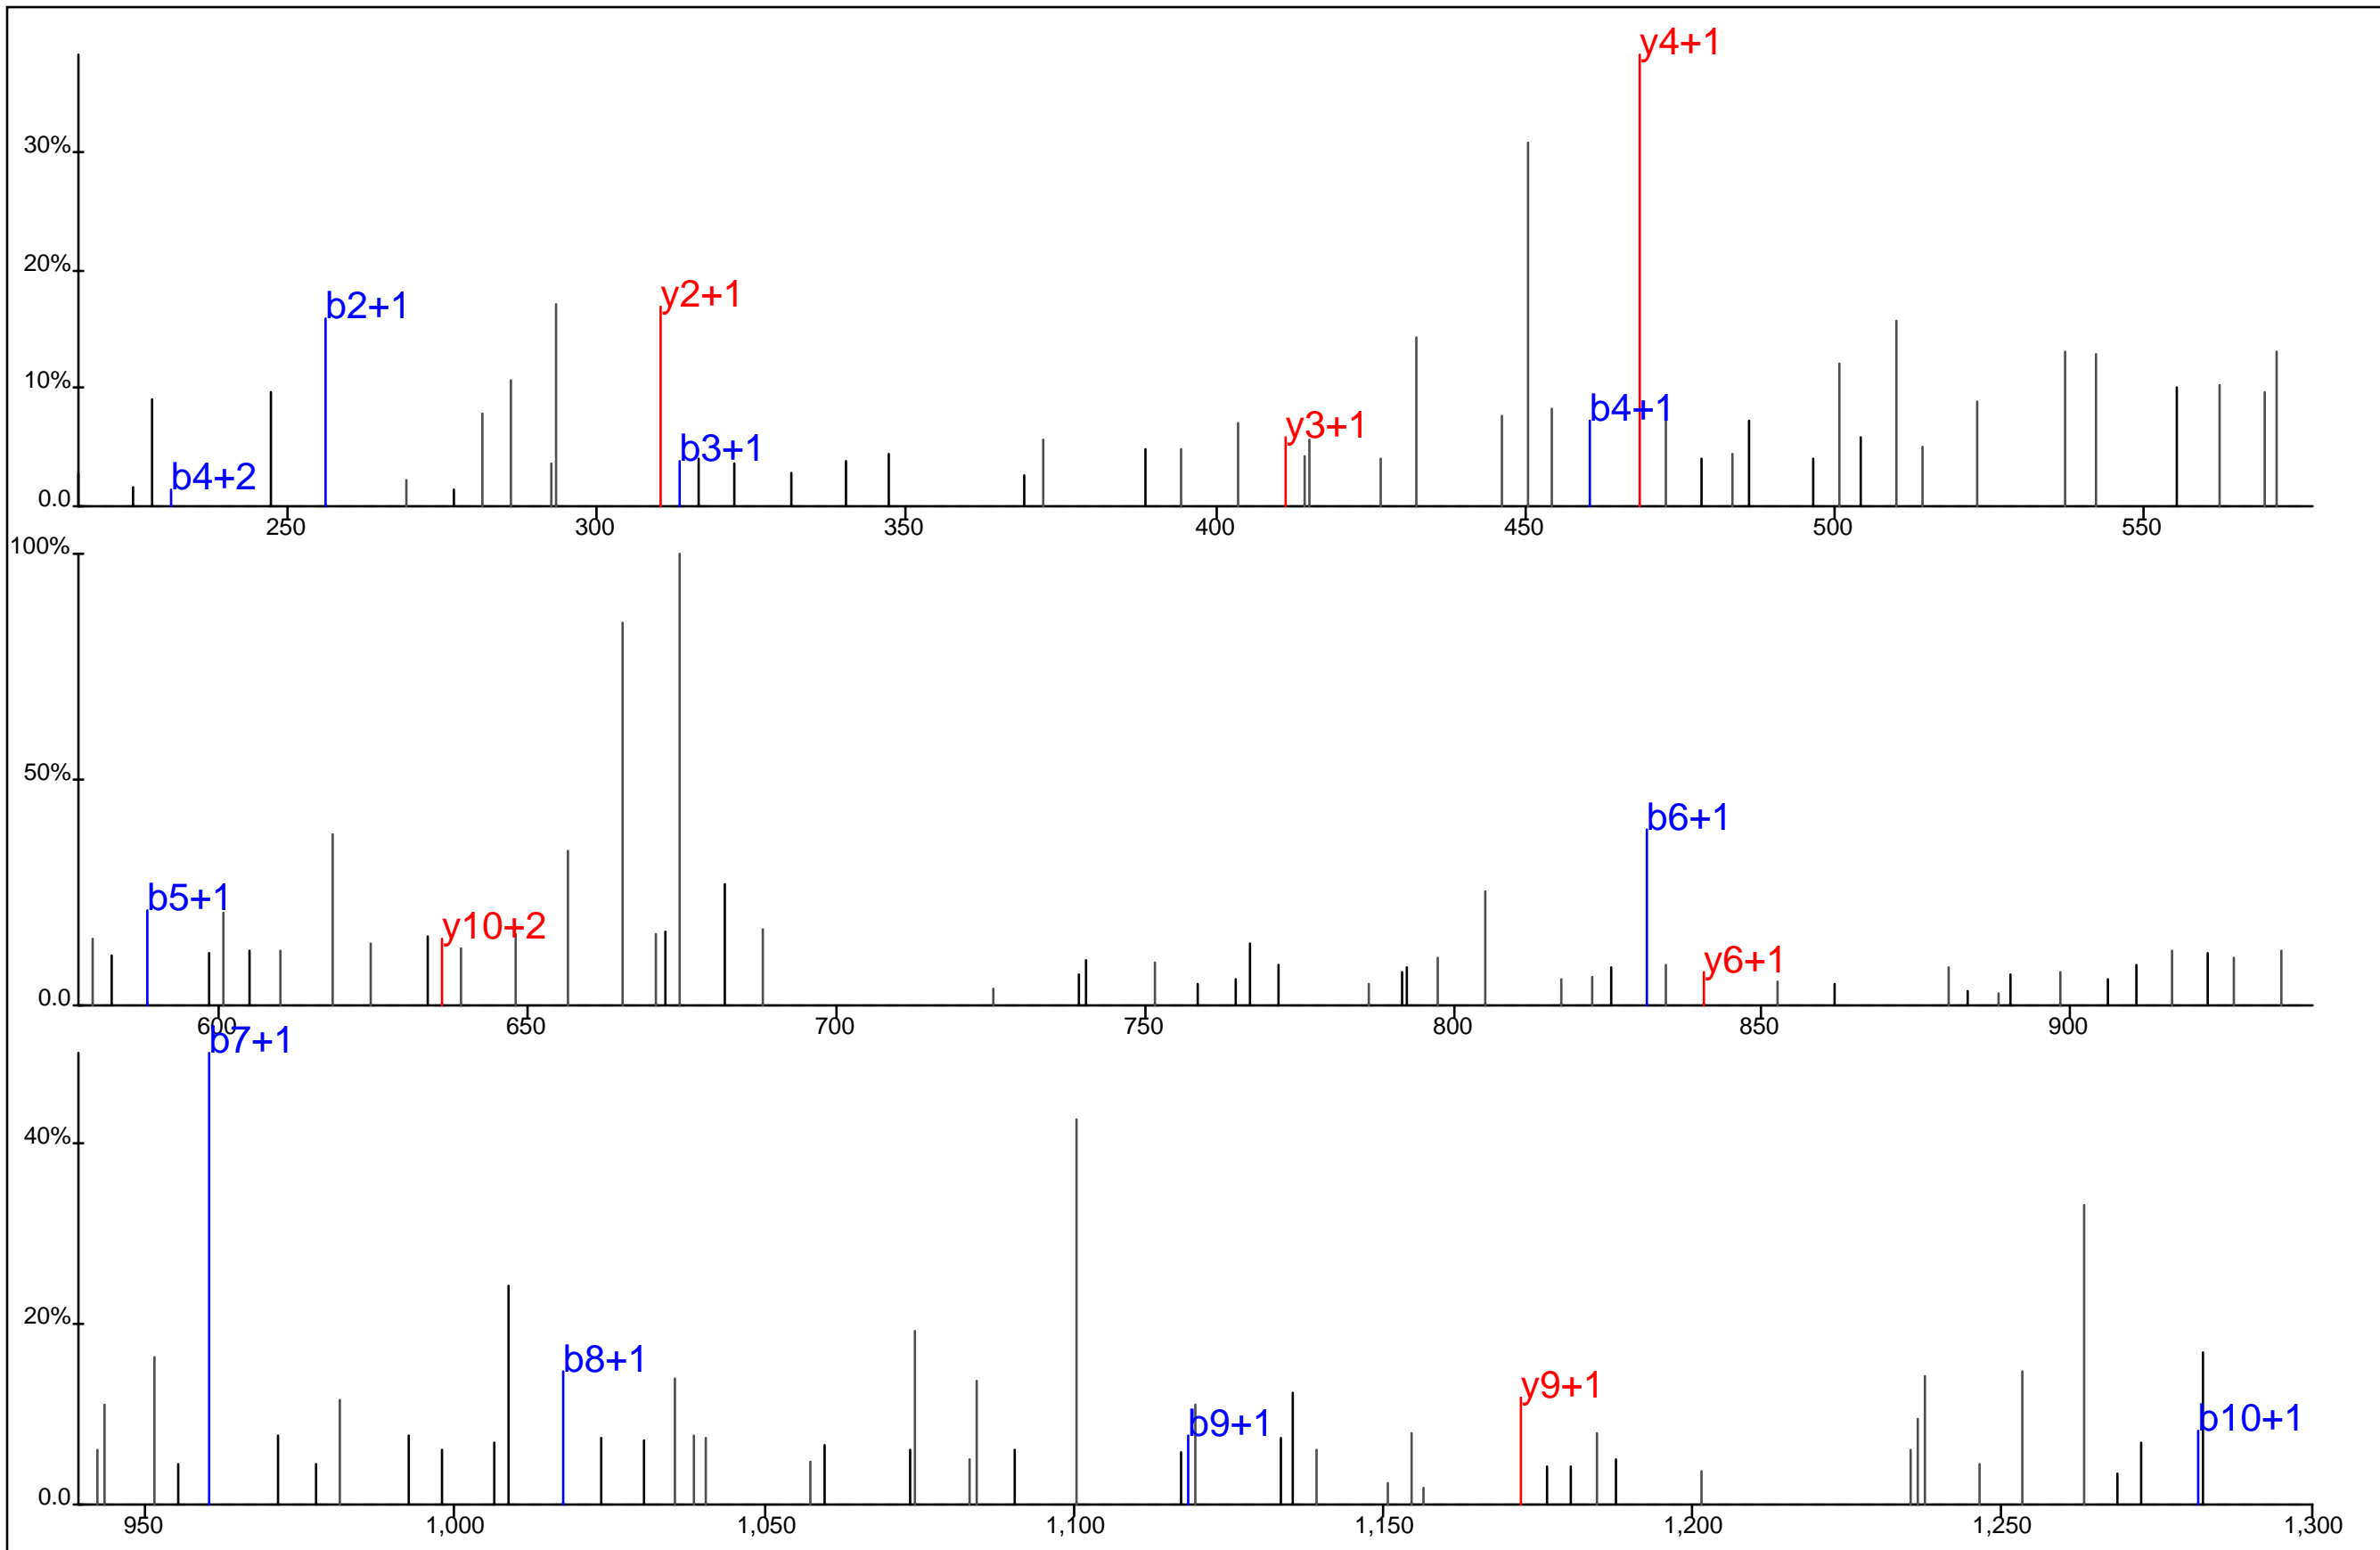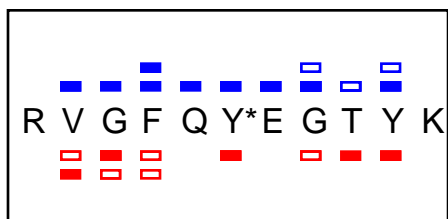

Protein Name: Glucose-6-phosphate dehydrogenase  
 gi Accession: 0  
 Precursor Mass: 714.3222+2  
 Delta Mass: 1.150 ppm  
 XCorr: 26.32

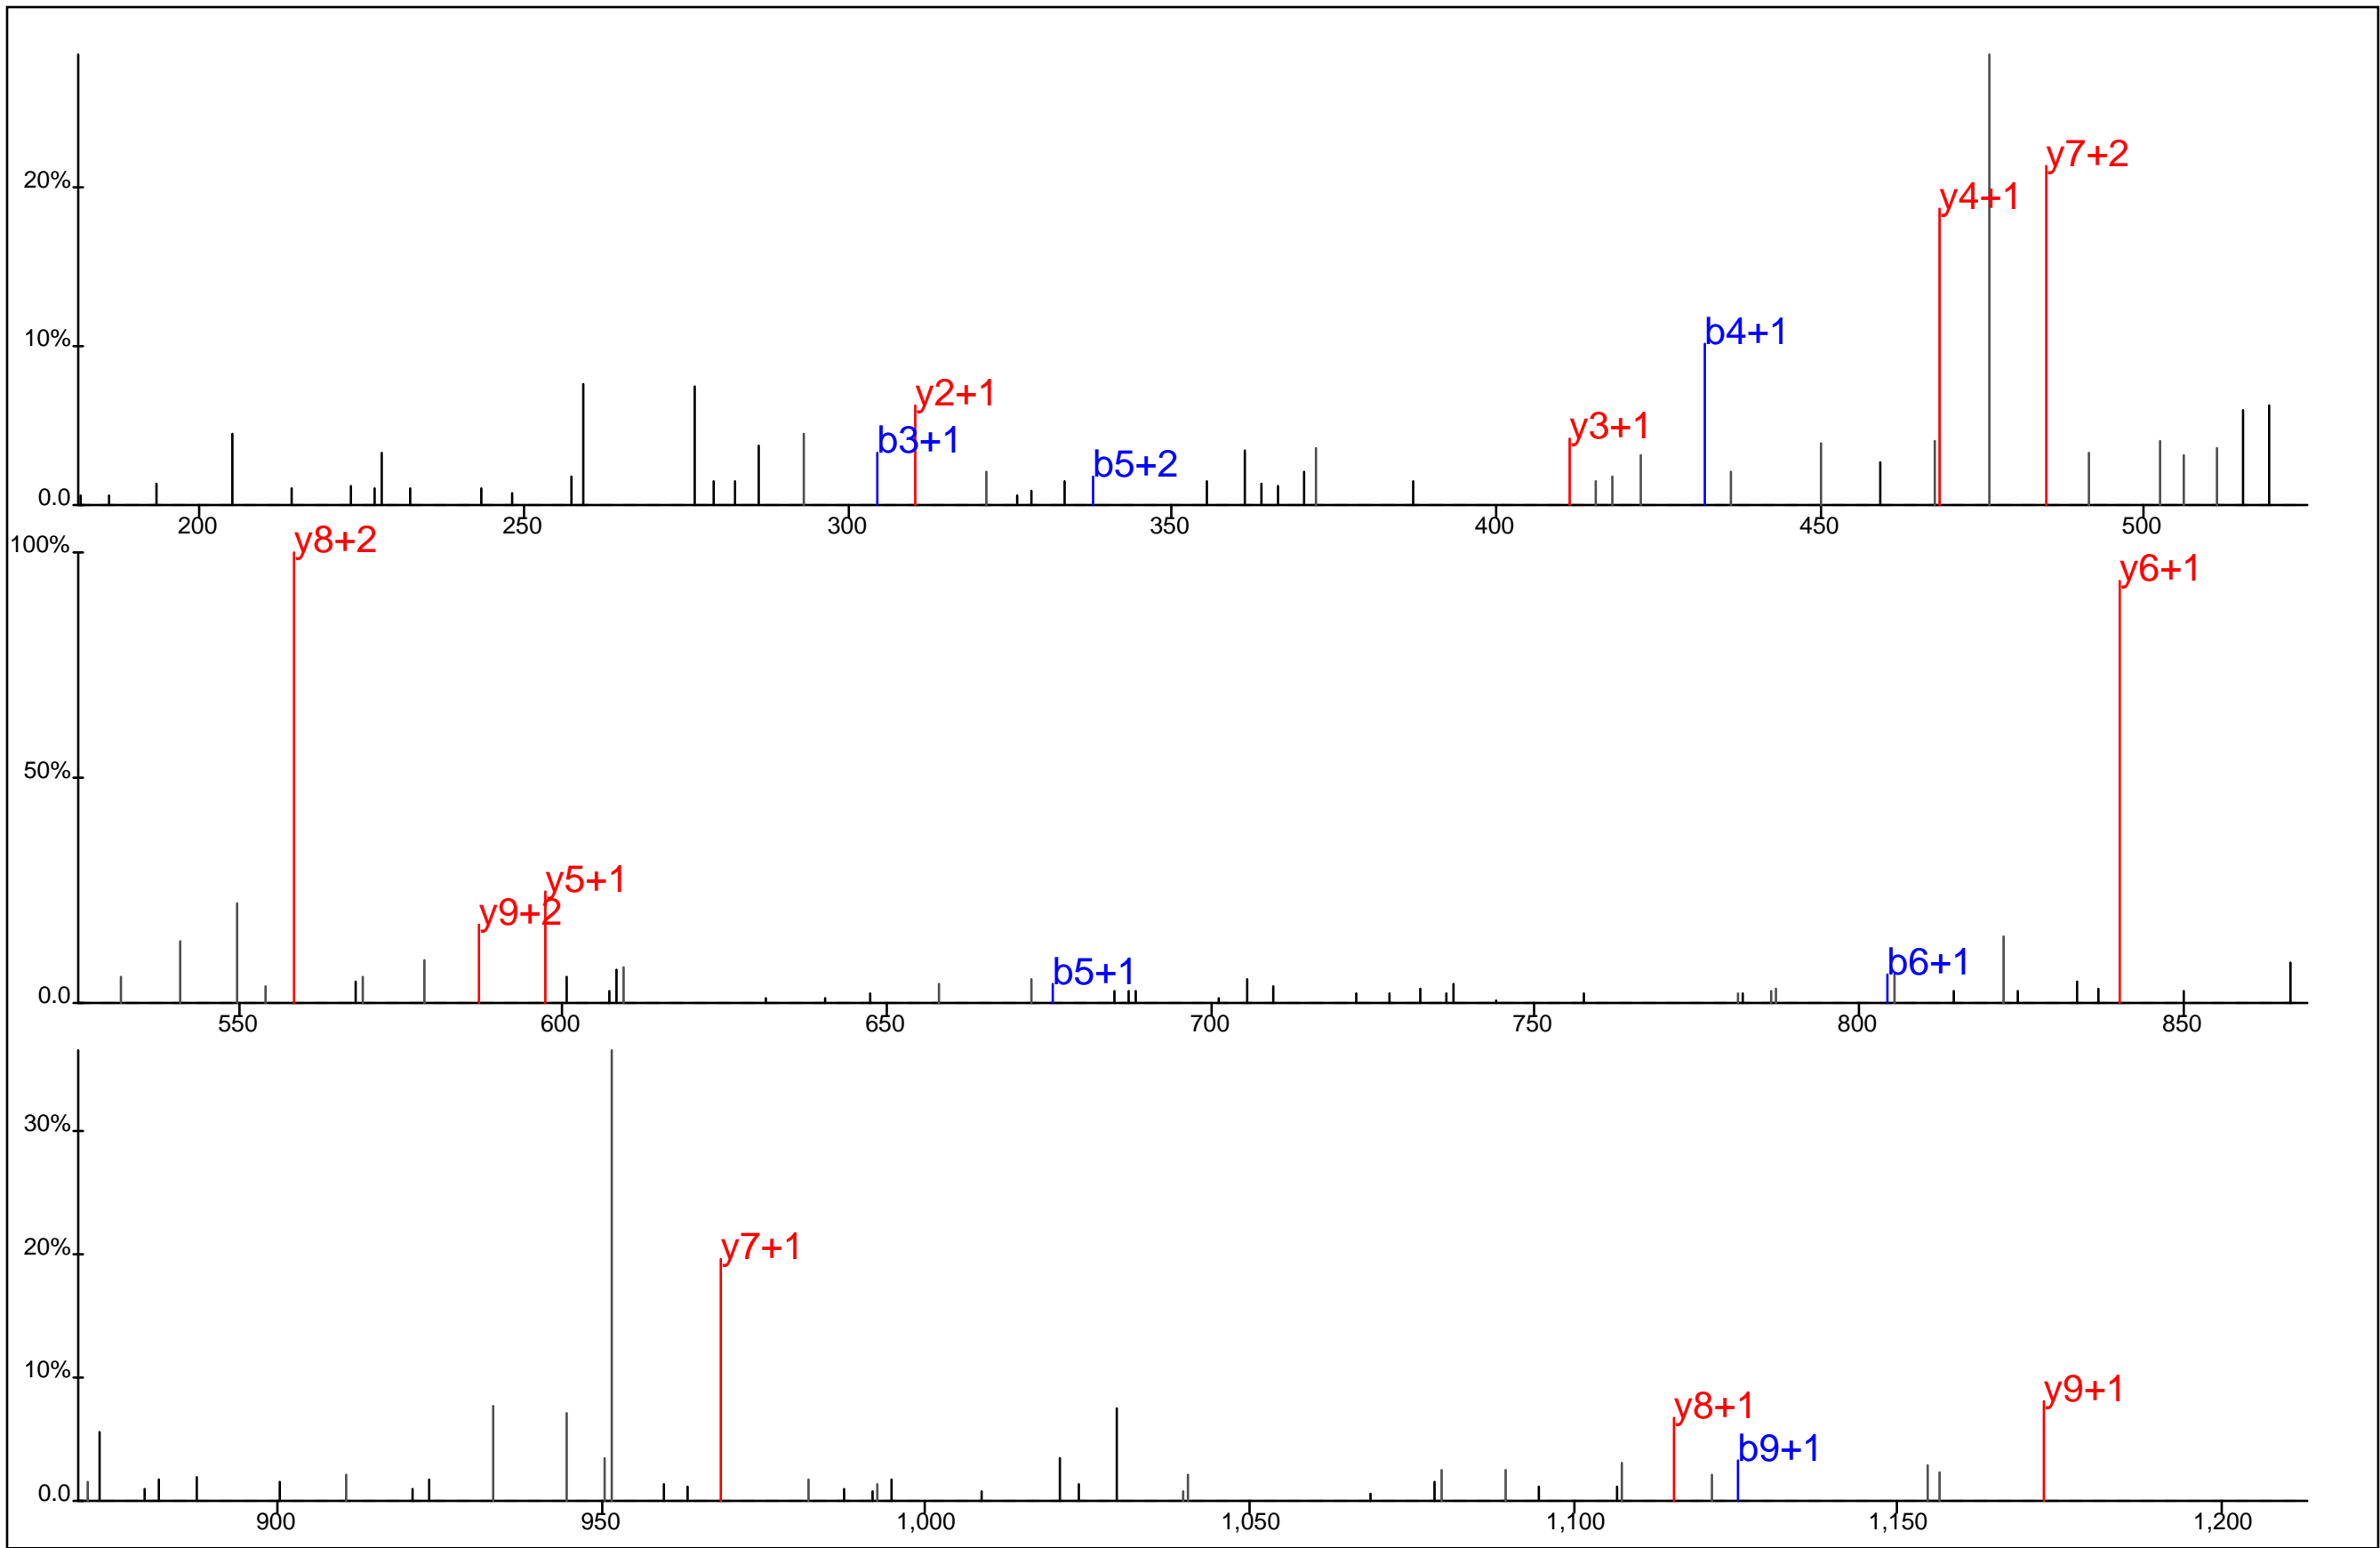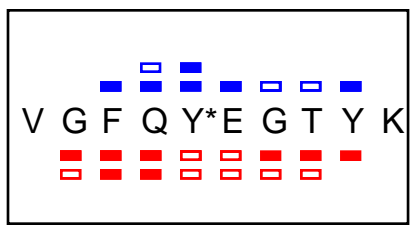

Protein Name: Glucose-6-phosphate dehydrogenase  
 gi Accession: 0  
 Precursor Mass: 636.2703+2  
 Delta Mass: 0.897 ppm  
 XCorr: 51.31

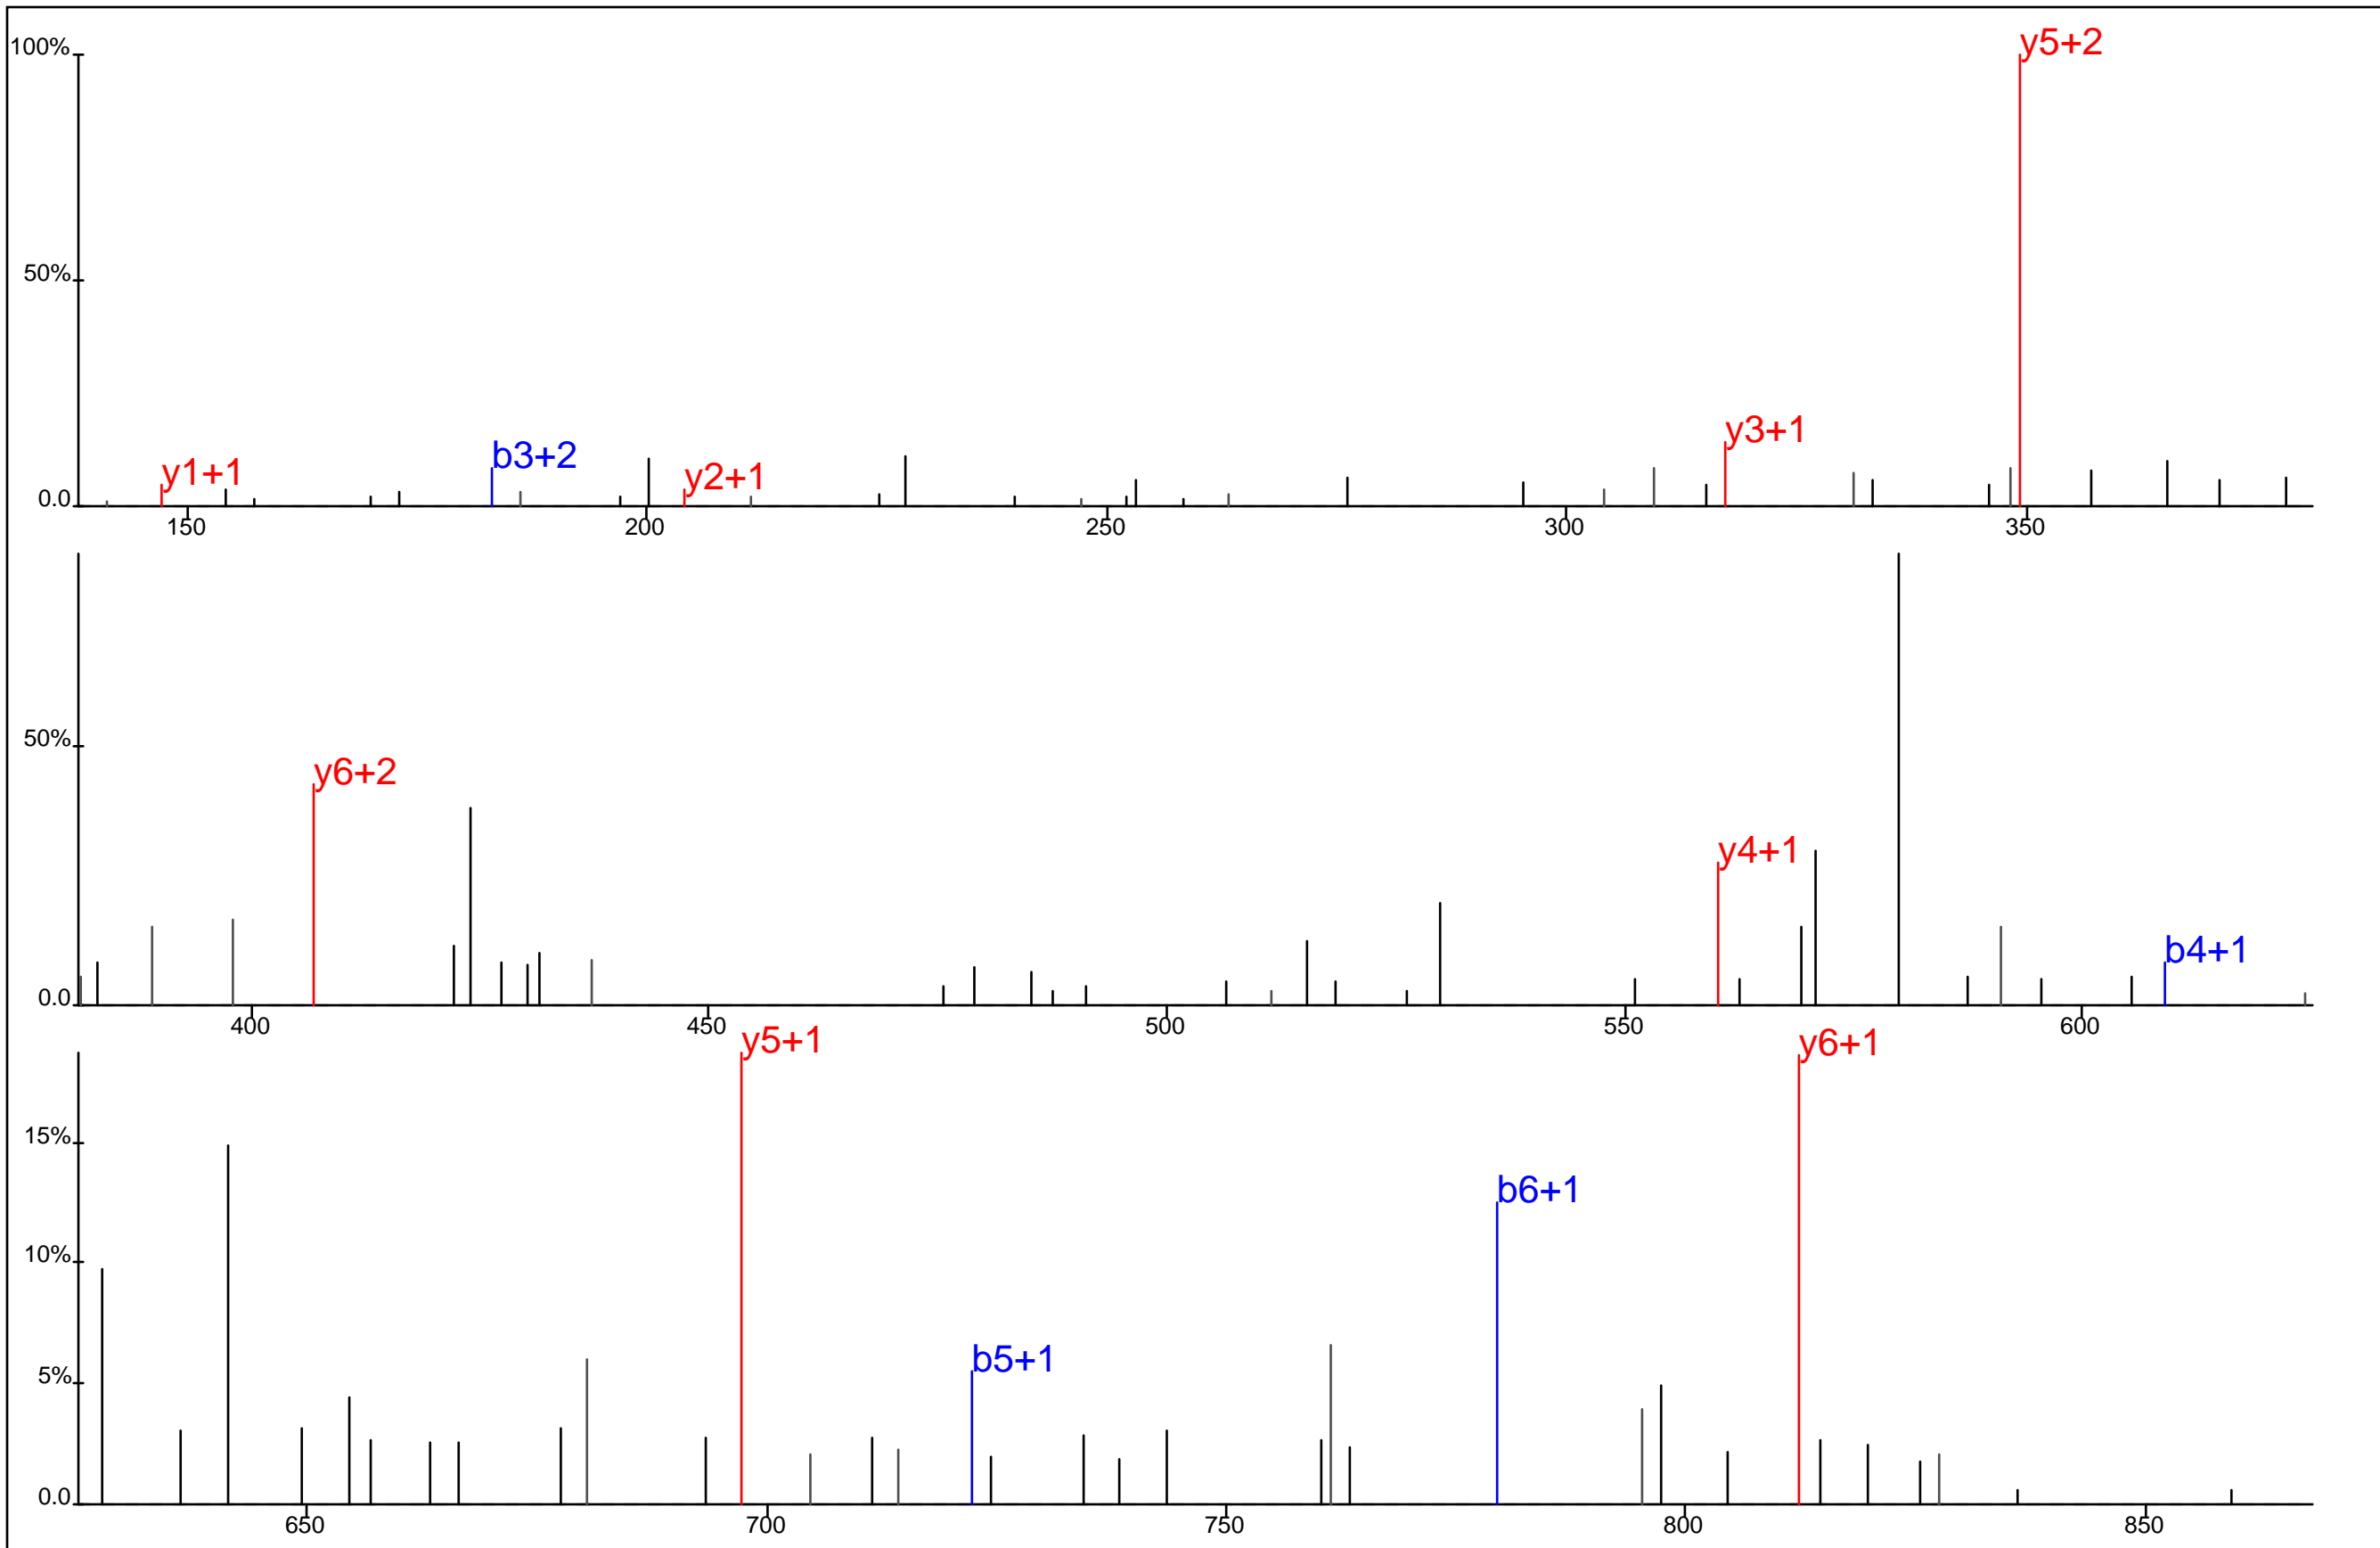

I D H Y\* L G K

Protein Name: Glucose-6-phosphate dehydrogenase  
 gi Accession: 0  
 Precursor Mass: 463.2123+2  
 Delta Mass: 0.657 ppm  
 XCorr: 27.7

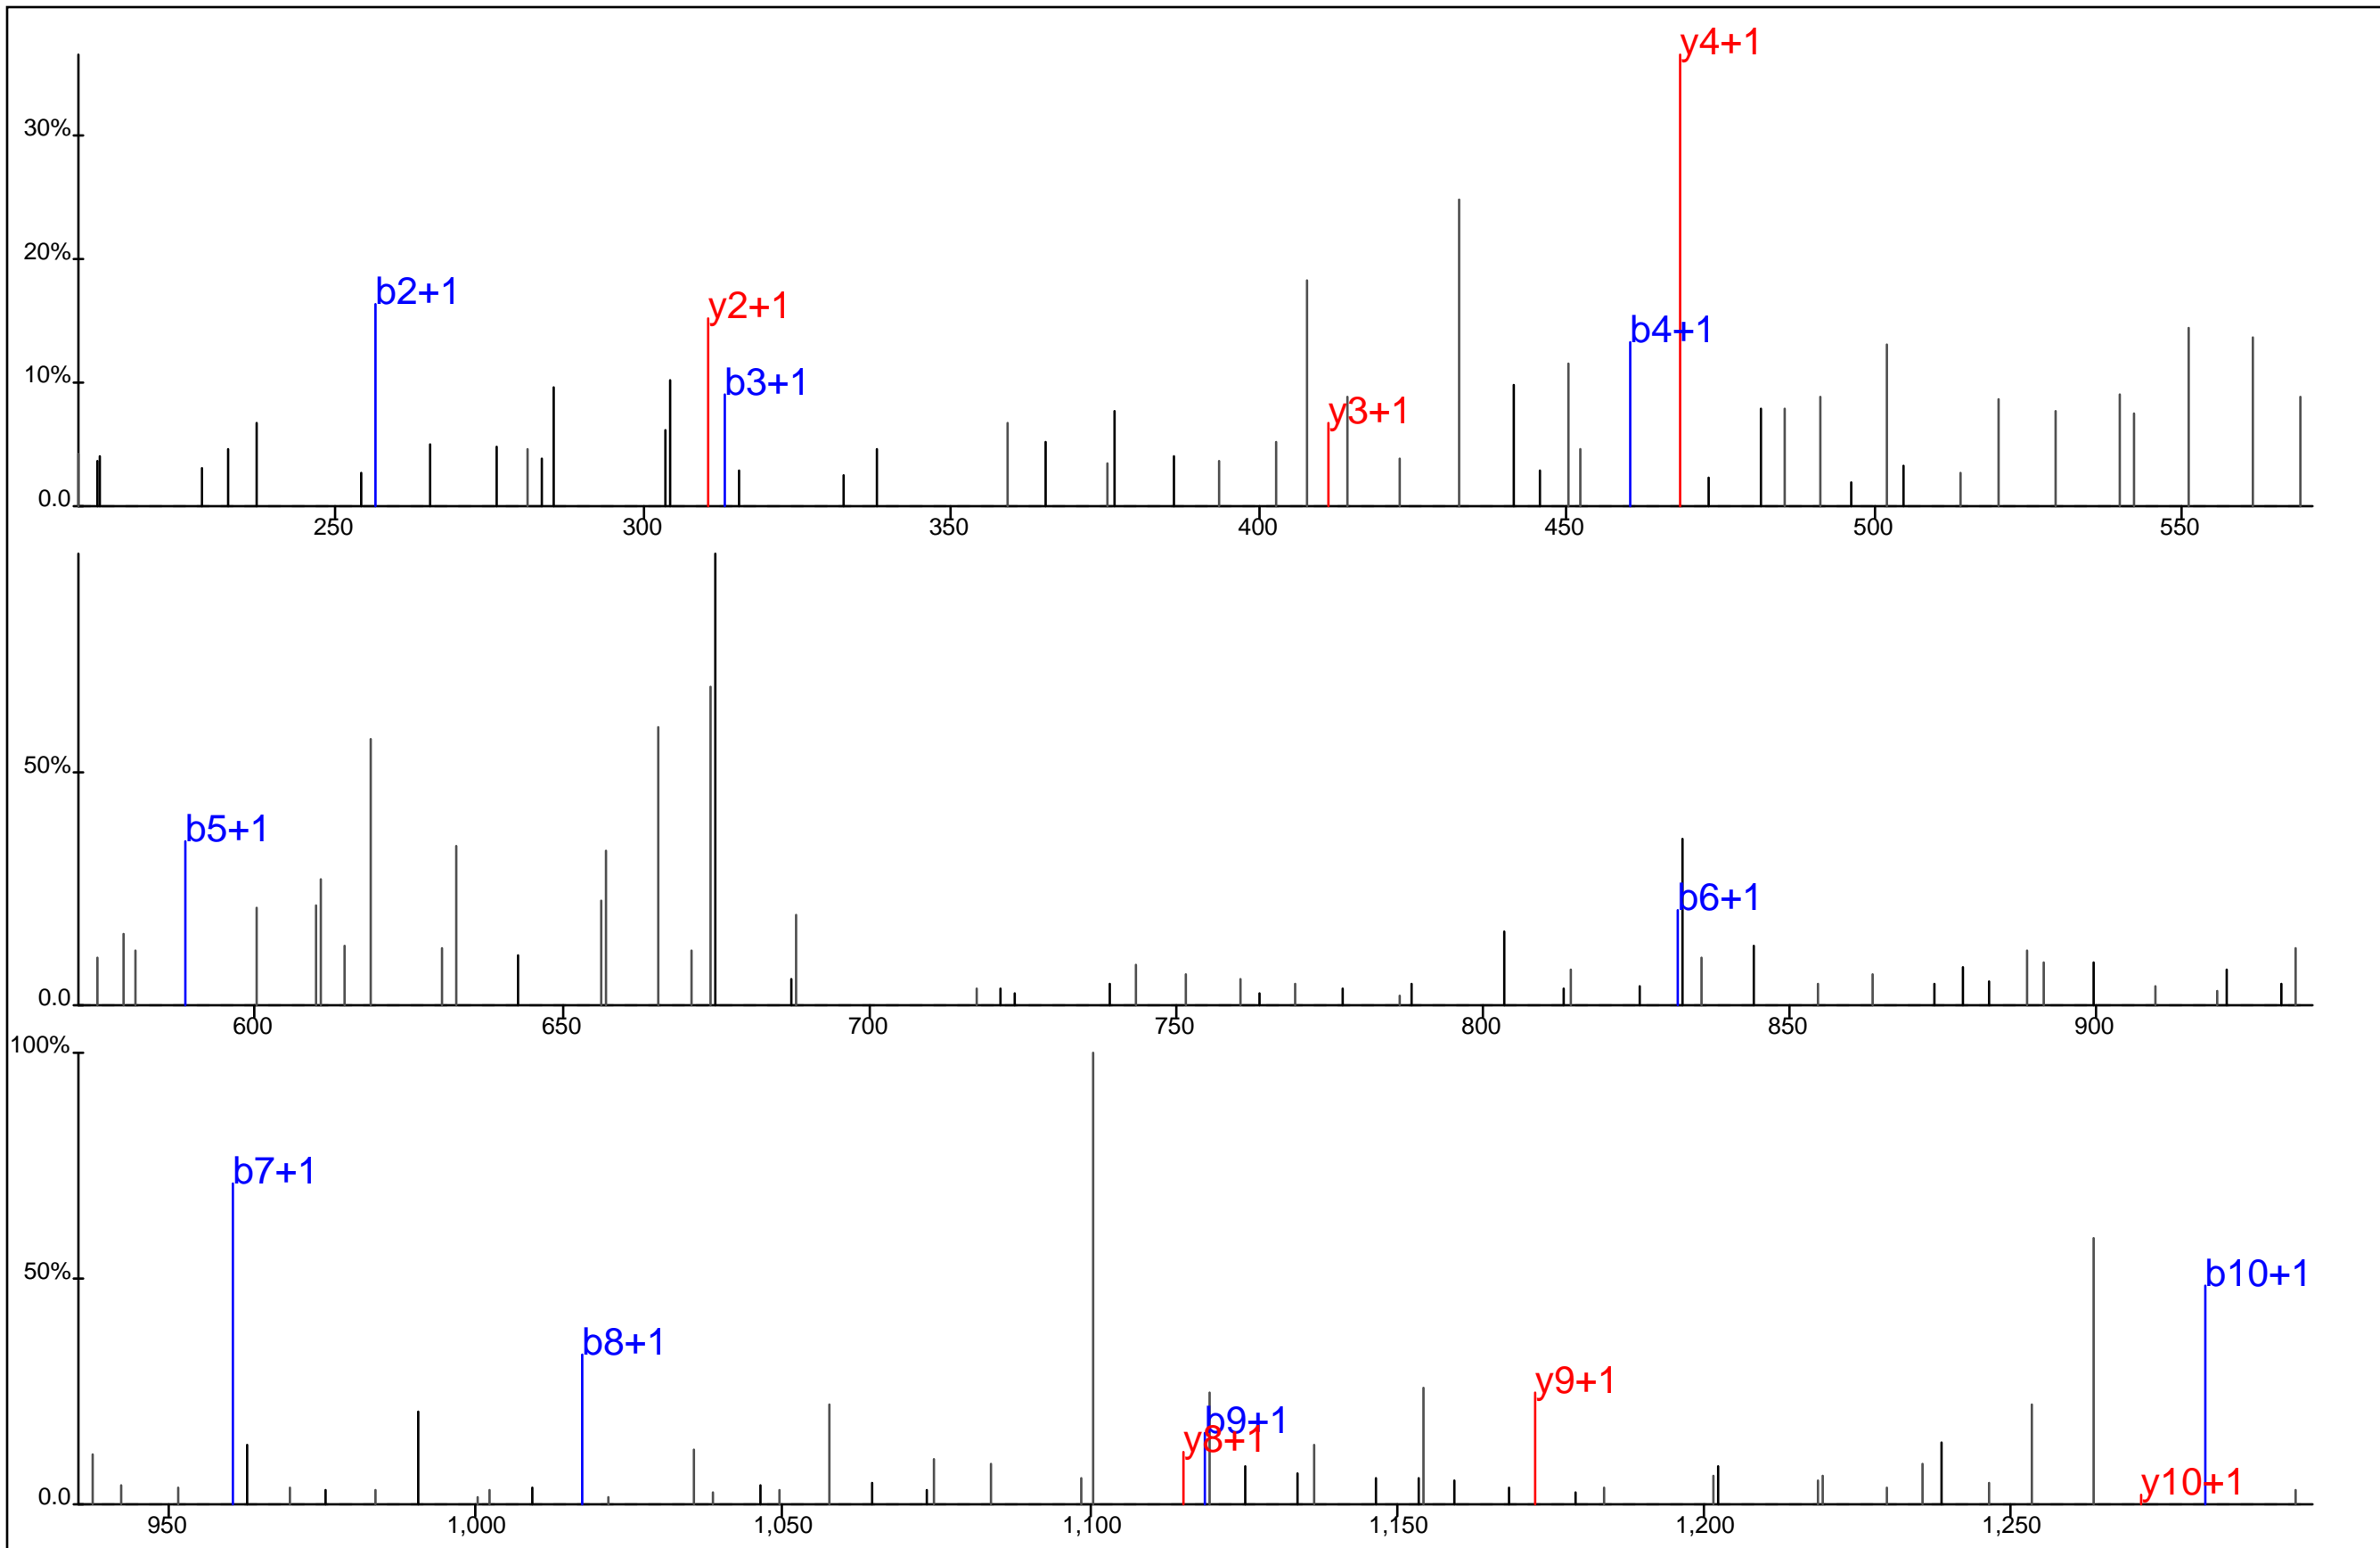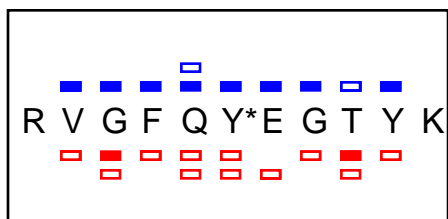

Protein Name: Glucose-6-phosphate dehydrogenase  
 gi Accession: 0  
 Precursor Mass: 714.3214+2  
 Delta Mass: 0.048 ppm  
 XCorr: 46.39

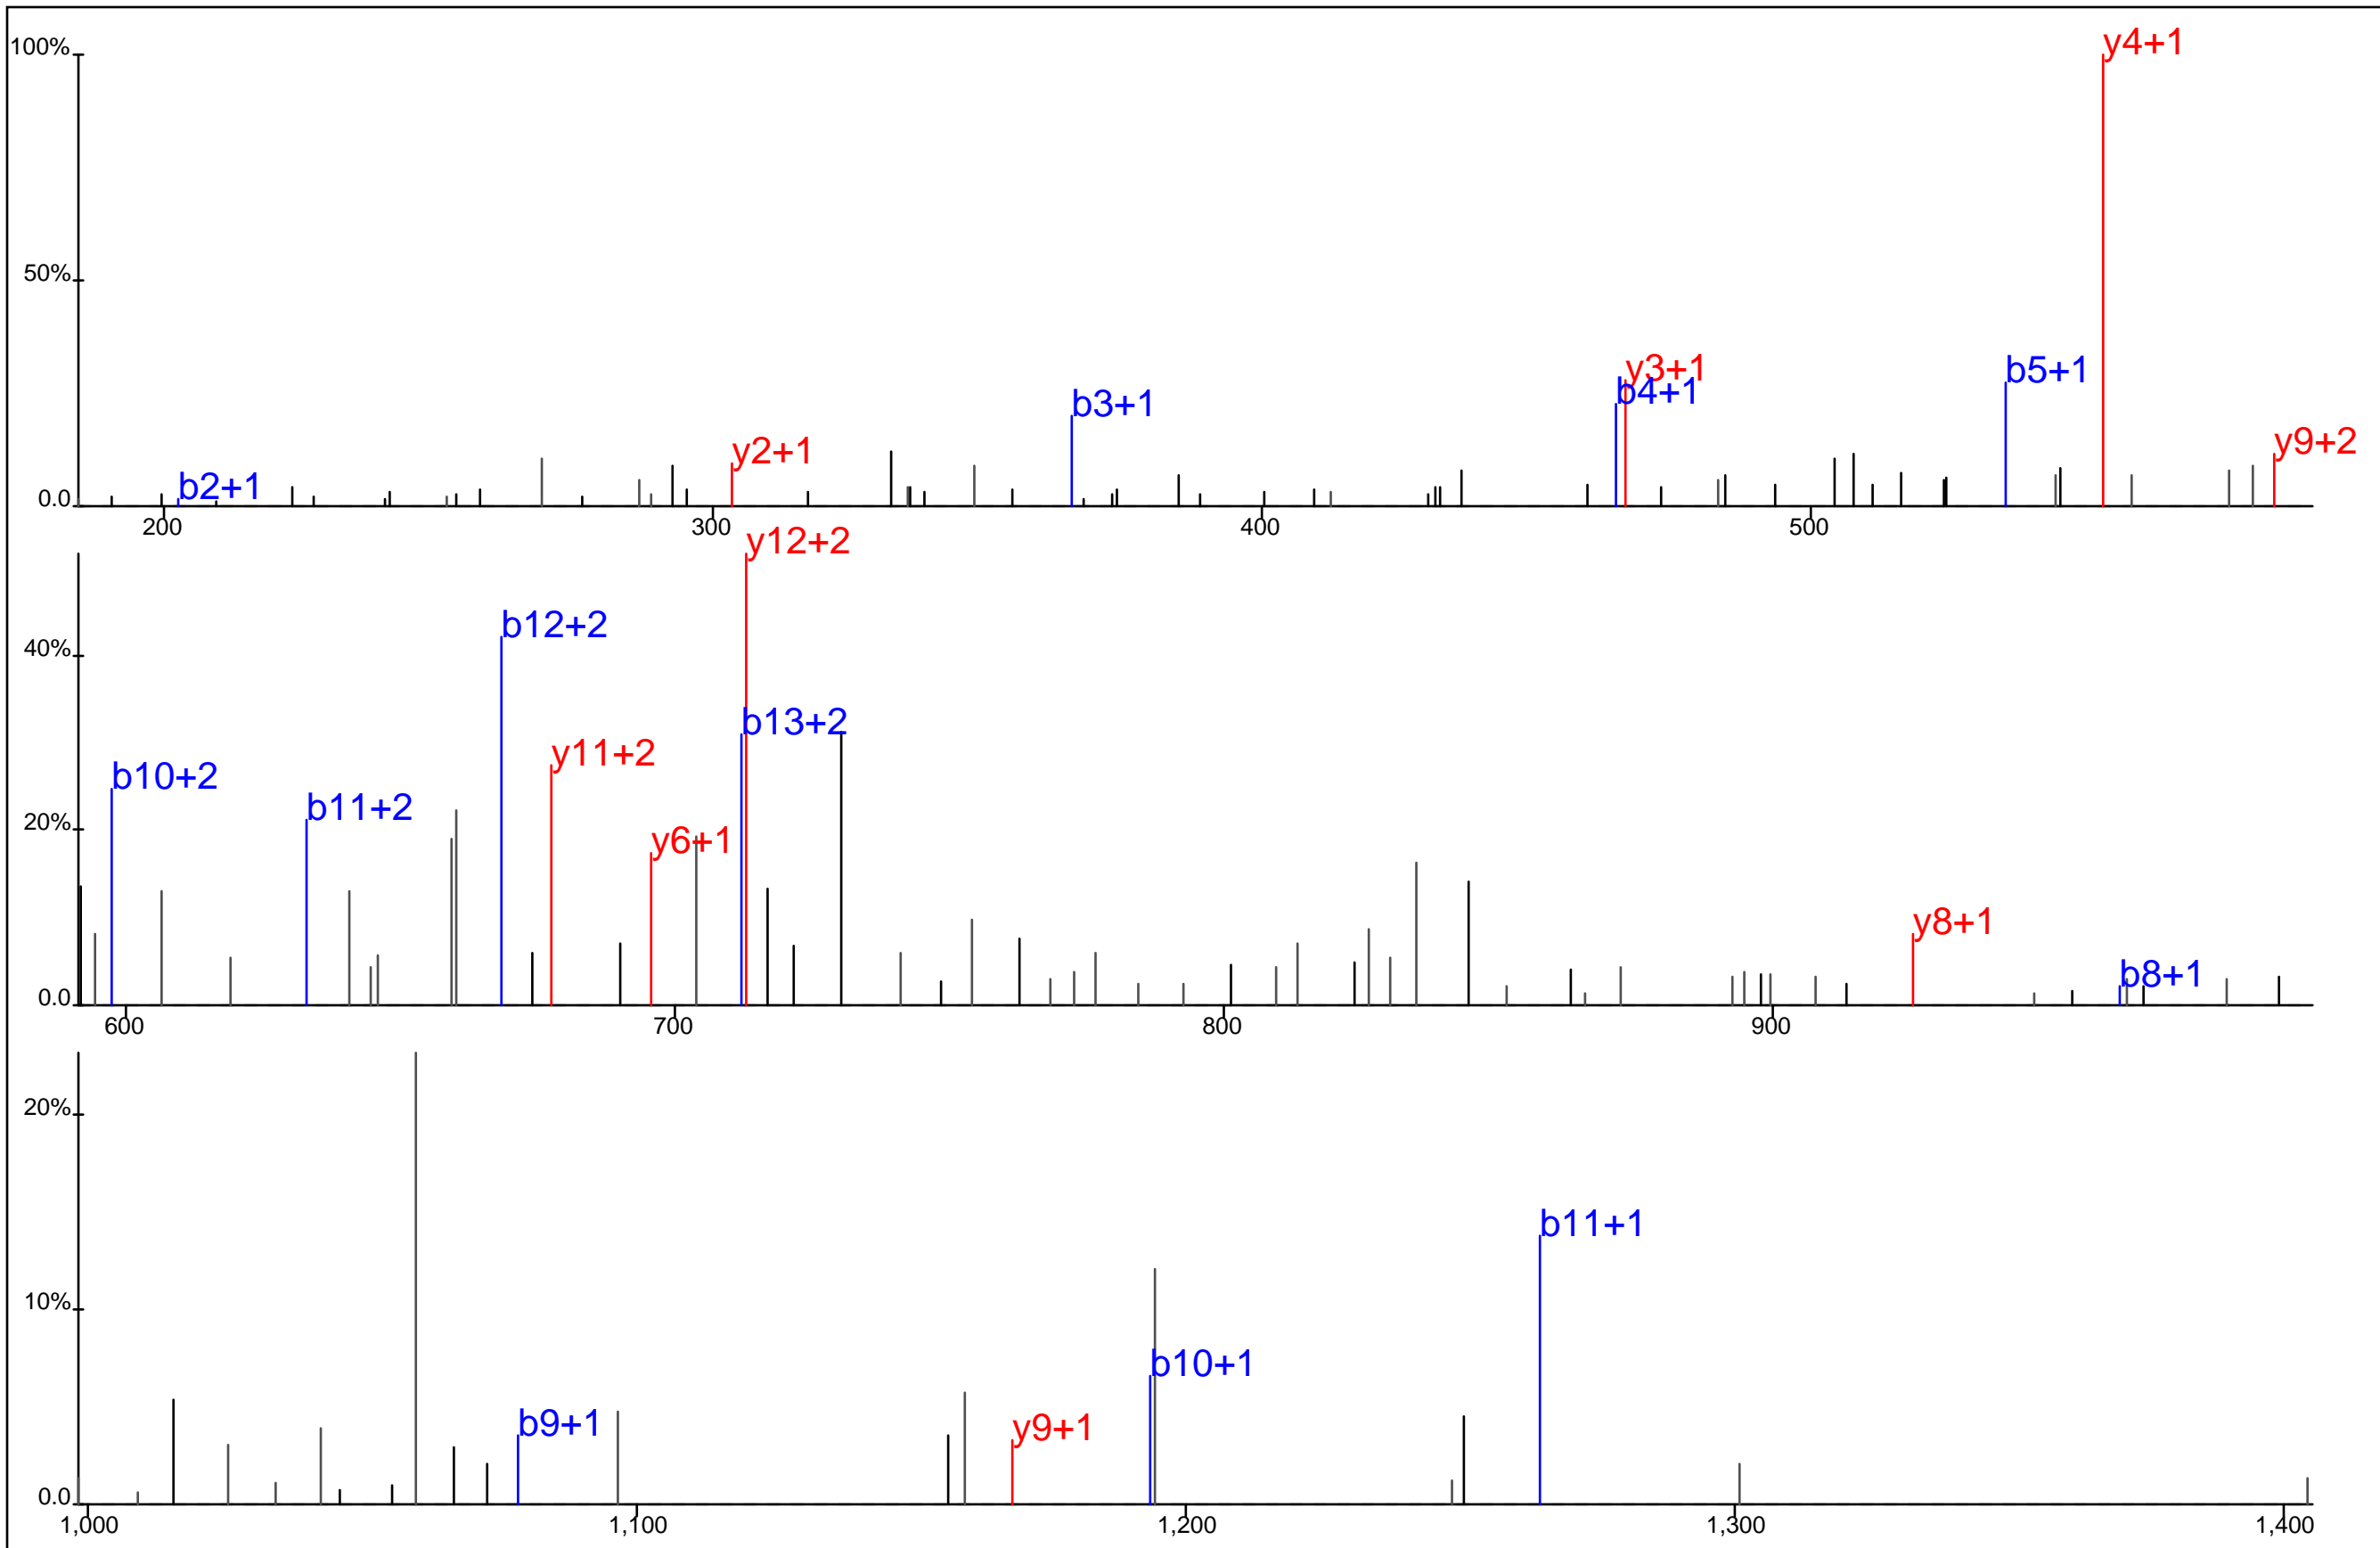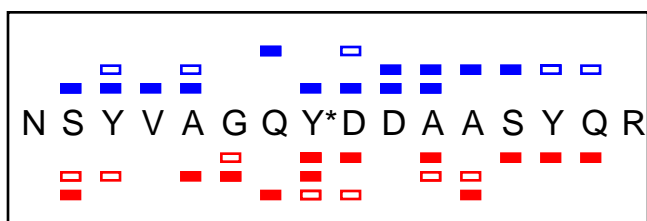

Protein Name: Glucose-6-phosphate dehydrogenase  
 gi Accession: 0  
 Precursor Mass: 629.9232+3  
 Delta Mass: 0.231 ppm  
 XCorr: 35.25

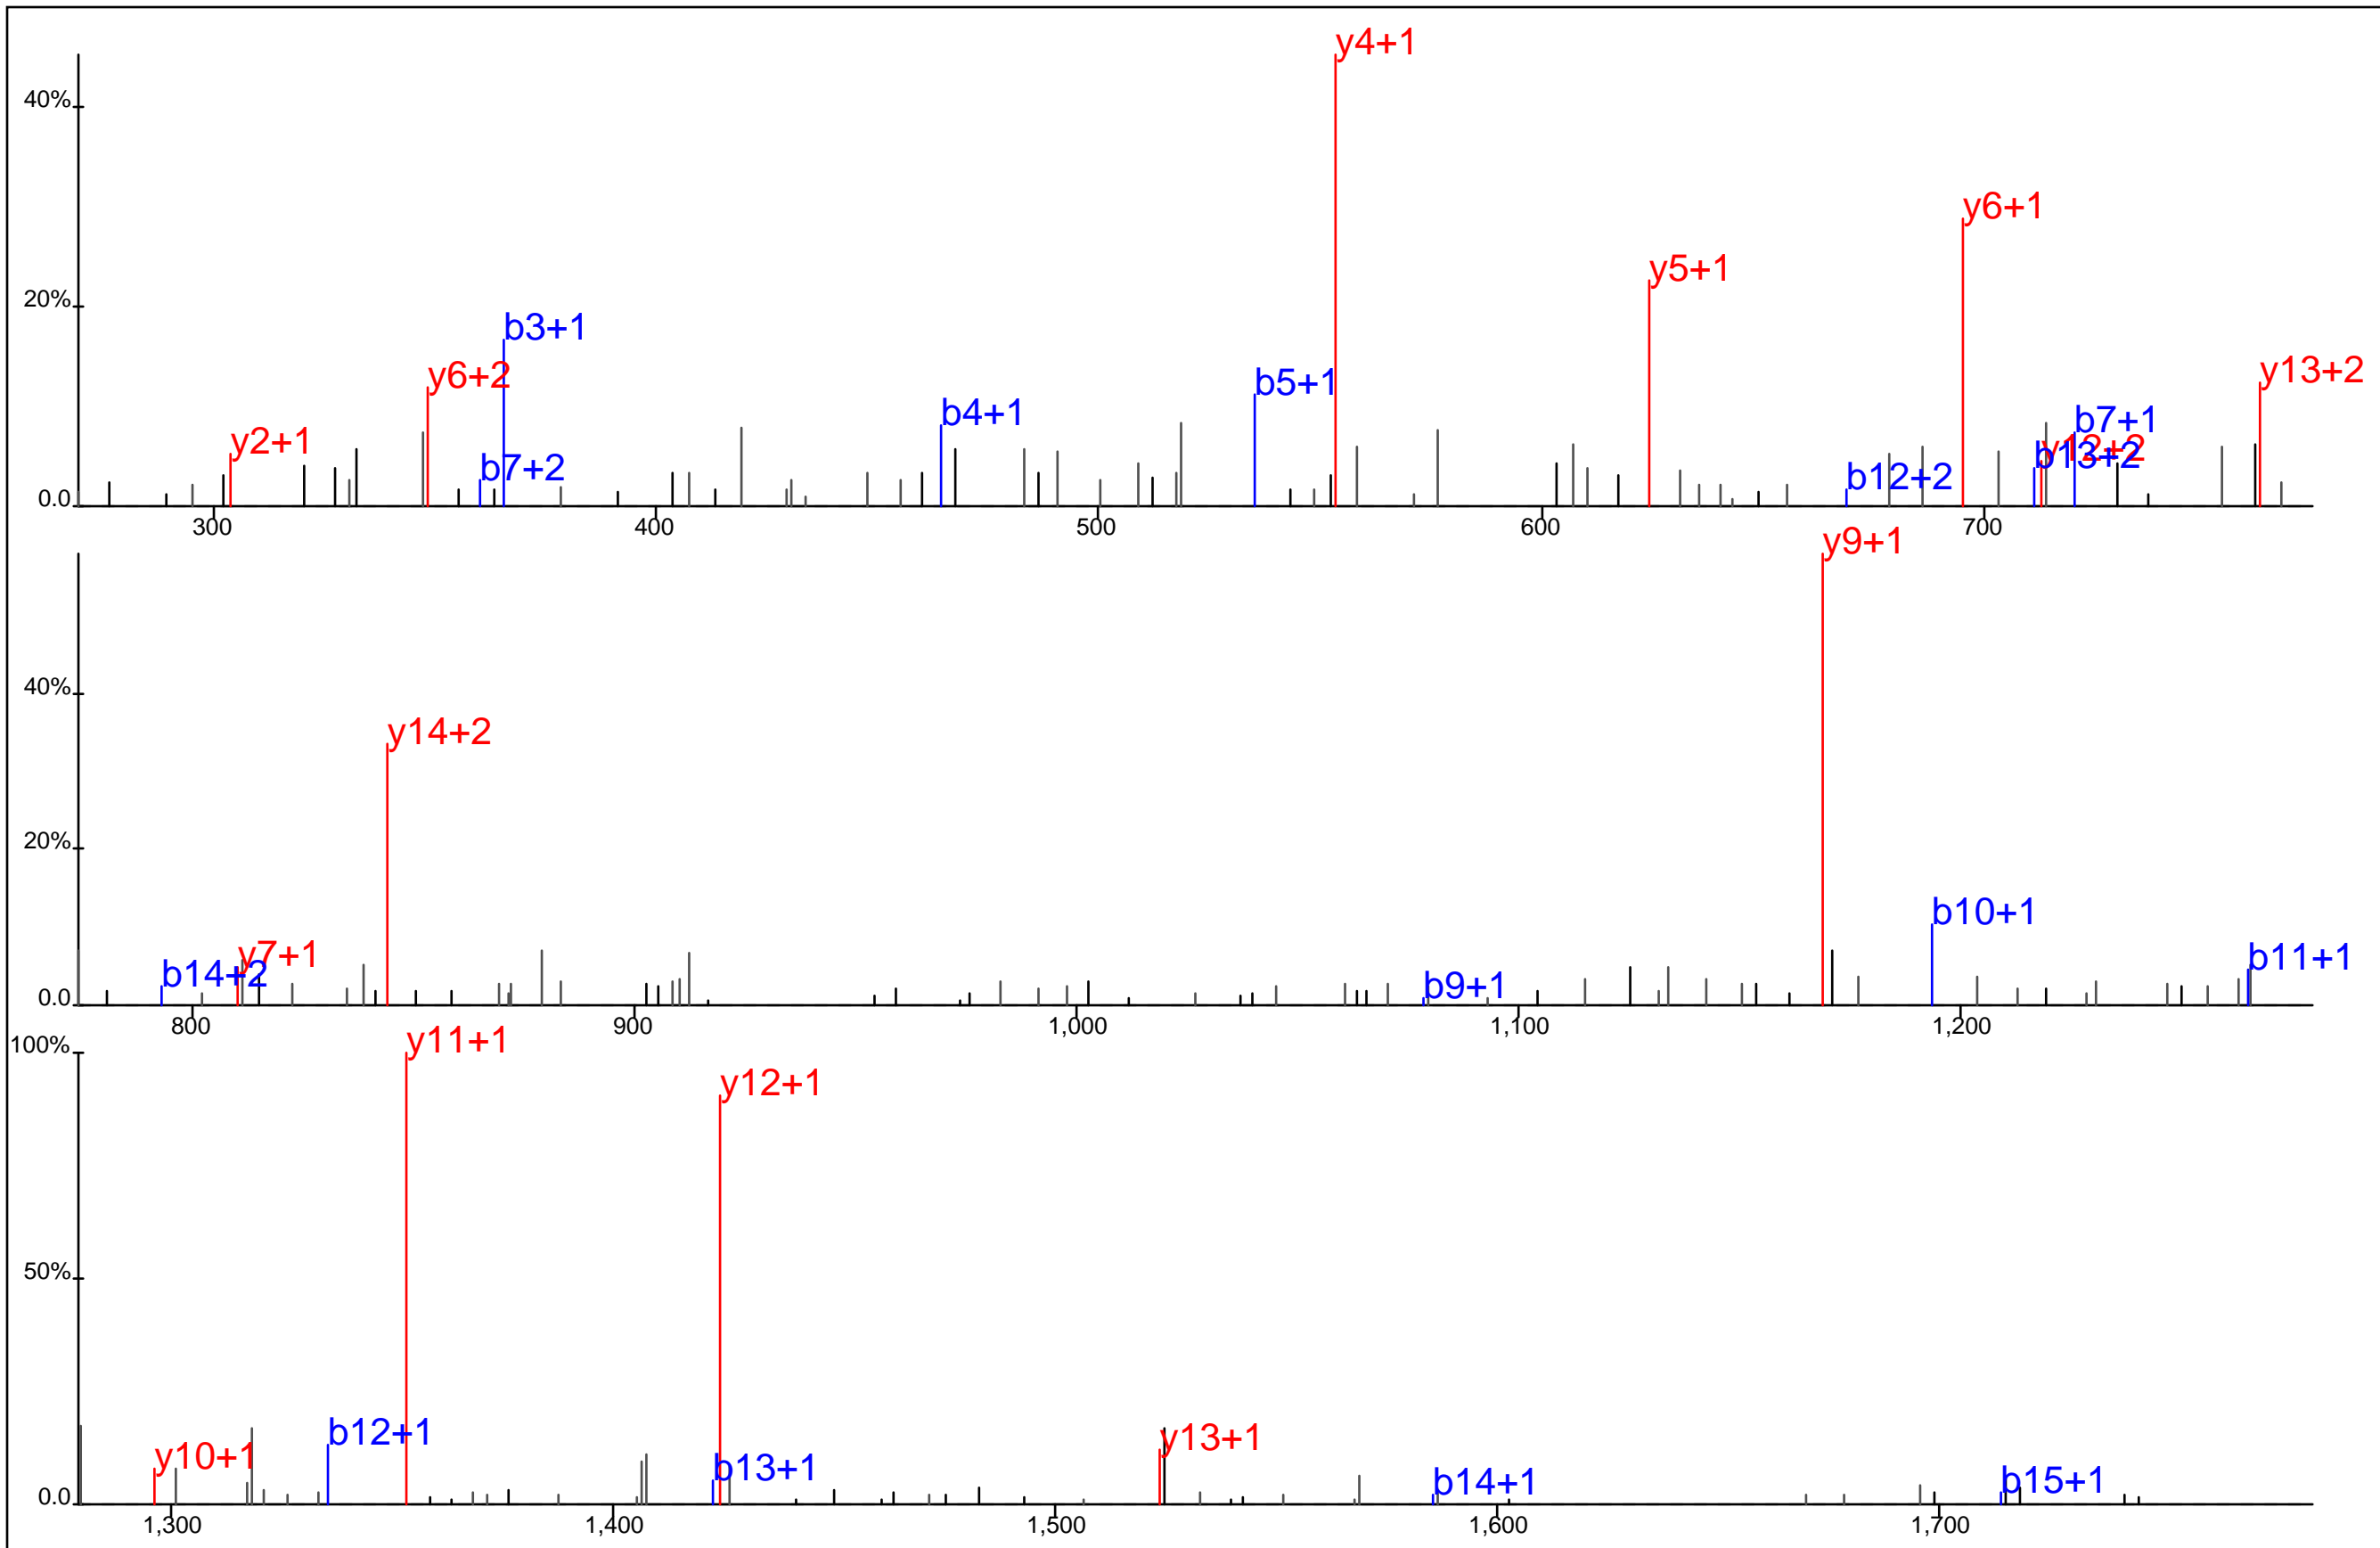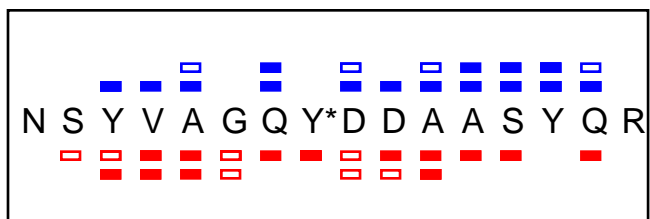

Protein Name: Glucose-6-phosphate dehydrogenase  
 gi Accession: 0  
 Precursor Mass: 944.3827+2  
 Delta Mass: 1.919 ppm  
 XCorr: 51.93



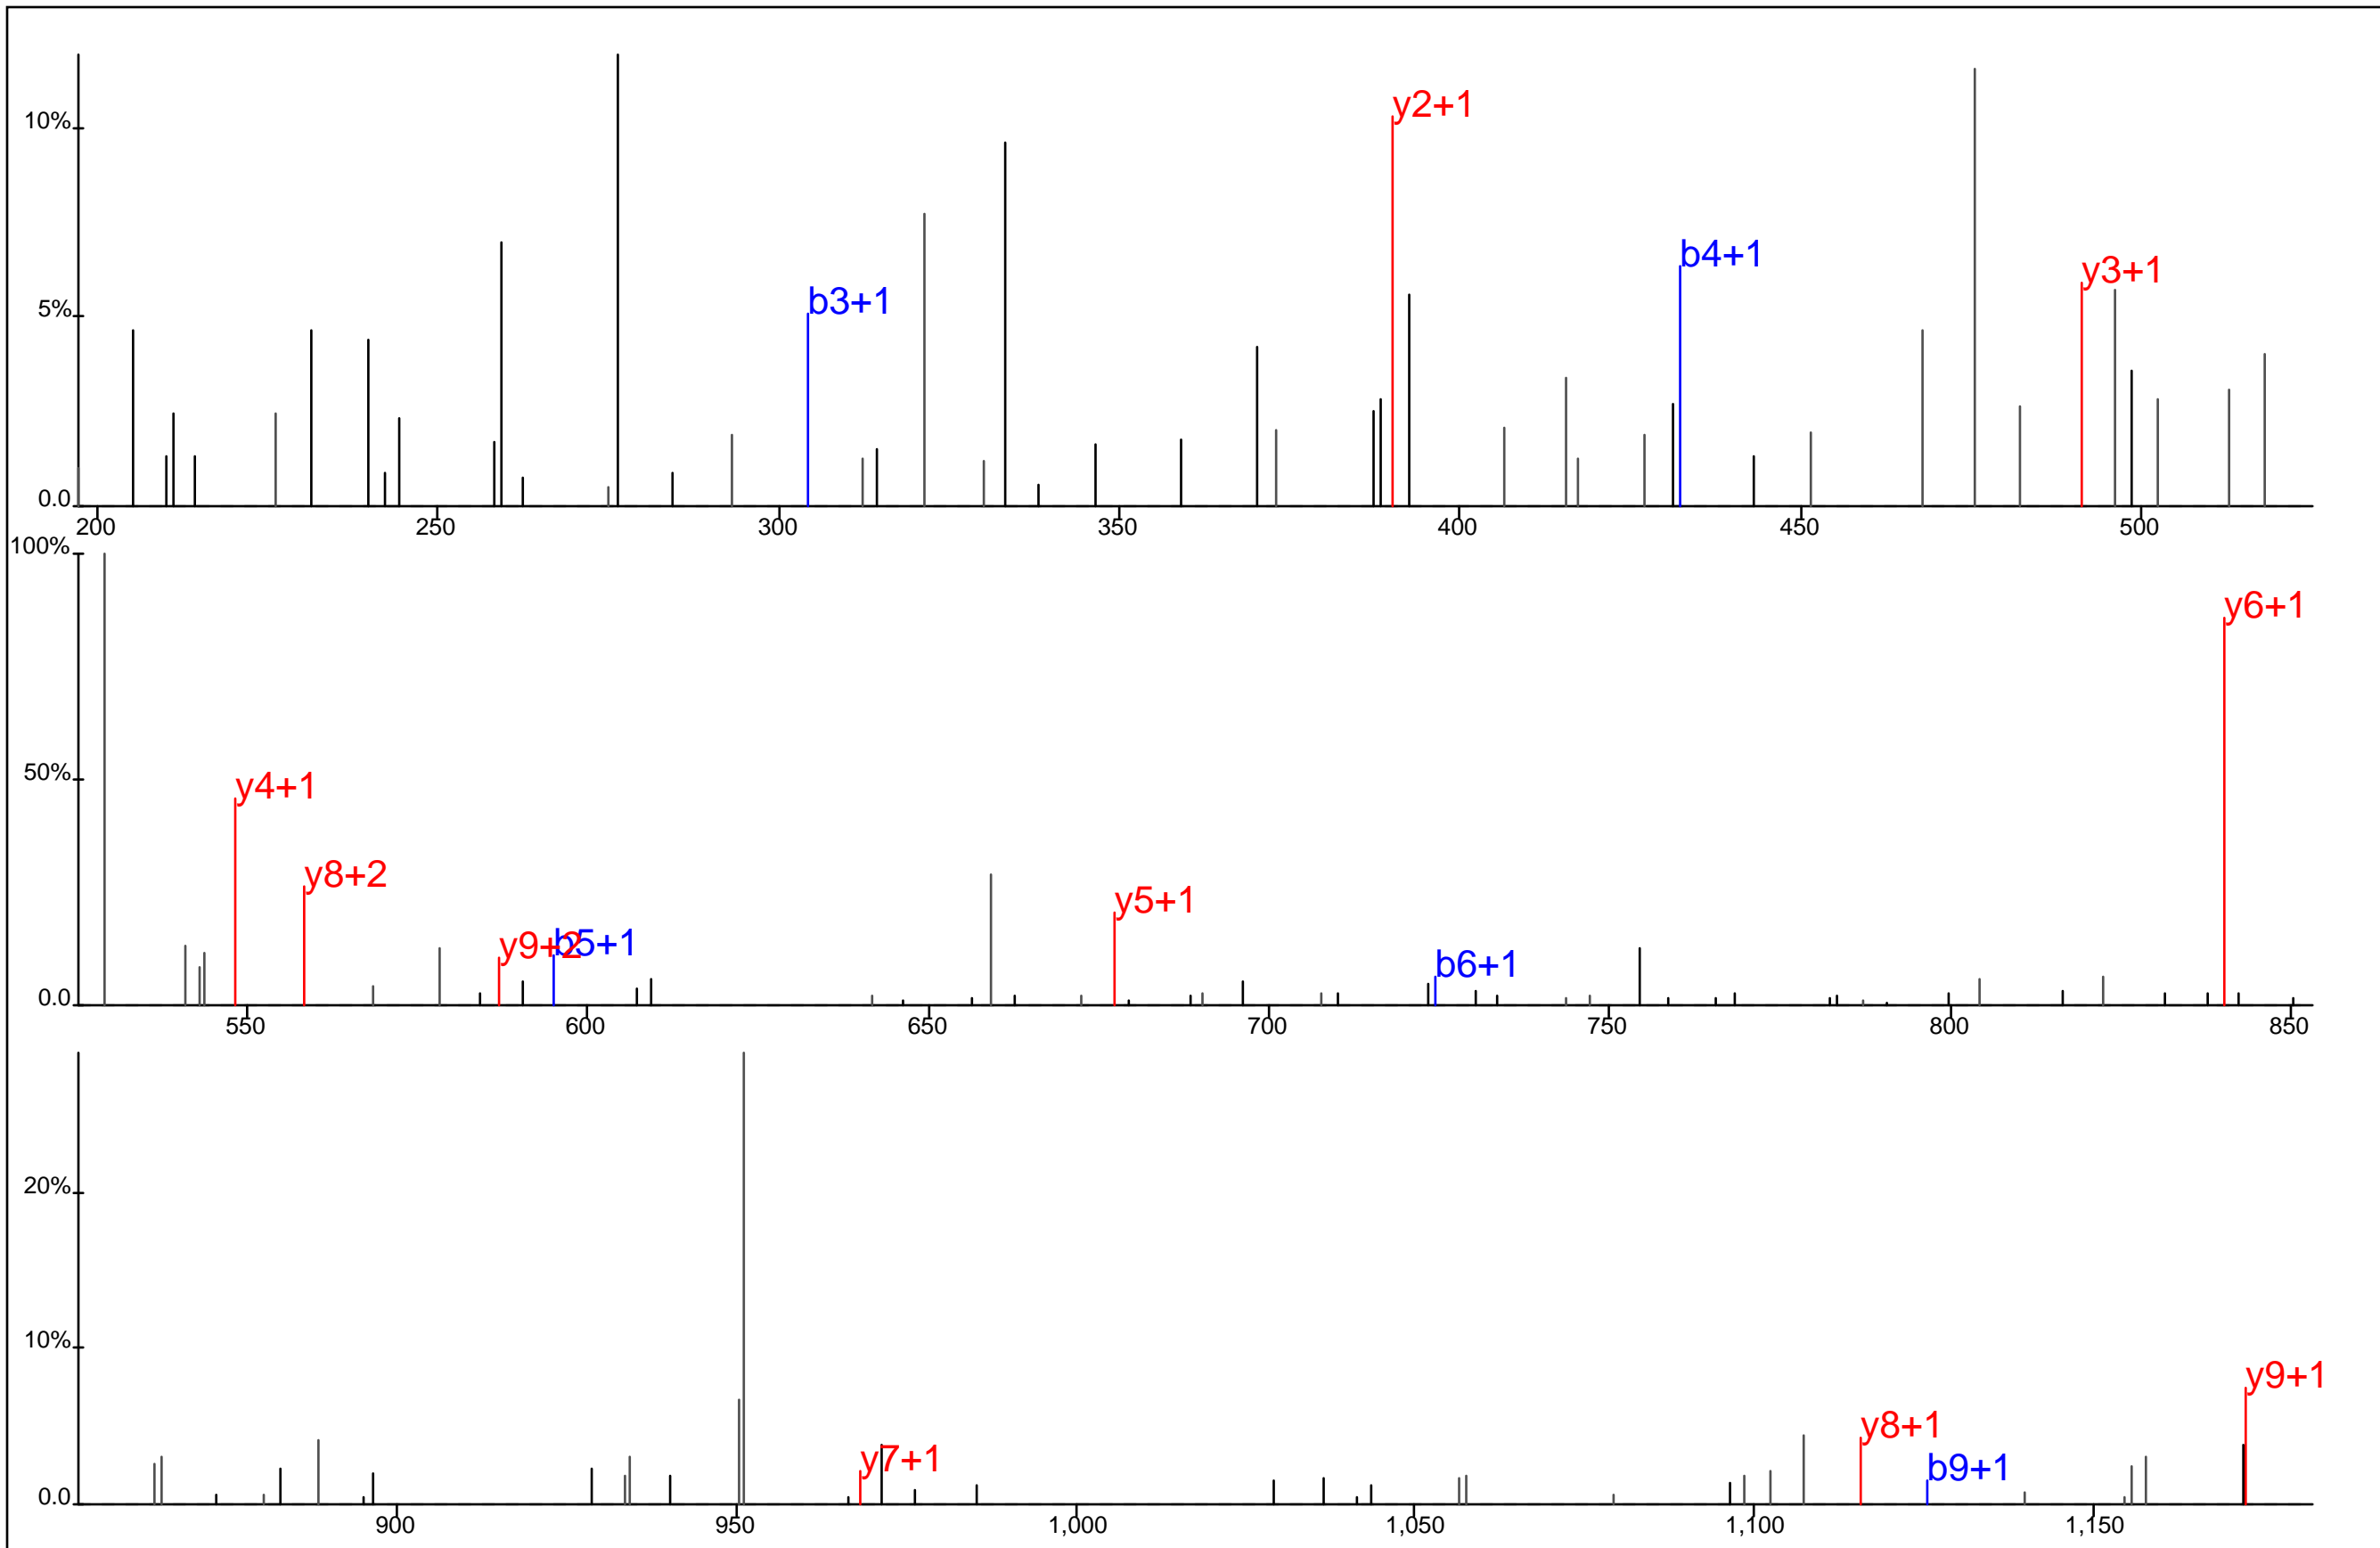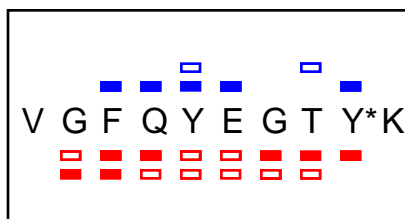

Protein Name: Glucose-6-phosphate dehydrogenase  
 gi Accession: 0  
 Precursor Mass: 636.2695+2  
 Delta Mass: 2.049 ppm  
 XCorr: 38.6

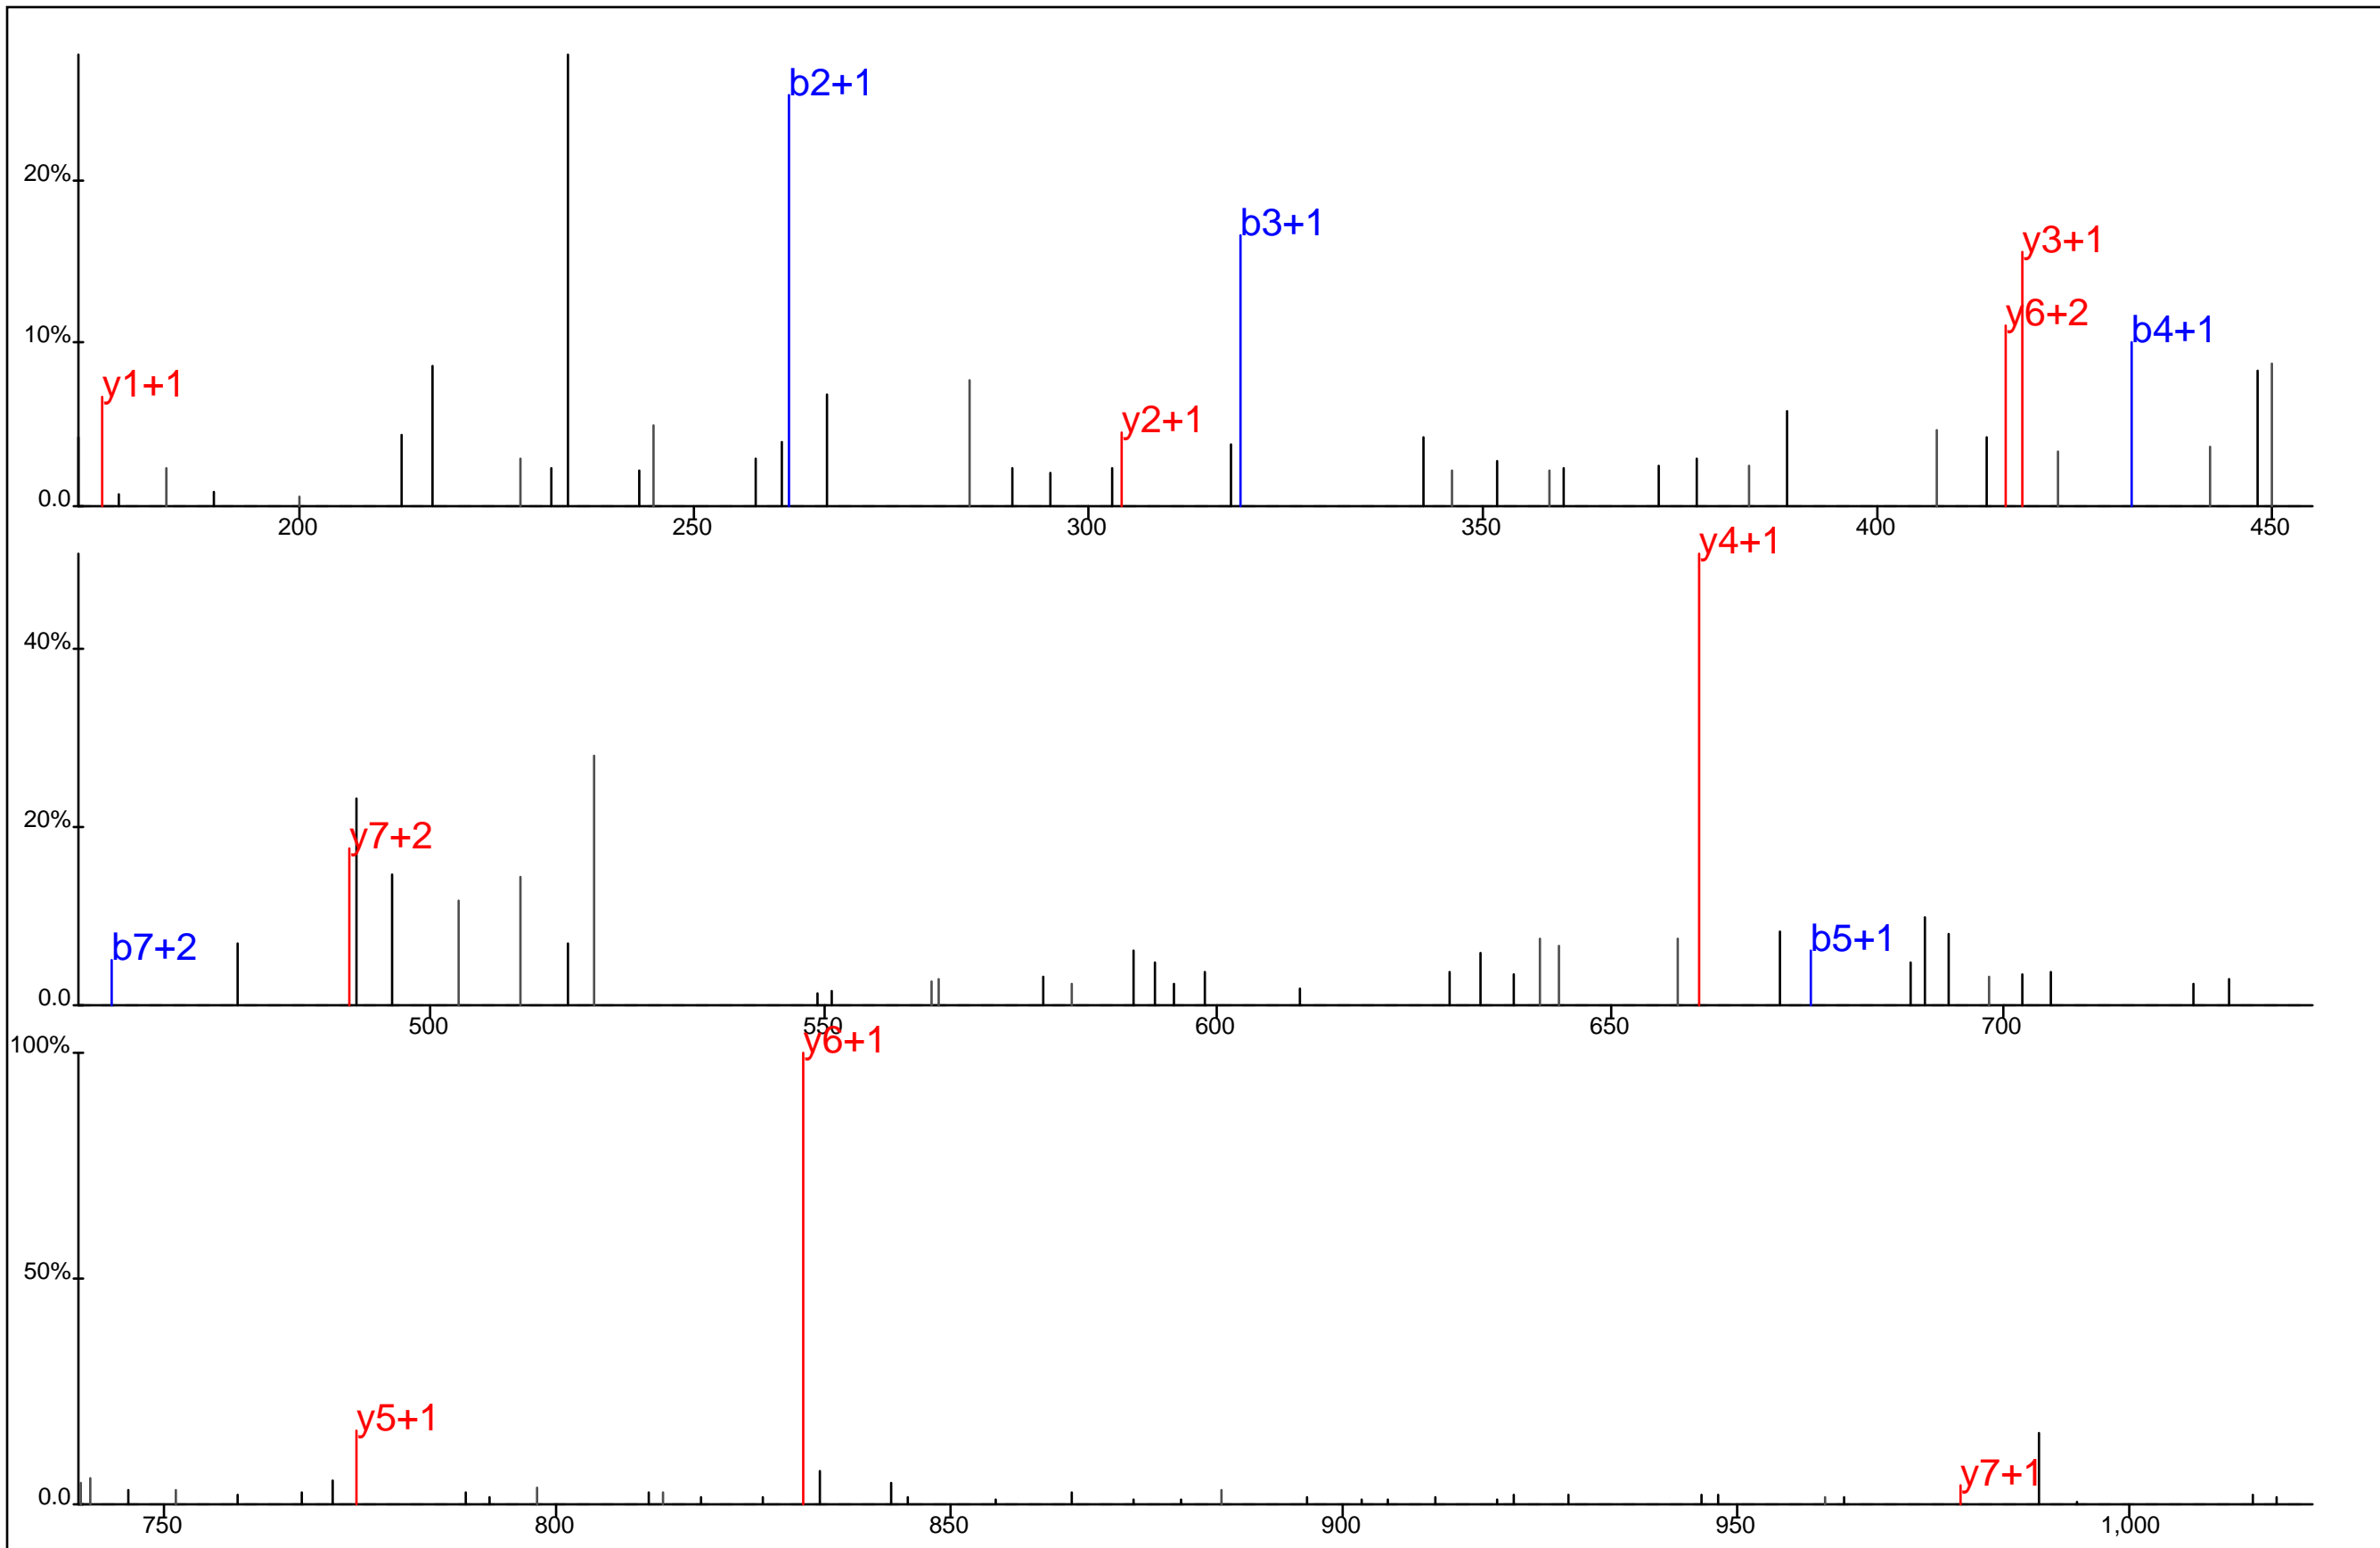

■ ■ ■ ■ ■ ■  
 N F G L Y\* N E R  
■ ■ ■ ■ ■ ■

Protein Name: Glutamate oxaloacetate transaminase-1  
 gi Accession: 0  
 Precursor Mass: 546.7294+2  
 Delta Mass: 0.450 ppm  
 XCorr: 32.3

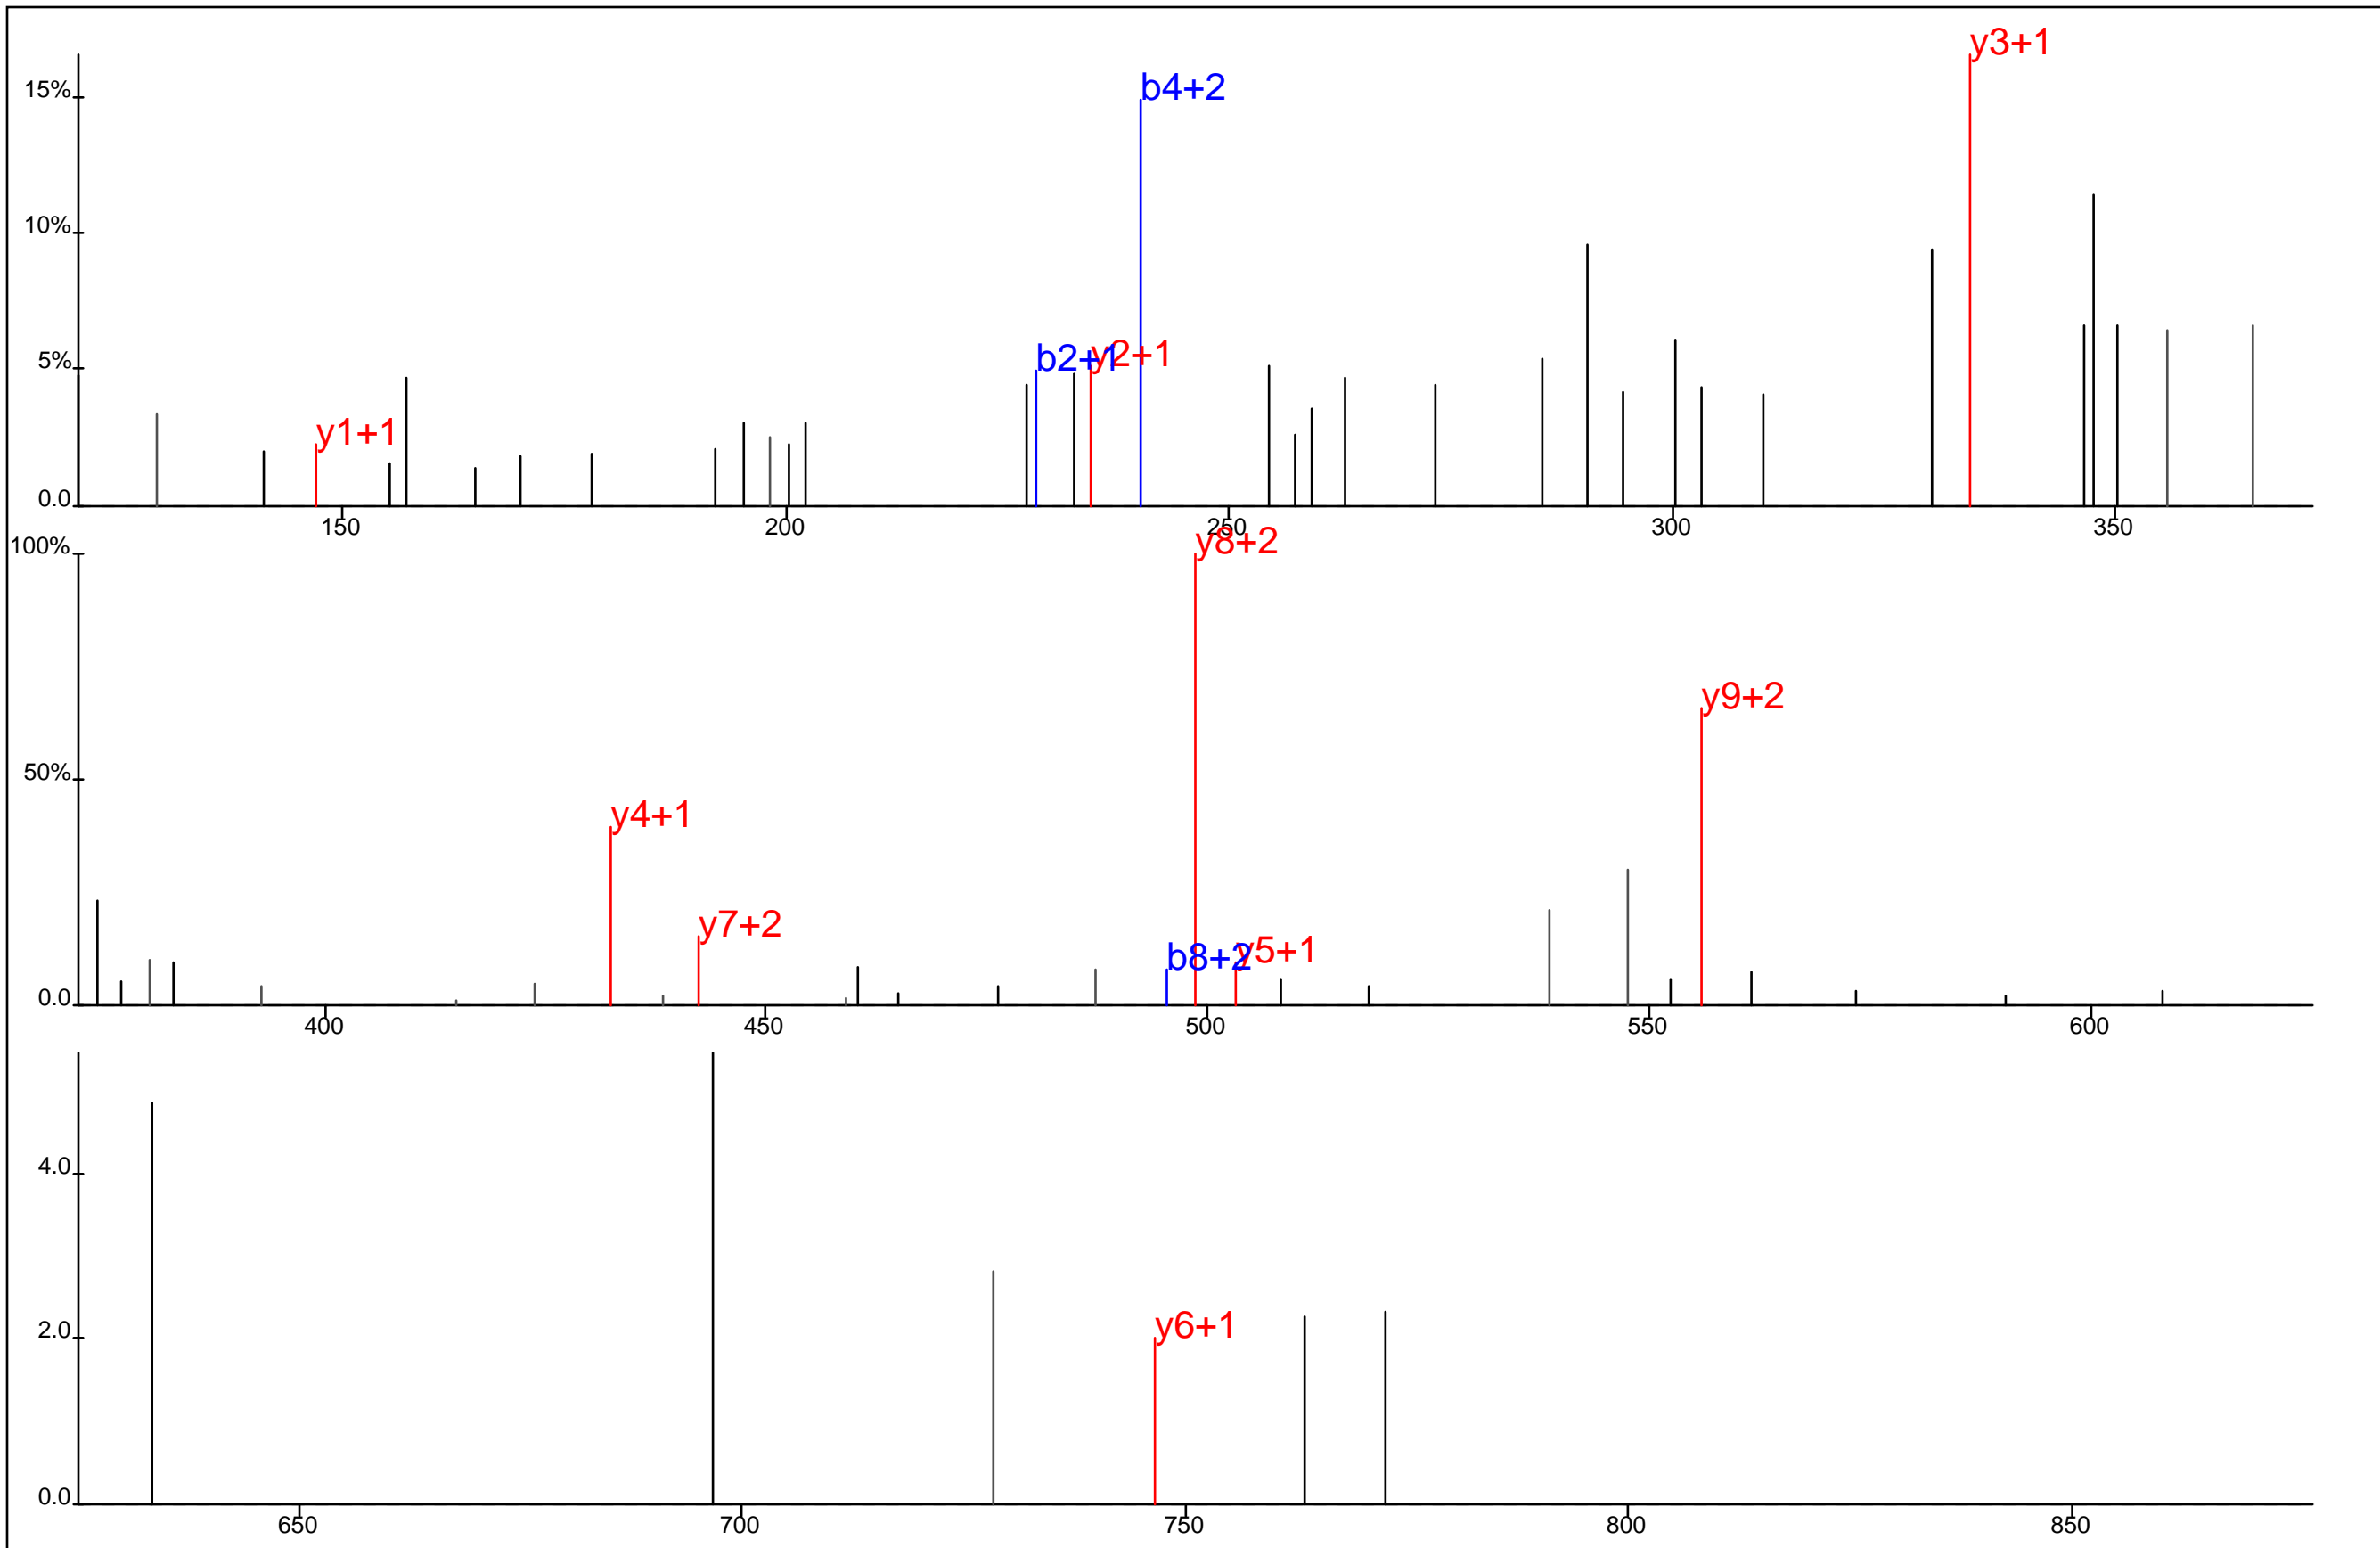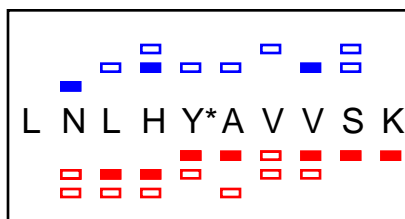

Protein Name: Glutamyl tRNA synthetase  
 gi Accession: 0  
 Precursor Mass: 408.5441+3  
 Delta Mass: 0.515 ppm  
 XCorr: 24.2

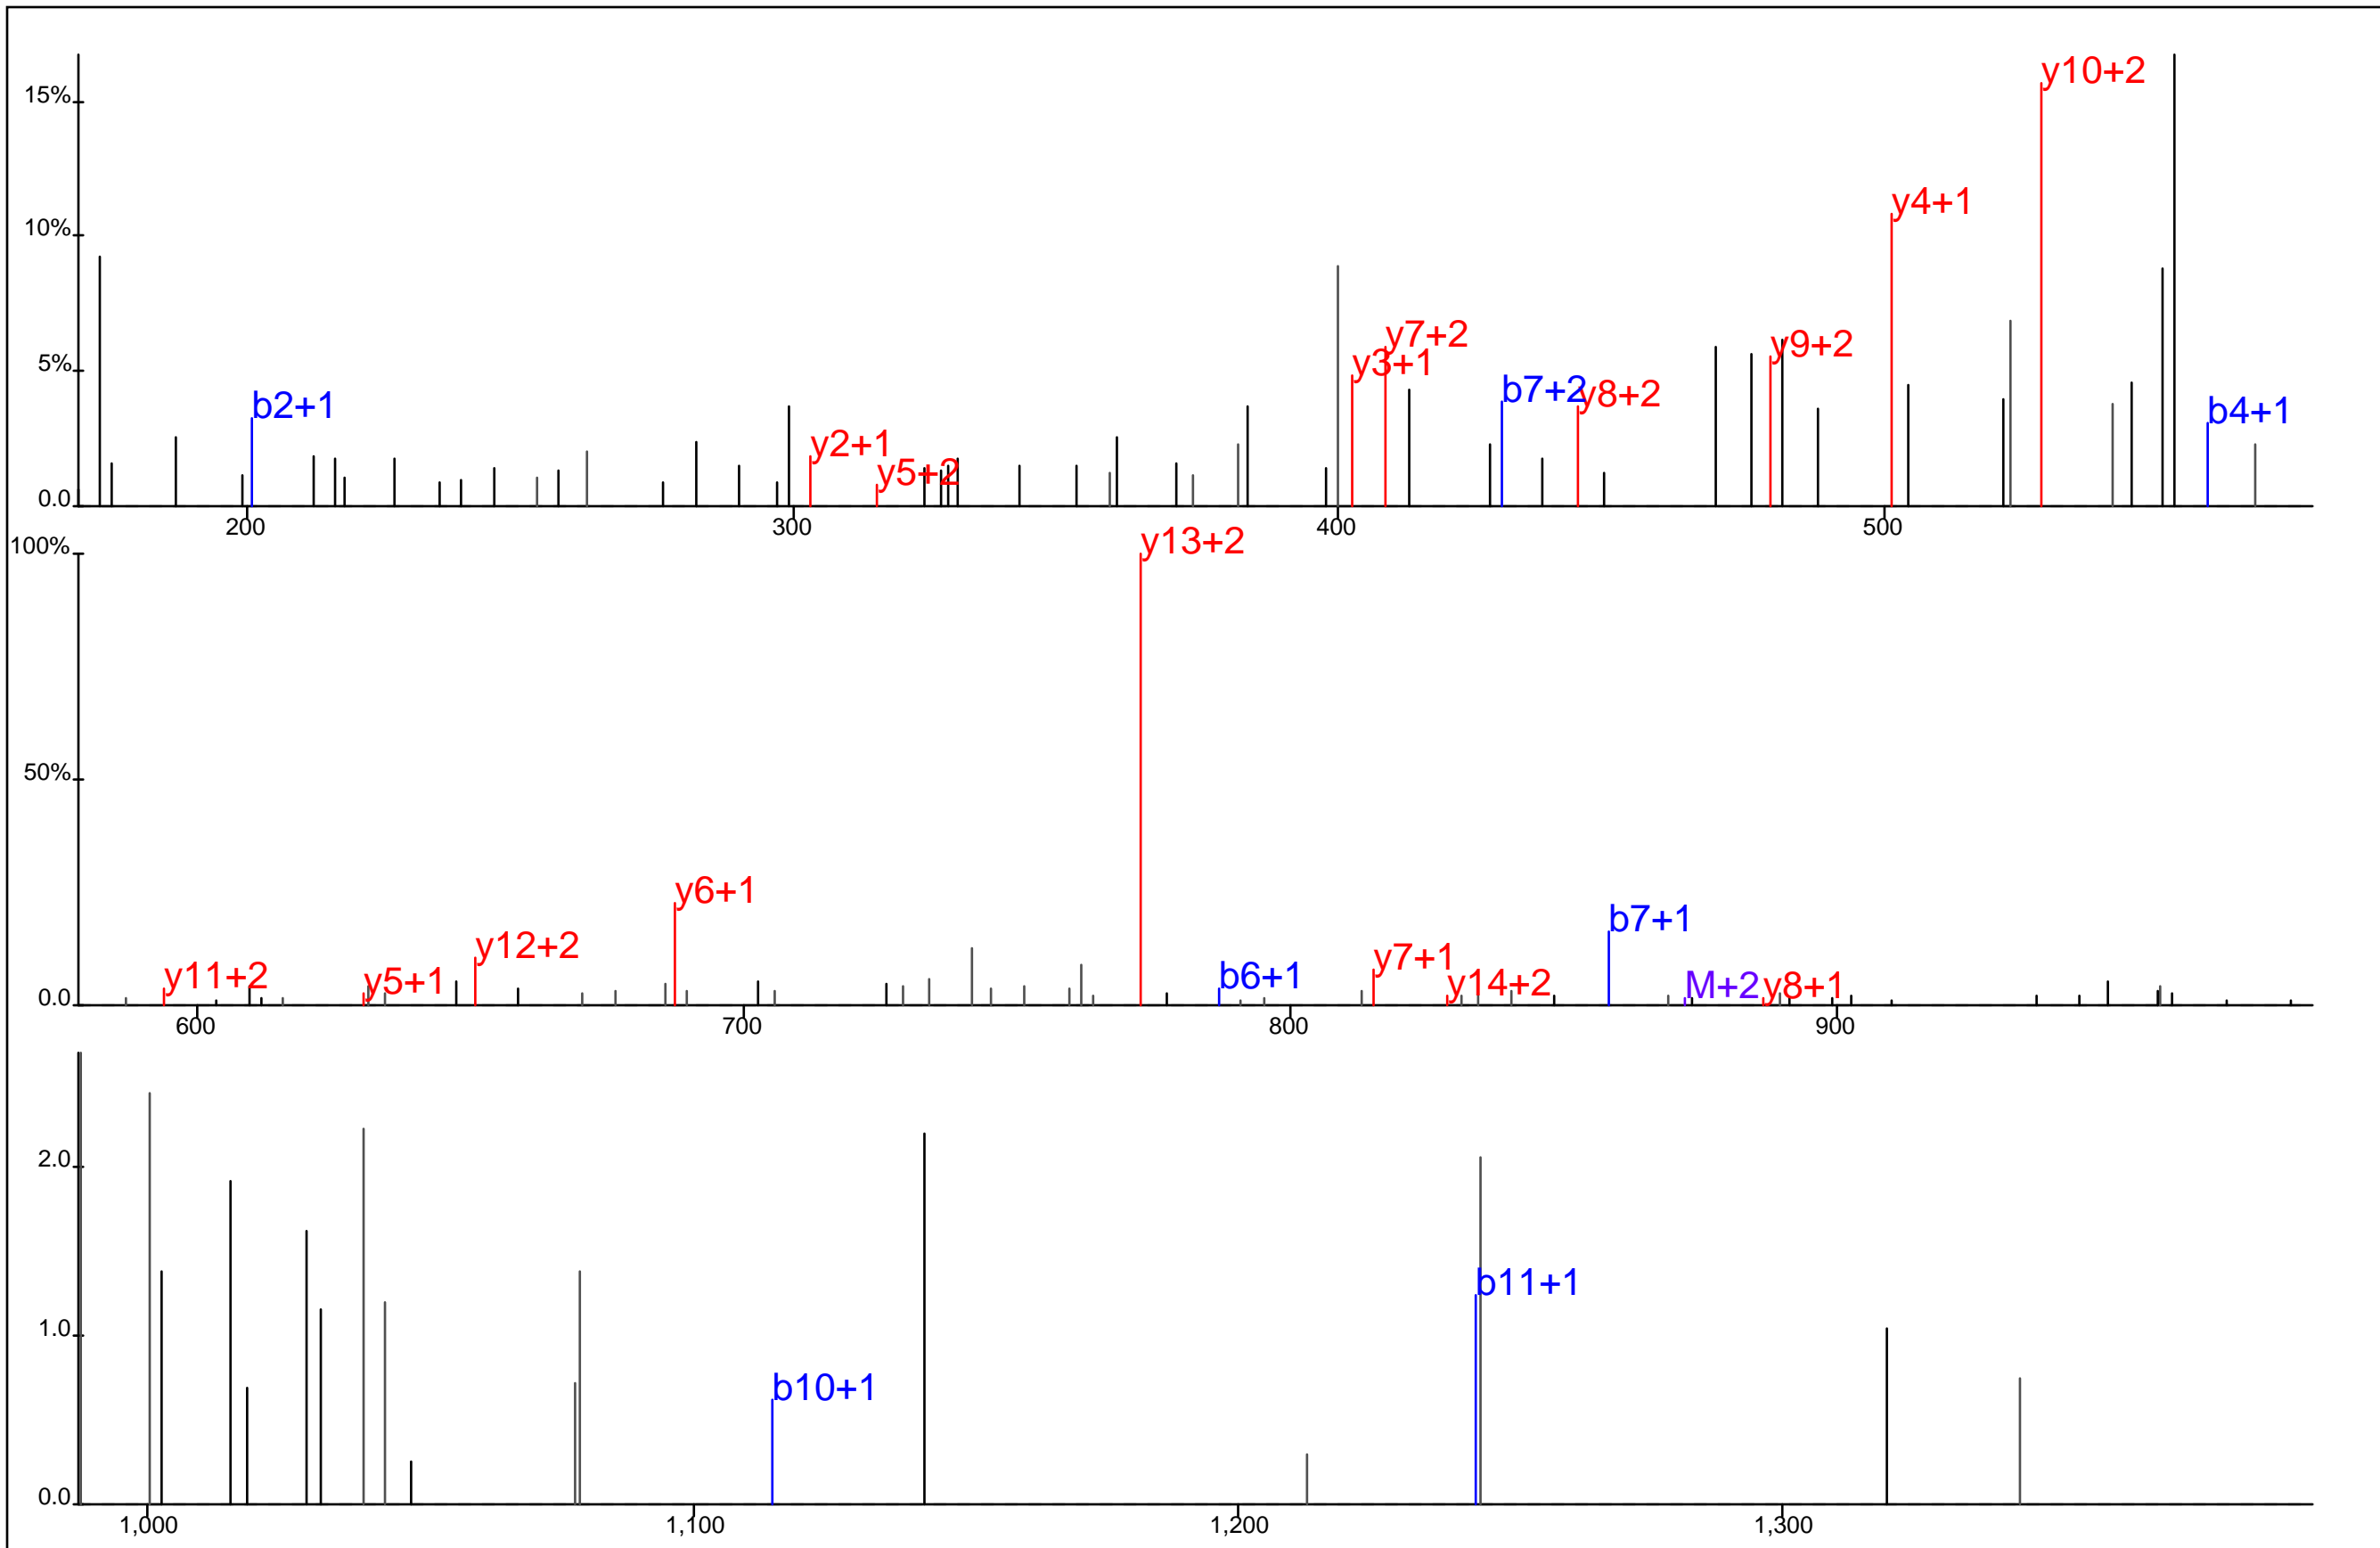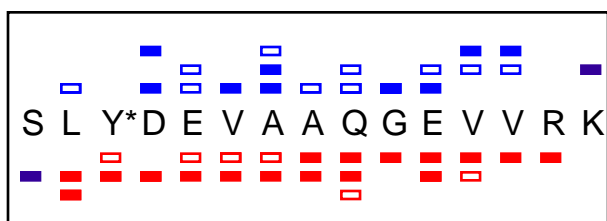

Protein Name: Glutamylyl-prolyl-tRNA synthetase  
 gi Accession: 0  
 Precursor Mass: 581.9489+3  
 Delta Mass: 0.416 ppm  
 XCorr: 27.83

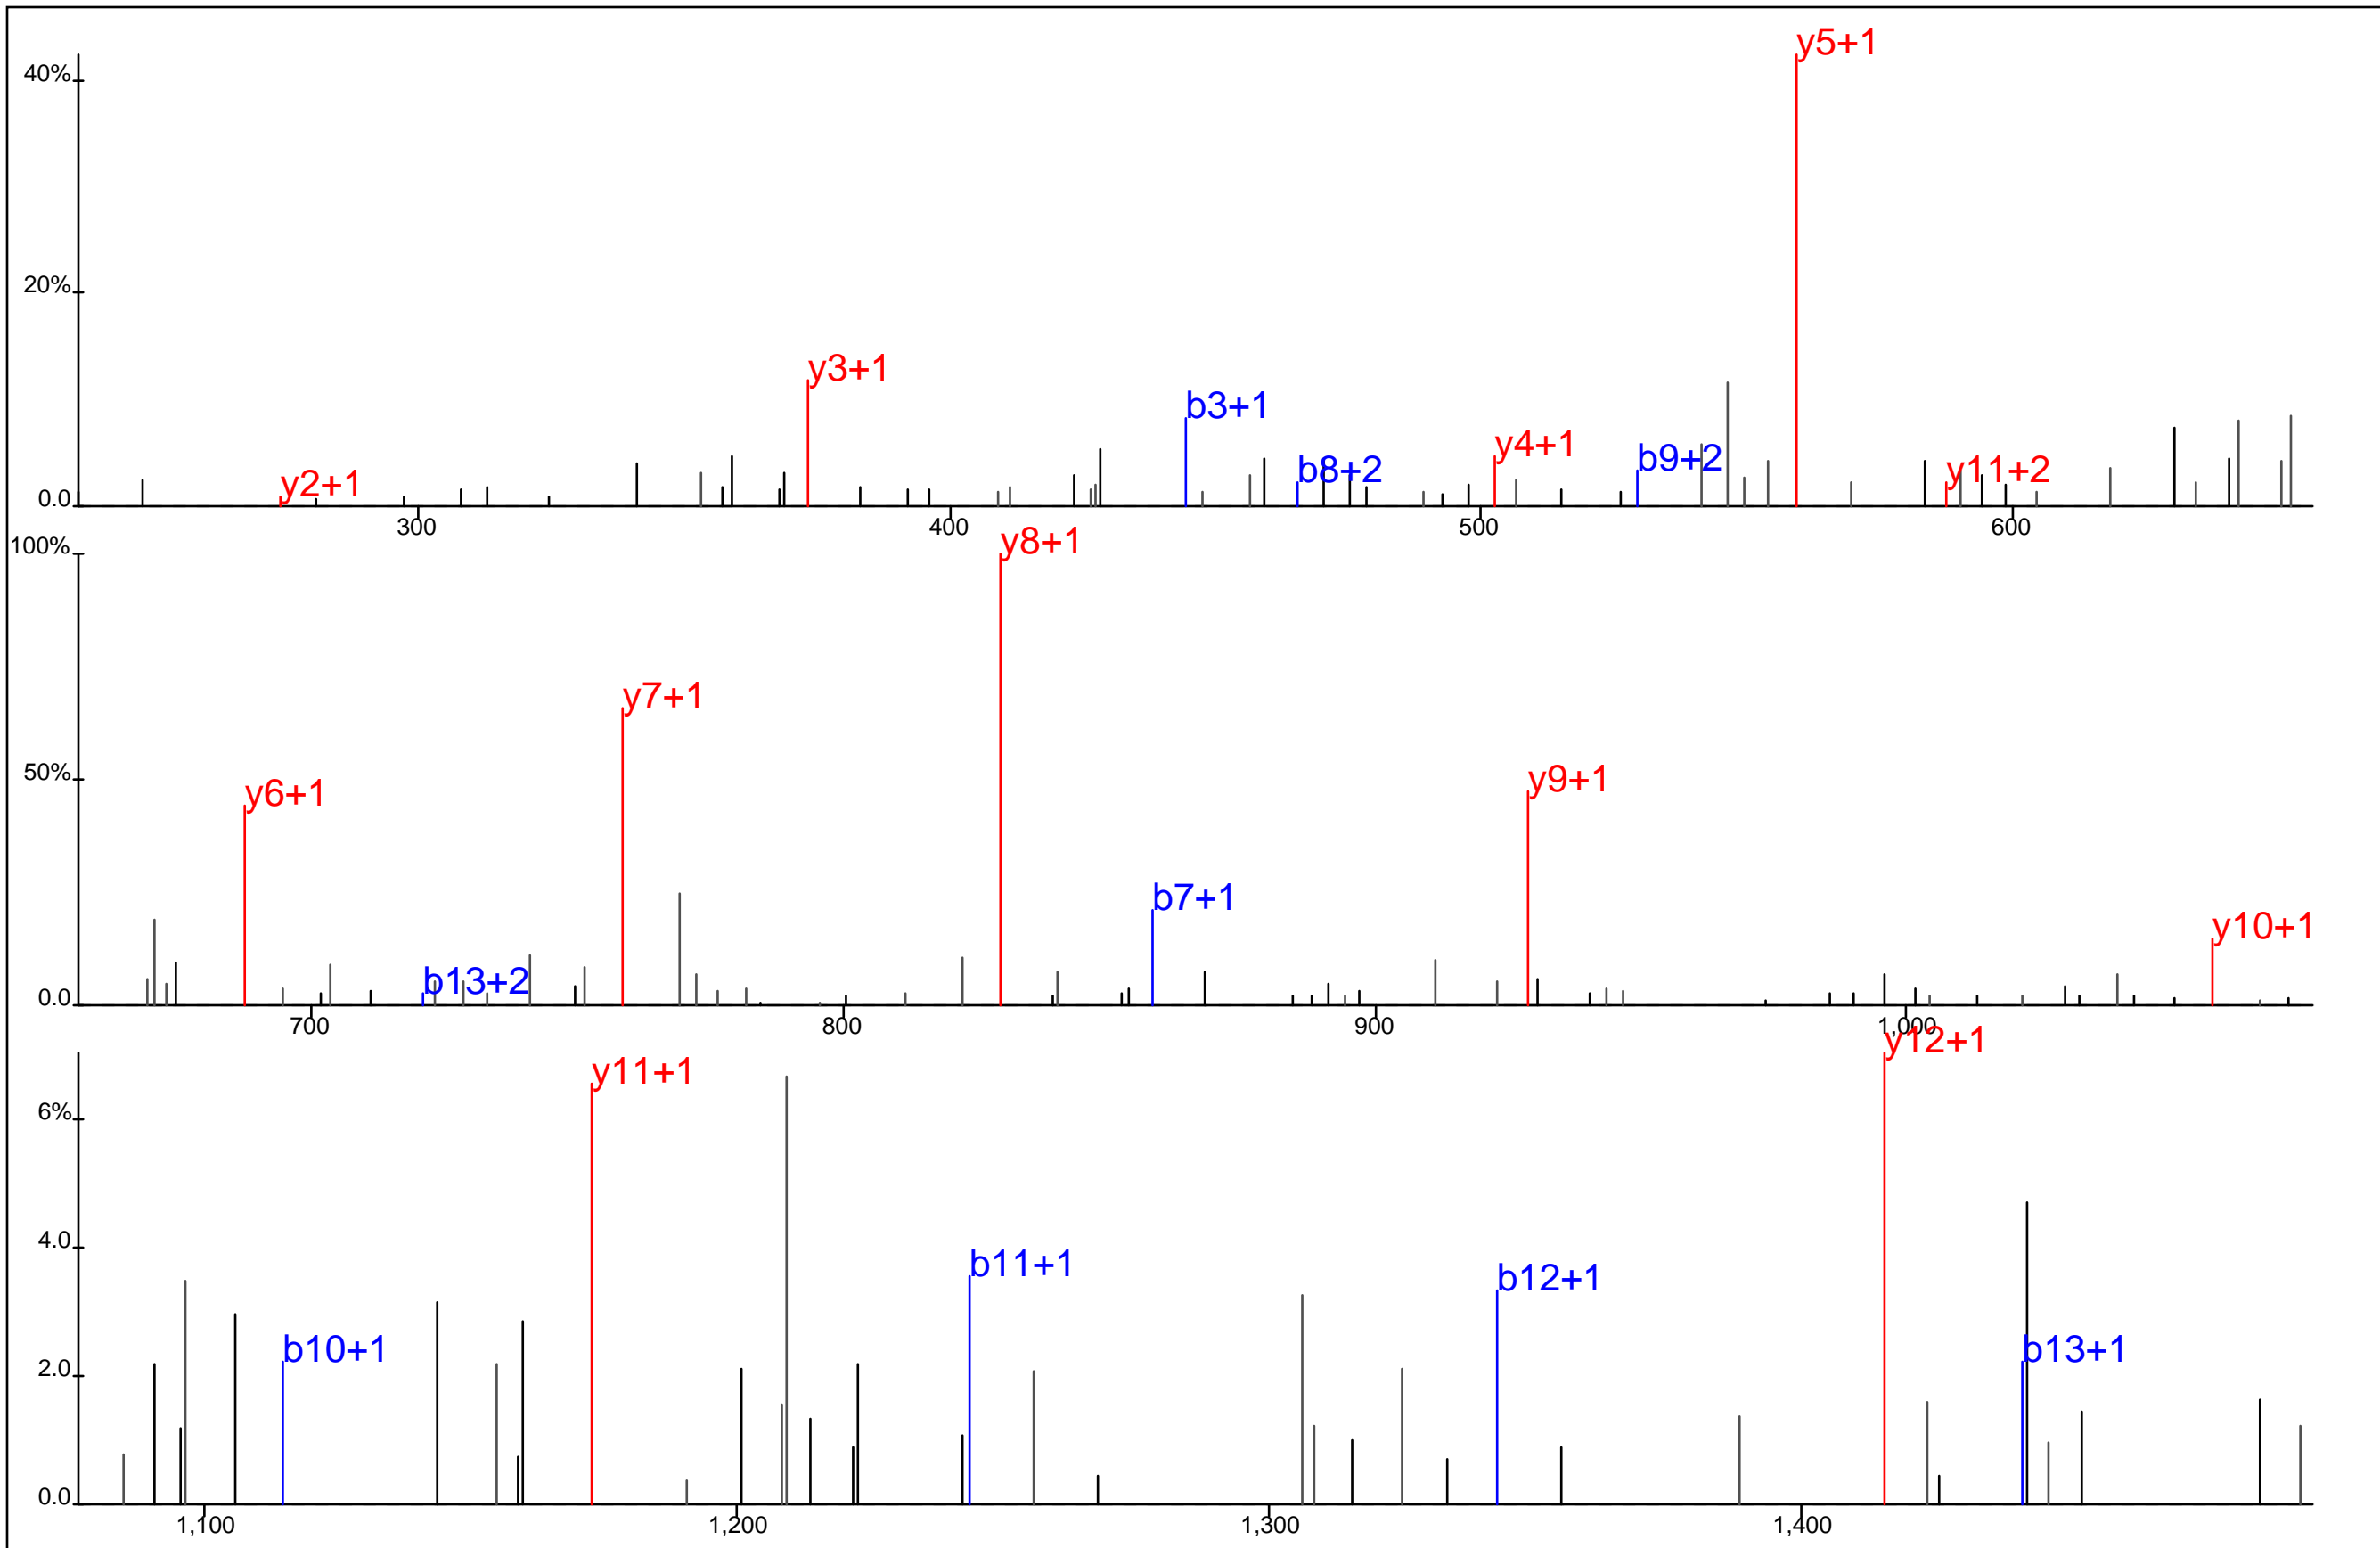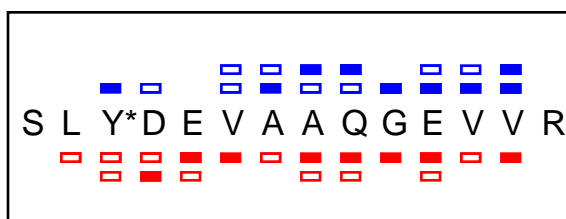

Protein Name: Glutamyl-prolyl-tRNA synthetase  
 gi Accession: 0  
 Precursor Mass: 808.3726+2  
 Delta Mass: 0.941 ppm  
 XCorr: 77.66

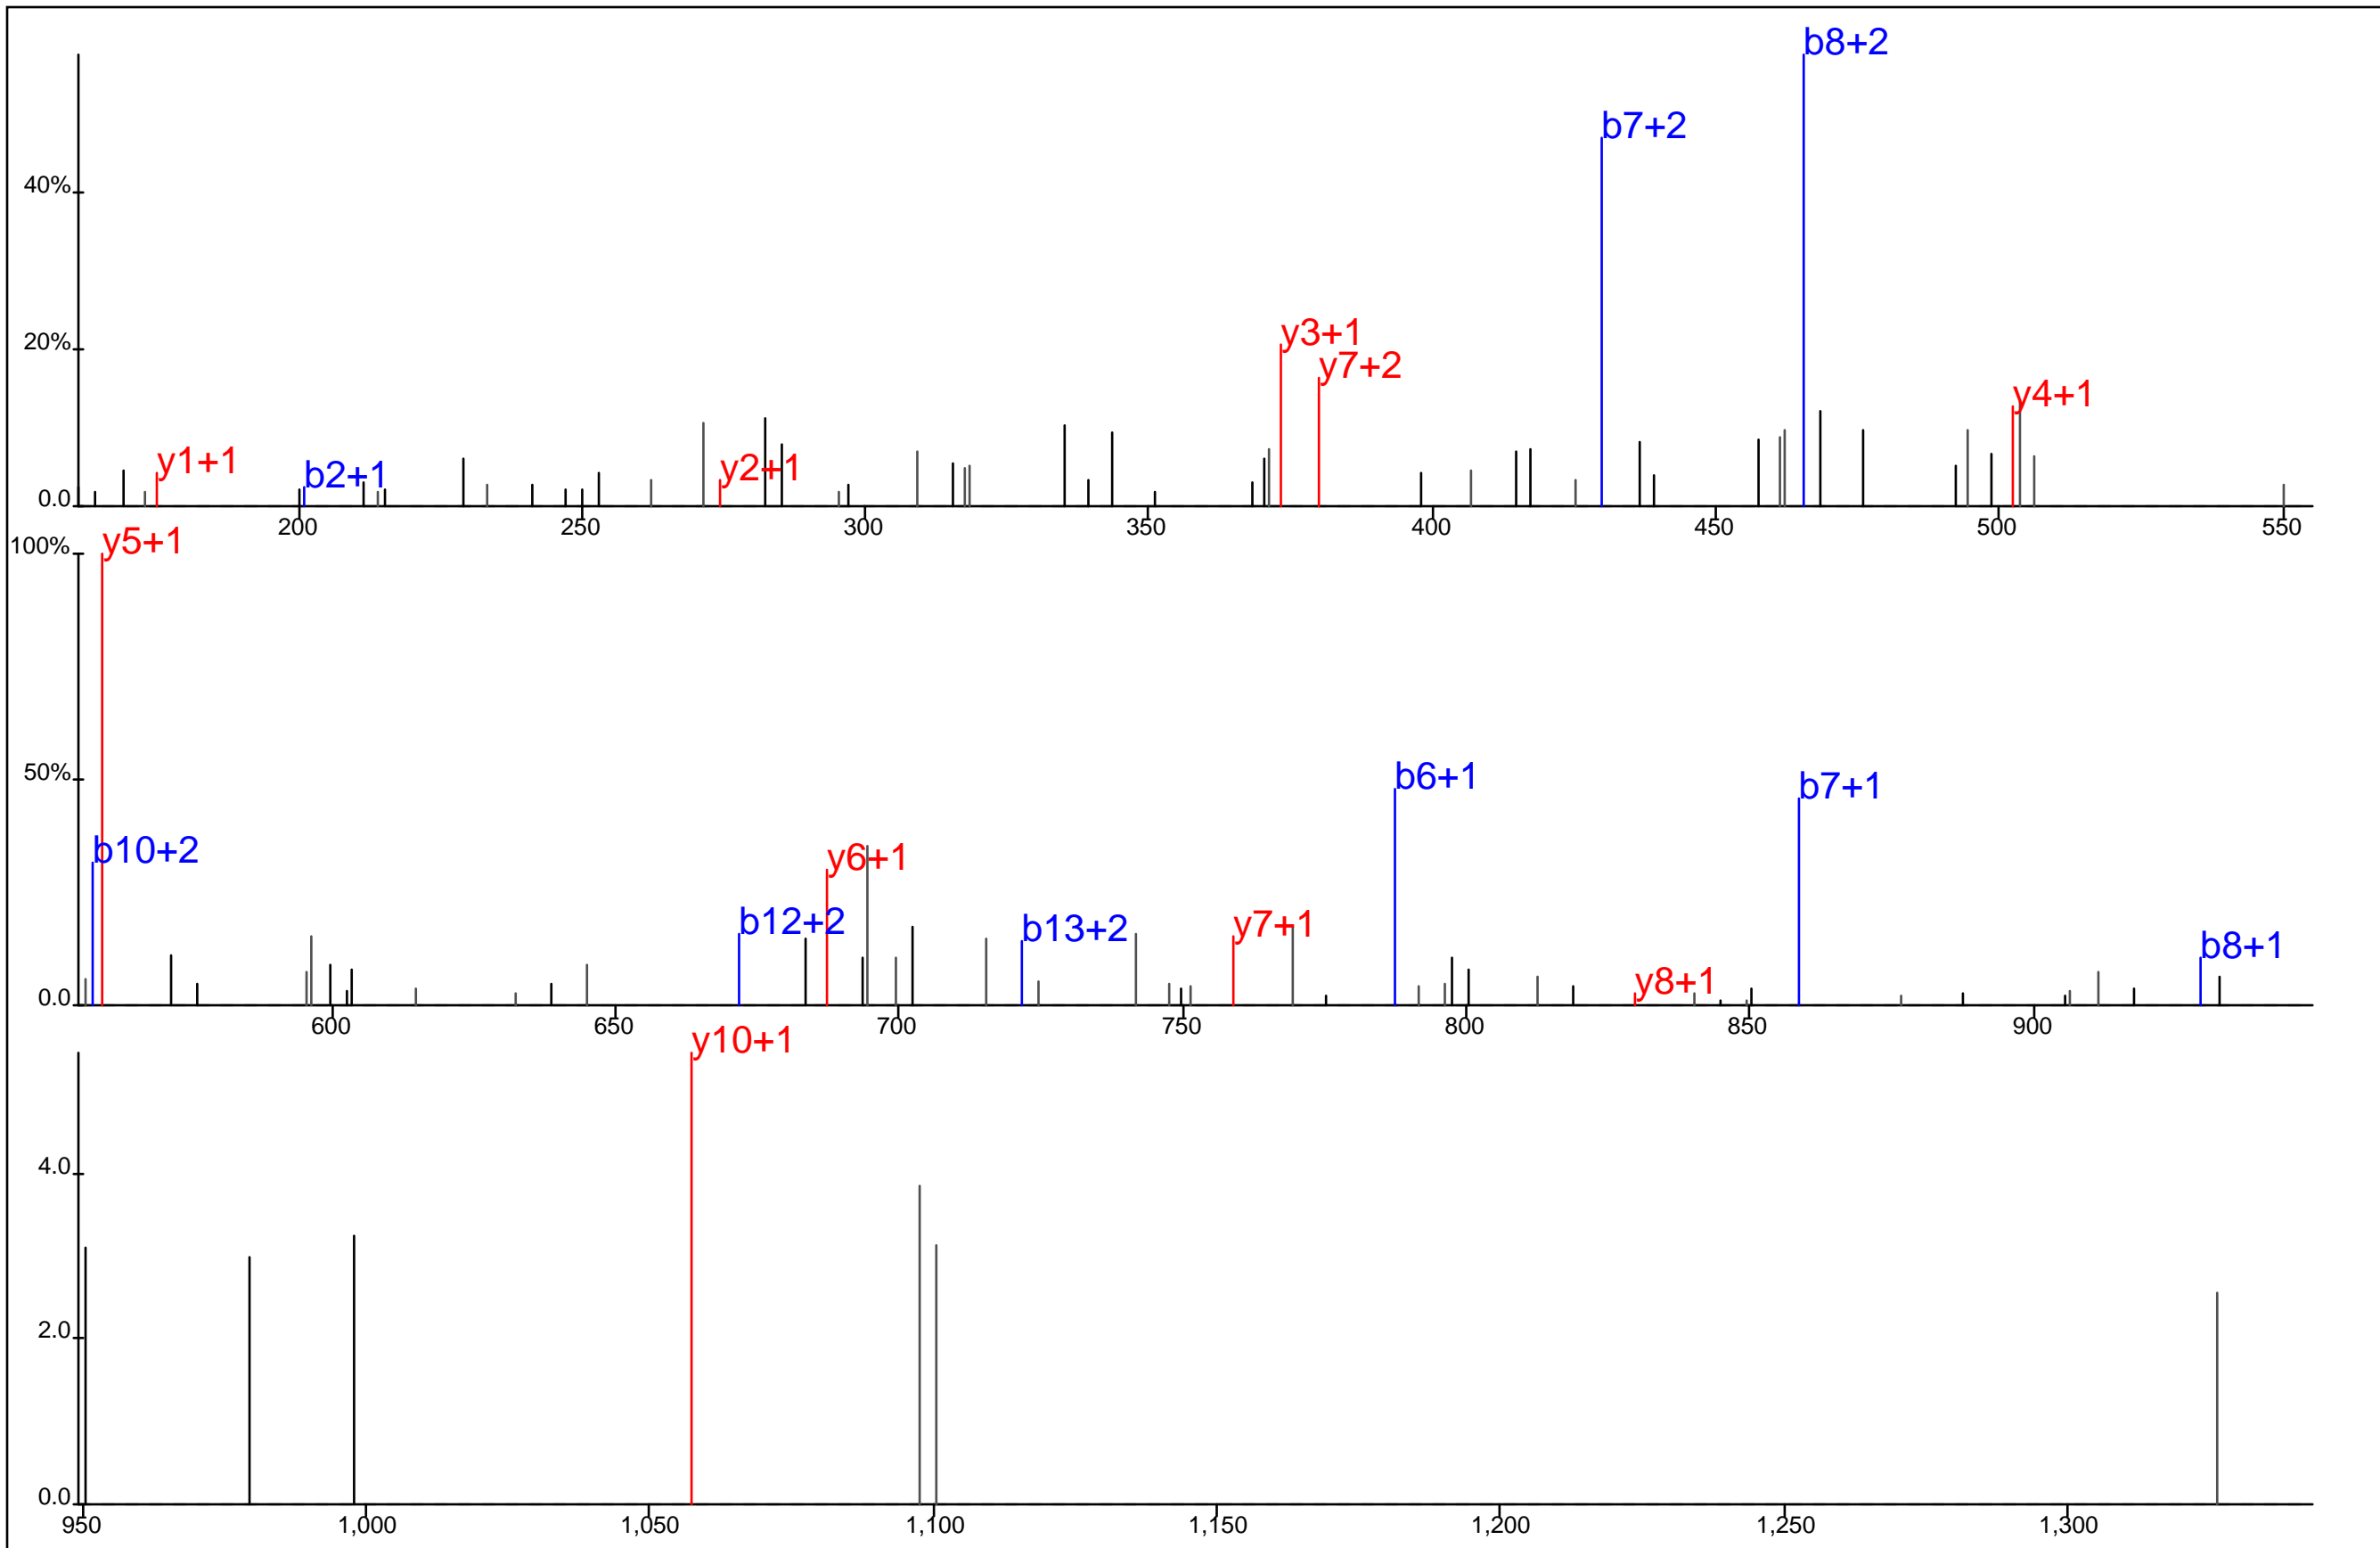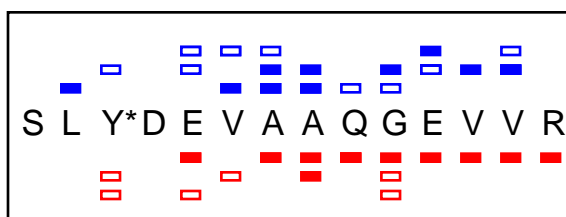

Protein Name: Glutamyl-prolyl-tRNA synthetase  
 gi Accession: 0  
 Precursor Mass: 539.2504+3  
 Delta Mass: 0.252 ppm  
 XCorr: 25.83

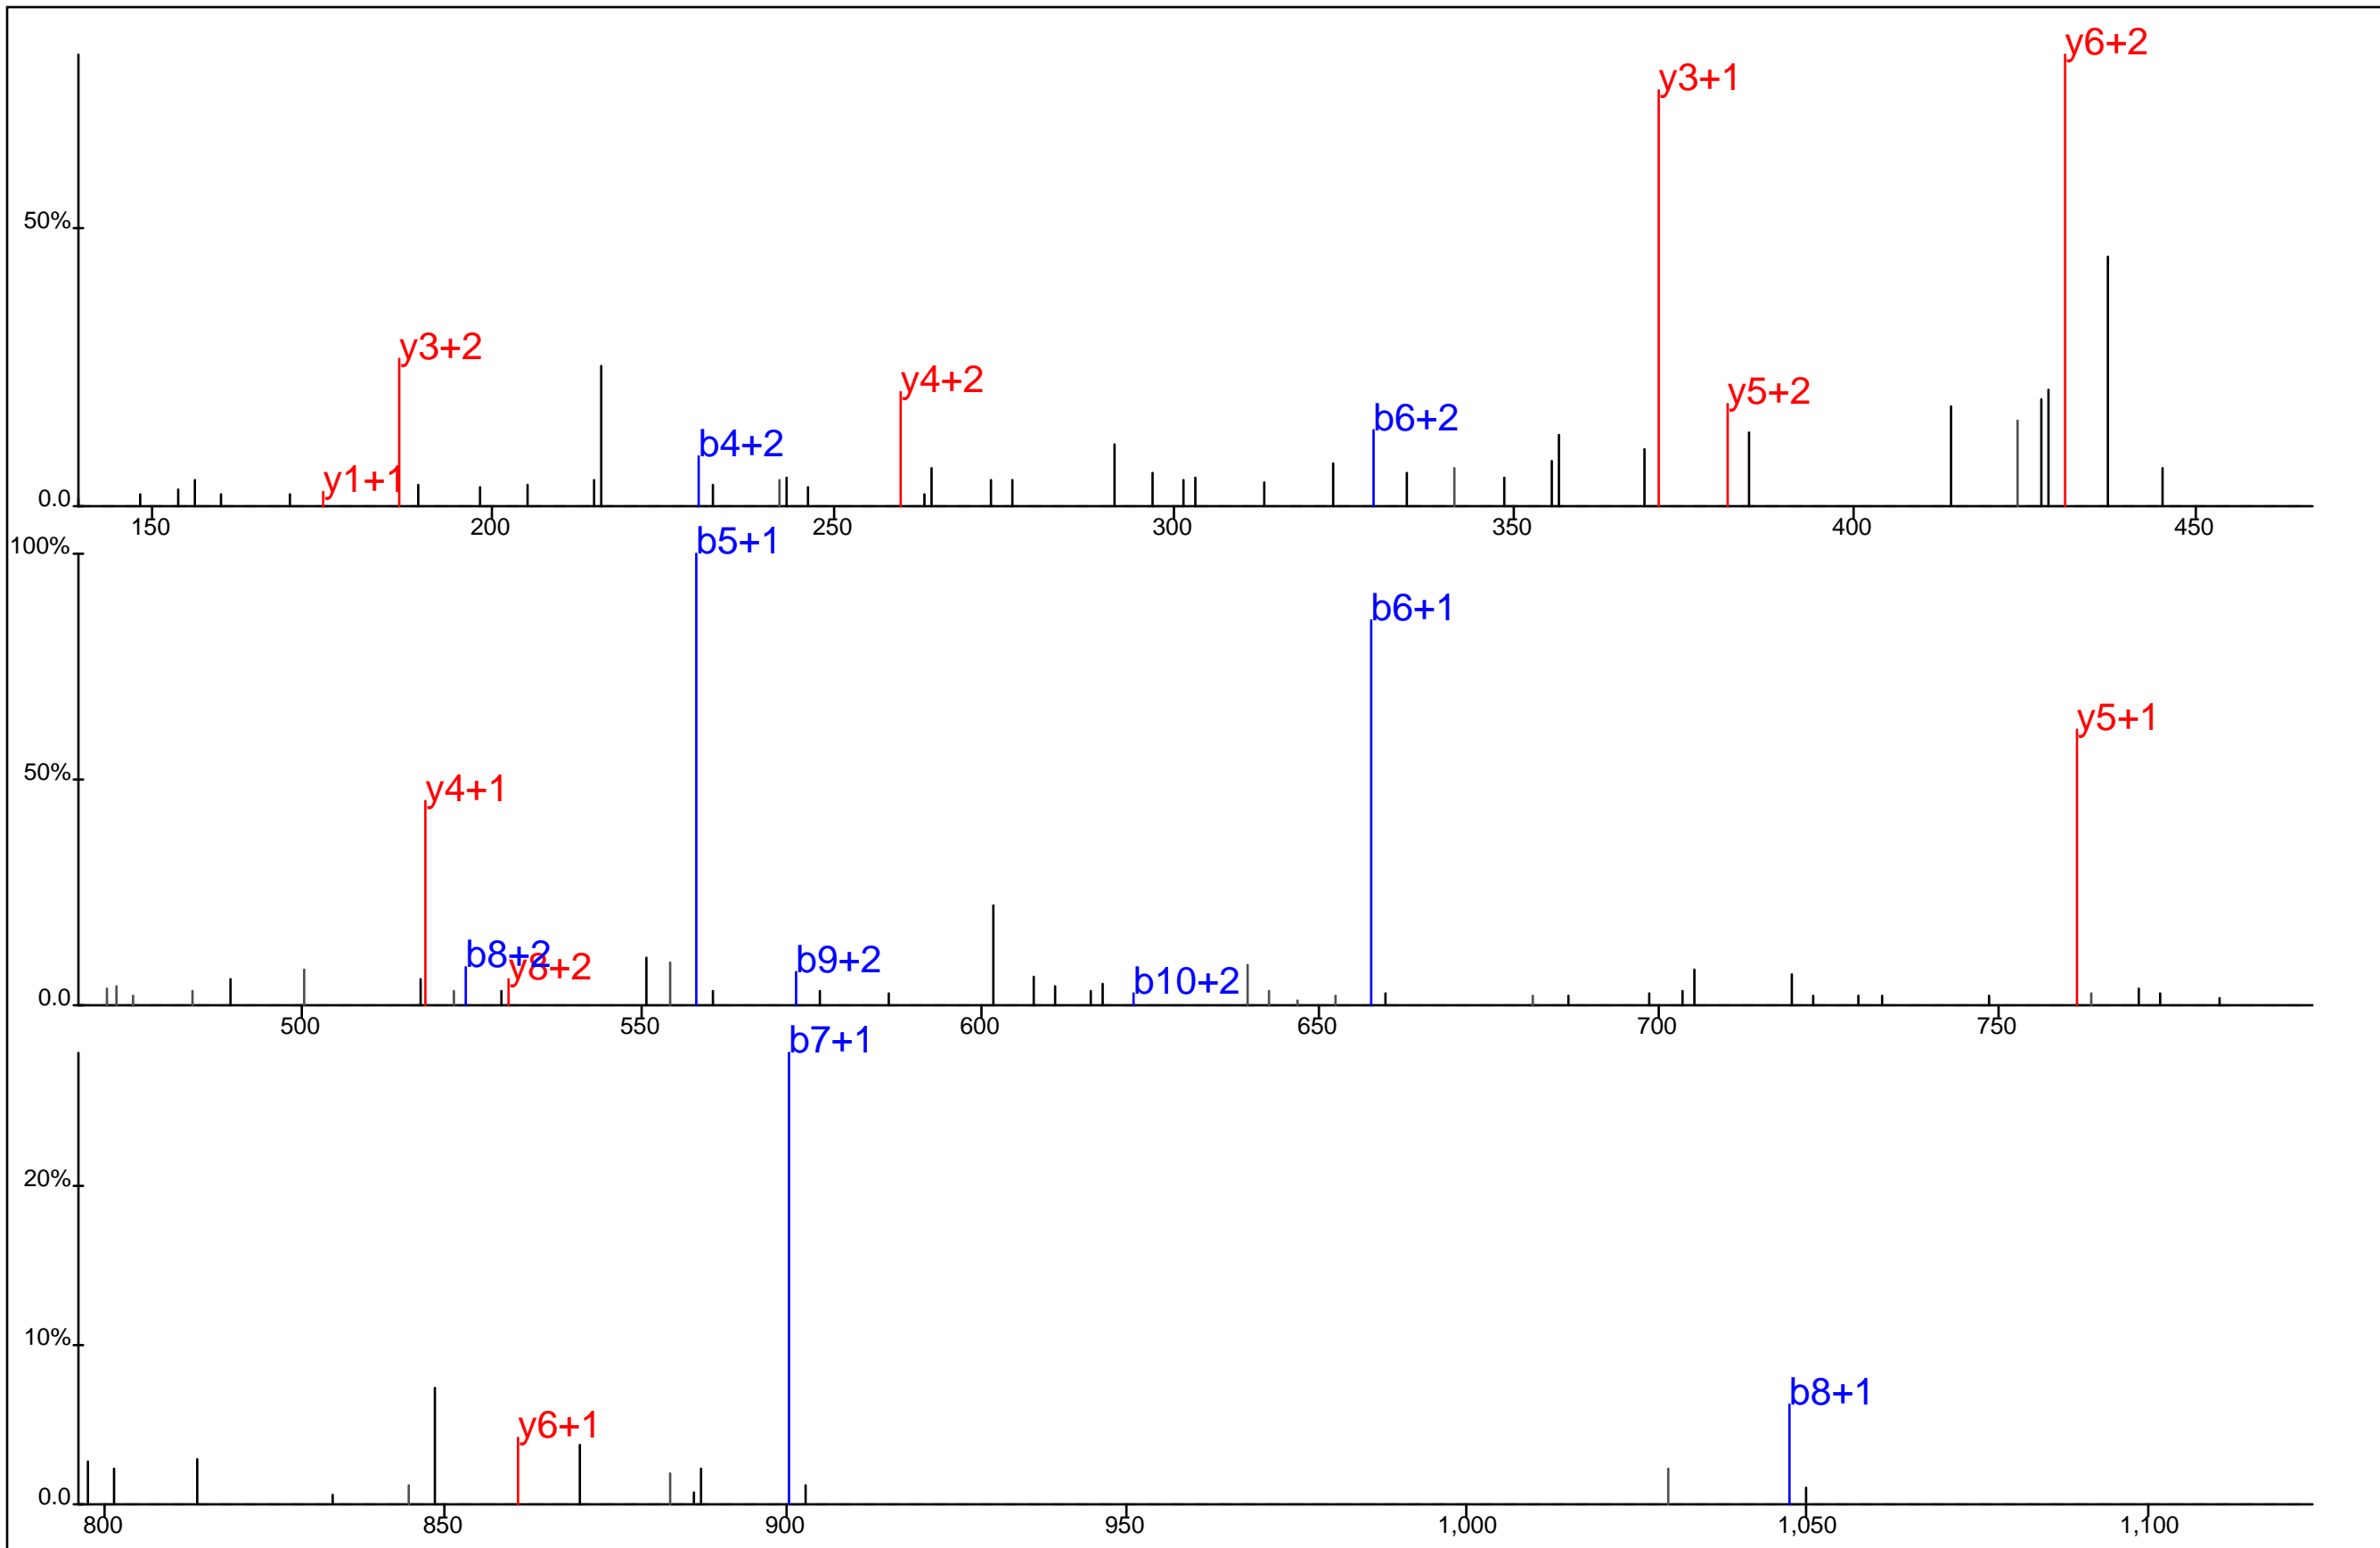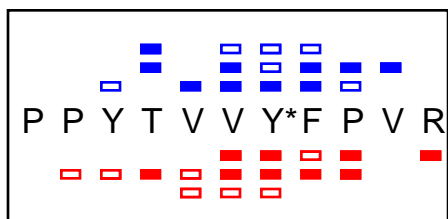

Protein Name: Glutathione S transferase 3  
 gi Accession: 0  
 Precursor Mass: 473.2356+3  
 Delta Mass: 0.532 ppm  
 XCorr: 35.13

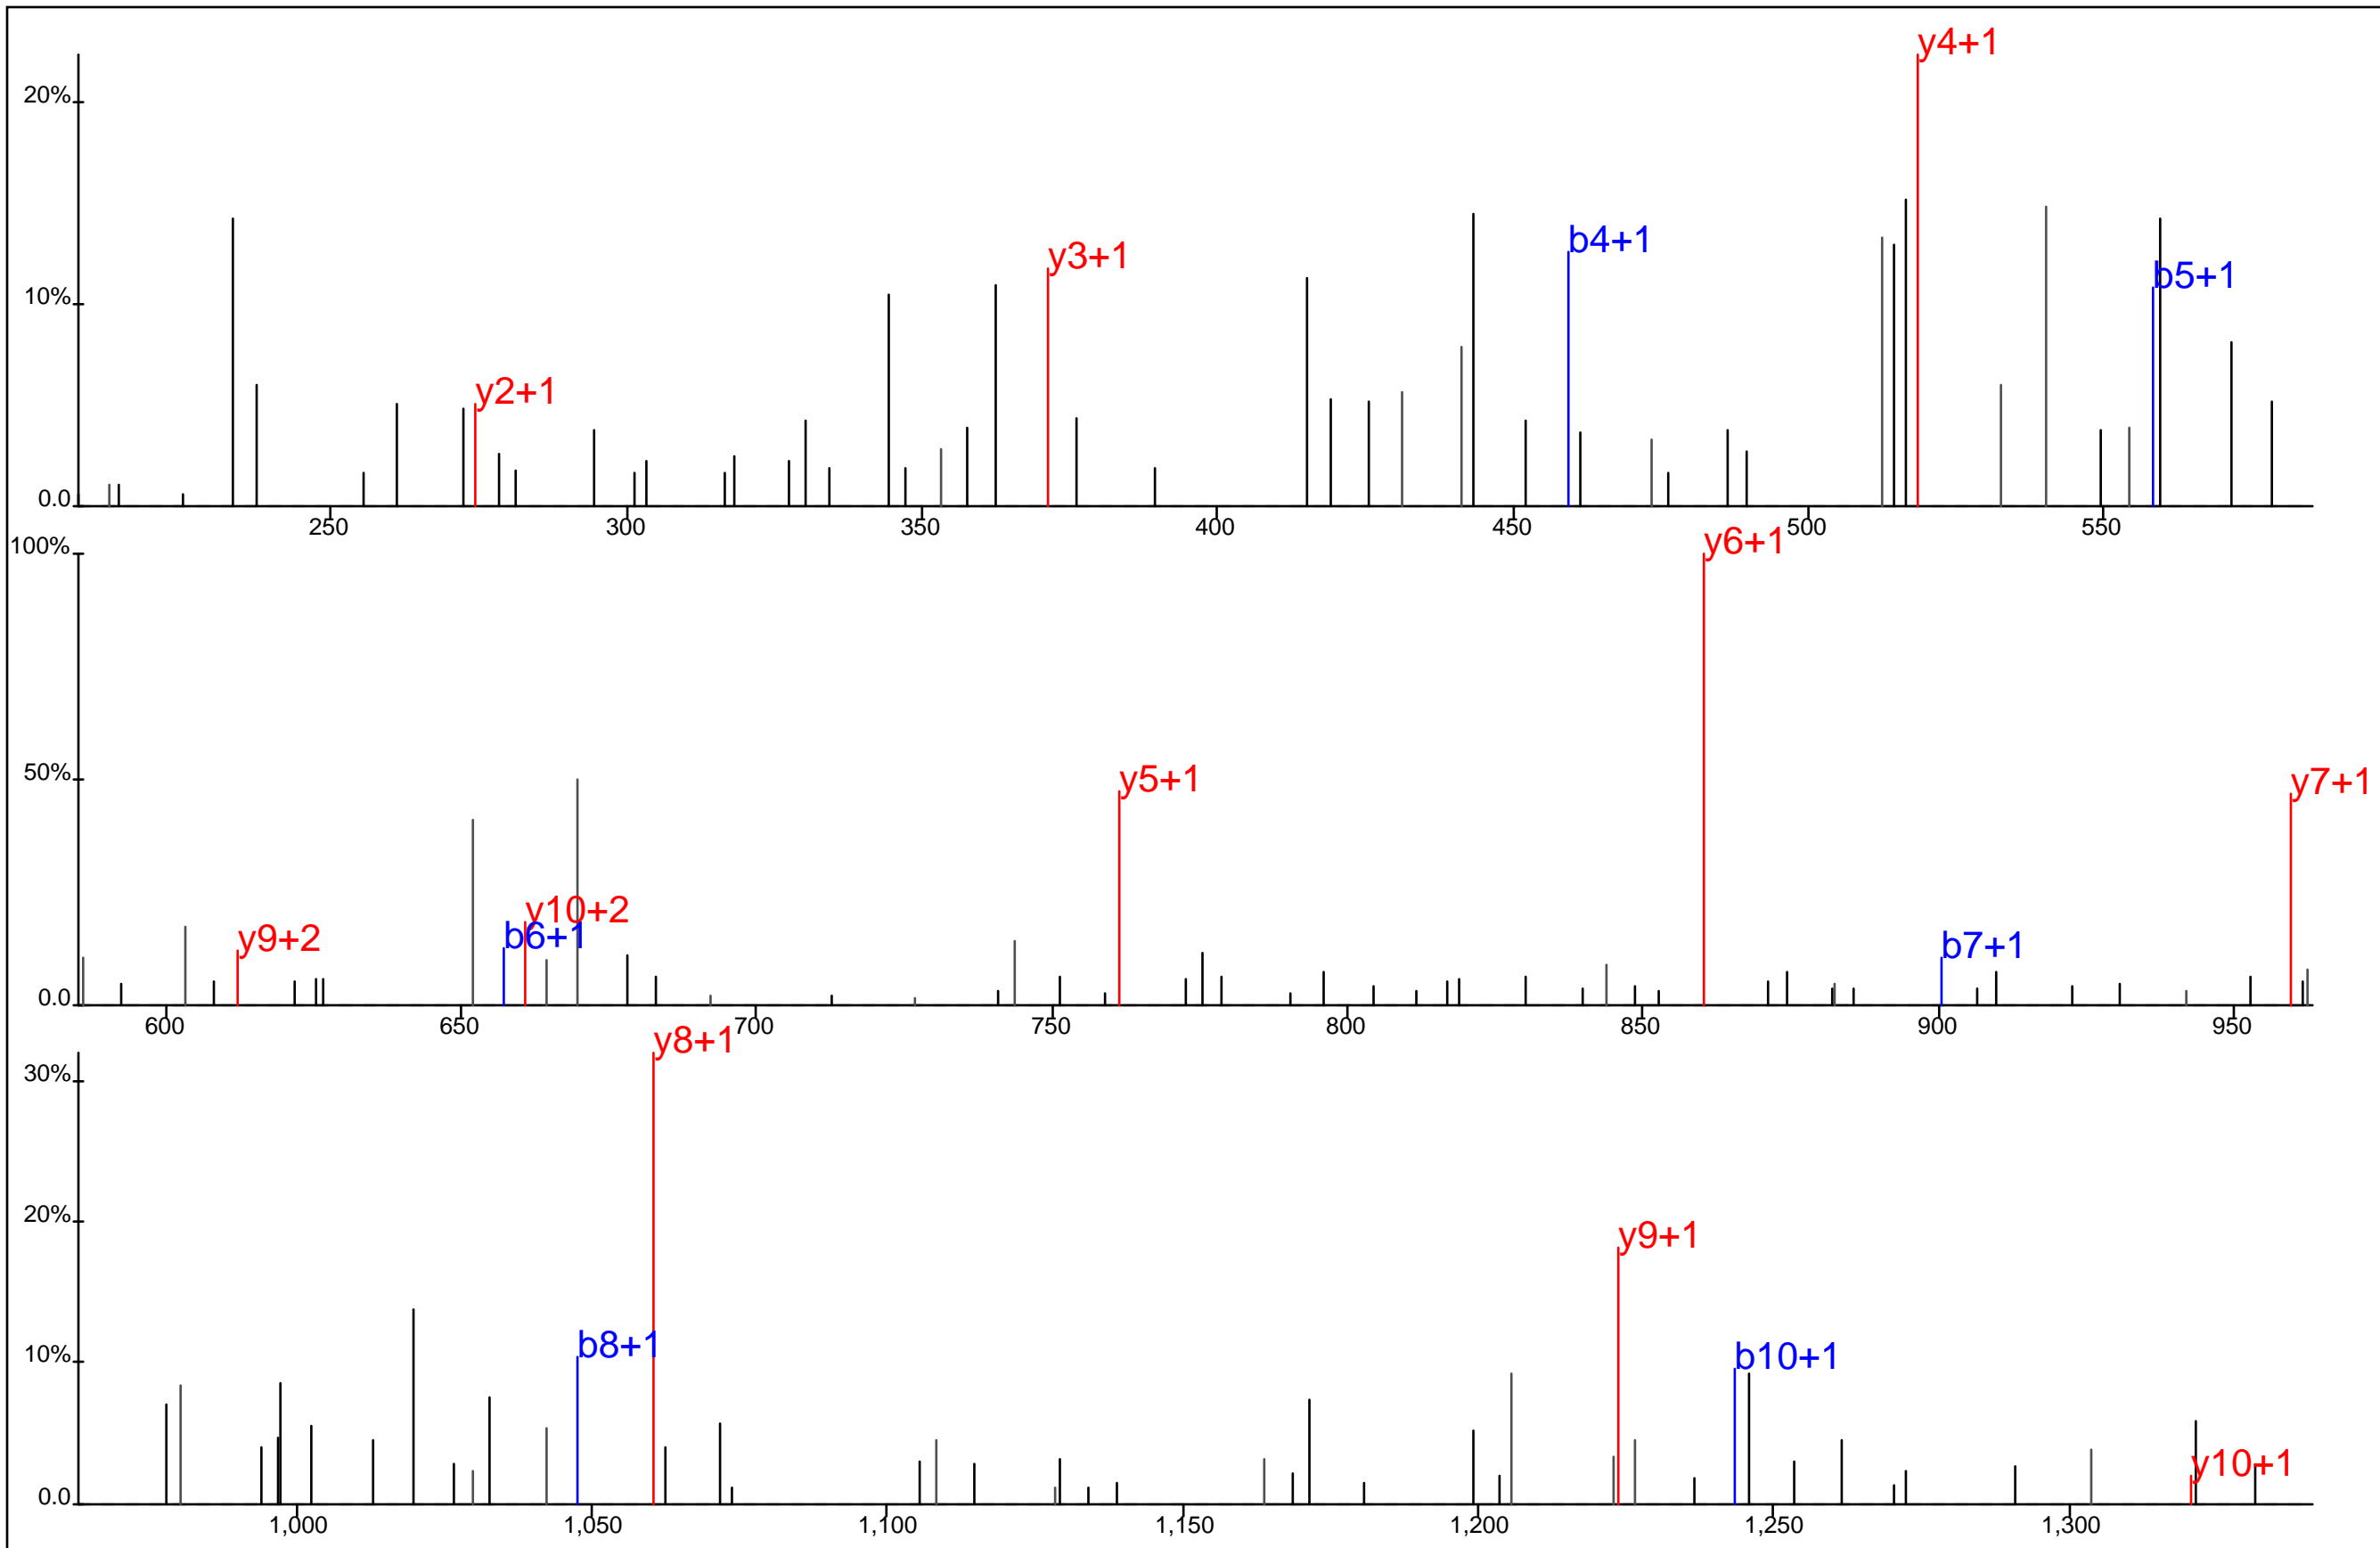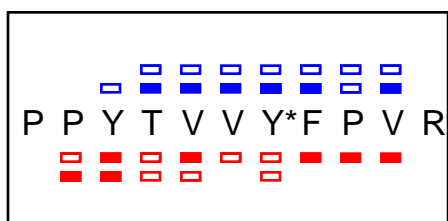

Protein Name: Glutathione S transferase 3  
 gi Accession: 0  
 Precursor Mass: 709.3515+2  
 Delta Mass: 2.930 ppm  
 XCorr: 51.48



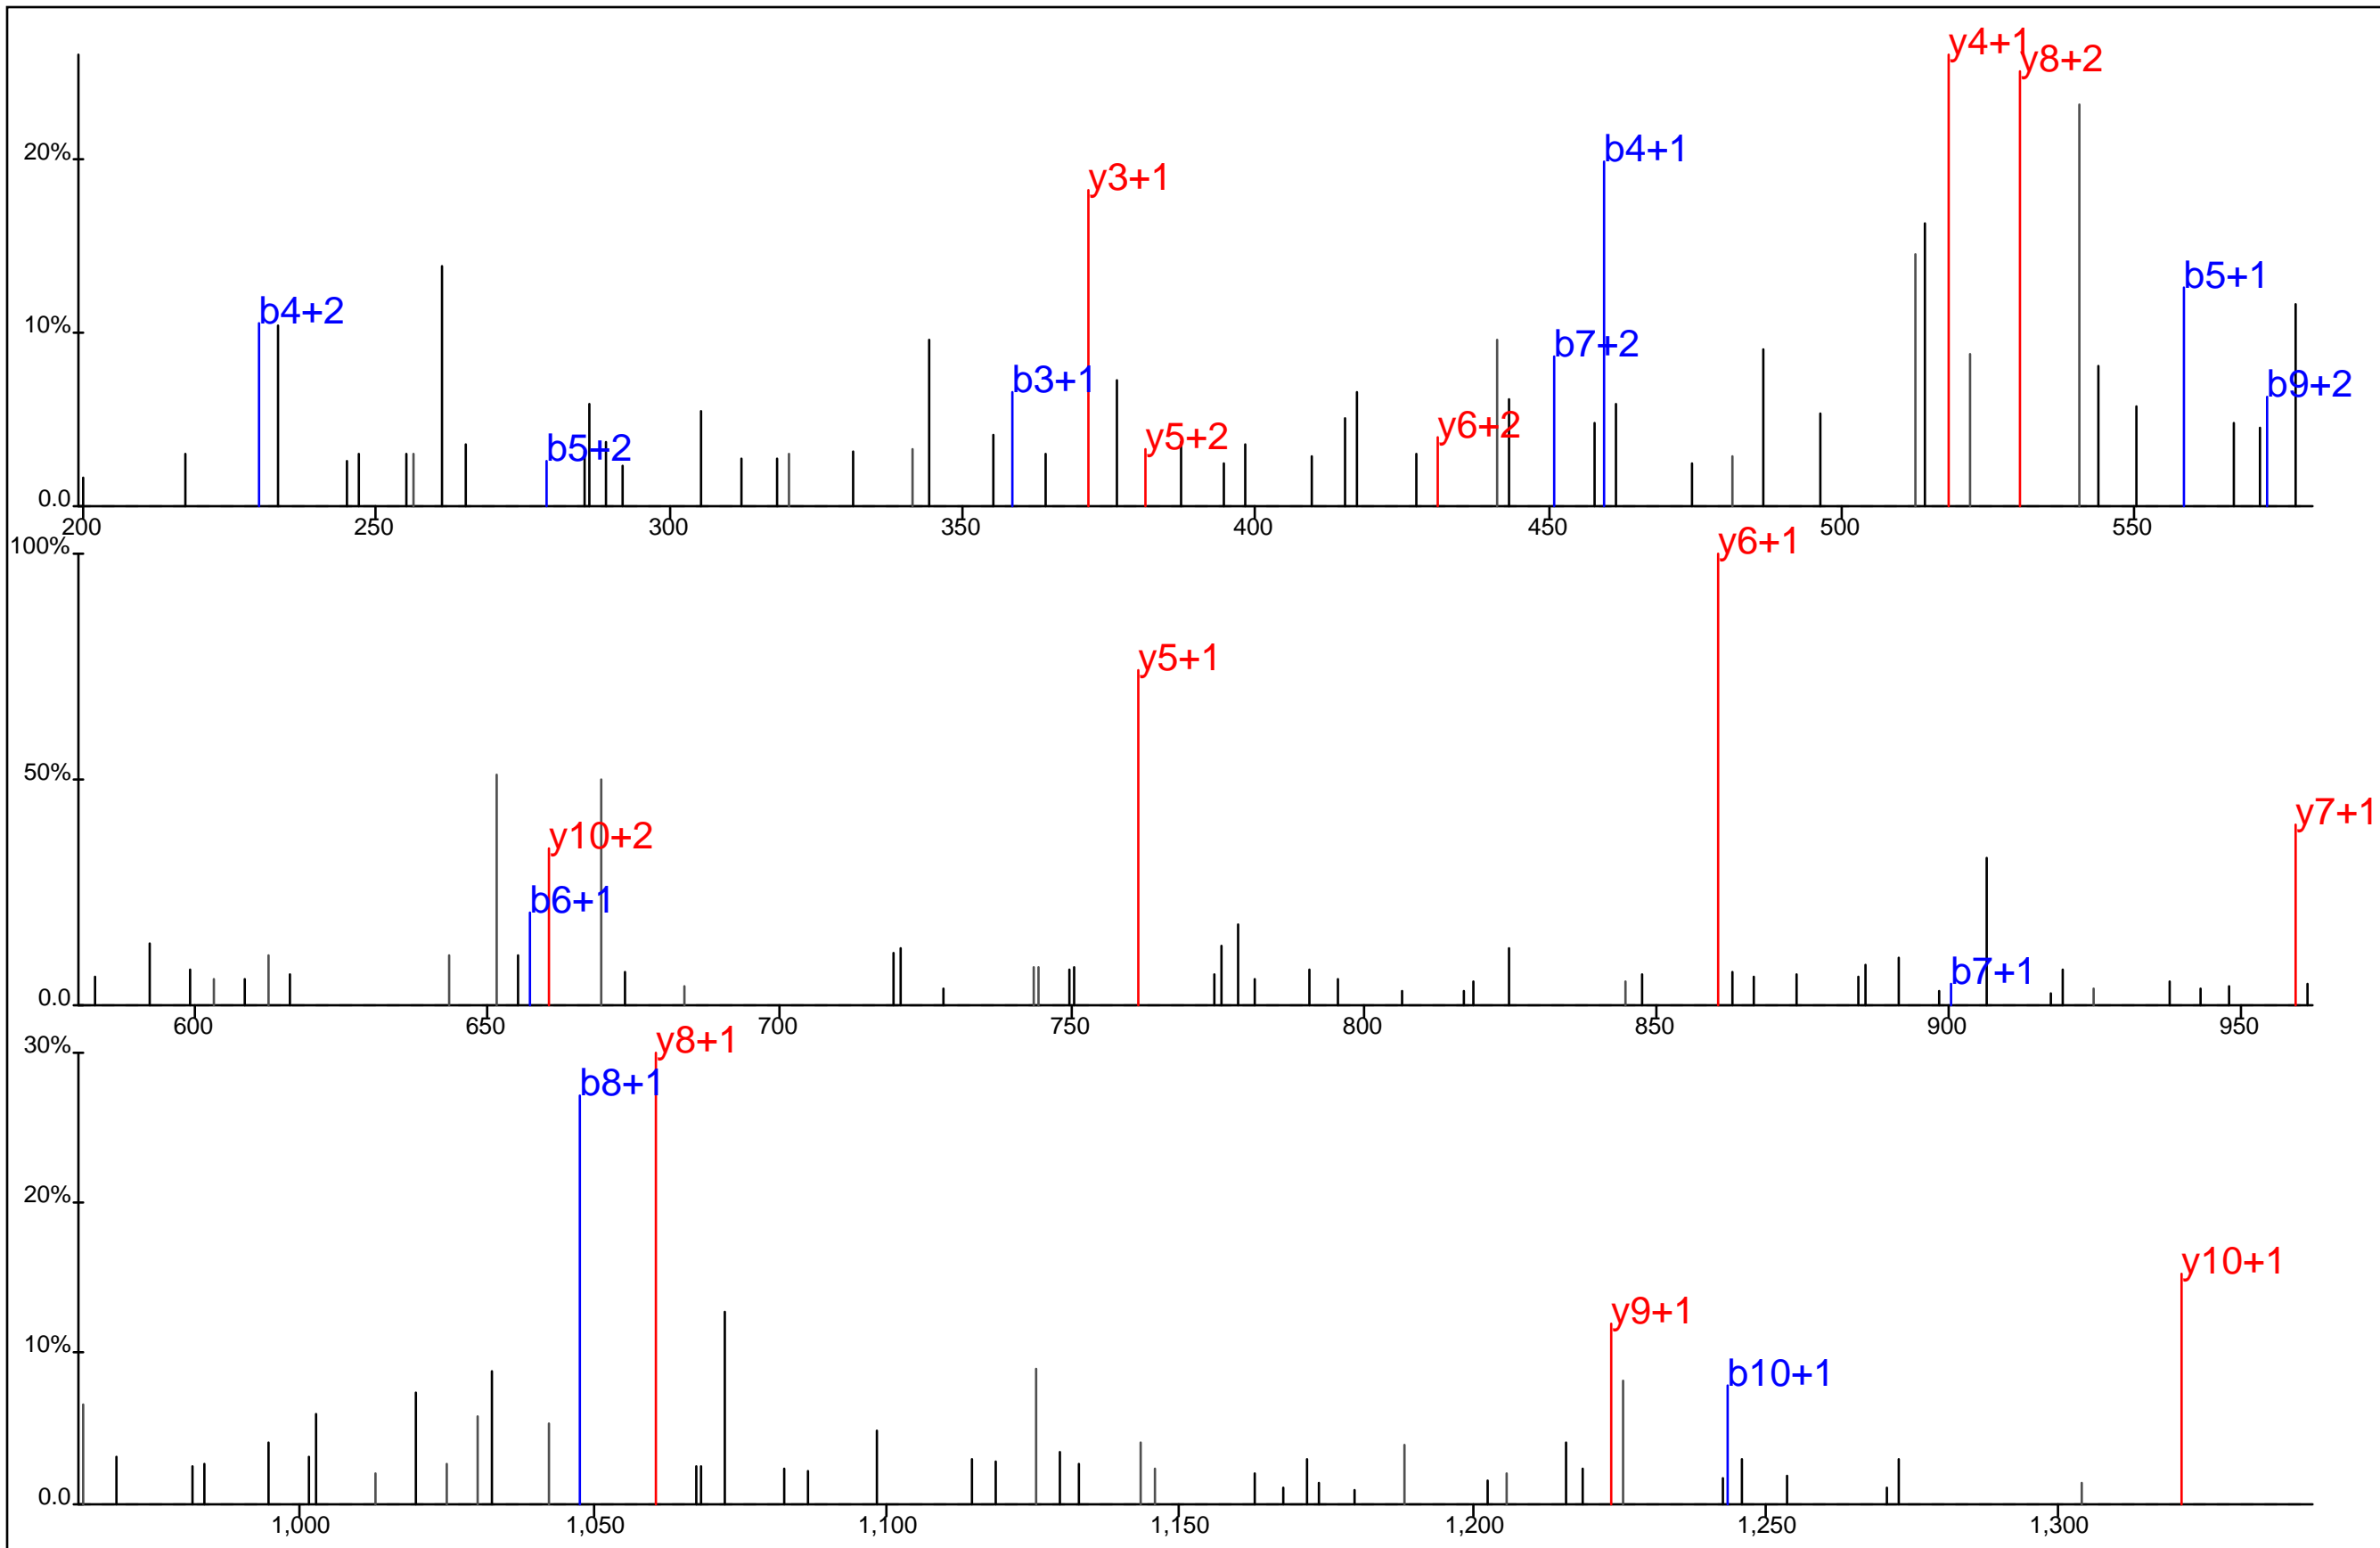

■ ■ ■ ■ ■ ■ ■ ■  
 P P Y T V V Y\*F P V R  
■ ■ ■ ■ ■ ■ ■ ■

Protein Name: Glutathione S transferase 3  
 gi Accession: 0  
 Precursor Mass: 709.3524+2  
 Delta Mass: 4.136 ppm  
 XCorr: 67.96

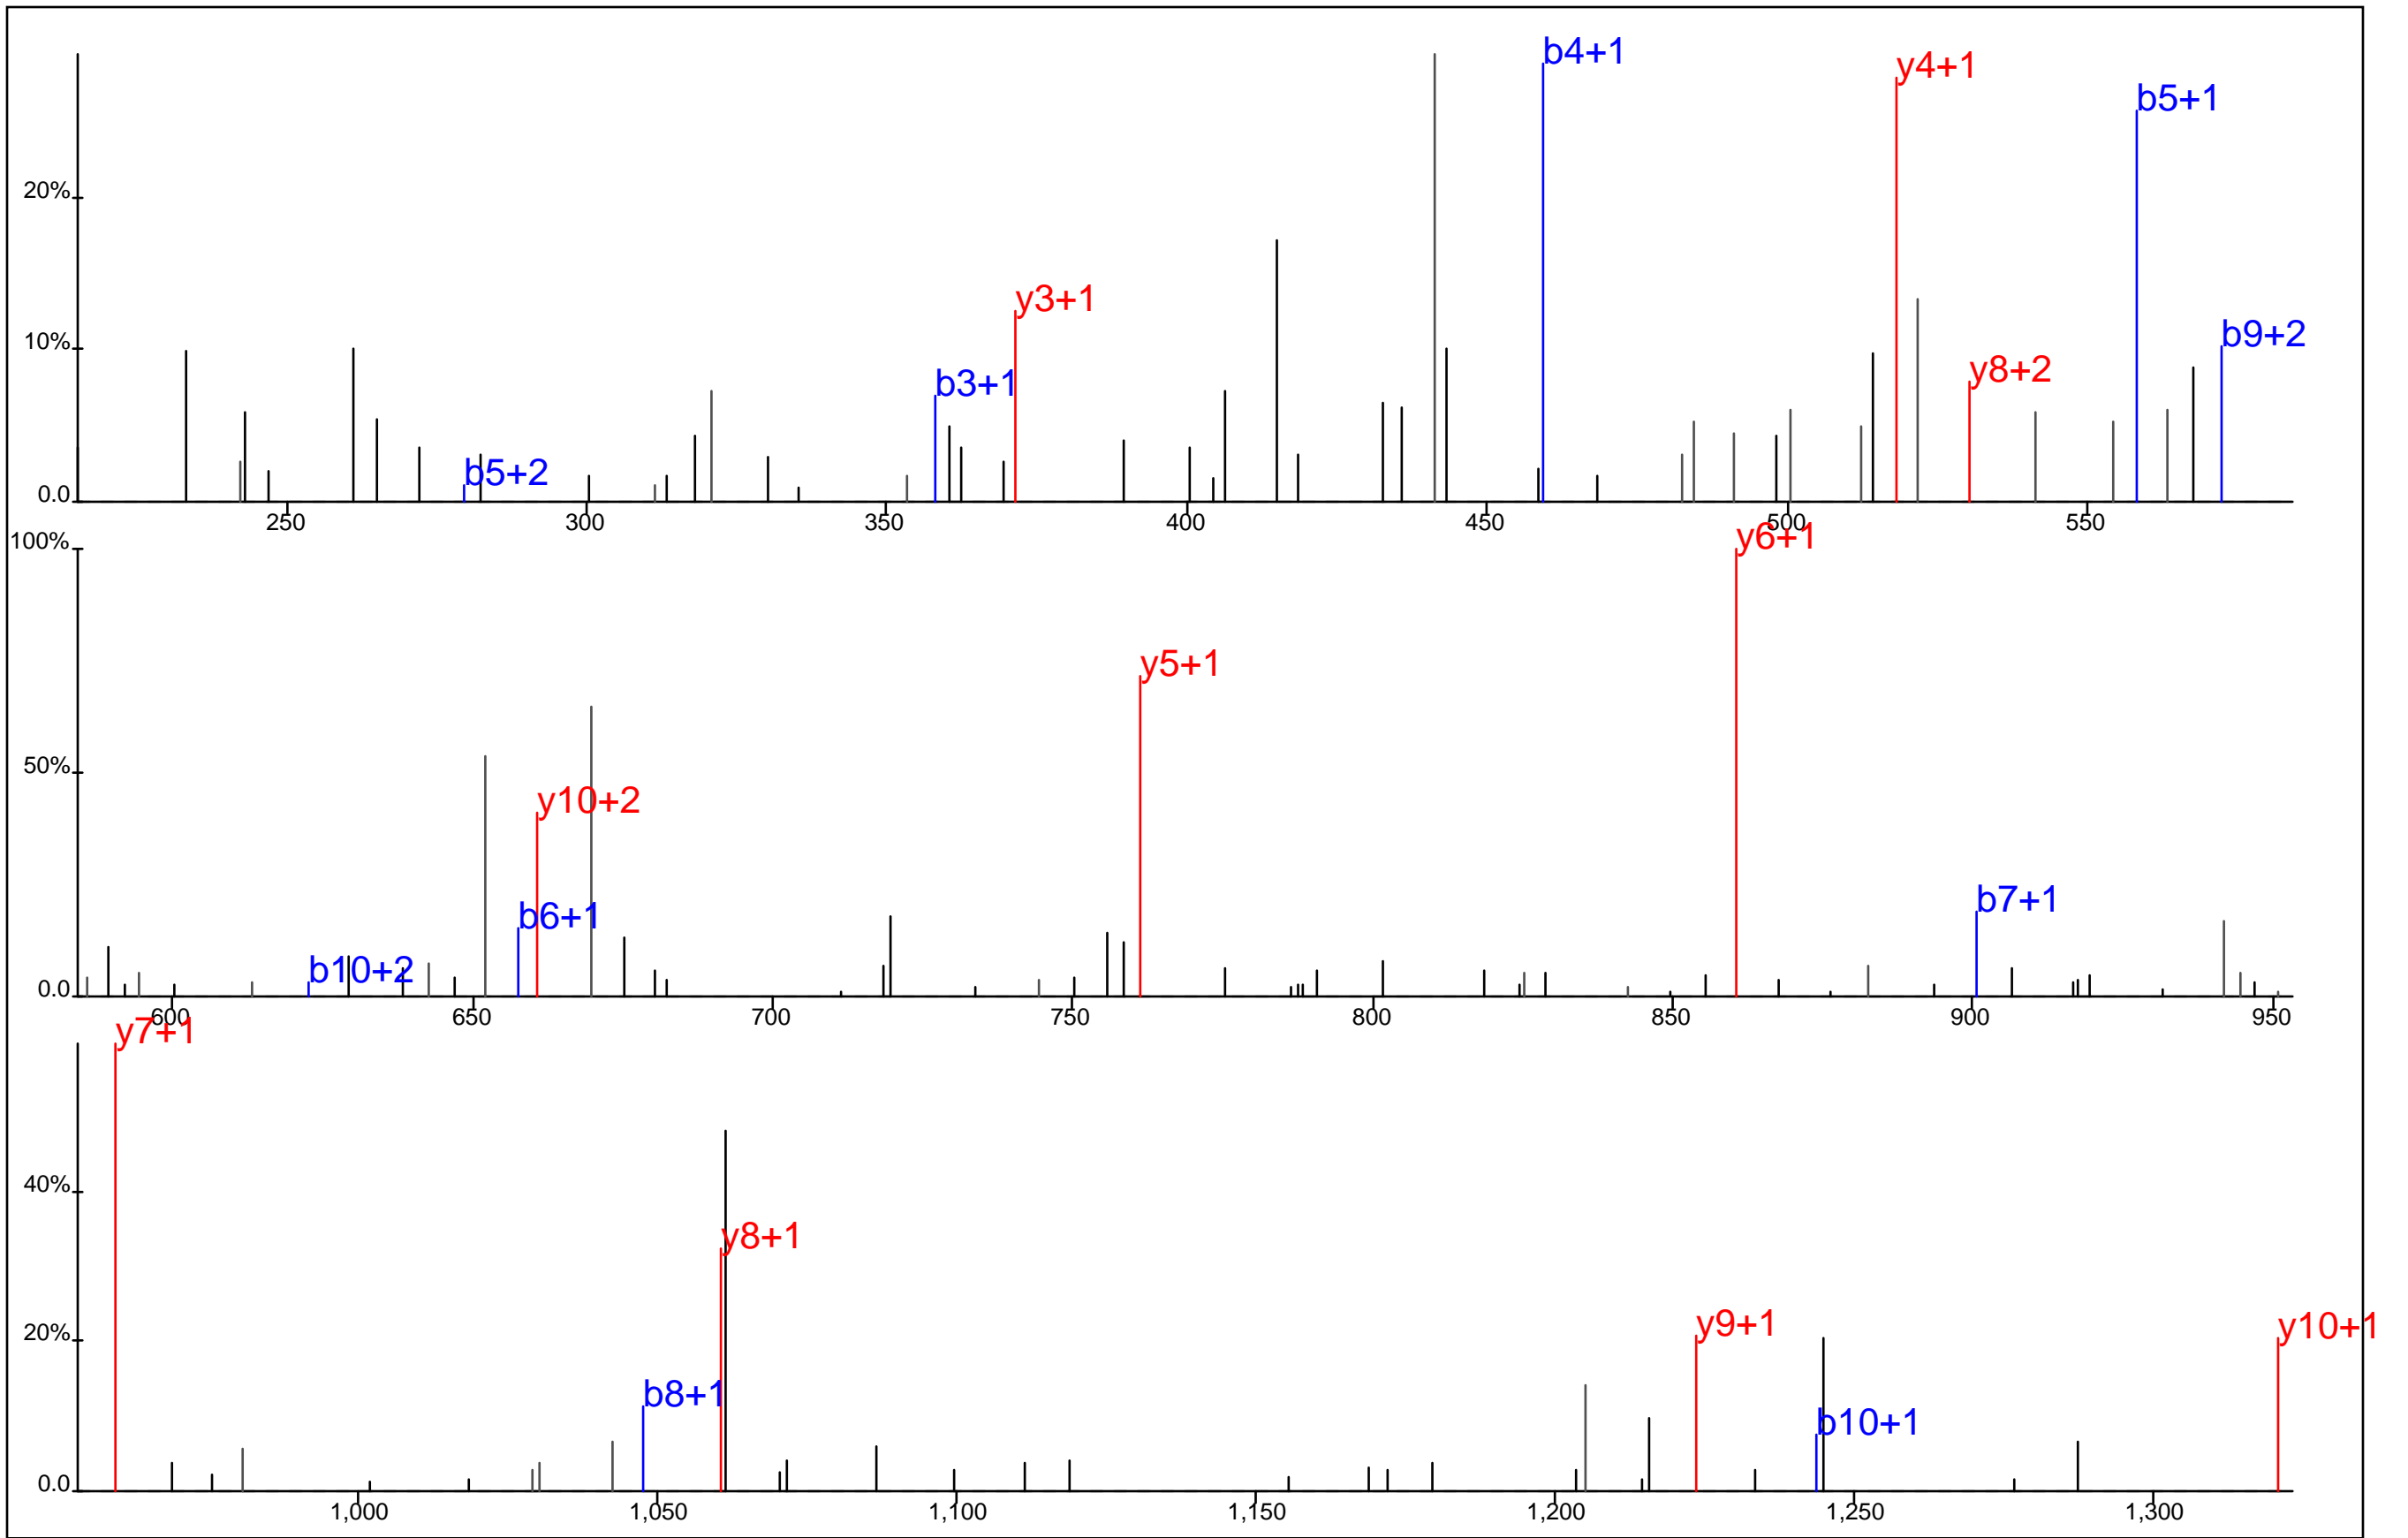

P P Y T V V Y\* F P V R

Protein Name: Glutathione S transferase 3  
 gi Accession: 0  
 Precursor Mass: 709.3531+2  
 Delta Mass: 5.255 ppm  
 XCorr: 53.77

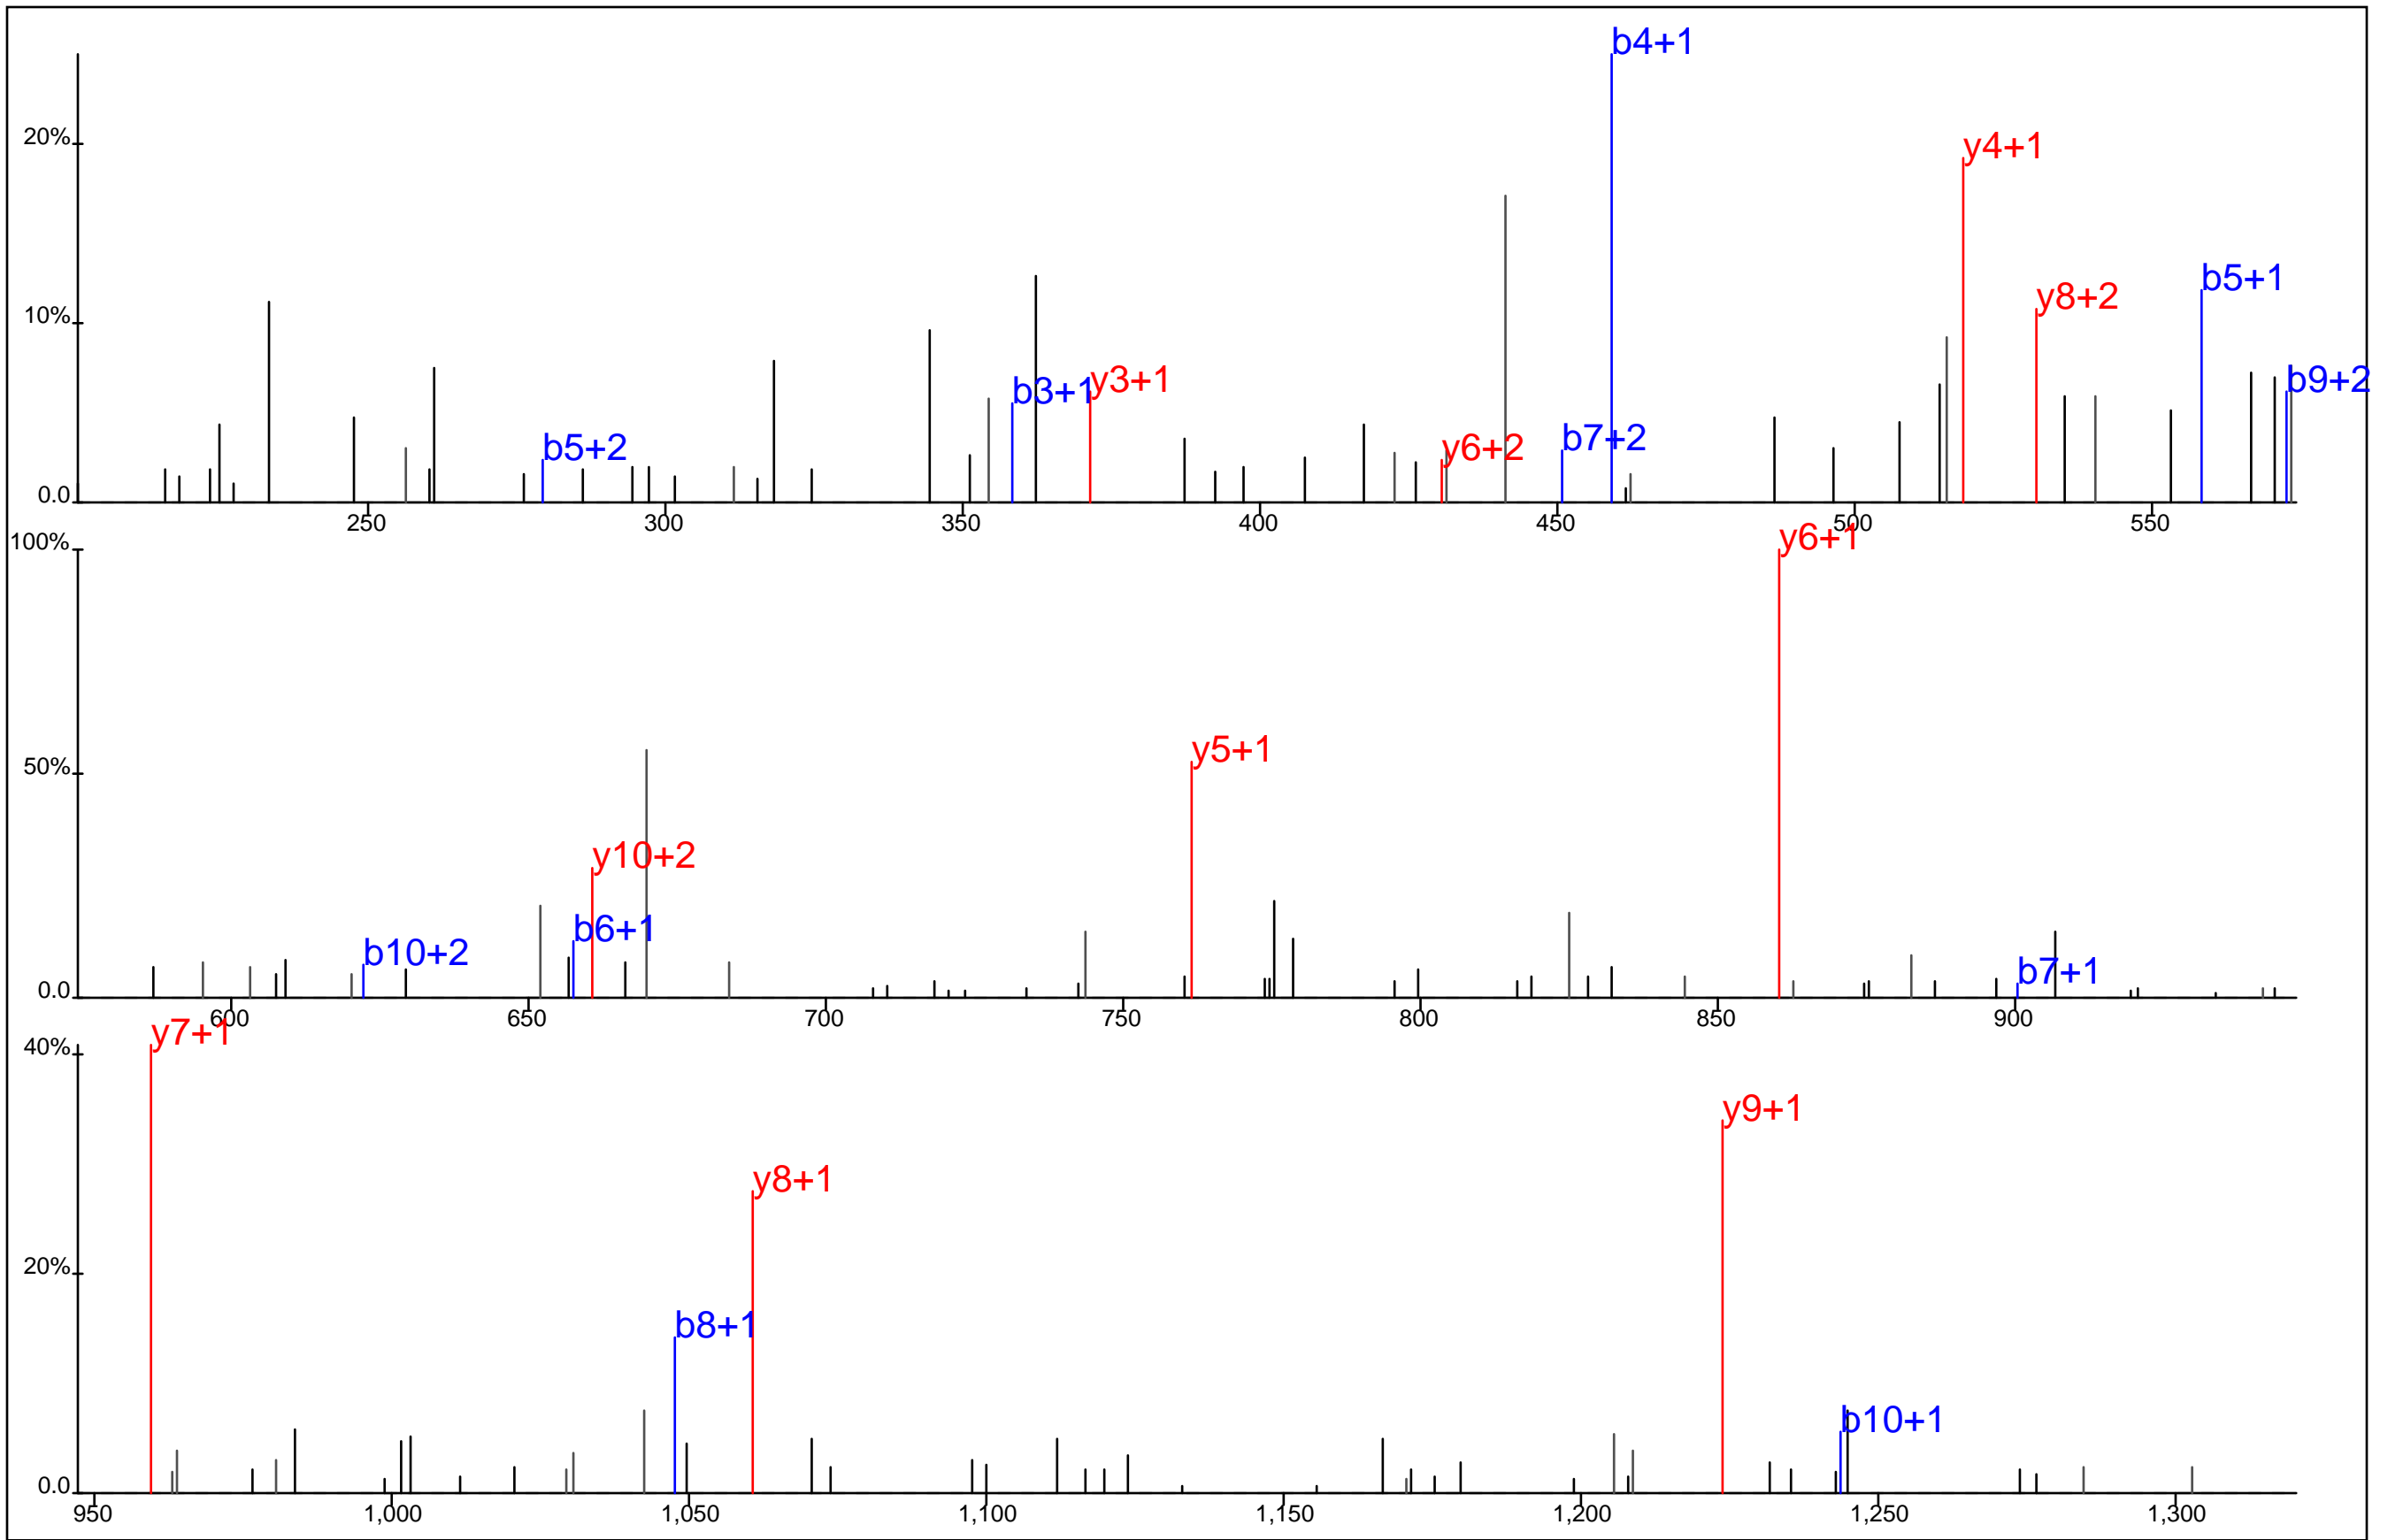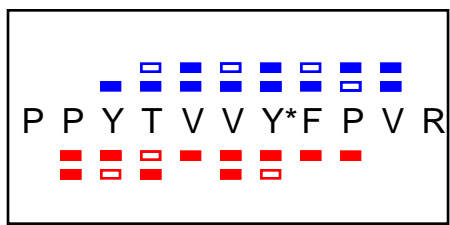

Protein Name: Glutathione S transferase 3  
 gi Accession: 0  
 Precursor Mass: 709.3524+2  
 Delta Mass: 4.222 ppm  
 XCorr: 48.55

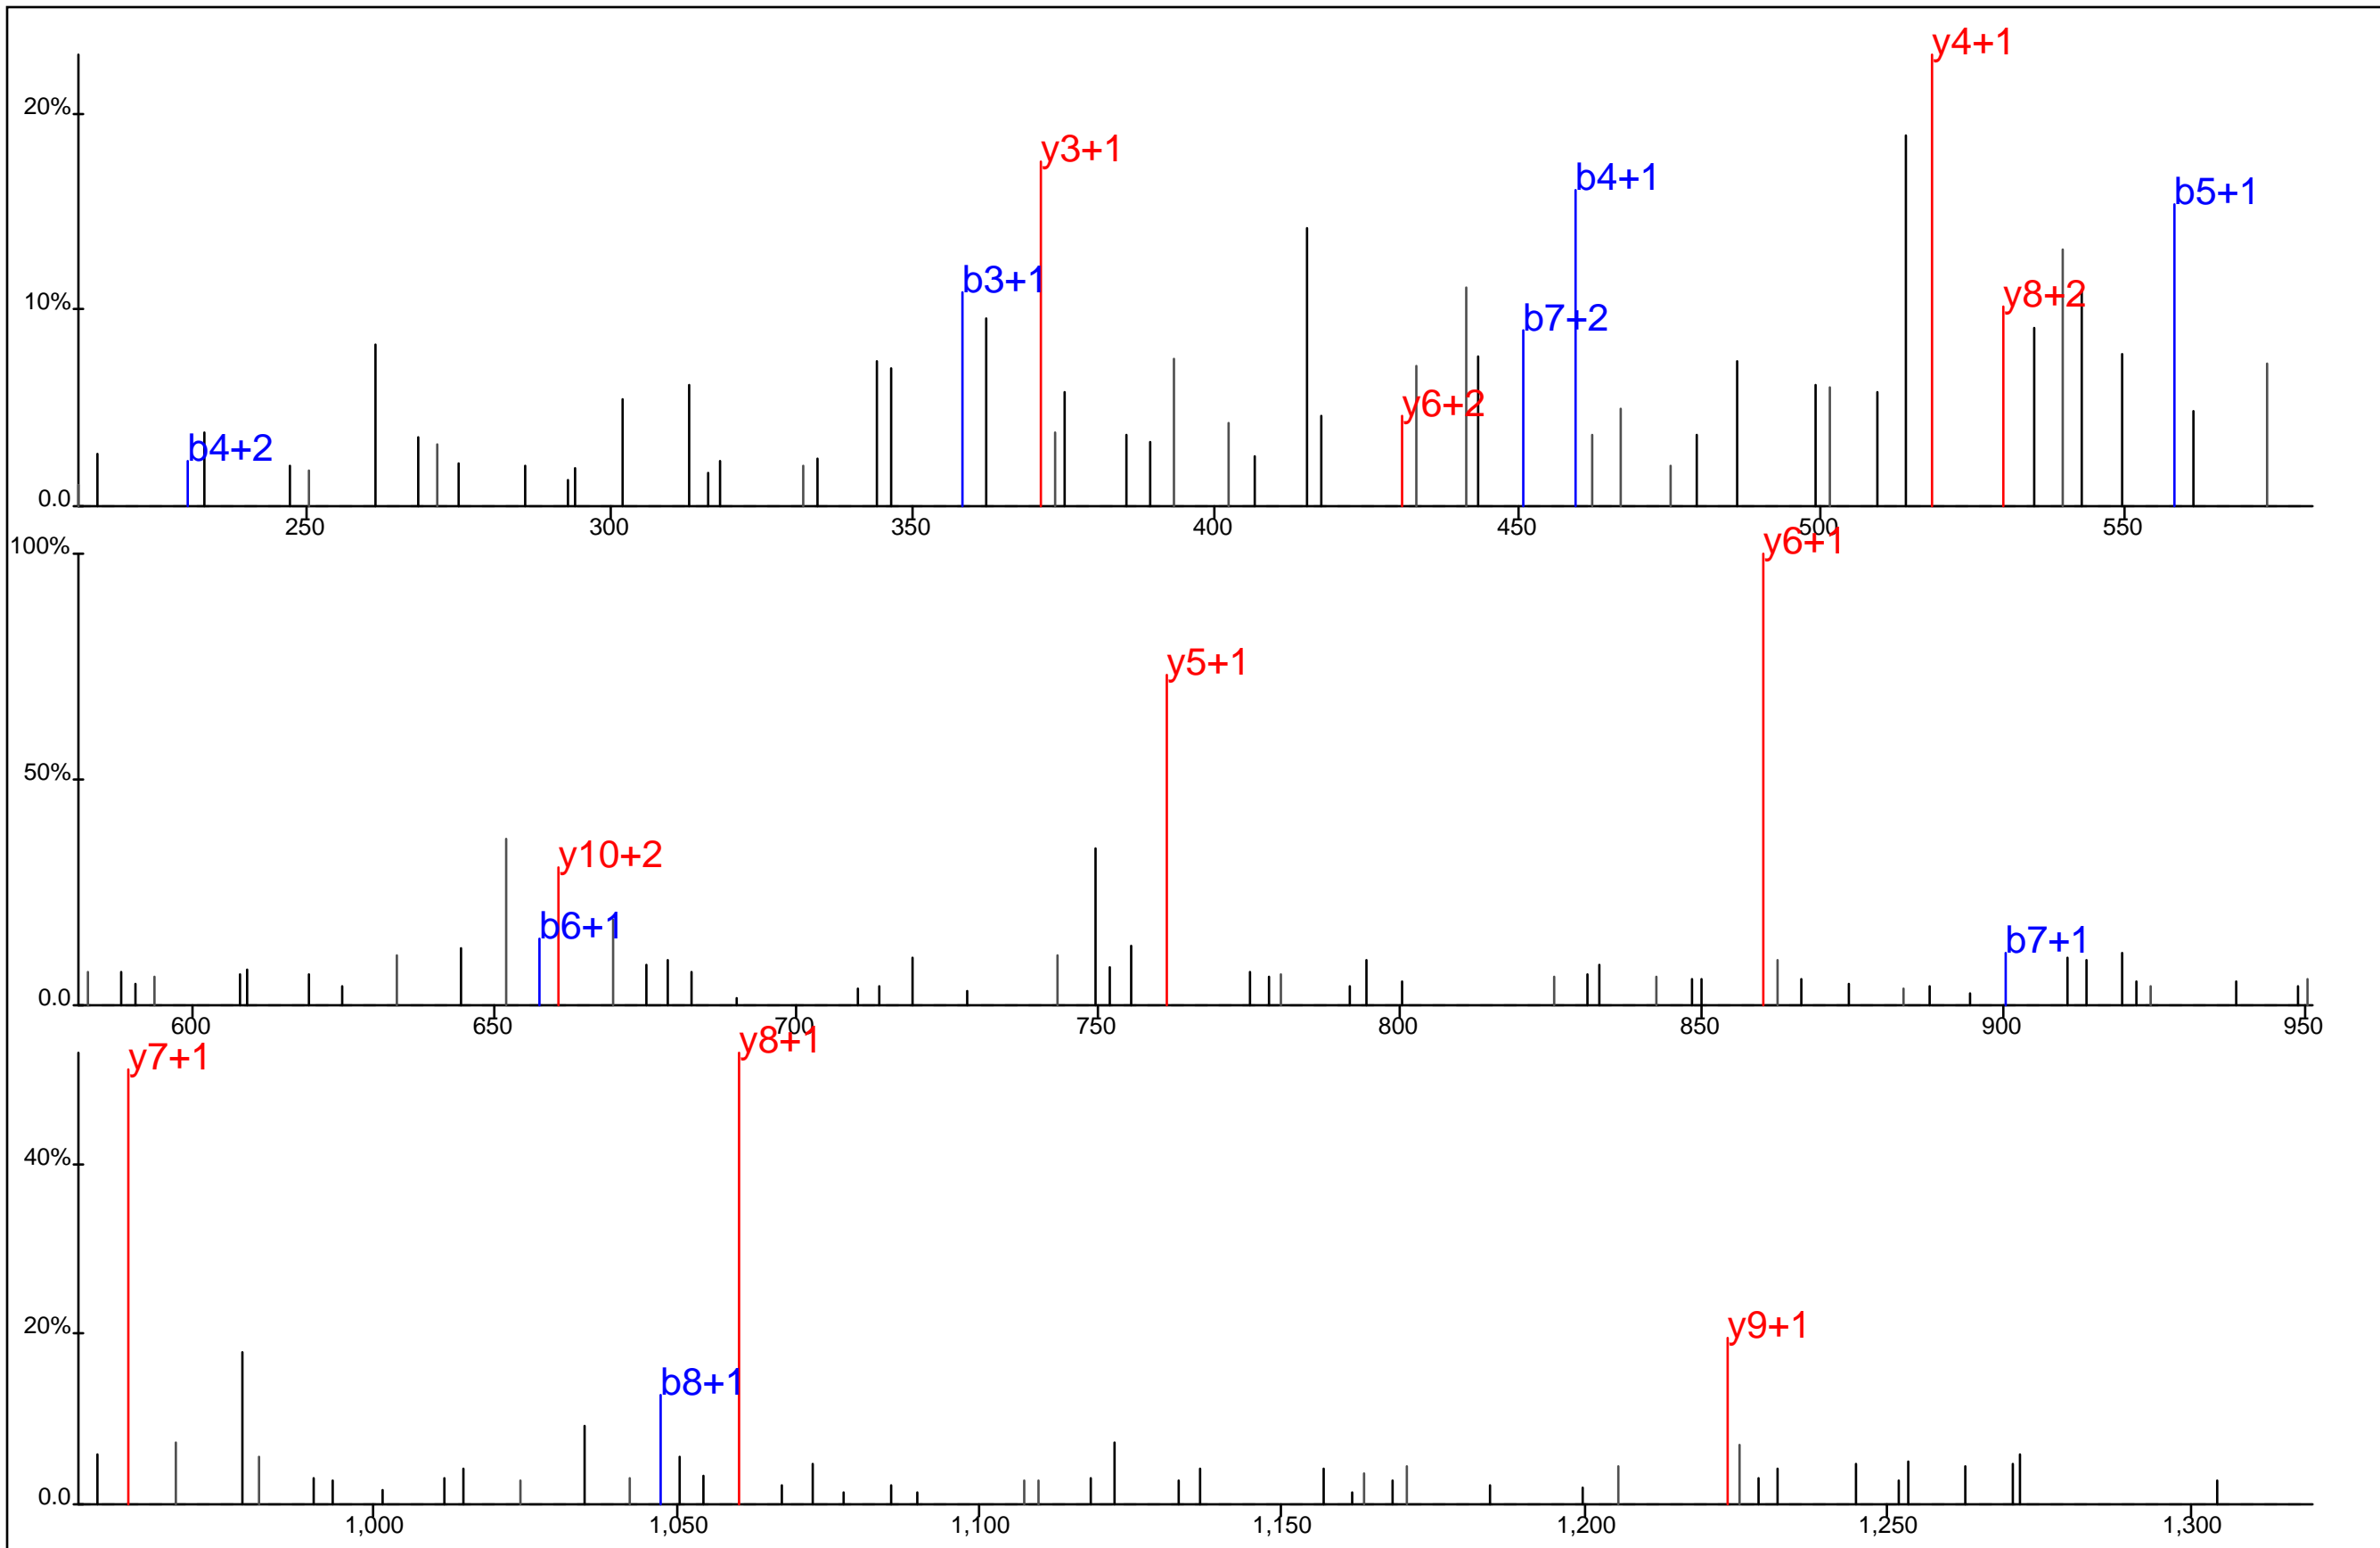

P P Y T V V Y\* F P V R

Protein Name: Glutathione S transferase 3  
 gi Accession: 0  
 Precursor Mass: 709.3500+2  
 Delta Mass: 0.813 ppm  
 XCorr: 68.34

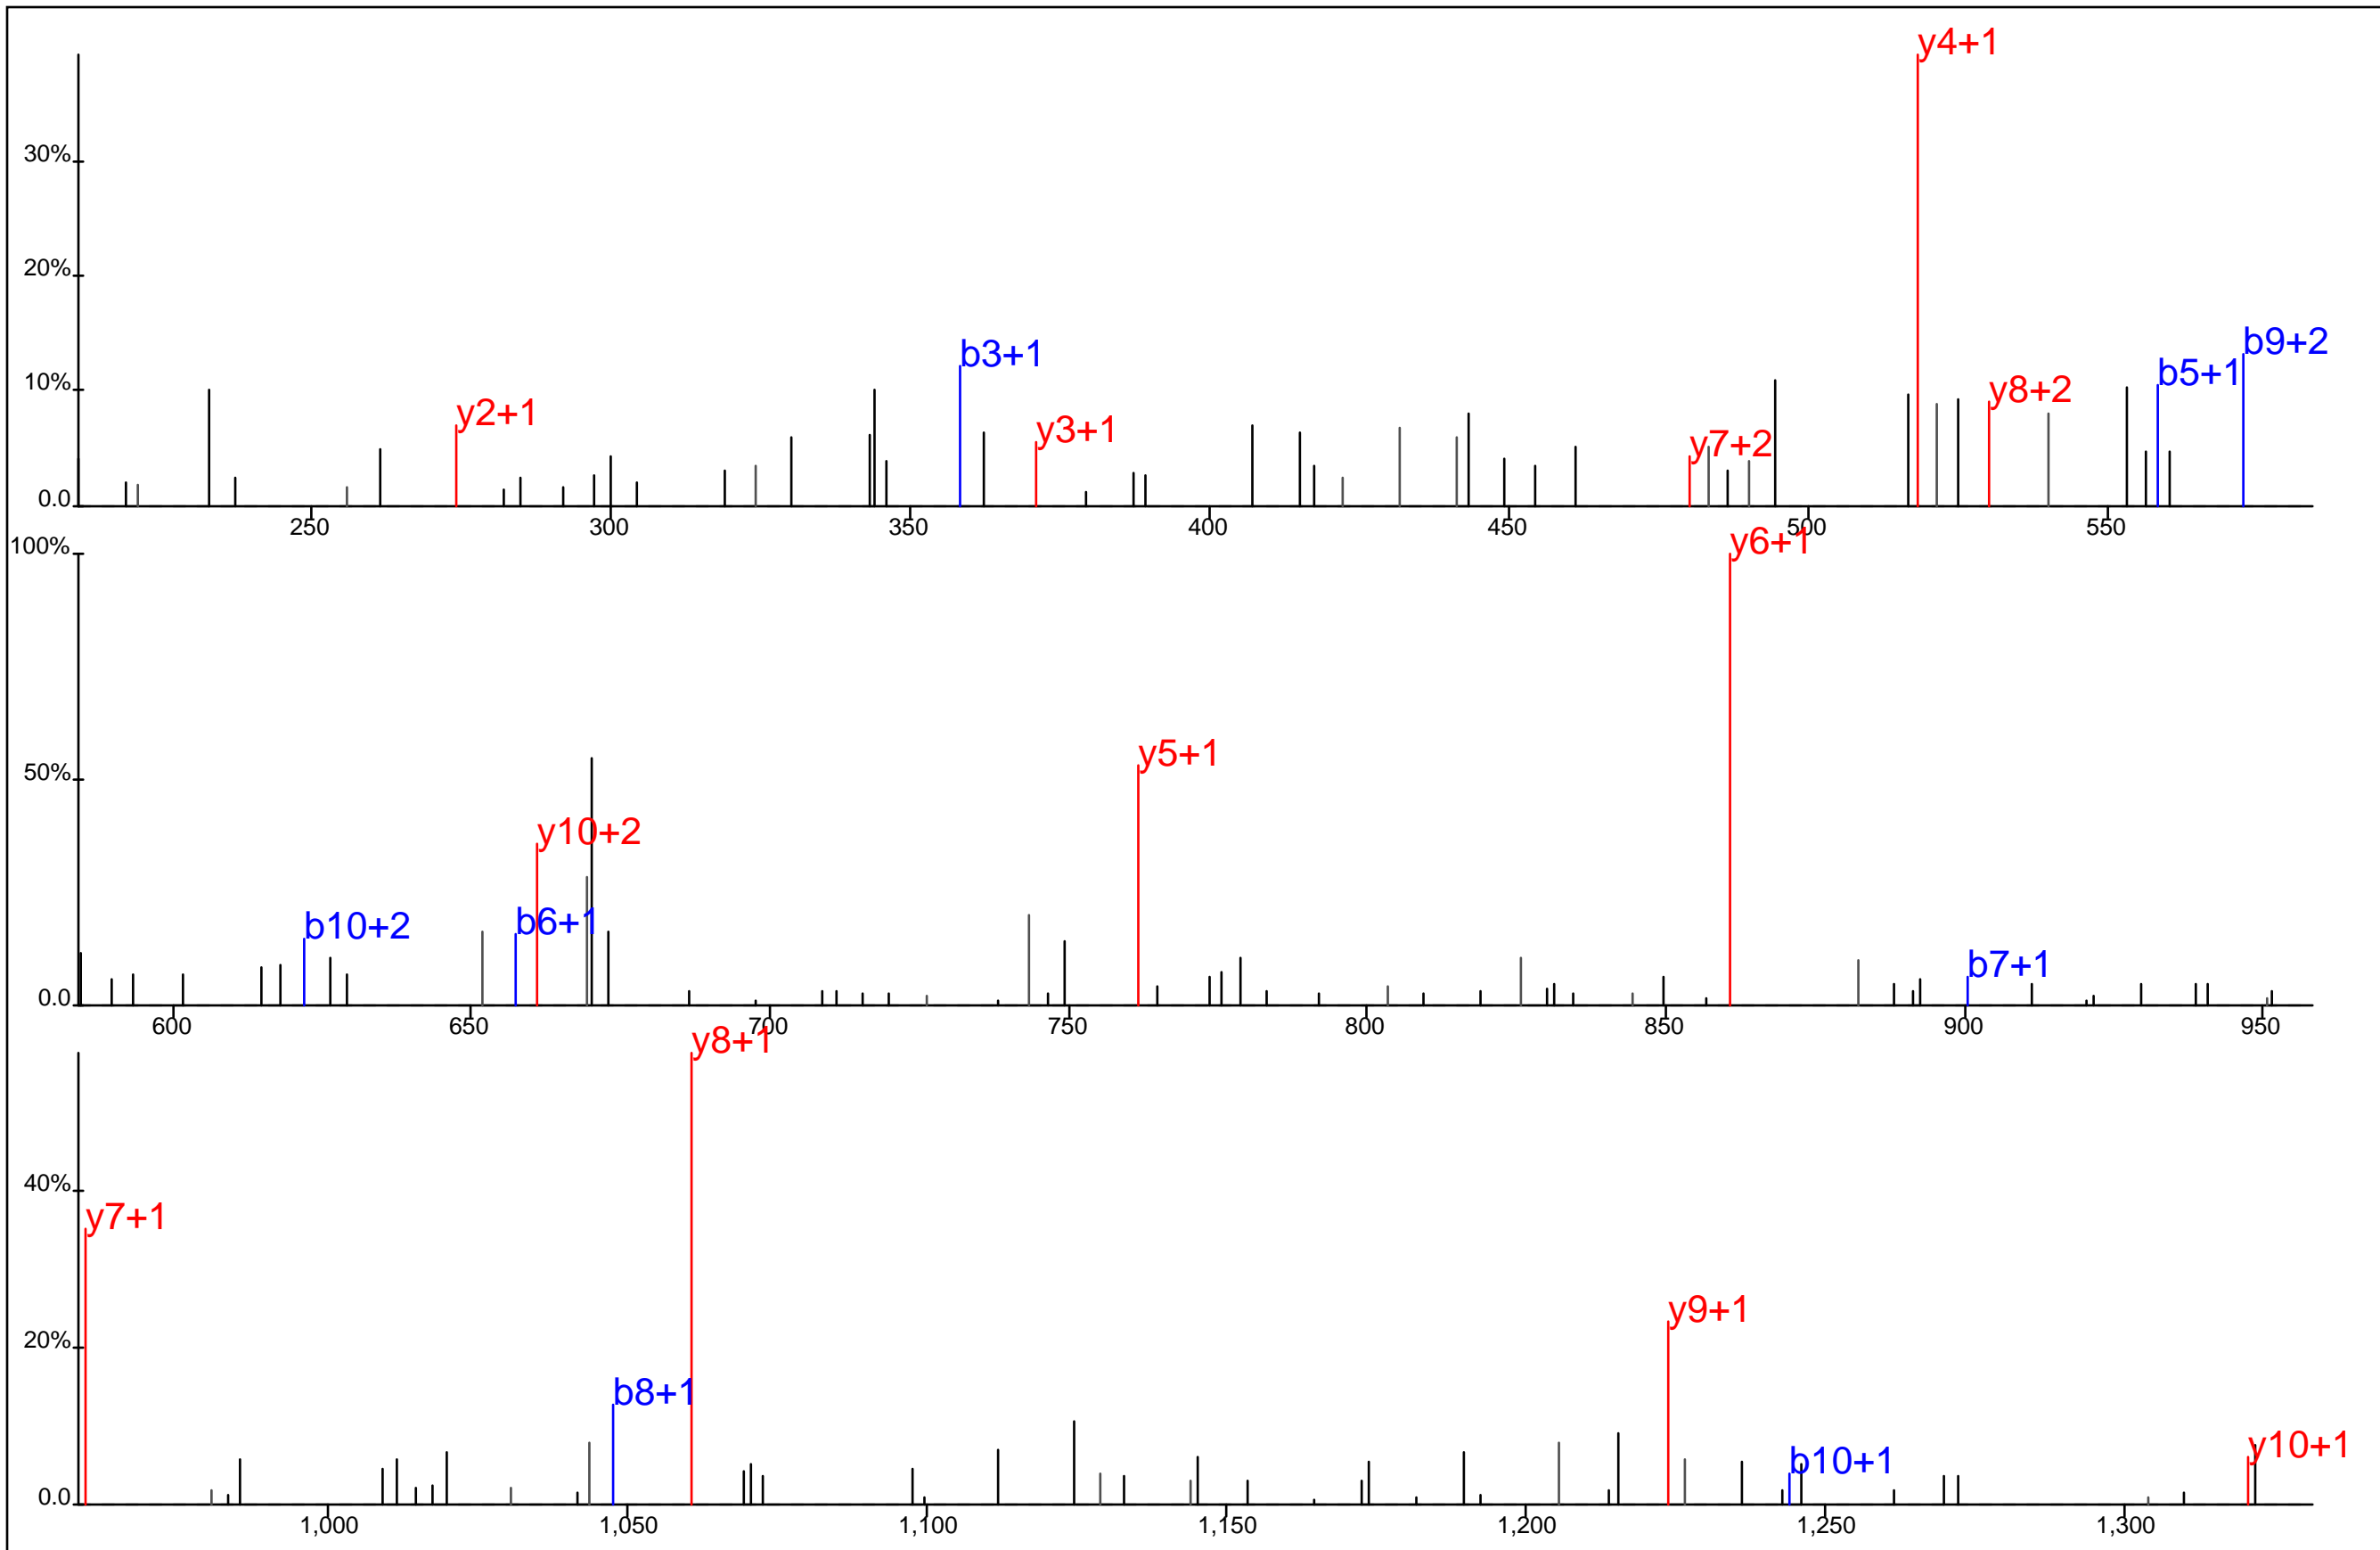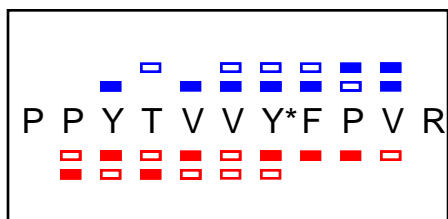

Protein Name: Glutathione S transferase 3  
 gi Accession: 0  
 Precursor Mass: 709.3502+2  
 Delta Mass: 1.037 ppm  
 XCorr: 46.31

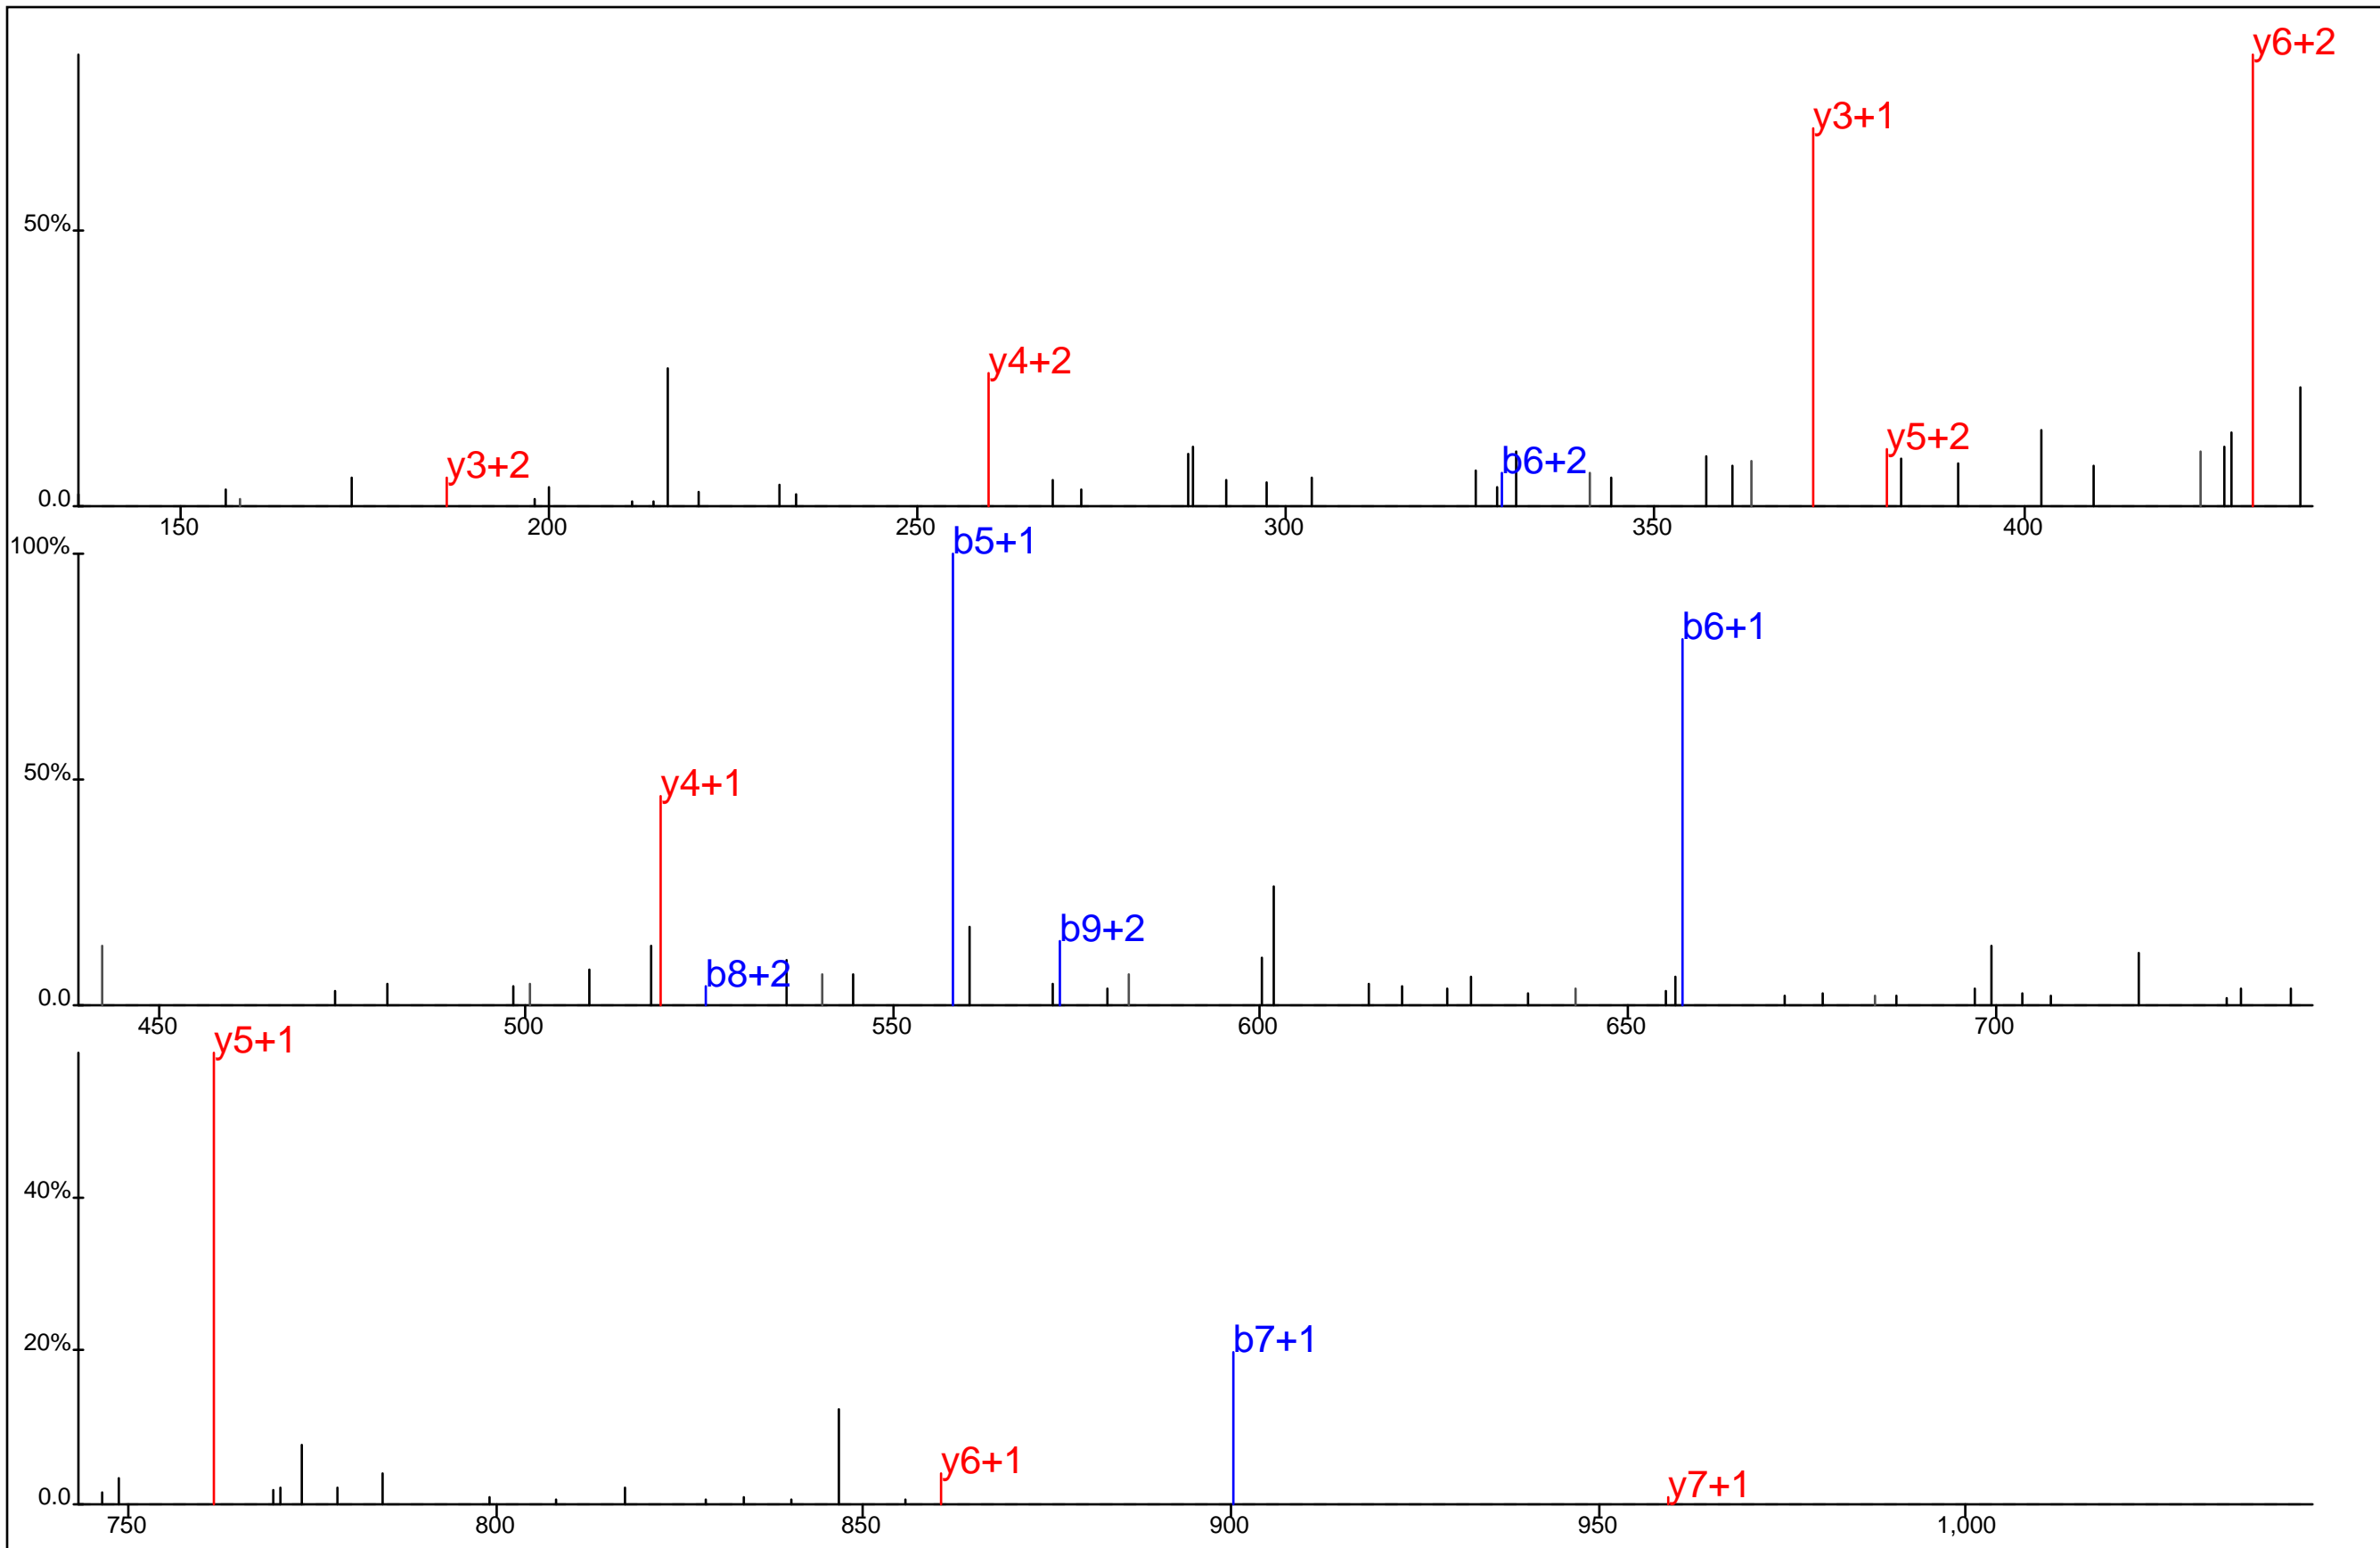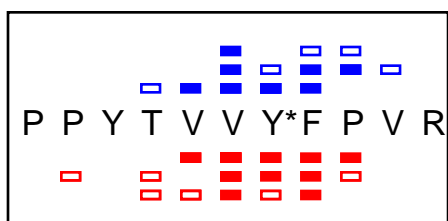

Protein Name: Glutathione S transferase 3  
 gi Accession: 0  
 Precursor Mass: 473.2366+3  
 Delta Mass: 2.663 ppm  
 XCorr: 33.53

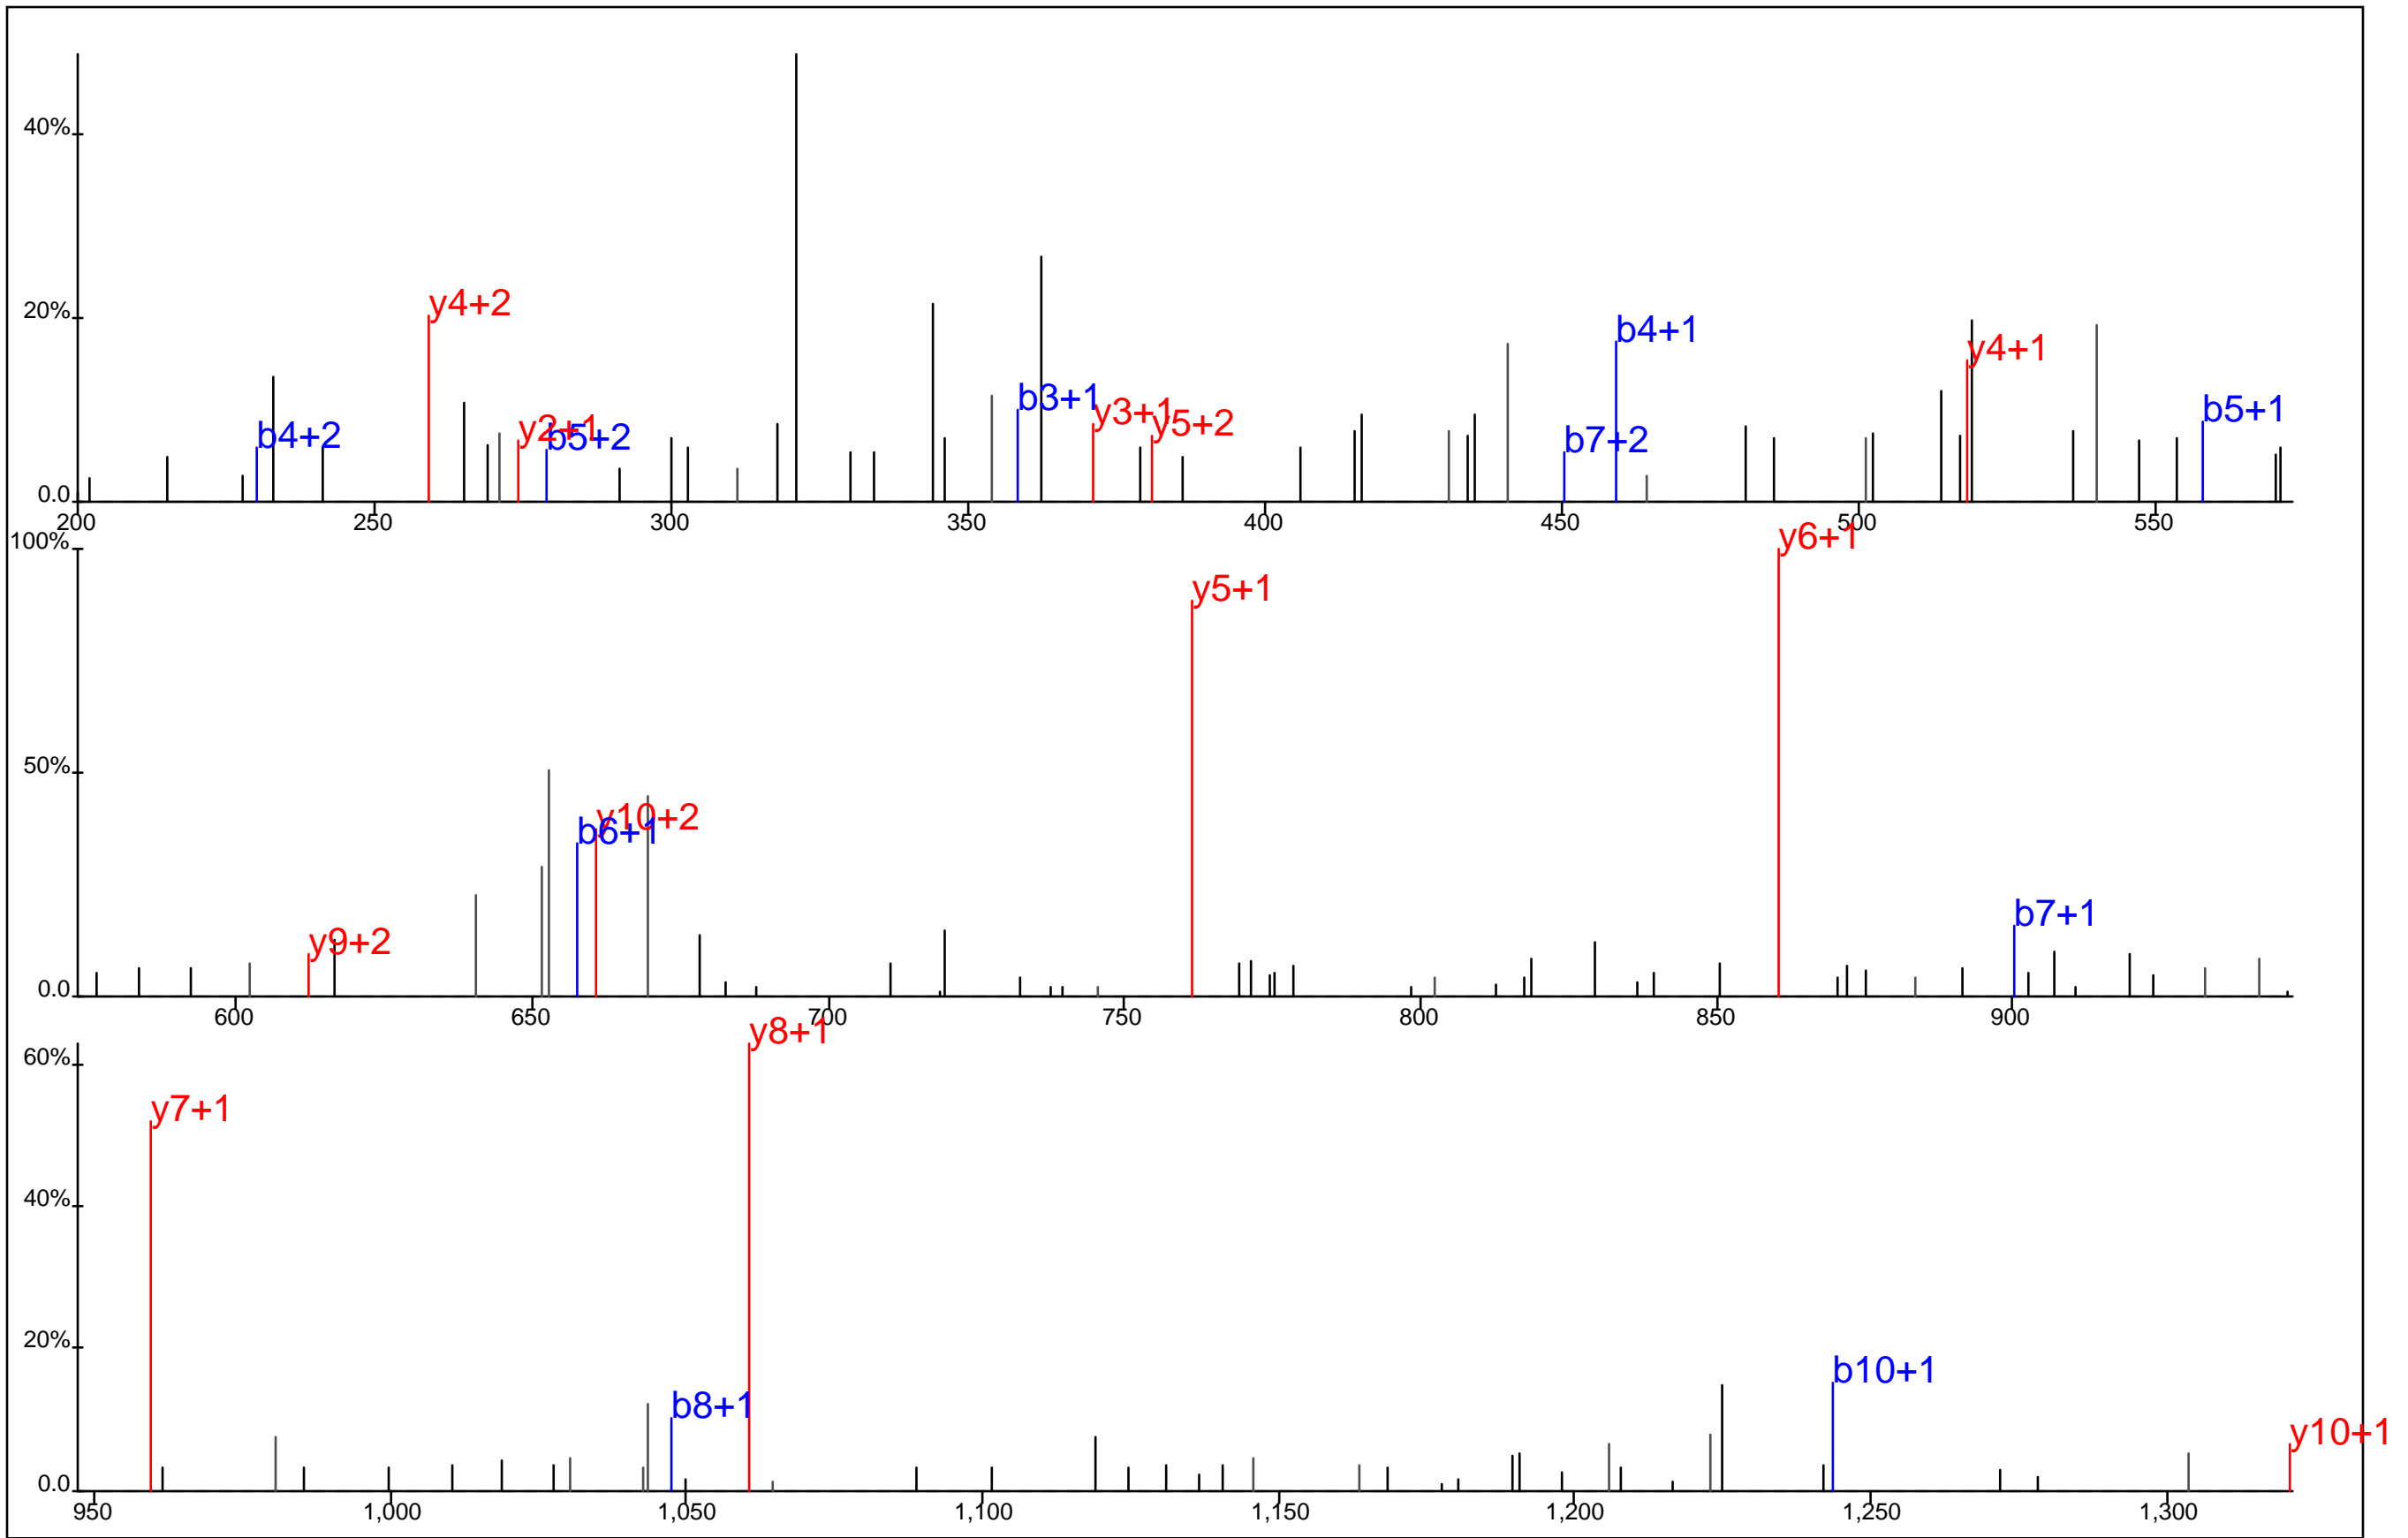

■ ■ ■ ■ ■ ■ ■ ■  
 P P Y T V V Y\*F P V R  
■ ■ ■ ■ ■ ■ ■ ■

Protein Name: Glutathione S transferase 3  
 gi Accession: 0  
 Precursor Mass: 709.3451+2  
 Delta Mass: 6.110 ppm  
 XCorr: 30.09

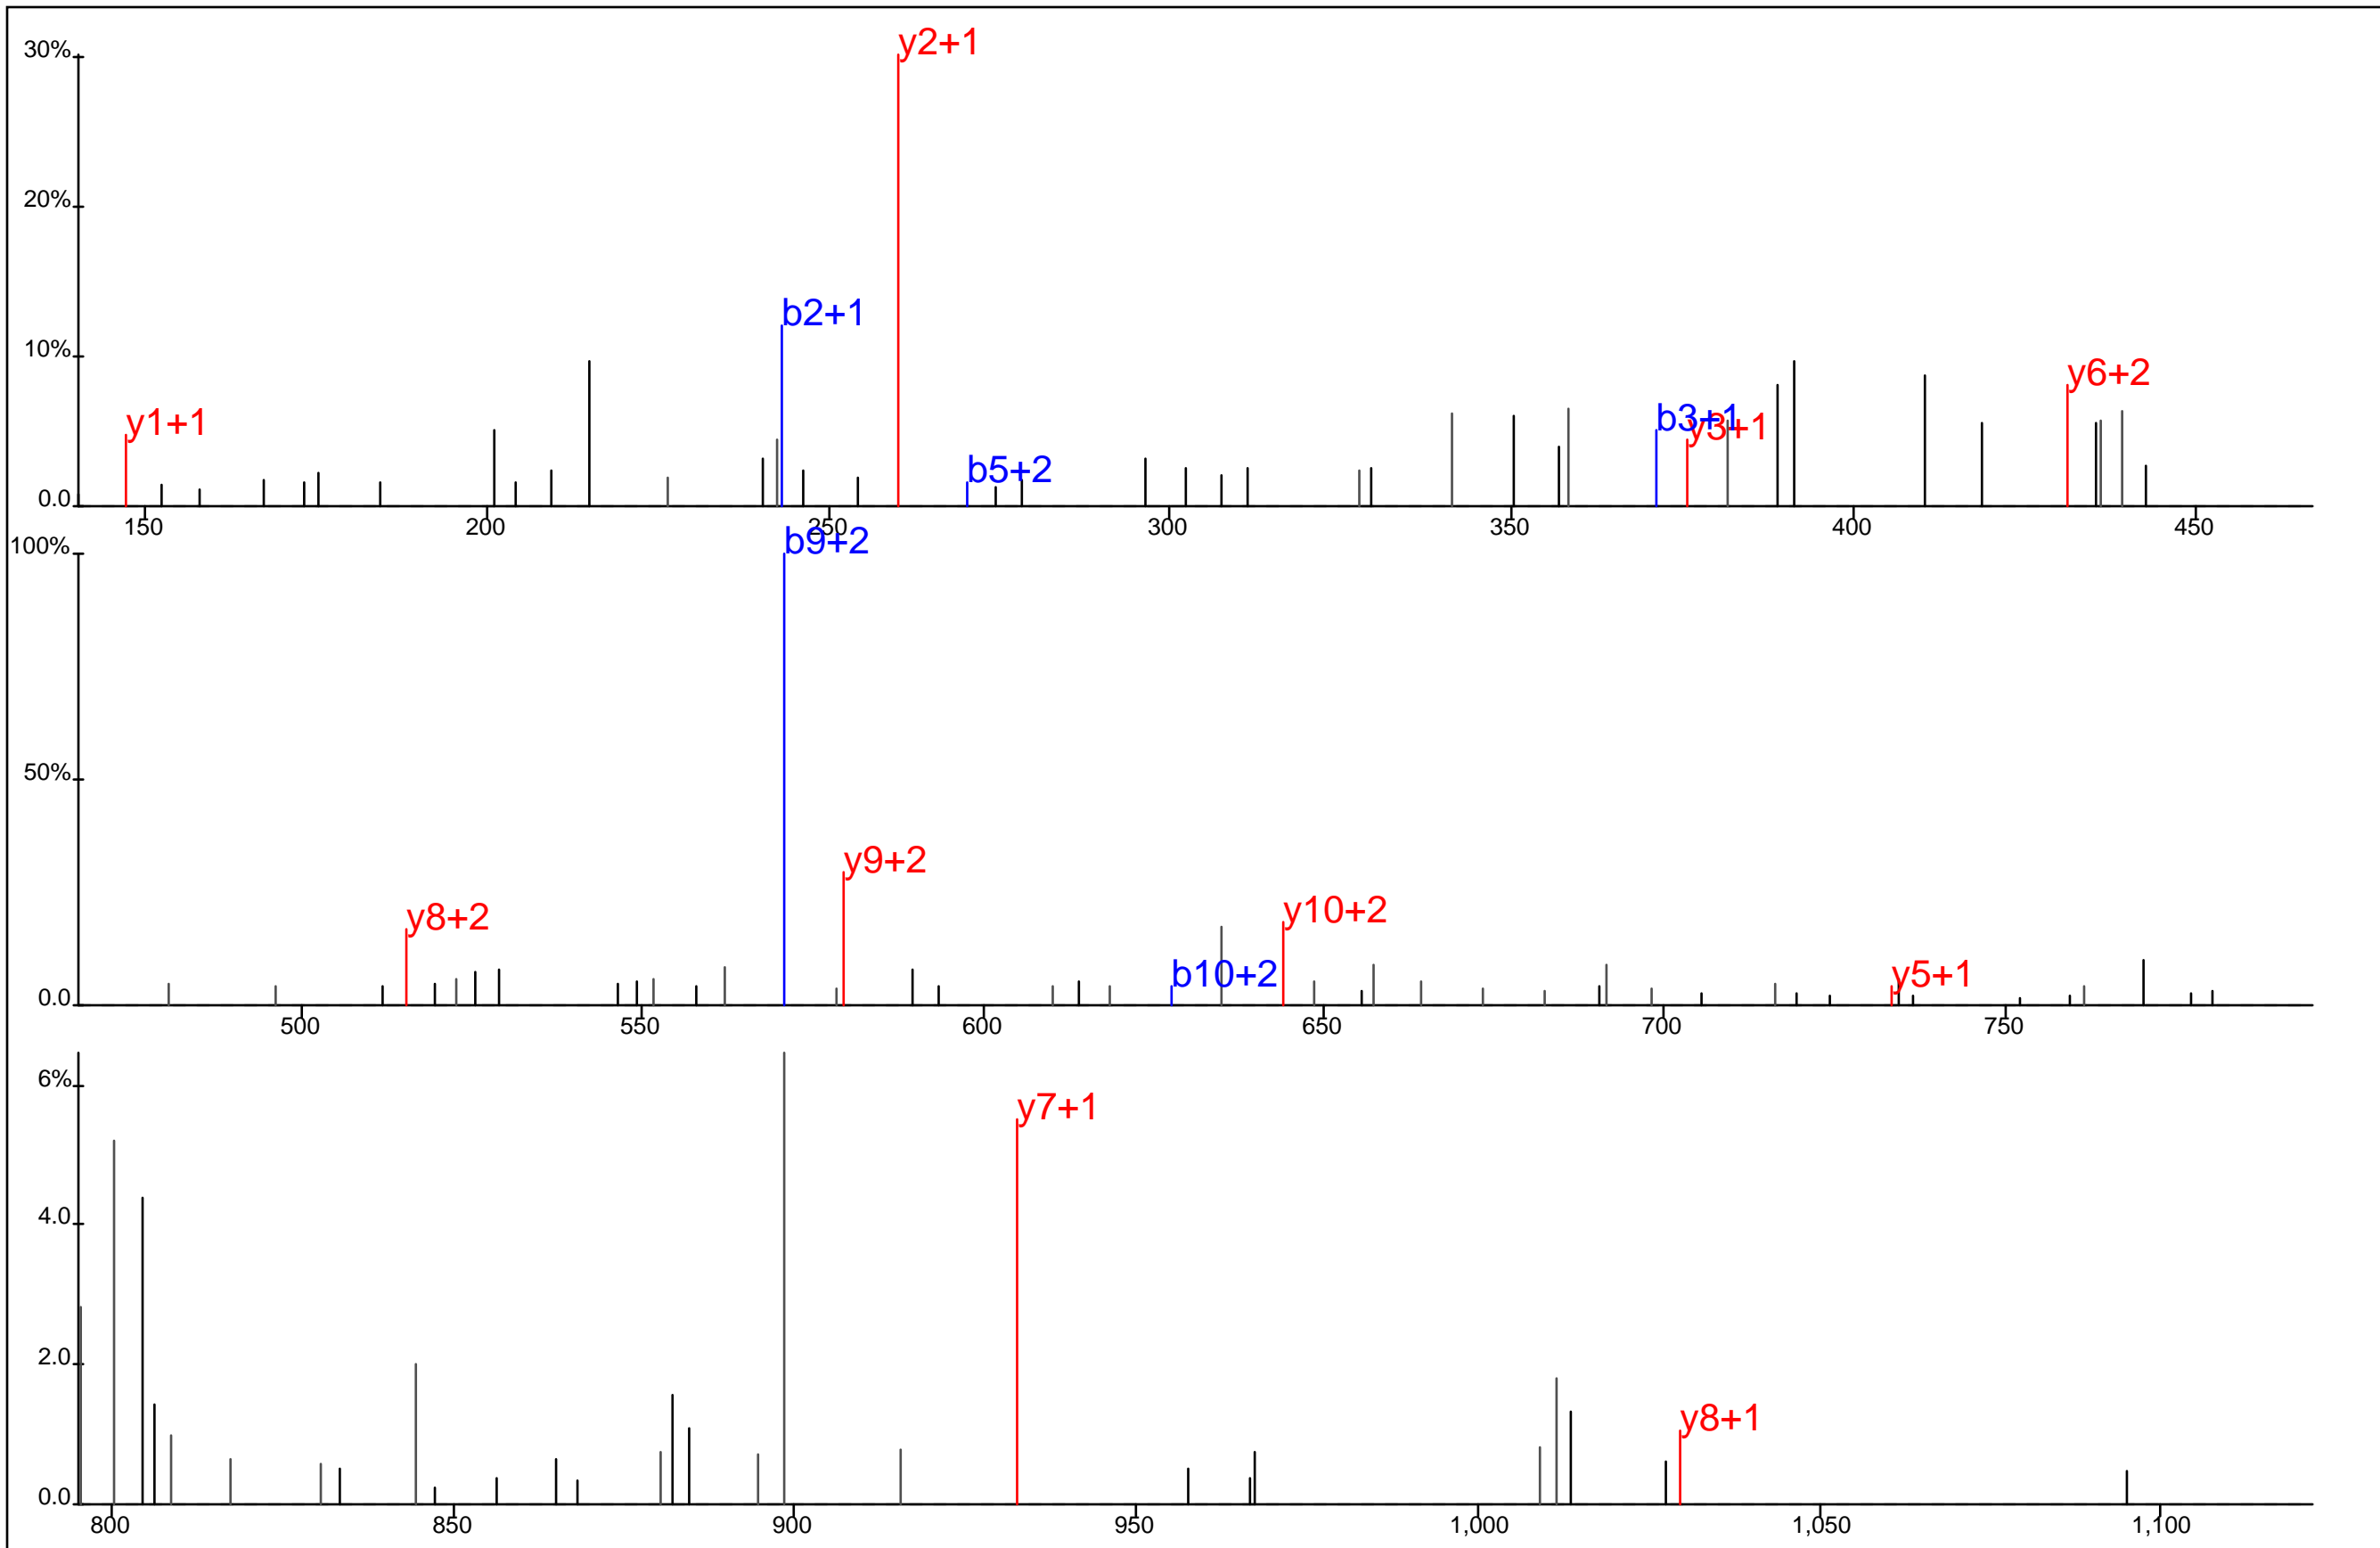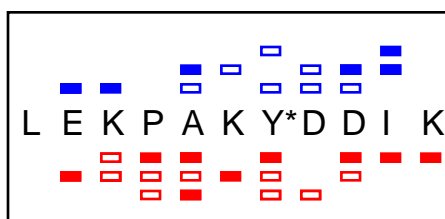

Protein Name: Glyceraldehyde 3 phosphate dehydrogenase  
 gi Accession: 0  
 Precursor Mass: 467.2320+3  
 Delta Mass: 3.917 ppm  
 XCorr: 22.58



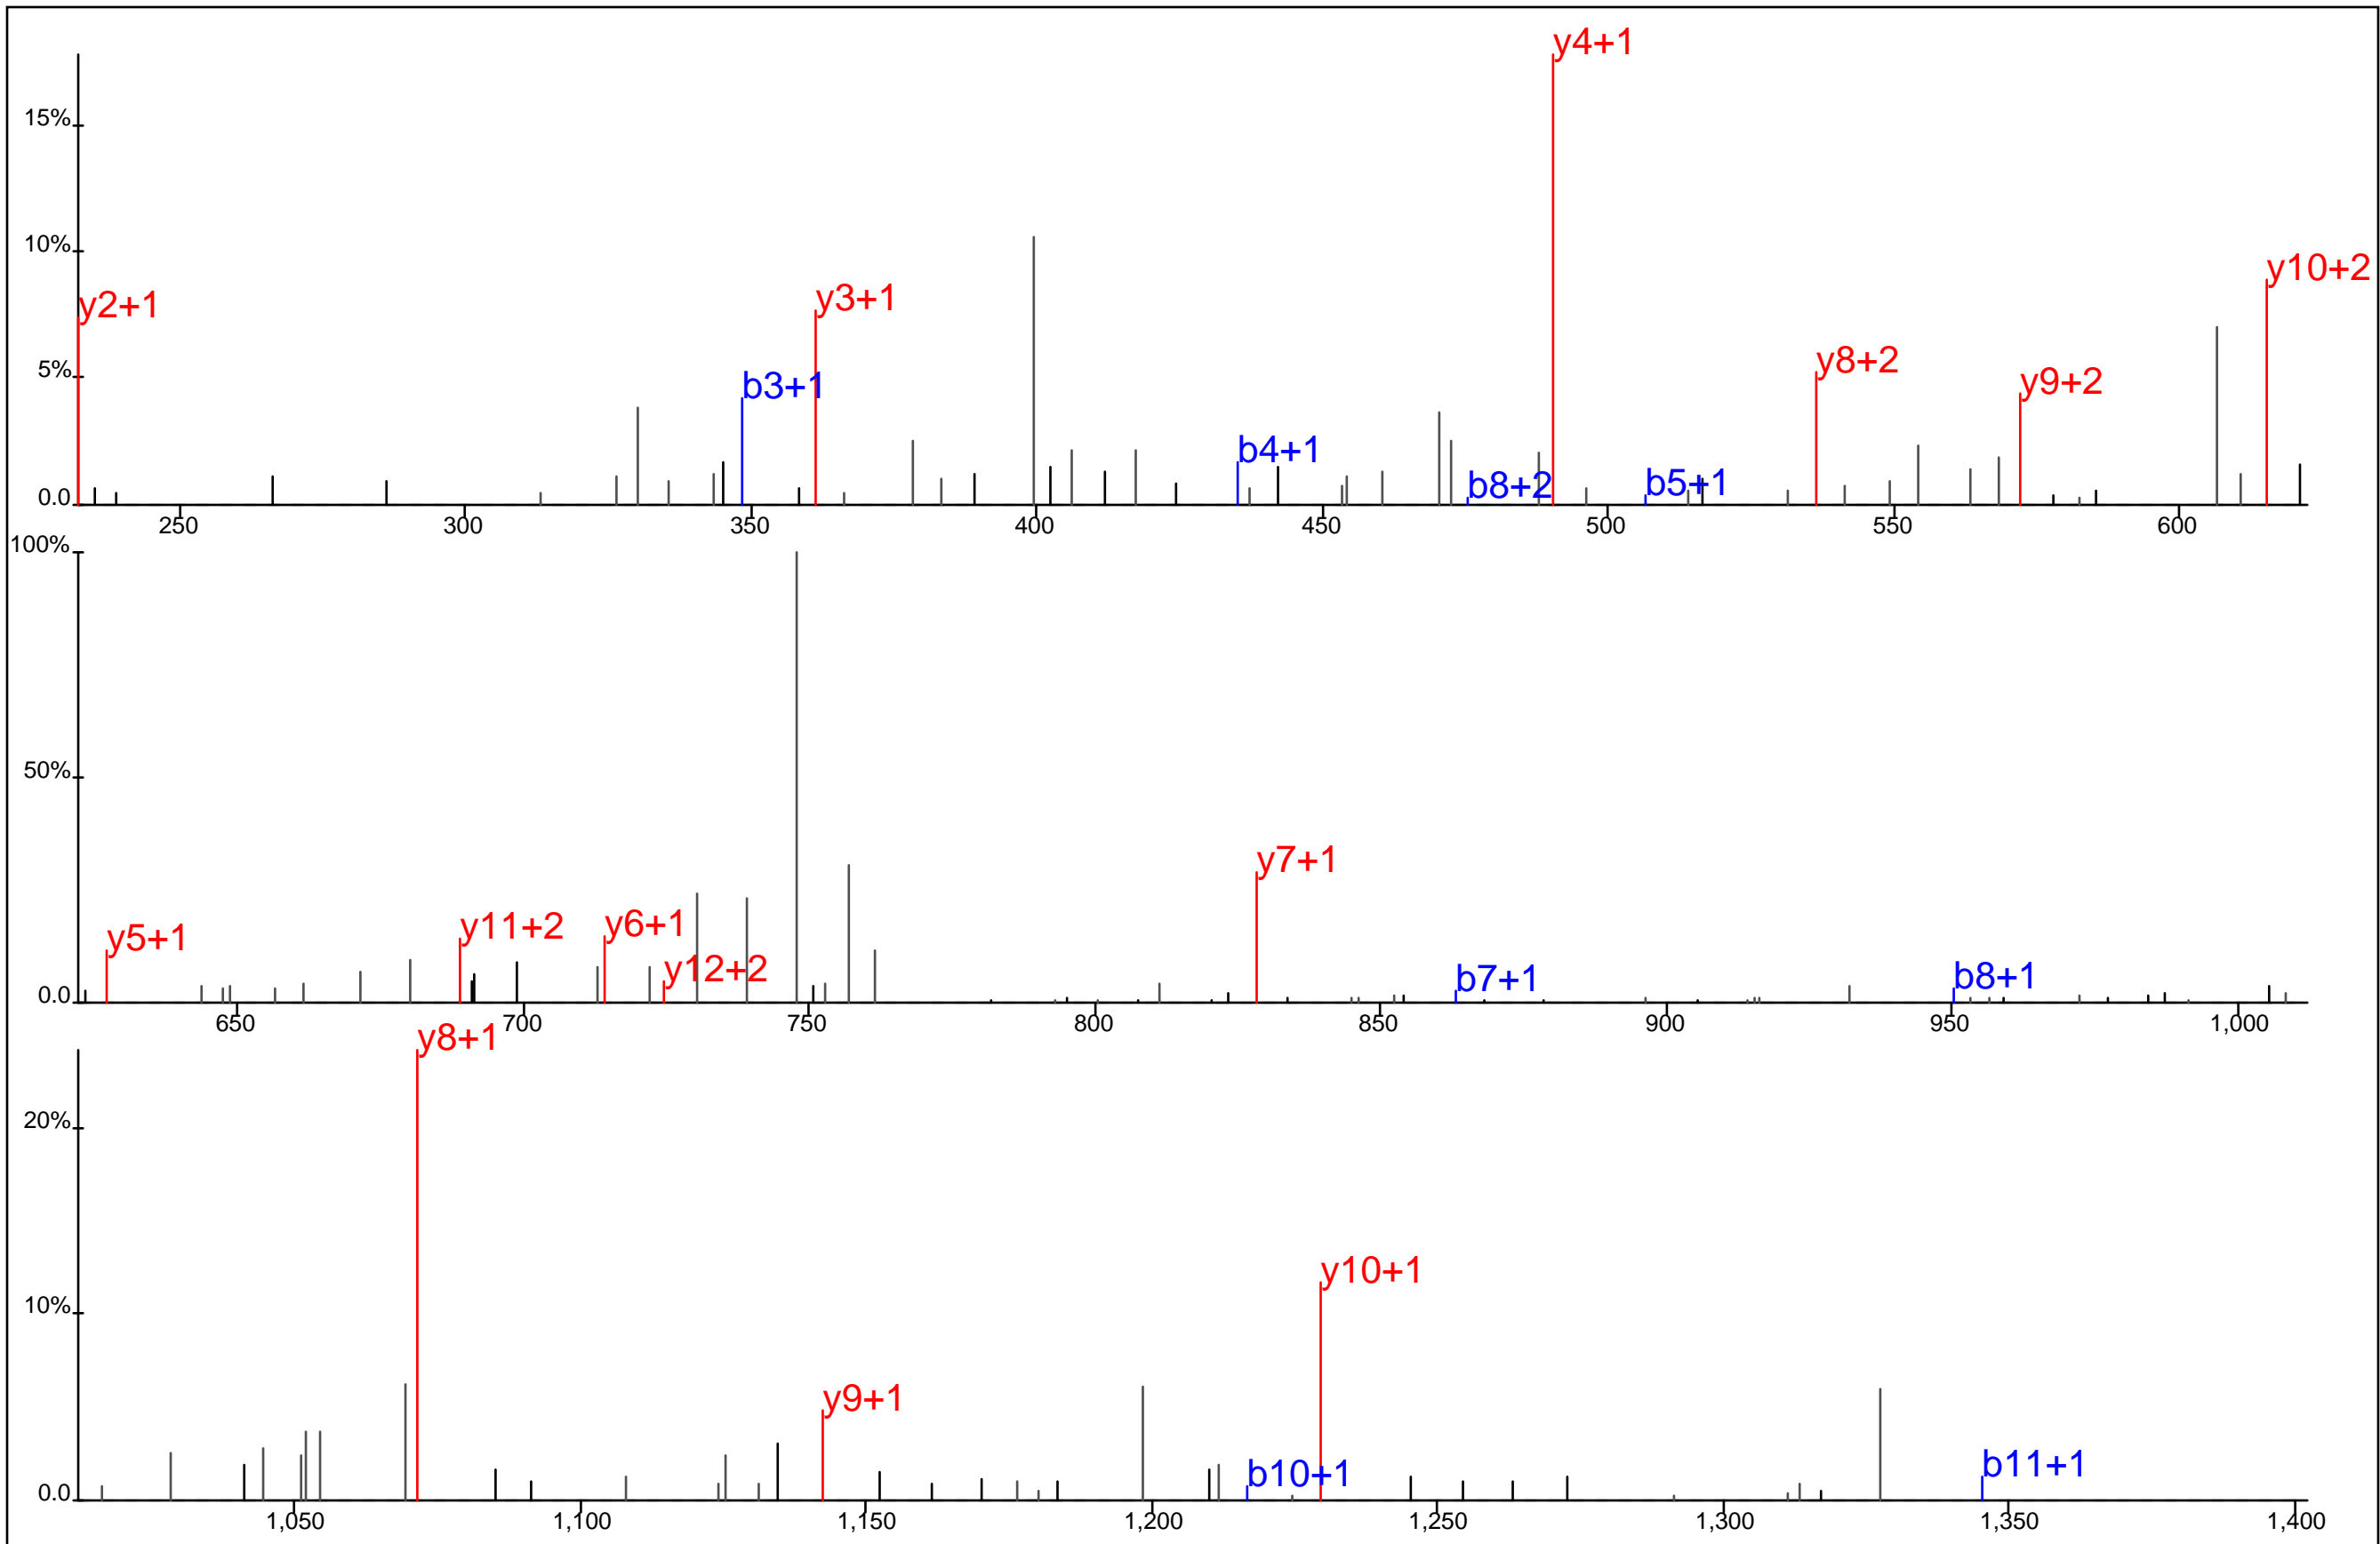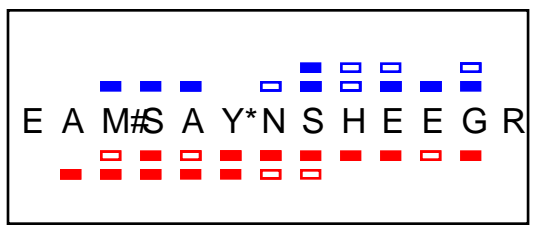

Protein Name: Glycogen debranching enzyme  
 gi Accession: 0  
 Precursor Mass: 788.7910+2  
 Delta Mass: 0.903 ppm  
 XCorr: 68.34

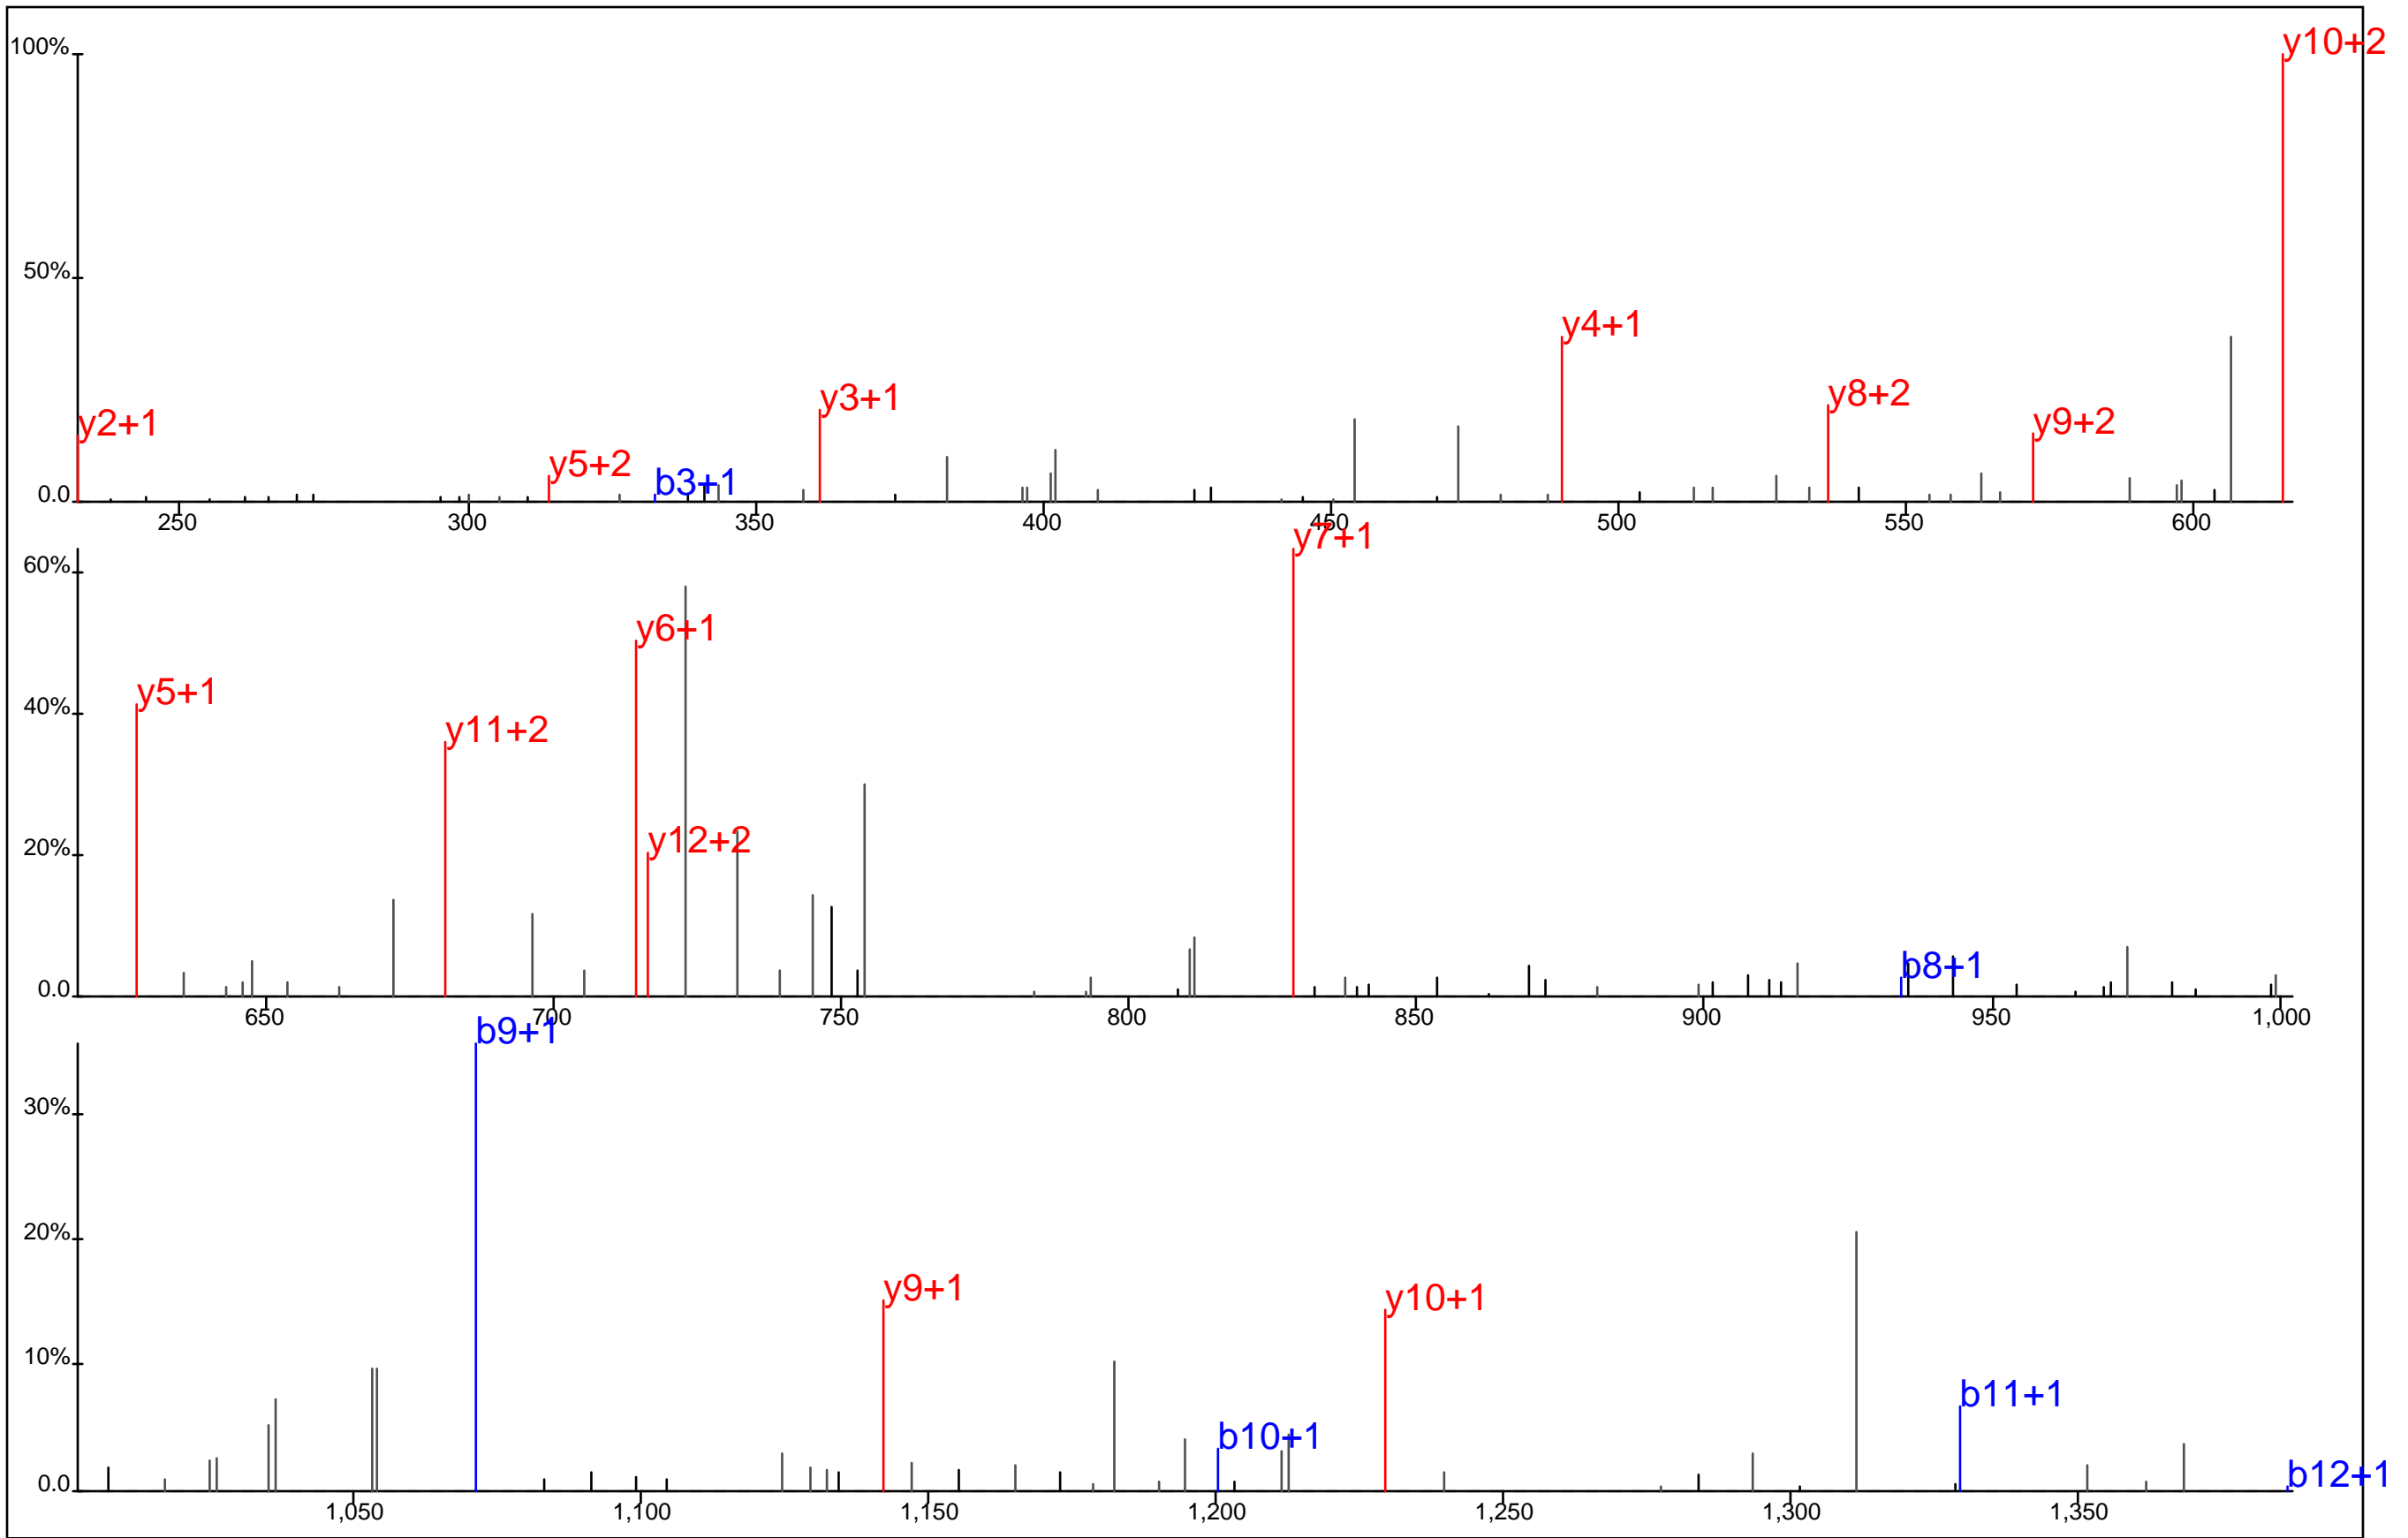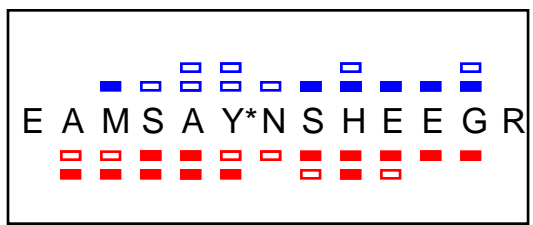

Protein Name: Glycogen debranching enzyme  
 gi Accession: 0  
 Precursor Mass: 780.7921+2  
 Delta Mass: 0.936 ppm  
 XCorr: 66.42

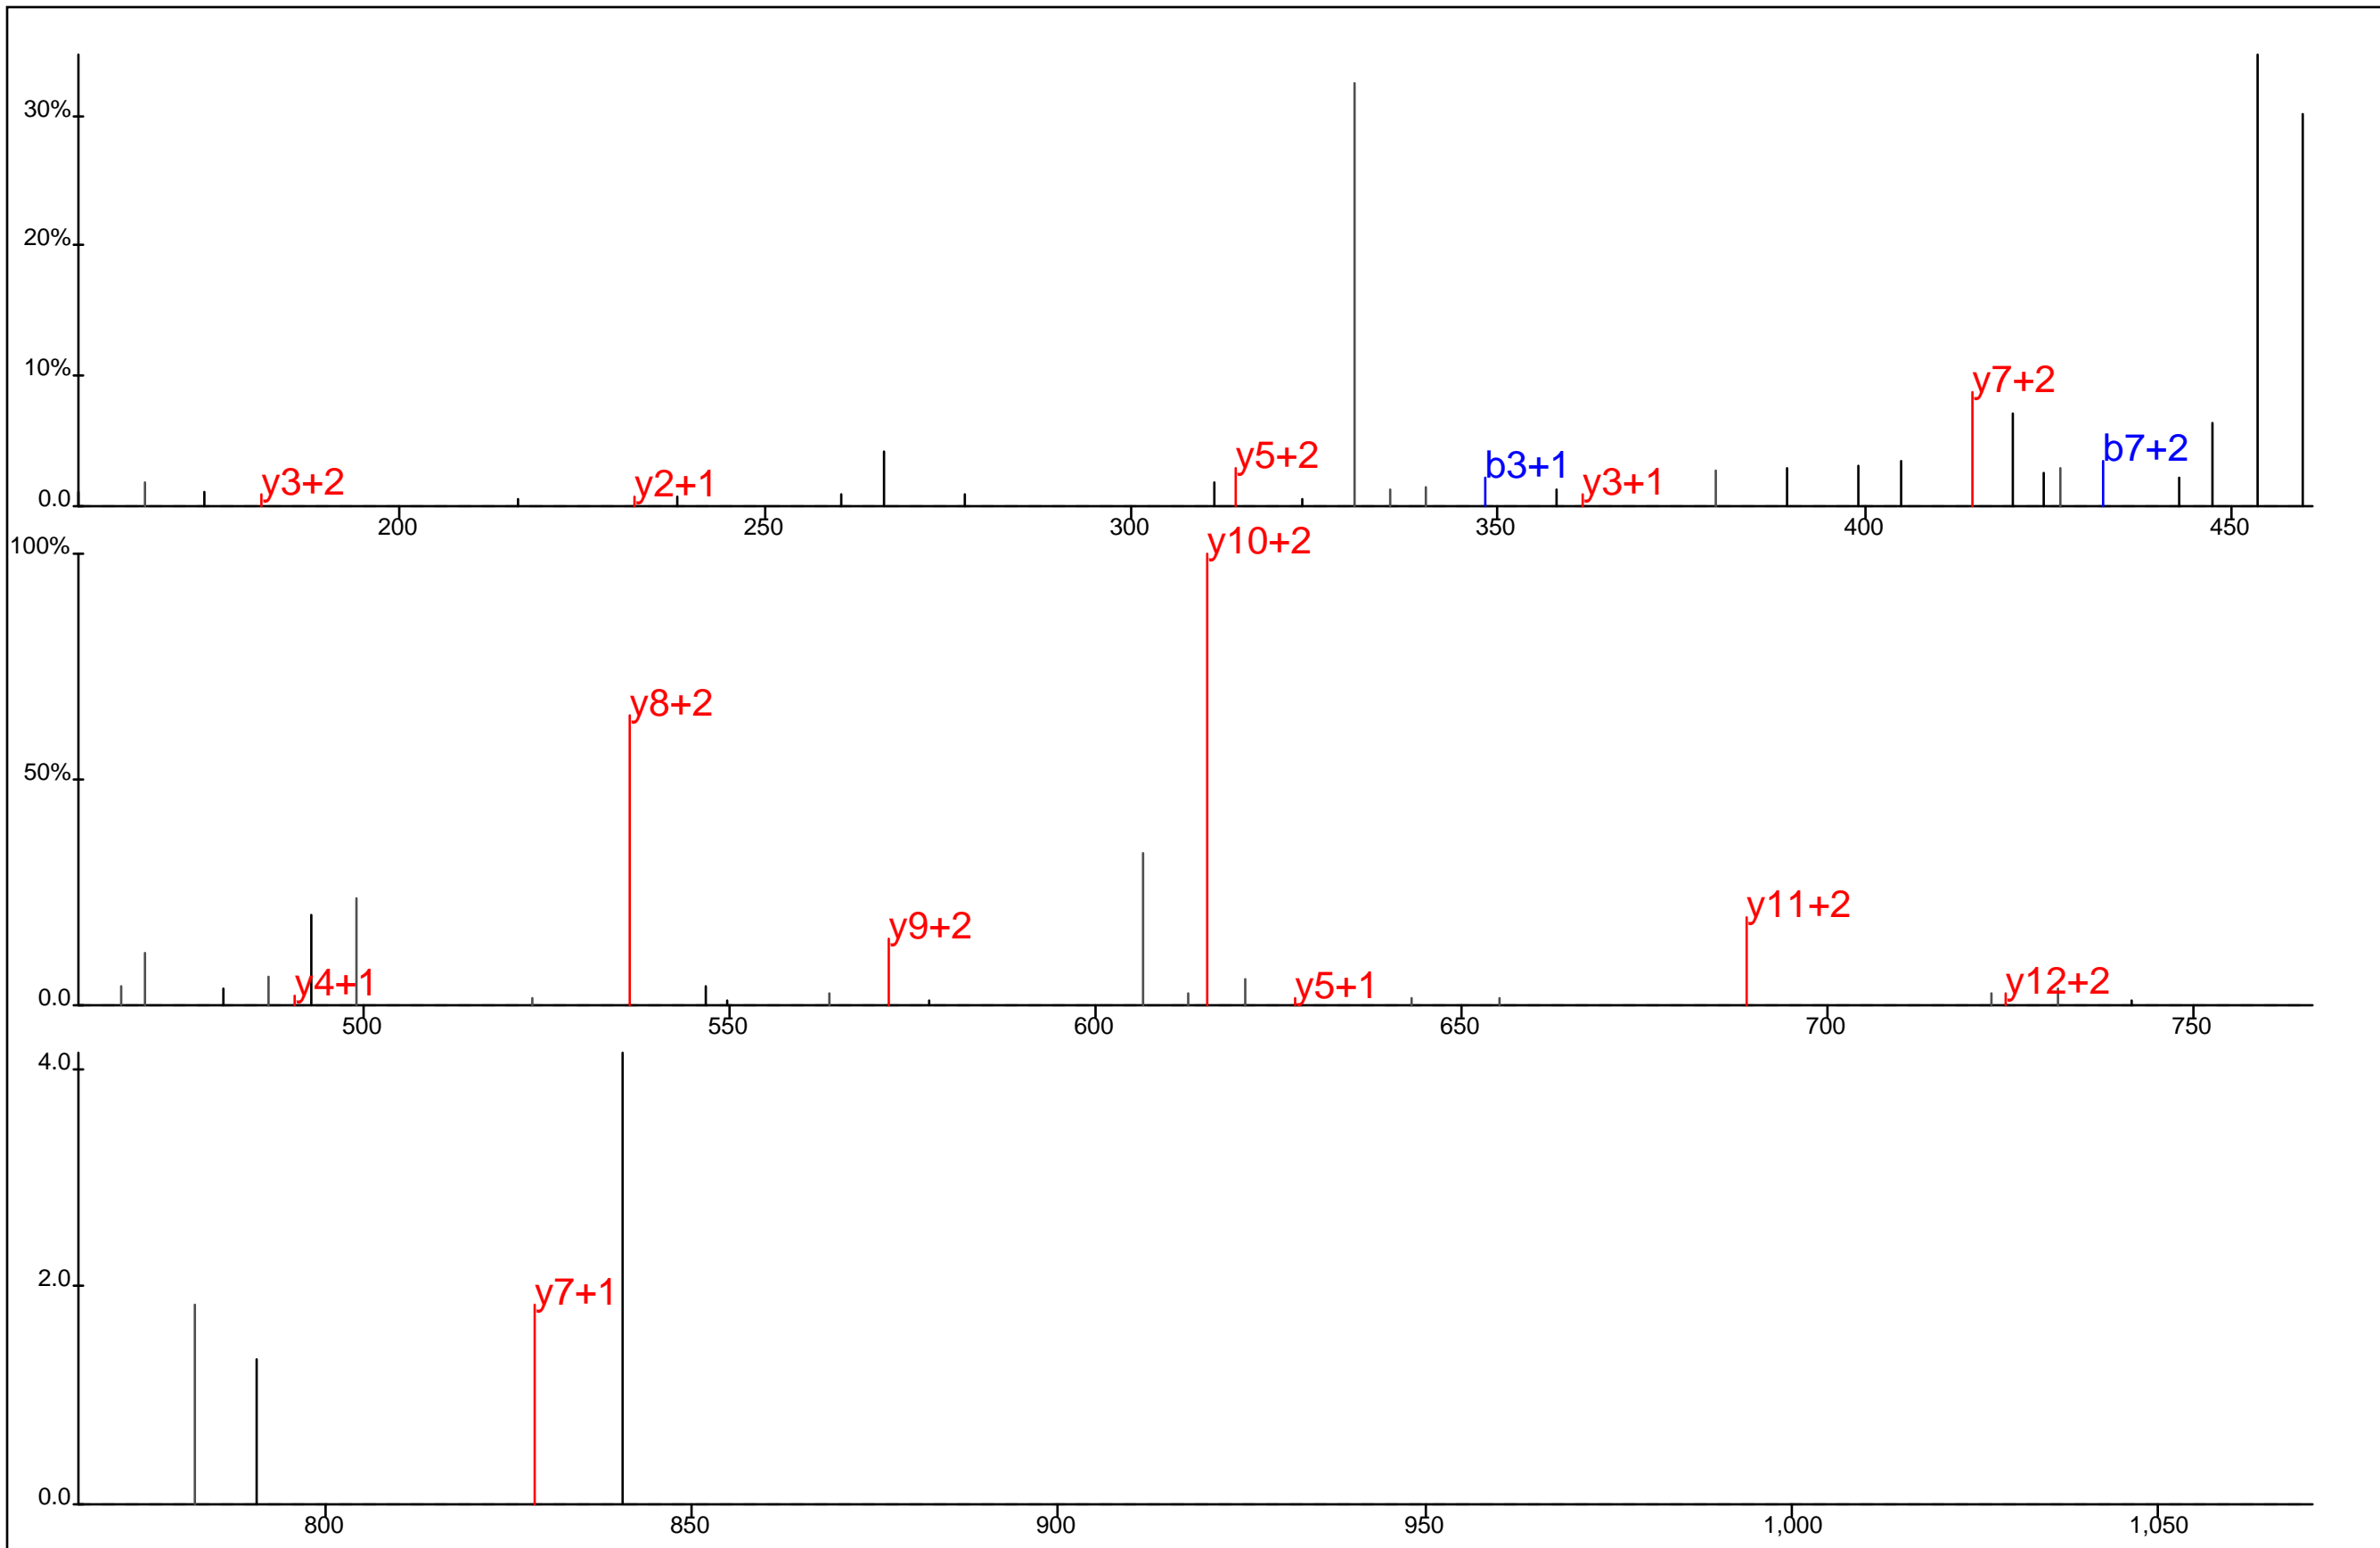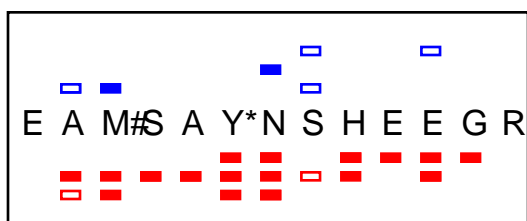

Protein Name: Glycogen debranching enzyme  
 gi Accession: 0  
 Precursor Mass: 526.1954+3  
 Delta Mass: 1.002 ppm  
 XCorr: 39.92

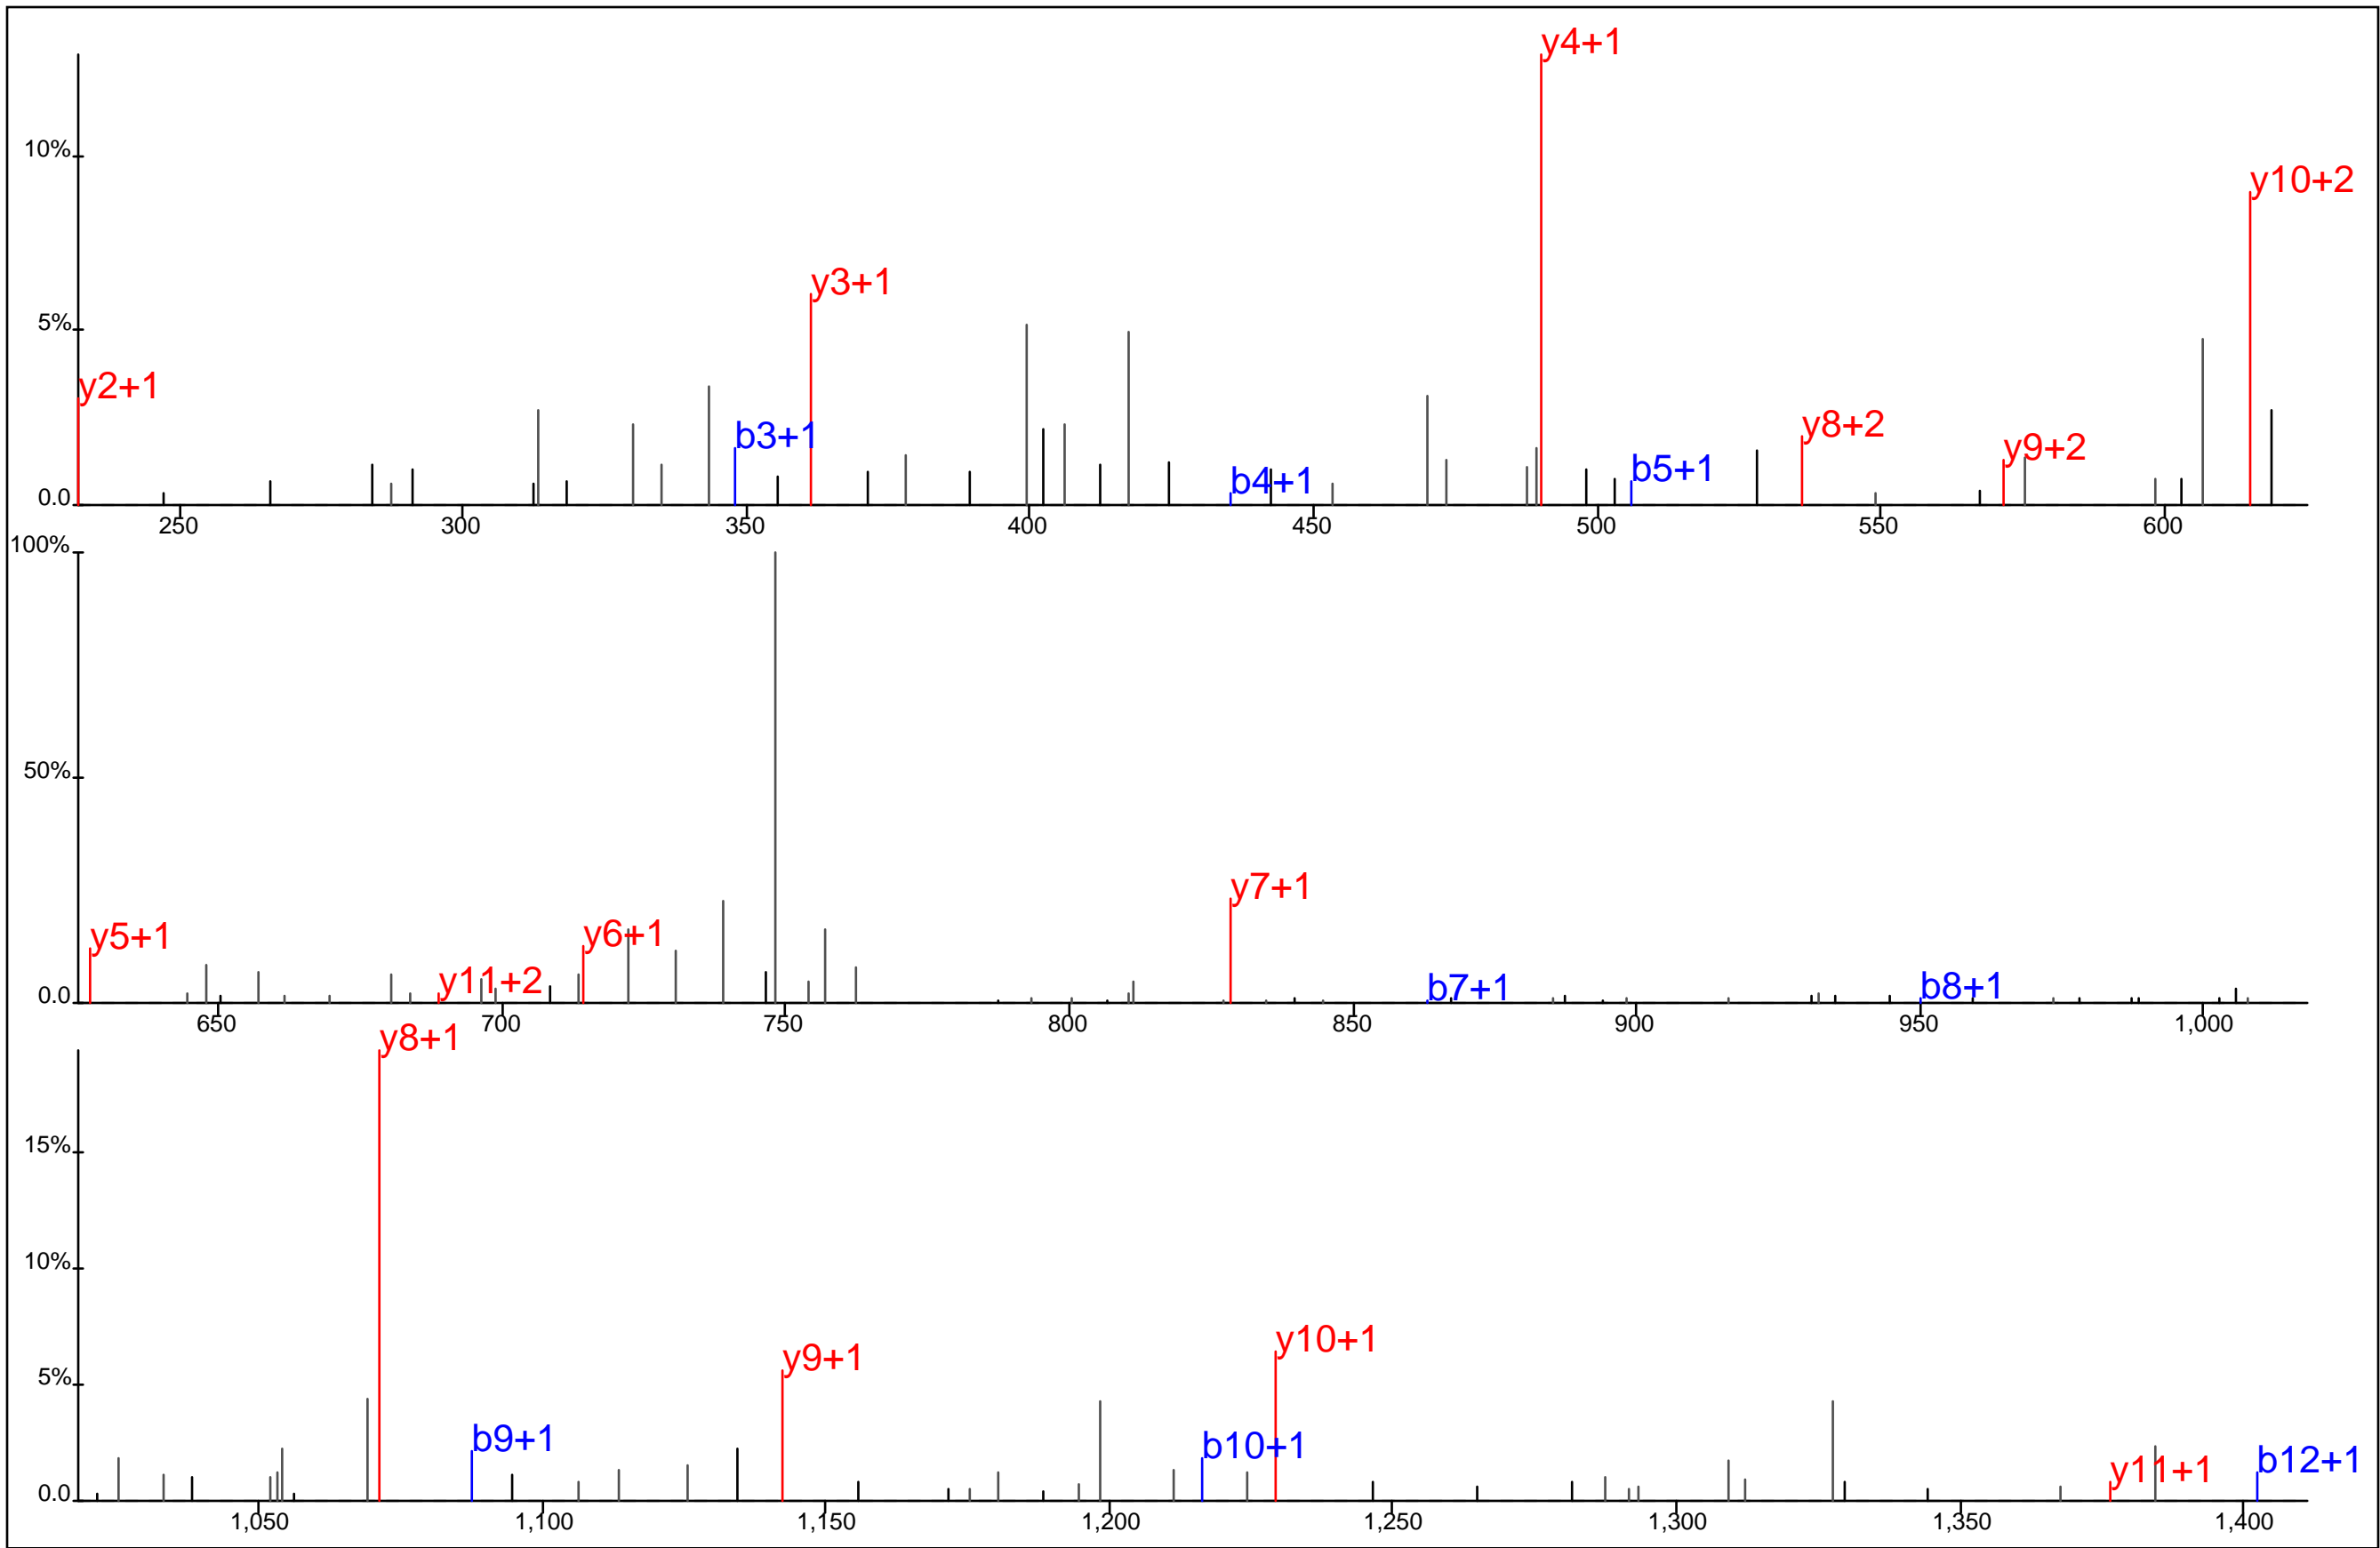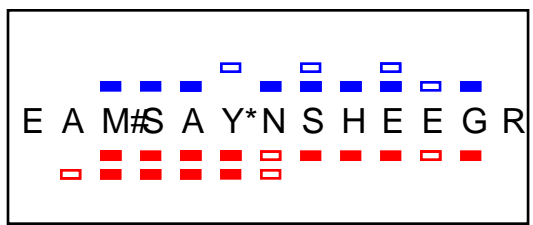

Protein Name: Glycogen debranching enzyme  
 gi Accession: 0  
 Precursor Mass: 788.7902+2  
 Delta Mass: 0.181 ppm  
 XCorr: 55.88

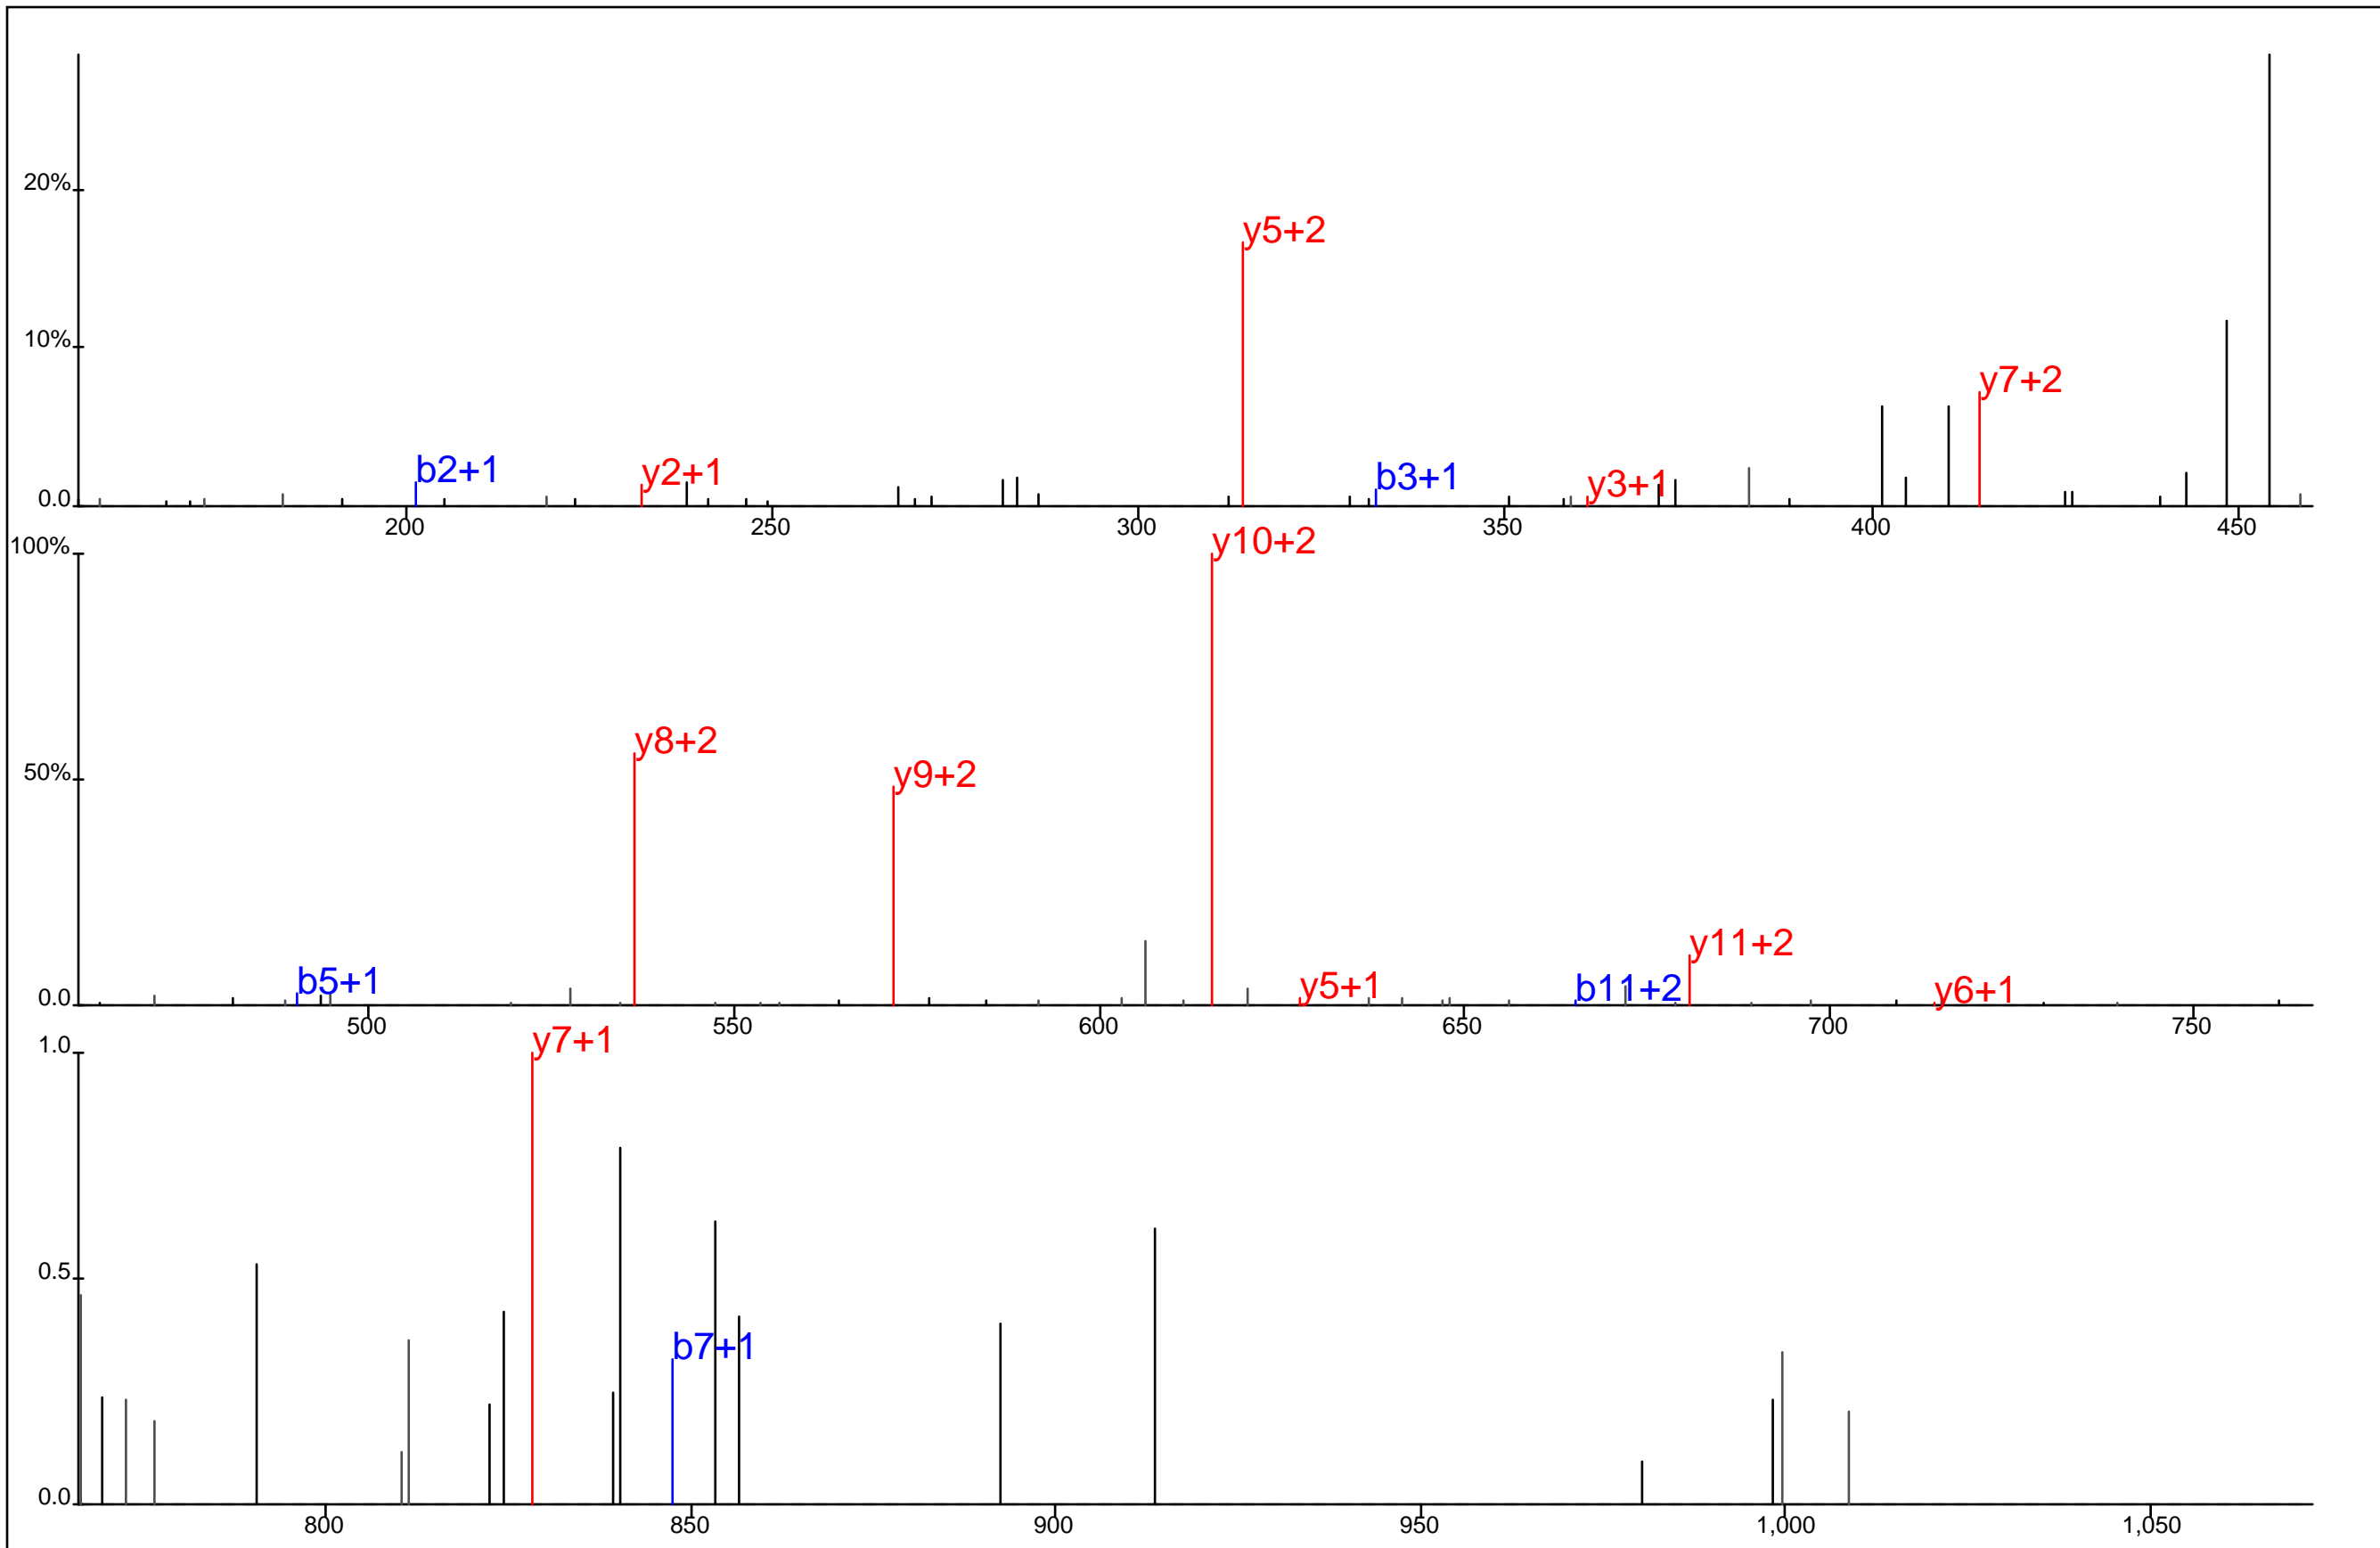

E A M S A Y\* N S H E E G R  
 (Blue boxes highlight the sequence: E A M S A Y\* N S H E E G R)  
 (Red boxes highlight the sequence: E A M S A Y\* N S H E E G R)

Protein Name: Glycogen debranching enzyme  
 gi Accession: 0  
 Precursor Mass: 520.8643+3  
 Delta Mass: 0.122 ppm  
 XCorr: 28.2

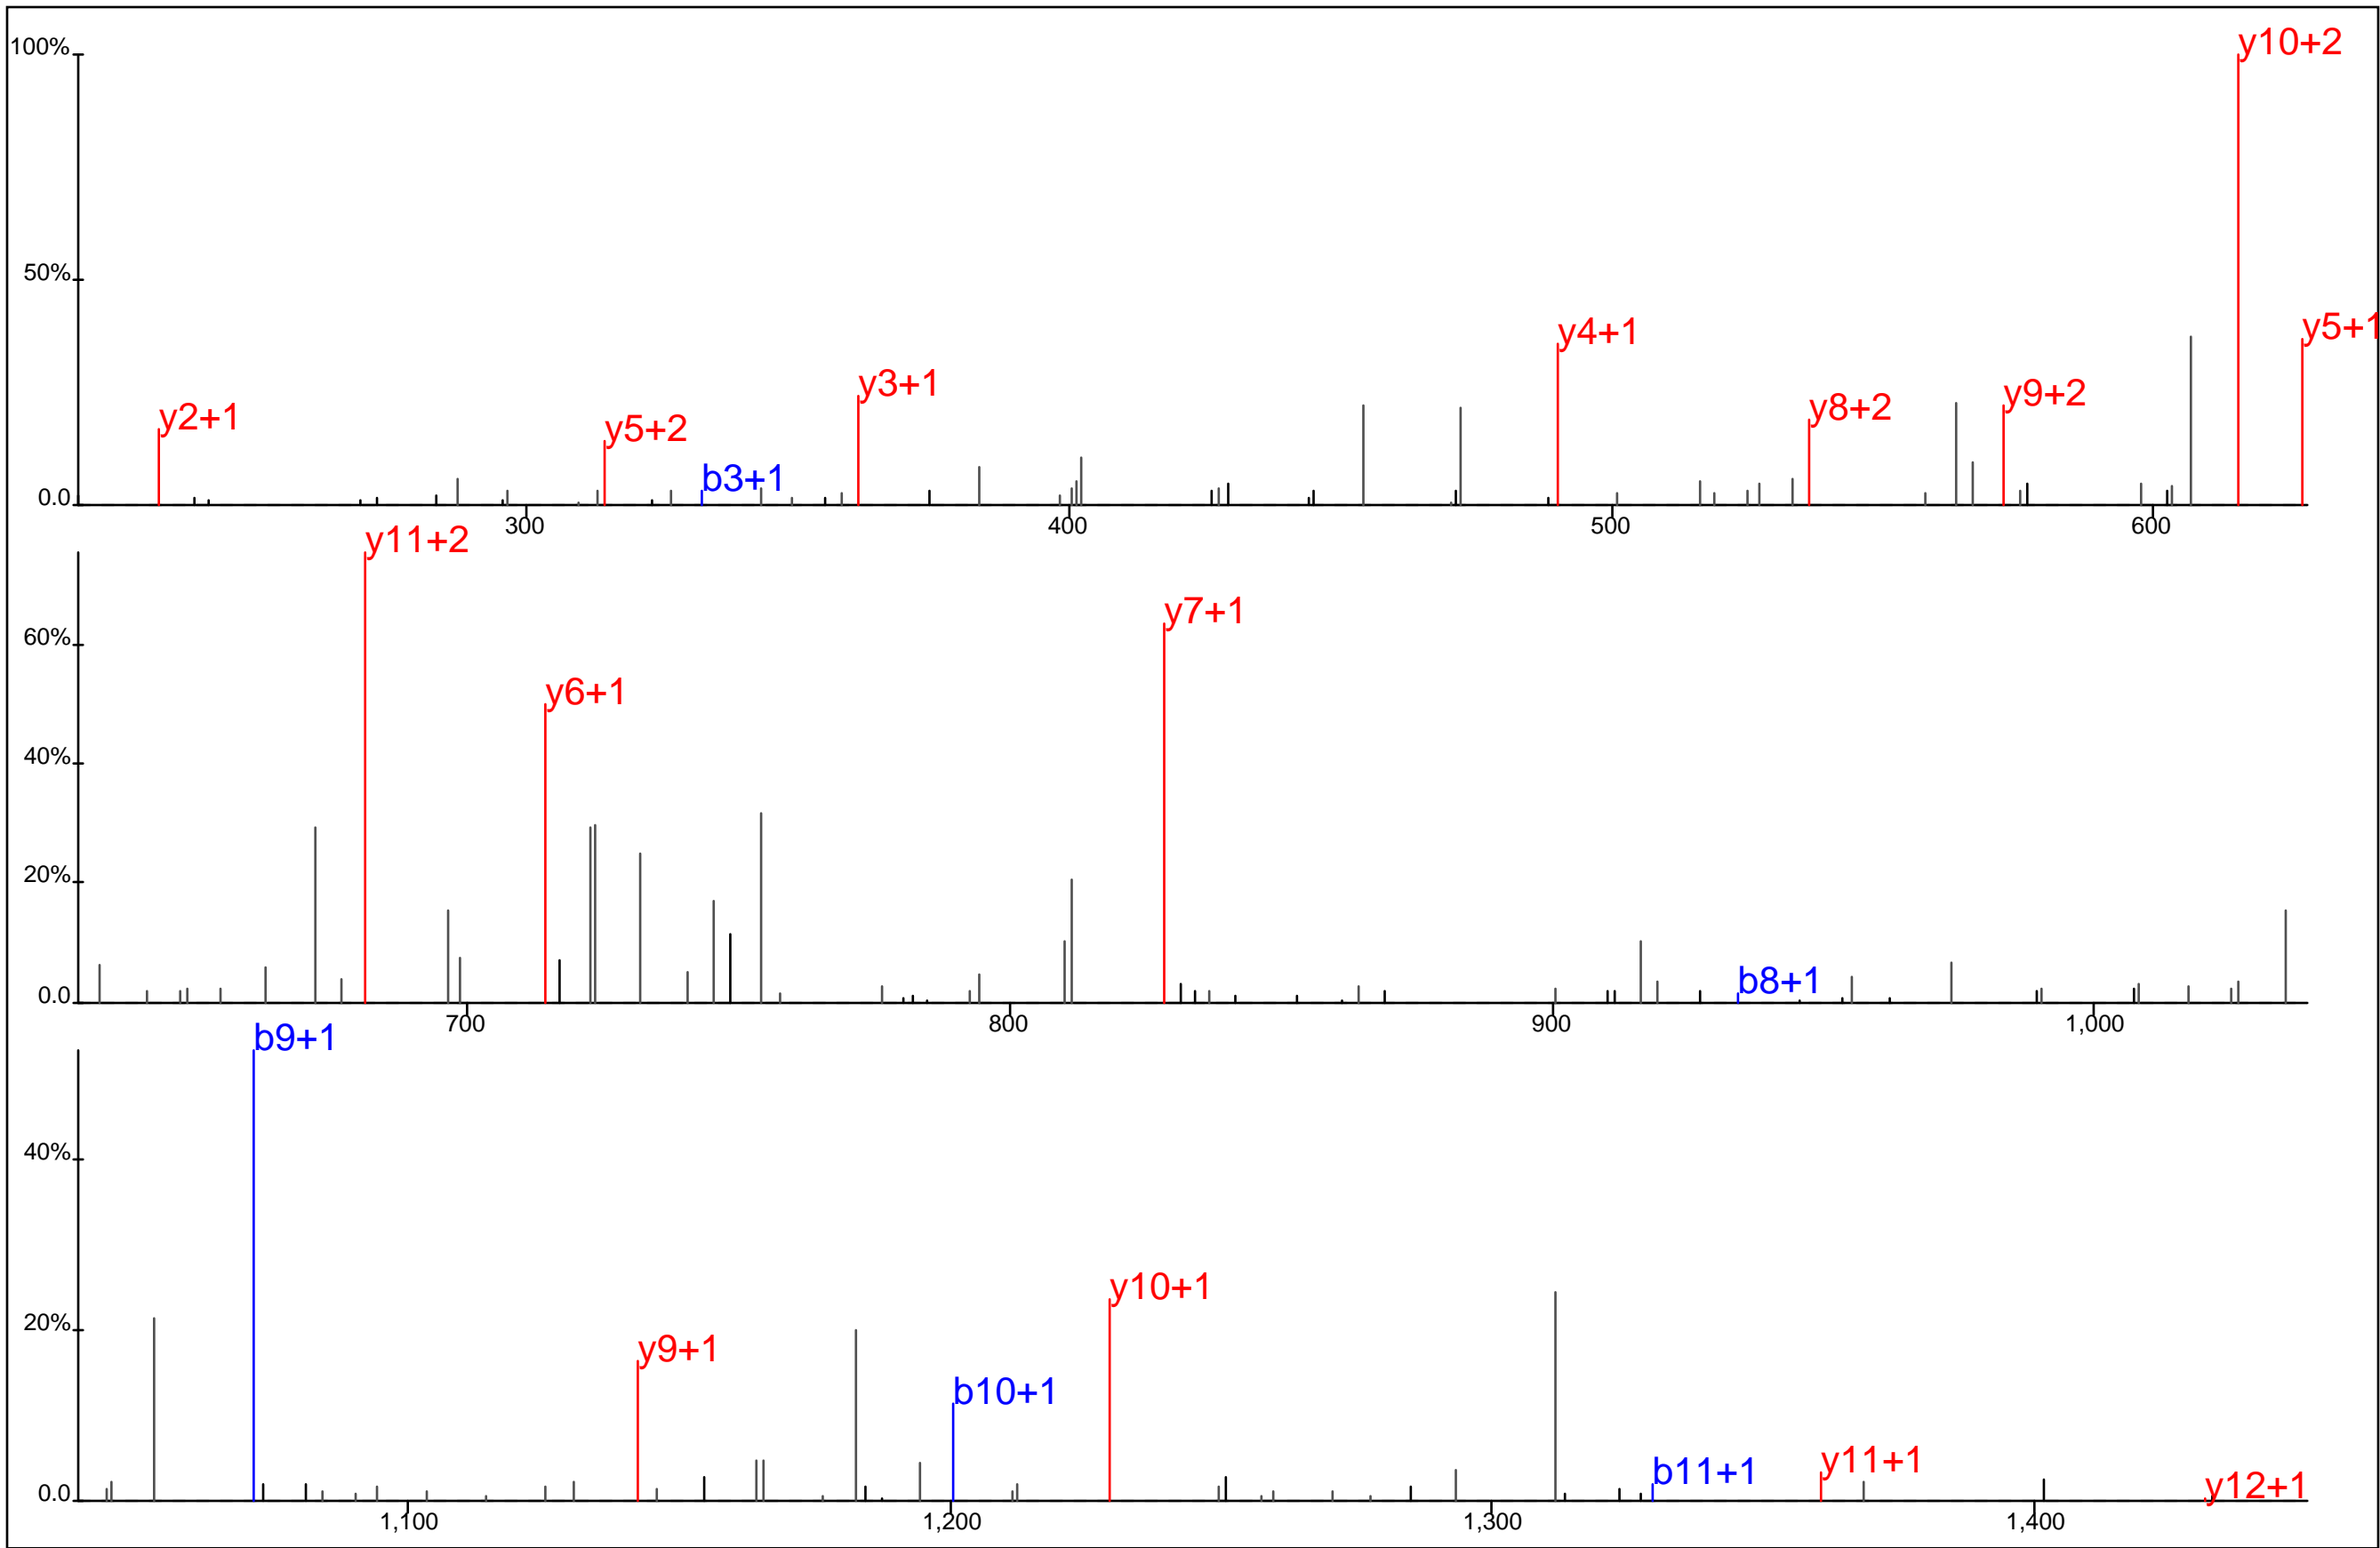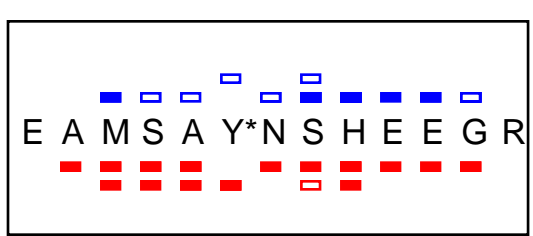

Protein Name: Glycogen debranching enzyme  
 gi Accession: 0  
 Precursor Mass: 780.7932+2  
 Delta Mass: 0.395 ppm  
 XCorr: 78.52

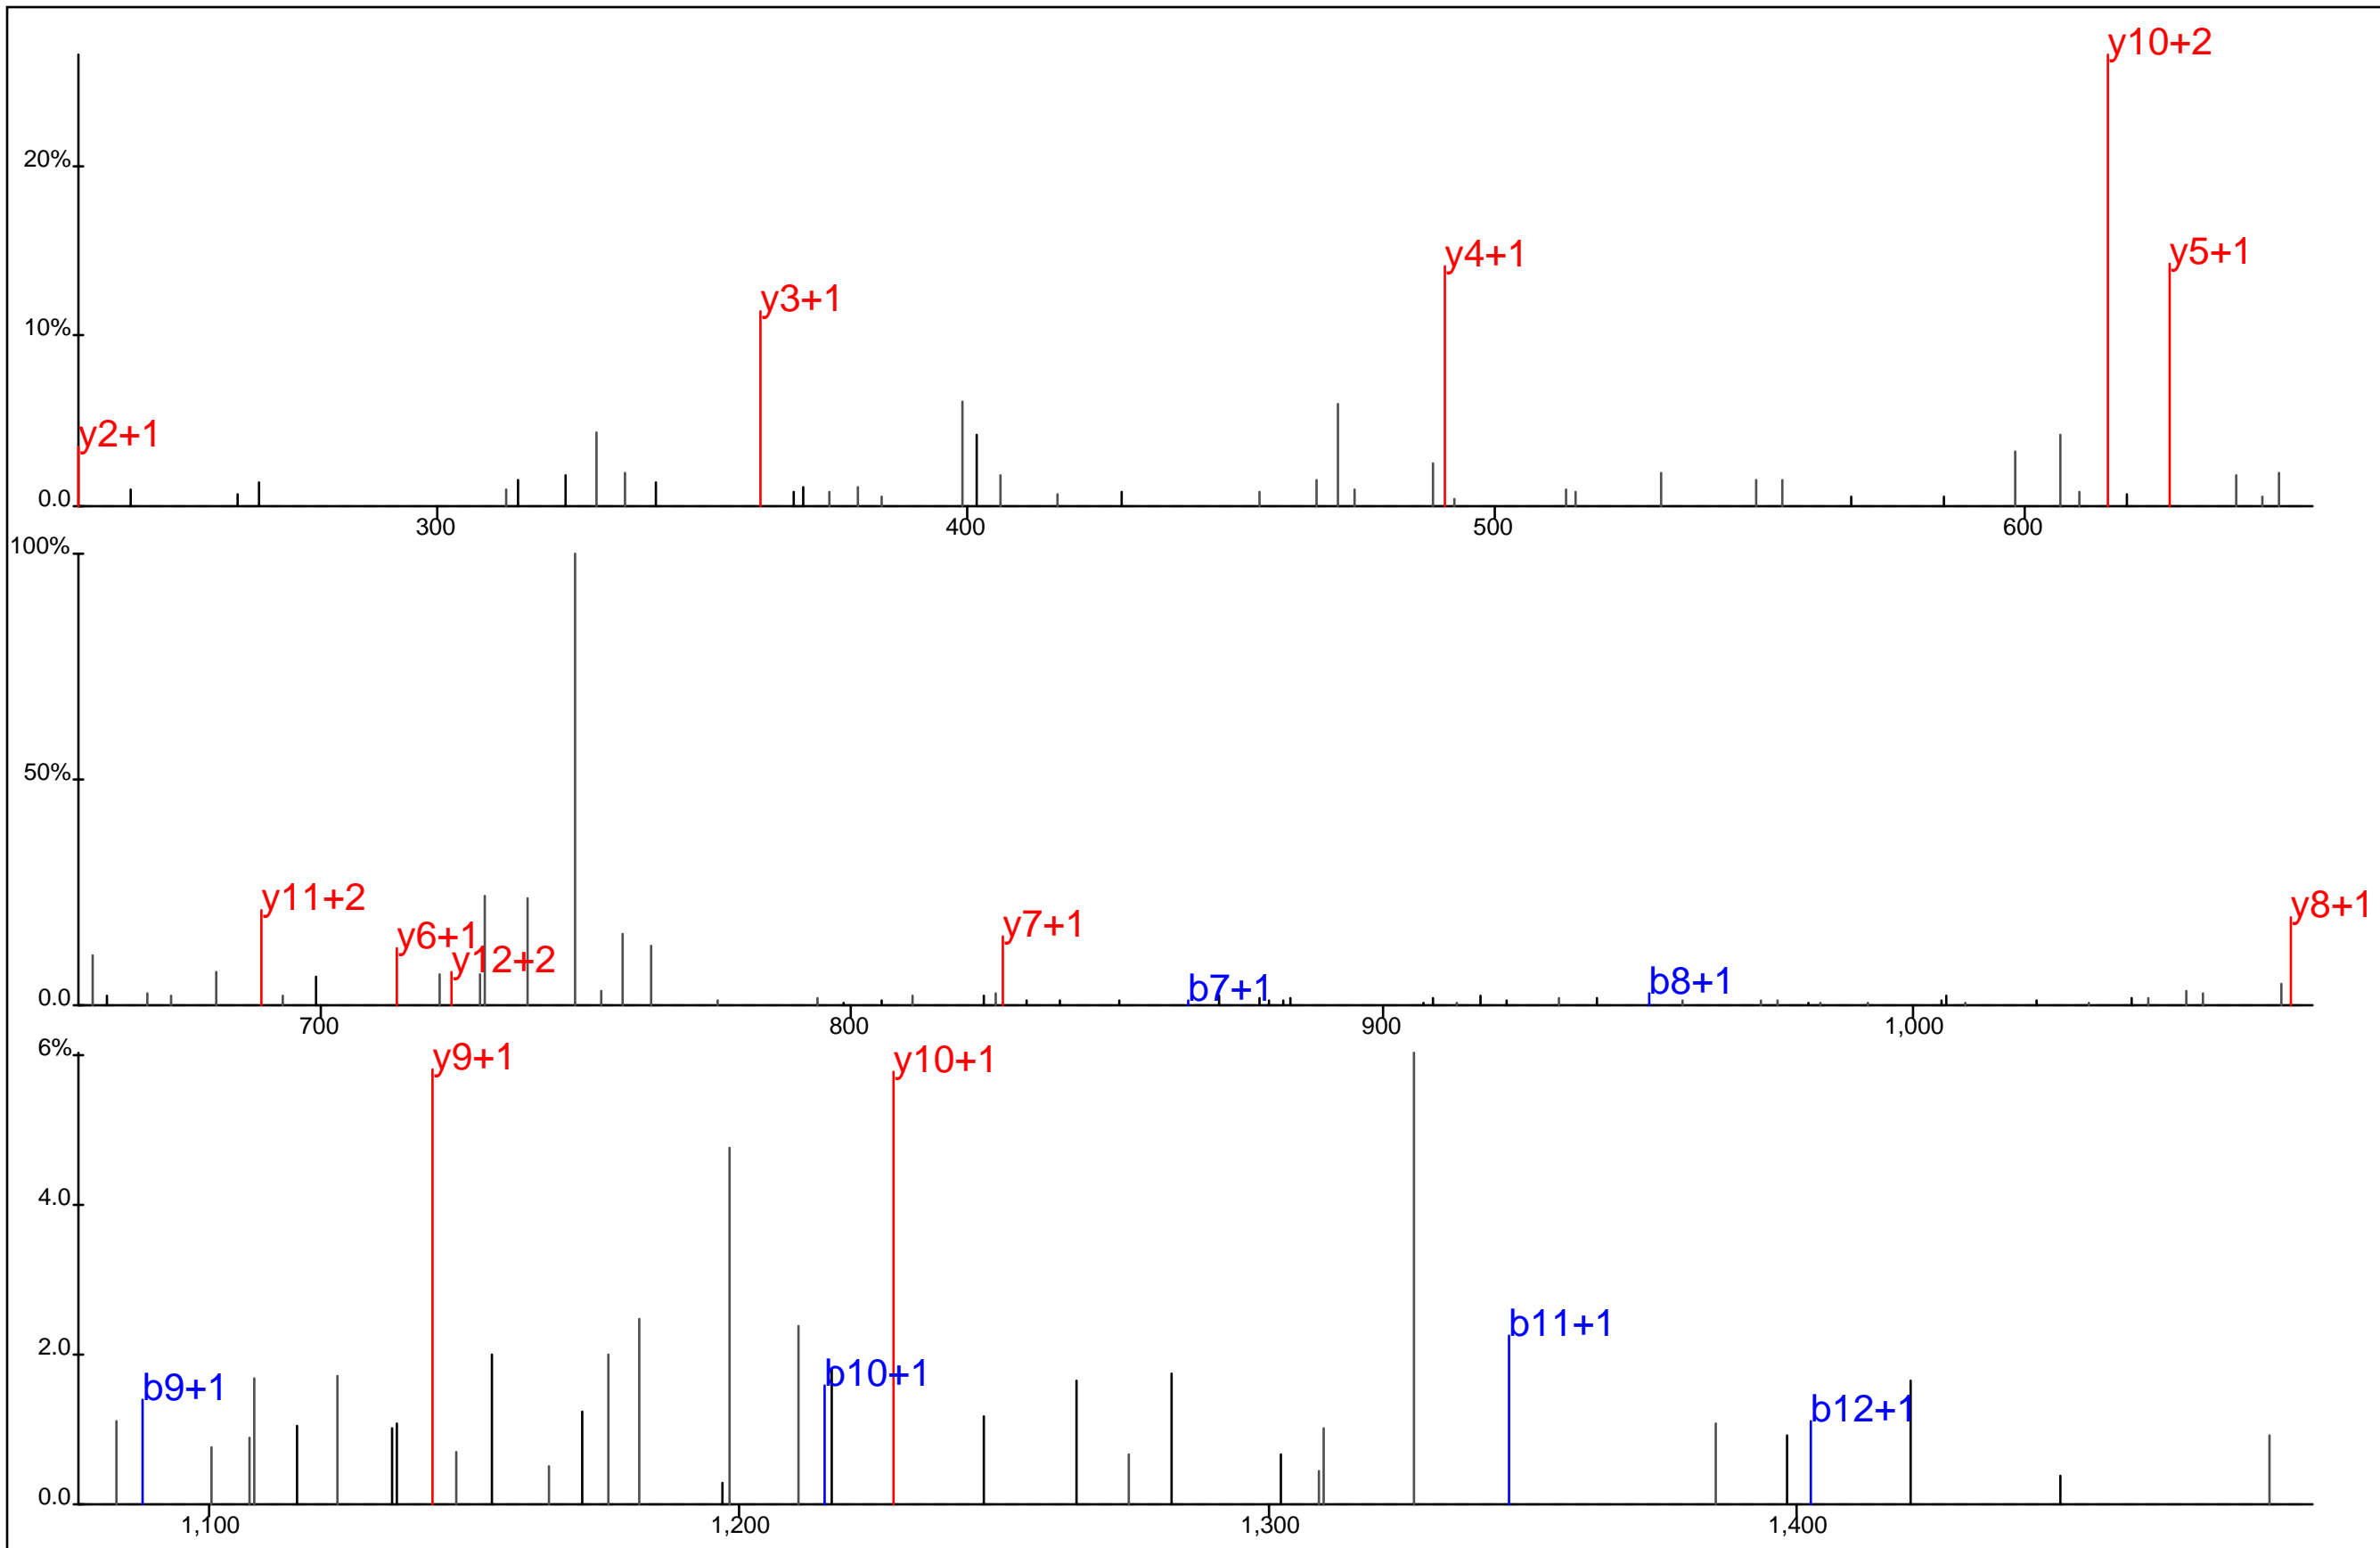

□ □ □ □ □ □  
 E A M ~~S~~ A Y\* N S H E E G R  
□ □ □ □ □ □ □ □ □

Protein Name: Glycogen debranching enzyme  
 gi Accession: 0  
 Precursor Mass: 788.7895+2  
 Delta Mass: 1.033 ppm  
 XCorr: 48.51

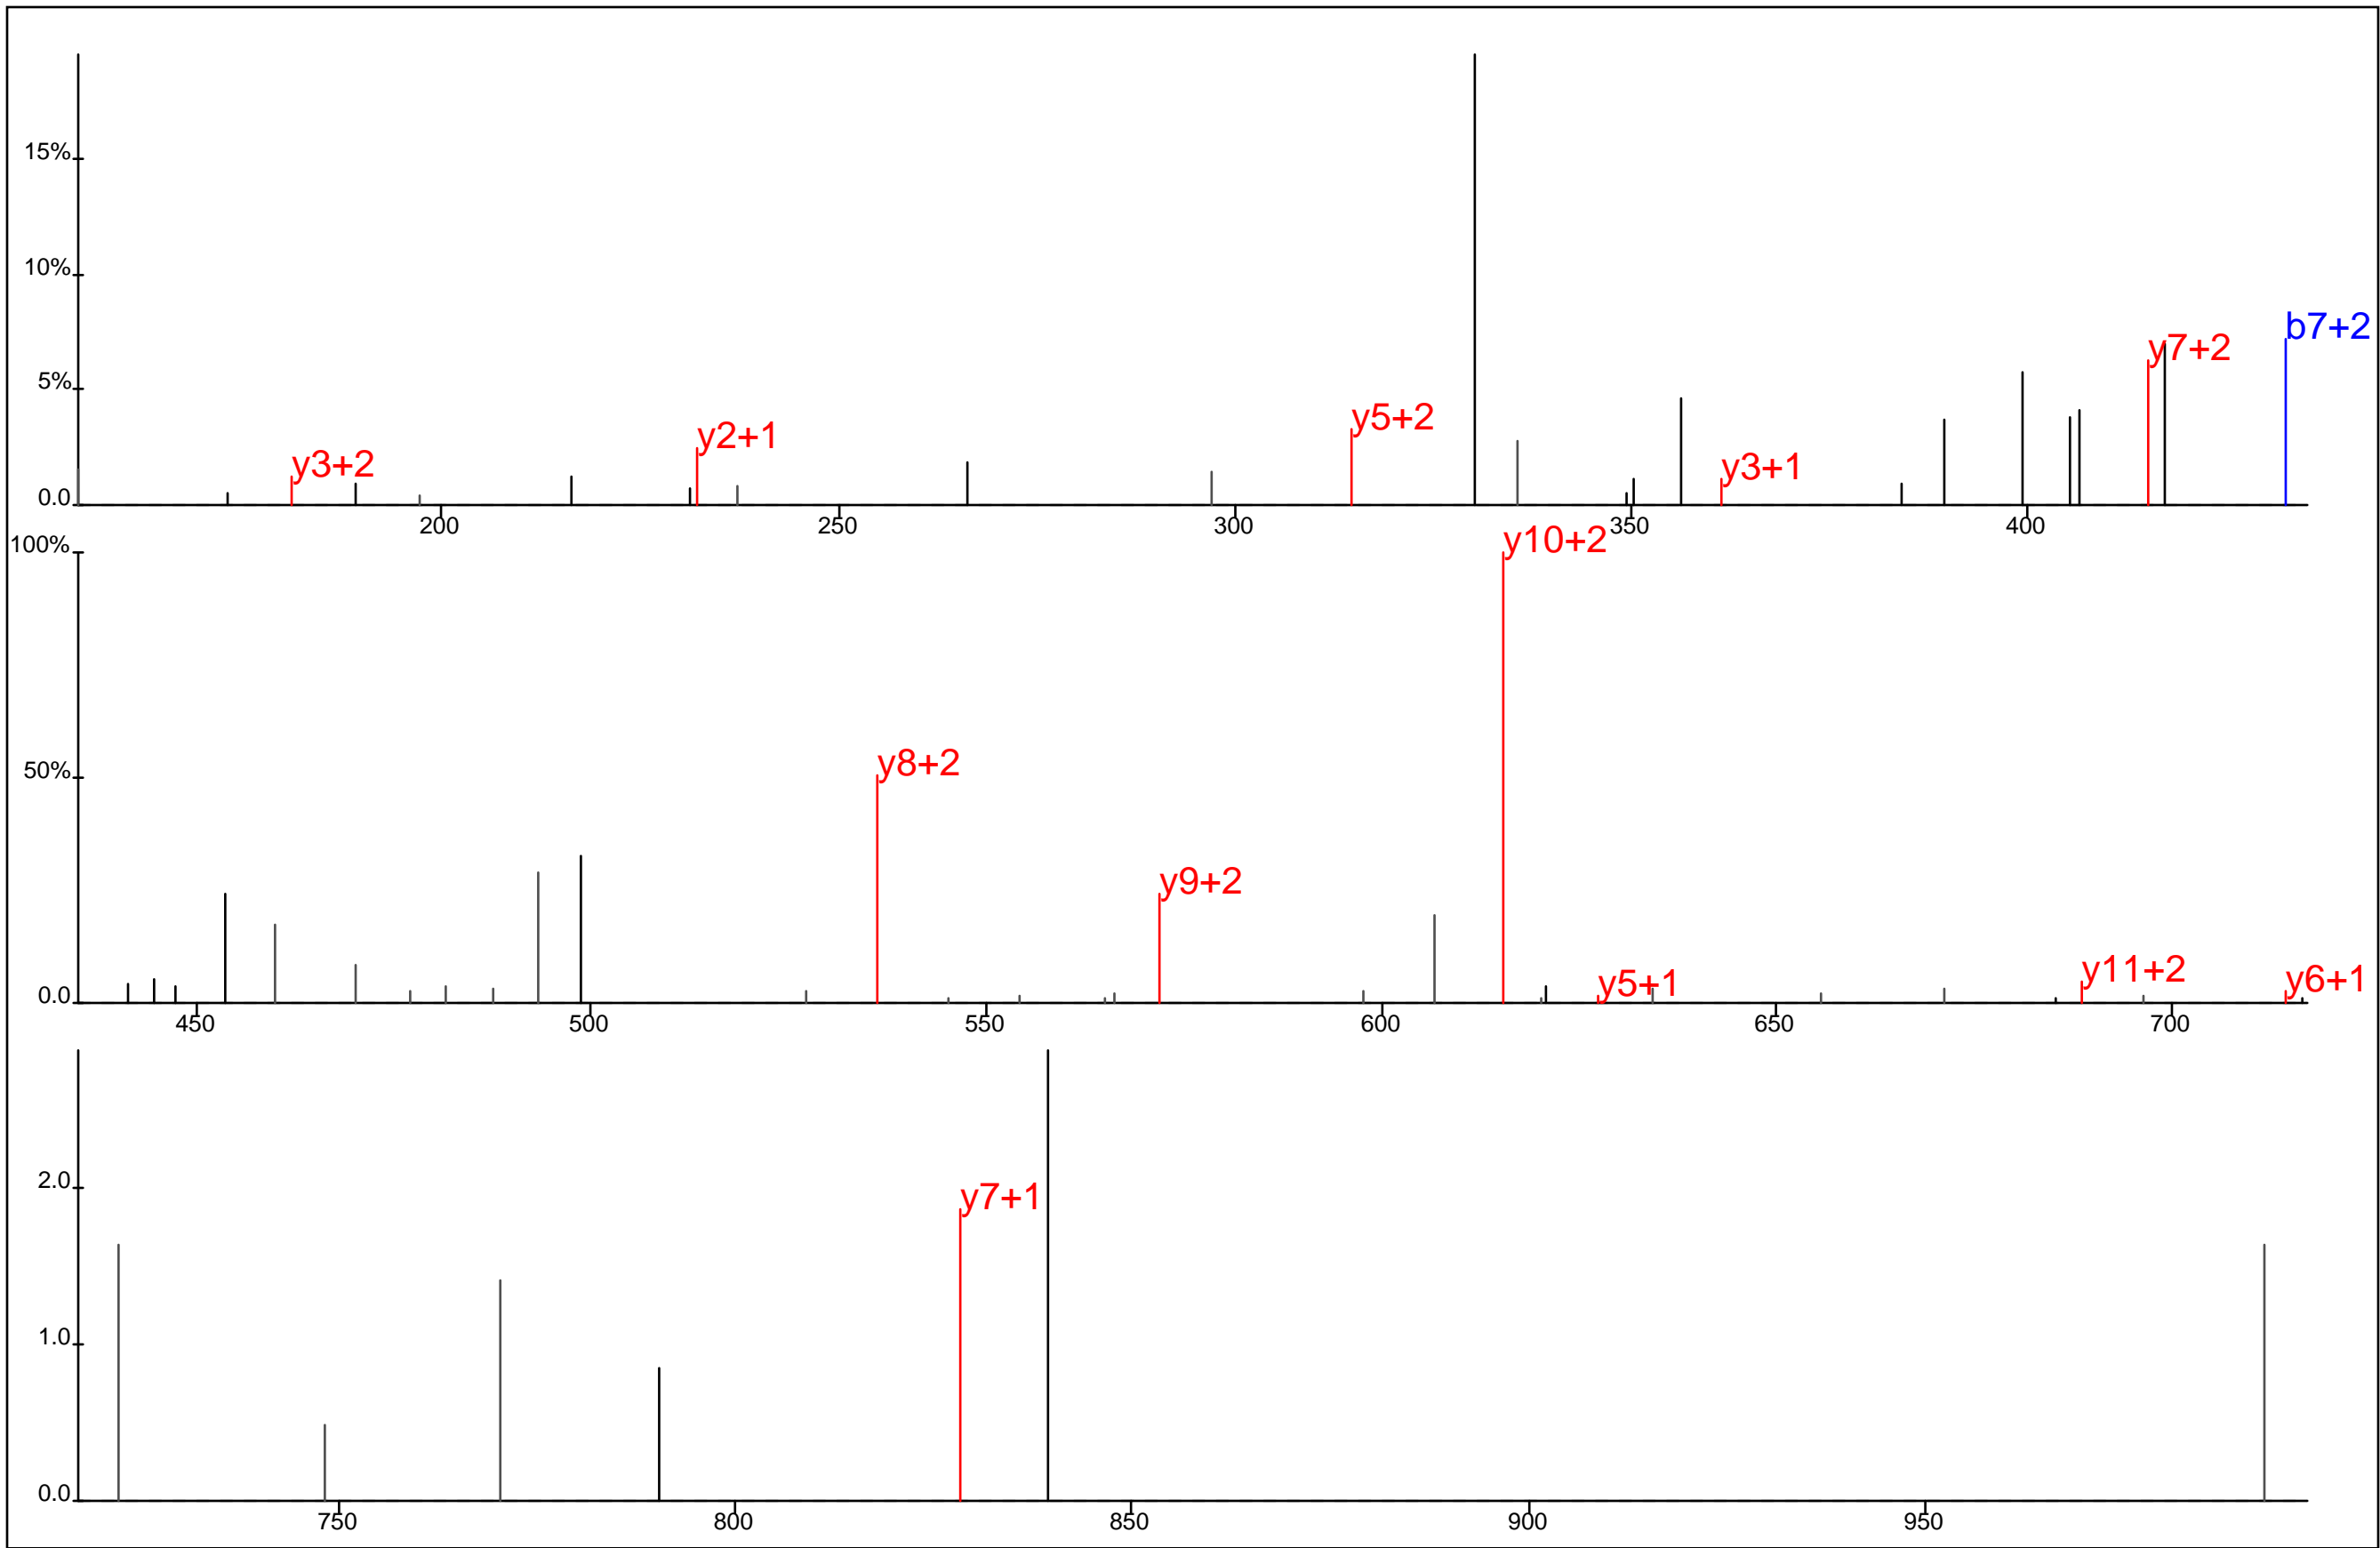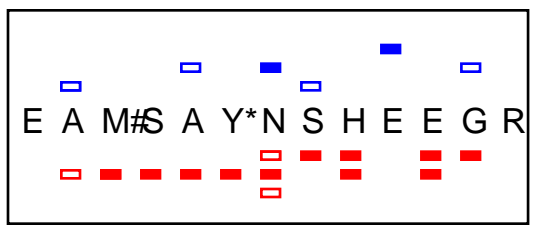

Protein Name: Glycogen debranching enzyme  
 gi Accession: 0  
 Precursor Mass: 526.1958+3  
 Delta Mass: 0.305 ppm  
 XCorr: 30.44



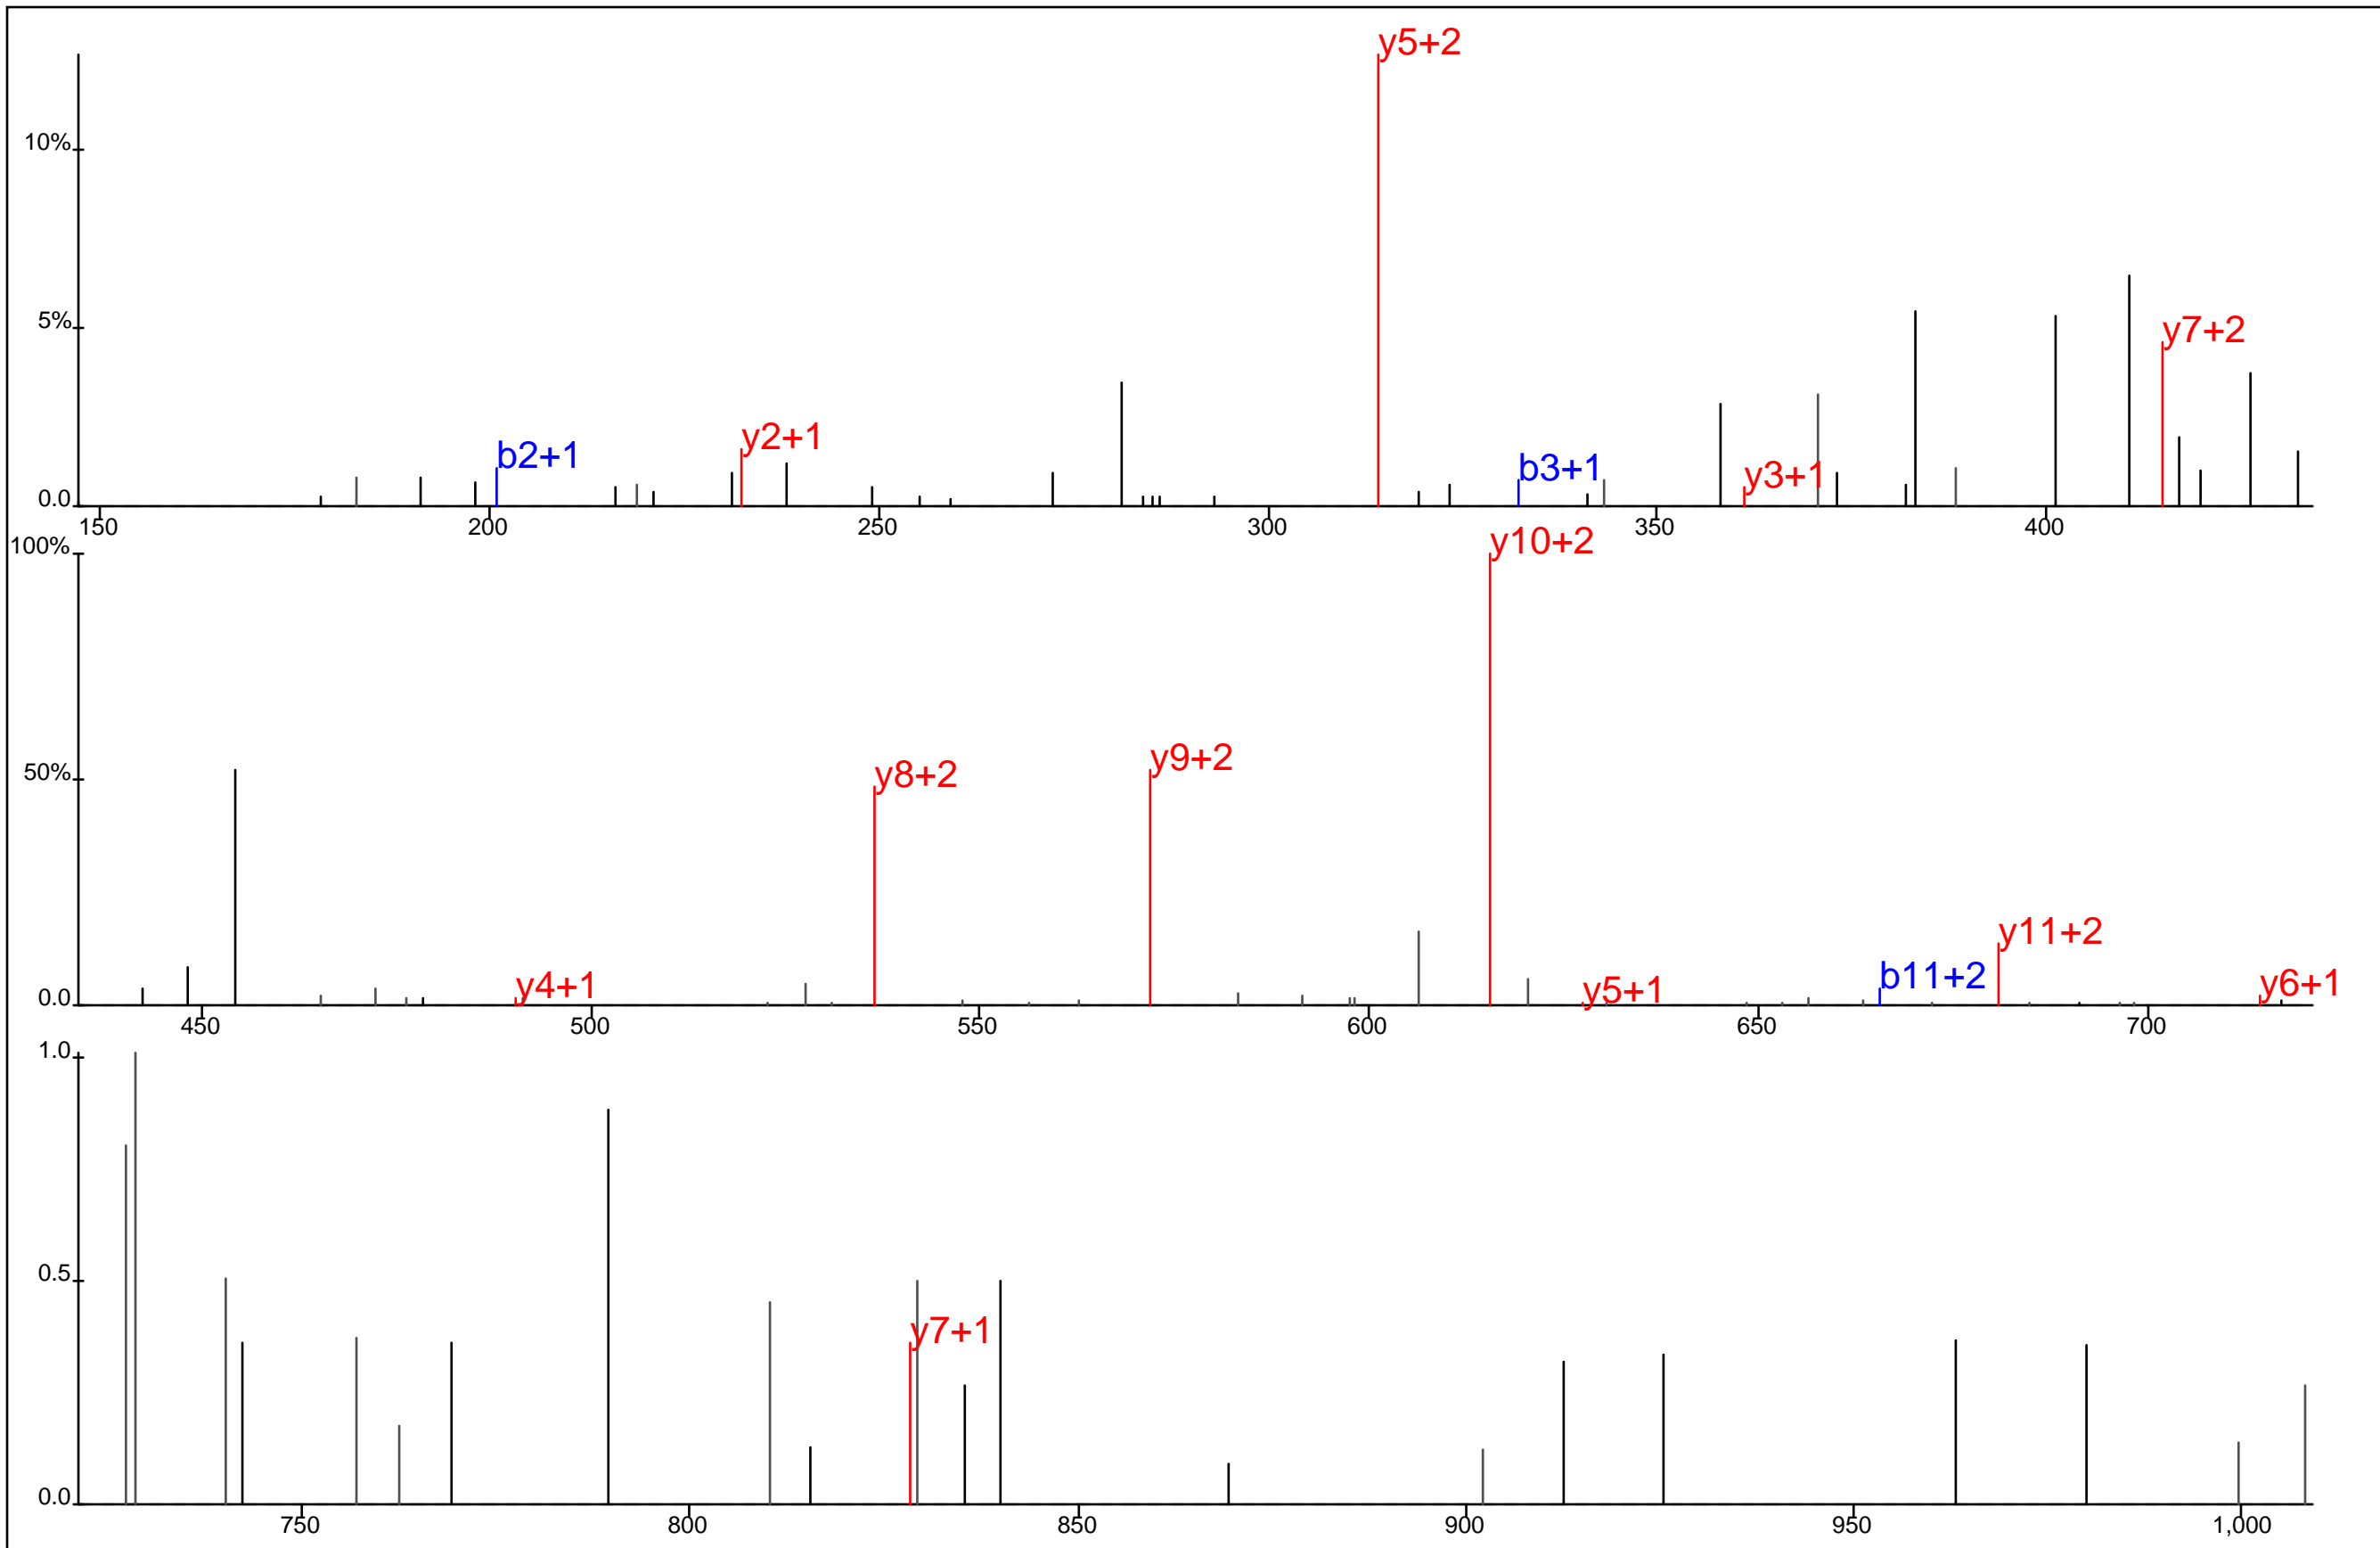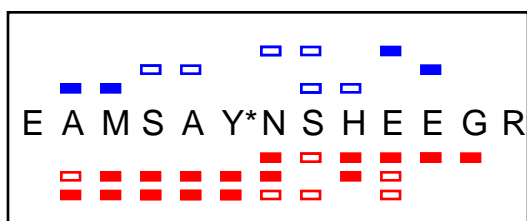

Protein Name: Glycogen debranching enzyme  
 gi Accession: 0  
 Precursor Mass: 520.8640+3  
 Delta Mass: 0.708 ppm  
 XCorr: 28.83

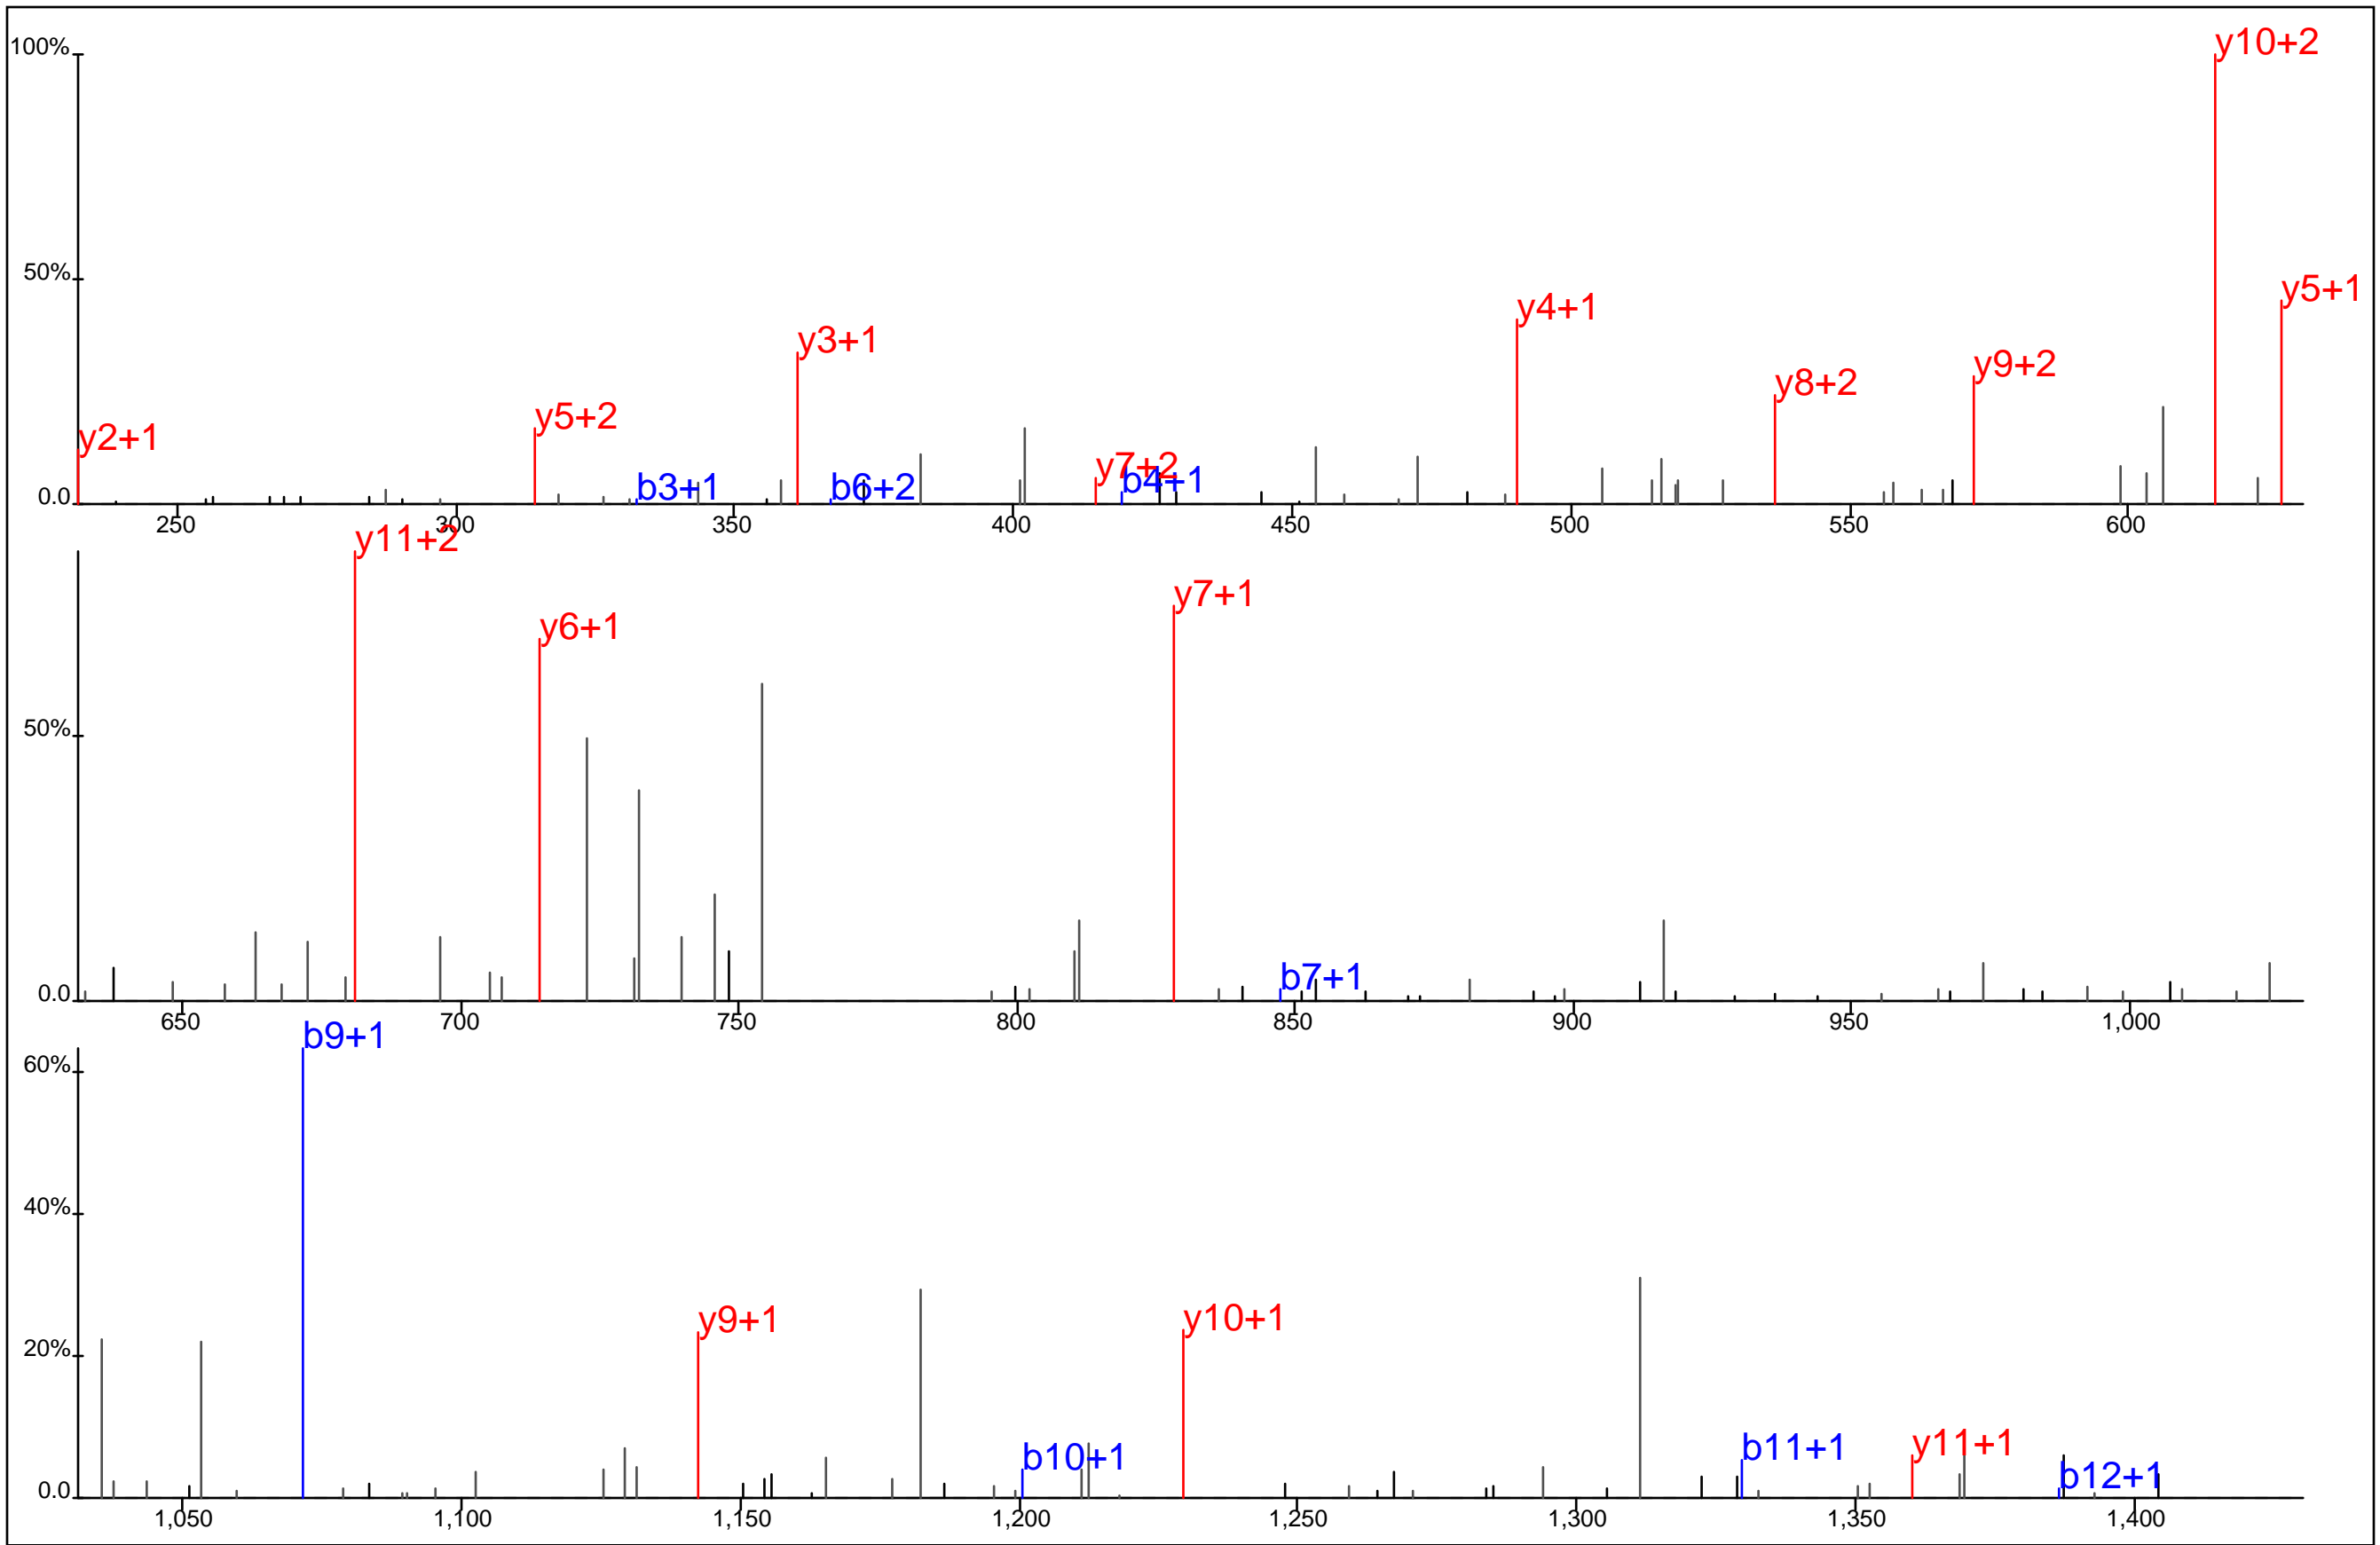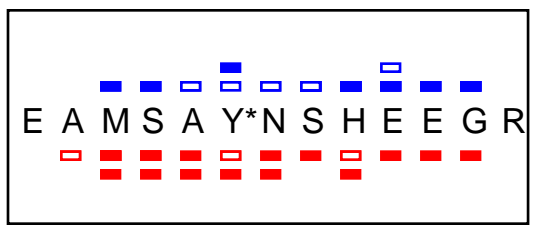

Protein Name: Glycogen debranching enzyme  
 gi Accession: 0  
 Precursor Mass: 780.7943+2  
 Delta Mass: 1.802 ppm  
 XCorr: 69.47

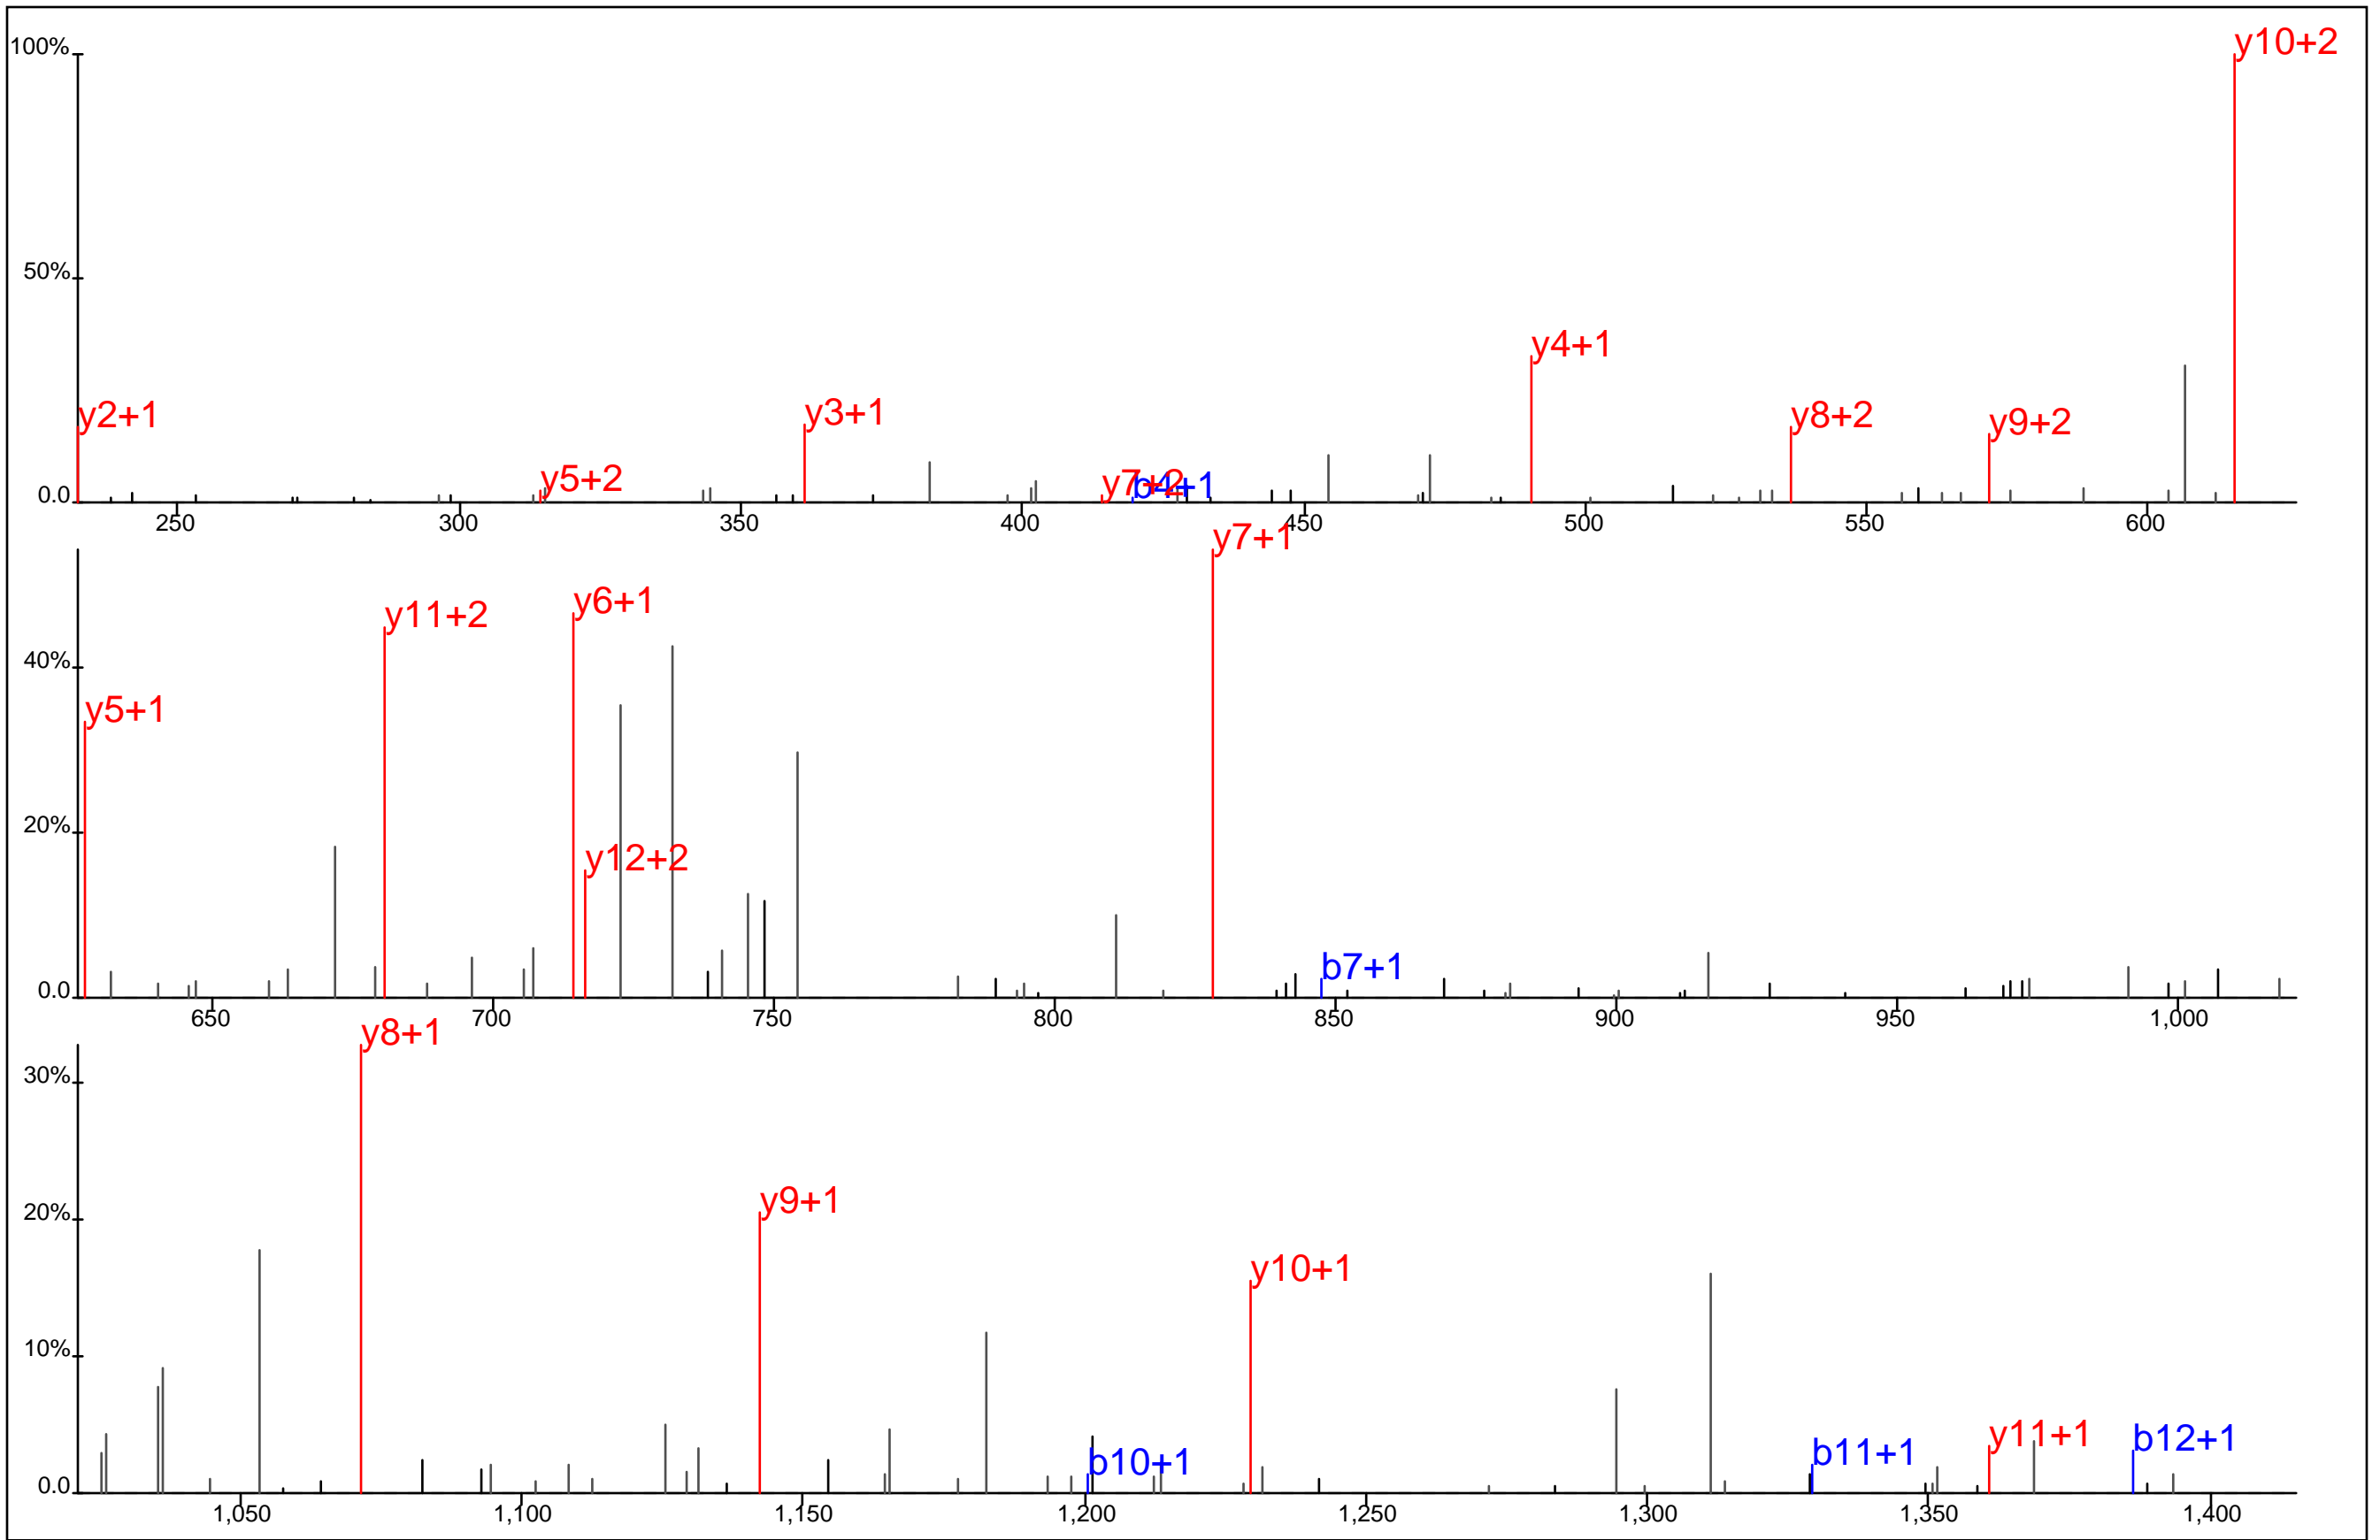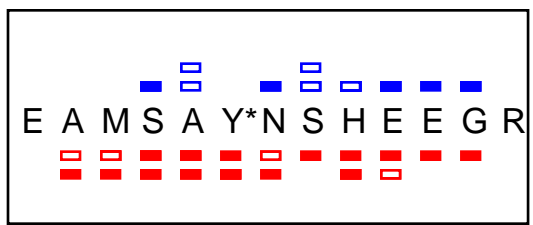

Protein Name: Glycogen debranching enzyme  
 gi Accession: 0  
 Precursor Mass: 780.7927+2  
 Delta Mass: 0.153 ppm  
 XCorr: 78.63

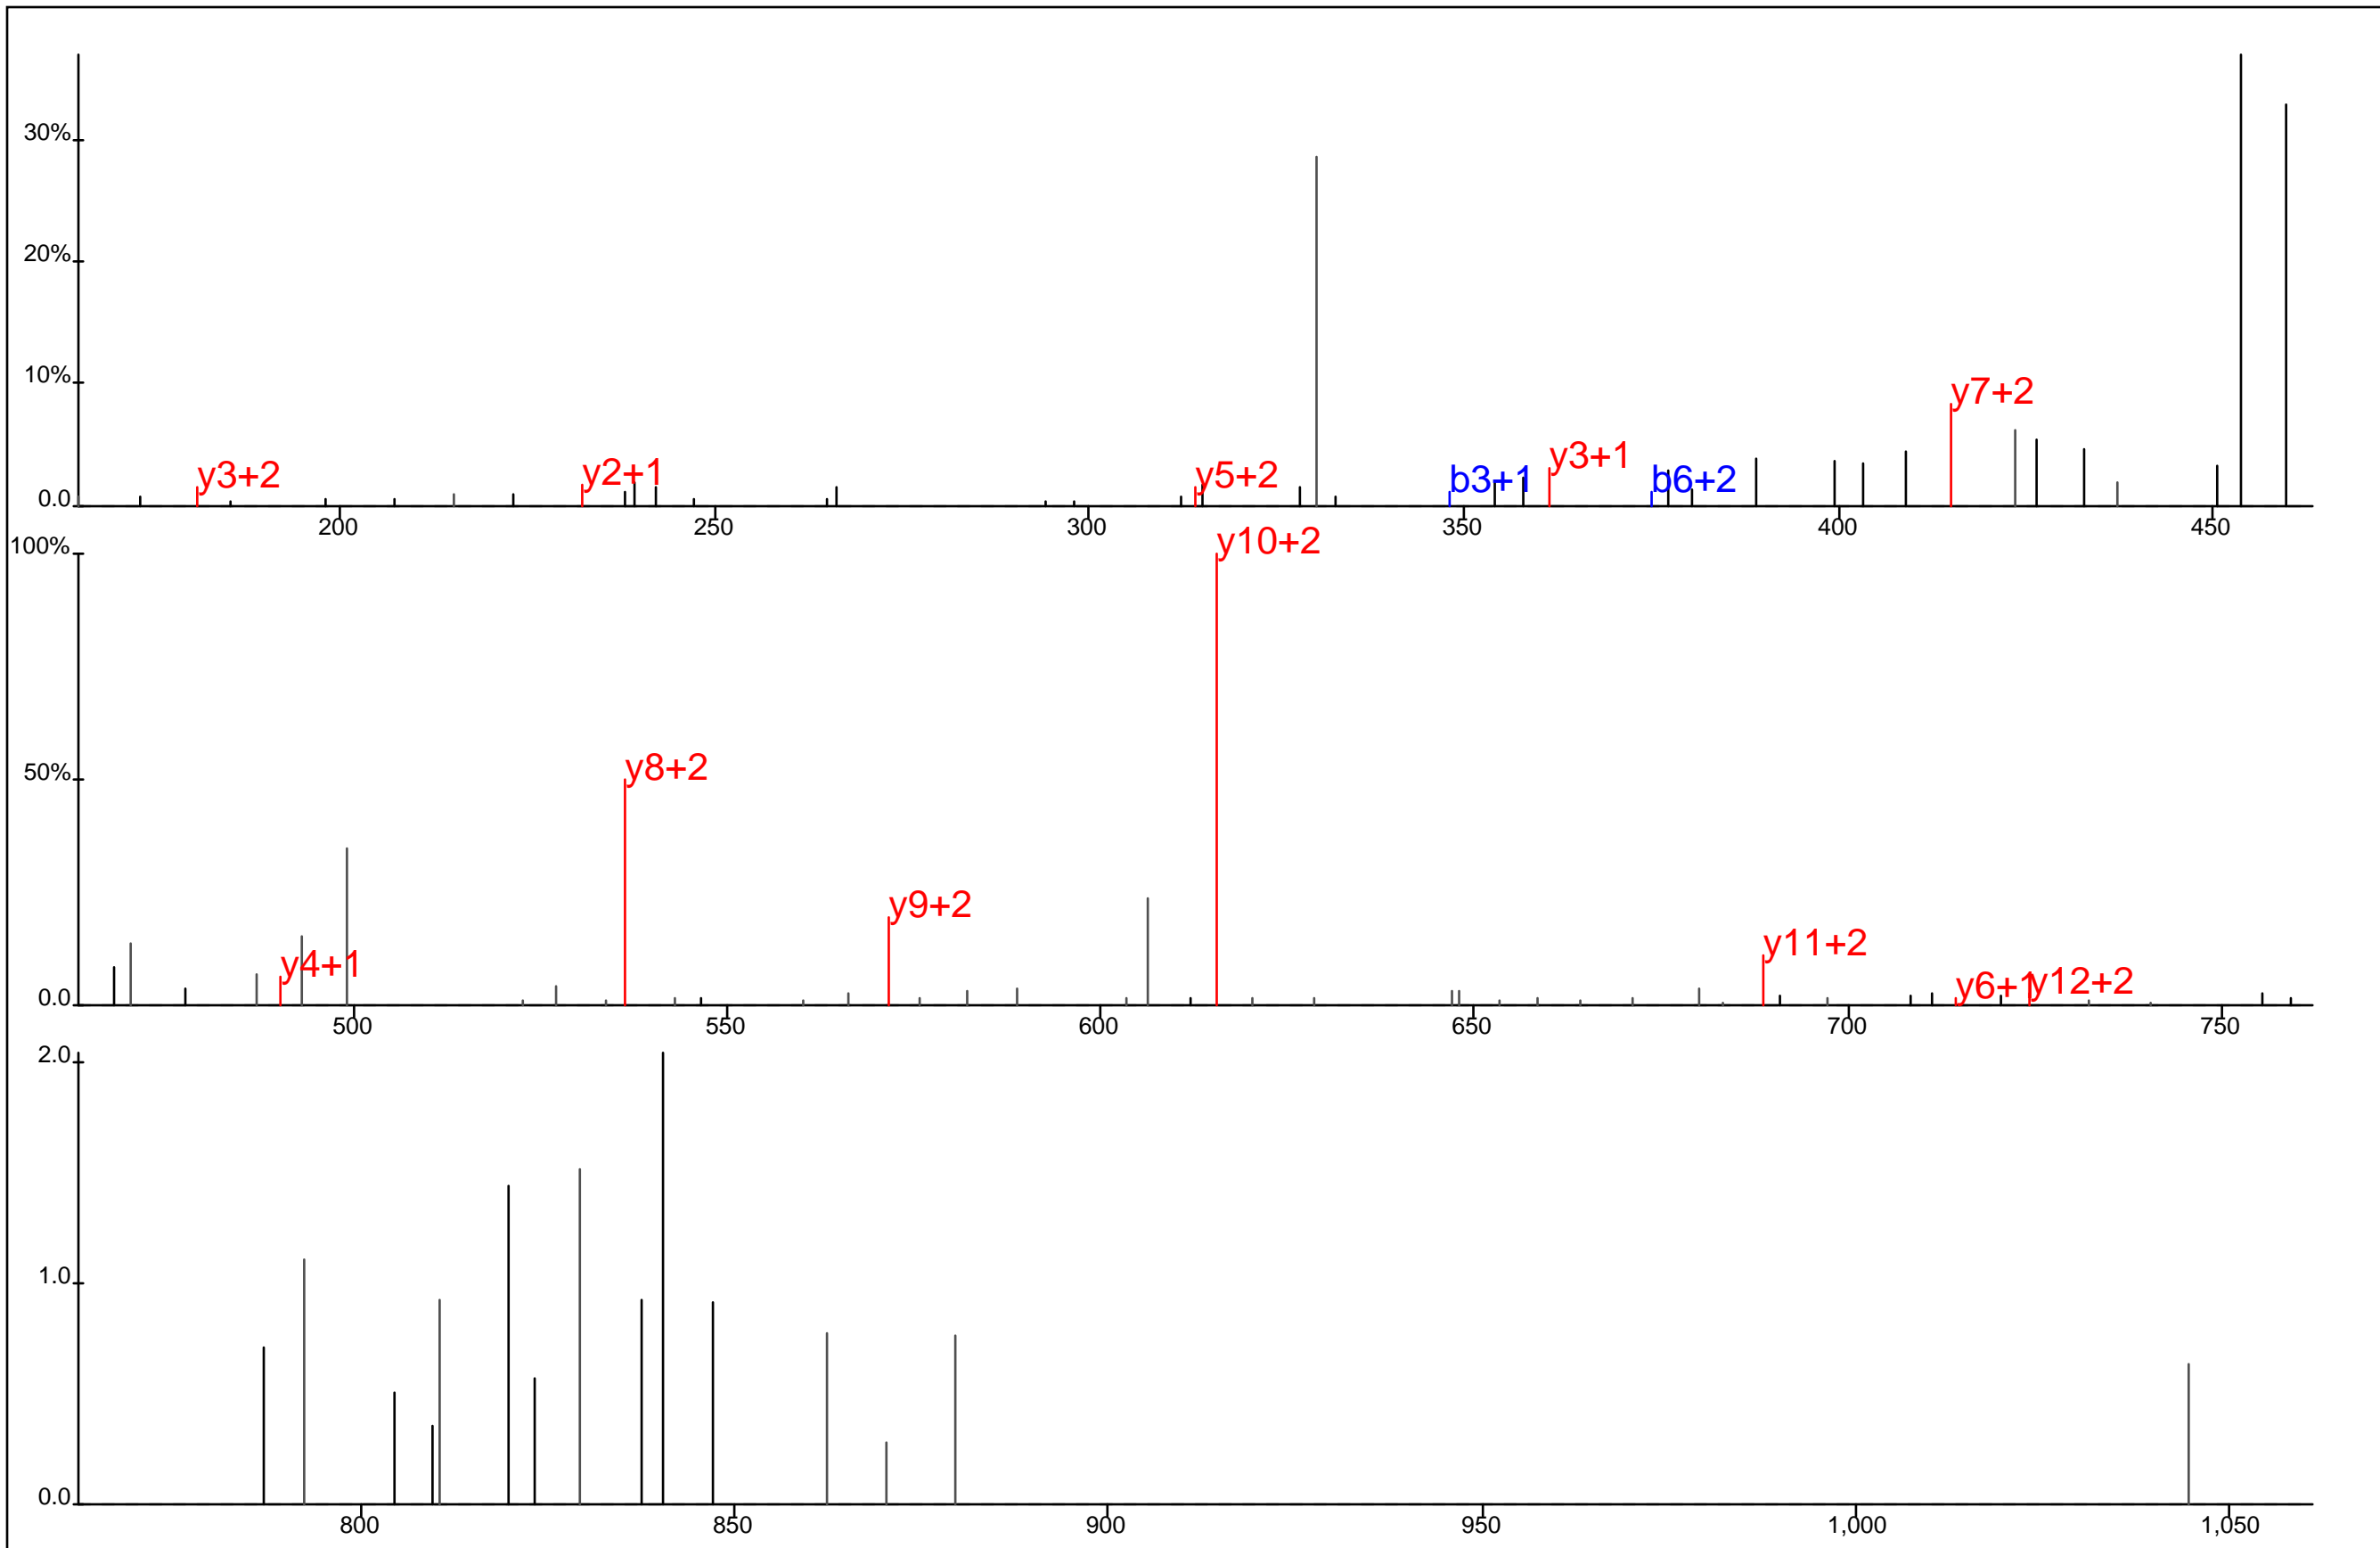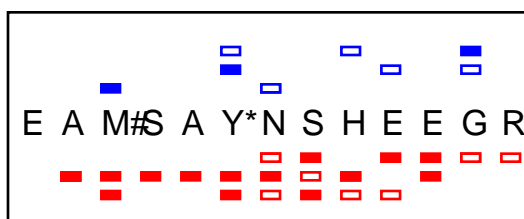

Protein Name: Glycogen debranching enzyme  
 gi Accession: 0  
 Precursor Mass: 526.1959+3  
 Delta Mass: 0.189 ppm  
 XCorr: 35.93

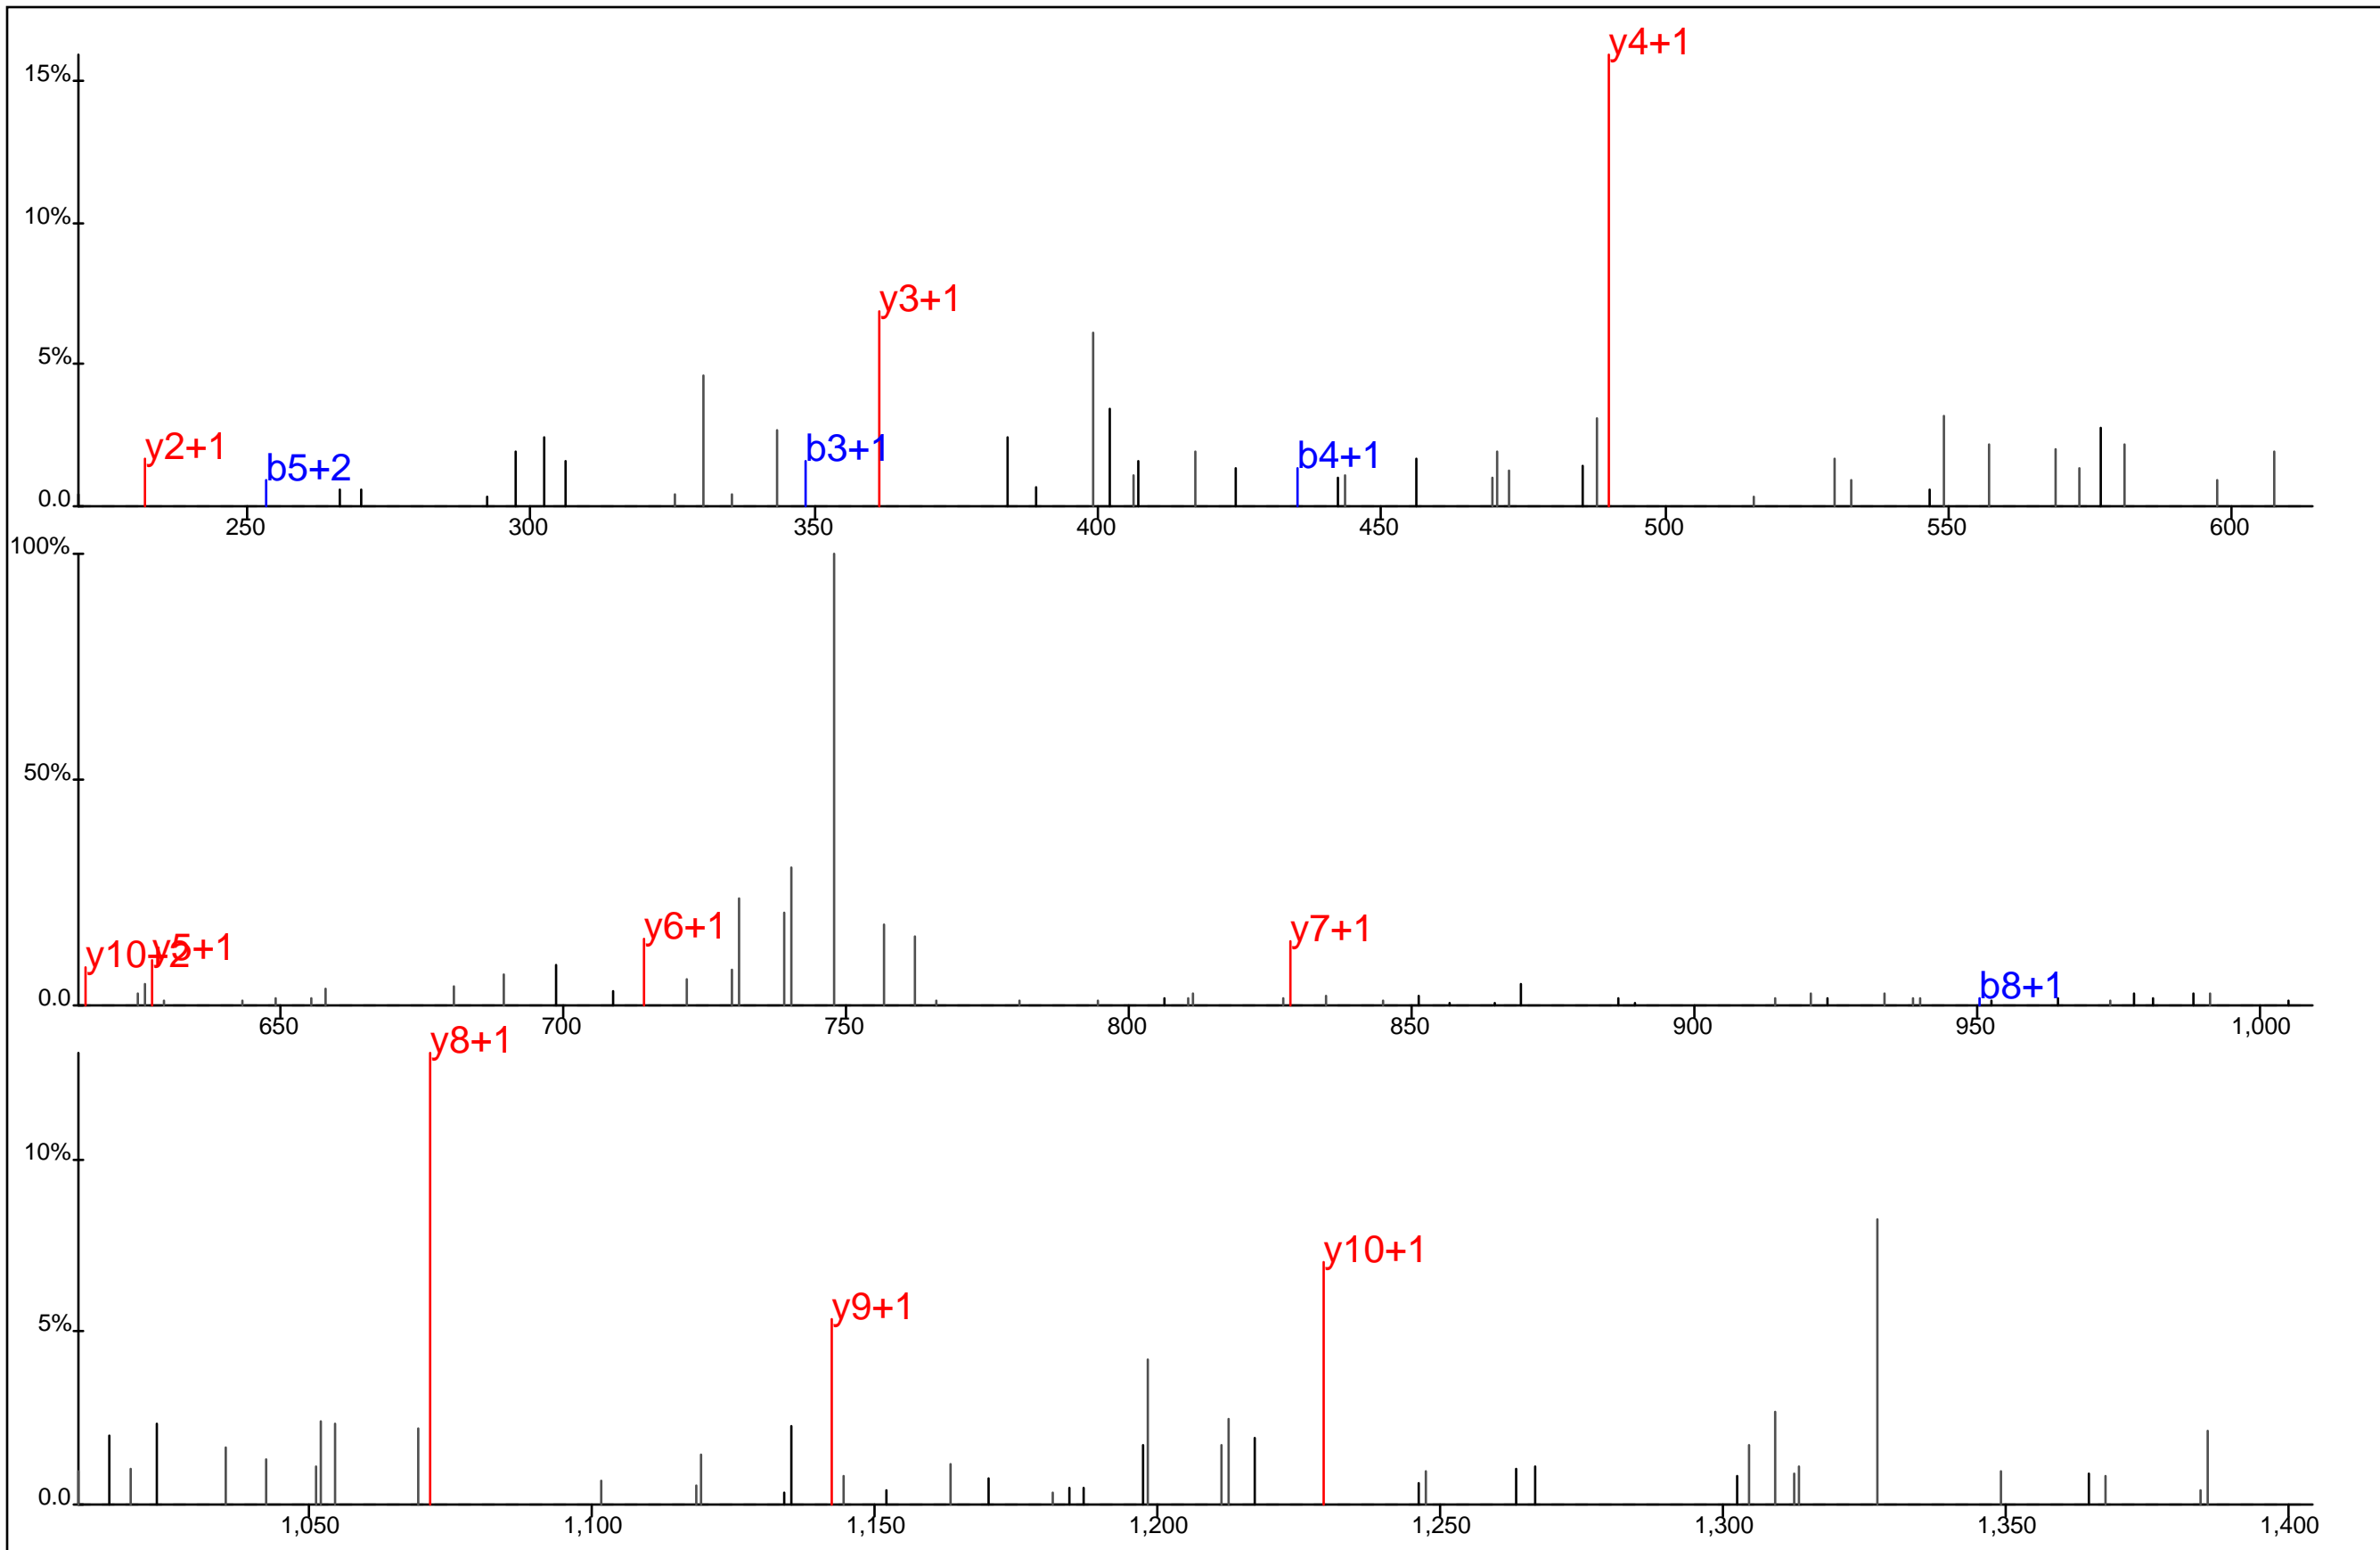

E A M S A Y\* N S H E E G R  
■ ■ ■ ■ ■ ■ ■ ■ ■ ■  
□ □ □ □ □ □ □ □ □ □

Protein Name: Glycogen debranching enzyme  
 gi Accession: 0  
 Precursor Mass: 788.7902+2  
 Delta Mass: 0.181 ppm  
 XCorr: 50.2

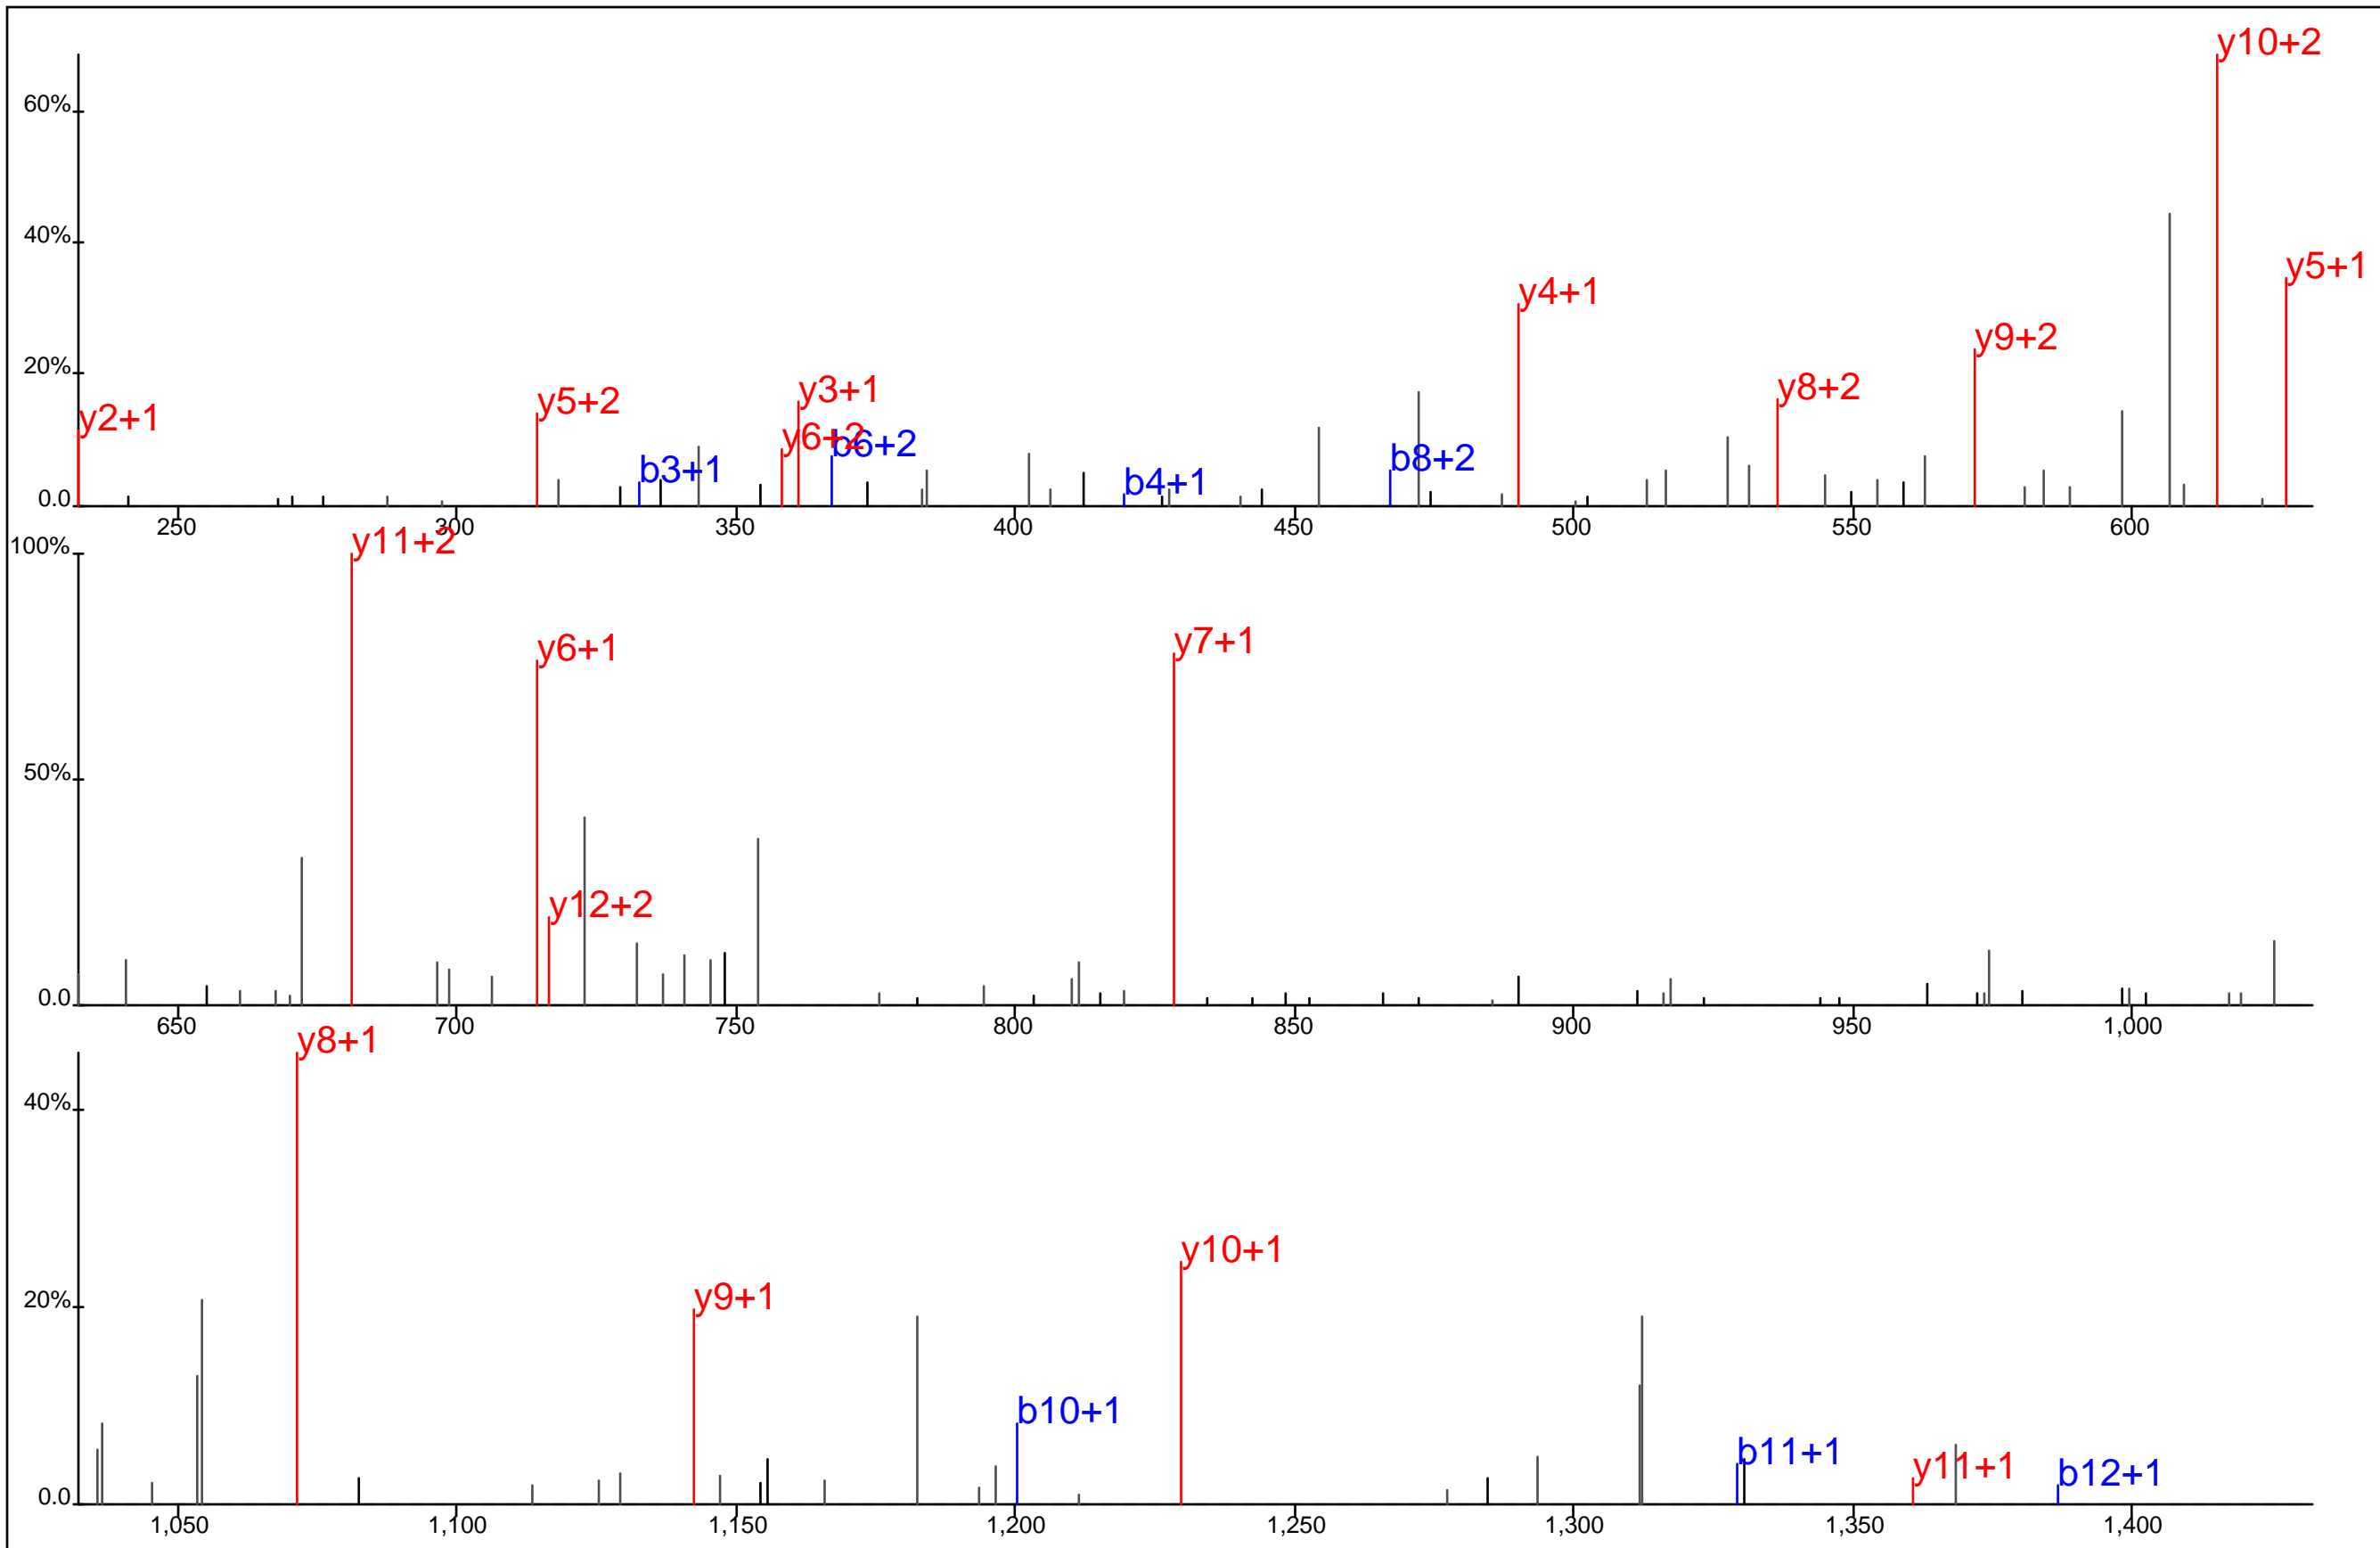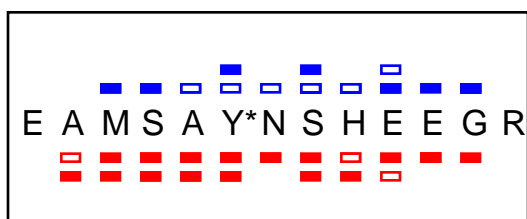

Protein Name: Glycogen debranching enzyme  
 gi Accession: 0  
 Precursor Mass: 780.7923+2  
 Delta Mass: 0.701 ppm  
 XCorr: 75.49

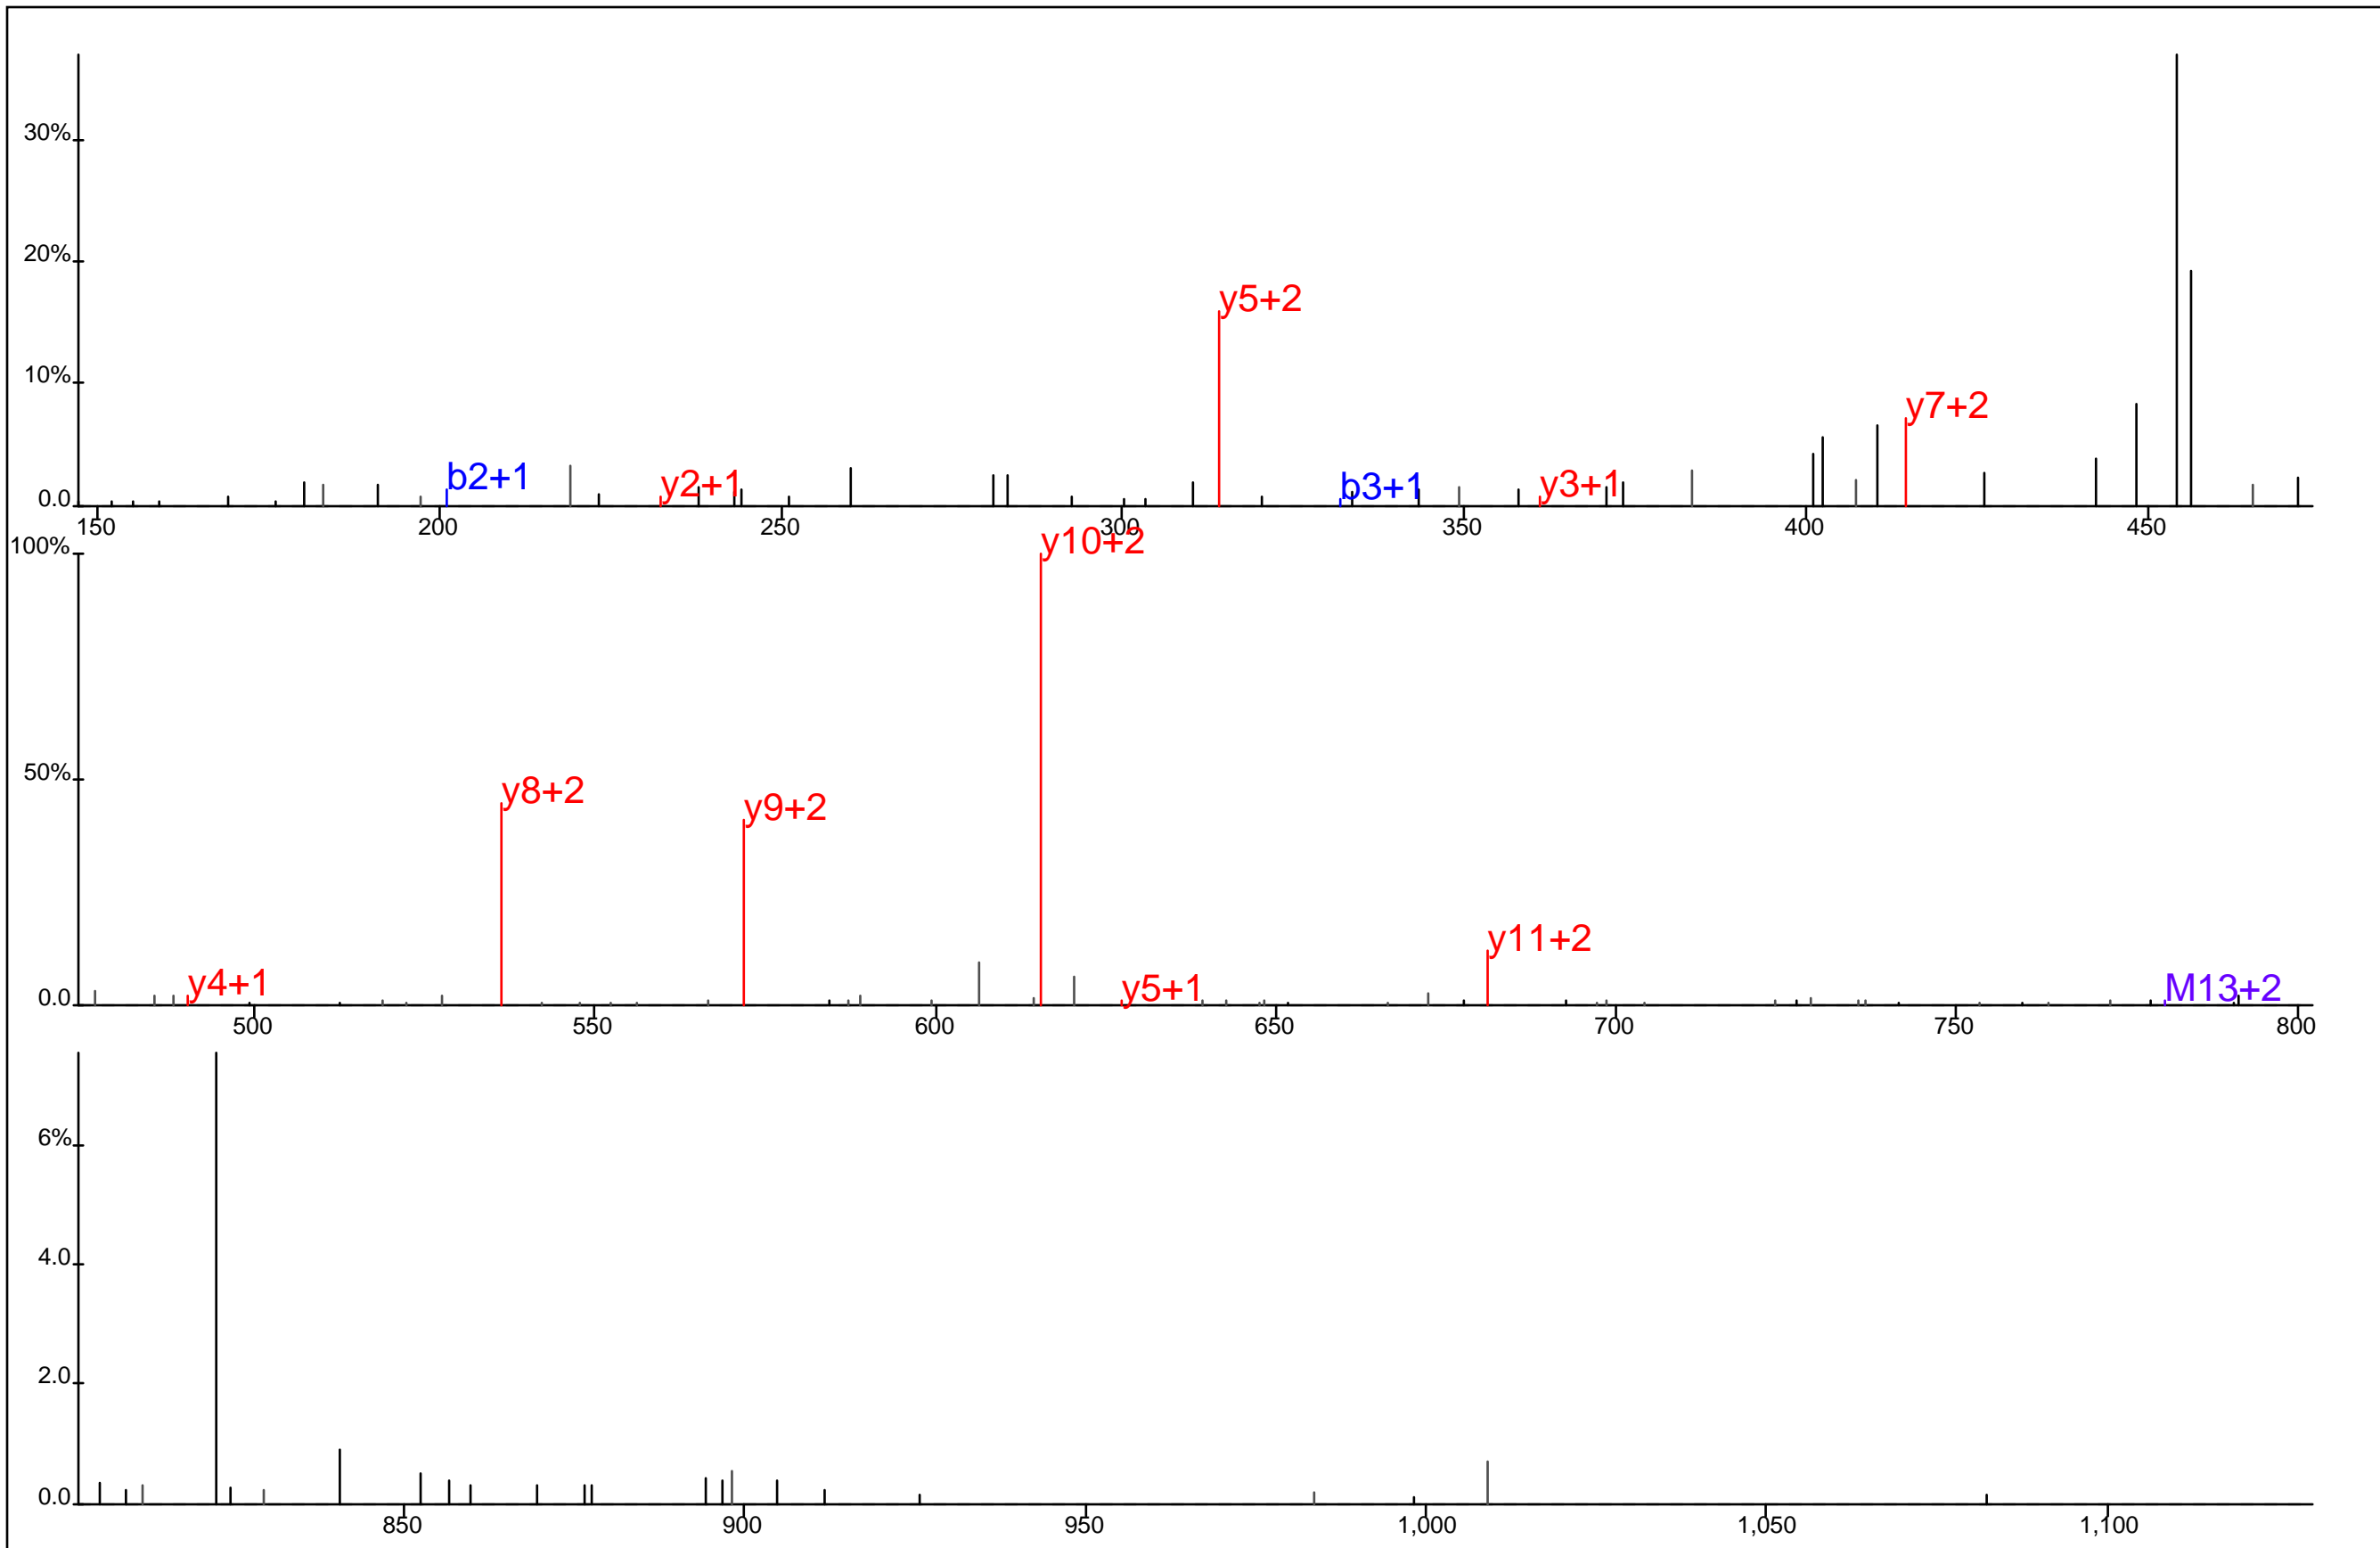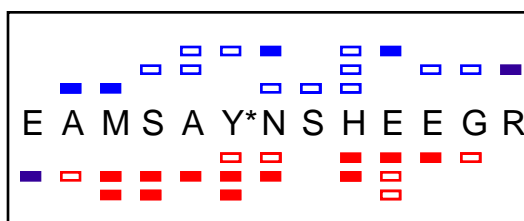

Protein Name: Glycogen debranching enzyme  
 gi Accession: 0  
 Precursor Mass: 520.8648+3  
 Delta Mass: 0.934 ppm  
 XCorr: 27.12

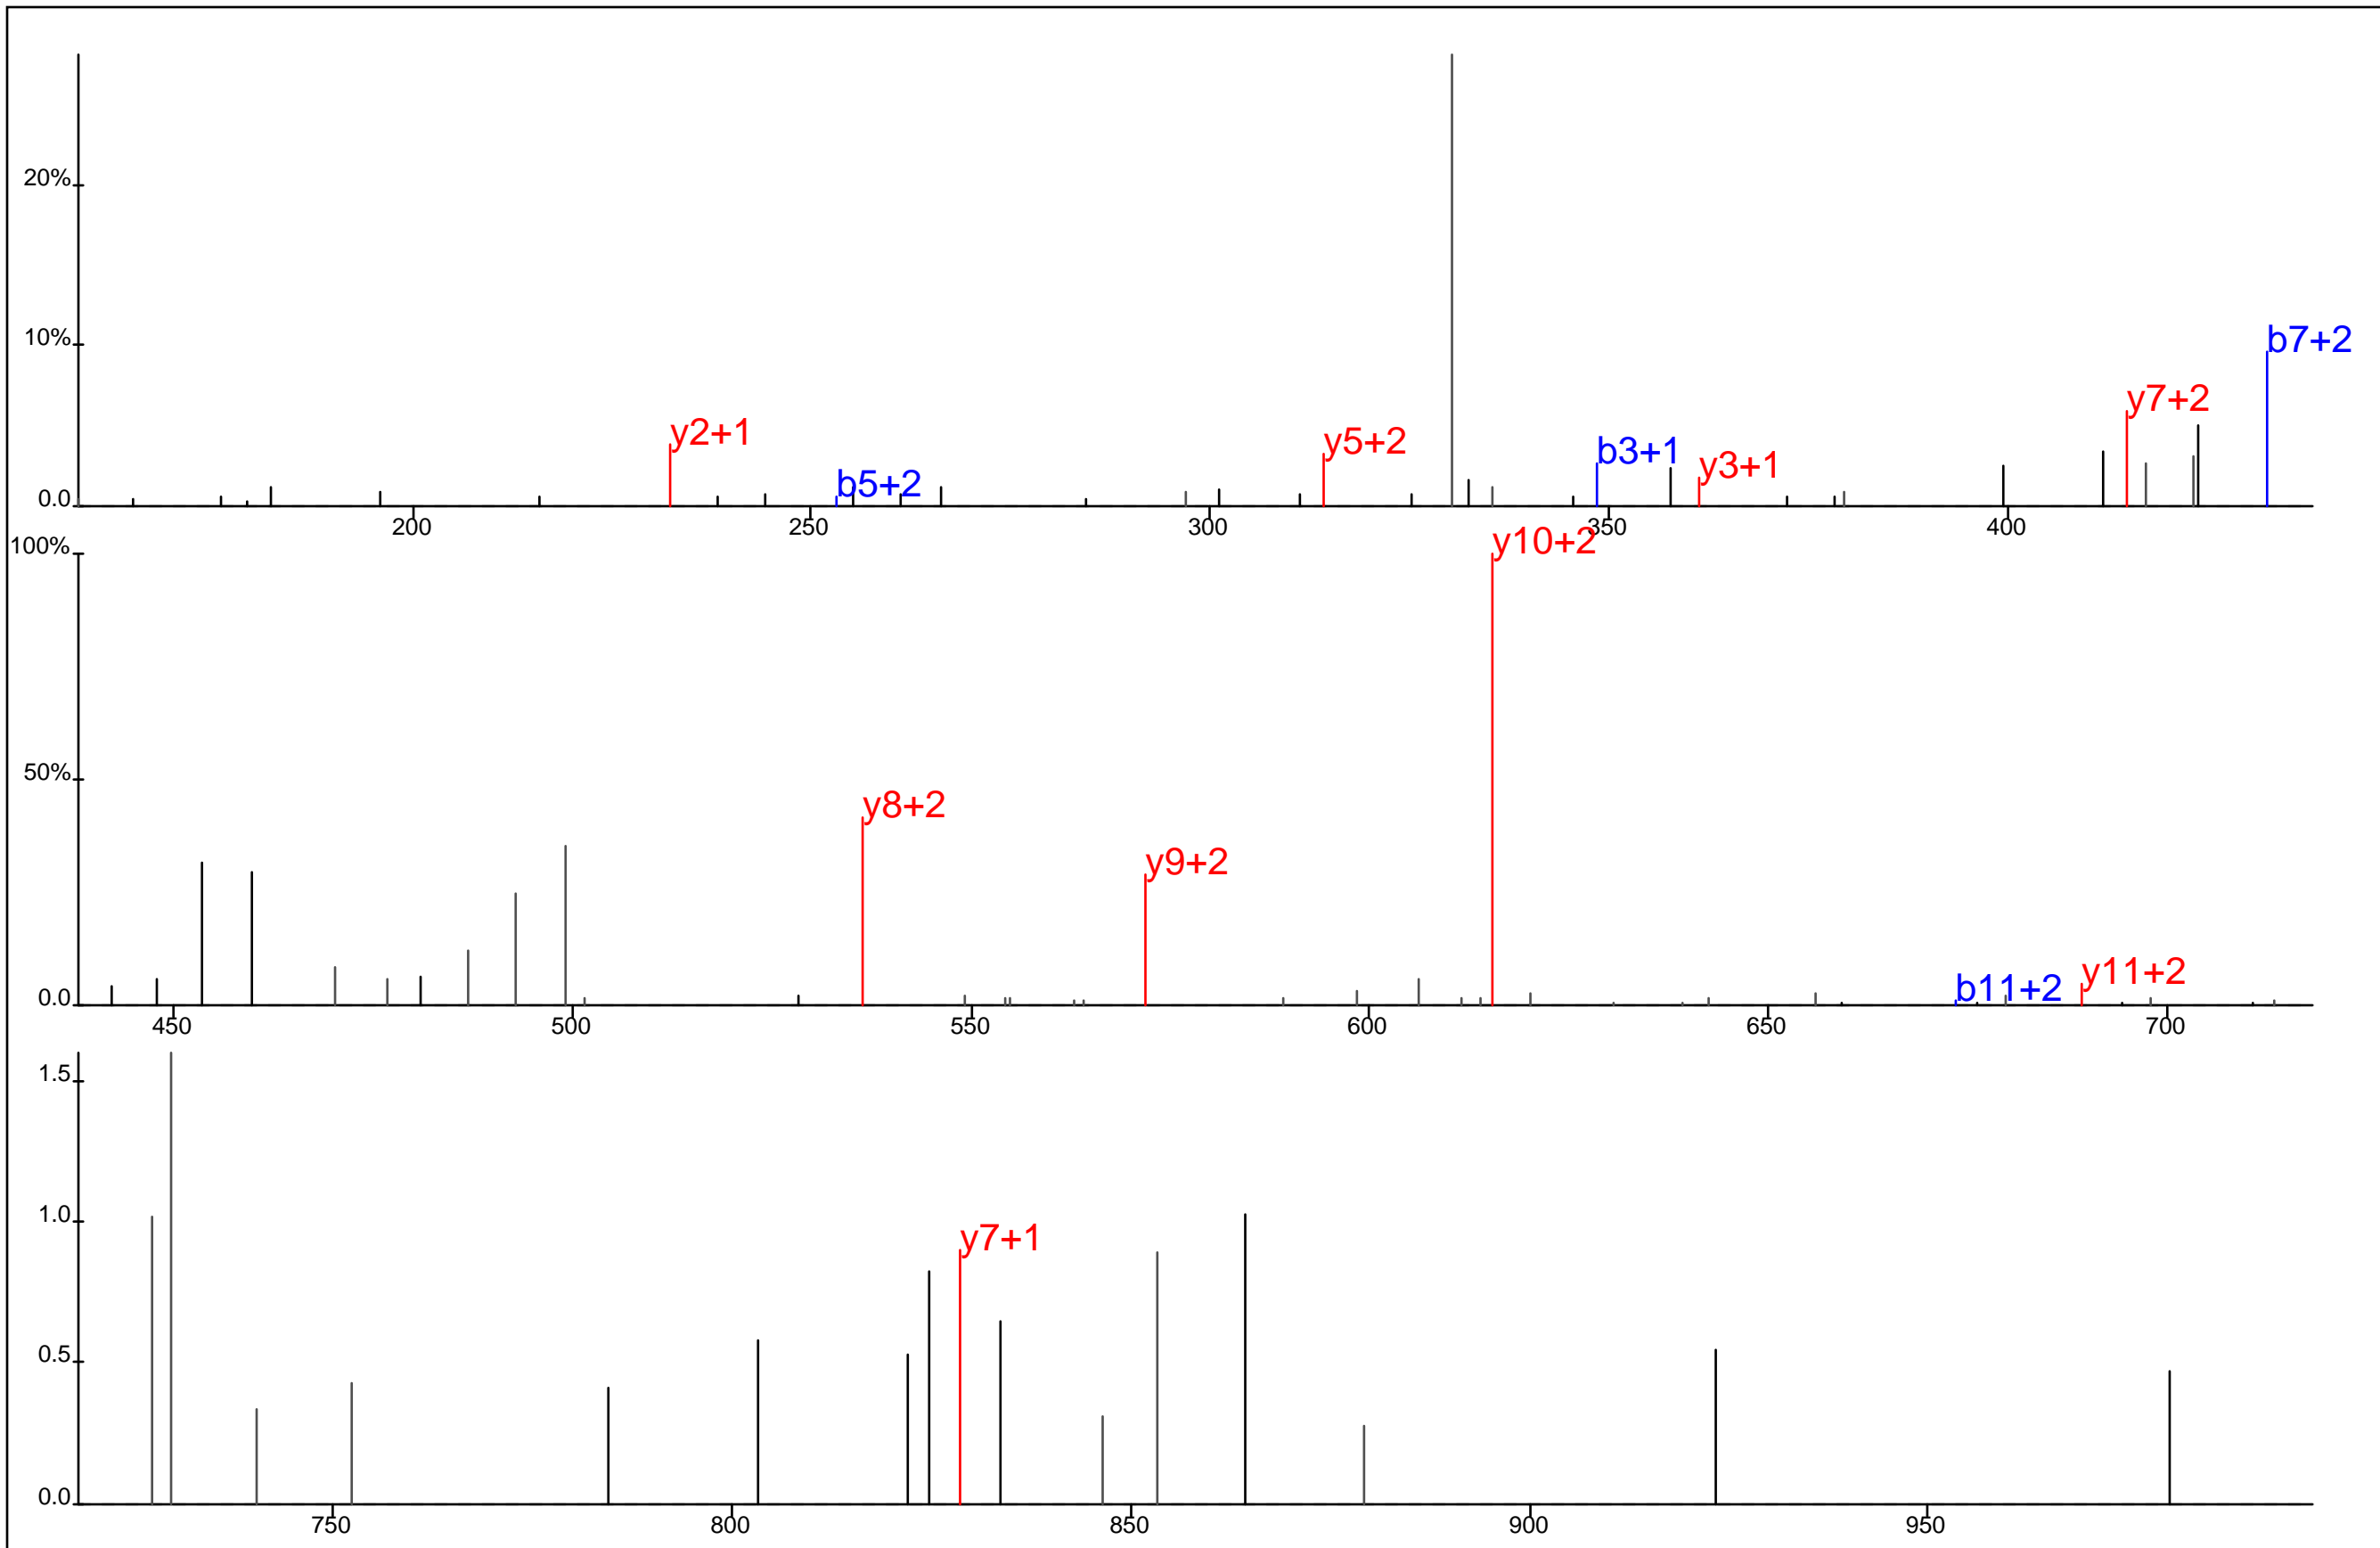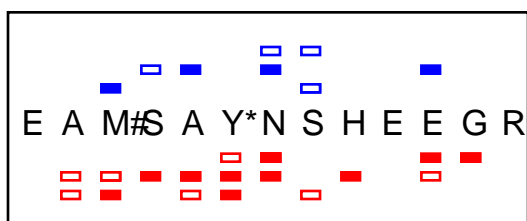

Protein Name: Glycogen debranching enzyme  
 gi Accession: 0  
 Precursor Mass: 526.1951+3  
 Delta Mass: 1.584 ppm  
 XCorr: 27.4



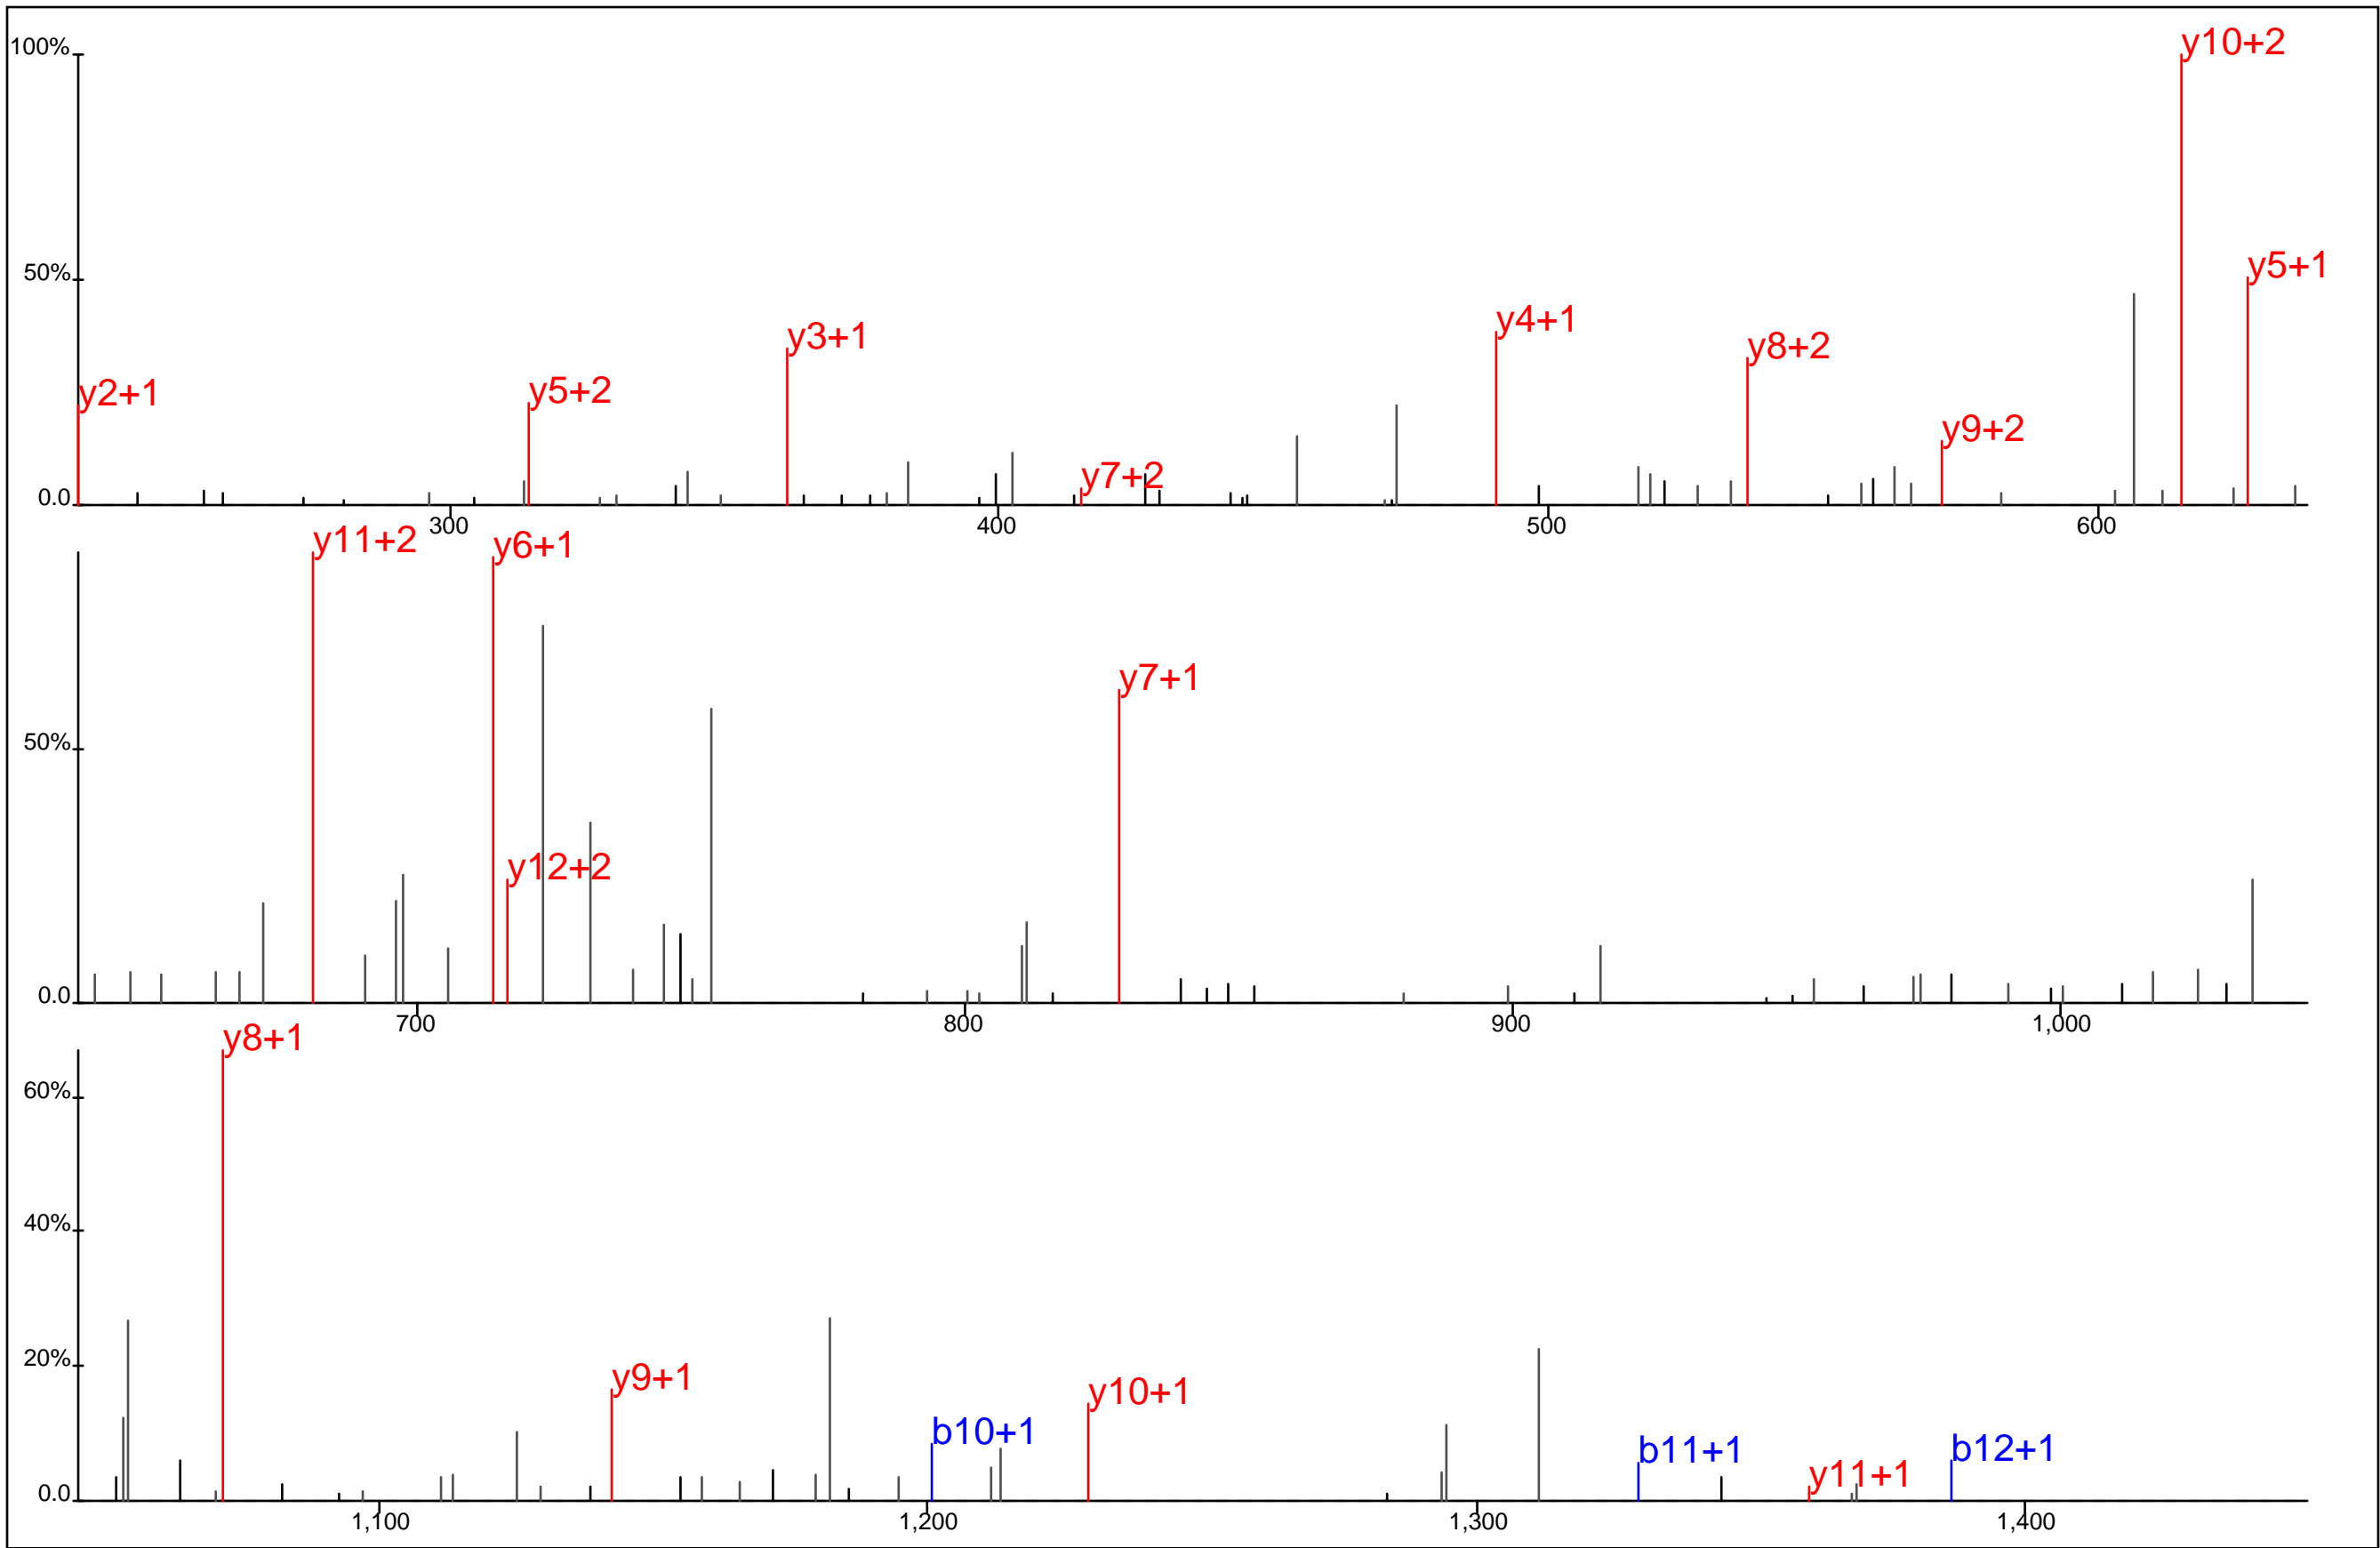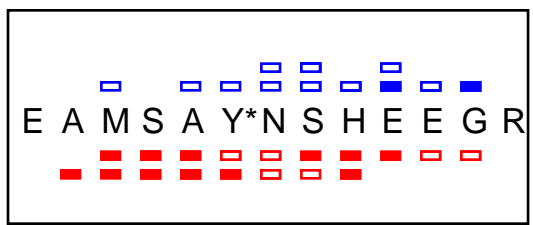

Protein Name: Glycogen debranching enzyme  
 gi Accession: 0  
 Precursor Mass: 780.7935+2  
 Delta Mass: 0.786 ppm  
 XCorr: 61.11

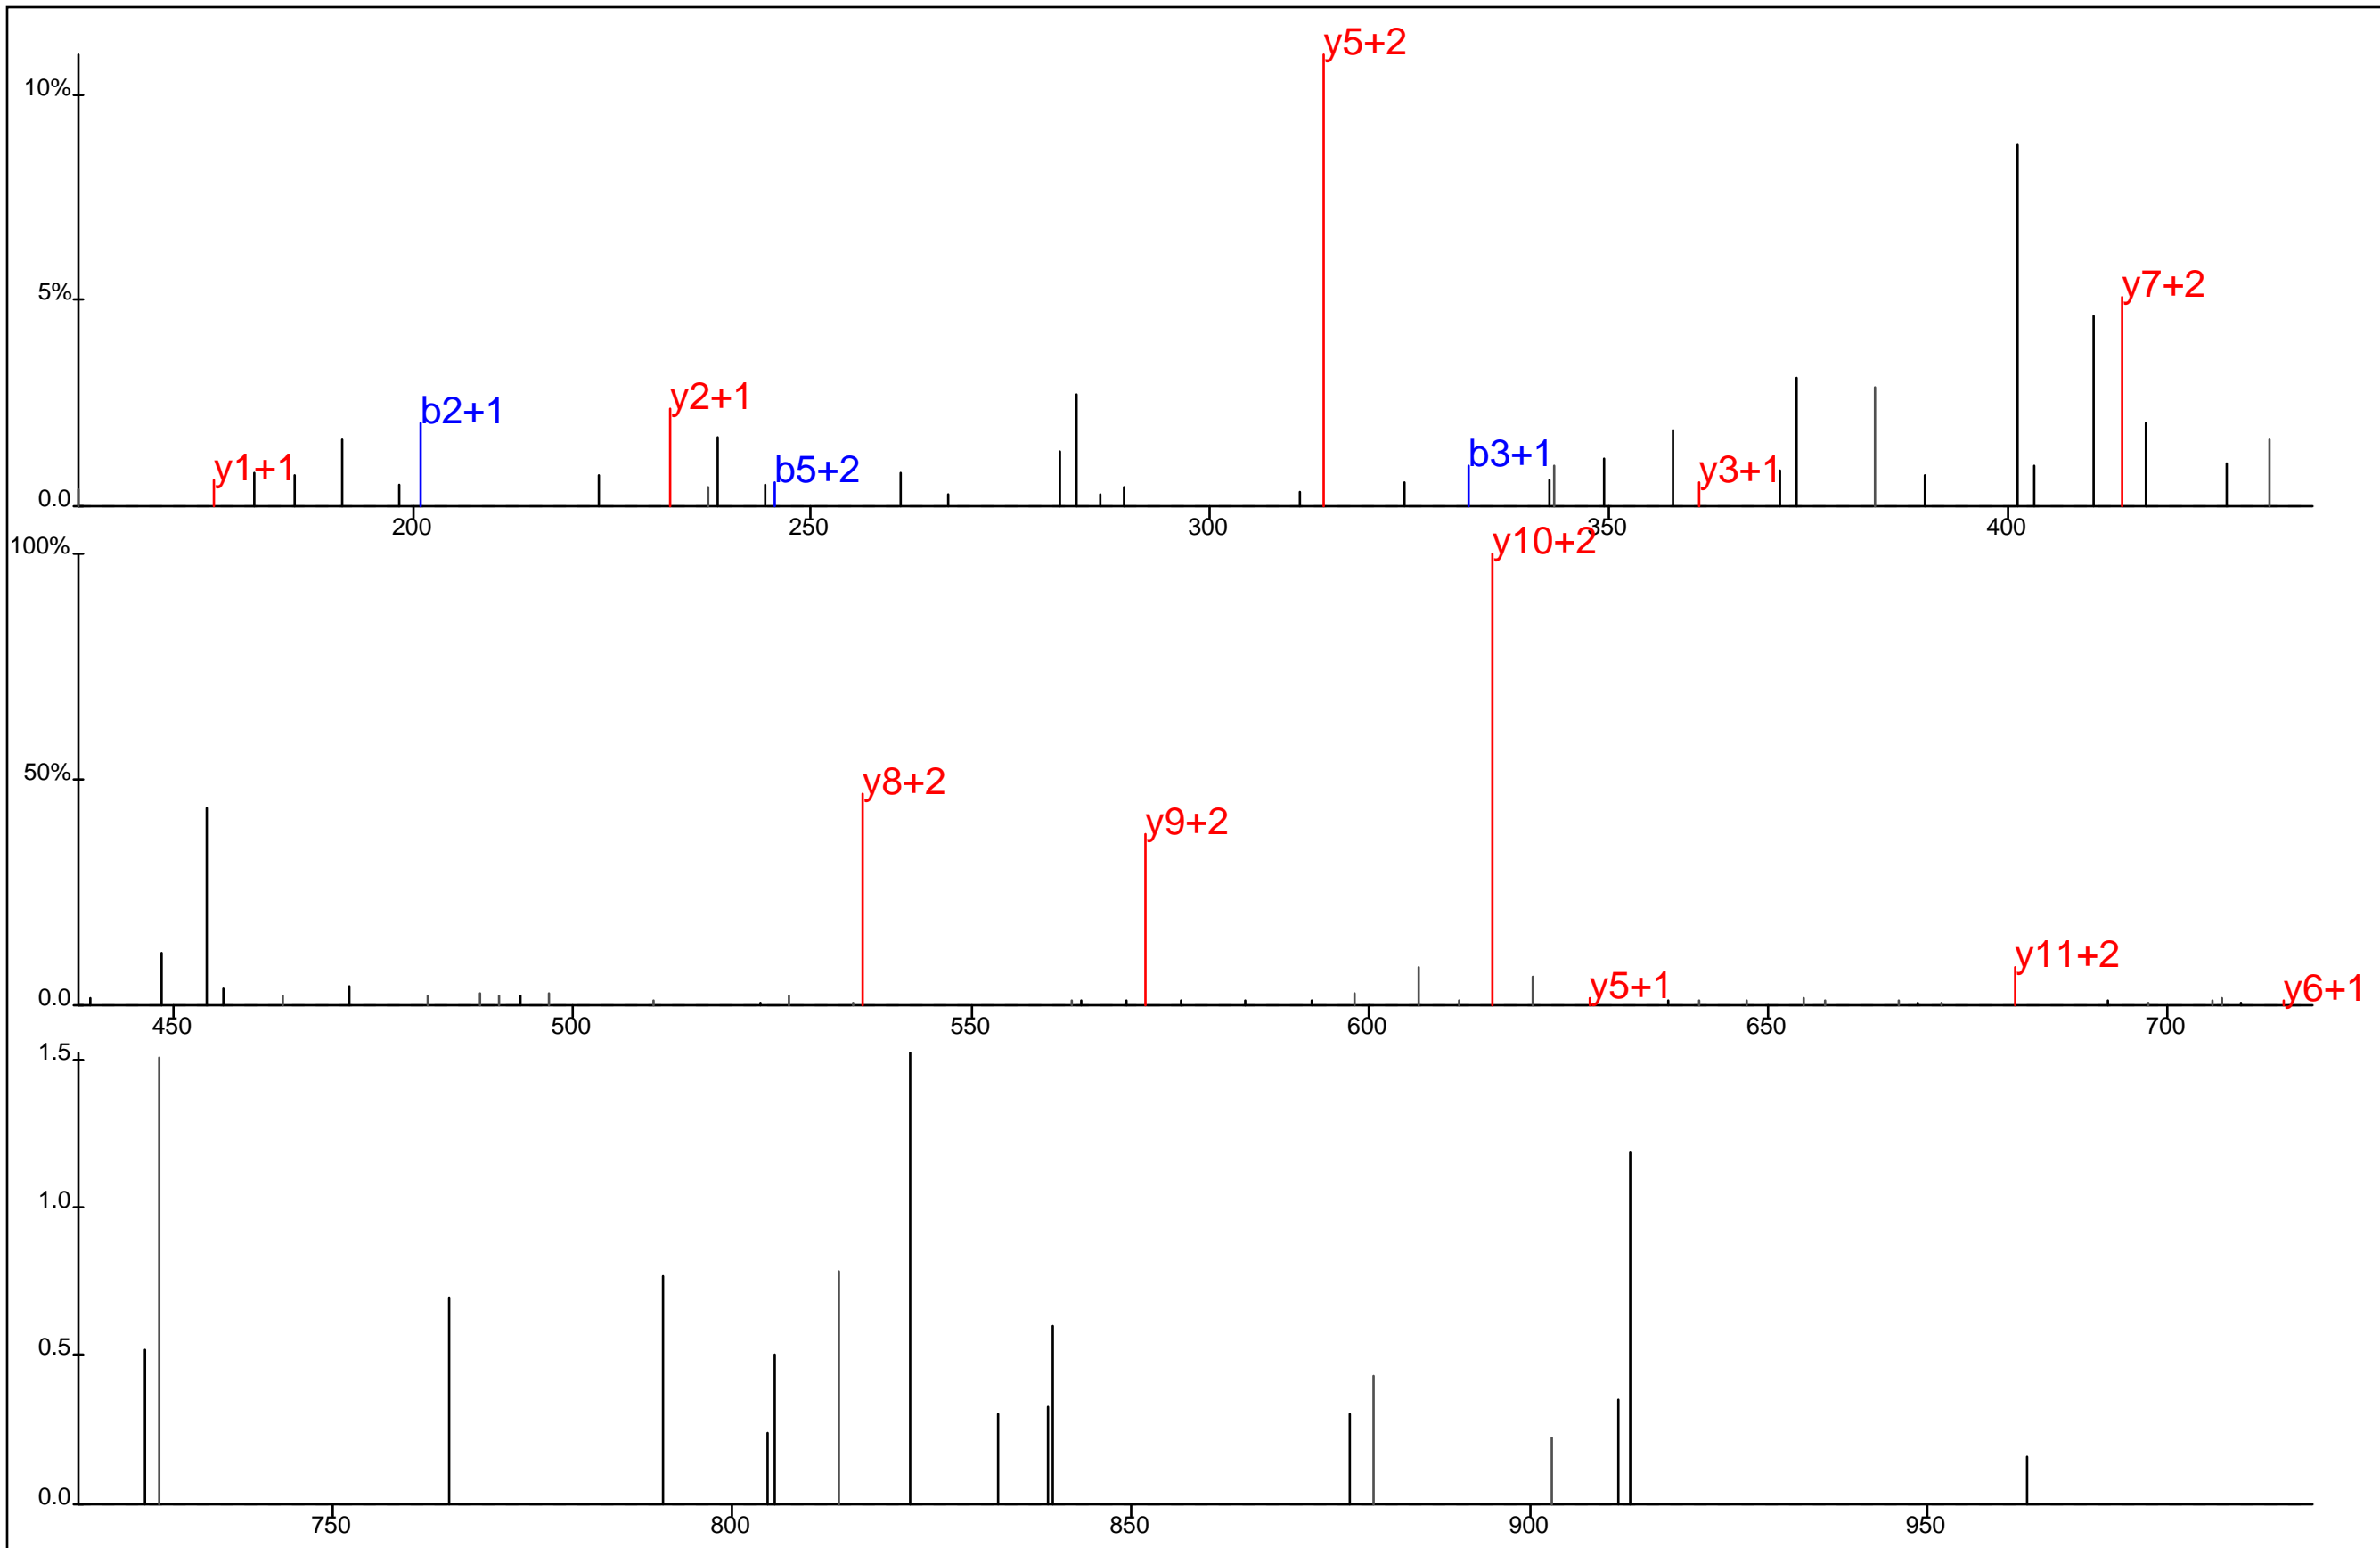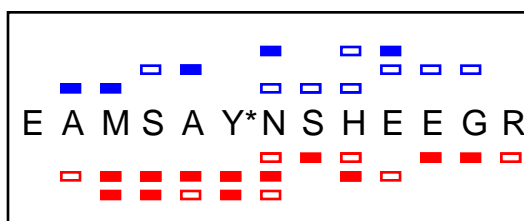

Protein Name: Glycogen debranching enzyme  
 gi Accession: 0  
 Precursor Mass: 520.8646+3  
 Delta Mass: 0.465 ppm  
 XCorr: 30.57

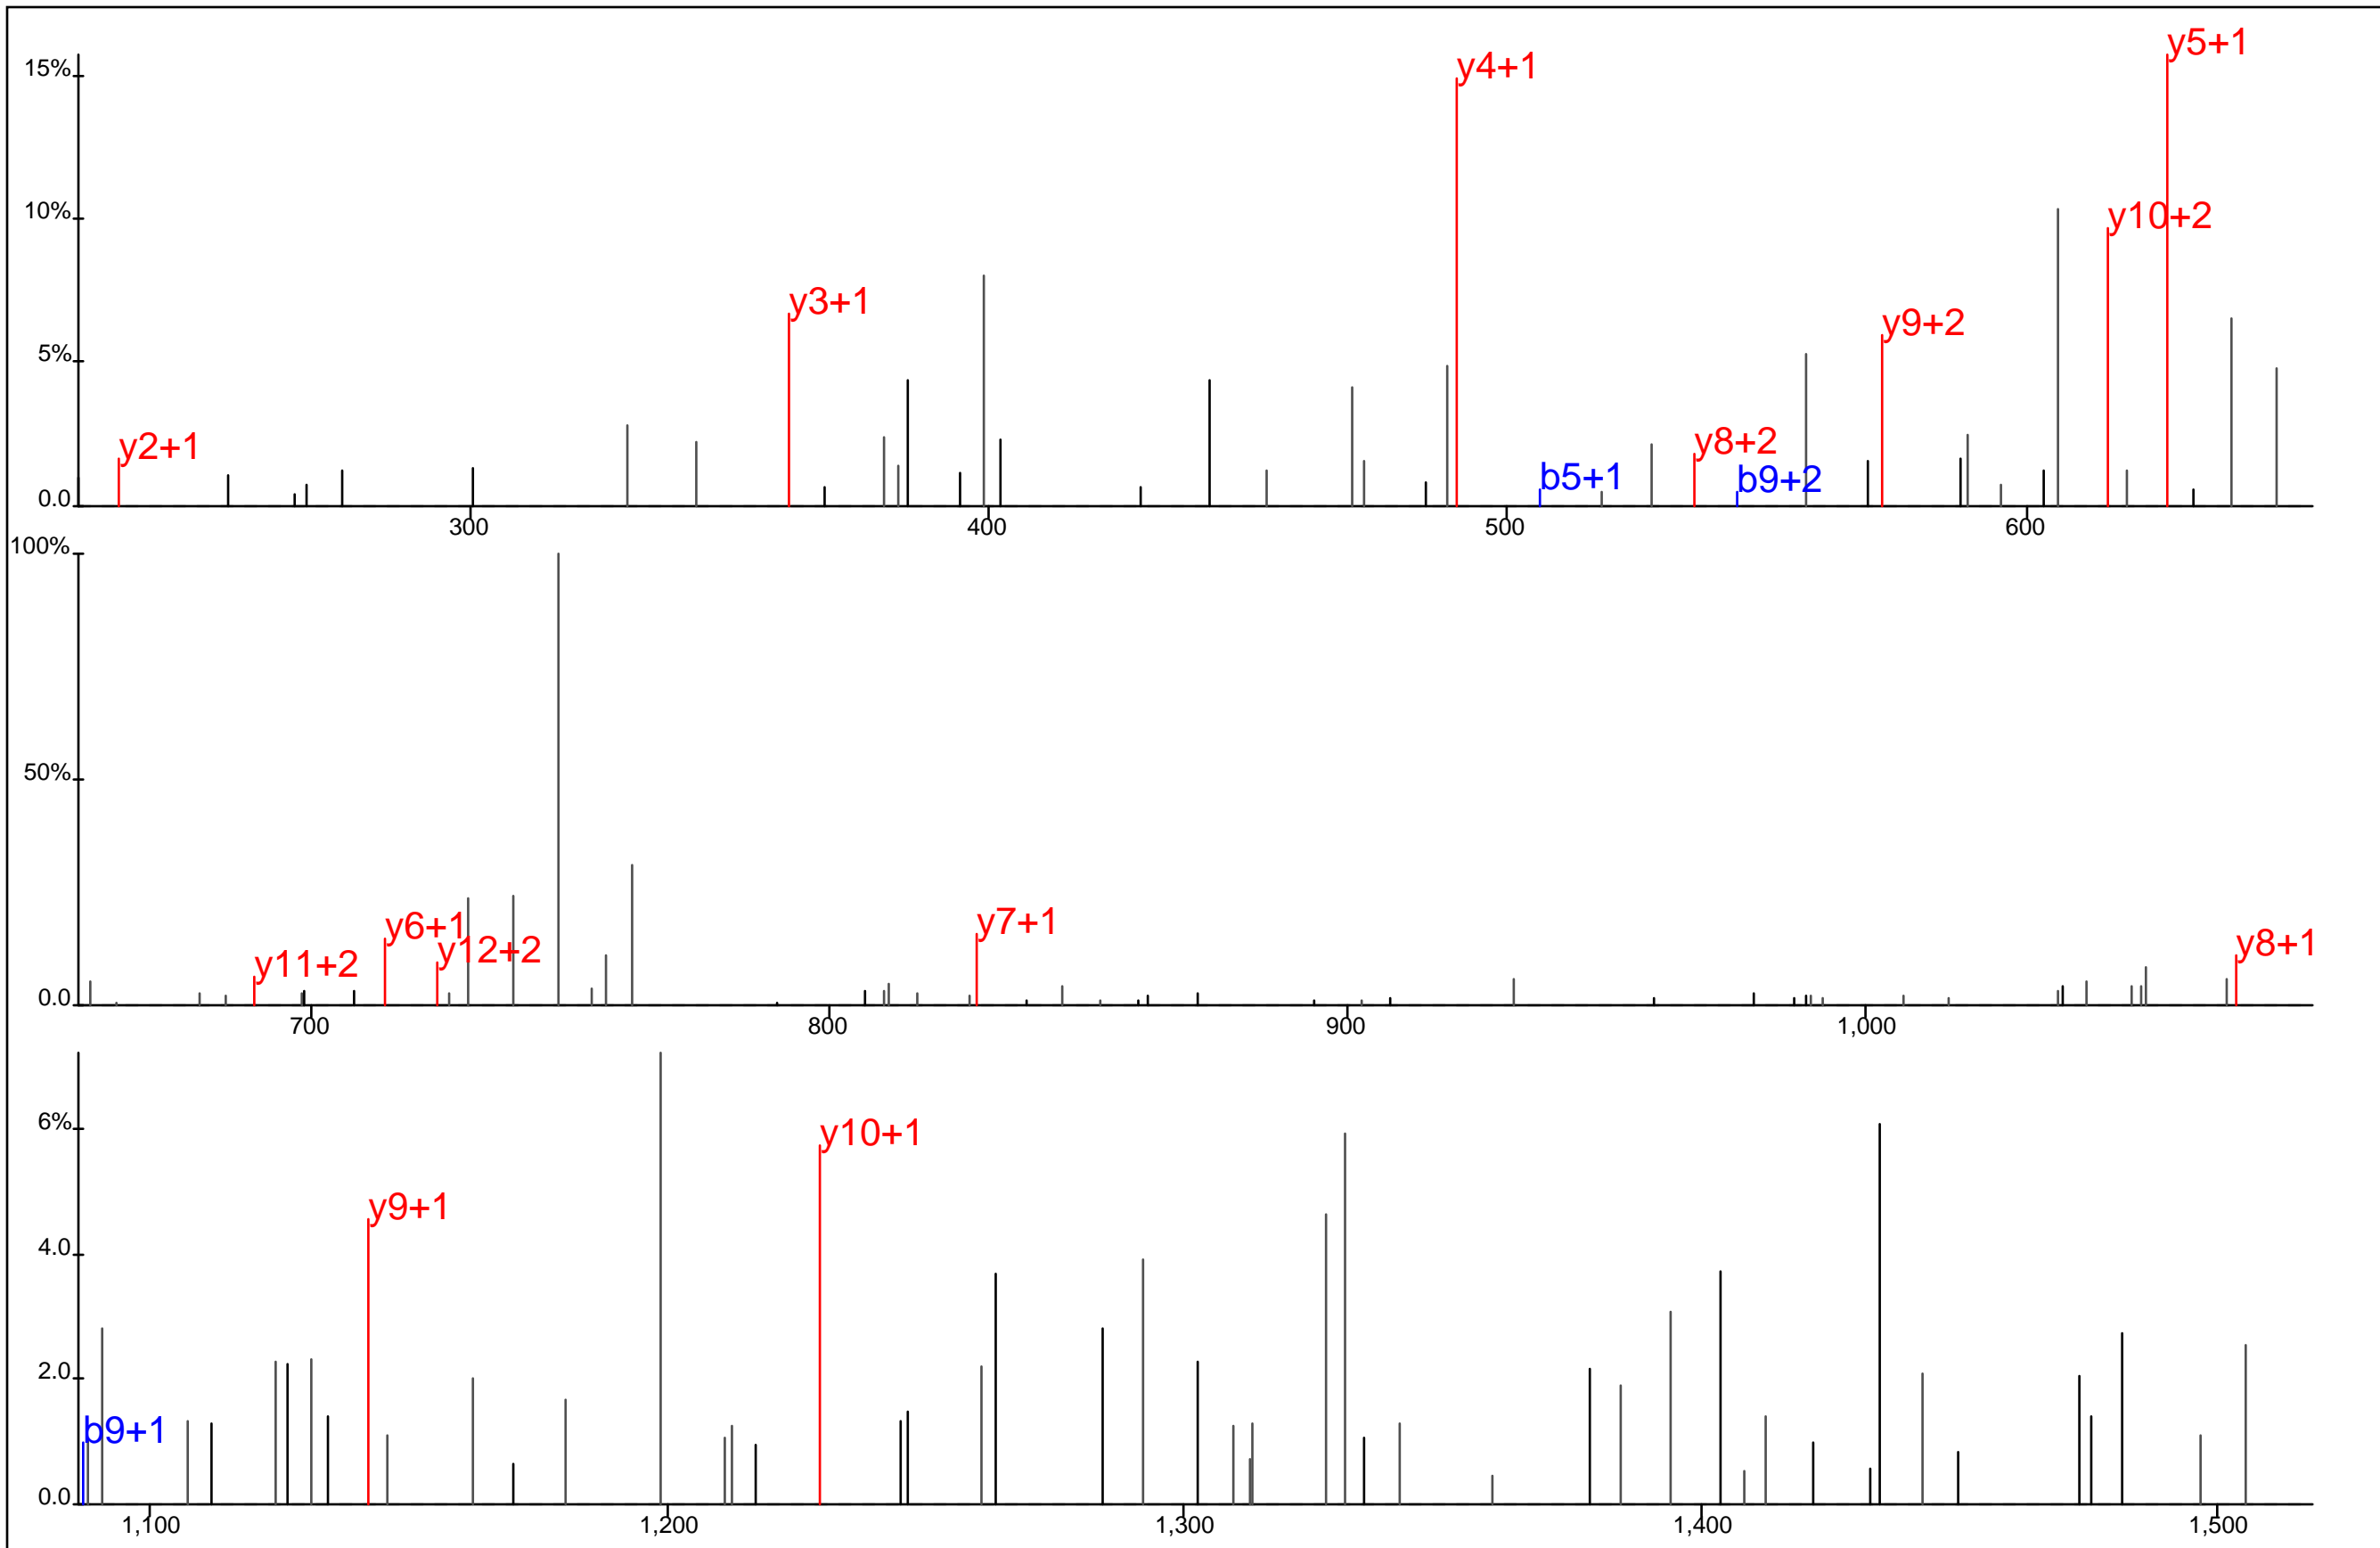

■ ■  
 E A M#S A Y\*N S H E E G R  
■ ■ ■ ■ ■ ■ ■ ■

Protein Name: Glycogen debranching enzyme  
 gi Accession: 0  
 Precursor Mass: 788.7914+2  
 Delta Mass: 1.368 ppm  
 XCorr: 52.12

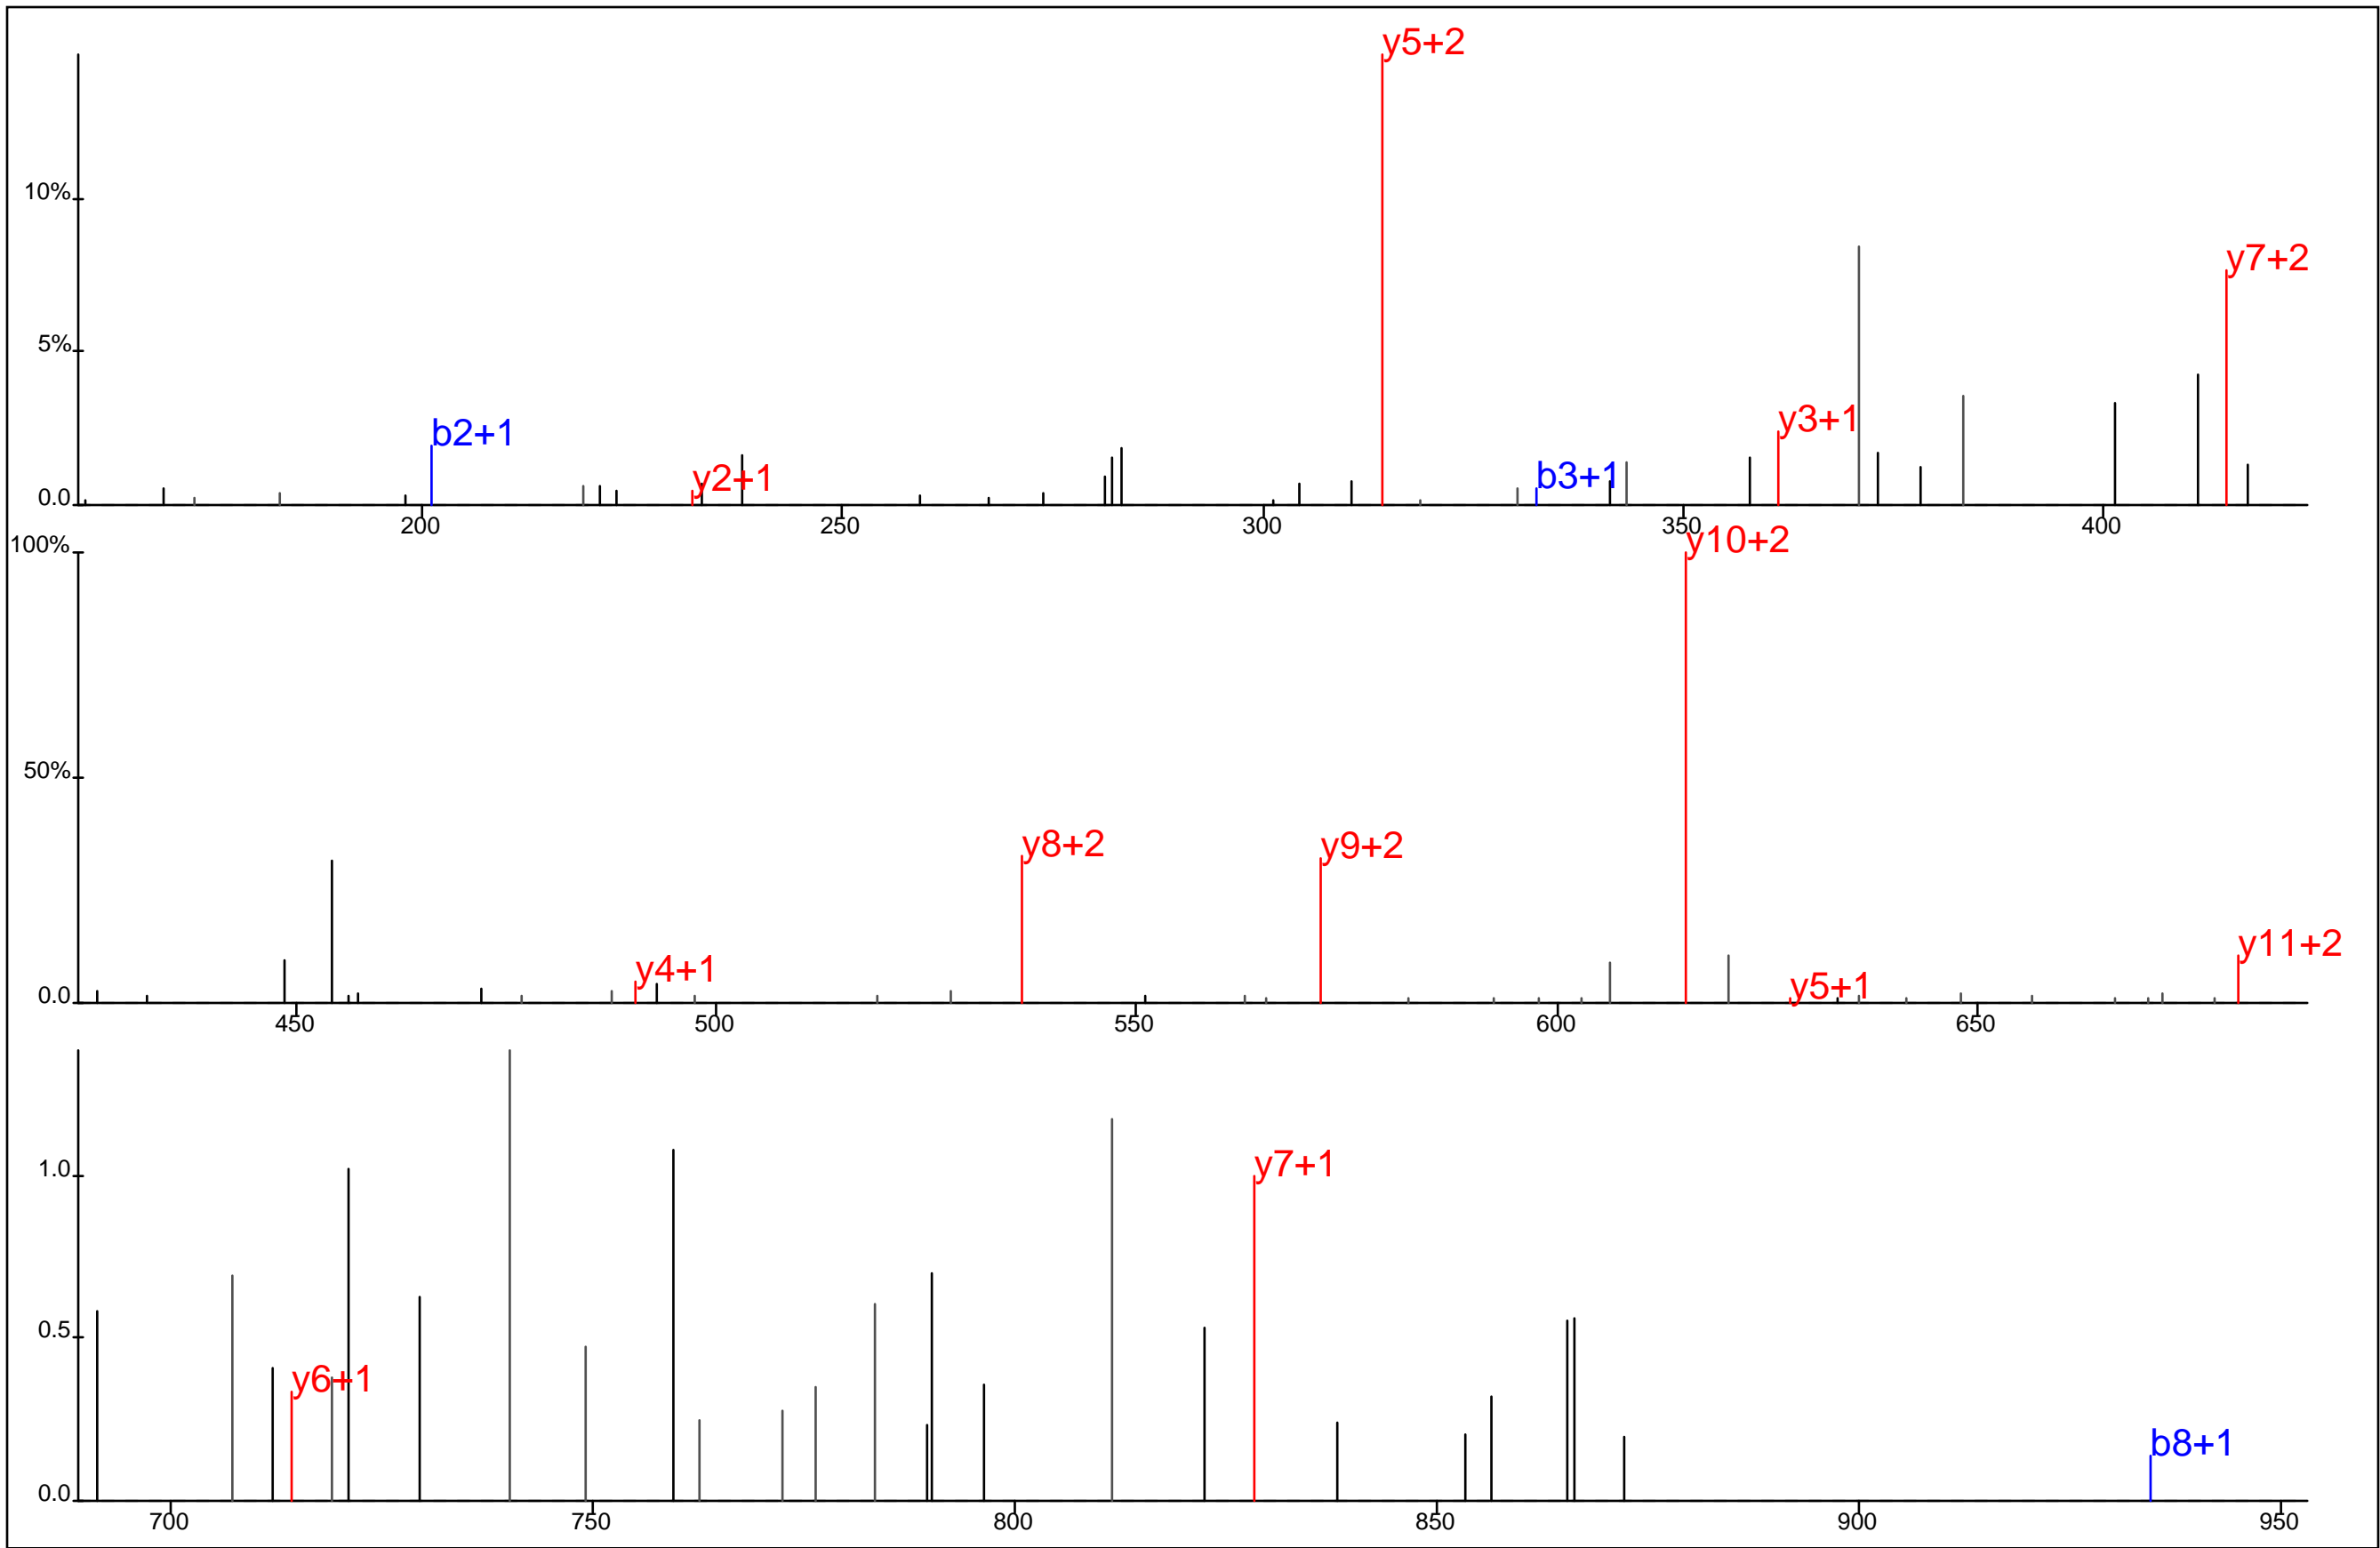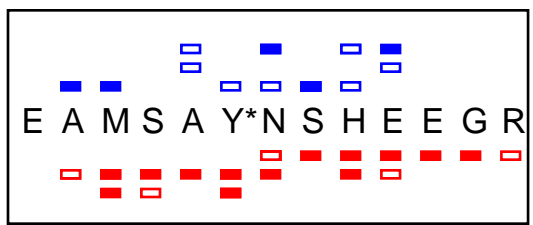

Protein Name: Glycogen debranching enzyme  
 gi Accession: 0  
 Precursor Mass: 520.8638+3  
 Delta Mass: 1.060 ppm  
 XCorr: 33.95

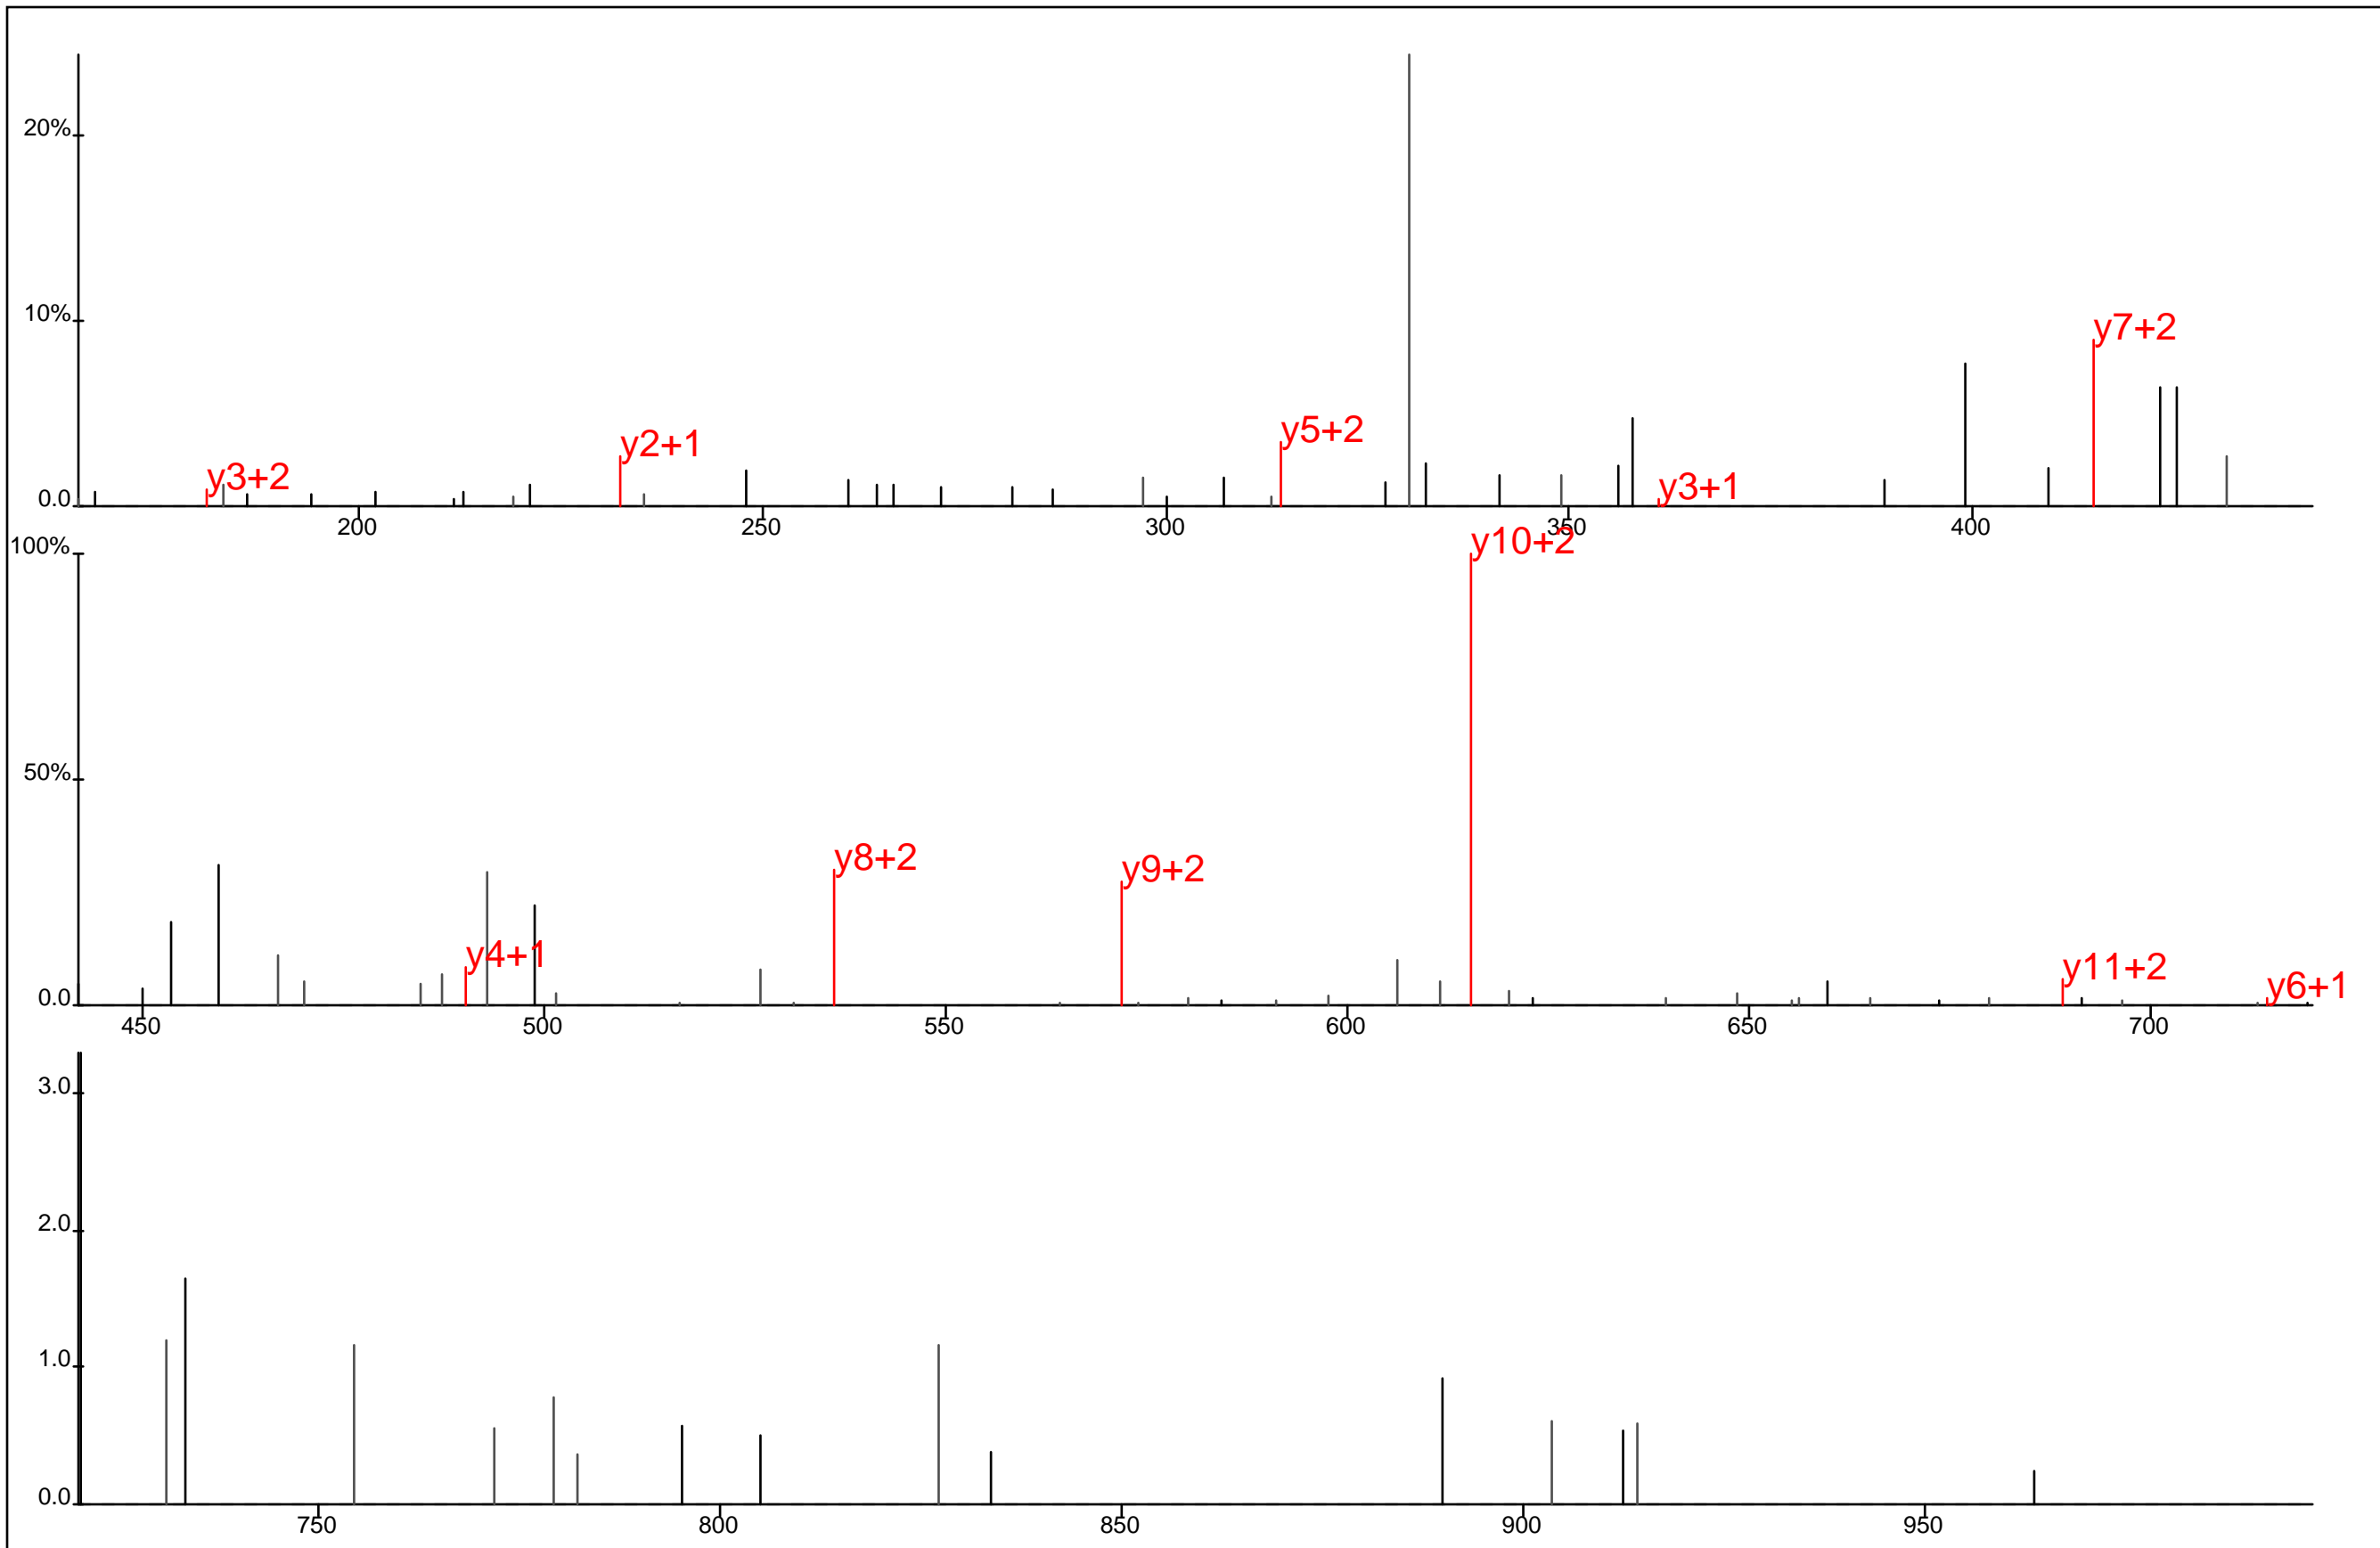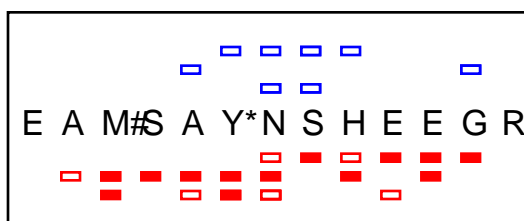

Protein Name: Glycogen debranching enzyme  
 gi Accession: 0  
 Precursor Mass: 526.1962+3  
 Delta Mass: 0.391 ppm  
 XCorr: 25.63

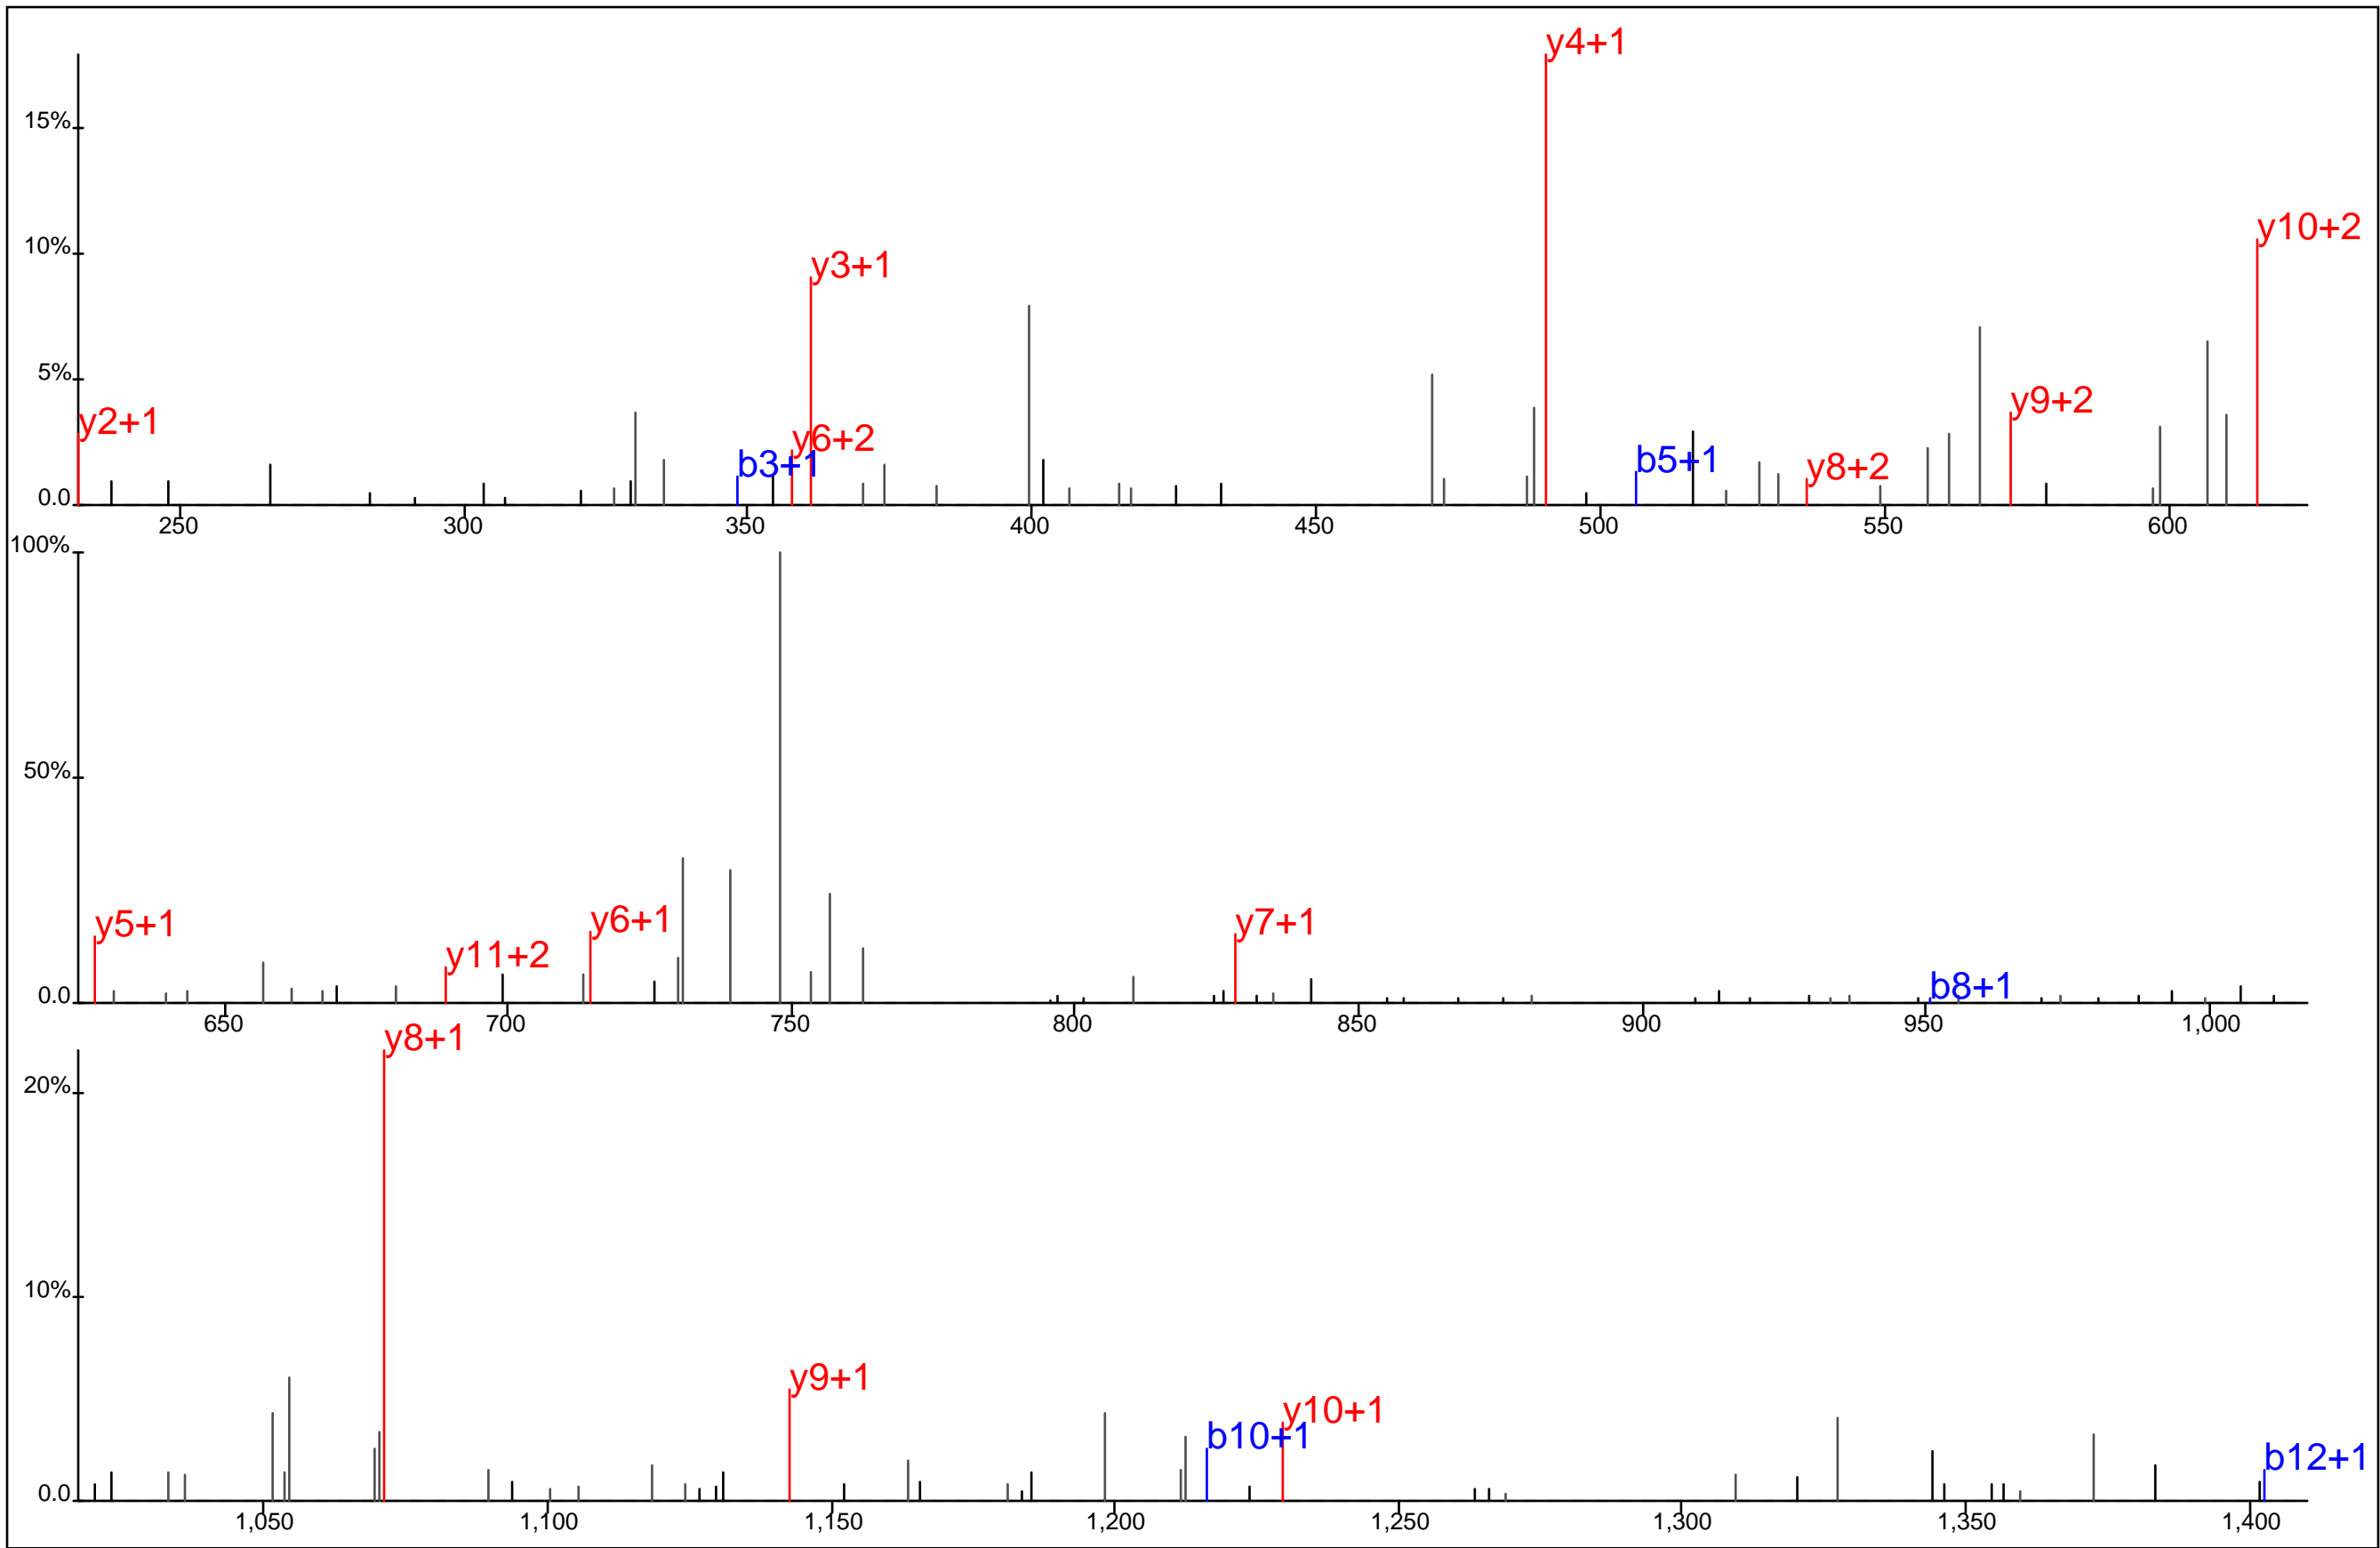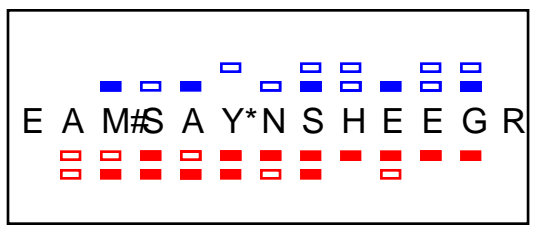

Protein Name: Glycogen debranching enzyme  
 gi Accession: 0  
 Precursor Mass: 788.7925+2  
 Delta Mass: 2.760 ppm  
 XCorr: 47.97

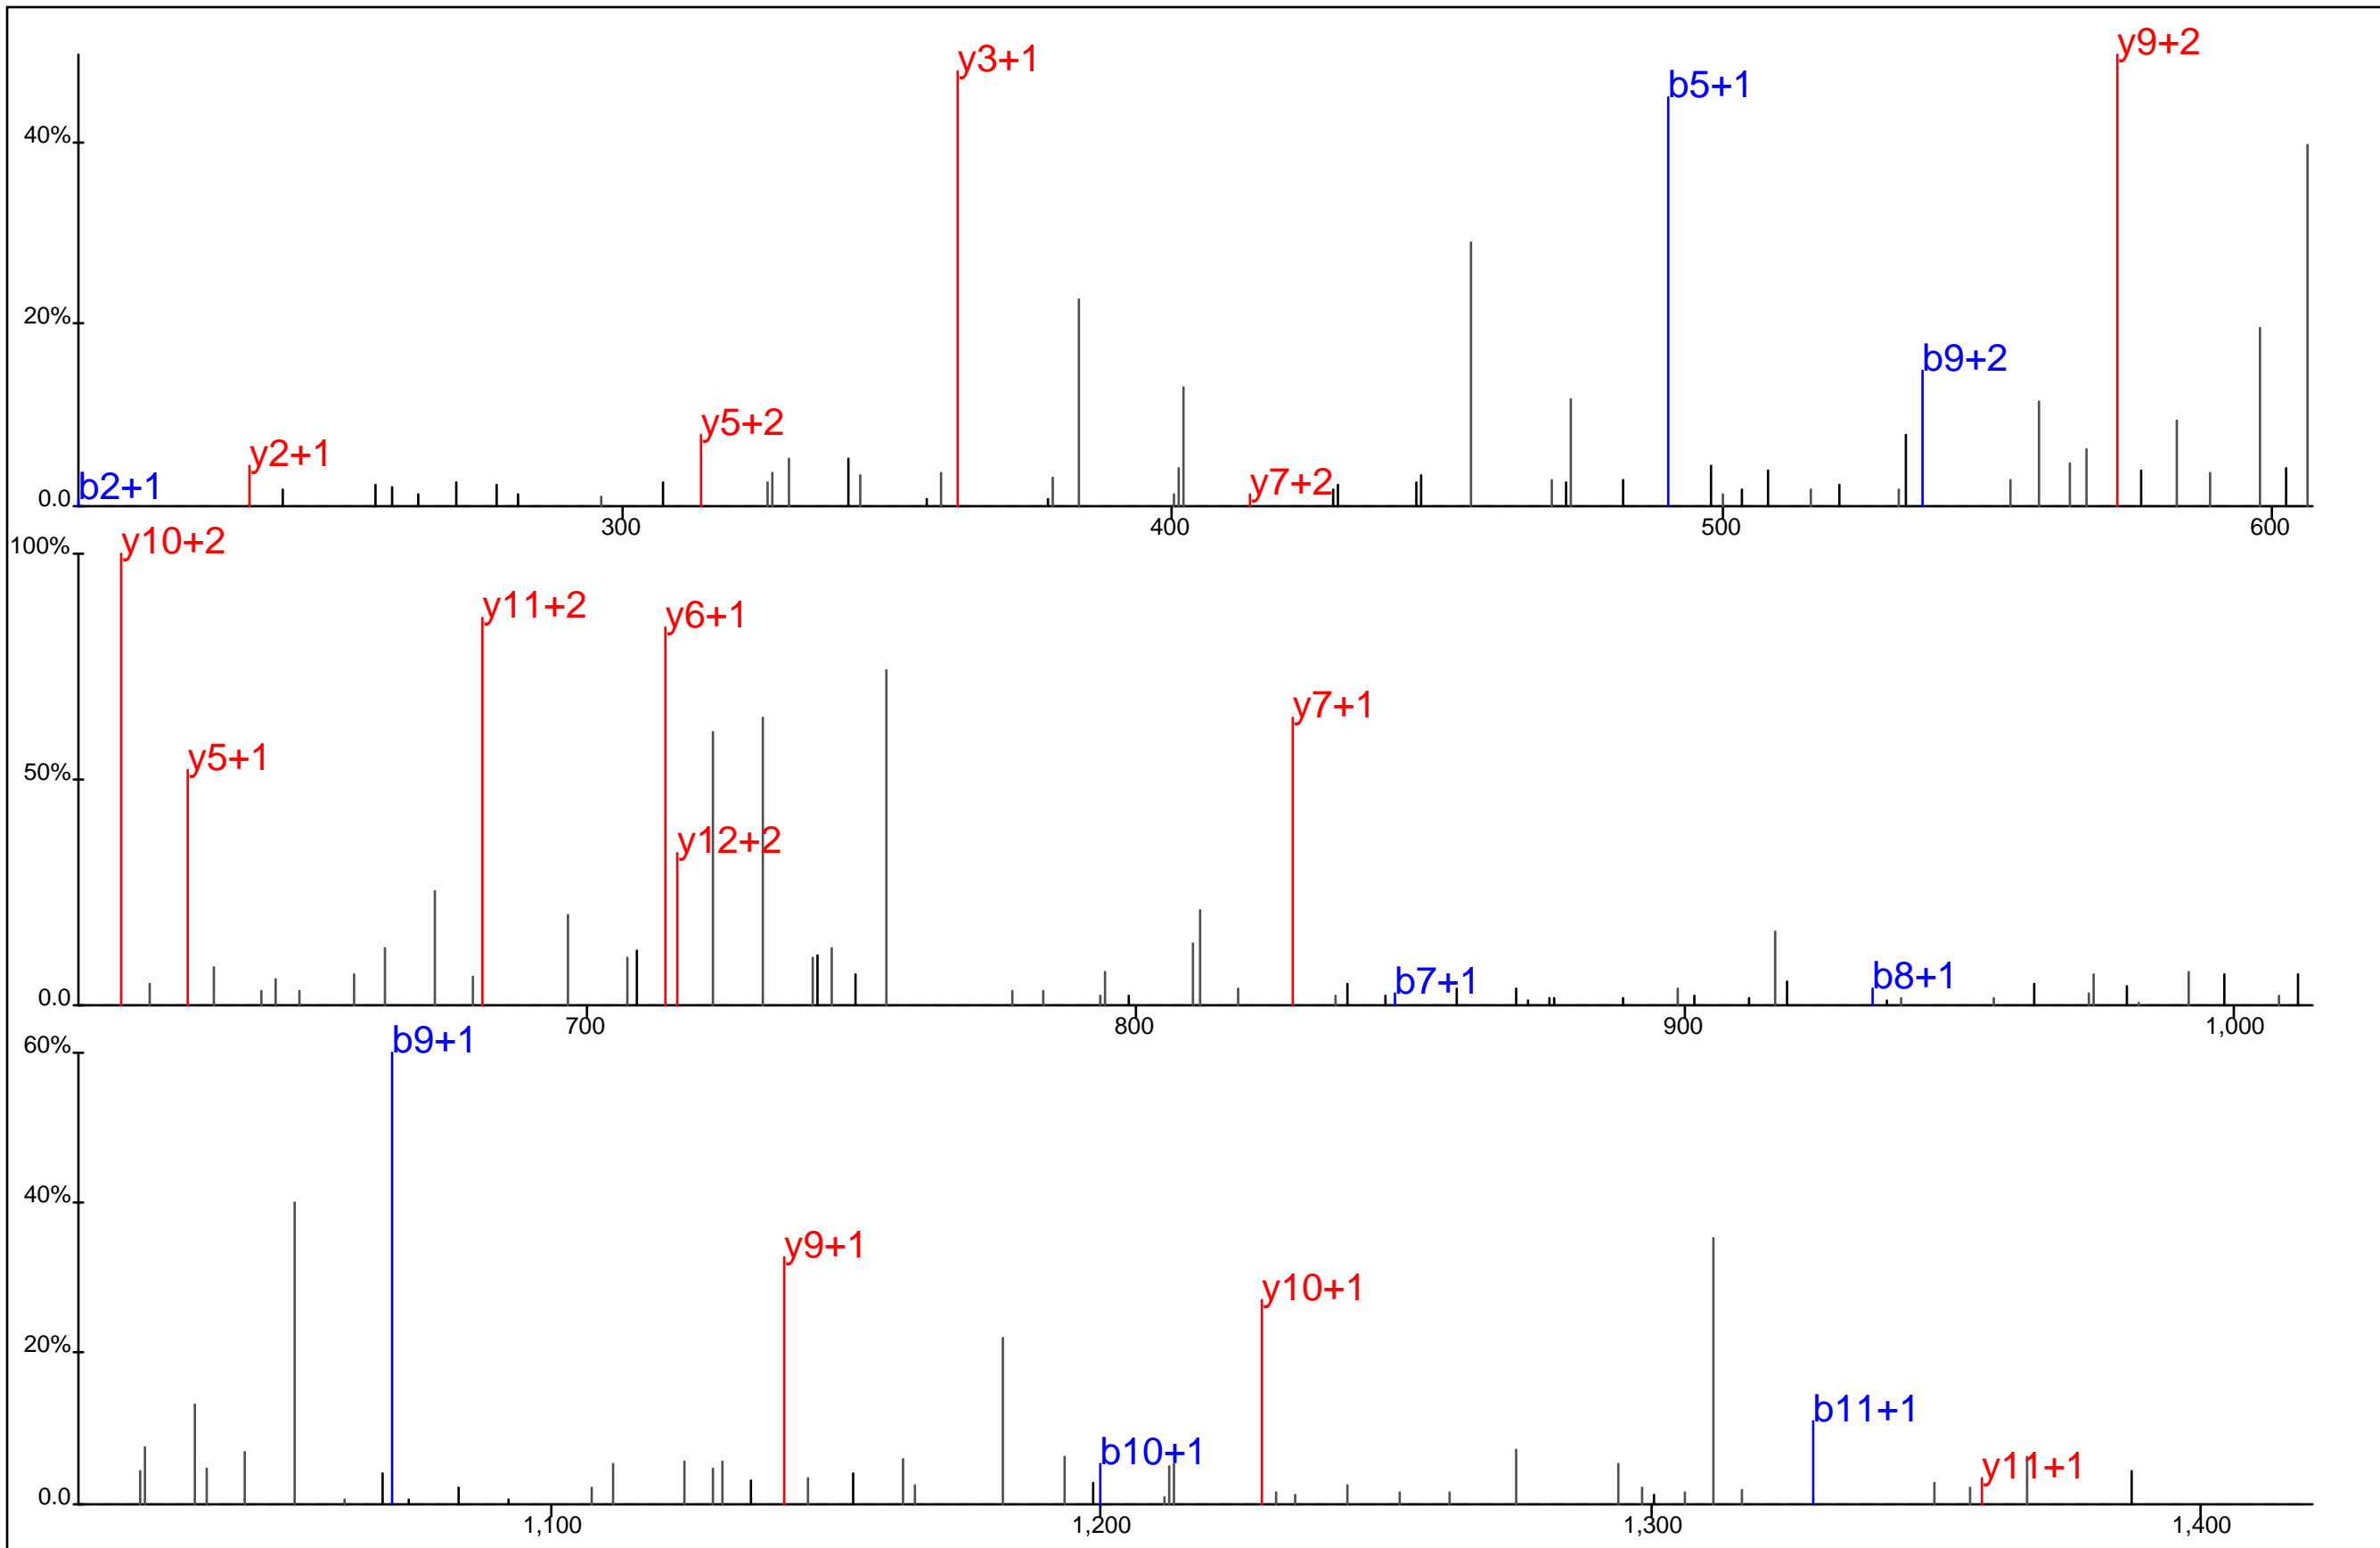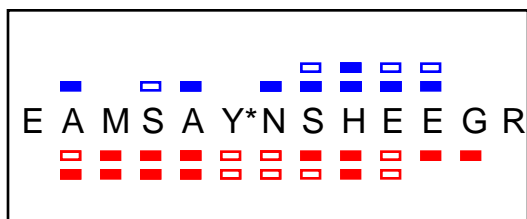

Protein Name: Glycogen debranching enzyme  
 gi Accession: 0  
 Precursor Mass: 780.7943+2  
 Delta Mass: 1.802 ppm  
 XCorr: 74.65

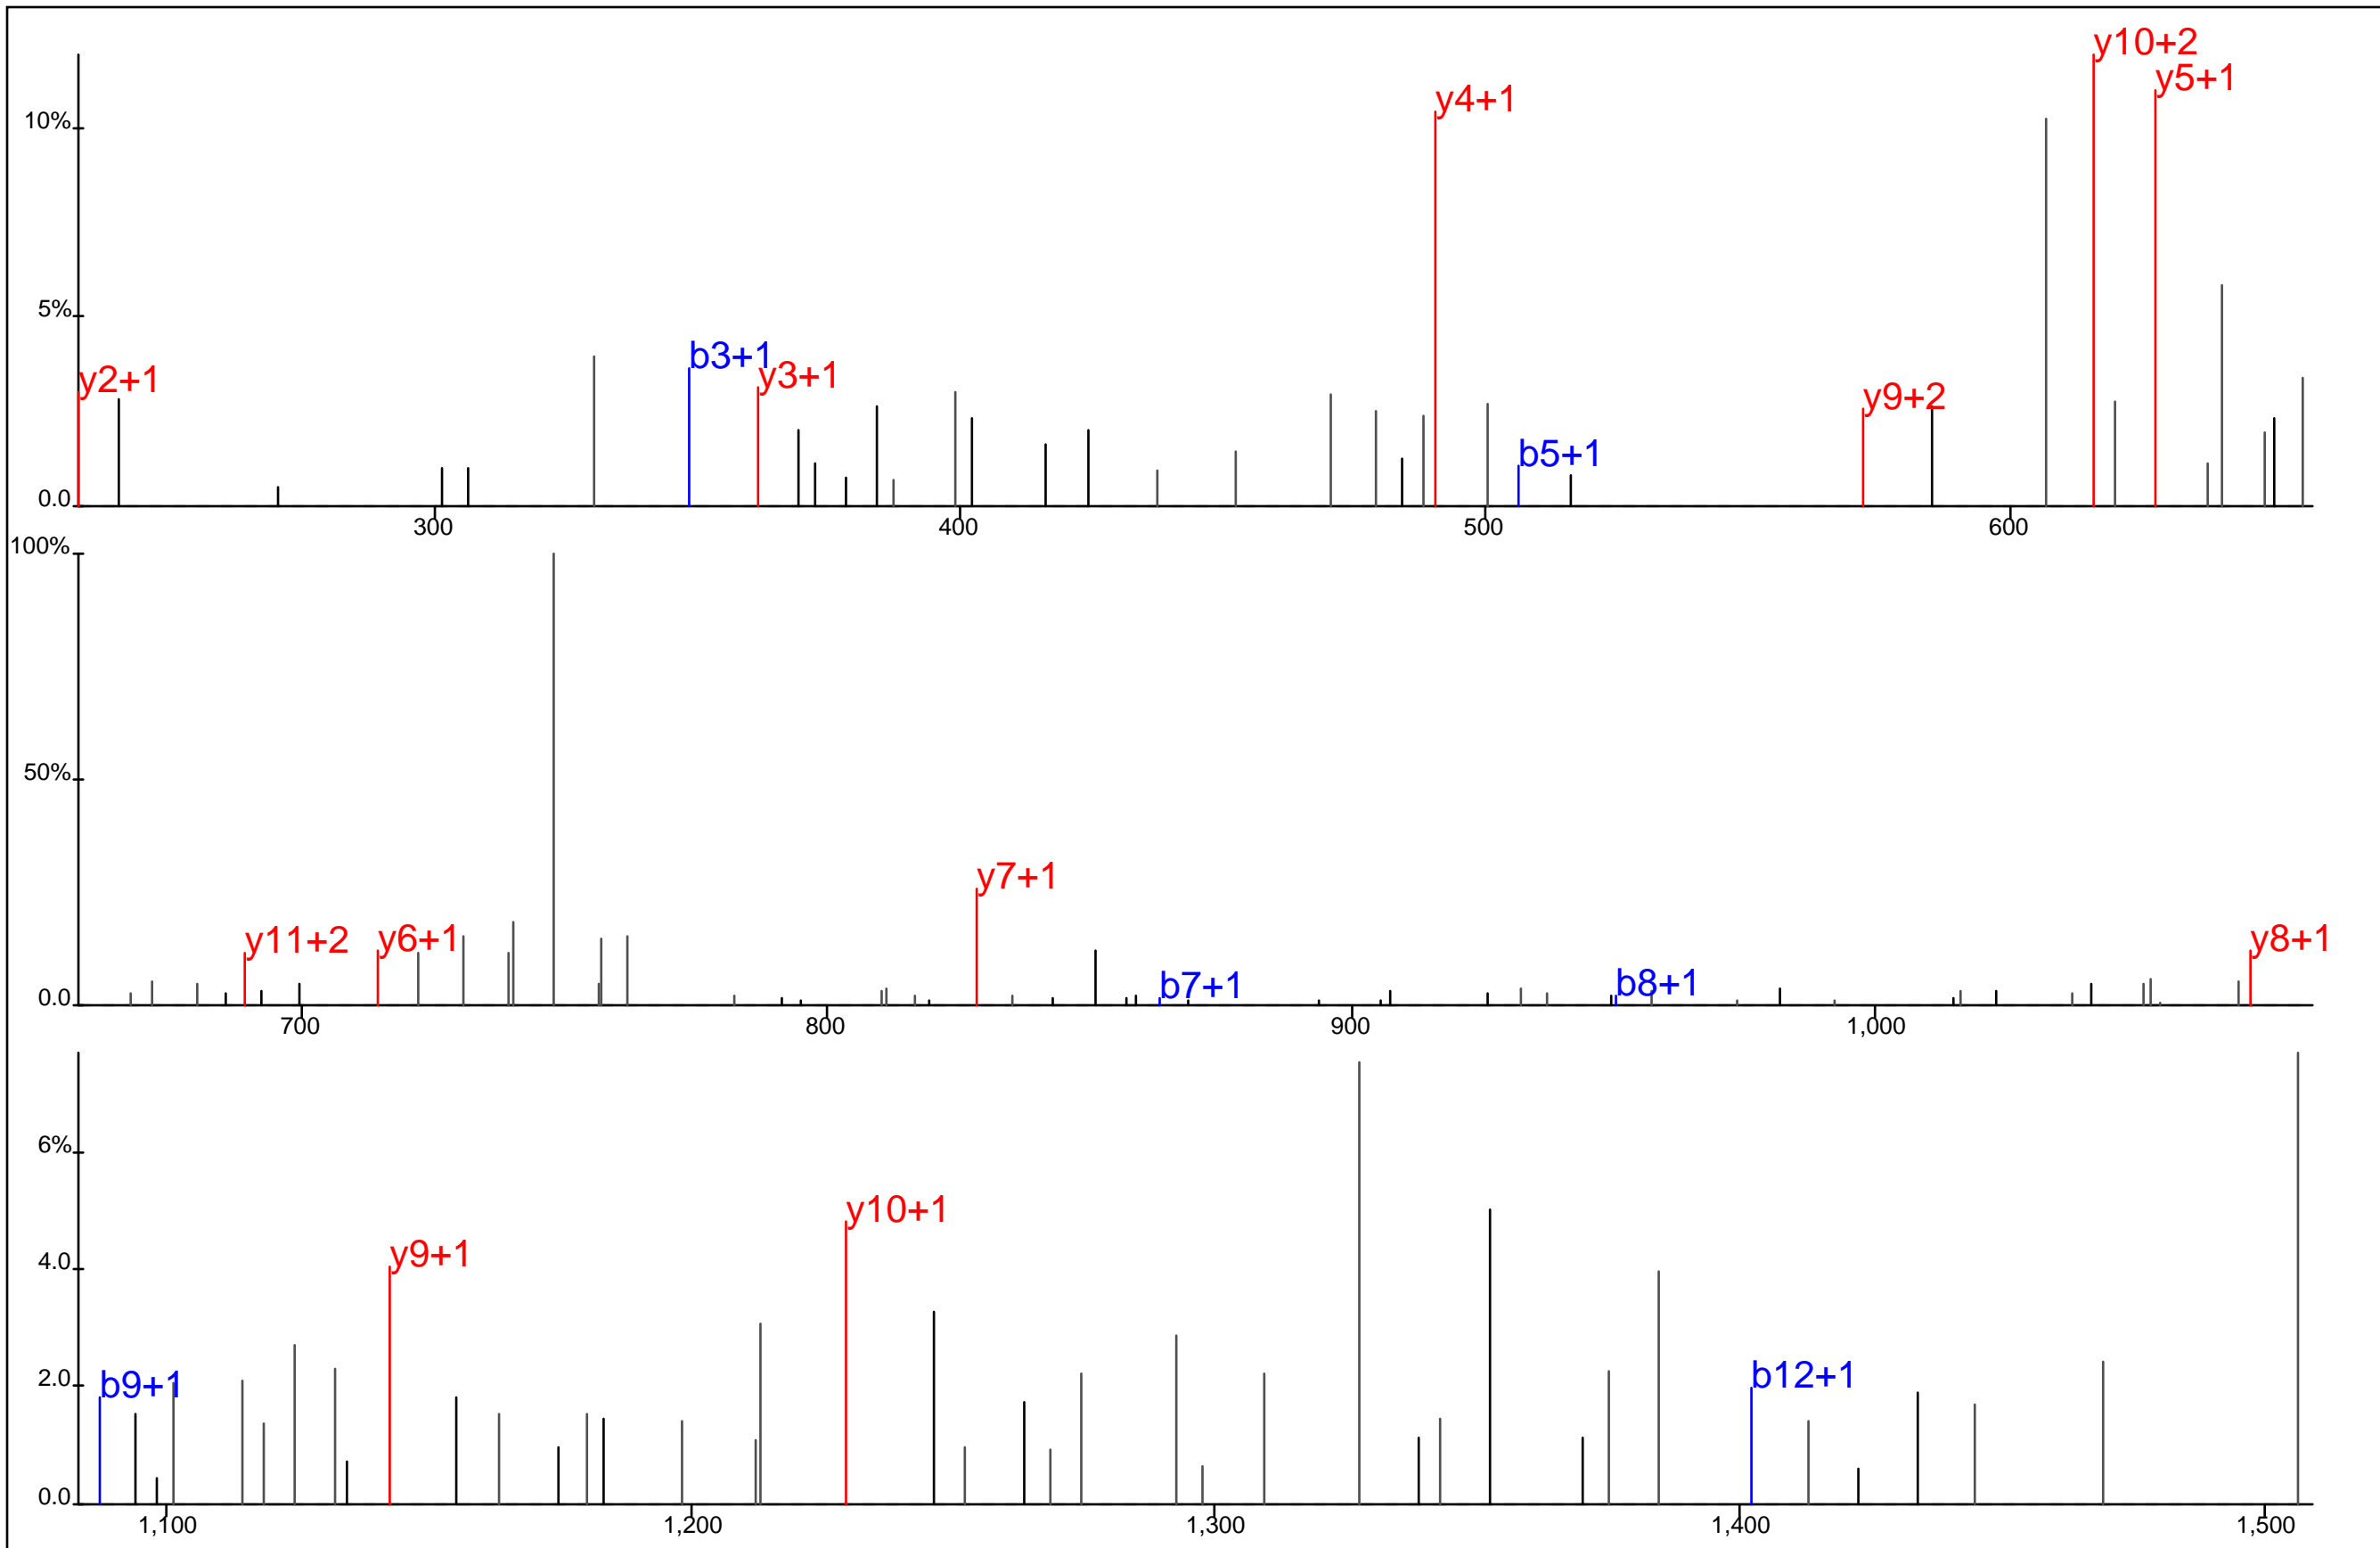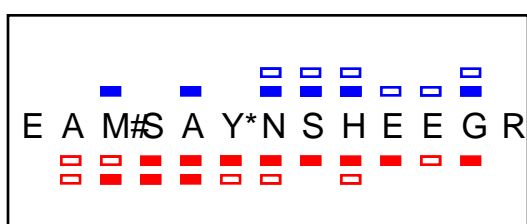

Protein Name: Glycogen debranching enzyme  
 gi Accession: 0  
 Precursor Mass: 788.7884+2  
 Delta Mass: 2.427 ppm  
 XCorr: 49.6



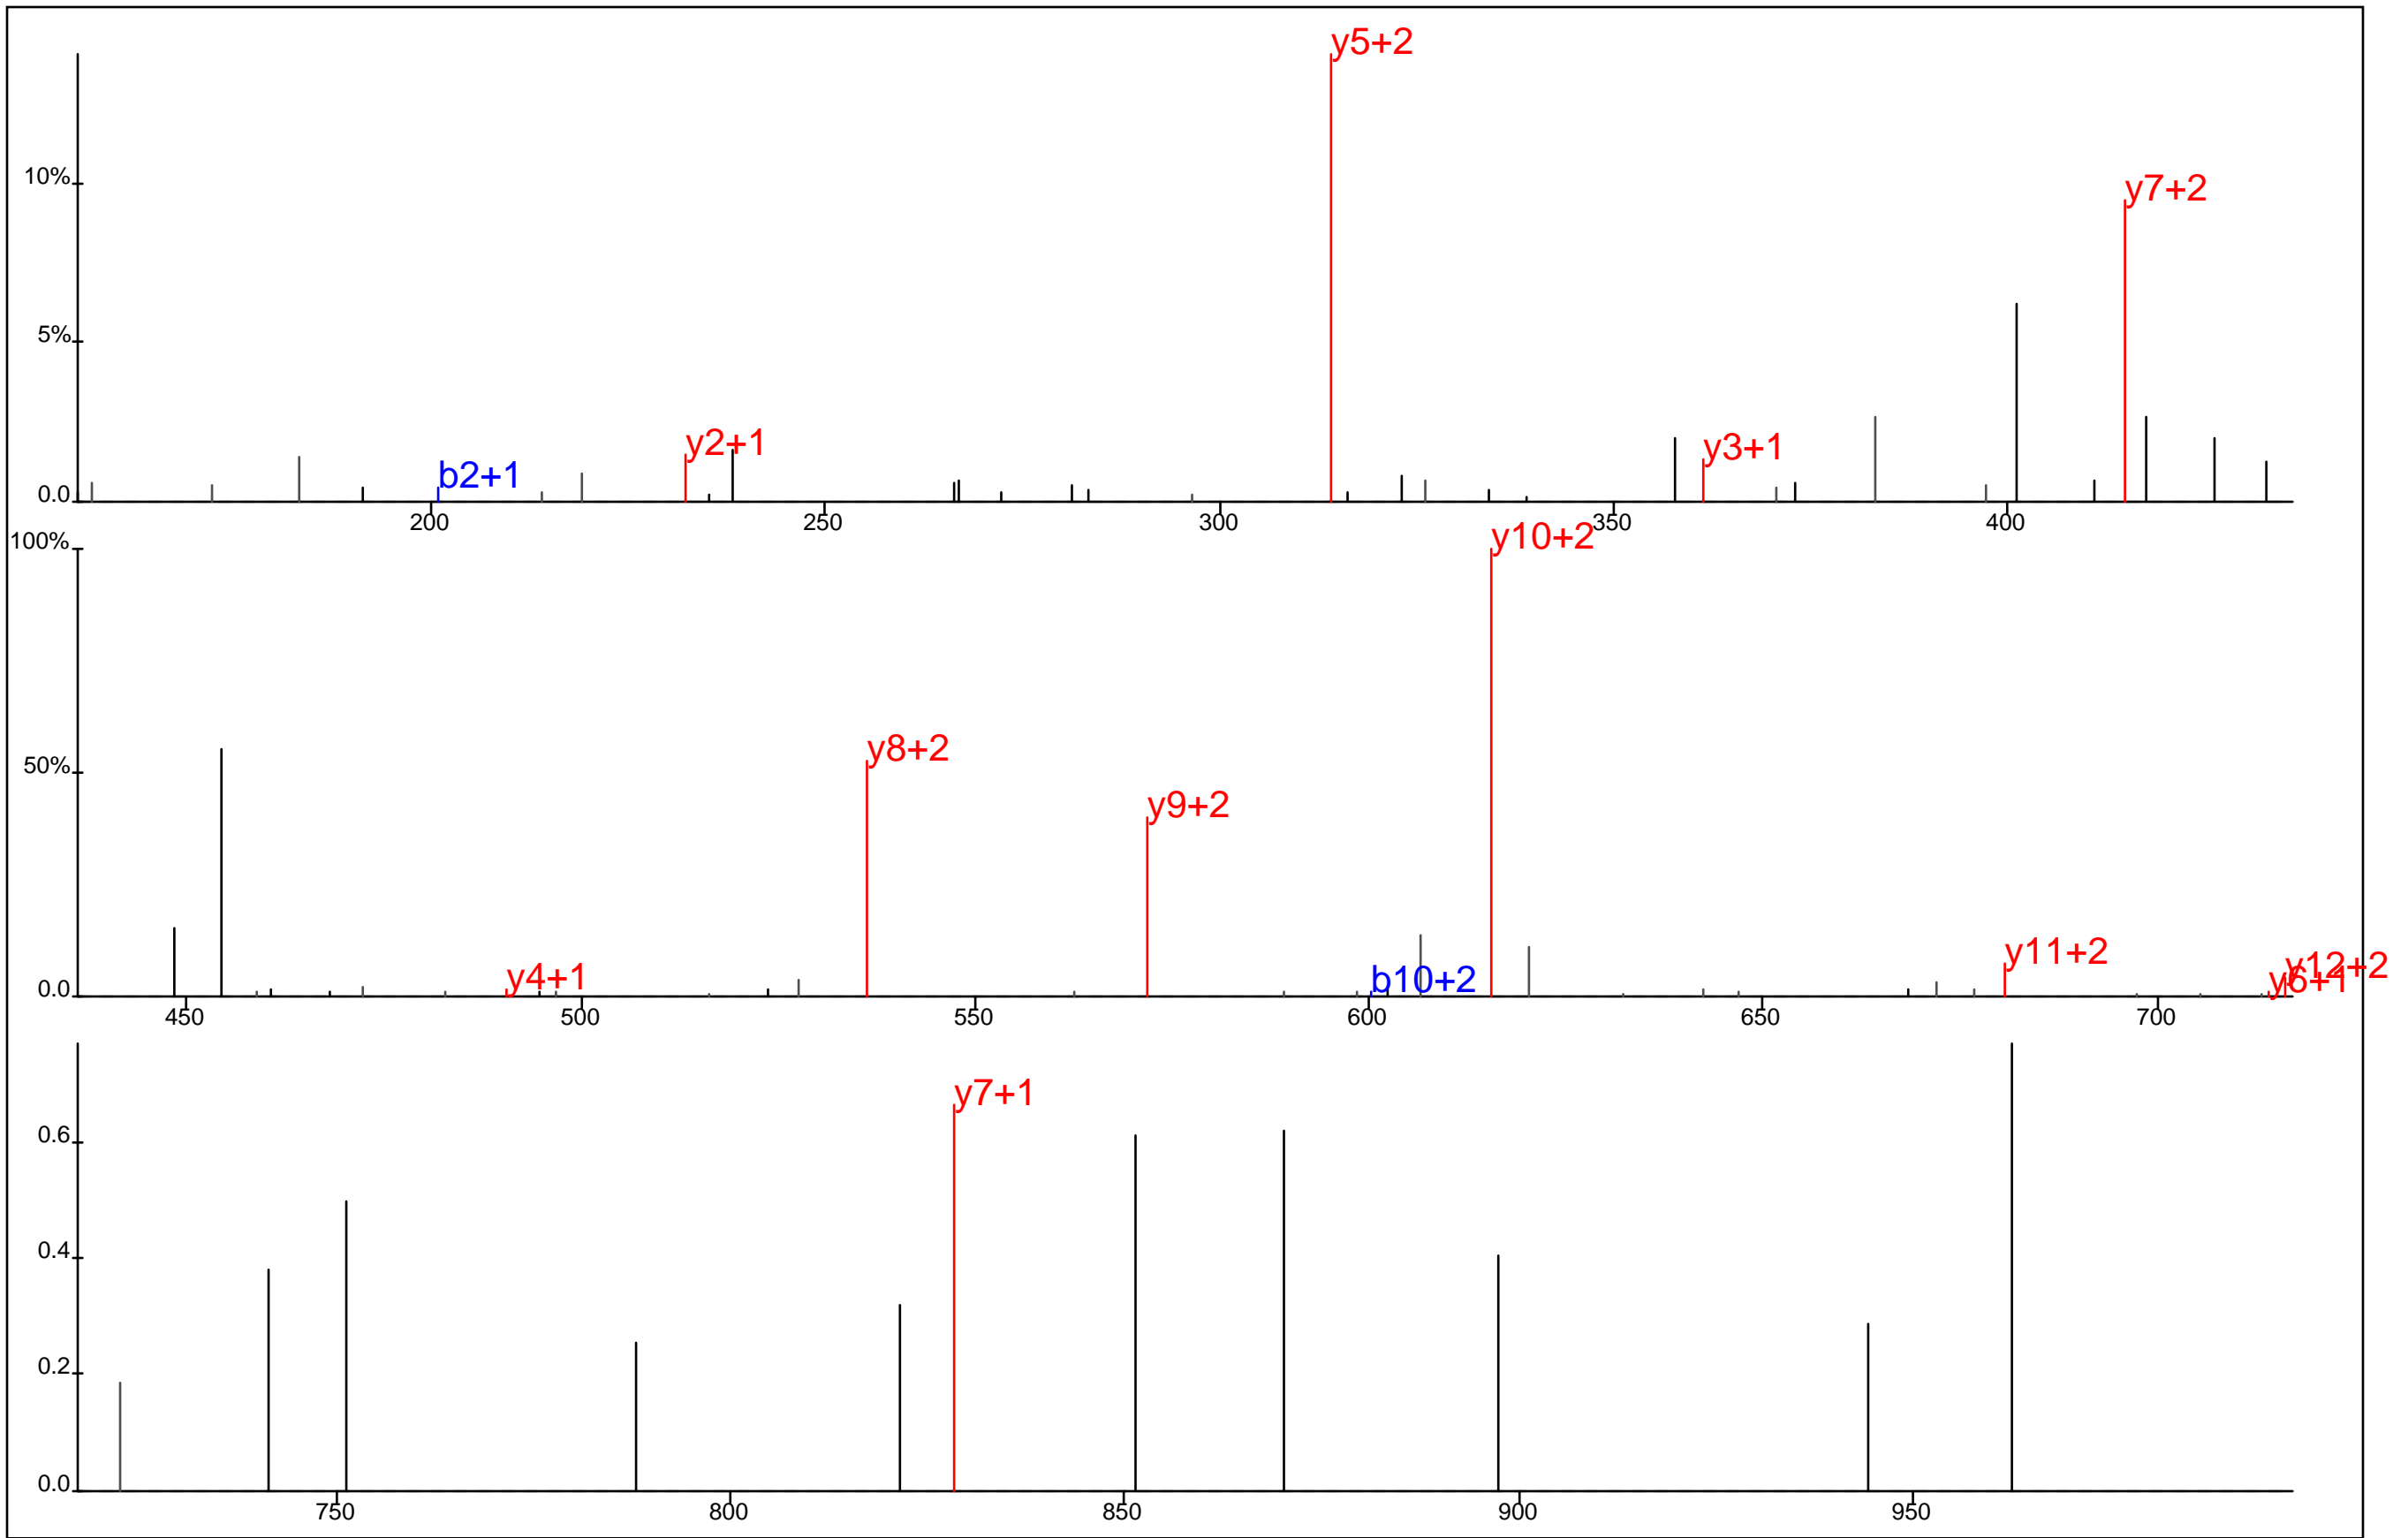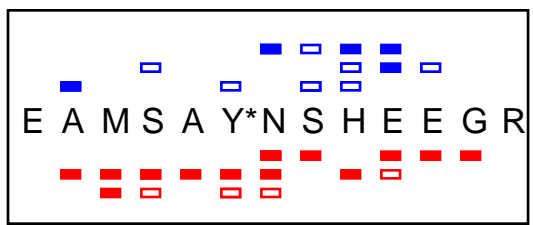

Protein Name: Glycogen debranching enzyme  
 gi Accession: 0  
 Precursor Mass: 520.8635+3  
 Delta Mass: 1.531 ppm  
 XCorr: 38.07

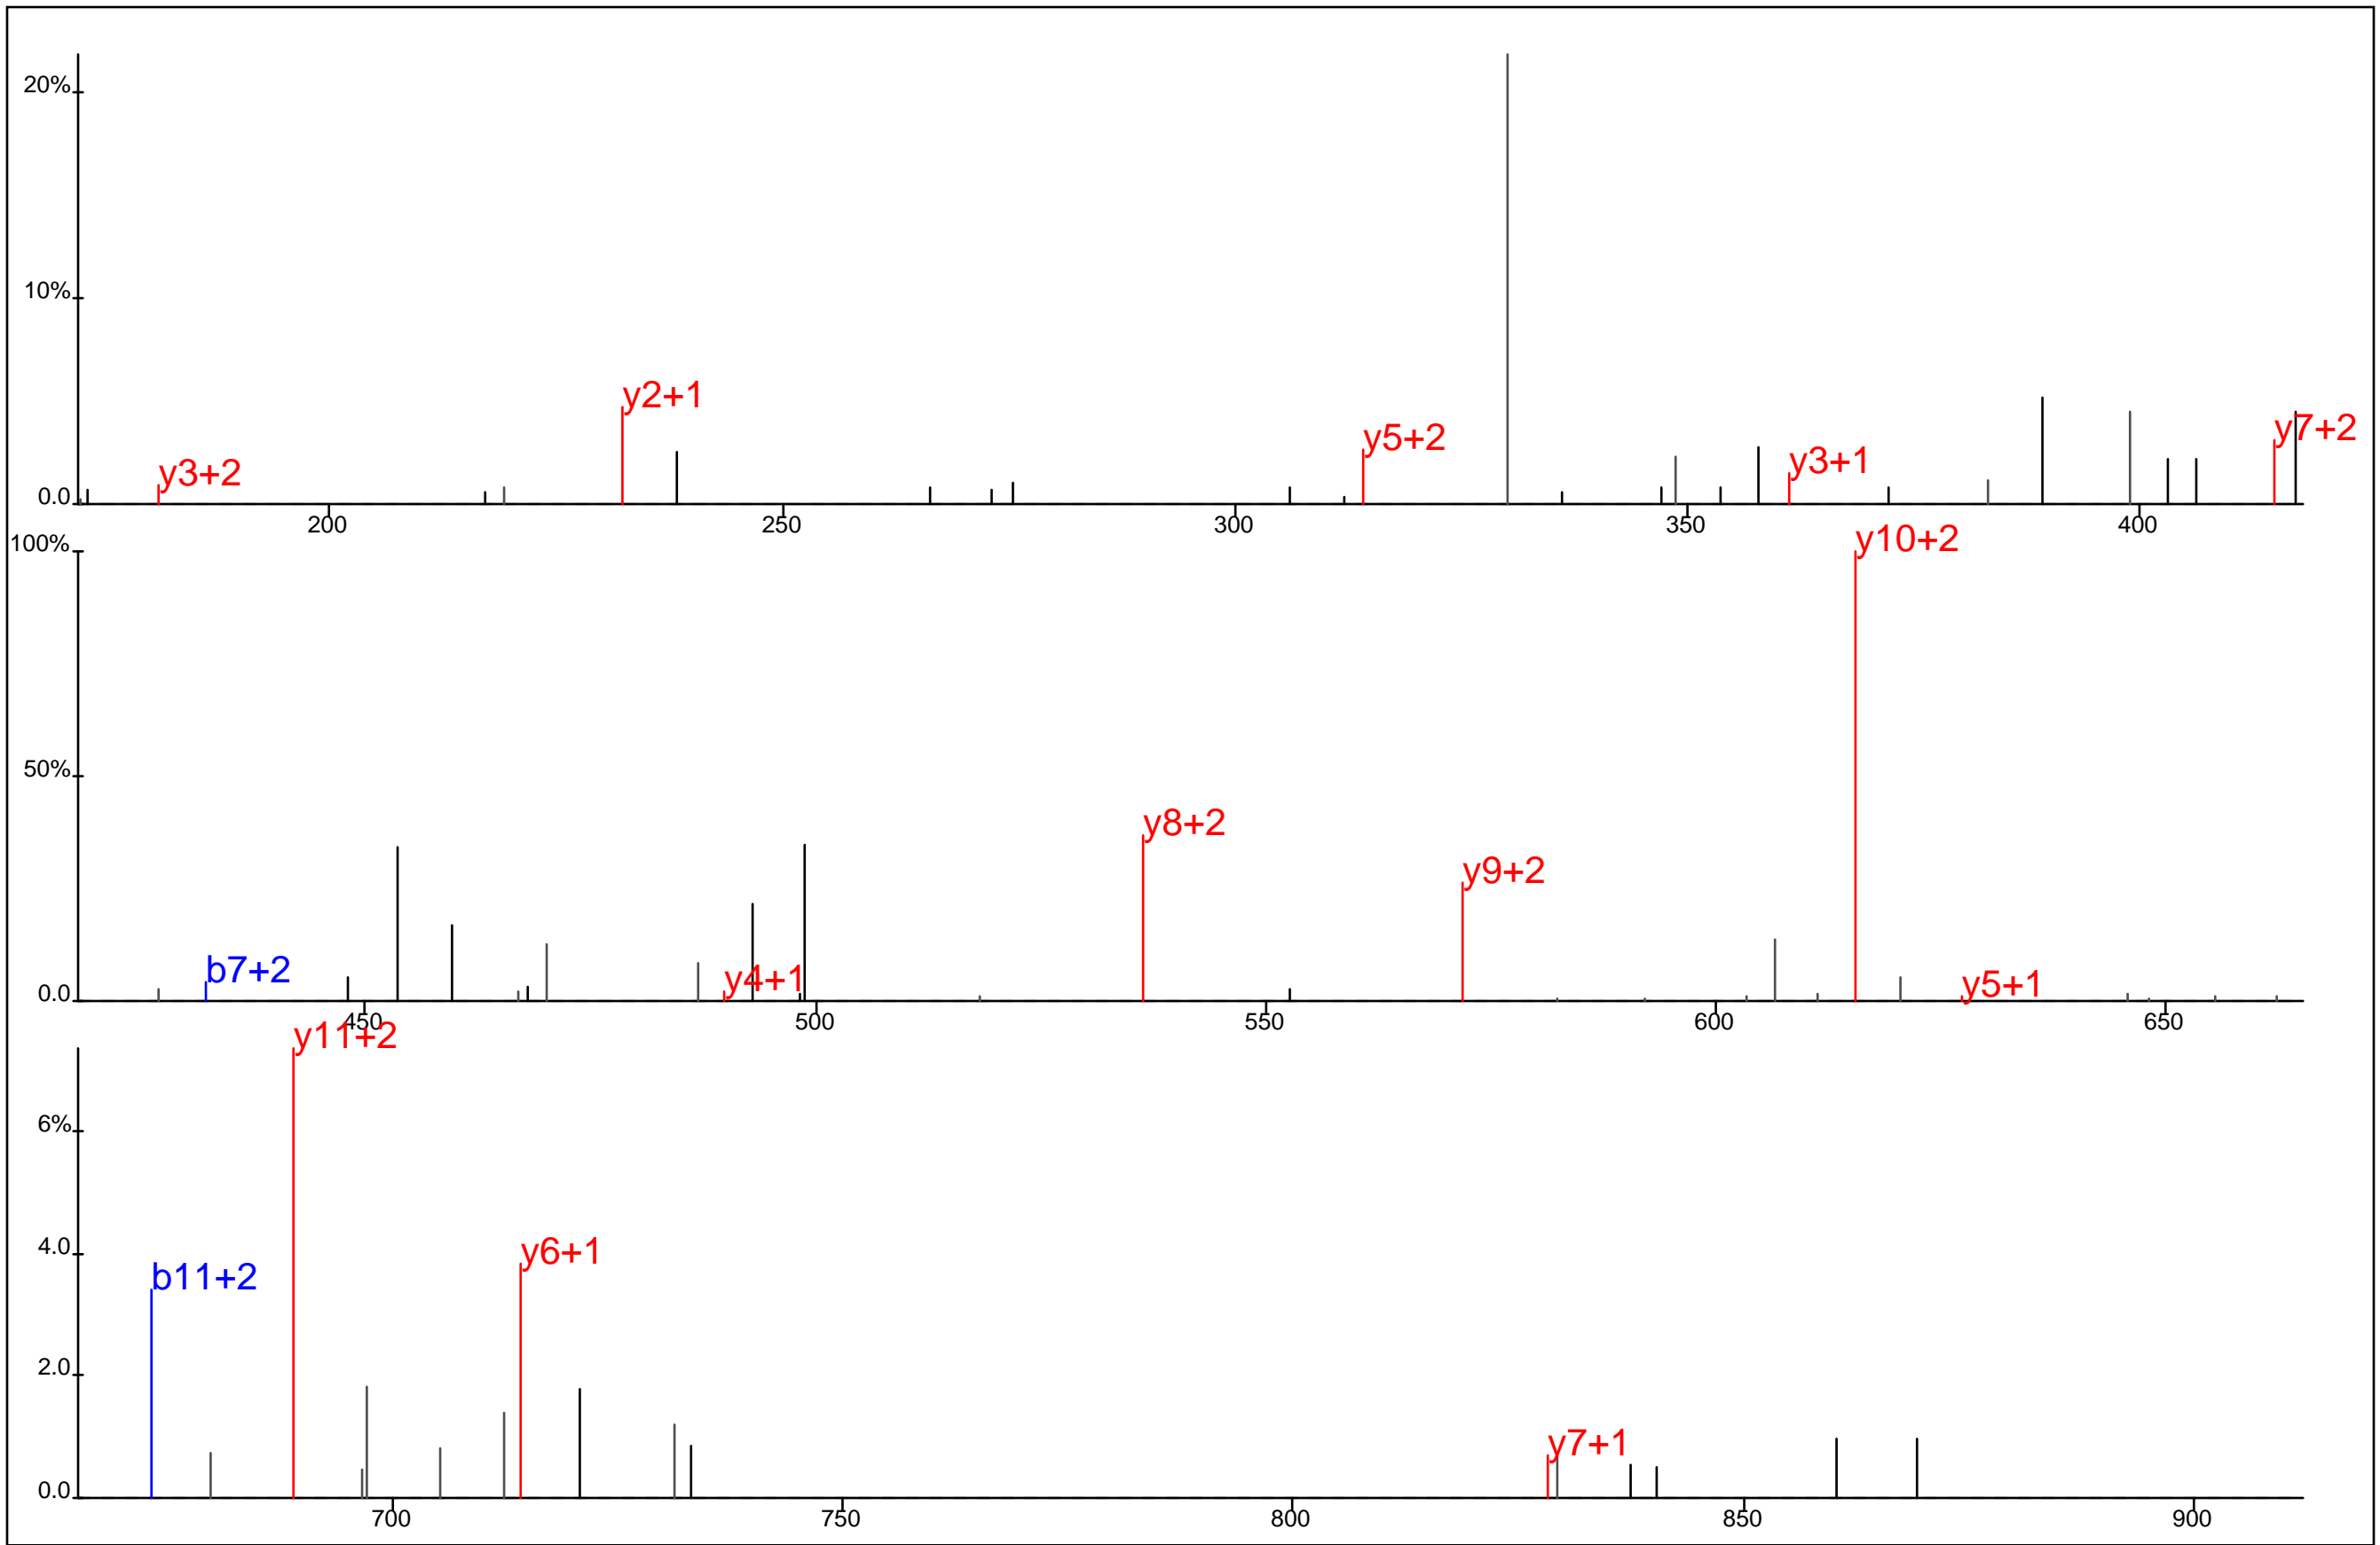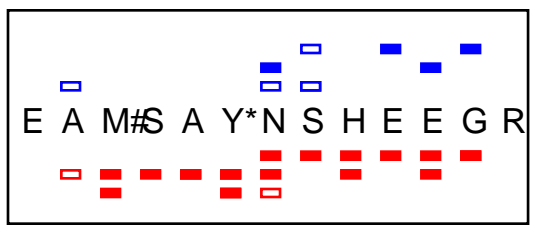

Protein Name: Glycogen debranching enzyme  
 gi Accession: 0  
 Precursor Mass: 526.1950+3  
 Delta Mass: 1.816 ppm  
 XCorr: 36.23

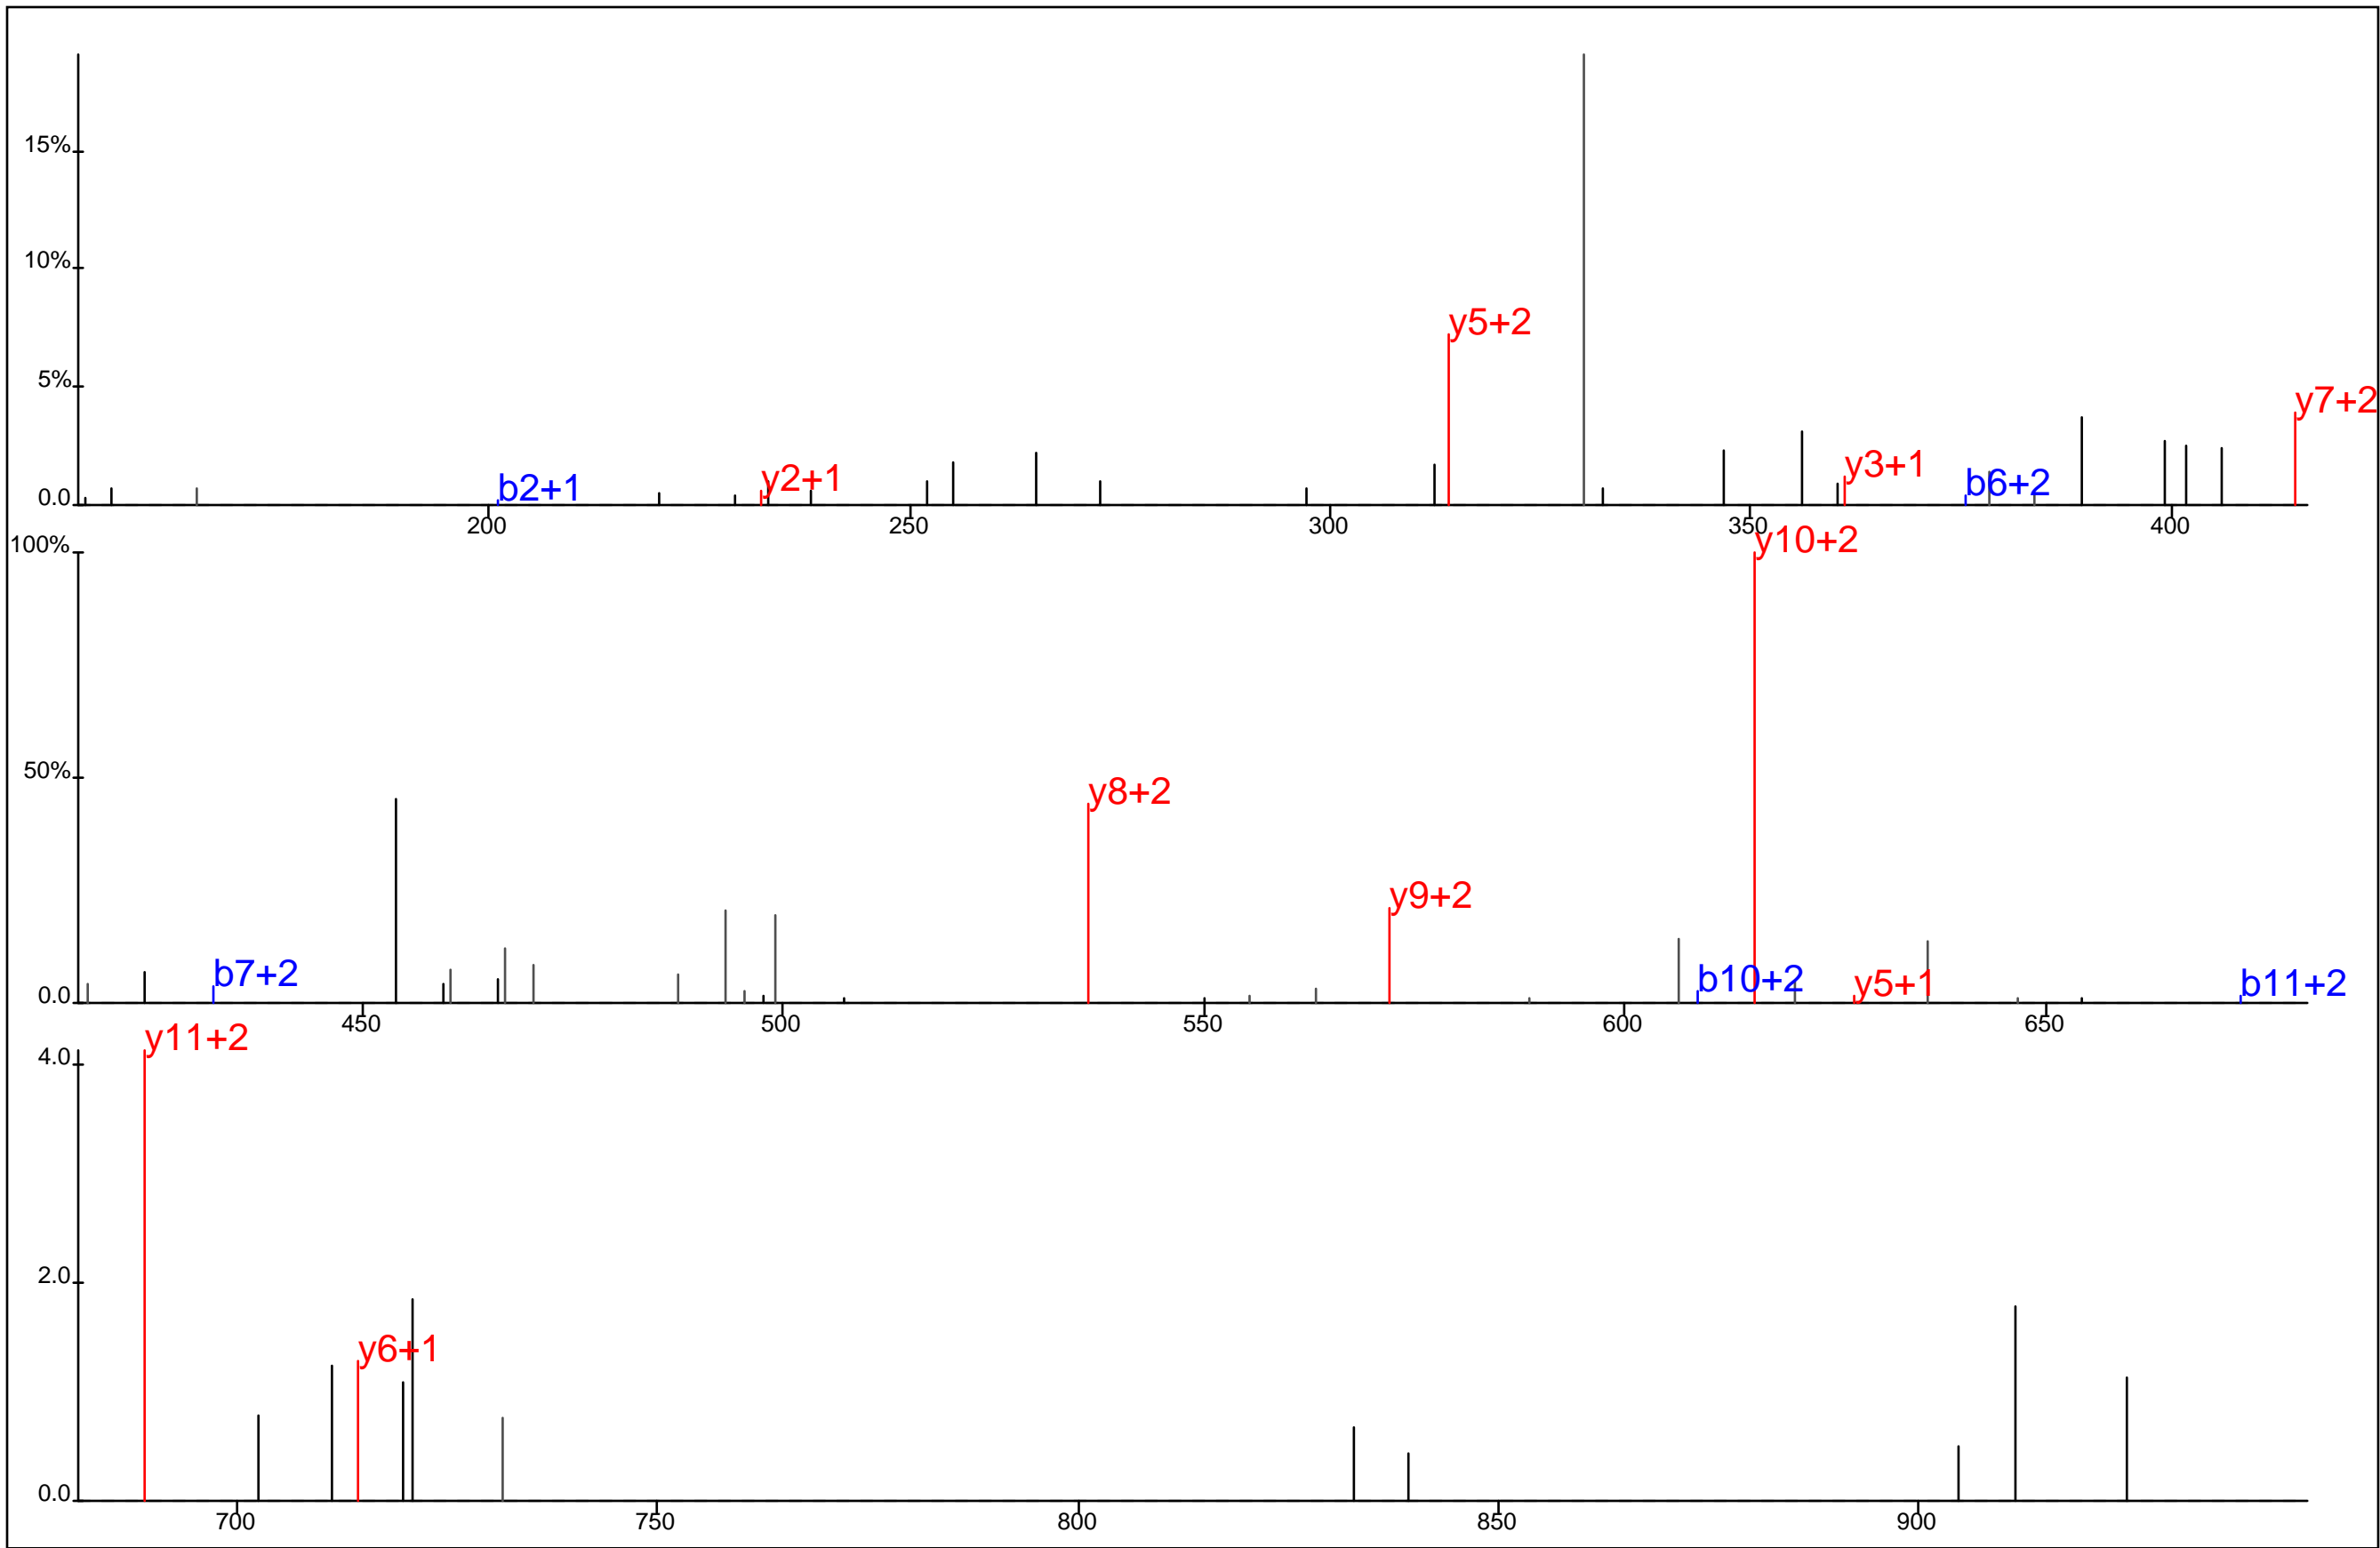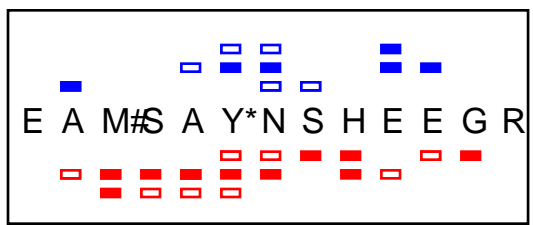

Protein Name: Glycogen debranching enzyme  
 gi Accession: 0  
 Precursor Mass: 526.1958+3  
 Delta Mass: 0.305 ppm  
 XCorr: 27.09

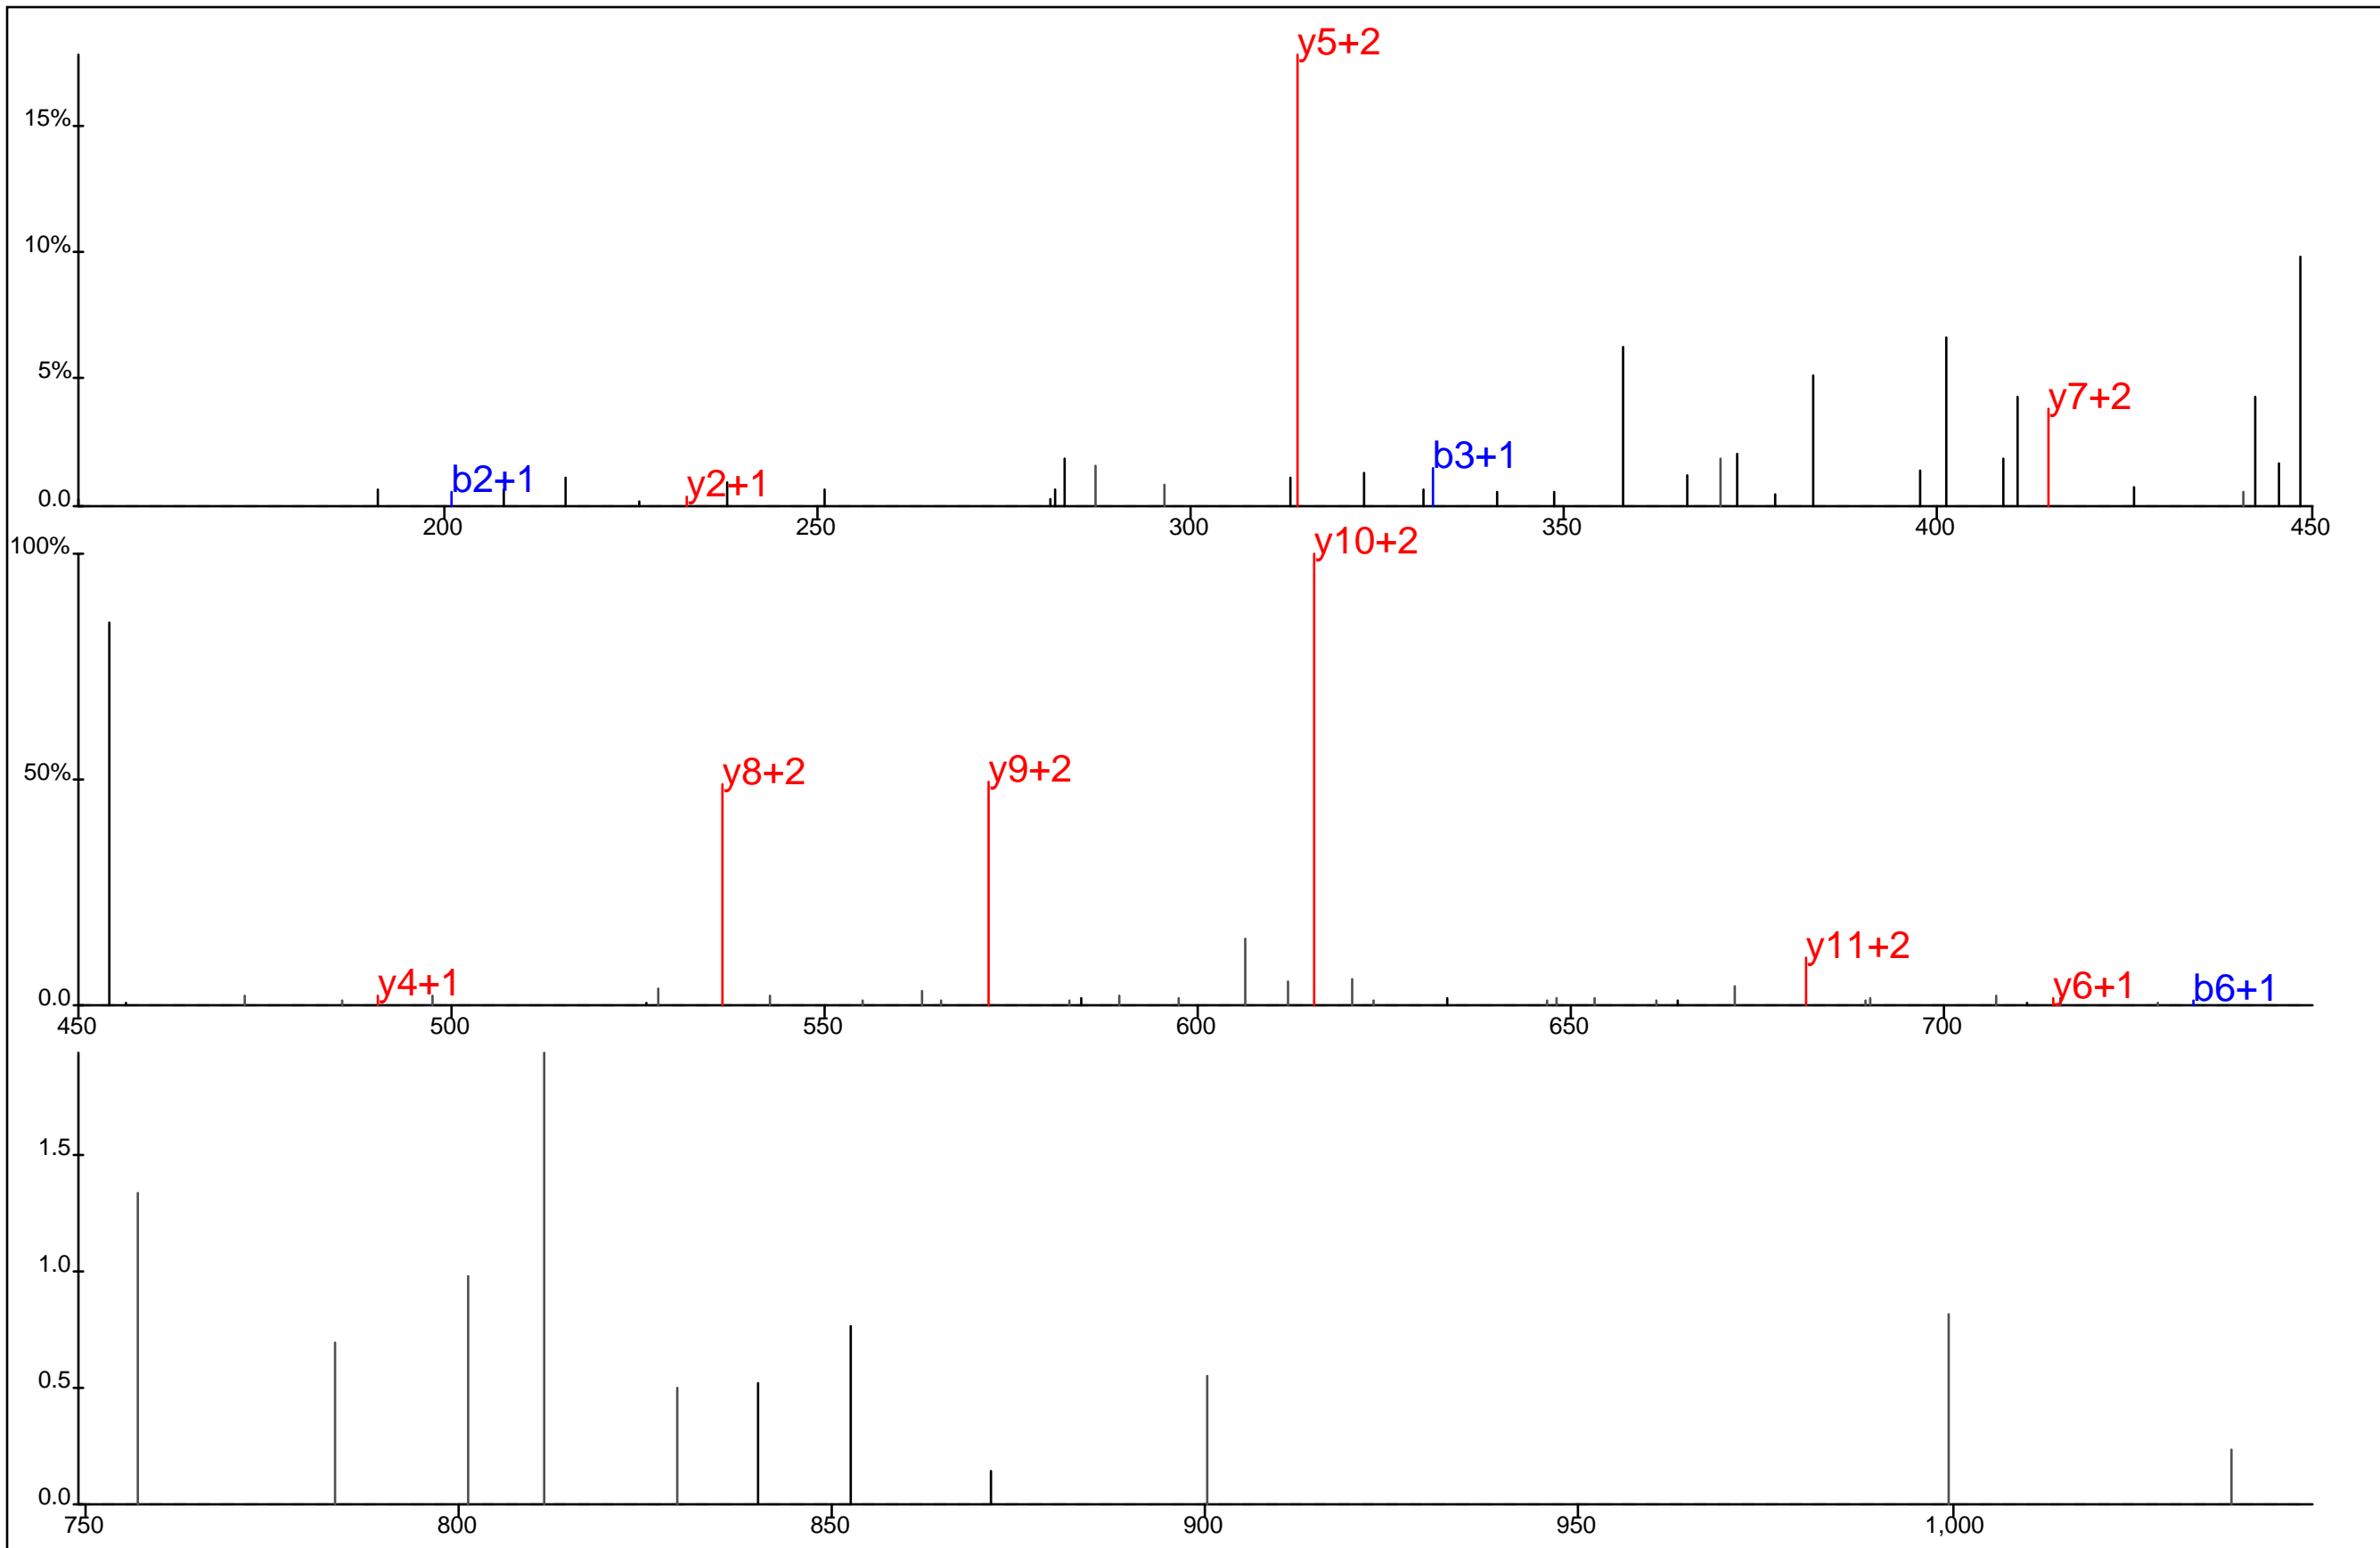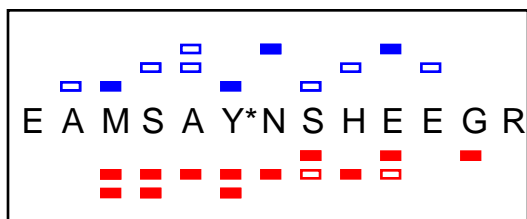

Protein Name: Glycogen debranching enzyme  
 gi Accession: 0  
 Precursor Mass: 520.8637+3  
 Delta Mass: 1.179 ppm  
 XCorr: 26.66

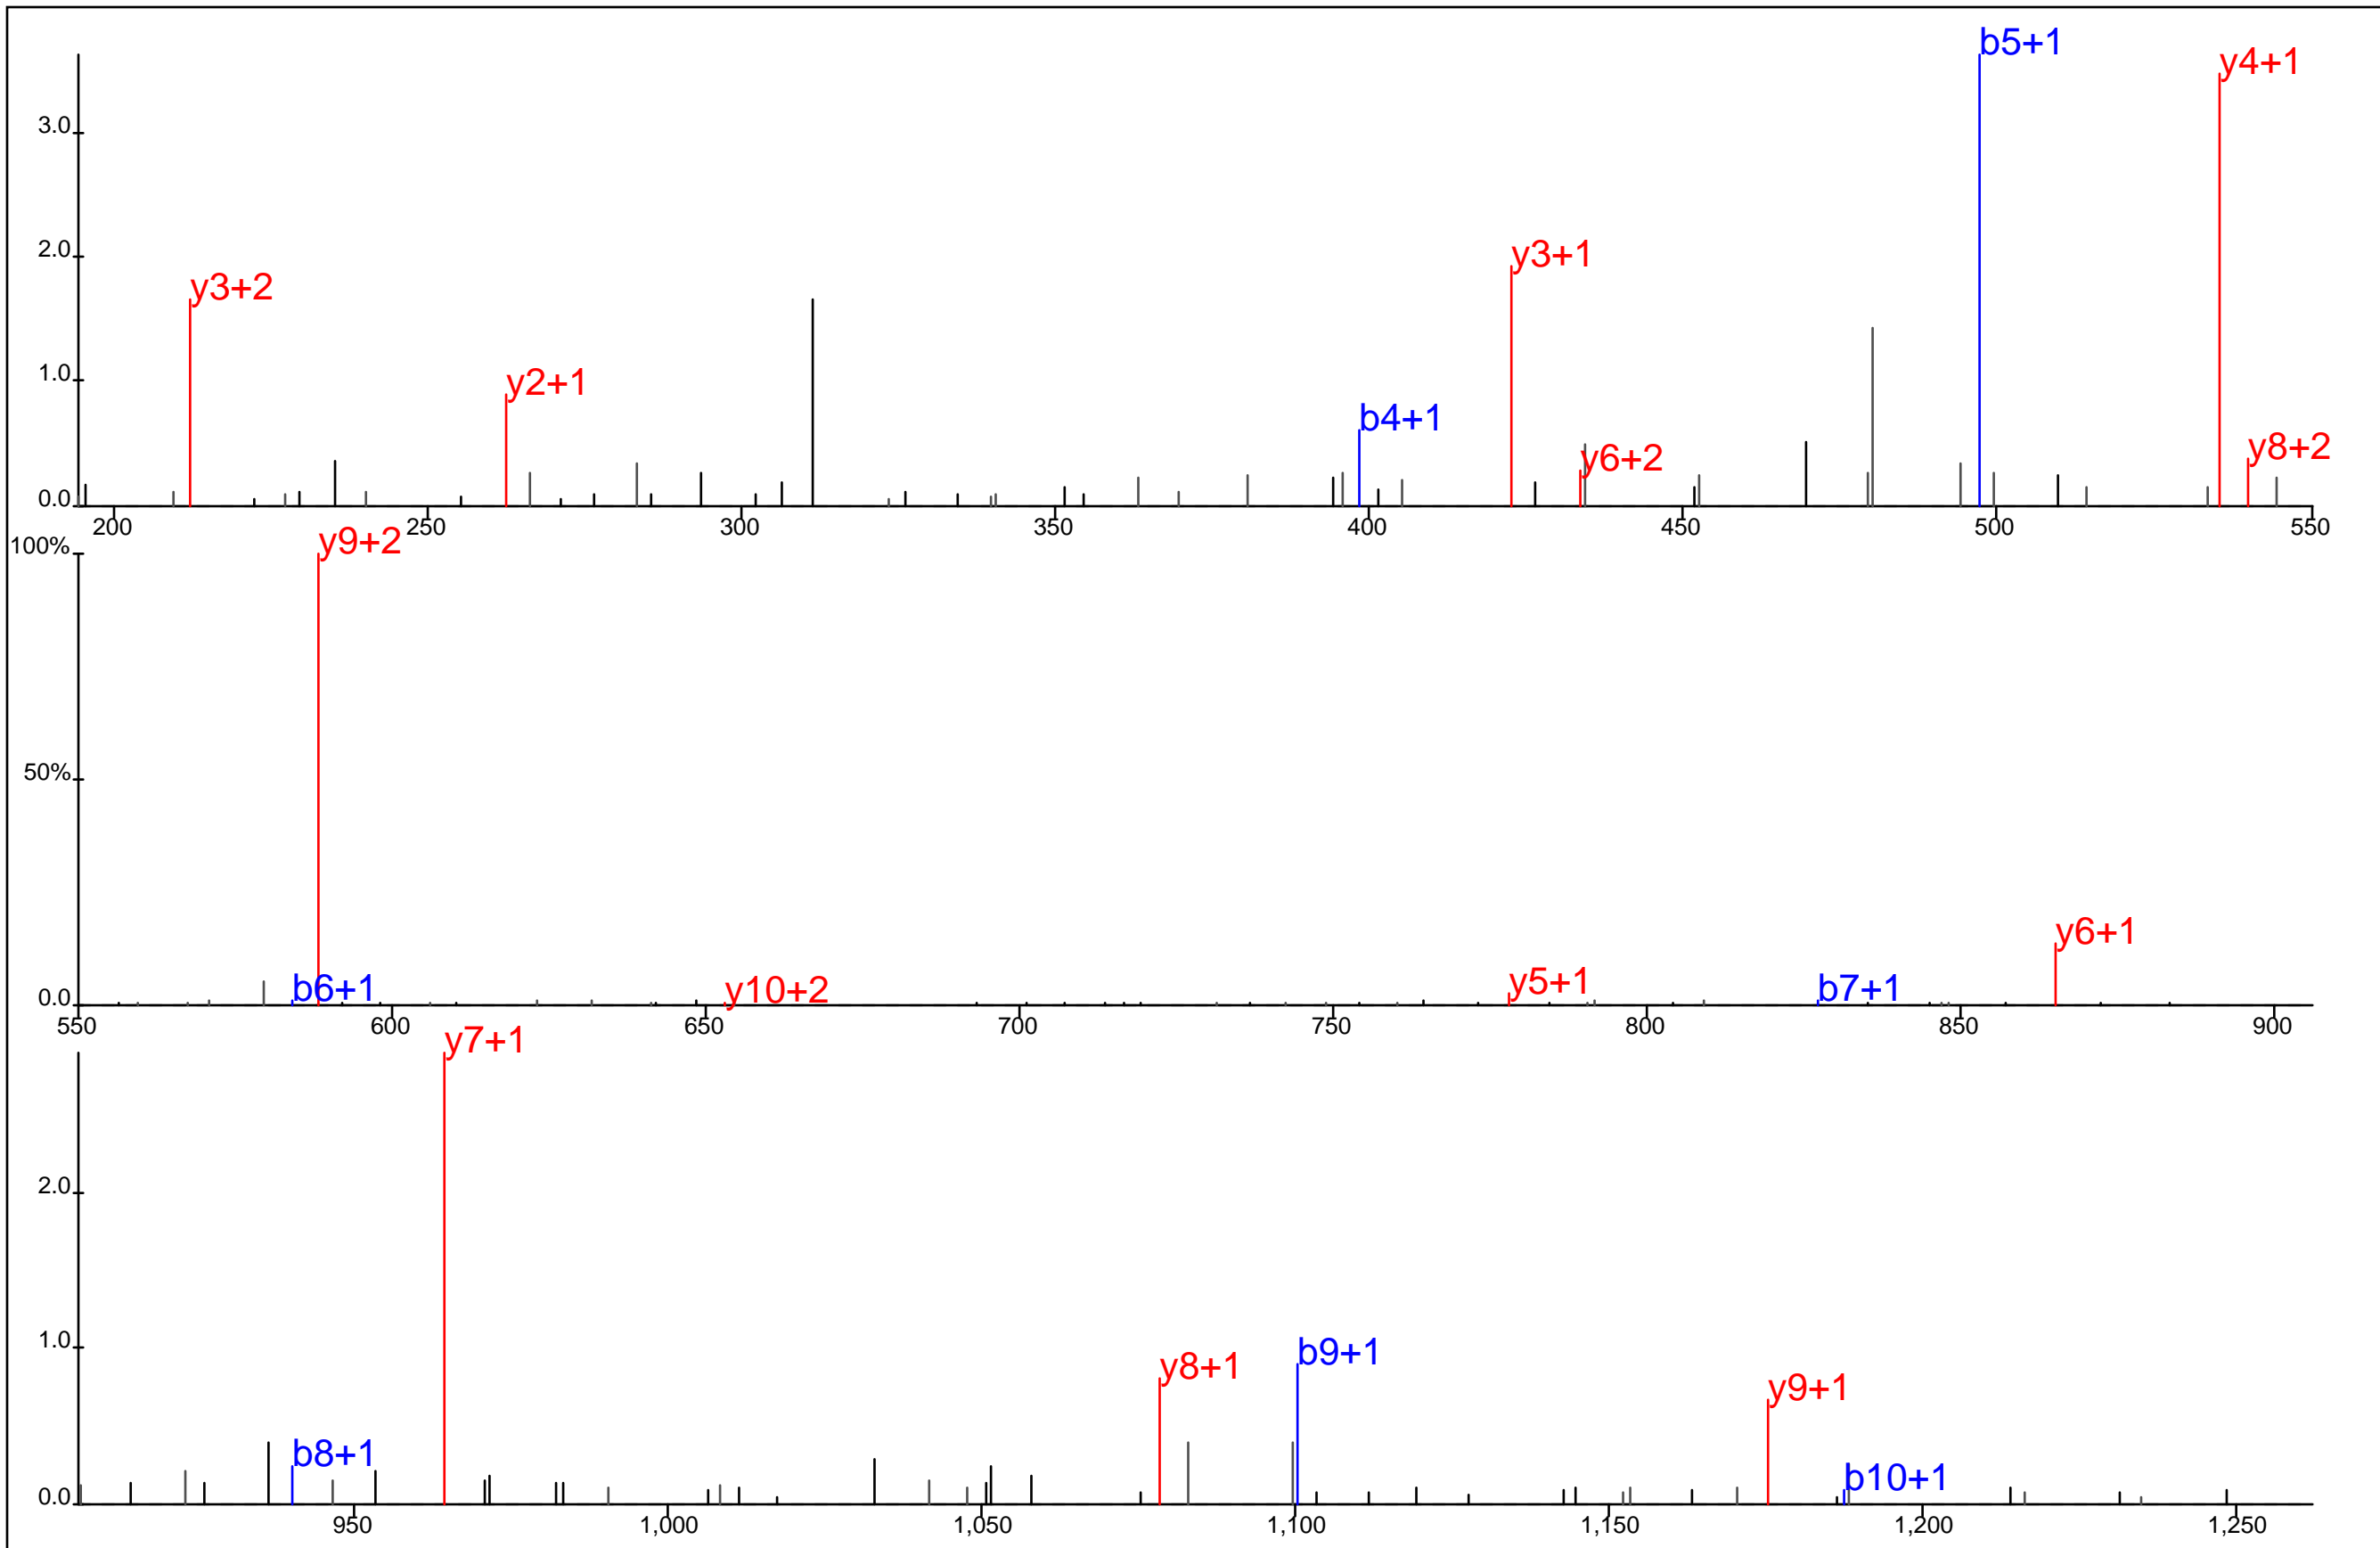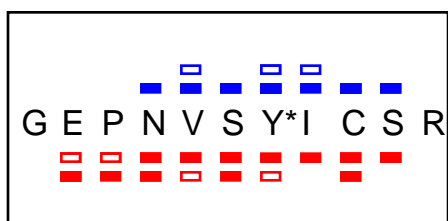

Protein Name: Glycogen synthase kinase 3 beta  
 gi Accession: 0  
 Precursor Mass: 681.2822+2  
 Delta Mass: 1.127 ppm  
 XCorr: 51.76

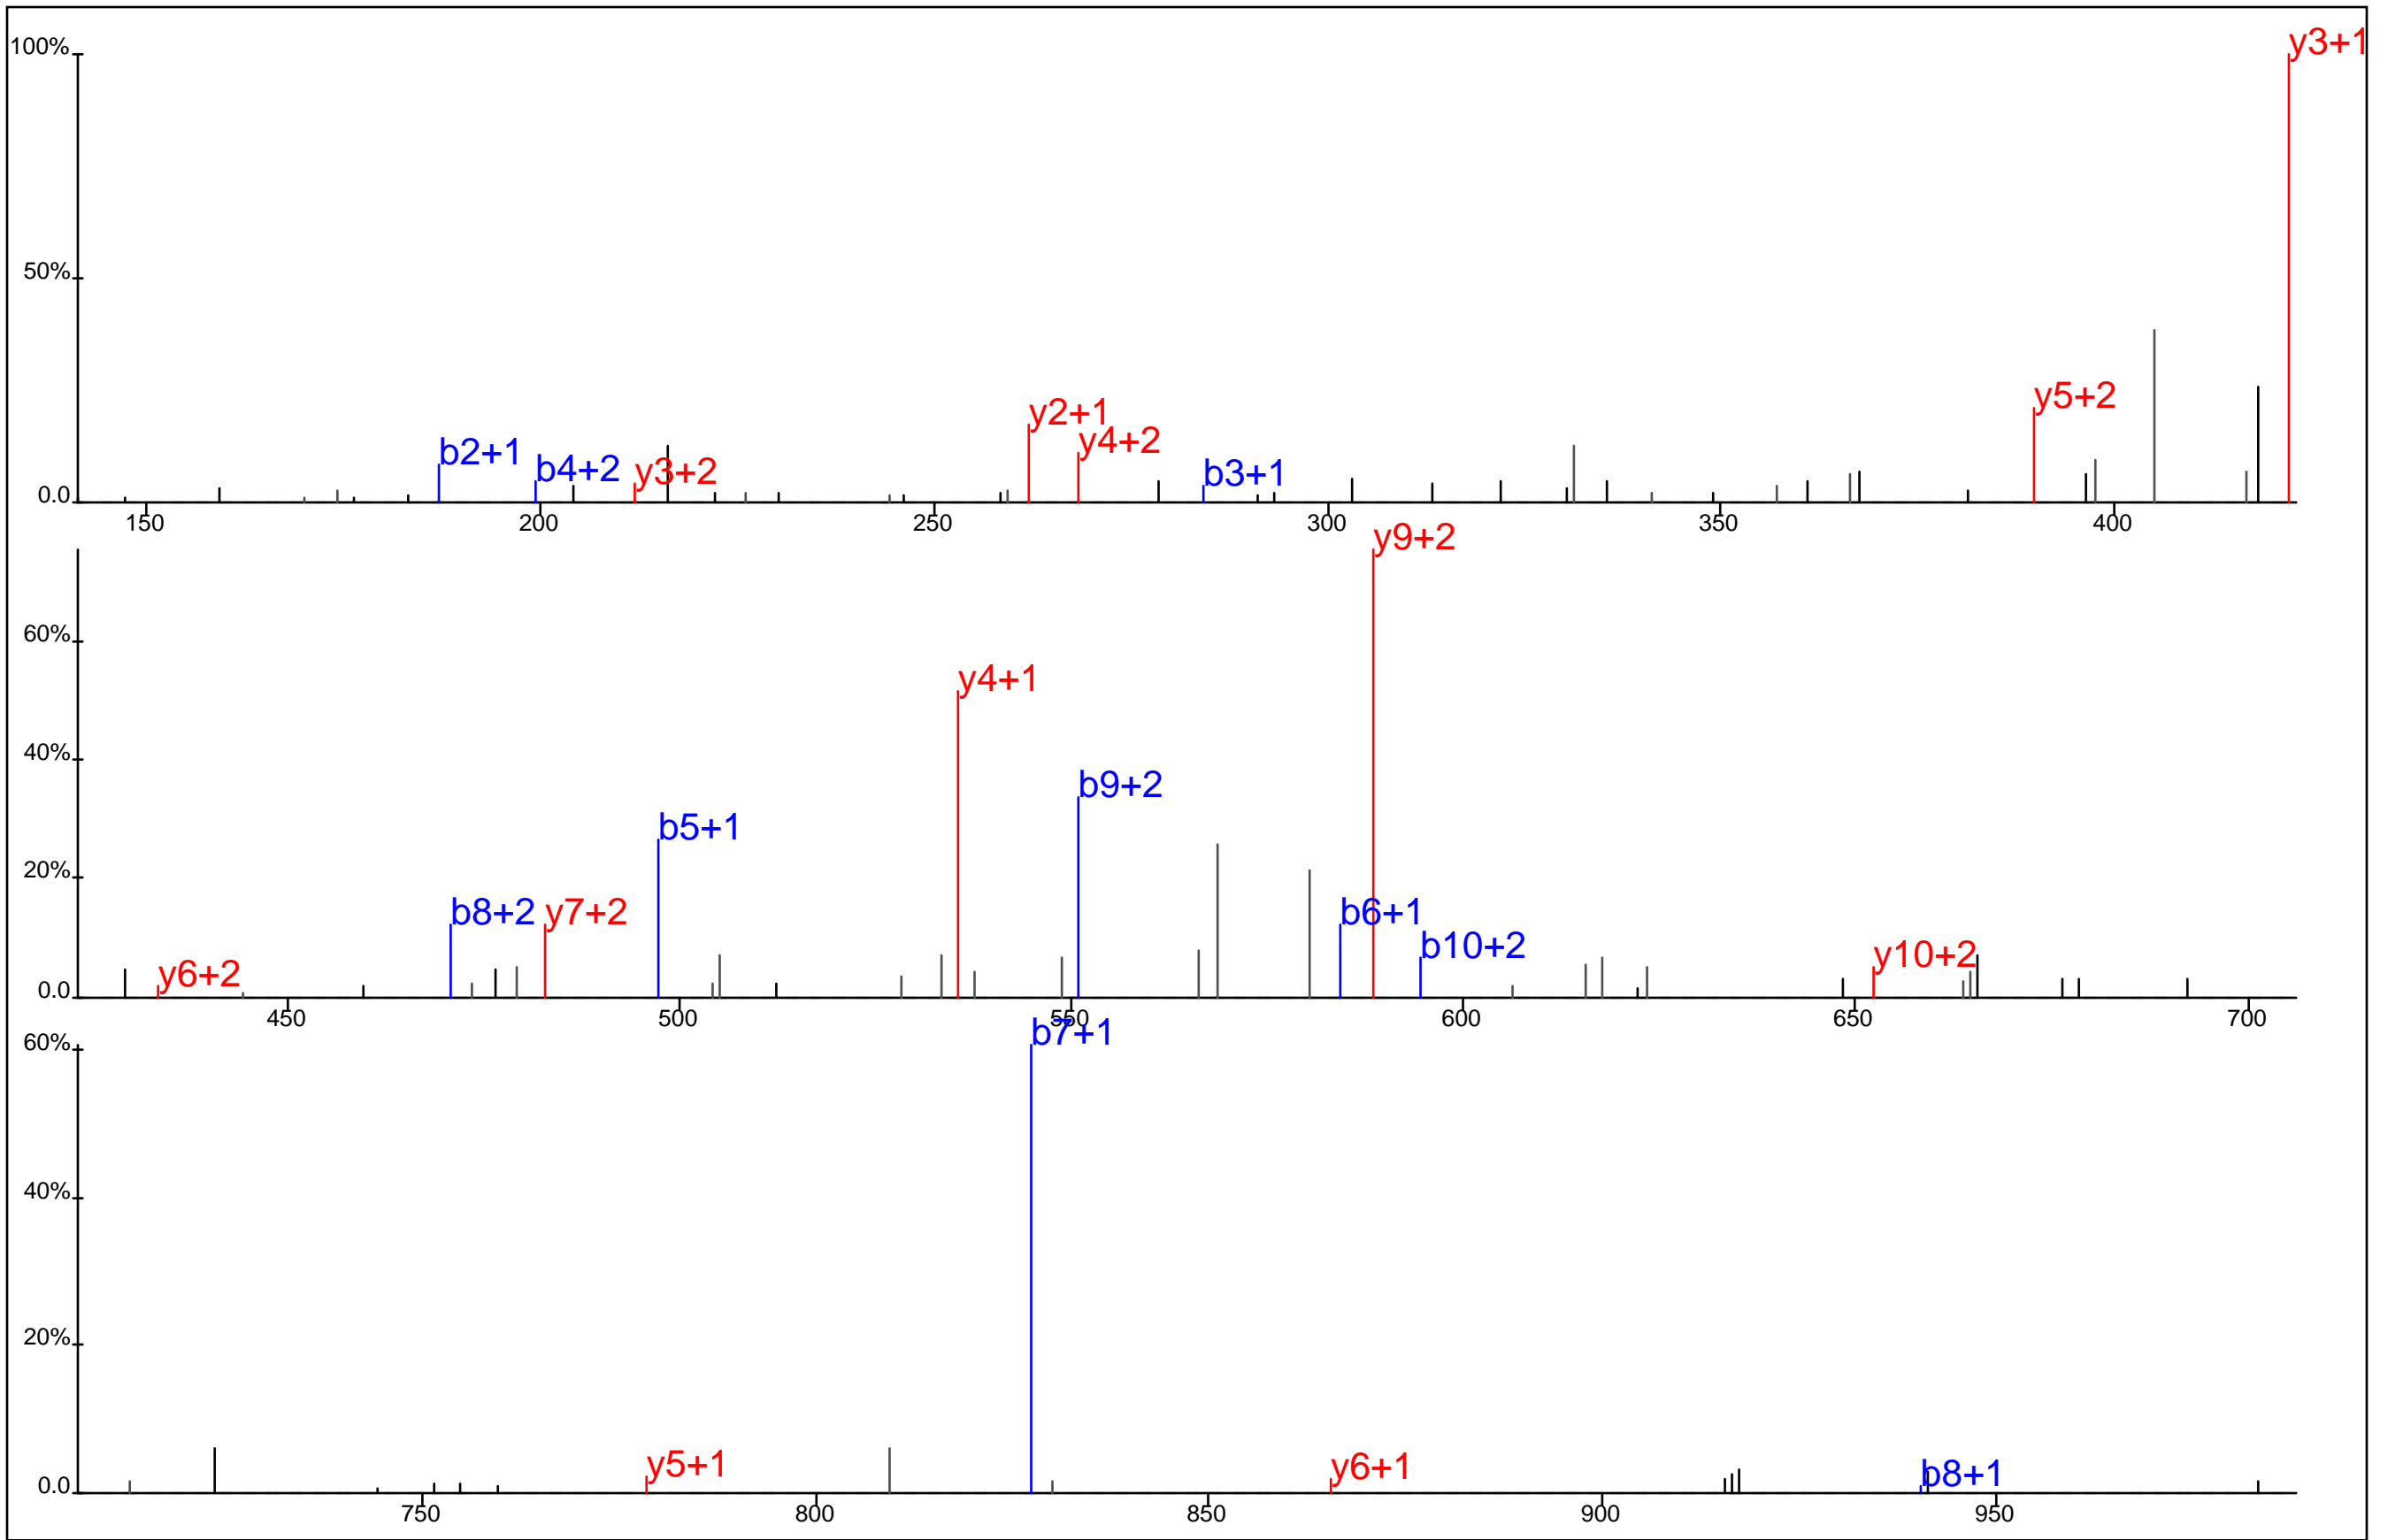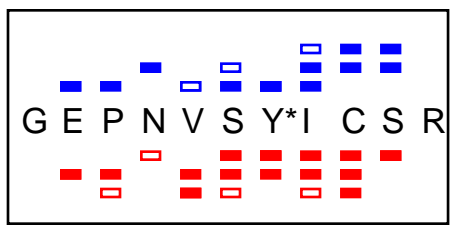

Protein Name: Glycogen synthase kinase 3 beta  
 gi Accession: 0  
 Precursor Mass: 454.5224+3  
 Delta Mass: 2.179 ppm  
 XCorr: 36.36

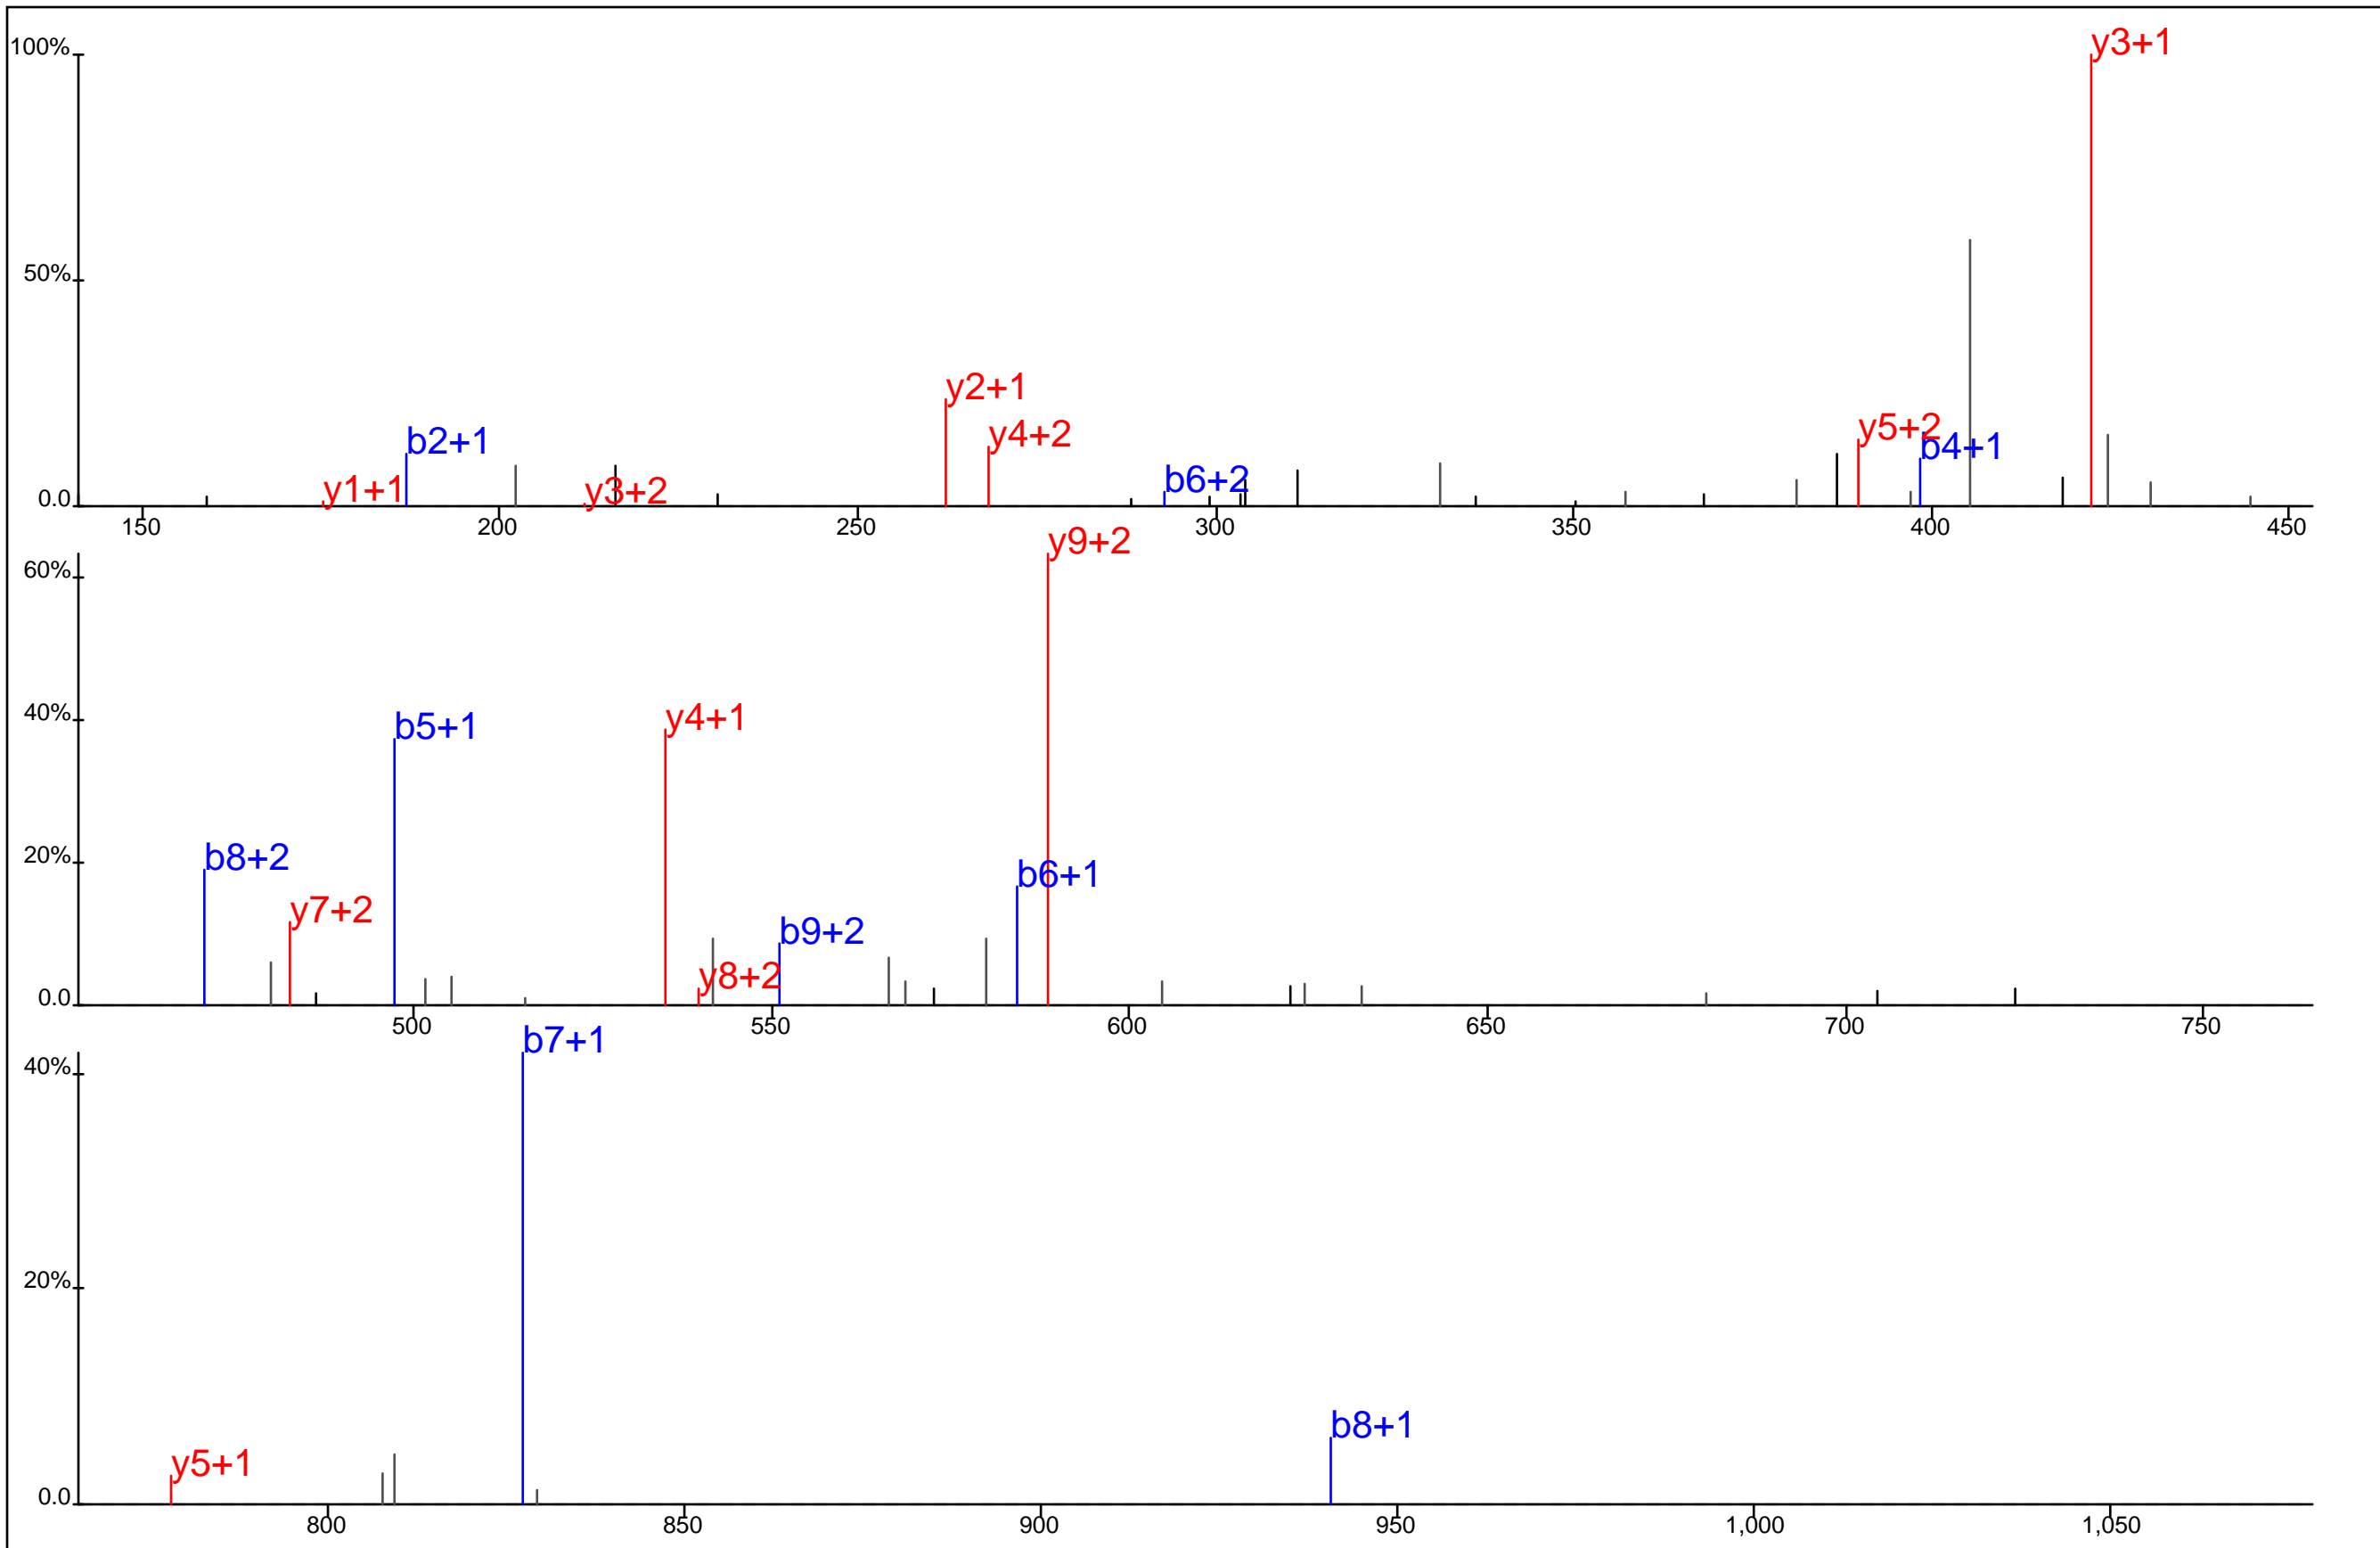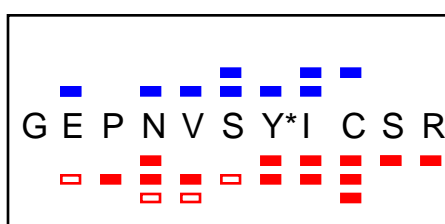

Protein Name: Glycogen synthase kinase 3 beta  
 gi Accession: 0  
 Precursor Mass: 454.5238+3  
 Delta Mass: 0.914 ppm  
 XCorr: 44.22

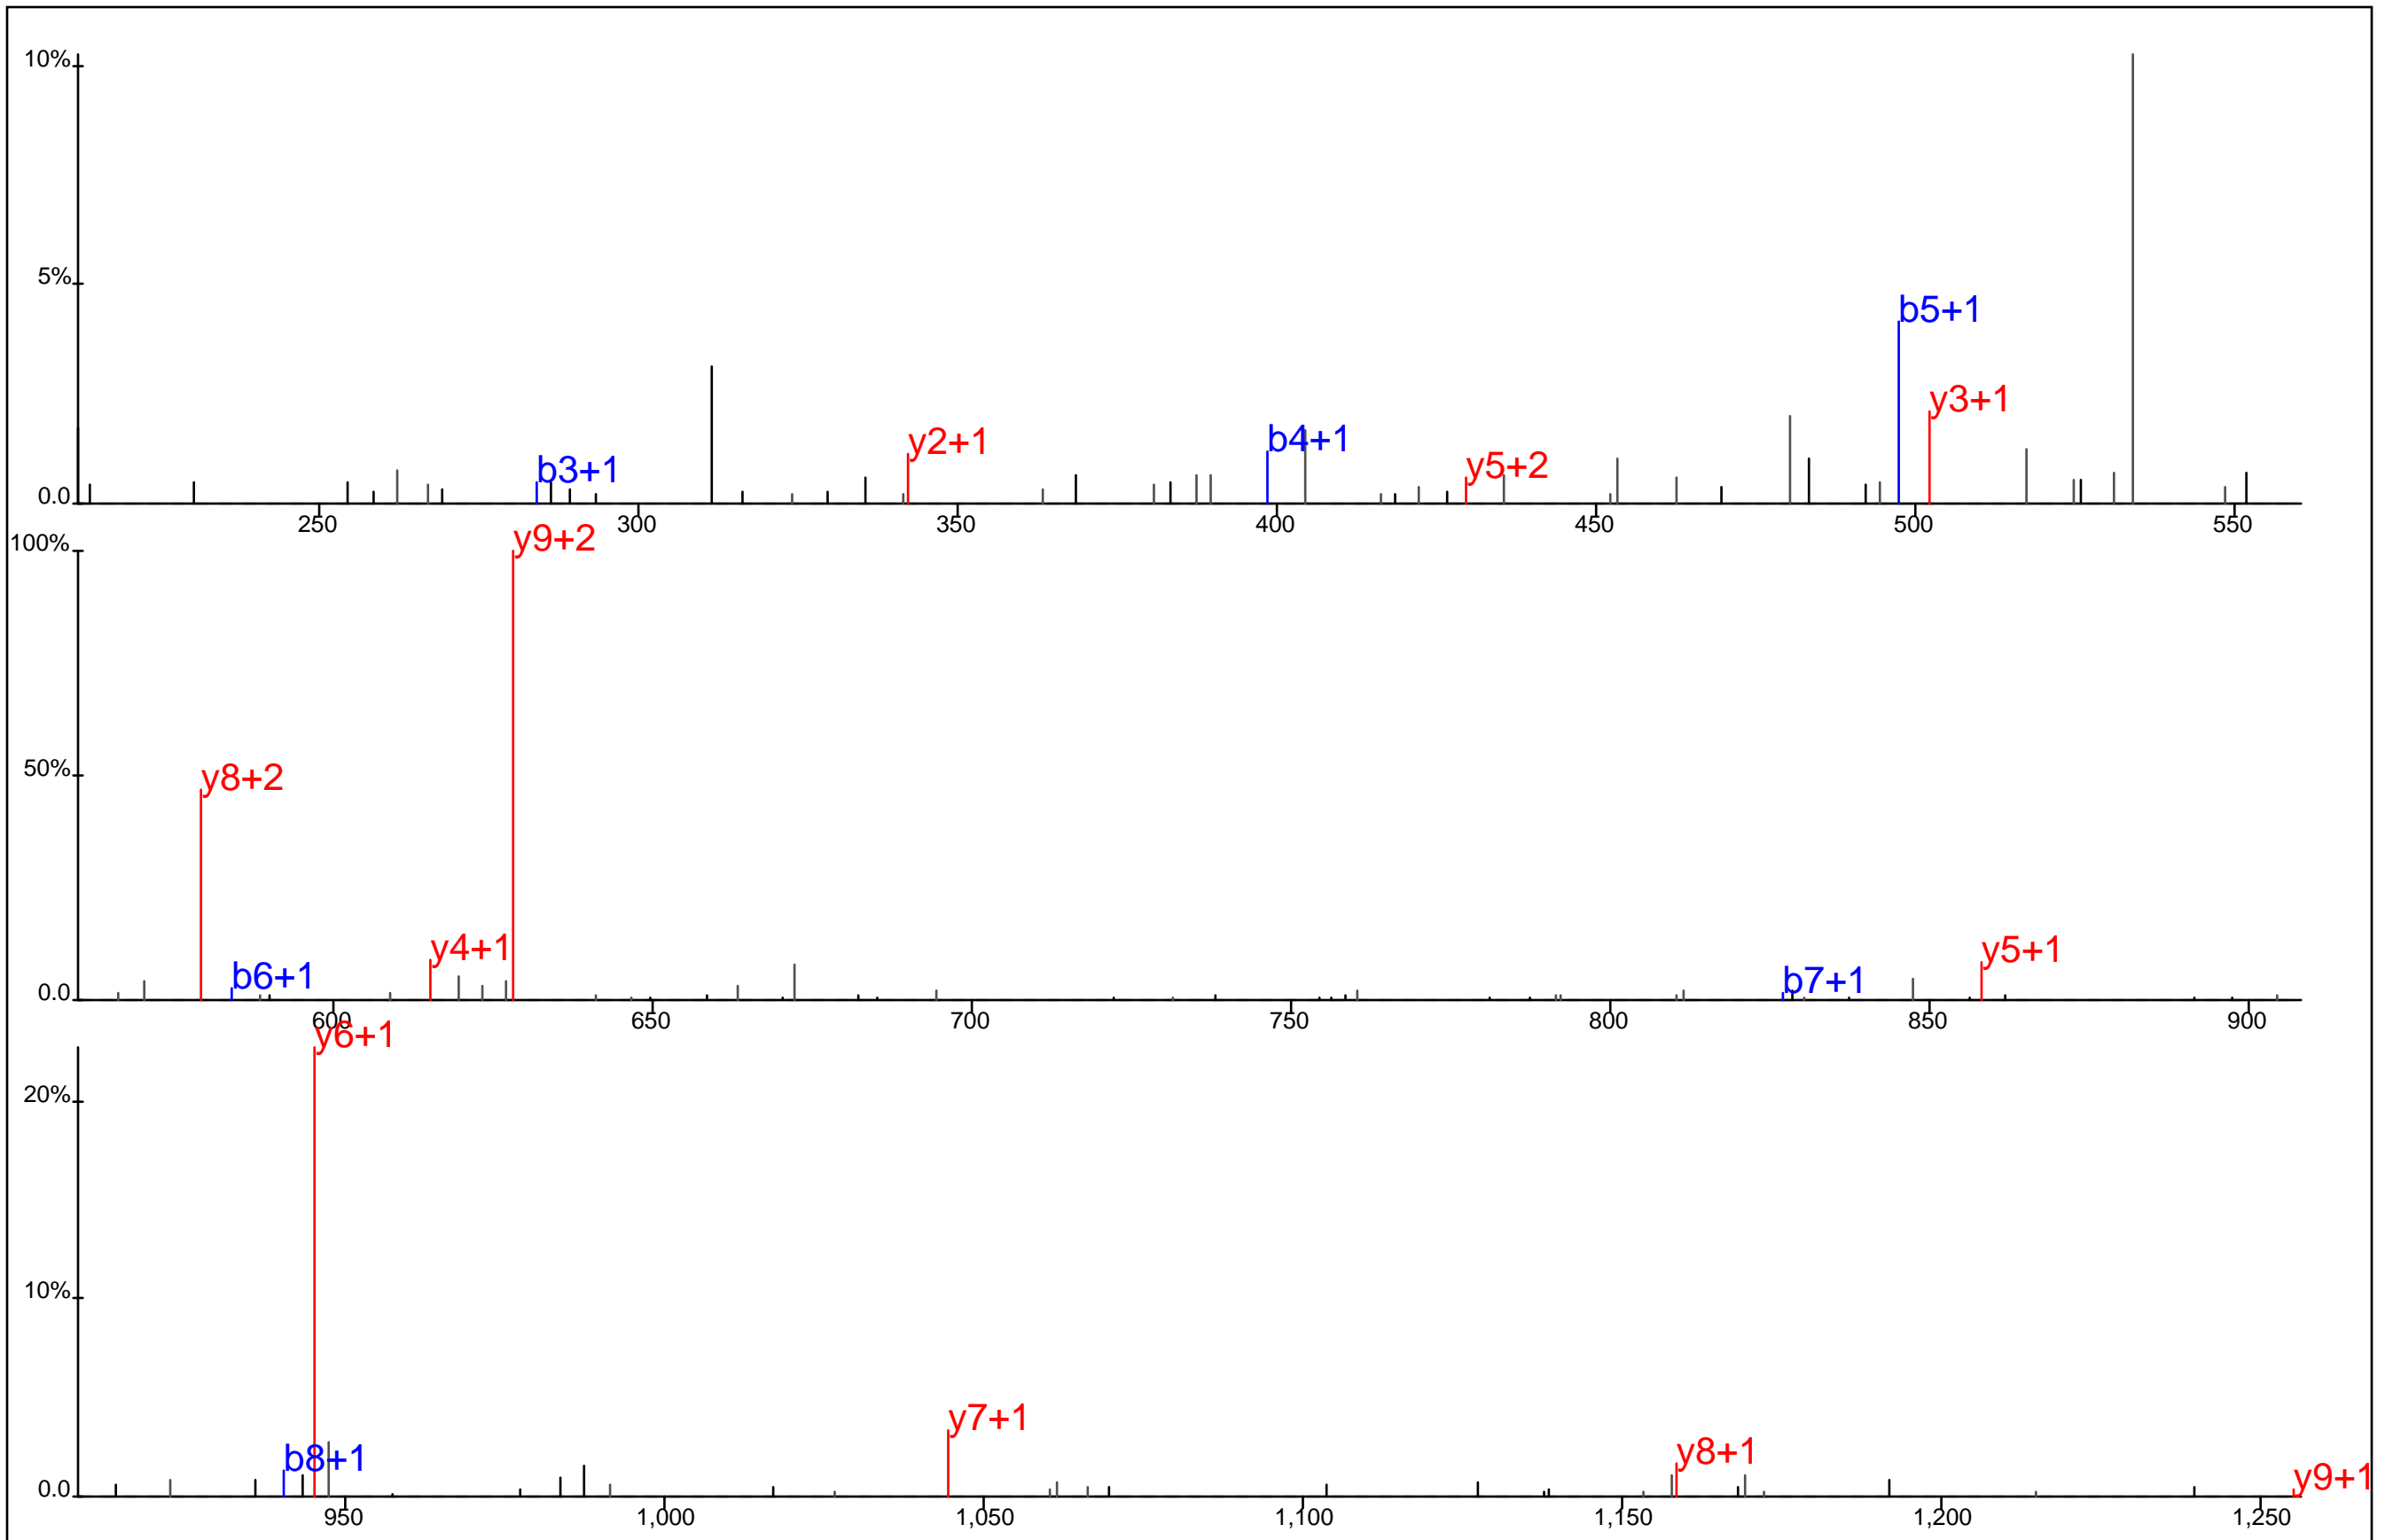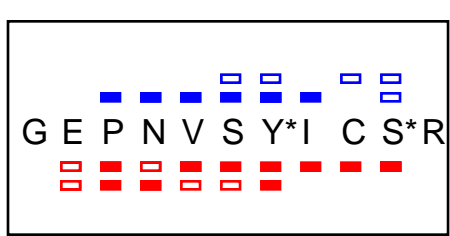

Protein Name: Glycogen synthase kinase 3 beta  
 gi Accession: 0  
 Precursor Mass: 721.2650+2  
 Delta Mass: 0.541 ppm  
 XCorr: 53.78



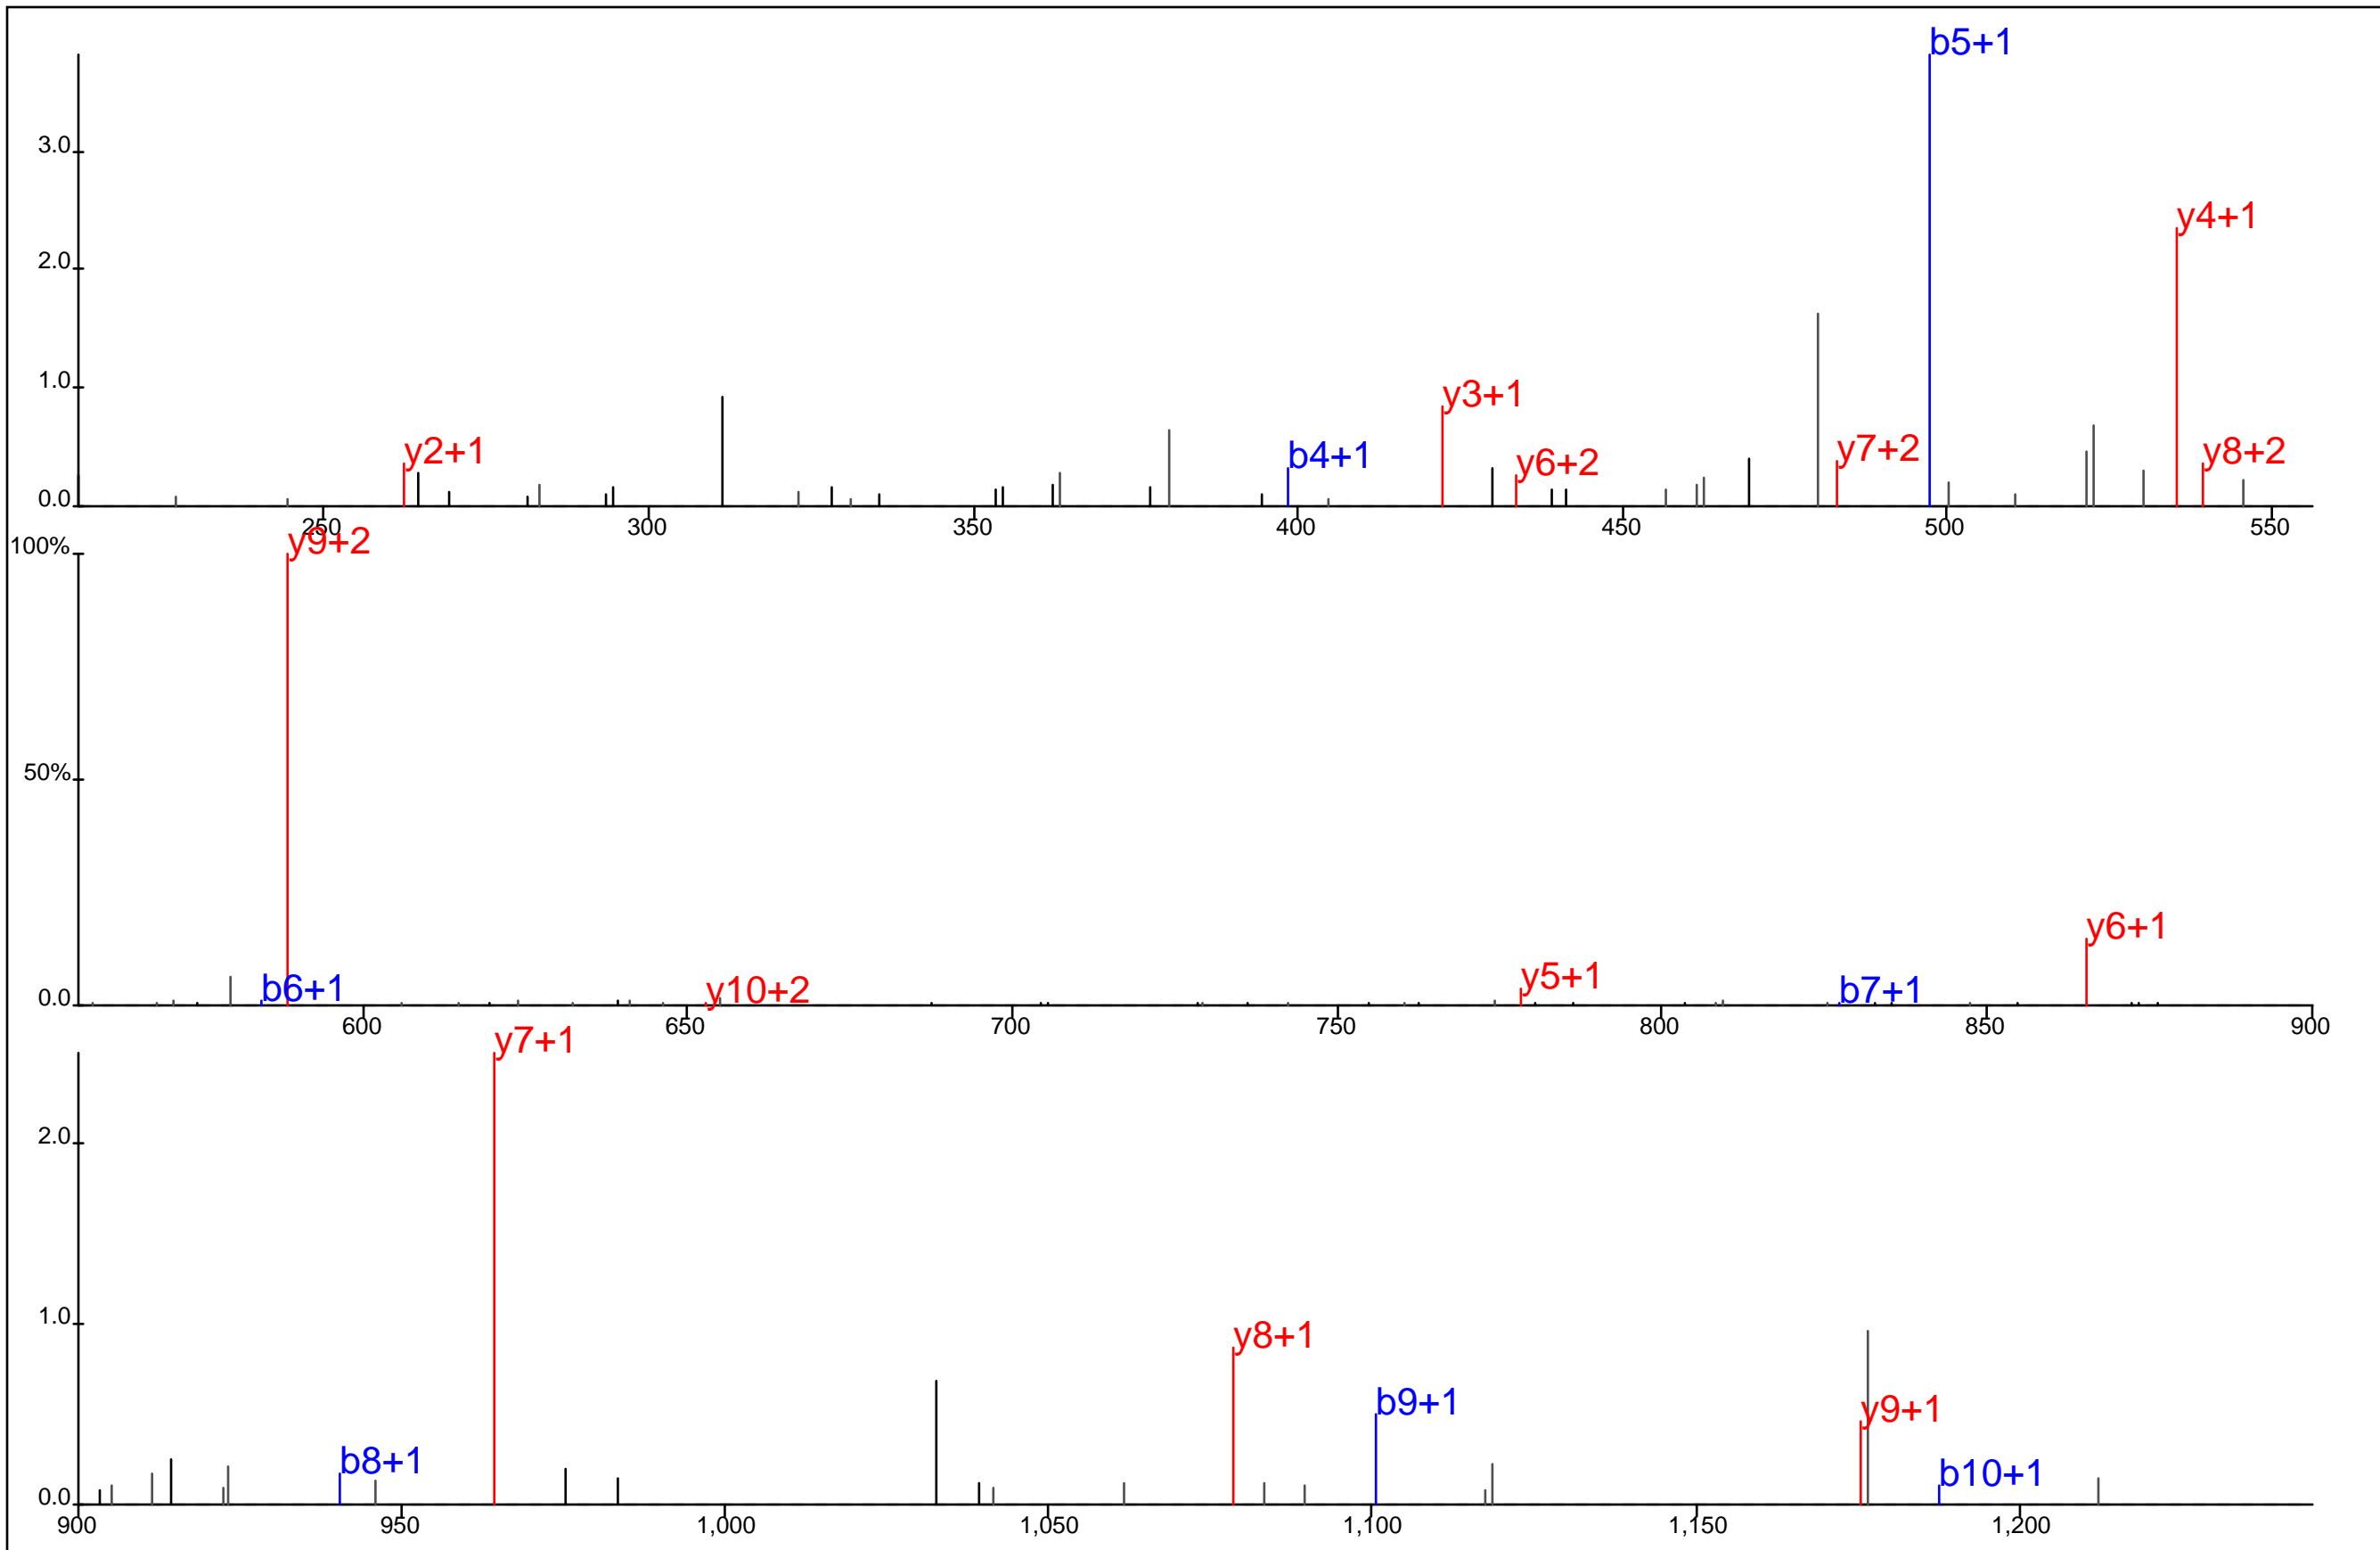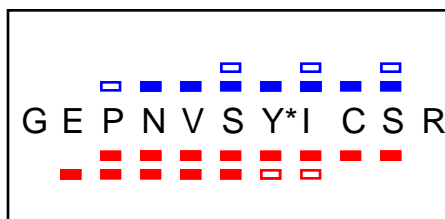

Protein Name: Glycogen synthase kinase 3 beta  
 gi Accession: 0  
 Precursor Mass: 681.2816+2  
 Delta Mass: 0.229 ppm  
 XCorr: 50.21

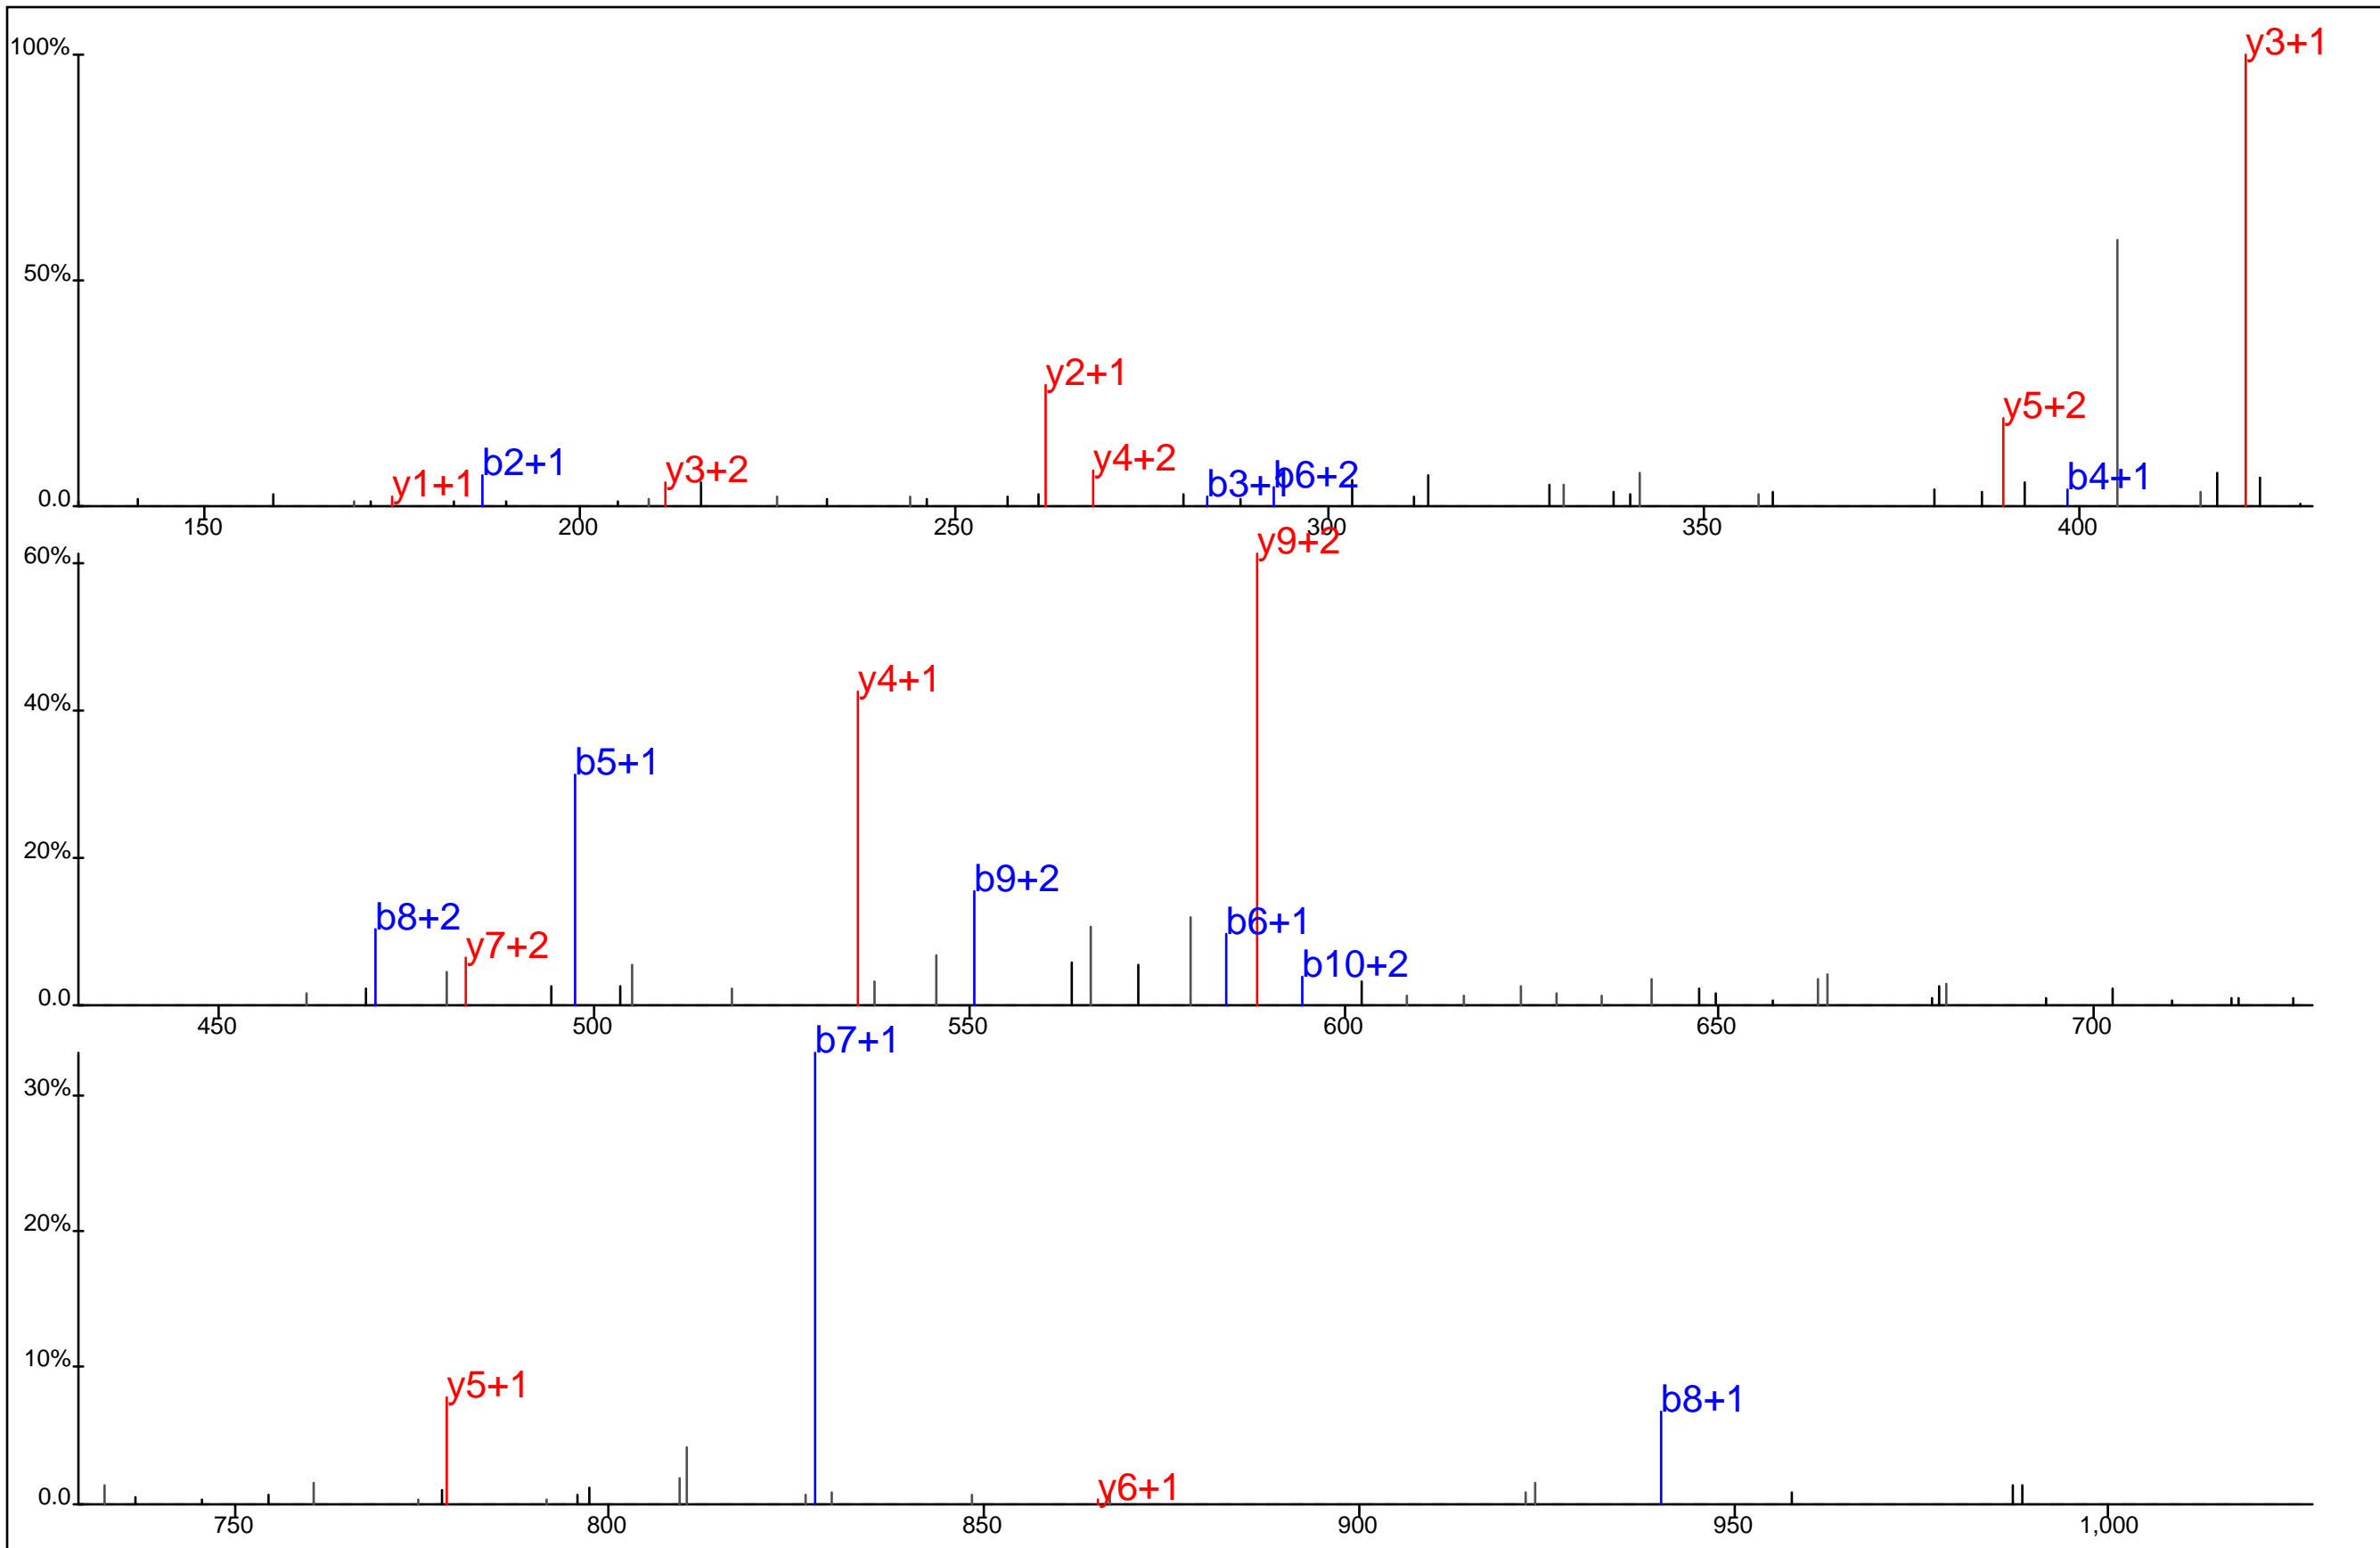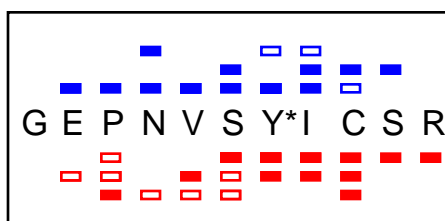

Protein Name: Glycogen synthase kinase 3 beta  
 gi Accession: 0  
 Precursor Mass: 454.5234+3  
 Delta Mass: 0.040 ppm  
 XCorr: 41.41

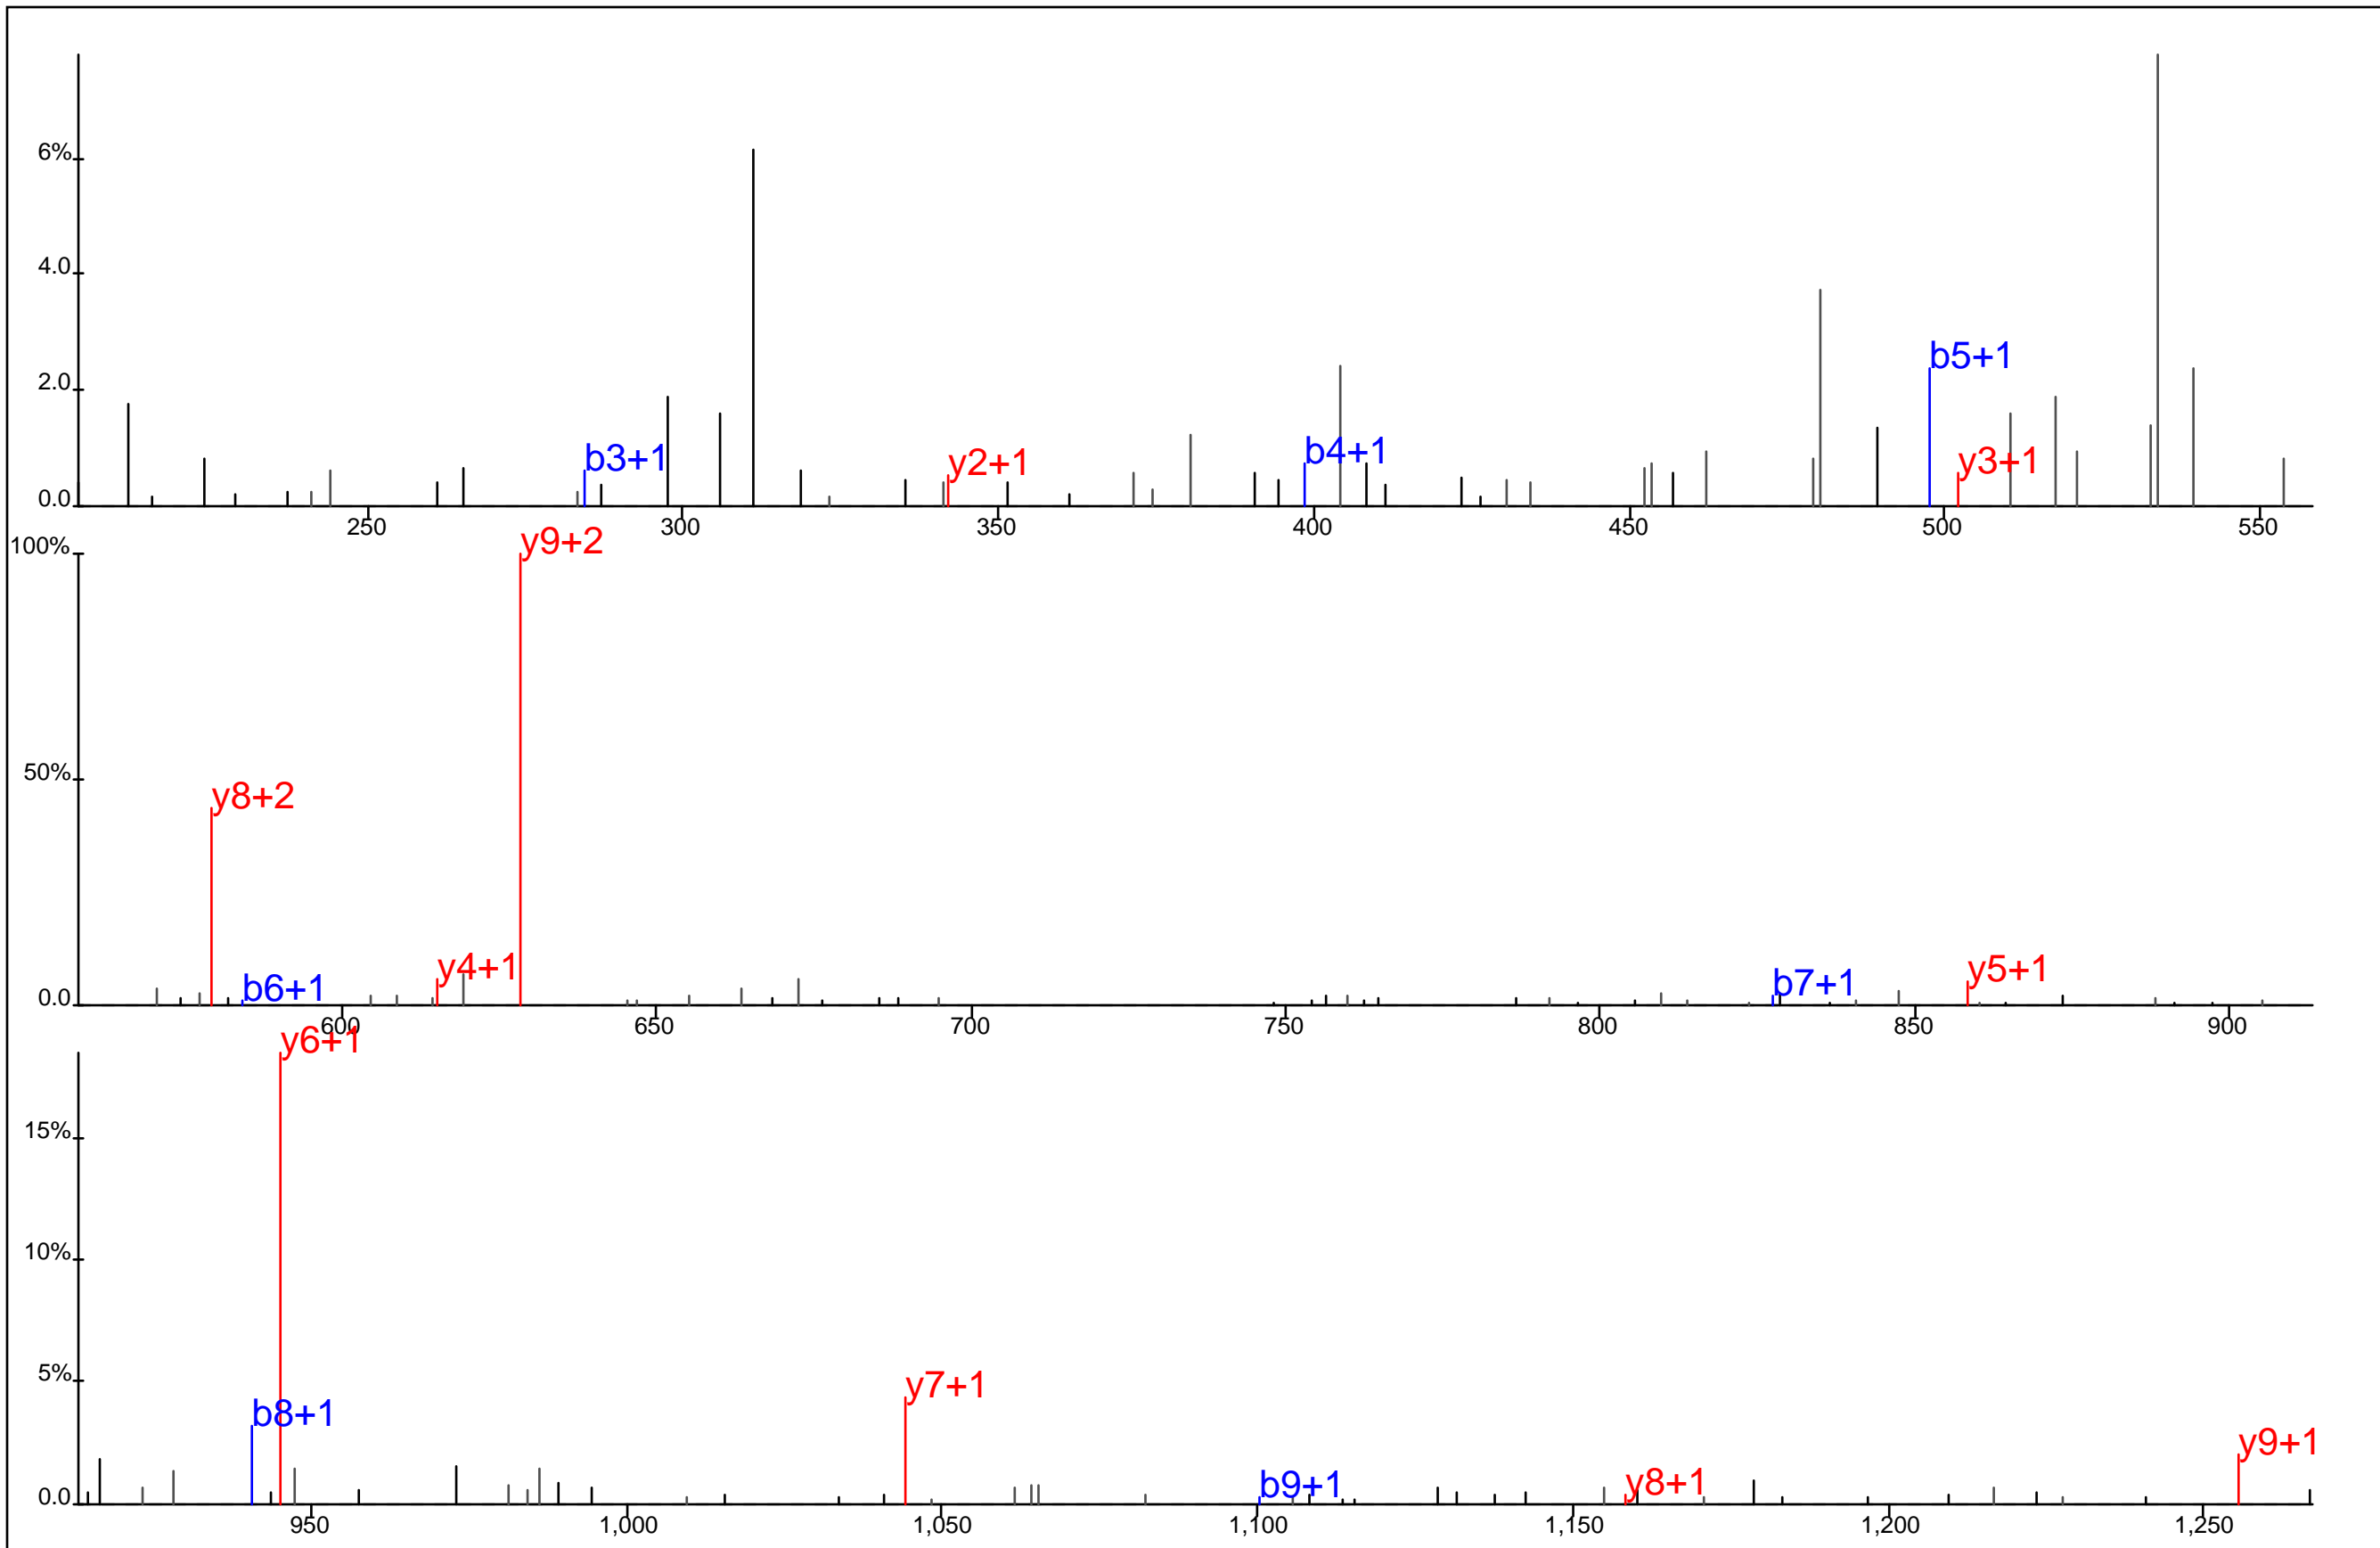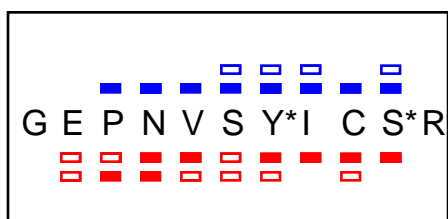

Protein Name: Glycogen synthase kinase 3 beta  
 gi Accession: 0  
 Precursor Mass: 721.2659+2  
 Delta Mass: 1.895 ppm  
 XCorr: 26.25

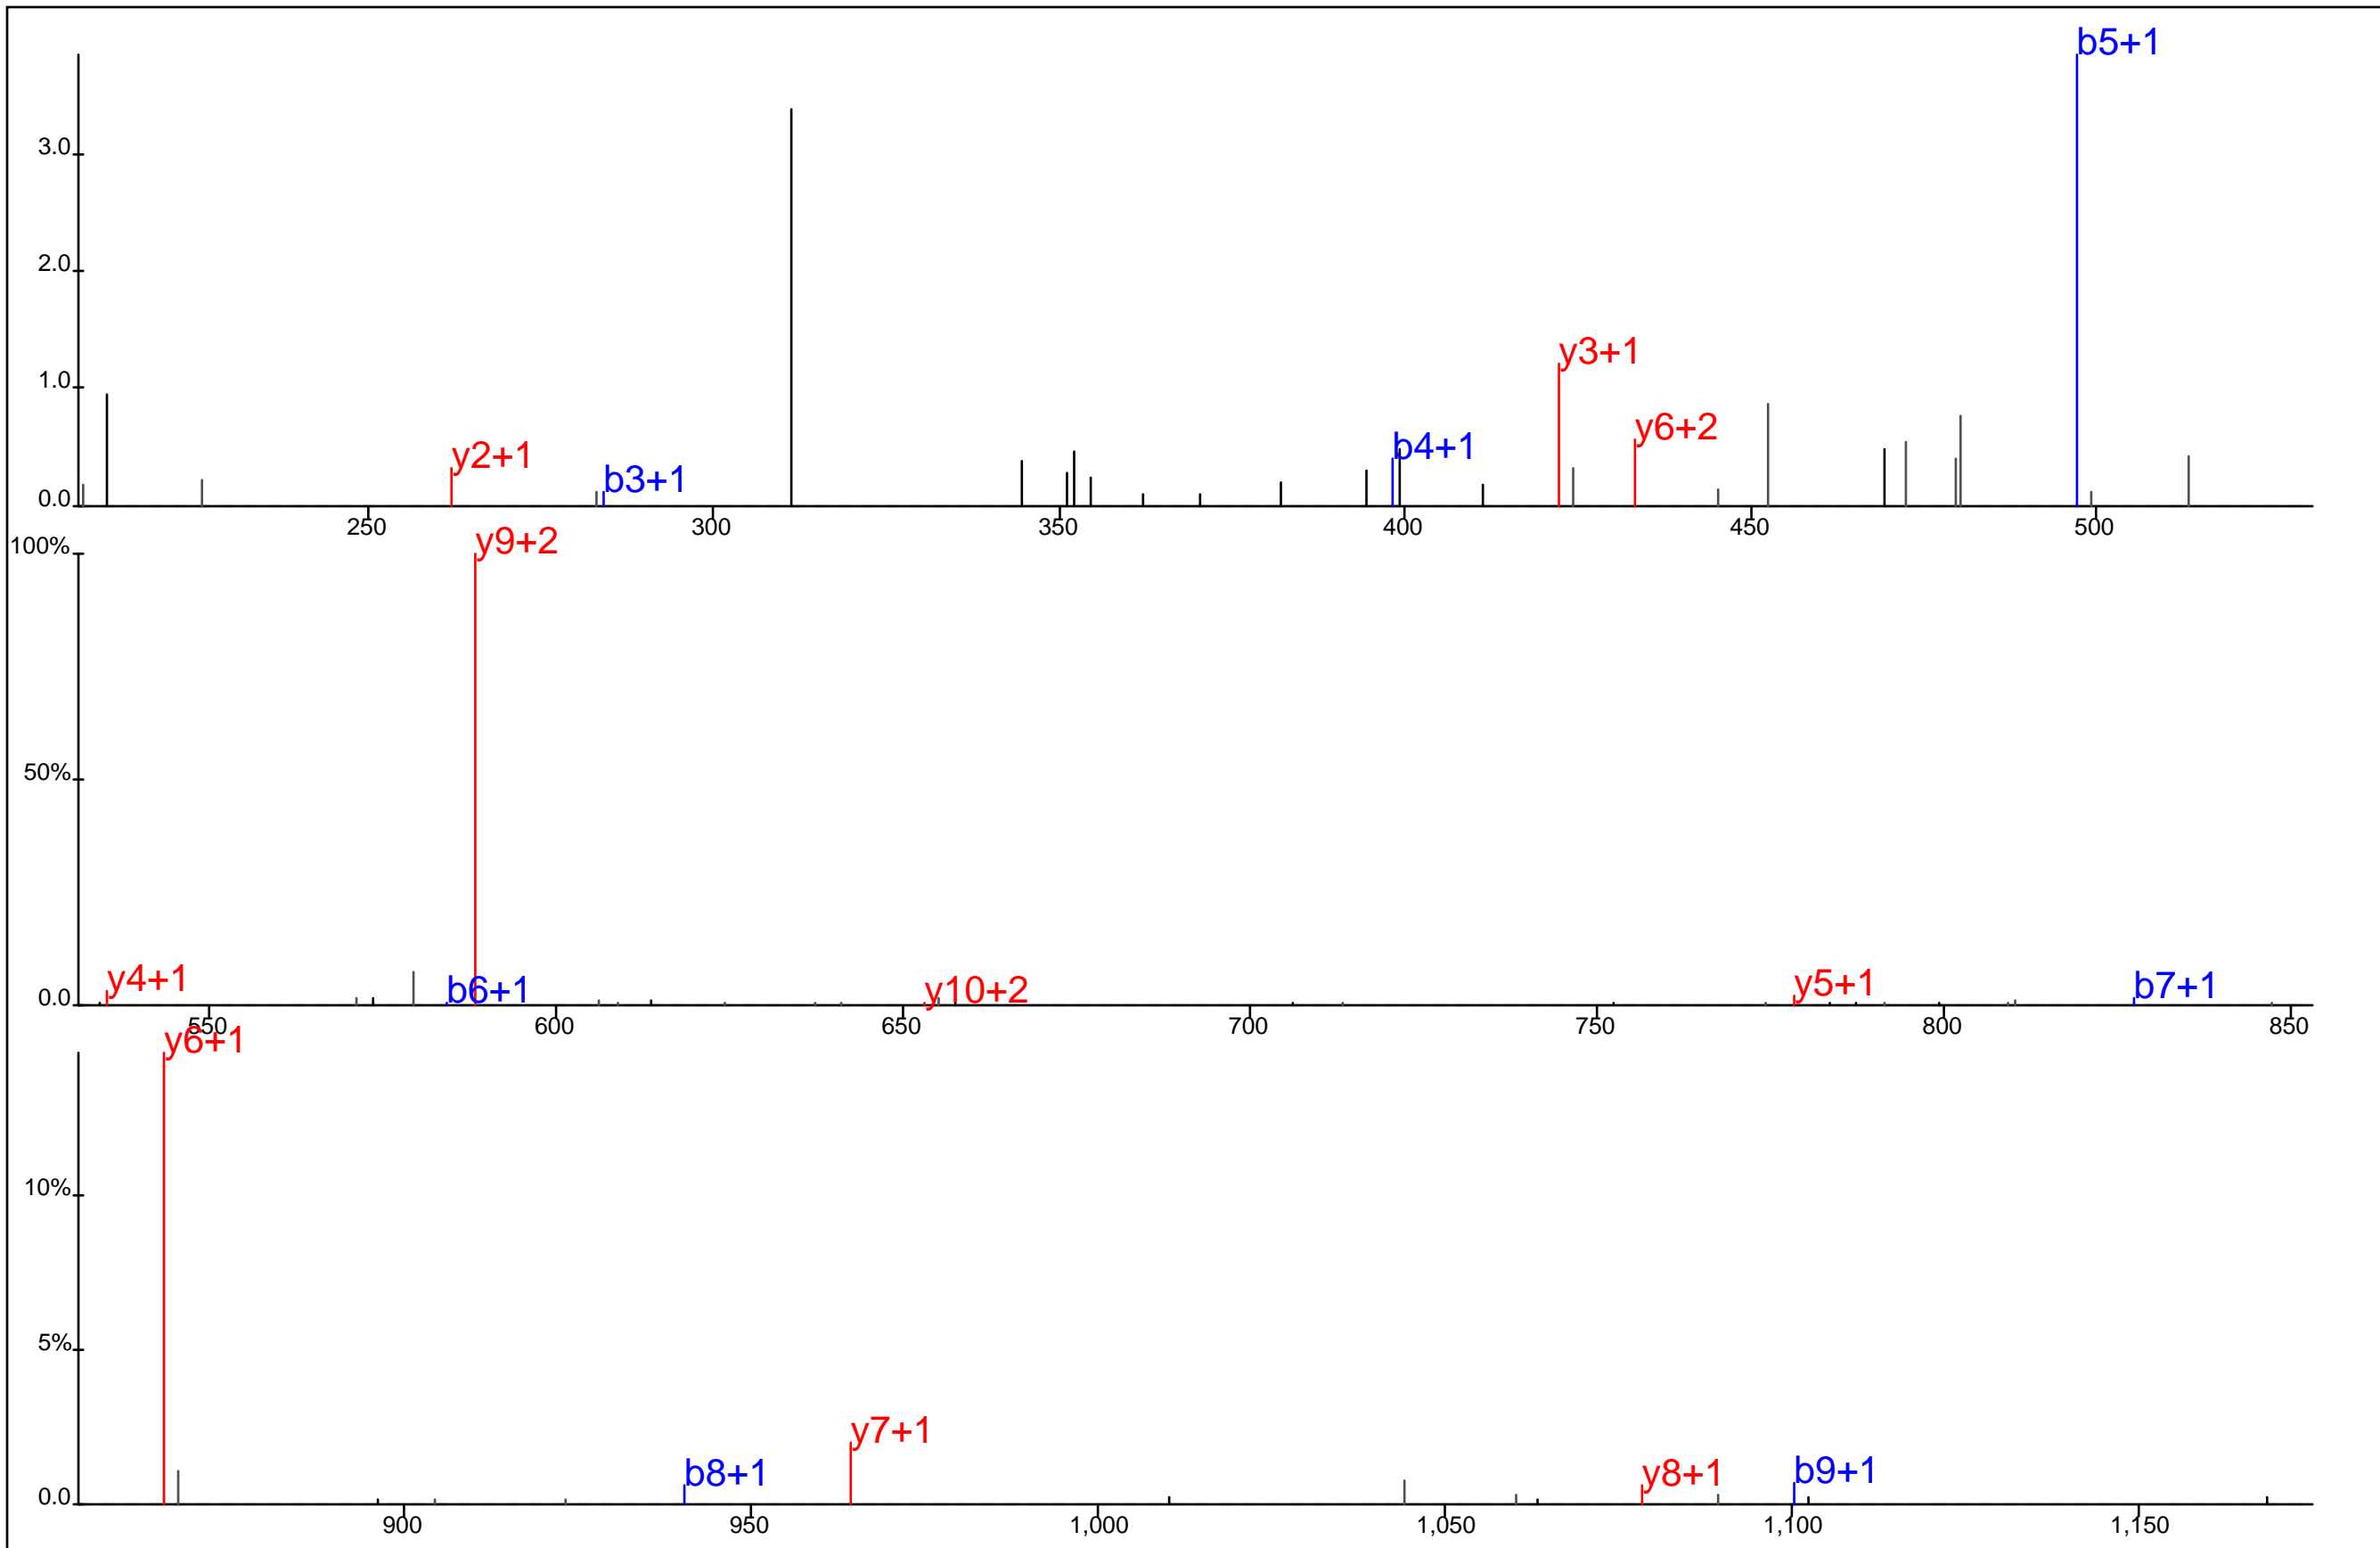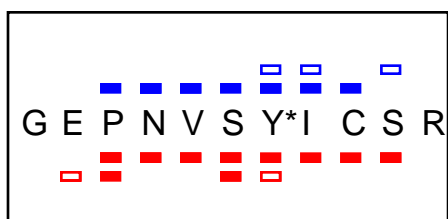

Protein Name: Glycogen synthase kinase 3 beta  
 gi Accession: 0  
 Precursor Mass: 681.2819+2  
 Delta Mass: 0.767 ppm  
 XCorr: 52.87

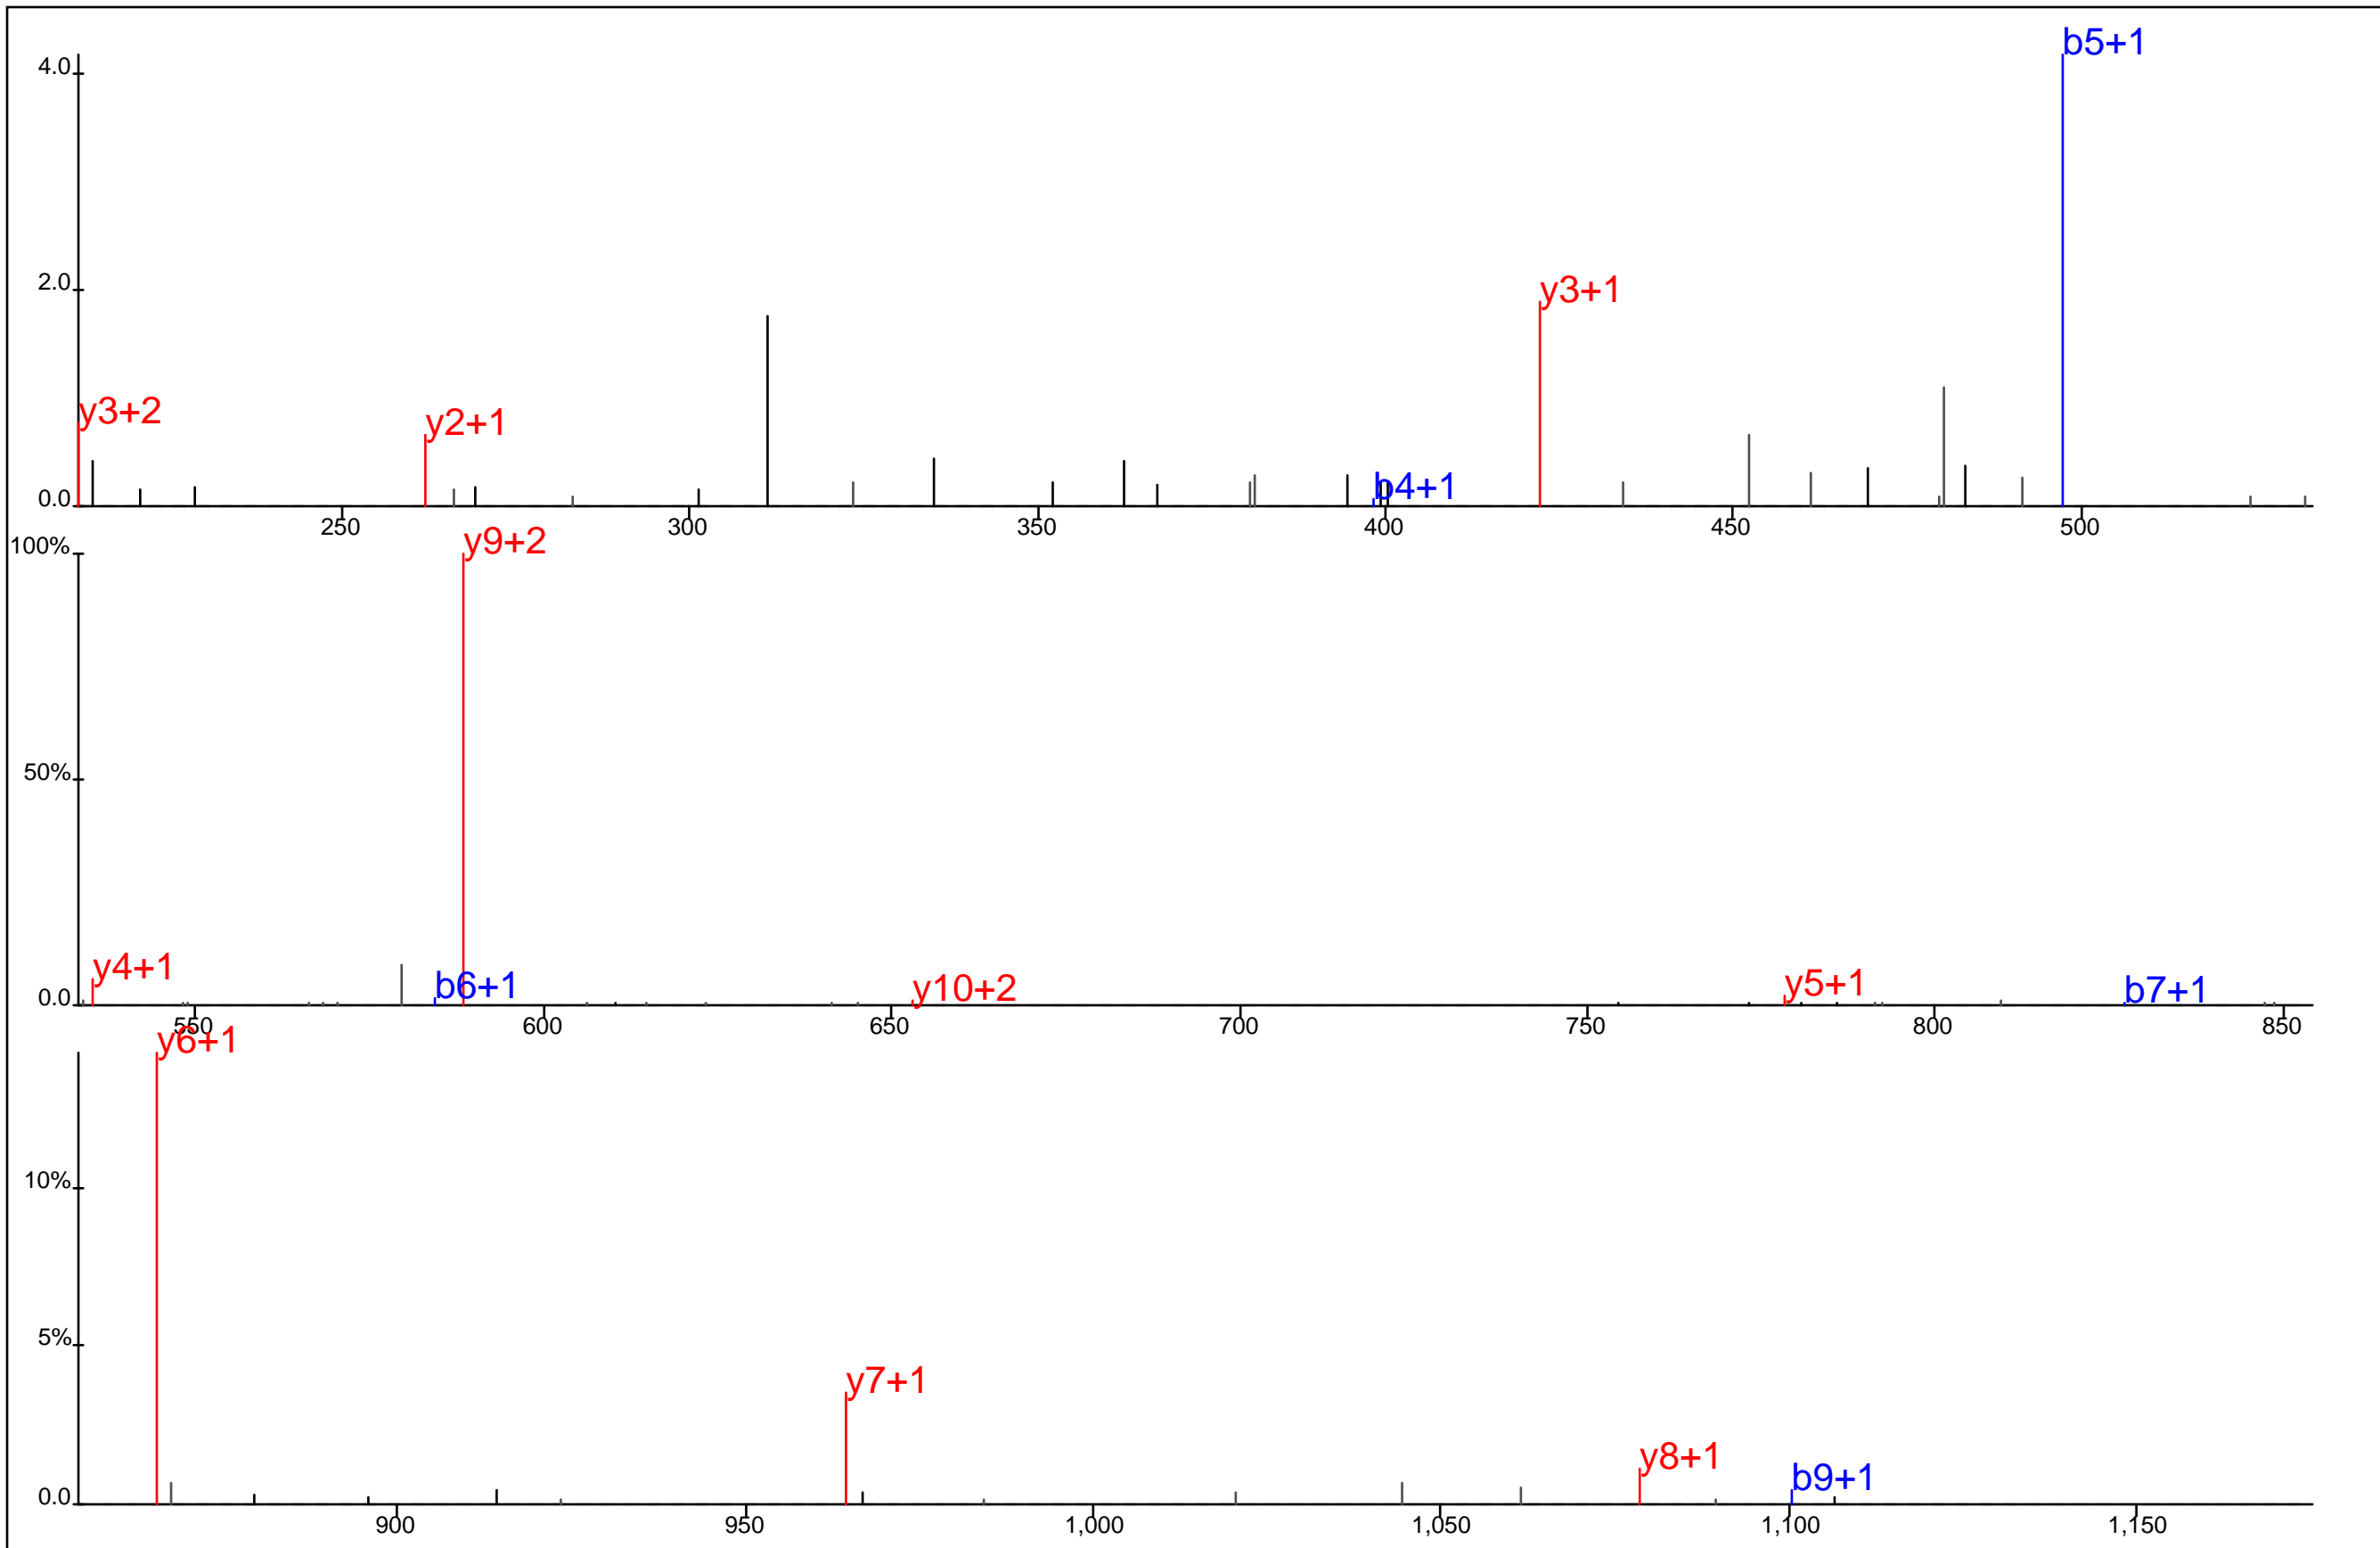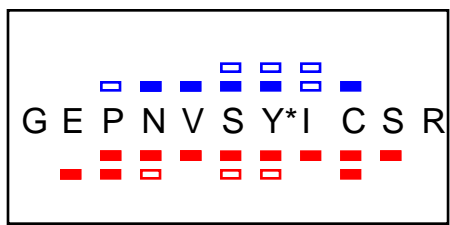

Protein Name: Glycogen synthase kinase 3 beta  
 gi Accession: 0  
 Precursor Mass: 681.2814+2  
 Delta Mass: 0.040 ppm  
 XCorr: 51.17

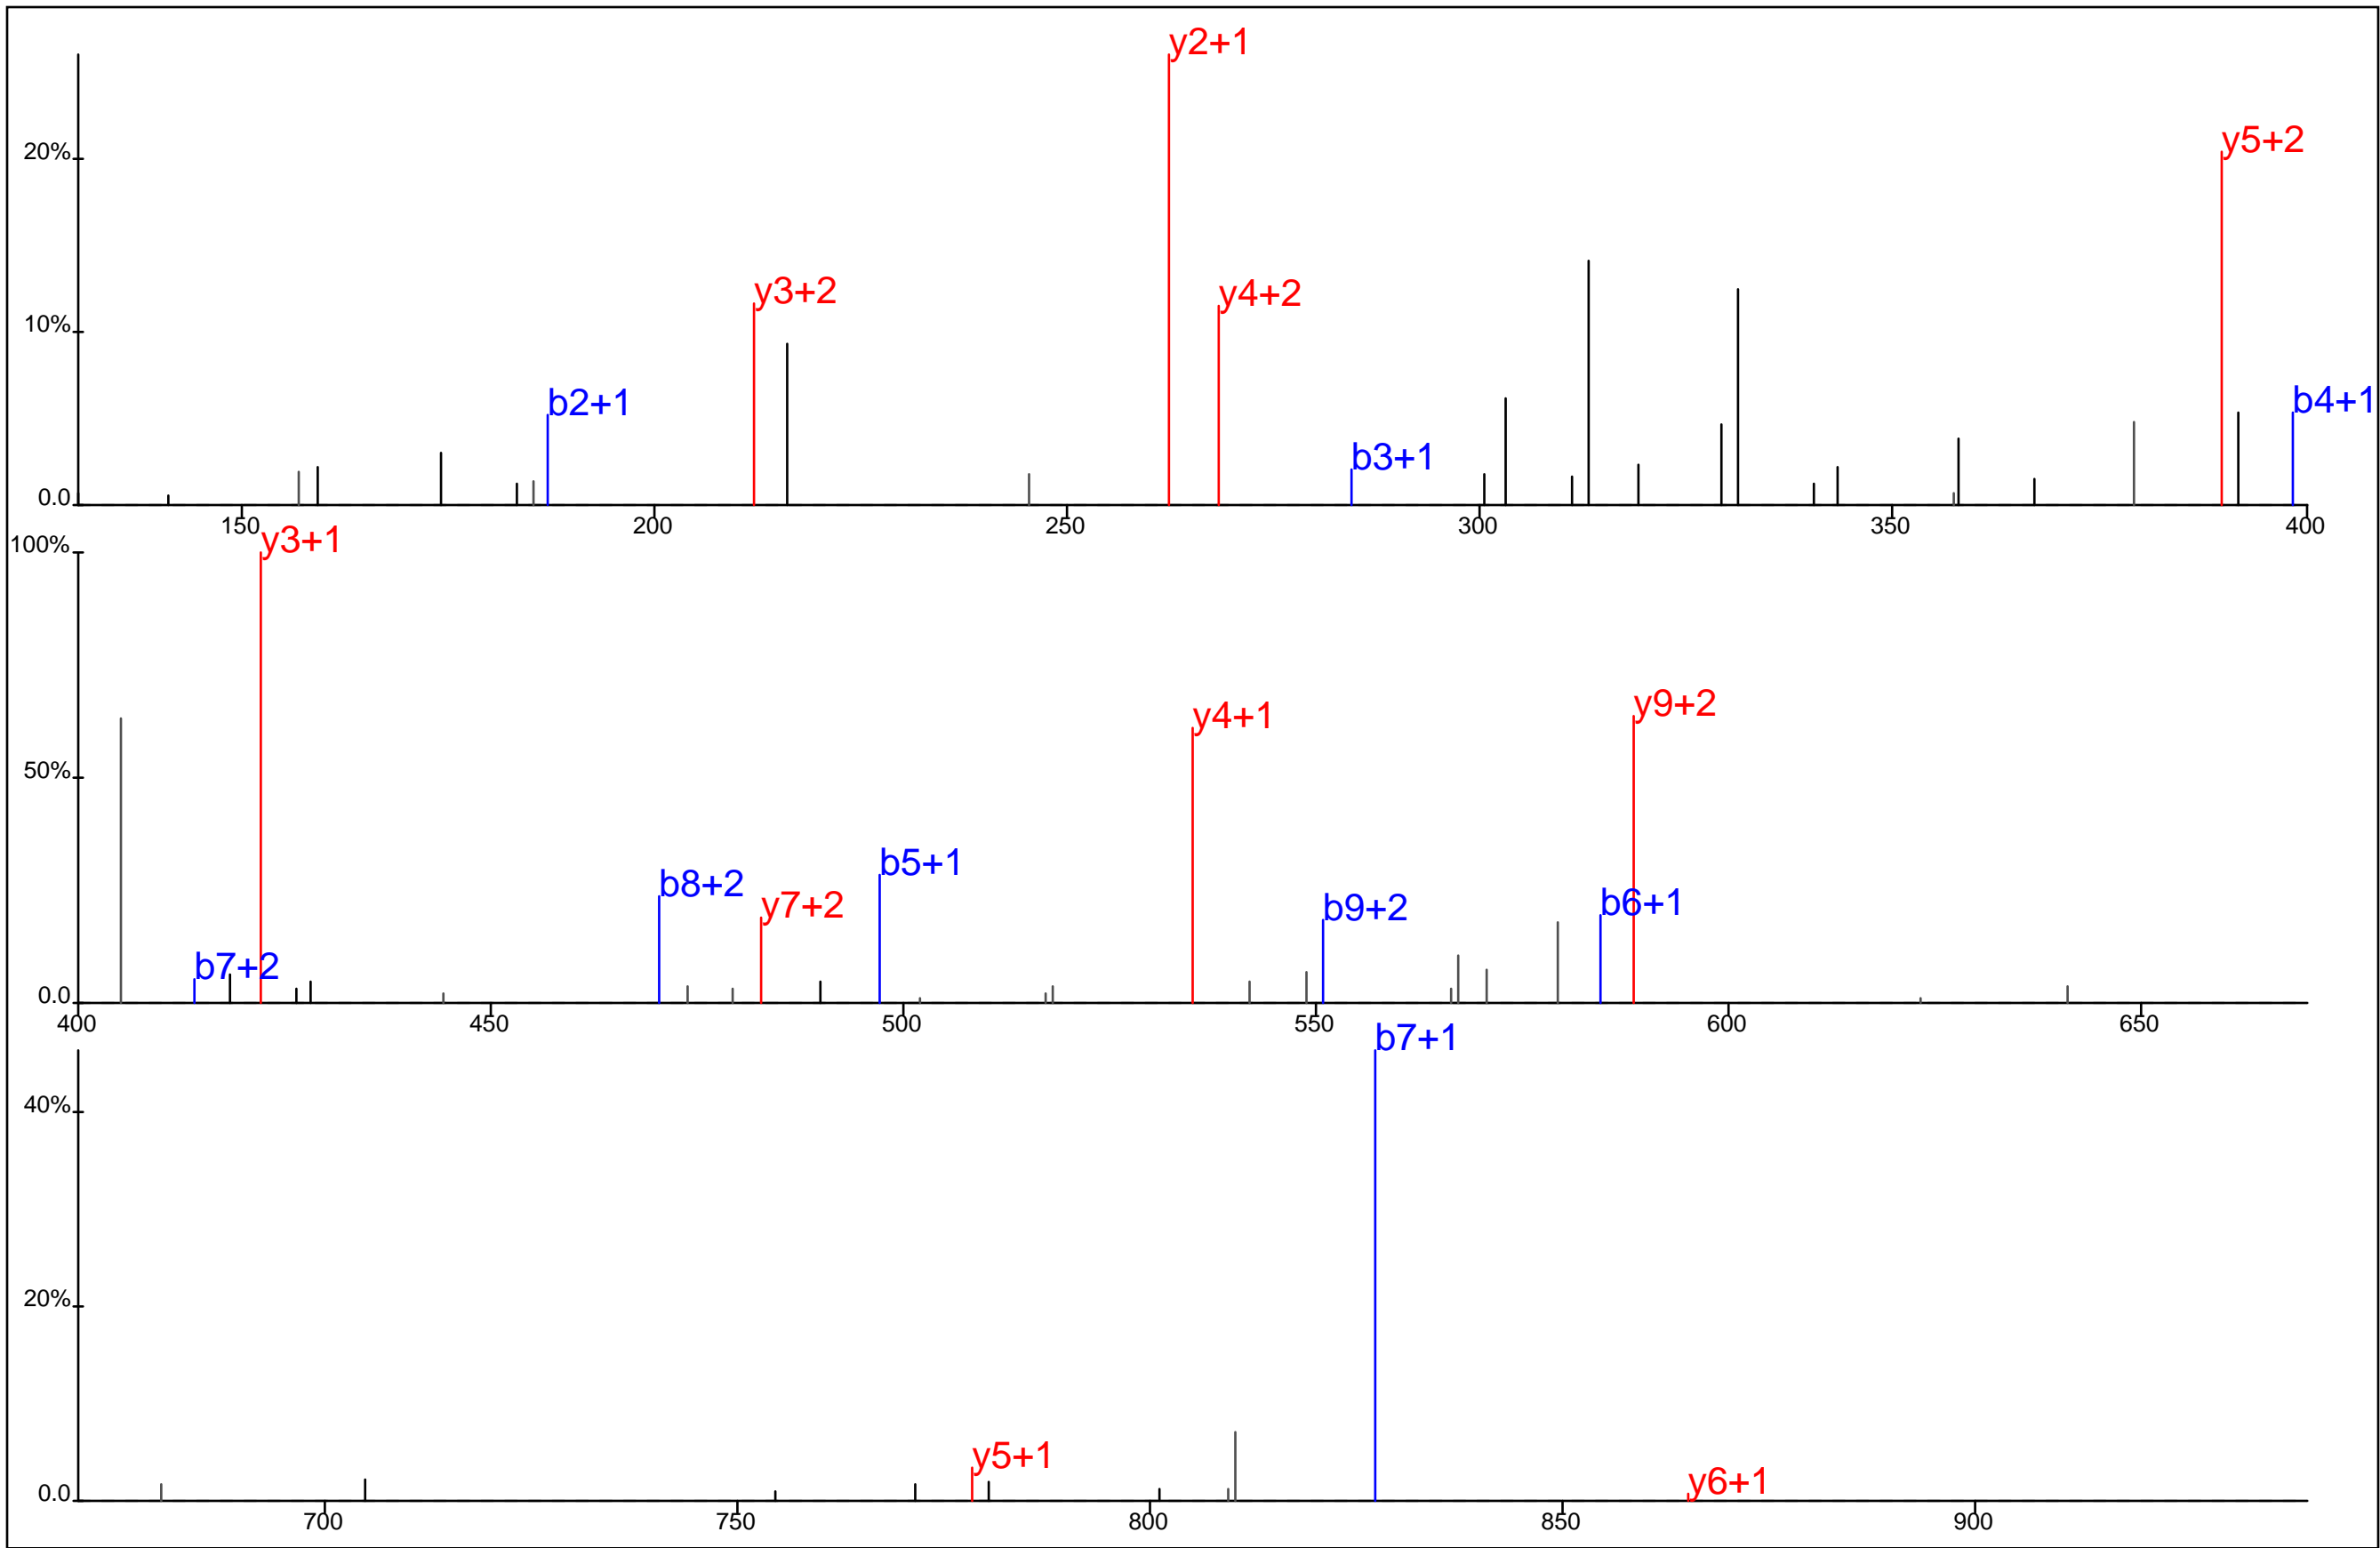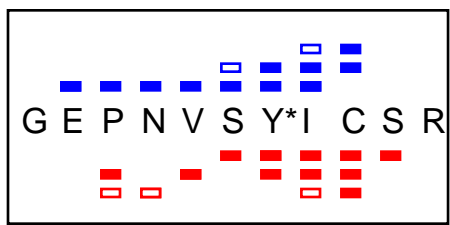

Protein Name: Glycogen synthase kinase 3 beta  
 gi Accession: 0  
 Precursor Mass: 454.5233+3  
 Delta Mass: 0.161 ppm  
 XCorr: 41.85

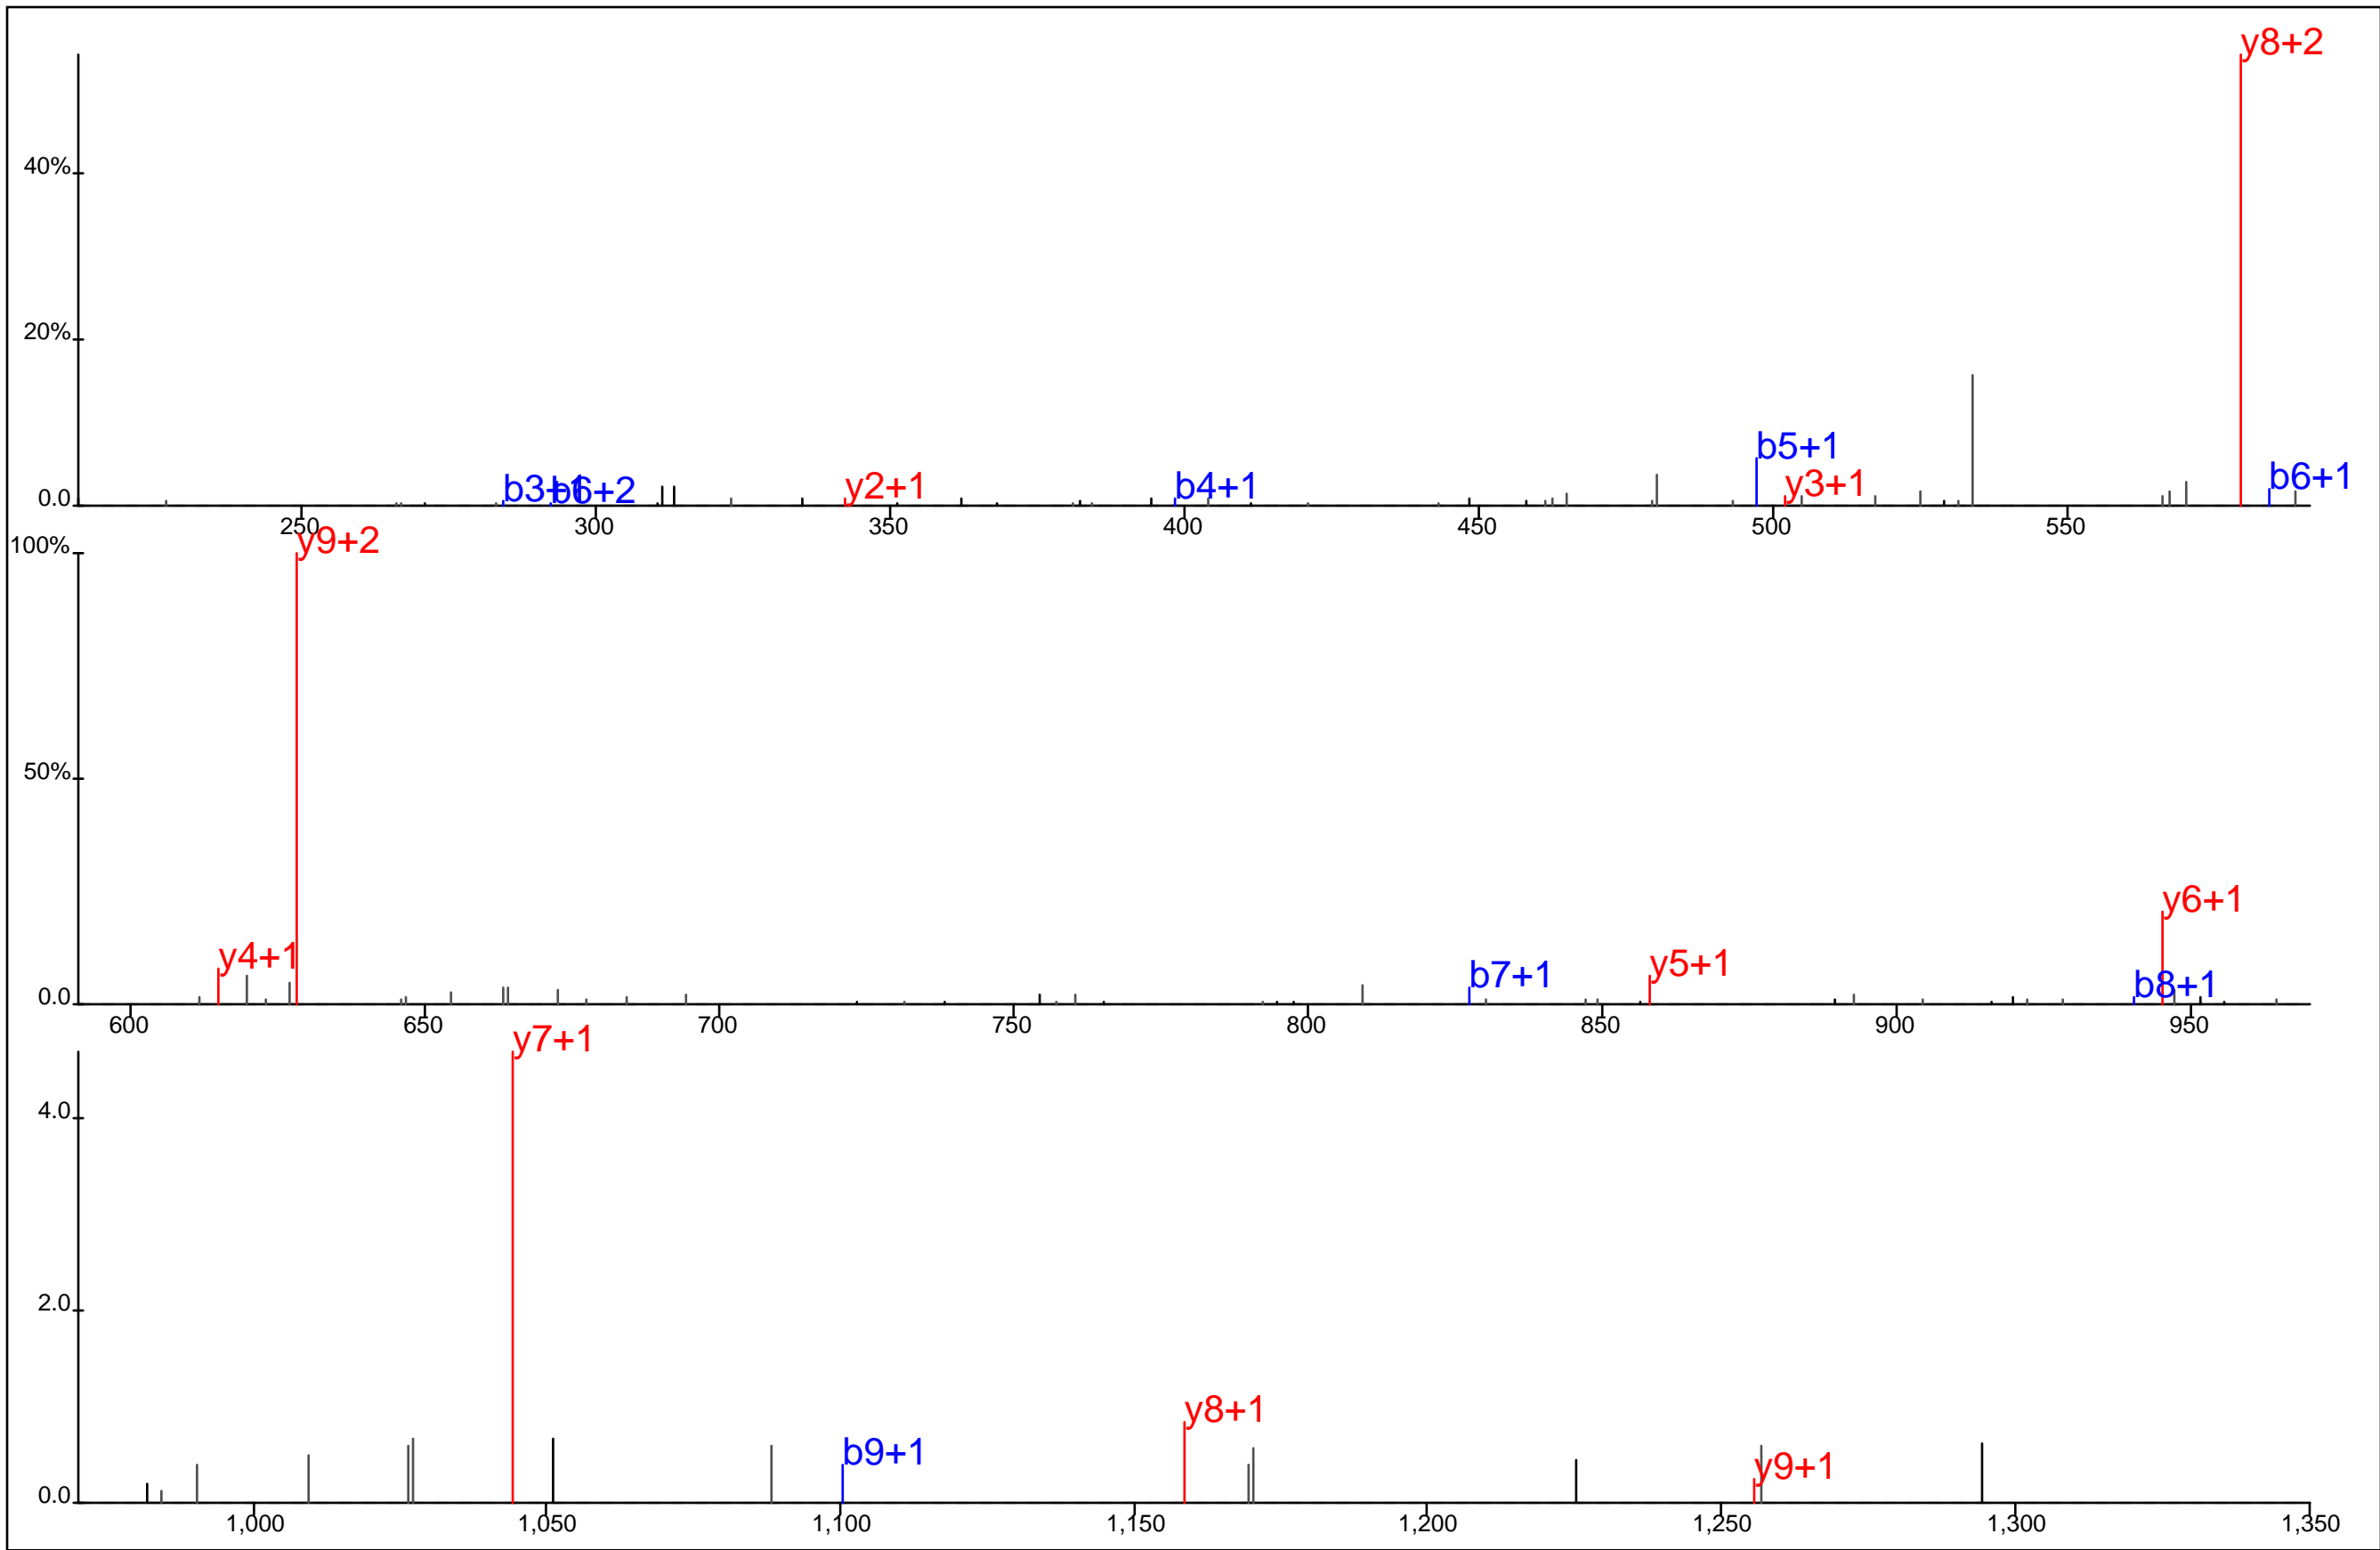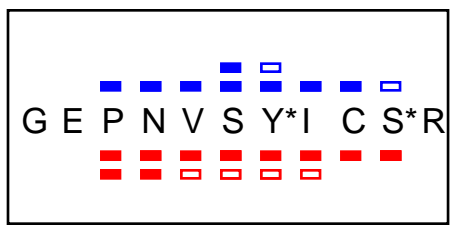

Protein Name: Glycogen synthase kinase 3 beta  
 gi Accession: 0  
 Precursor Mass: 721.2647+2  
 Delta Mass: 0.201 ppm  
 XCorr: 47.01

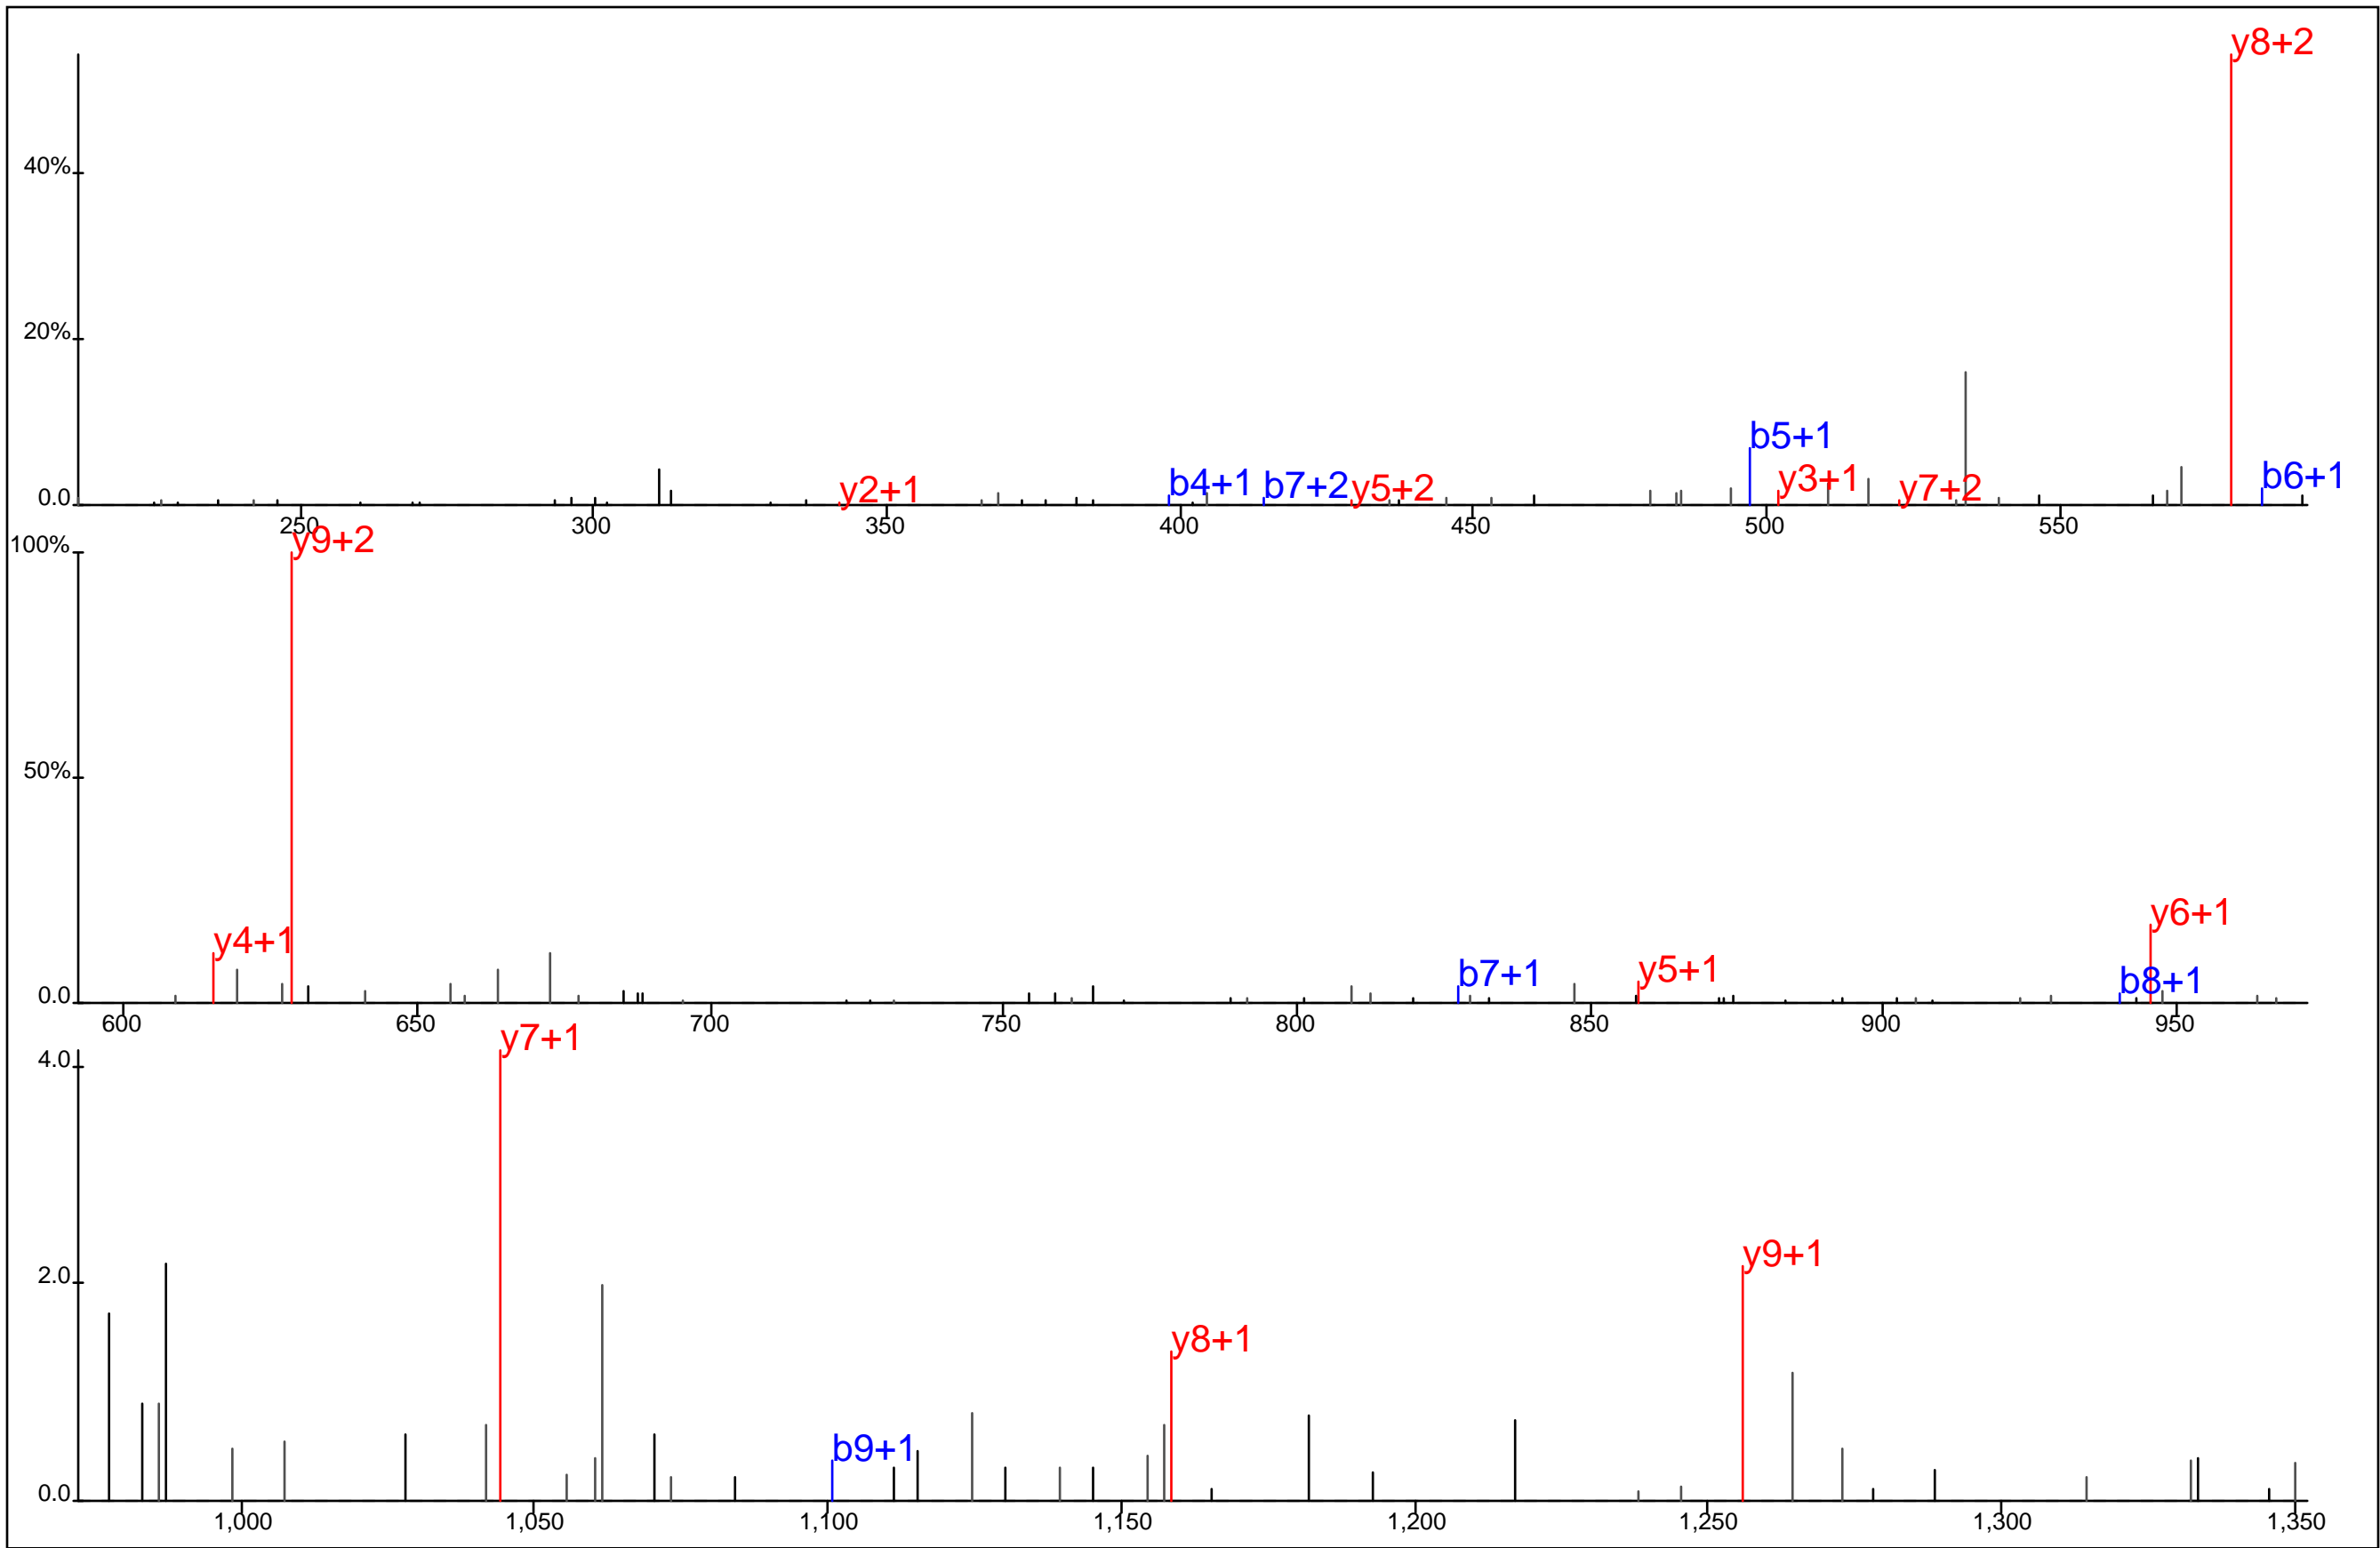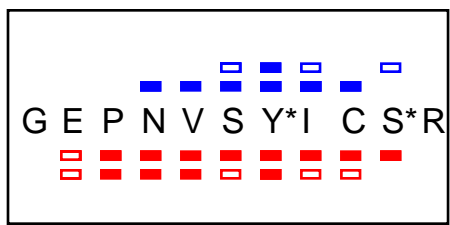

Protein Name: Glycogen synthase kinase 3 beta  
 gi Accession: 0  
 Precursor Mass: 721.2636+2  
 Delta Mass: 1.322 ppm  
 XCorr: 30.69



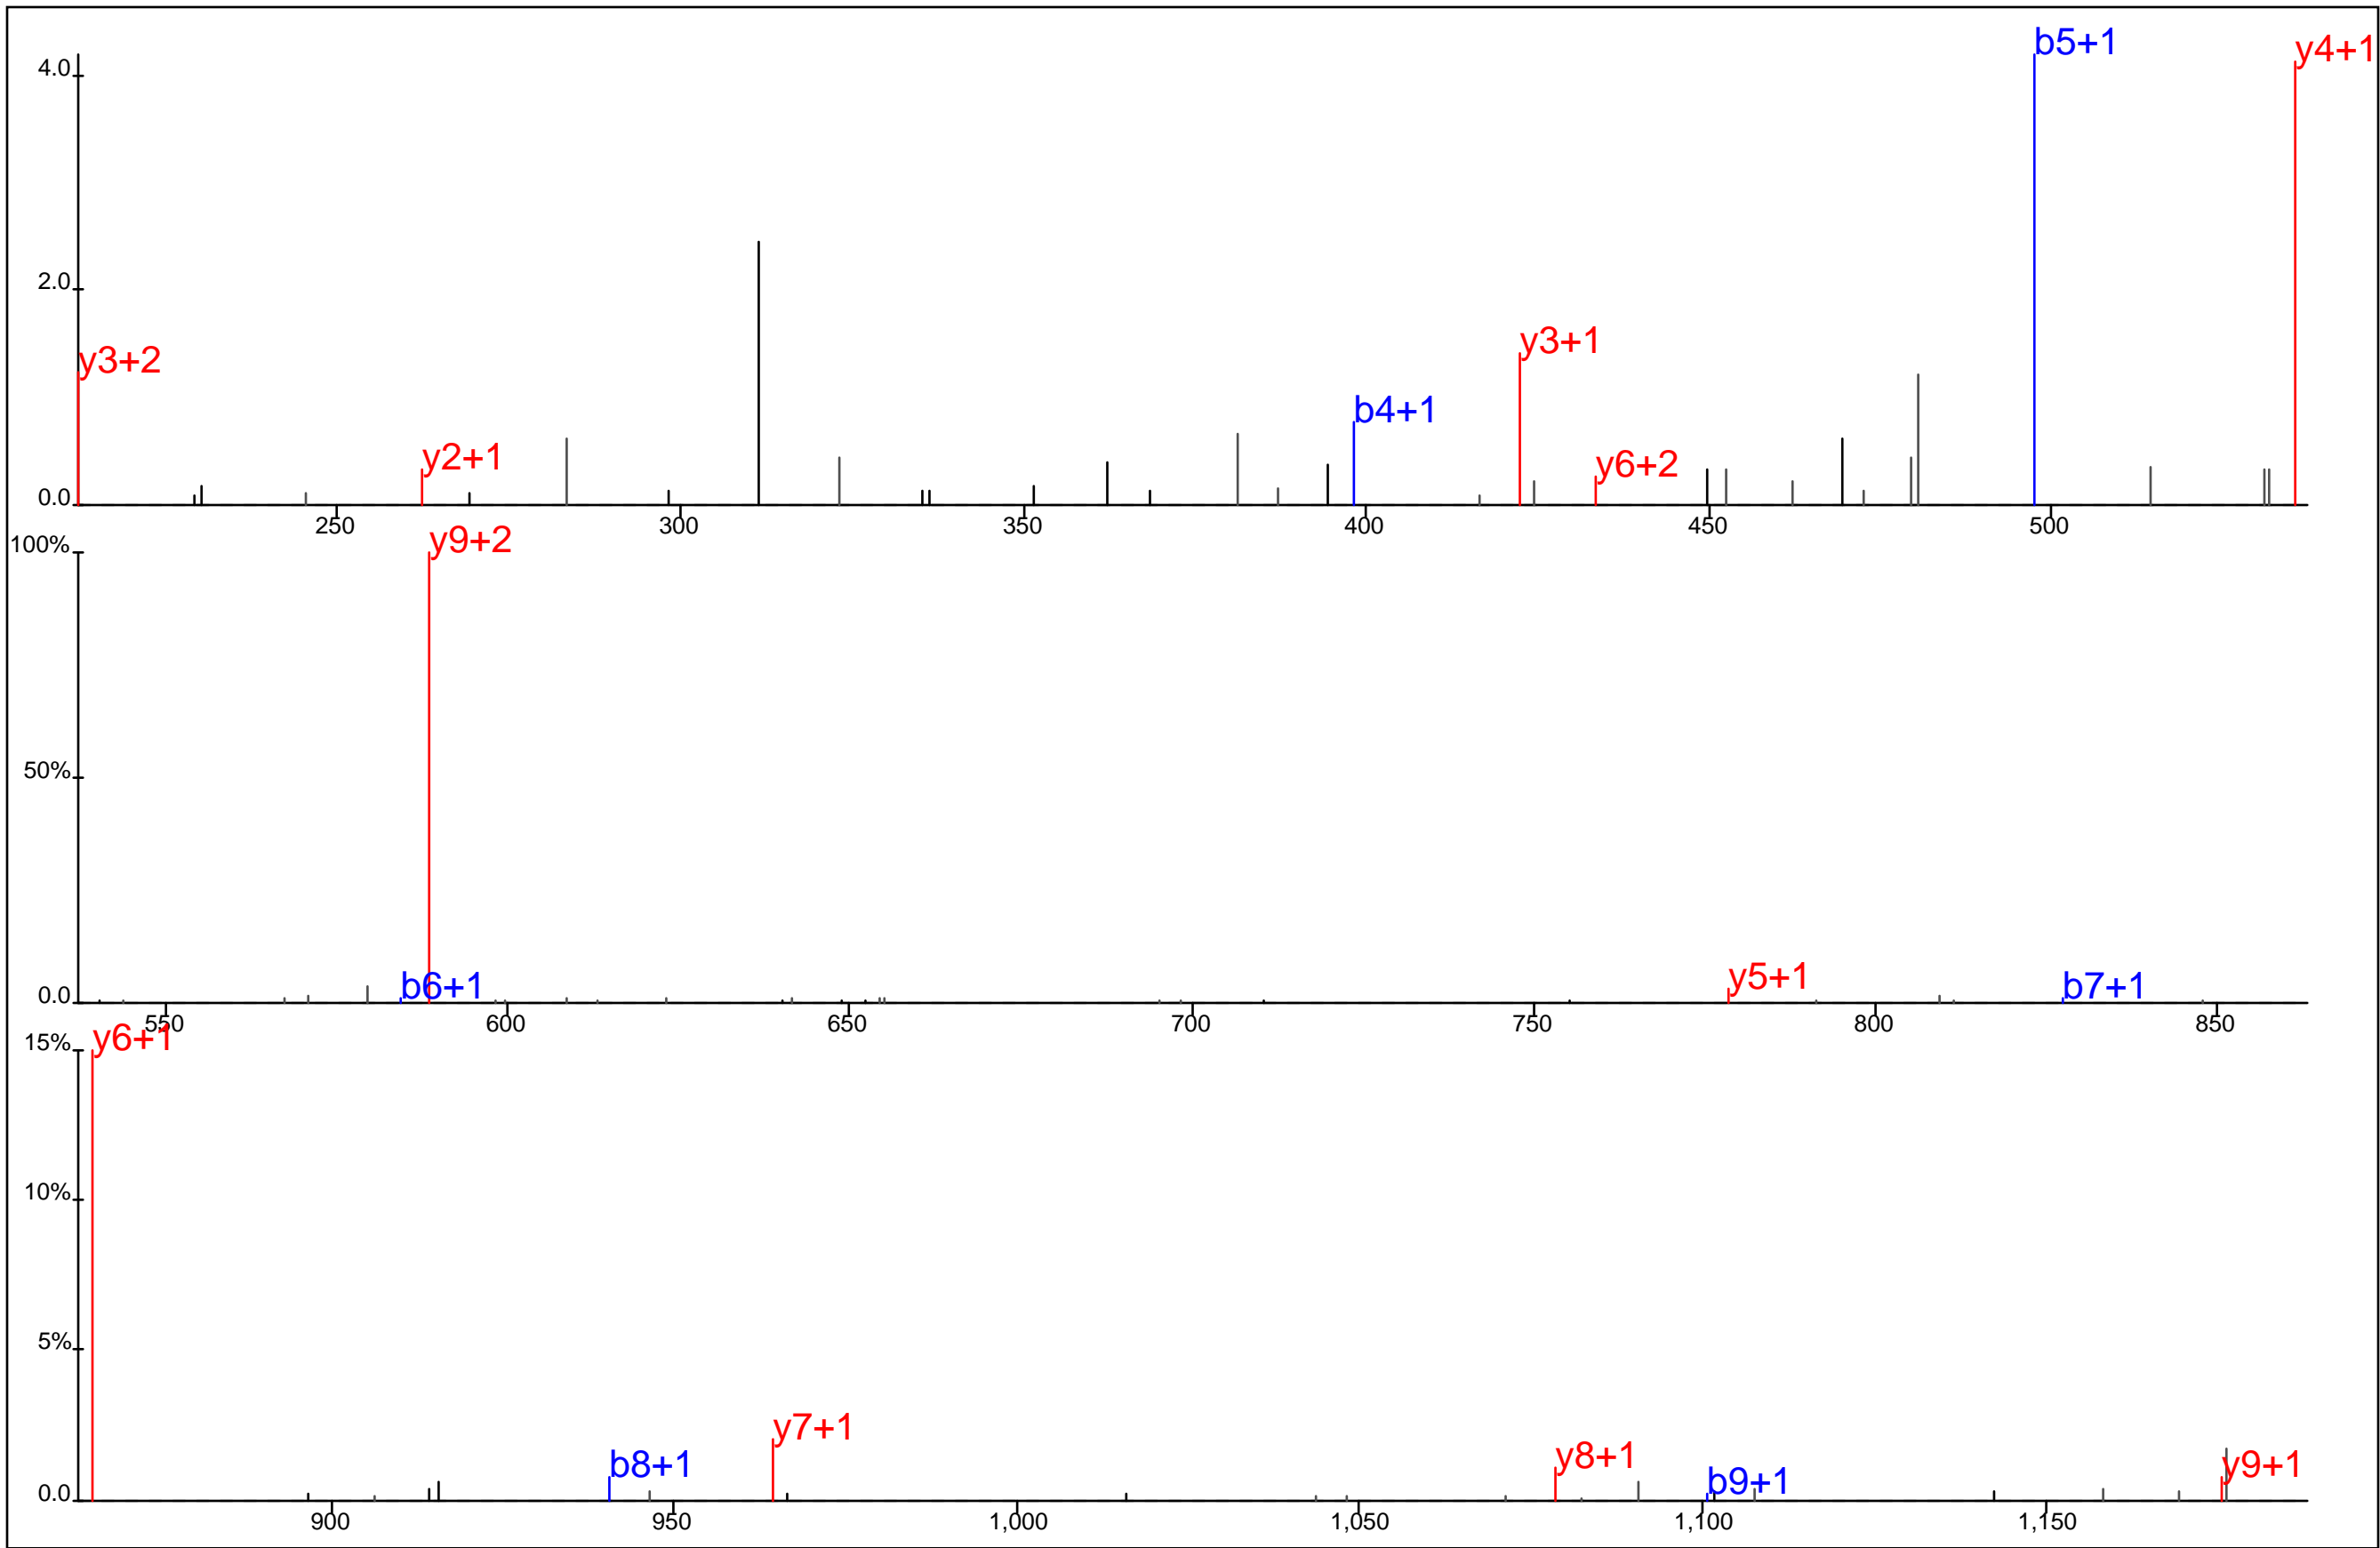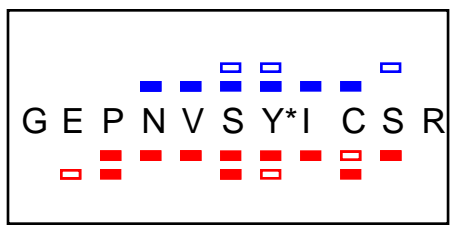

Protein Name: Glycogen synthase kinase 3 beta  
 gi Accession: 0  
 Precursor Mass: 681.2815+2  
 Delta Mass: 0.140 ppm  
 XCorr: 56.15

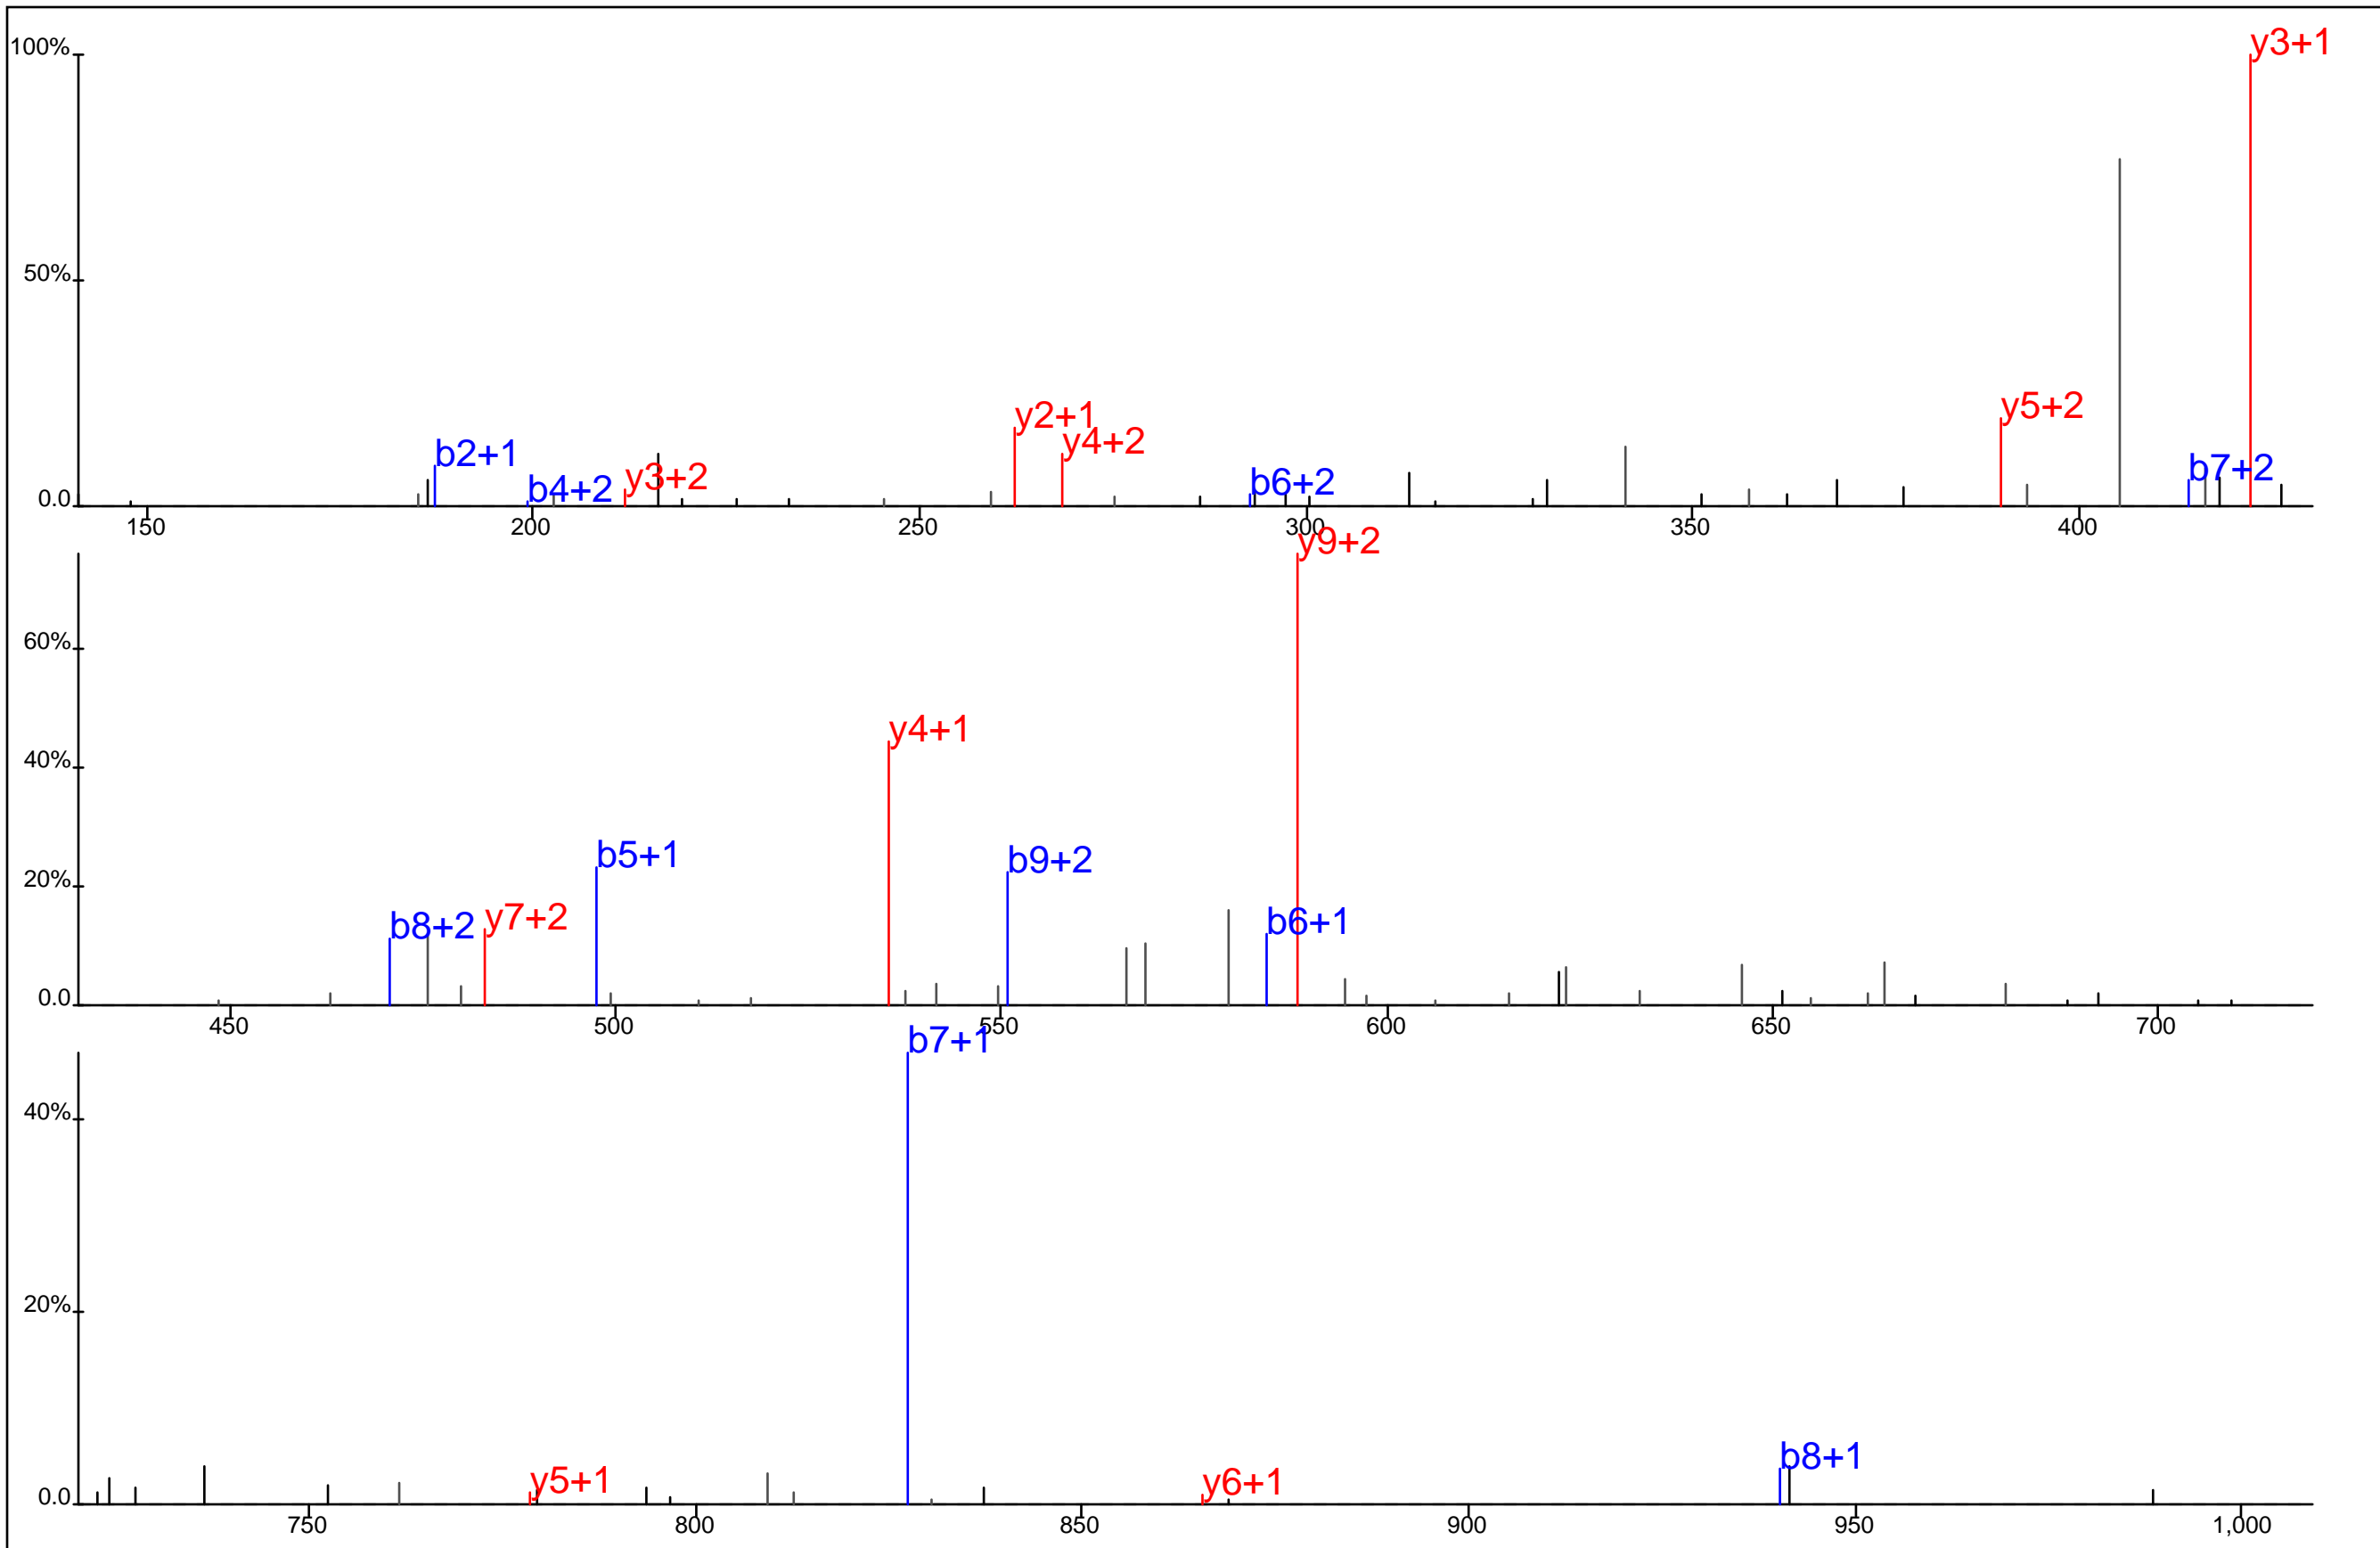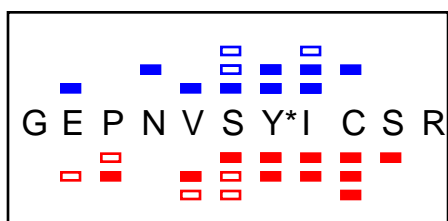

Protein Name: Glycogen synthase kinase 3 beta  
 gi Accession: 0  
 Precursor Mass: 454.5233+3  
 Delta Mass: 0.229 ppm  
 XCorr: 37.81

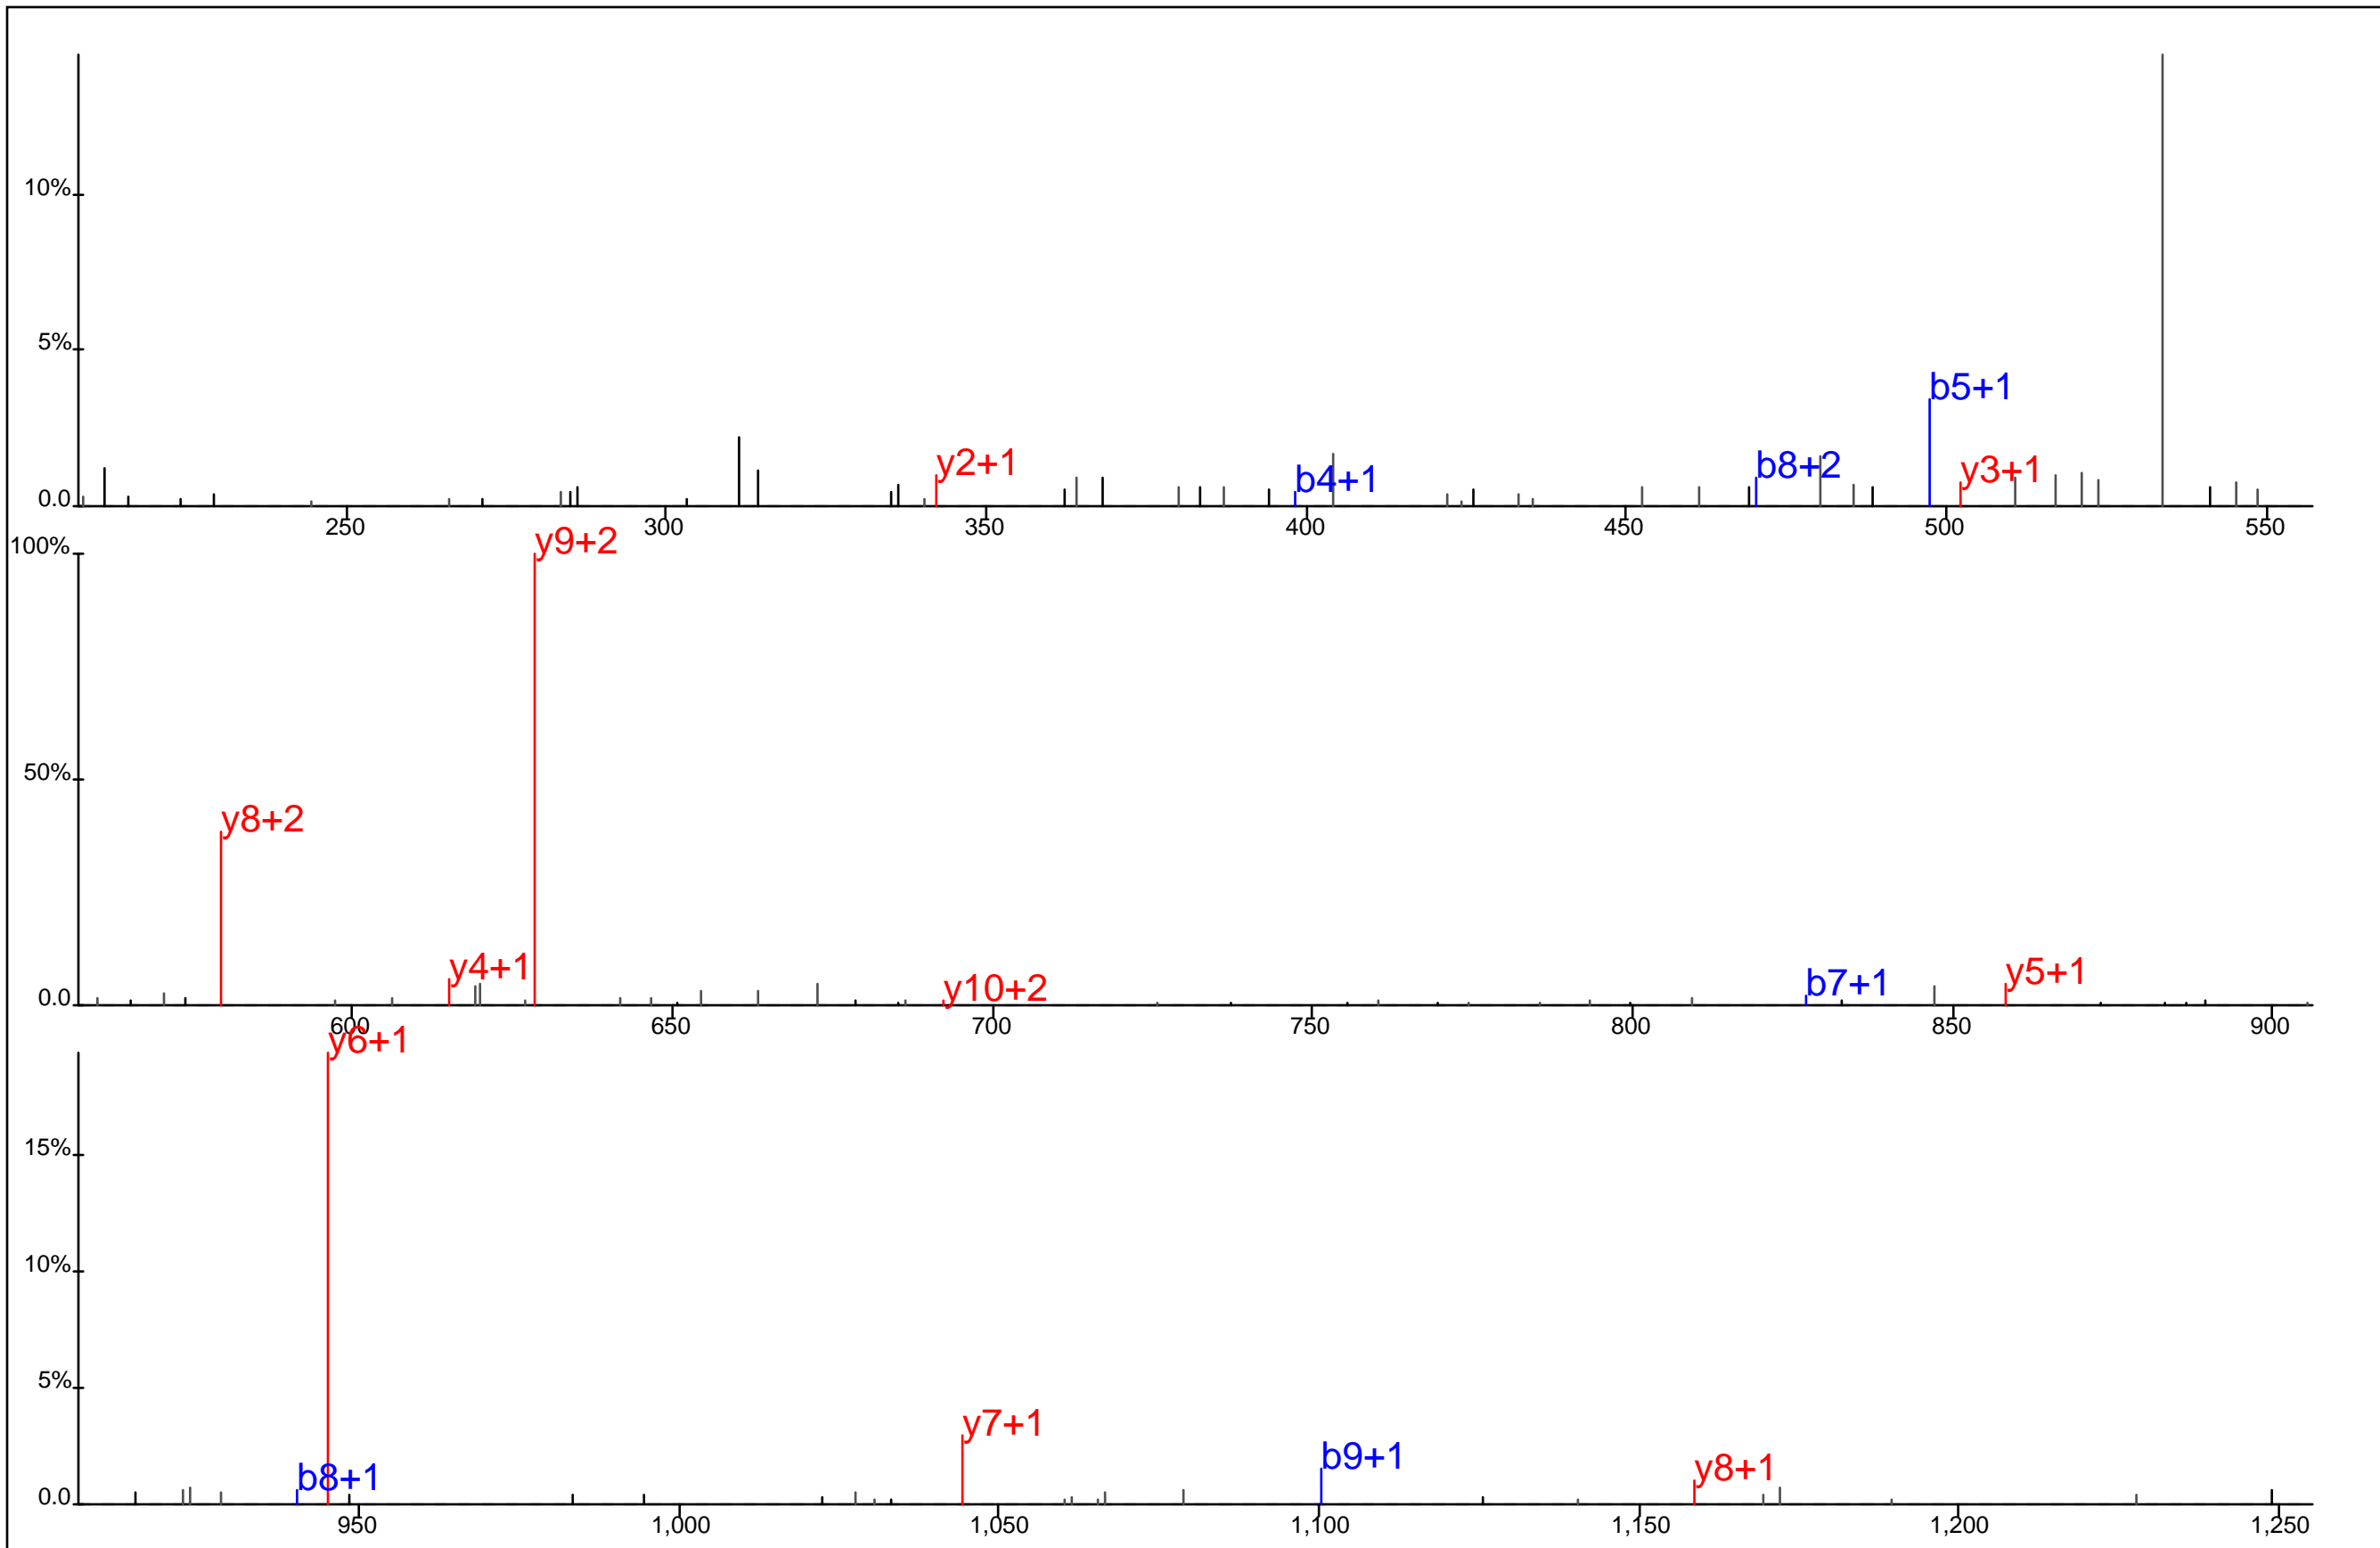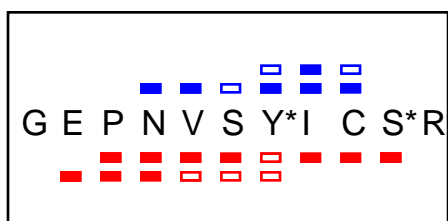

Protein Name: Glycogen synthase kinase 3 beta  
 gi Accession: 0  
 Precursor Mass: 721.2647+2  
 Delta Mass: 0.201 ppm  
 XCorr: 50.81

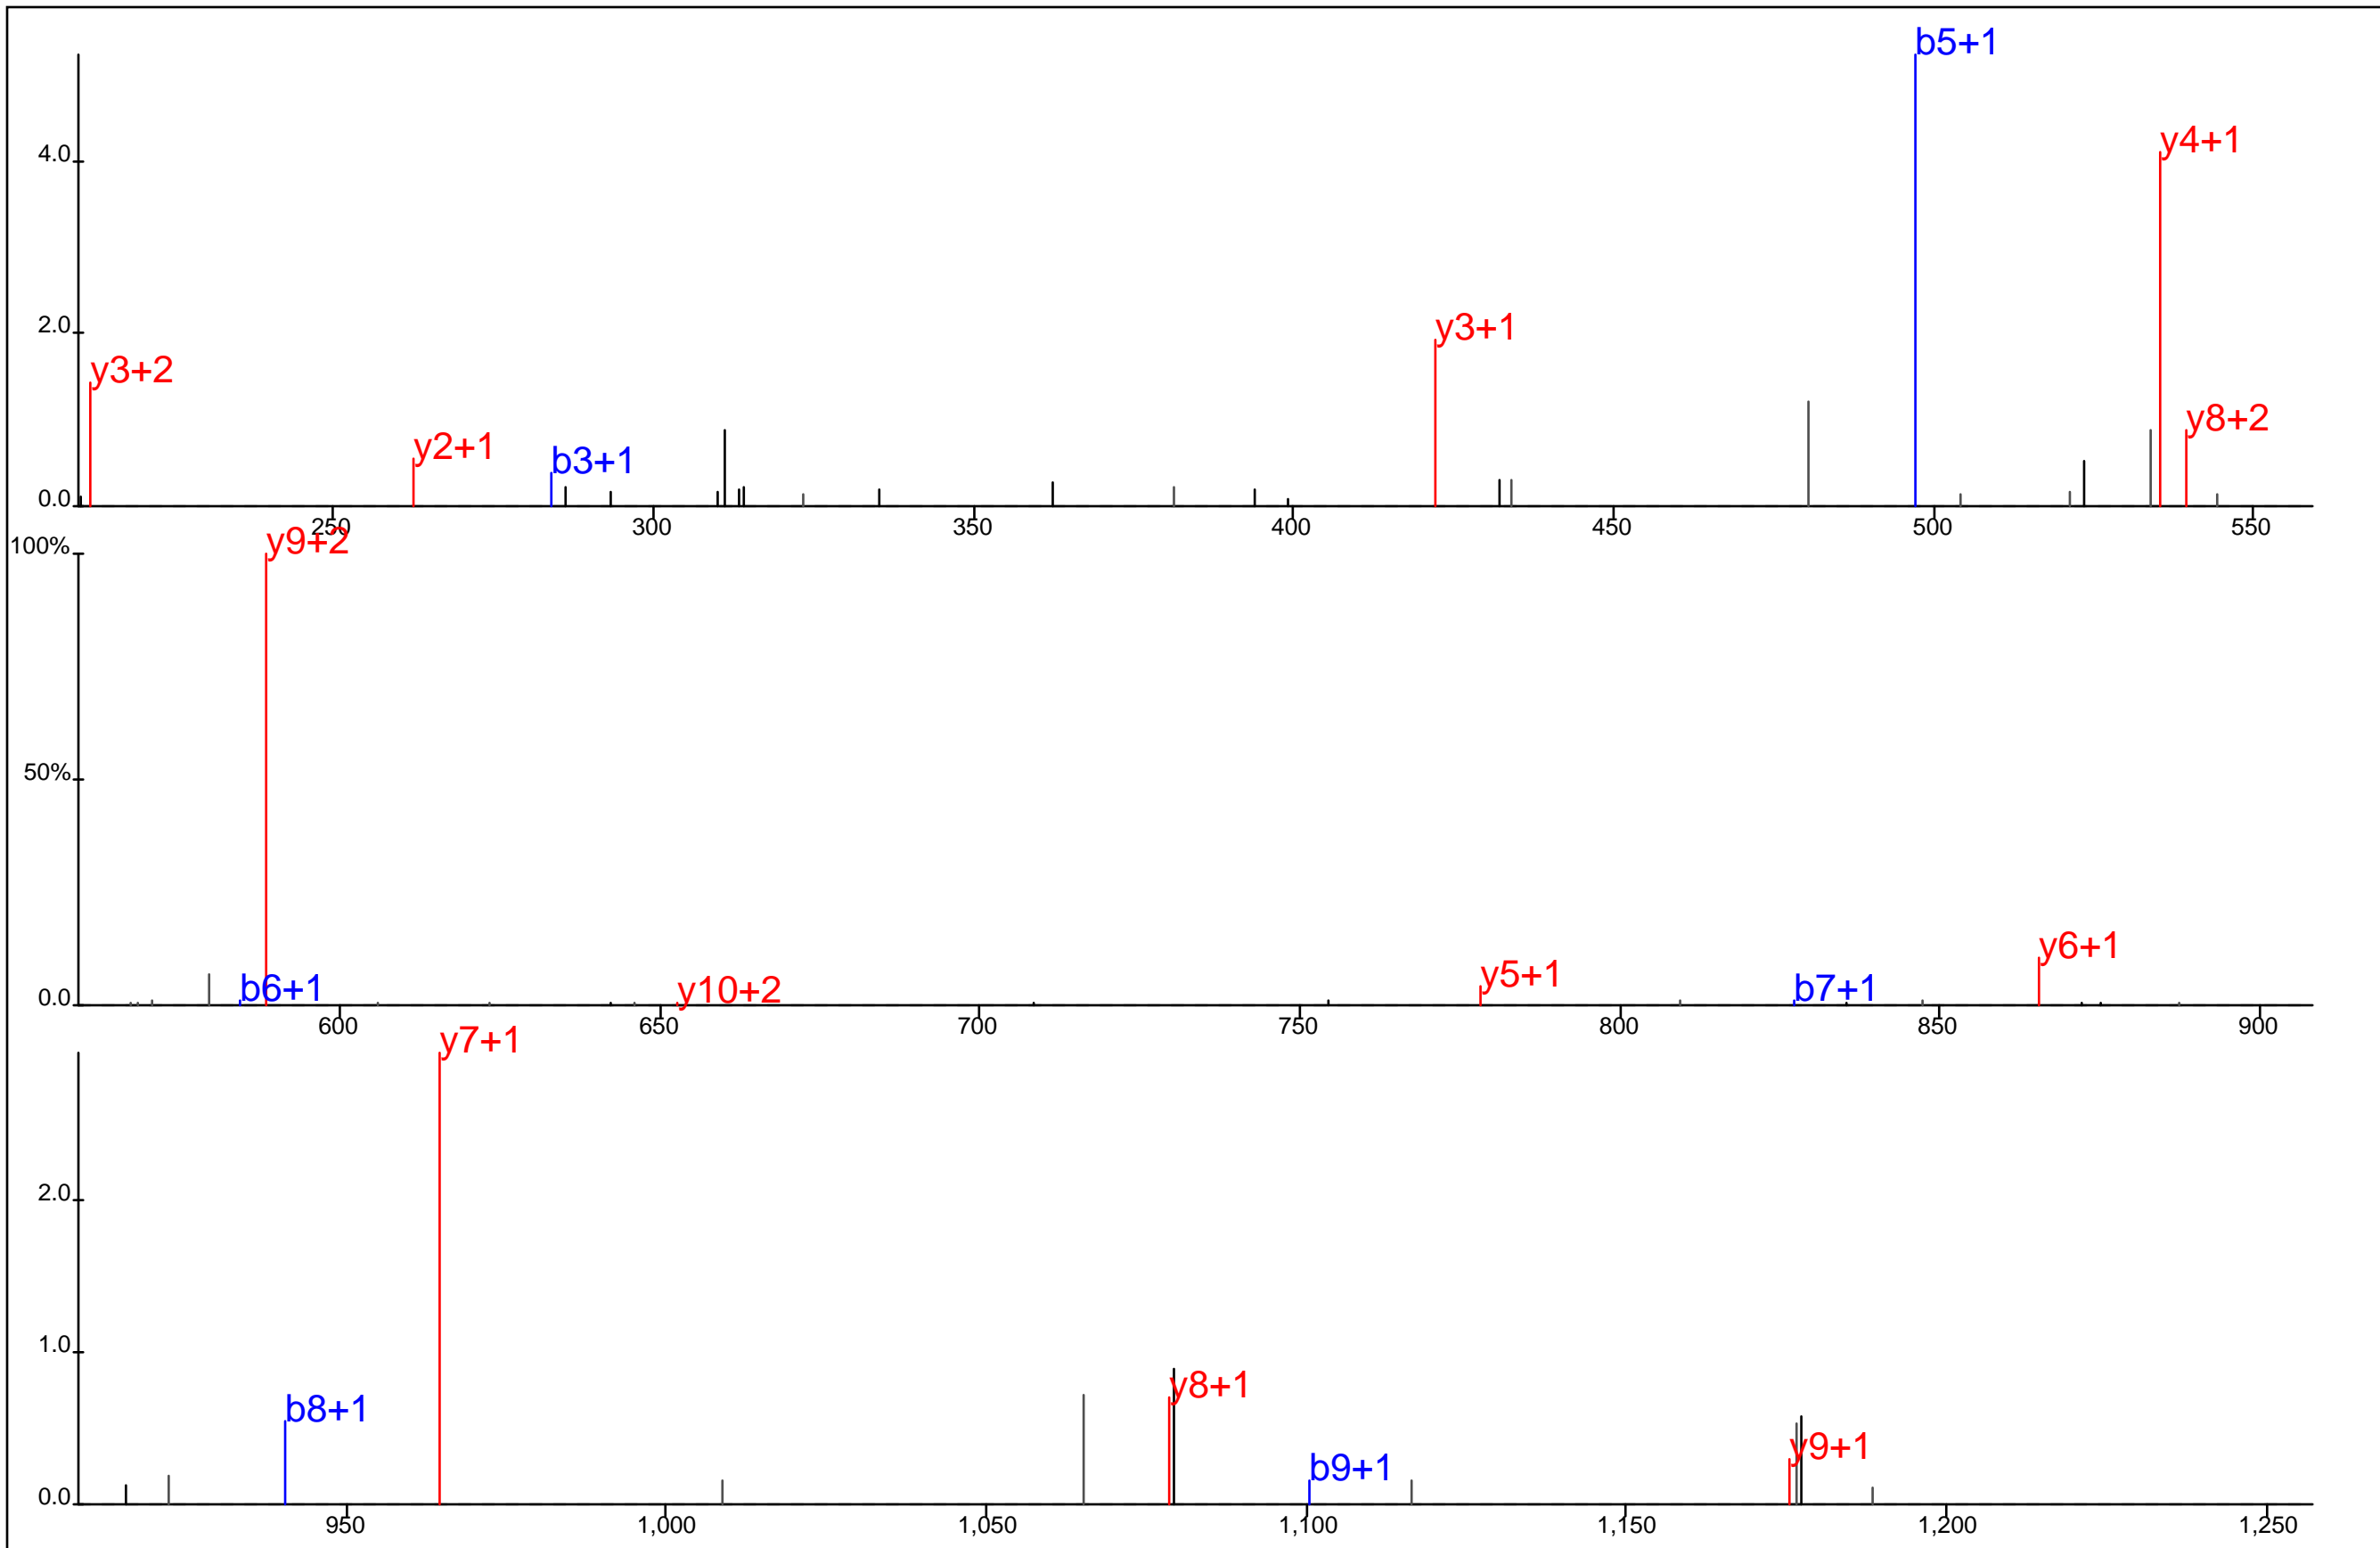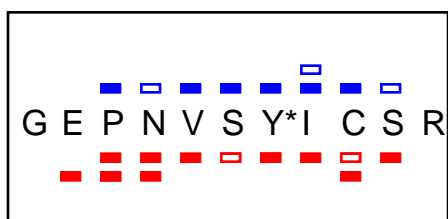

Protein Name: Glycogen synthase kinase 3 beta  
 gi Accession: 0  
 Precursor Mass: 681.2816+2  
 Delta Mass: 0.319 ppm  
 XCorr: 57.7

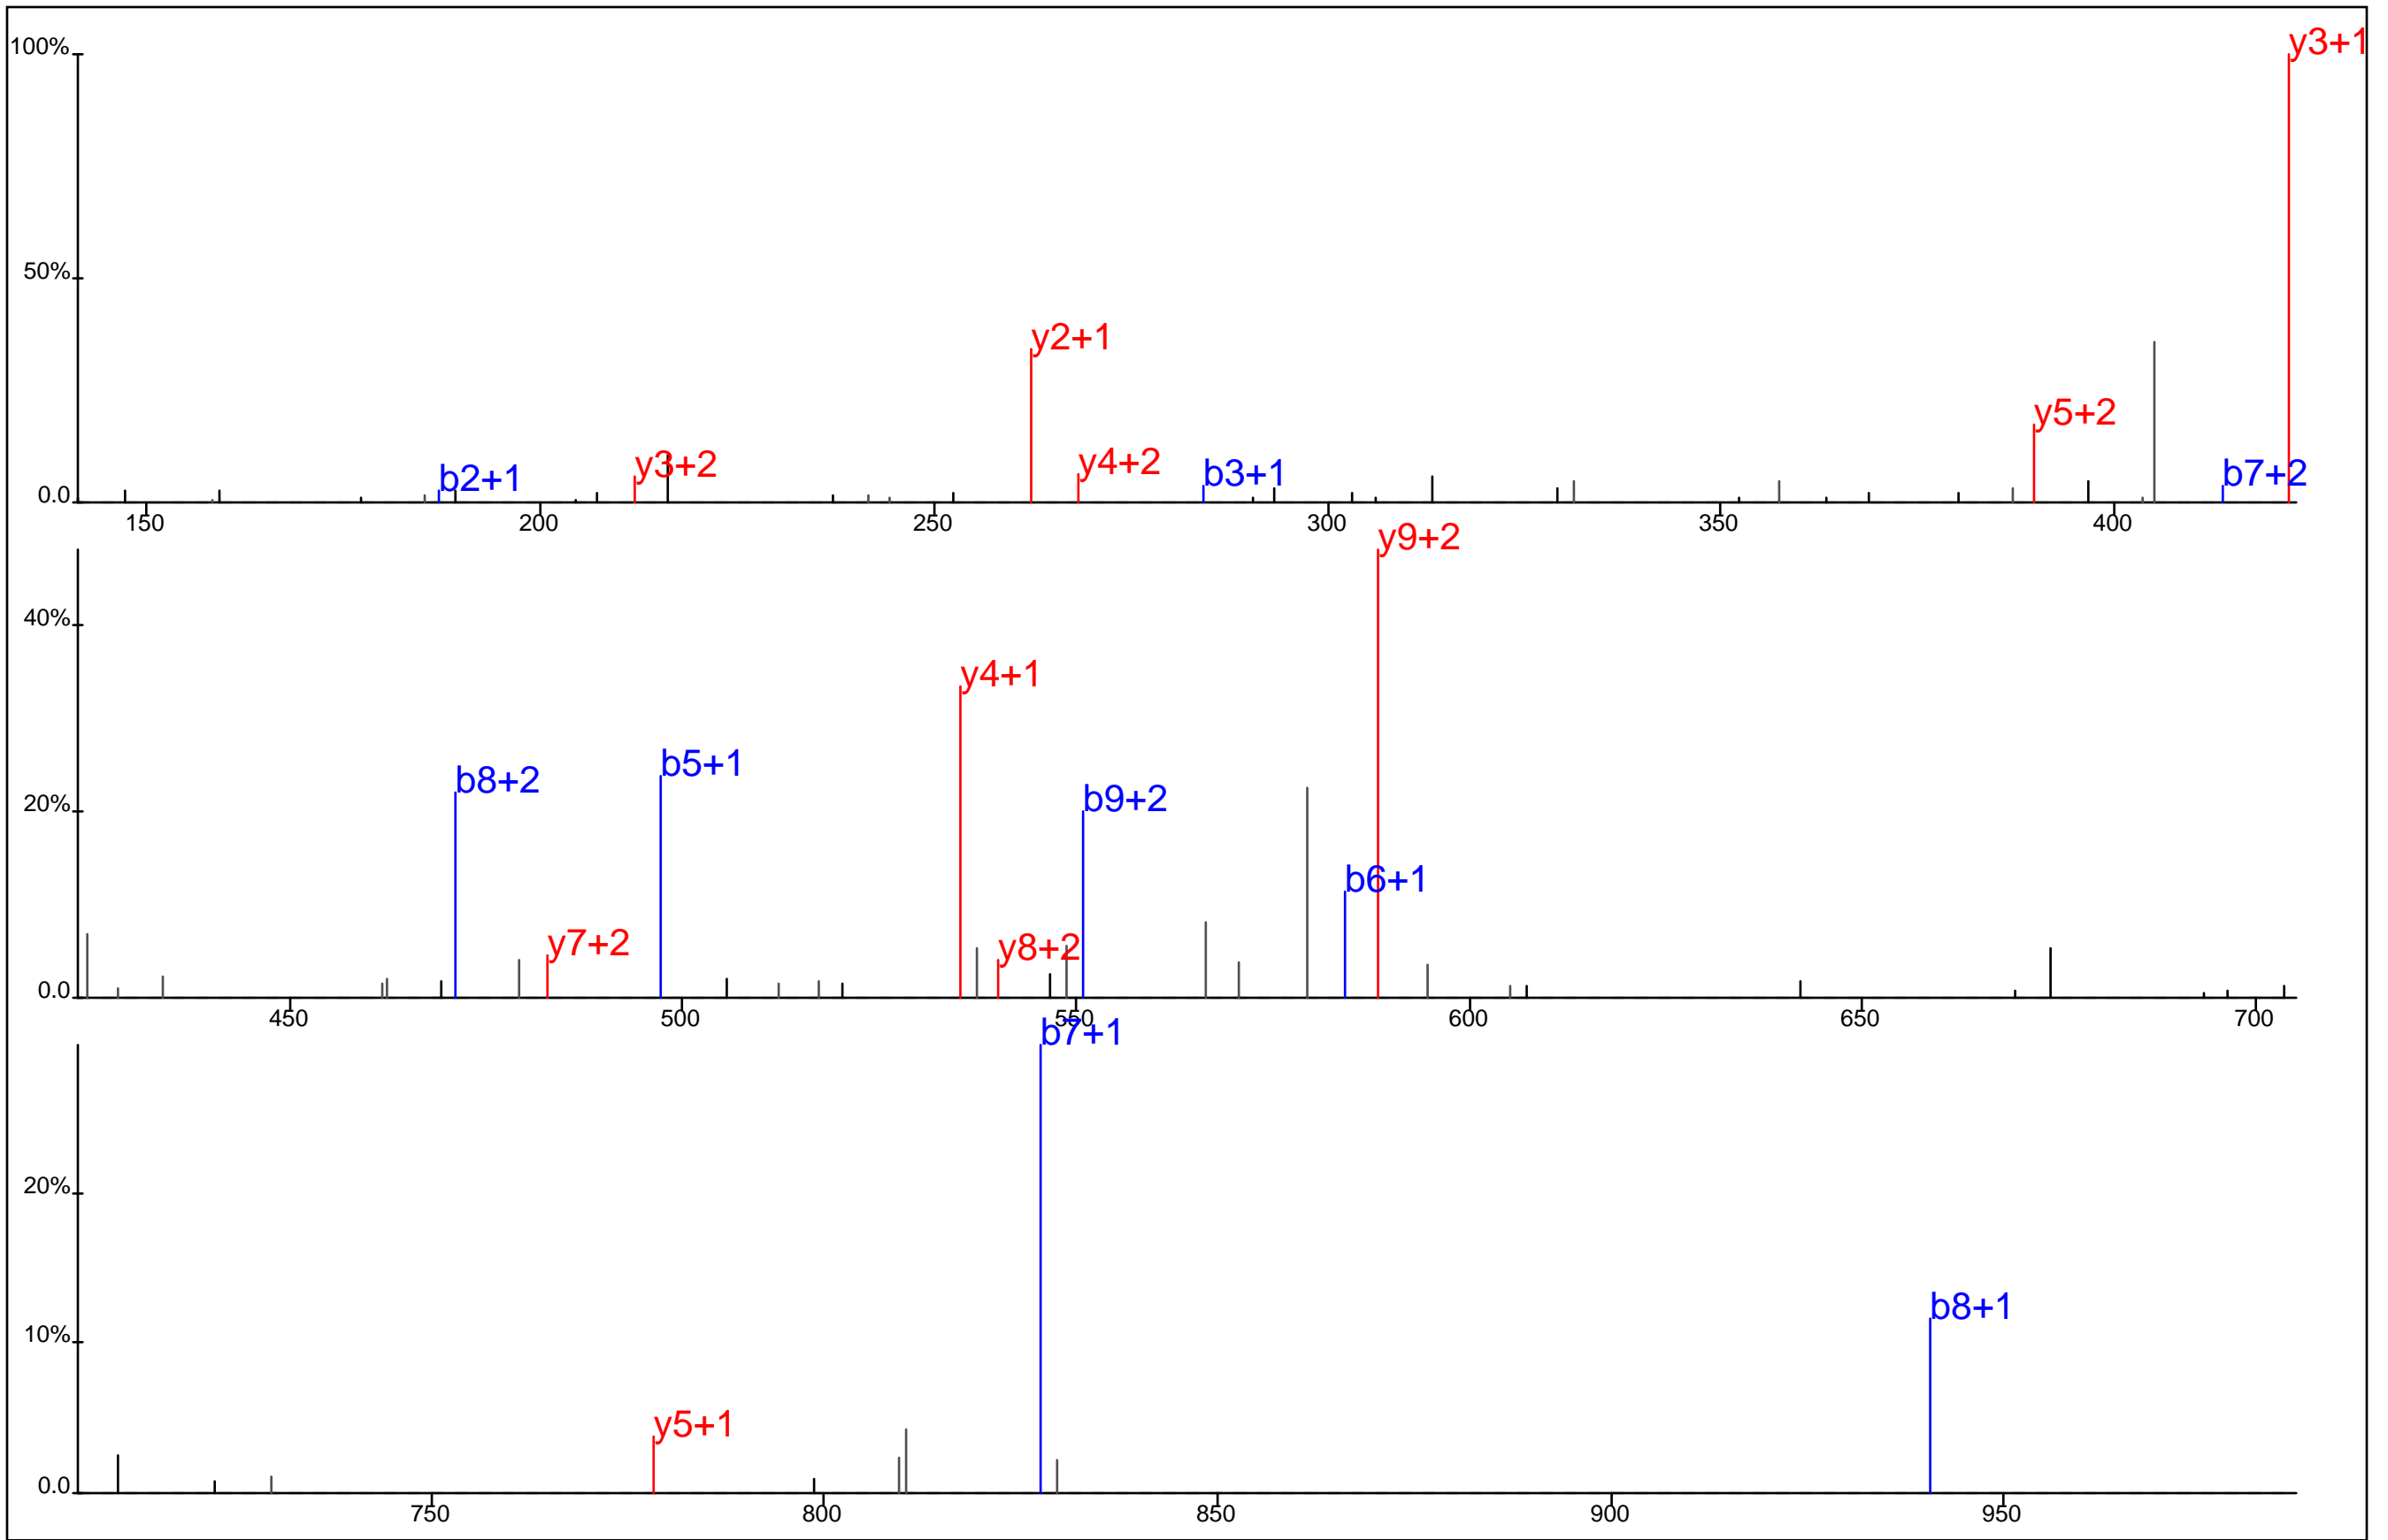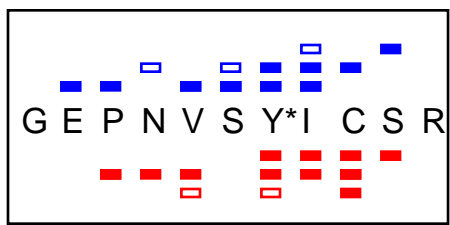

Protein Name: Glycogen synthase kinase 3 beta  
 gi Accession: 0  
 Precursor Mass: 454.5238+3  
 Delta Mass: 1.049 ppm  
 XCorr: 35.07

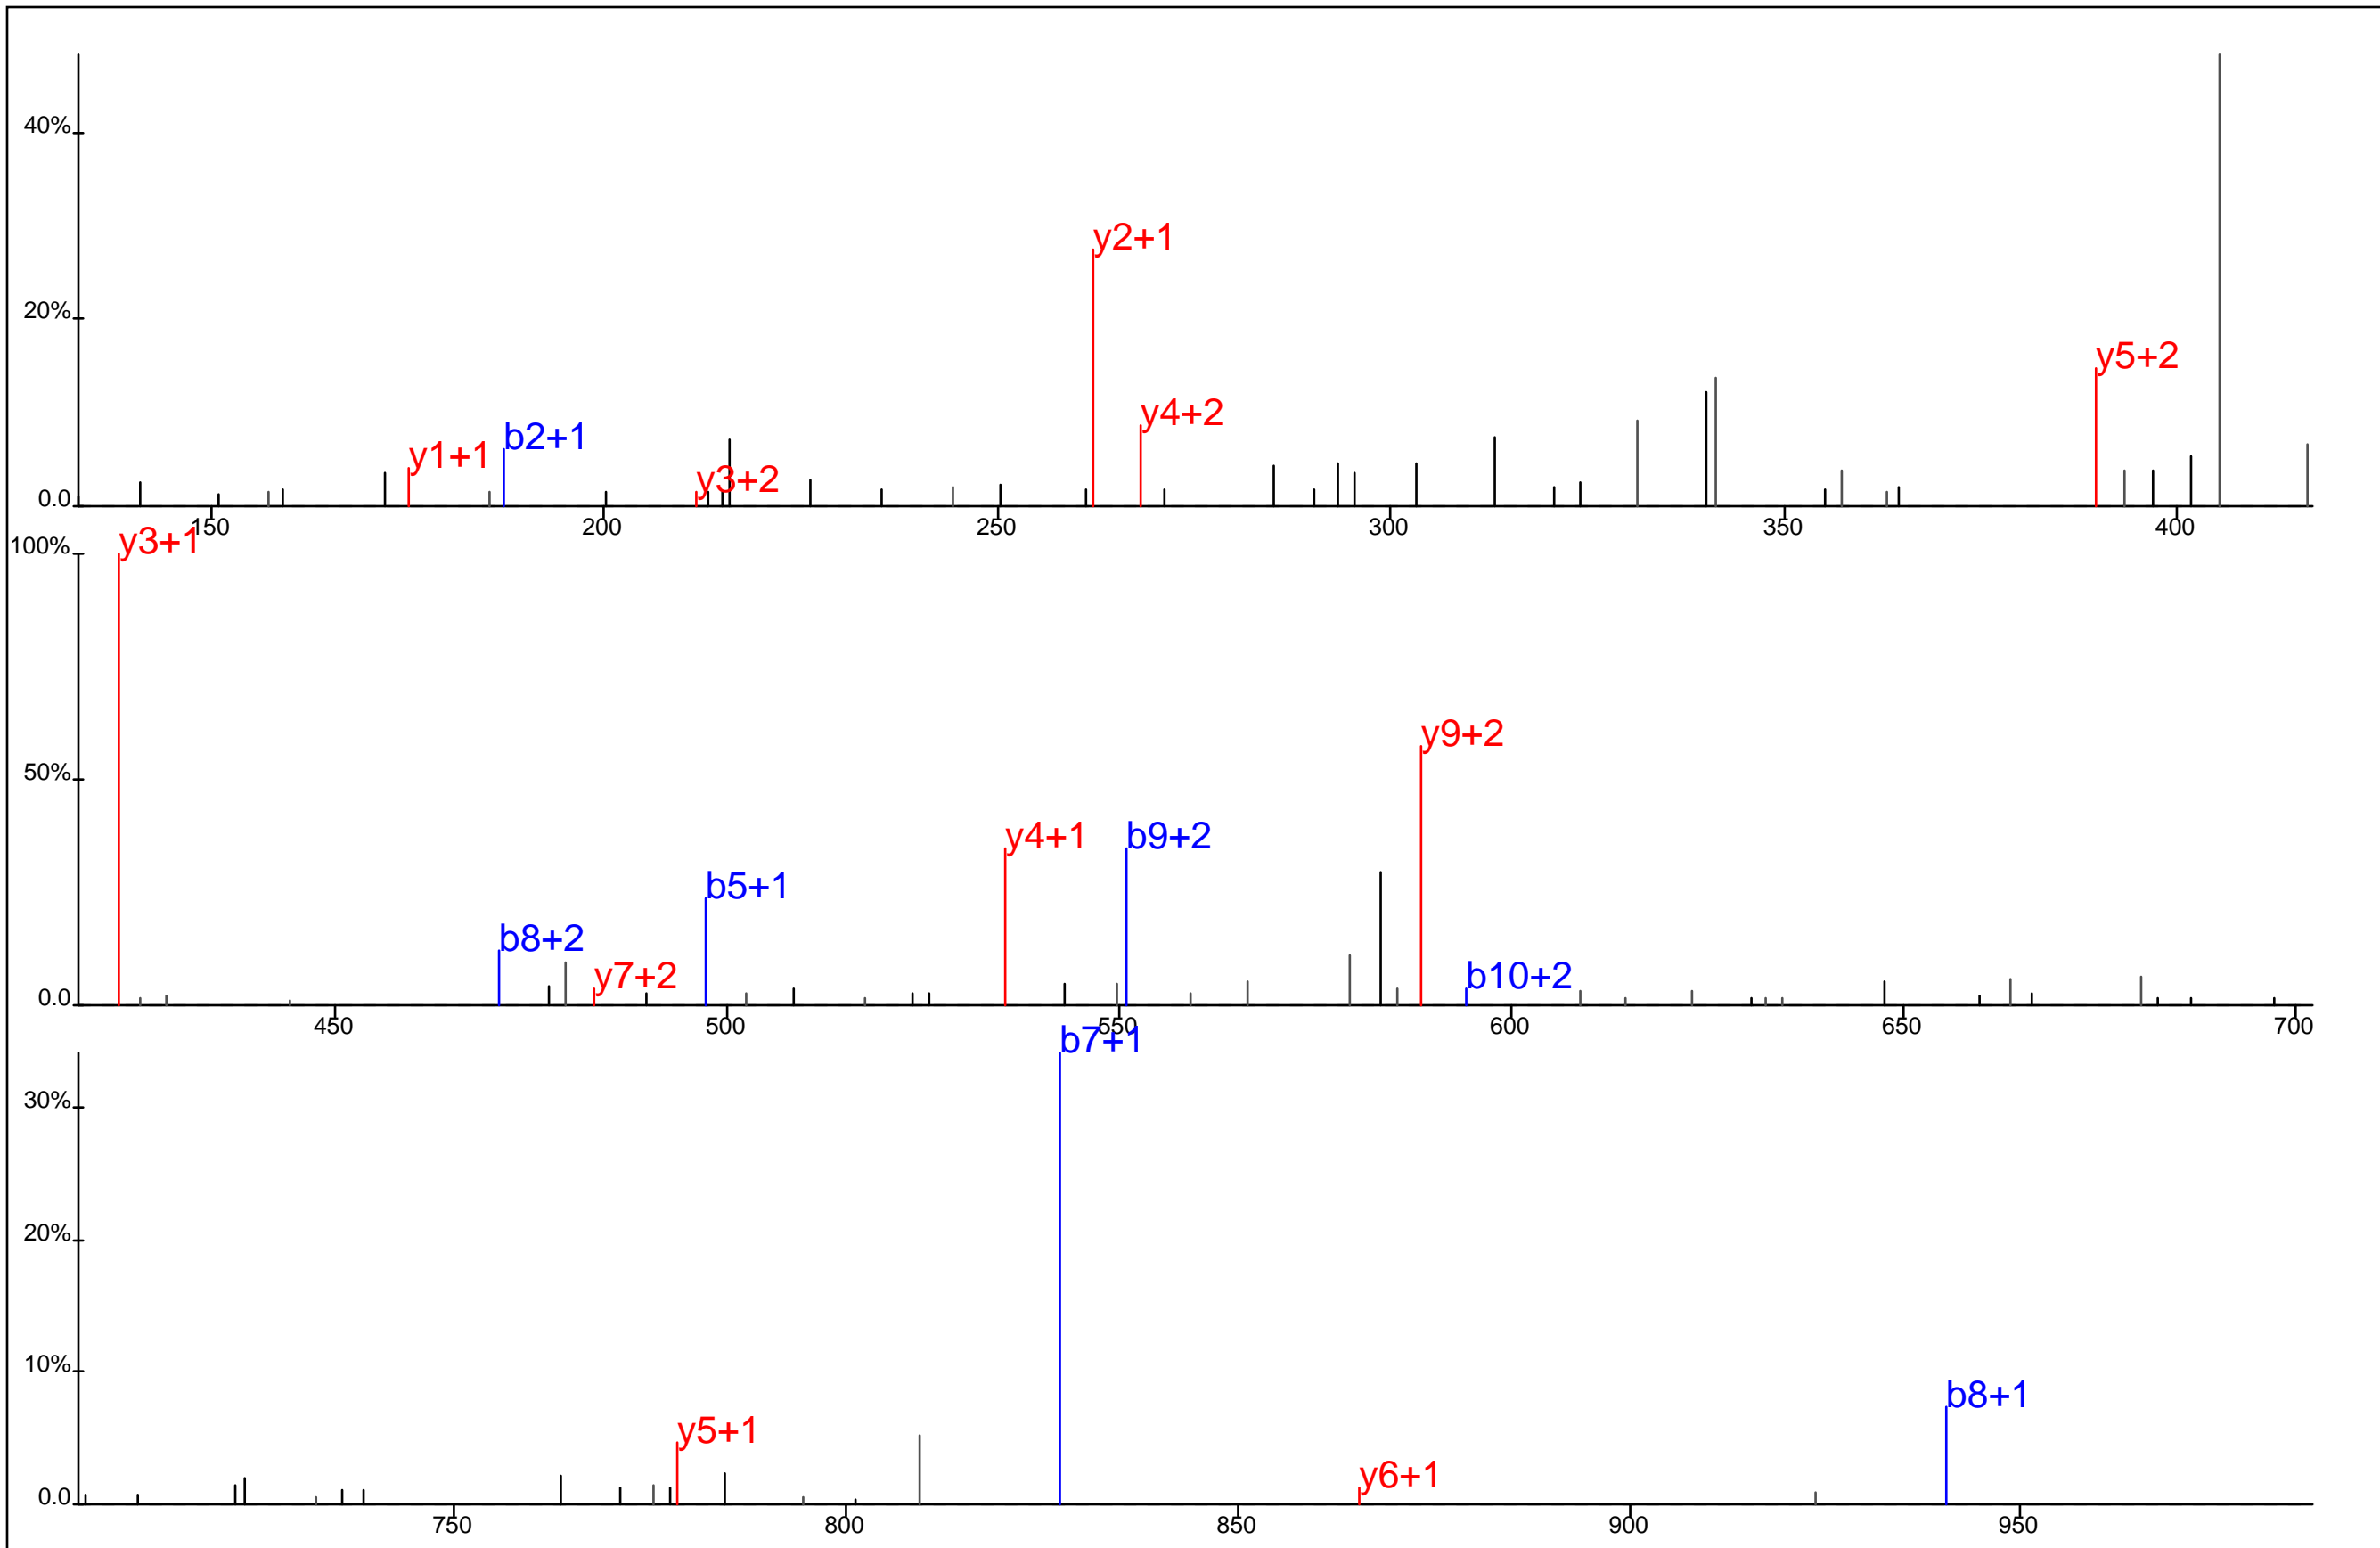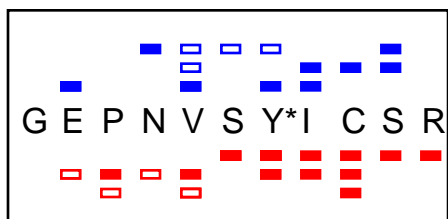

Protein Name: Glycogen synthase kinase 3 beta  
 gi Accession: 0  
 Precursor Mass: 454.5233+3  
 Delta Mass: 0.095 ppm  
 XCorr: 45.02

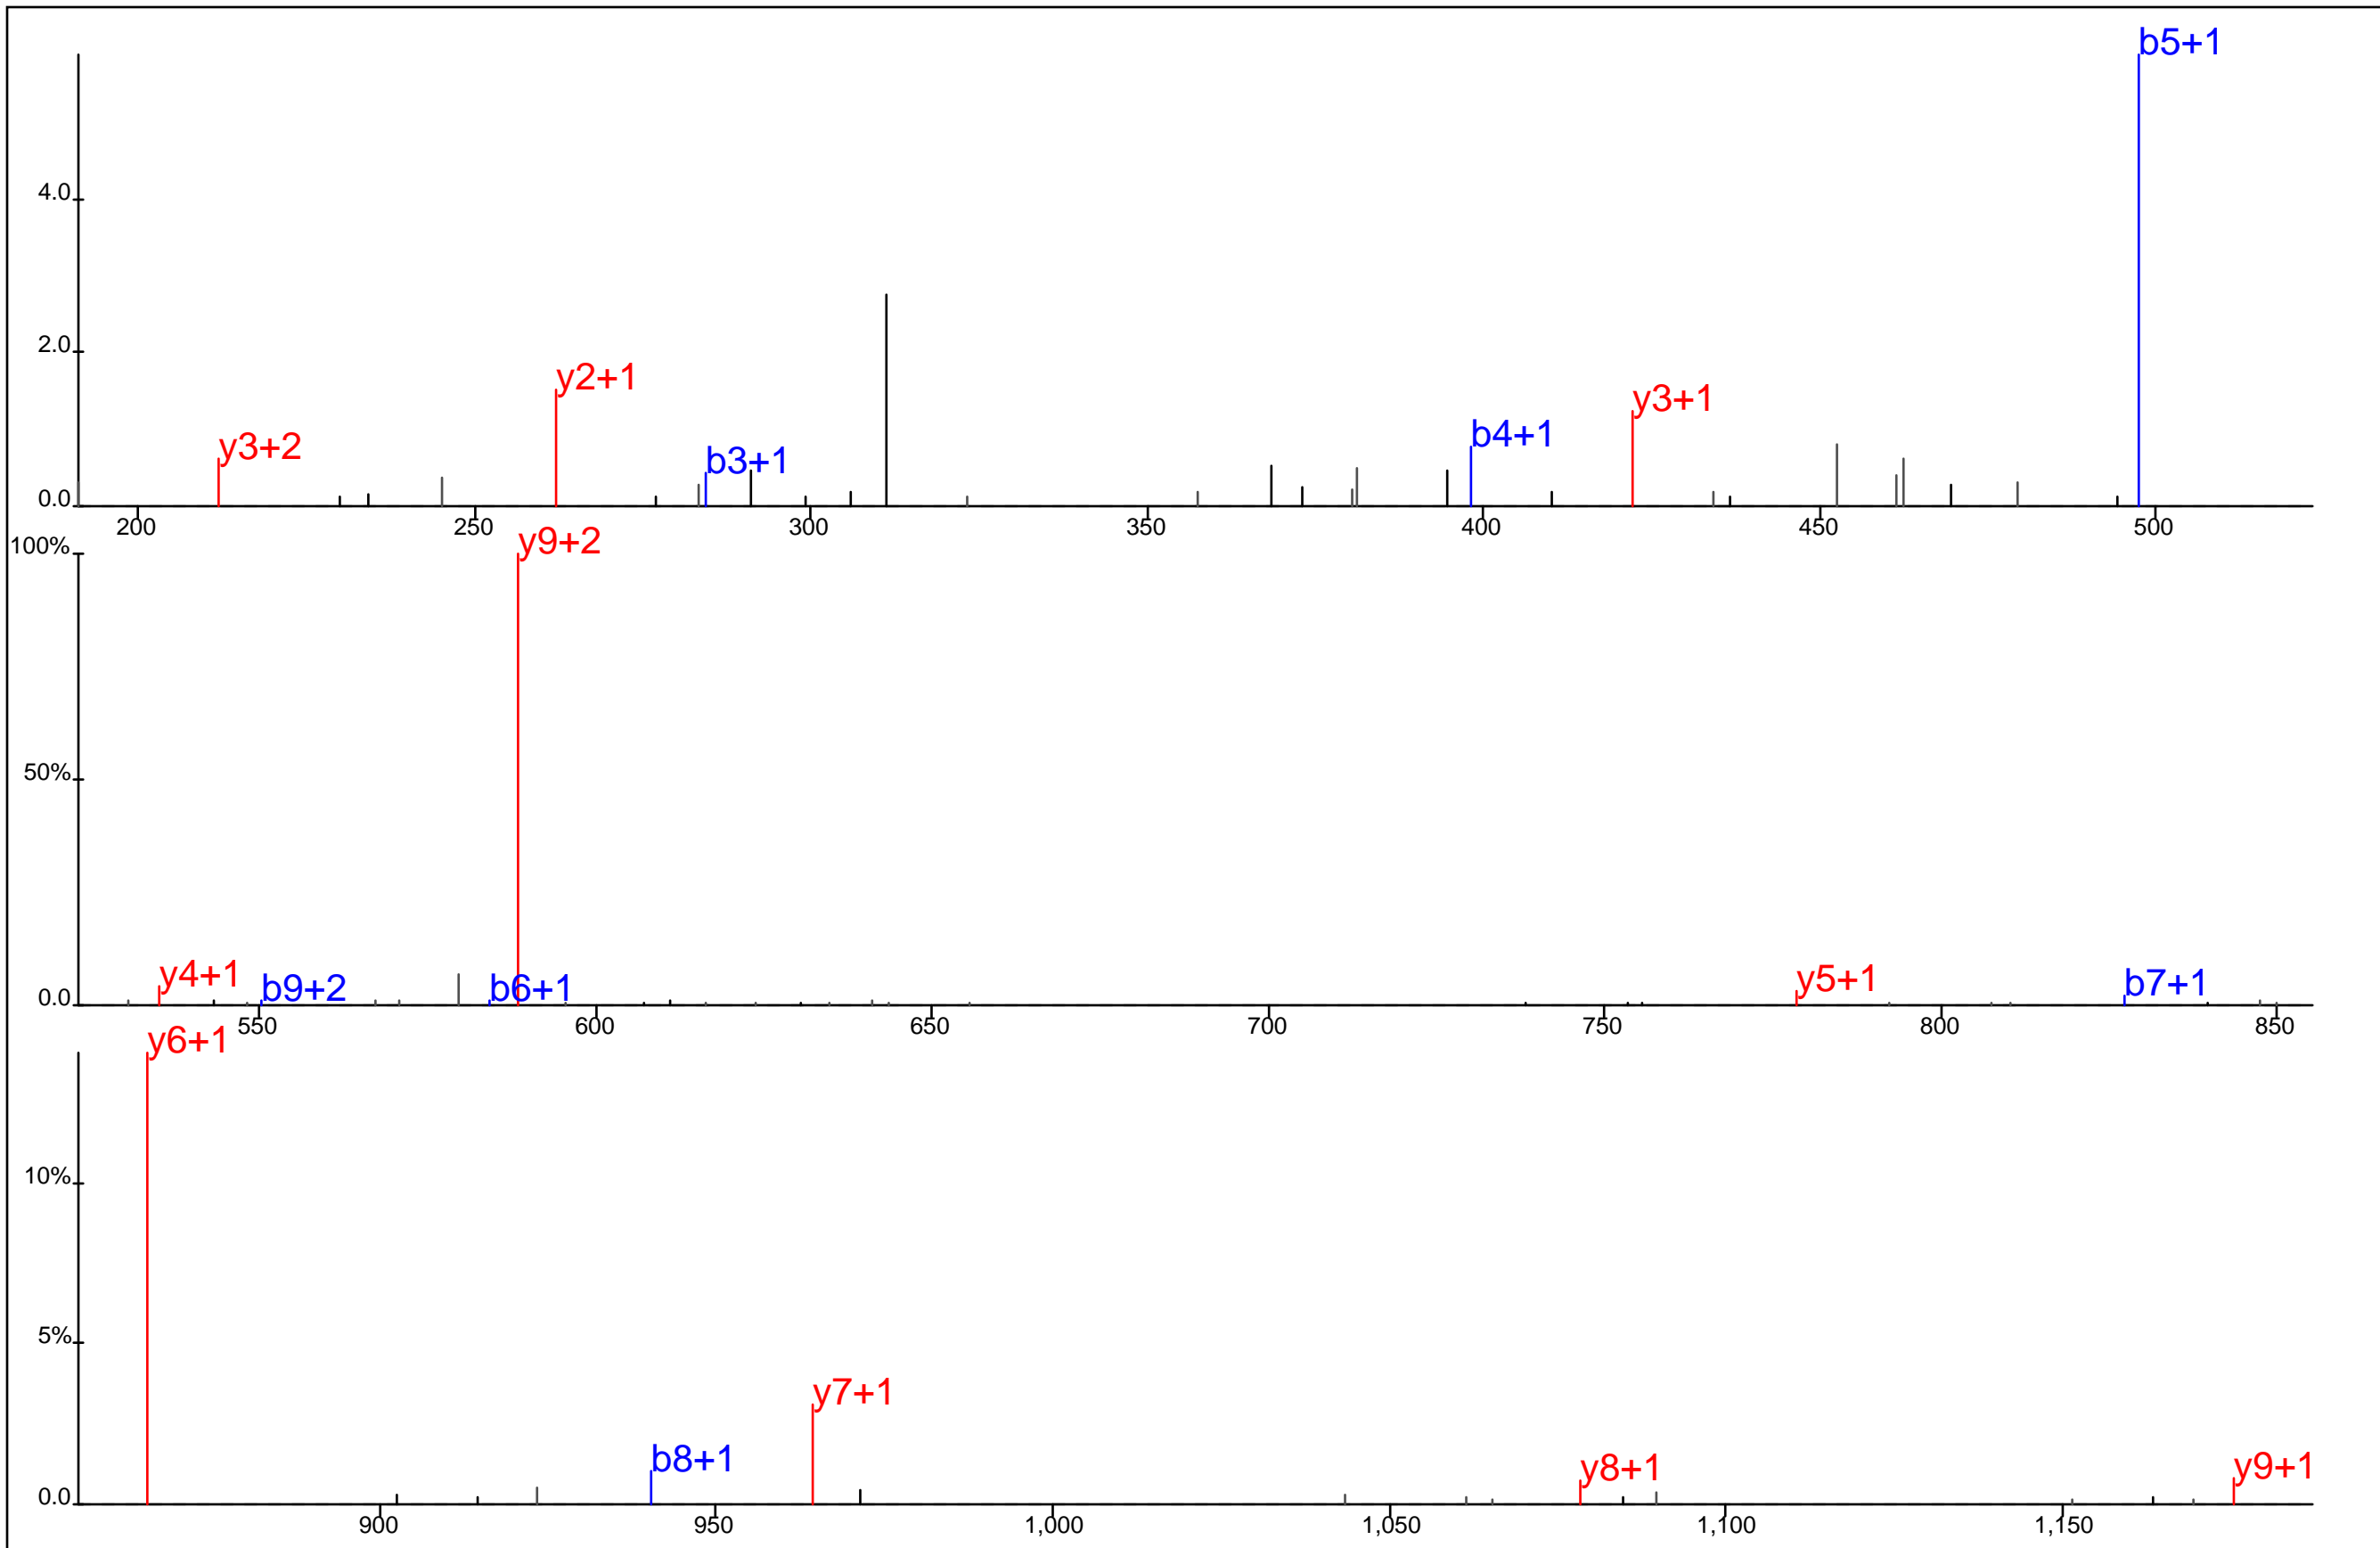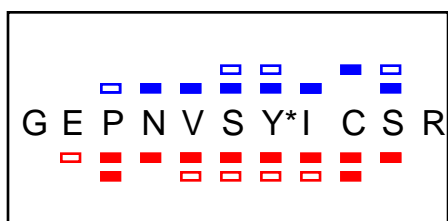

Protein Name: Glycogen synthase kinase 3 beta  
 gi Accession: 0  
 Precursor Mass: 681.2810+2  
 Delta Mass: 0.577 ppm  
 XCorr: 58.57

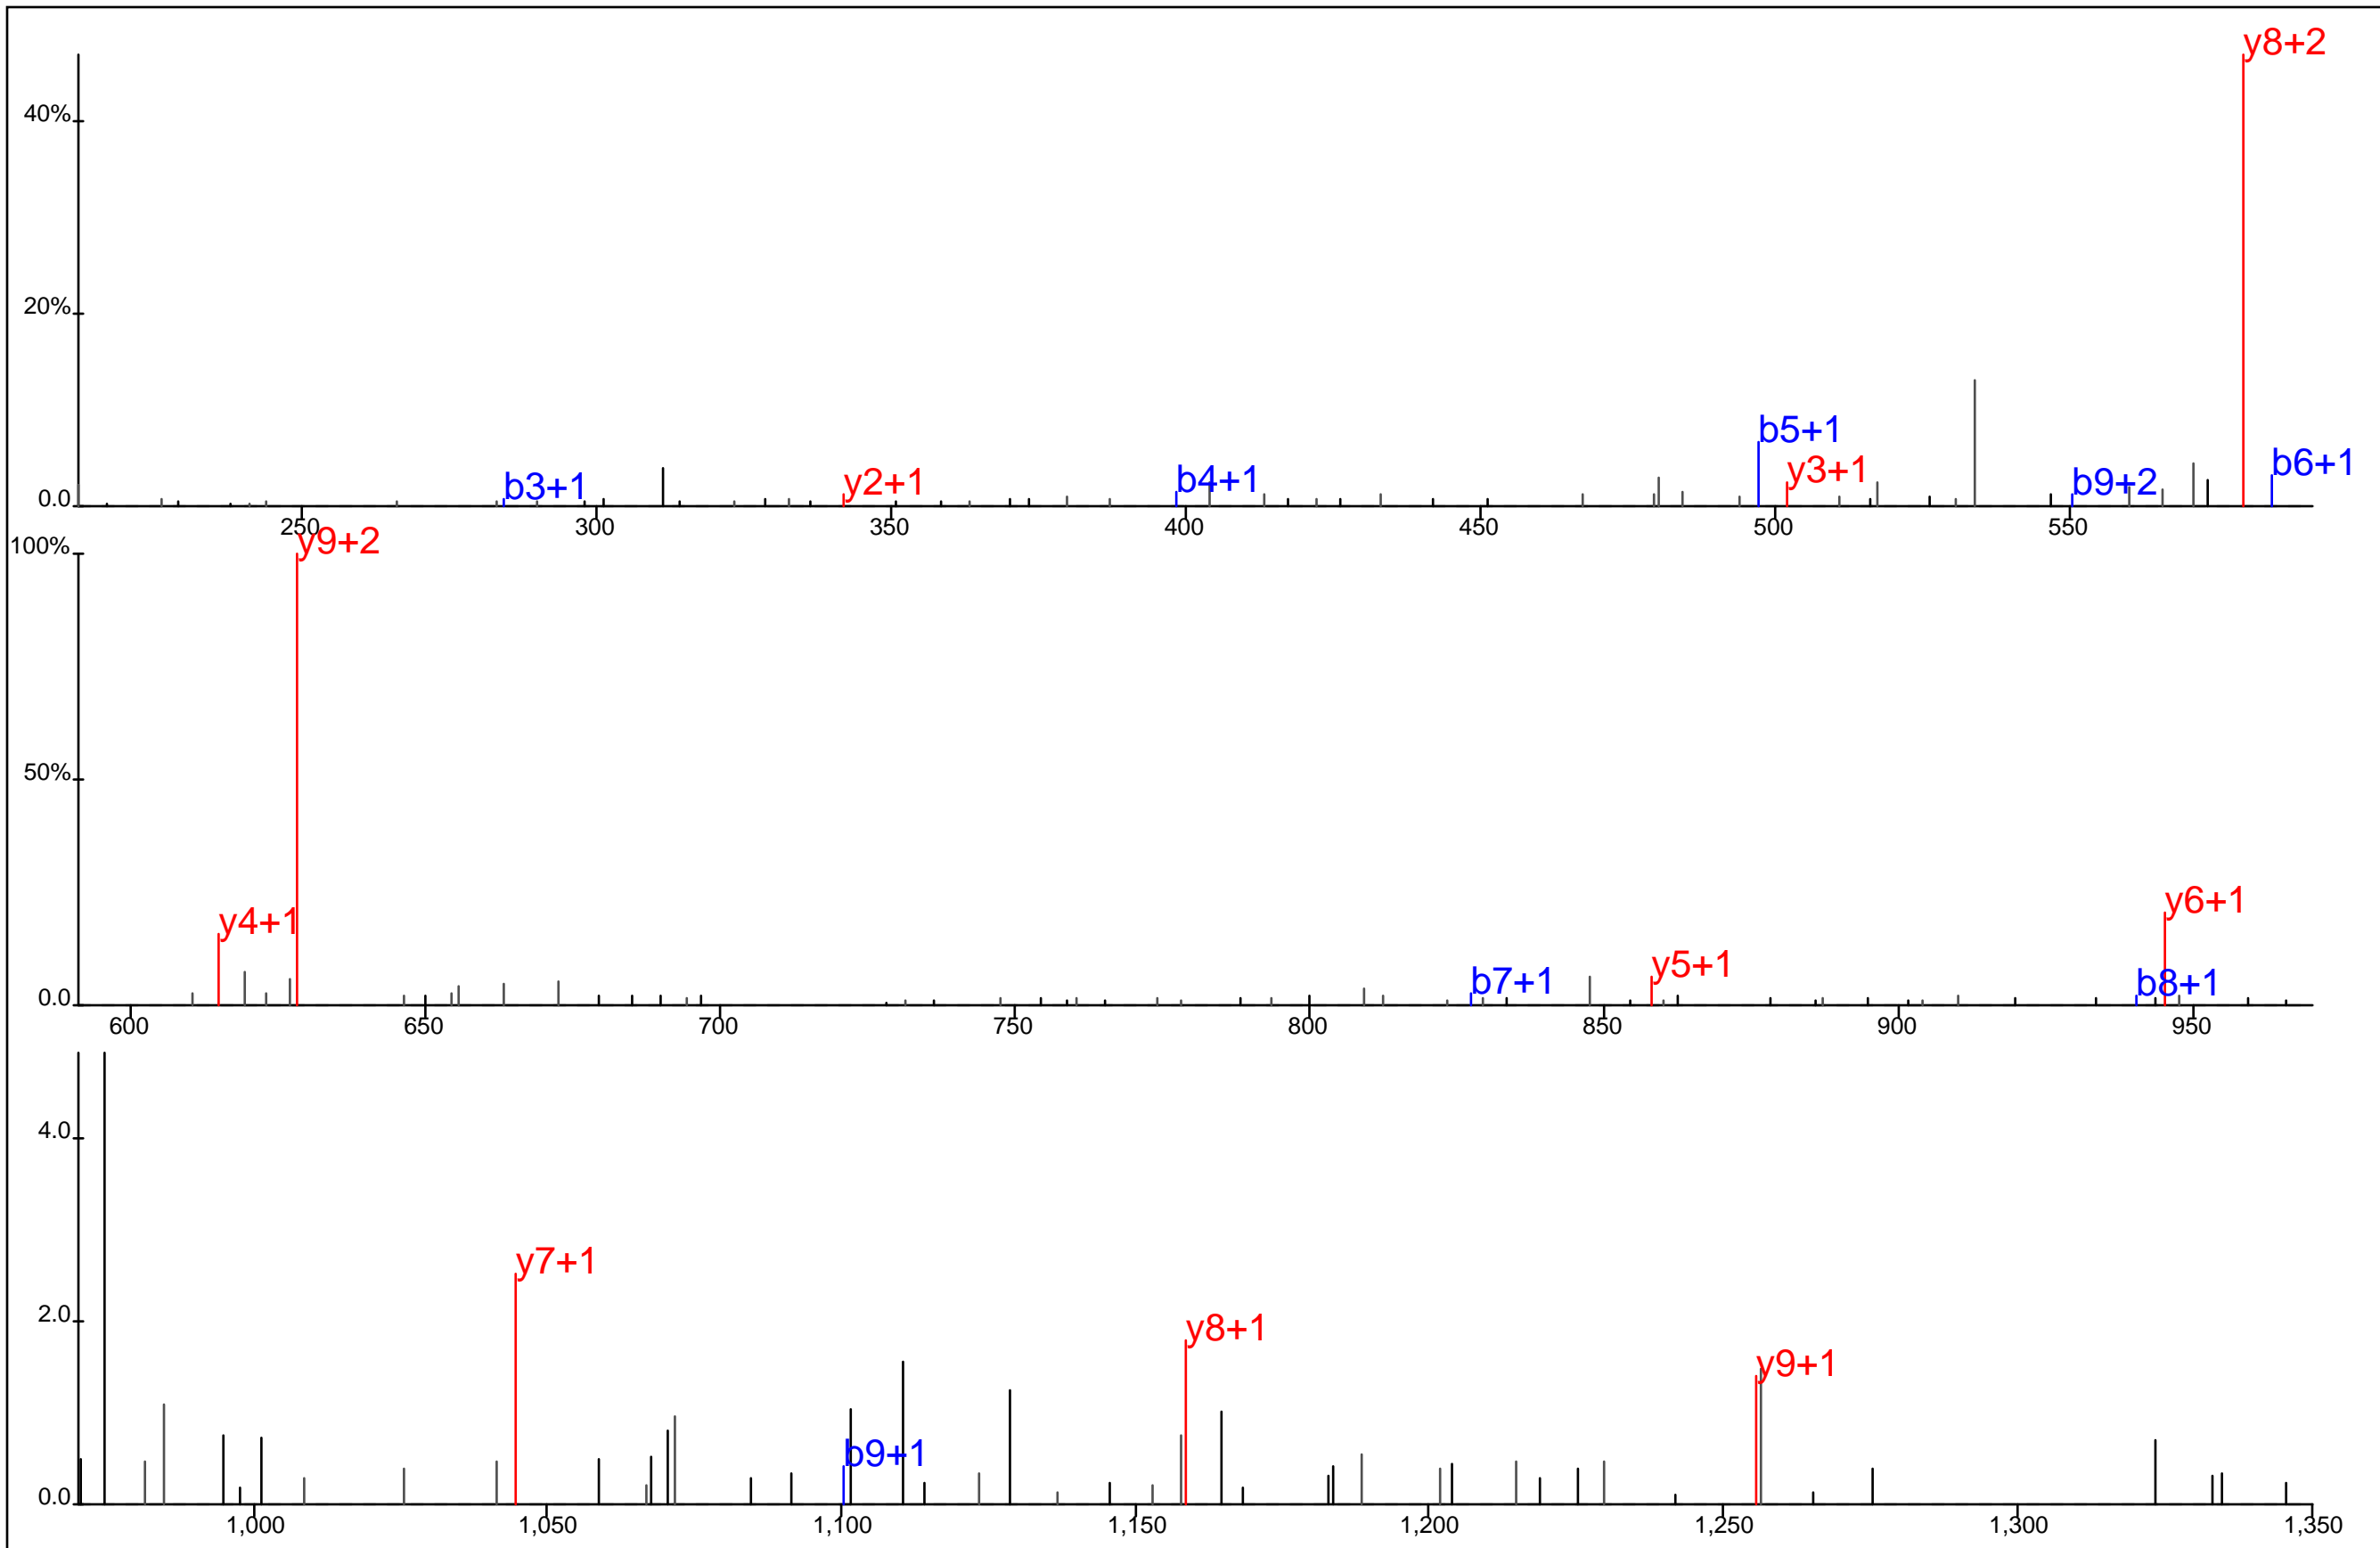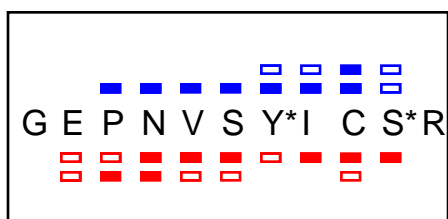

Protein Name: Glycogen synthase kinase 3 beta  
 gi Accession: 0  
 Precursor Mass: 721.2638+2  
 Delta Mass: 1.068 ppm  
 XCorr: 50.97



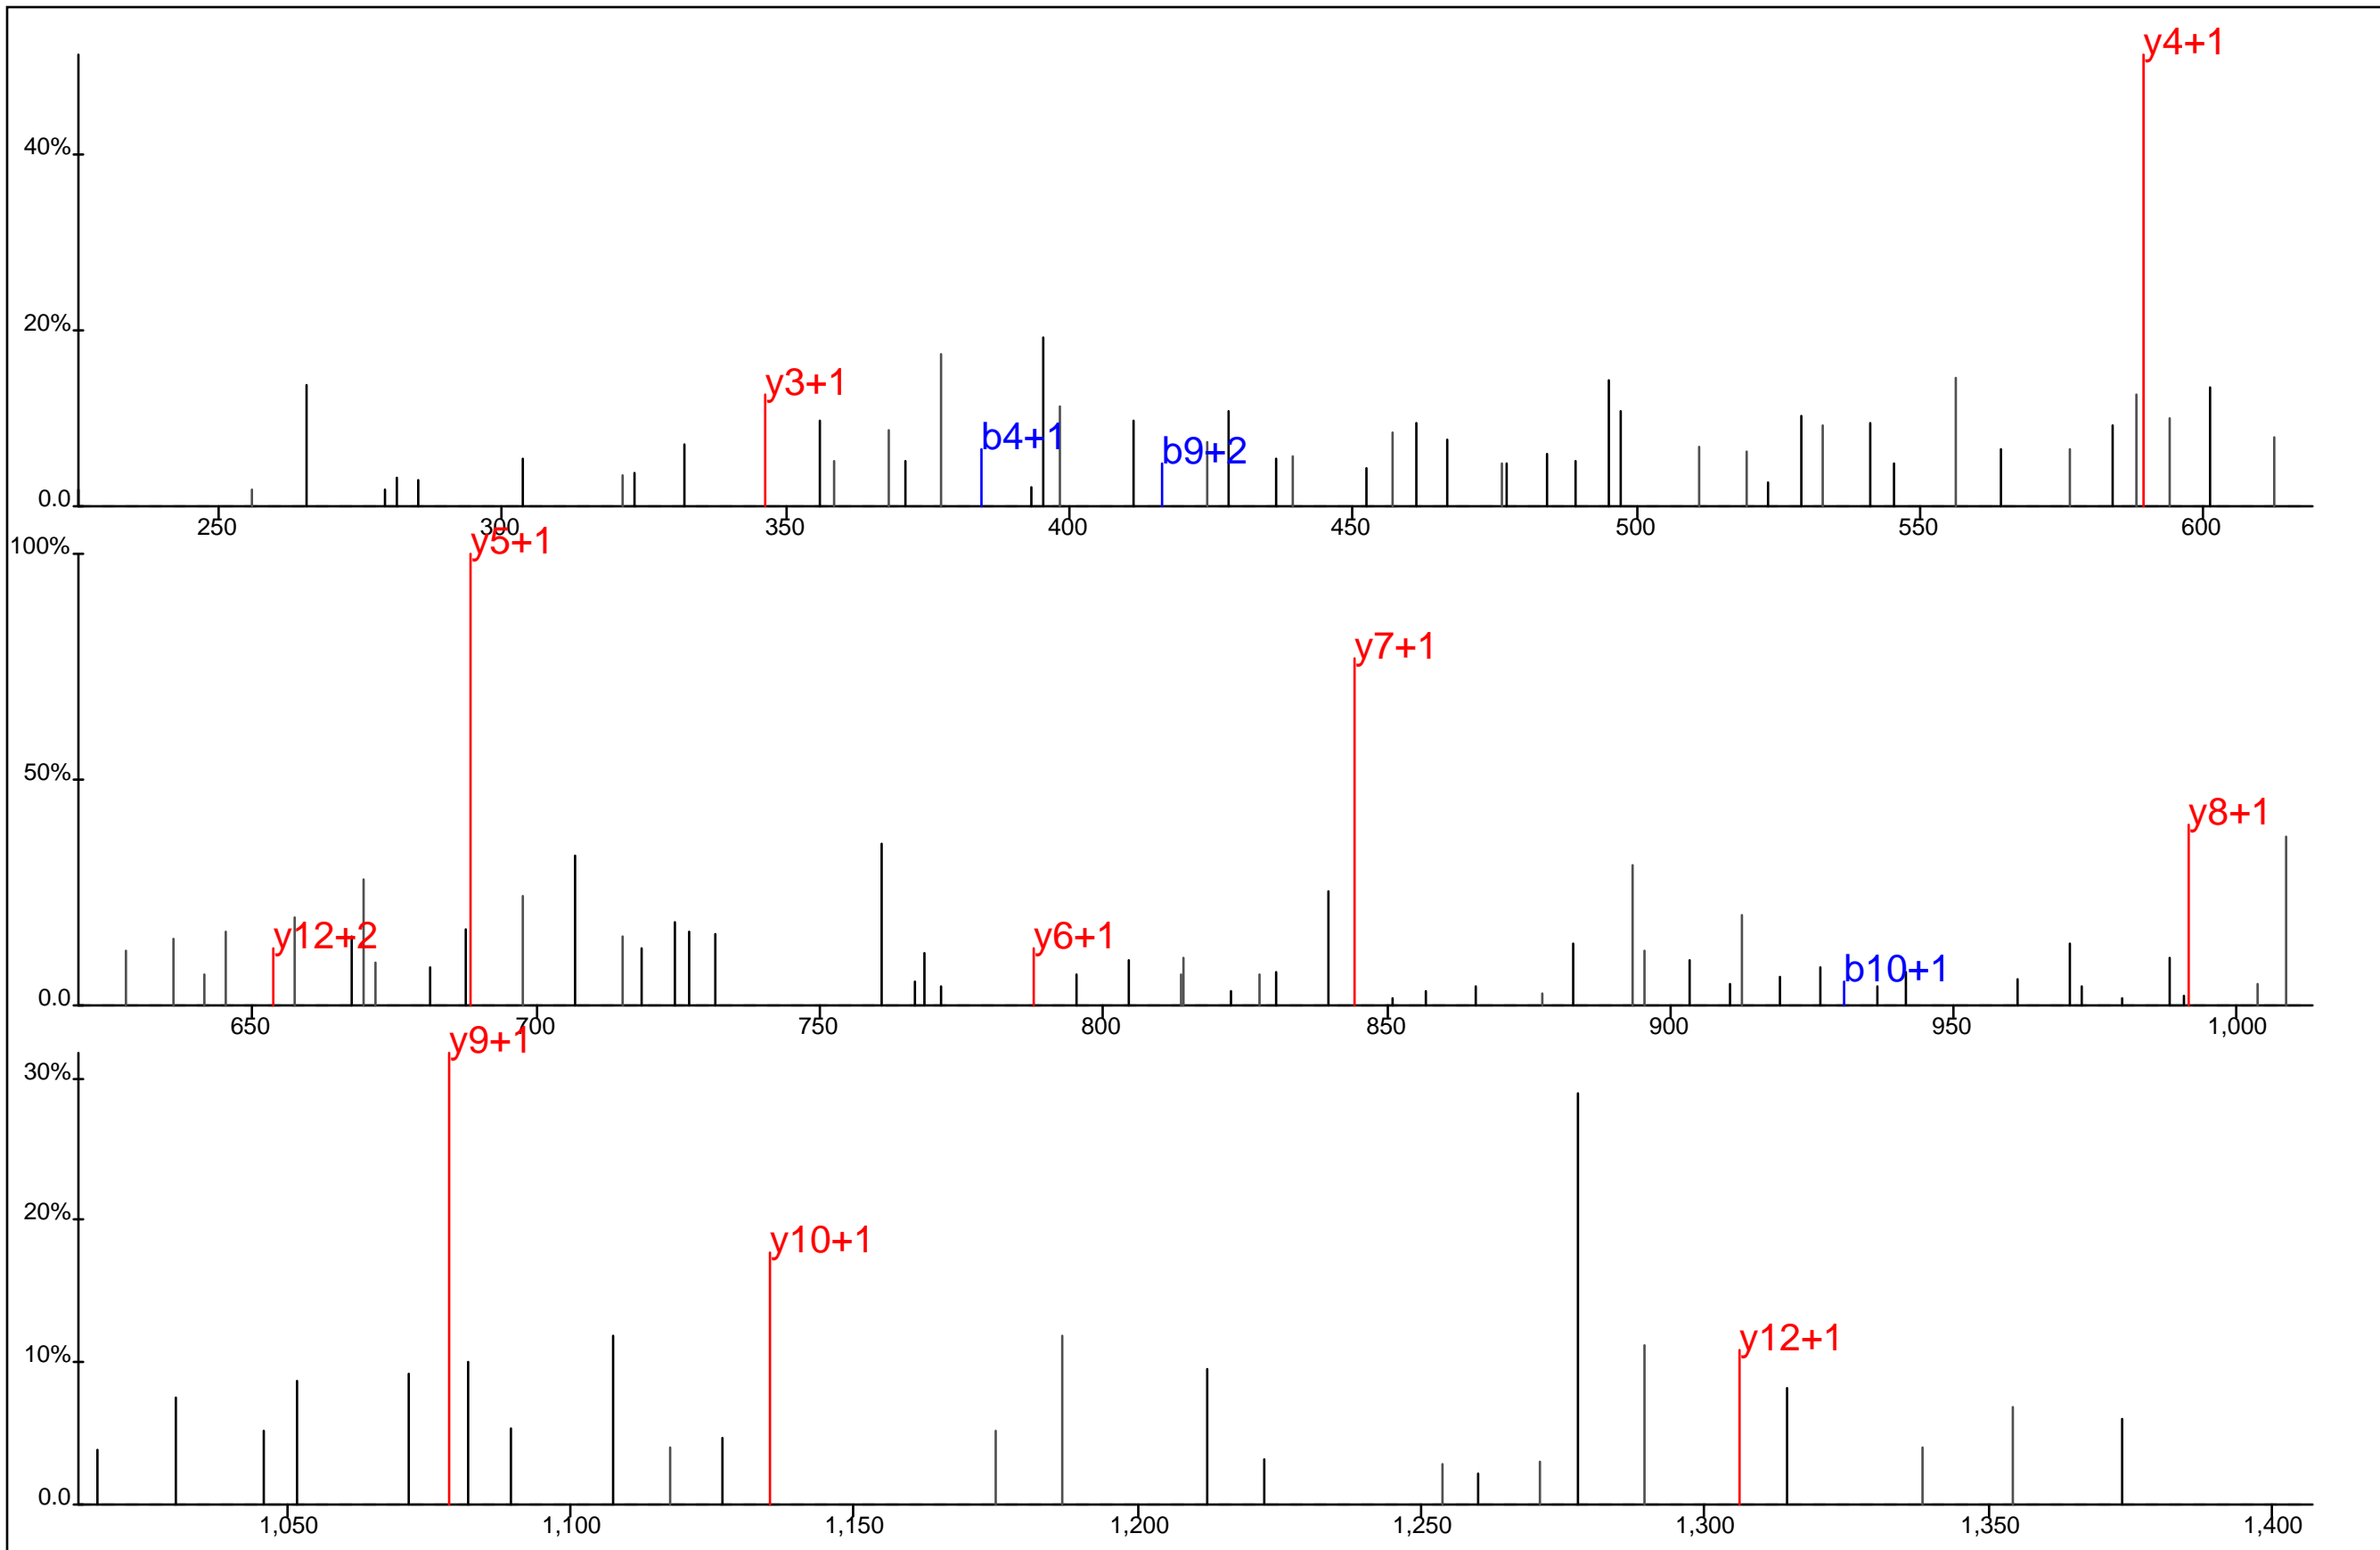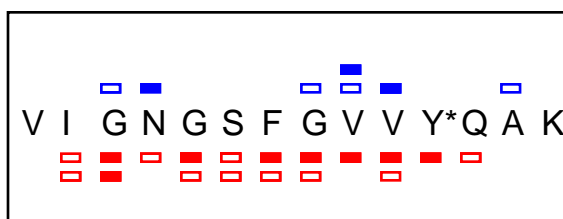

Protein Name: Glycogen synthase kinase 3 beta  
 gi Accession: 0  
 Precursor Mass: 759.8729+2  
 Delta Mass: 2.120 ppm  
 XCorr: 35.19

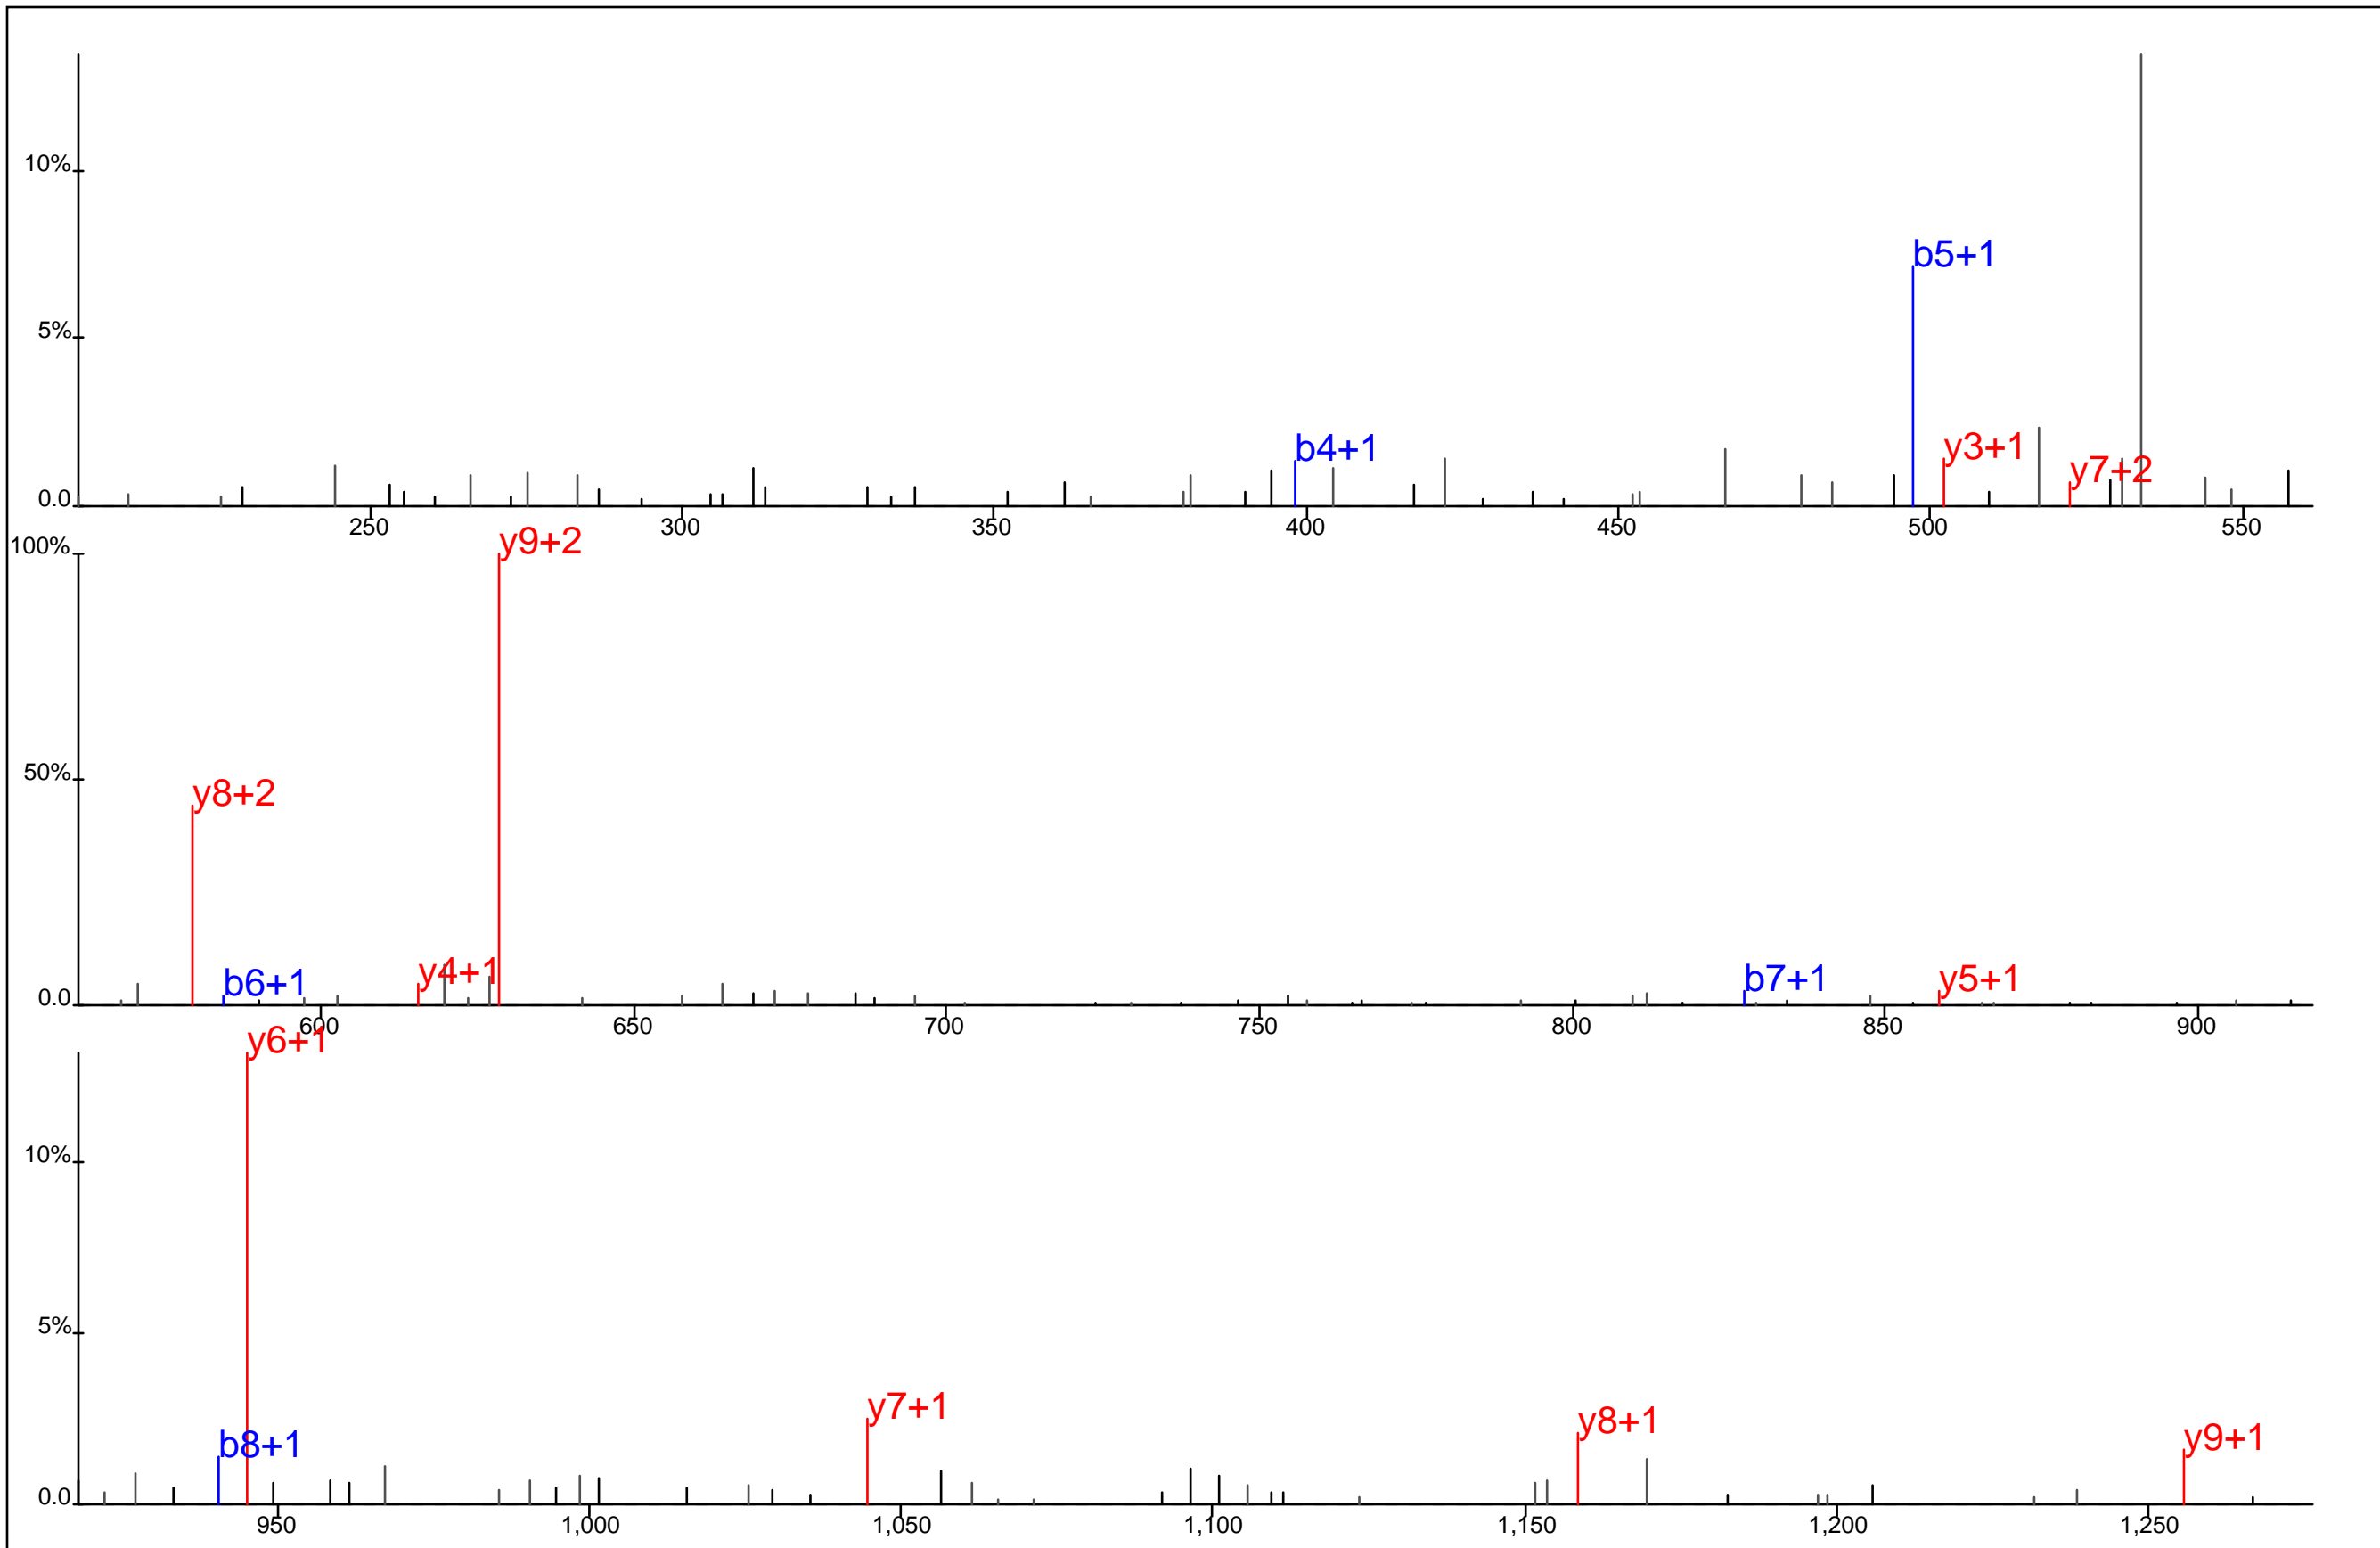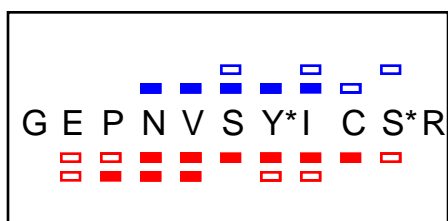

Protein Name: Glycogen synthase kinase 3 beta  
 gi Accession: 0  
 Precursor Mass: 721.2651+2  
 Delta Mass: 0.795 ppm  
 XCorr: 43.06

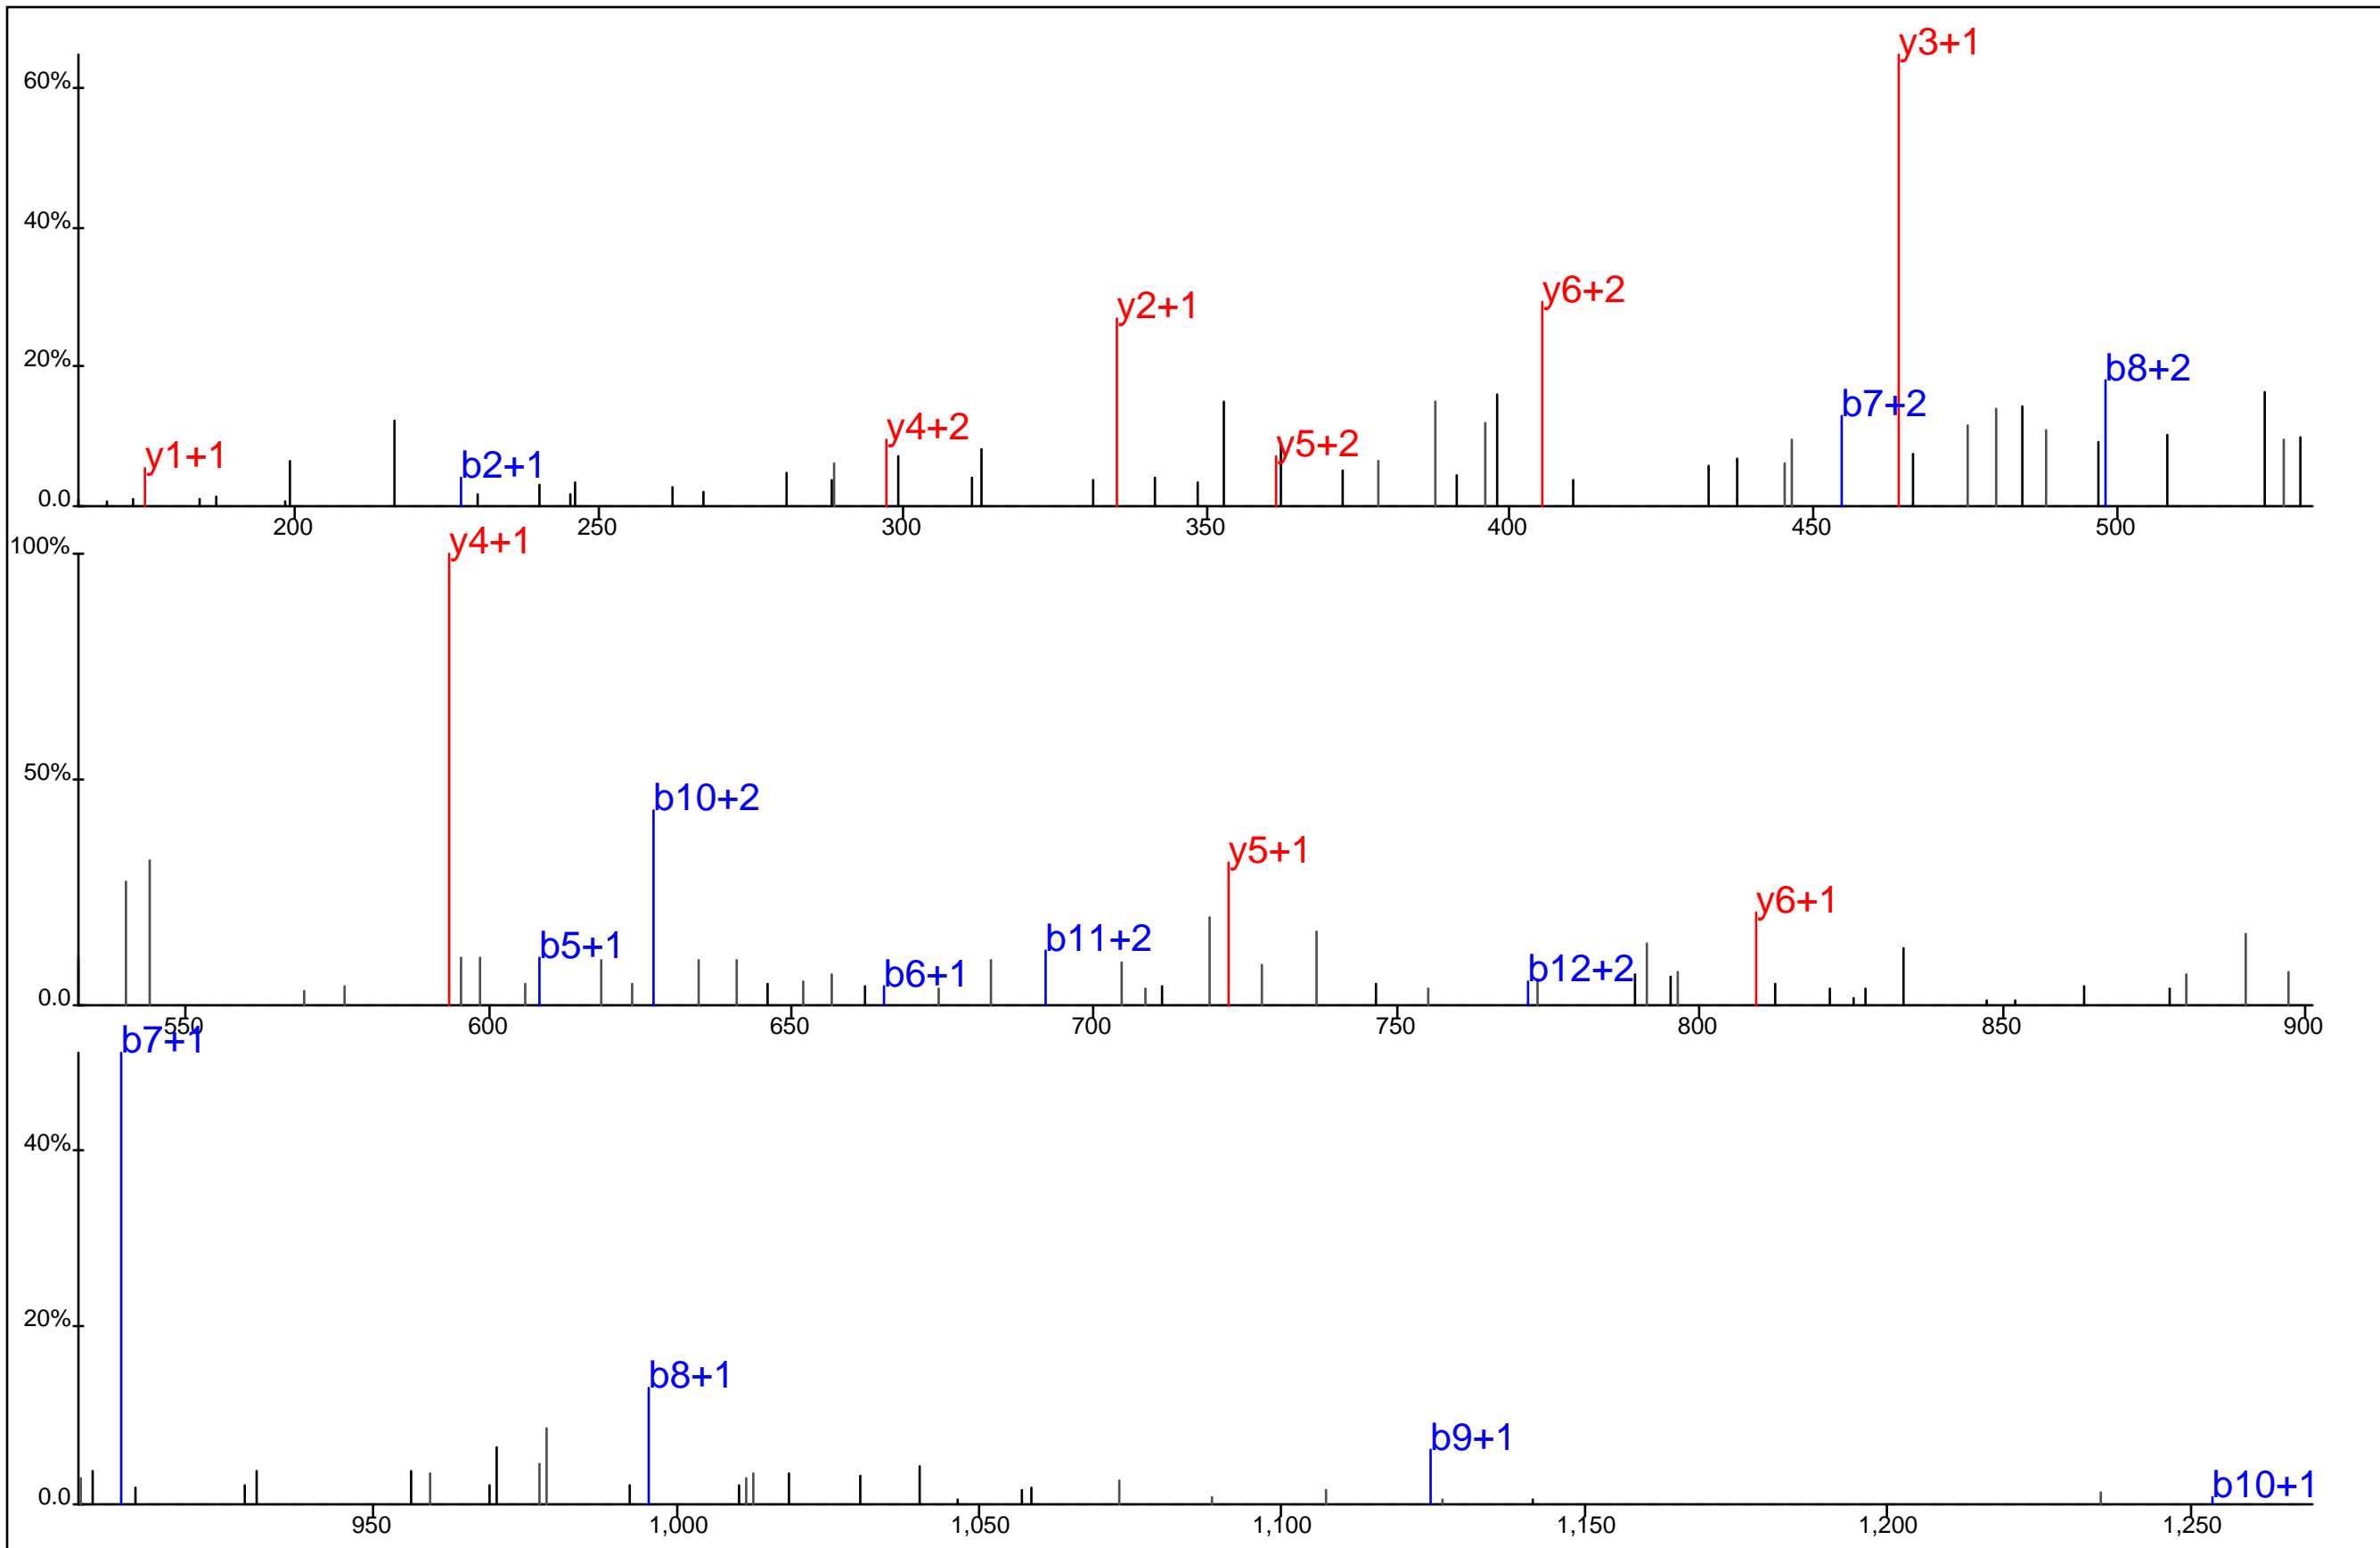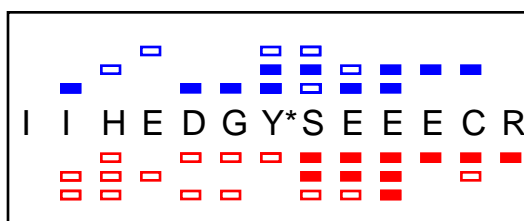

Protein Name: GNAI2  
 gi Accession: 0  
 Precursor Mass: 572.8918+3  
 Delta Mass: 2.173 ppm  
 XCorr: 31.77

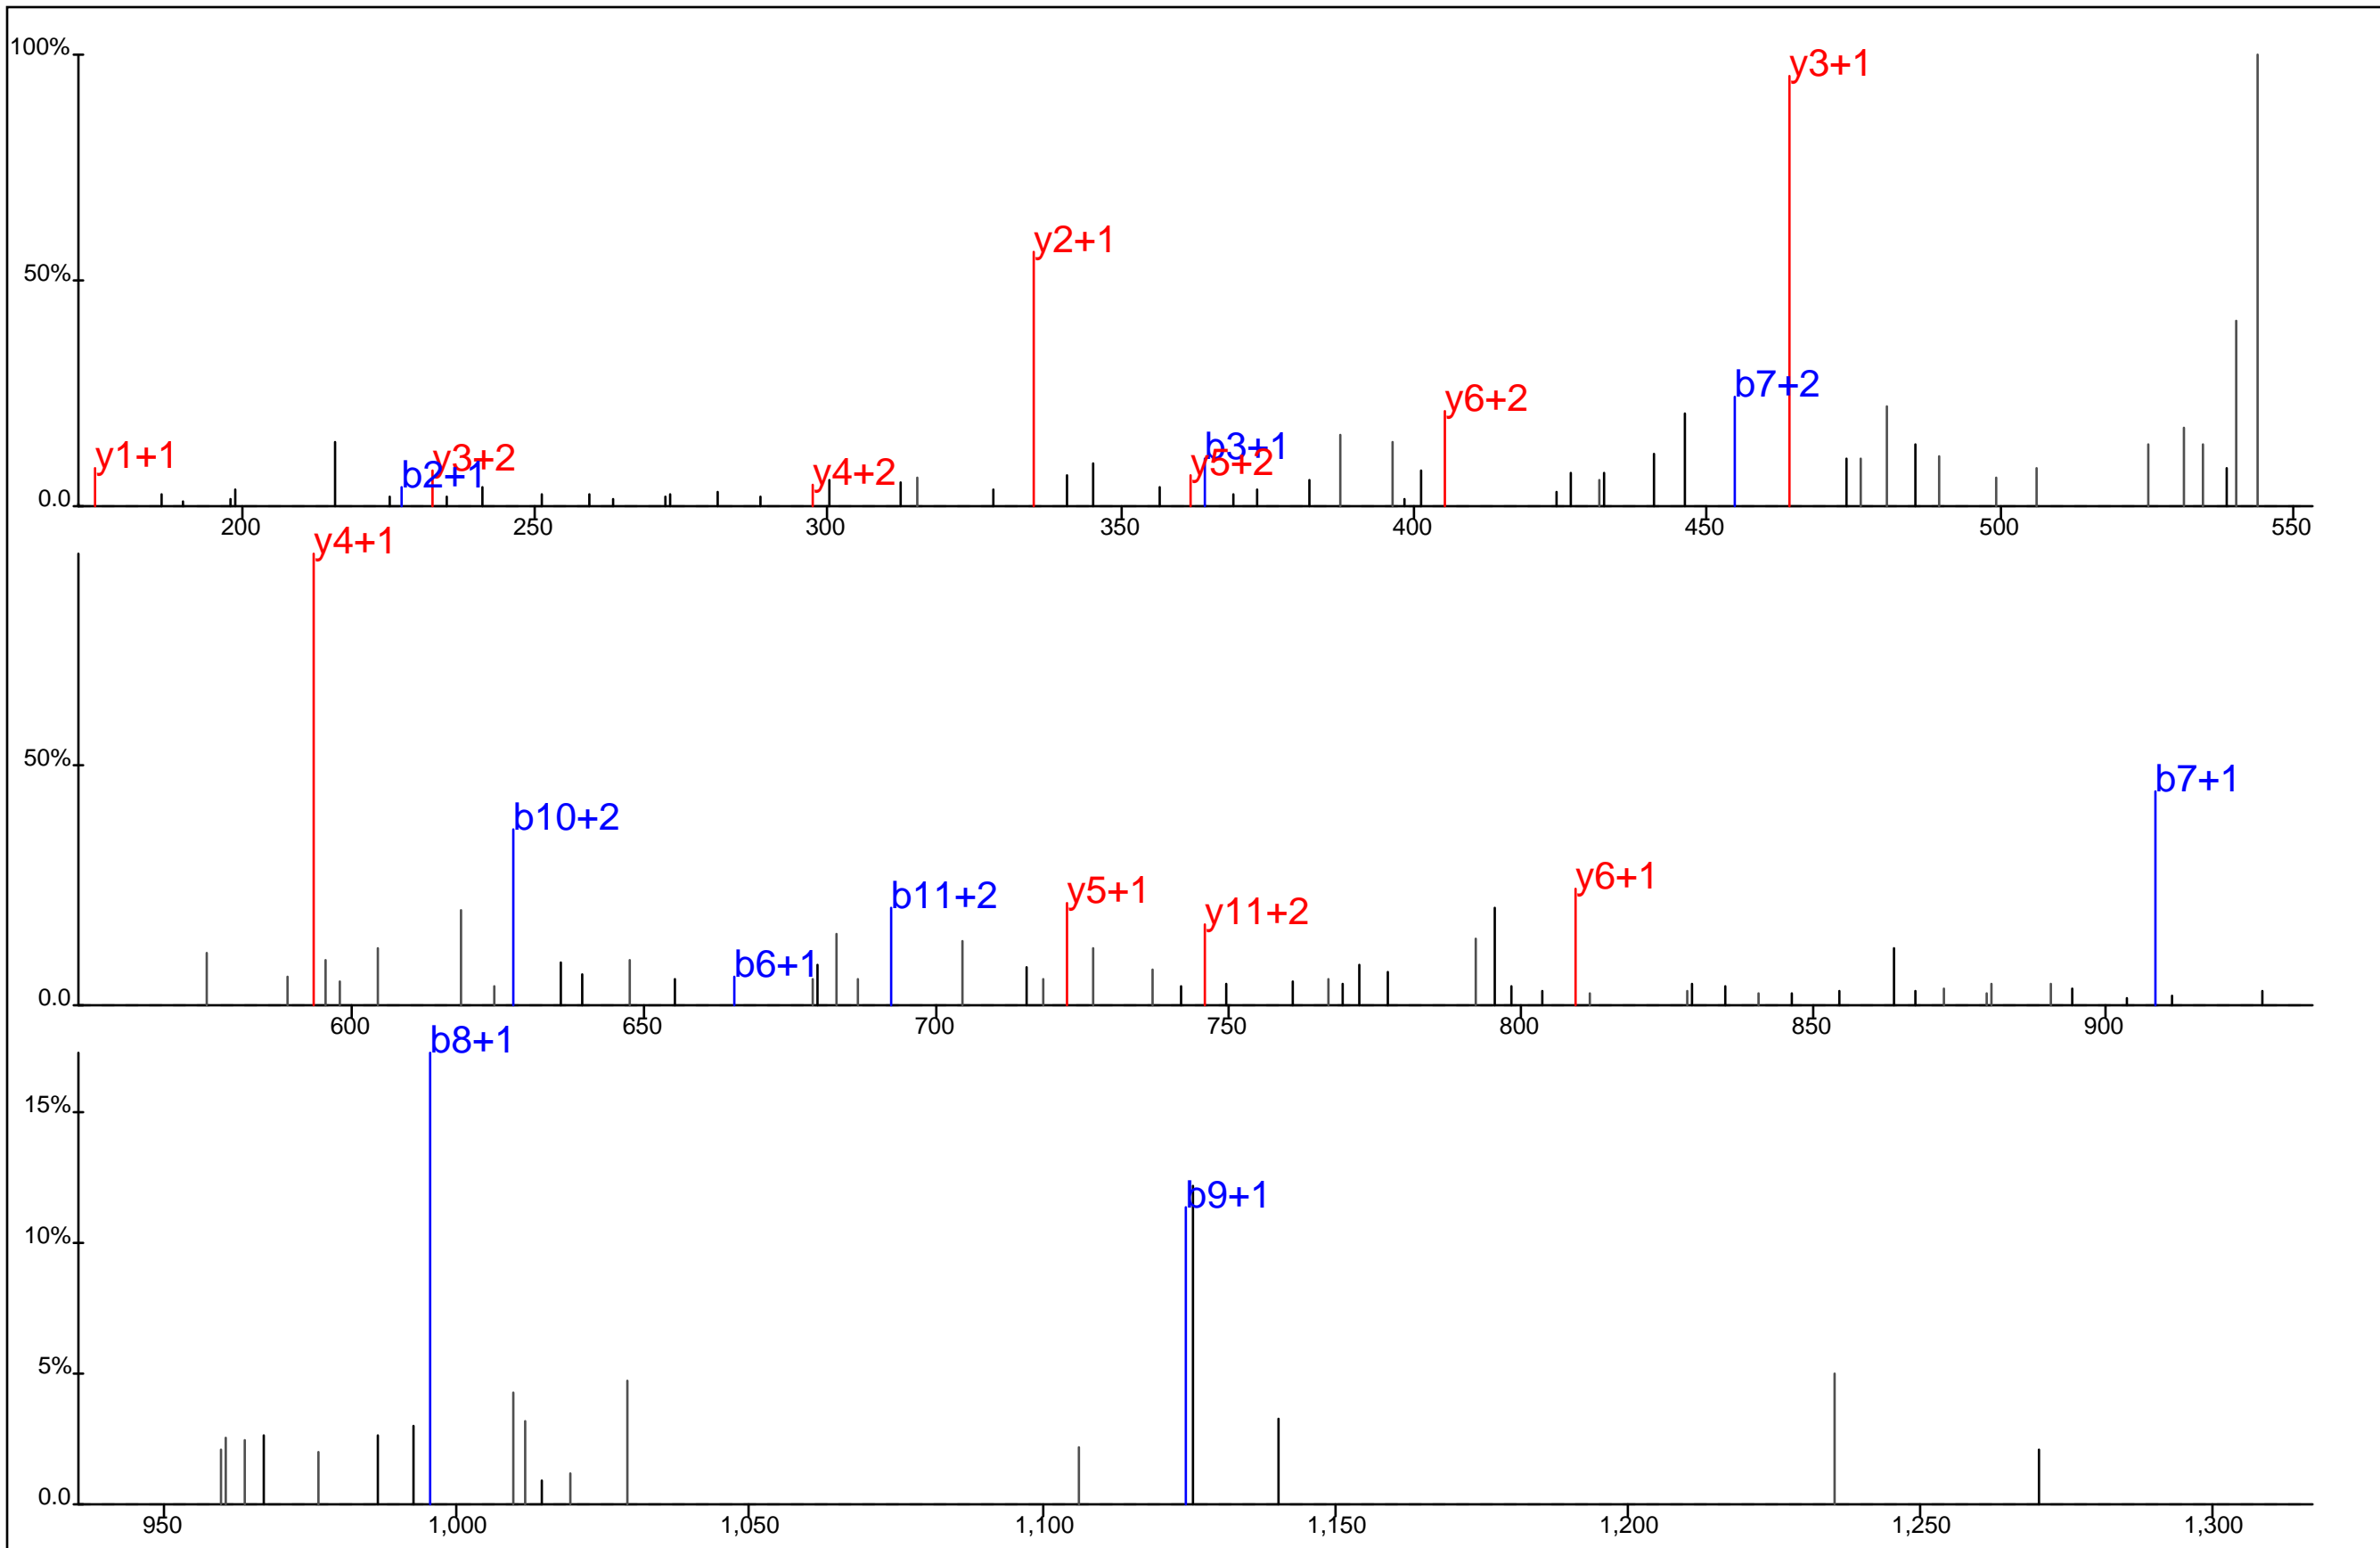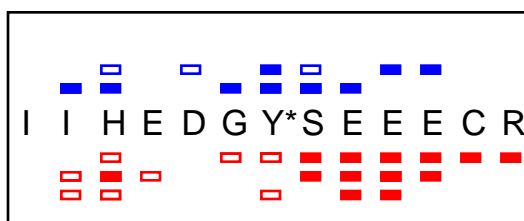

Protein Name: GNAI2  
 gi Accession: 0  
 Precursor Mass: 572.8906+3  
 Delta Mass: 0.040 ppm  
 XCorr: 33.7

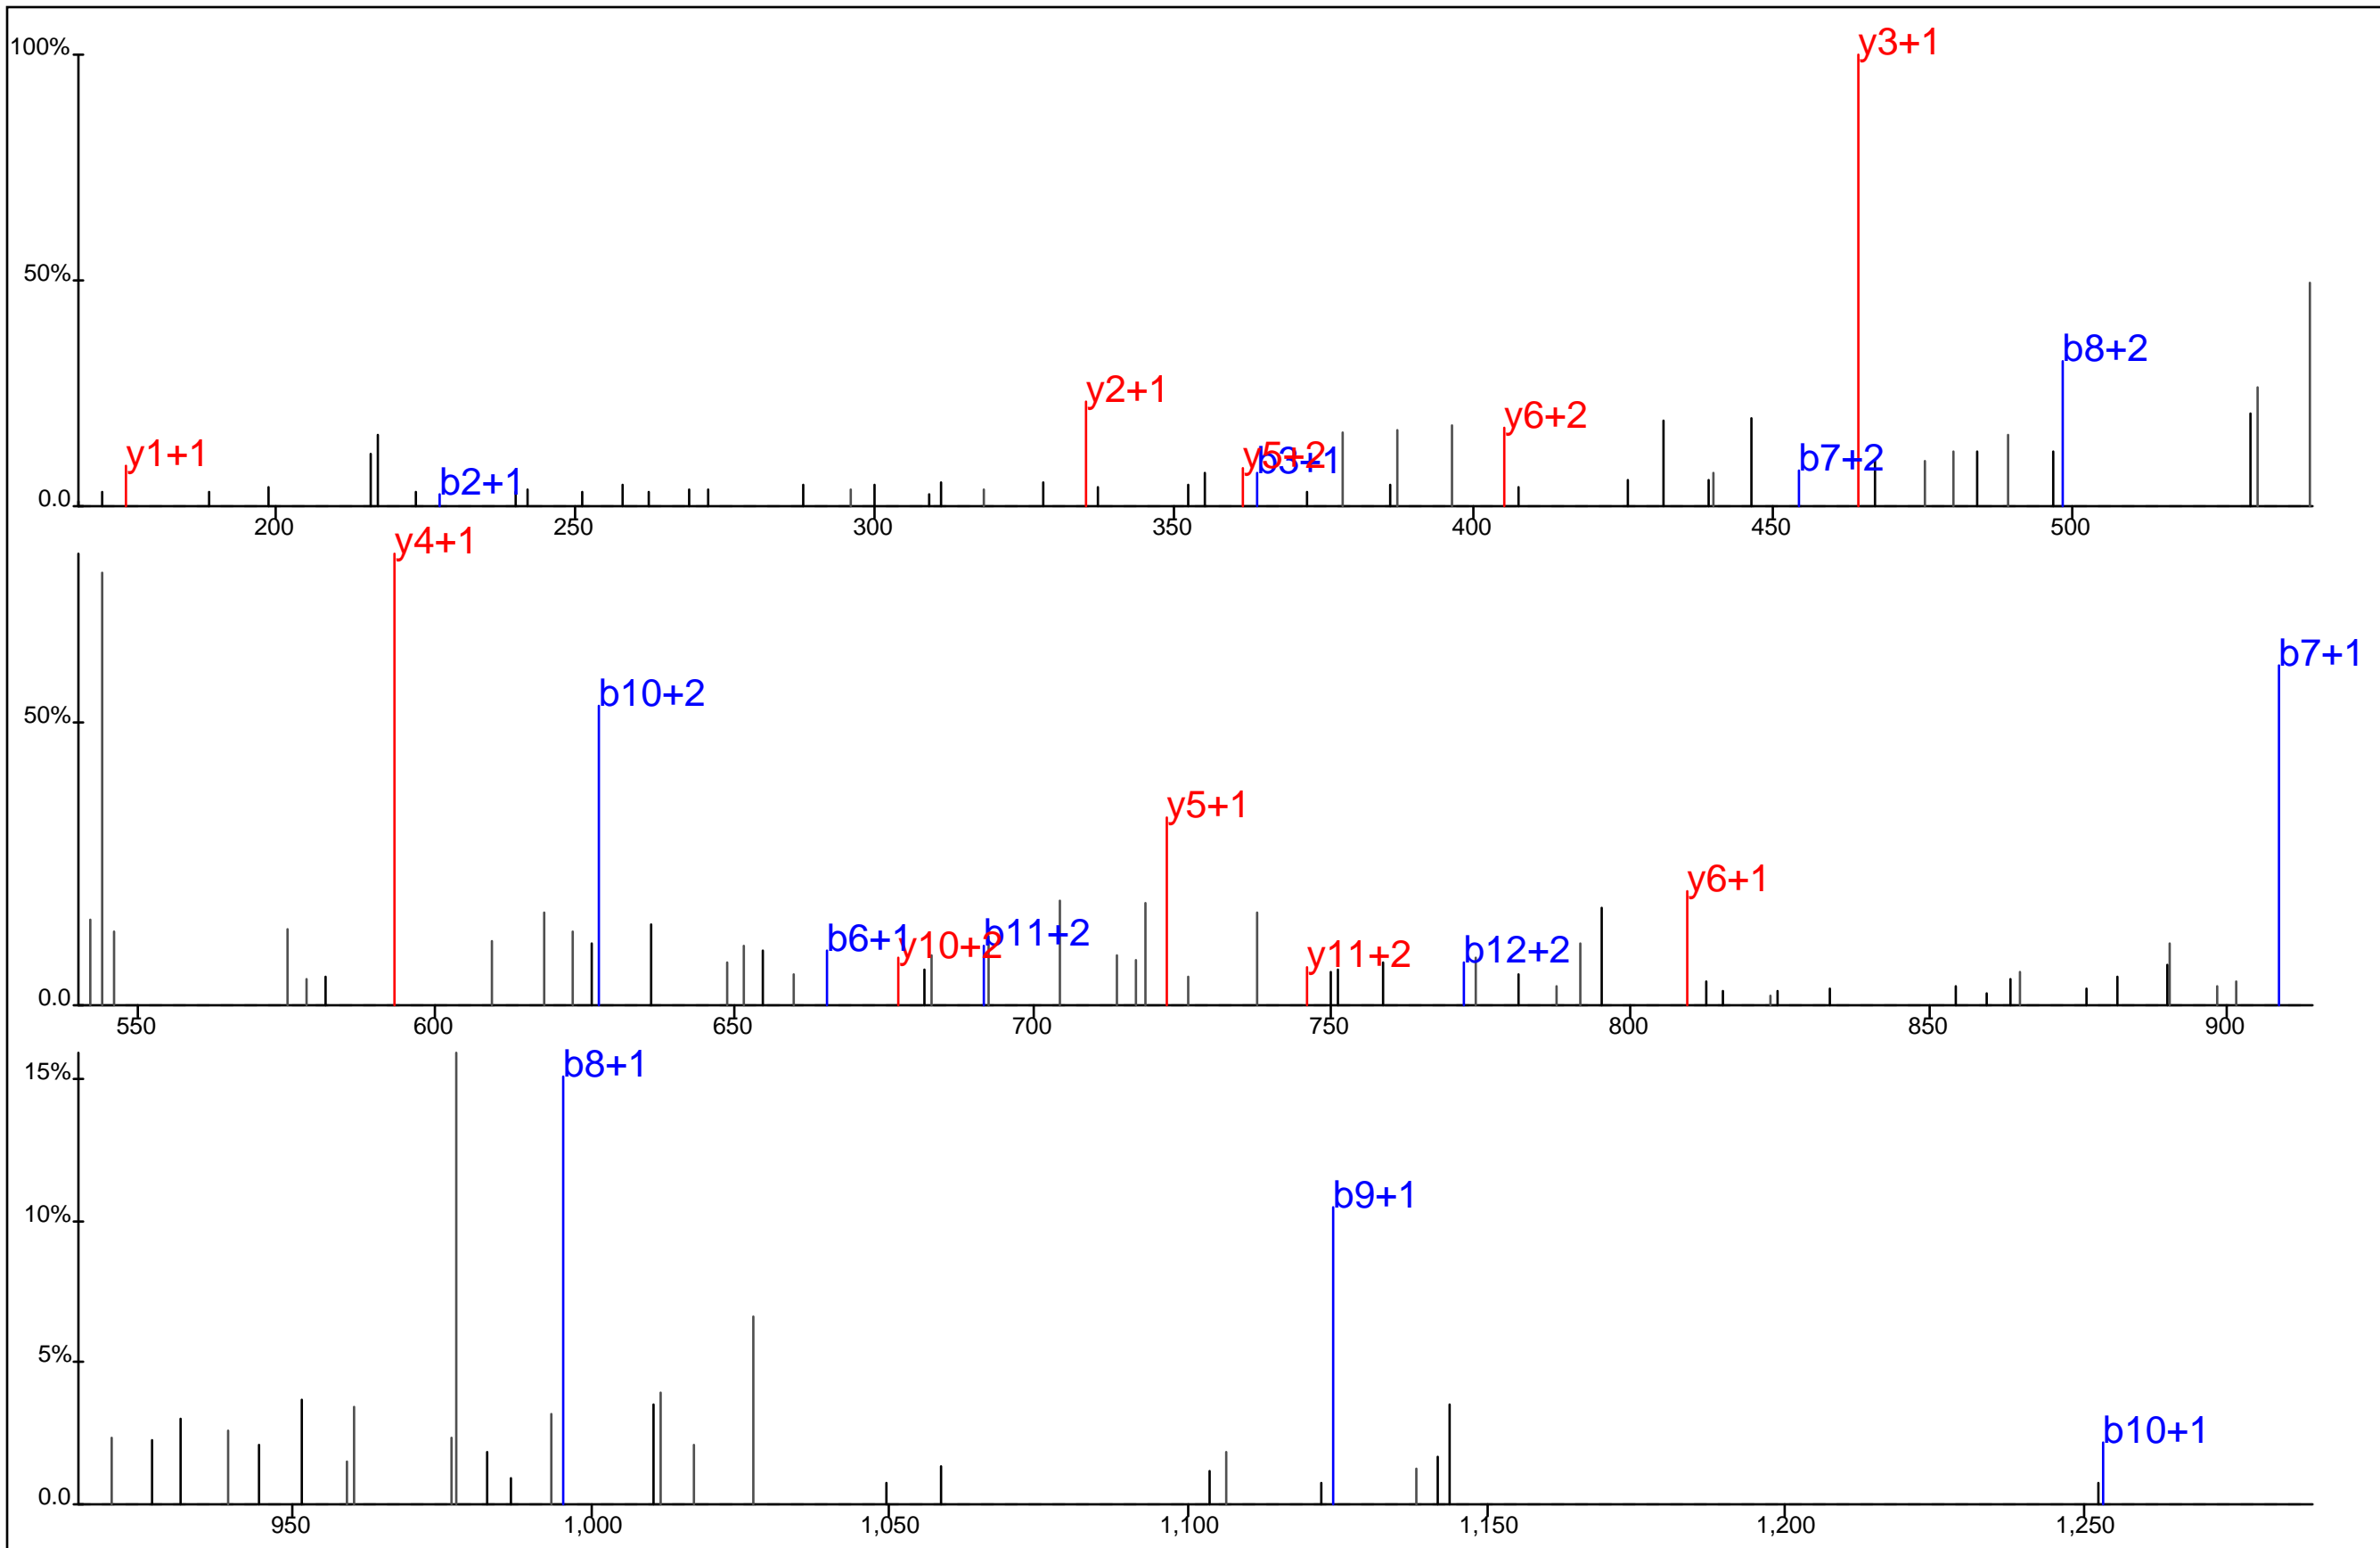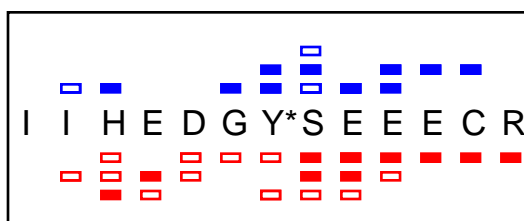

Protein Name: GNAI2  
 gi Accession: 0  
 Precursor Mass: 572.8926+3  
 Delta Mass: 3.559 ppm  
 XCorr: 30.99

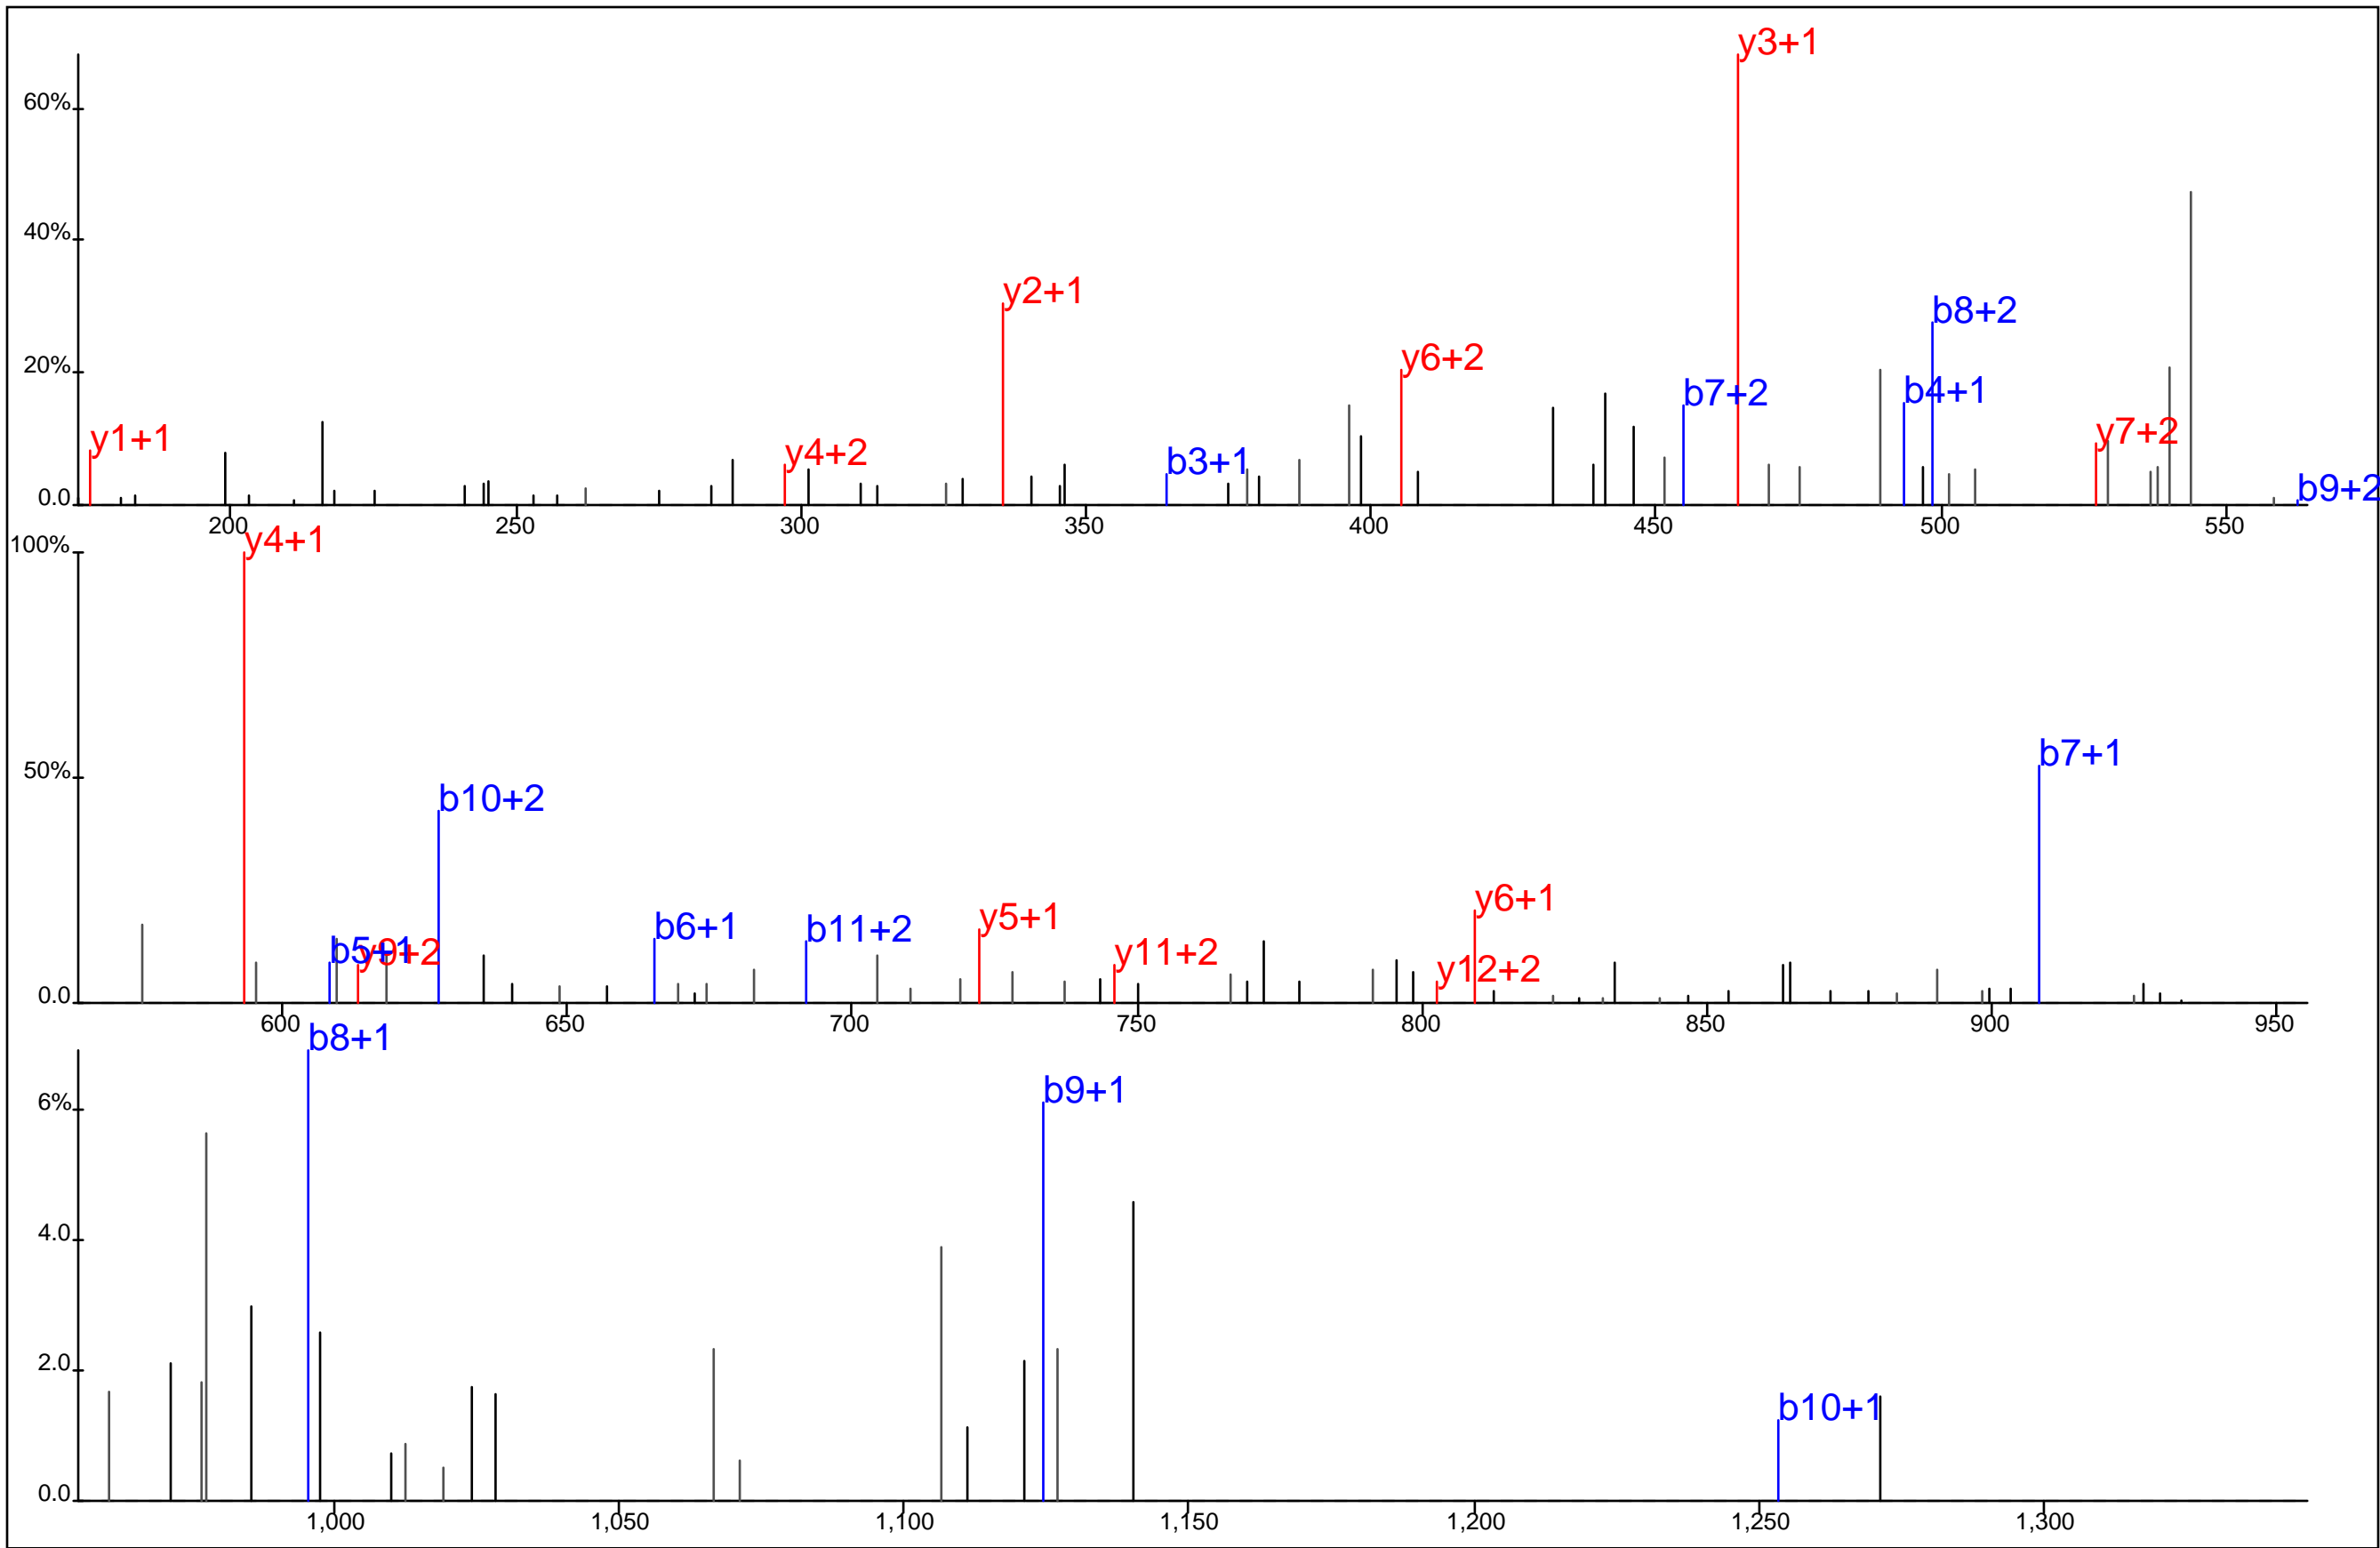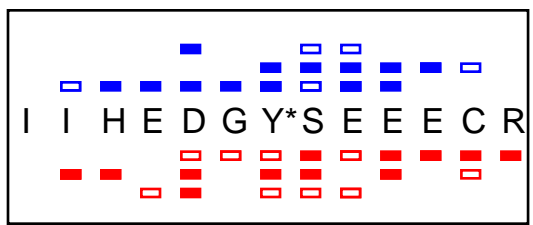

Protein Name: GNAI2  
 gi Accession: 0  
 Precursor Mass: 572.8899+3  
 Delta Mass: 1.133 ppm  
 XCorr: 34.03

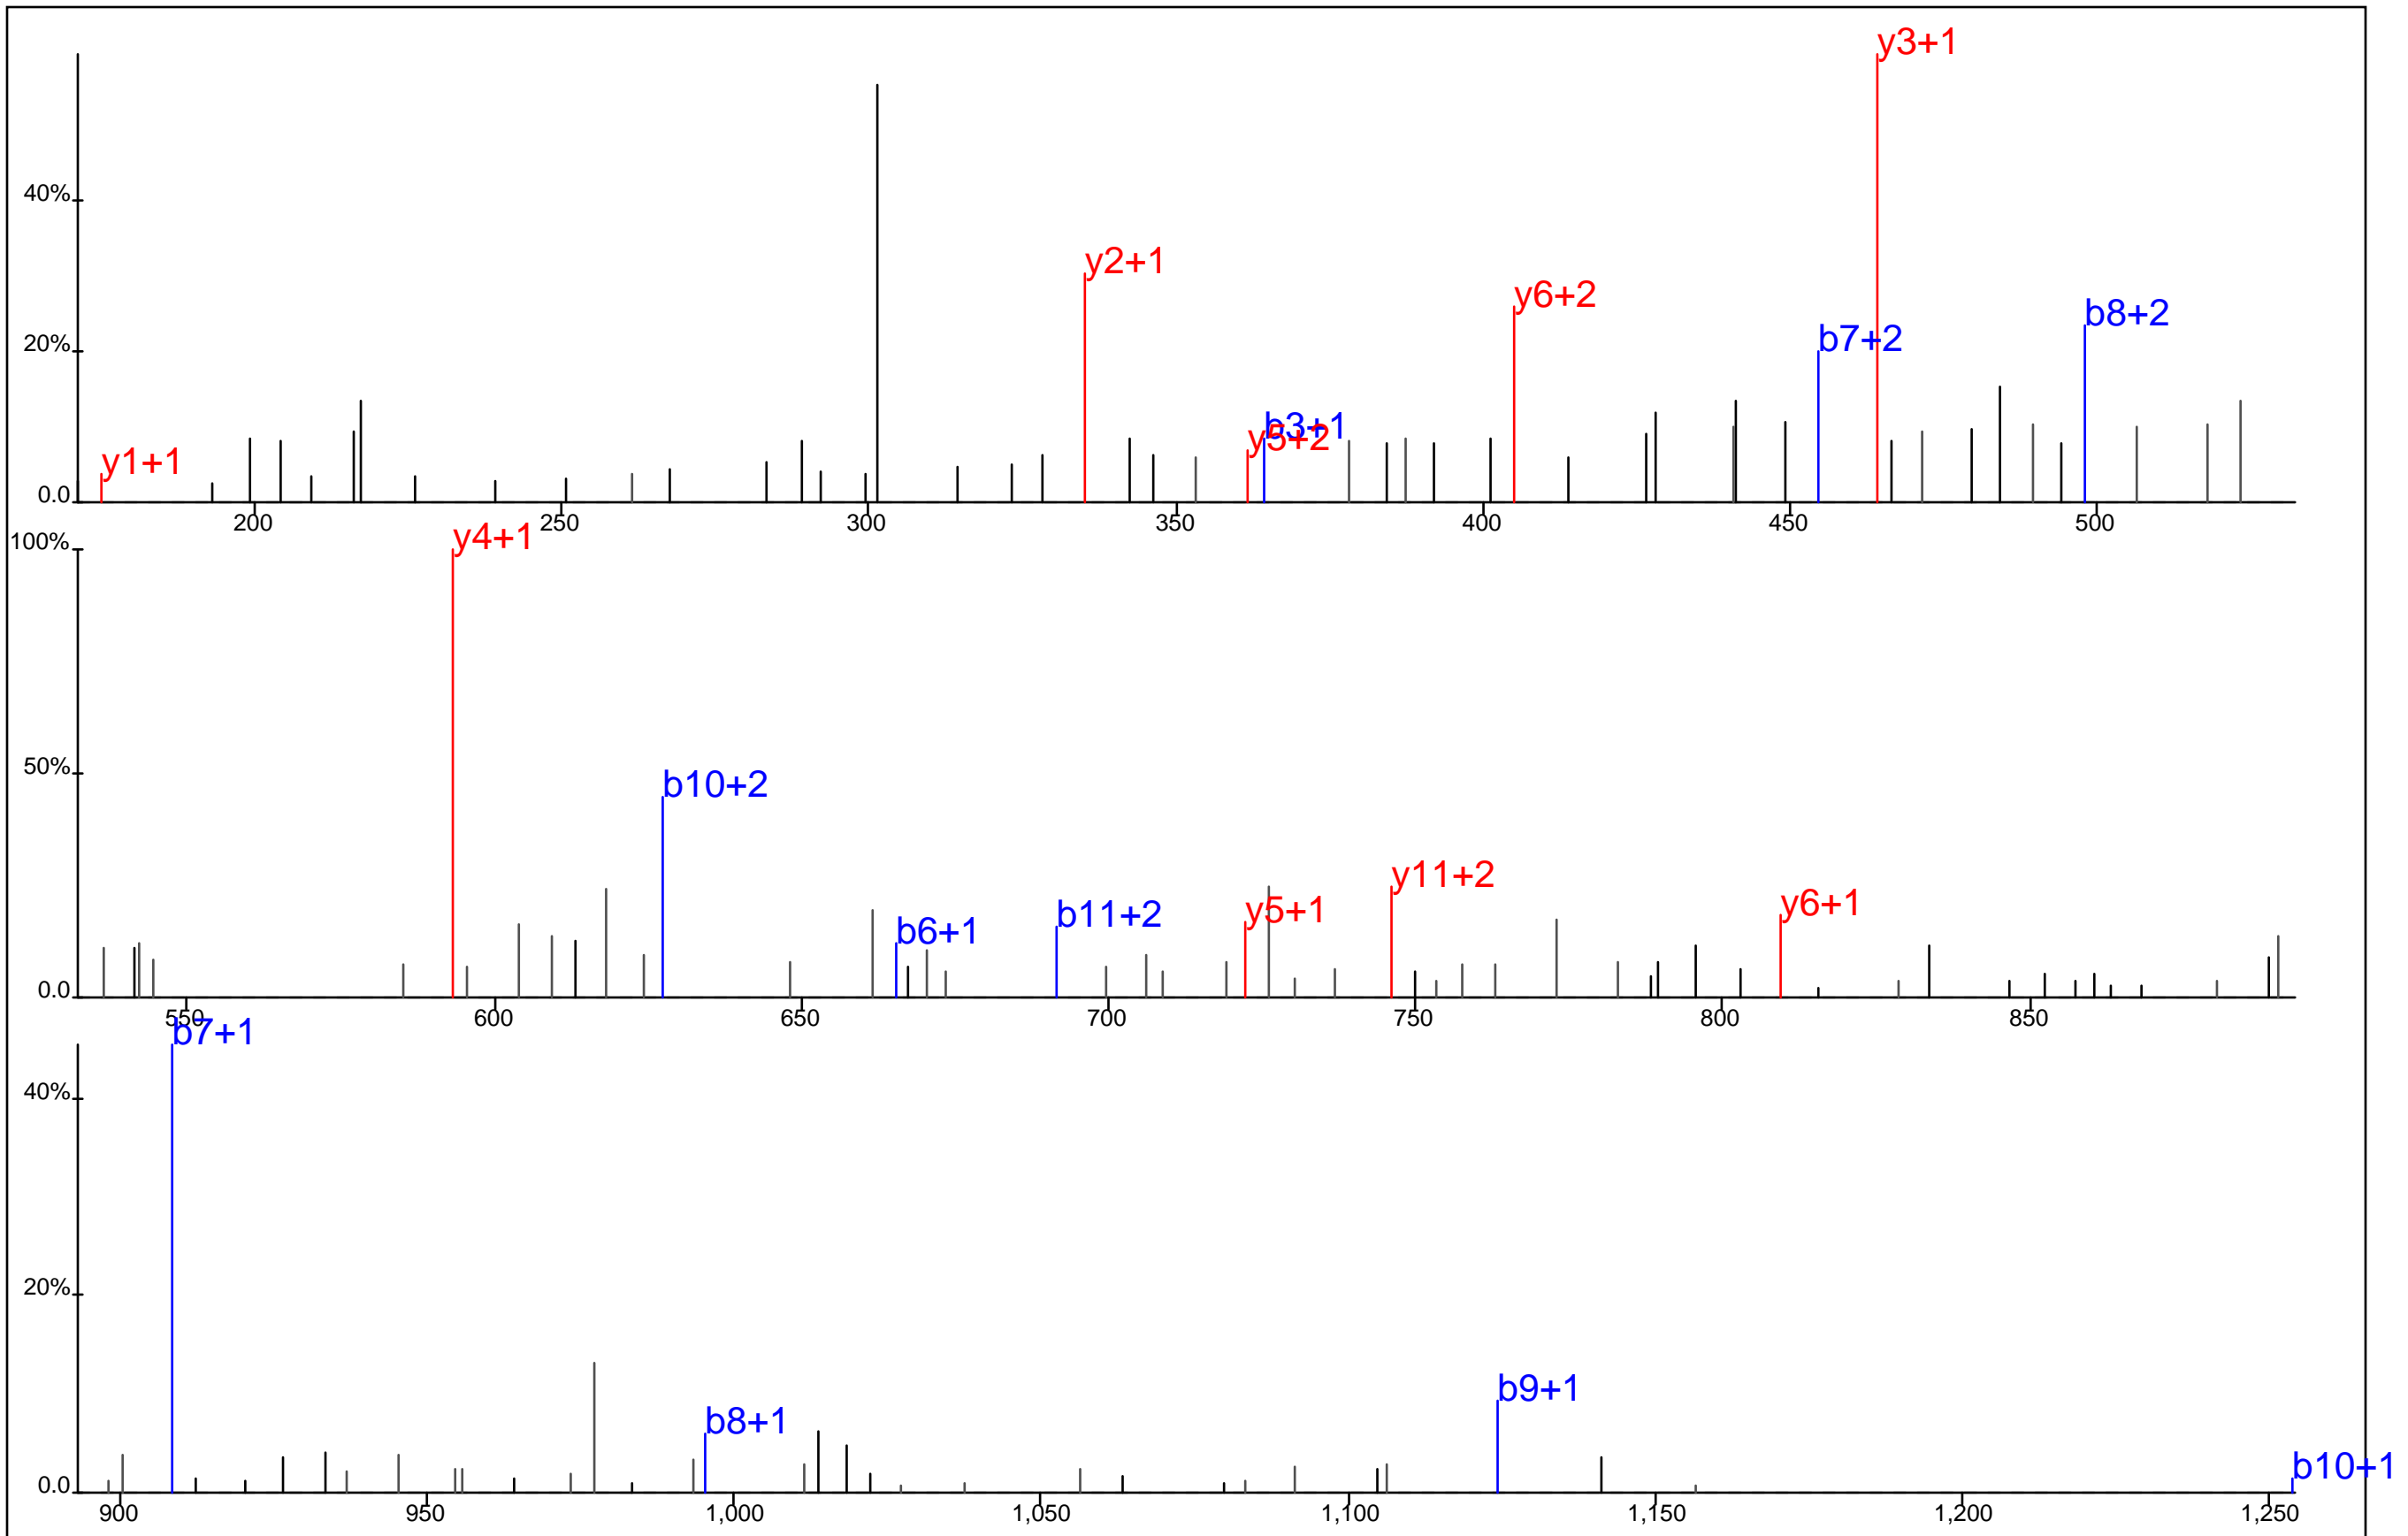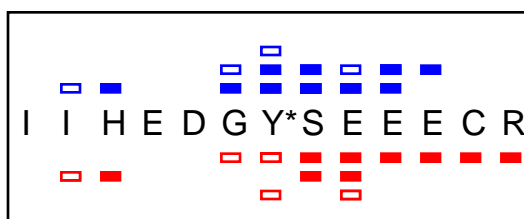

Protein Name: GNAI2  
 gi Accession: 0  
 Precursor Mass: 572.8929+3  
 Delta Mass: 4.199 ppm  
 XCorr: 24.81

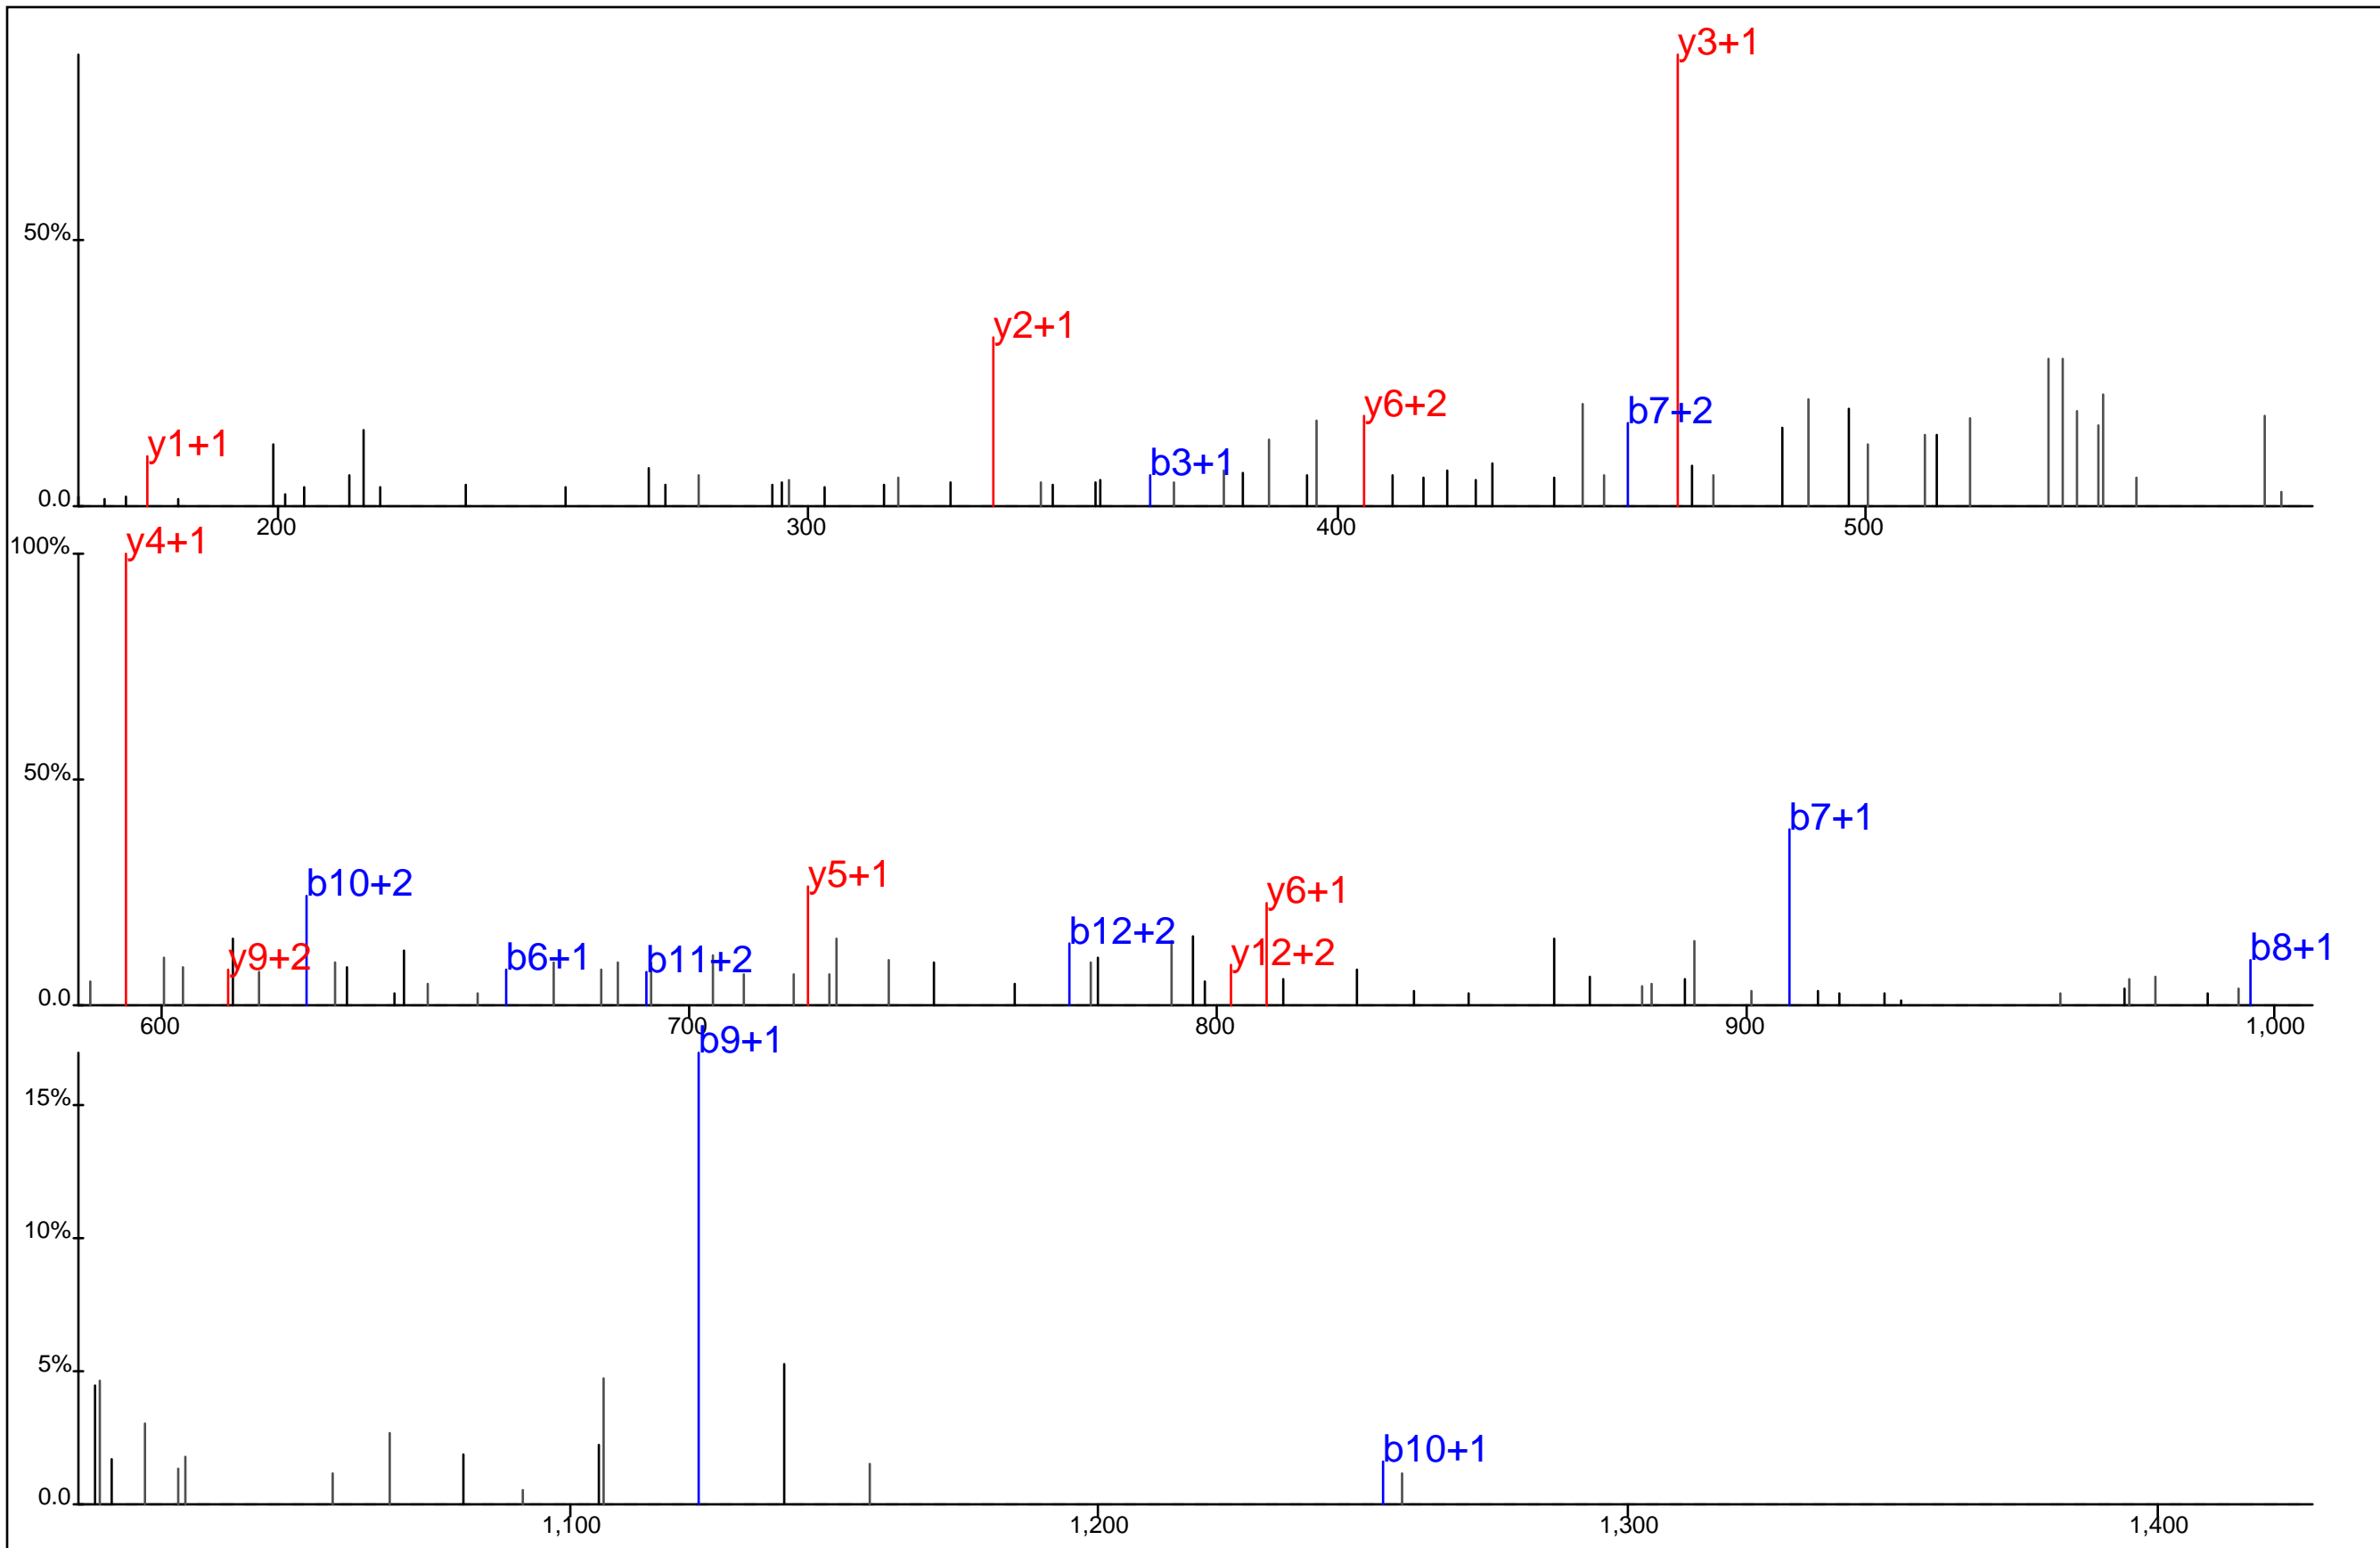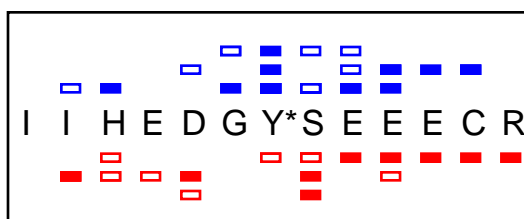

Protein Name: GNAI2  
 gi Accession: 0  
 Precursor Mass: 572.8921+3  
 Delta Mass: 2.706 ppm  
 XCorr: 34.87



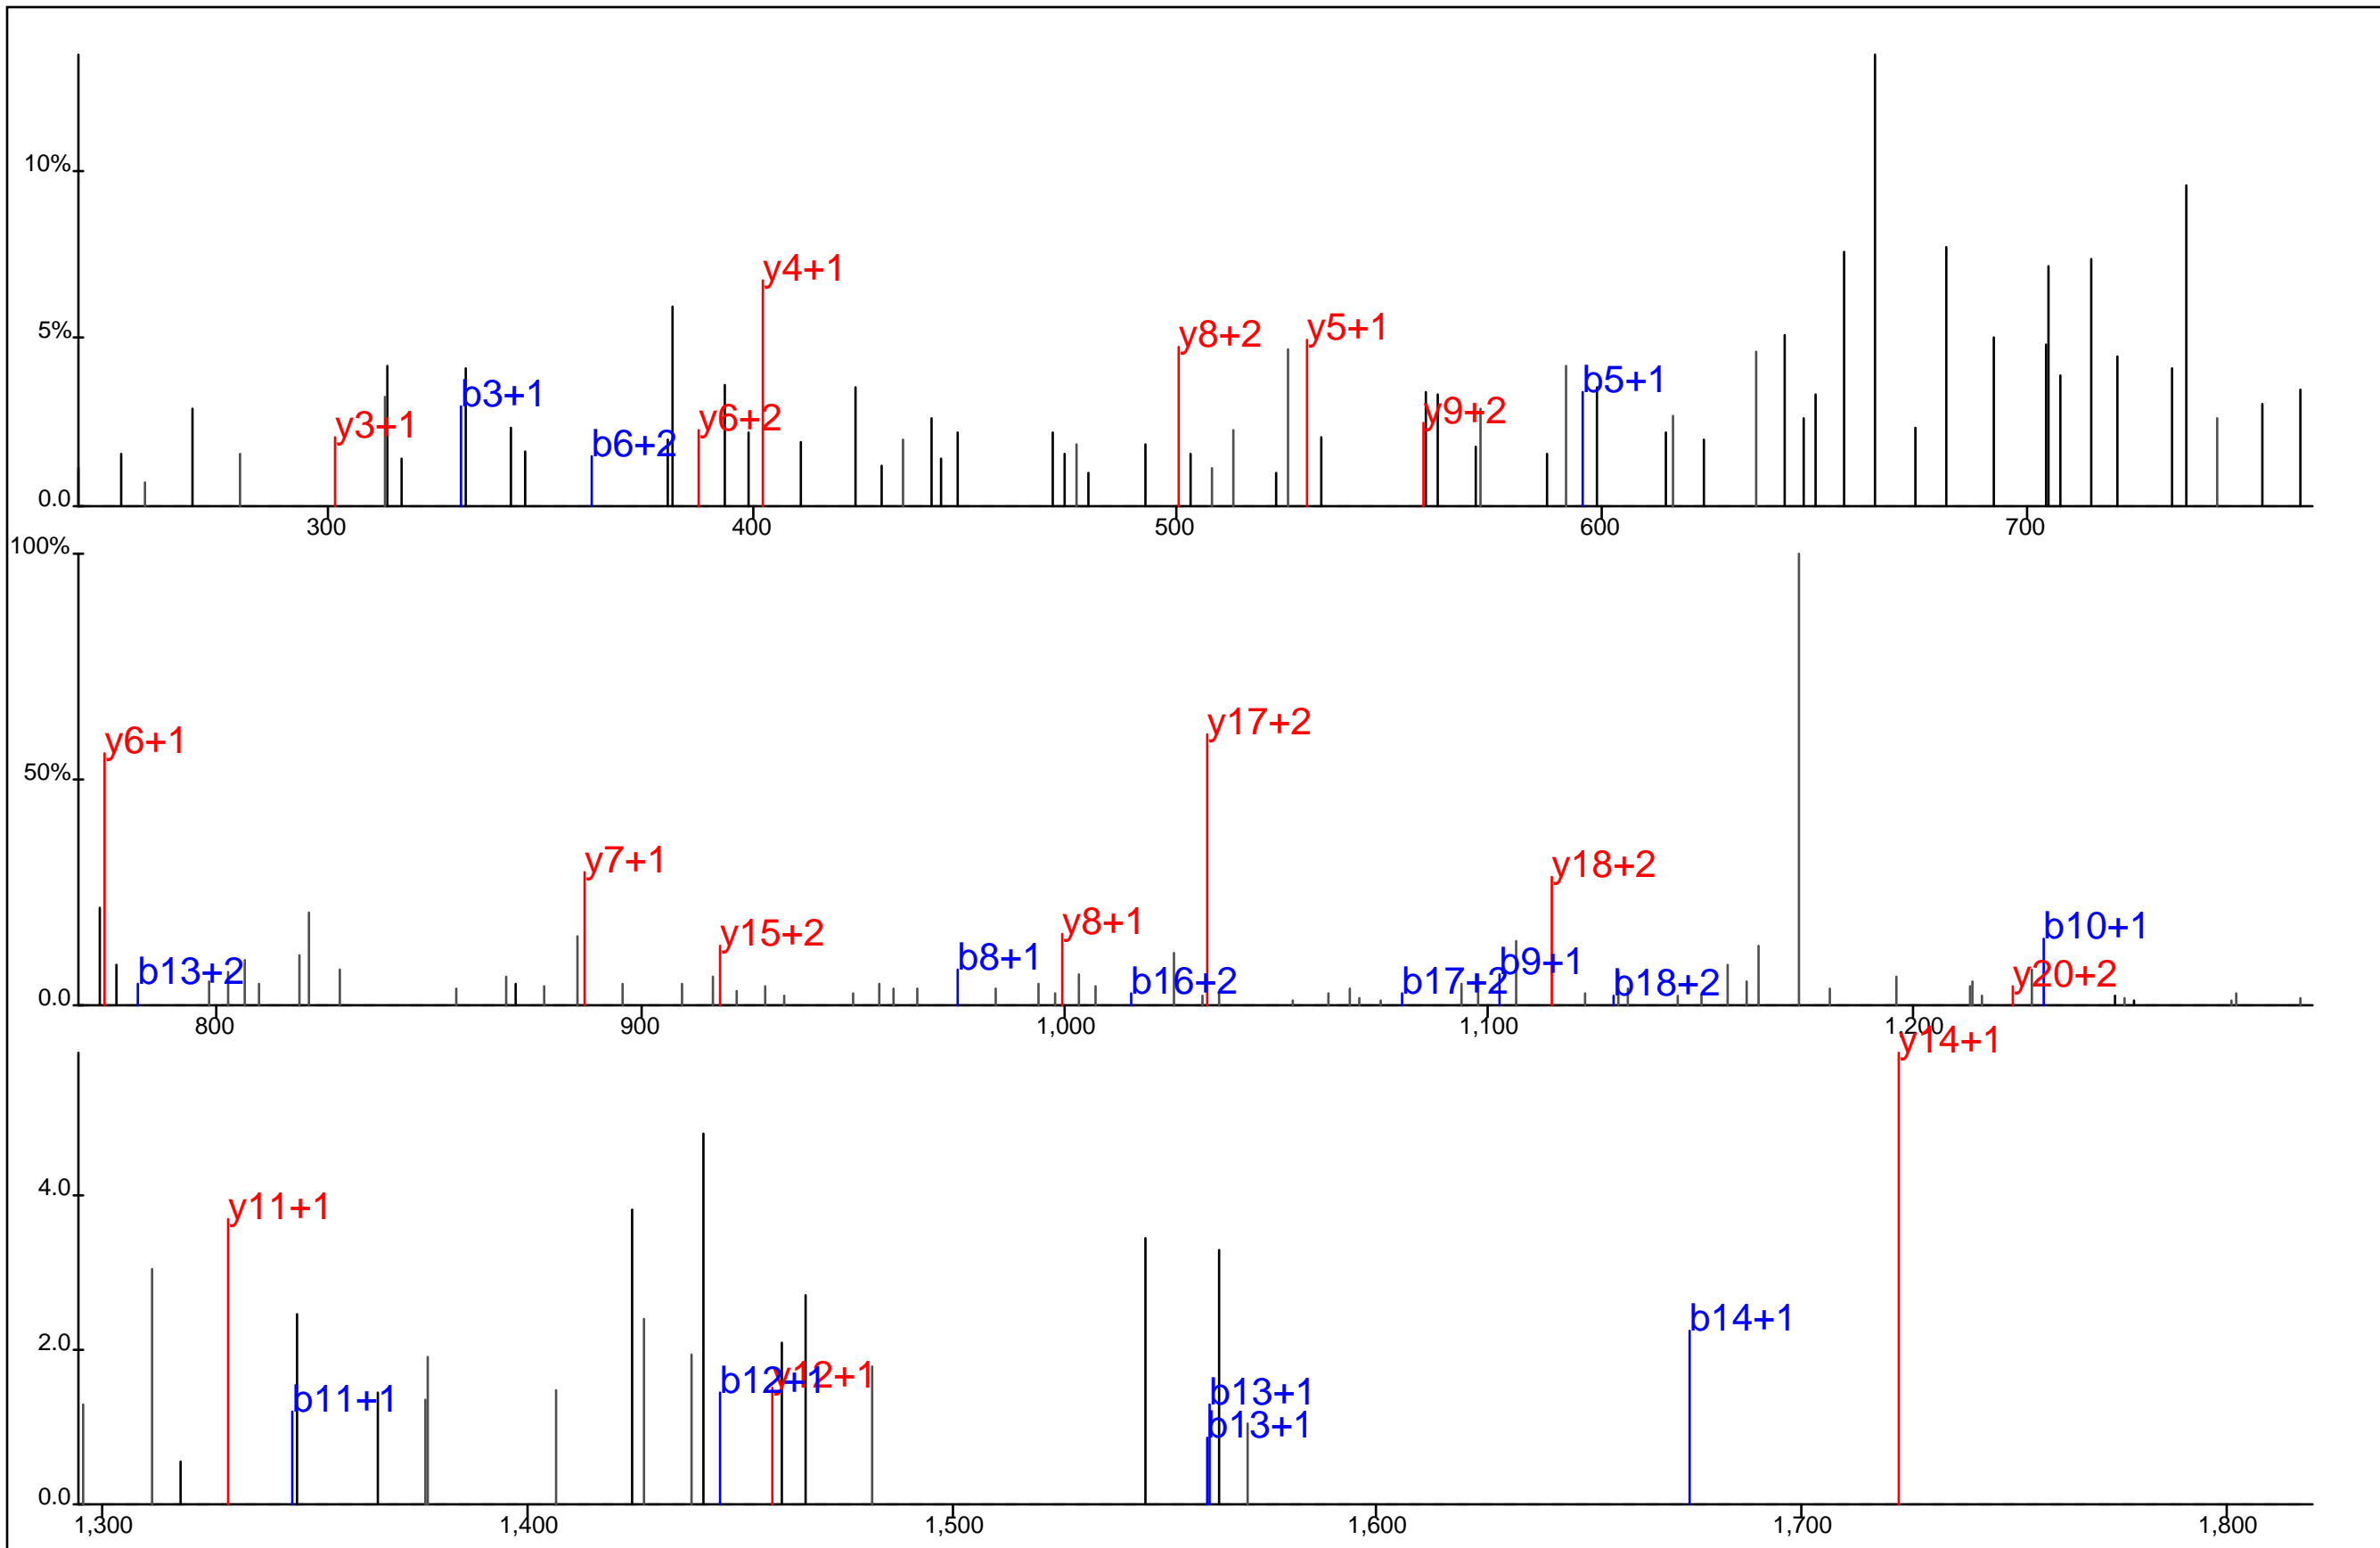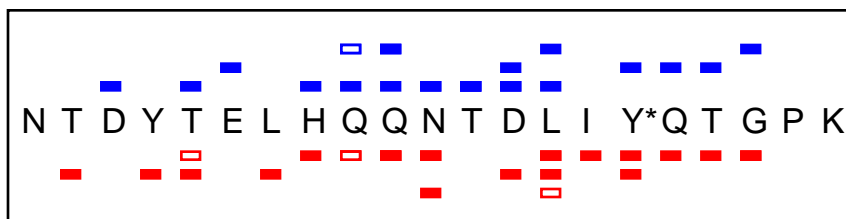

Protein Name: Golgin 84  
 gi Accession: 0  
 Precursor Mass: 853.7183+3  
 Delta Mass: 0.134 ppm  
 XCorr: 39.2

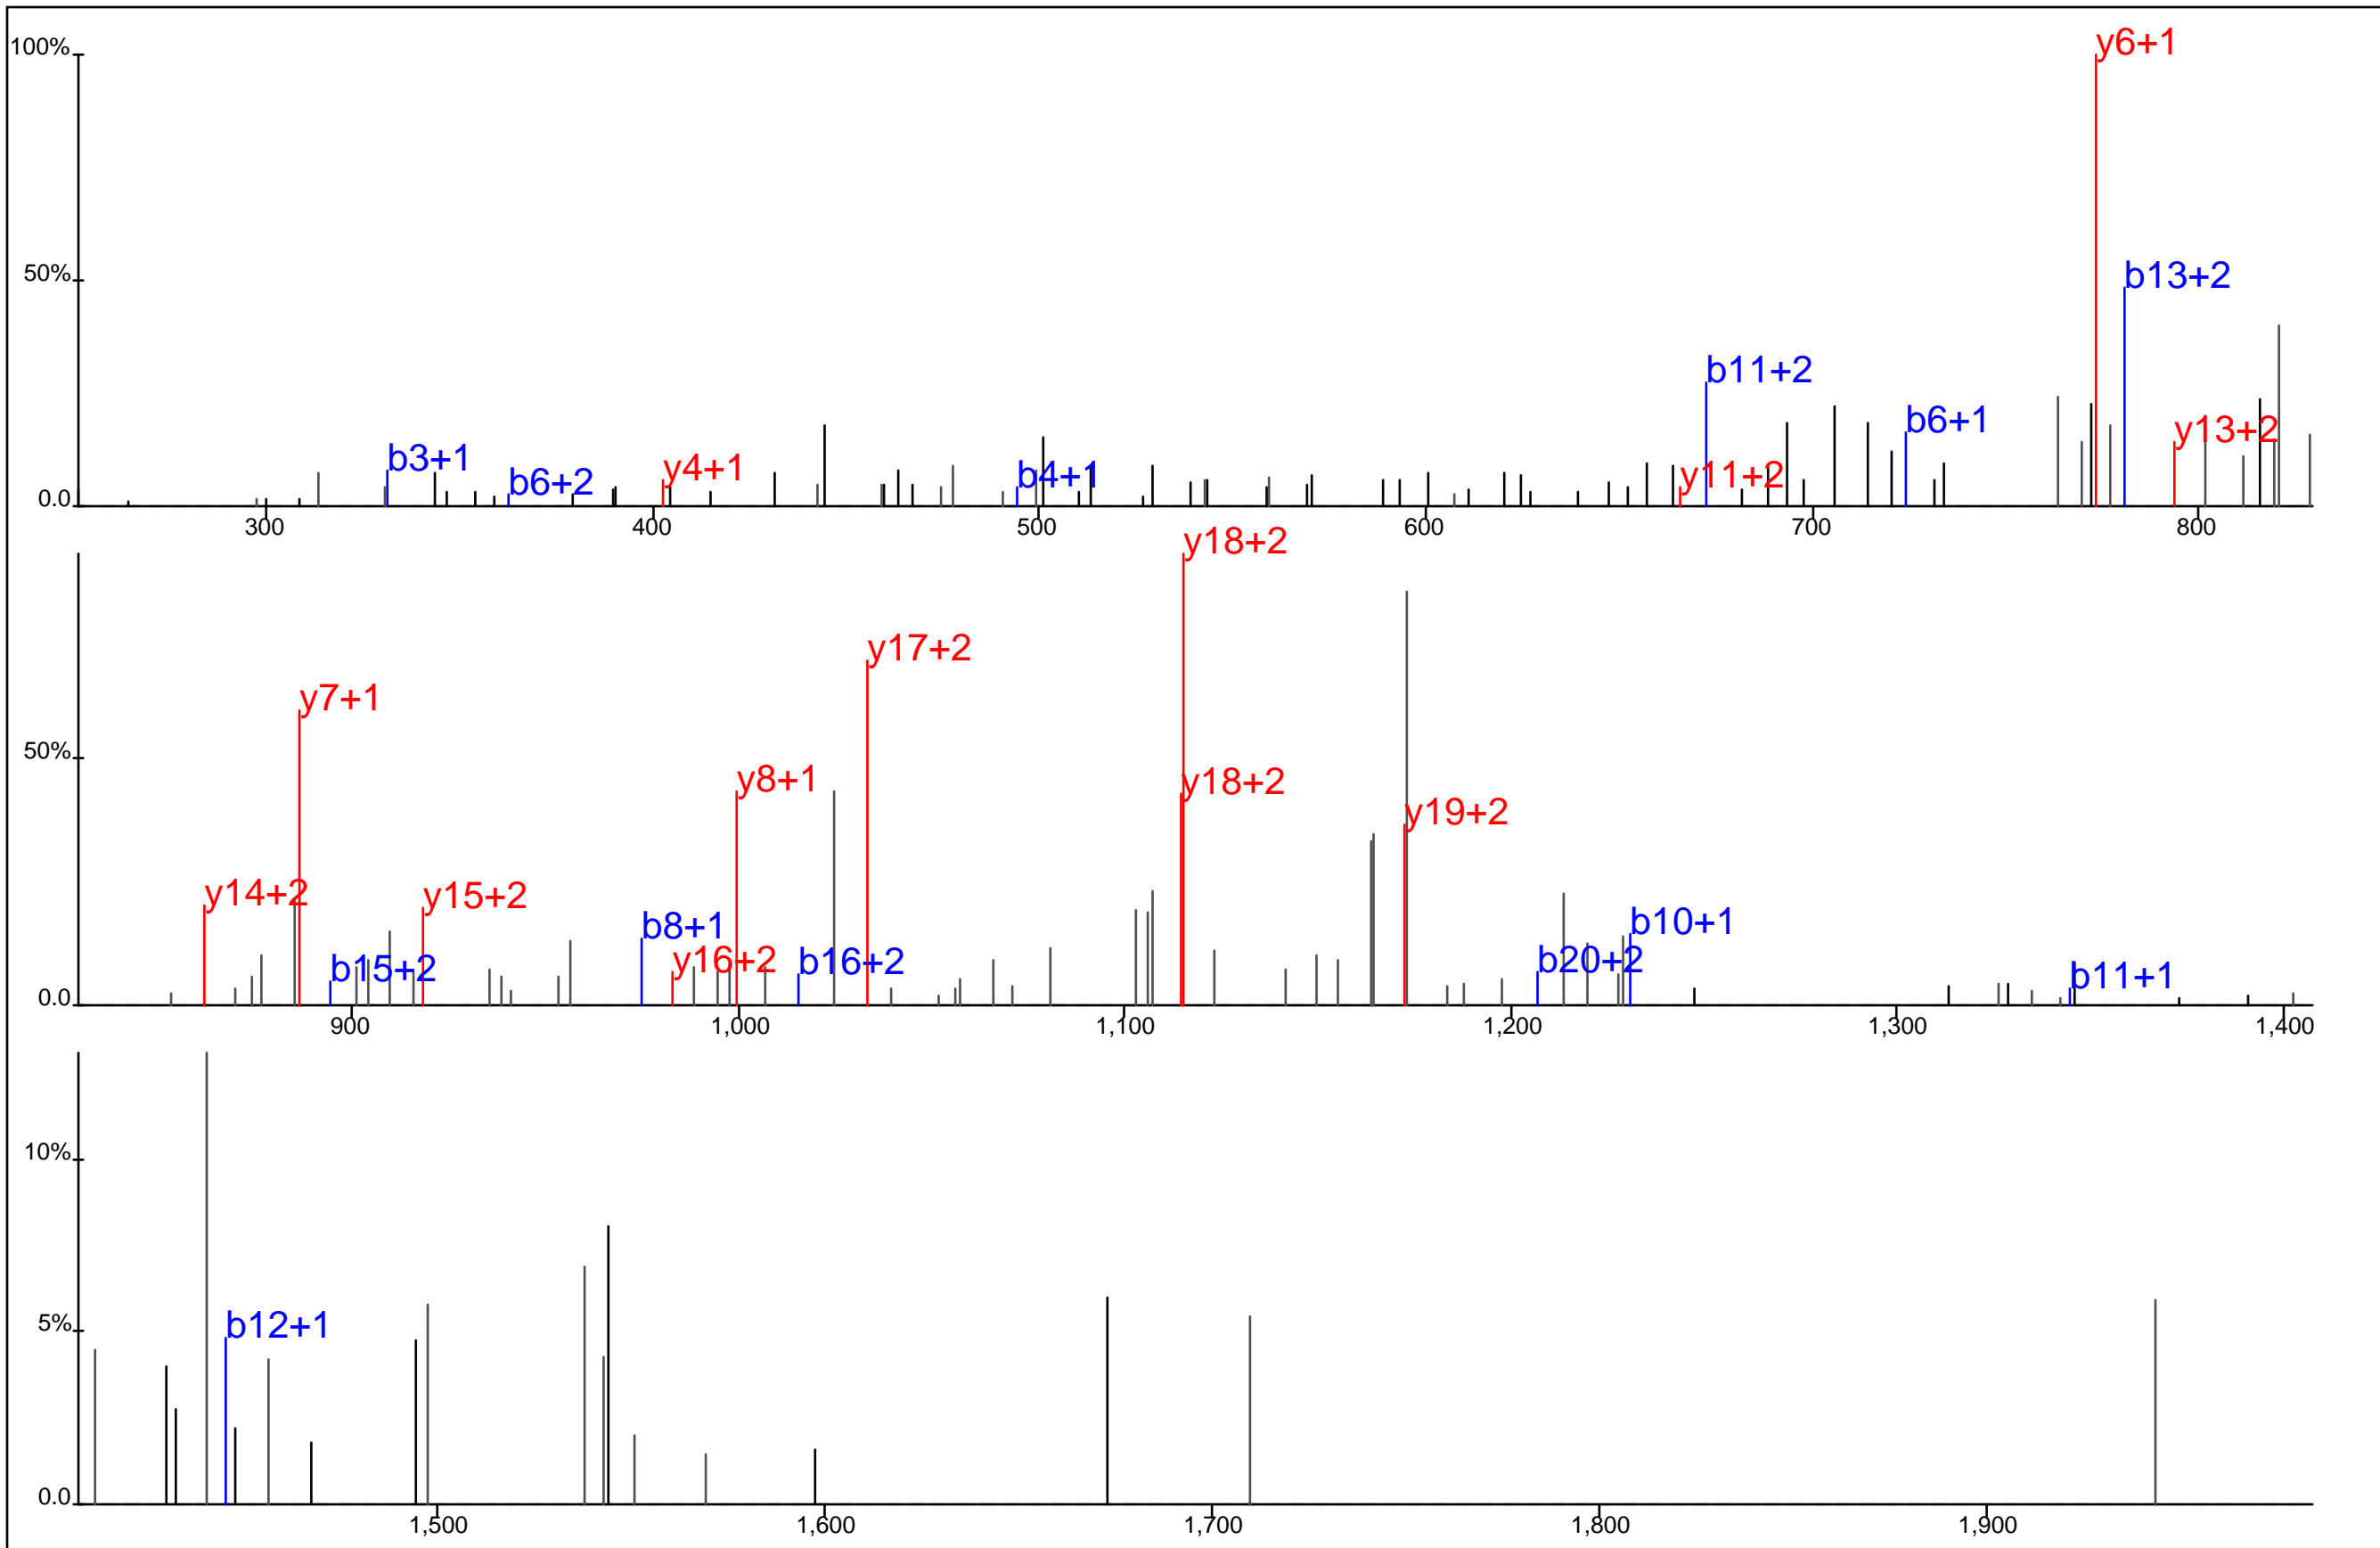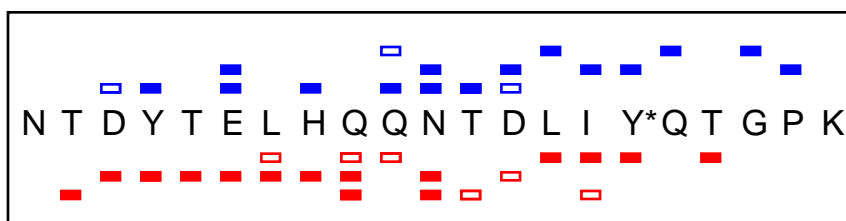

Protein Name: Golgin 84  
 gi Accession: 0  
 Precursor Mass: 853.7172+3  
 Delta Mass: 1.083 ppm  
 XCorr: 22.42

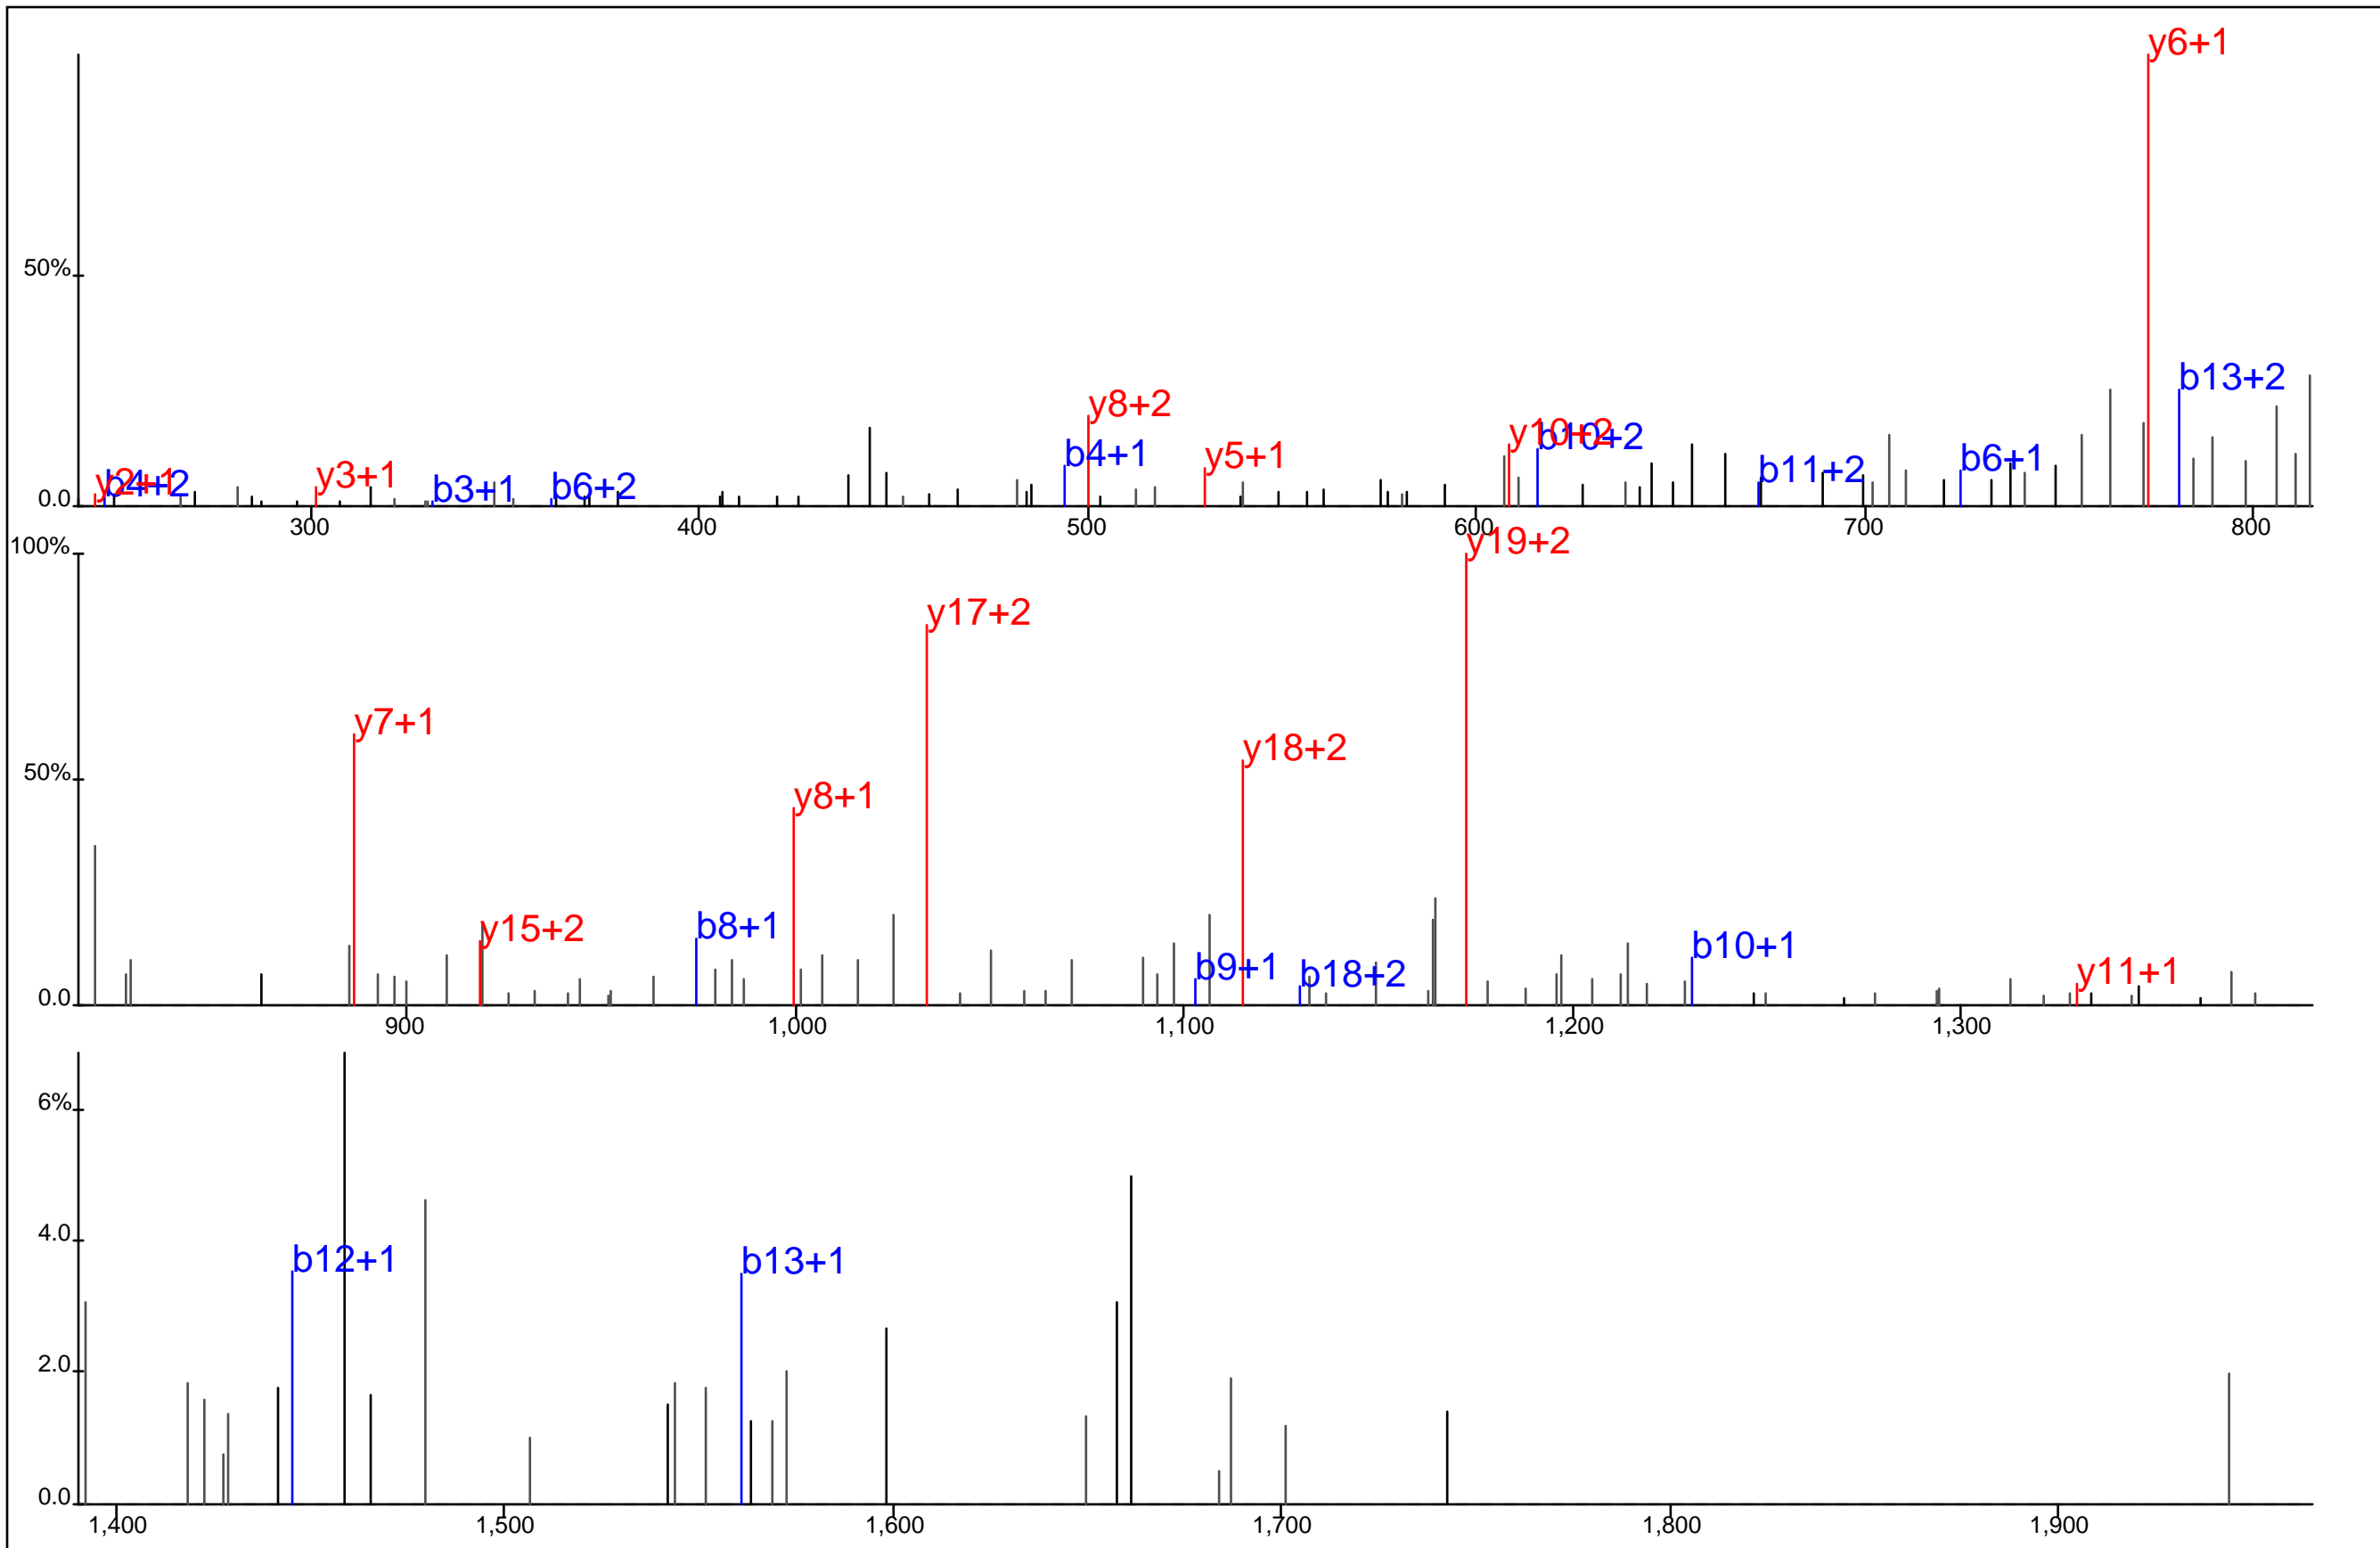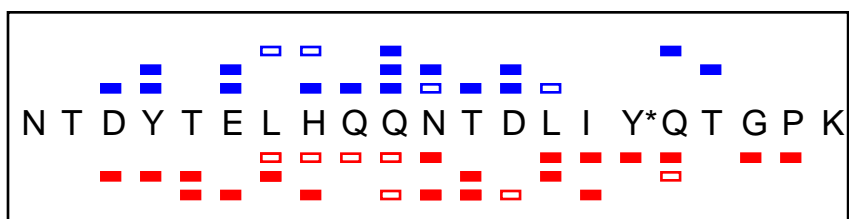

Protein Name: Golgin 84  
 gi Accession: 0  
 Precursor Mass: 853.7198+3  
 Delta Mass: 1.994 ppm  
 XCorr: 31.32

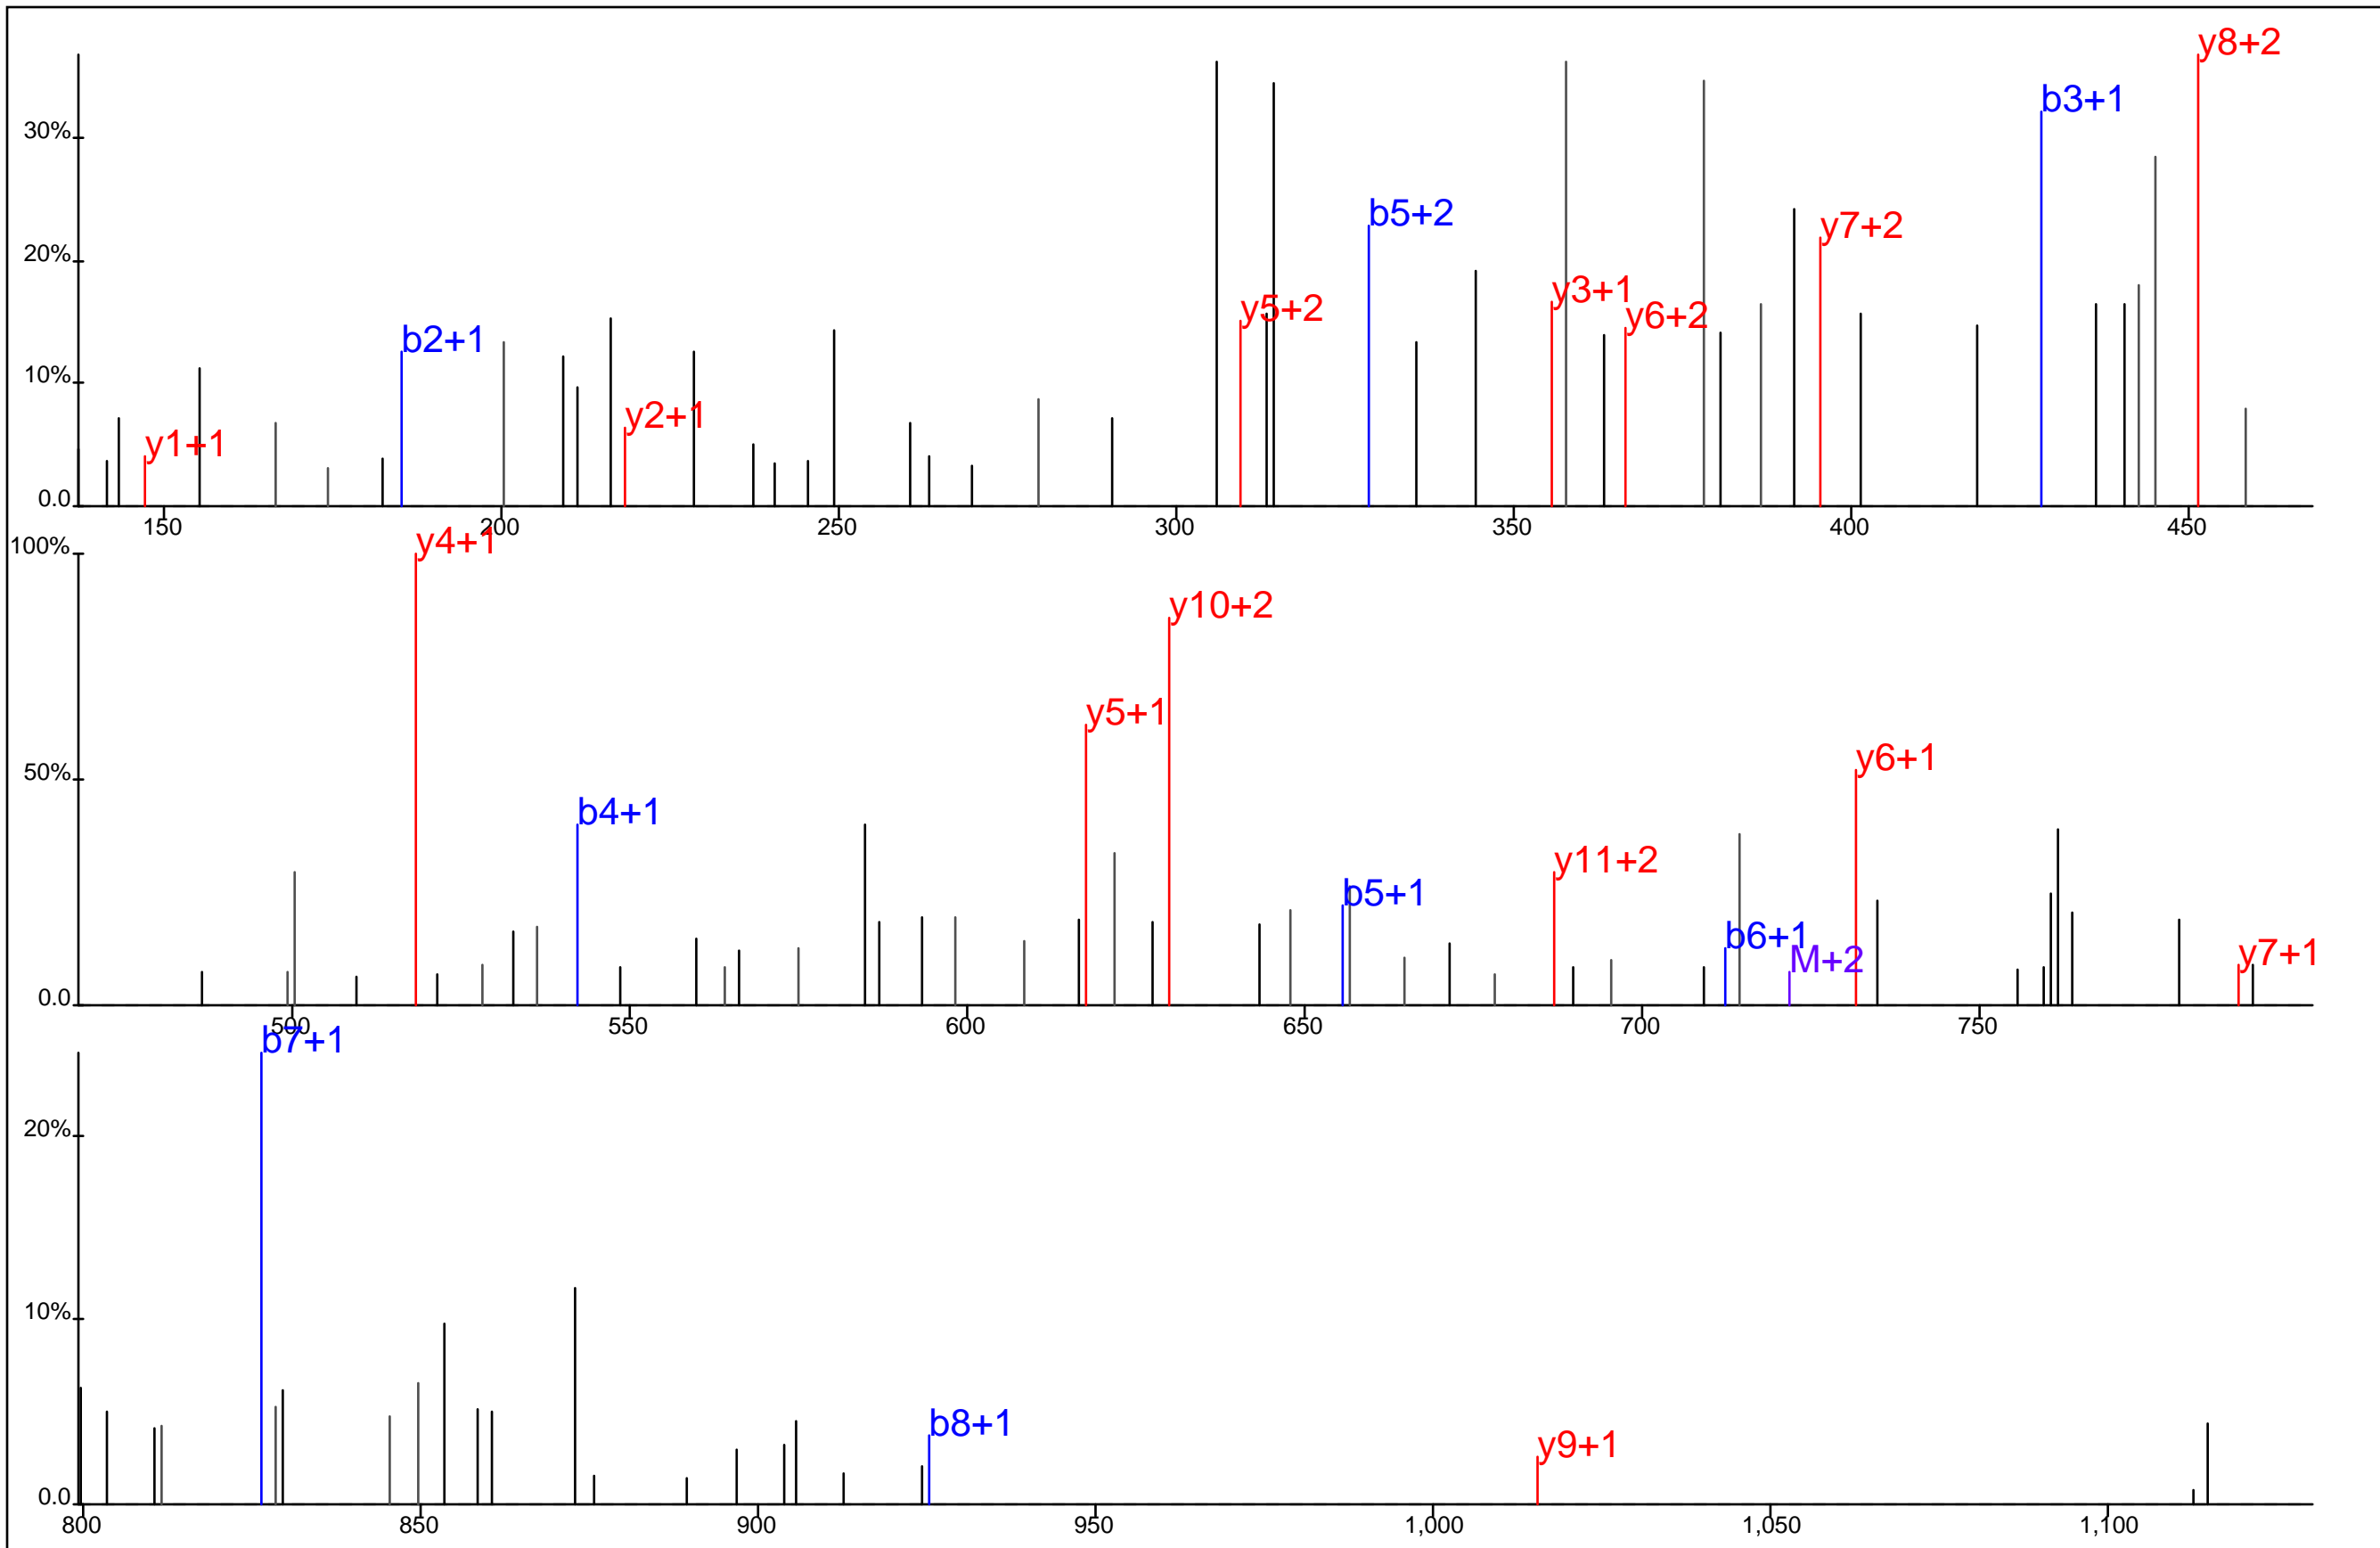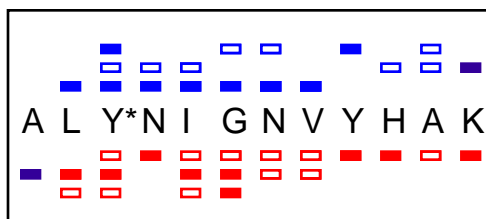

Protein Name: G-protein signalling modulator 1  
 gi Accession: 0  
 Precursor Mass: 481.5661+3  
 Delta Mass: 0.630 ppm  
 XCorr: 23.2

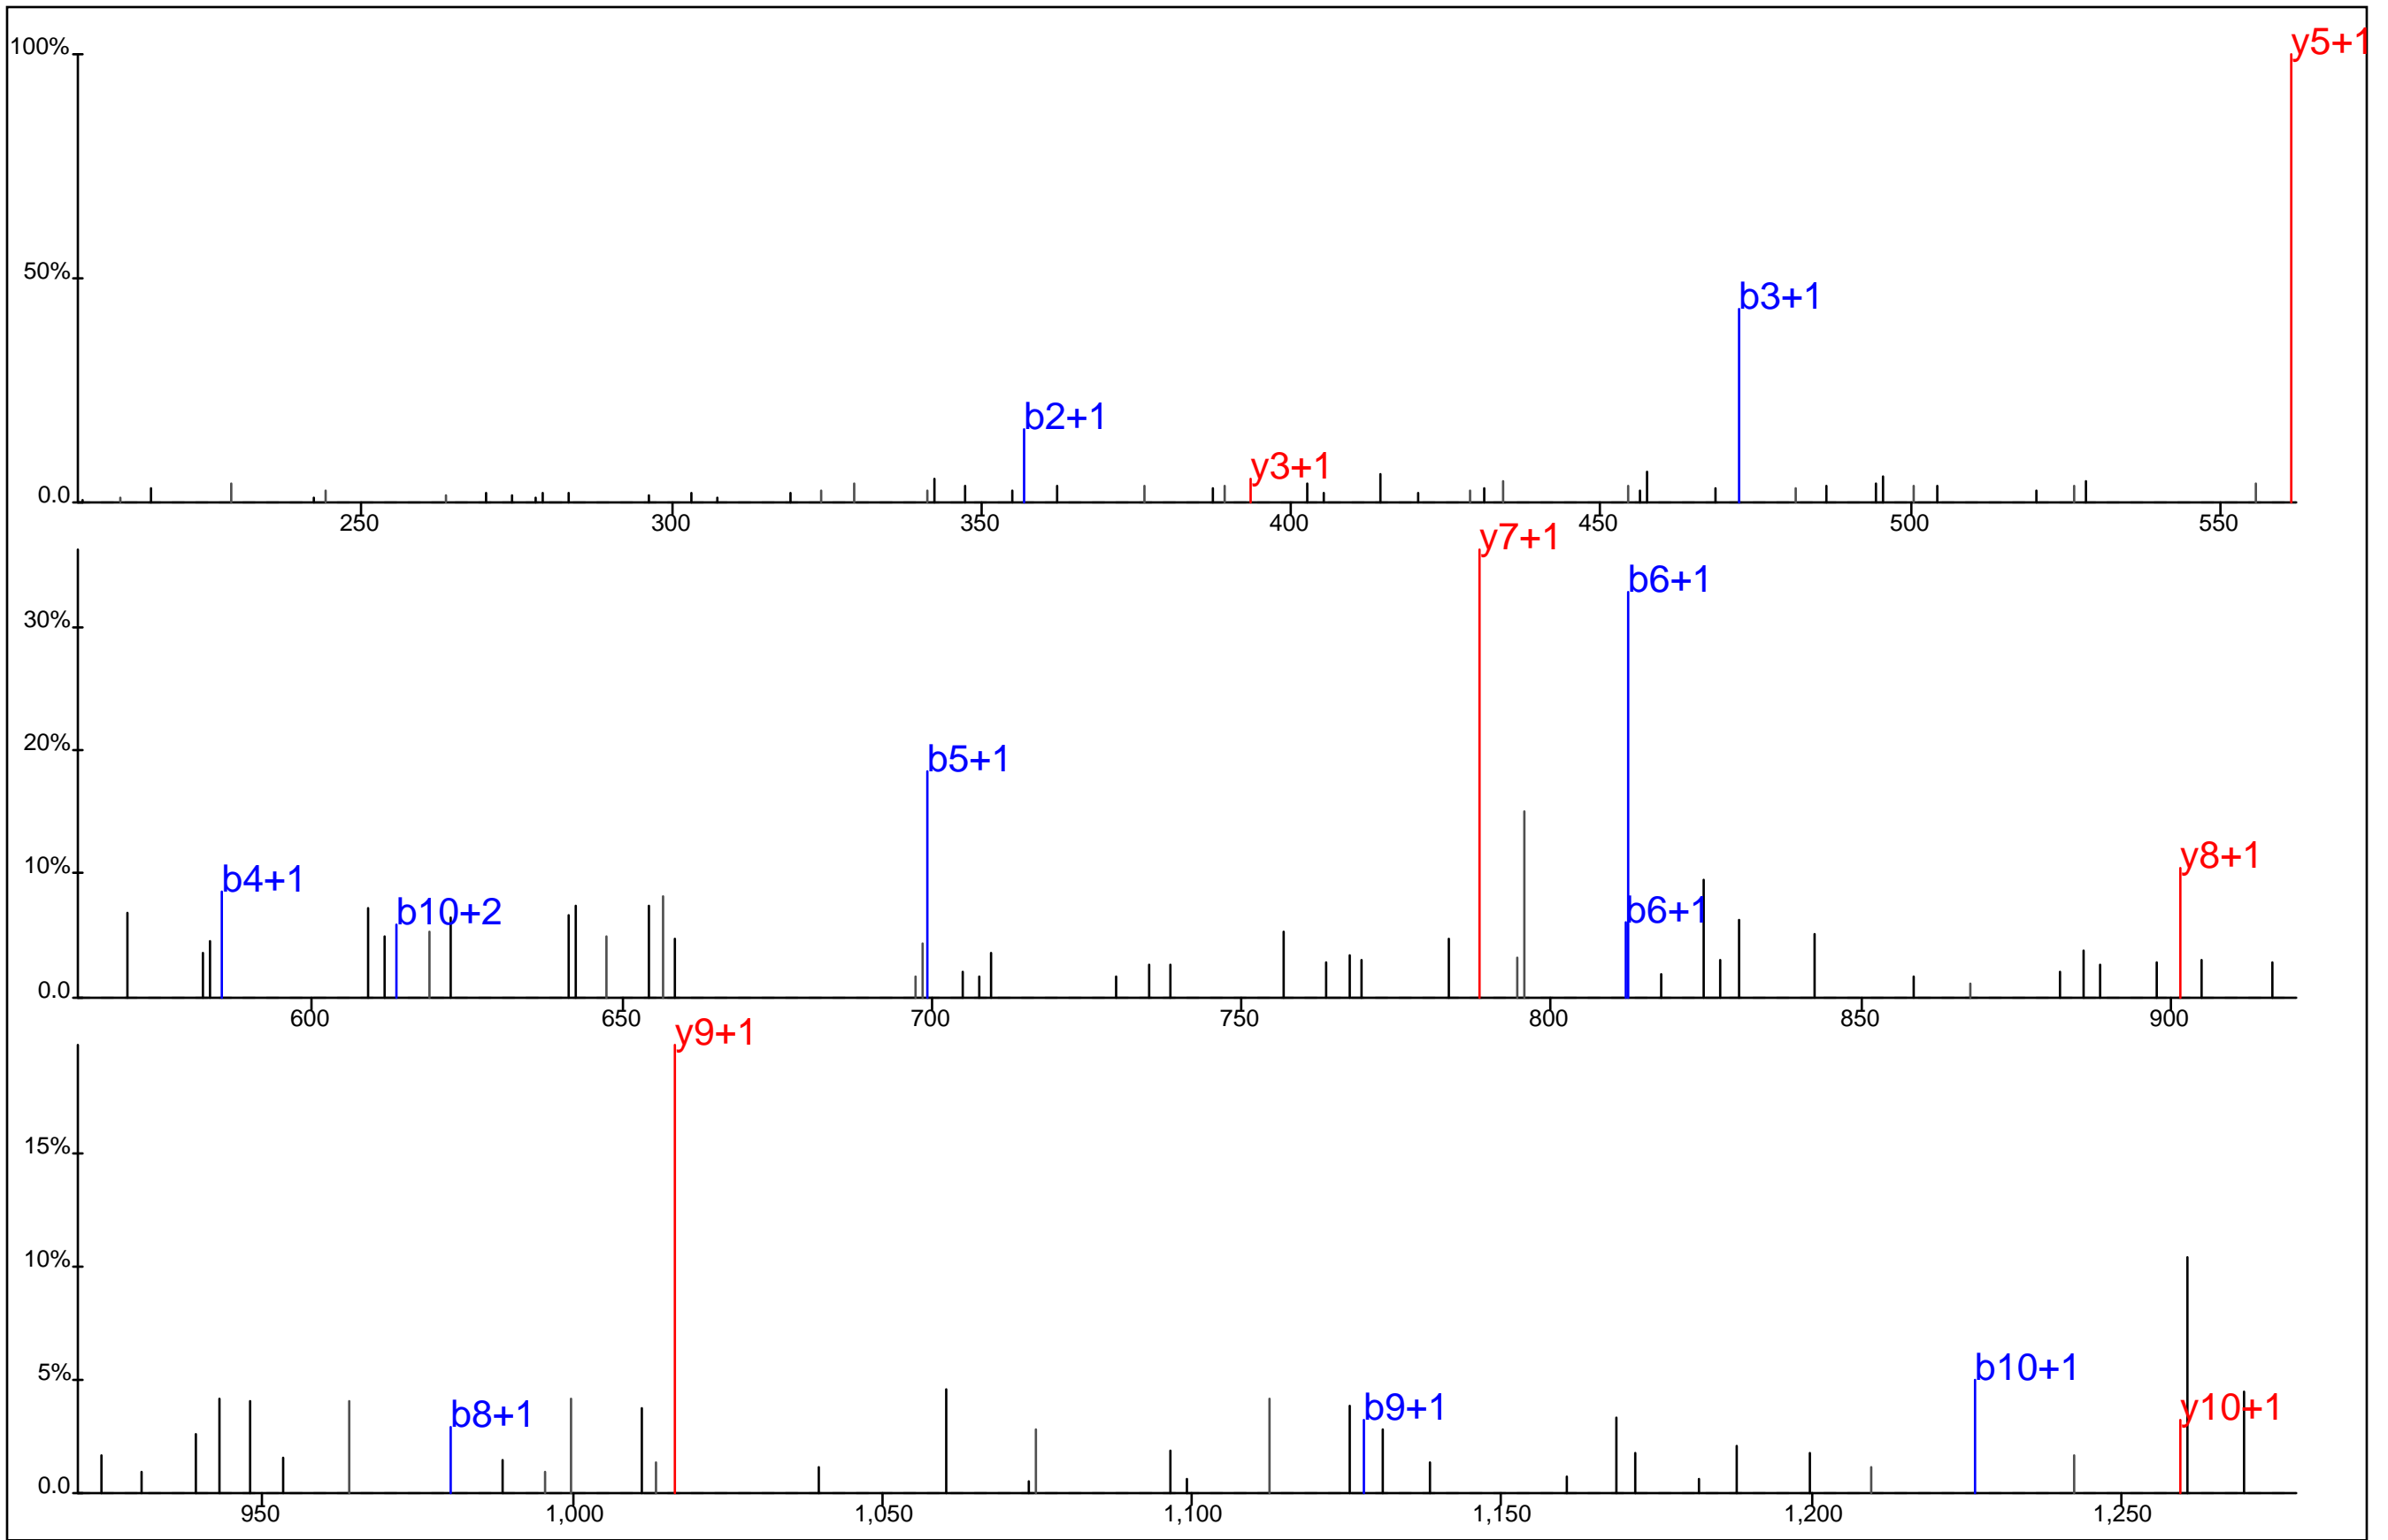

|  |                                                                                                              |
|--|--------------------------------------------------------------------------------------------------------------|
|  | Protein Name: Grb4<br>gi Accession: 0<br>Precursor Mass: 686.8517+2<br>Delta Mass: 3.564 ppm<br>XCorr: 39.17 |
|--|--------------------------------------------------------------------------------------------------------------|

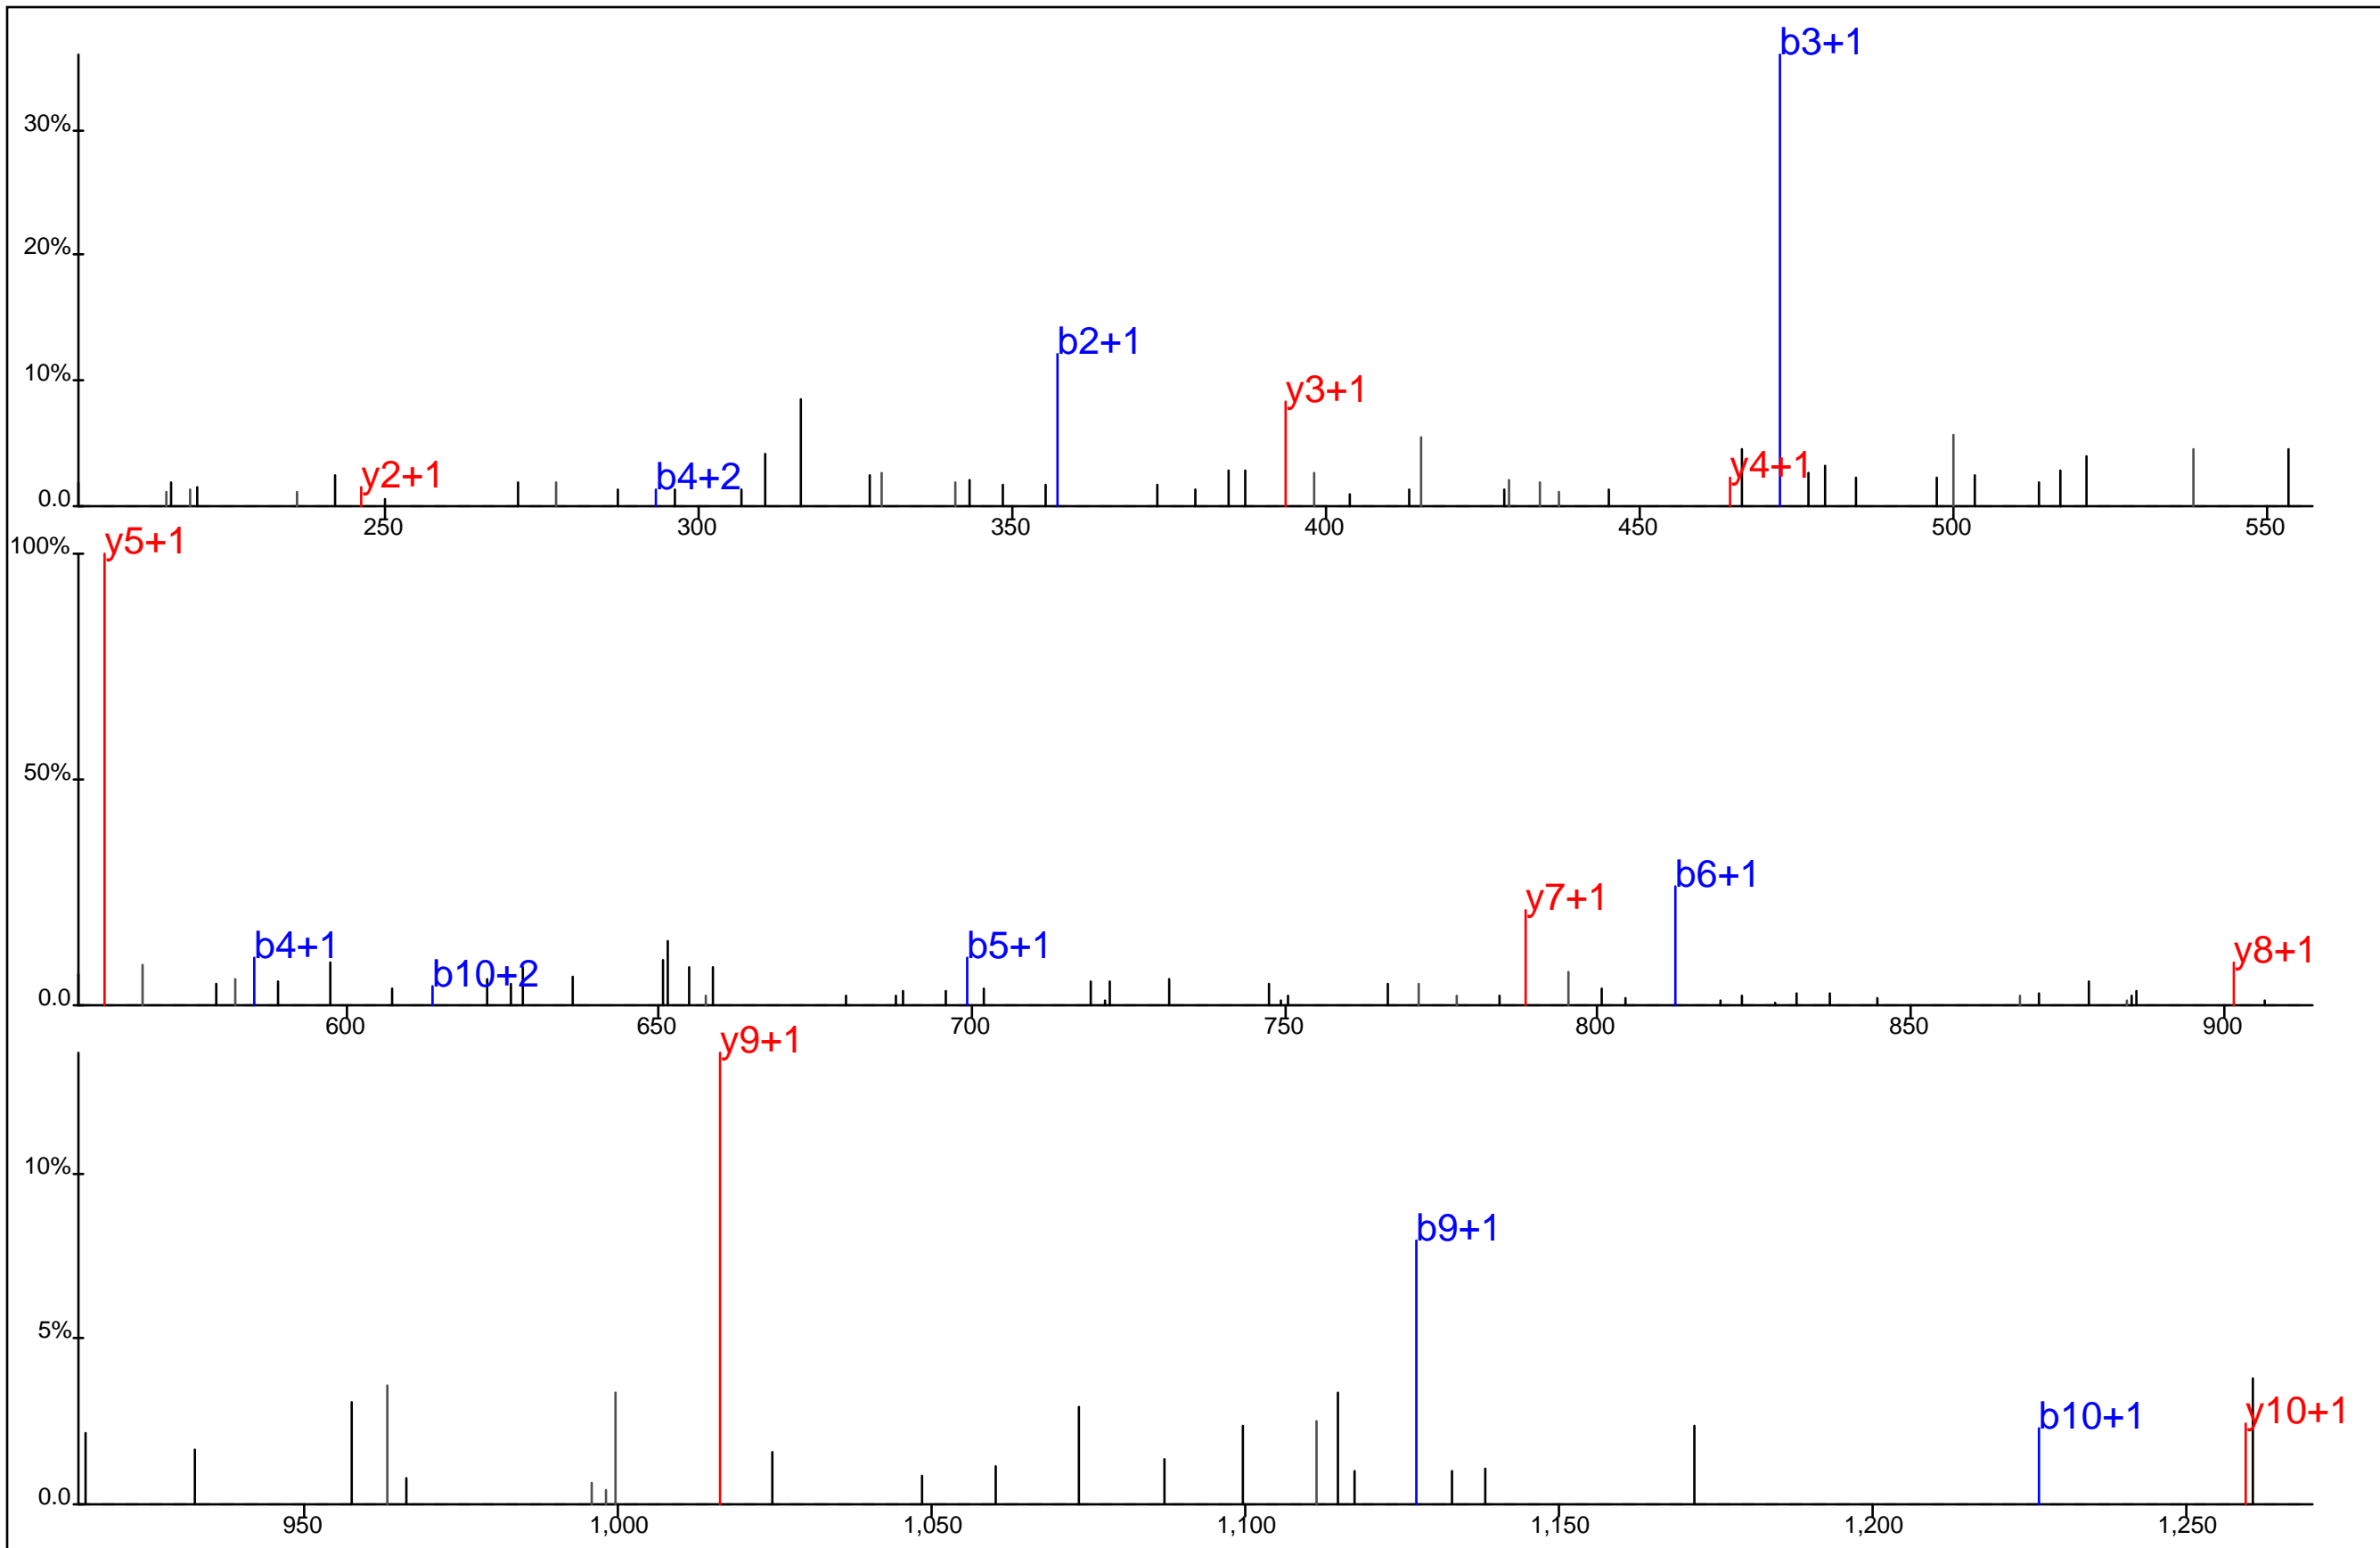

■ ■ ■ ■ ■ ■ ■ ■  
 I Y\* D L N I P A F V K  
□ □ □ □ □ □ □ □

Protein Name: Grb4  
 gi Accession: 0  
 Precursor Mass: 686.8511+2  
 Delta Mass: 2.762 ppm  
 XCorr: 42.54

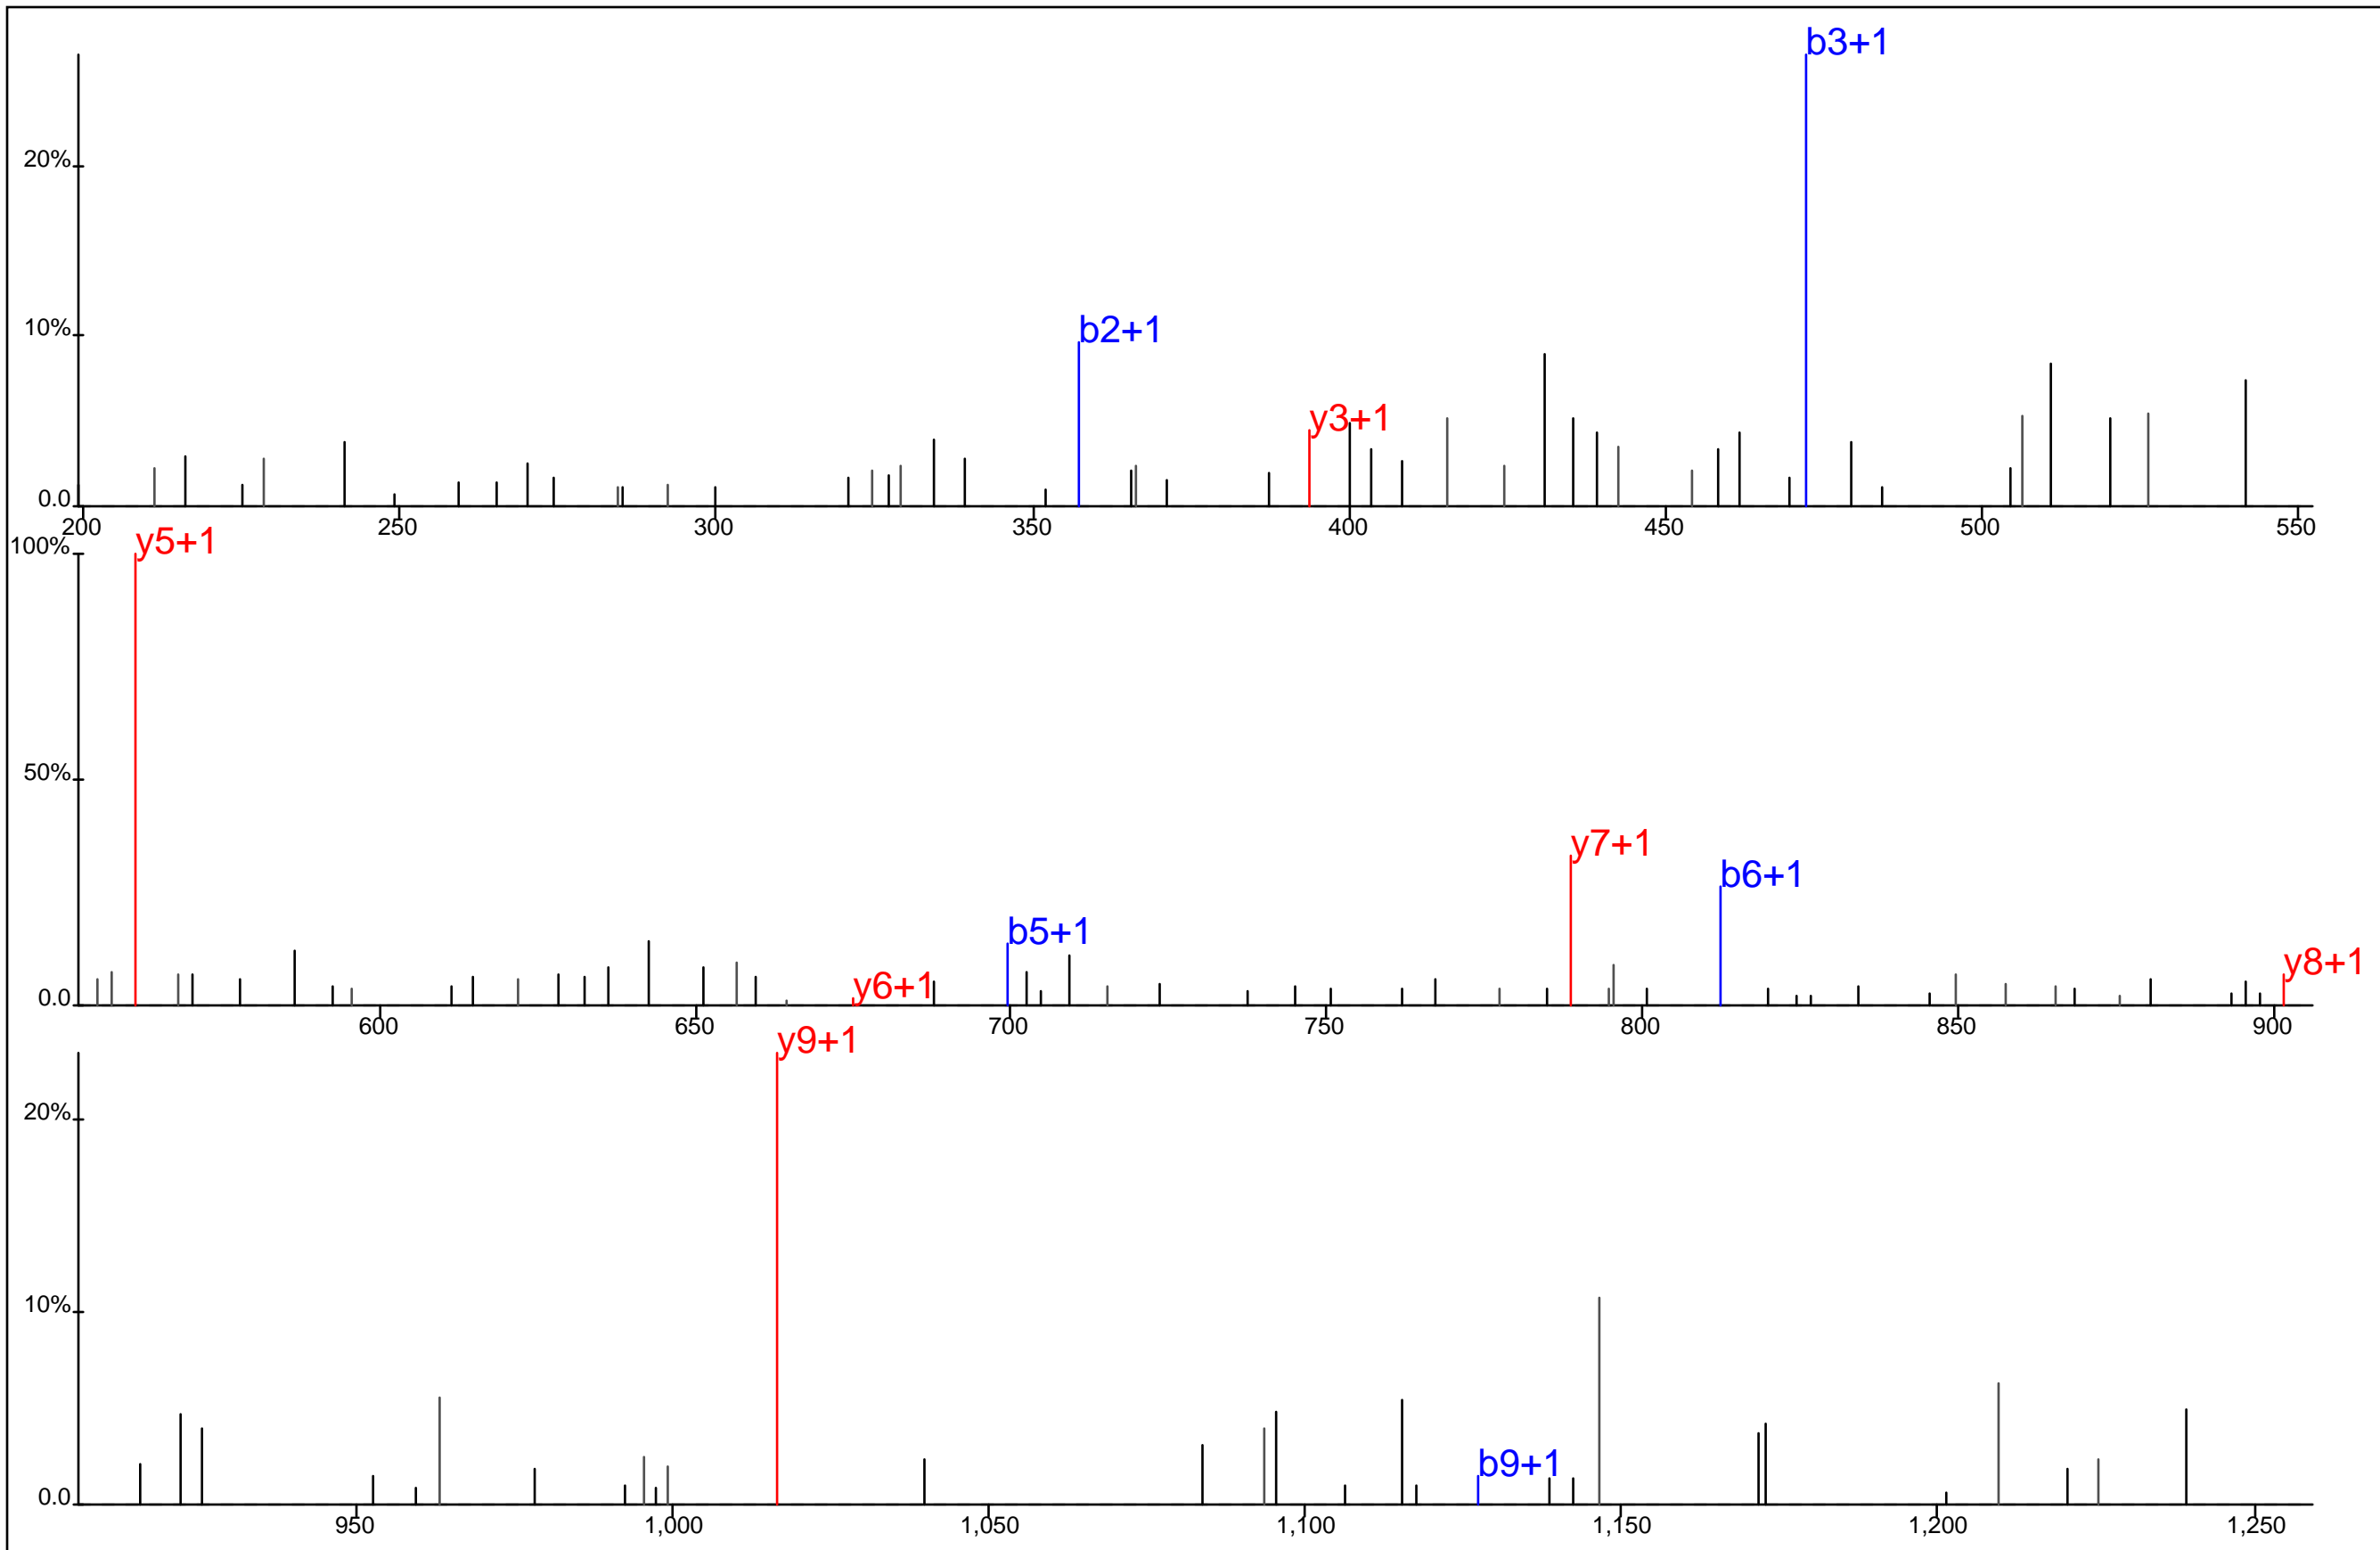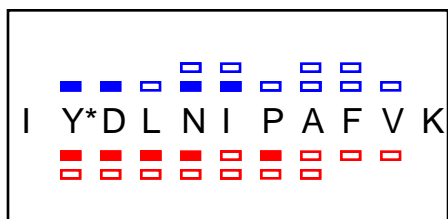

Protein Name: Grb4  
 gi Accession: 0  
 Precursor Mass: 686.8498+2  
 Delta Mass: 0.806 ppm  
 XCorr: 34.14

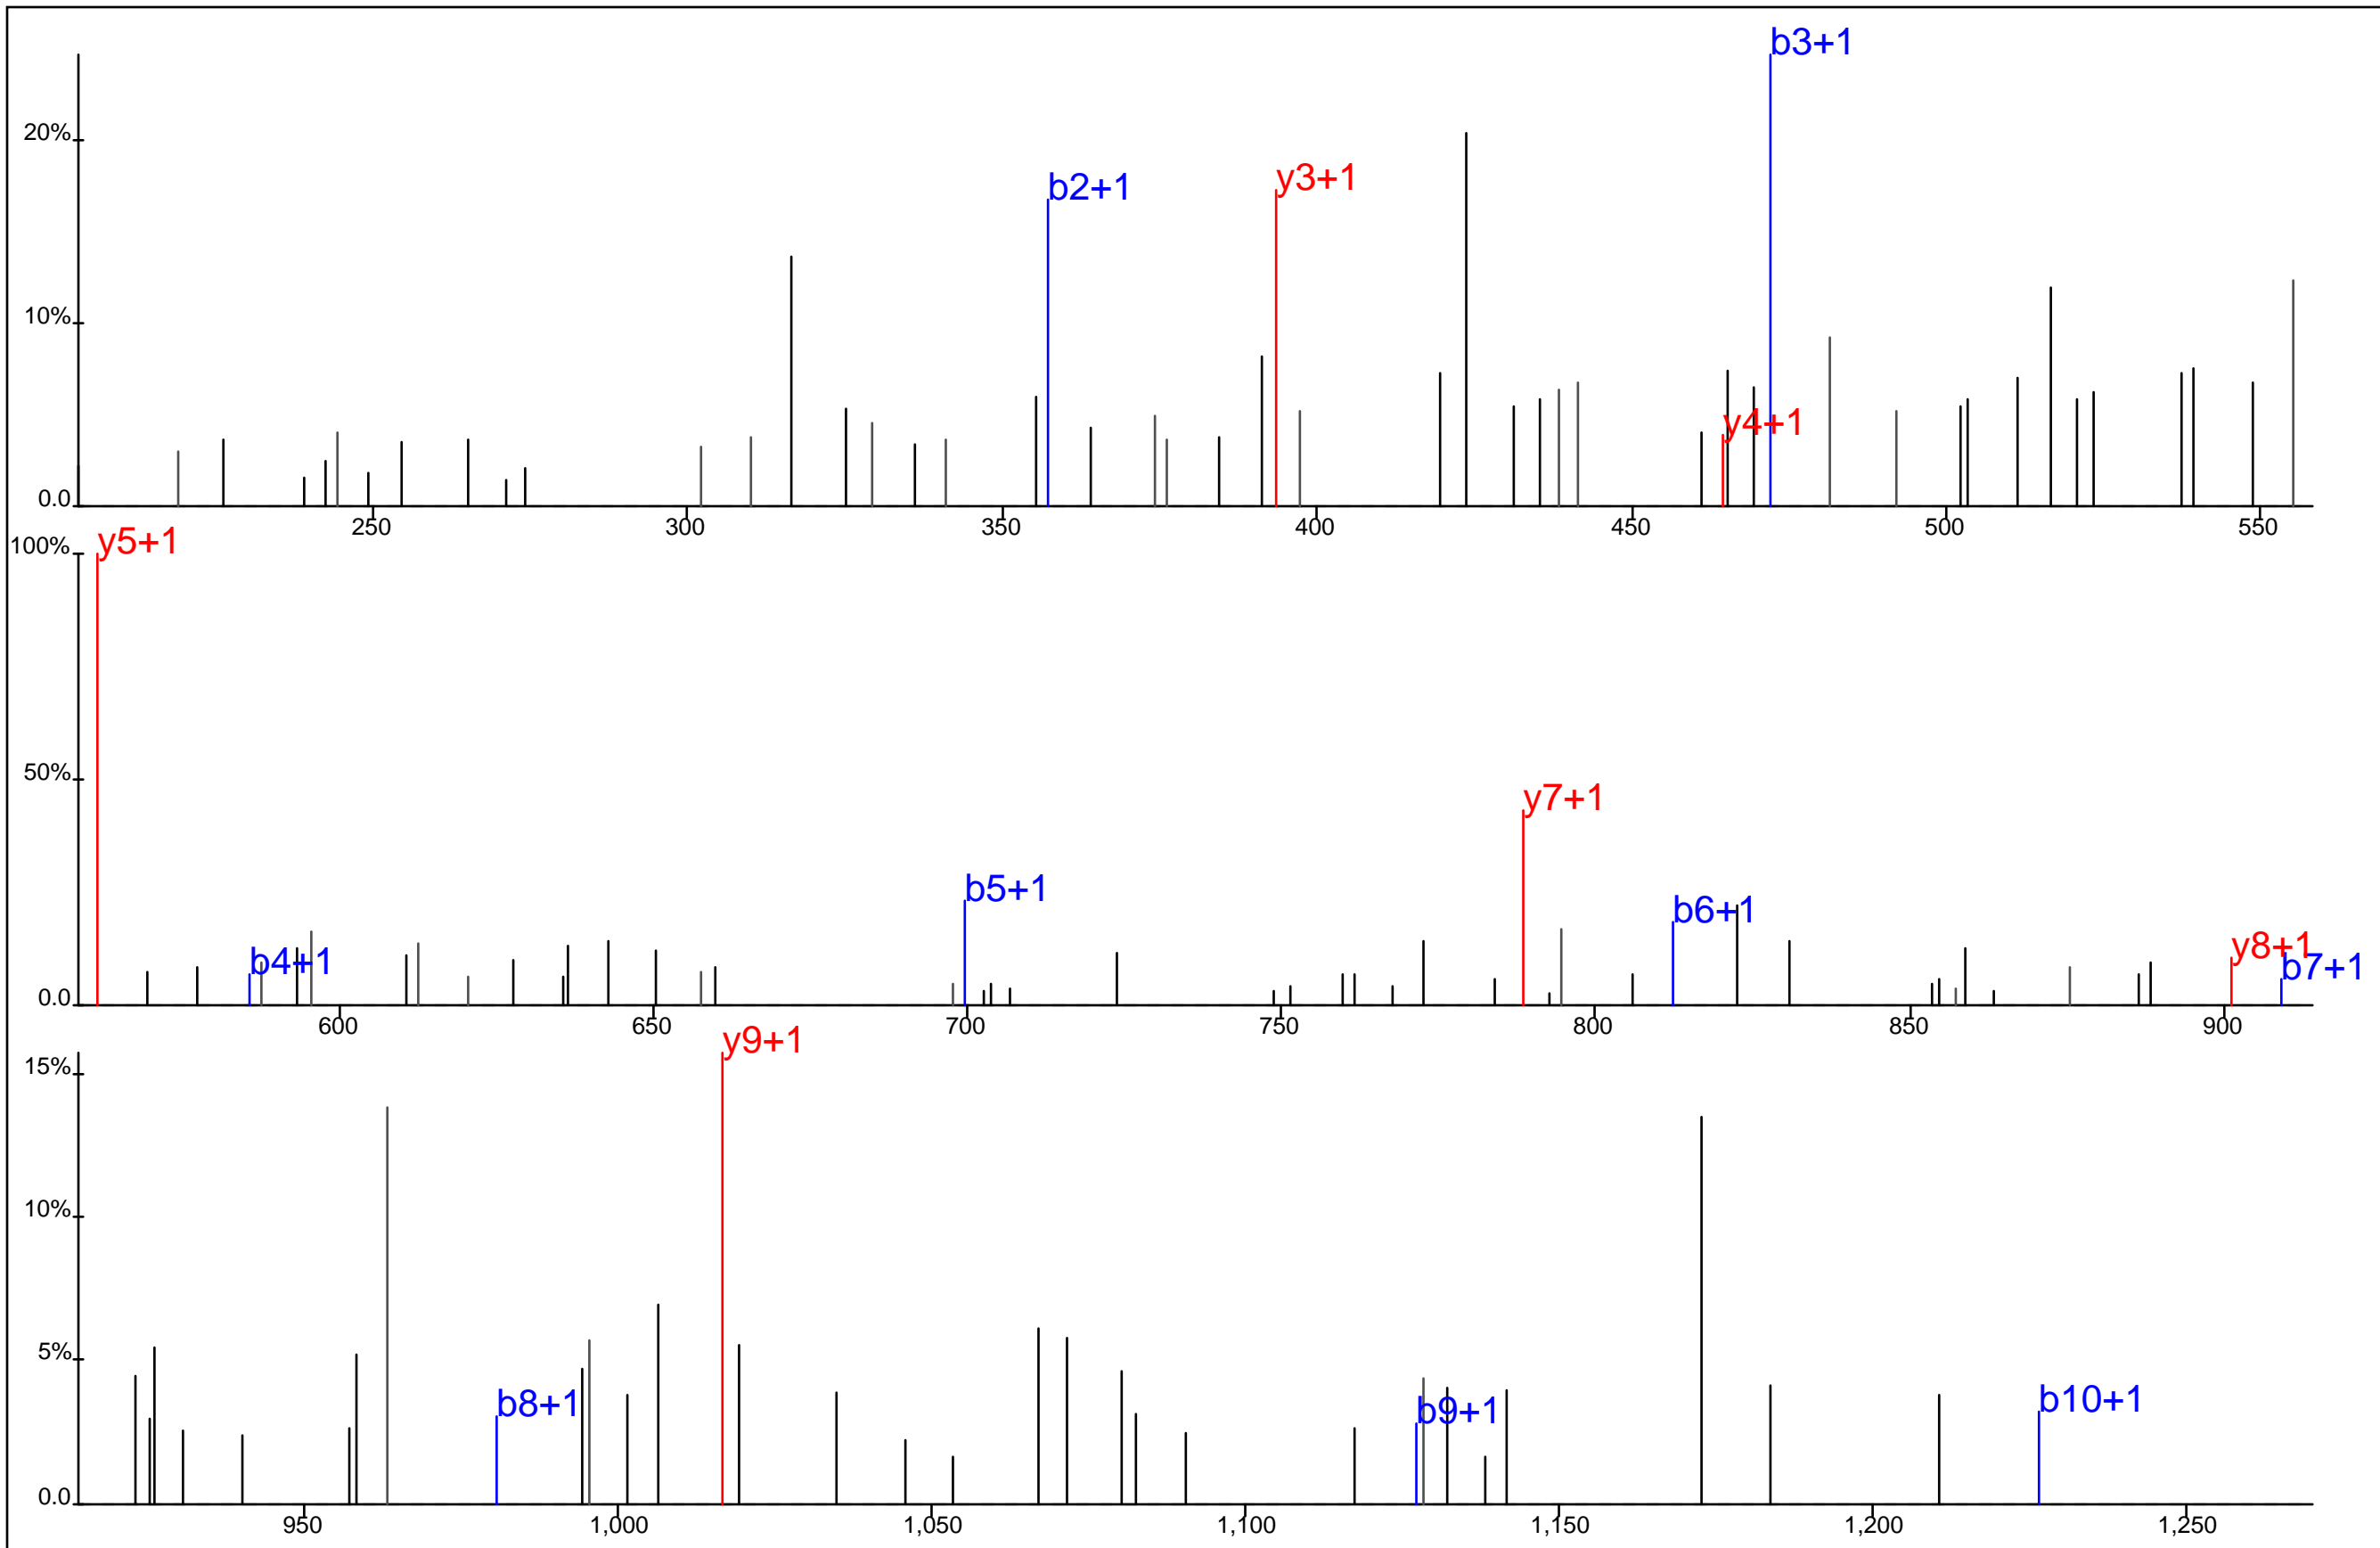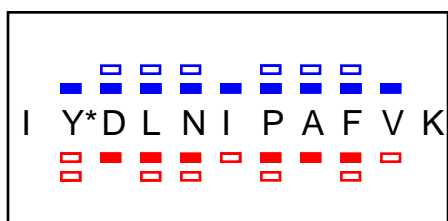

Protein Name: Grb4  
 gi Accession: 0  
 Precursor Mass: 686.8452+2  
 Delta Mass: 5.952 ppm  
 XCorr: 22.59



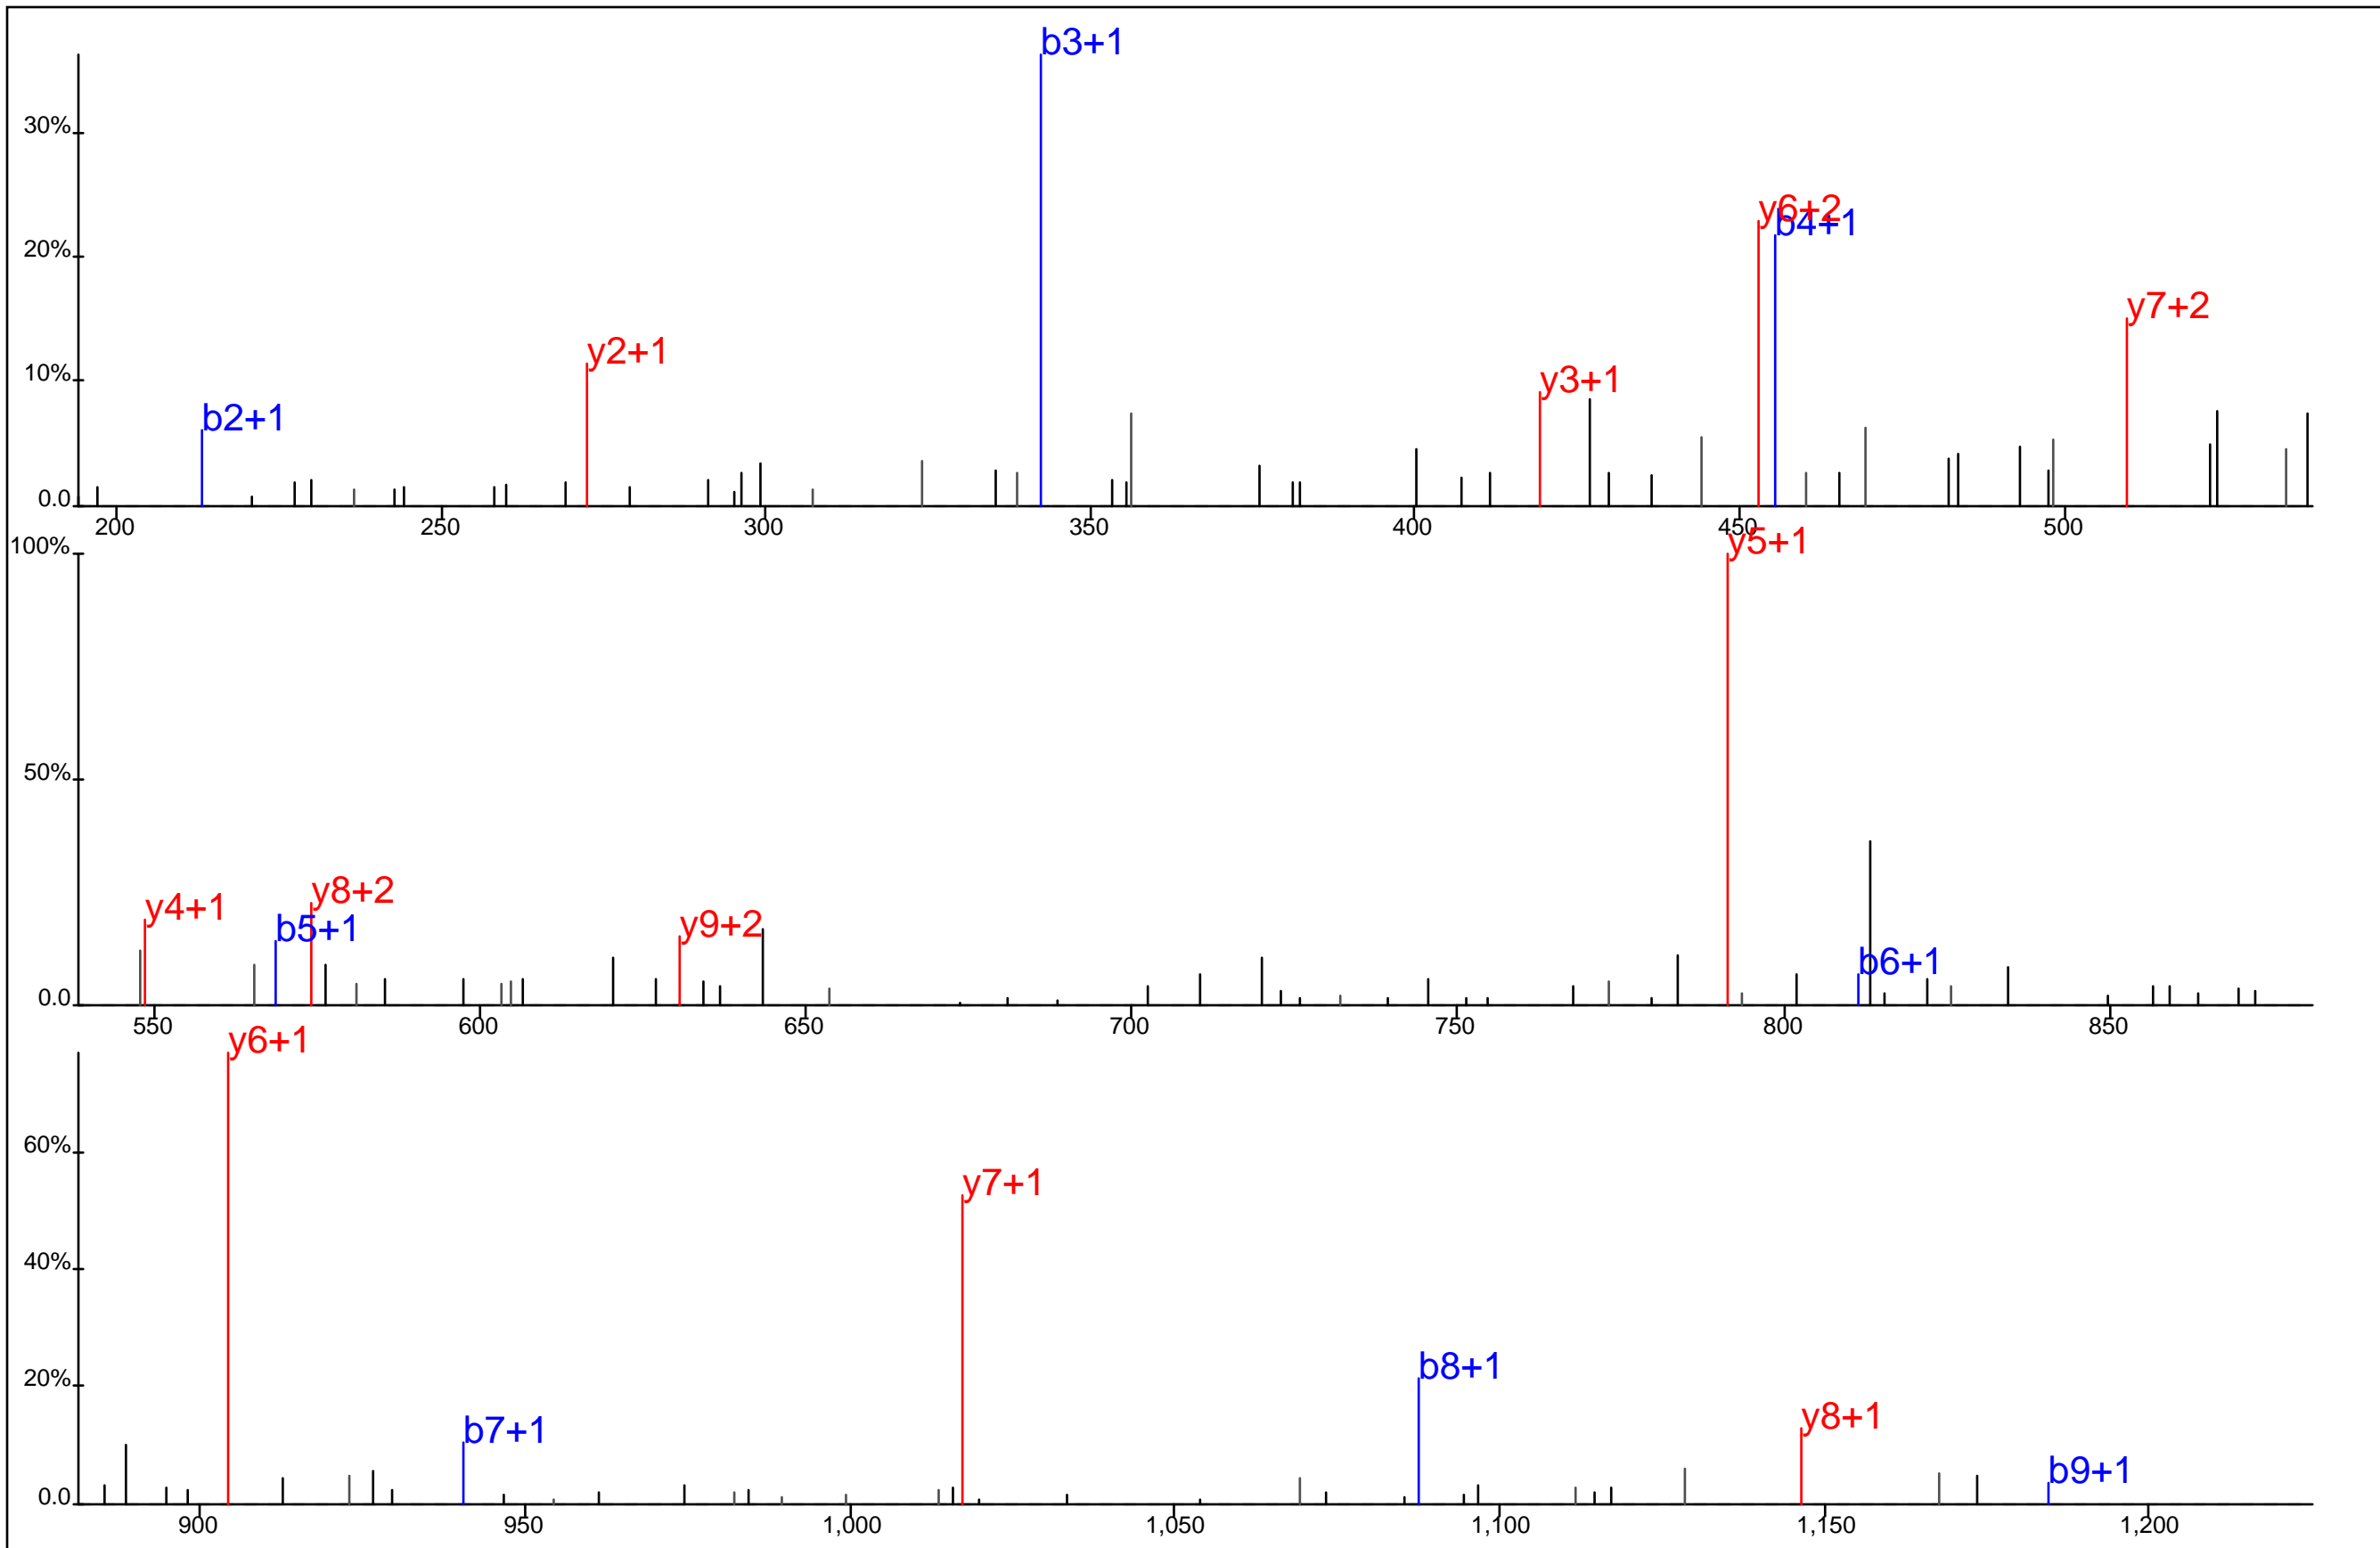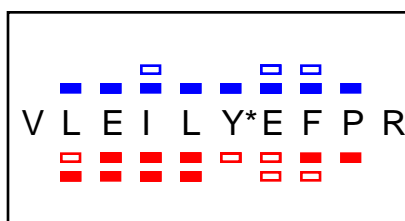

Protein Name: Growth inhibition and differentiation related protein 86  
 gi Accession: 0  
 Precursor Mass: 679.8416+2  
 Delta Mass: 0.294 ppm  
 XCorr: 43.23

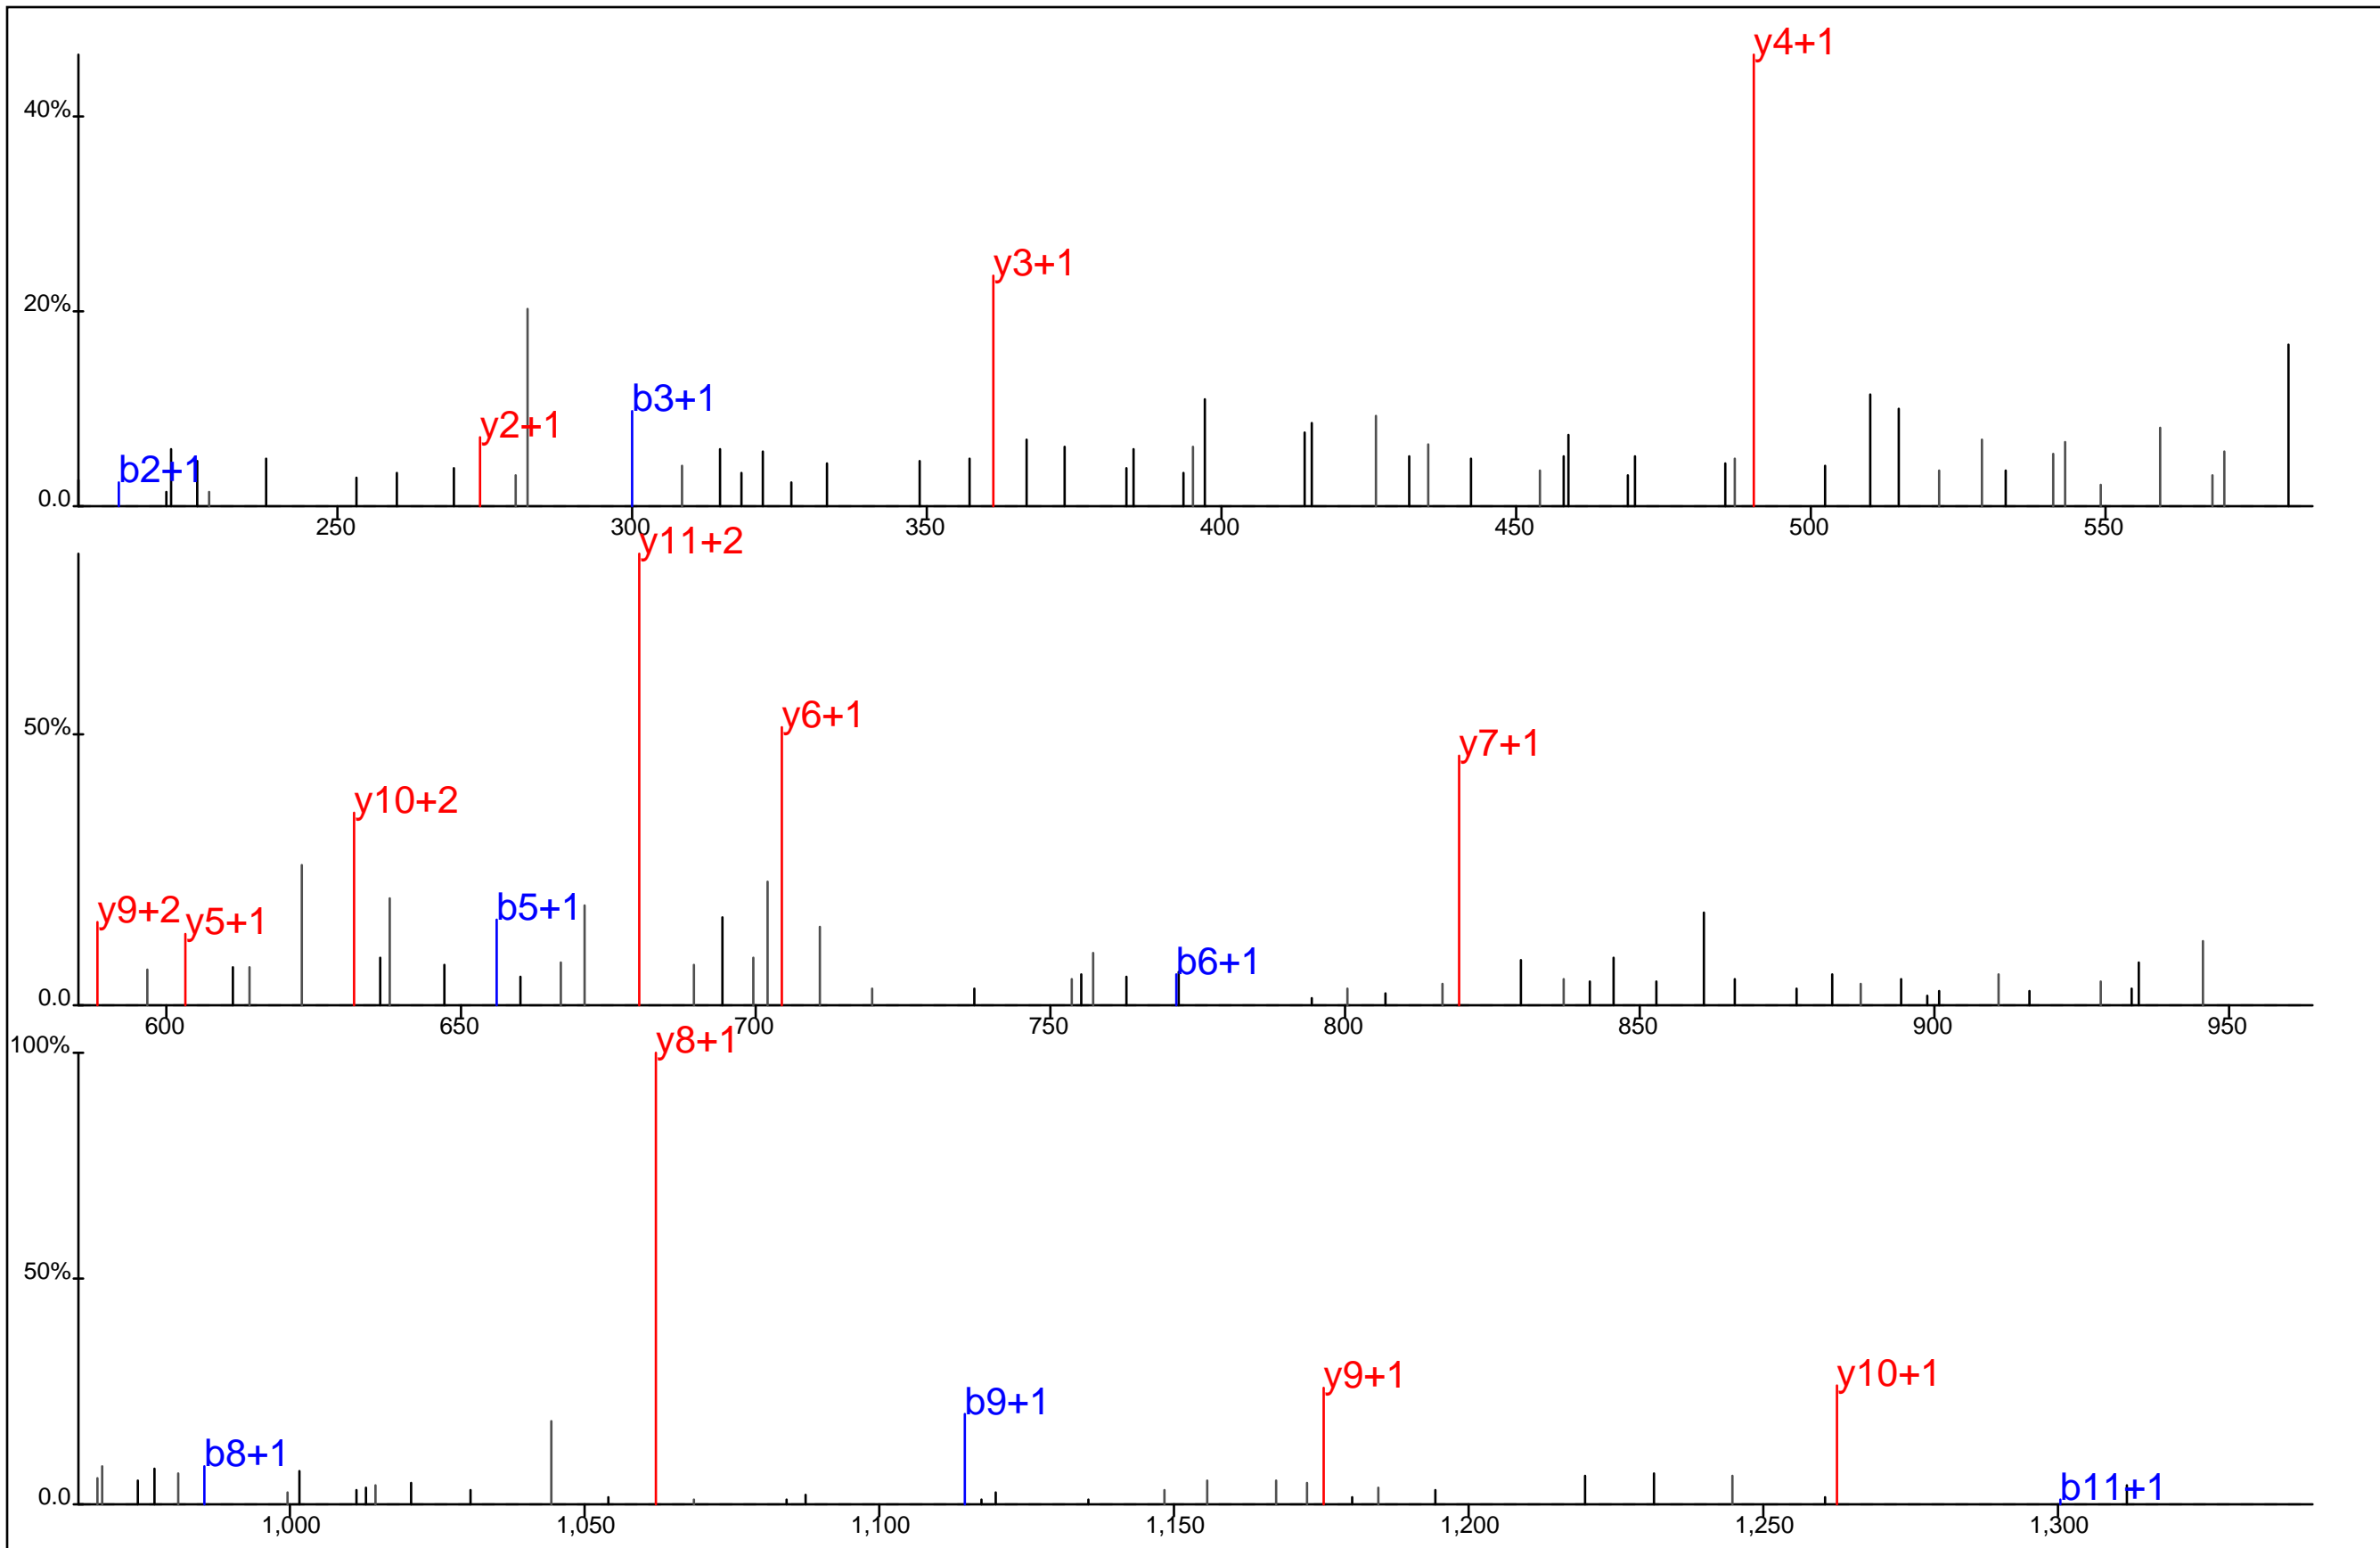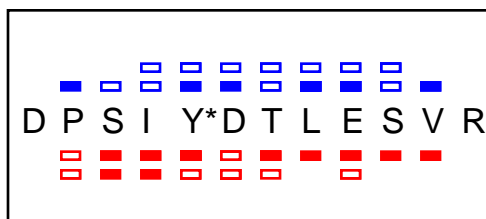

Protein Name: GRP1 associated scaffold protein  
 gi Accession: 0  
 Precursor Mass: 737.8281+2  
 Delta Mass: 1.941 ppm  
 XCorr: 52.52

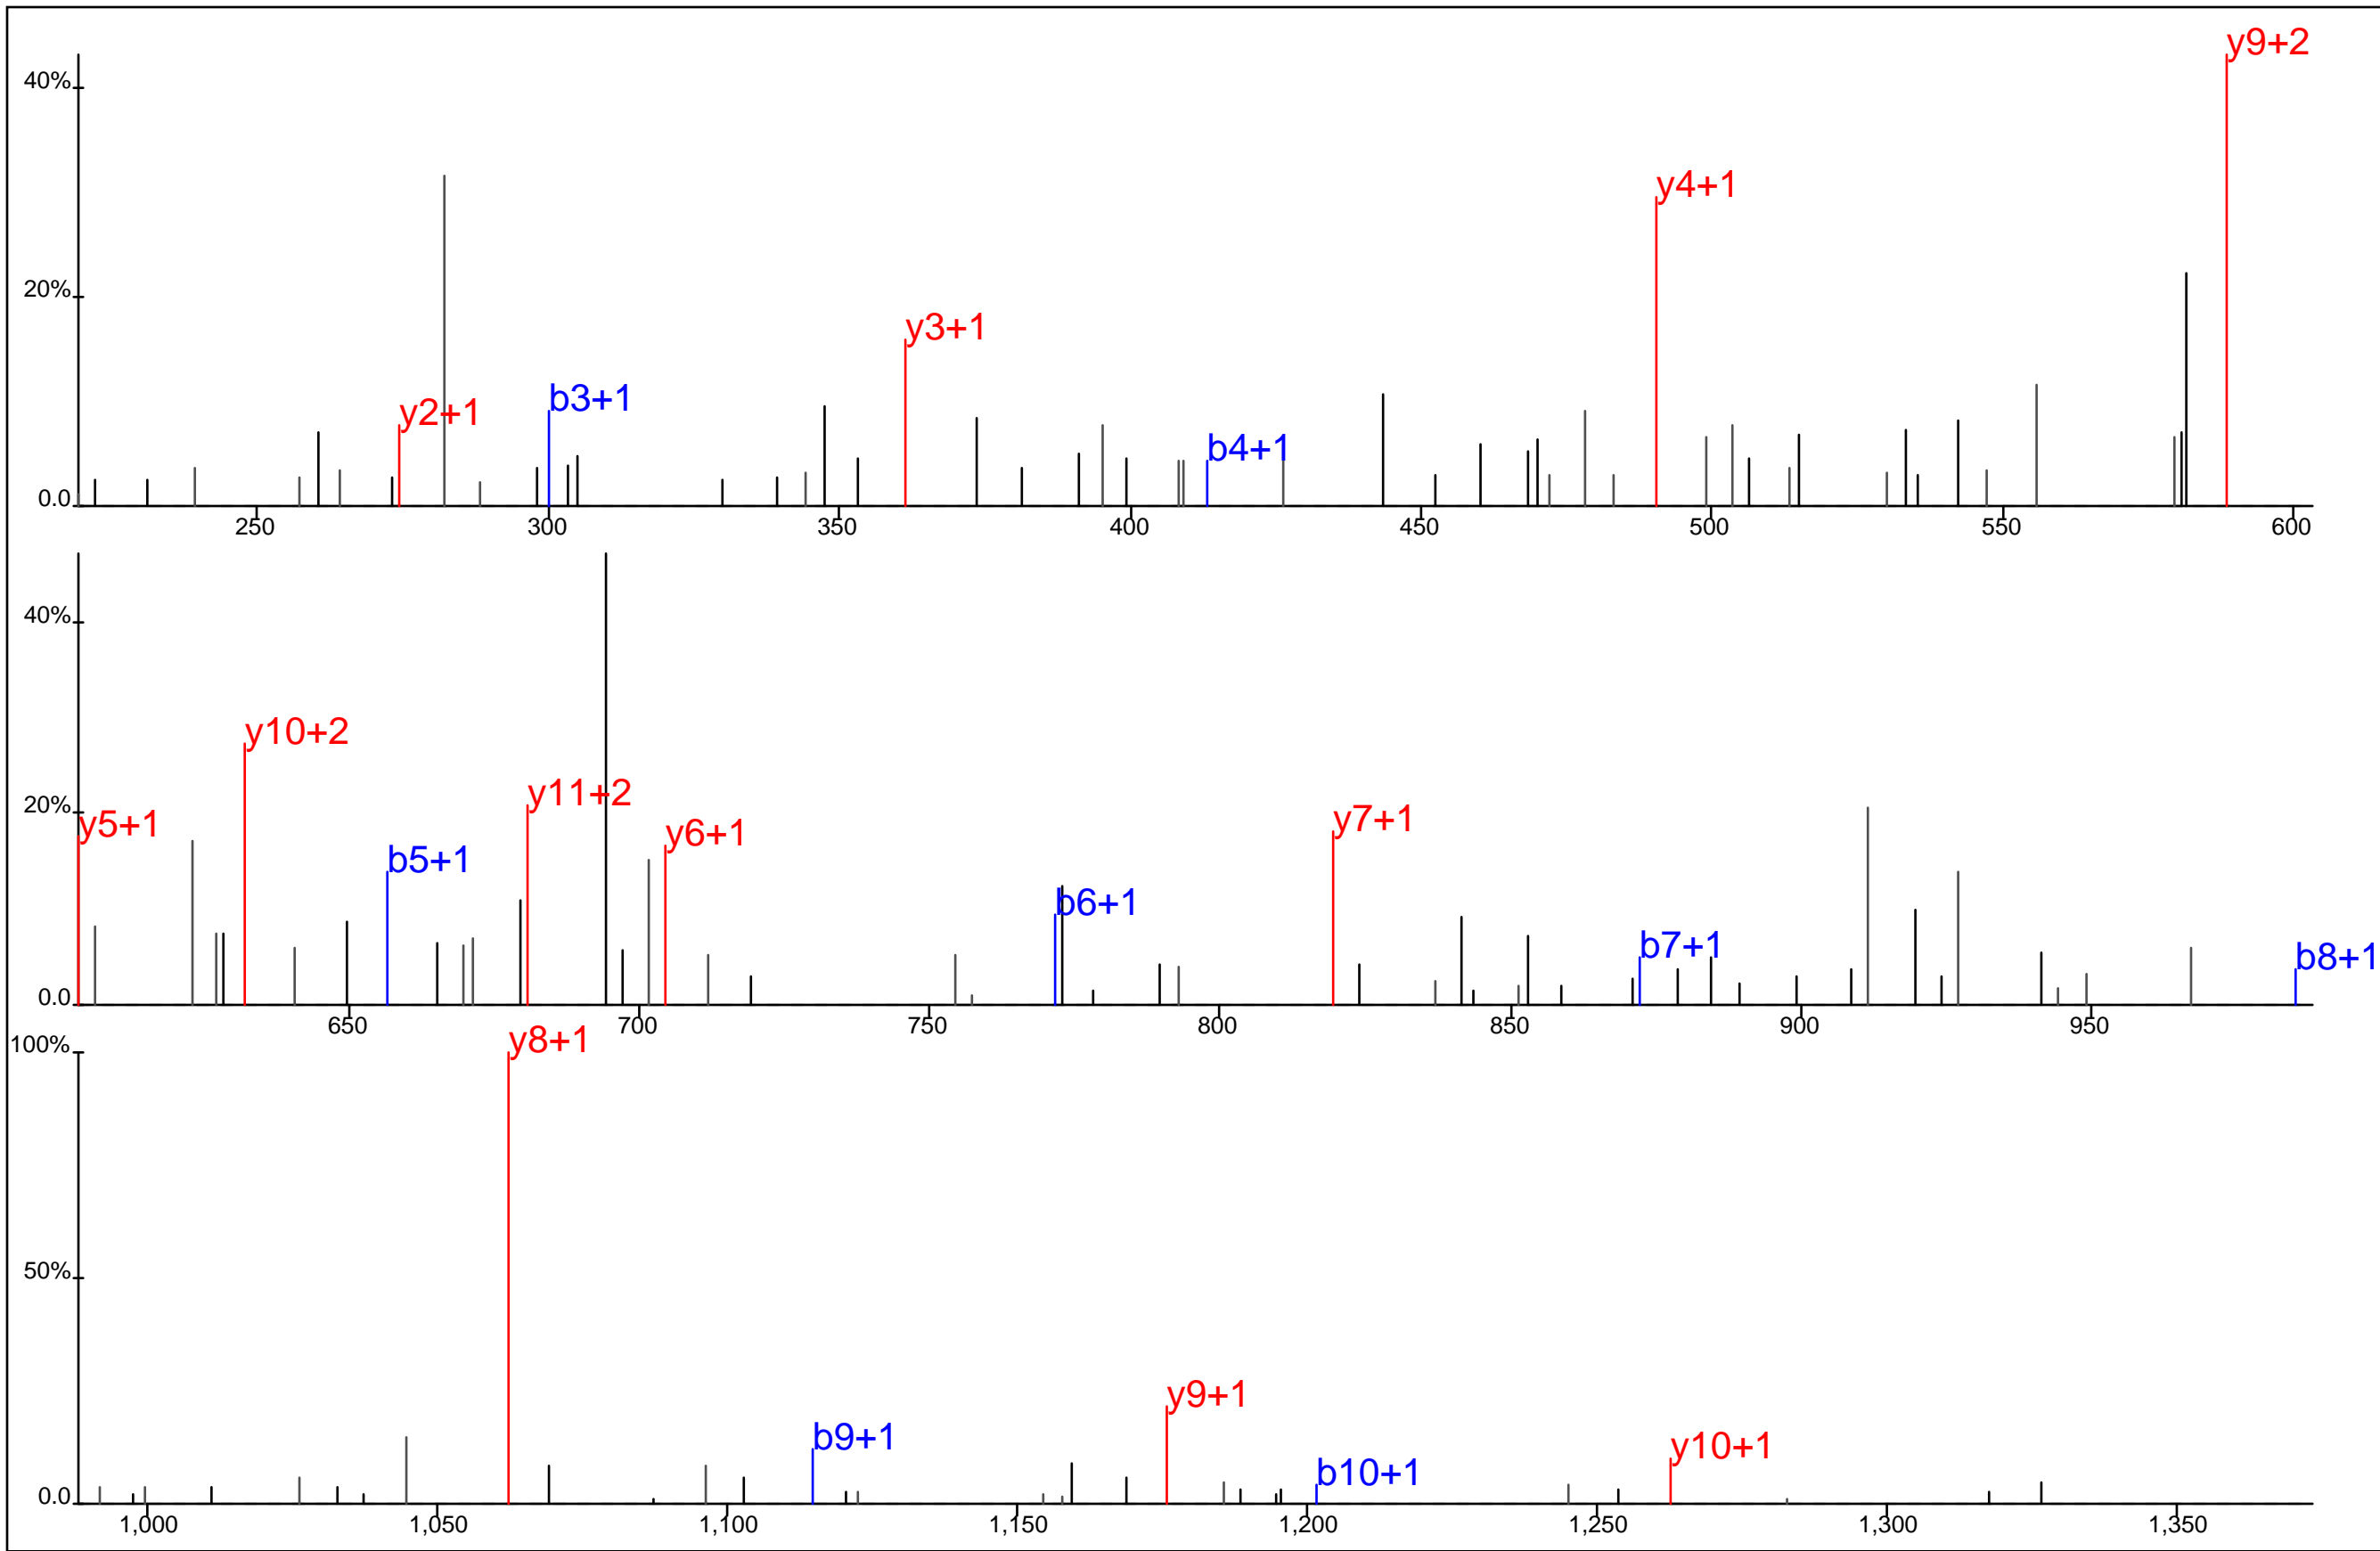

■ ■ ■ ■ ■ ■ ■  
 D P S I Y\* D T L E S V R  
■ ■ ■ ■ ■ ■ ■ ■

Protein Name: GRP1 associated scaffold protein  
 gi Accession: 0  
 Precursor Mass: 737.8271+2  
 Delta Mass: 0.616 ppm  
 XCorr: 43.83

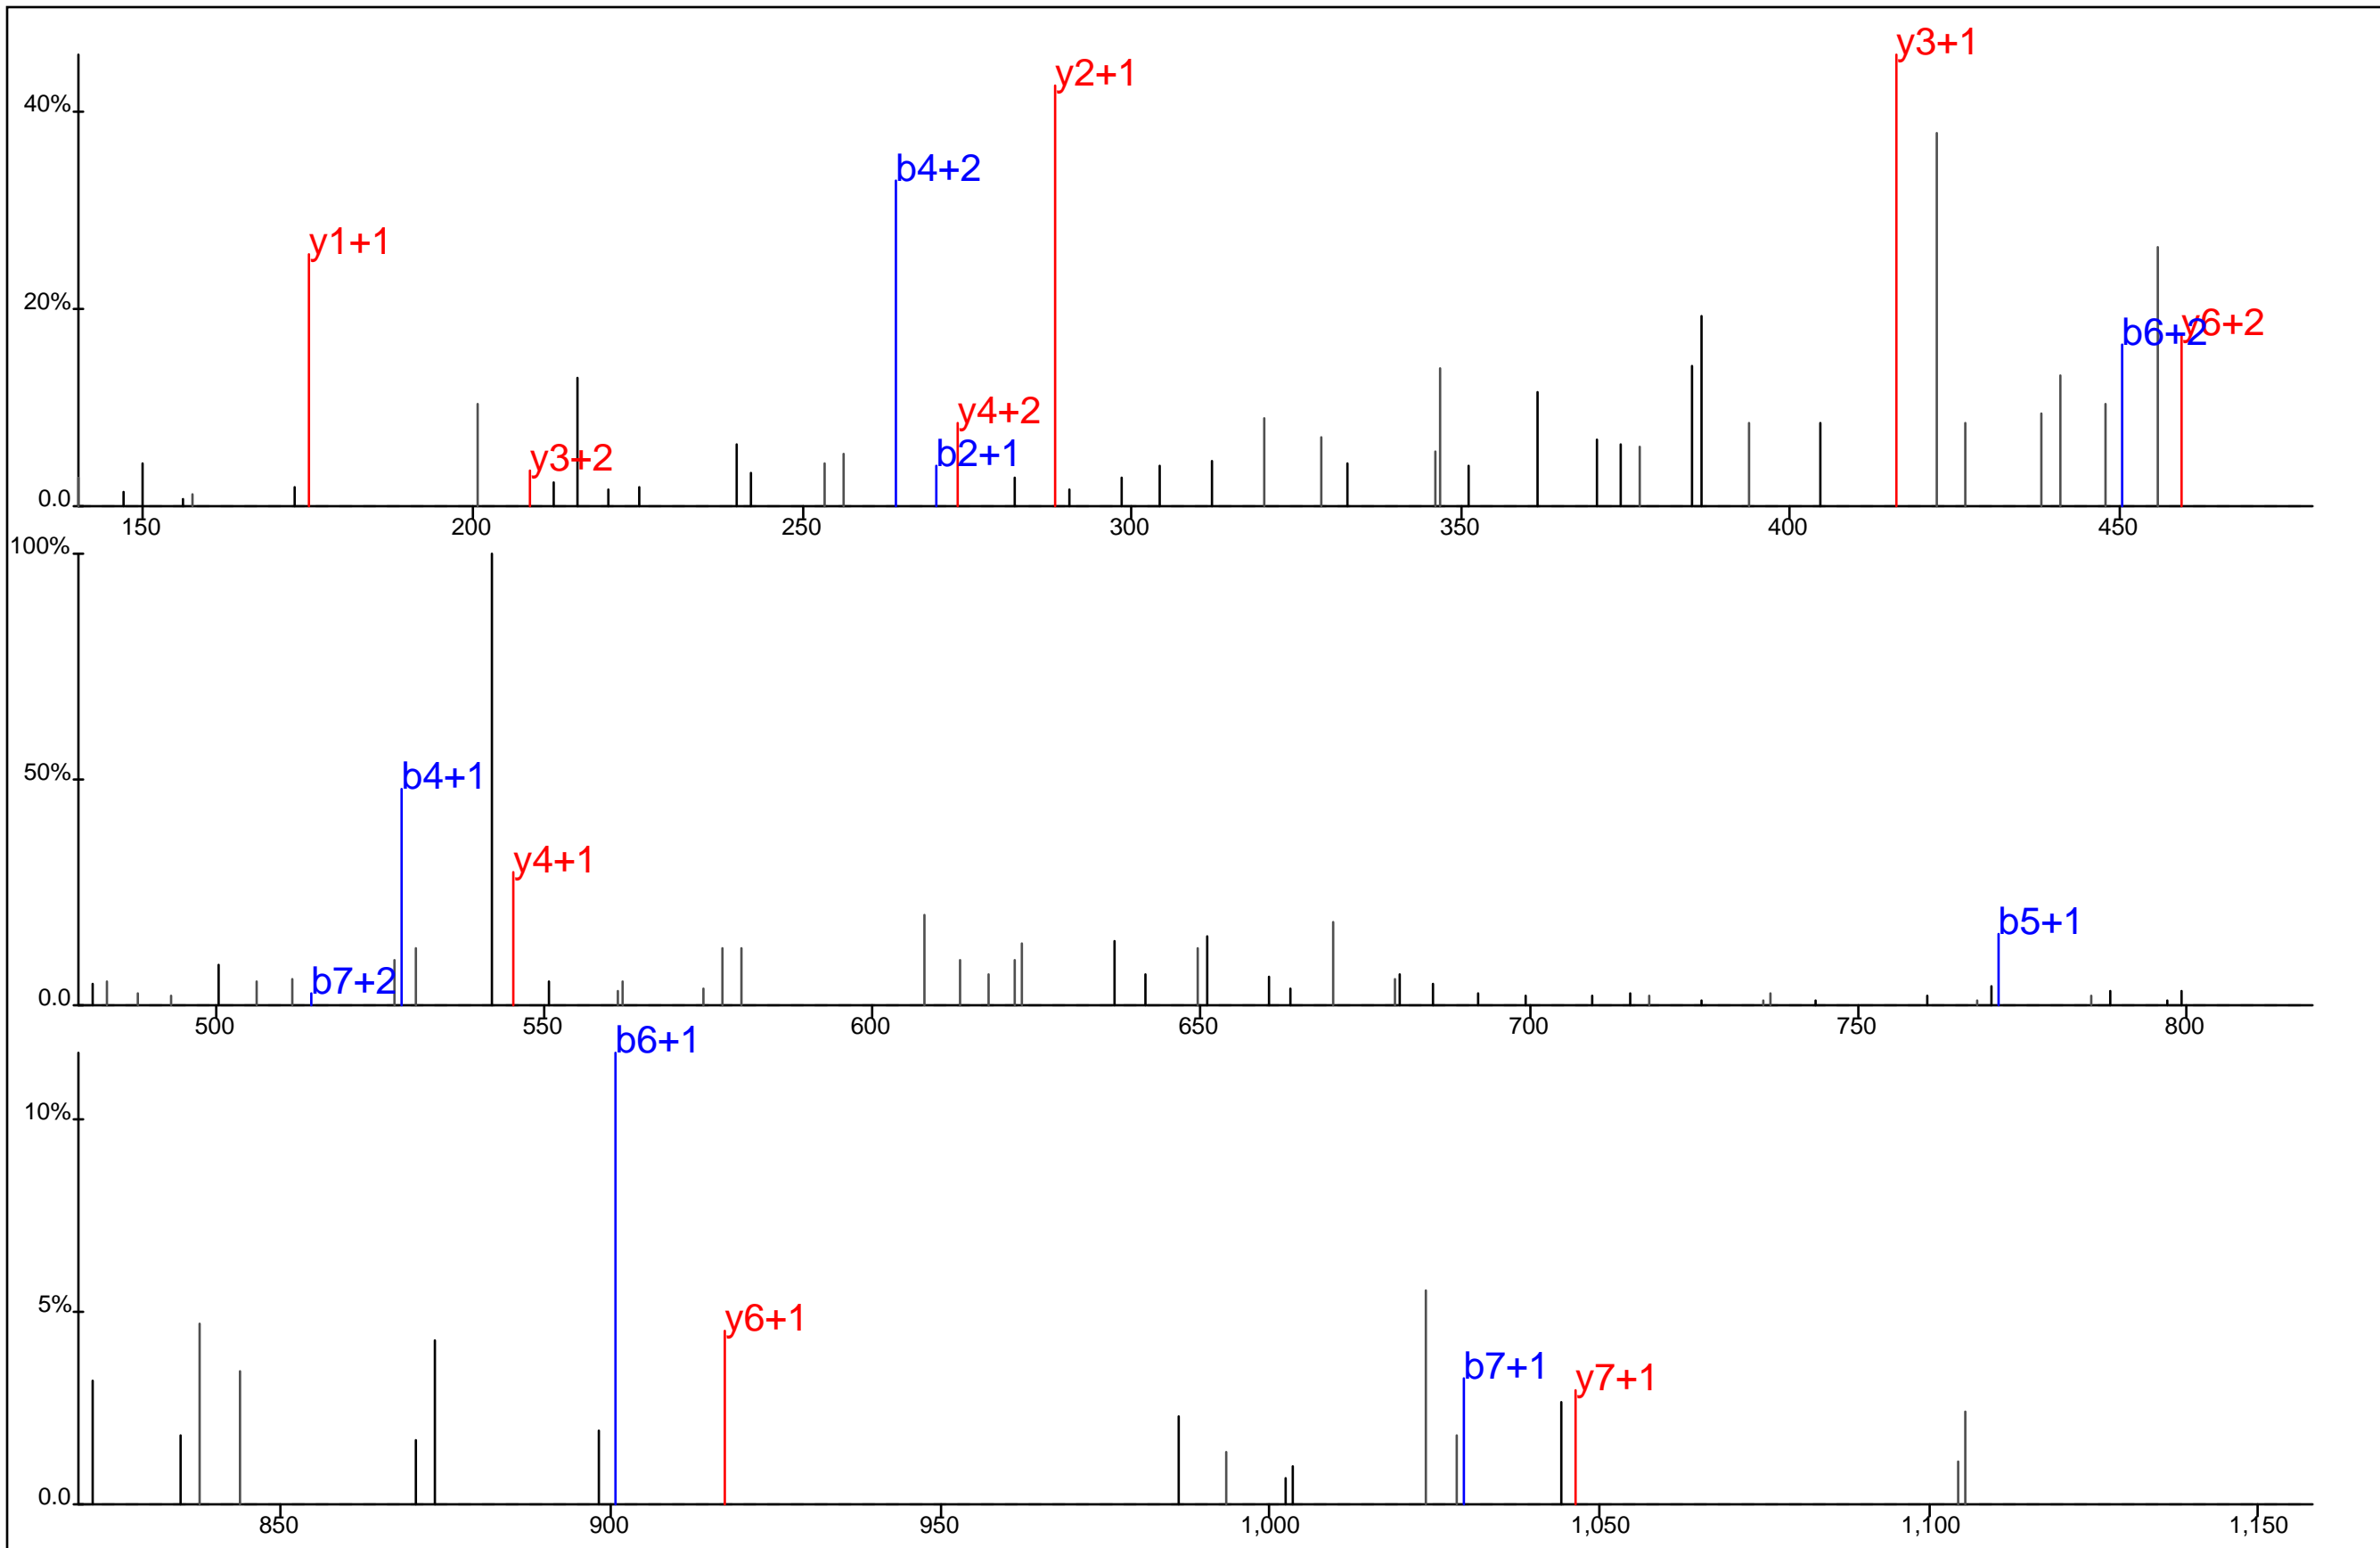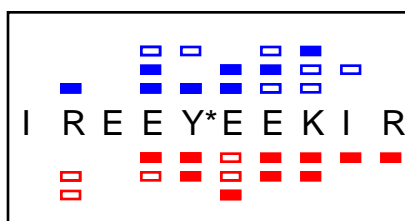

Protein Name: GTPase IMAP family member 4  
 gi Accession: 0  
 Precursor Mass: 482.2328+3  
 Delta Mass: 0.604 ppm  
 XCorr: 31.6

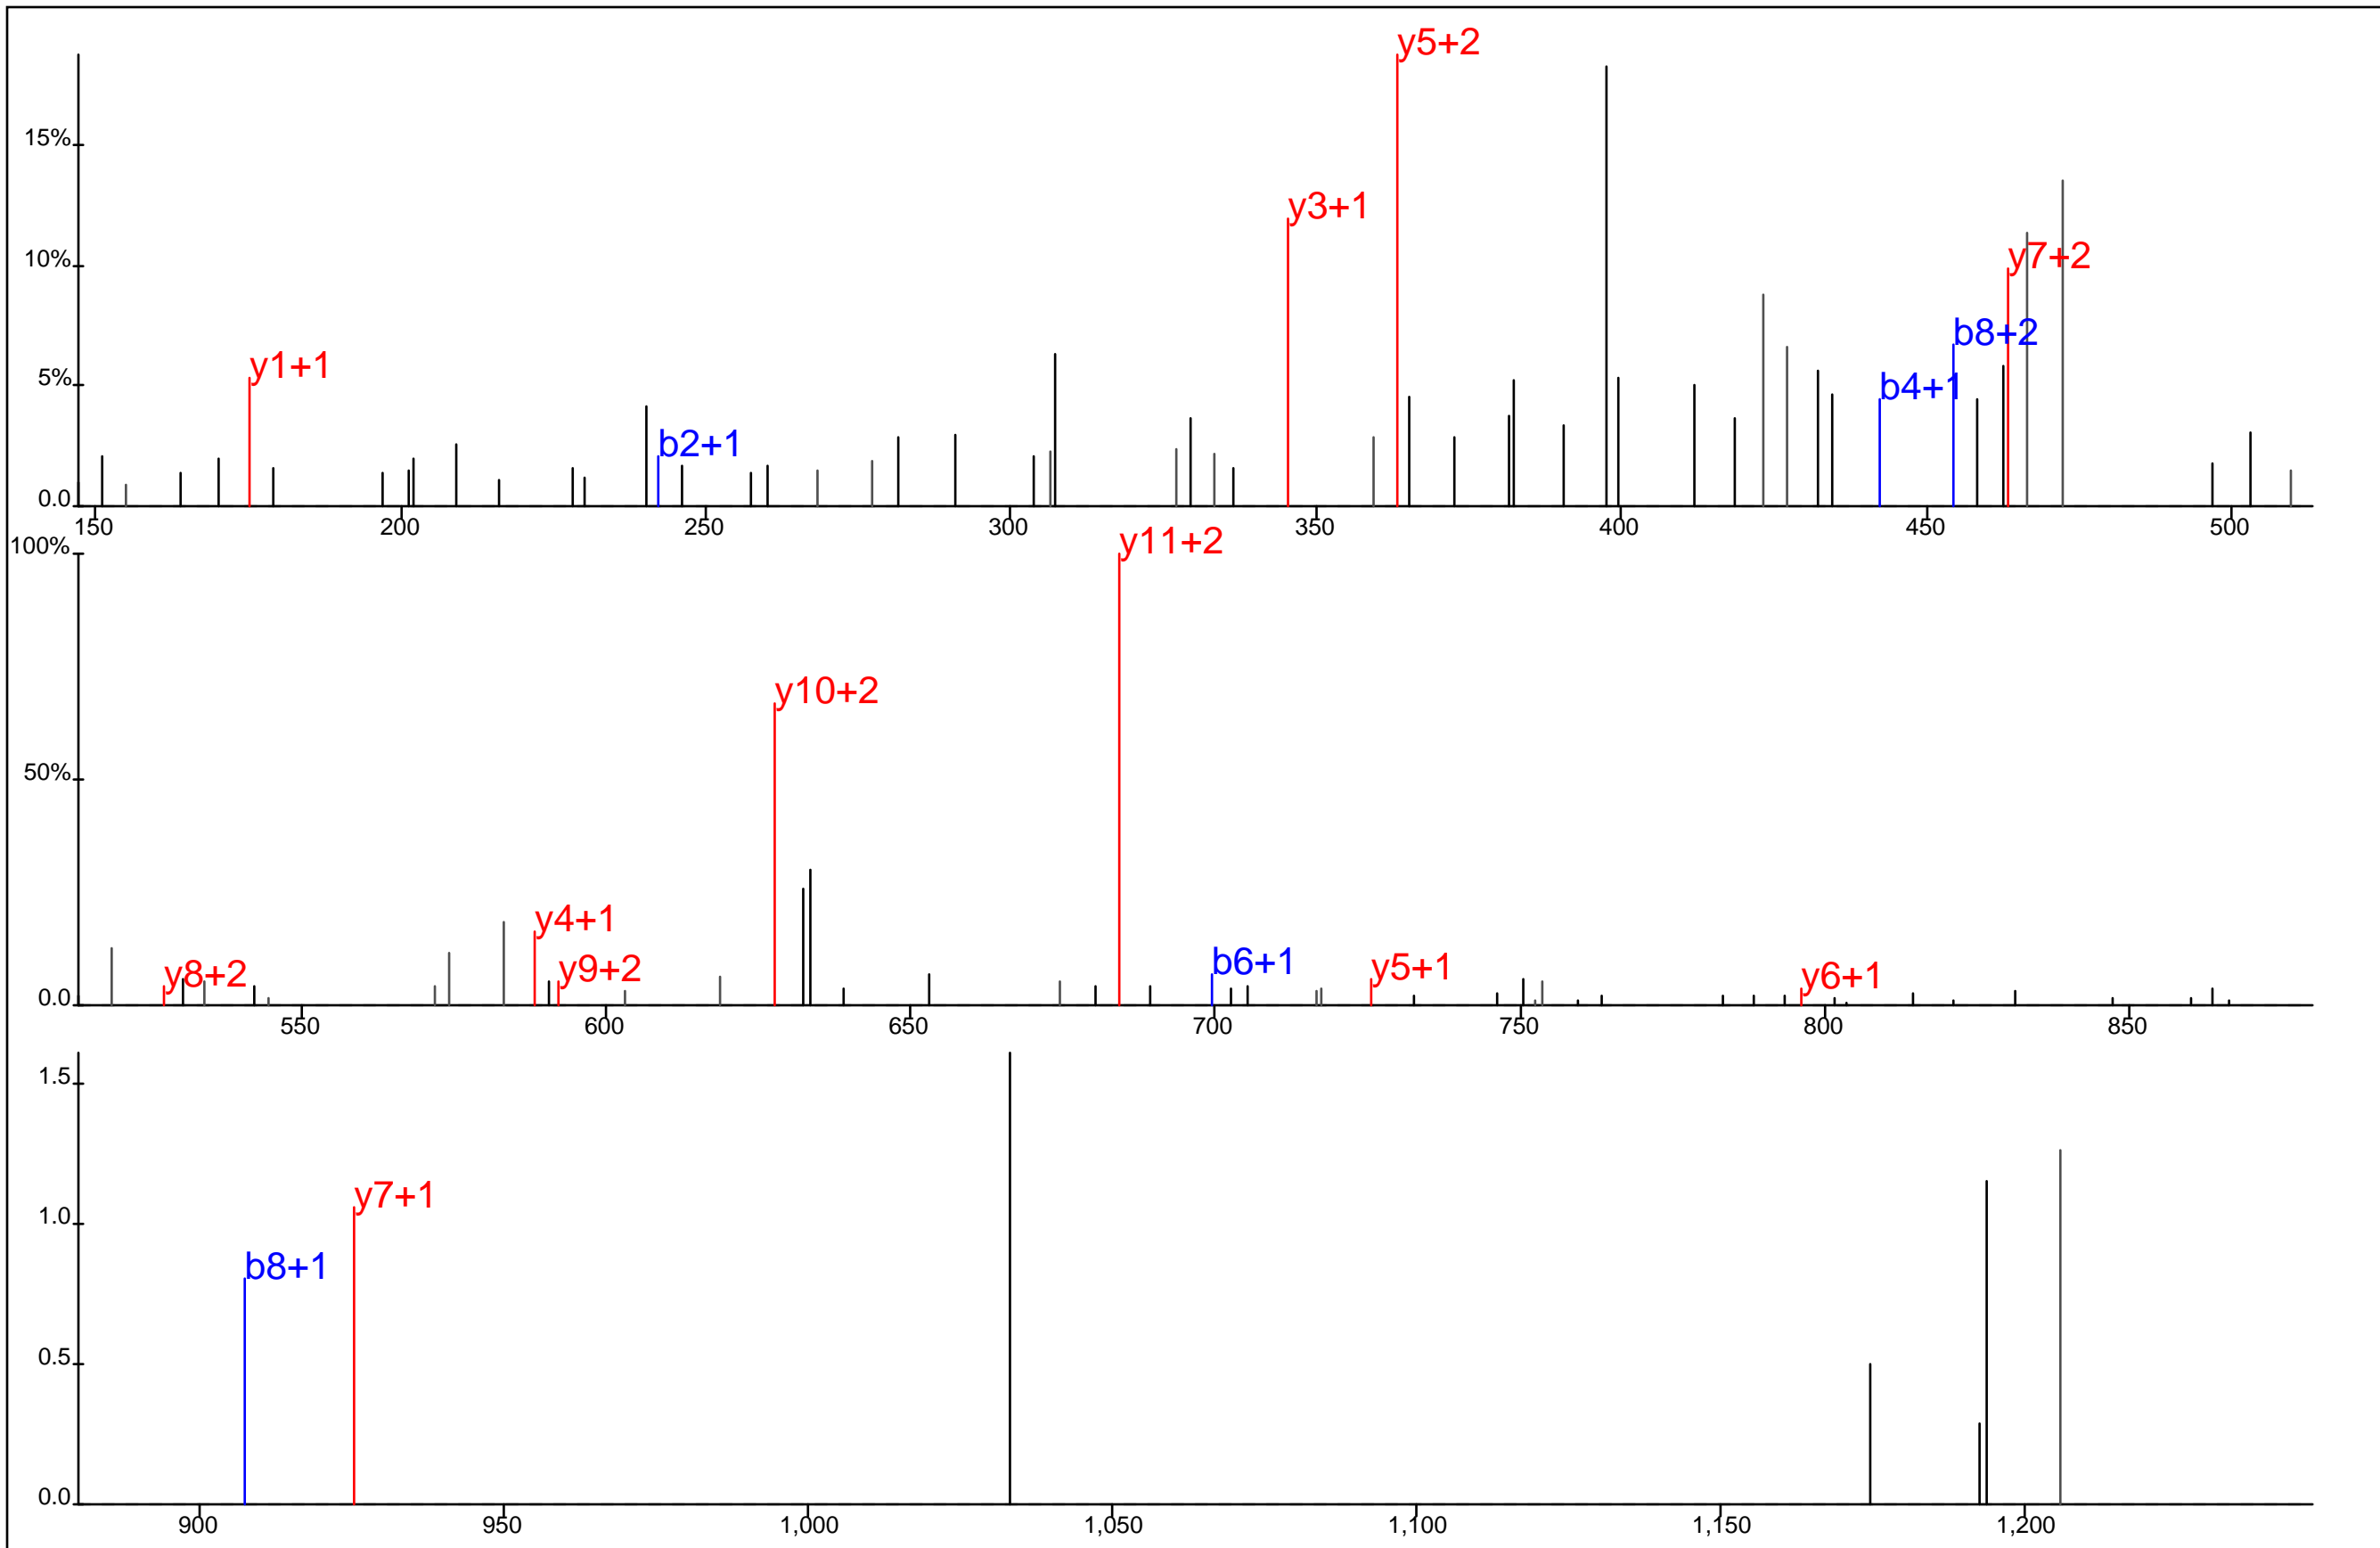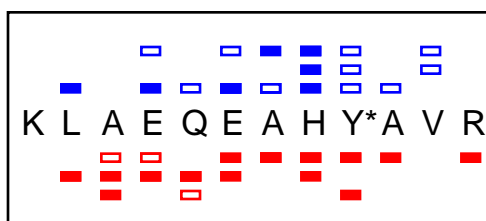

Protein Name: GTPase IMAP family member 4  
 gi Accession: 0  
 Precursor Mass: 498.9071+3  
 Delta Mass: 2.243 ppm  
 XCorr: 21.96

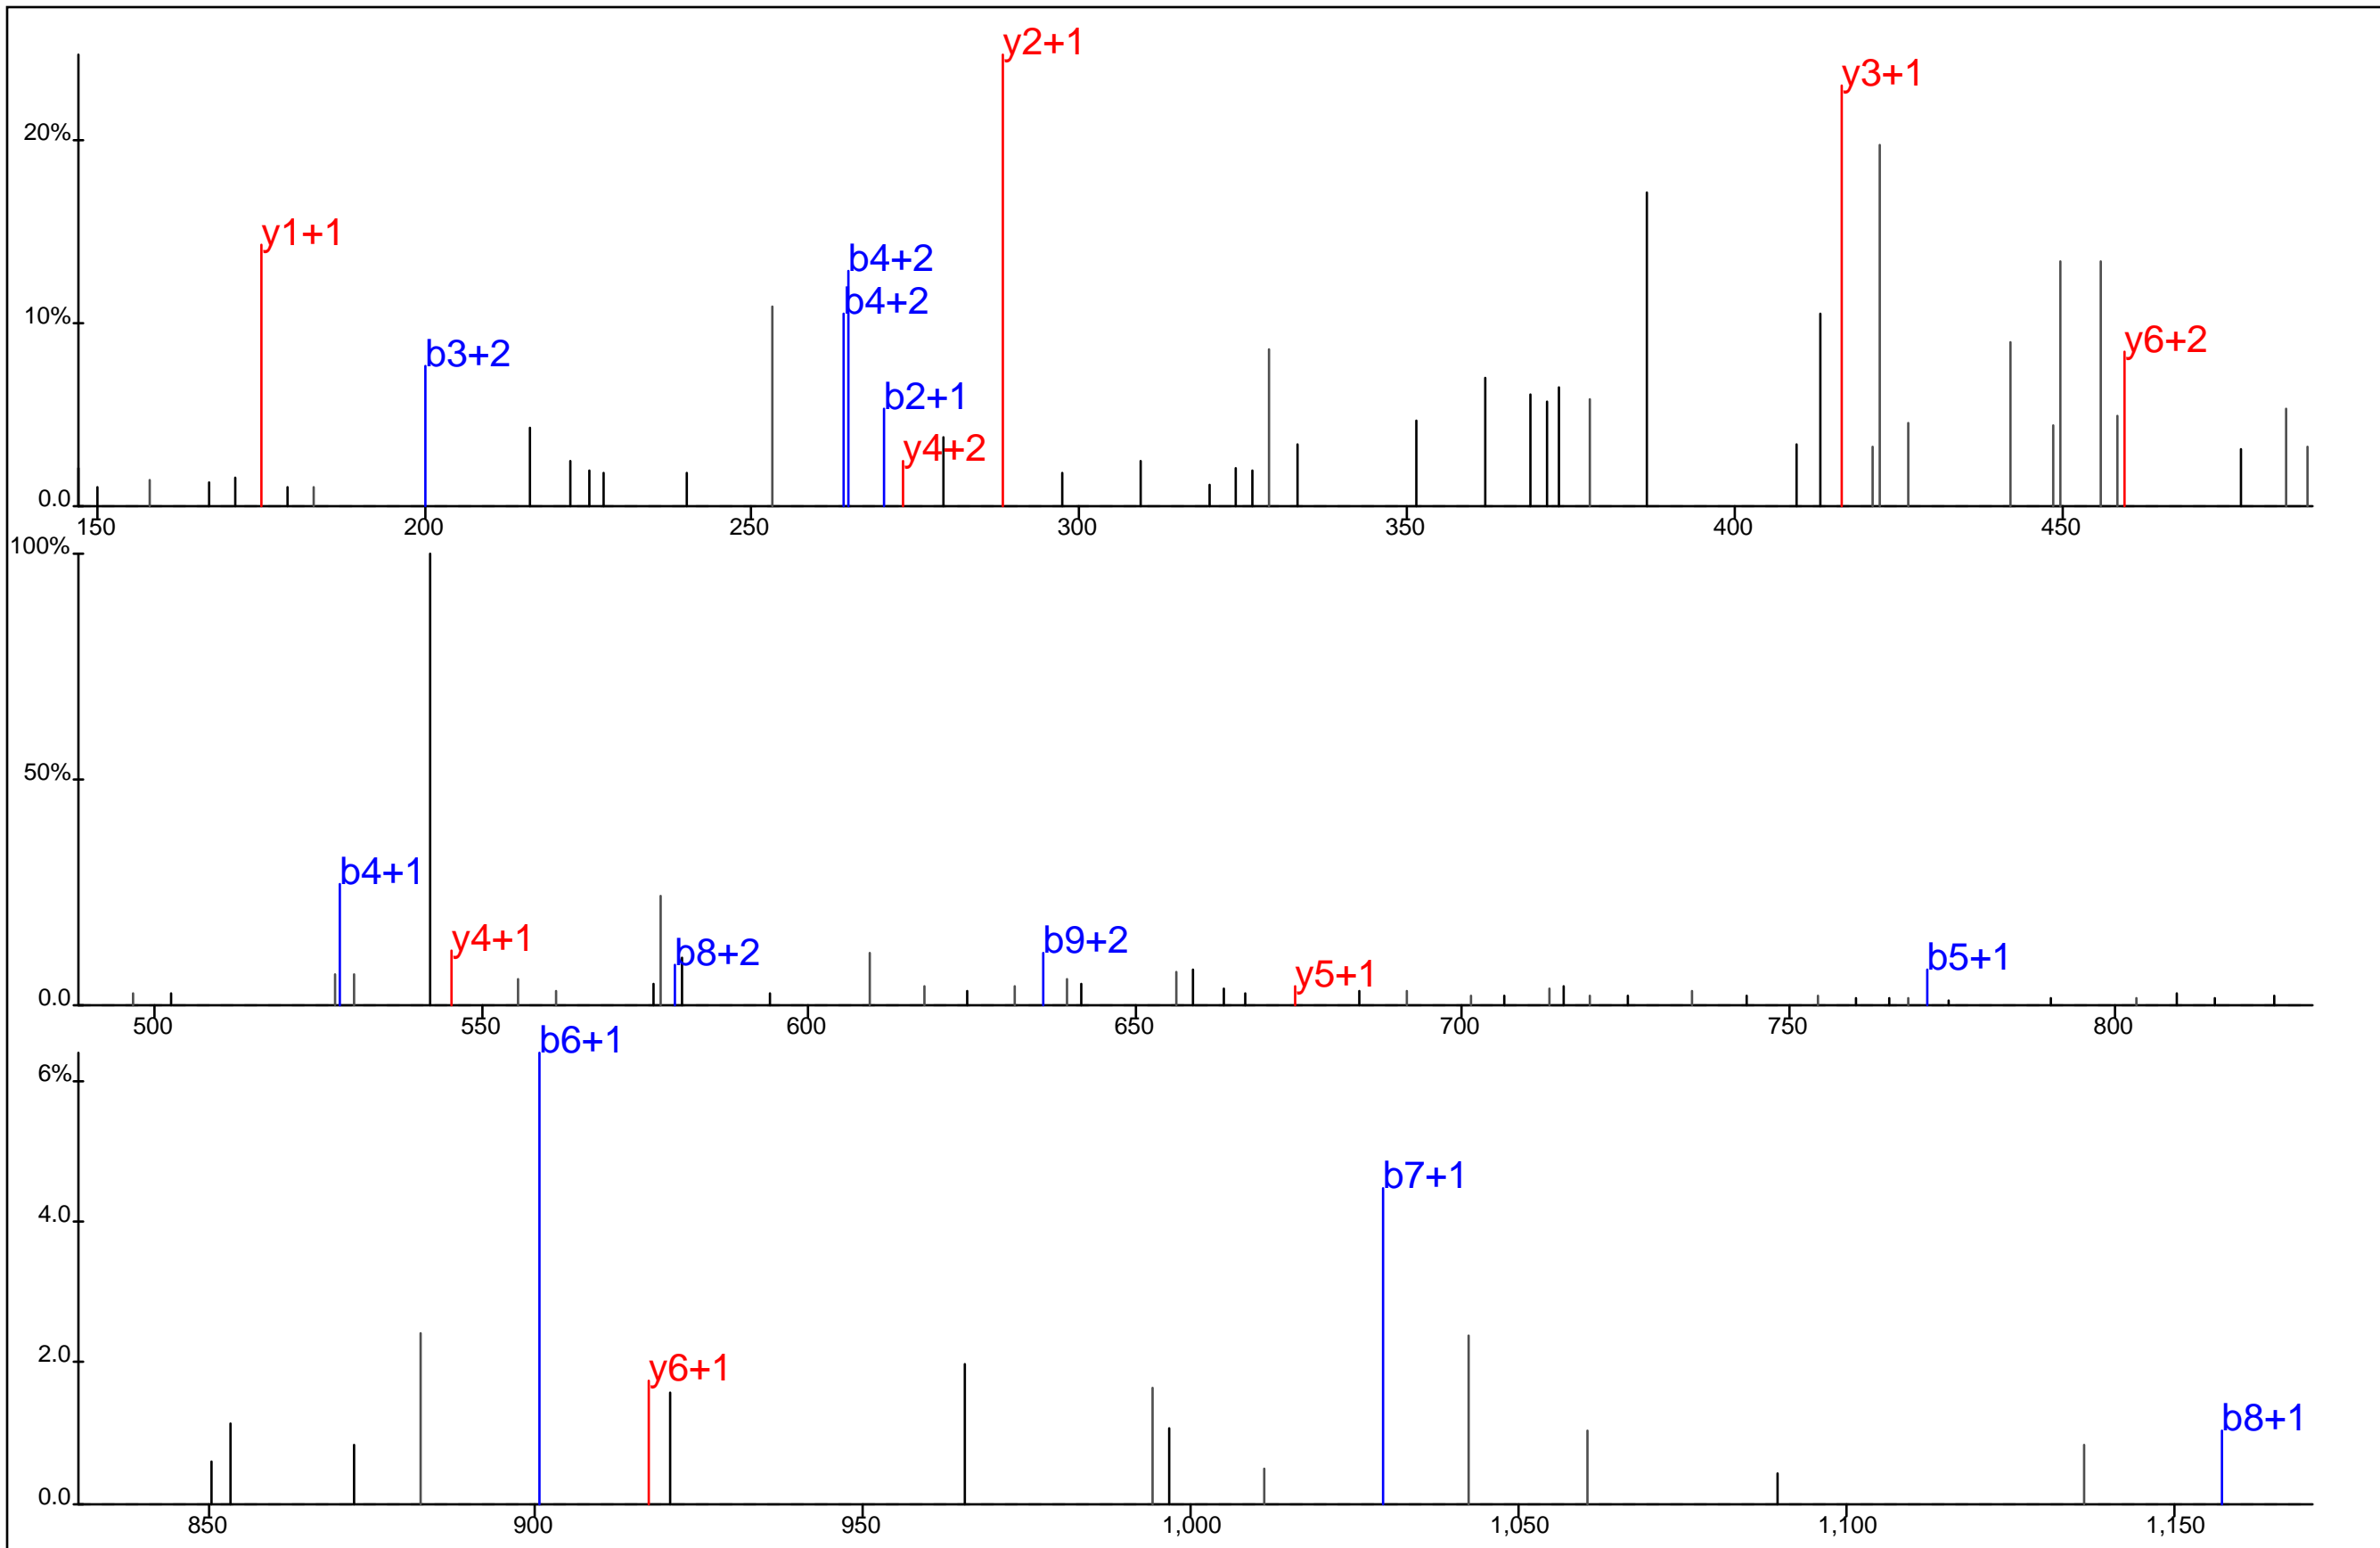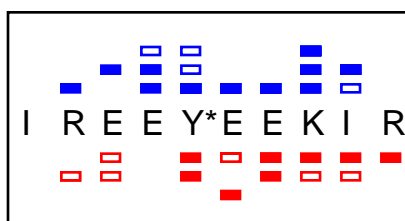

Protein Name: GTPase IMAP family member 4  
 gi Accession: 0  
 Precursor Mass: 482.2332+3  
 Delta Mass: 1.238 ppm  
 XCorr: 24.92

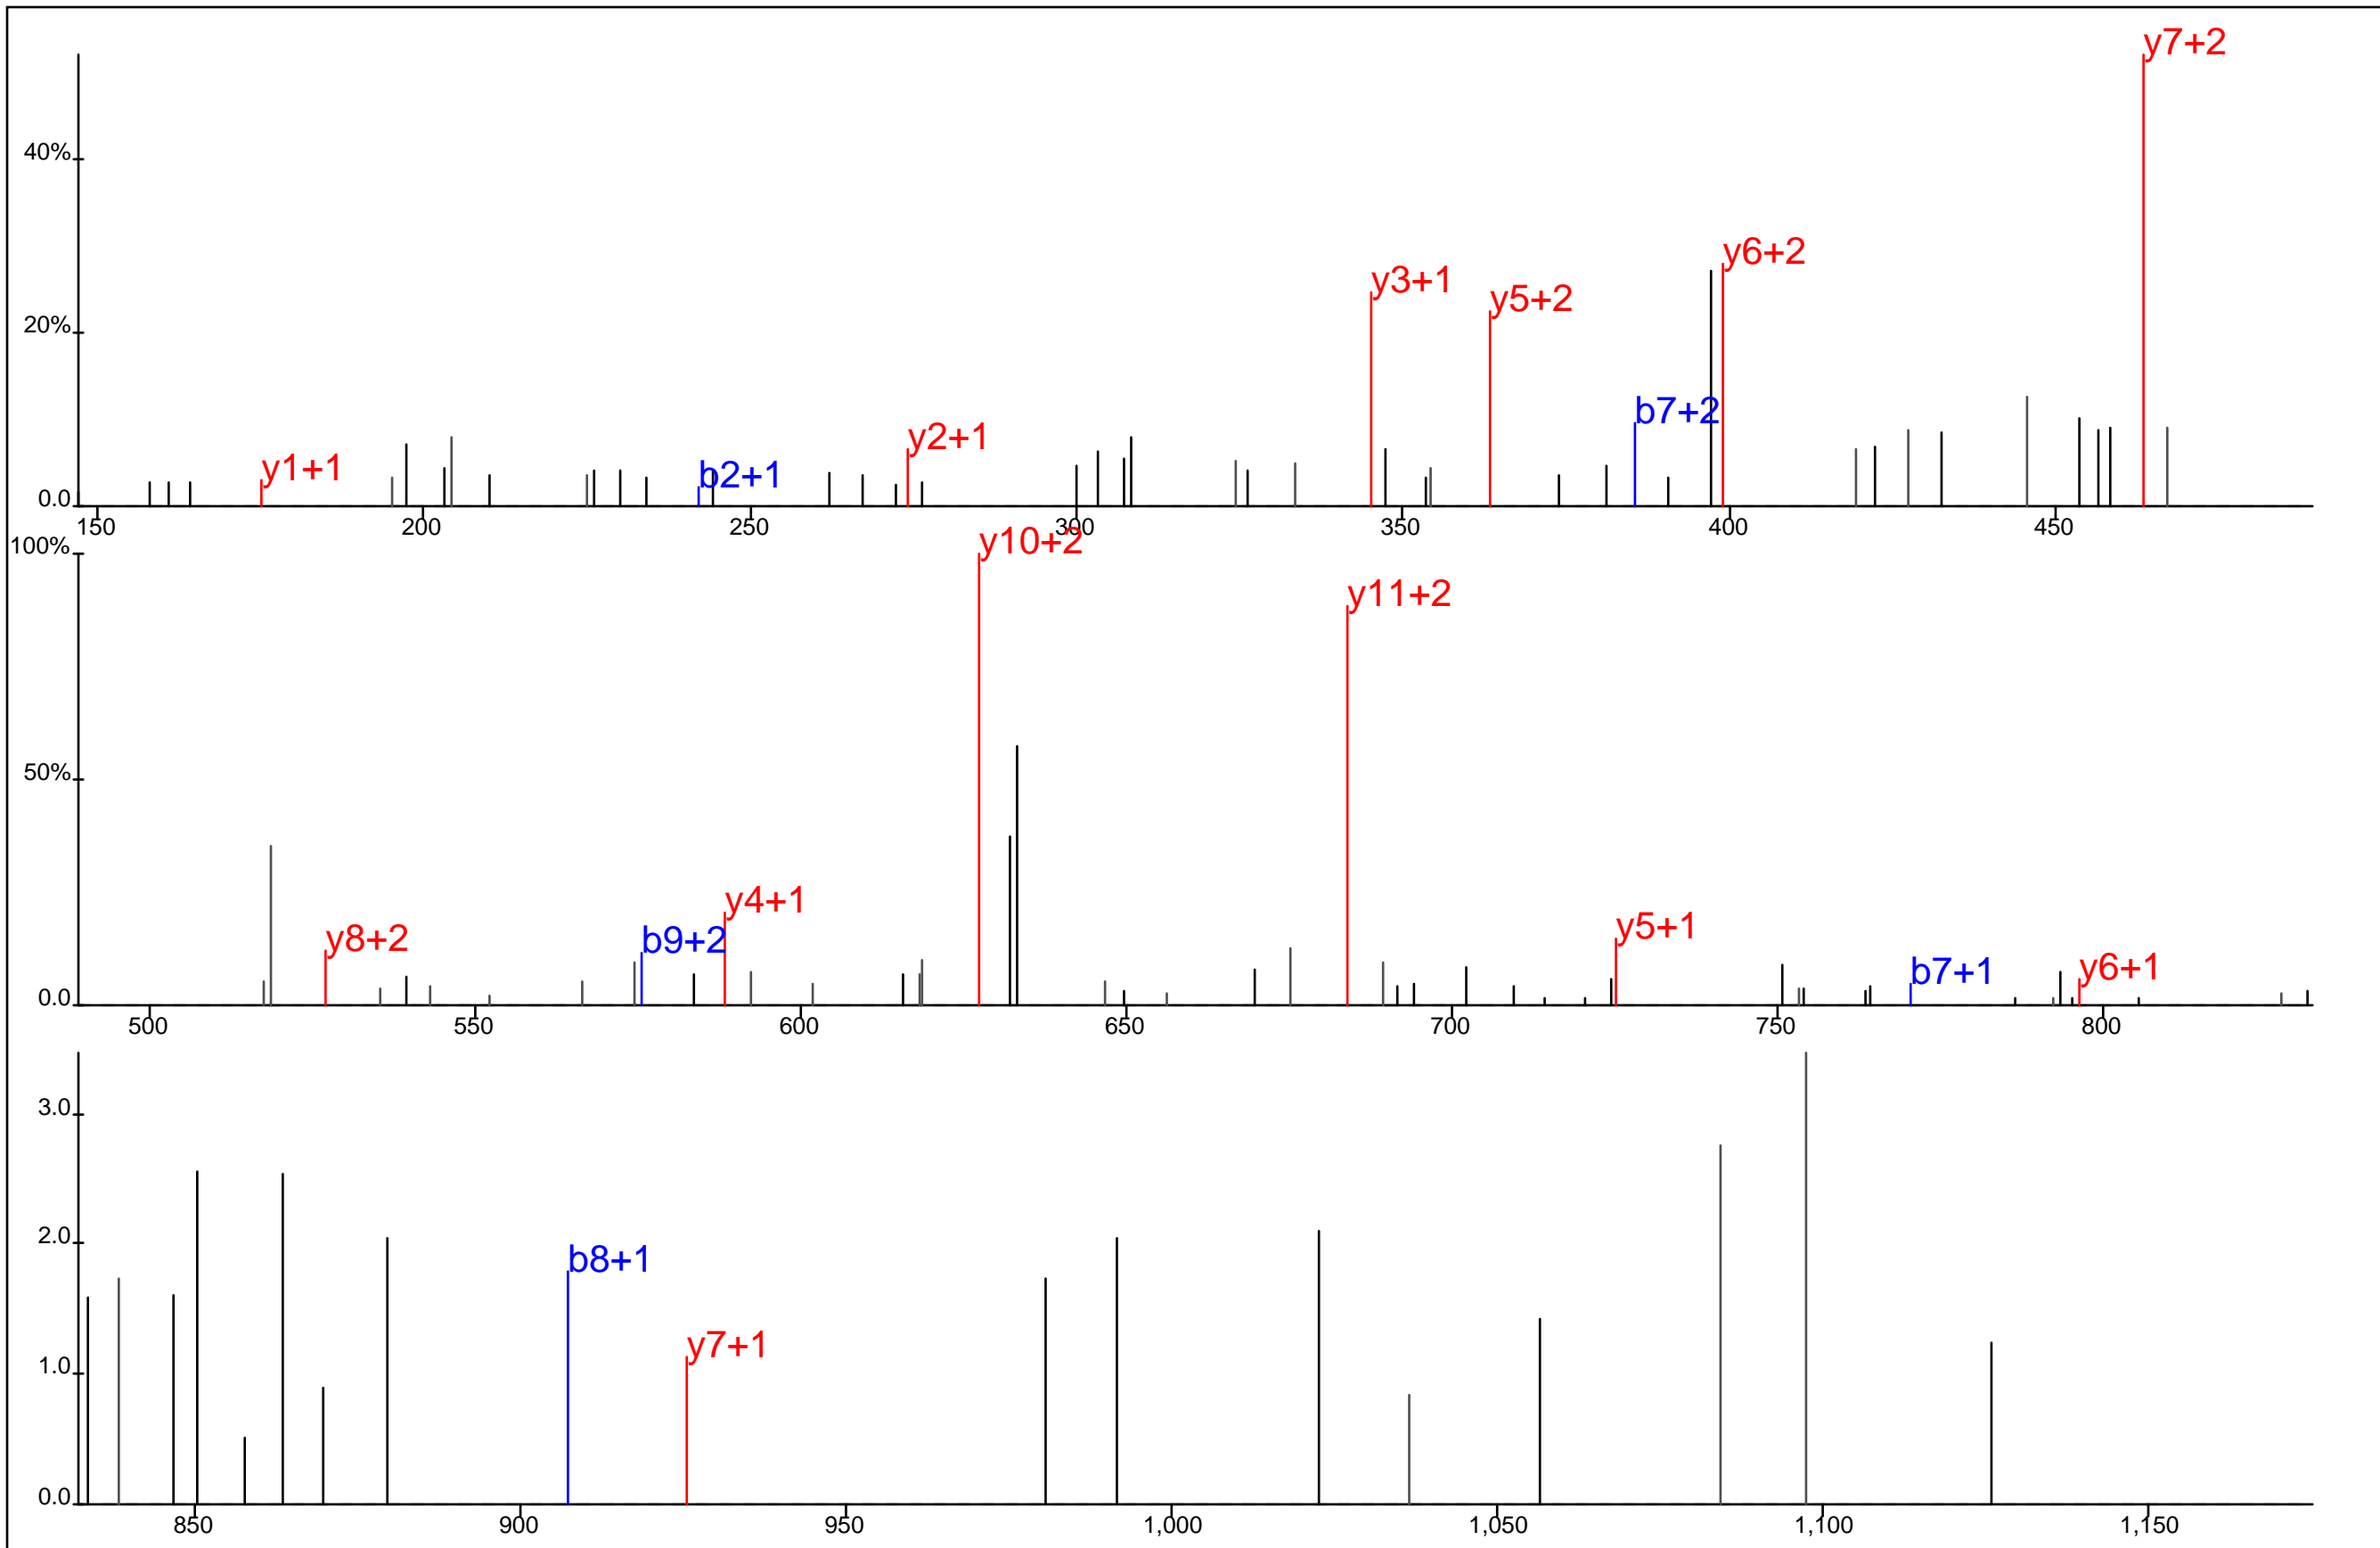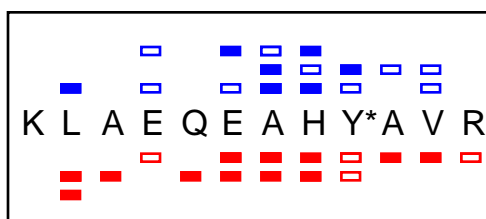

Protein Name: GTPase IMAP family member 4  
 gi Accession: 0  
 Precursor Mass: 498.9090+3  
 Delta Mass: 1.617 ppm  
 XCorr: 29.11

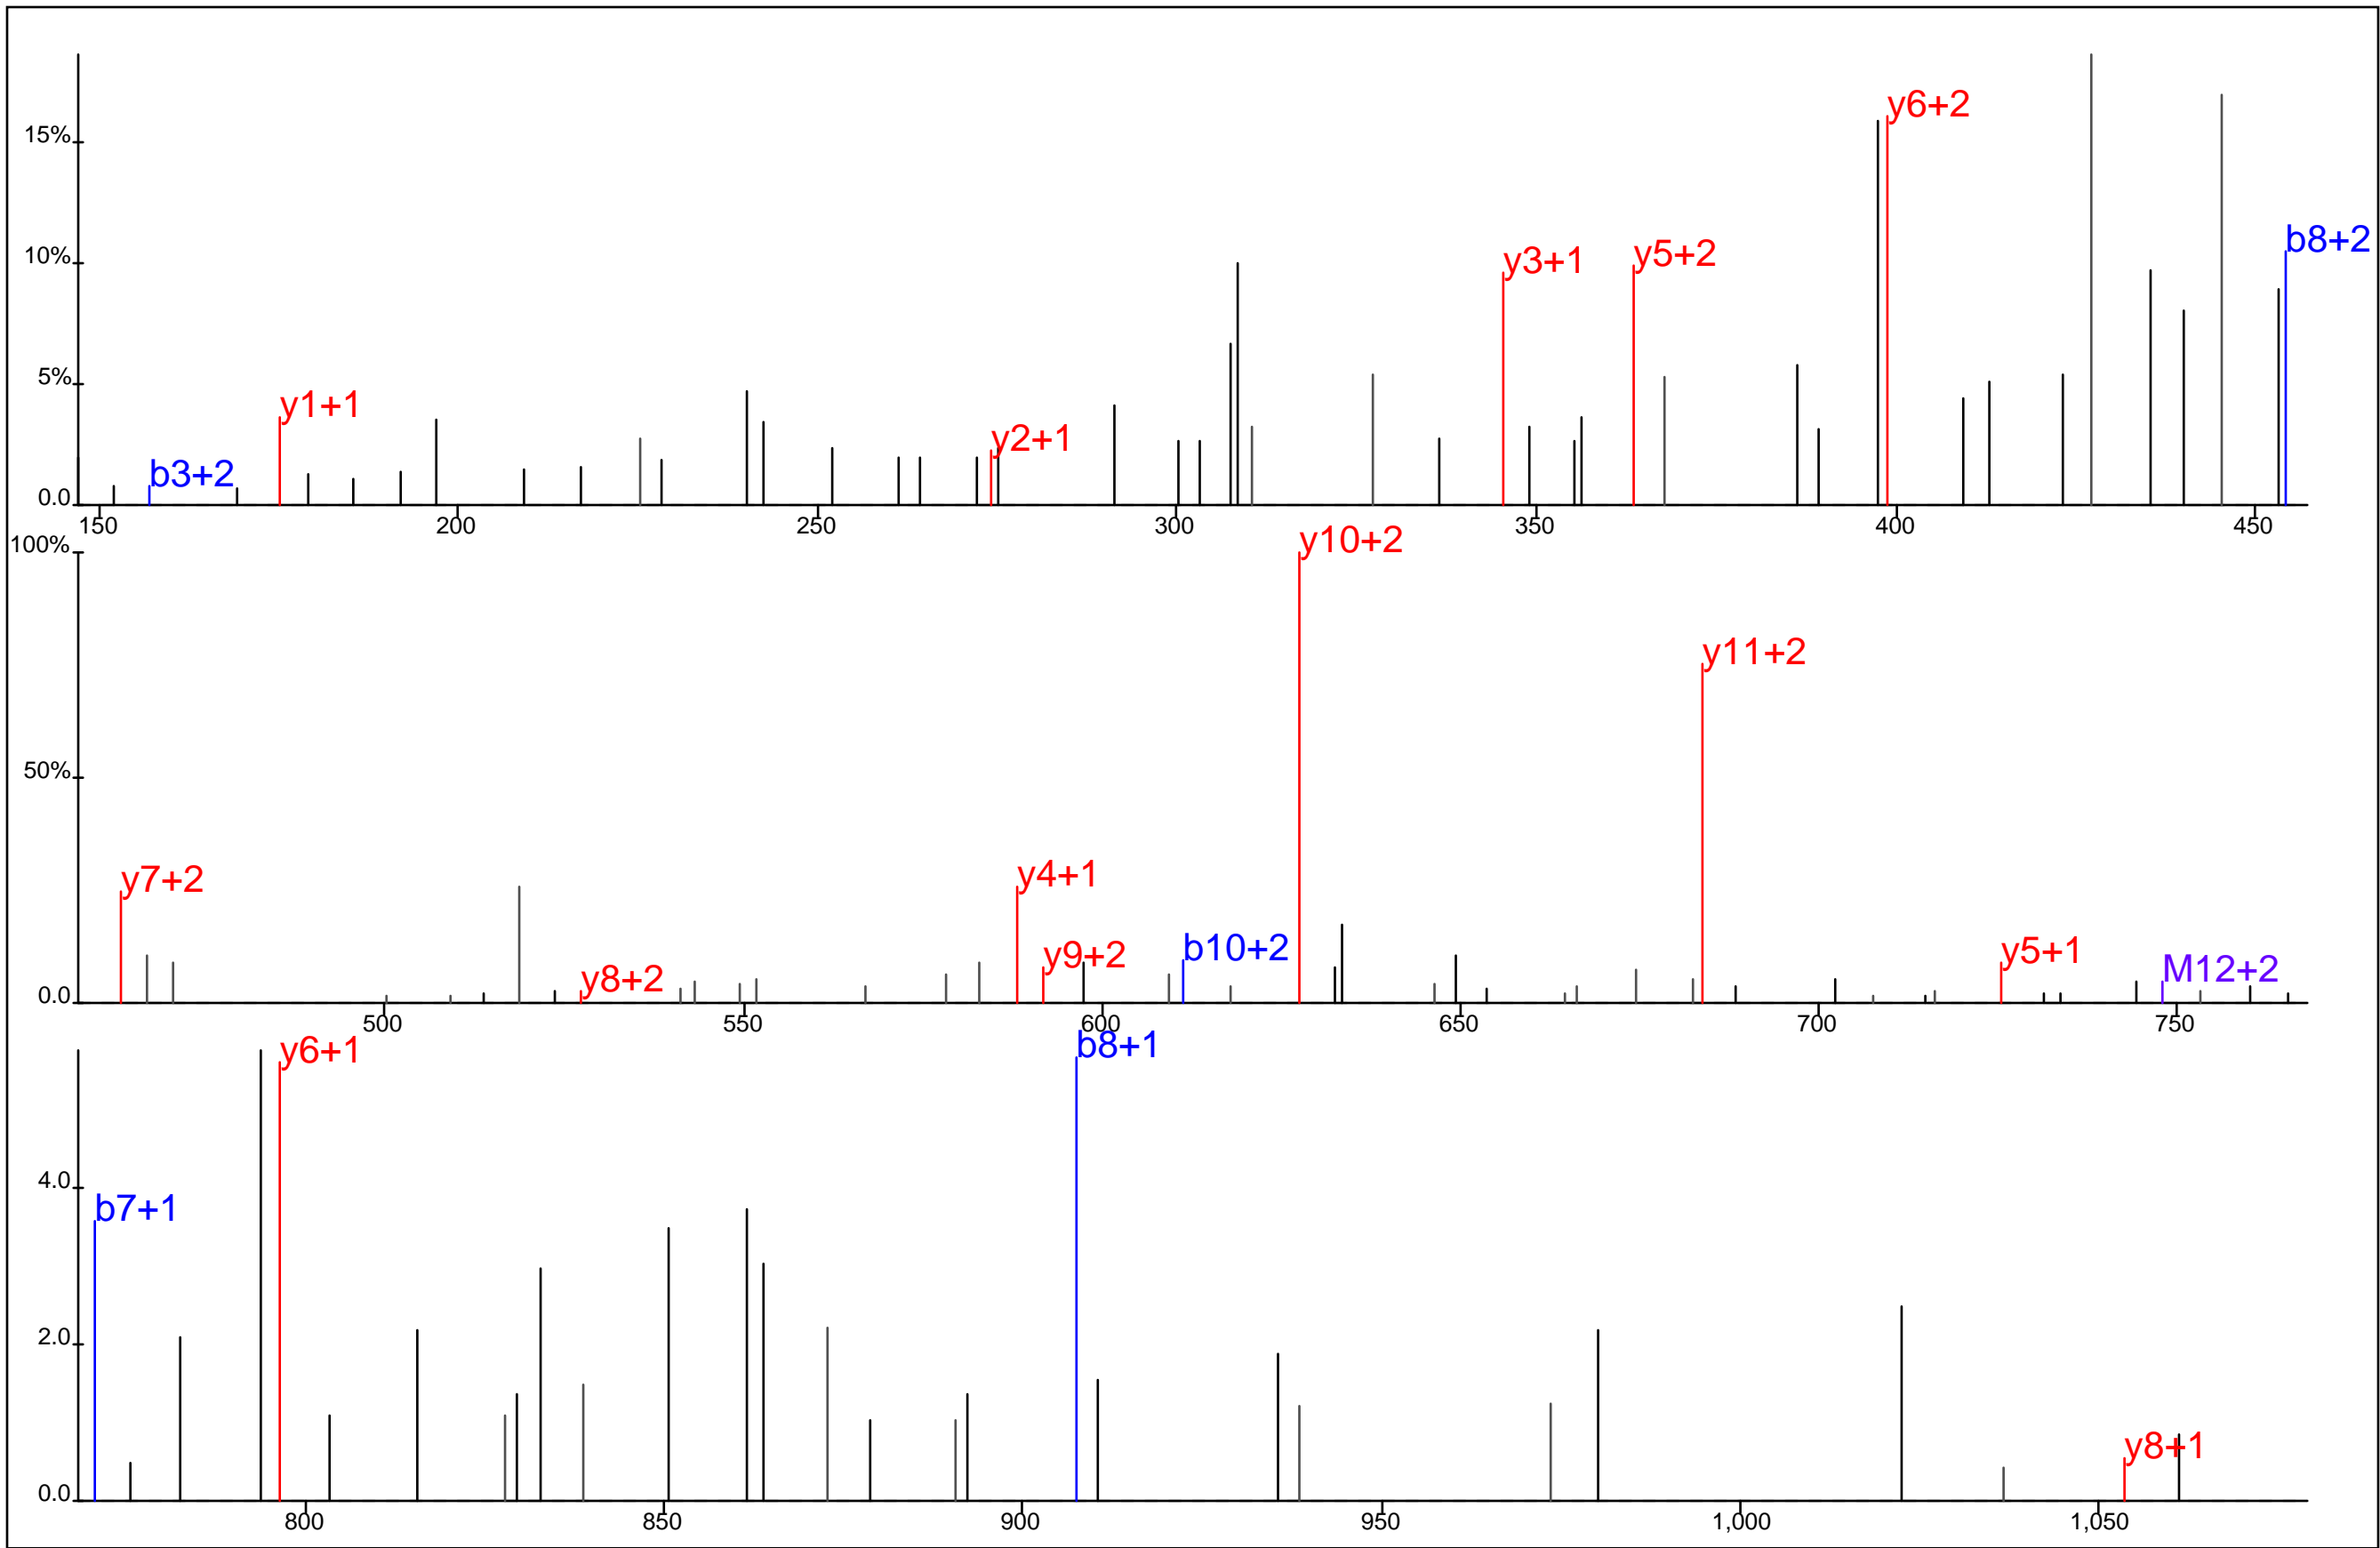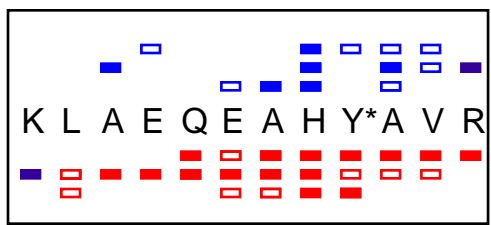

Protein Name: GTPase IMAP family member 4  
 gi Accession: 0  
 Precursor Mass: 498.9085+3  
 Delta Mass: 0.636 ppm  
 XCorr: 32.65



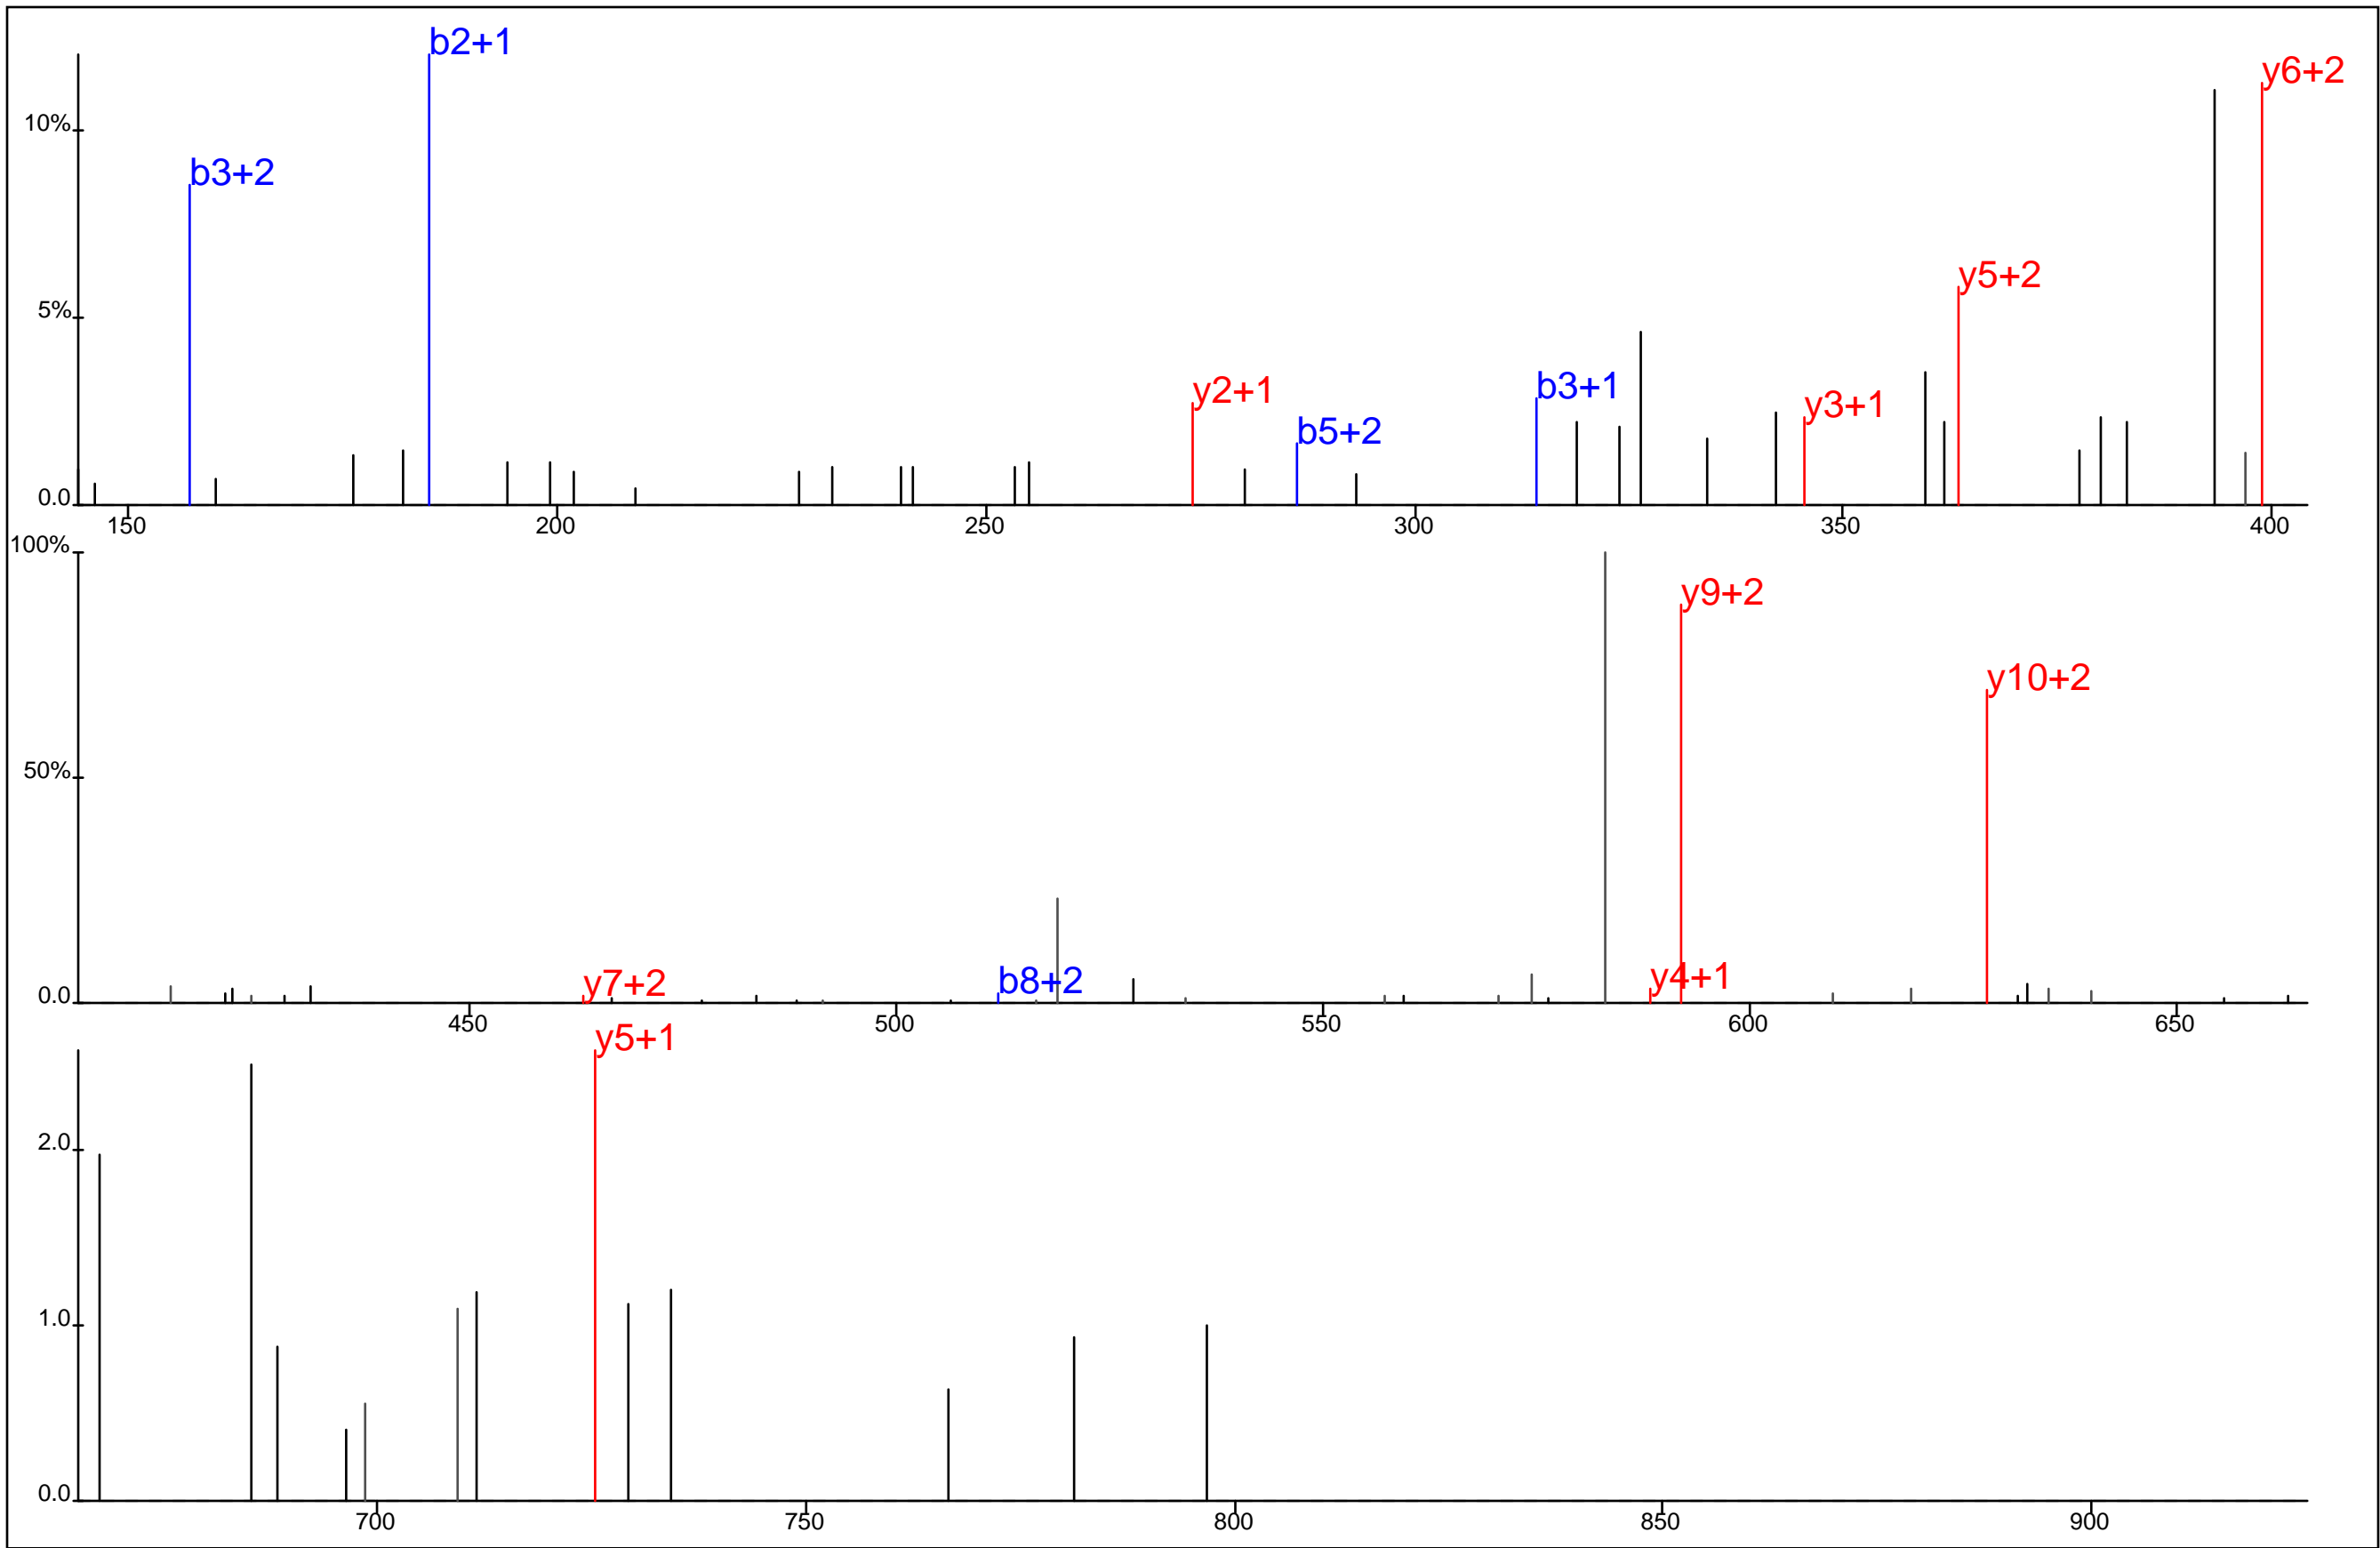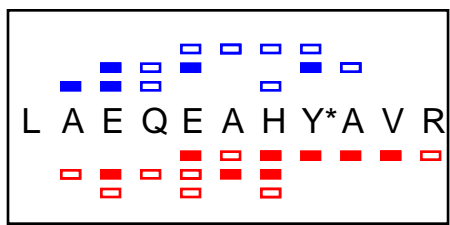

Protein Name: GTPase IMAP family member 4  
 gi Accession: 0  
 Precursor Mass: 456.2104+3  
 Delta Mass: 1.202 ppm  
 XCorr: 26.12

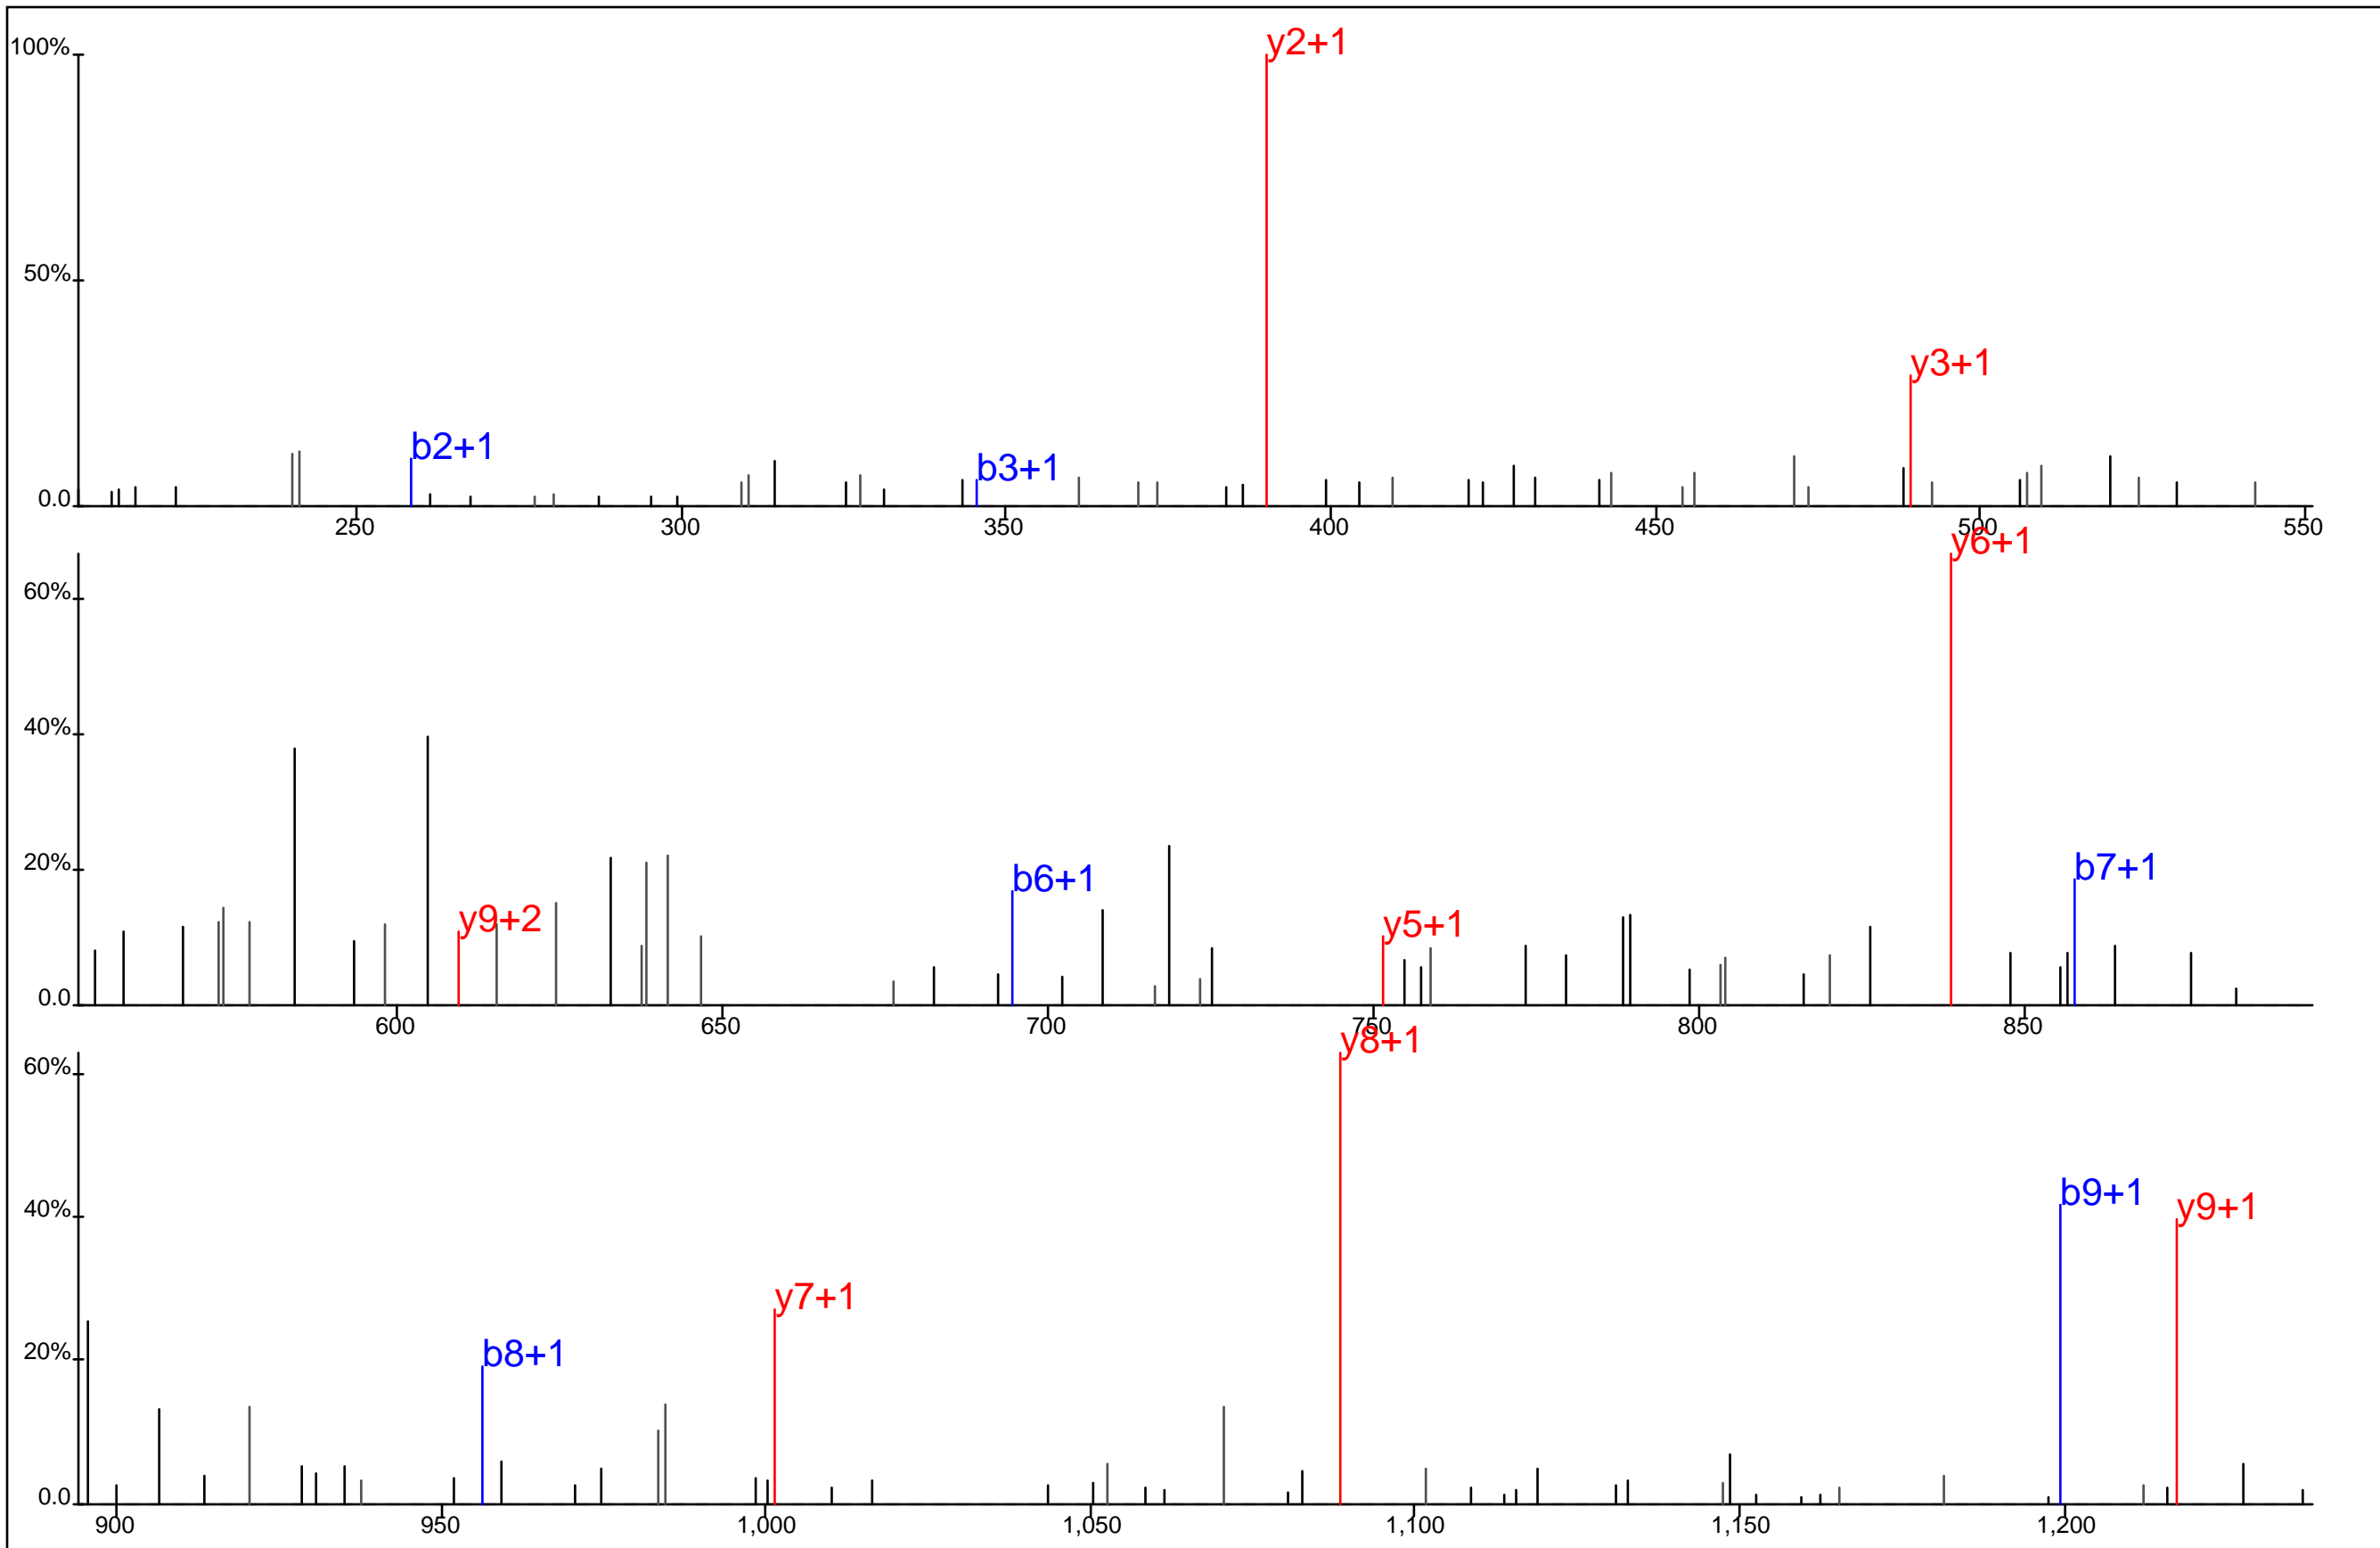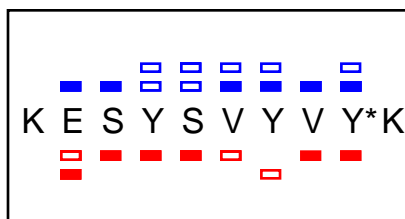

Protein Name: H2B Histone family, member E  
 gi Accession: 0  
 Precursor Mass: 673.3100+2  
 Delta Mass: 3.866 ppm  
 XCorr: 40.53

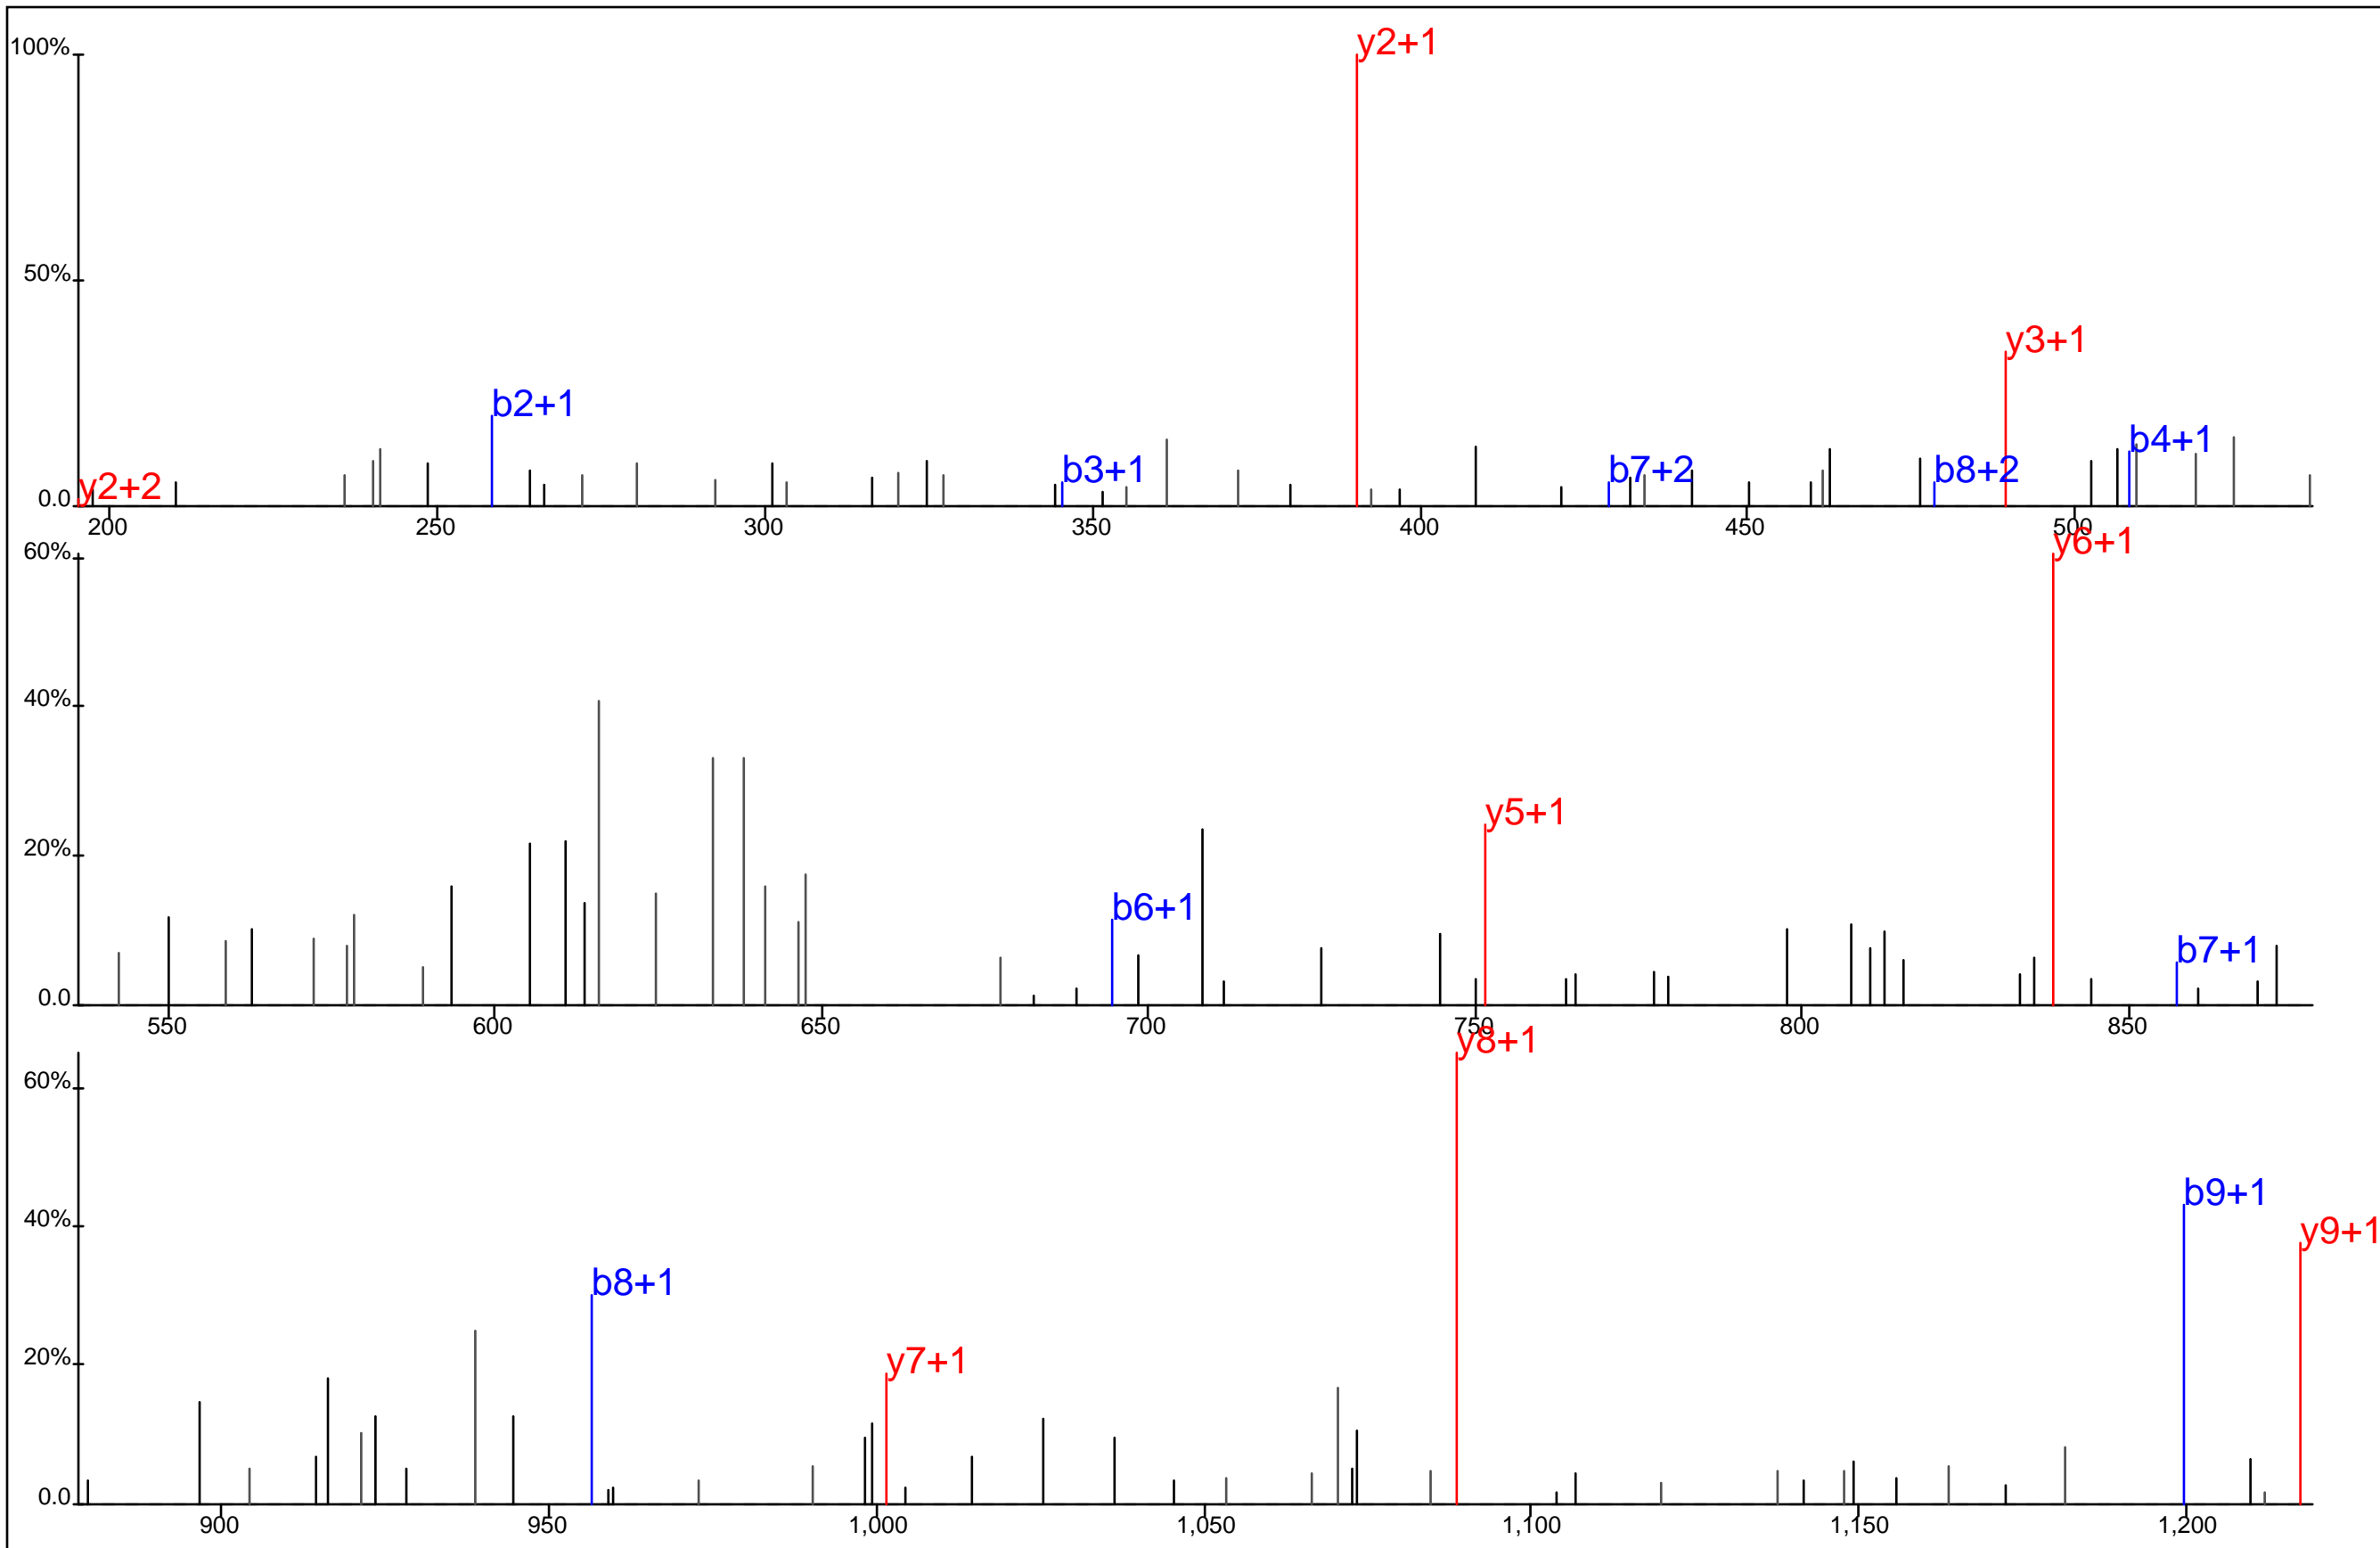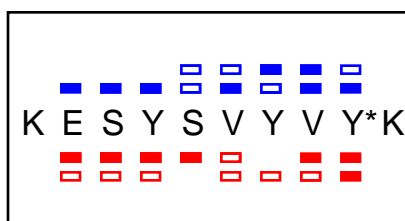

Protein Name: H2B Histone family, member E  
 gi Accession: 0  
 Precursor Mass: 673.3087+2  
 Delta Mass: 1.957 ppm  
 XCorr: 43.69

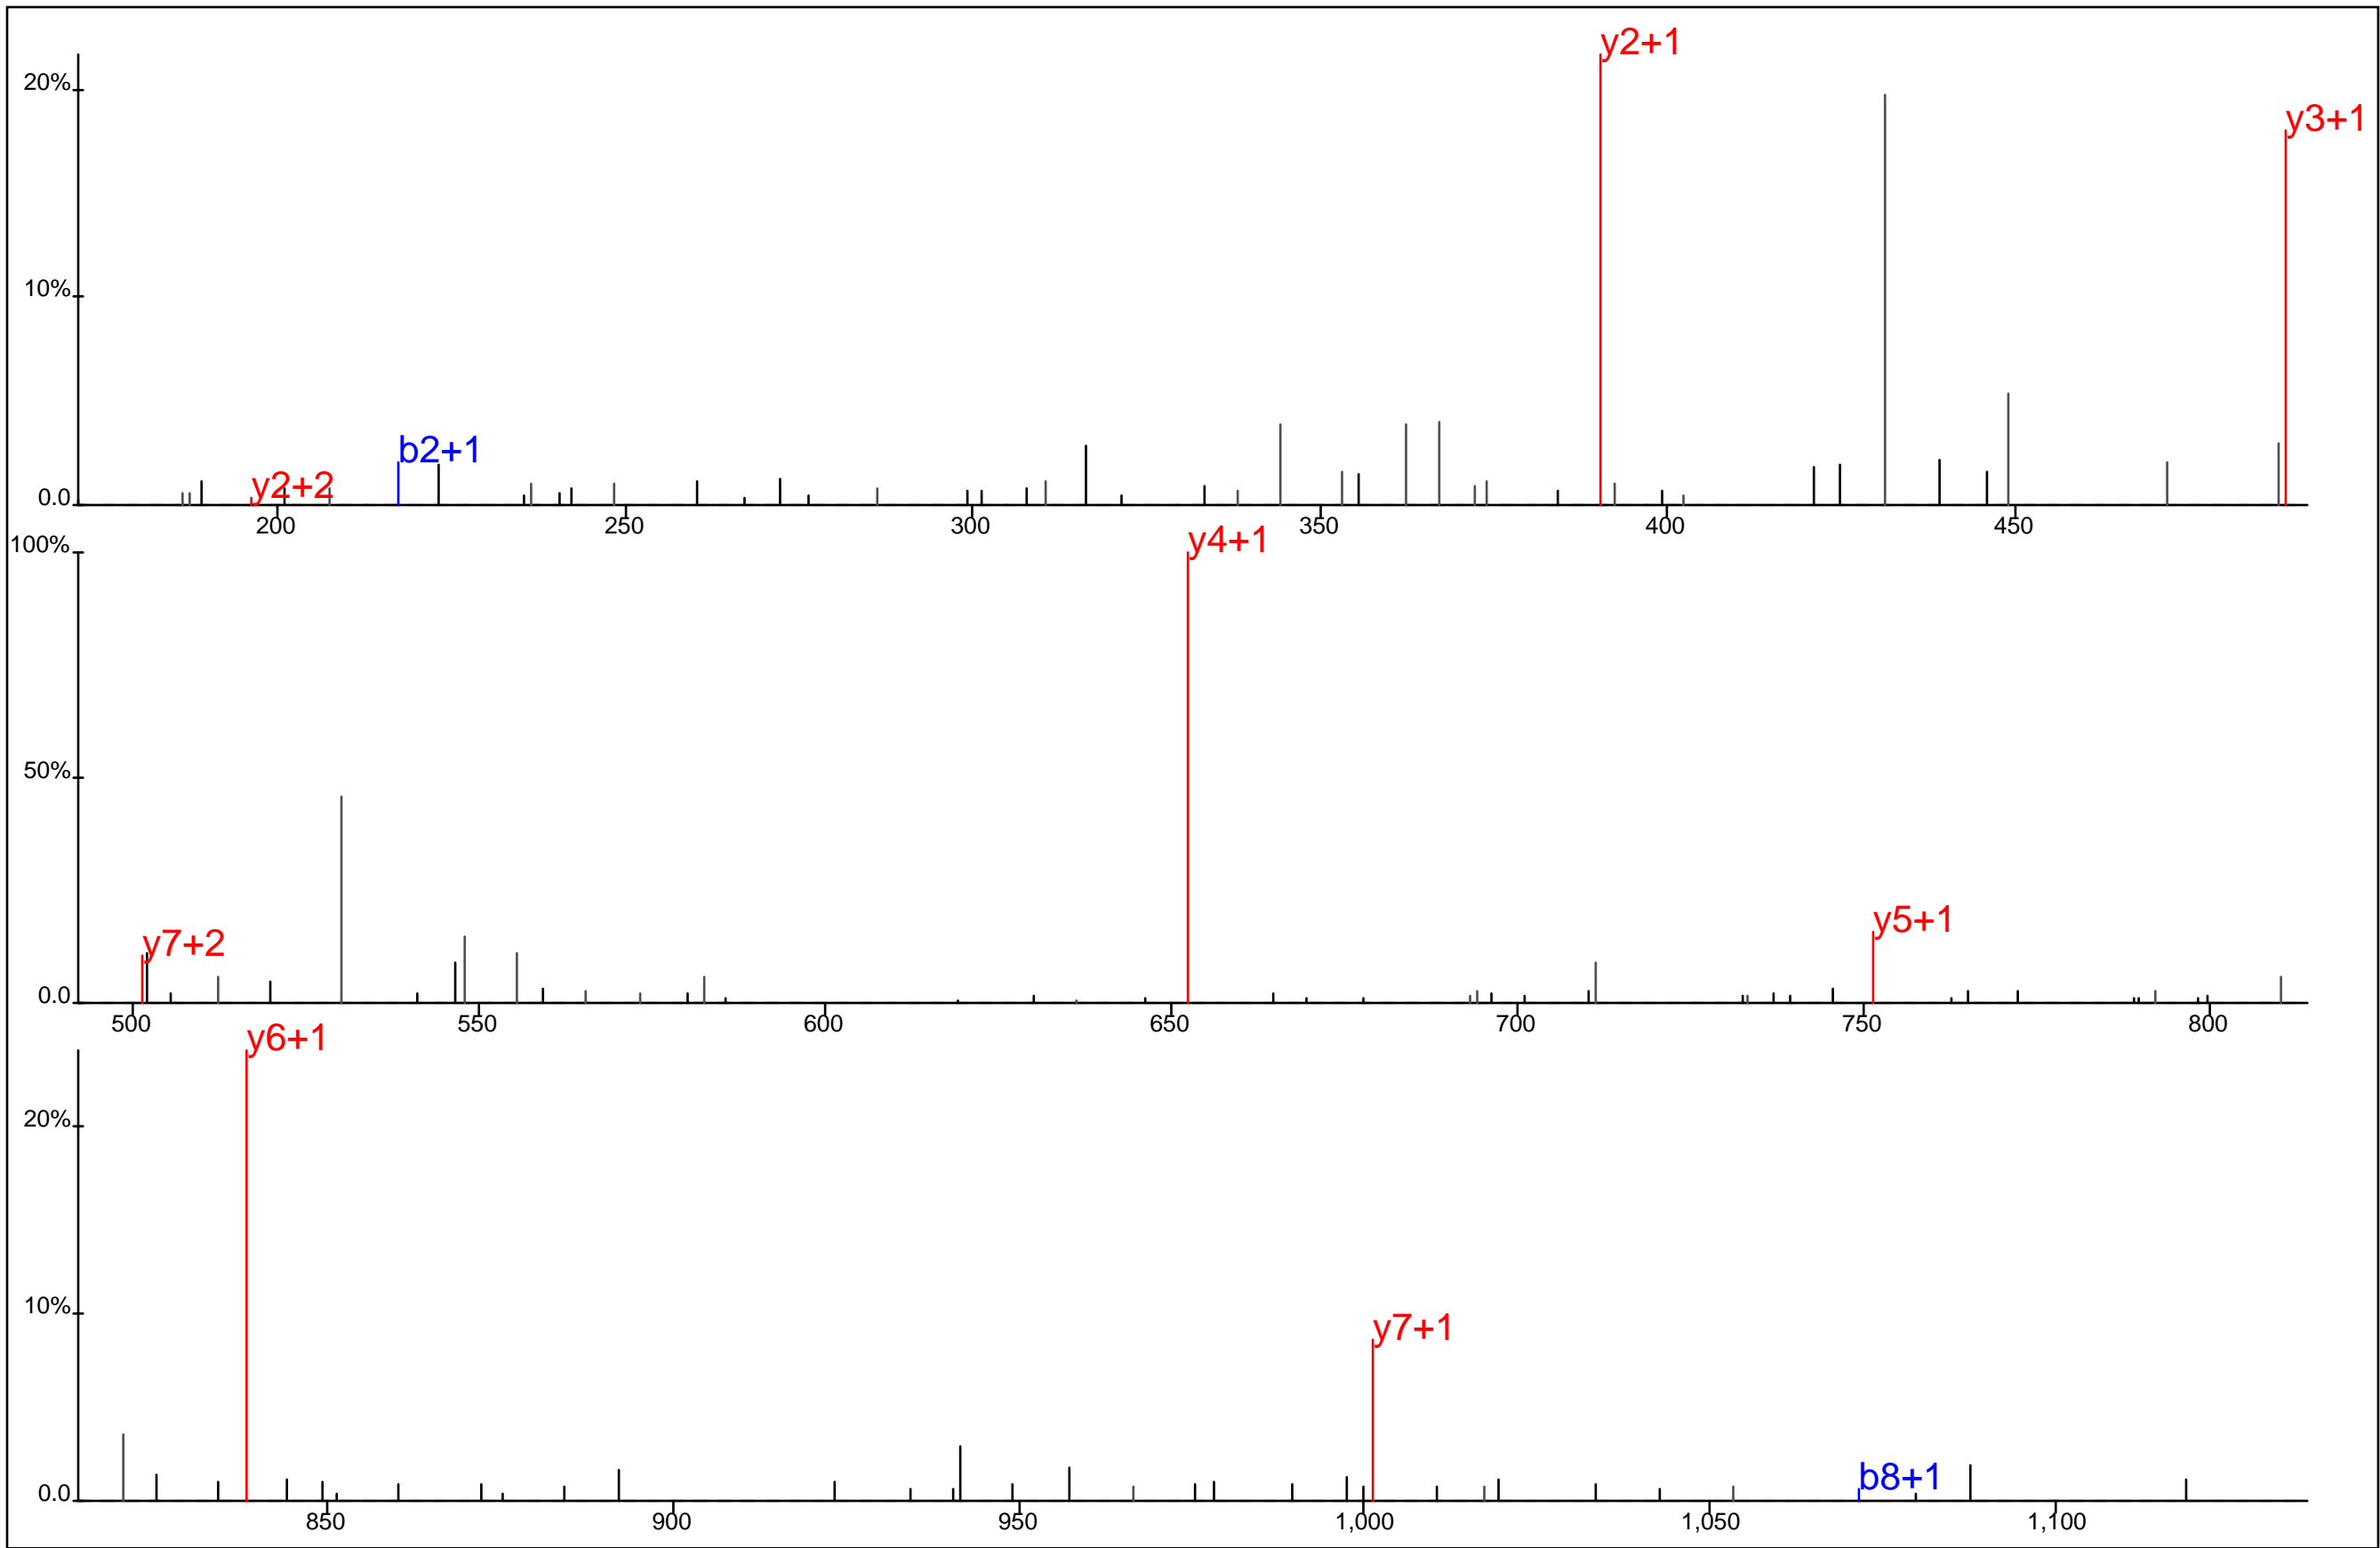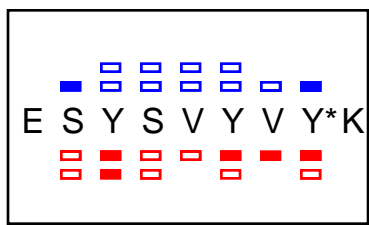

Protein Name: H2B Histone family, member E  
 gi Accession: 0  
 Precursor Mass: 609.2587+2  
 Delta Mass: 2.065 ppm  
 XCorr: 32.82

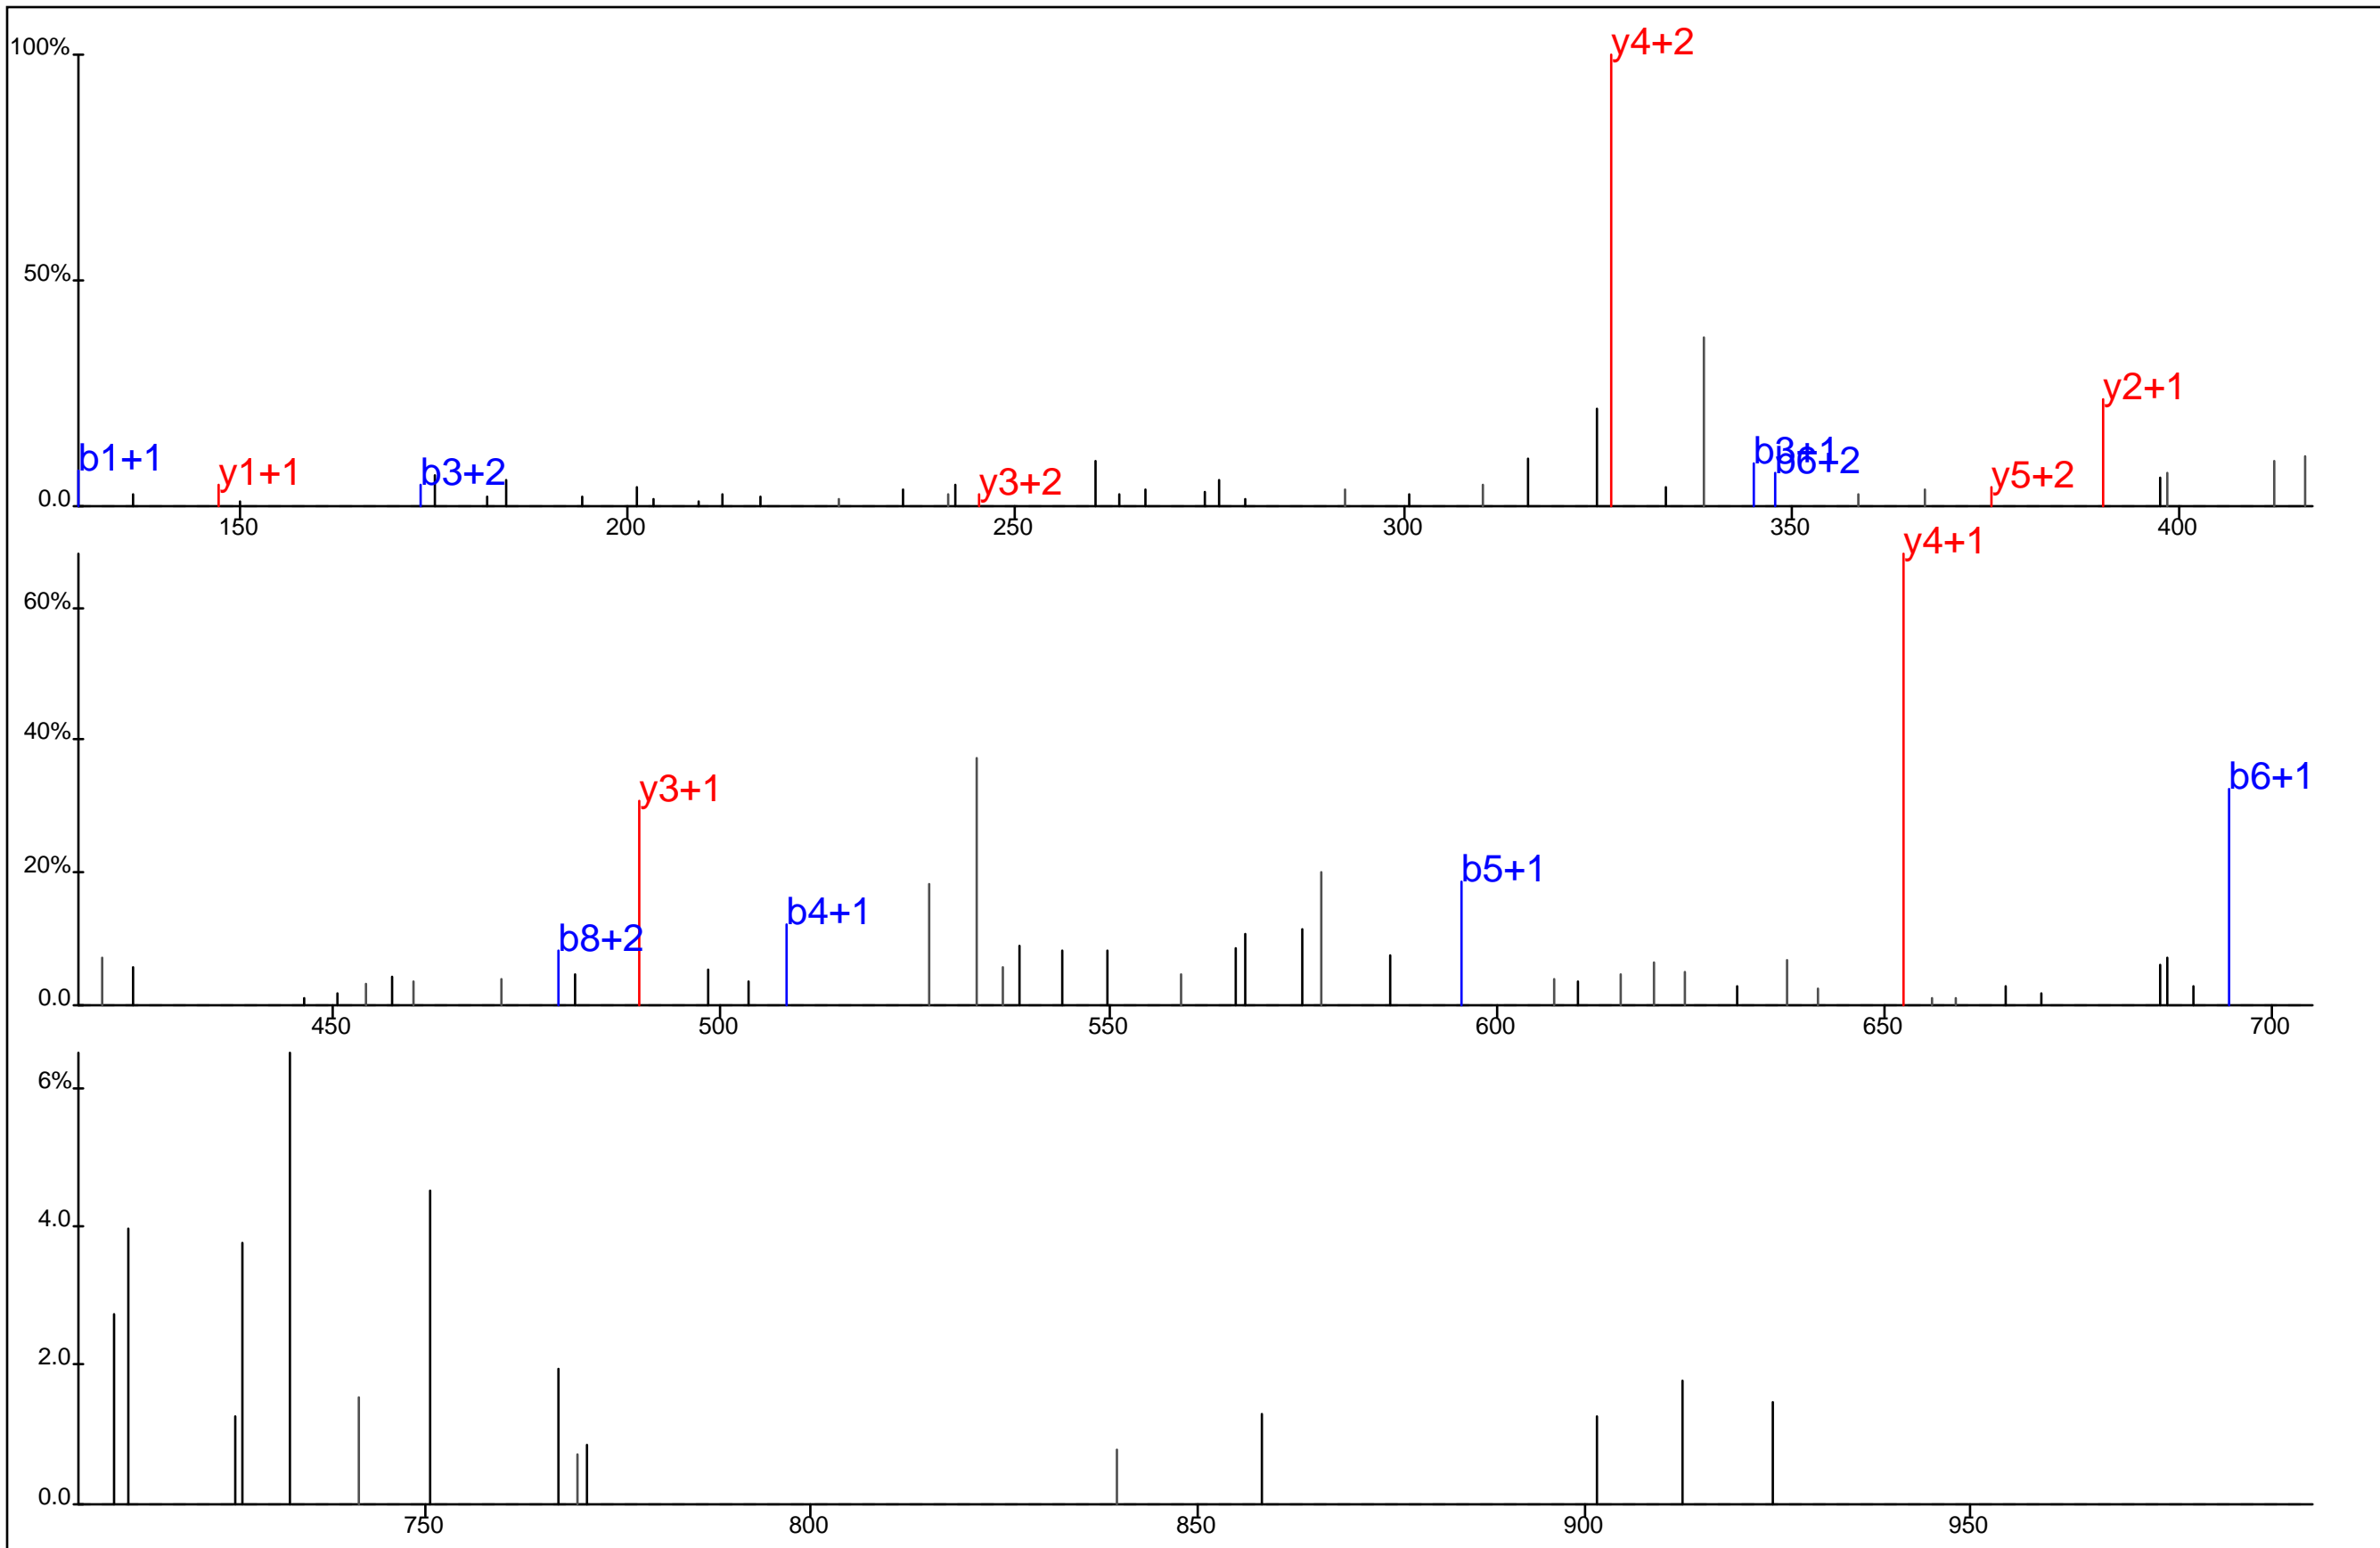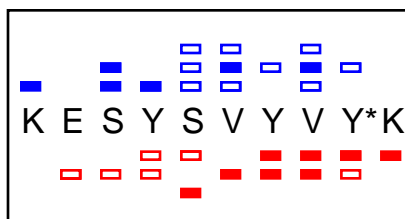

Protein Name: H2B Histone family, member E  
 gi Accession: 0  
 Precursor Mass: 449.2074+3  
 Delta Mass: 0.087 ppm  
 XCorr: 21.29

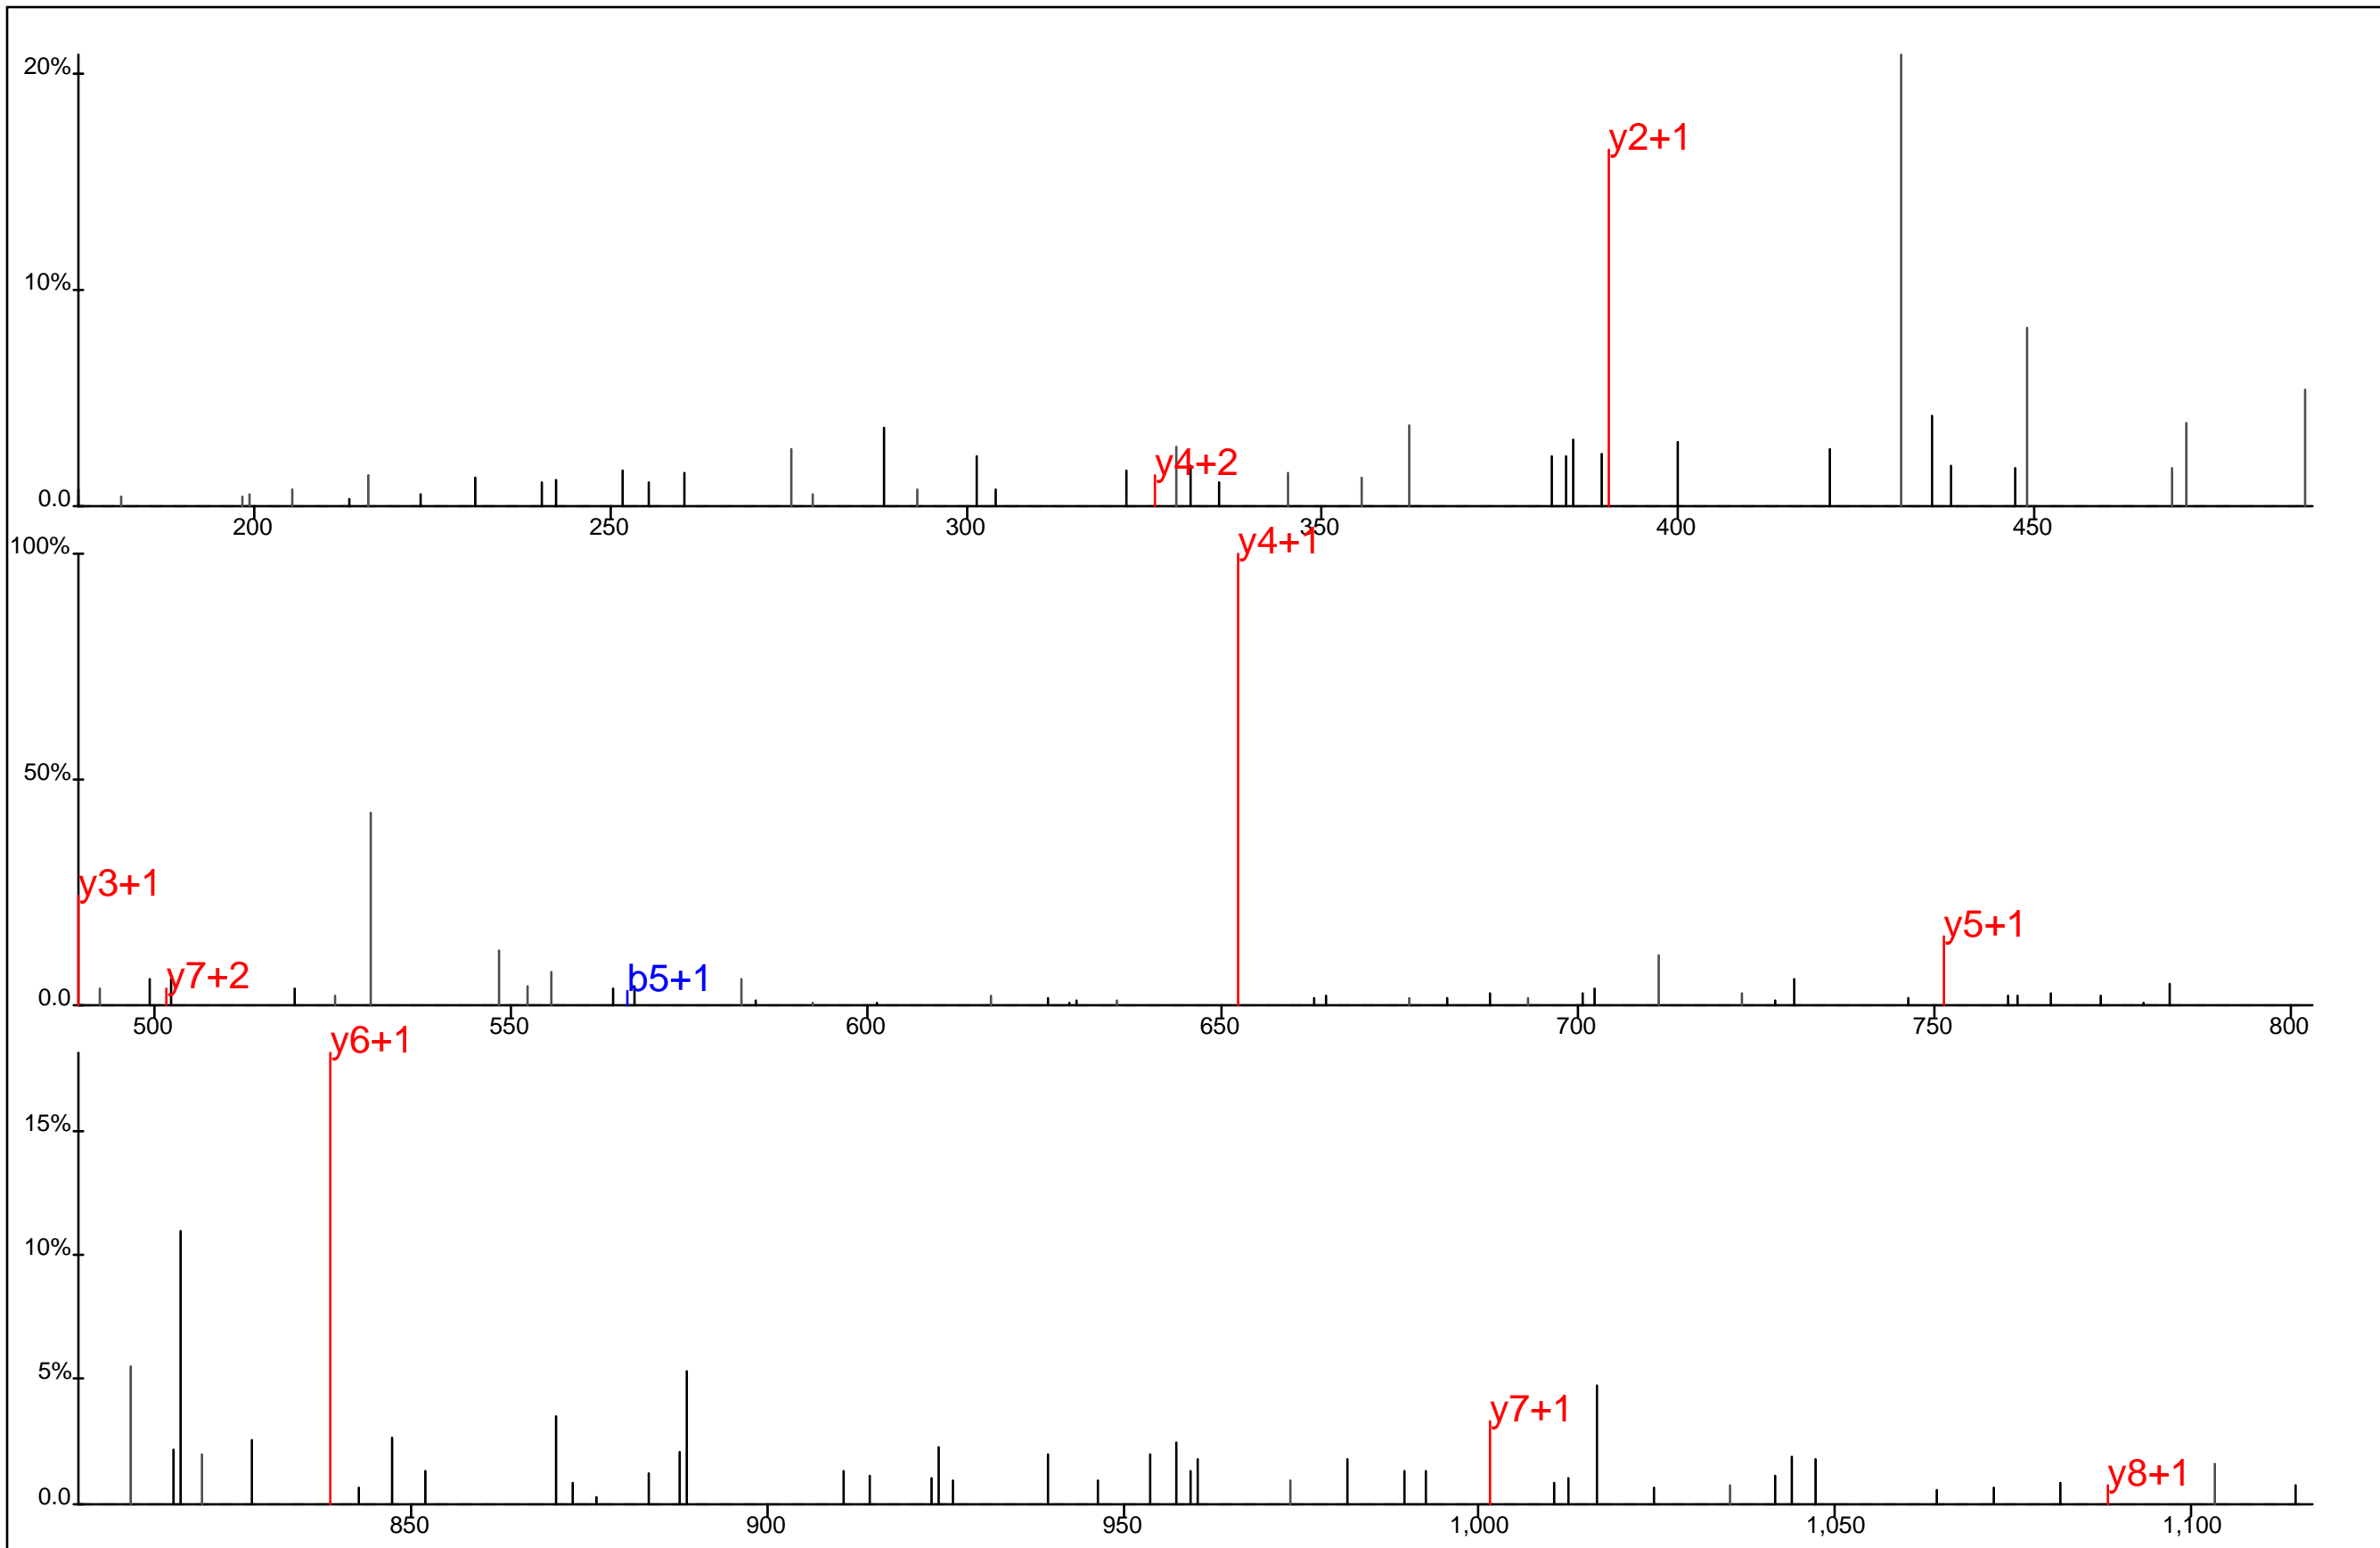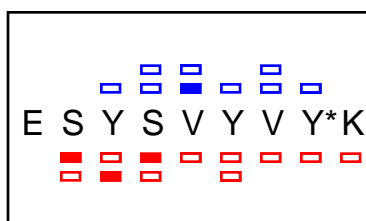

Protein Name: H2B Histone family, member E  
 gi Accession: 0  
 Precursor Mass: 609.2597+2  
 Delta Mass: 0.360 ppm  
 XCorr: 25.02

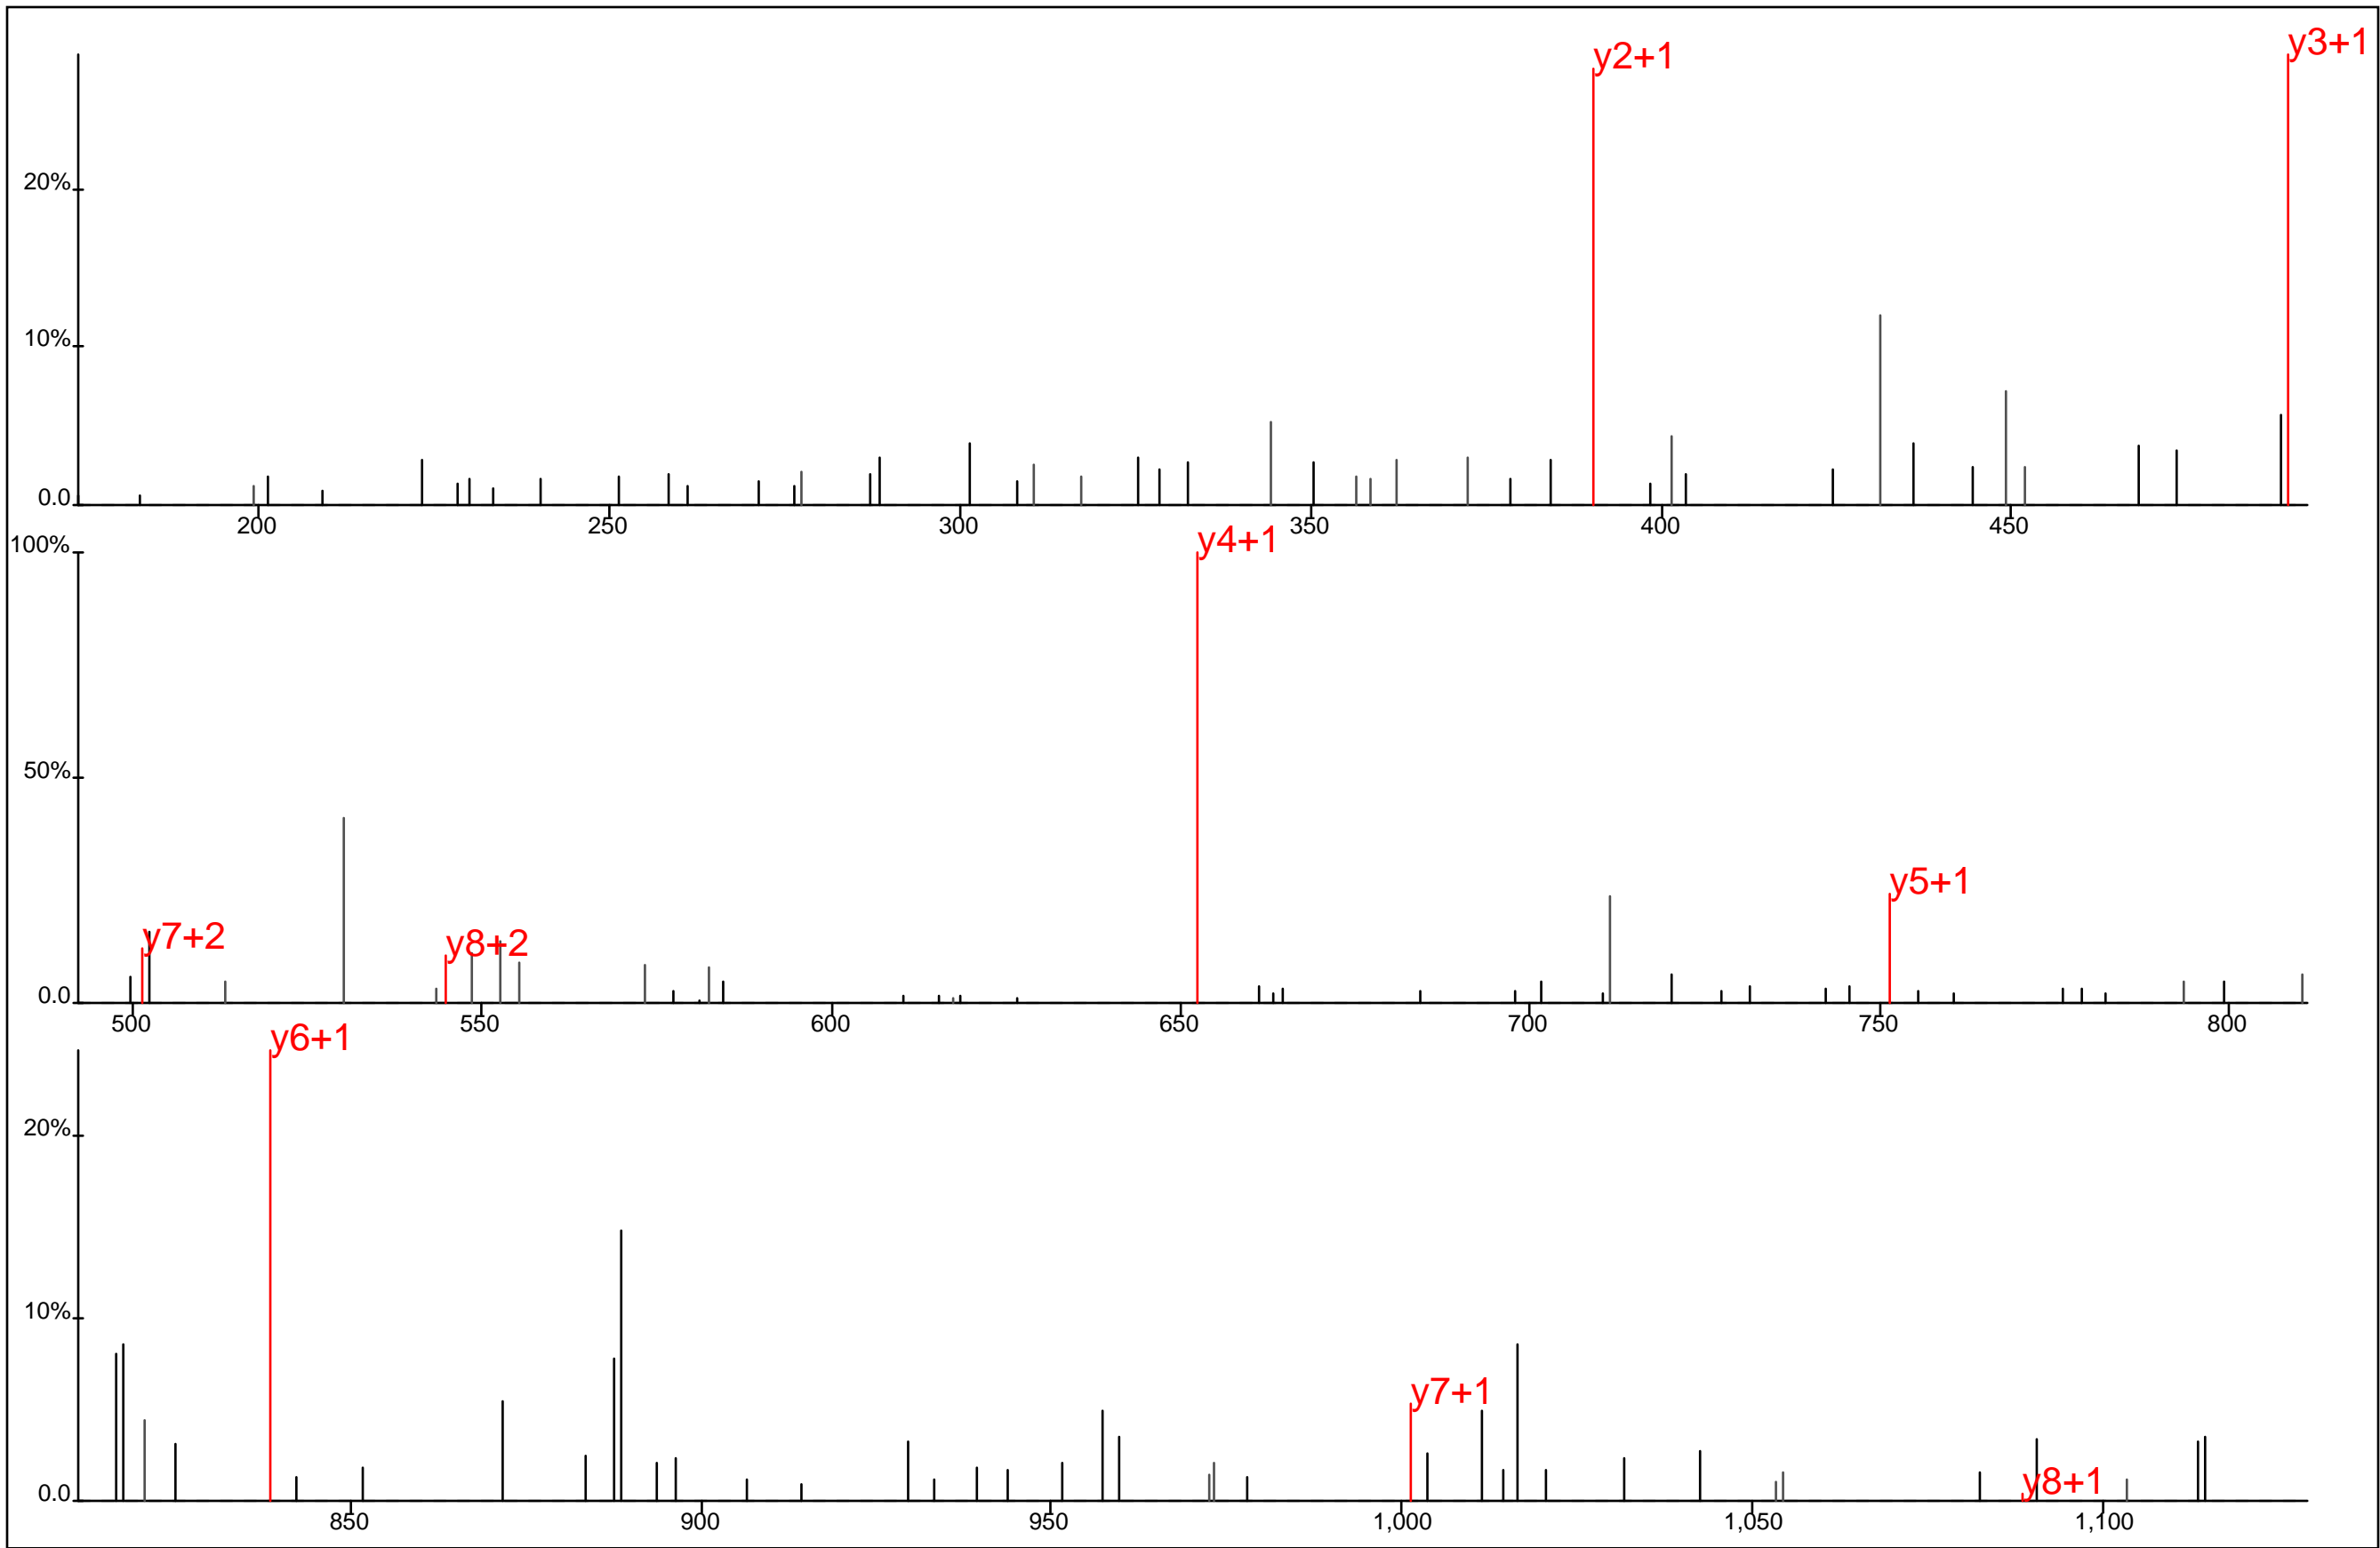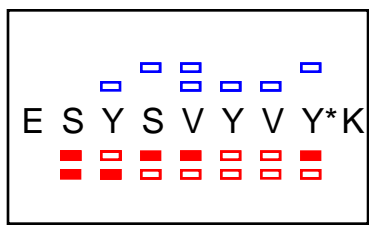

Protein Name: H2B Histone family, member E  
 gi Accession: 0  
 Precursor Mass: 609.2596+2  
 Delta Mass: 0.560 ppm  
 XCorr: 24.5

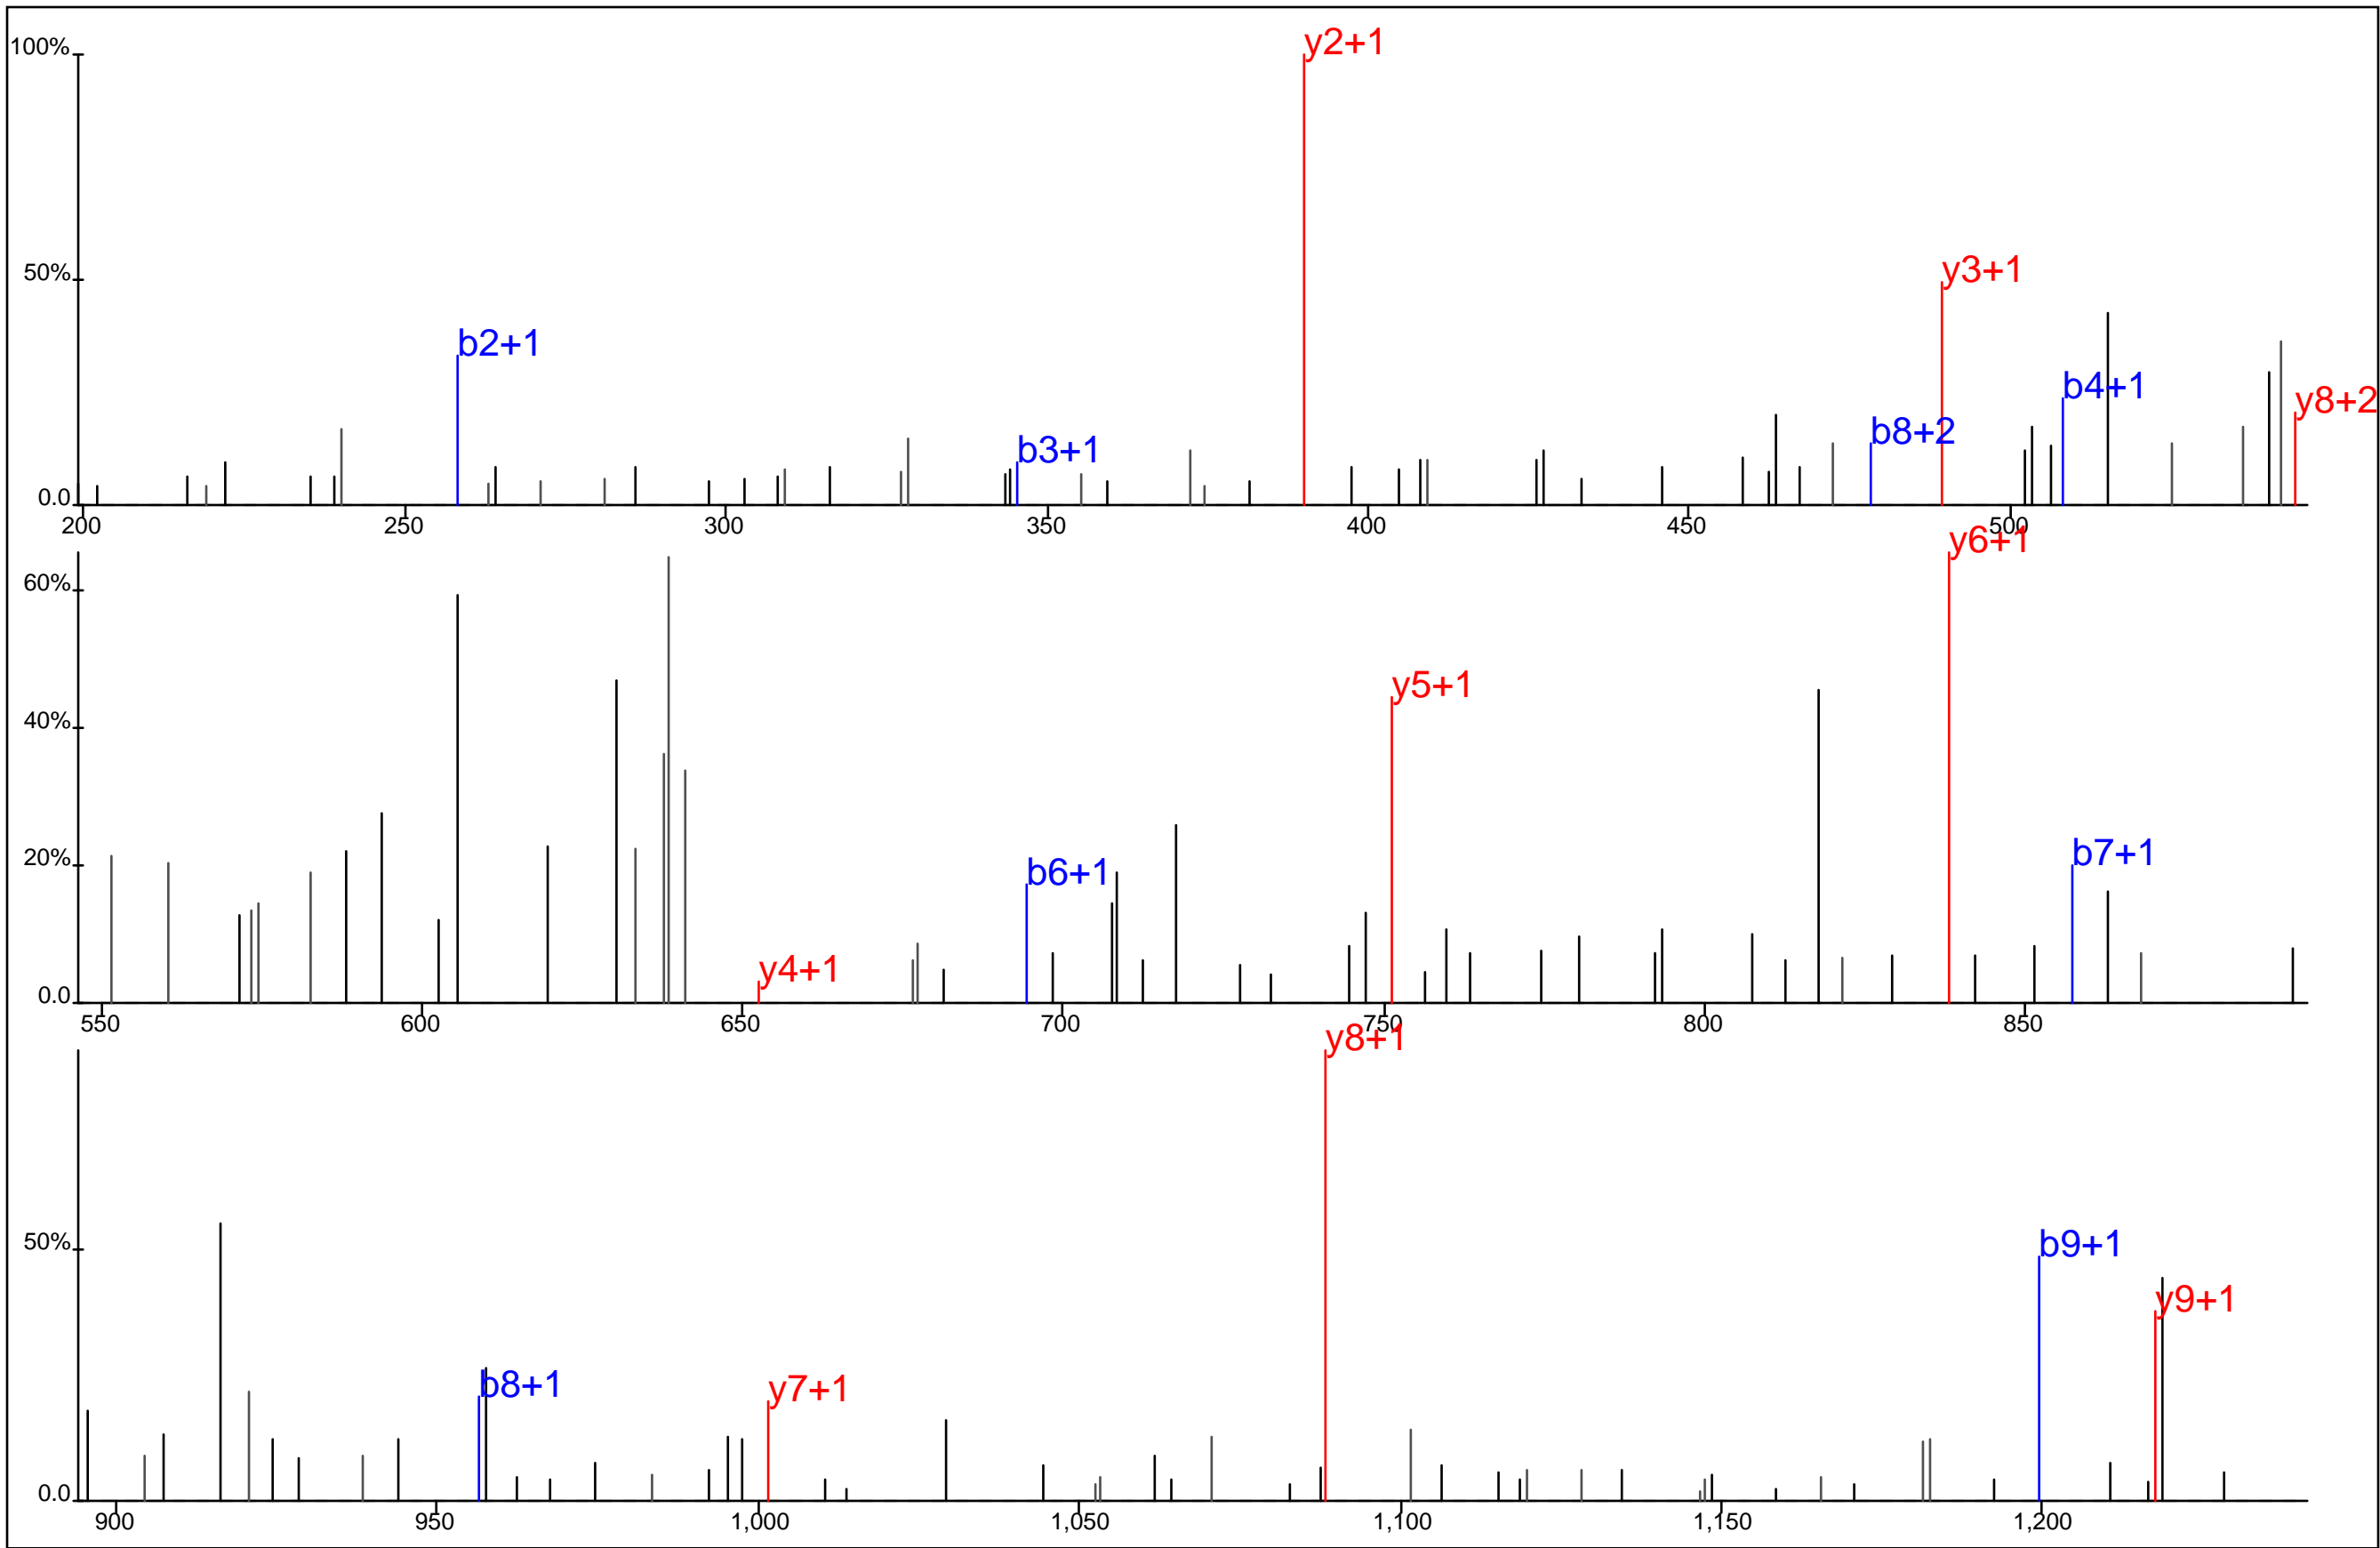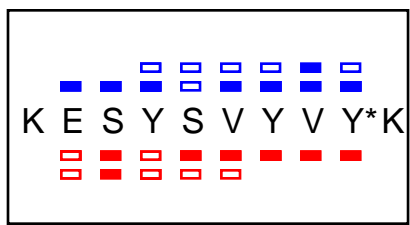

Protein Name: H2B Histone family, member E  
 gi Accession: 0  
 Precursor Mass: 673.3100+2  
 Delta Mass: 3.866 ppm  
 XCorr: 32.23



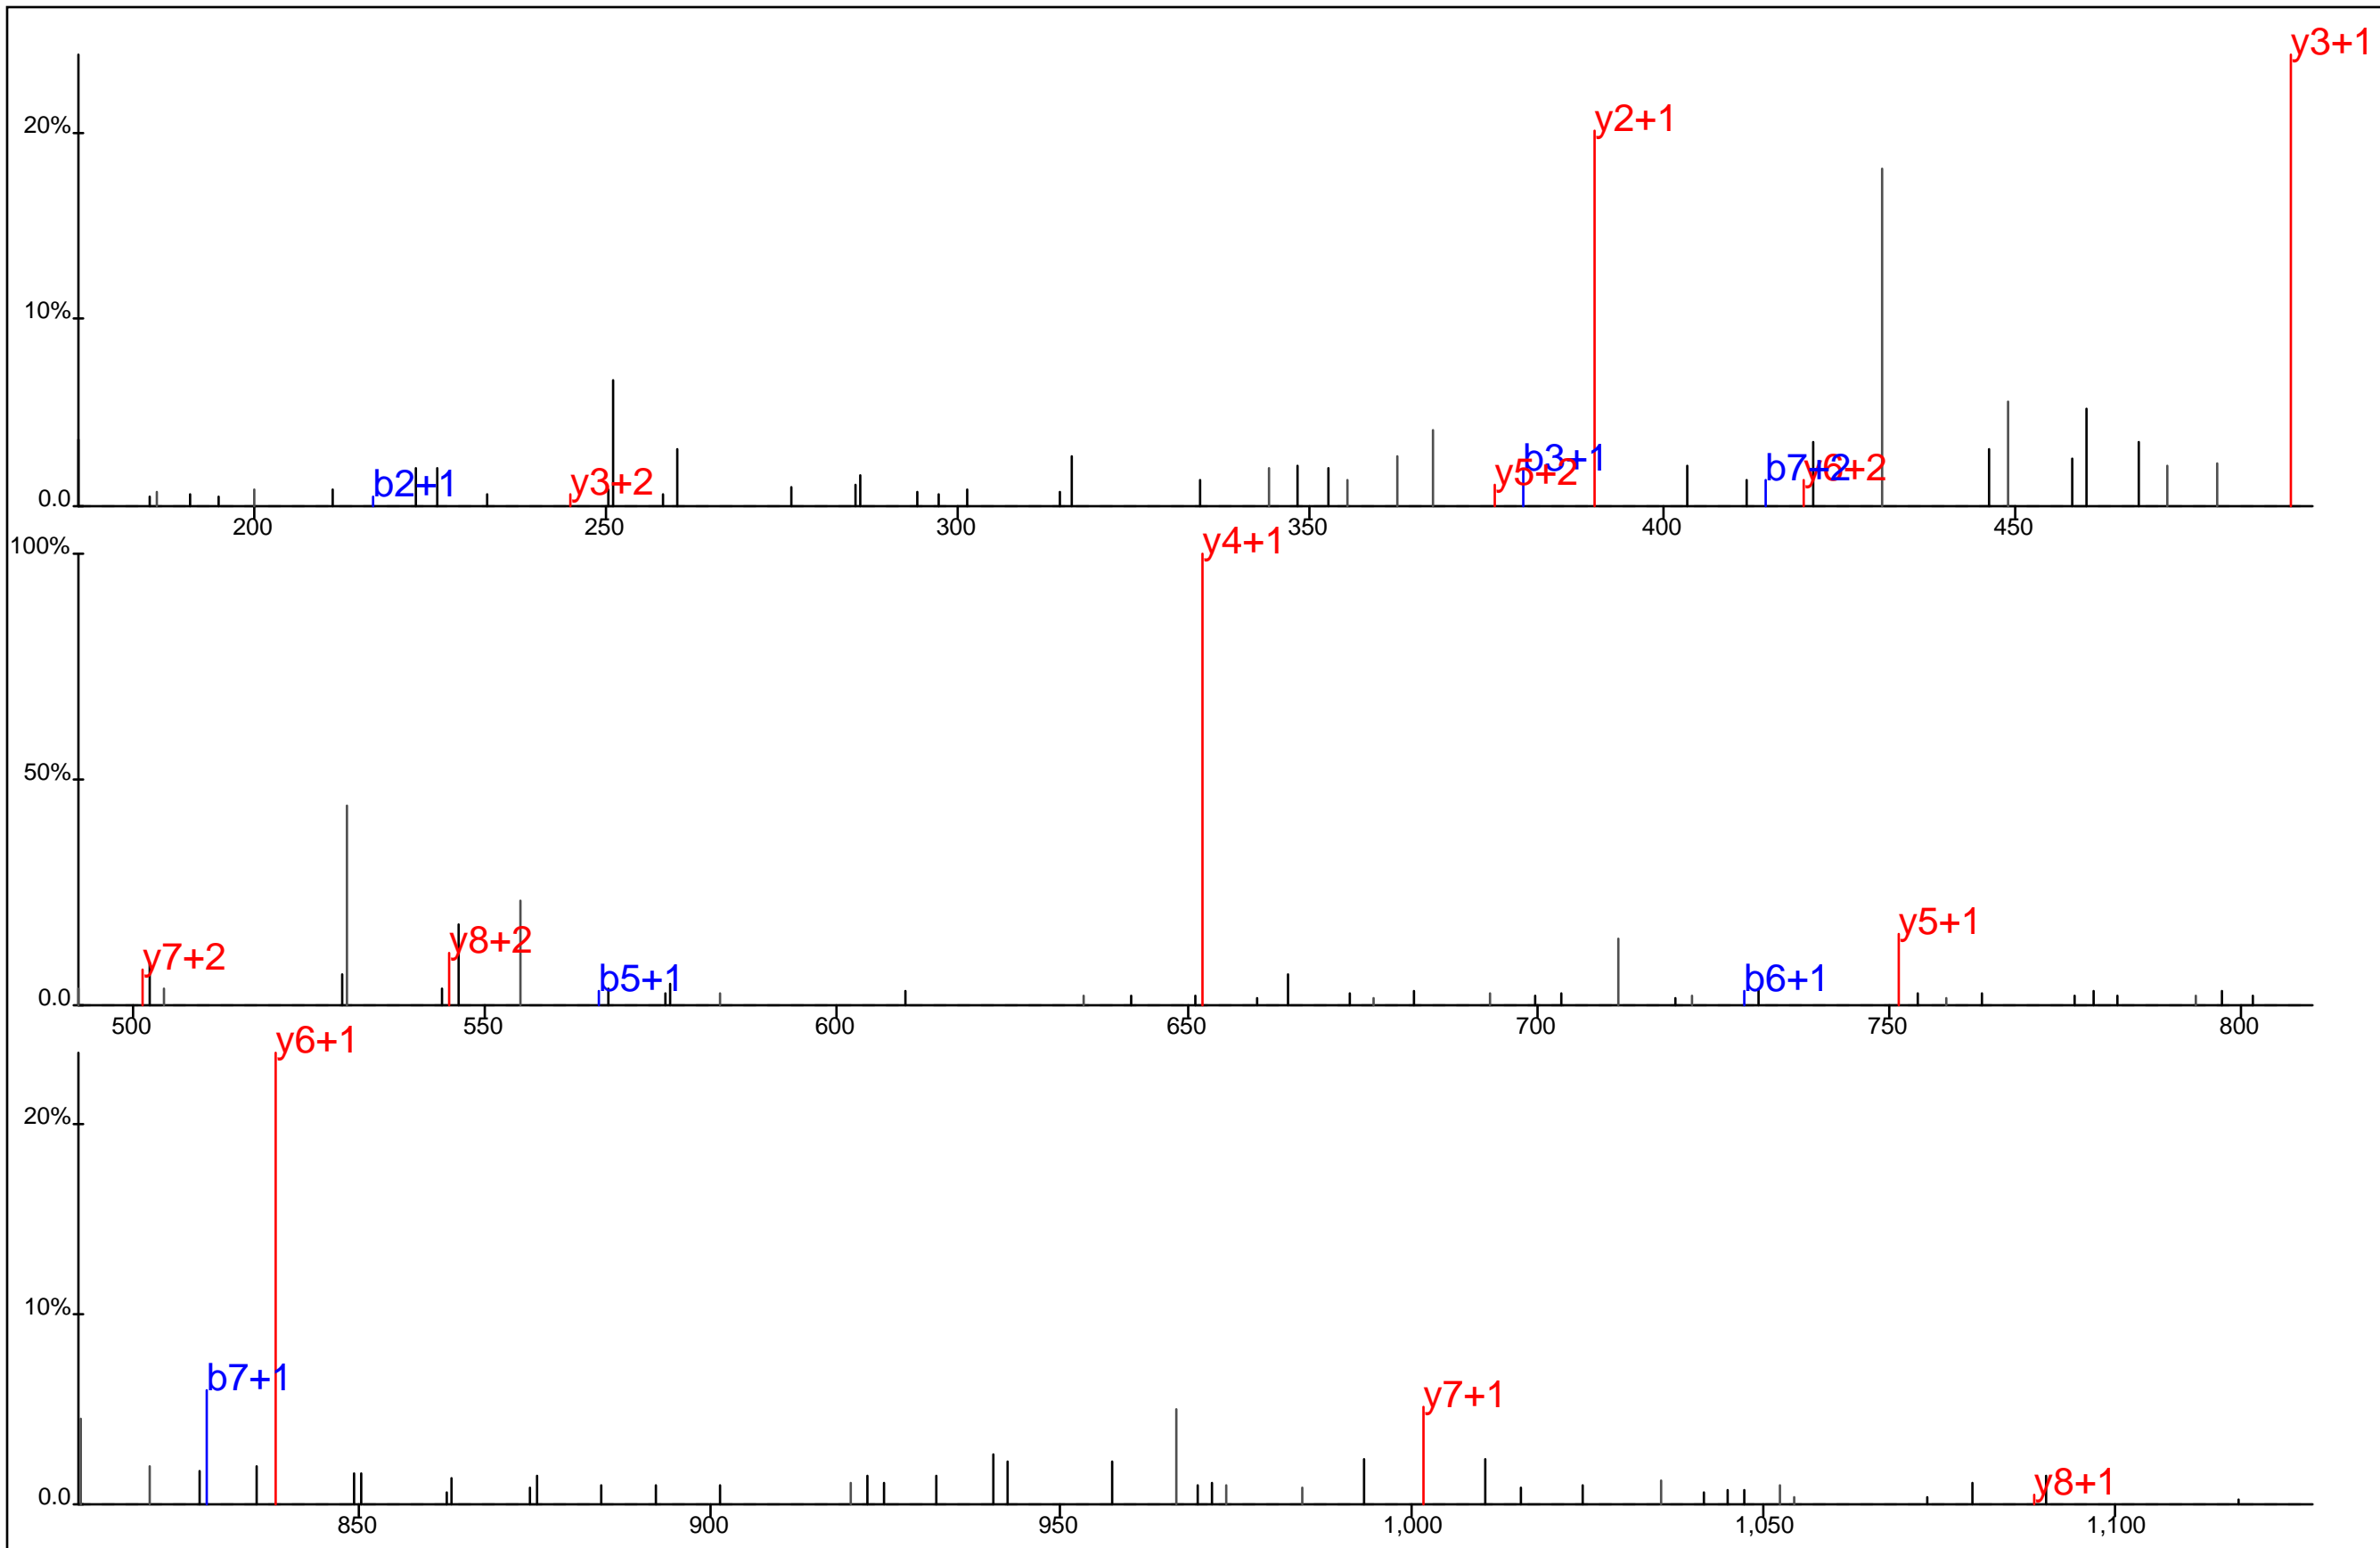

■ ■ □ □ ■ □  
 E S Y S V Y V Y\*K  
■ ■ □ □ □ □ ■ □

Protein Name: H2B Histone family, member E  
 gi Accession: 0  
 Precursor Mass: 609.2589+2  
 Delta Mass: 1.764 ppm  
 XCorr: 32.04

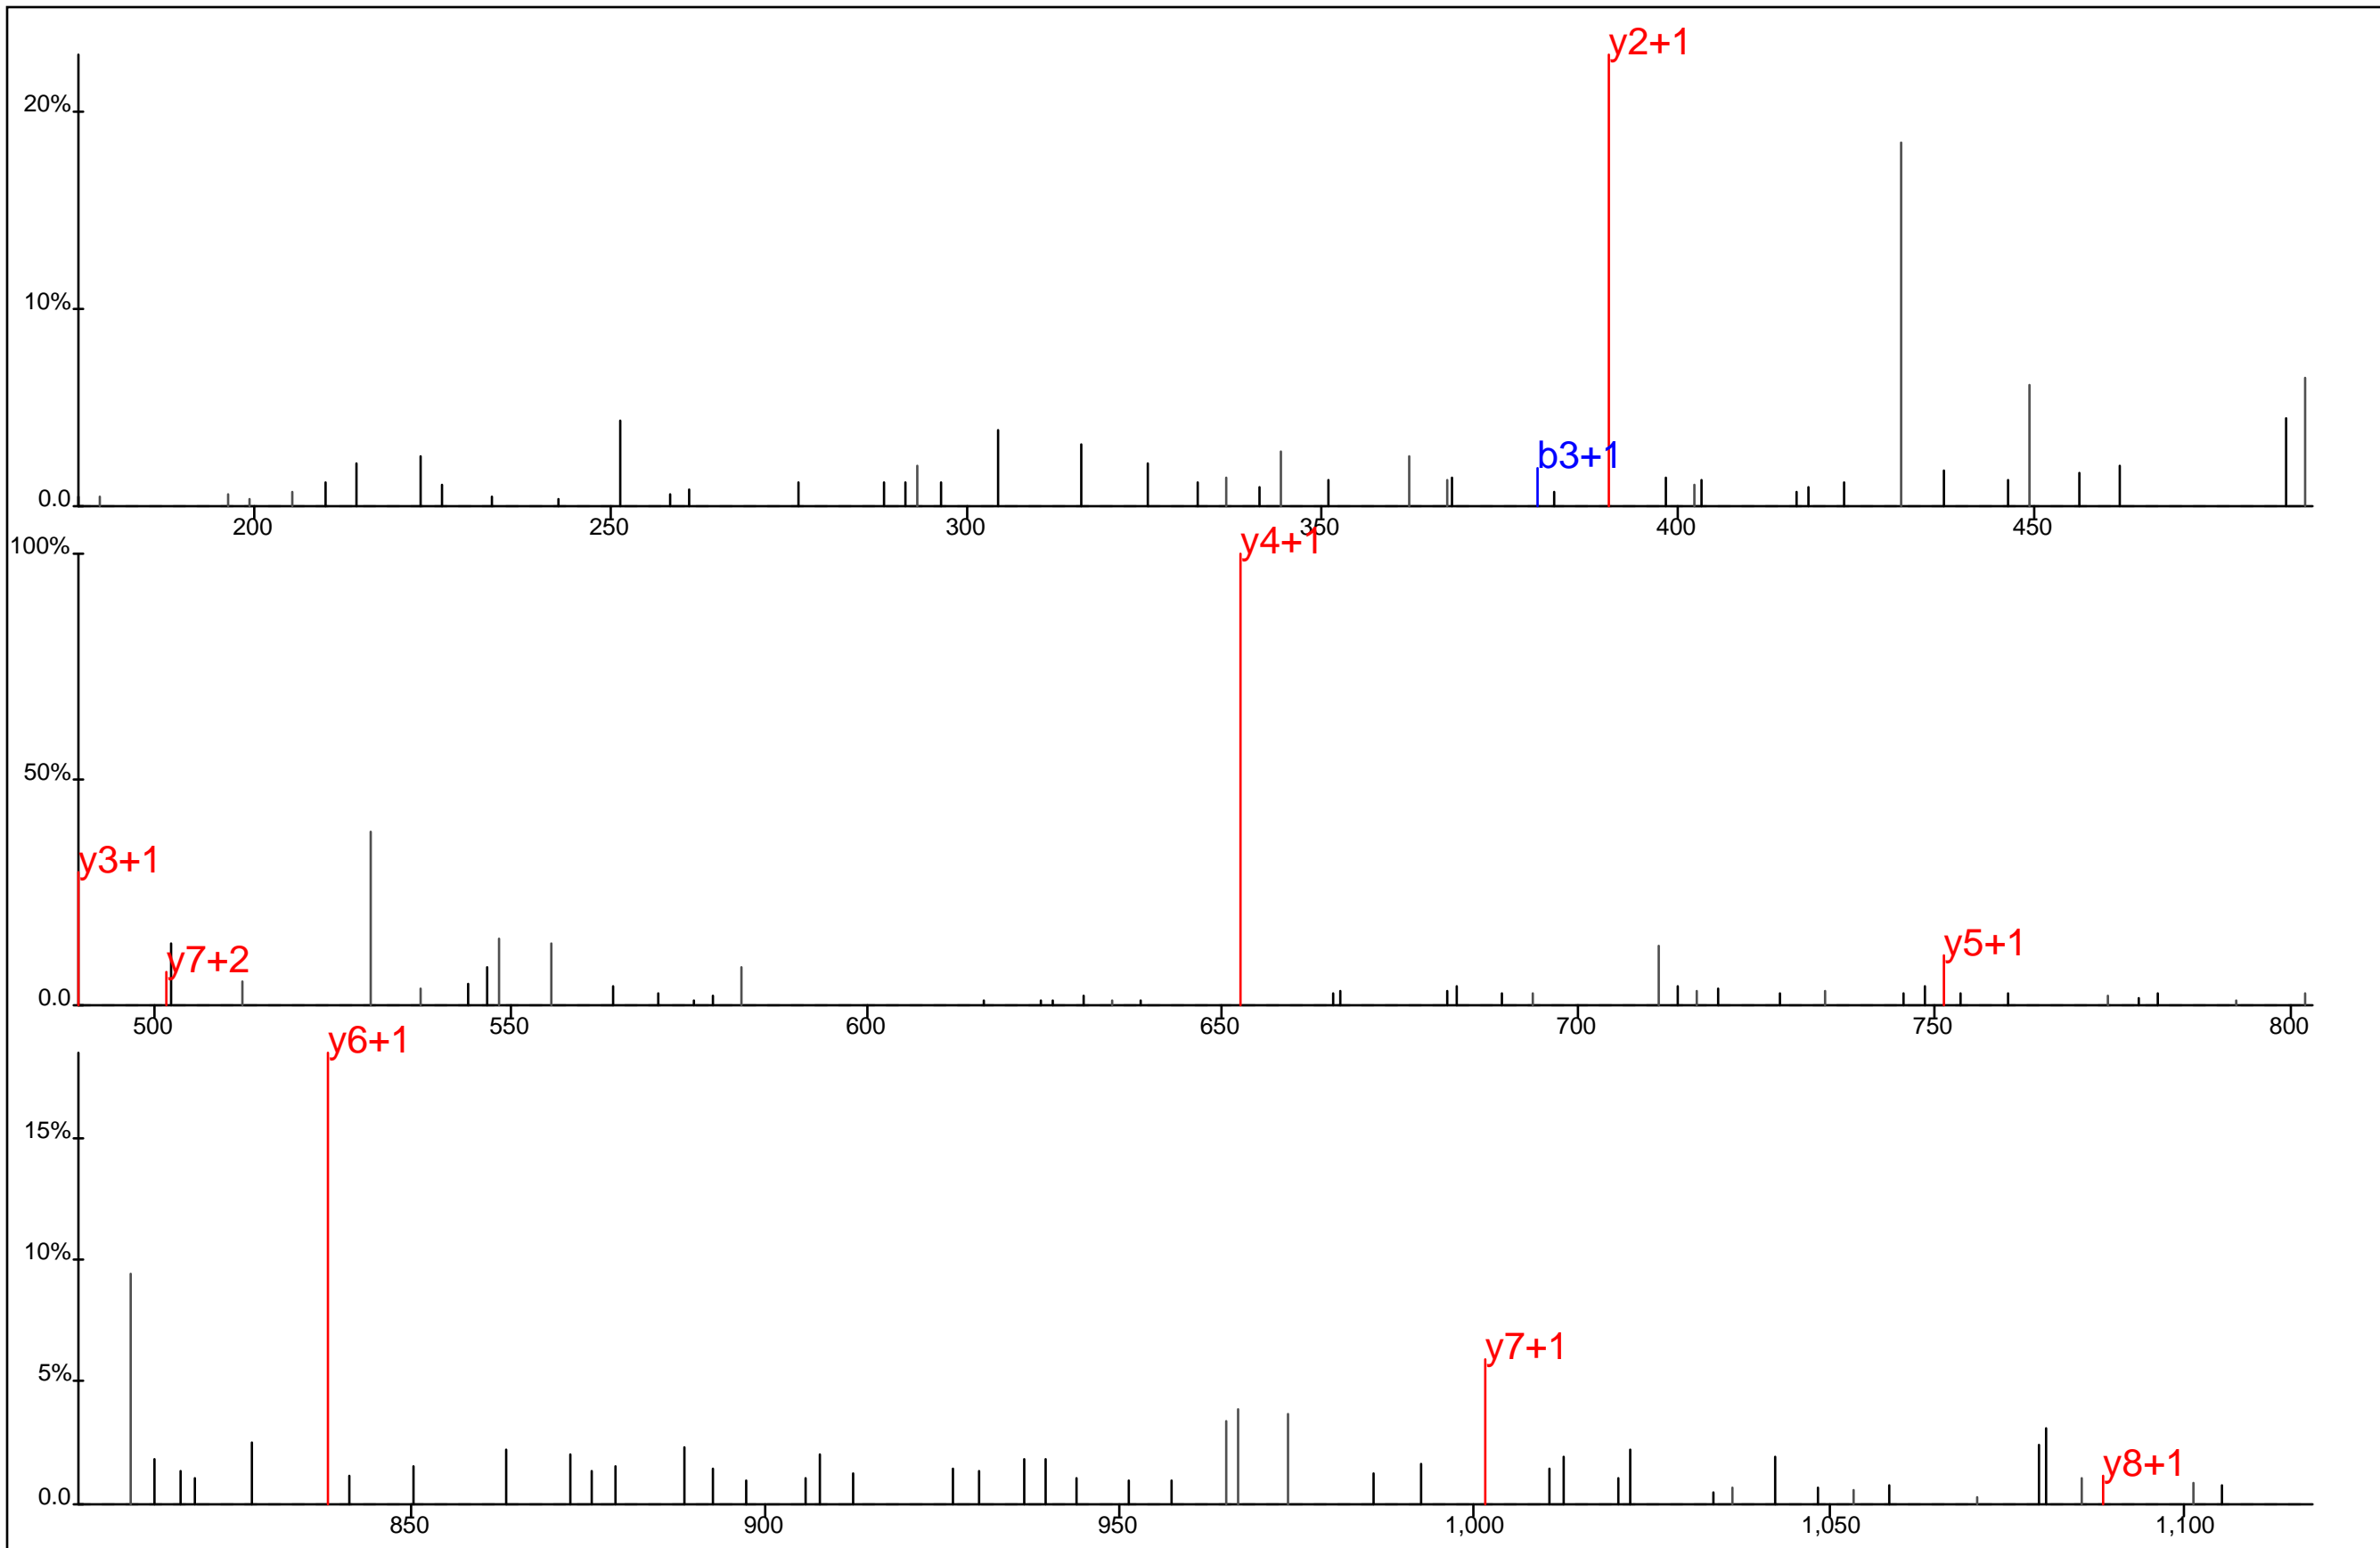

□ ■ □ □ □ □ □ □  
 E S Y S V Y V Y\*K  
■ ■ ■ ■ ■ ■ ■ ■

Protein Name: H2B Histone family, member E  
 gi Accession: 0  
 Precursor Mass: 609.2596+2  
 Delta Mass: 0.560 ppm  
 XCorr: 25.03

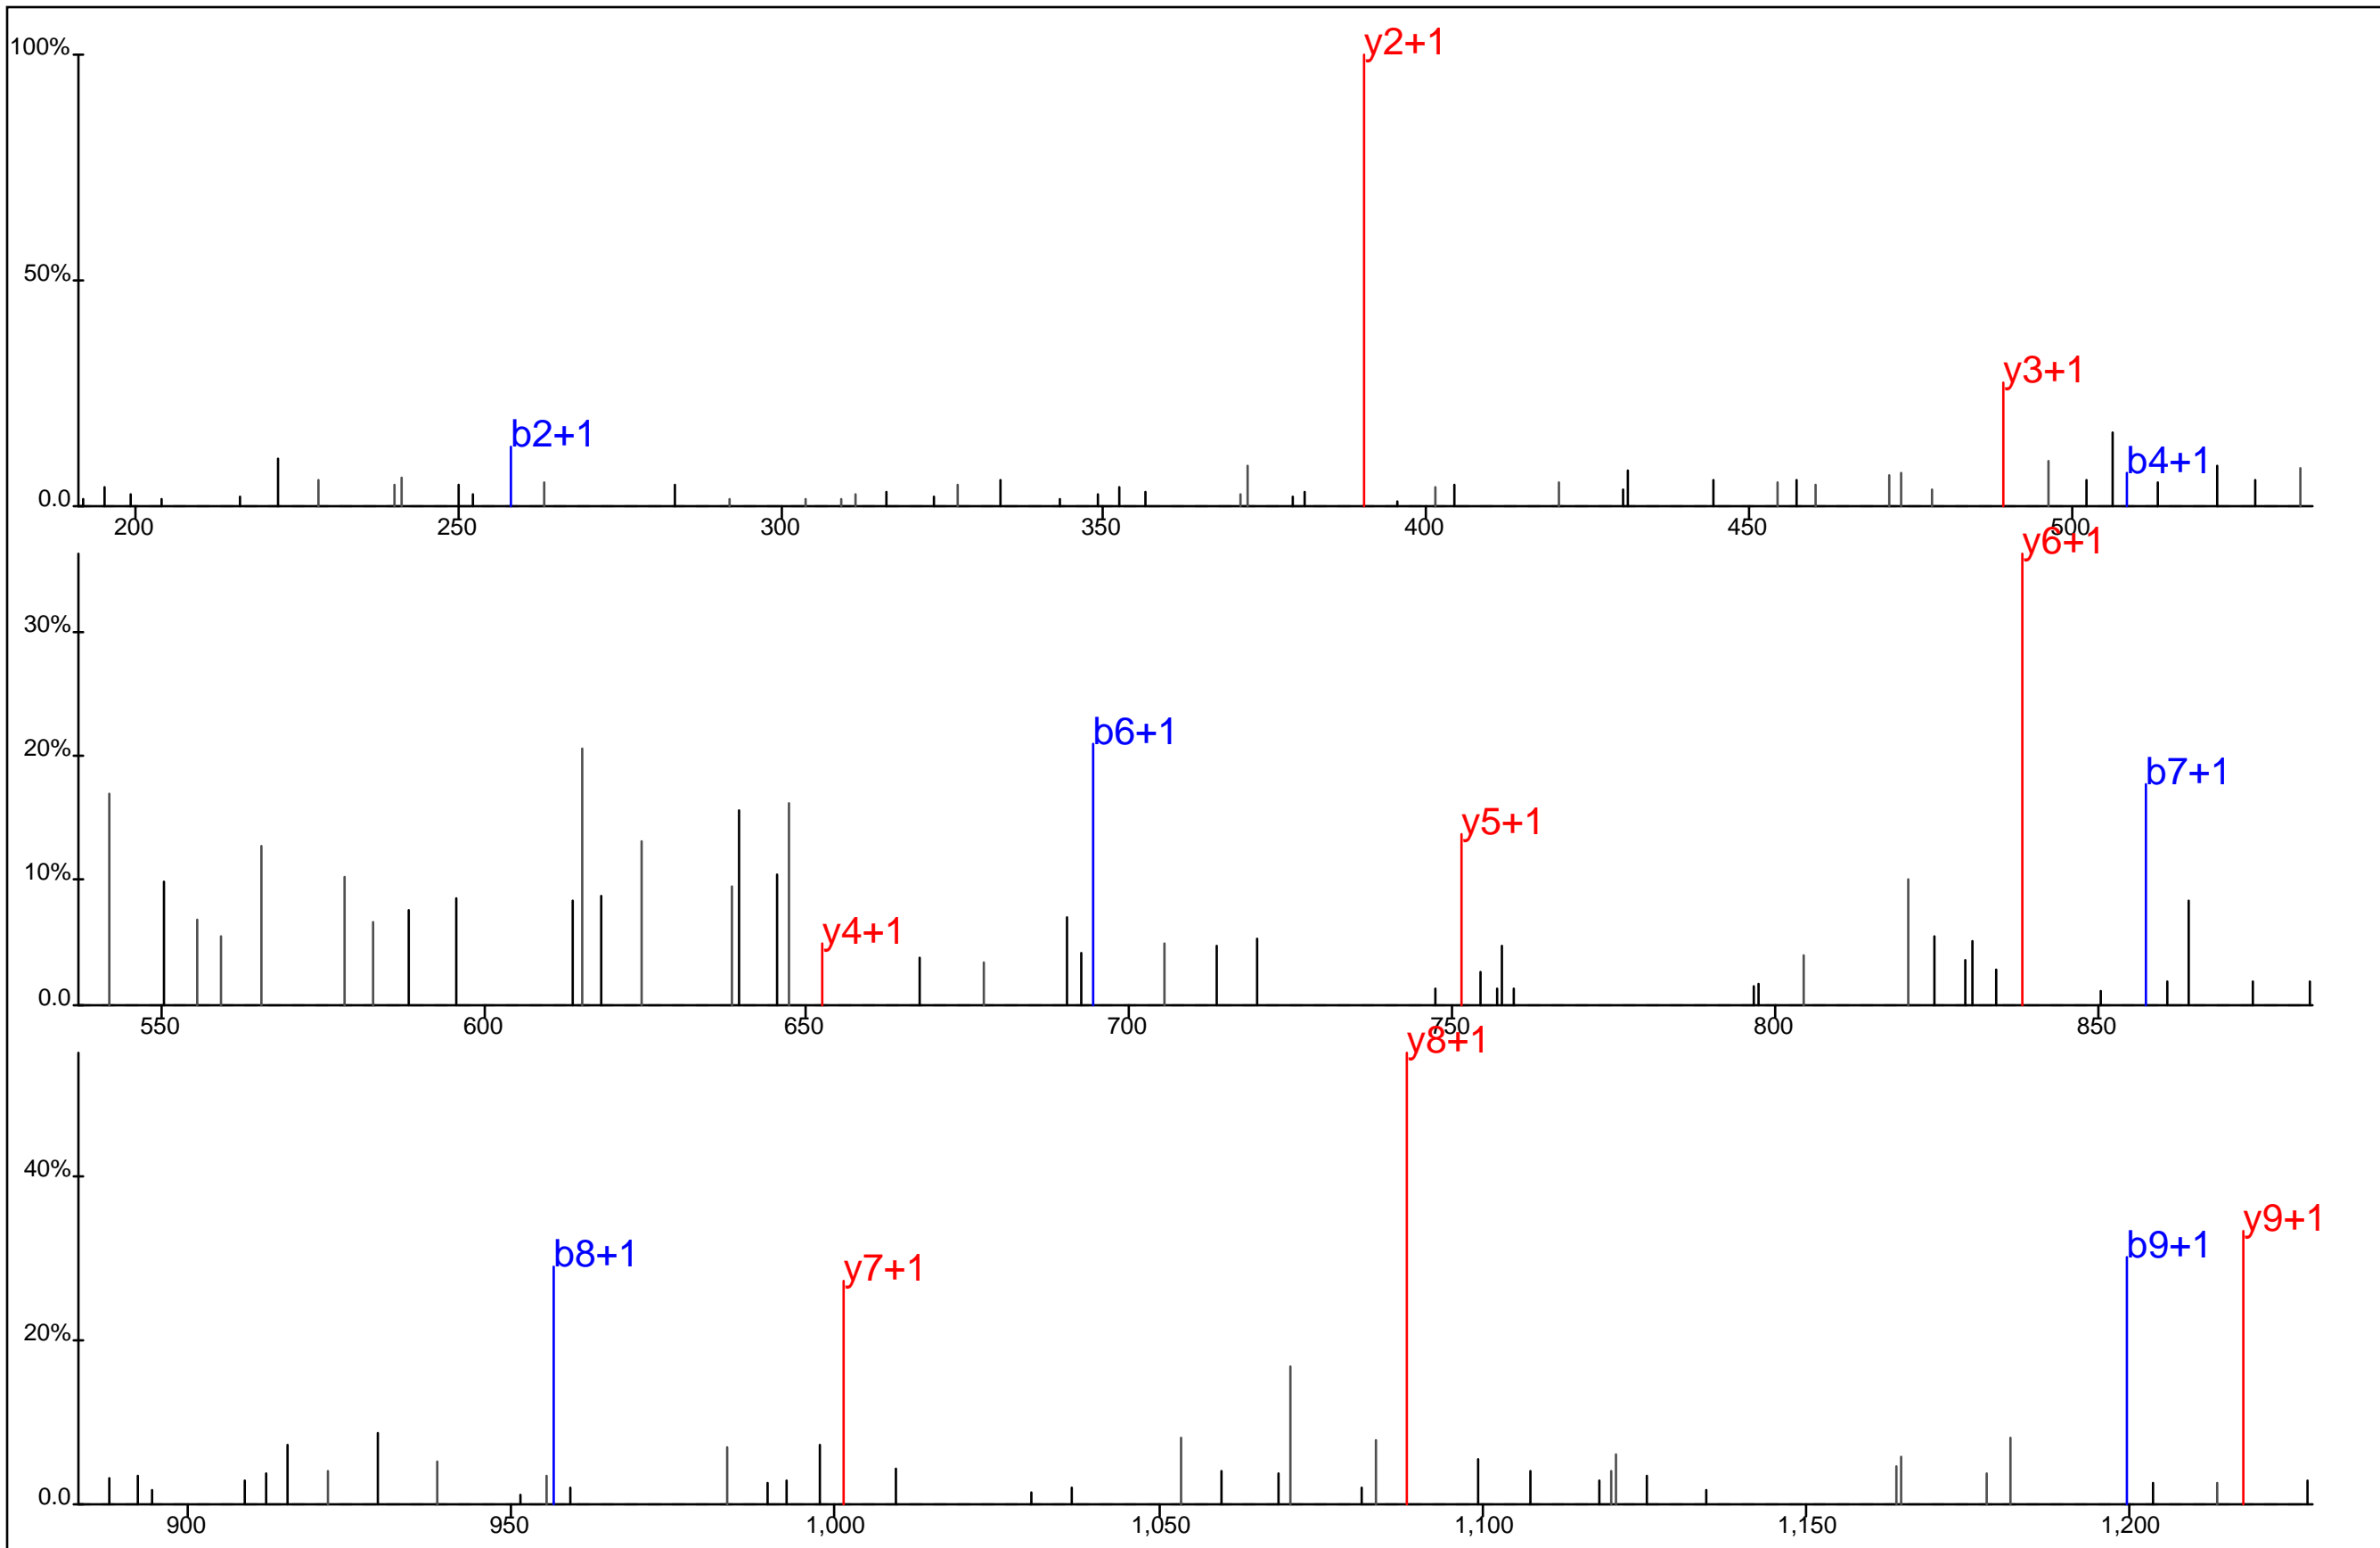

■ □ ▤ ▥ ■ ■ ▤ ▥  
**K E S Y S V Y V Y\* K**  
▨ ▩ ▪ ▫ ▬ ▭ ▮ ▯

Protein Name: H2B Histone family, member E  
 gi Accession: 0  
 Precursor Mass: 673.3071+2  
 Delta Mass: 0.401 ppm  
 XCorr: 47.72

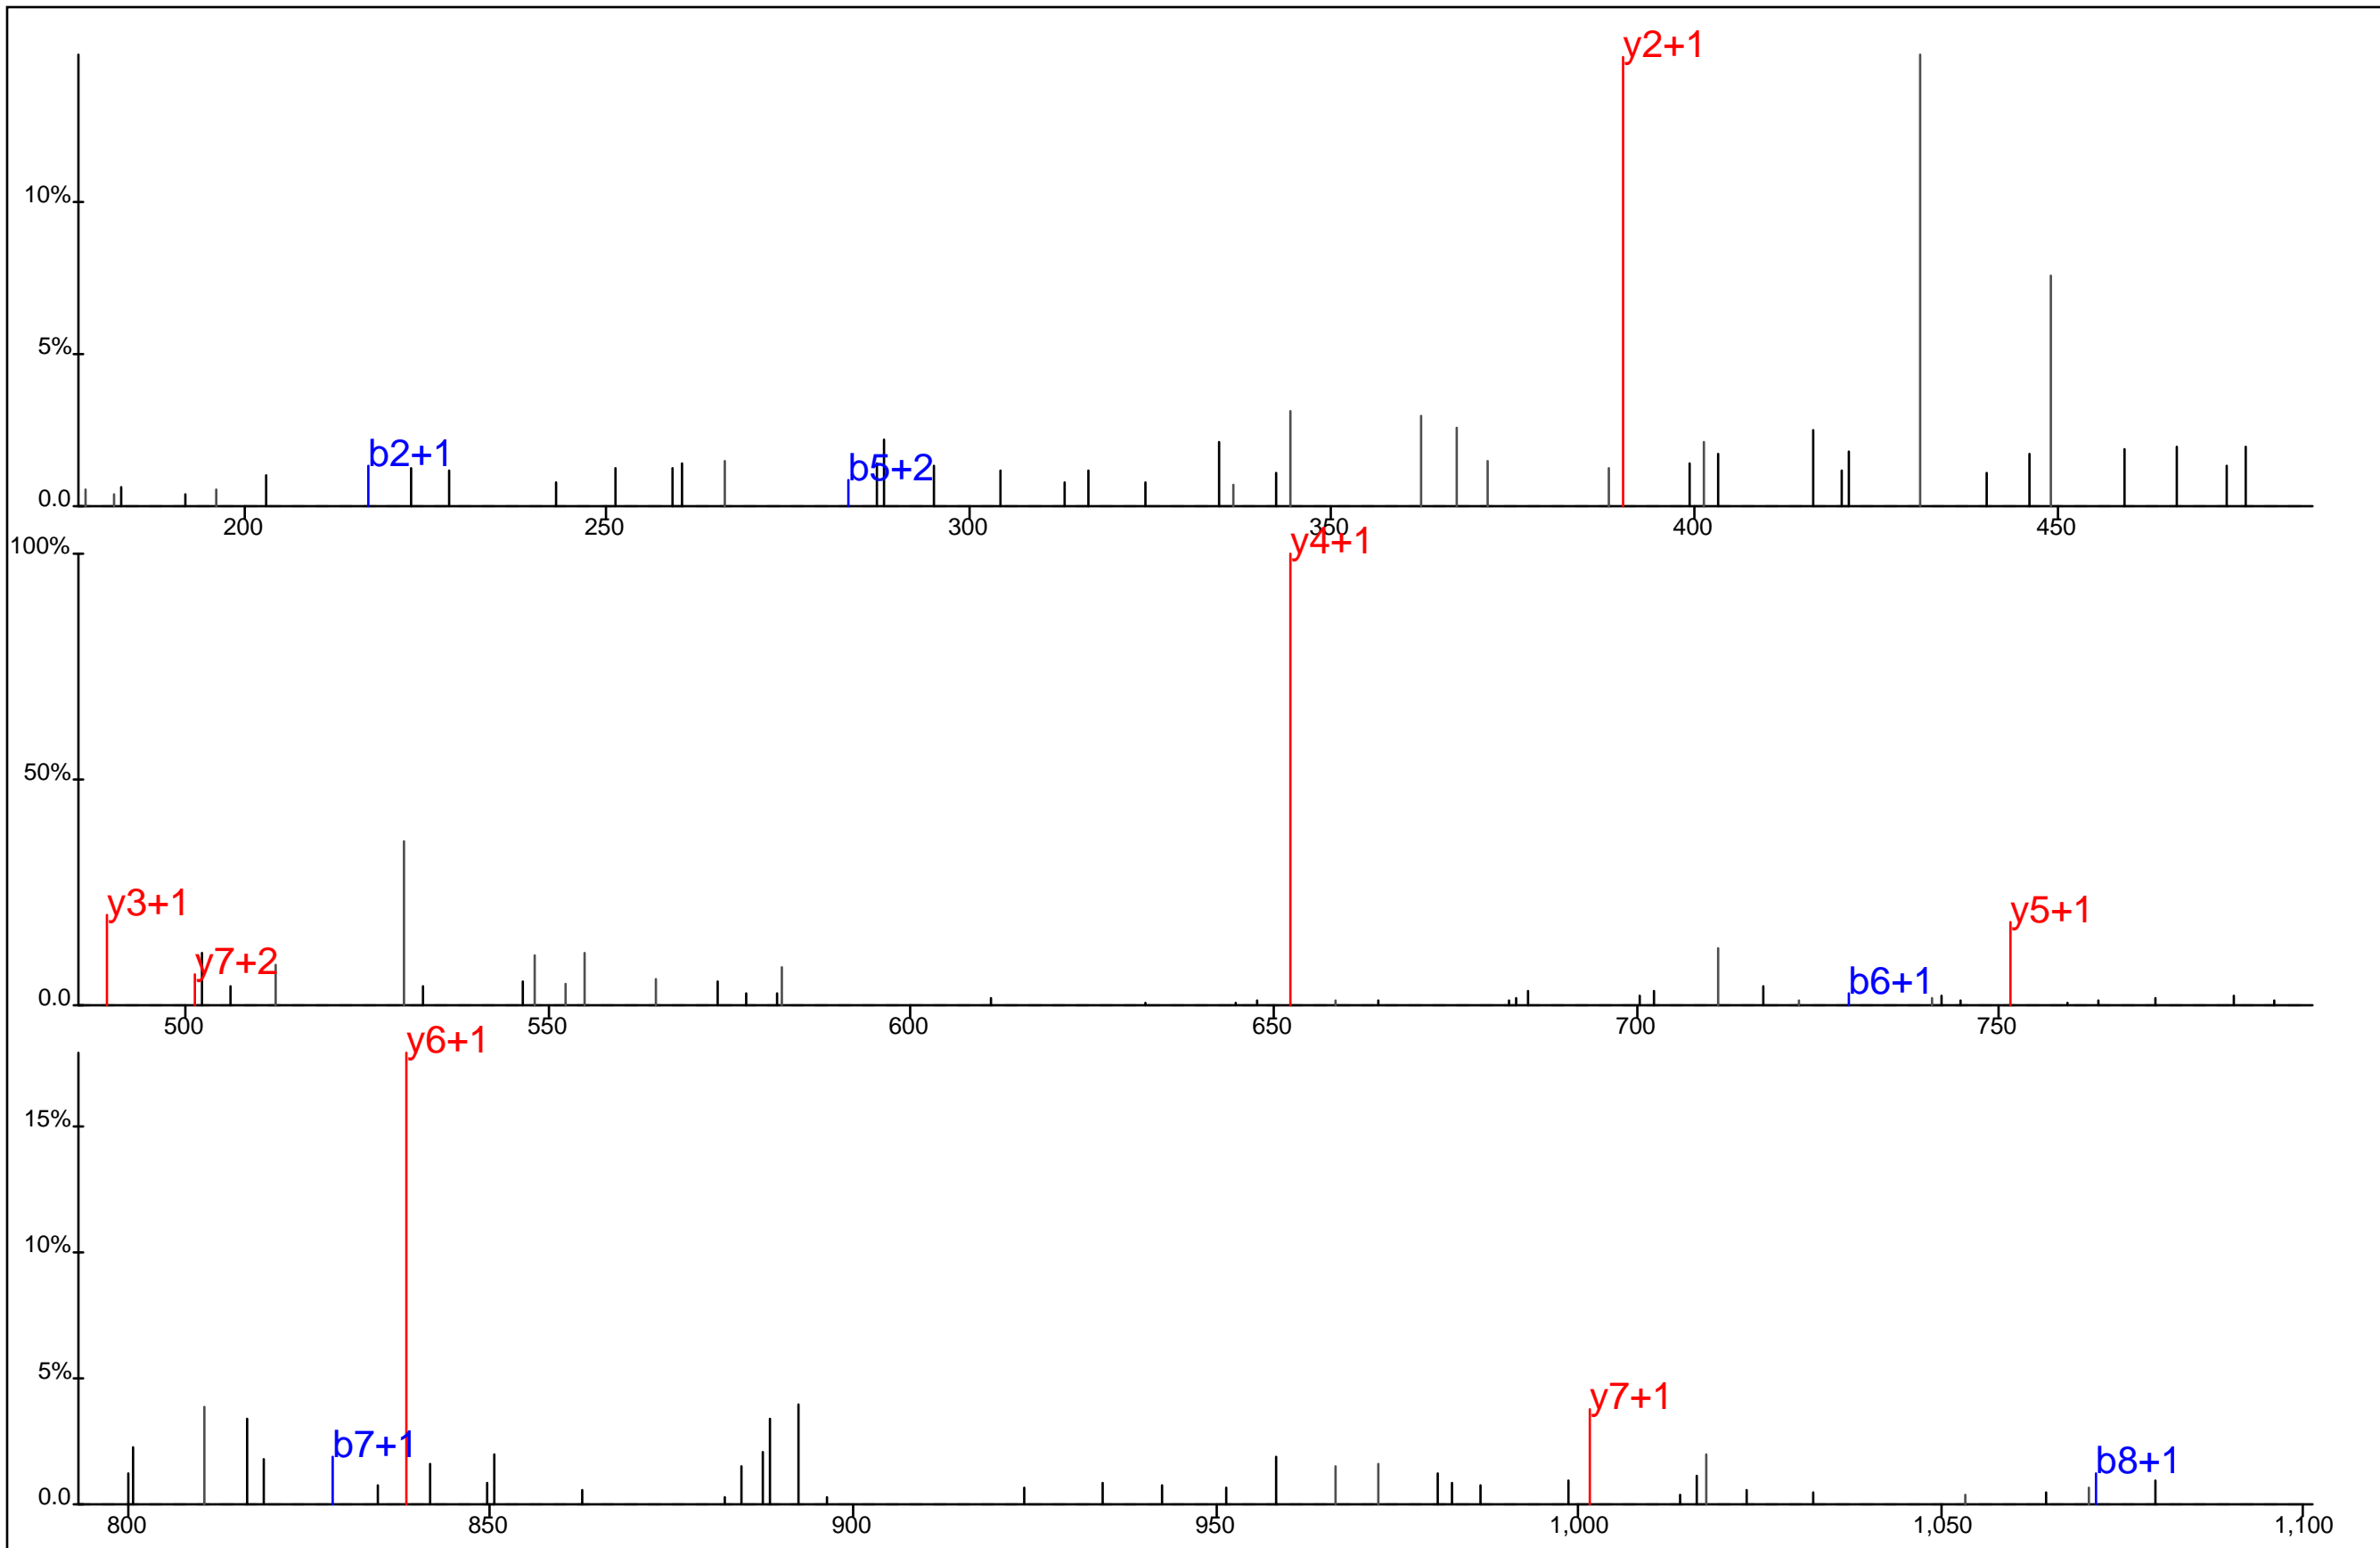

■ □ ▤ ▥ ▦ ▧ ▨ ▩  
 E S Y S V Y V Y\*K  
▩ ▨ ▧ ▦ ▥ ▤ ▣ ▢

Protein Name: H2B Histone family, member E  
 gi Accession: 0  
 Precursor Mass: 609.2596+2  
 Delta Mass: 0.560 ppm  
 XCorr: 29.39

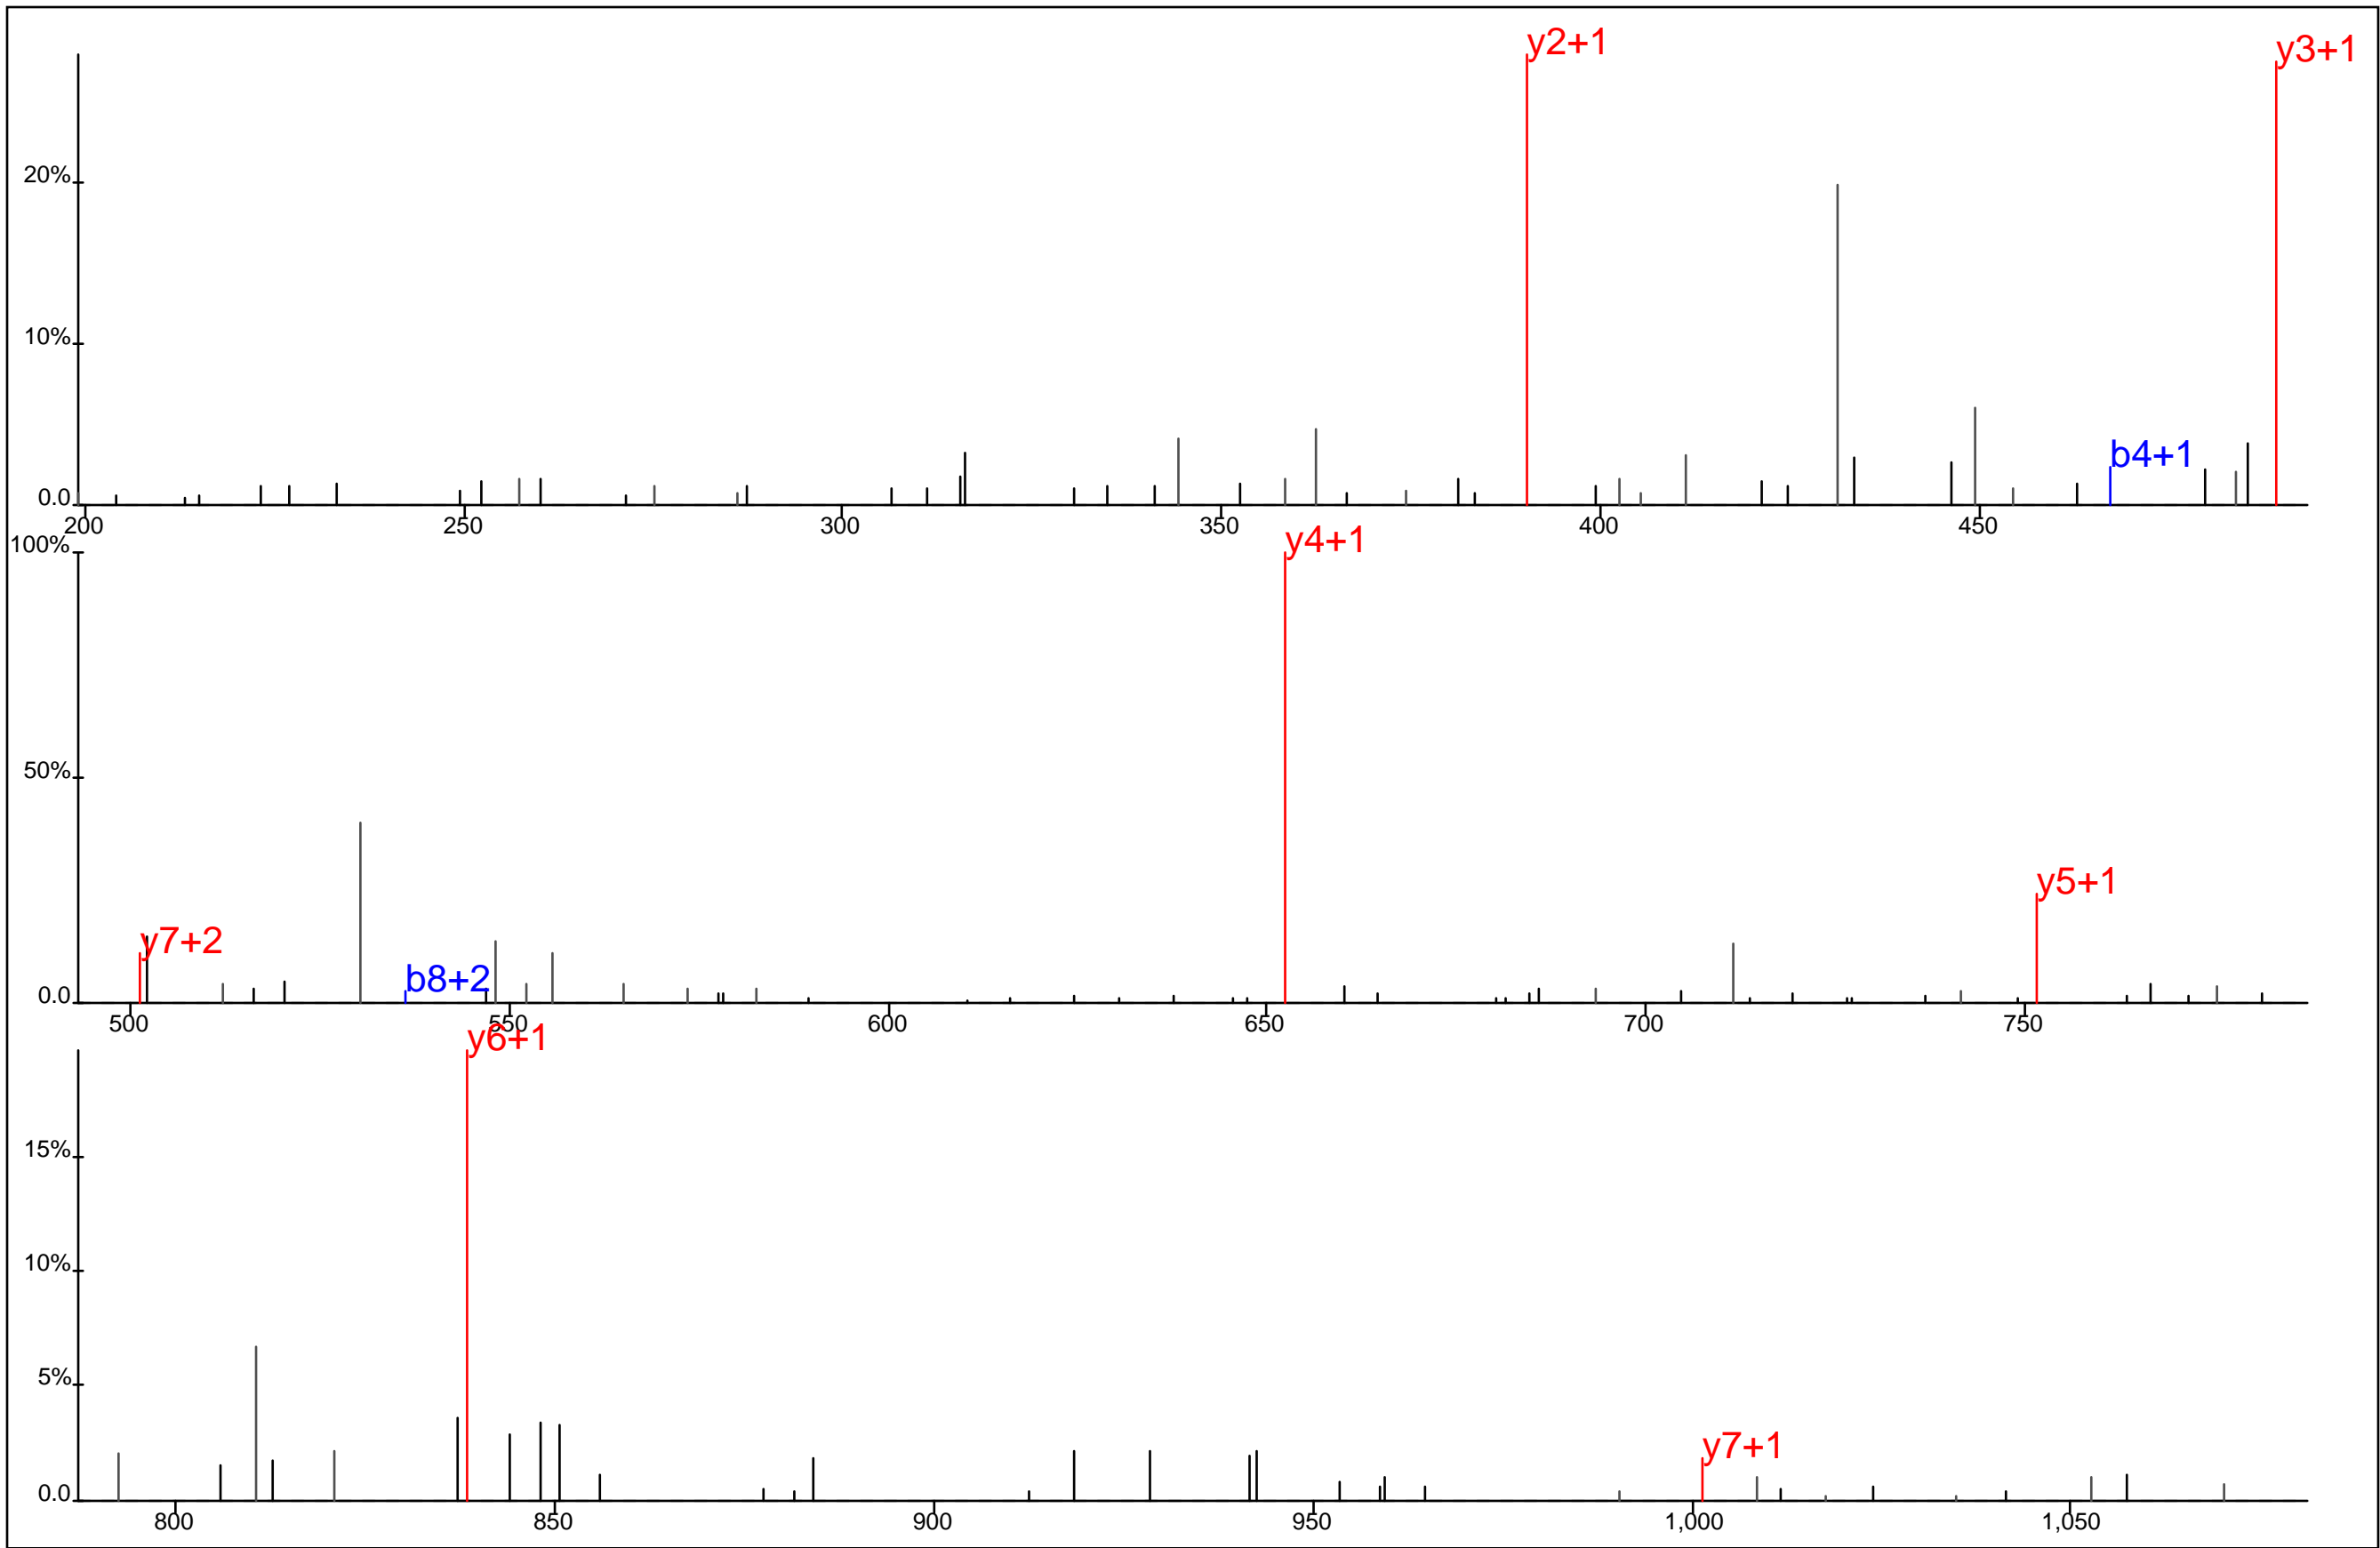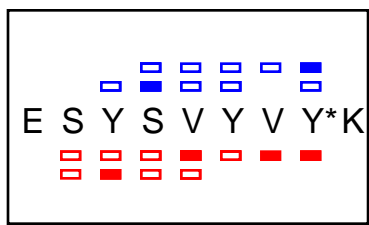

Protein Name: H2B Histone family, member E  
 gi Accession: 0  
 Precursor Mass: 609.2599+2  
 Delta Mass: 0.059 ppm  
 XCorr: 46.84

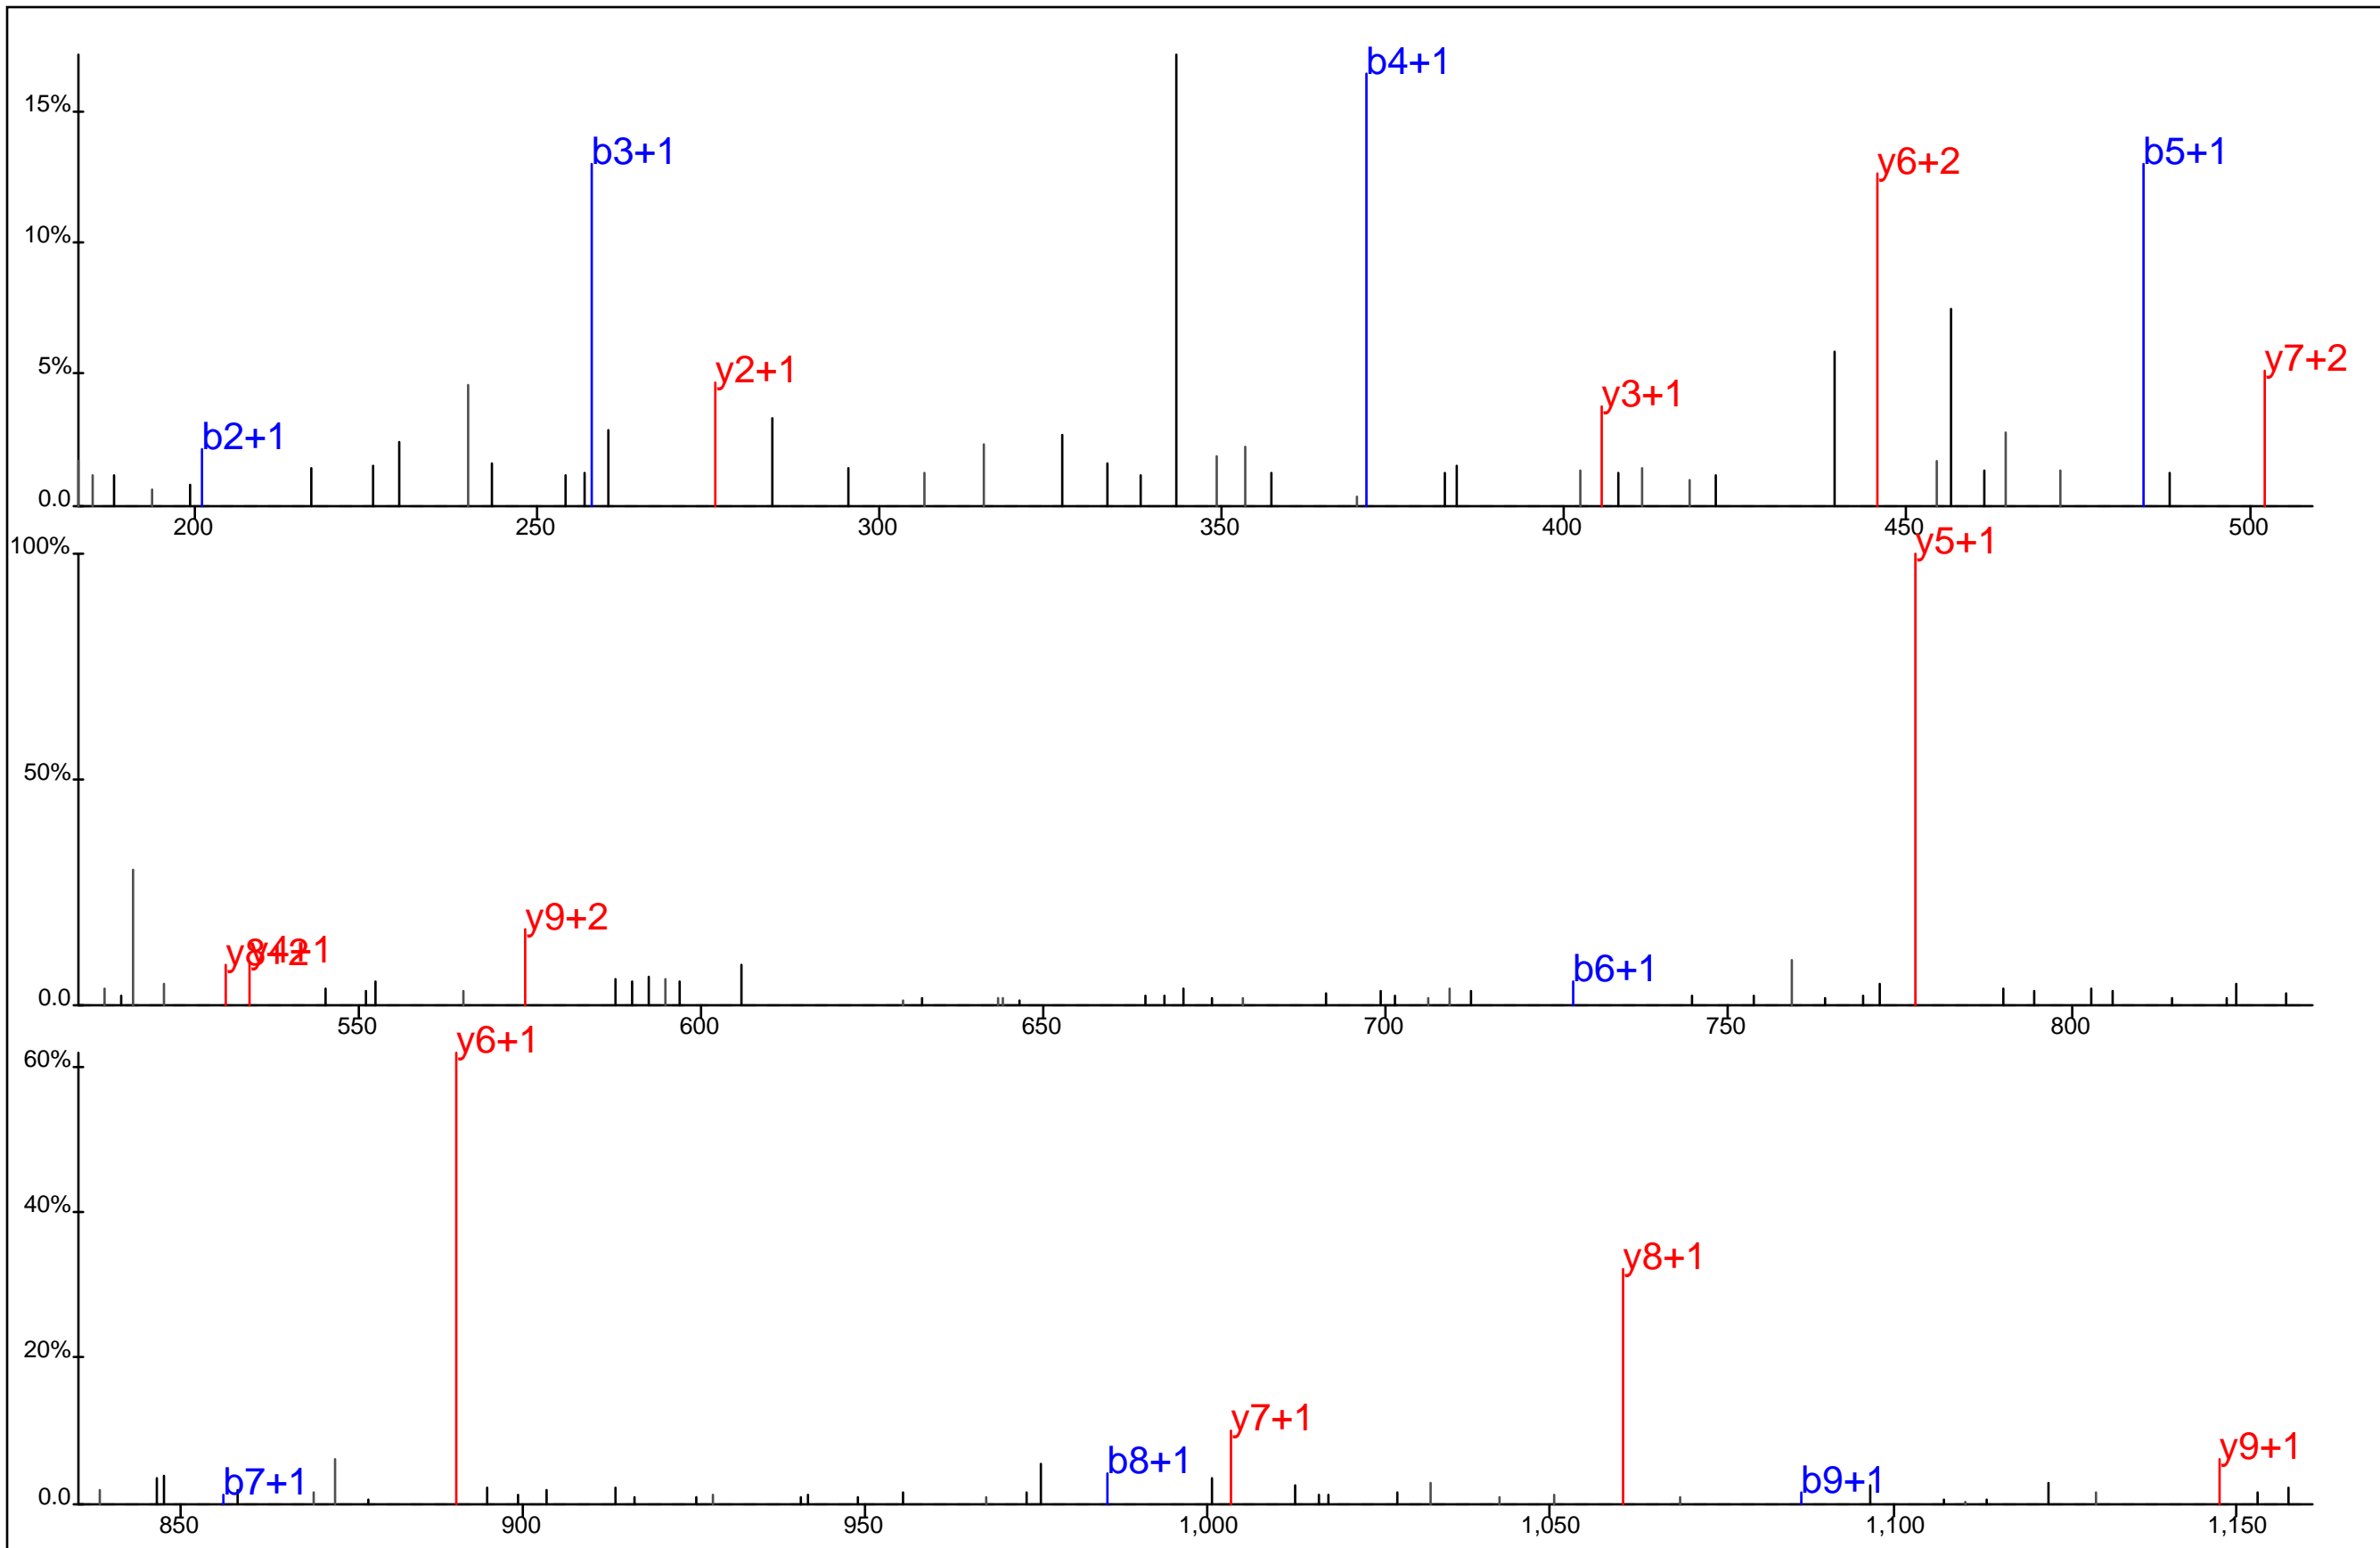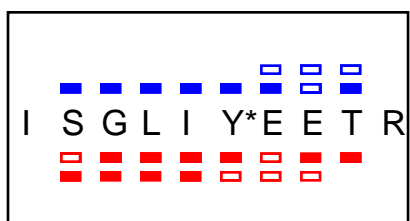

Protein Name: H4 Histone family, member A  
 gi Accession: 0  
 Precursor Mass: 630.7962+2  
 Delta Mass: 1.579 ppm  
 XCorr: 45.1

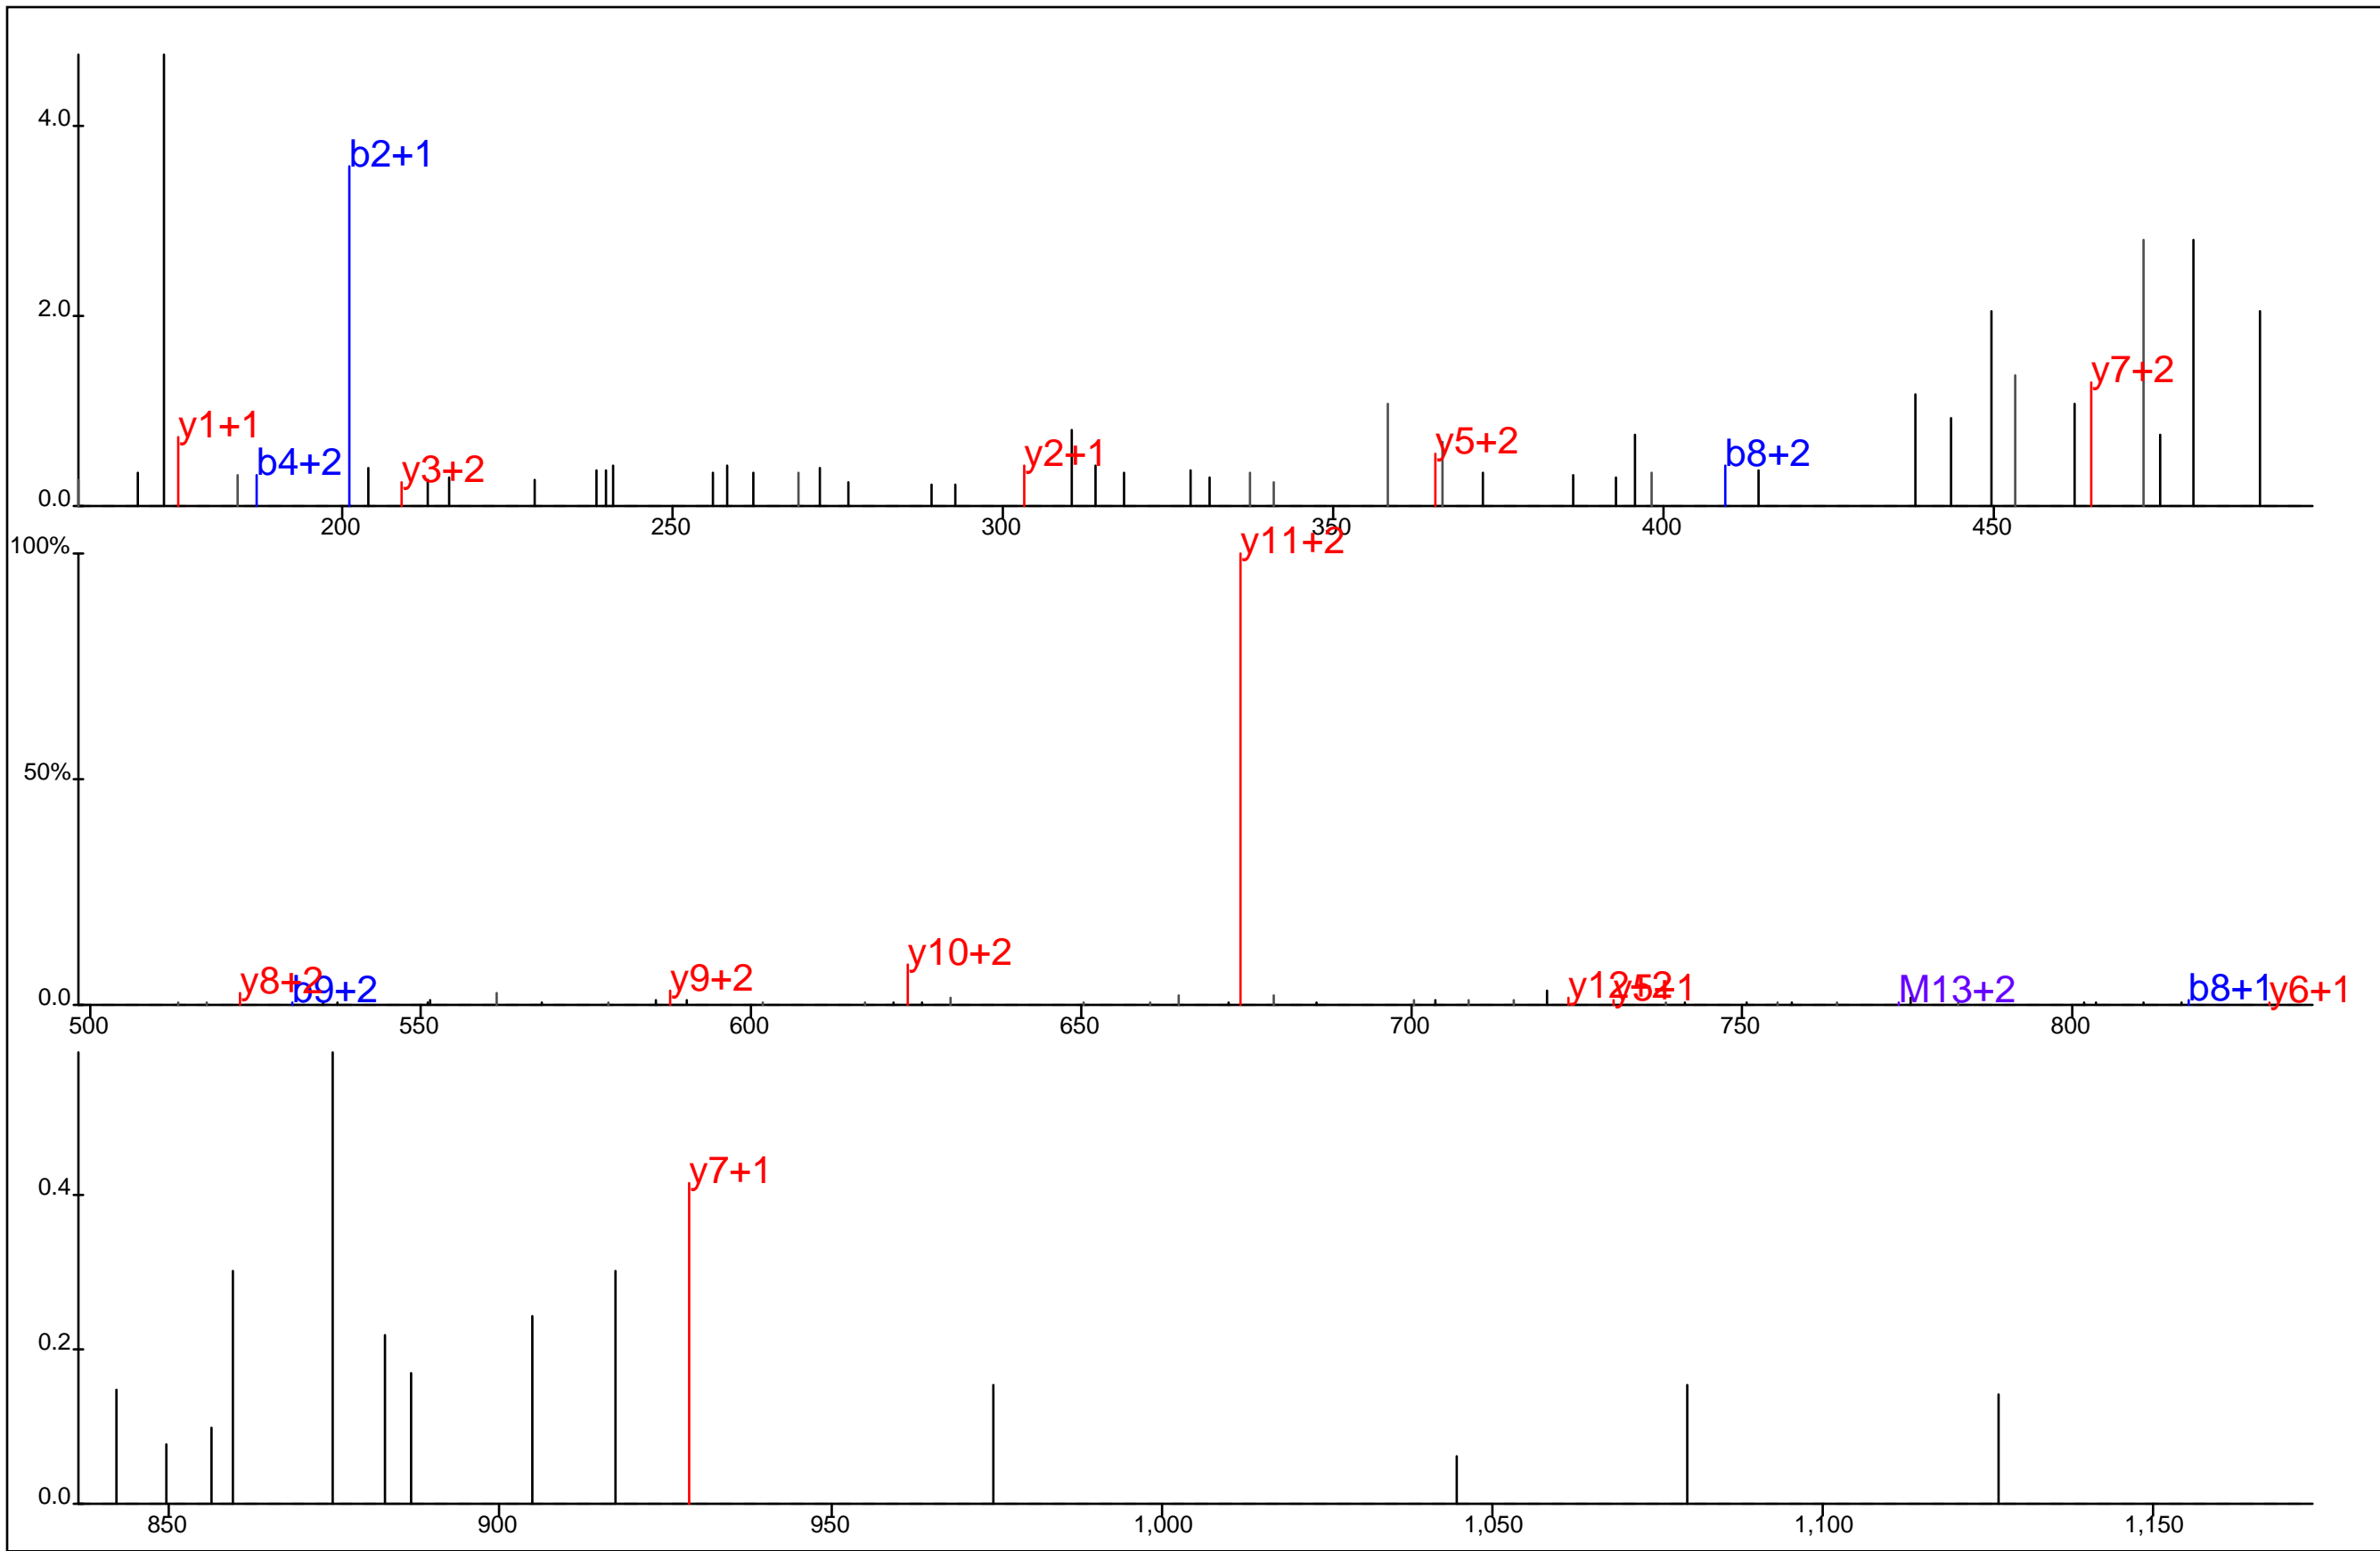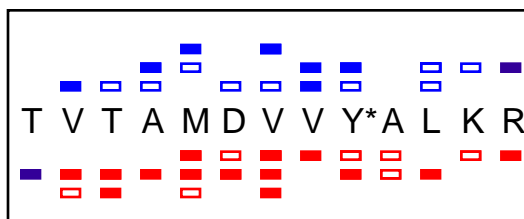

Protein Name: H4 Histone family, member A  
 gi Accession: 0  
 Precursor Mass: 516.2614+3  
 Delta Mass: 0.124 ppm  
 XCorr: 24.58

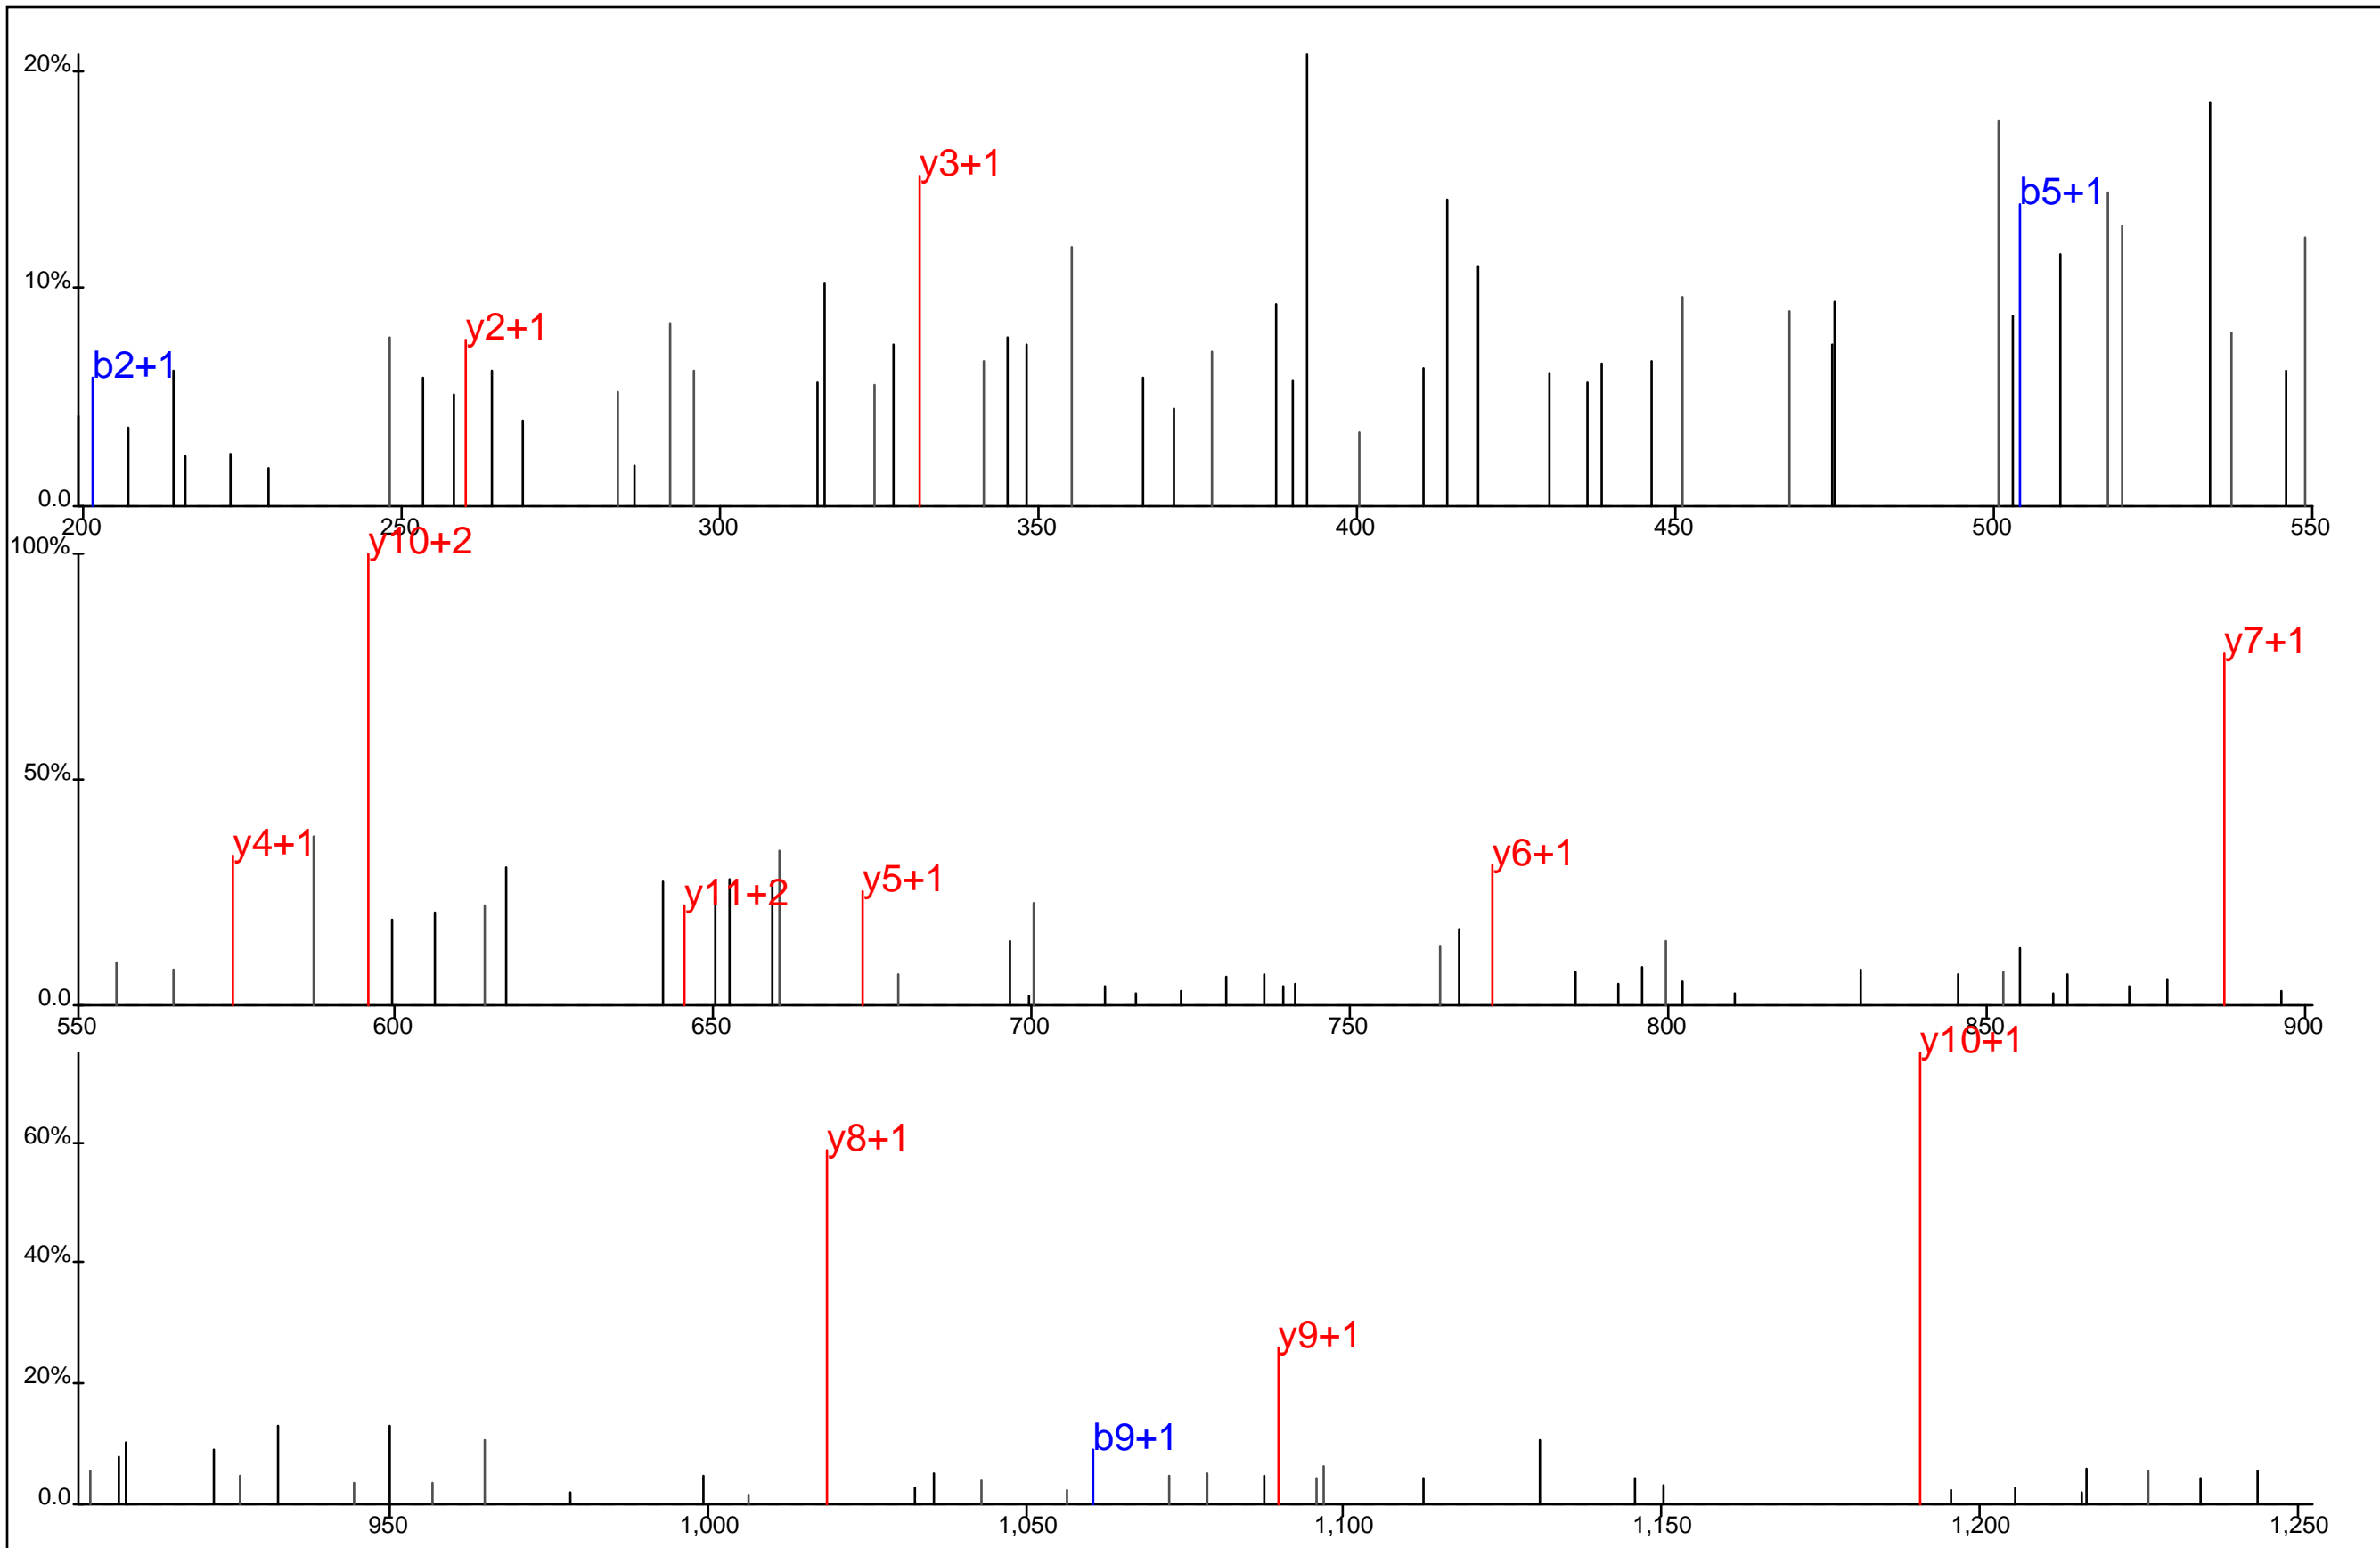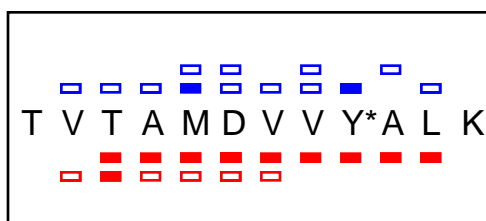

Protein Name: H4 Histone family, member A  
 gi Accession: 0  
 Precursor Mass: 695.8375+2  
 Delta Mass: 0.807 ppm  
 XCorr: 30.96



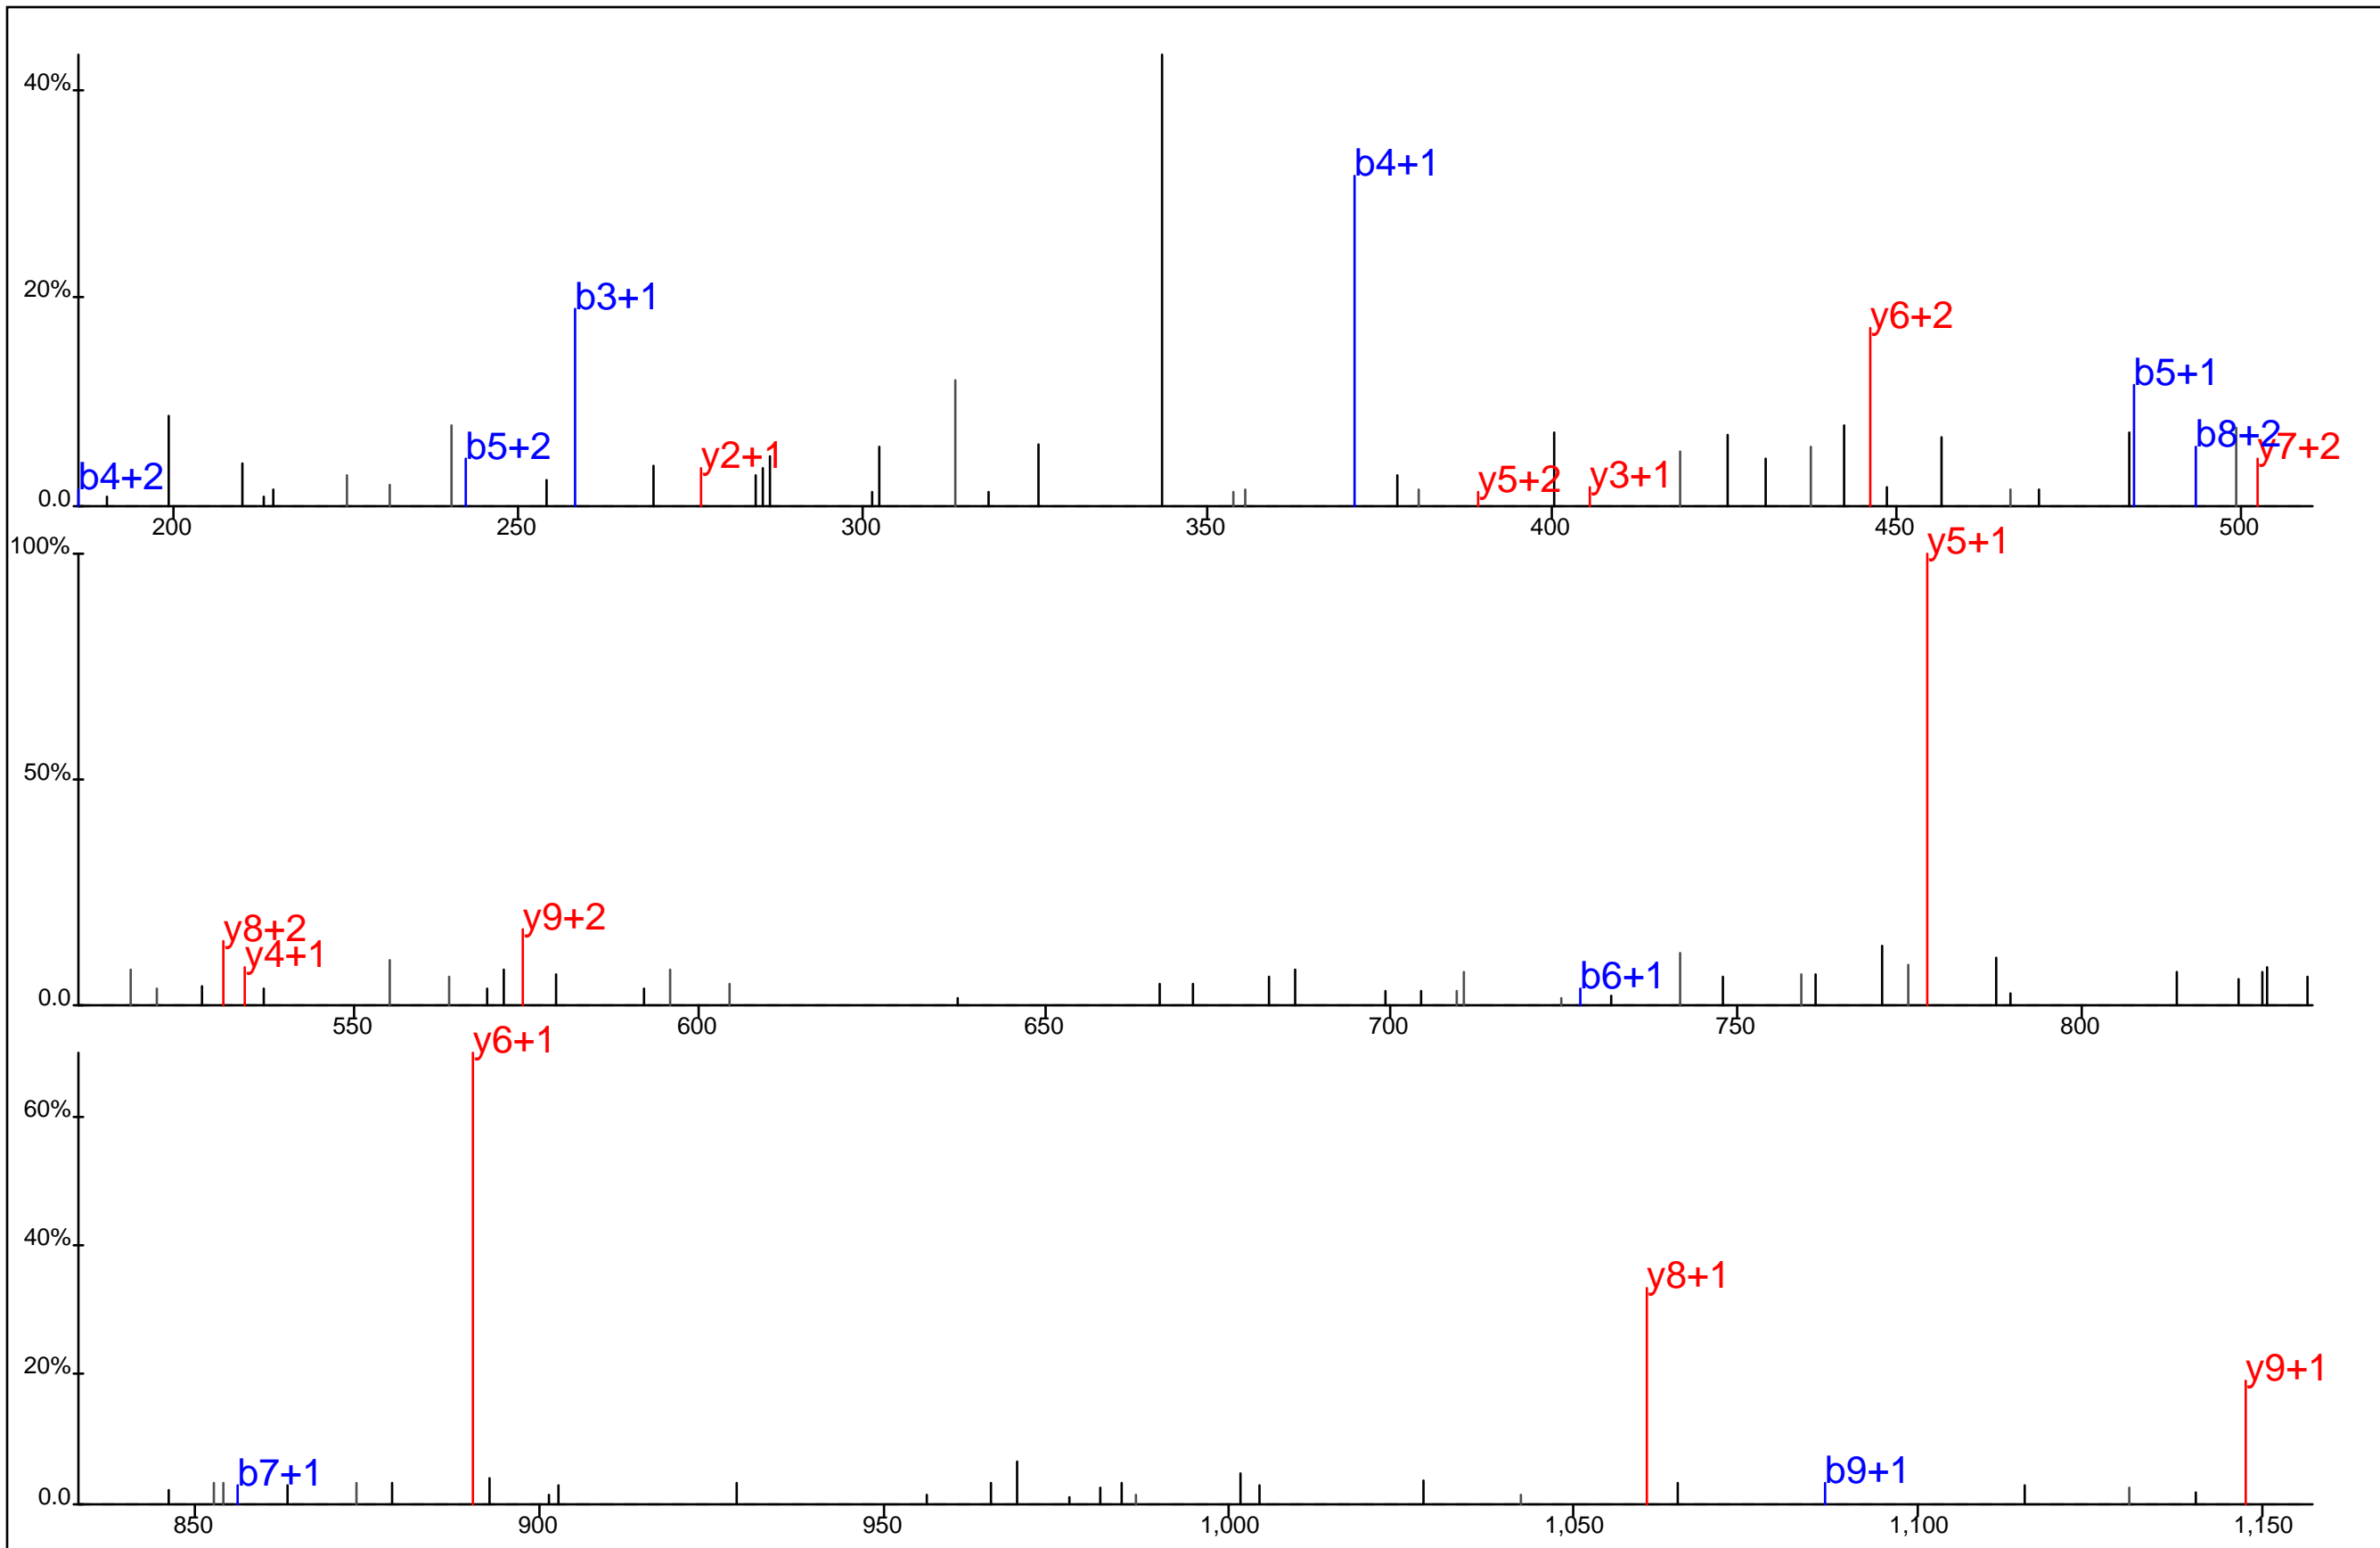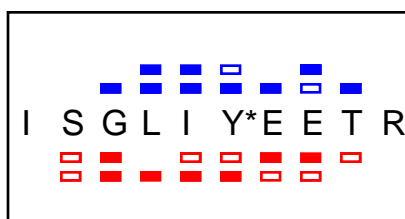

Protein Name: H4 Histone family, member A  
 gi Accession: 0  
 Precursor Mass: 630.7972+2  
 Delta Mass: 0.067 ppm  
 XCorr: 27.43

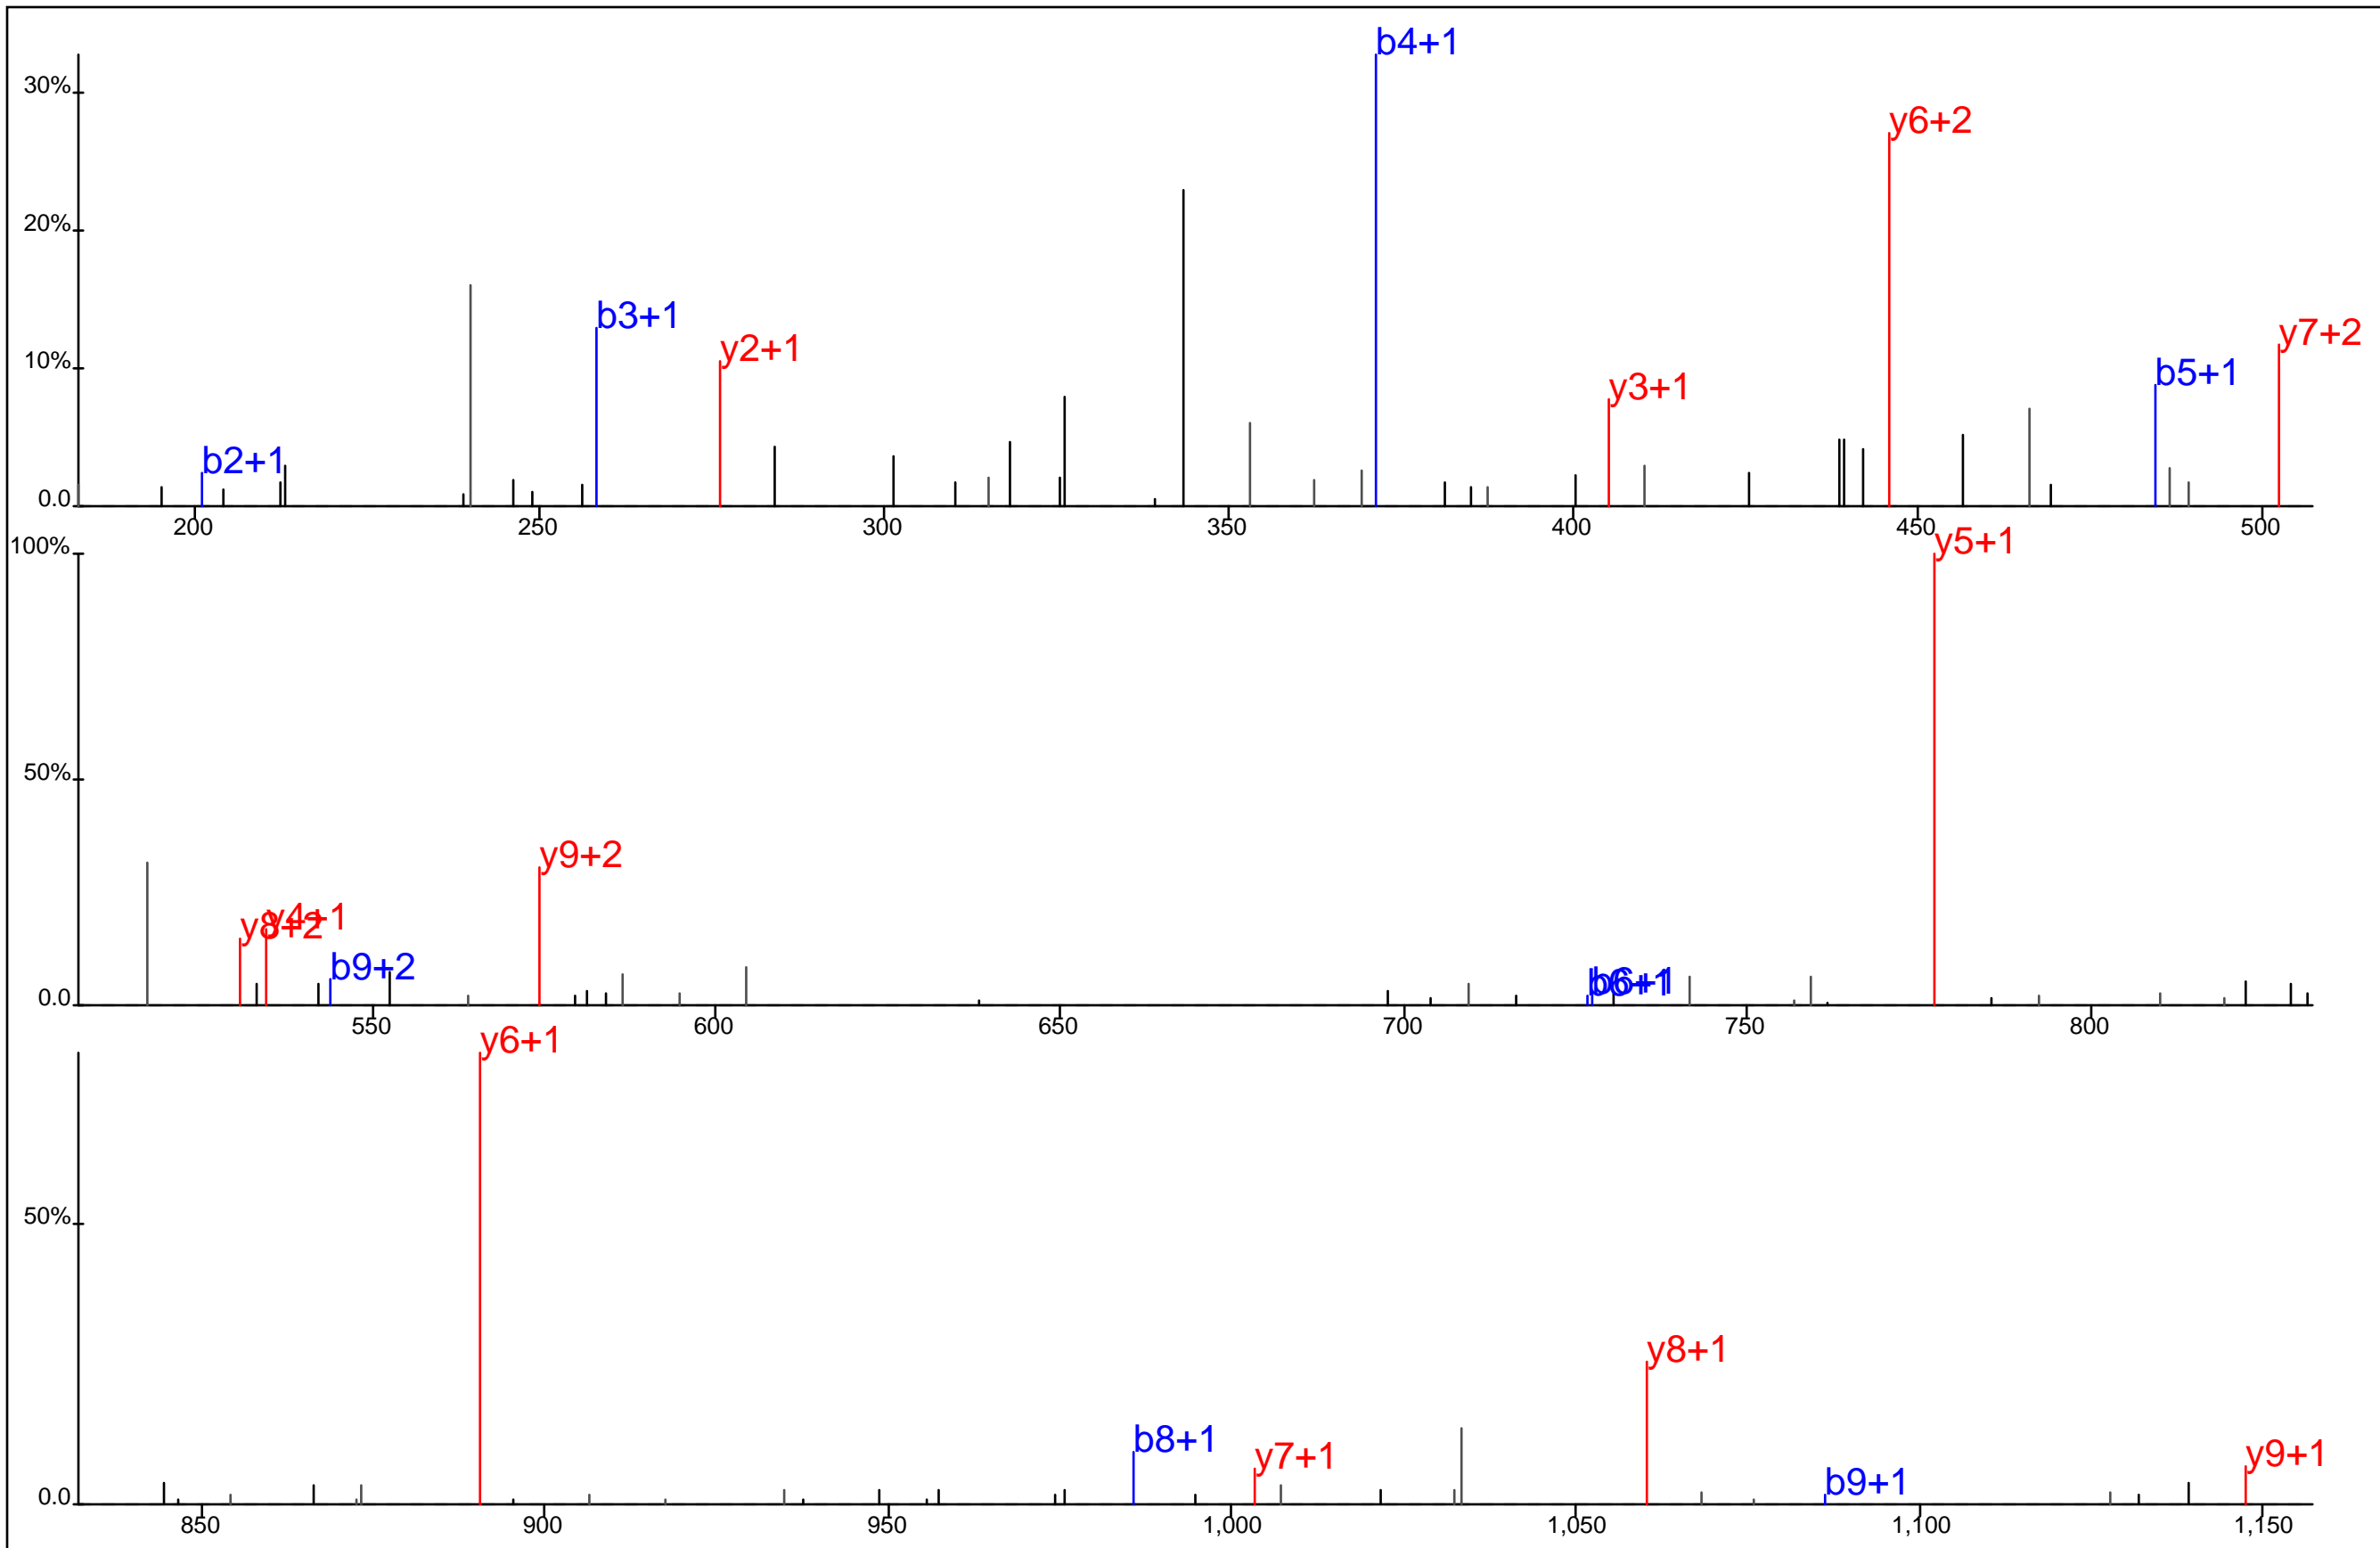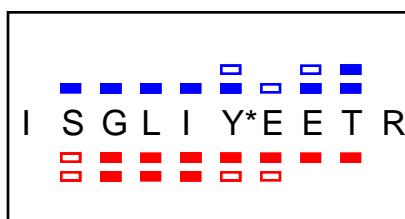

Protein Name: H4 Histone family, member A  
 gi Accession: 0  
 Precursor Mass: 630.7976+2  
 Delta Mass: 0.647 ppm  
 XCorr: 48.27

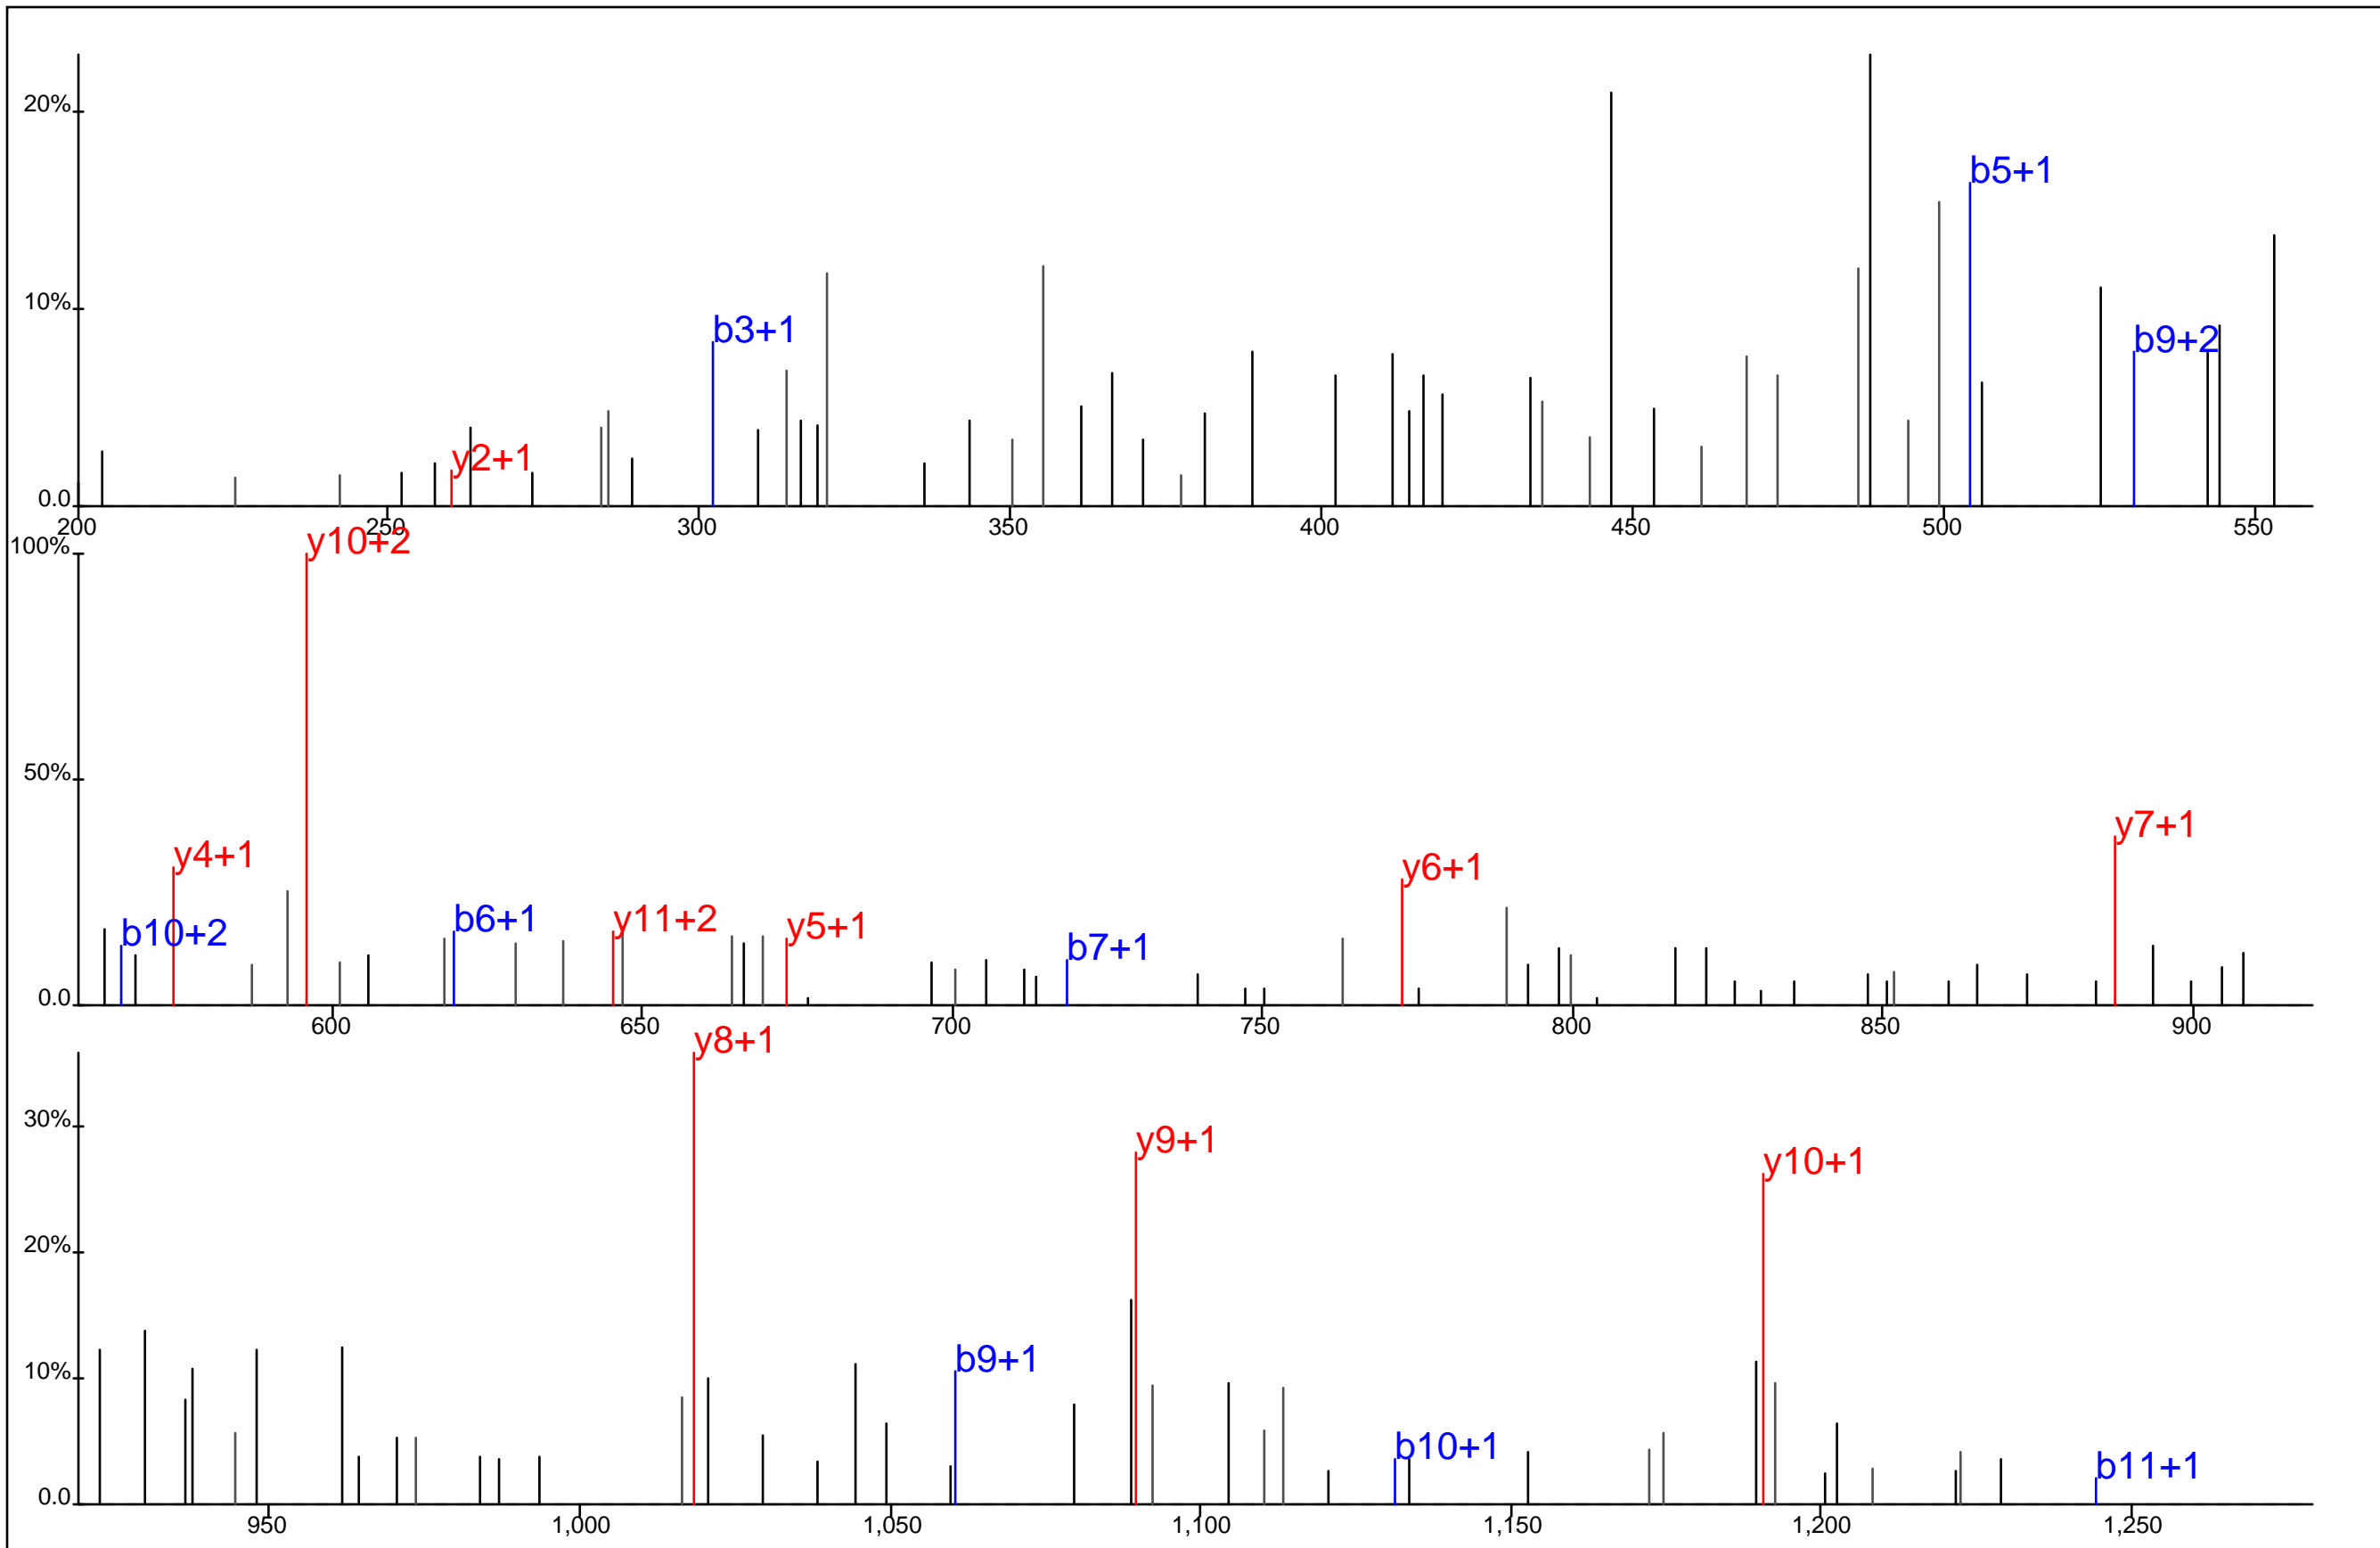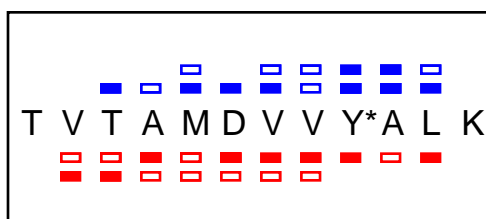

Protein Name: H4 Histone family, member A  
 gi Accession: 0  
 Precursor Mass: 695.8372+2  
 Delta Mass: 1.245 ppm  
 XCorr: 20.82

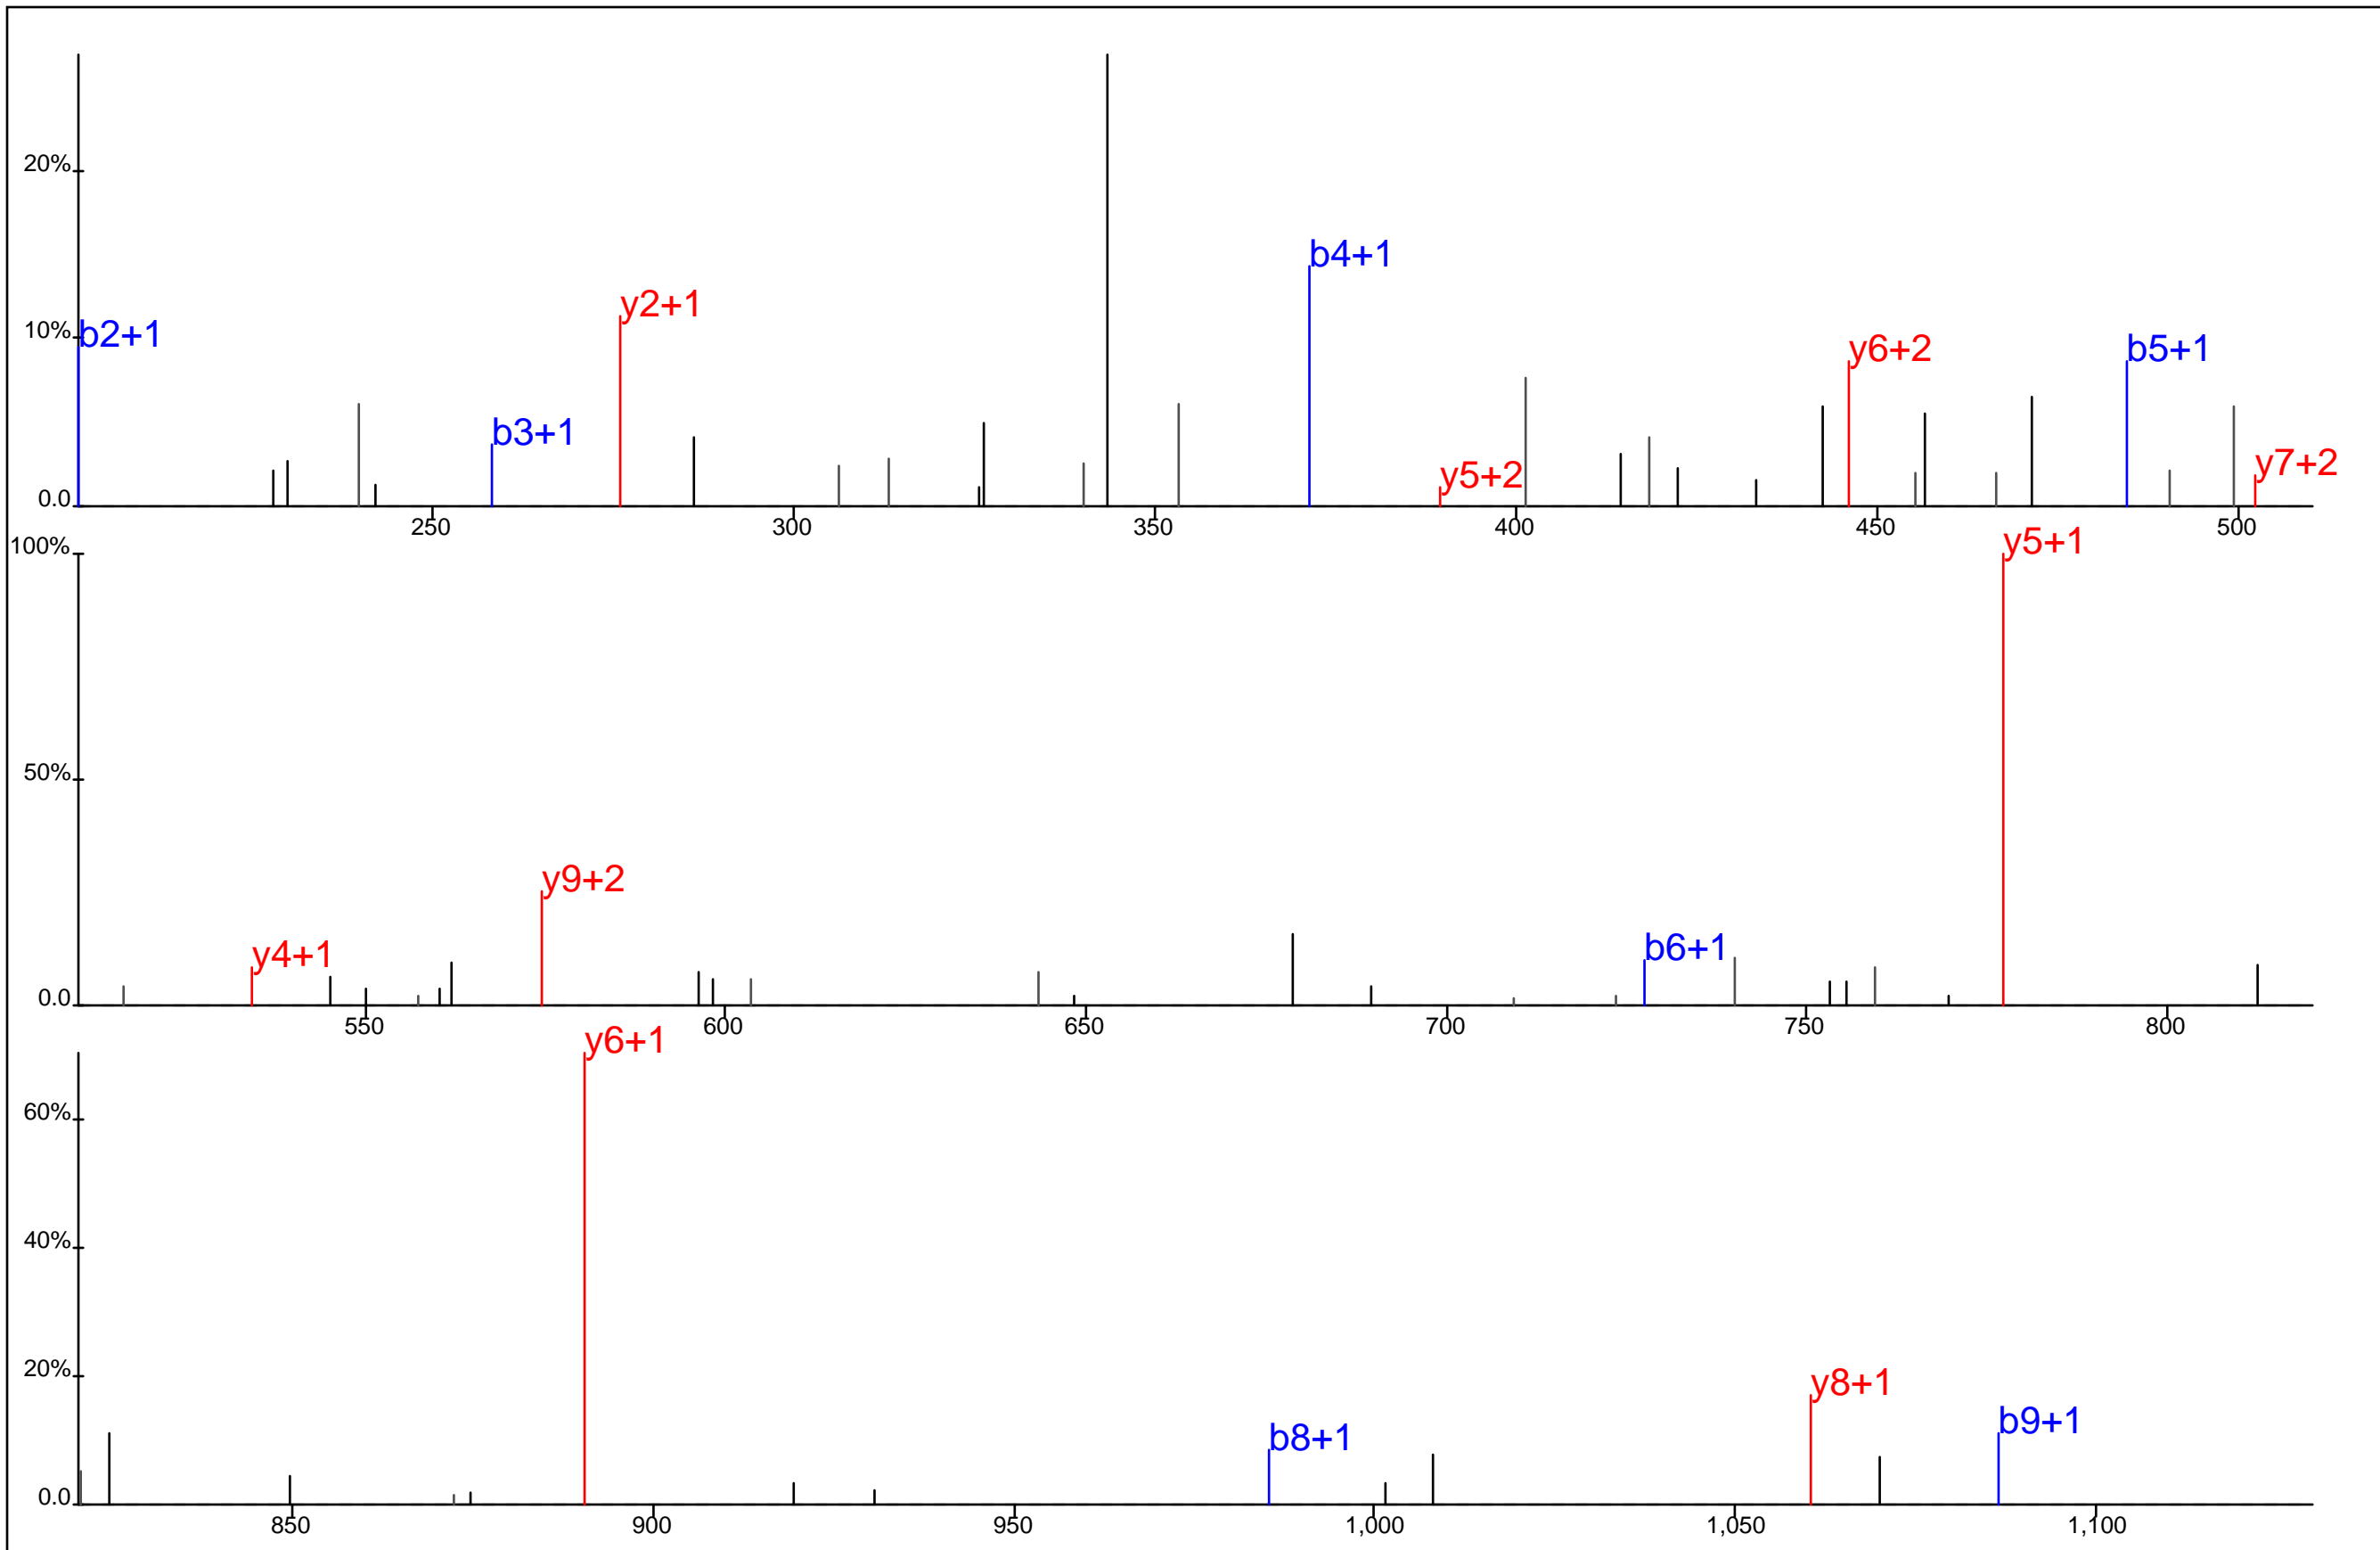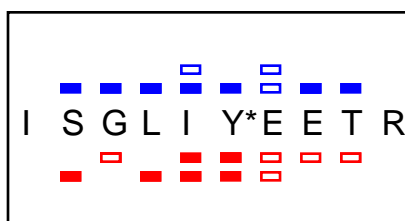

Protein Name: H4 Histone family, member A  
 gi Accession: 0  
 Precursor Mass: 630.7952+2  
 Delta Mass: 3.225 ppm  
 XCorr: 34.18

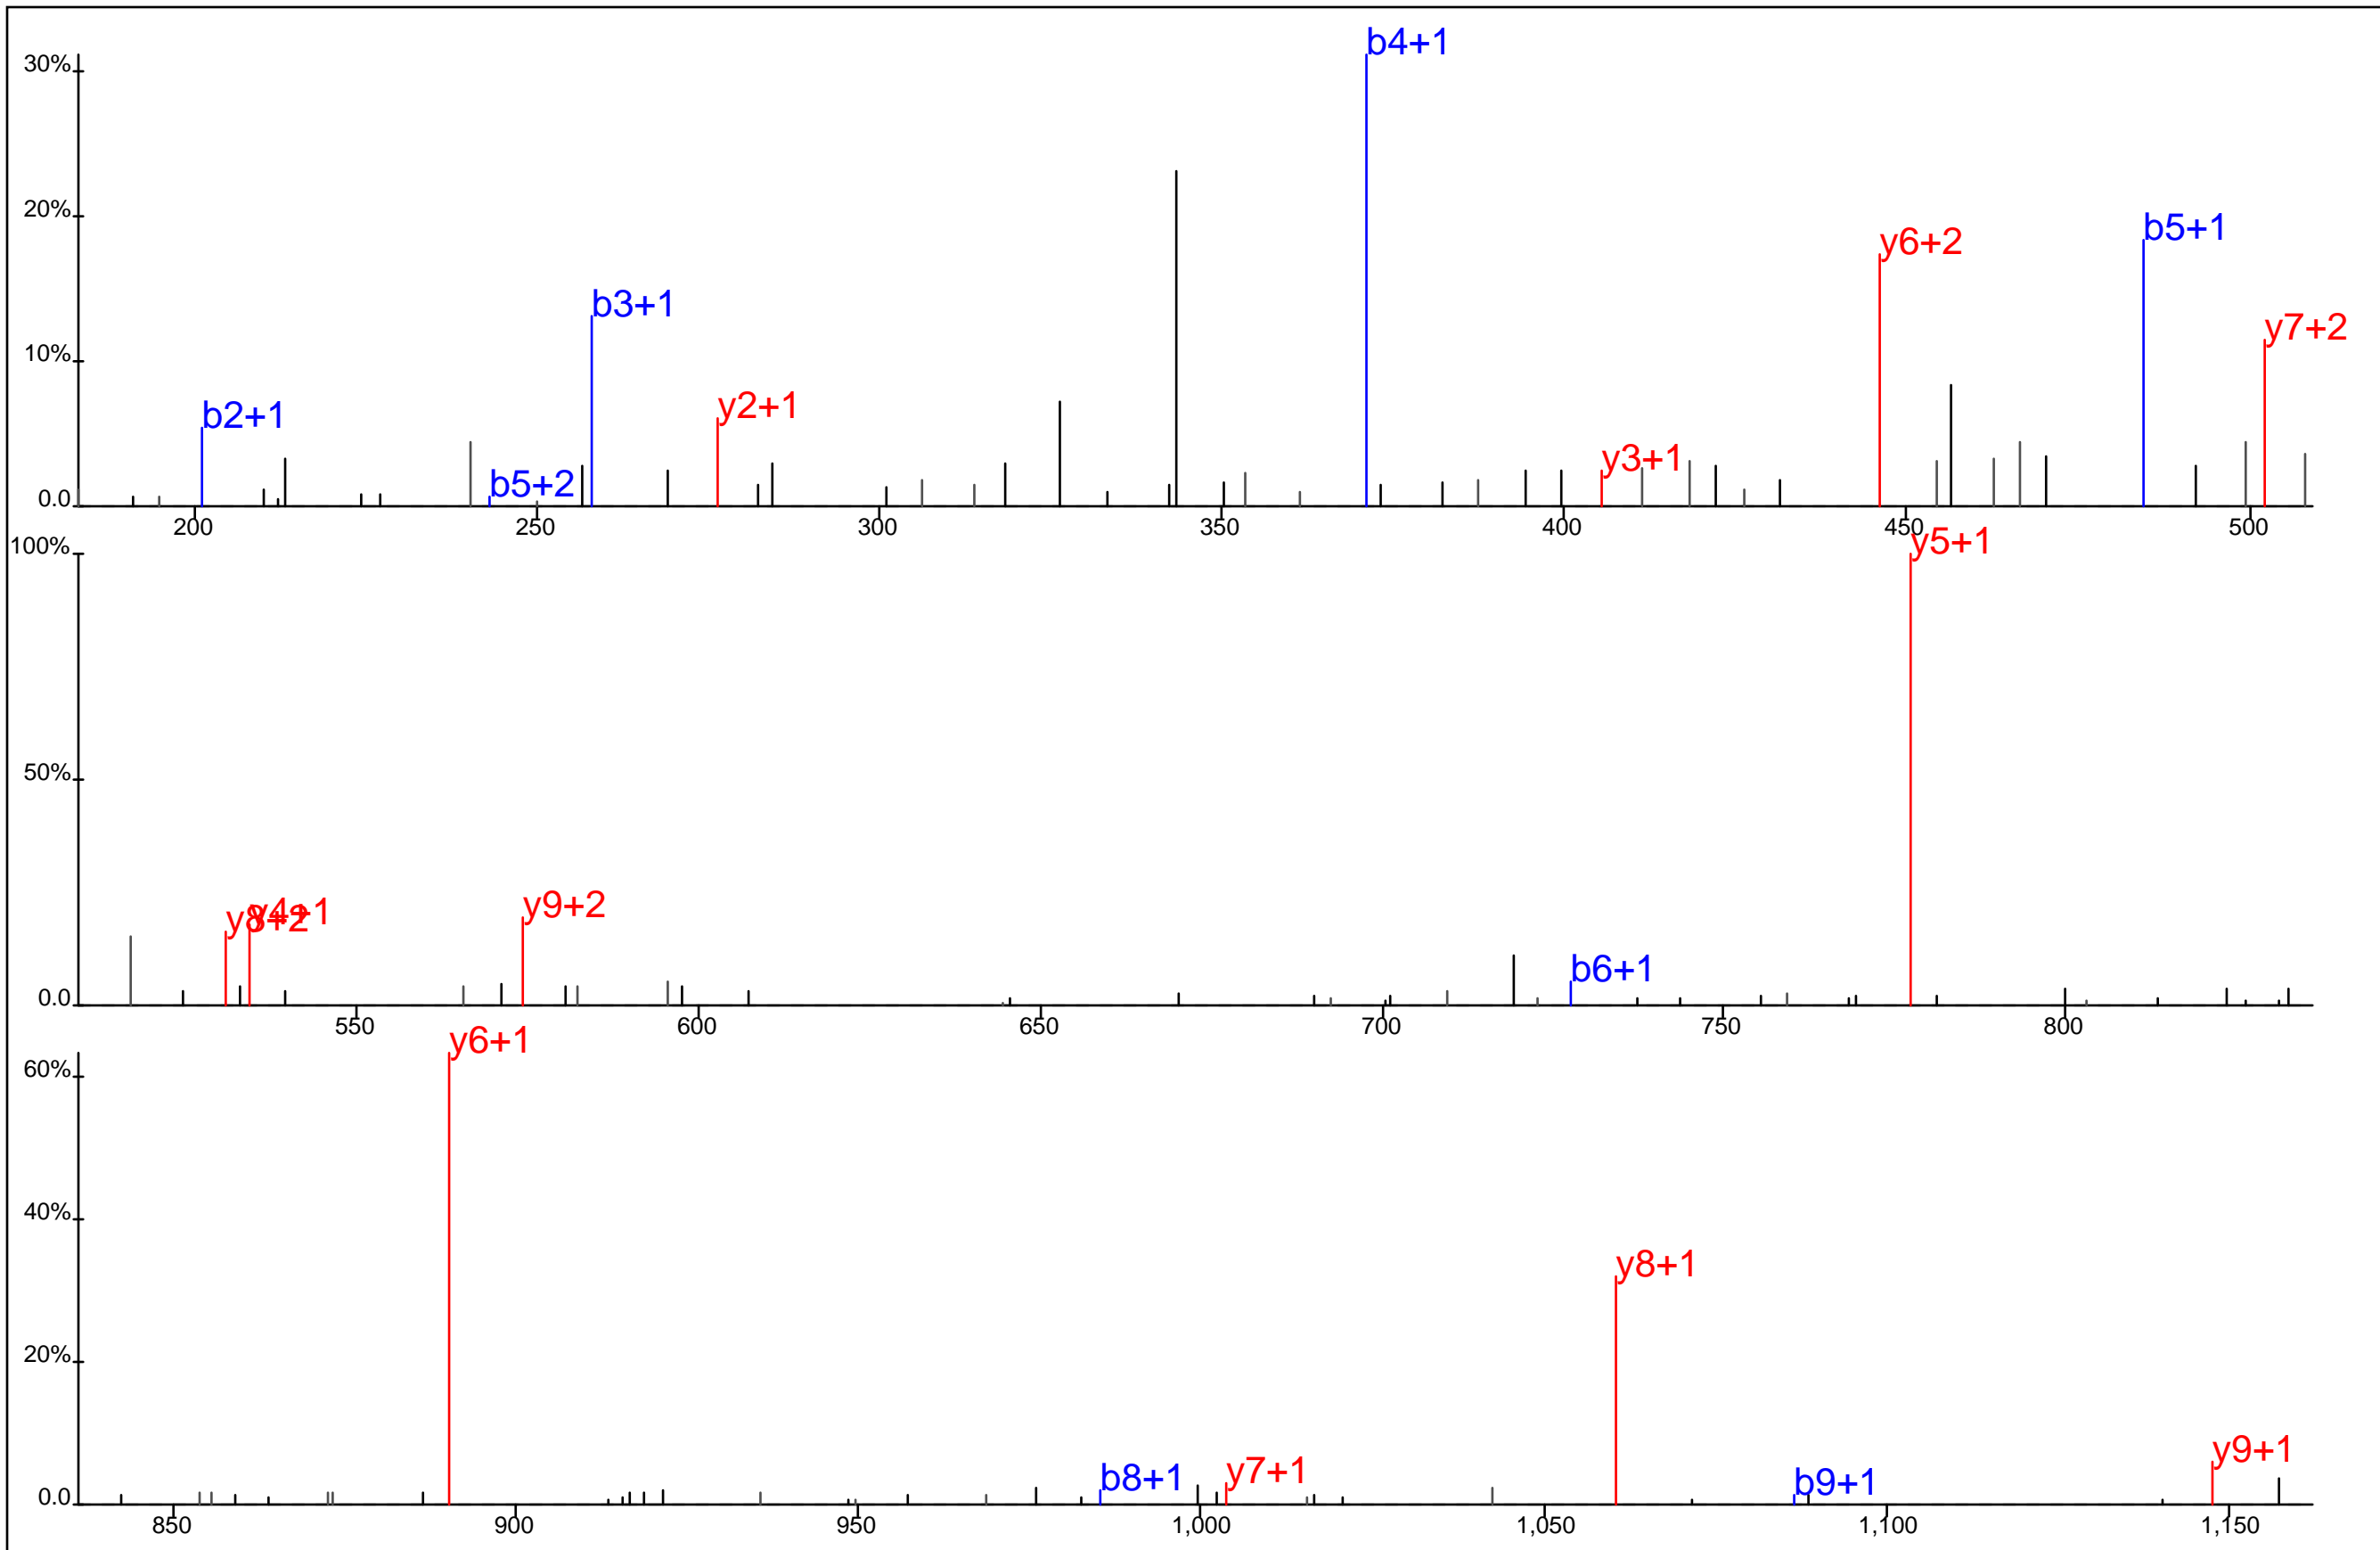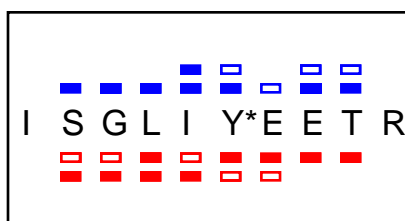

Protein Name: H4 Histone family, member A  
 gi Accession: 0  
 Precursor Mass: 630.7976+2  
 Delta Mass: 0.647 ppm  
 XCorr: 39.94

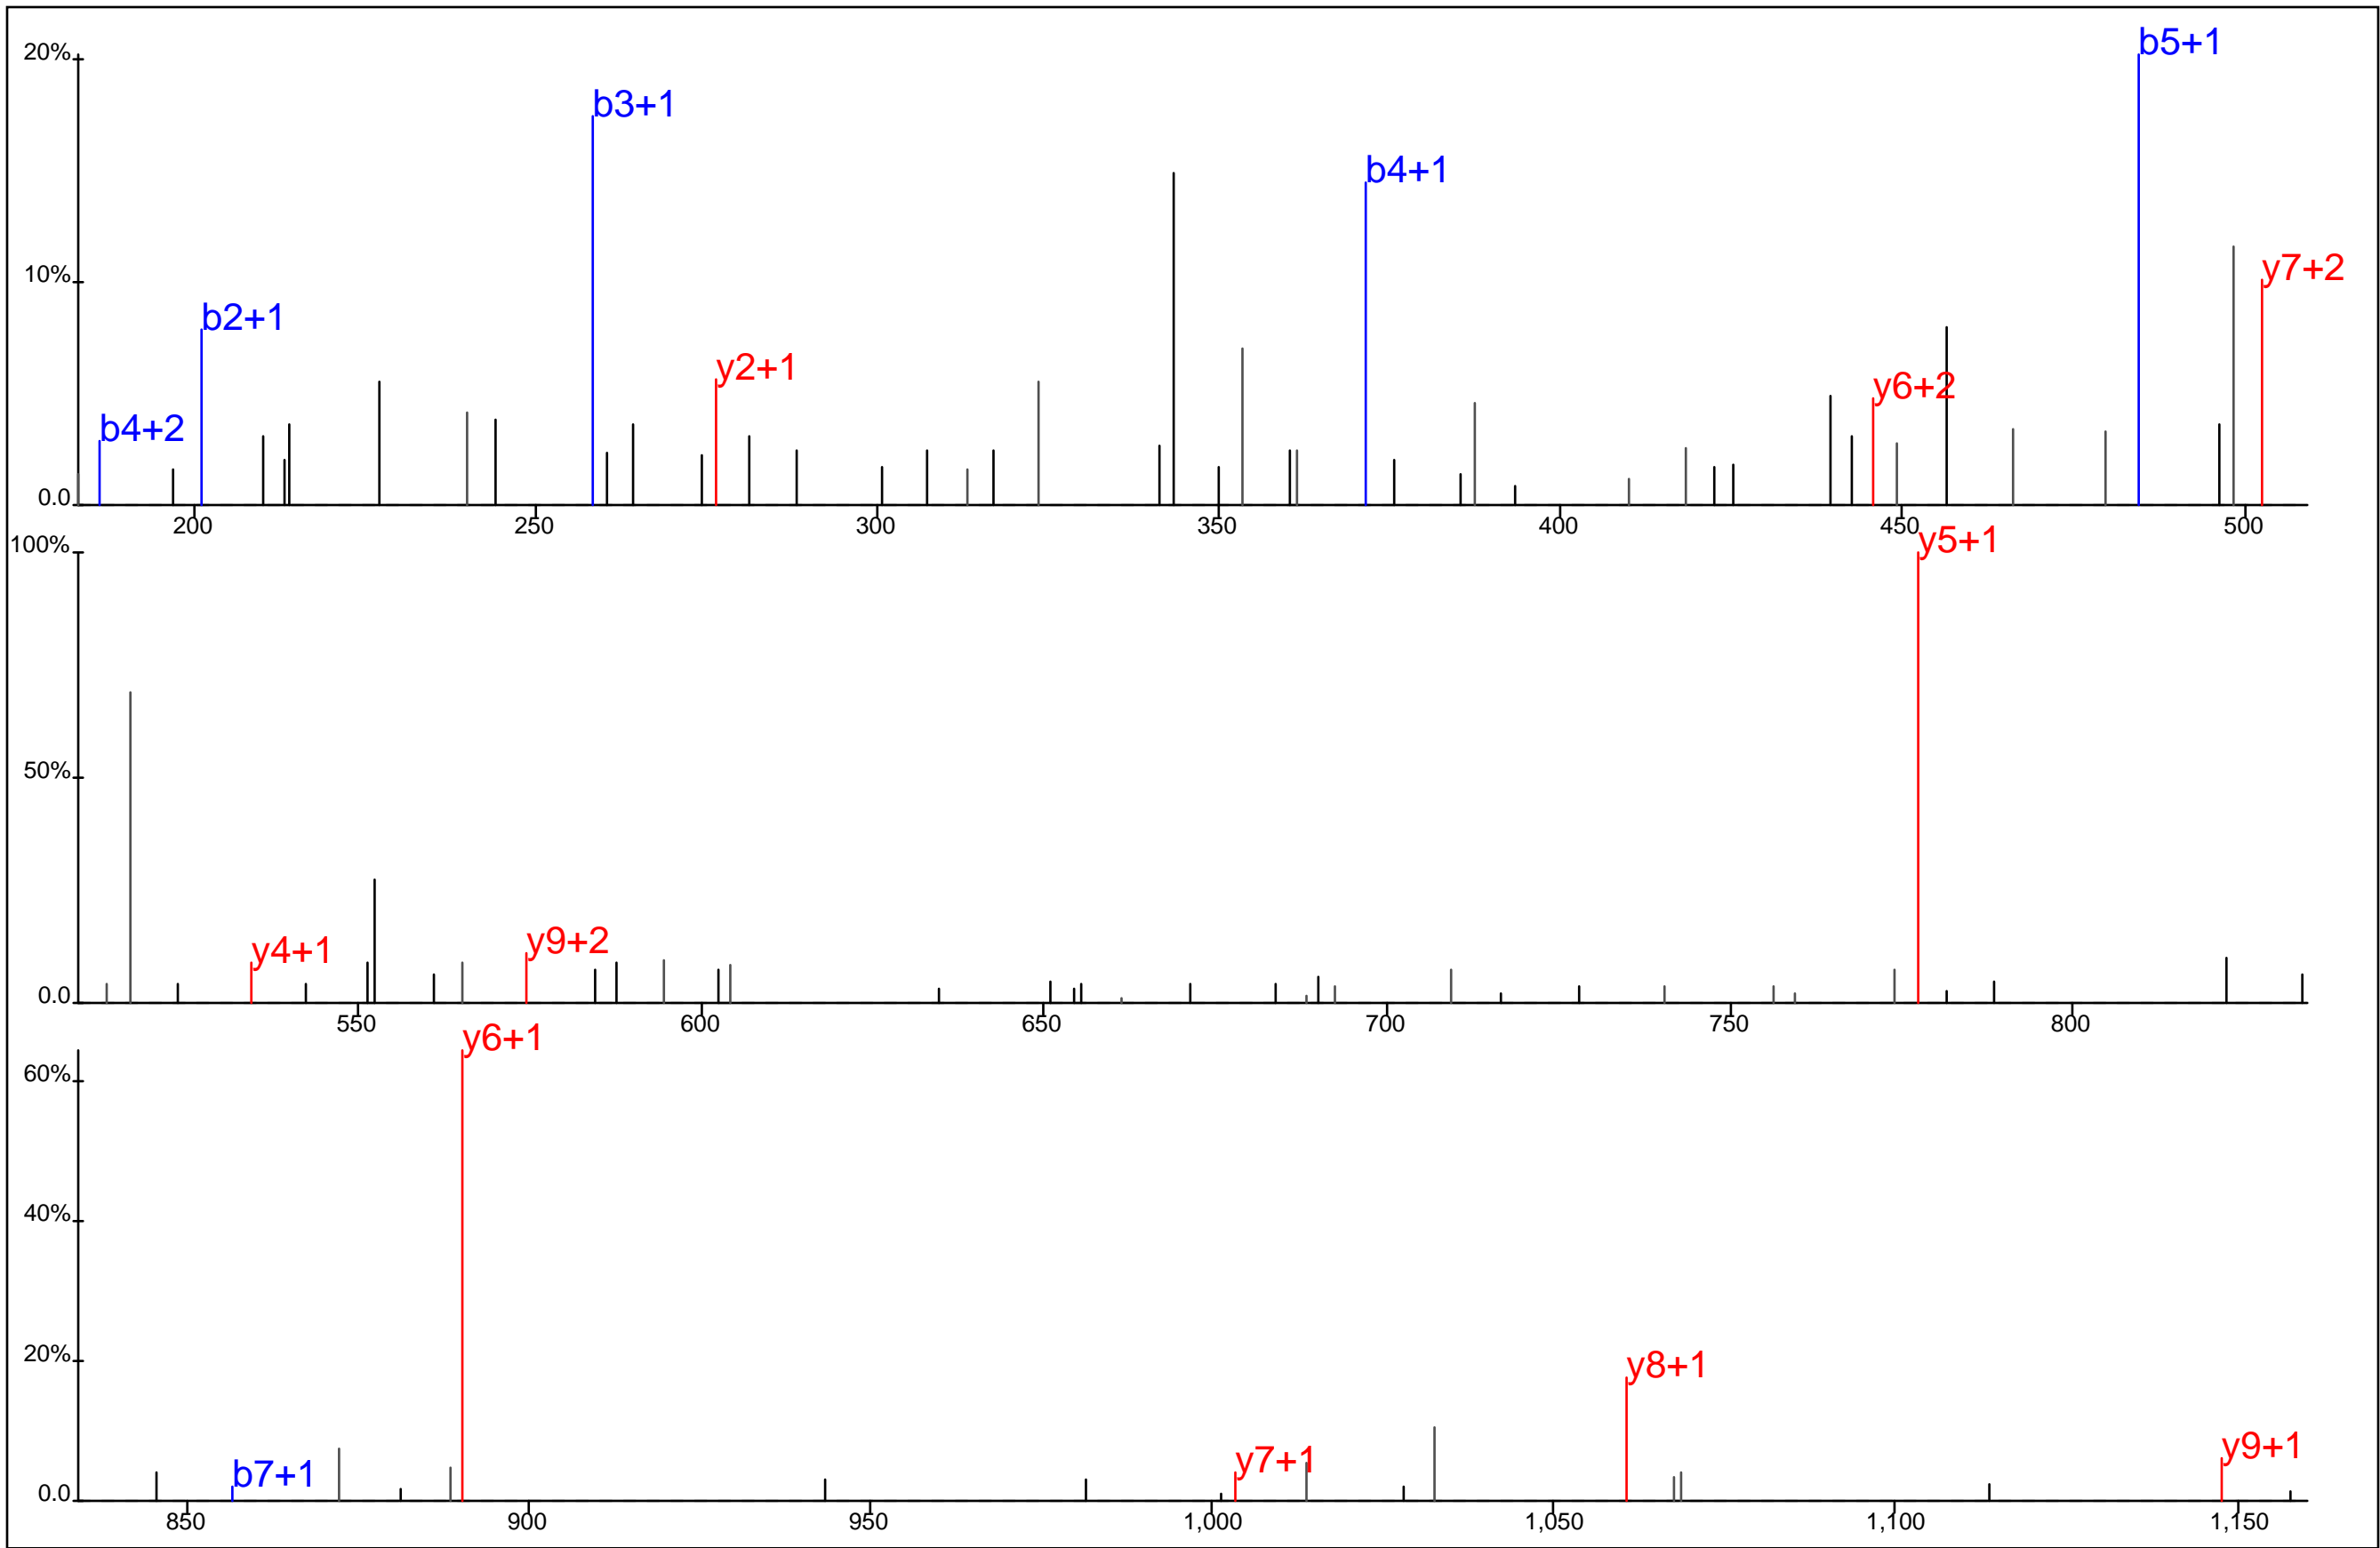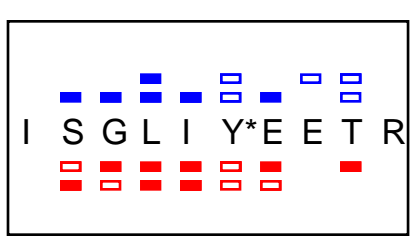

Protein Name: H4 Histone family, member A  
 gi Accession: 0  
 Precursor Mass: 630.7965+2  
 Delta Mass: 1.095 ppm  
 XCorr: 25.08

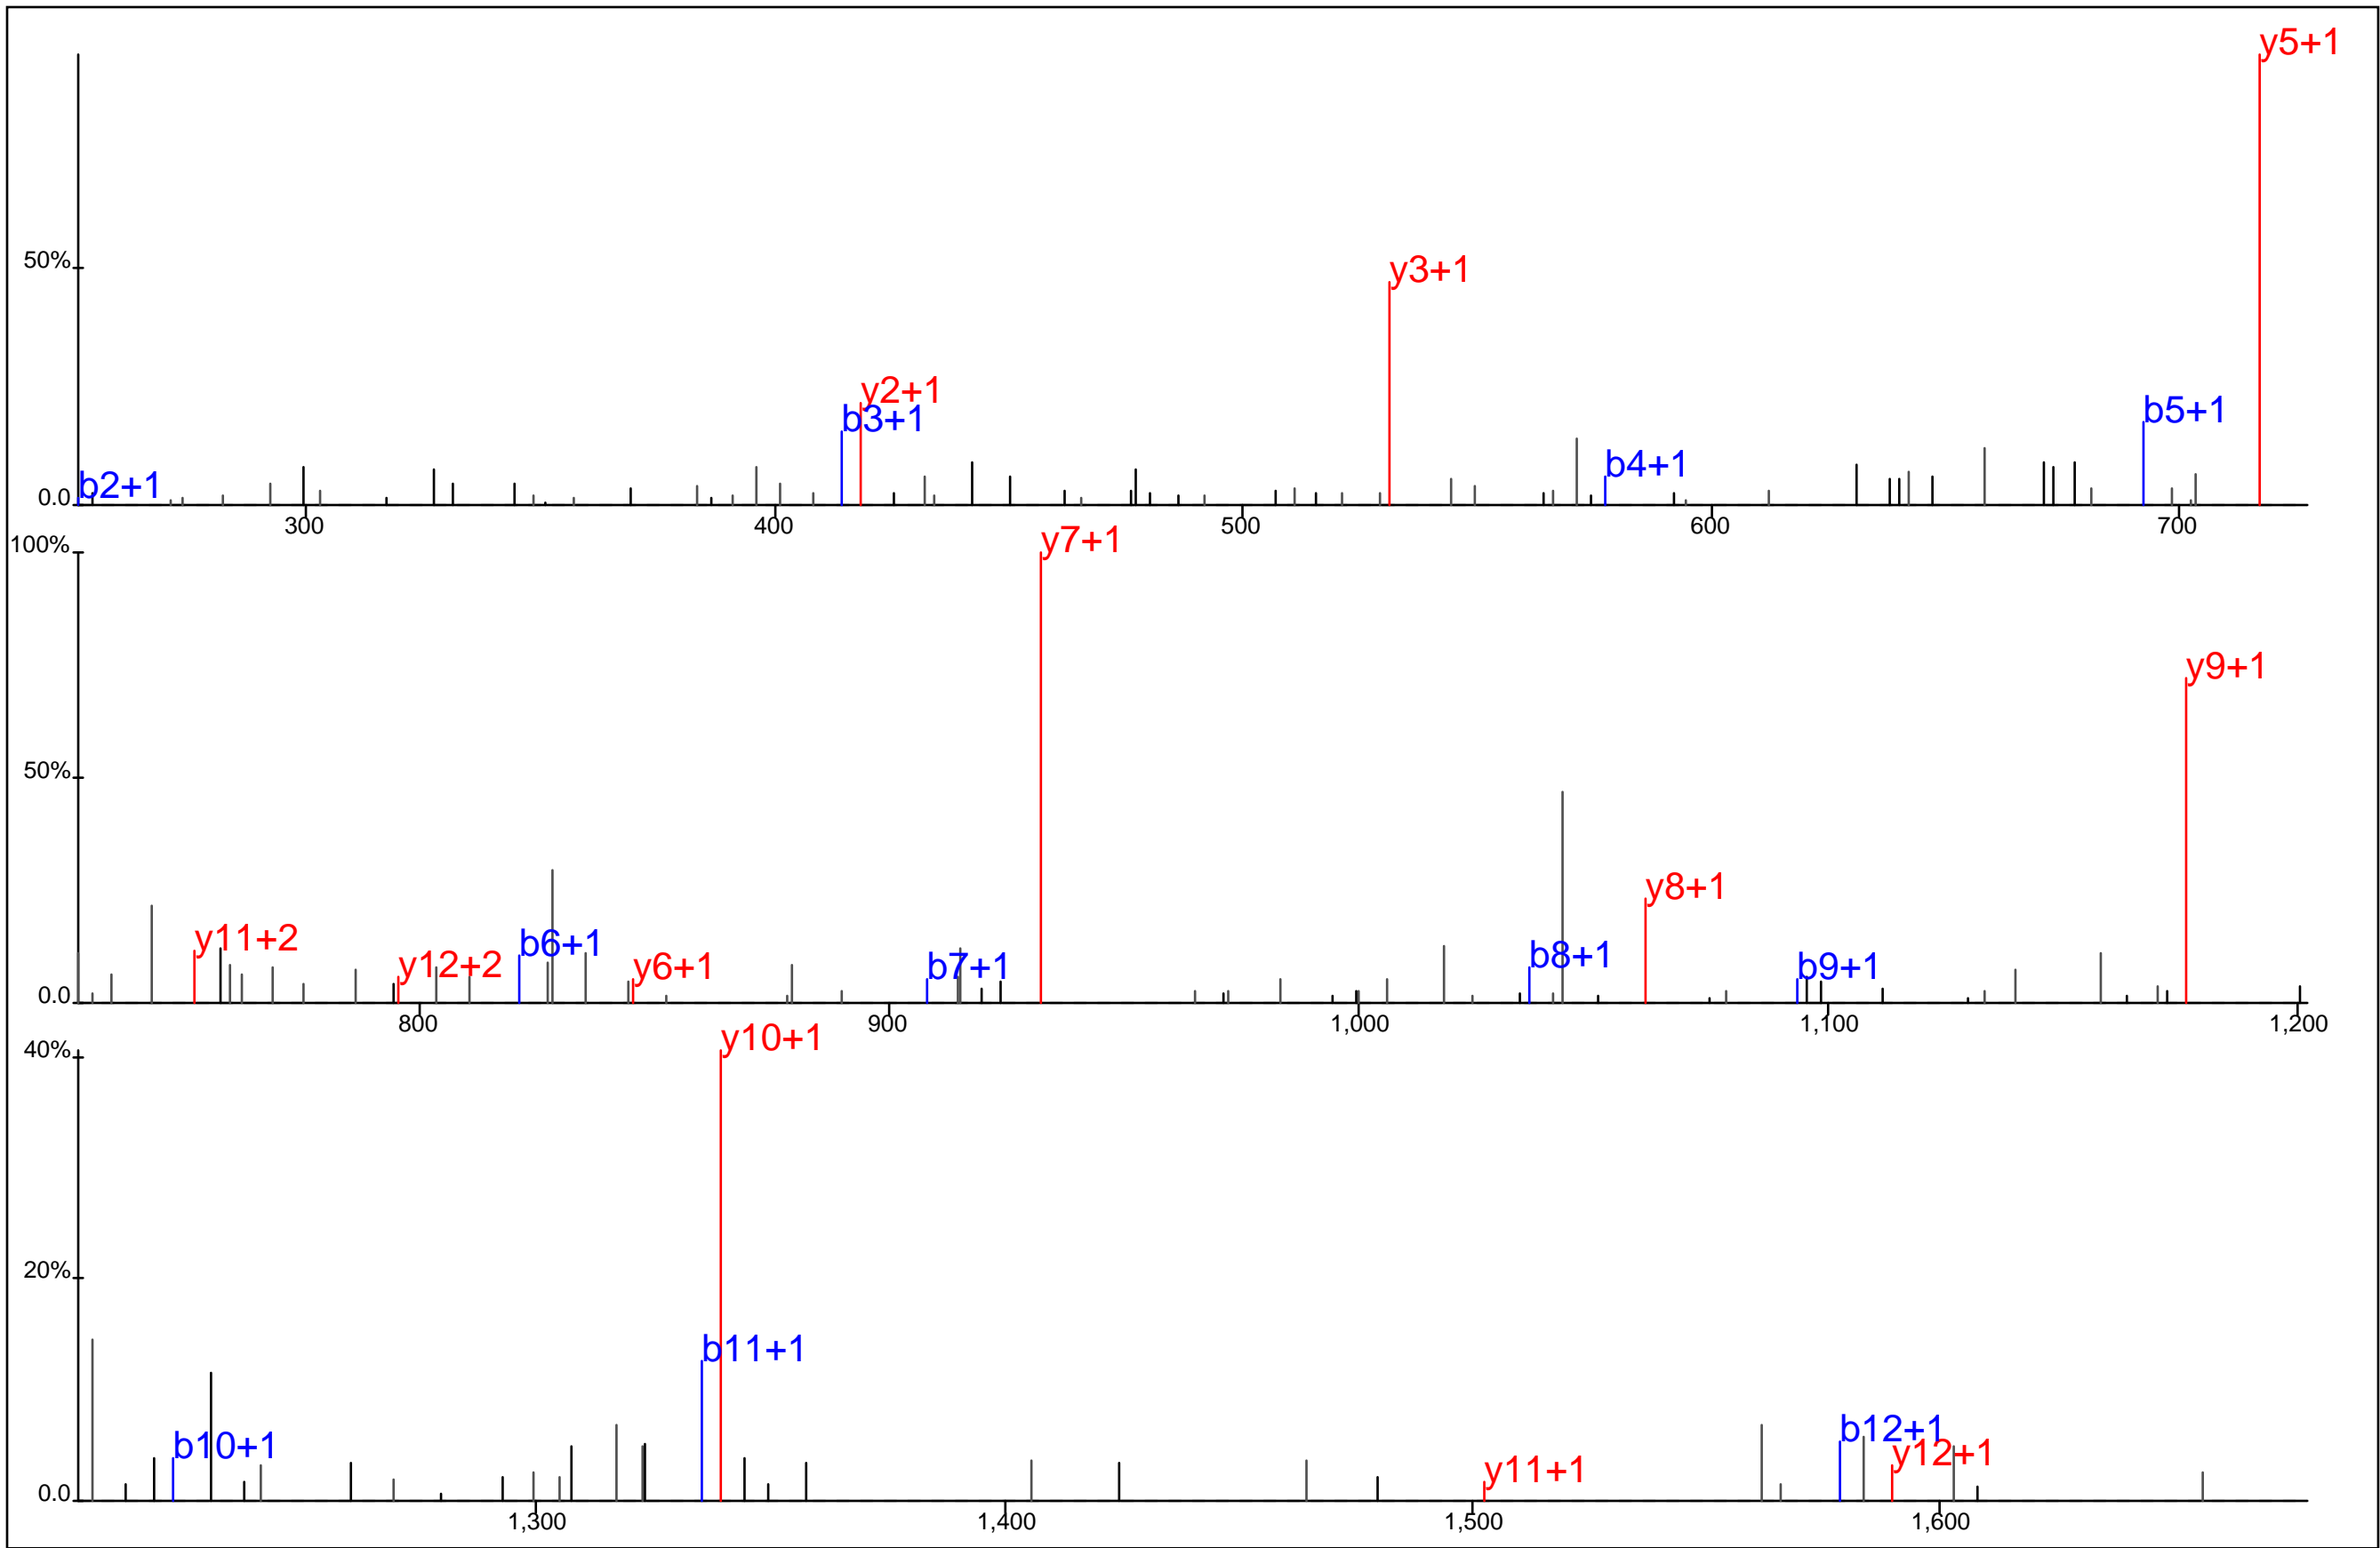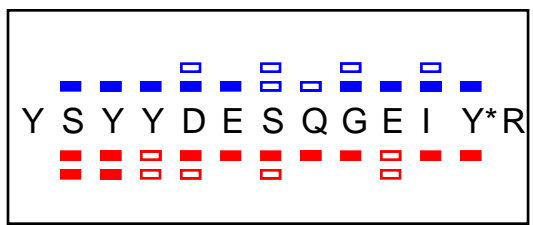

Protein Name: HCV NS5A transactivated protein 7  
 gi Accession: 0  
 Precursor Mass: 876.8441+2  
 Delta Mass: 1.206 ppm  
 XCorr: 45.14

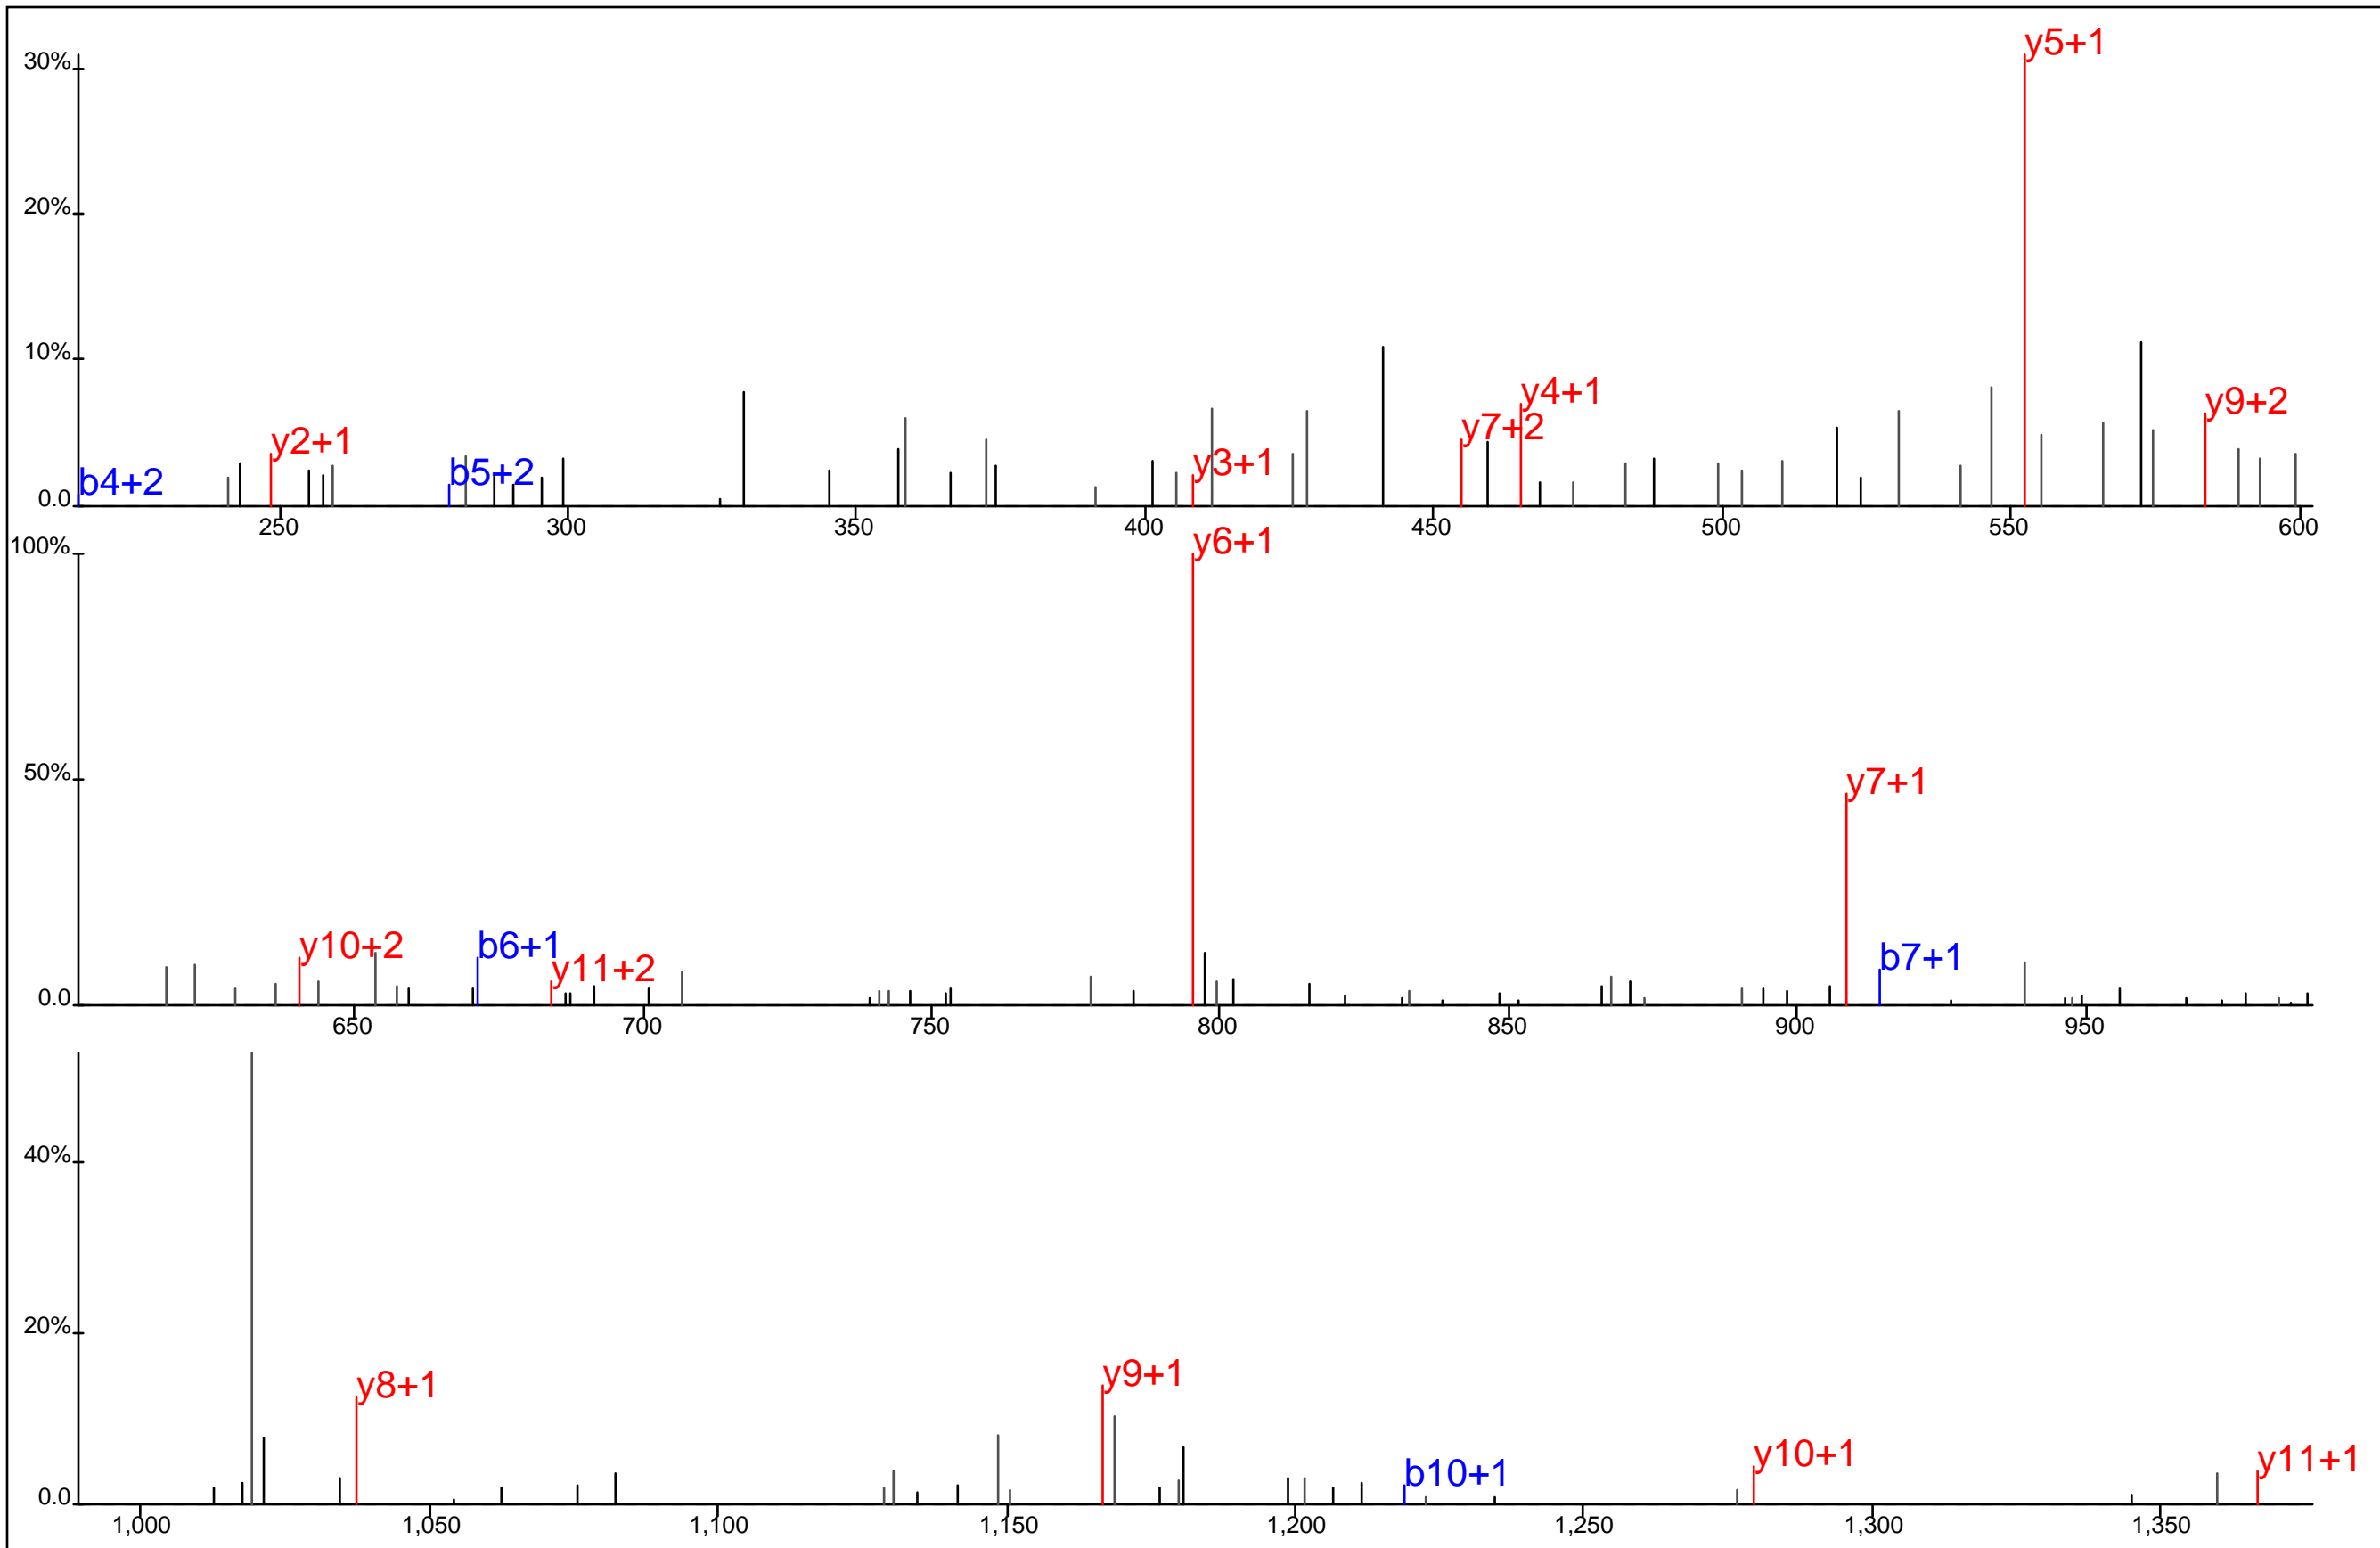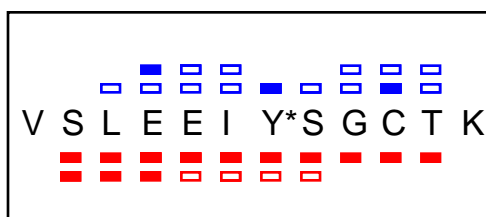

Protein Name: Heat shock 40 kDa protein 1  
 gi Accession: 0  
 Precursor Mass: 733.3181+2  
 Delta Mass: 0.636 ppm  
 XCorr: 65.88



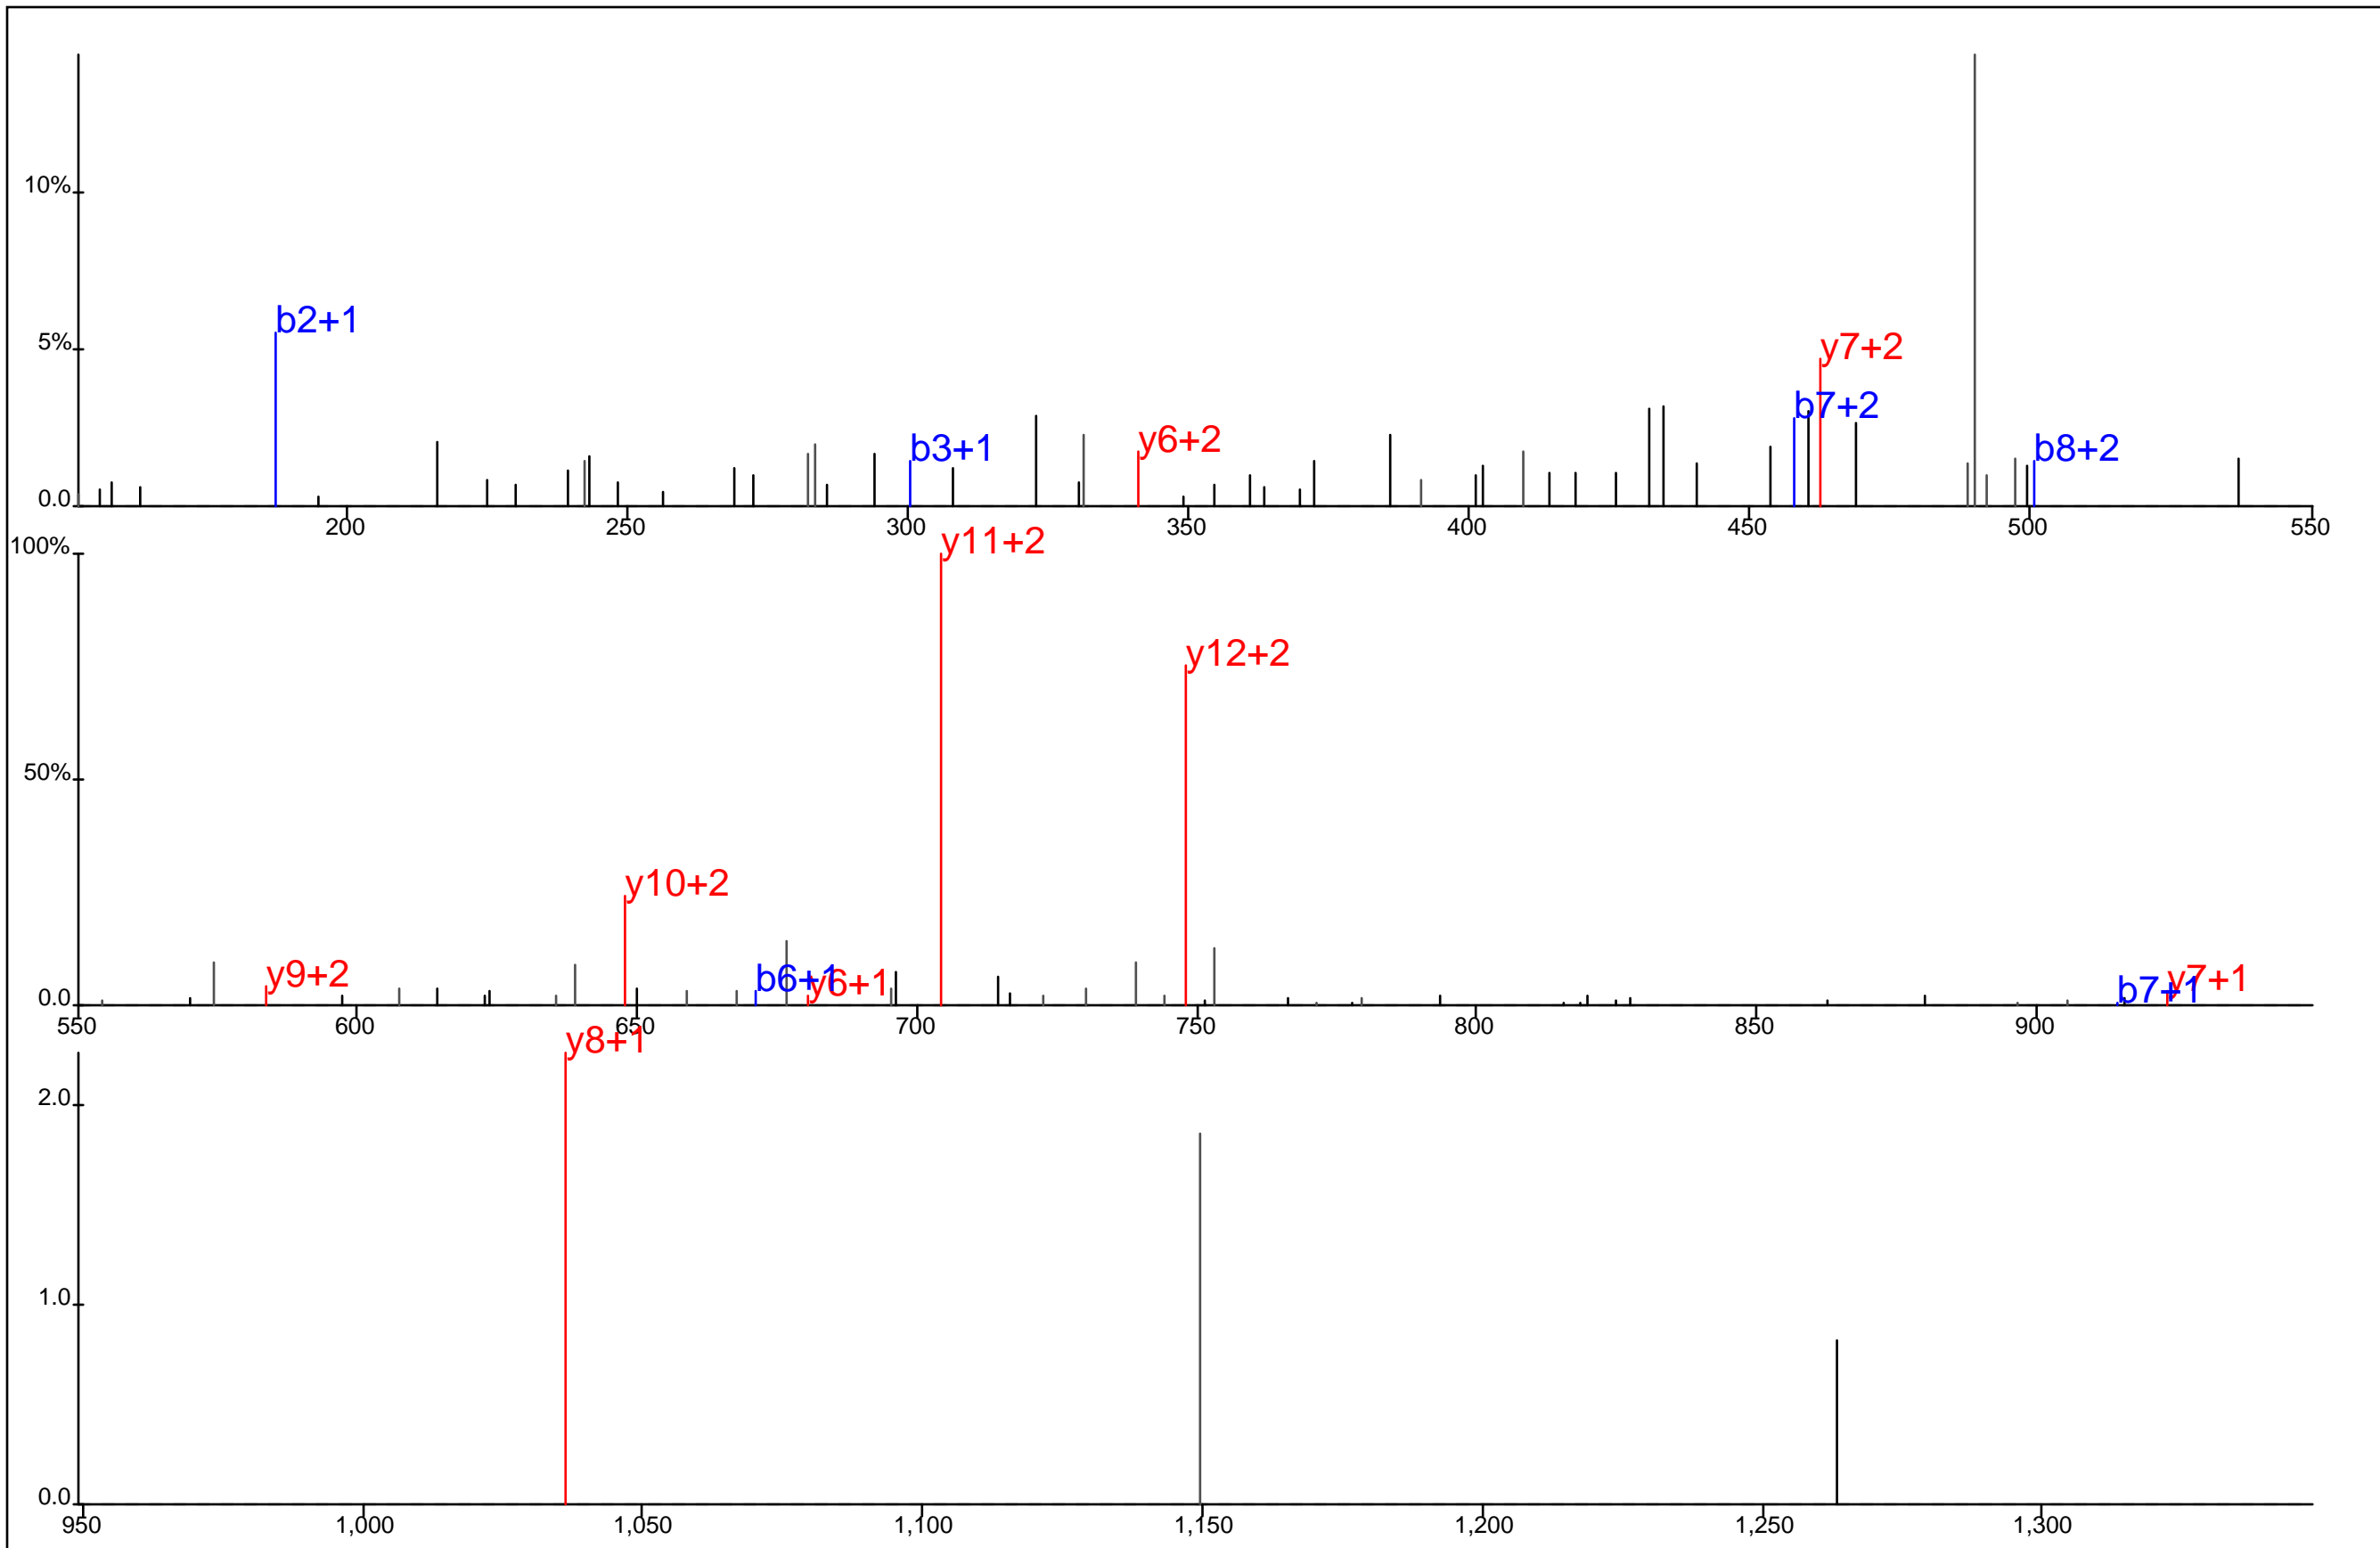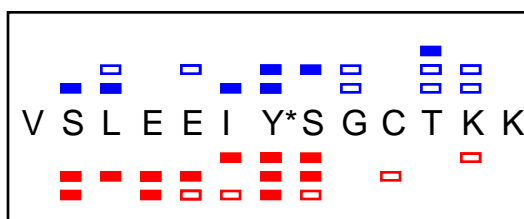

Protein Name: Heat shock 40 kDa protein 1  
 gi Accession: 0  
 Precursor Mass: 531.9116+3  
 Delta Mass: 1.670 ppm  
 XCorr: 20.99

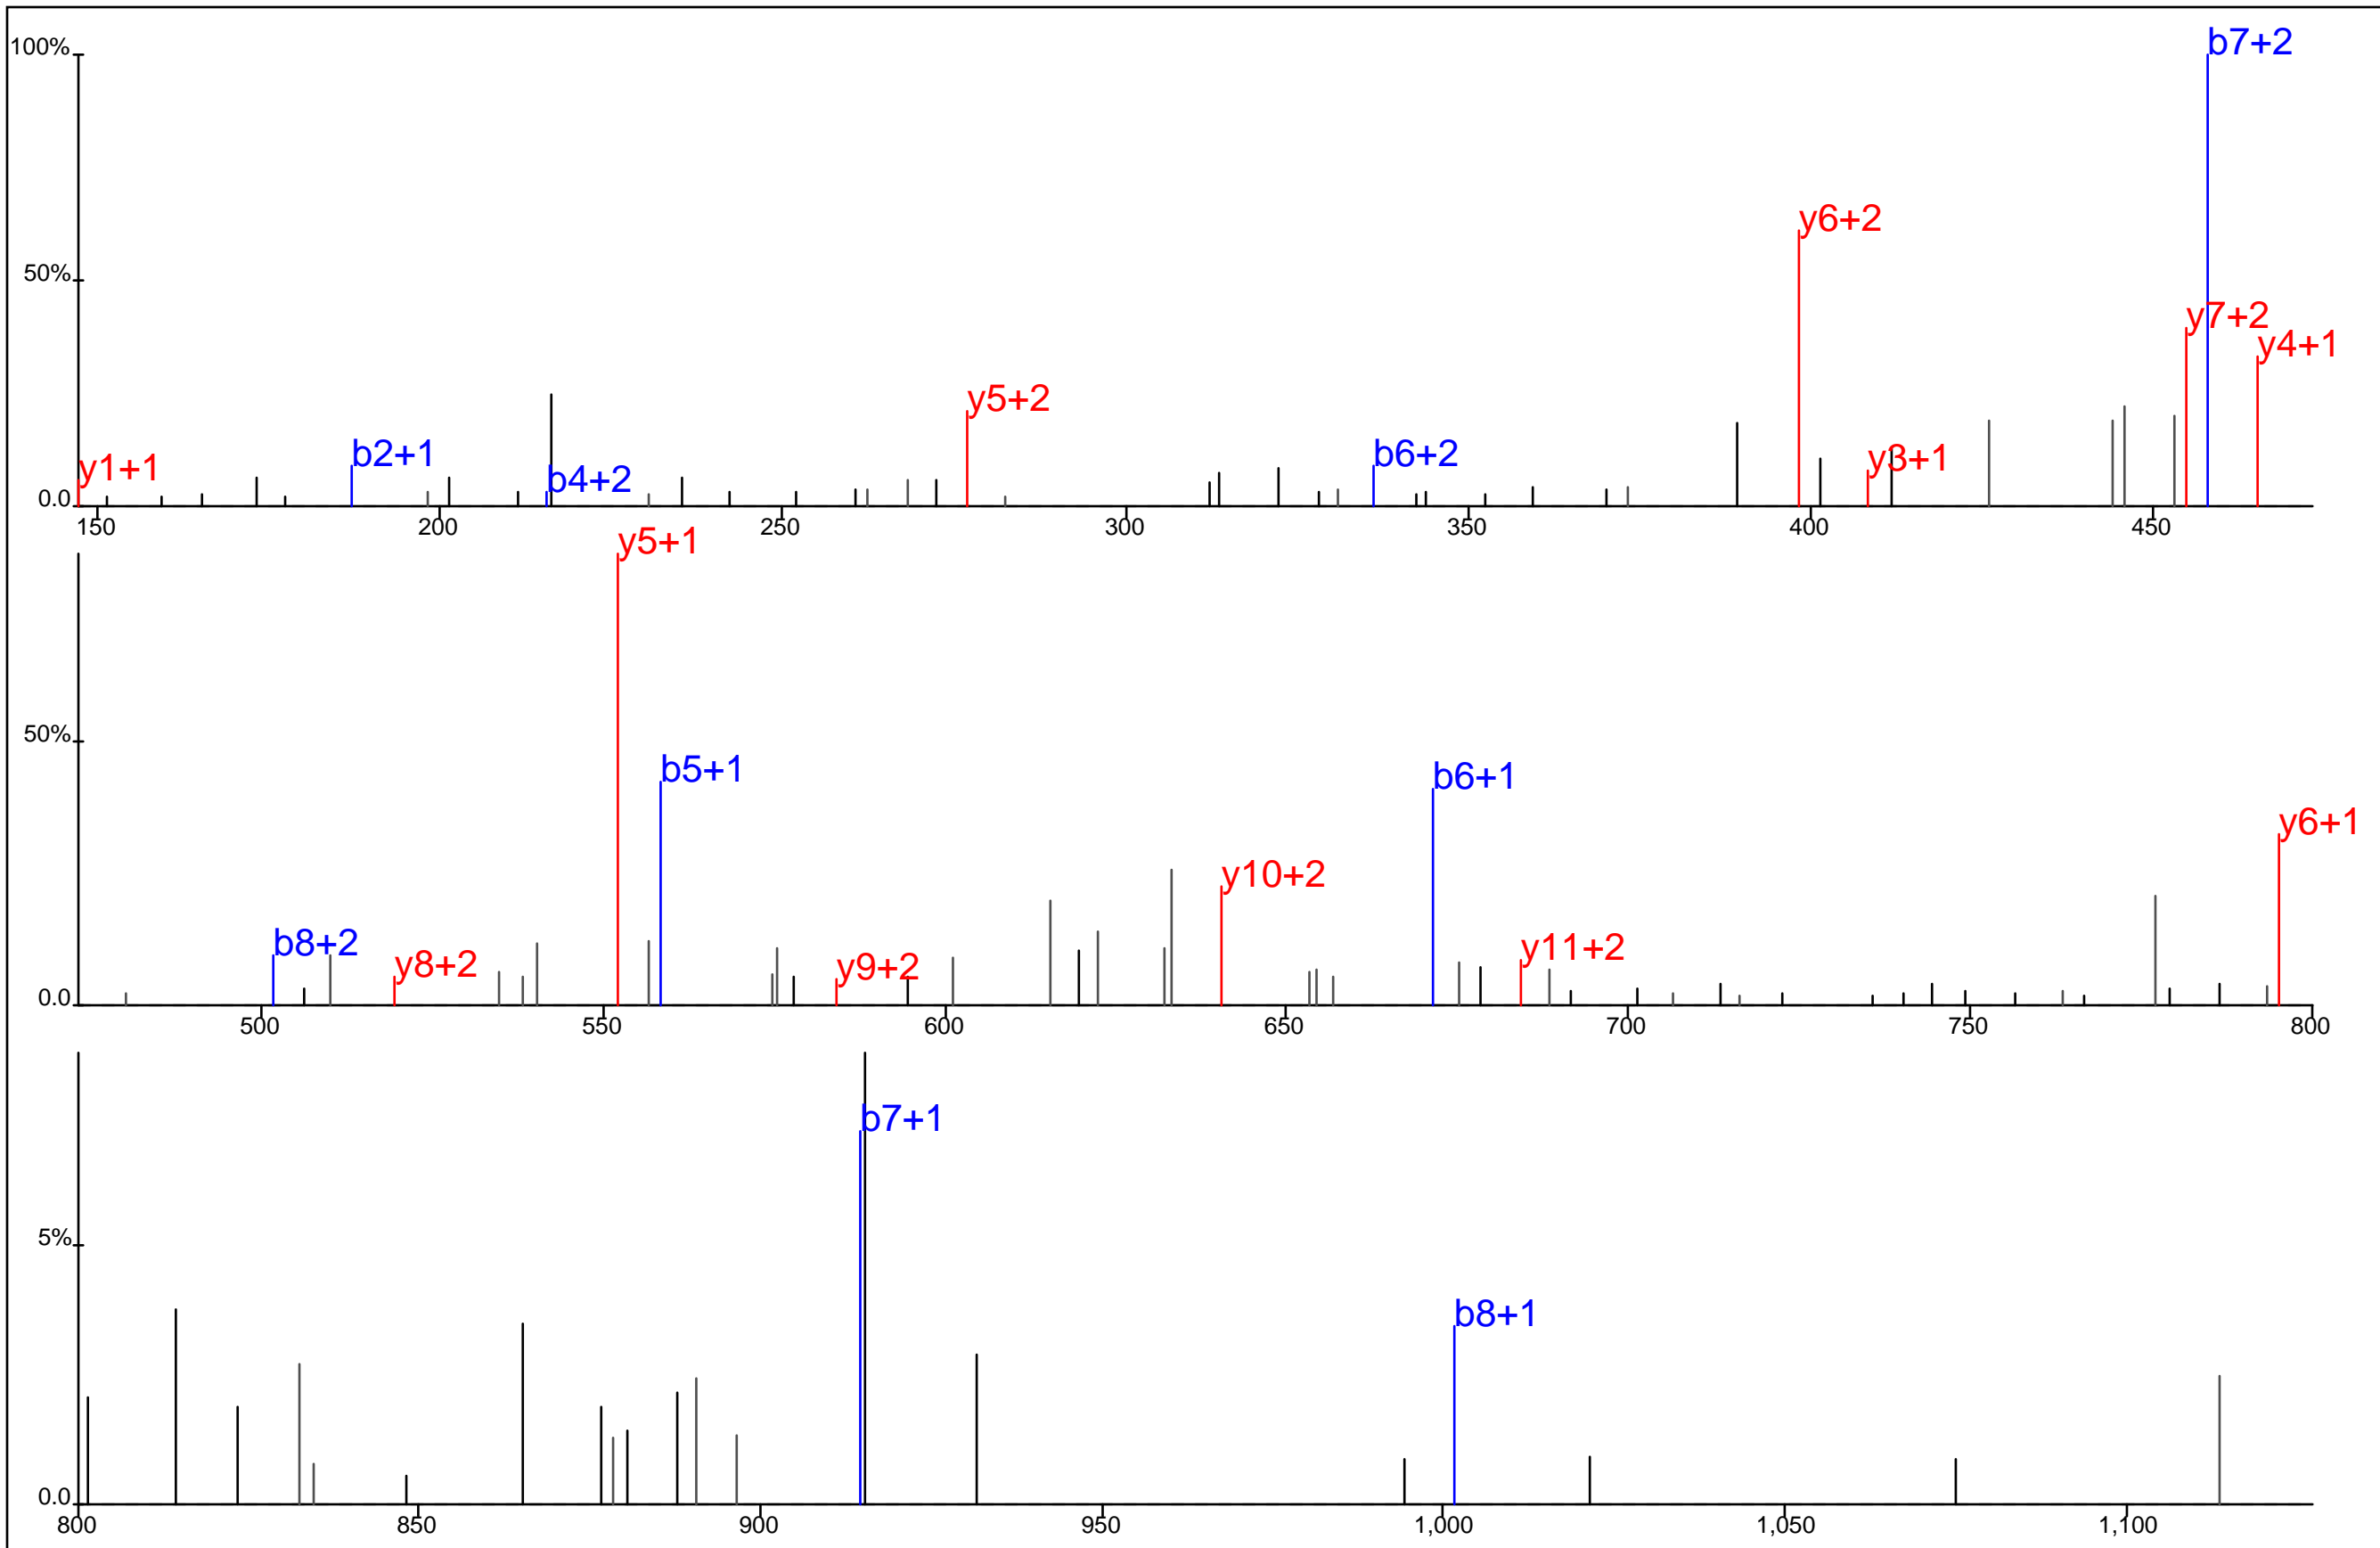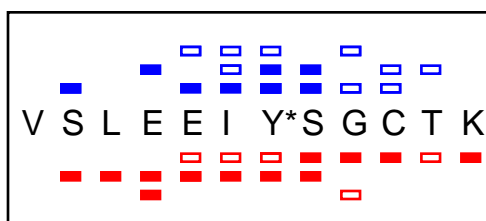

Protein Name: Heat shock 40 kDa protein 1  
 gi Accession: 0  
 Precursor Mass: 489.2151+3  
 Delta Mass: 1.960 ppm  
 XCorr: 34.08

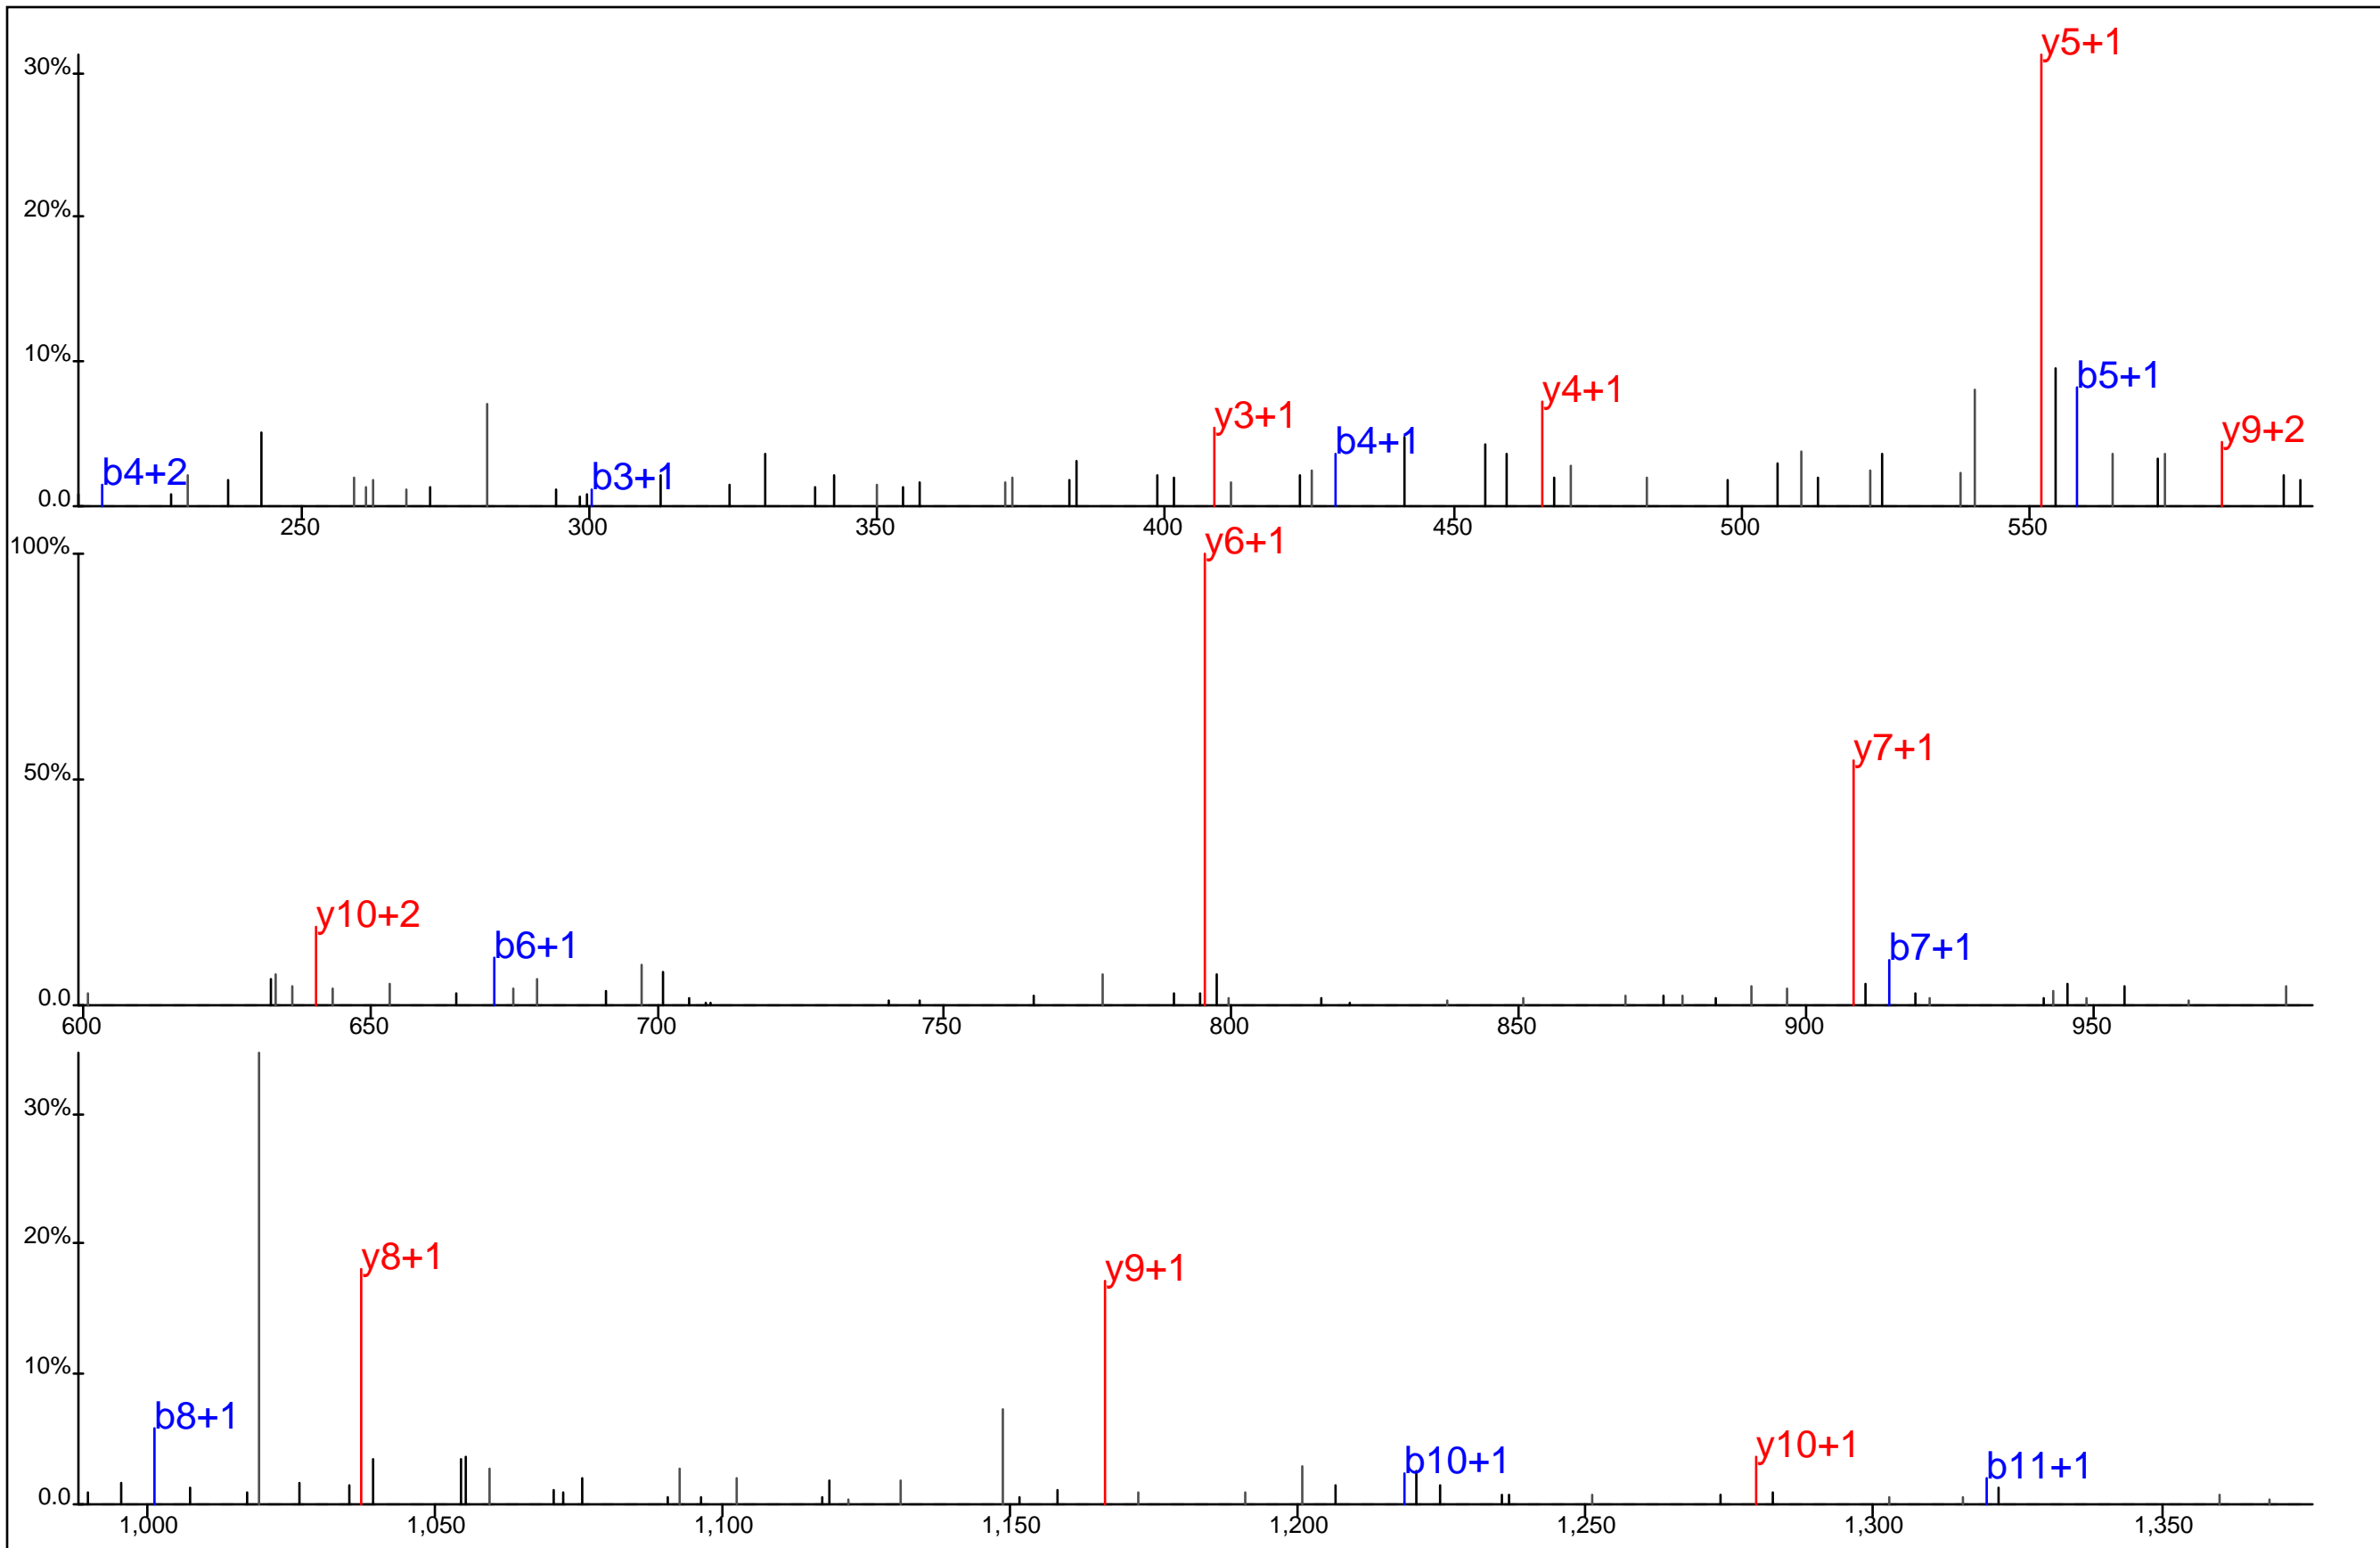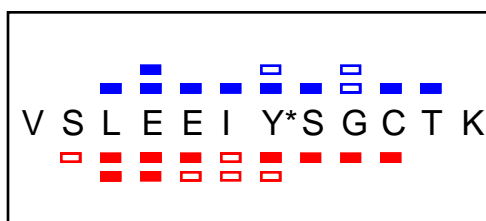

Protein Name: Heat shock 40 kDa protein 1  
 gi Accession: 0  
 Precursor Mass: 733.3159+2  
 Delta Mass: 2.445 ppm  
 XCorr: 64.87

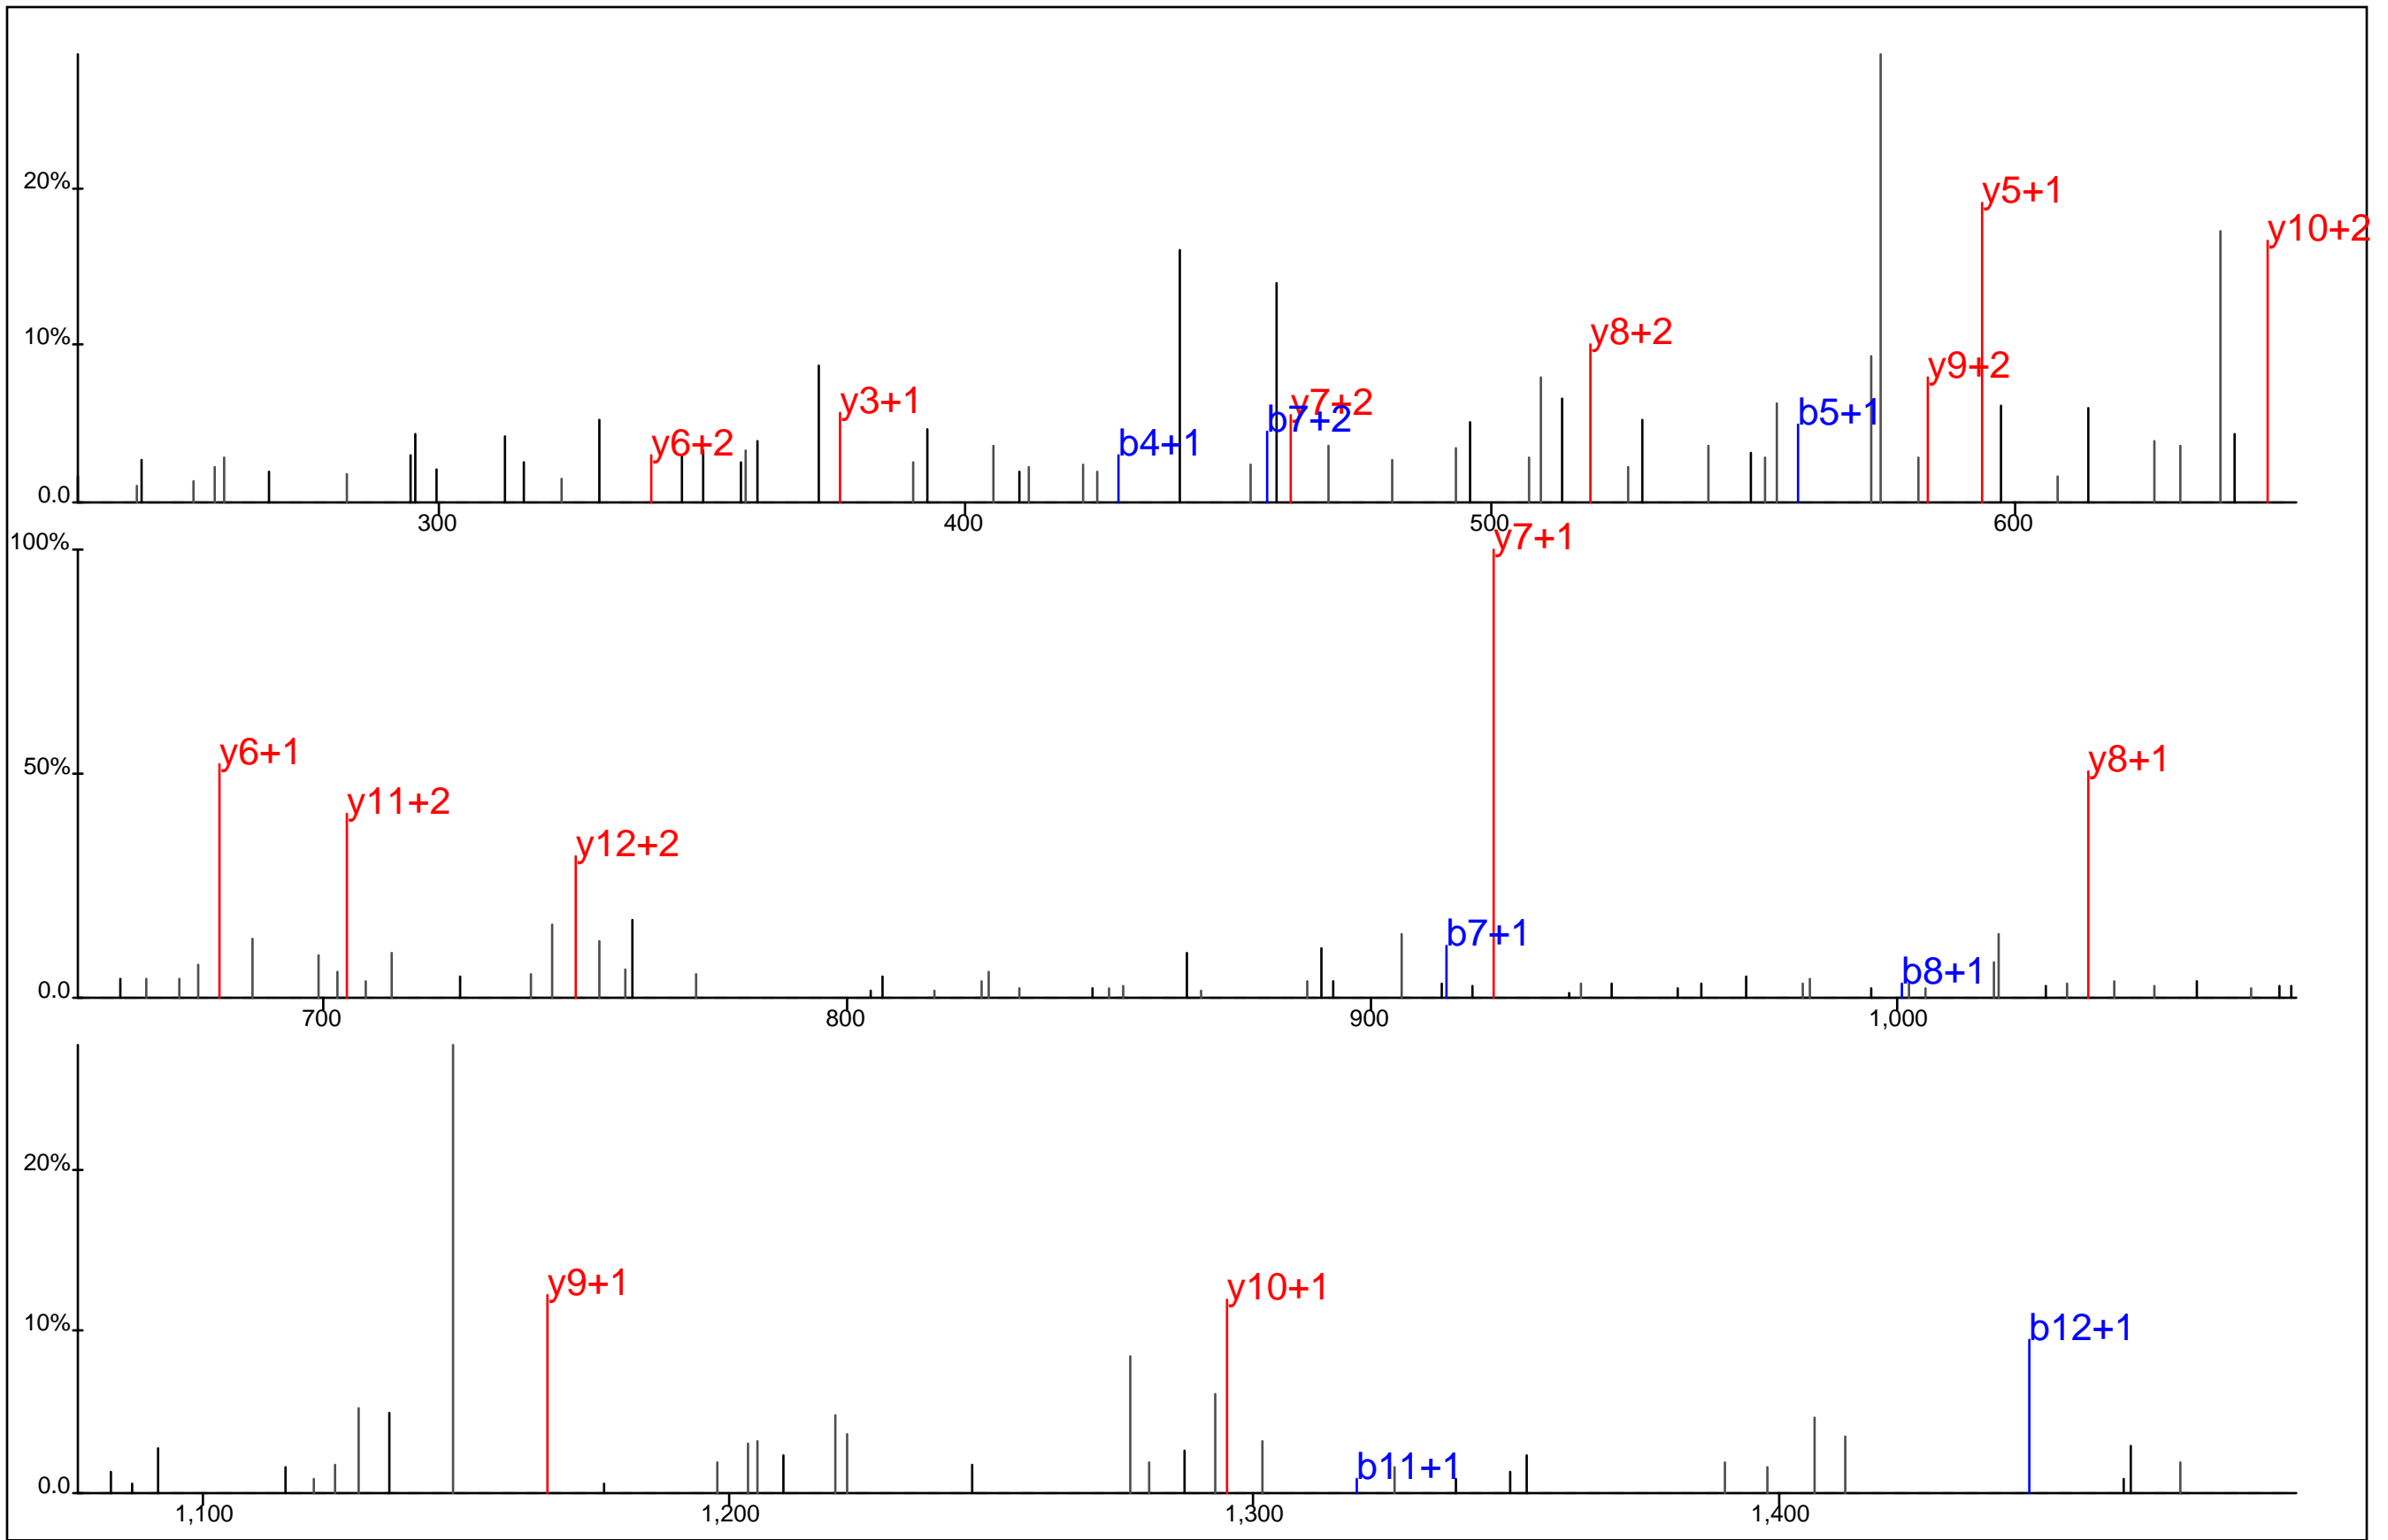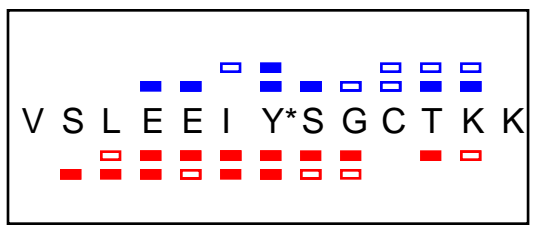

Protein Name: Heat shock 40 kDa protein 1  
 gi Accession: 0  
 Precursor Mass: 797.3633+2  
 Delta Mass: 2.313 ppm  
 XCorr: 40.13

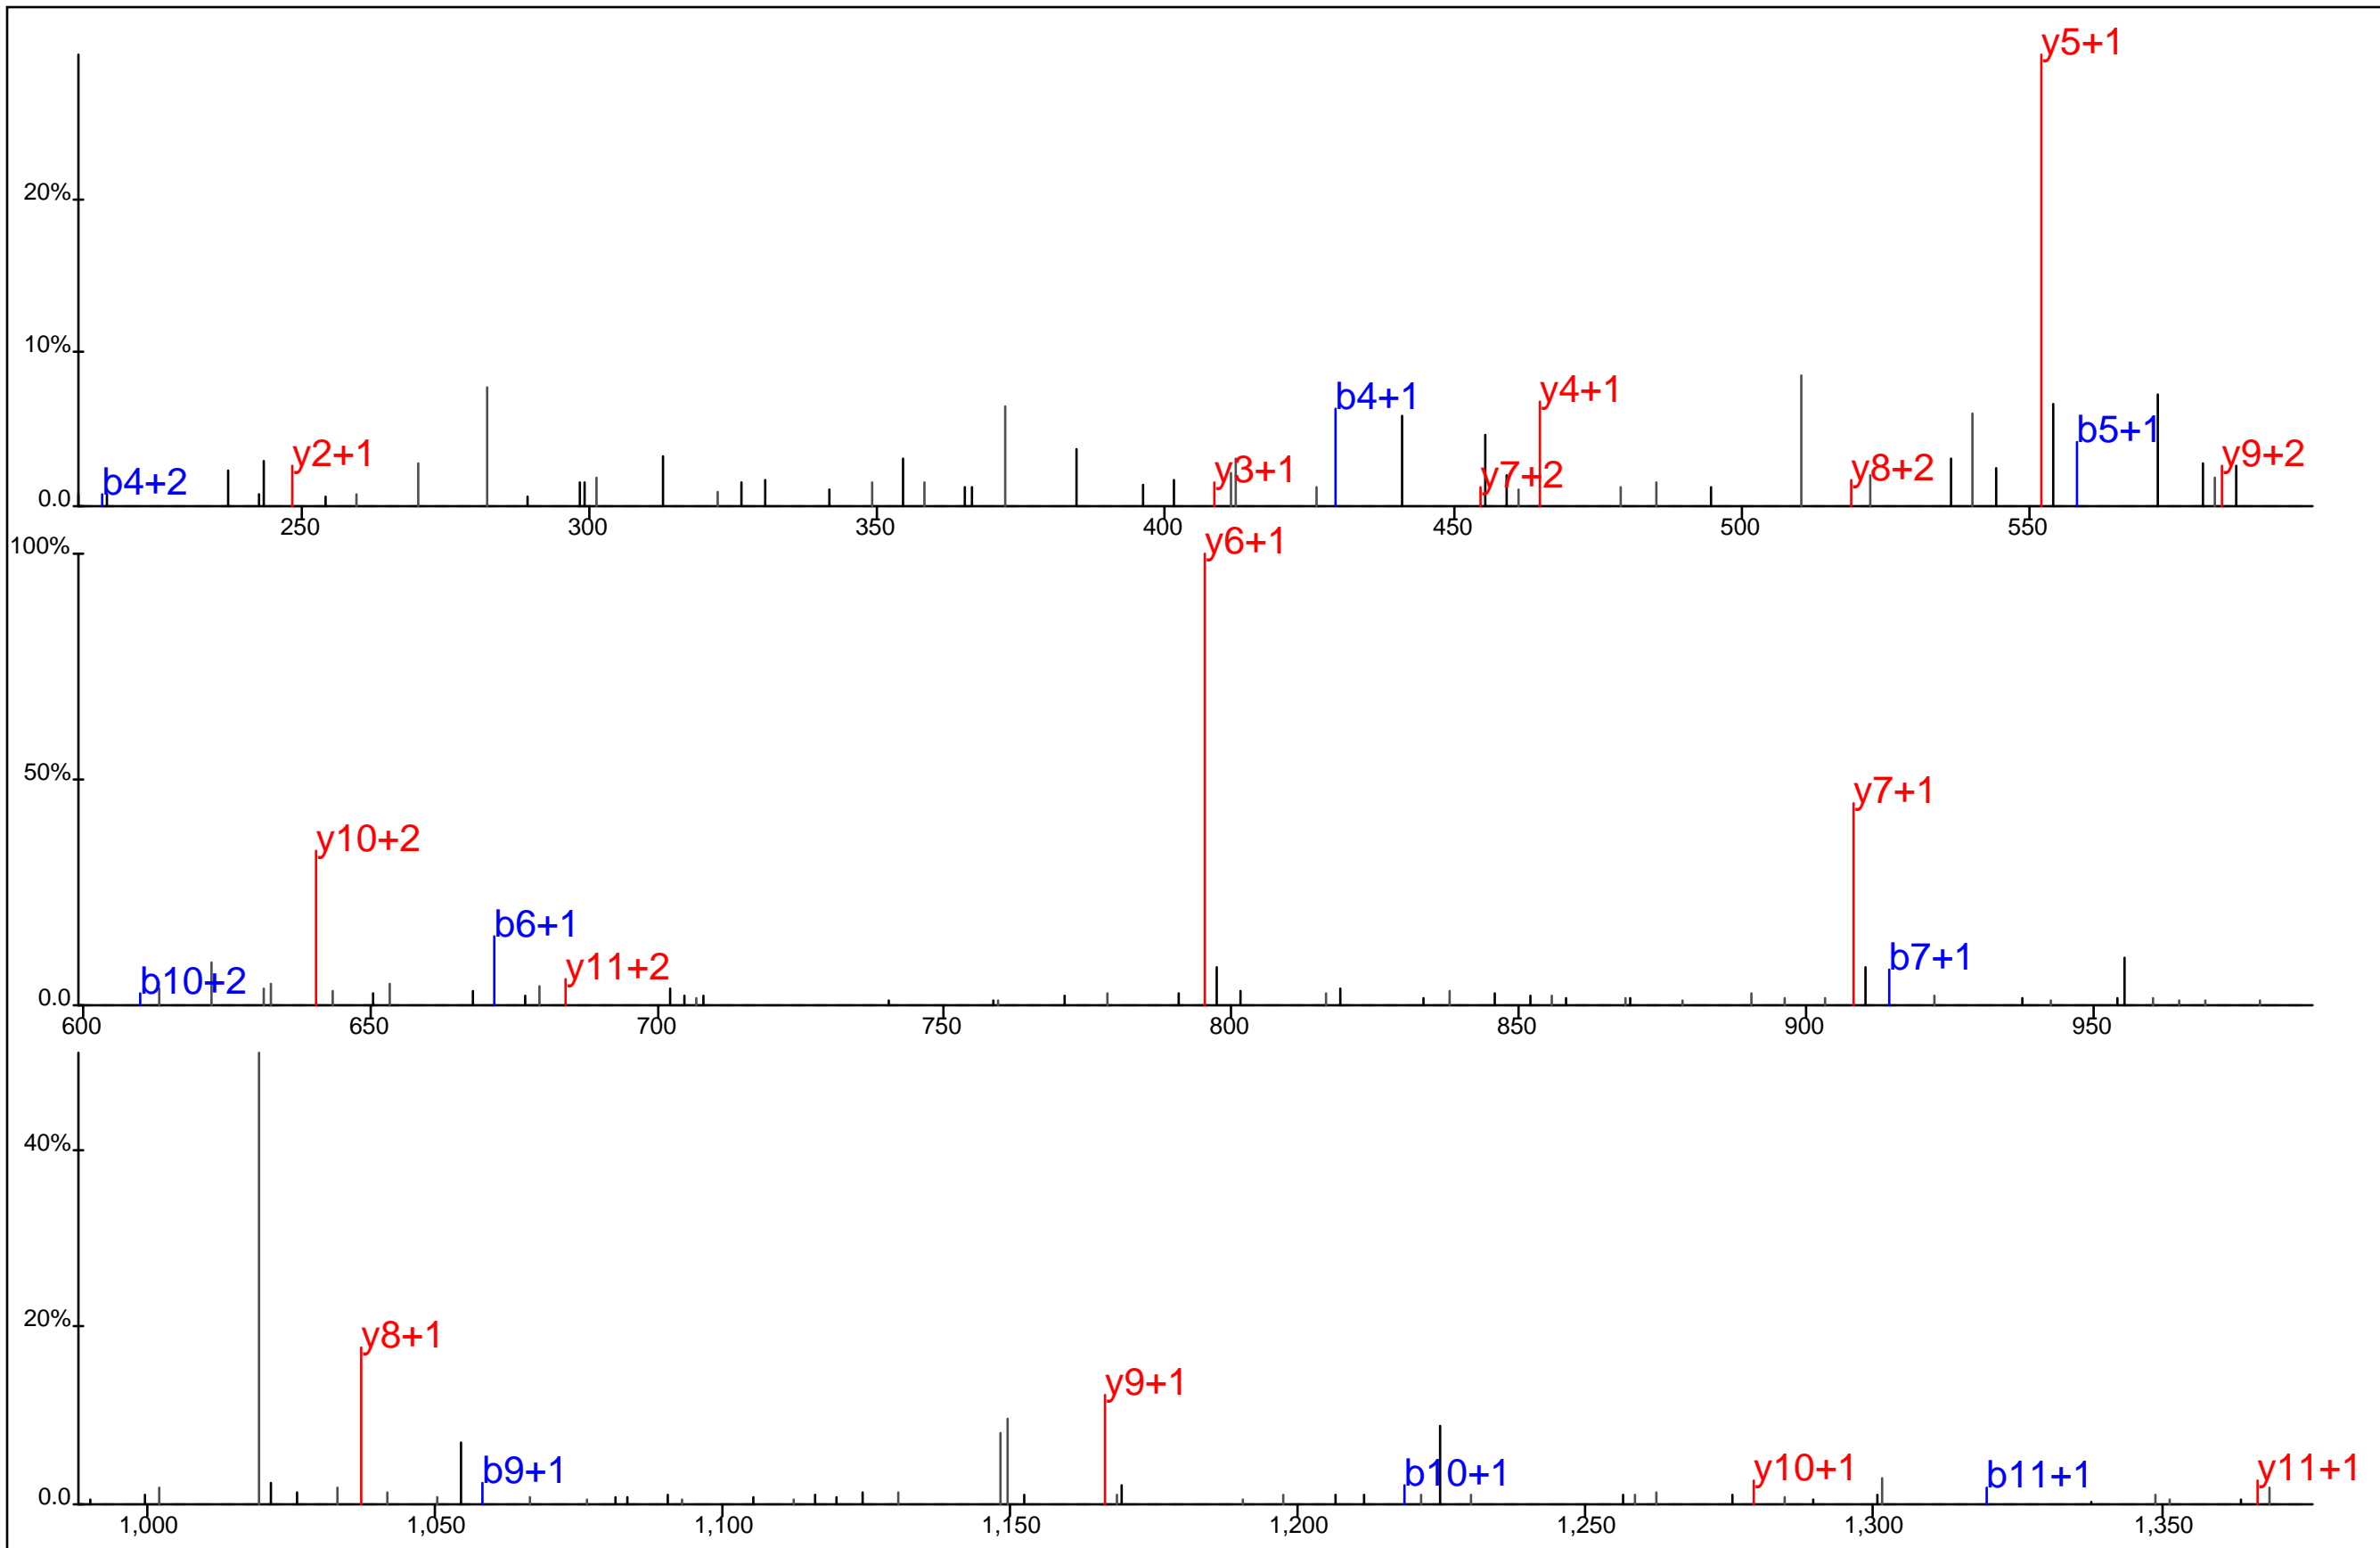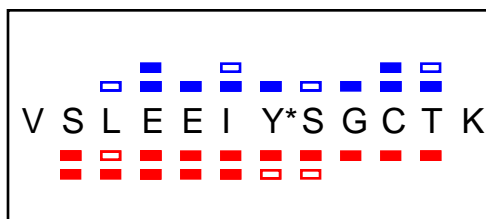

Protein Name: Heat shock 40 kDa protein 1  
 gi Accession: 0  
 Precursor Mass: 733.3158+2  
 Delta Mass: 2.529 ppm  
 XCorr: 49.01

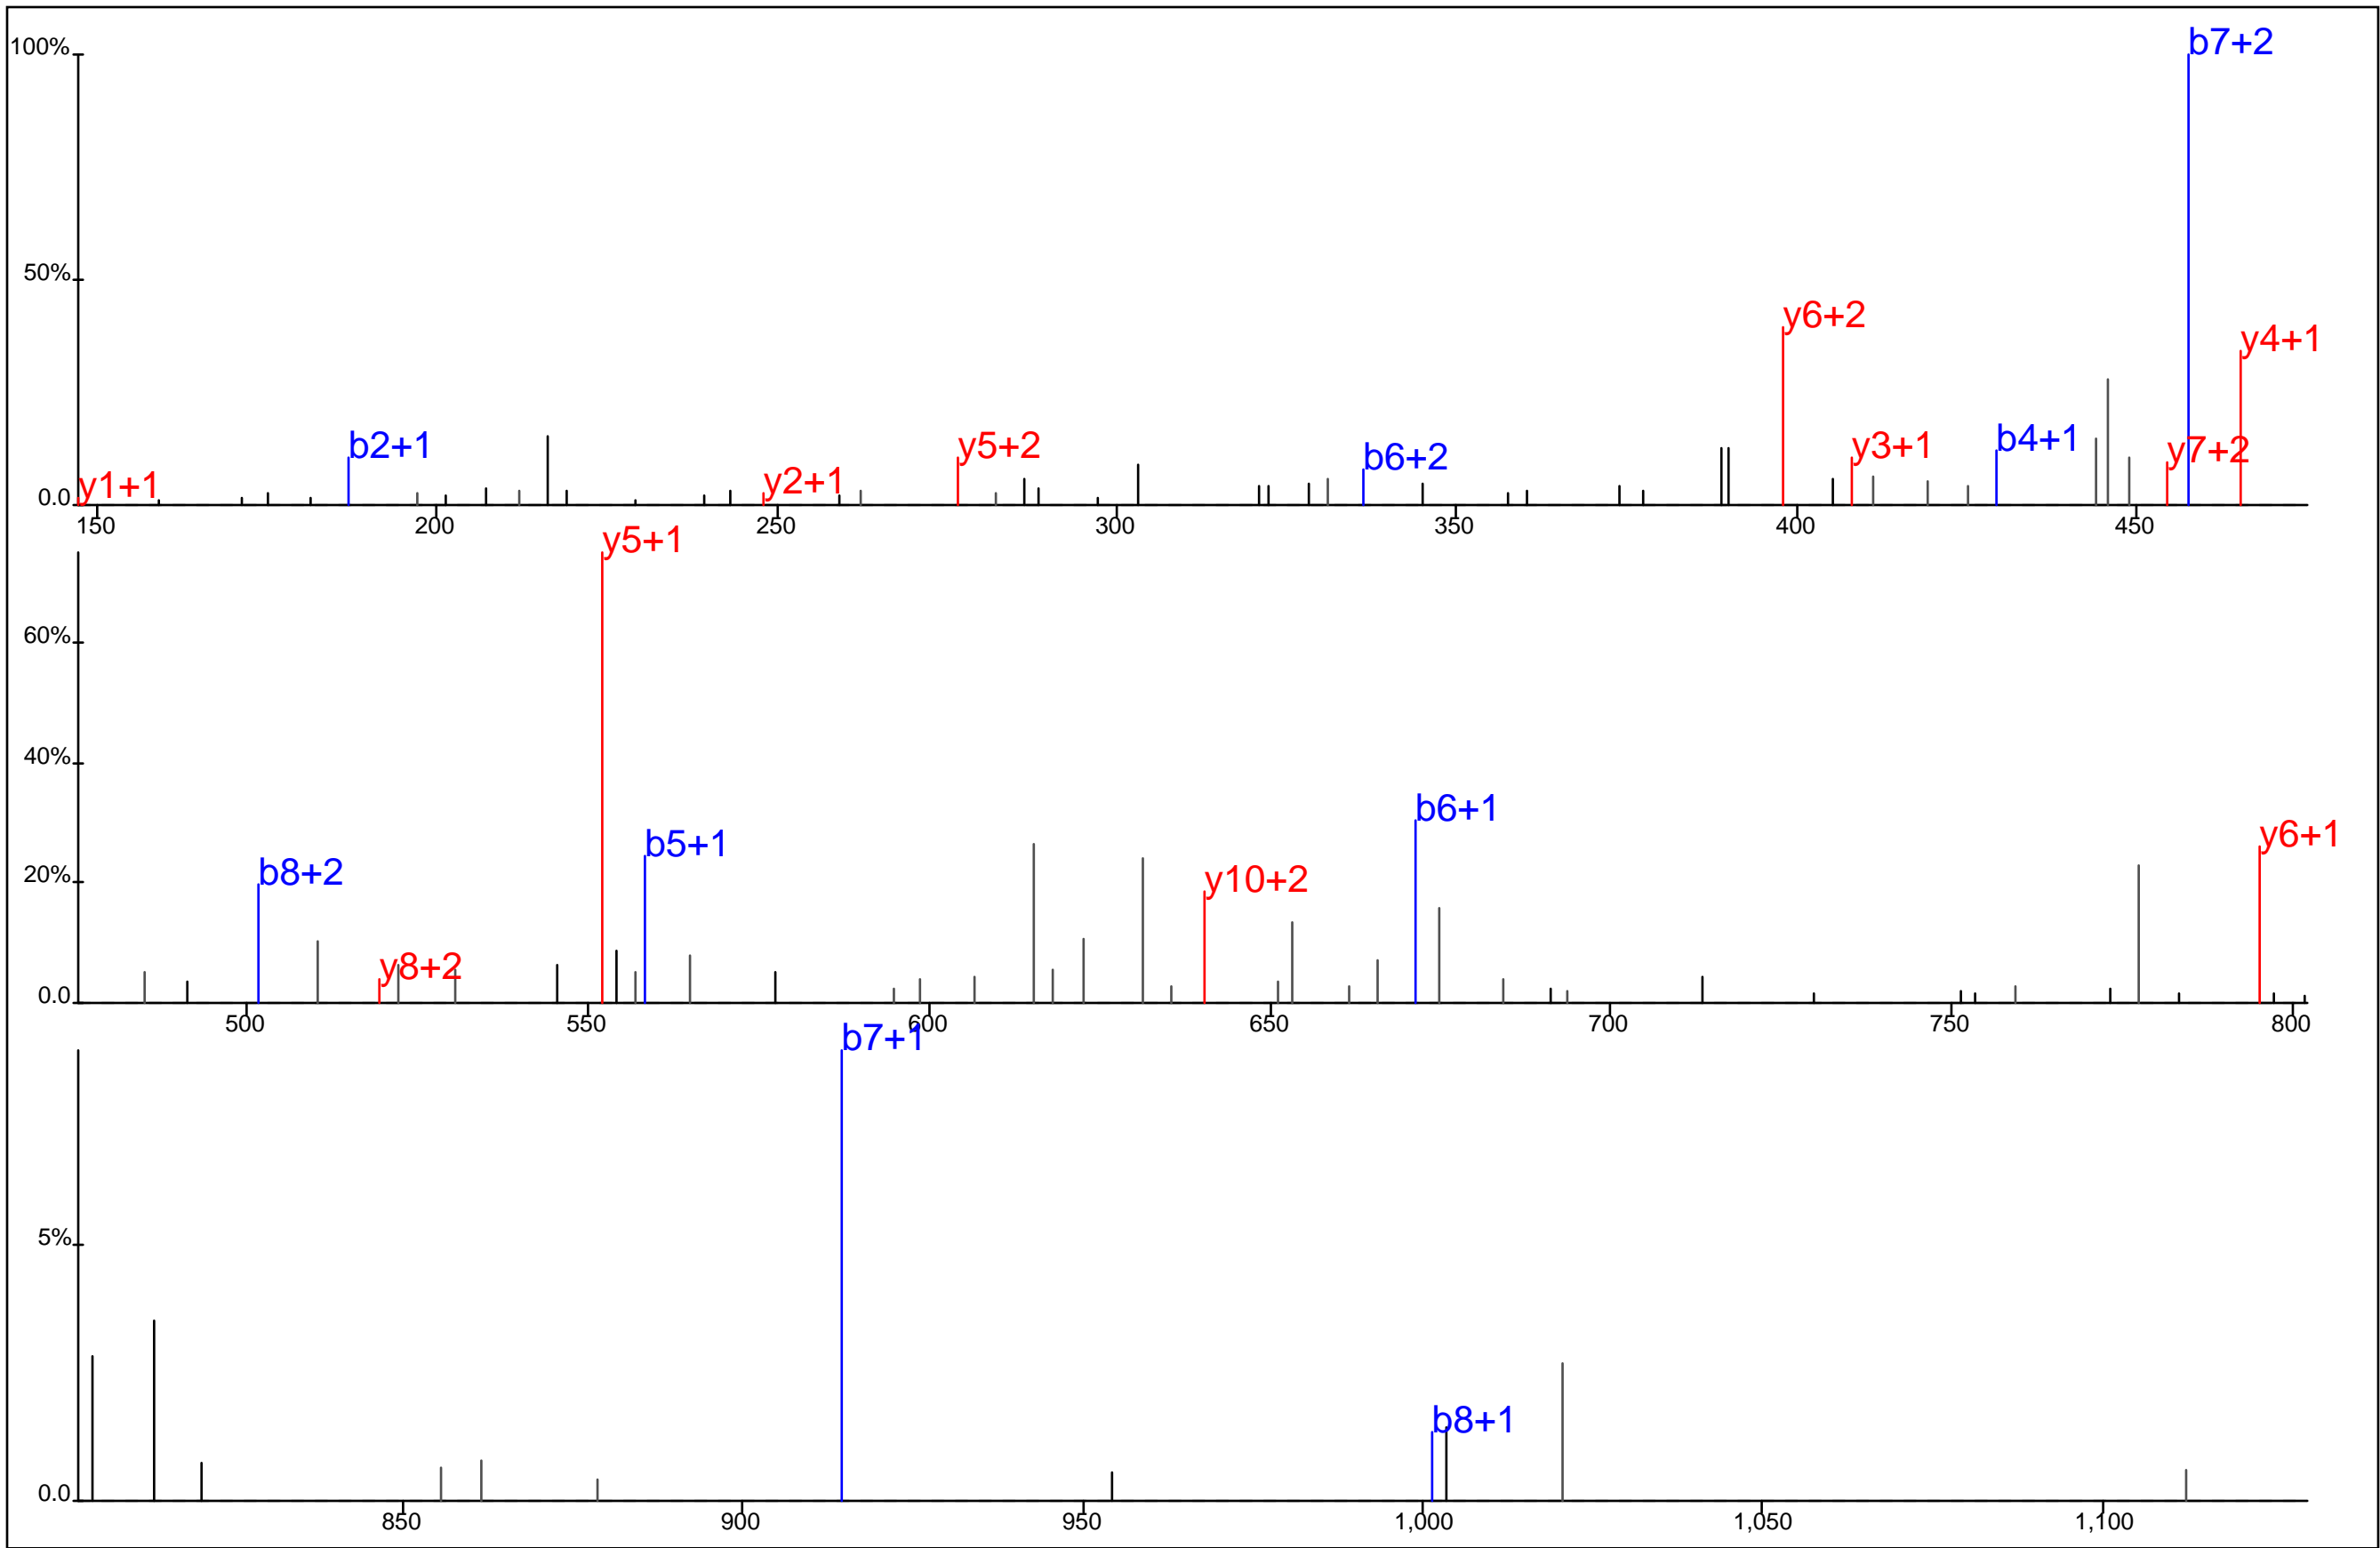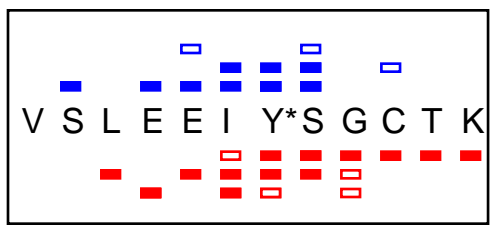

Protein Name: Heat shock 40 kDa protein 1  
 gi Accession: 0  
 Precursor Mass: 489.2151+3  
 Delta Mass: 1.960 ppm  
 XCorr: 25.26

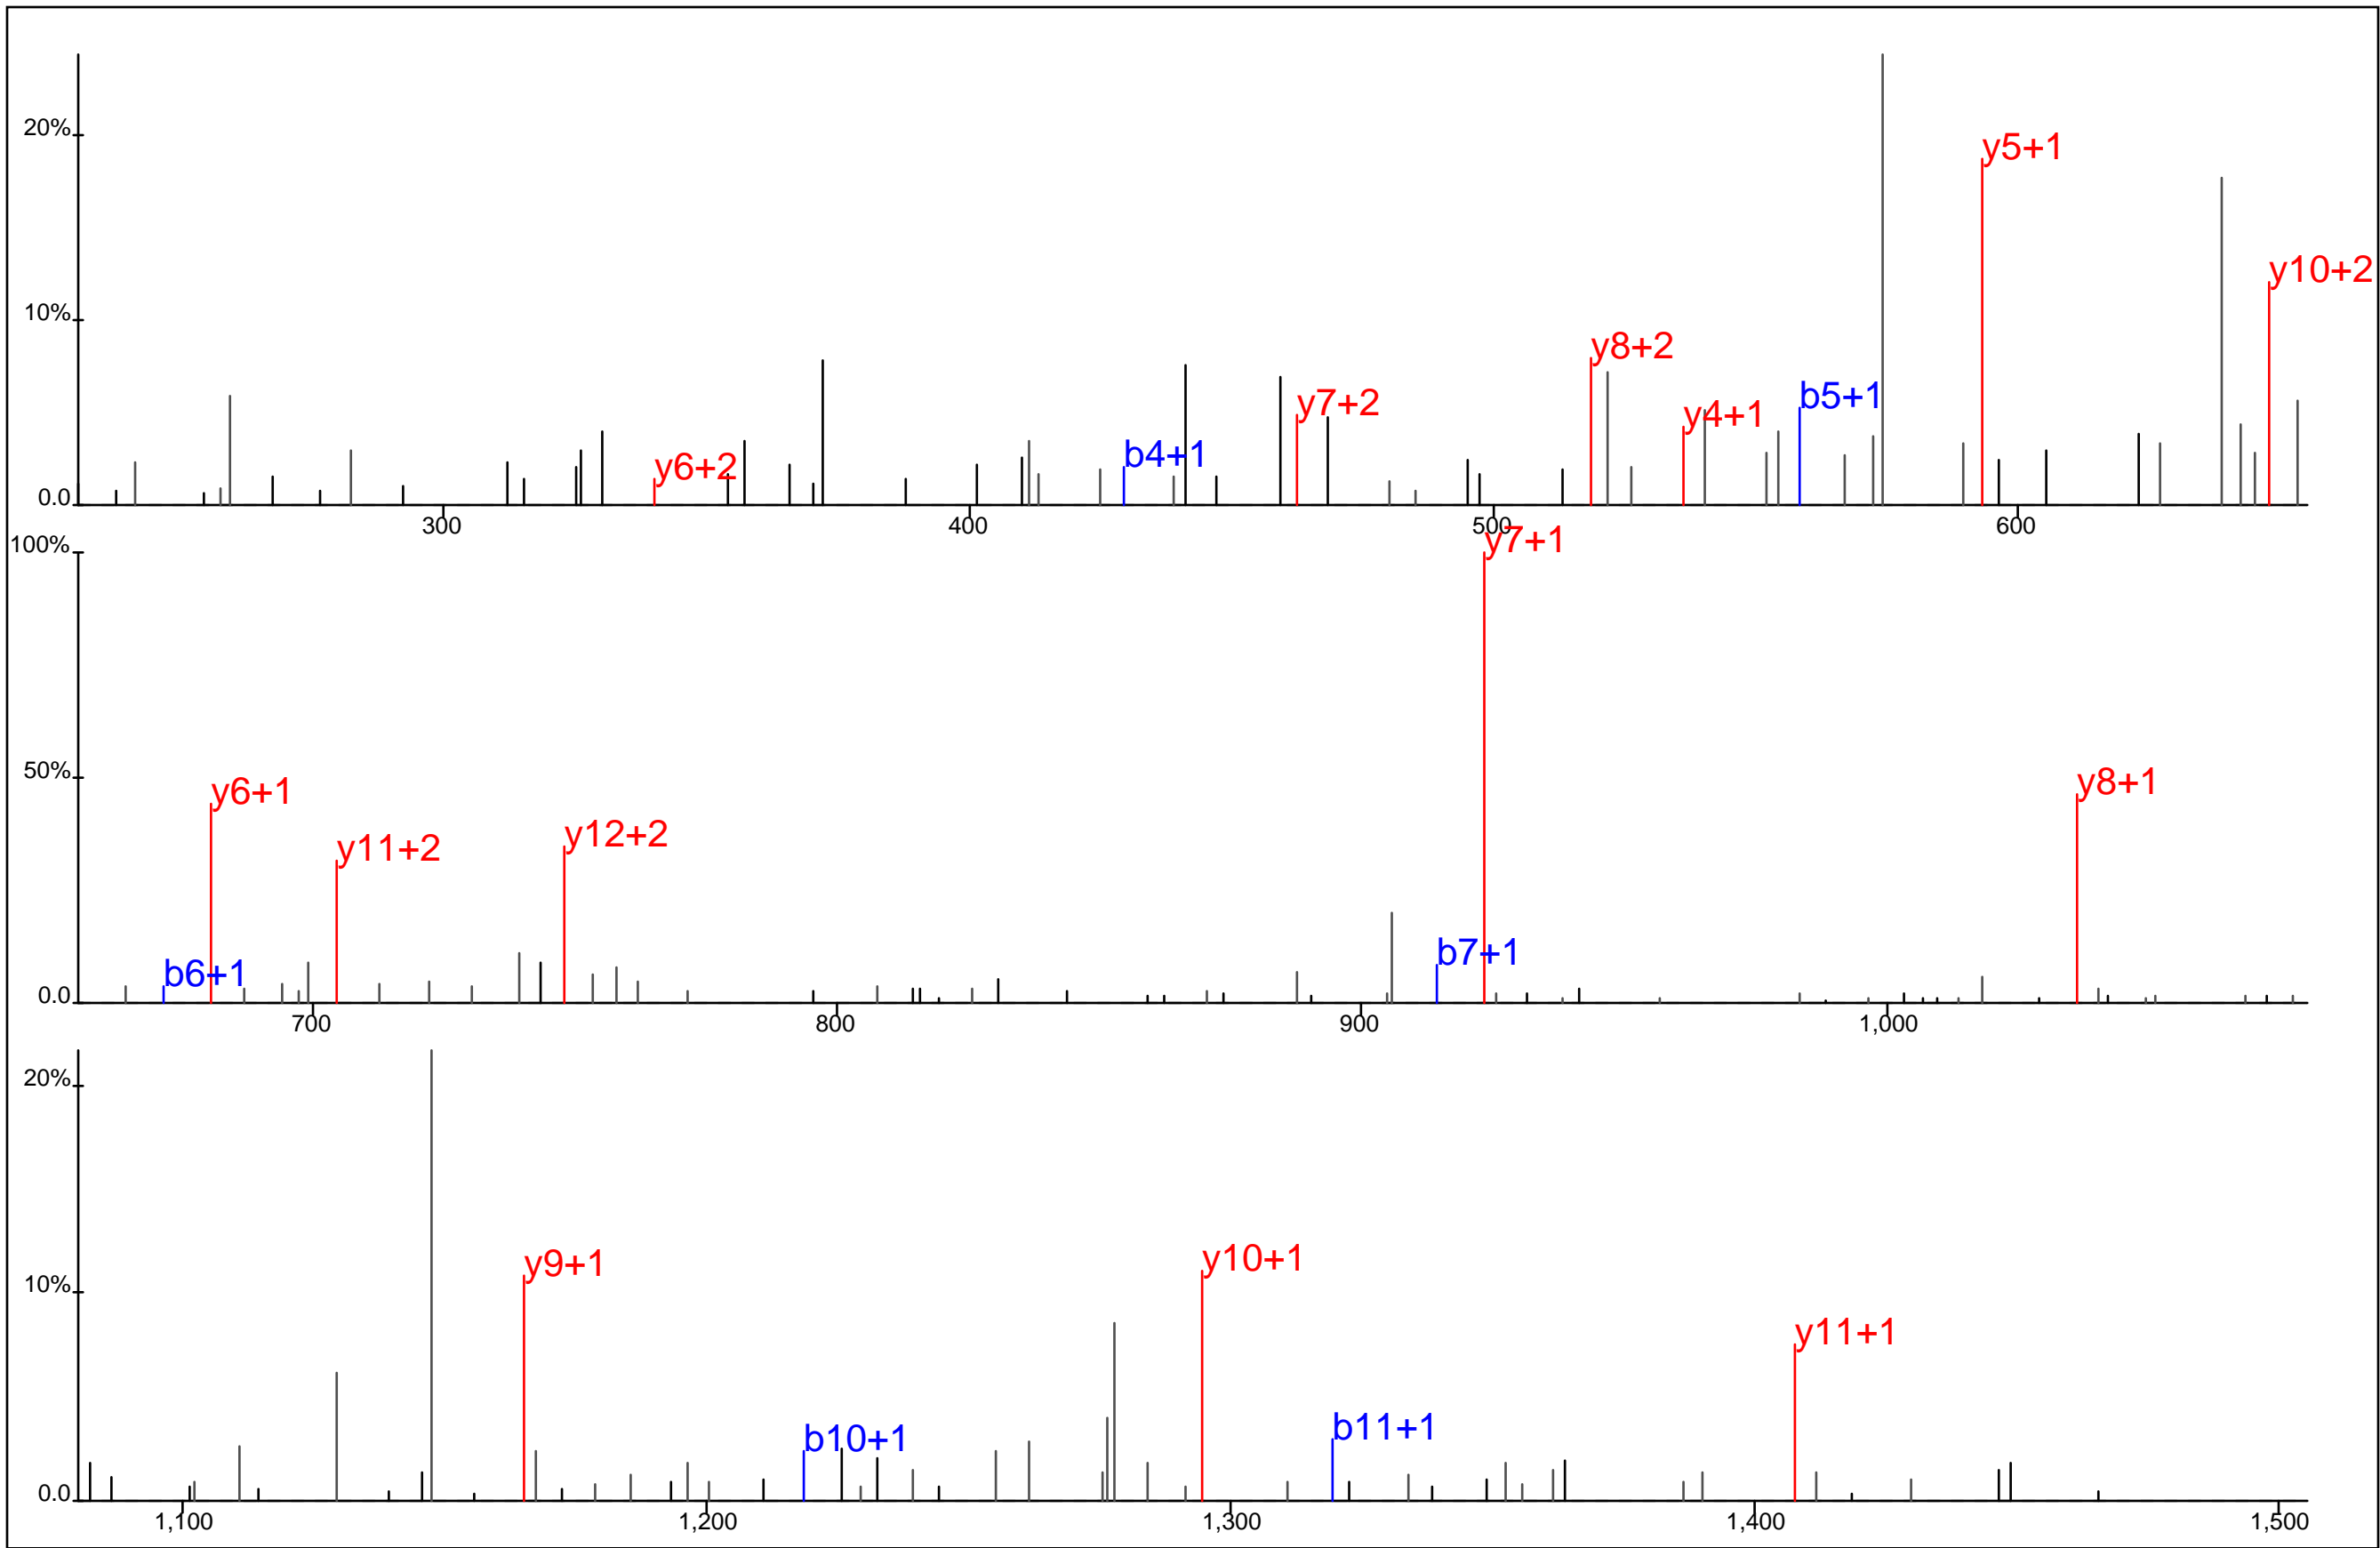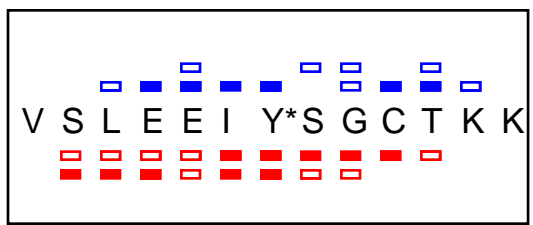

Protein Name: Heat shock 40 kDa protein 1  
 gi Accession: 0  
 Precursor Mass: 797.3655+2  
 Delta Mass: 0.522 ppm  
 XCorr: 44.65

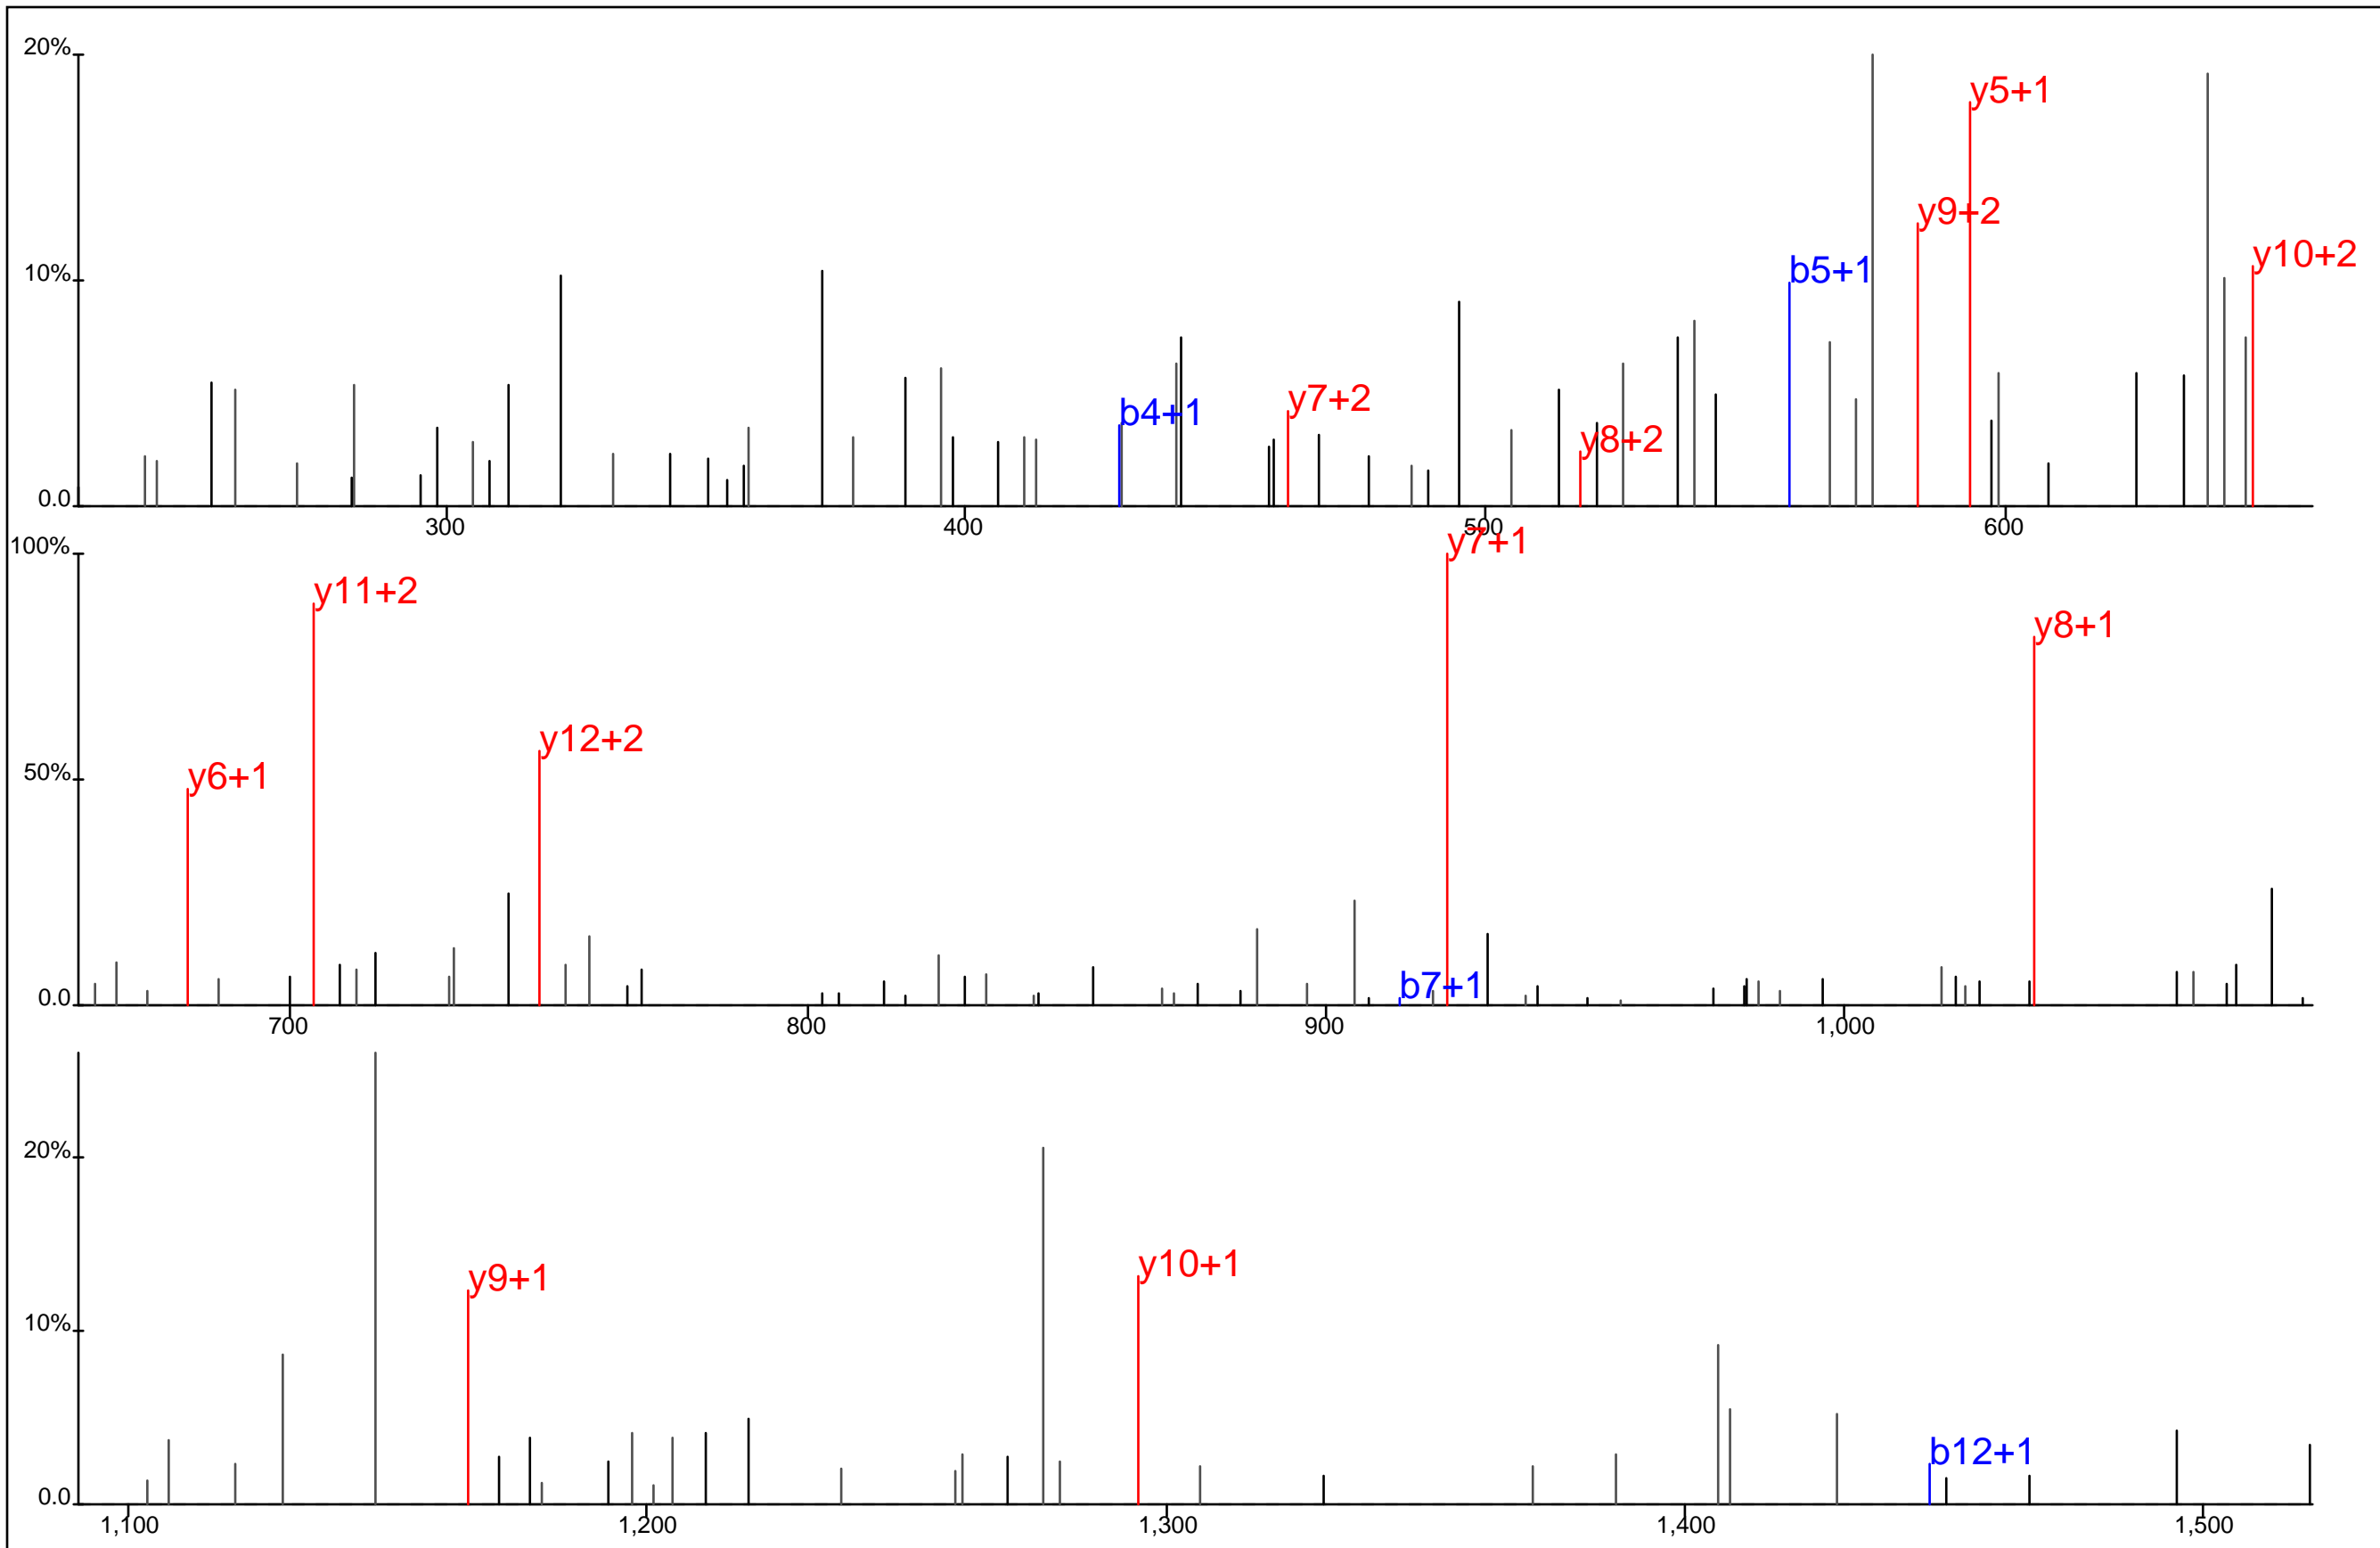

▢ ▢ ▢ ▢ ▢ ▢ ▢ ▢ ▢ ▢  
 V S L E E I Y\* S G C T K K  
▢ ▢ ▢ ▢ ▢ ▢ ▢ ▢ ▢ ▢

Protein Name: Heat shock 40 kDa protein 1  
 gi Accession: 0  
 Precursor Mass: 797.3638+2  
 Delta Mass: 1.699 ppm  
 XCorr: 28.0



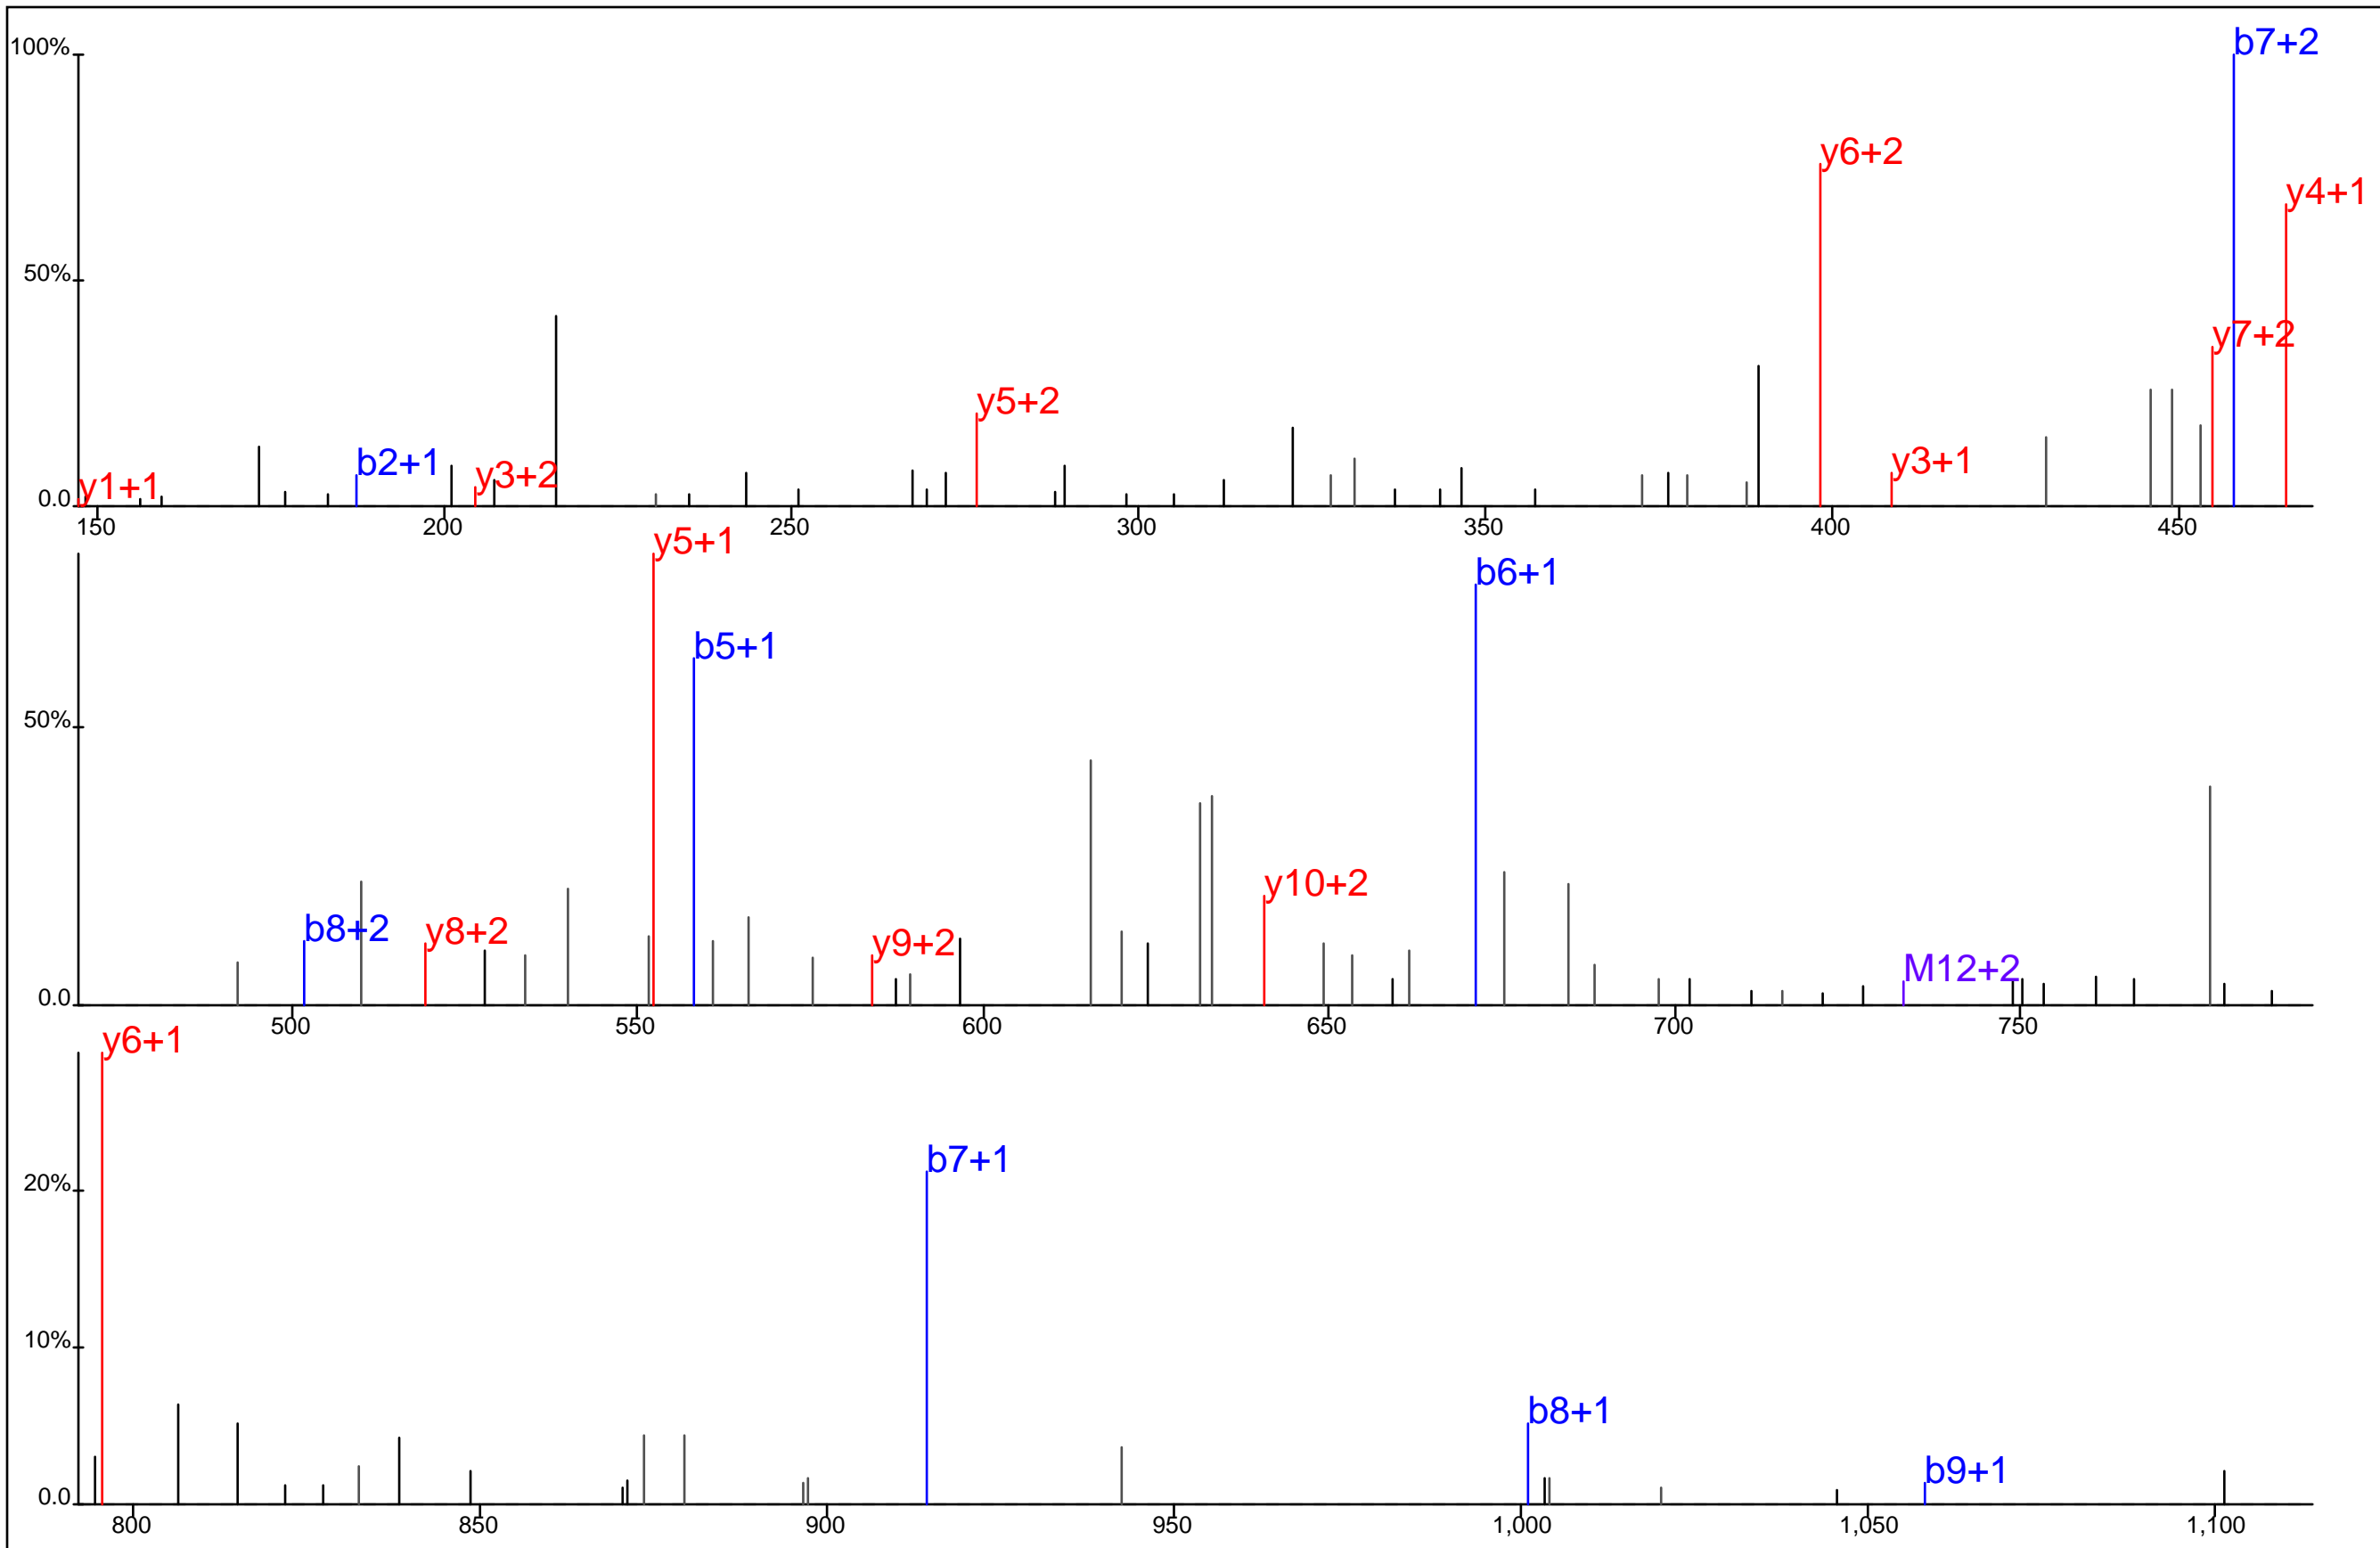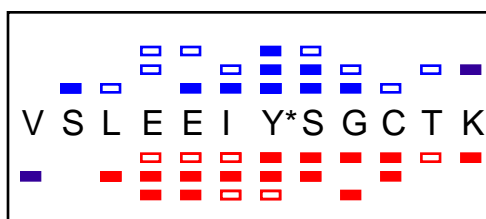

Protein Name: Heat shock 40 kDa protein 1  
 gi Accession: 0  
 Precursor Mass: 489.2154+3  
 Delta Mass: 2.398 ppm  
 XCorr: 28.1

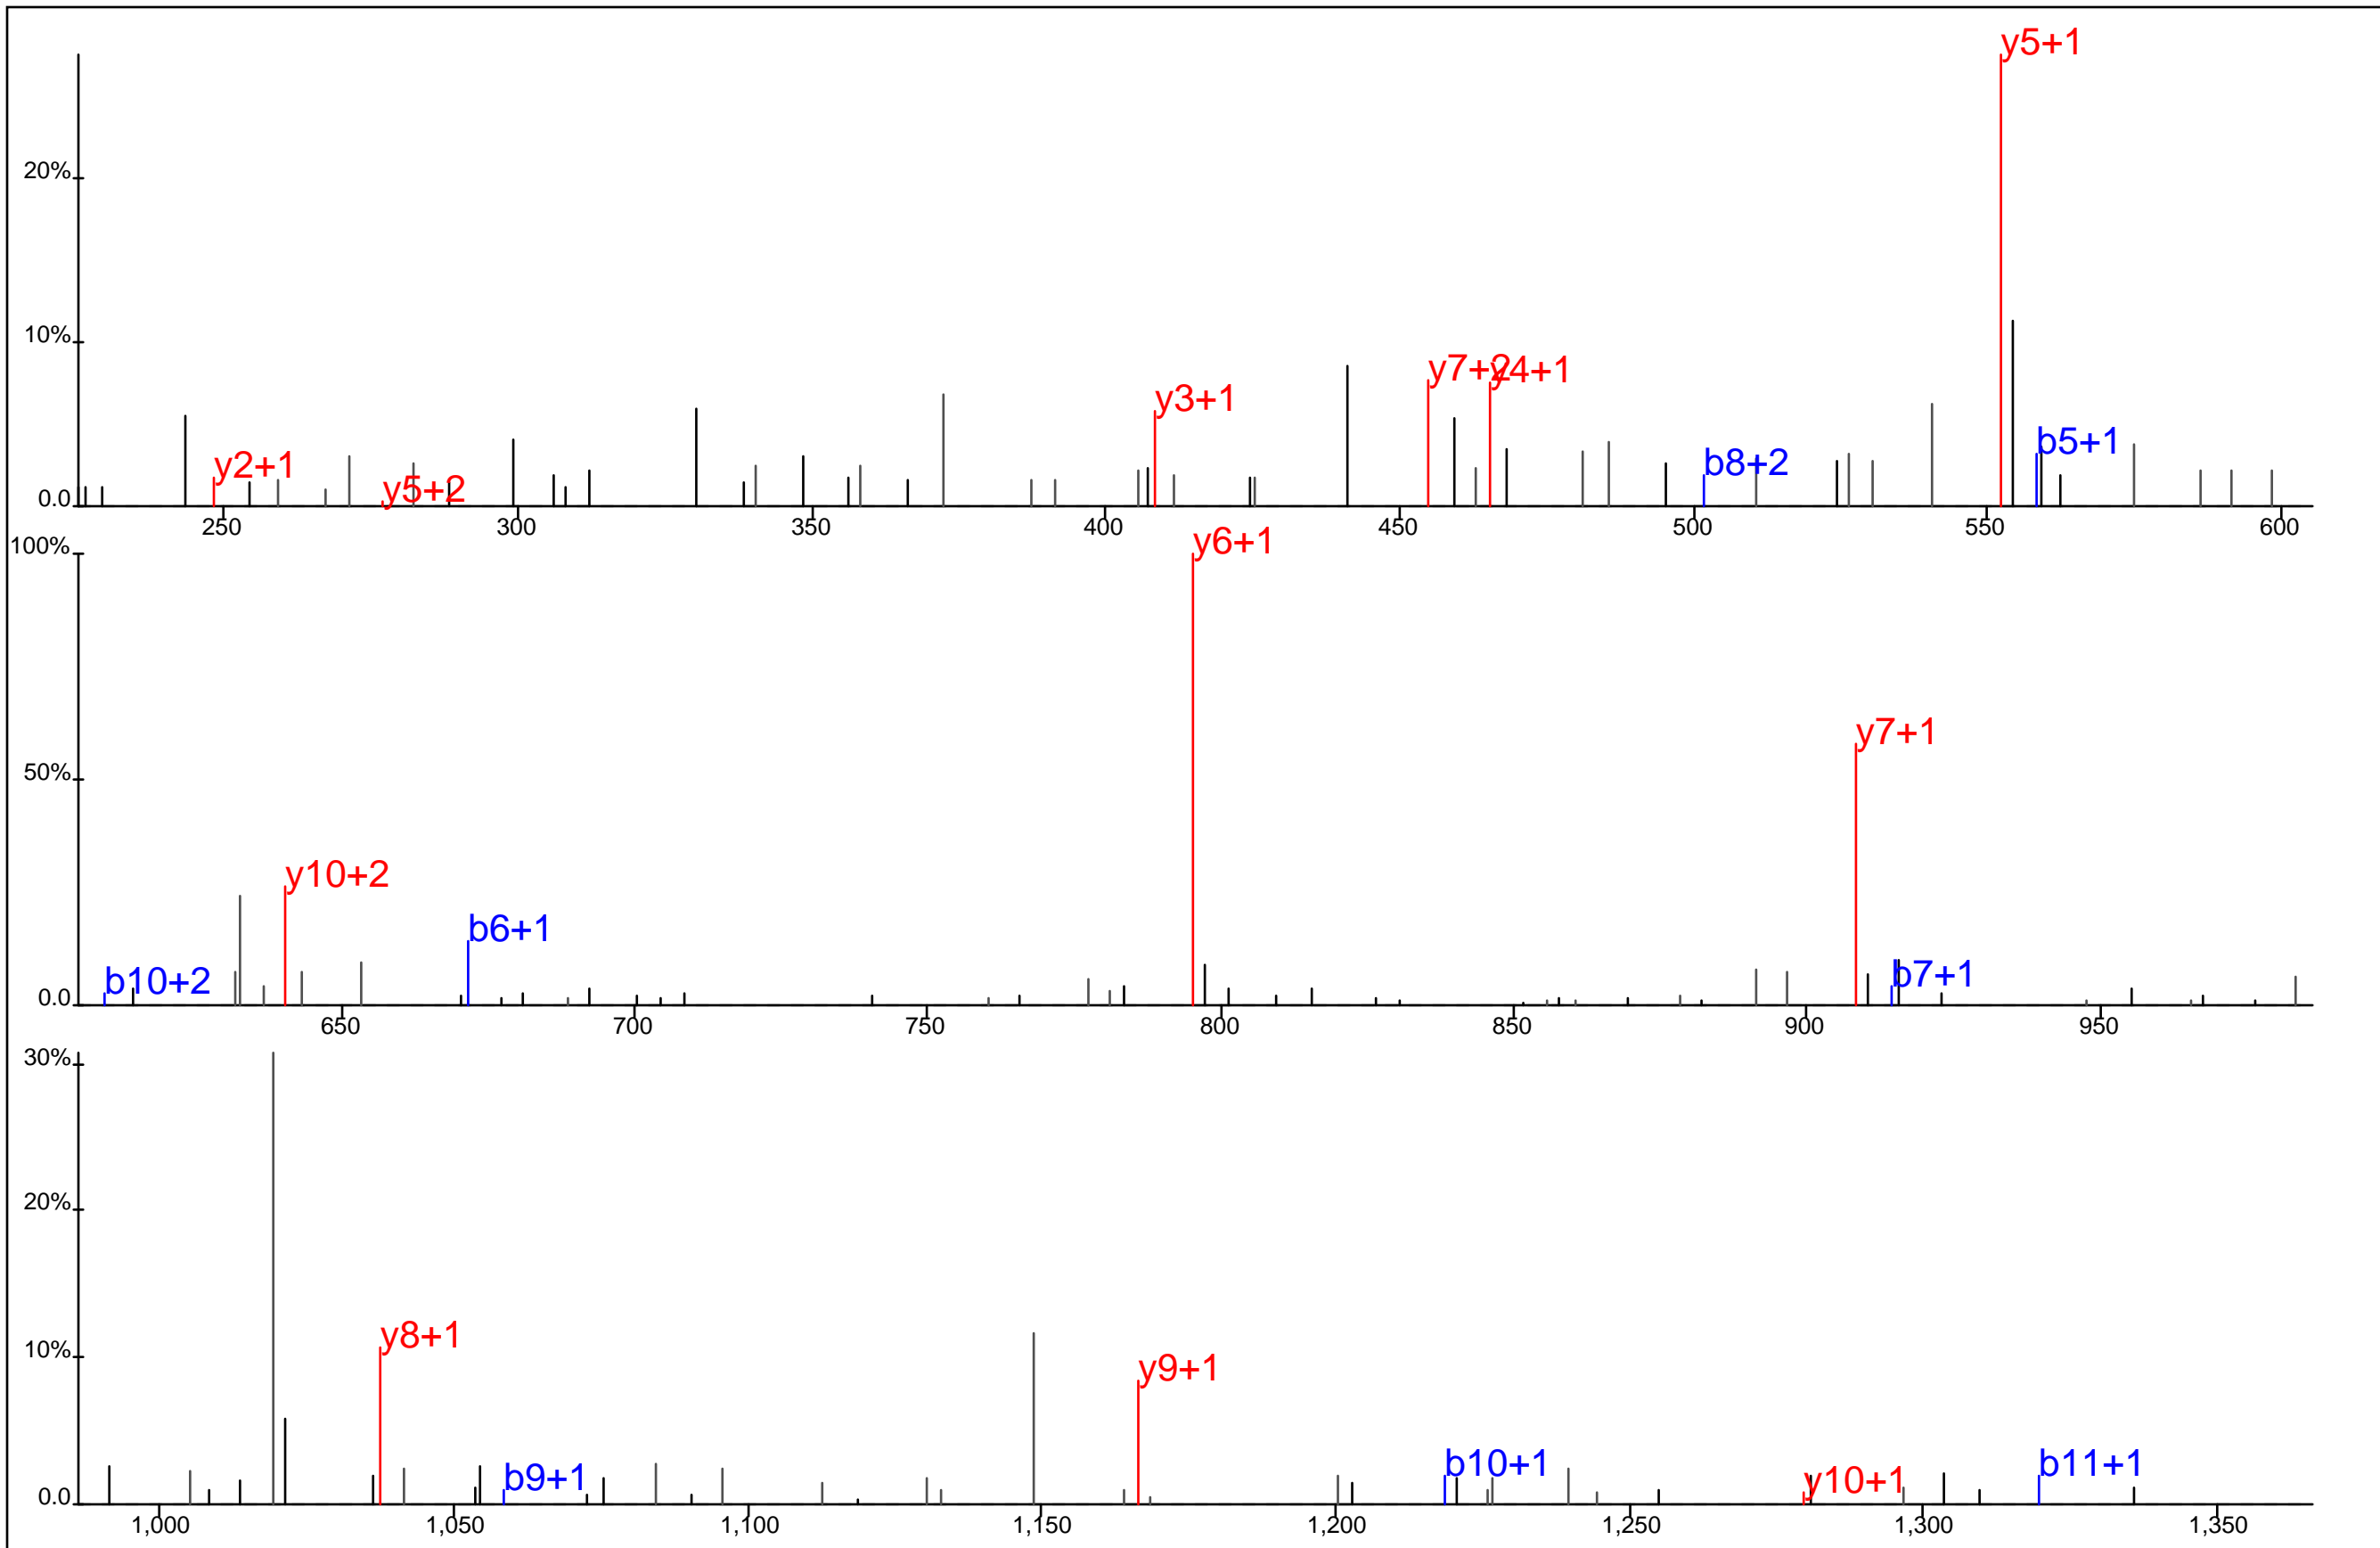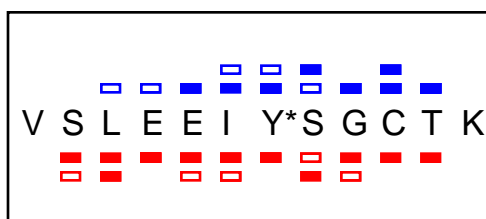

Protein Name: Heat shock 40 kDa protein 1  
 gi Accession: 0  
 Precursor Mass: 733.3169+2  
 Delta Mass: 1.029 ppm  
 XCorr: 46.56

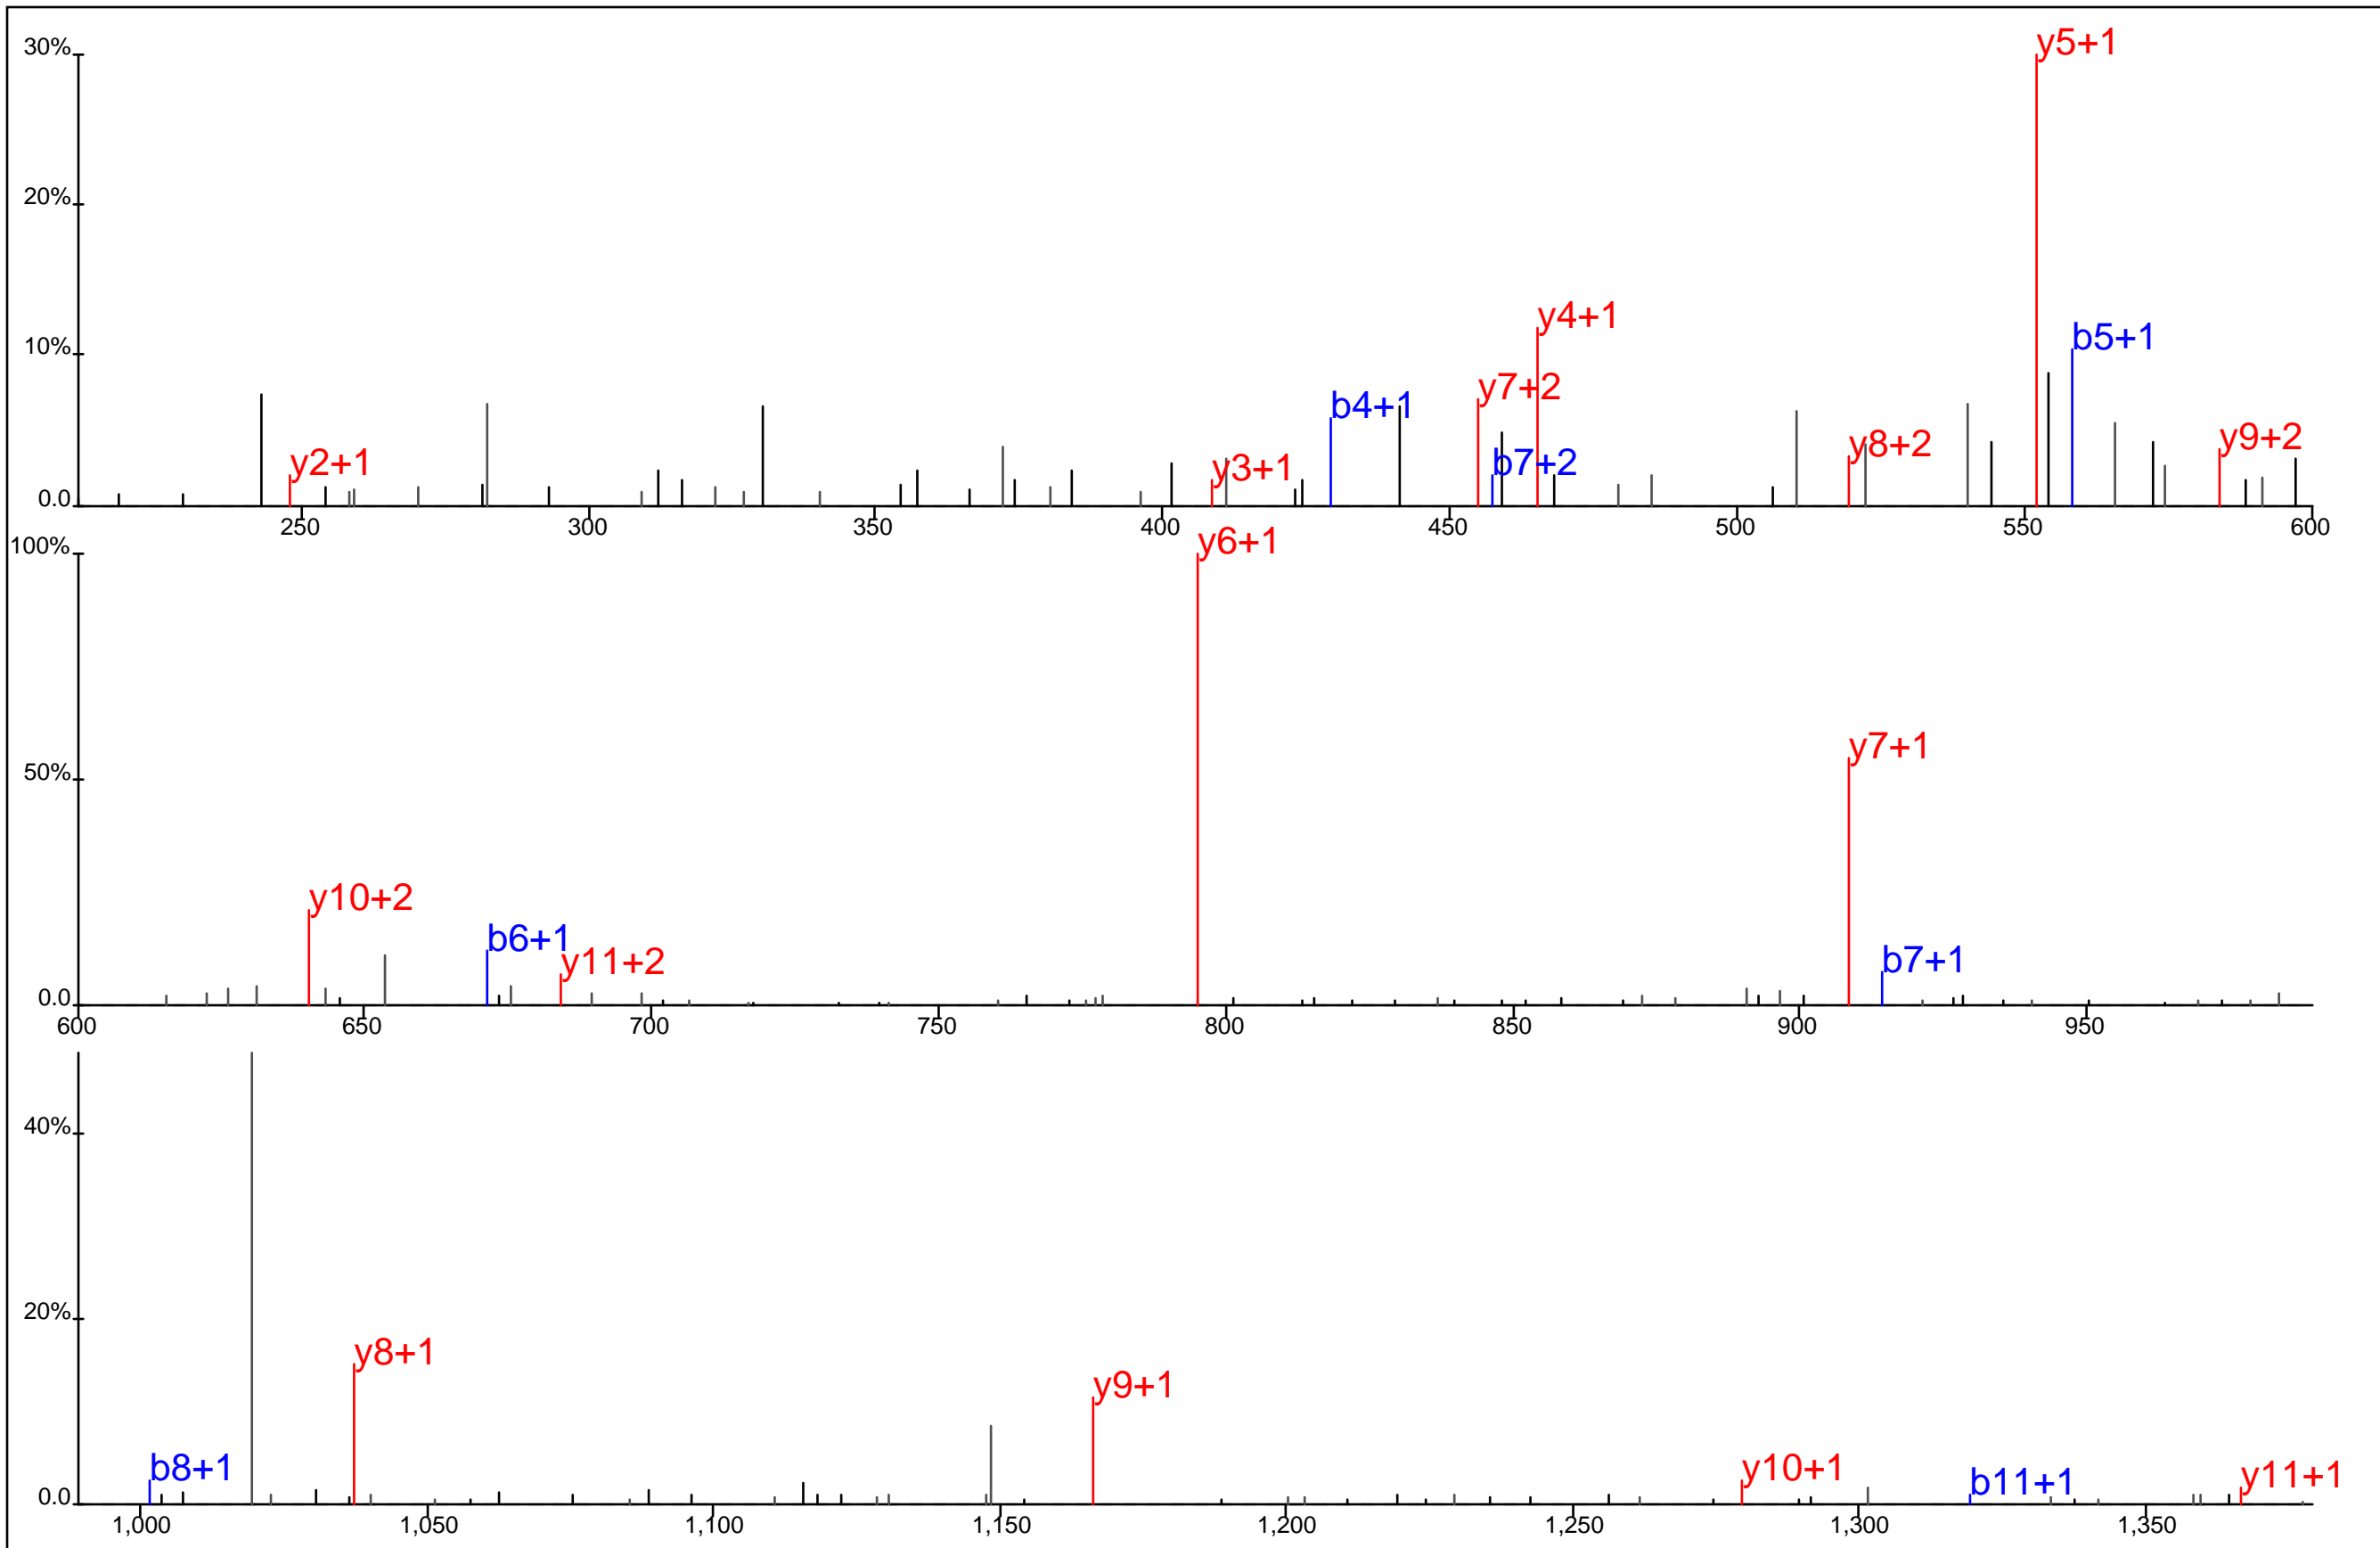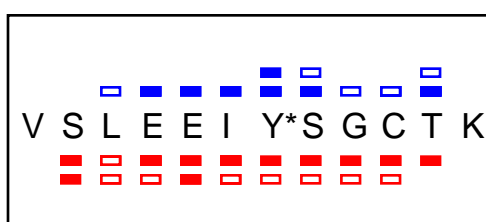

Protein Name: Heat shock 40 kDa protein 1  
 gi Accession: 0  
 Precursor Mass: 733.3188+2  
 Delta Mass: 1.553 ppm  
 XCorr: 71.84

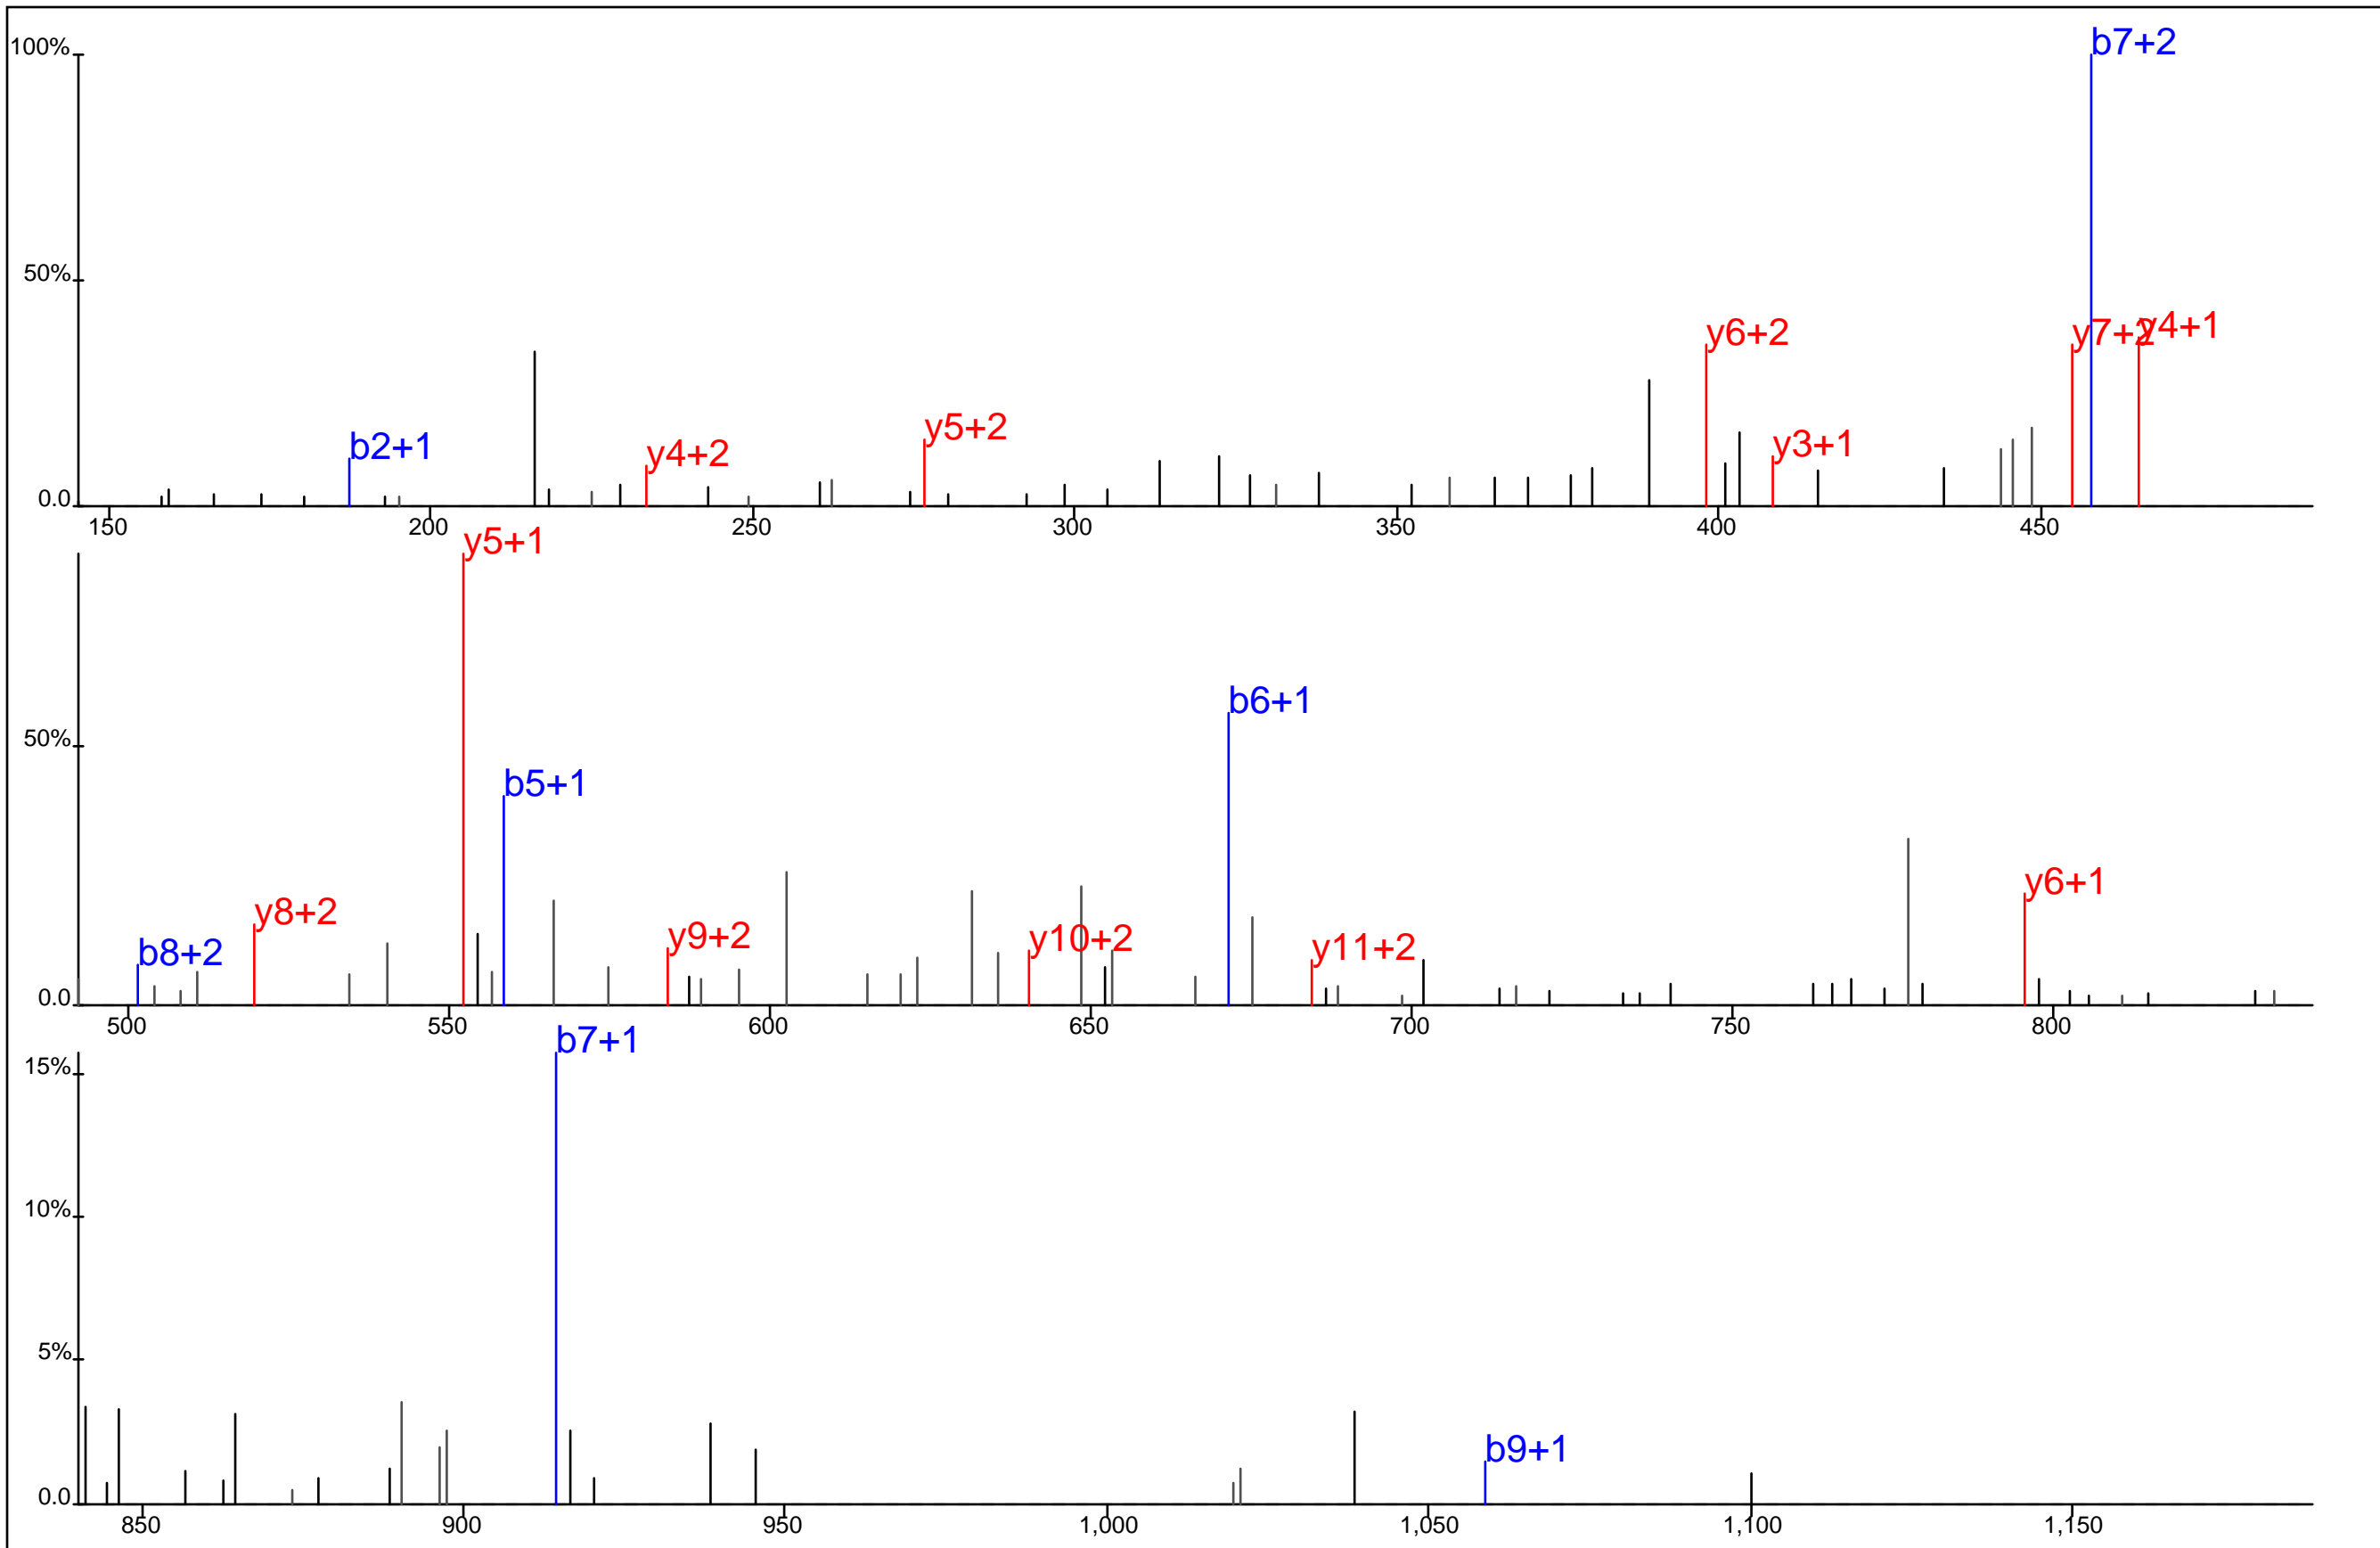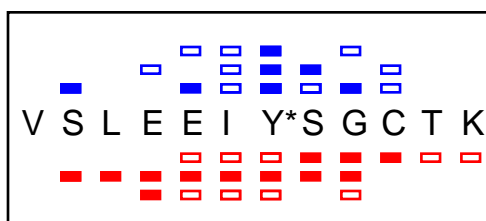

Protein Name: Heat shock 40 kDa protein 1  
 gi Accession: 0  
 Precursor Mass: 489.2147+3  
 Delta Mass: 1.023 ppm  
 XCorr: 33.16

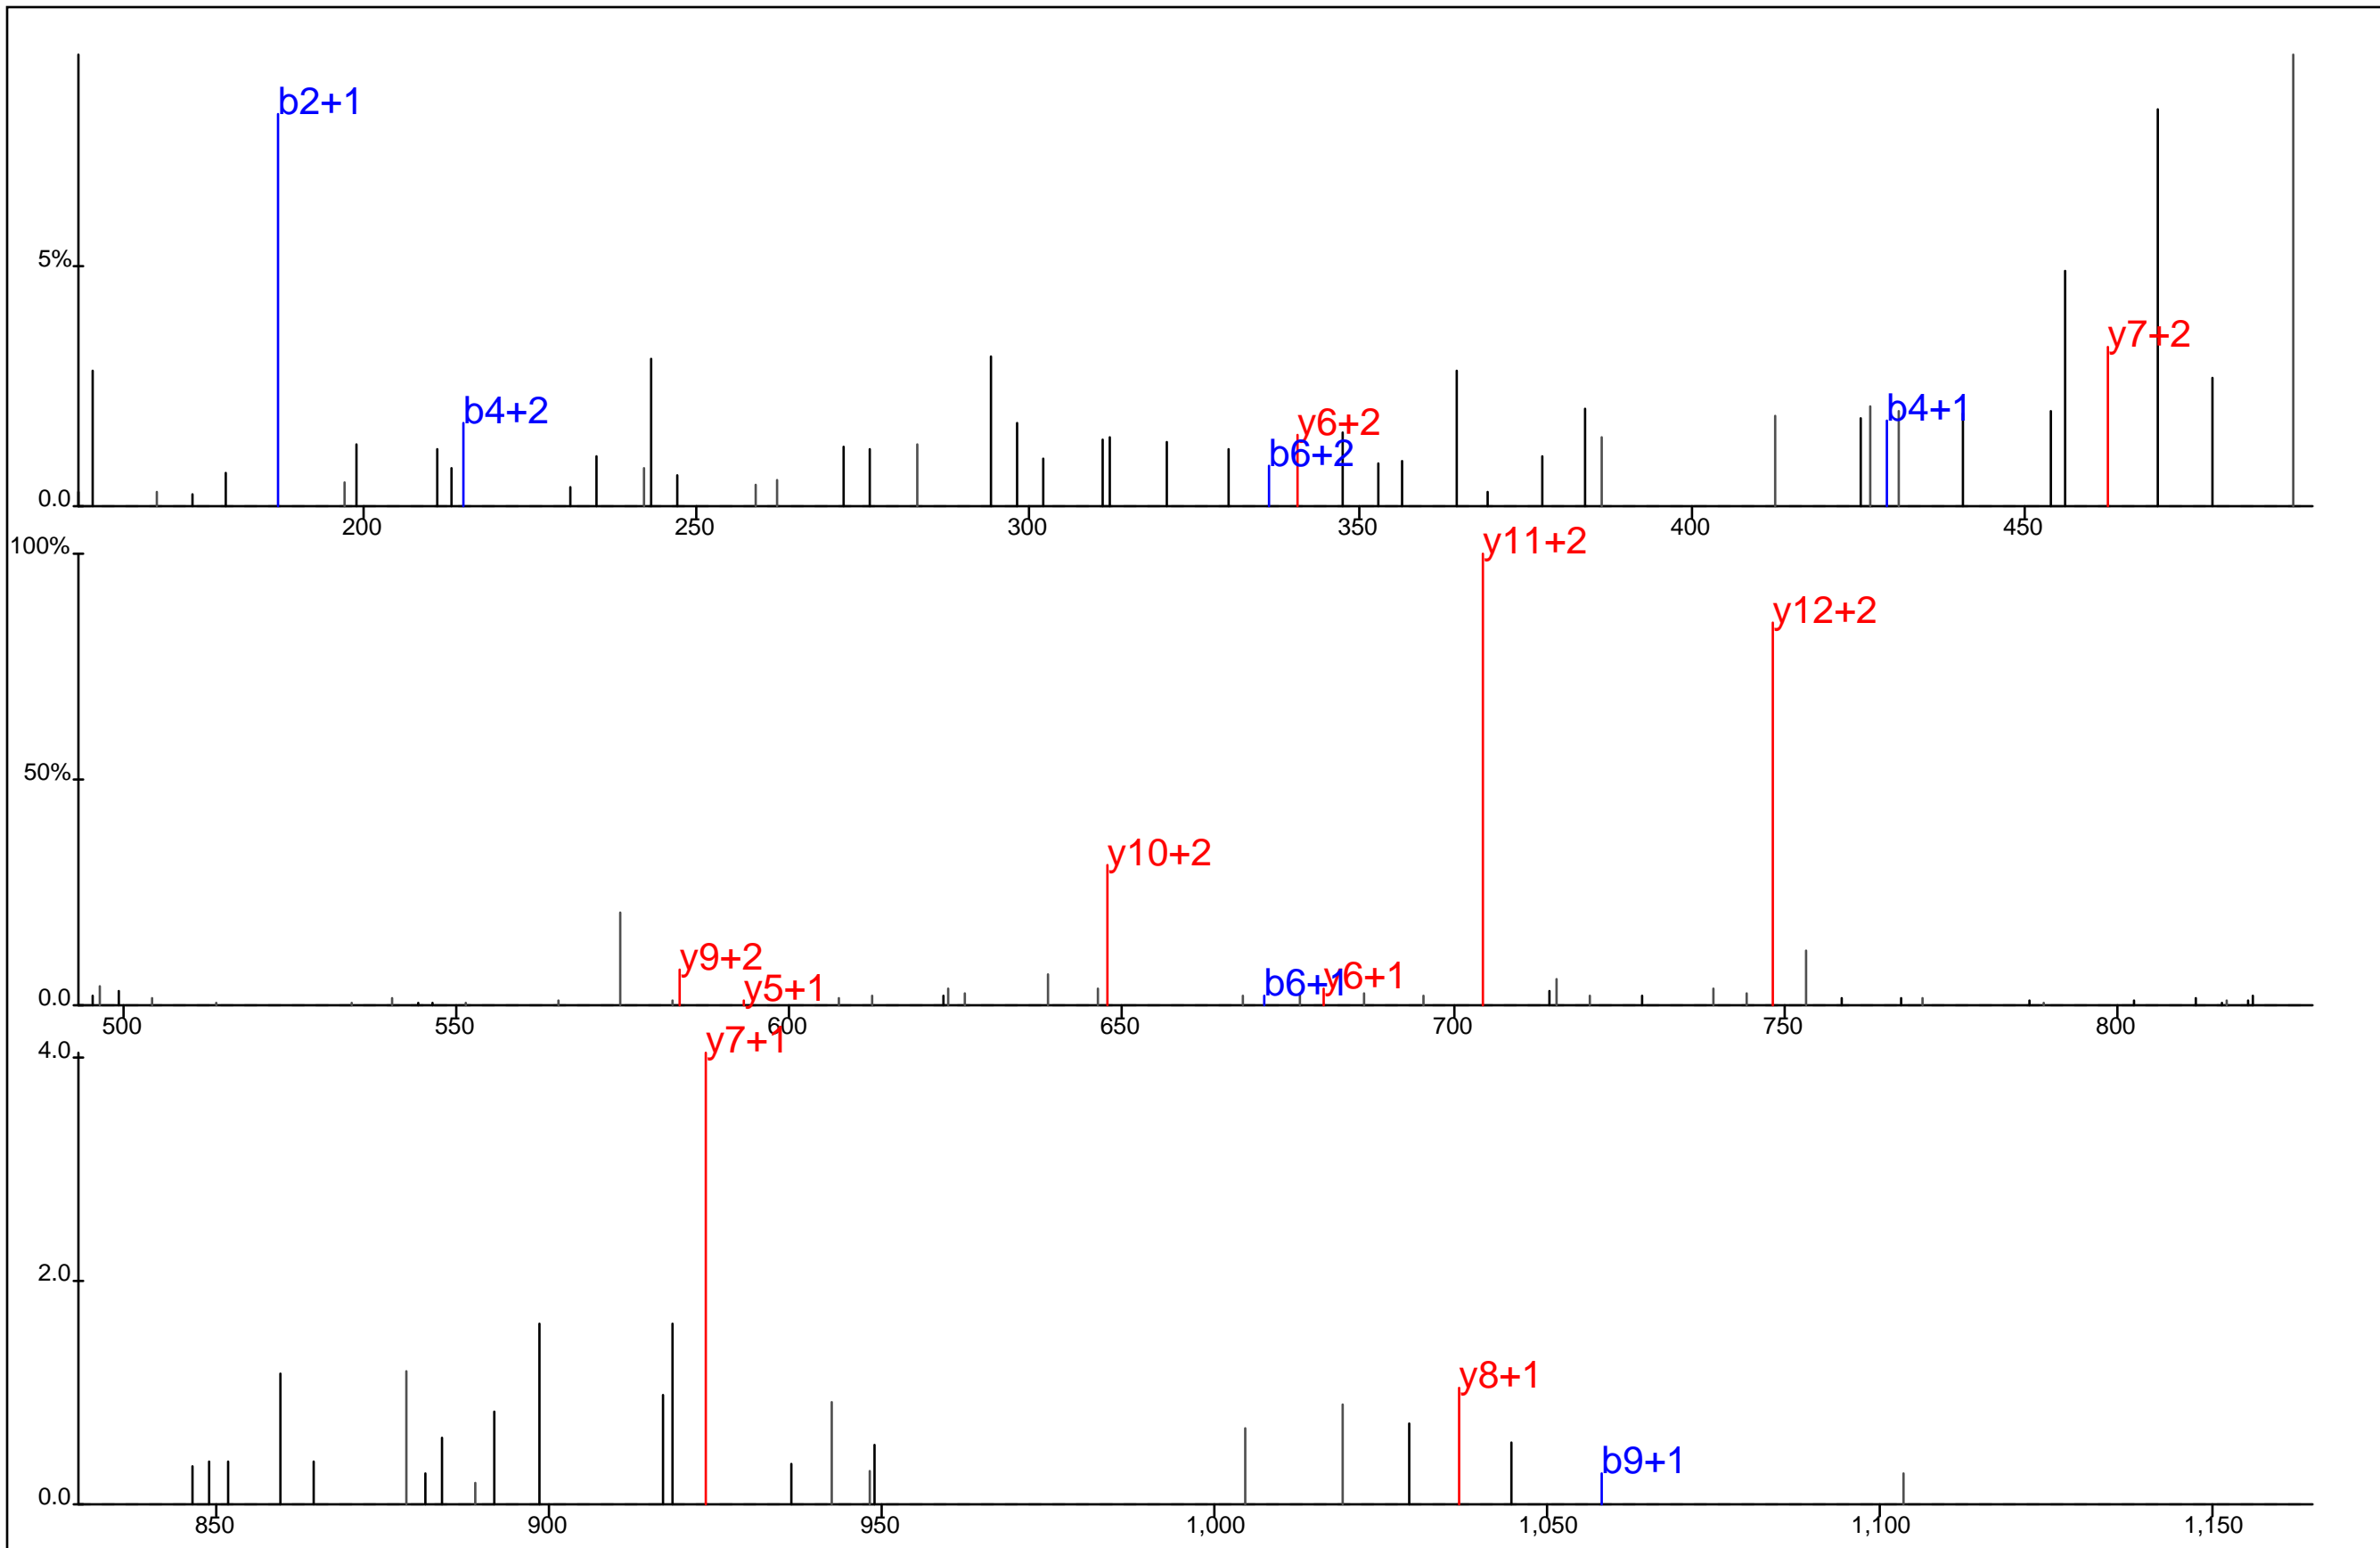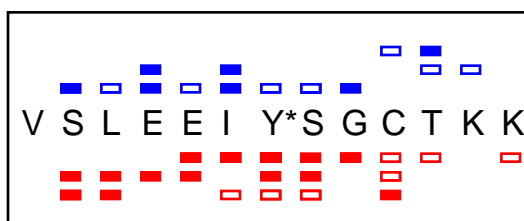

Protein Name: Heat shock 40 kDa protein 1  
 gi Accession: 0  
 Precursor Mass: 531.9106+3  
 Delta Mass: 3.624 ppm  
 XCorr: 22.12

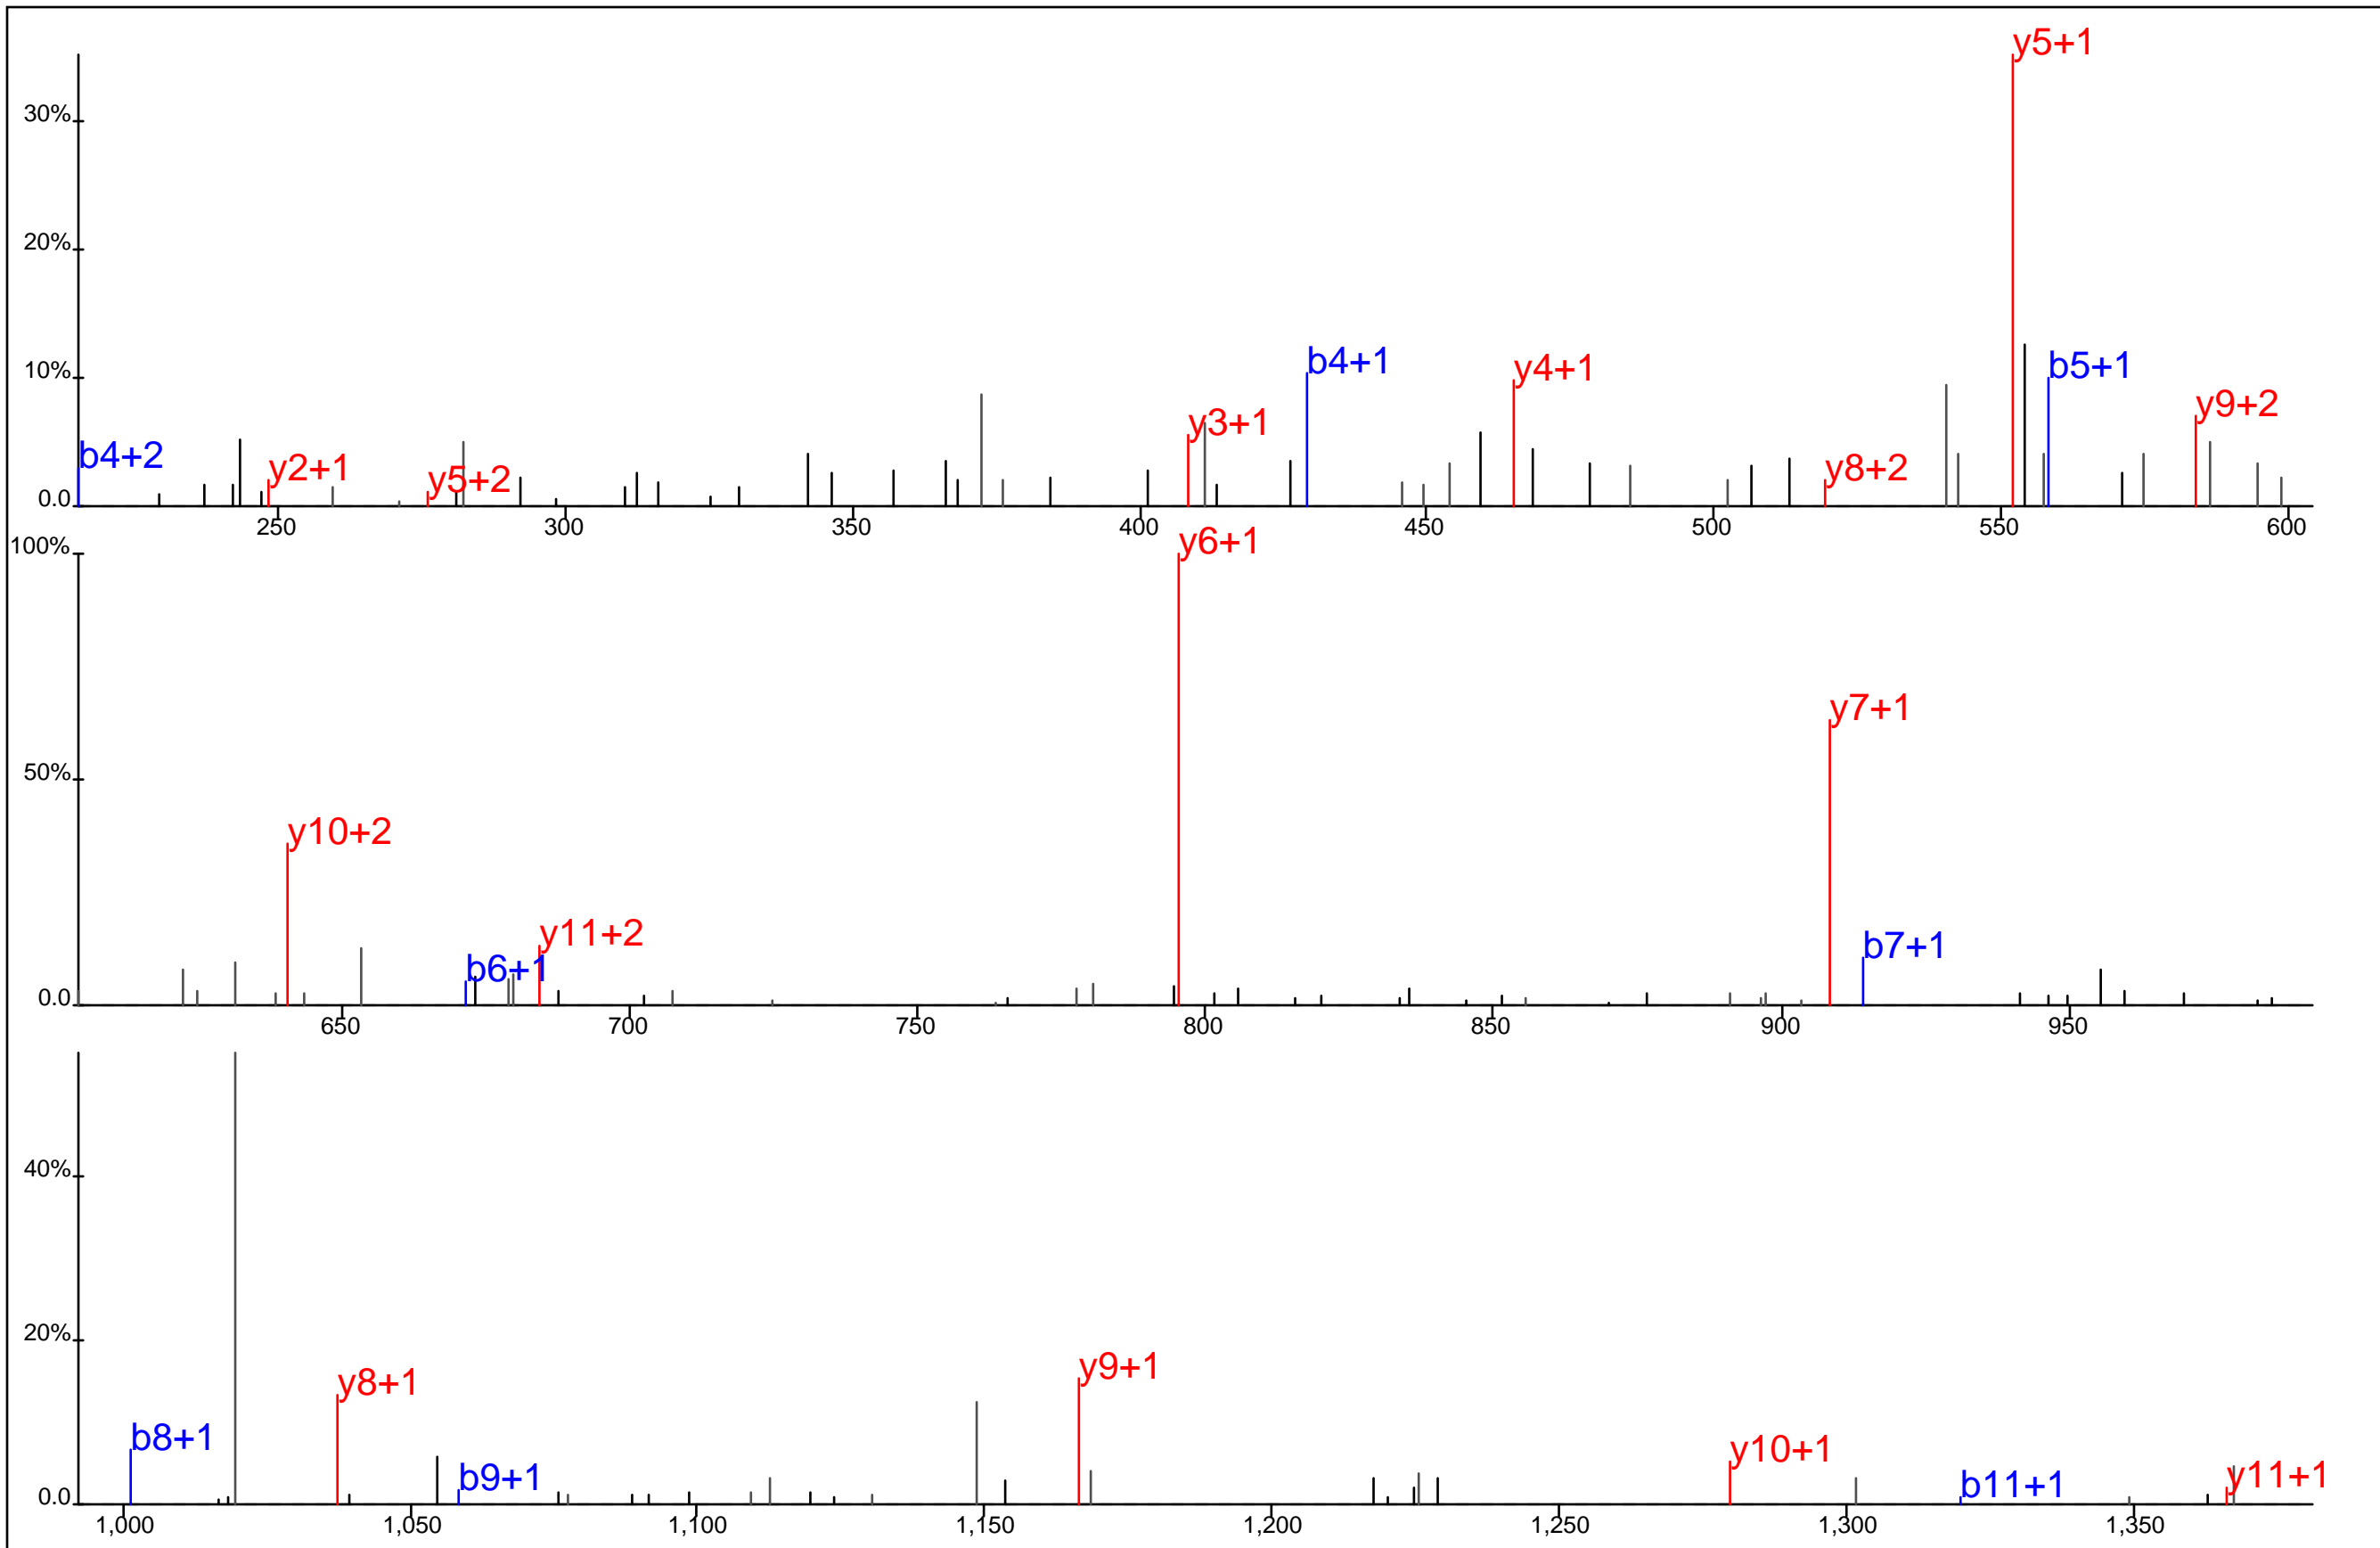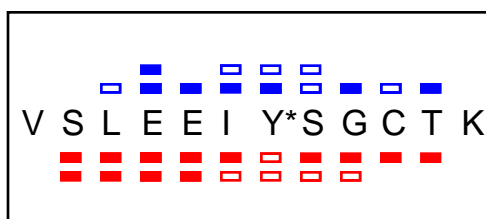

Protein Name: Heat shock 40 kDa protein 1  
 gi Accession: 0  
 Precursor Mass: 733.3177+2  
 Delta Mass: 0.136 ppm  
 XCorr: 60.39

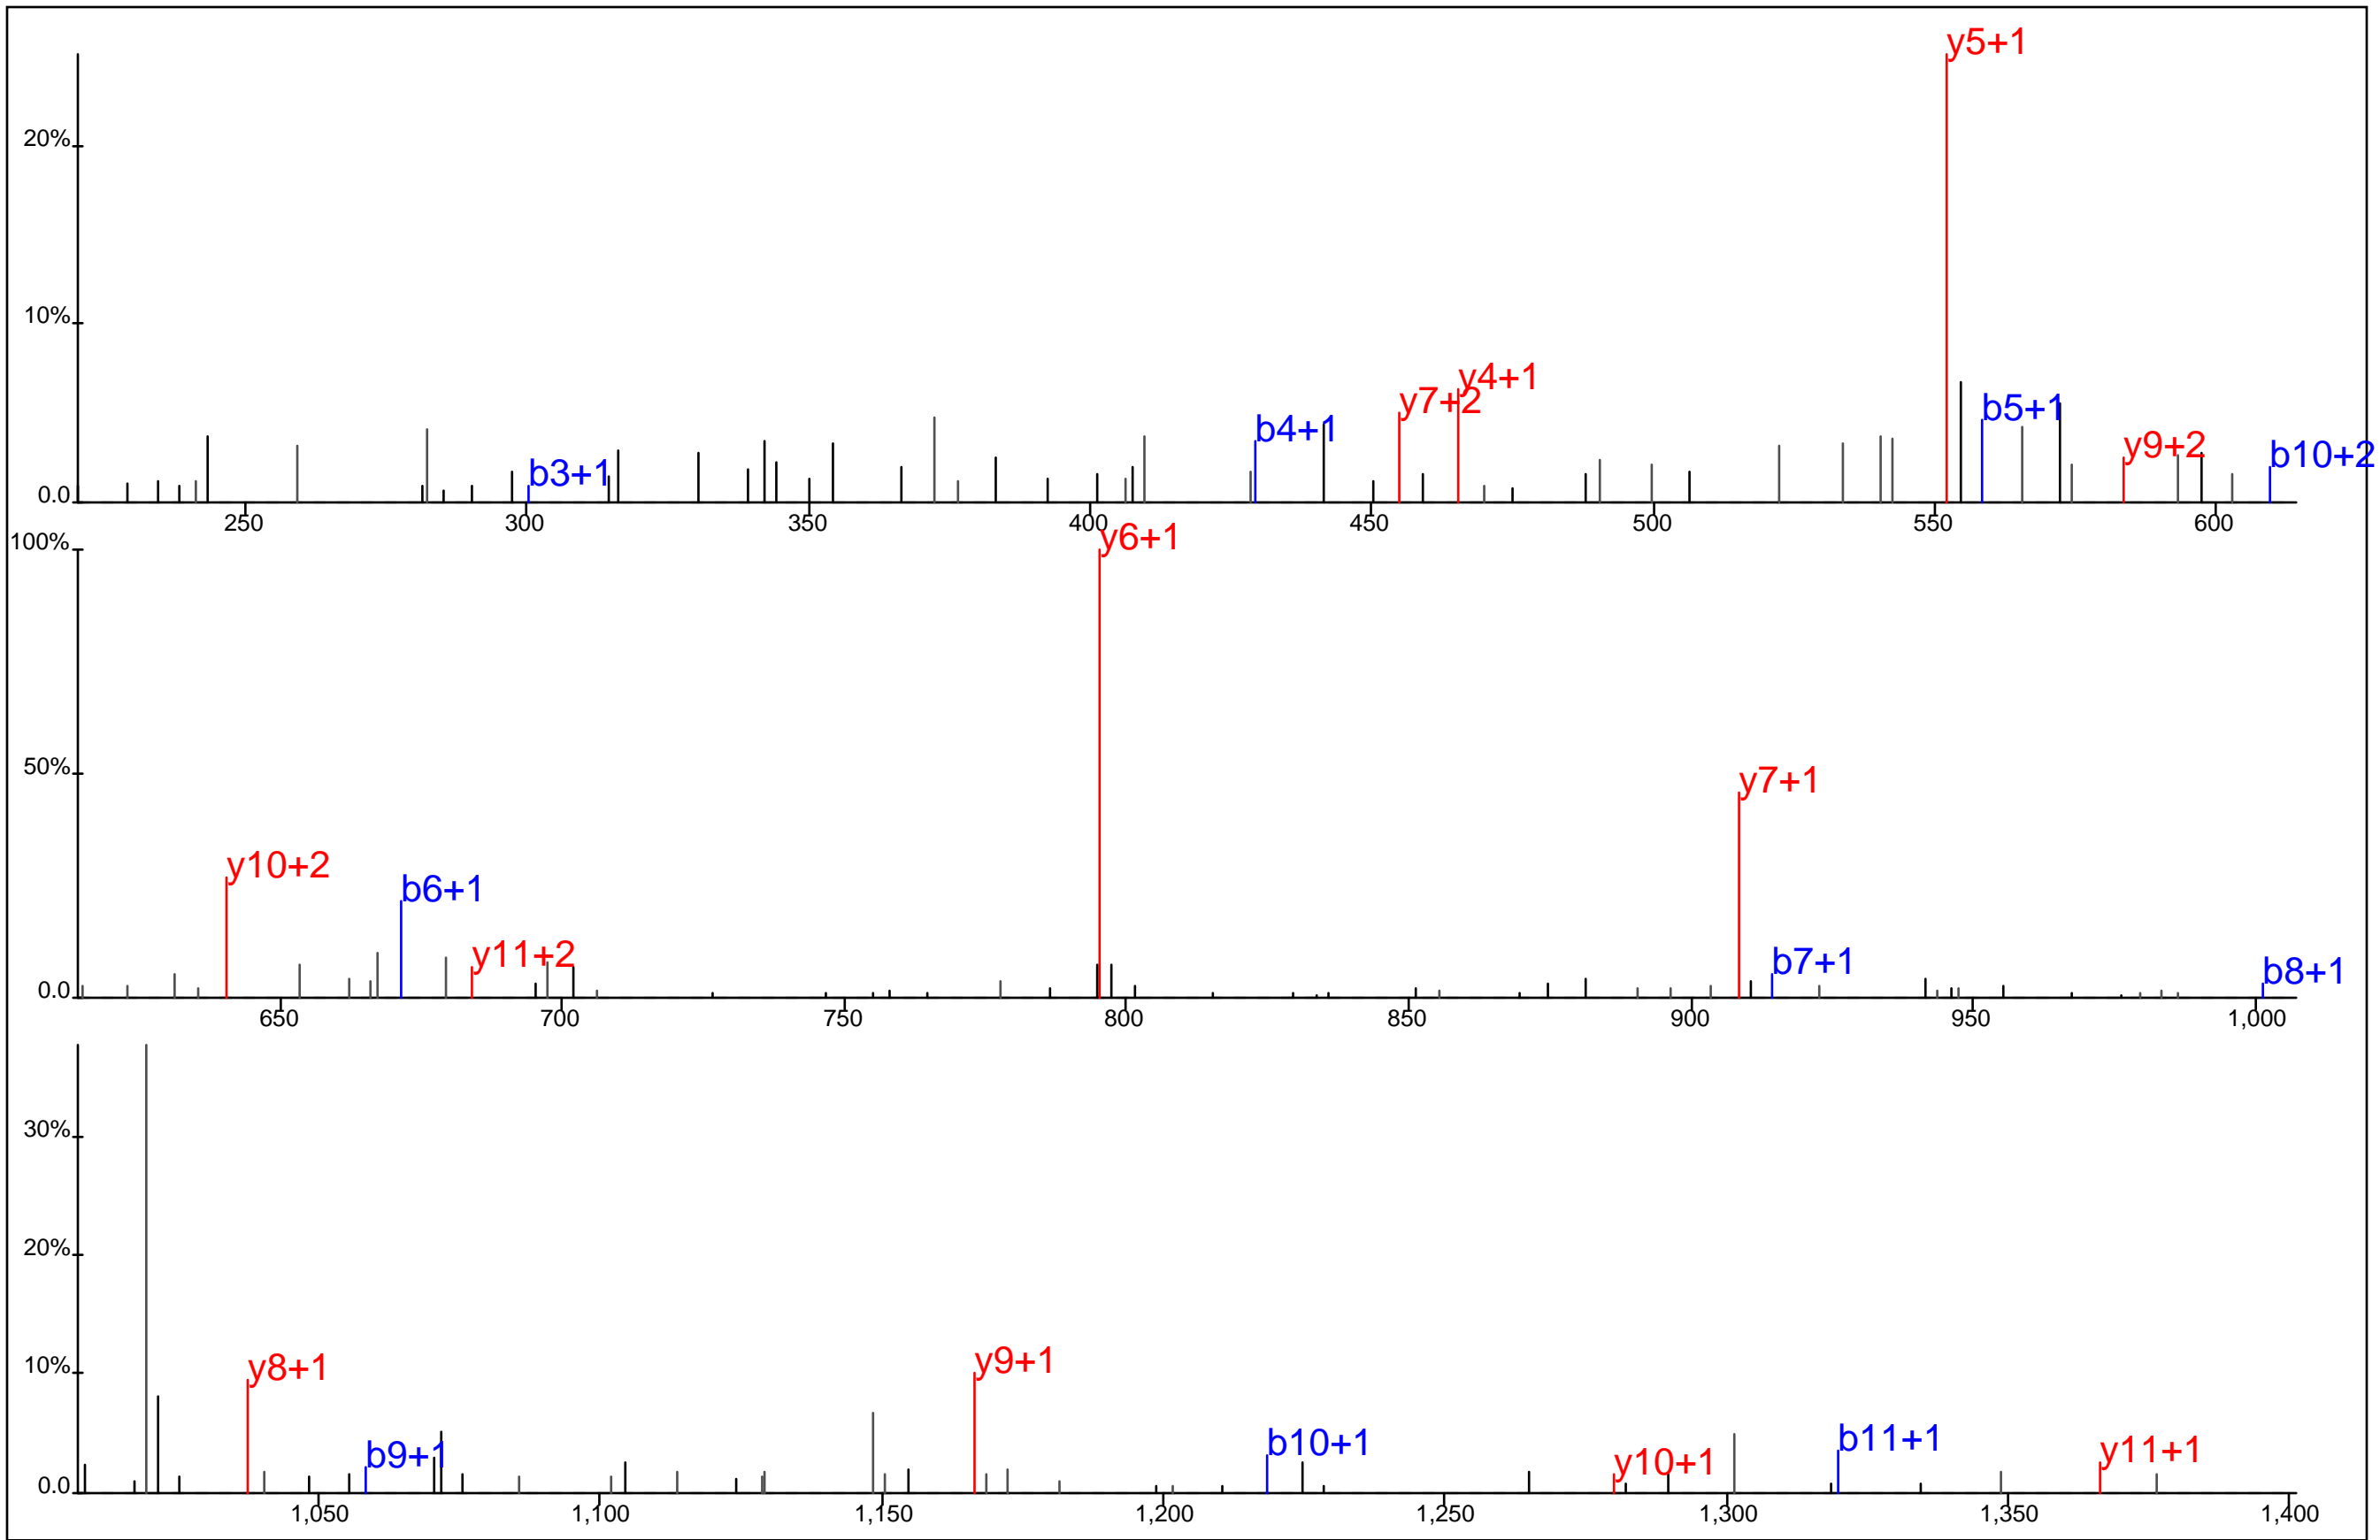

■ ■ ■ ■ ■ ■ ■ ■  
 V S L E E I Y\* S G C T K  
■ ■ ■ ■ ■ ■ ■ ■

Protein Name: Heat shock 40 kDa protein 1  
 gi Accession: 0  
 Precursor Mass: 733.3167+2  
 Delta Mass: 1.363 ppm  
 XCorr: 52.47

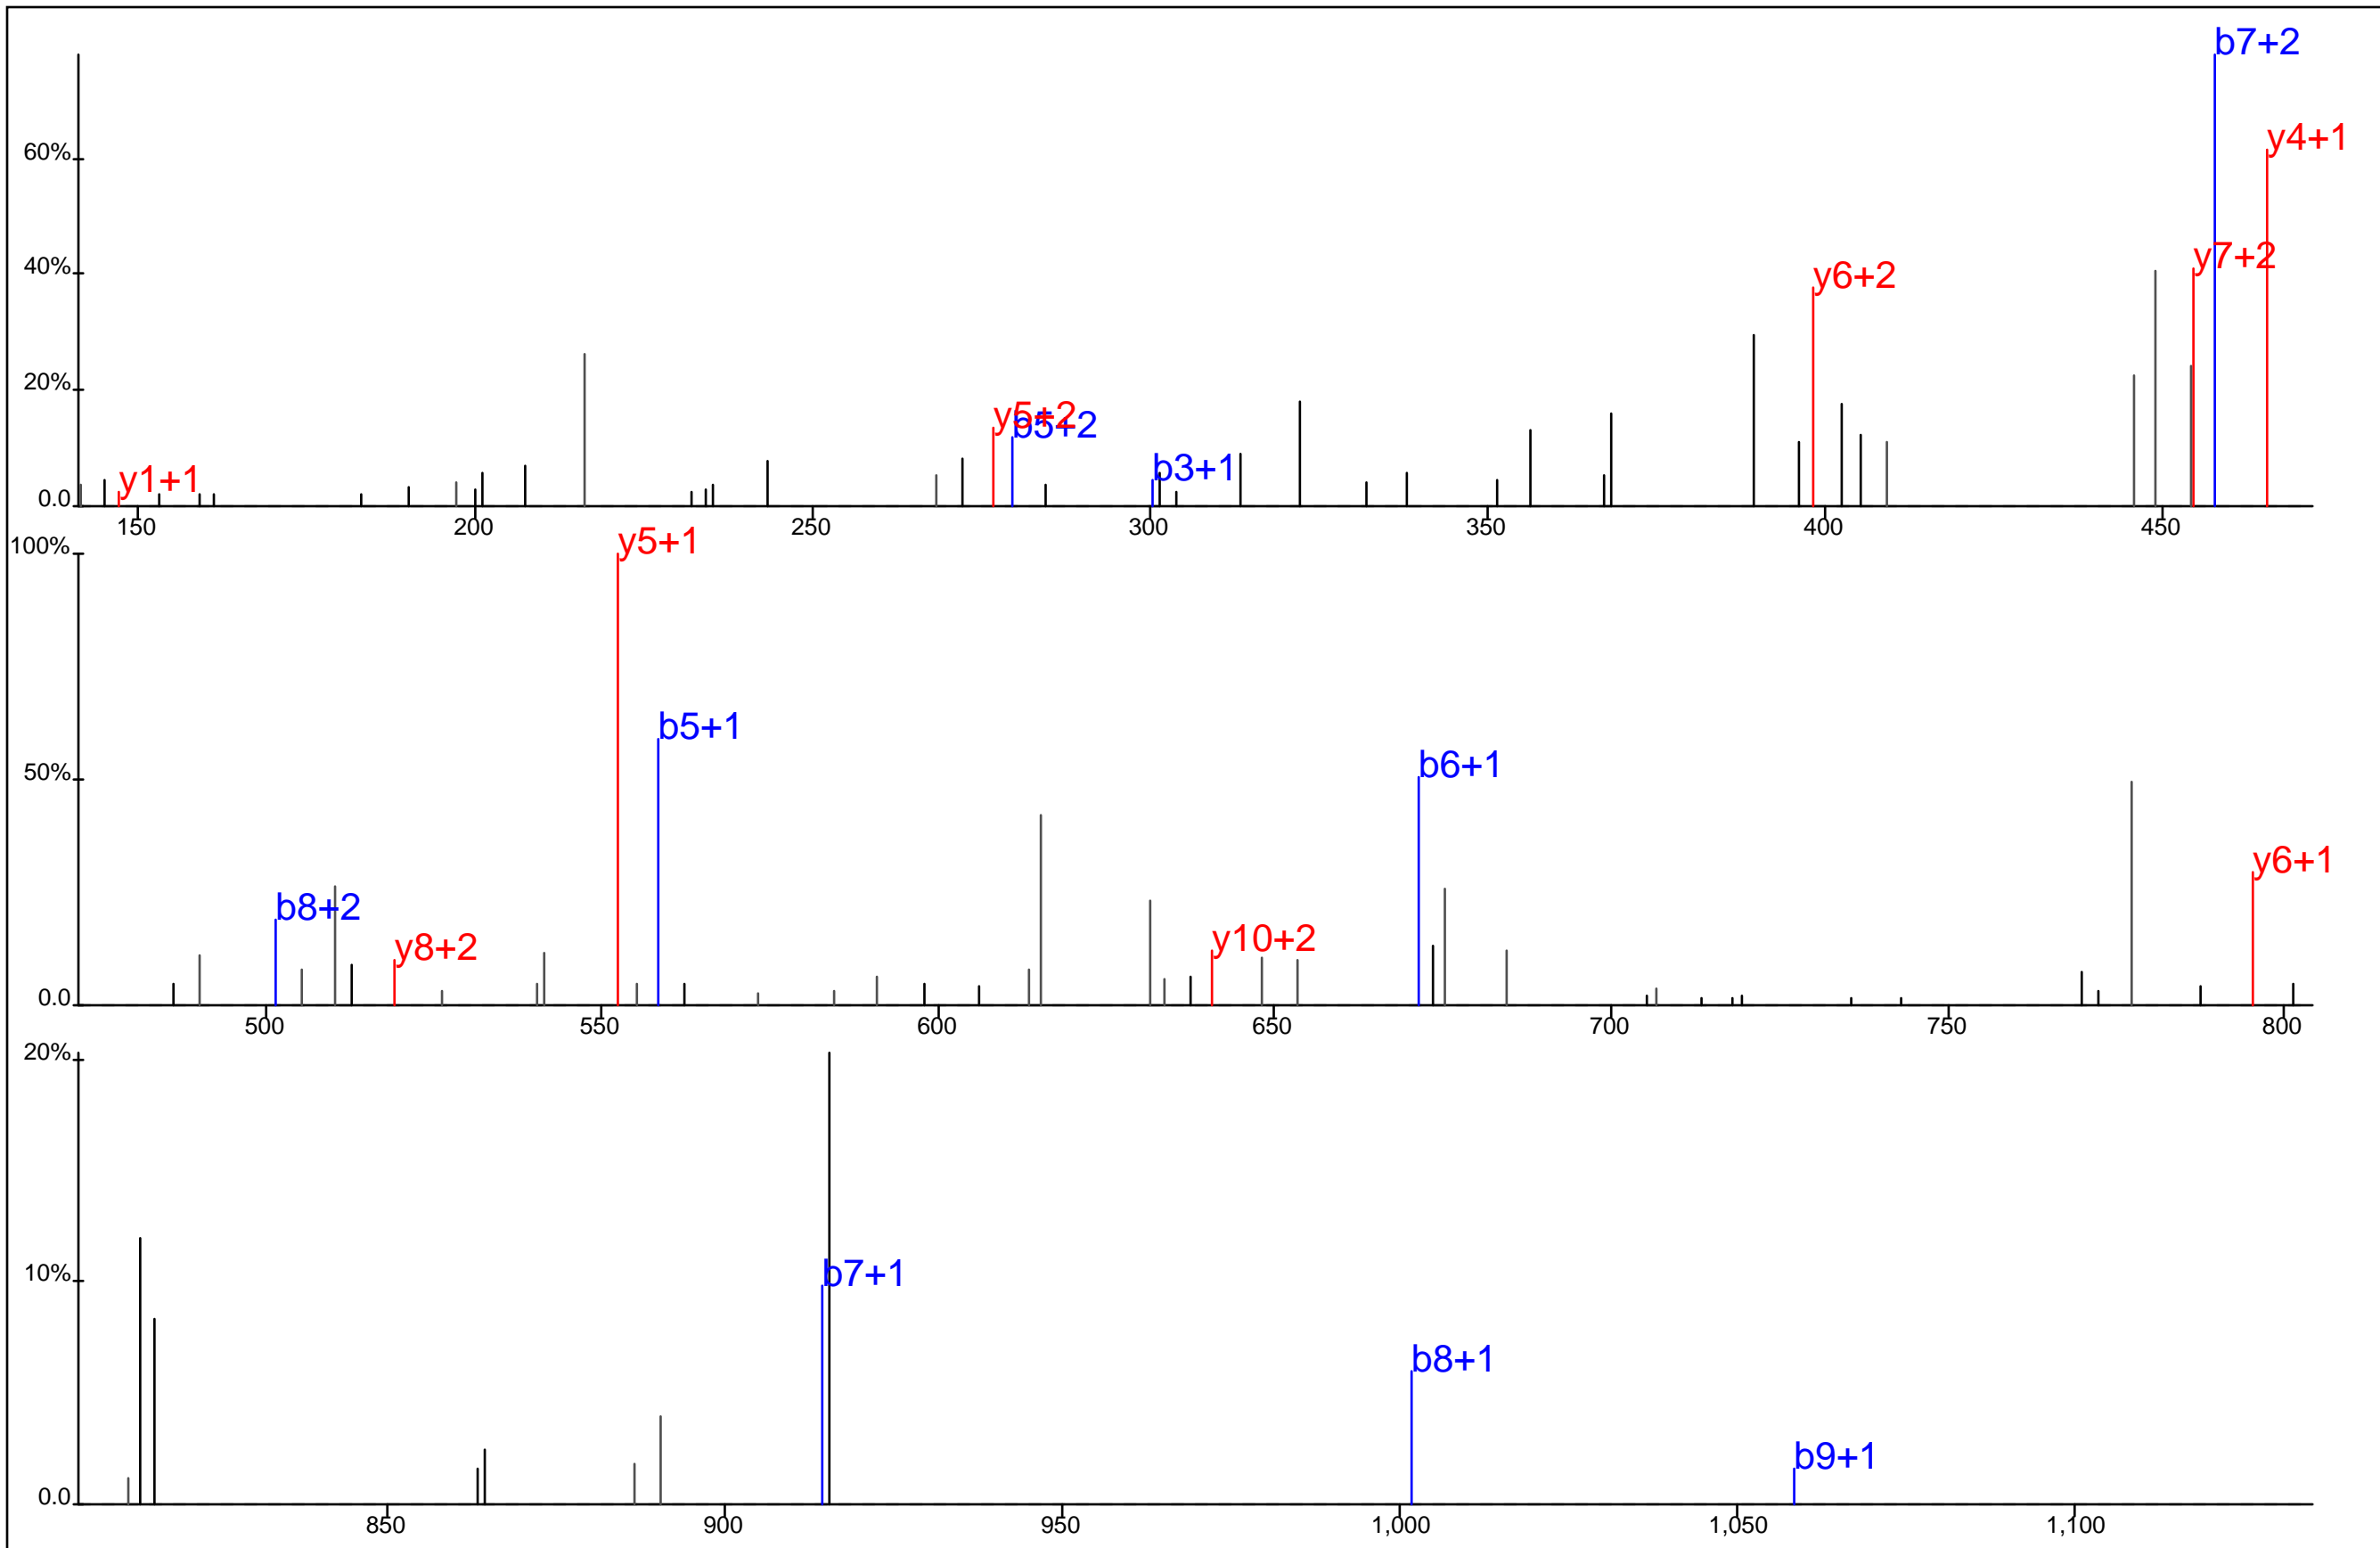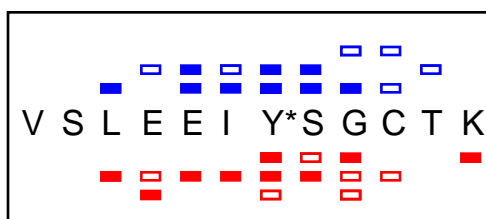

Protein Name: Heat shock 40 kDa protein 1  
 gi Accession: 0  
 Precursor Mass: 489.2144+3  
 Delta Mass: 0.523 ppm  
 XCorr: 29.53



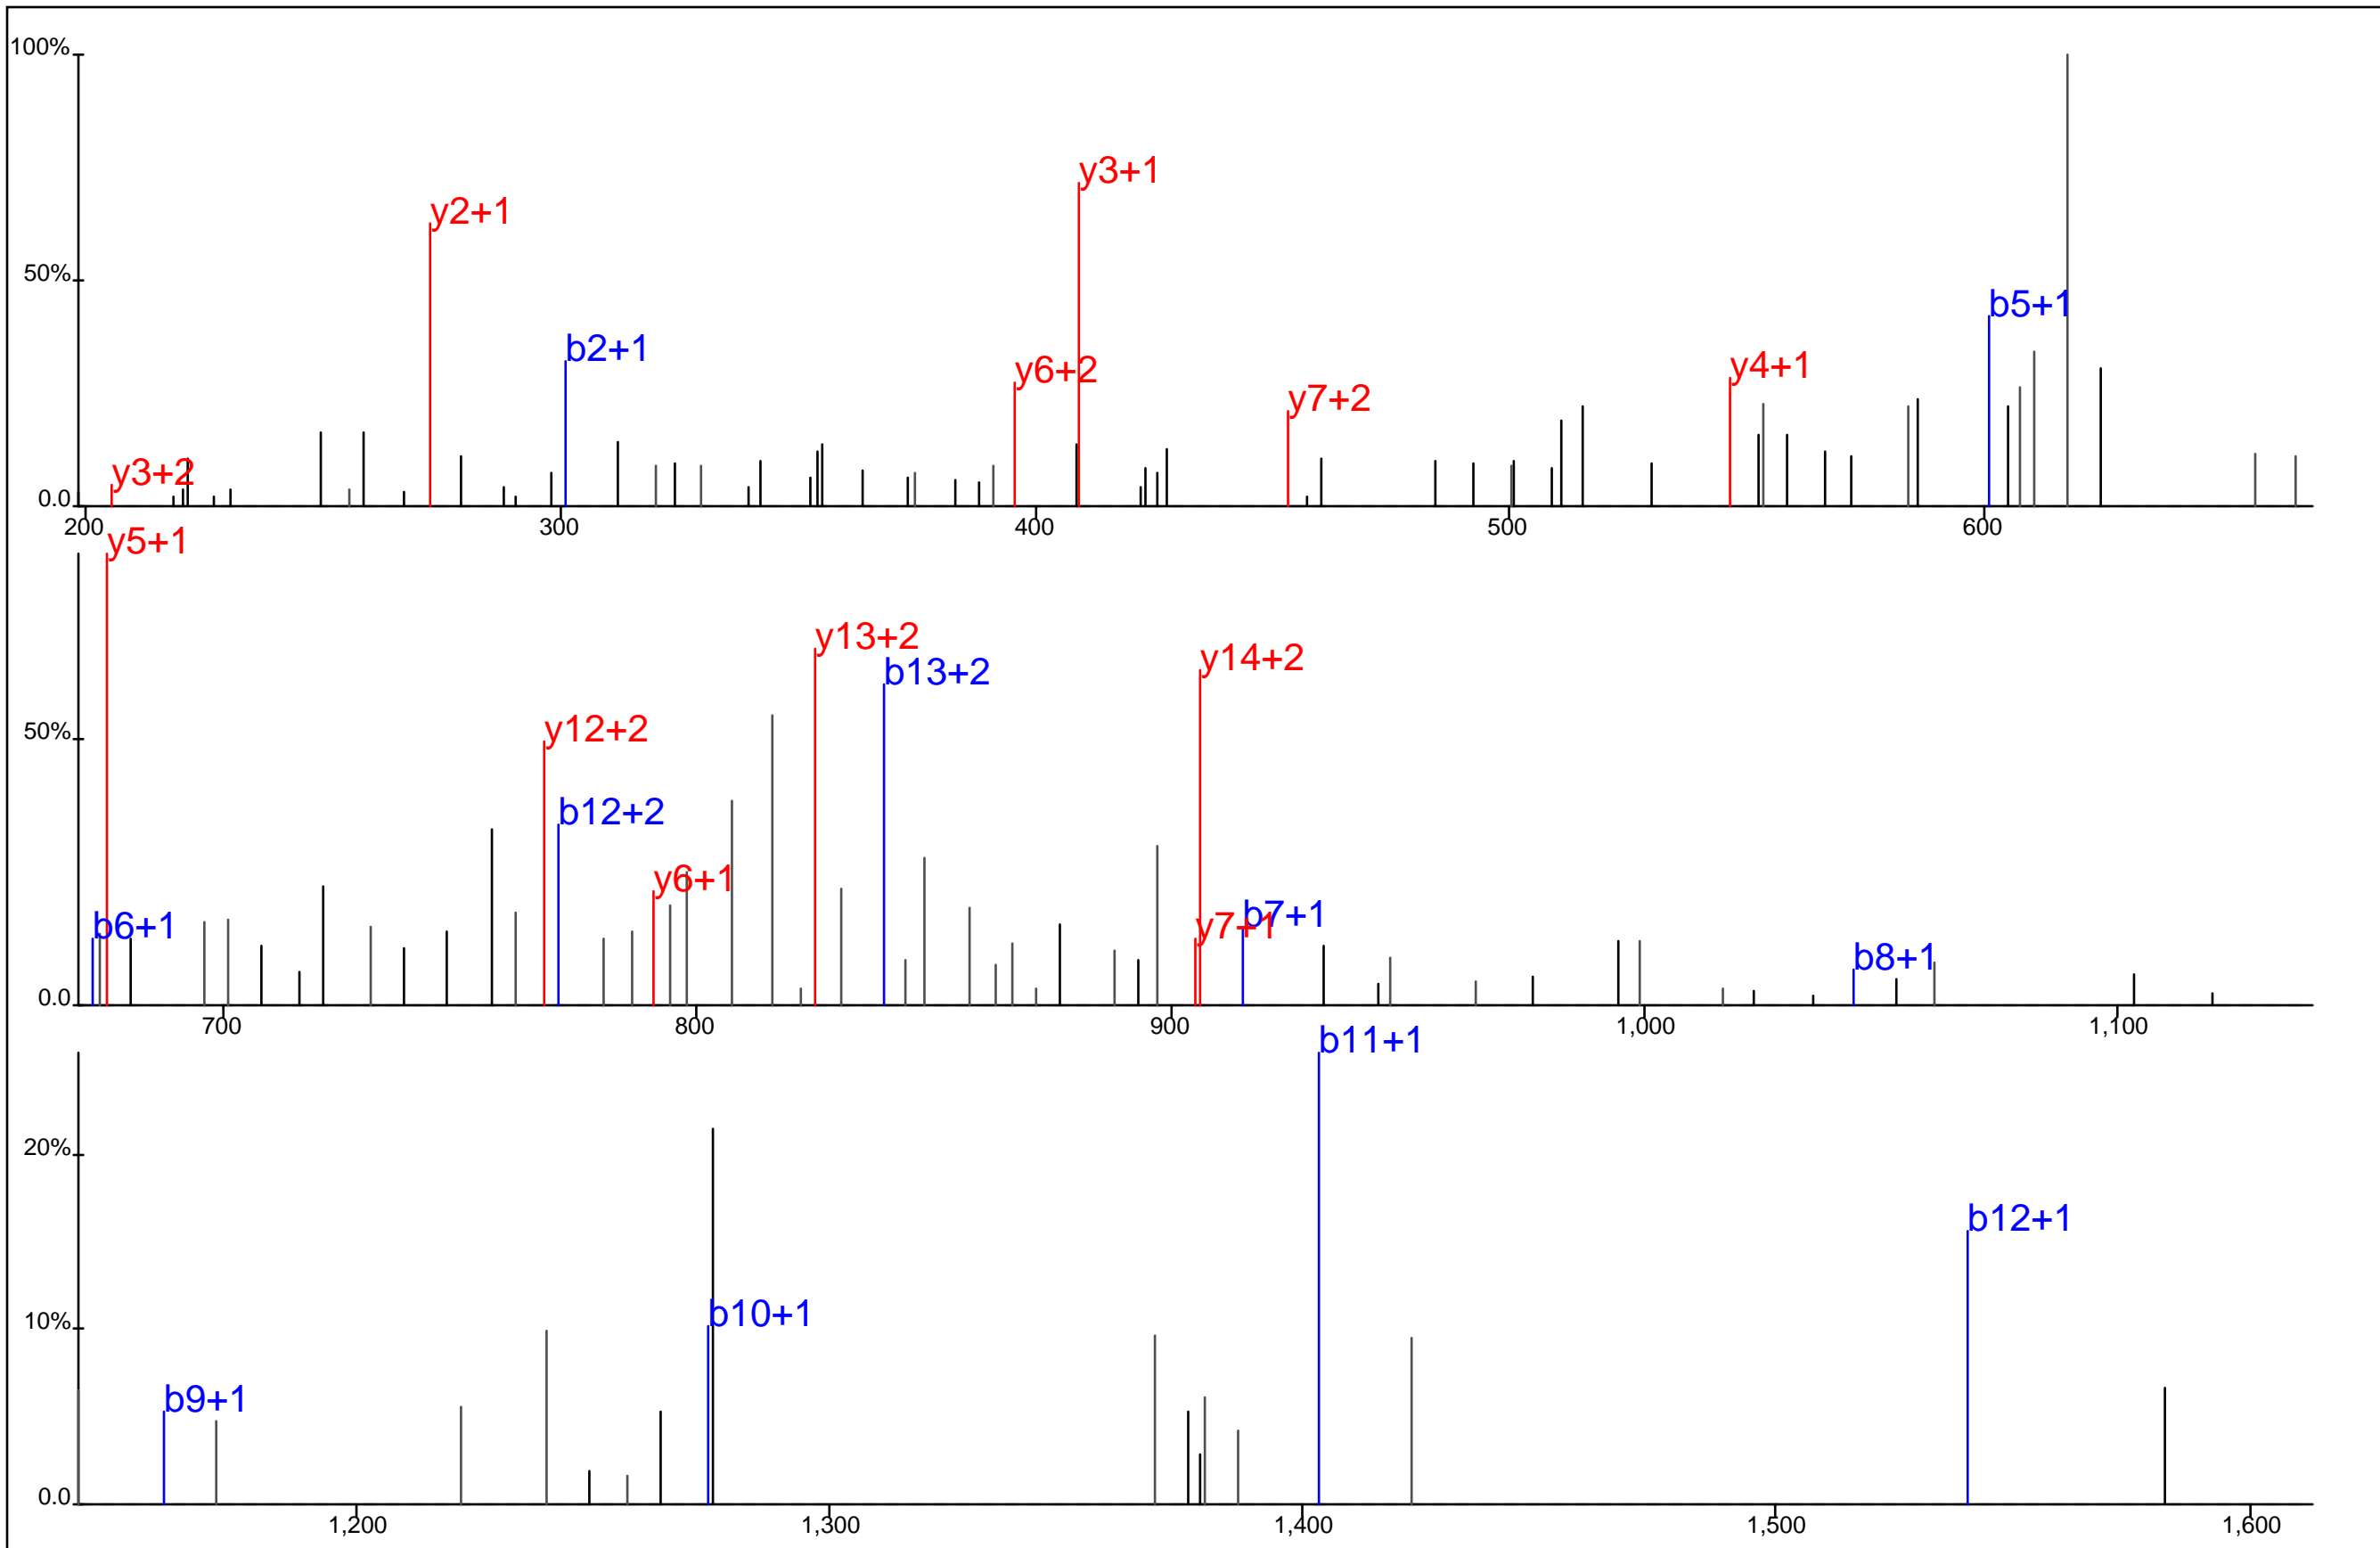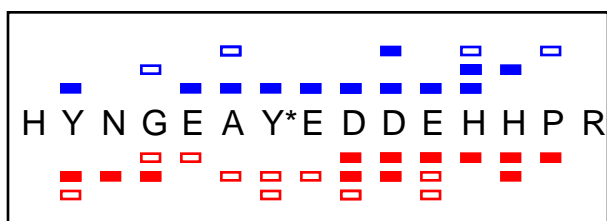

Protein Name: Heat shock 40 kDa protein 4  
 gi Accession: 0  
 Precursor Mass: 650.2426+3  
 Delta Mass: 5.882 ppm  
 XCorr: 40.5

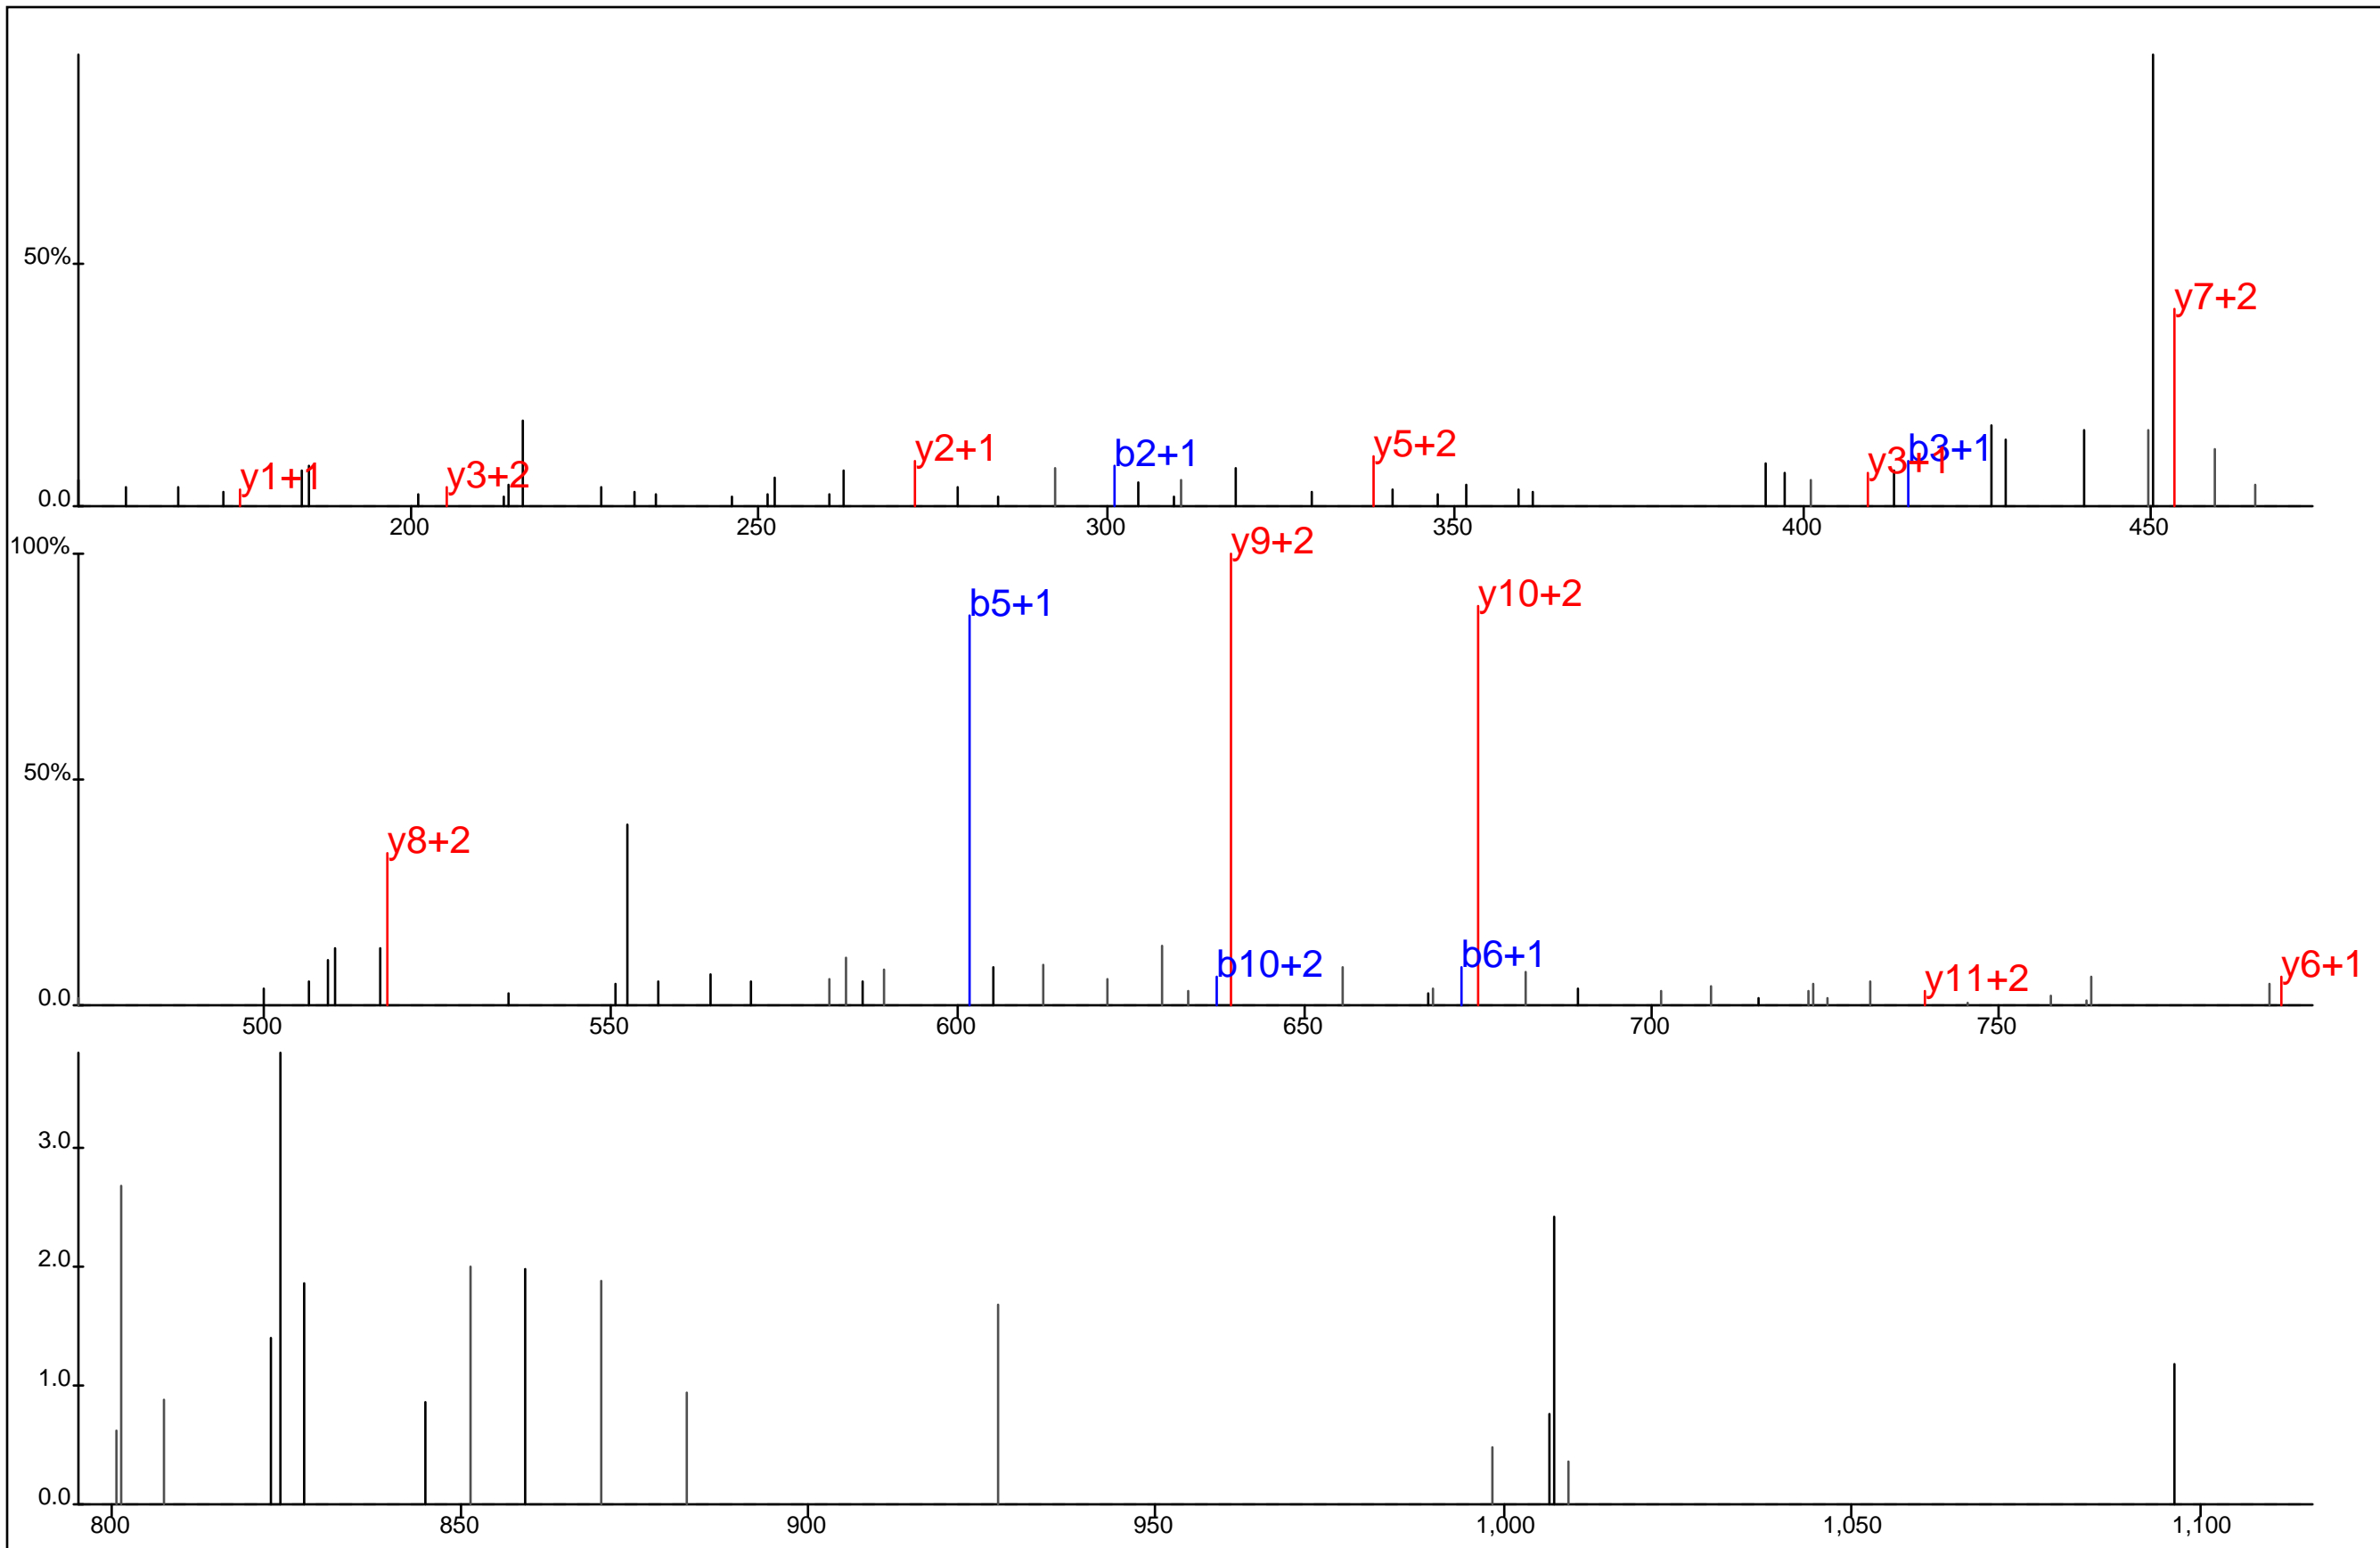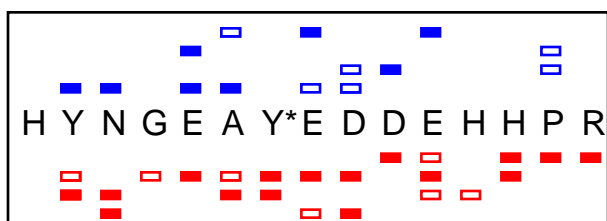

Protein Name: Heat shock 40 kDa protein 4  
 gi Accession: 0  
 Precursor Mass: 487.9357+4  
 Delta Mass: 1.911 ppm  
 XCorr: 20.66

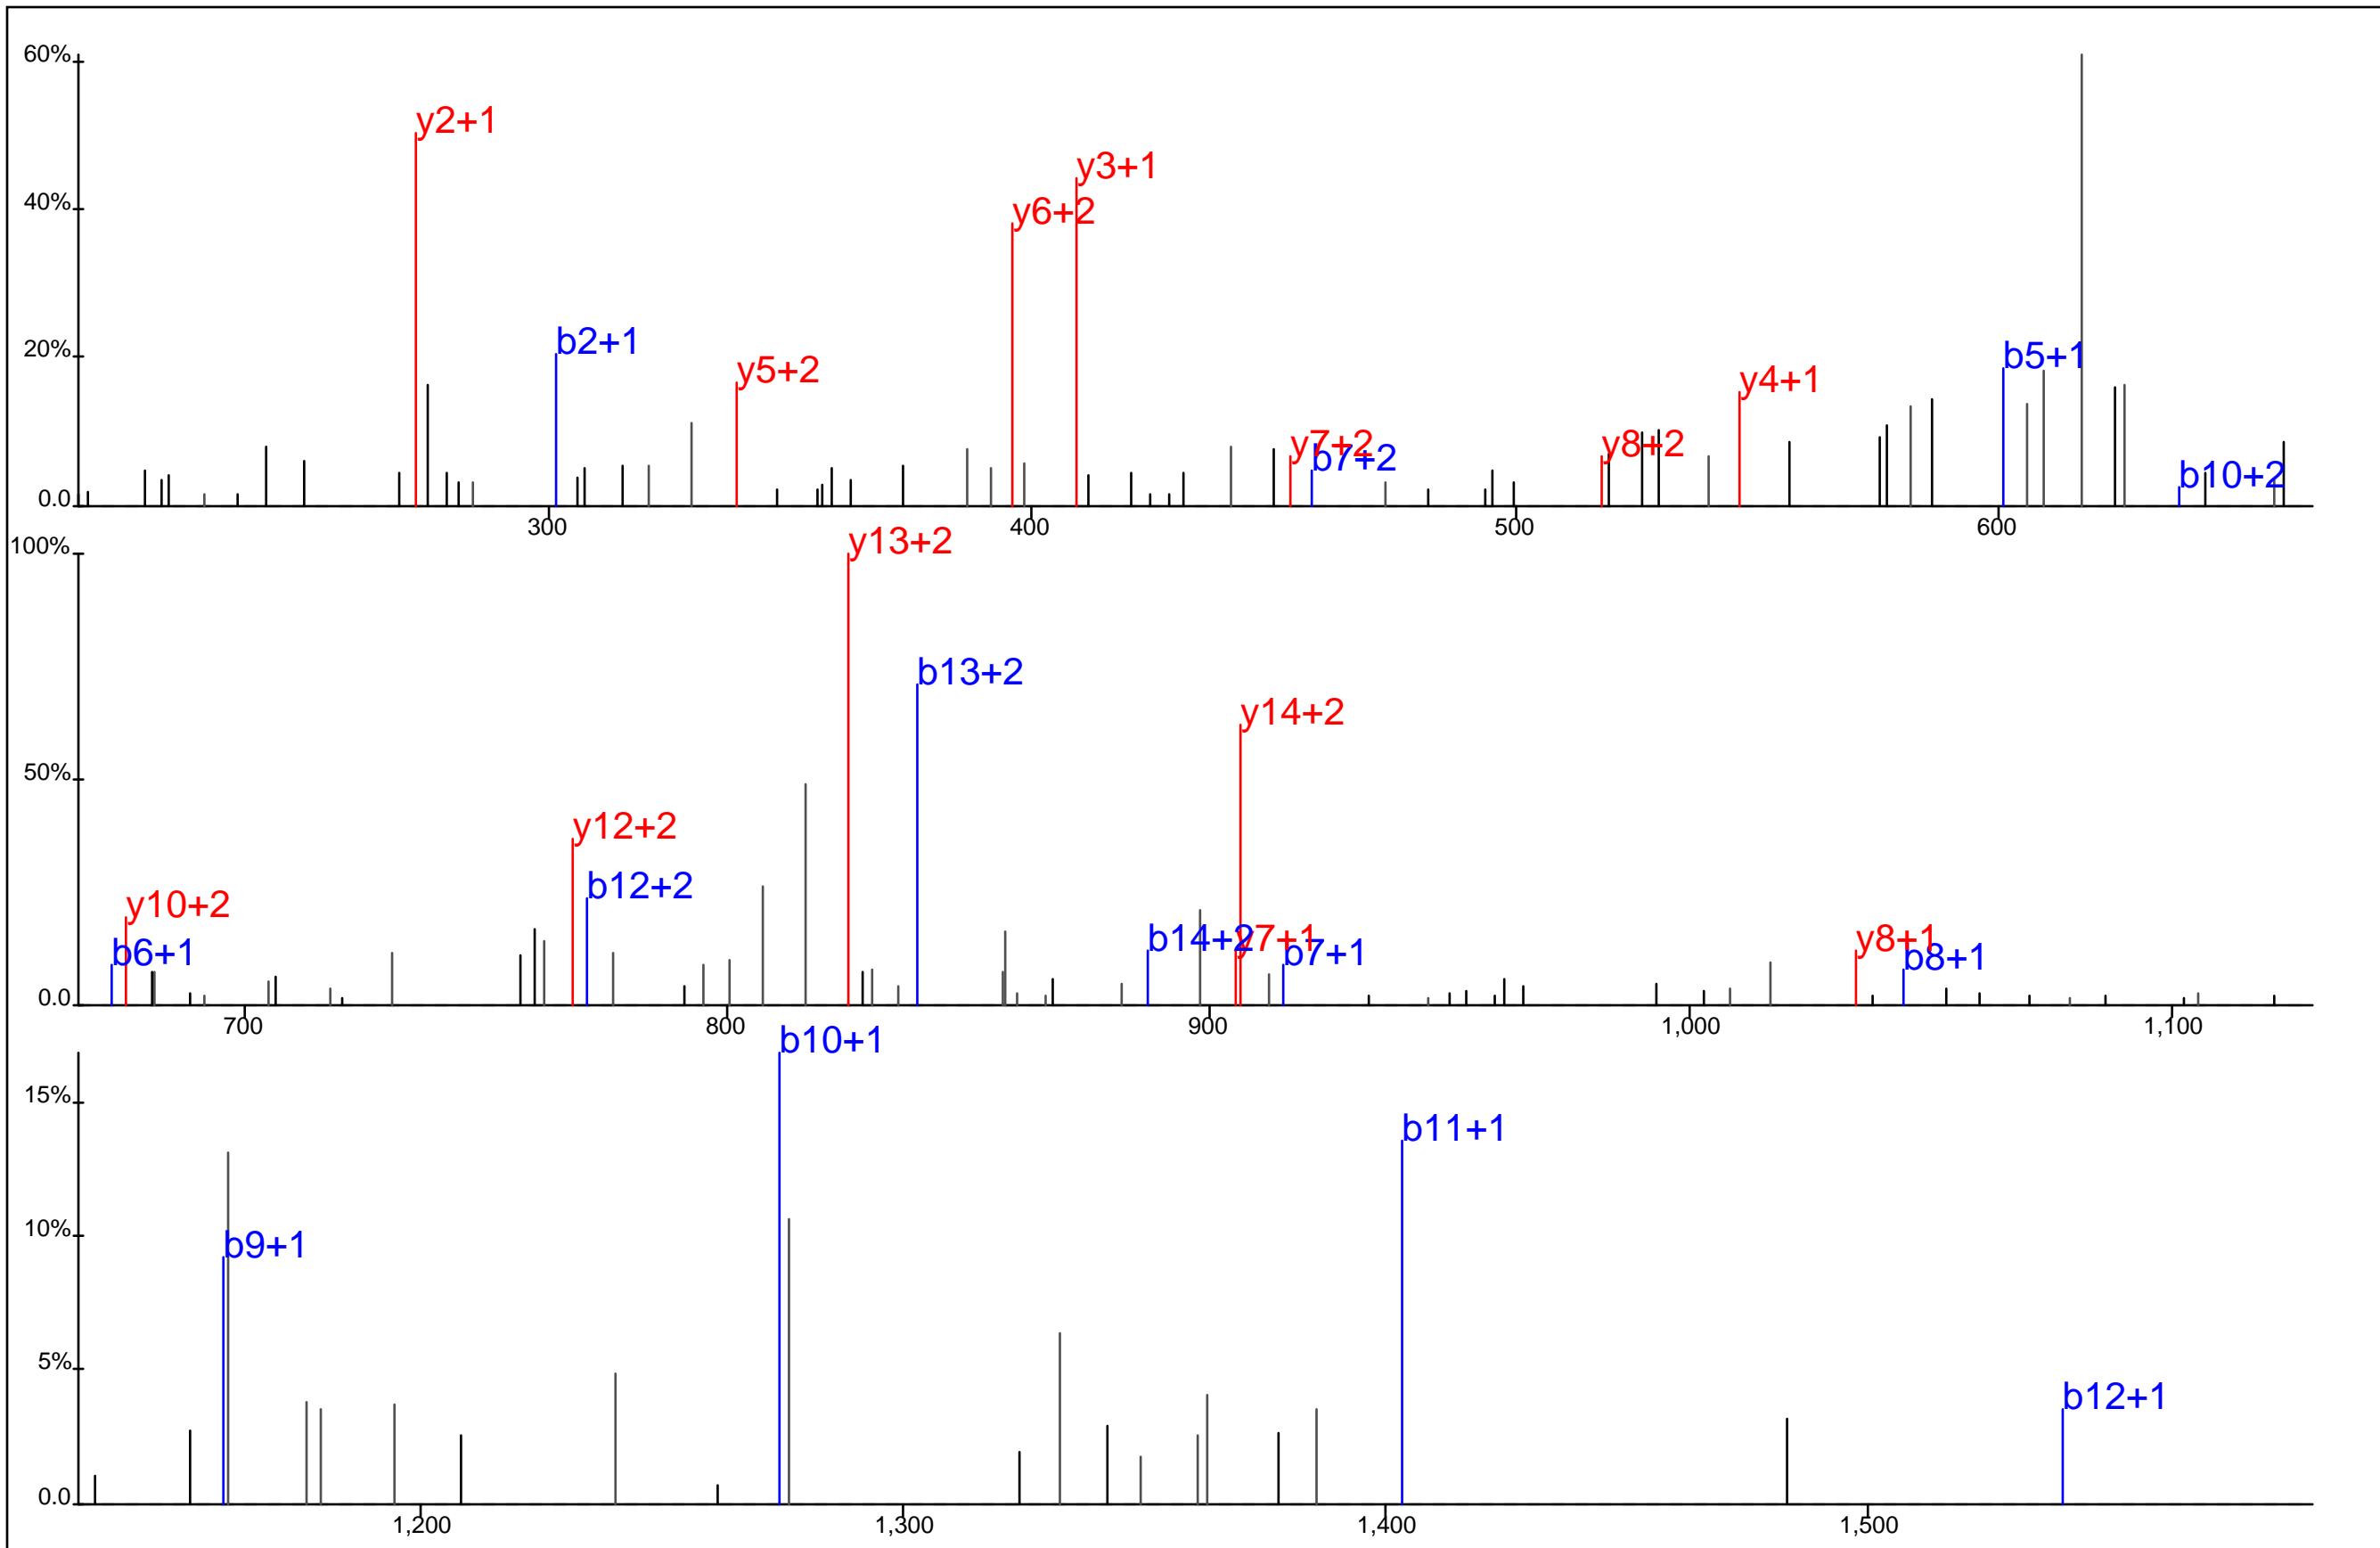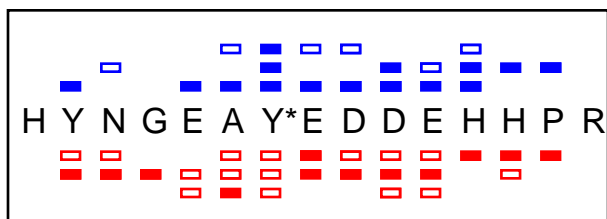

Protein Name: Heat shock 40 kDa protein 4  
 gi Accession: 0  
 Precursor Mass: 650.2468+3  
 Delta Mass: 0.601 ppm  
 XCorr: 53.99

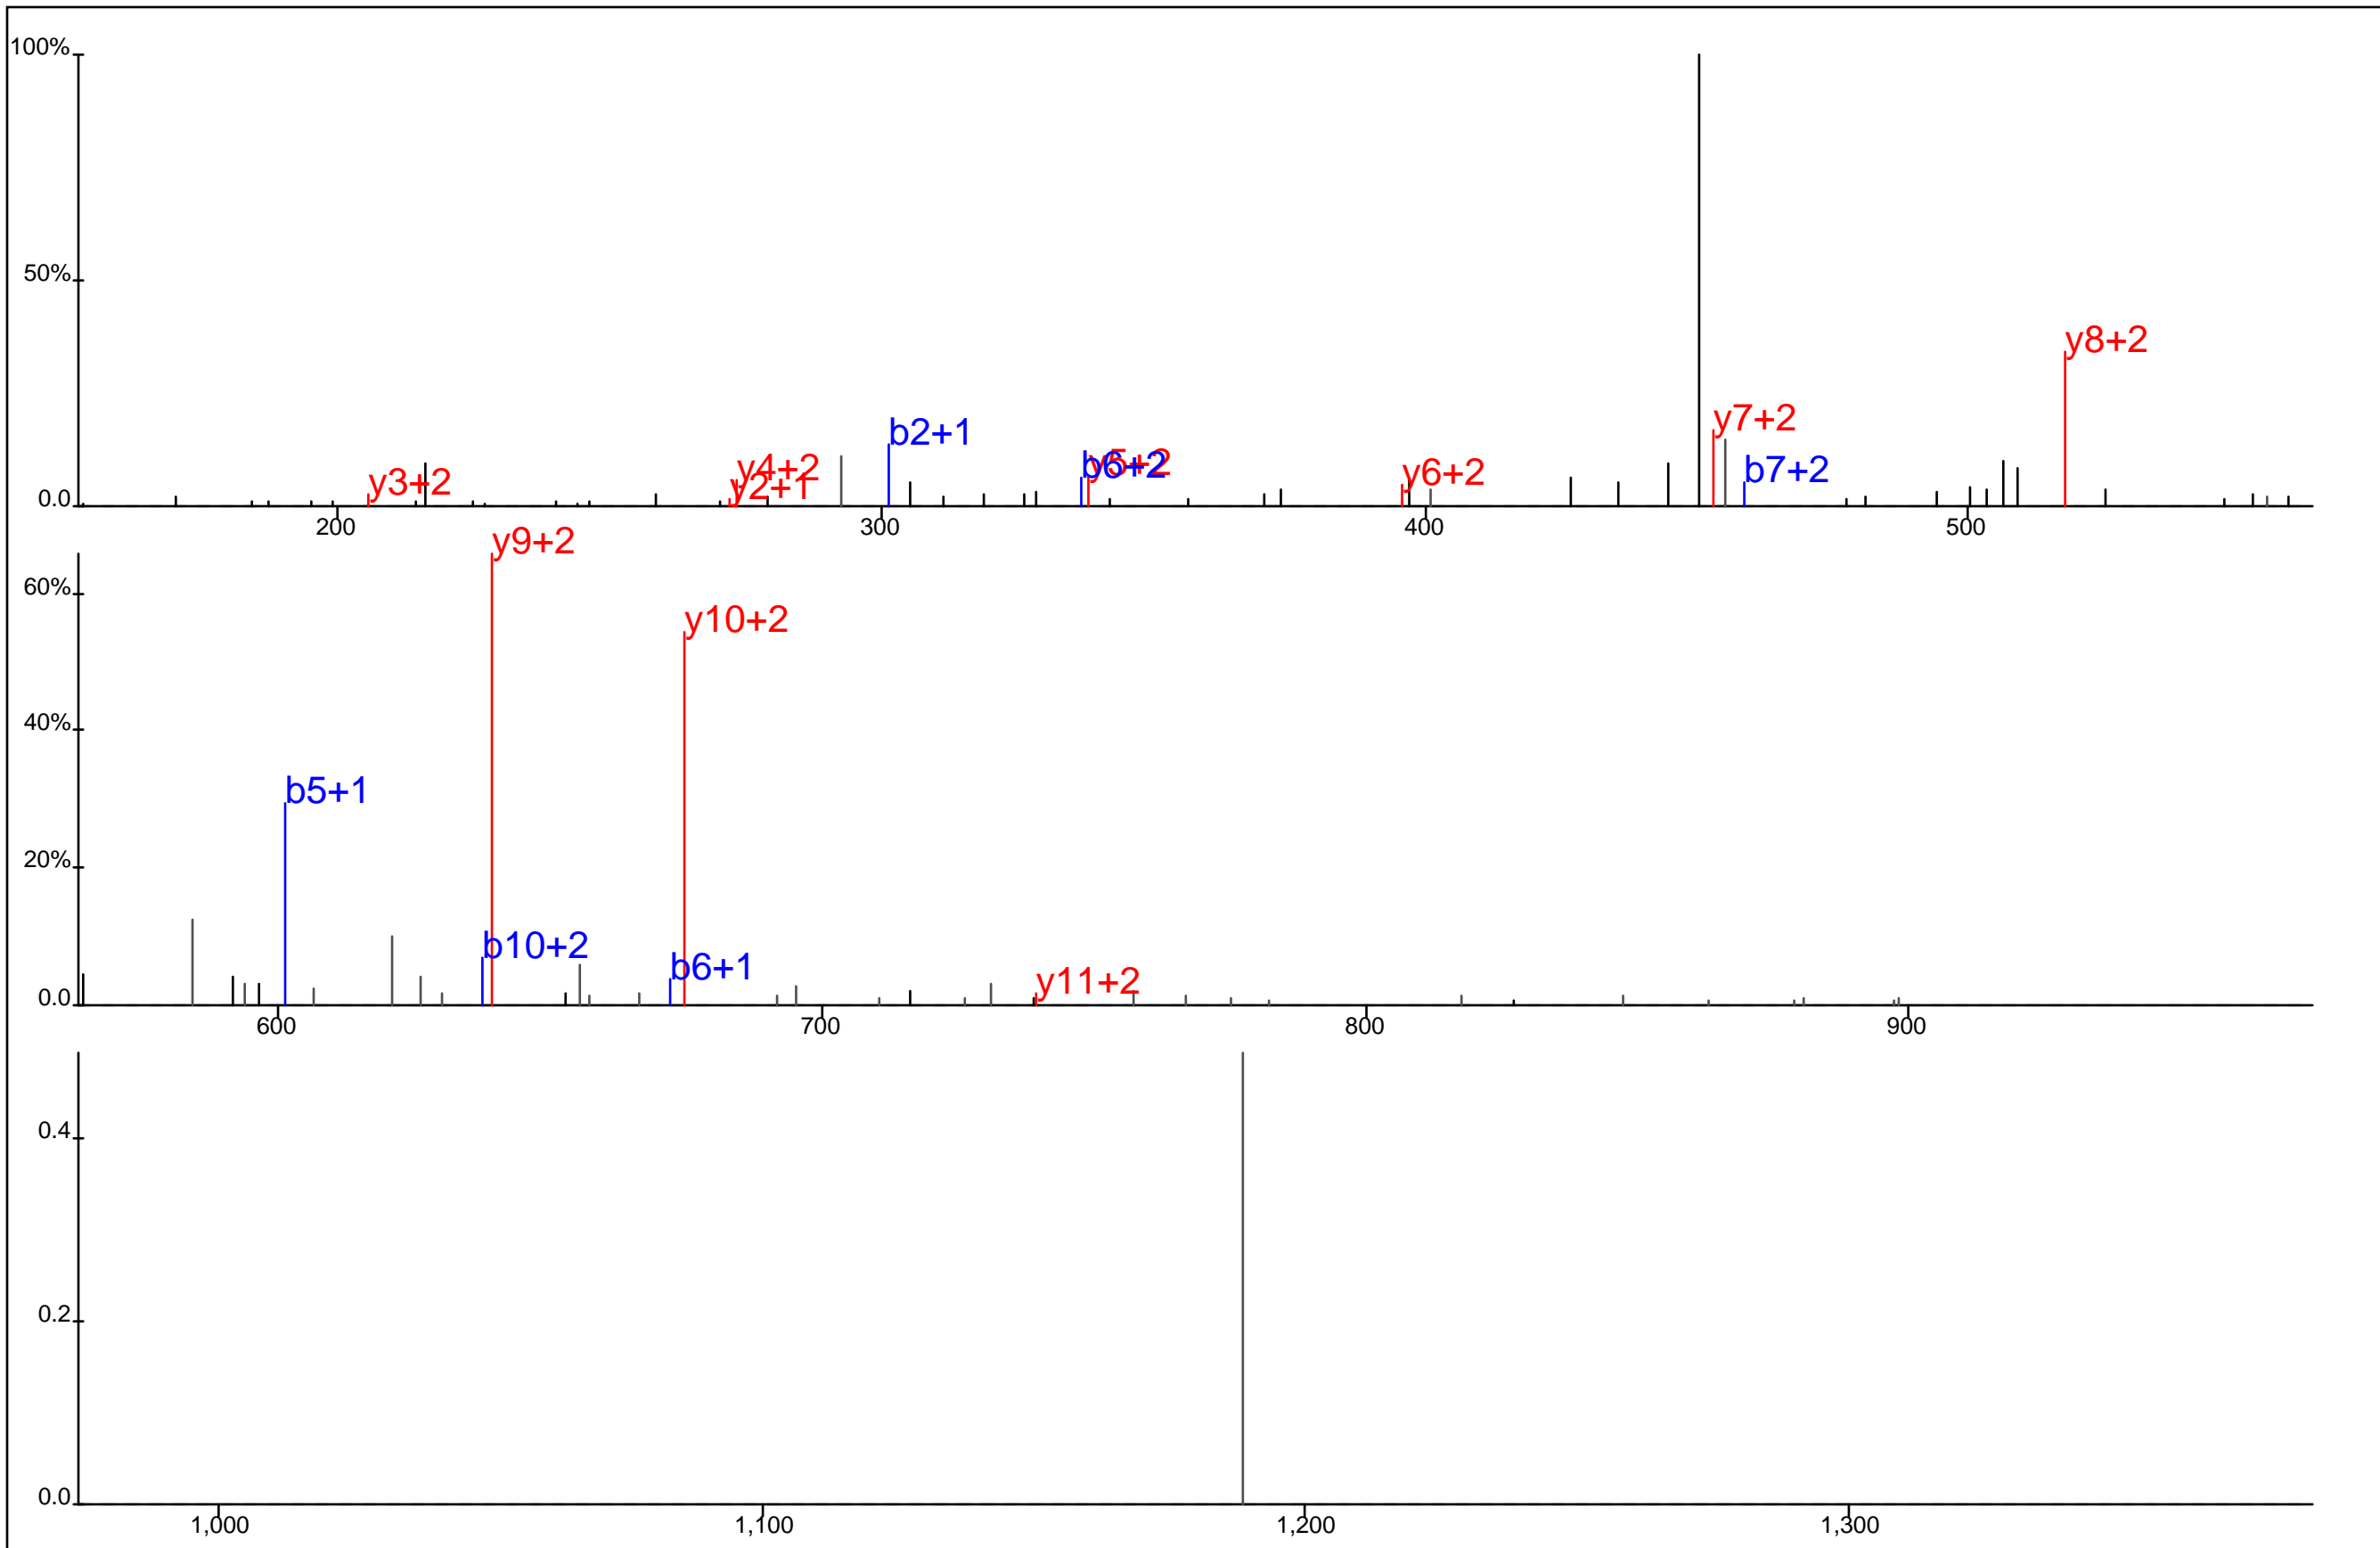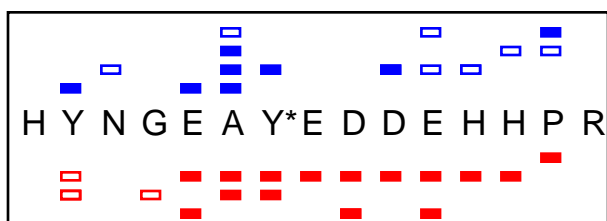

Protein Name: Heat shock 40 kDa protein 4  
 gi Accession: 0  
 Precursor Mass: 487.9361+4  
 Delta Mass: 0.971 ppm  
 XCorr: 37.28

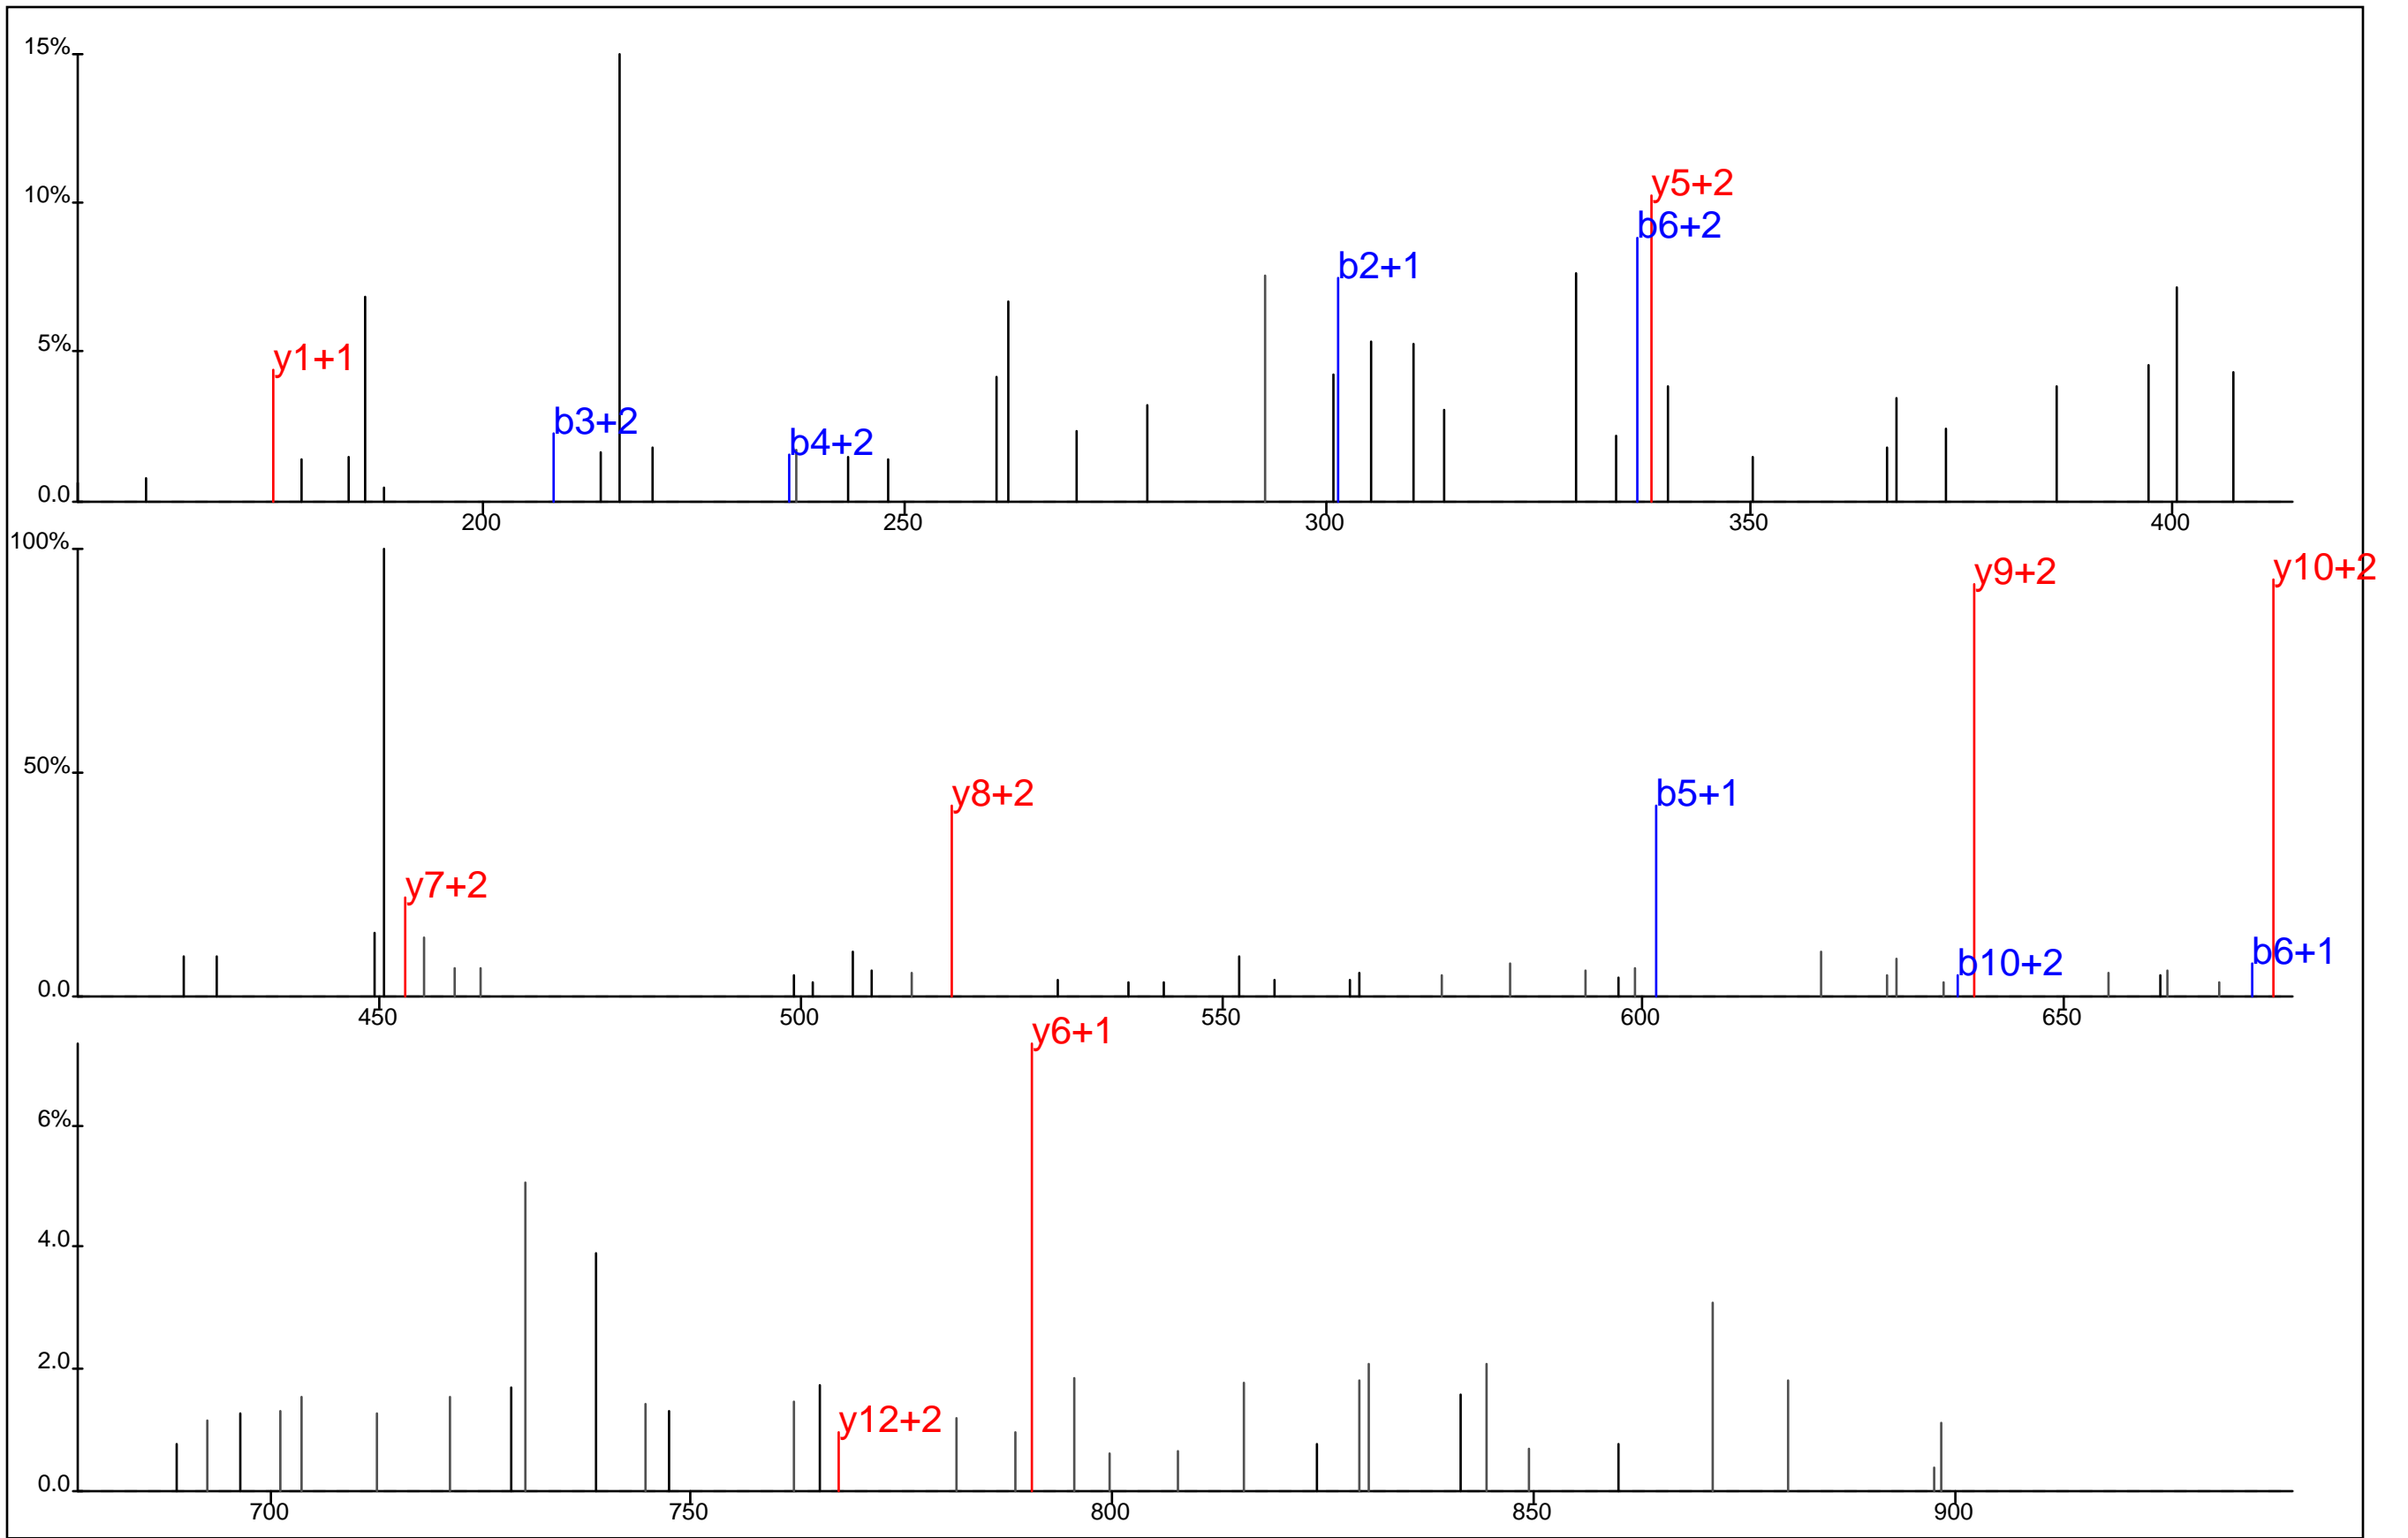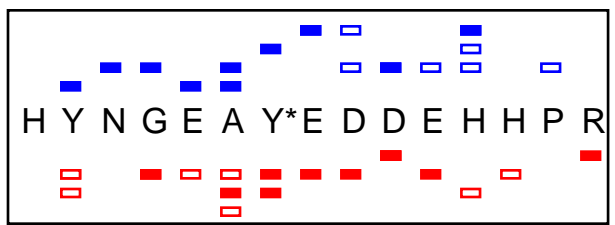

Protein Name: Heat shock 40 kDa protein 4  
 gi Accession: 0  
 Precursor Mass: 487.9364+4  
 Delta Mass: 0.345 ppm  
 XCorr: 26.36

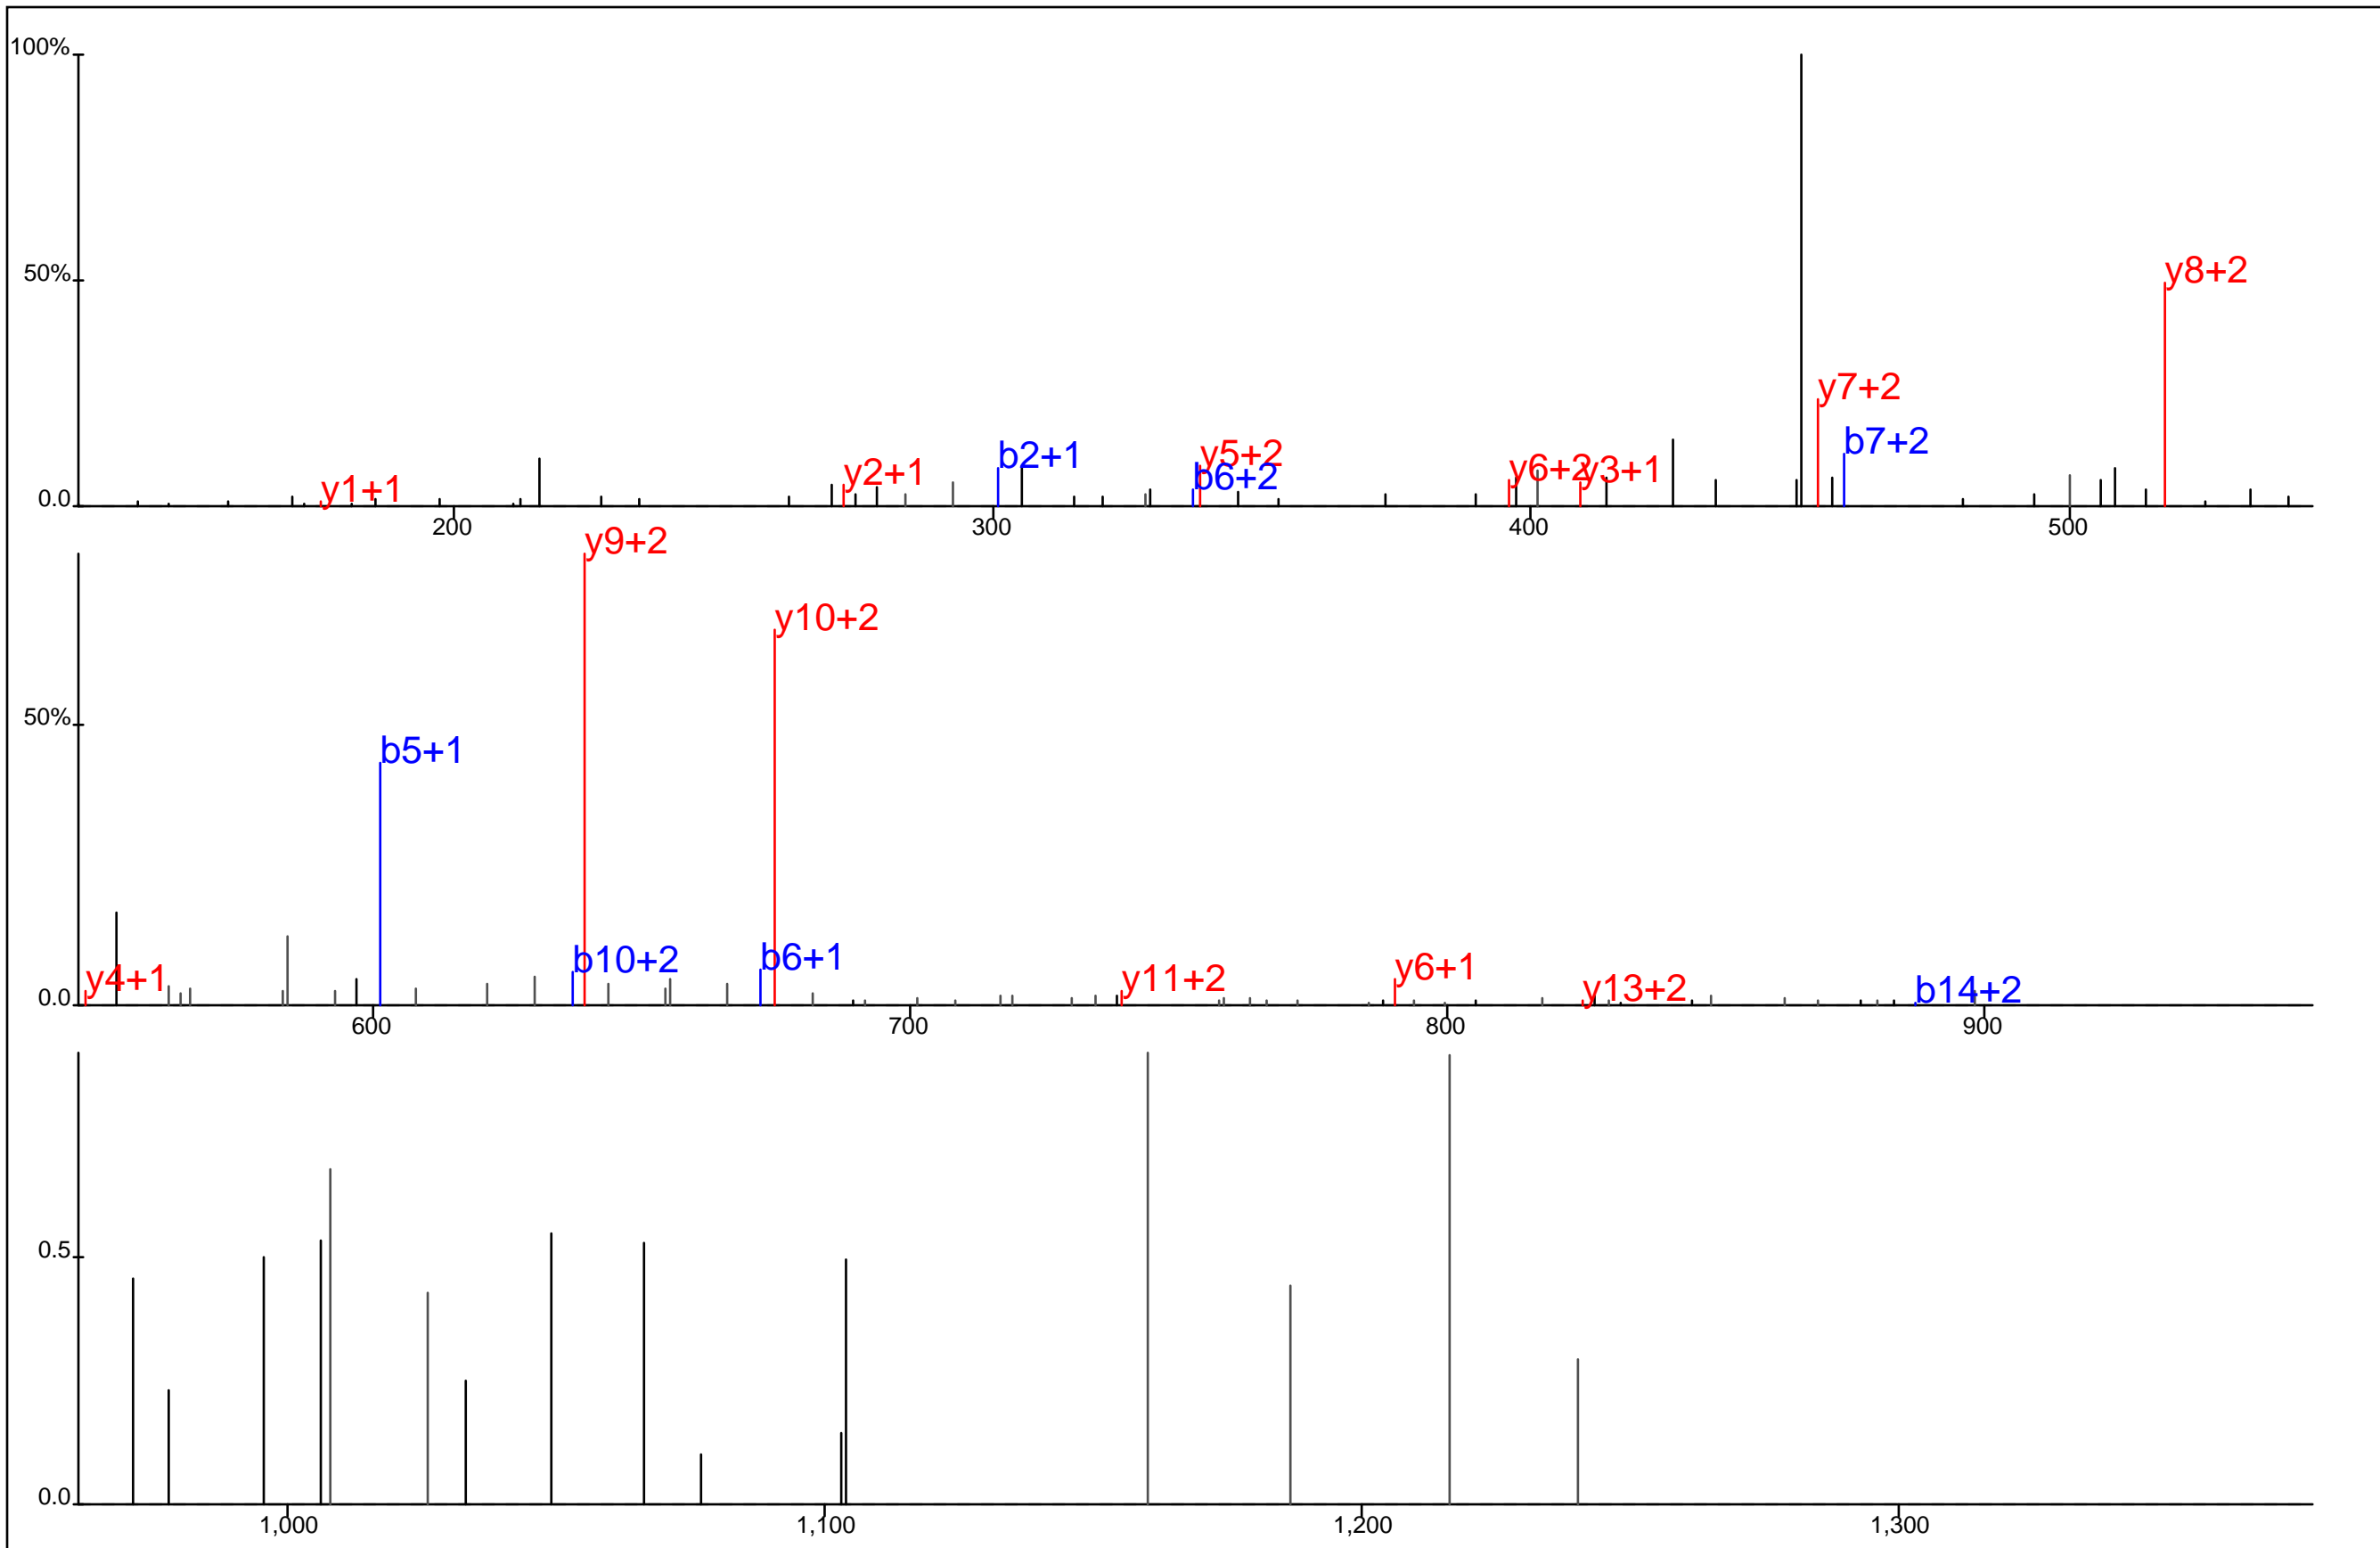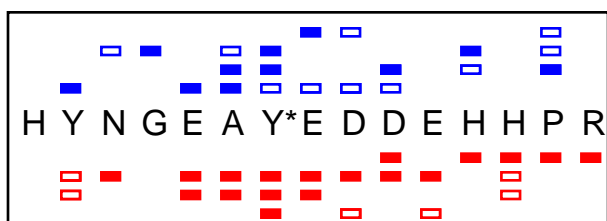

Protein Name: Heat shock 40 kDa protein 4  
 gi Accession: 0  
 Precursor Mass: 487.9356+4  
 Delta Mass: 2.036 ppm  
 XCorr: 21.98

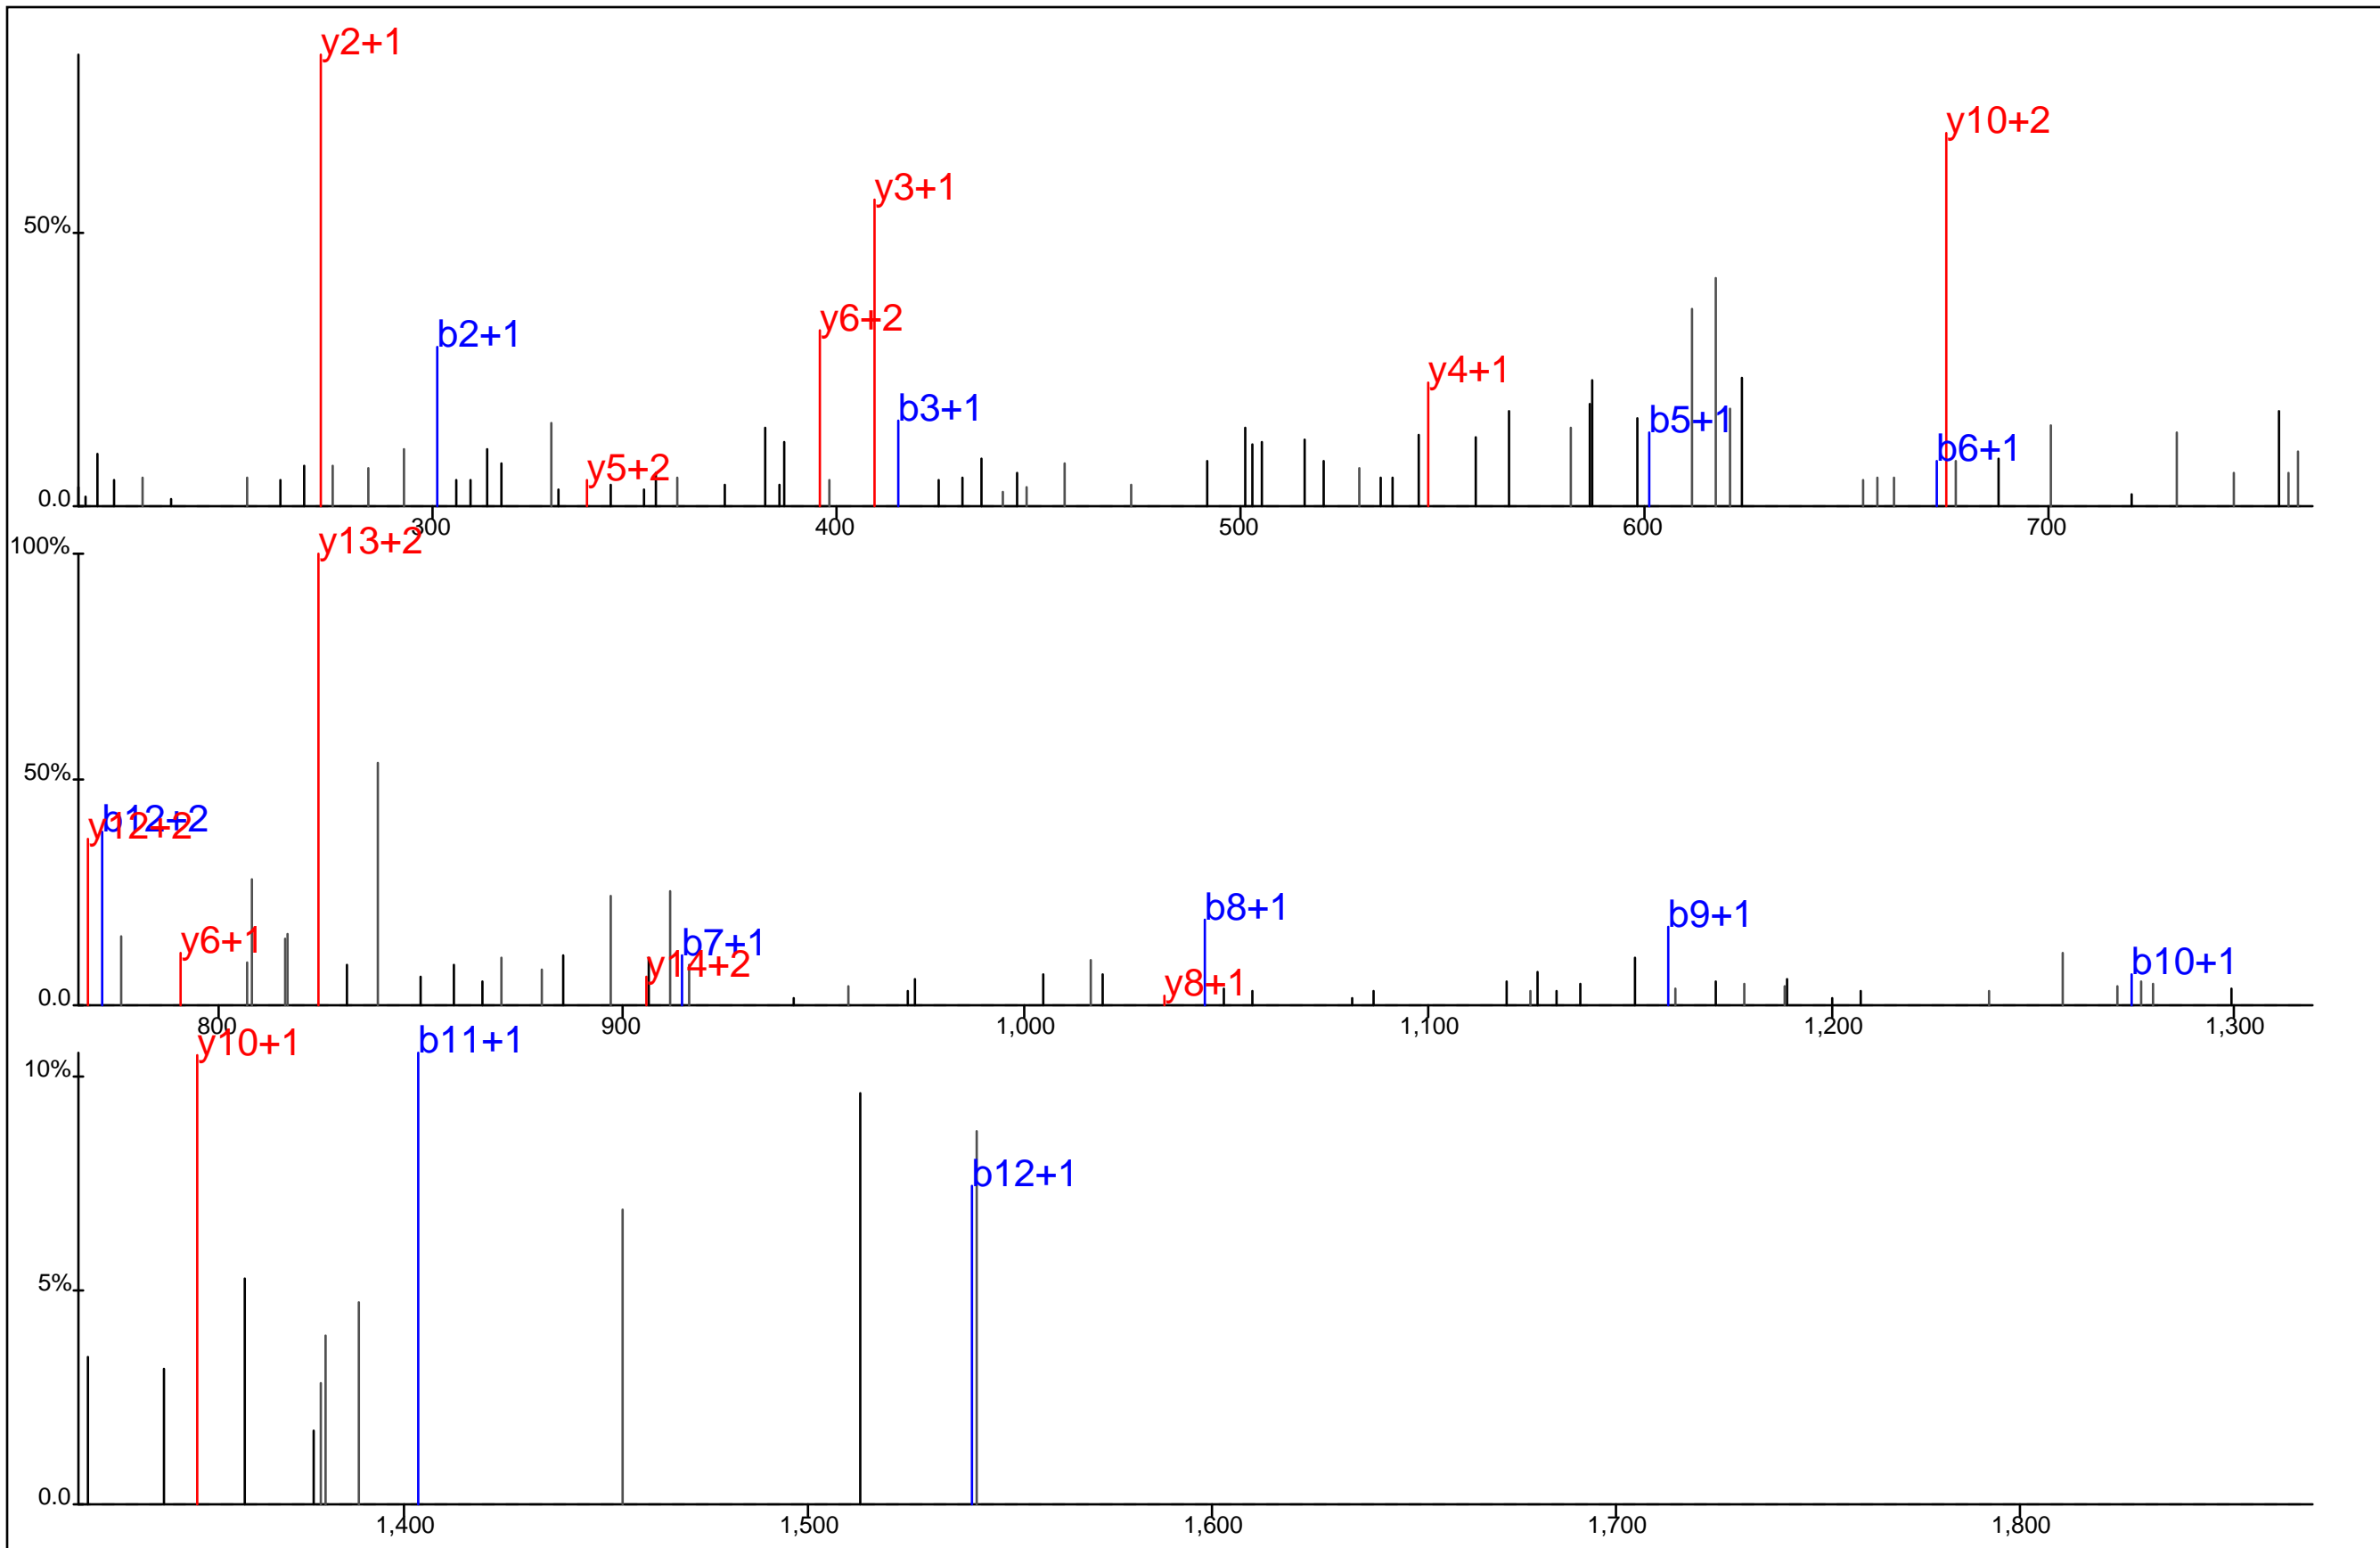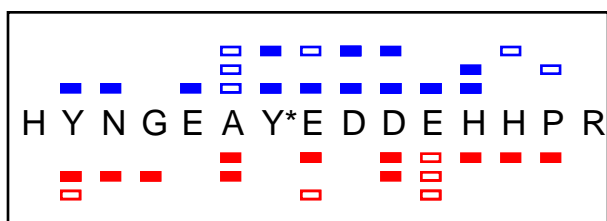

Protein Name: Heat shock 40 kDa protein 4  
 gi Accession: 0  
 Precursor Mass: 650.2482+3  
 Delta Mass: 2.856 ppm  
 XCorr: 38.19

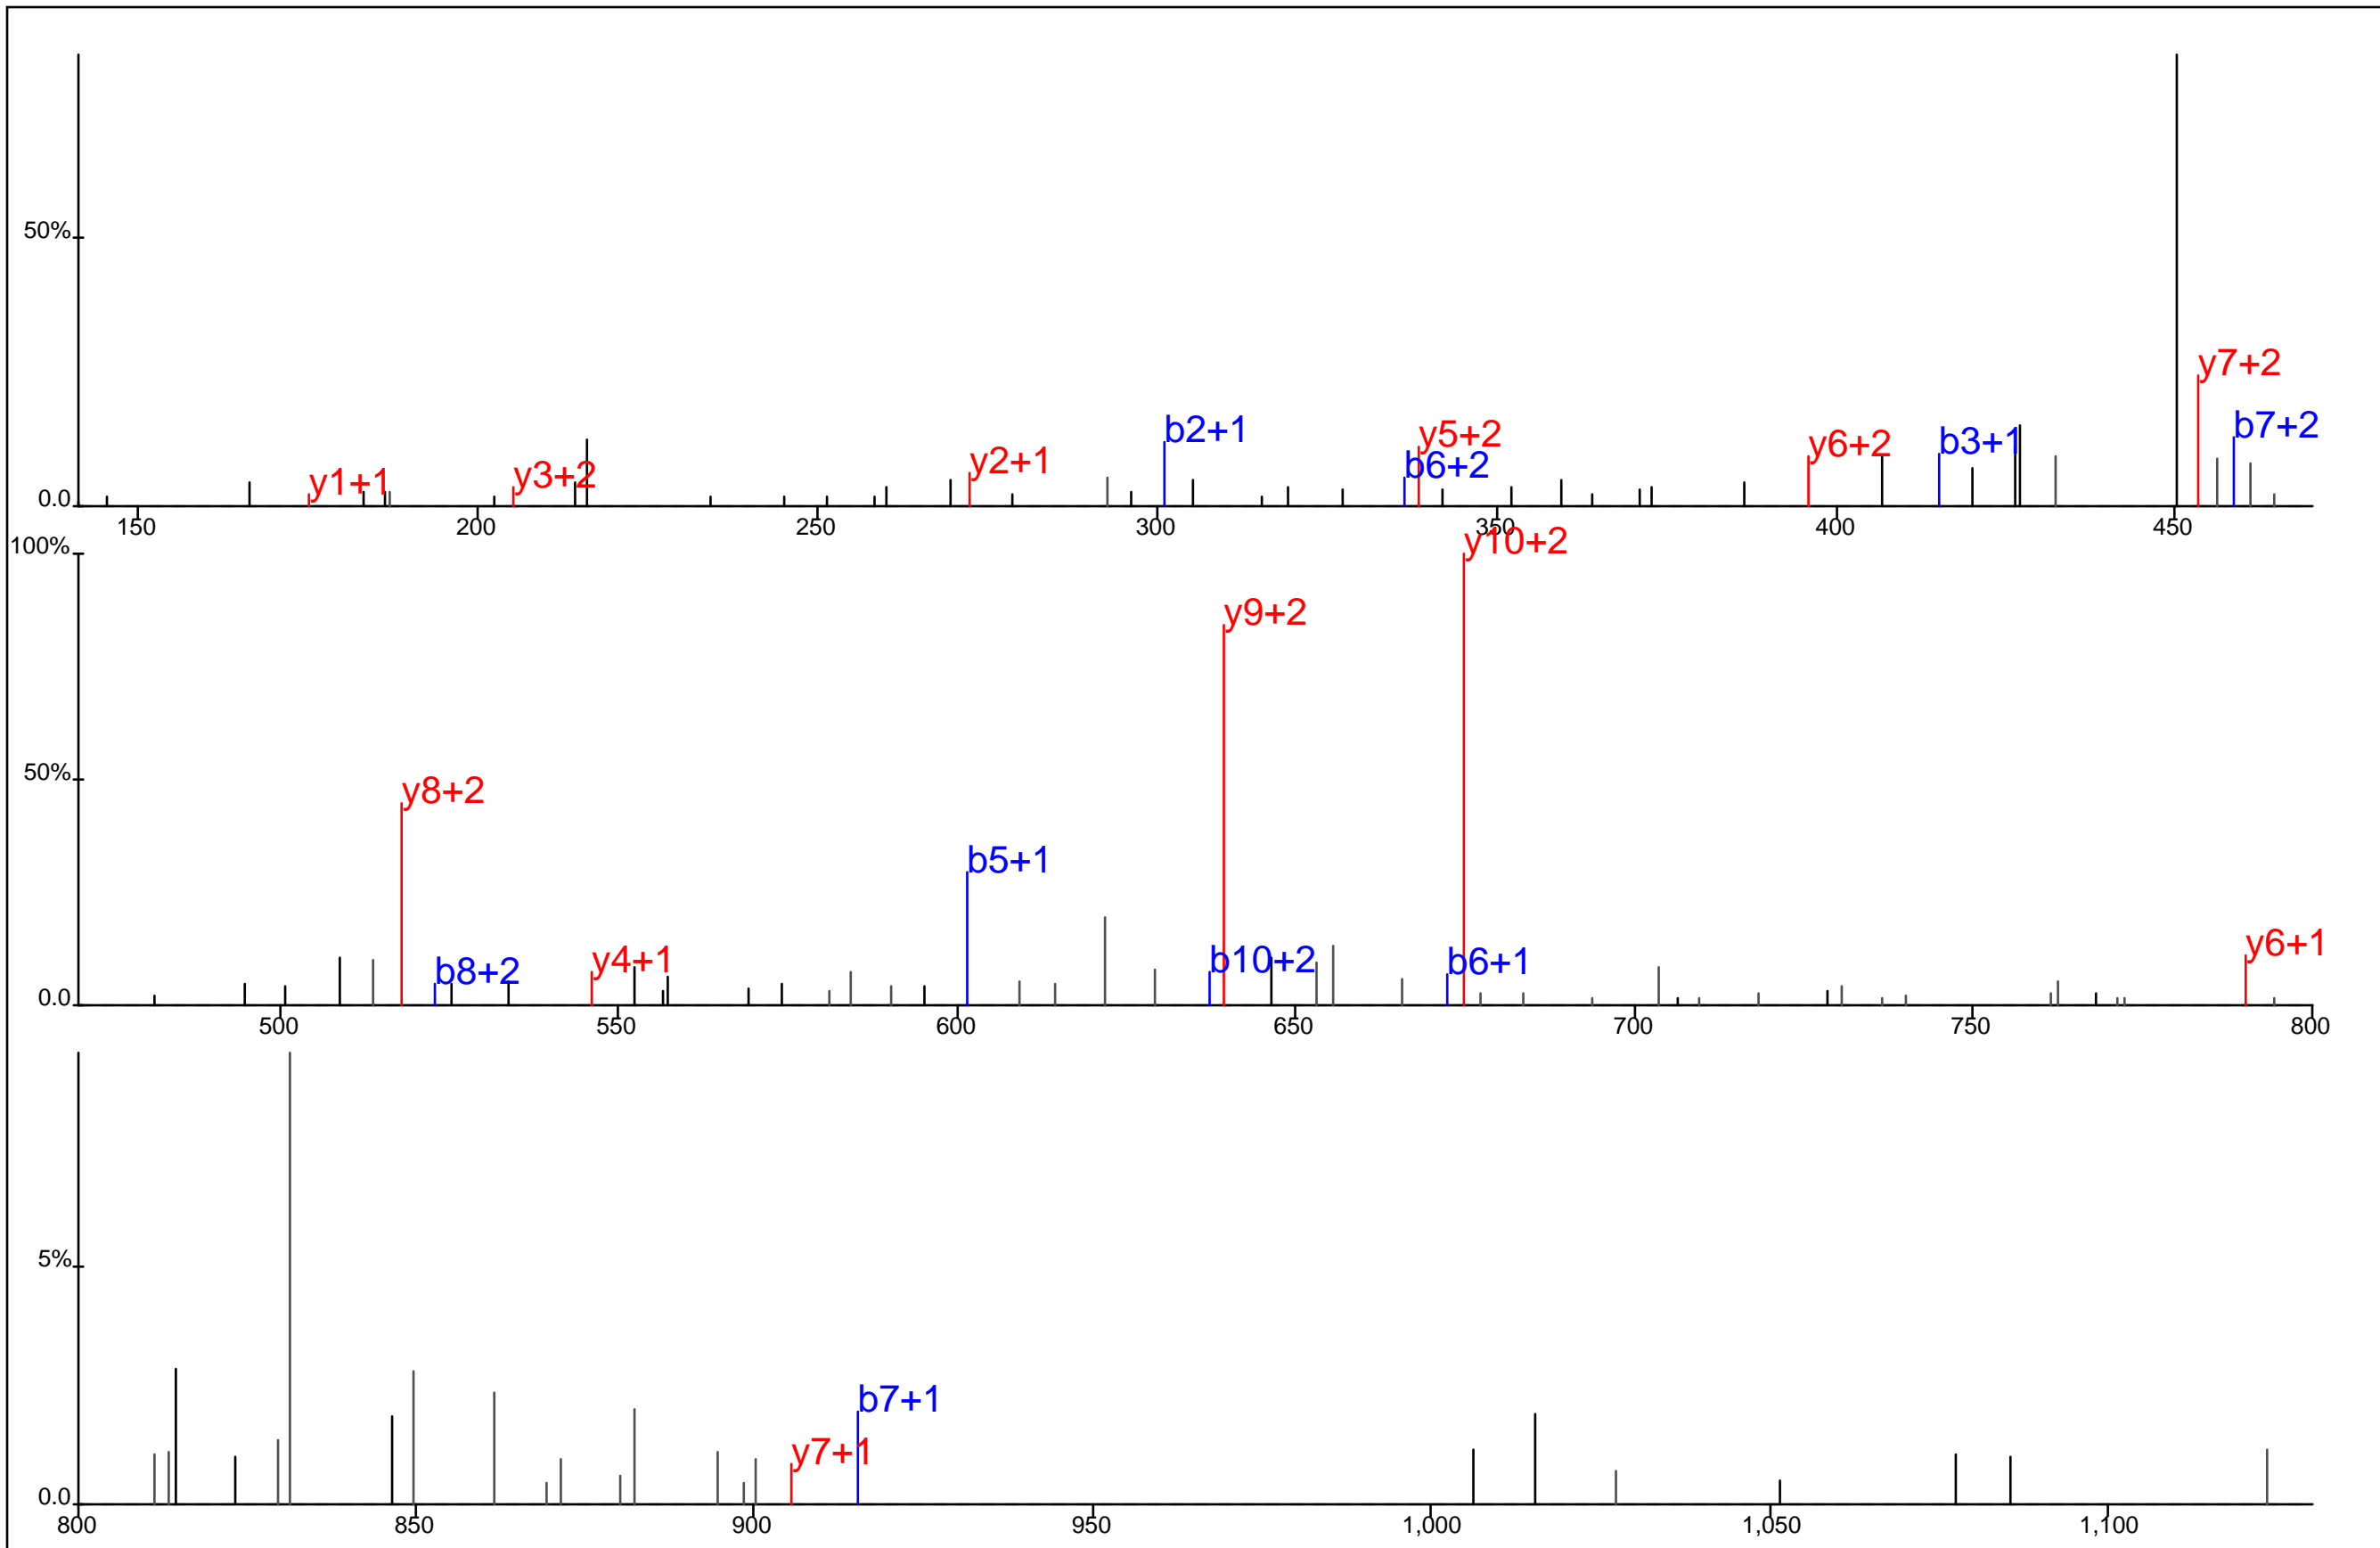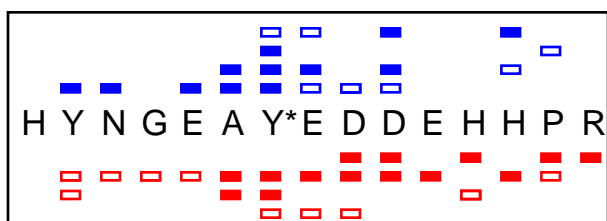

Protein Name: Heat shock 40 kDa protein 4  
 gi Accession: 0  
 Precursor Mass: 487.9368+4  
 Delta Mass: 0.406 ppm  
 XCorr: 27.93



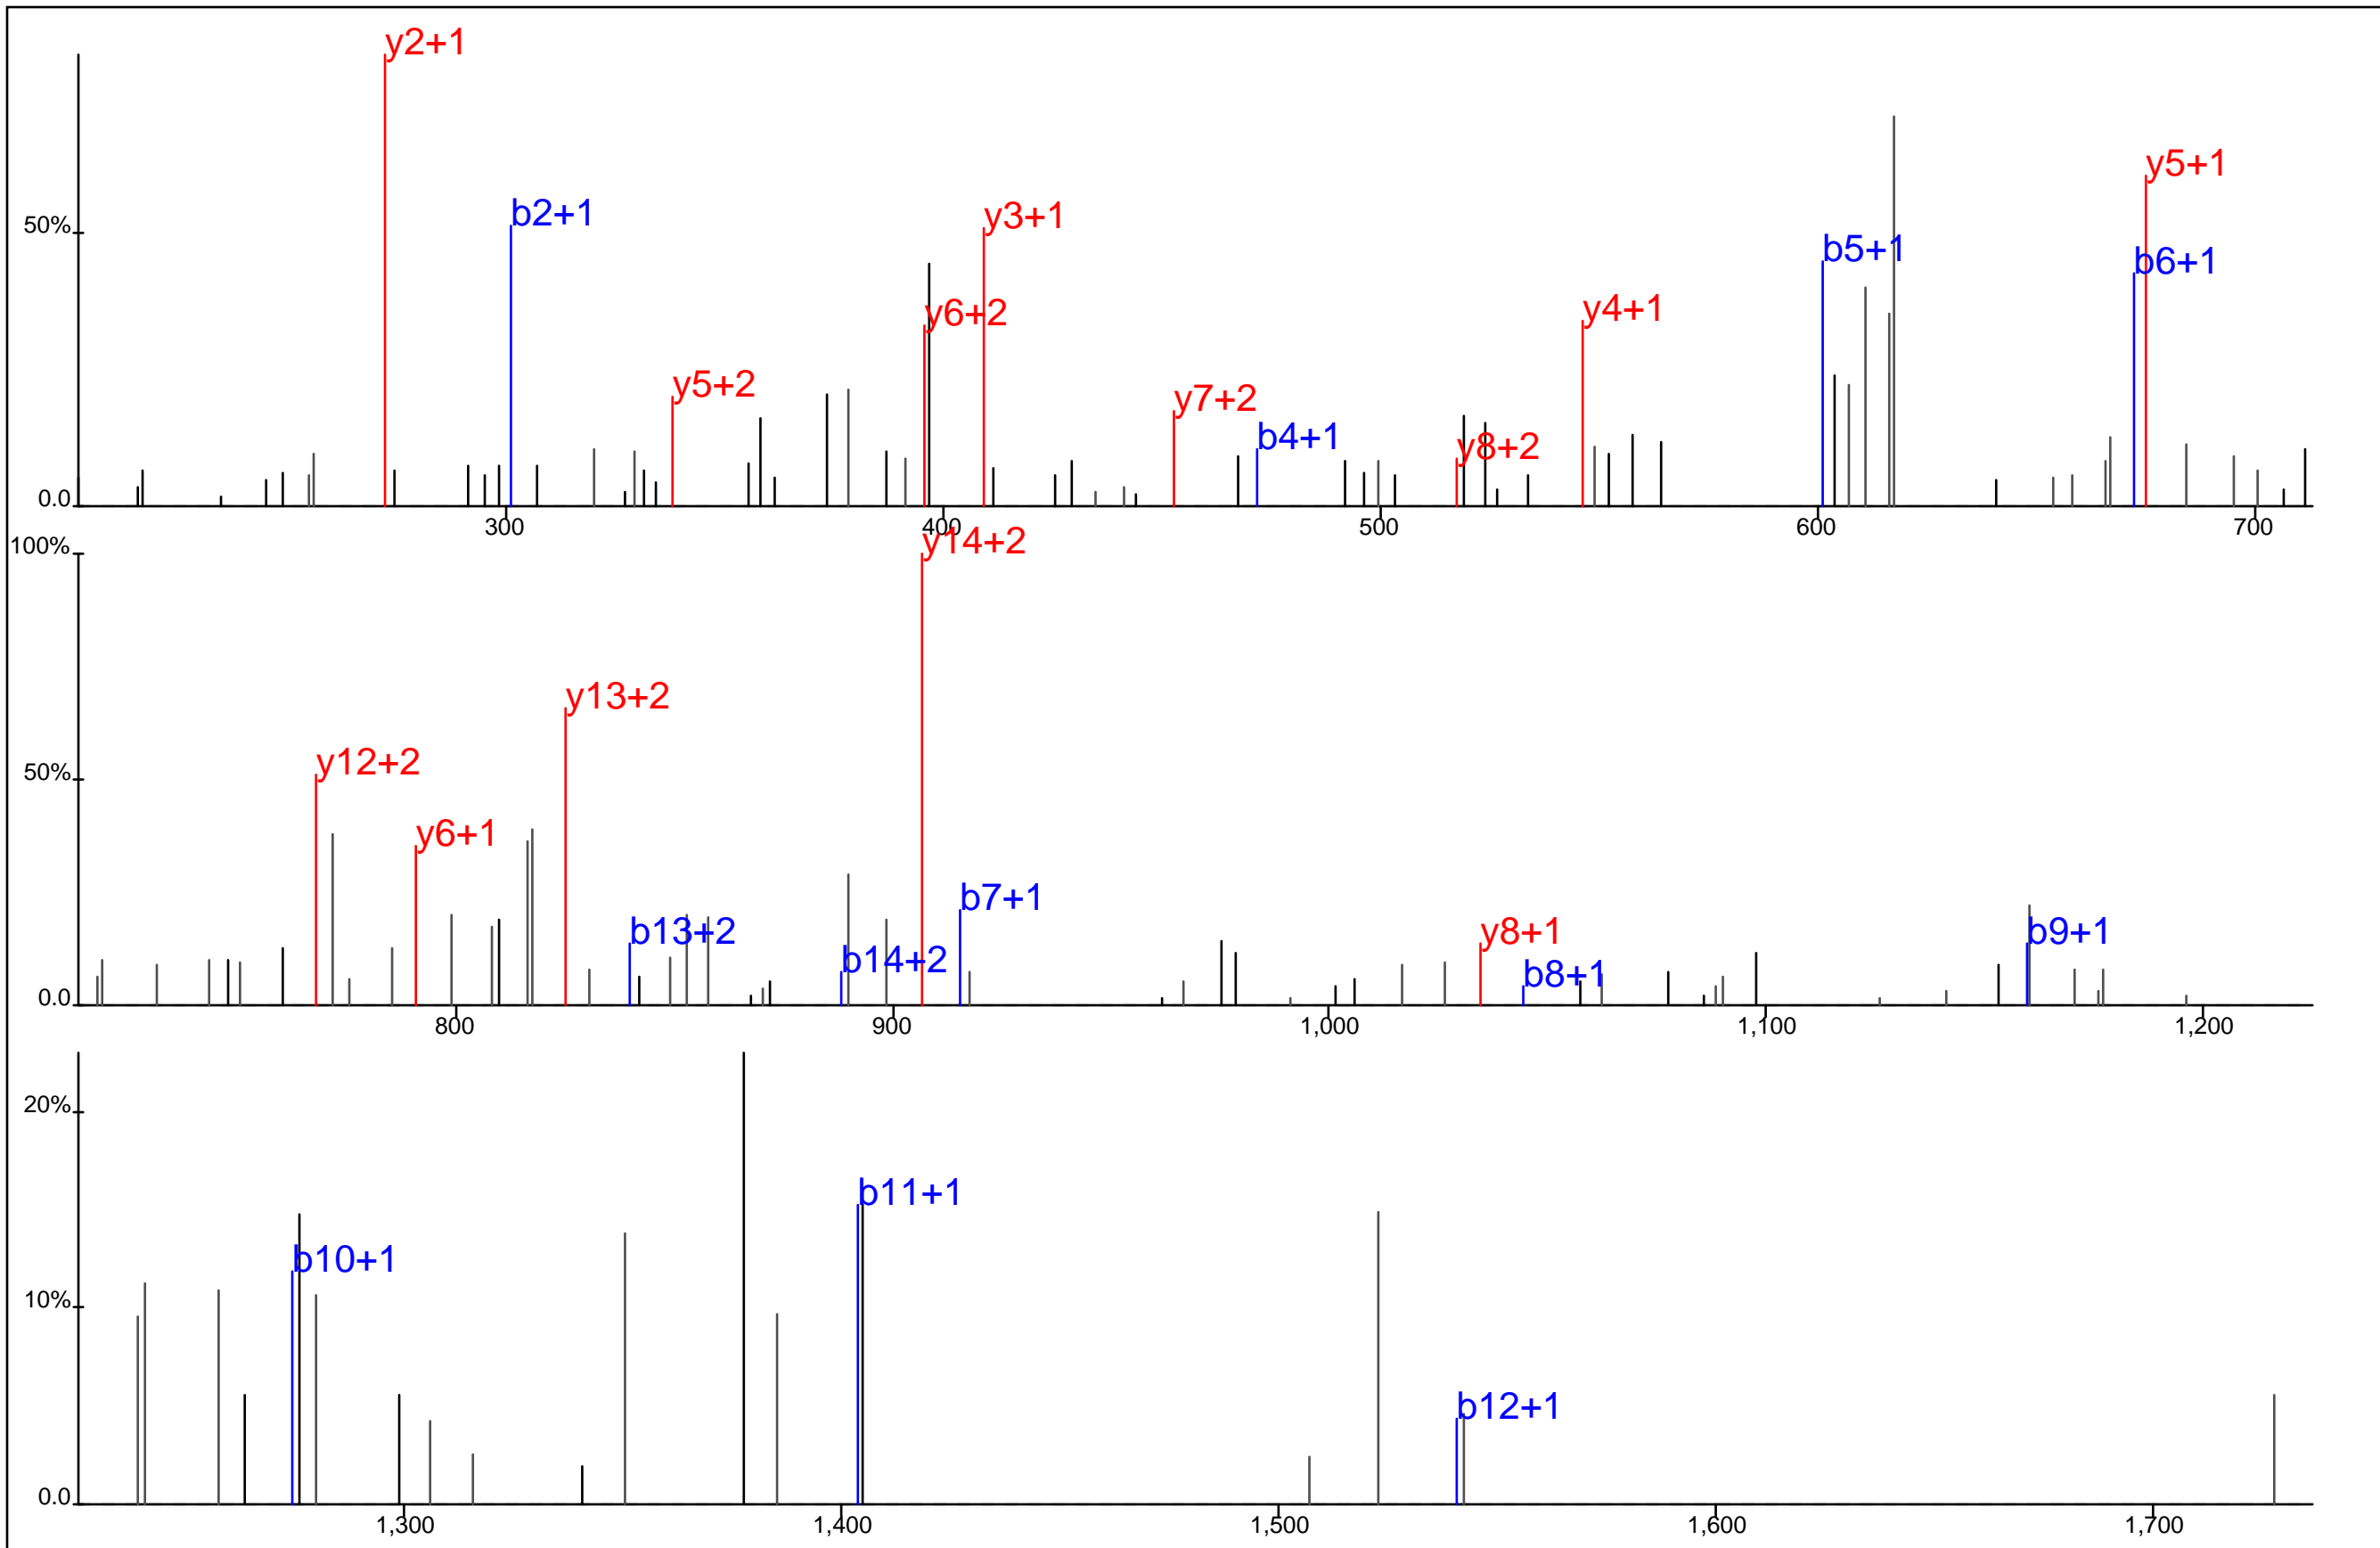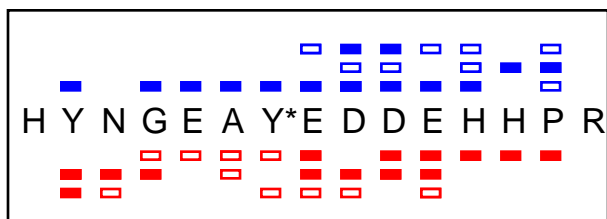

Protein Name: Heat shock 40 kDa protein 4  
 gi Accession: 0  
 Precursor Mass: 650.2463+3  
 Delta Mass: 0.056 ppm  
 XCorr: 49.43

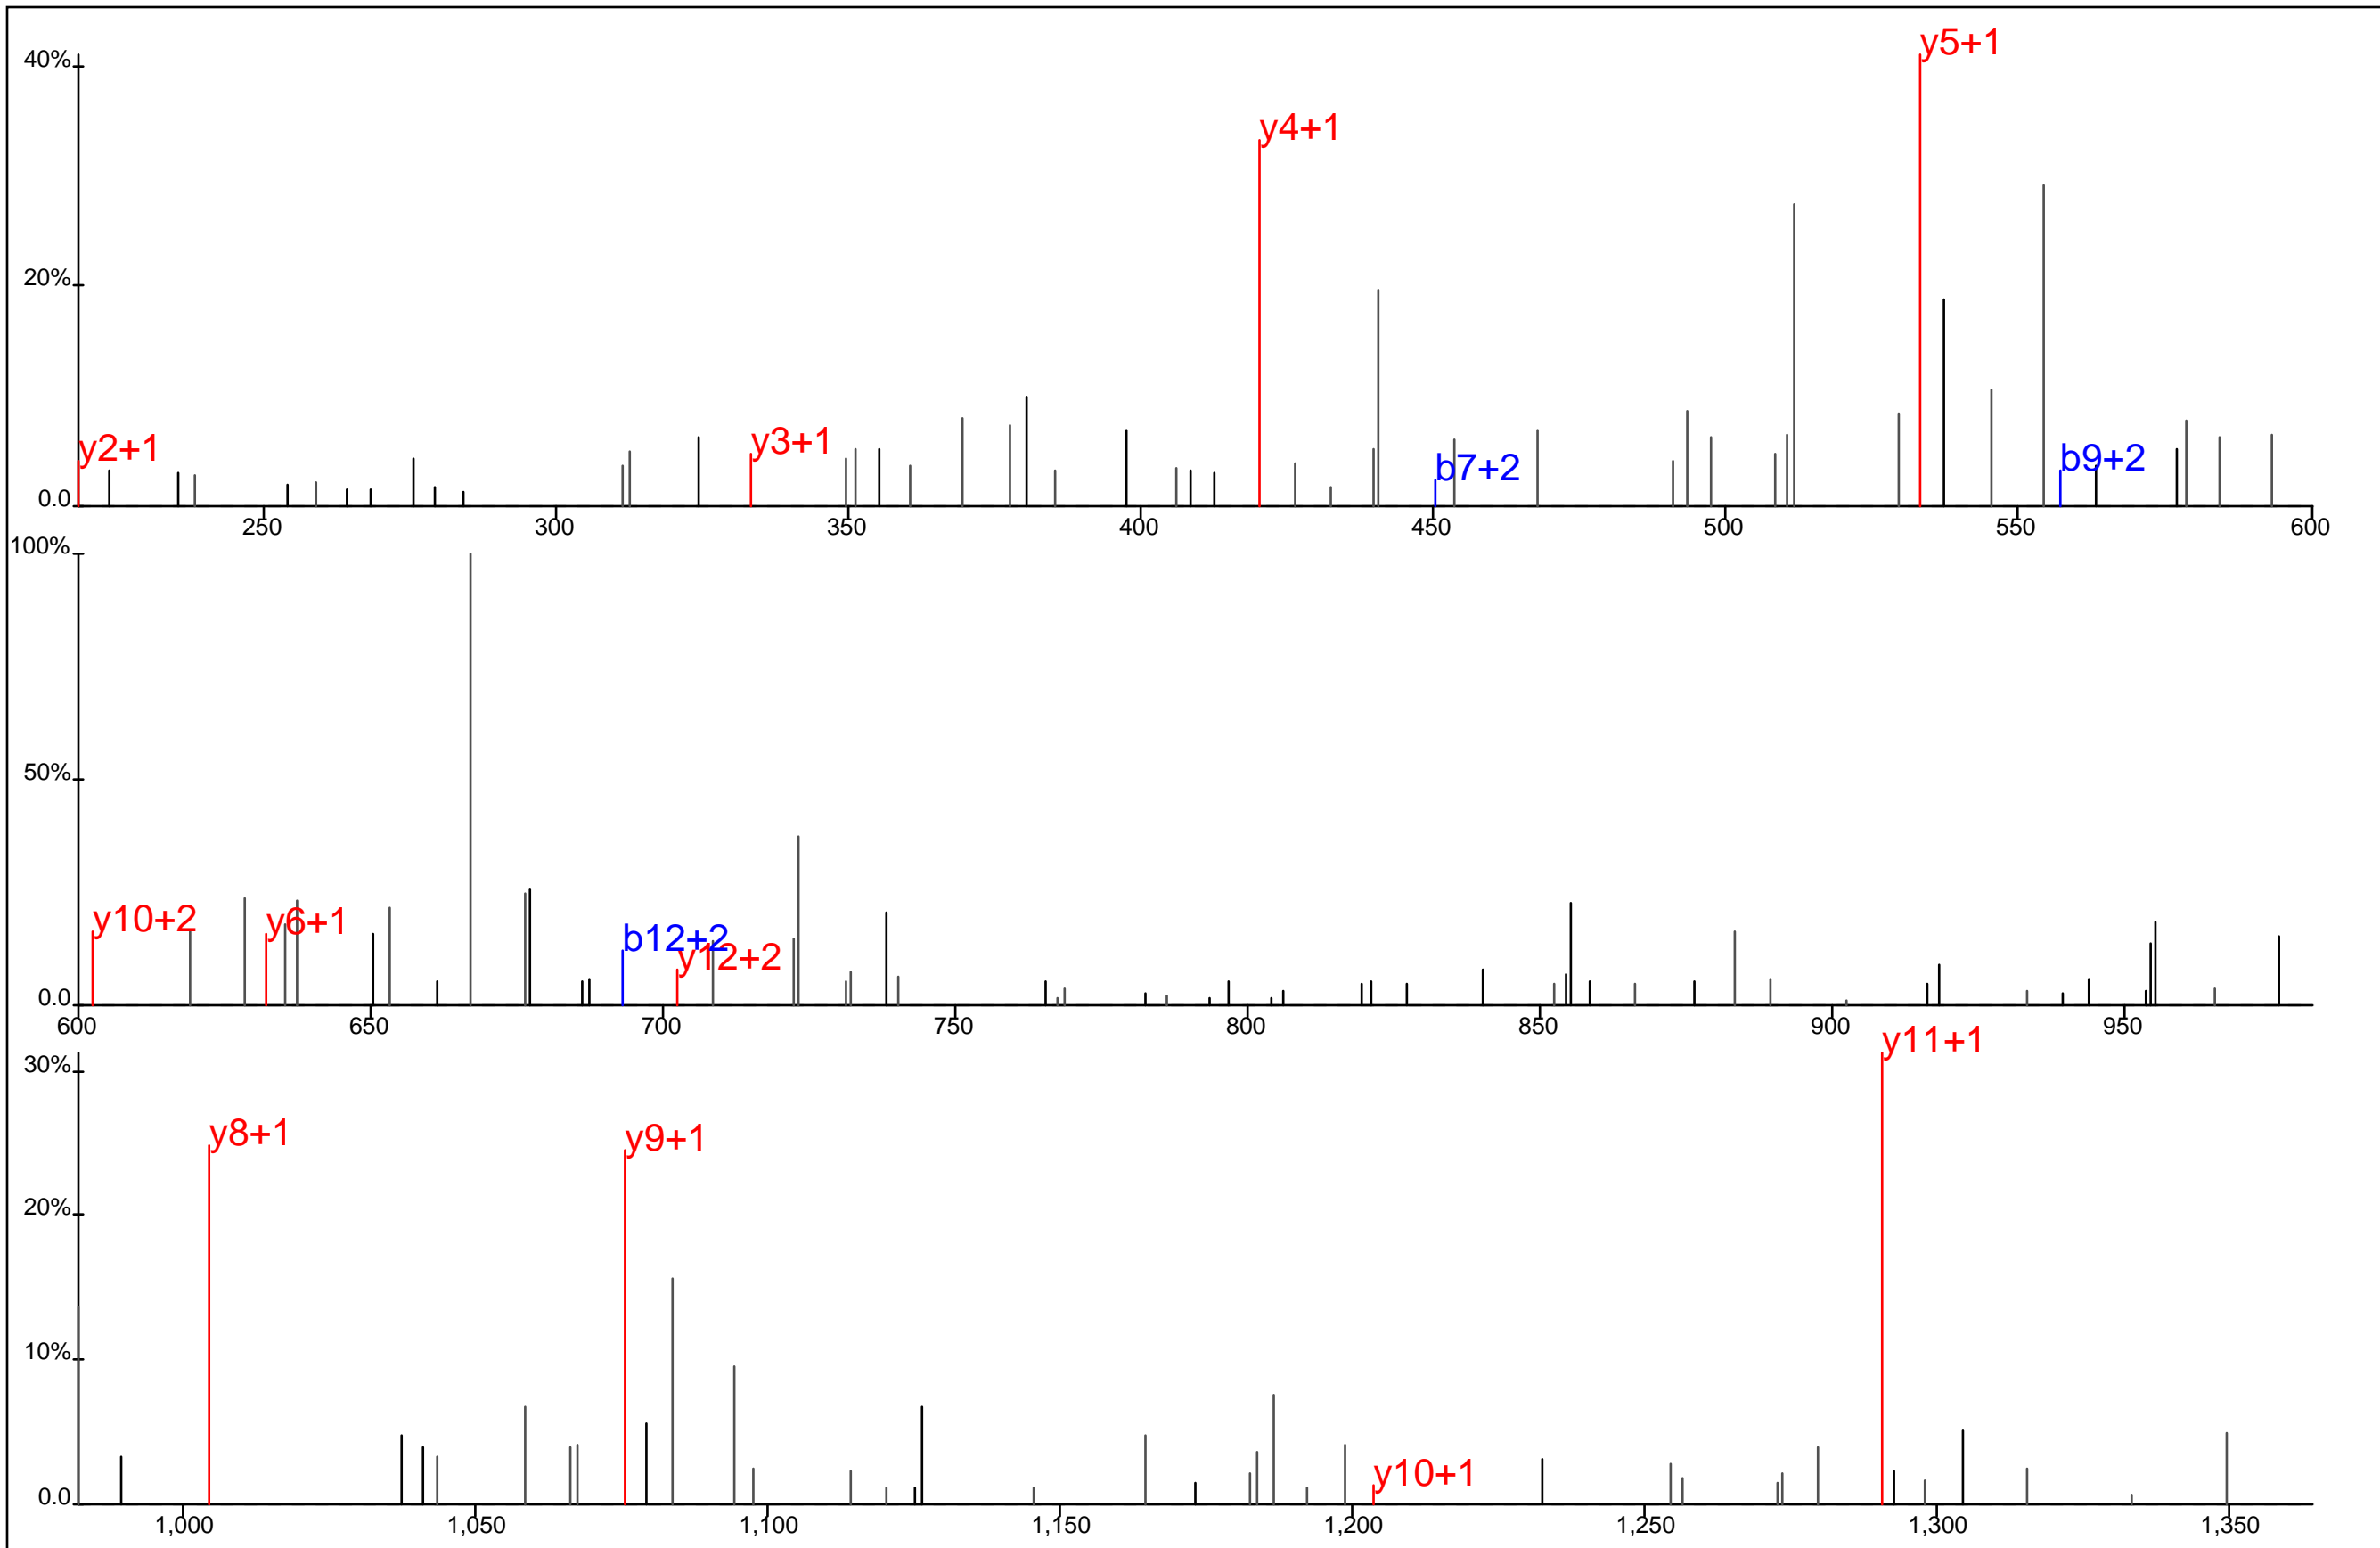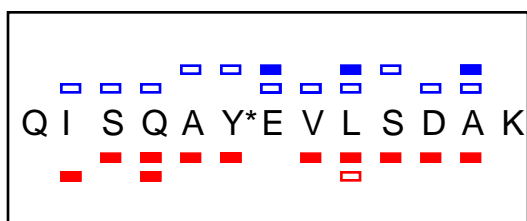

Protein Name: Heat shock 40 kDa protein 4  
 gi Accession: 0  
 Precursor Mass: 766.3548+2  
 Delta Mass: 1.060 ppm  
 XCorr: 21.73

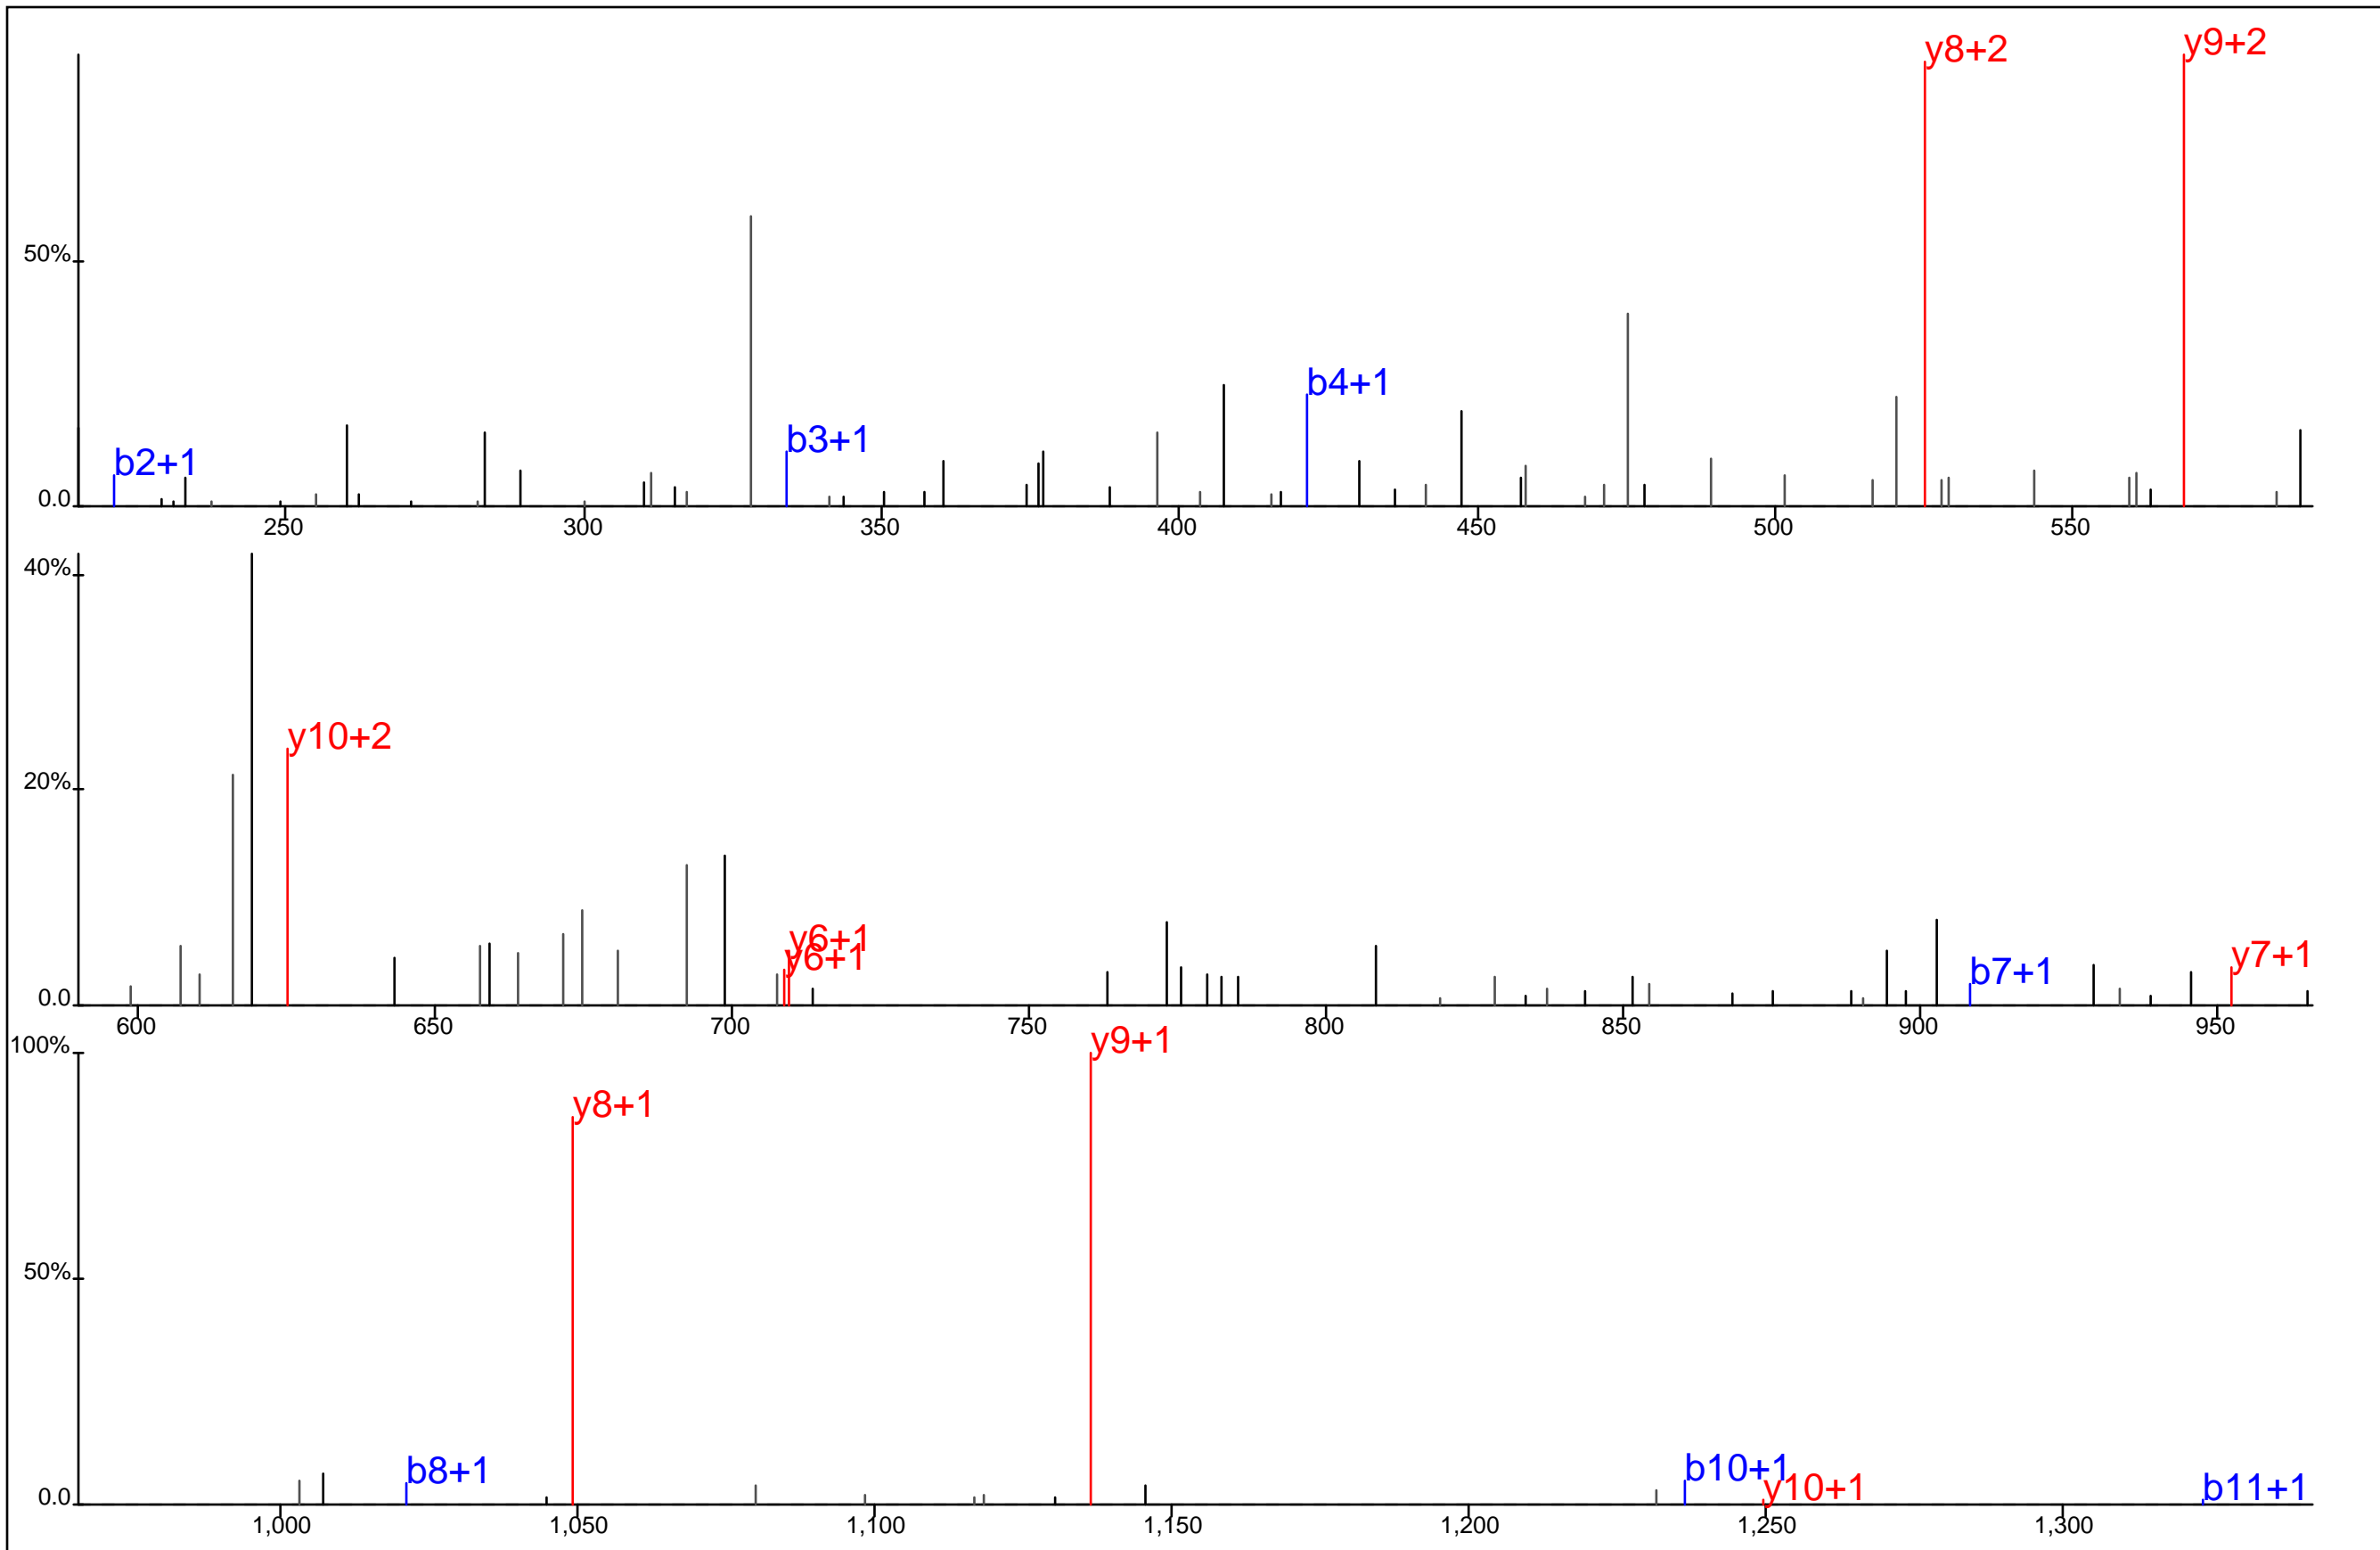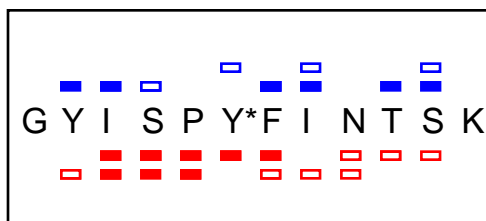

Protein Name: Heat shock 60 KD protein 1 (chaperonin)  
 gi Accession: 0  
 Precursor Mass: 735.3384+2  
 Delta Mass: 1.170 ppm  
 XCorr: 20.57

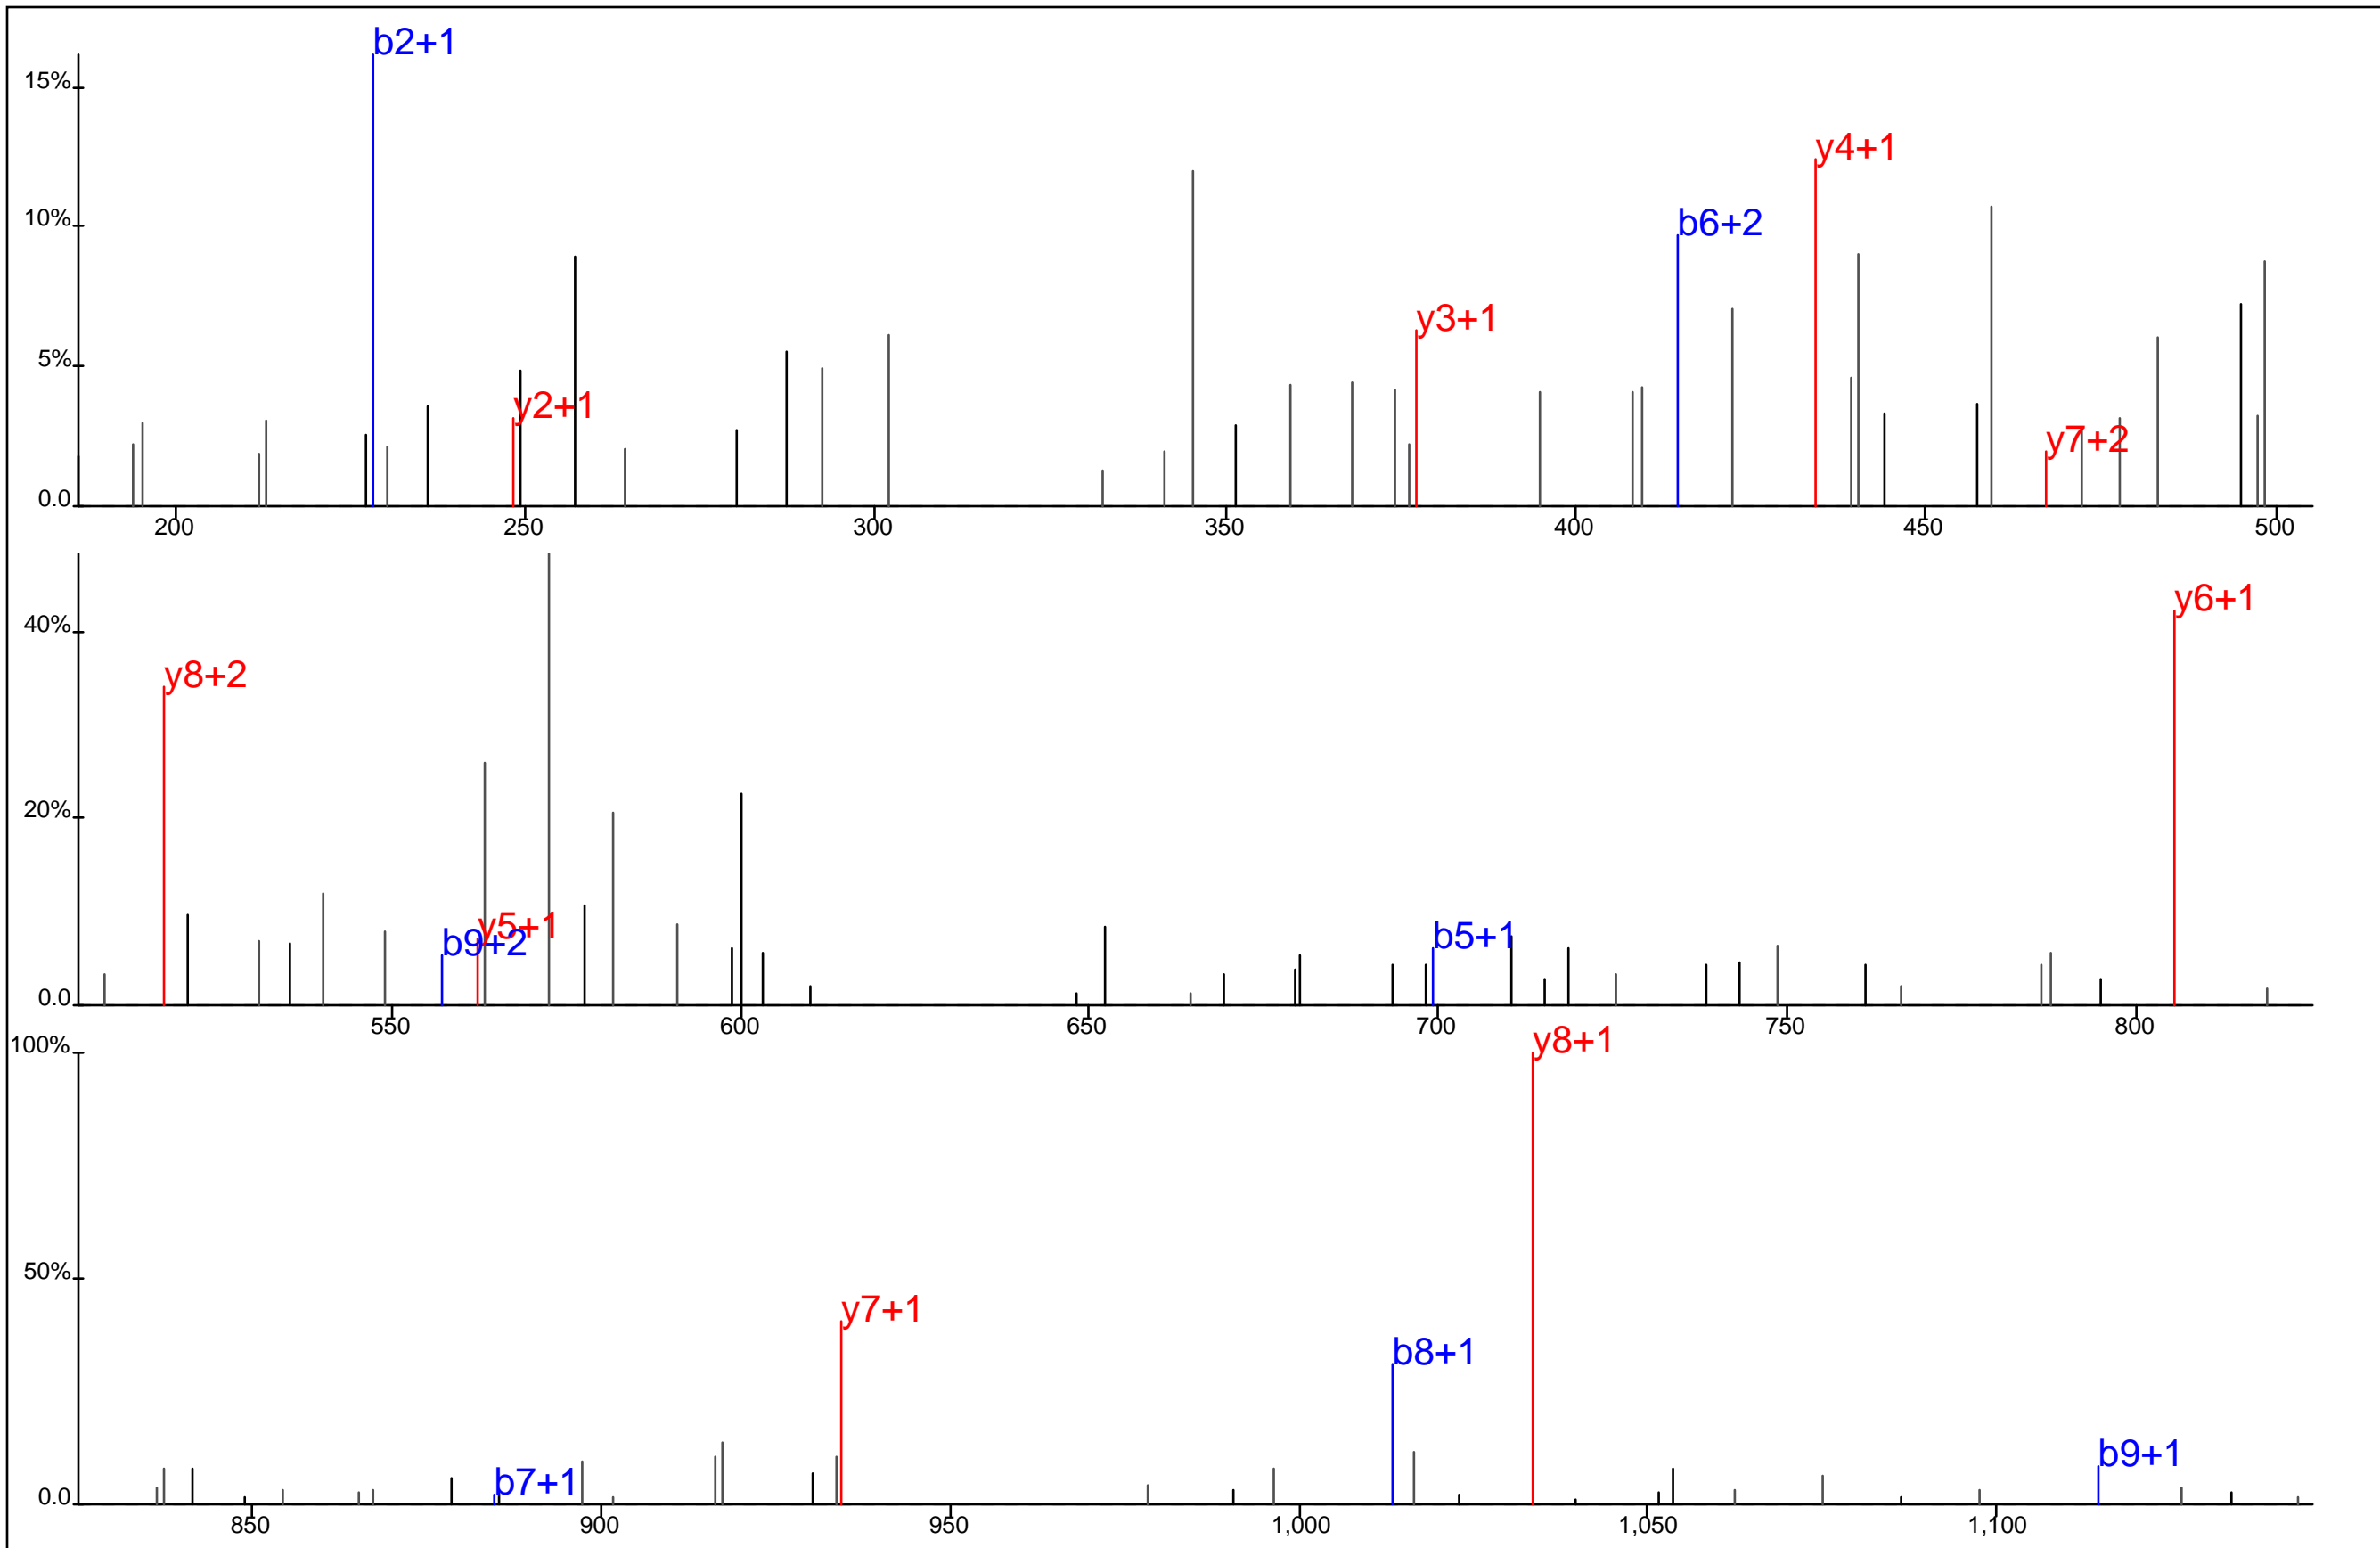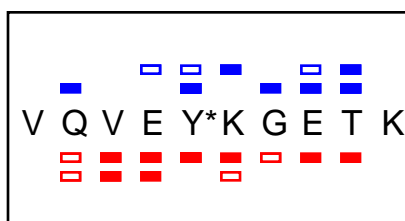

Protein Name: Heat shock 70kDa protein 2  
 gi Accession: 0  
 Precursor Mass: 630.7966+2  
 Delta Mass: 1.014 ppm  
 XCorr: 30.0

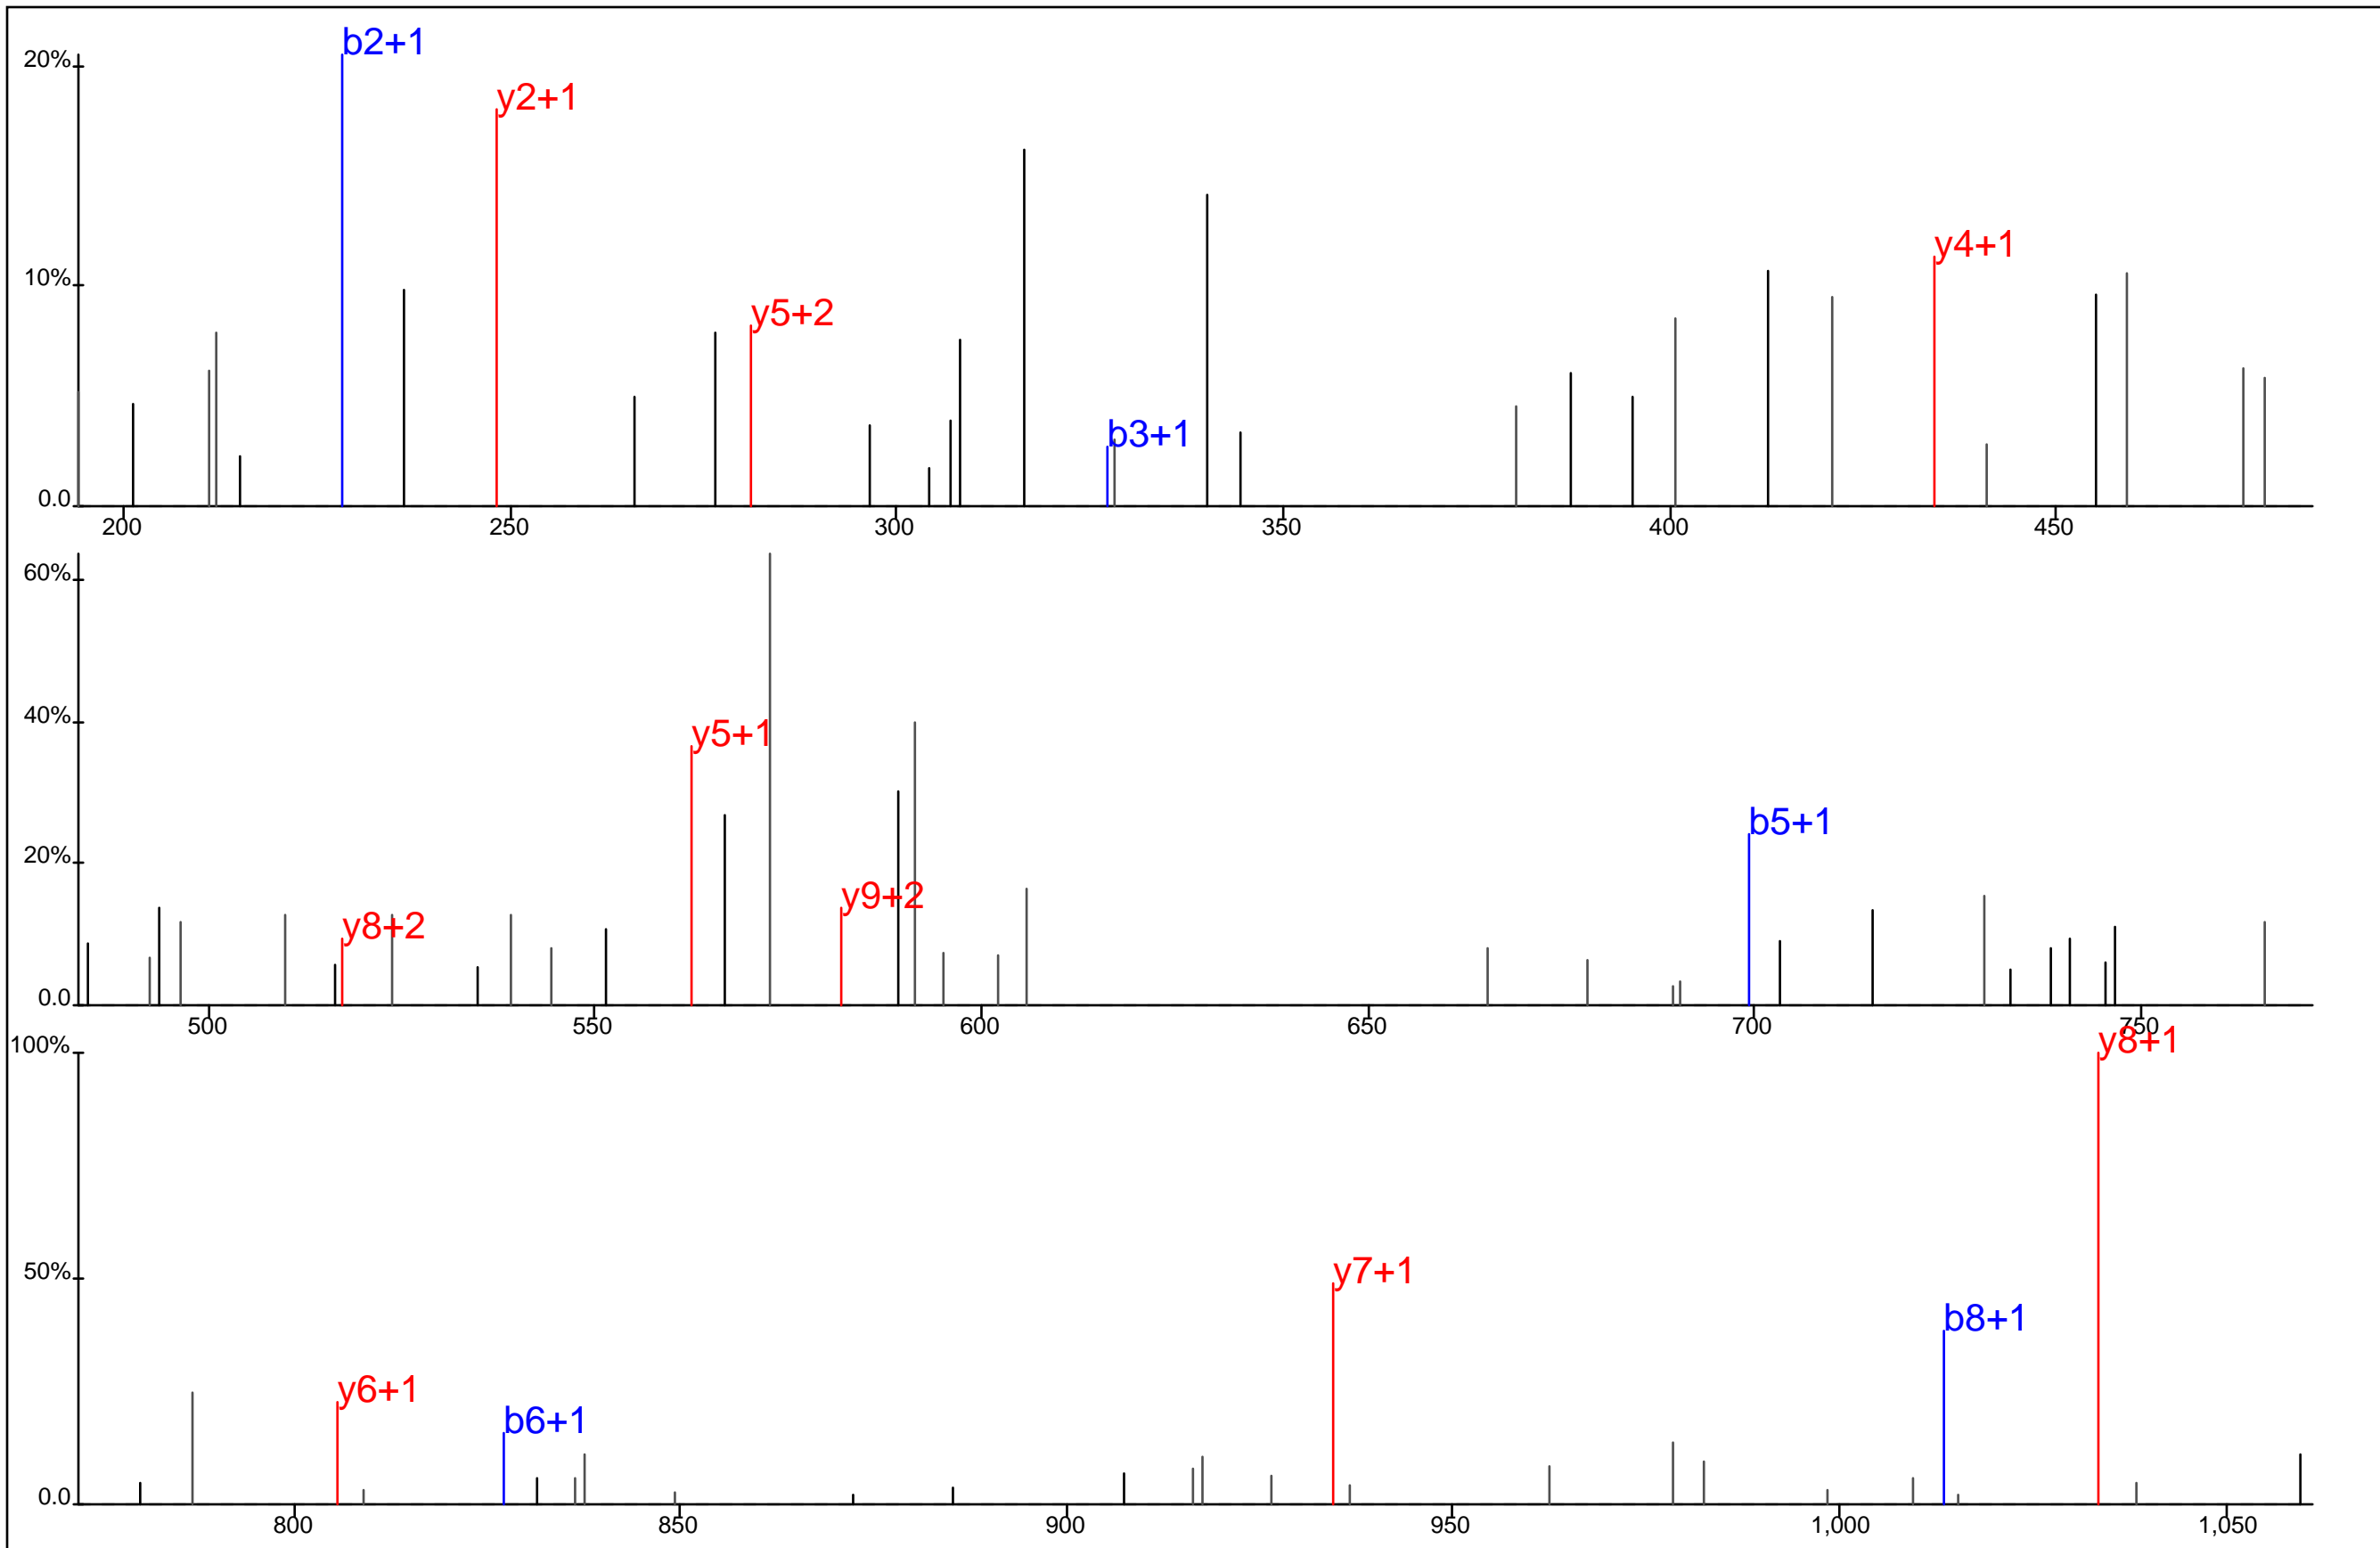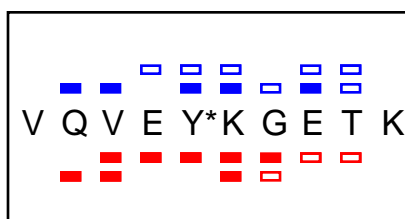

Protein Name: Heat shock 70kDa protein 2  
 gi Accession: 0  
 Precursor Mass: 630.7961+2  
 Delta Mass: 1.788 ppm  
 XCorr: 29.94

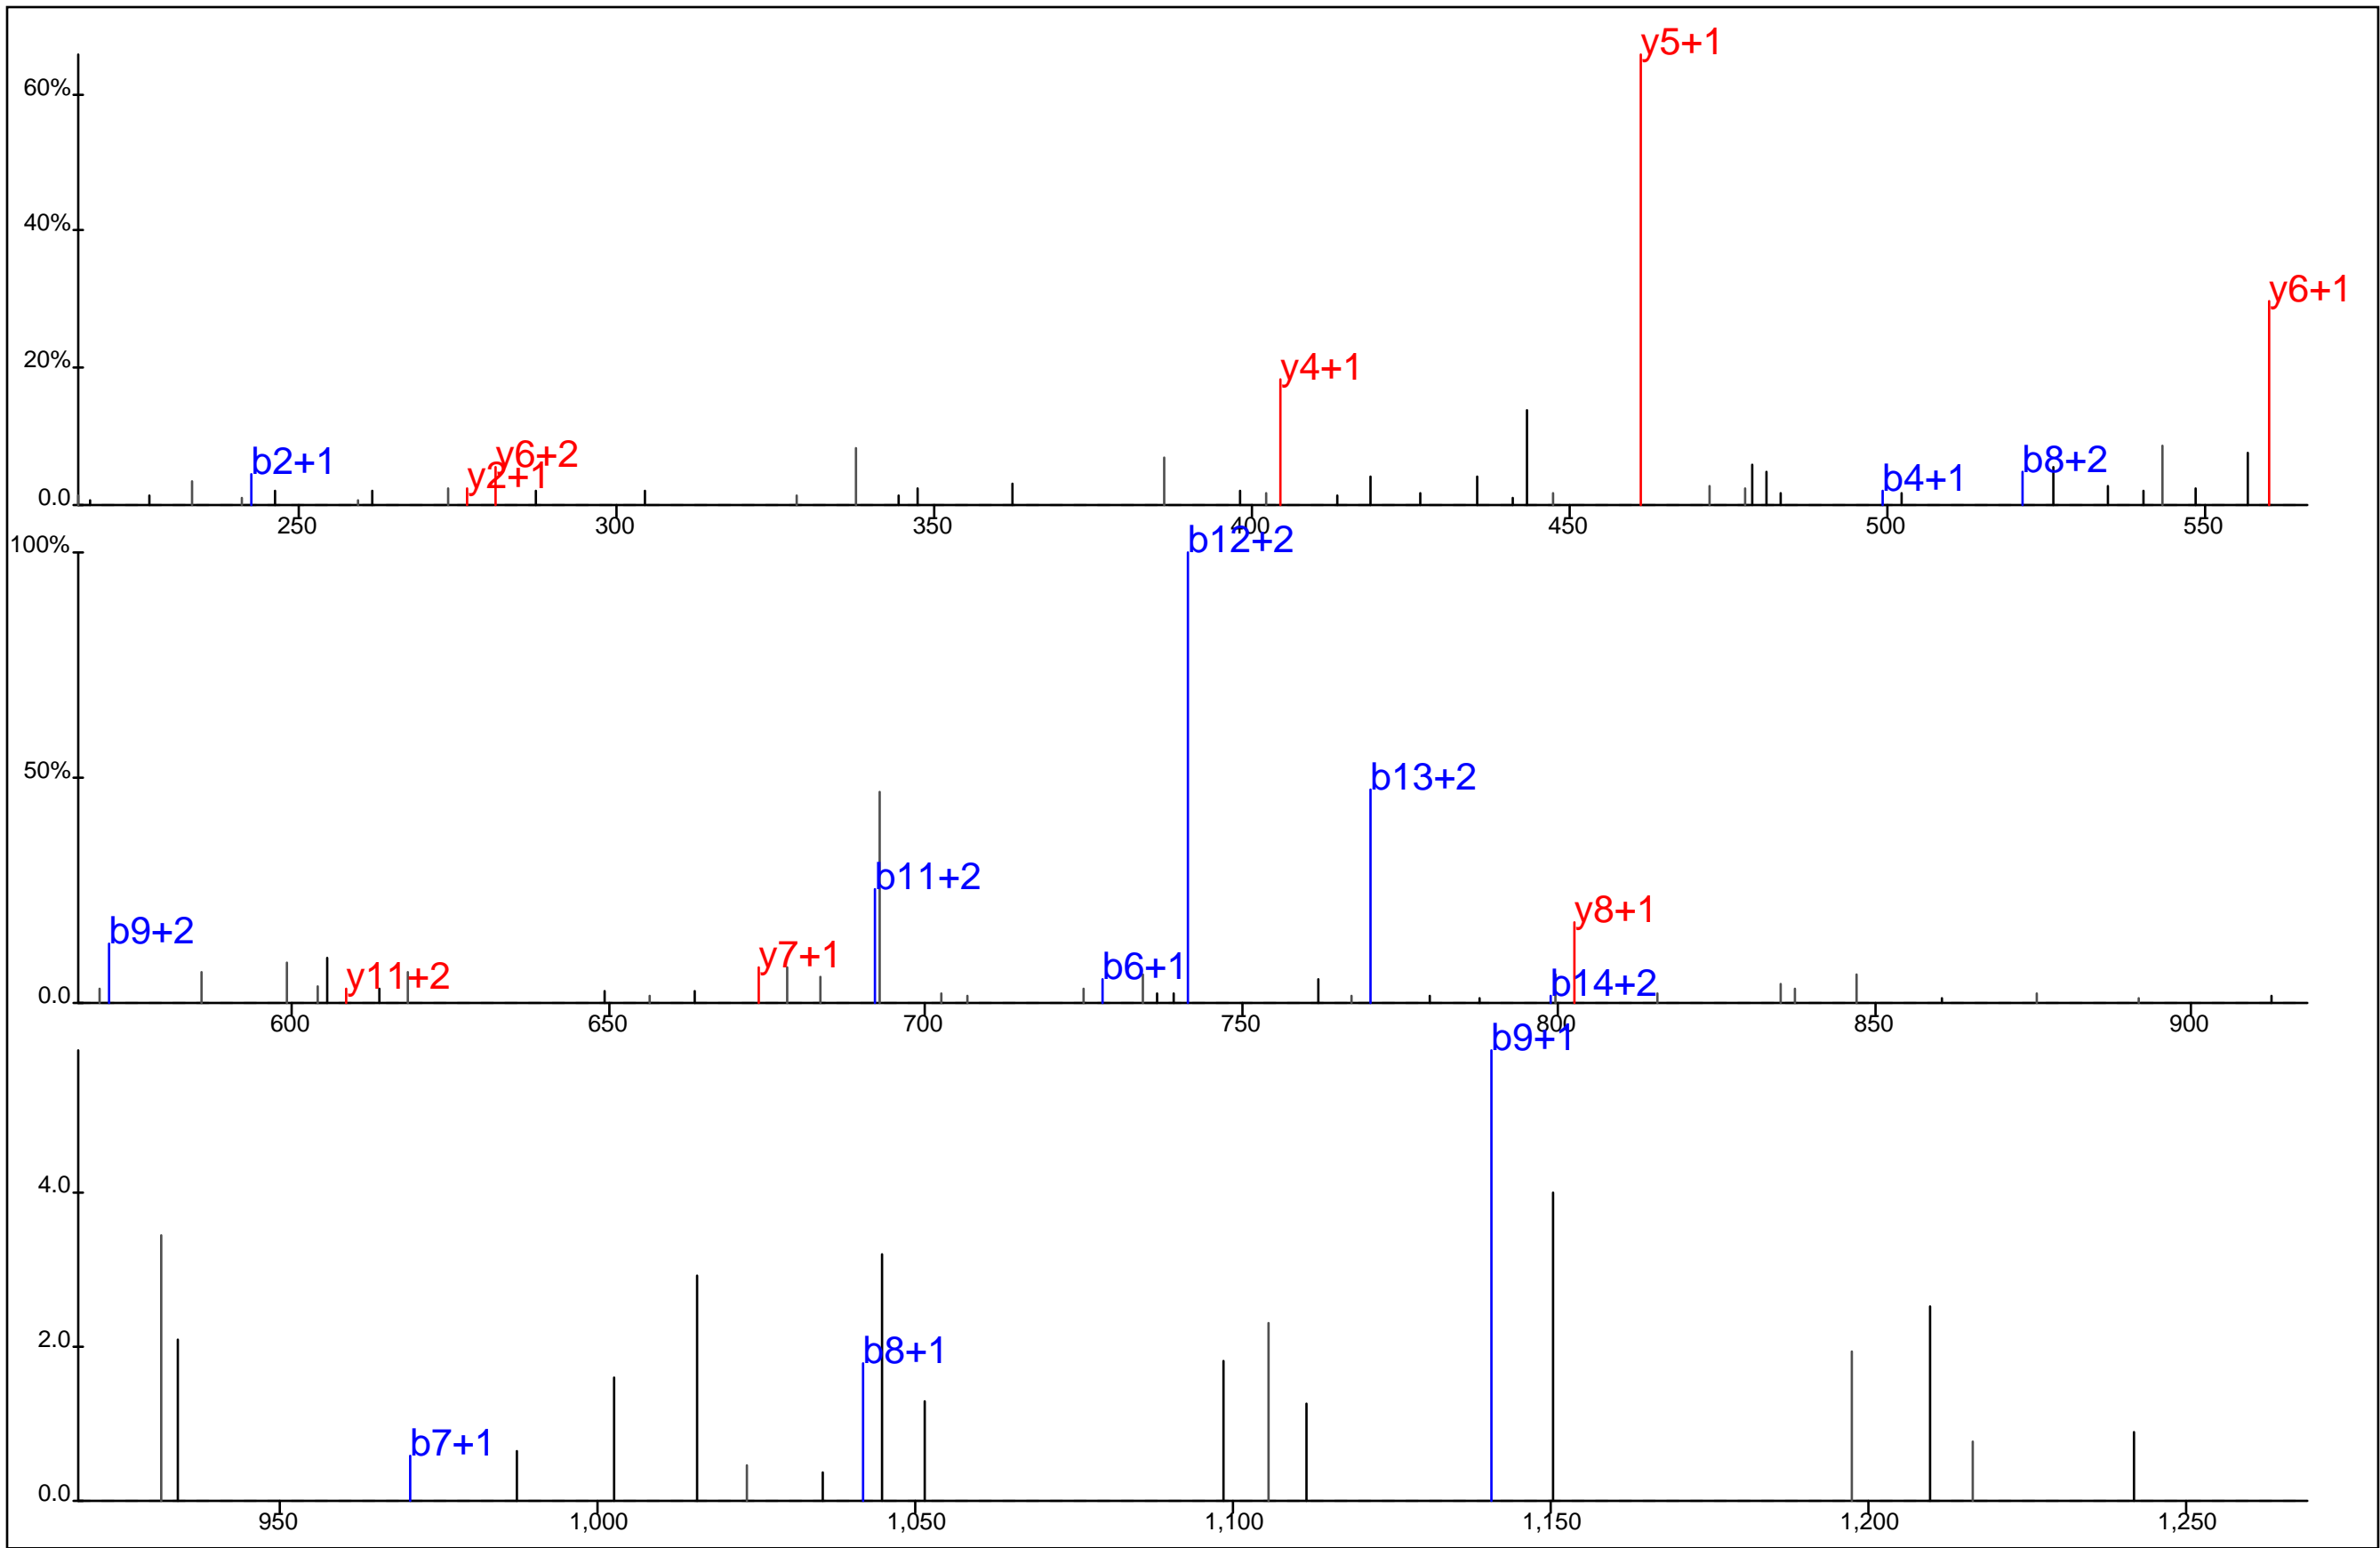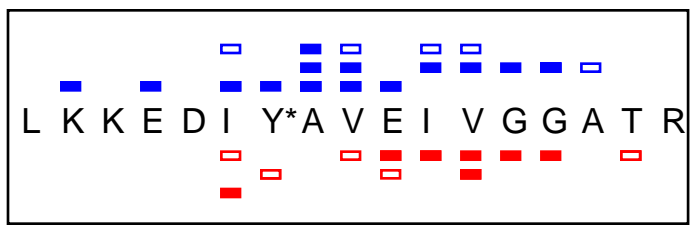

Protein Name: Heat shock 70kDa protein 4  
 gi Accession: 0  
 Precursor Mass: 648.0074+3  
 Delta Mass: 1.701 ppm  
 XCorr: 32.28

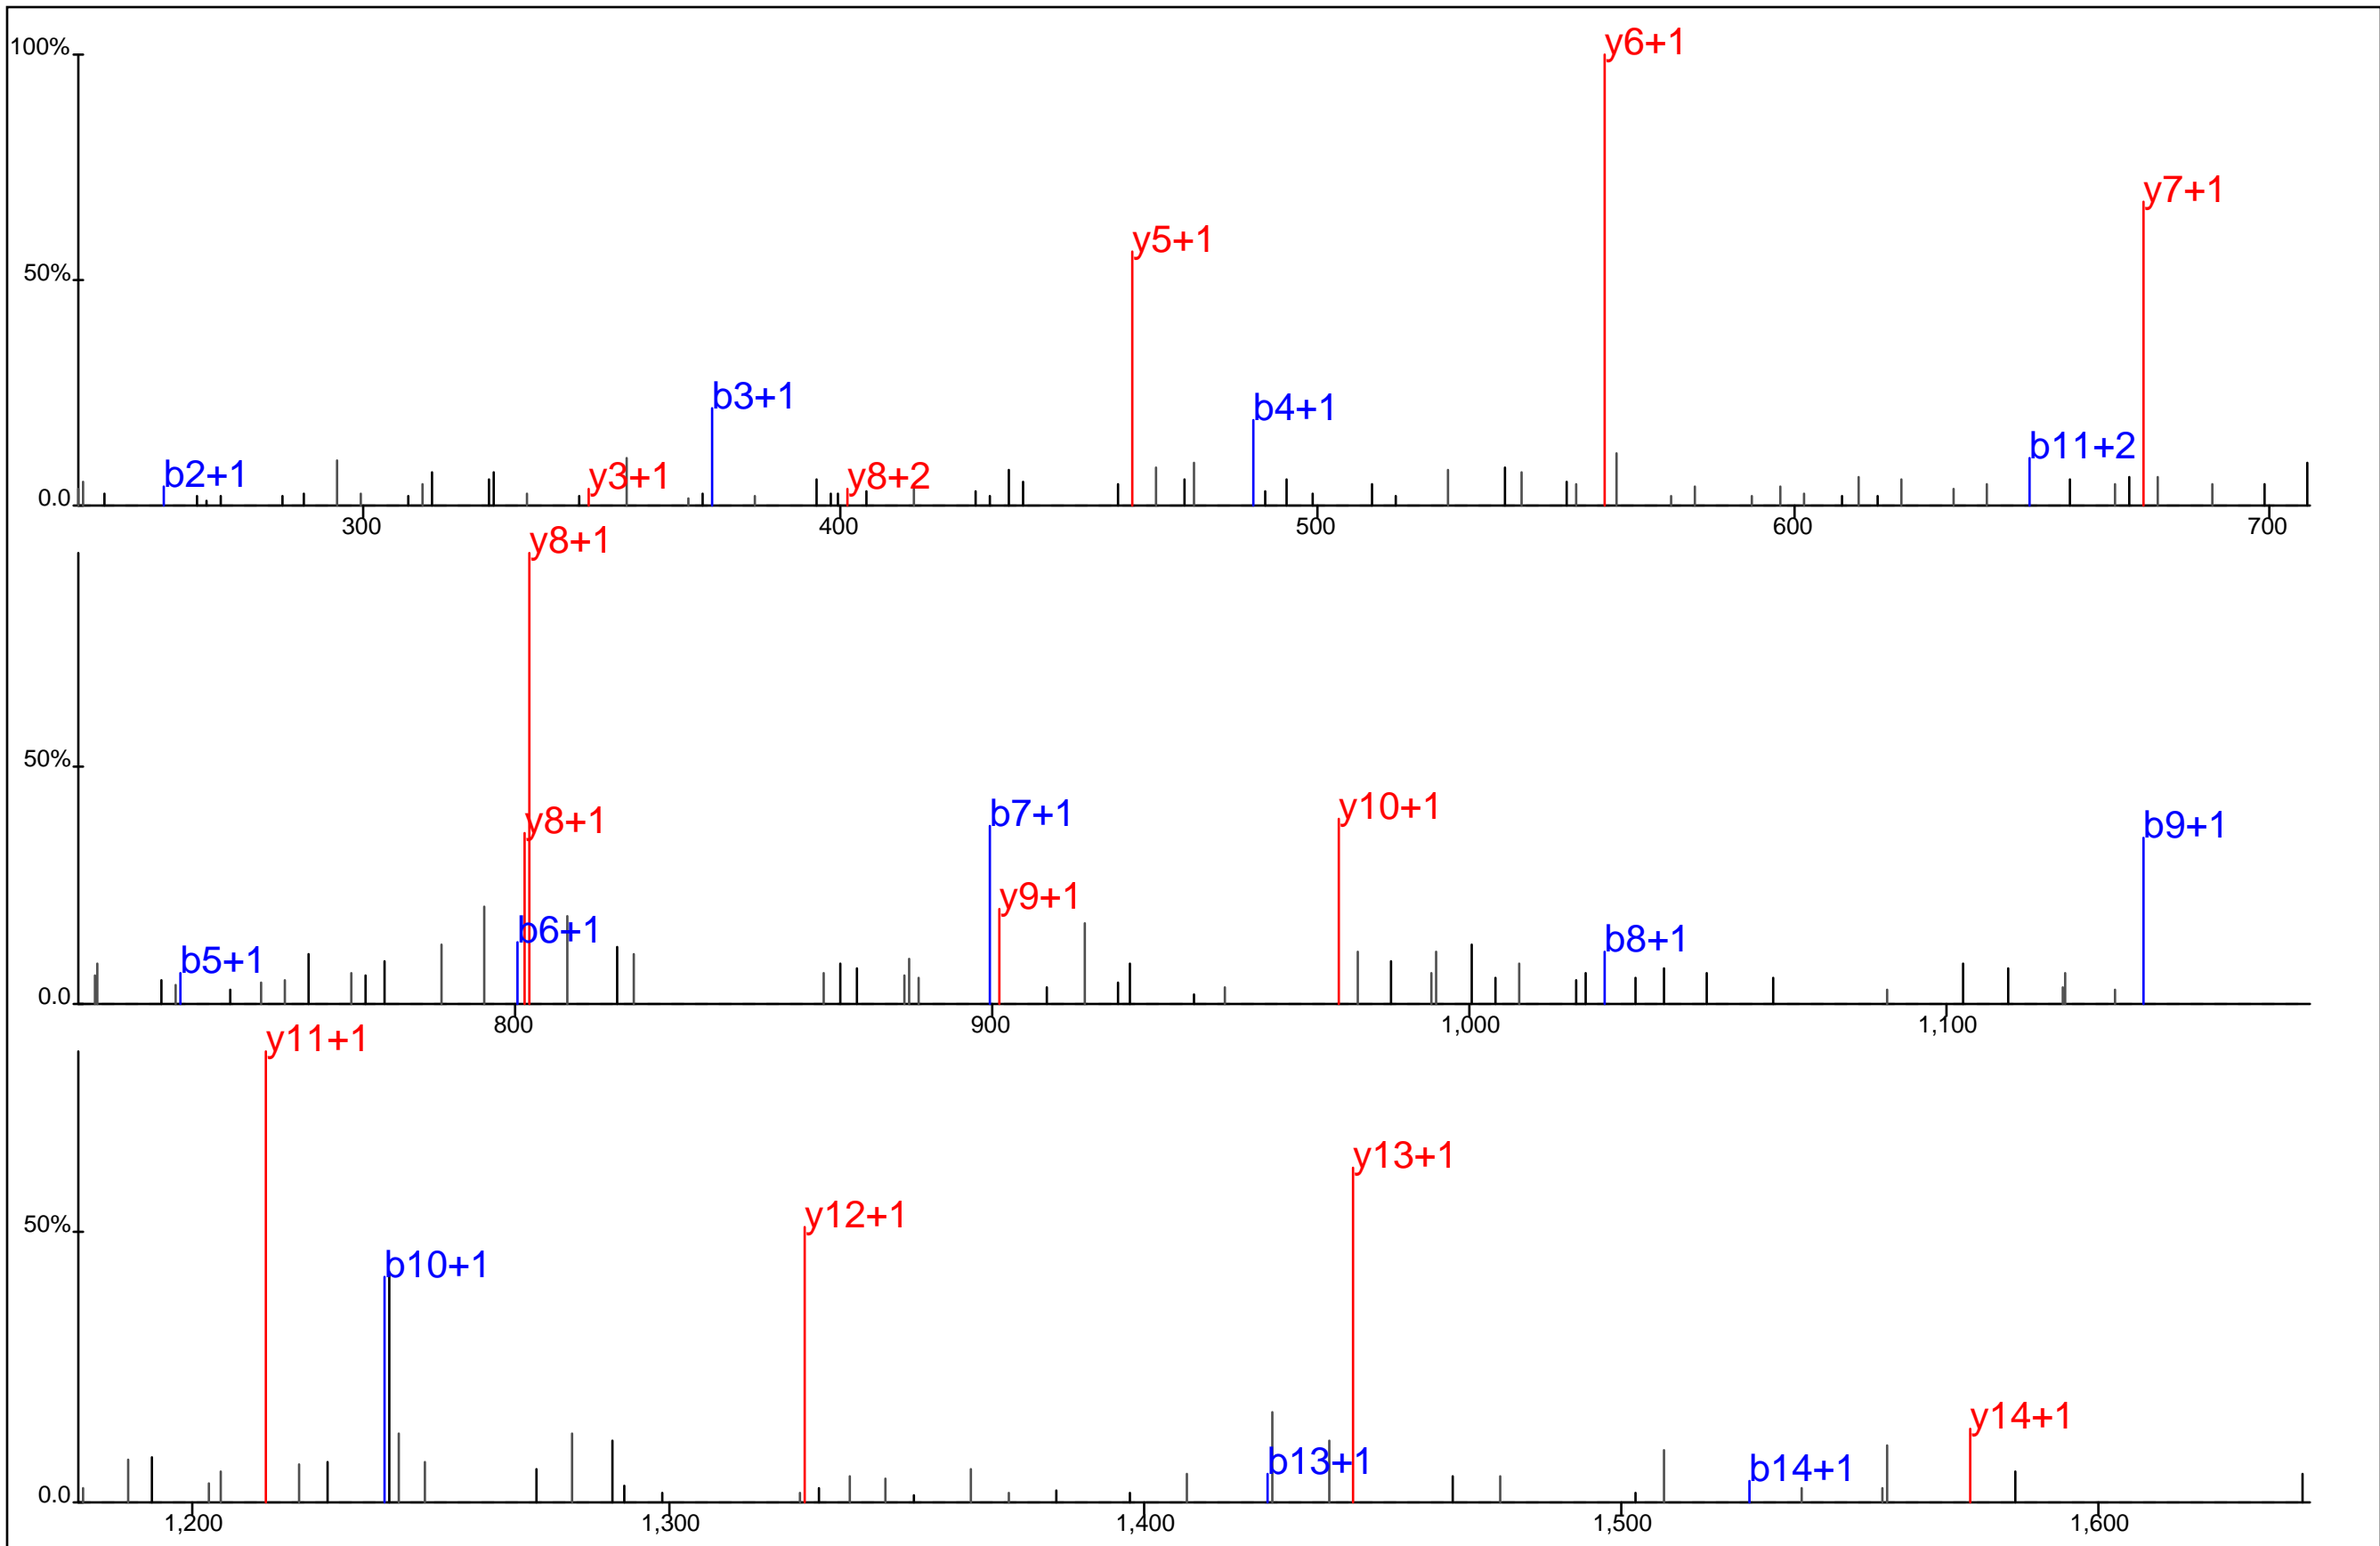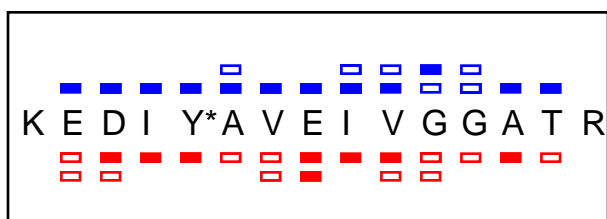

Protein Name: Heat shock 70kDa protein 4  
 gi Accession: 0  
 Precursor Mass: 850.9193+2  
 Delta Mass: 3.382 ppm  
 XCorr: 77.49

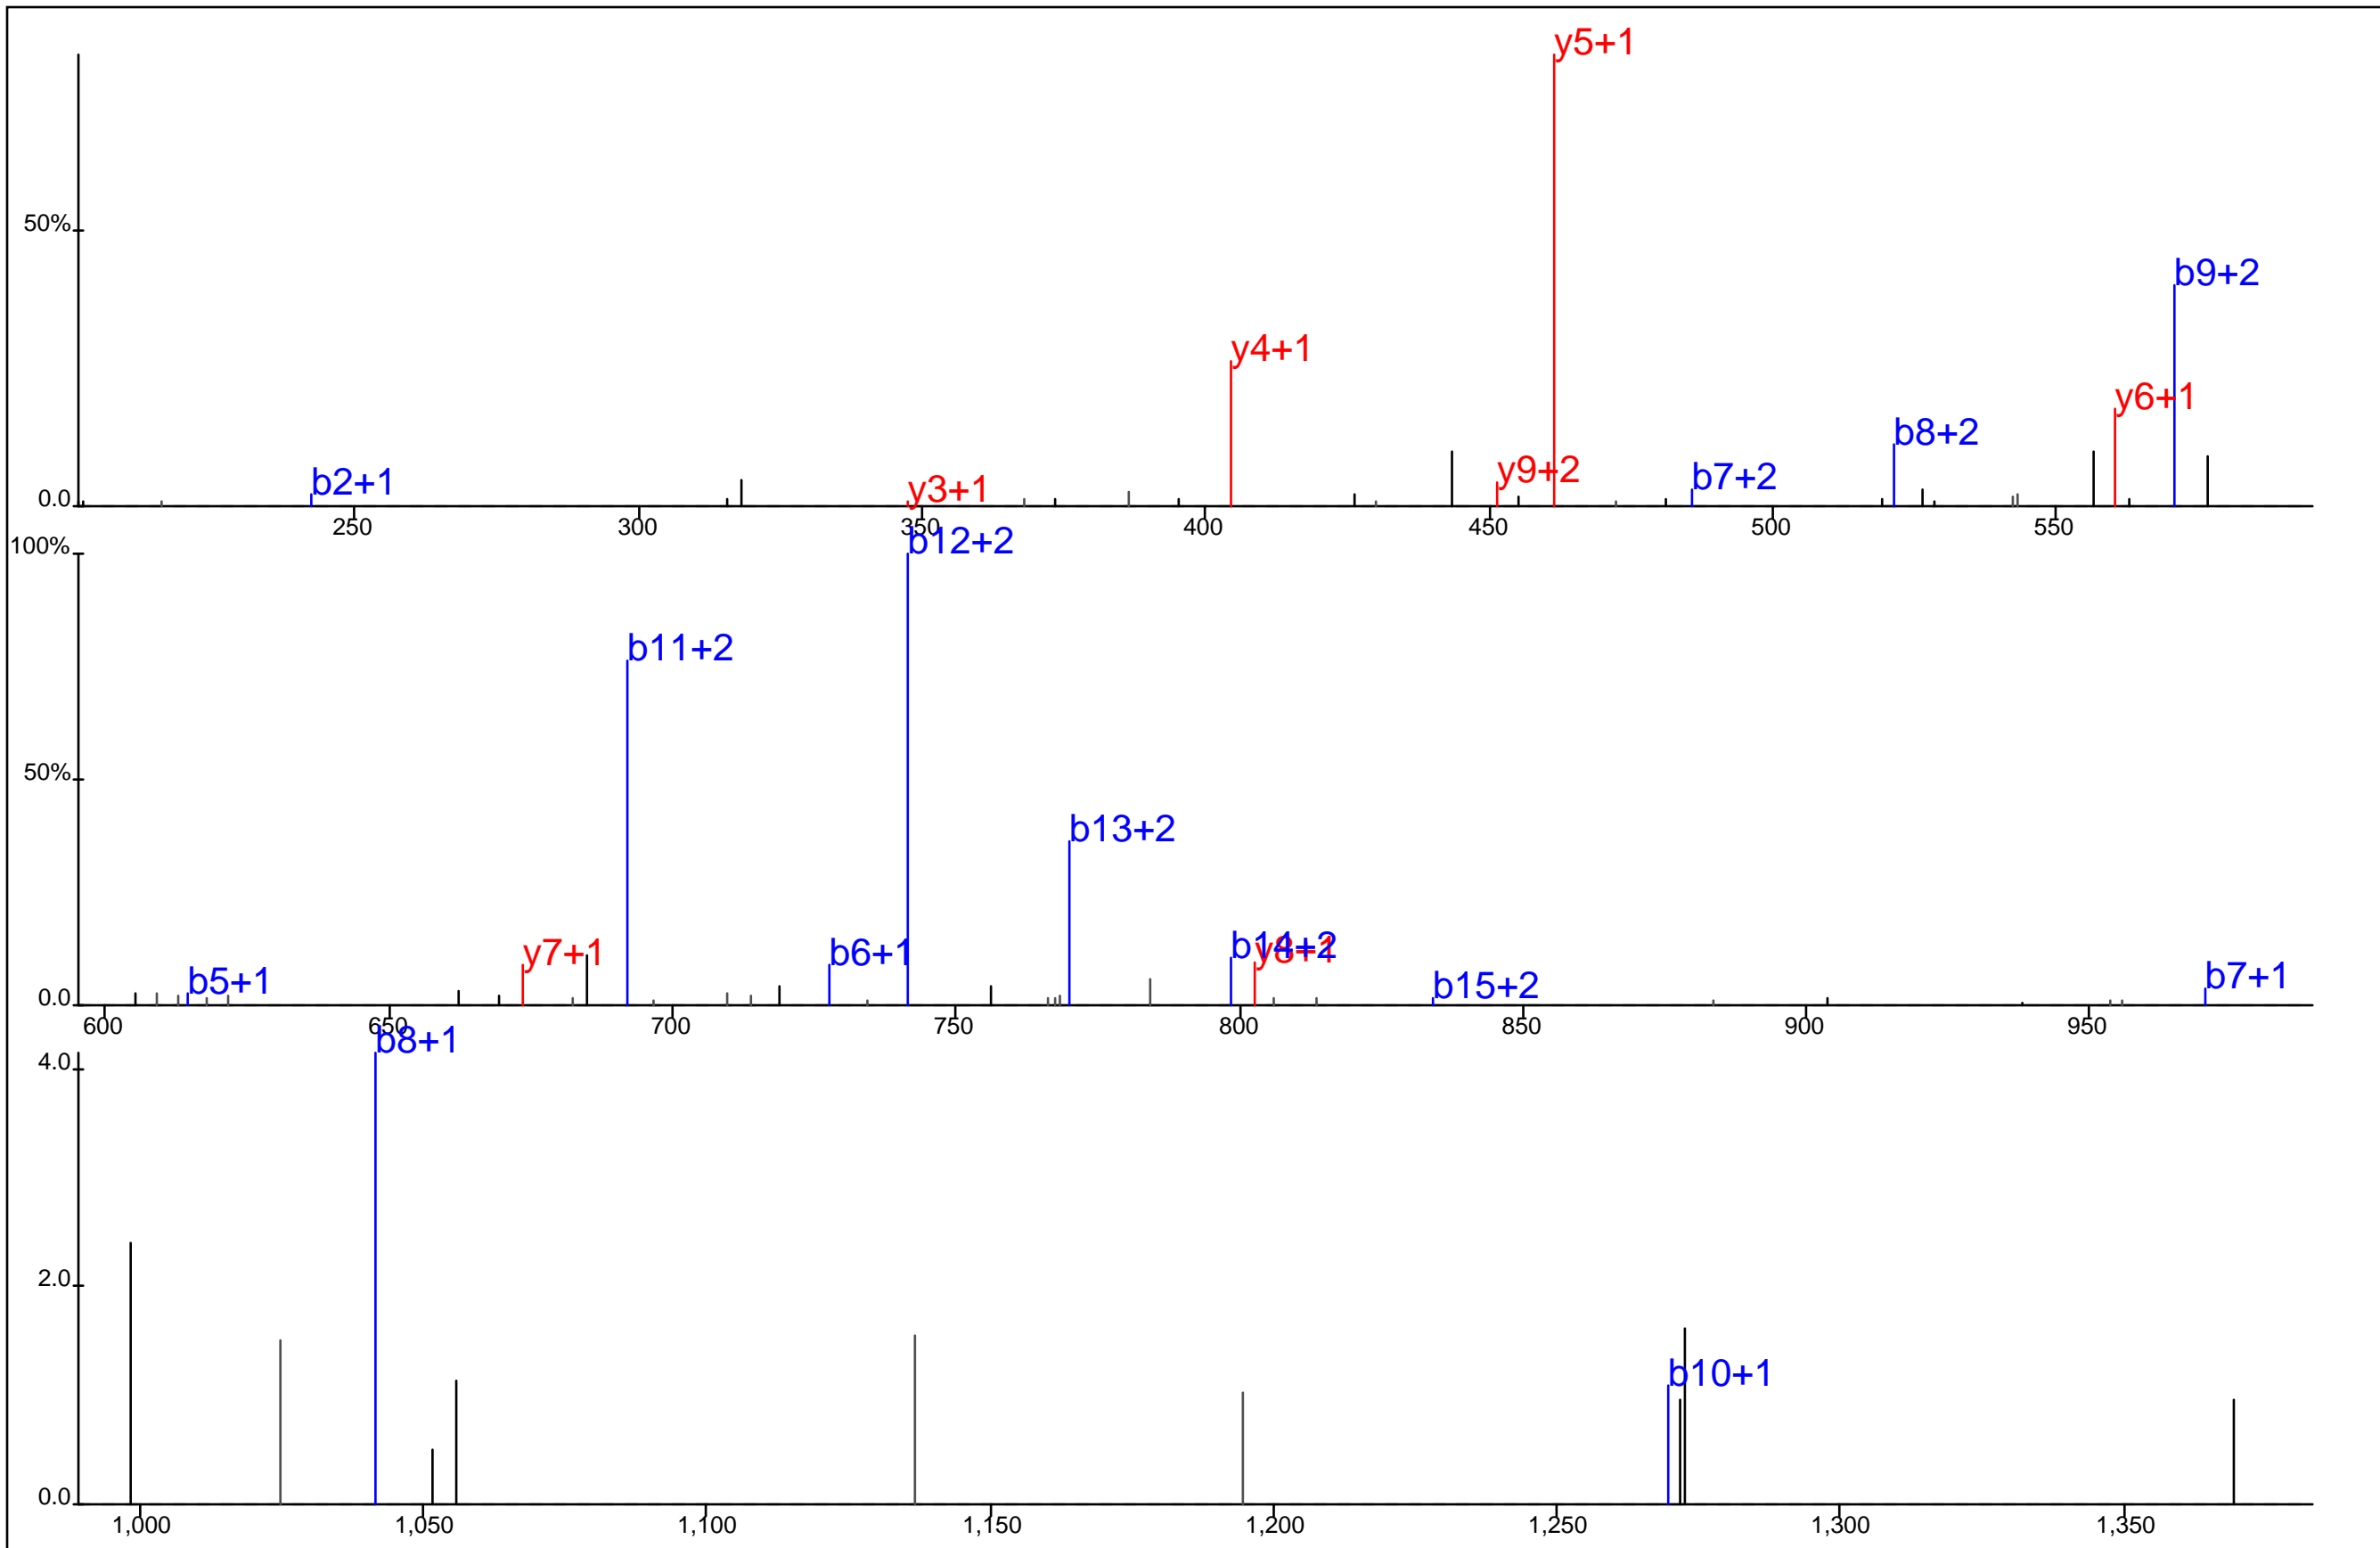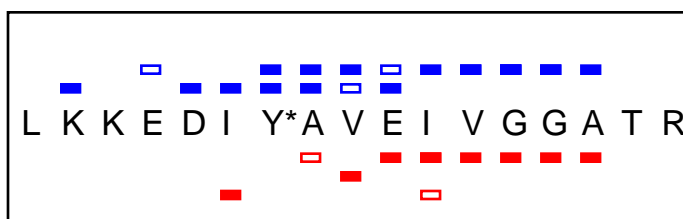

Protein Name: Heat shock 70kDa protein 4  
 gi Accession: 0  
 Precursor Mass: 648.0074+3  
 Delta Mass: 1.607 ppm  
 XCorr: 42.7



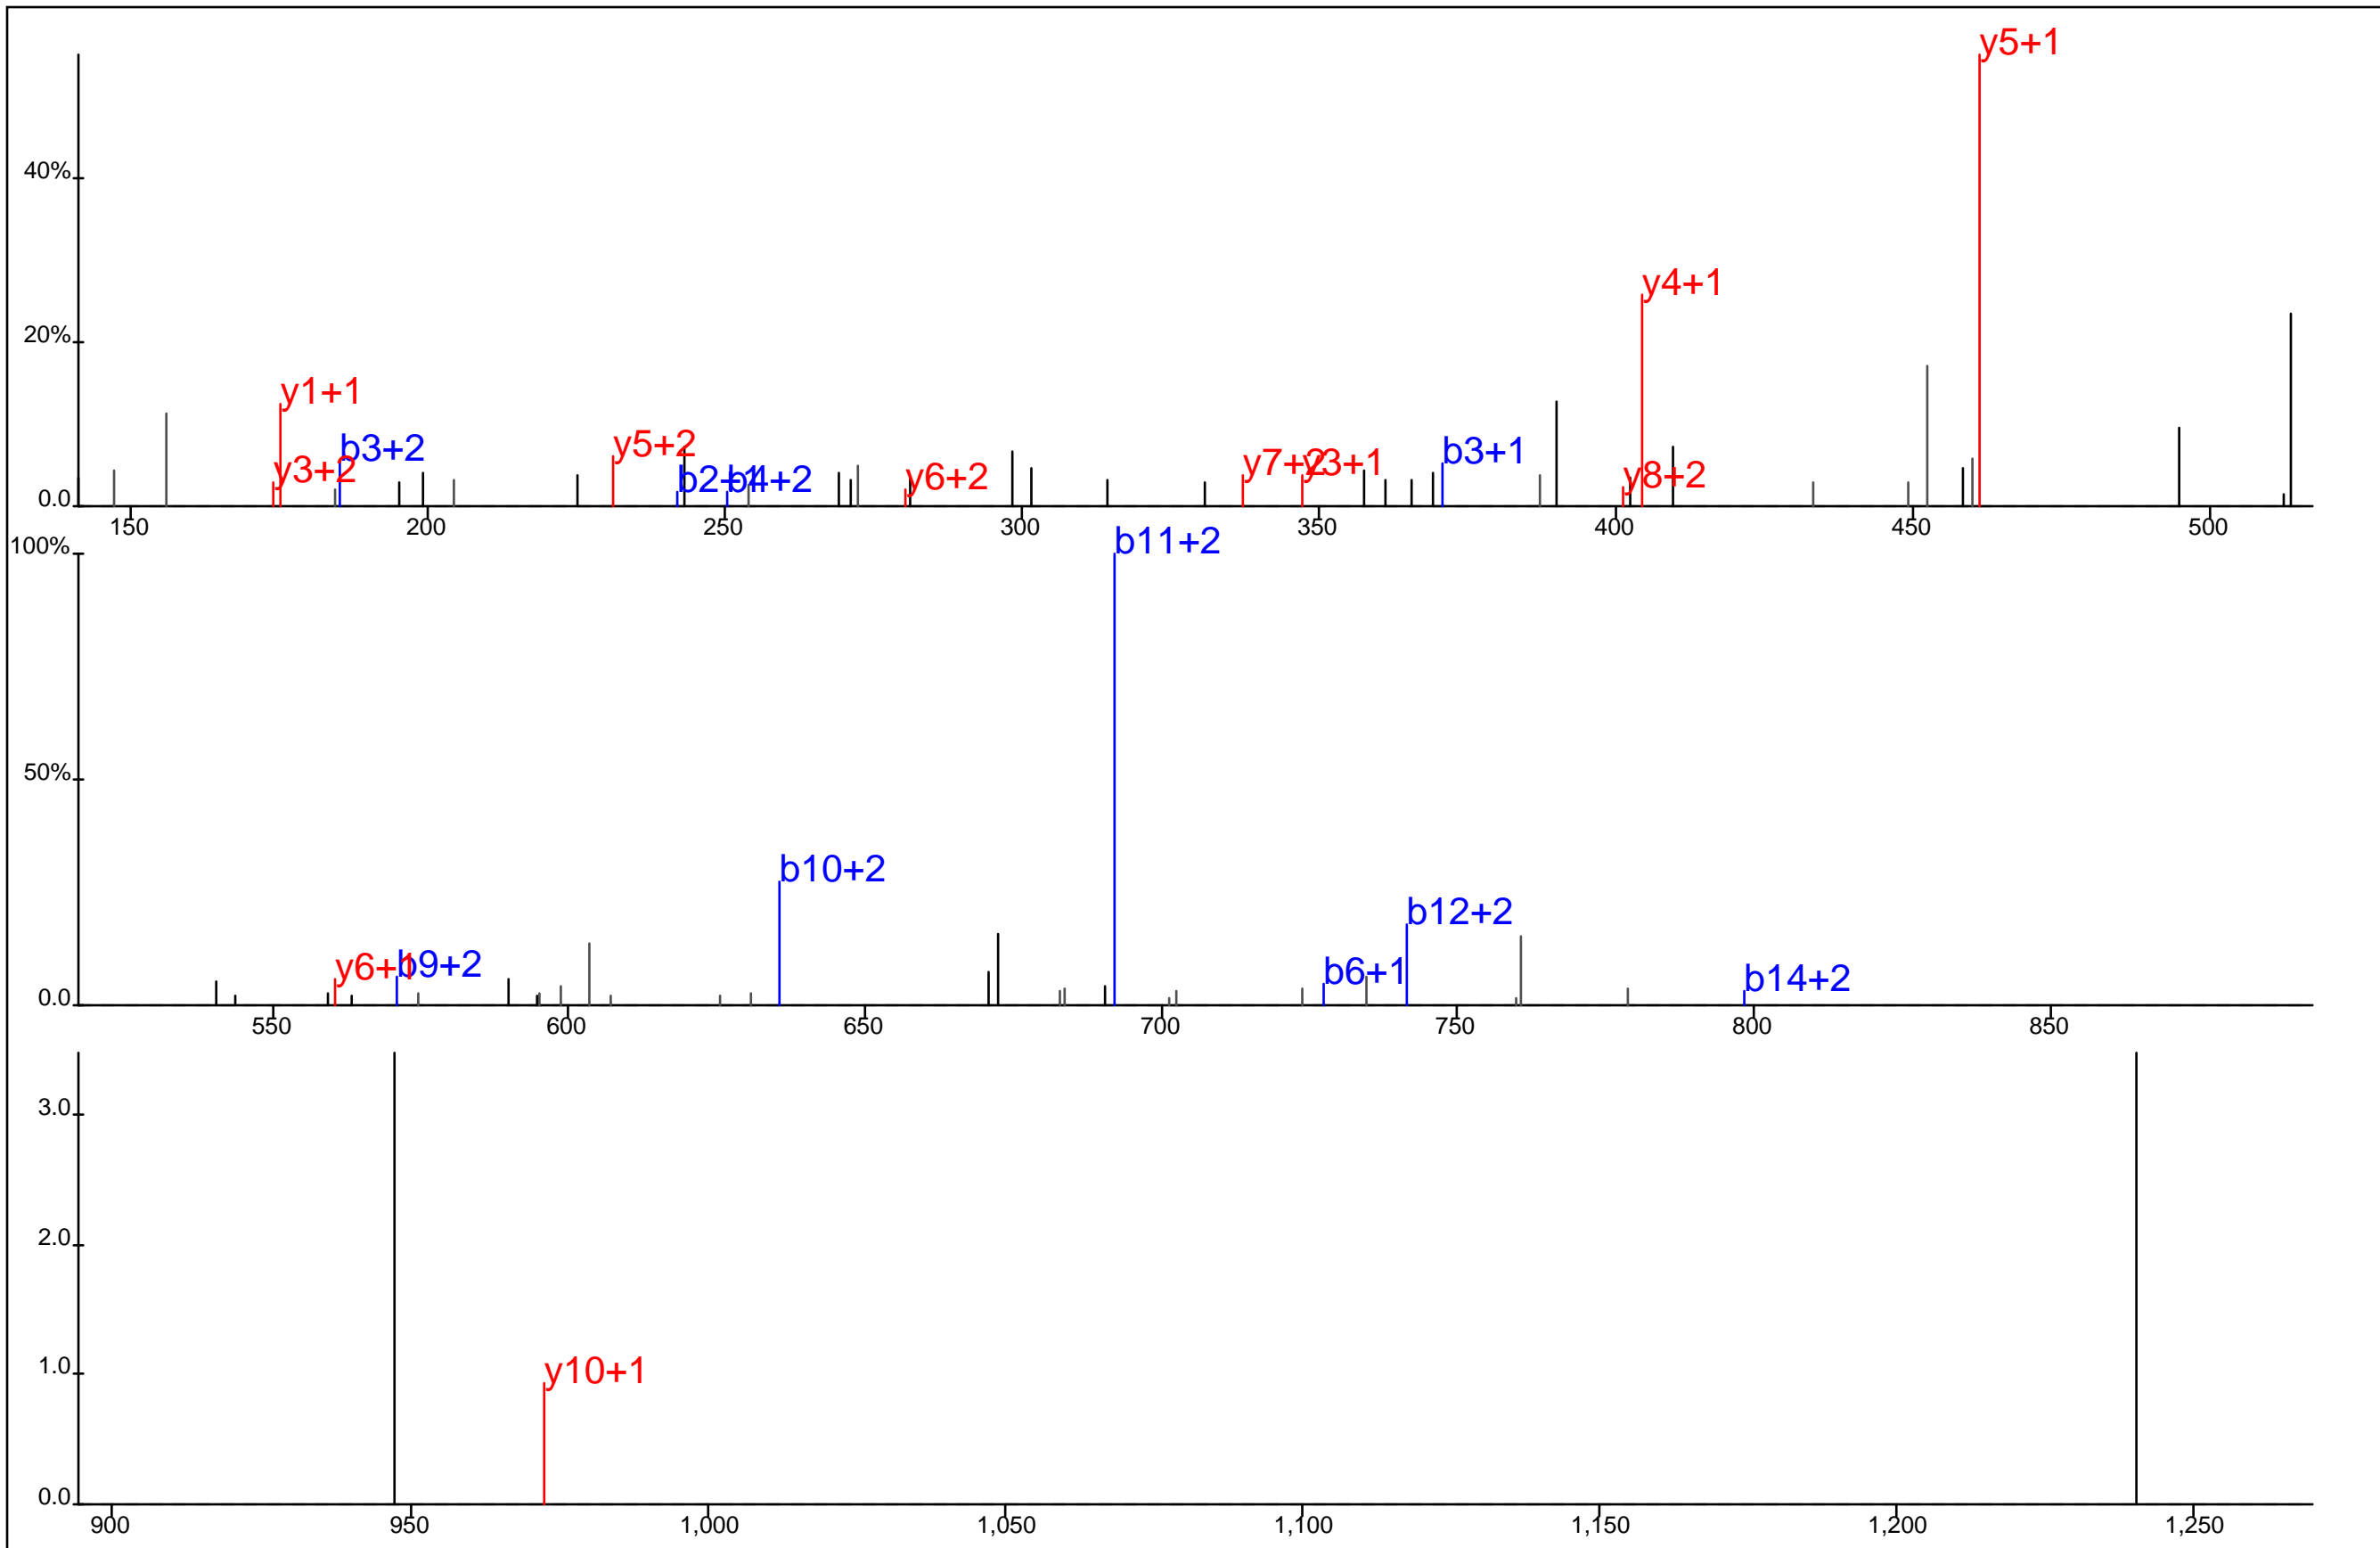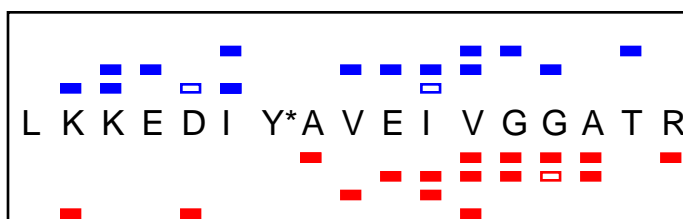

Protein Name: Heat shock 70kDa protein 4  
 gi Accession: 0  
 Precursor Mass: 486.2563+4  
 Delta Mass: 0.473 ppm  
 XCorr: 27.09

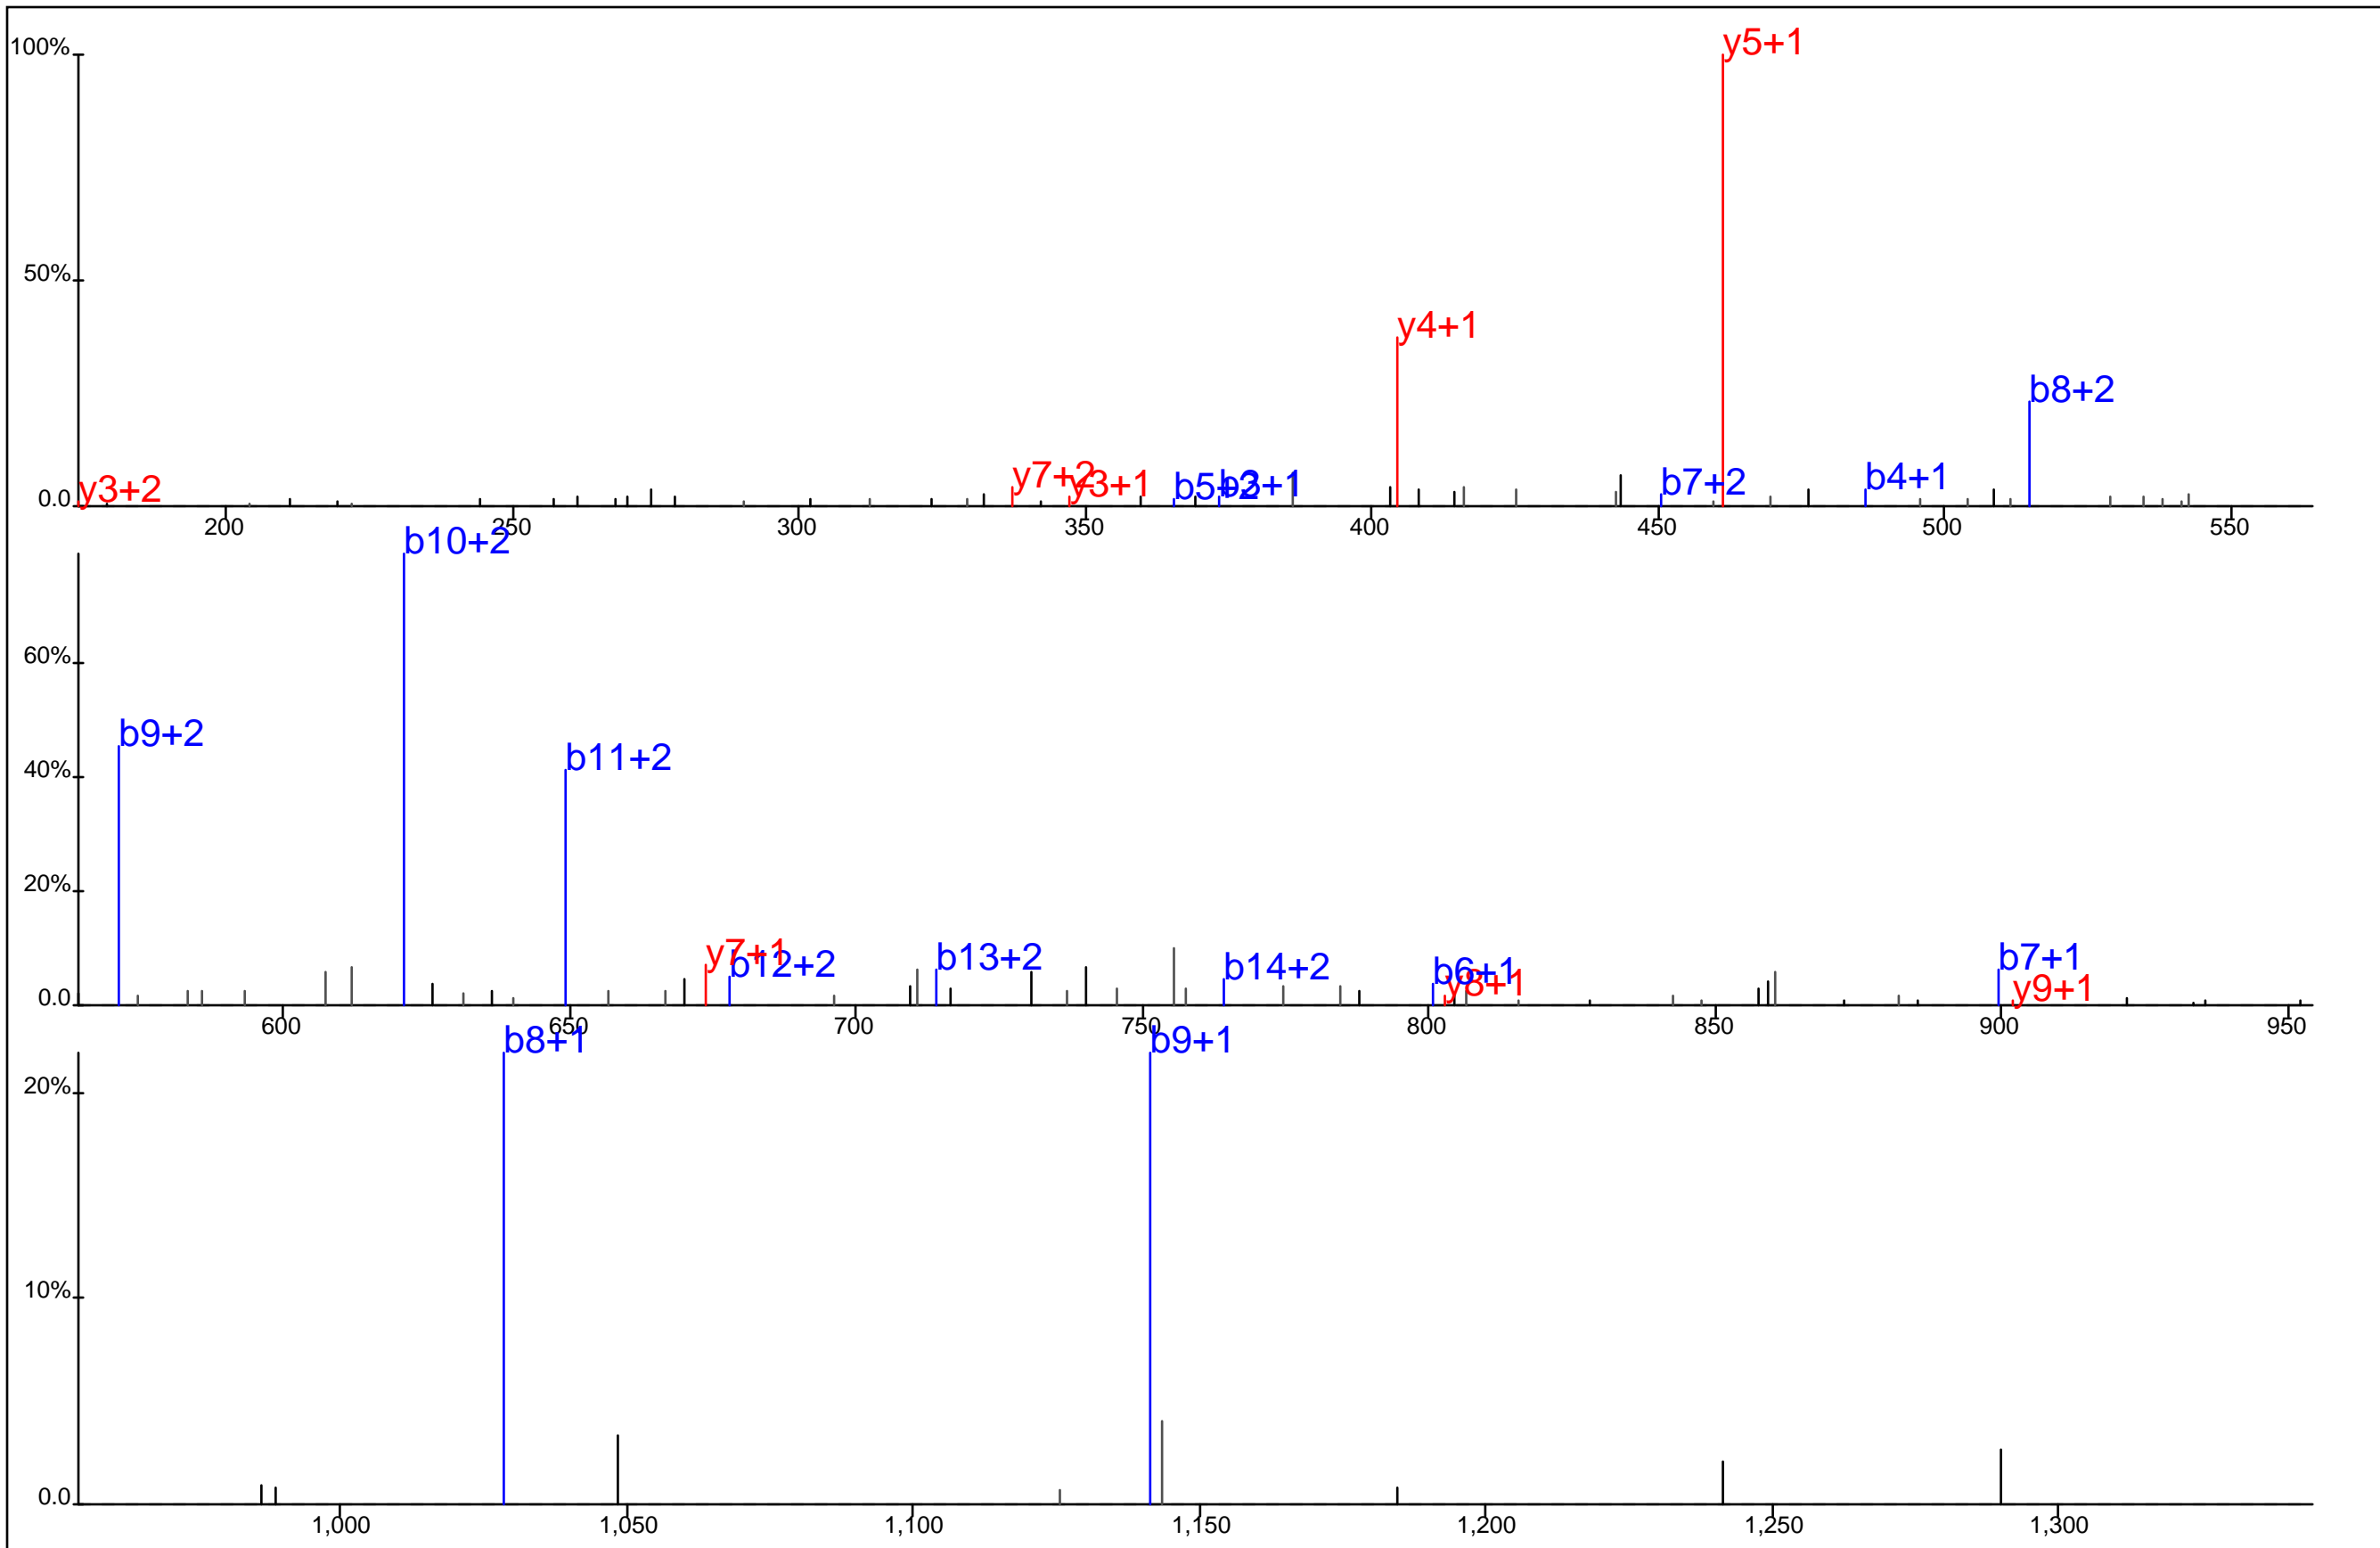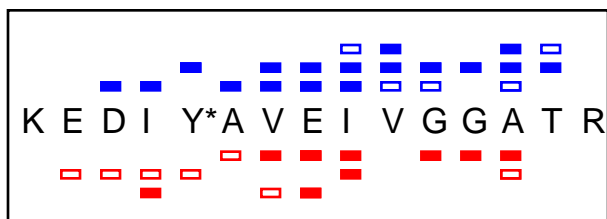

Protein Name: Heat shock 70kDa protein 4  
 gi Accession: 0  
 Precursor Mass: 567.6135+3  
 Delta Mass: 0.324 ppm  
 XCorr: 36.9

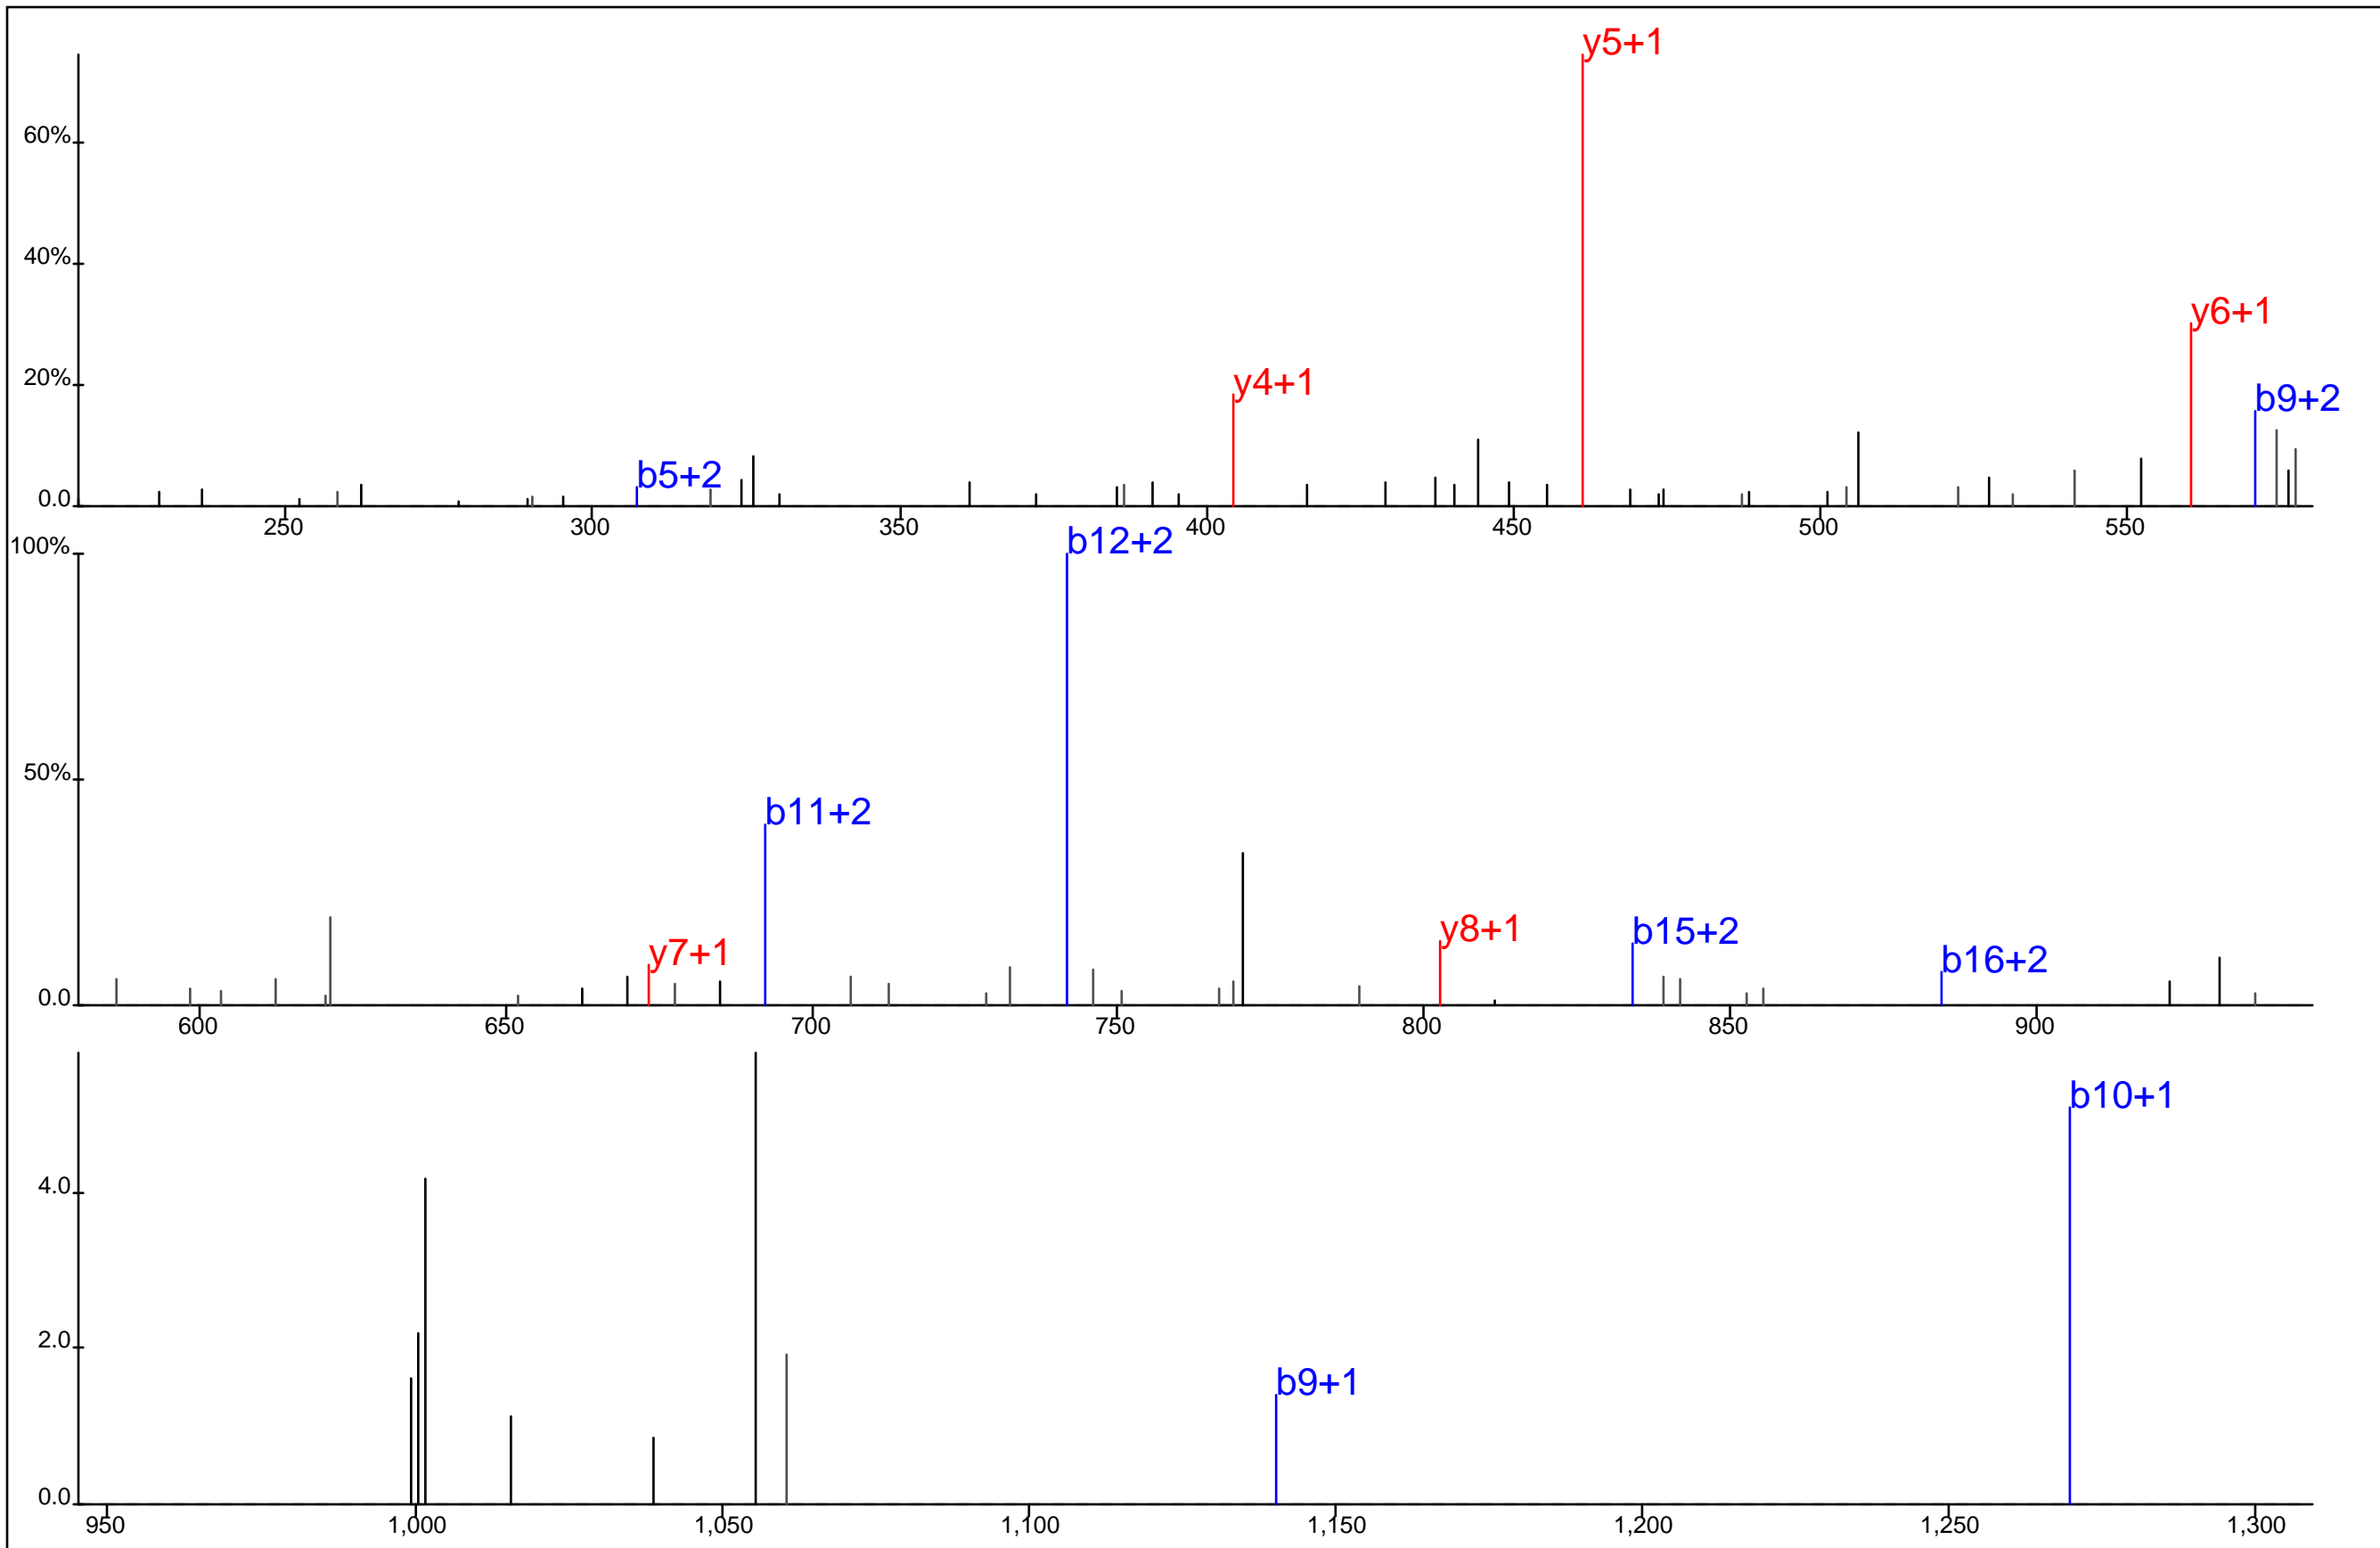

L K K E D I Y\* A V E I V G G A T R  
 [Red boxes under Y, A, V, E, I, V, G, G, A, T]  
 [Blue boxes under L, K, K, E, D, I, Y, A, V, E, I, V, G, G, A, T, R]

Protein Name: Heat shock 70kDa protein 4  
 gi Accession: 0  
 Precursor Mass: 648.0073+3  
 Delta Mass: 1.513 ppm  
 XCorr: 28.84

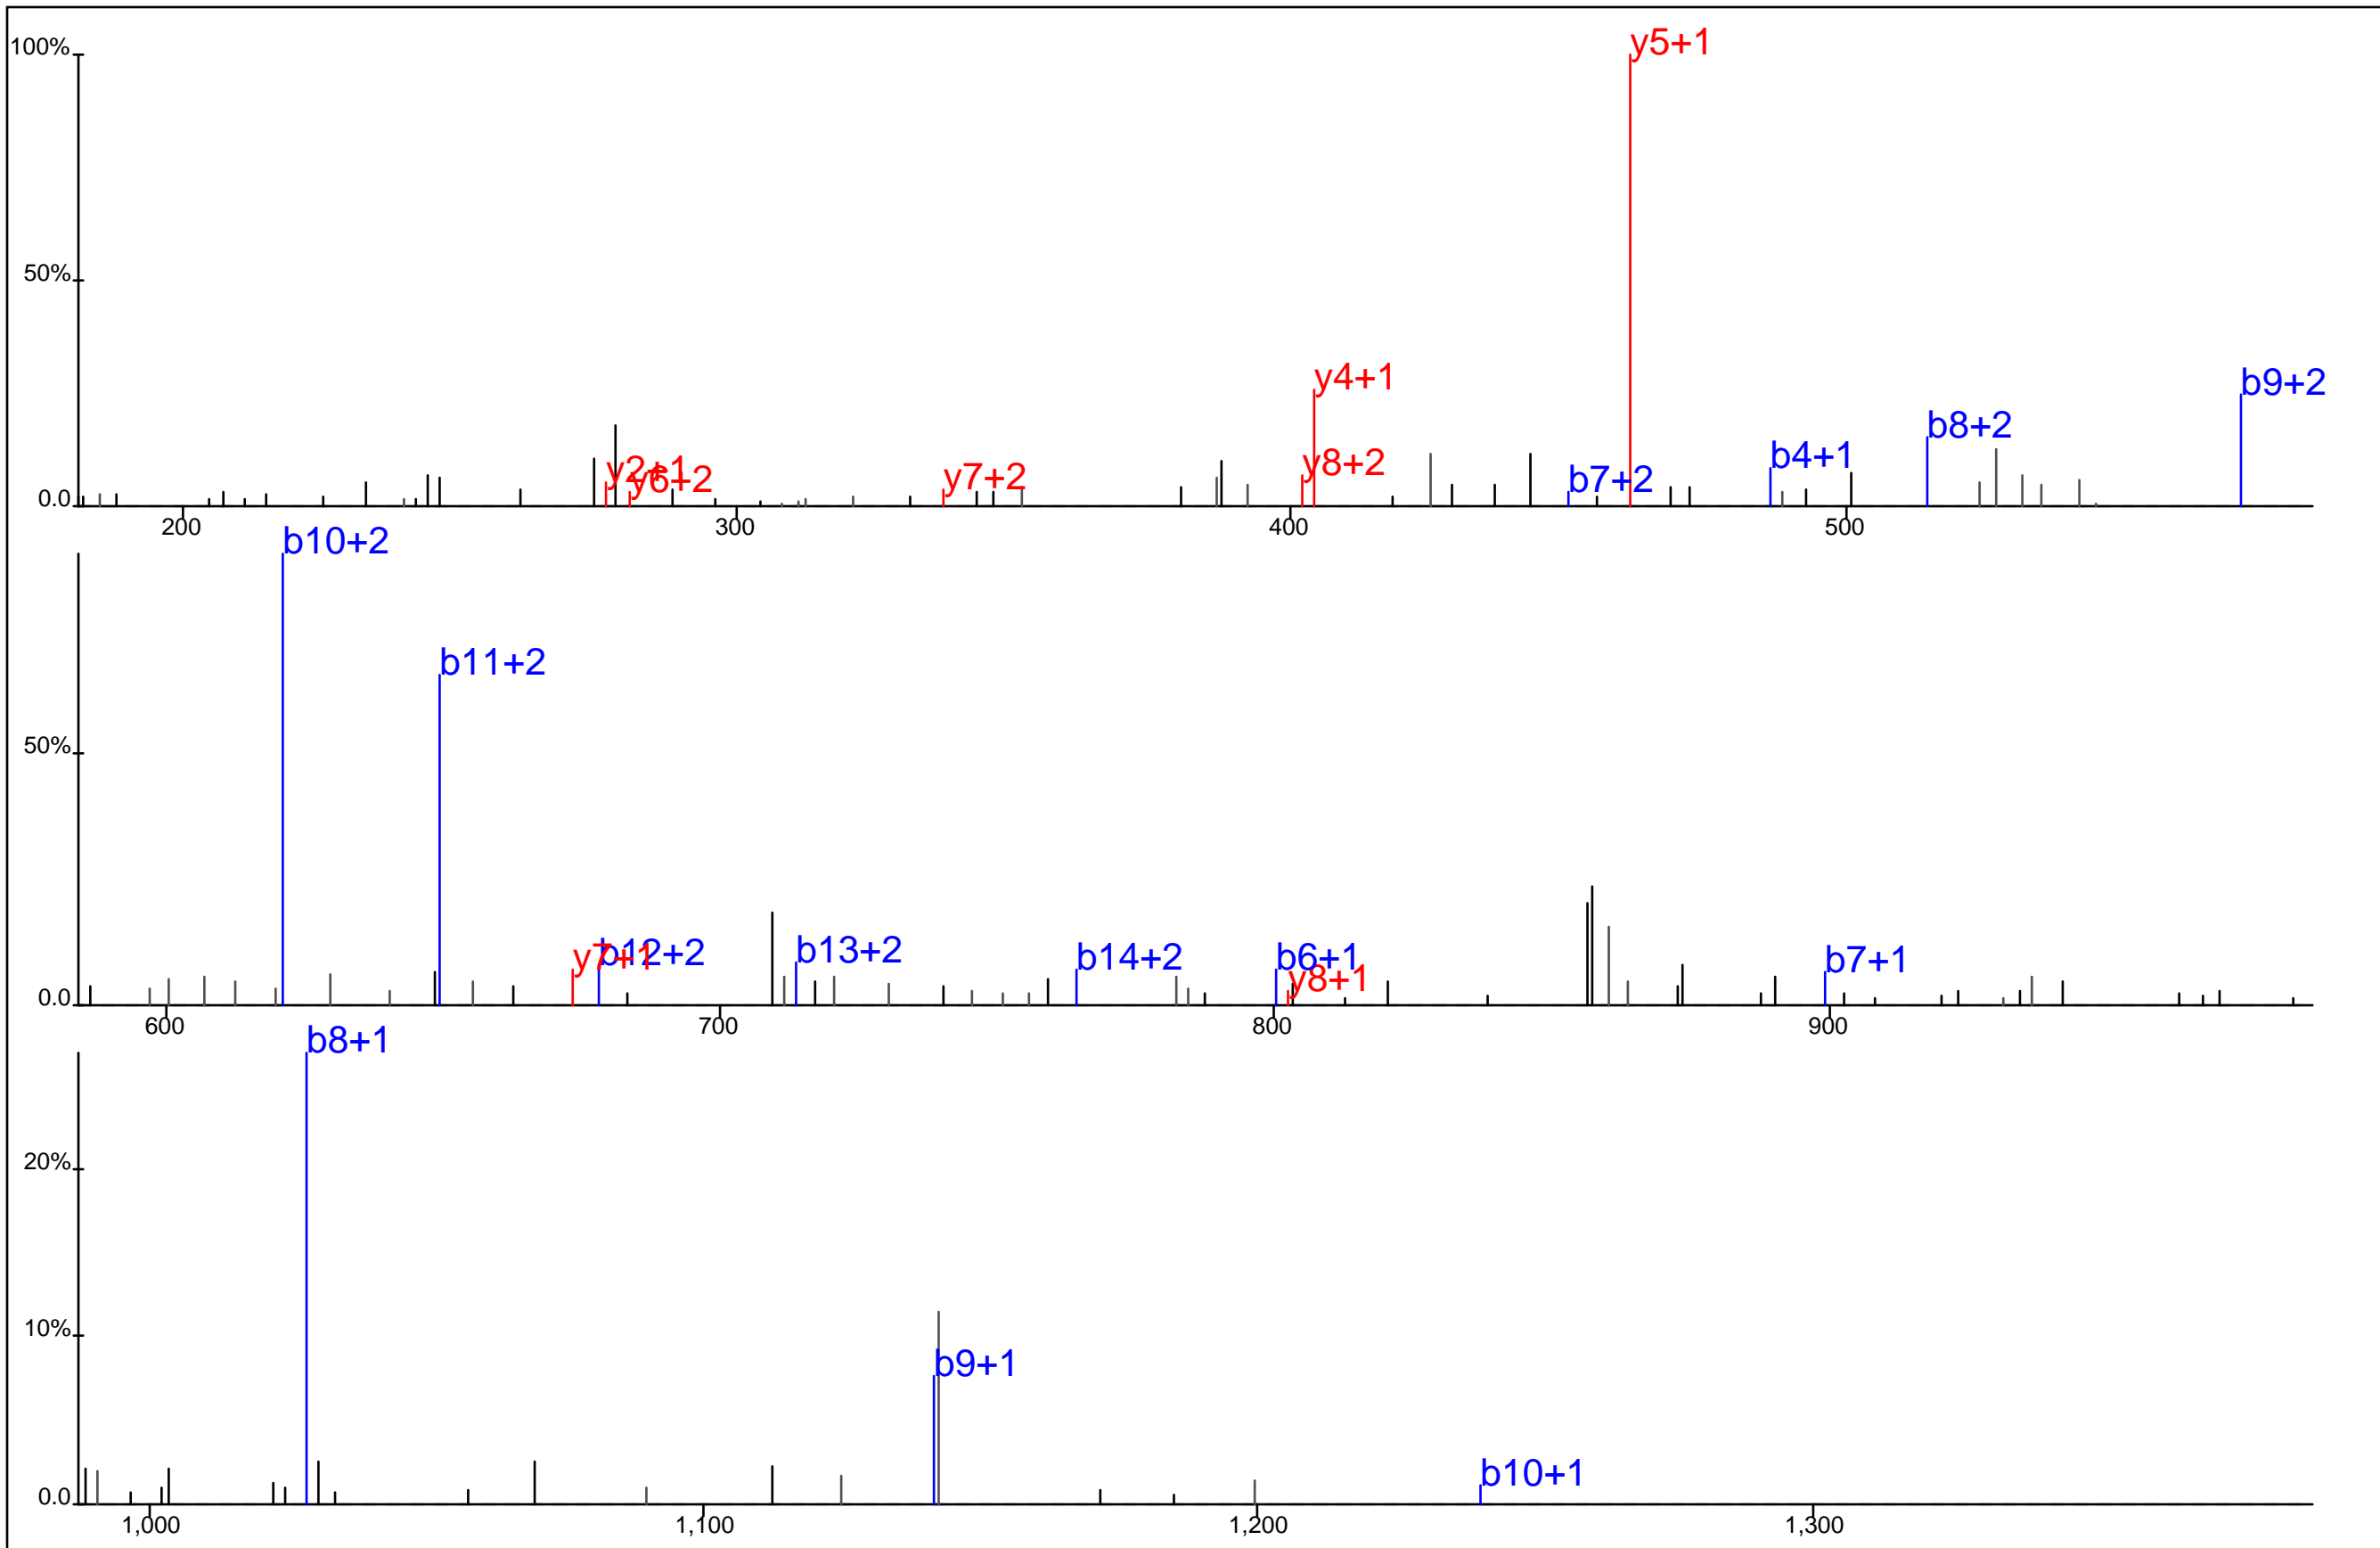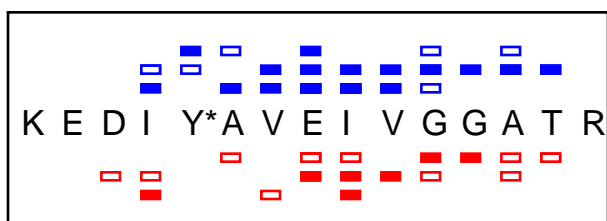

Protein Name: Heat shock 70kDa protein 4  
 gi Accession: 0  
 Precursor Mass: 567.6139+3  
 Delta Mass: 0.971 ppm  
 XCorr: 29.0

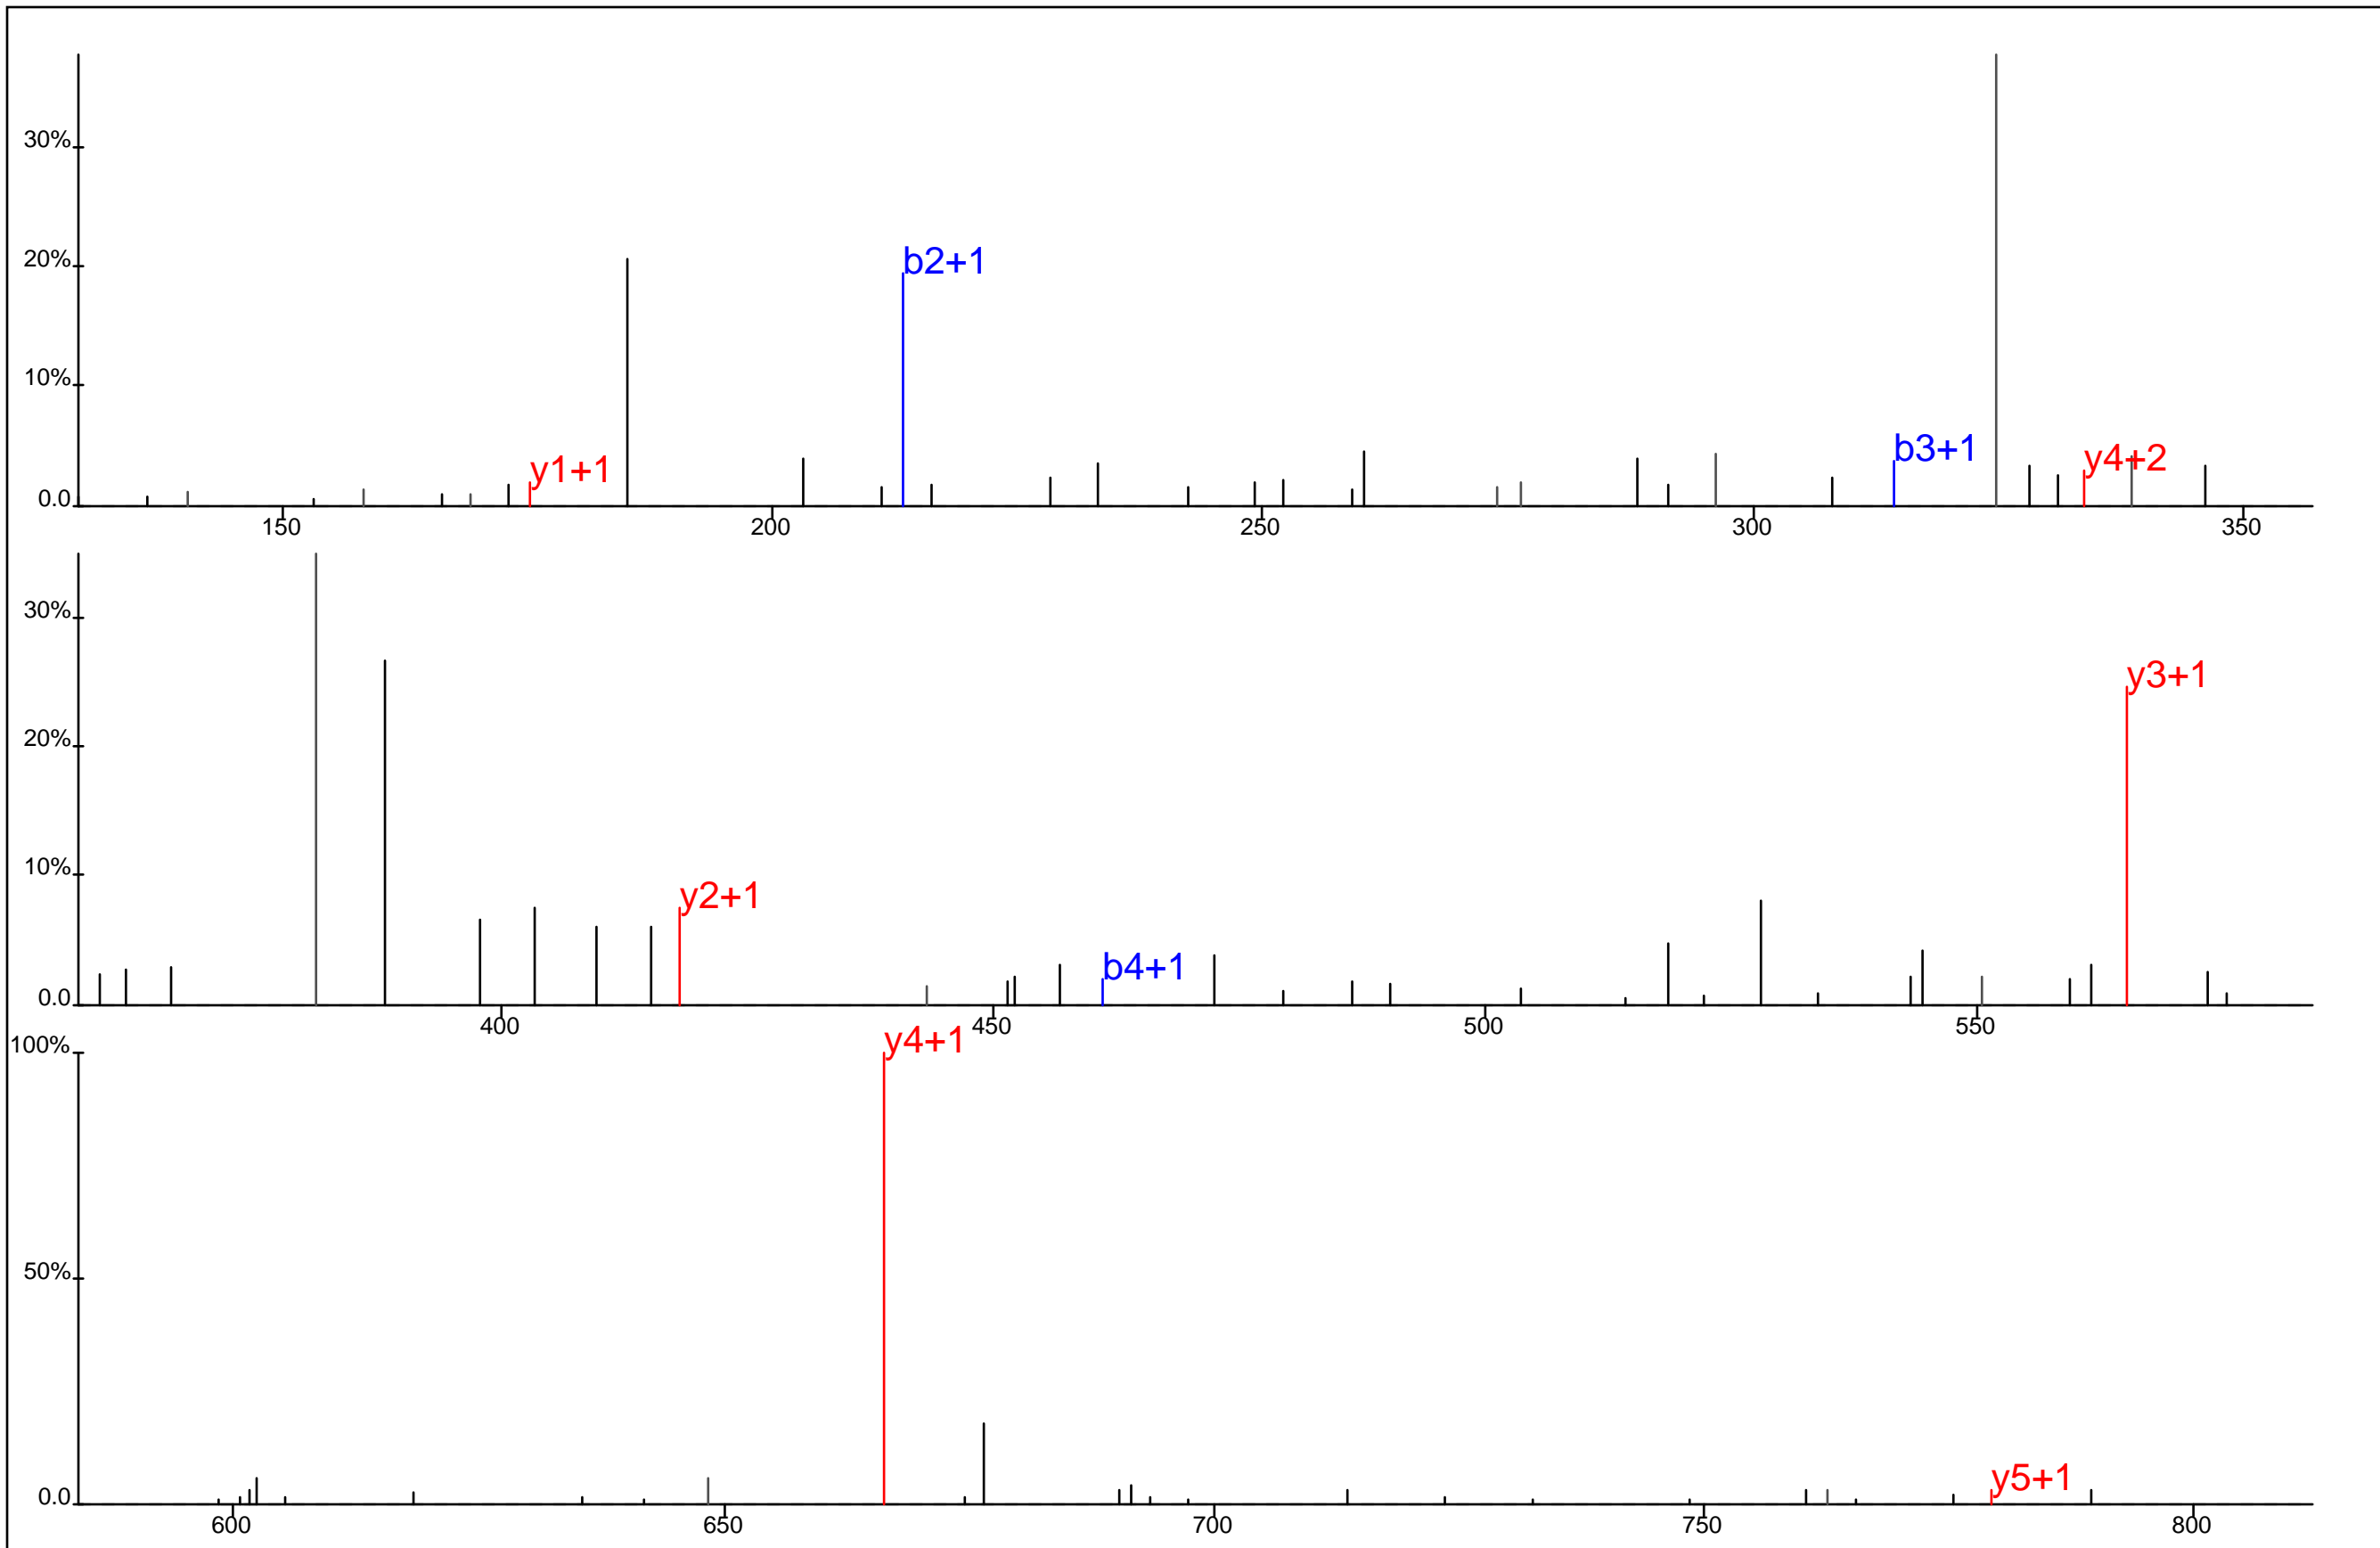

□ ■ □ □  
 V L T F Y\* R  
□ ■ □ □

Protein Name: Heat shock 70kDa protein 4  
 gi Accession: 0  
 Precursor Mass: 439.7120+2  
 Delta Mass: 0.428 ppm  
 XCorr: 20.24

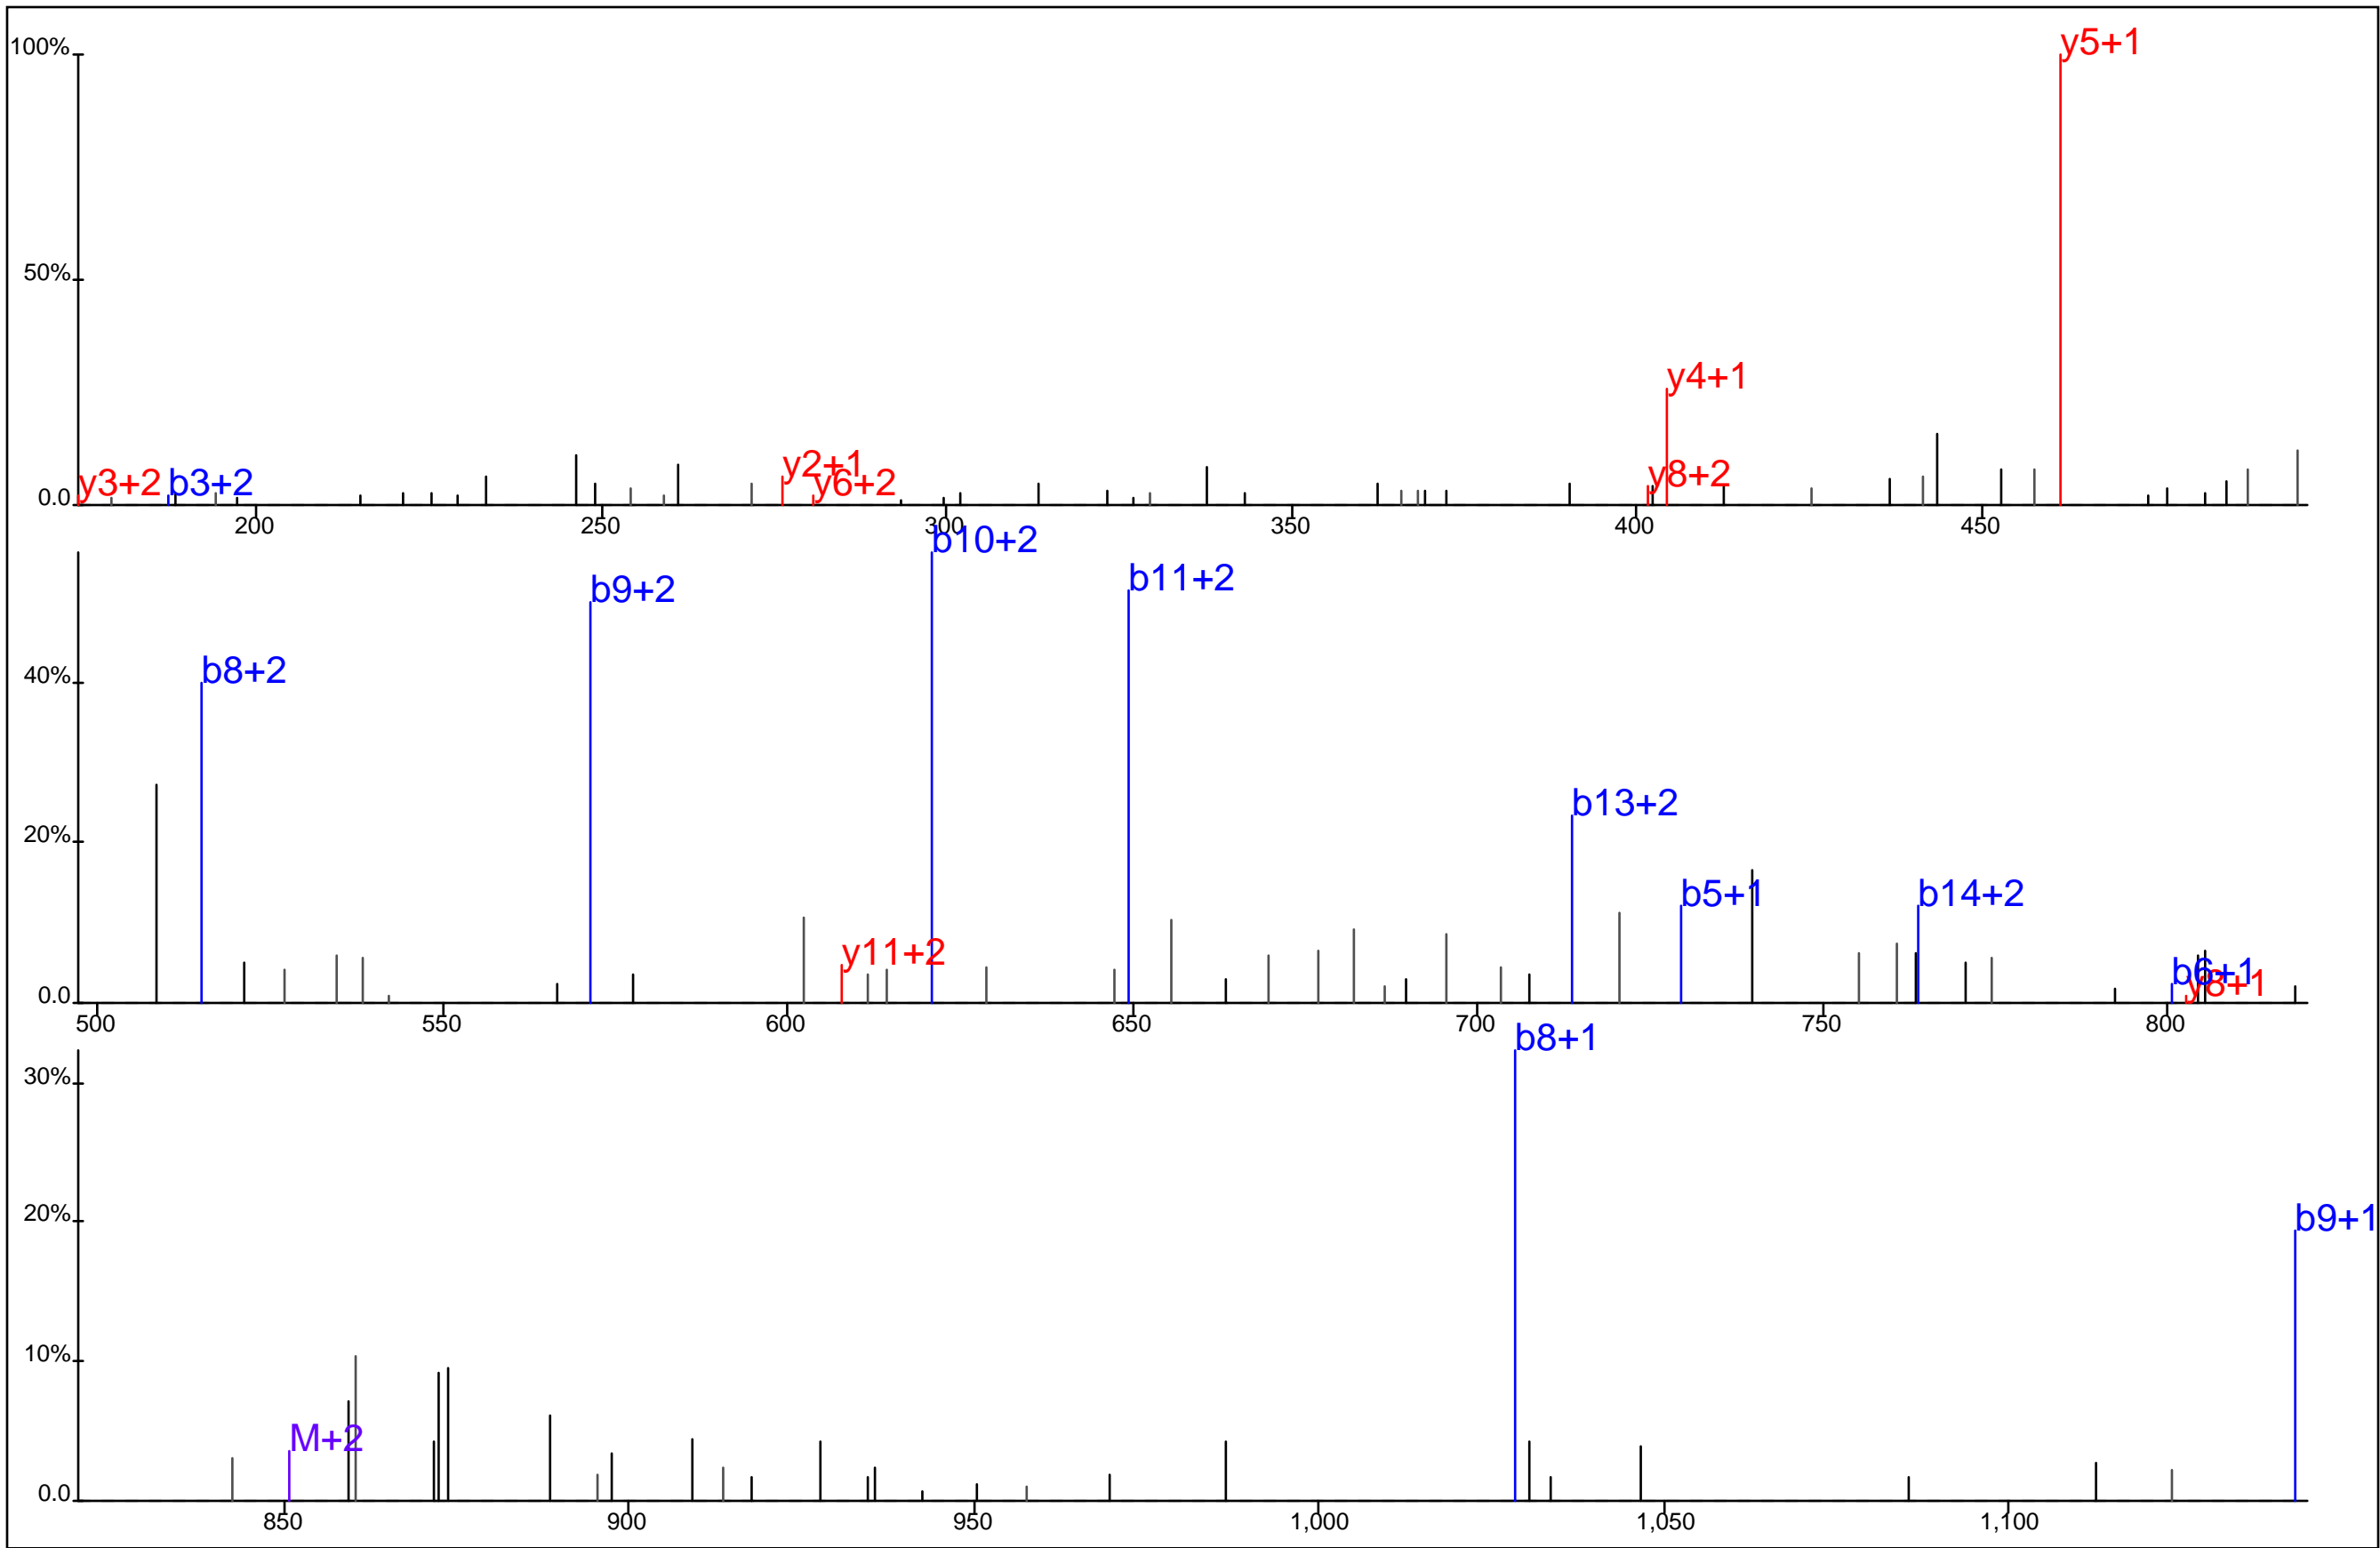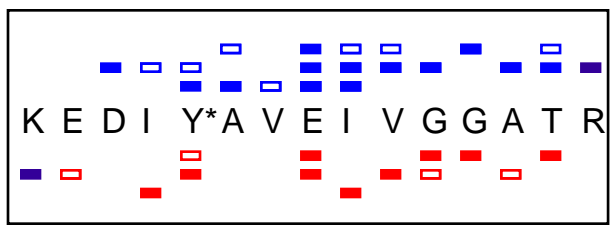

Protein Name: Heat shock 70kDa protein 4  
 gi Accession: 0  
 Precursor Mass: 567.6124+3  
 Delta Mass: 1.720 ppm  
 XCorr: 21.96

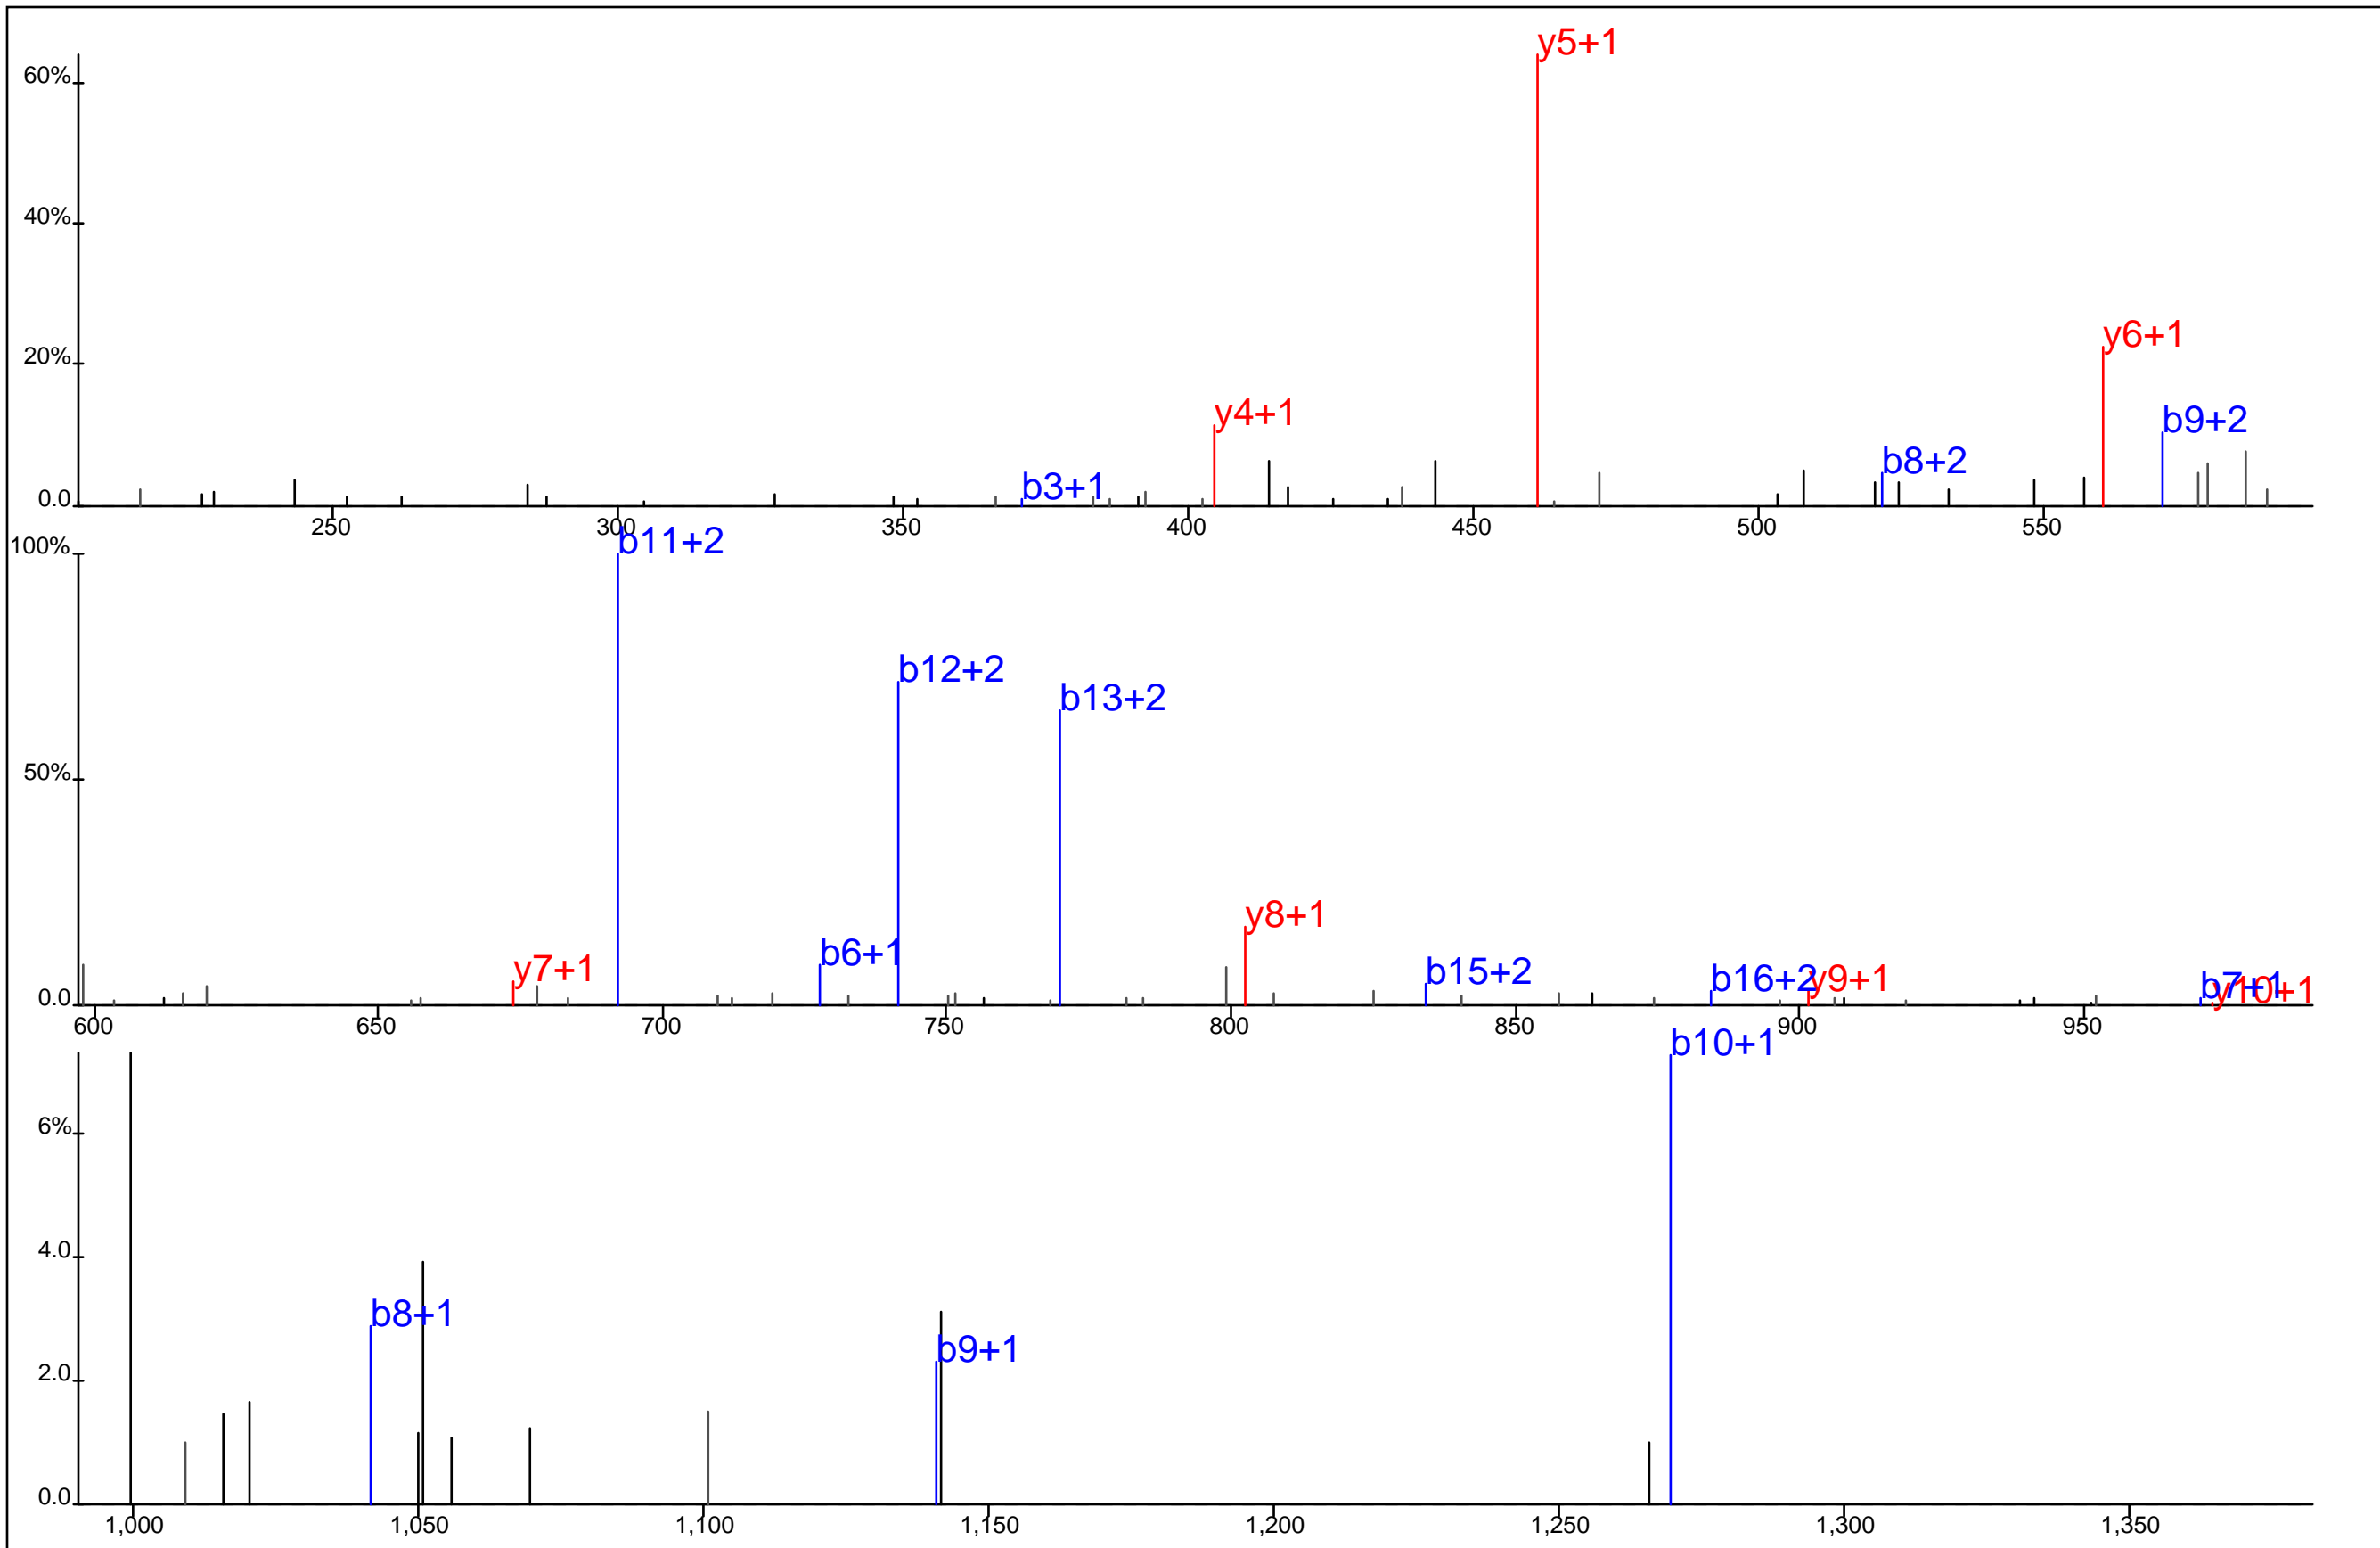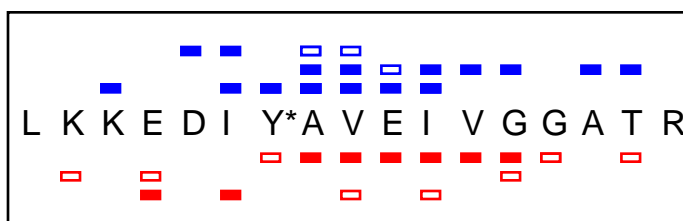

Protein Name: Heat shock 70kDa protein 4  
 gi Accession: 0  
 Precursor Mass: 648.0063+3  
 Delta Mass: 0.005 ppm  
 XCorr: 41.19

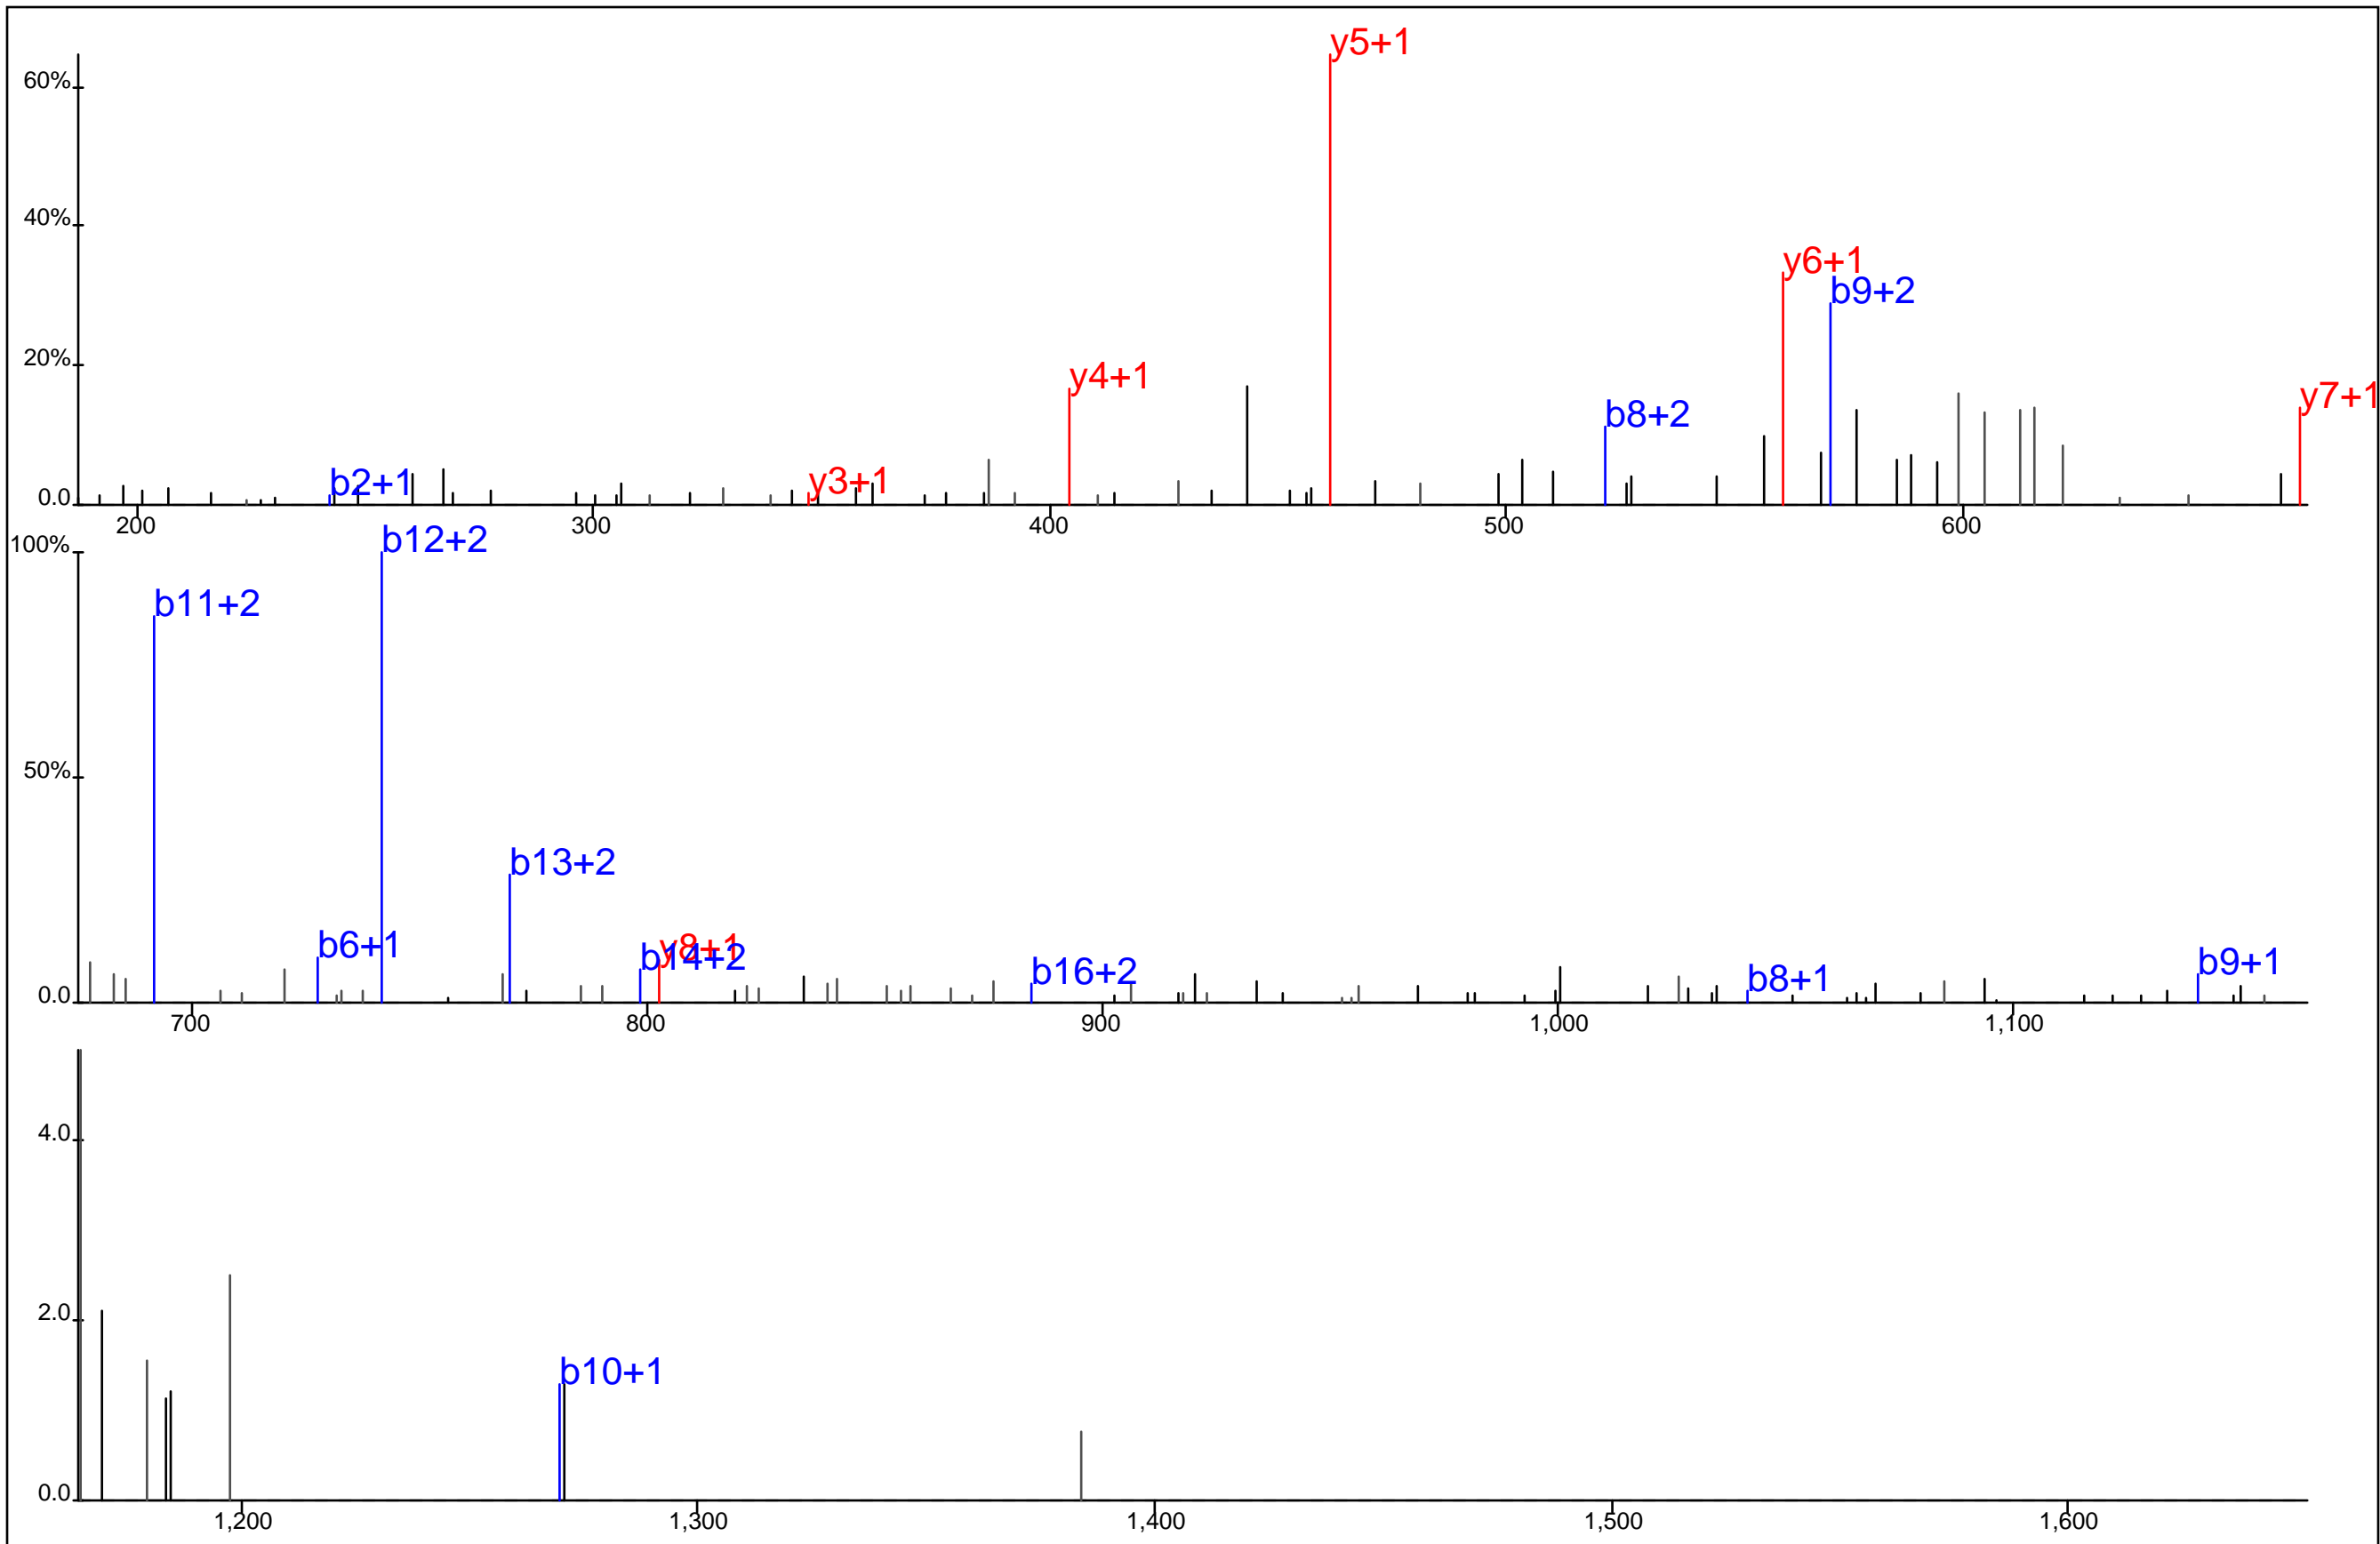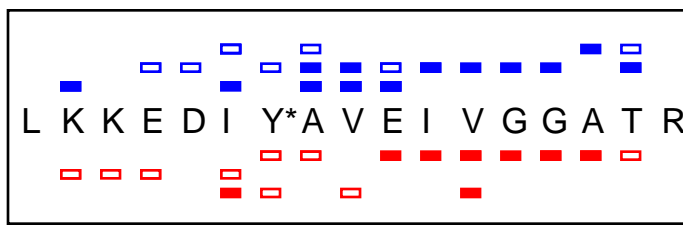

Protein Name: Heat shock 70kDa protein 4  
 gi Accession: 0  
 Precursor Mass: 648.0037+3  
 Delta Mass: 4.144 ppm  
 XCorr: 22.75



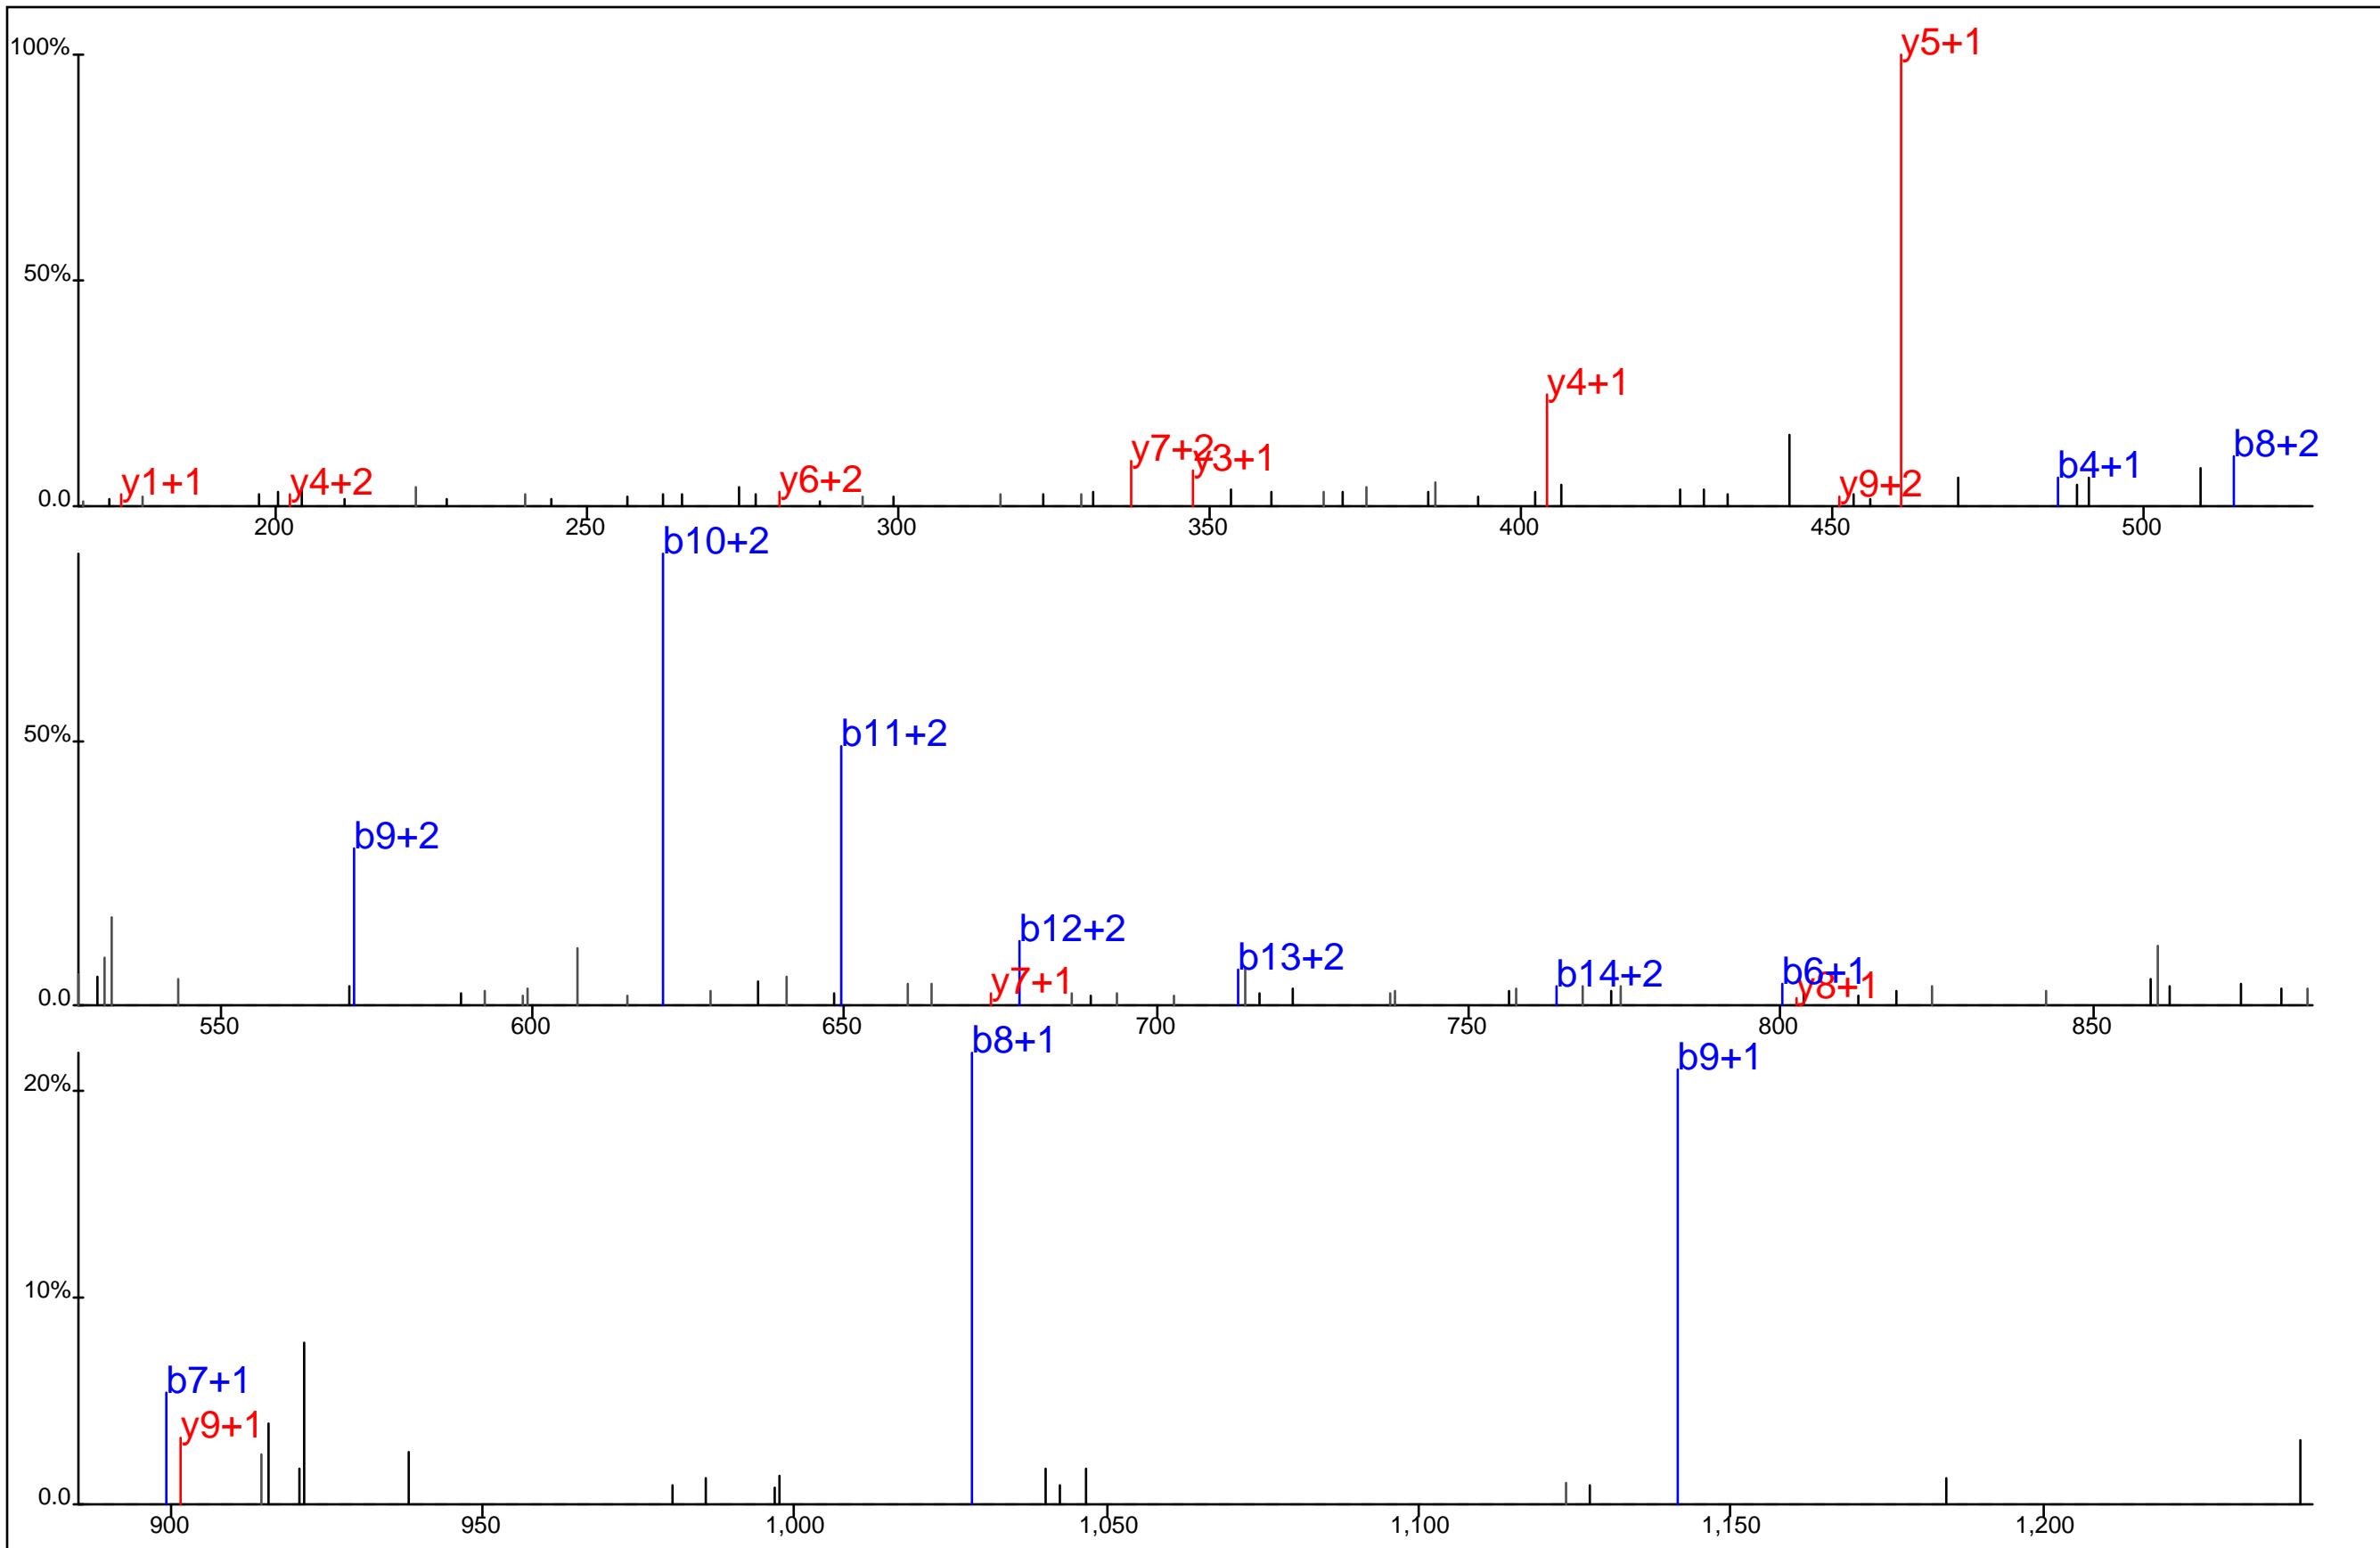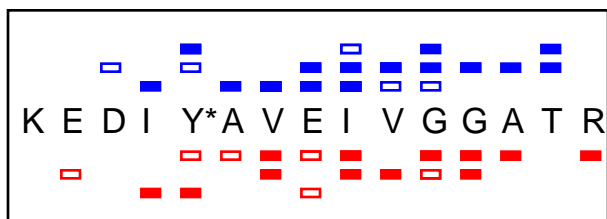

Protein Name: Heat shock 70kDa protein 4  
 gi Accession: 0  
 Precursor Mass: 567.6130+3  
 Delta Mass: 0.644 ppm  
 XCorr: 33.97

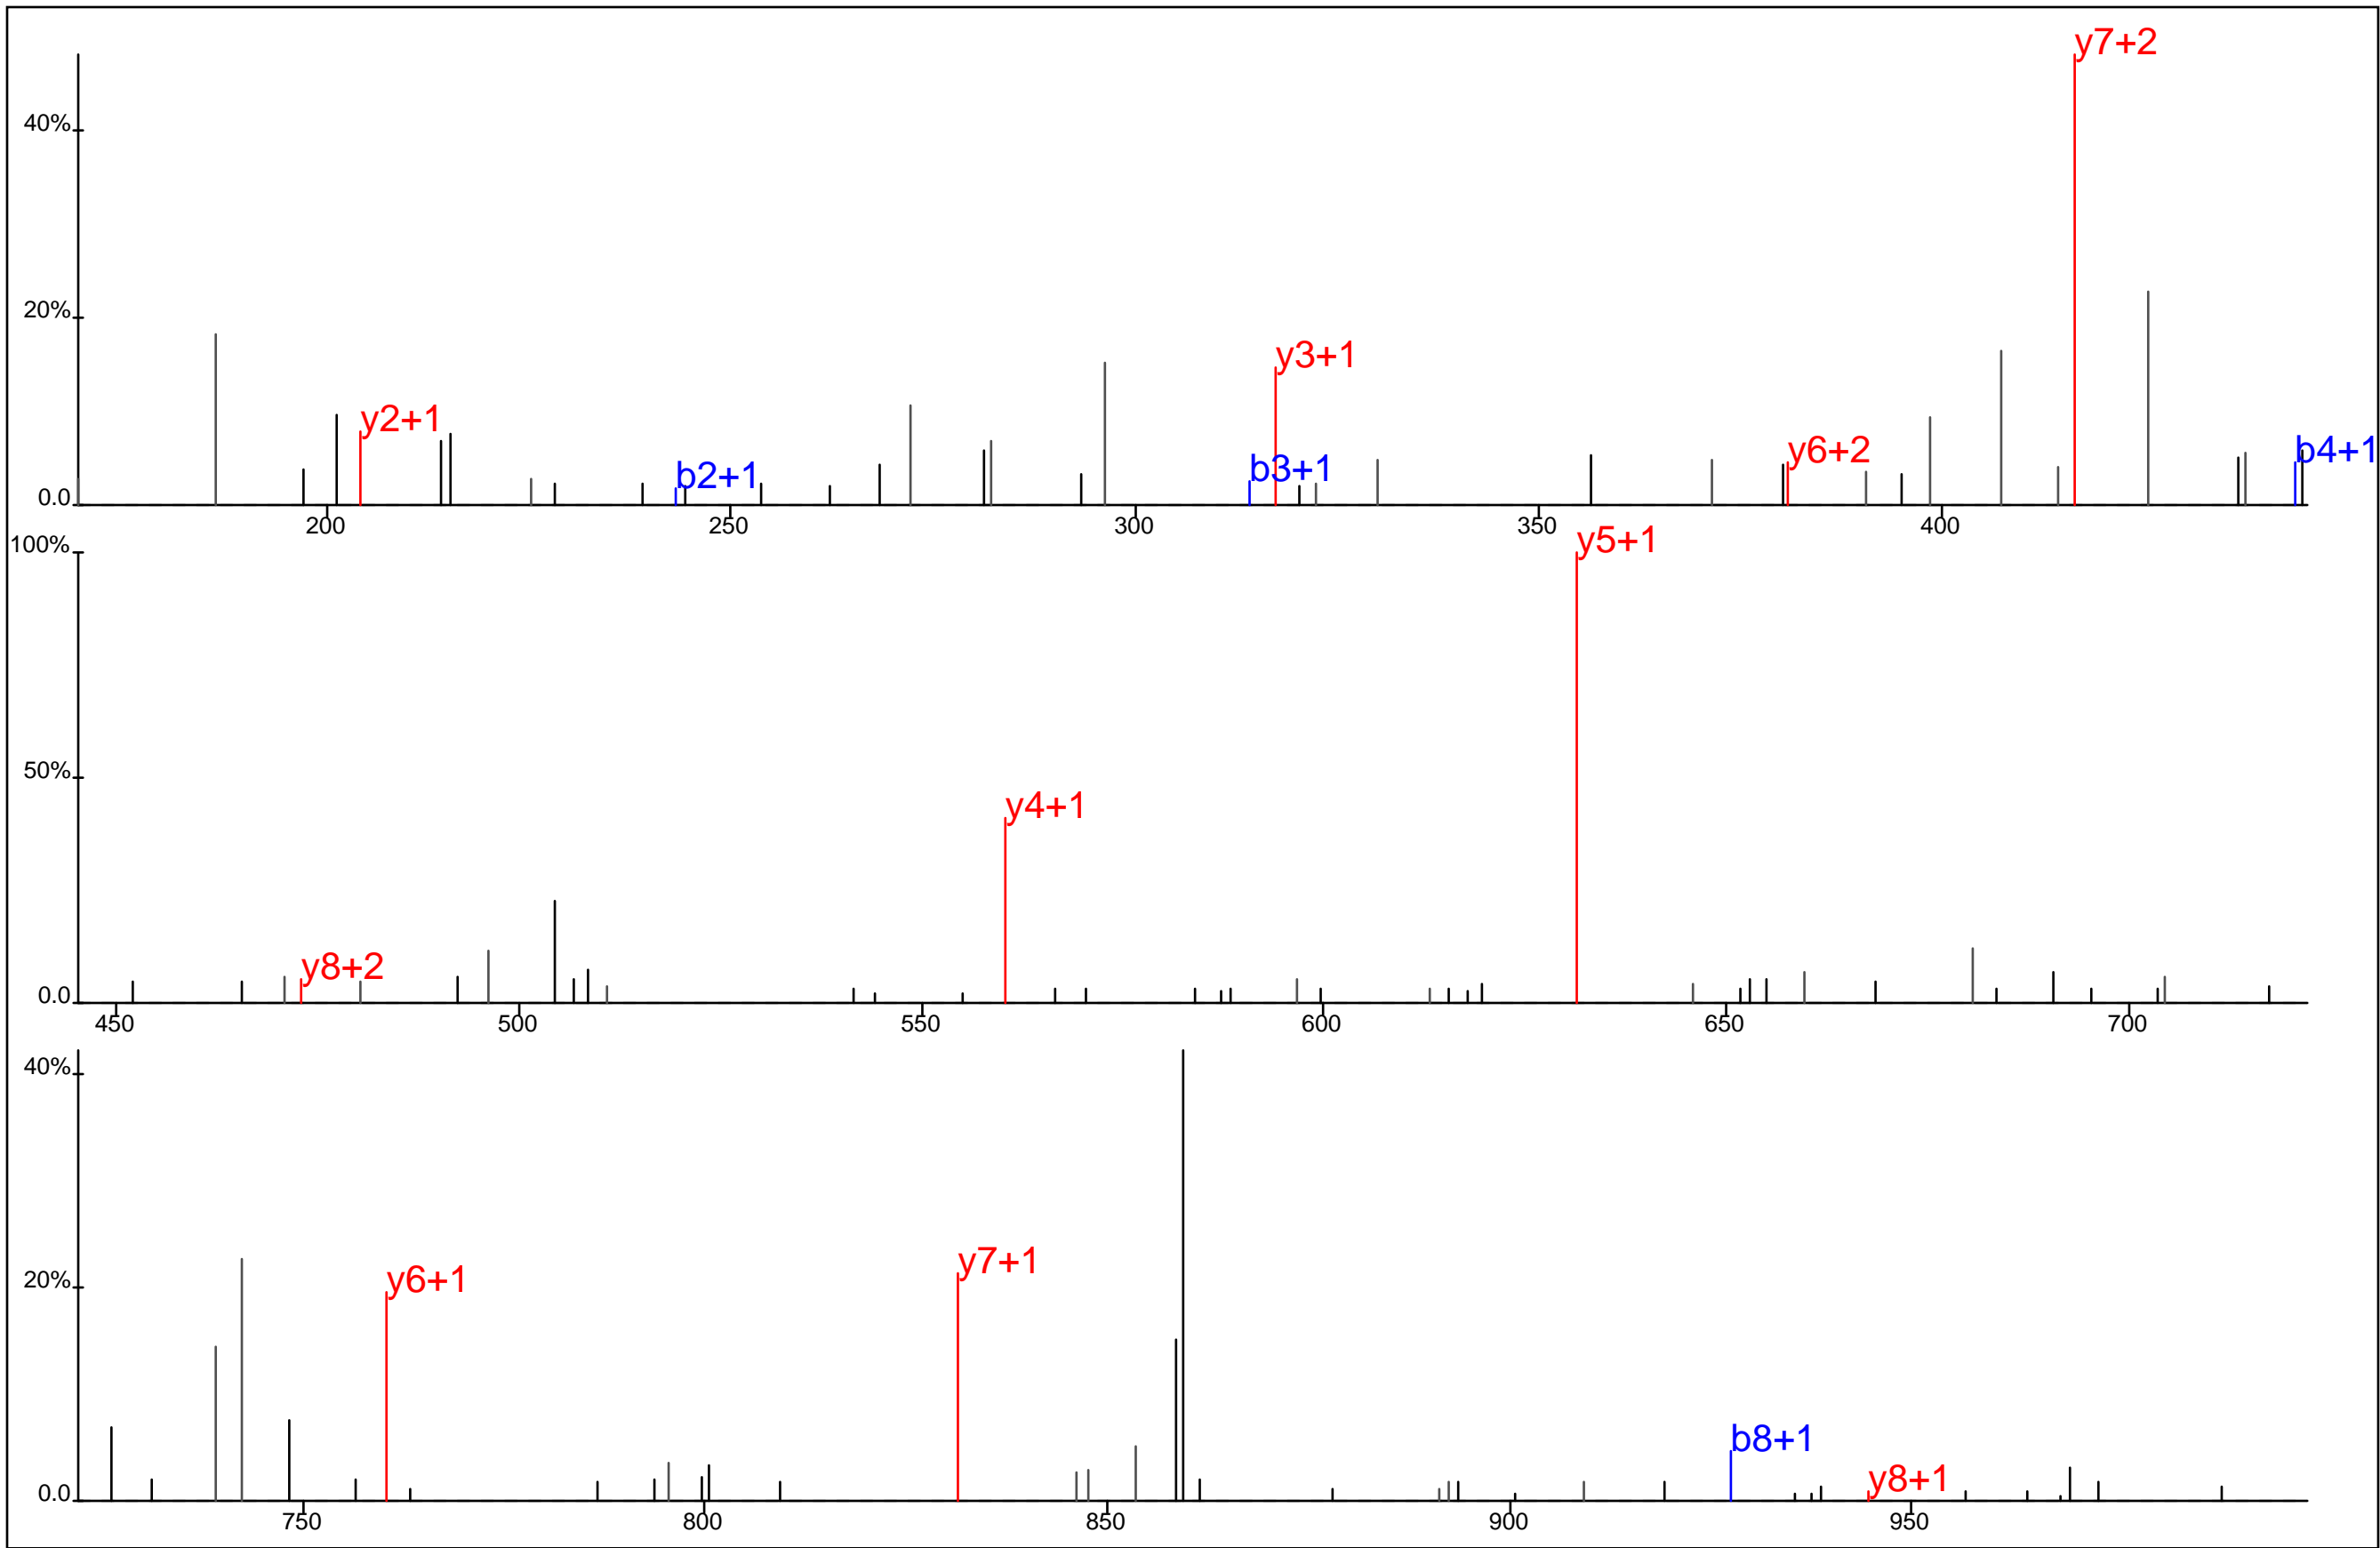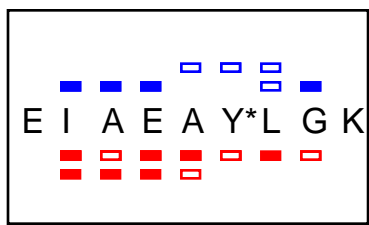

Protein Name: Heat shock 70 kDa protein 8  
 gi Accession: 0  
 Precursor Mass: 537.2474+2  
 Delta Mass: 3.678 ppm  
 XCorr: 28.29

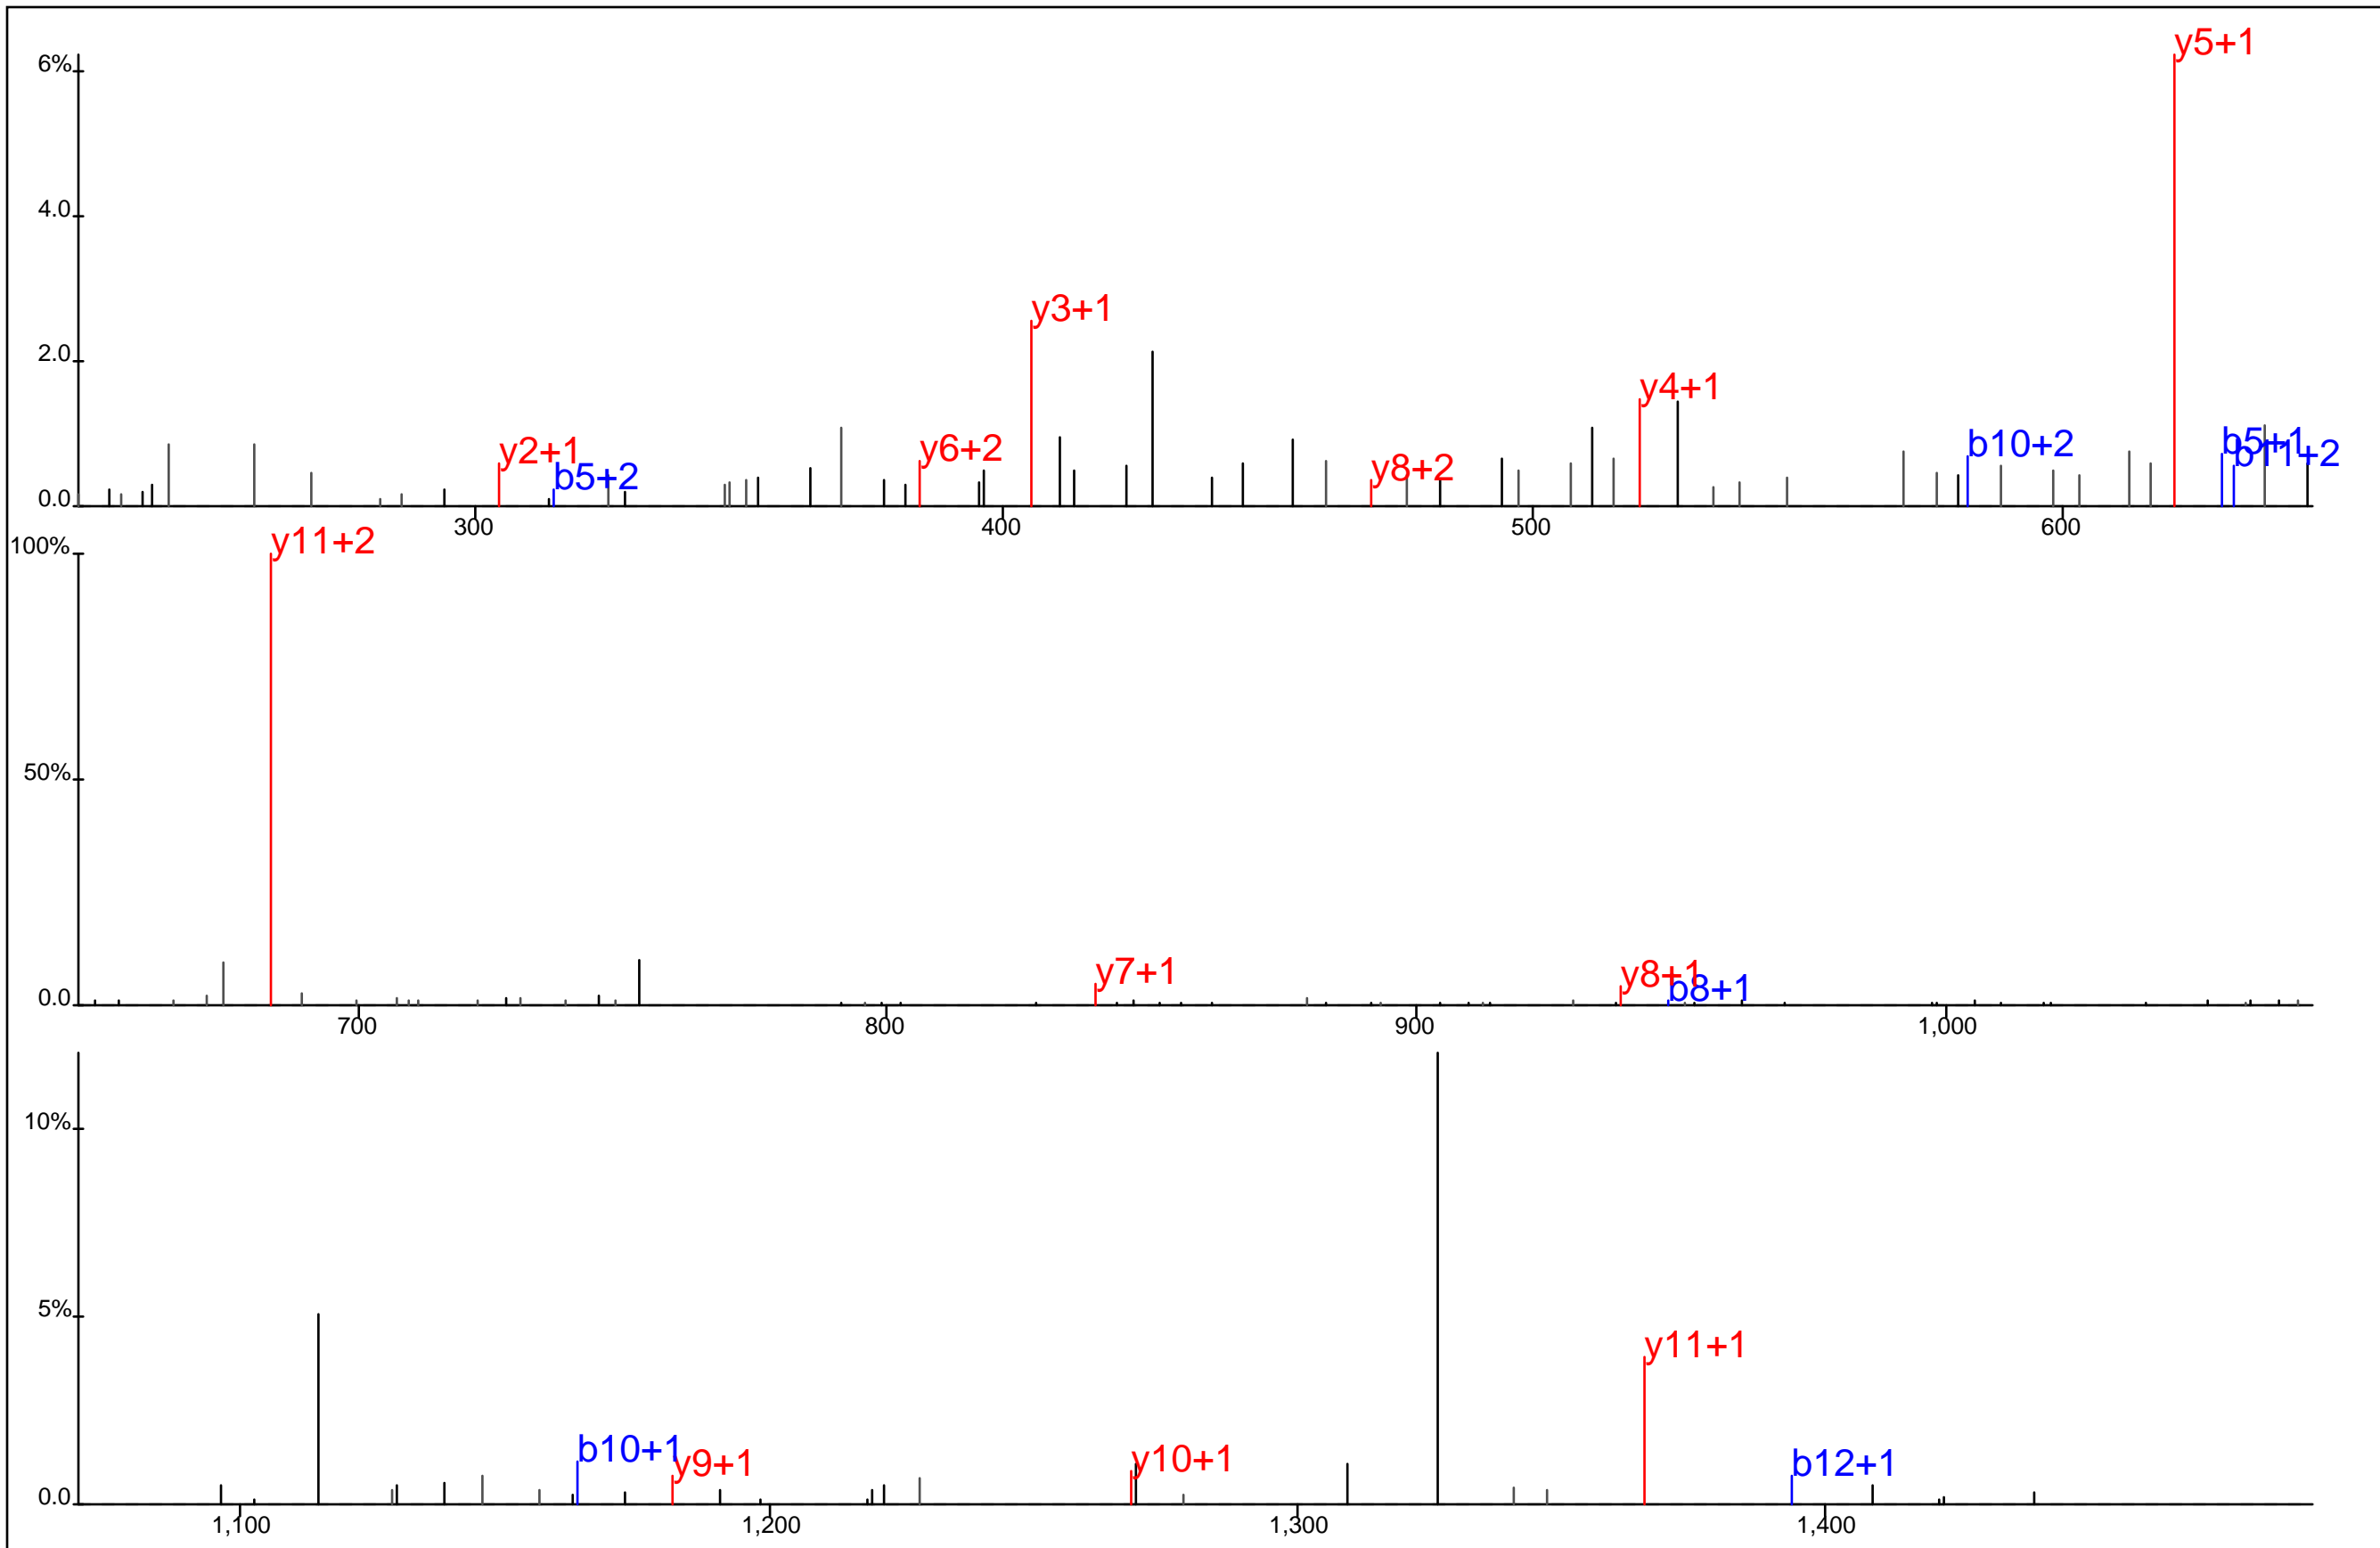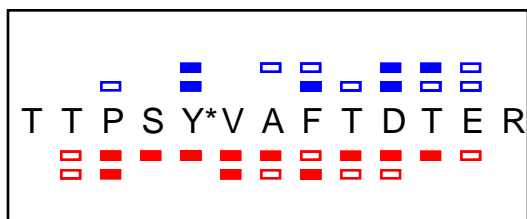

Protein Name: Heat shock 70 KD protein 1A  
 gi Accession: 0  
 Precursor Mass: 784.3339+2  
 Delta Mass: 4.563 ppm  
 XCorr: 43.05

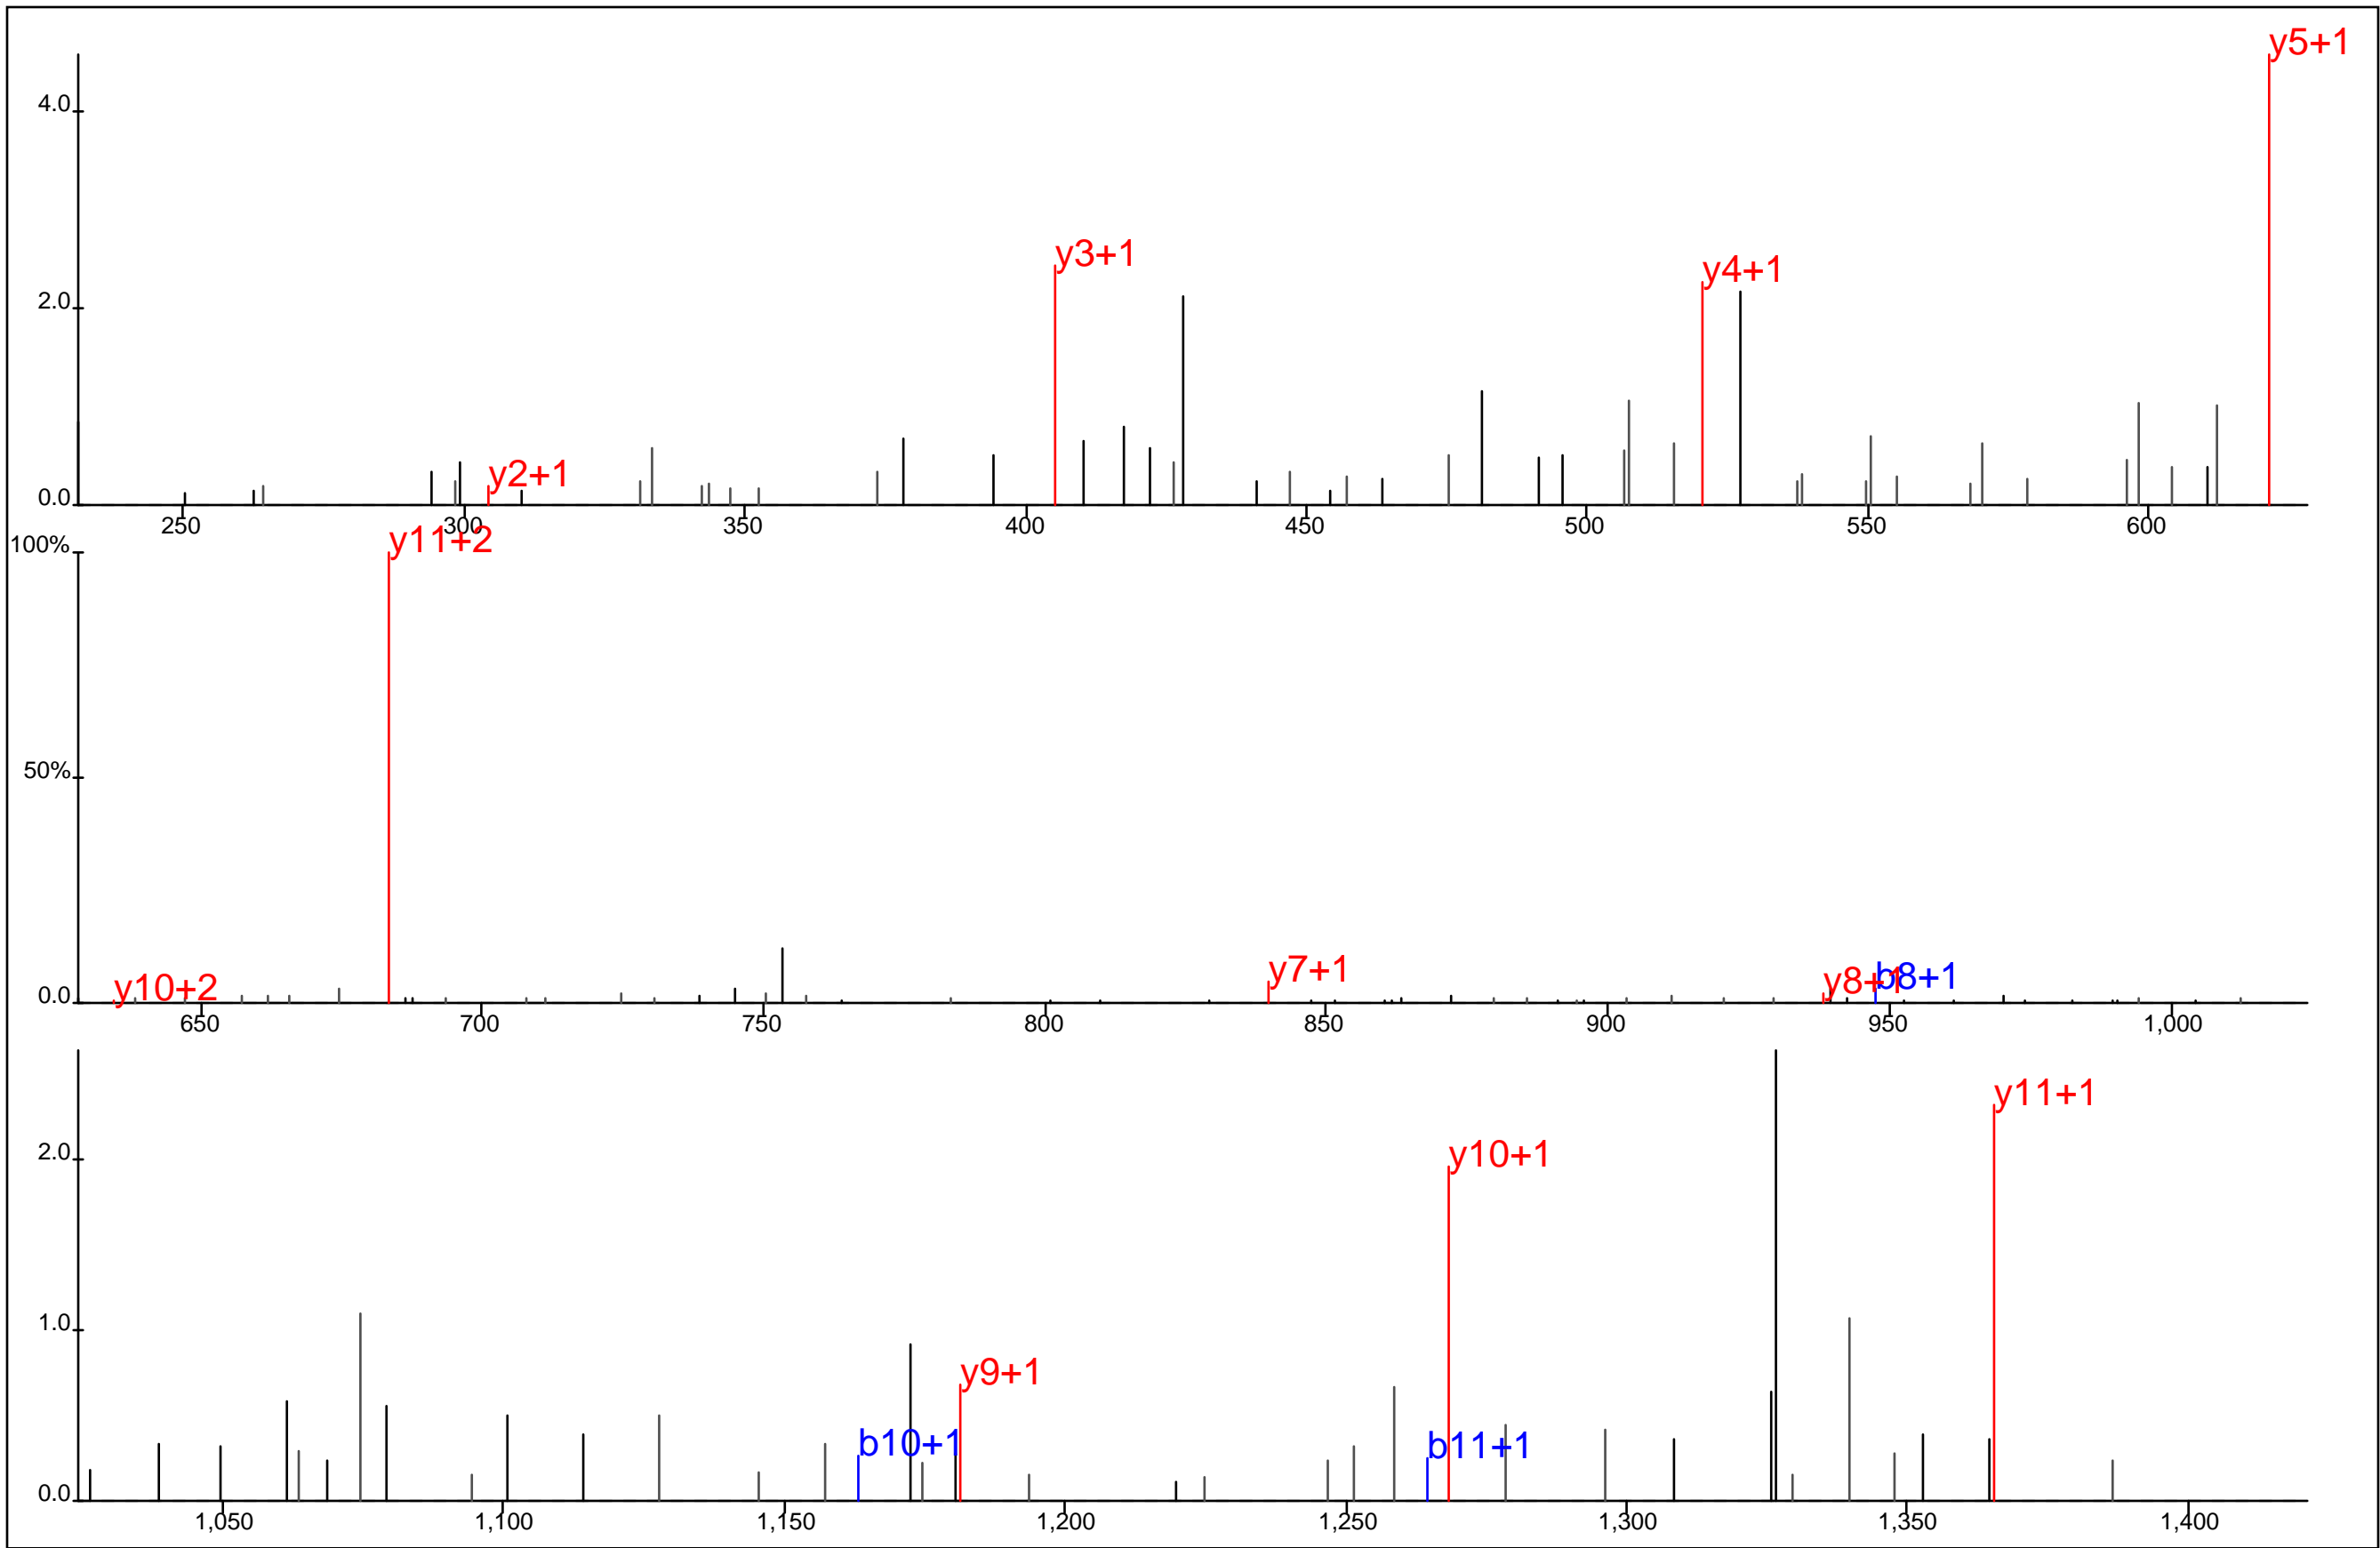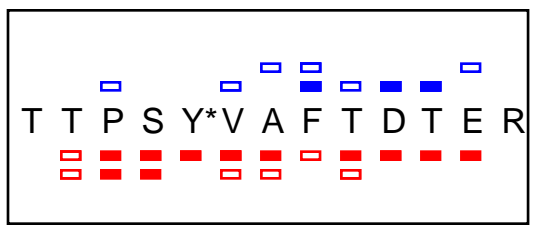

Protein Name: Heat shock 70 KD protein 1A  
 gi Accession: 0  
 Precursor Mass: 784.3351+2  
 Delta Mass: 3.006 ppm  
 XCorr: 31.72

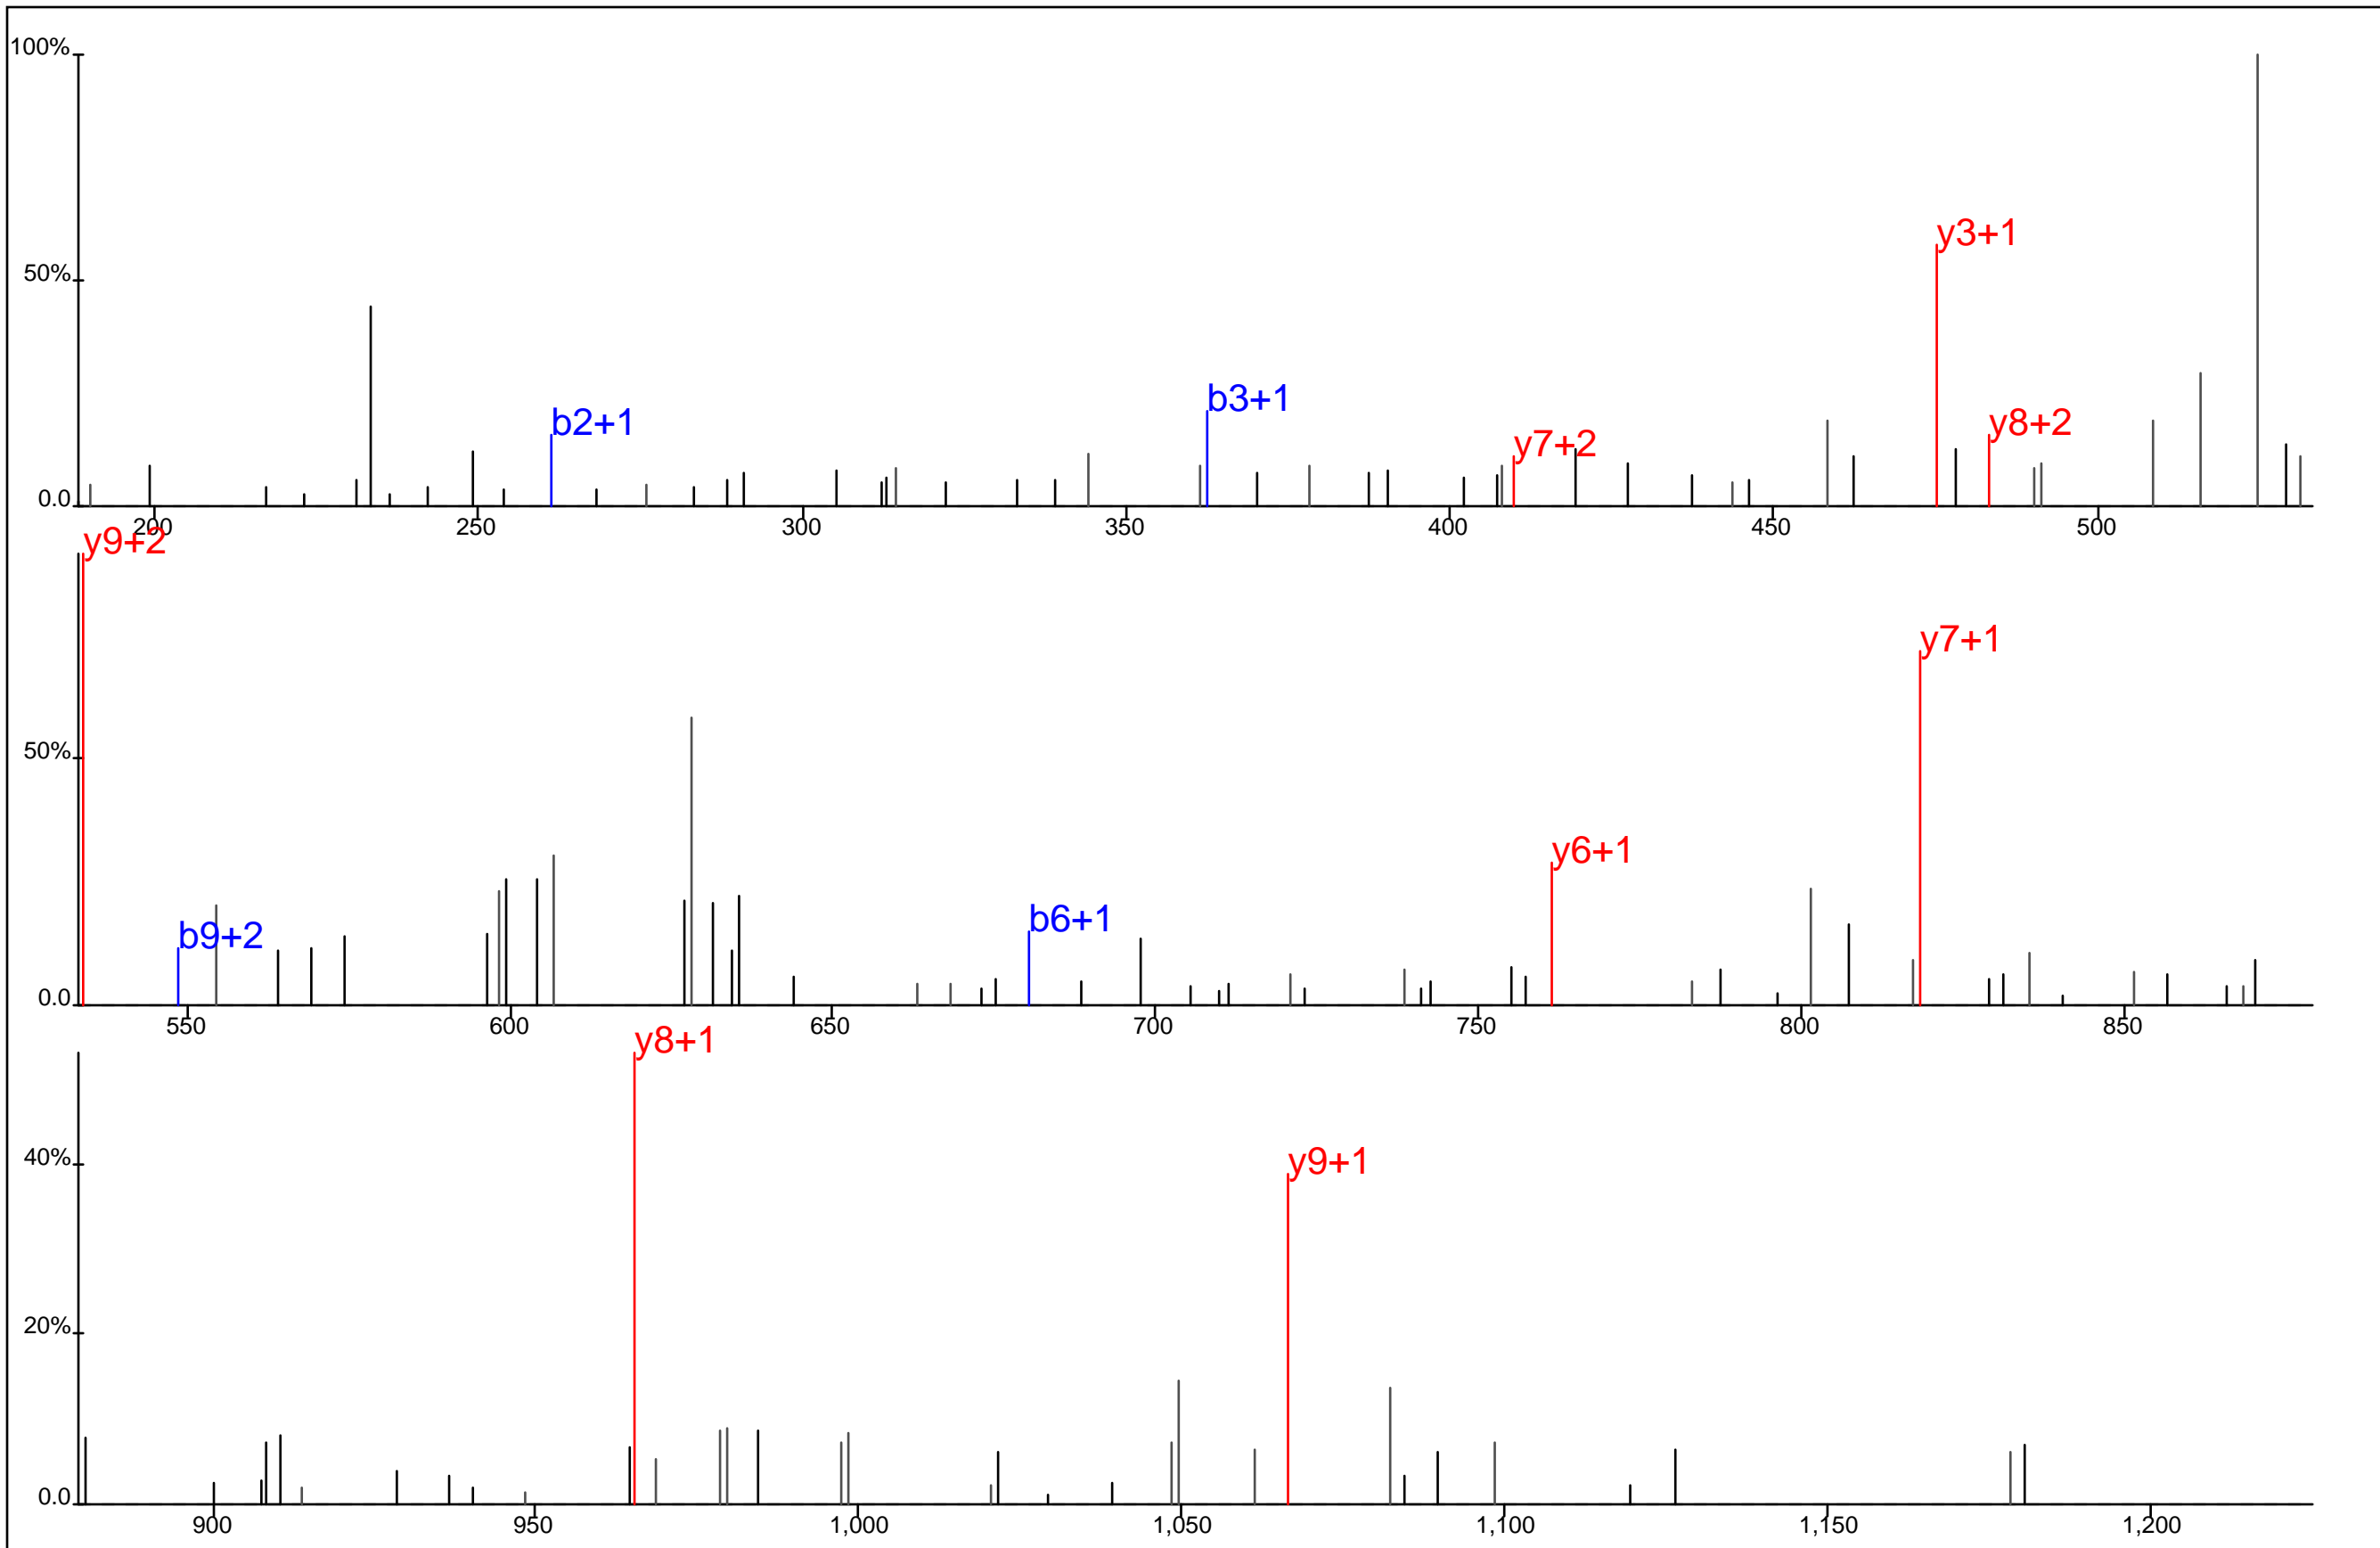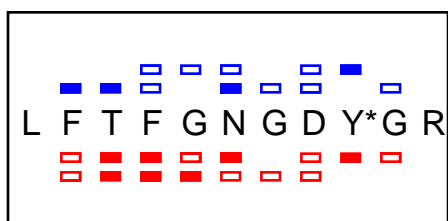

Protein Name: Hect domain and RCC1 like domain 1  
 gi Accession: 0  
 Precursor Mass: 663.7789+2  
 Delta Mass: 0.653 ppm  
 XCorr: 27.76

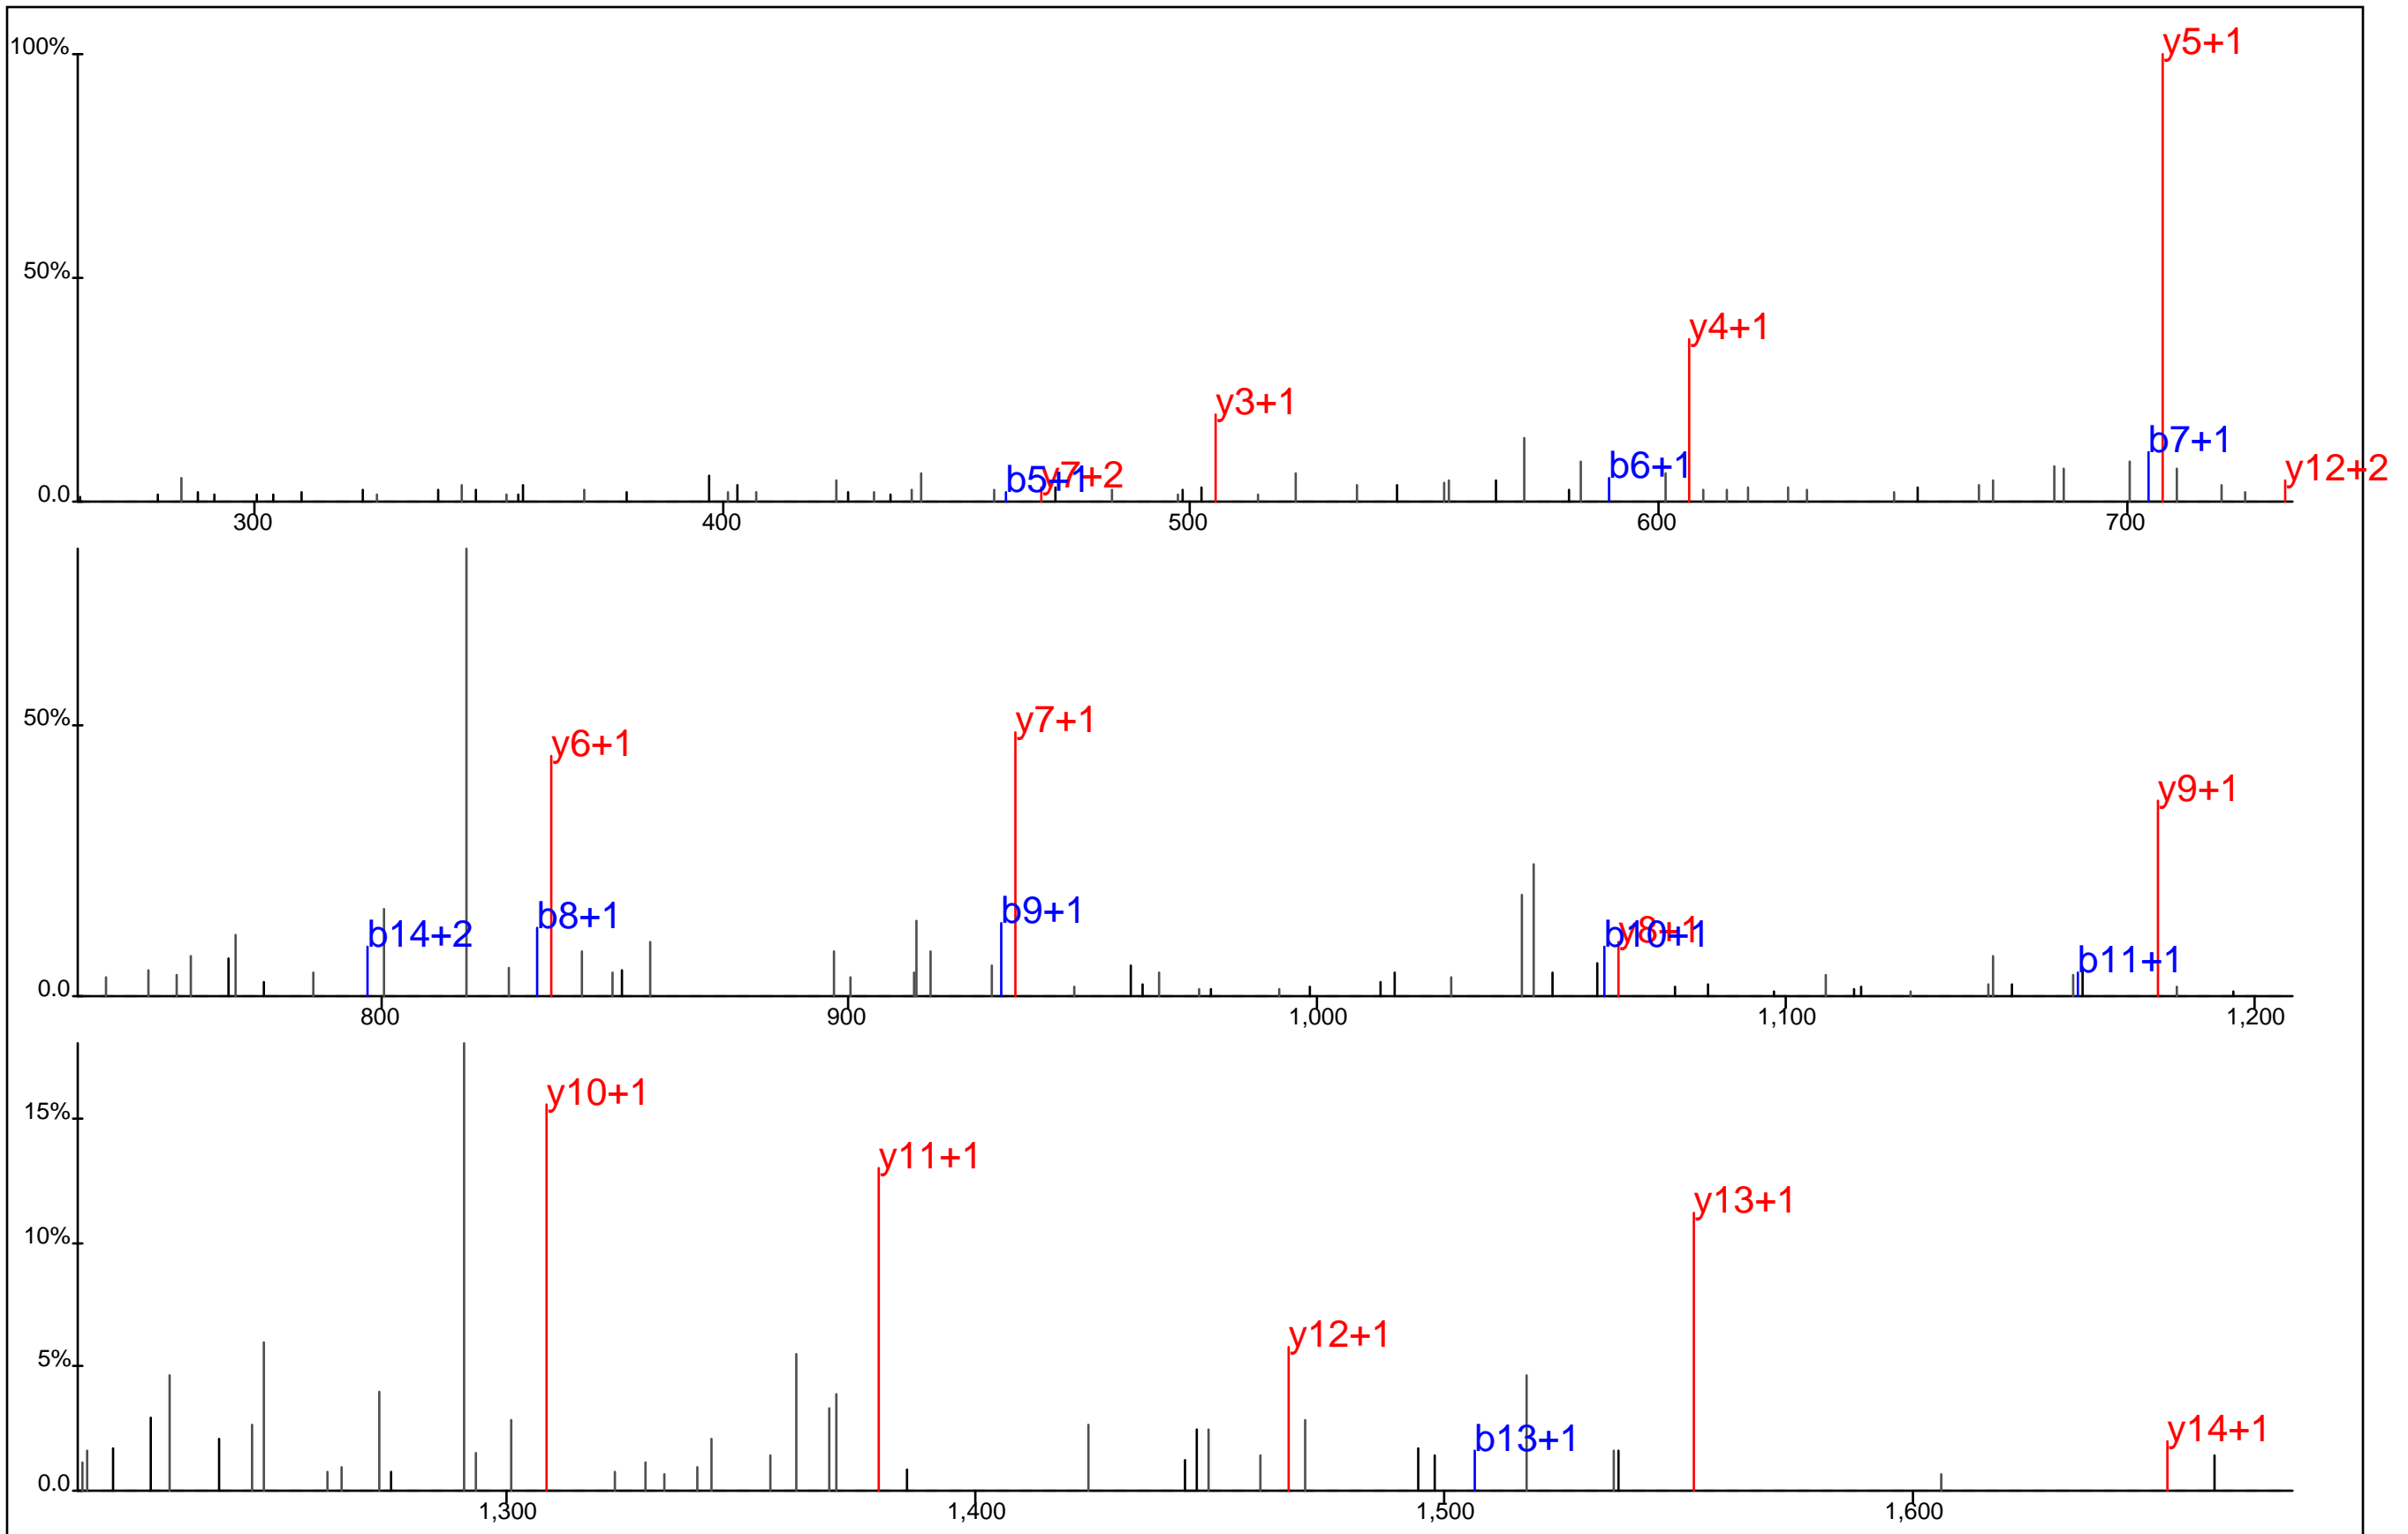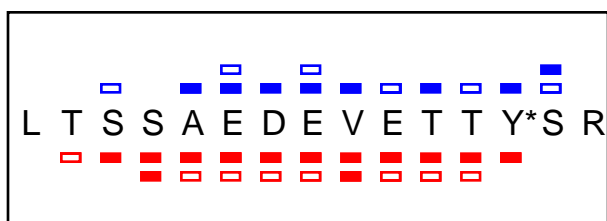

Protein Name: Helicase with zinc finger domain  
 gi Accession: 0  
 Precursor Mass: 884.3676+2  
 Delta Mass: 2.301 ppm  
 XCorr: 91.79

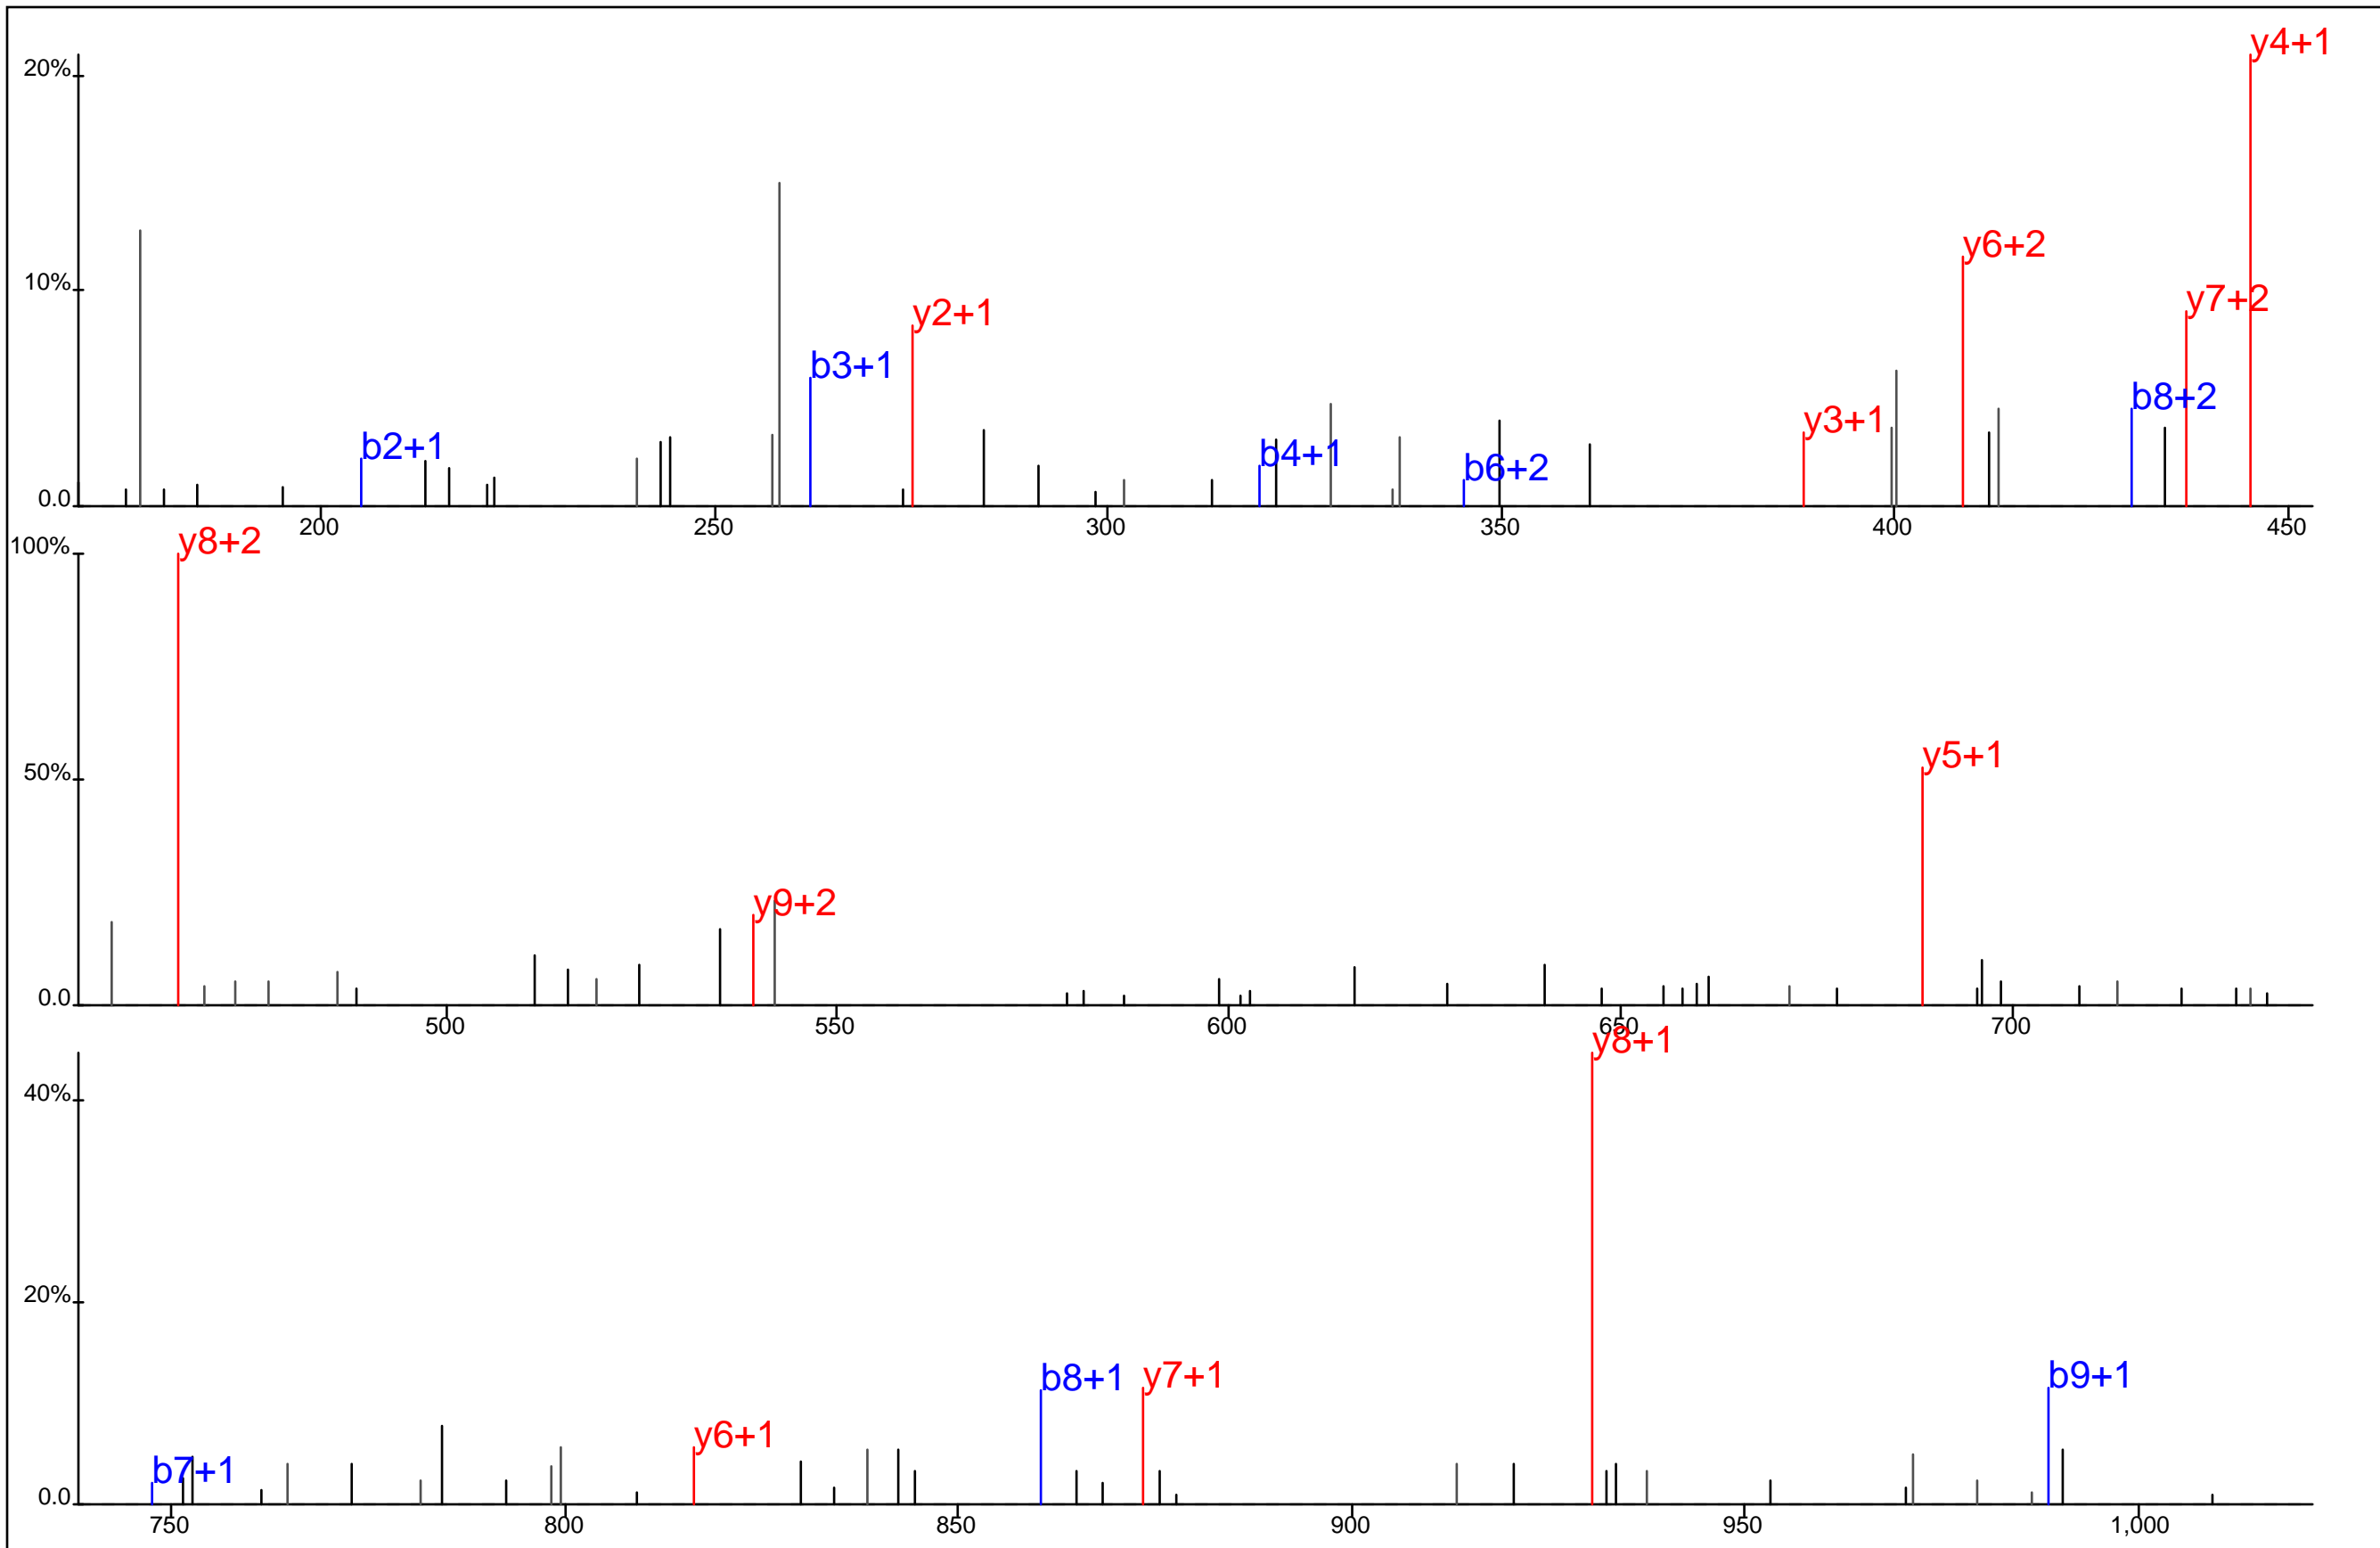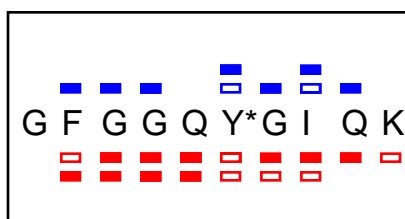

Protein Name: Hematopoietic cell specific LYN substrate 1  
 gi Accession: 0  
 Precursor Mass: 567.7531+2  
 Delta Mass: 0.880 ppm  
 XCorr: 28.78

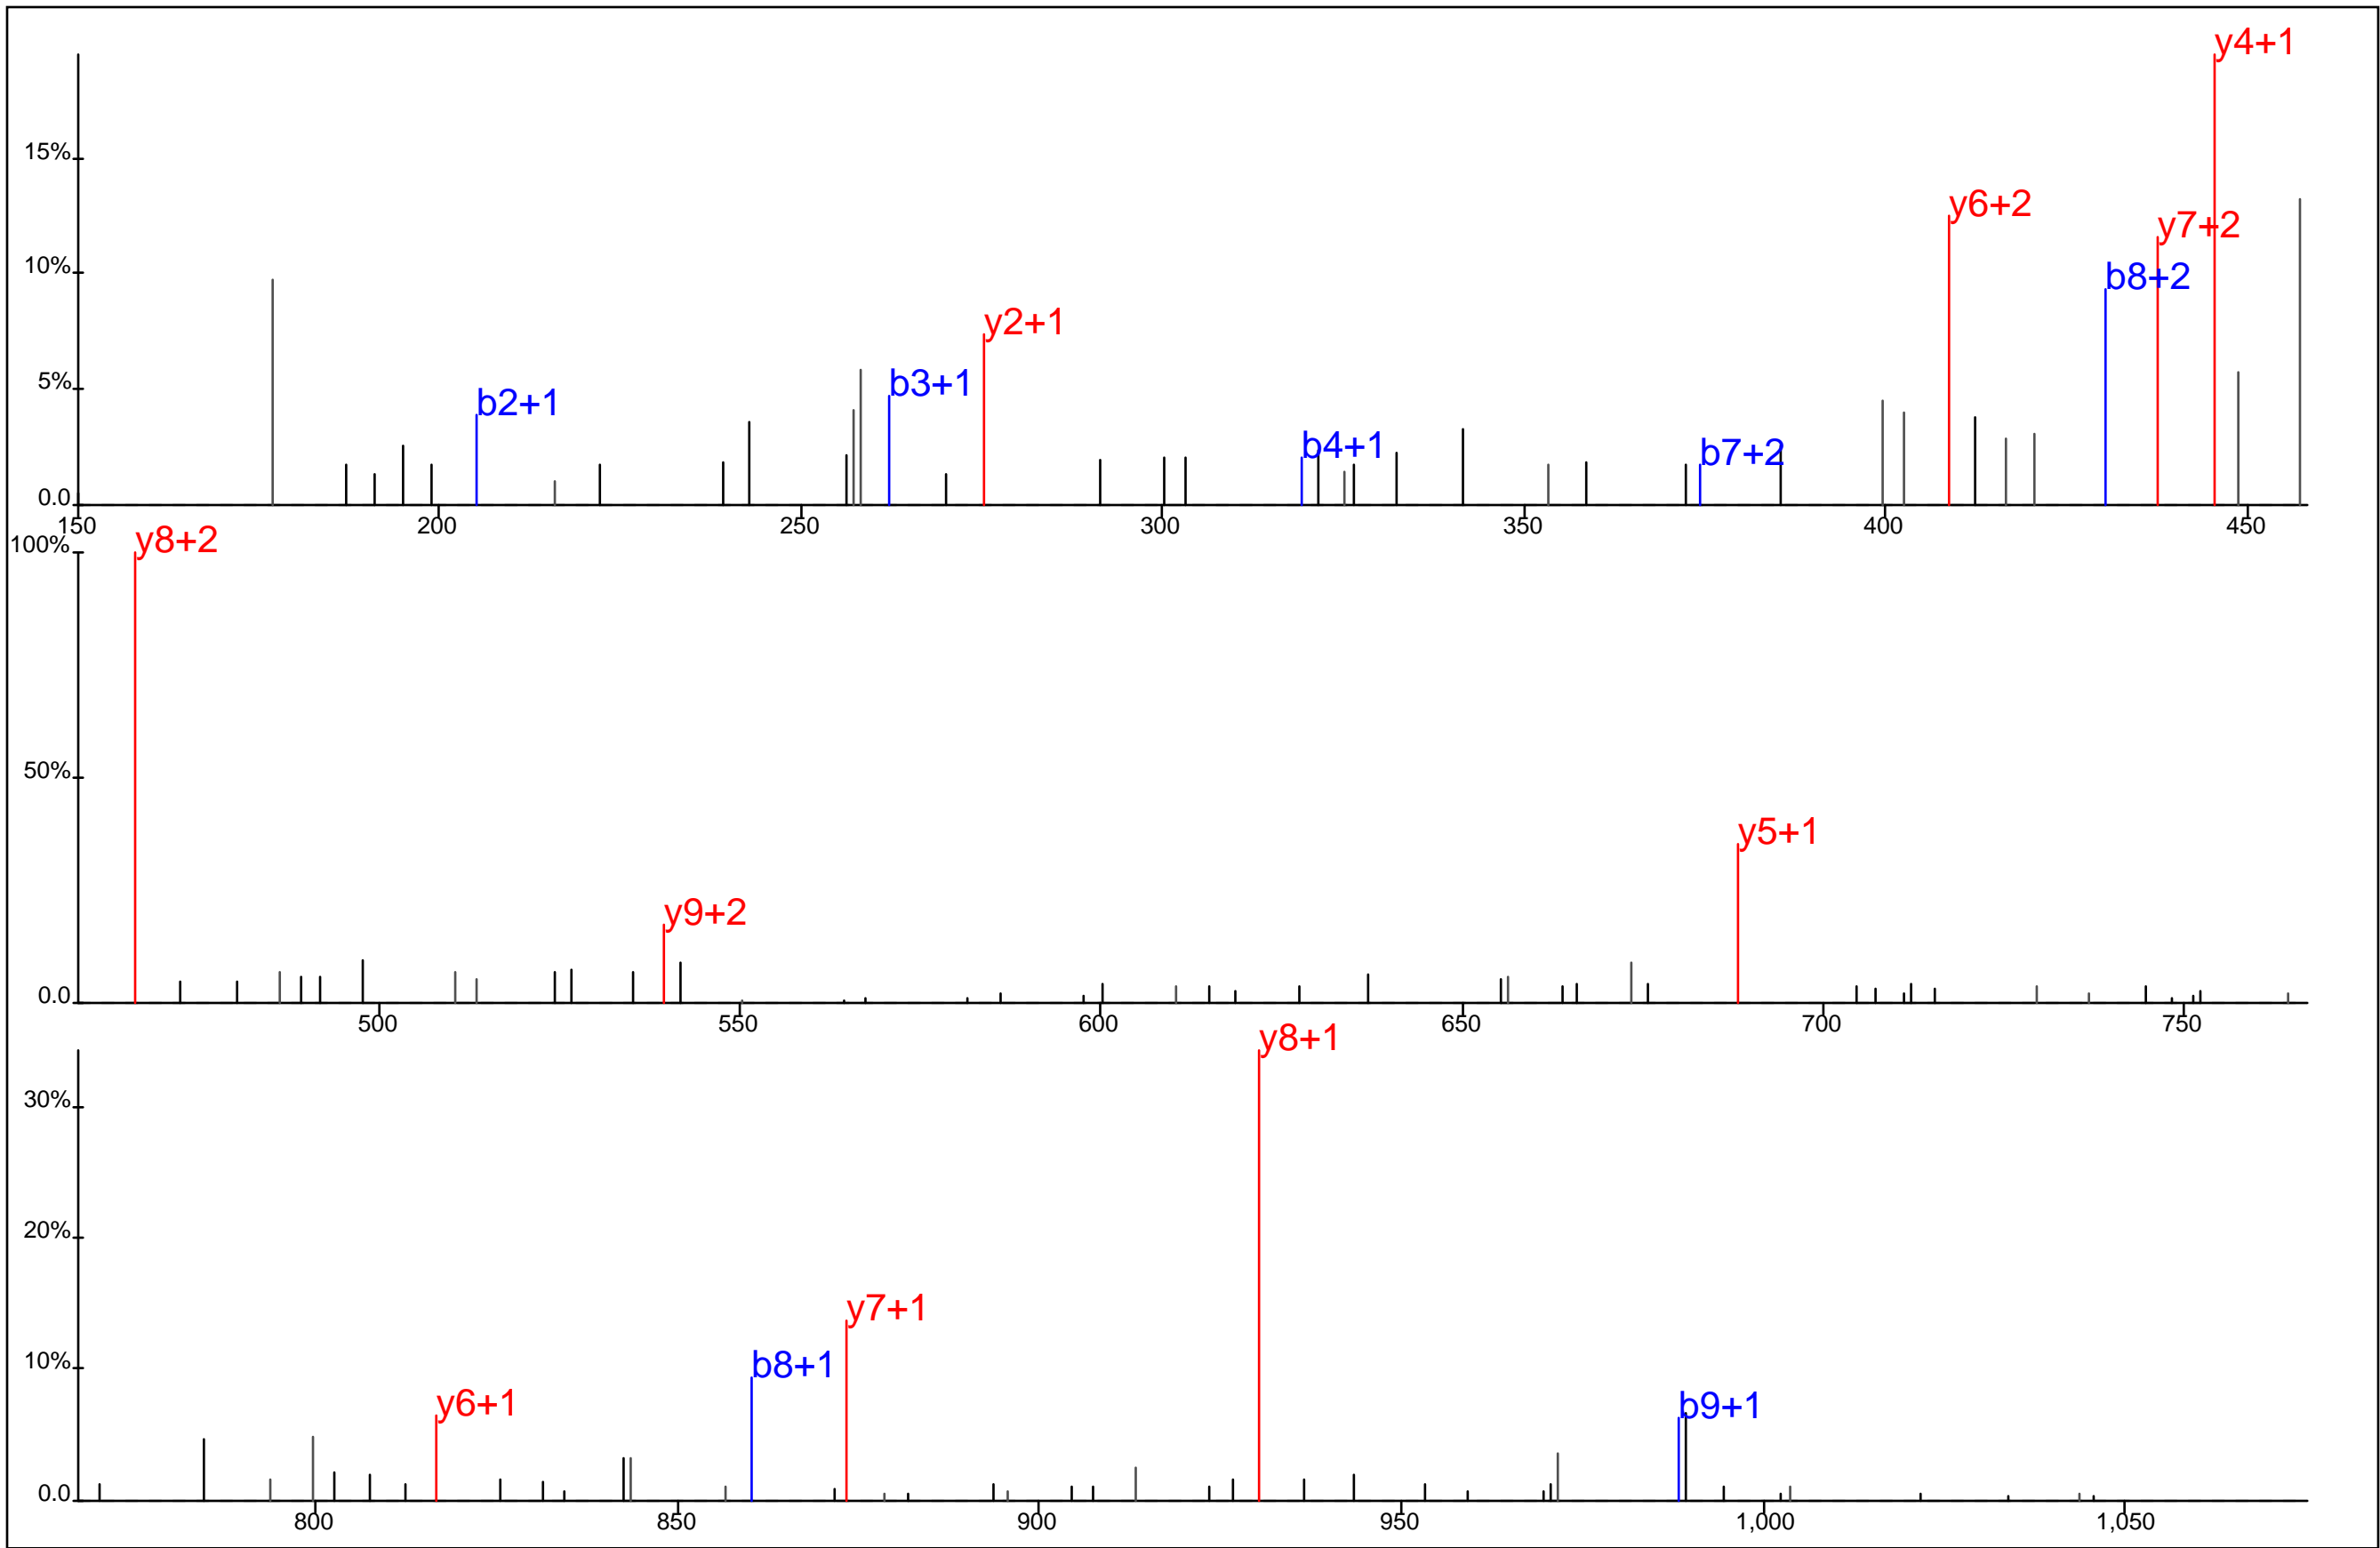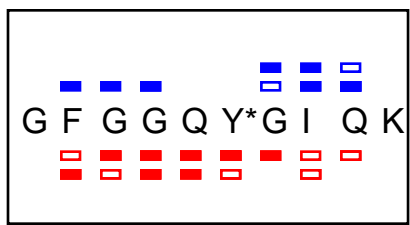

Protein Name: Hematopoietic cell specific LYN substrate 1  
 gi Accession: 0  
 Precursor Mass: 567.7516+2  
 Delta Mass: 1.810 ppm  
 XCorr: 45.36



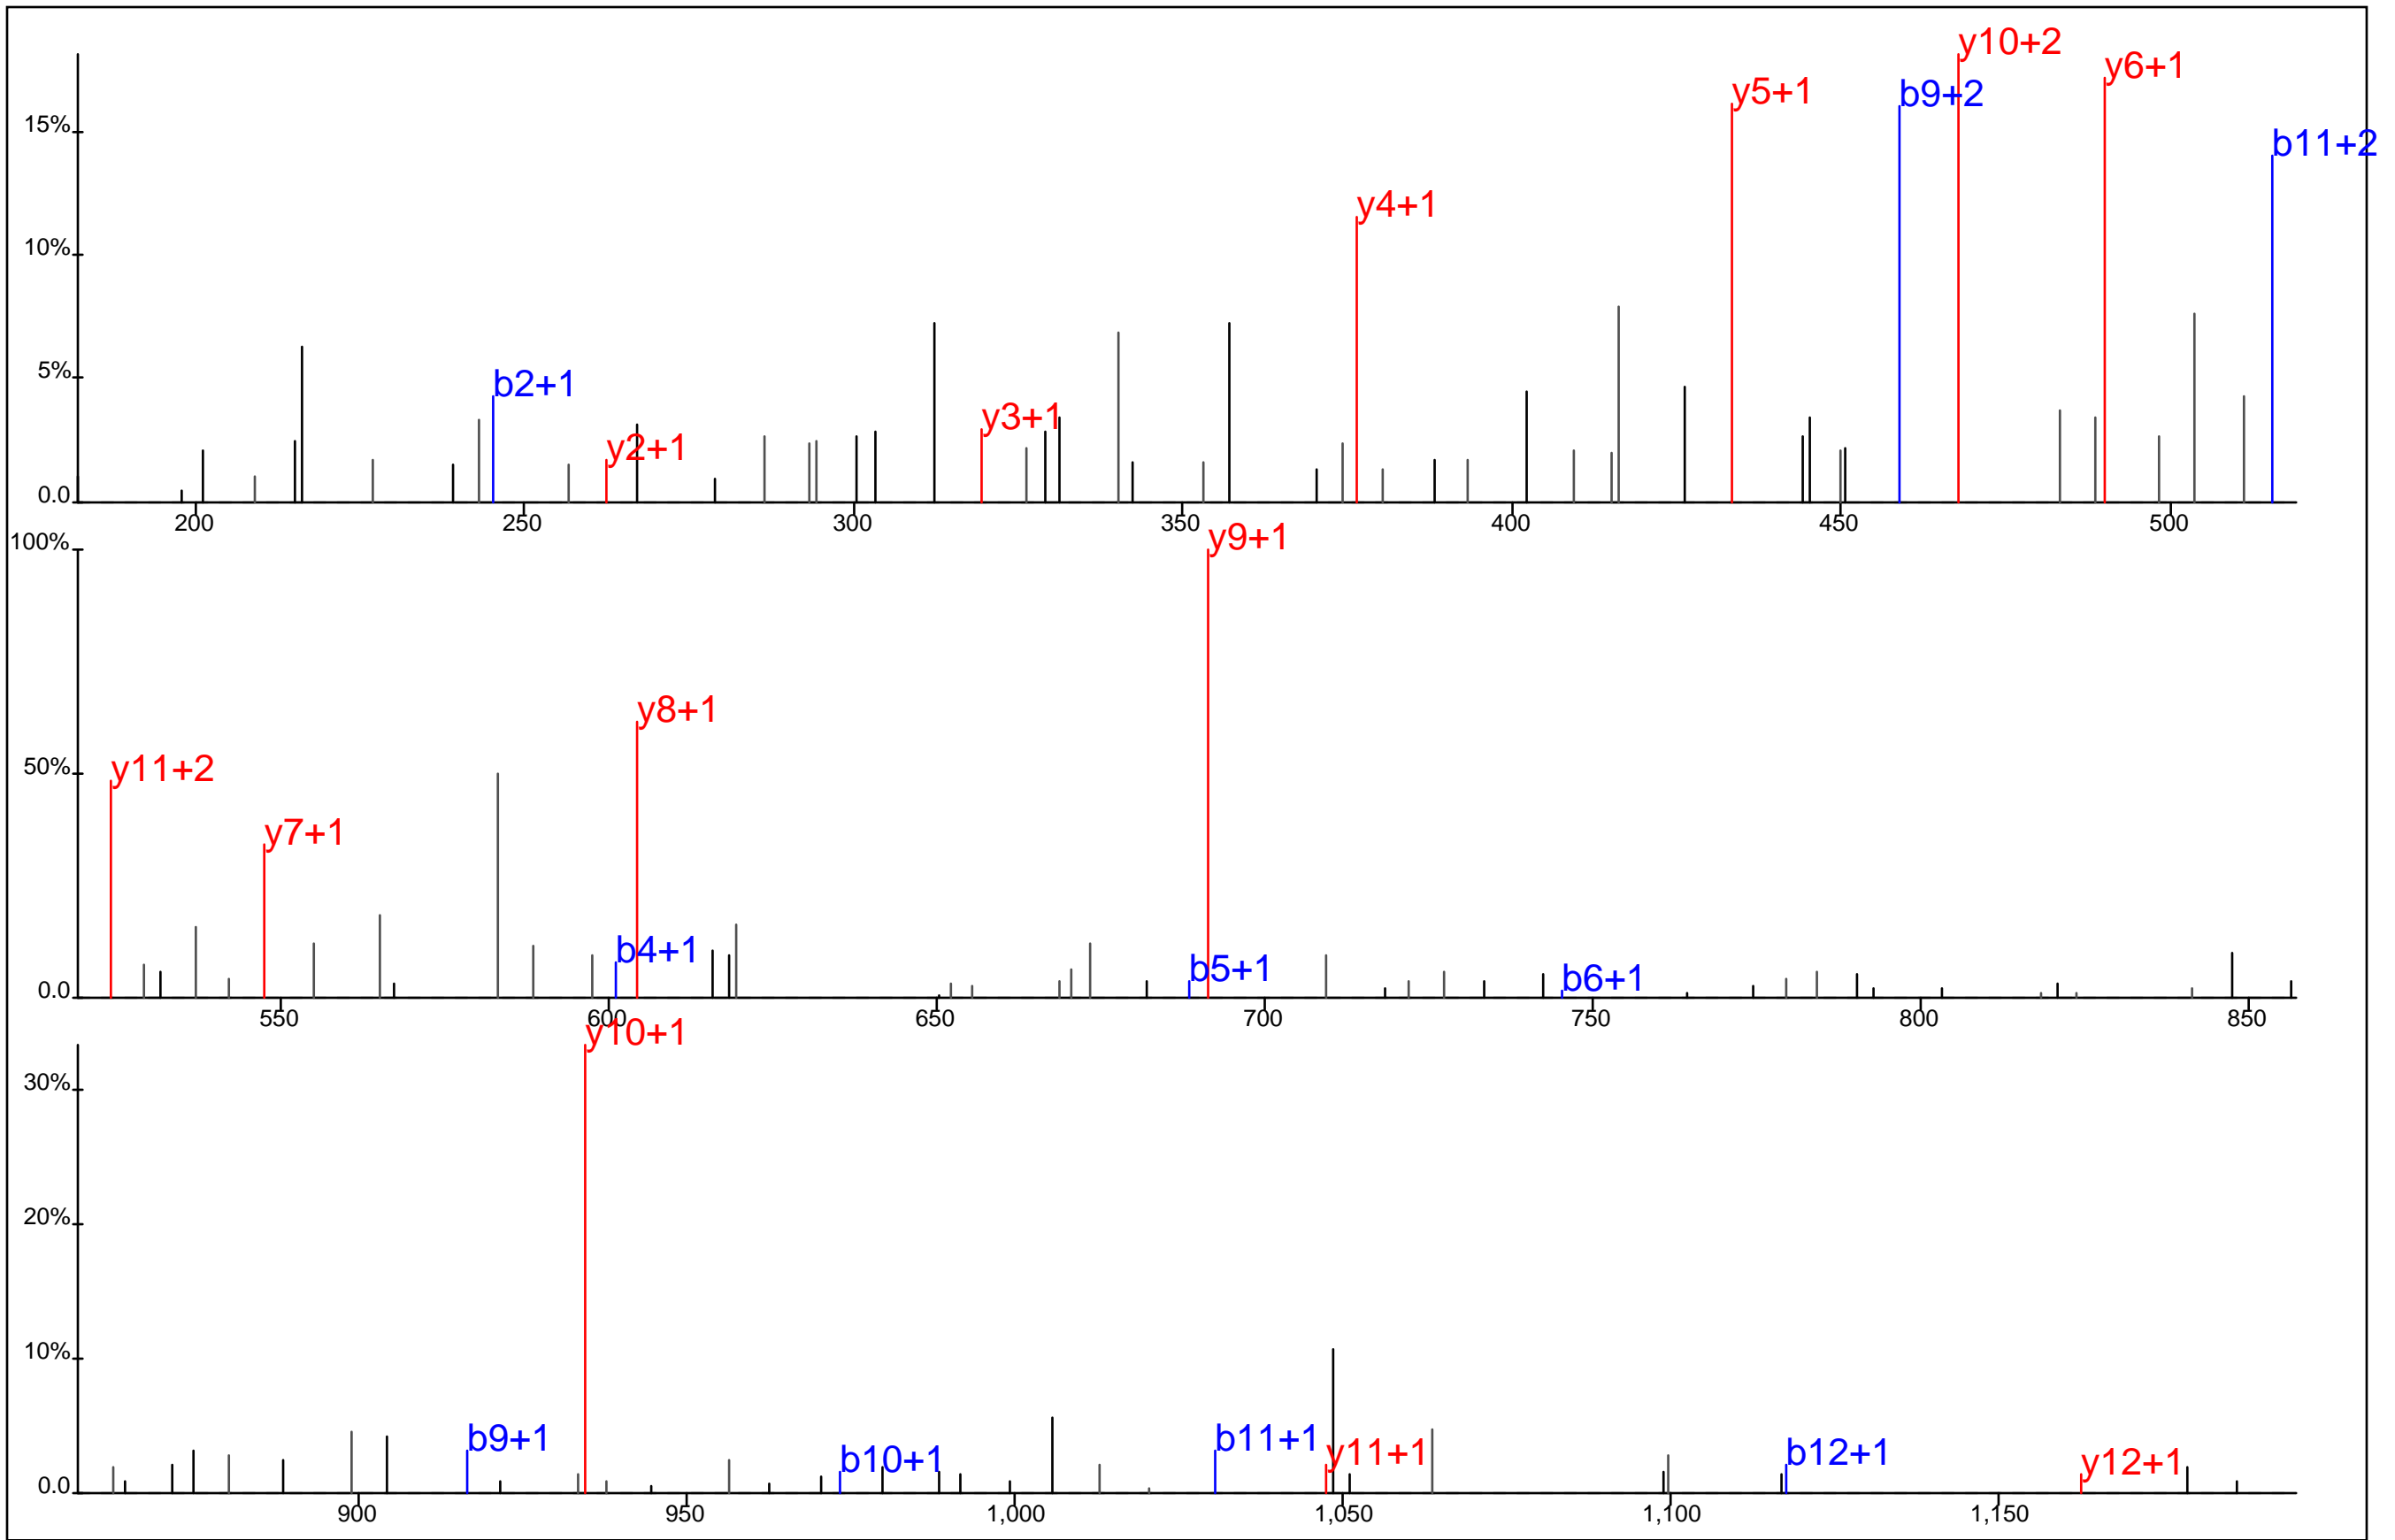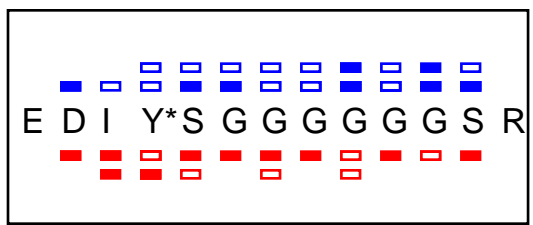

Protein Name: Heterogeneous nuclear ribonucleoprotein A0  
 gi Accession: 0  
 Precursor Mass: 646.2523+2  
 Delta Mass: 1.789 ppm  
 XCorr: 55.5

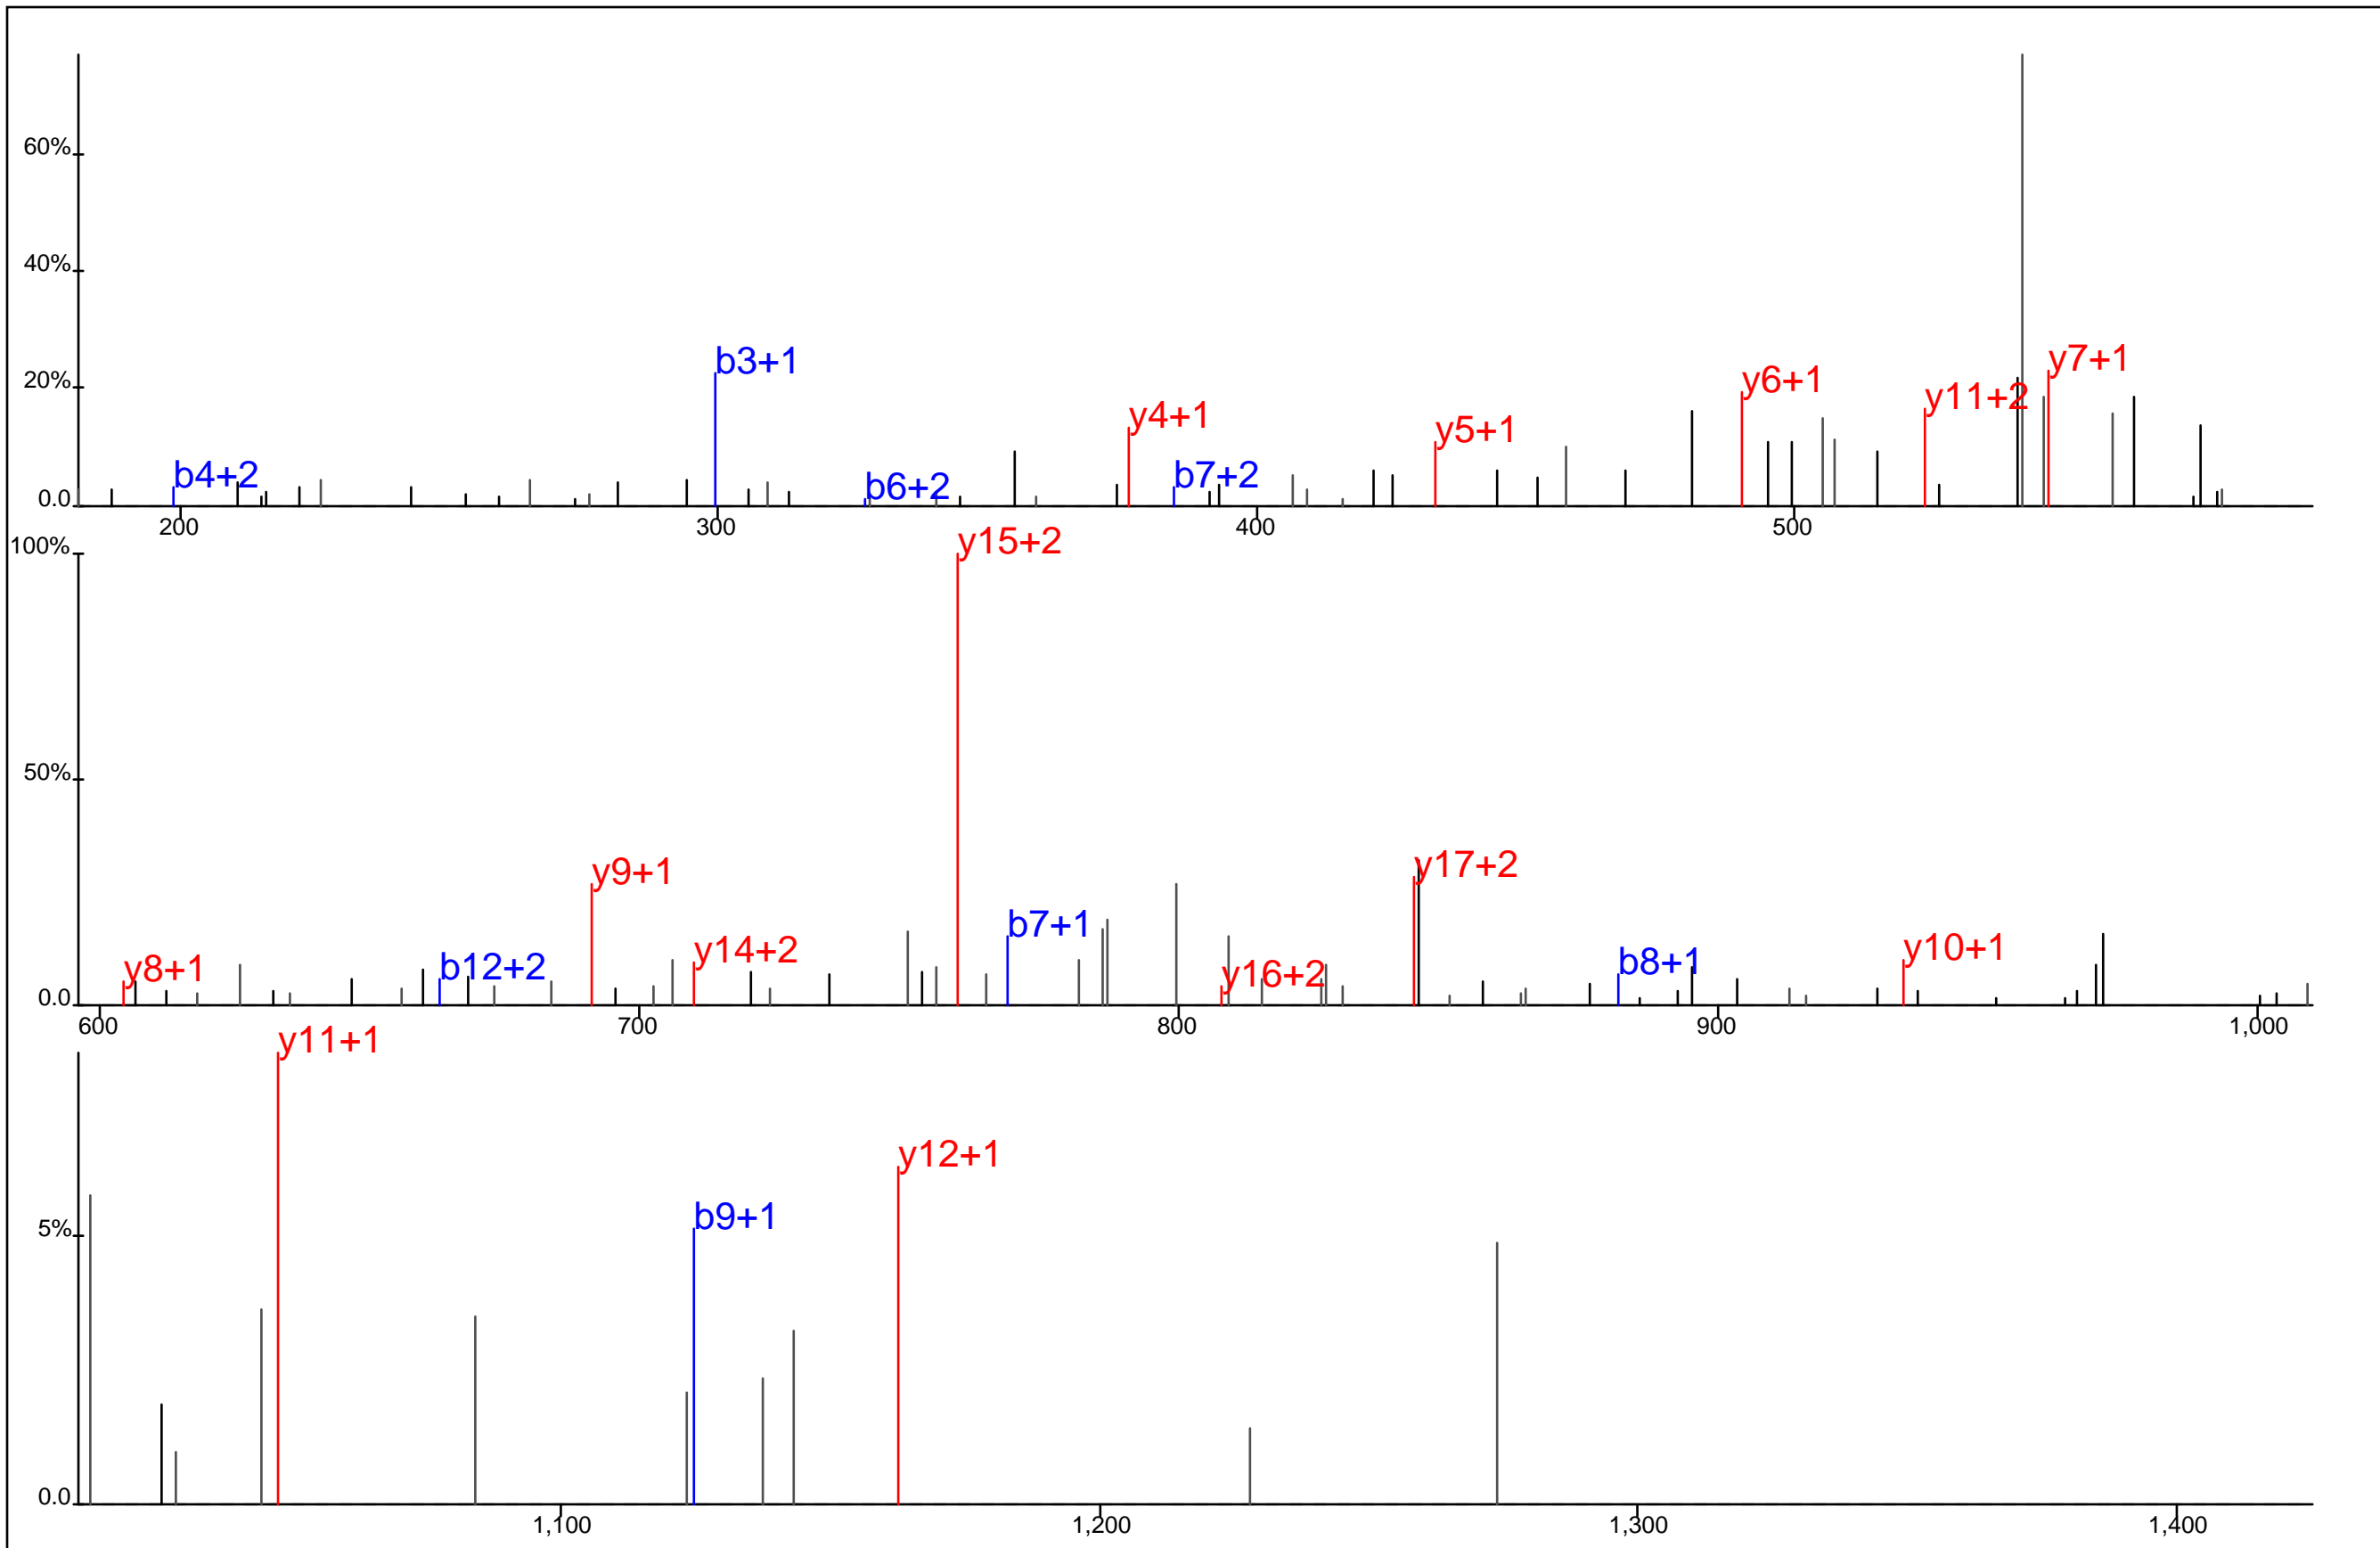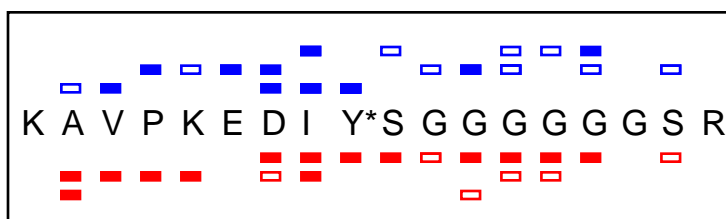

Protein Name: Heterogeneous nuclear ribonucleoprotein A0  
 gi Accession: 0  
 Precursor Mass: 605.6170+3  
 Delta Mass: 3.748 ppm  
 XCorr: 37.89

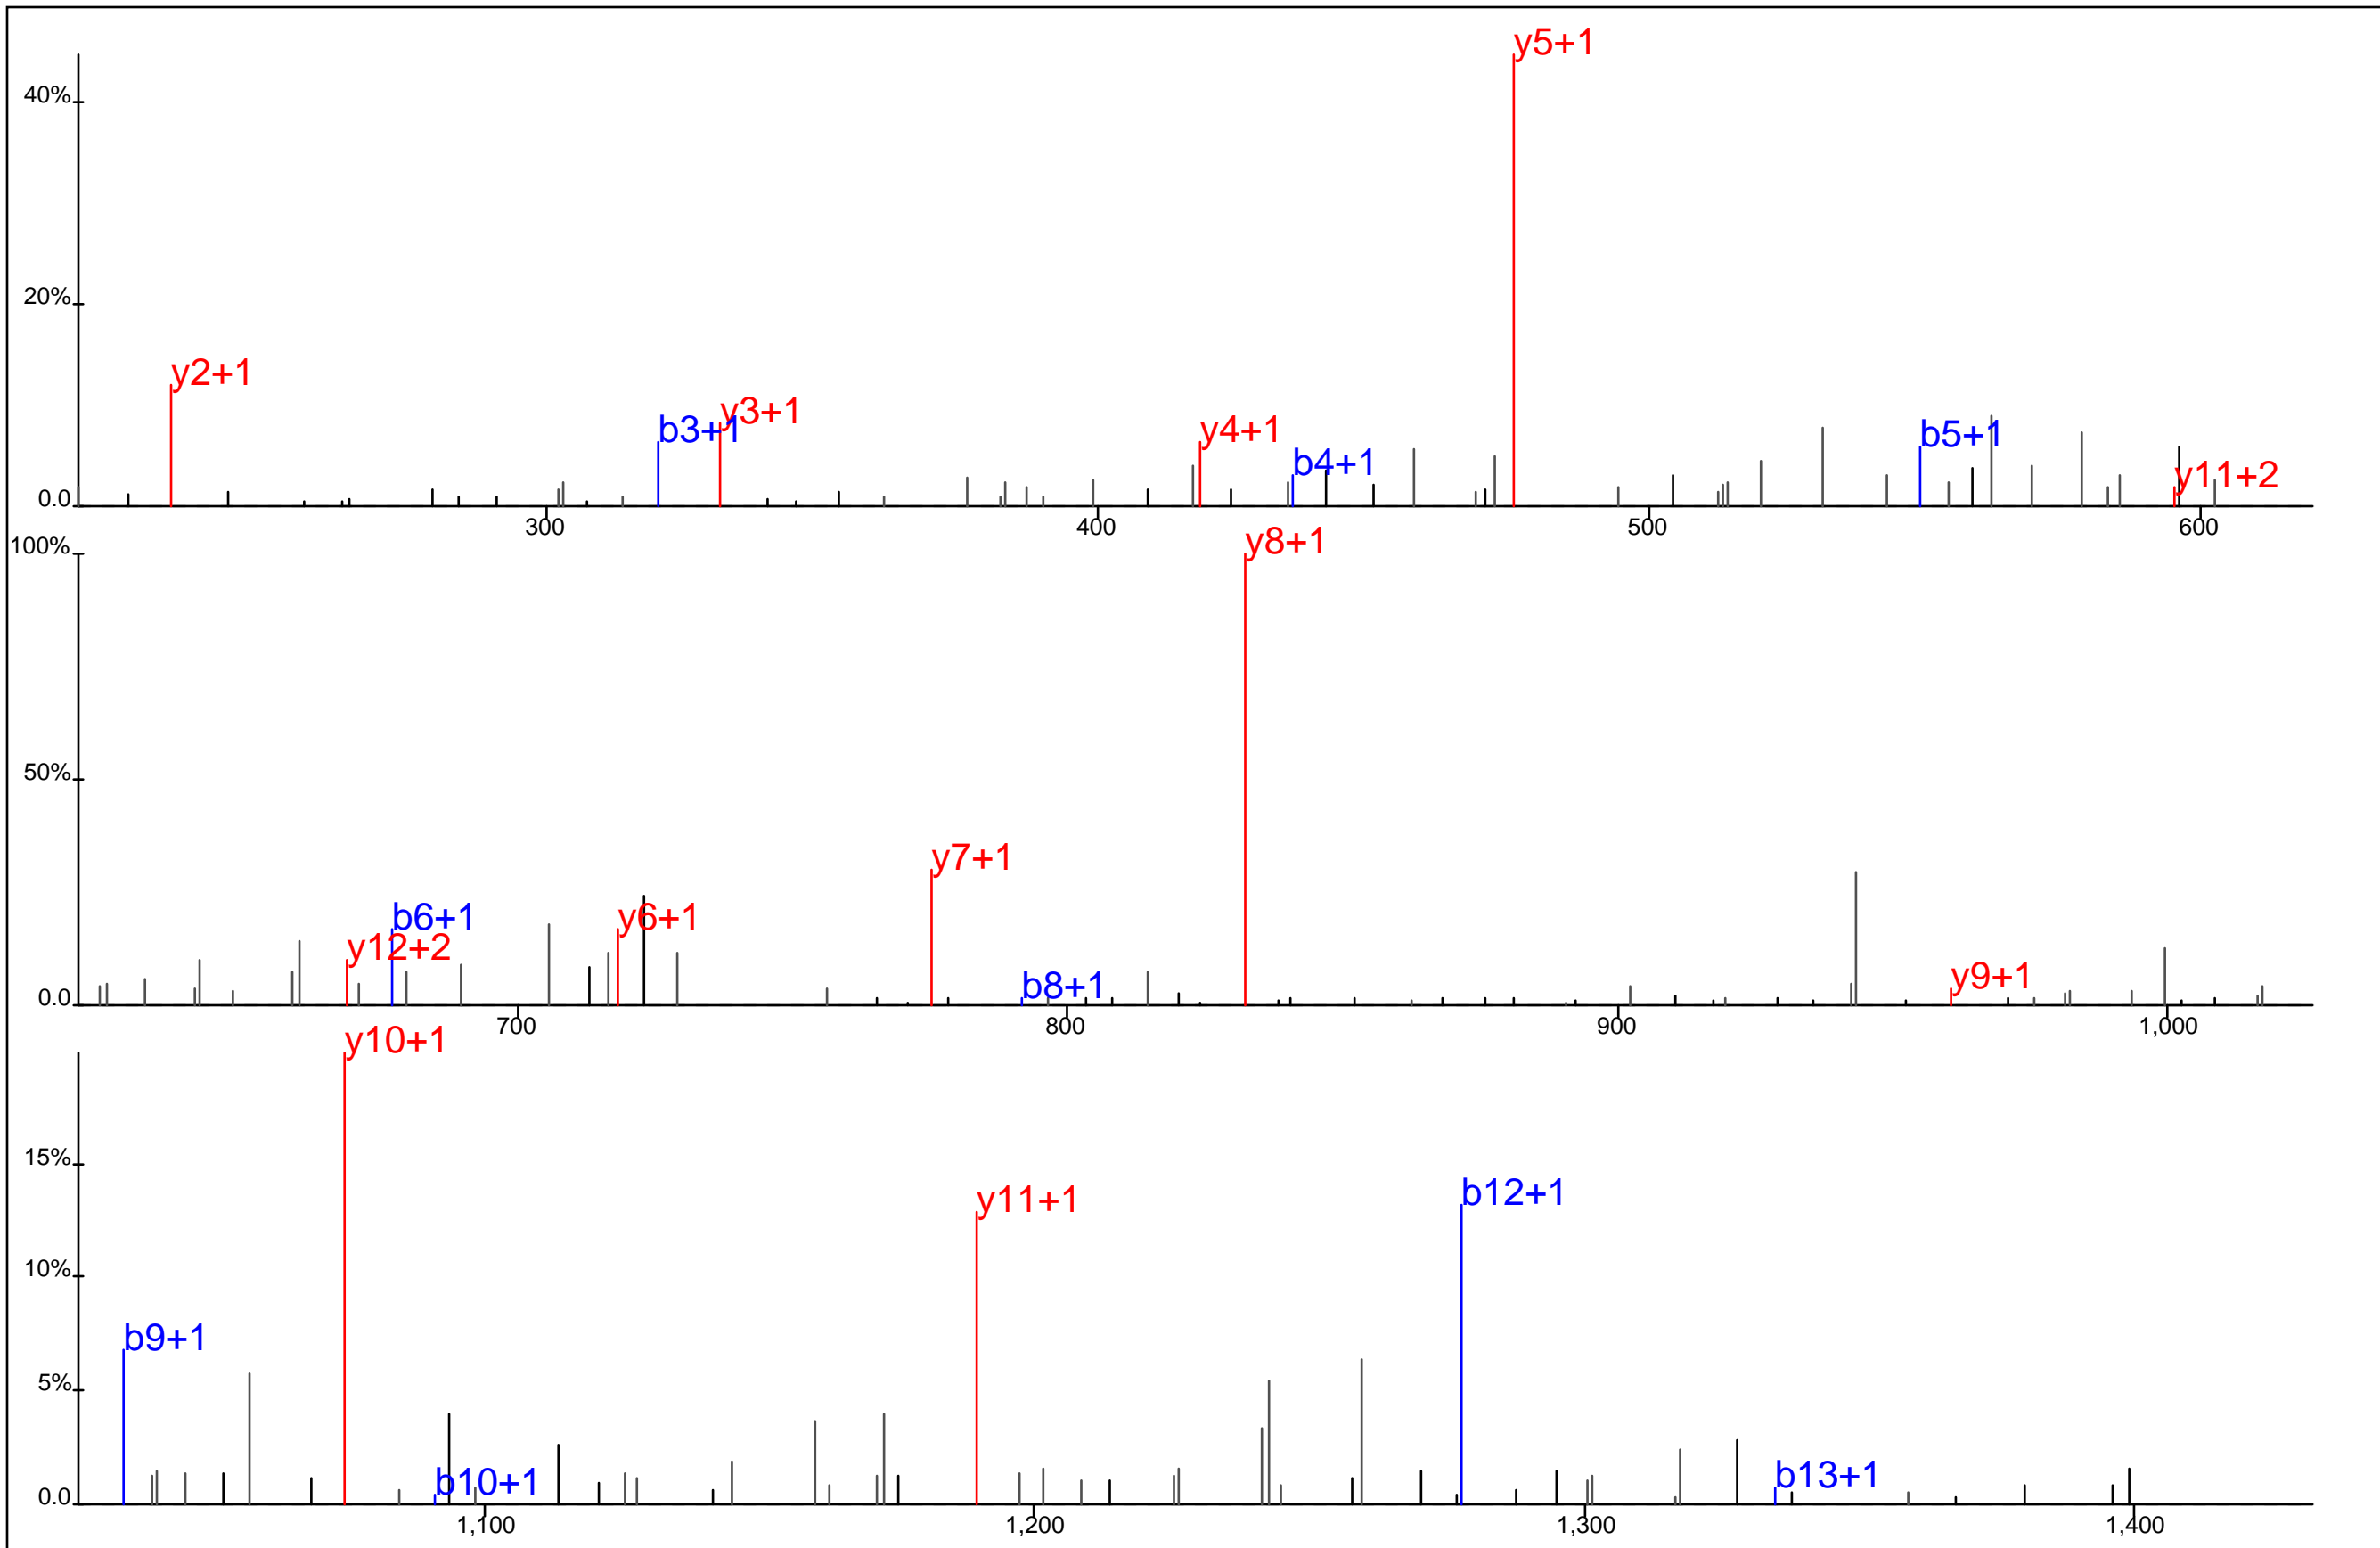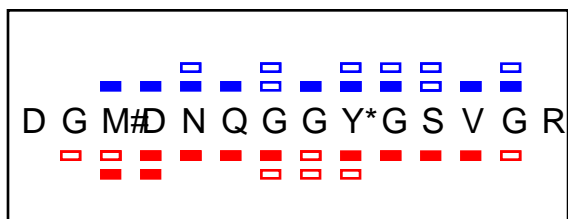

Protein Name: Heterogeneous nuclear ribonucleoprotein H3  
 gi Accession: 0  
 Precursor Mass: 754.7788+2  
 Delta Mass: 2.095 ppm  
 XCorr: 68.02

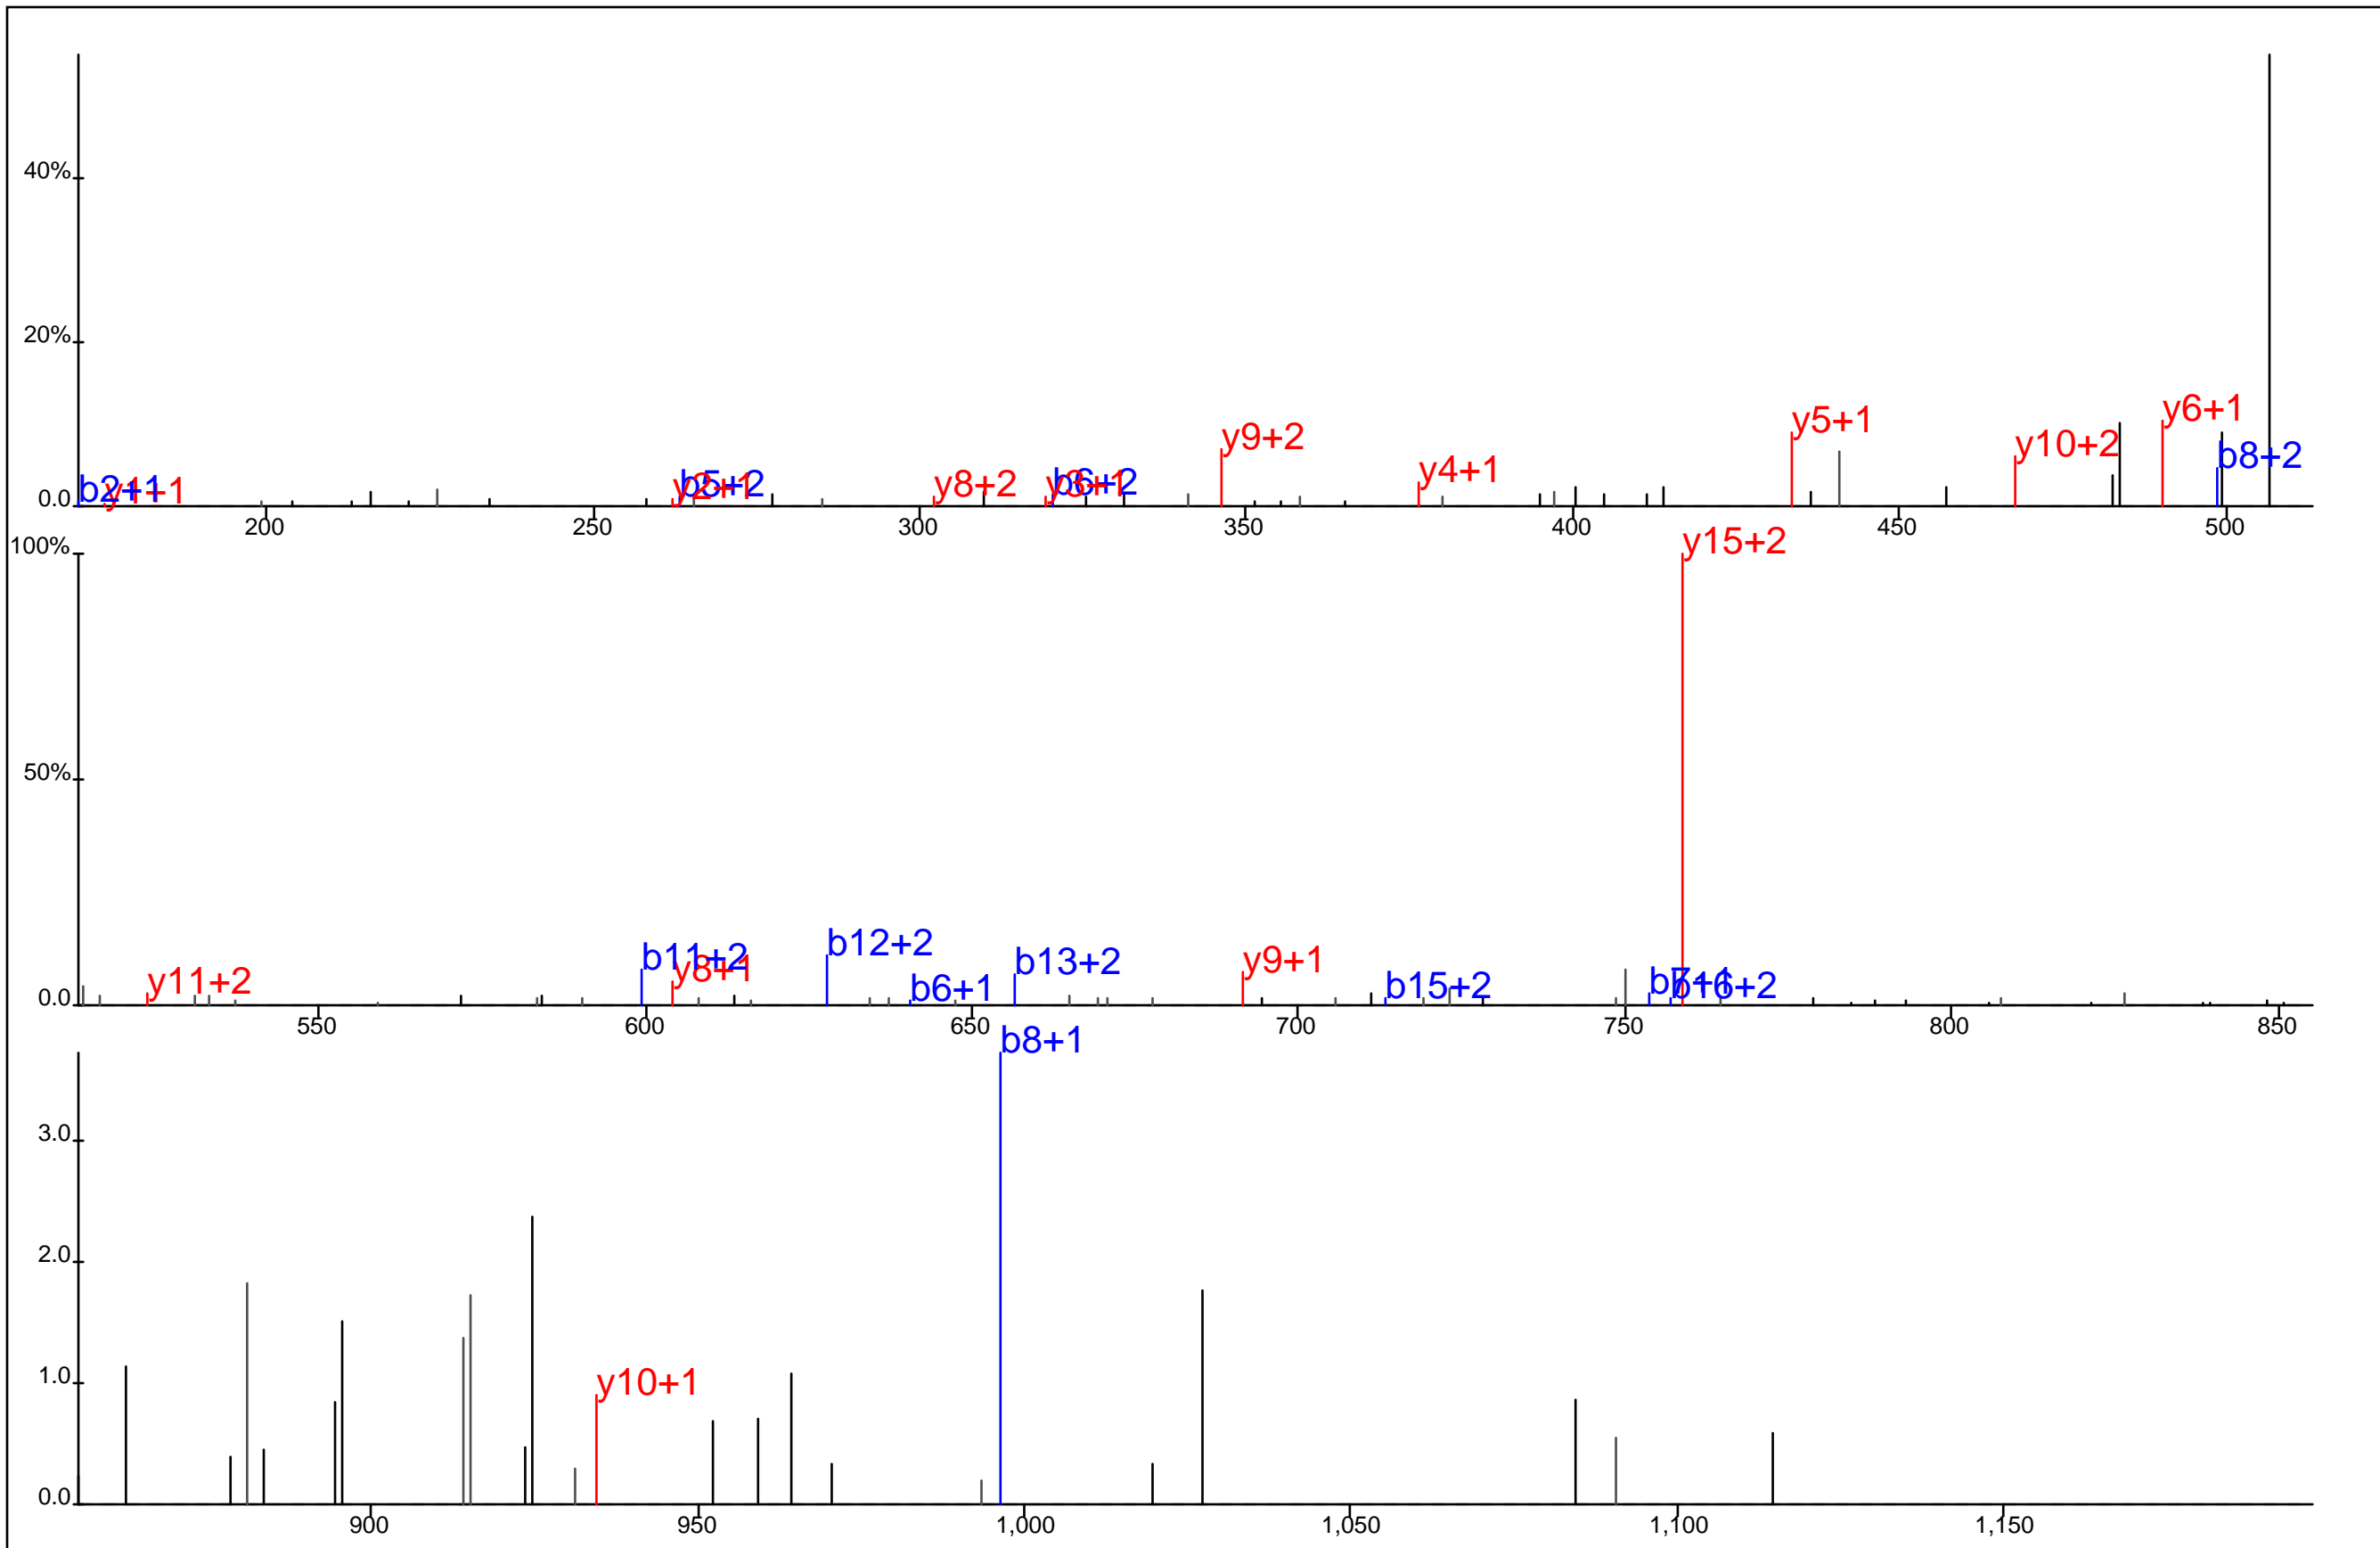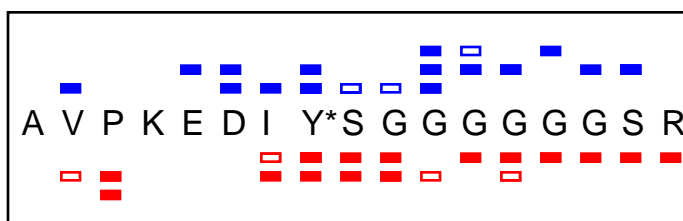

Protein Name: Heterogeneous nuclear ribonucleoprotein A0  
 gi Accession: 0  
 Precursor Mass: 562.9219+3  
 Delta Mass: 1.751 ppm  
 XCorr: 27.8

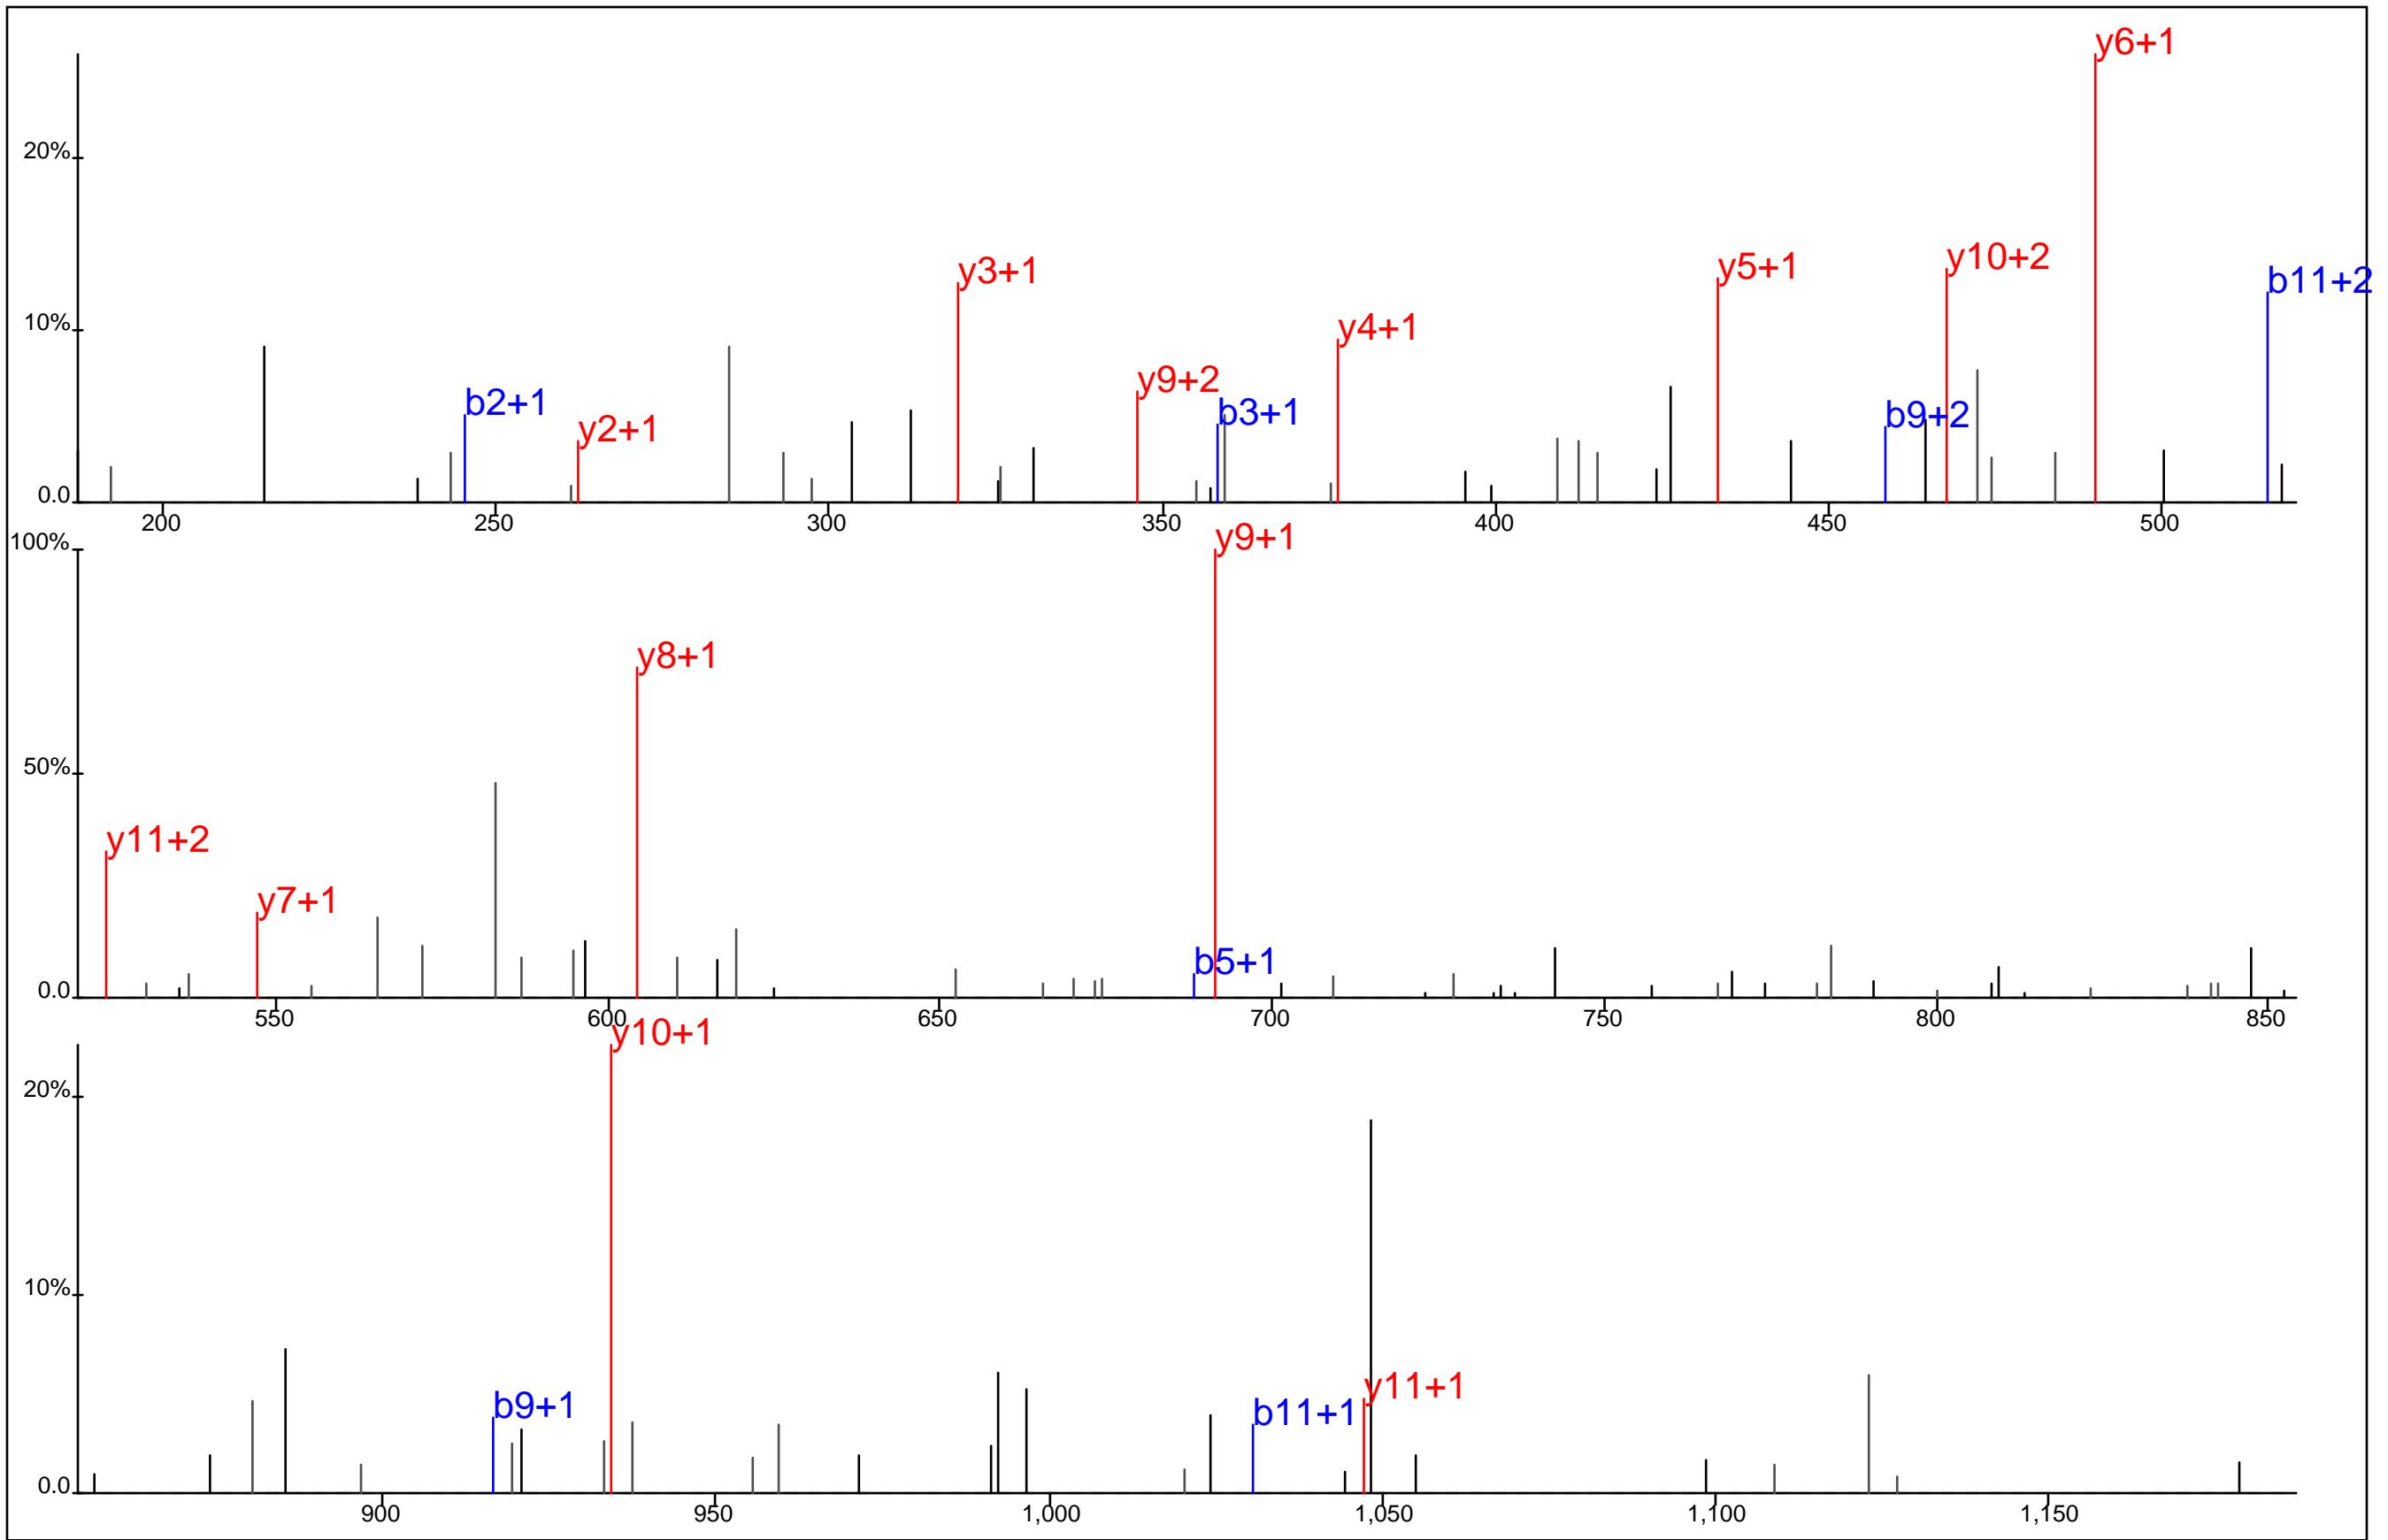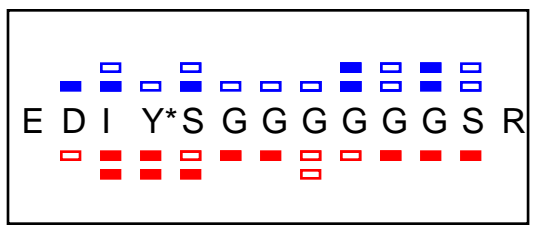

Protein Name: Heterogeneous nuclear ribonucleoprotein A0  
 gi Accession: 0  
 Precursor Mass: 646.2510+2  
 Delta Mass: 0.195 ppm  
 XCorr: 59.99

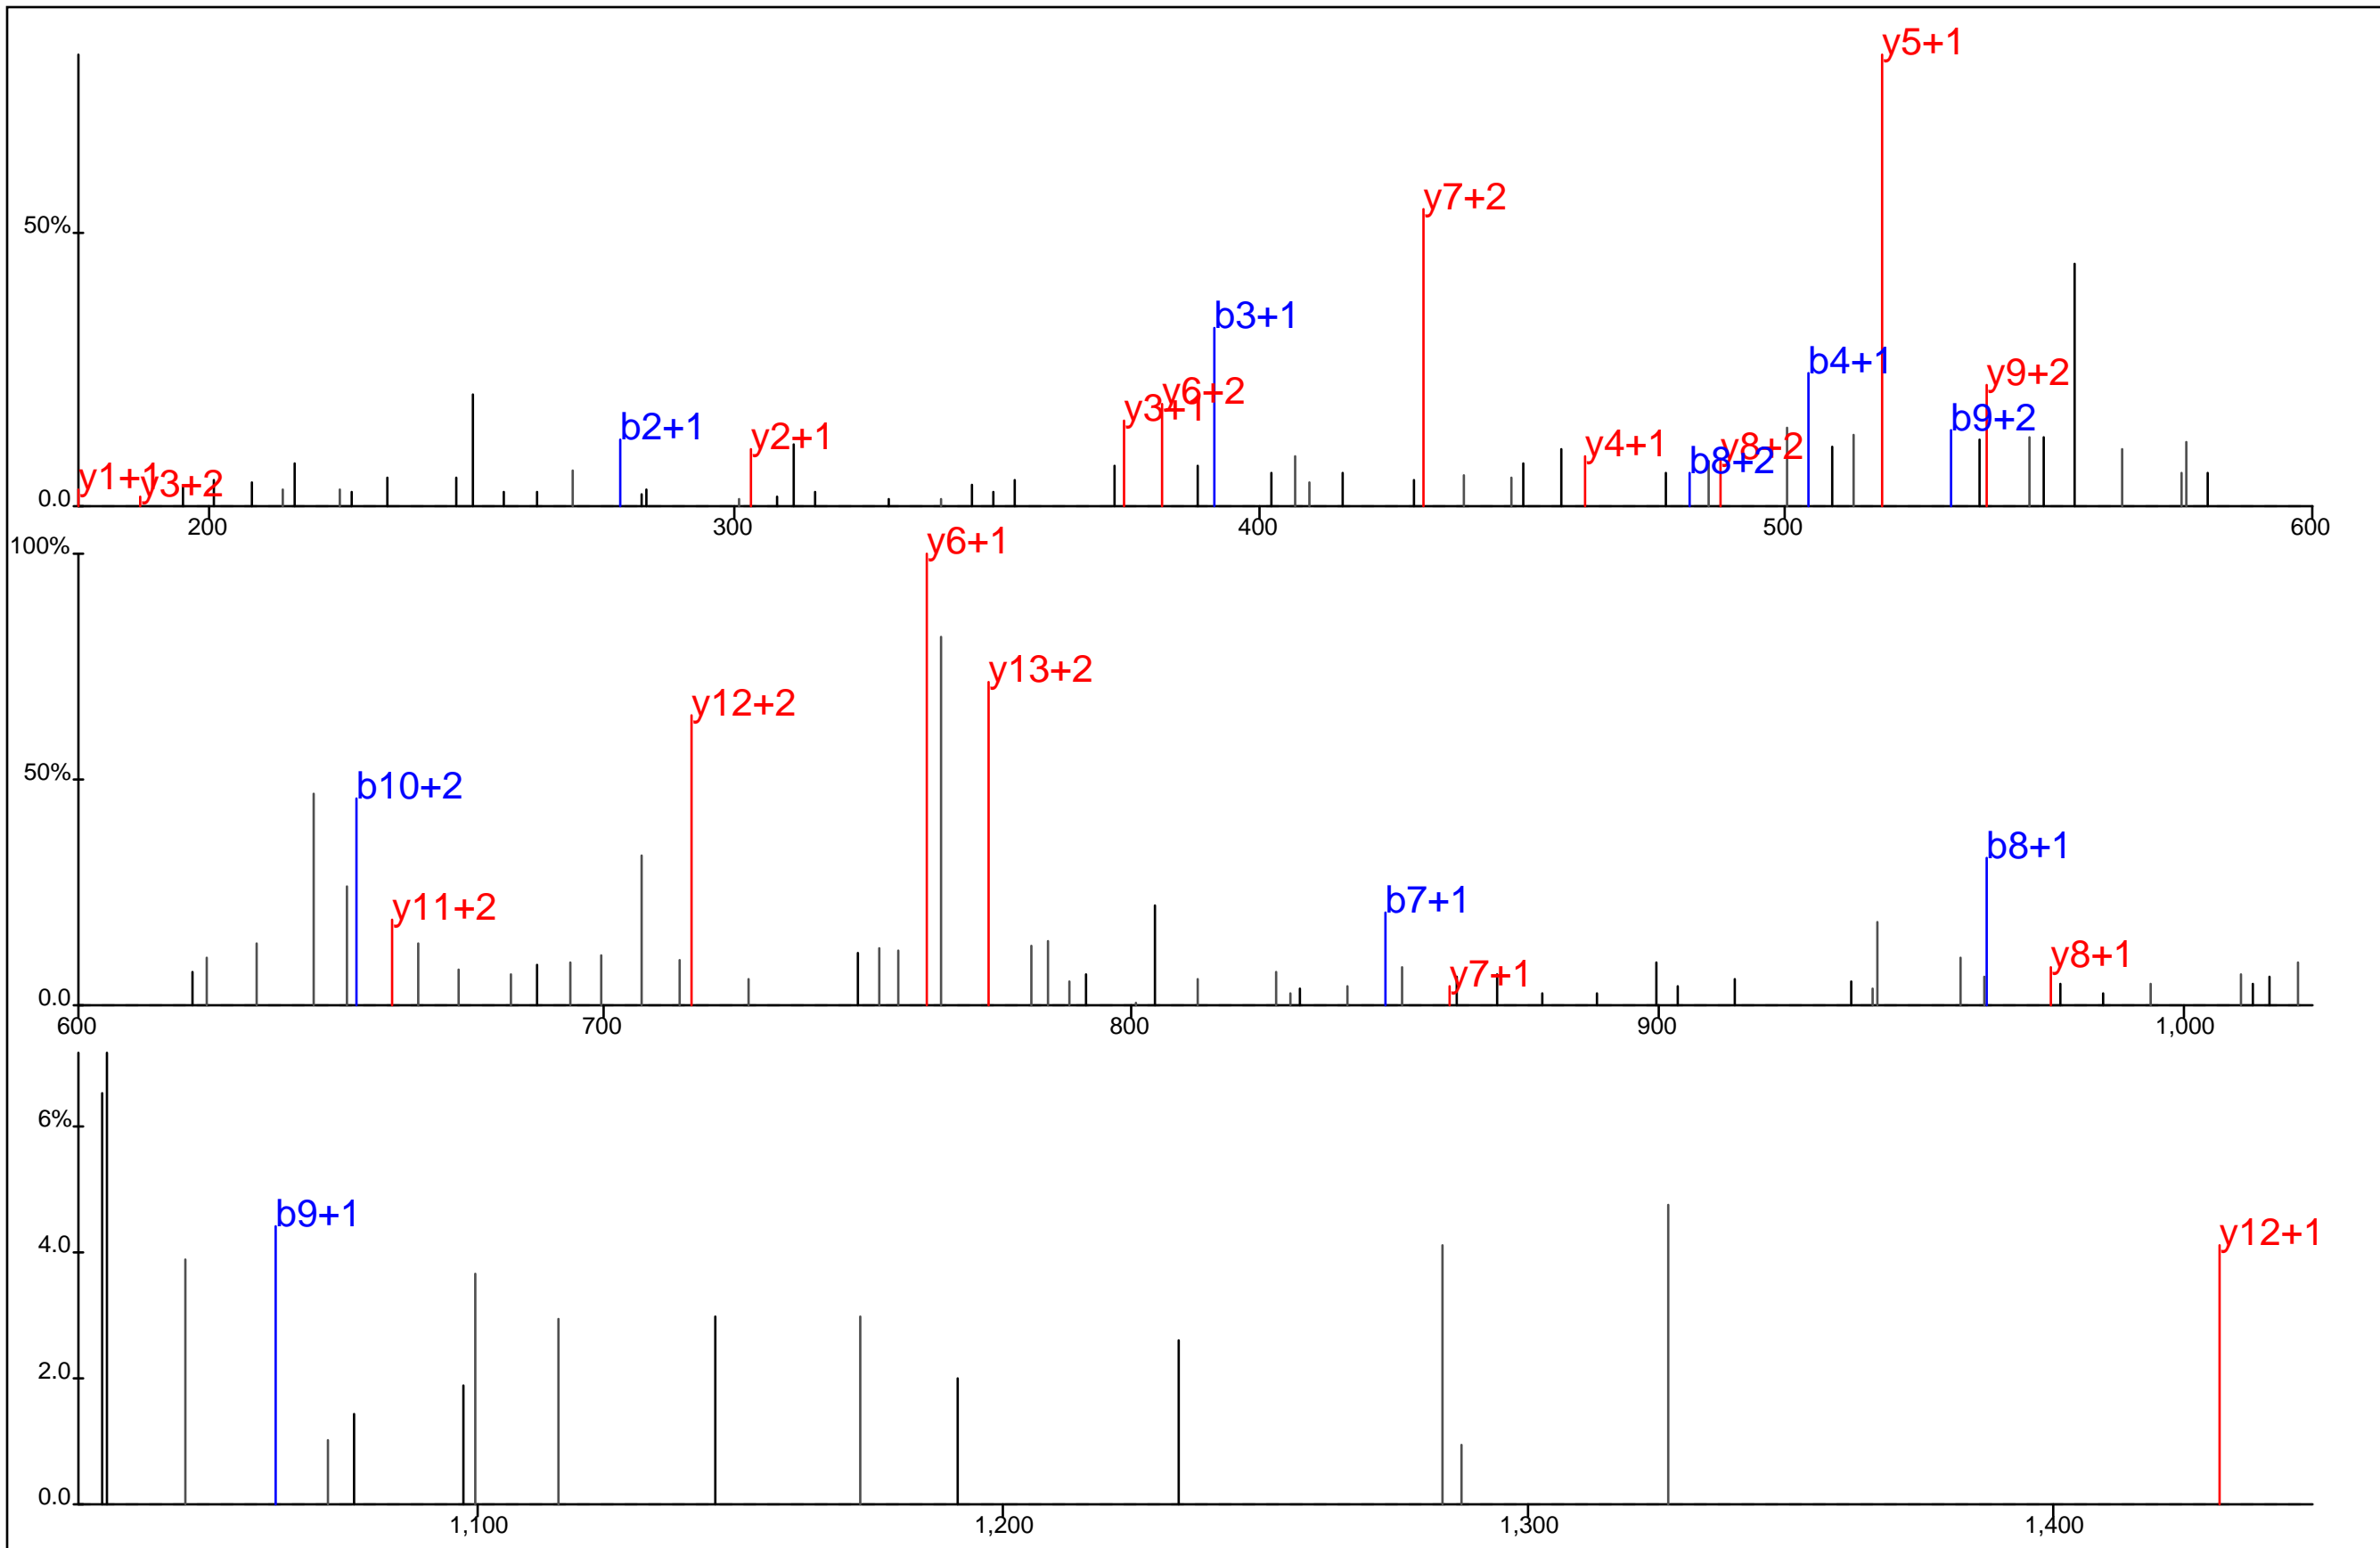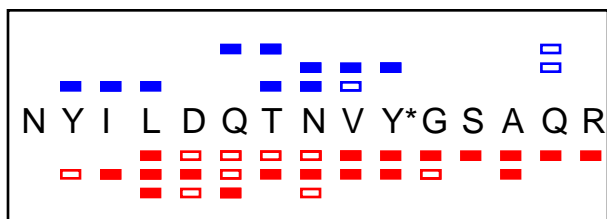

Protein Name: Heterogeneous nuclear ribonucleoprotein U like 1  
 gi Accession: 0  
 Precursor Mass: 607.9434+3  
 Delta Mass: 0.540 ppm  
 XCorr: 30.15

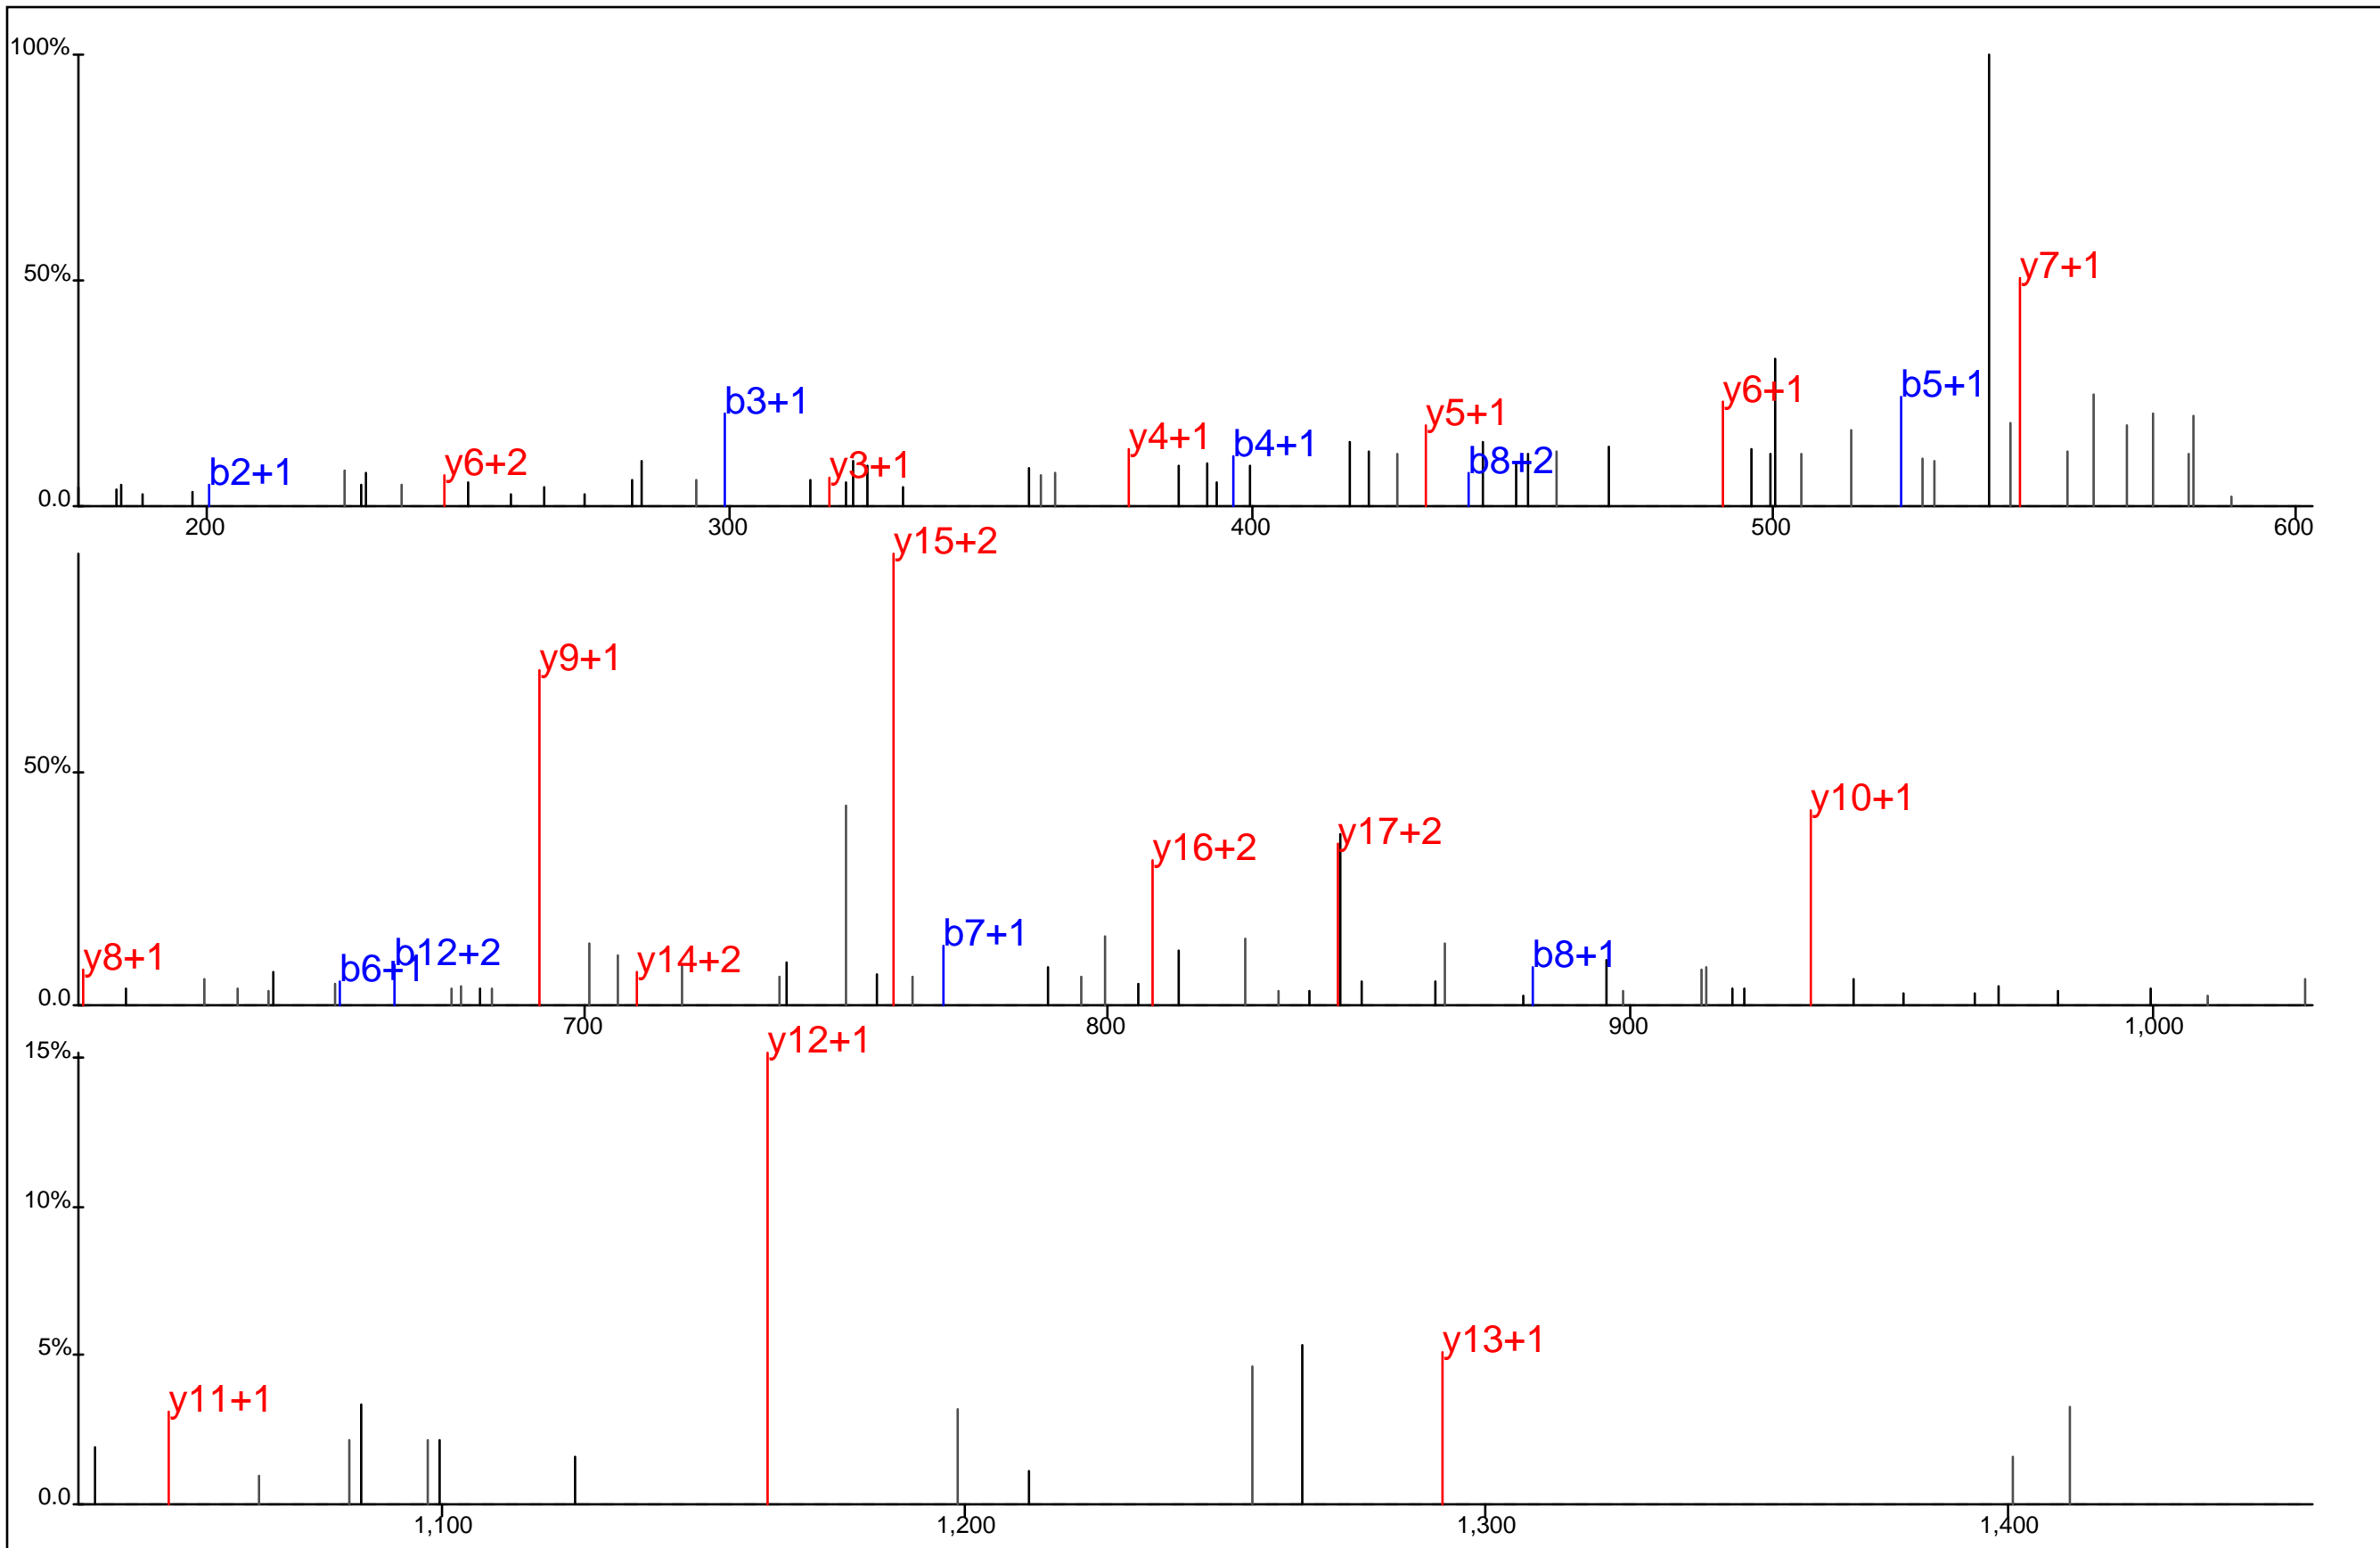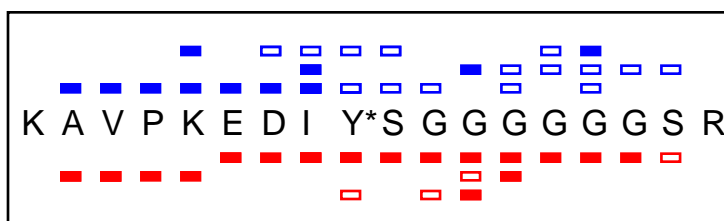

Protein Name: Heterogeneous nuclear ribonucleoprotein A0  
 gi Accession: 0  
 Precursor Mass: 605.6198+3  
 Delta Mass: 0.894 ppm  
 XCorr: 51.45

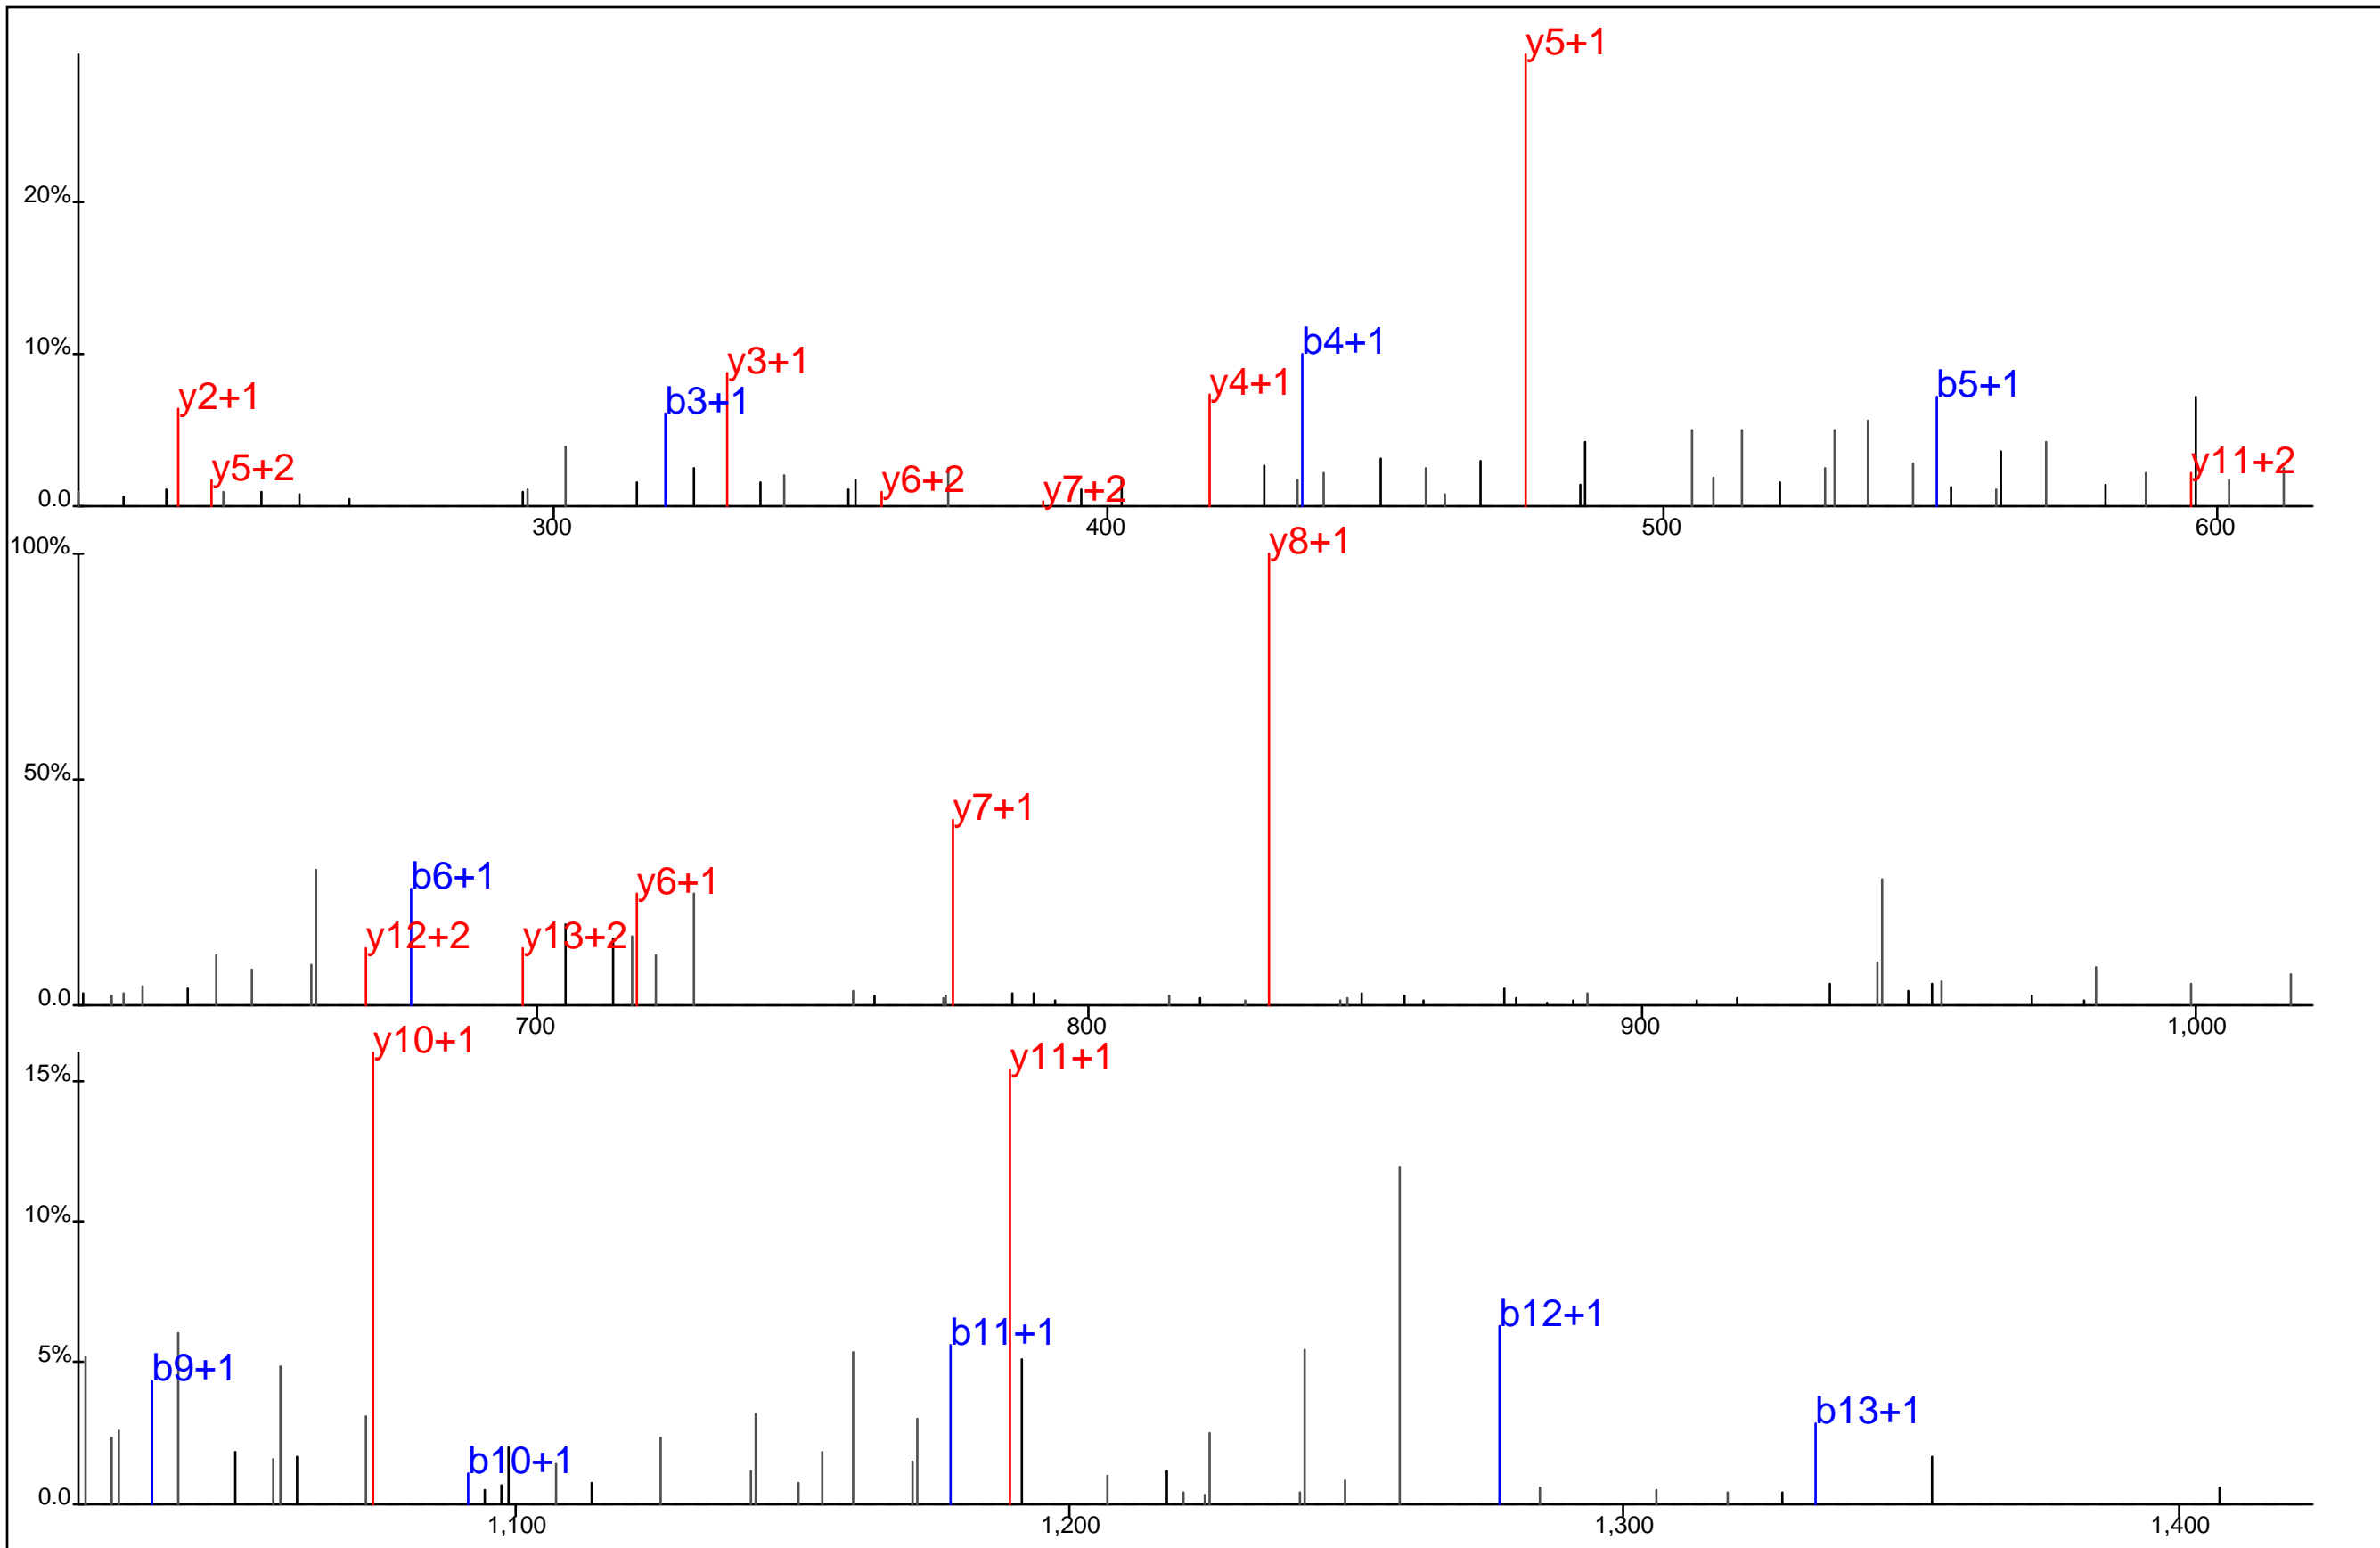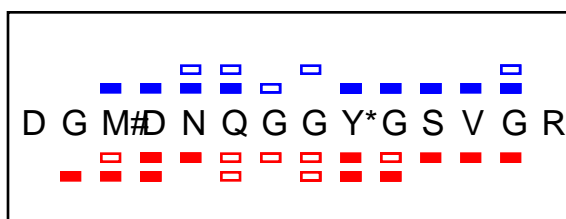

Protein Name: Heterogeneous nuclear ribonucleoprotein H3  
 gi Accession: 0  
 Precursor Mass: 754.7784+2  
 Delta Mass: 1.527 ppm  
 XCorr: 76.08



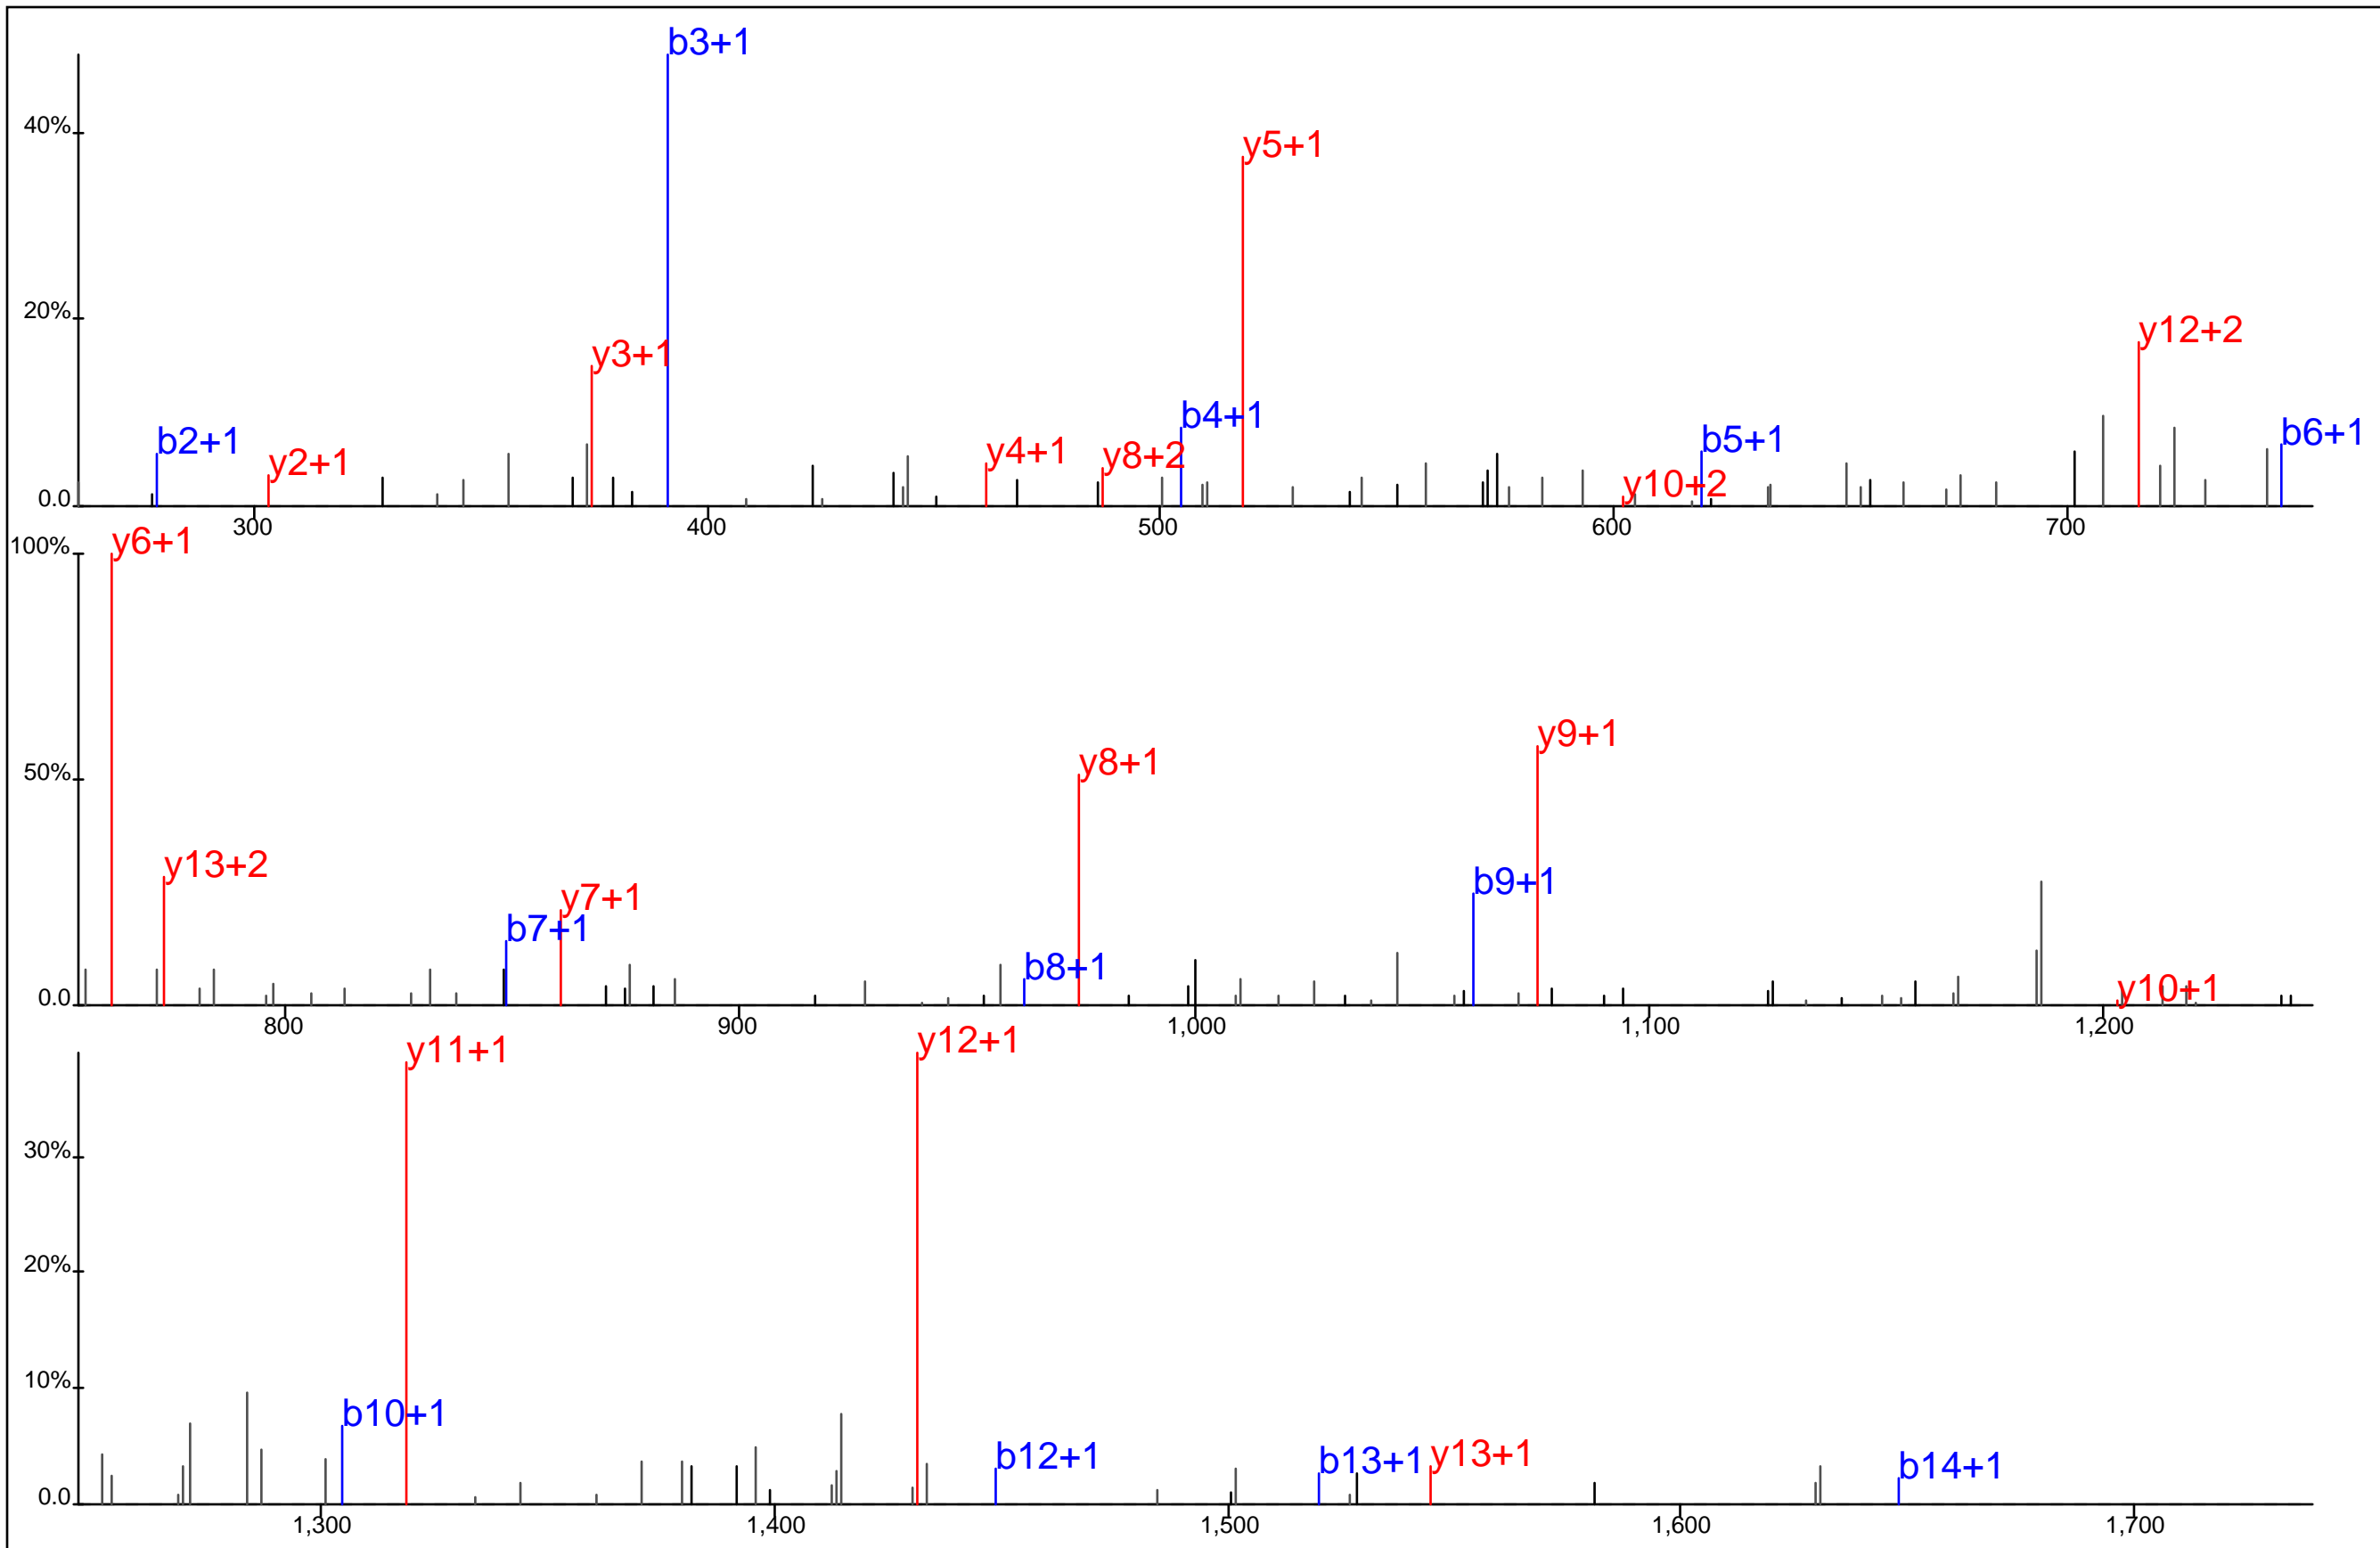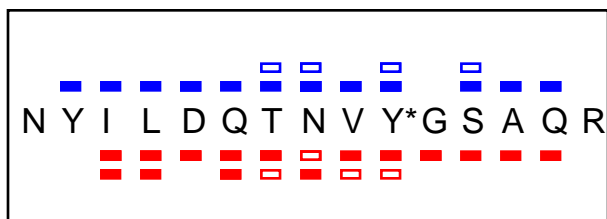

Protein Name: Heterogeneous nuclear ribonucleoprotein U like 1  
 gi Accession: 0  
 Precursor Mass: 911.4105+2  
 Delta Mass: 1.605 ppm  
 XCorr: 79.68

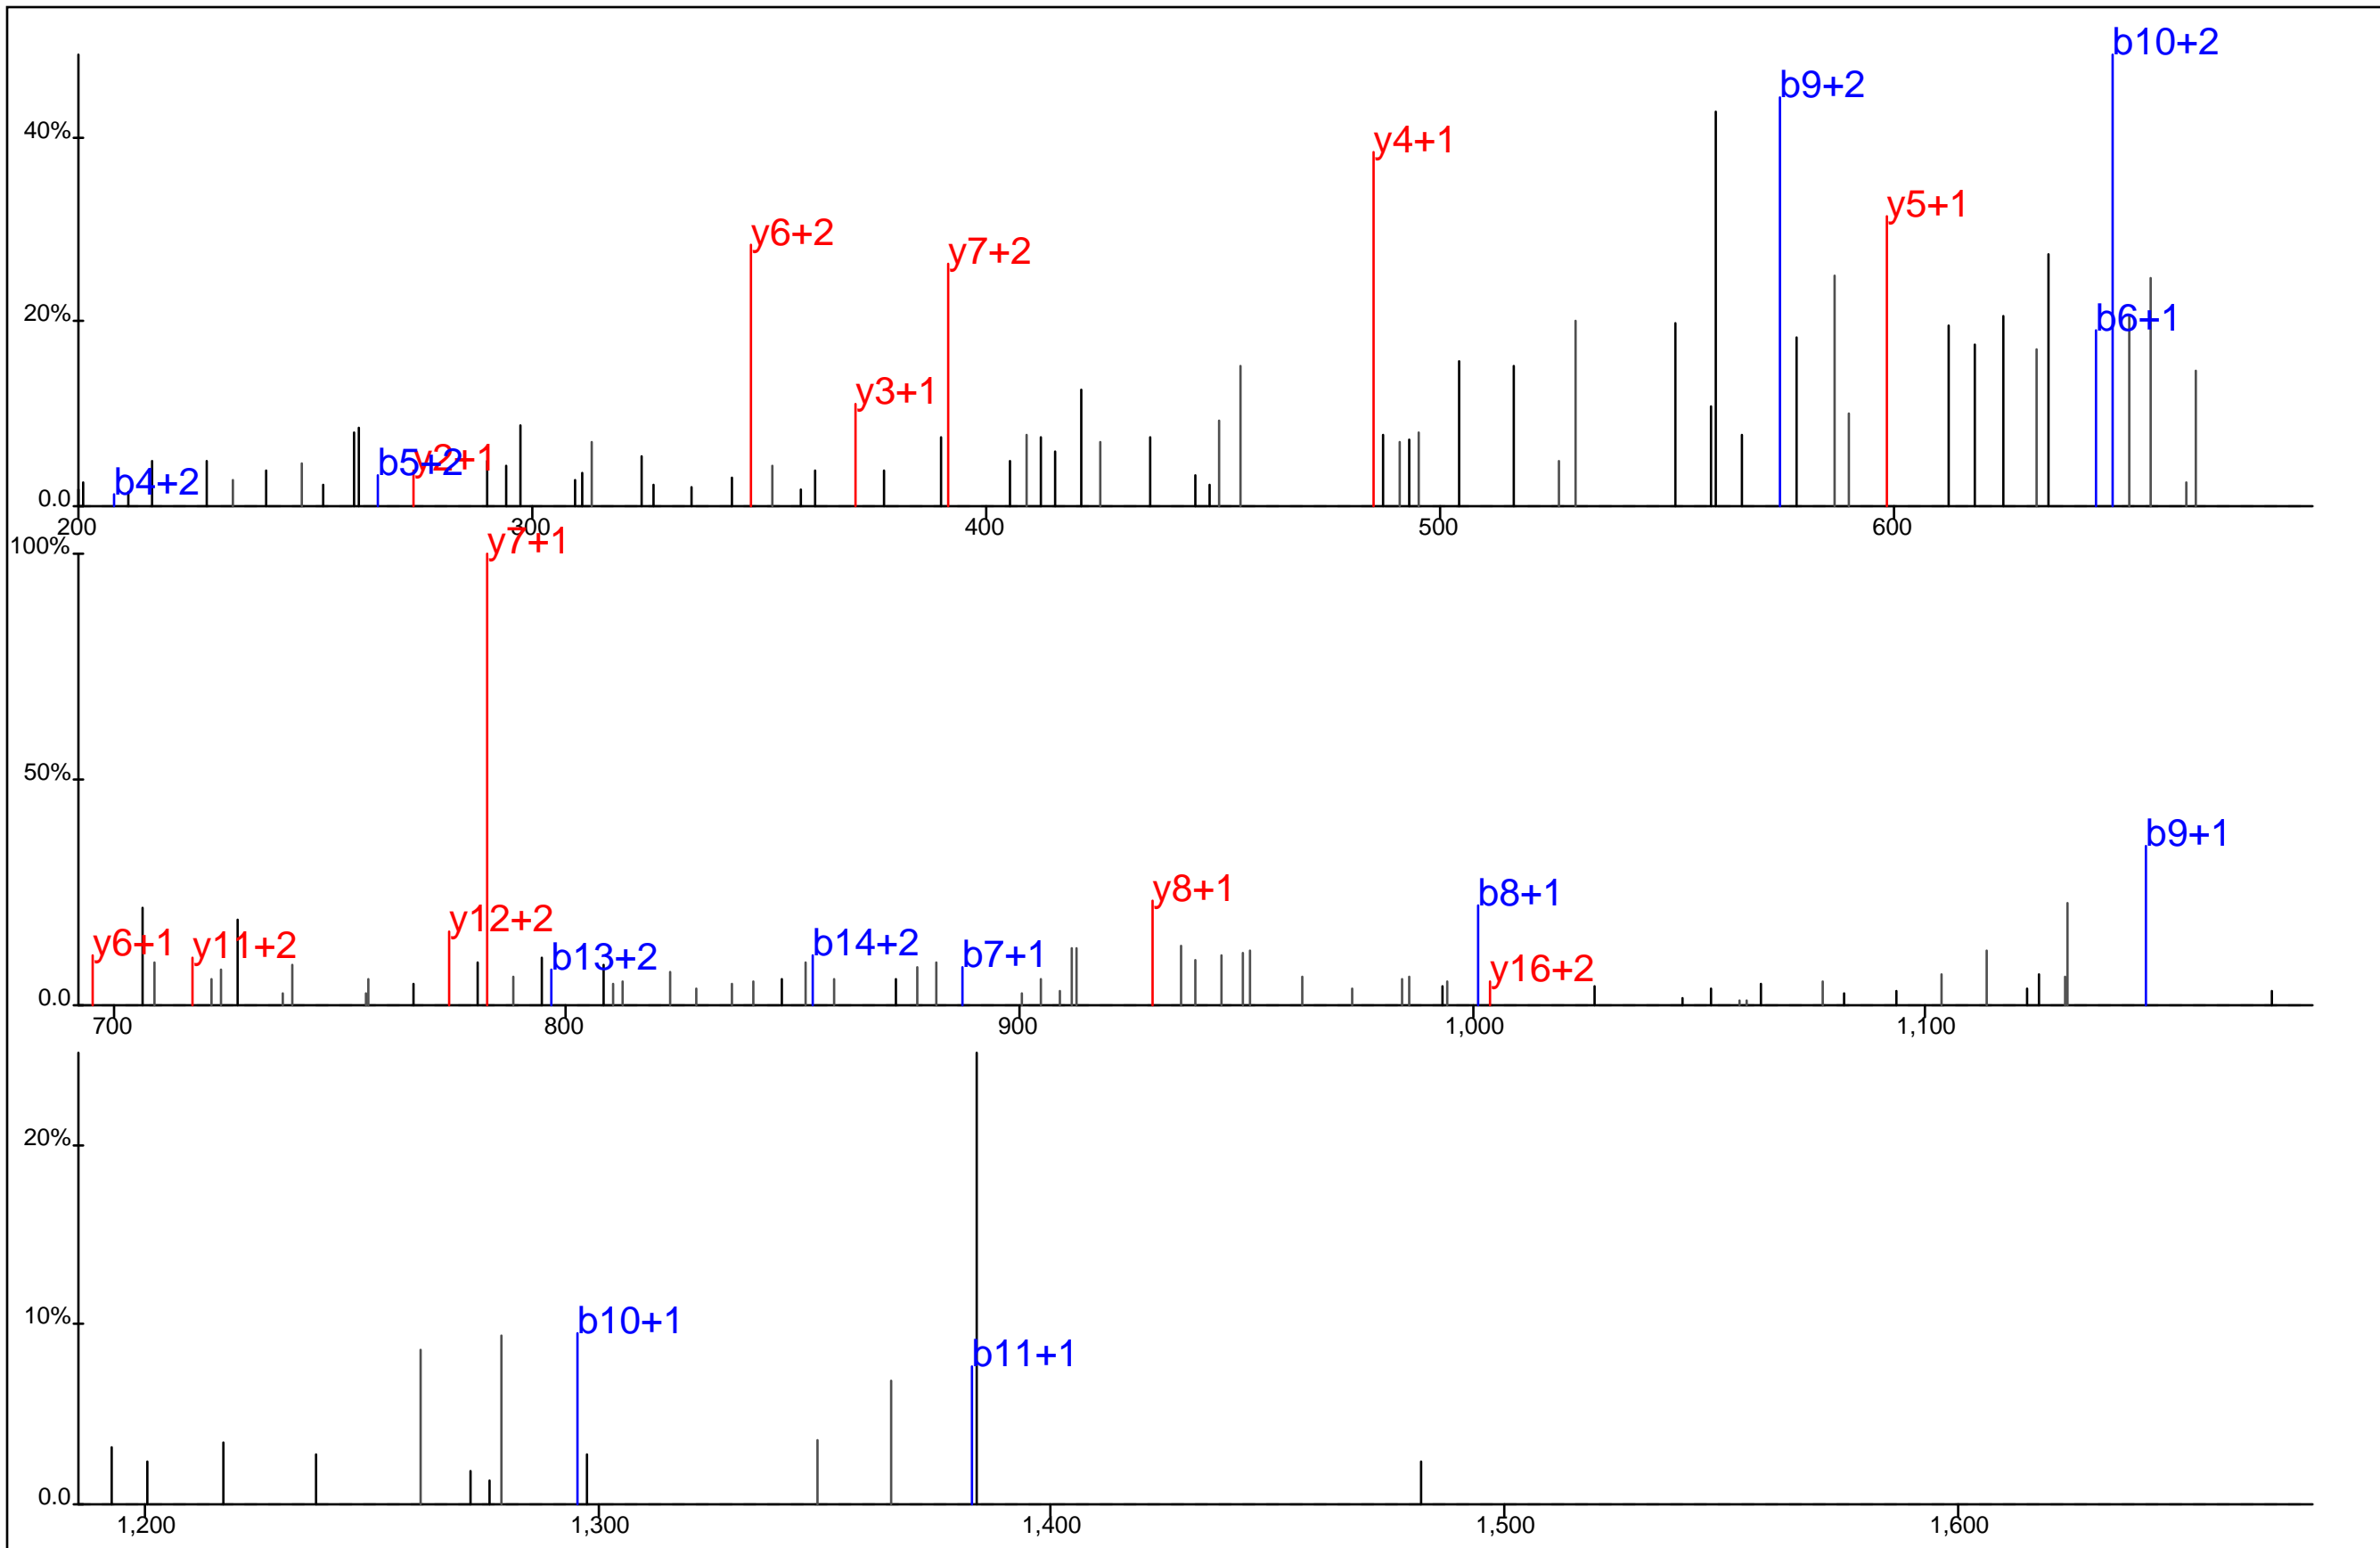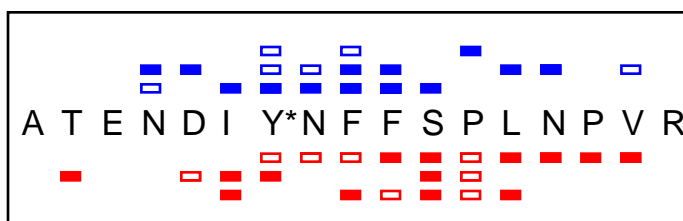

Protein Name: Heterogeneous nuclear ribonucleoprotein H1  
 gi Accession: 0  
 Precursor Mass: 692.9871+3  
 Delta Mass: 1.930 ppm  
 XCorr: 24.87

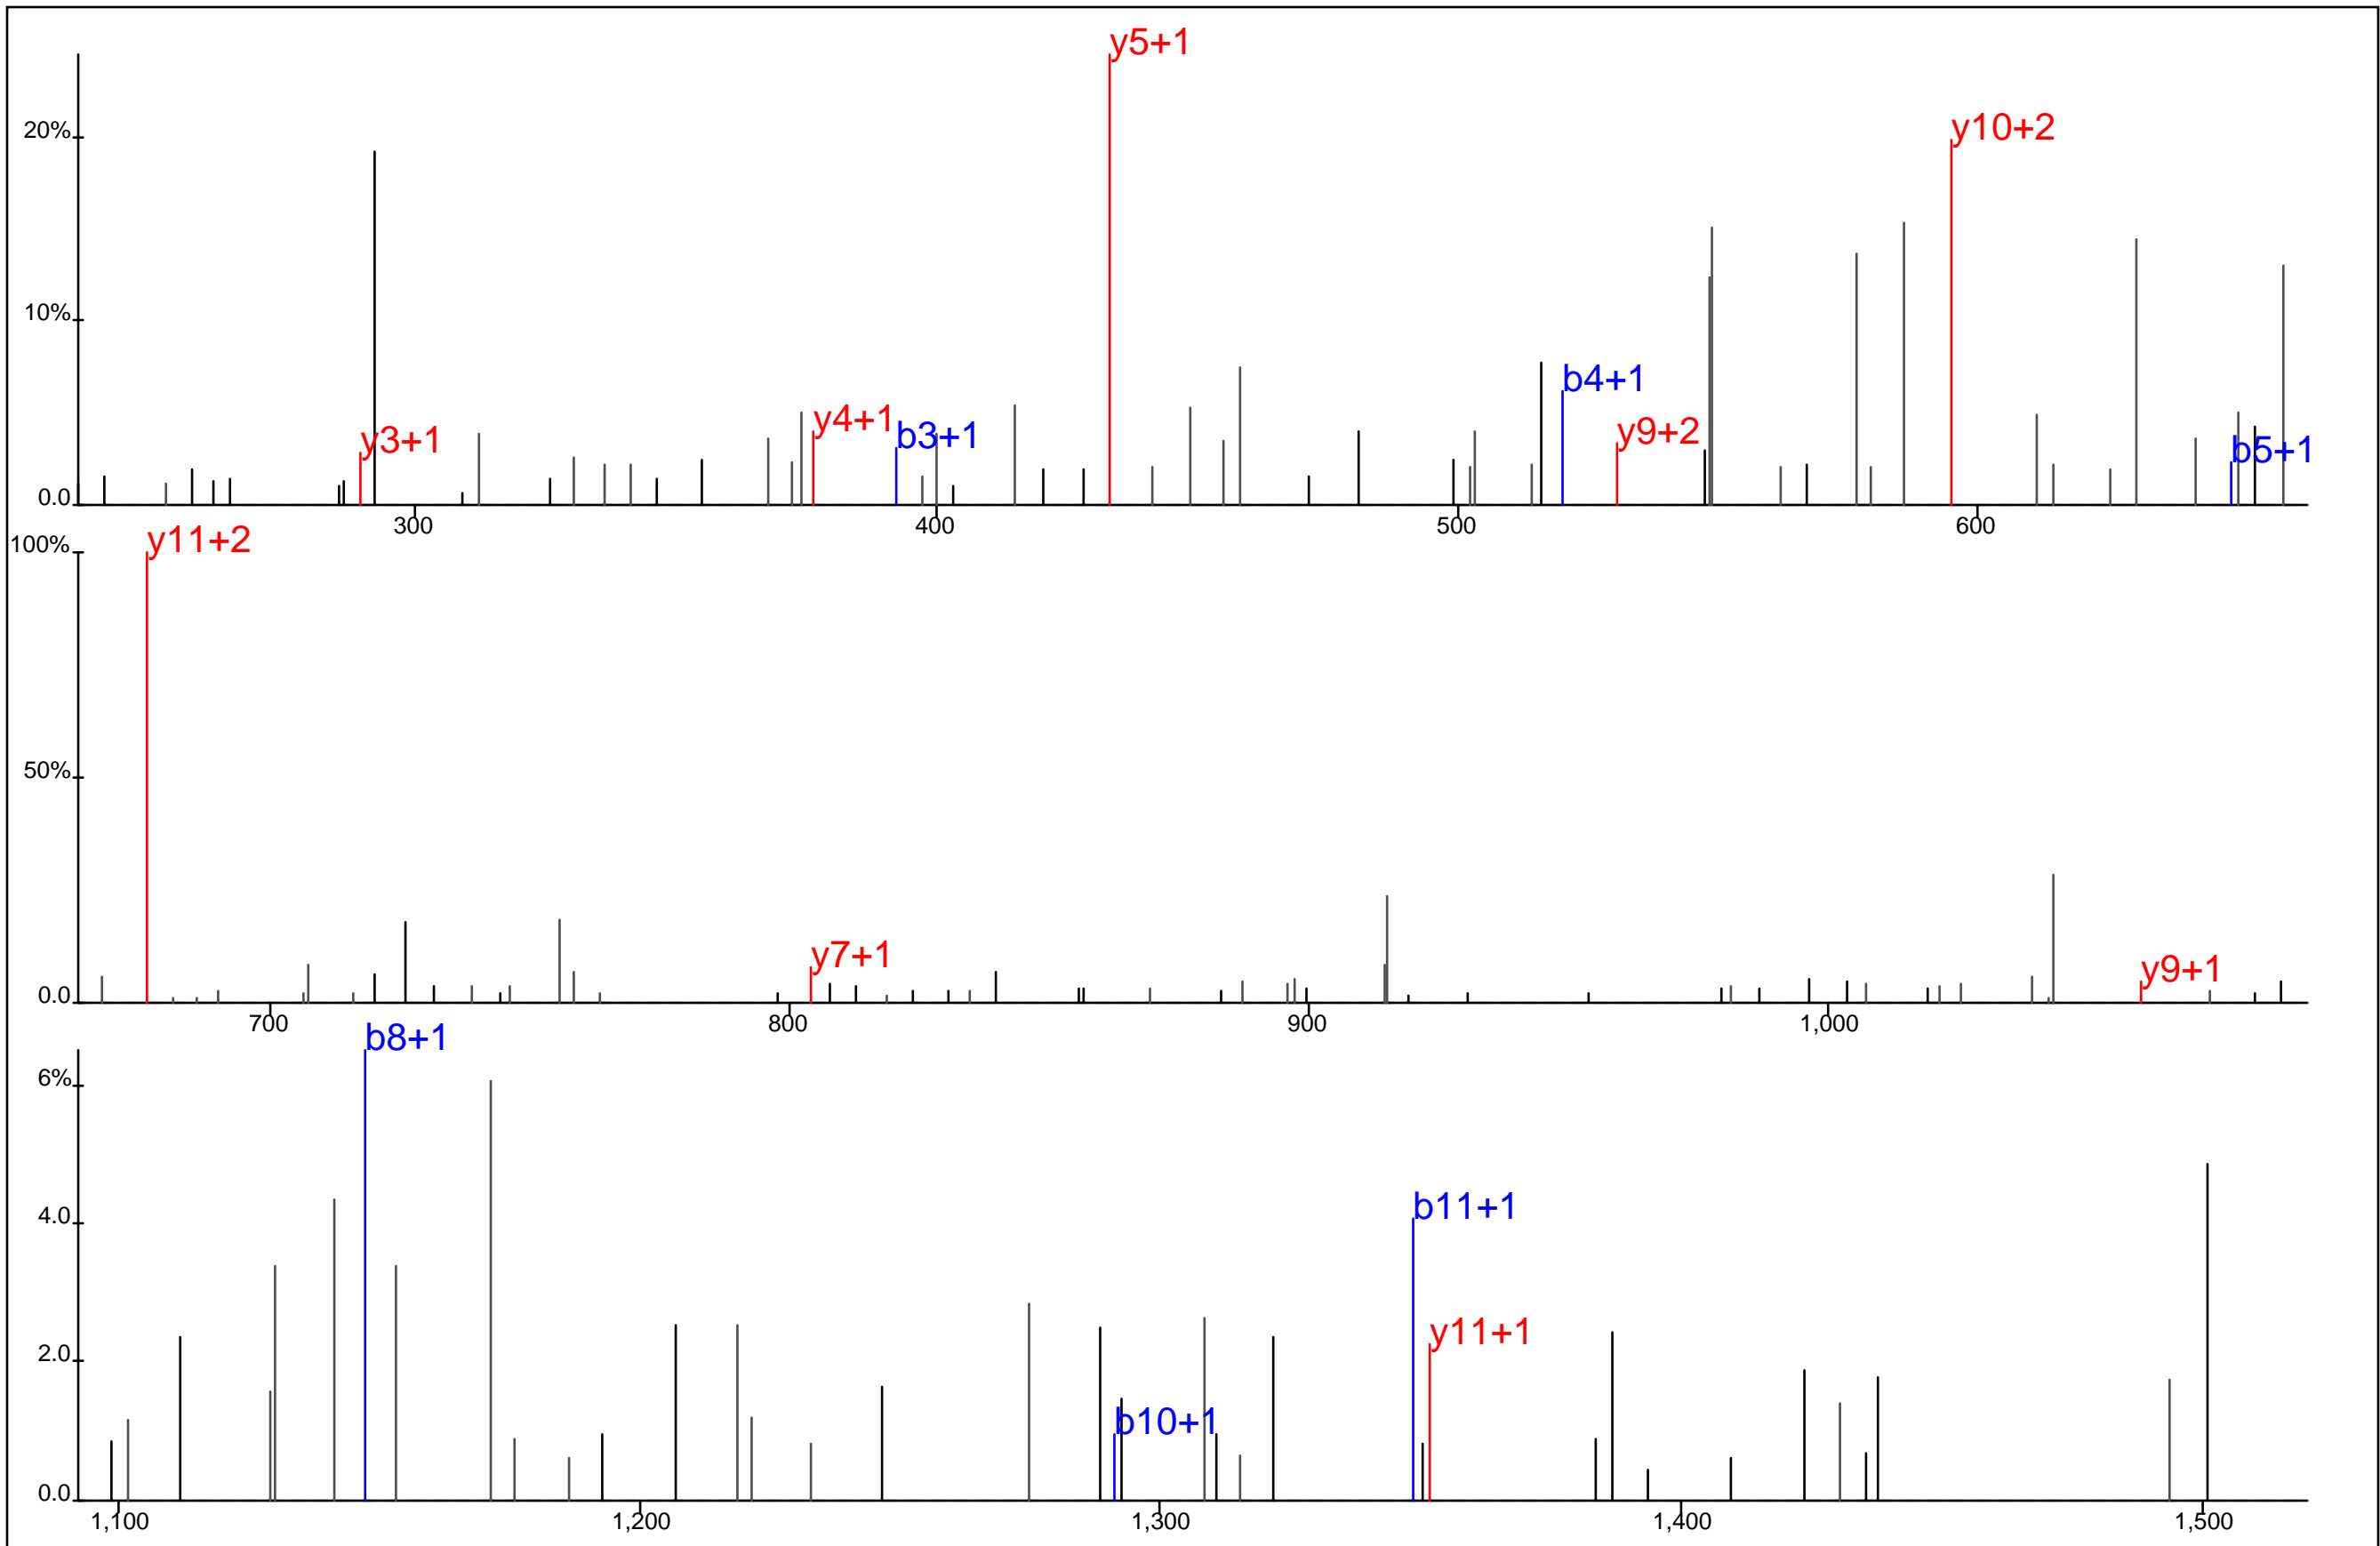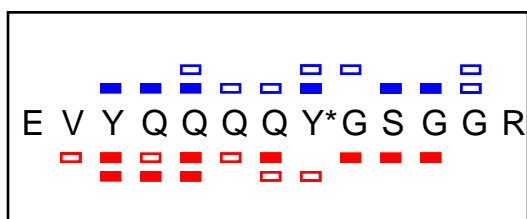

Protein Name: Heterogeneous nuclear ribonucleoprotein A/B  
 gi Accession: 0  
 Precursor Mass: 790.3306+2  
 Delta Mass: 0.116 ppm  
 XCorr: 26.65

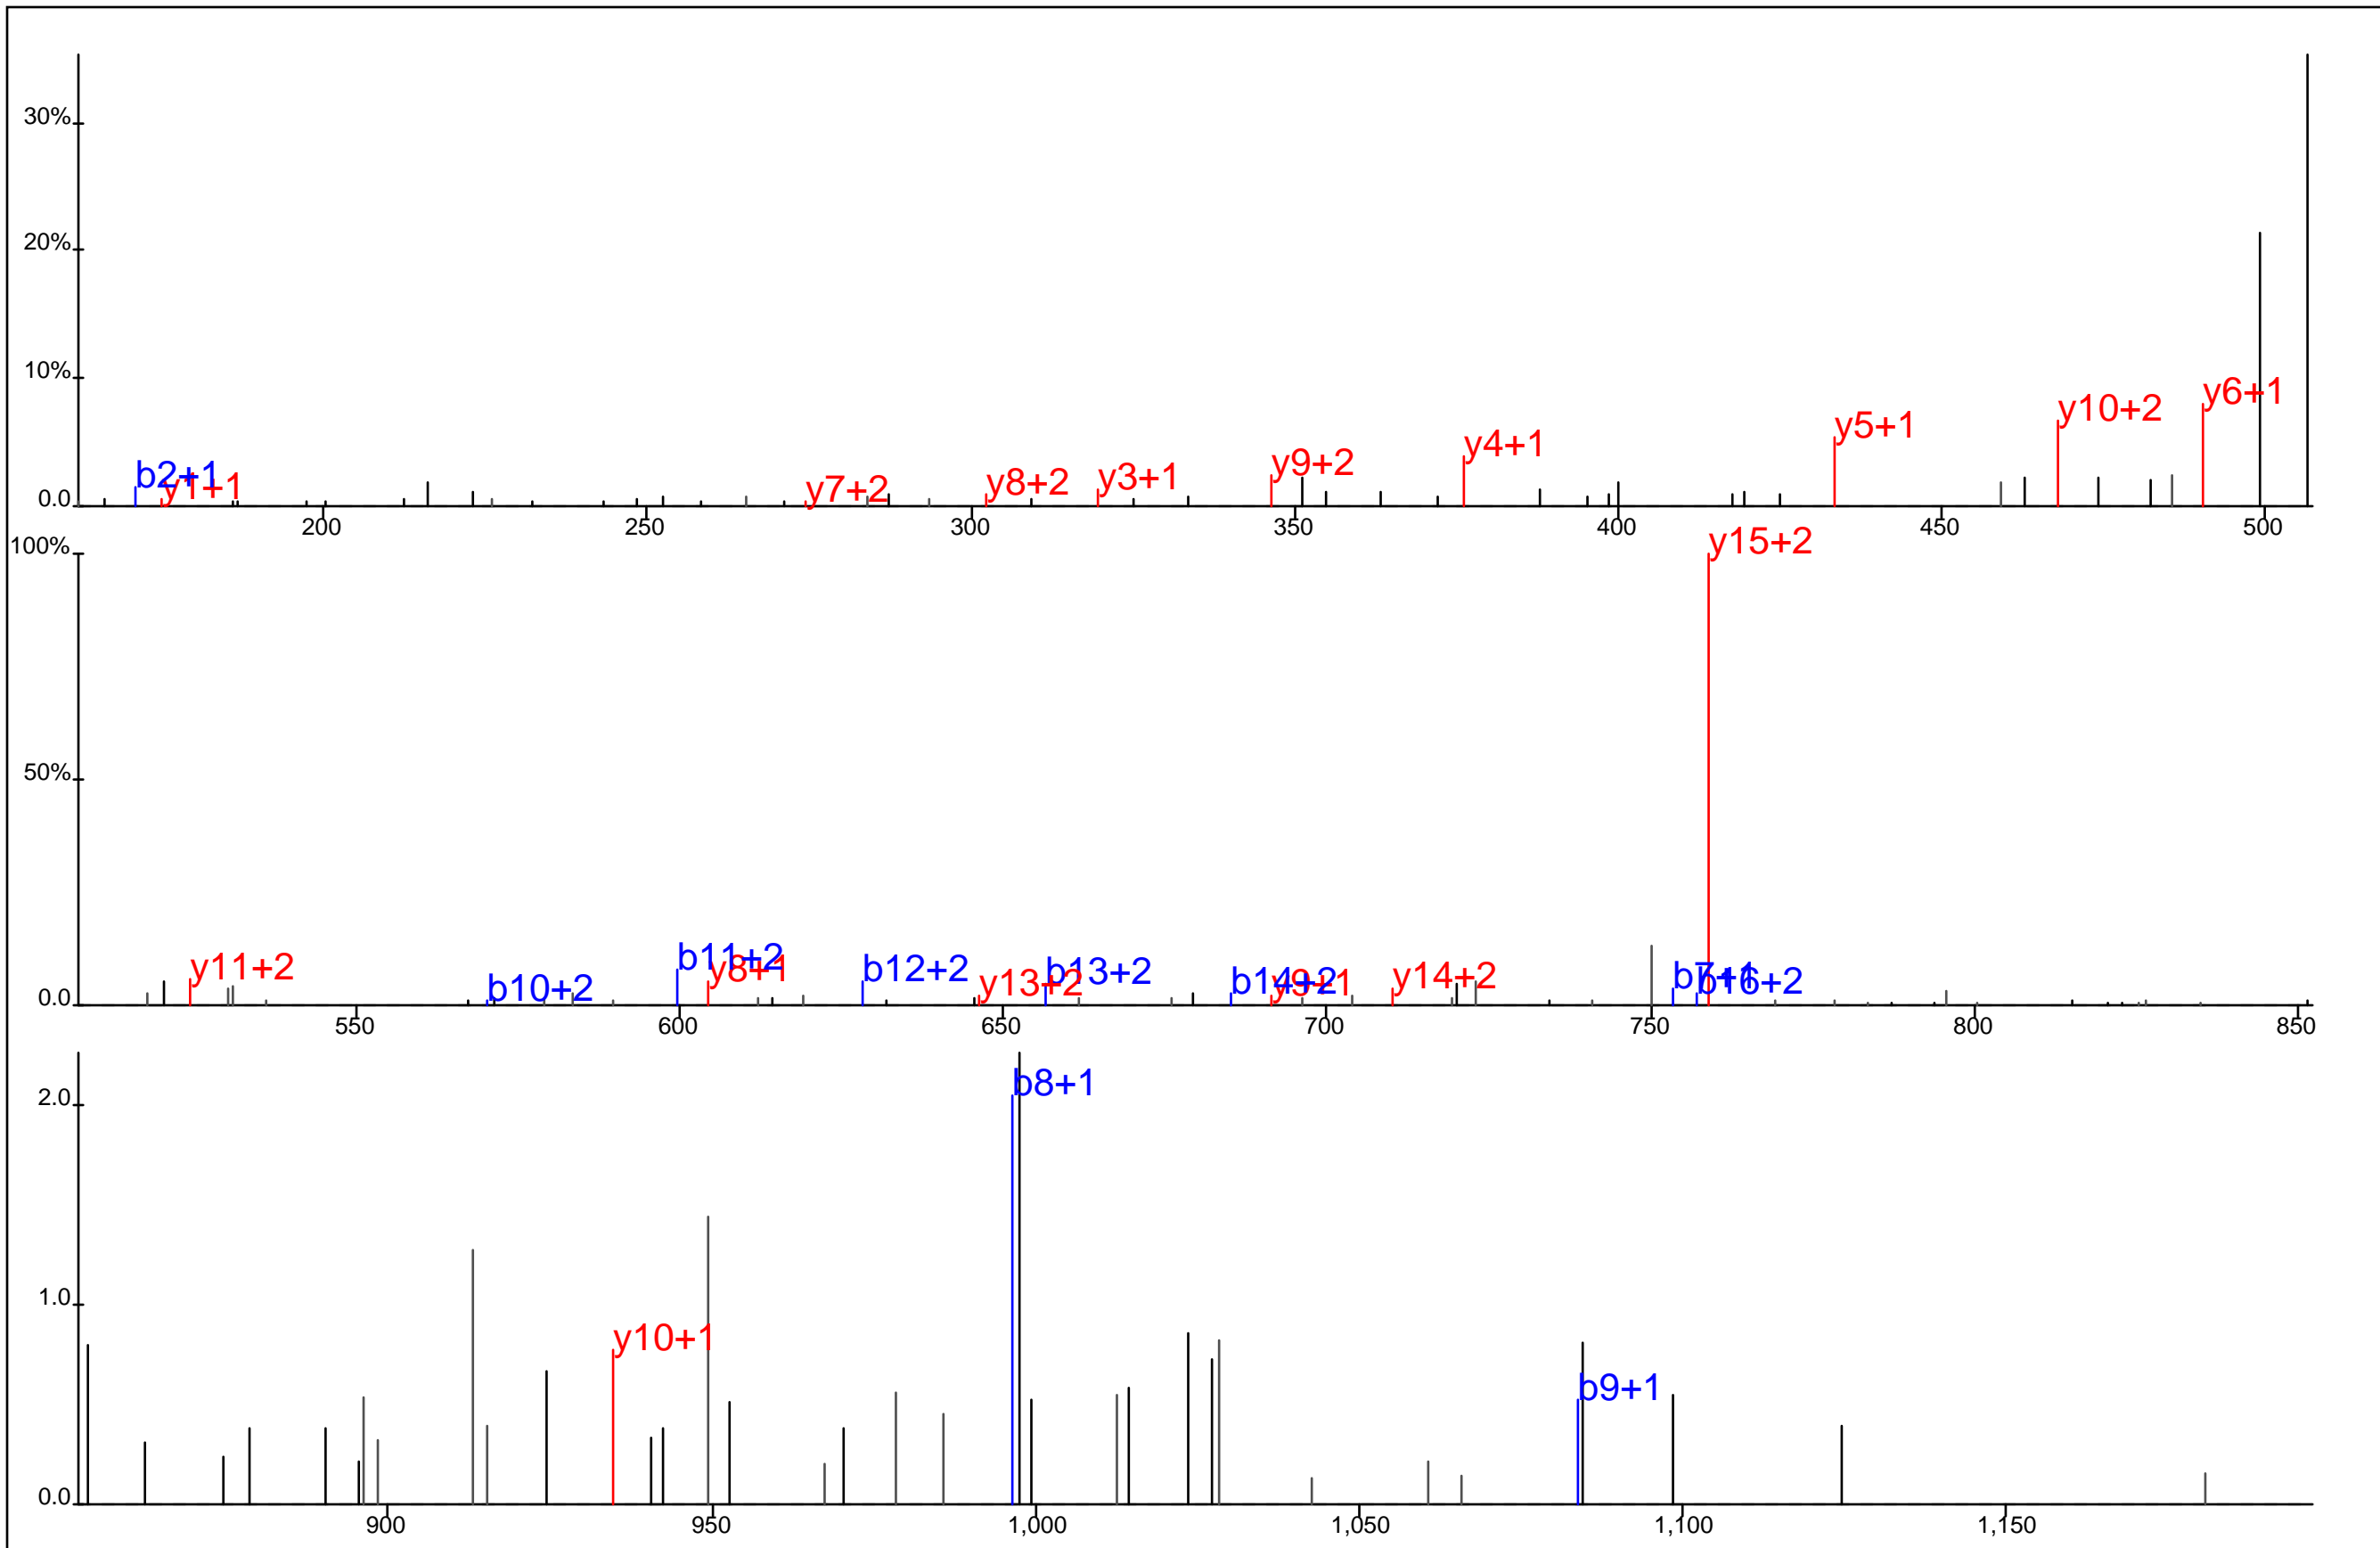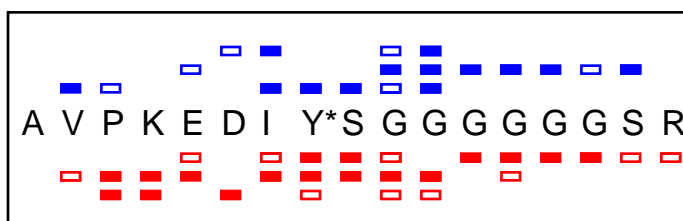

Protein Name: Heterogeneous nuclear ribonucleoprotein A0  
 gi Accession: 0  
 Precursor Mass: 562.9202+3  
 Delta Mass: 1.288 ppm  
 XCorr: 39.88

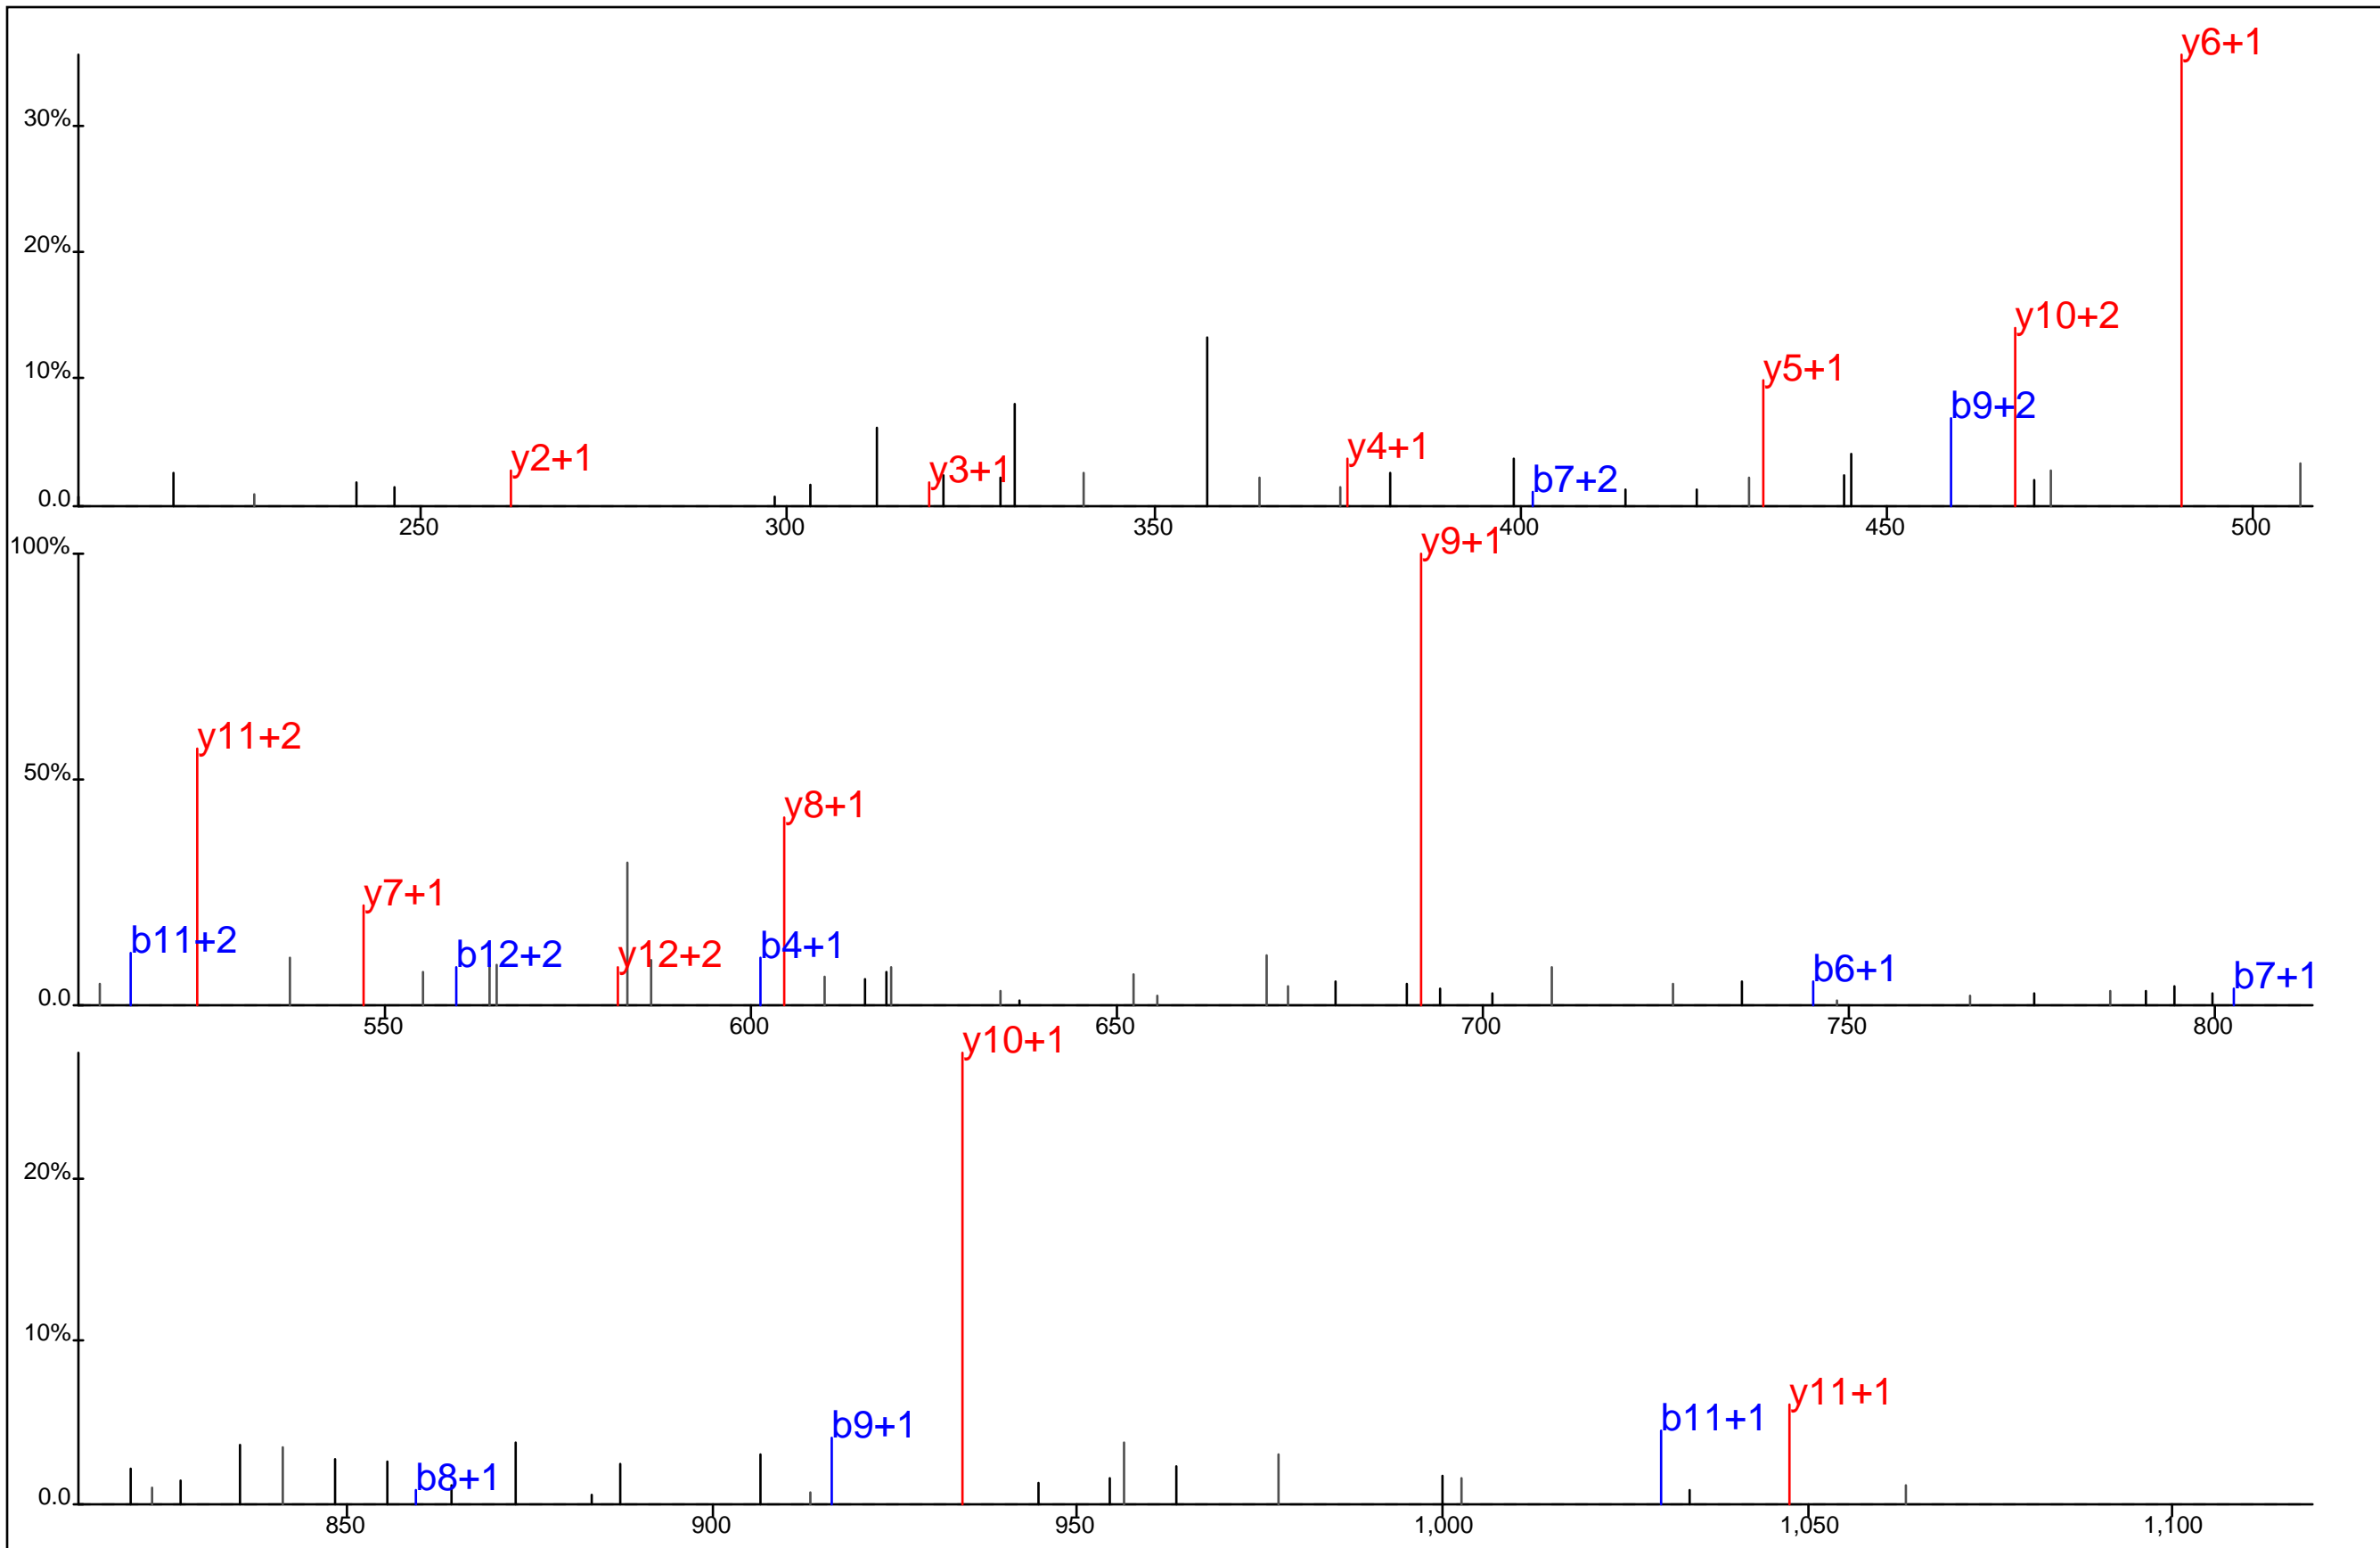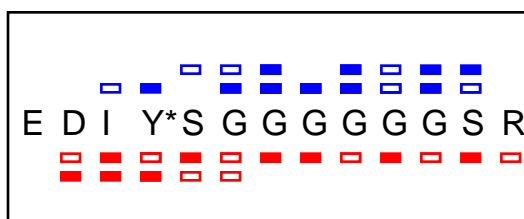

Protein Name: Heterogeneous nuclear ribonucleoprotein A0  
 gi Accession: 0  
 Precursor Mass: 646.2534+2  
 Delta Mass: 3.491 ppm  
 XCorr: 56.68

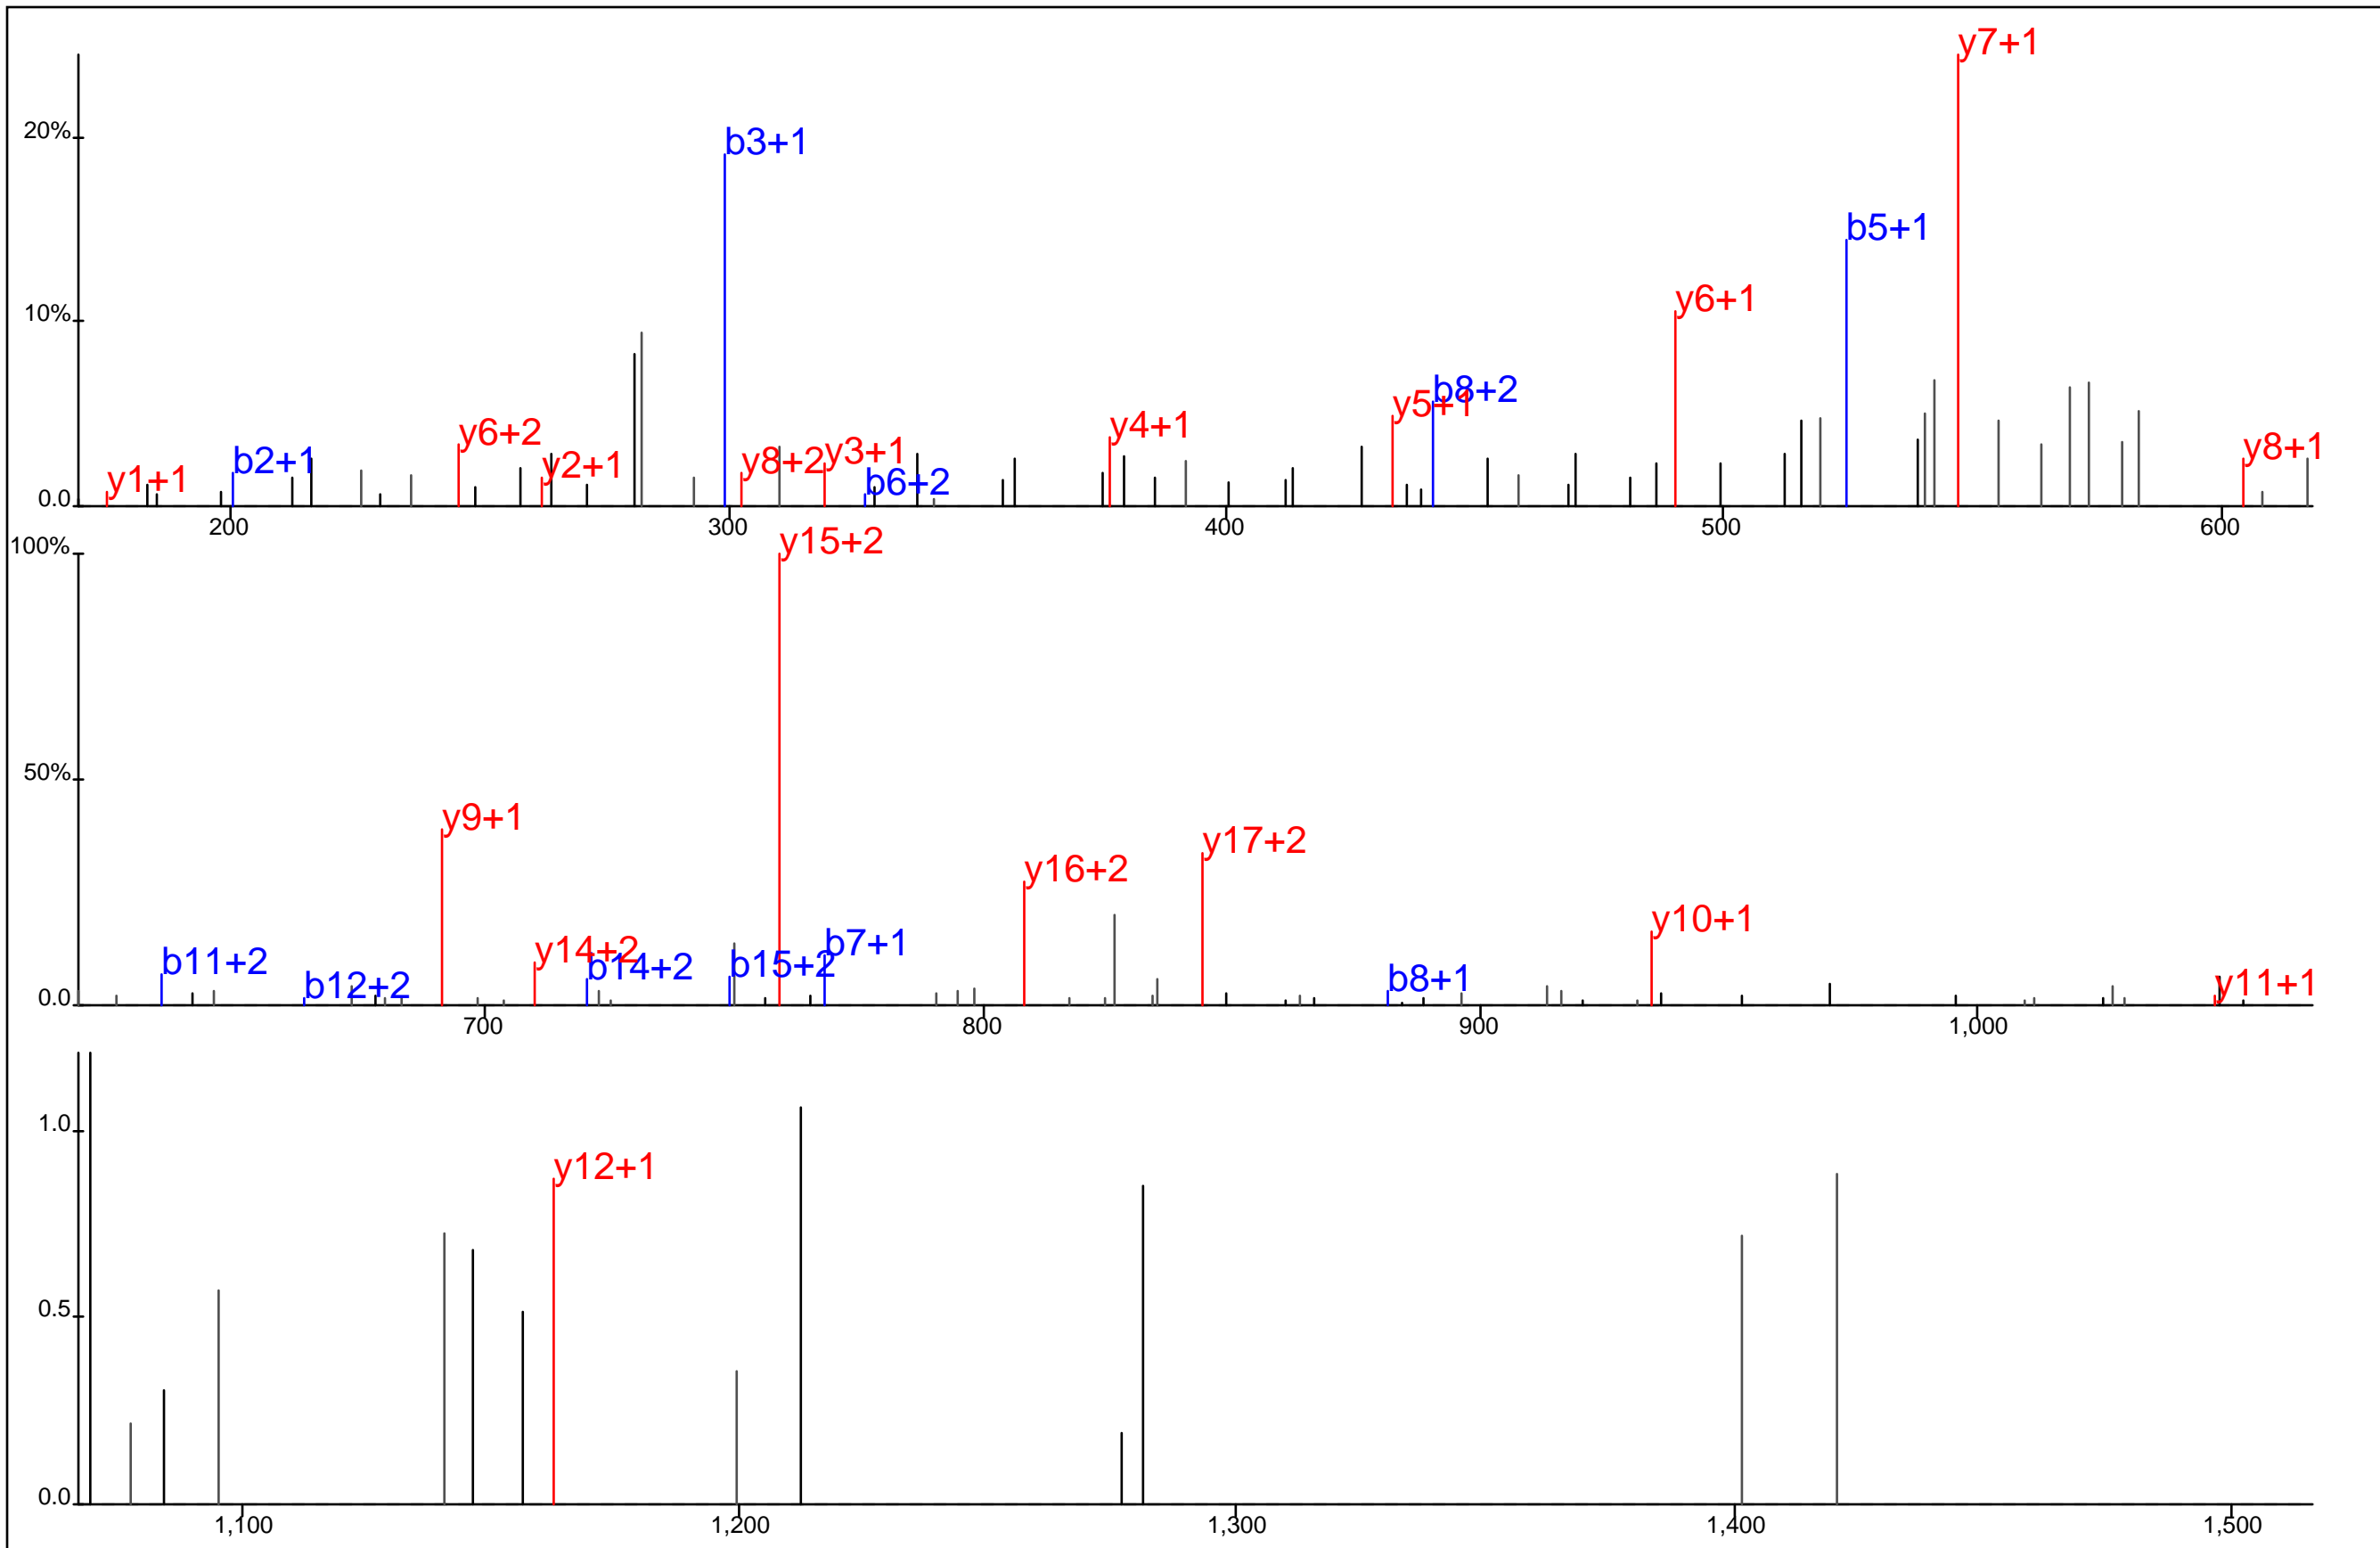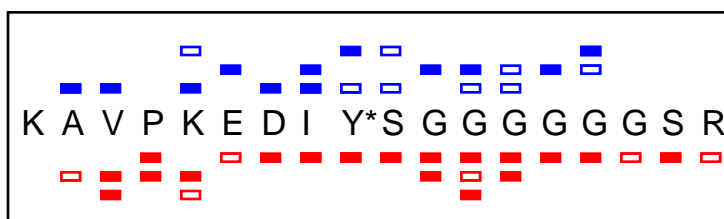

Protein Name: Heterogeneous nuclear ribonucleoprotein A0  
 gi Accession: 0  
 Precursor Mass: 605.6210+3  
 Delta Mass: 2.912 ppm  
 XCorr: 54.68

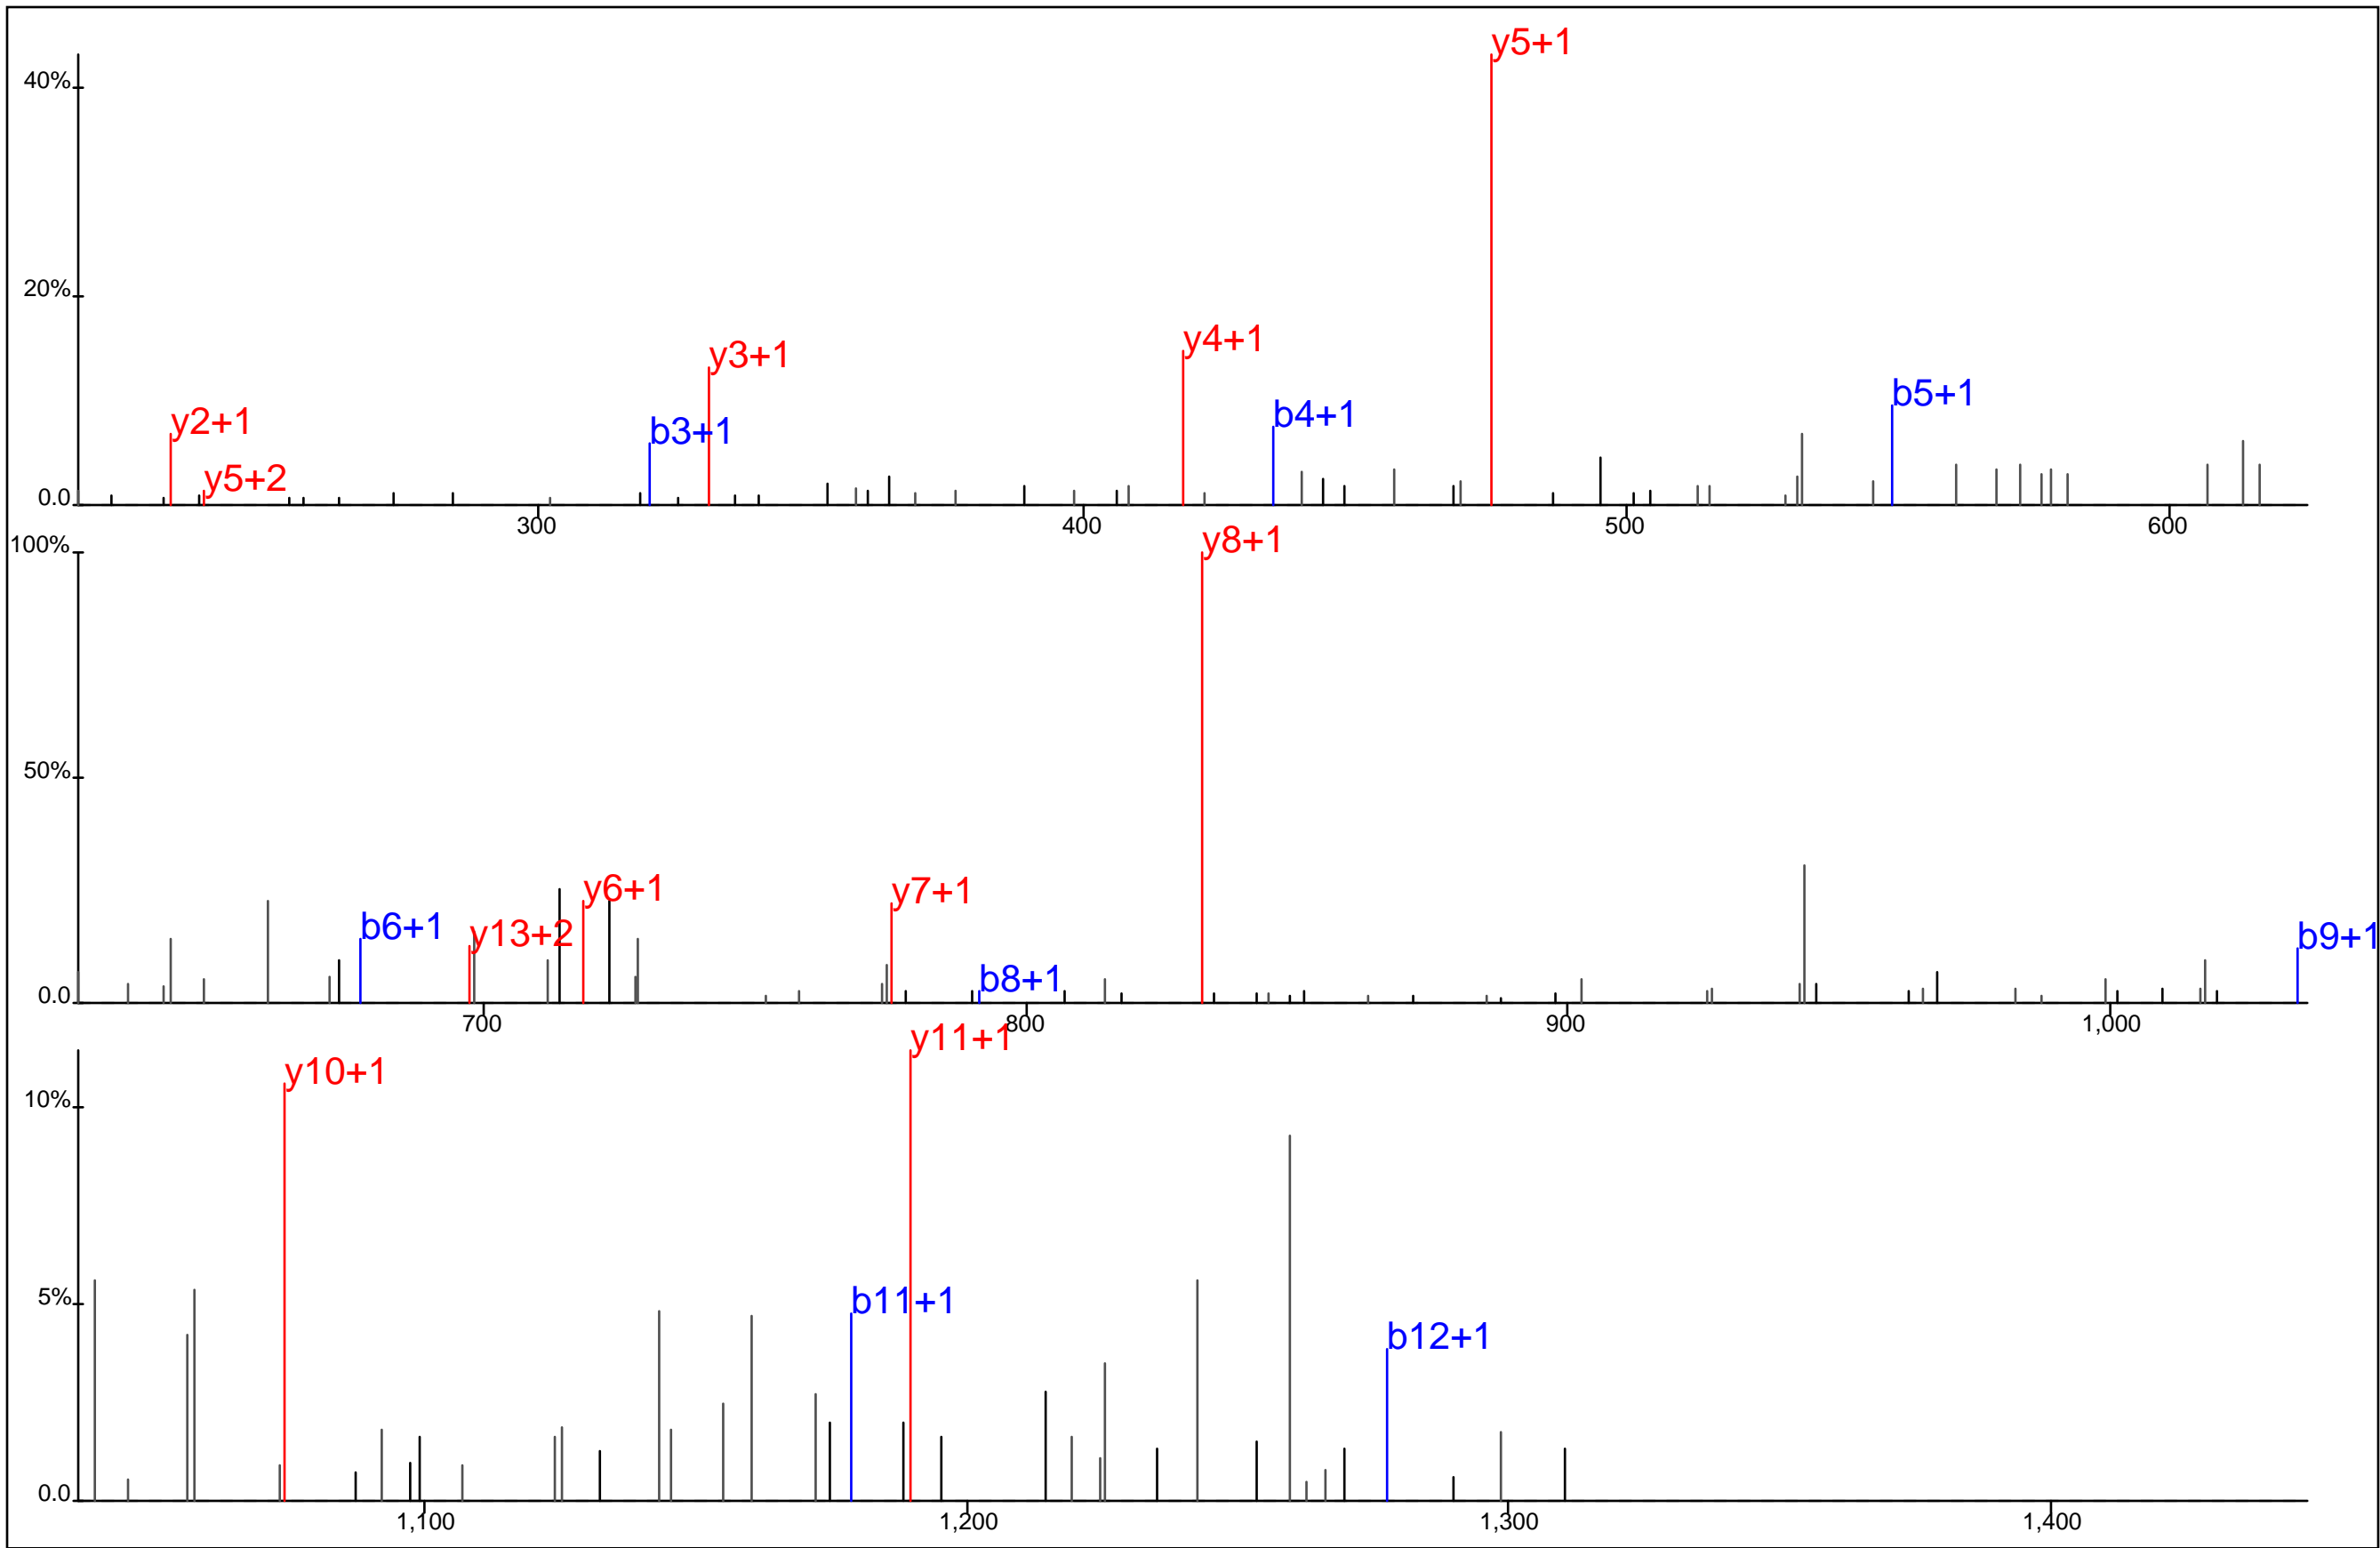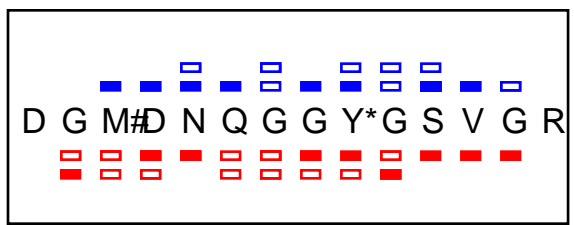

Protein Name: Heterogeneous nuclear ribonucleoprotein H3  
 gi Accession: 0  
 Precursor Mass: 754.7755+2  
 Delta Mass: 2.356 ppm  
 XCorr: 69.94

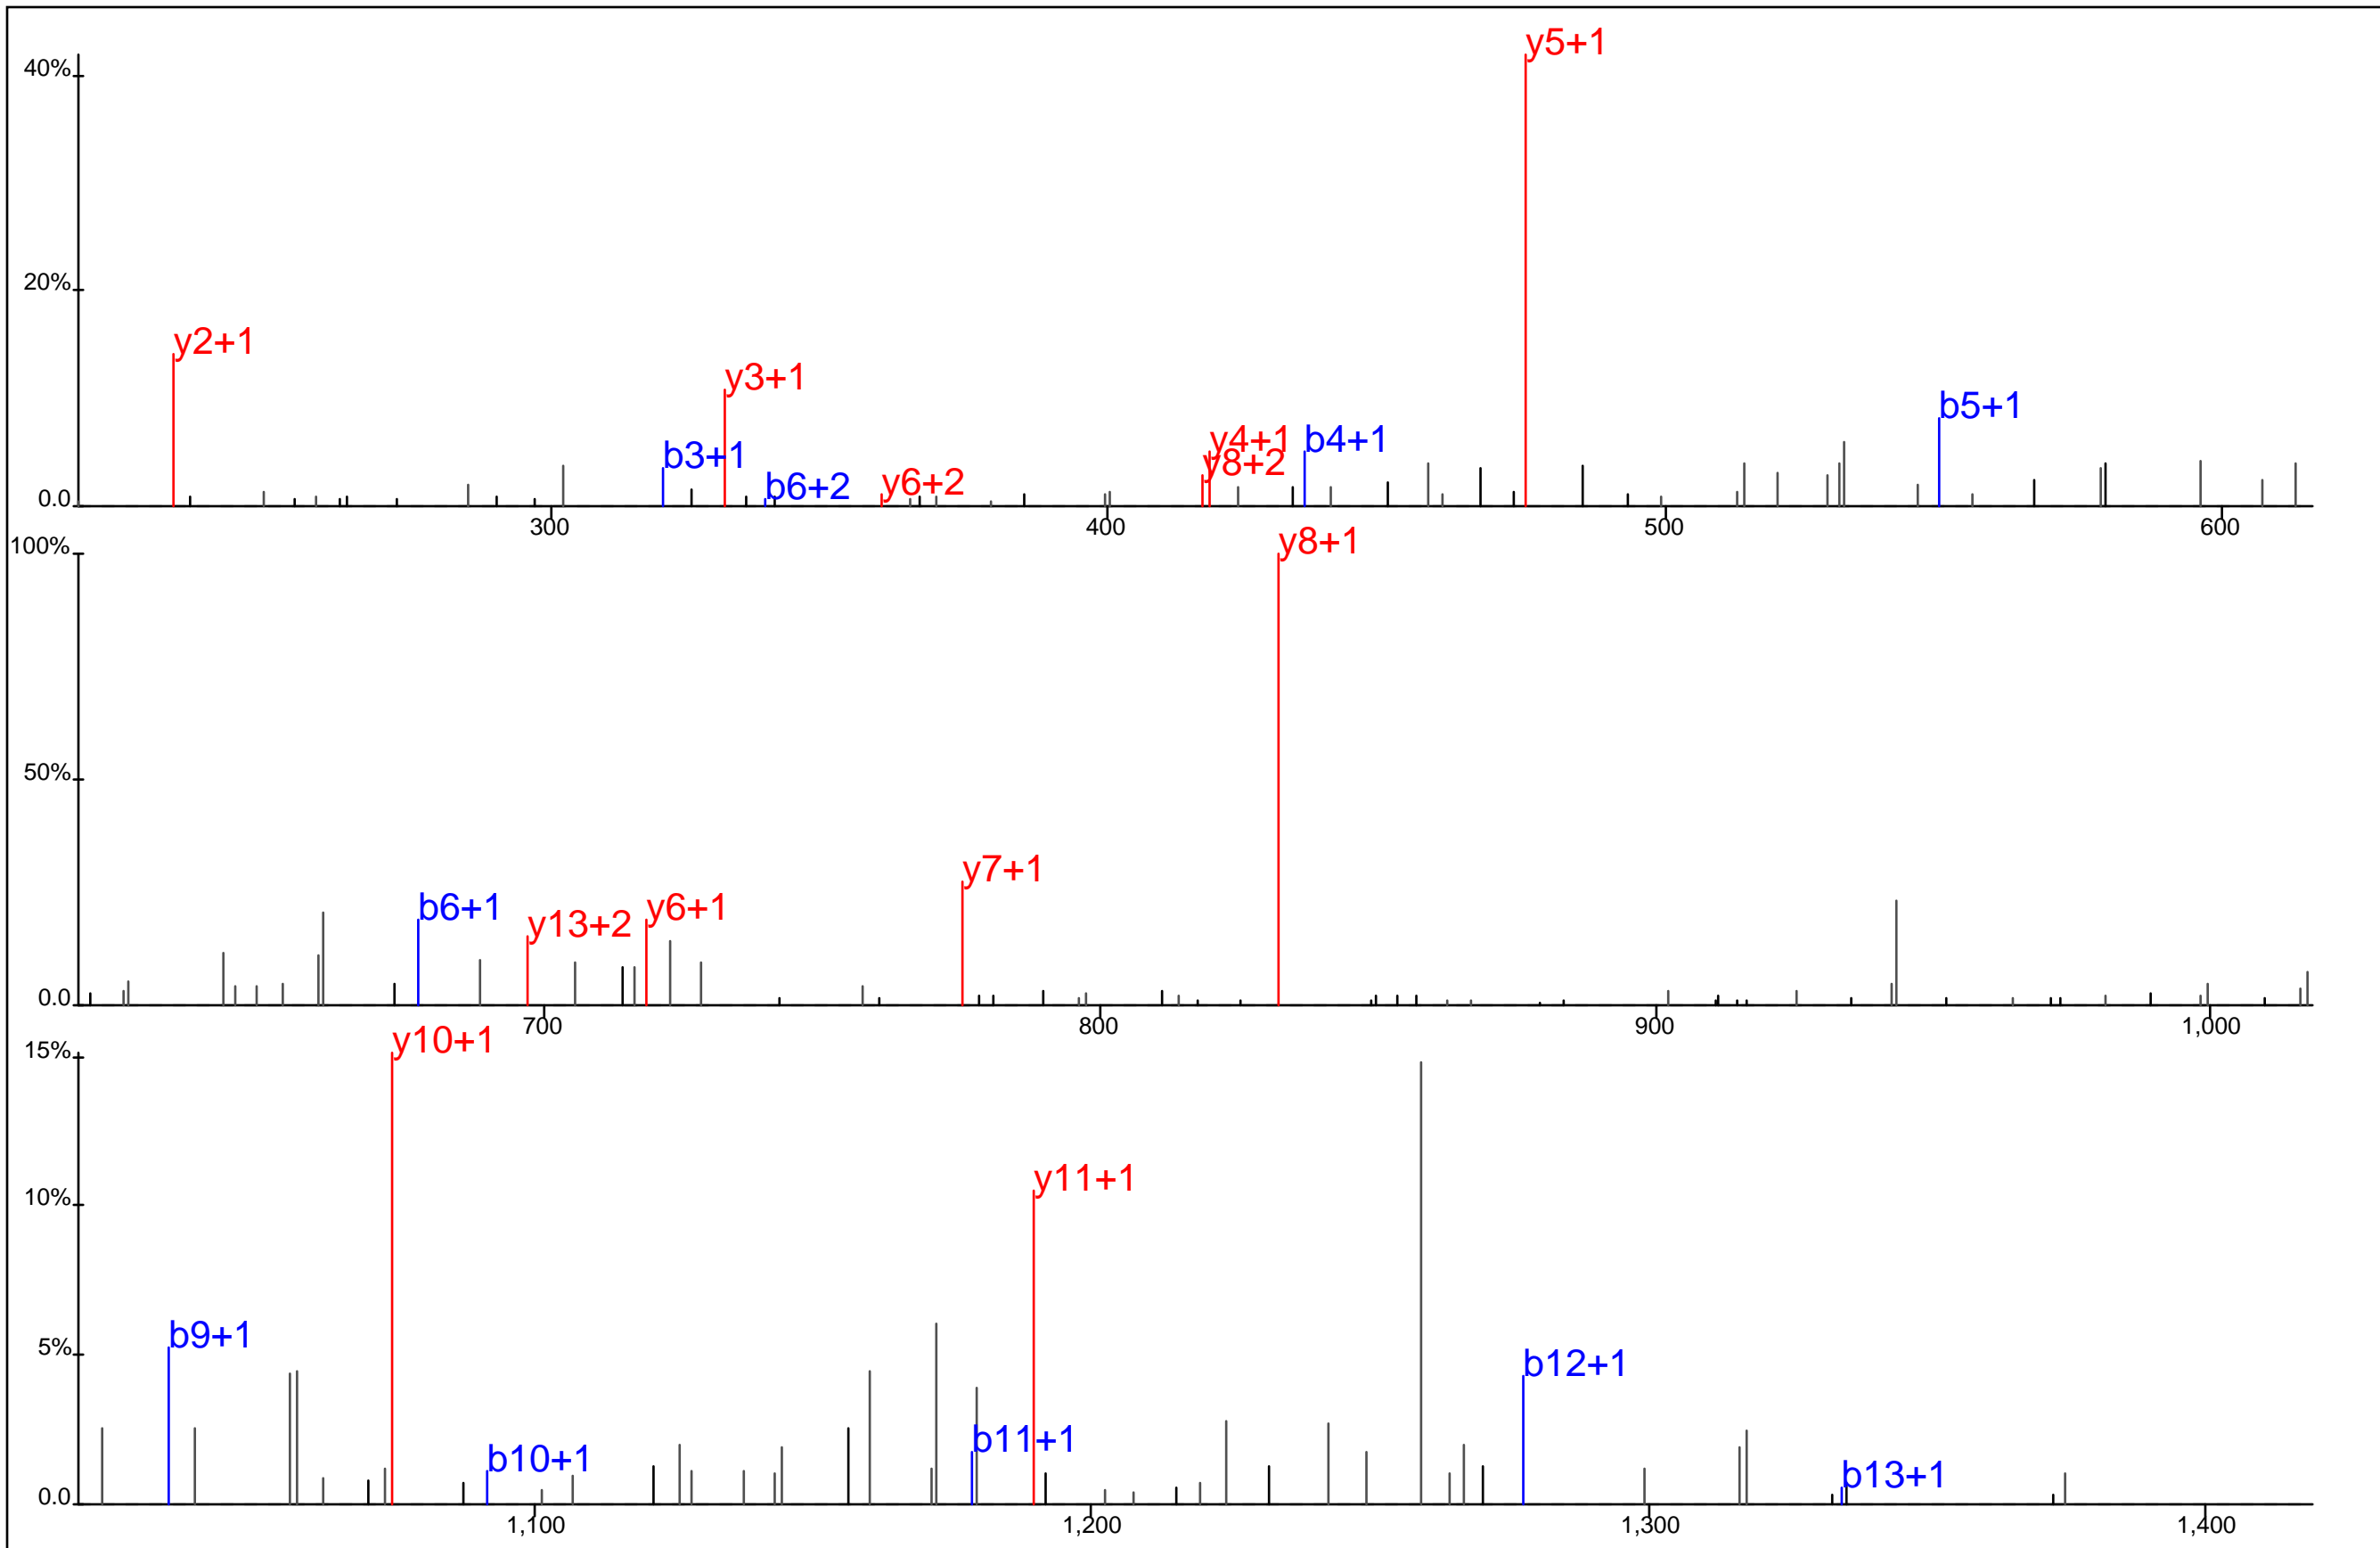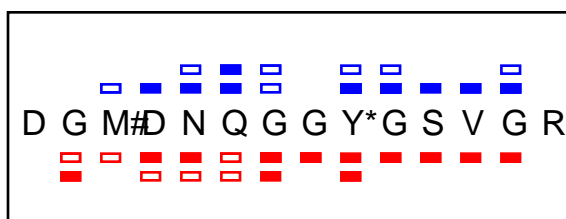

Protein Name: Heterogeneous nuclear ribonucleoprotein H3  
 gi Accession: 0  
 Precursor Mass: 754.7756+2  
 Delta Mass: 2.113 ppm  
 XCorr: 84.23



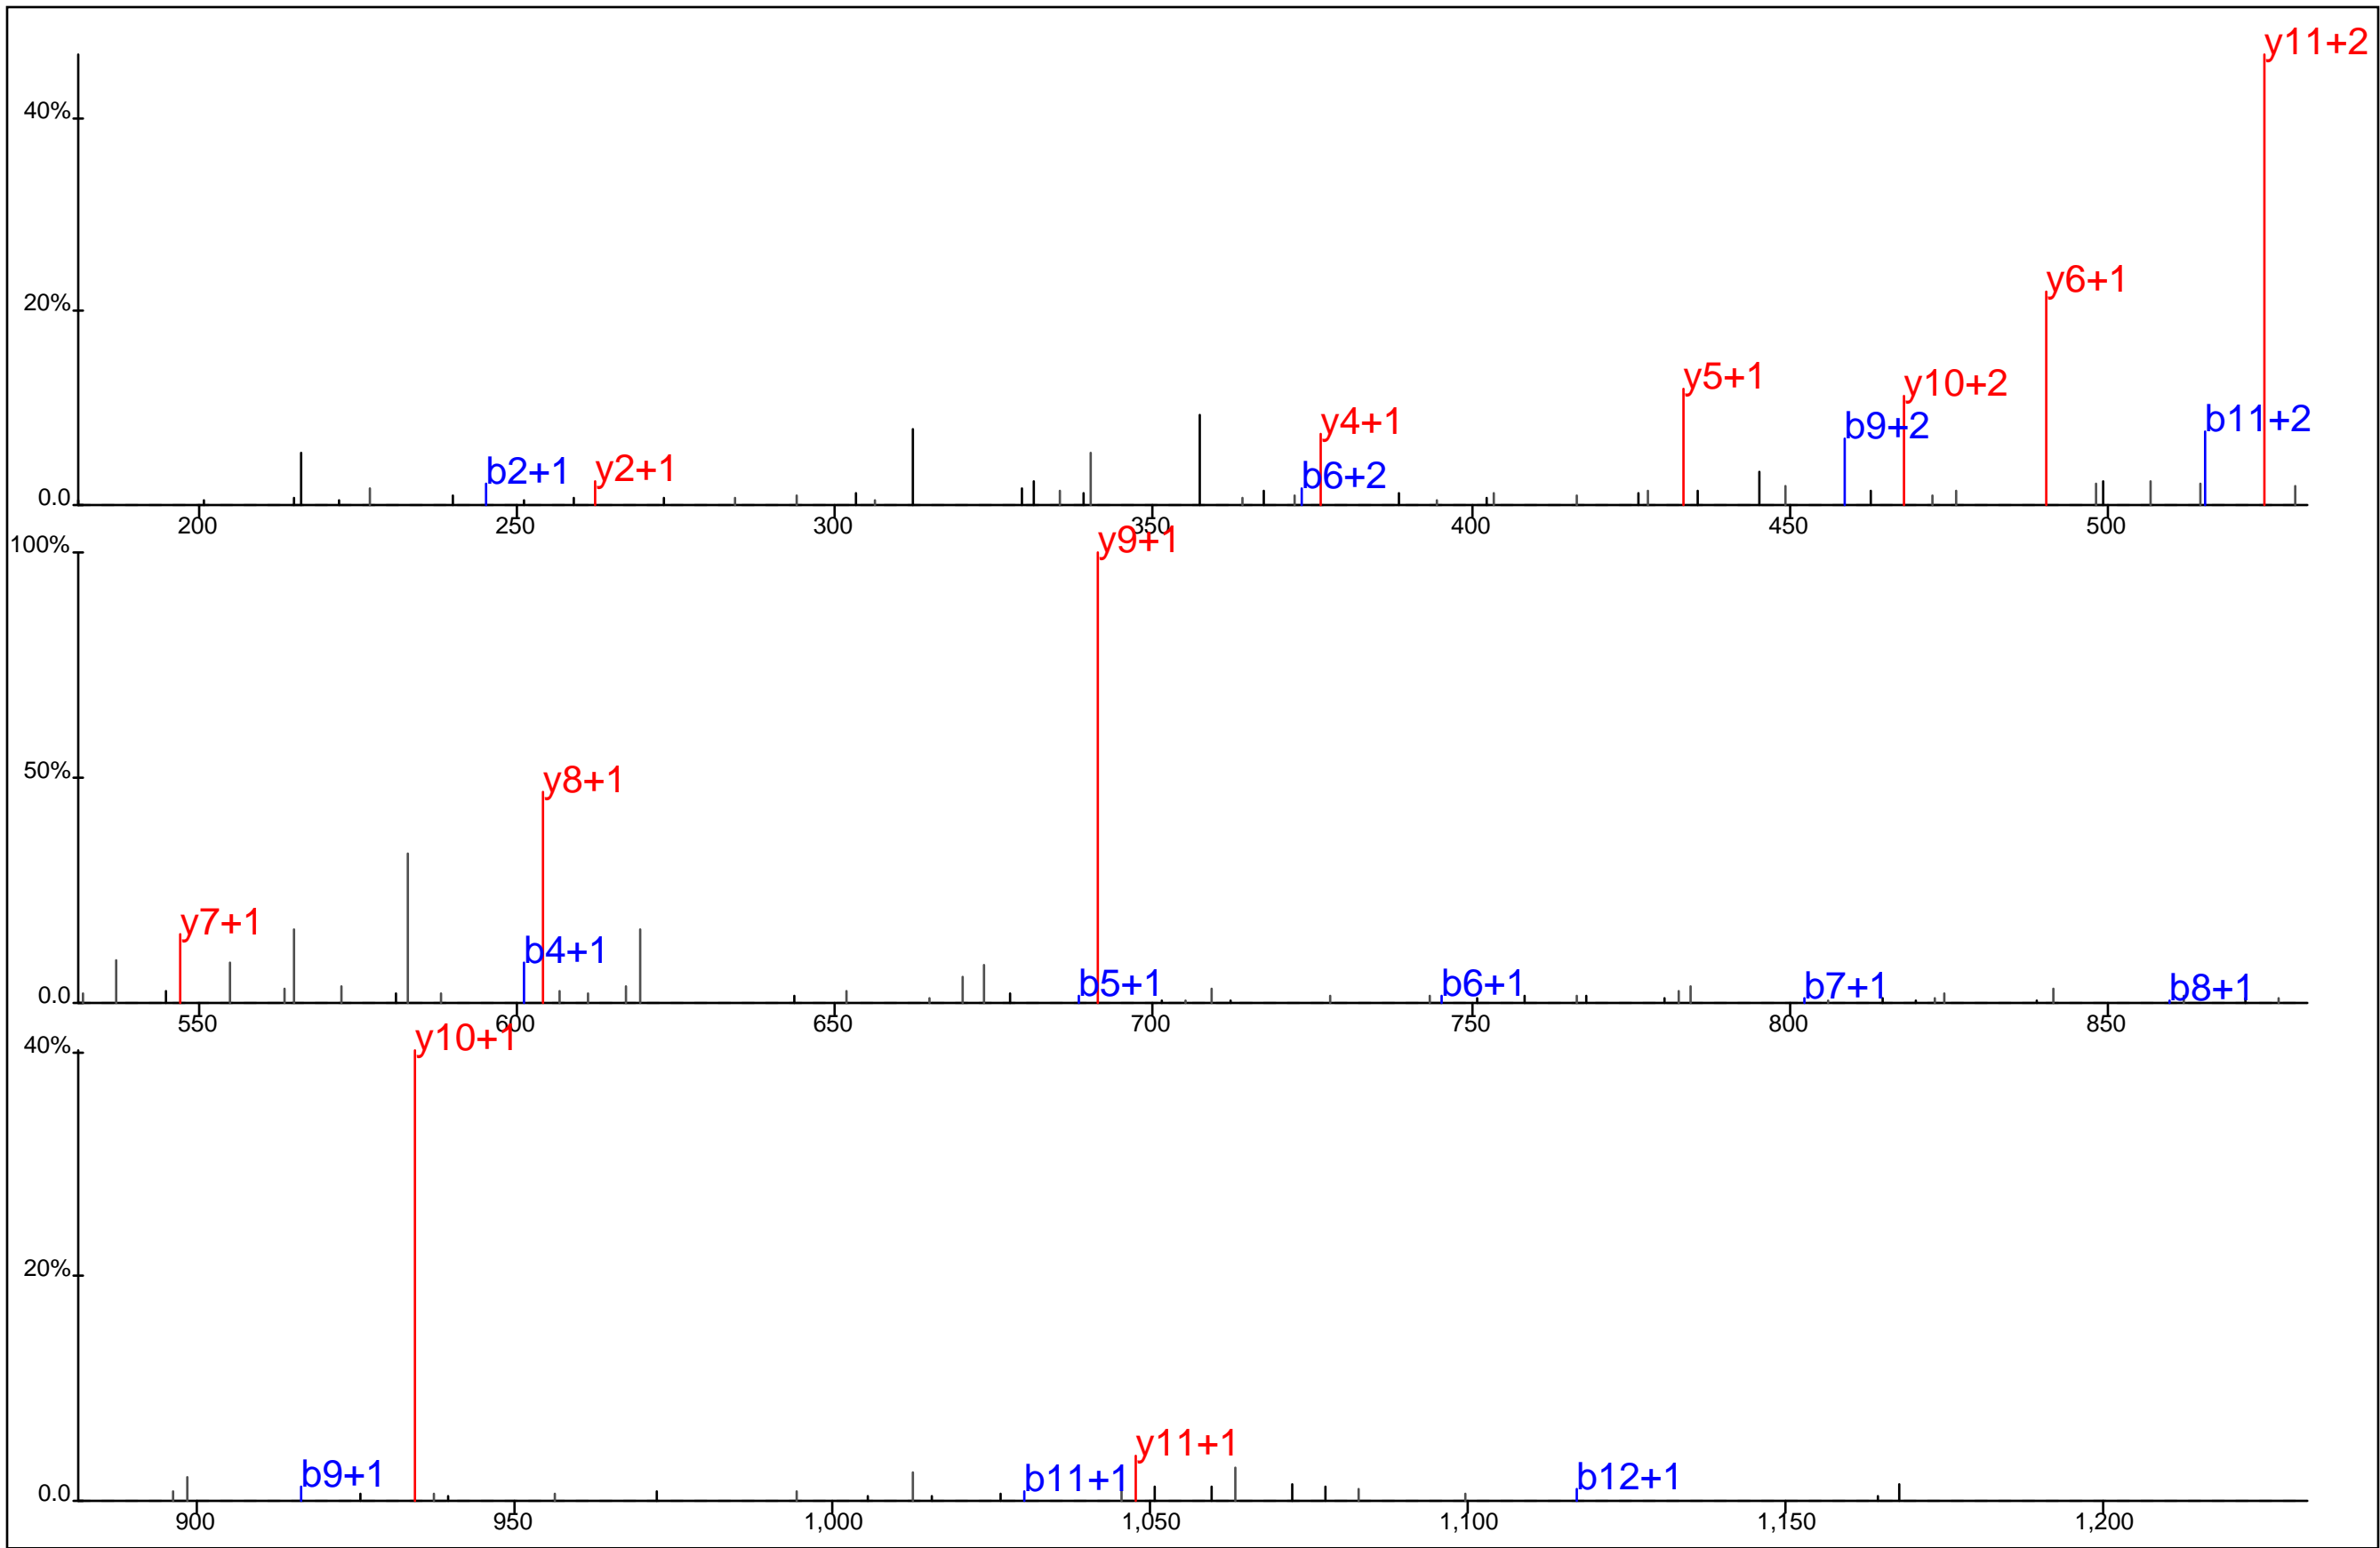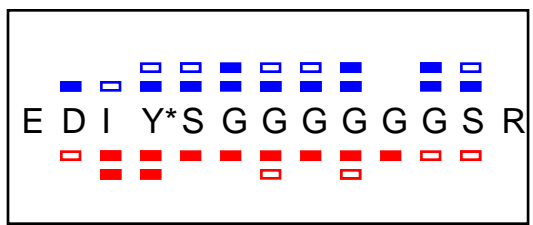

Protein Name: Heterogeneous nuclear ribonucleoprotein A0  
 gi Accession: 0  
 Precursor Mass: 646.2505+2  
 Delta Mass: 1.047 ppm  
 XCorr: 61.9

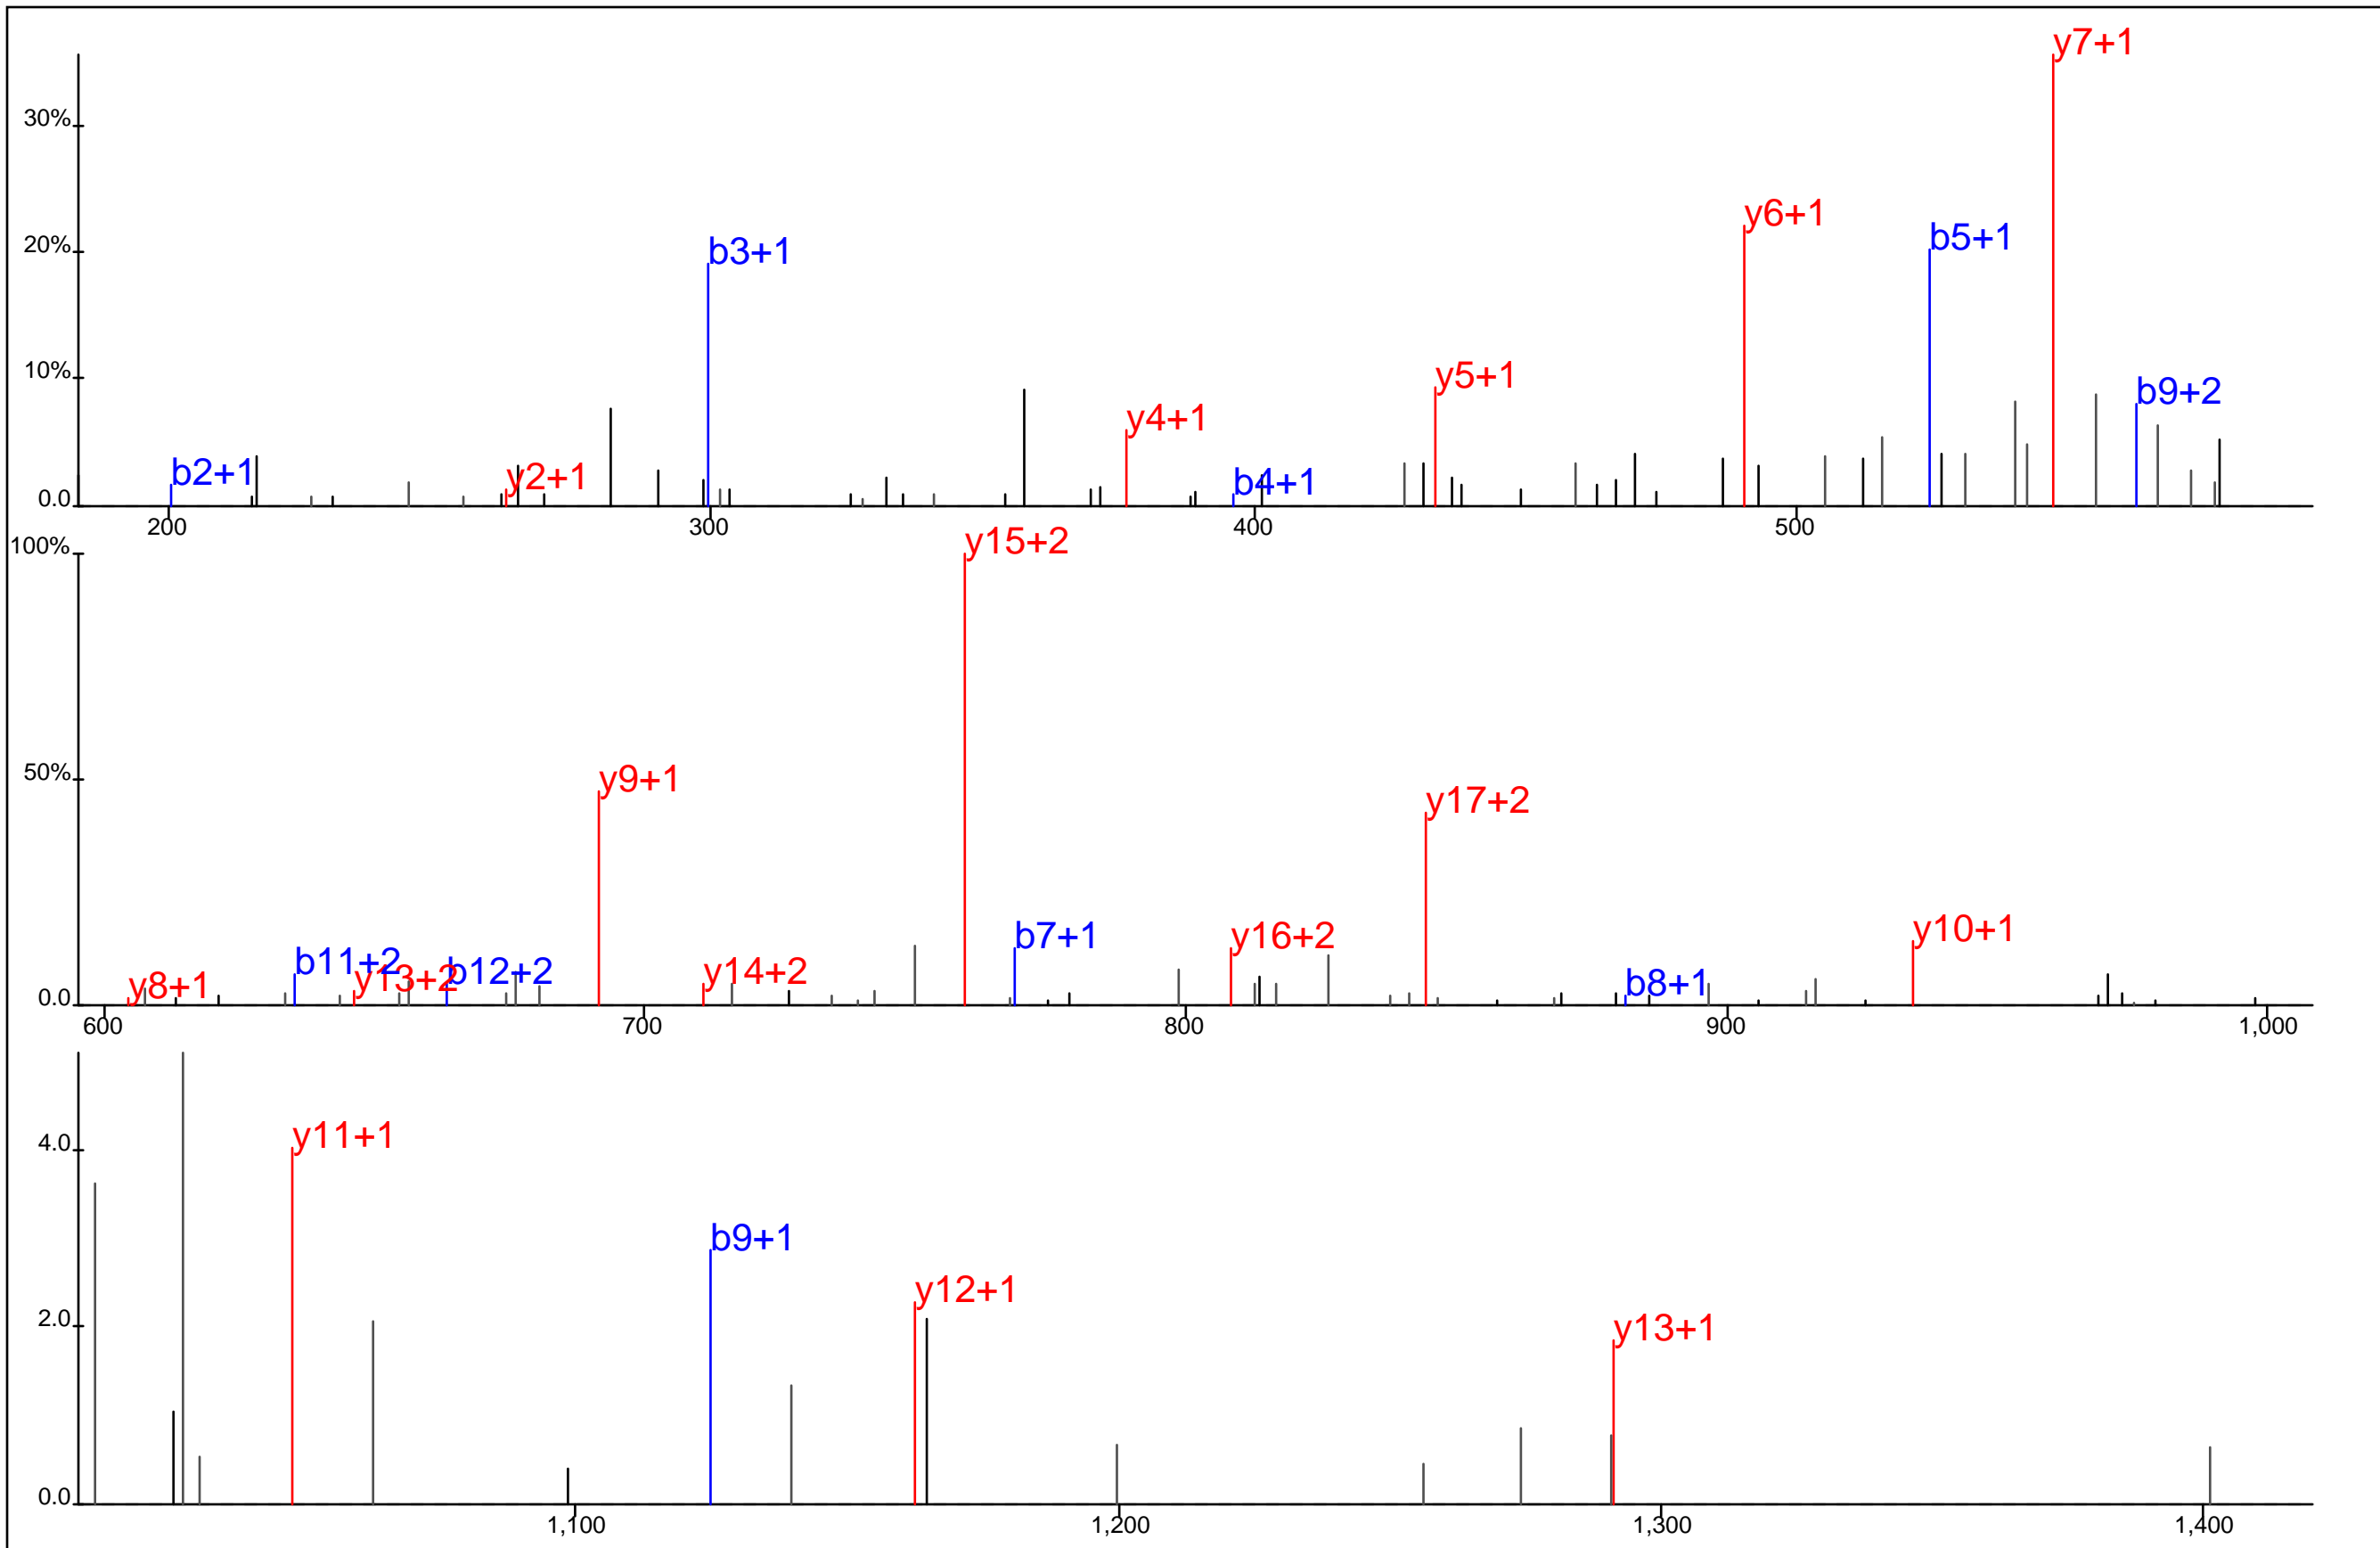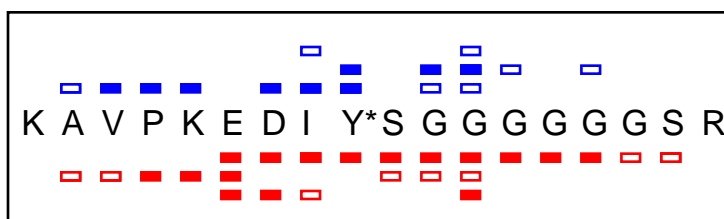

Protein Name: Heterogeneous nuclear ribonucleoprotein A0  
 gi Accession: 0  
 Precursor Mass: 605.6173+3  
 Delta Mass: 3.242 ppm  
 XCorr: 51.74

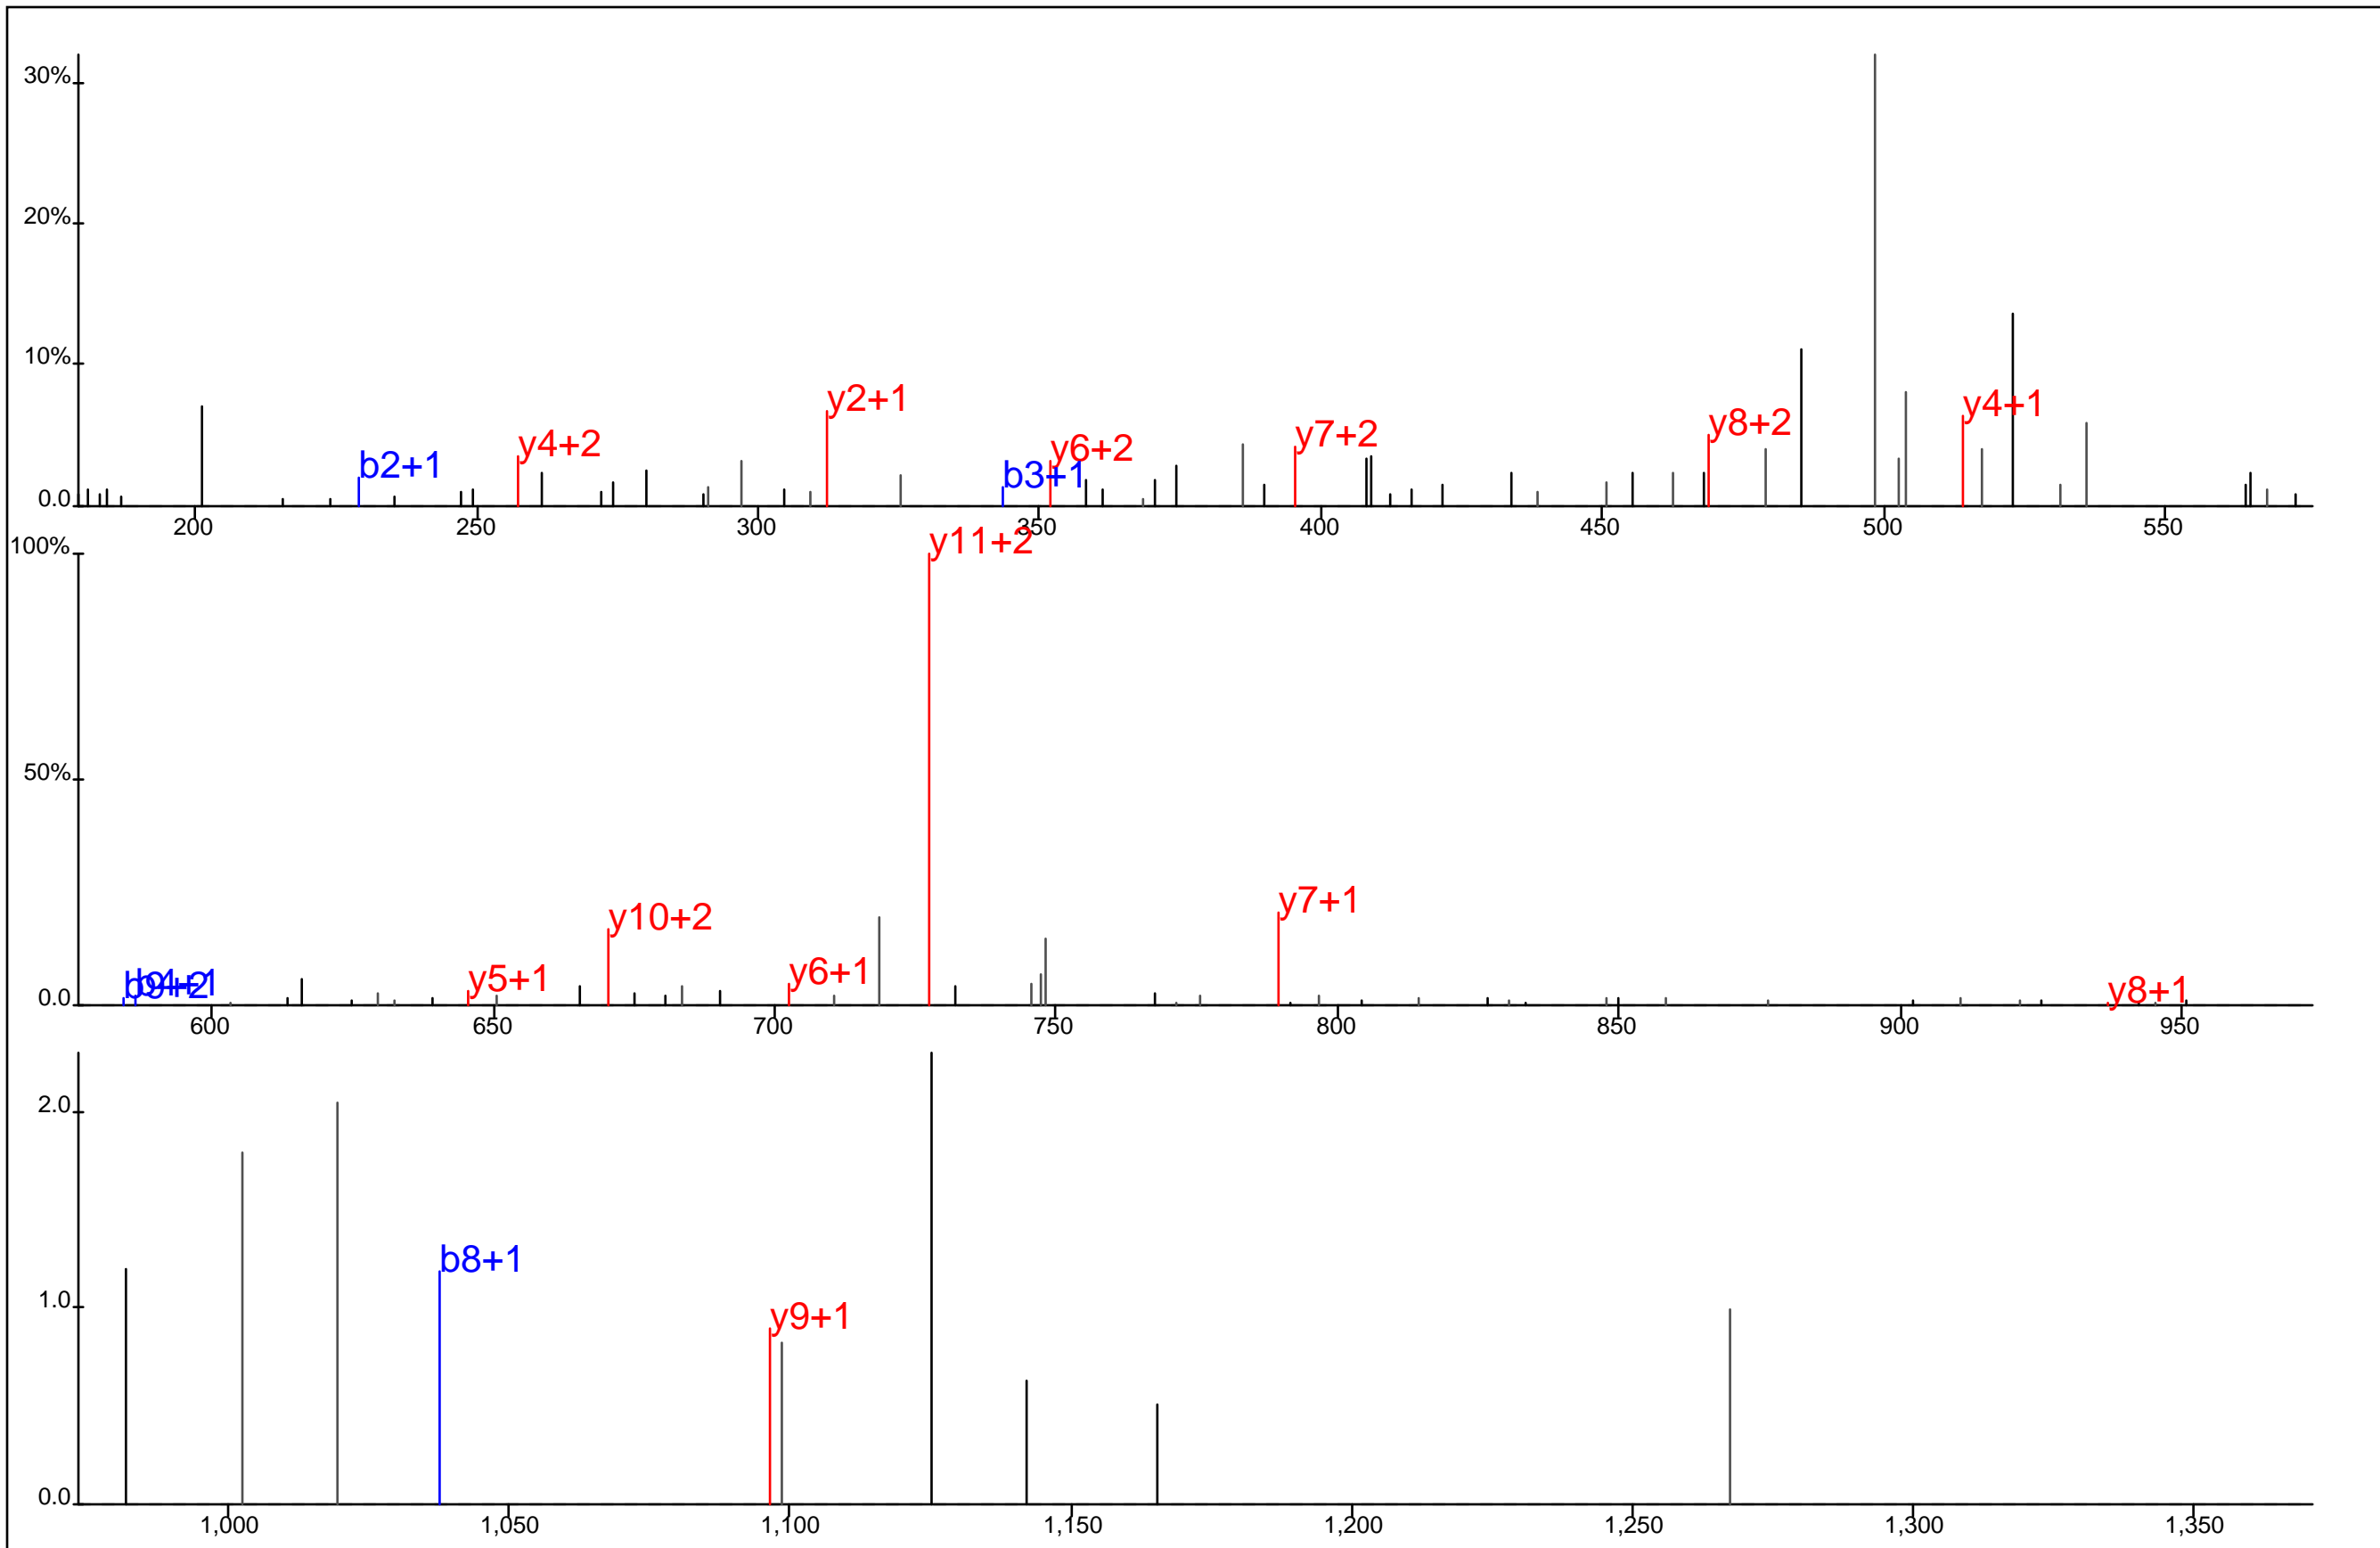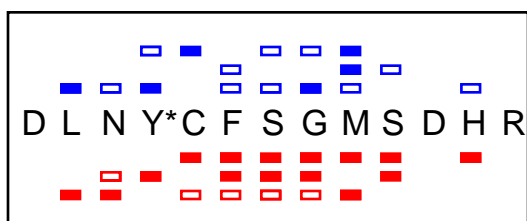

Protein Name: Heterogeneous nuclear ribonucleoprotein H1  
 gi Accession: 0  
 Precursor Mass: 561.2091+3  
 Delta Mass: 0.414 ppm  
 XCorr: 24.22

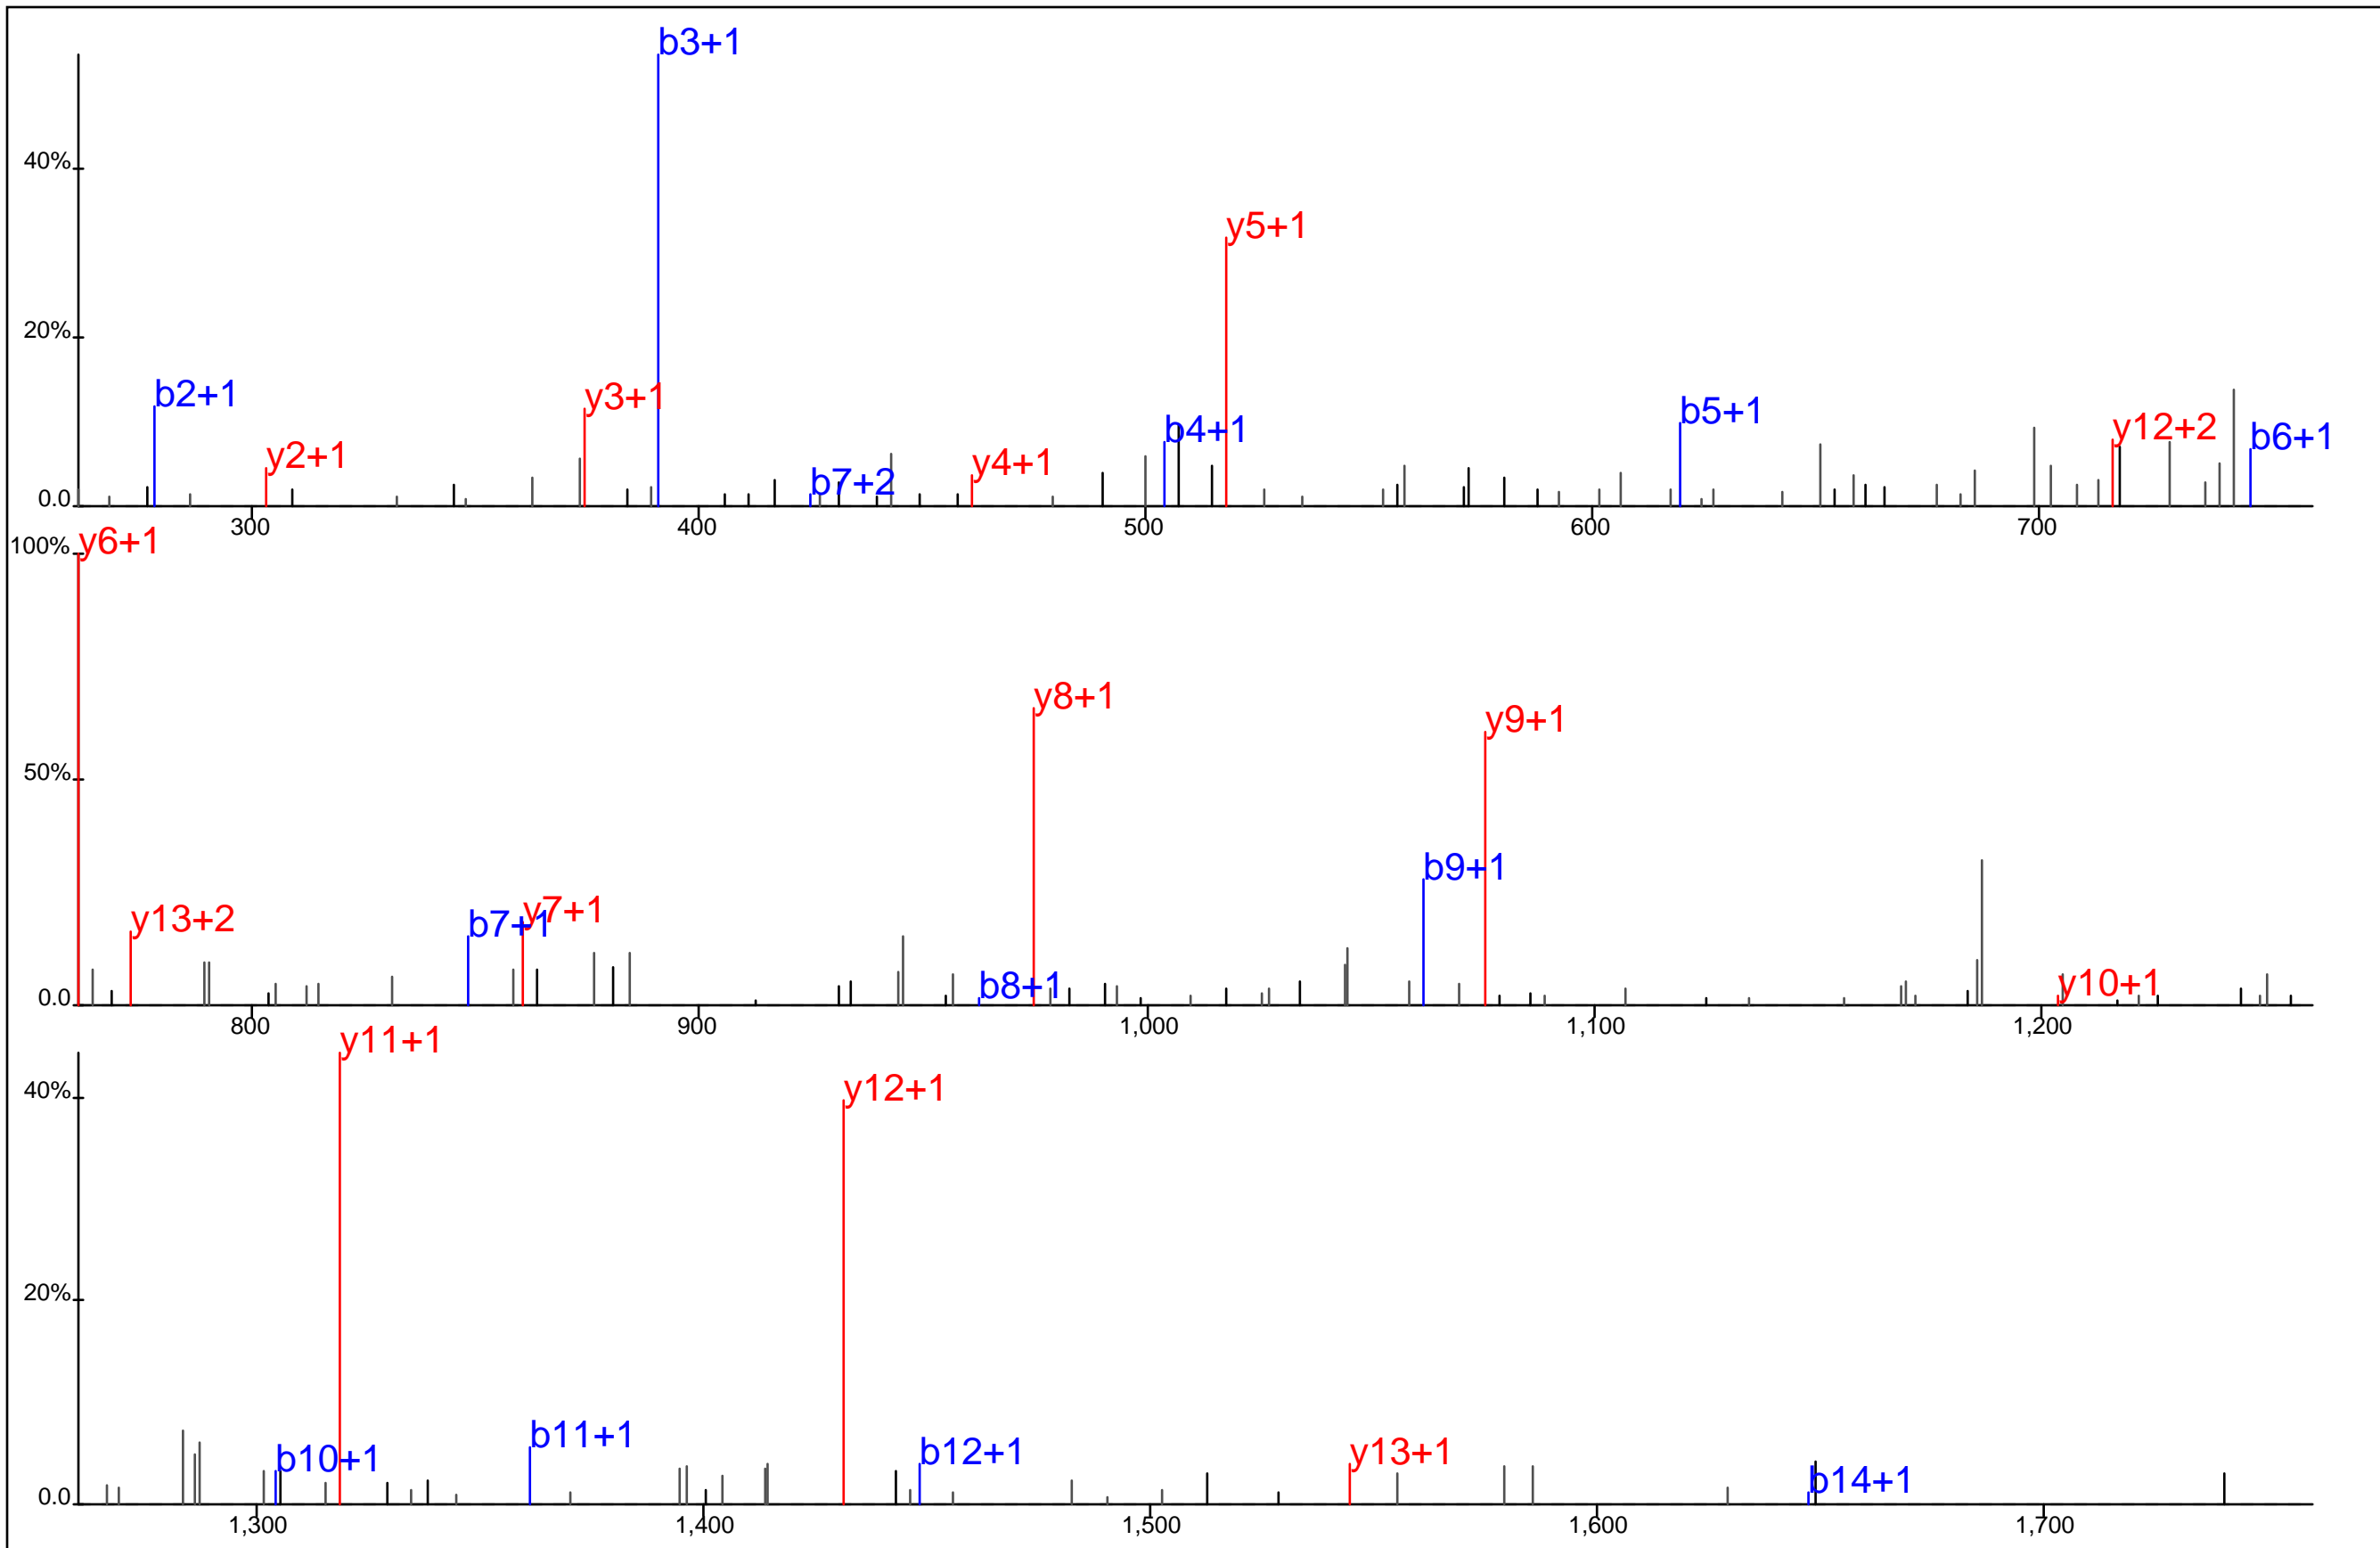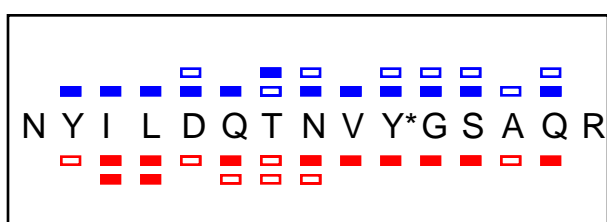

Protein Name: Heterogeneous nuclear ribonucleoprotein U like 1  
 gi Accession: 0  
 Precursor Mass: 911.4131+2  
 Delta Mass: 1.277 ppm  
 XCorr: 74.97

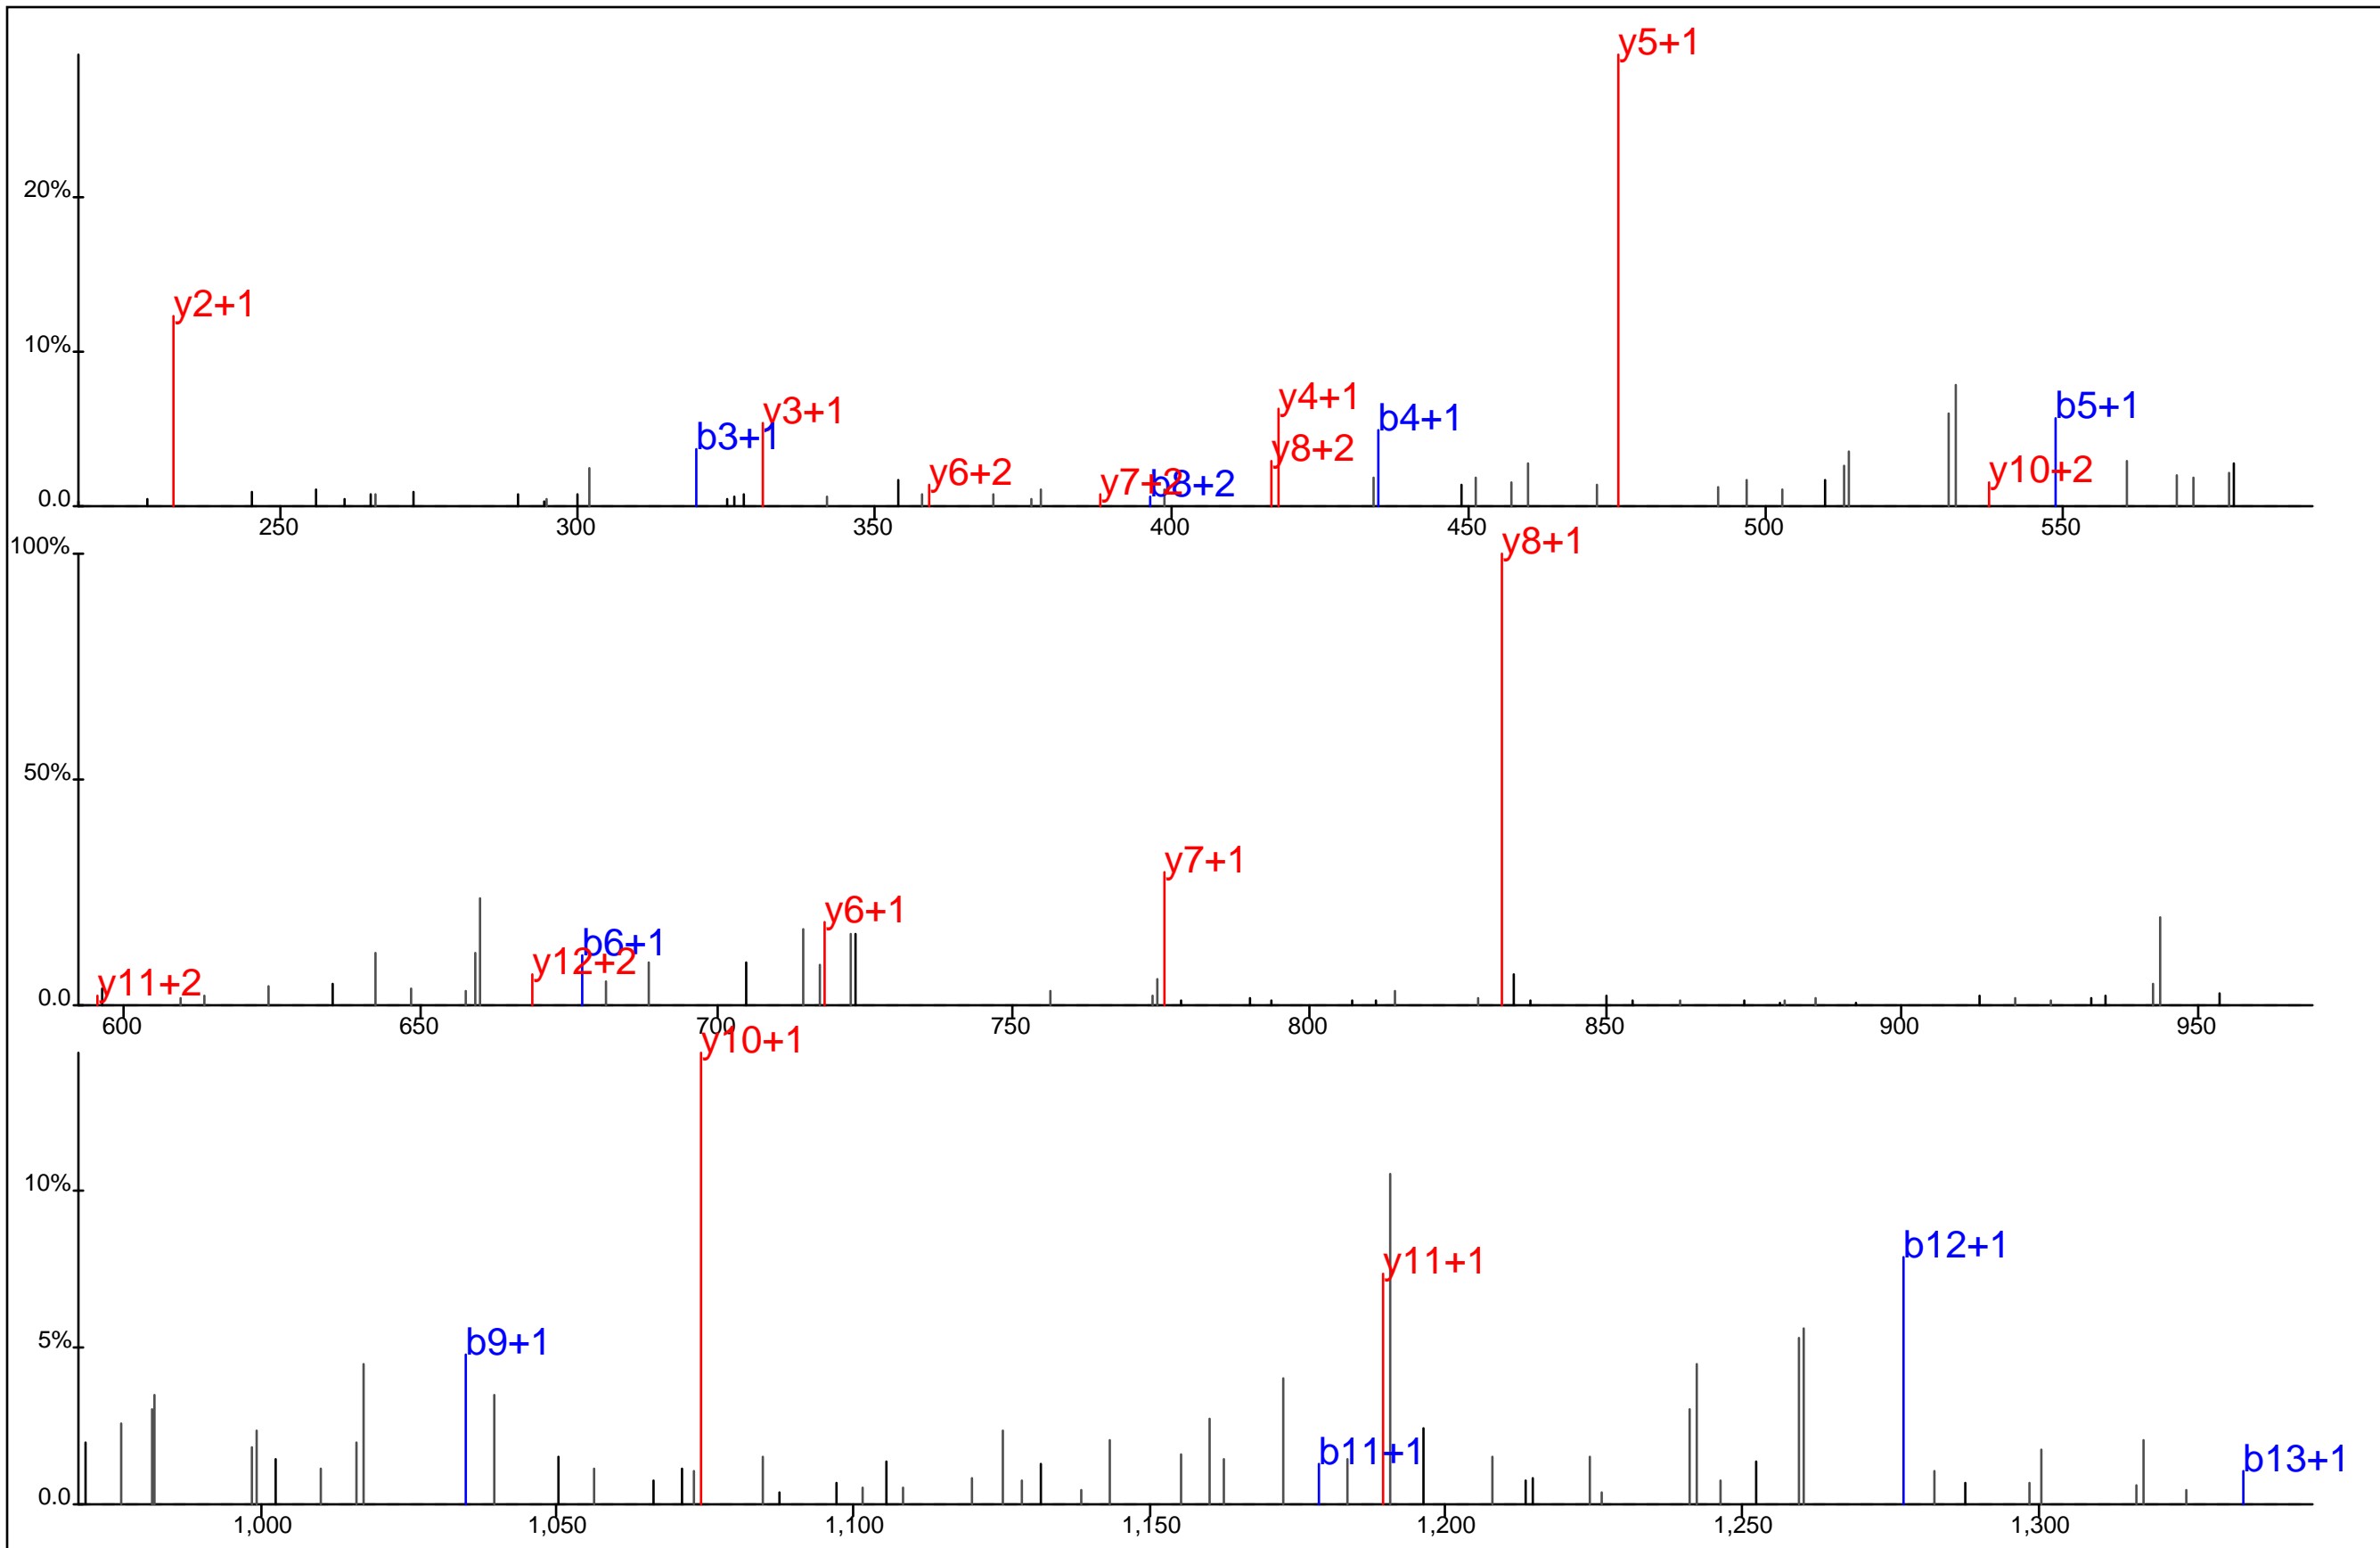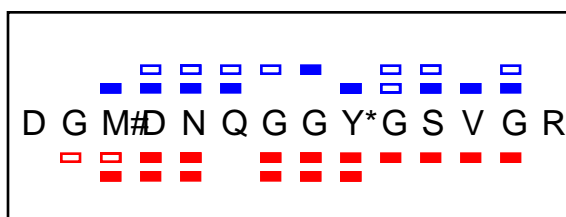

Protein Name: Heterogeneous nuclear ribonucleoprotein H3  
 gi Accession: 0  
 Precursor Mass: 754.7762+2  
 Delta Mass: 1.385 ppm  
 XCorr: 83.74

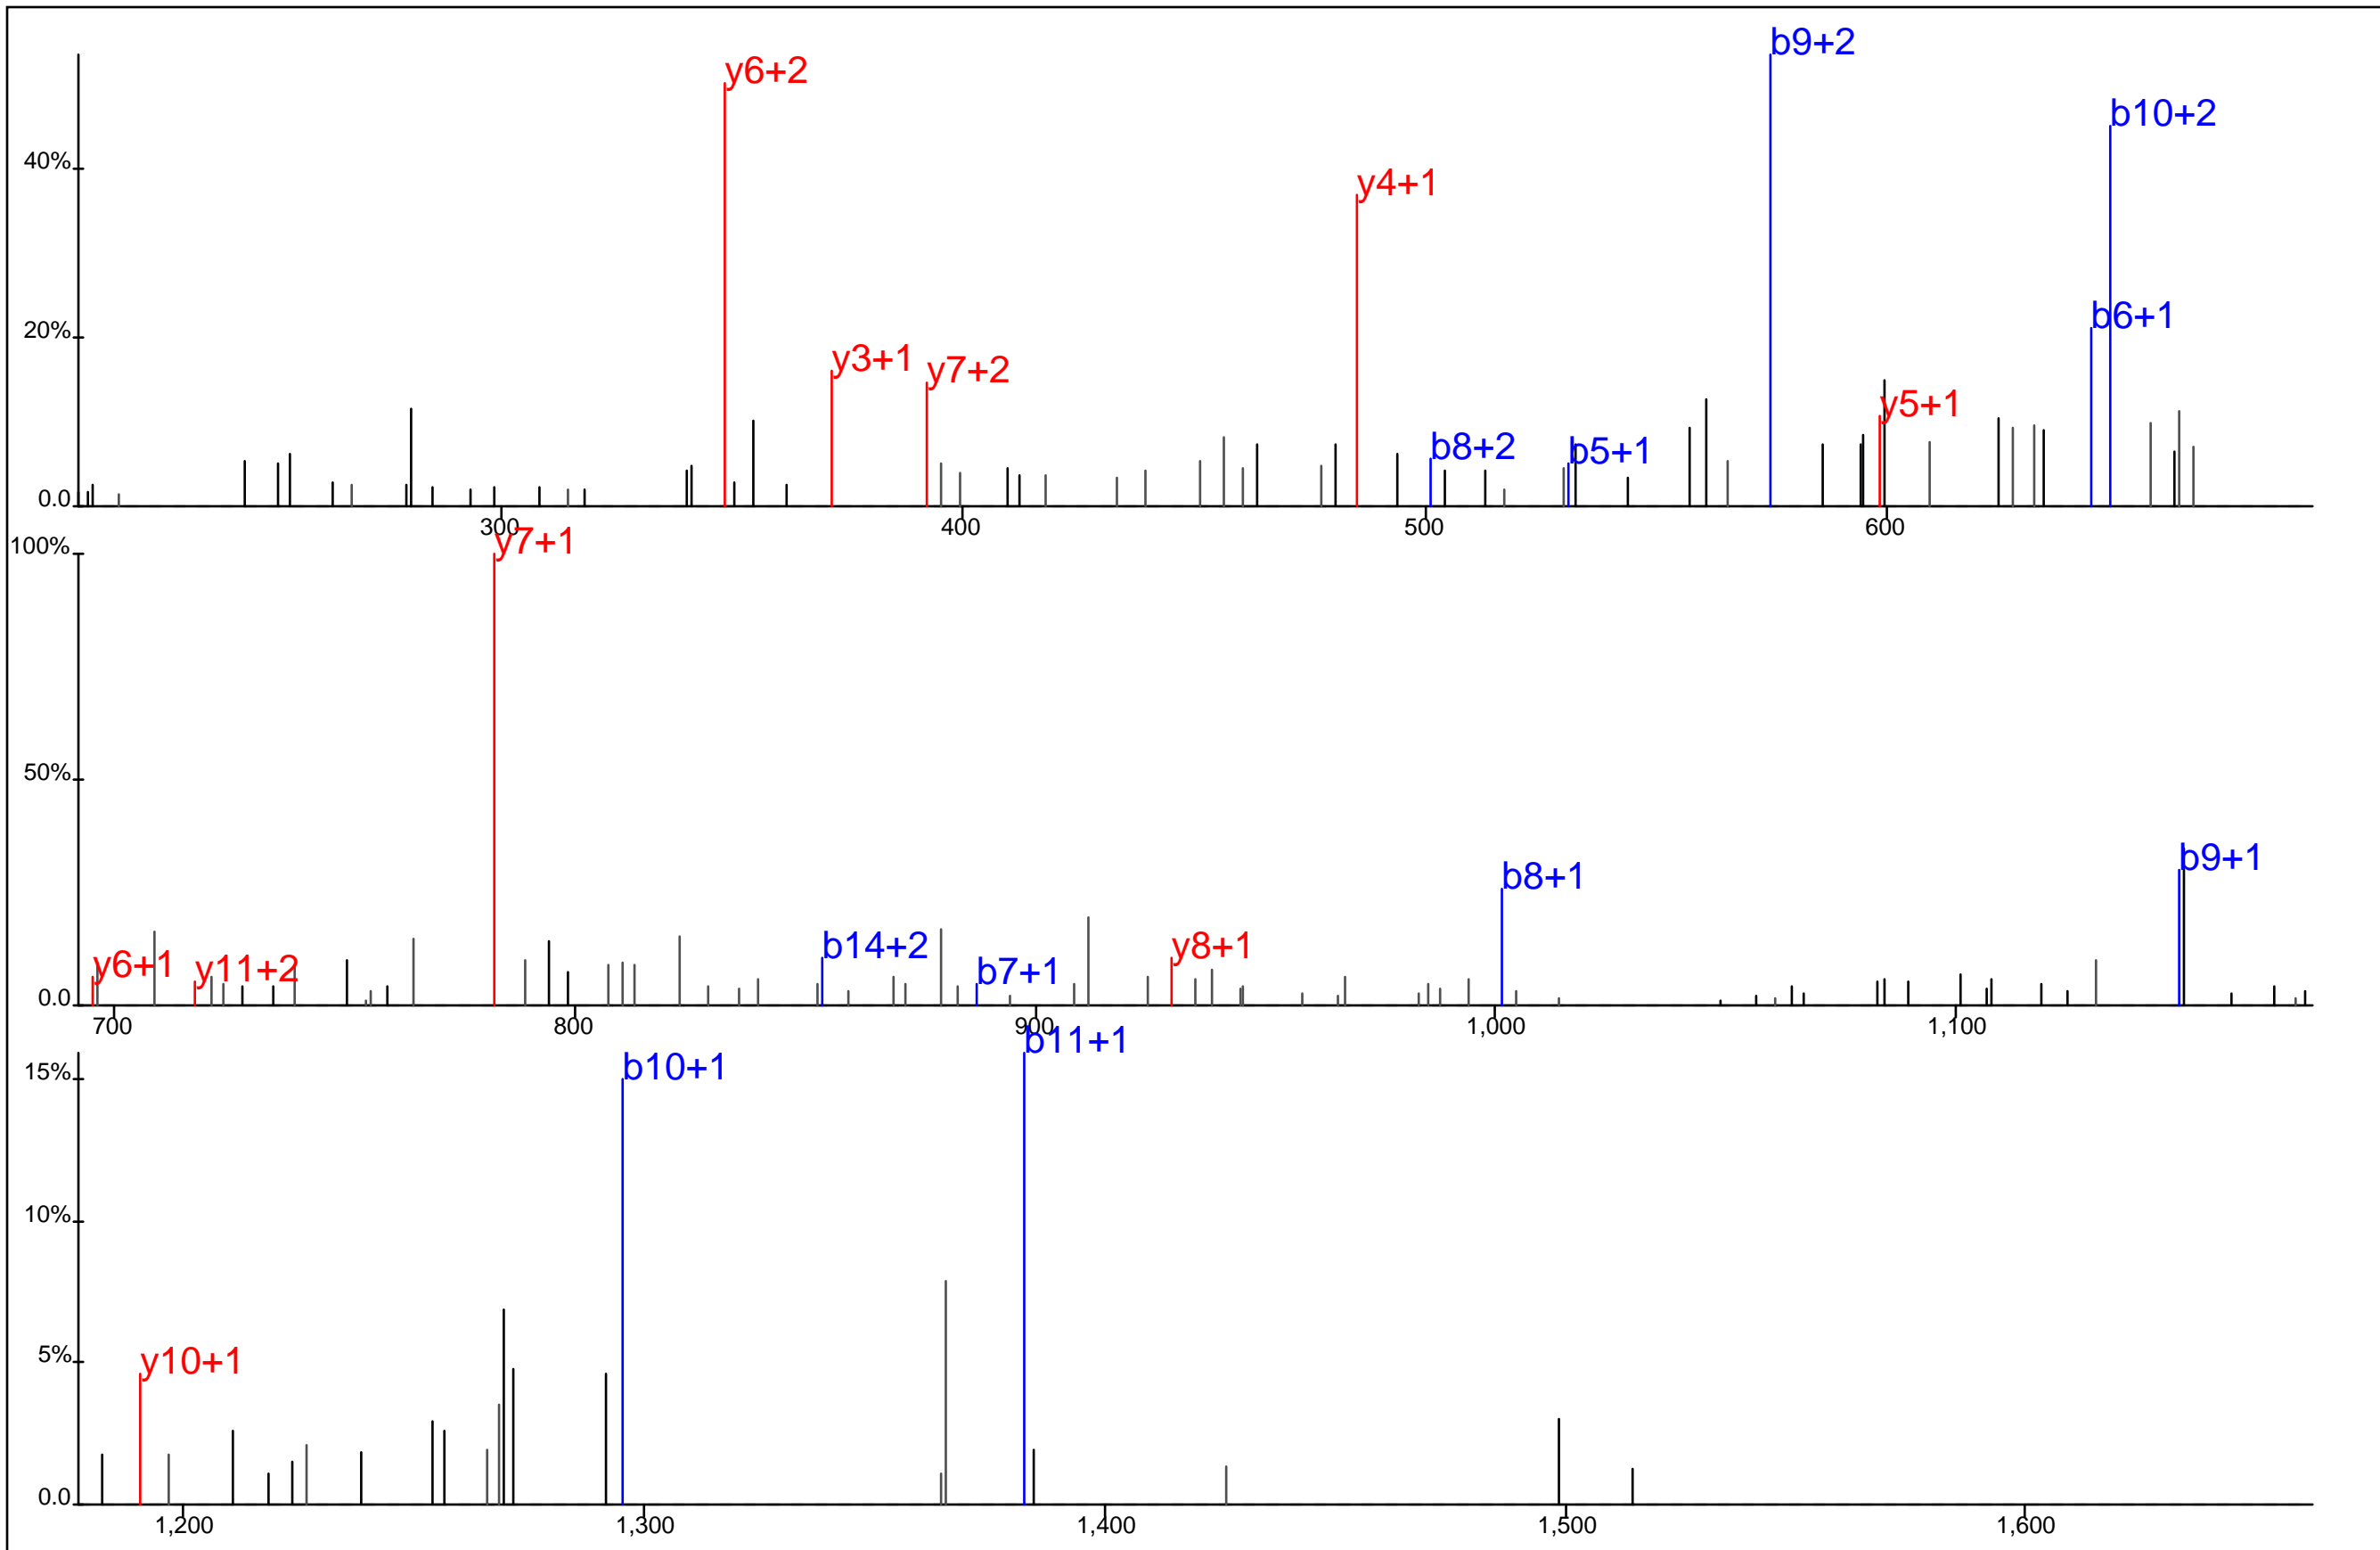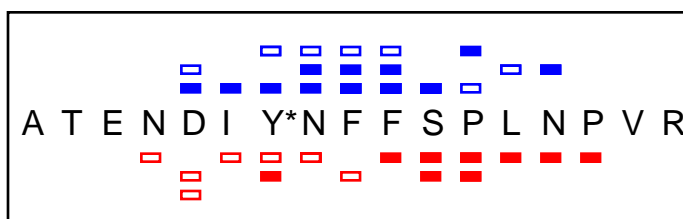

Protein Name: Heterogeneous nuclear ribonucleoprotein H1  
 gi Accession: 0  
 Precursor Mass: 692.9868+3  
 Delta Mass: 1.488 ppm  
 XCorr: 24.36

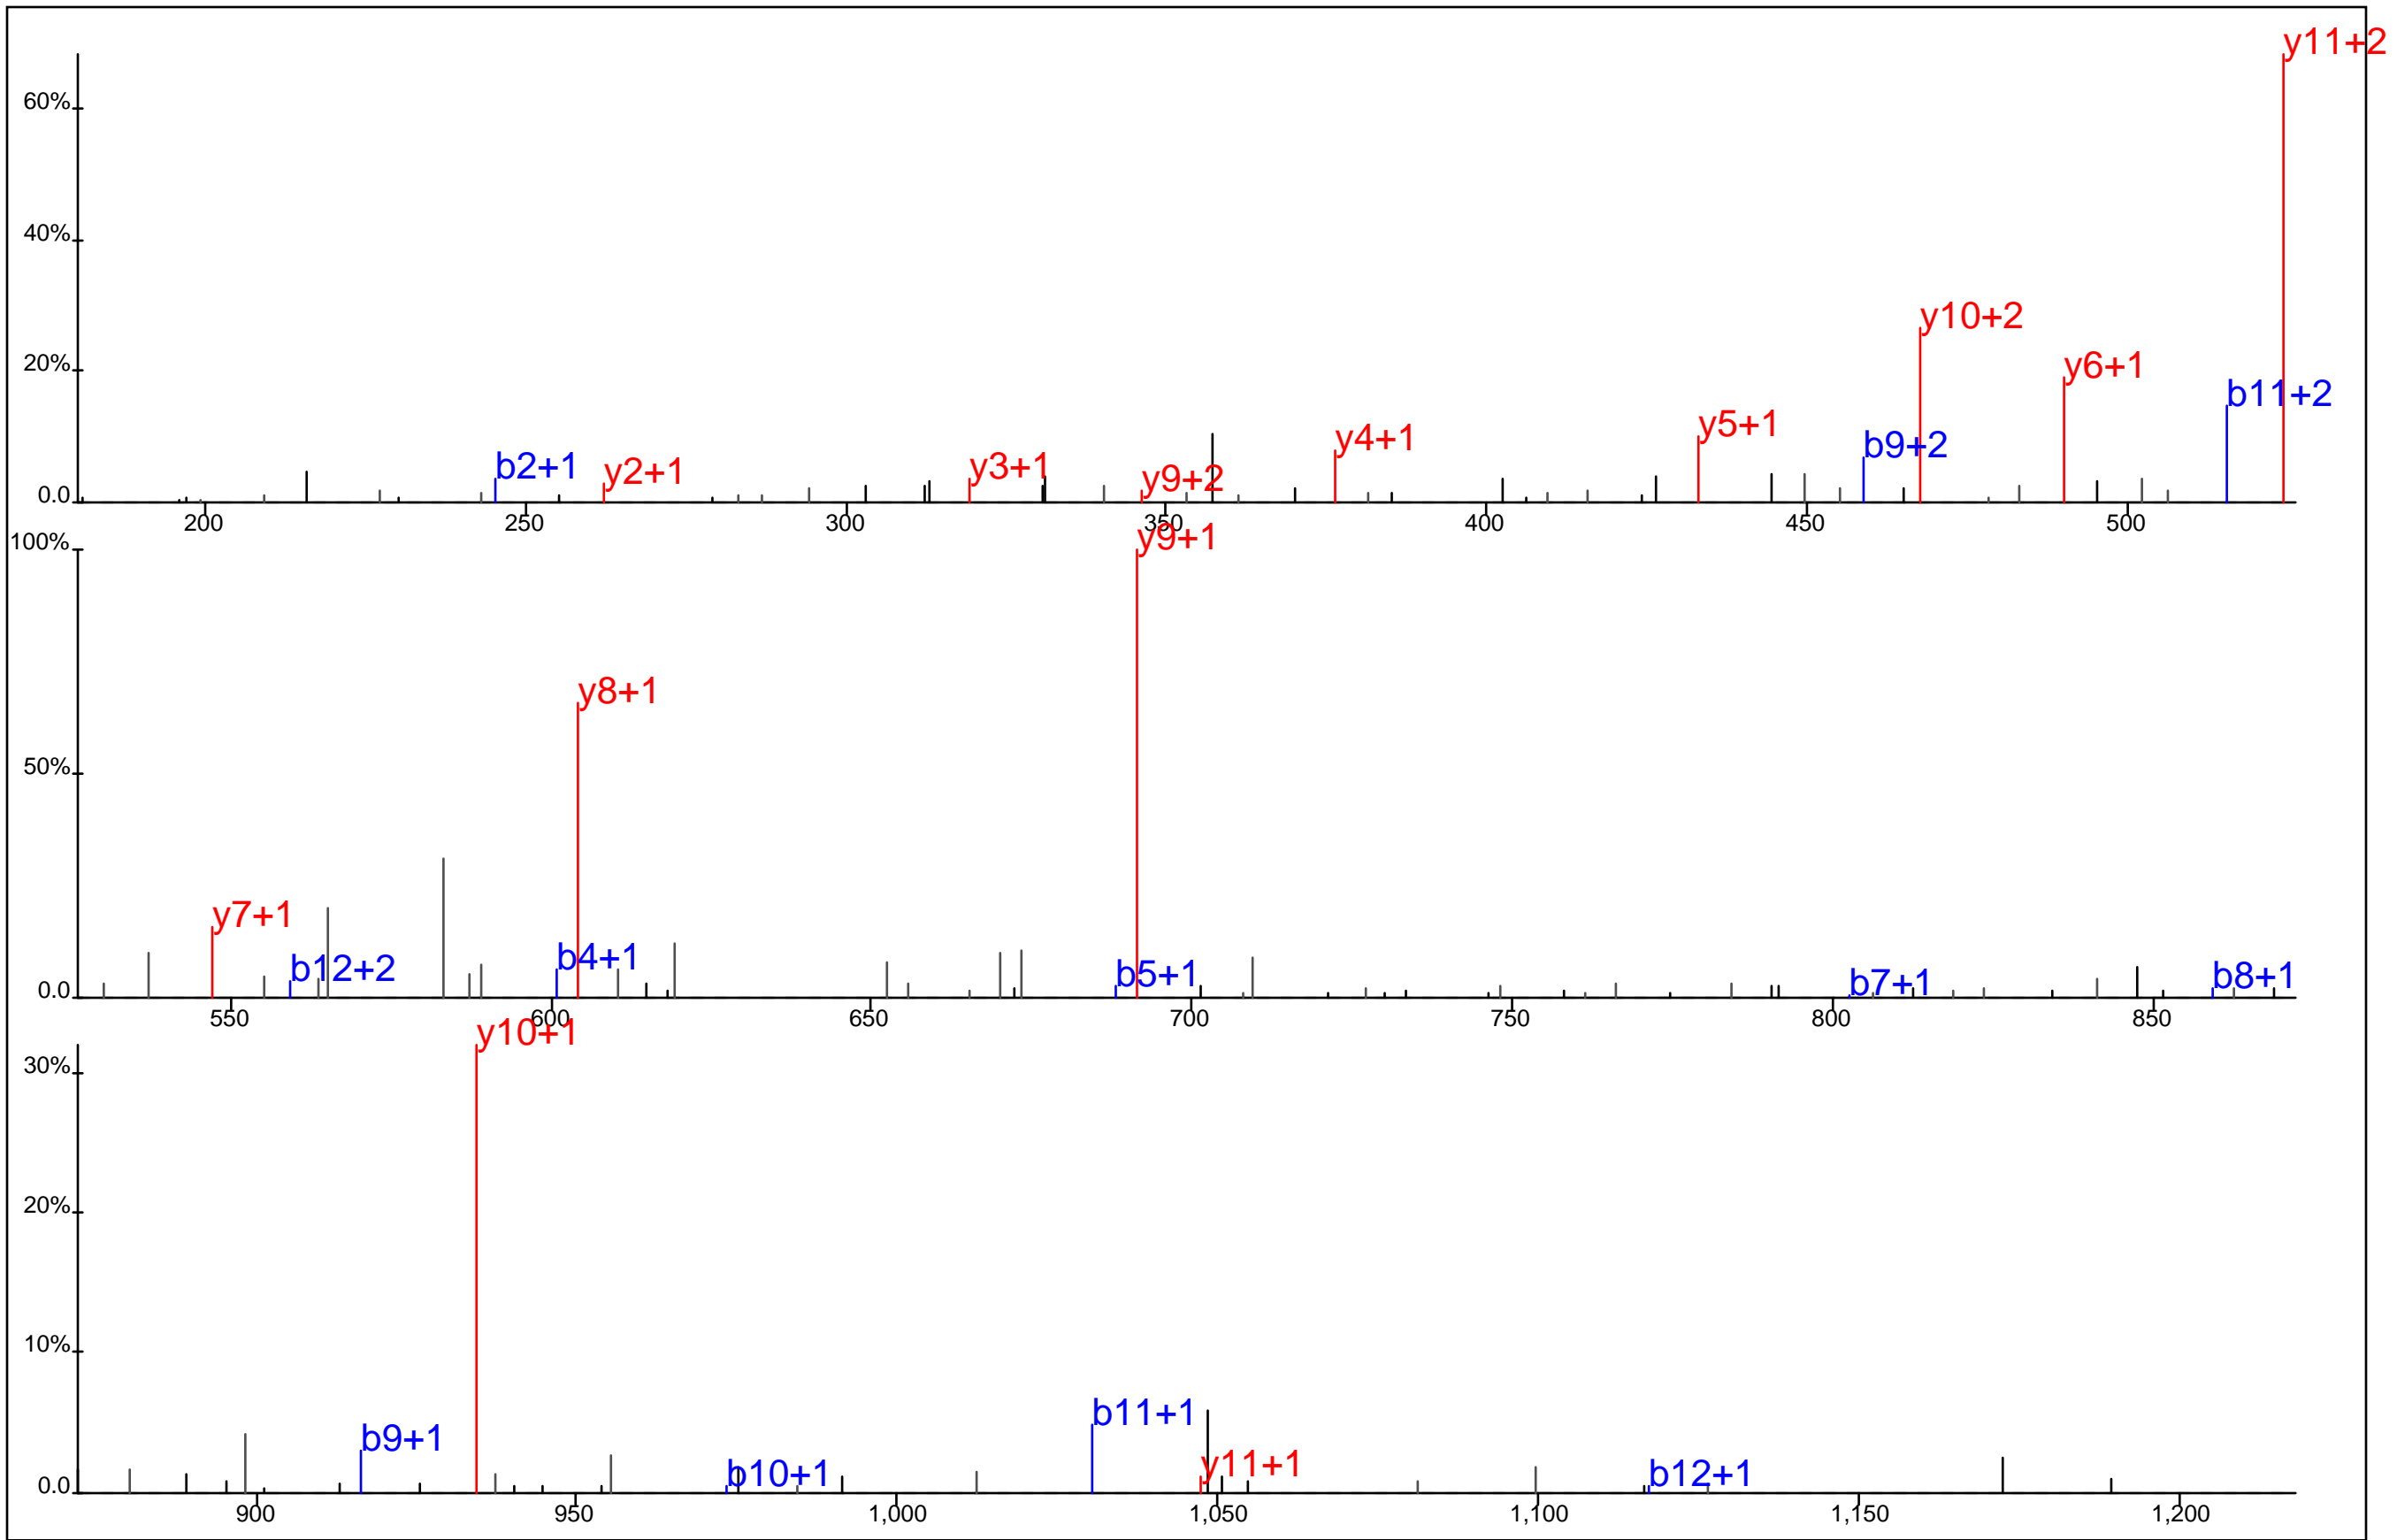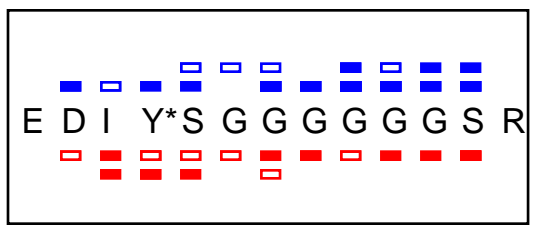

Protein Name: Heterogeneous nuclear ribonucleoprotein A0  
 gi Accession: 0  
 Precursor Mass: 646.2521+2  
 Delta Mass: 1.411 ppm  
 XCorr: 67.61

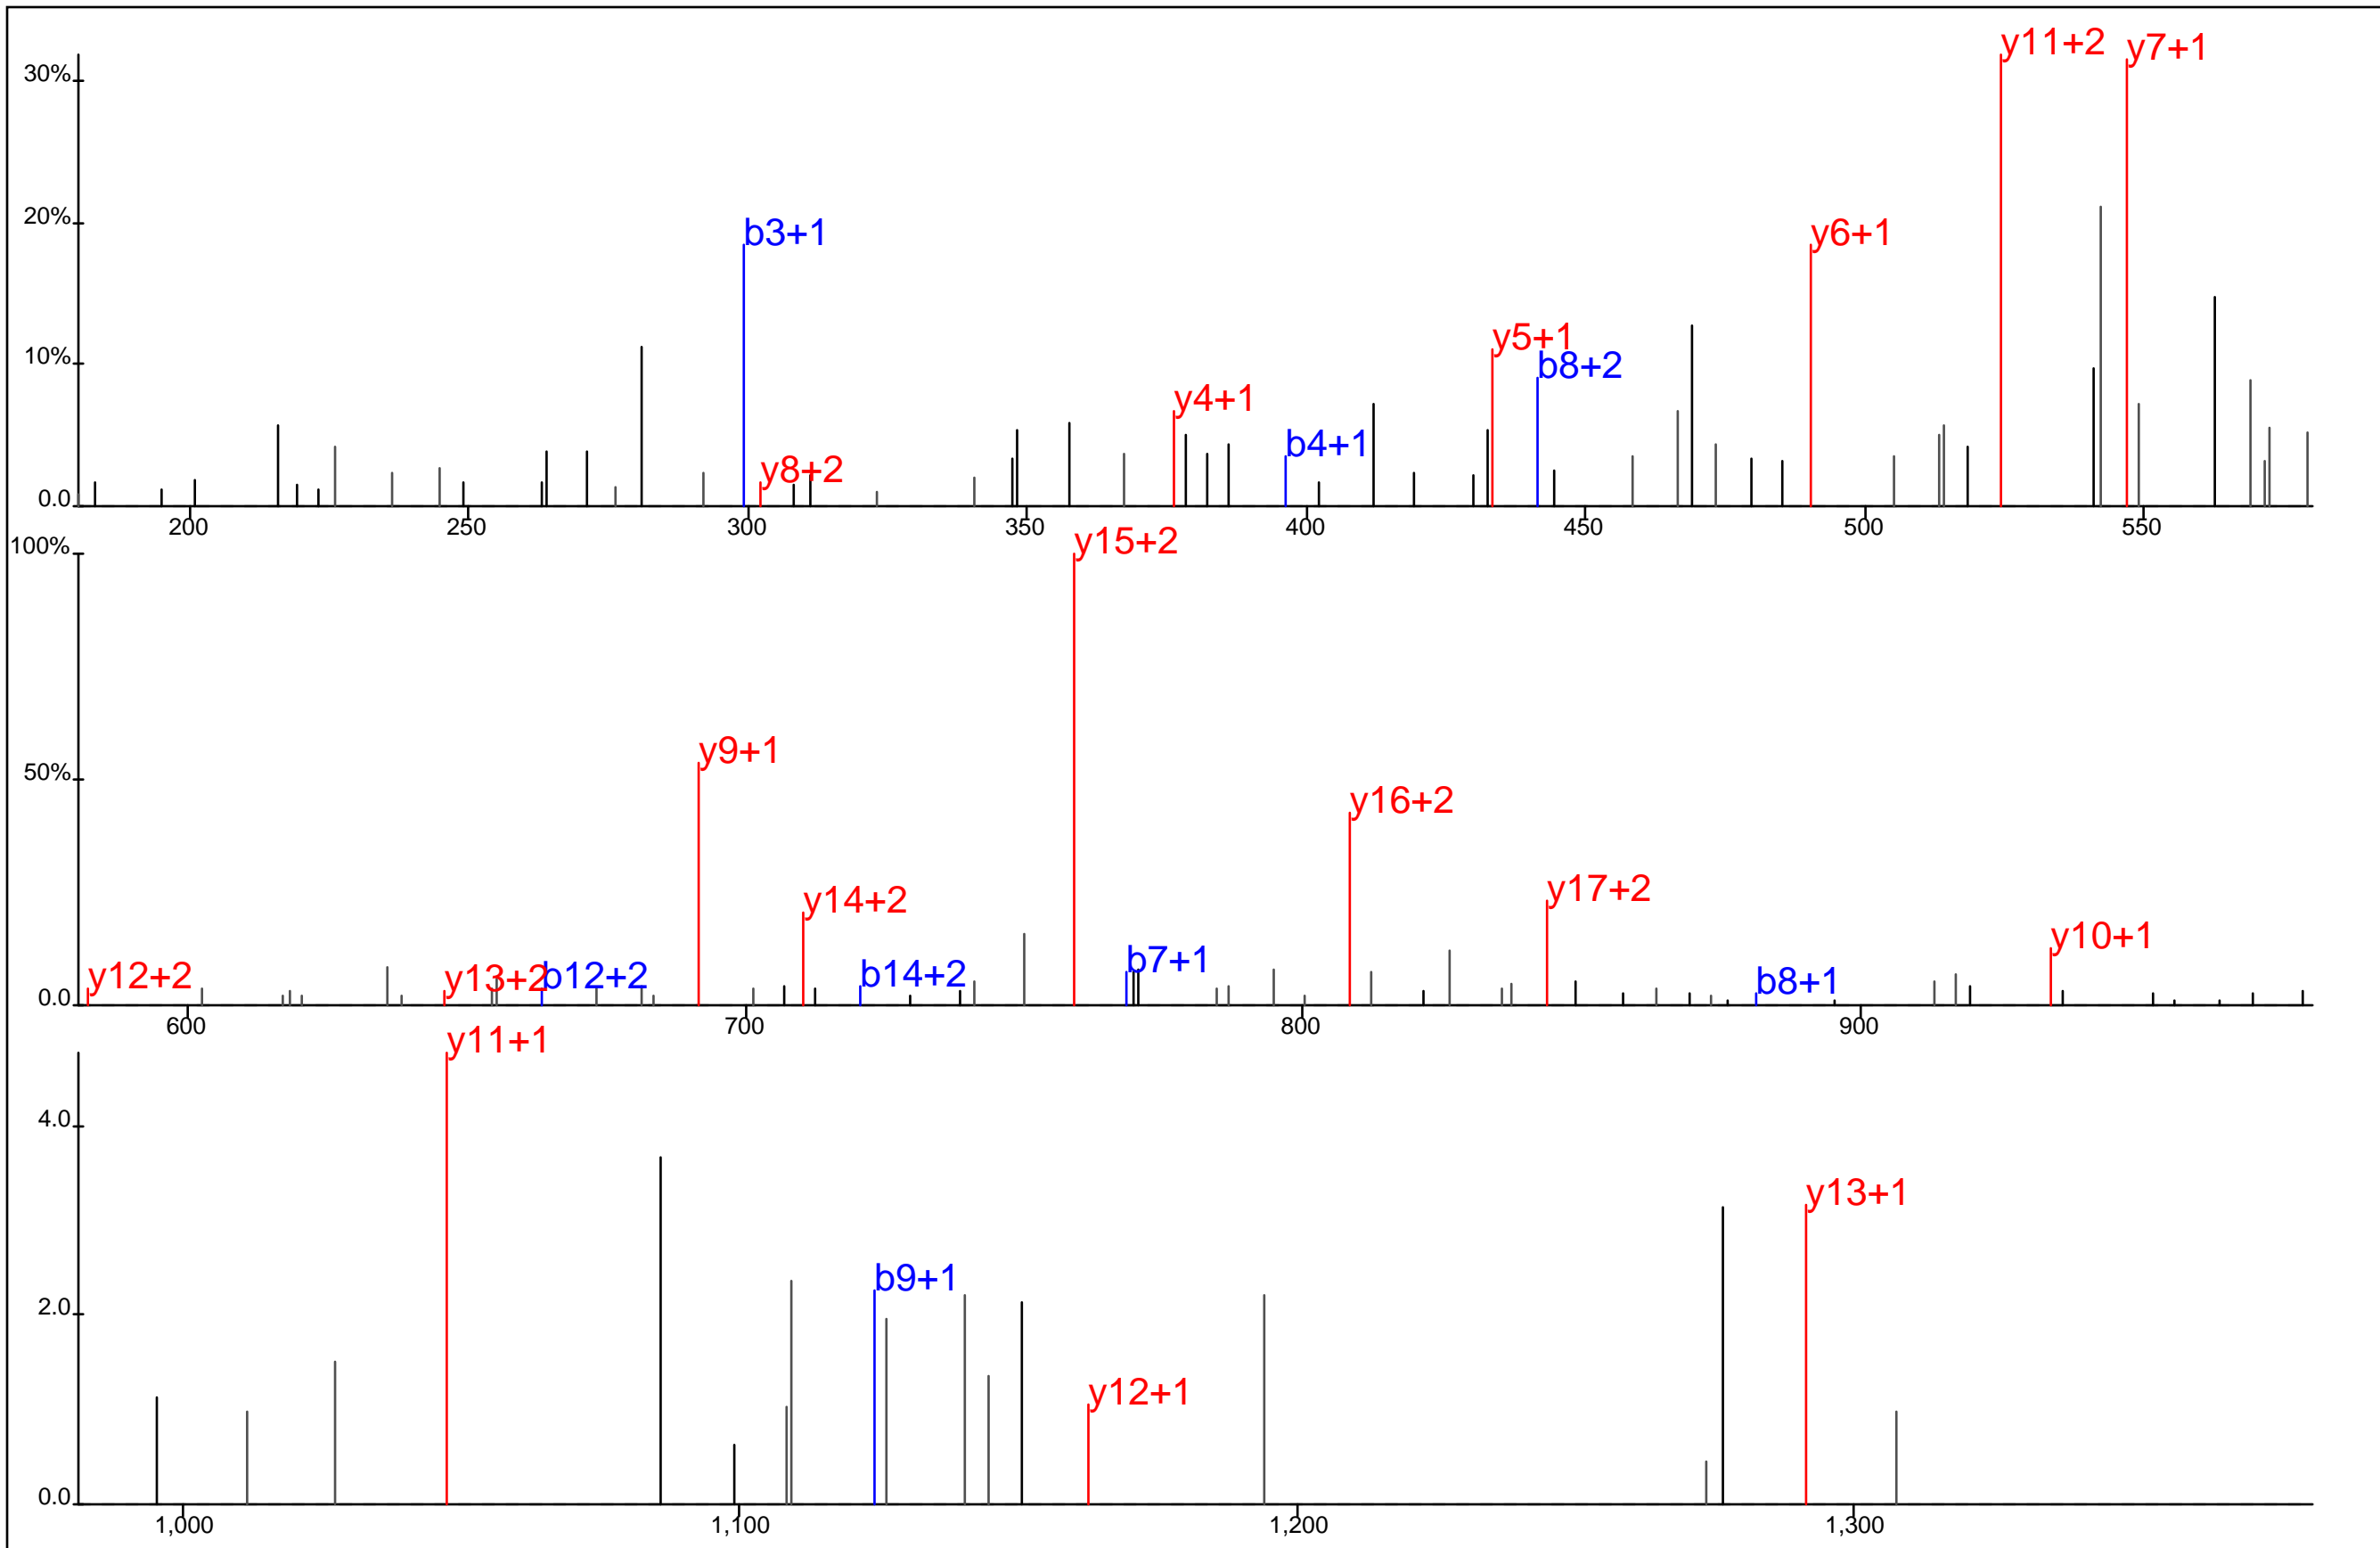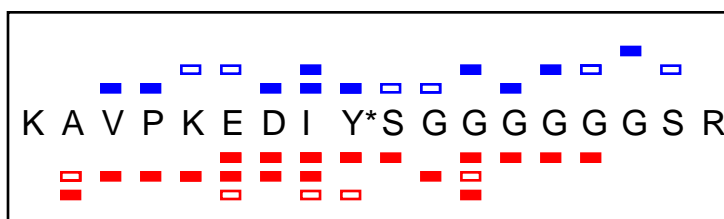

Protein Name: Heterogeneous nuclear ribonucleoprotein A0  
 gi Accession: 0  
 Precursor Mass: 605.6152+3  
 Delta Mass: 6.775 ppm  
 XCorr: 52.89



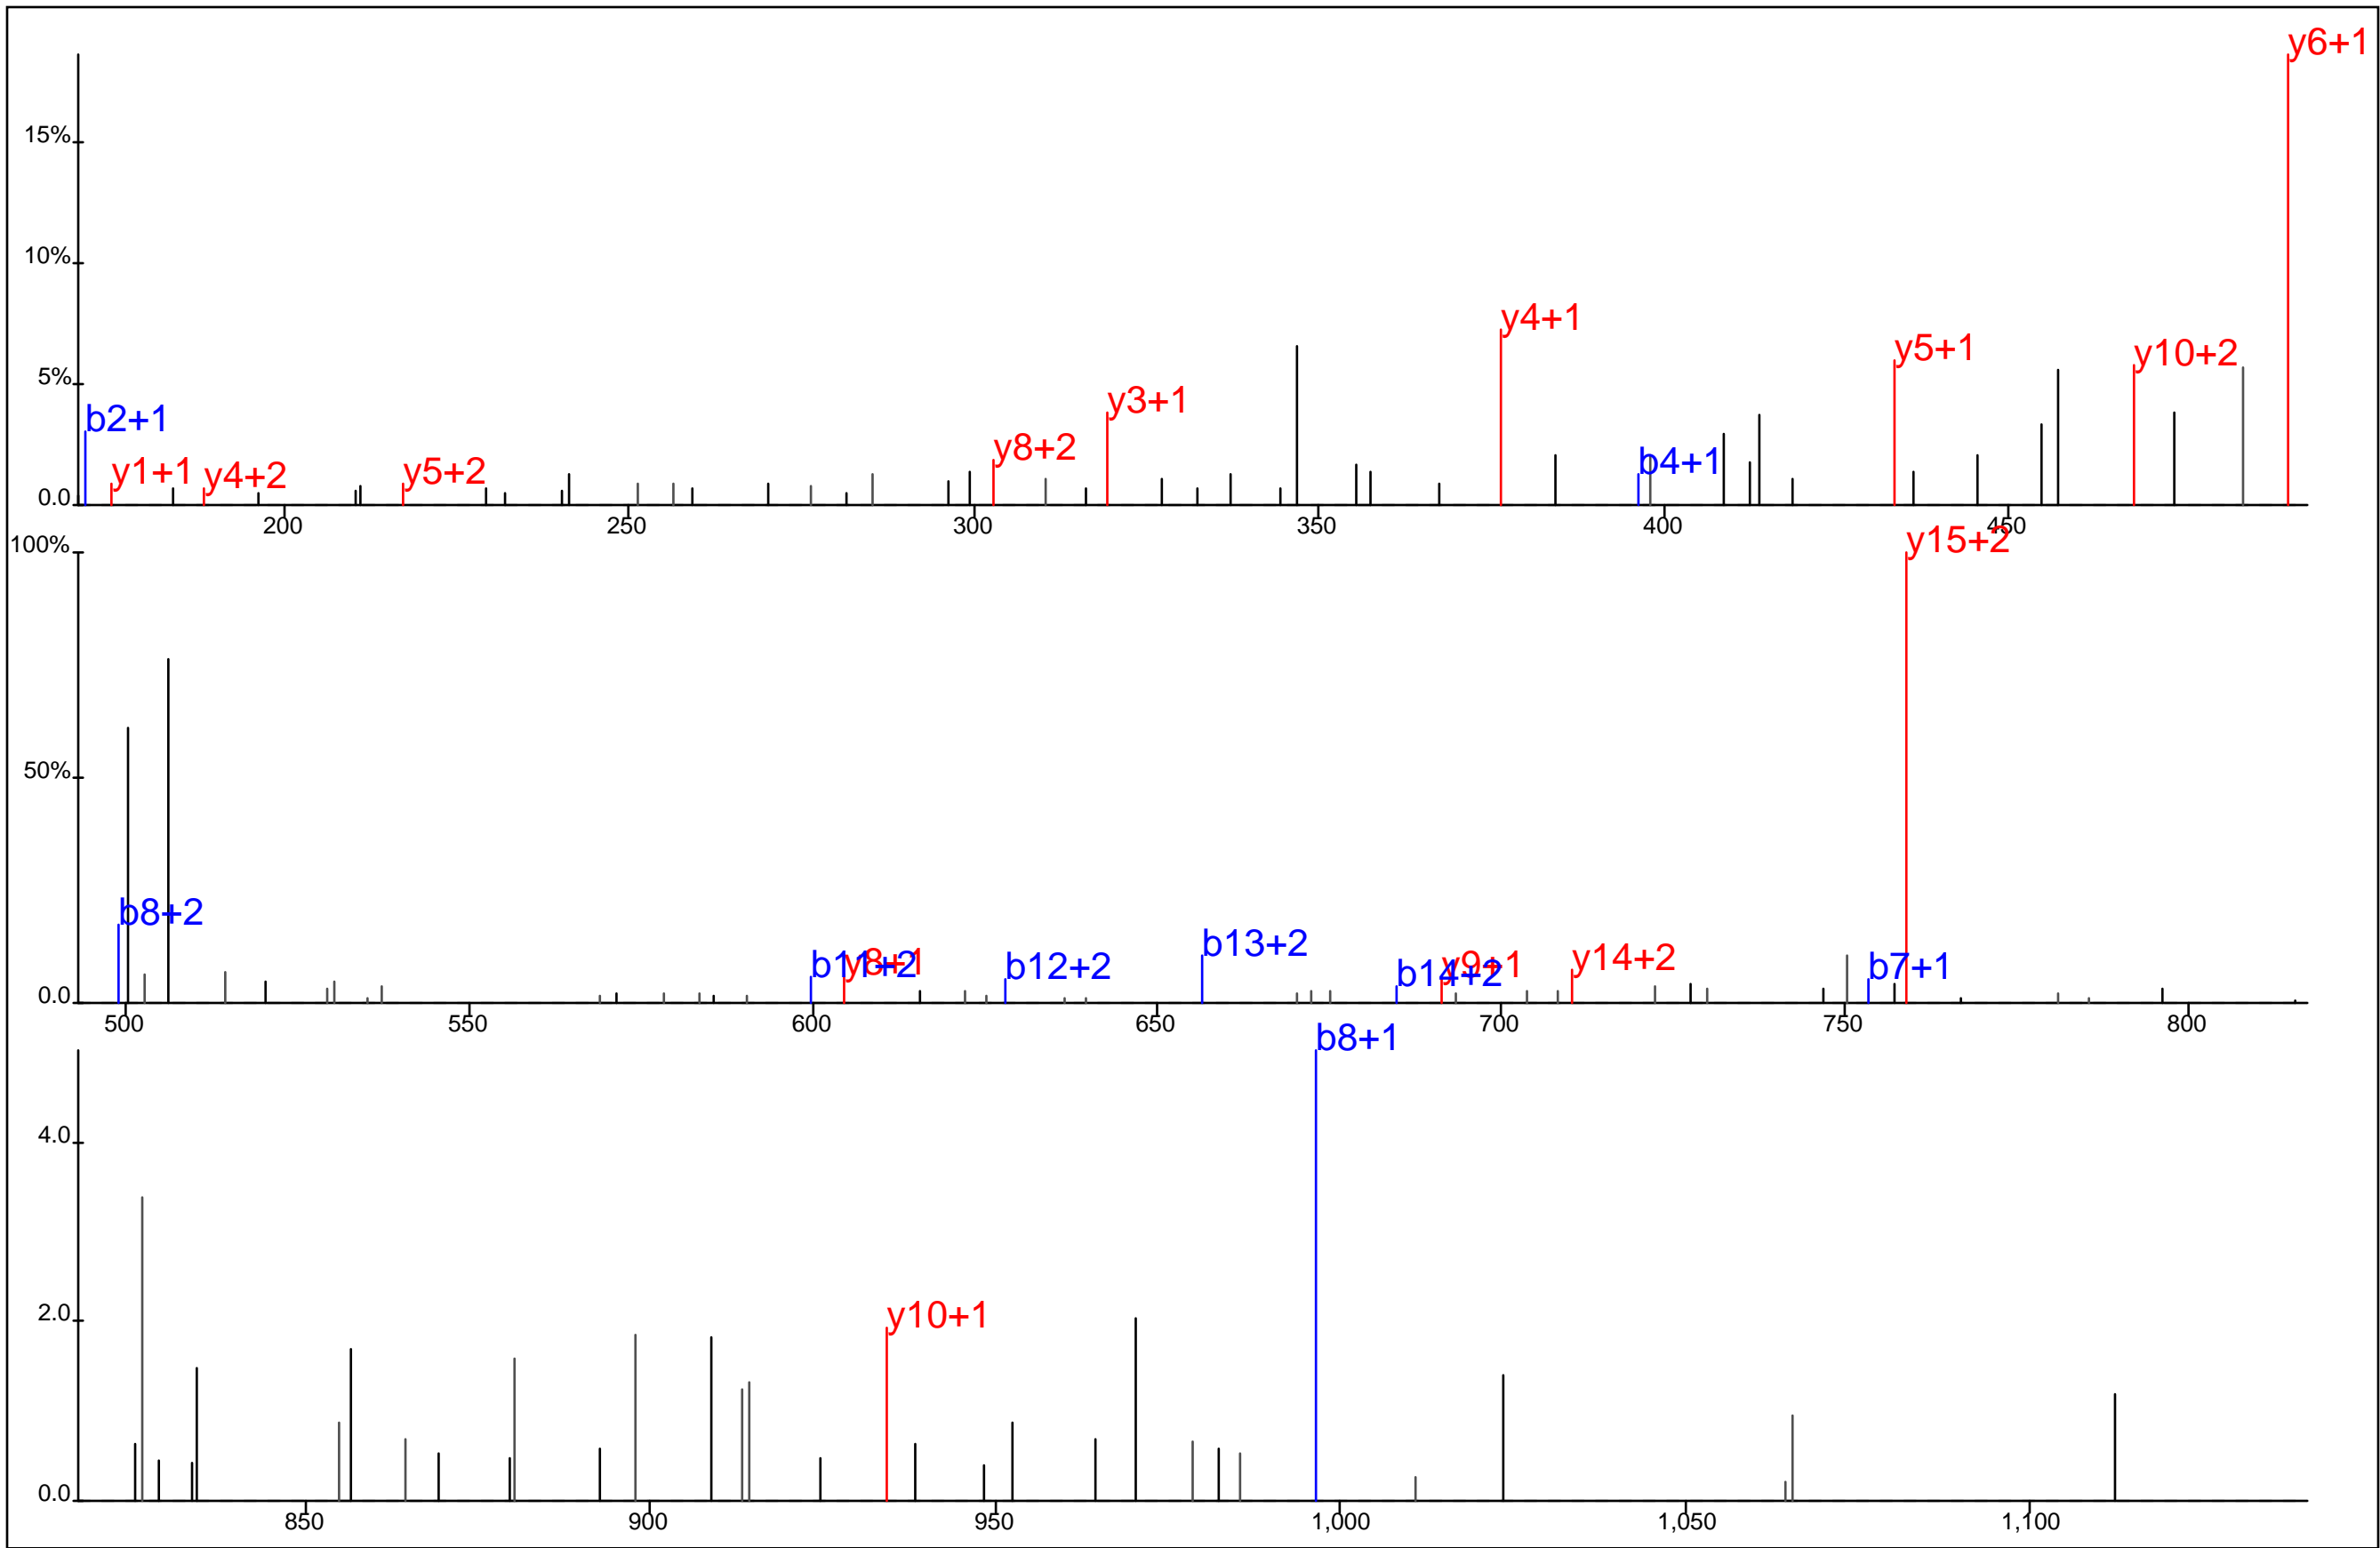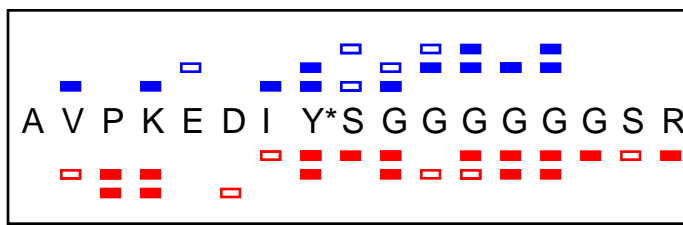

Protein Name: Heterogeneous nuclear ribonucleoprotein A0  
 gi Accession: 0  
 Precursor Mass: 562.9199+3  
 Delta Mass: 1.831 ppm  
 XCorr: 37.94

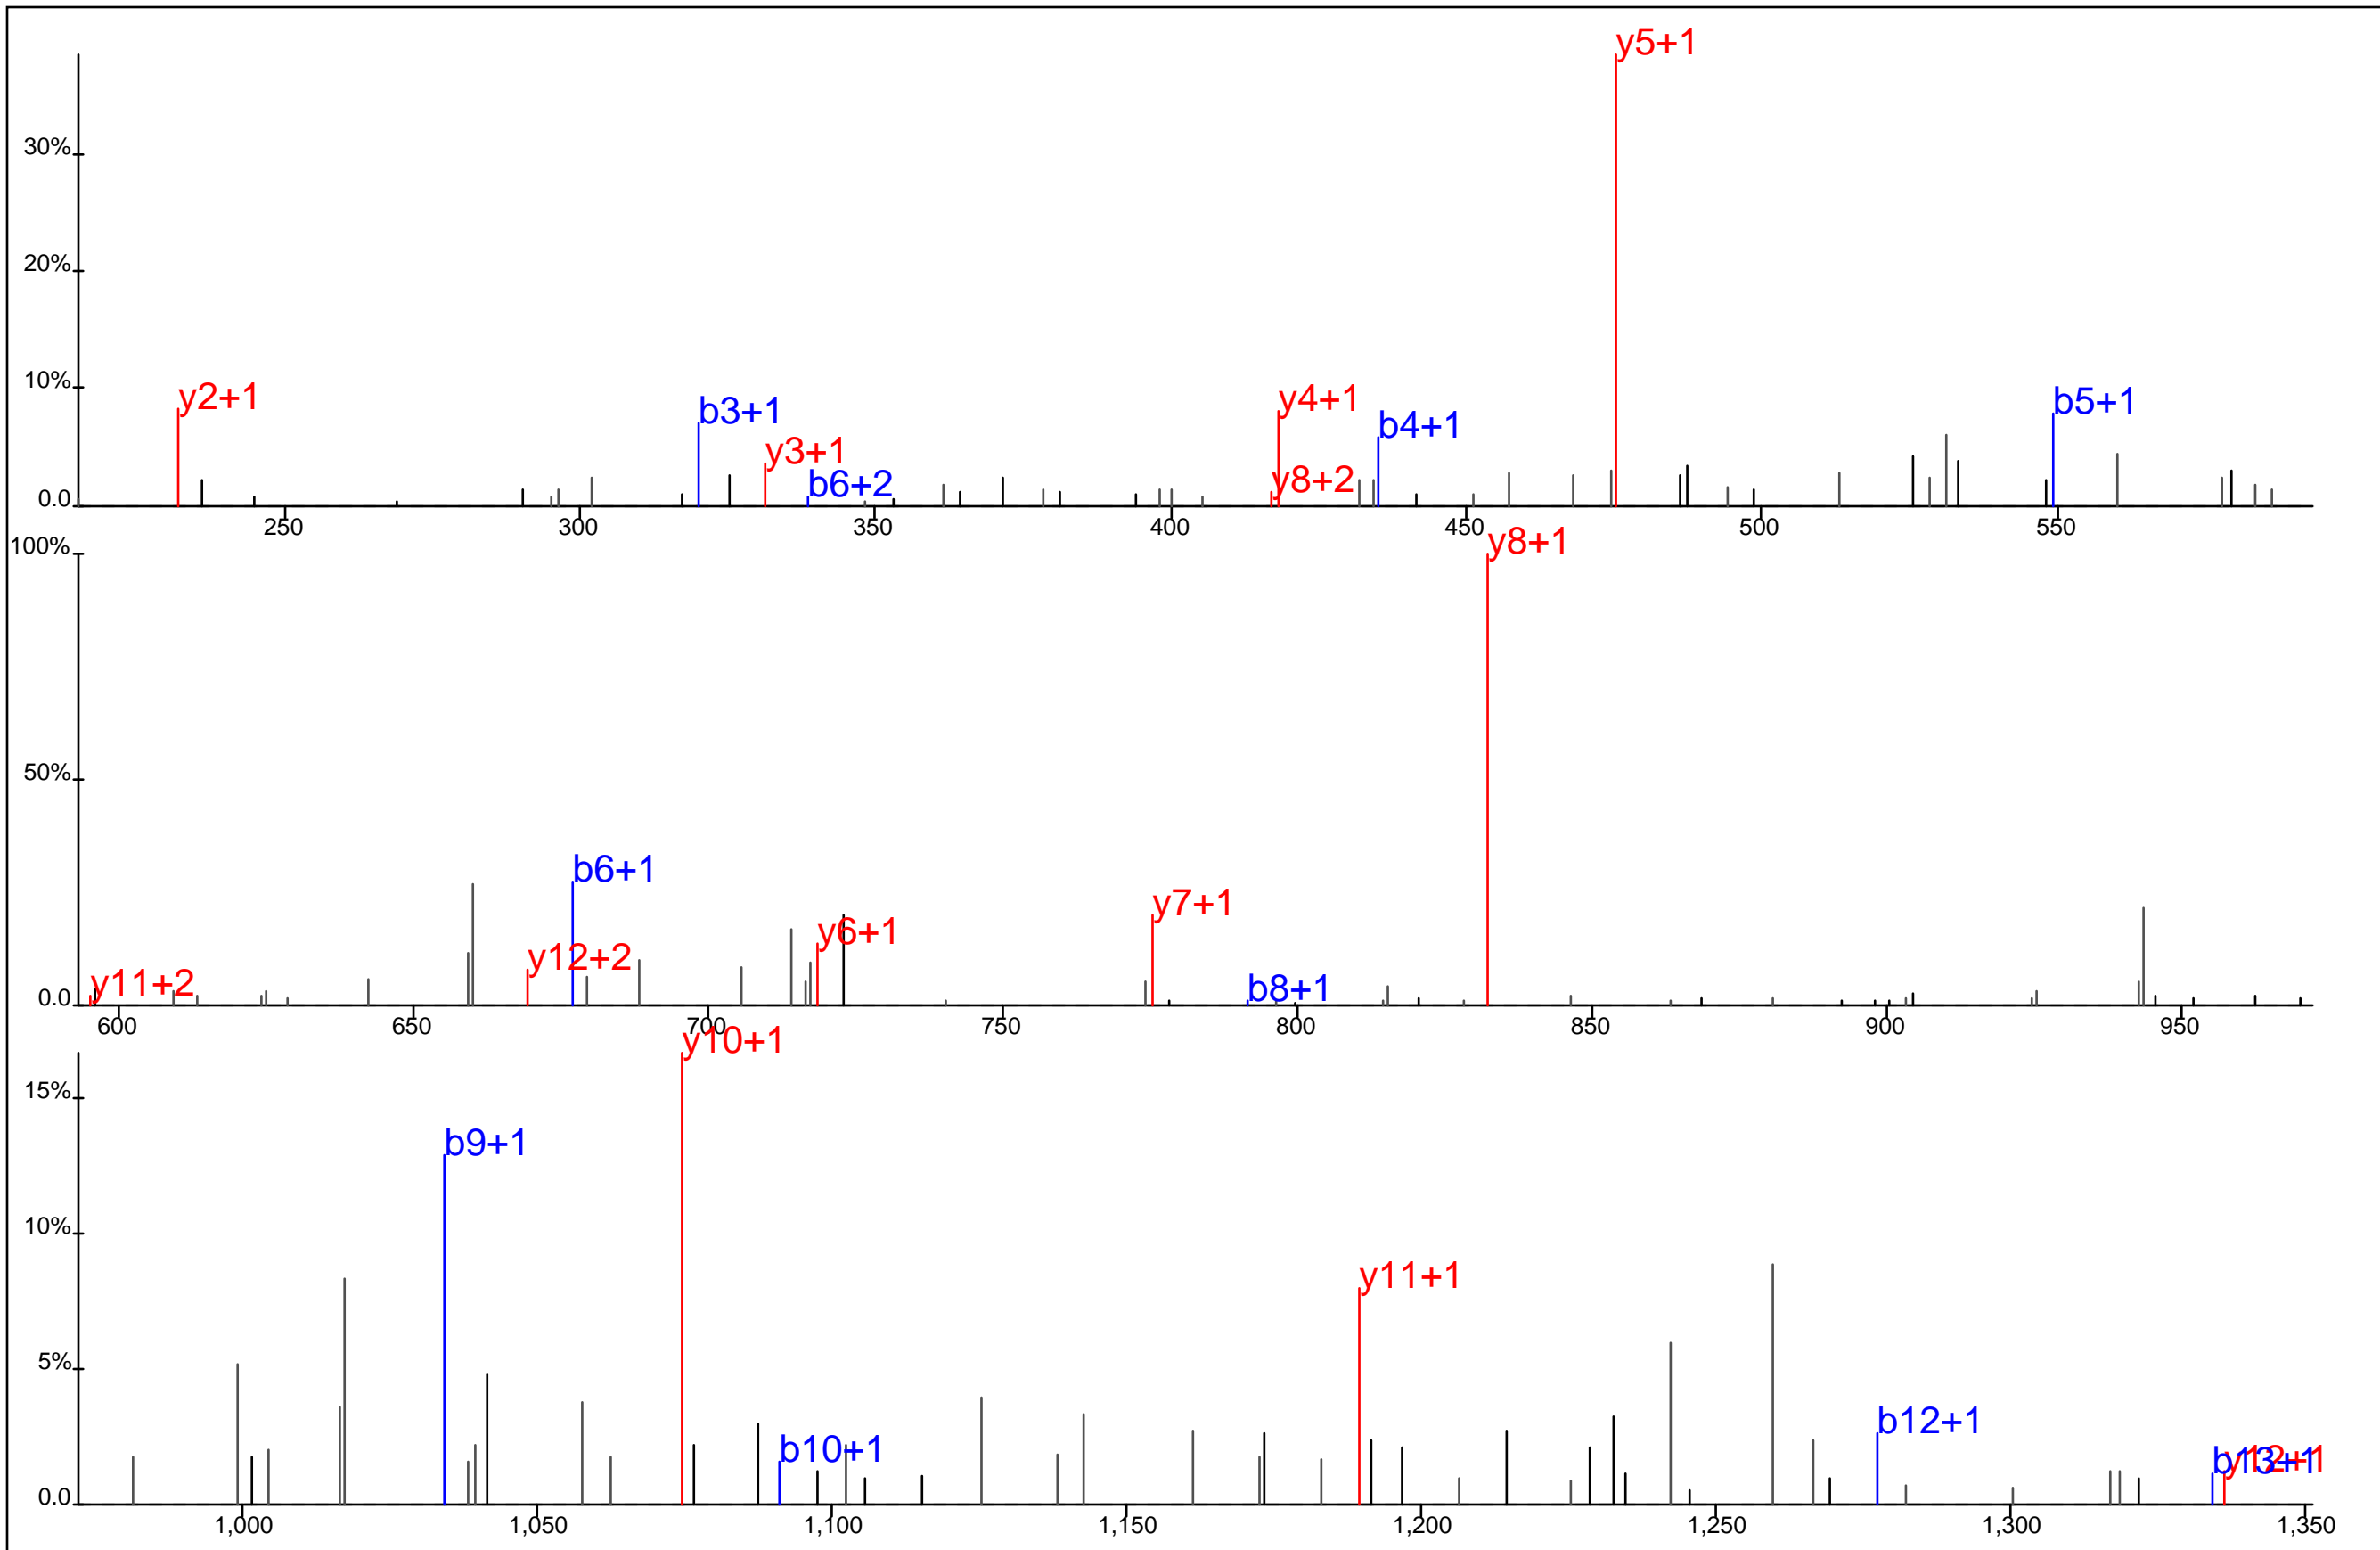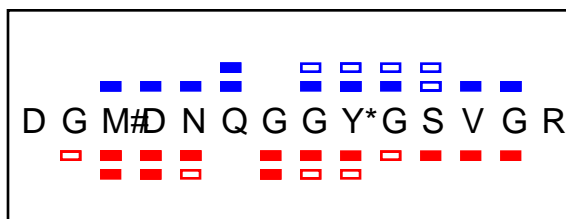

Protein Name: Heterogeneous nuclear ribonucleoprotein H3  
 gi Accession: 0  
 Precursor Mass: 754.7768+2  
 Delta Mass: 0.577 ppm  
 XCorr: 84.02

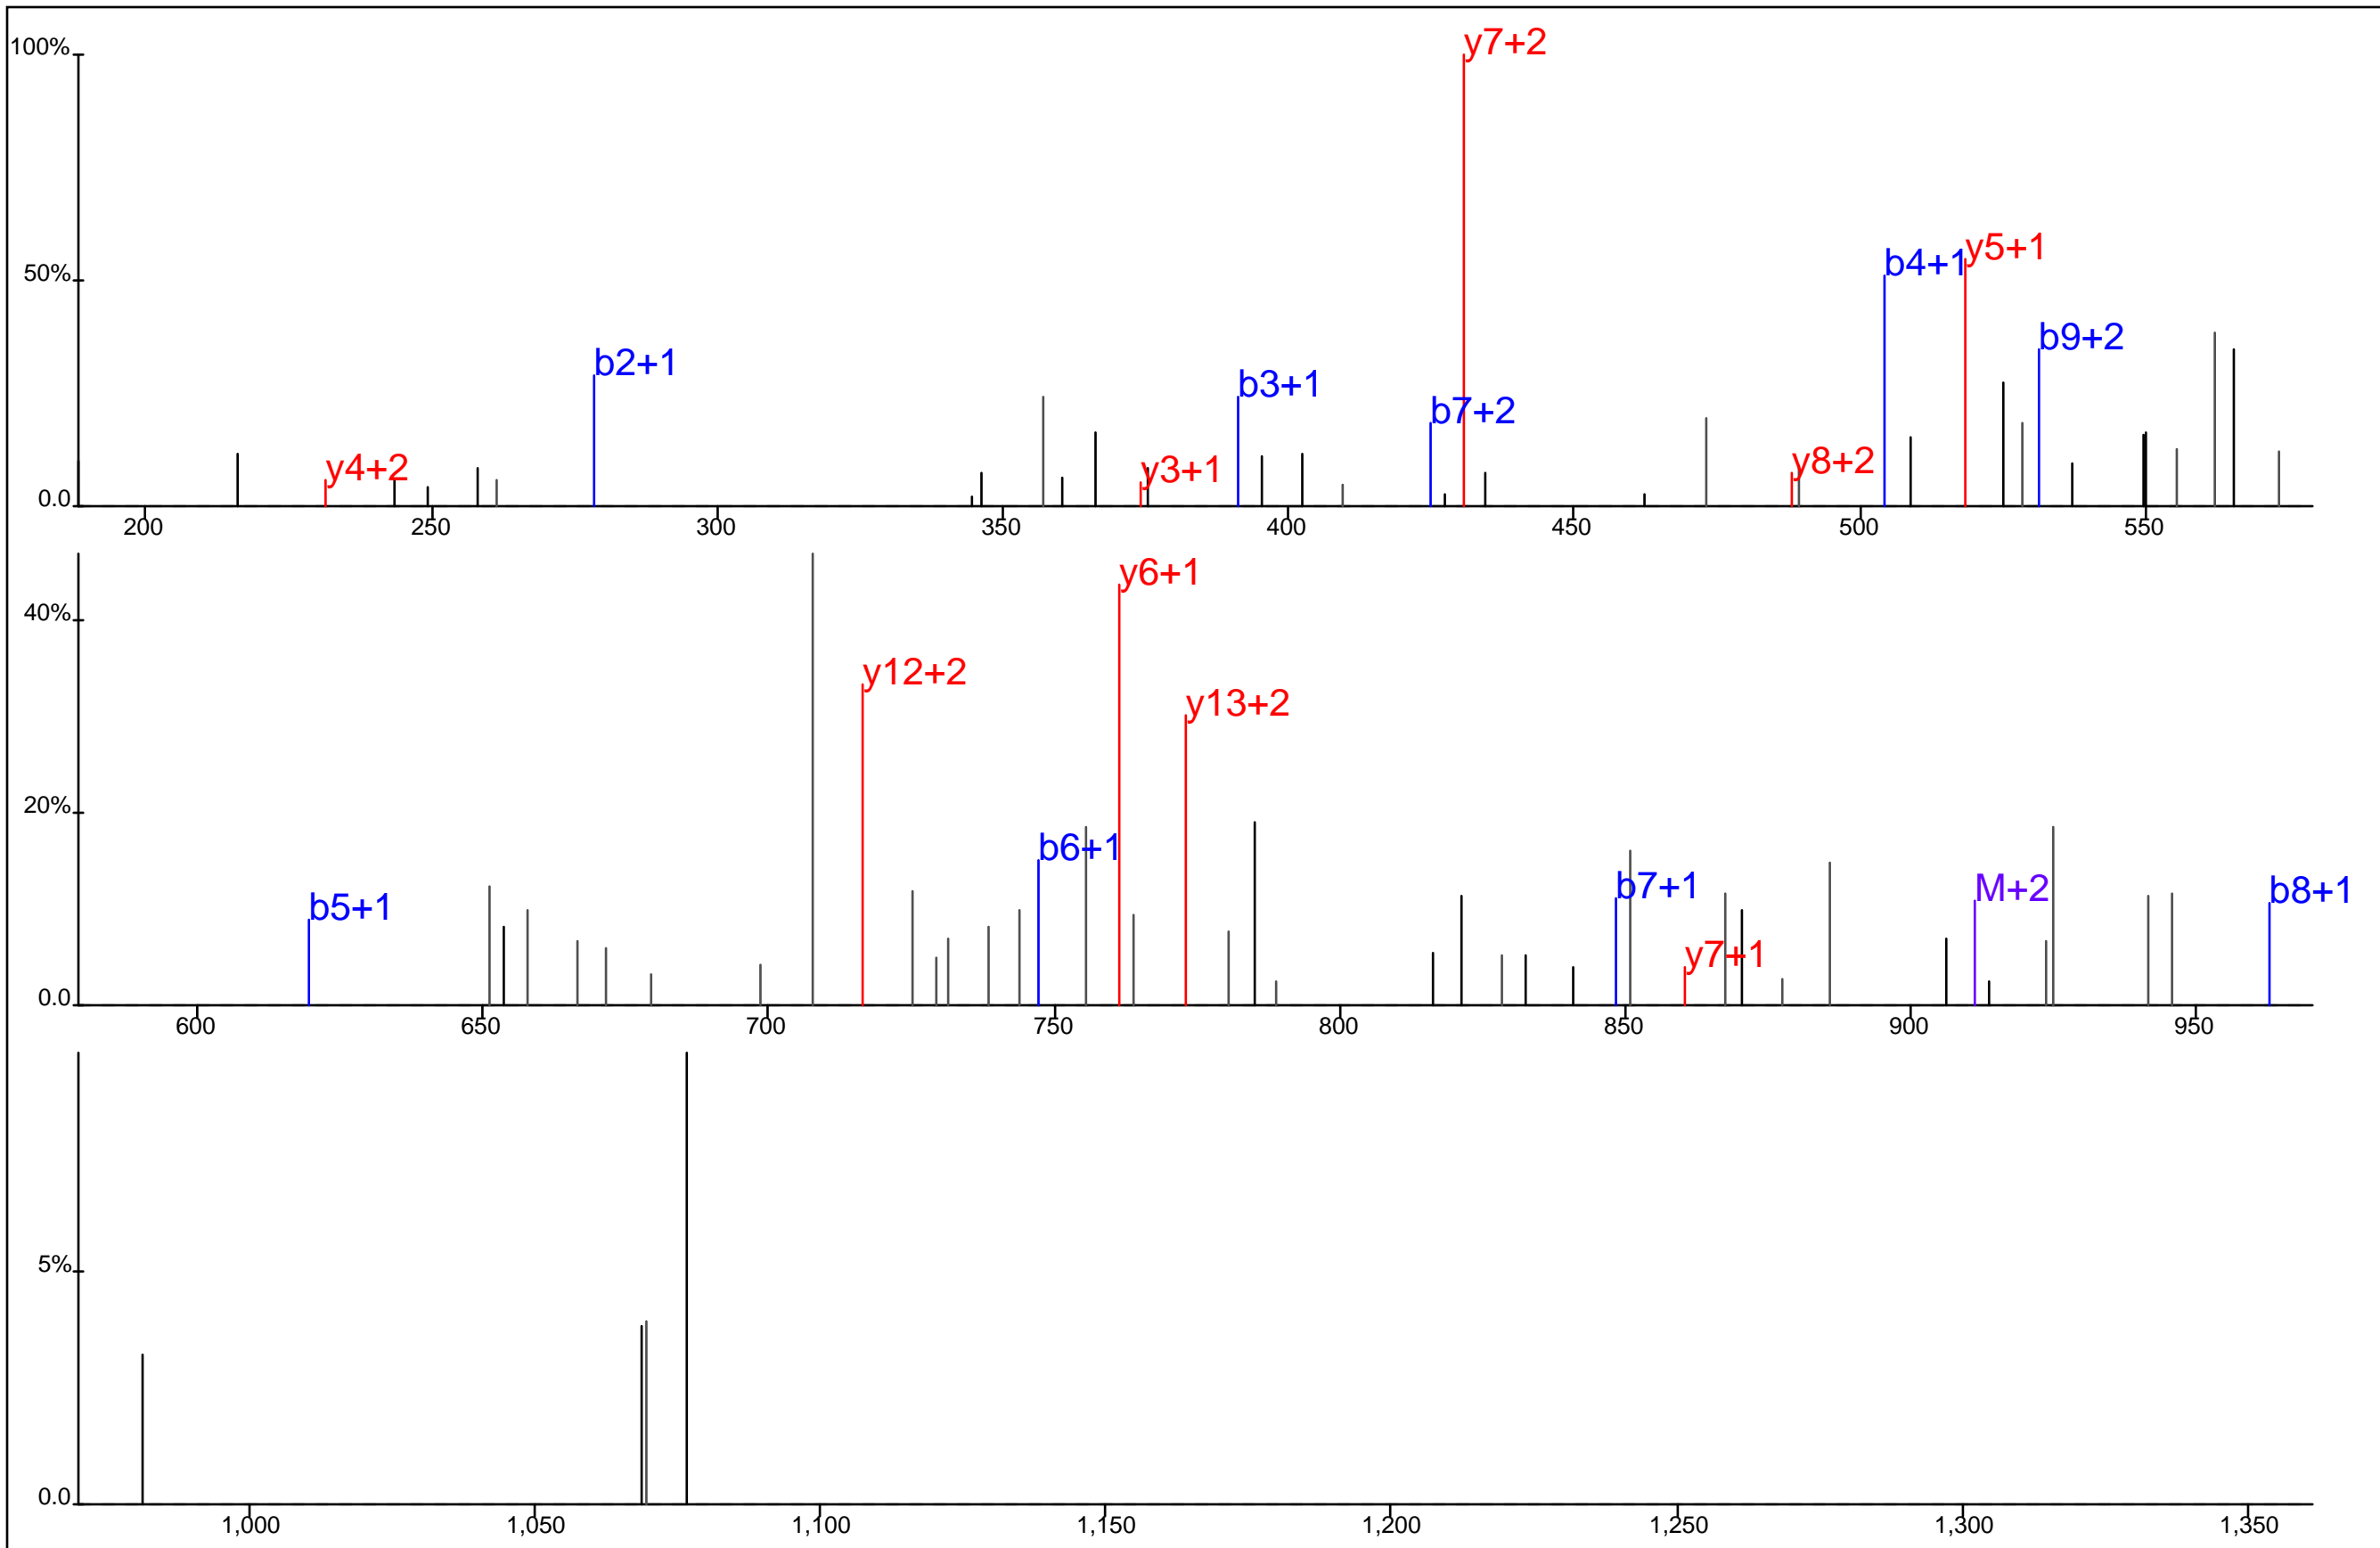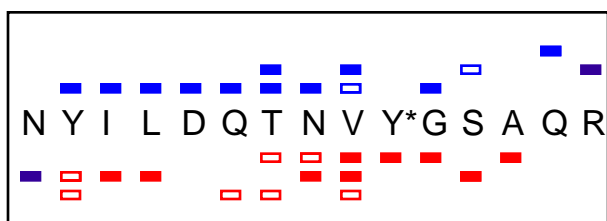

Protein Name: Heterogeneous nuclear ribonucleoprotein U like 1  
 gi Accession: 0  
 Precursor Mass: 607.9443+3  
 Delta Mass: 0.968 ppm  
 XCorr: 28.43

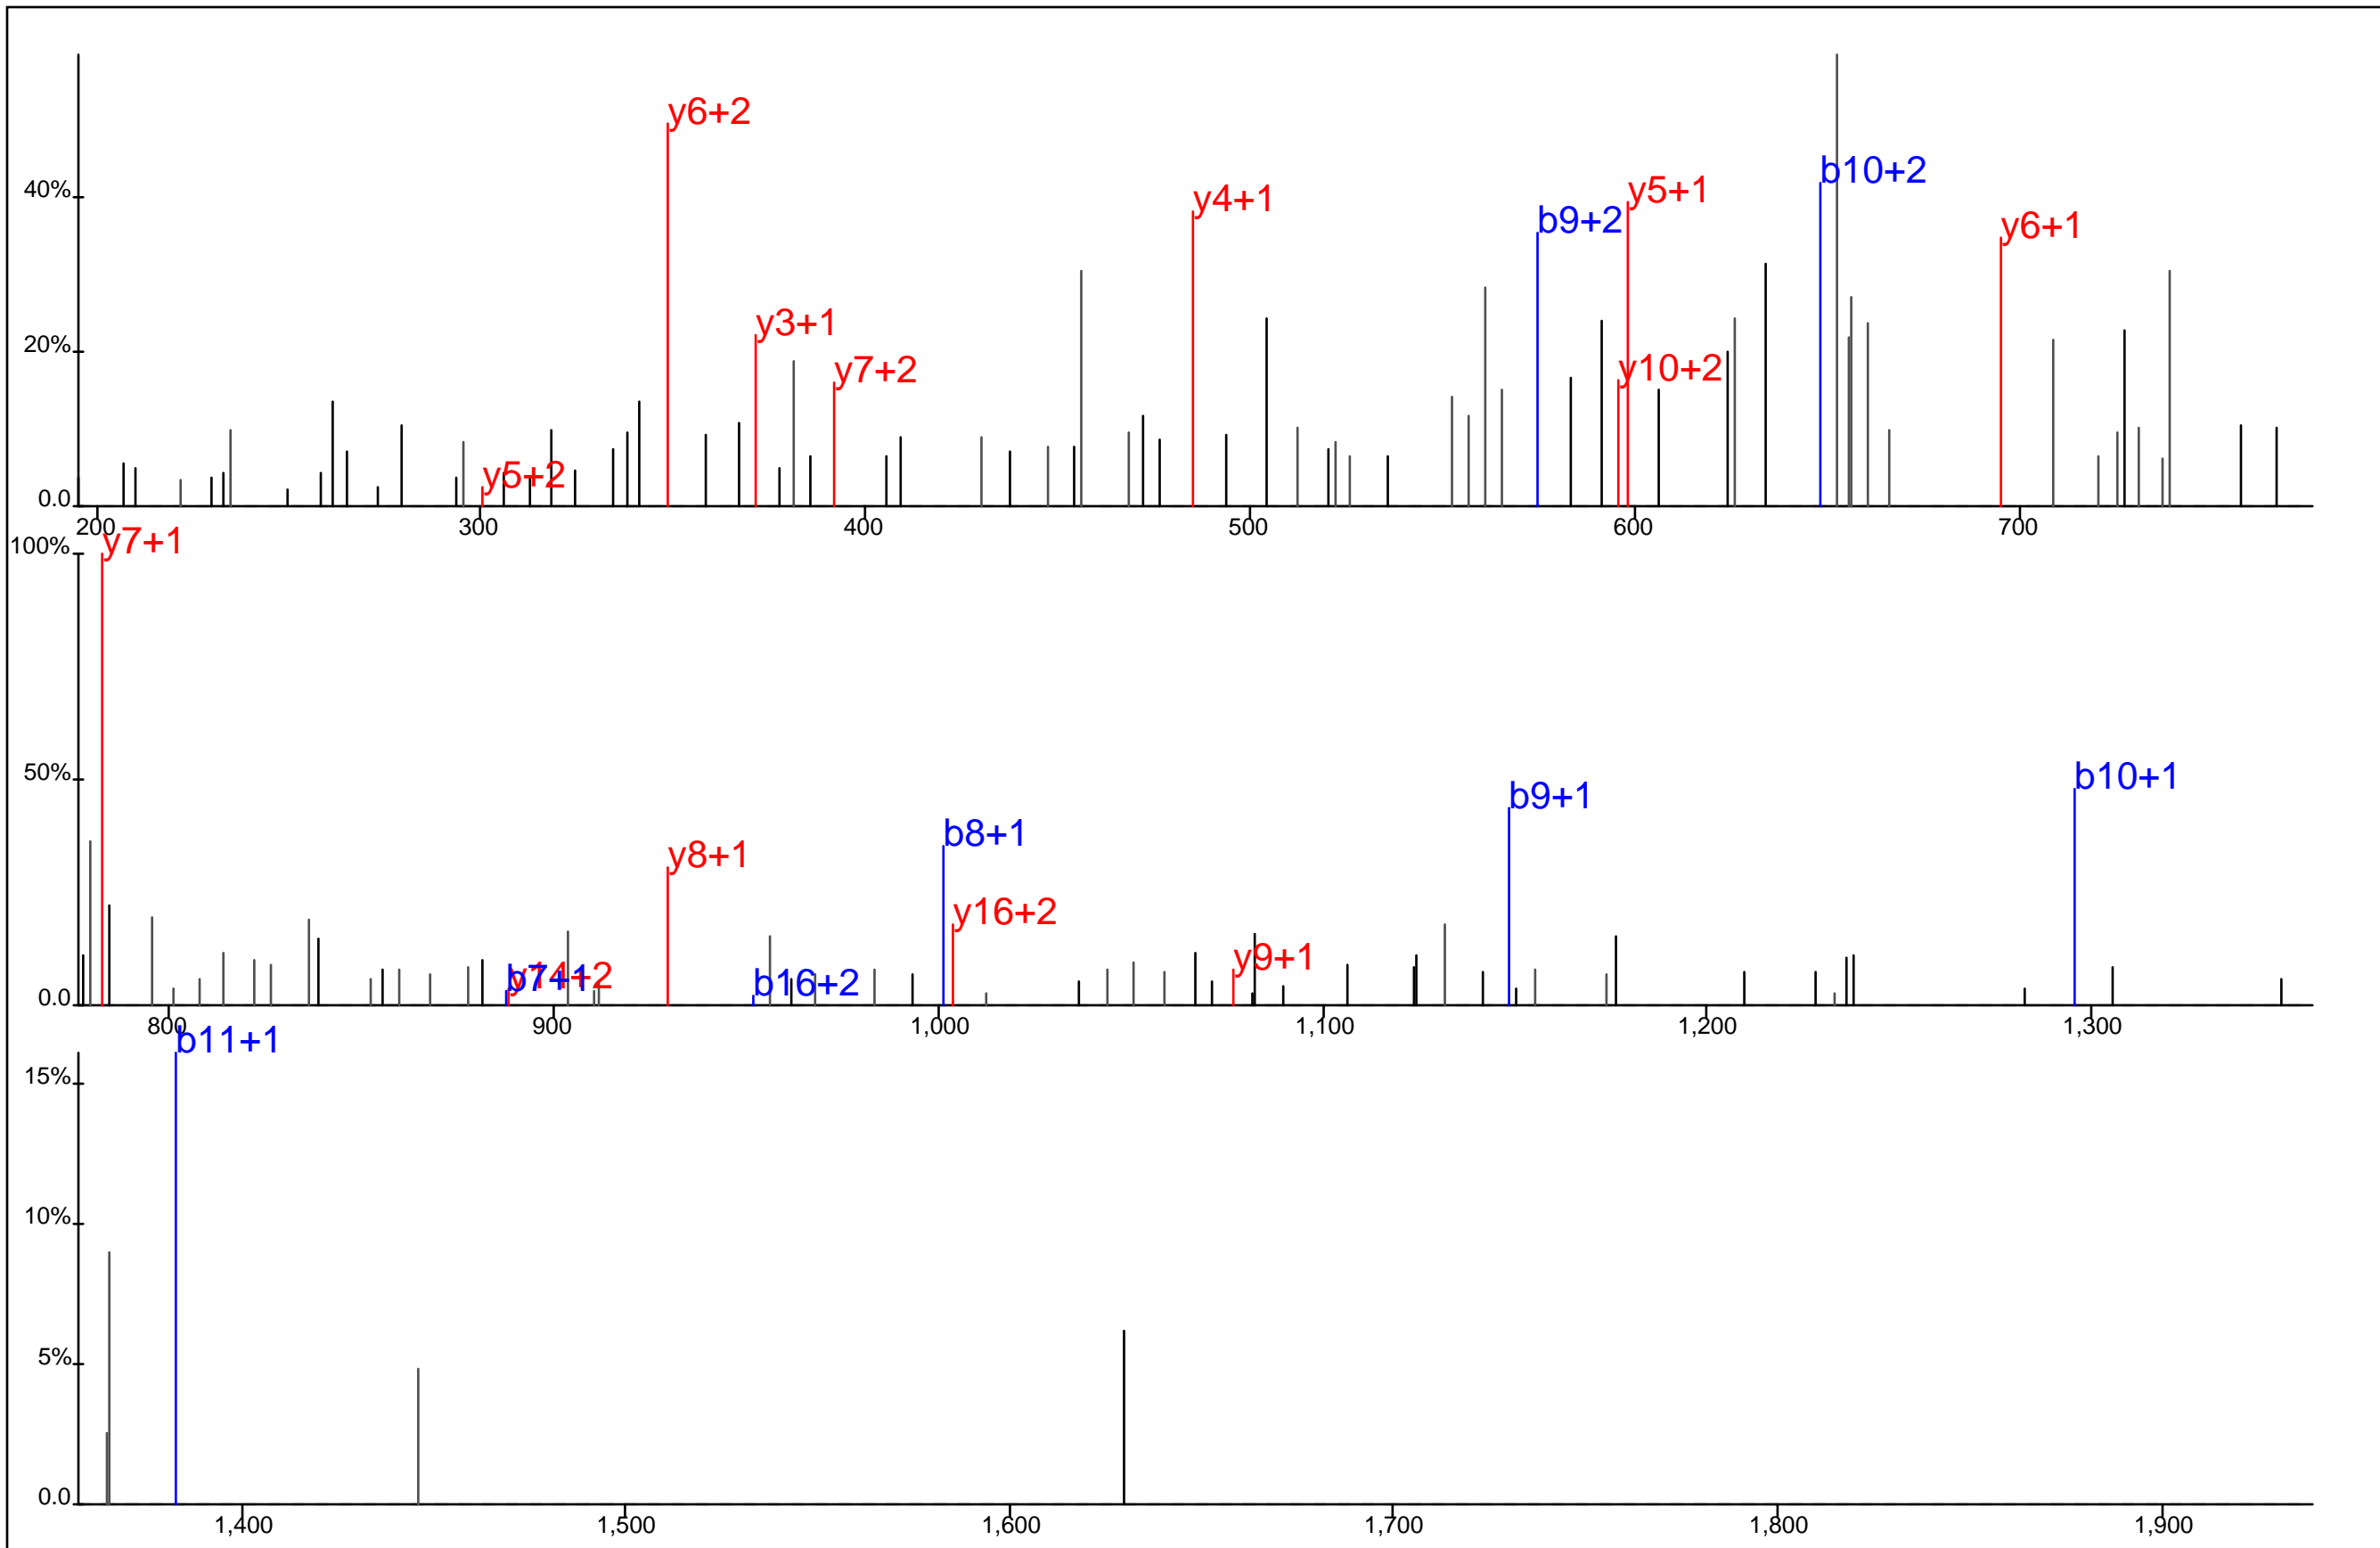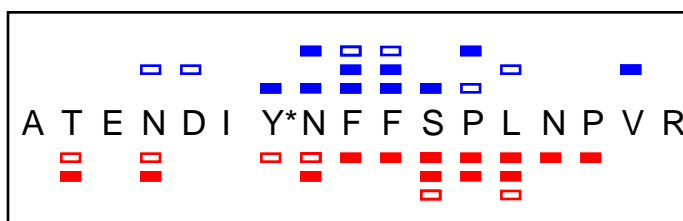

Protein Name: Heterogeneous nuclear ribonucleoprotein H1  
 gi Accession: 0  
 Precursor Mass: 692.9892+3  
 Delta Mass: 5.016 ppm  
 XCorr: 20.2

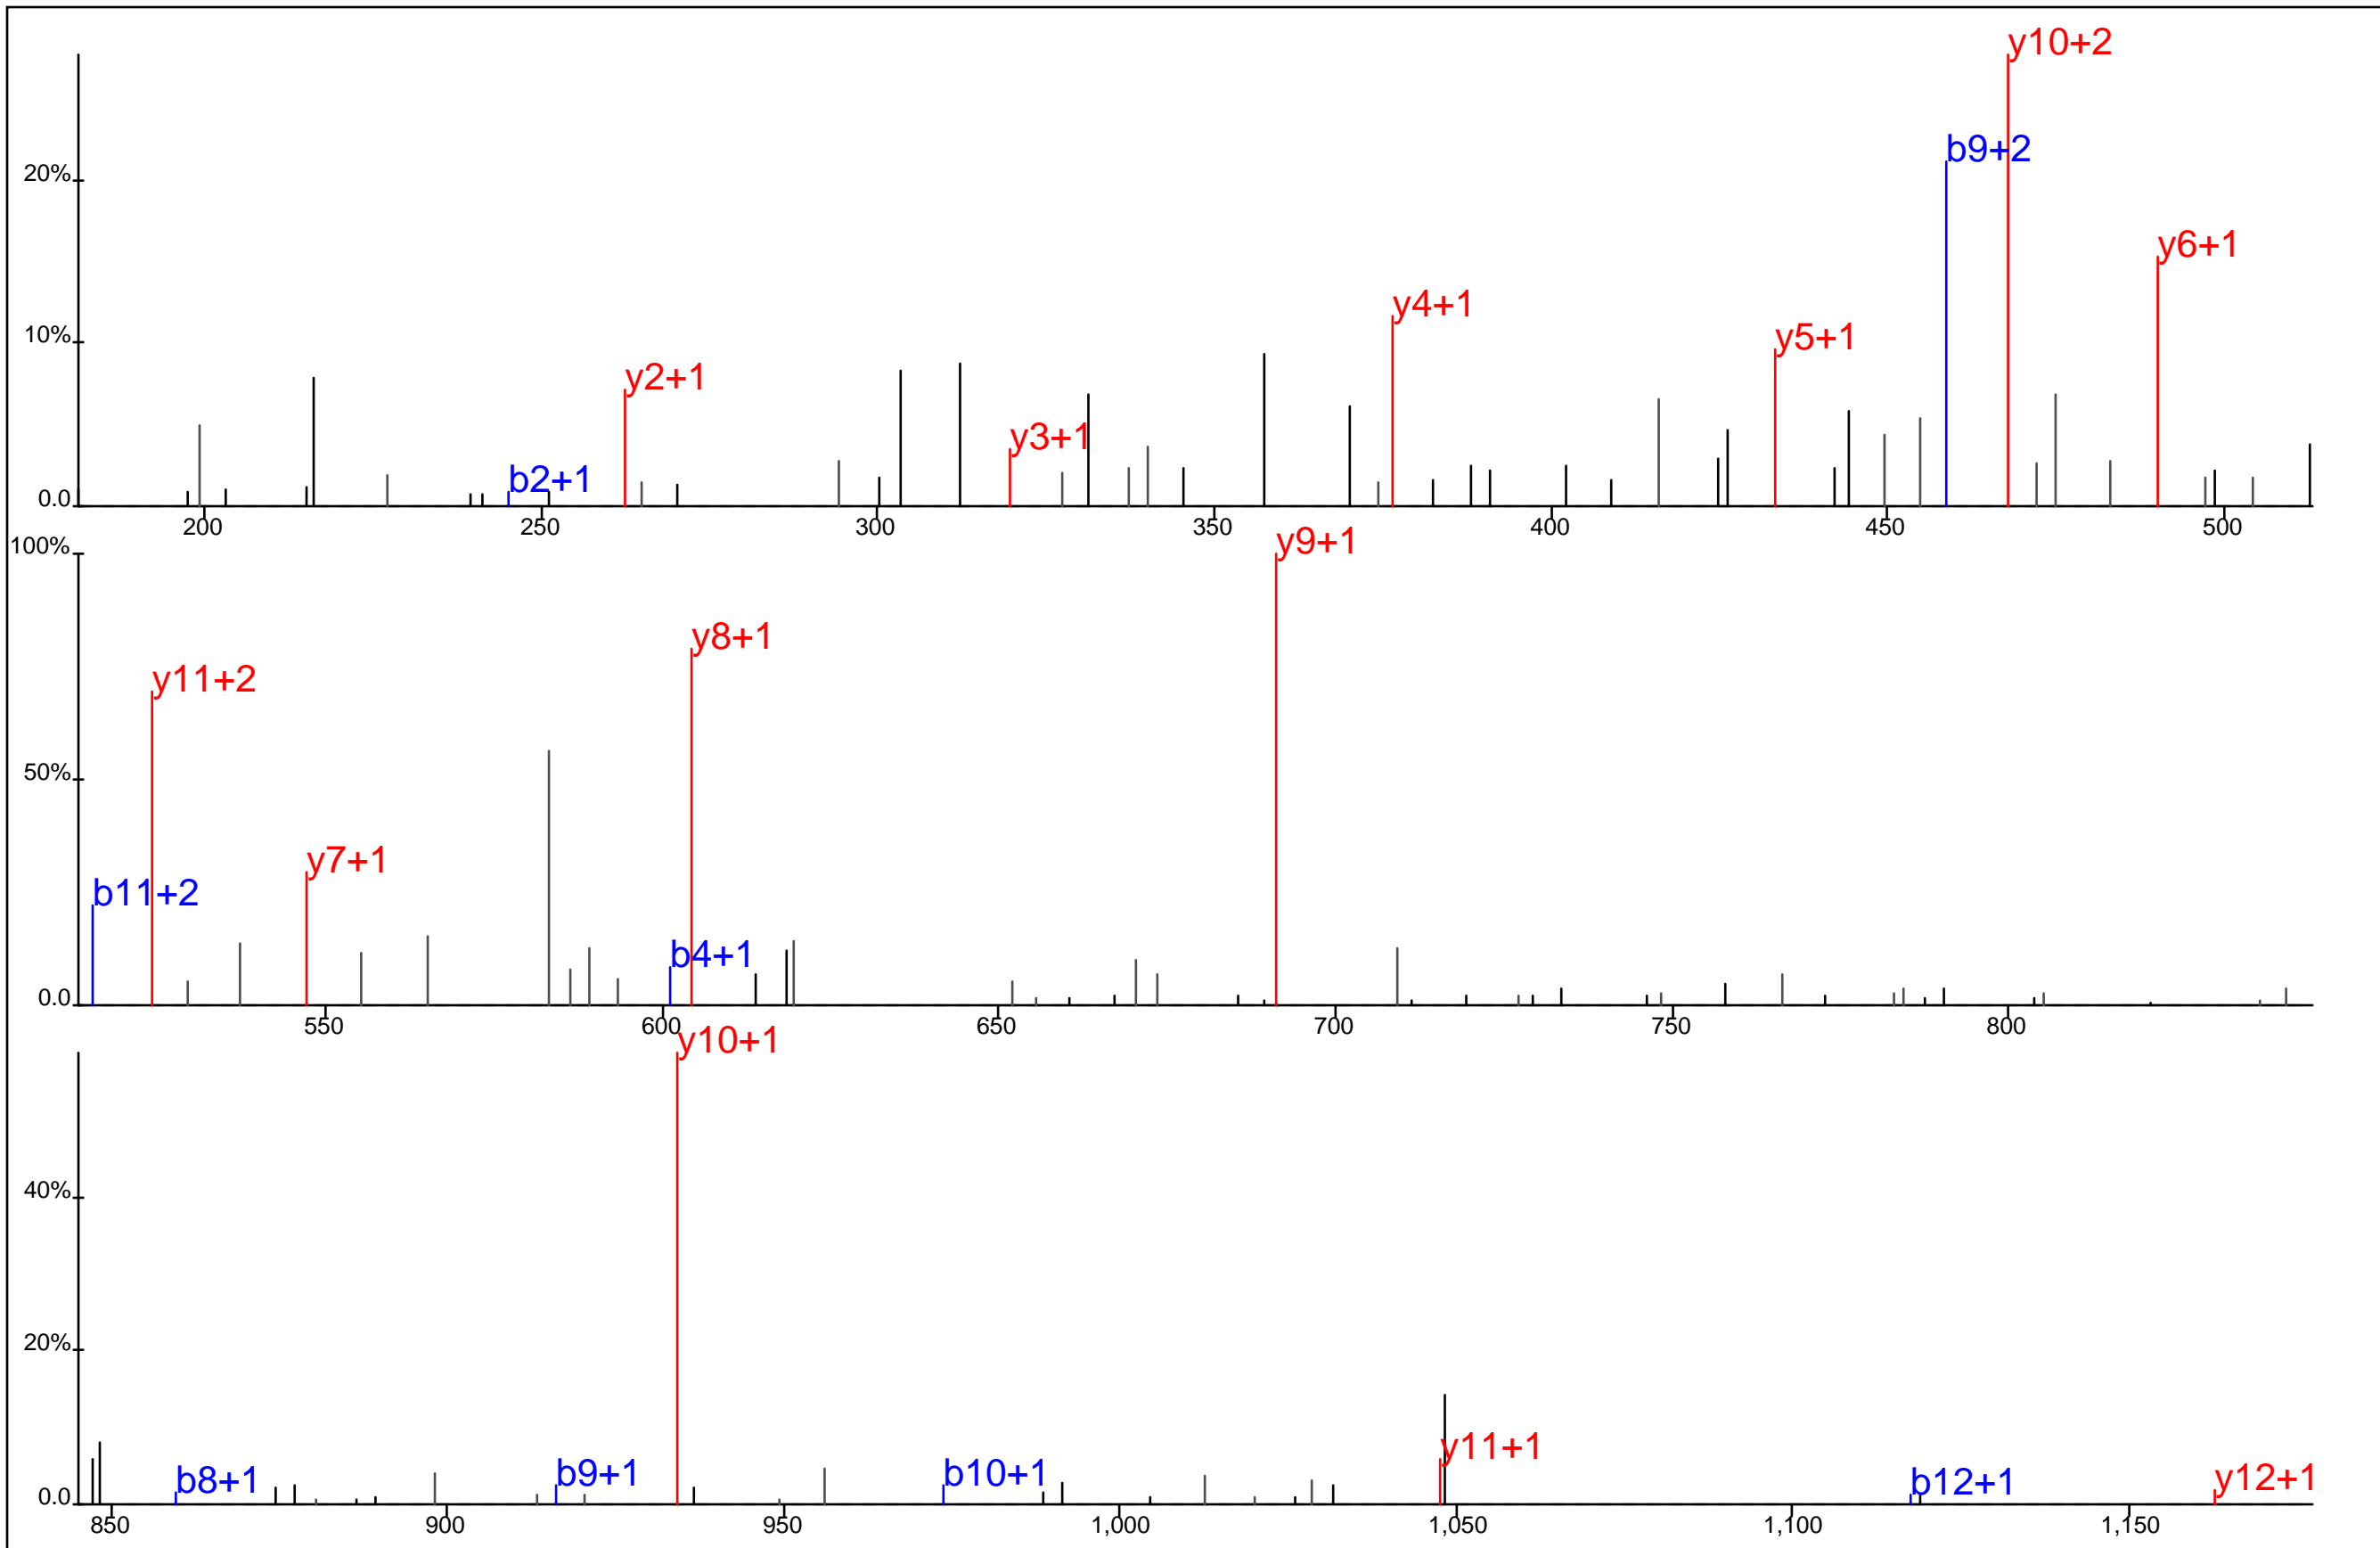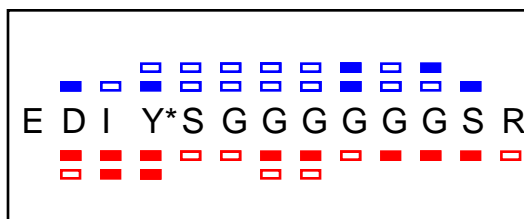

Protein Name: Heterogeneous nuclear ribonucleoprotein A0  
 gi Accession: 0  
 Precursor Mass: 646.2524+2  
 Delta Mass: 1.883 ppm  
 XCorr: 69.09

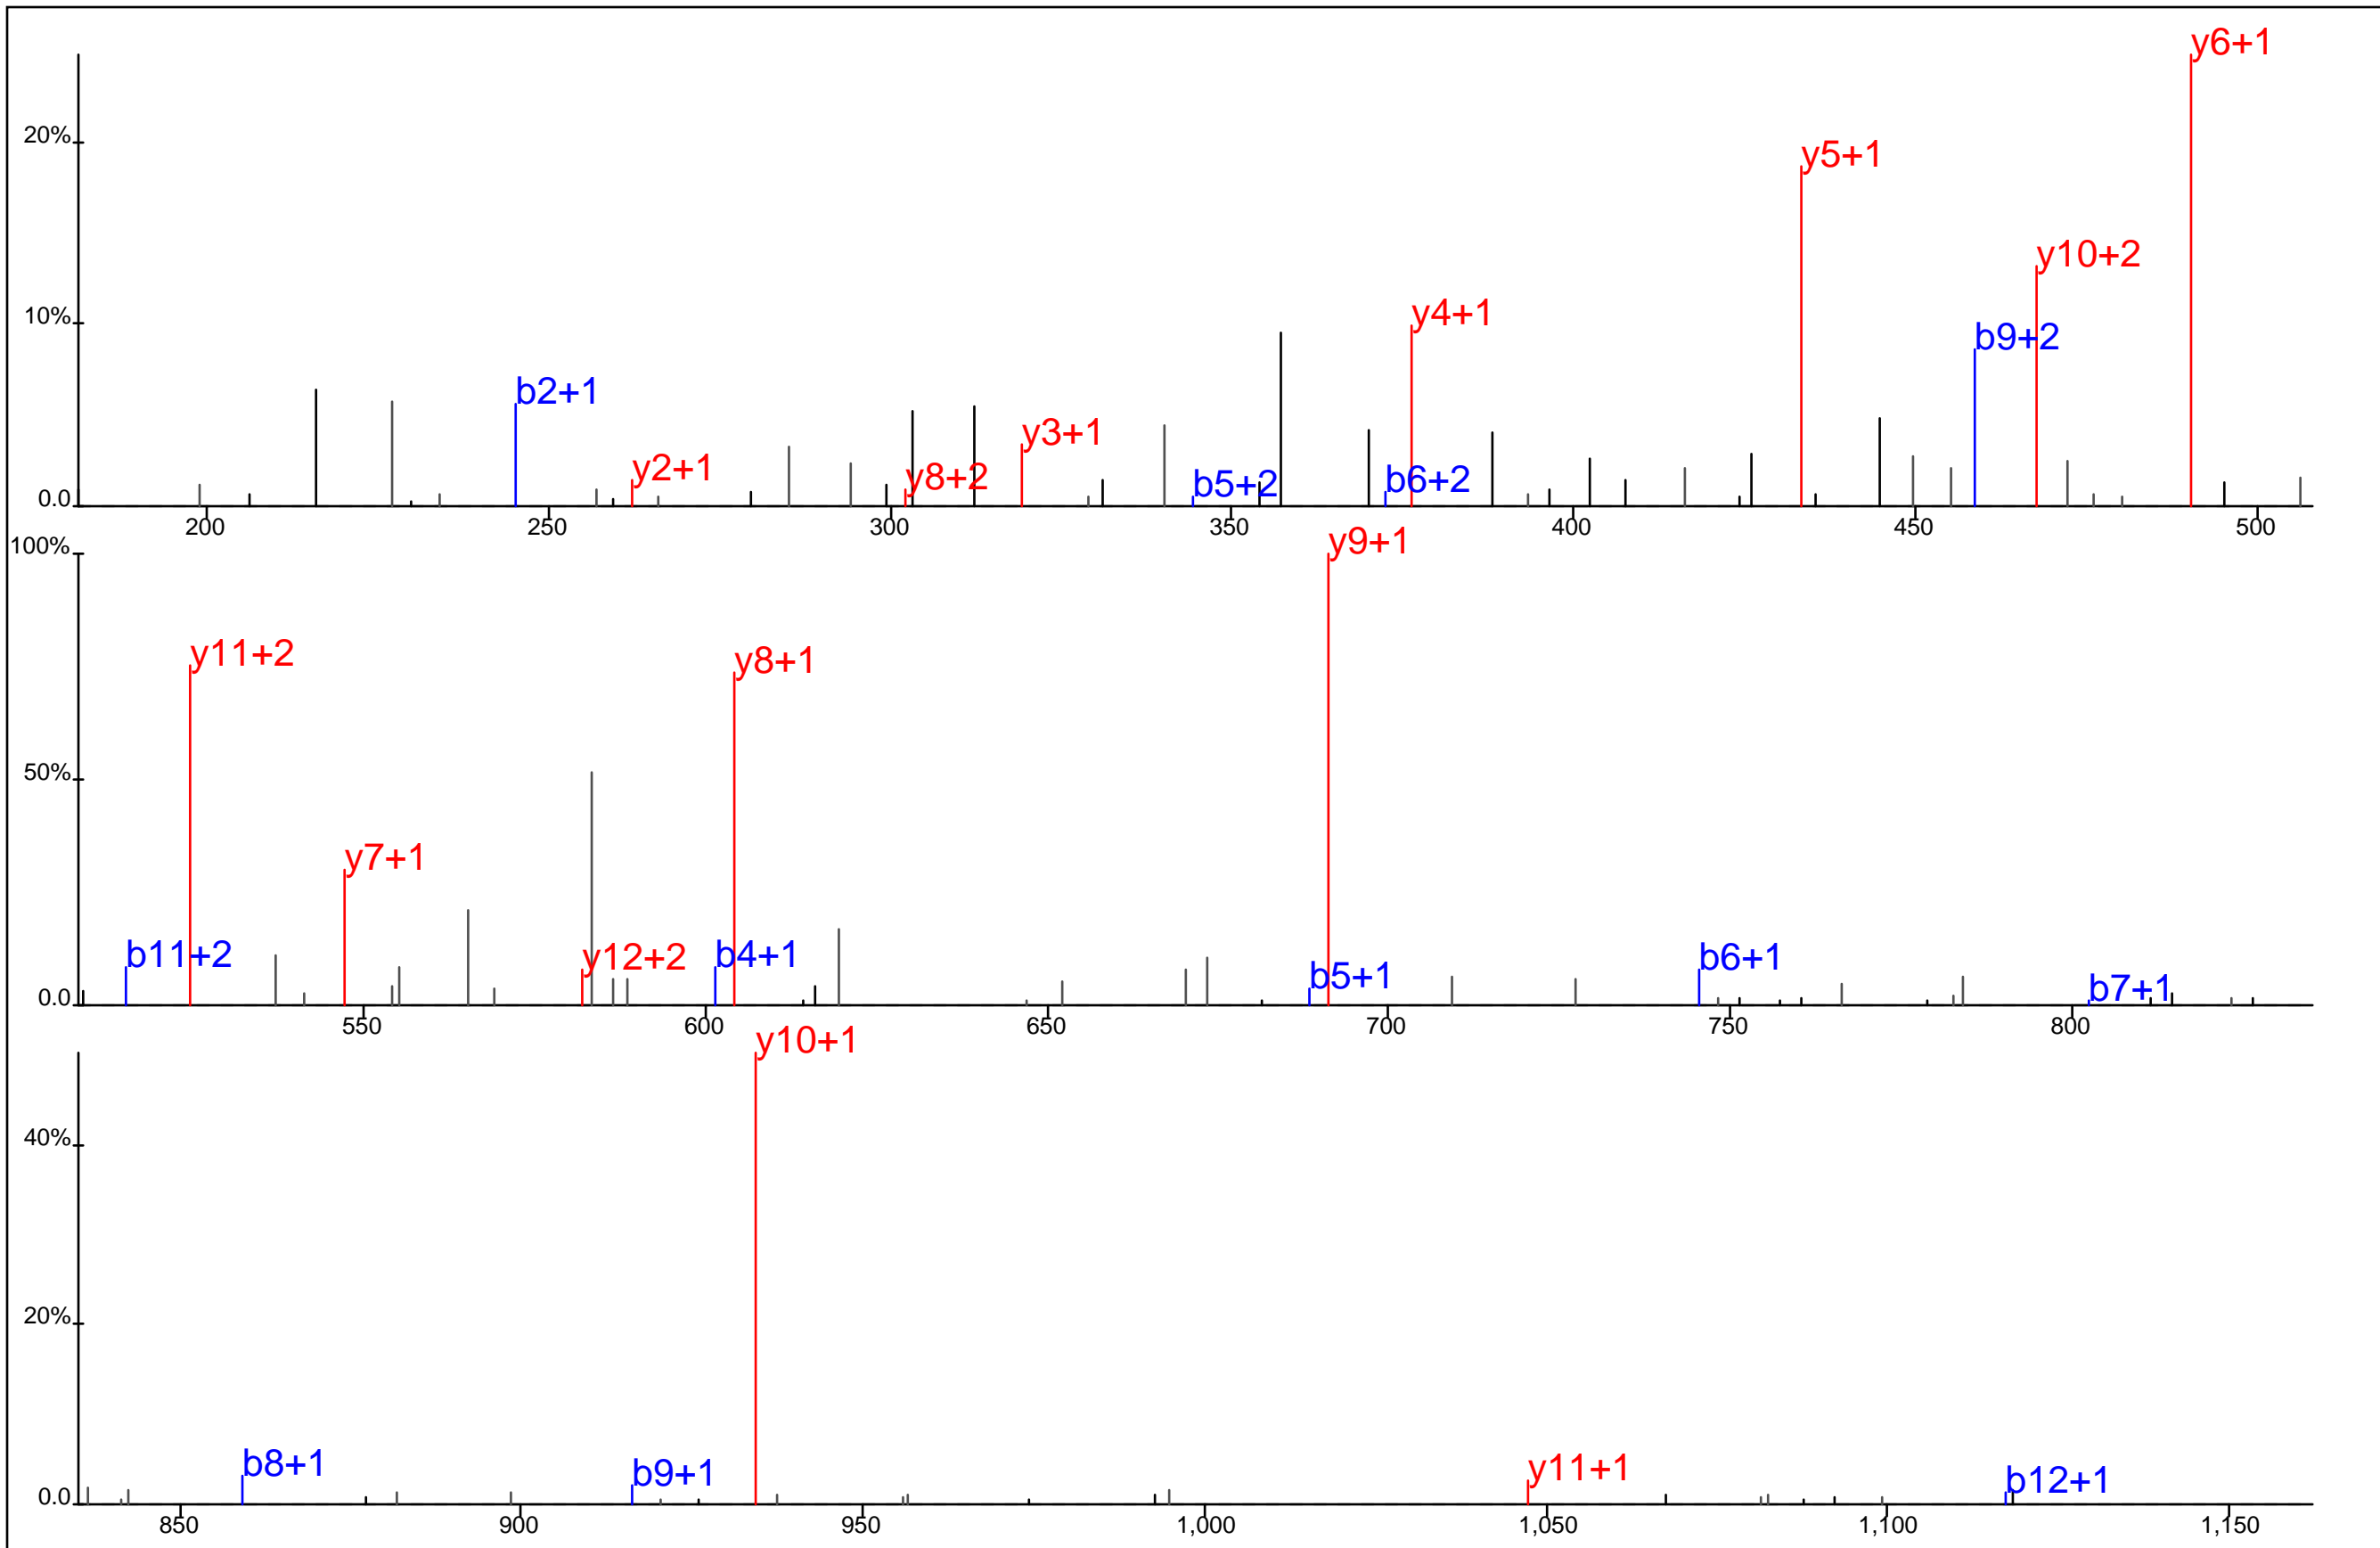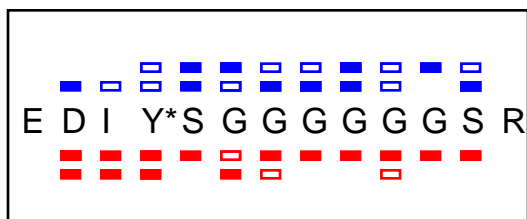

Protein Name: Heterogeneous nuclear ribonucleoprotein A0  
 gi Accession: 0  
 Precursor Mass: 646.2503+2  
 Delta Mass: 1.330 ppm  
 XCorr: 73.19

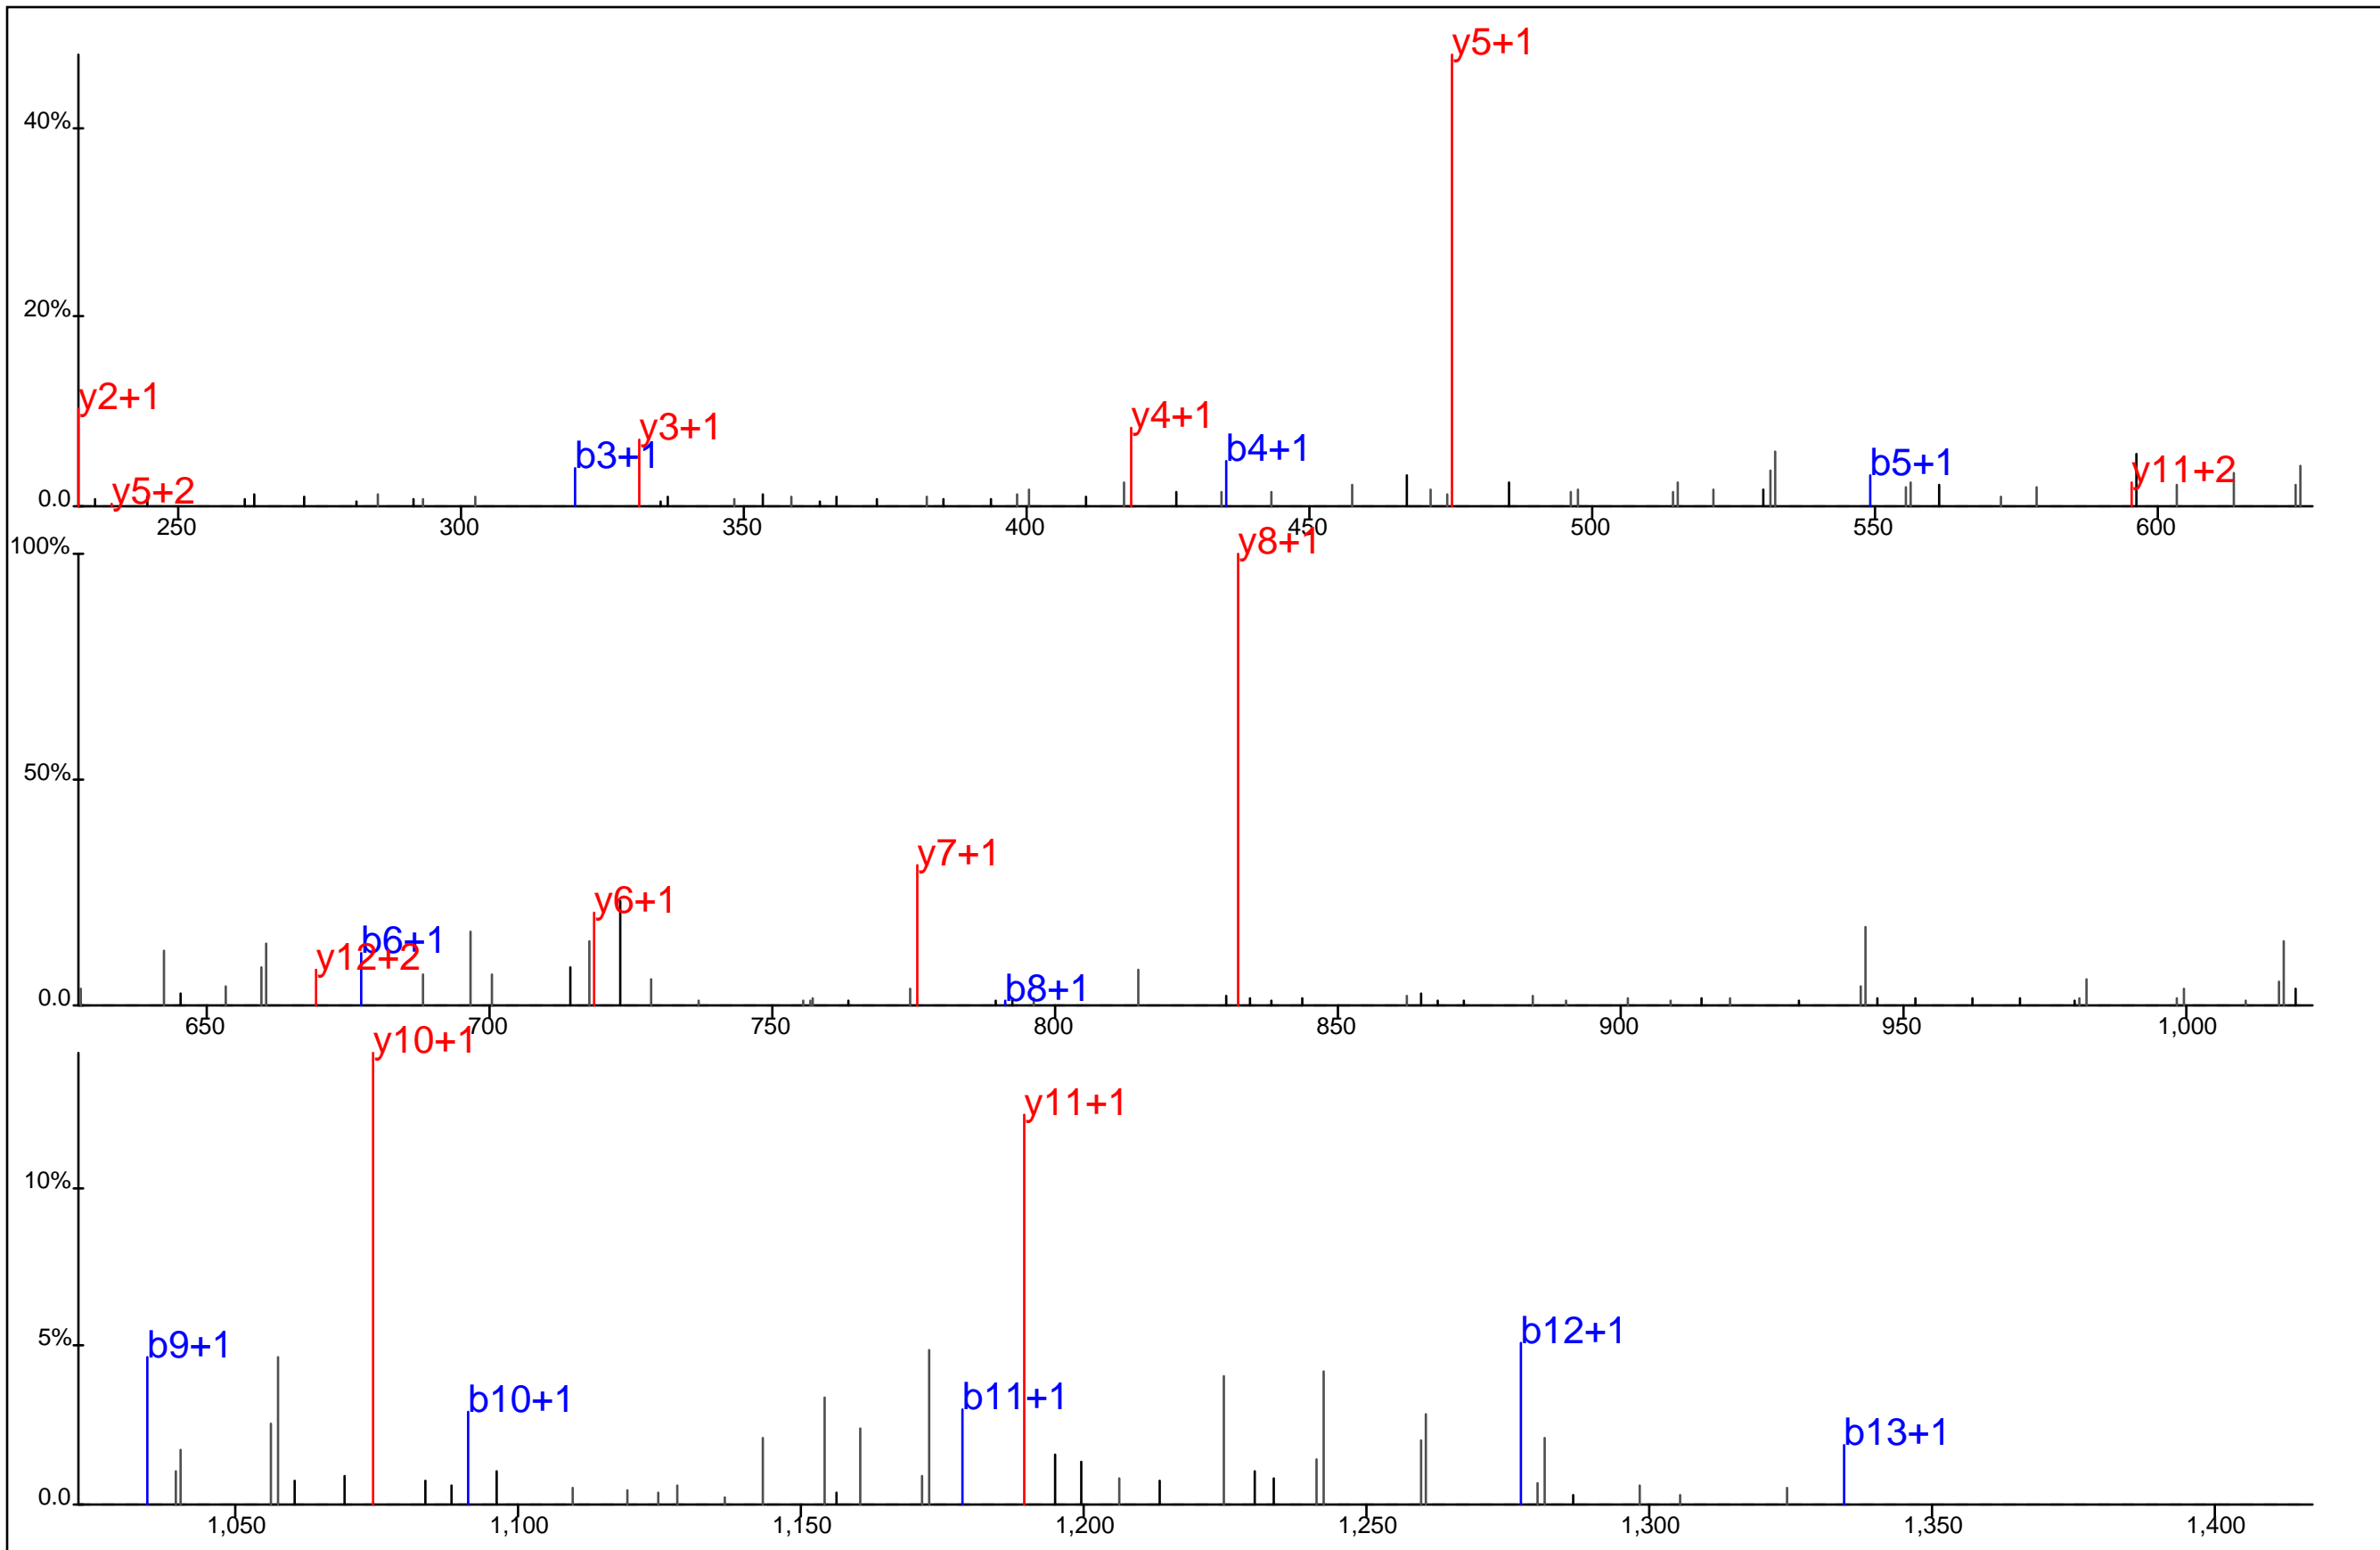

□ □ □ □ □ □ □ □ □ □ □  
 D G M#D N Q G G Y\*G S V G R  
□ □ □ □ □ □ □ □ □ □ □

Protein Name: Heterogeneous nuclear ribonucleoprotein H3  
 gi Accession: 0  
 Precursor Mass: 754.7773+2  
 Delta Mass: 0.072 ppm  
 XCorr: 77.68

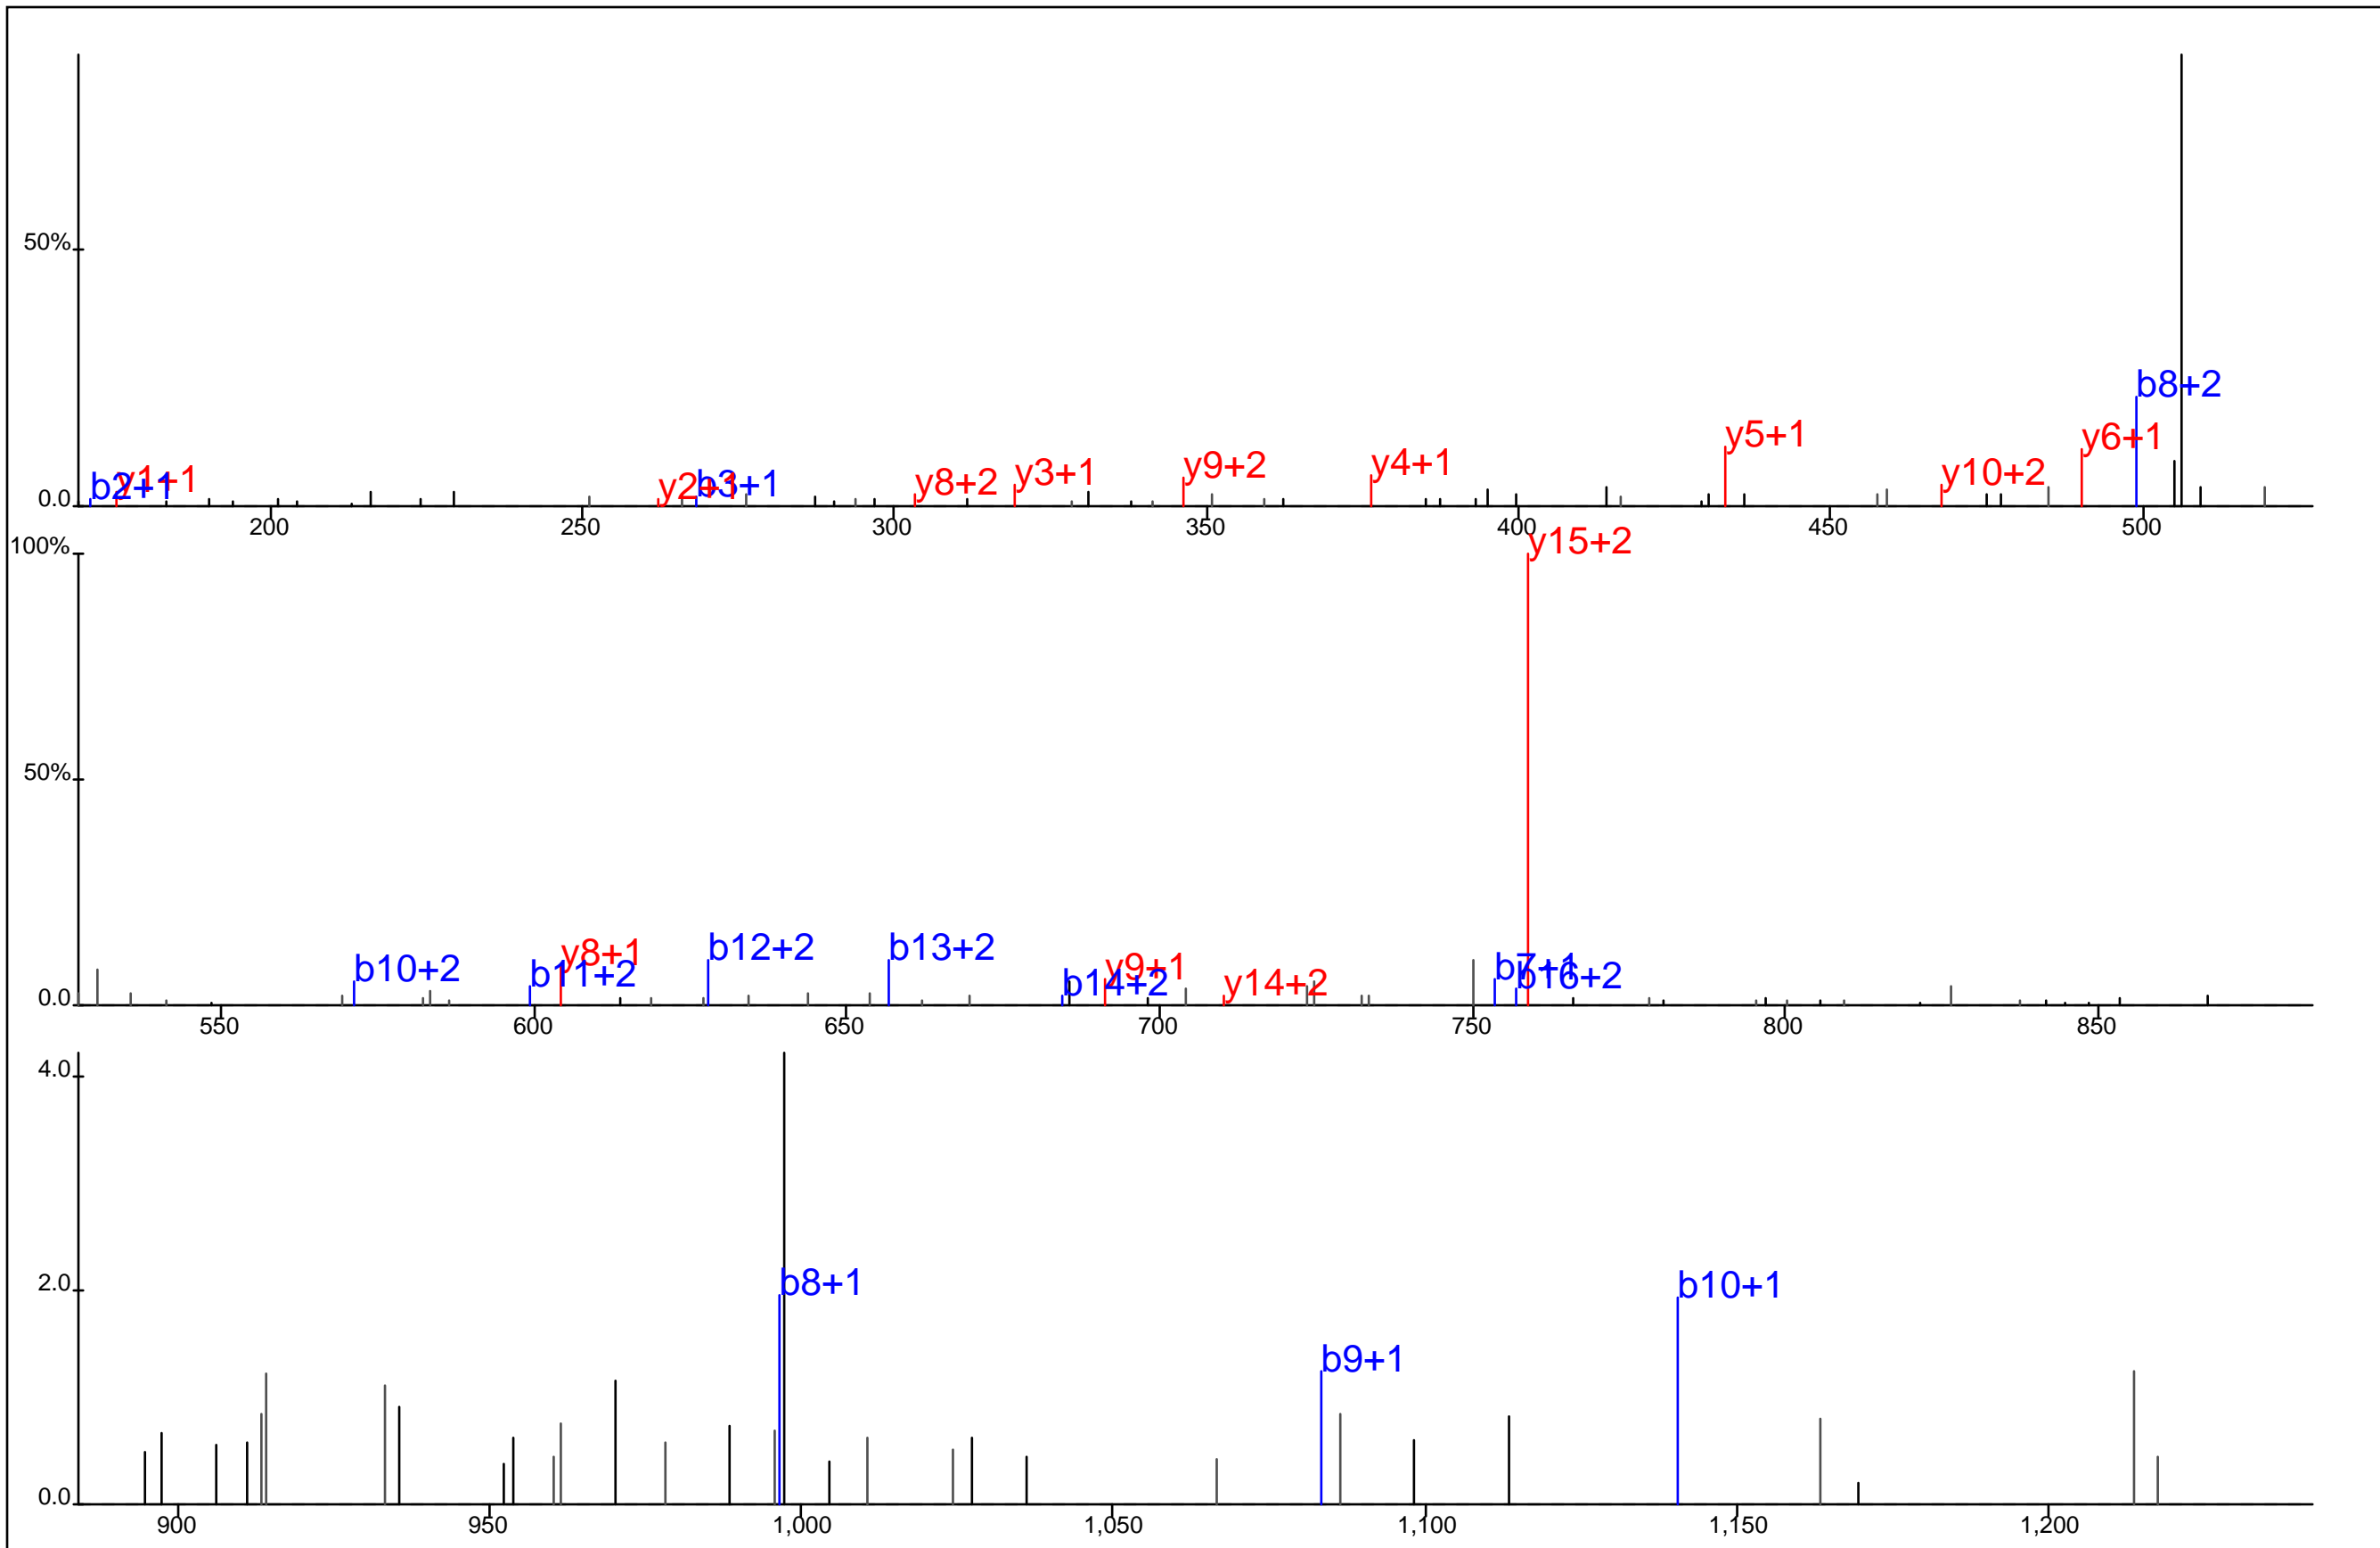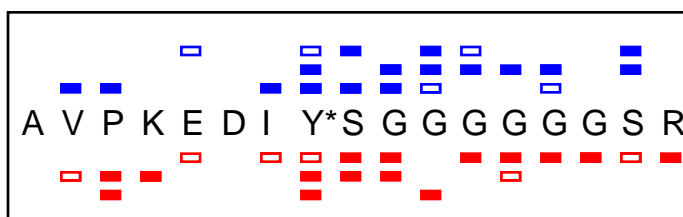

Protein Name: Heterogeneous nuclear ribonucleoprotein A0  
 gi Accession: 0  
 Precursor Mass: 562.9224+3  
 Delta Mass: 2.511 ppm  
 XCorr: 31.98



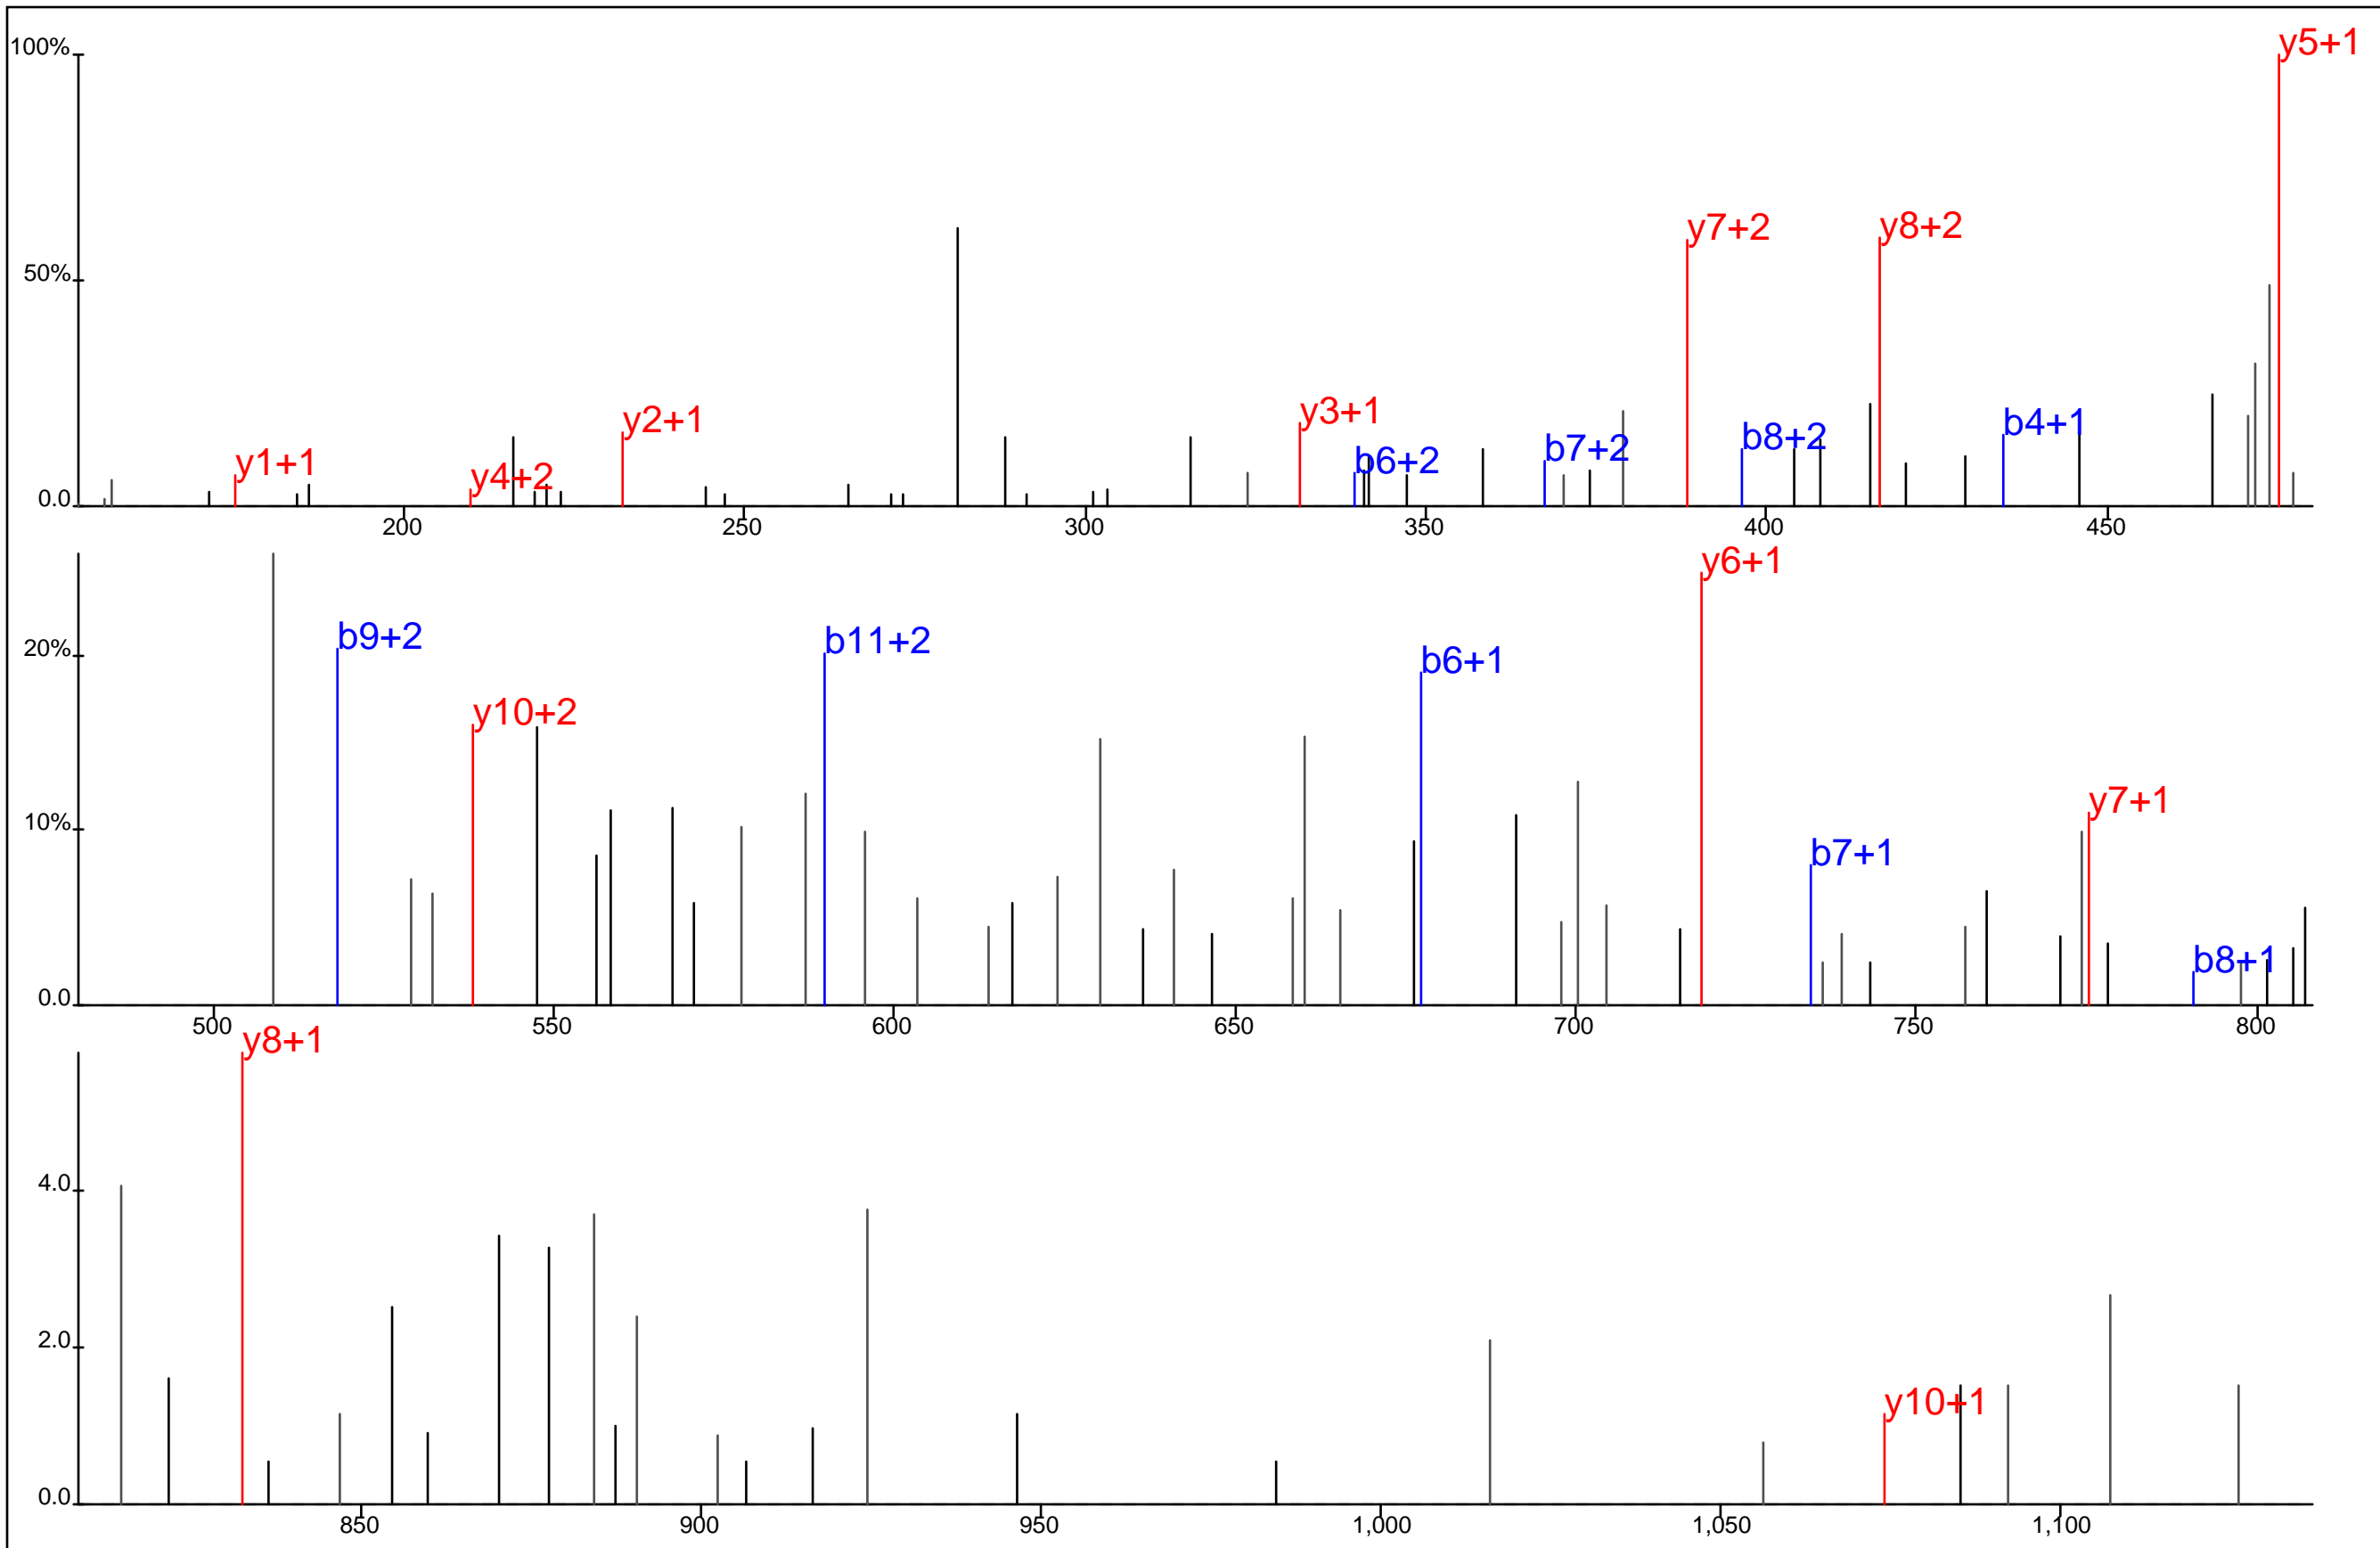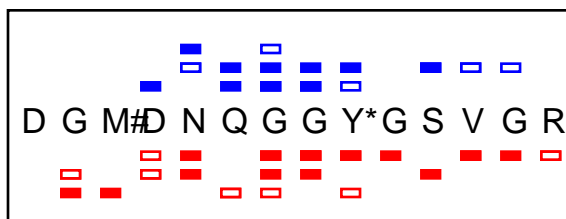

Protein Name: Heterogeneous nuclear ribonucleoprotein H3  
 gi Accession: 0  
 Precursor Mass: 503.5214+3  
 Delta Mass: 1.621 ppm  
 XCorr: 34.5

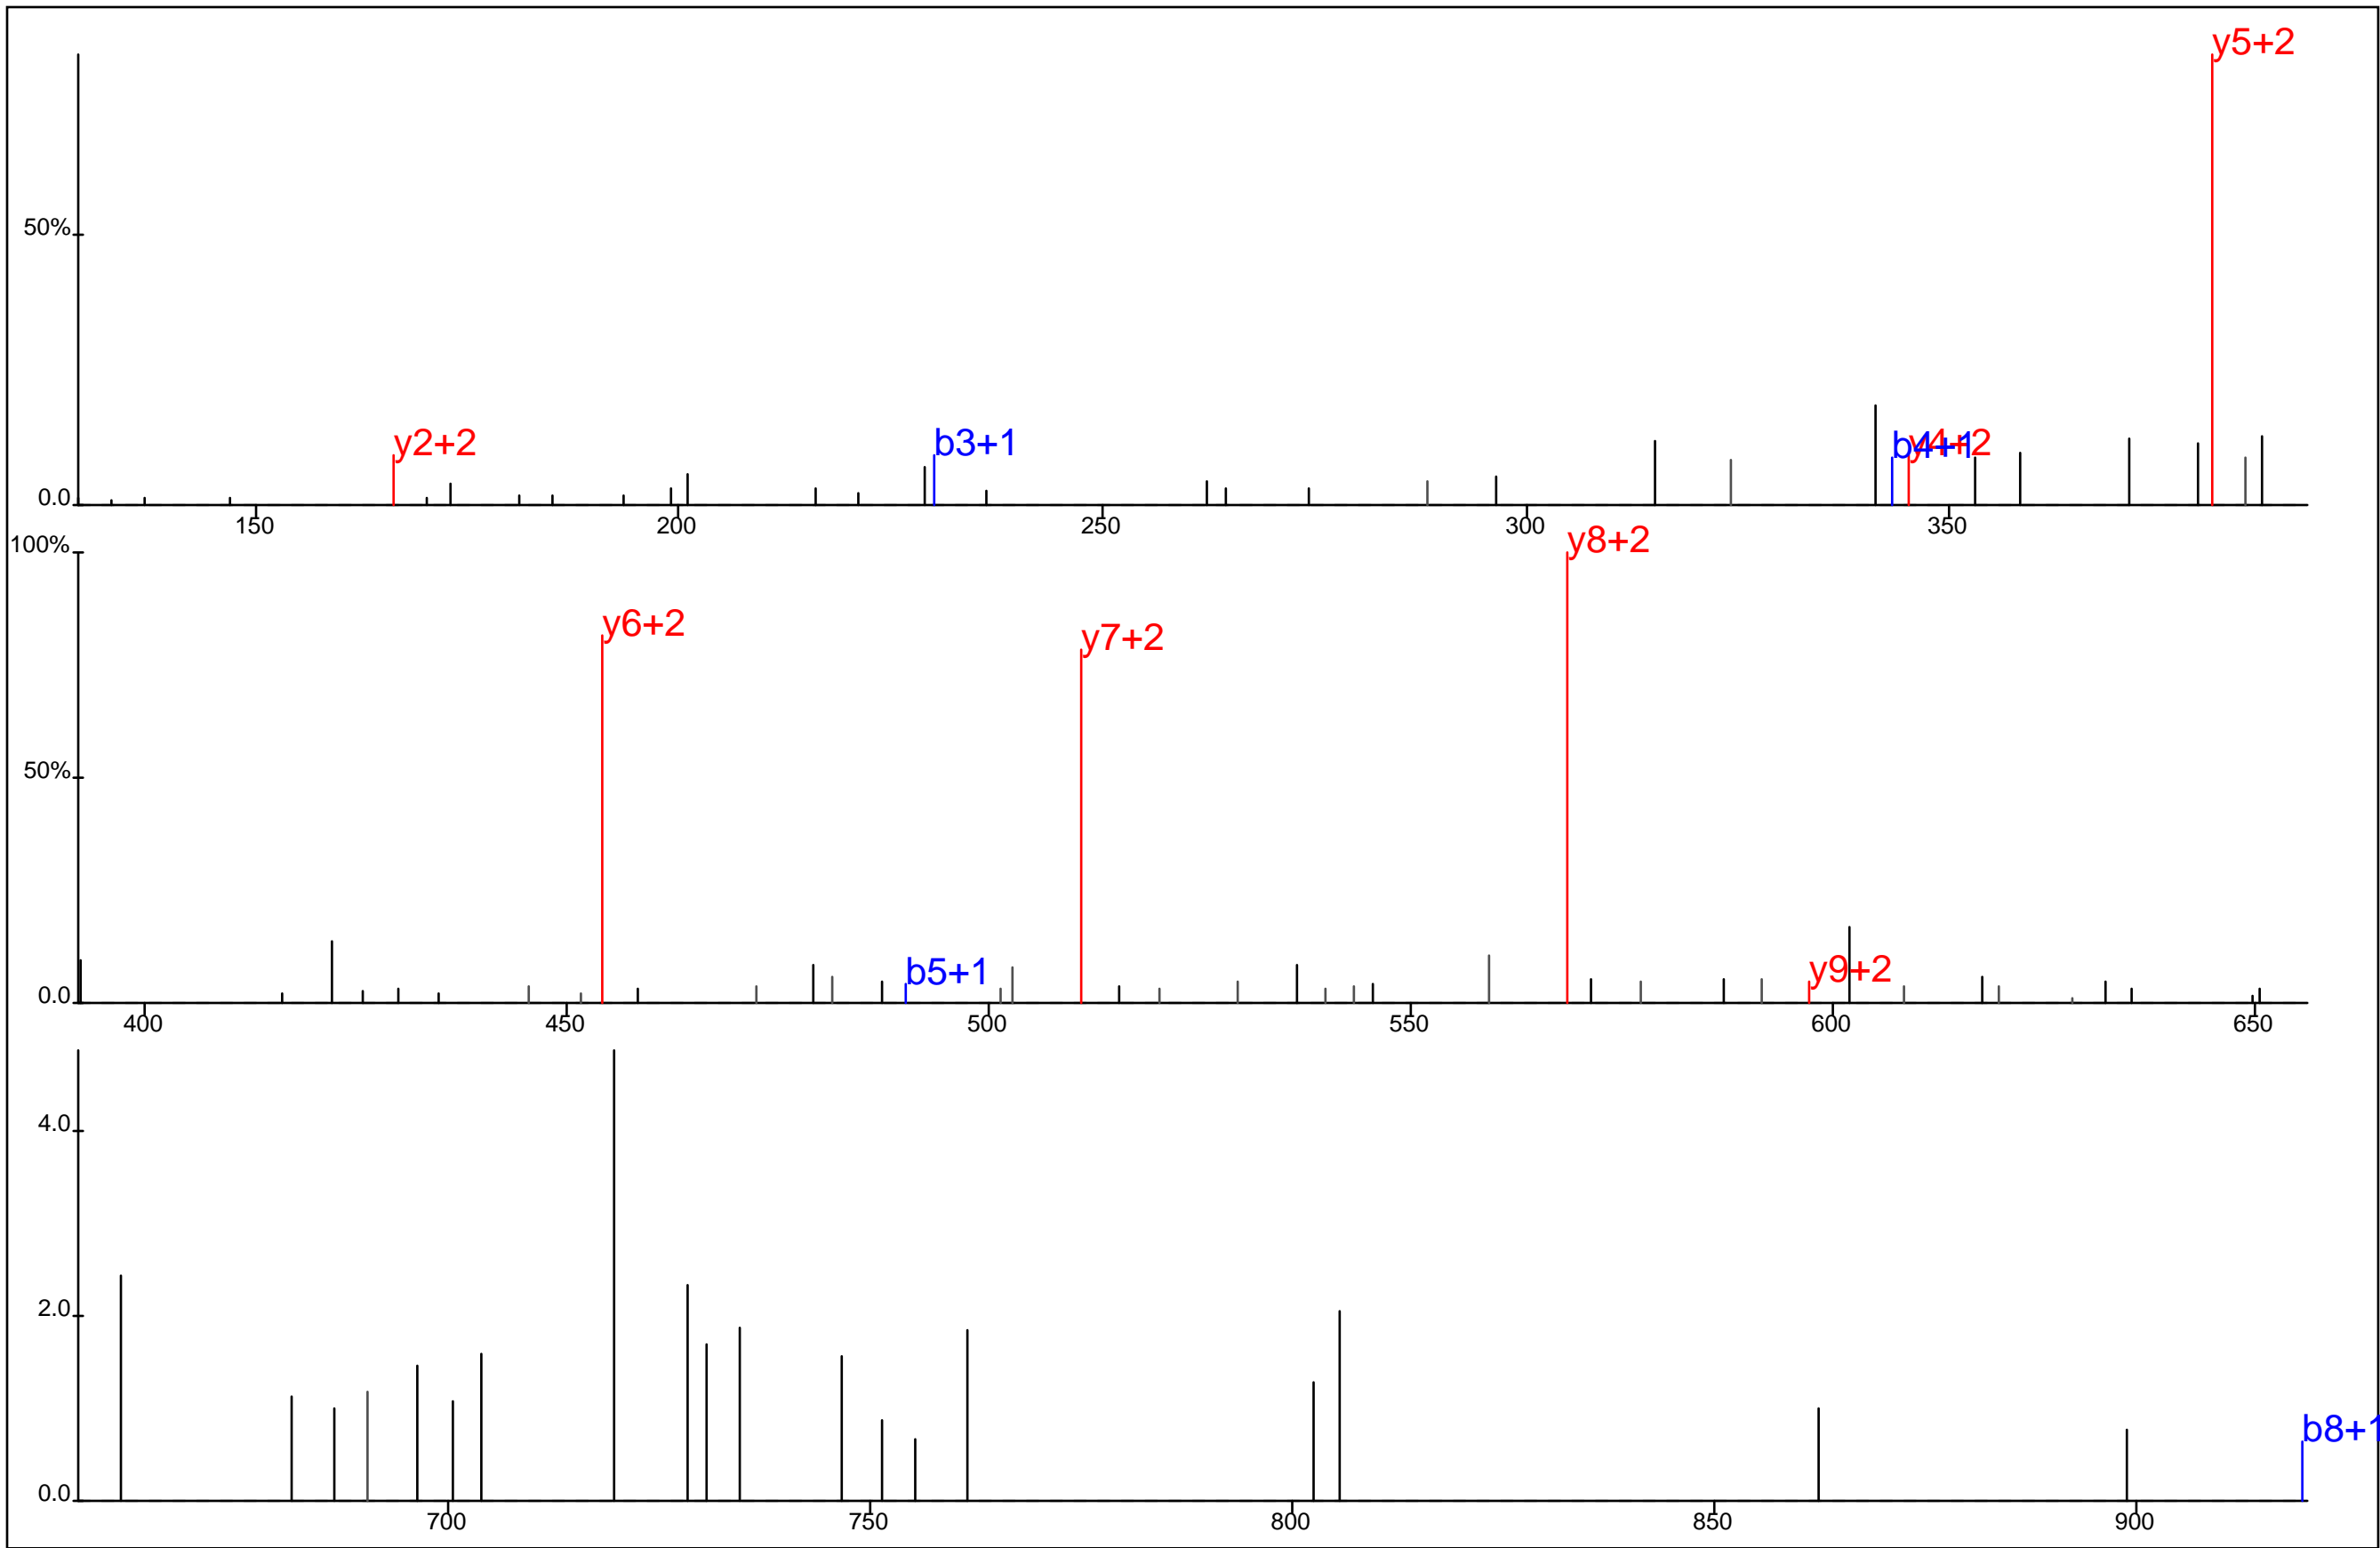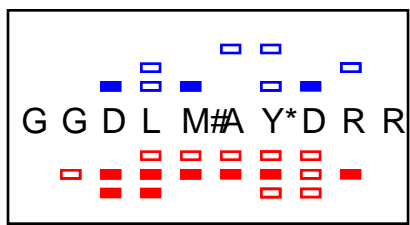

Protein Name: Heterogeneous nuclear ribonucleoprotein K  
 gi Accession: 0  
 Precursor Mass: 417.1729+3  
 Delta Mass: 0.802 ppm  
 XCorr: 21.42

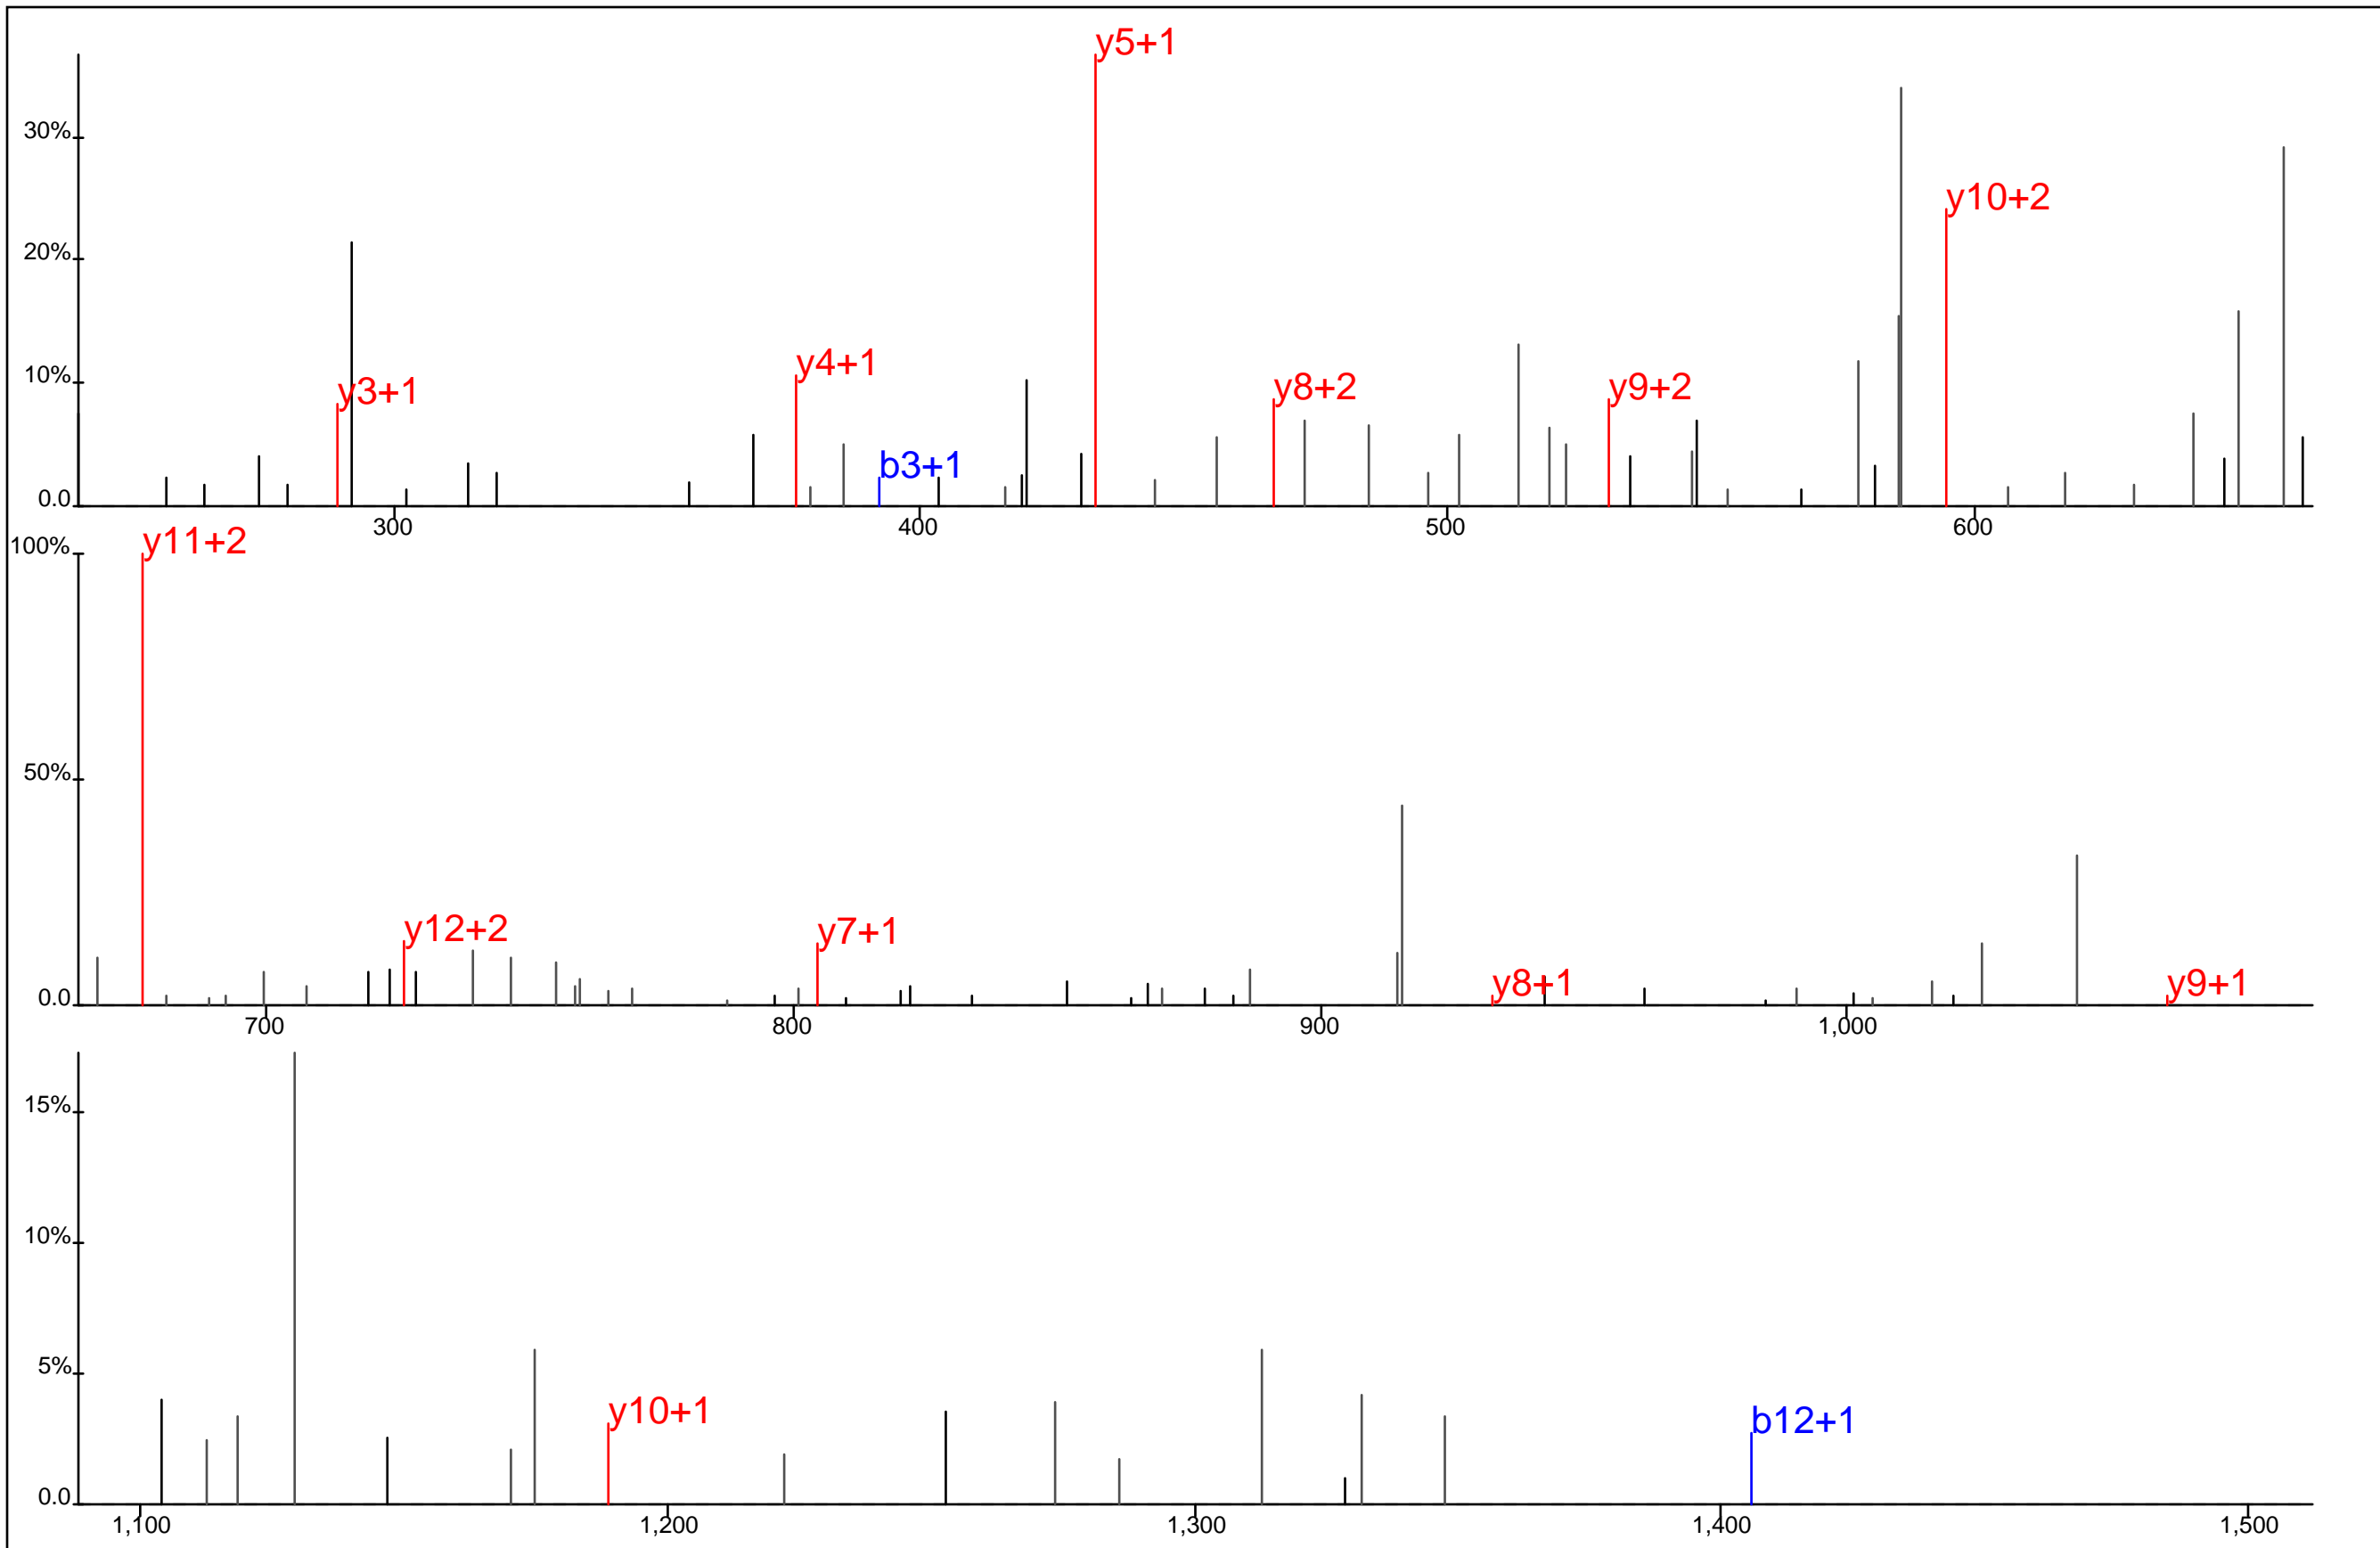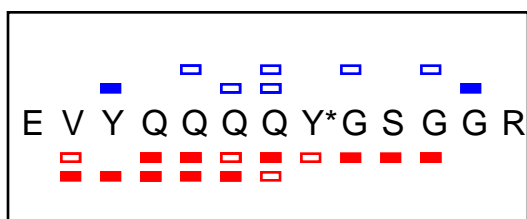

Protein Name: Heterogeneous nuclear ribonucleoprotein A/B  
 gi Accession: 0  
 Precursor Mass: 790.3274+2  
 Delta Mass: 3.901 ppm  
 XCorr: 29.13

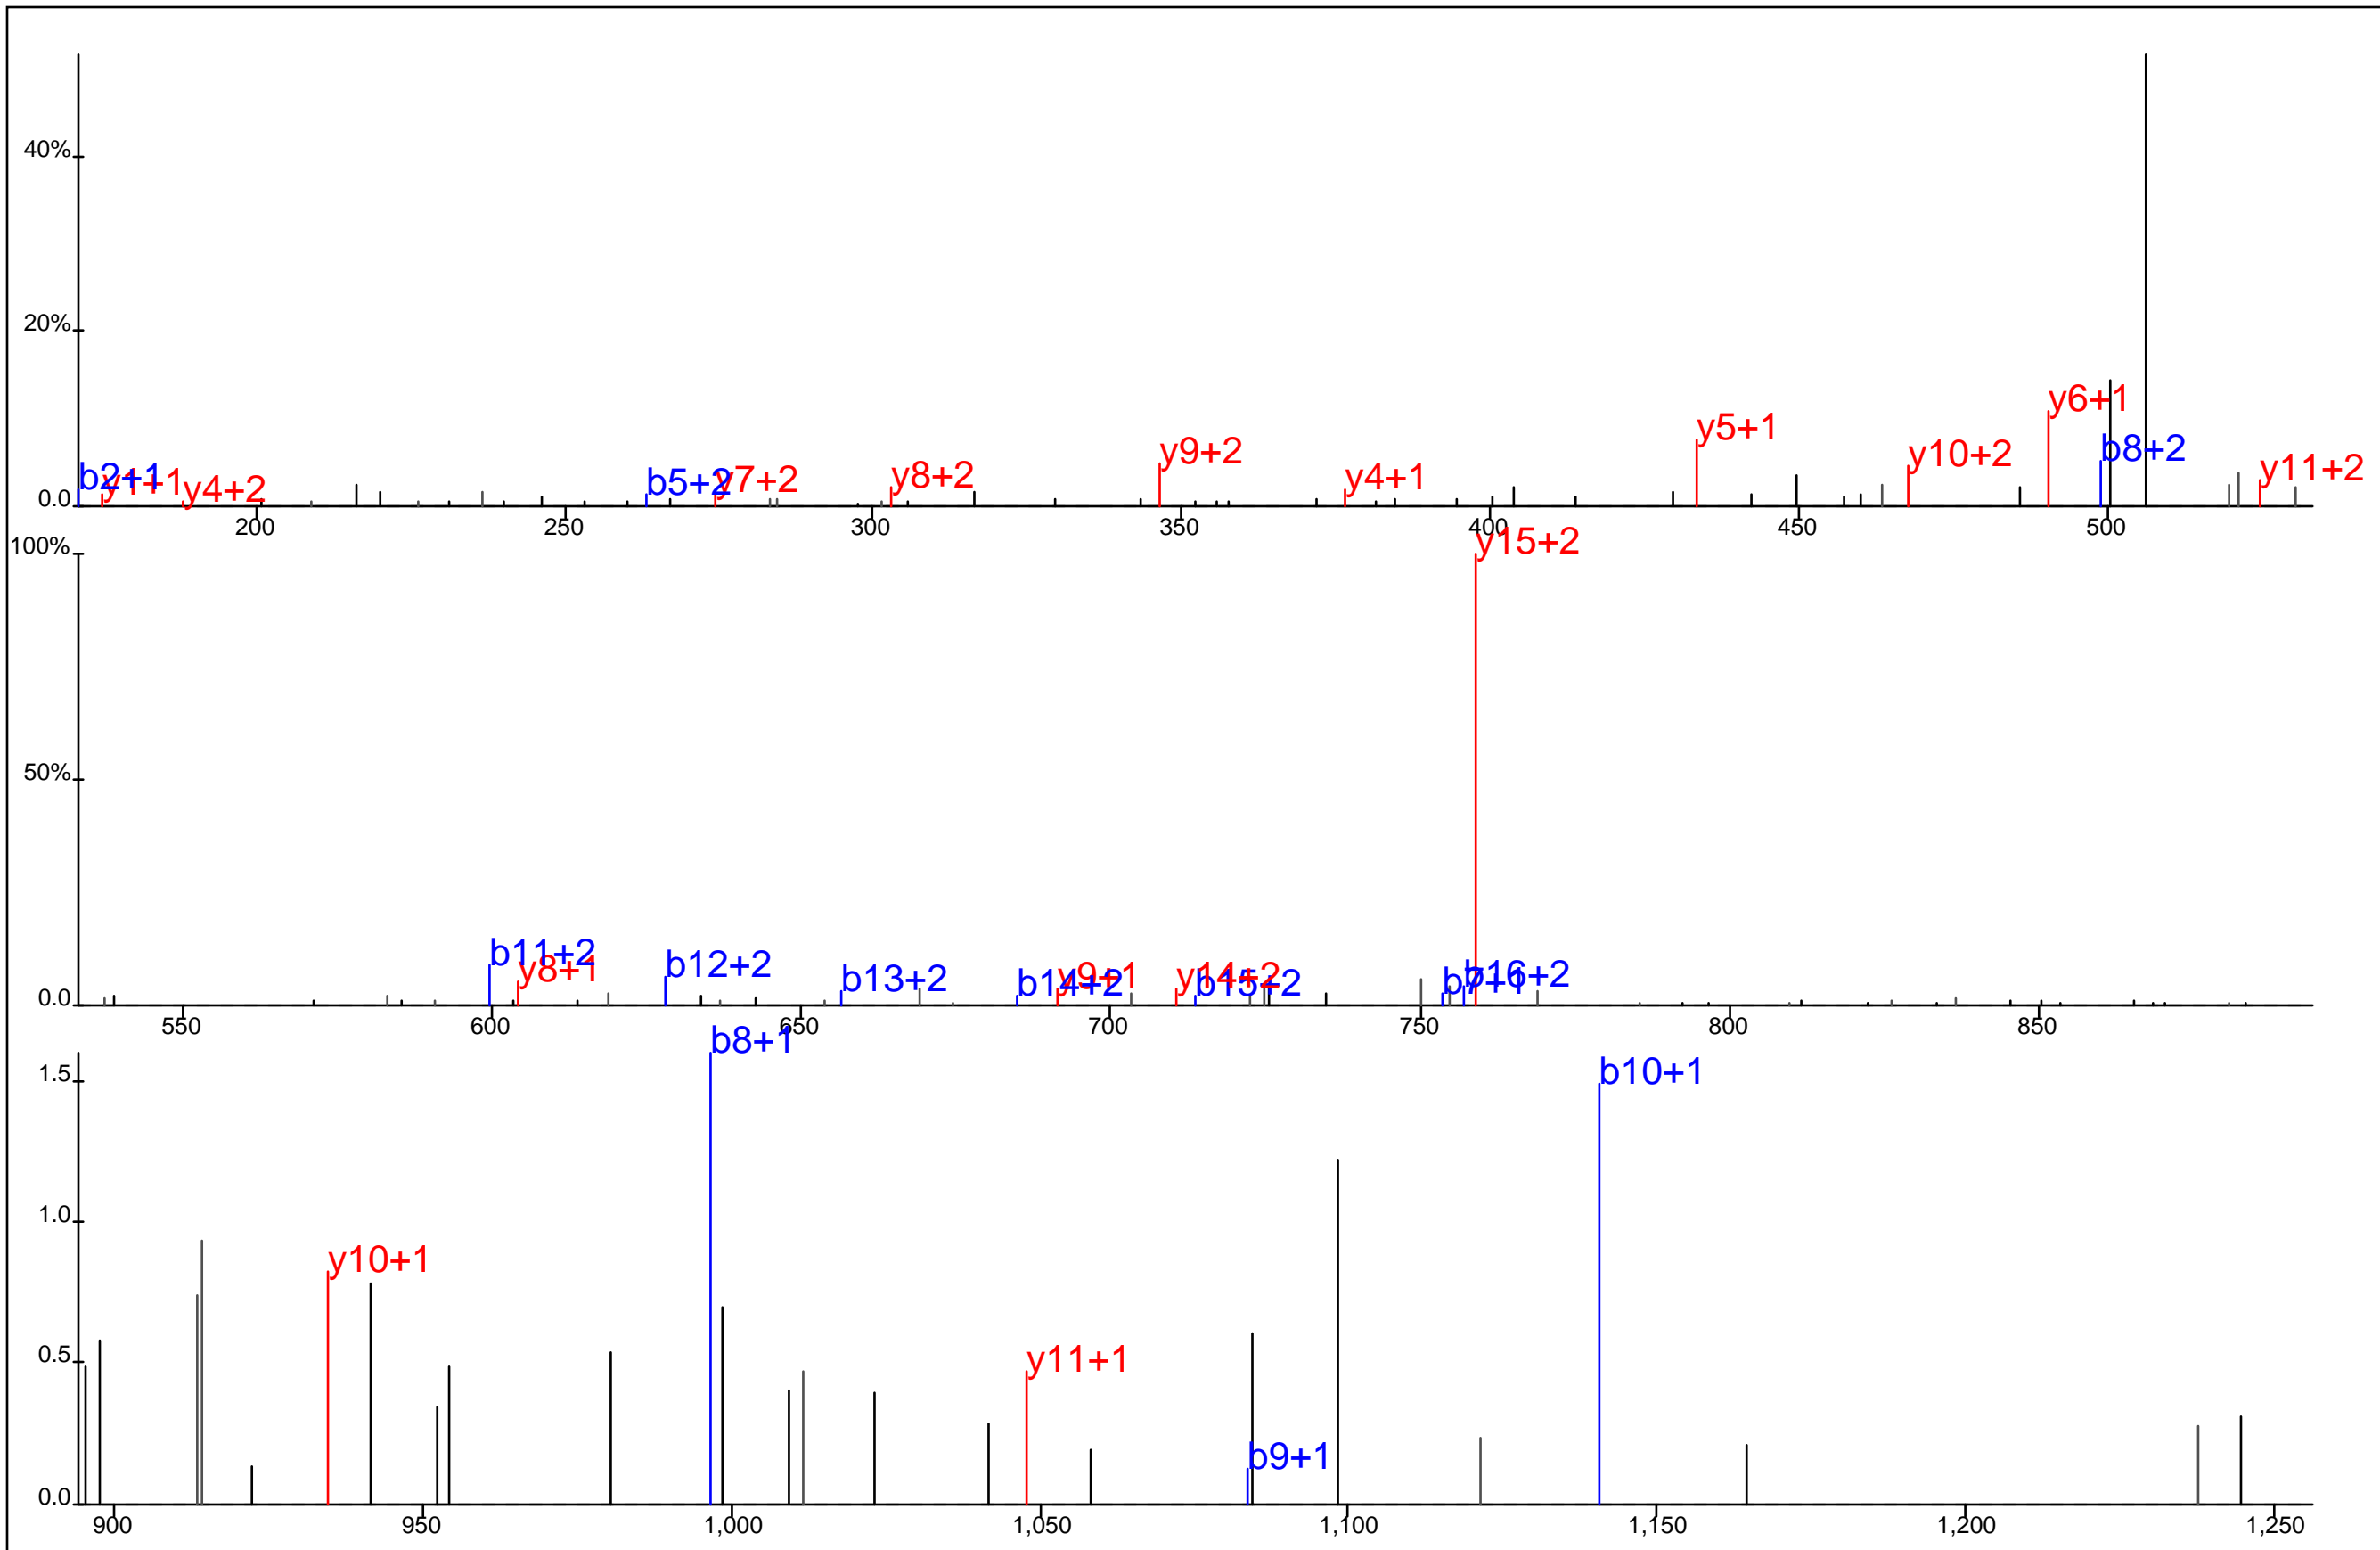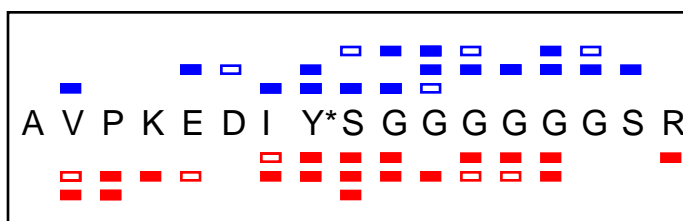

Protein Name: Heterogeneous nuclear ribonucleoprotein A0  
 gi Accession: 0  
 Precursor Mass: 562.9220+3  
 Delta Mass: 1.860 ppm  
 XCorr: 38.75

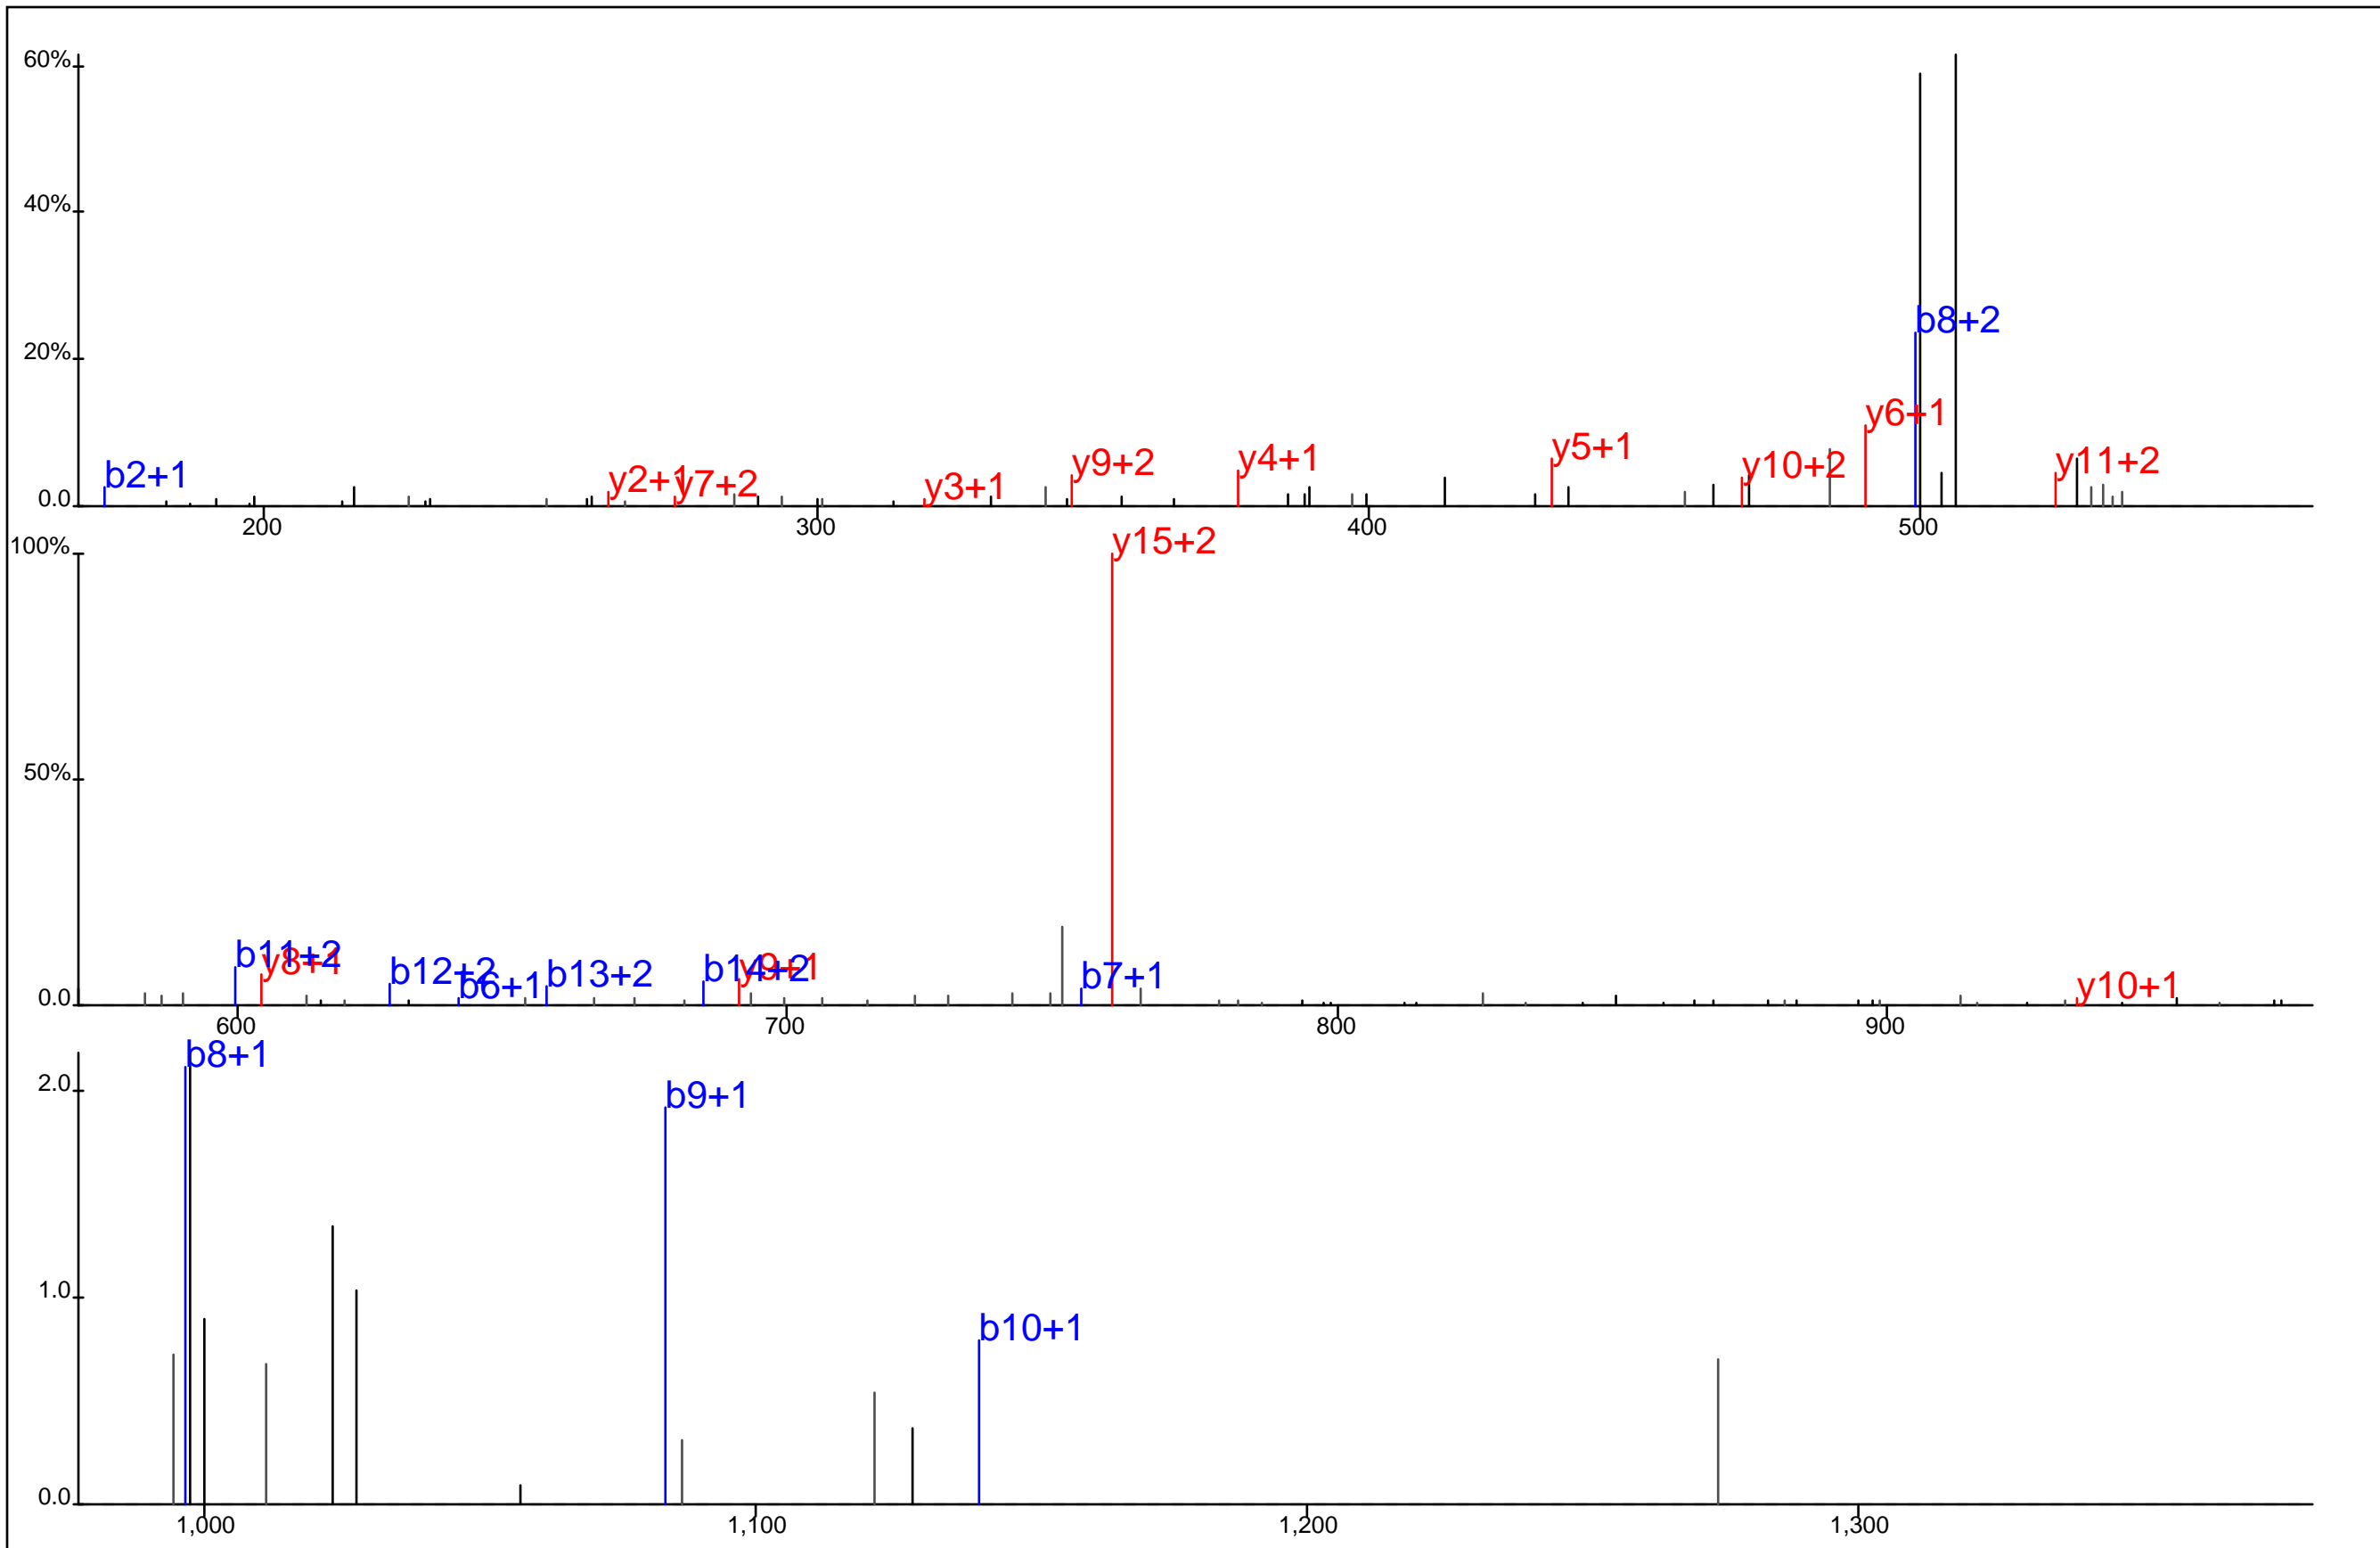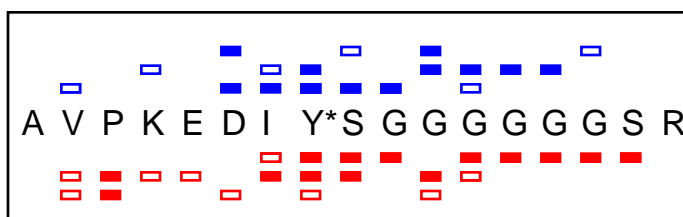

Protein Name: Heterogeneous nuclear ribonucleoprotein A0  
 gi Accession: 0  
 Precursor Mass: 562.9214+3  
 Delta Mass: 0.883 ppm  
 XCorr: 29.8

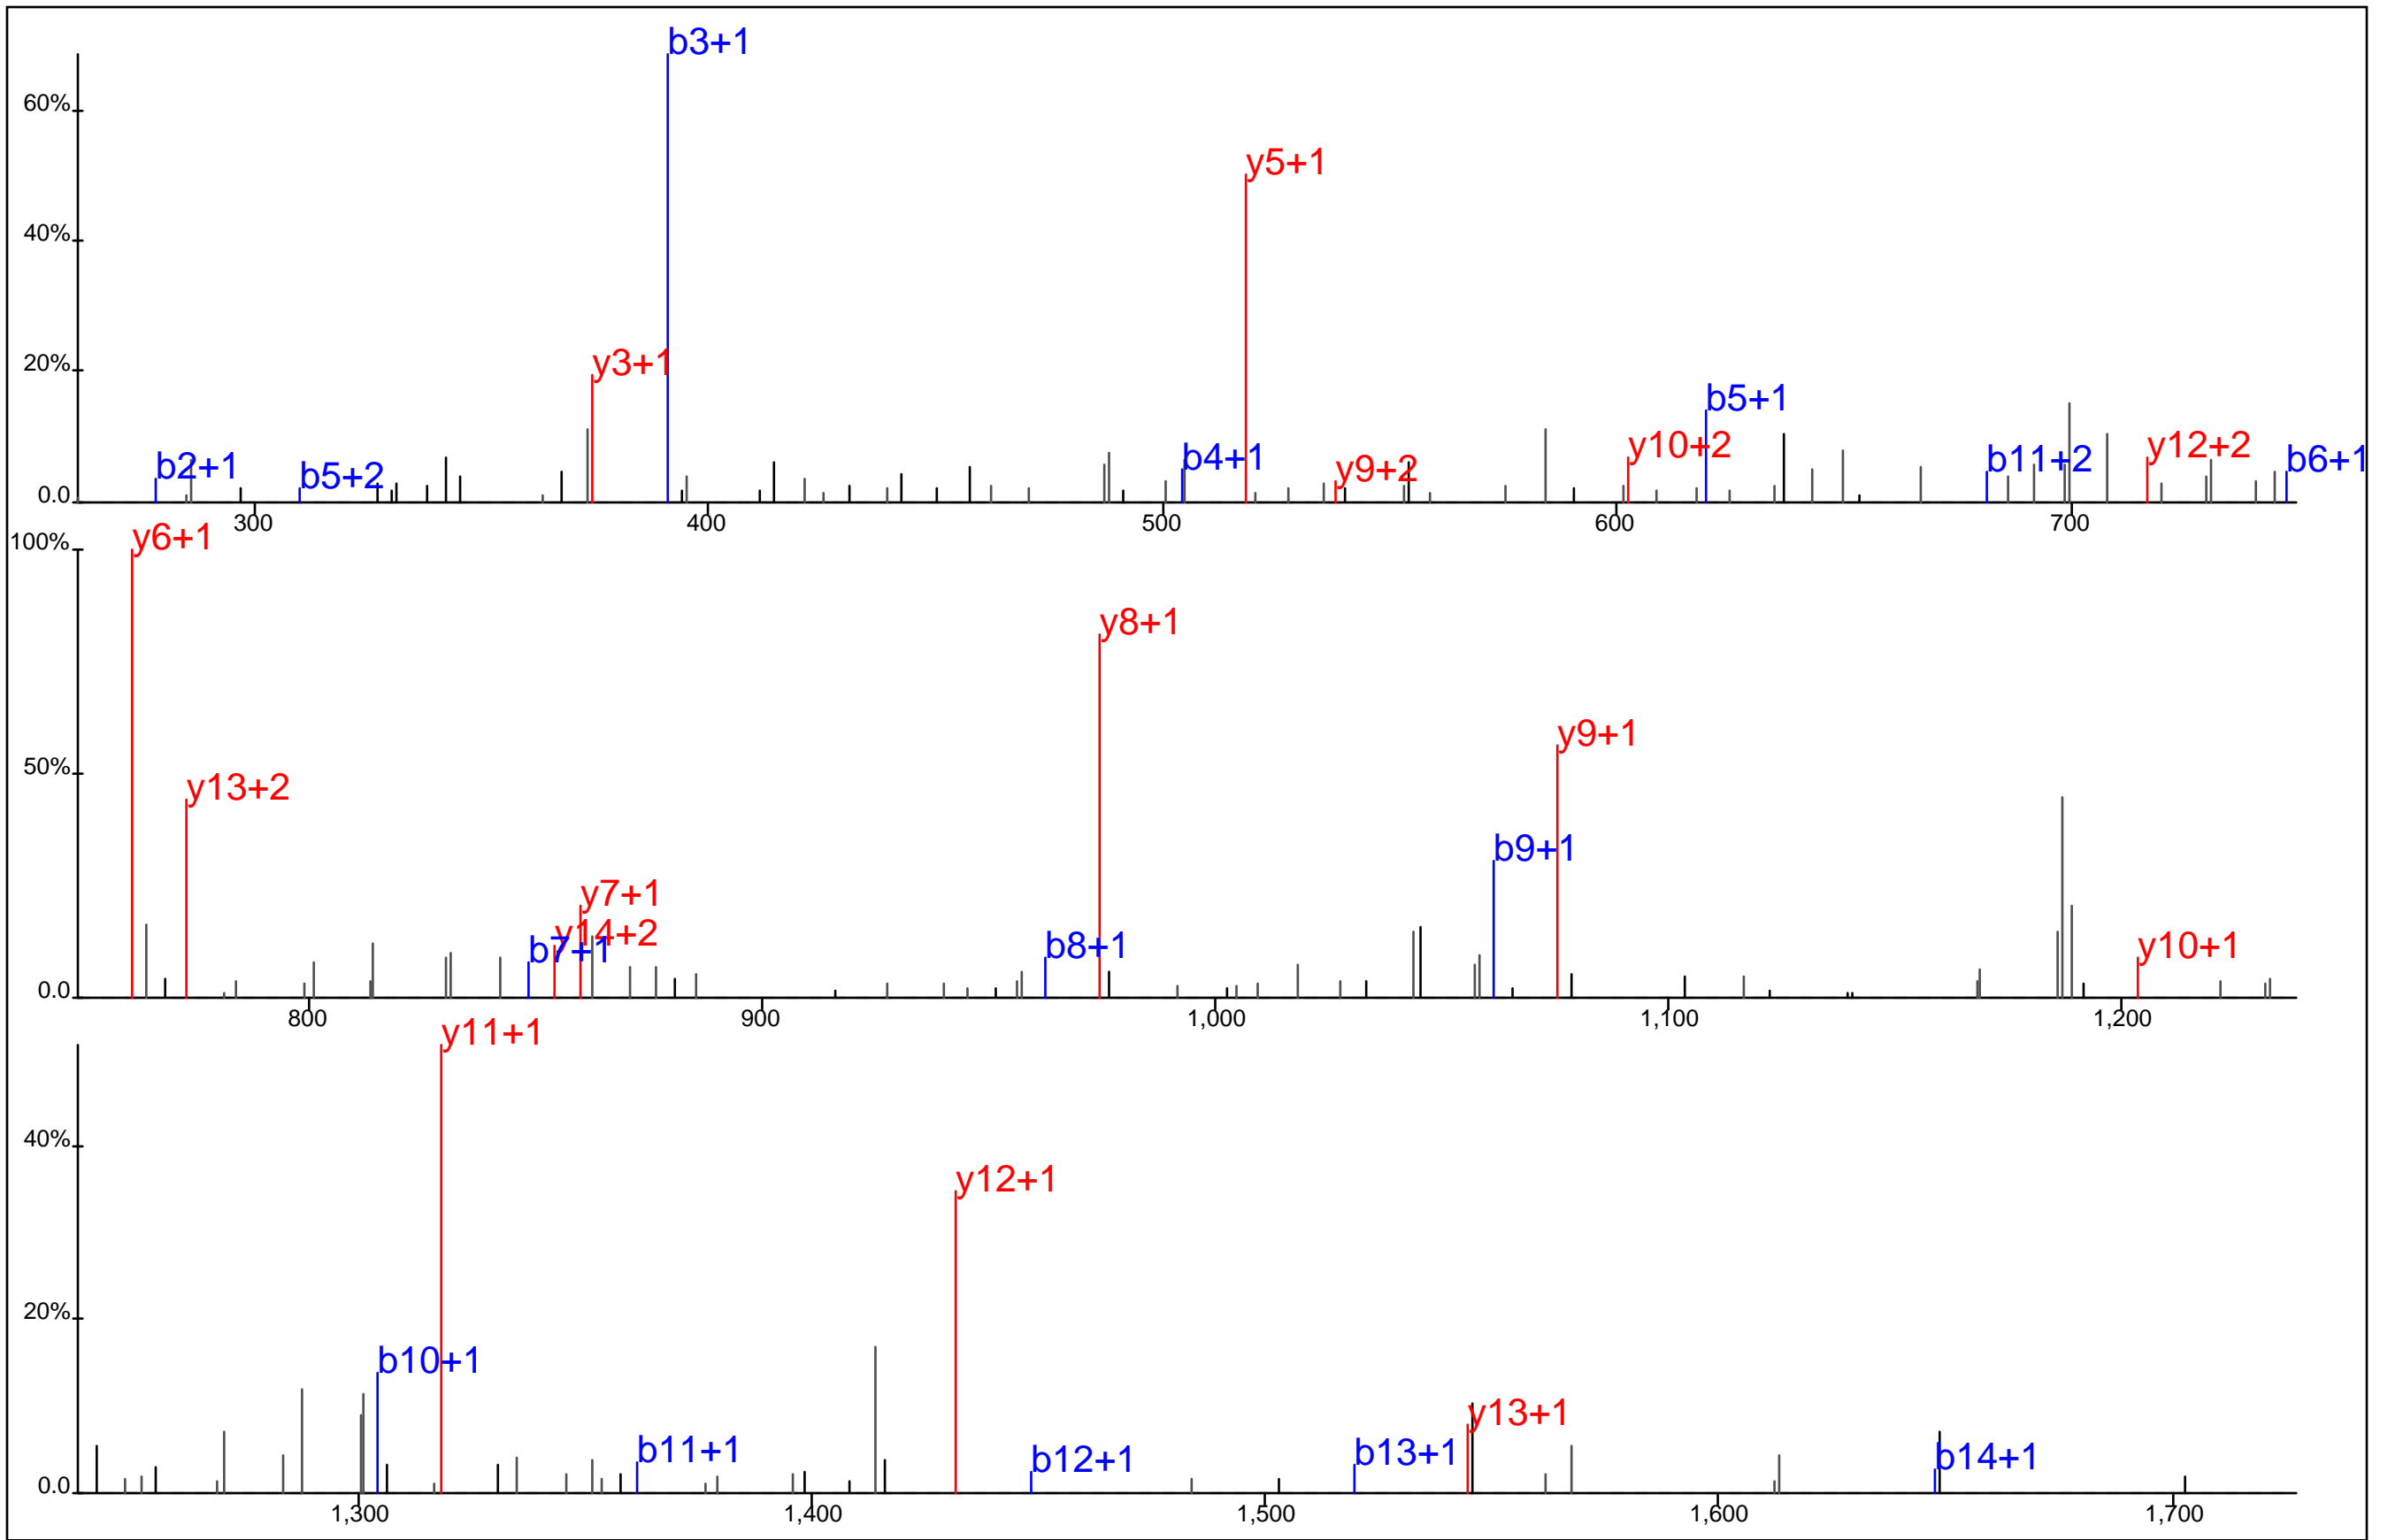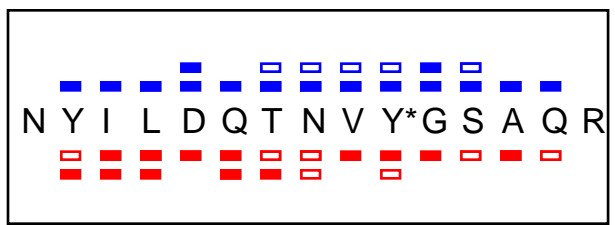

Protein Name: Heterogeneous nuclear ribonucleoprotein U like 1  
 gi Accession: 0  
 Precursor Mass: 911.4116+2  
 Delta Mass: 0.399 ppm  
 XCorr: 59.12

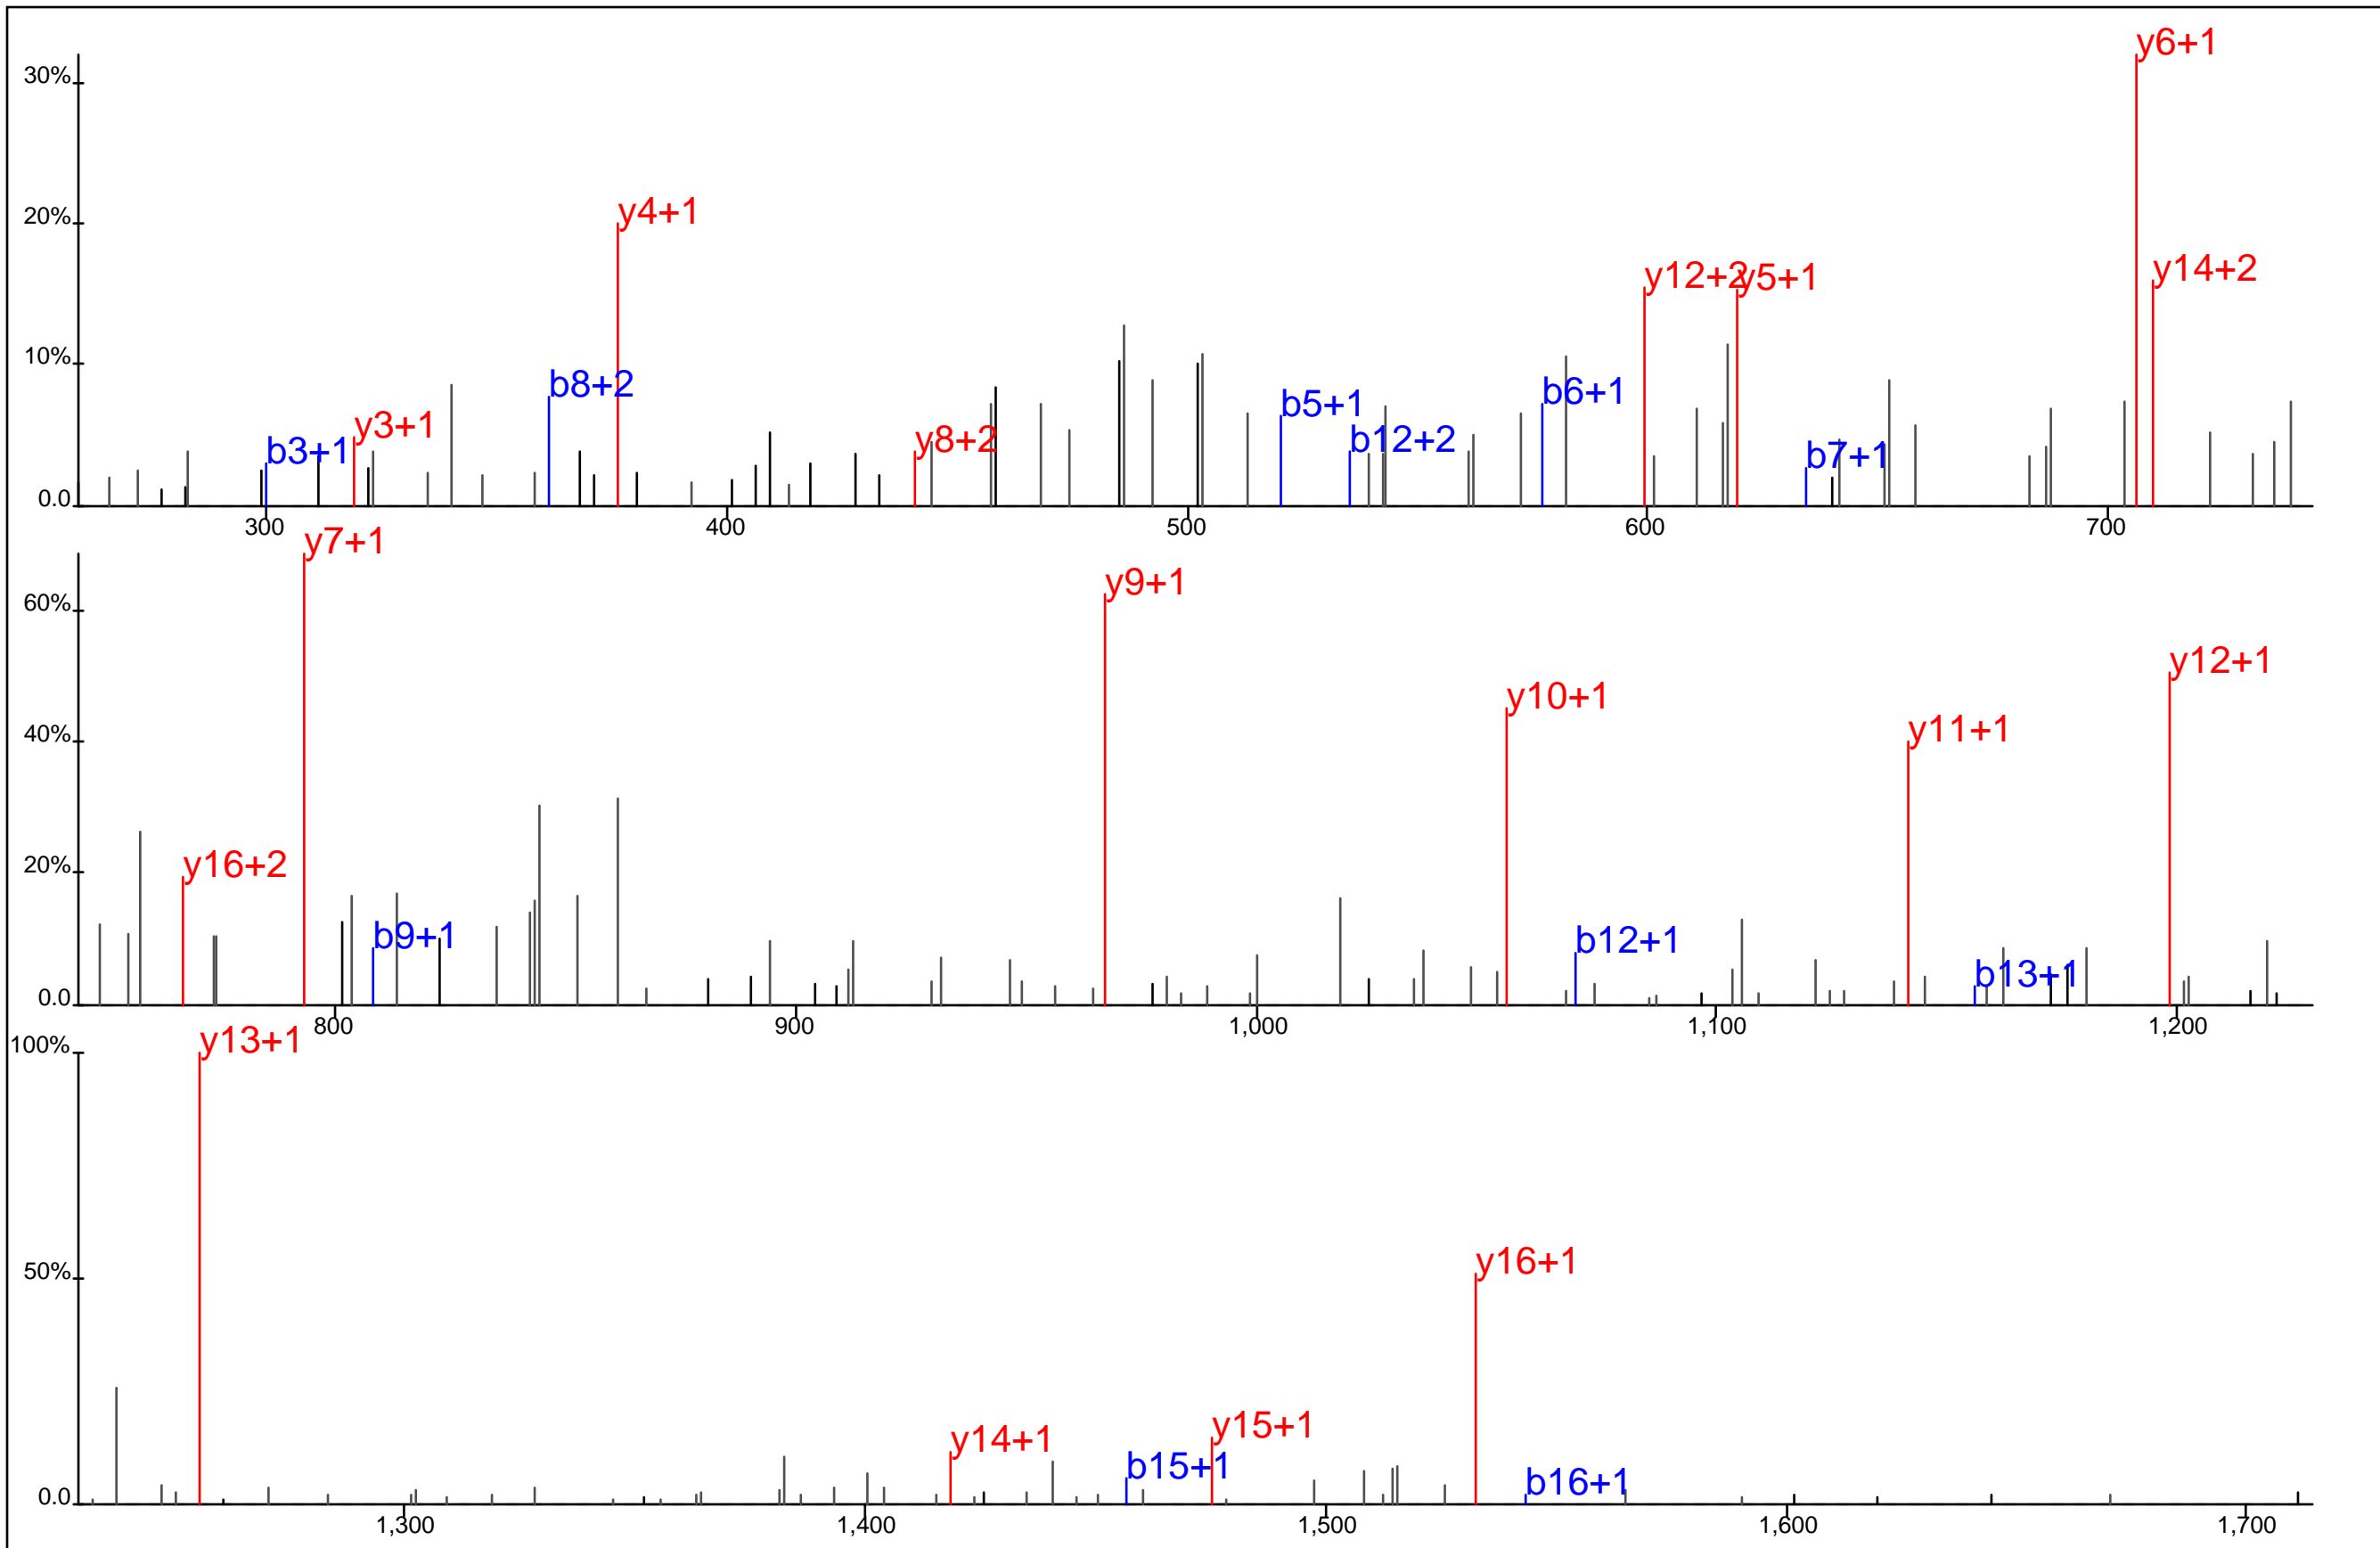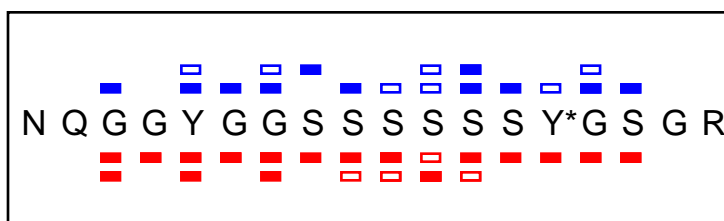

Protein Name: Heterogenous nuclear ribonucleoprotein A1  
 gi Accession: 0  
 Precursor Mass: 887.8376+2  
 Delta Mass: 0.898 ppm  
 XCorr: 87.22

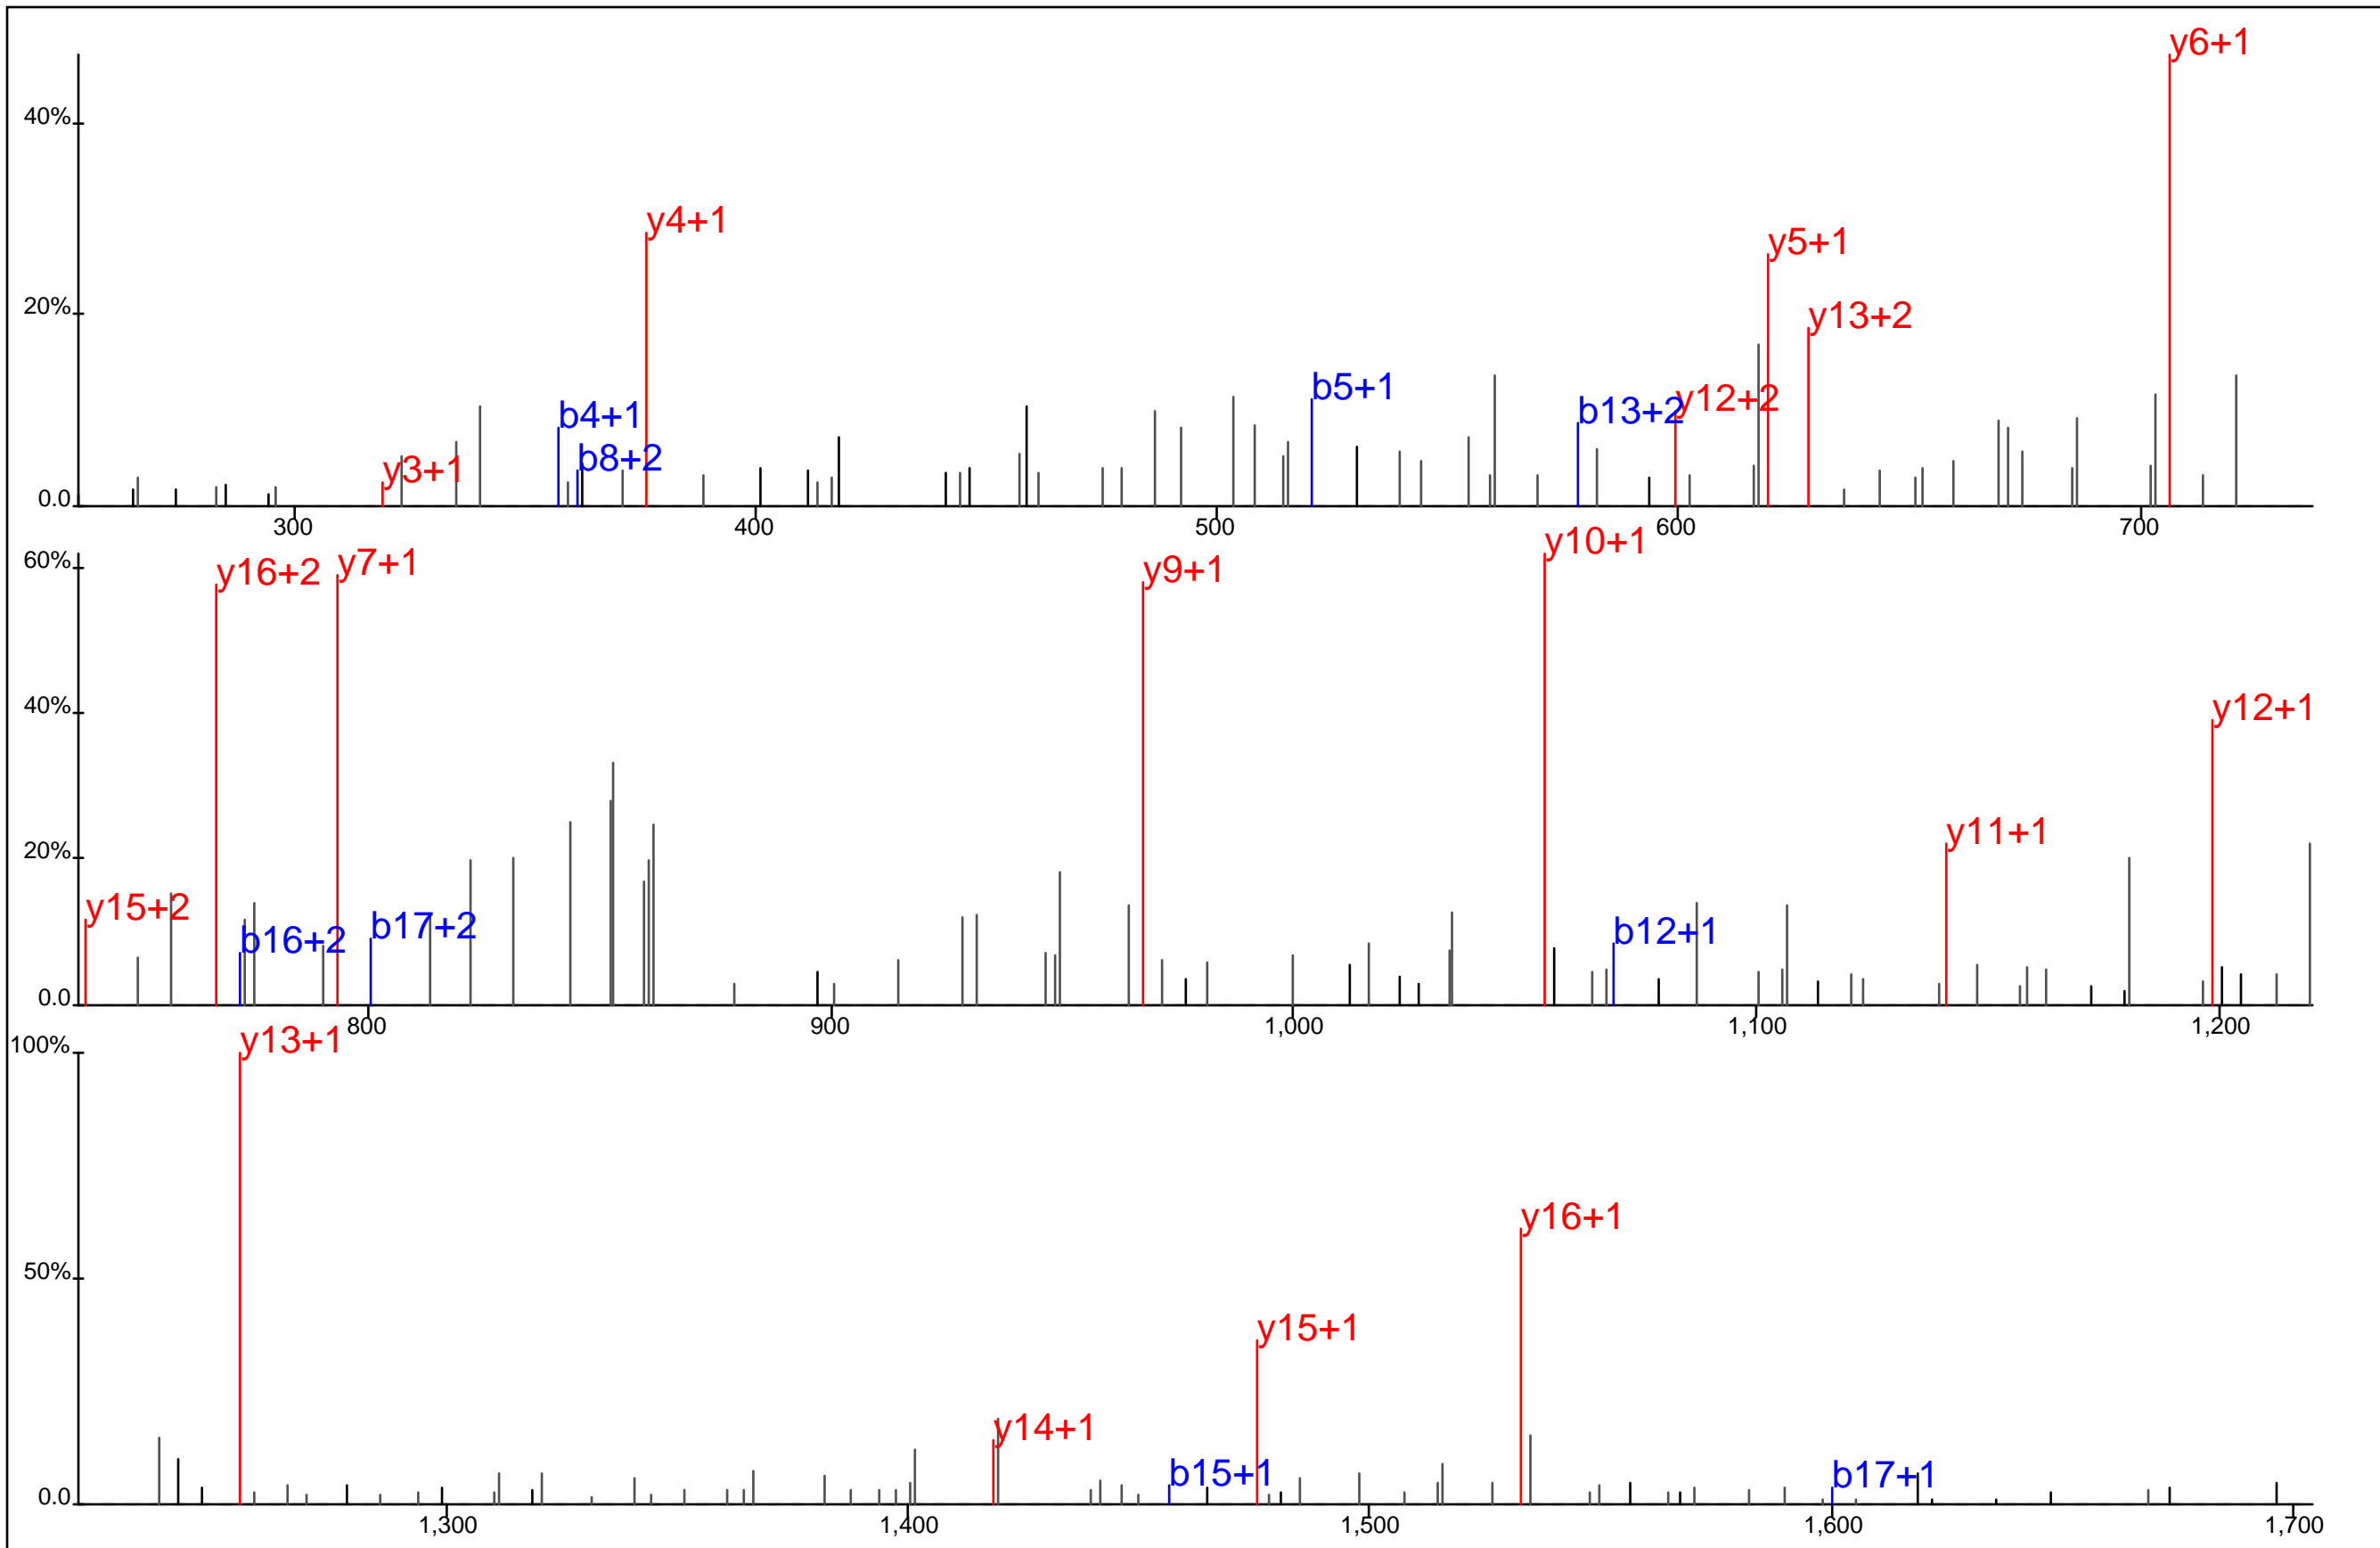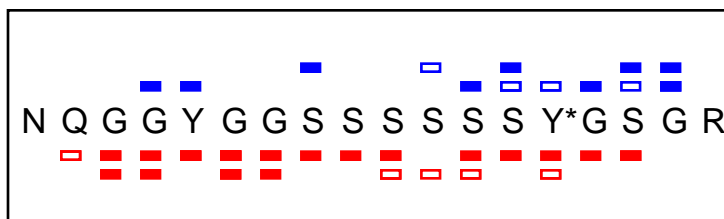

Protein Name: Heterogenous nuclear ribonucleoprotein A1  
 gi Accession: 0  
 Precursor Mass: 887.8386+2  
 Delta Mass: 1.999 ppm  
 XCorr: 89.88



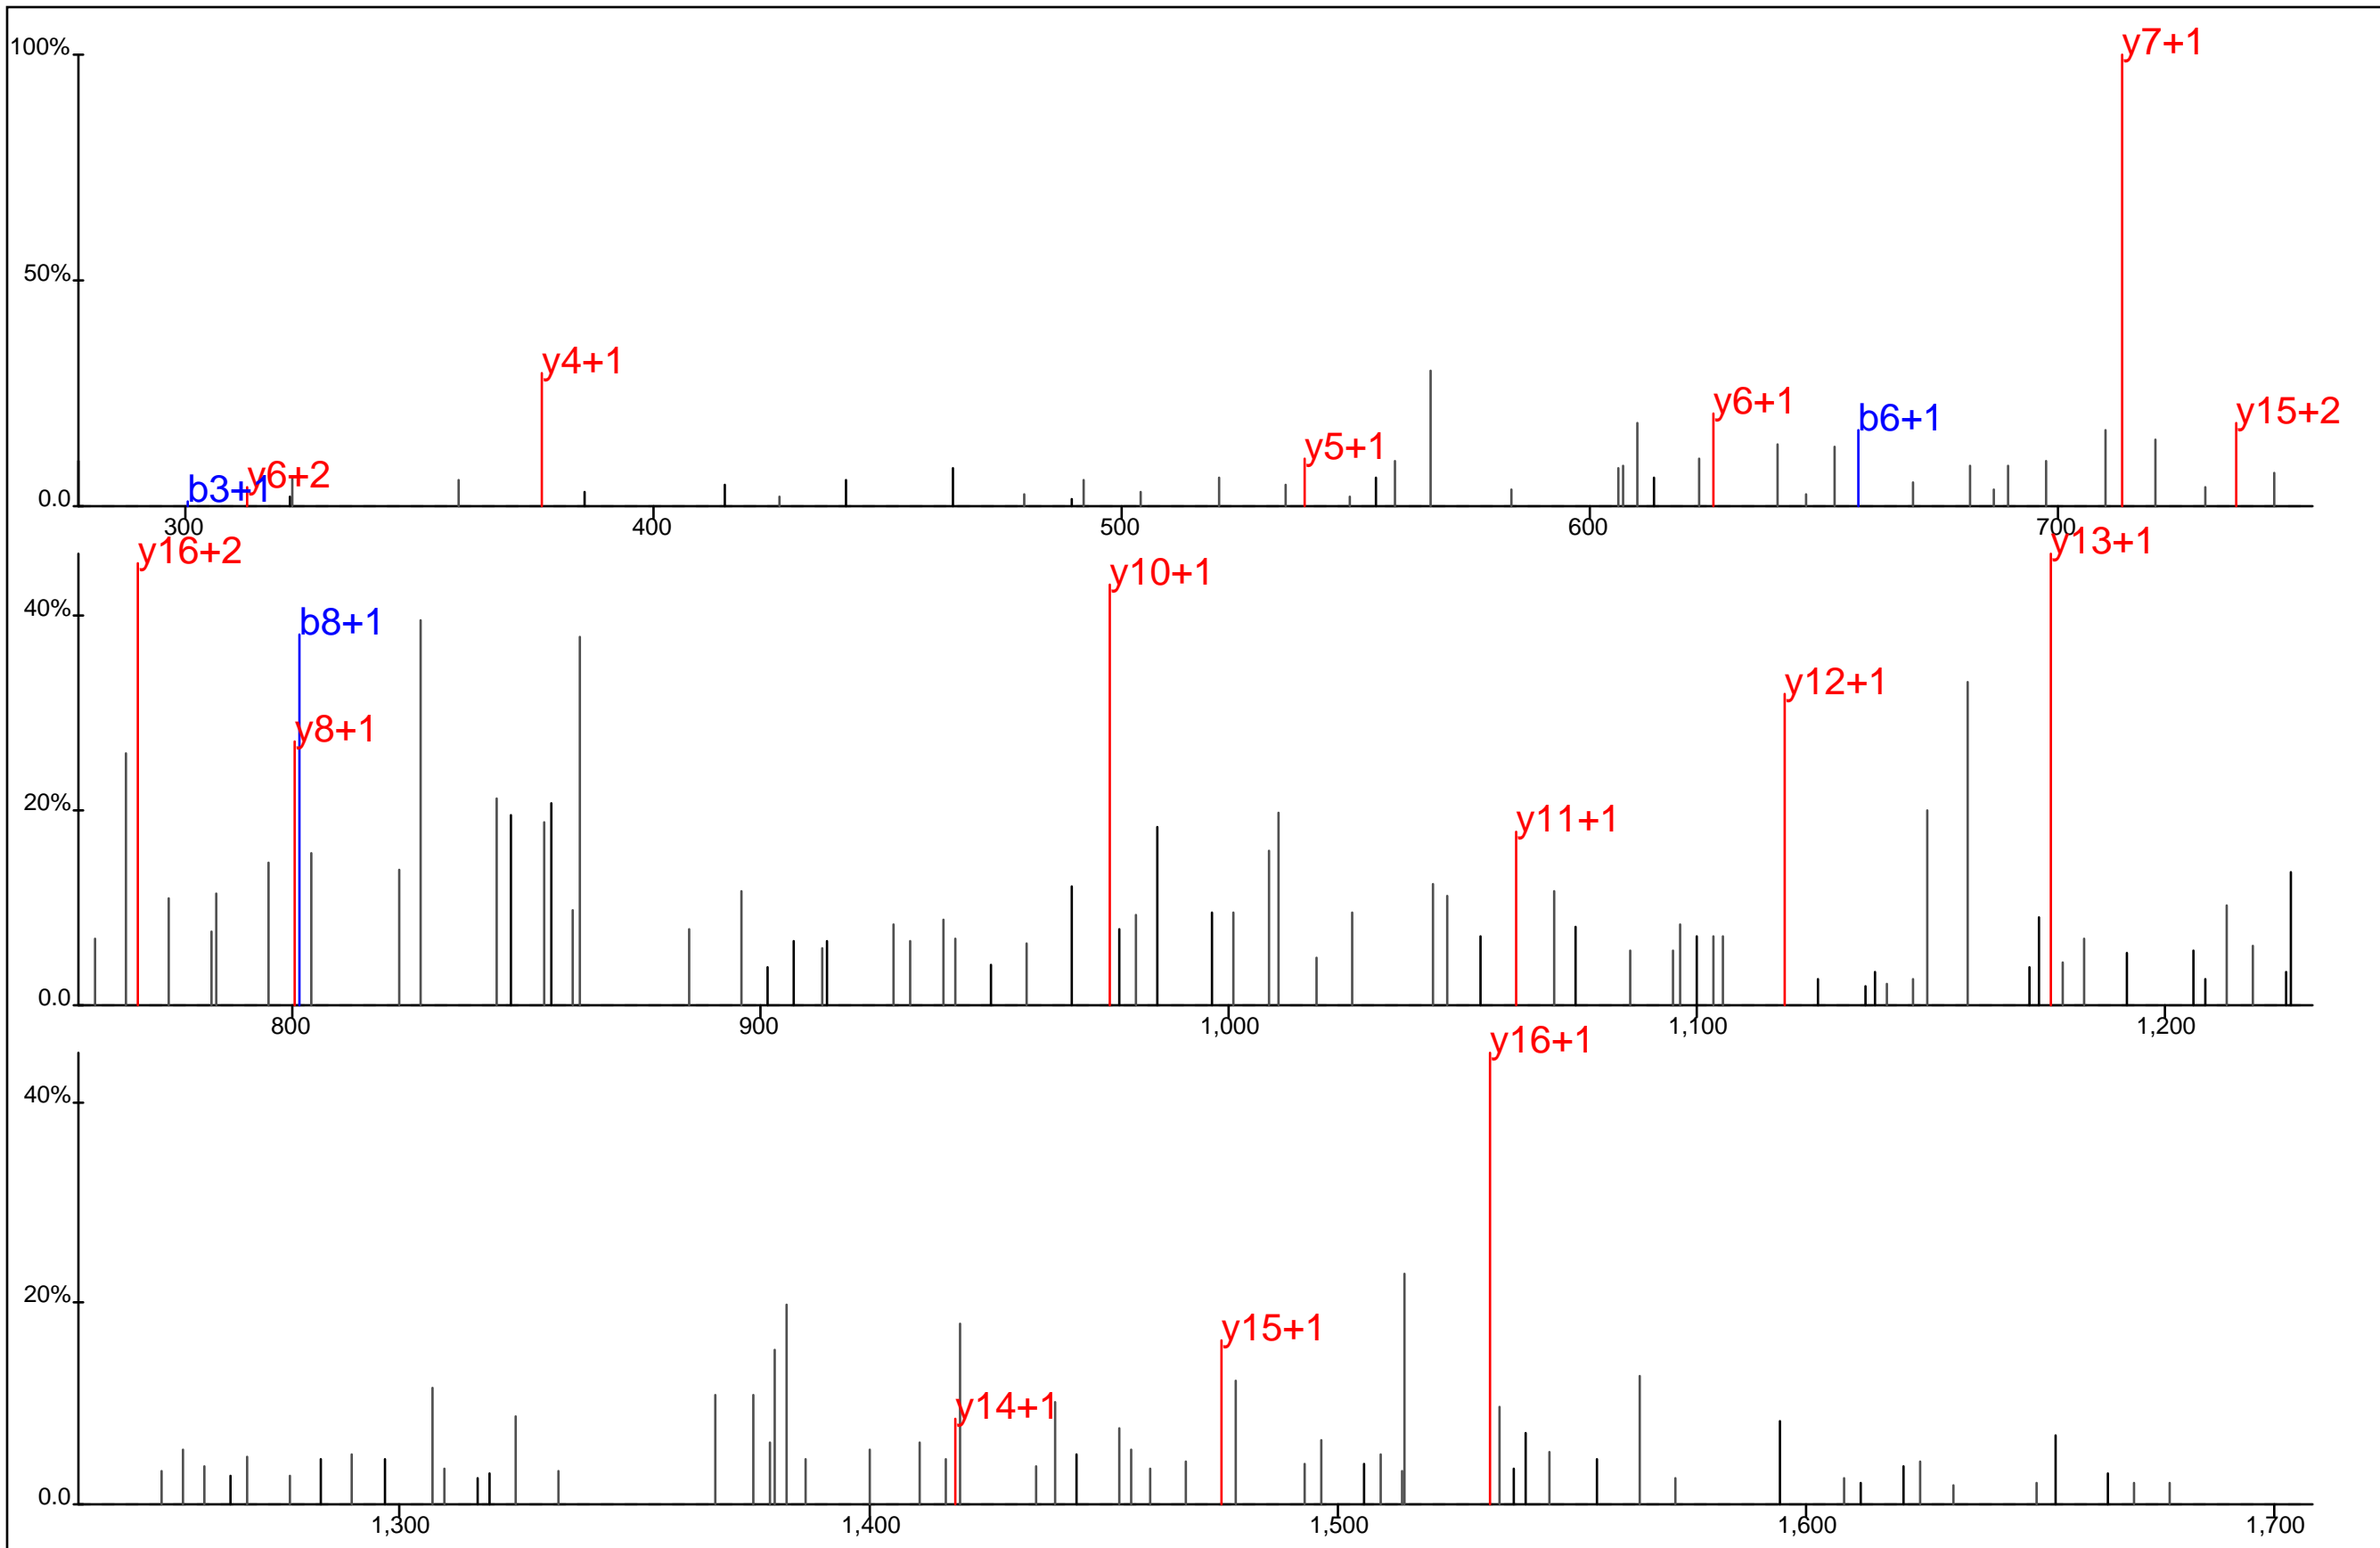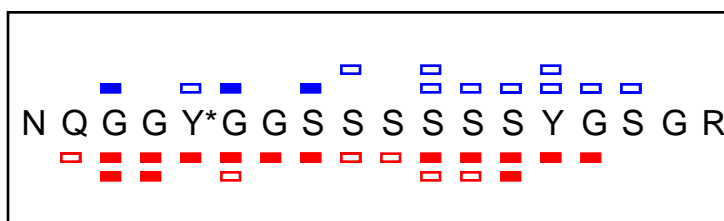

Protein Name: Heterogenous nuclear ribonucleoprotein A1  
 gi Accession: 0  
 Precursor Mass: 887.8365+2  
 Delta Mass: 0.408 ppm  
 XCorr: 40.65

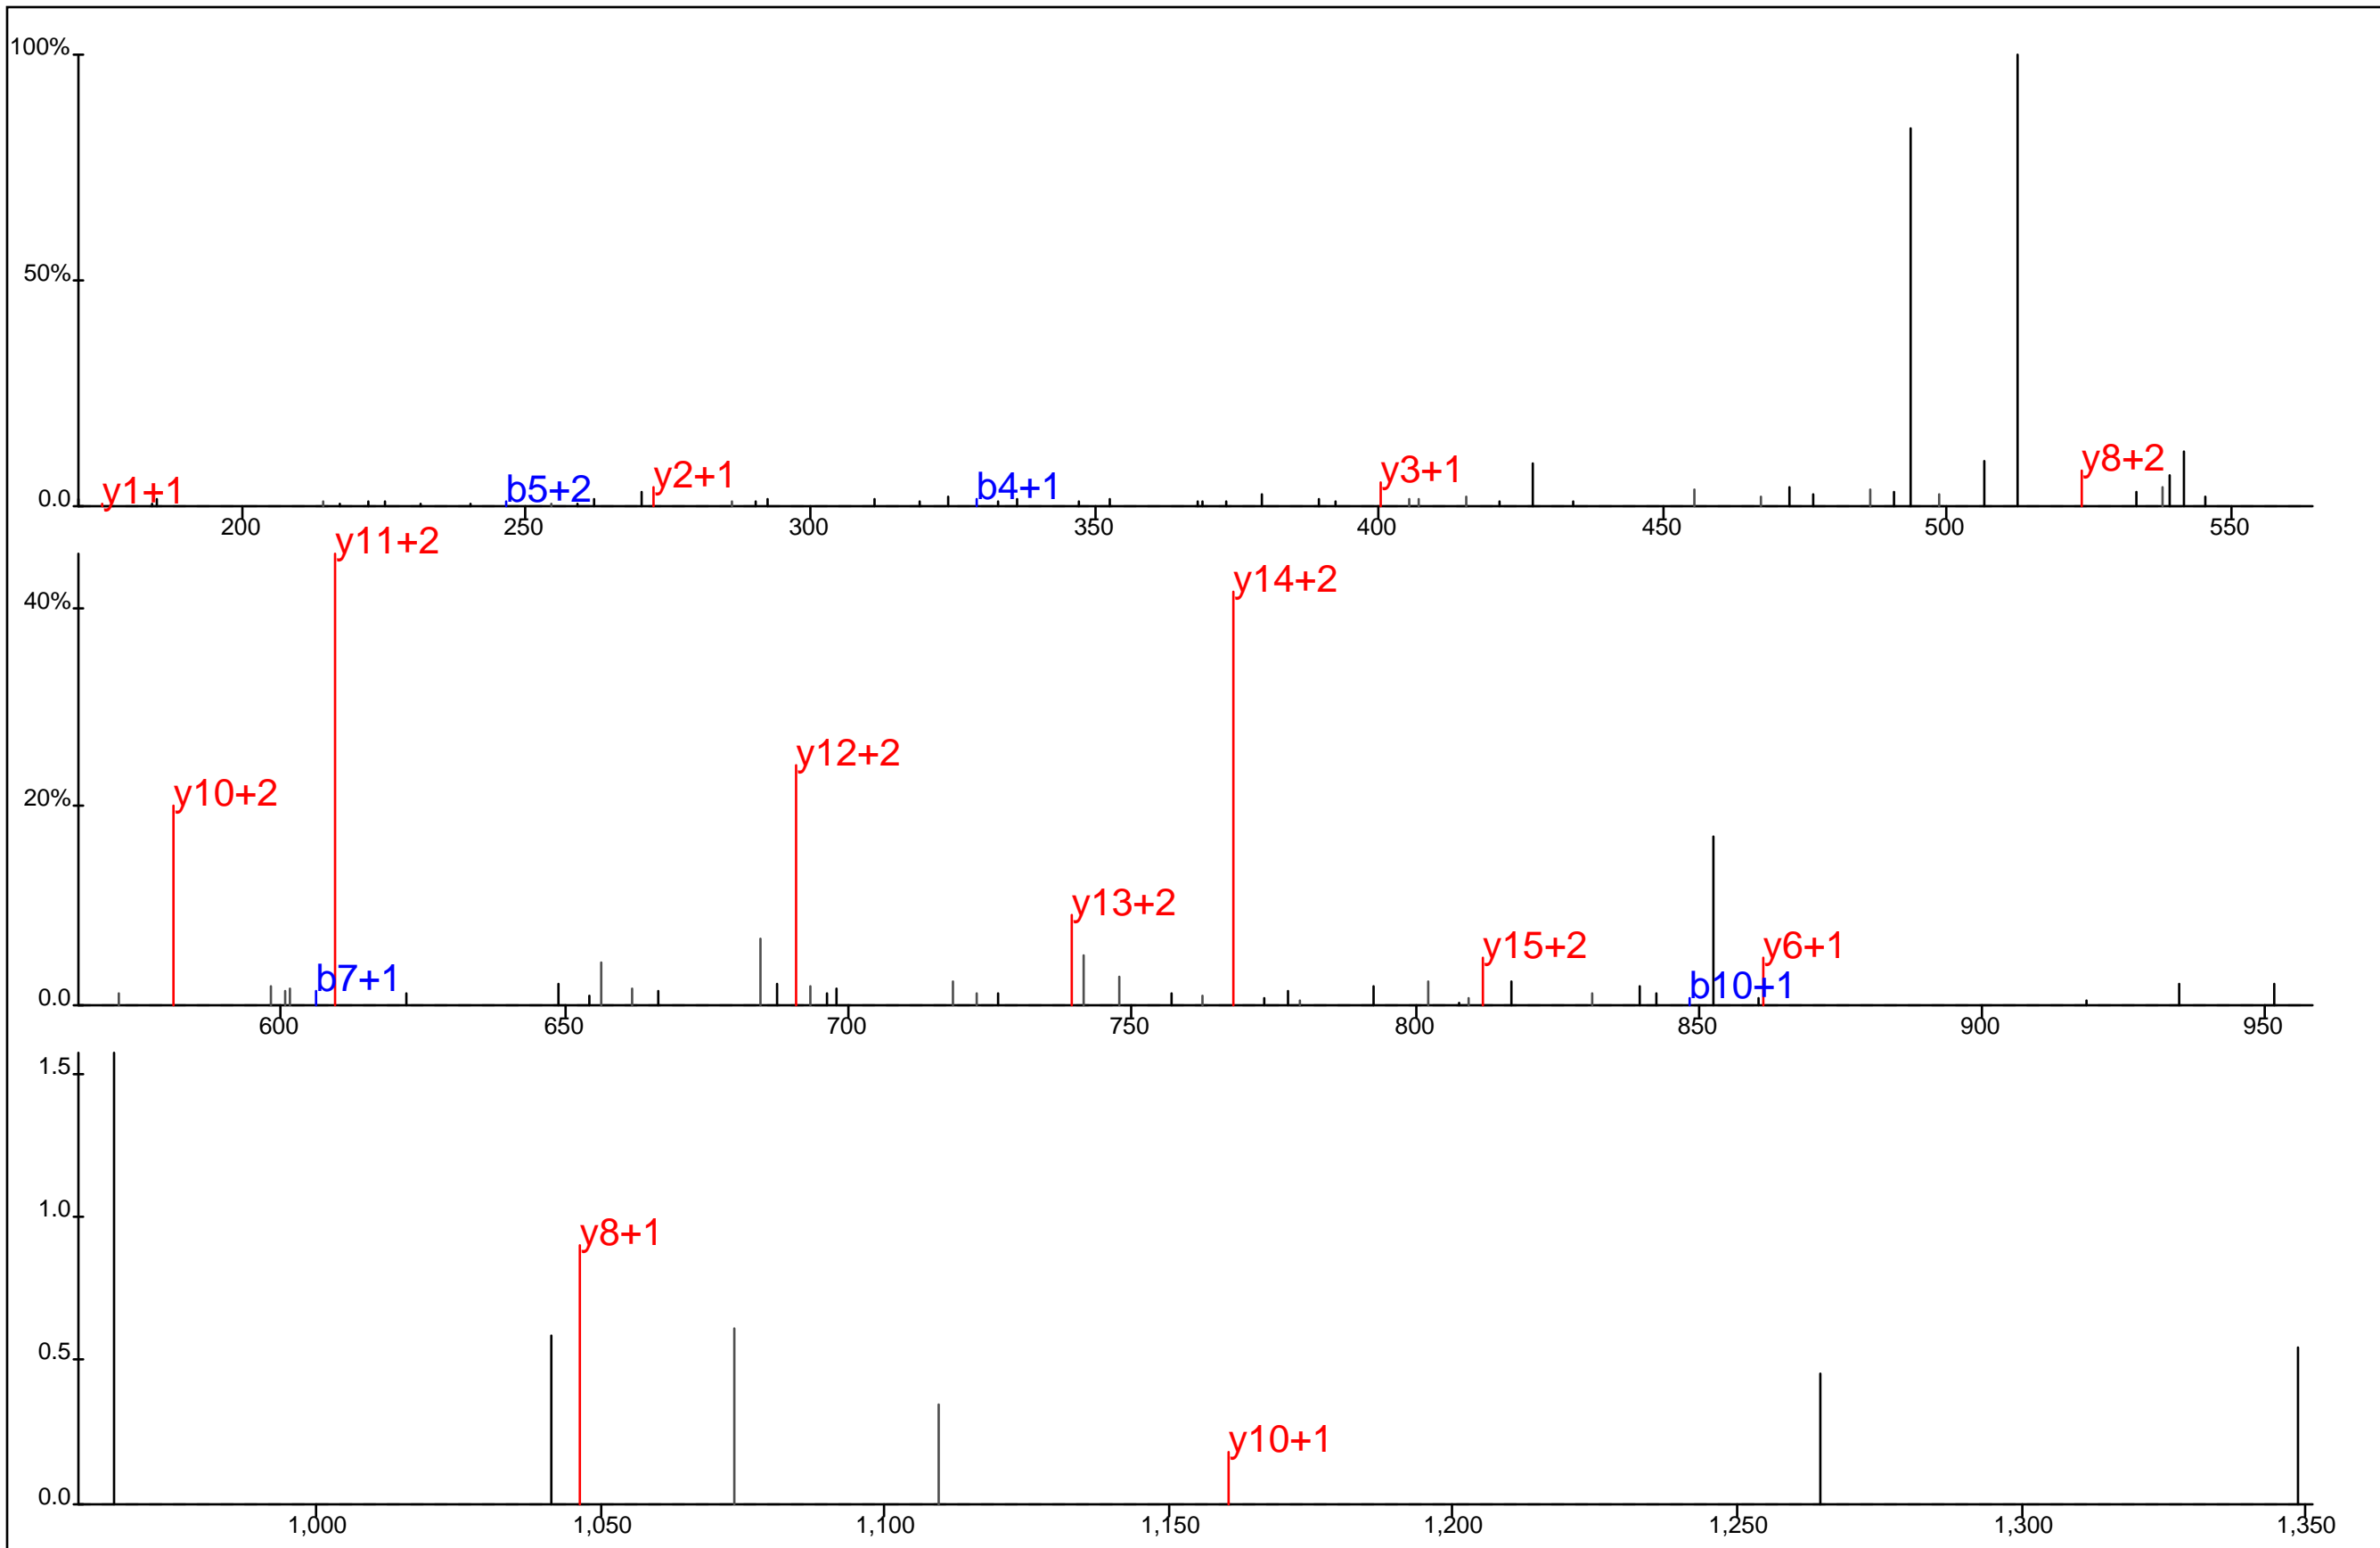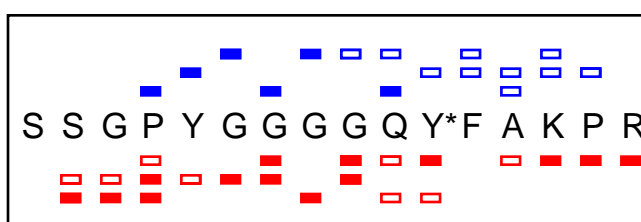

Protein Name: Heterogenous nuclear ribonucleoprotein A1  
 gi Accession: 0  
 Precursor Mass: 570.2546+3  
 Delta Mass: 0.749 ppm  
 XCorr: 24.29

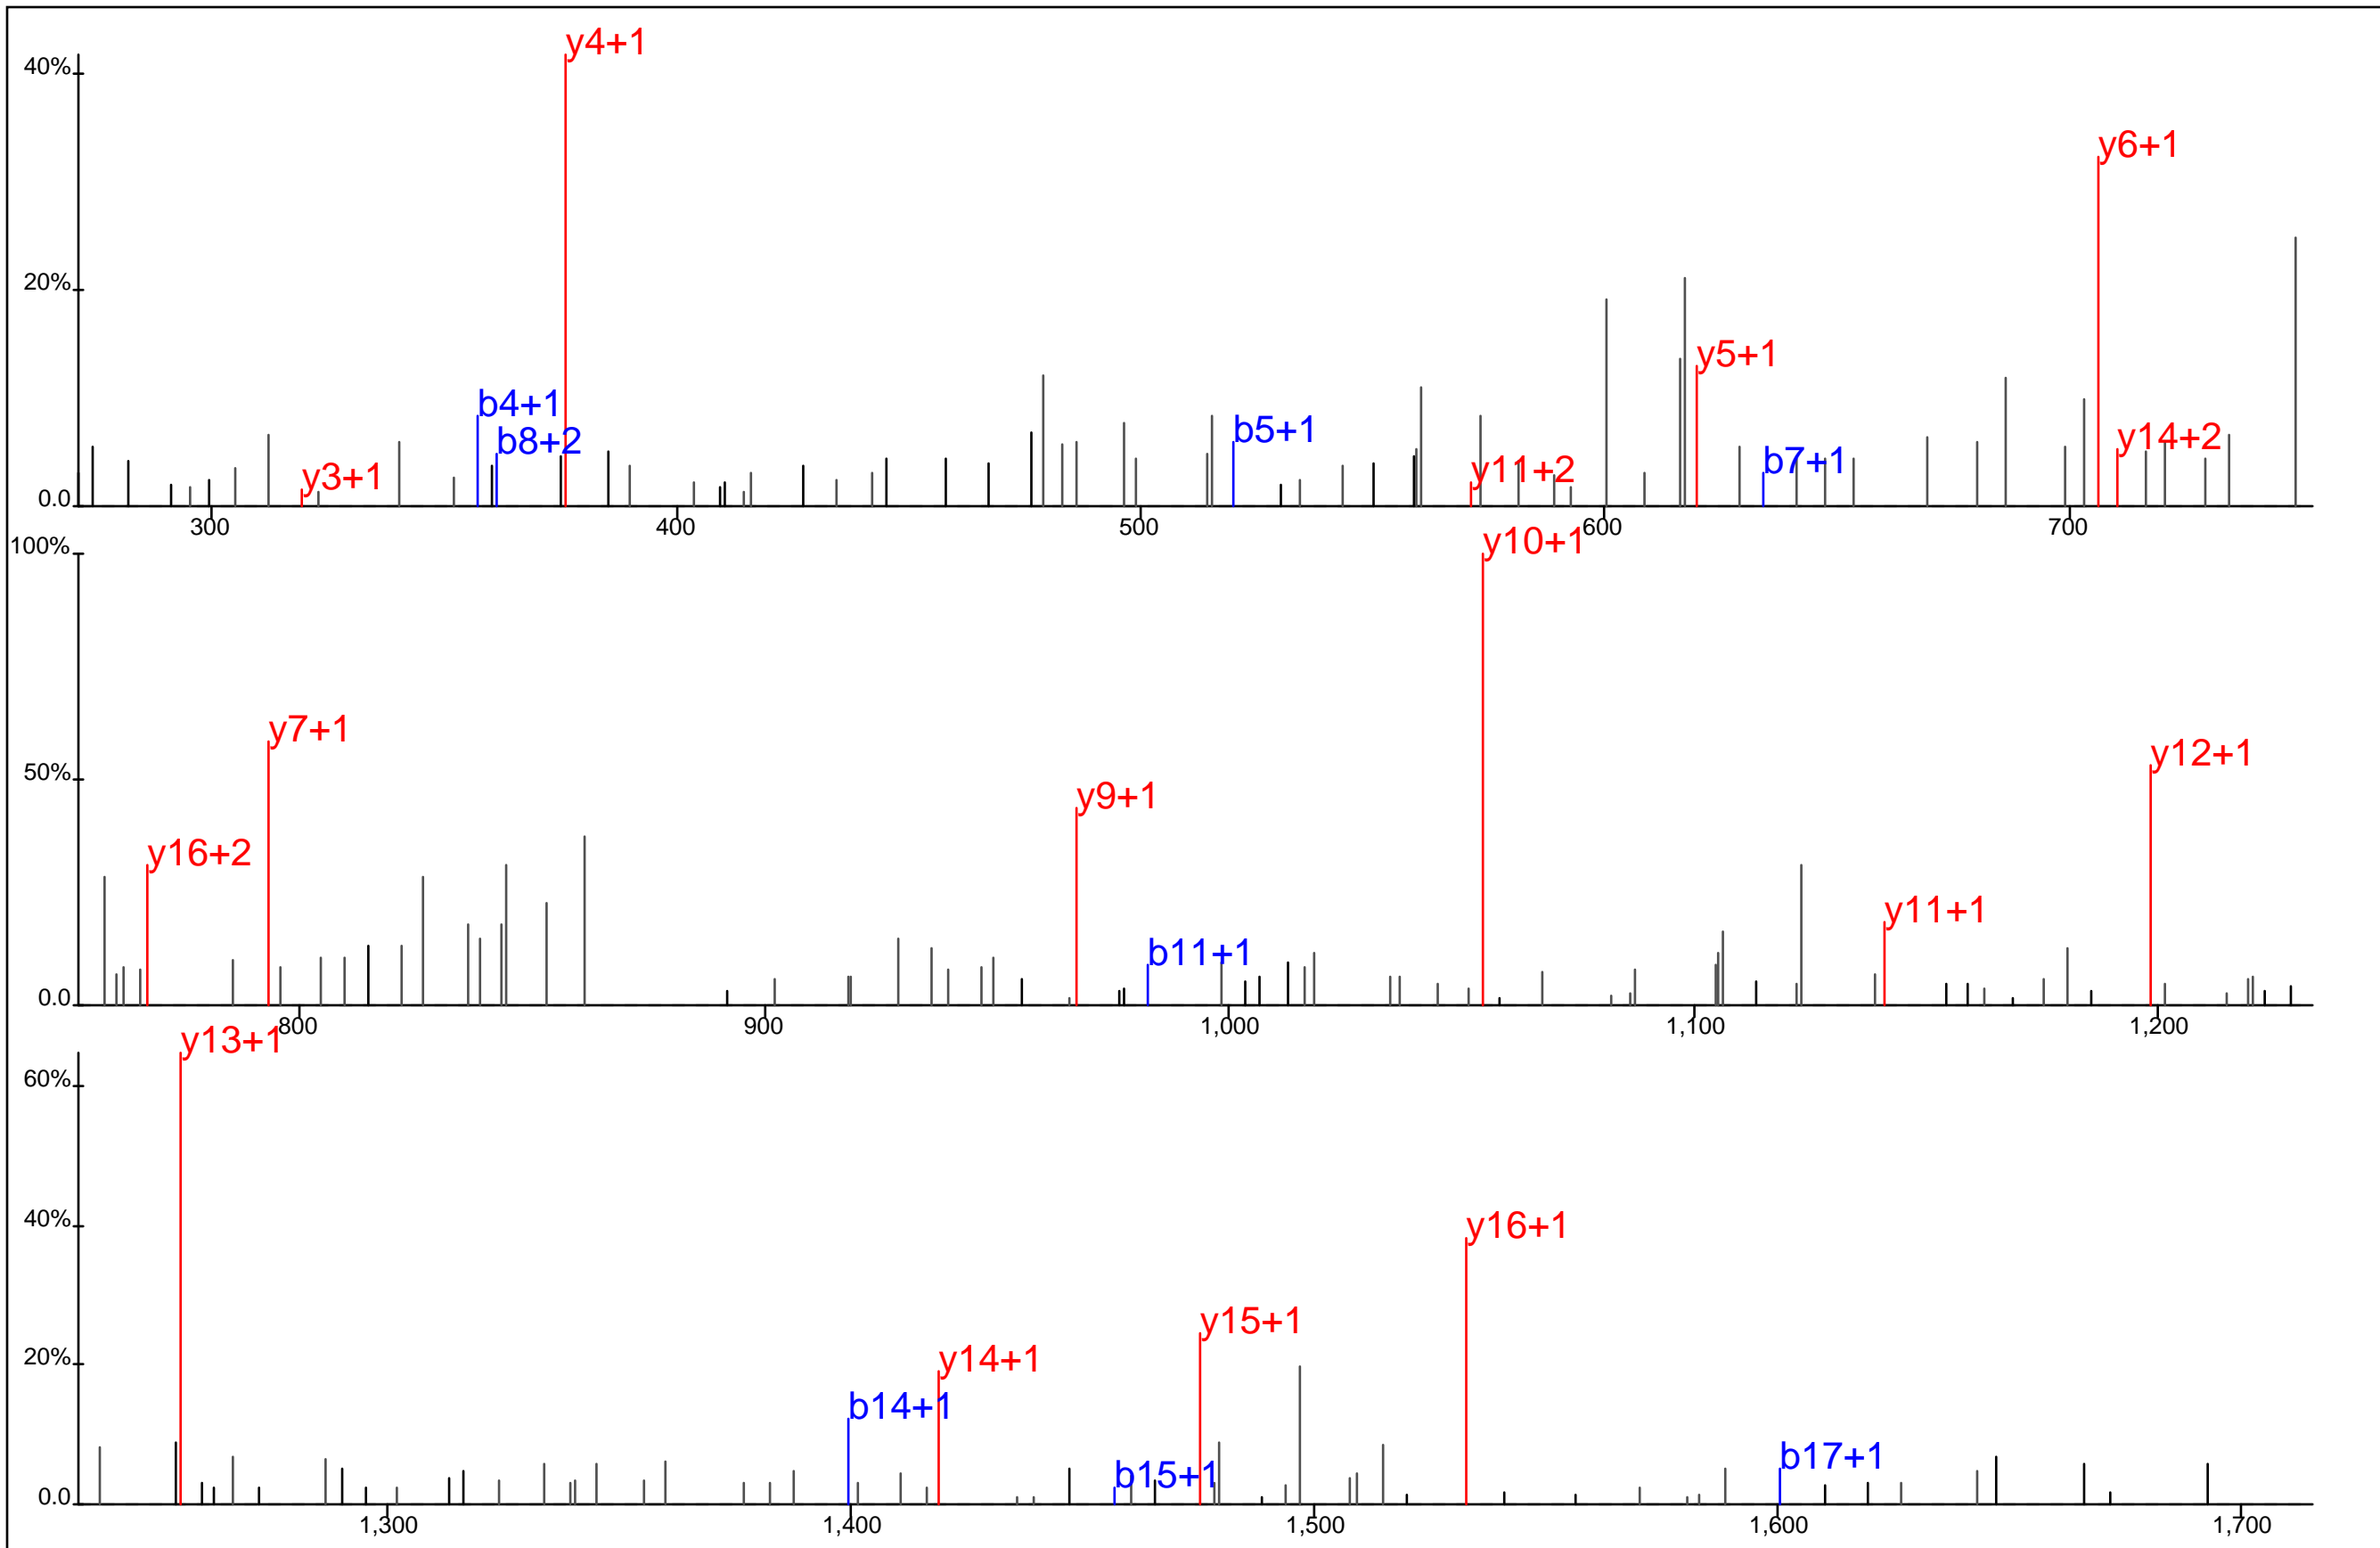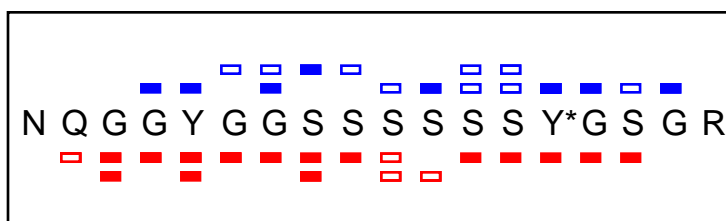

Protein Name: Heterogenous nuclear ribonucleoprotein A1  
 gi Accession: 0  
 Precursor Mass: 887.8357+2  
 Delta Mass: 1.303 ppm  
 XCorr: 73.16

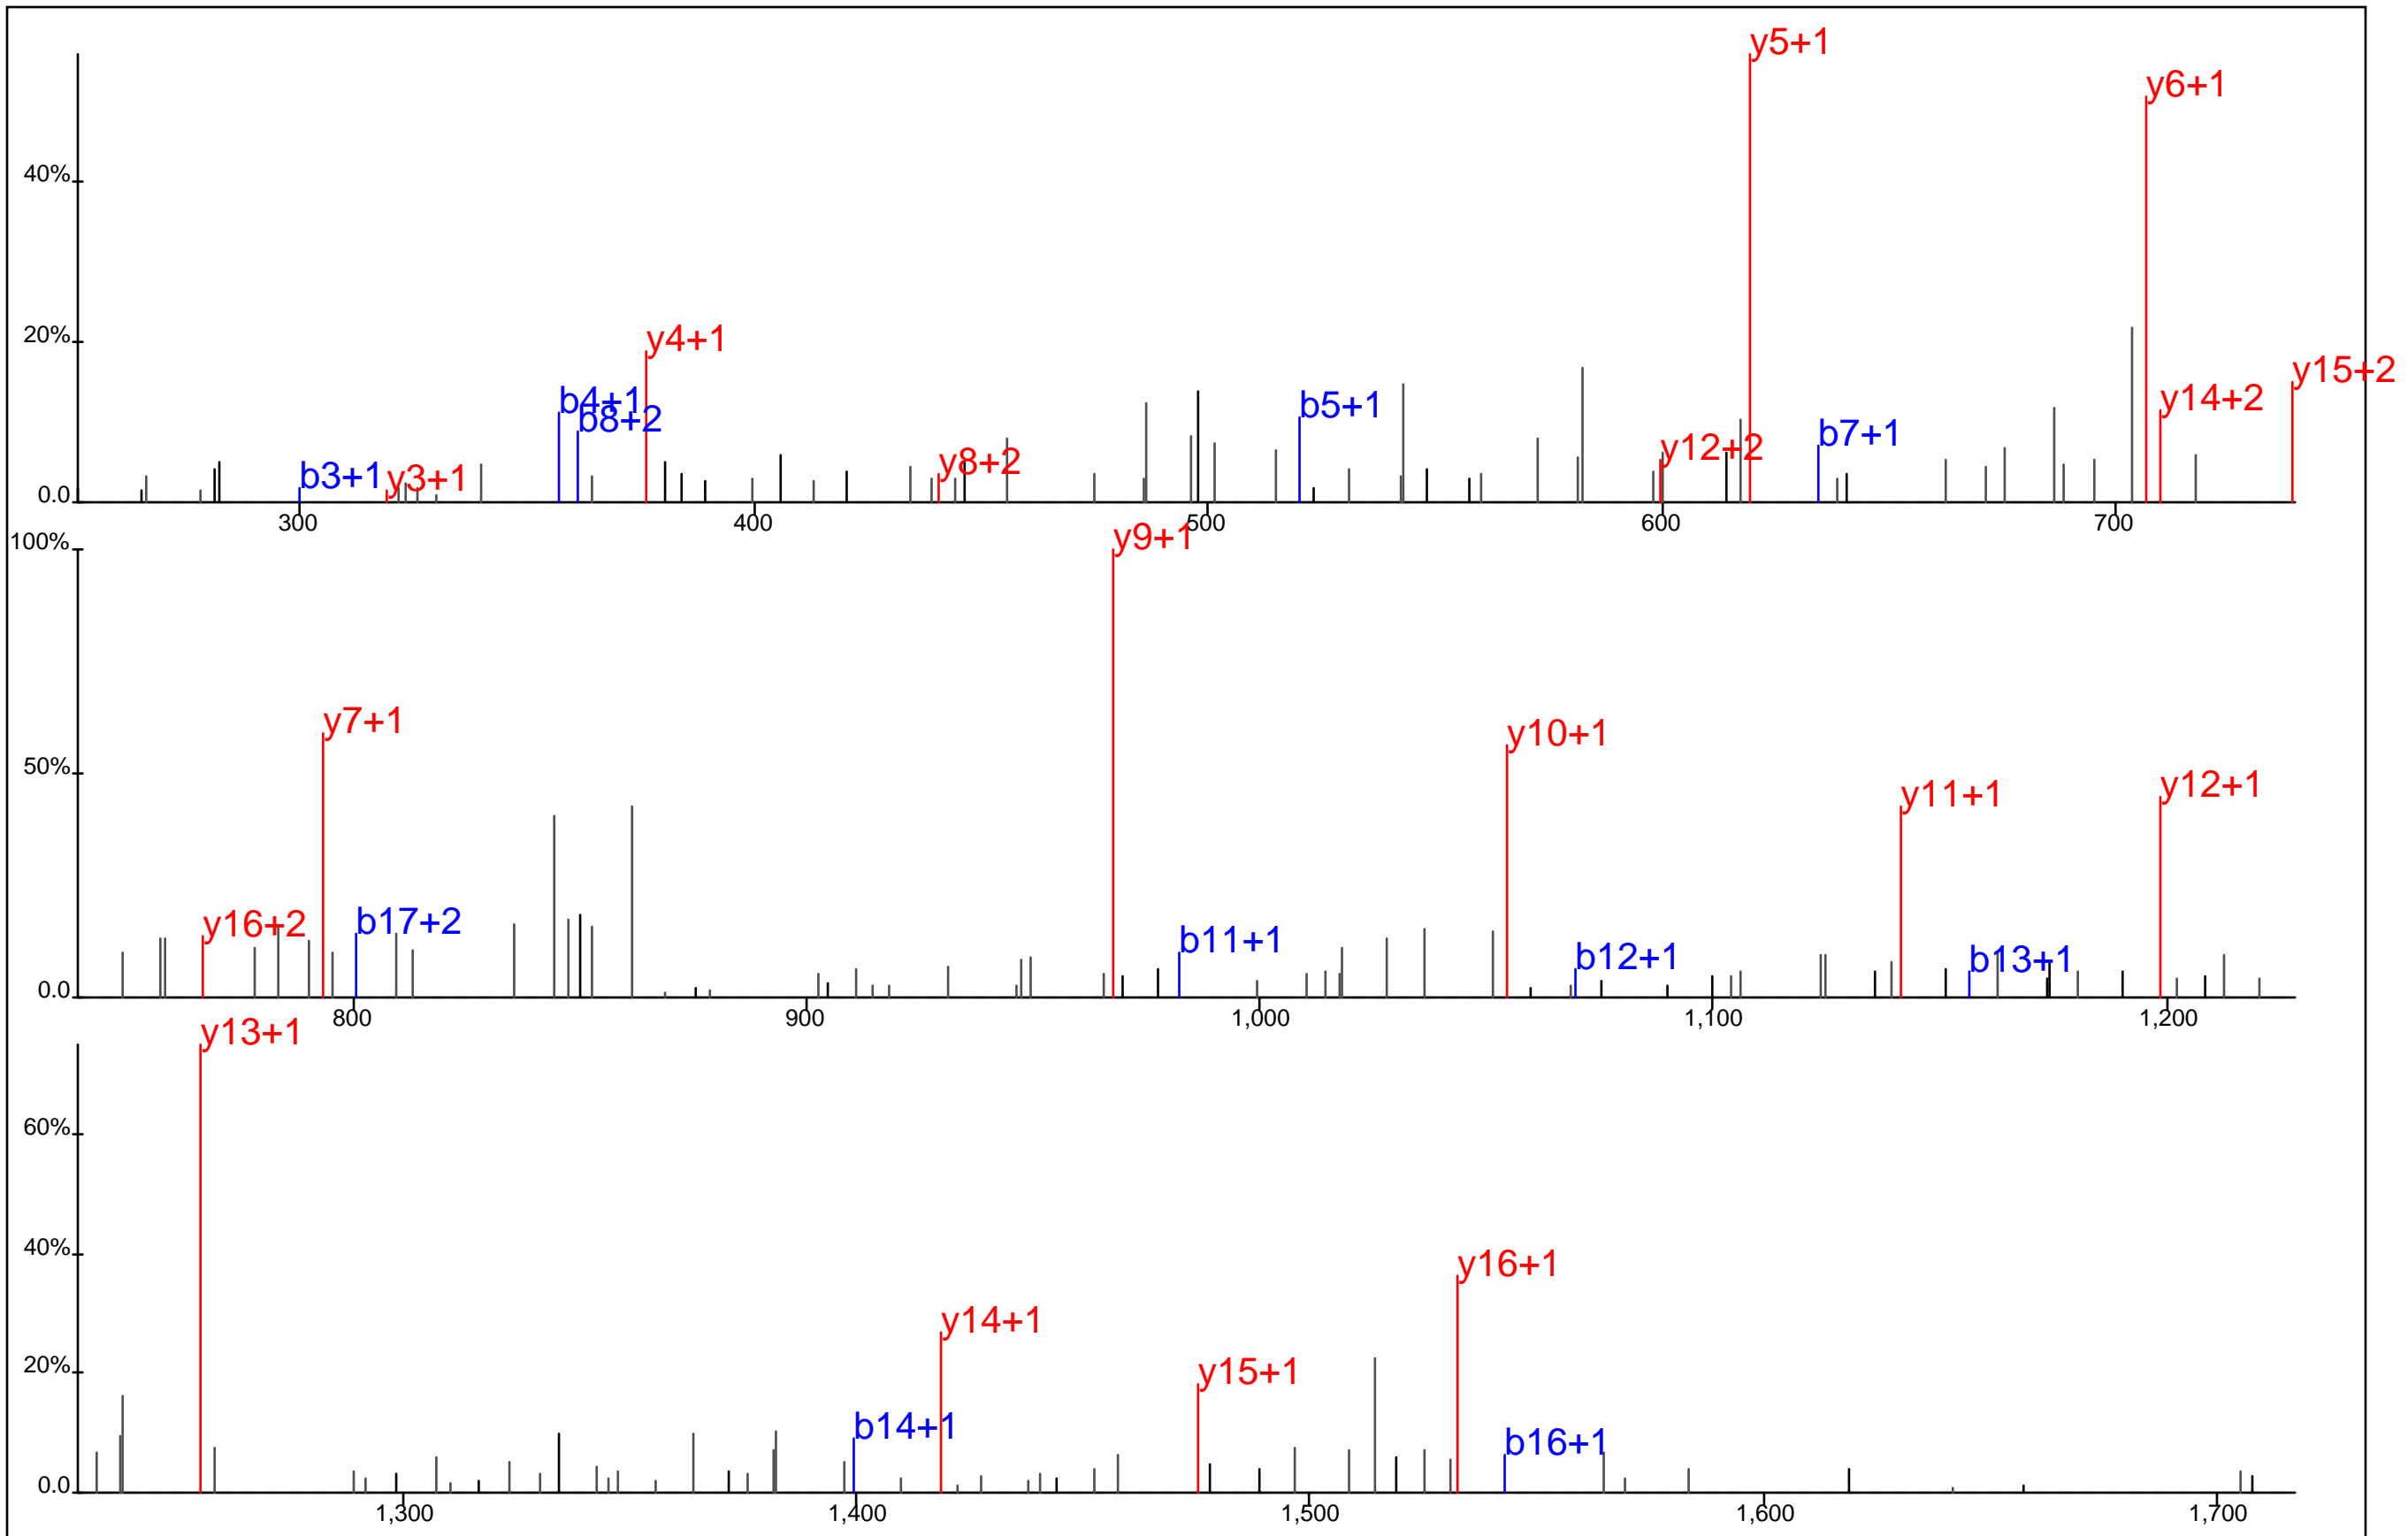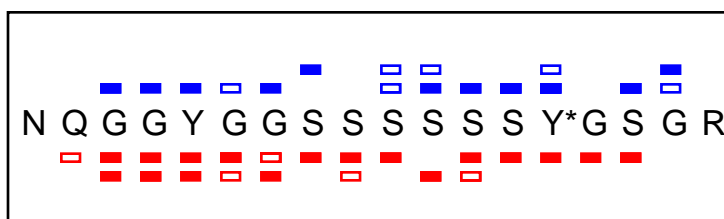

Protein Name: Heterogenous nuclear ribonucleoprotein A1  
 gi Accession: 0  
 Precursor Mass: 887.8336+2  
 Delta Mass: 3.641 ppm  
 XCorr: 77.17

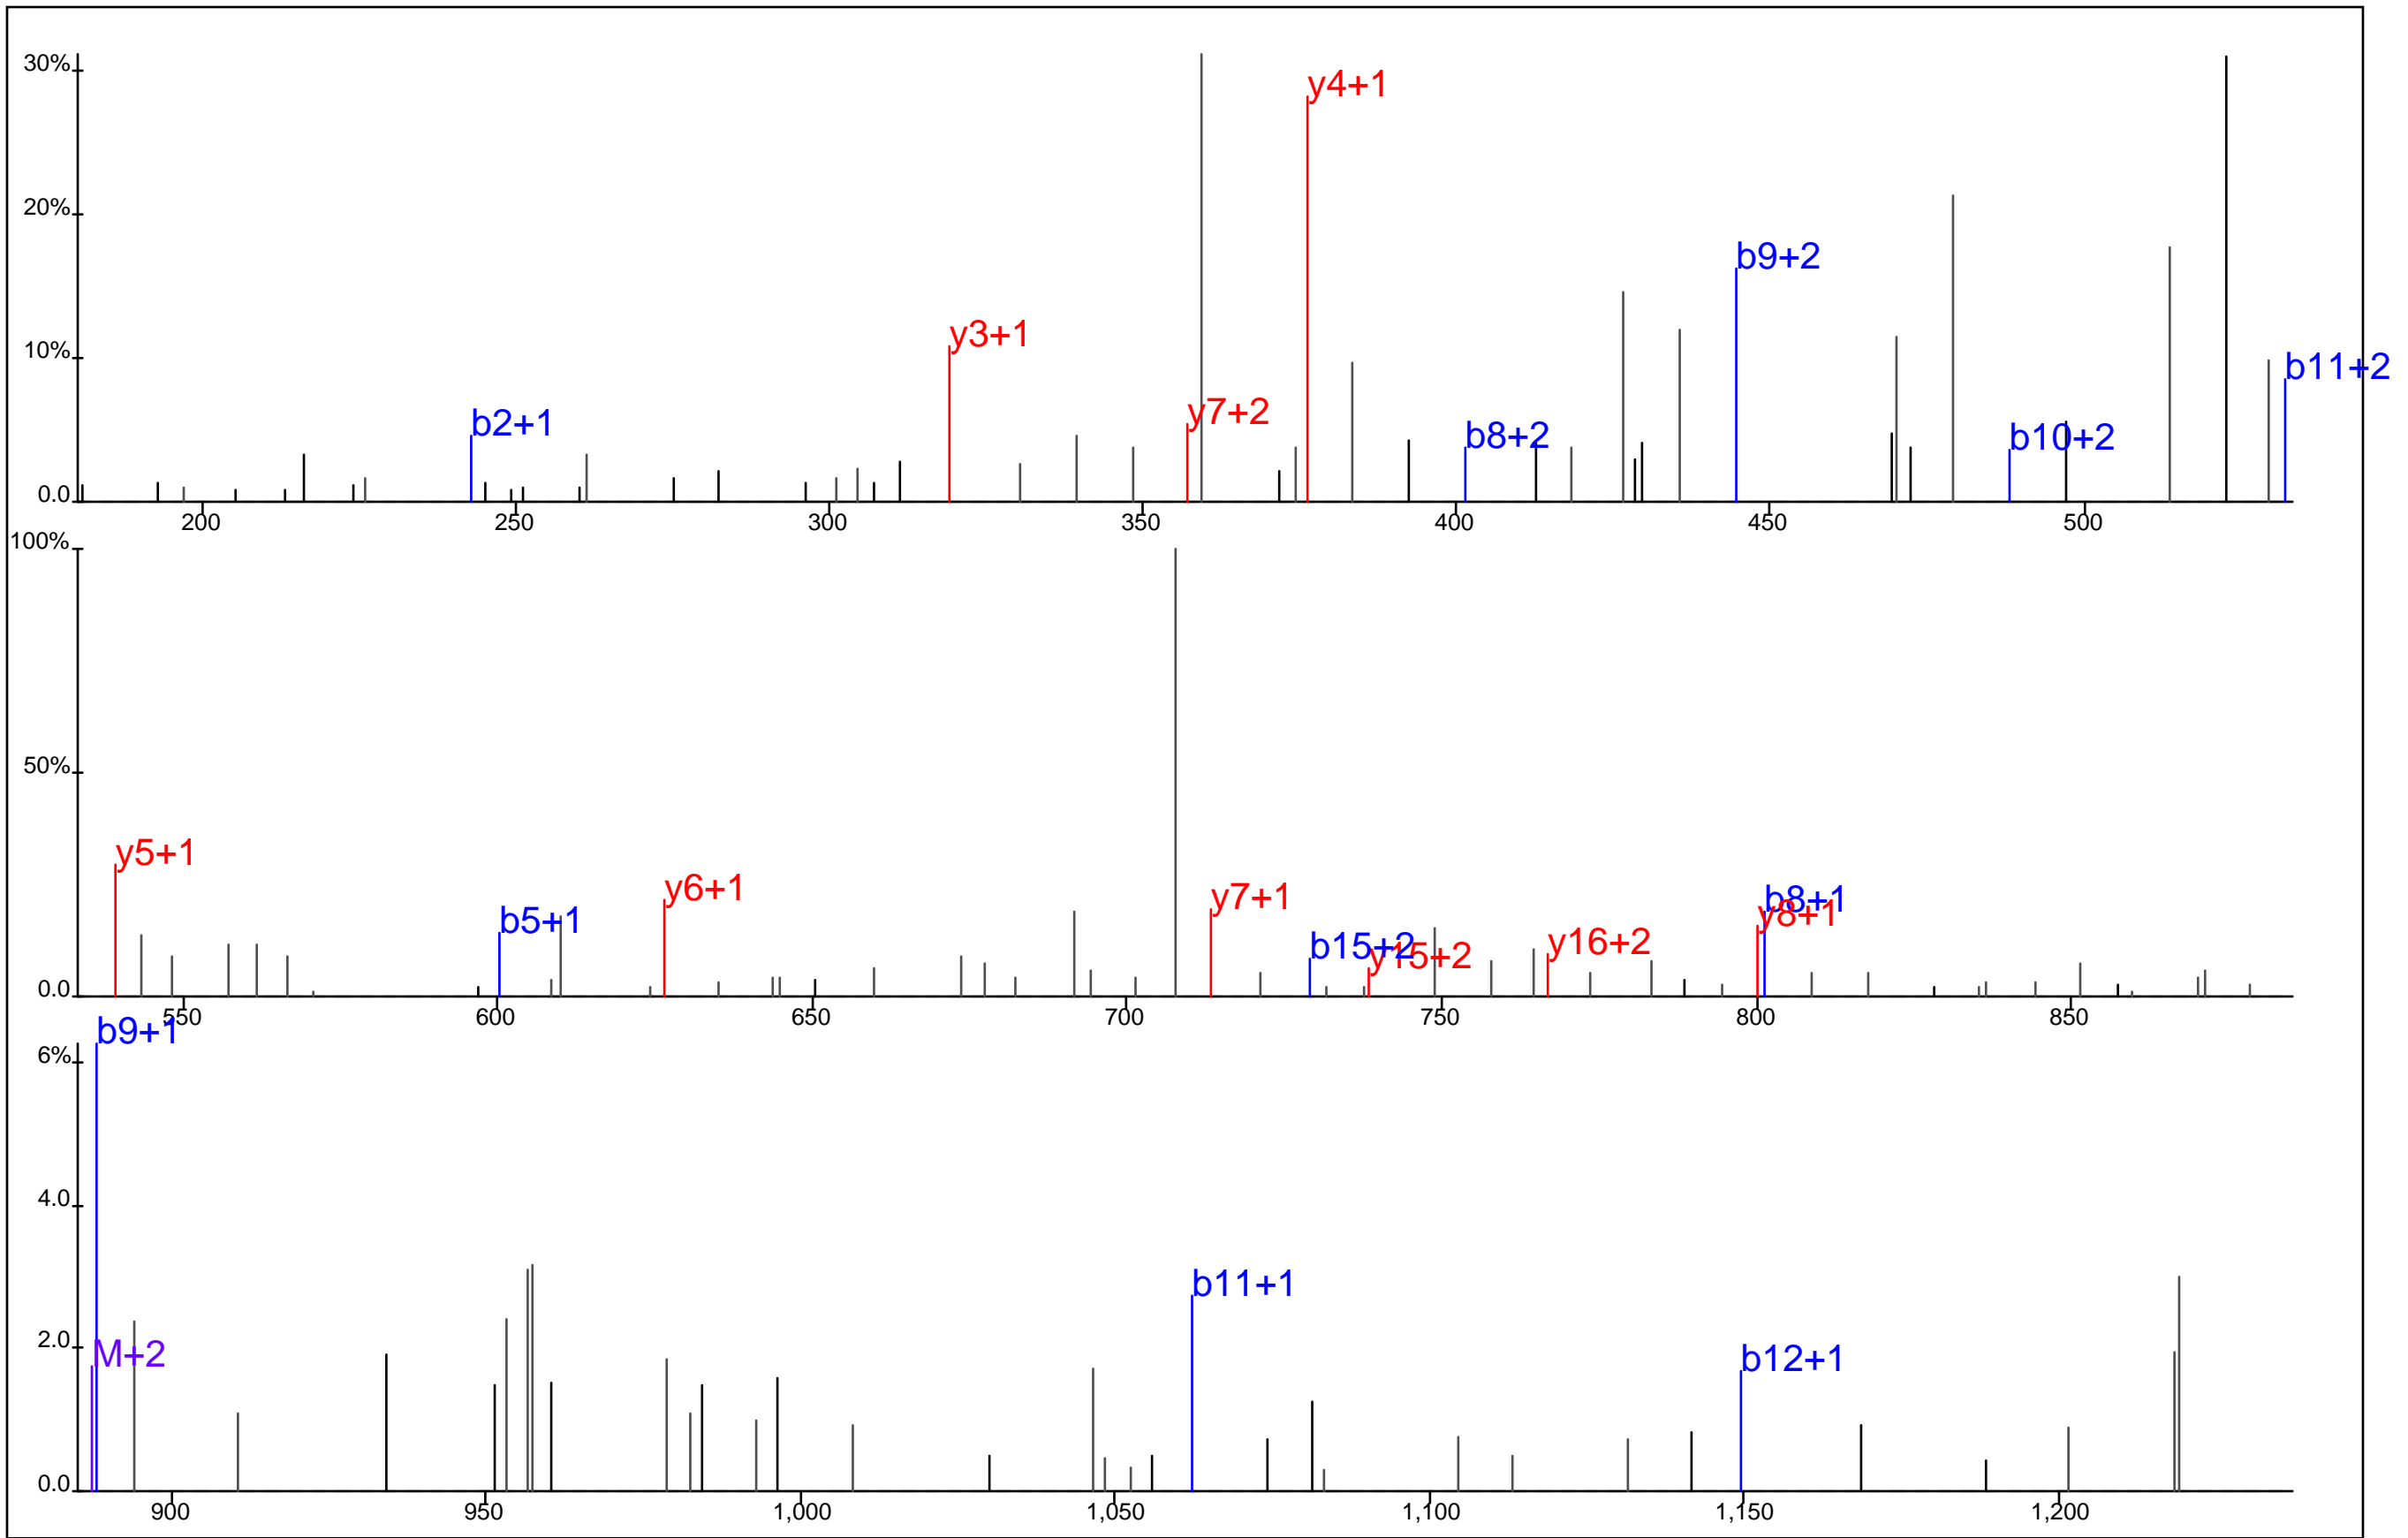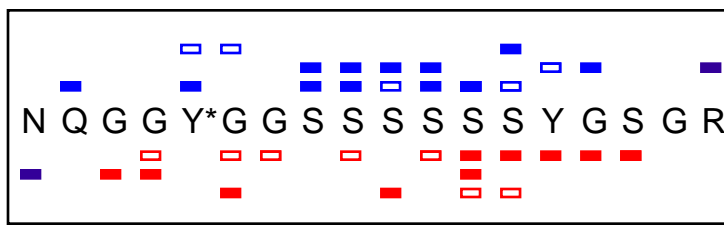

Protein Name: Heterogenous nuclear ribonucleoprotein A1  
 gi Accession: 0  
 Precursor Mass: 592.2267+3  
 Delta Mass: 0.415 ppm  
 XCorr: 44.7

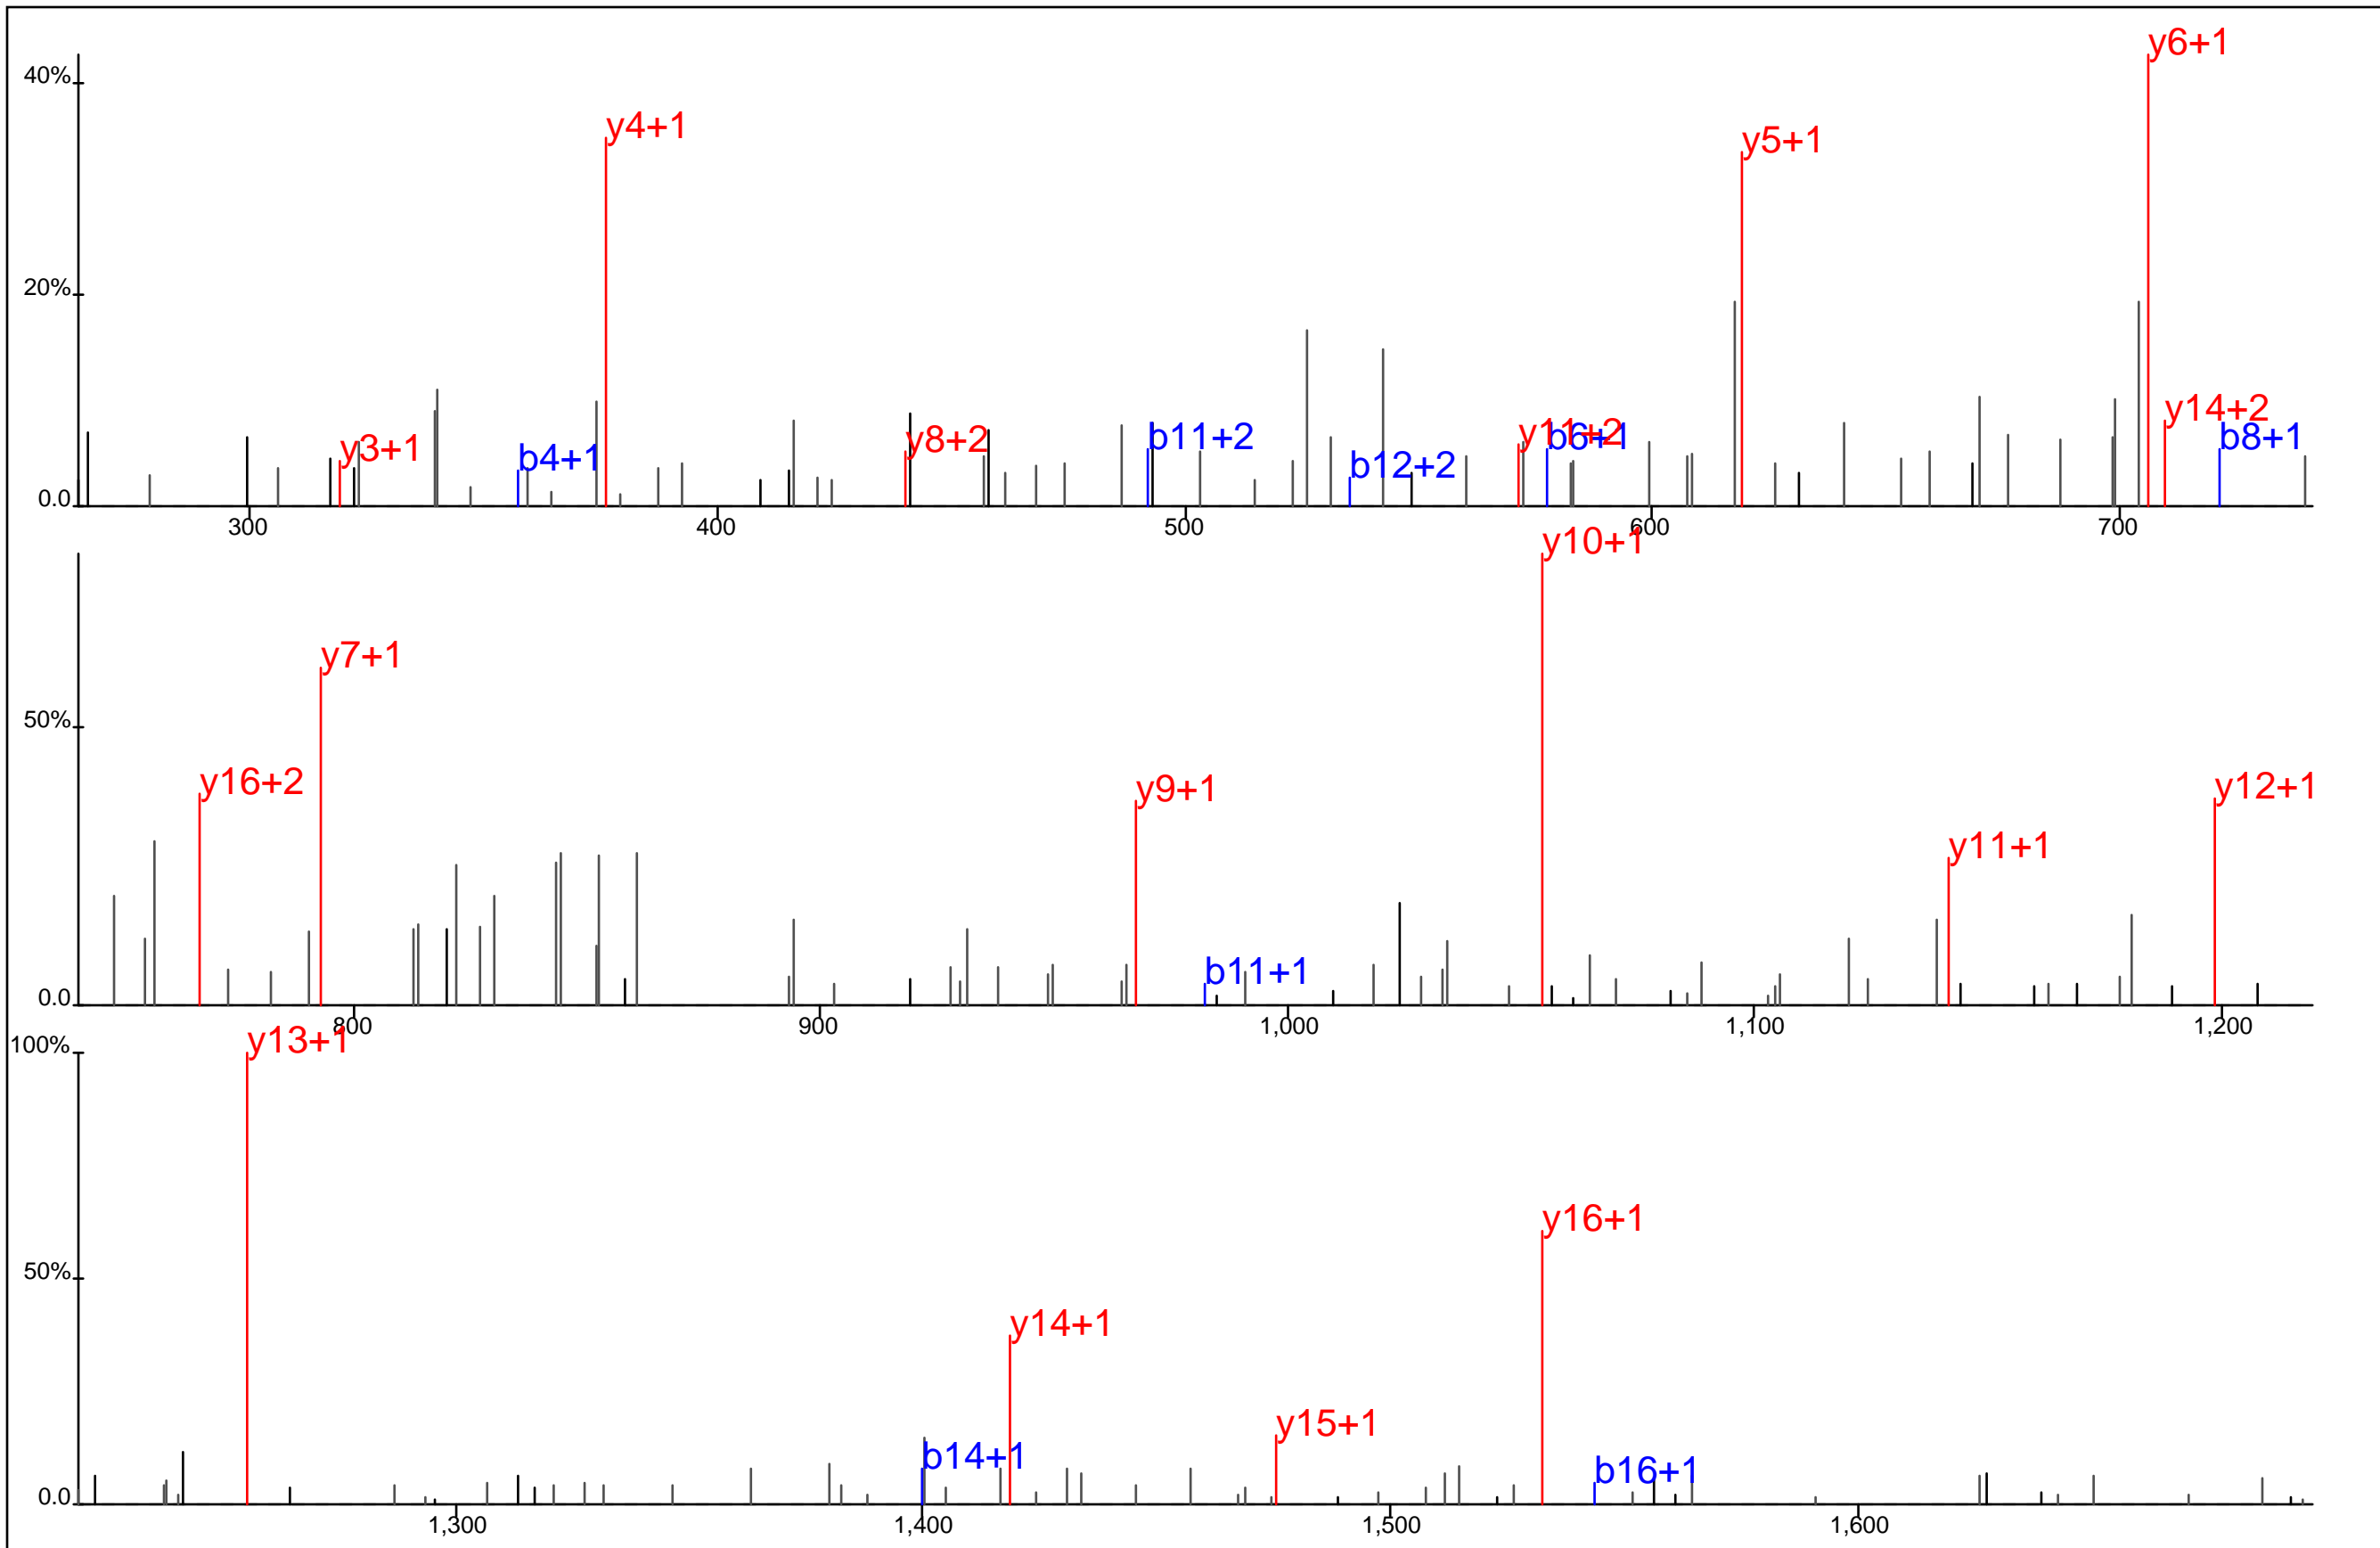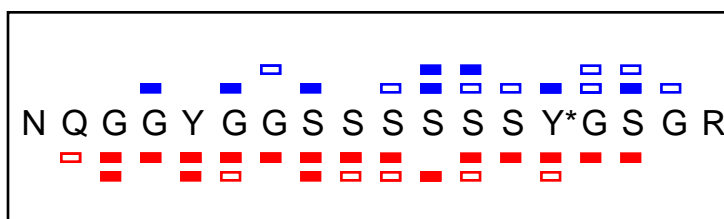

Protein Name: Heterogenous nuclear ribonucleoprotein A1  
 gi Accession: 0  
 Precursor Mass: 887.8383+2  
 Delta Mass: 1.587 ppm  
 XCorr: 76.03

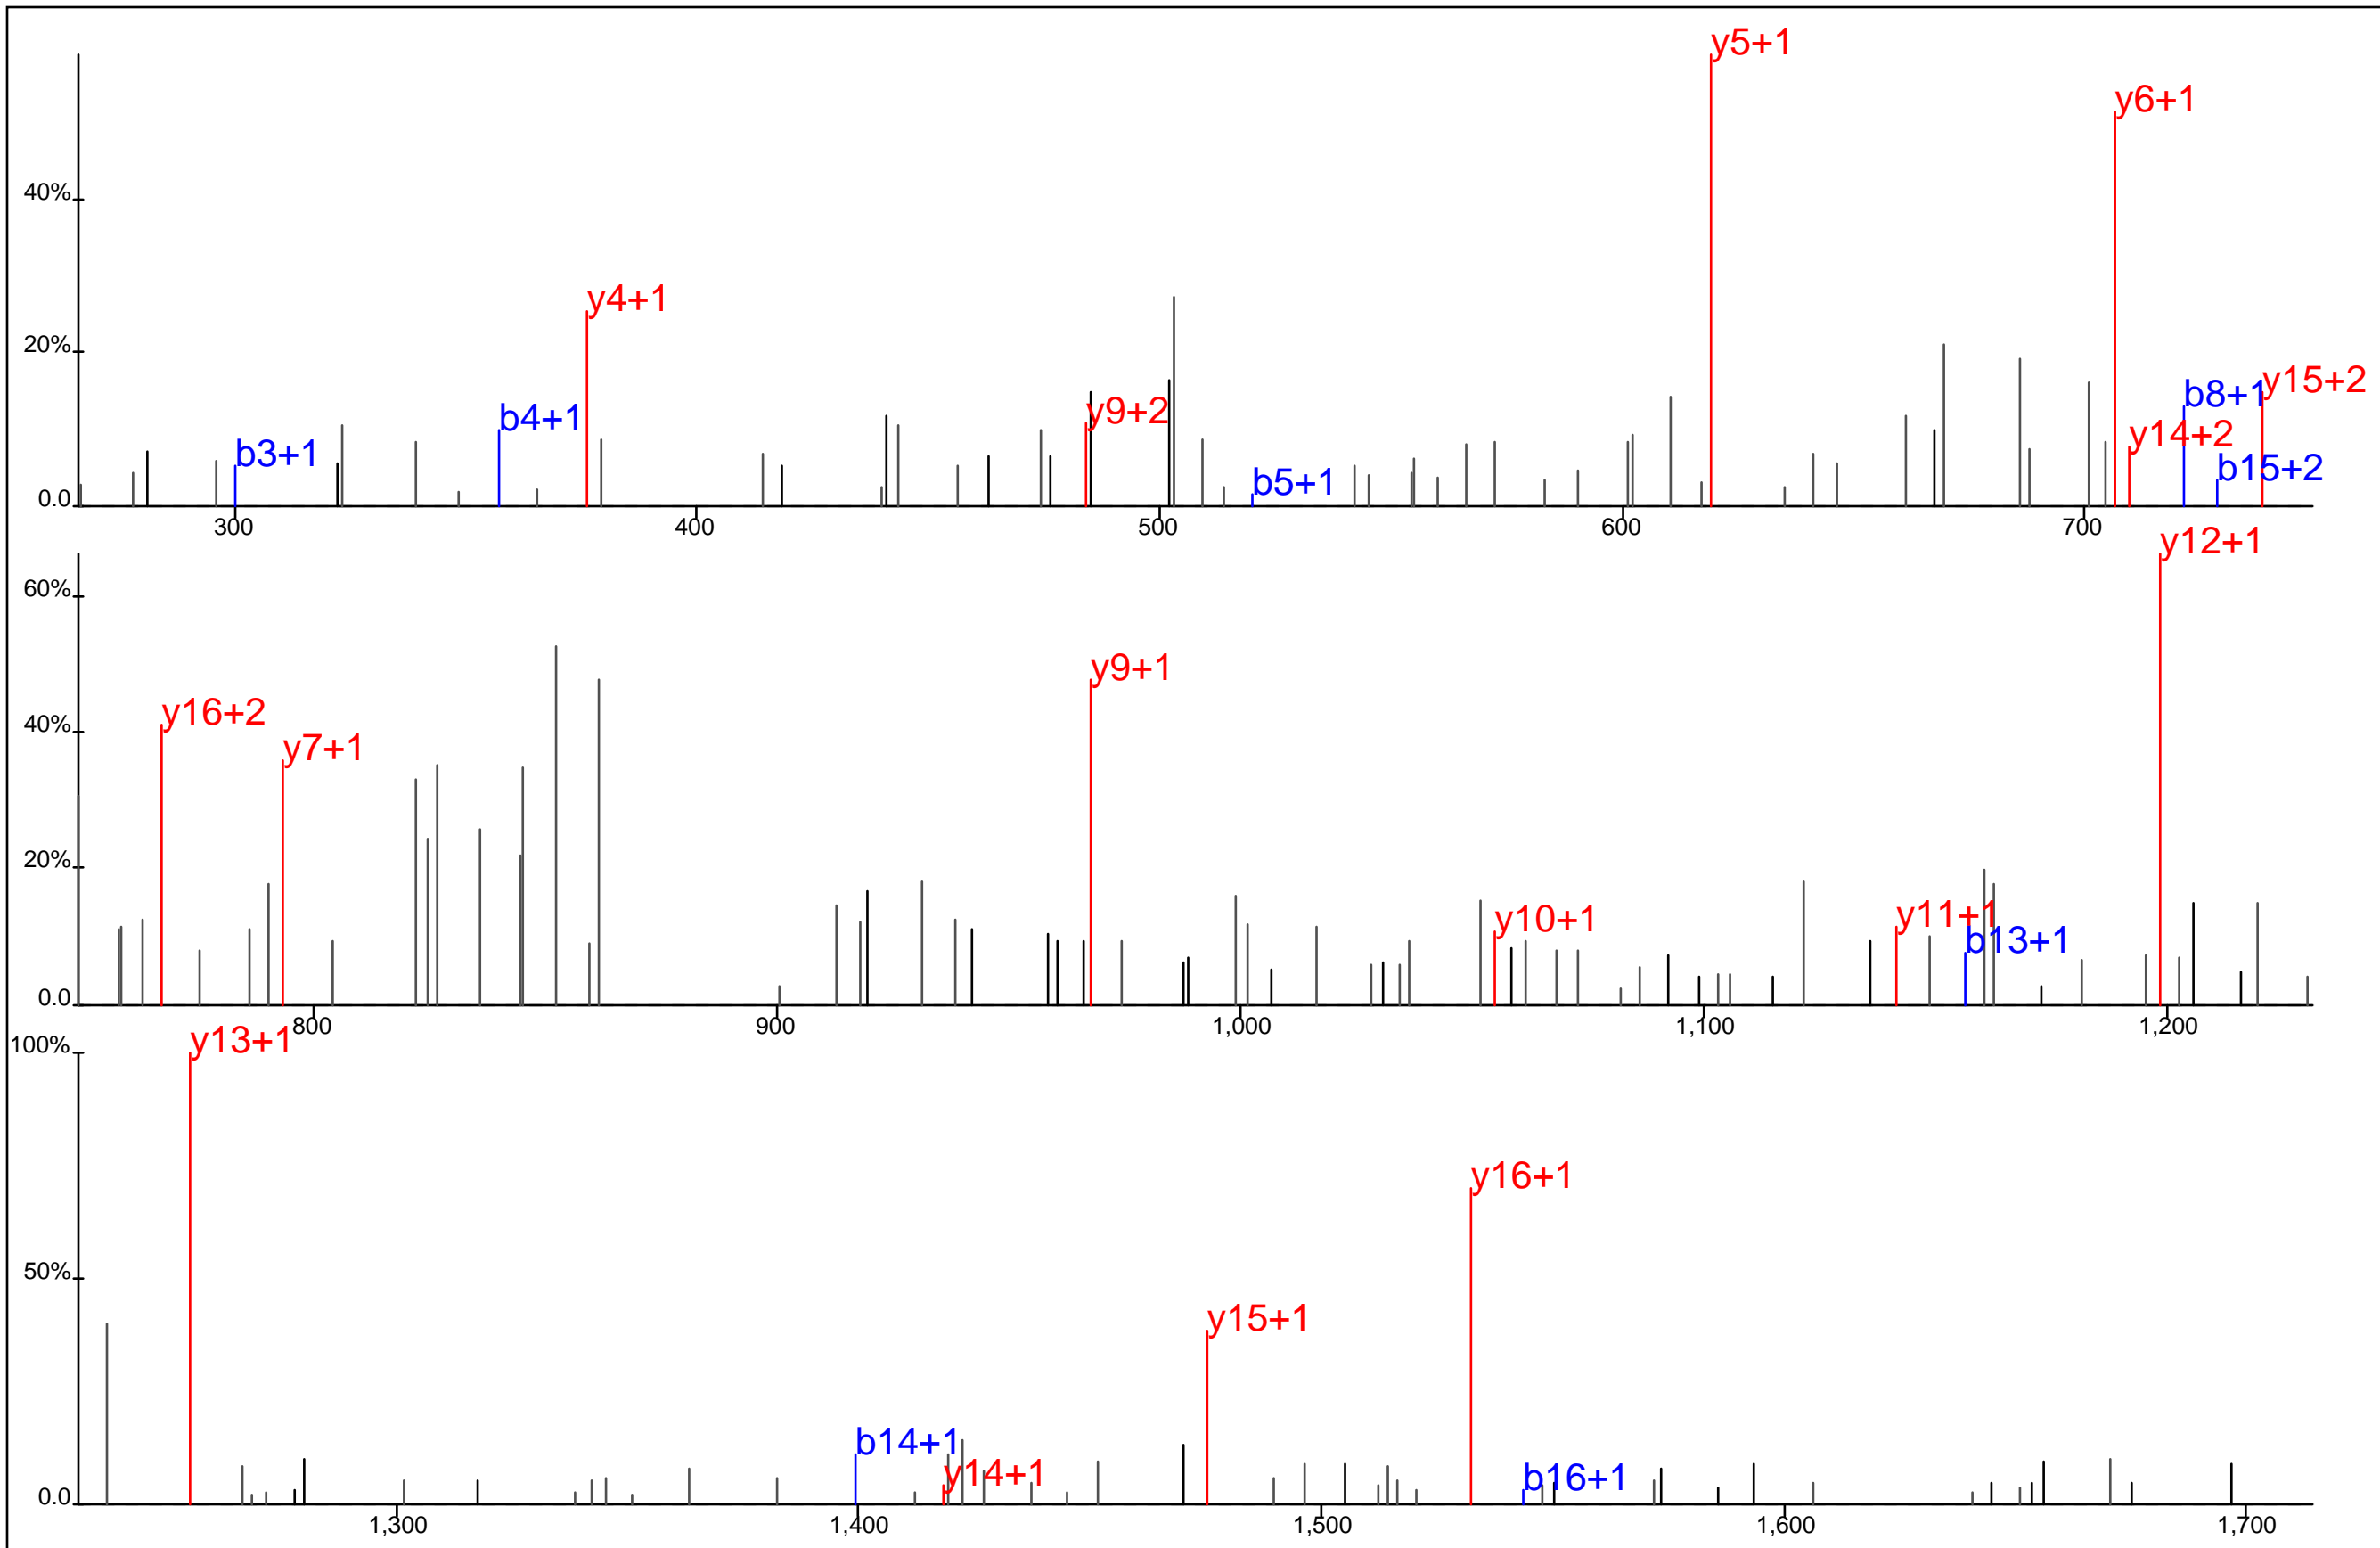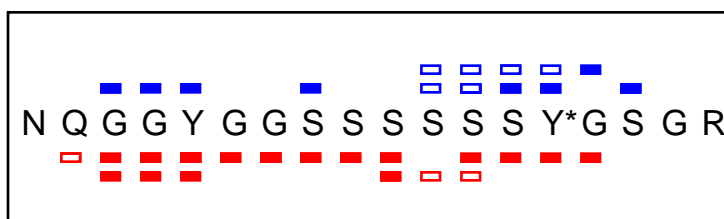

Protein Name: Heterogenous nuclear ribonucleoprotein A1  
 gi Accession: 0  
 Precursor Mass: 887.8339+2  
 Delta Mass: 3.298 ppm  
 XCorr: 30.14

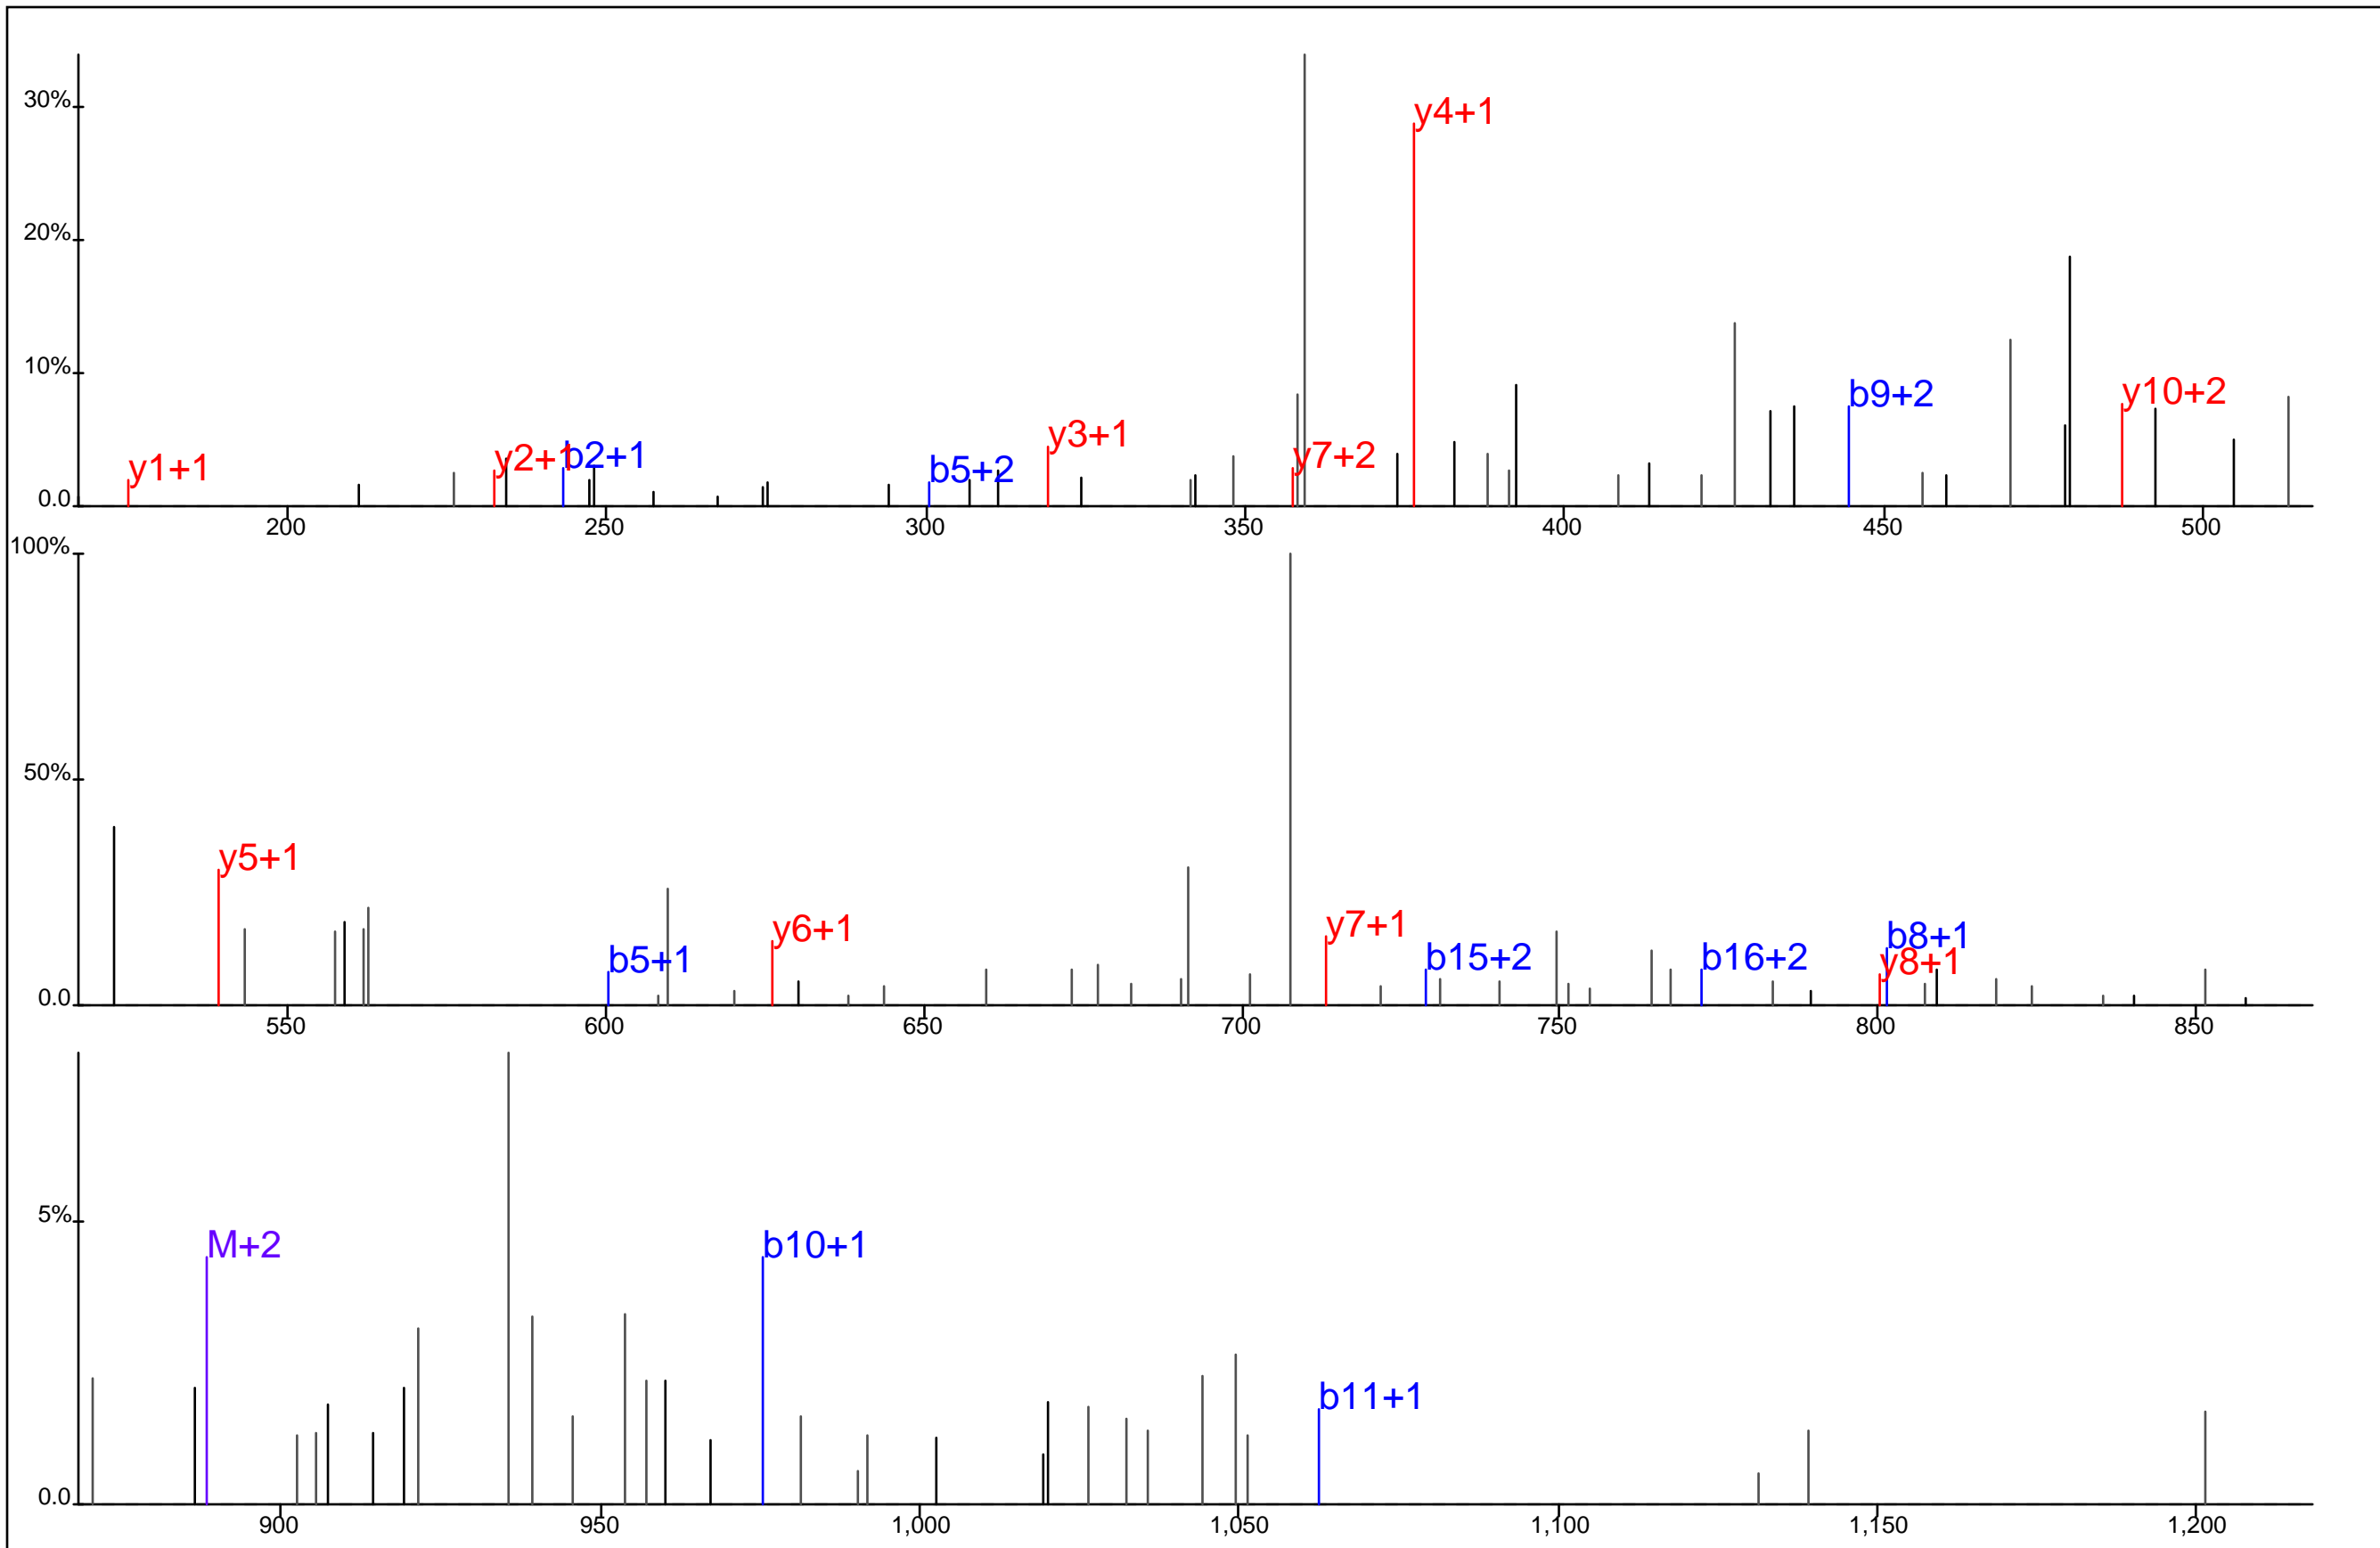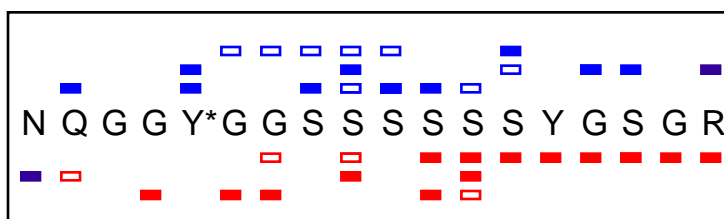

Protein Name: Heterogenous nuclear ribonucleoprotein A1  
 gi Accession: 0  
 Precursor Mass: 592.2277+3  
 Delta Mass: 1.235 ppm  
 XCorr: 45.72



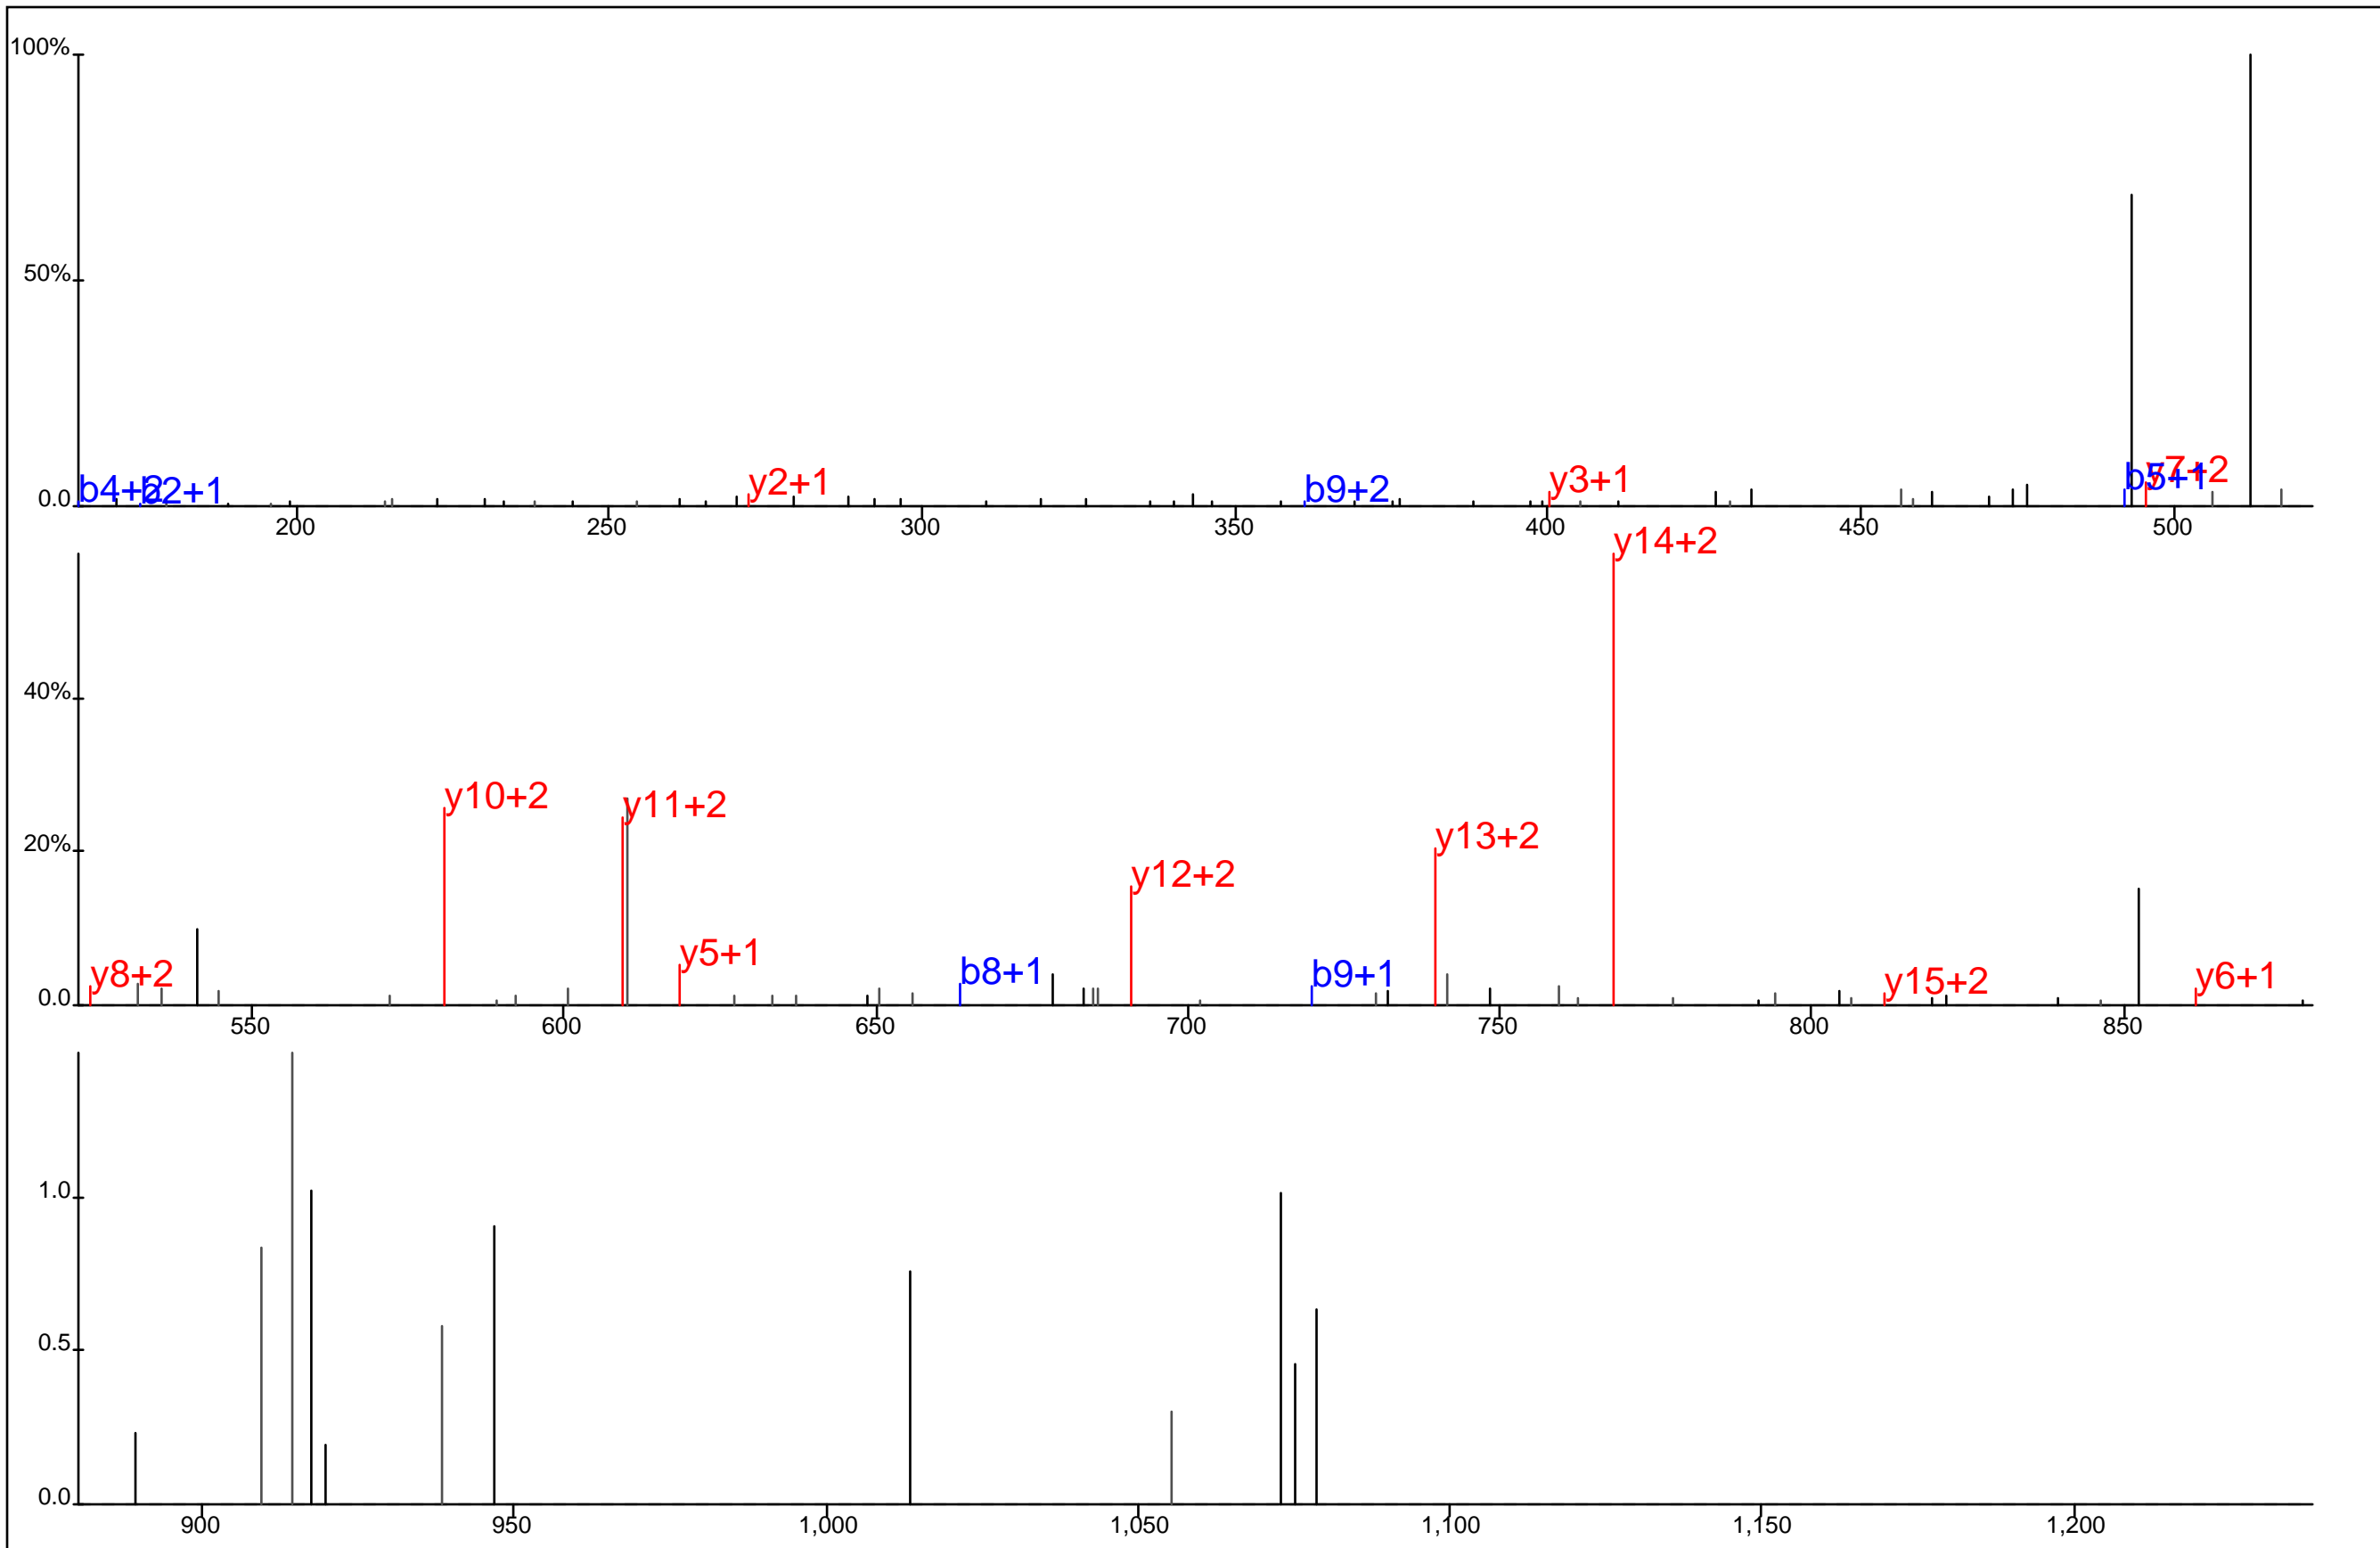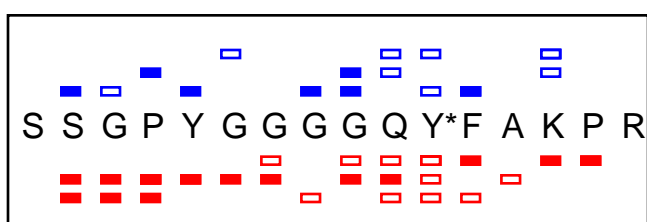

Protein Name: Heterogenous nuclear ribonucleoprotein A1  
 gi Accession: 0  
 Precursor Mass: 570.2546+3  
 Delta Mass: 0.749 ppm  
 XCorr: 20.44

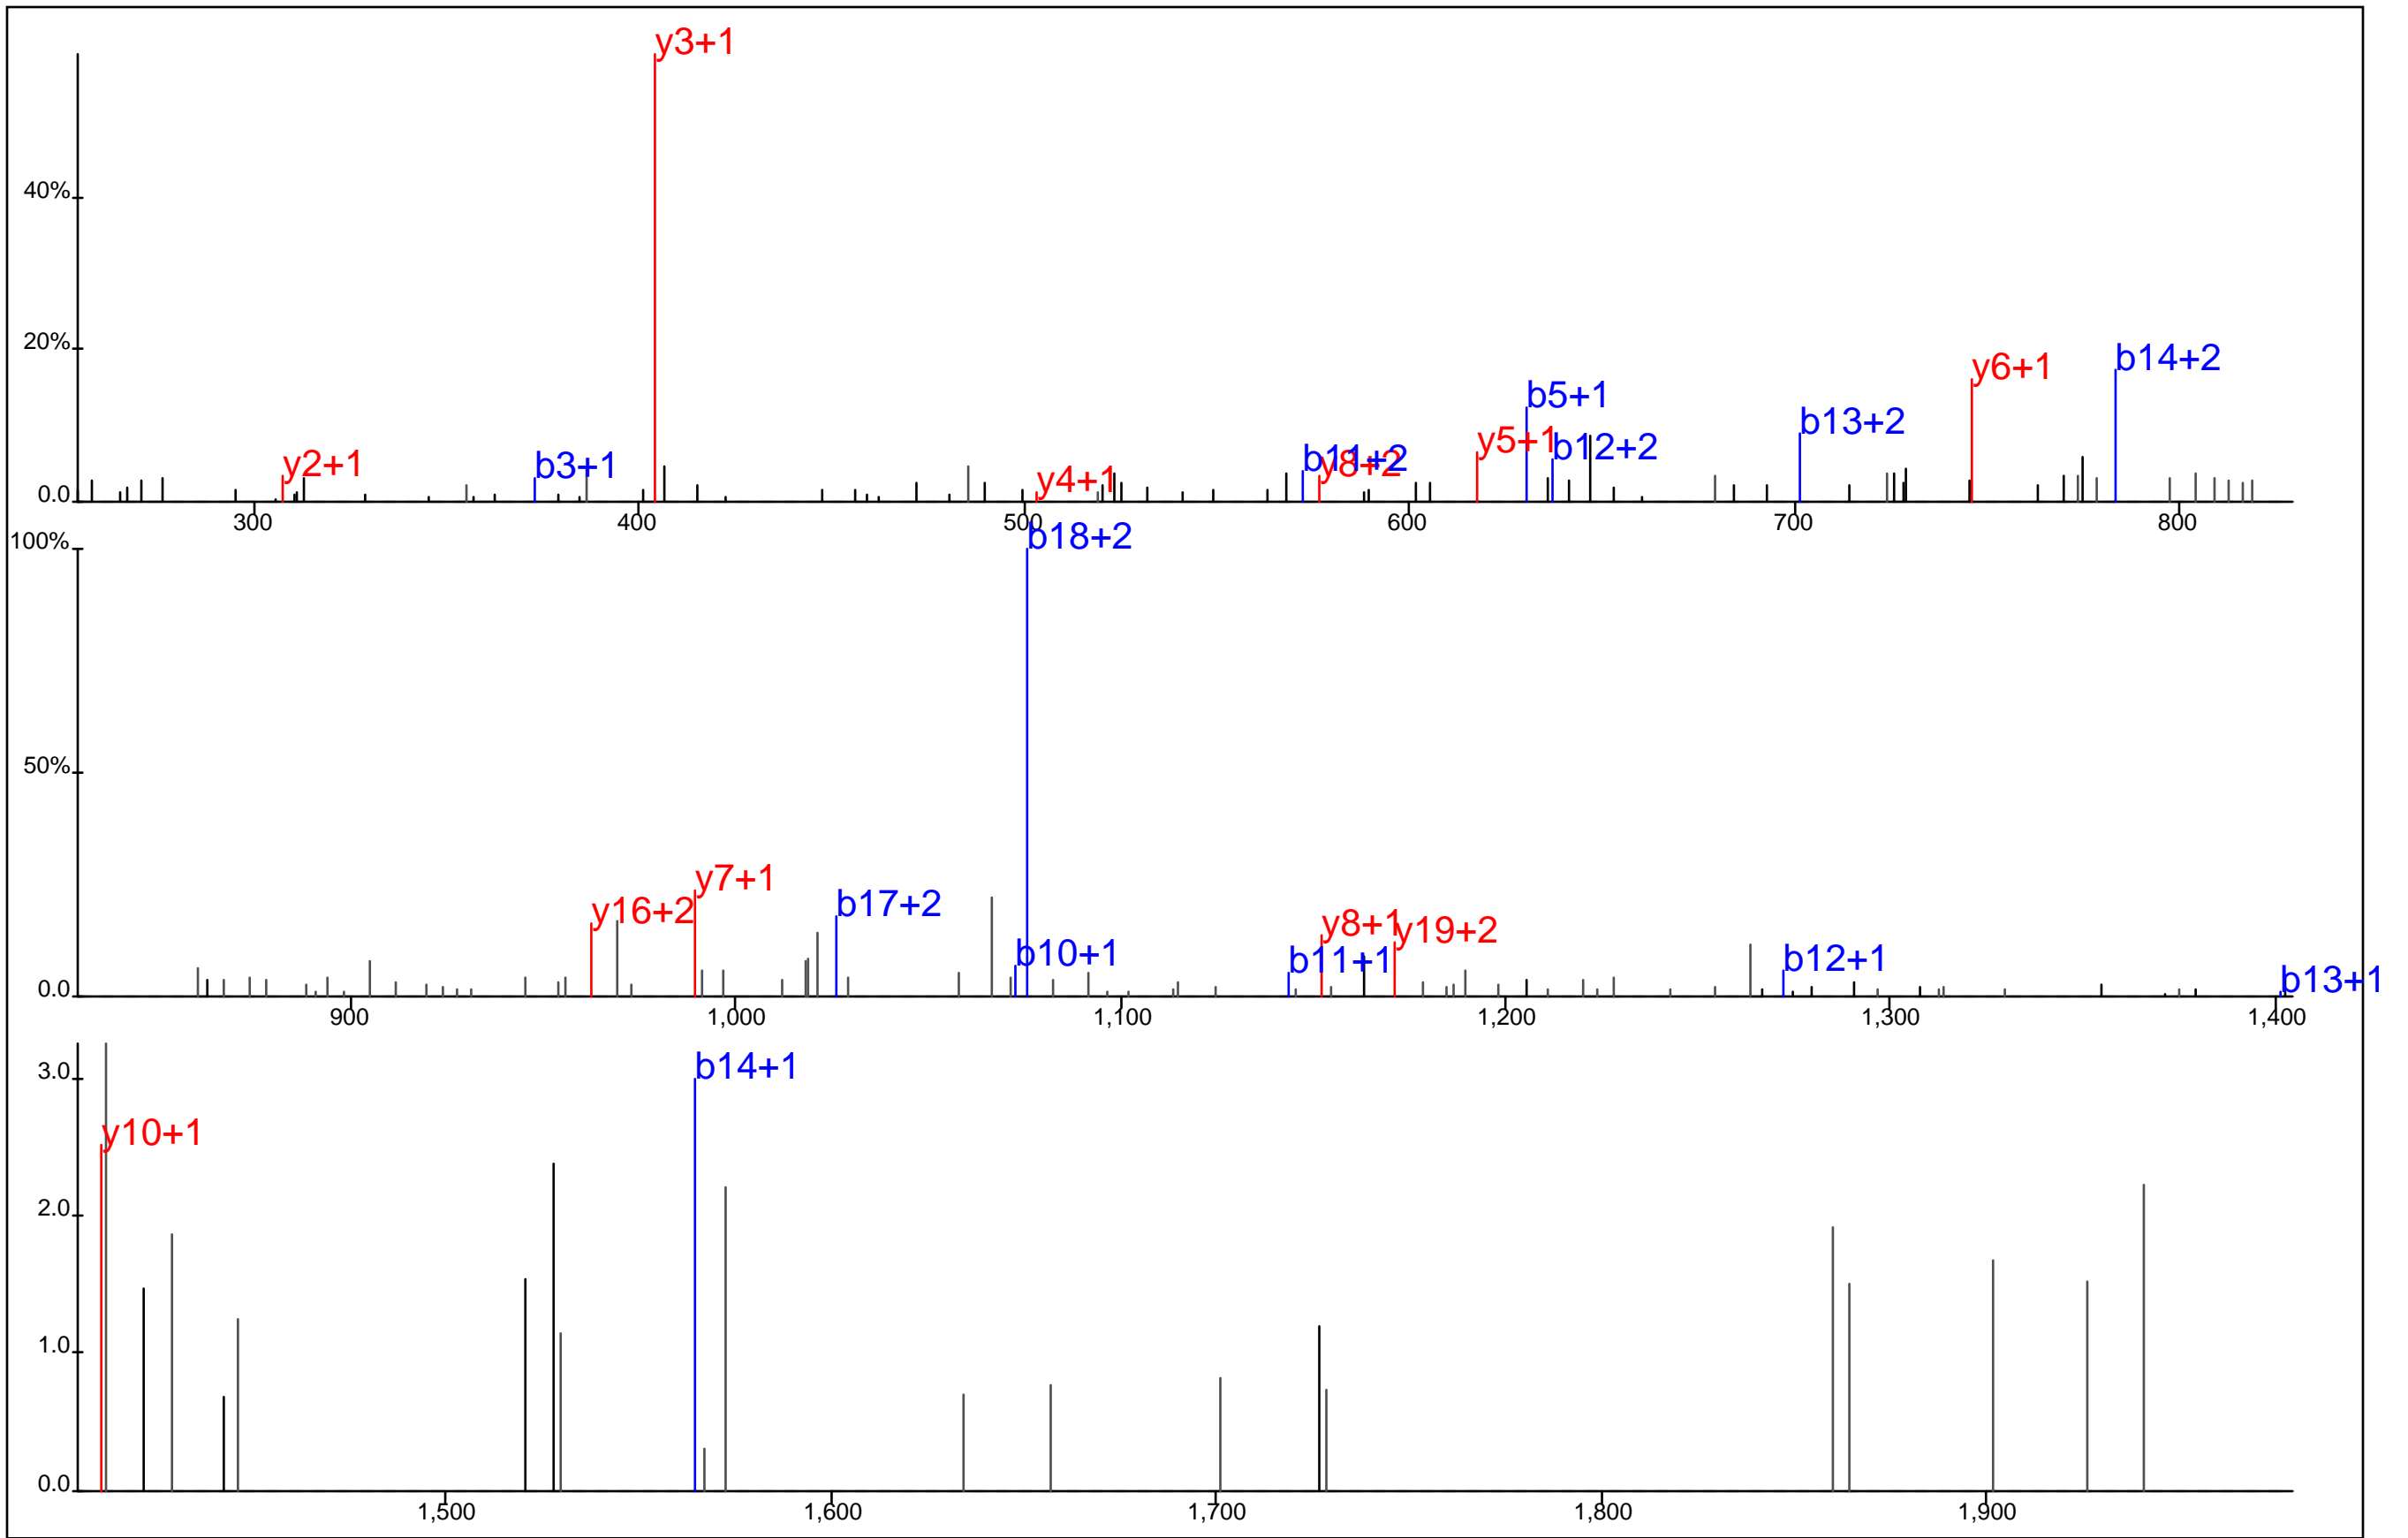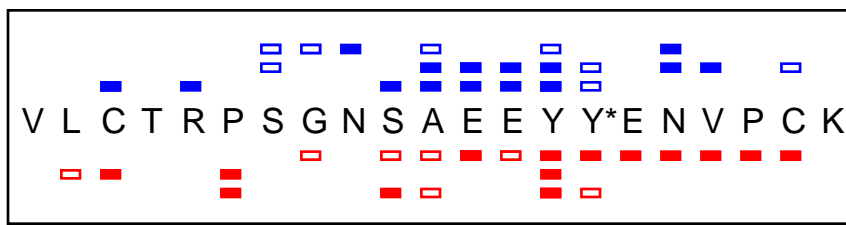

Protein Name: HGAL  
 gi Accession: 0  
 Precursor Mass: 851.6987+3  
 Delta Mass: 1.217 ppm  
 XCorr: 23.53

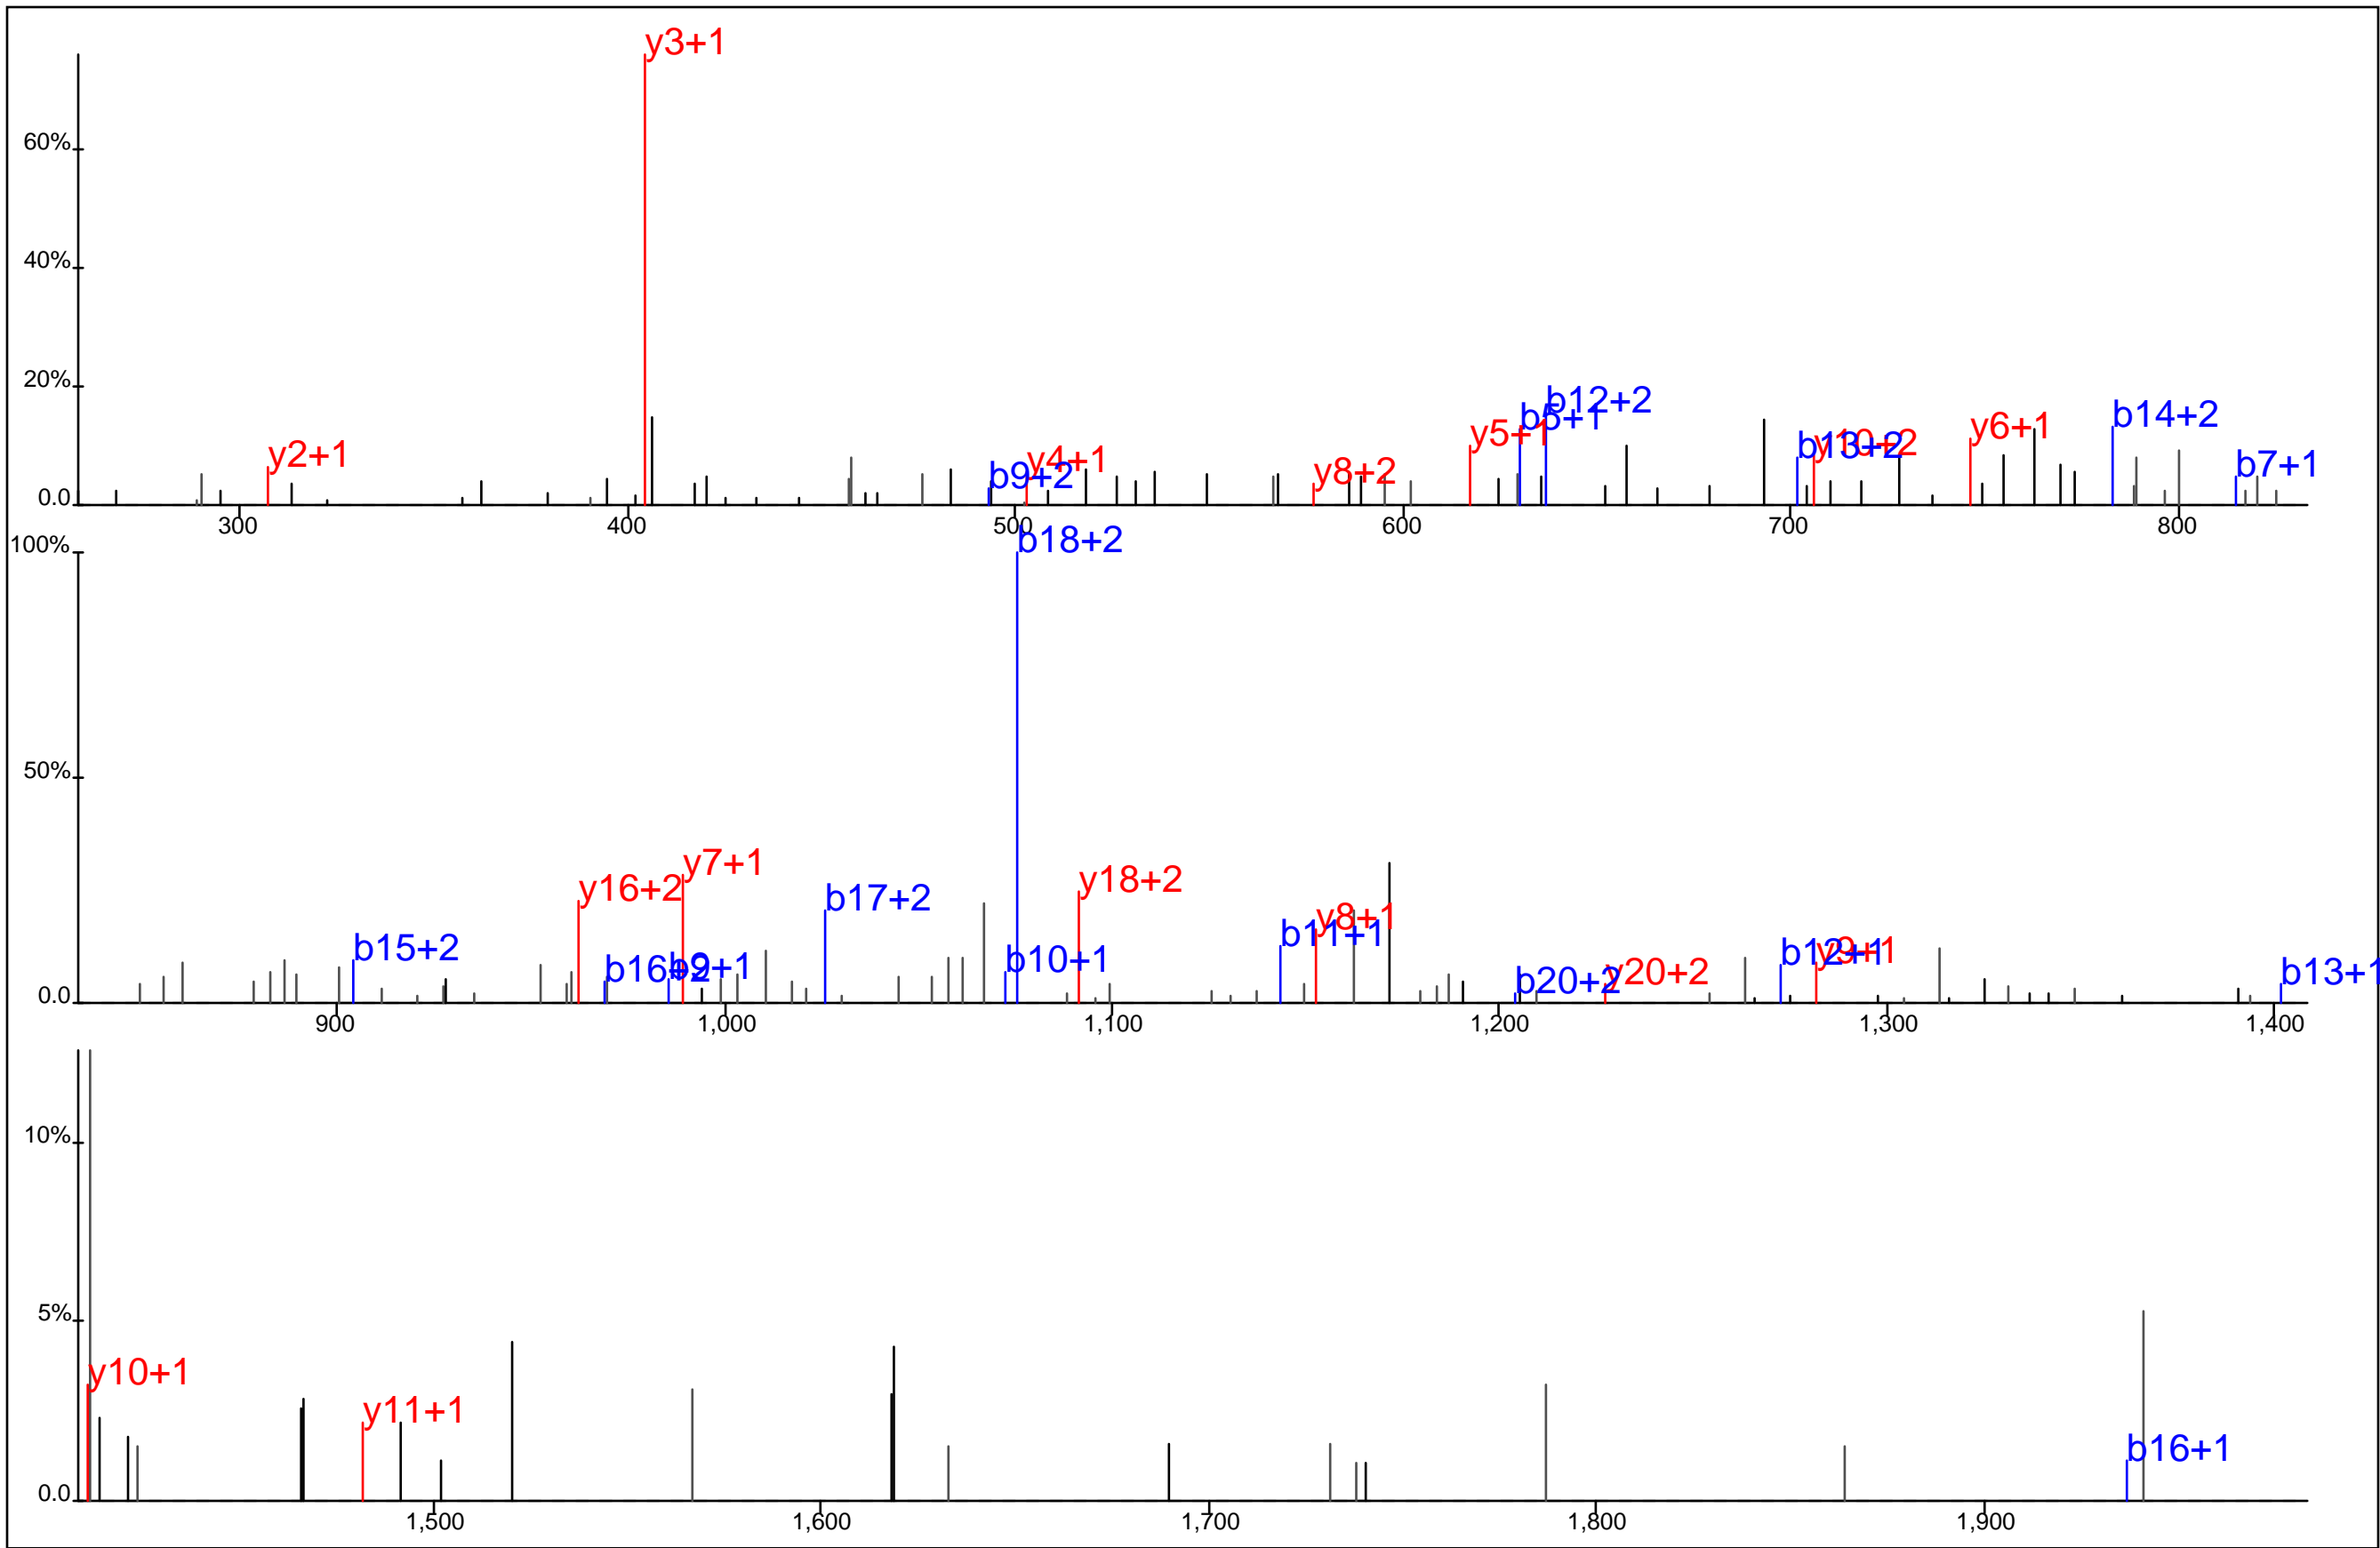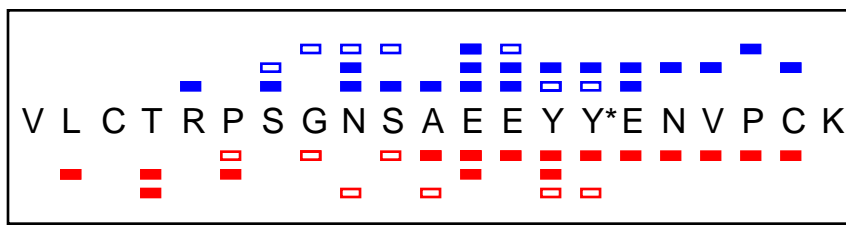

Protein Name: HGAL  
 gi Accession: 0  
 Precursor Mass: 851.6971+3  
 Delta Mass: 0.719 ppm  
 XCorr: 33.54

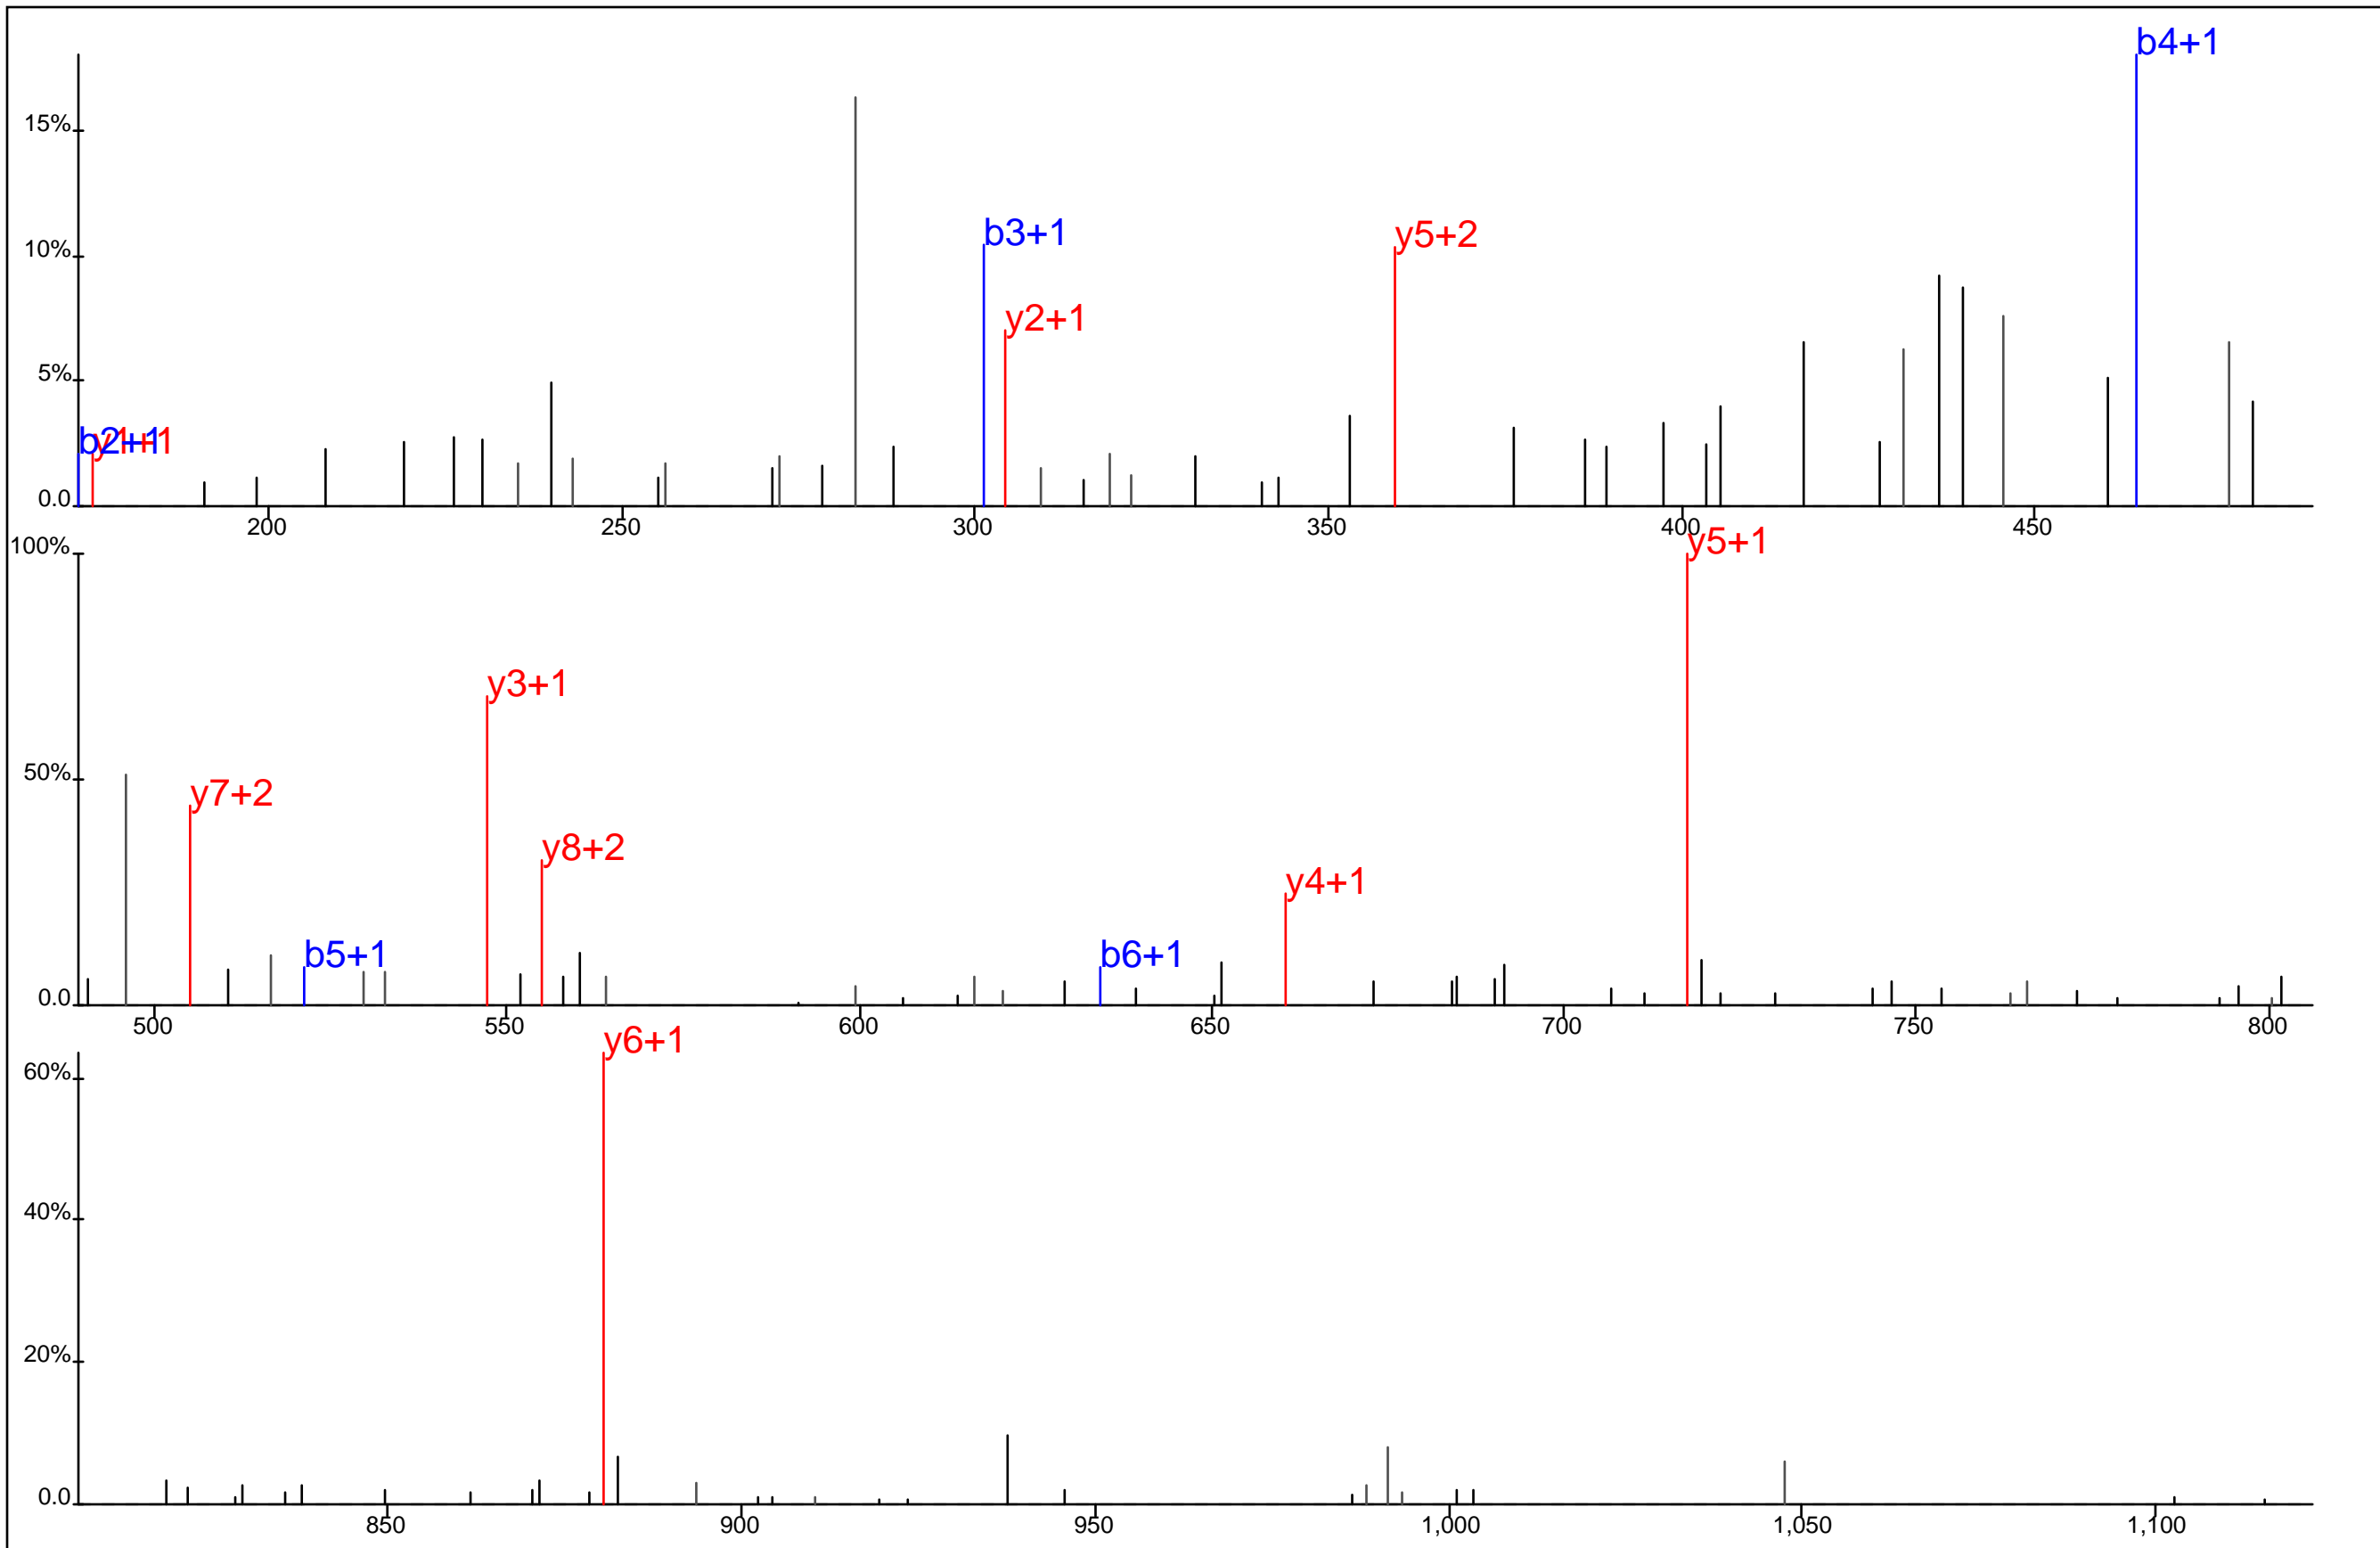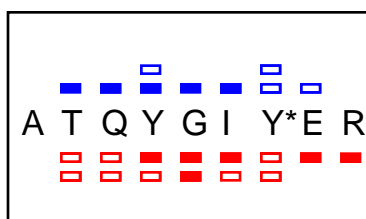

Protein Name: HIP14  
 gi Accession: 0  
 Precursor Mass: 590.7565+2  
 Delta Mass: 1.916 ppm  
 XCorr: 21.36

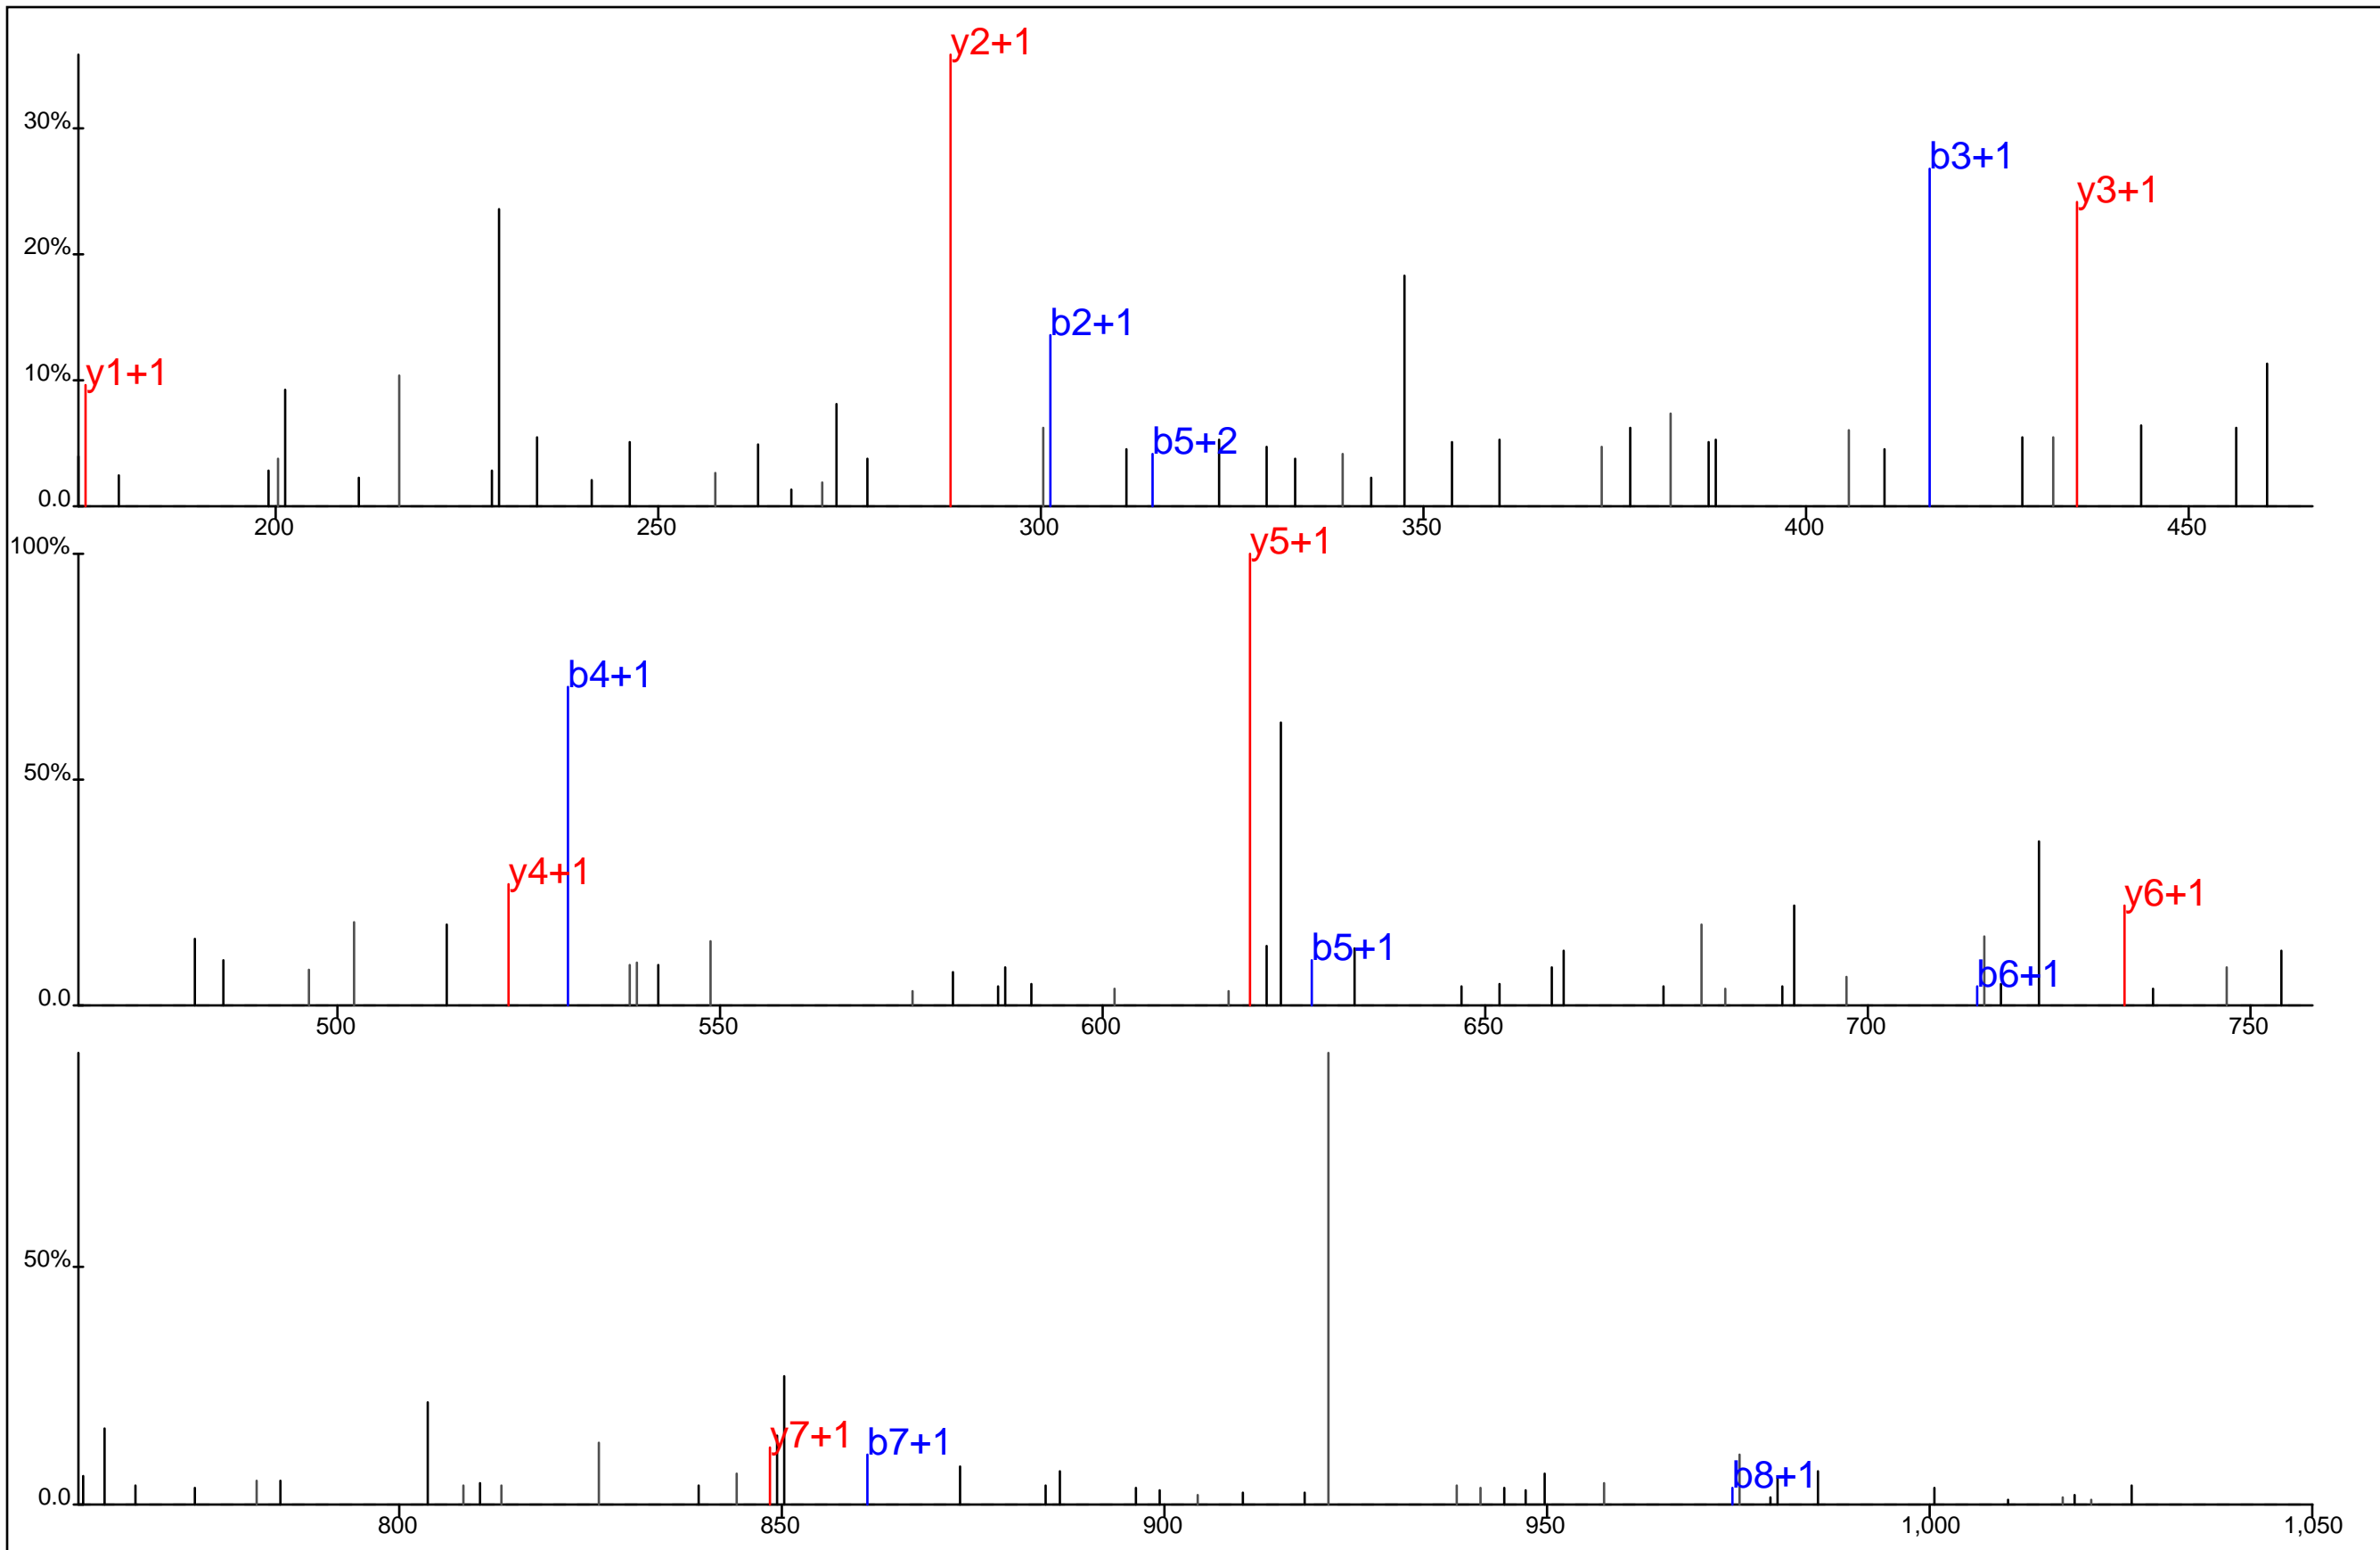

■ □ ■ □ ■ □ ■ □  
 G Y\* D N P S F L R  
□ ■ □ ■ □ ■ □ ■

Protein Name: HIP14  
 gi Accession: 0  
 Precursor Mass: 574.7426+2  
 Delta Mass: 0.549 ppm  
 XCorr: 22.64

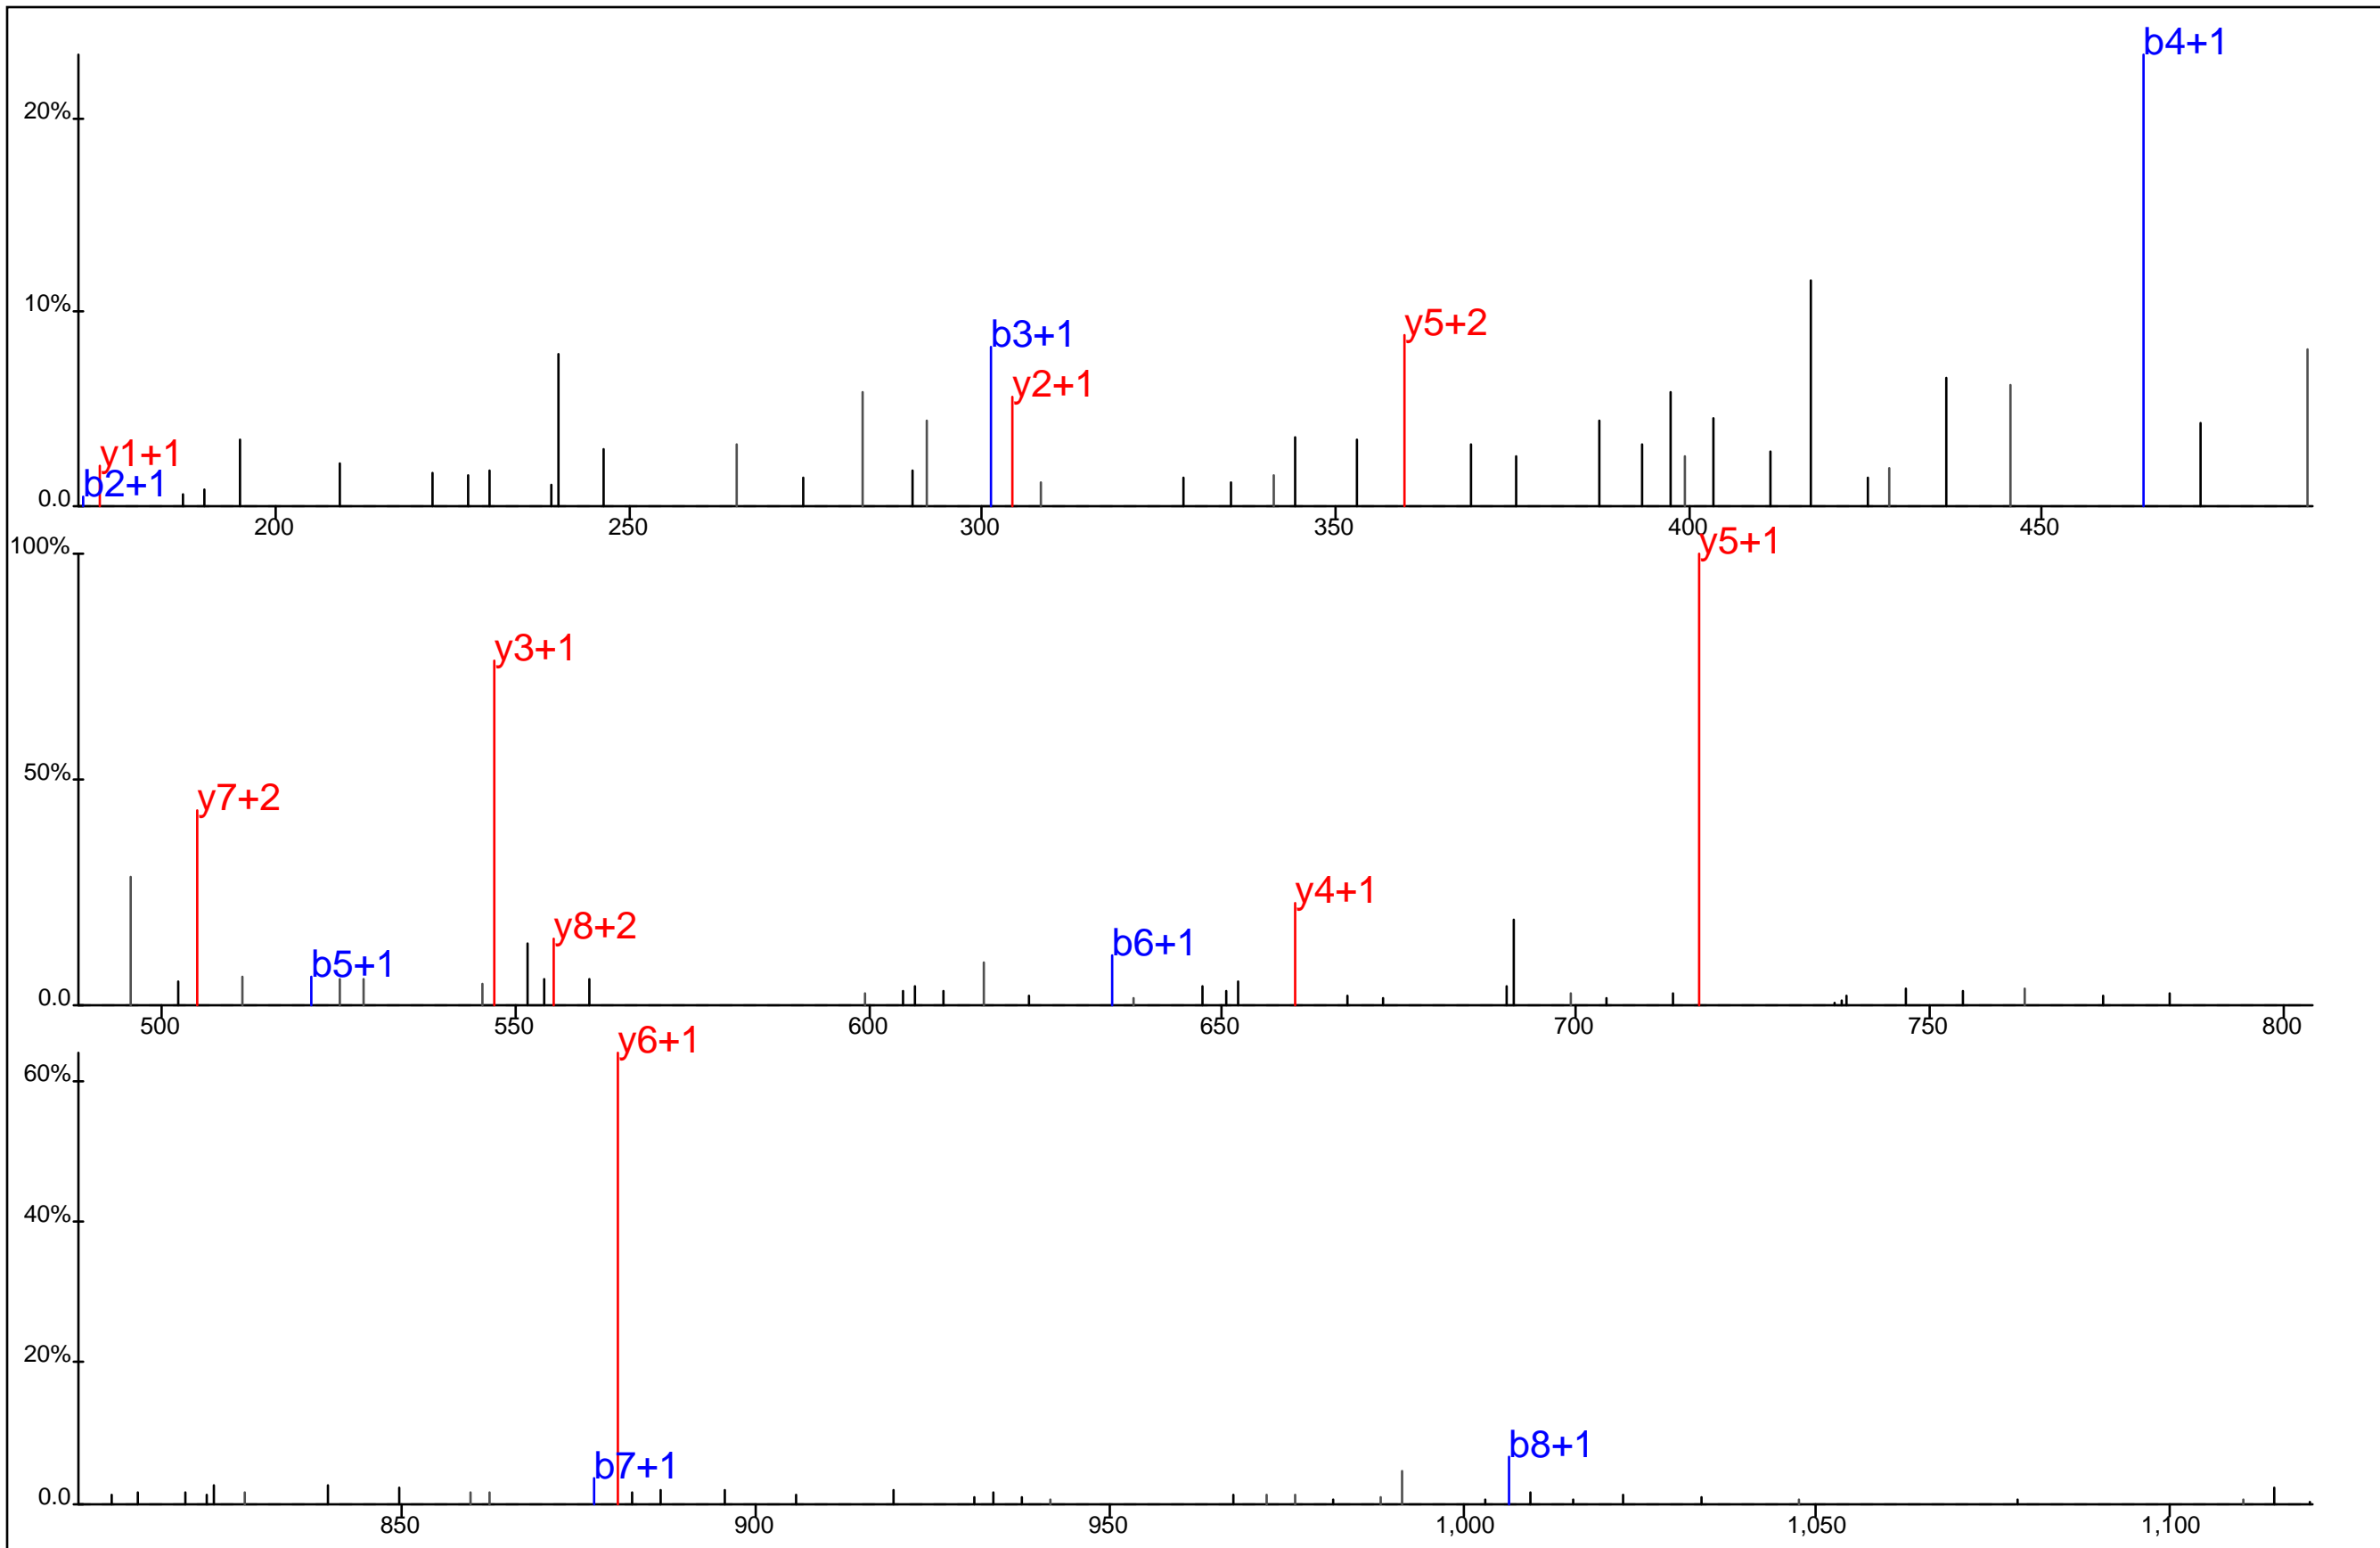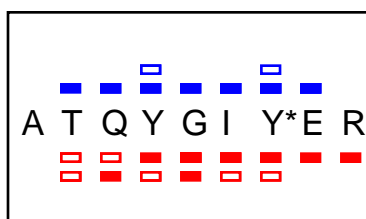

Protein Name: HIP14  
 gi Accession: 0  
 Precursor Mass: 590.7556+2  
 Delta Mass: 0.468 ppm  
 XCorr: 31.25

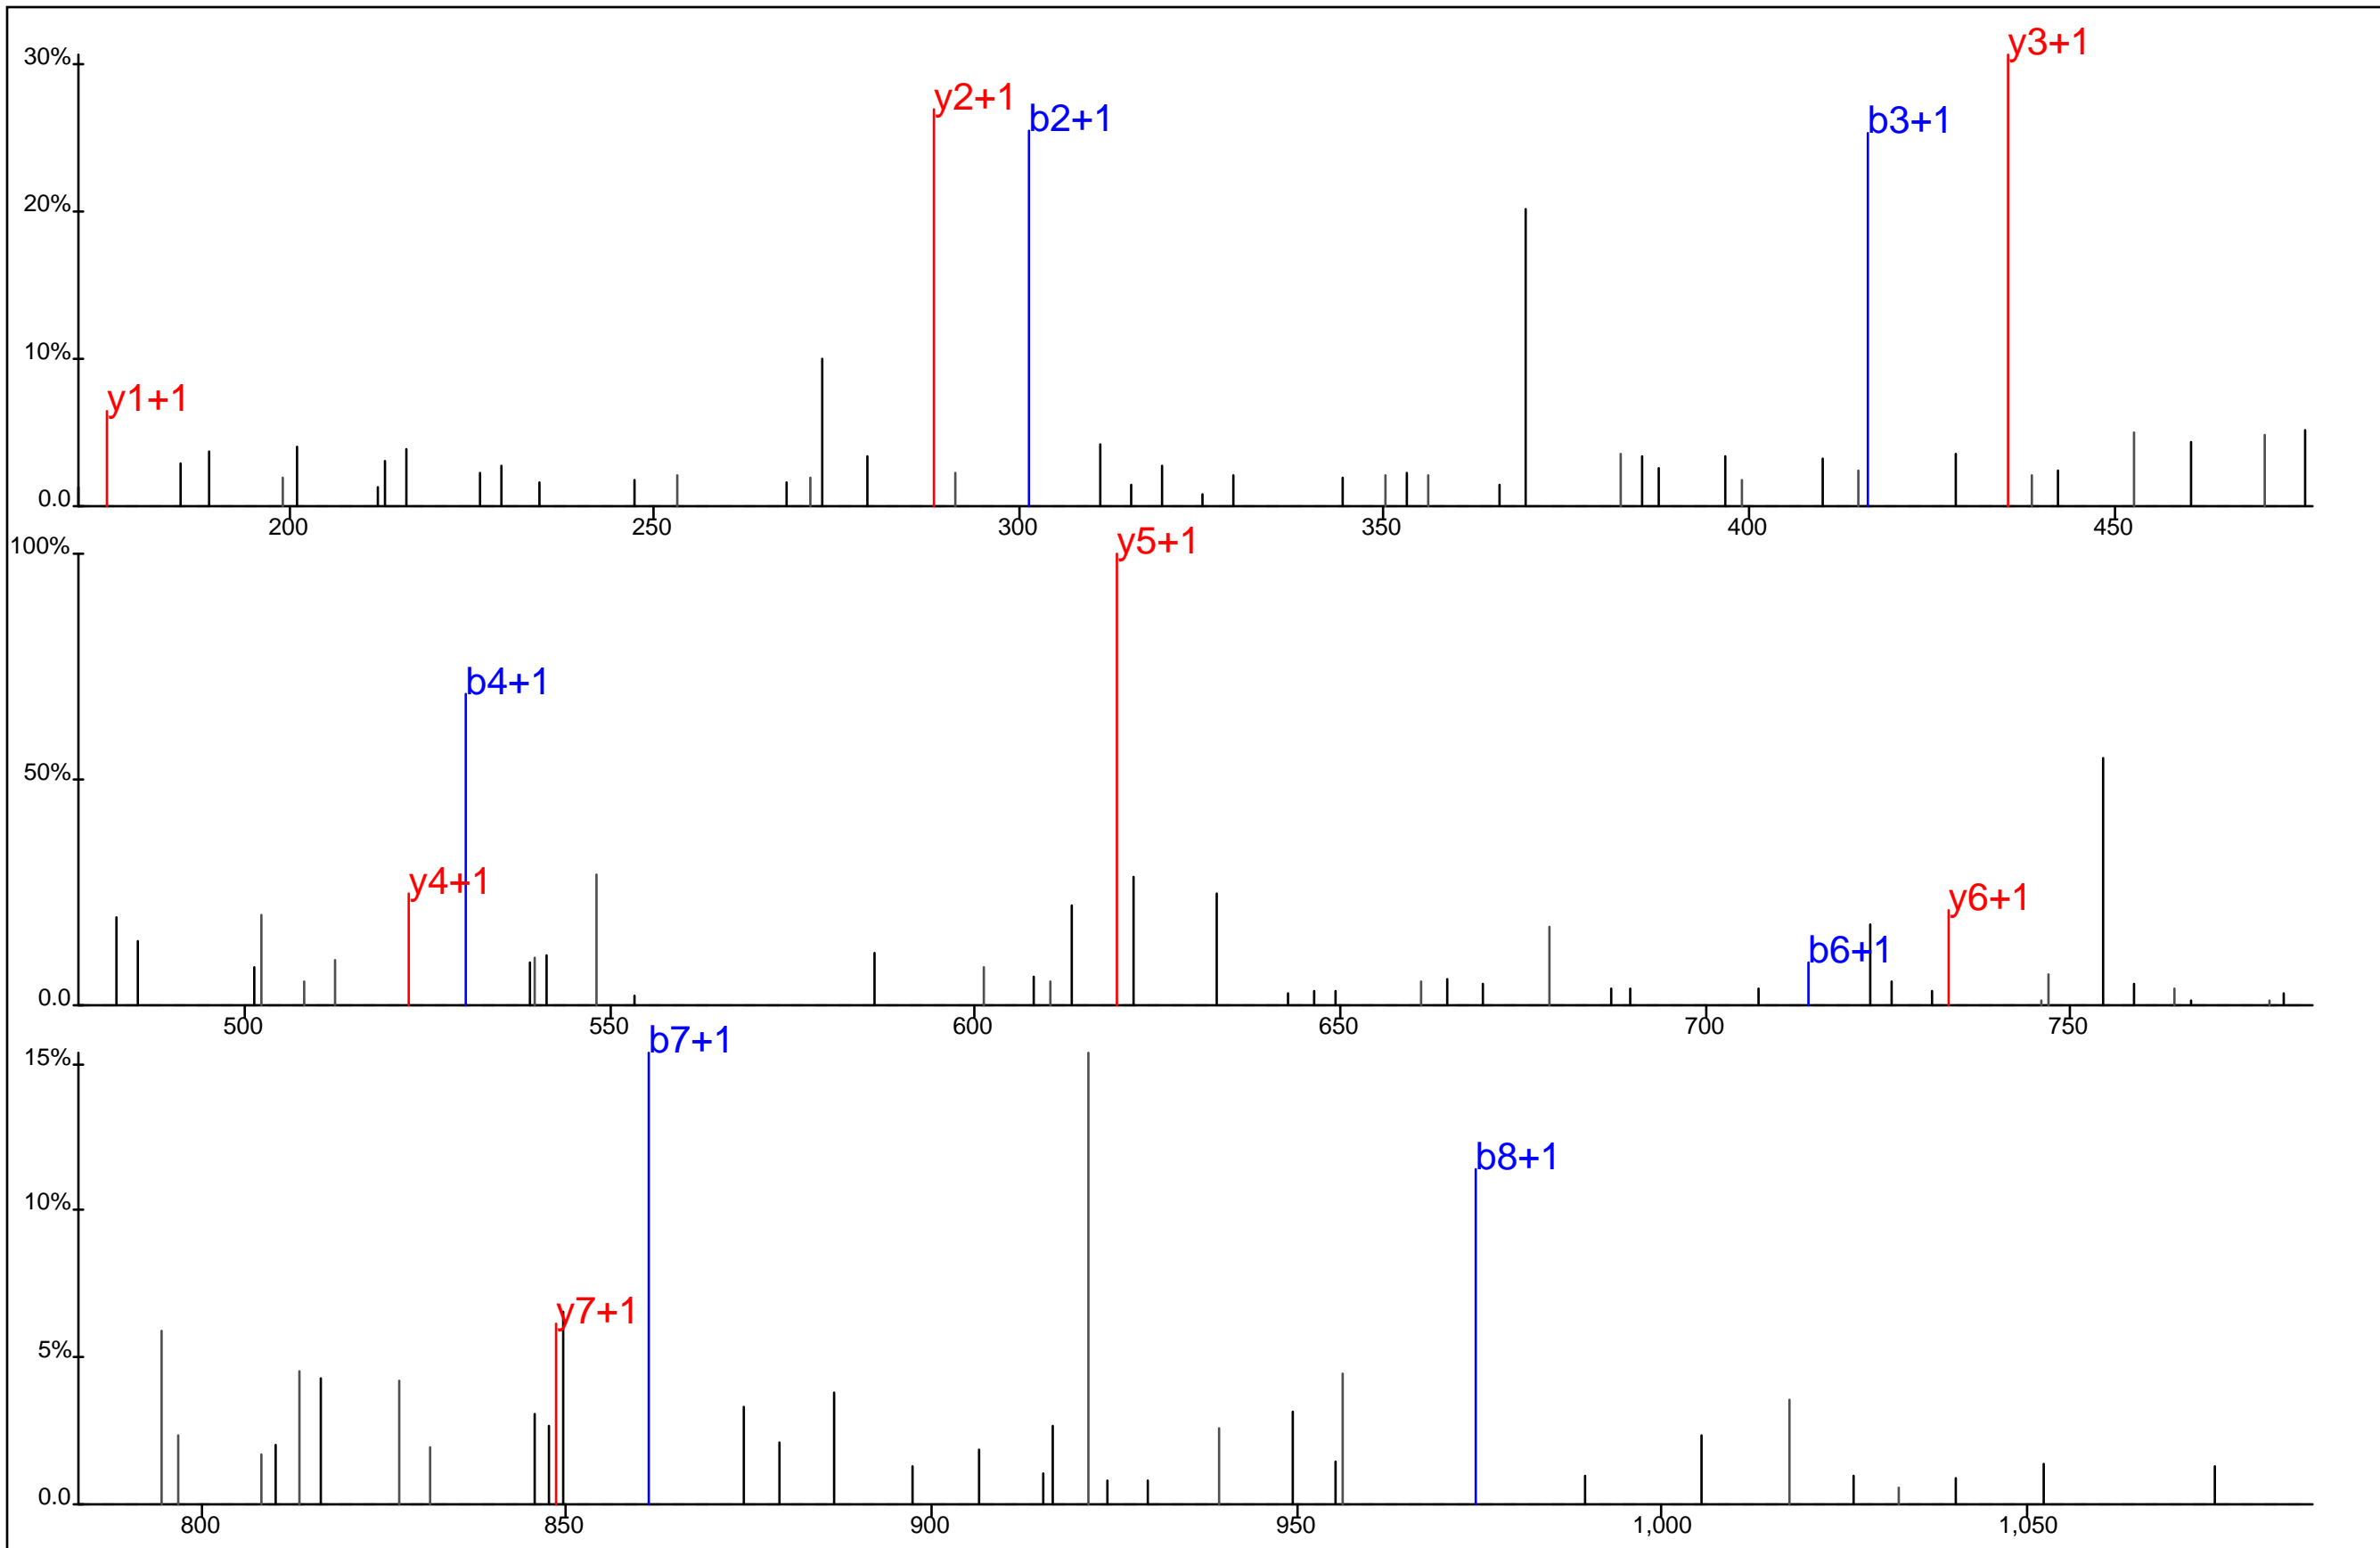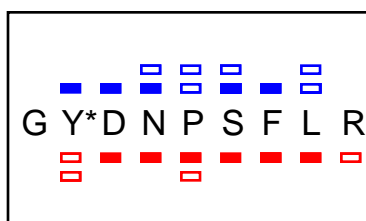

Protein Name: HIP14  
 gi Accession: 0  
 Precursor Mass: 574.7428+2  
 Delta Mass: 0.973 ppm  
 XCorr: 37.75

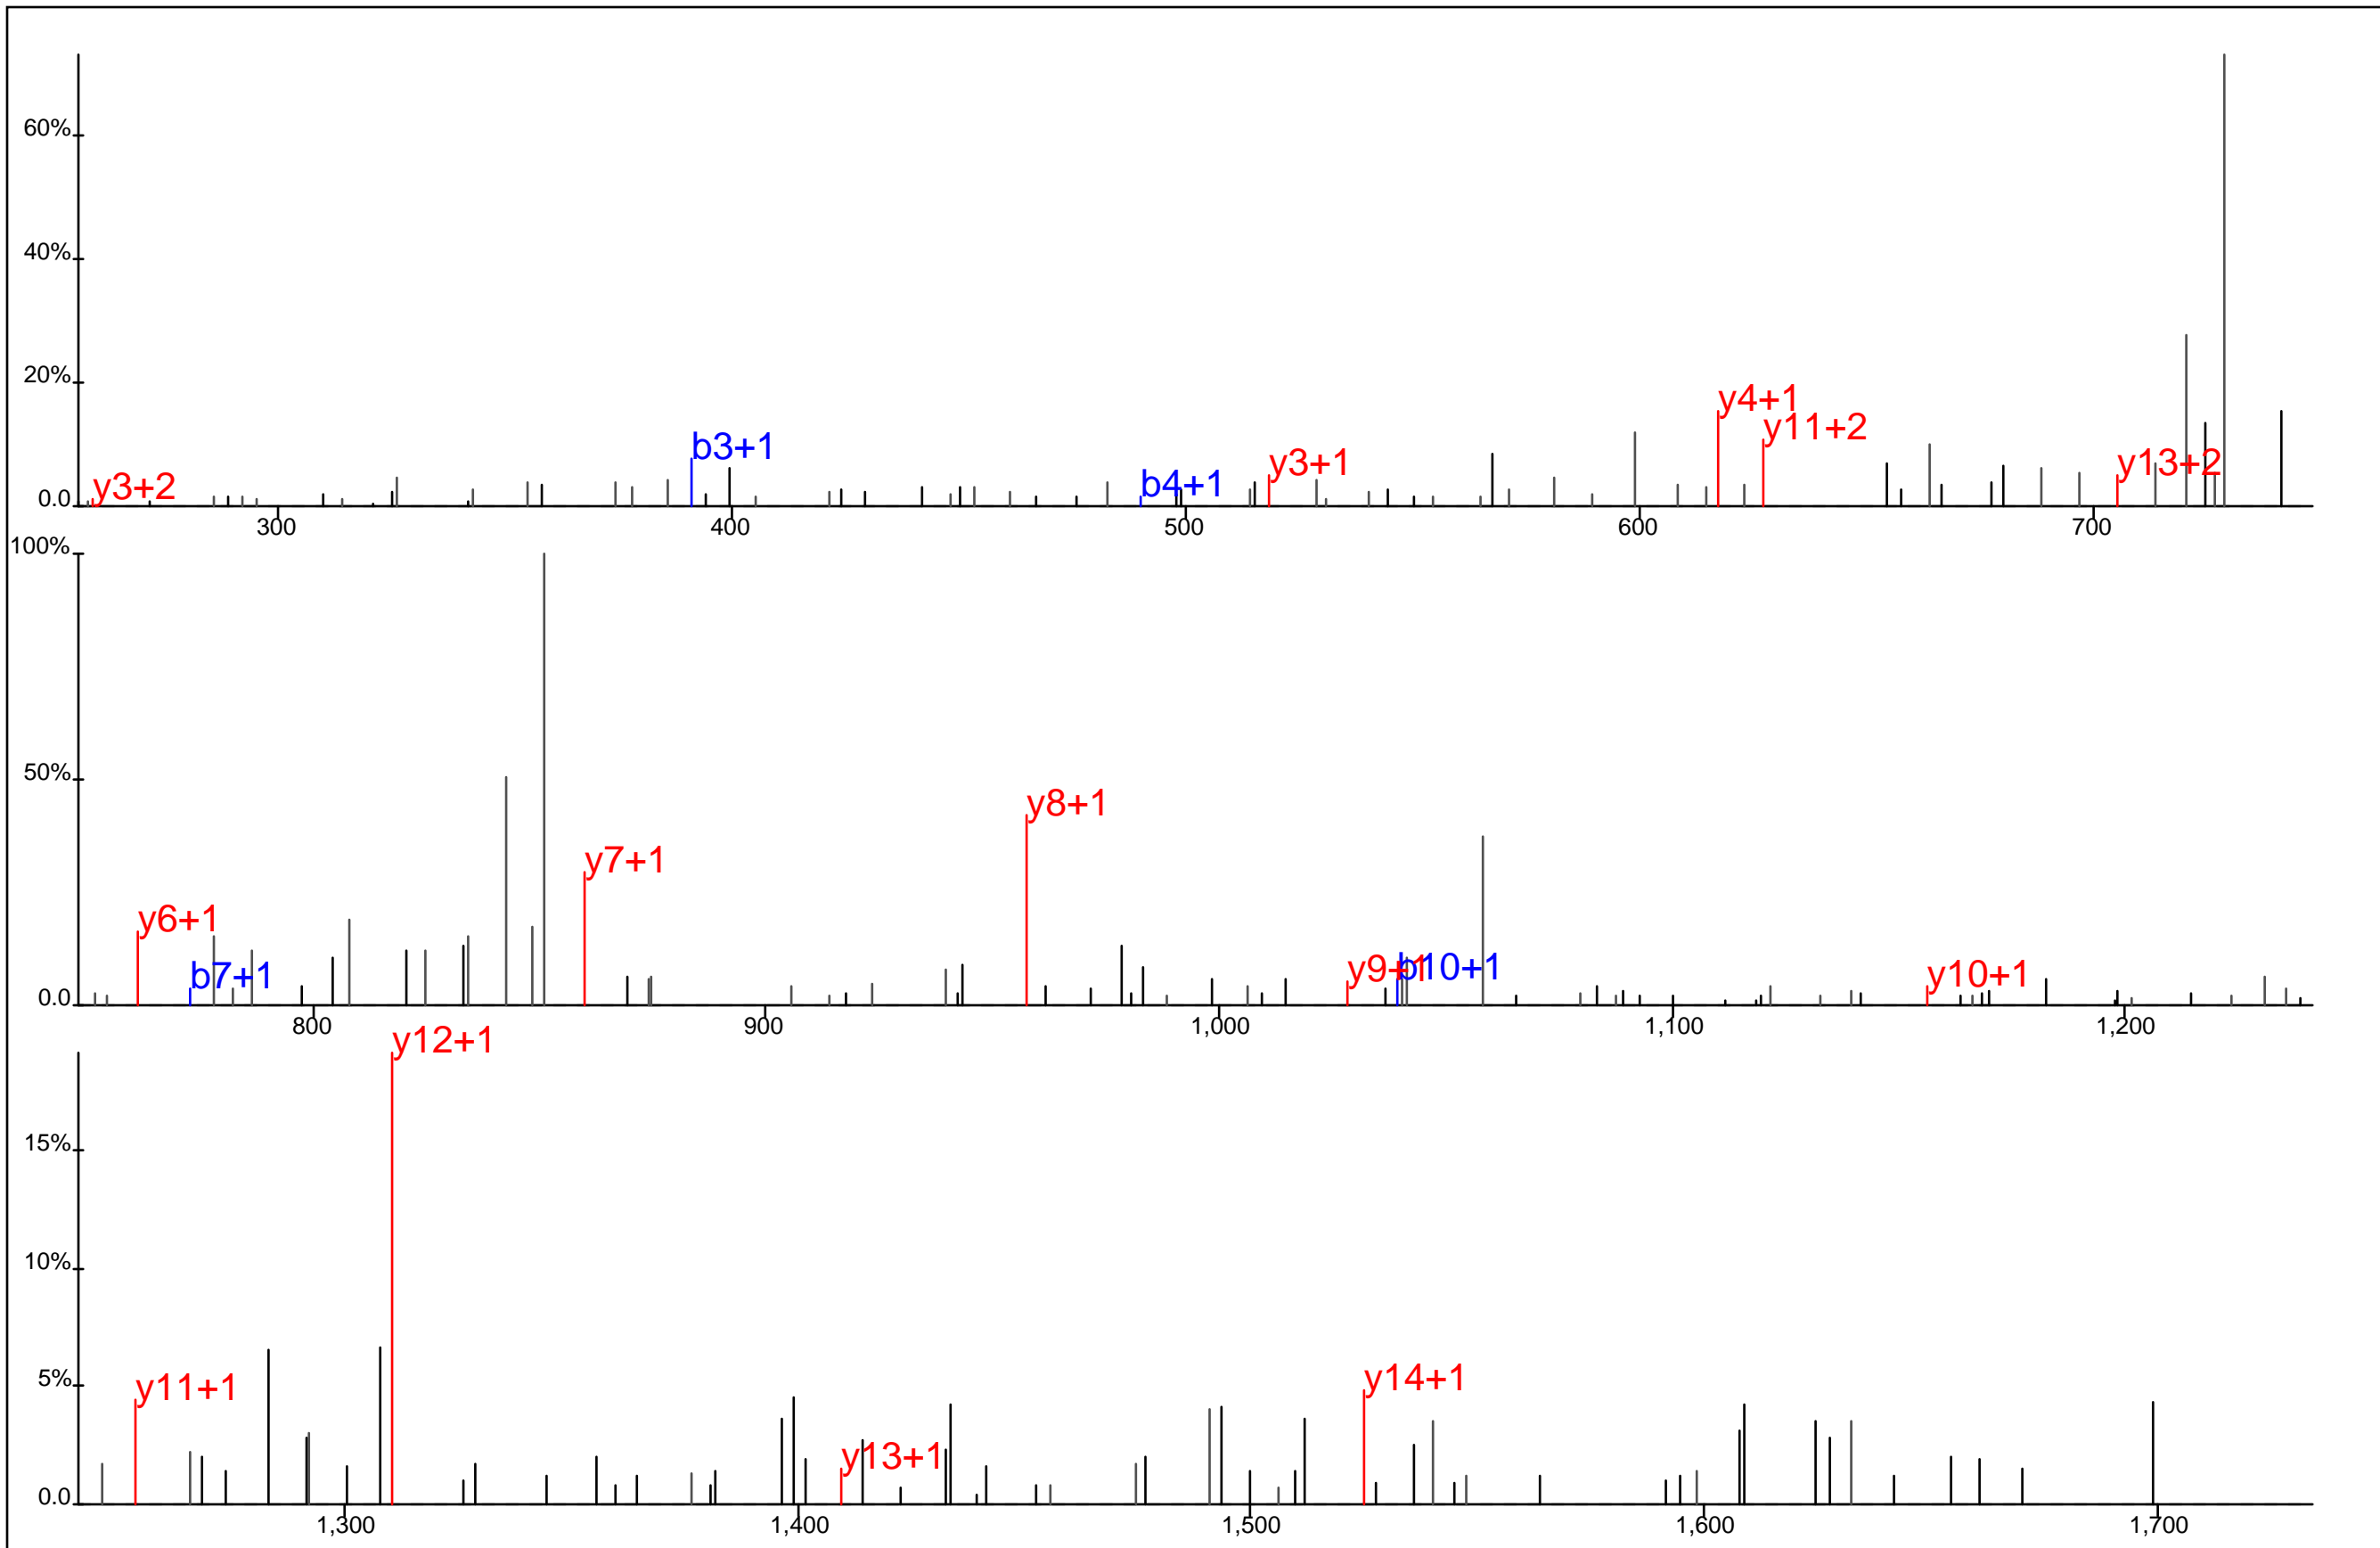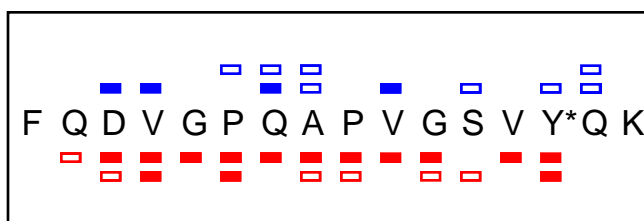

Protein Name: HIP55  
 gi Accession: 0  
 Precursor Mass: 900.4246+2  
 Delta Mass: 3.019 ppm  
 XCorr: 21.86



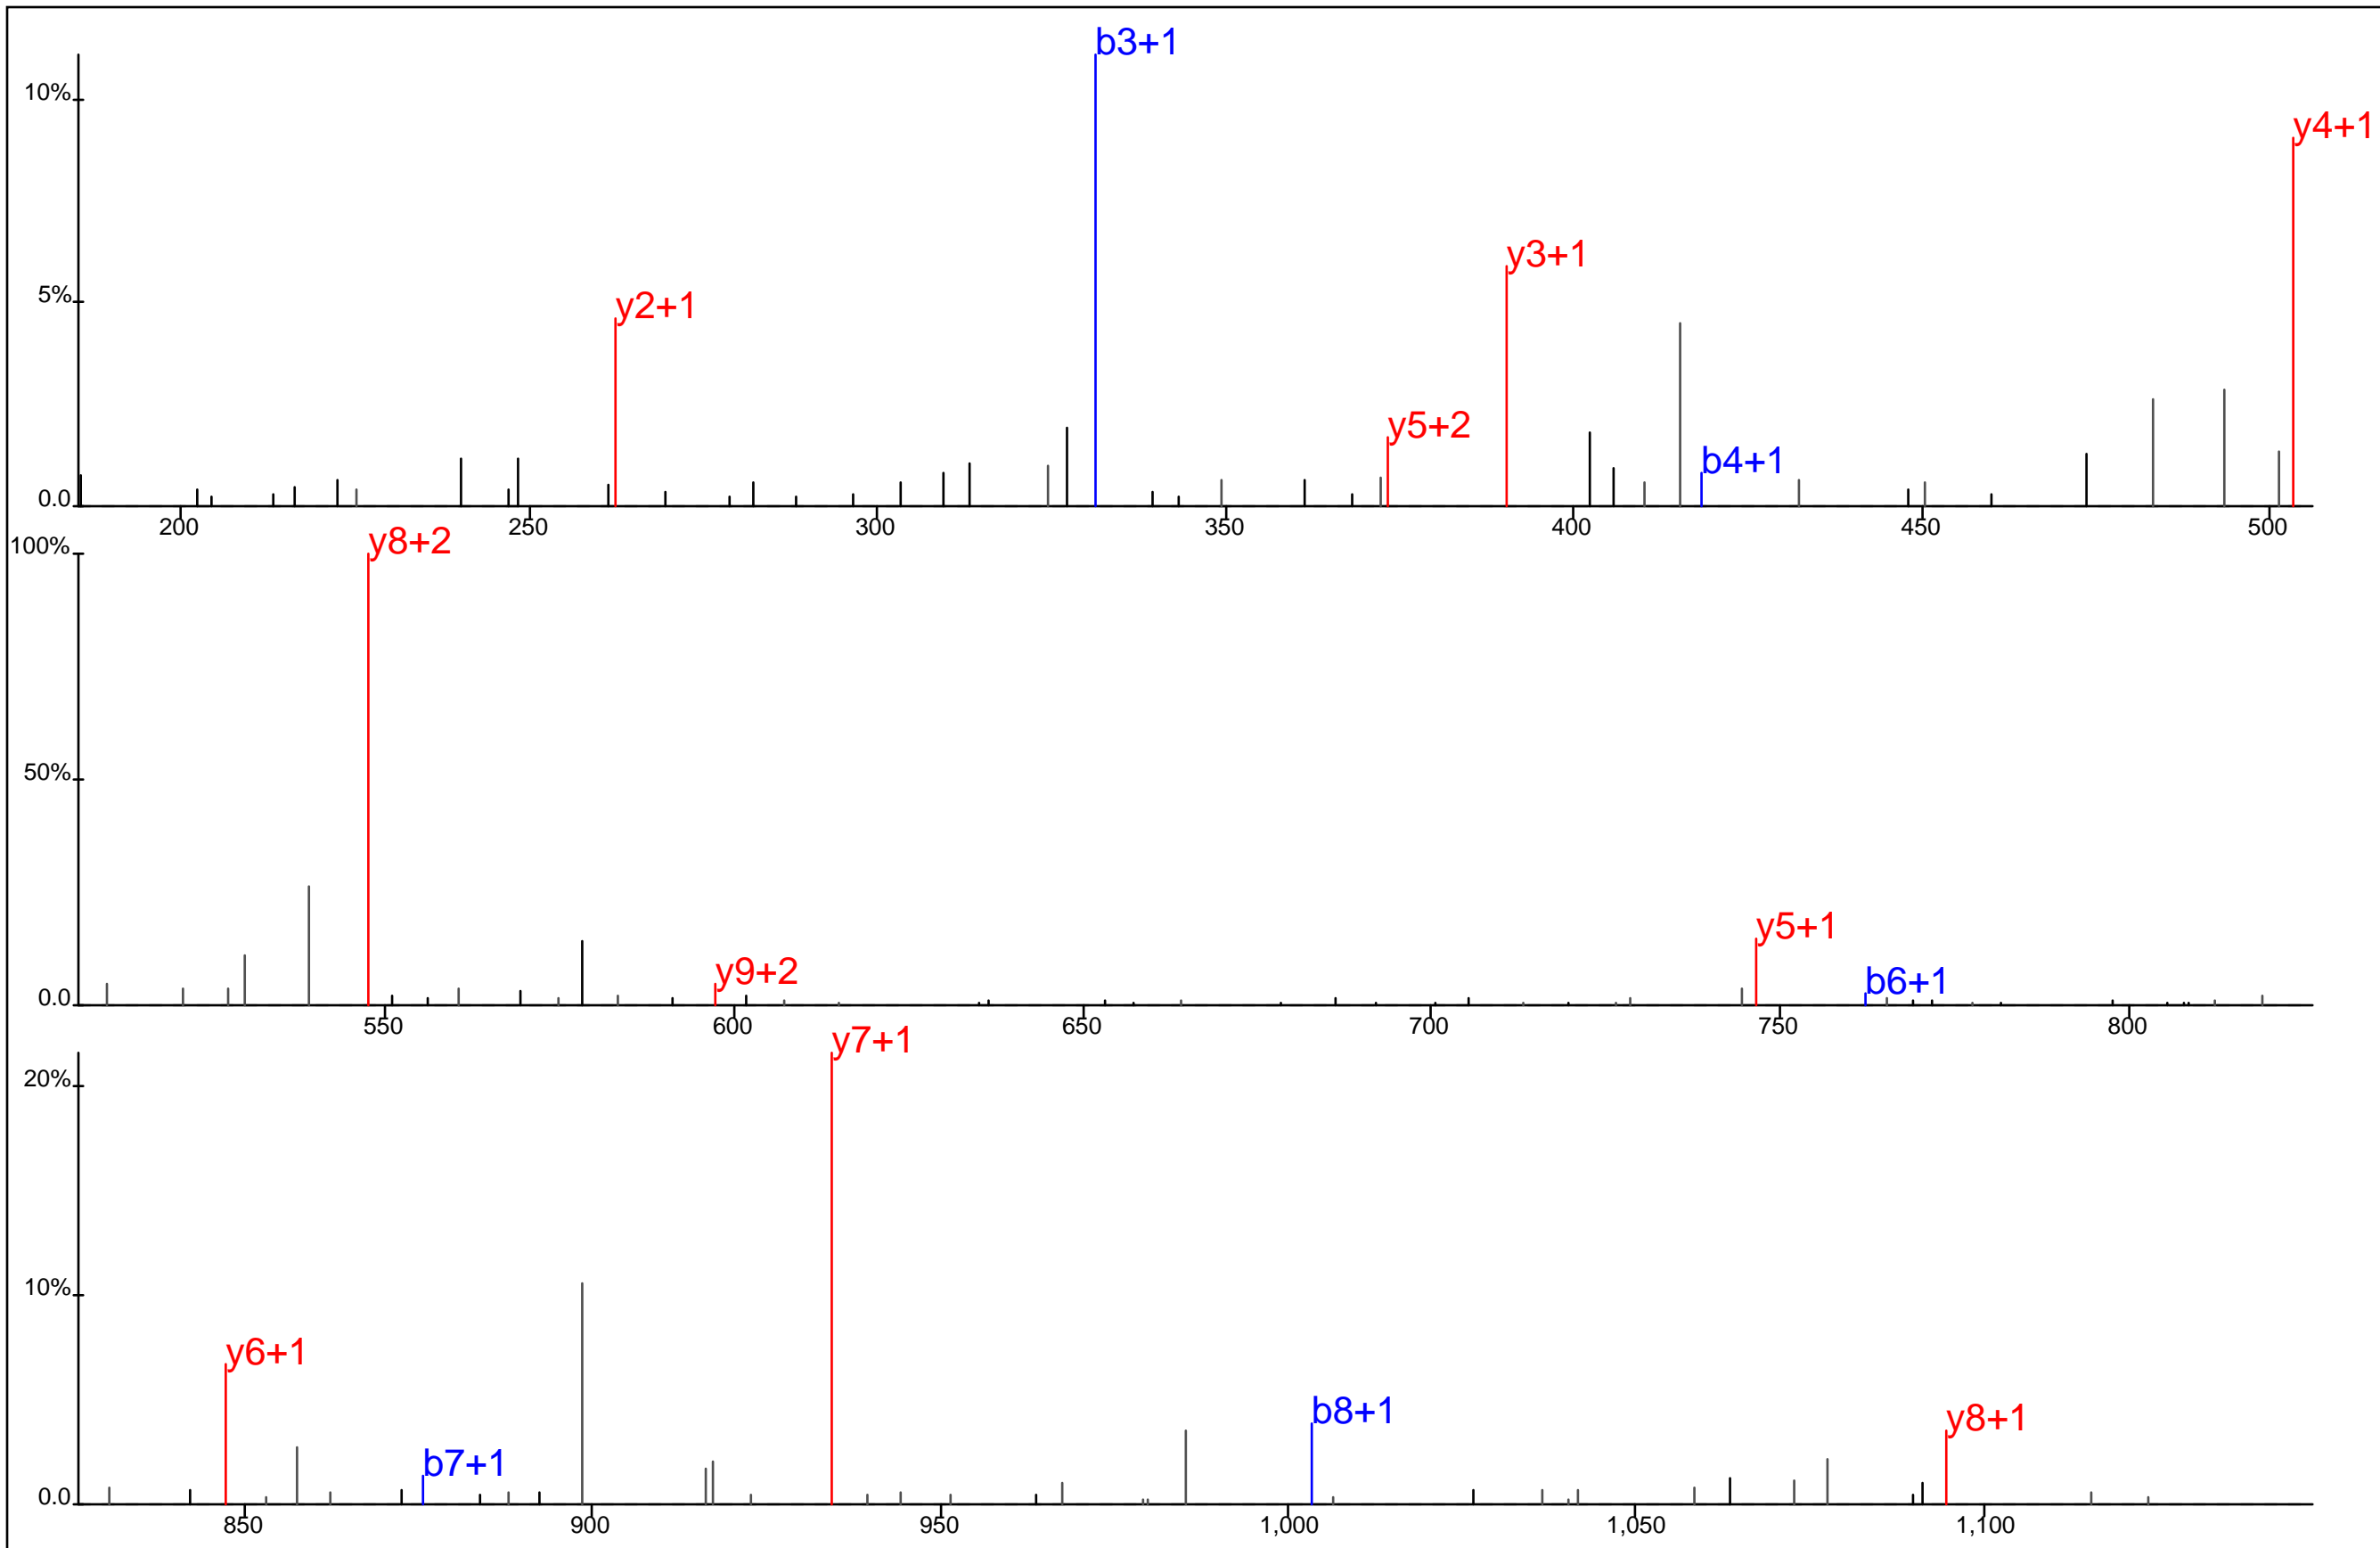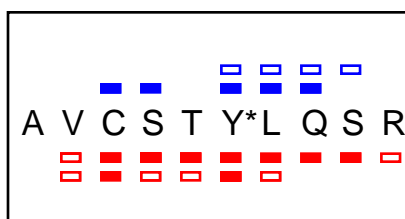

Protein Name: HIPK1  
 gi Accession: 0  
 Precursor Mass: 632.7735+2  
 Delta Mass: 0.451 ppm  
 XCorr: 60.6

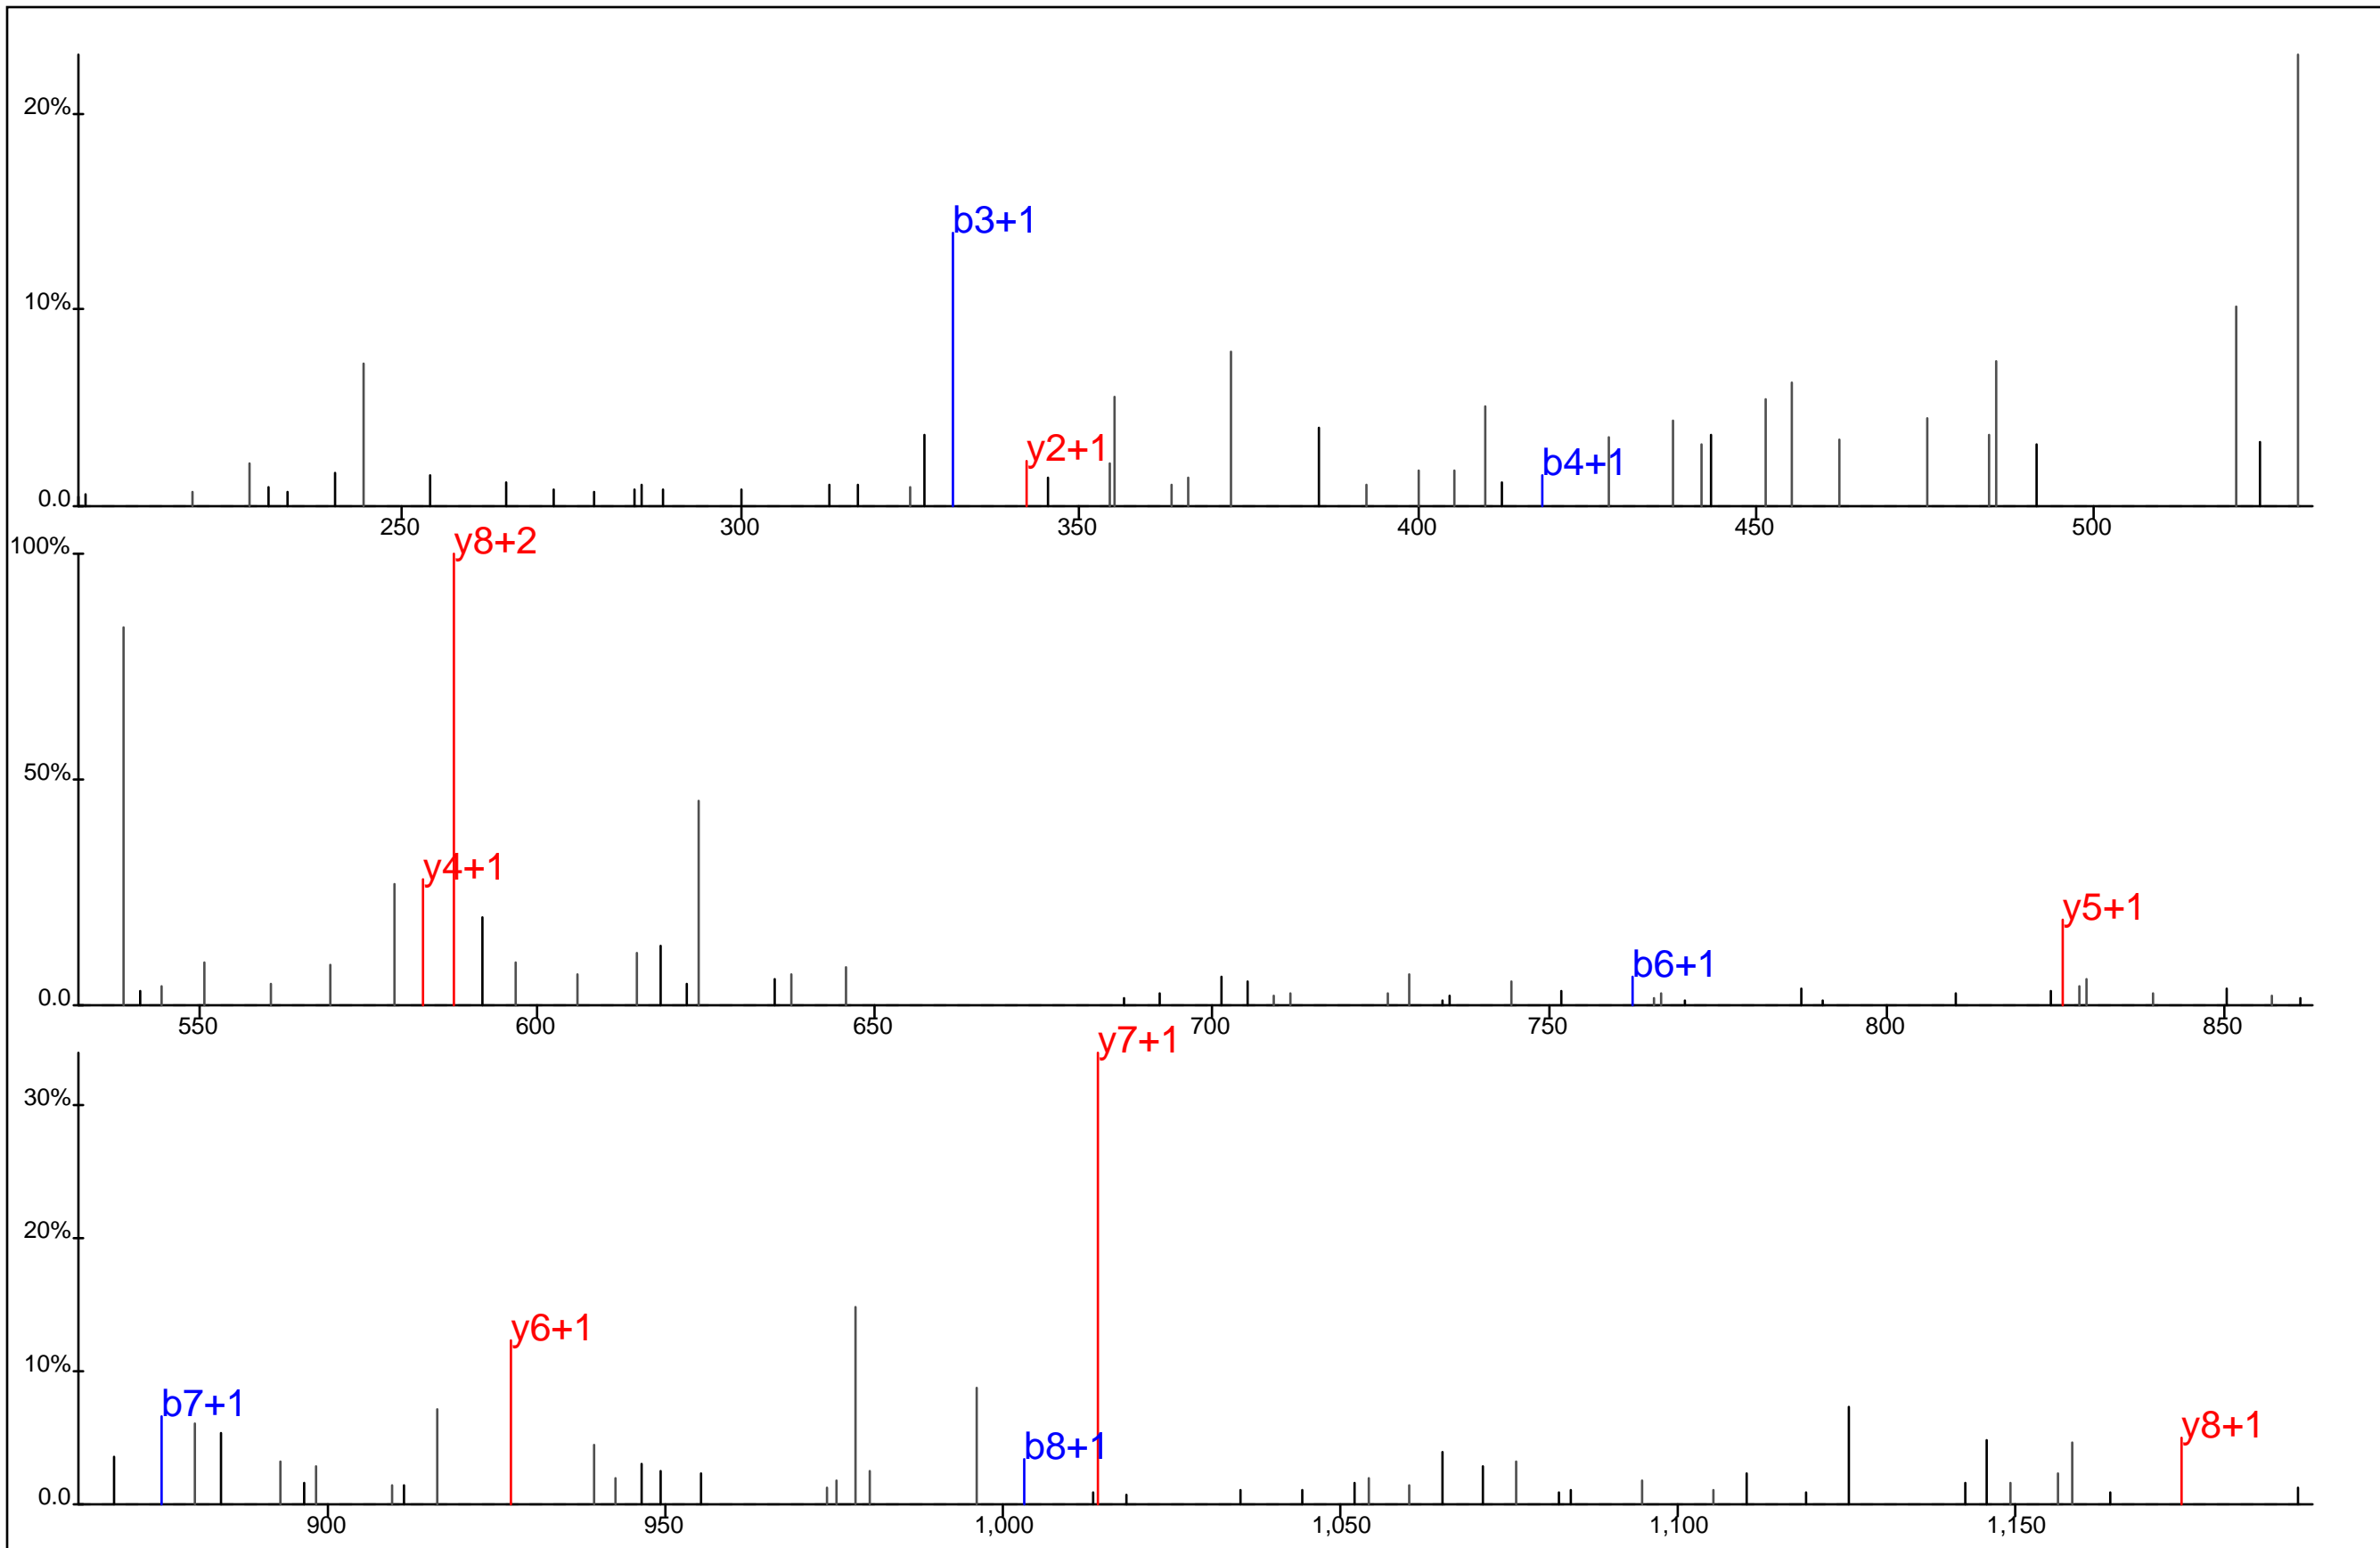

■ ■ □ ■ ■ □ □  
 A V C S T Y\*L Q S\*R  
□ ■ ■ □ ■ ■ □ ■ □

Protein Name: HIPK1  
 gi Accession: 0  
 Precursor Mass: 672.7574+2  
 Delta Mass: 1.504 ppm  
 XCorr: 31.98

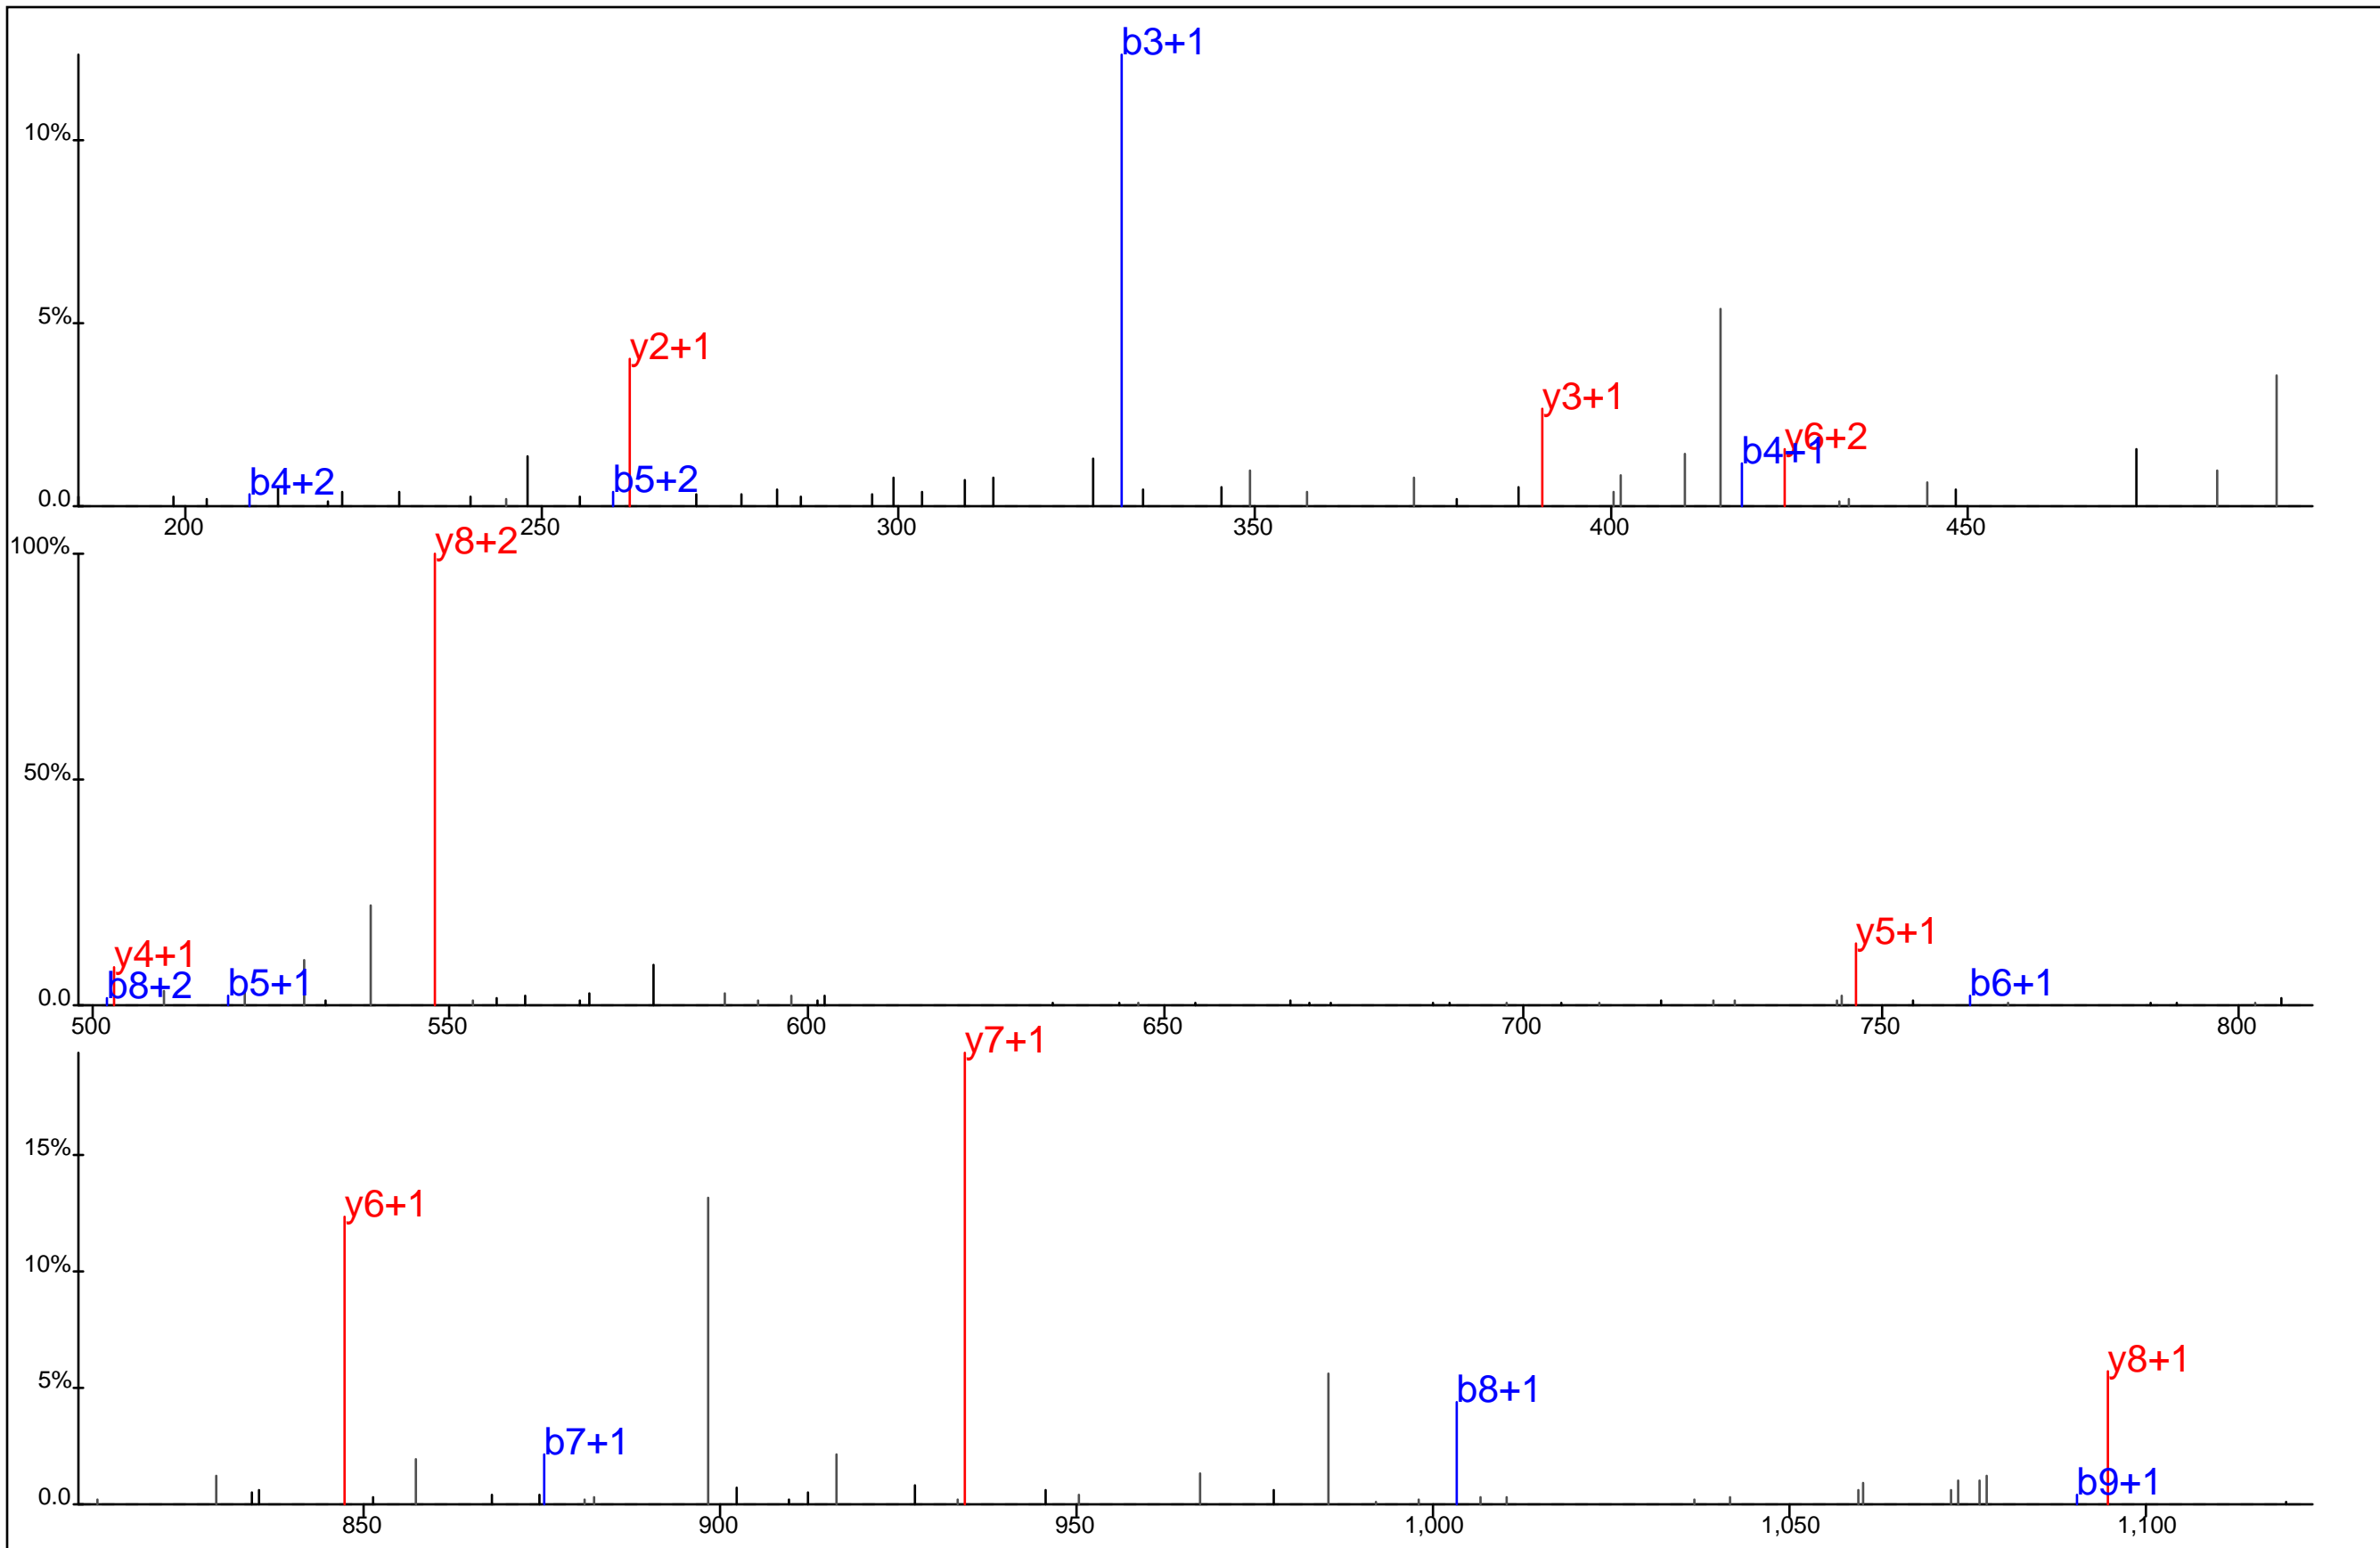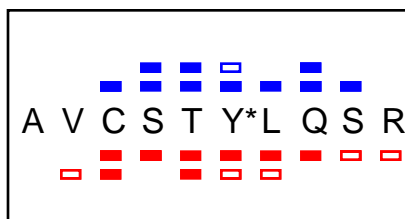

Protein Name: HIPK1  
 gi Accession: 0  
 Precursor Mass: 632.7744+2  
 Delta Mass: 1.898 ppm  
 XCorr: 52.18

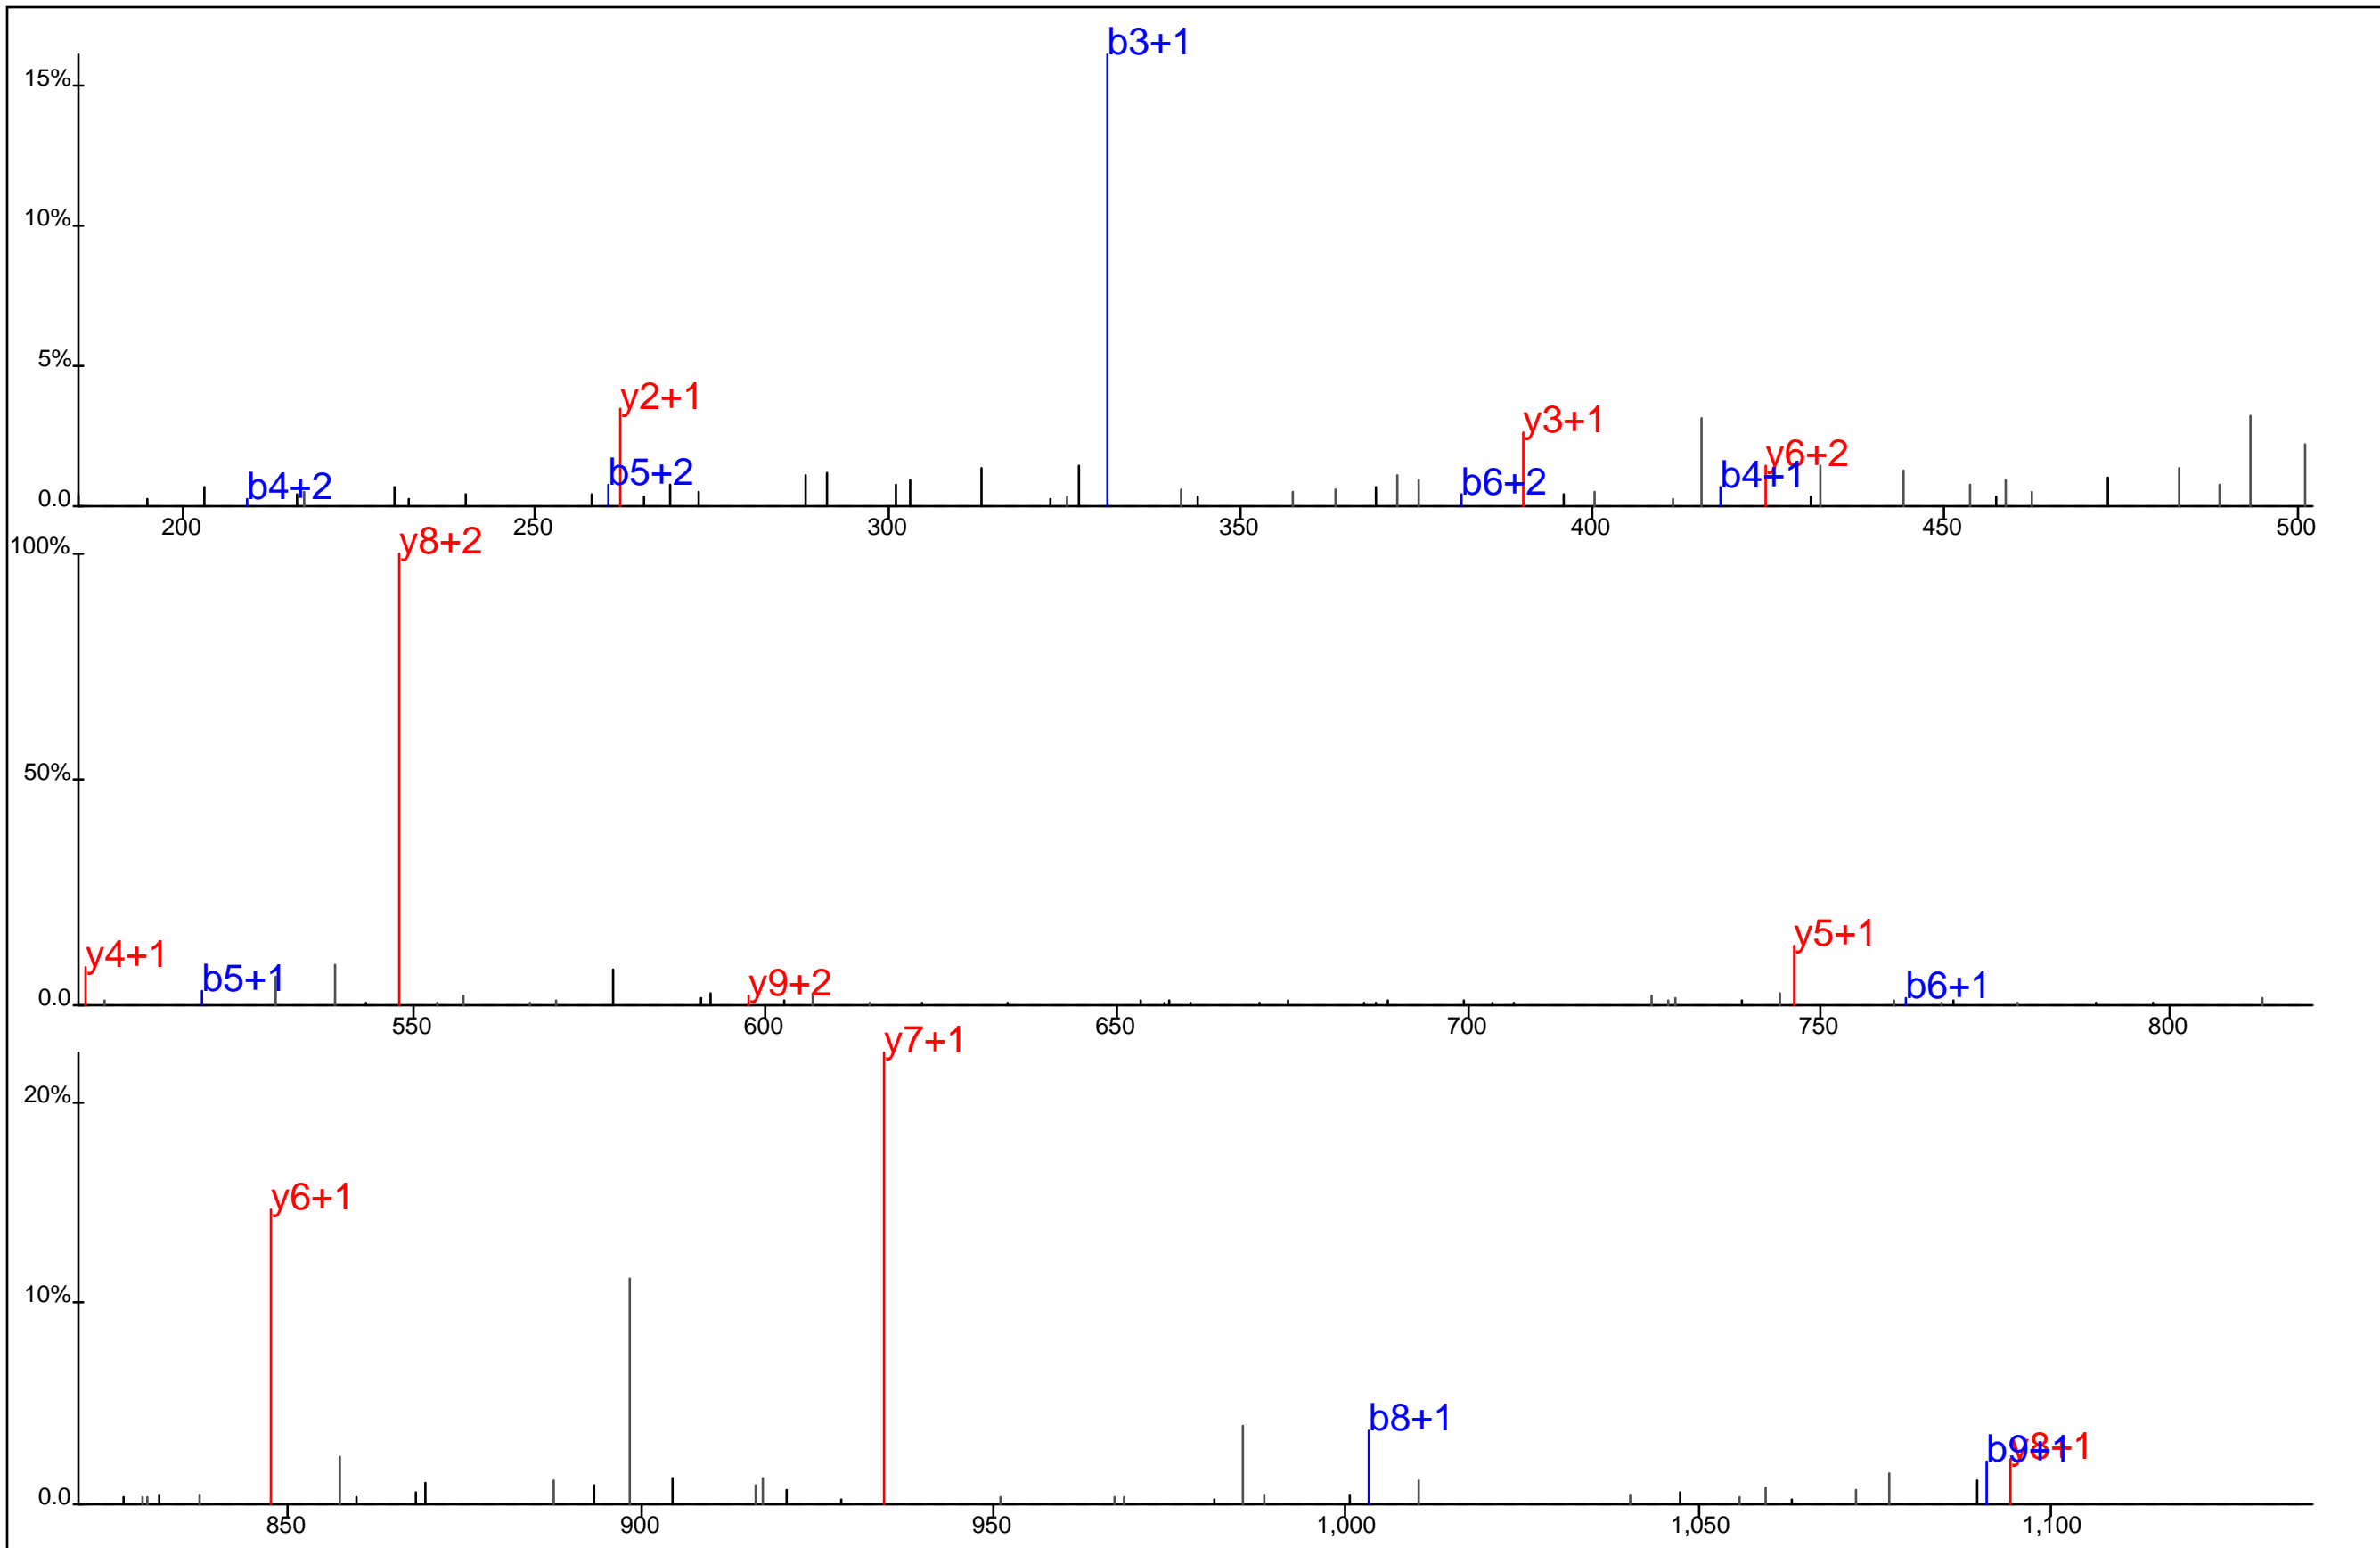

A V C S T Y\* L Q S R  
 □ □ □ □ □ □ □ □ □ □  
 □ □ □ □ □ □ □ □ □ □

Protein Name: HIPK1  
 gi Accession: 0  
 Precursor Mass: 632.7734+2  
 Delta Mass: 0.256 ppm  
 XCorr: 47.24

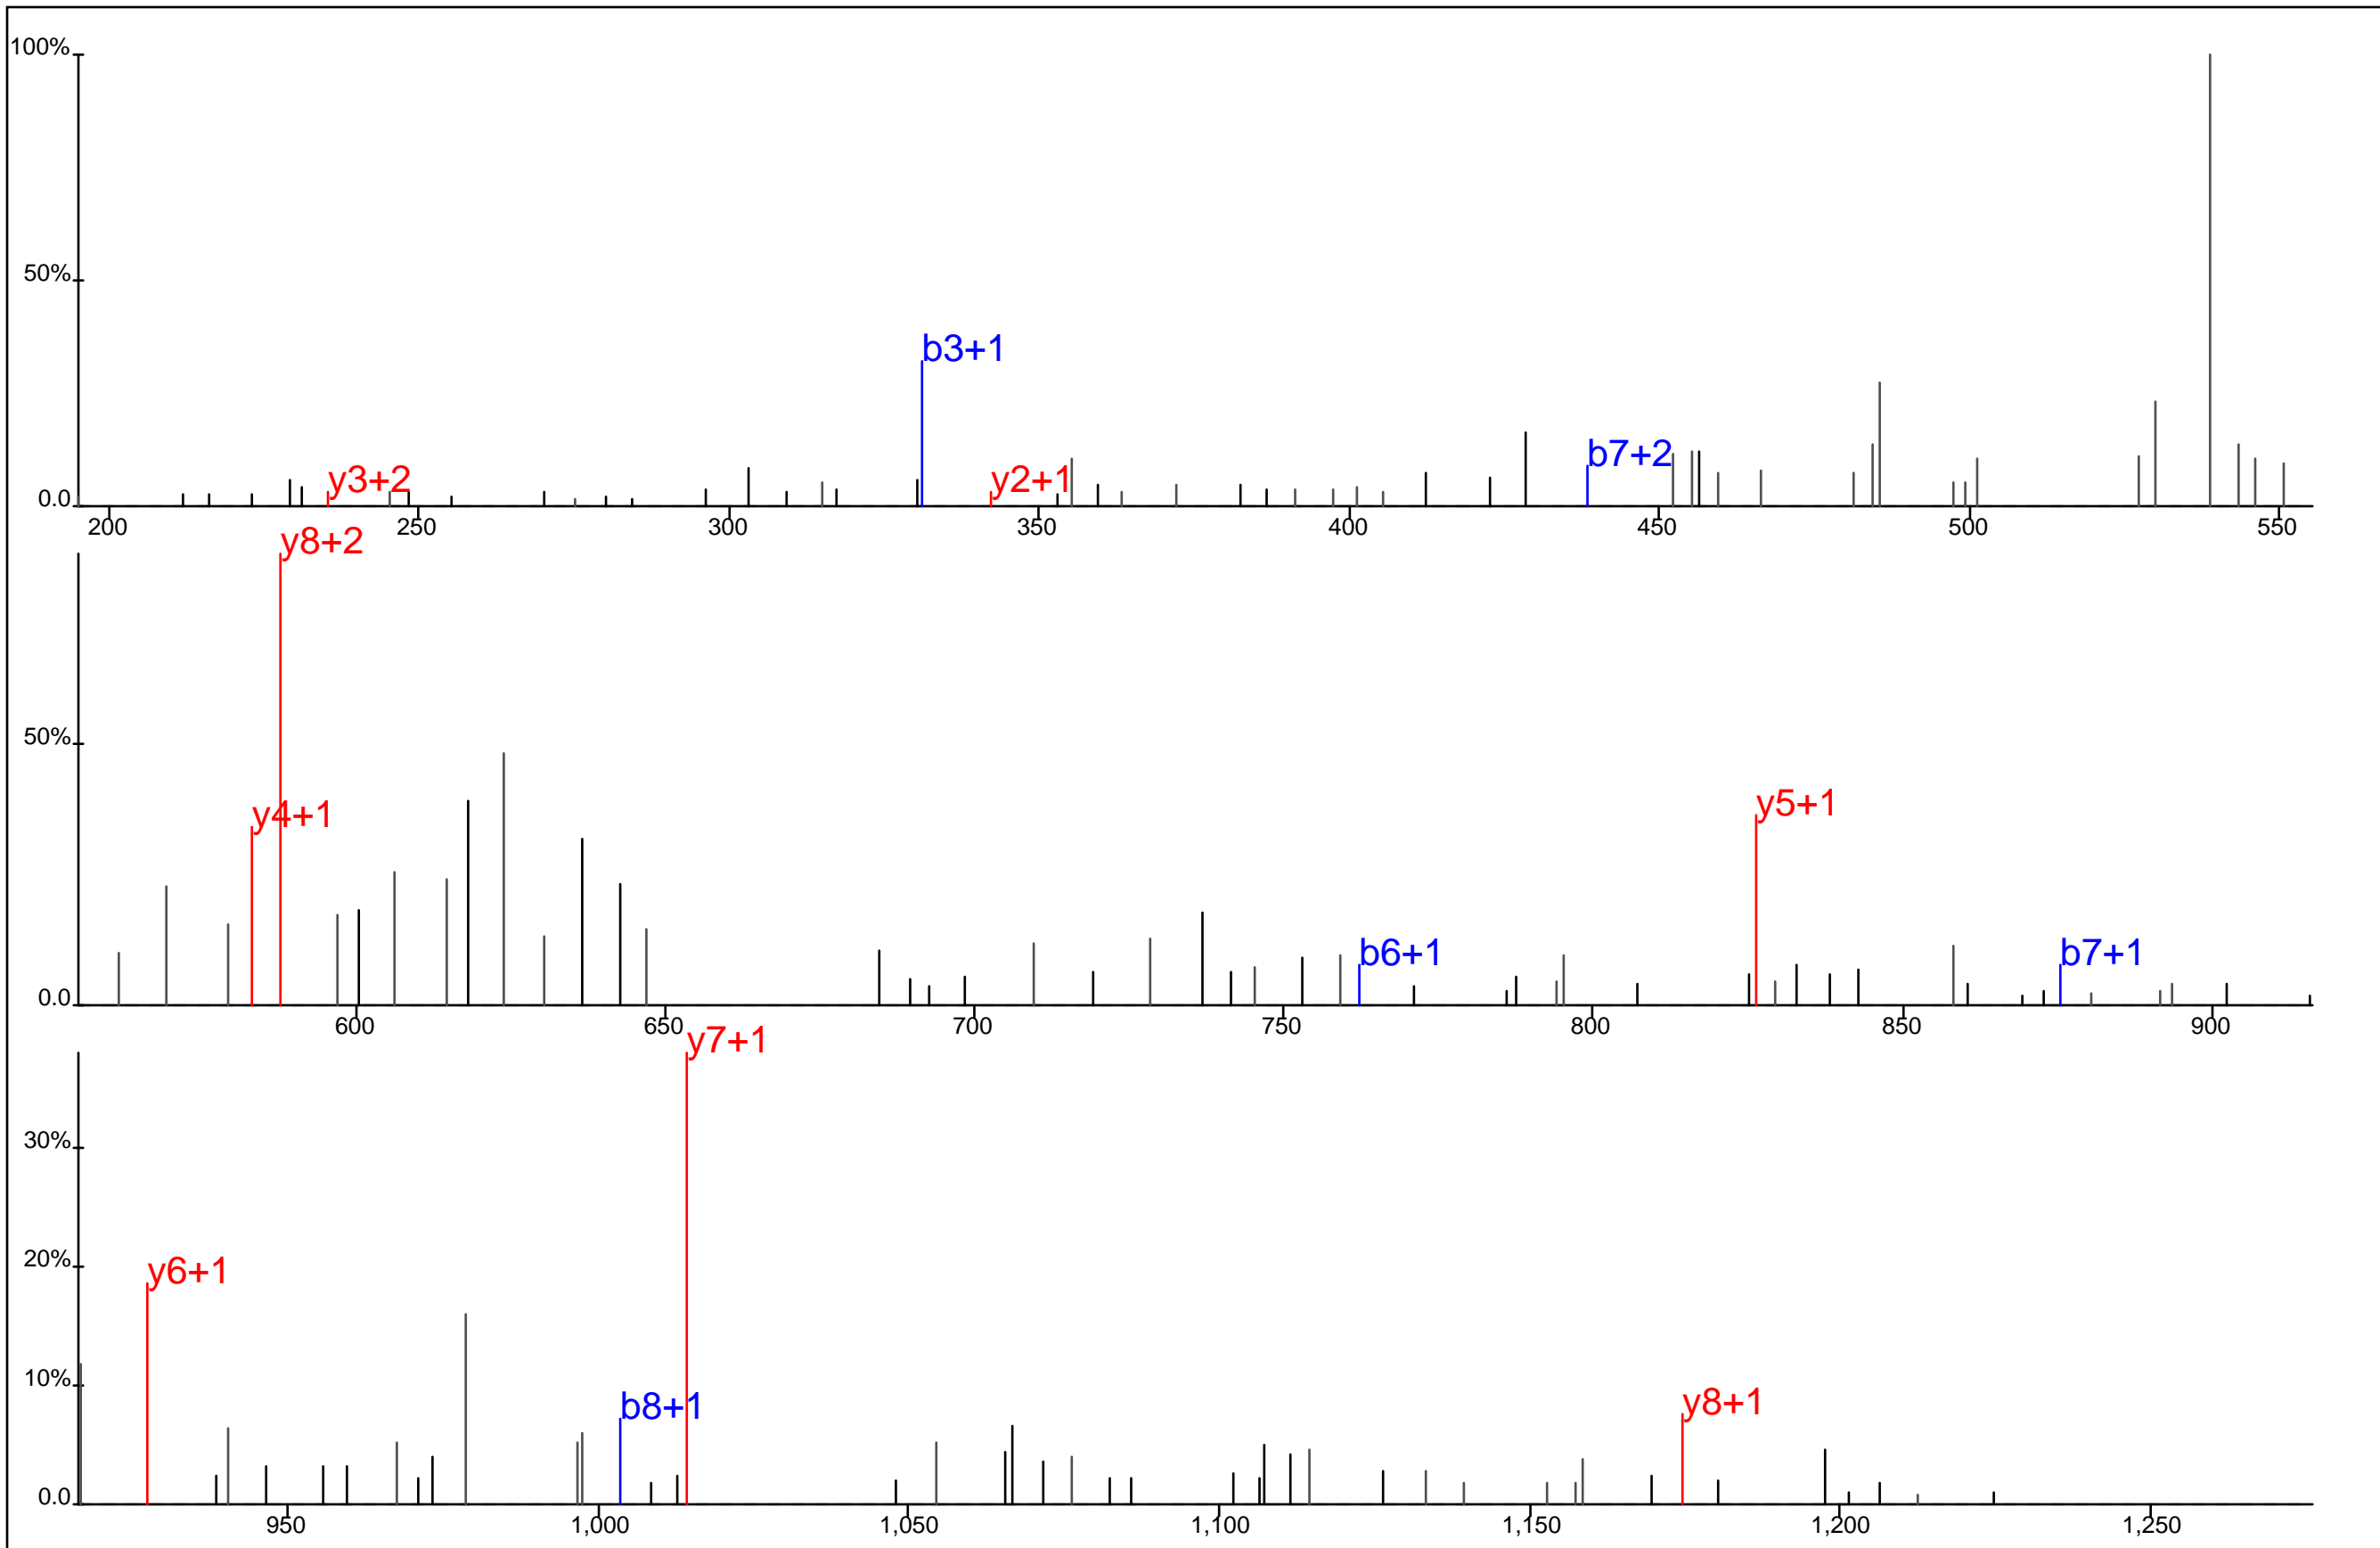

■ ■ ■ ■ ■ ■ ■ ■ ■ ■  
 A V C S T Y\* L Q S\* R  
■ ■ ■ ■ ■ ■ ■ ■ ■ ■

Protein Name: HIPK1  
 gi Accession: 0  
 Precursor Mass: 672.7553+2  
 Delta Mass: 1.583 ppm  
 XCorr: 20.48

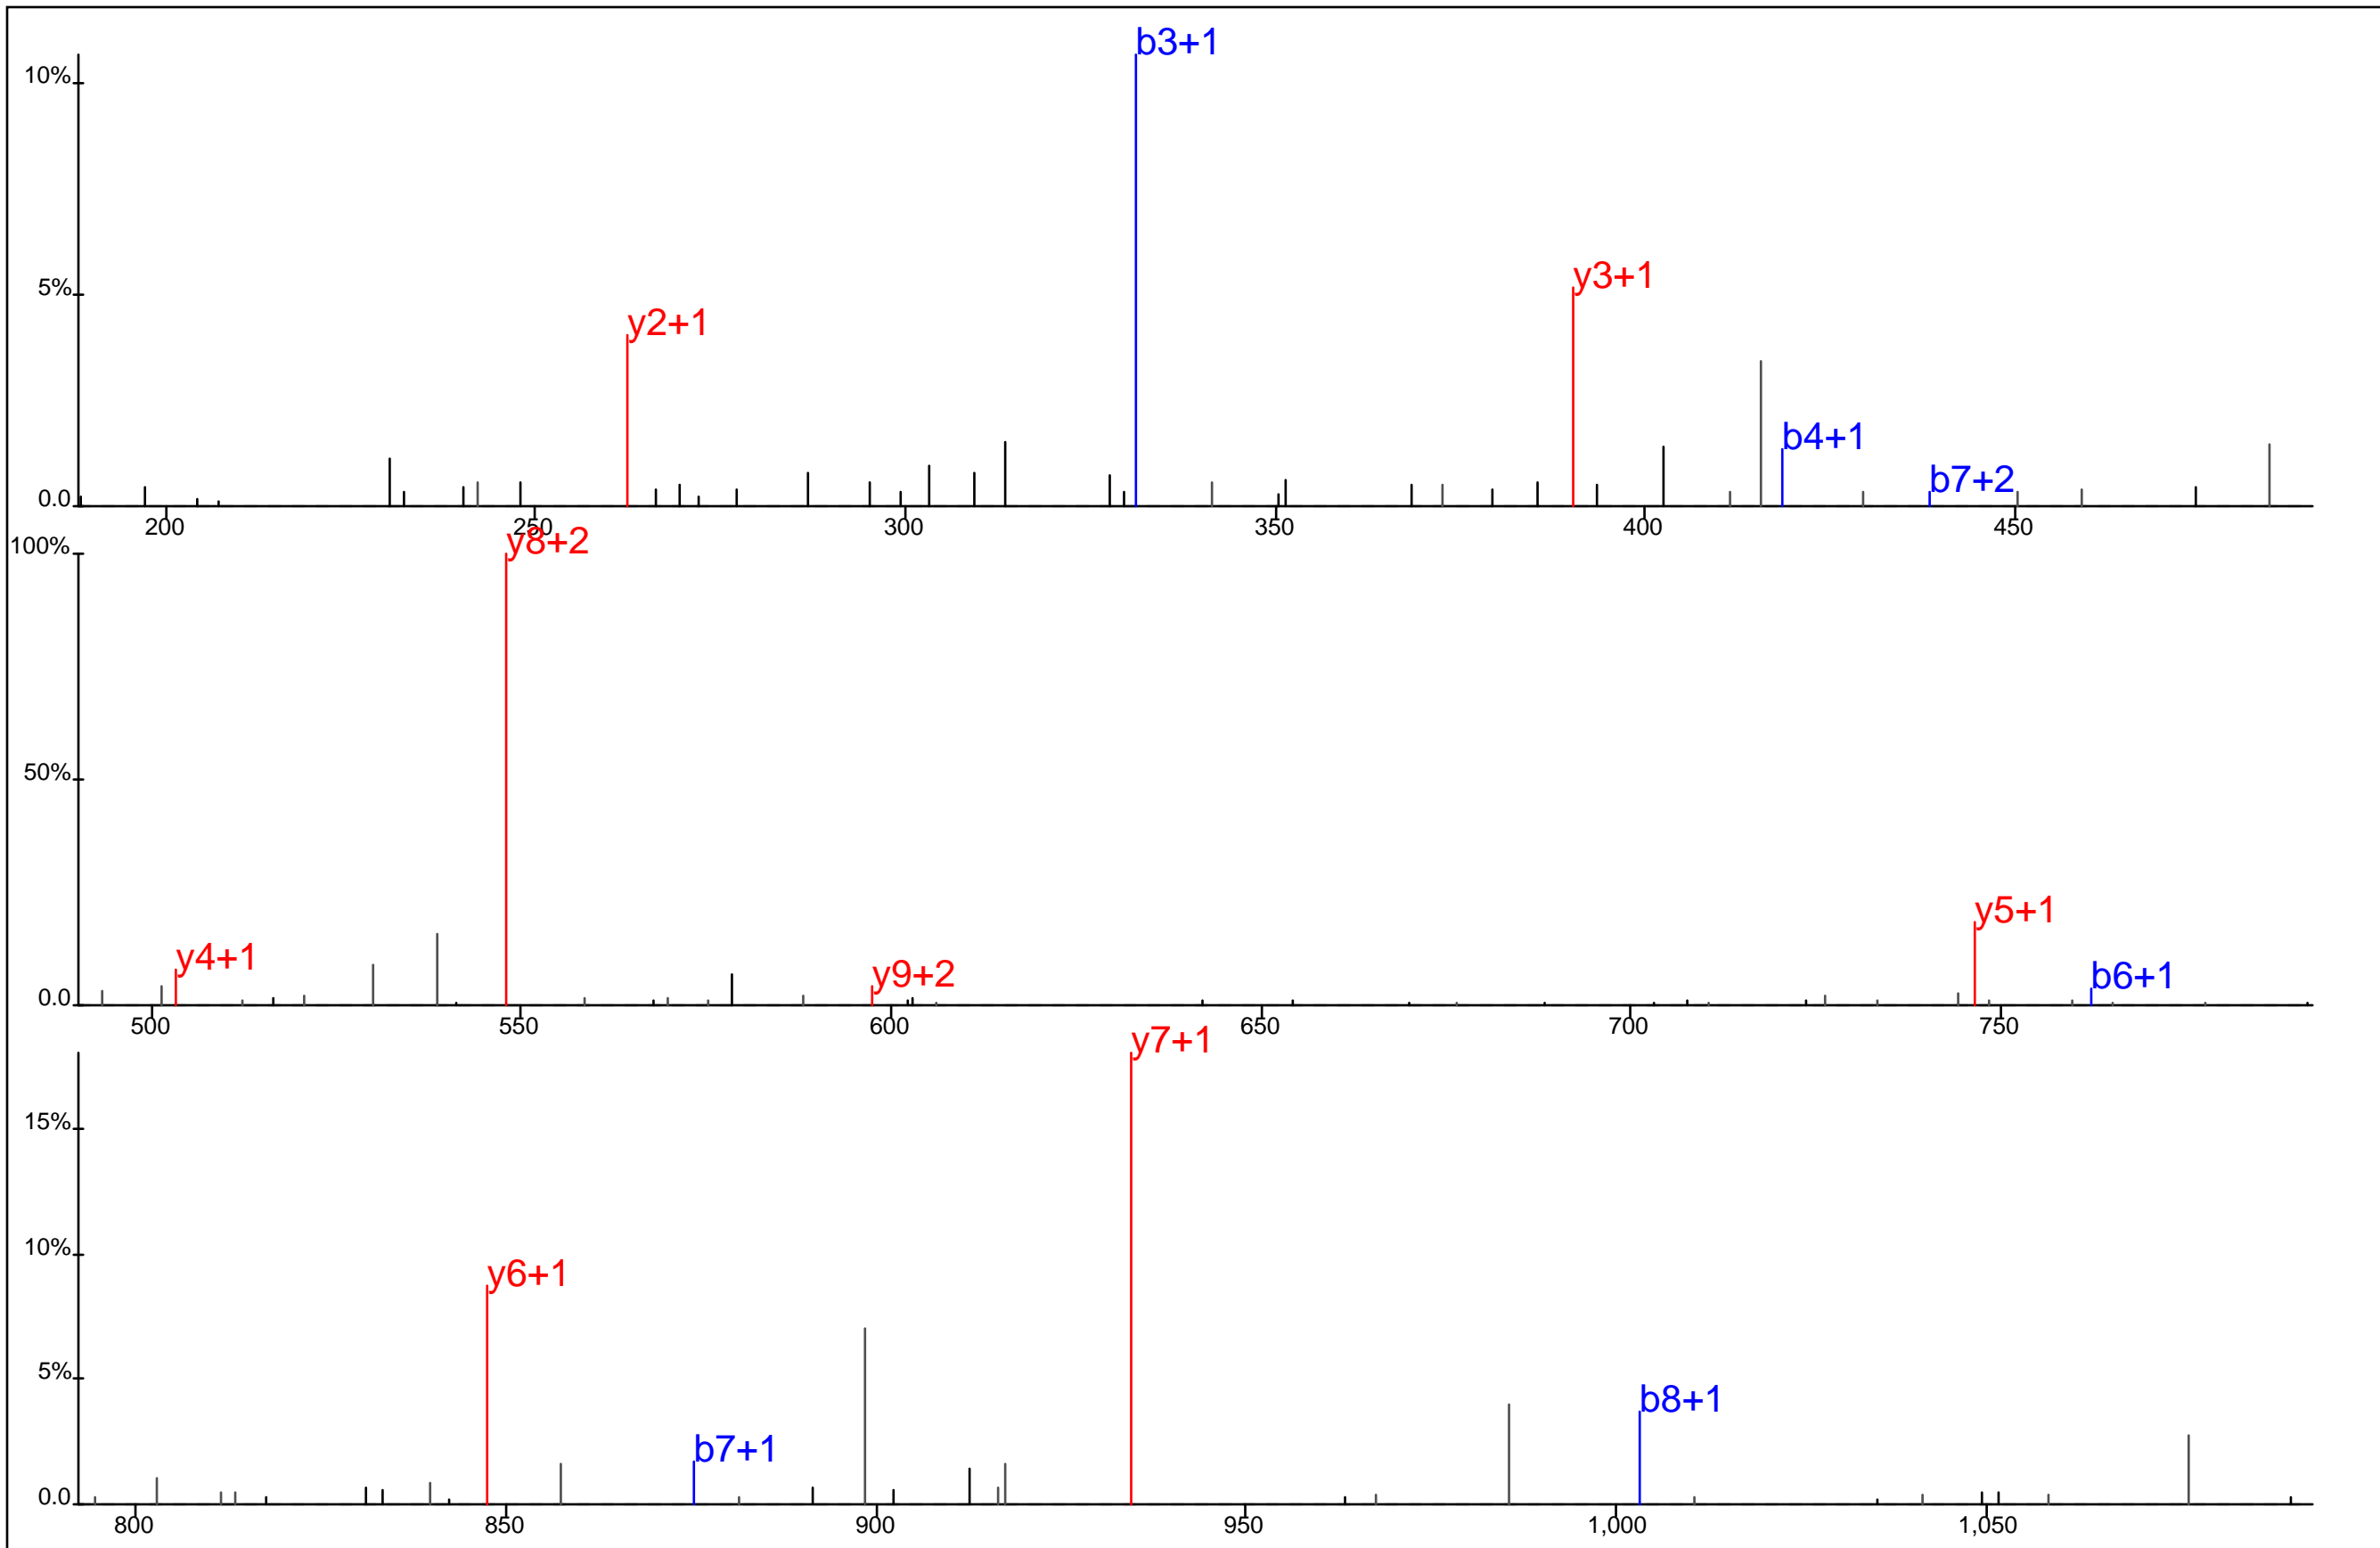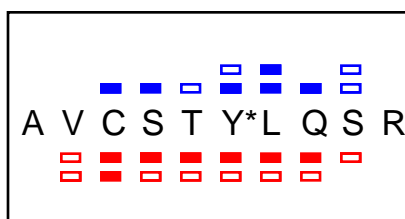

Protein Name: HIPK1  
 gi Accession: 0  
 Precursor Mass: 632.7733+2  
 Delta Mass: 0.063 ppm  
 XCorr: 61.3

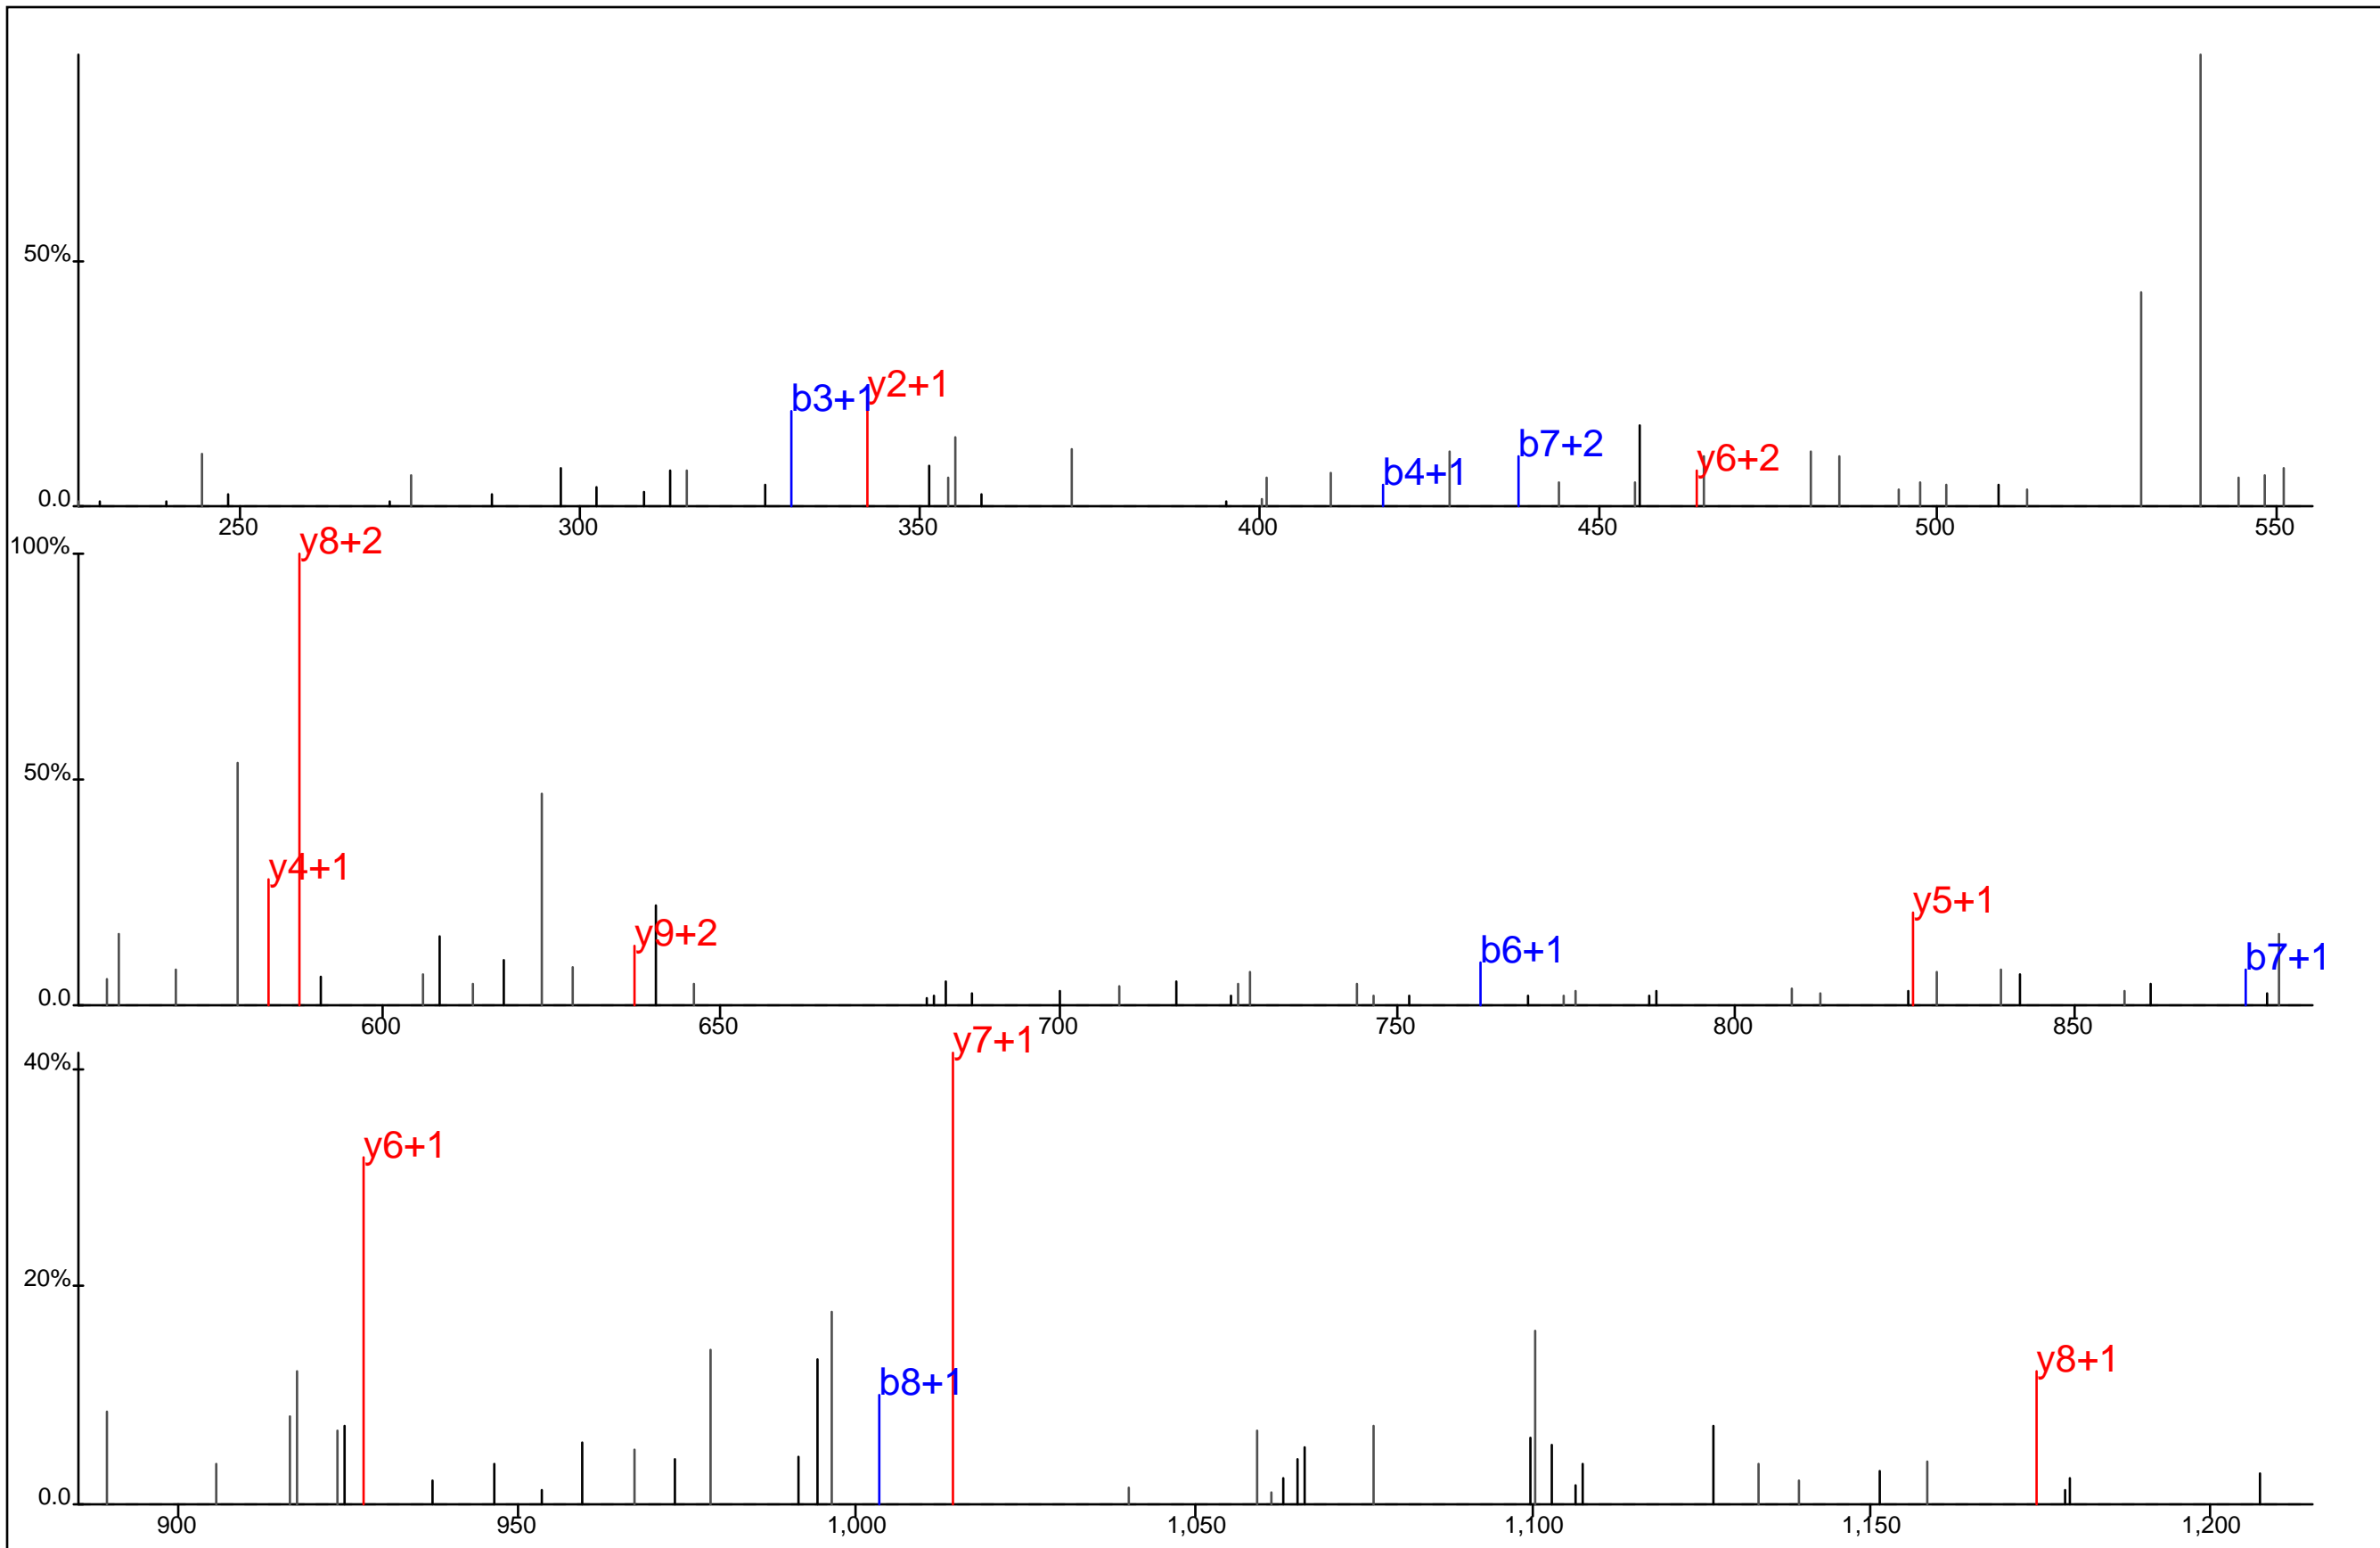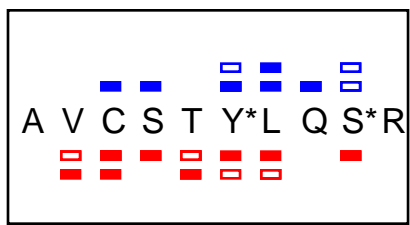

Protein Name: HIPK1  
 gi Accession: 0  
 Precursor Mass: 672.7567+2  
 Delta Mass: 0.415 ppm  
 XCorr: 27.62

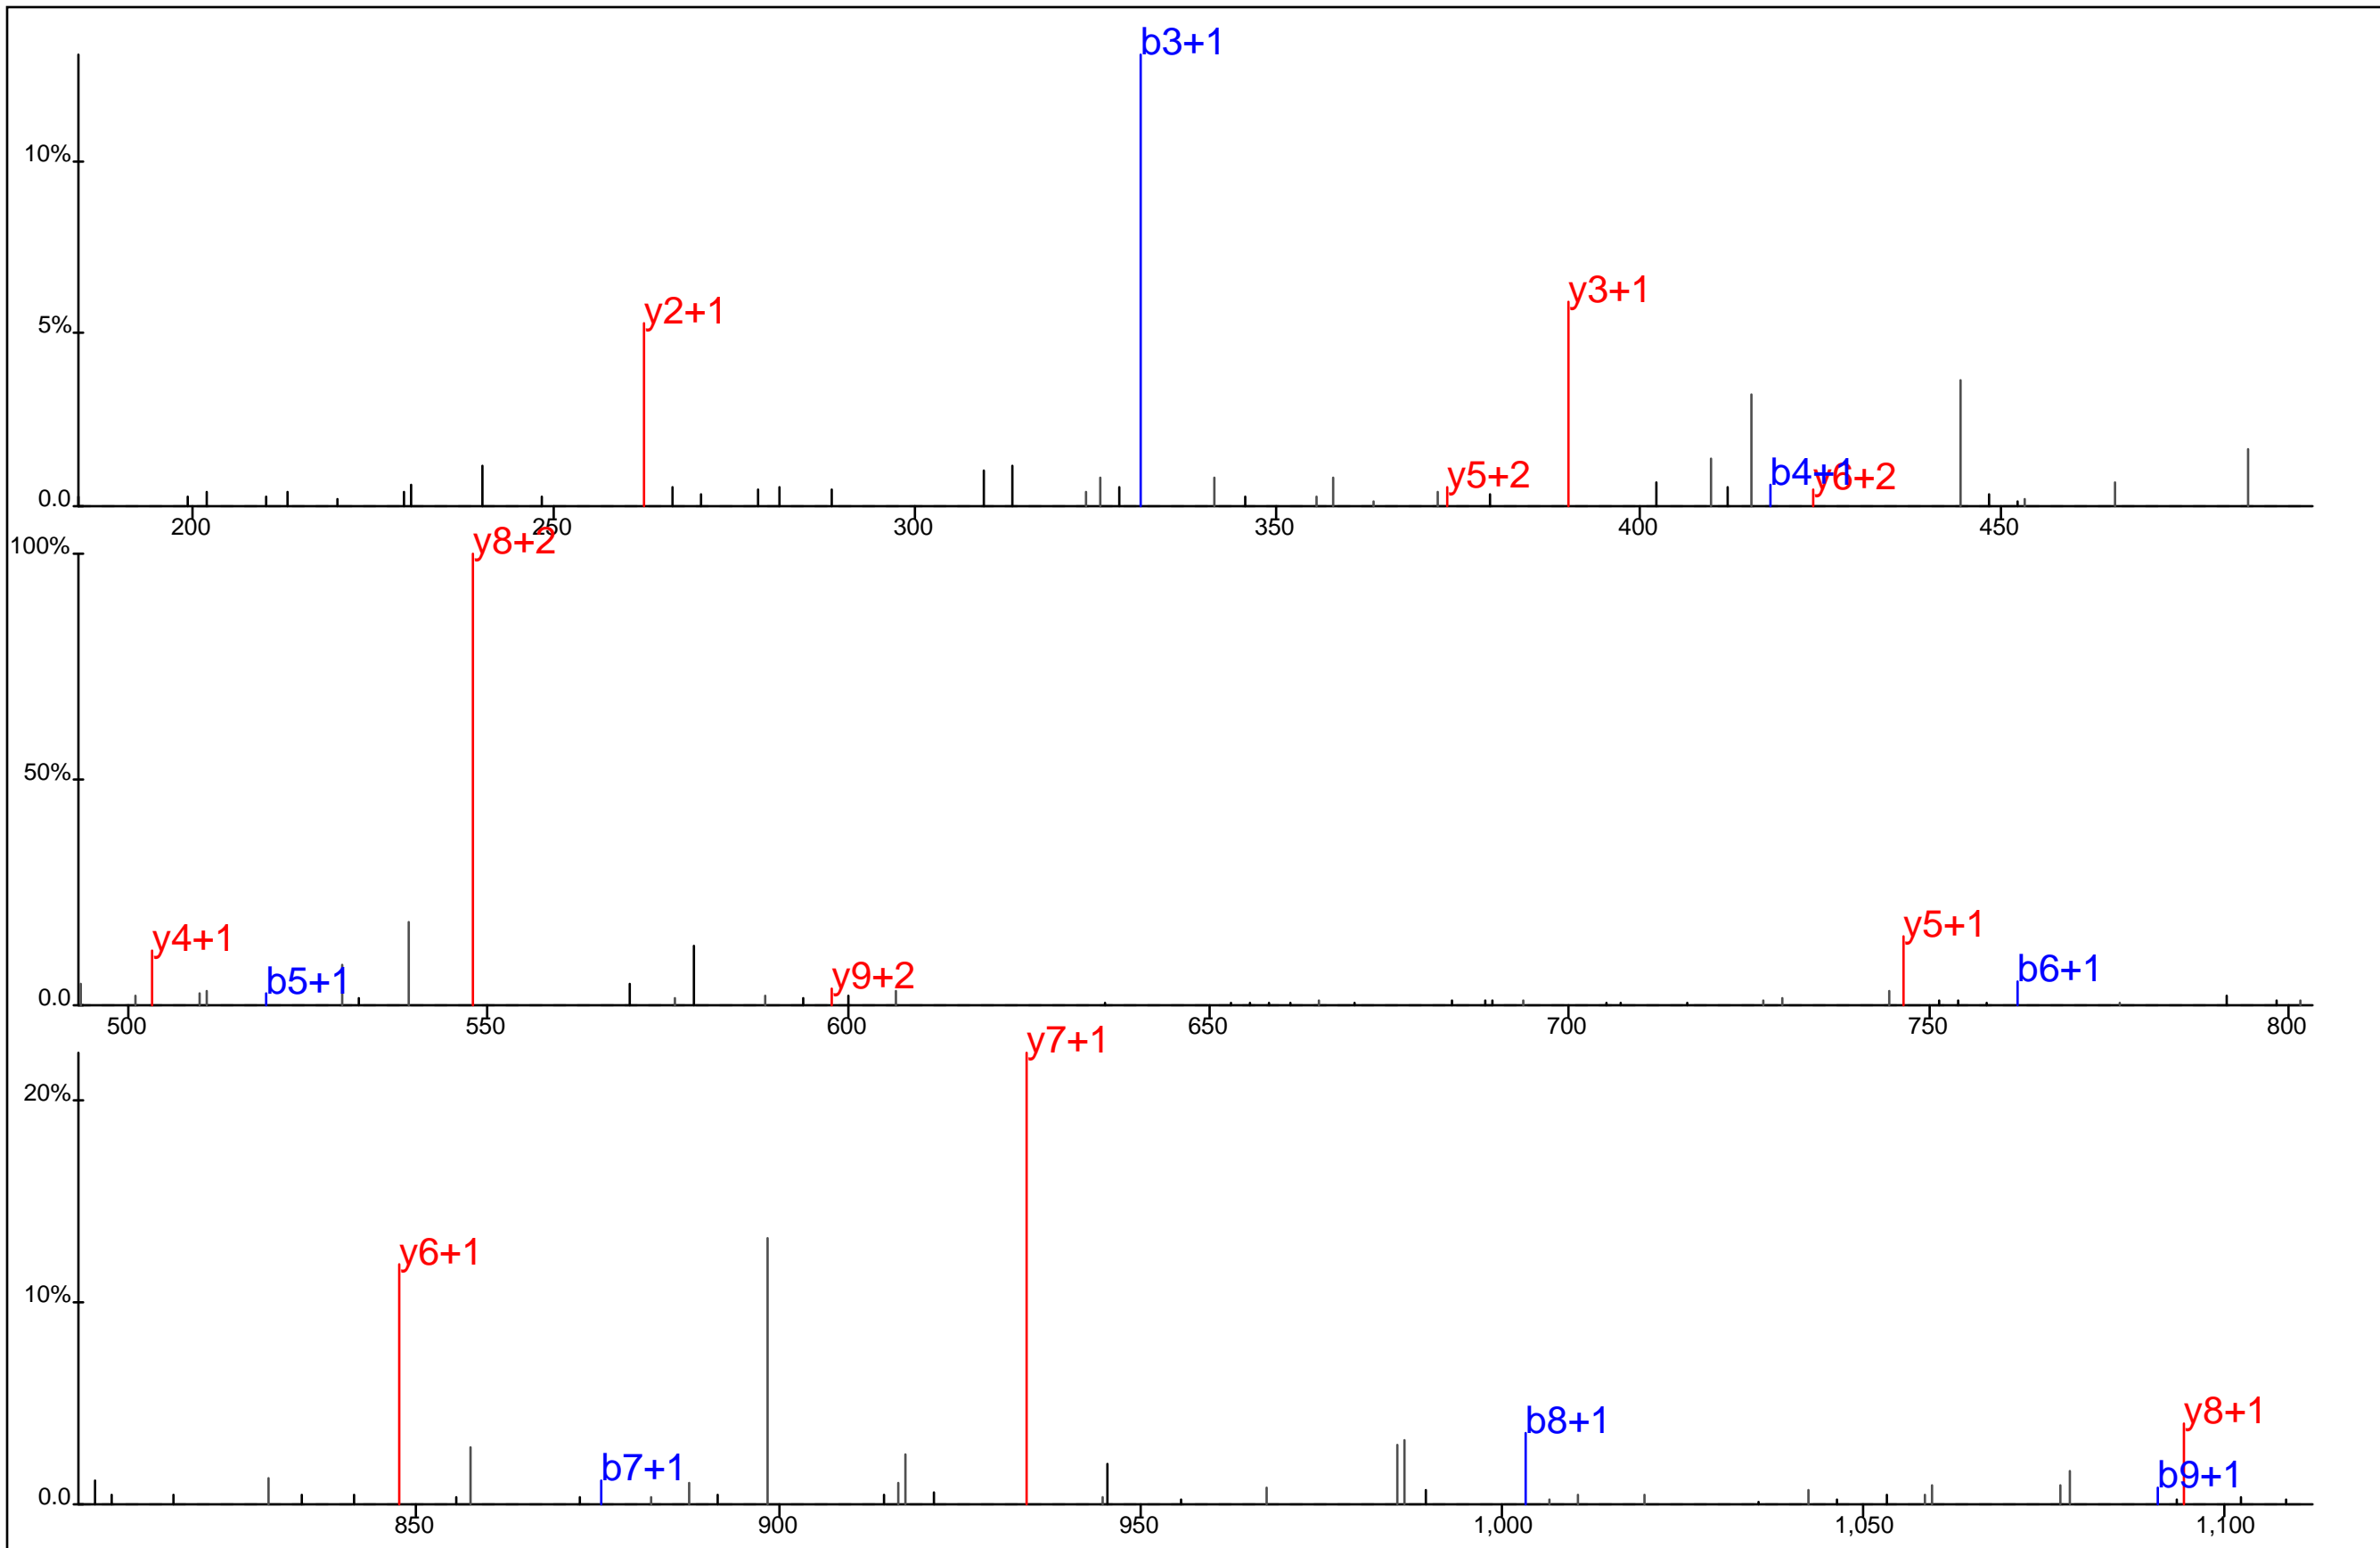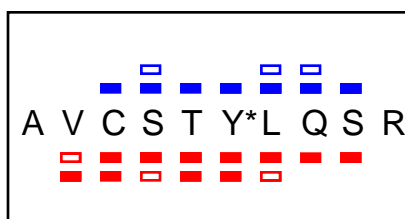

Protein Name: HIPK1  
 gi Accession: 0  
 Precursor Mass: 632.7730+2  
 Delta Mass: 0.323 ppm  
 XCorr: 60.79



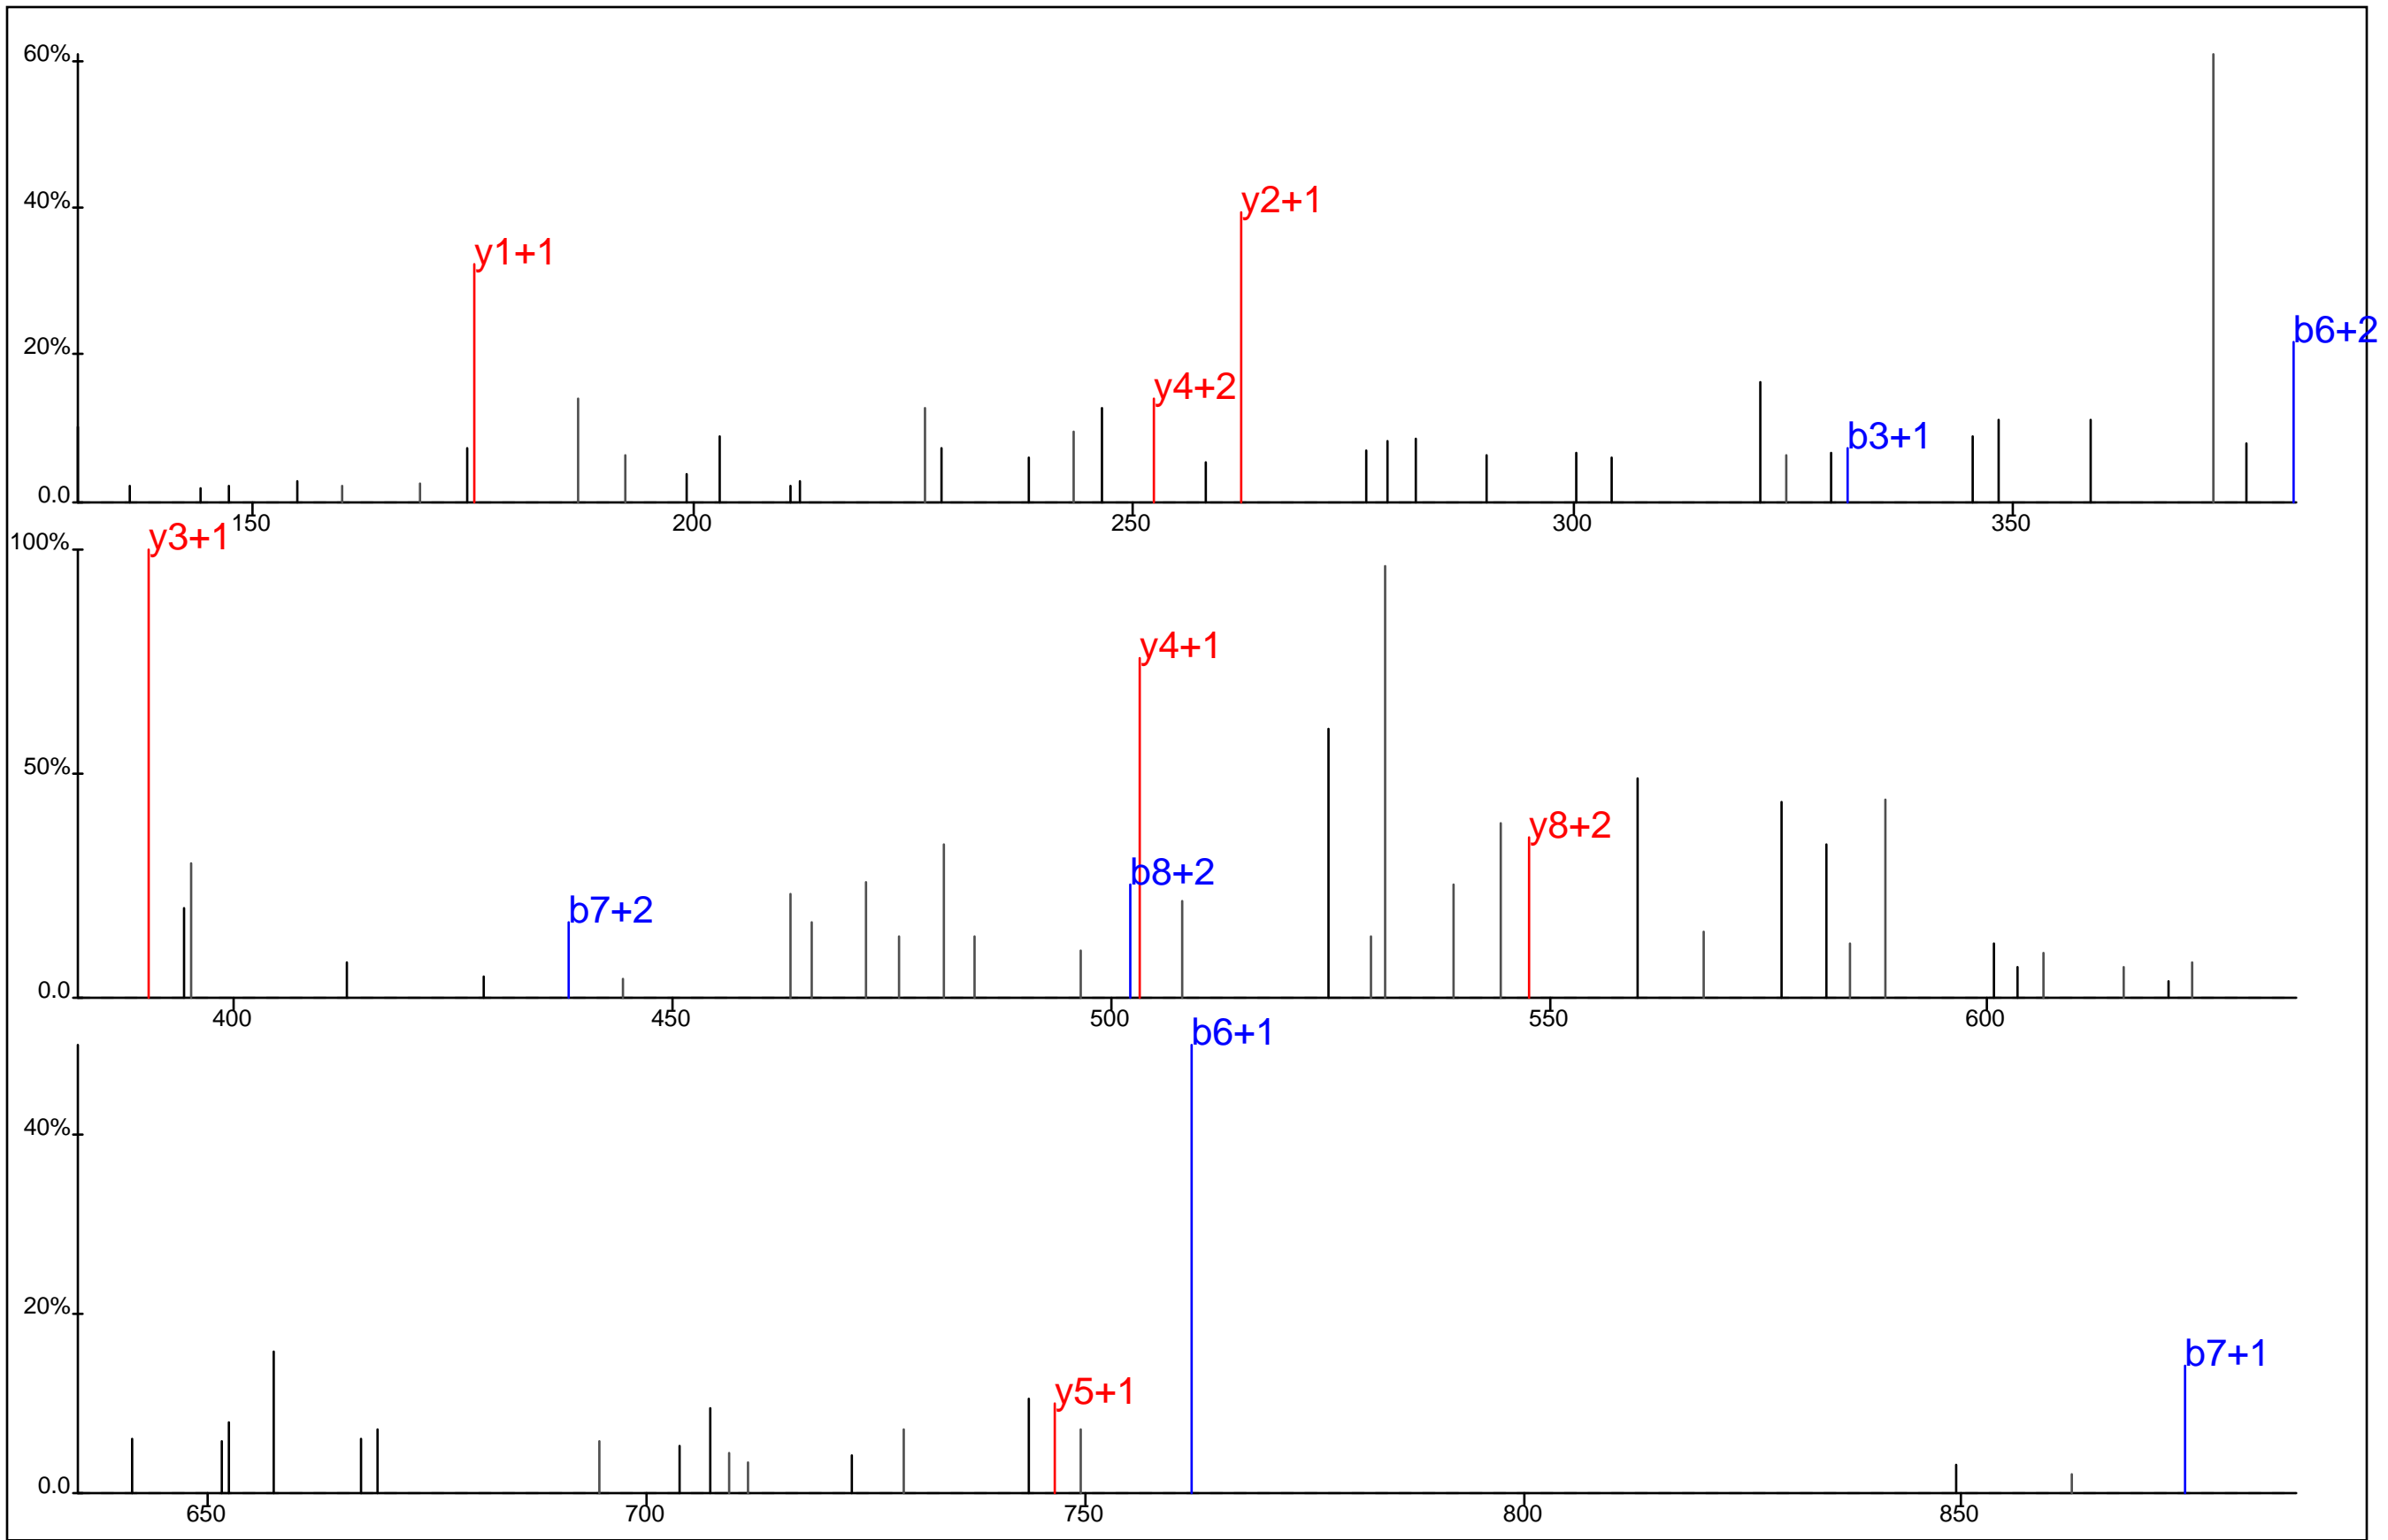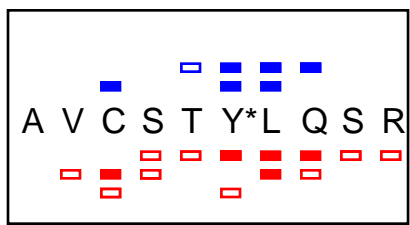

Protein Name: HIPK1  
 gi Accession: 0  
 Precursor Mass: 422.1848+3  
 Delta Mass: 0.584 ppm  
 XCorr: 24.87

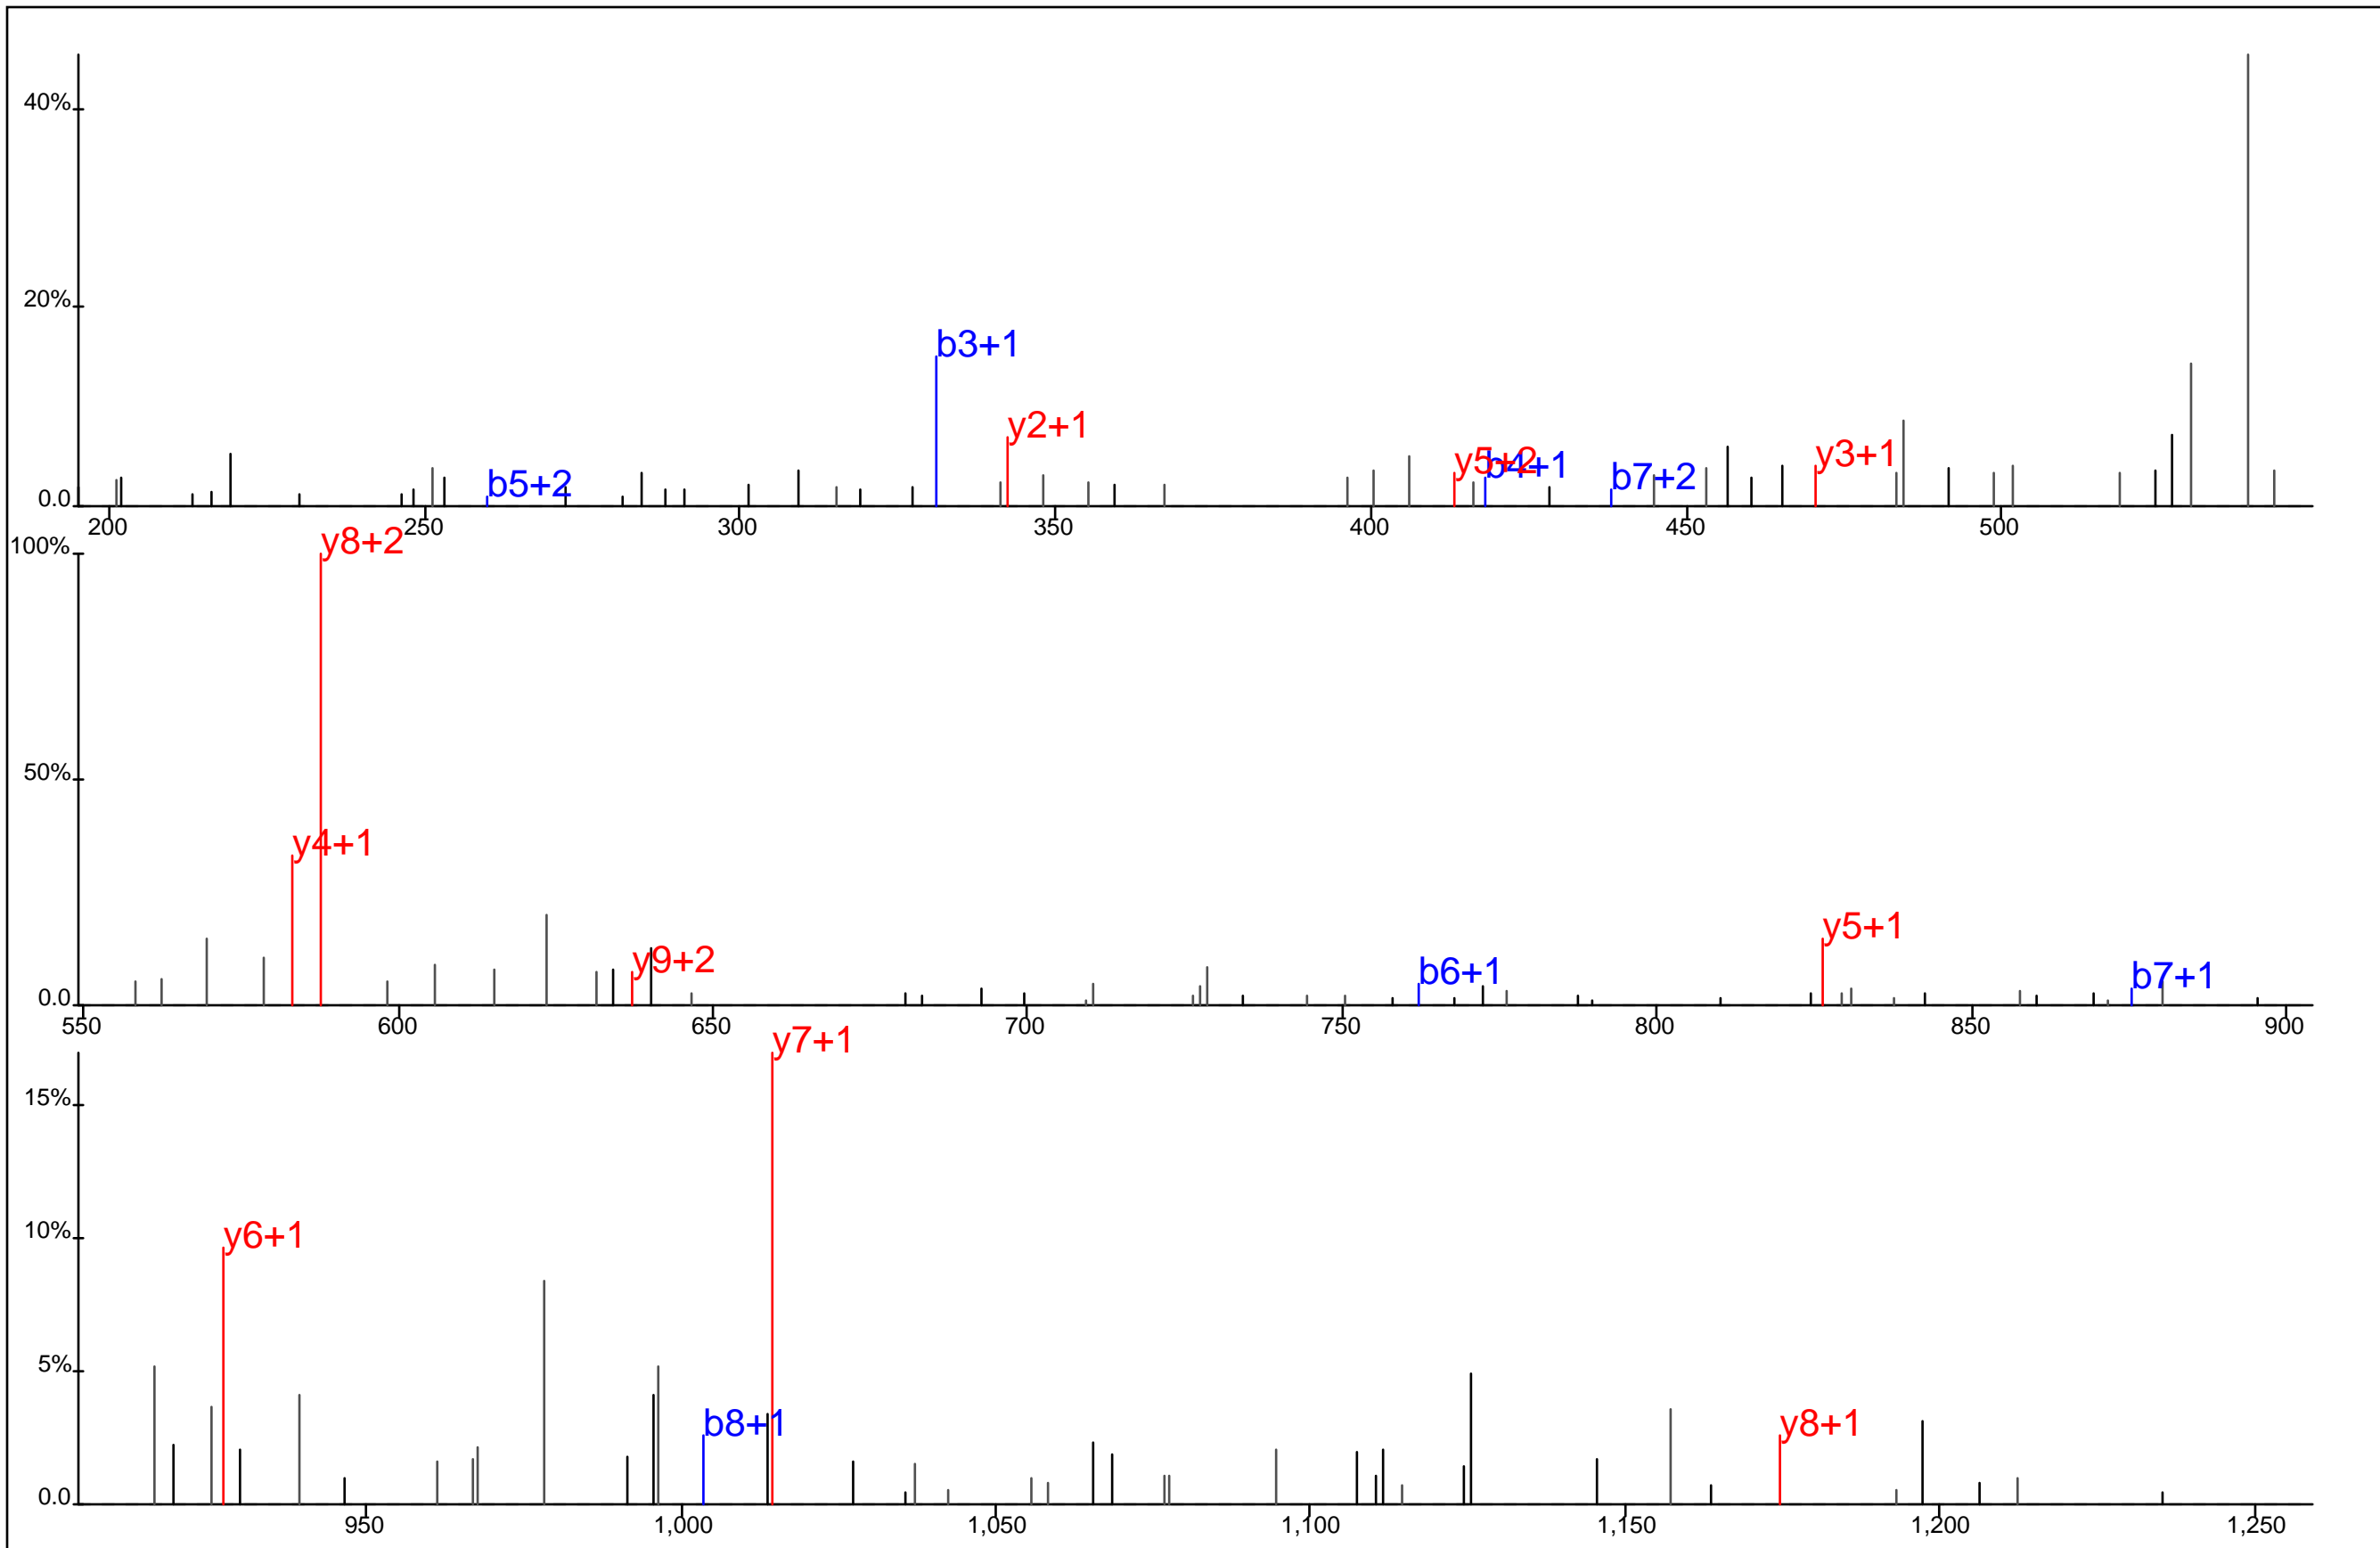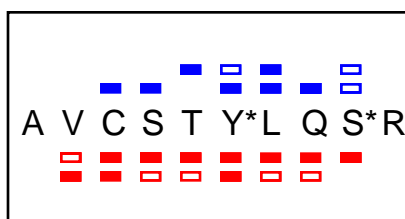

Protein Name: HIPK1  
 gi Accession: 0  
 Precursor Mass: 672.7577+2  
 Delta Mass: 1.958 ppm  
 XCorr: 30.47

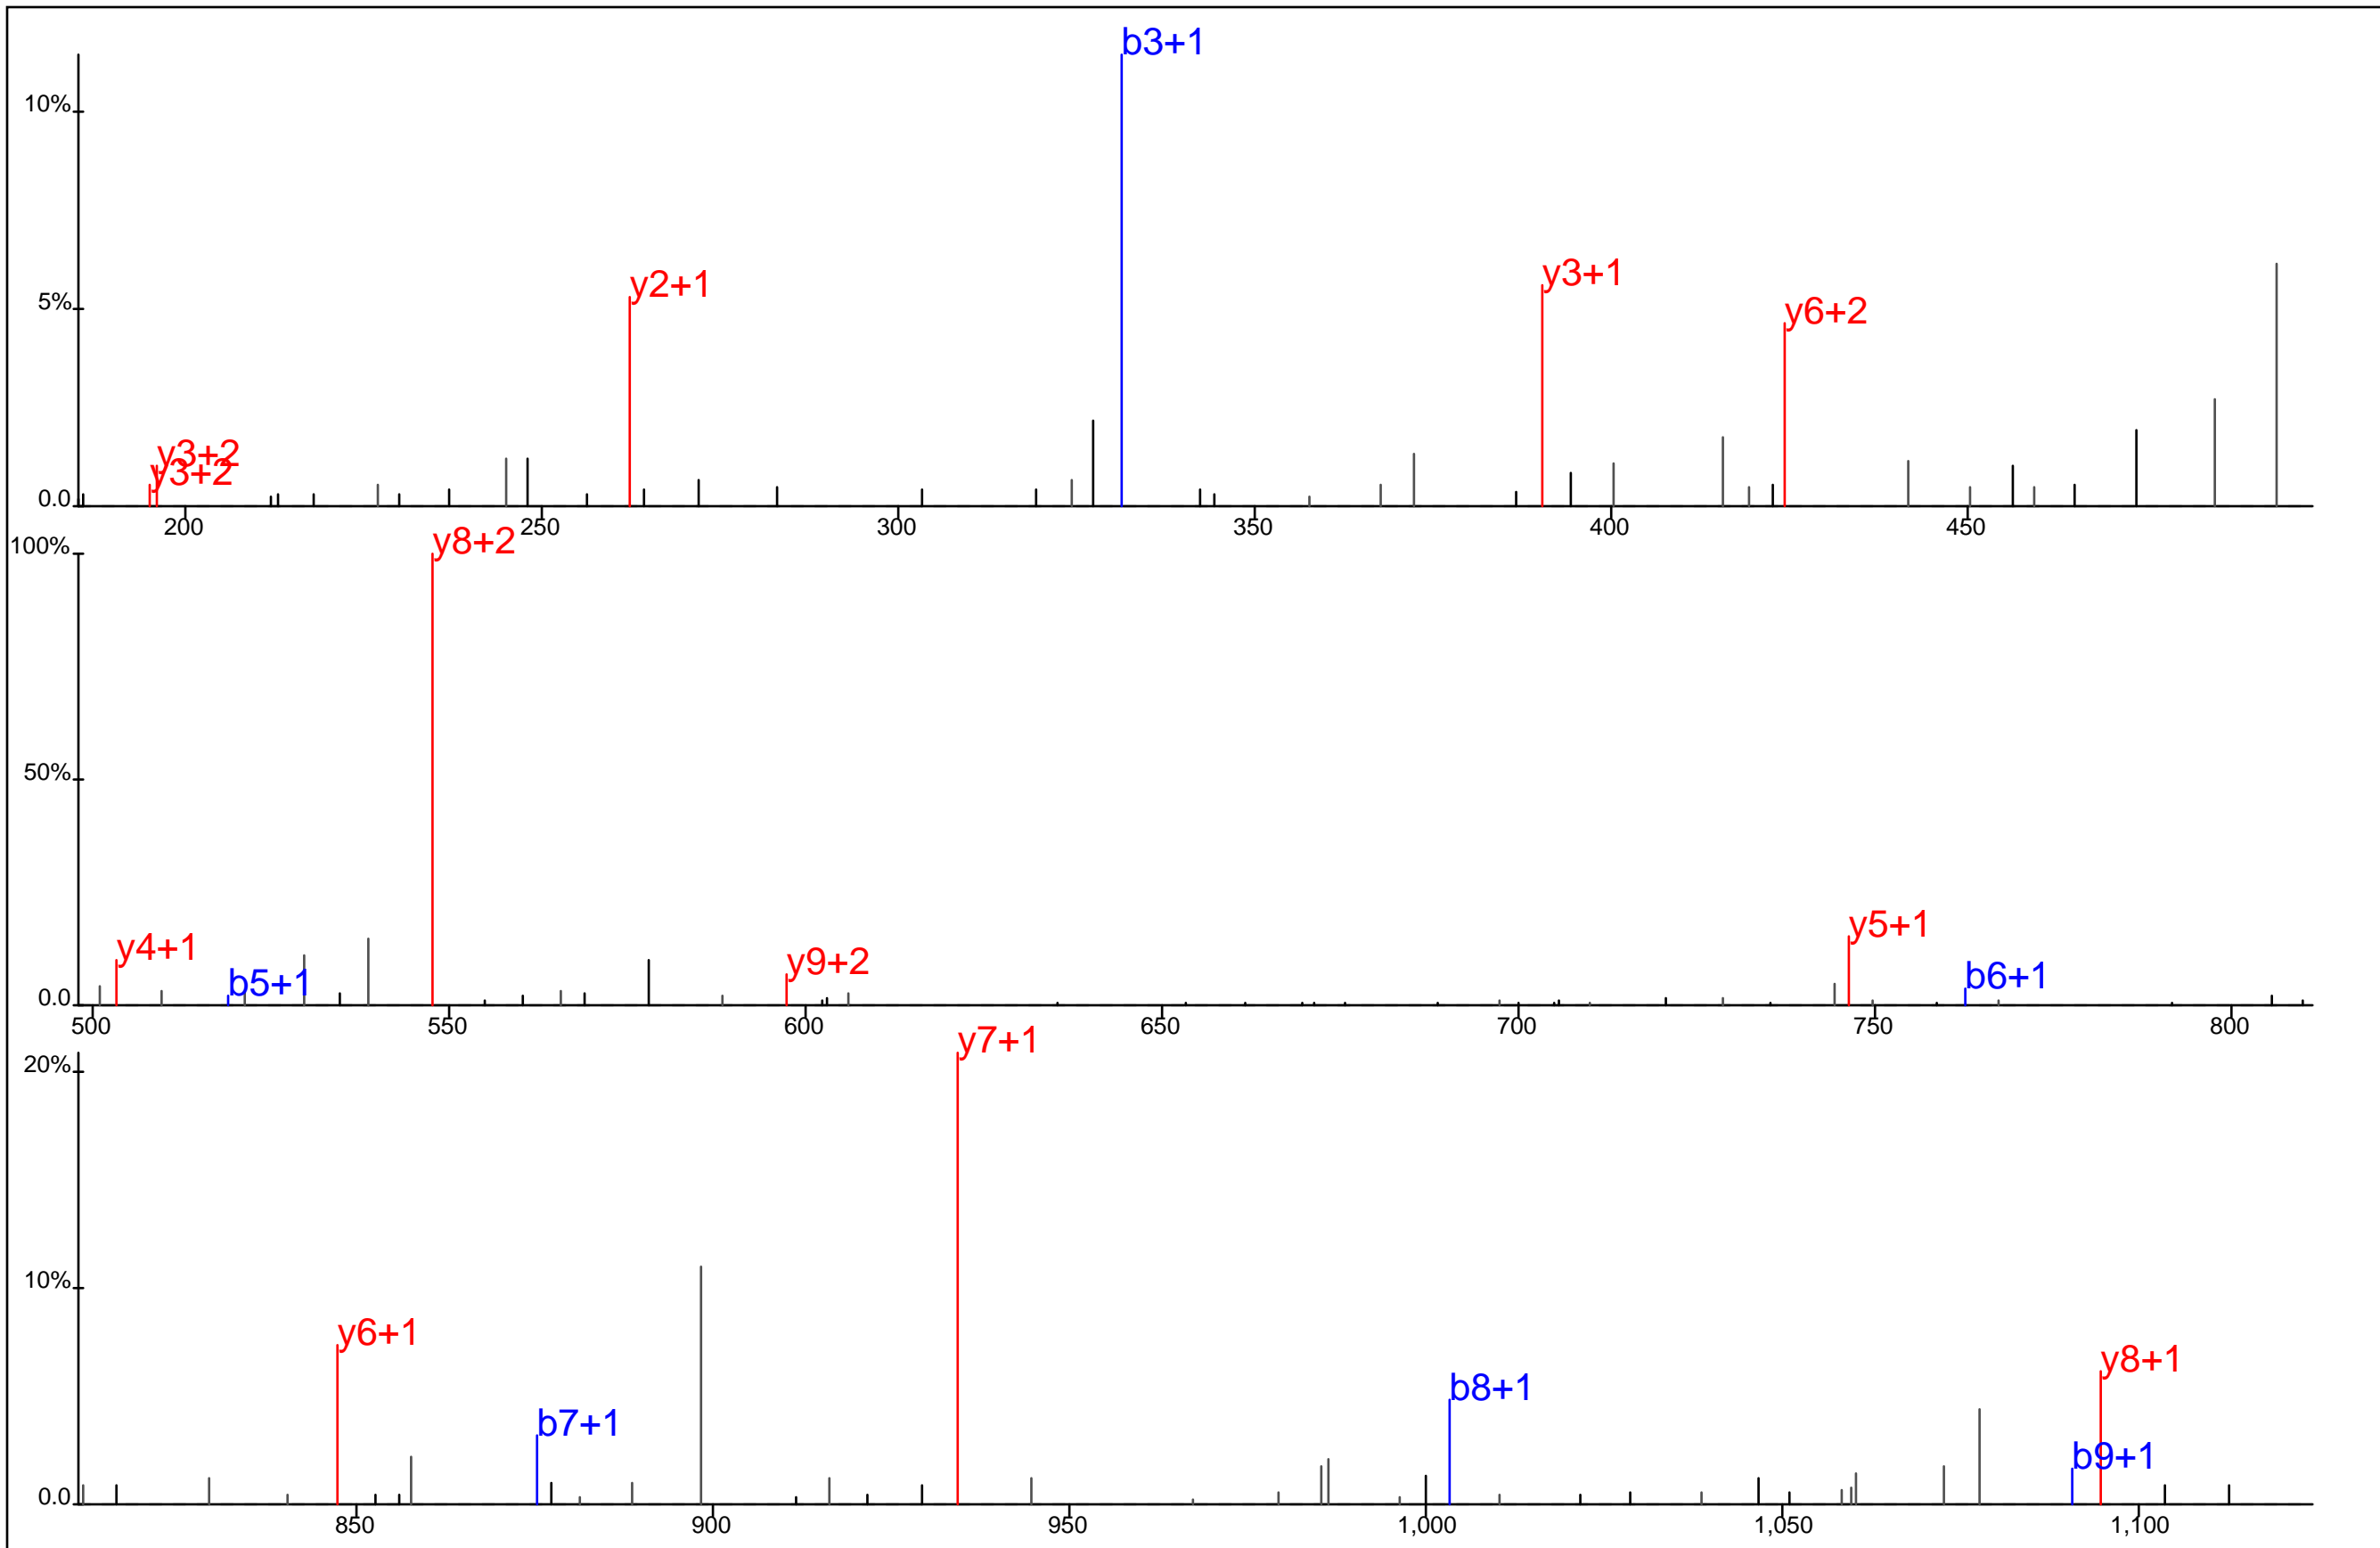

■ ■ ■ ■ ■ ■ ■ ■ ■ ■  
 A V C S T Y\* L Q S R  
■ ■ ■ ■ ■ ■ ■ ■ ■ ■

Protein Name: HIPK1  
 gi Accession: 0  
 Precursor Mass: 632.7731+2  
 Delta Mass: 0.226 ppm  
 XCorr: 60.76

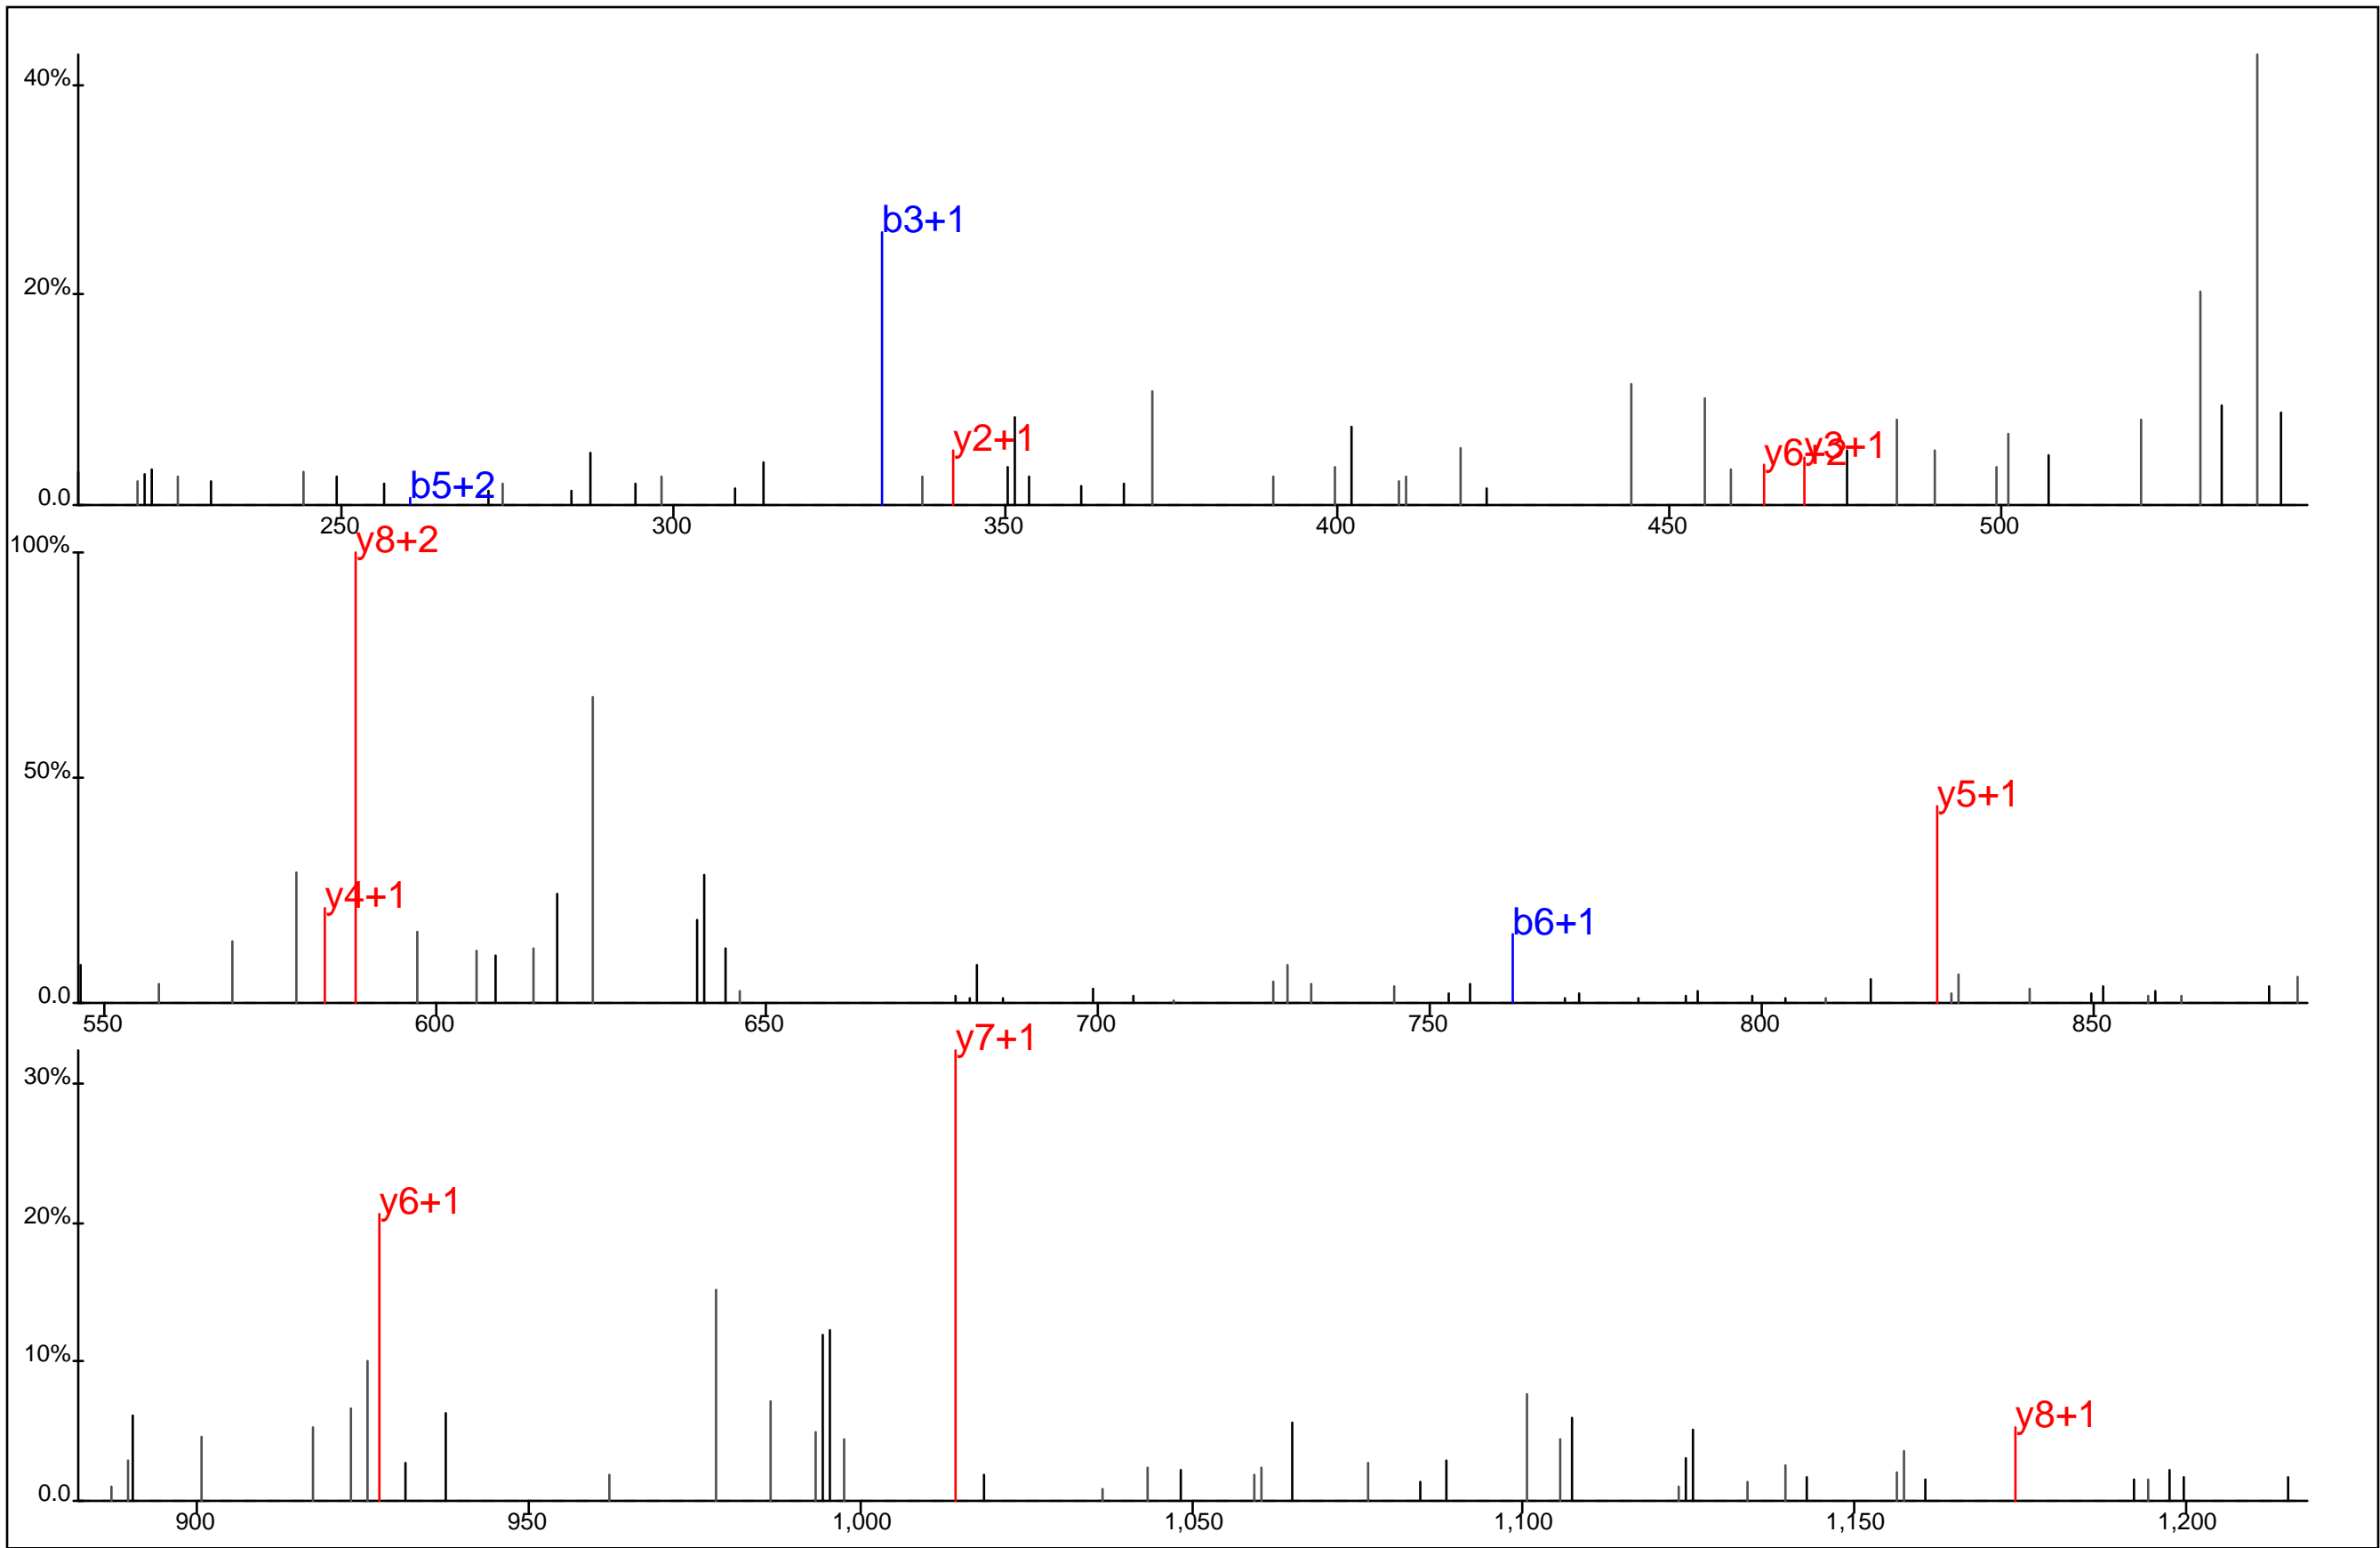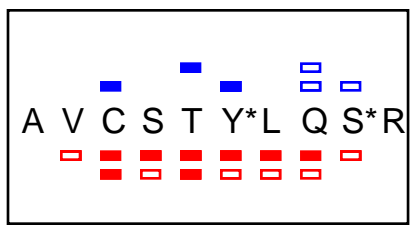

Protein Name: HIPK1  
 gi Accession: 0  
 Precursor Mass: 672.7563+2  
 Delta Mass: 0.039 ppm  
 XCorr: 23.92

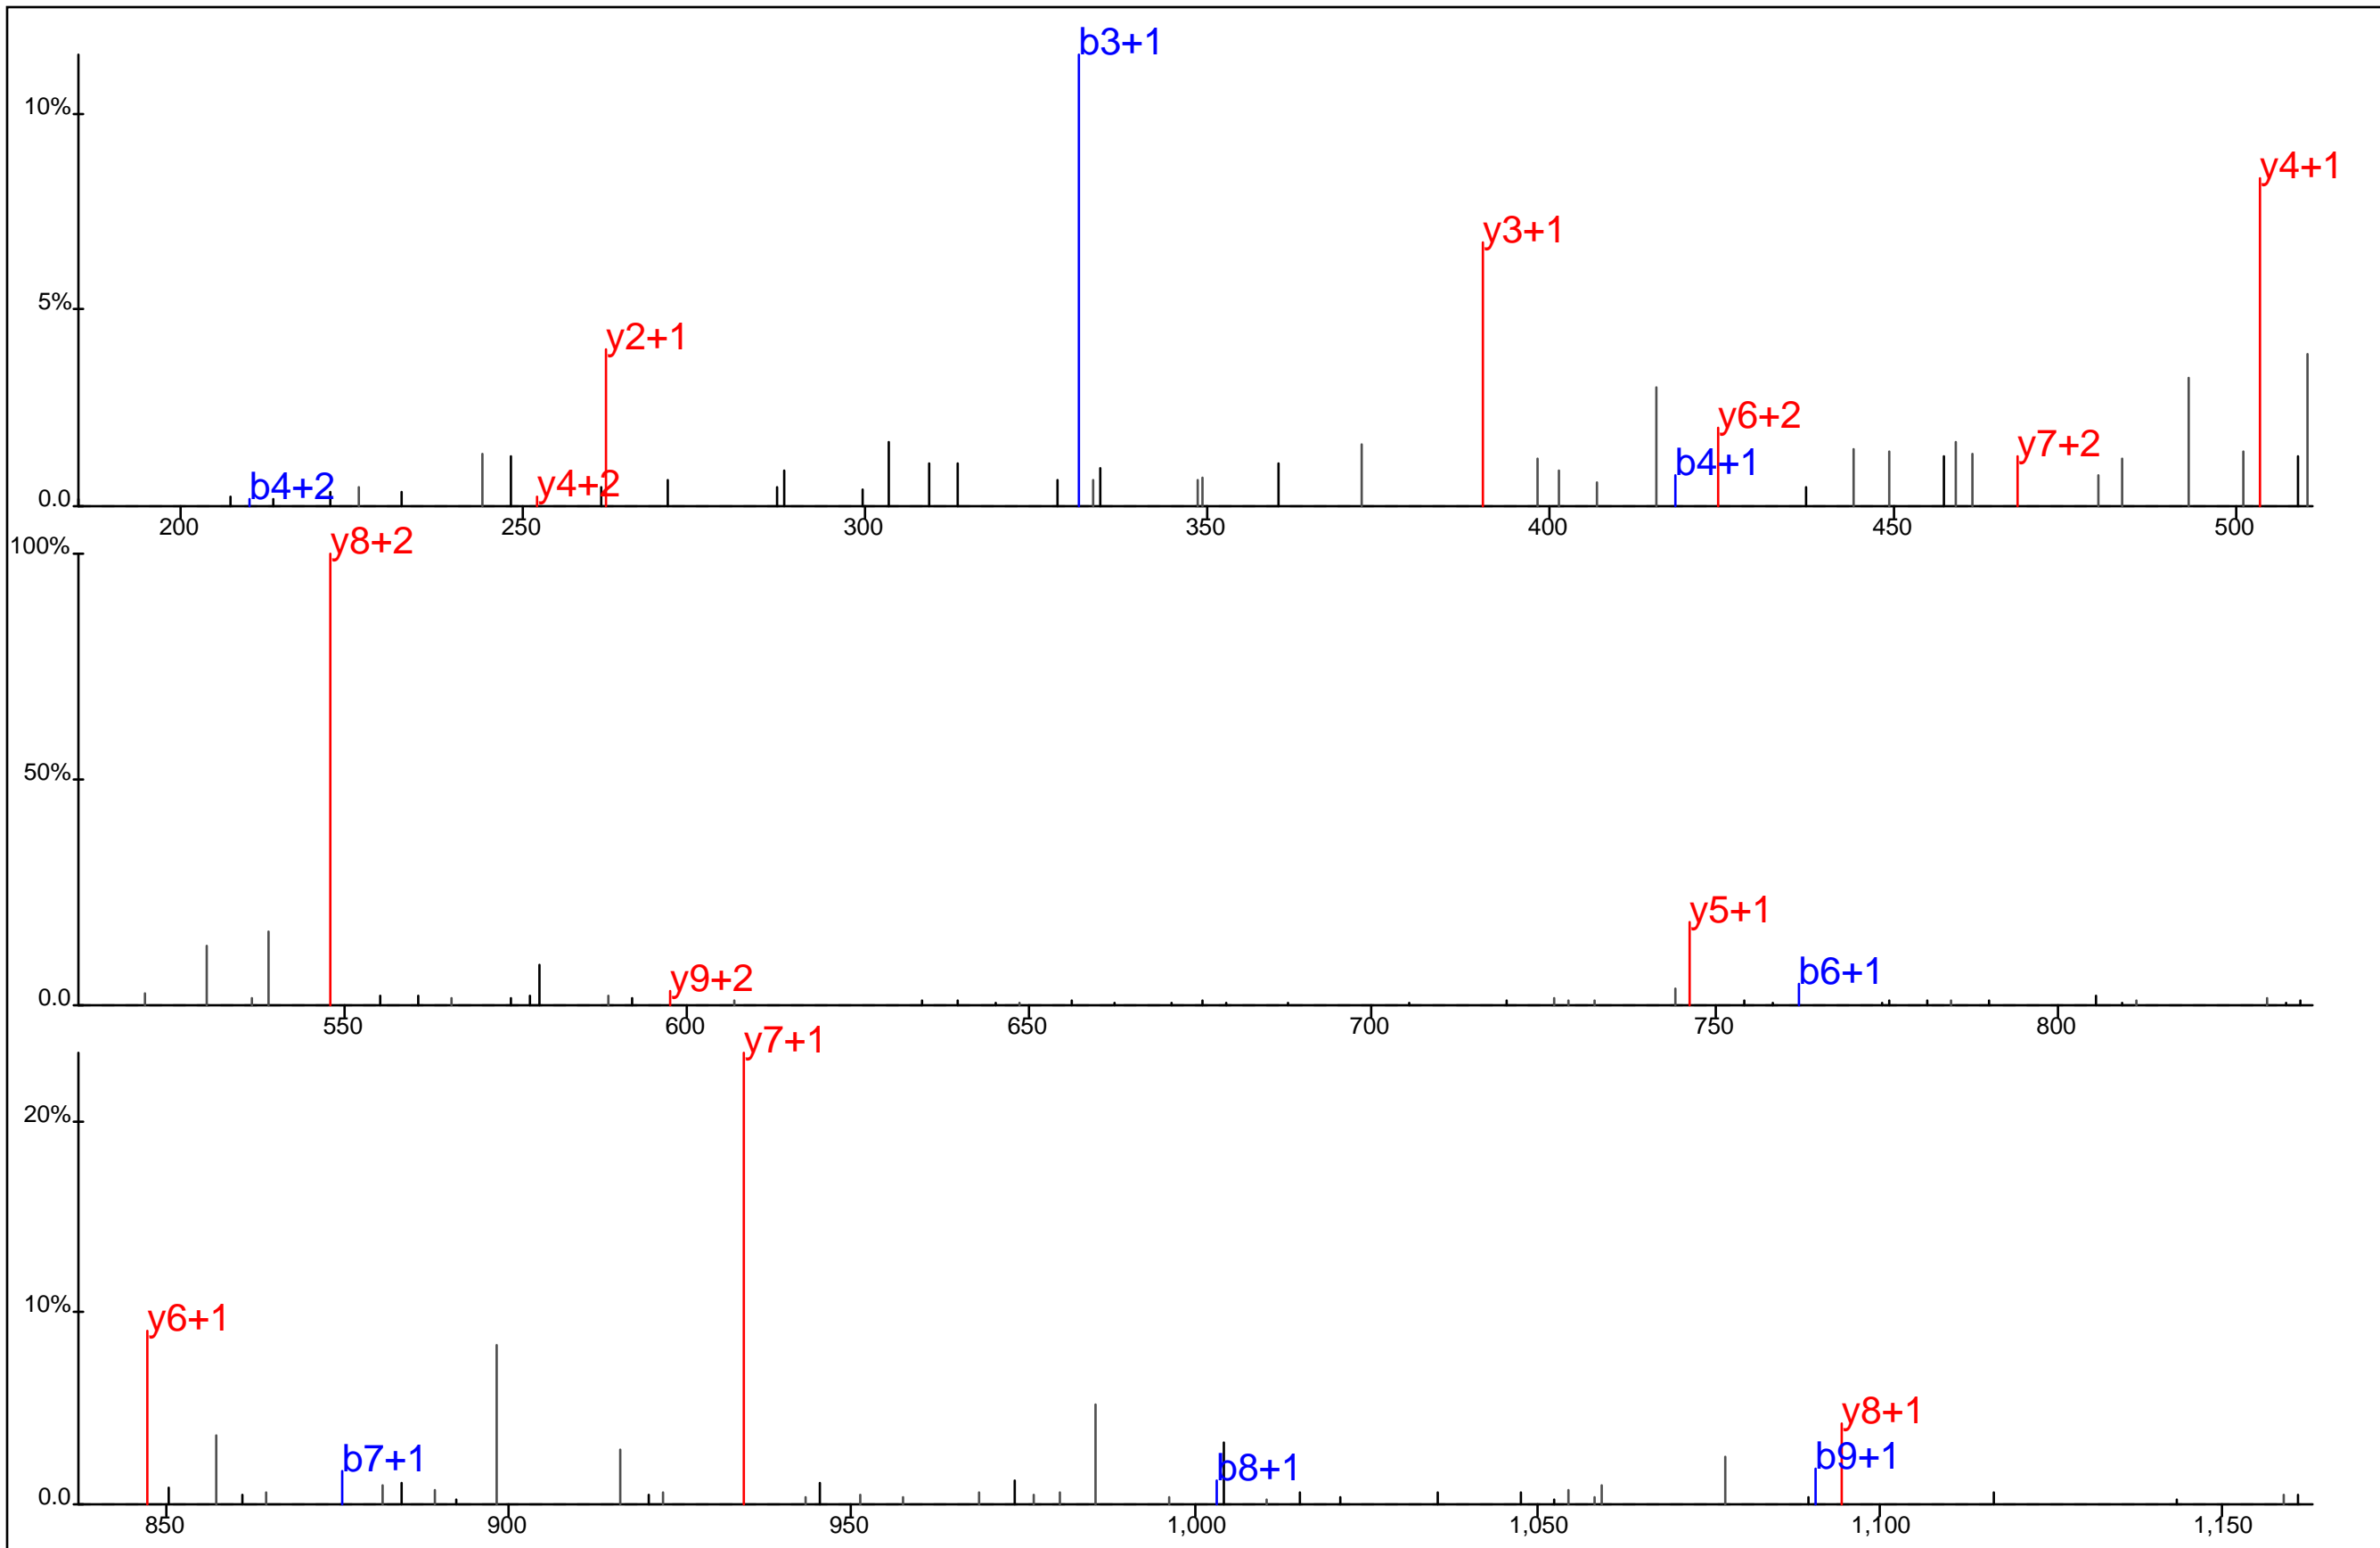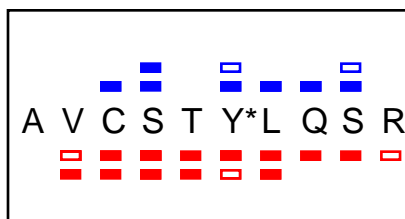

Protein Name: HIPK1  
 gi Accession: 0  
 Precursor Mass: 632.7723+2  
 Delta Mass: 1.480 ppm  
 XCorr: 51.16

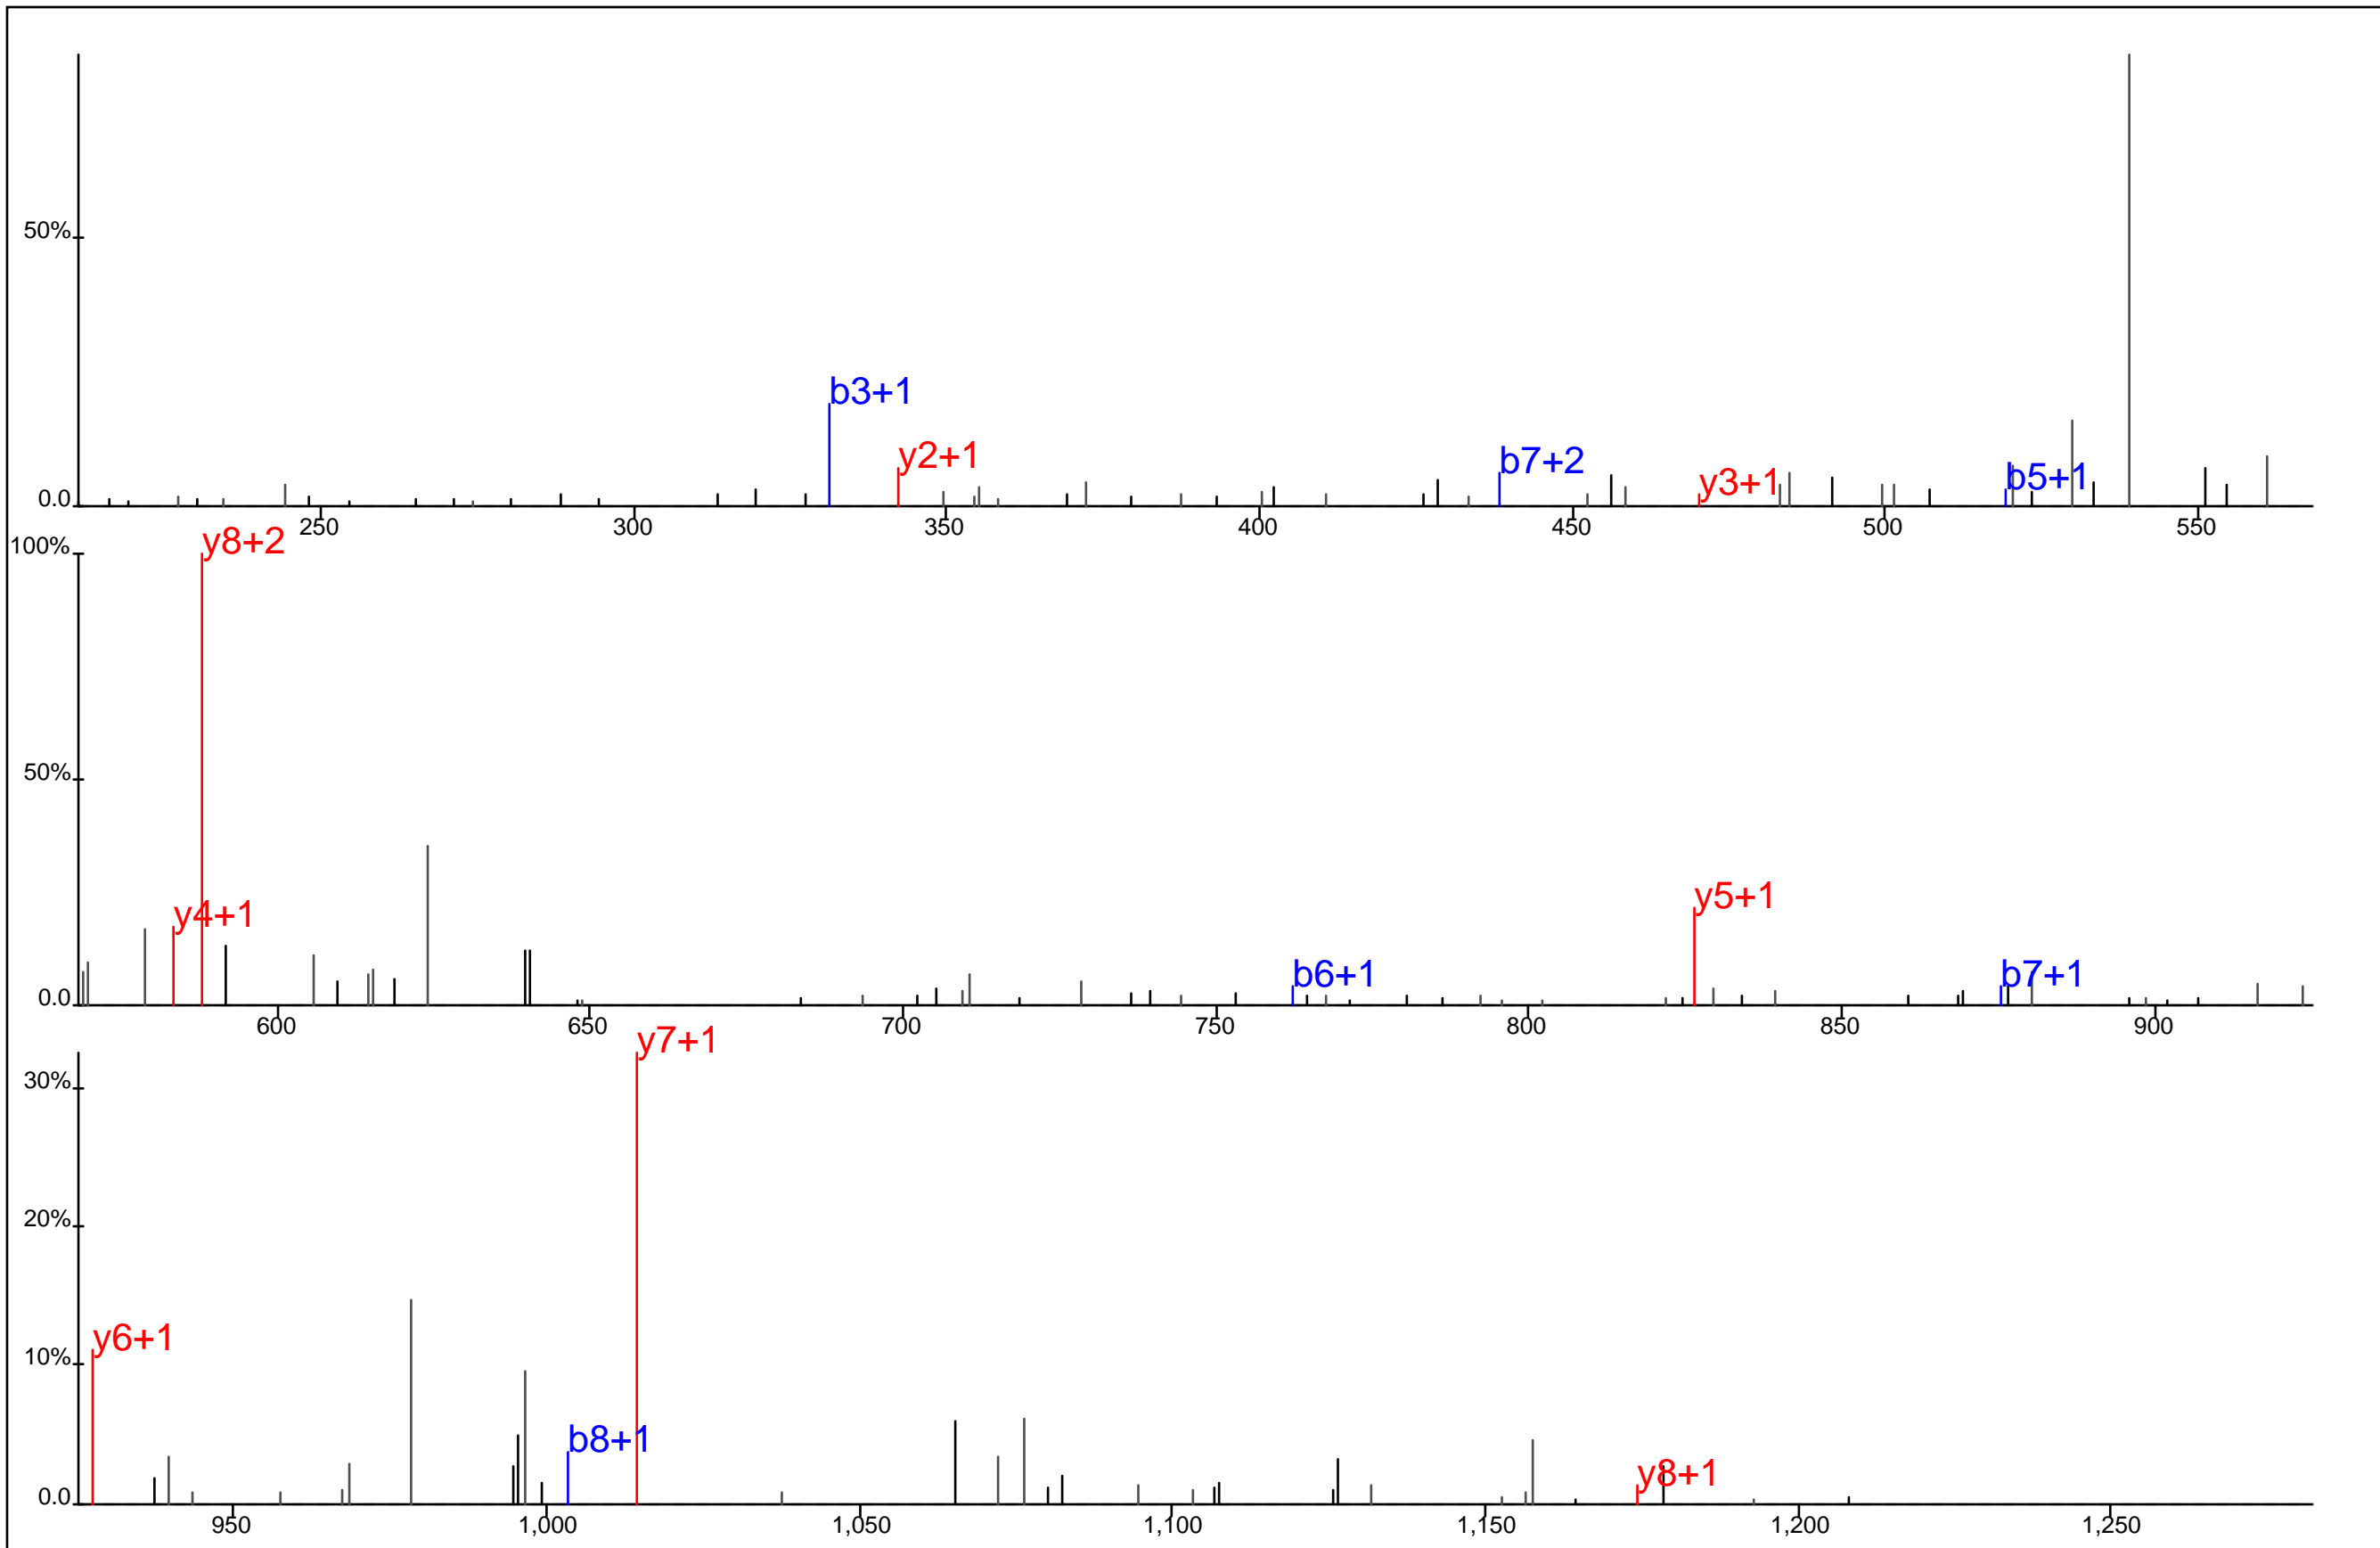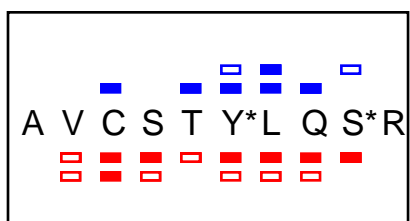

Protein Name: HIPK1  
 gi Accession: 0  
 Precursor Mass: 672.7568+2  
 Delta Mass: 0.687 ppm  
 XCorr: 27.37

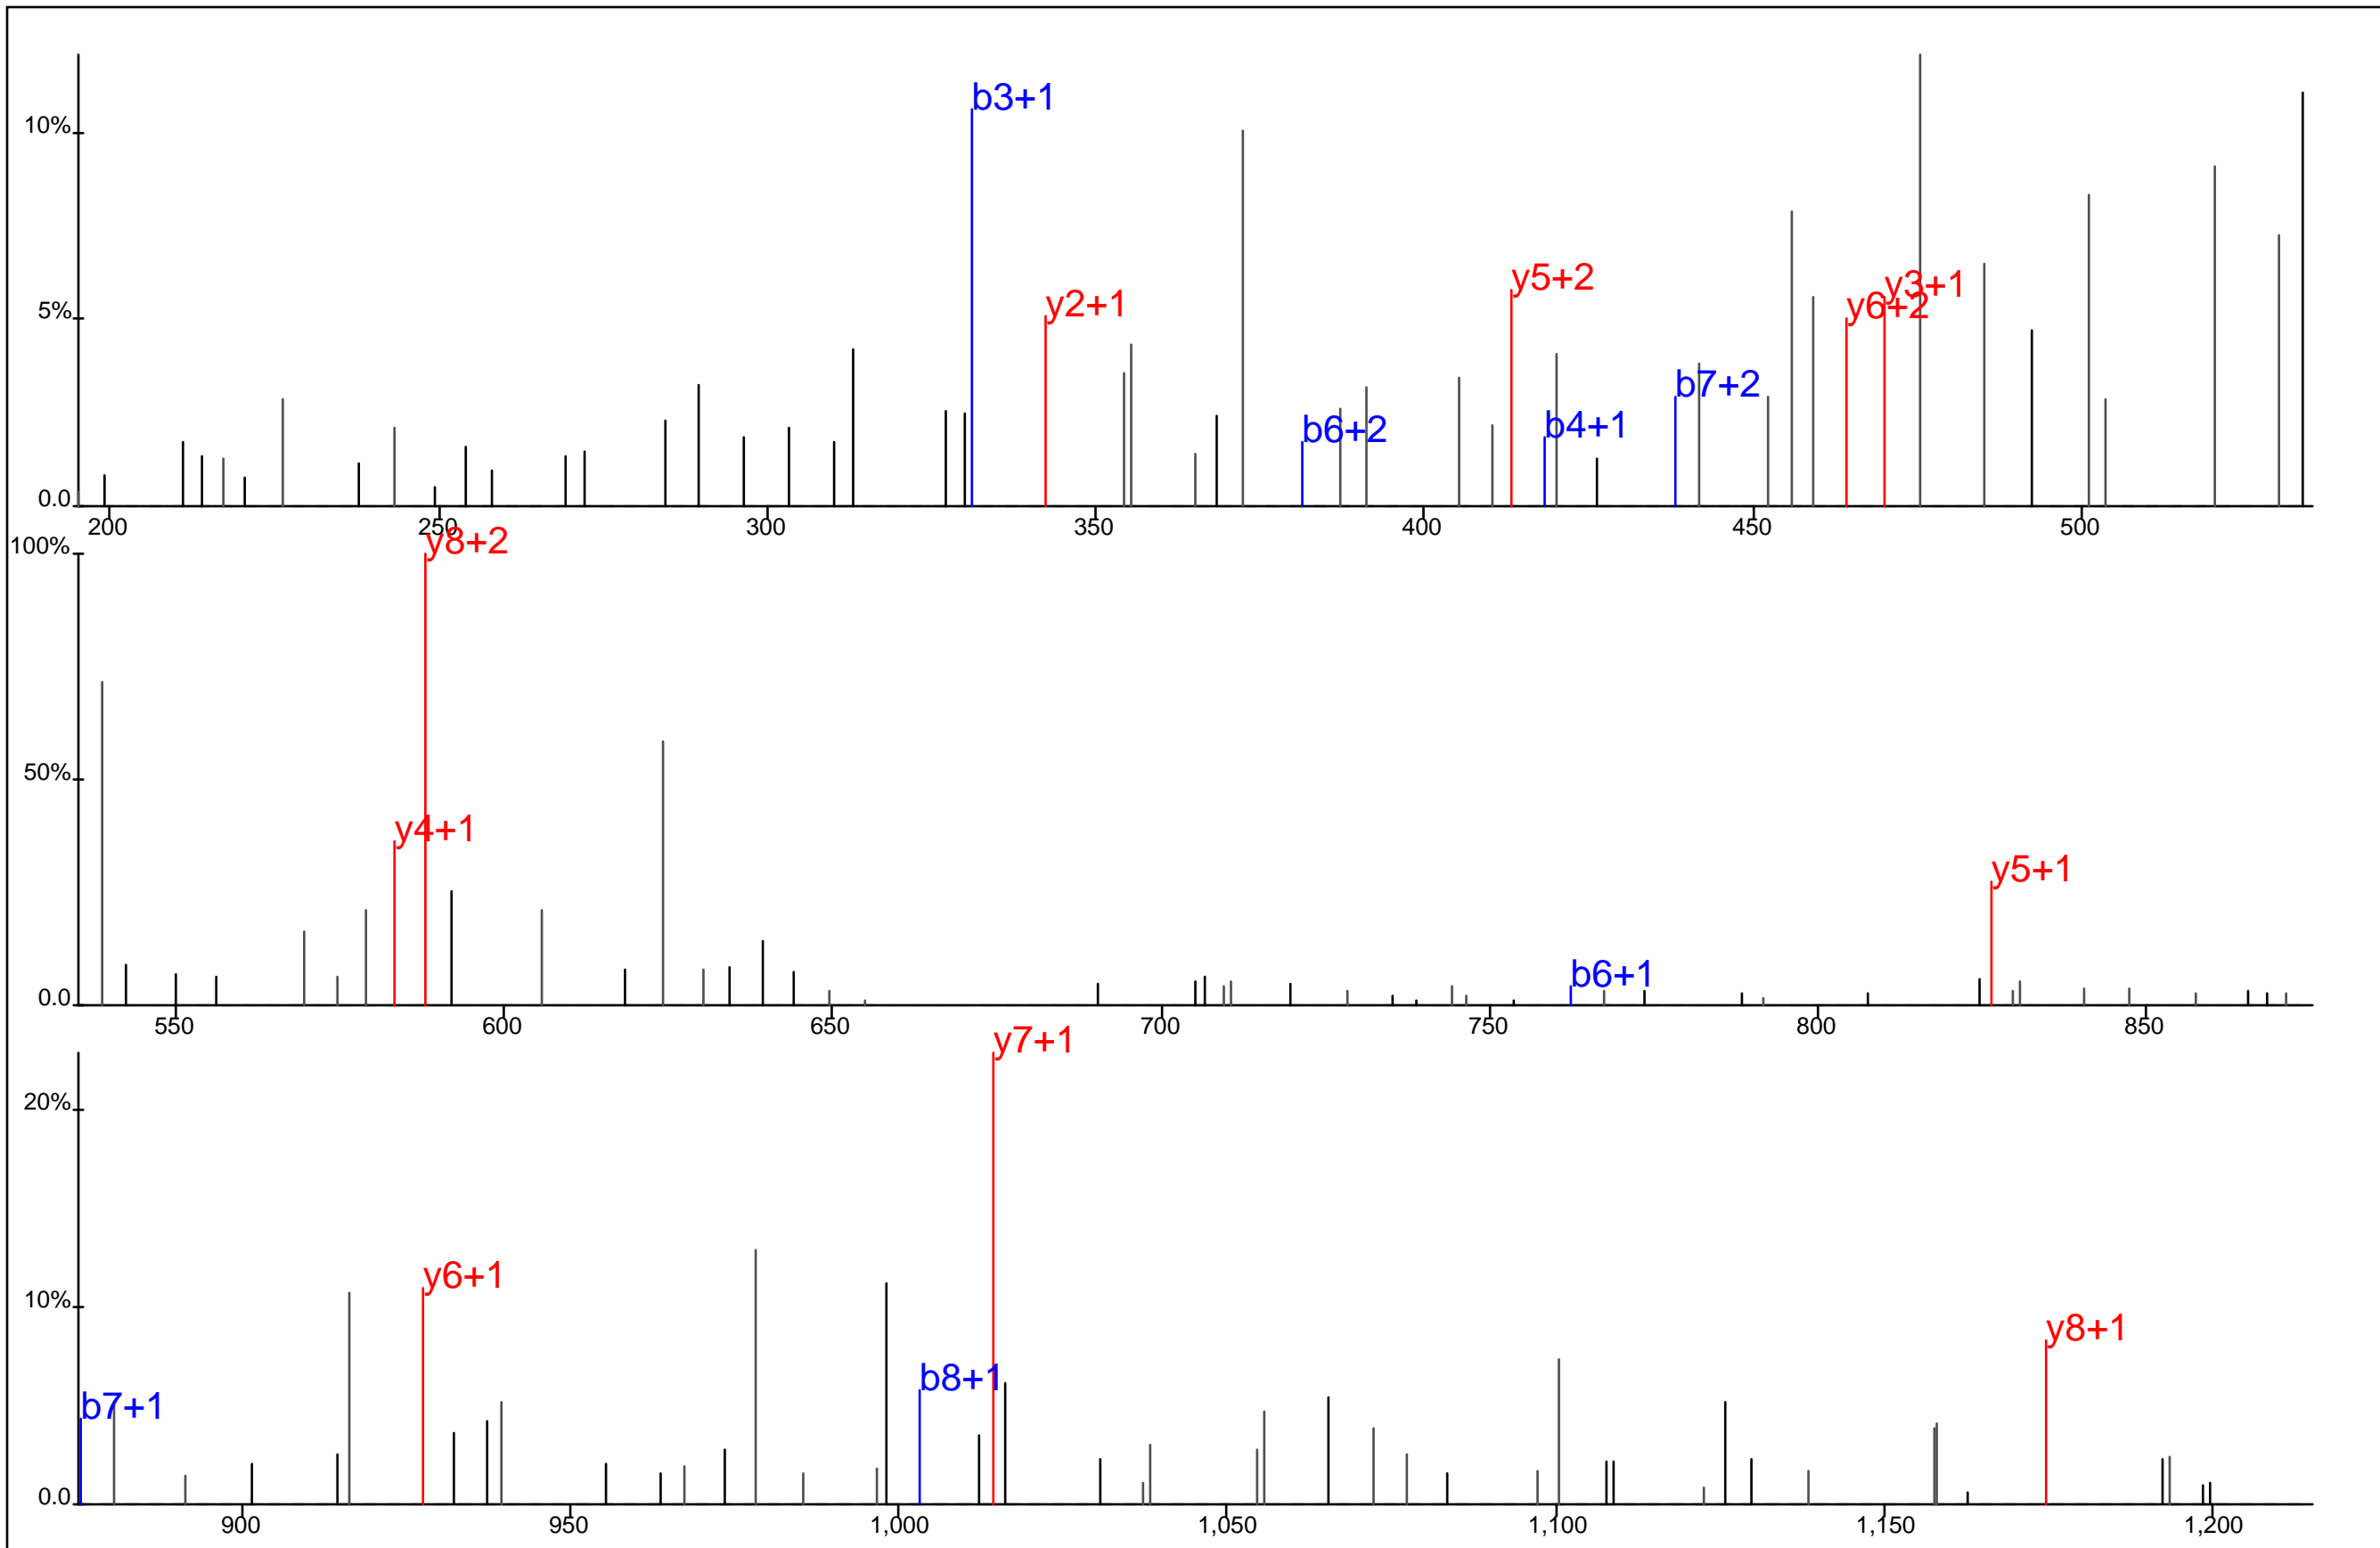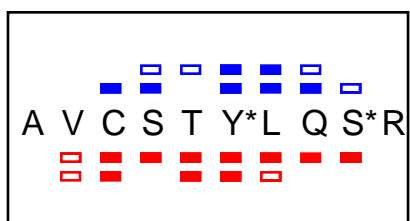

Protein Name: HIPK1  
 gi Accession: 0  
 Precursor Mass: 672.7604+2  
 Delta Mass: 6.044 ppm  
 XCorr: 24.81

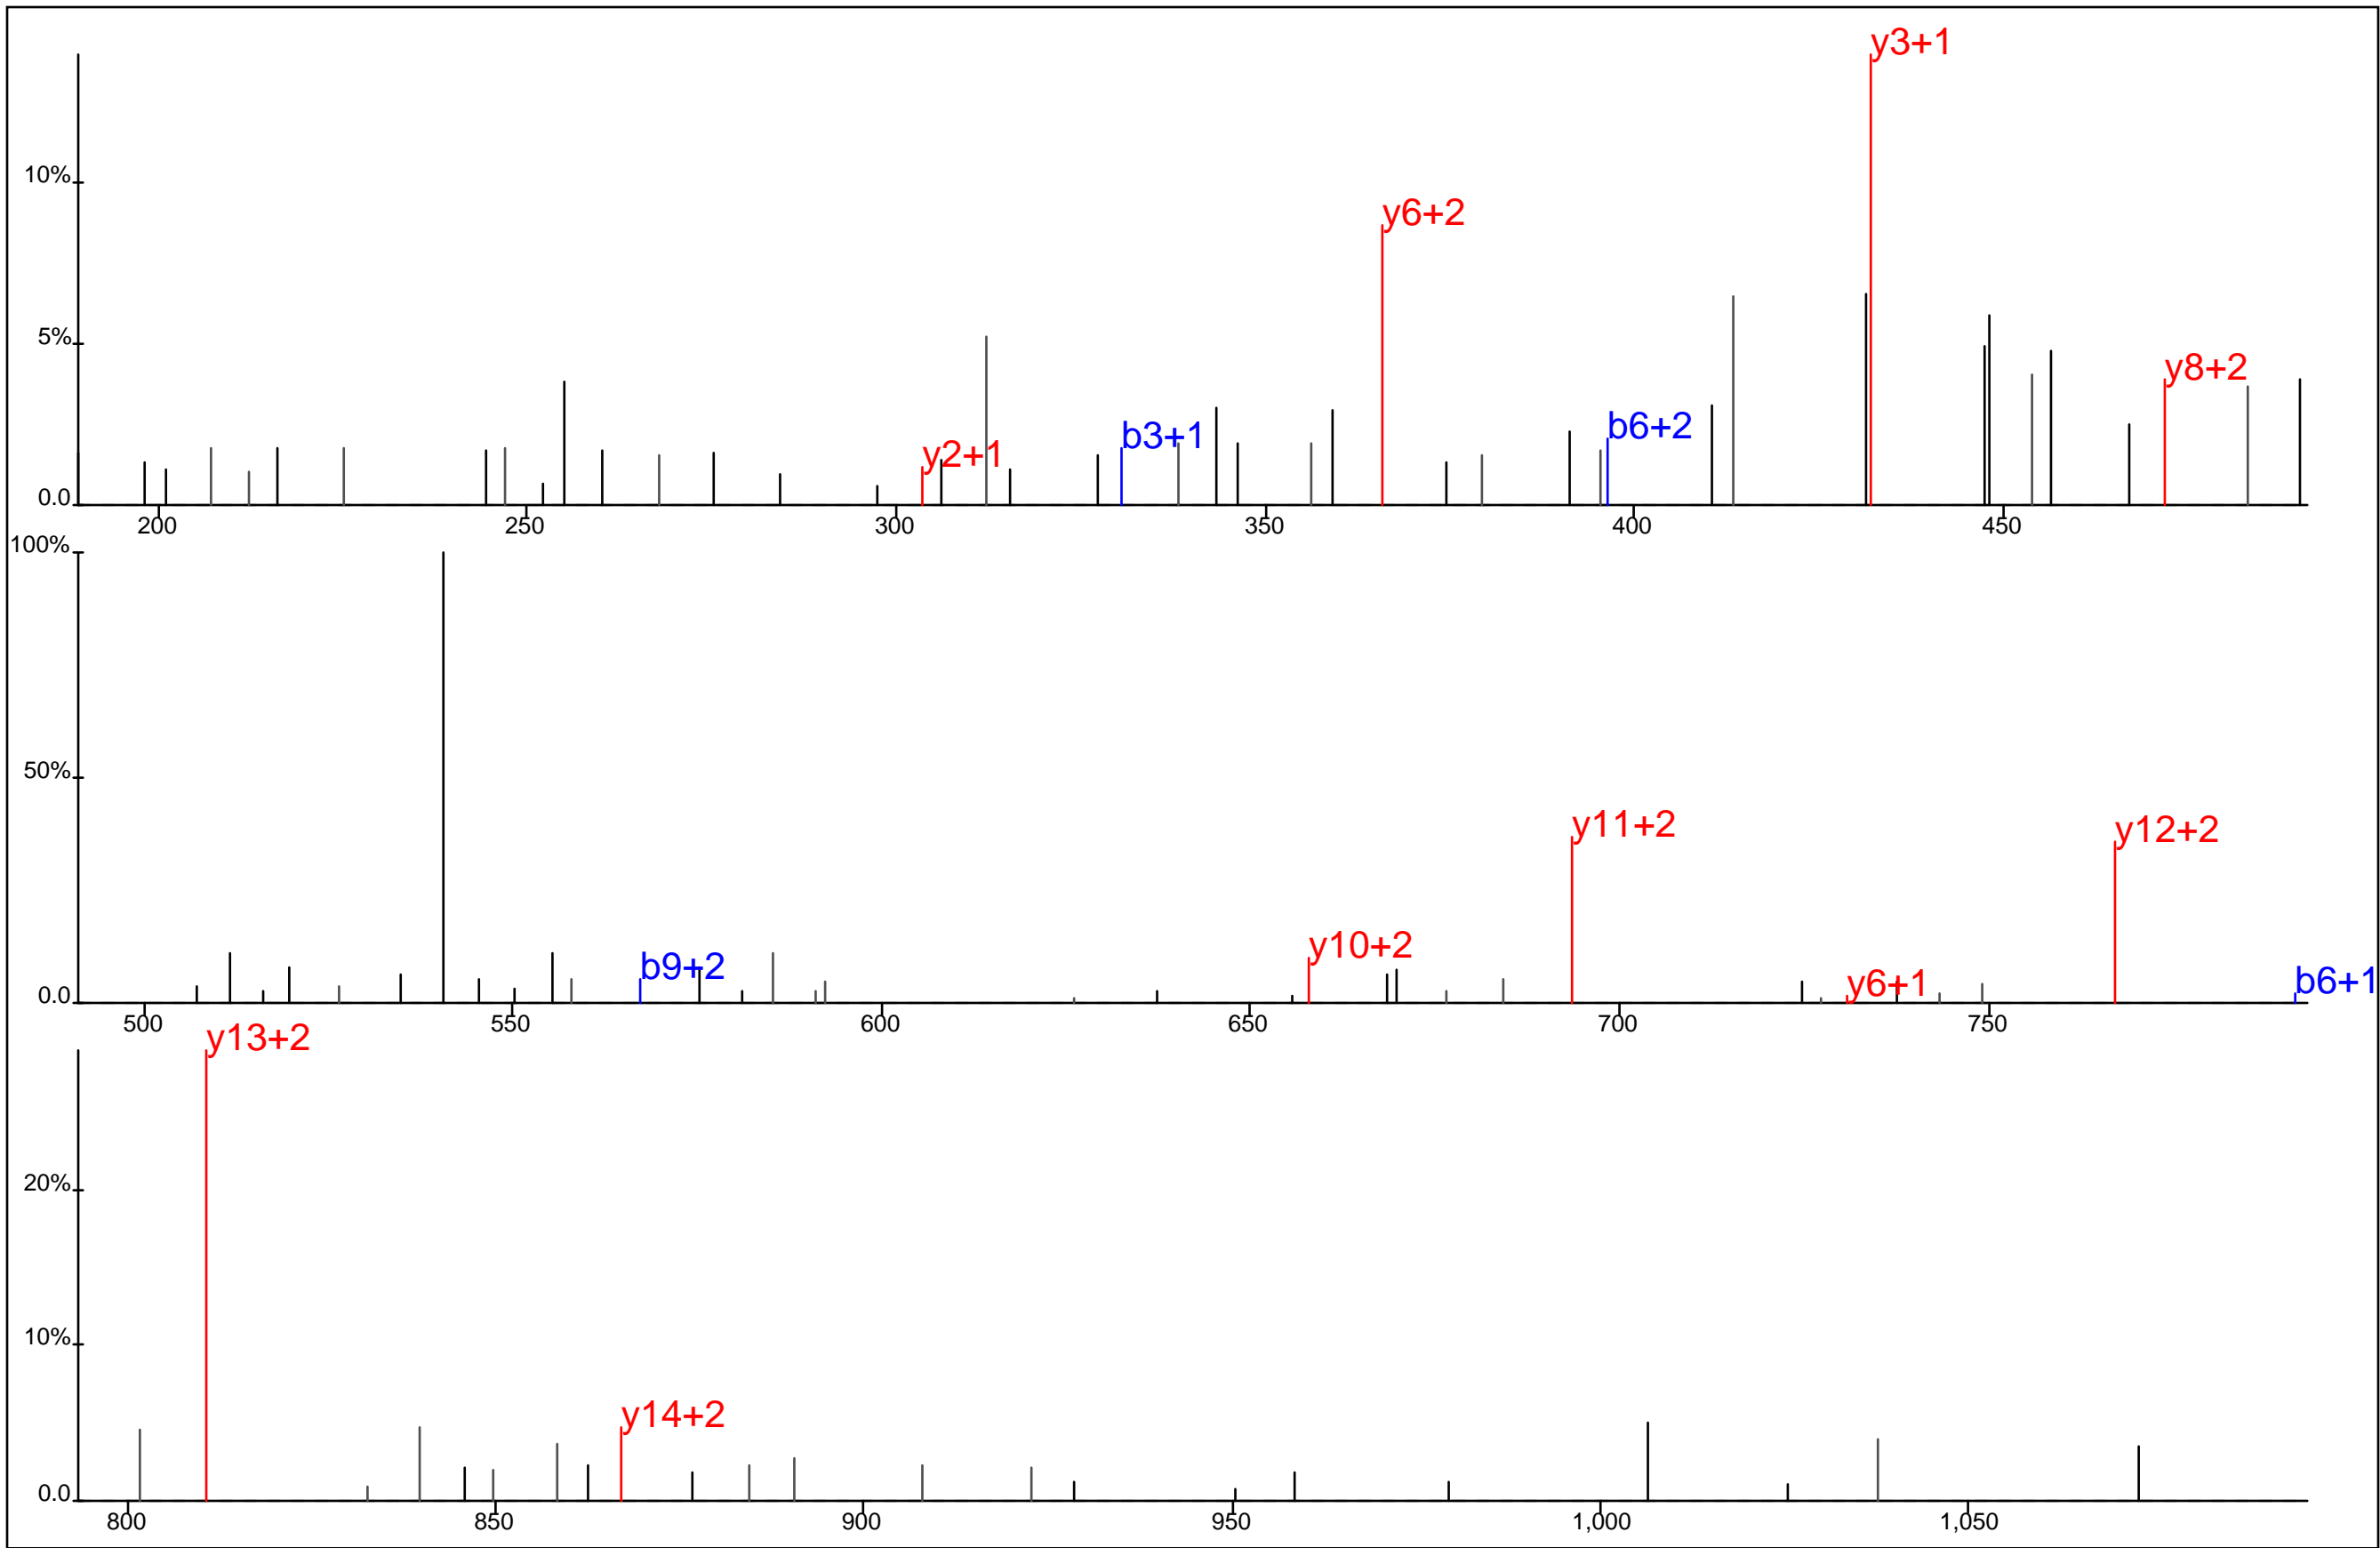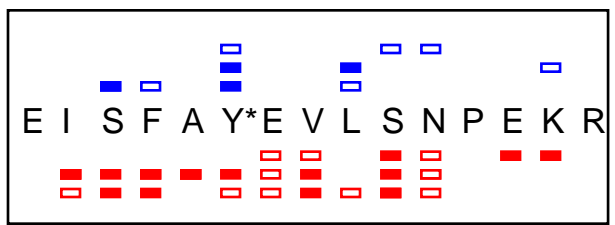

Protein Name: HIRA interacting protein 4  
 gi Accession: 0  
 Precursor Mass: 621.2969+3  
 Delta Mass: 1.683 ppm  
 XCorr: 20.19



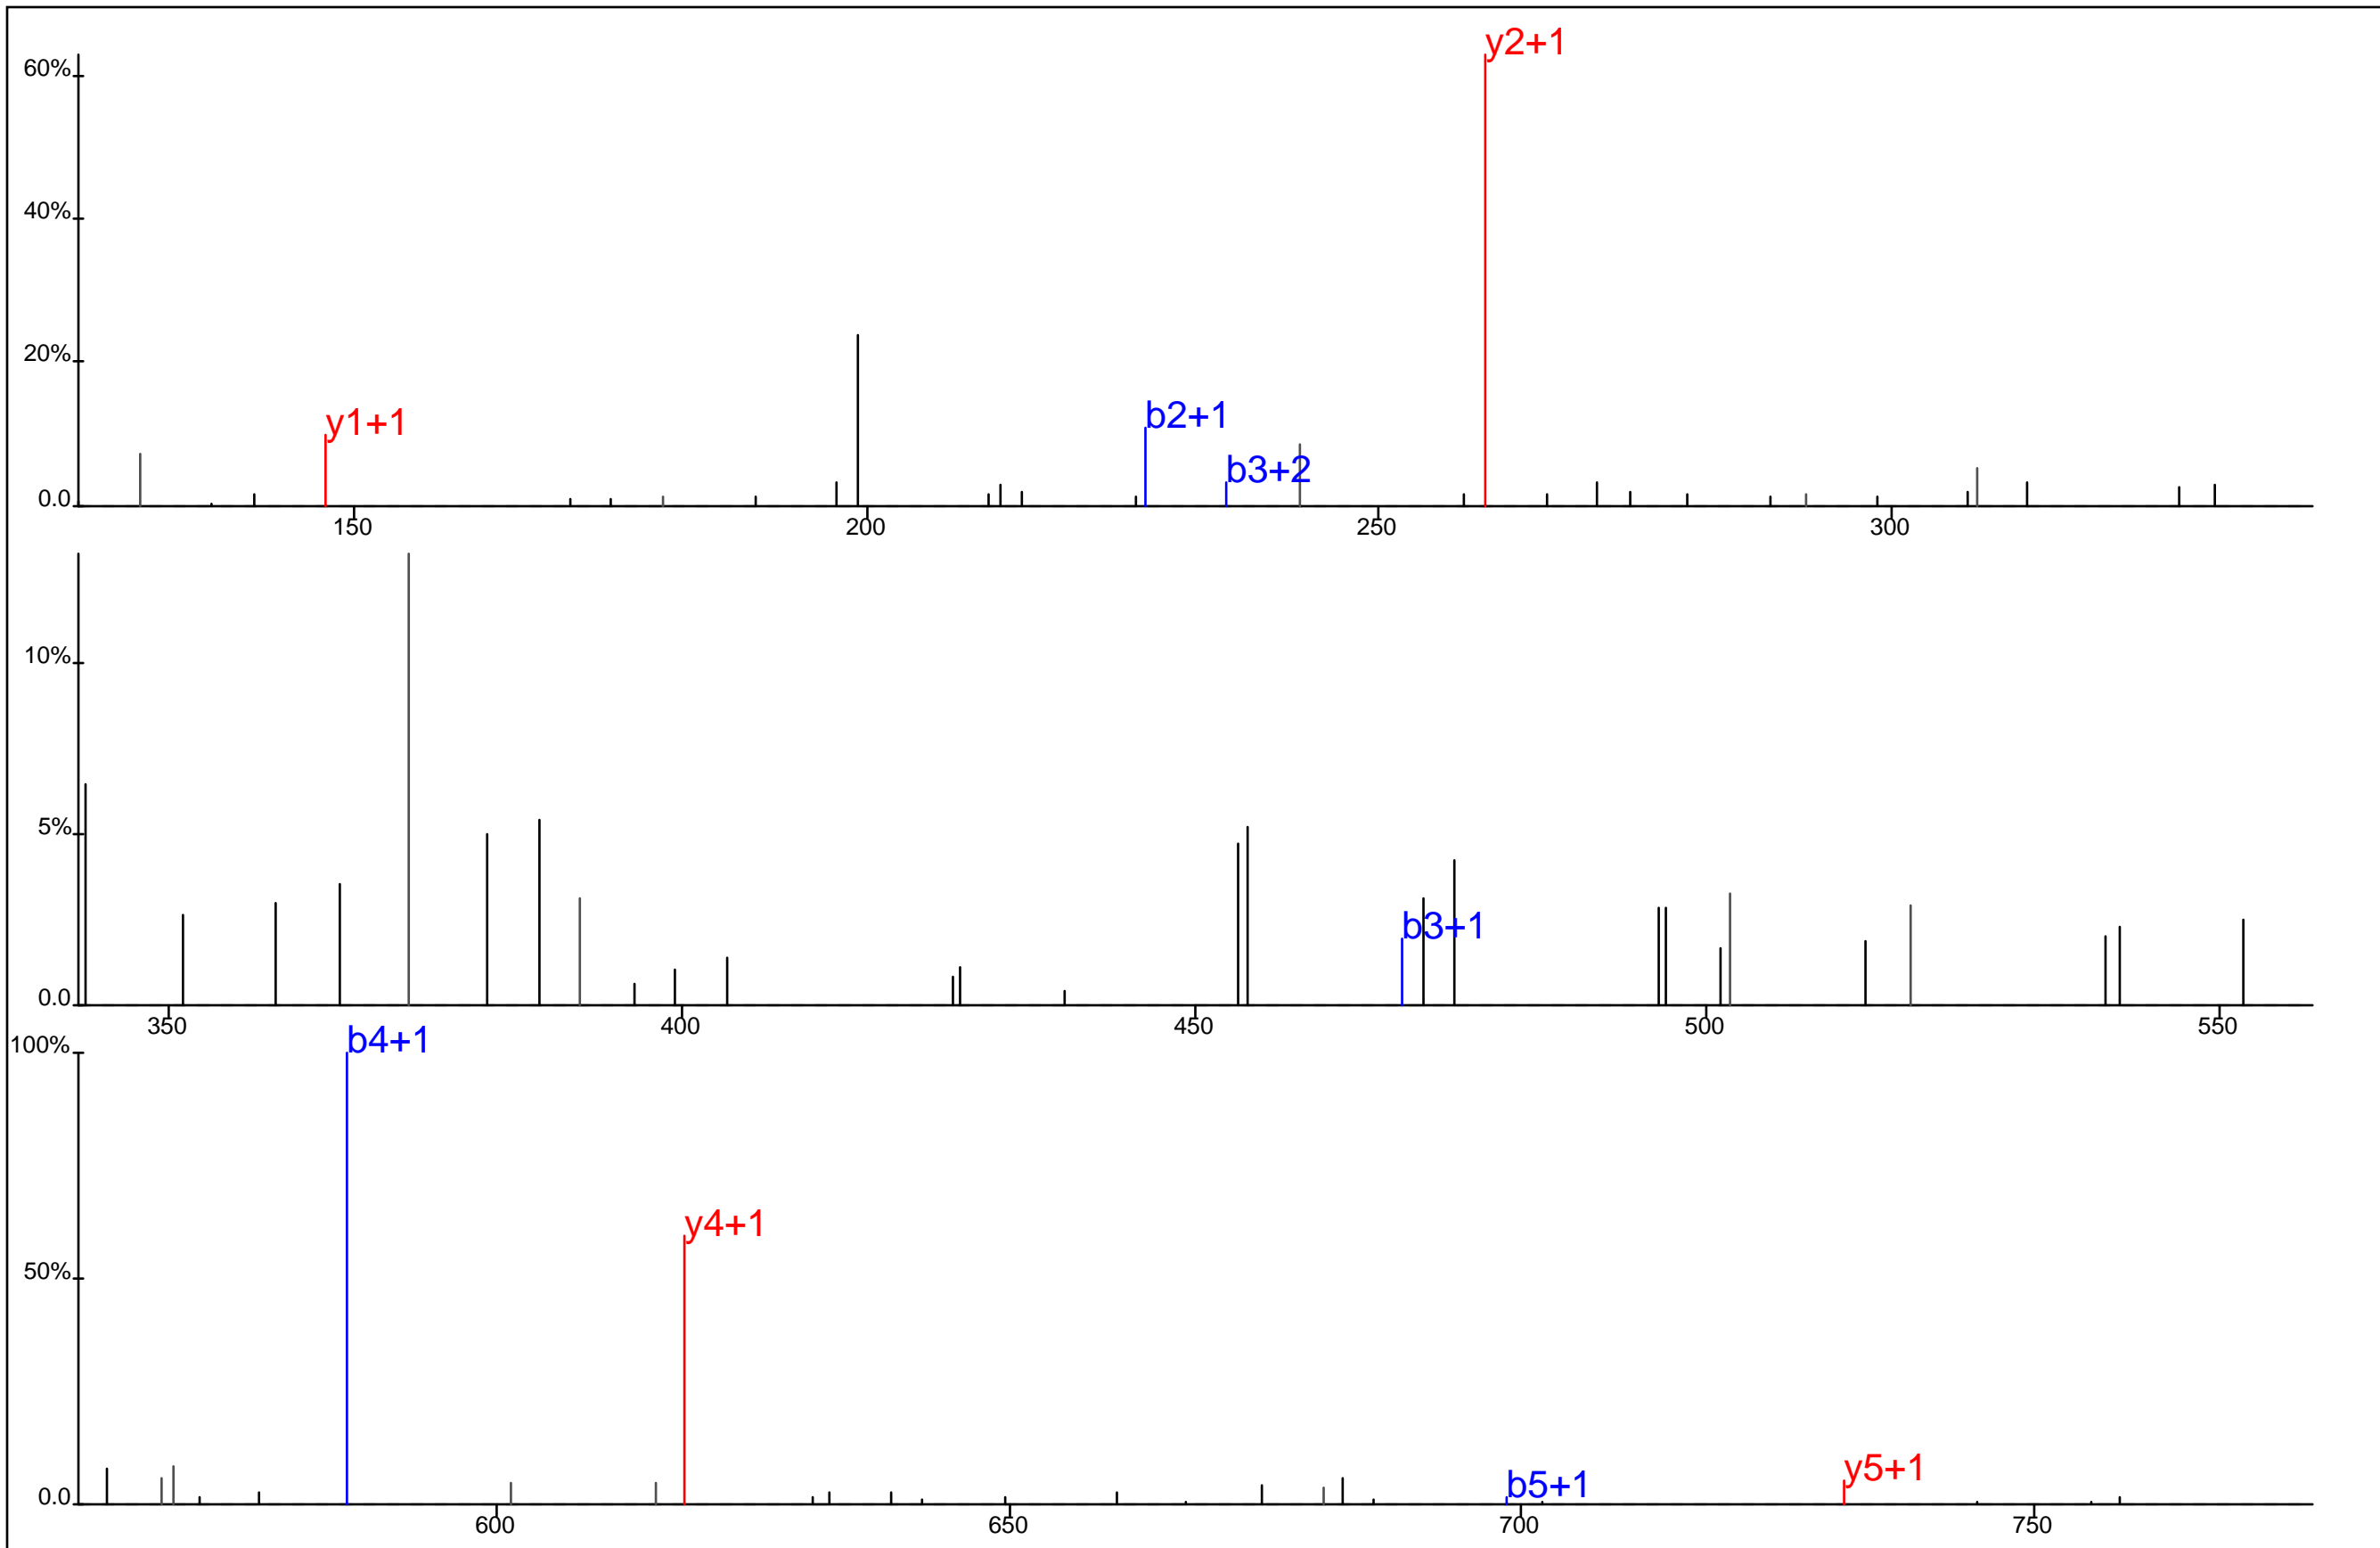

L I Y\* D L K

Protein Name: Histidyl-tRNA synthetase  
 gi Accession: 0  
 Precursor Mass: 422.7154+2  
 Delta Mass: 2.368 ppm  
 XCorr: 20.98

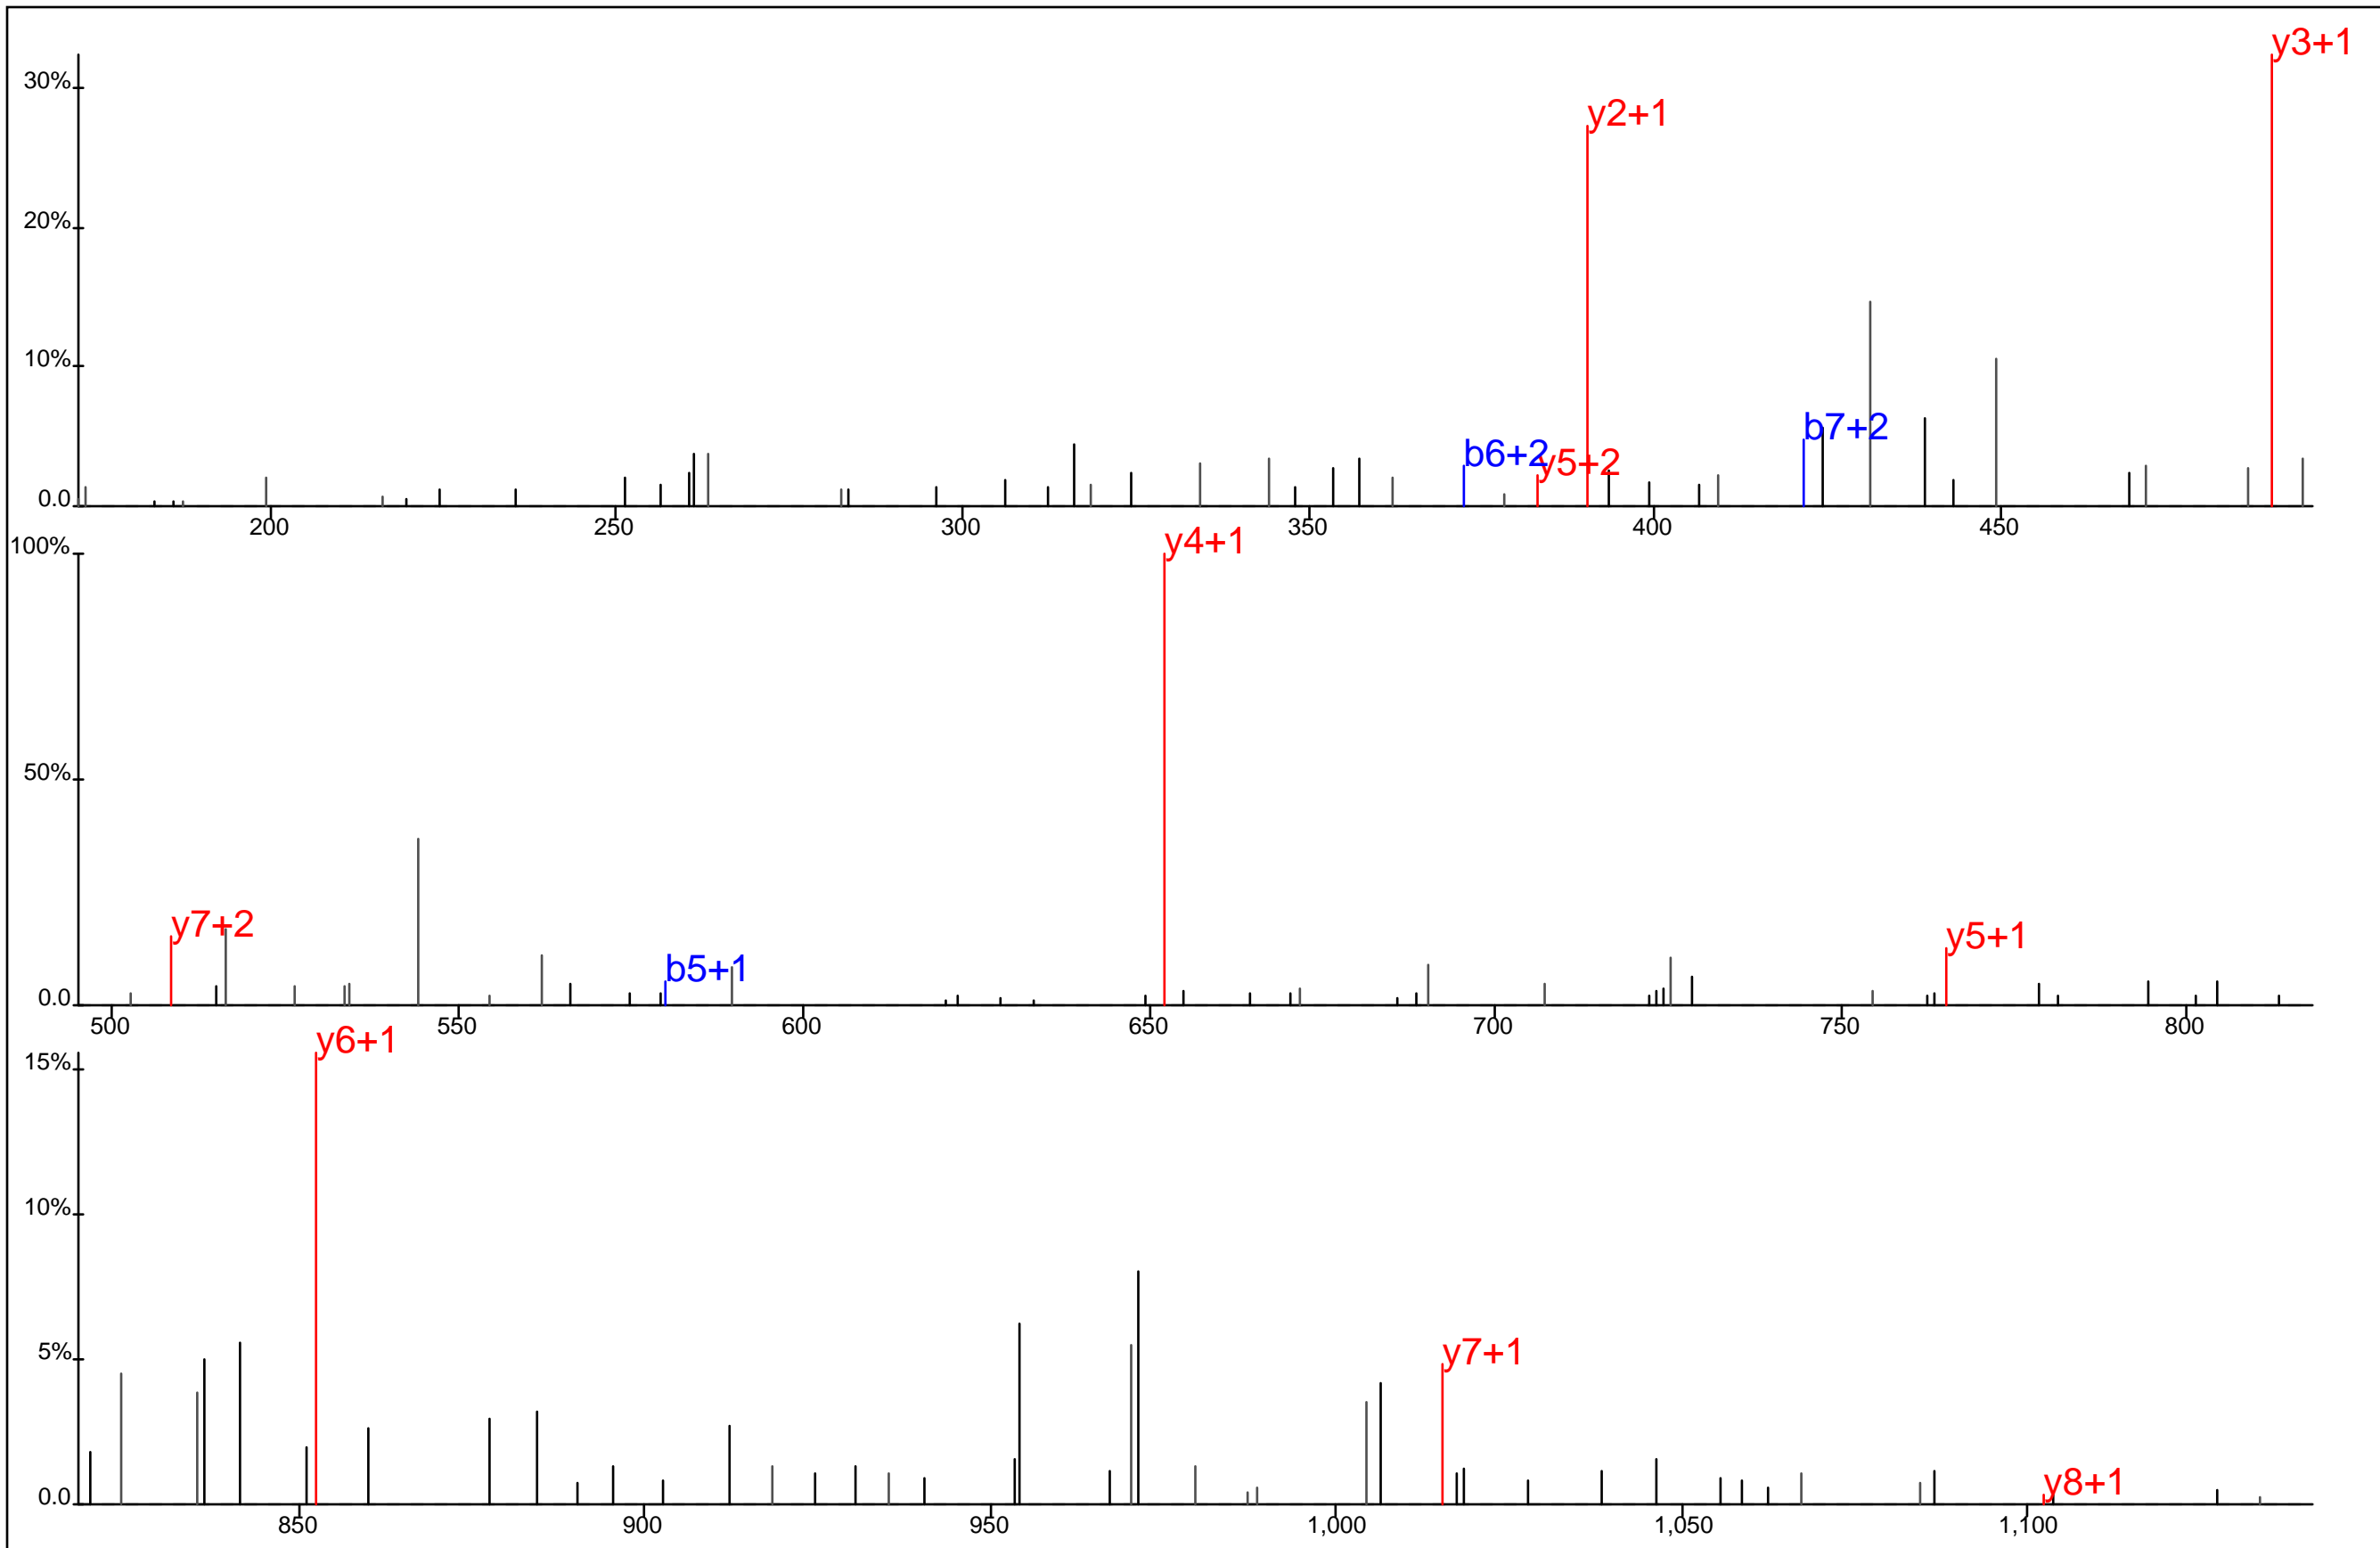

□ □ □ □ □ □  
 E S Y S I Y V Y\*K  
□ □ □ □ □ □

Protein Name: Histone 2, H2BE  
 gi Accession: 0  
 Precursor Mass: 616.2650+2  
 Delta Mass: 4.531 ppm  
 XCorr: 27.48

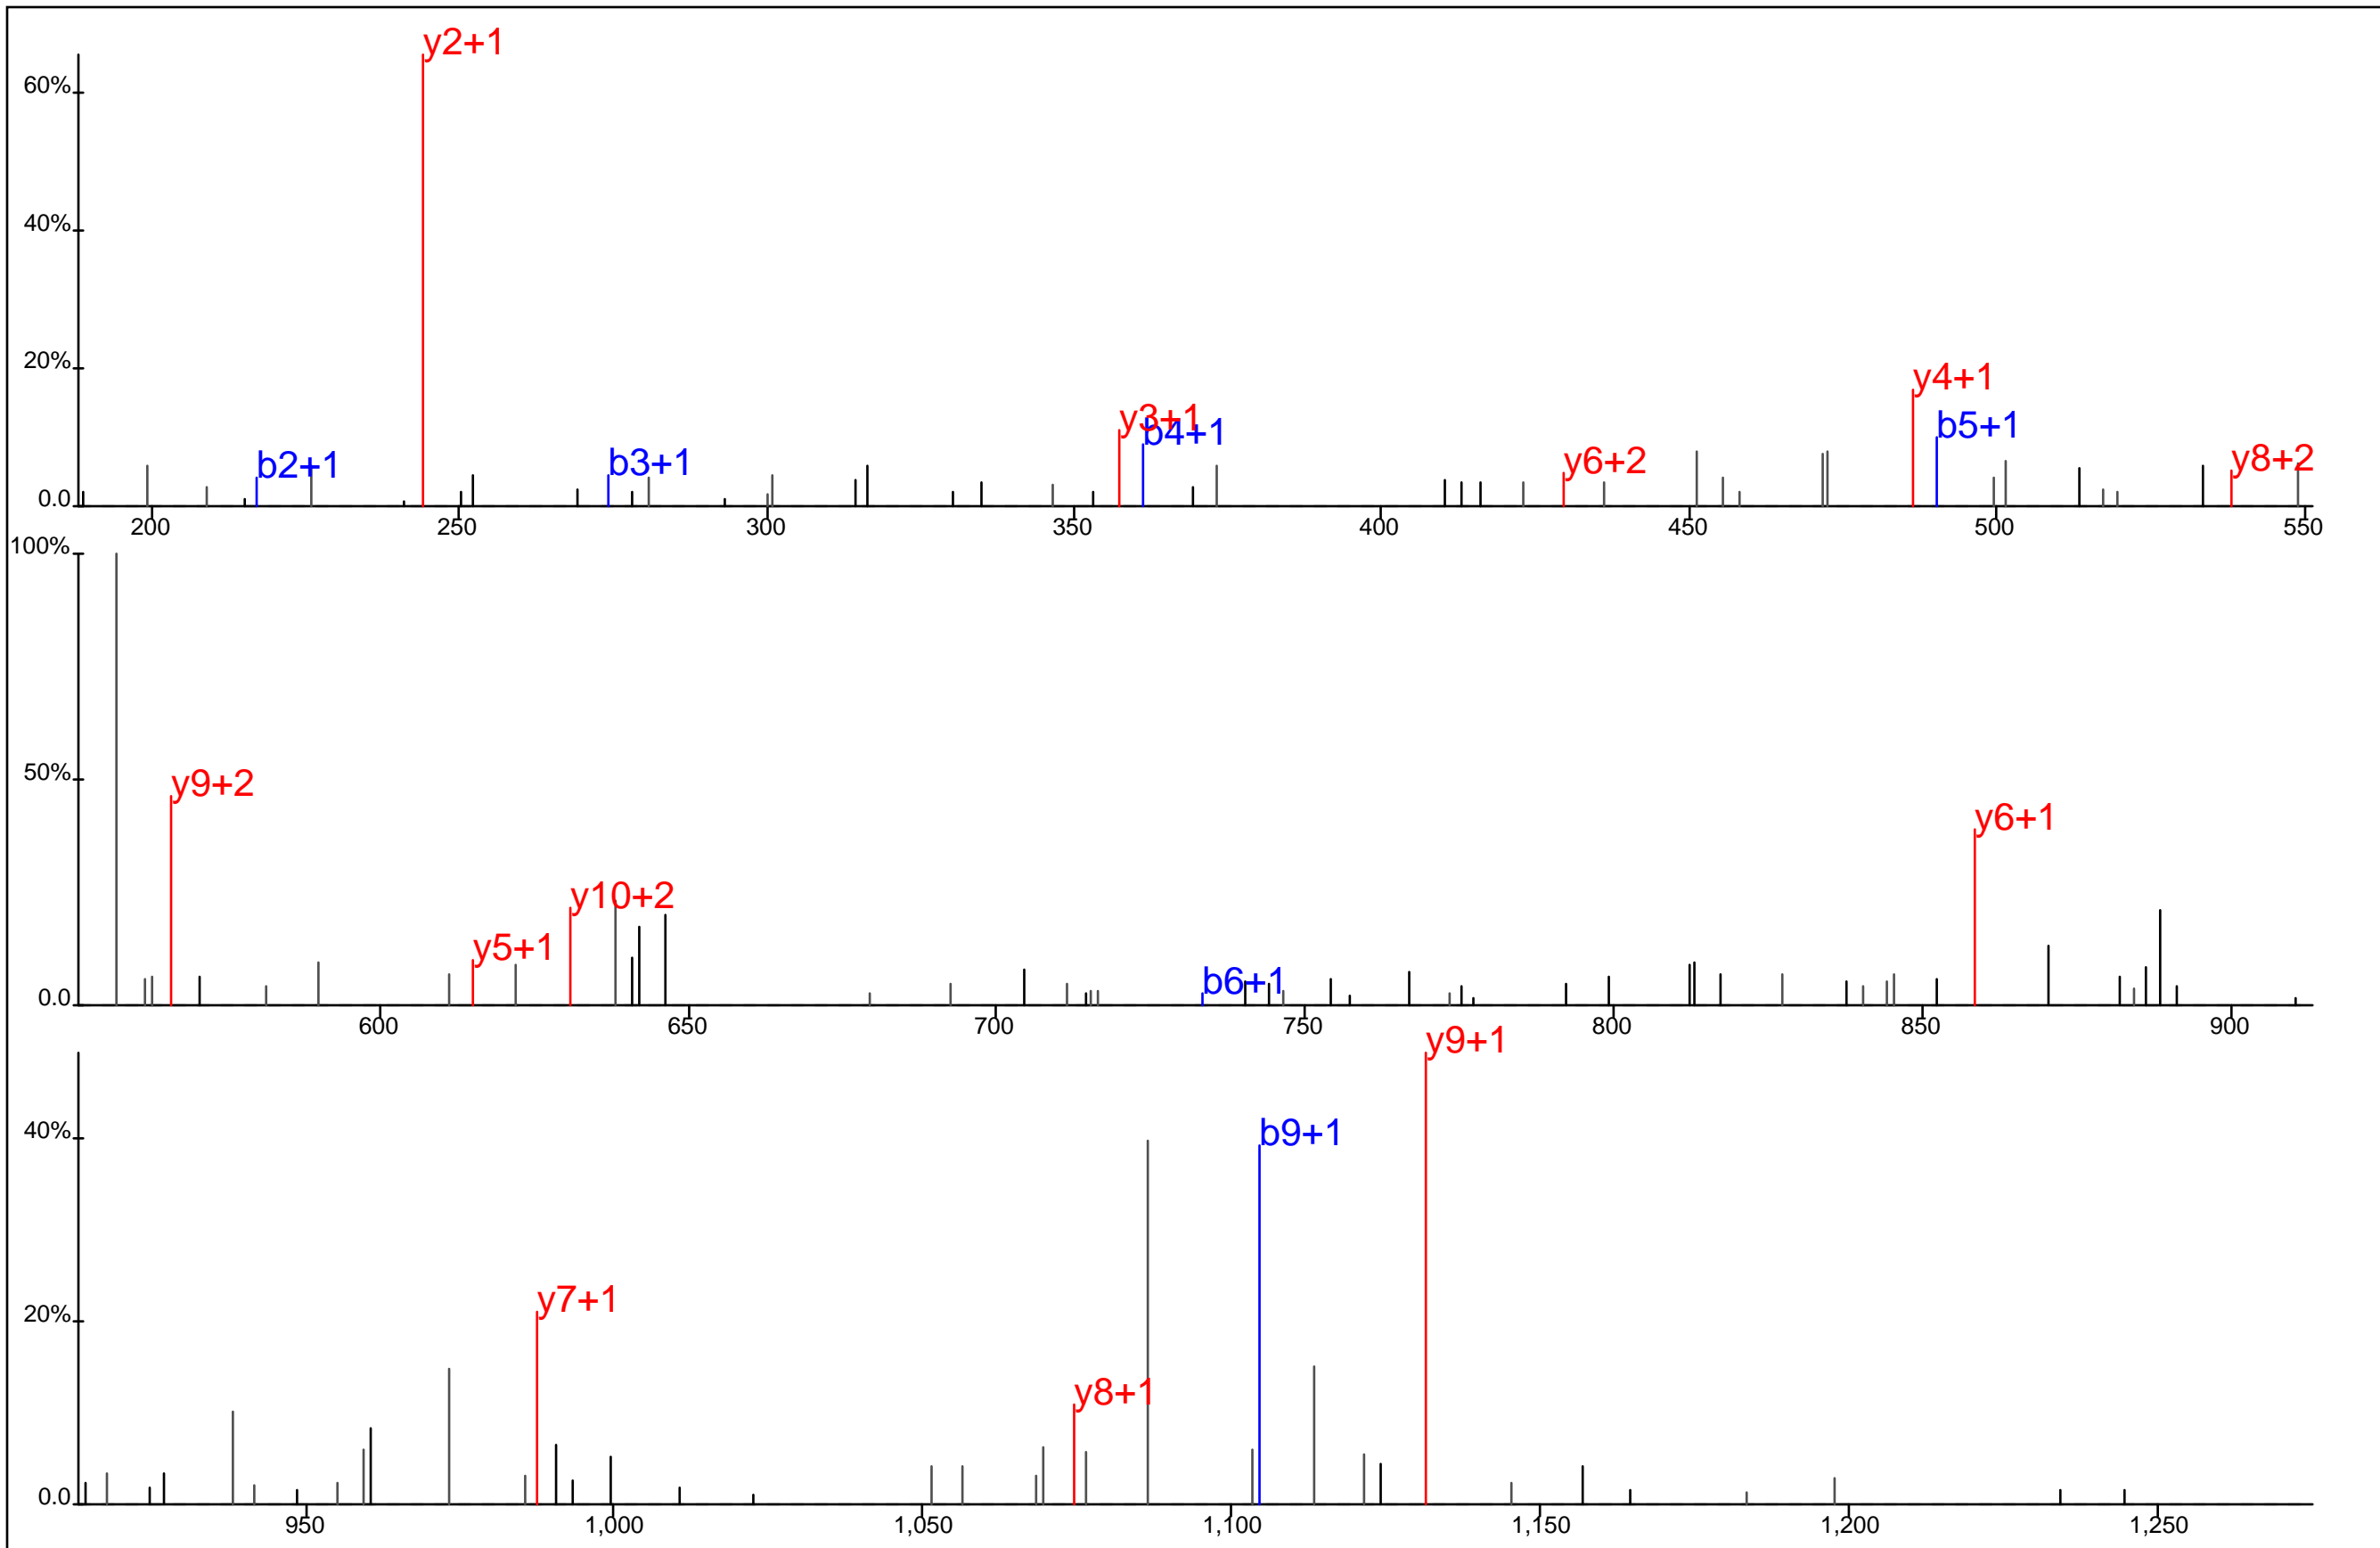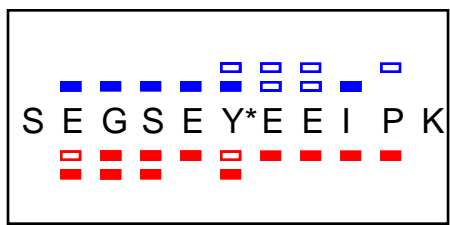

Protein Name: HLA-B associated transcript 2  
 gi Accession: 0  
 Precursor Mass: 674.2730+2  
 Delta Mass: 2.673 ppm  
 XCorr: 51.95

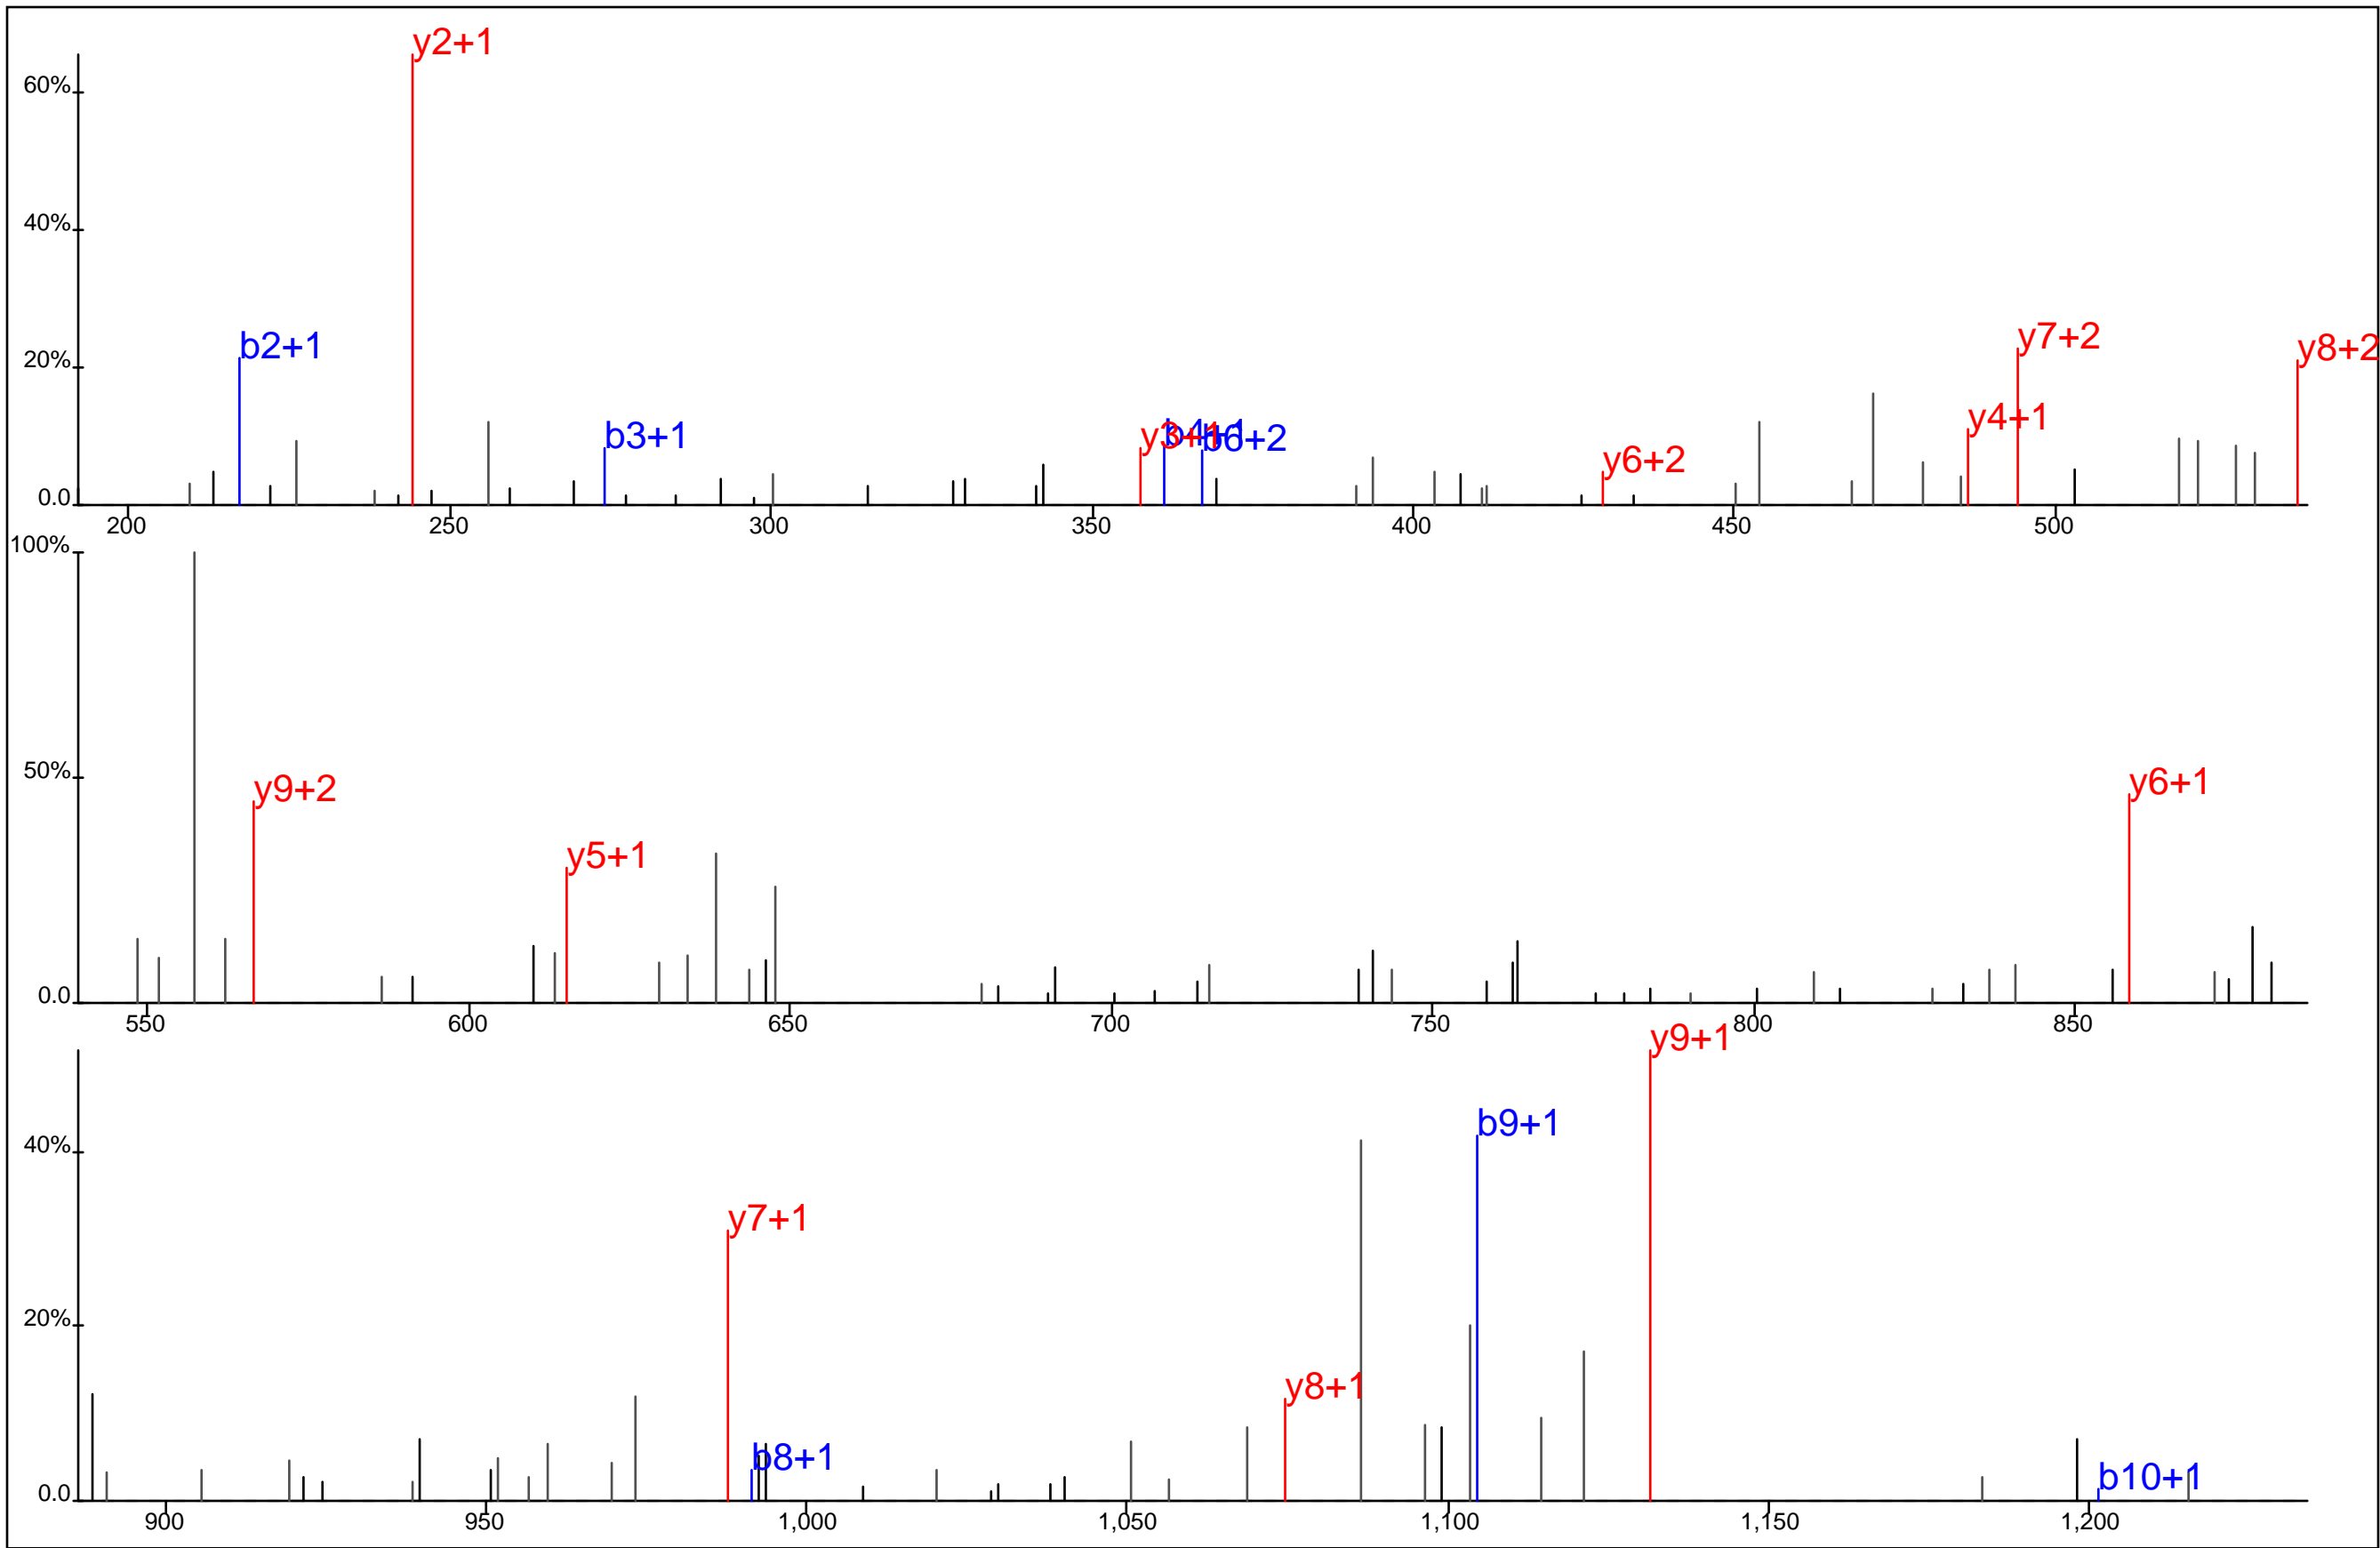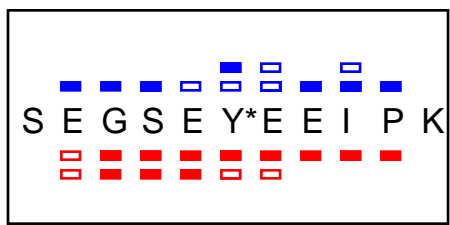

Protein Name: HLA-B associated transcript 2  
 gi Accession: 0  
 Precursor Mass: 674.2693+2  
 Delta Mass: 2.762 ppm  
 XCorr: 46.8

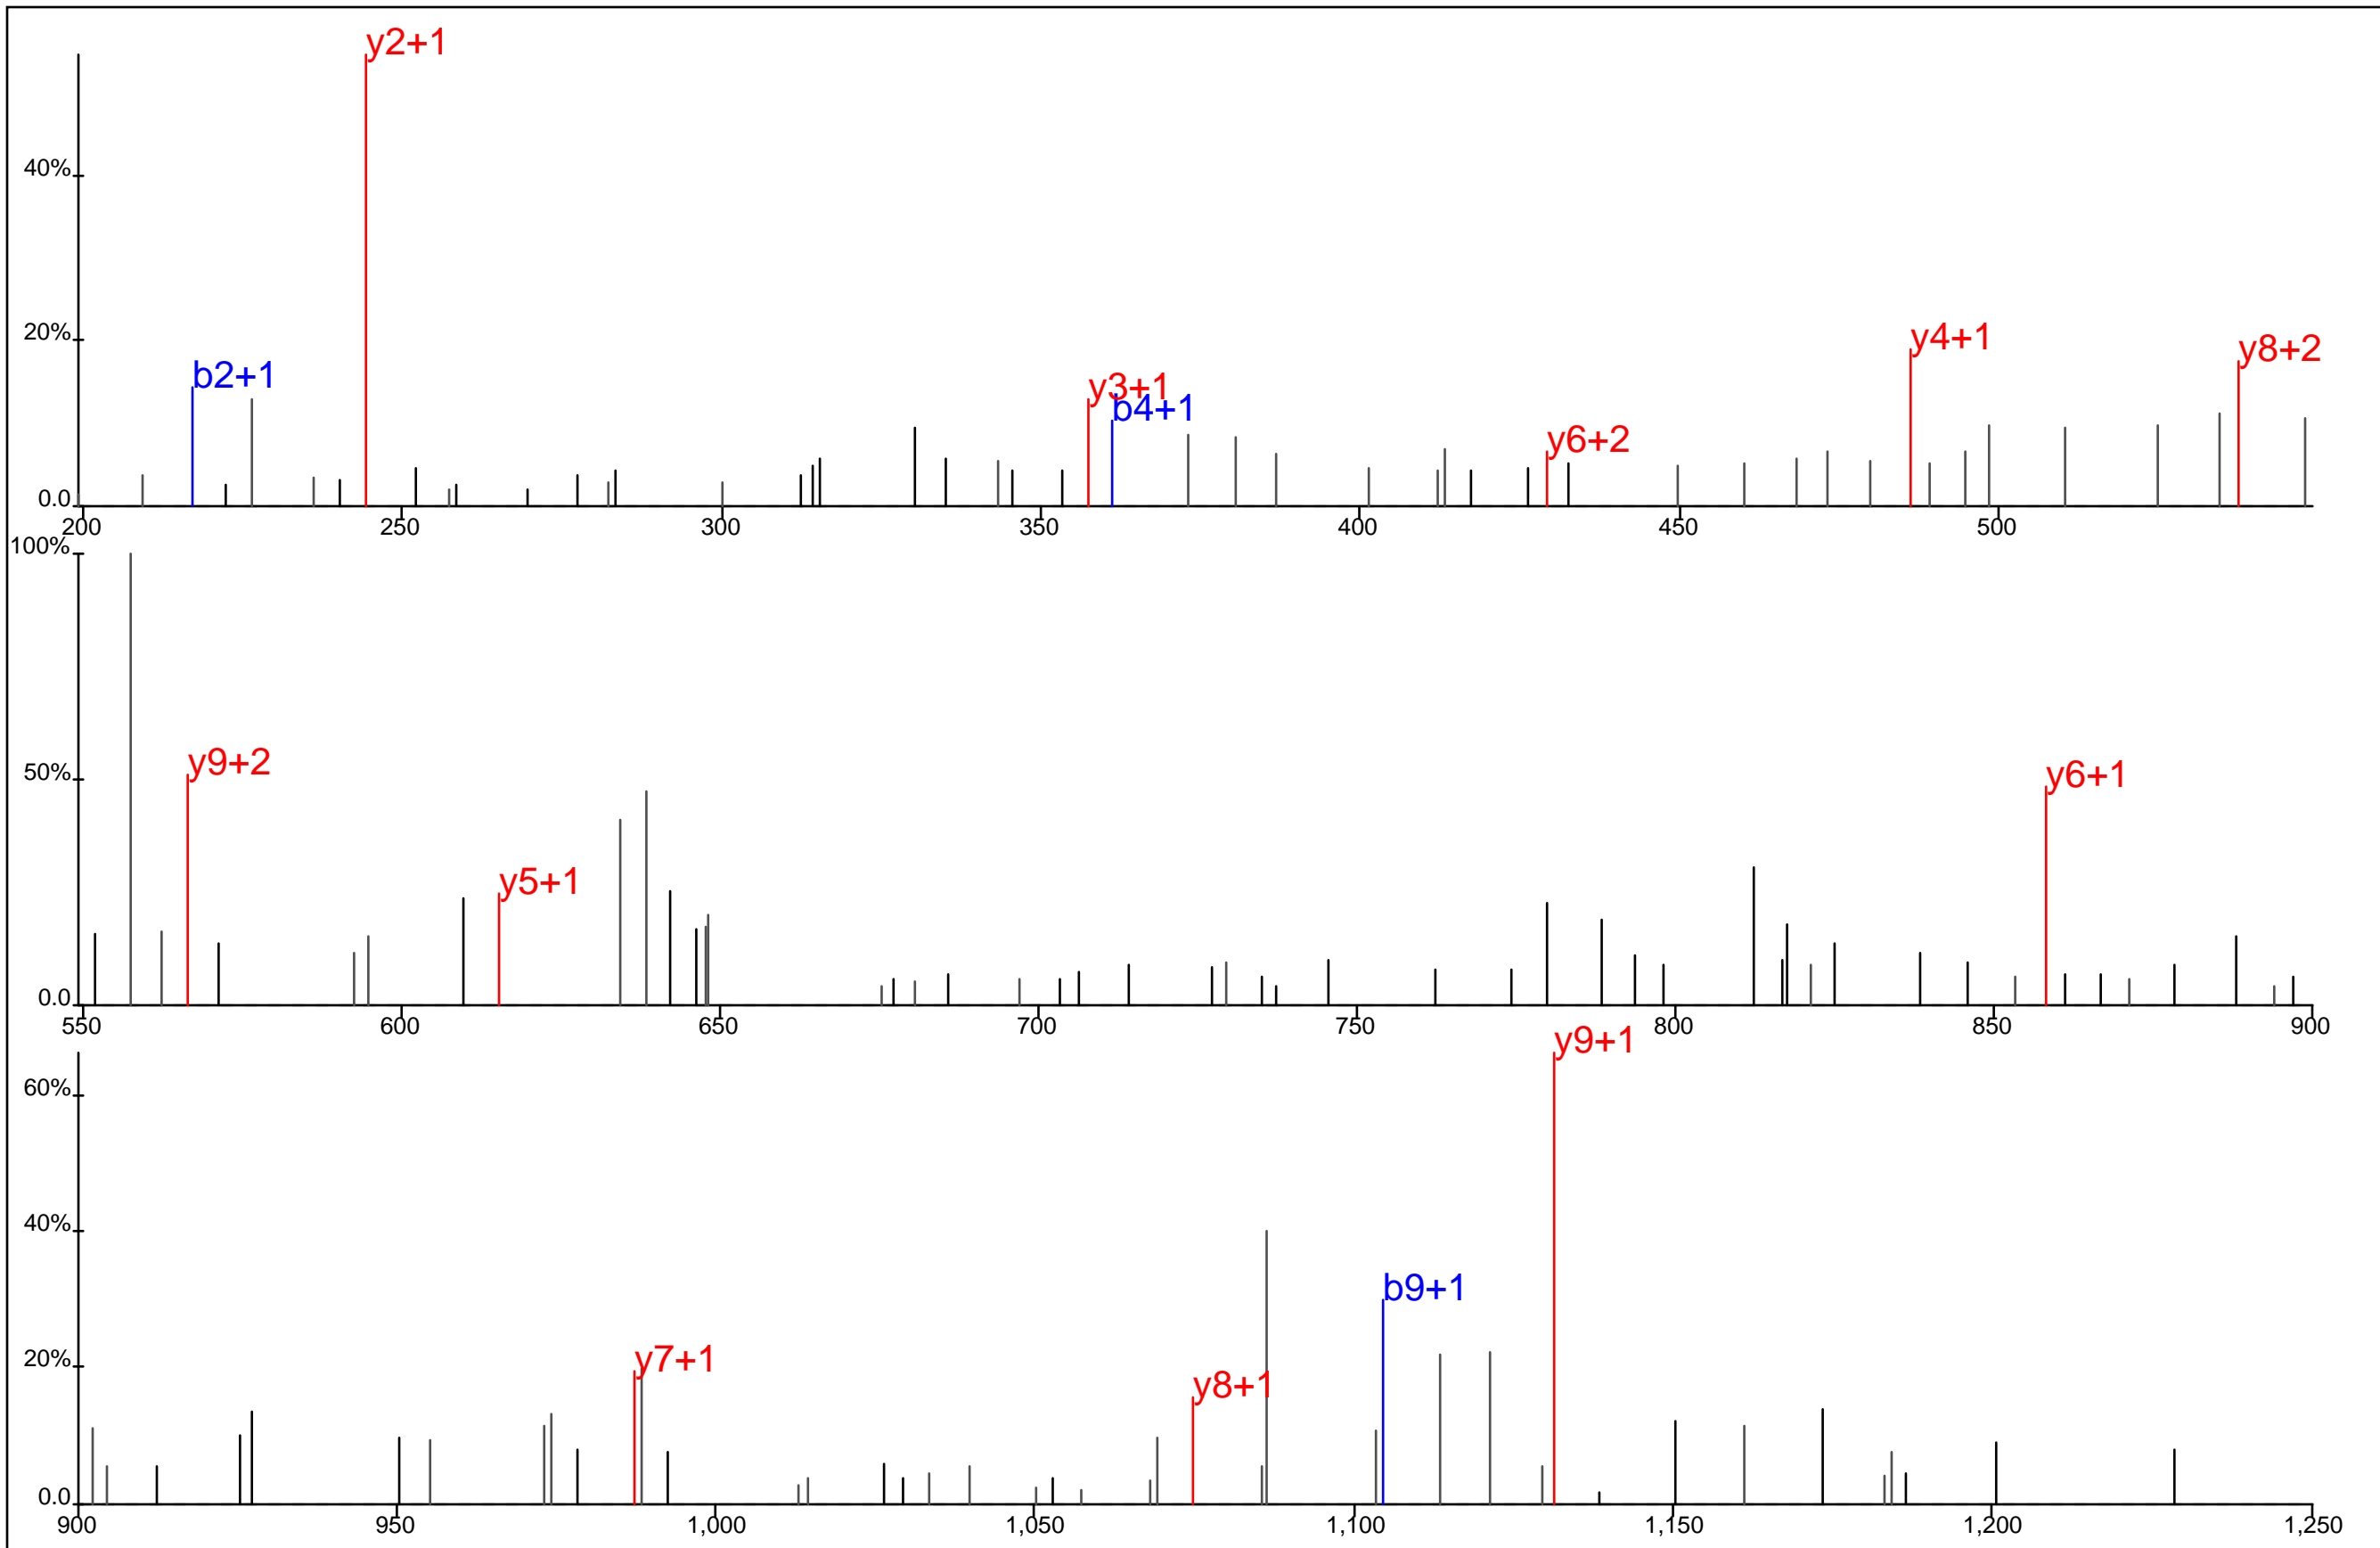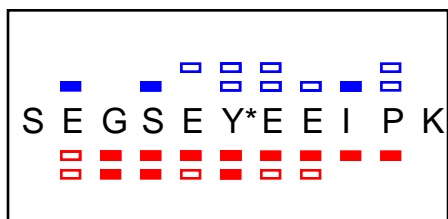

Protein Name: HLA-B associated transcript 2  
 gi Accession: 0  
 Precursor Mass: 674.2744+2  
 Delta Mass: 4.757 ppm  
 XCorr: 41.31

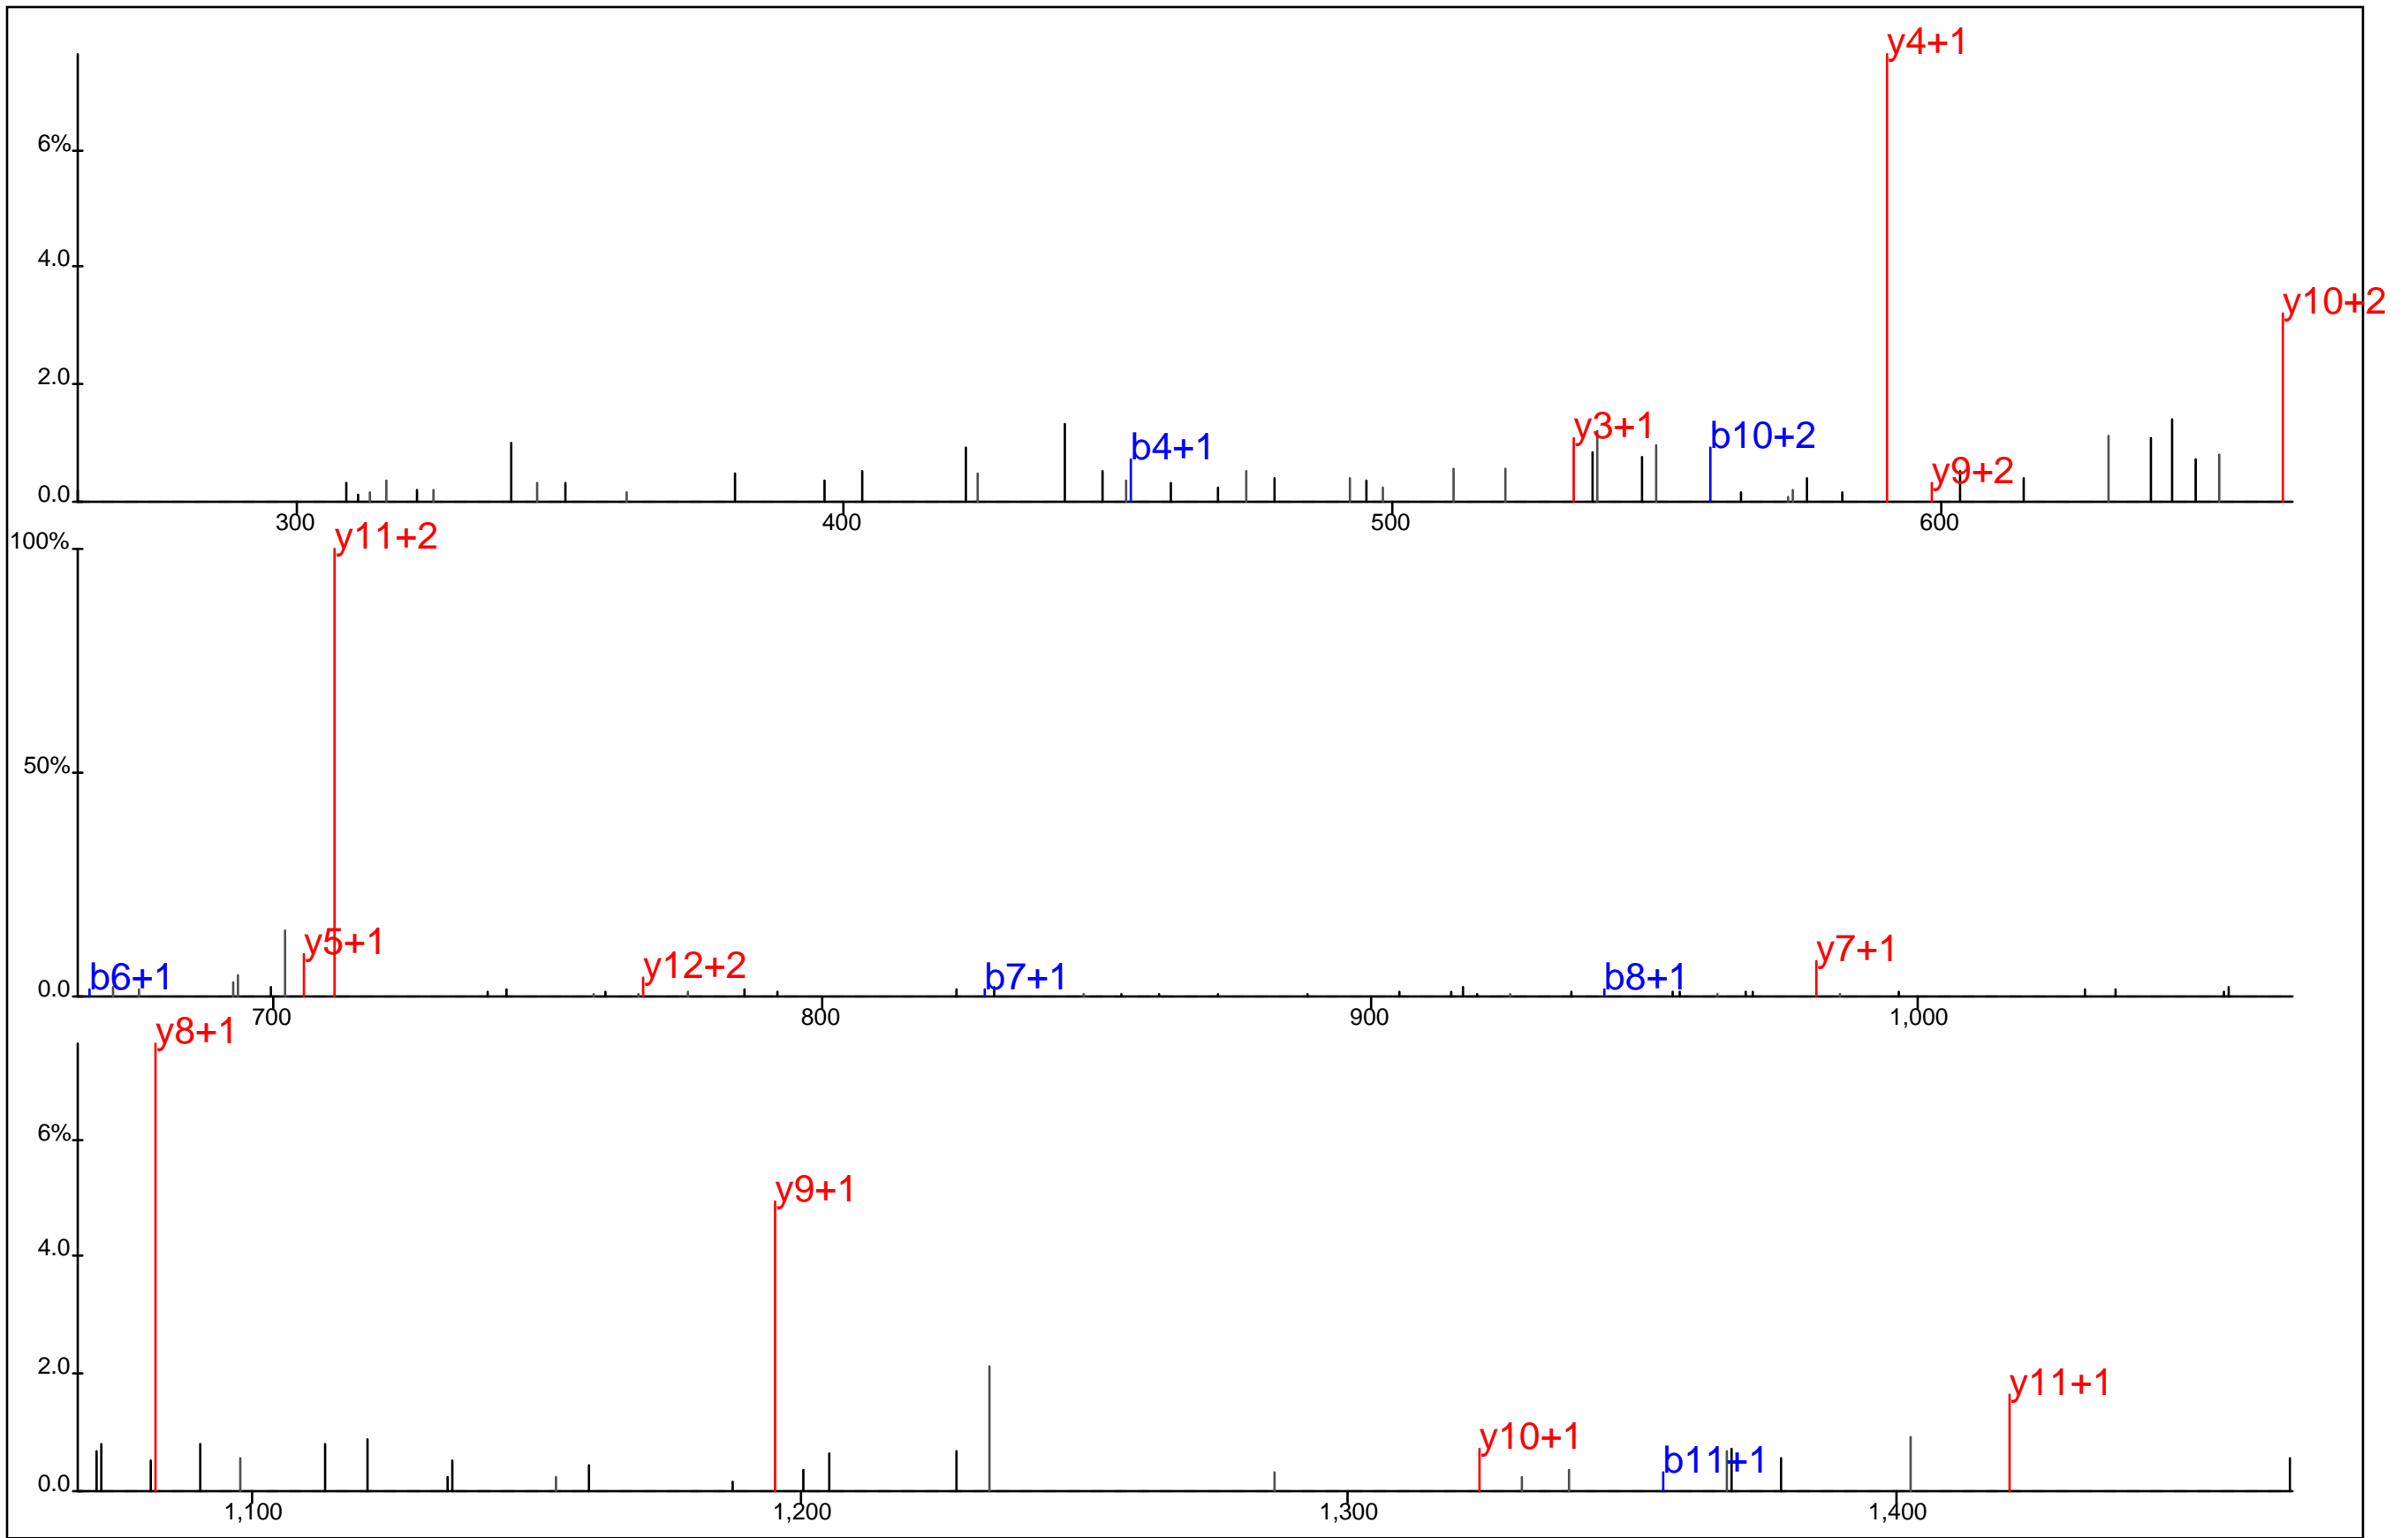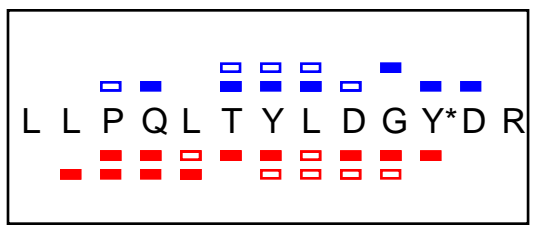

Protein Name: HLA DR associated protein I  
 gi Accession: 0  
 Precursor Mass: 823.8951+2  
 Delta Mass: 0.283 ppm  
 XCorr: 41.45

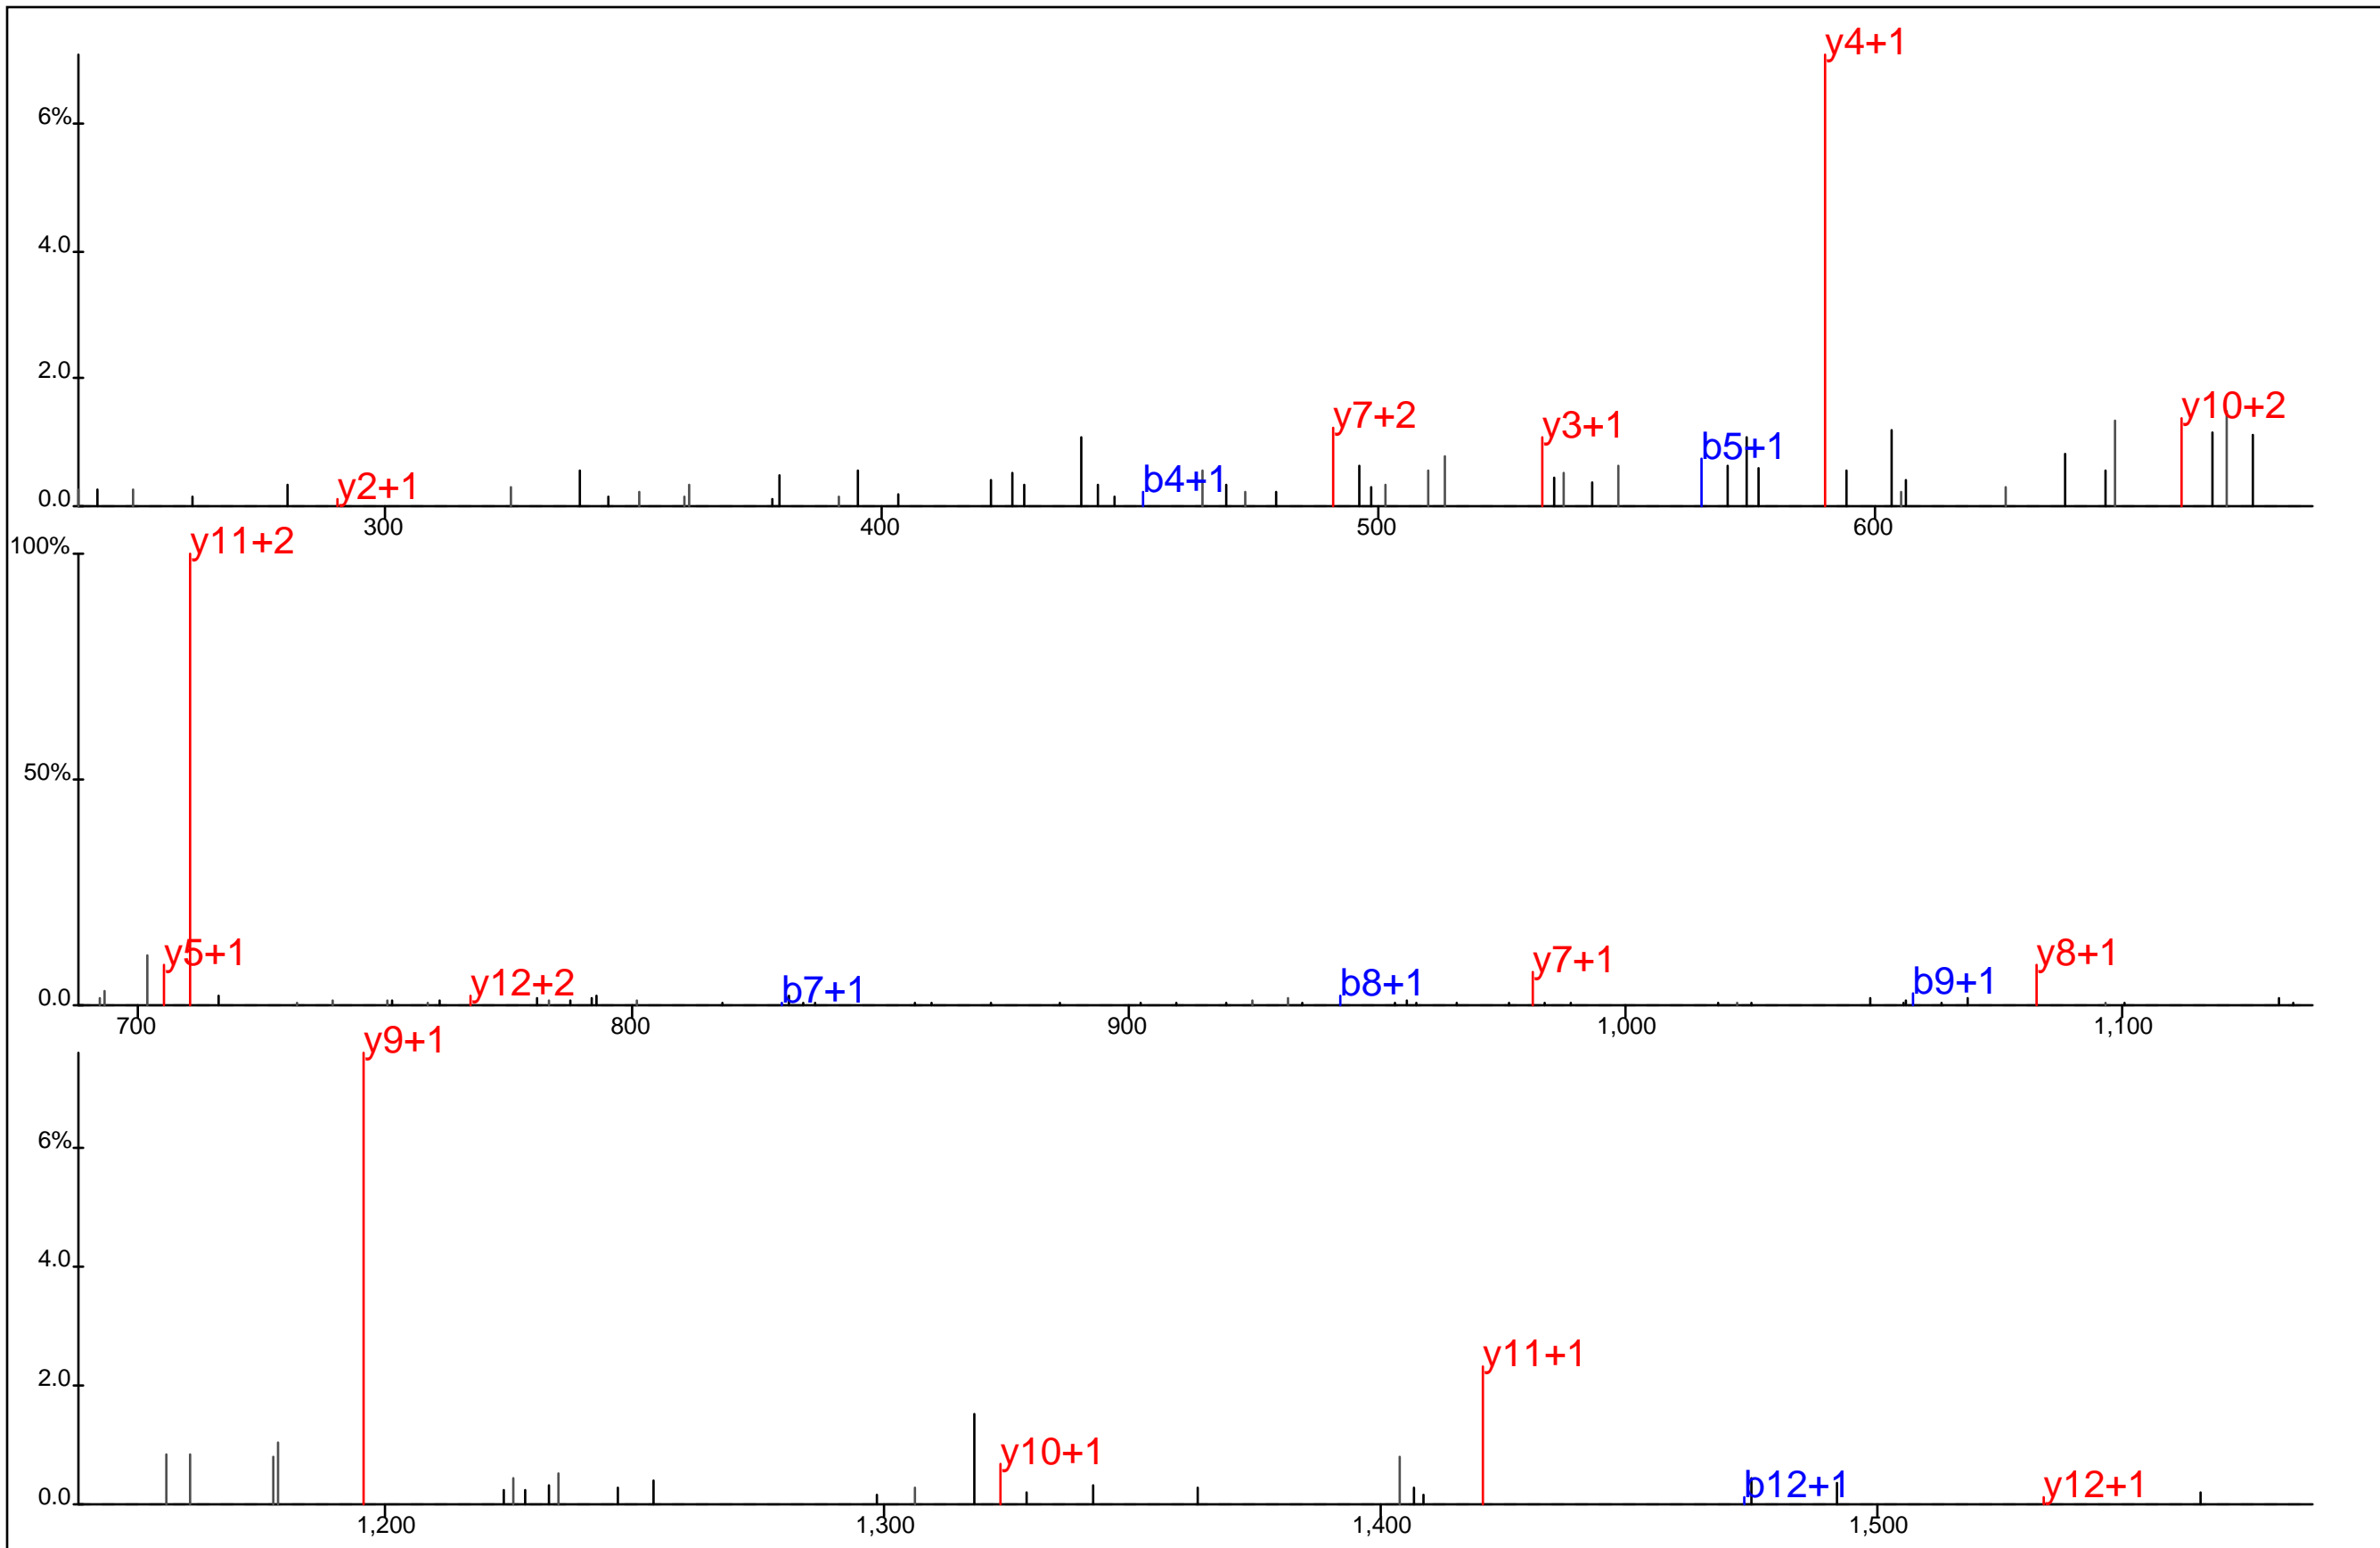

▢ ▢ ▢ ▢ ▢ ▢ ▢ ▢ ▢ ▢ ▢ ▢ ▢ ▢ ▢

▢ ▢ ▢ ▢ ▢ ▢ ▢ ▢ ▢ ▢ ▢ ▢ ▢ ▢ ▢

▢ ▢ ▢ ▢ ▢ ▢ ▢ ▢ ▢ ▢ ▢ ▢ ▢ ▢ ▢

▢ ▢ ▢ ▢ ▢ ▢ ▢ ▢ ▢ ▢ ▢ ▢ ▢ ▢ ▢

▢ ▢ ▢ ▢ ▢ ▢ ▢ ▢ ▢ ▢ ▢ ▢ ▢ ▢ ▢

▢ ▢ ▢ ▢ ▢ ▢ ▢ ▢ ▢ ▢ ▢ ▢ ▢ ▢ ▢

▢ ▢ ▢ ▢ ▢ ▢ ▢ ▢ ▢ ▢ ▢ ▢ ▢ ▢ ▢

▢ ▢ ▢ ▢ ▢ ▢ ▢ ▢ ▢ ▢ ▢ ▢ ▢ ▢ ▢

▢ ▢ ▢ ▢ ▢ ▢ ▢ ▢ ▢ ▢ ▢ ▢ ▢ ▢ ▢

▢ ▢ ▢ ▢ ▢ ▢ ▢ ▢ ▢ ▢ ▢ ▢ ▢ ▢ ▢

▢ ▢ ▢ ▢ ▢ ▢ ▢ ▢ ▢ ▢ ▢ ▢ ▢ ▢ ▢

▢ ▢ ▢ ▢ ▢ ▢ ▢ ▢ ▢ ▢ ▢ ▢ ▢ ▢ ▢

Protein Name: HLA DR associated protein I  
 gi Accession: 0  
 Precursor Mass: 823.8953+2  
 Delta Mass: 0.505 ppm  
 XCorr: 41.77

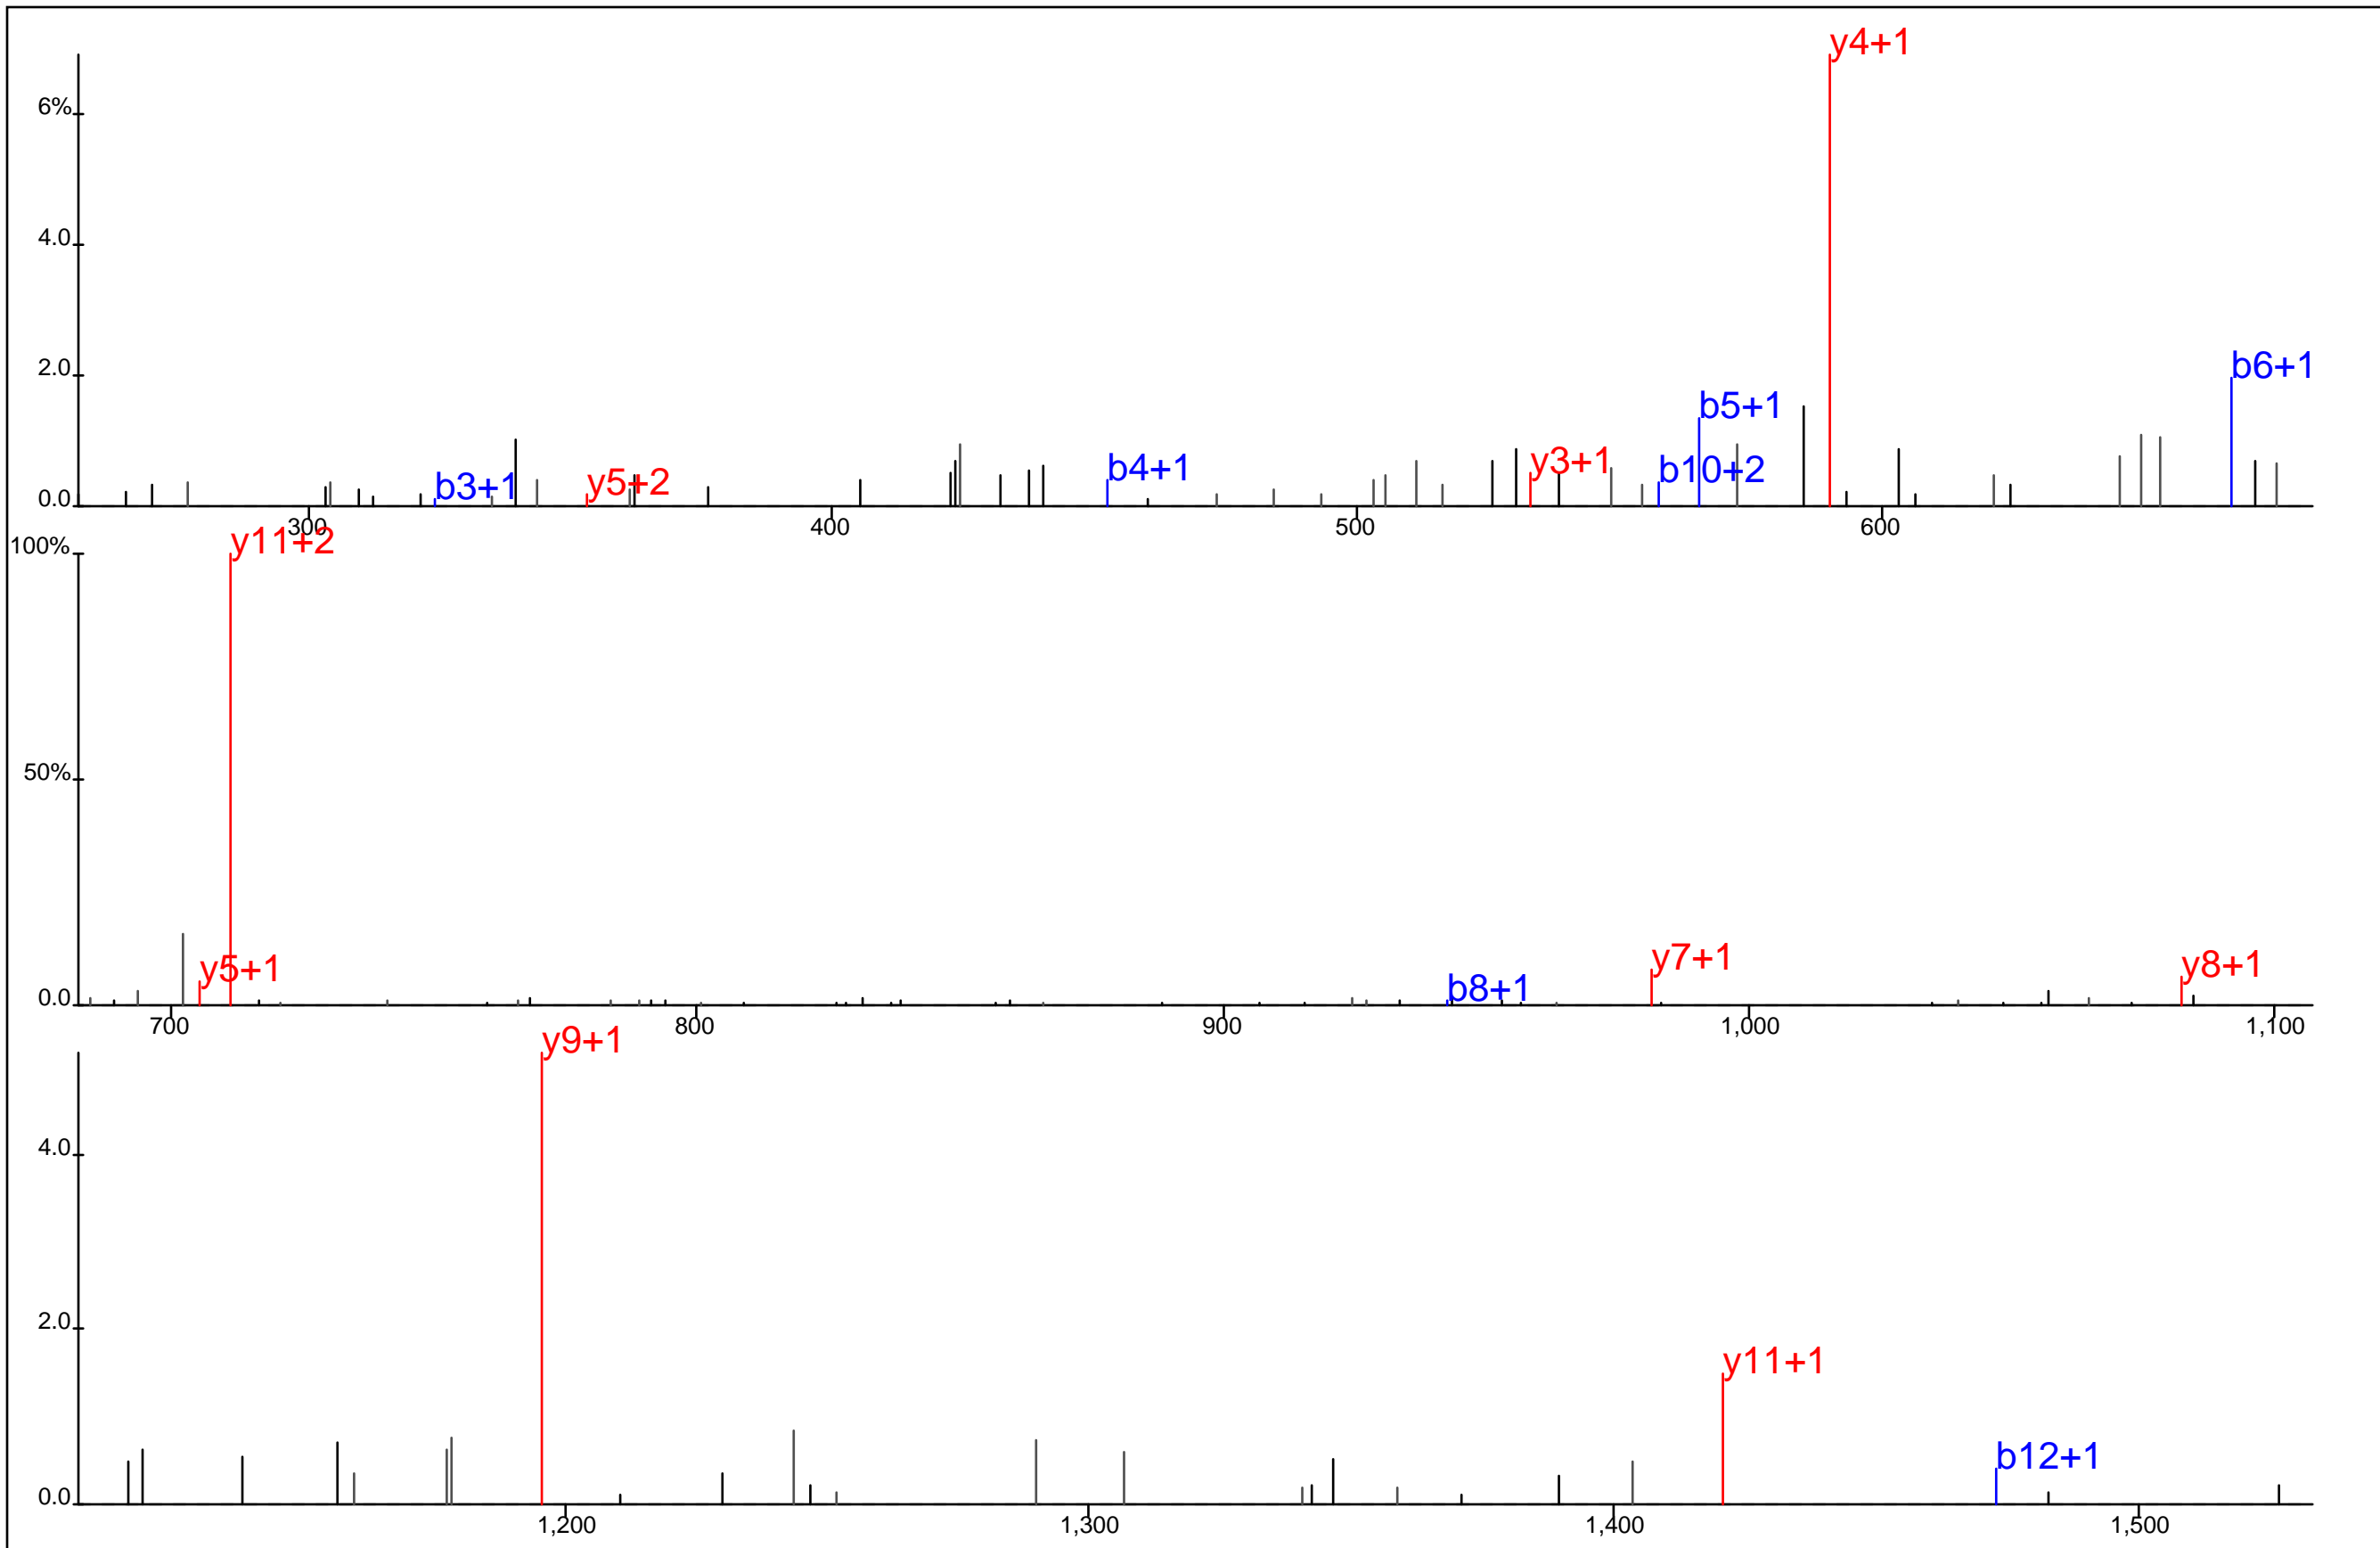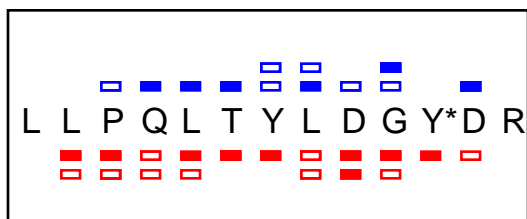

Protein Name: HLA DR associated protein I  
 gi Accession: 0  
 Precursor Mass: 823.8964+2  
 Delta Mass: 1.839 ppm  
 XCorr: 33.75



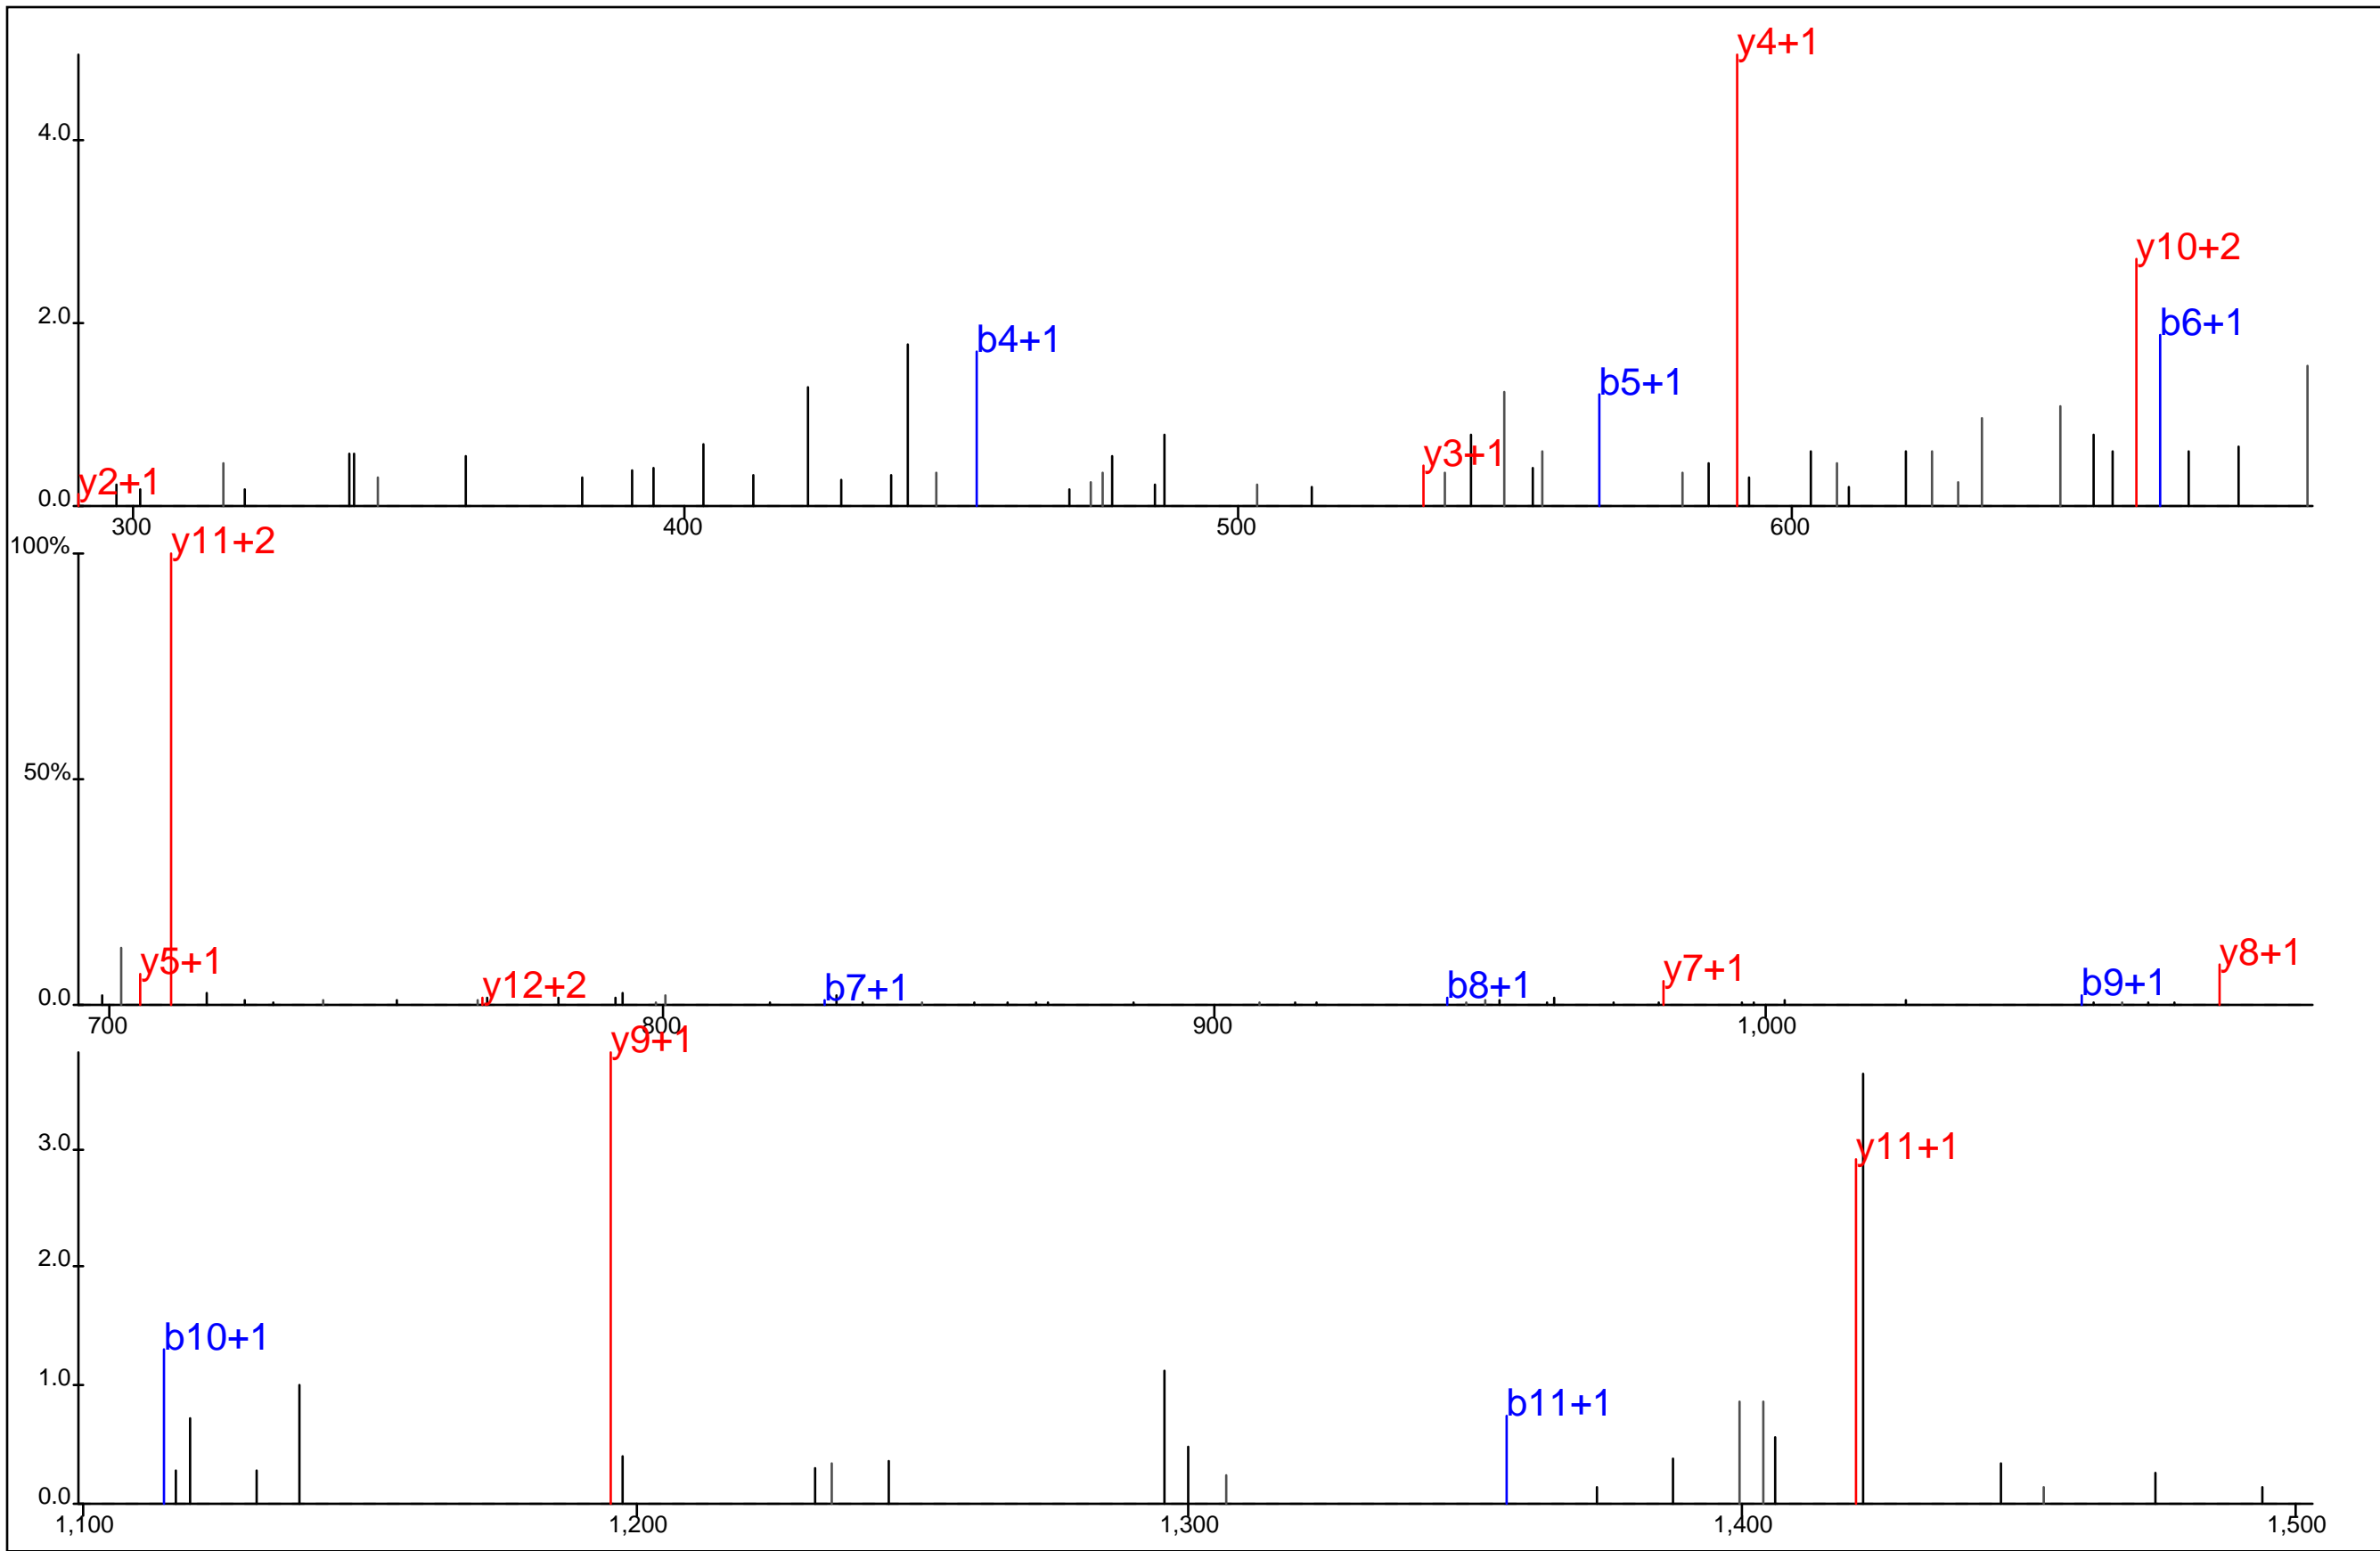

□ □ □ □ □ □ □ □ □ □ □ □  
 L L P Q L T Y L D G Y\* D R  
□ □ □ □ □ □ □ □ □ □ □ □

Protein Name: HLA DR associated protein I  
 gi Accession: 0  
 Precursor Mass: 823.8950+2  
 Delta Mass: 0.135 ppm  
 XCorr: 38.1

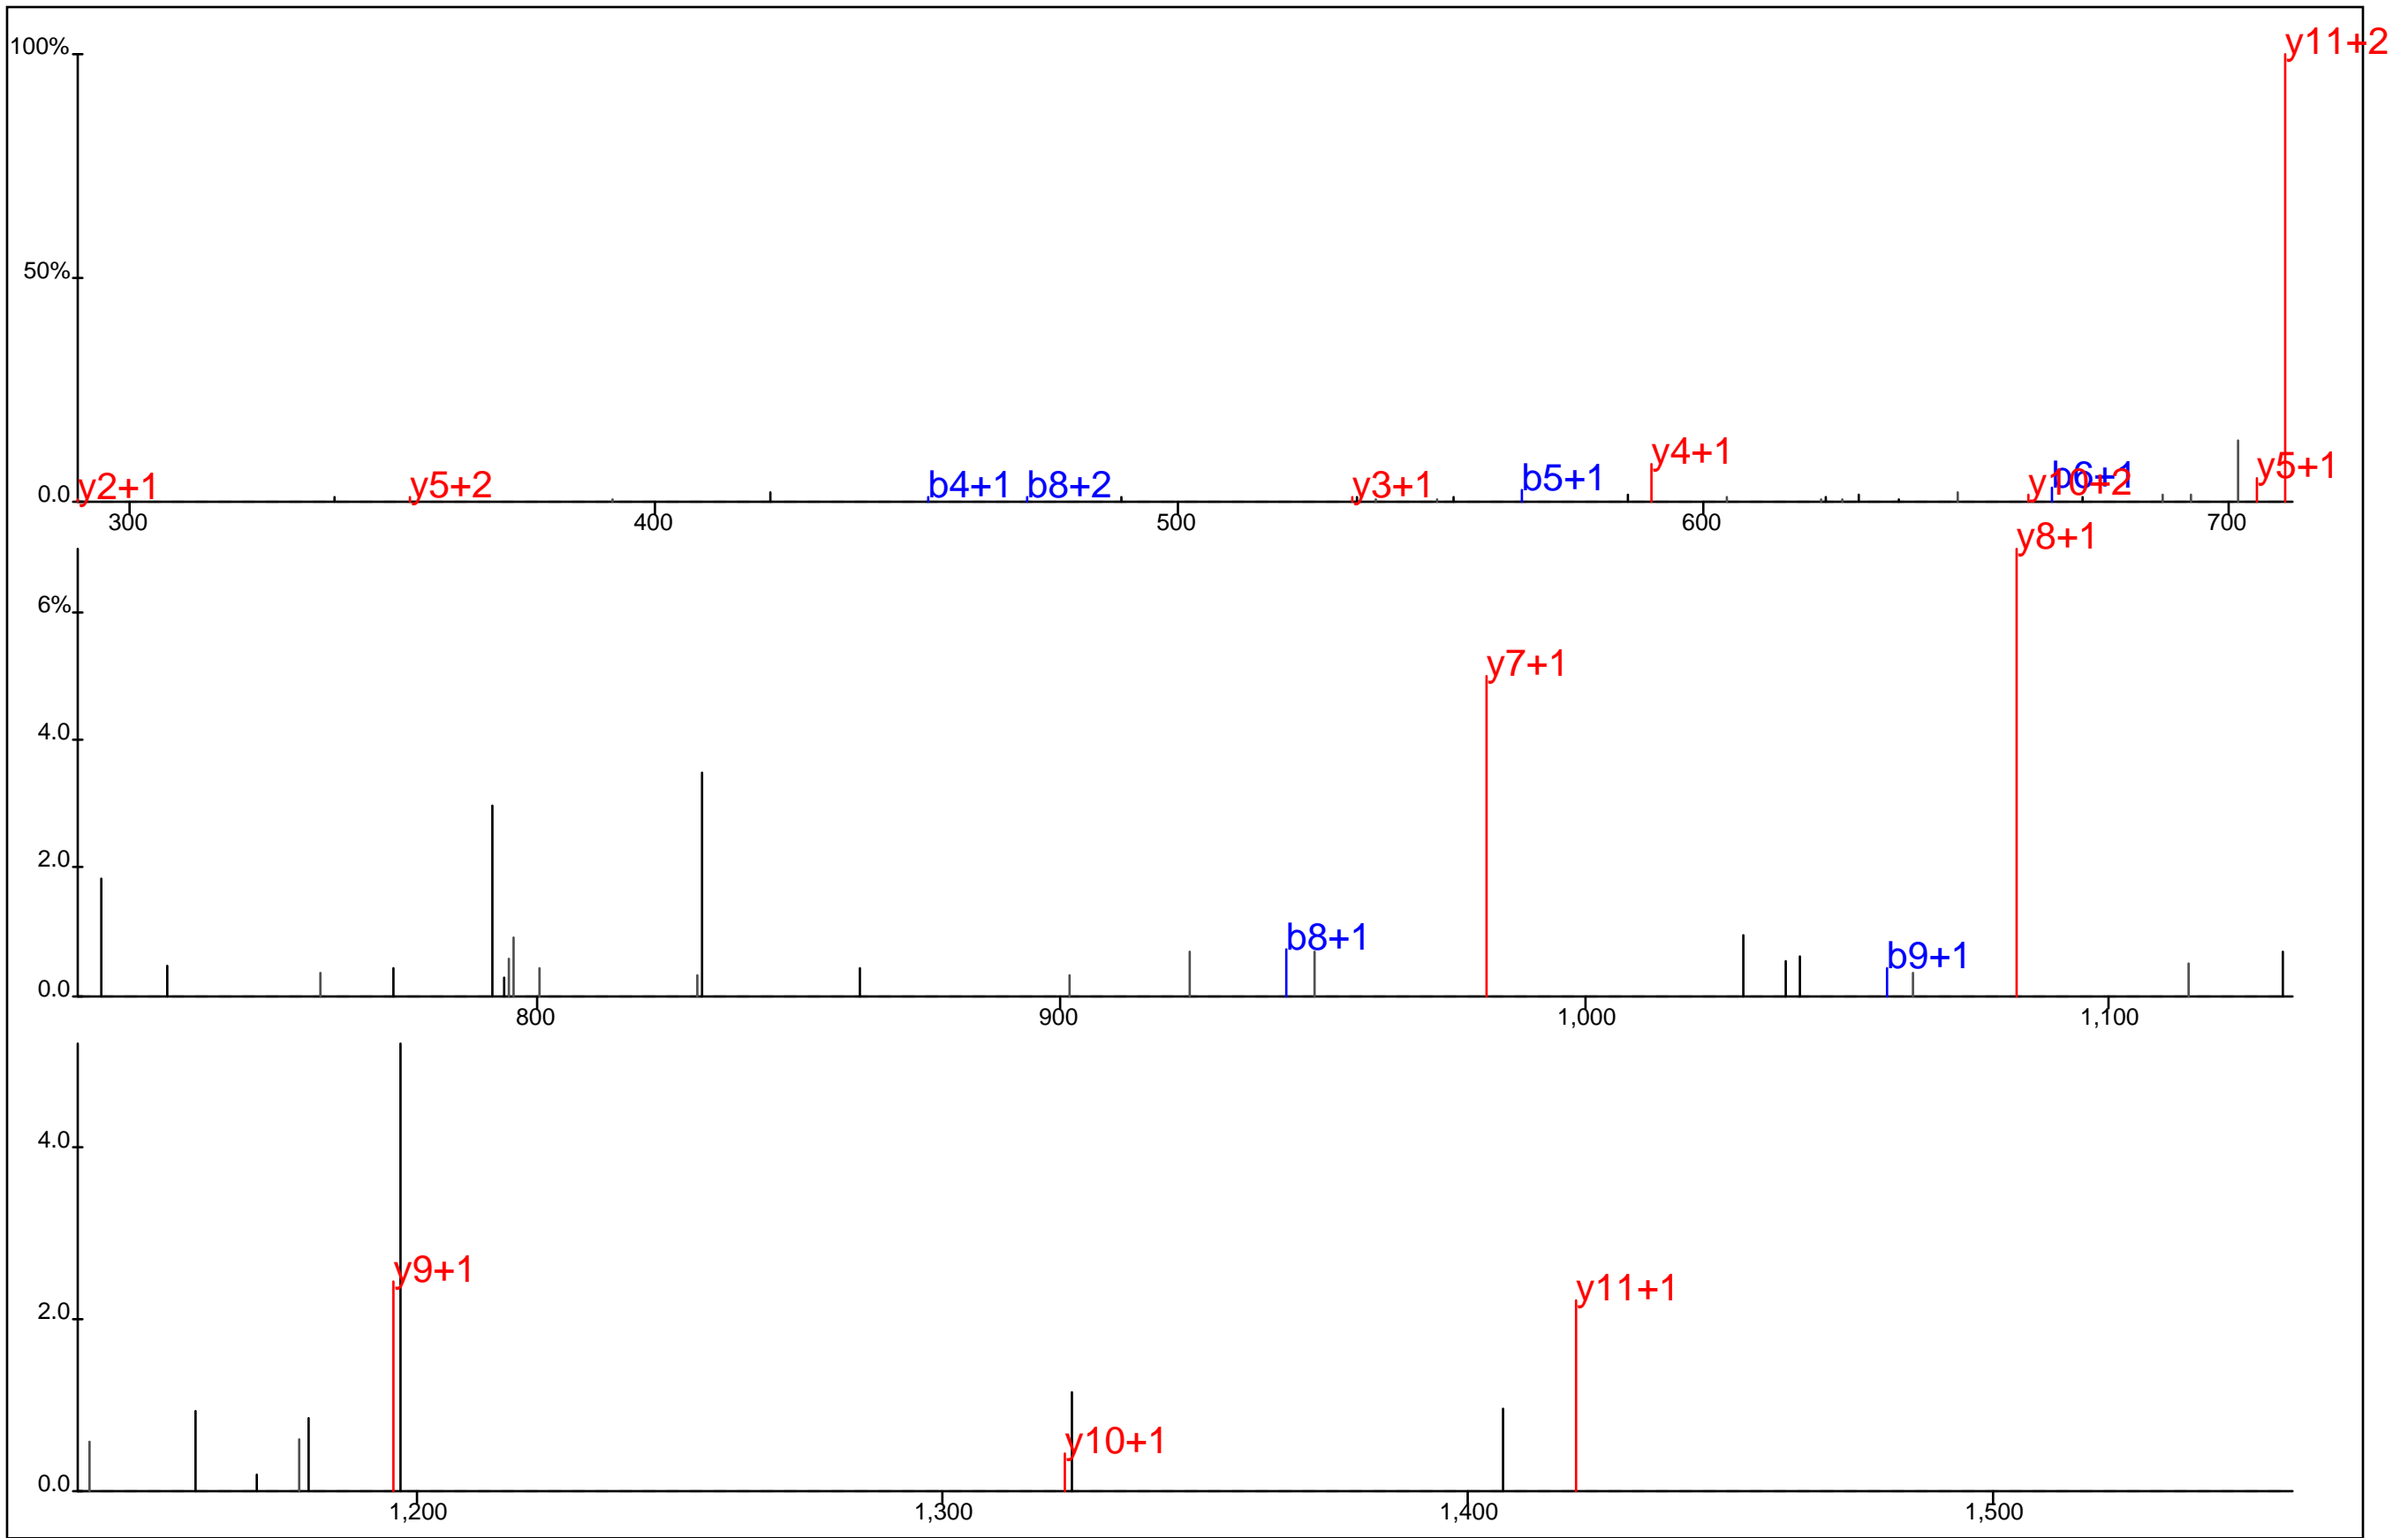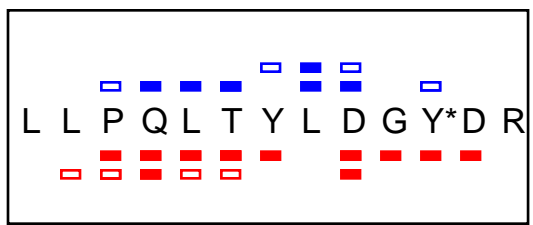

Protein Name: HLA DR associated protein I  
 gi Accession: 0  
 Precursor Mass: 823.8966+2  
 Delta Mass: 2.061 ppm  
 XCorr: 46.55

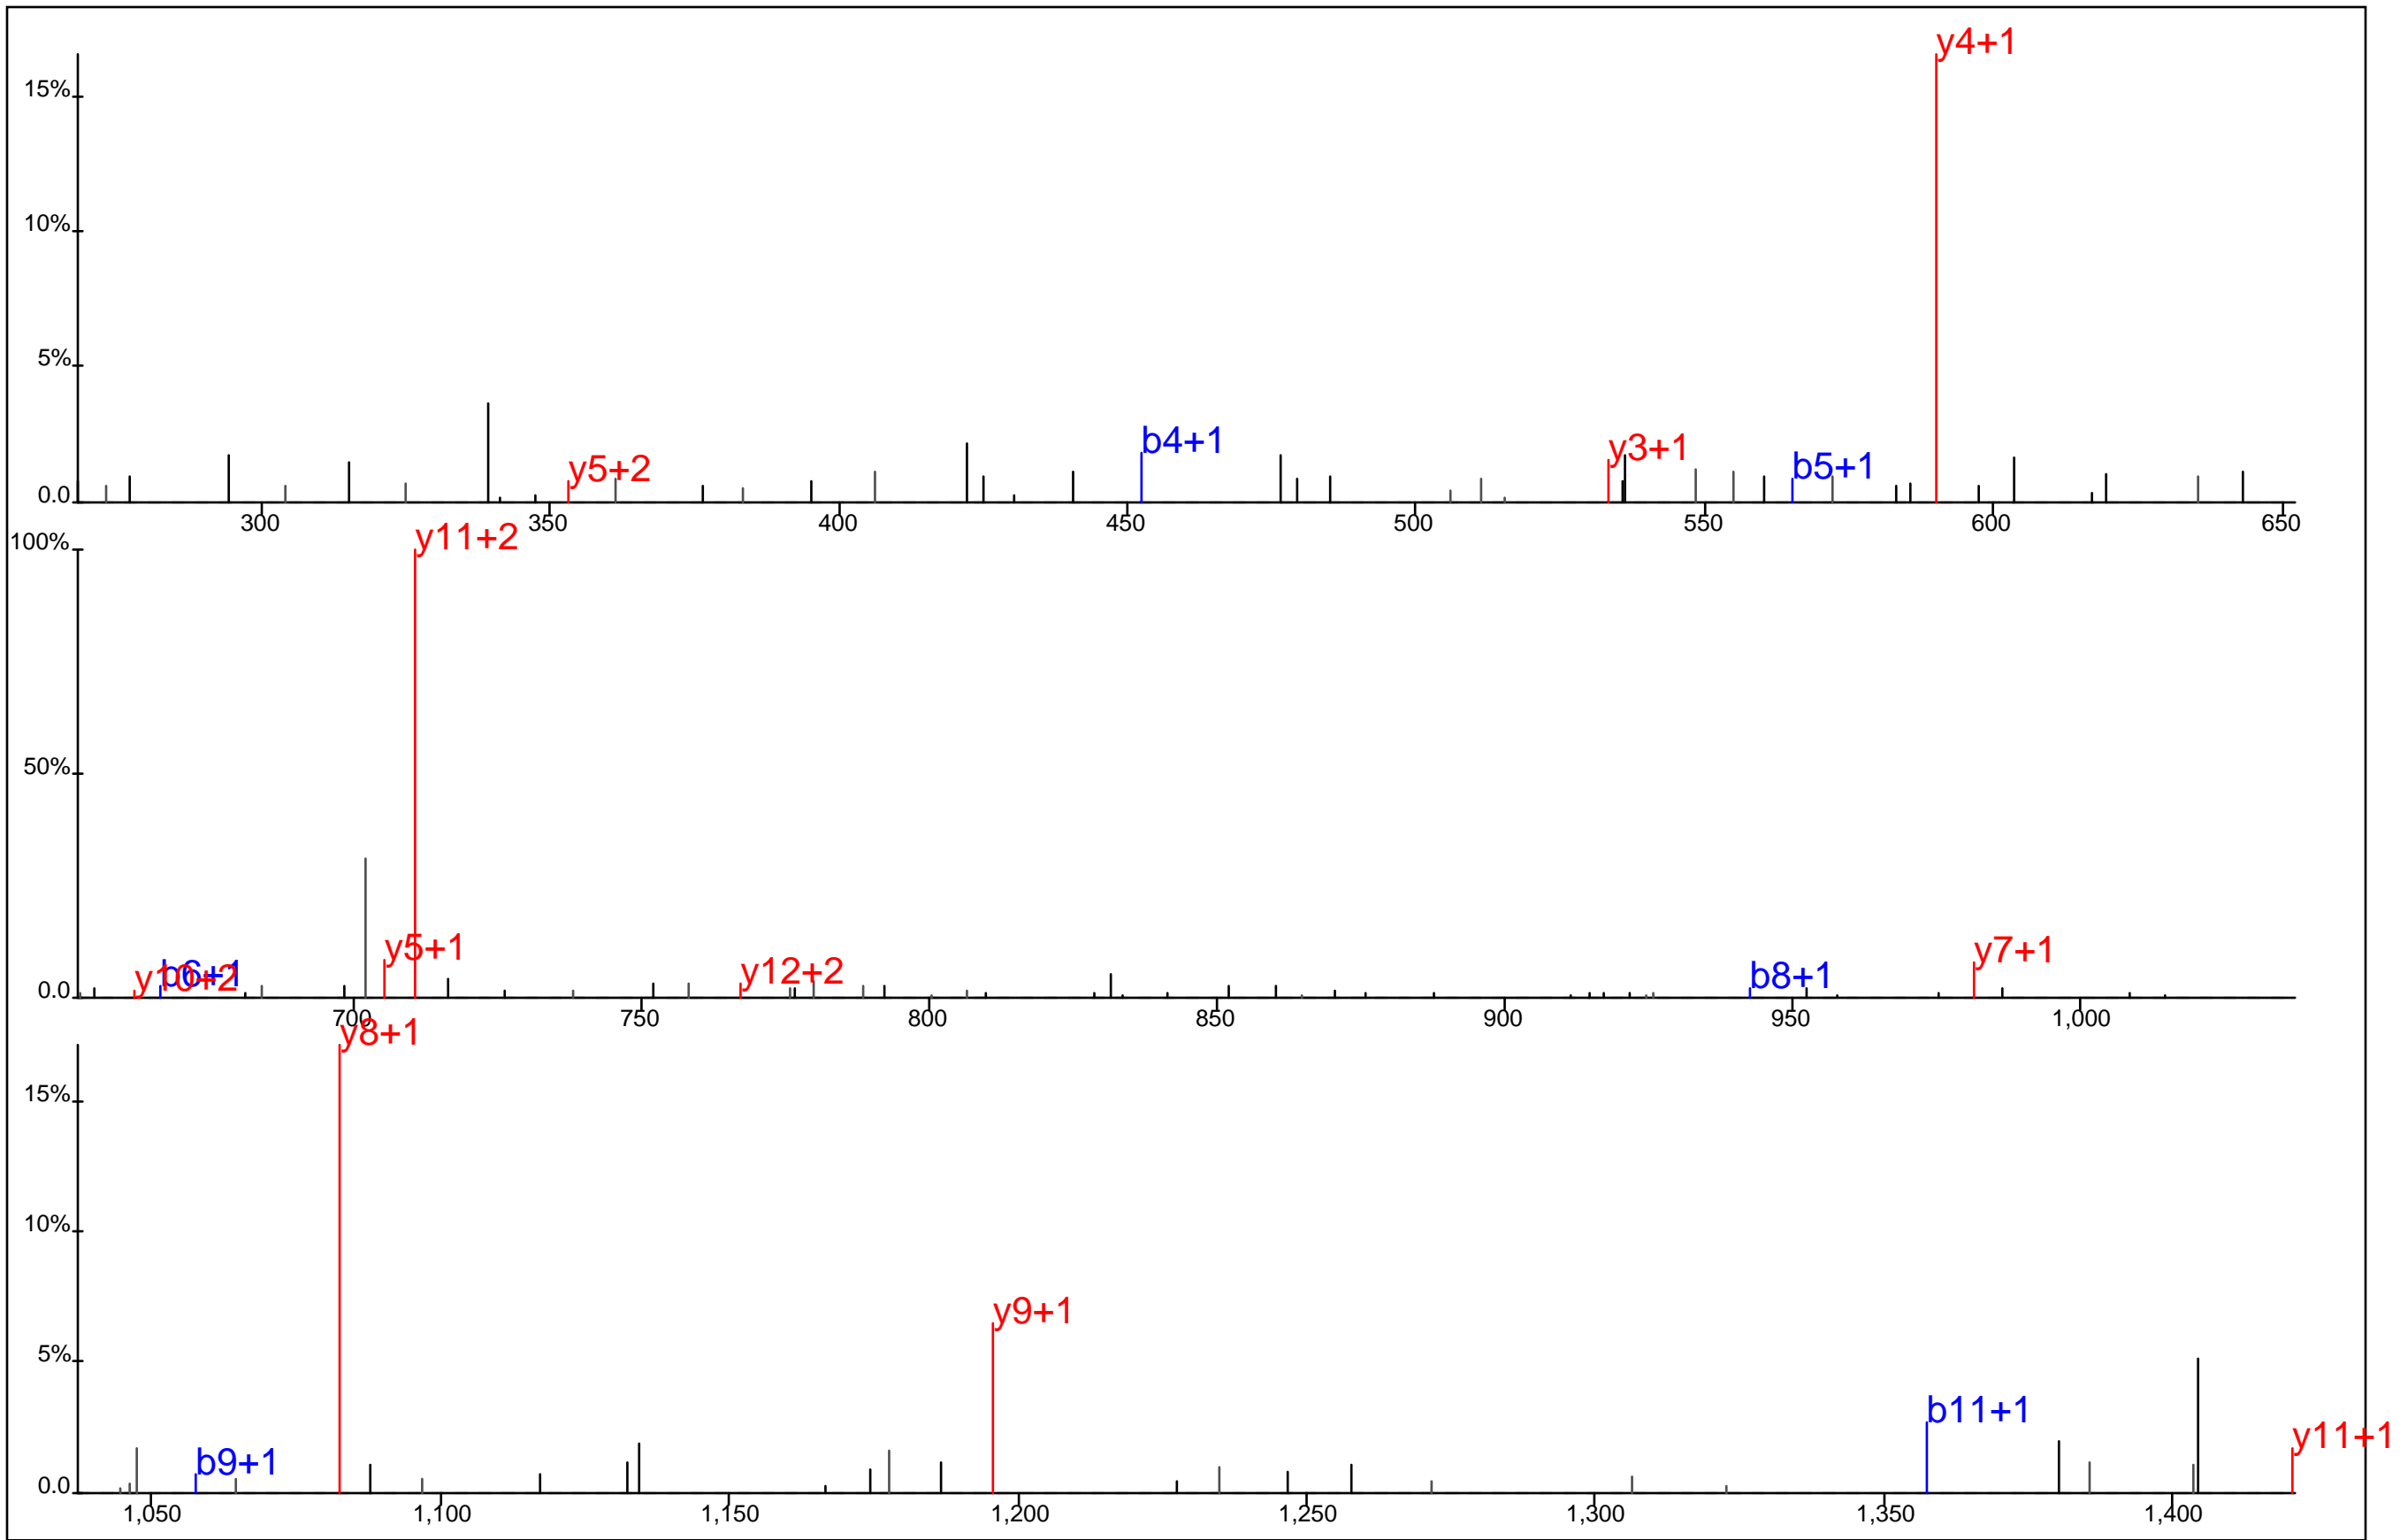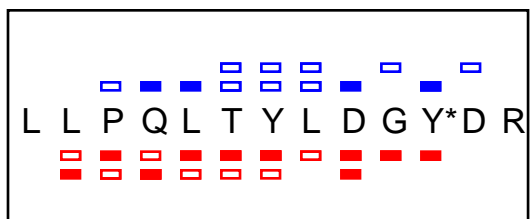

Protein Name: HLA DR associated protein I  
 gi Accession: 0  
 Precursor Mass: 823.8959+2  
 Delta Mass: 1.246 ppm  
 XCorr: 23.45

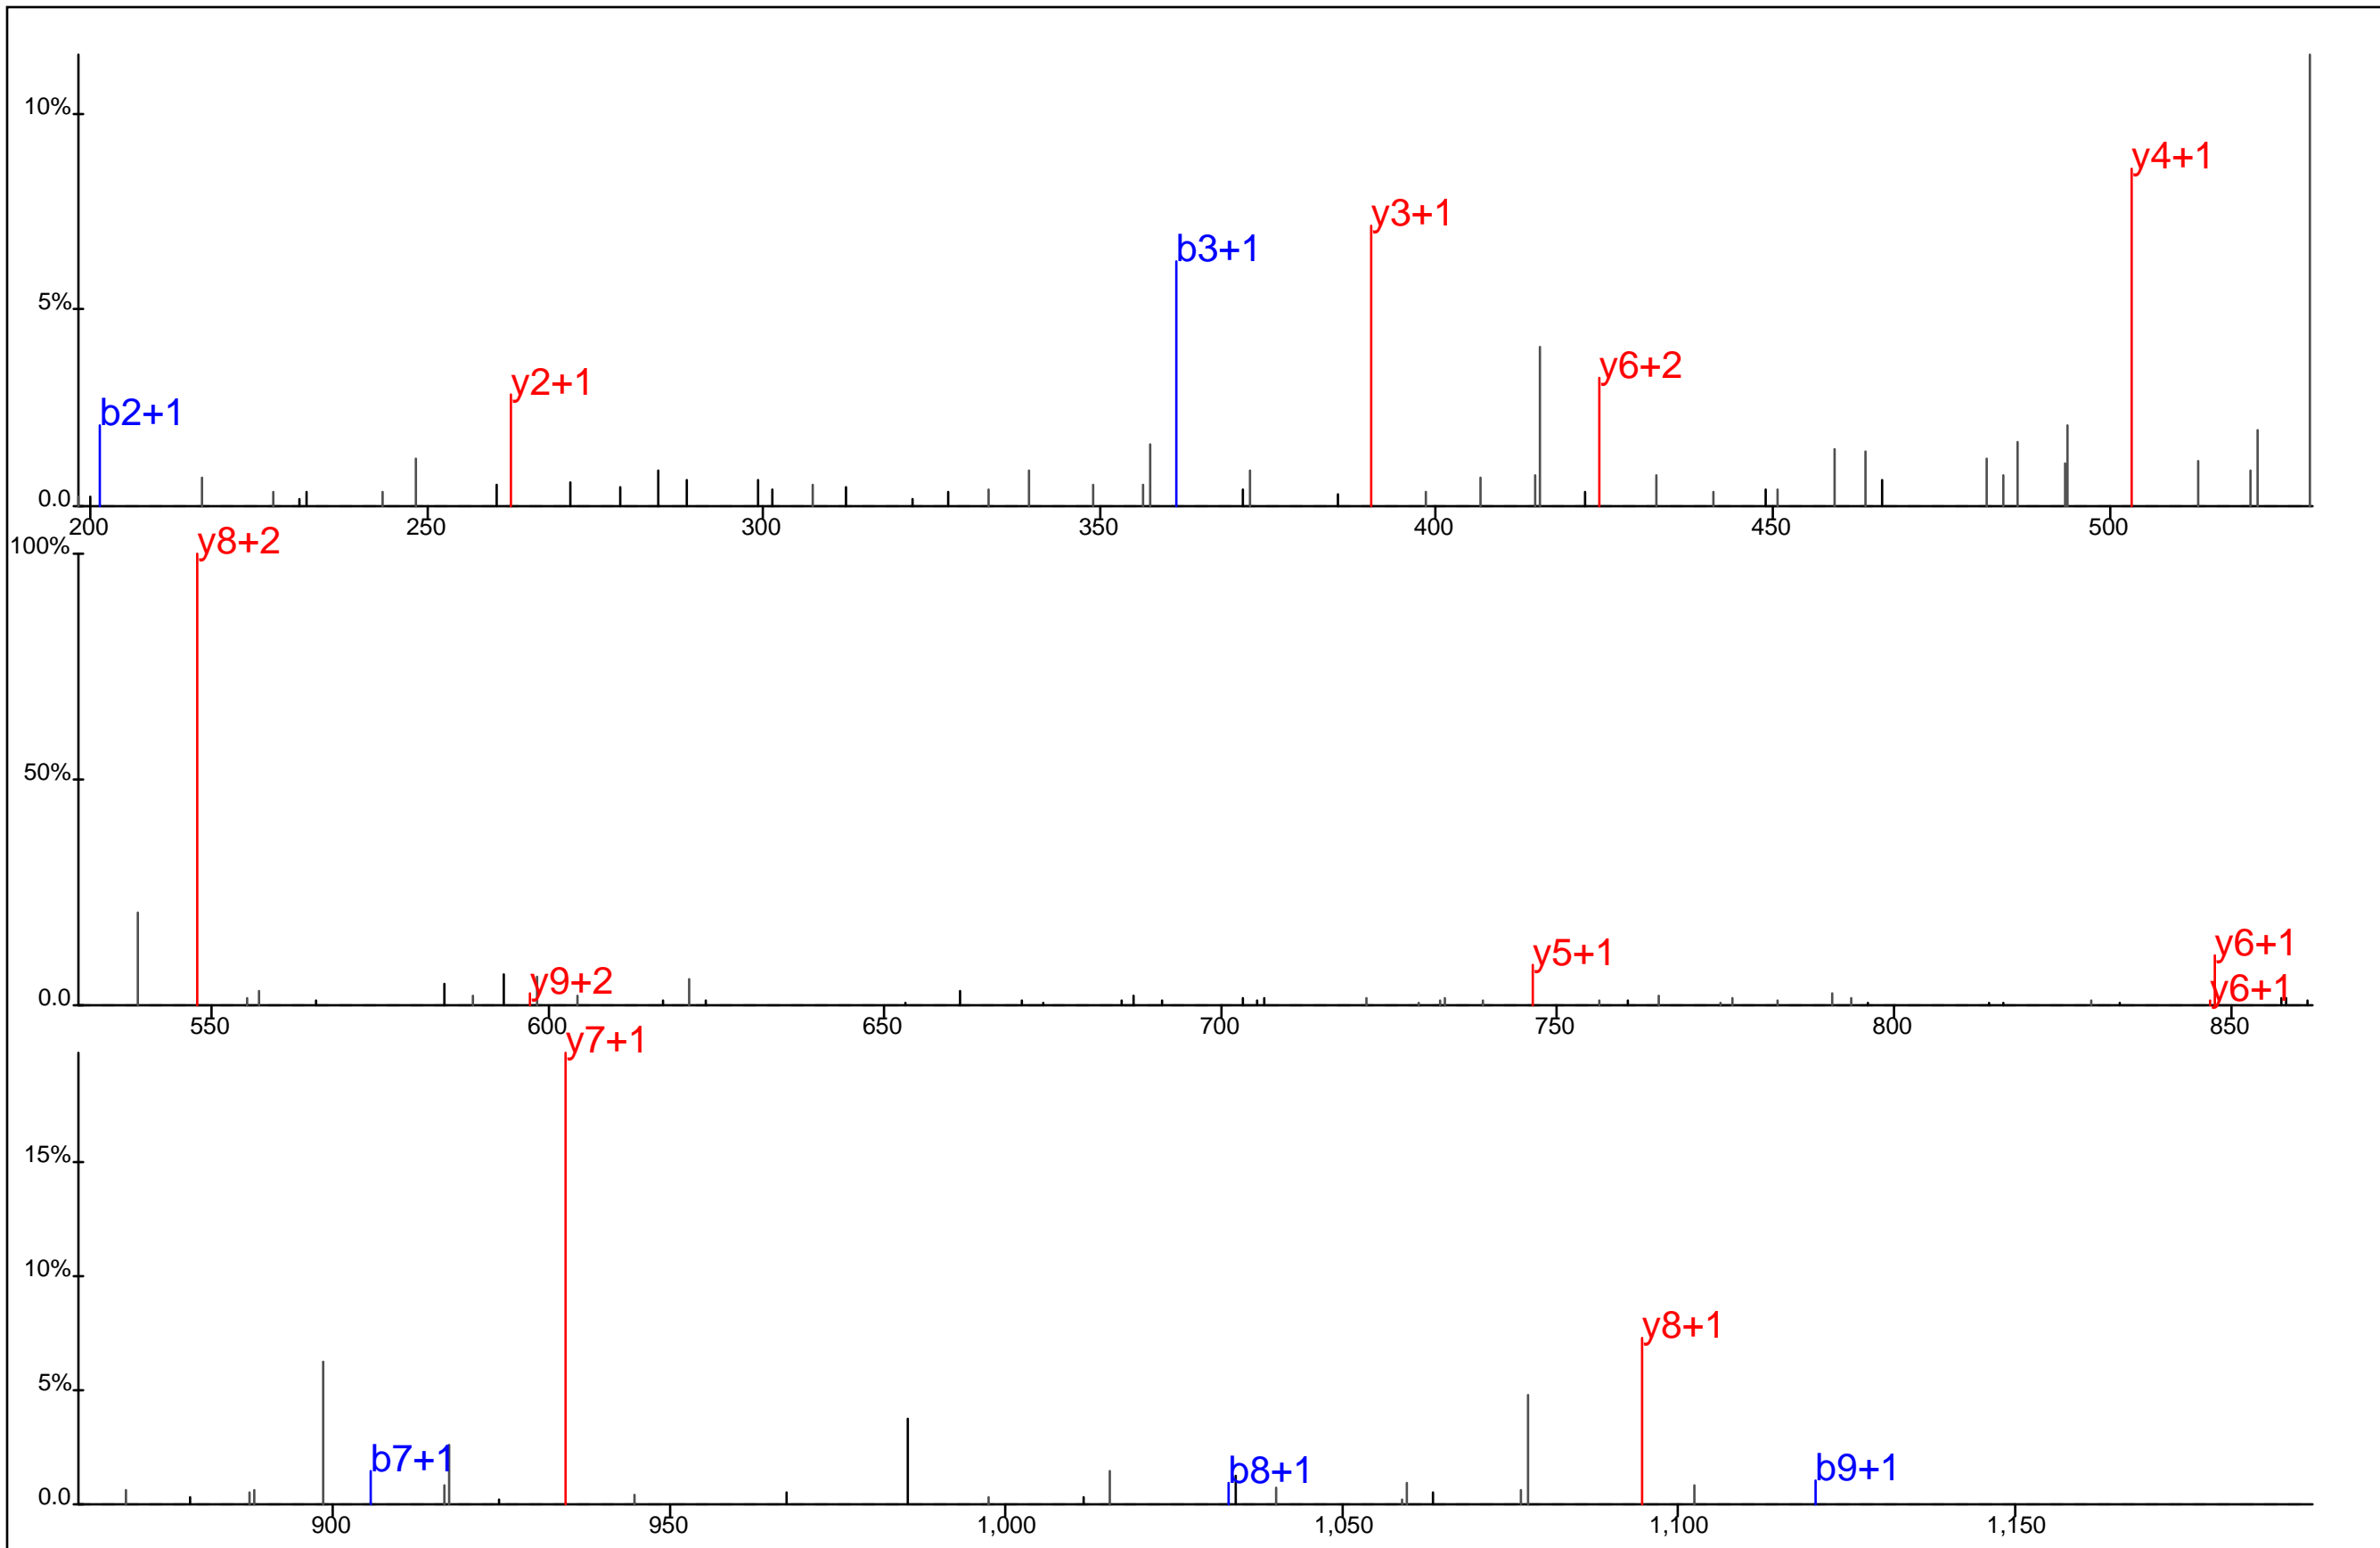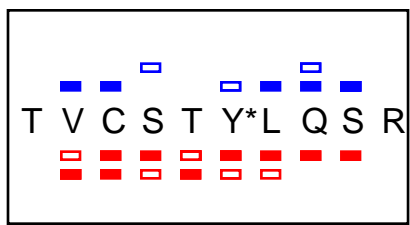

Protein Name: Homeodomain interacting protein kinase 3  
 gi Accession: 0  
 Precursor Mass: 647.7795+2  
 Delta Mass: 1.516 ppm  
 XCorr: 46.83

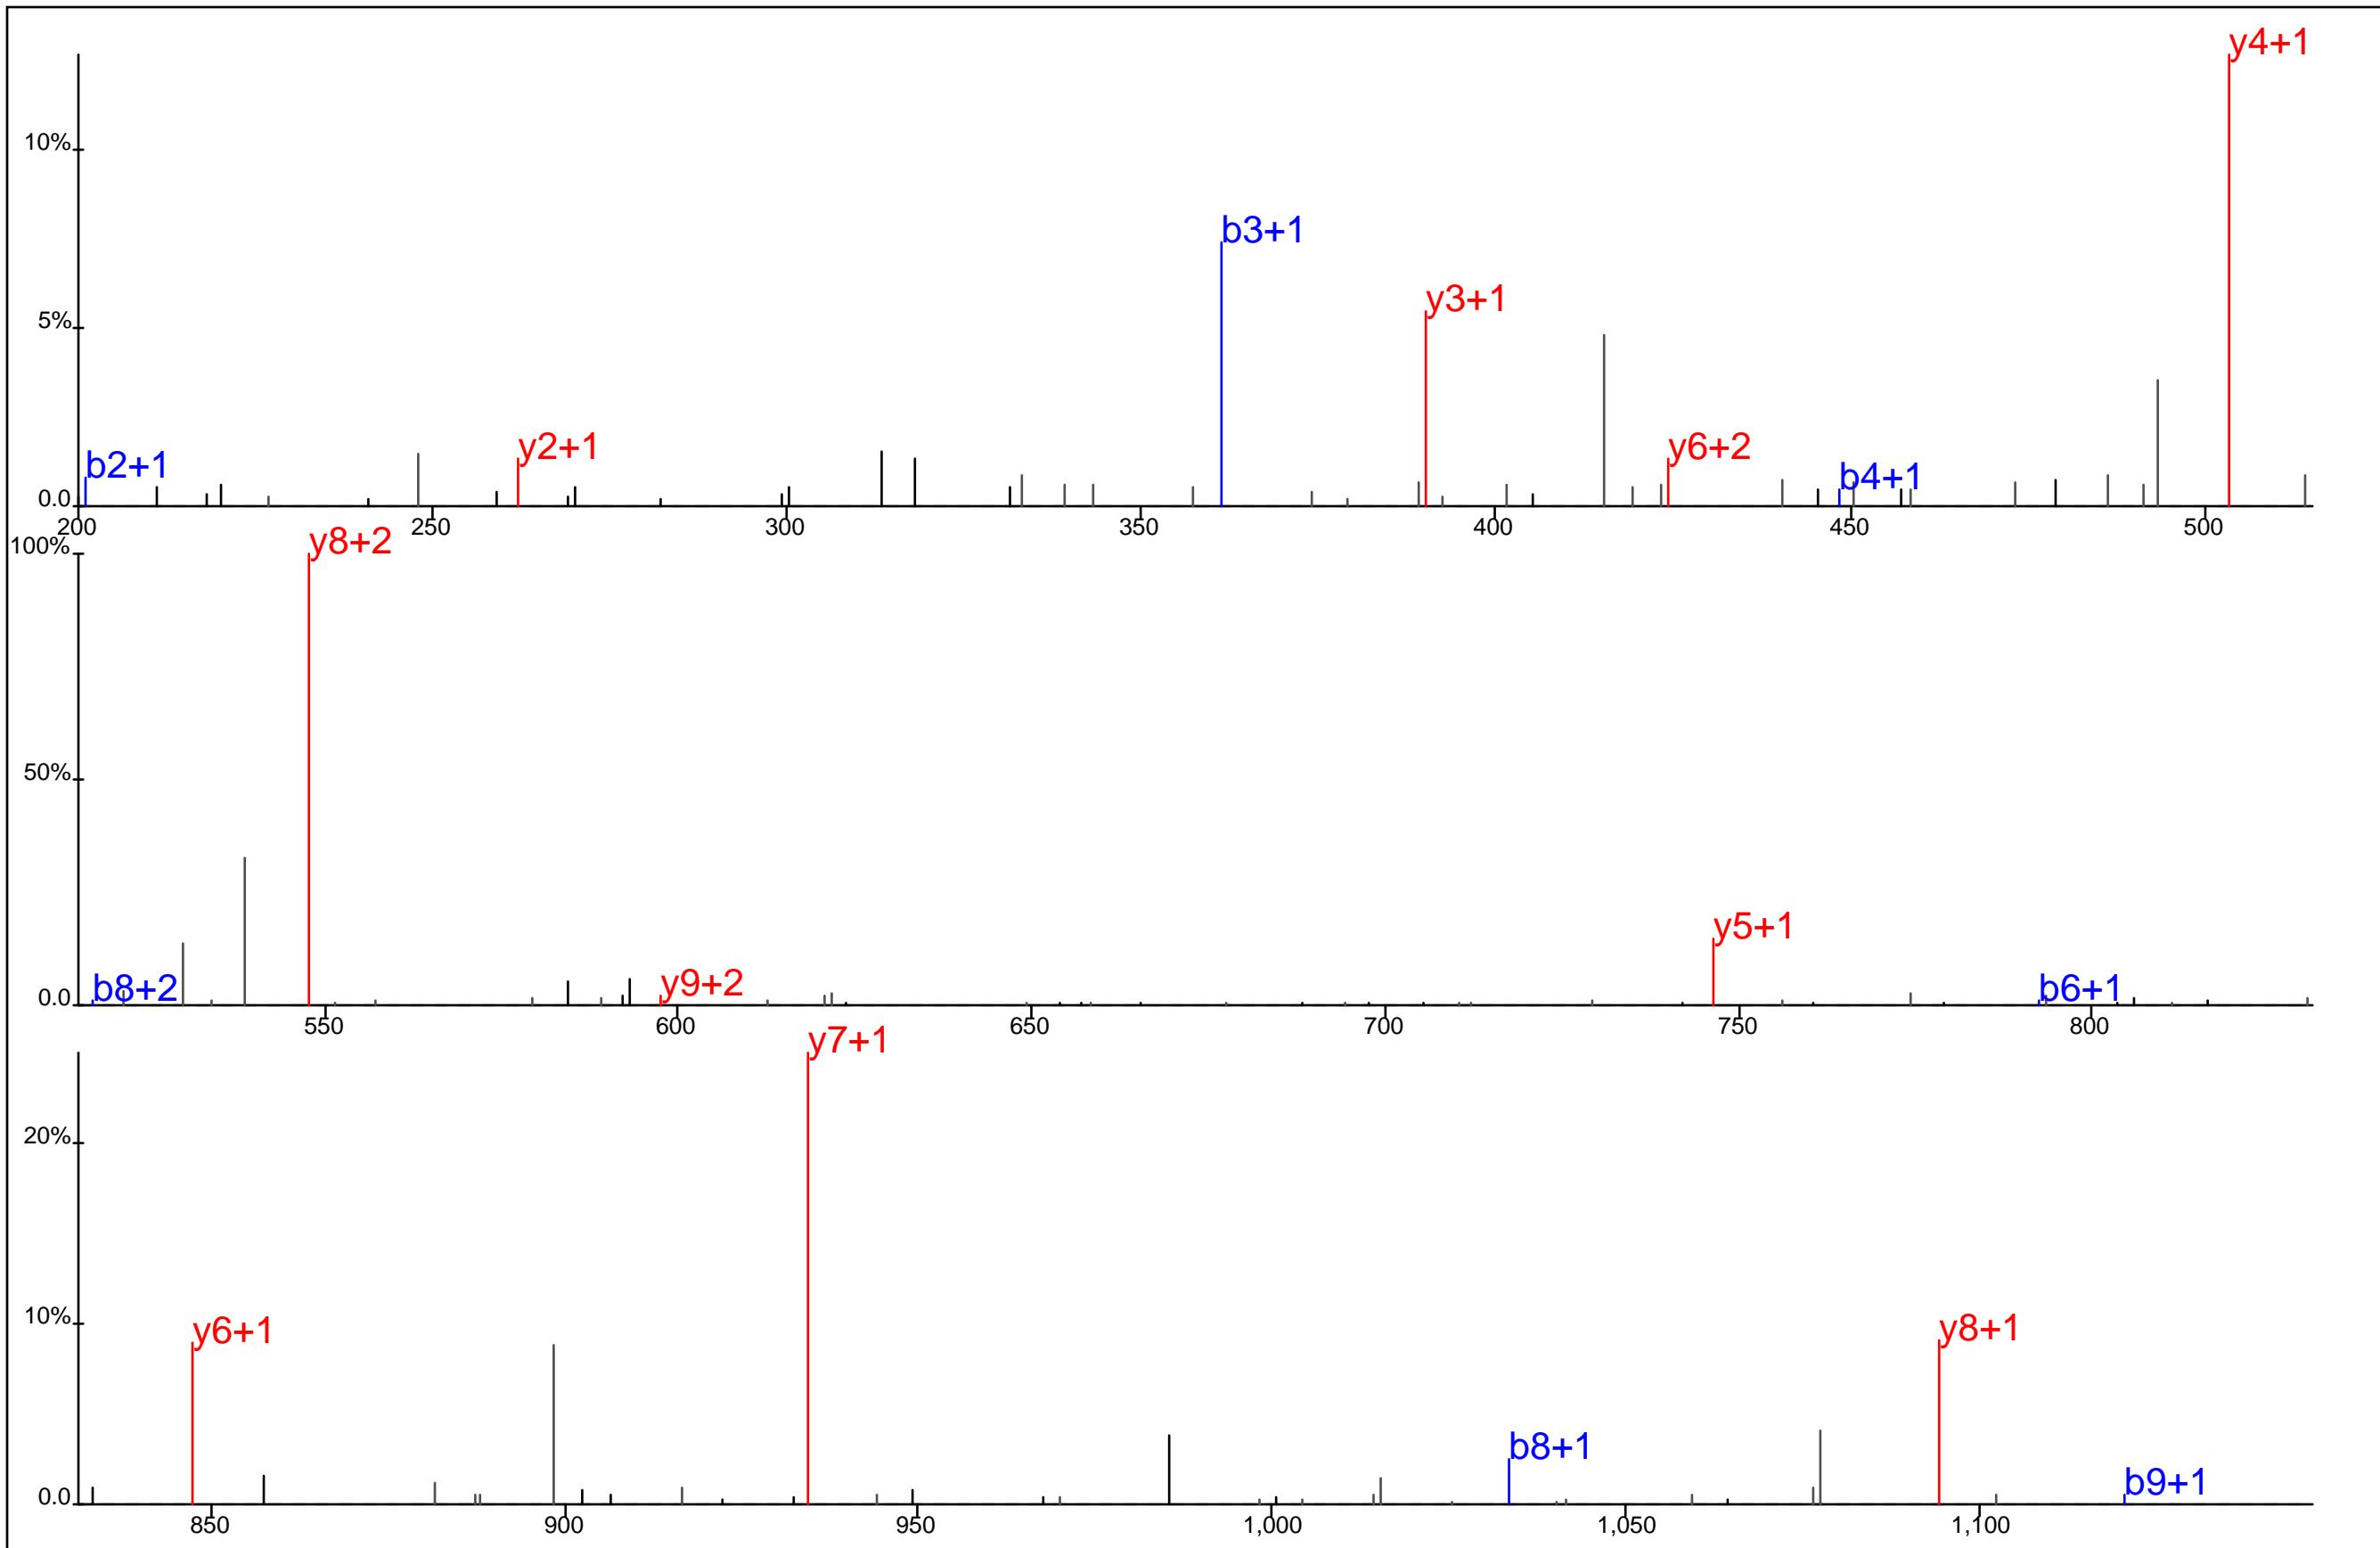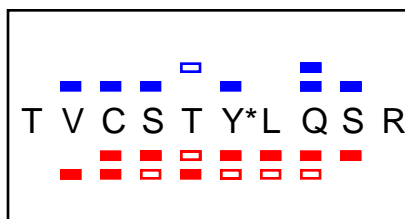

Protein Name: Homeodomain interacting protein kinase 3  
 gi Accession: 0  
 Precursor Mass: 647.7794+2  
 Delta Mass: 1.421 ppm  
 XCorr: 42.59

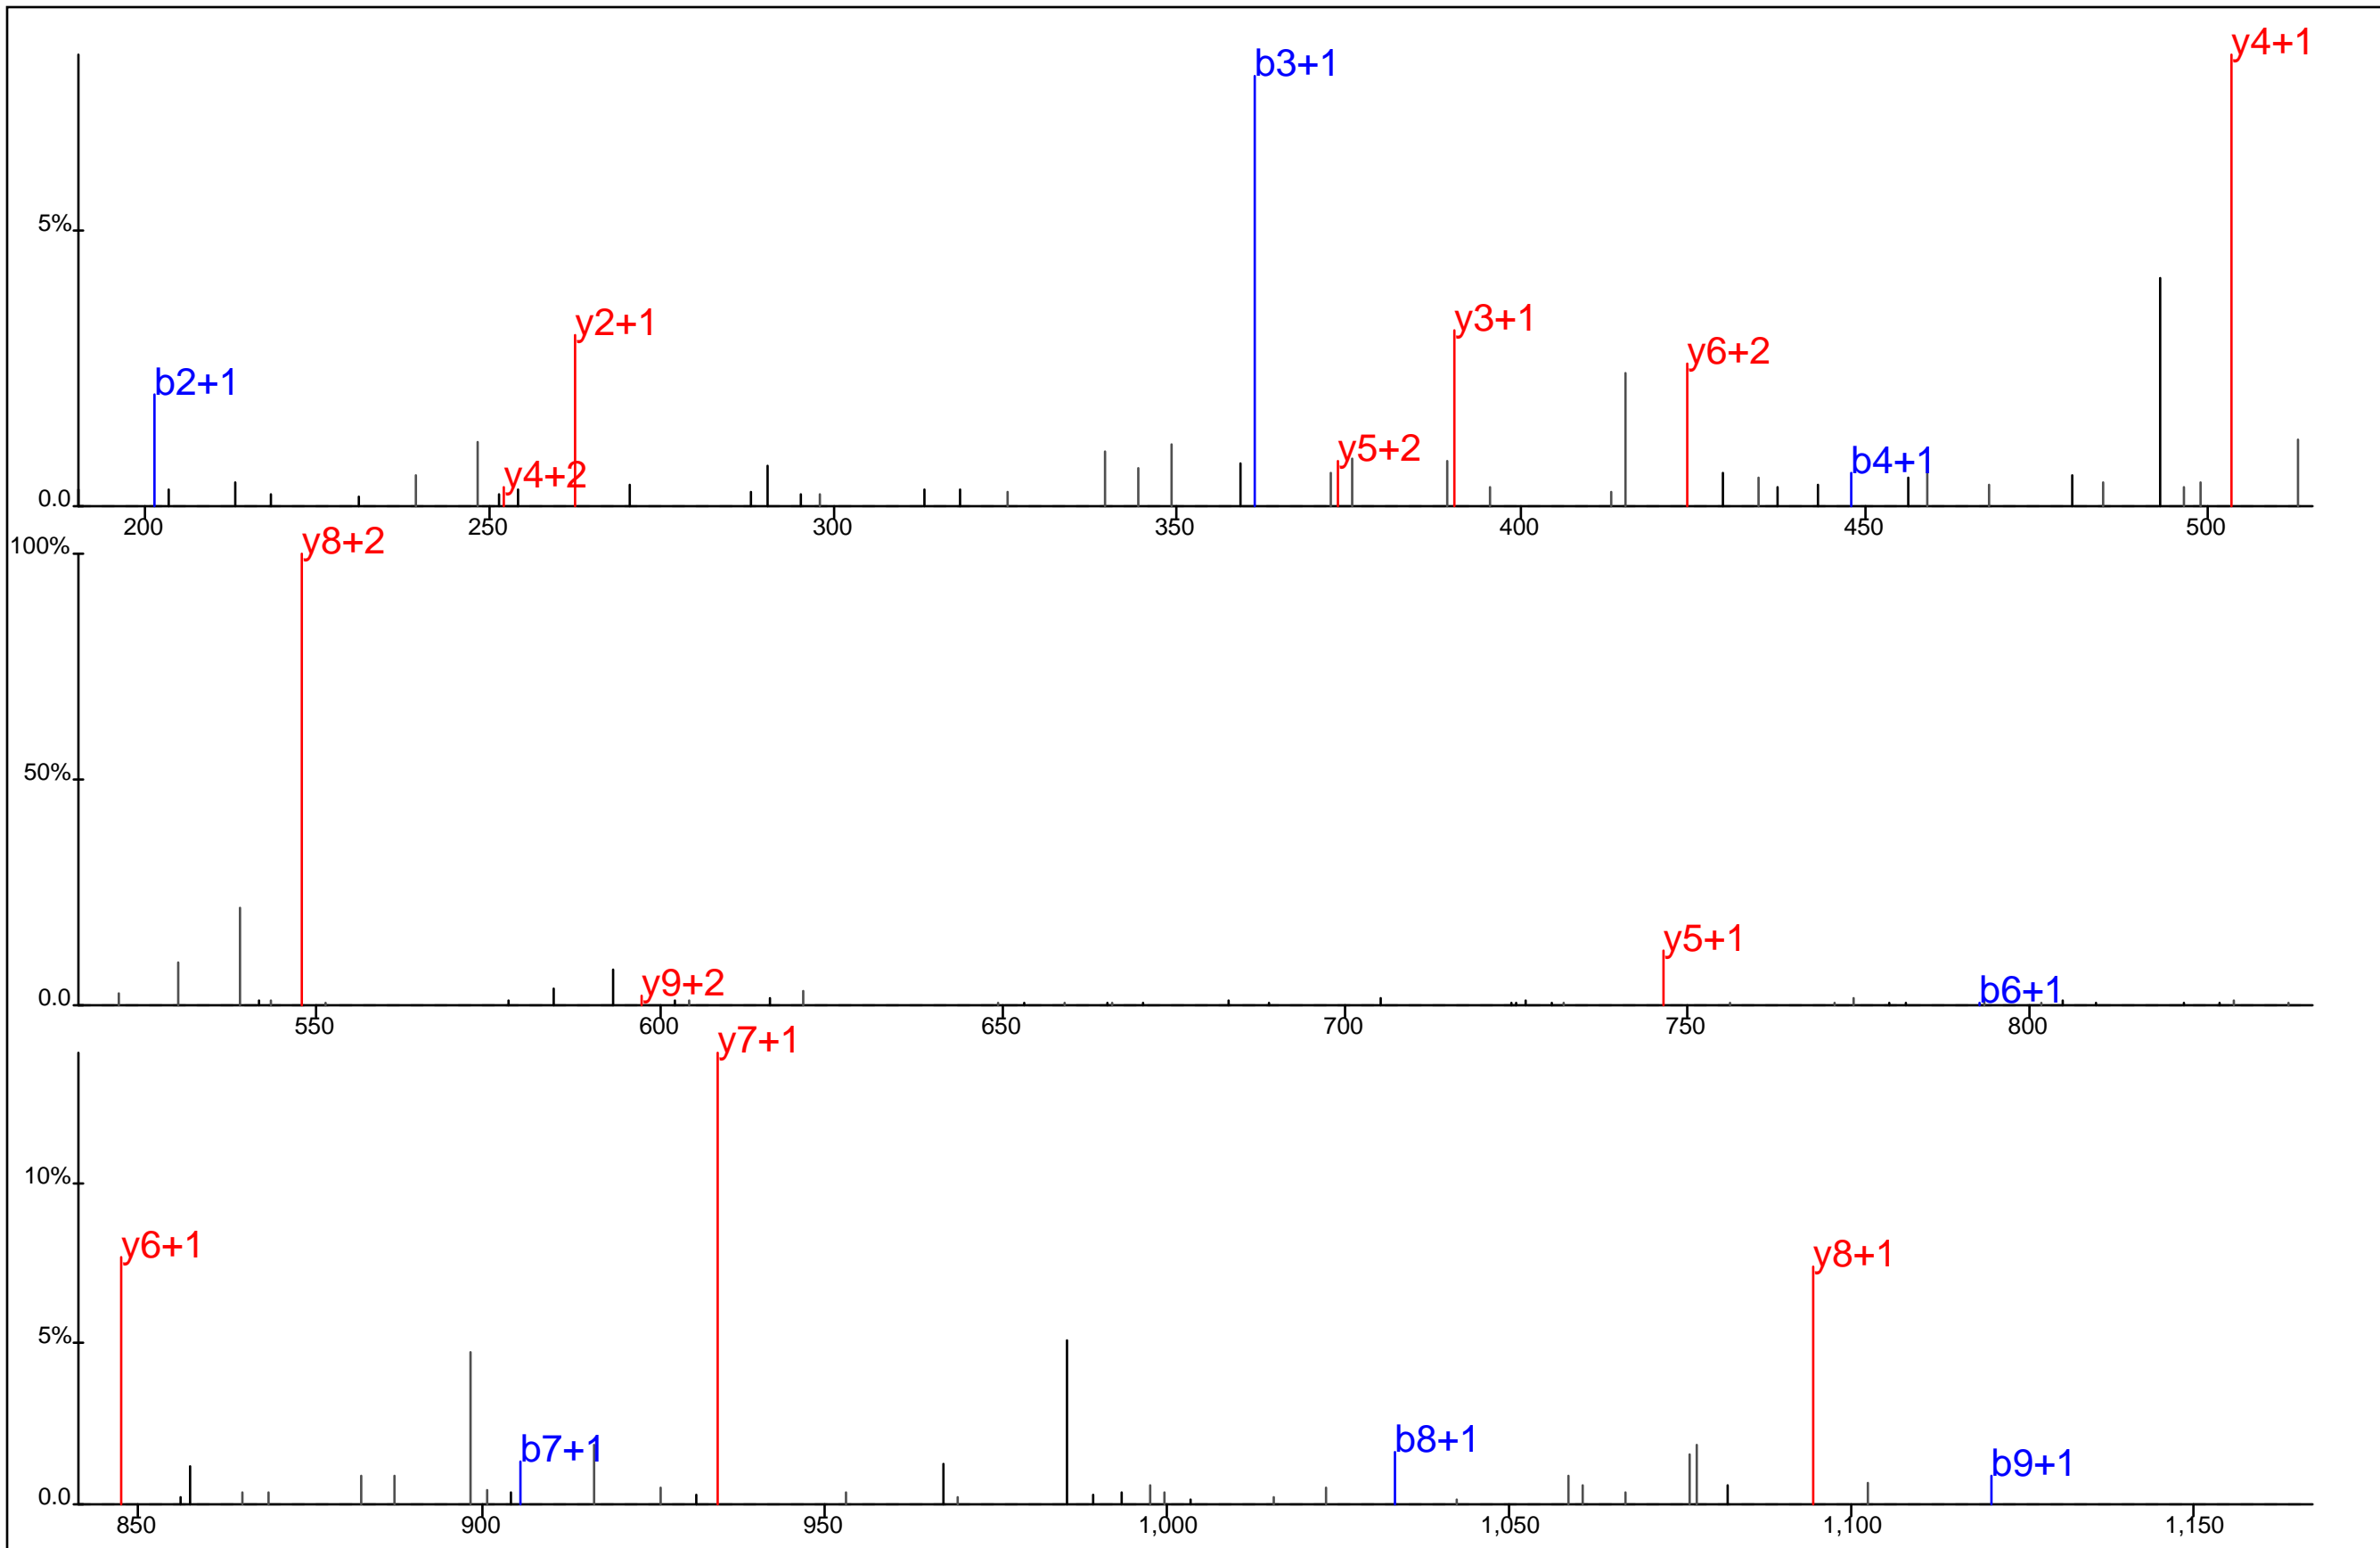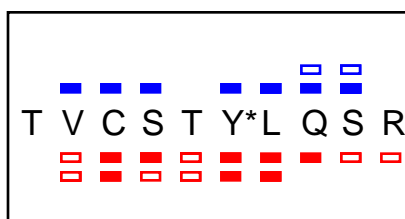

Protein Name: Homeodomain interacting protein kinase 3  
 gi Accession: 0  
 Precursor Mass: 647.7778+2  
 Delta Mass: 1.030 ppm  
 XCorr: 47.34

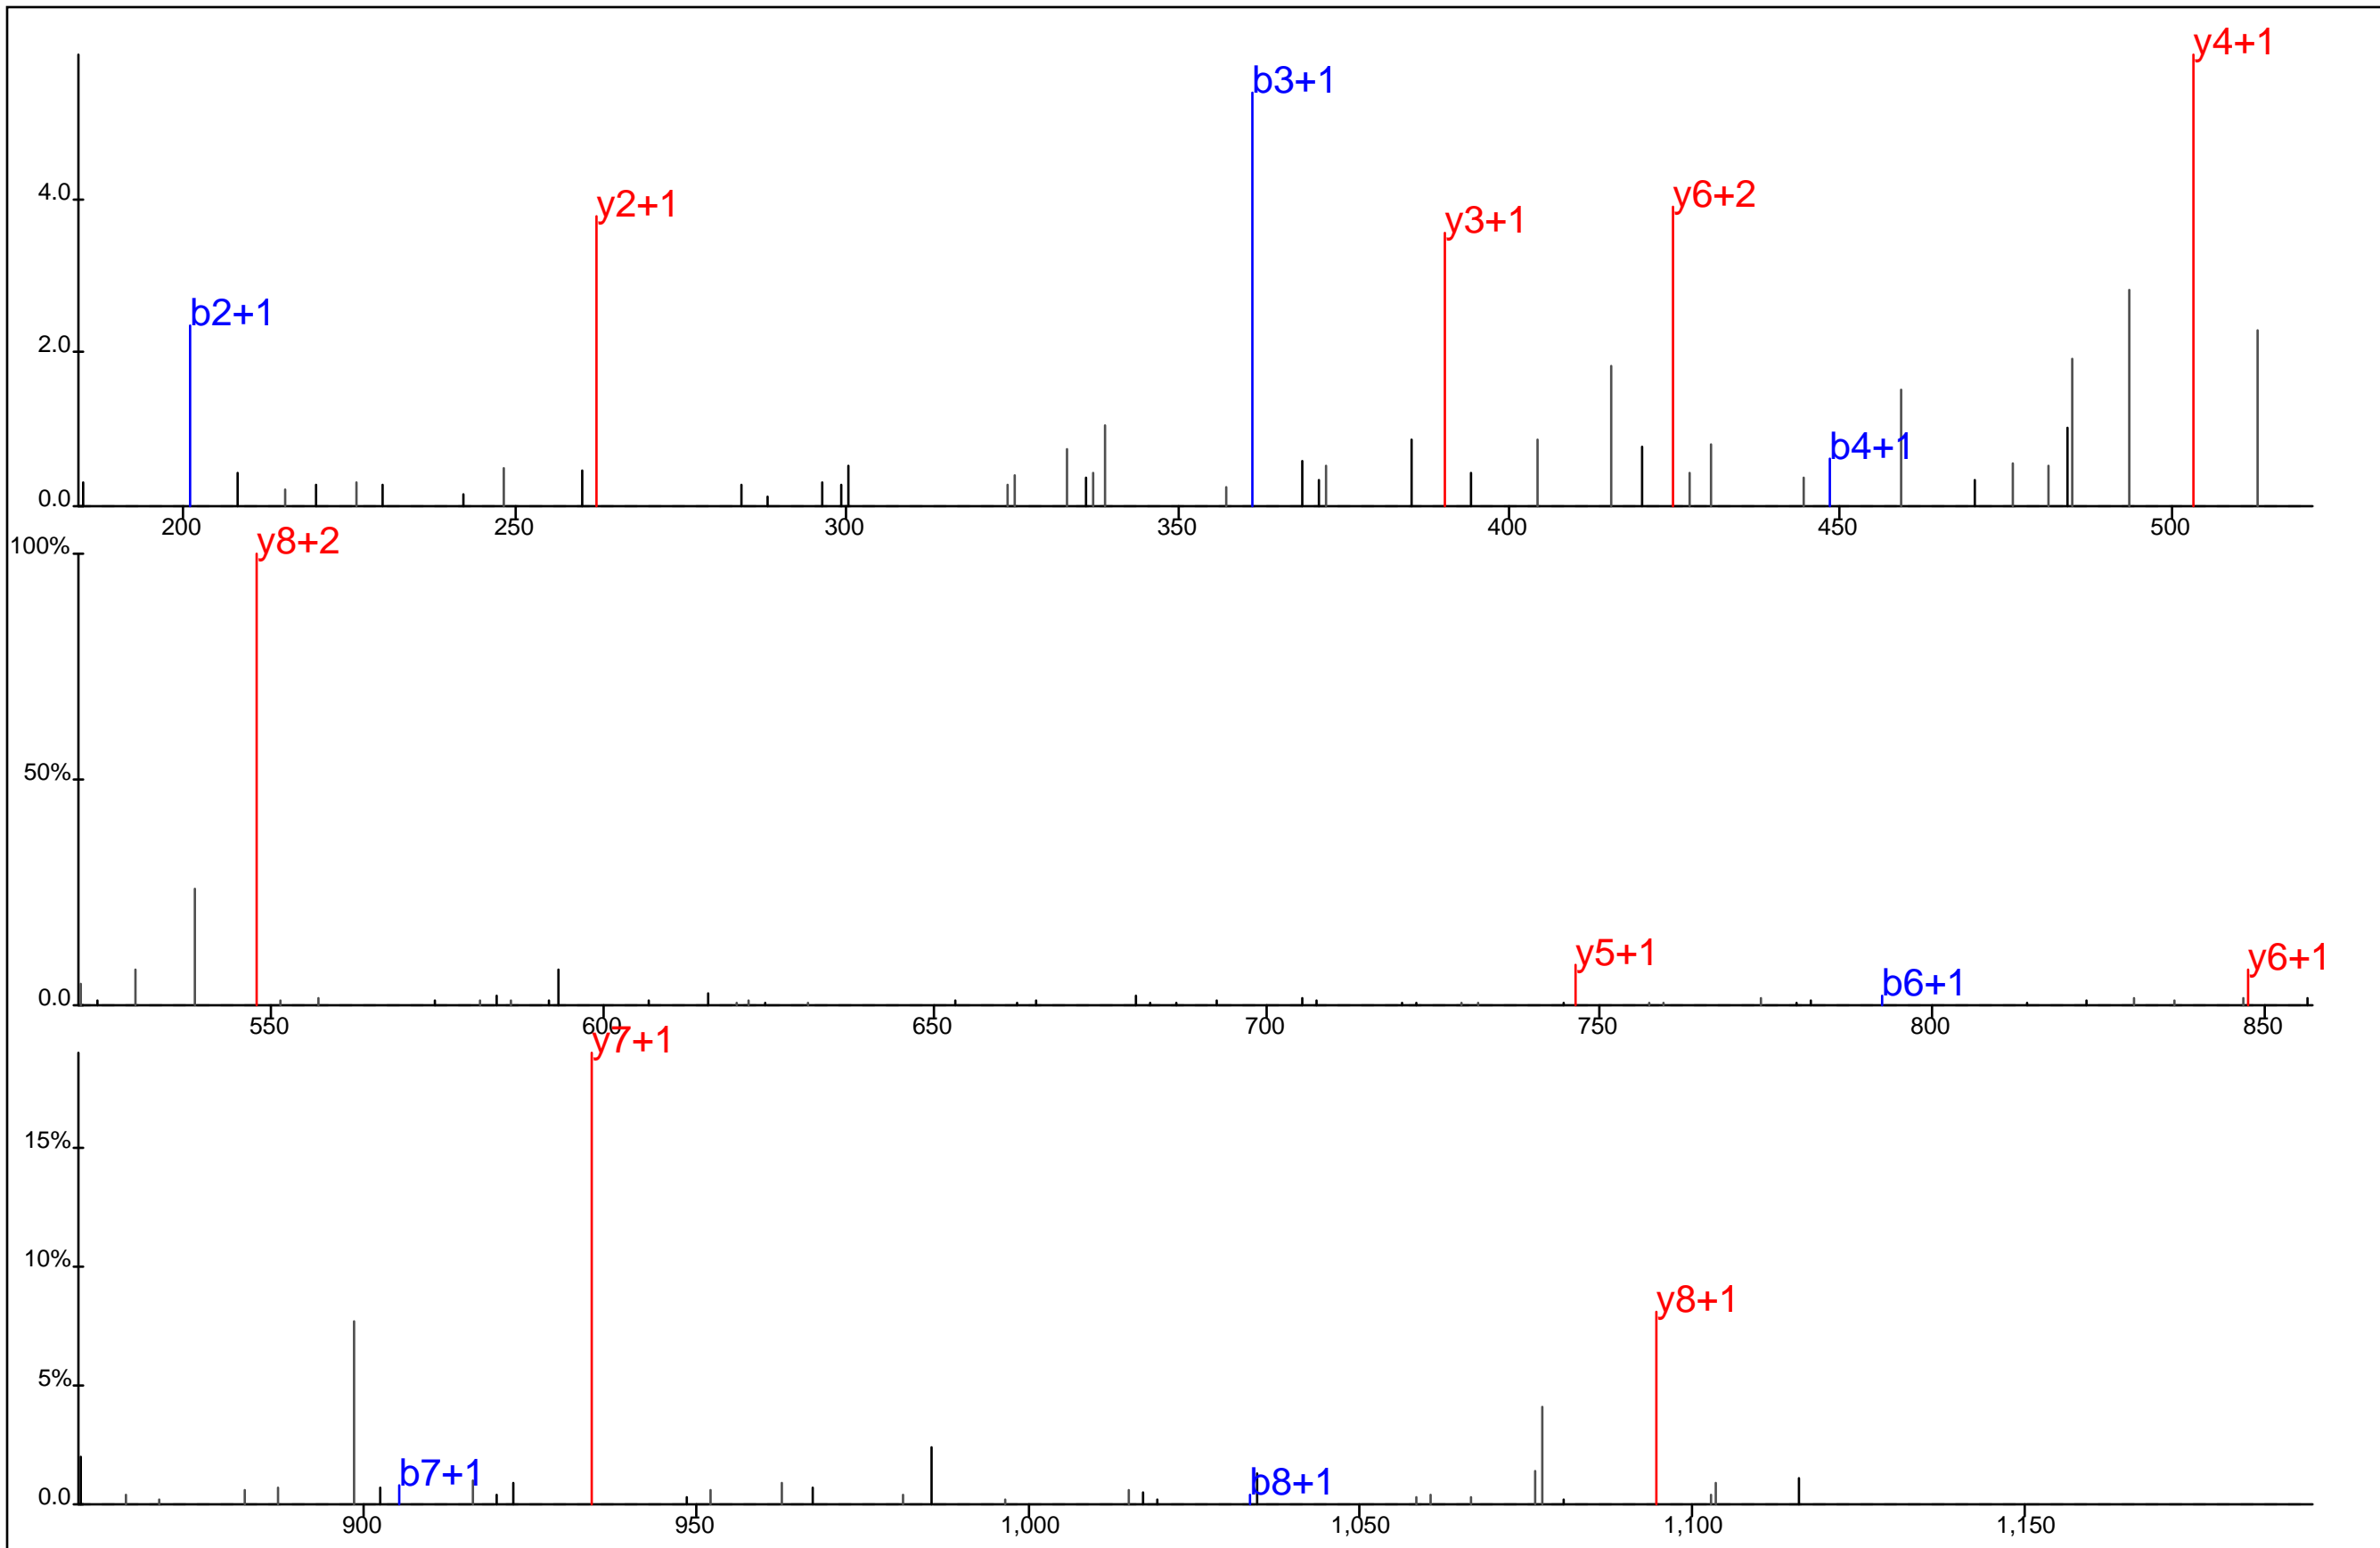

■ ■ ■    ■ ■ ■ ■  
 T V C S T Y\* L Q S R  
■ ■ ■ ■ ■ ■ ■ ■

Protein Name: Homeodomain interacting protein kinase 3  
 gi Accession: 0  
 Precursor Mass: 647.7790+2  
 Delta Mass: 0.762 ppm  
 XCorr: 54.53

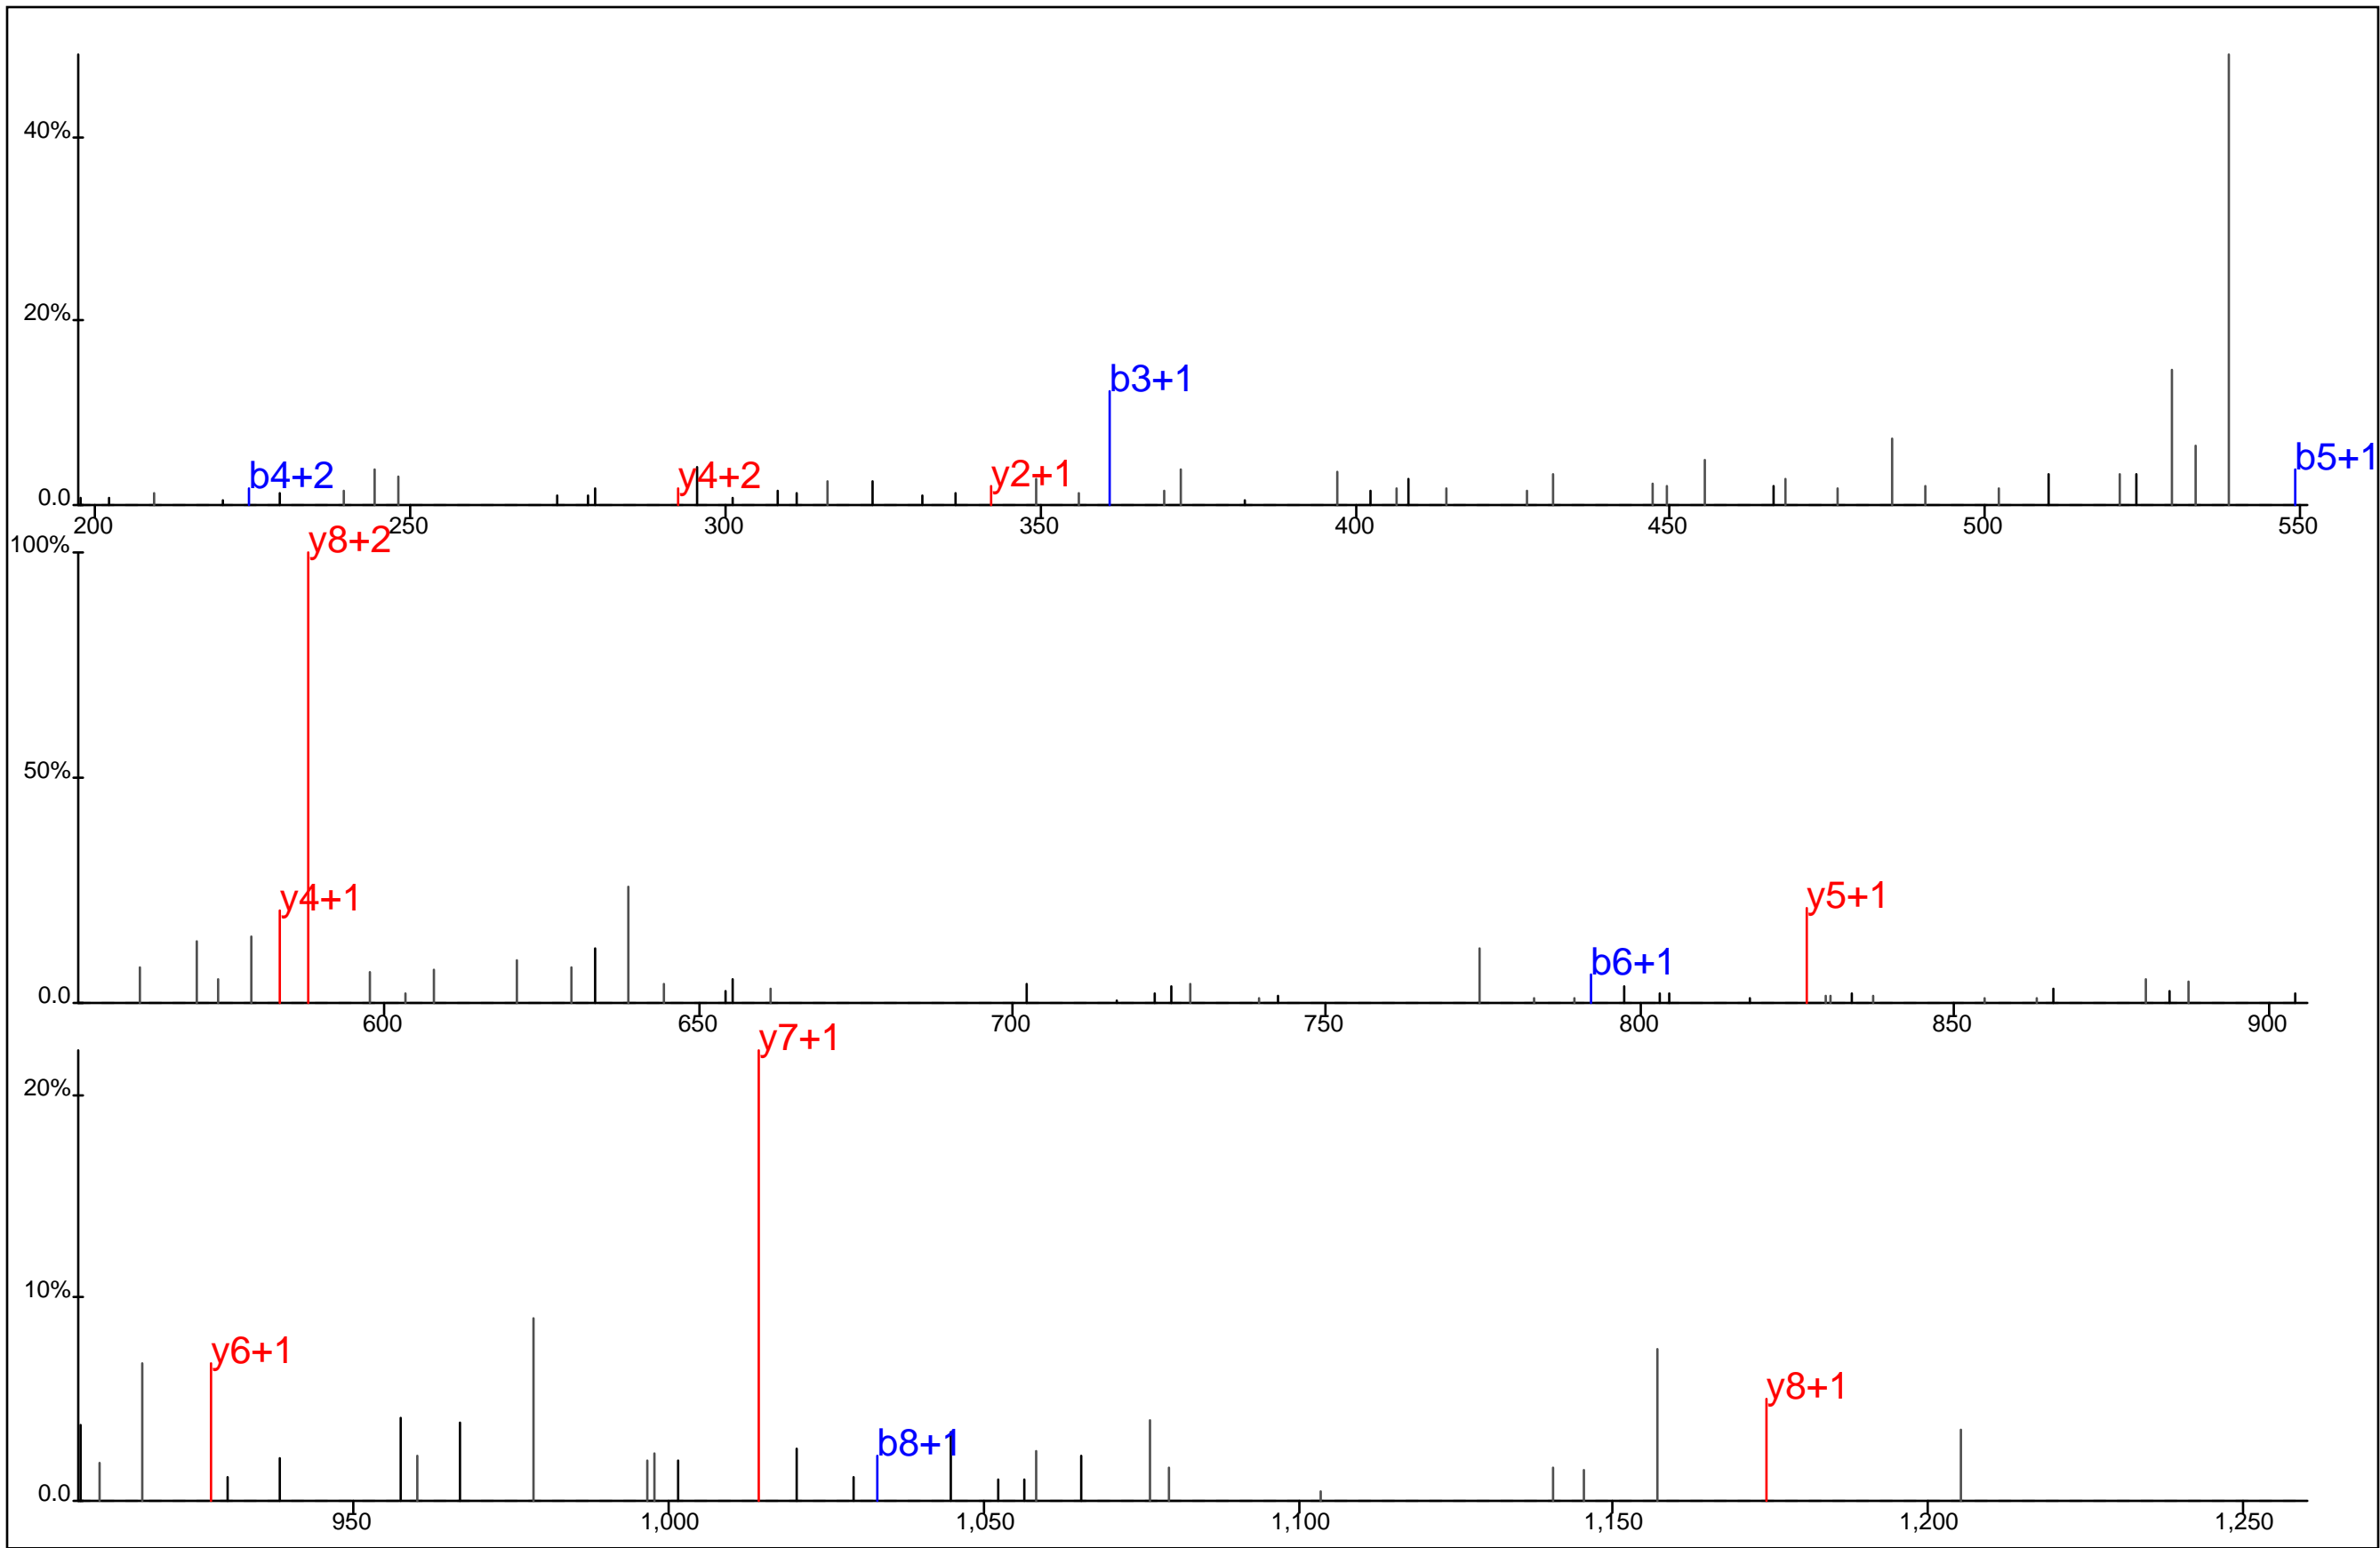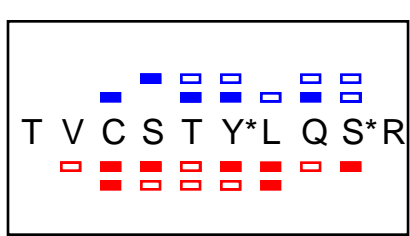

Protein Name: Homeodomain interacting protein kinase 3  
 gi Accession: 0  
 Precursor Mass: 687.7604+2  
 Delta Mass: 1.785 ppm  
 XCorr: 23.21



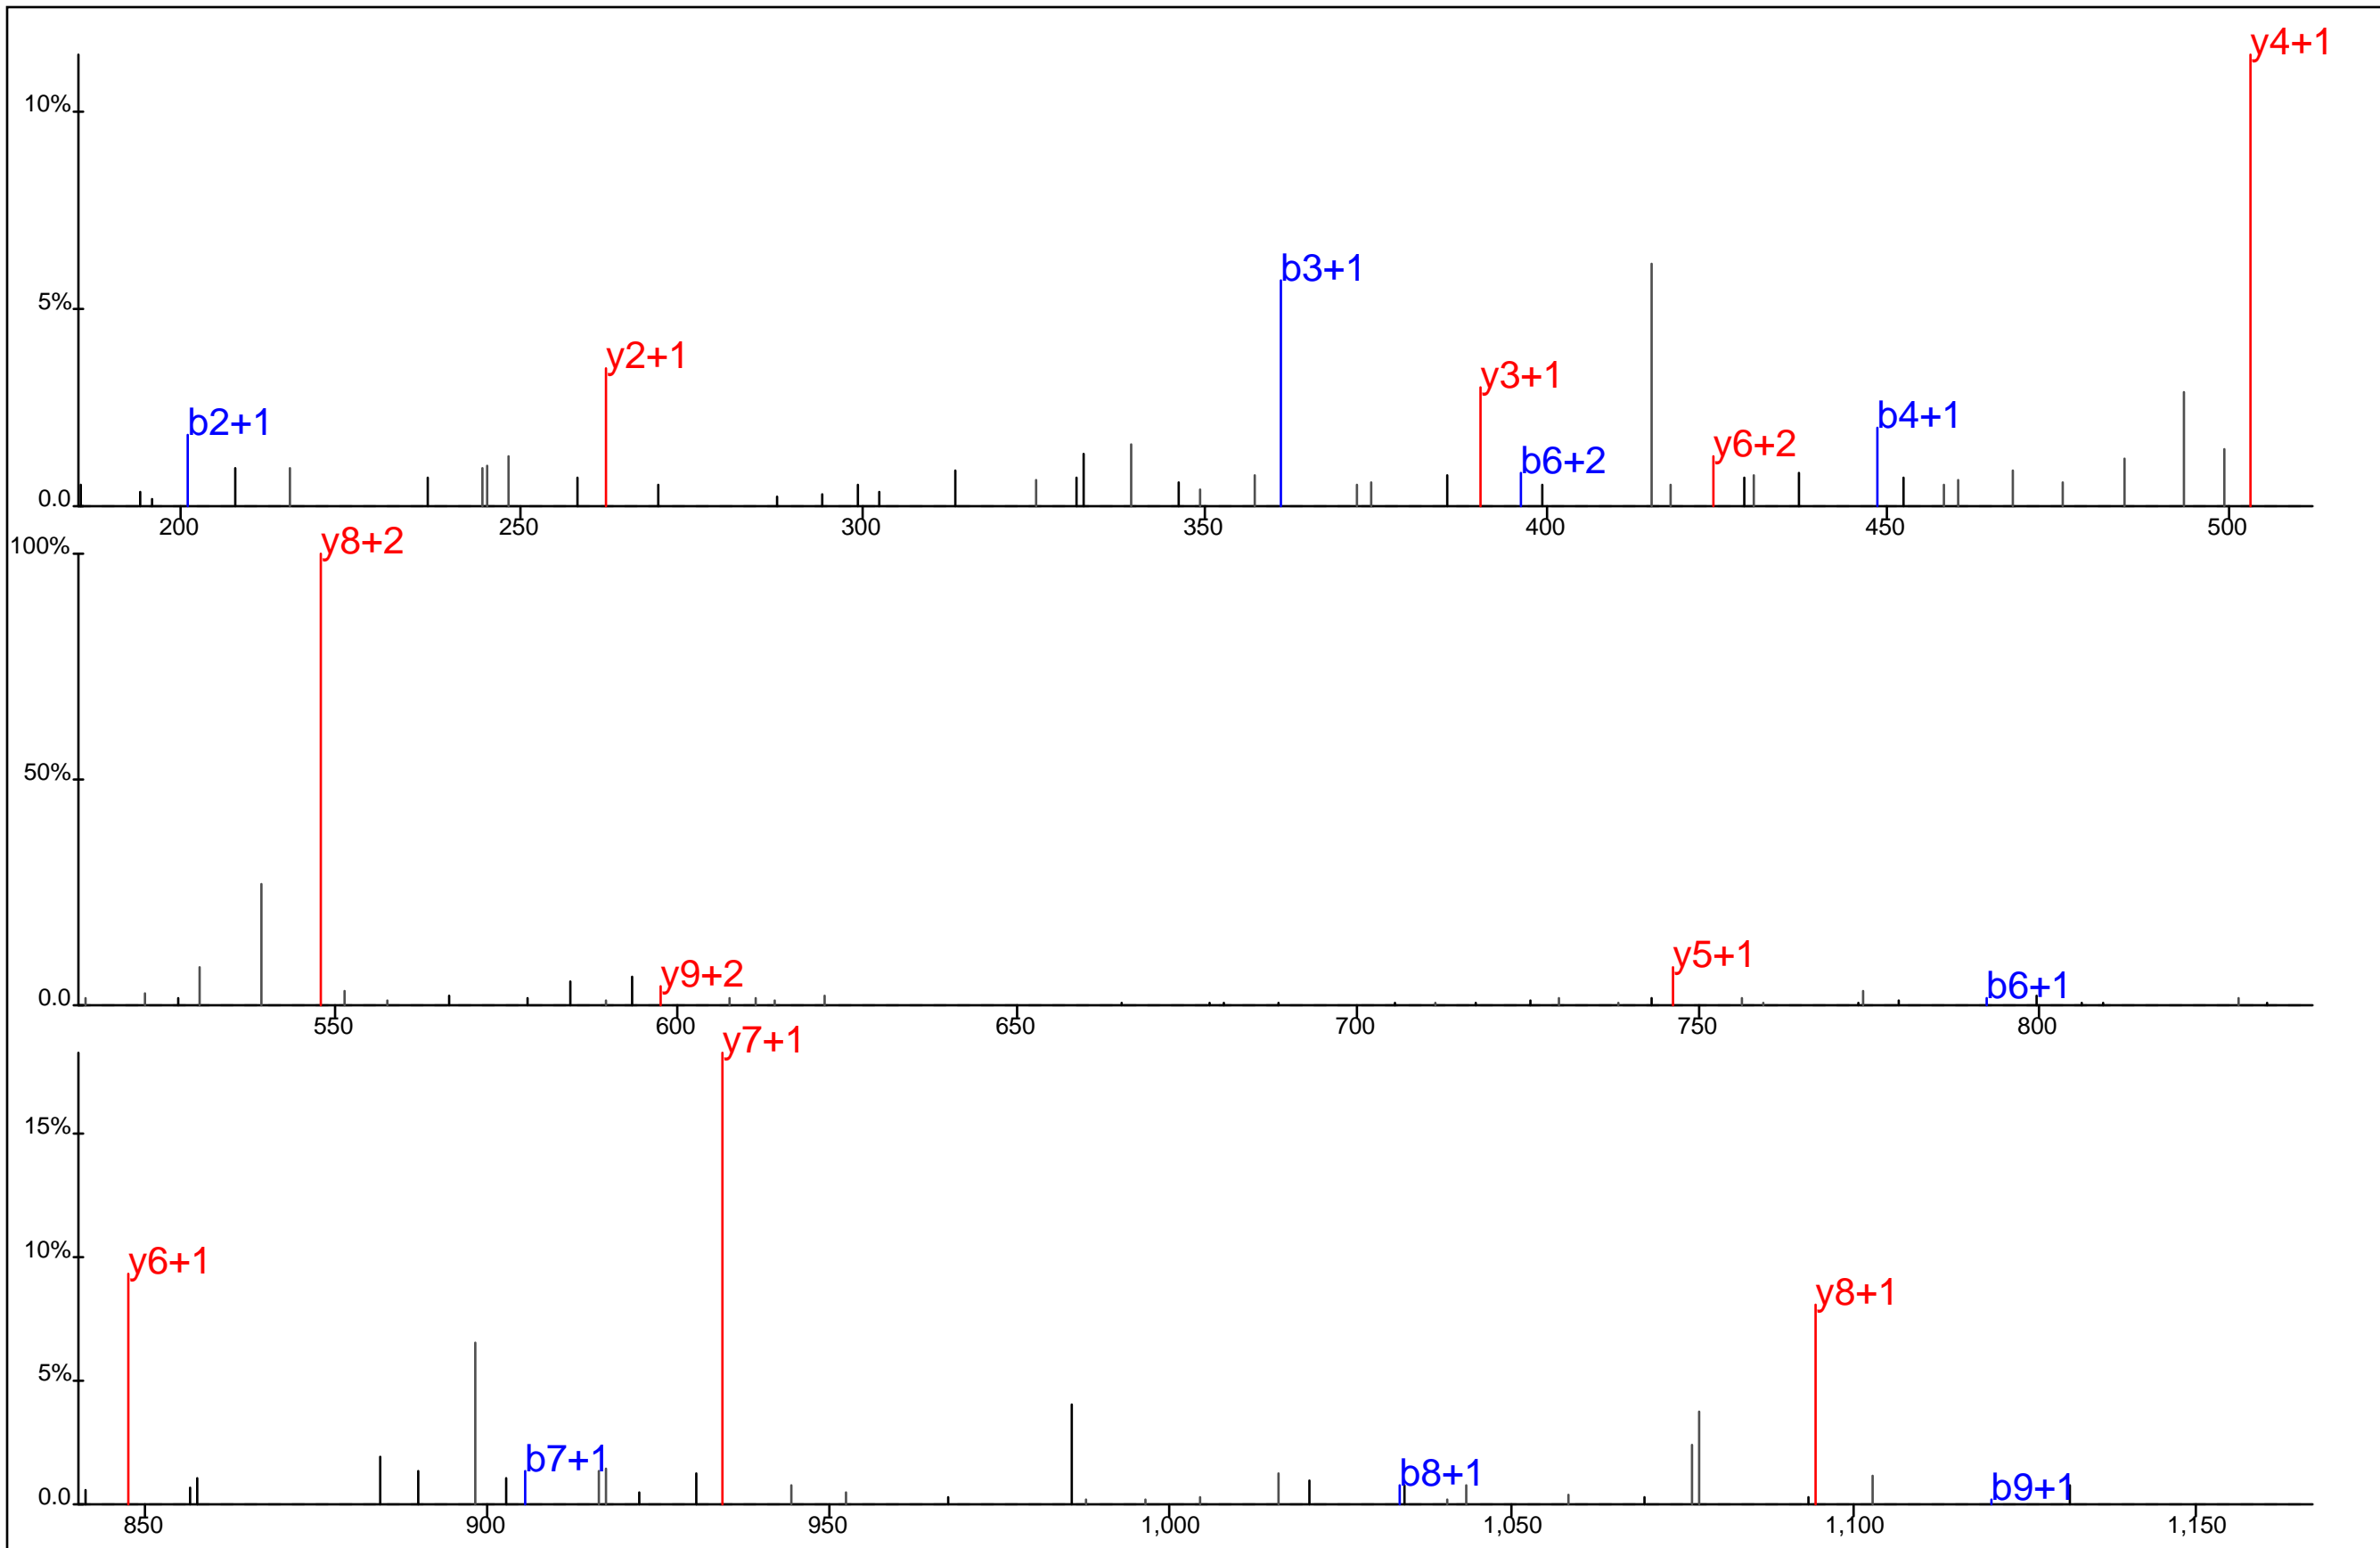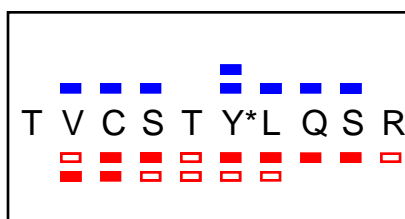

Protein Name: Homeodomain interacting protein kinase 3  
 gi Accession: 0  
 Precursor Mass: 647.7793+2  
 Delta Mass: 1.233 ppm  
 XCorr: 47.7

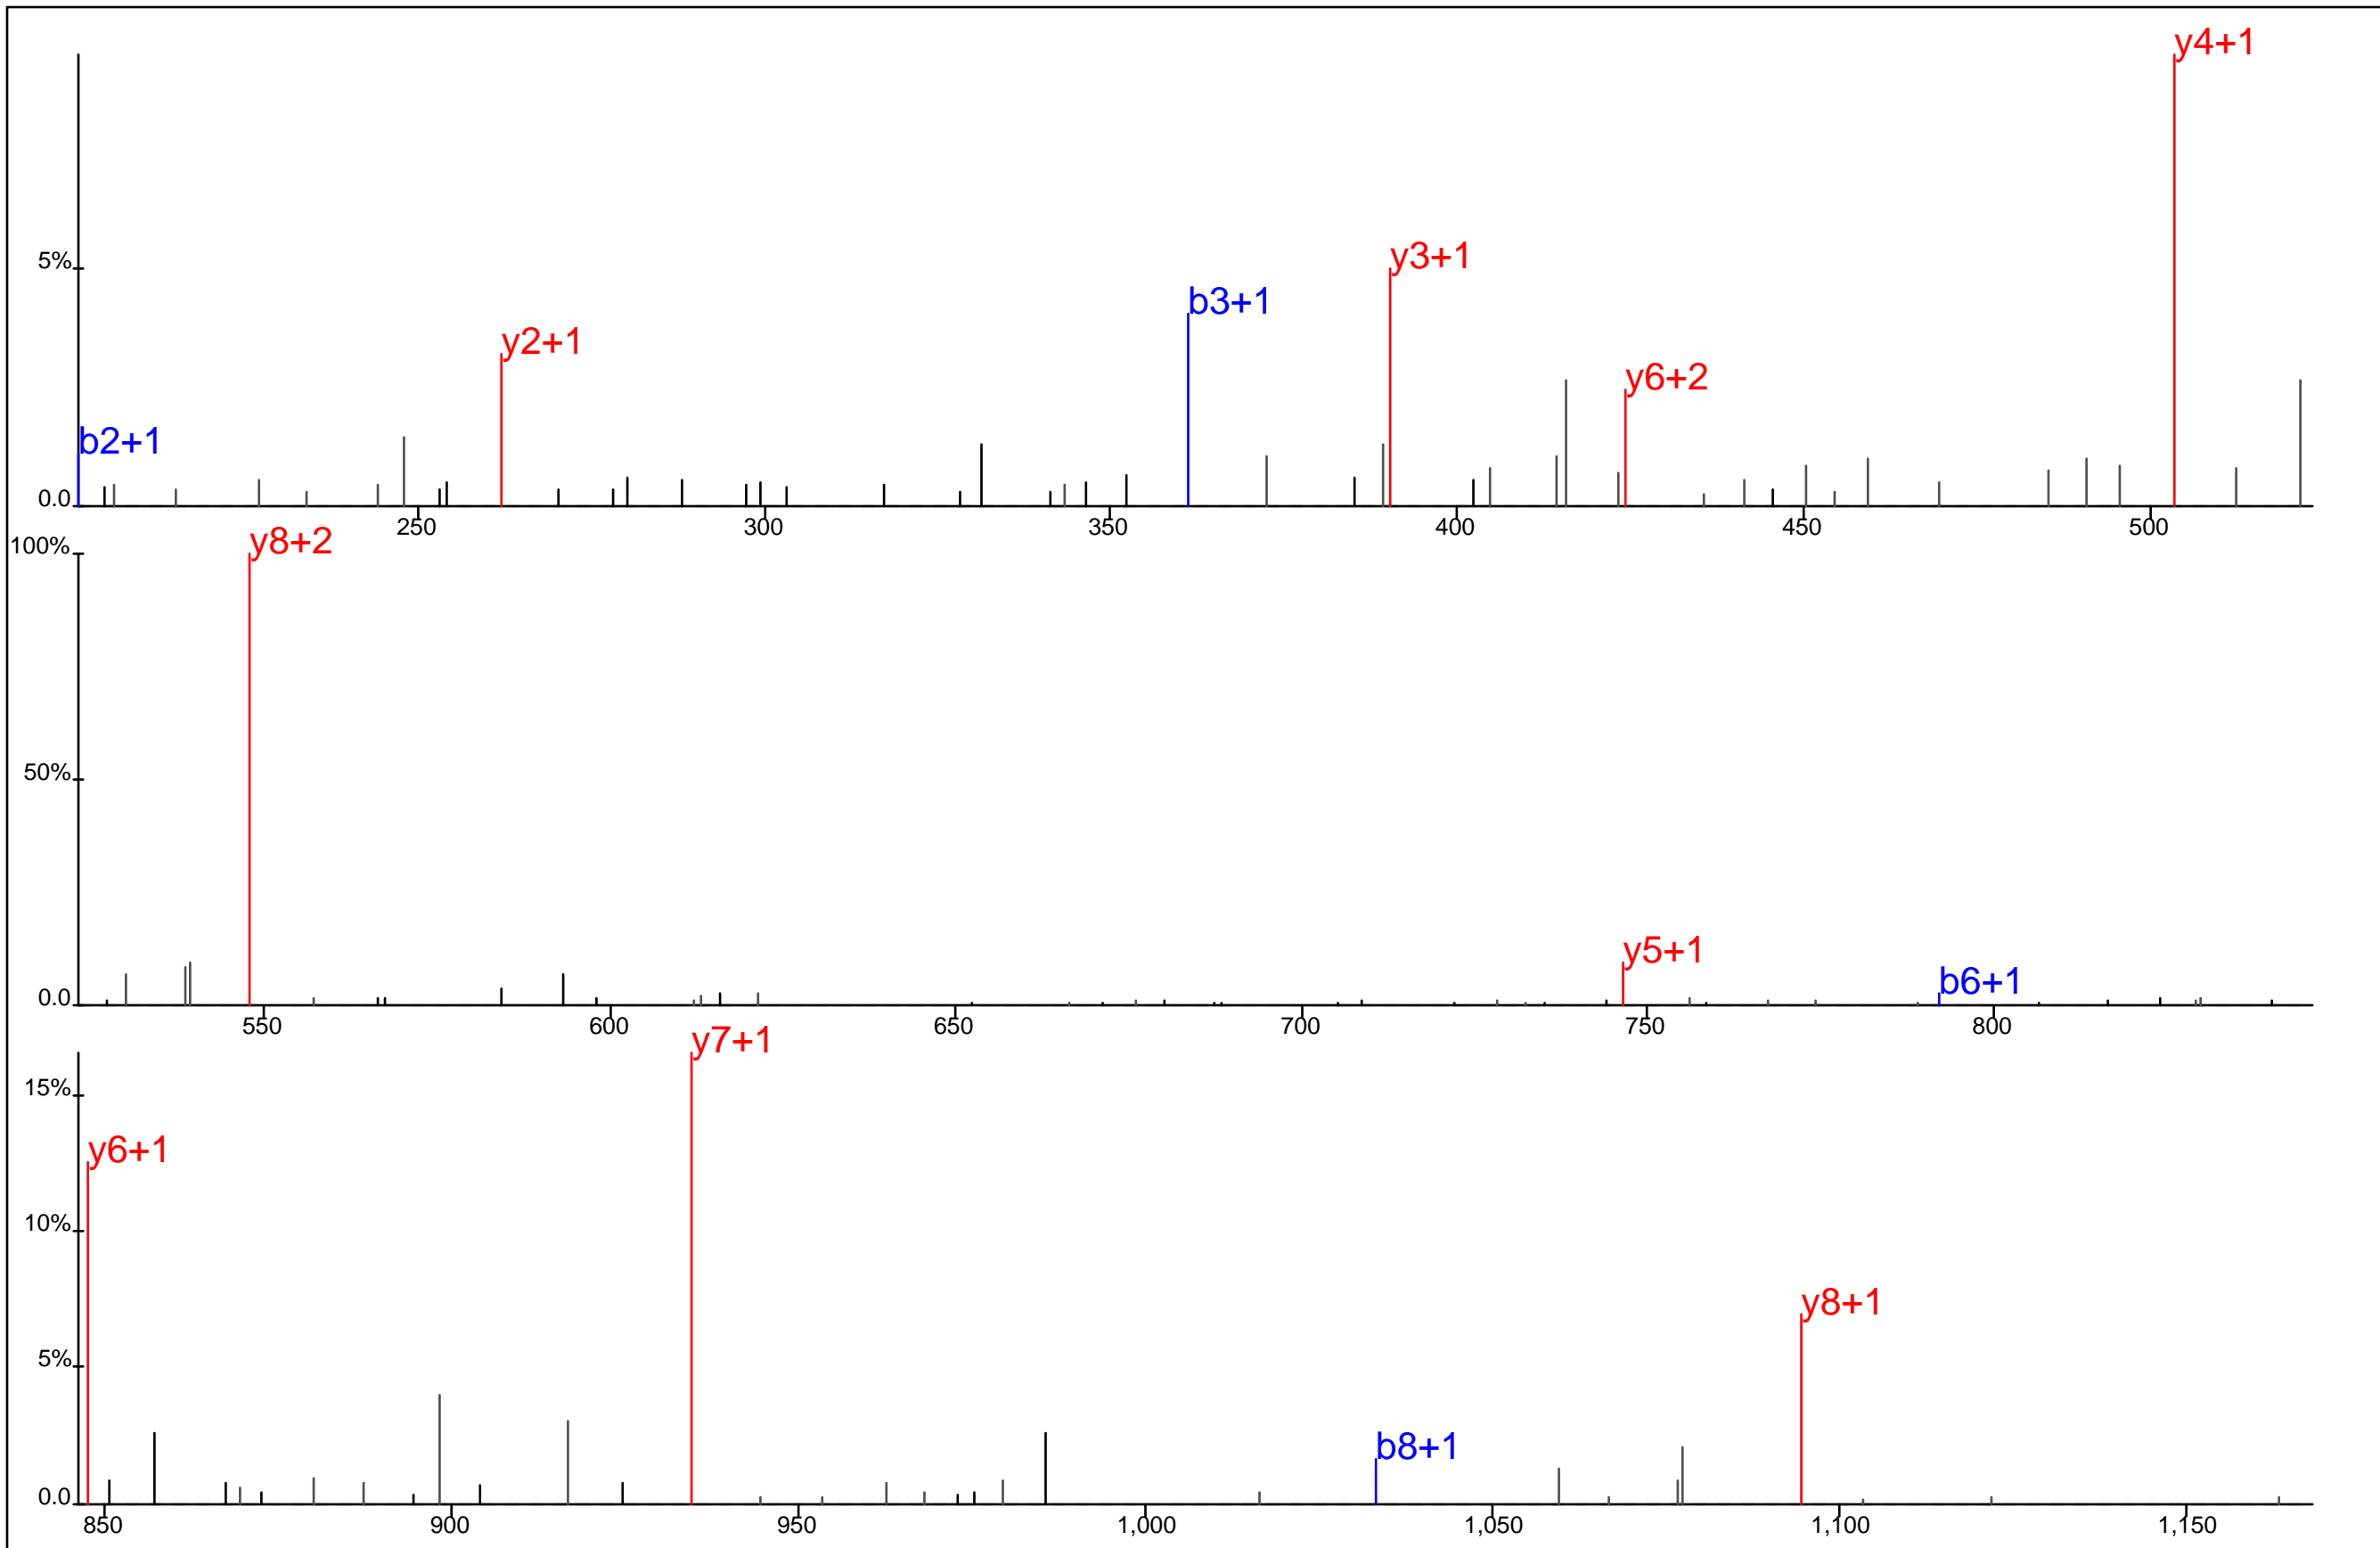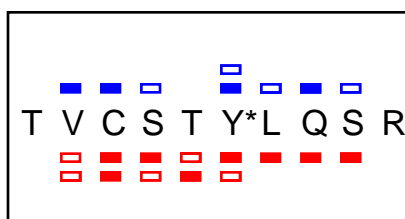

Protein Name: Homeodomain interacting protein kinase 3  
 gi Accession: 0  
 Precursor Mass: 647.7787+2  
 Delta Mass: 0.385 ppm  
 XCorr: 54.07

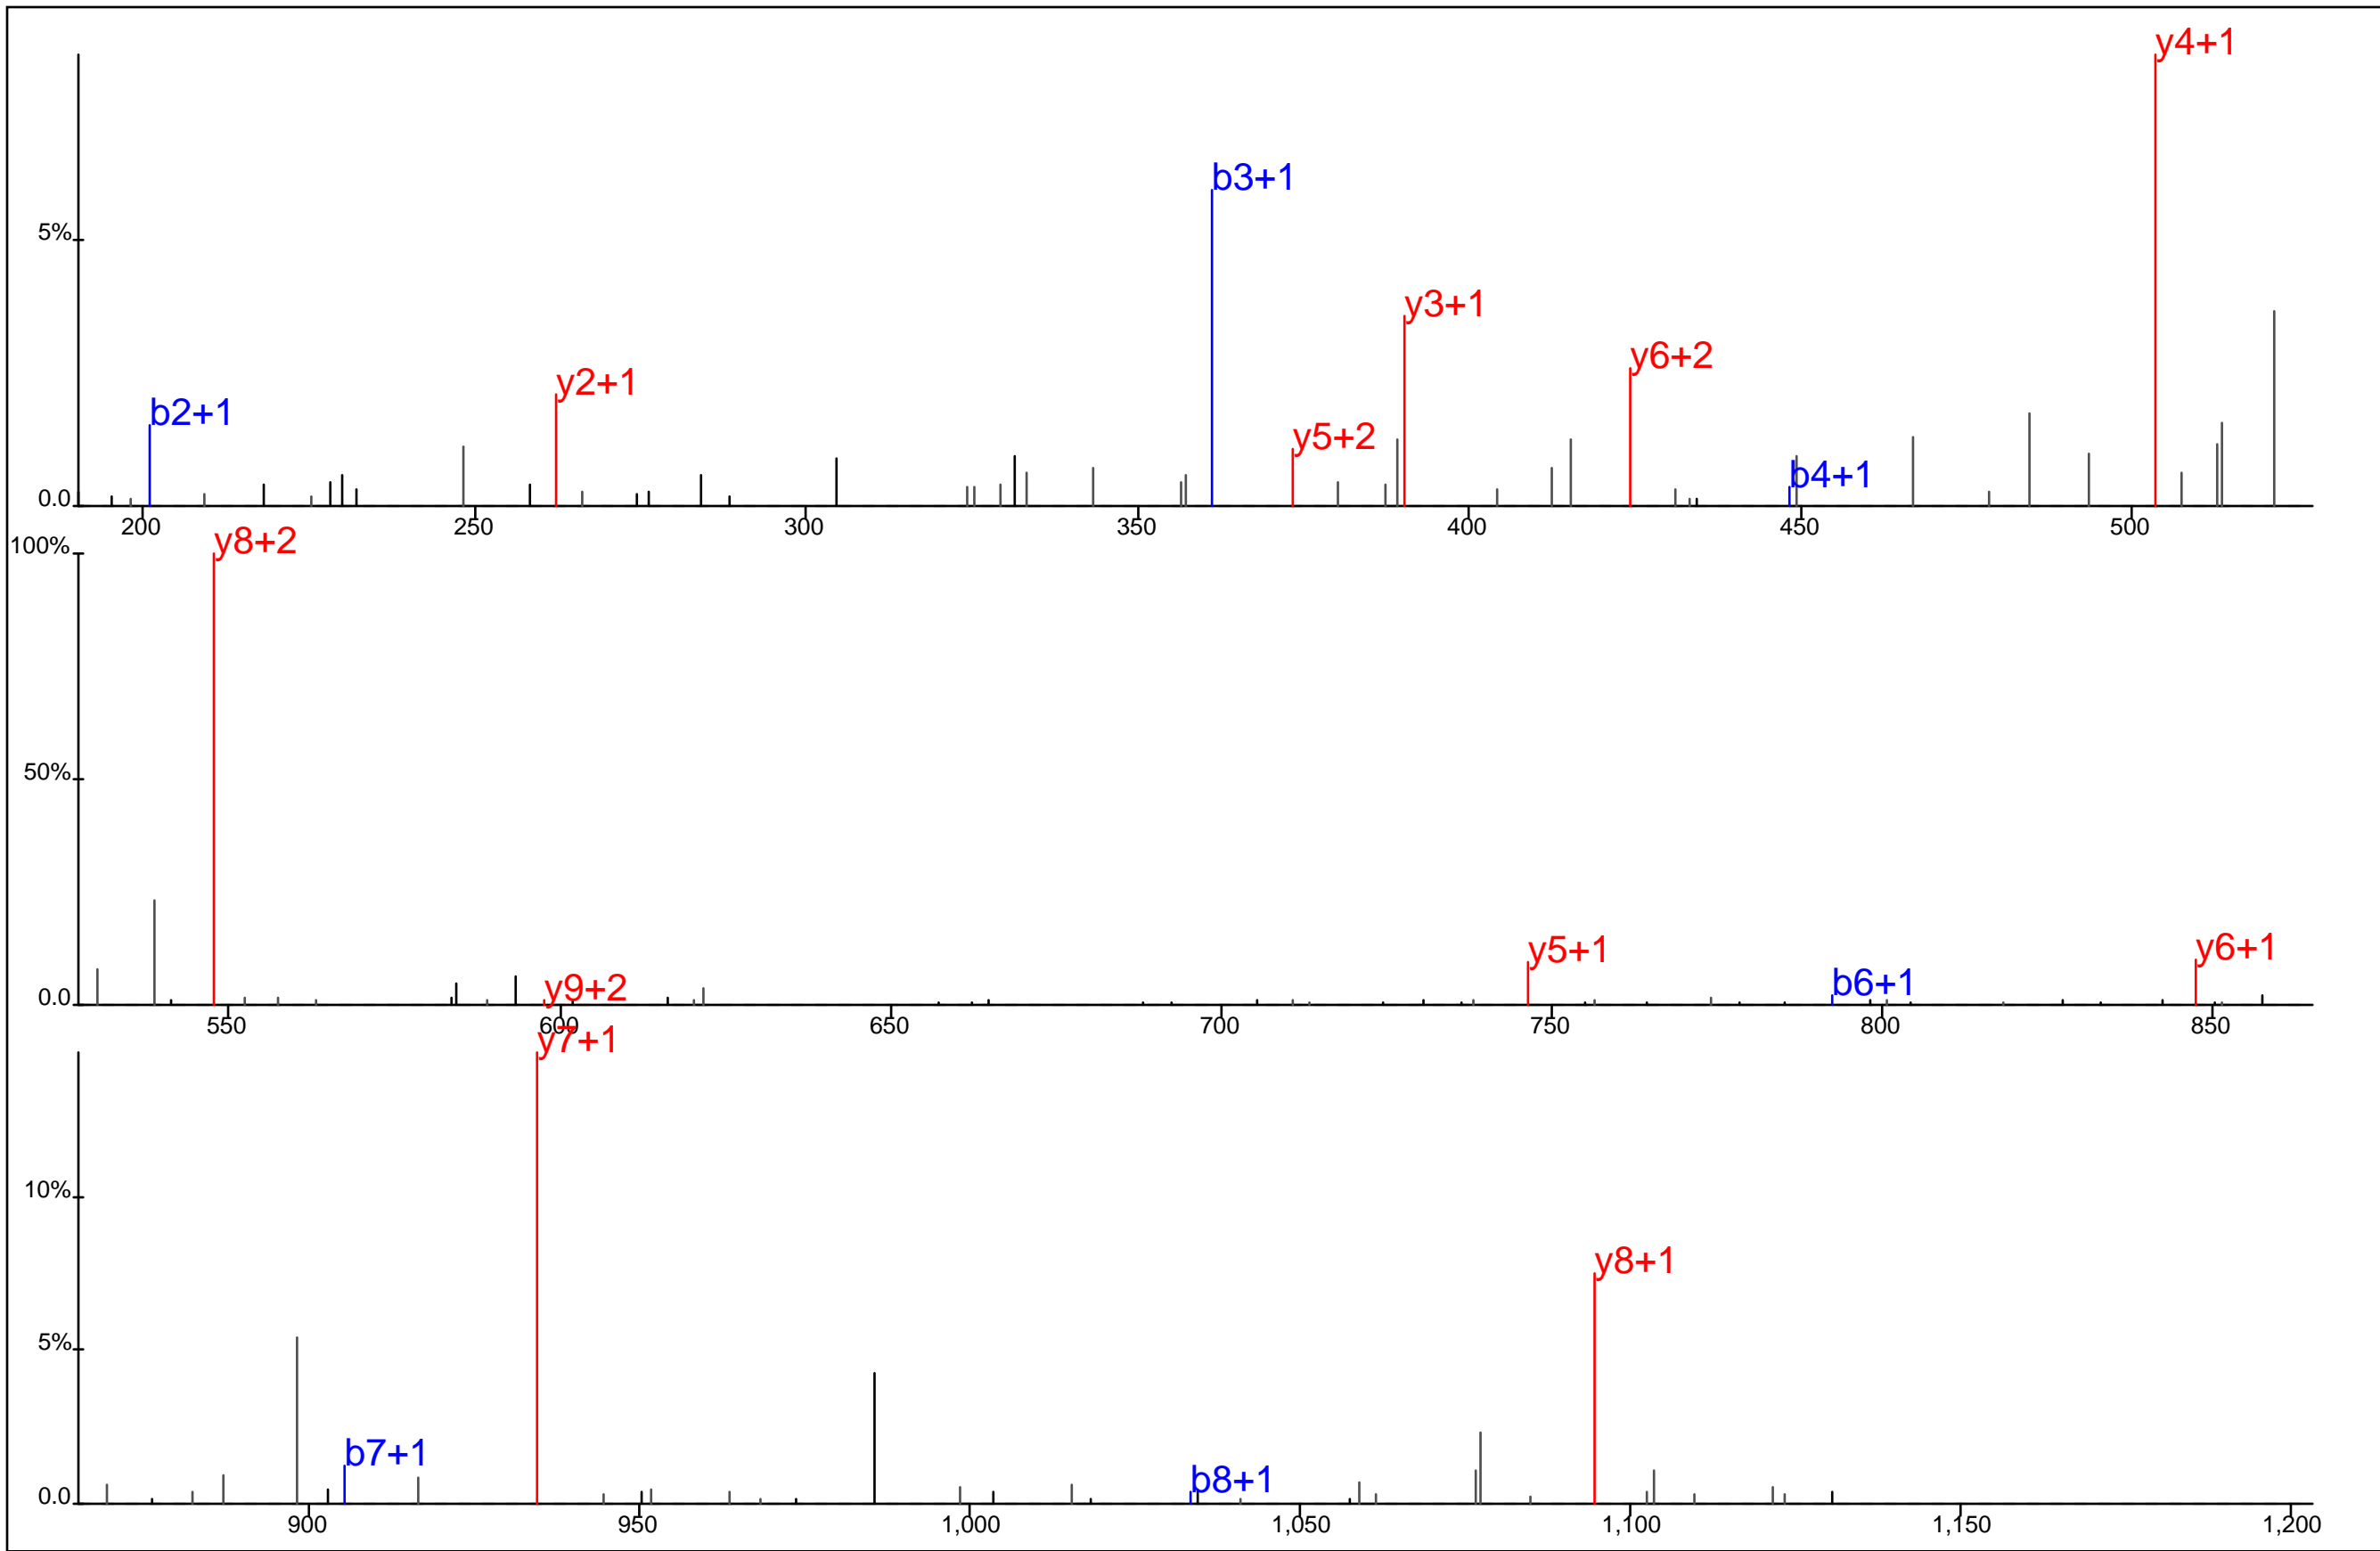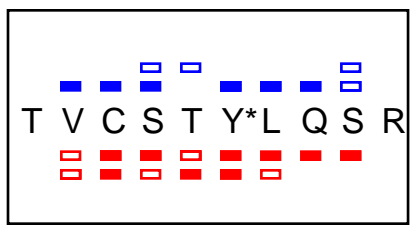

Protein Name: Homeodomain interacting protein kinase 3  
 gi Accession: 0  
 Precursor Mass: 647.7782+2  
 Delta Mass: 0.465 ppm  
 XCorr: 45.68

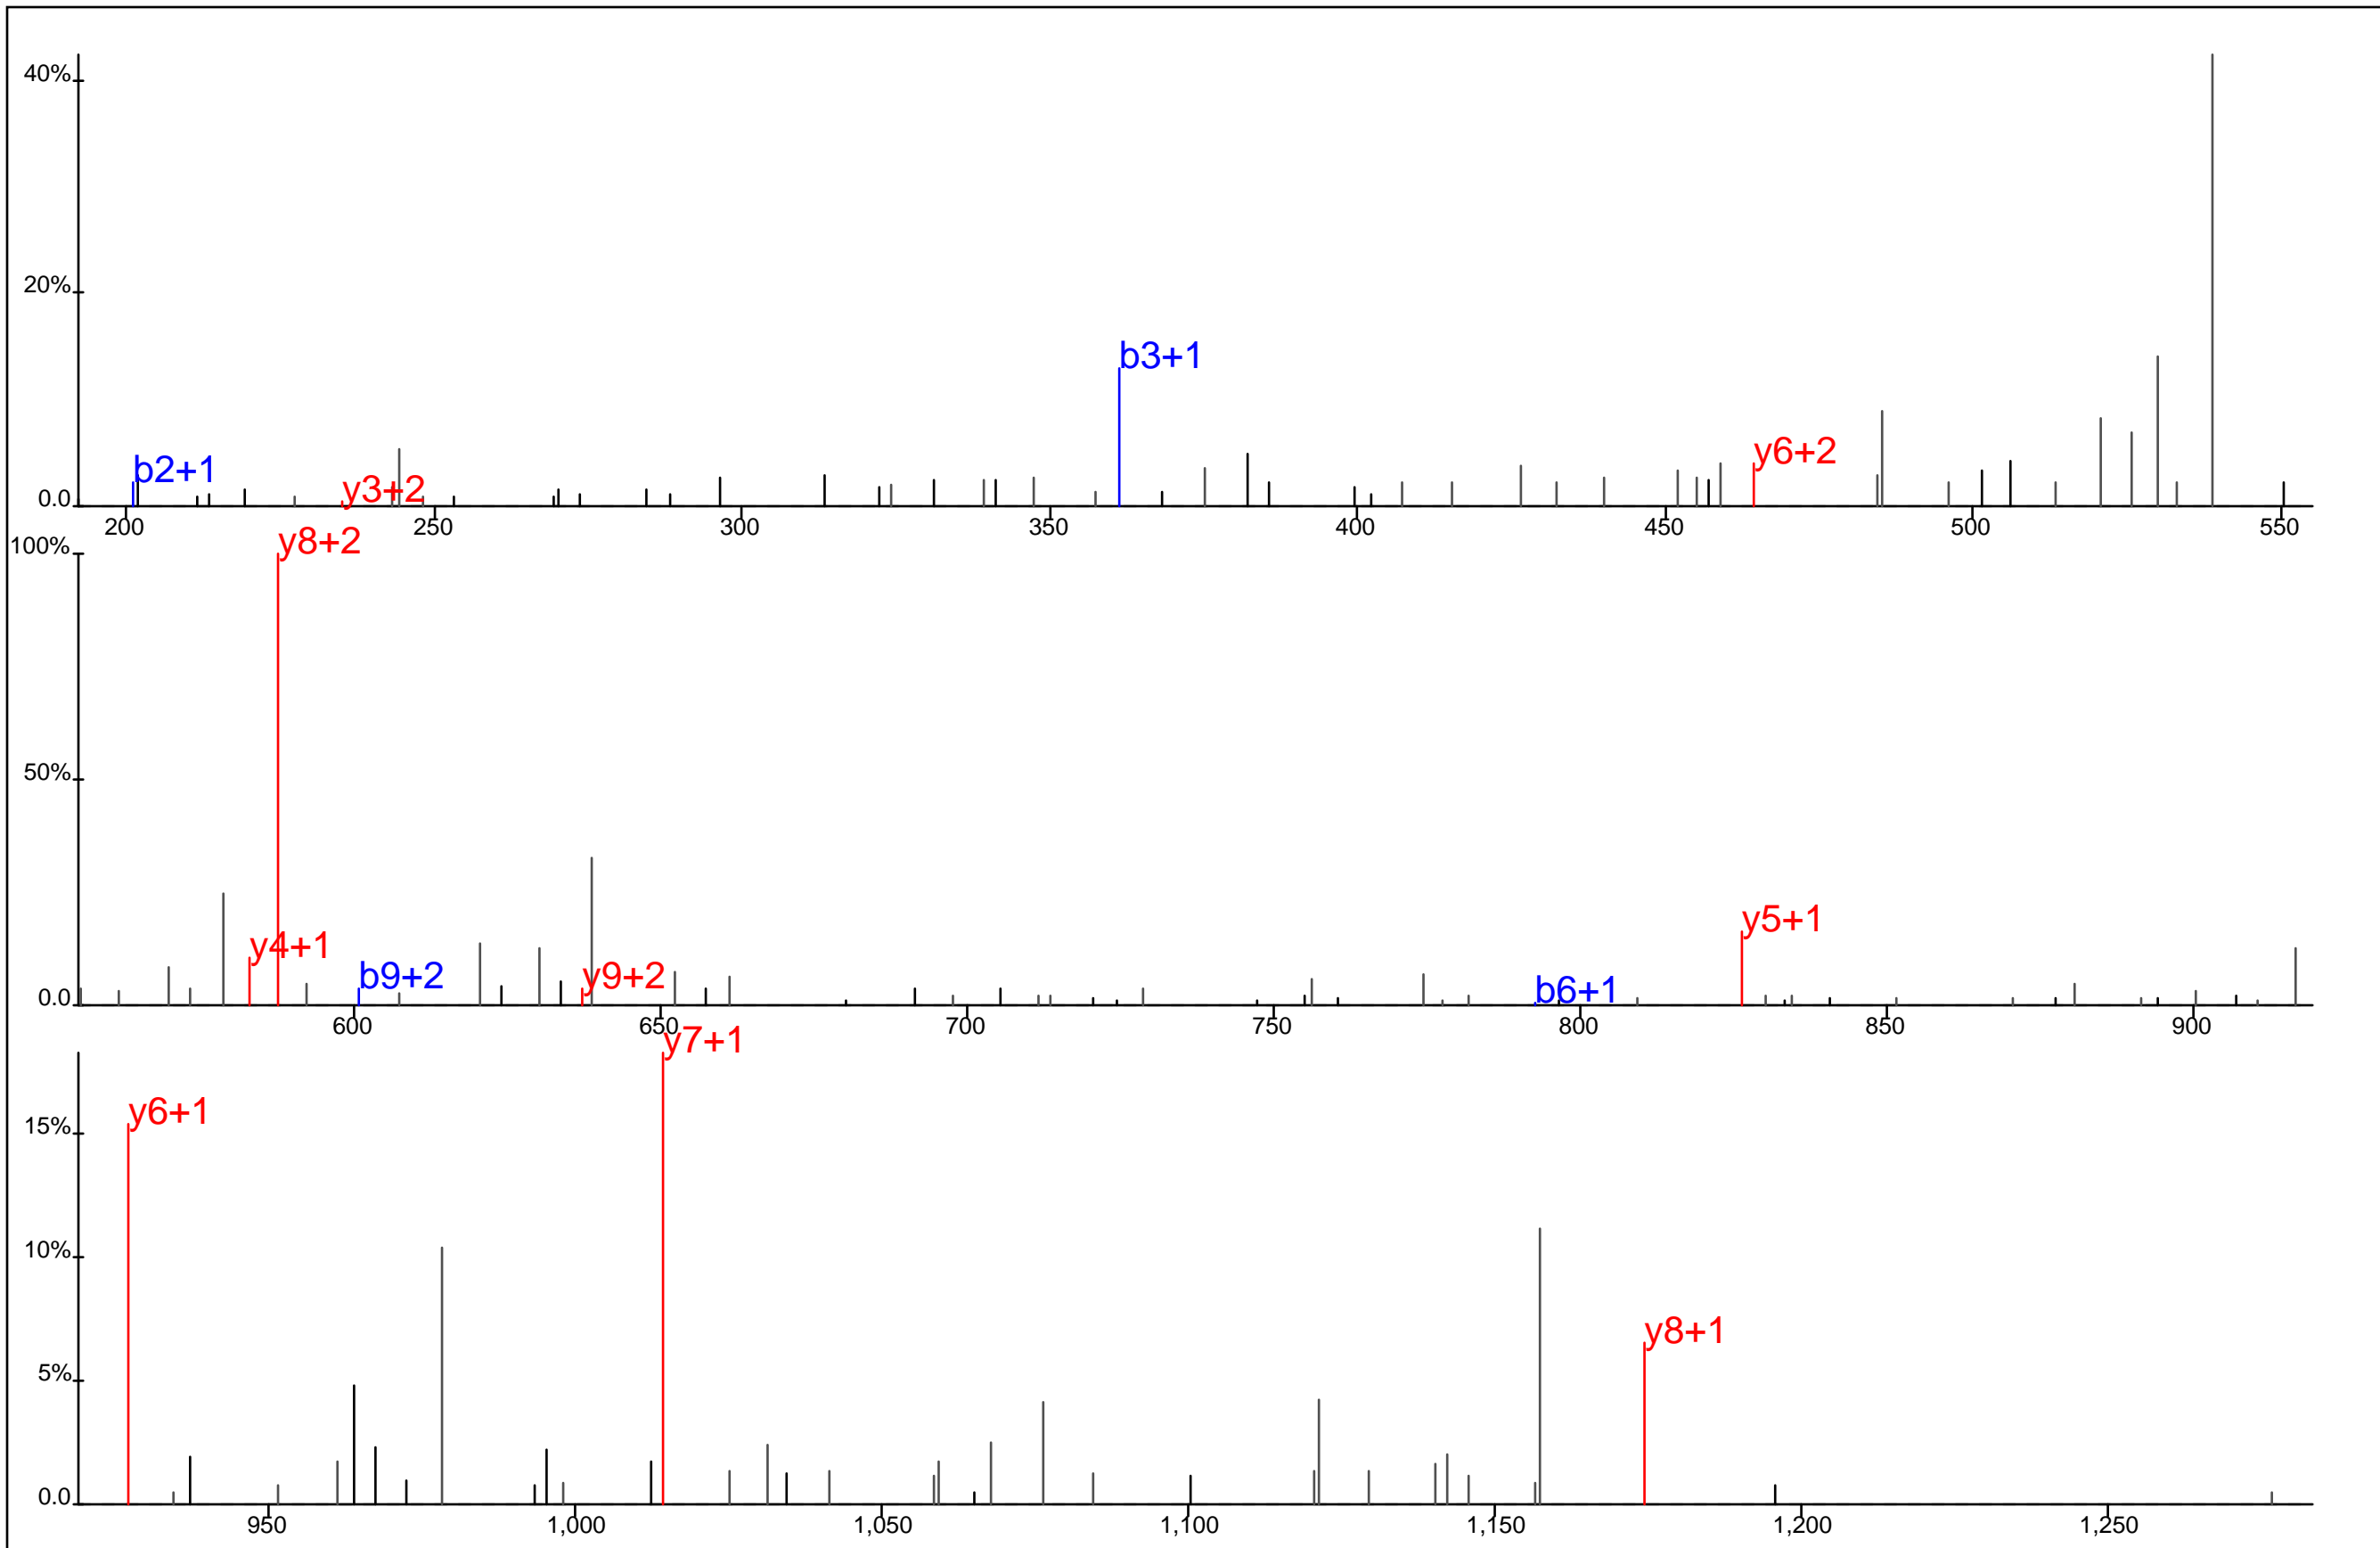

T V C S T Y\*L Q S\*R

Protein Name: Homeodomain interacting protein kinase 3  
 gi Accession: 0  
 Precursor Mass: 687.7609+2  
 Delta Mass: 1.075 ppm  
 XCorr: 21.02

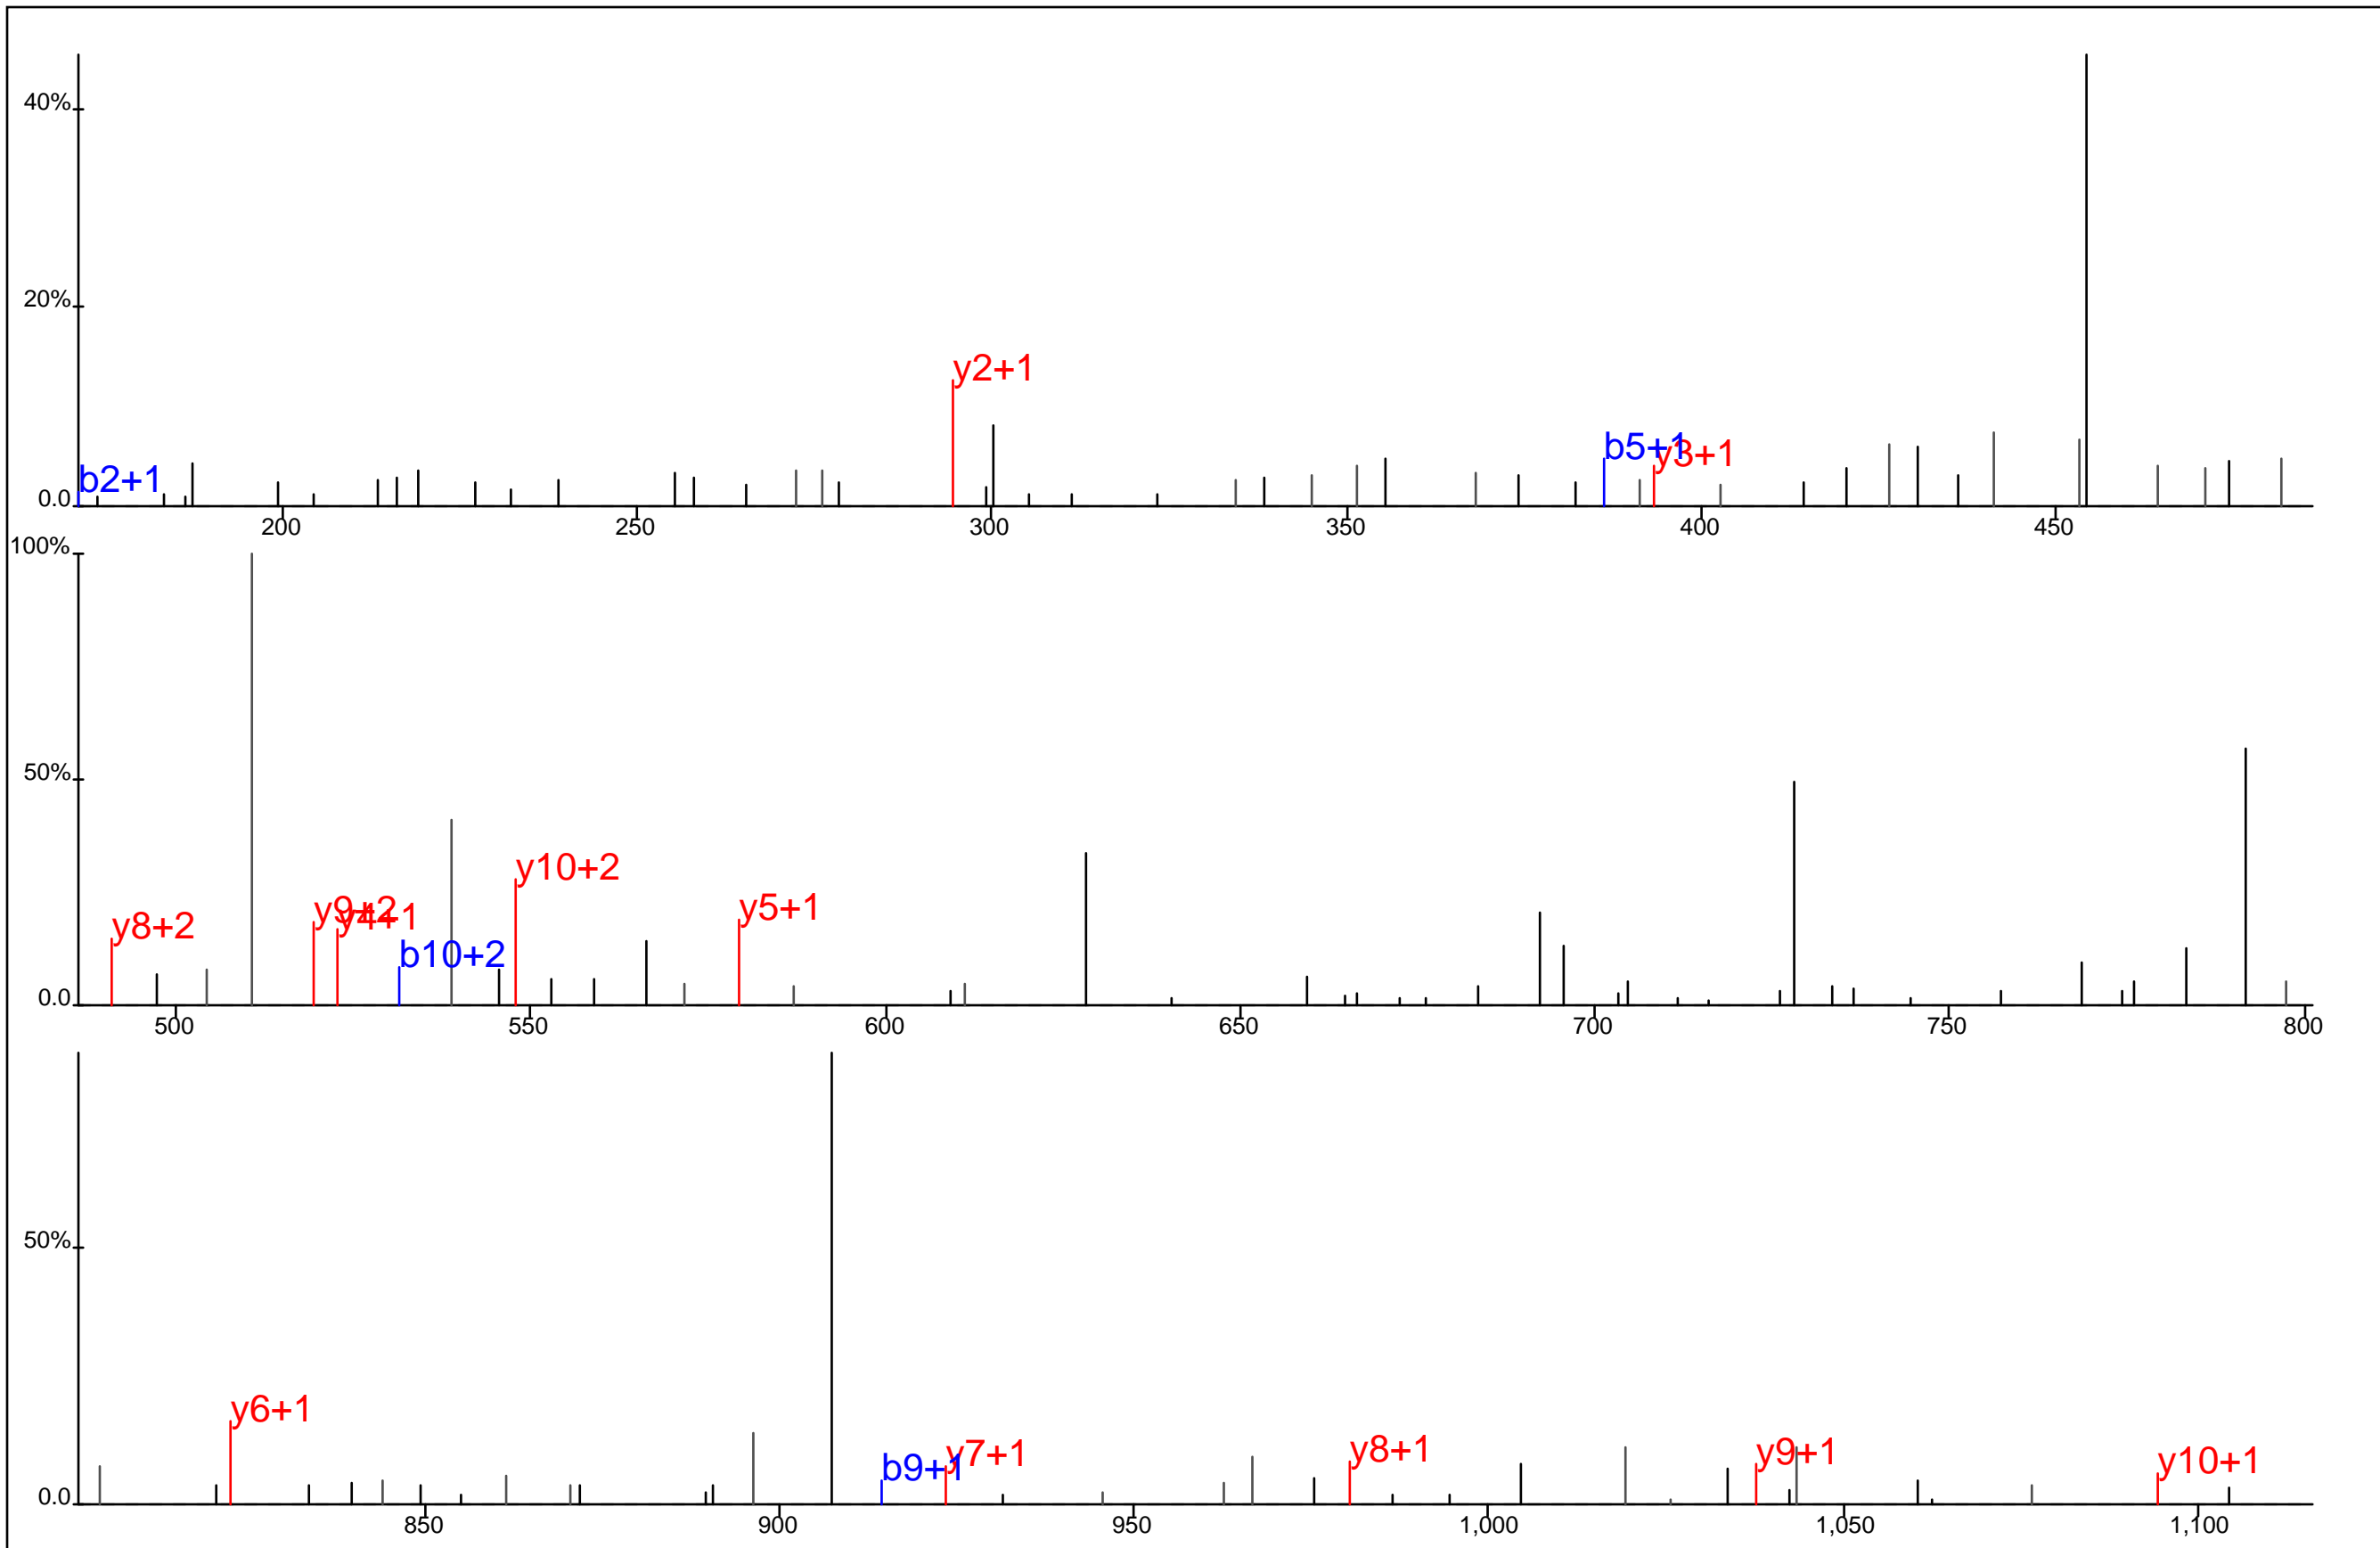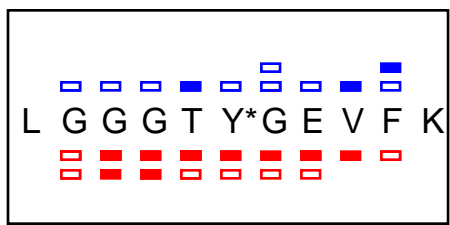

Protein Name: HPK1  
 gi Accession: 0  
 Precursor Mass: 604.2735+2  
 Delta Mass: 0.199 ppm  
 XCorr: 35.16

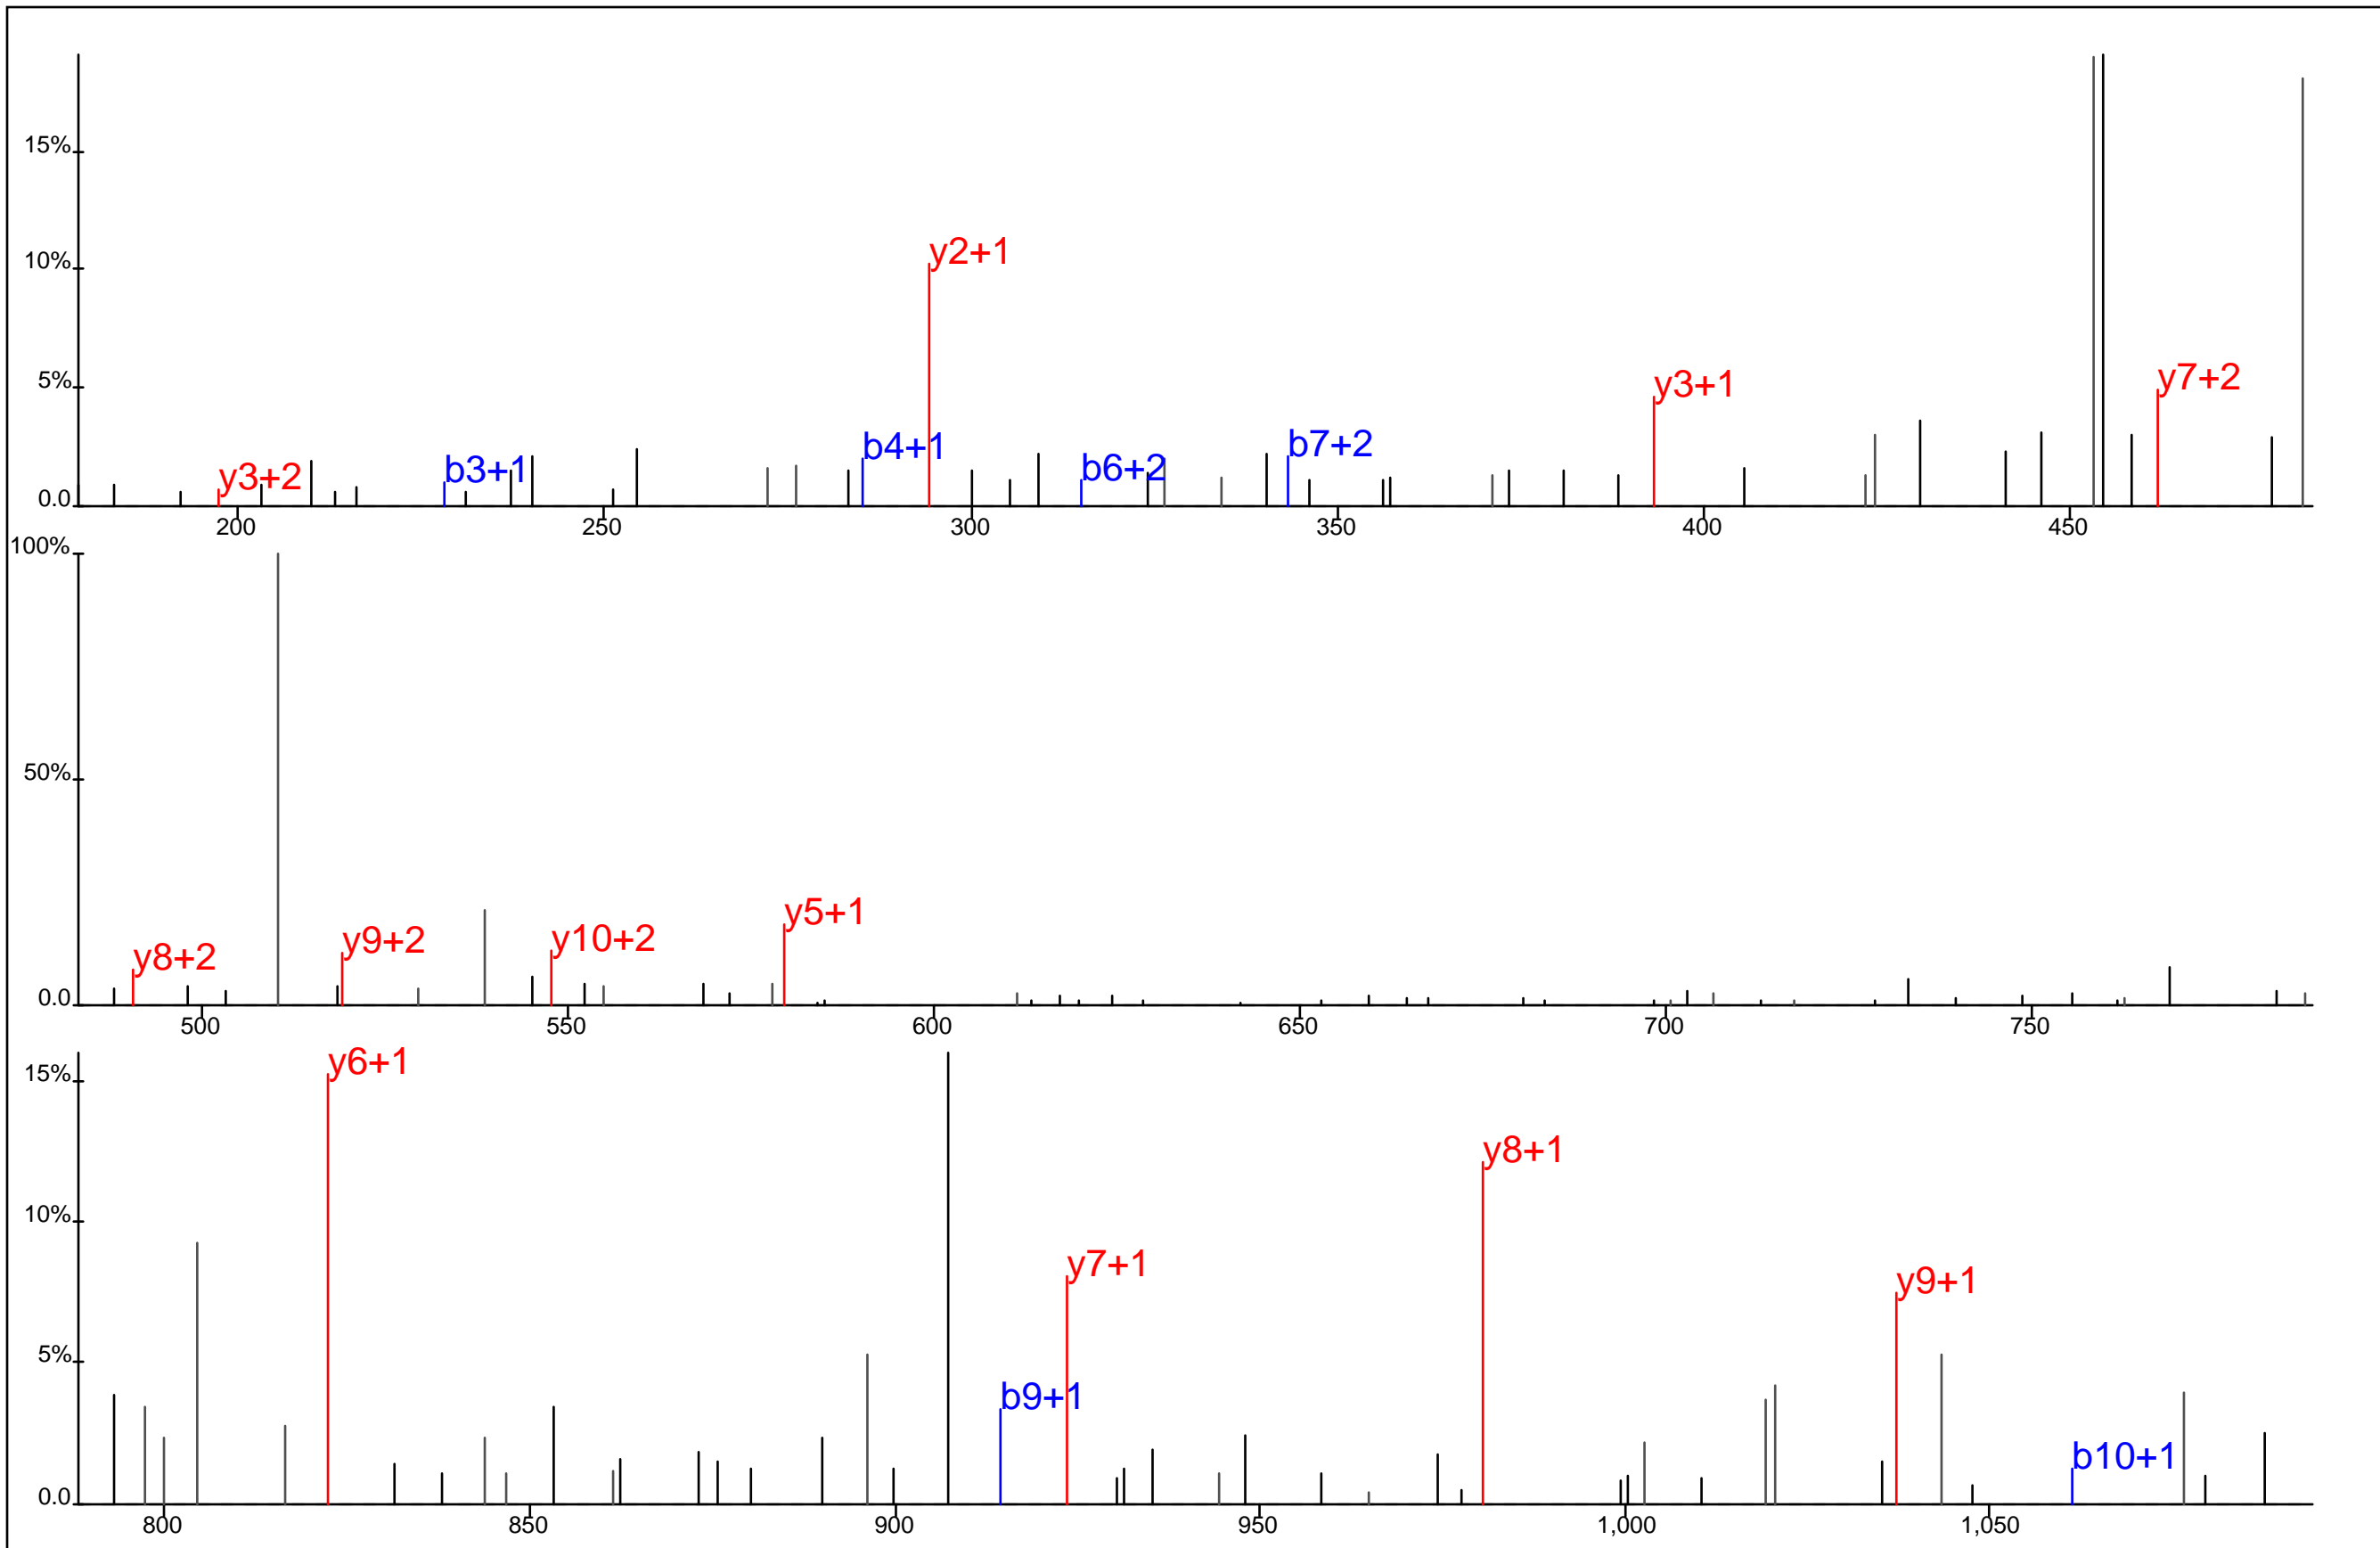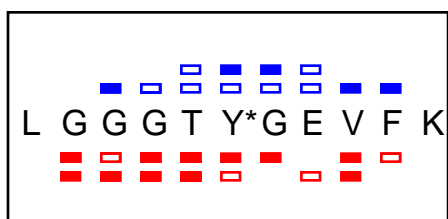

Protein Name: HPK1  
 gi Accession: 0  
 Precursor Mass: 604.2729+2  
 Delta Mass: 0.813 ppm  
 XCorr: 47.15

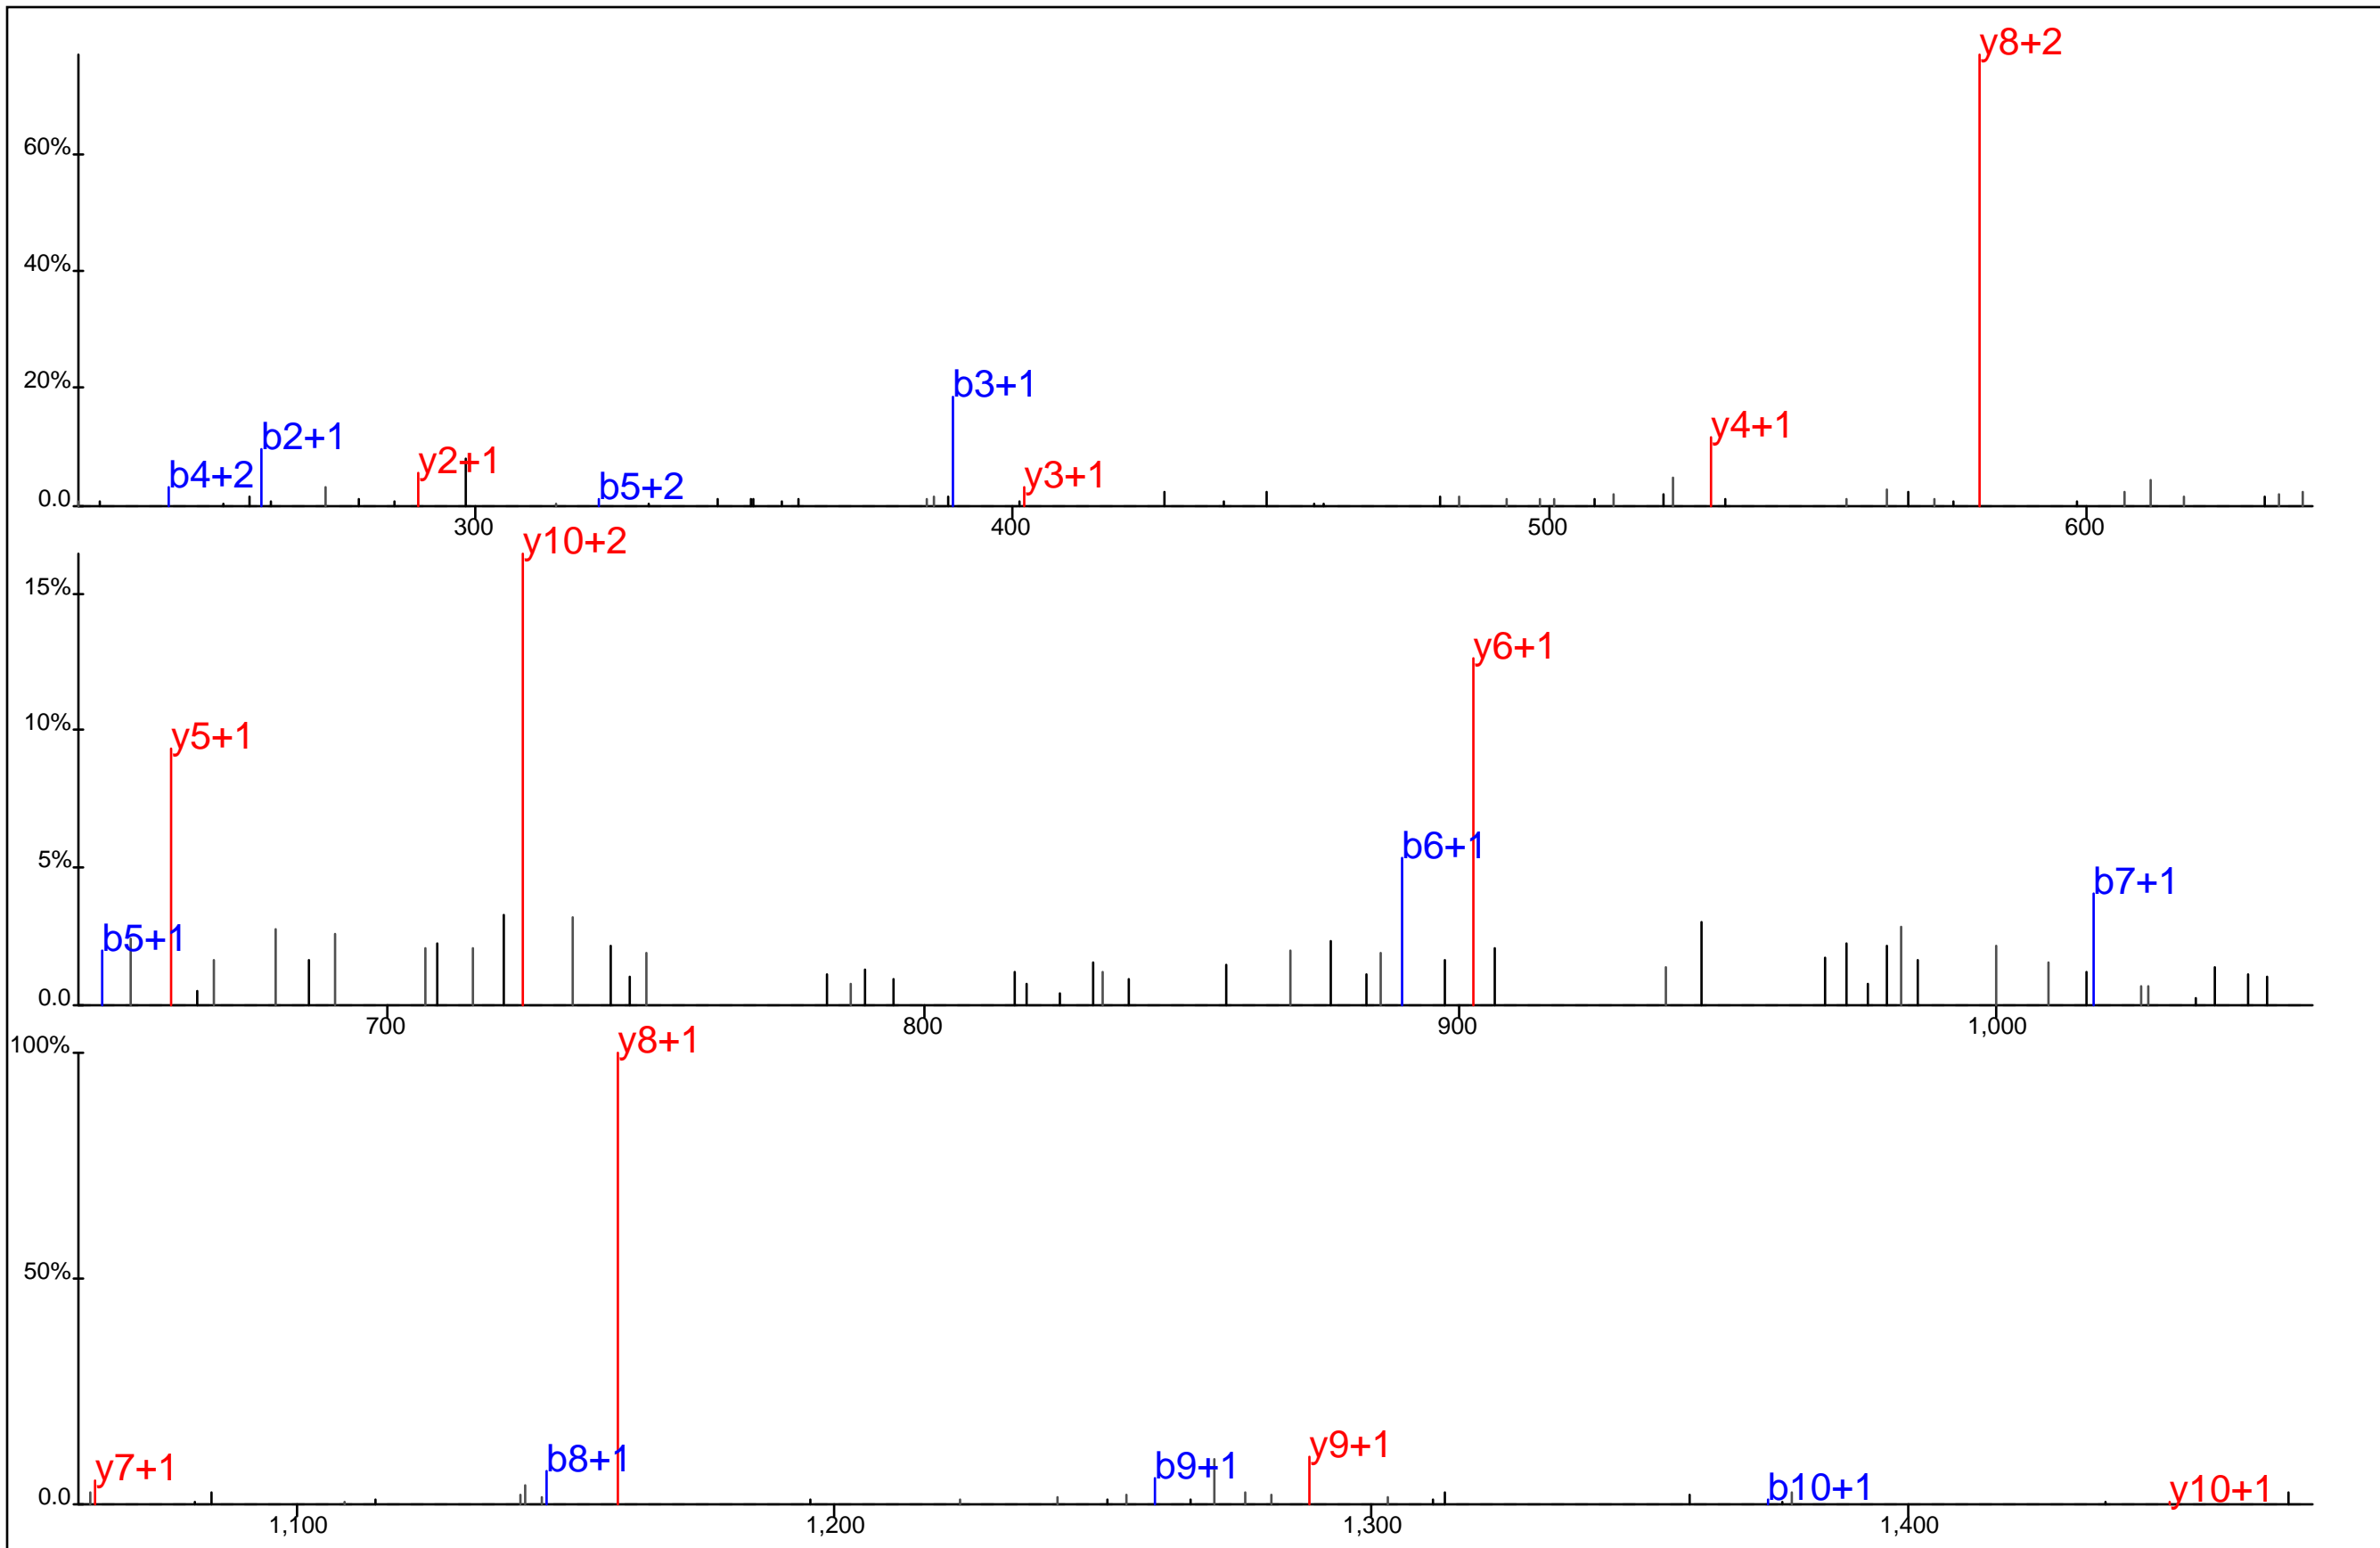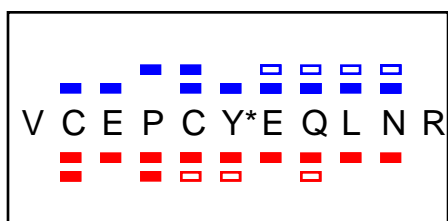

Protein Name: Hrs  
 gi Accession: 0  
 Precursor Mass: 774.3068+2  
 Delta Mass: 2.861 ppm  
 XCorr: 55.89

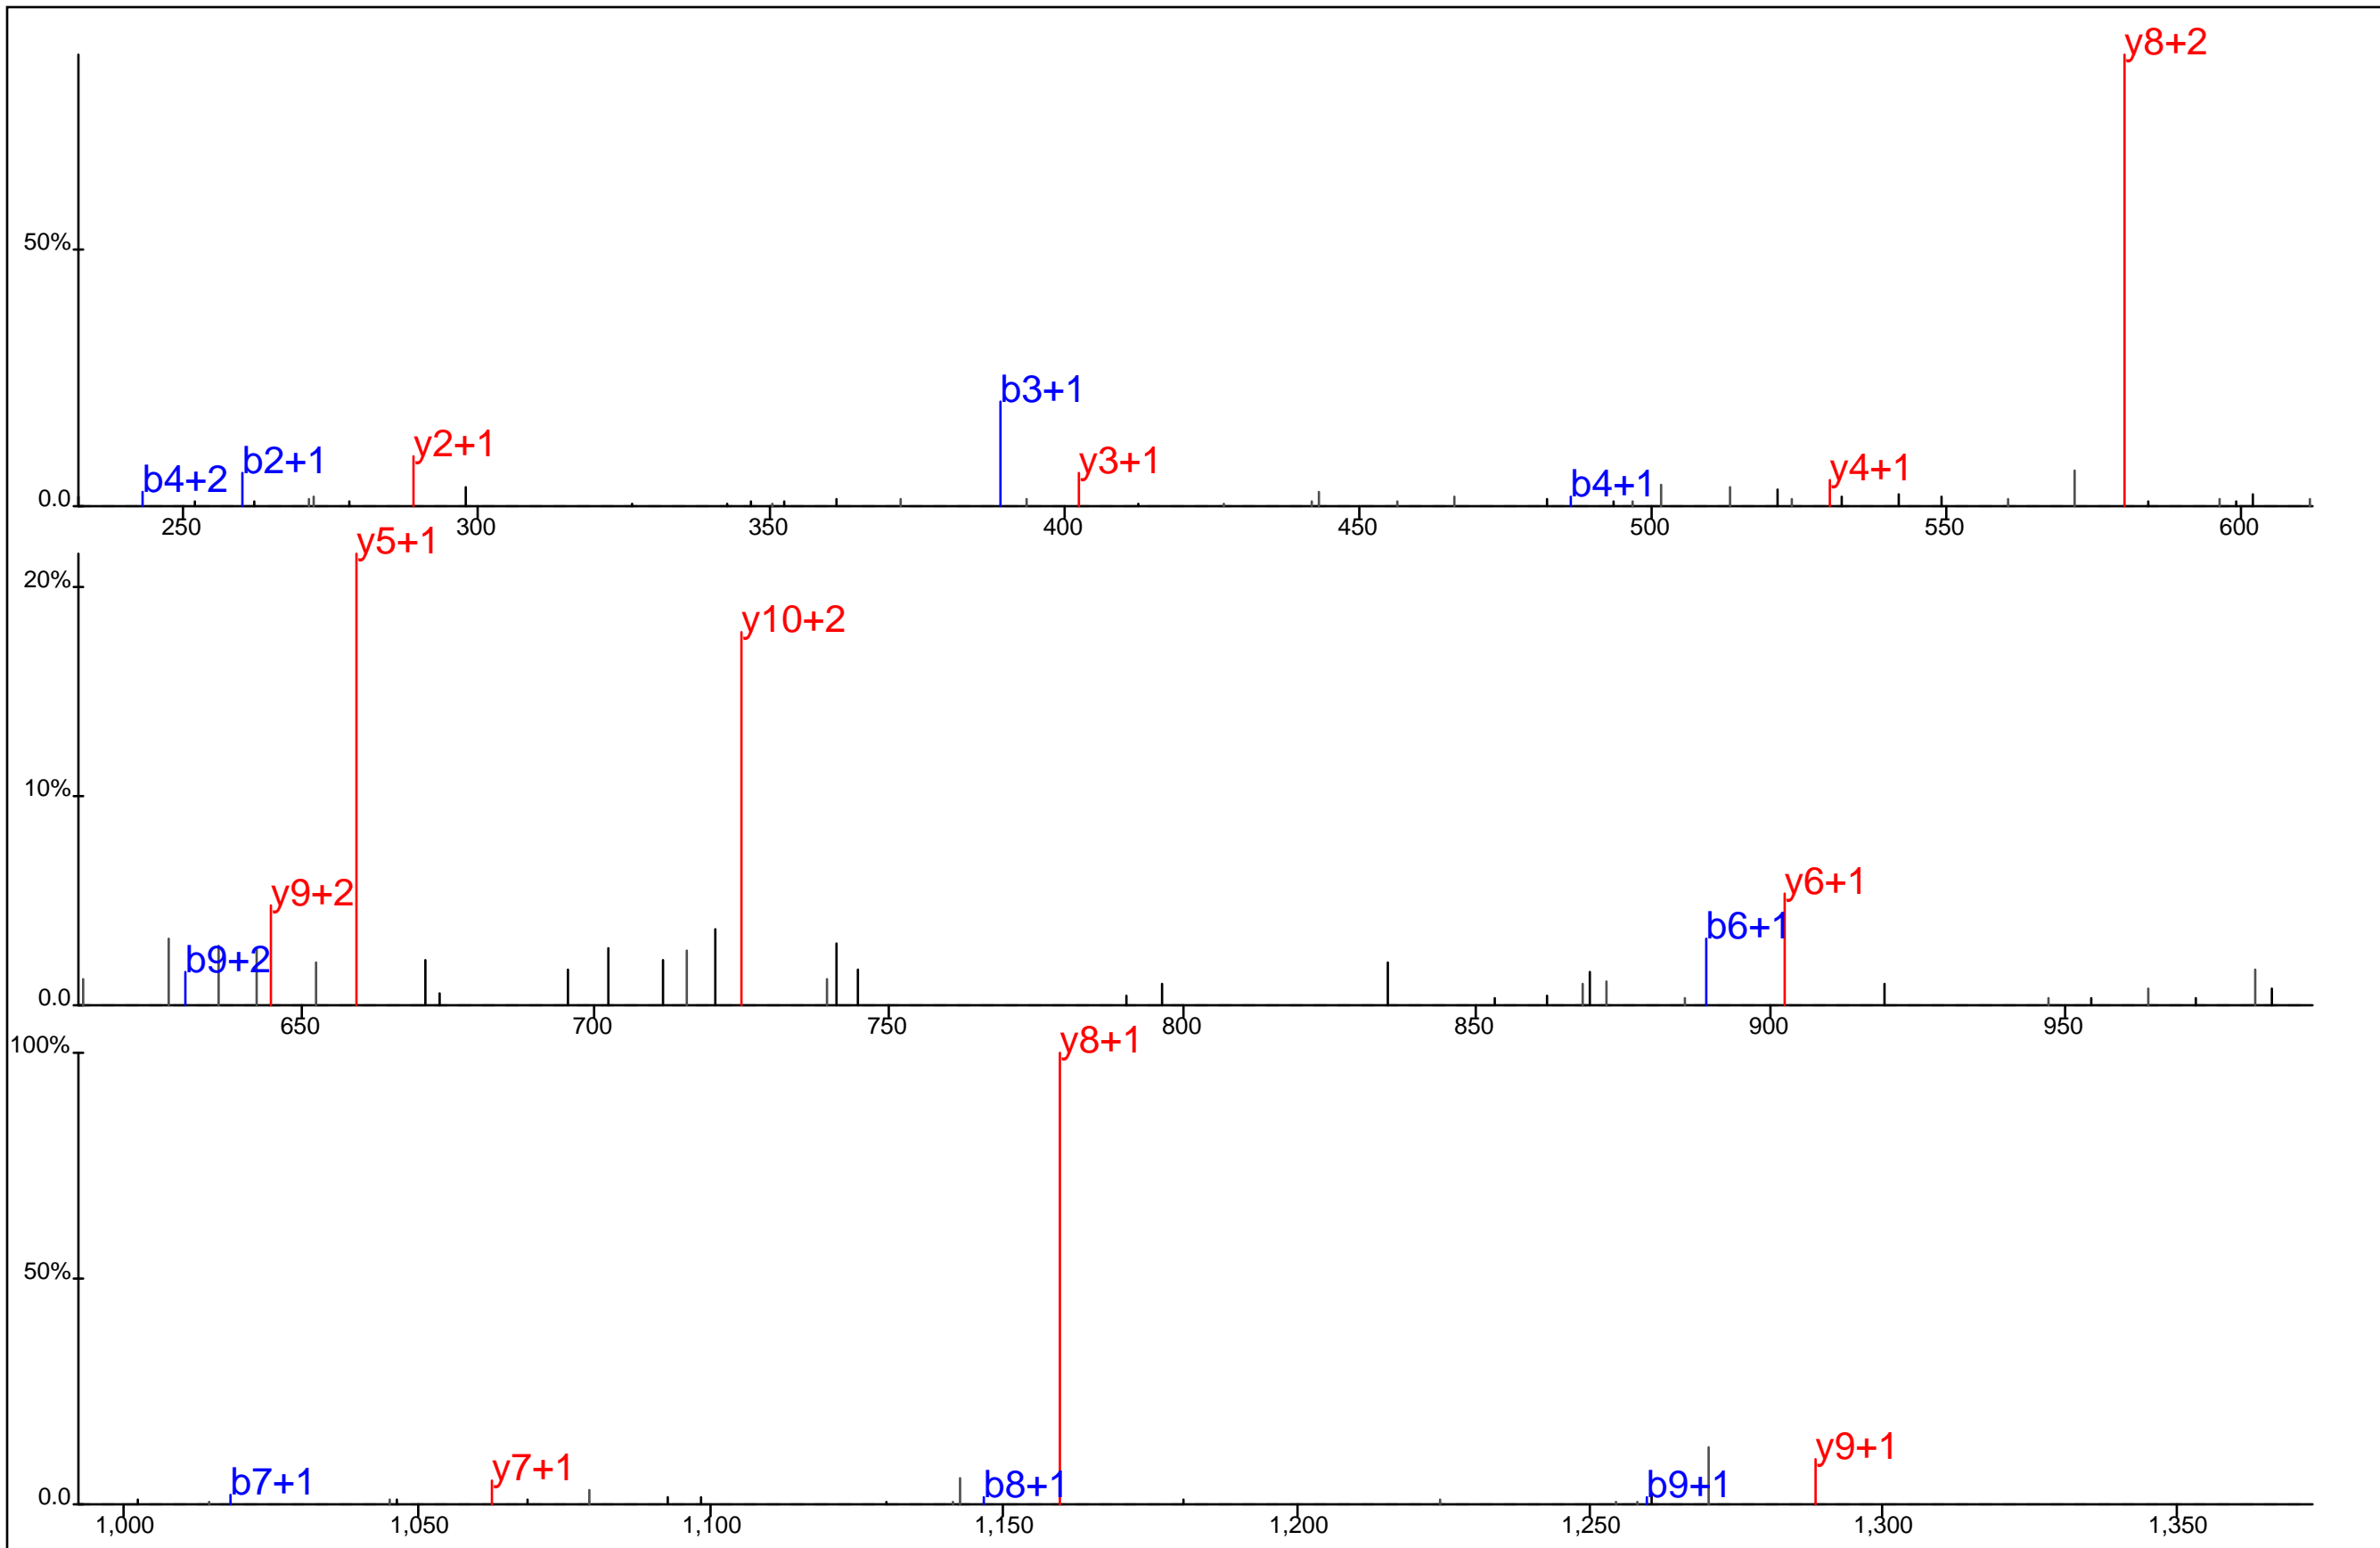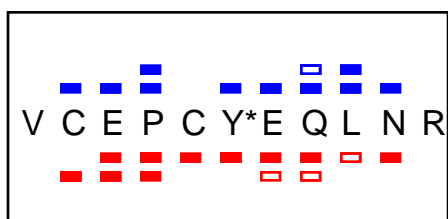

Protein Name: Hrs  
 gi Accession: 0  
 Precursor Mass: 774.3049+2  
 Delta Mass: 0.416 ppm  
 XCorr: 66.52



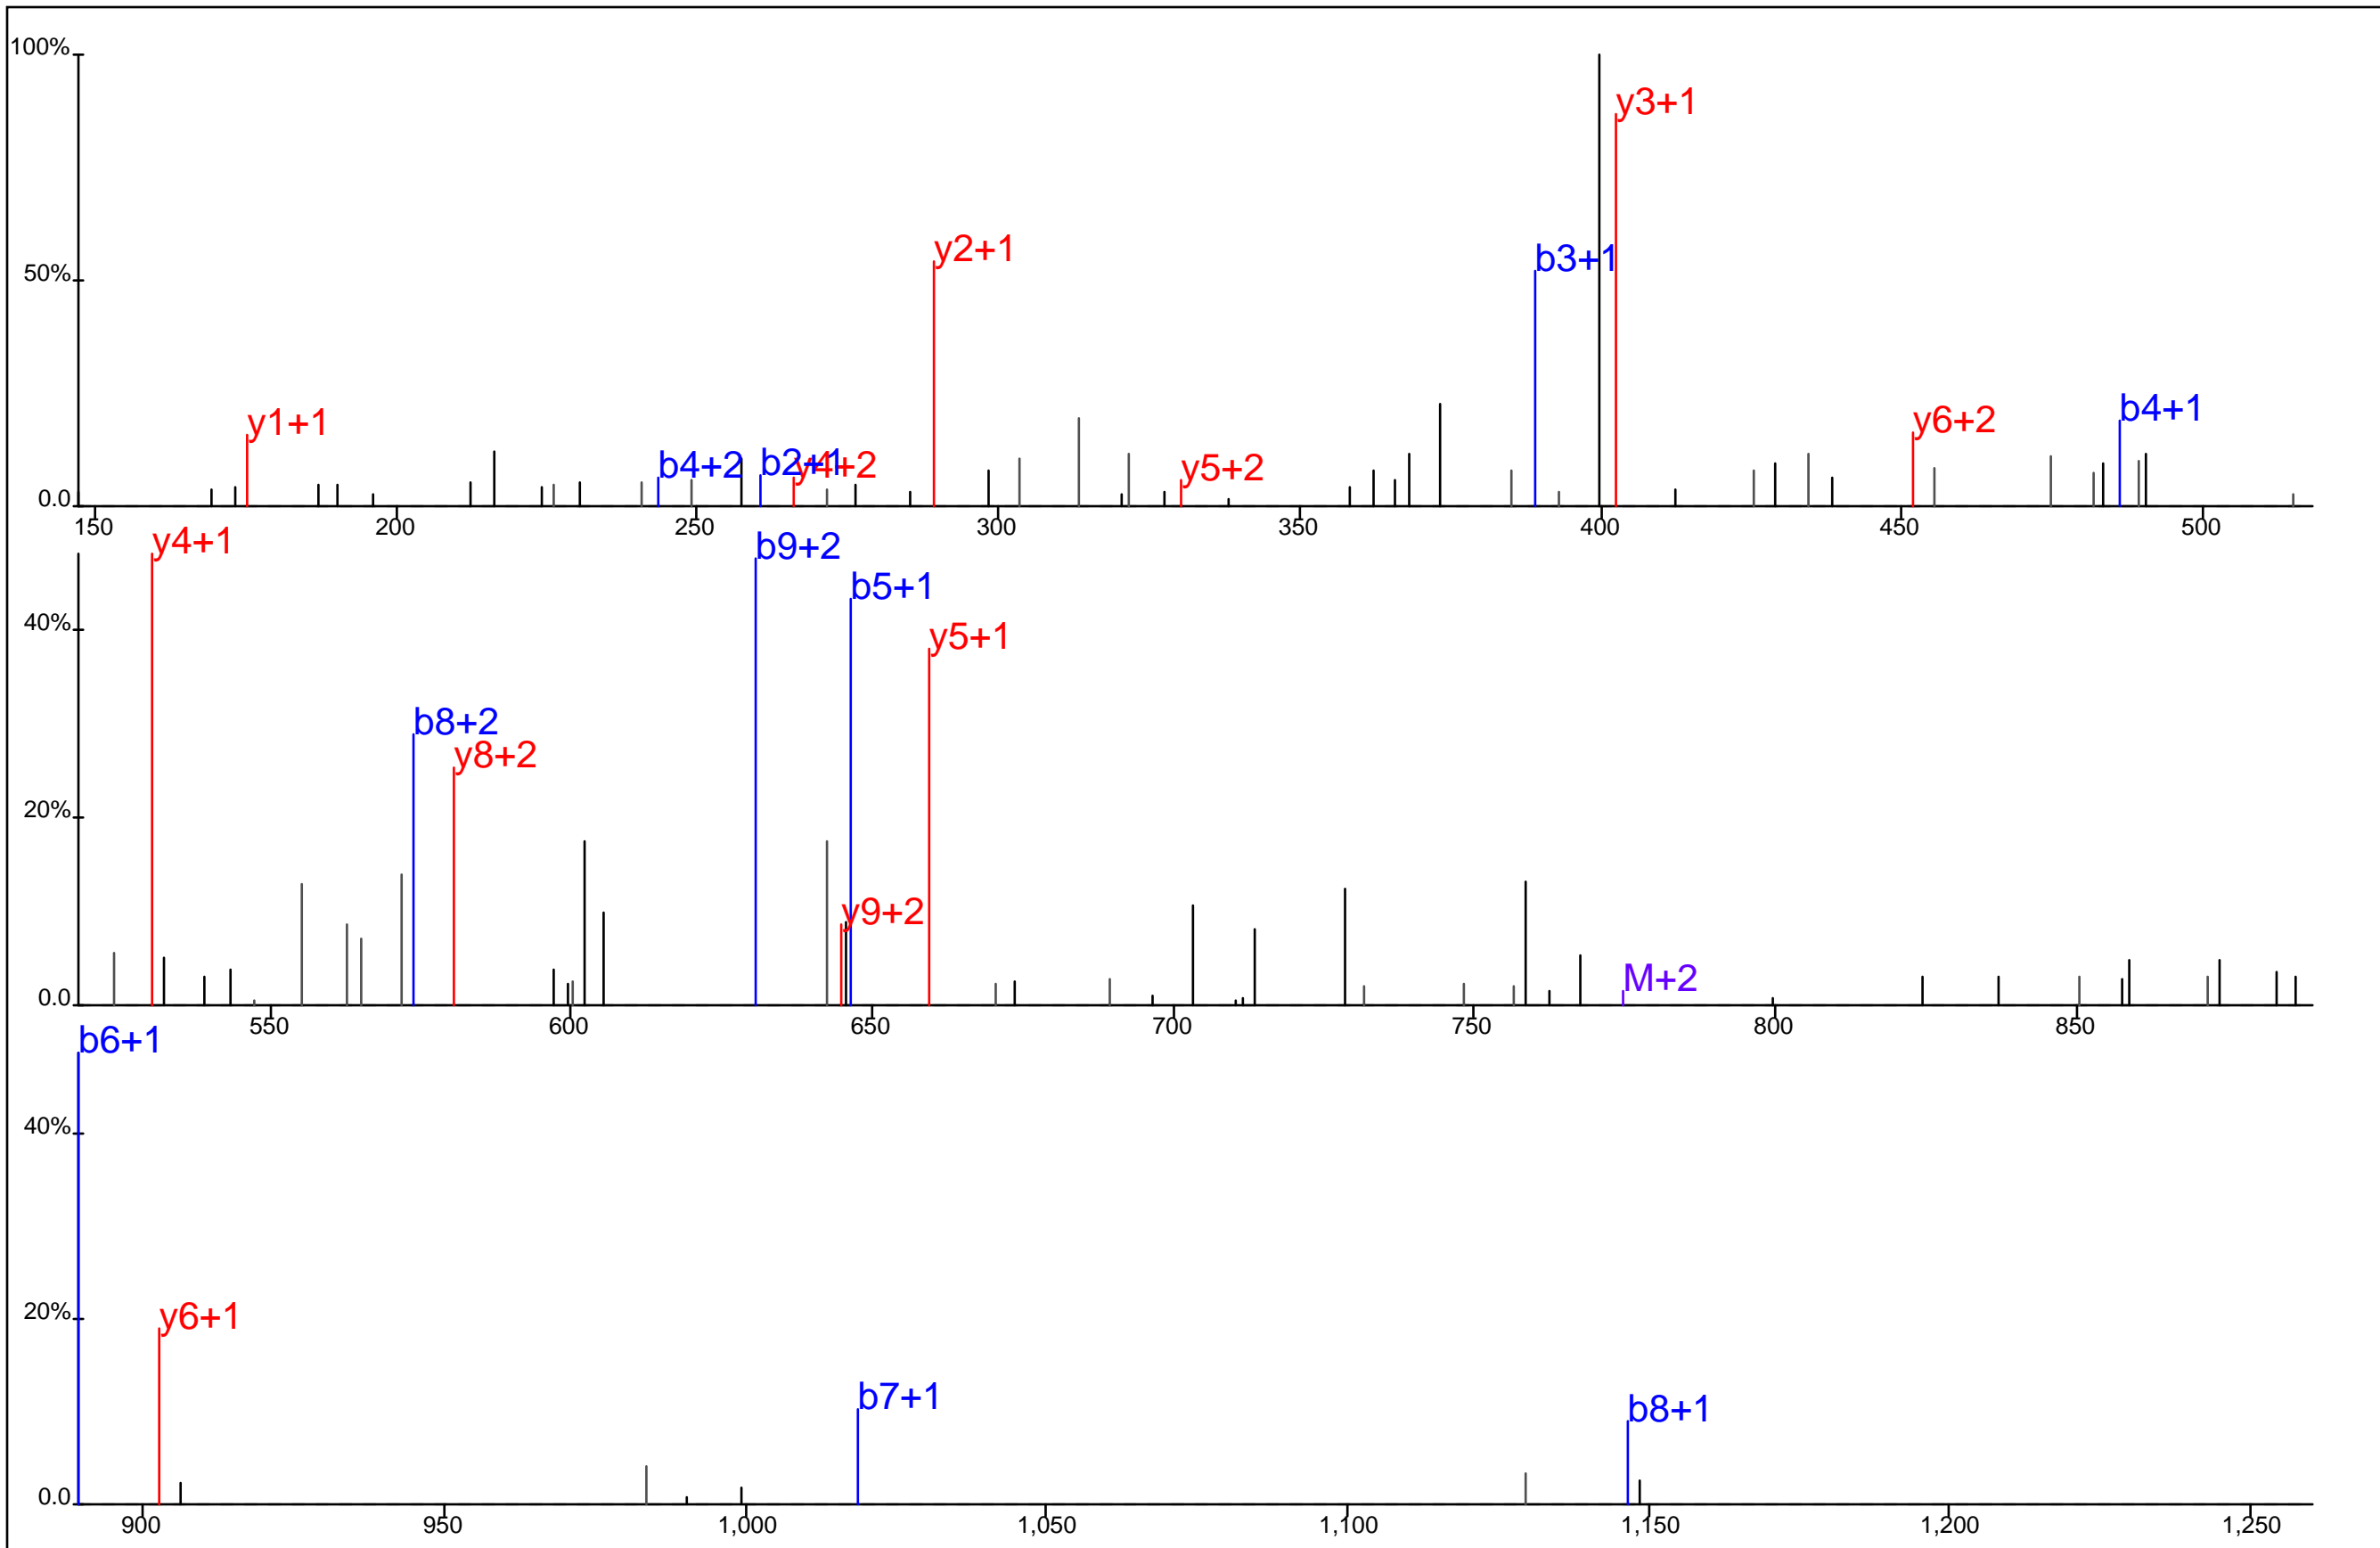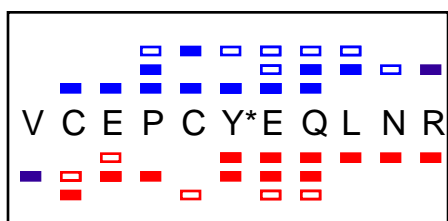

Protein Name: Hrs  
 gi Accession: 0  
 Precursor Mass: 516.5394+3  
 Delta Mass: 1.236 ppm  
 XCorr: 37.03

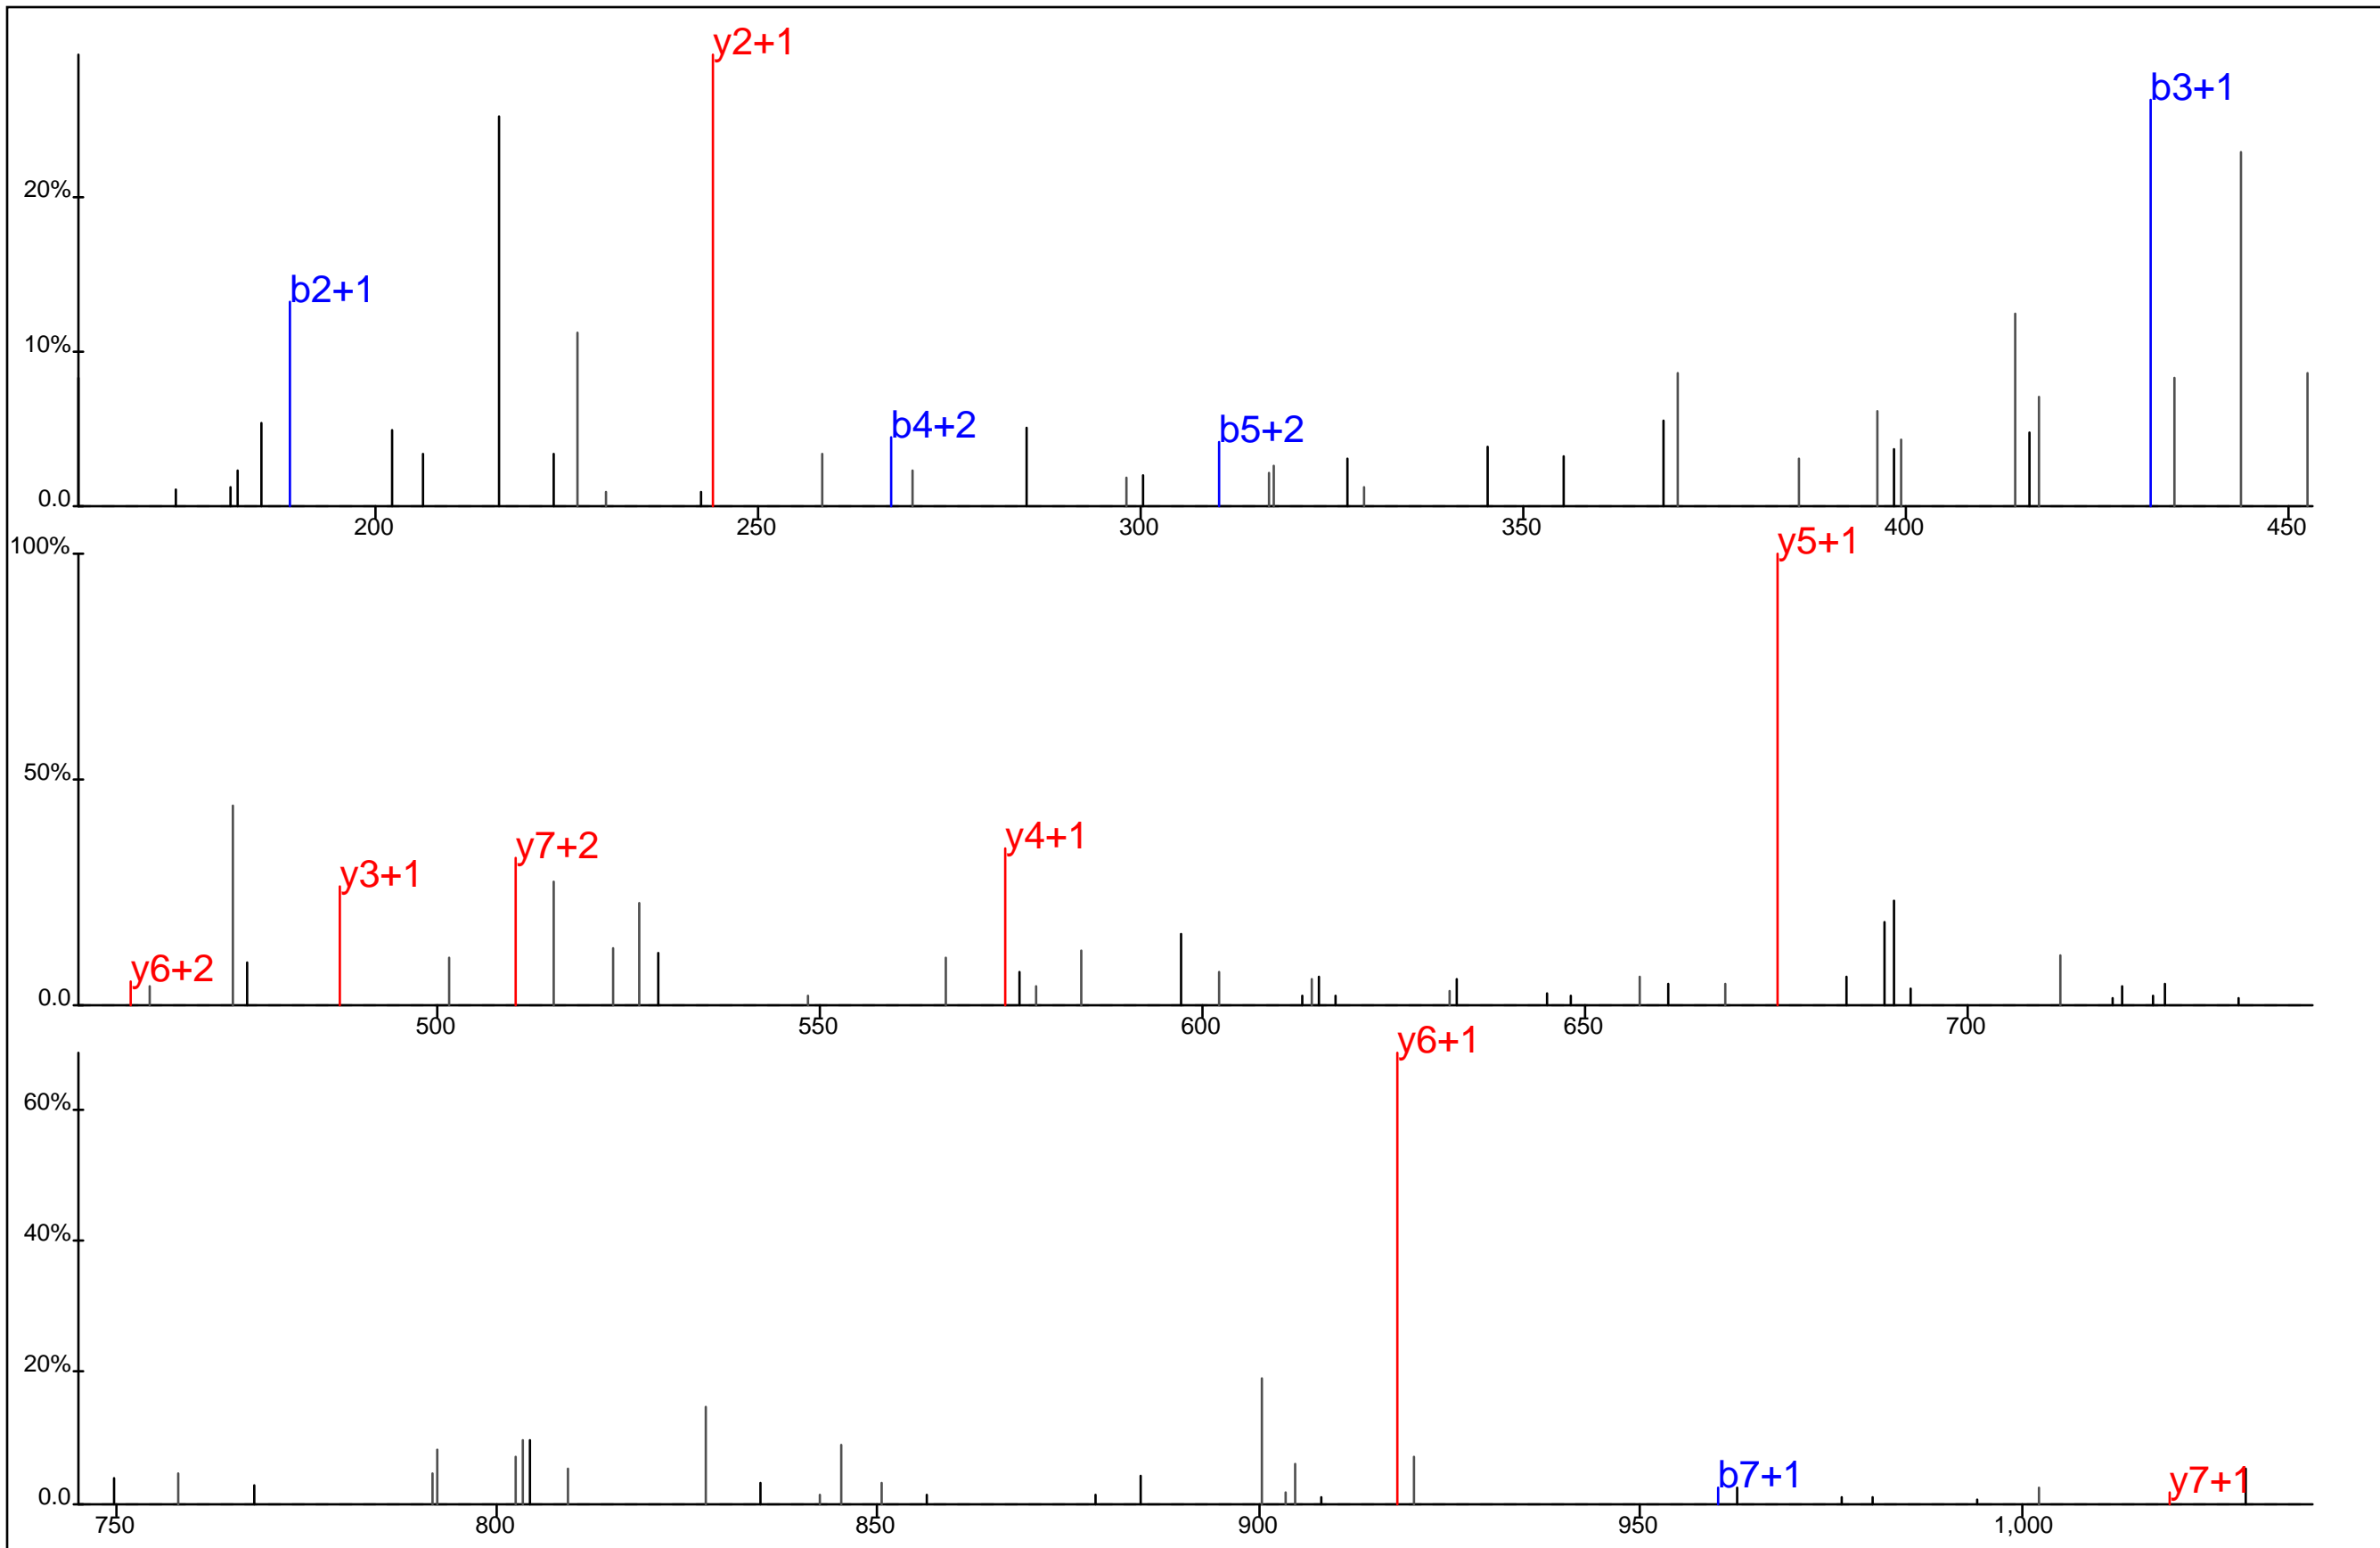

**S T Y\*T S Y\*P K**

Protein Name: Hrs  
 gi Accession: 0  
 Precursor Mass: 553.6956+2  
 Delta Mass: 0.282 ppm  
 XCorr: 28.38

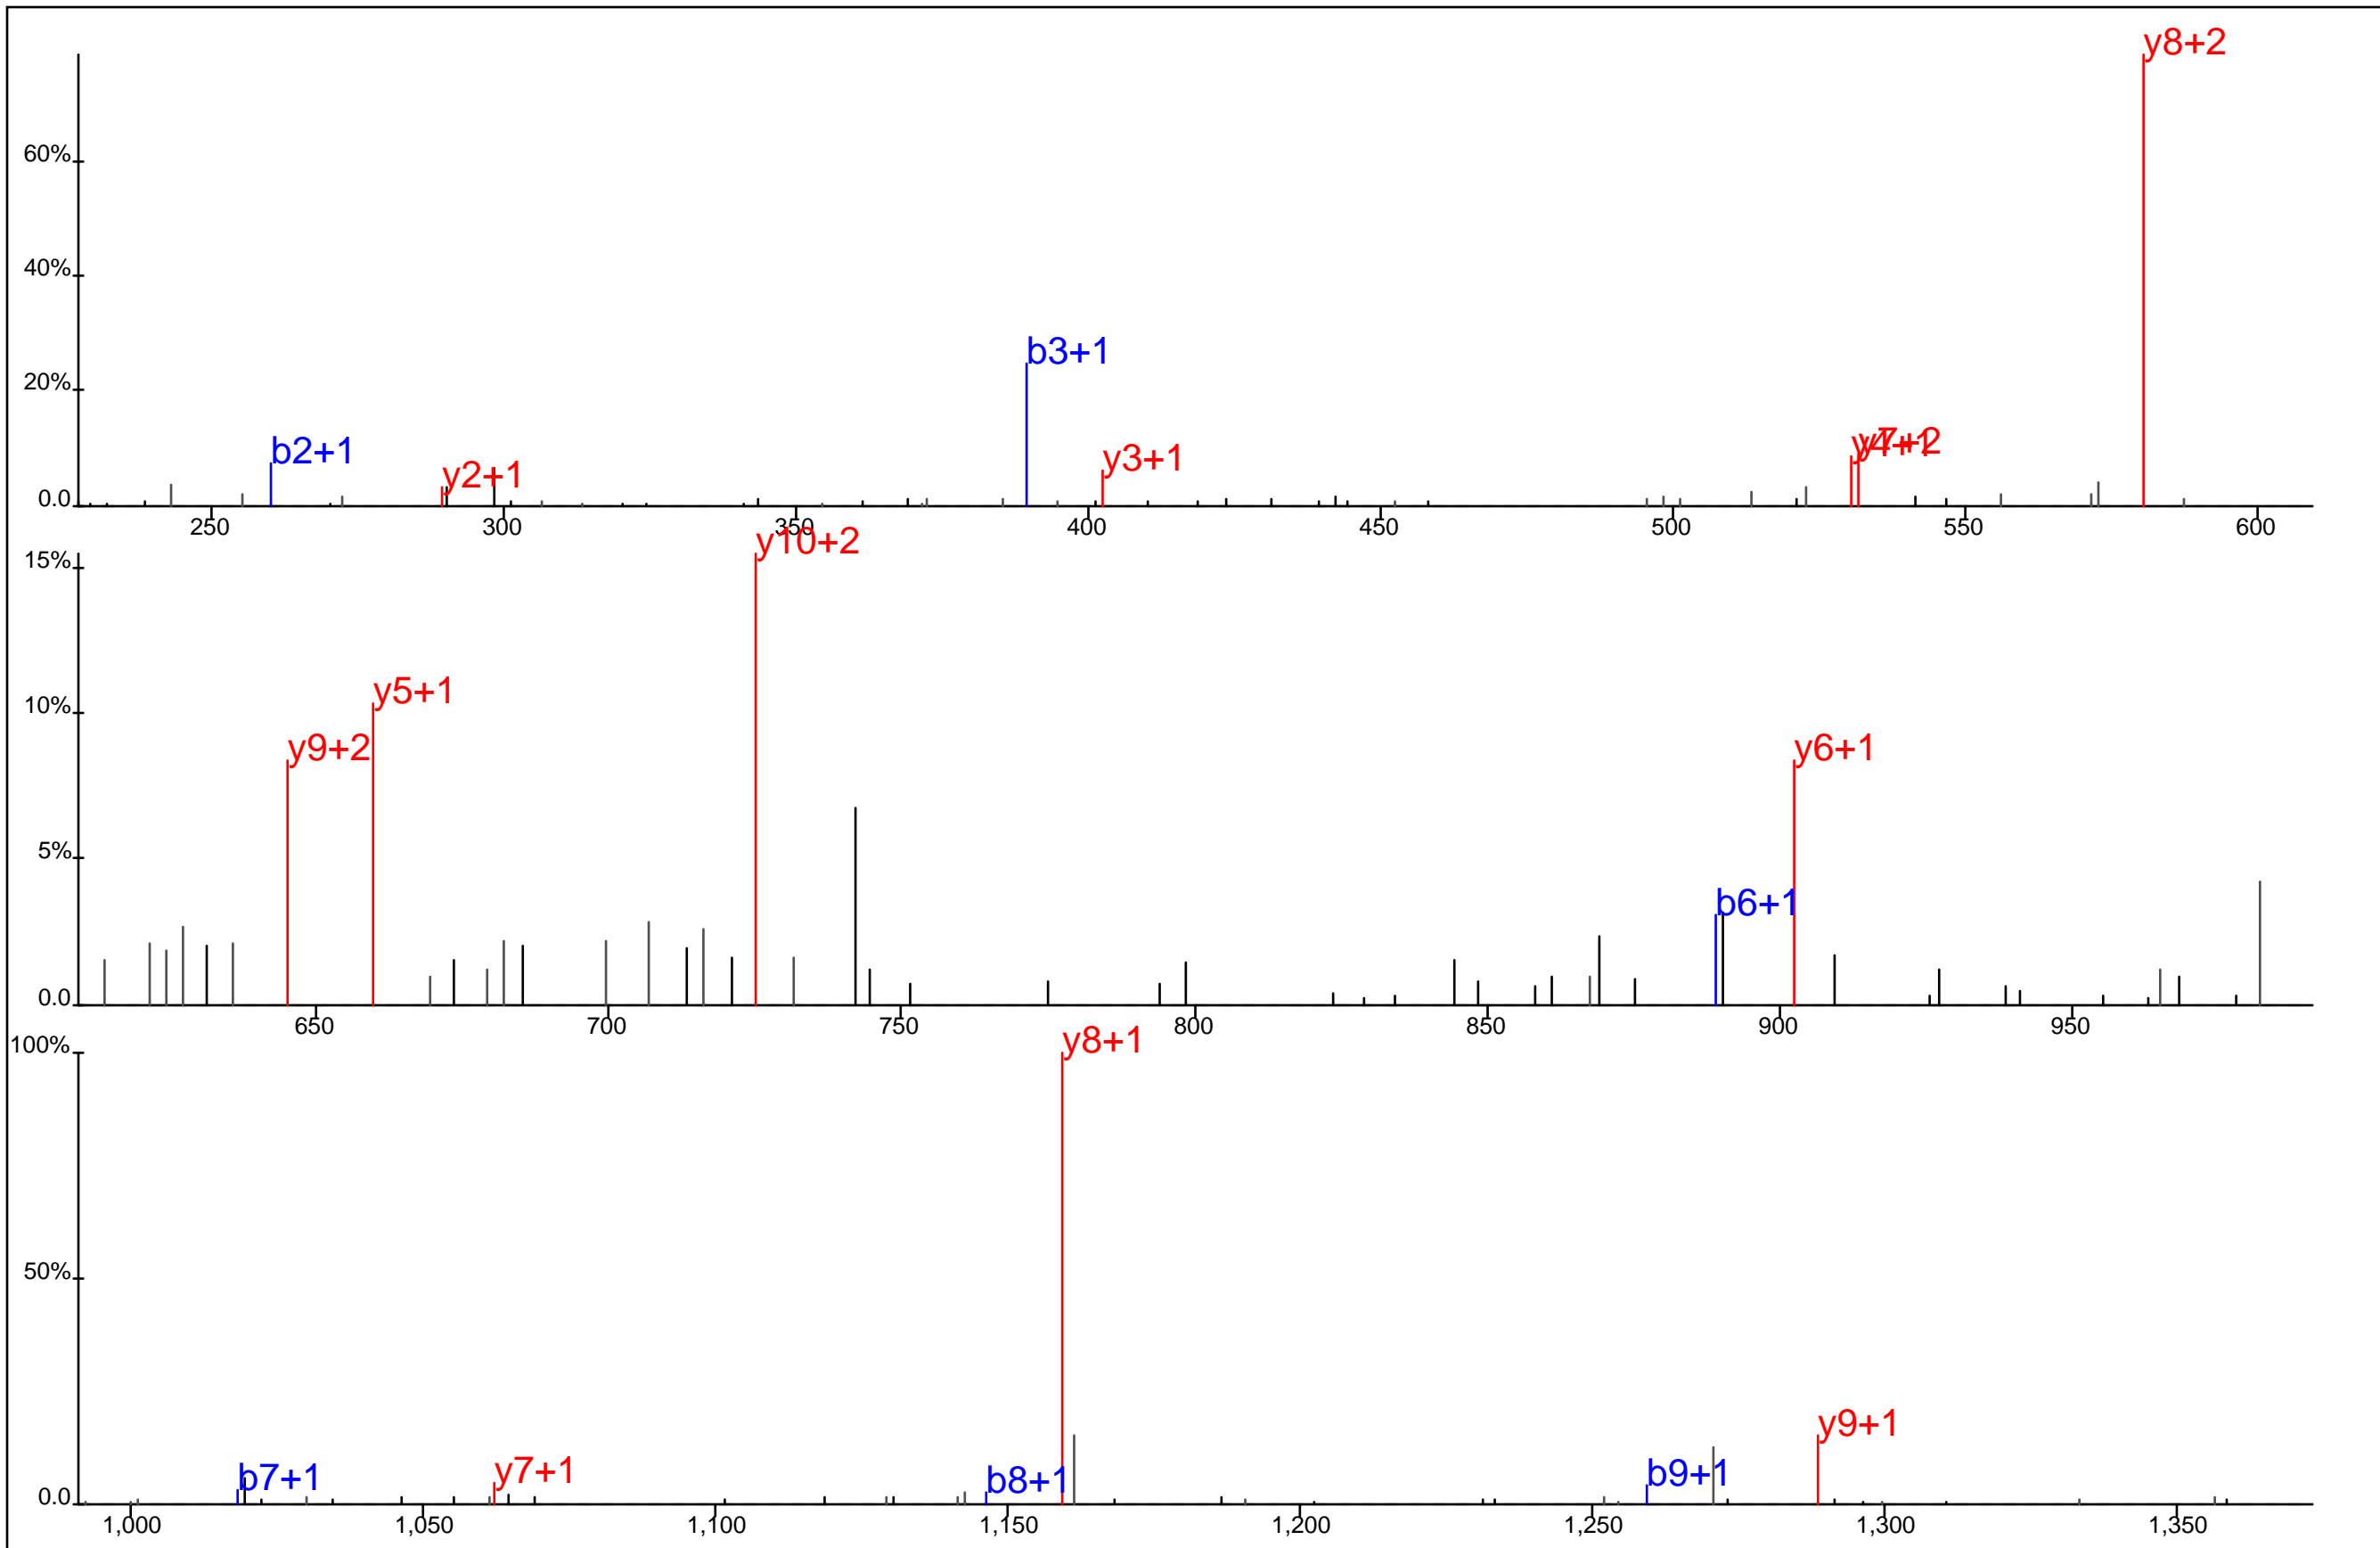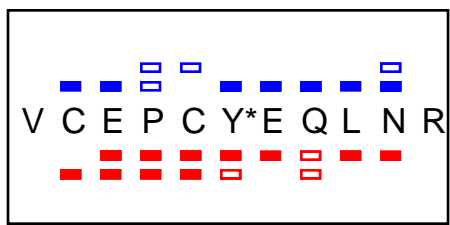

Protein Name: Hrs  
 gi Accession: 0  
 Precursor Mass: 774.3043+2  
 Delta Mass: 0.373 ppm  
 XCorr: 50.7

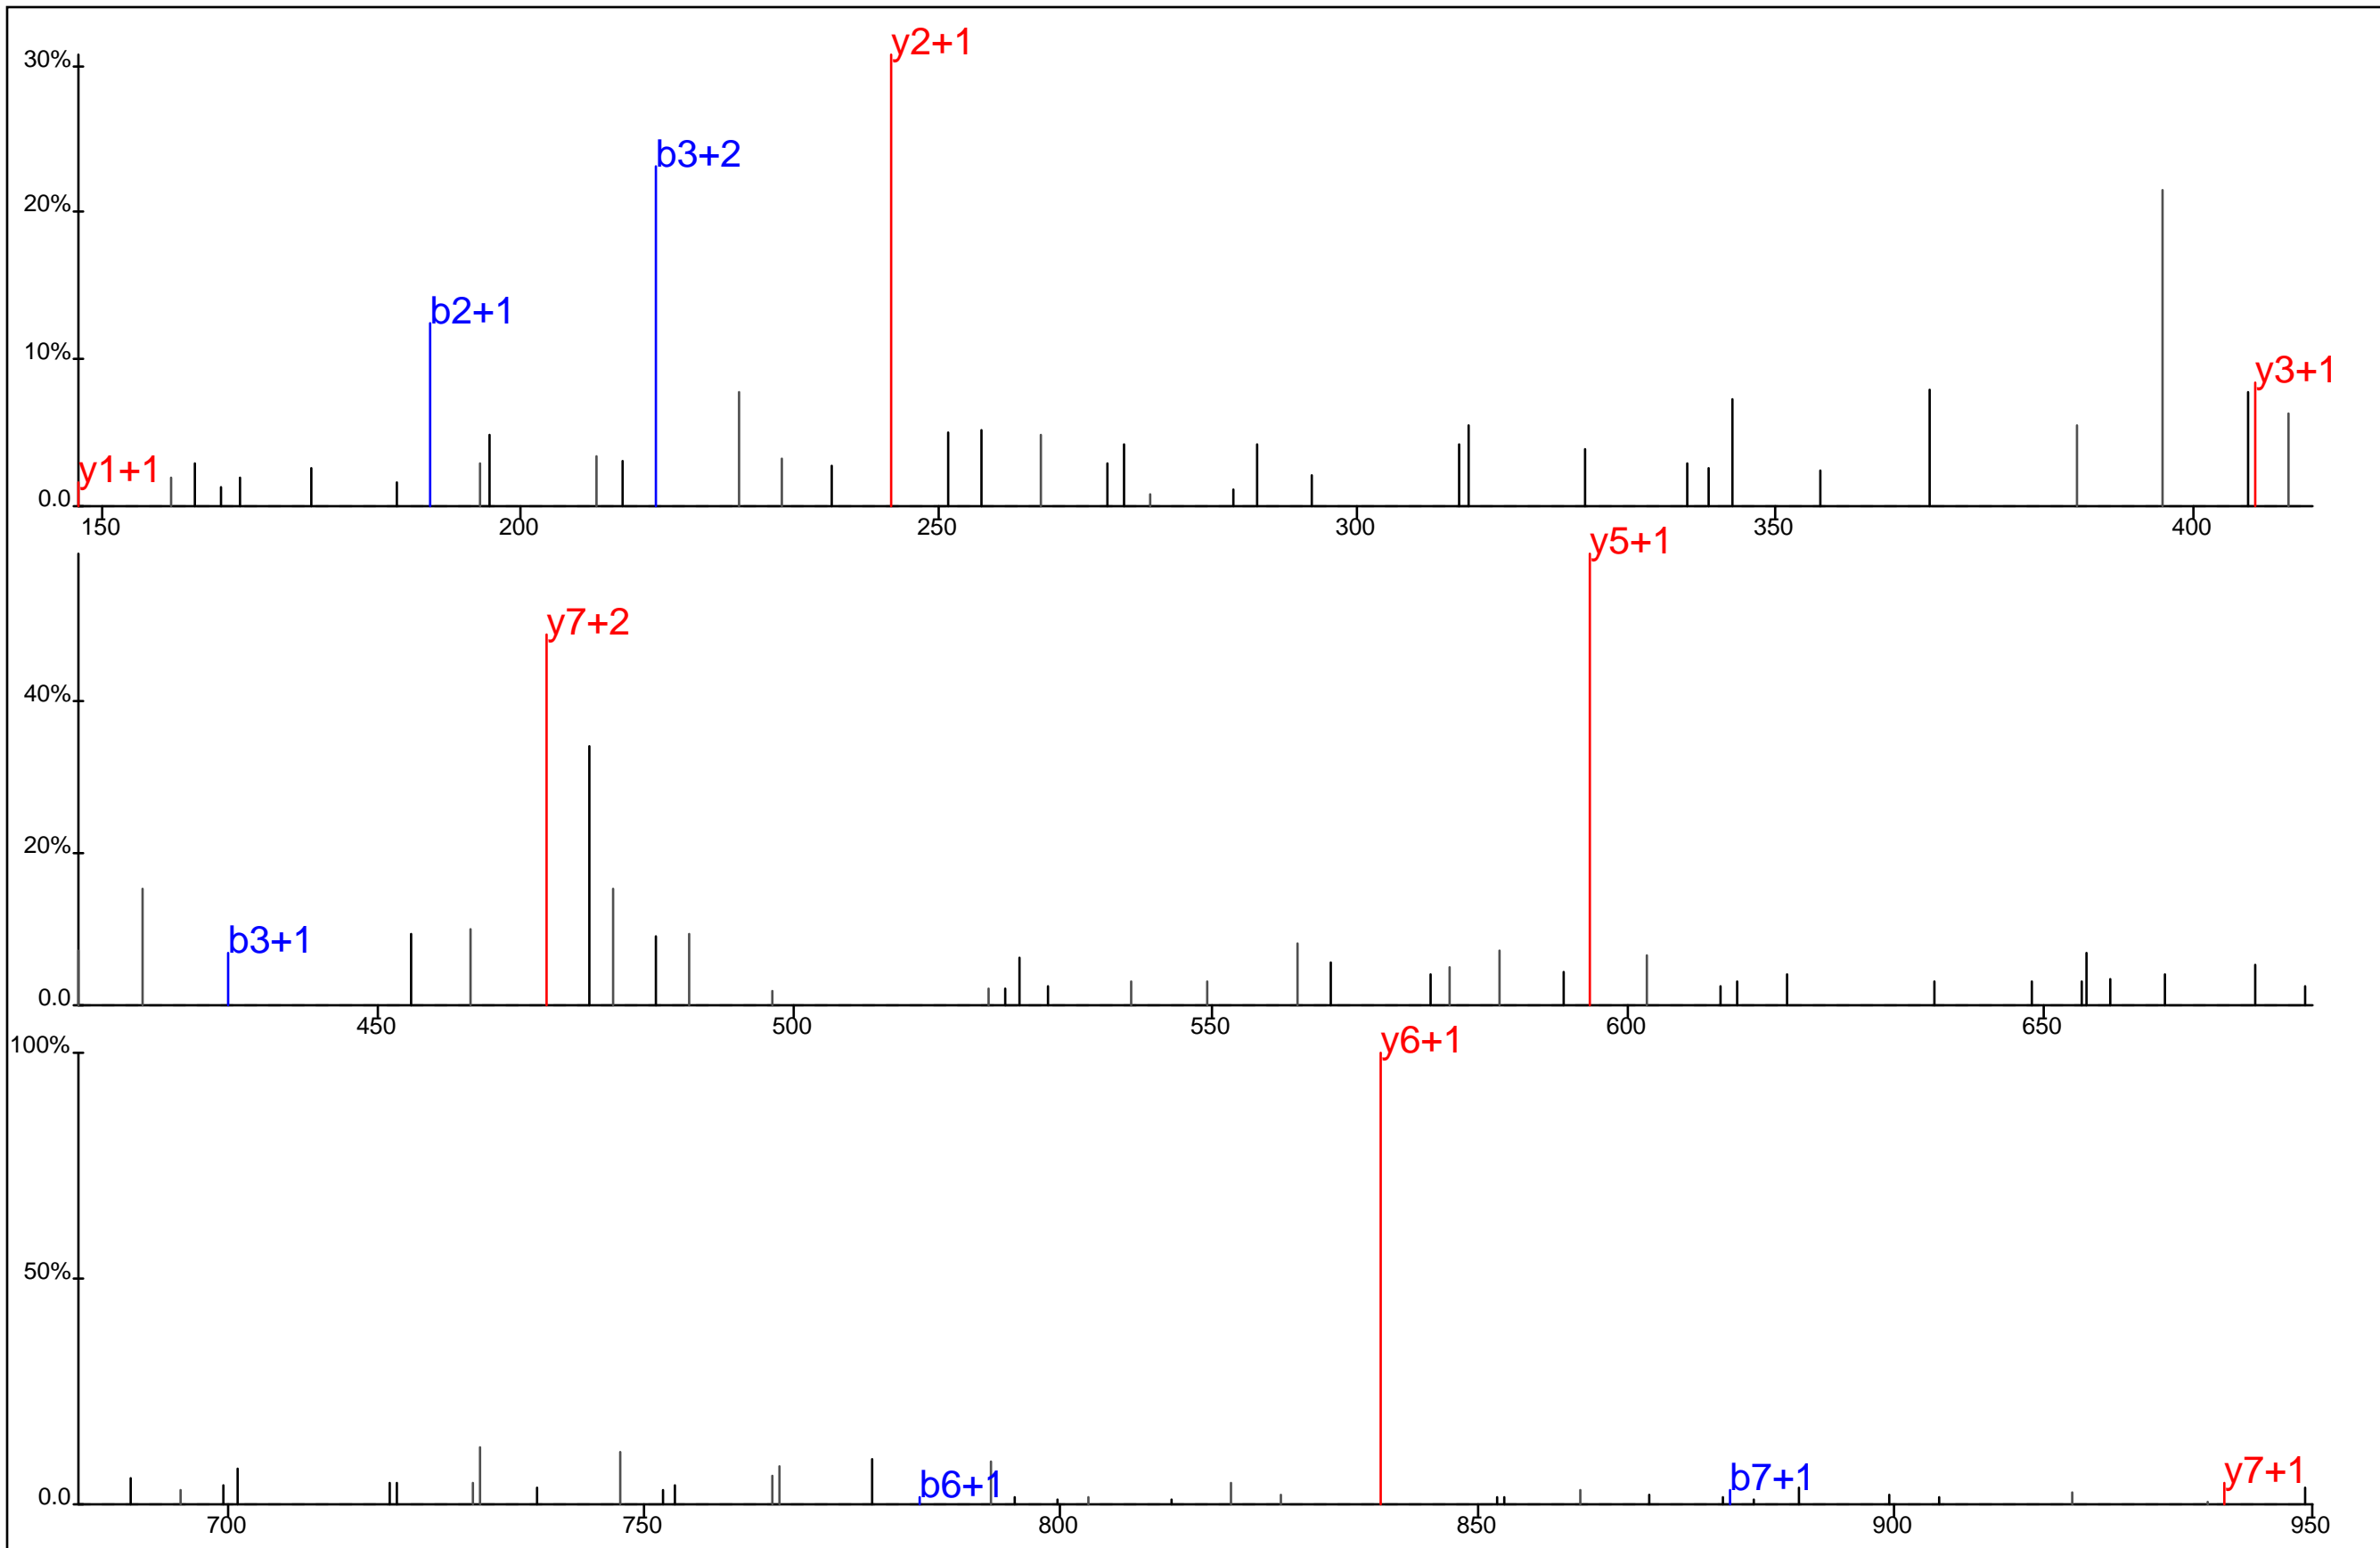

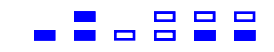
  
**S T Y\* T S Y P K**
  


Protein Name: Hrs  
 gi Accession: 0  
 Precursor Mass: 513.7141+2  
 Delta Mass: 2.917 ppm  
 XCorr: 20.0

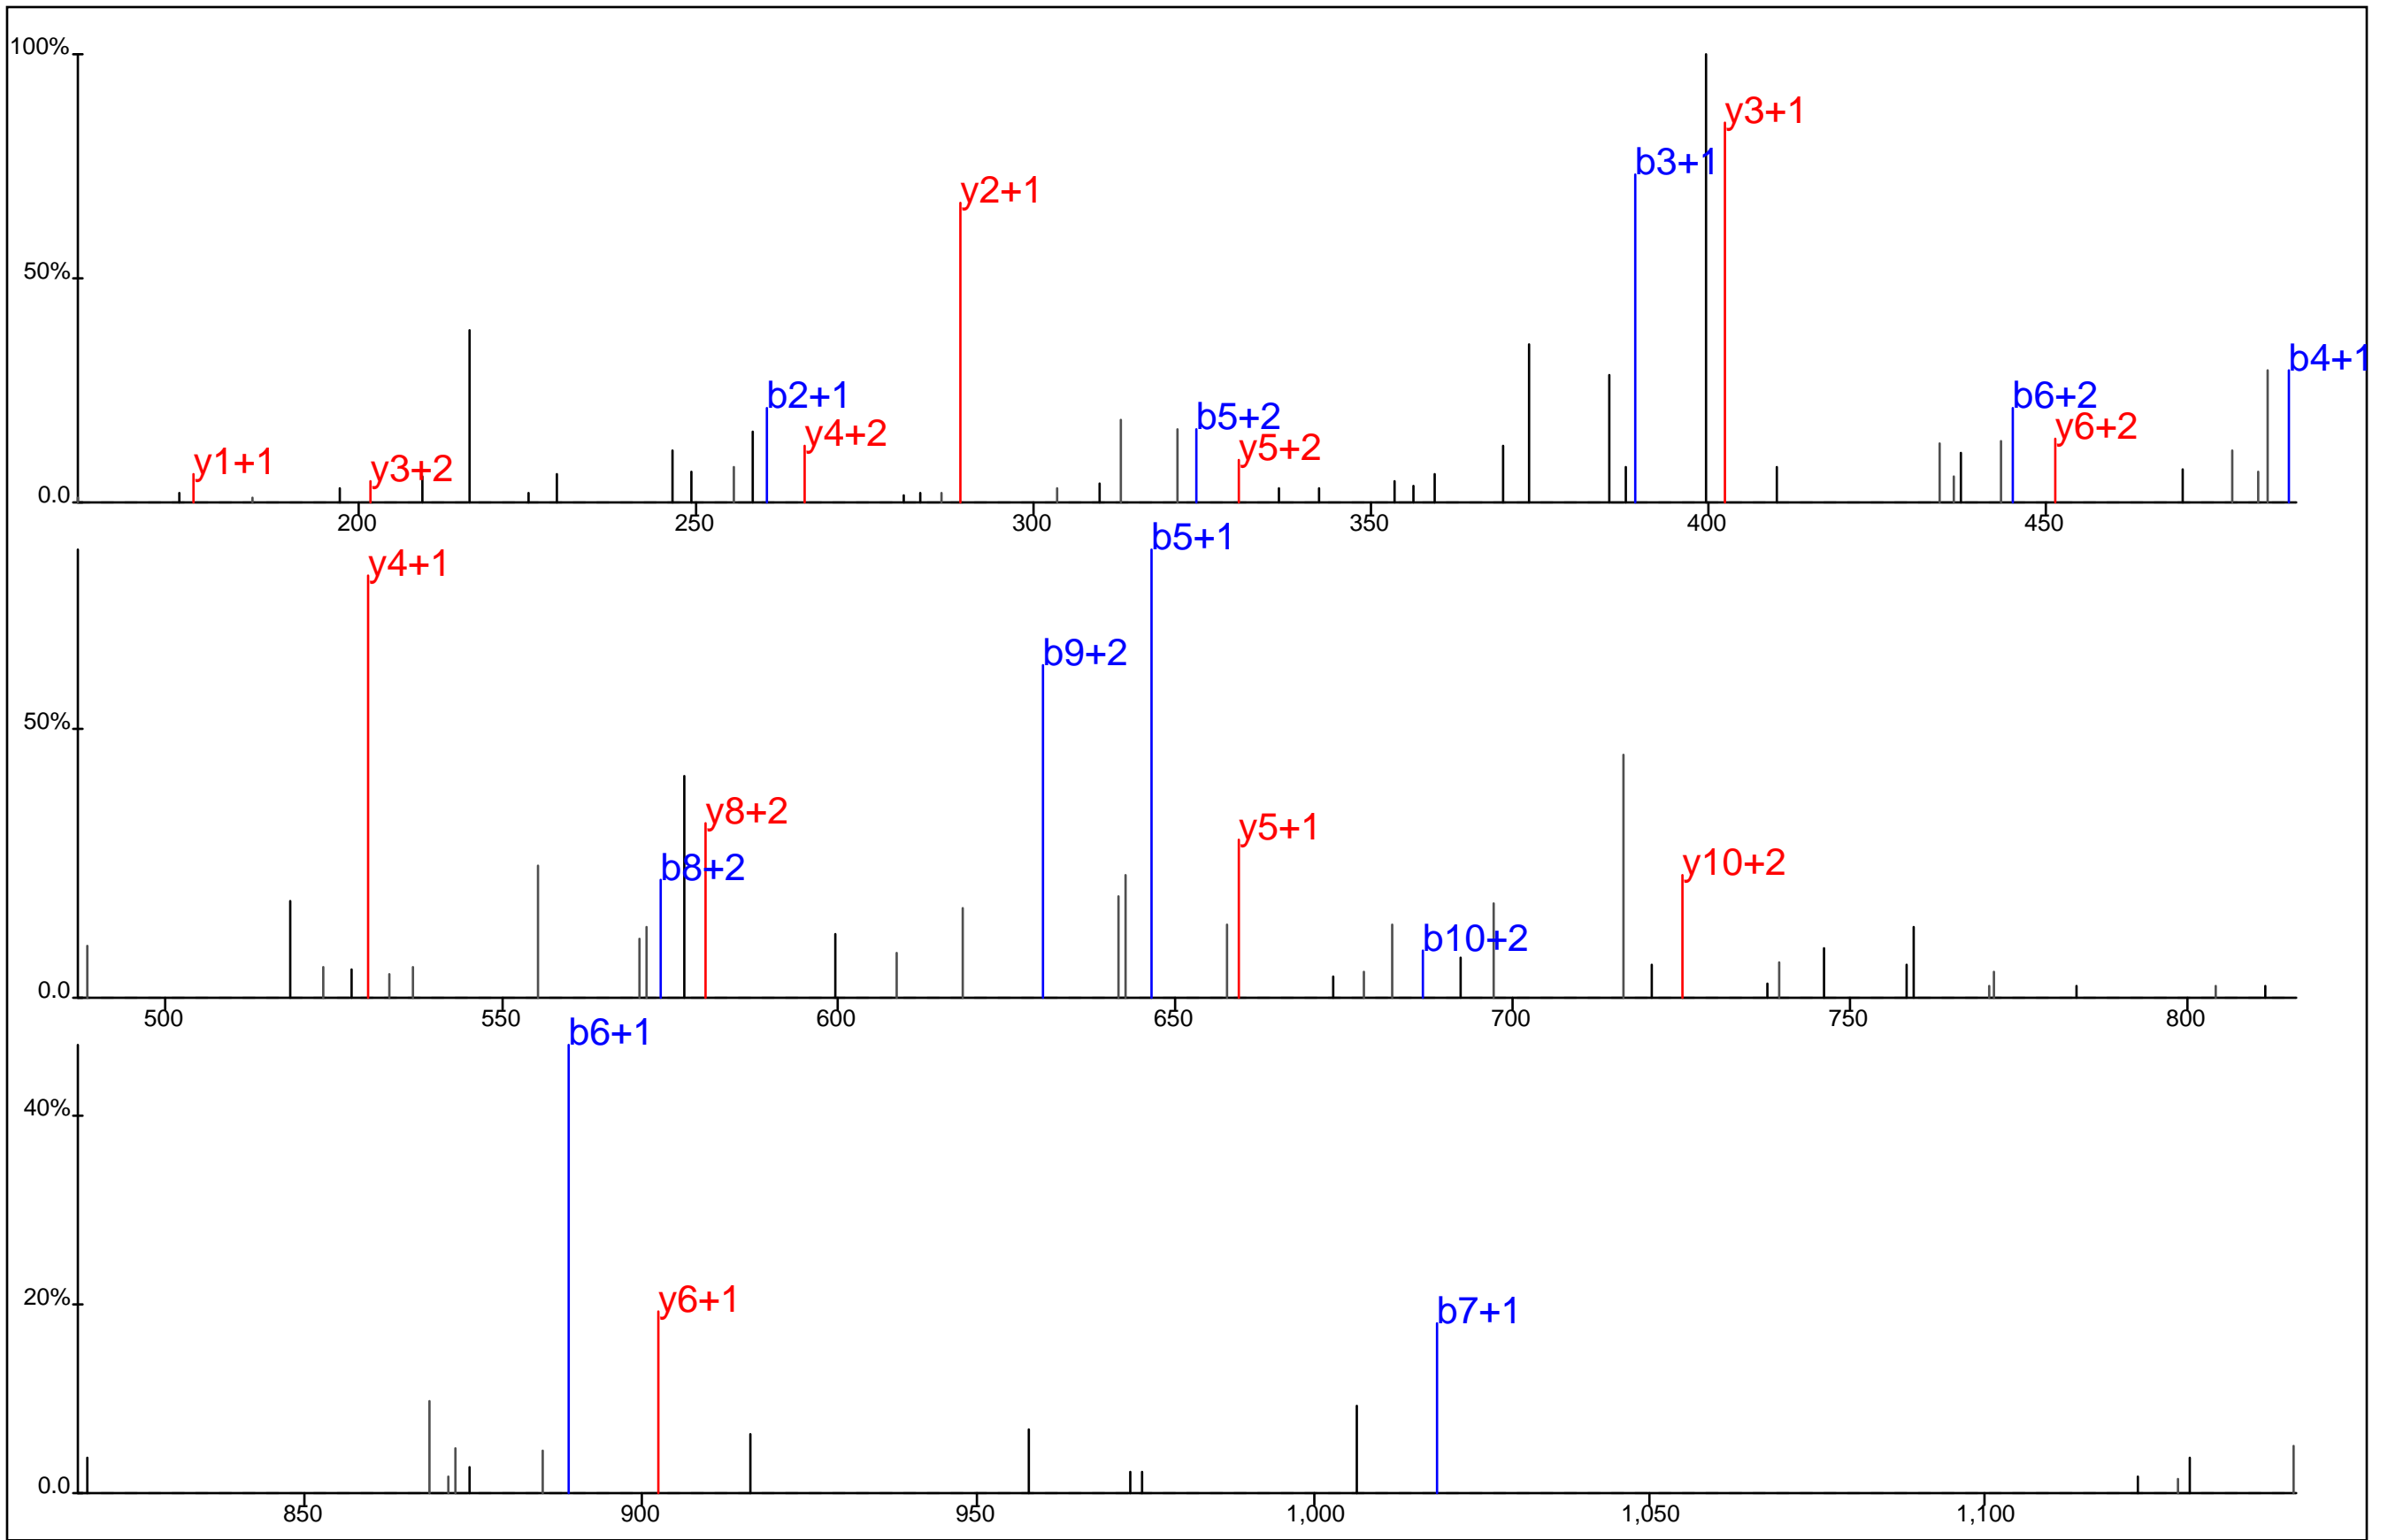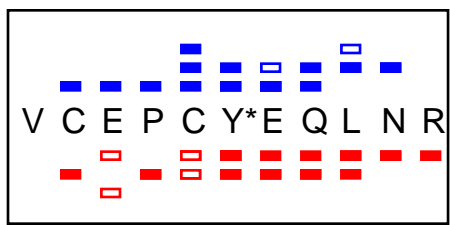

Protein Name: Hrs  
 gi Accession: 0  
 Precursor Mass: 516.5388+3  
 Delta Mass: 0.052 ppm  
 XCorr: 36.66

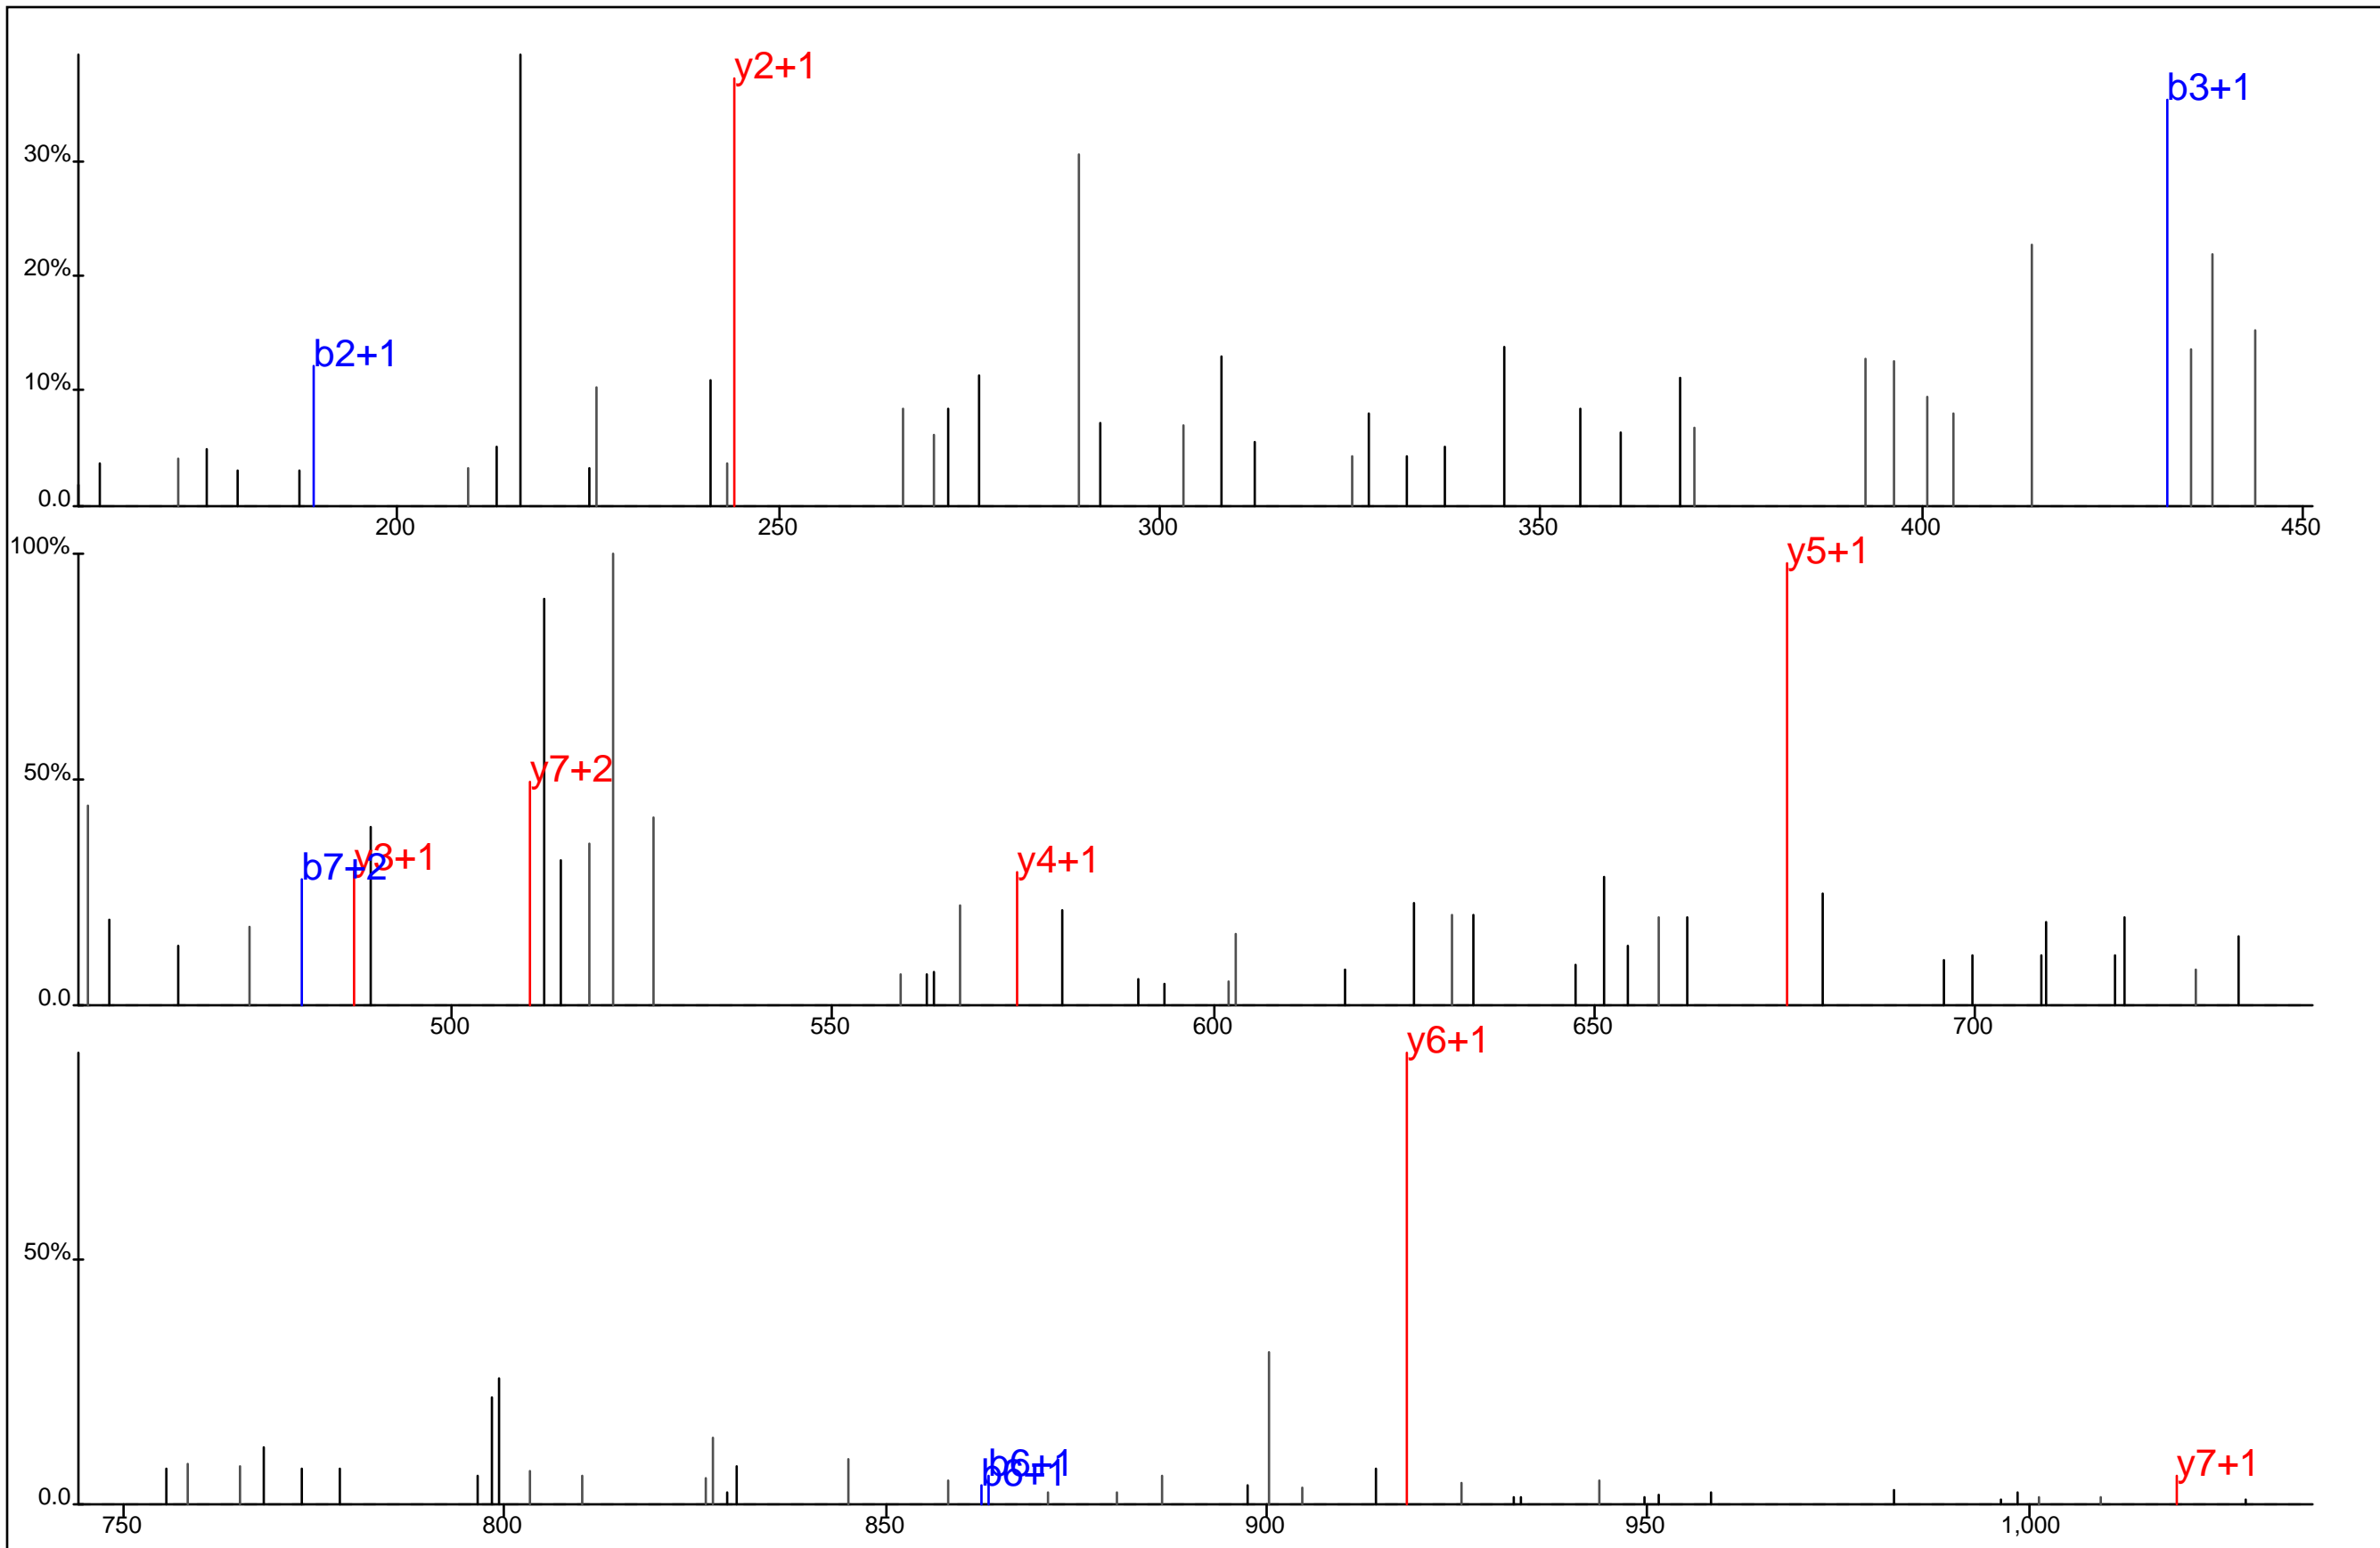

■ ▢ ▣ ▤ ▥ ▦  
 S T Y\*T S Y\*P K  
■ ▢ ▣ ▤ ▥ ▦

Protein Name: Hrs  
 gi Accession: 0  
 Precursor Mass: 553.6953+2  
 Delta Mass: 0.833 ppm  
 XCorr: 20.36

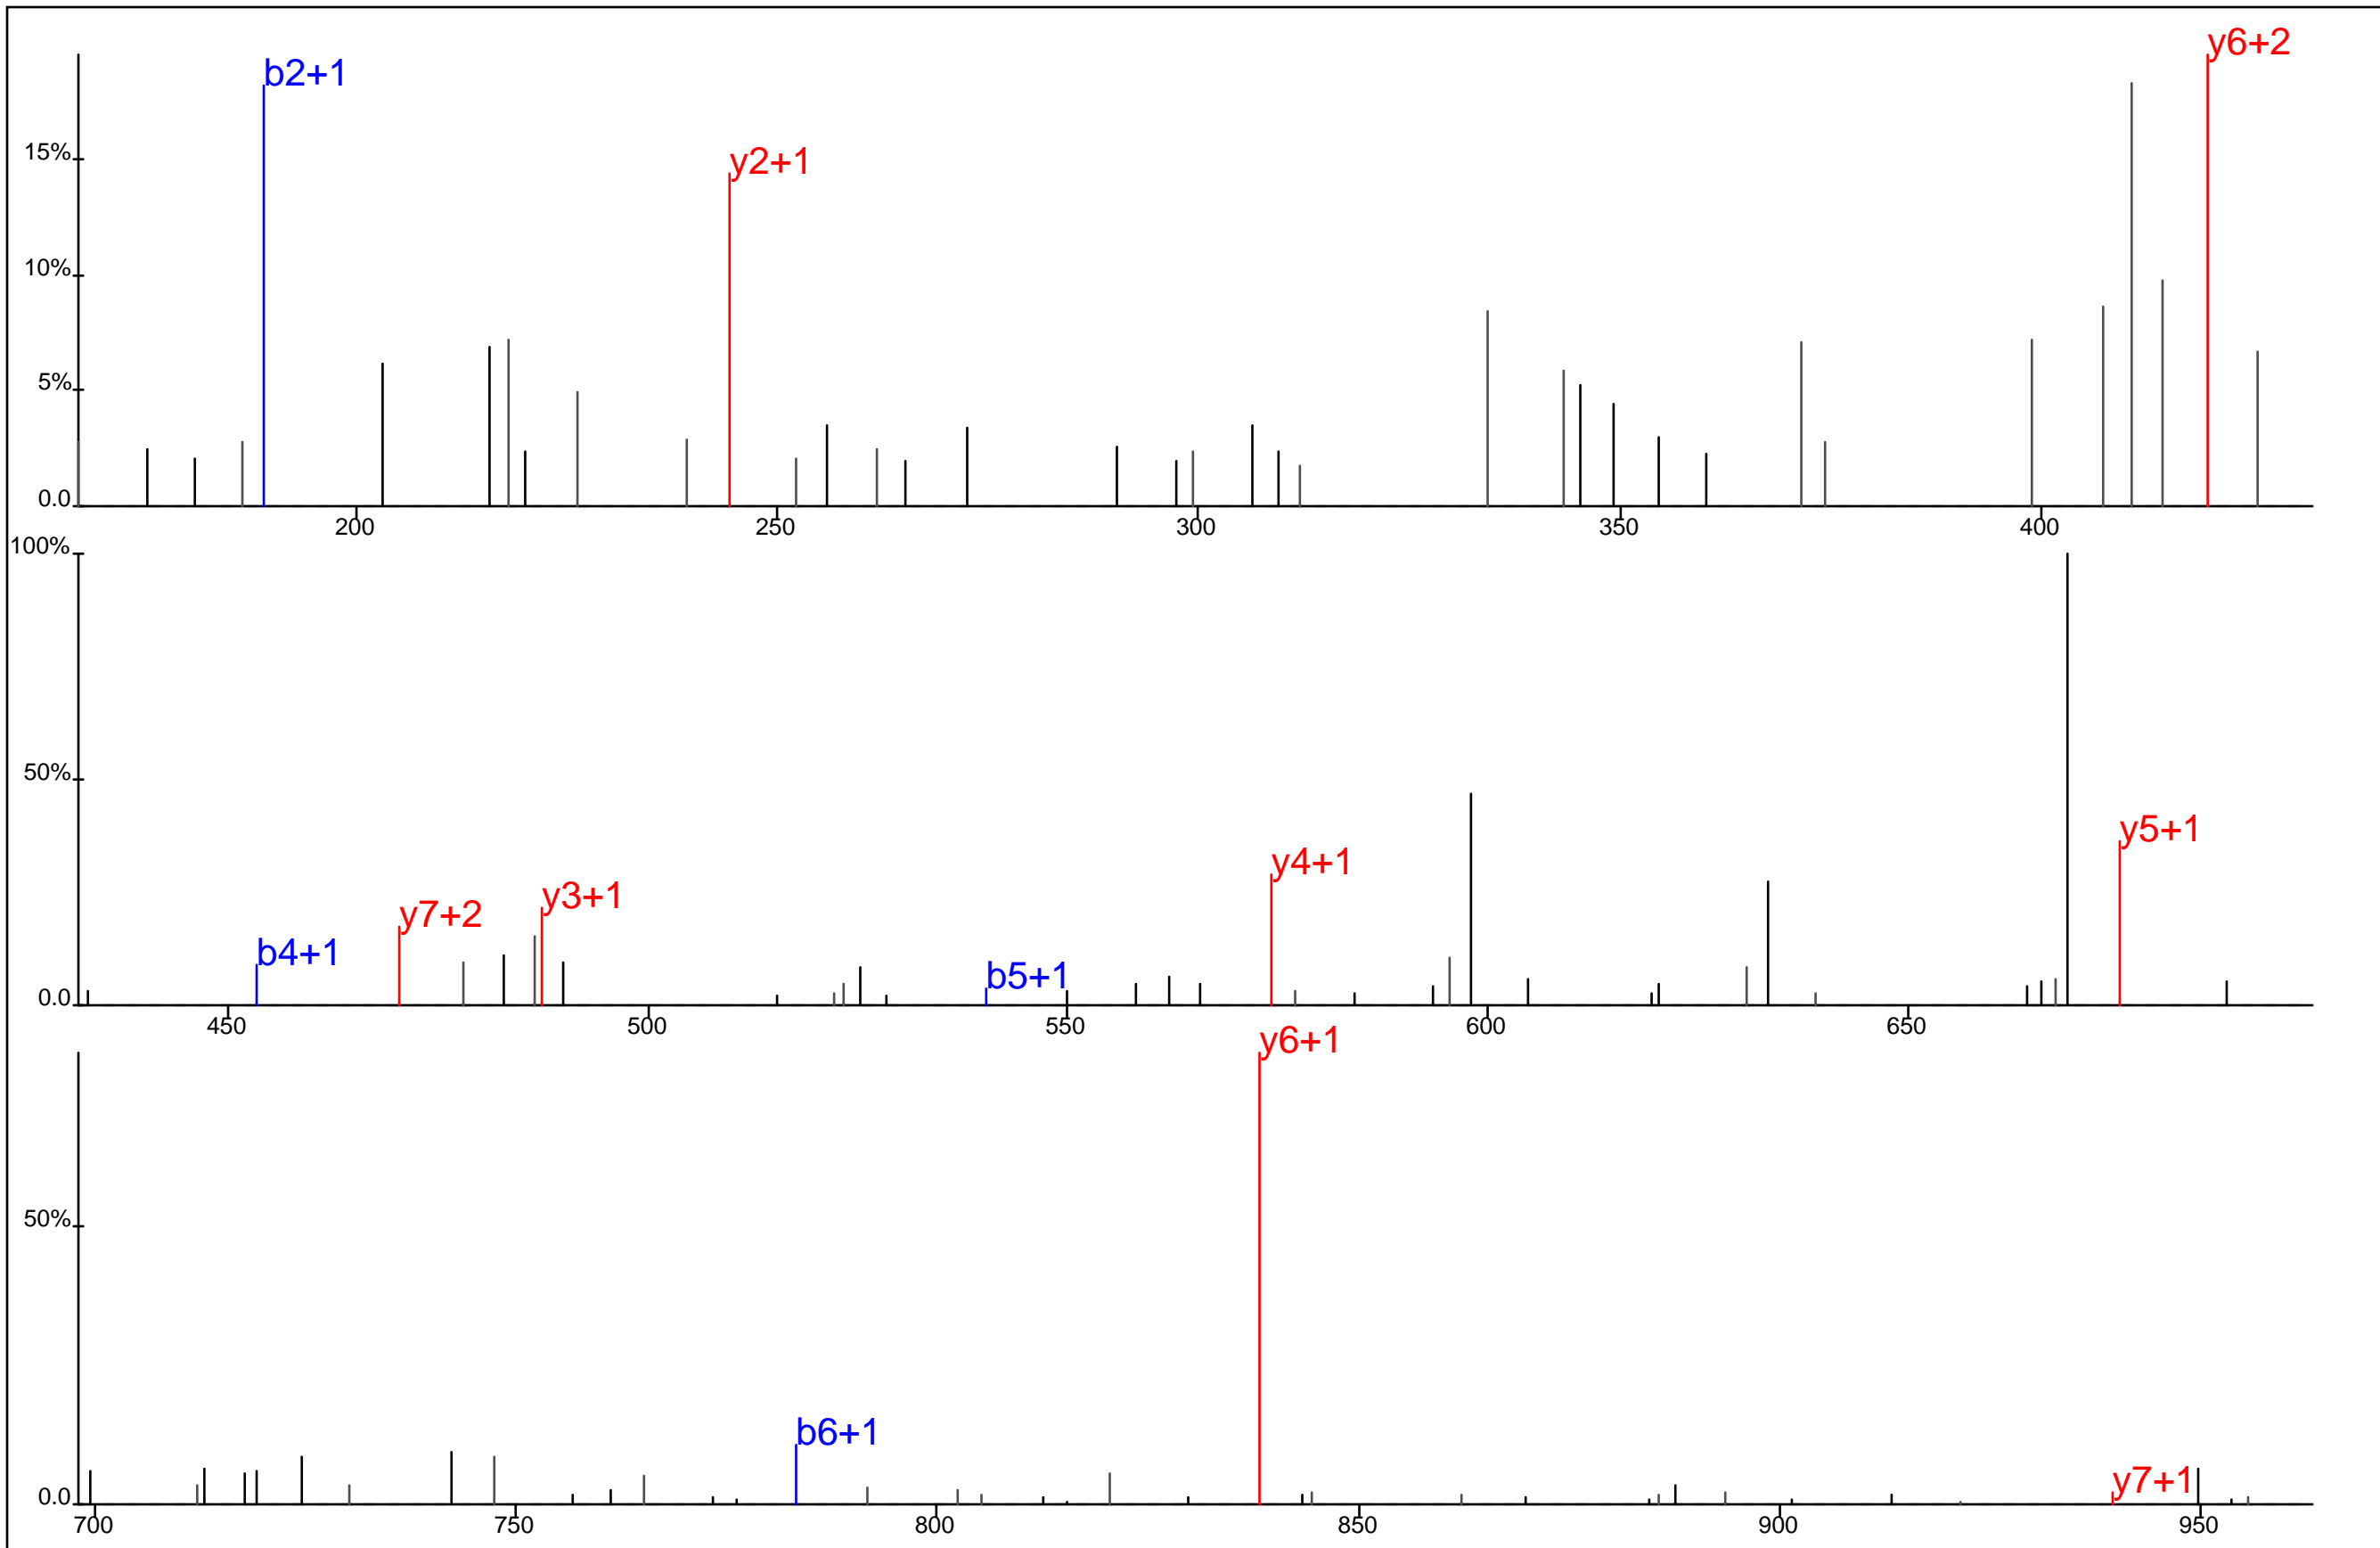

■ □ ■ □ ■ □  
 S T Y T S Y\*P K  
■ □ ■ □ ■ □

Protein Name: Hrs  
 gi Accession: 0  
 Precursor Mass: 513.7138+2  
 Delta Mass: 2.323 ppm  
 XCorr: 33.53

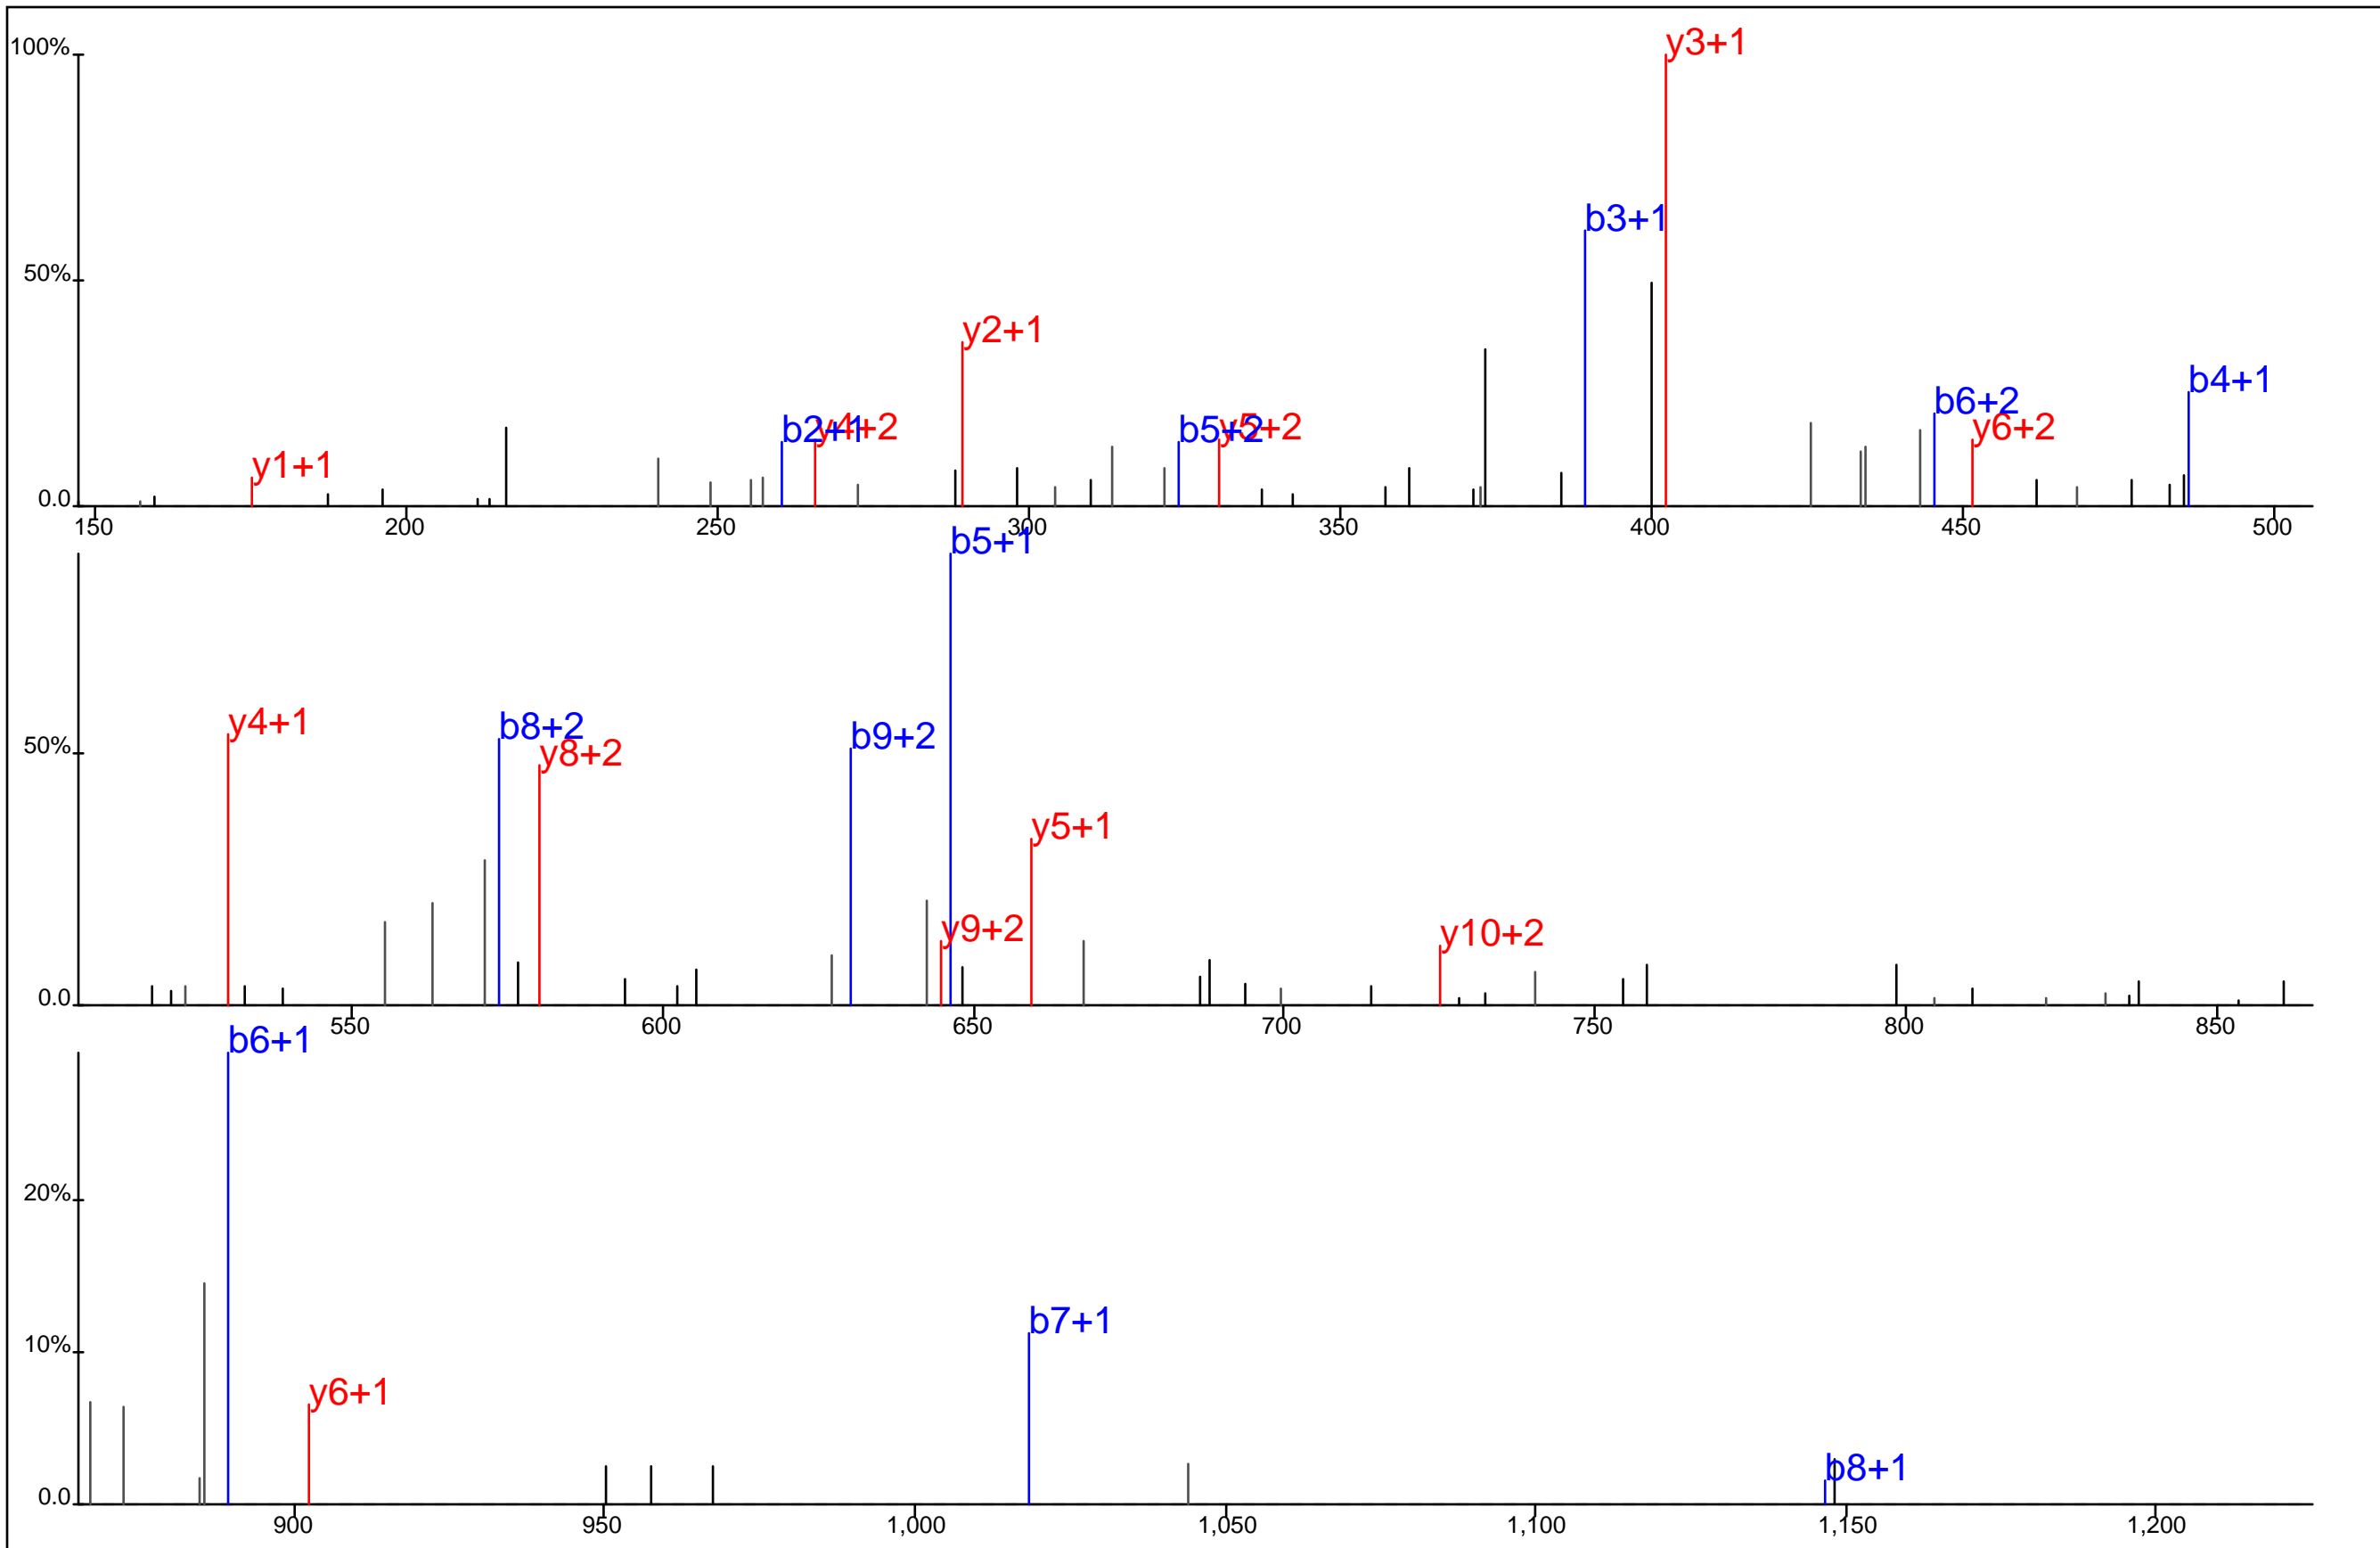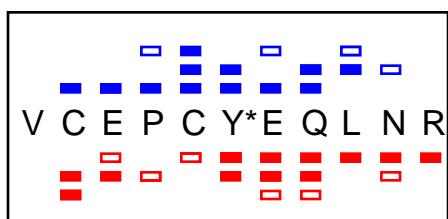

Protein Name: Hrs  
 gi Accession: 0  
 Precursor Mass: 516.5391+3  
 Delta Mass: 0.527 ppm  
 XCorr: 38.79



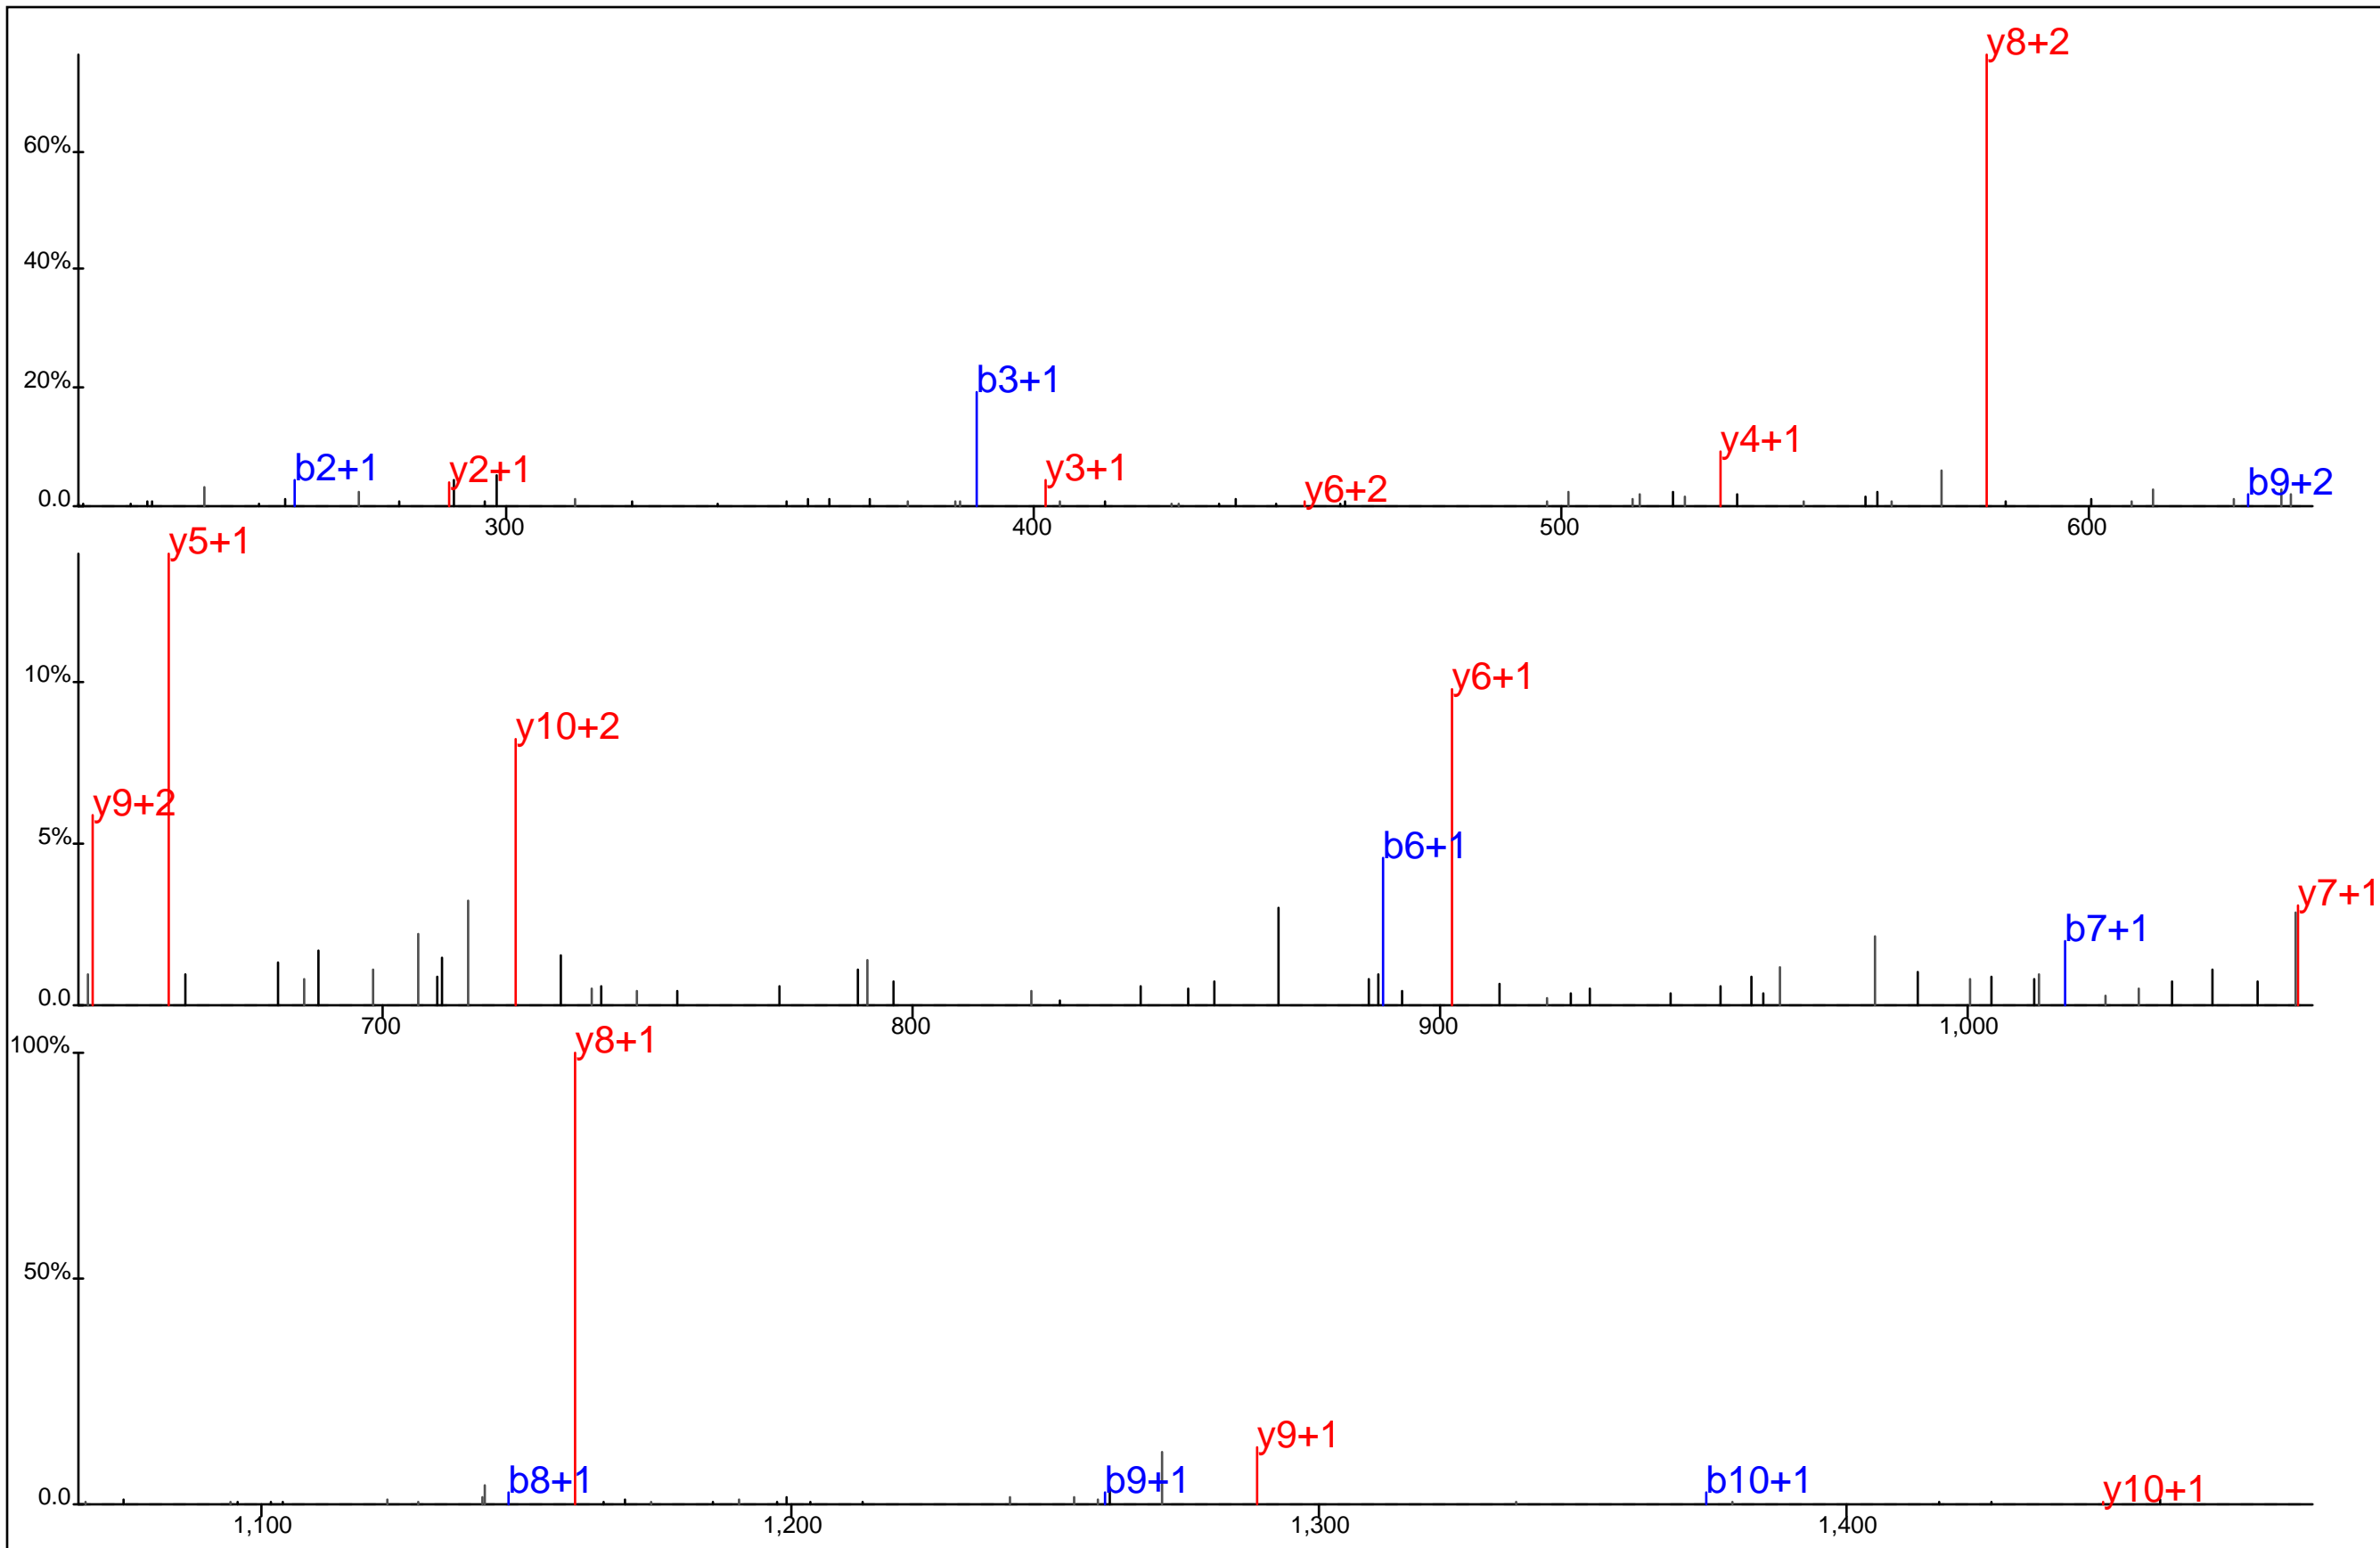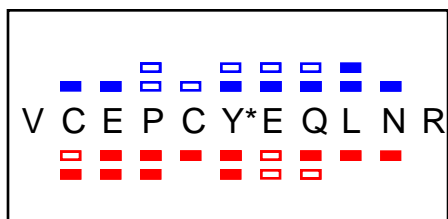

Protein Name: Hrs  
 gi Accession: 0  
 Precursor Mass: 774.3057+2  
 Delta Mass: 1.520 ppm  
 XCorr: 59.6

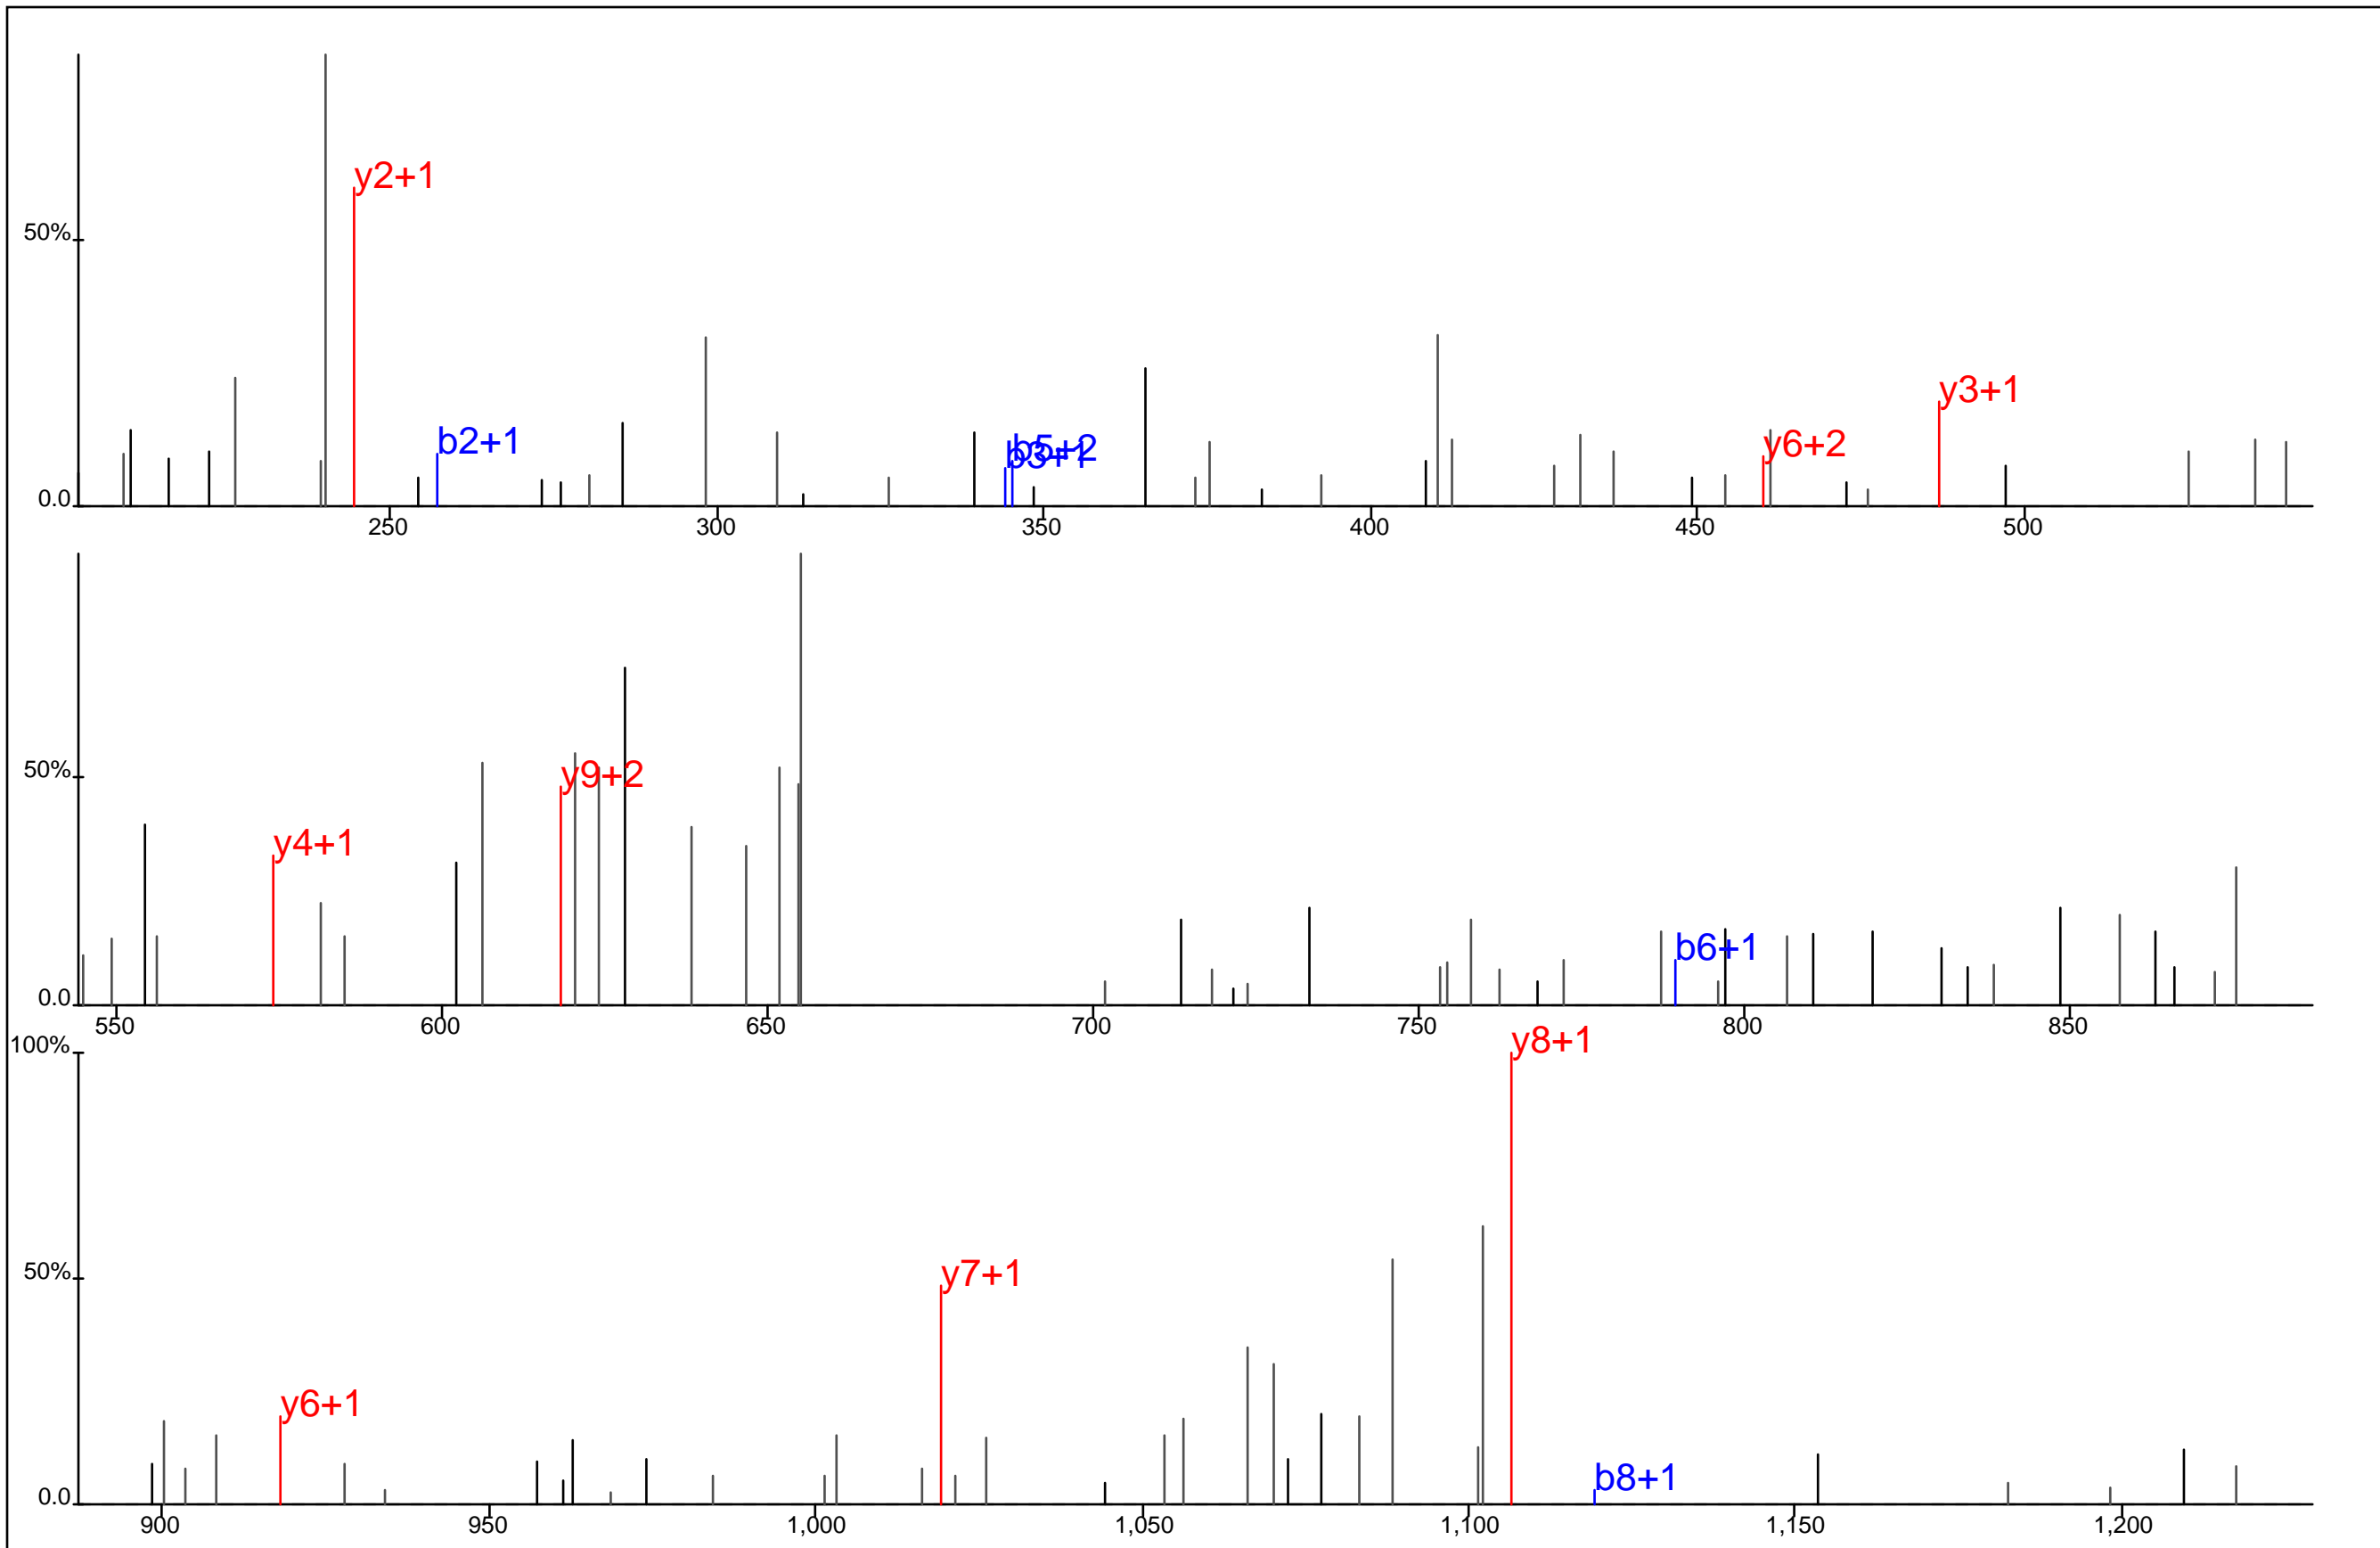

■ ■ ■ ■ ■ ■ ■ ■  
 Q K S T Y\* T S Y\* P K  
■ ■ ■ ■ ■ ■ ■ ■

Protein Name: Hrs  
 gi Accession: 0  
 Precursor Mass: 681.7722+2  
 Delta Mass: 0.570 ppm  
 XCorr: 23.03

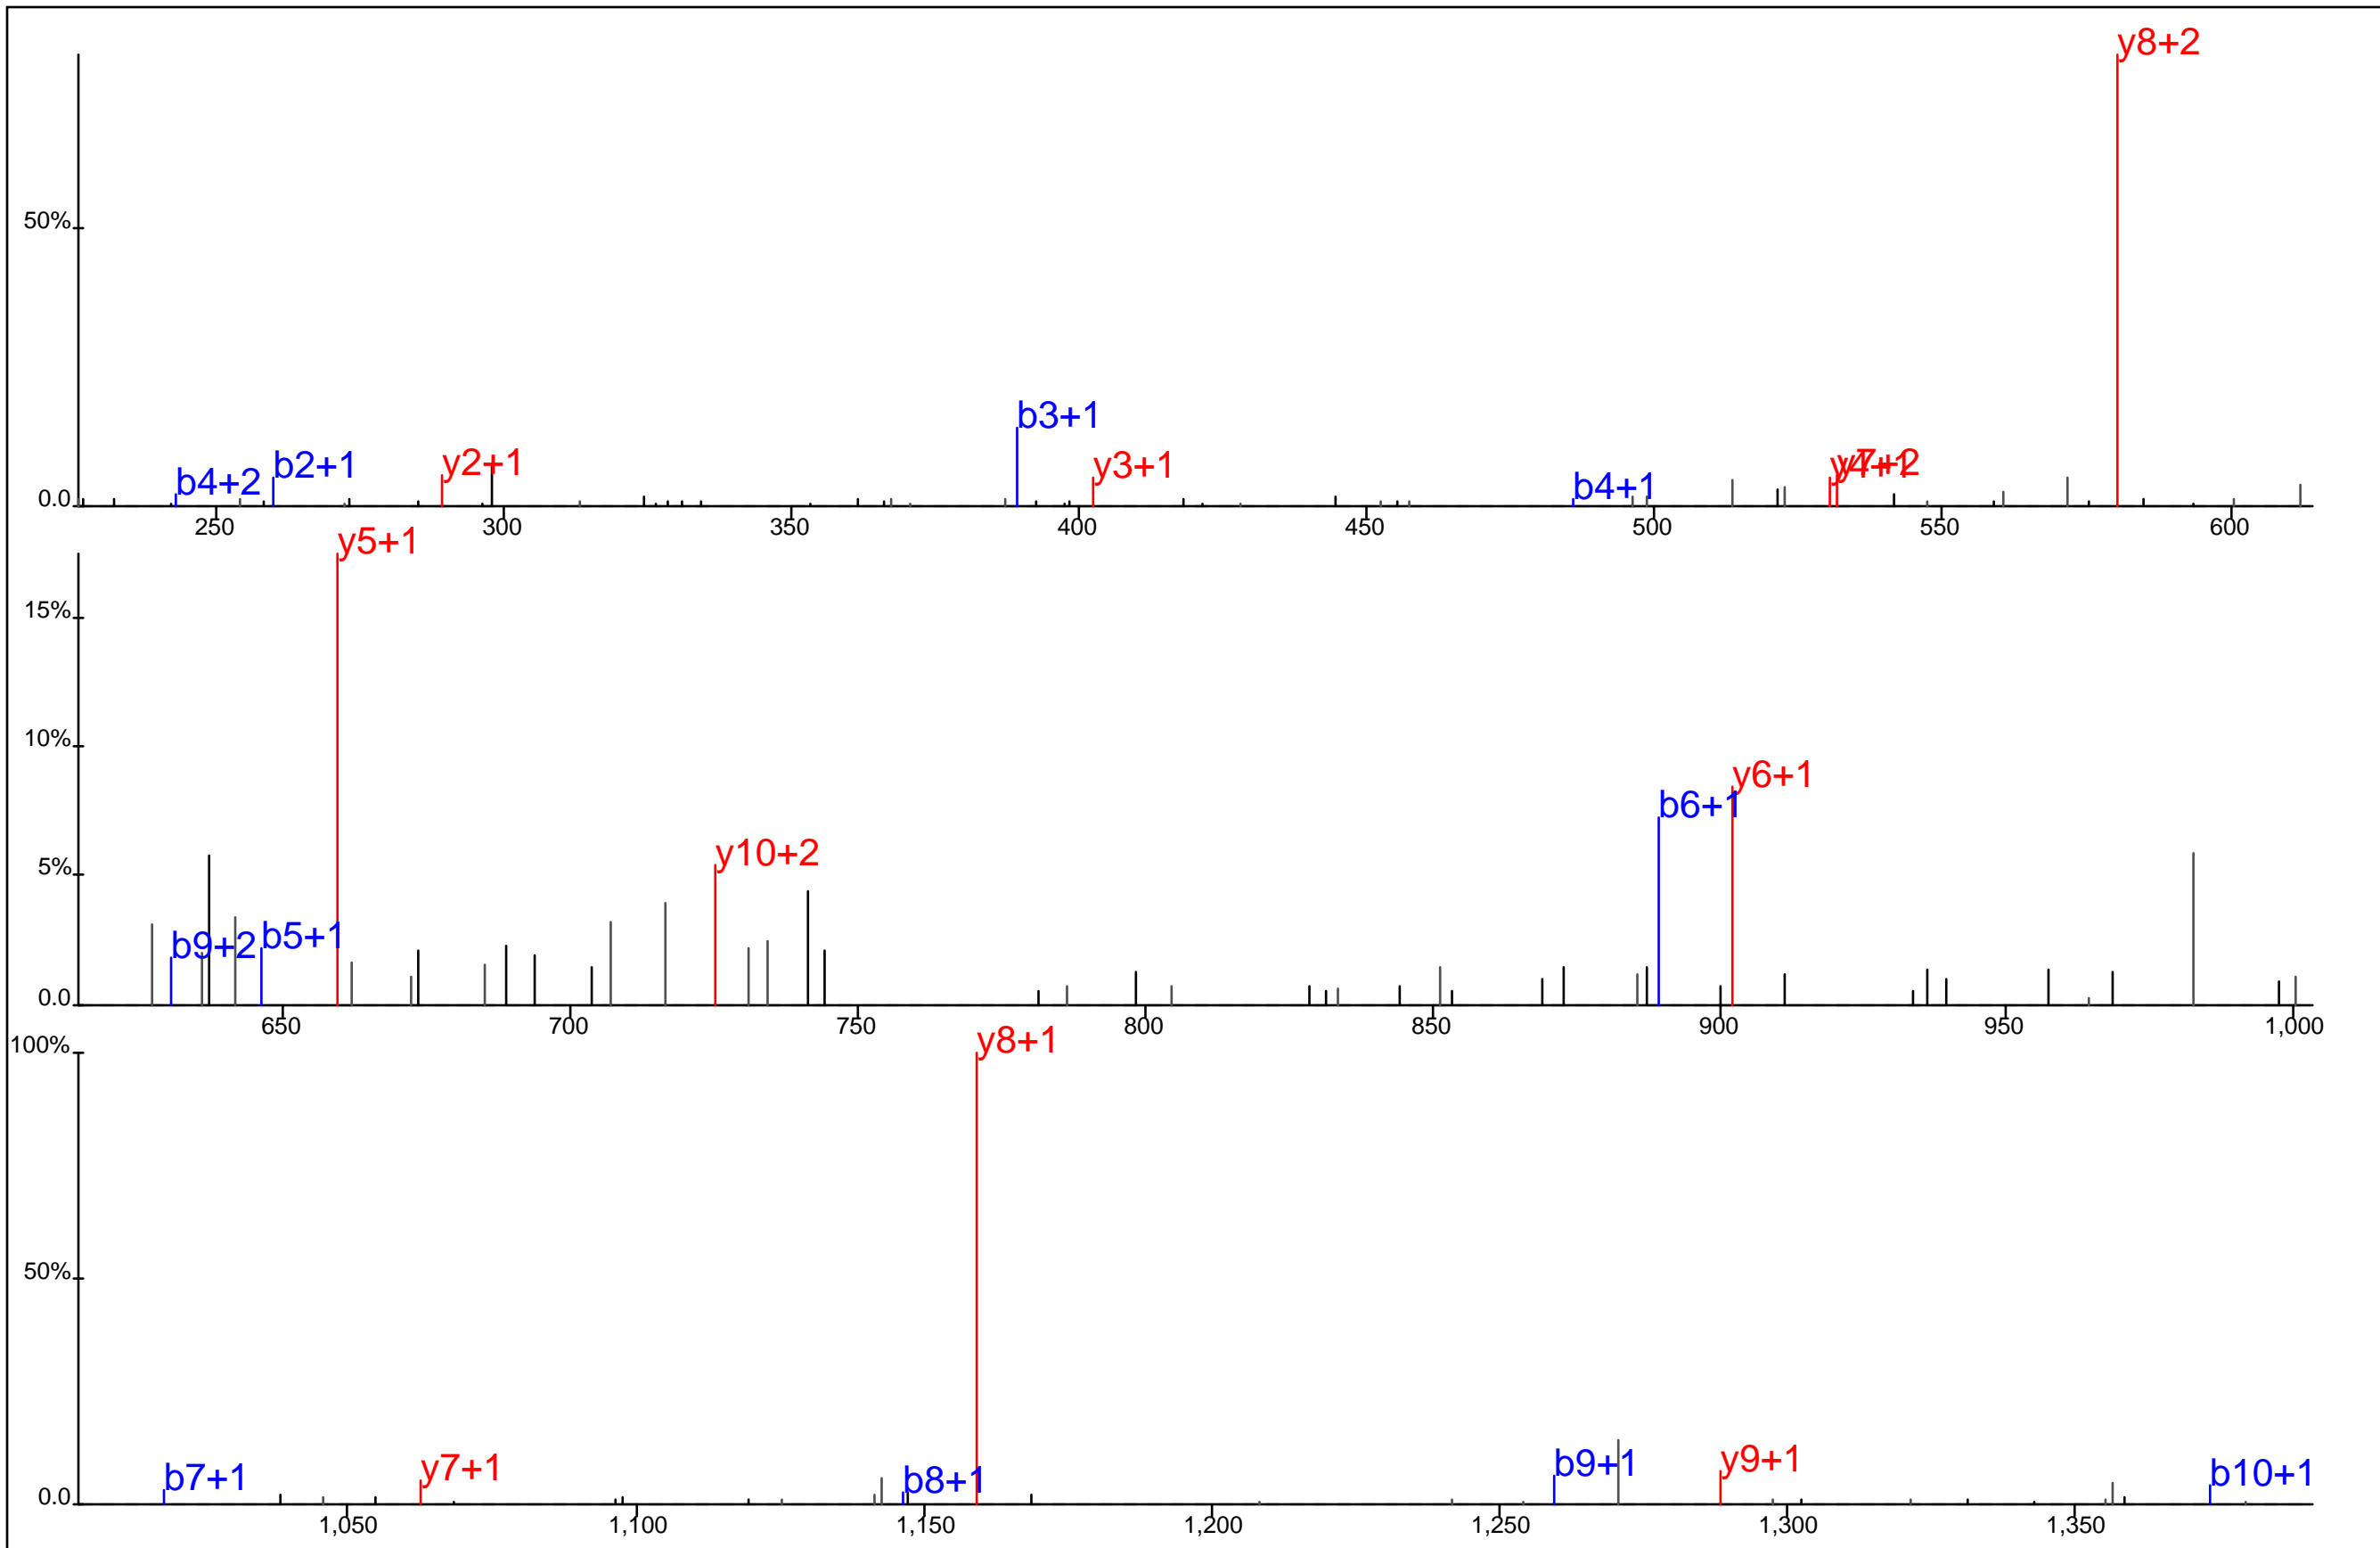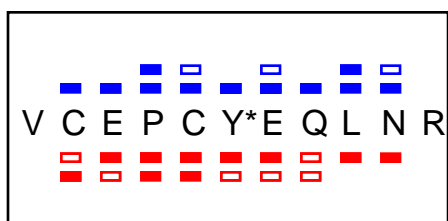

Protein Name: Hrs  
 gi Accession: 0  
 Precursor Mass: 774.3063+2  
 Delta Mass: 2.308 ppm  
 XCorr: 52.55

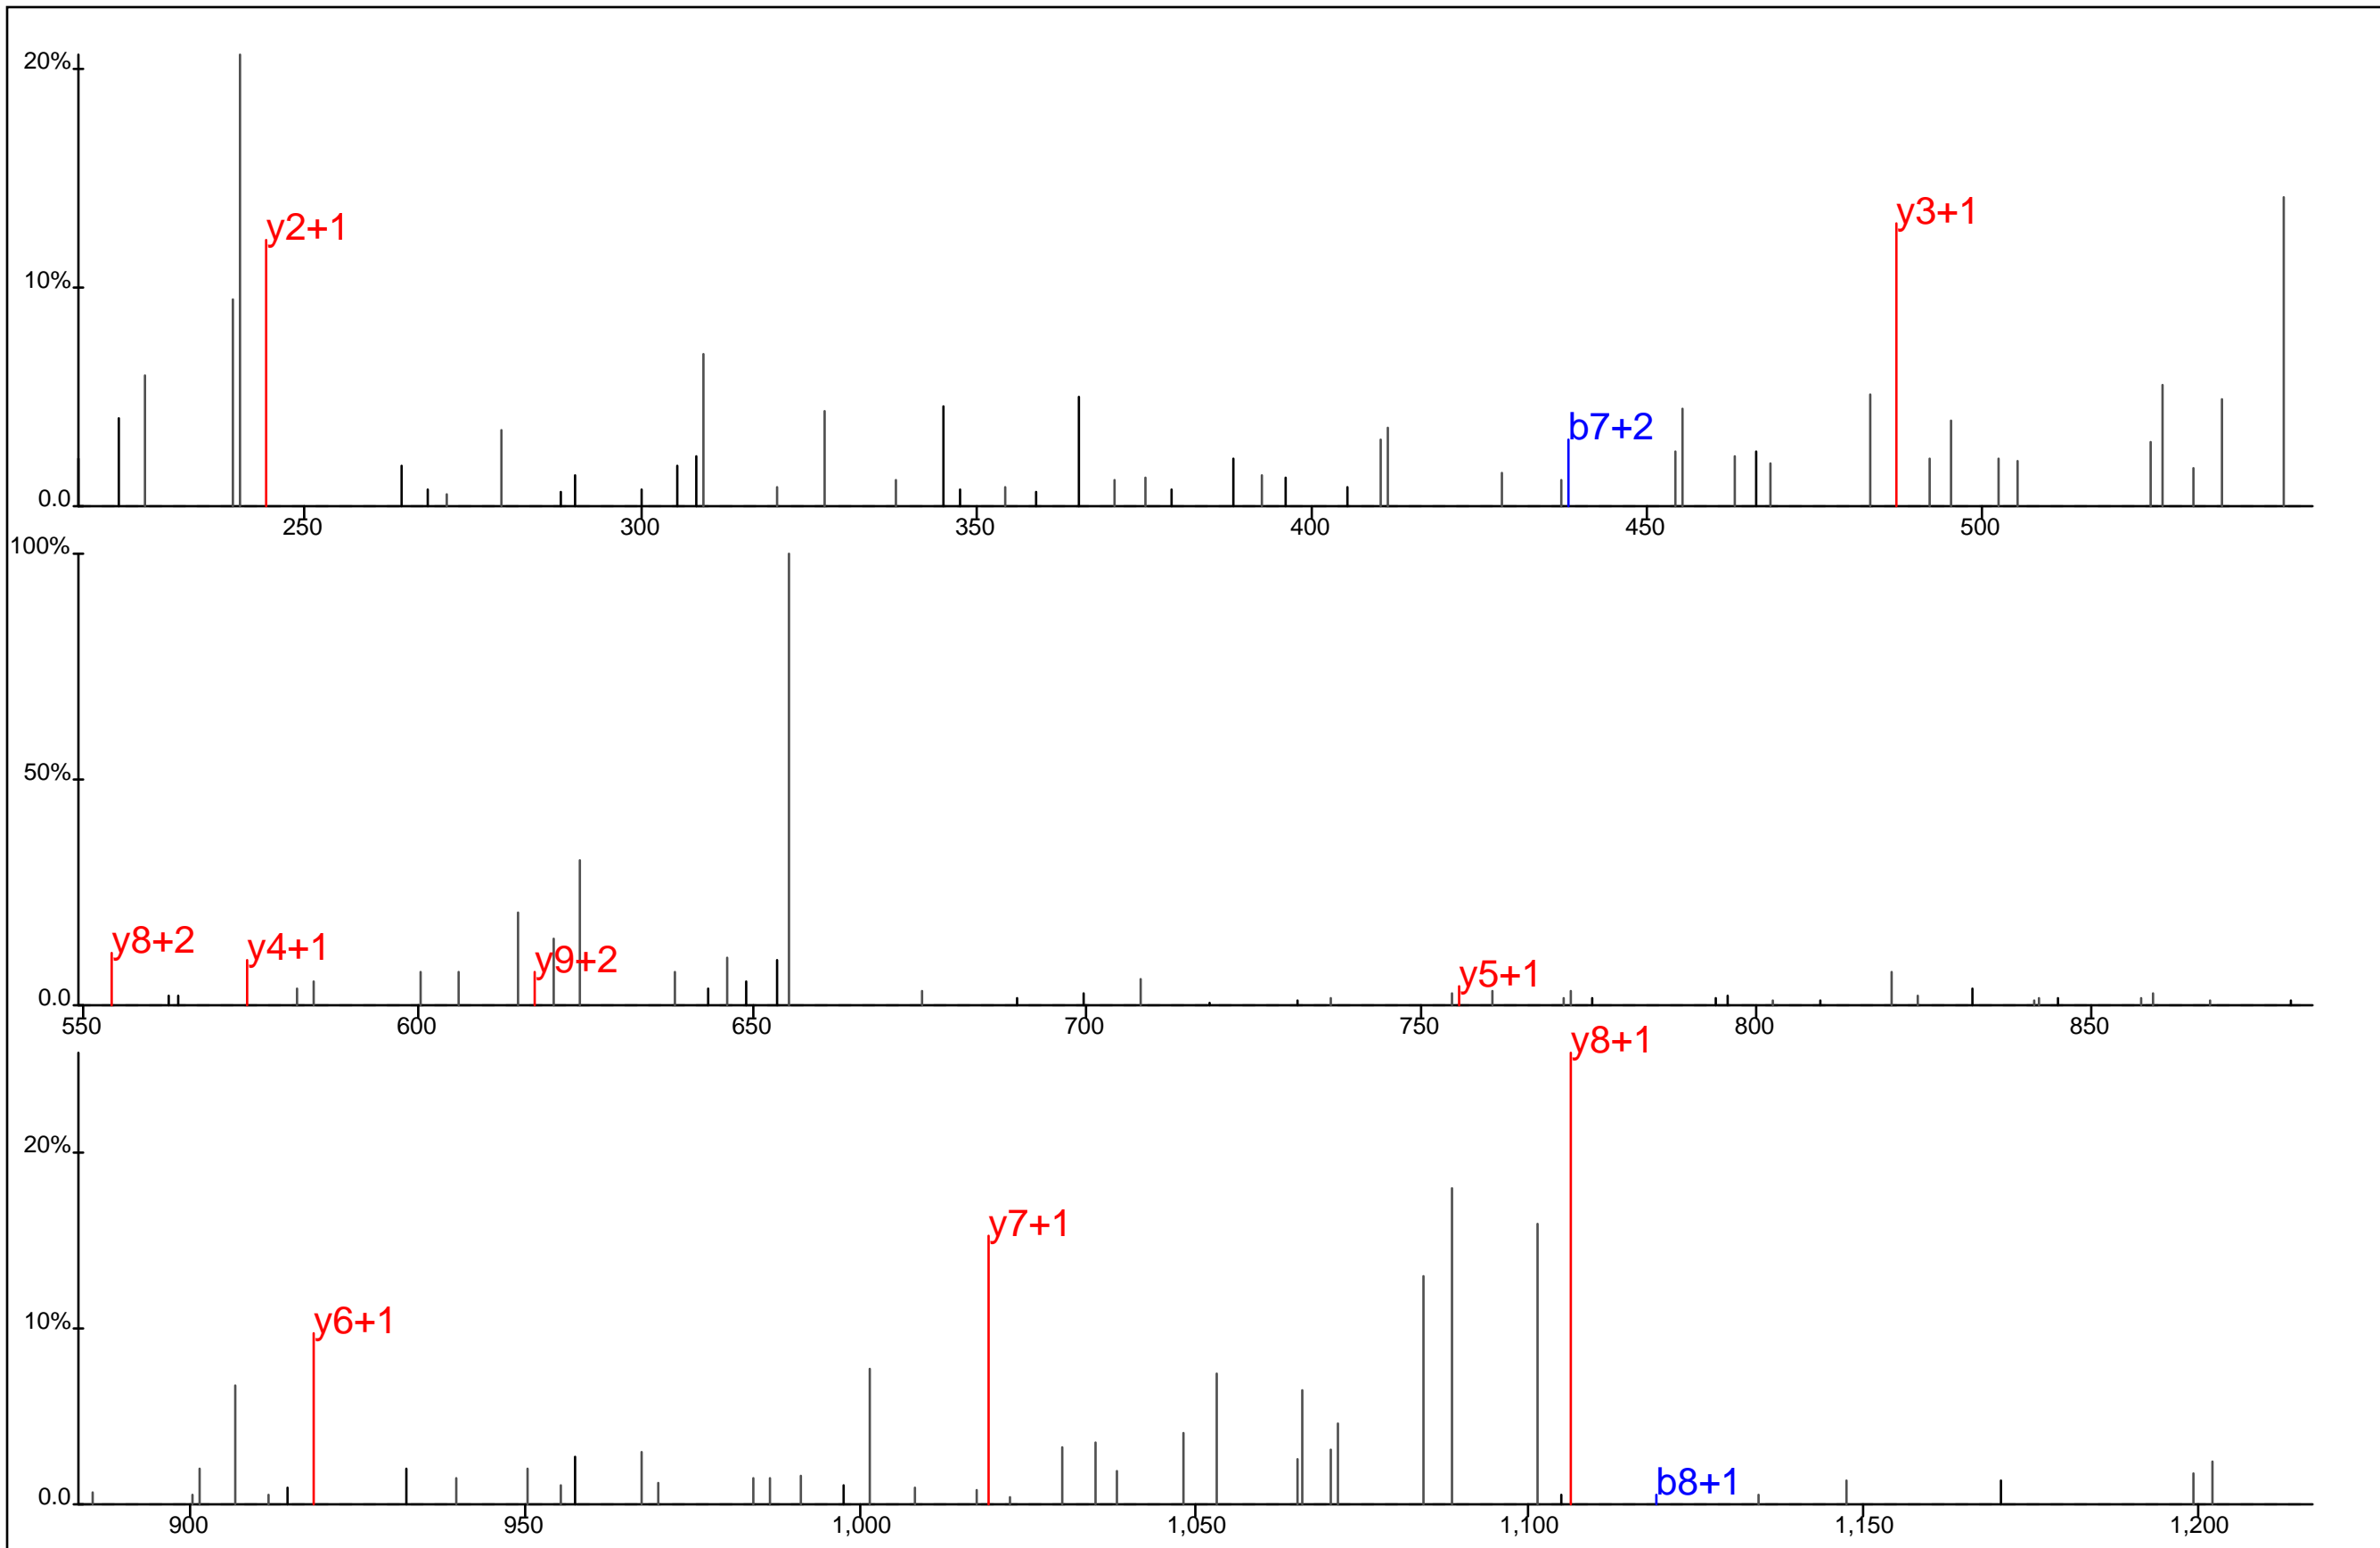

□ □ □ □ □ □ □  
 Q K S T Y T\* S Y\* P K  
■ ■ ■ ■ ■ ■ ■

Protein Name: Hrs  
 gi Accession: 0  
 Precursor Mass: 681.7715+2  
 Delta Mass: 1.556 ppm  
 XCorr: 22.04

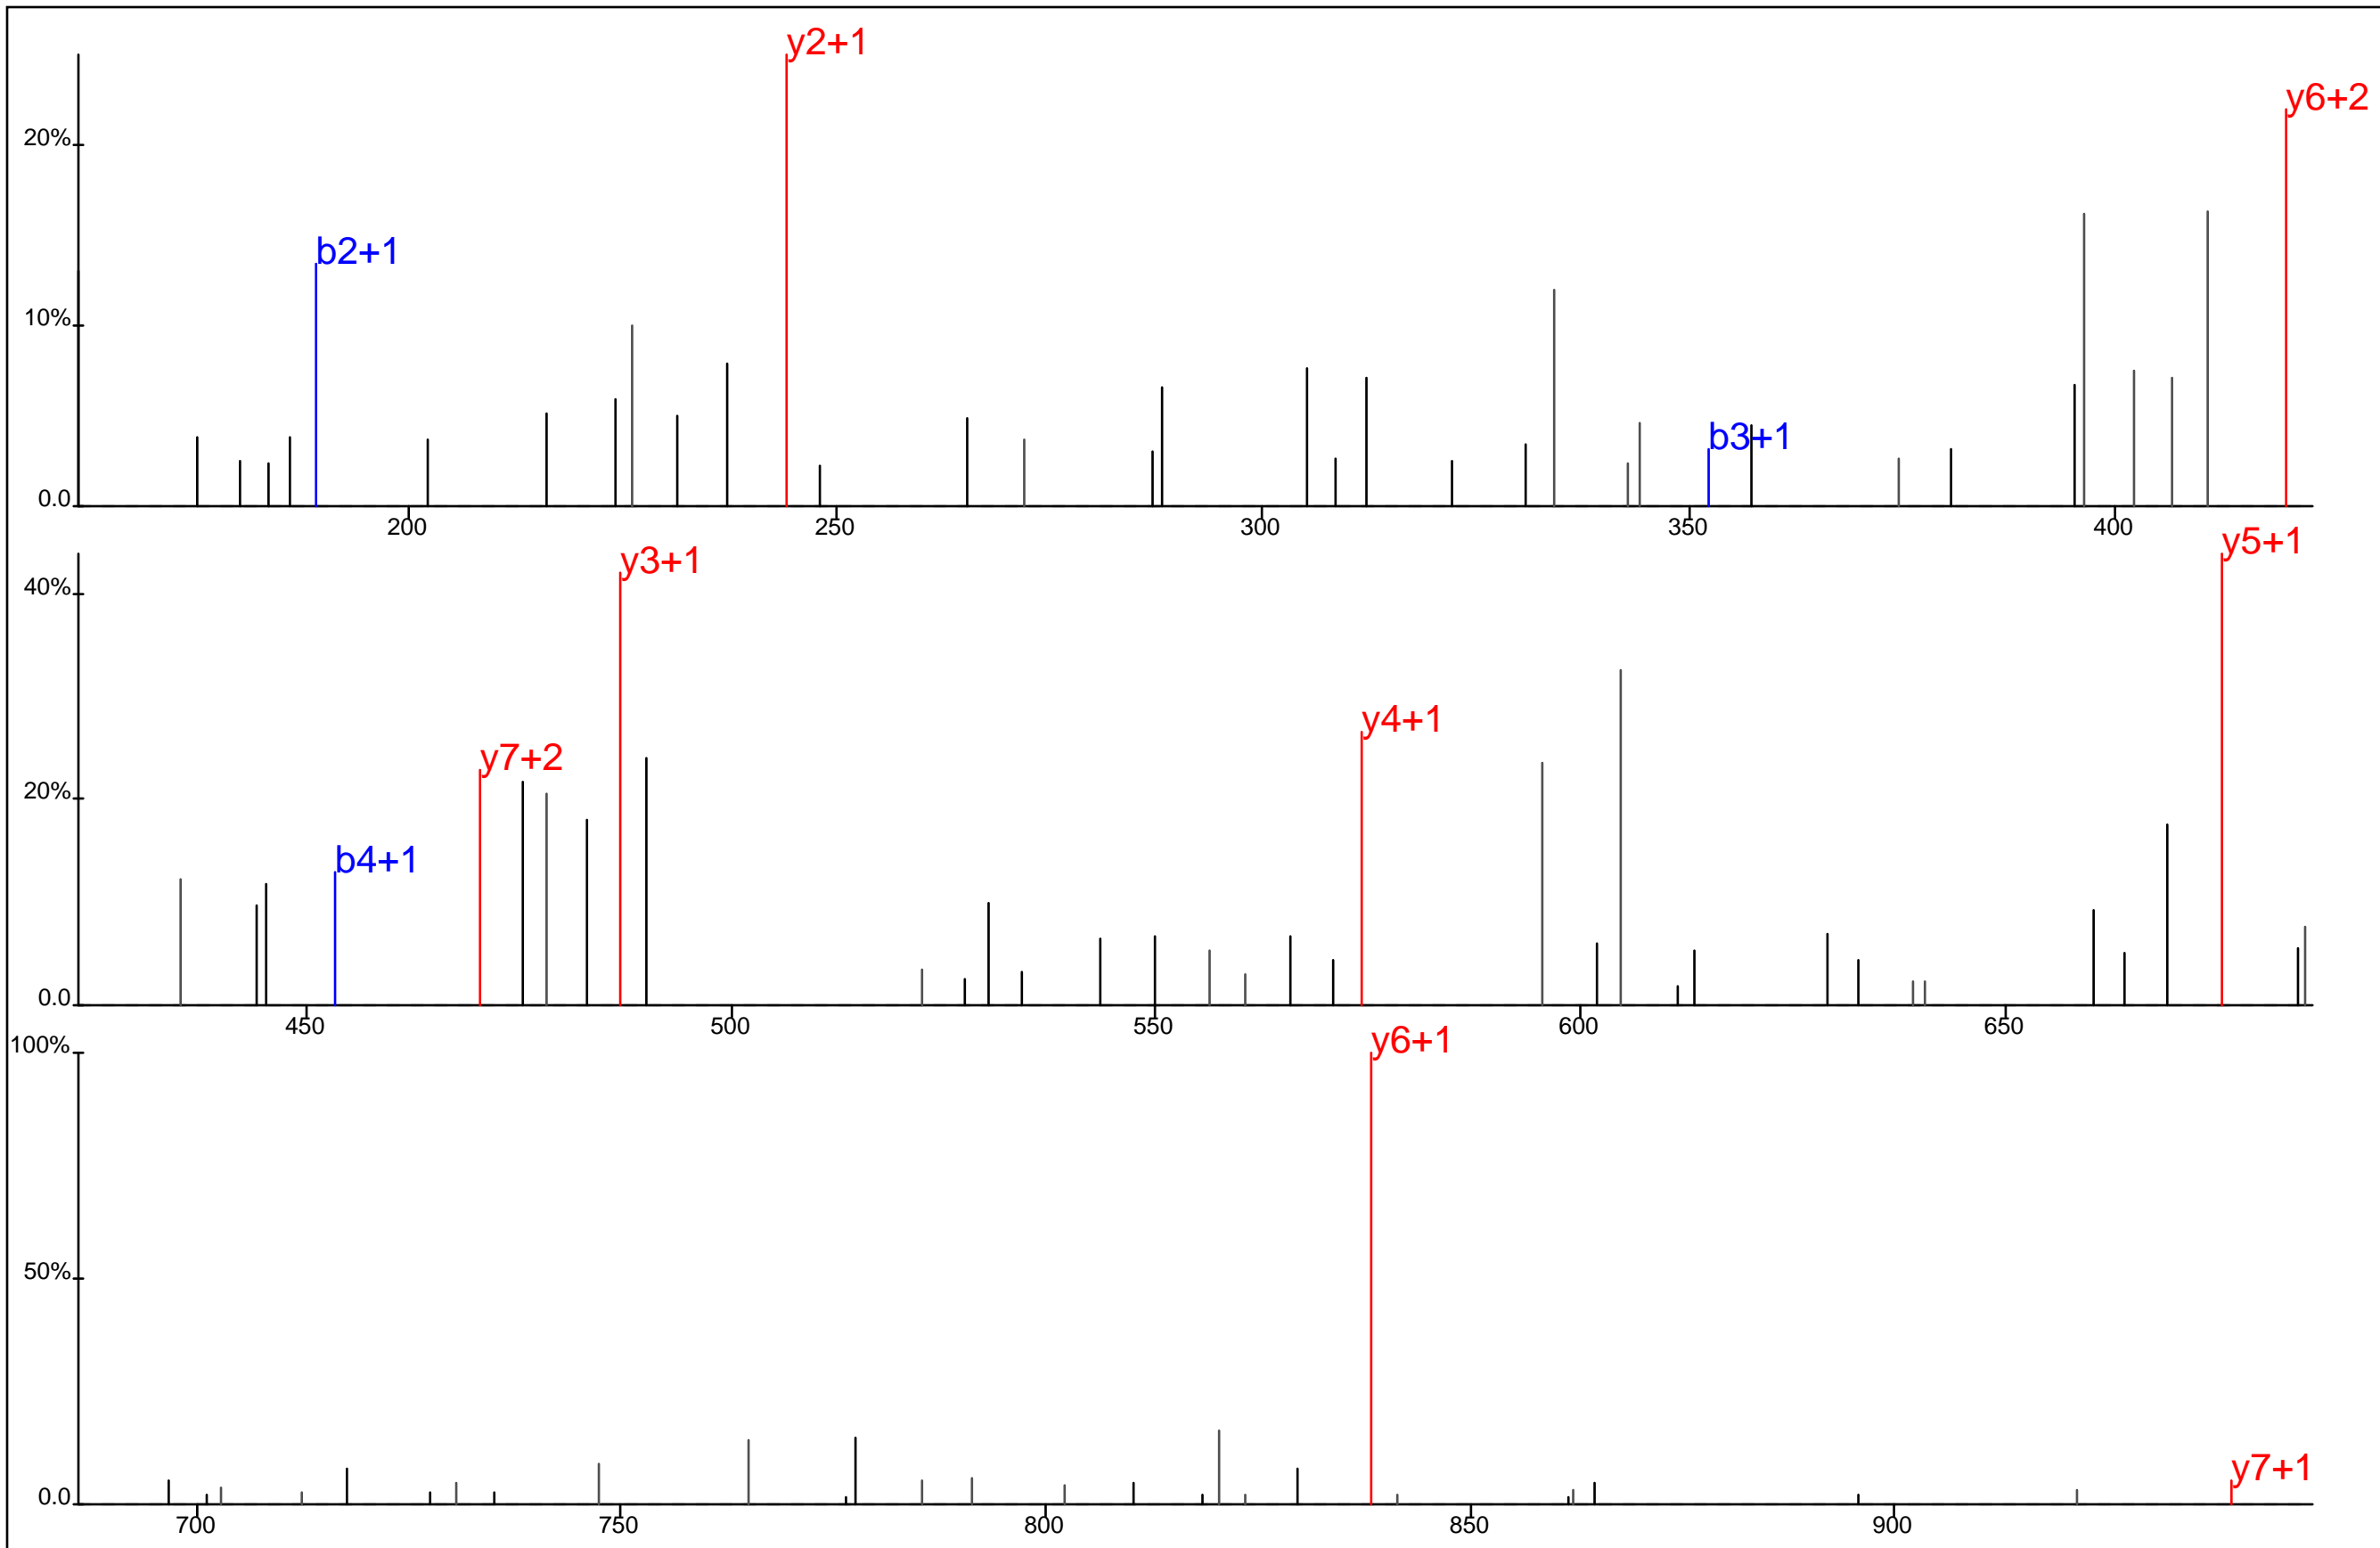

■ ▢ ■ ▢ ■ ▢  
 S T Y T S Y\* P K  
▢ ■ ▢ ▢ ■ ■

Protein Name: Hrs  
 gi Accession: 0  
 Precursor Mass: 513.7134+2  
 Delta Mass: 1.491 ppm  
 XCorr: 39.63

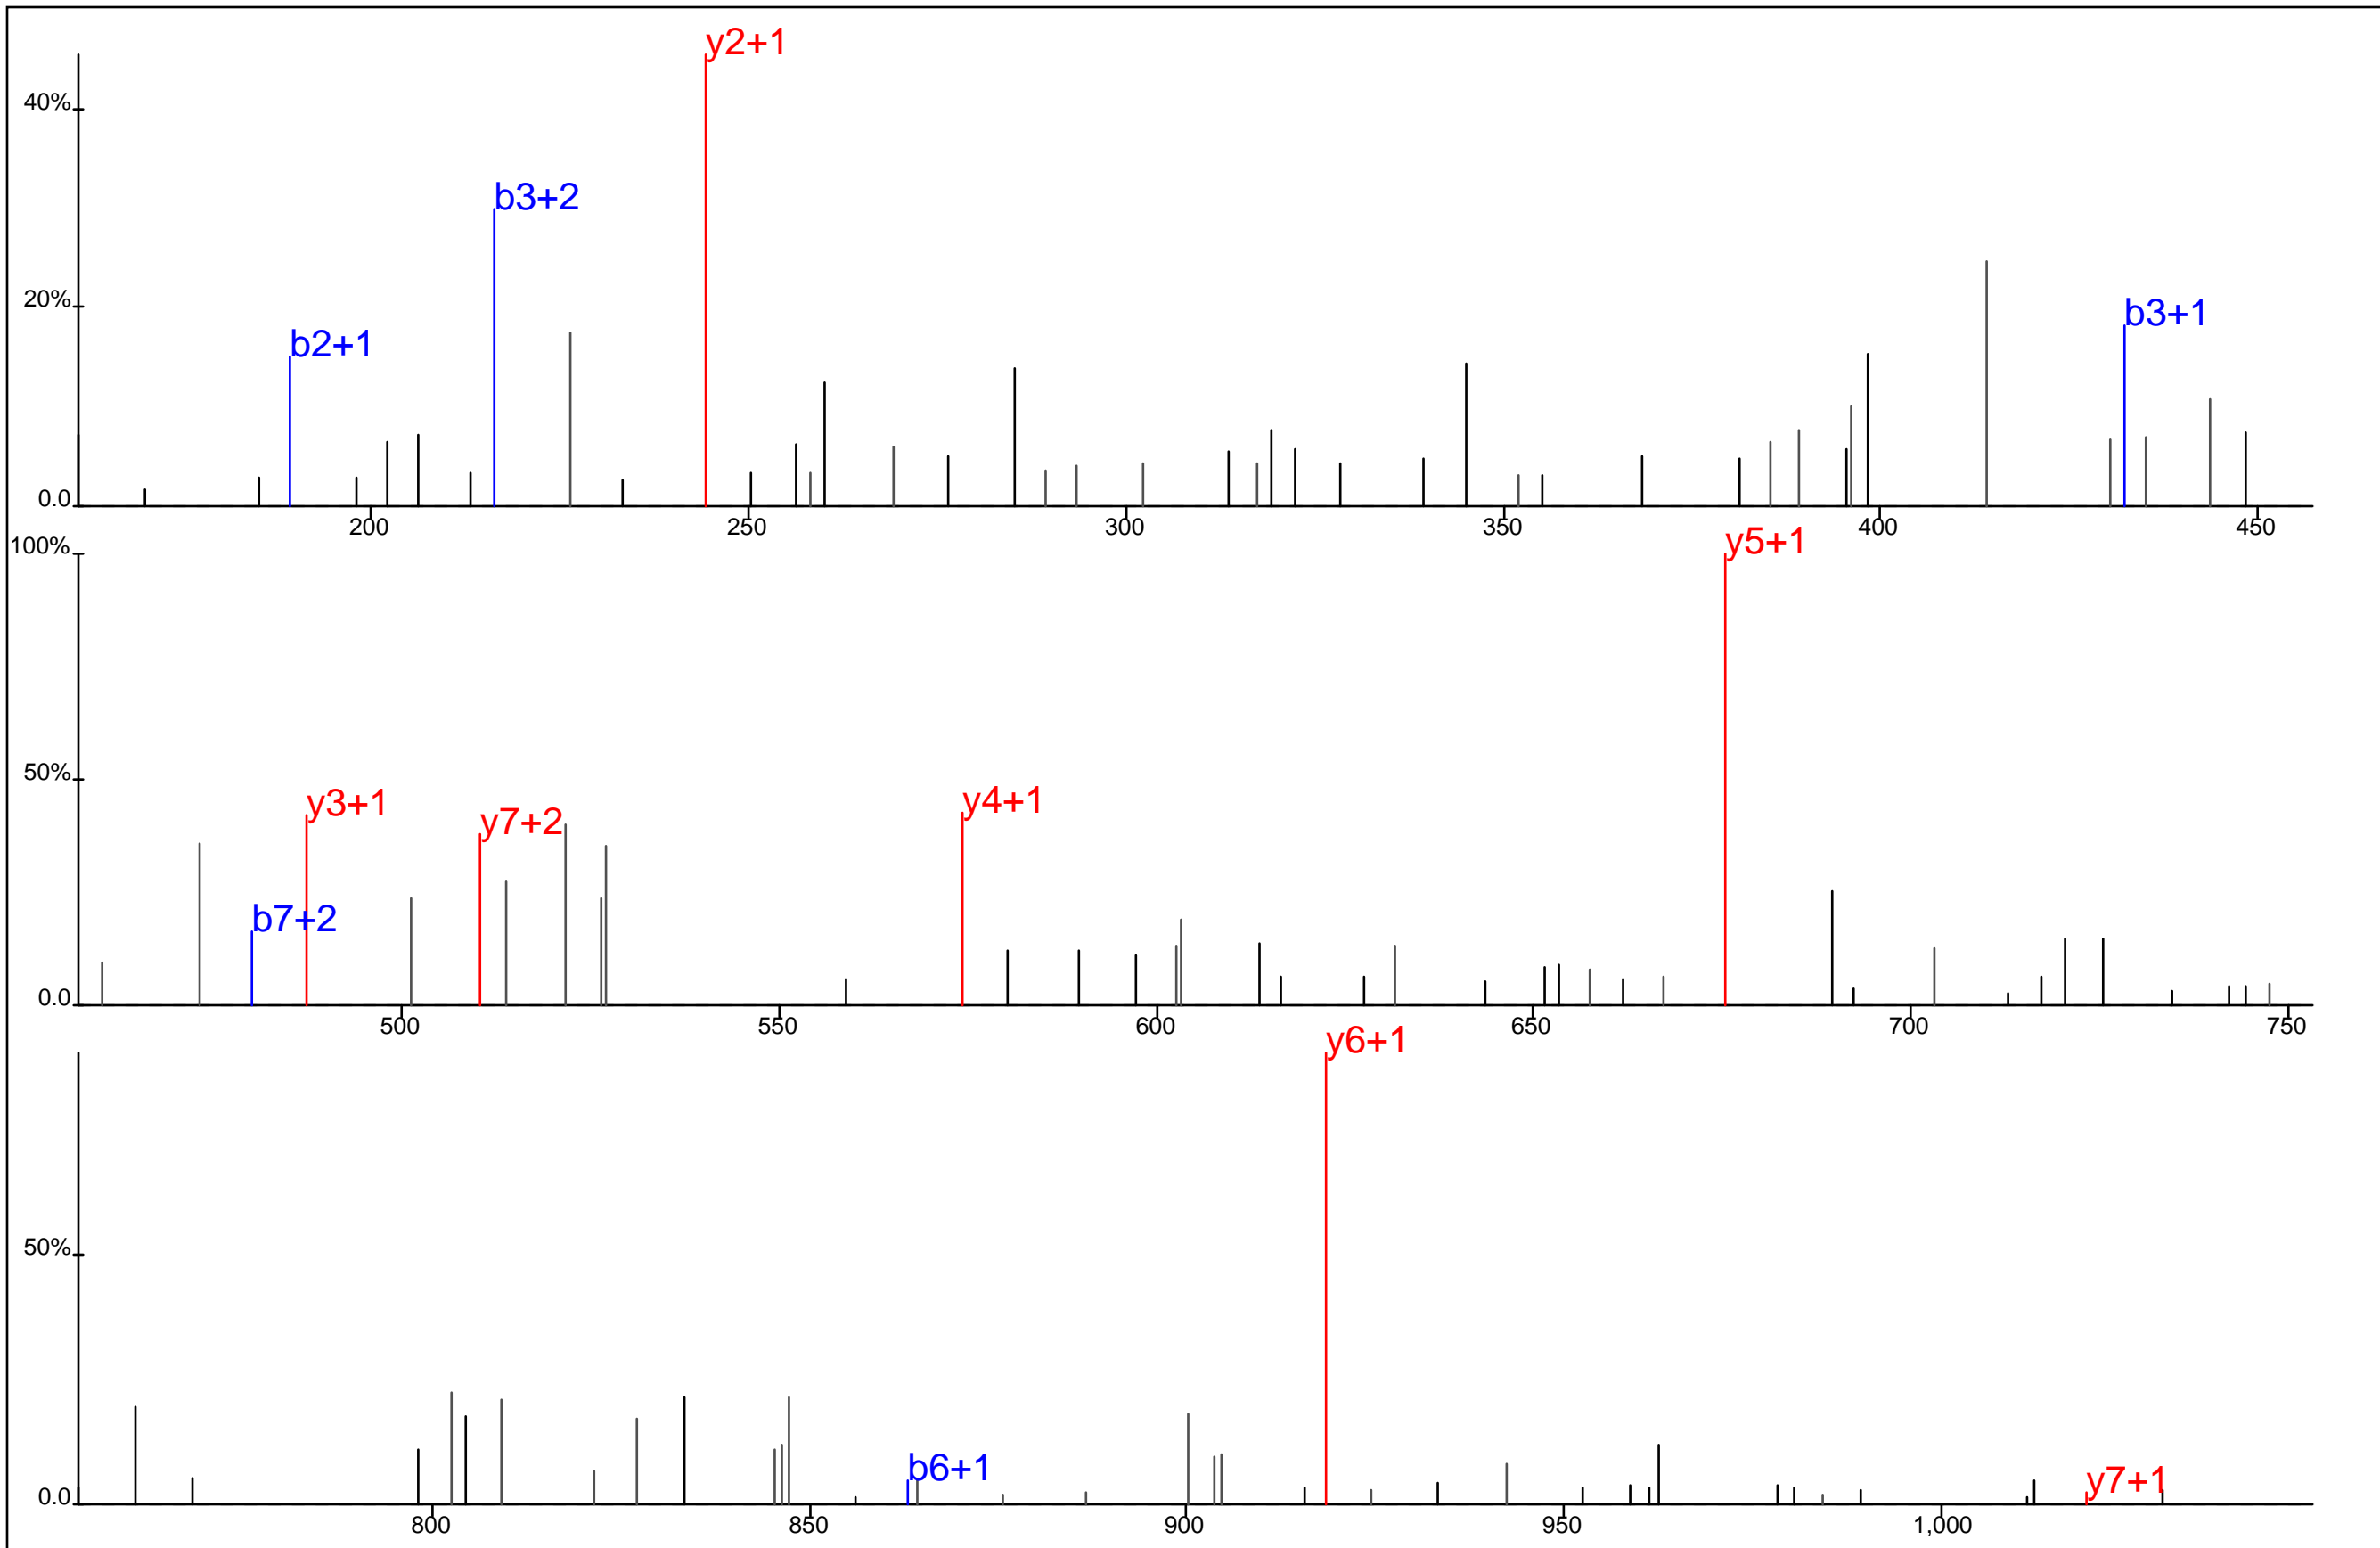

**S T Y\*T S Y\*P K**

Protein Name: Hrs  
 gi Accession: 0  
 Precursor Mass: 553.6956+2  
 Delta Mass: 0.392 ppm  
 XCorr: 31.43

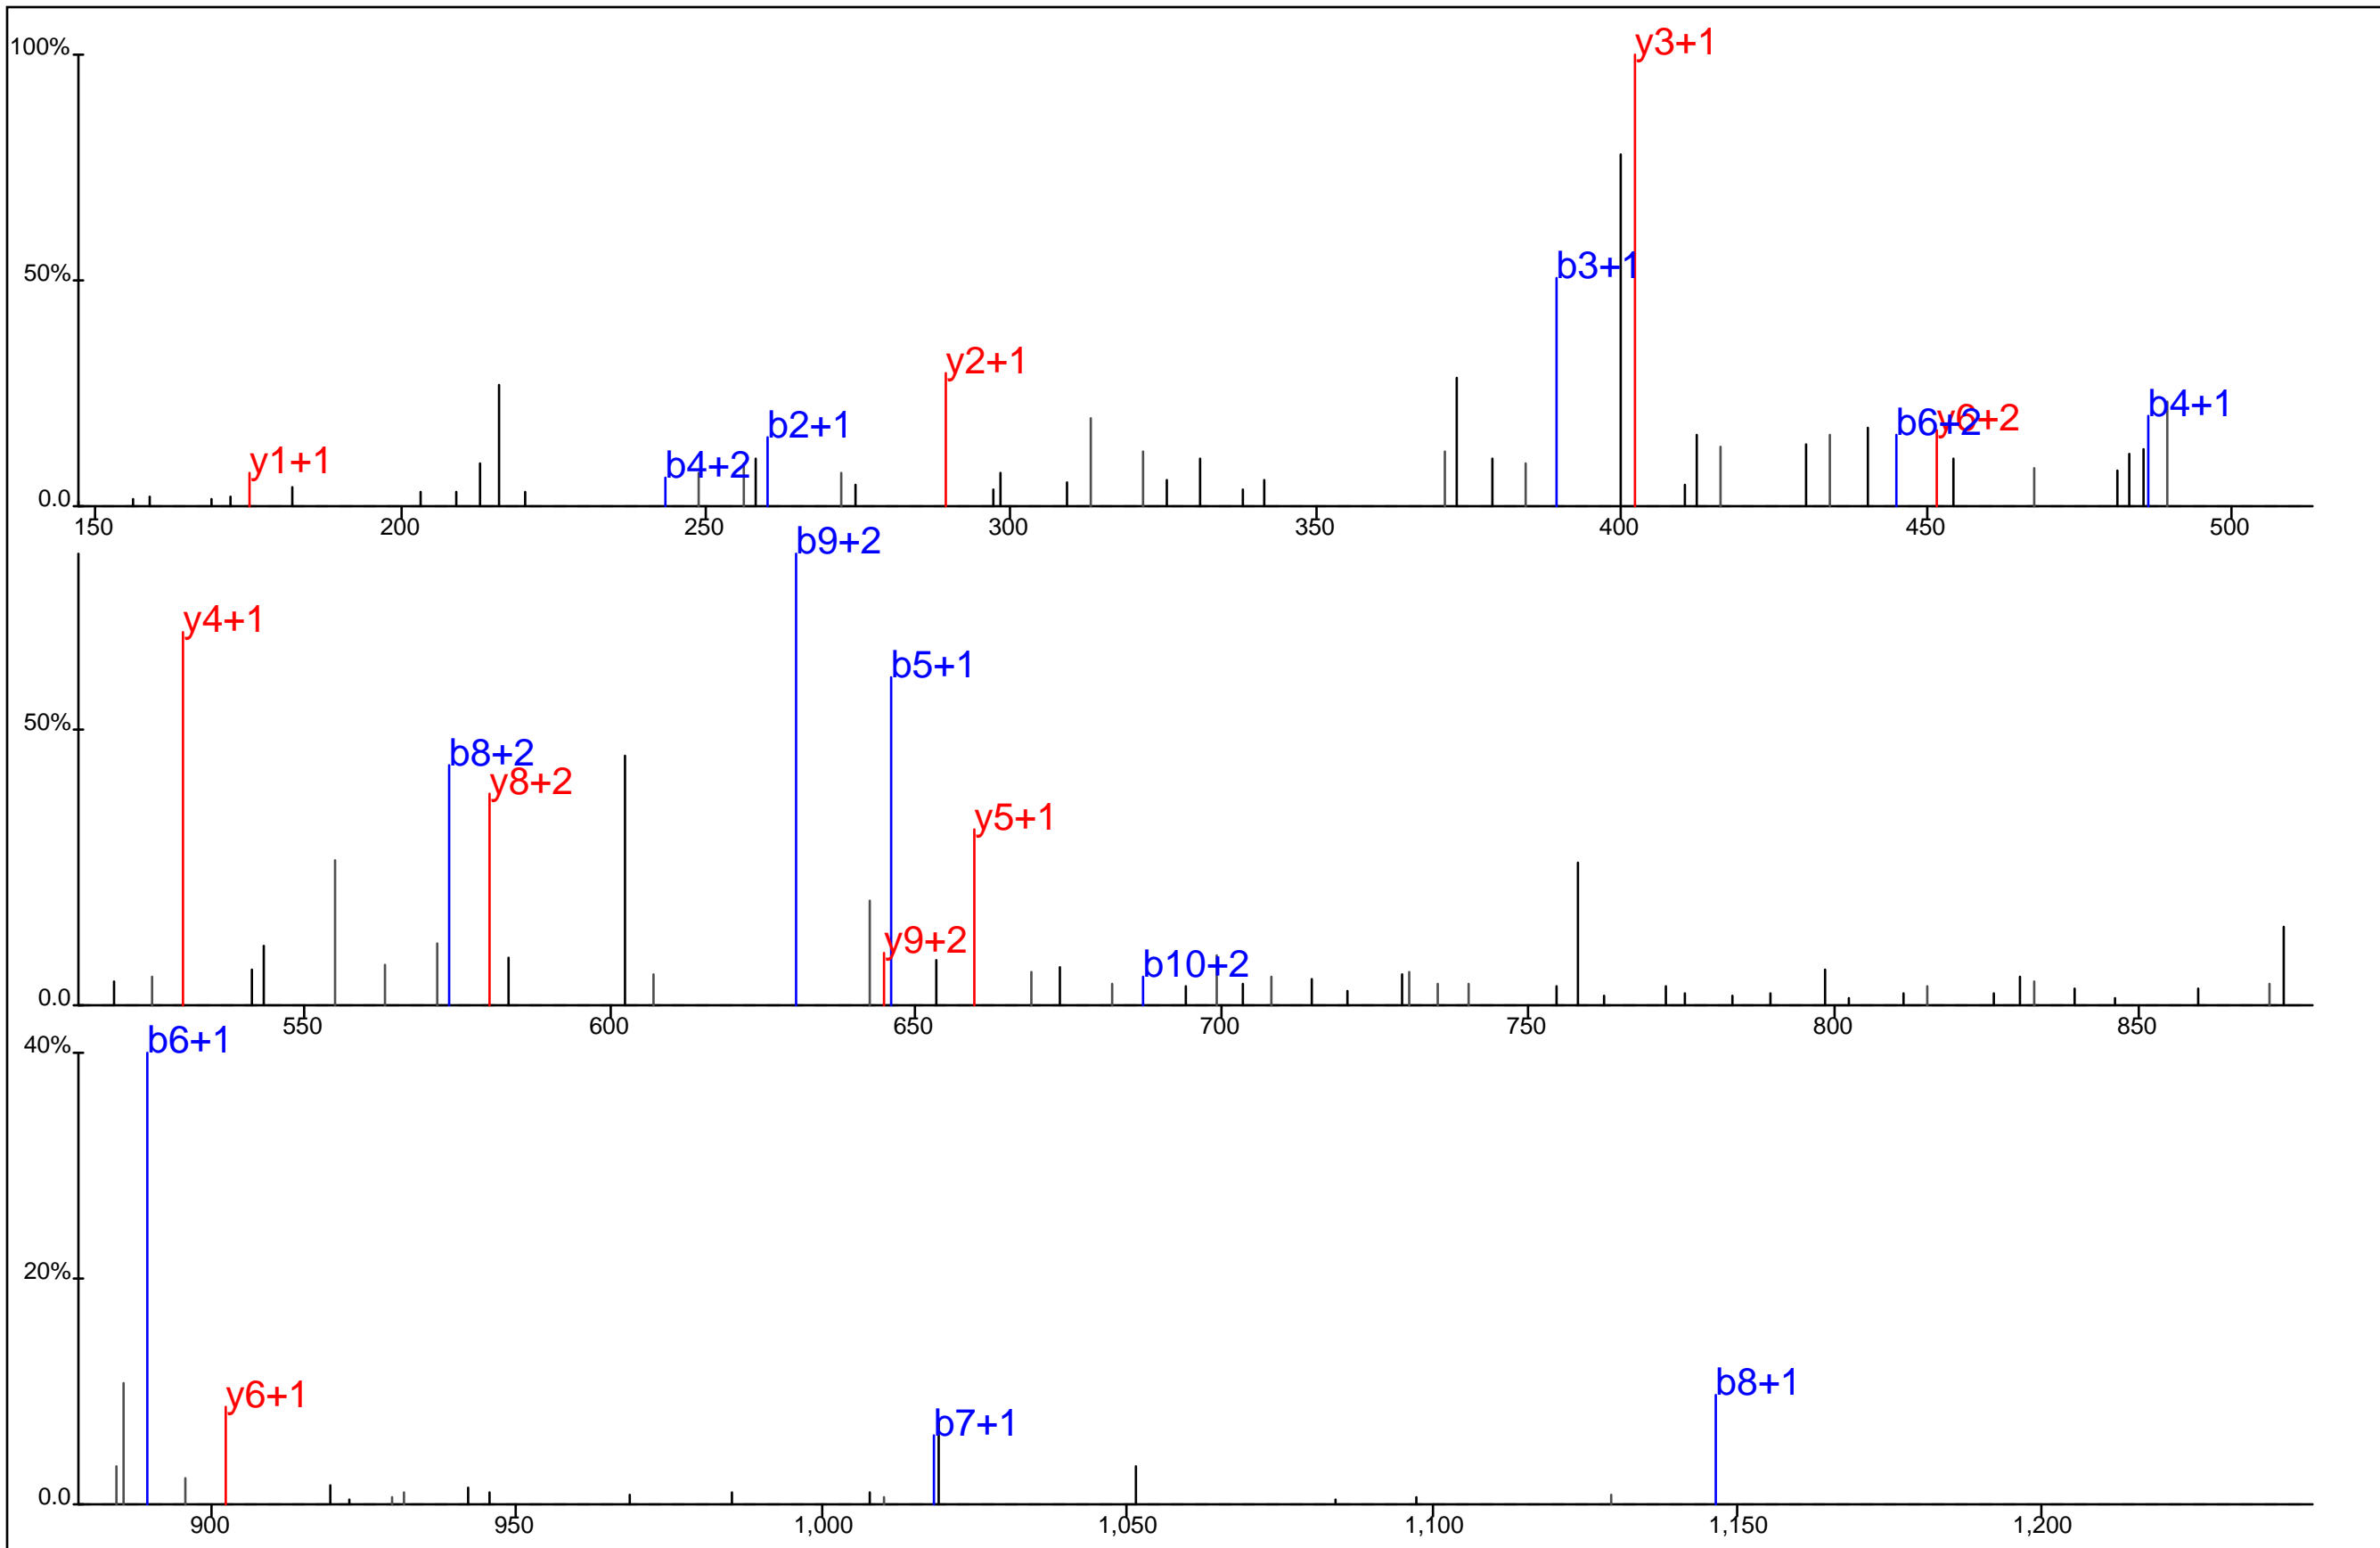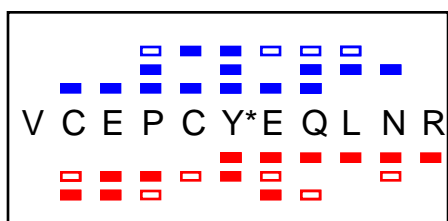

Protein Name: Hrs  
 gi Accession: 0  
 Precursor Mass: 516.5380+3  
 Delta Mass: 1.604 ppm  
 XCorr: 35.45

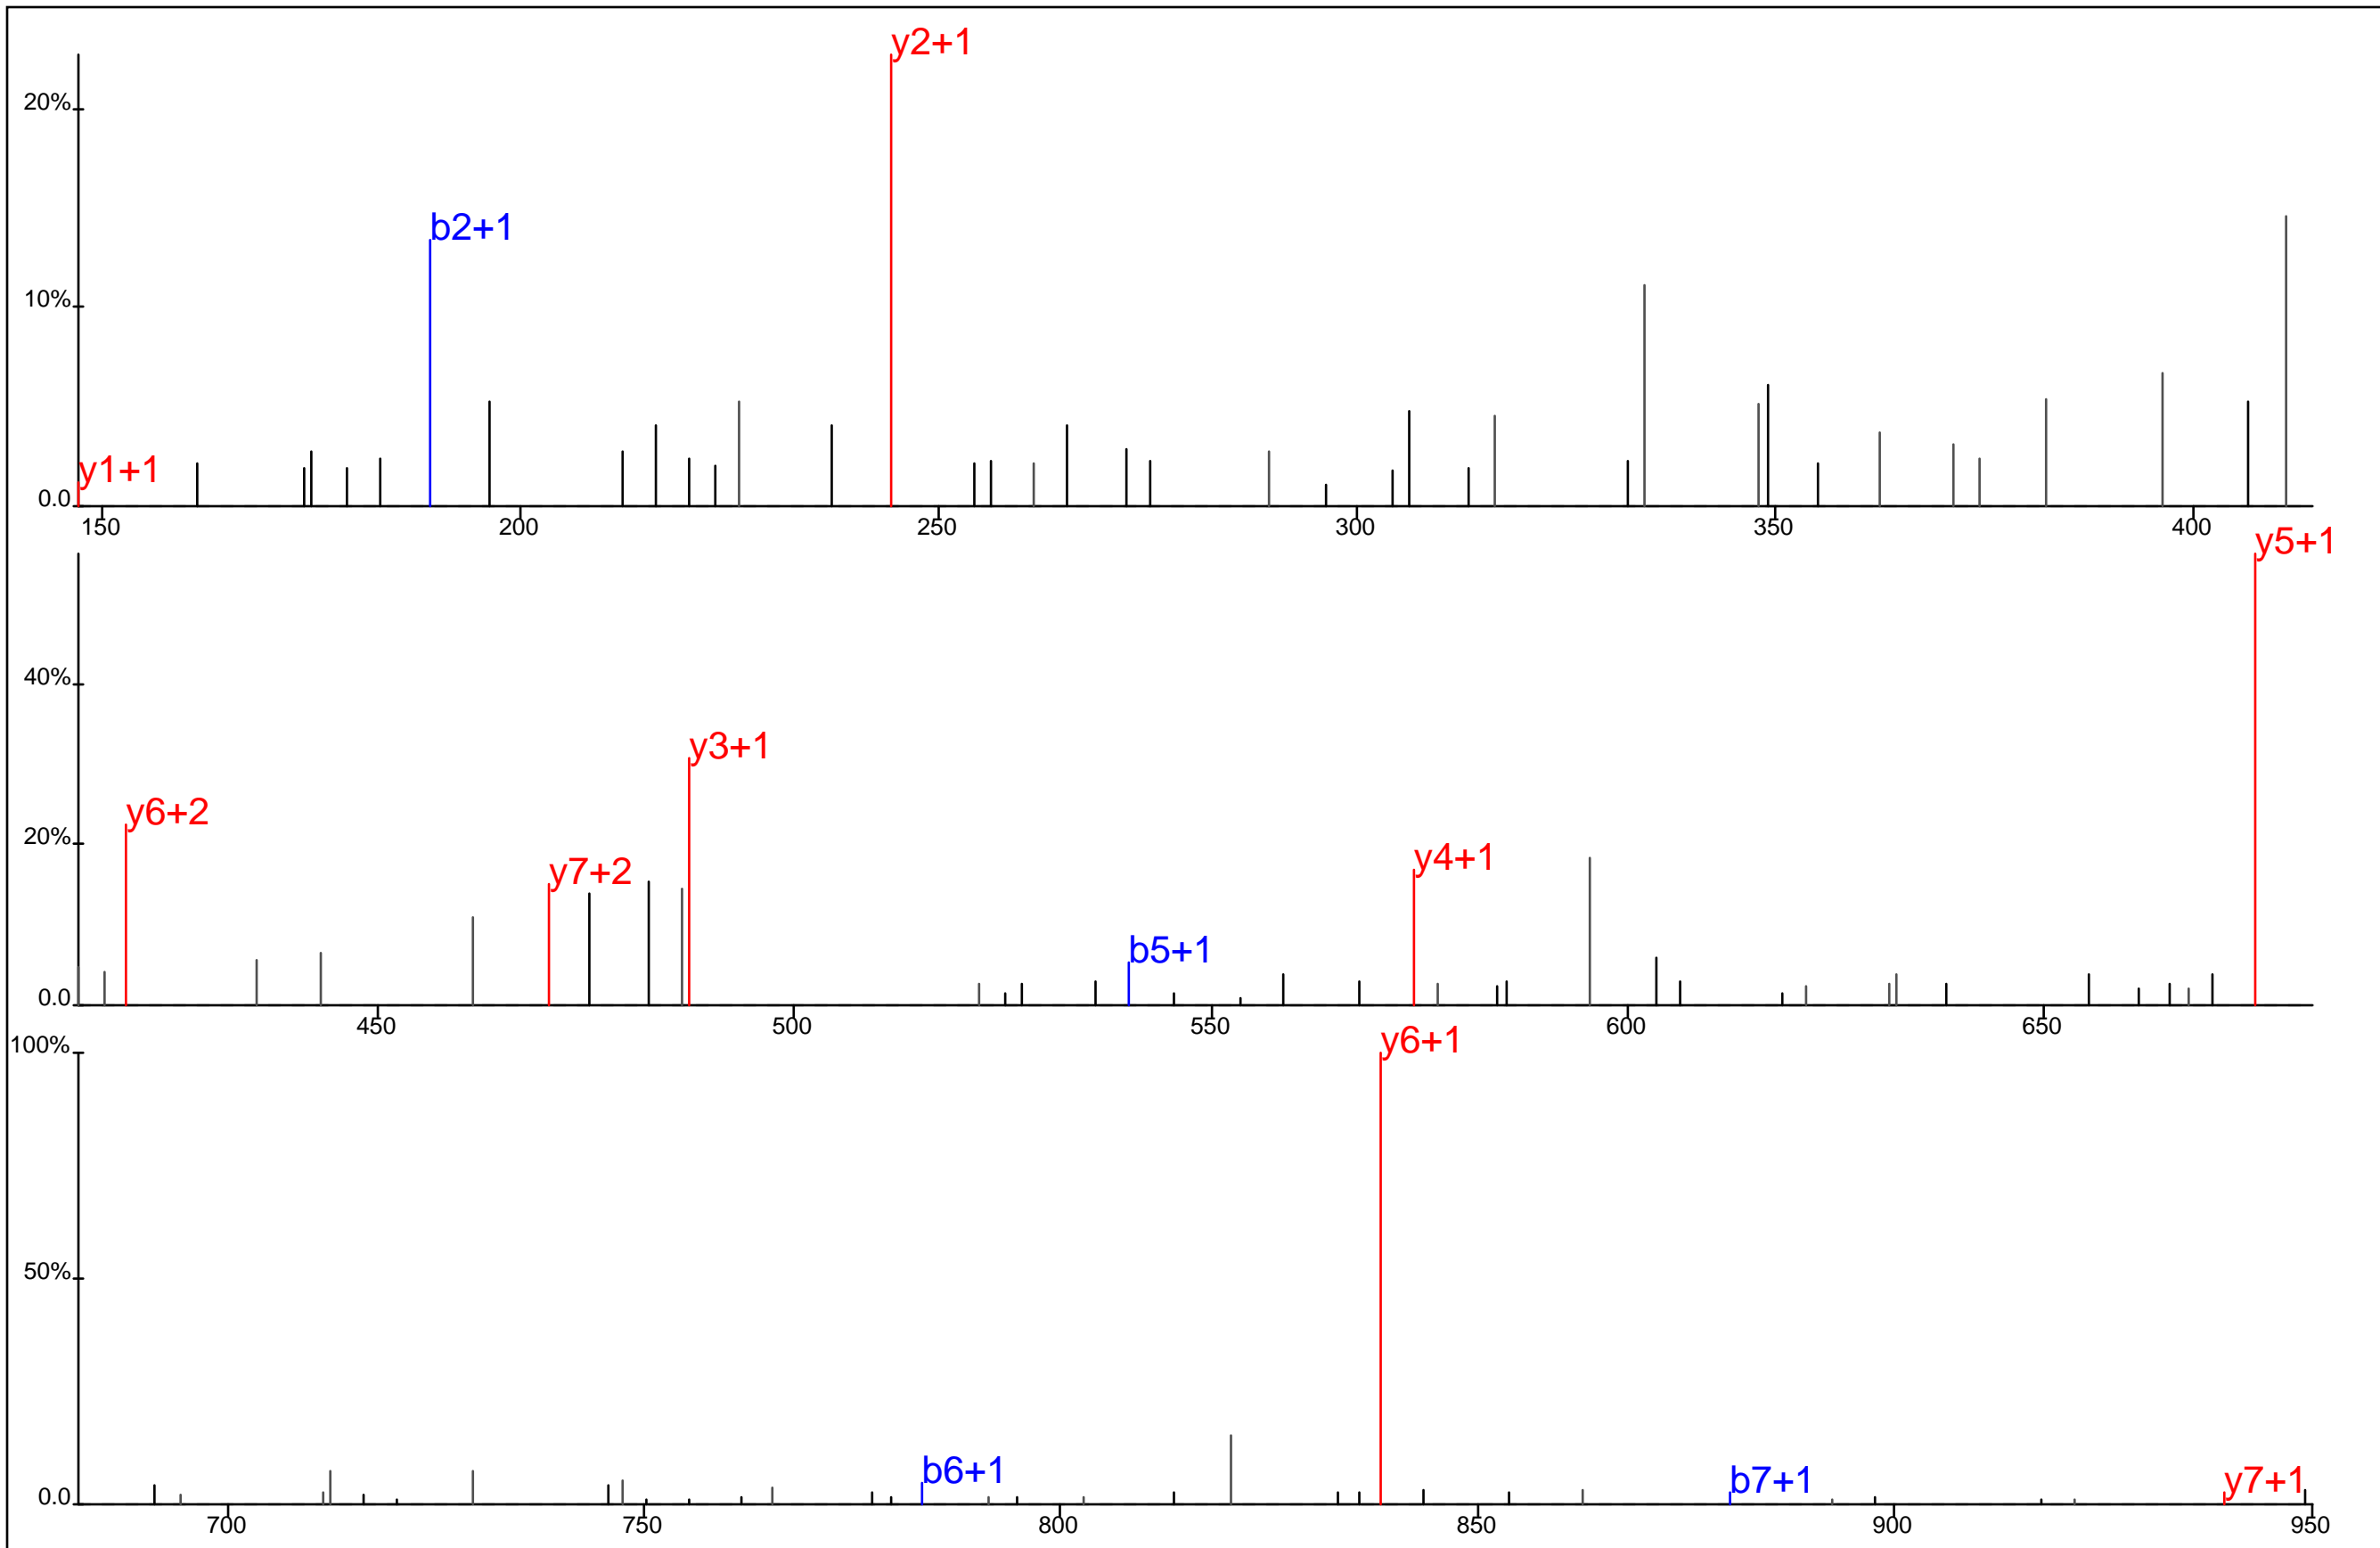

■ ▢ ▣ ▤ ▥ ▦  
 S T Y T S Y\*P K  
▢ ▣ ▤ ▥ ▦ ▧

Protein Name: Hrs  
 gi Accession: 0  
 Precursor Mass: 513.7130+2  
 Delta Mass: 0.659 ppm  
 XCorr: 37.48



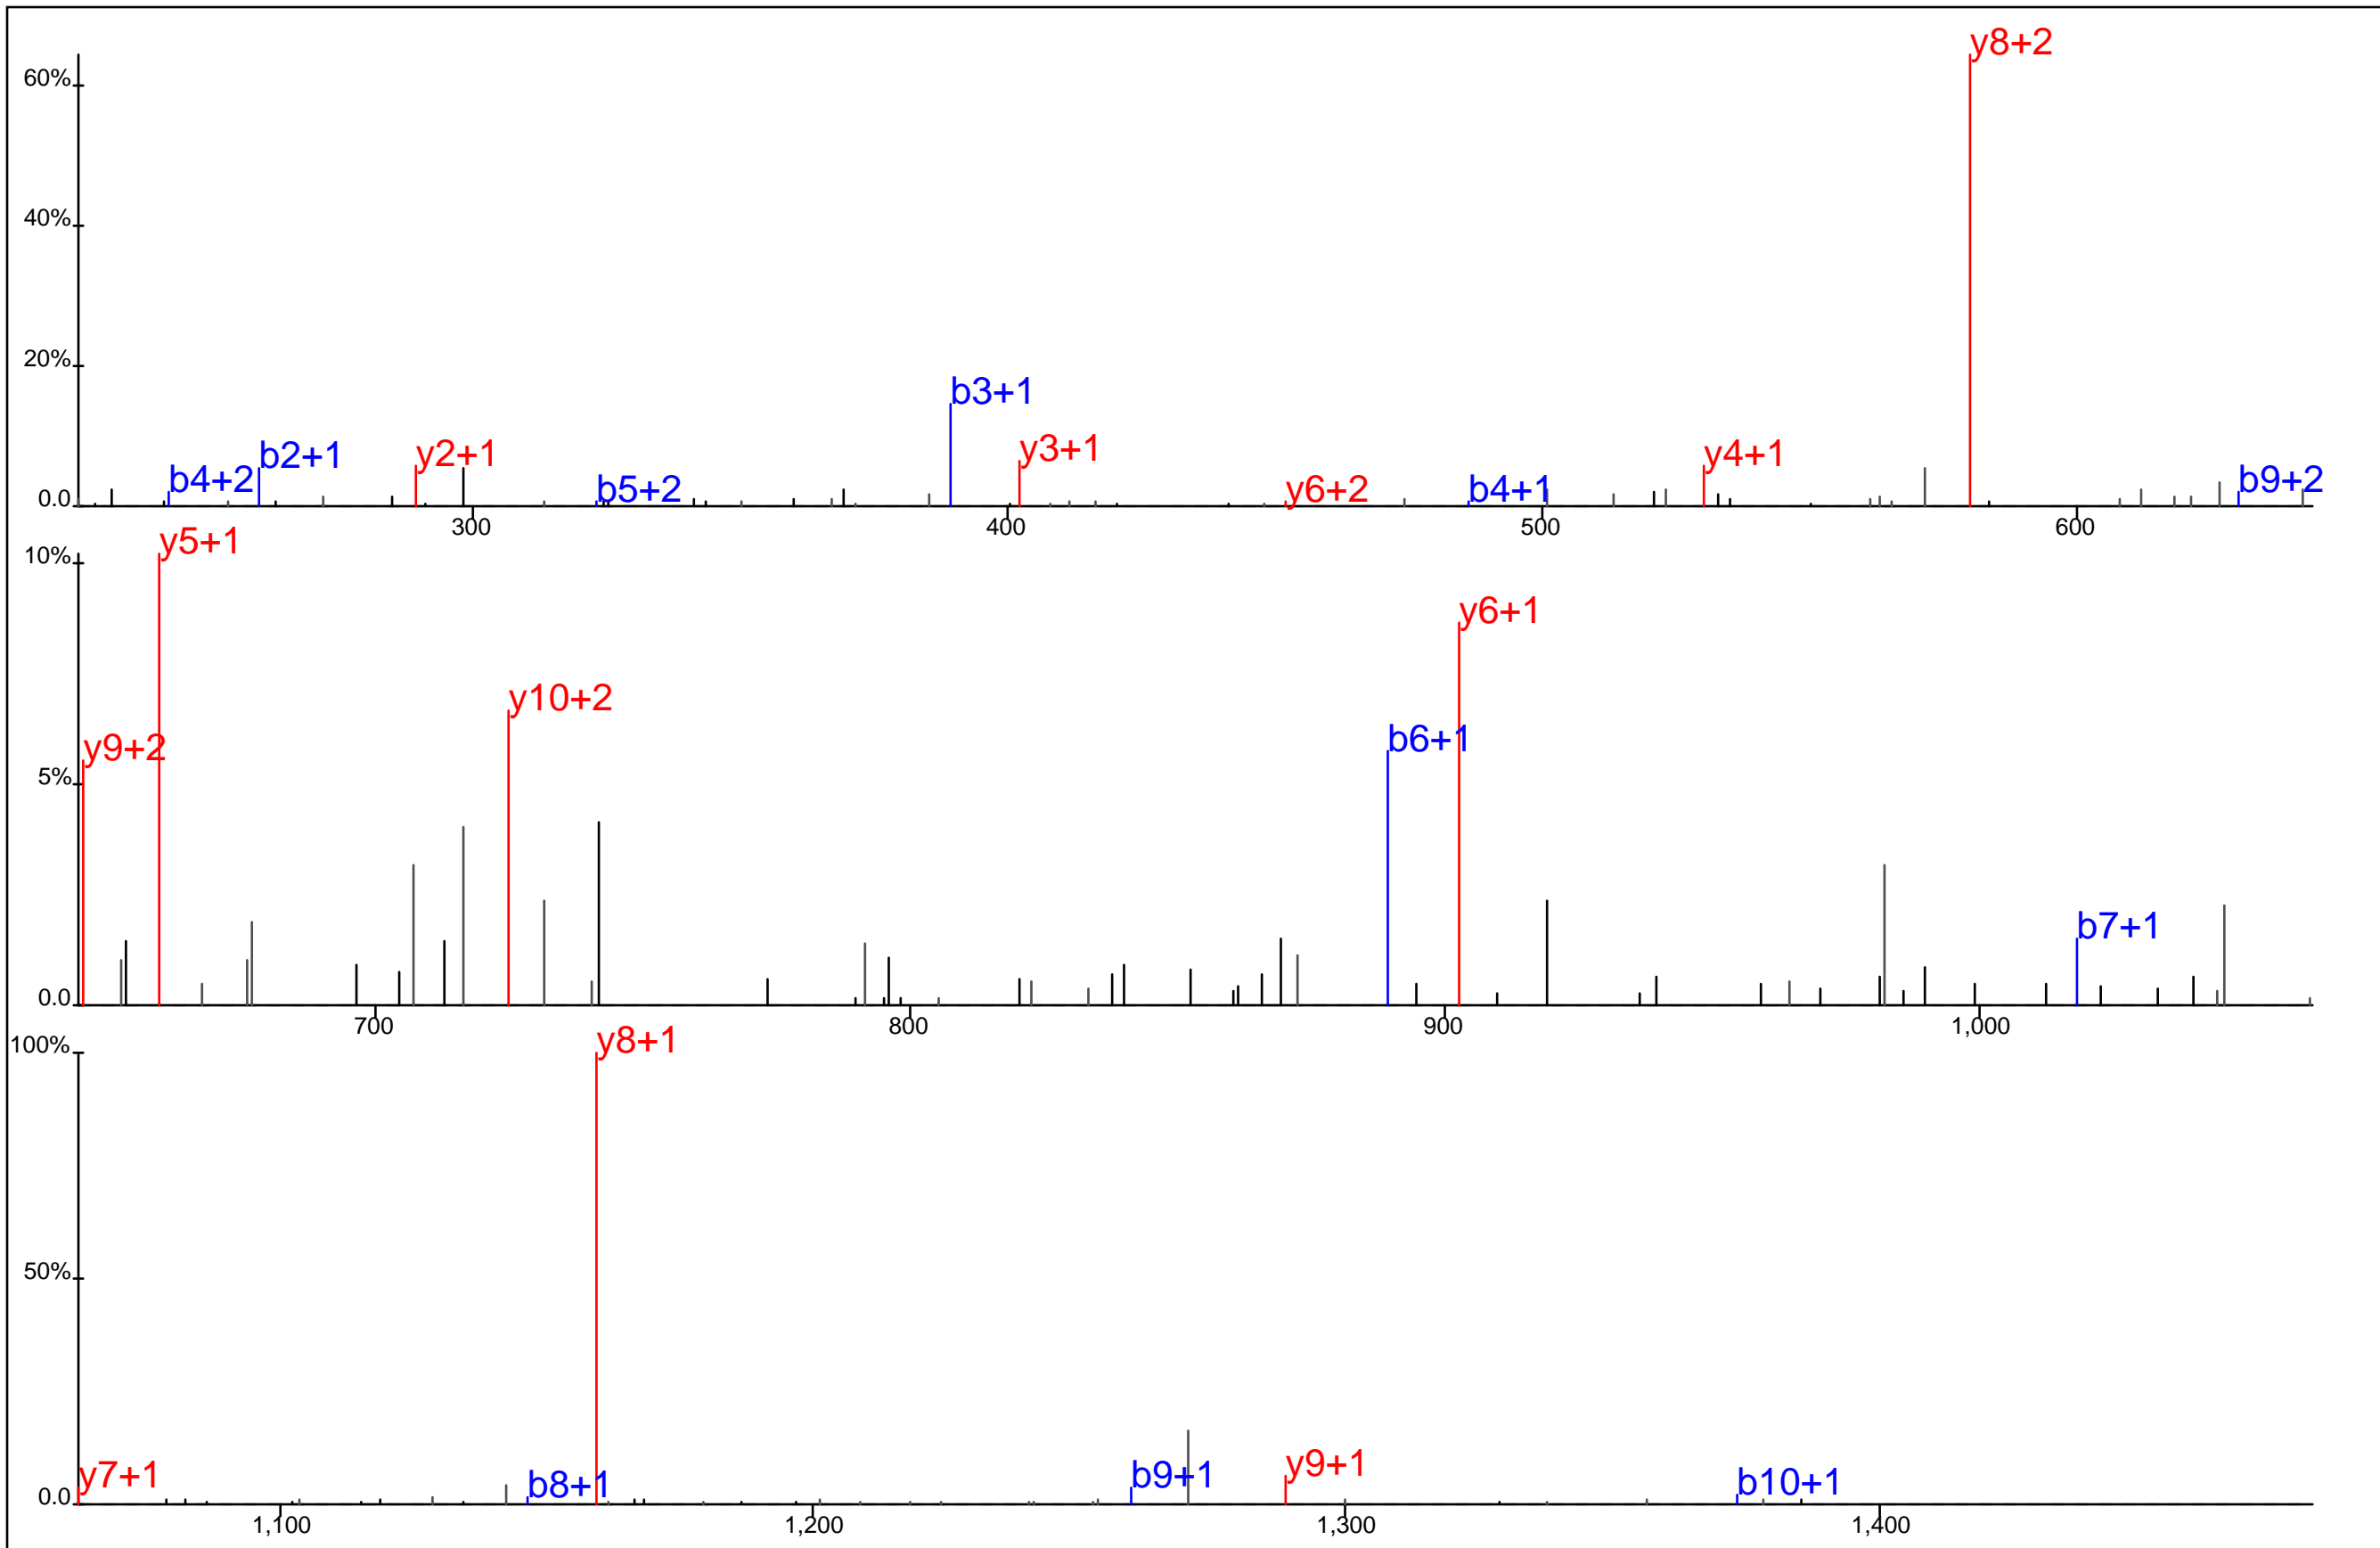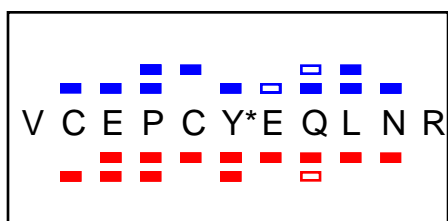

Protein Name: Hrs  
 gi Accession: 0  
 Precursor Mass: 774.3047+2  
 Delta Mass: 0.180 ppm  
 XCorr: 66.63

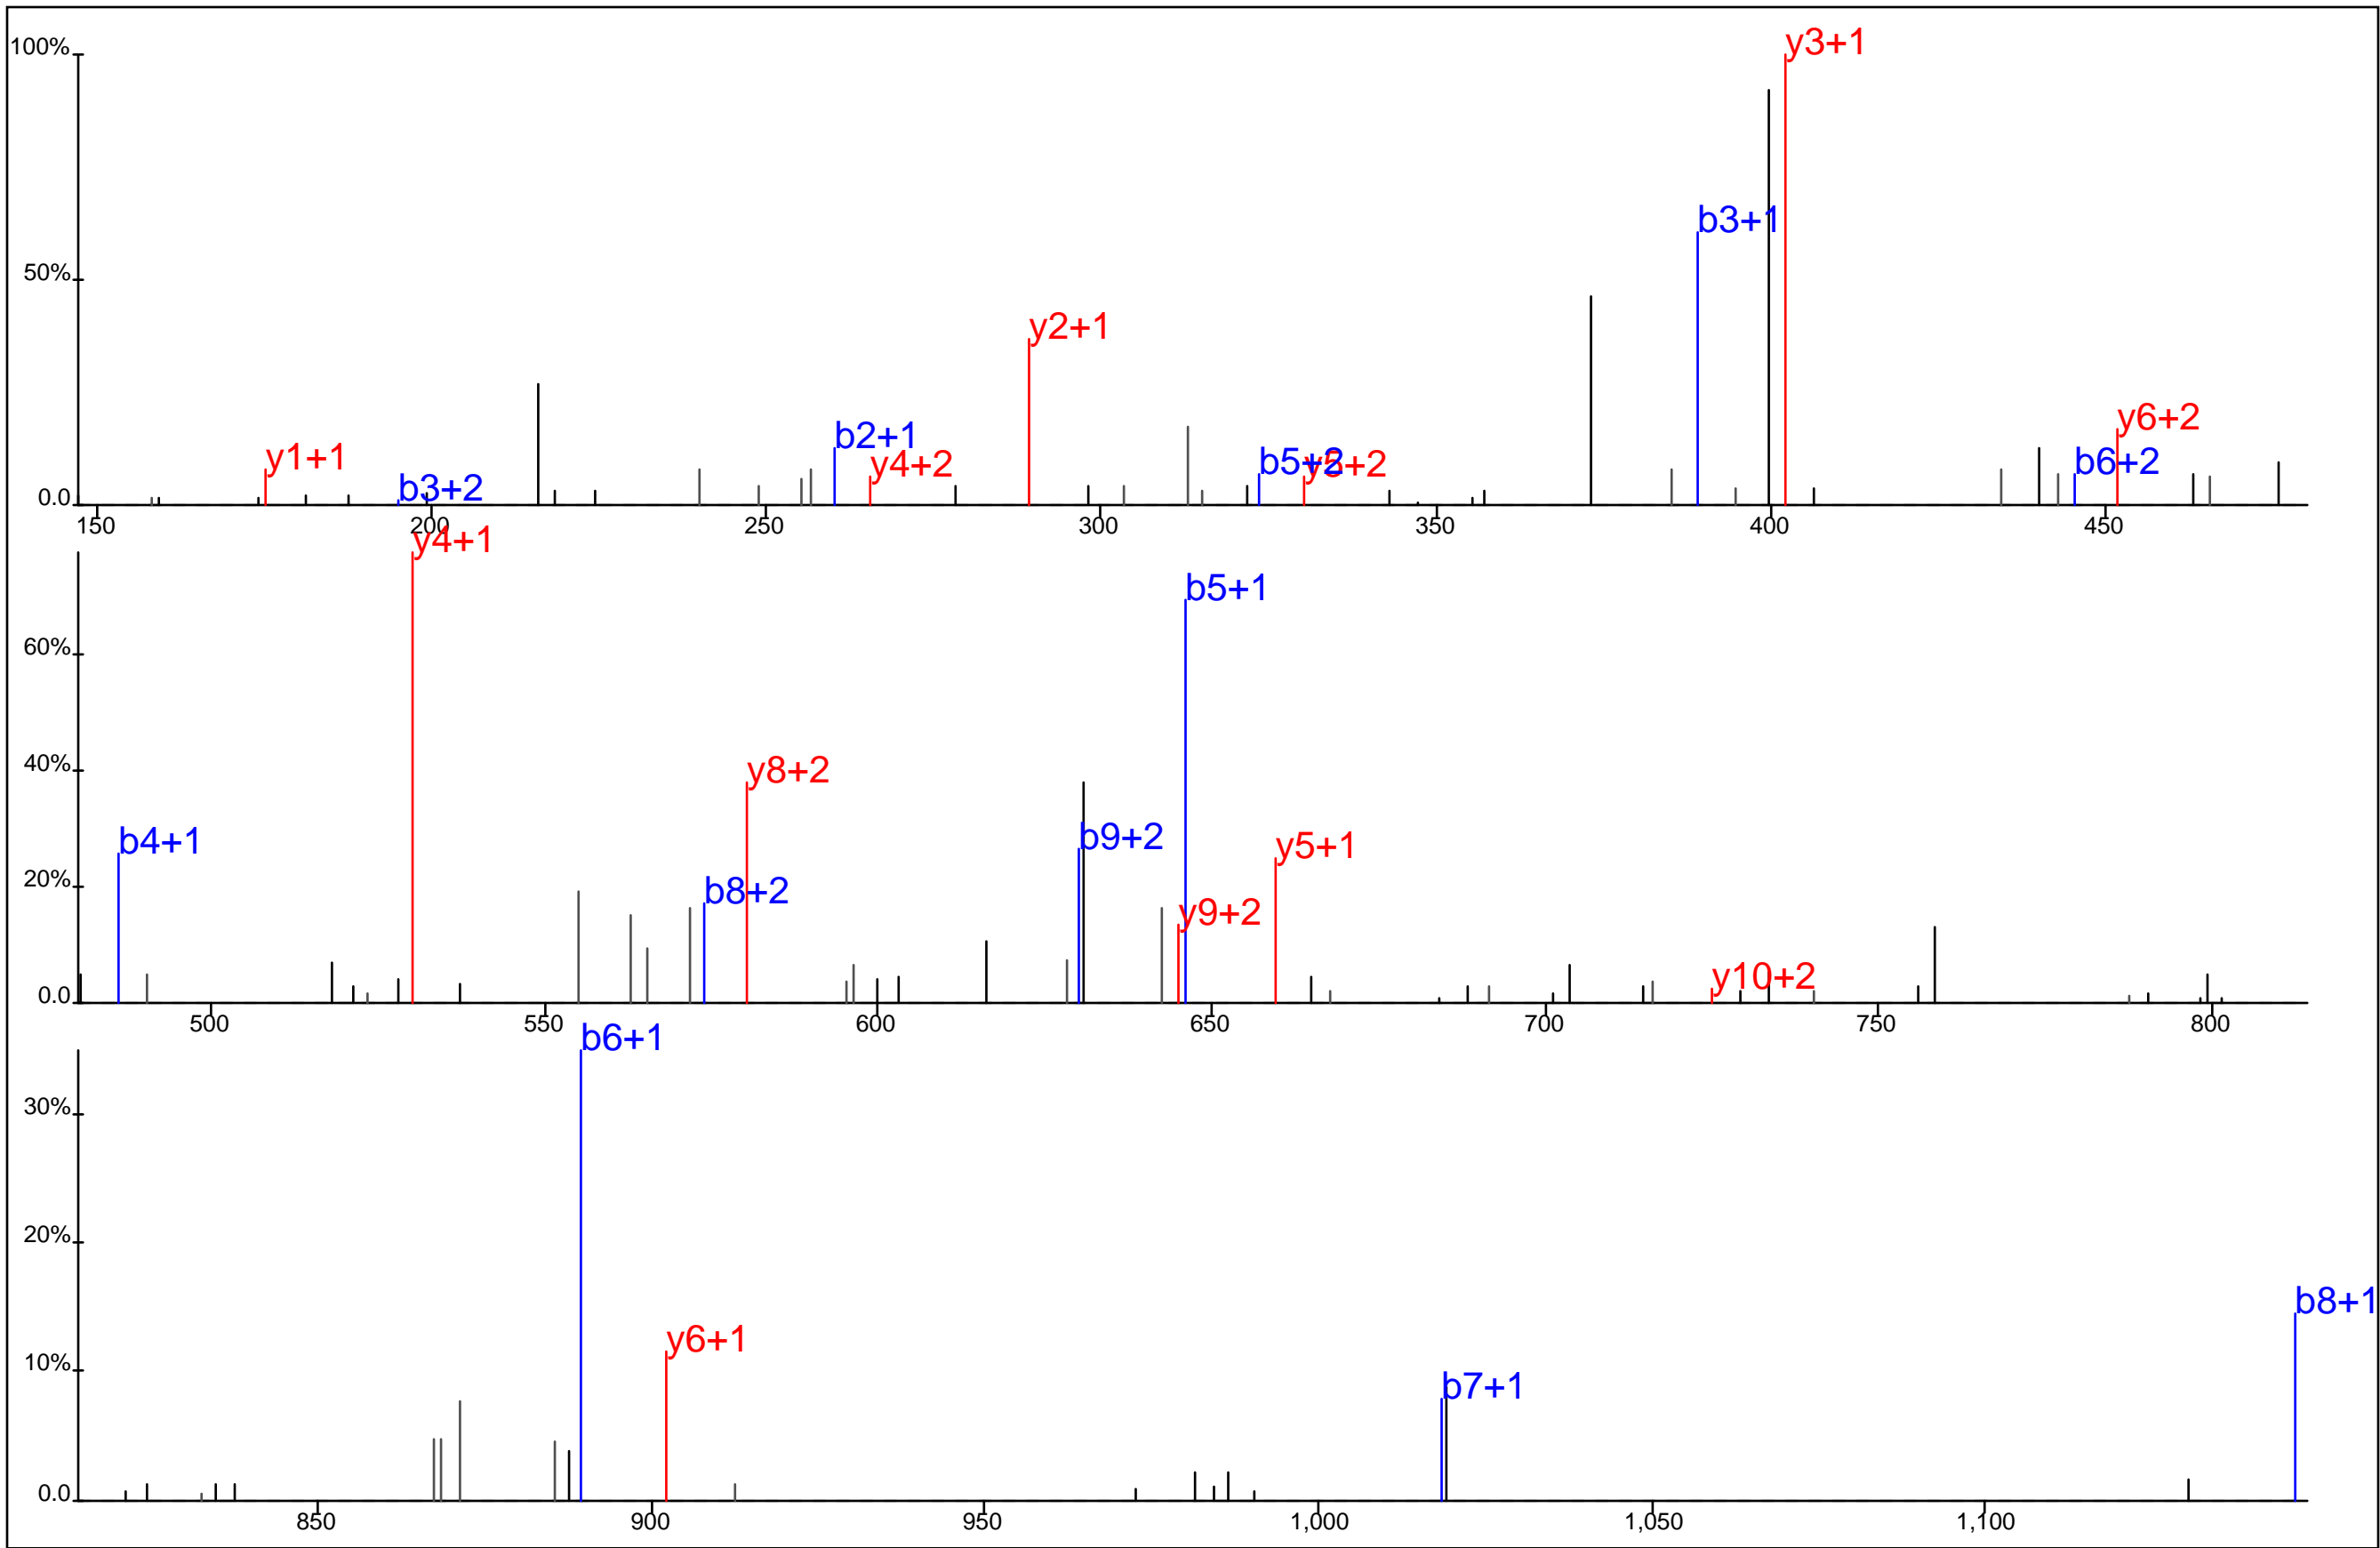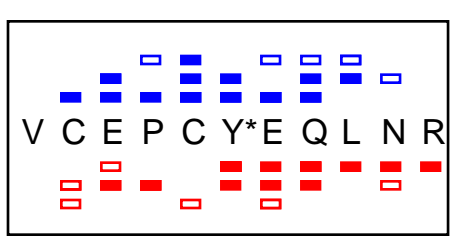

Protein Name: Hrs  
 gi Accession: 0  
 Precursor Mass: 516.5392+3  
 Delta Mass: 0.881 ppm  
 XCorr: 43.19

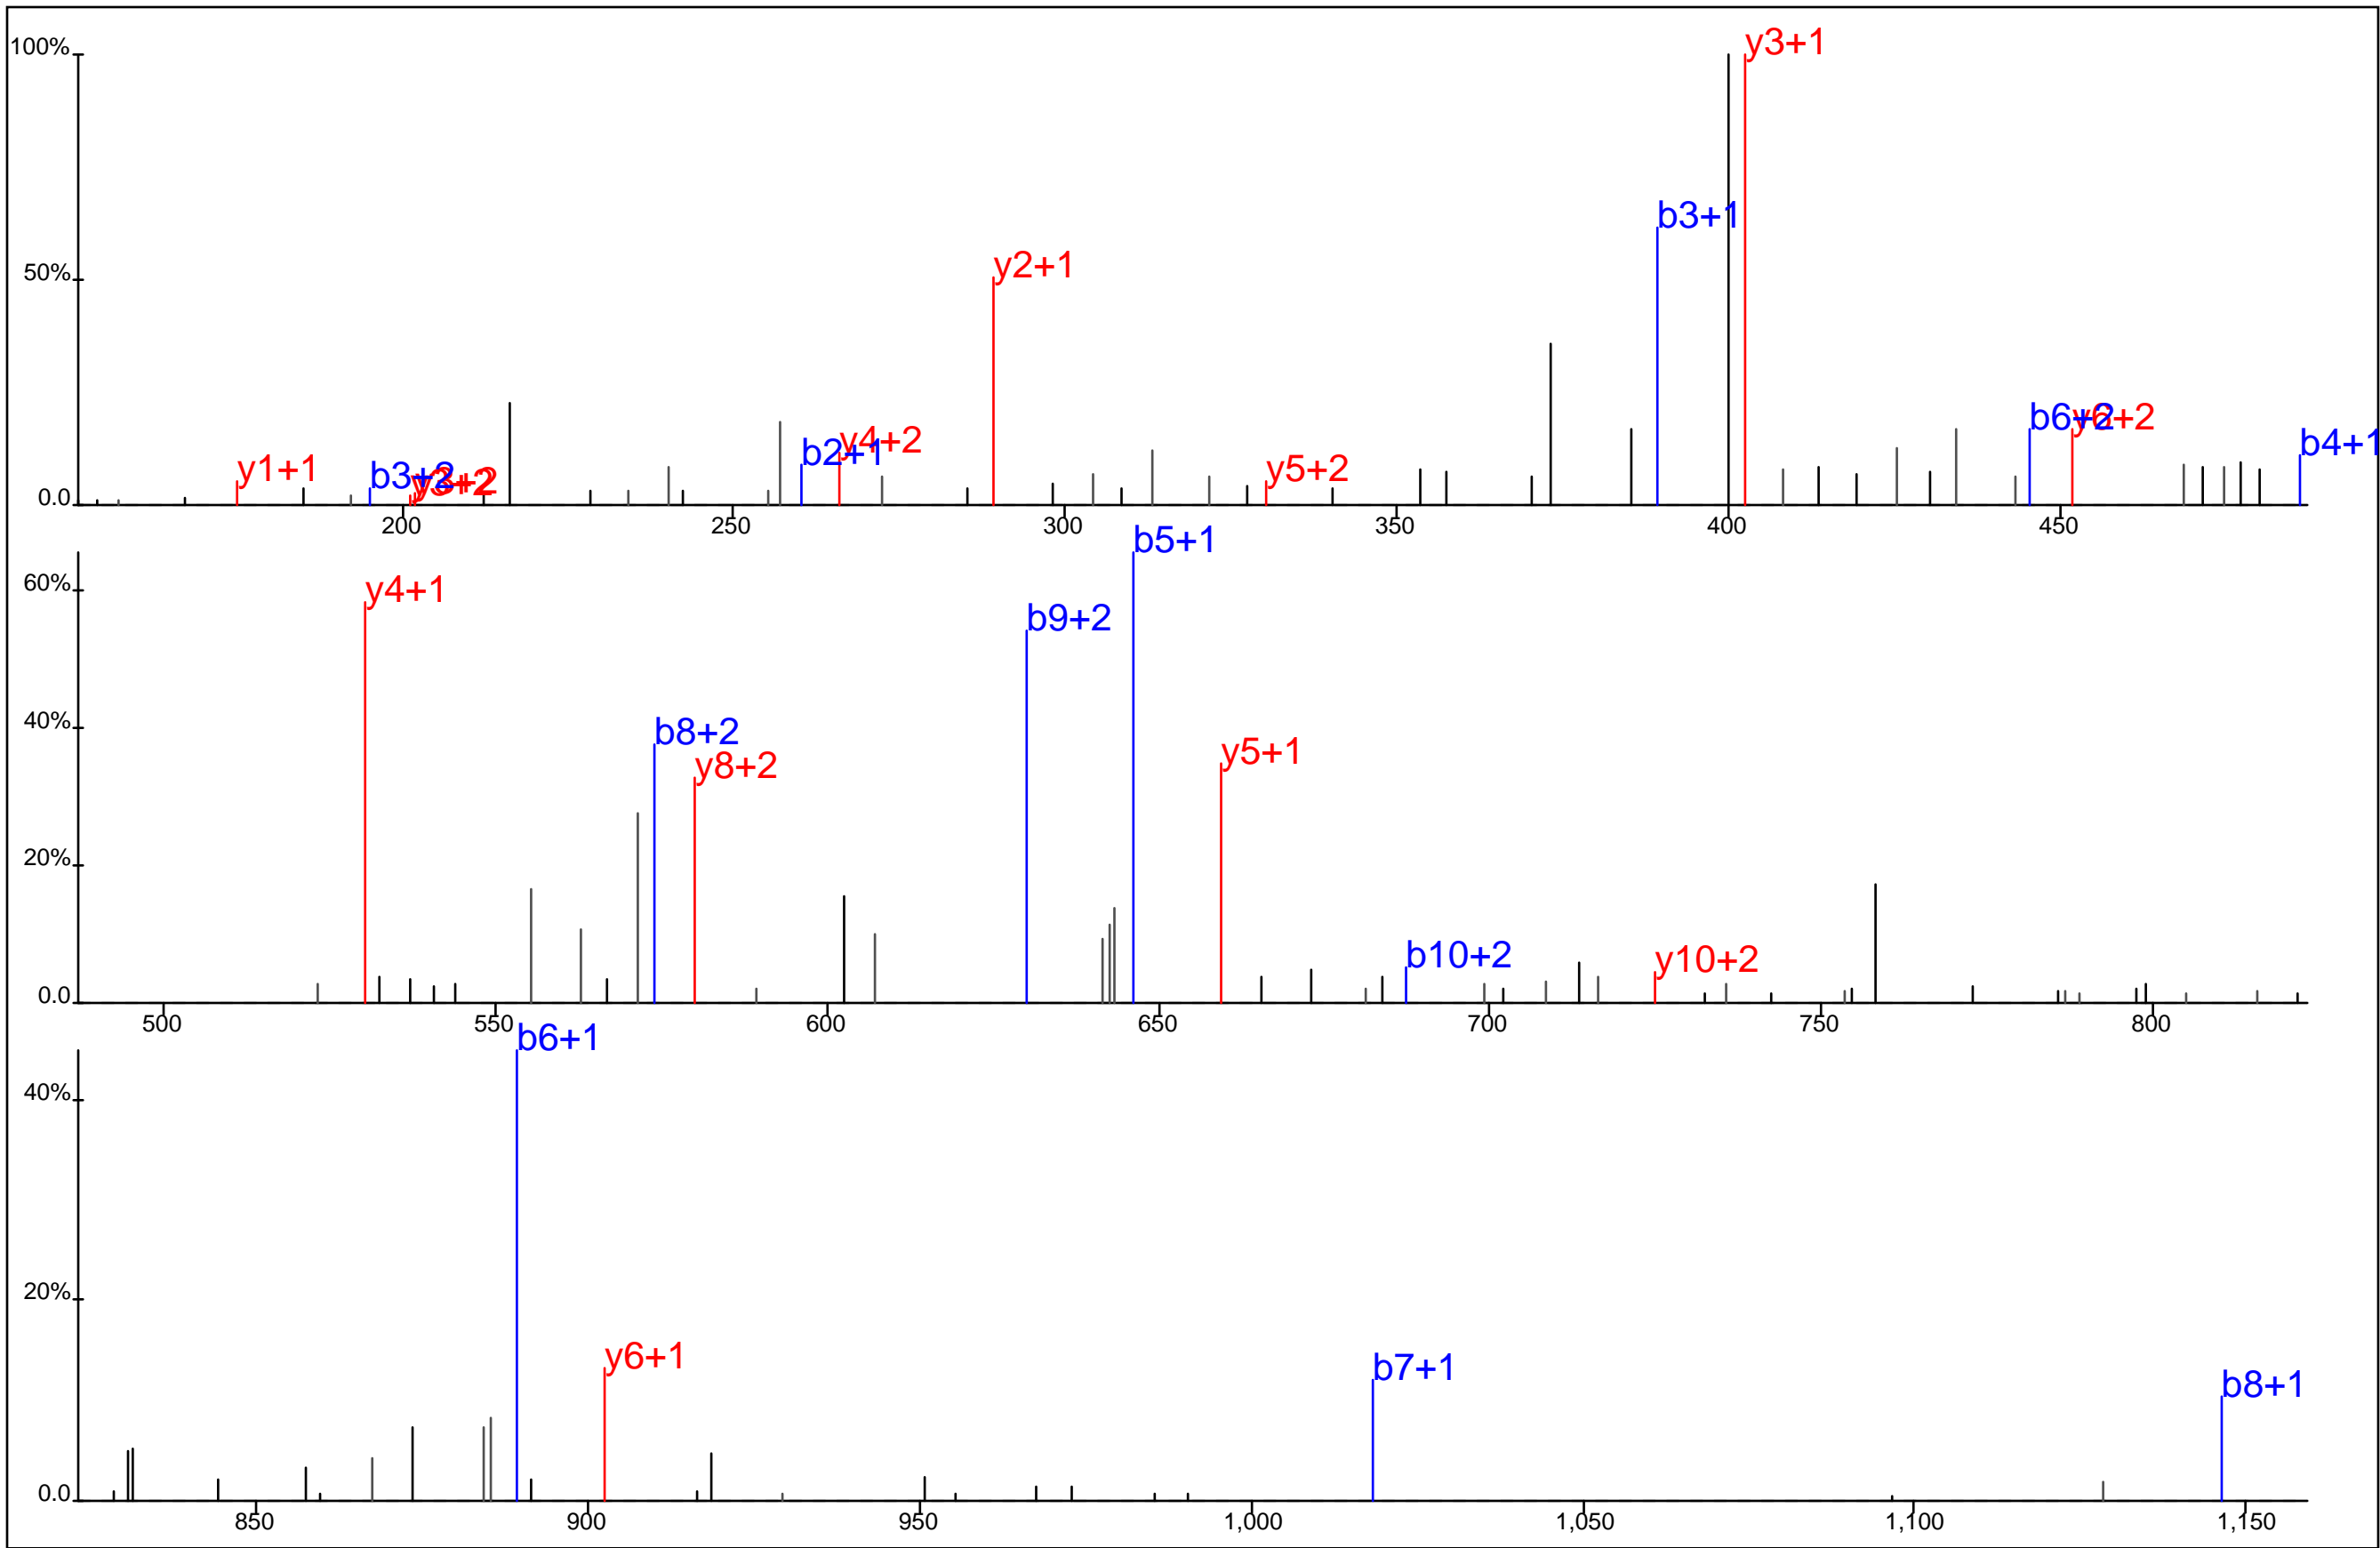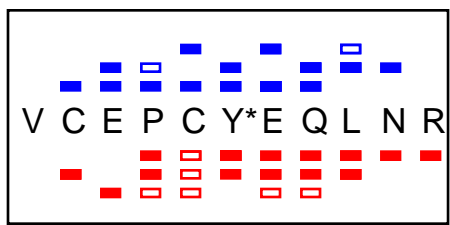

Protein Name: Hrs  
 gi Accession: 0  
 Precursor Mass: 516.5391+3  
 Delta Mass: 0.645 ppm  
 XCorr: 42.97

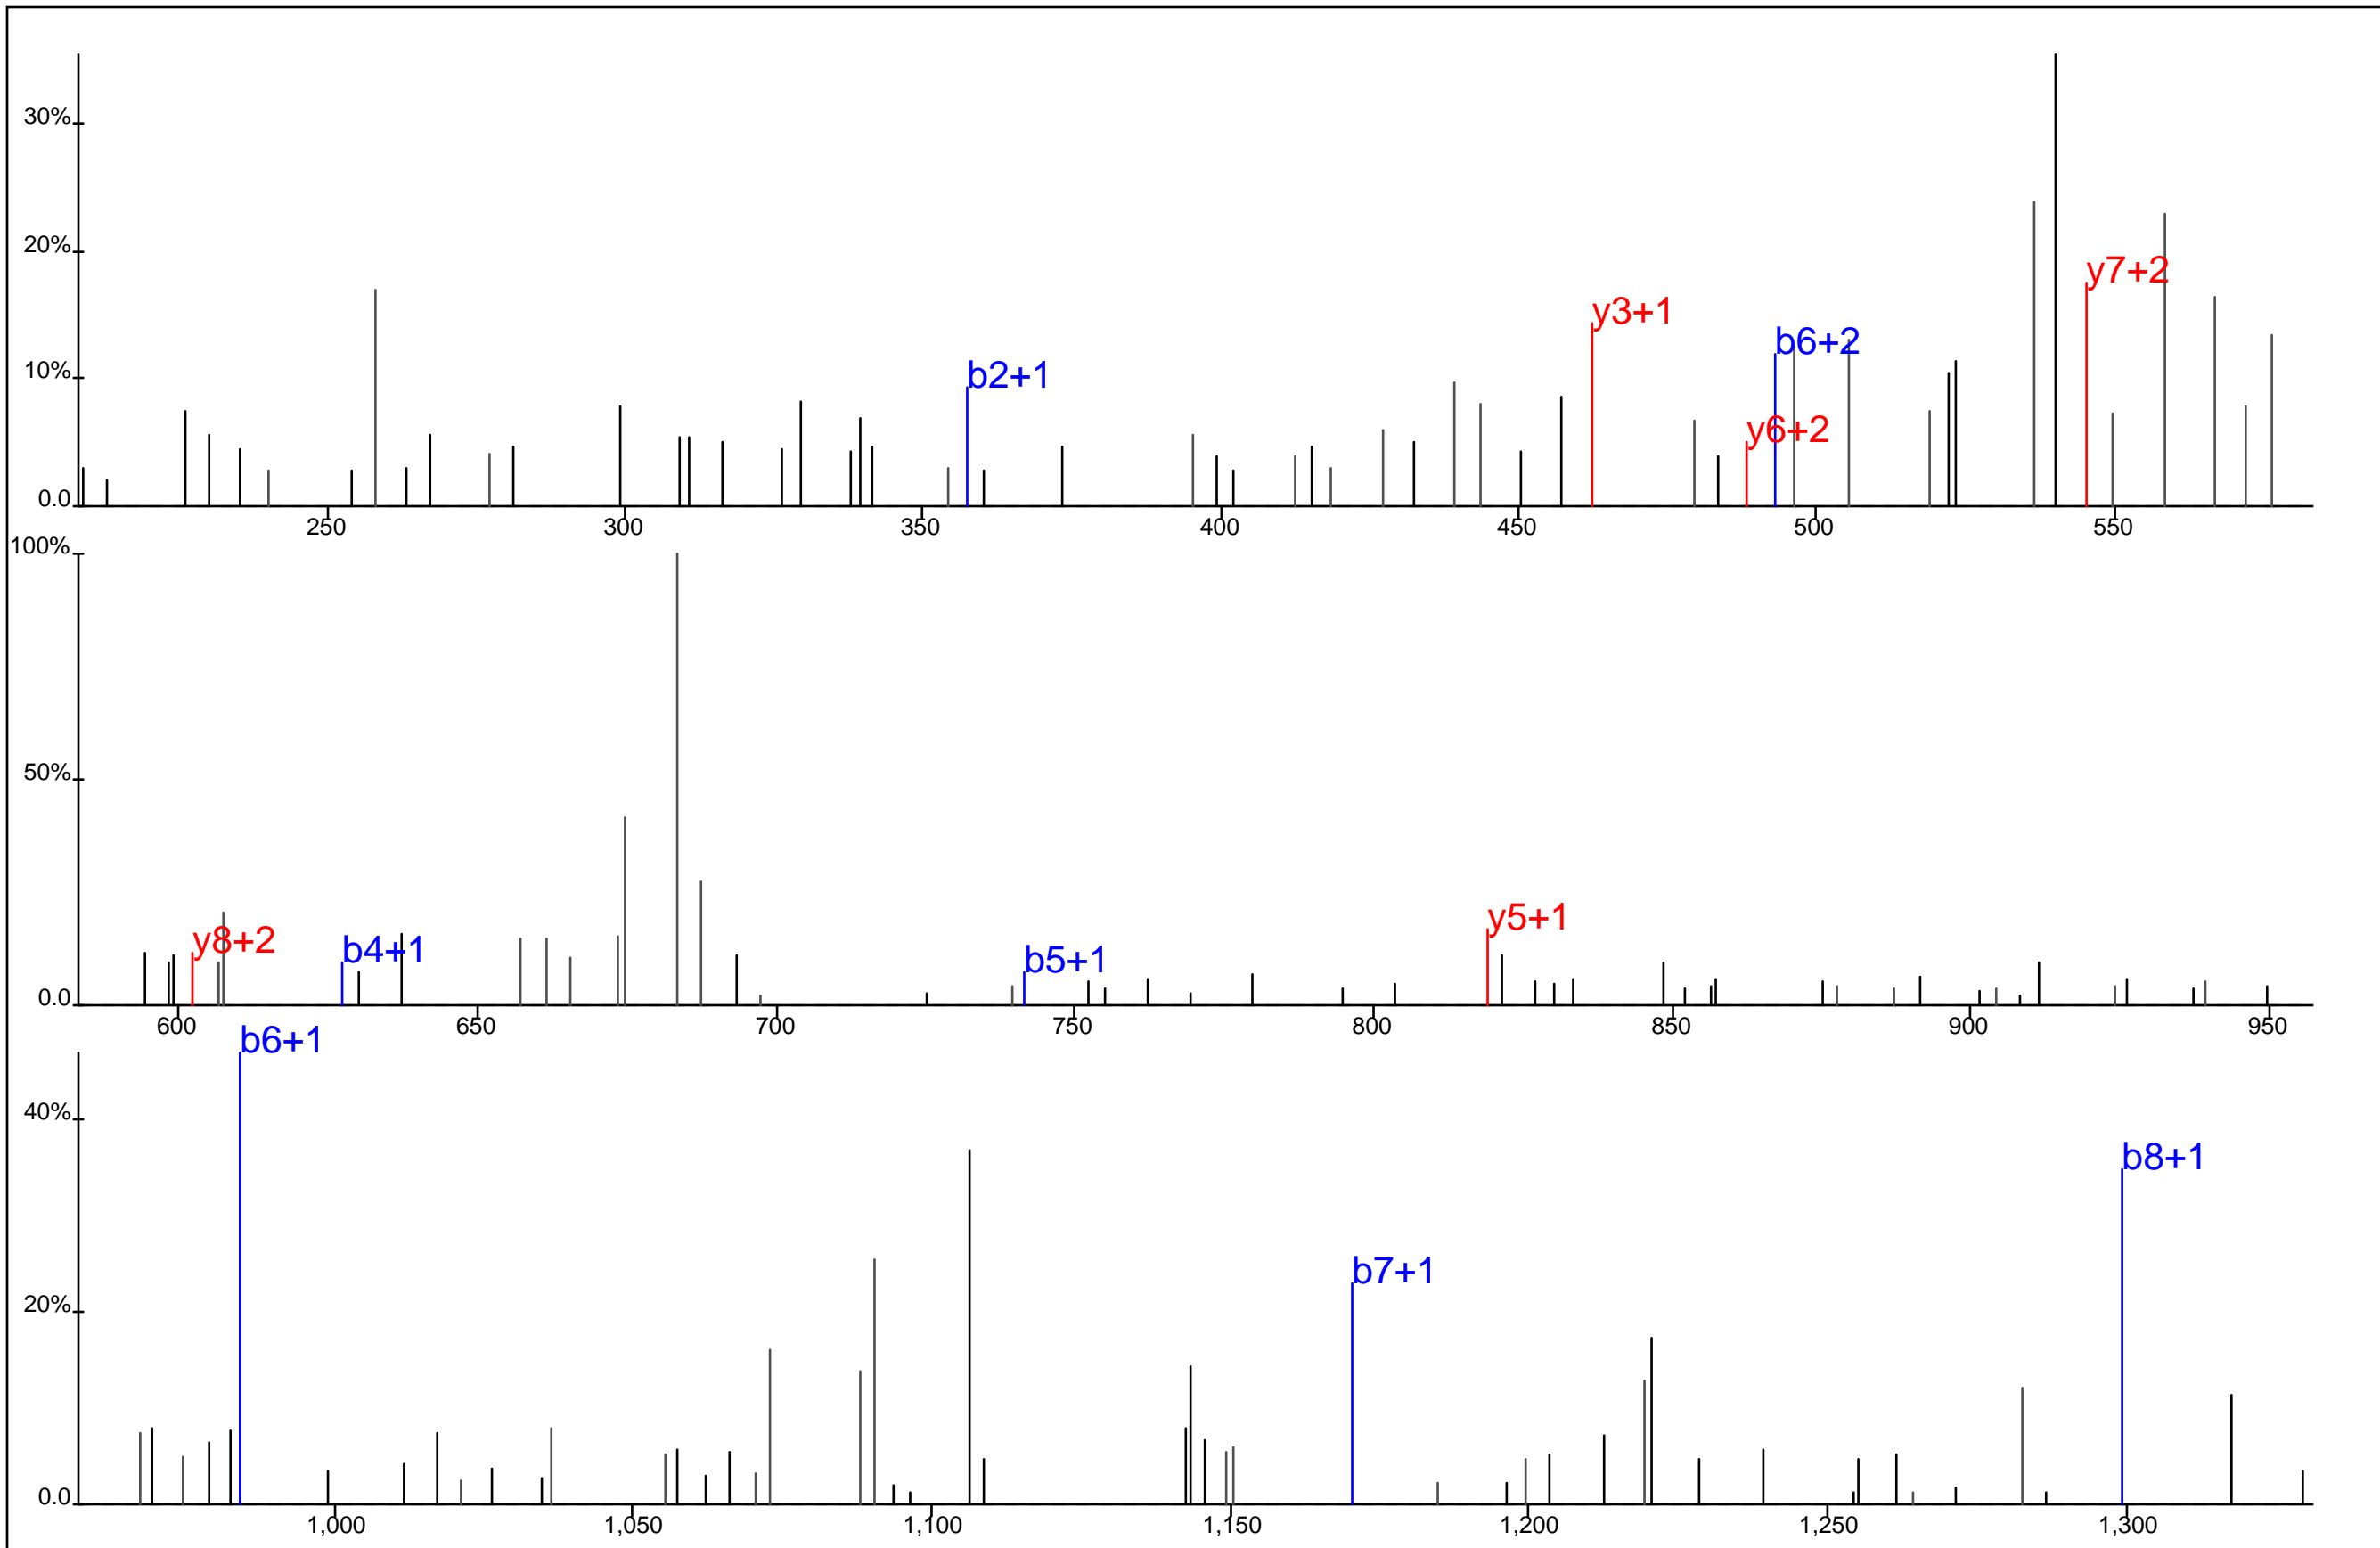


  
 Y\* L N R N Y\* W E K

Protein Name: Hrs  
 gi Accession: 0  
 Precursor Mass: 723.2861+2  
 Delta Mass: 0.008 ppm  
 XCorr: 26.74

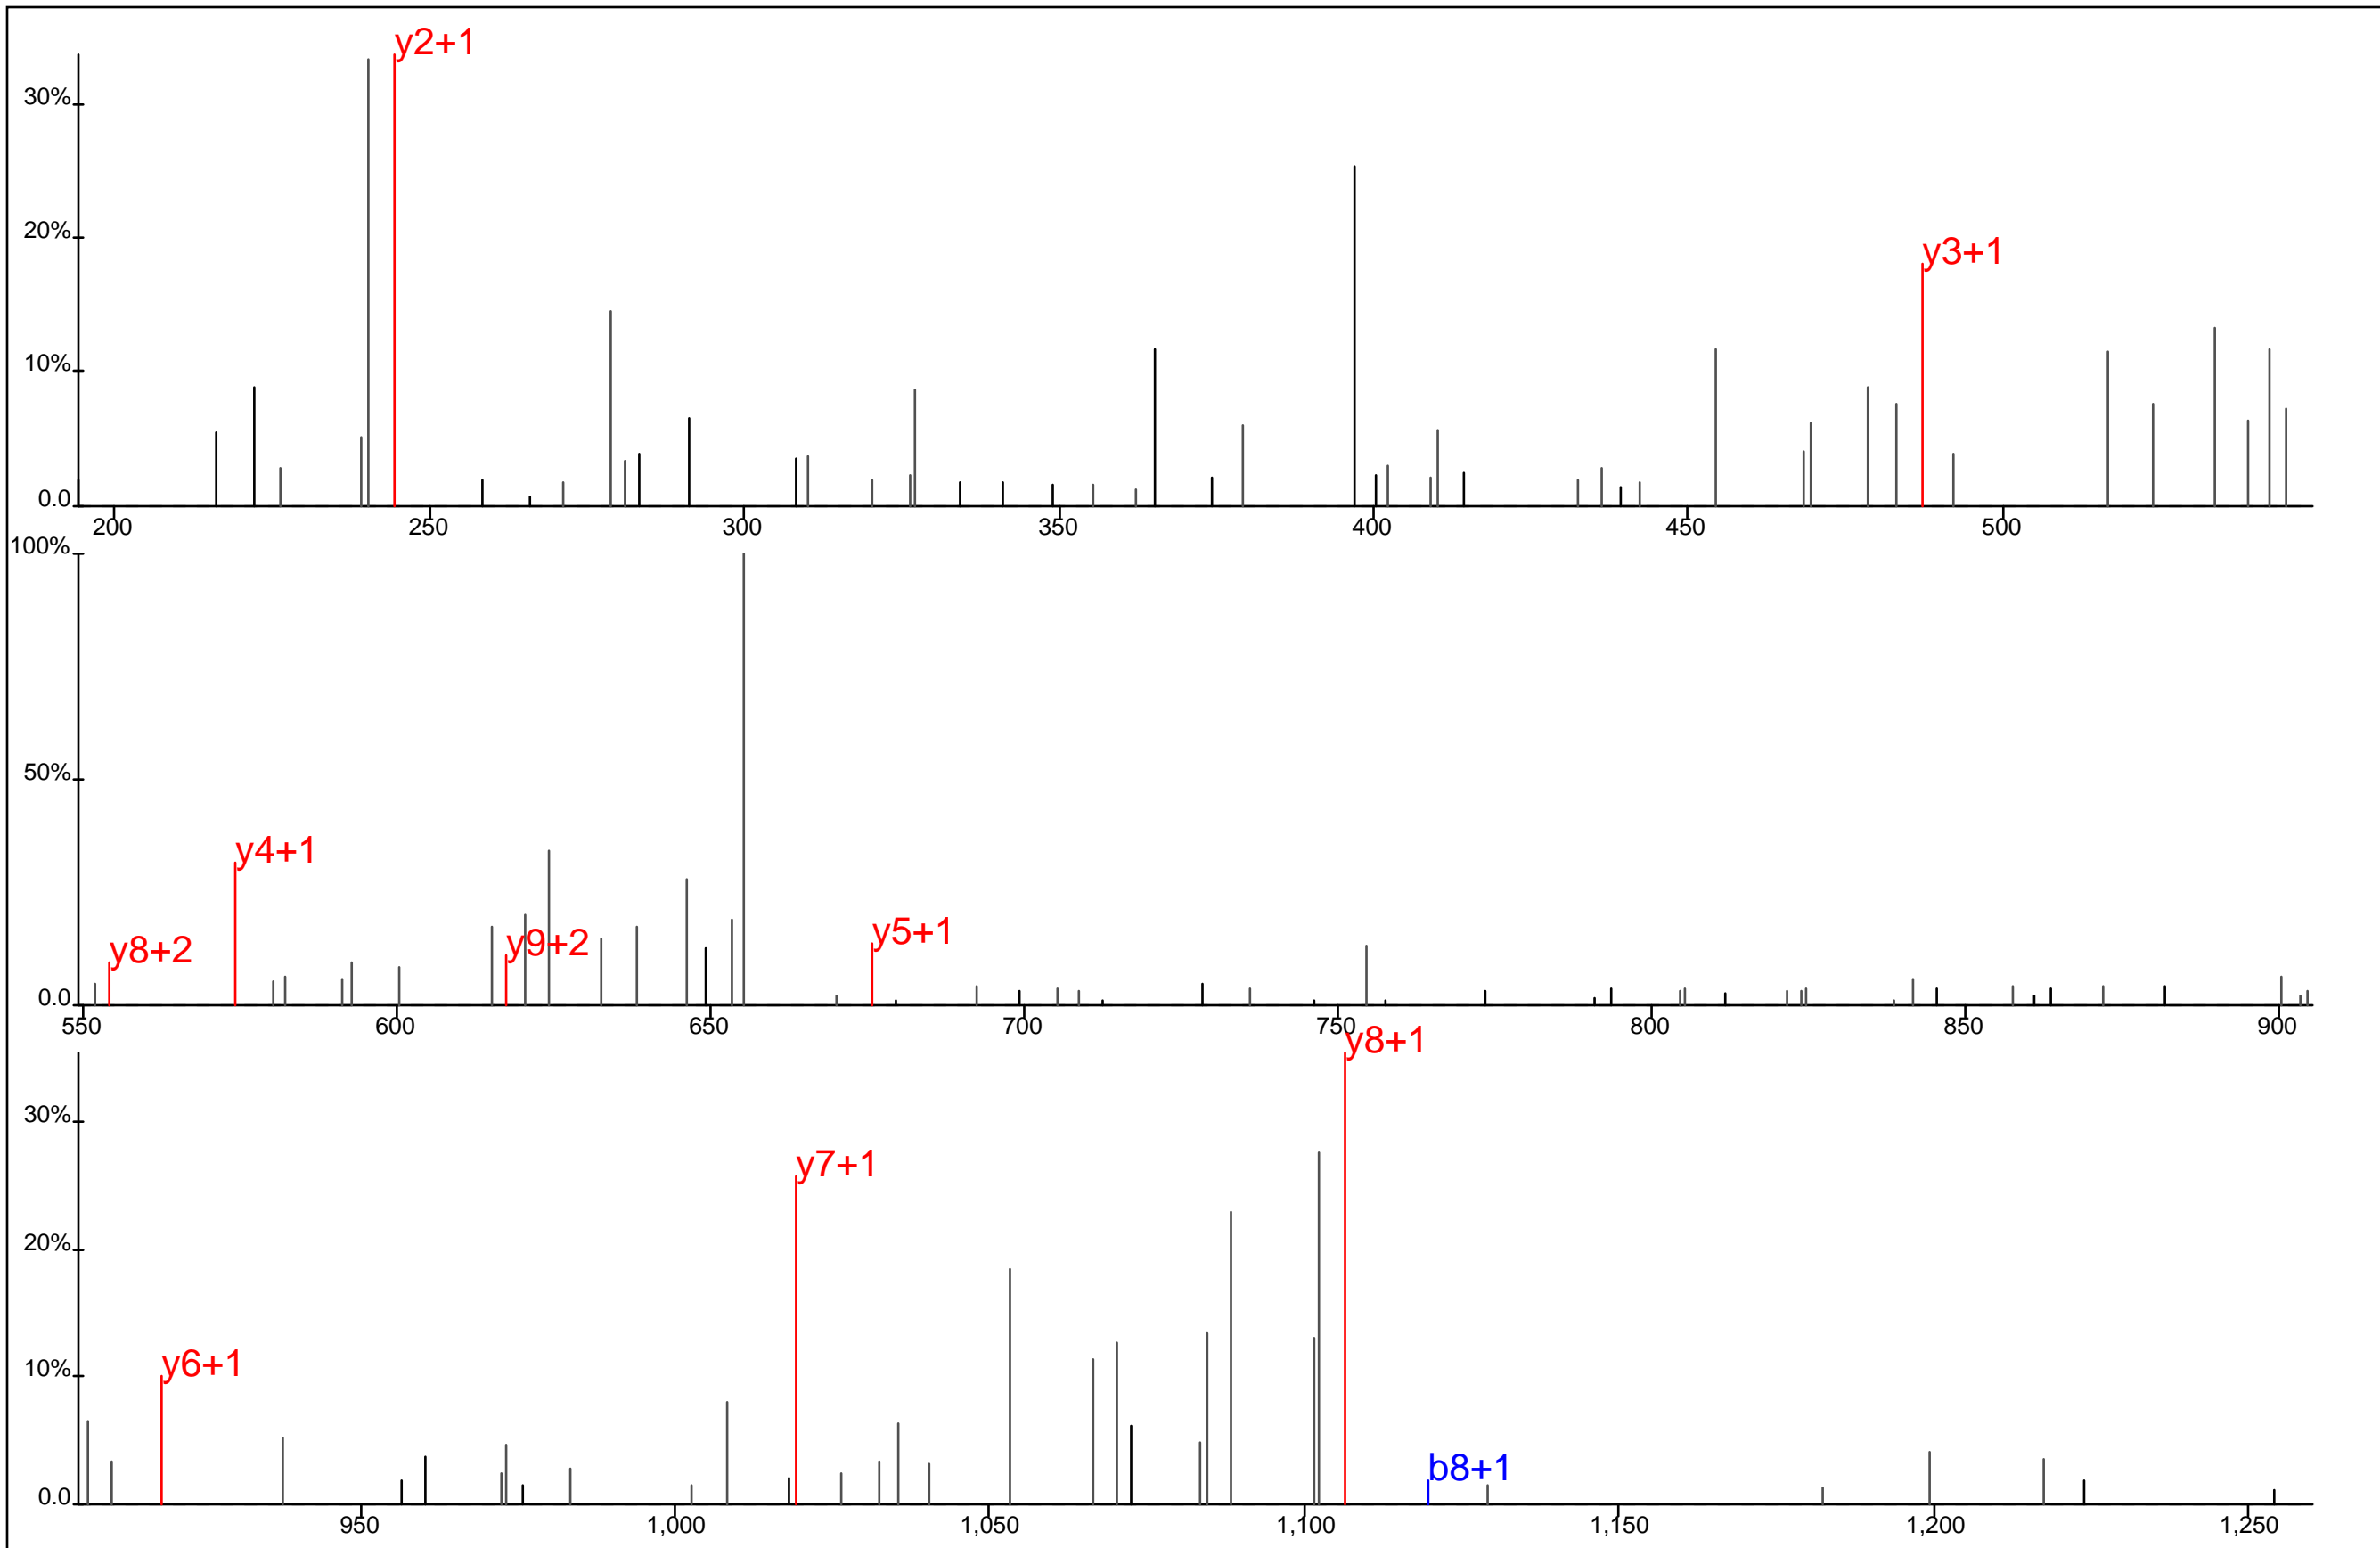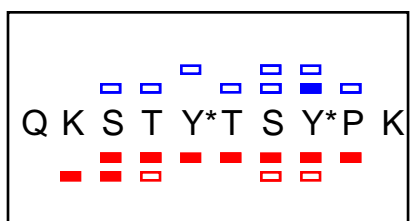

Protein Name: Hrs  
 gi Accession: 0  
 Precursor Mass: 681.7736+2  
 Delta Mass: 1.581 ppm  
 XCorr: 21.43

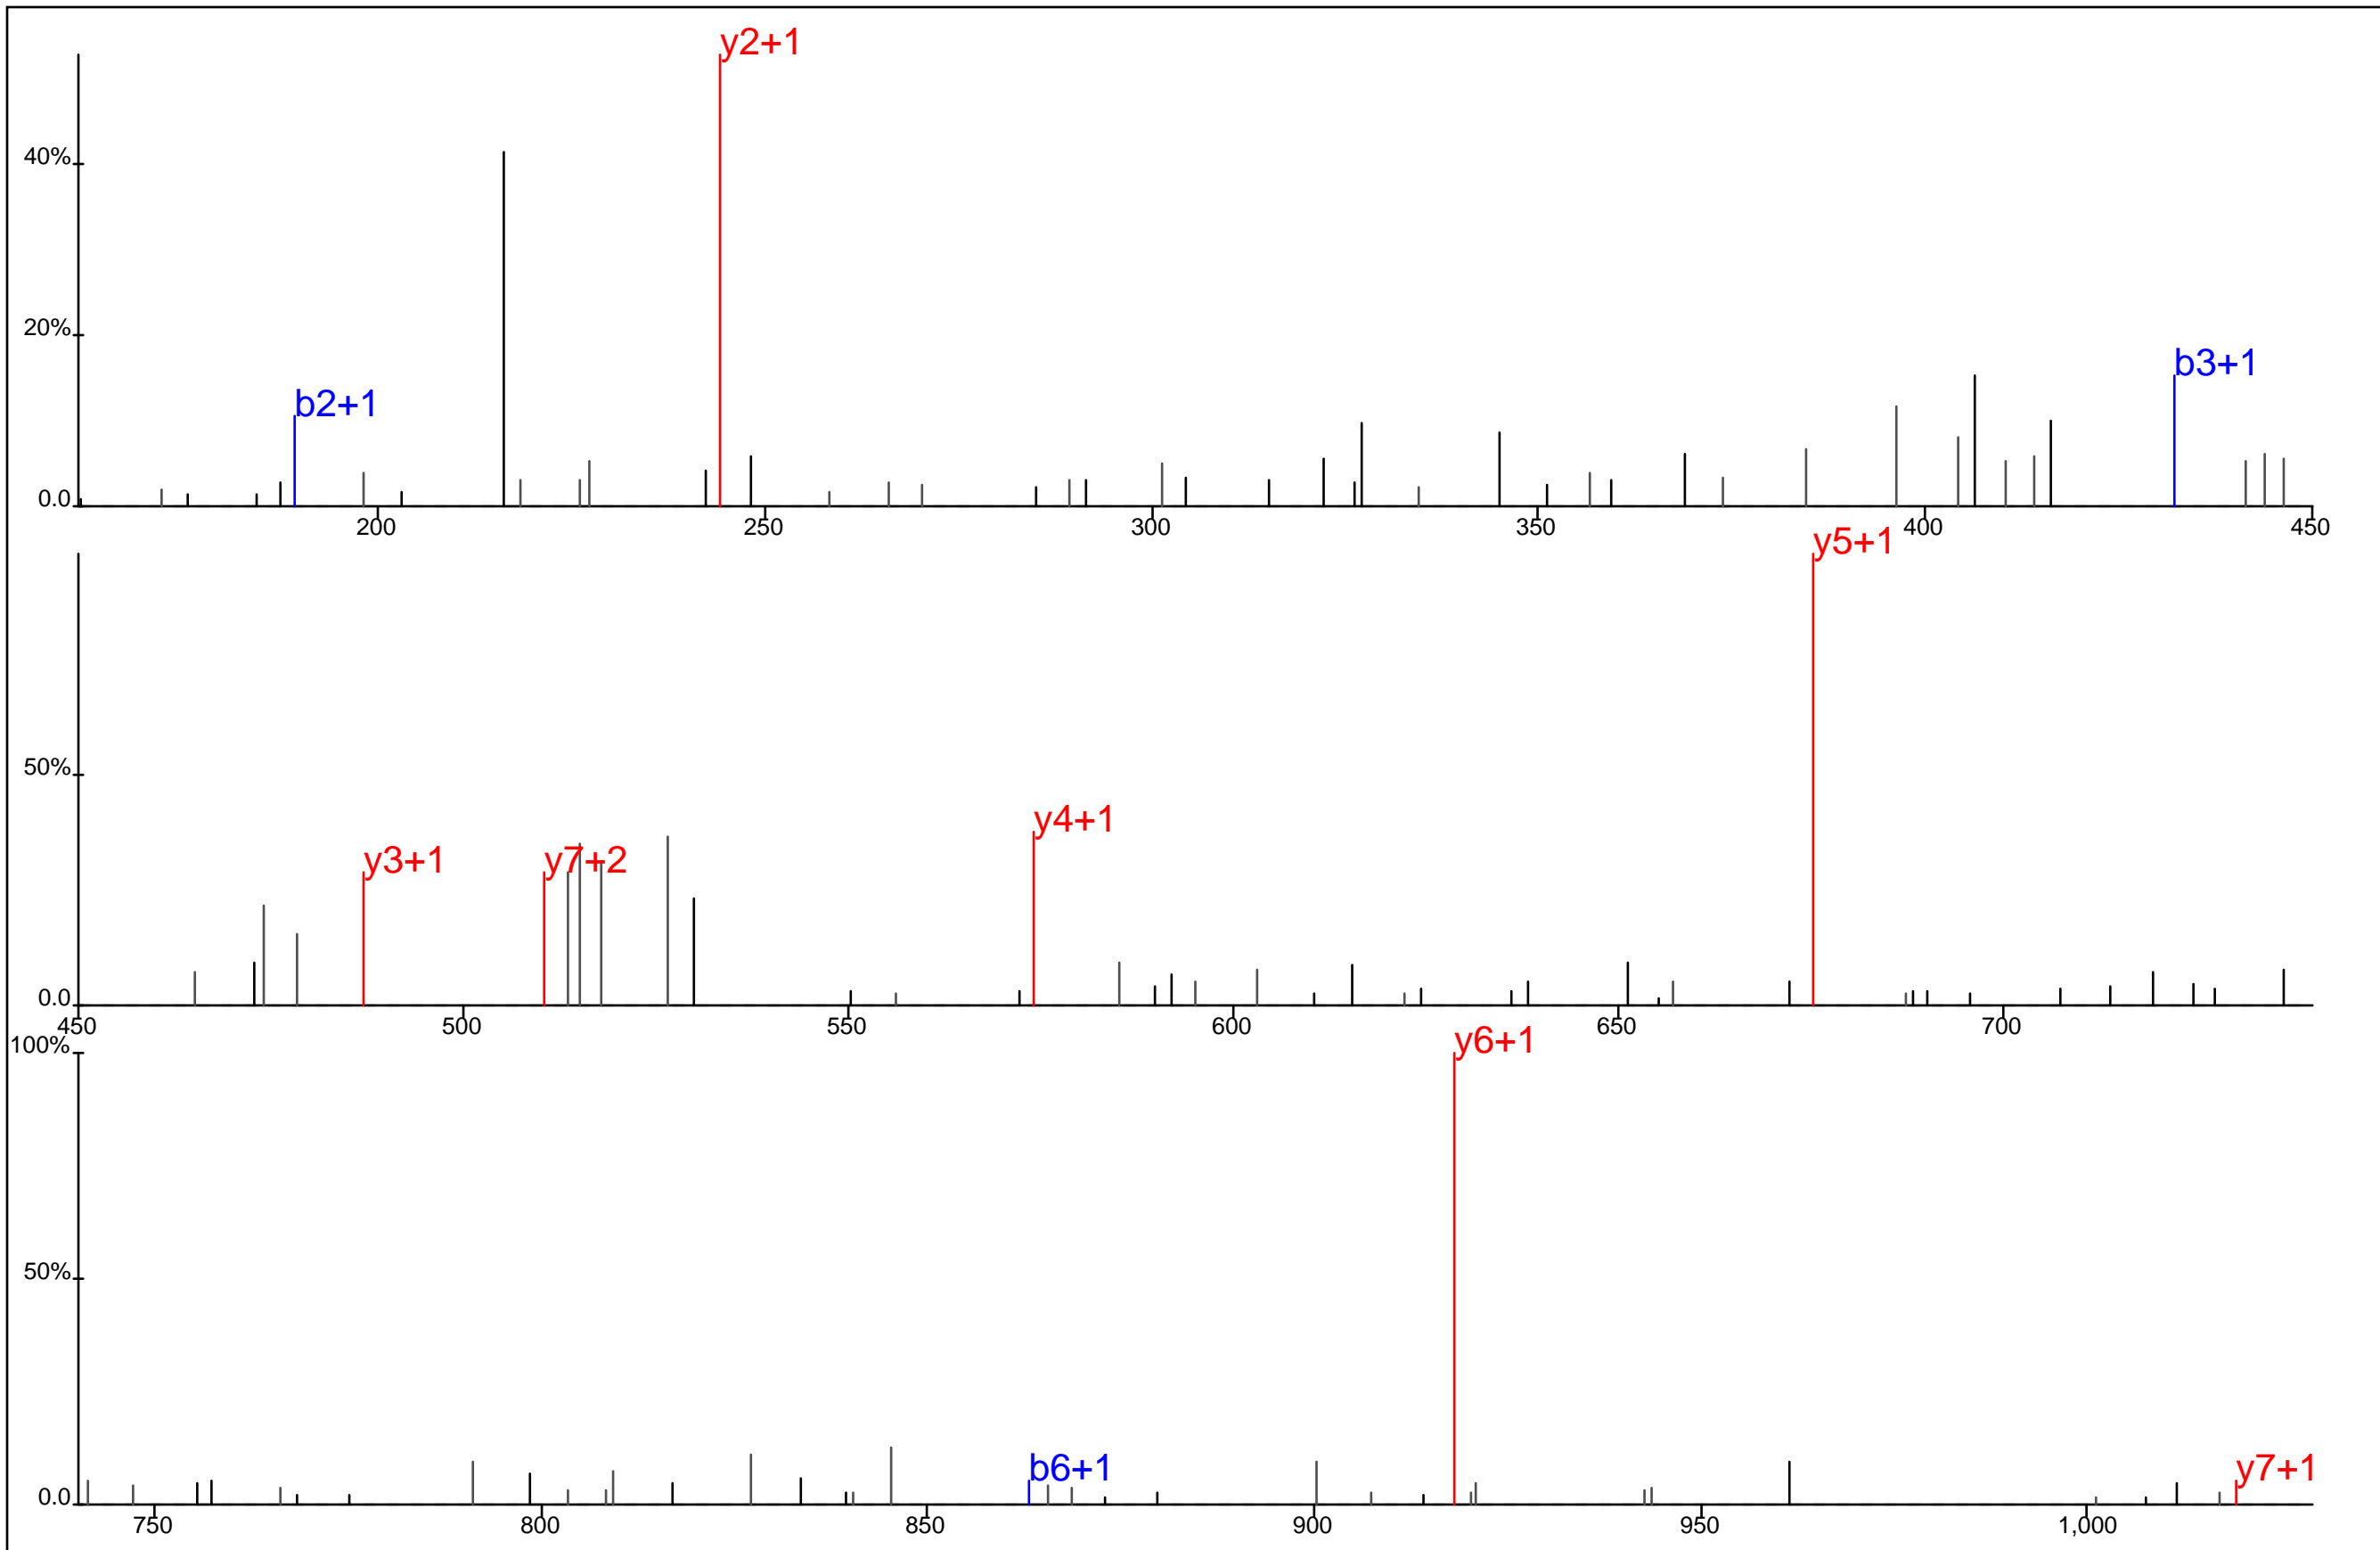

**S** **T** **Y\*** **T** **S** **Y\*** **P** **K**

Protein Name: Hrs  
 gi Accession: 0  
 Precursor Mass: 553.6951+2  
 Delta Mass: 1.276 ppm  
 XCorr: 32.19

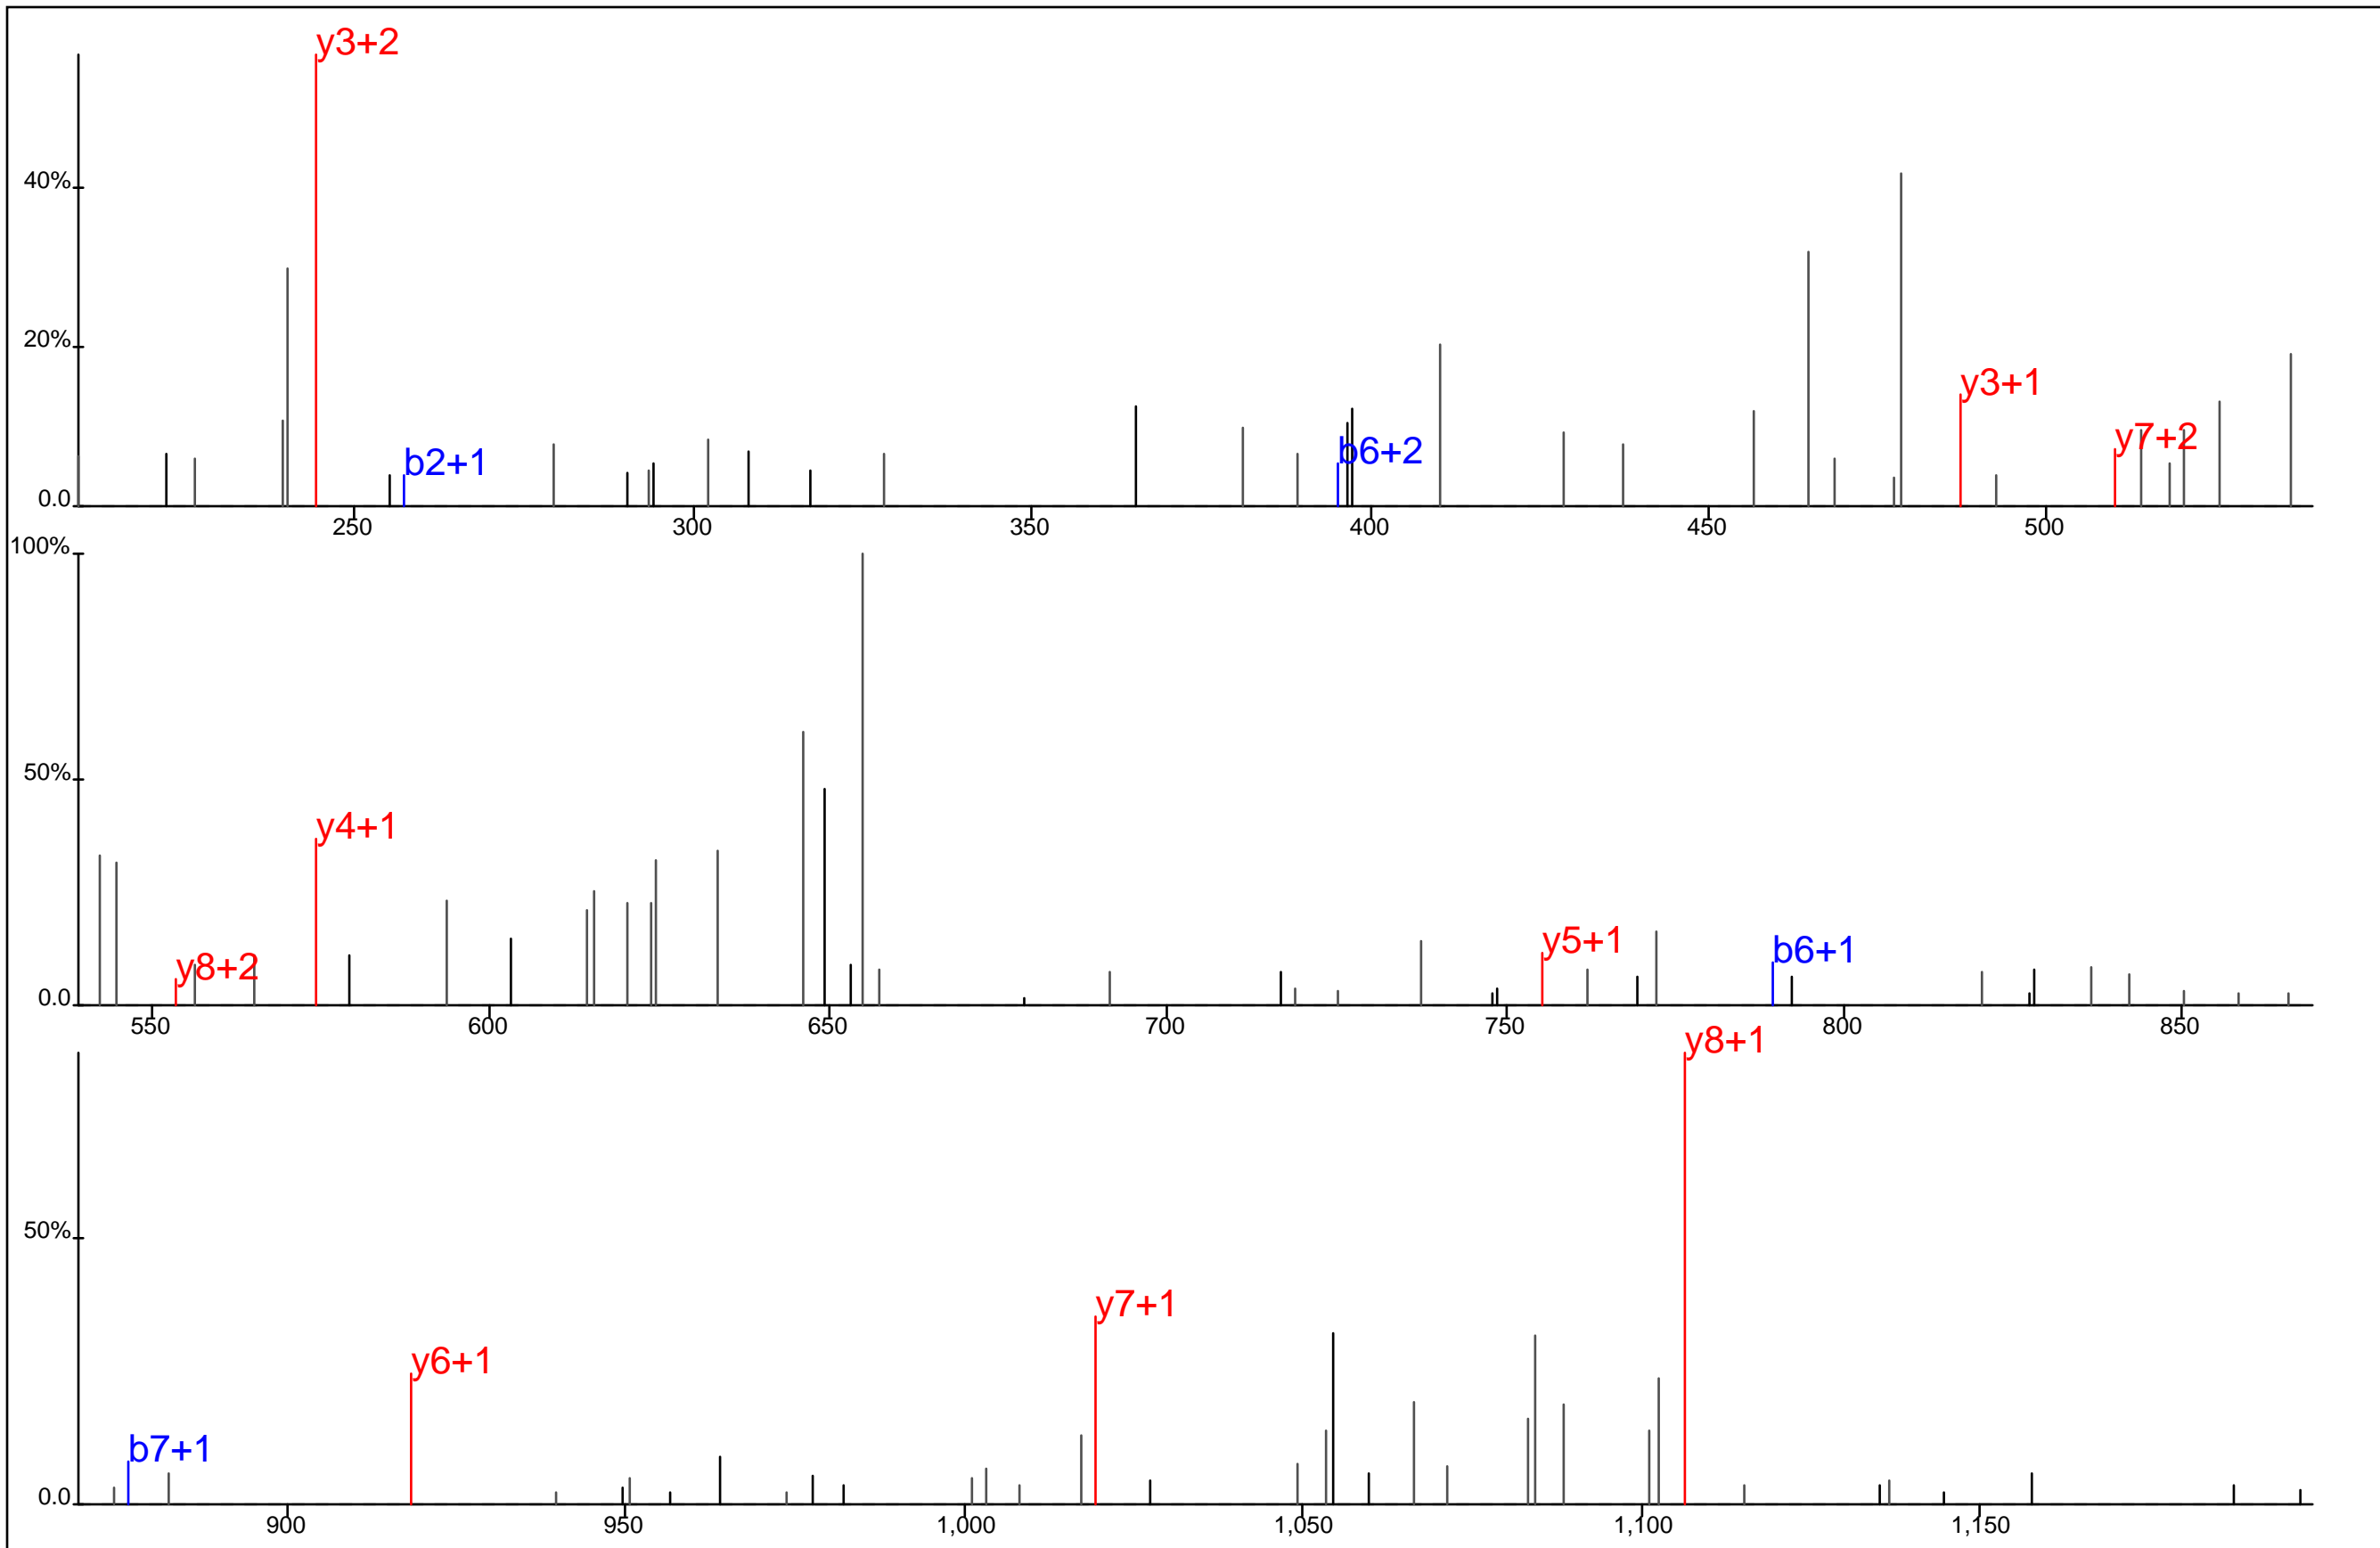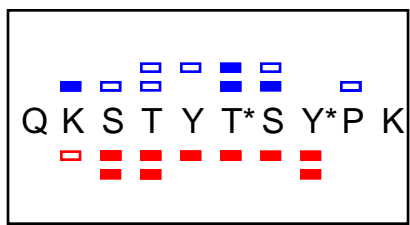

Protein Name: Hrs  
 gi Accession: 0  
 Precursor Mass: 681.7739+2  
 Delta Mass: 1.939 ppm  
 XCorr: 28.64

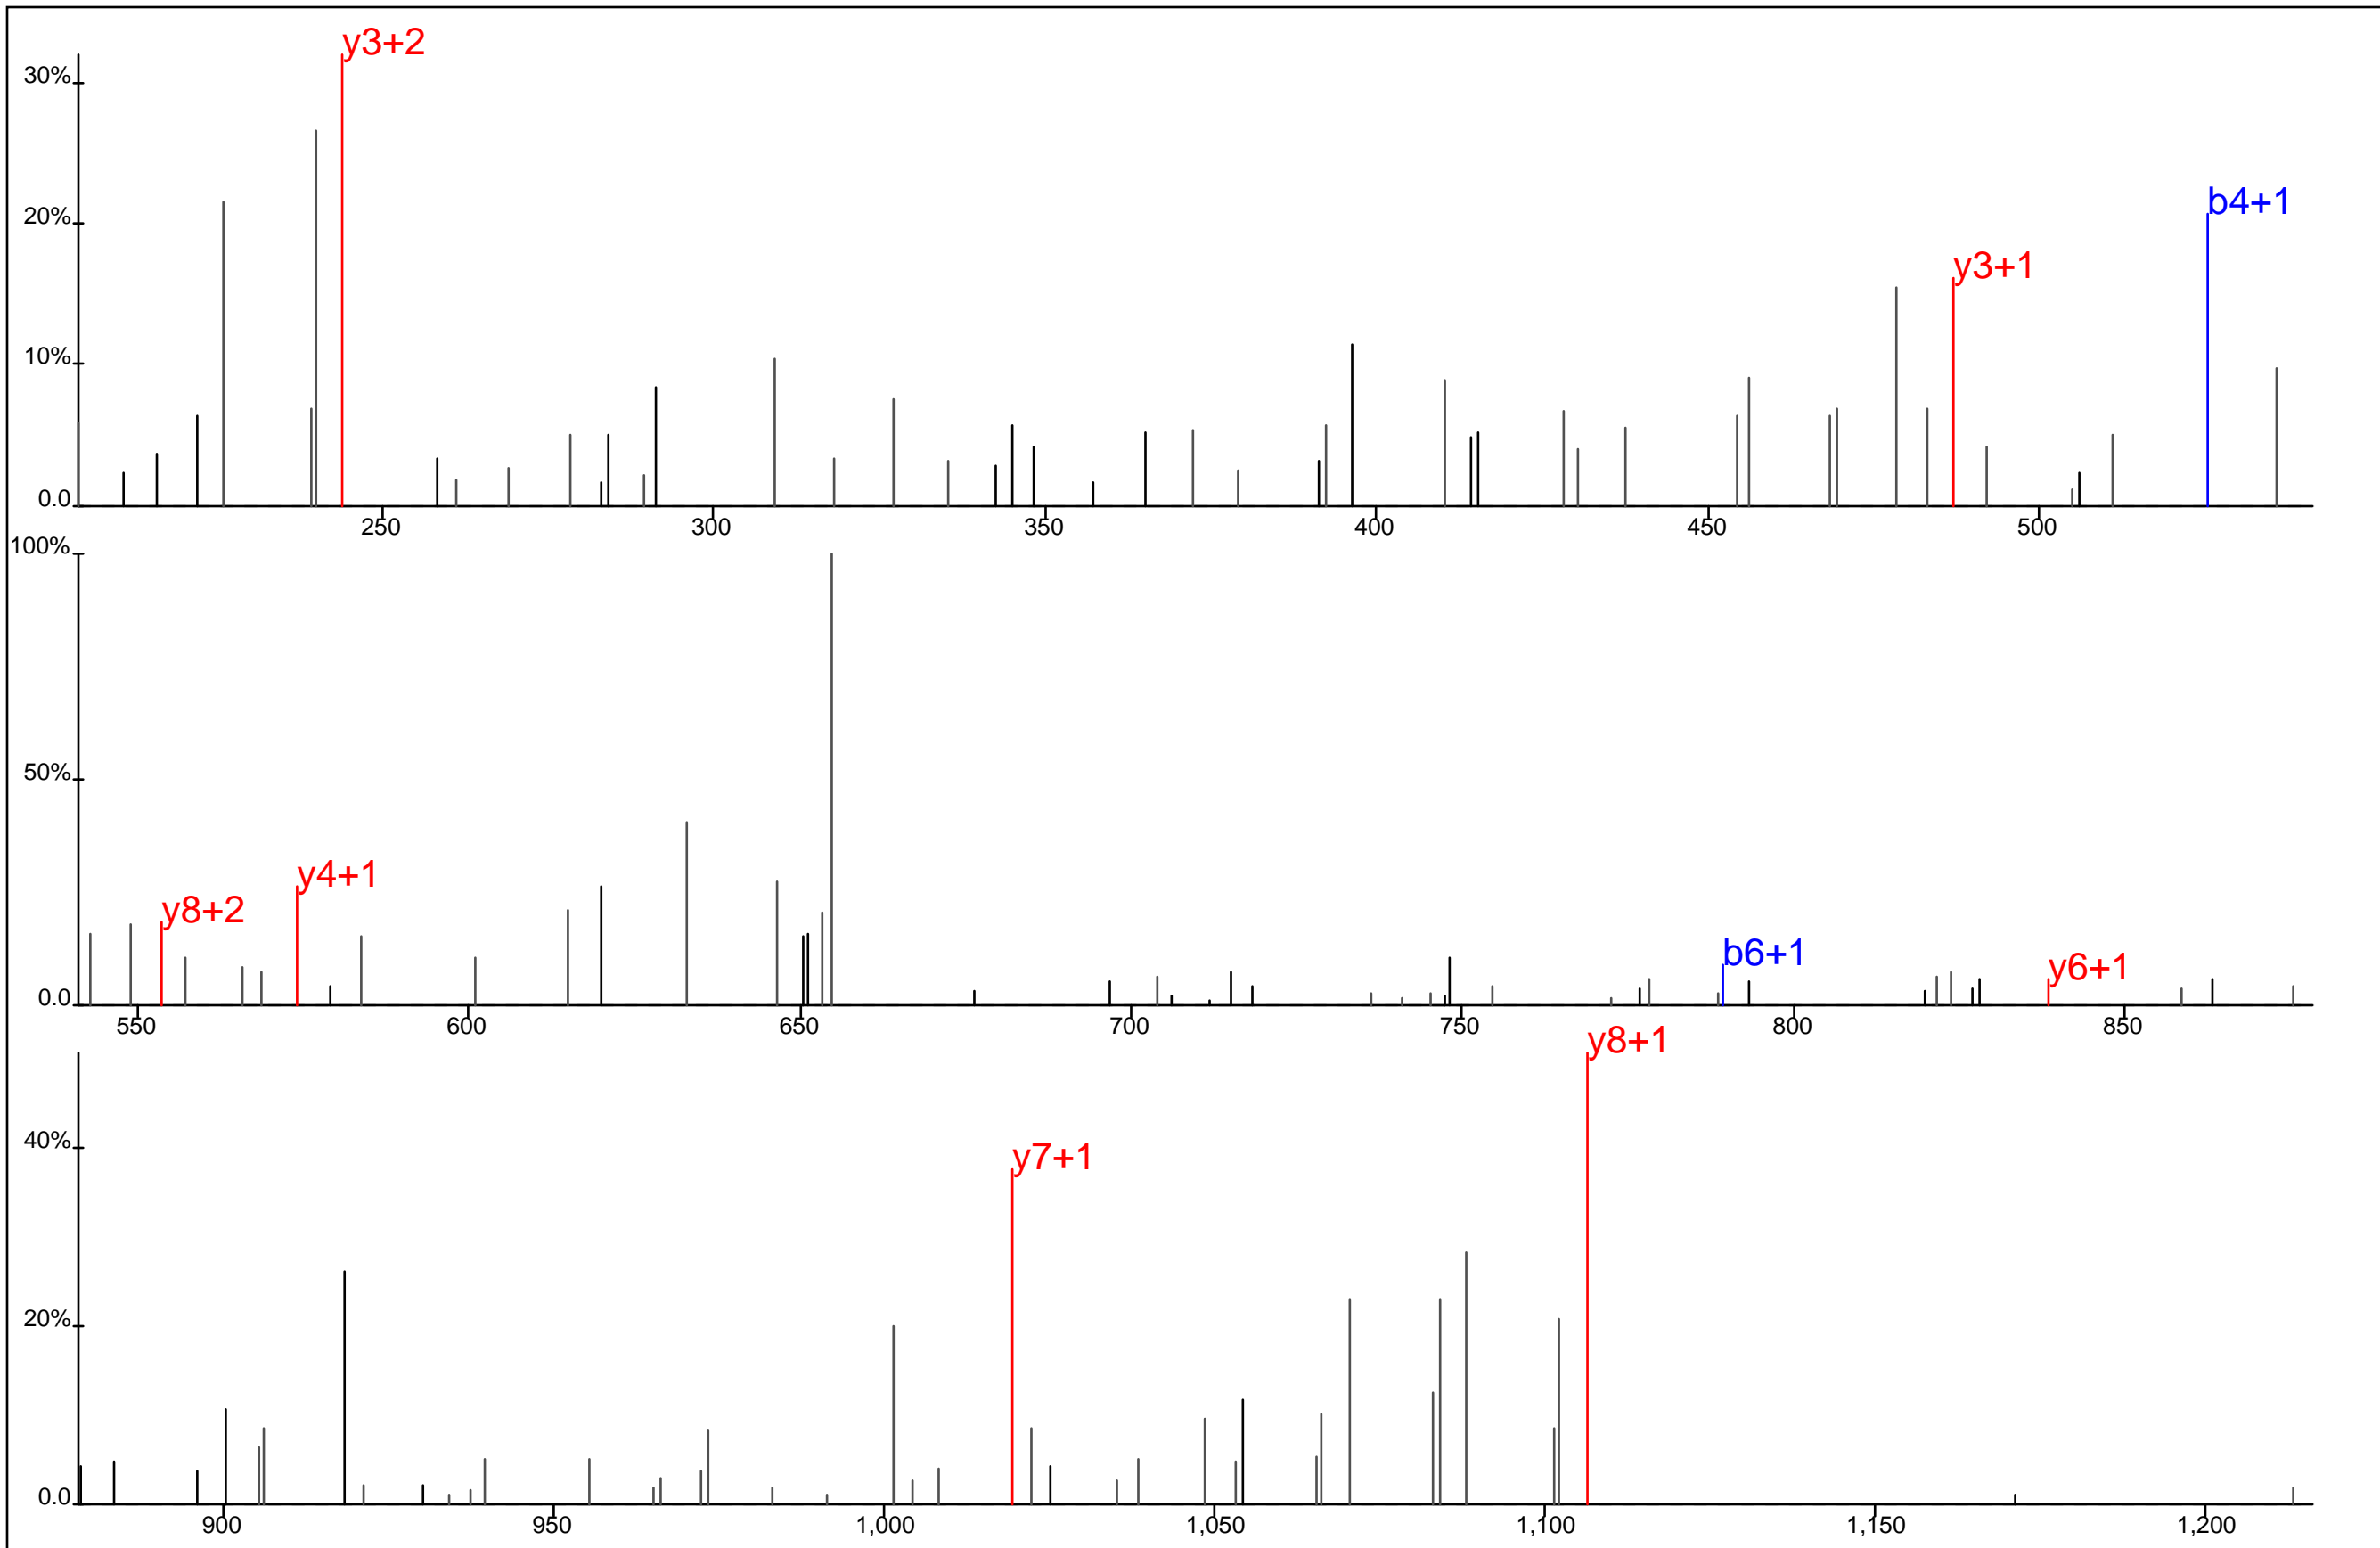

□ ■ □ □ □ □ □  
 Q K S T\*Y T S Y\*P K  
□ □ □ □ □ □ □

Protein Name: Hrs  
 gi Accession: 0  
 Precursor Mass: 681.7715+2  
 Delta Mass: 1.466 ppm  
 XCorr: 41.72



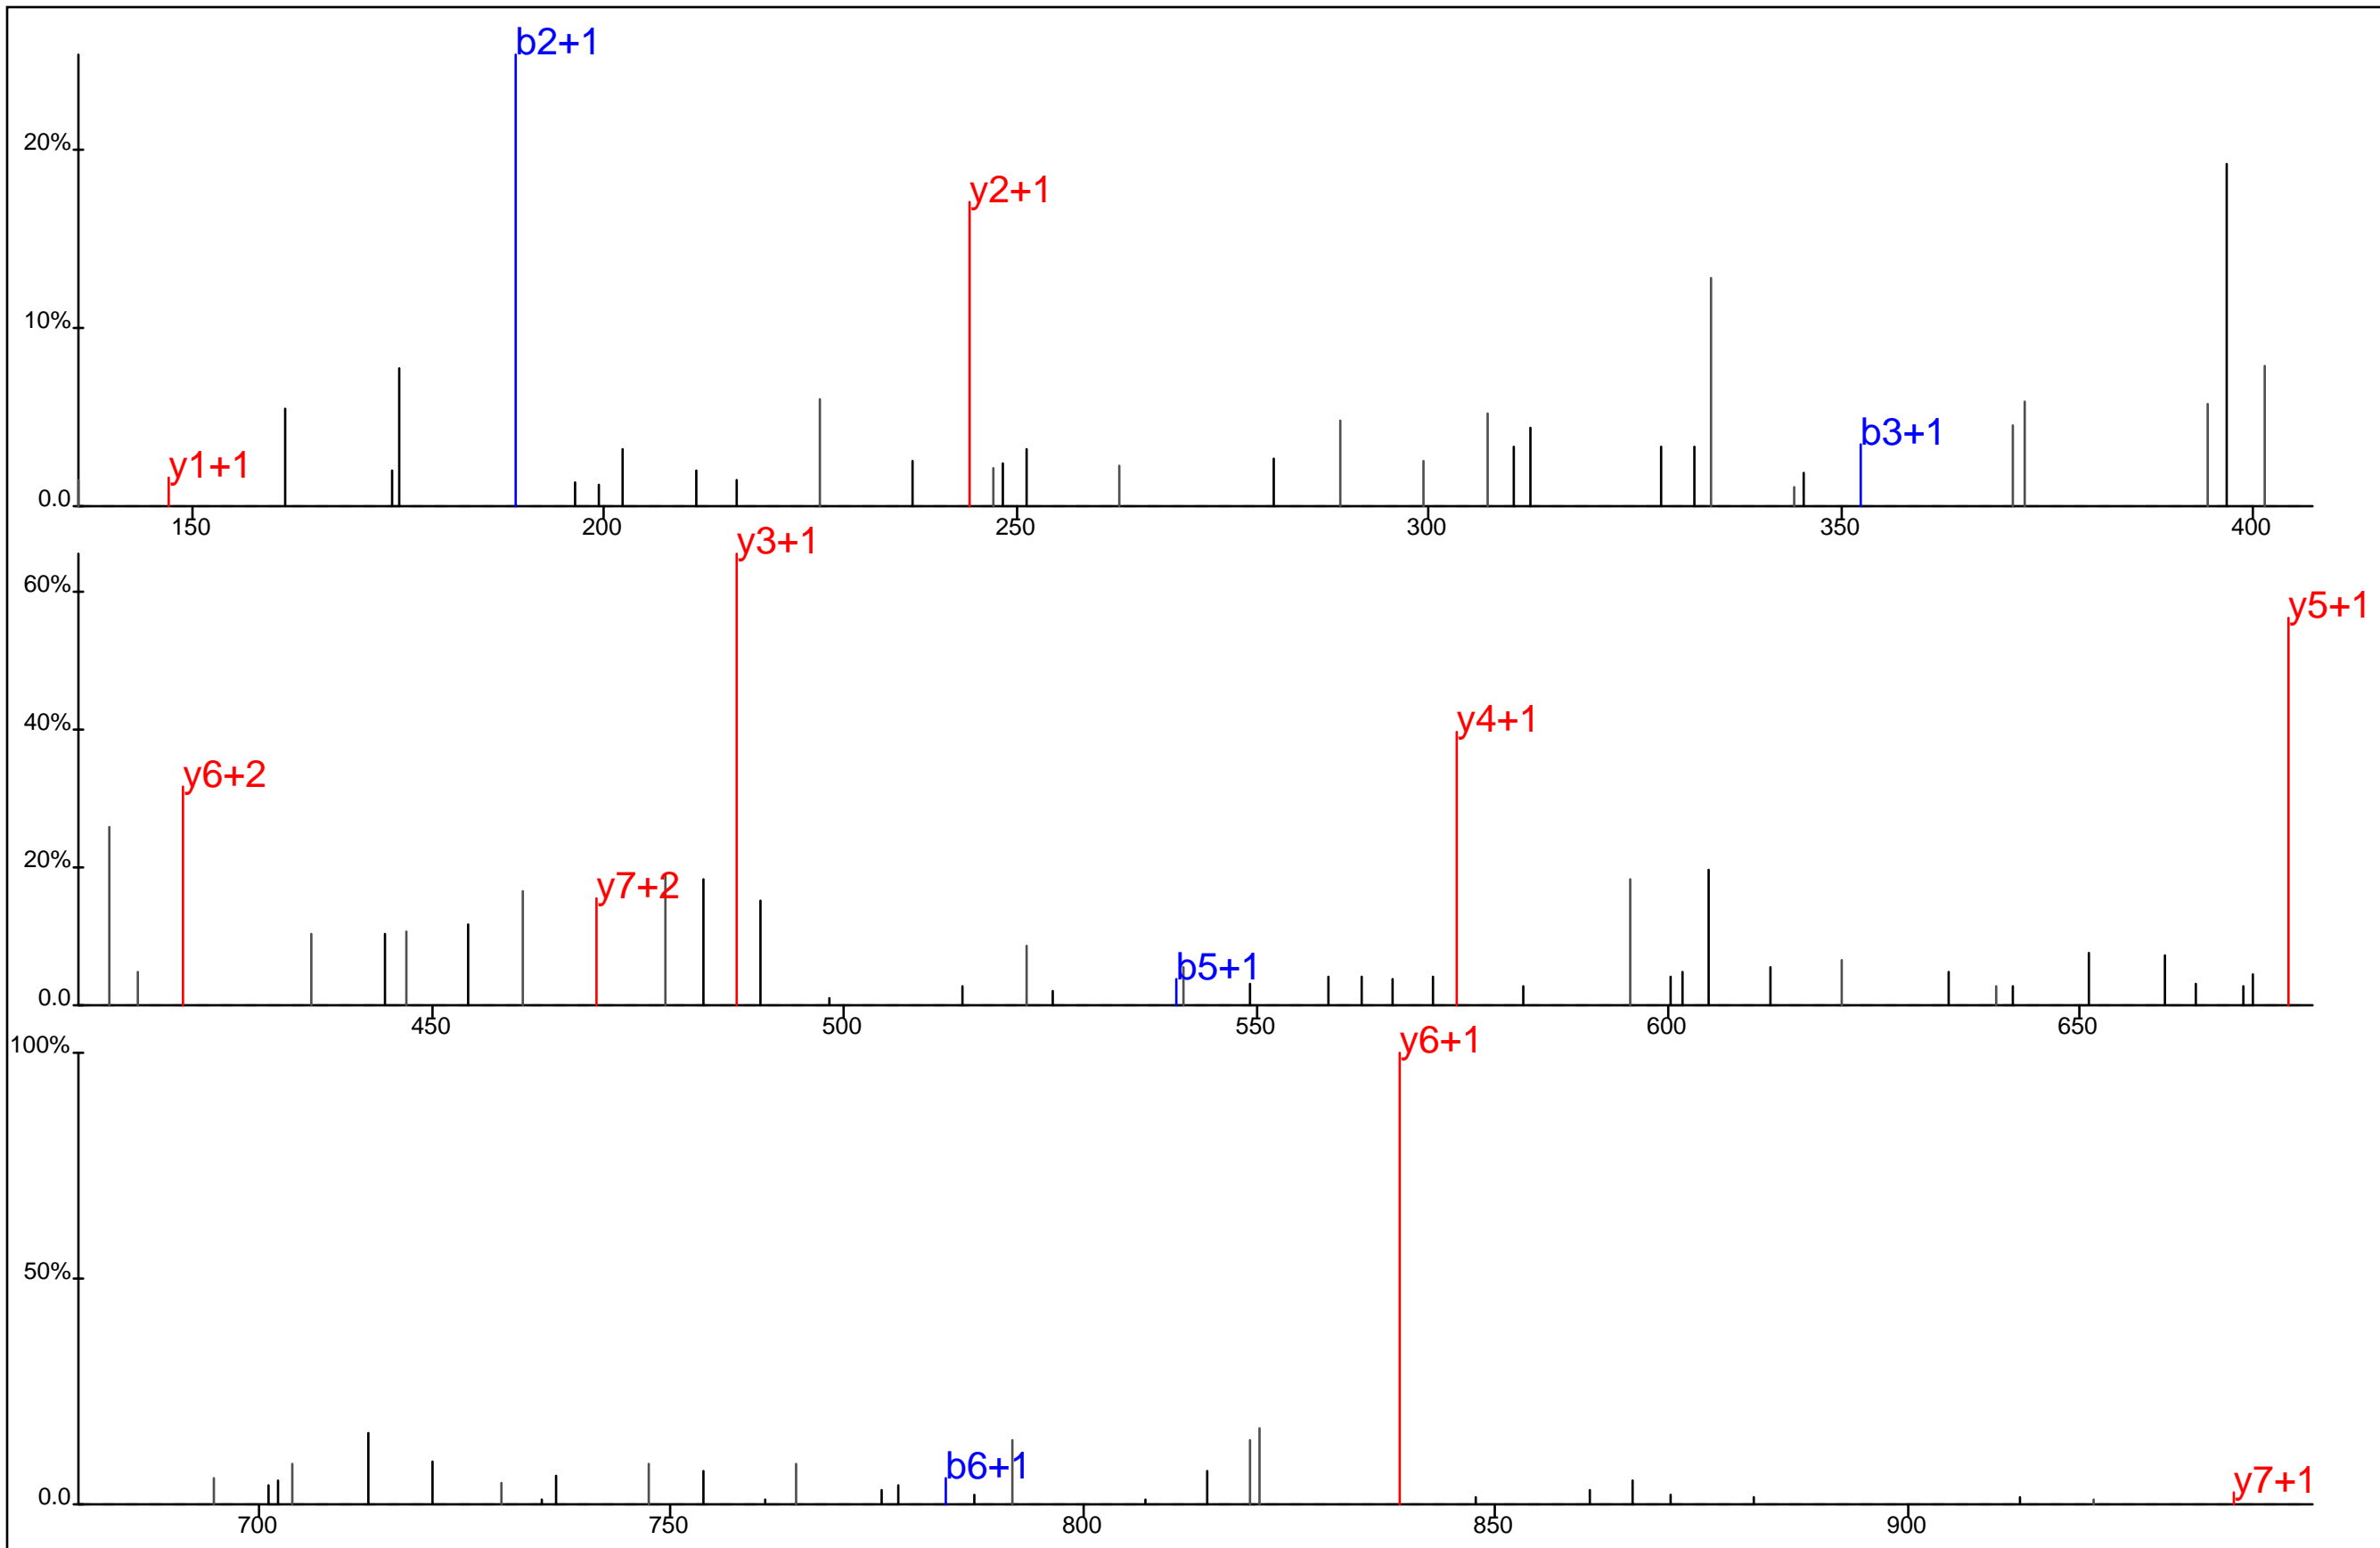

■ ■ ▢ ▢ ■ ▢  
 S T Y T S Y\*P K  
▢ ▢ ▢ ▢ ▢ ▢

Protein Name: Hrs  
 gi Accession: 0  
 Precursor Mass: 513.7121+2  
 Delta Mass: 1.007 ppm  
 XCorr: 40.38

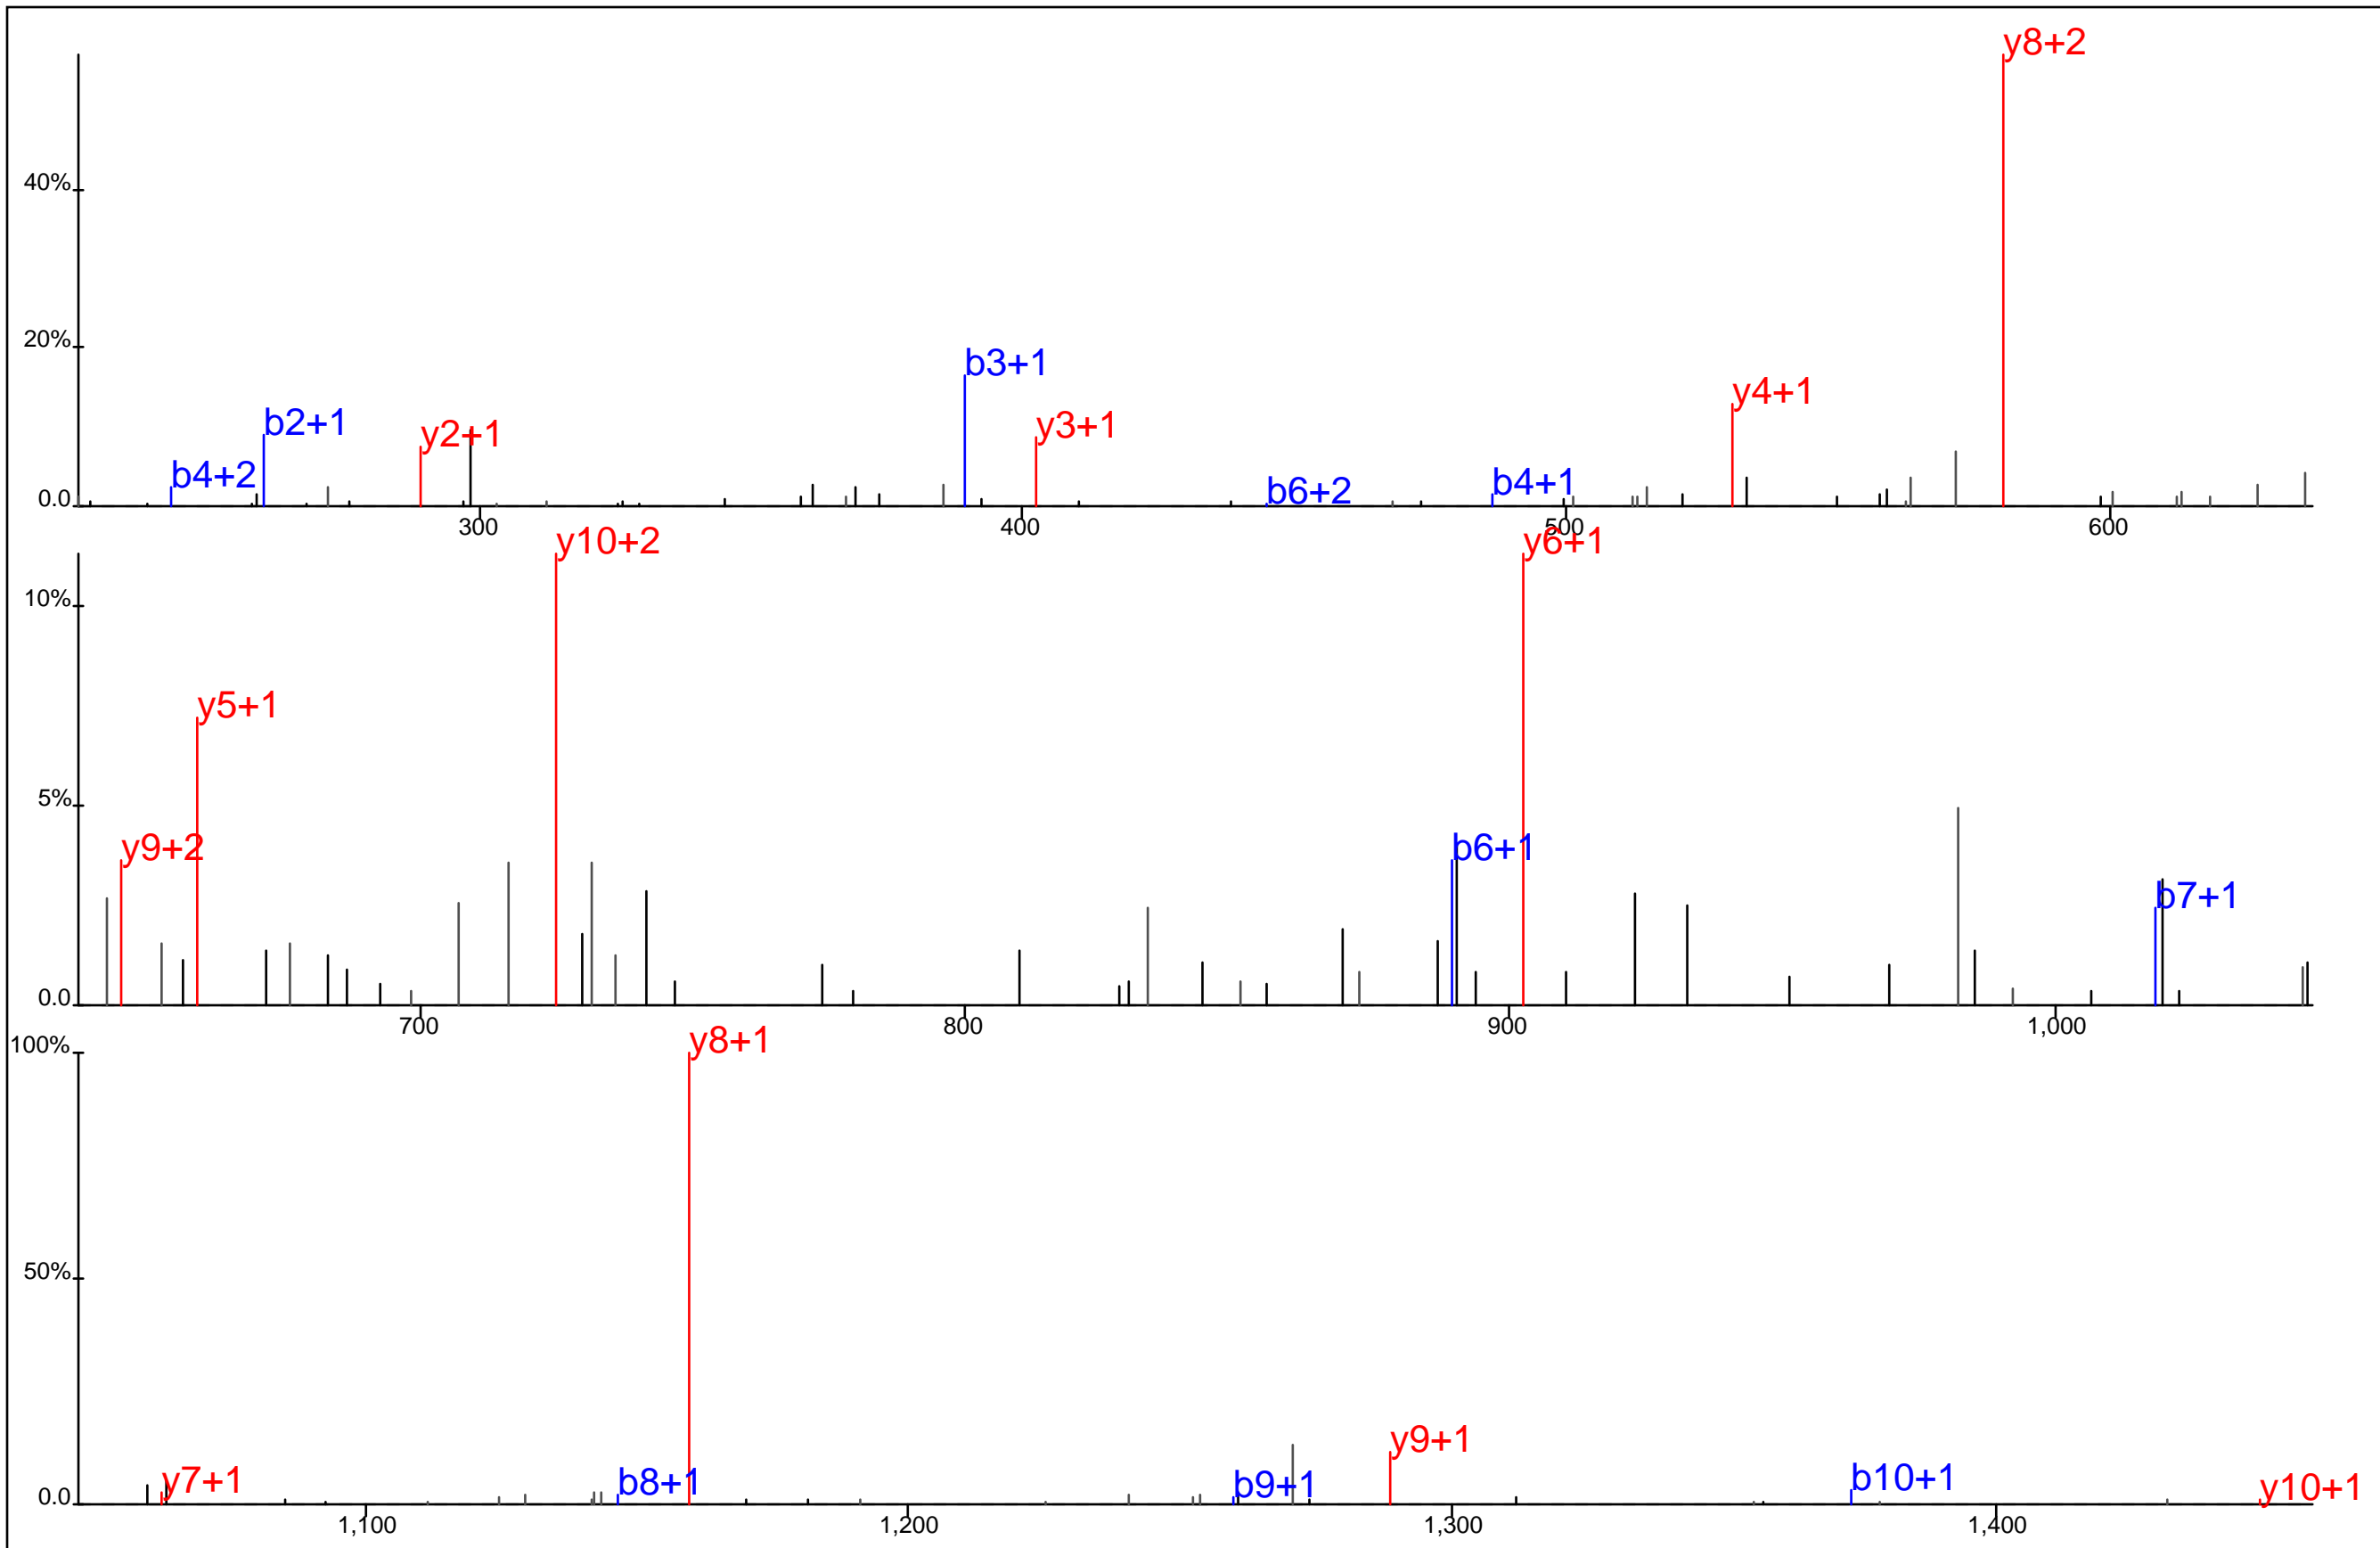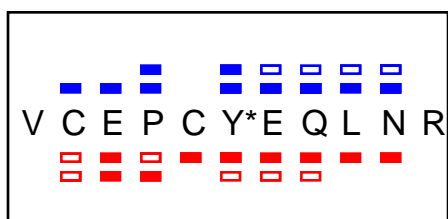

Protein Name: Hrs  
 gi Accession: 0  
 Precursor Mass: 774.3040+2  
 Delta Mass: 0.768 ppm  
 XCorr: 59.1

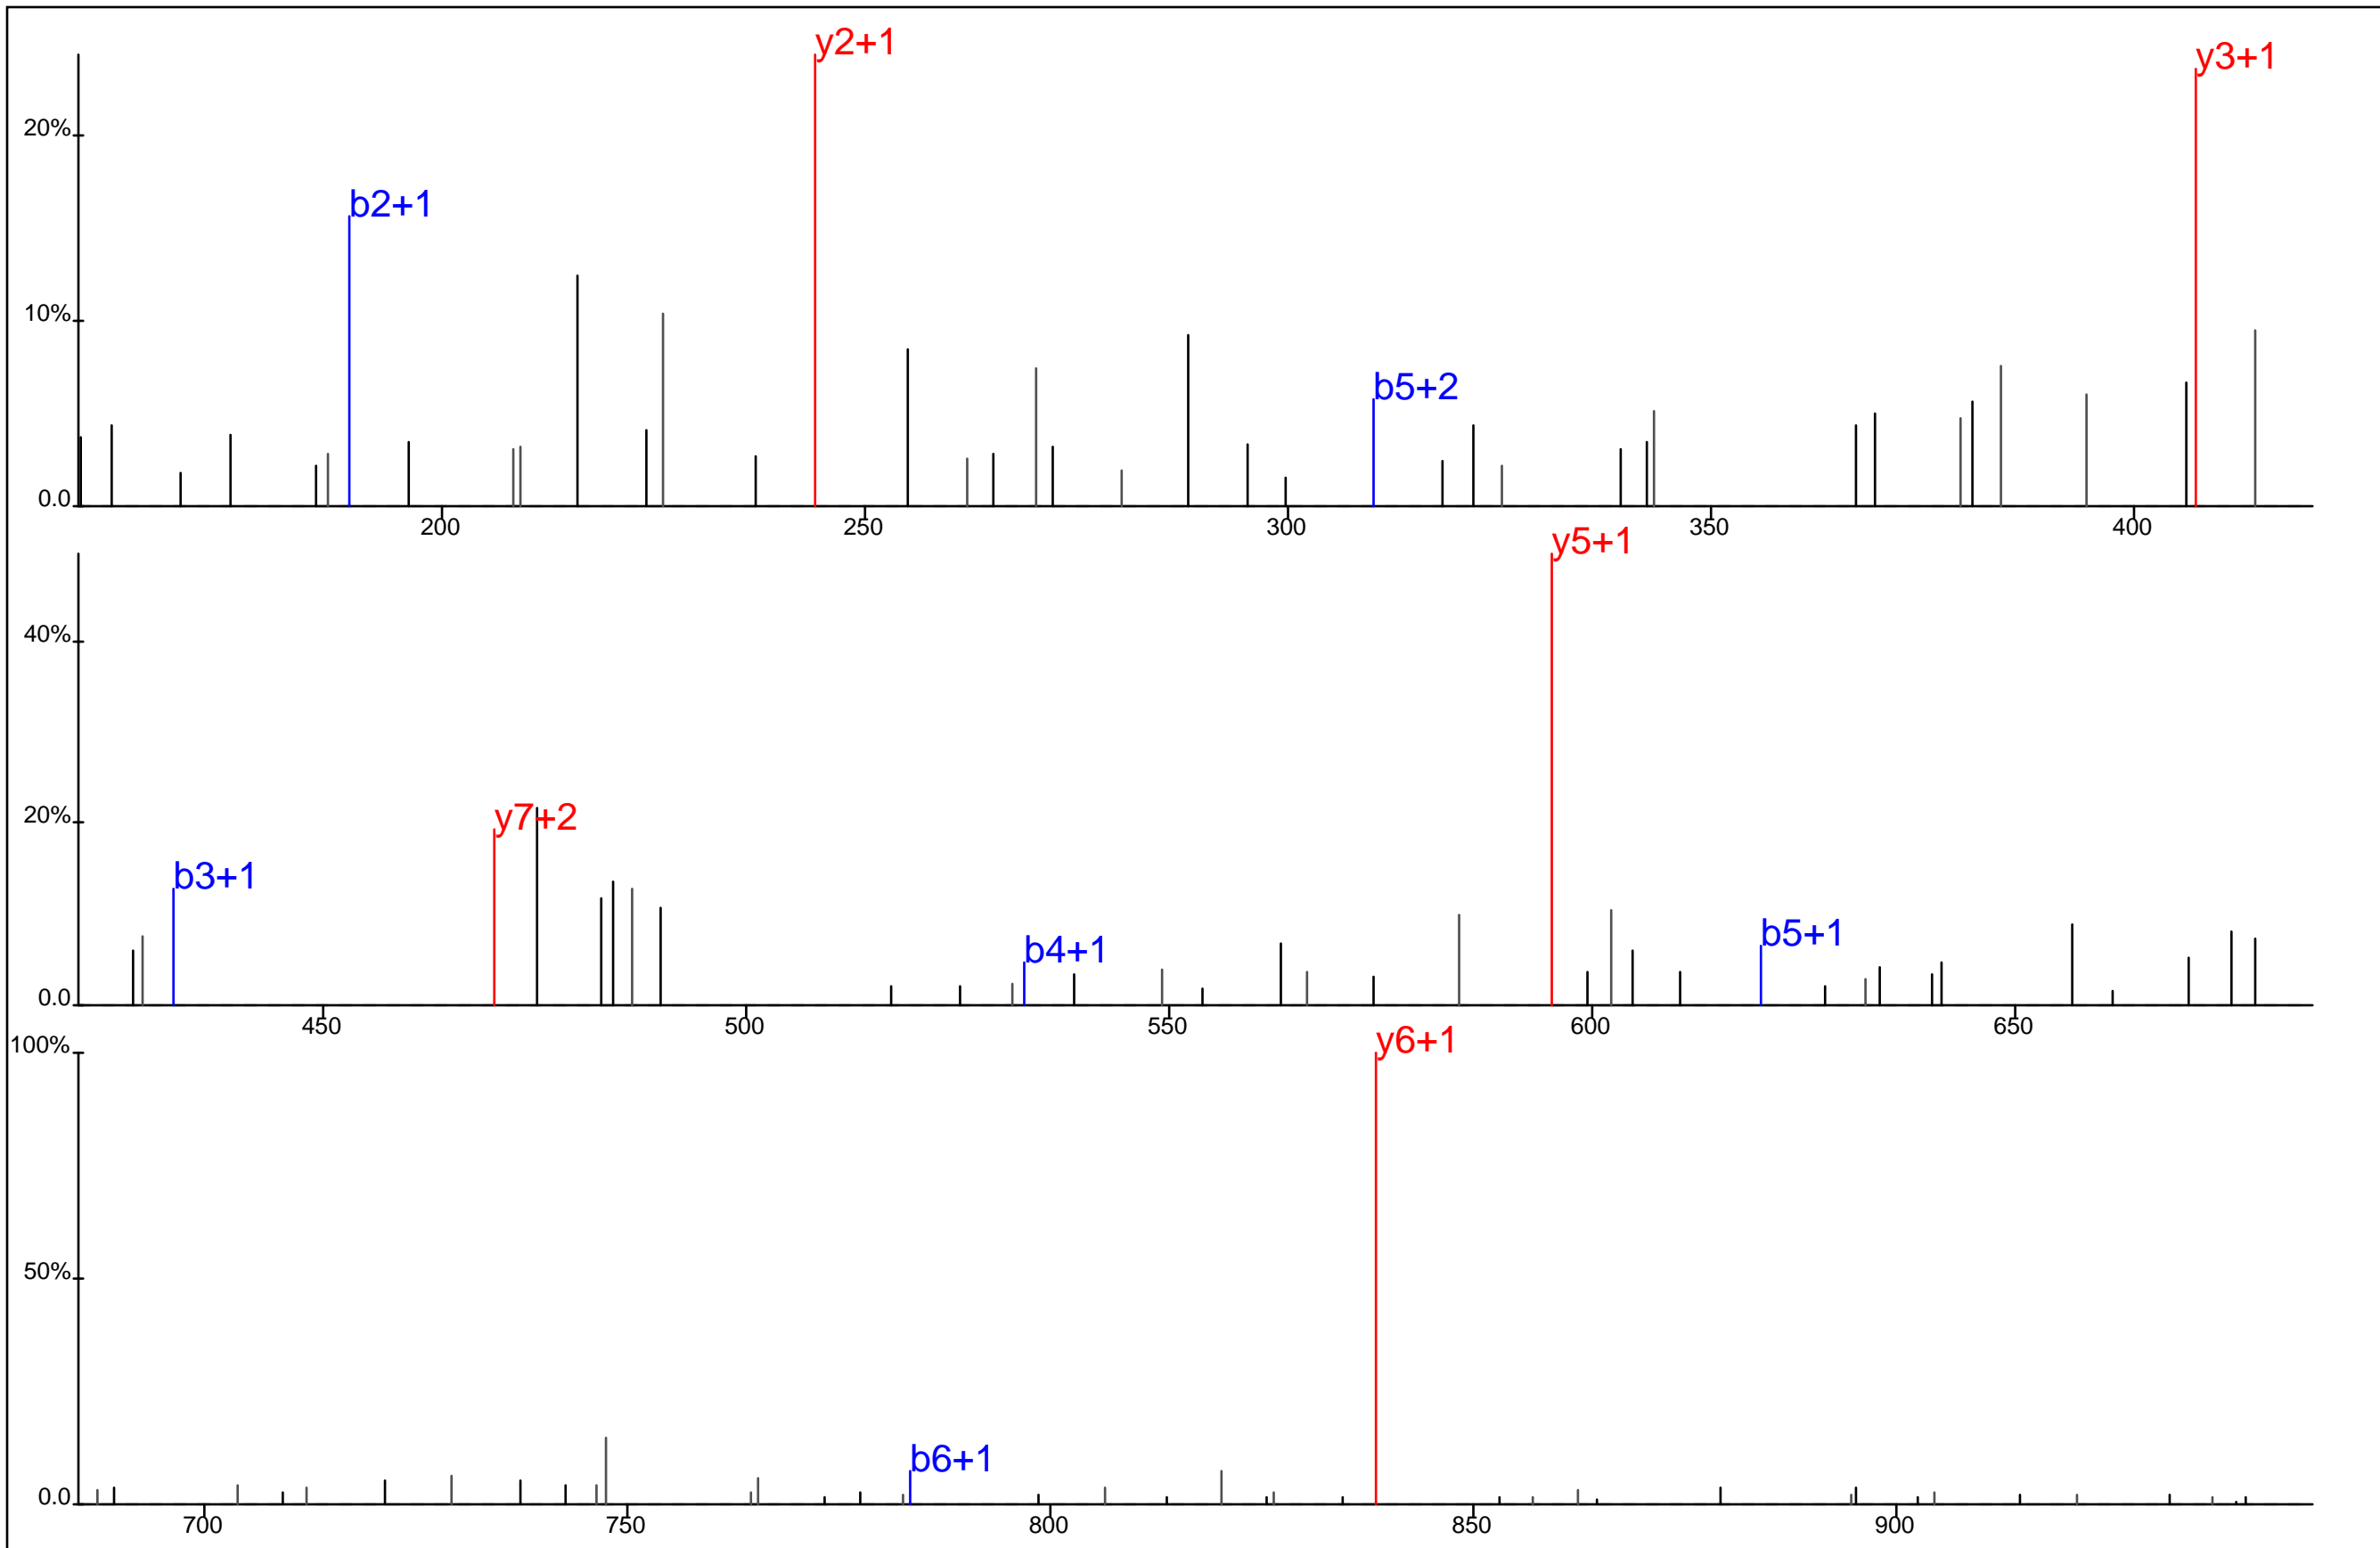

■ ▢ ▢ ▢ ▢ ▢  
 S T Y\* T S Y P K  
▢ ▢ ▢ ▢ ▢ ▢

Protein Name: Hrs  
 gi Accession: 0  
 Precursor Mass: 513.7125+2  
 Delta Mass: 0.294 ppm  
 XCorr: 21.48

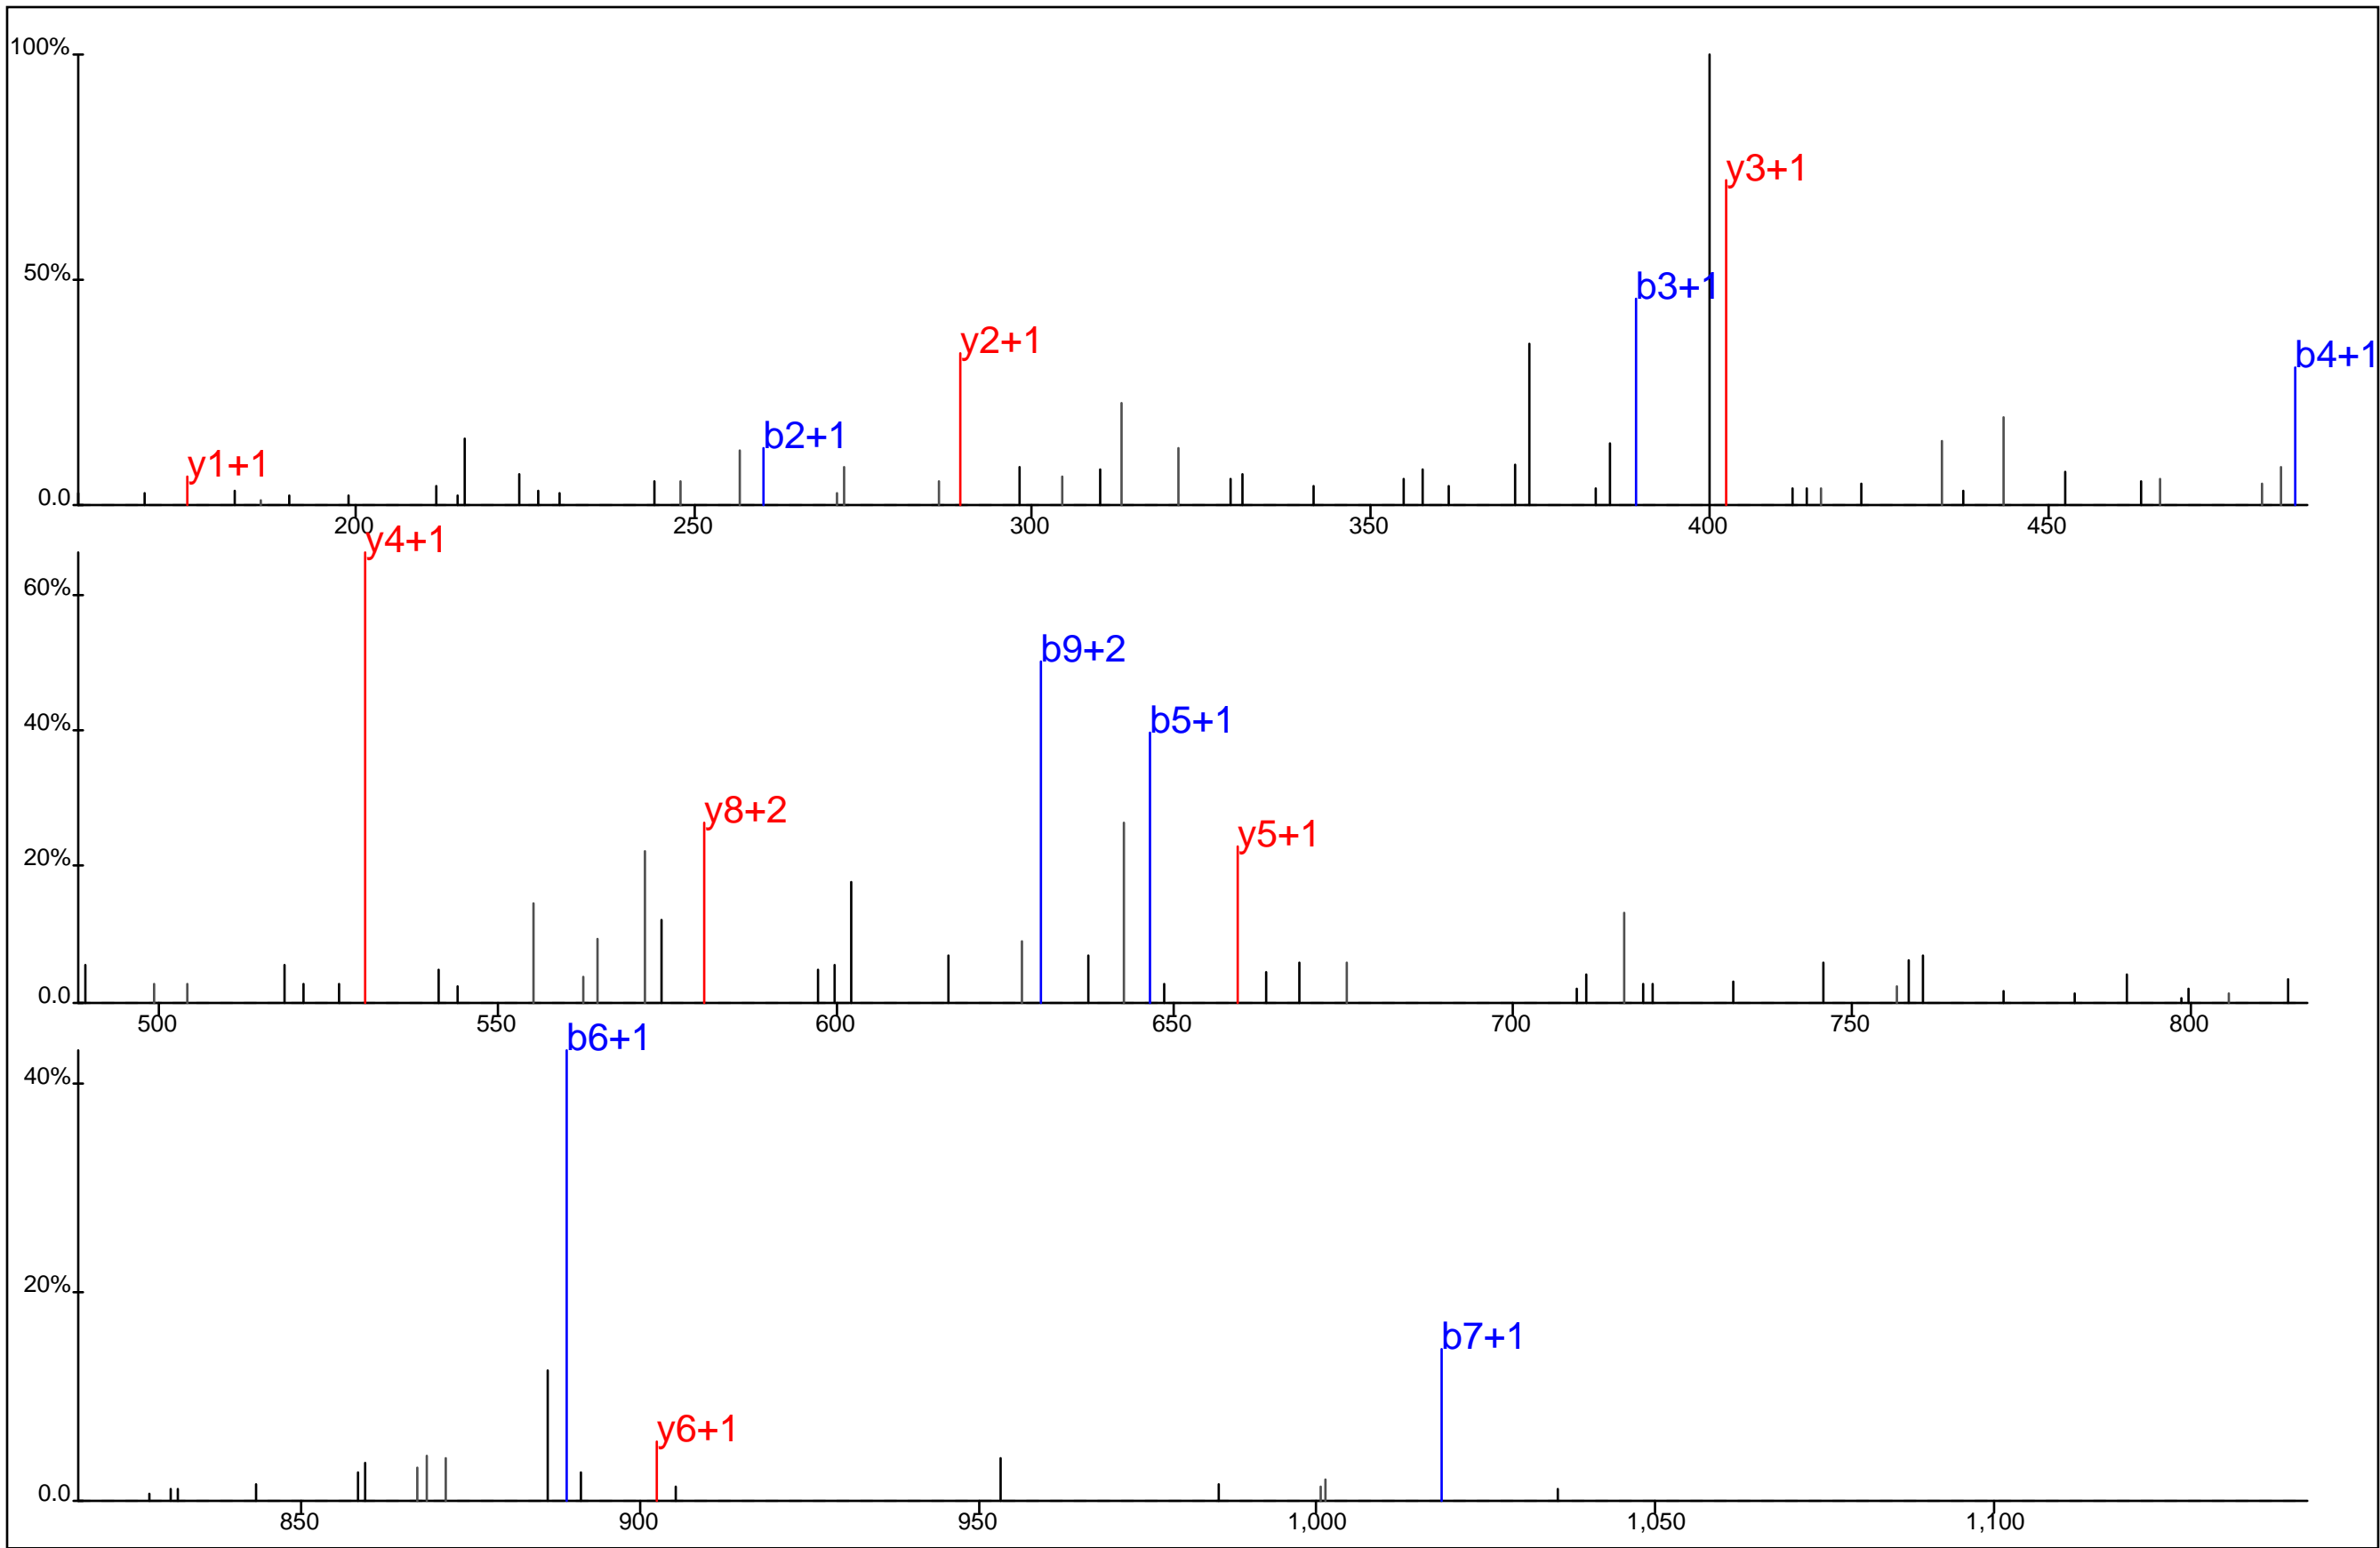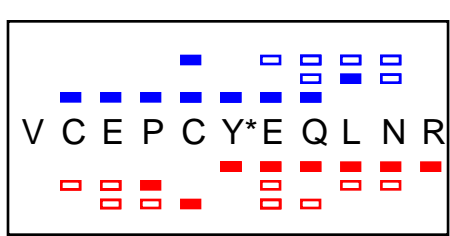

Protein Name: Hrs  
 gi Accession: 0  
 Precursor Mass: 516.5392+3  
 Delta Mass: 0.763 ppm  
 XCorr: 38.31

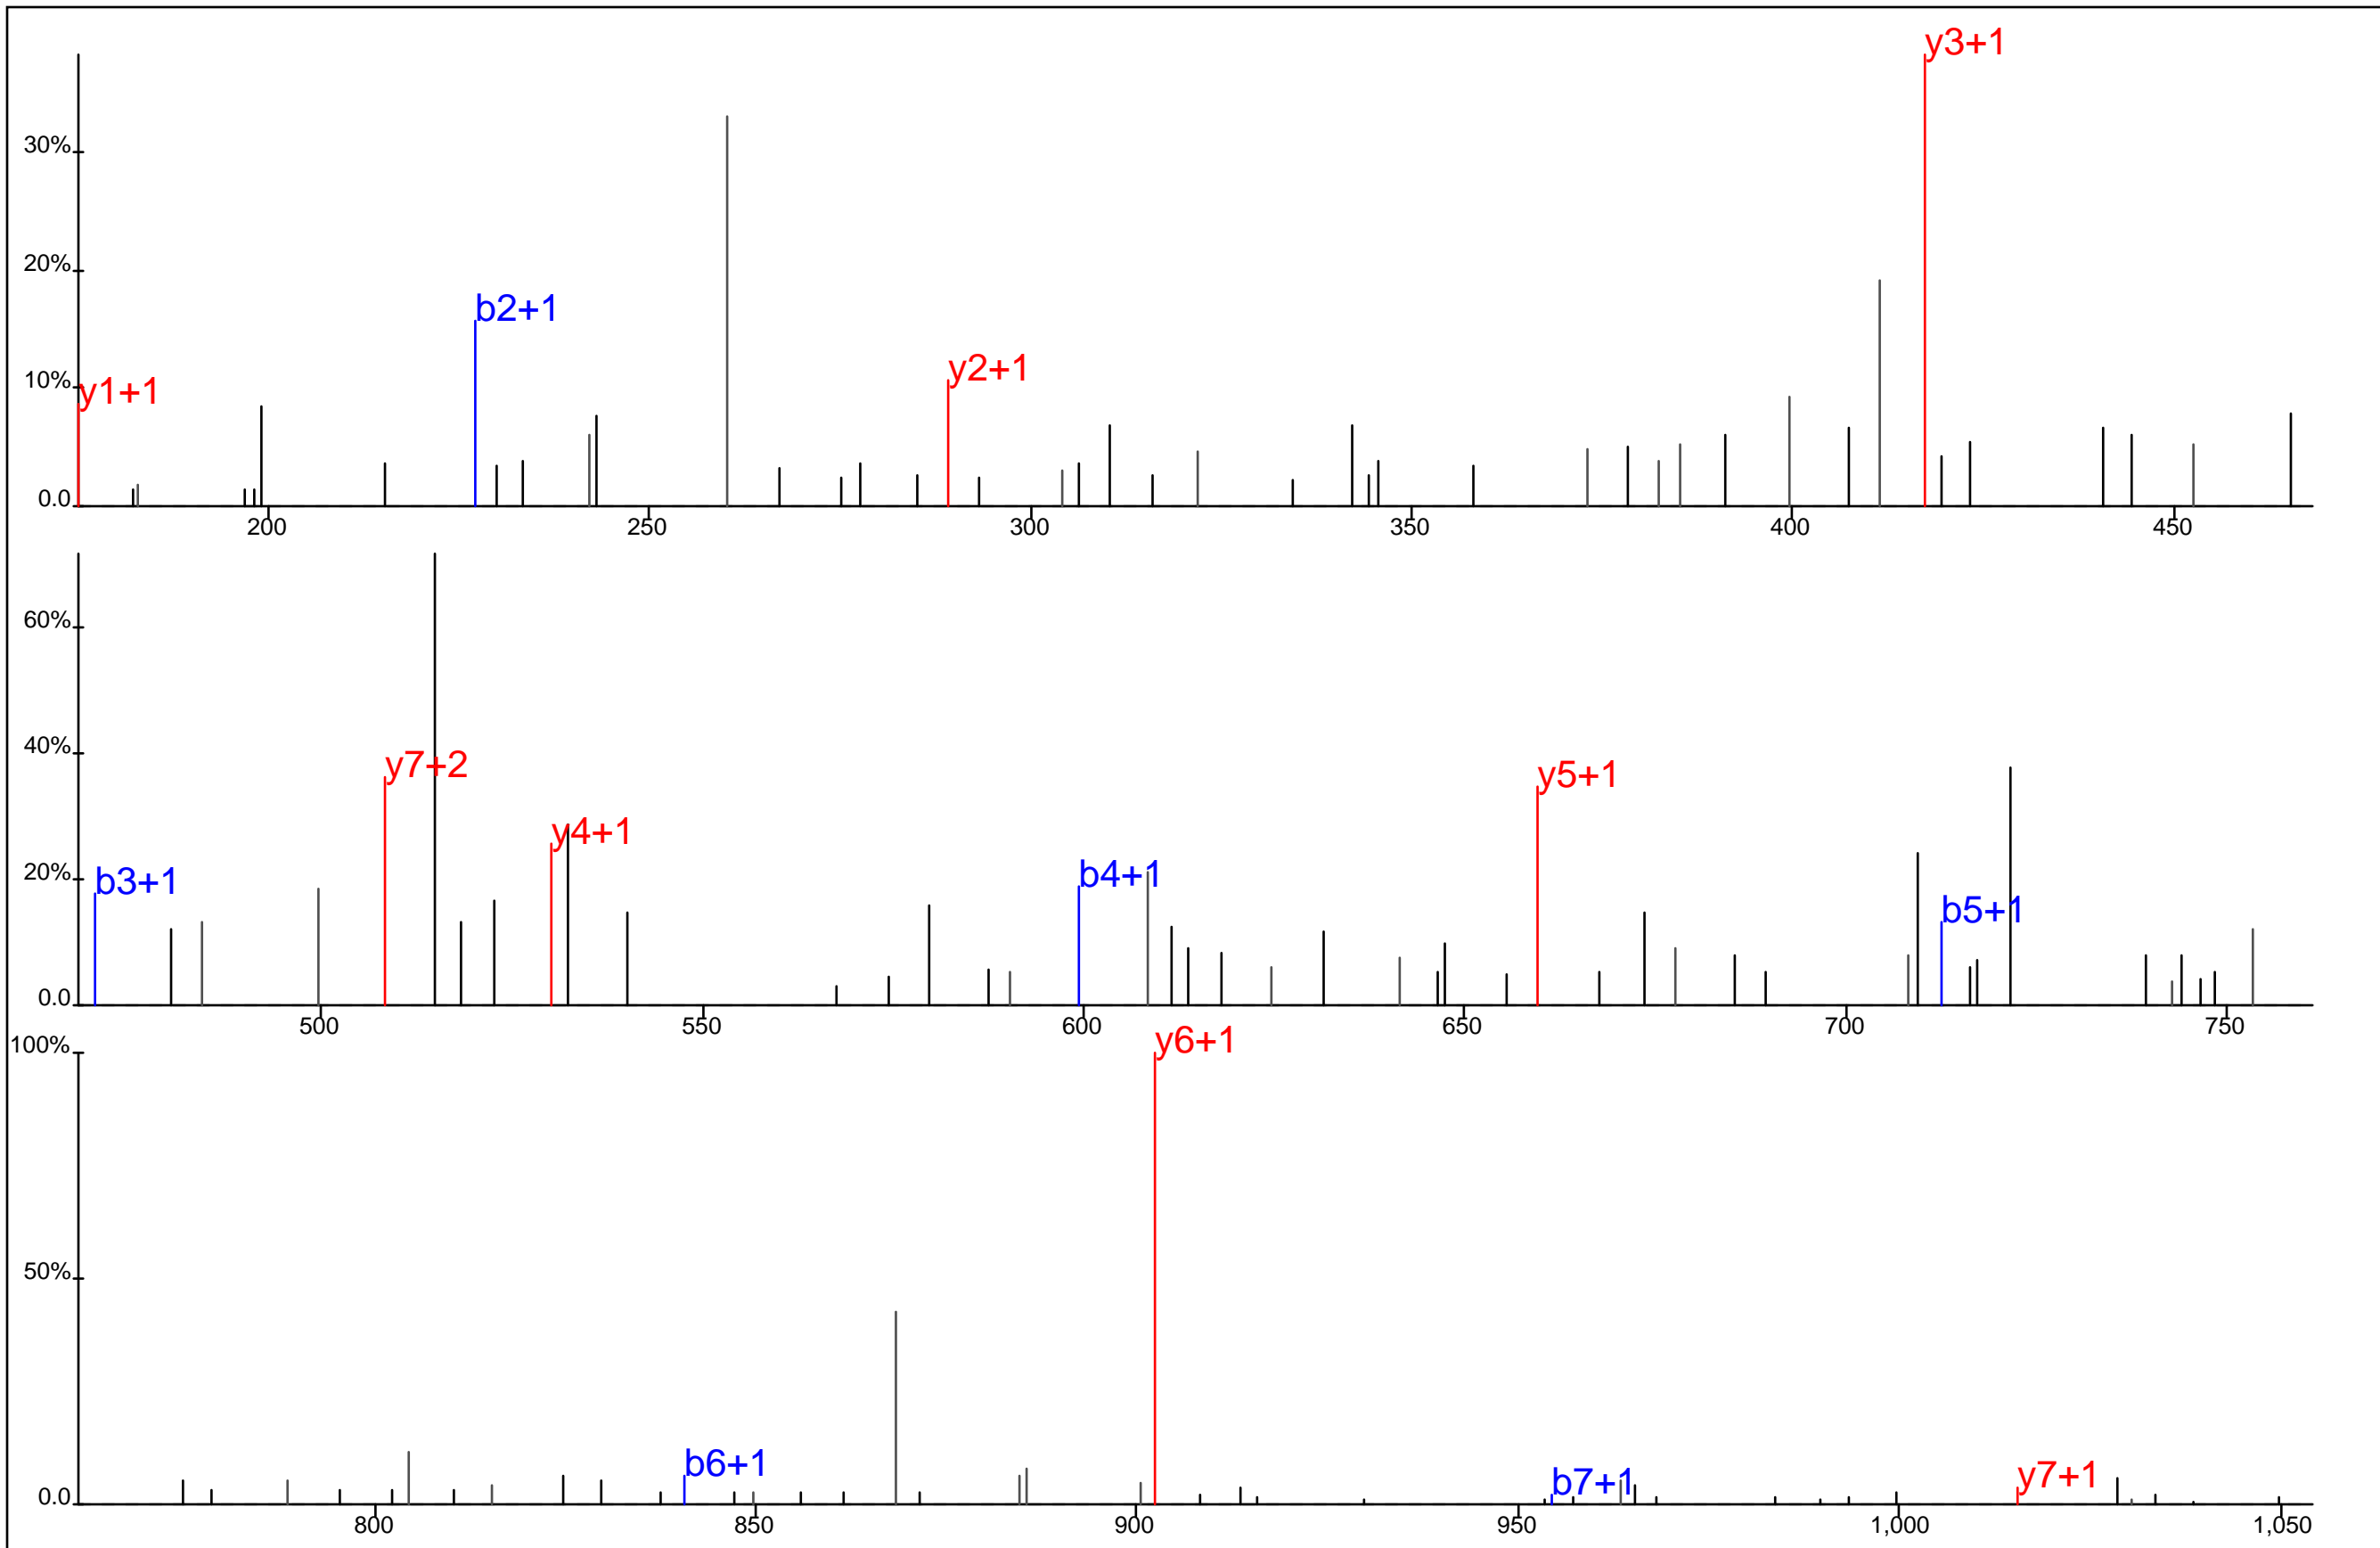

Protein Name: HSHIN1  
 gi Accession: 0  
 Precursor Mass: 564.7781+2  
 Delta Mass: 3.557 ppm  
 XCorr: 33.2

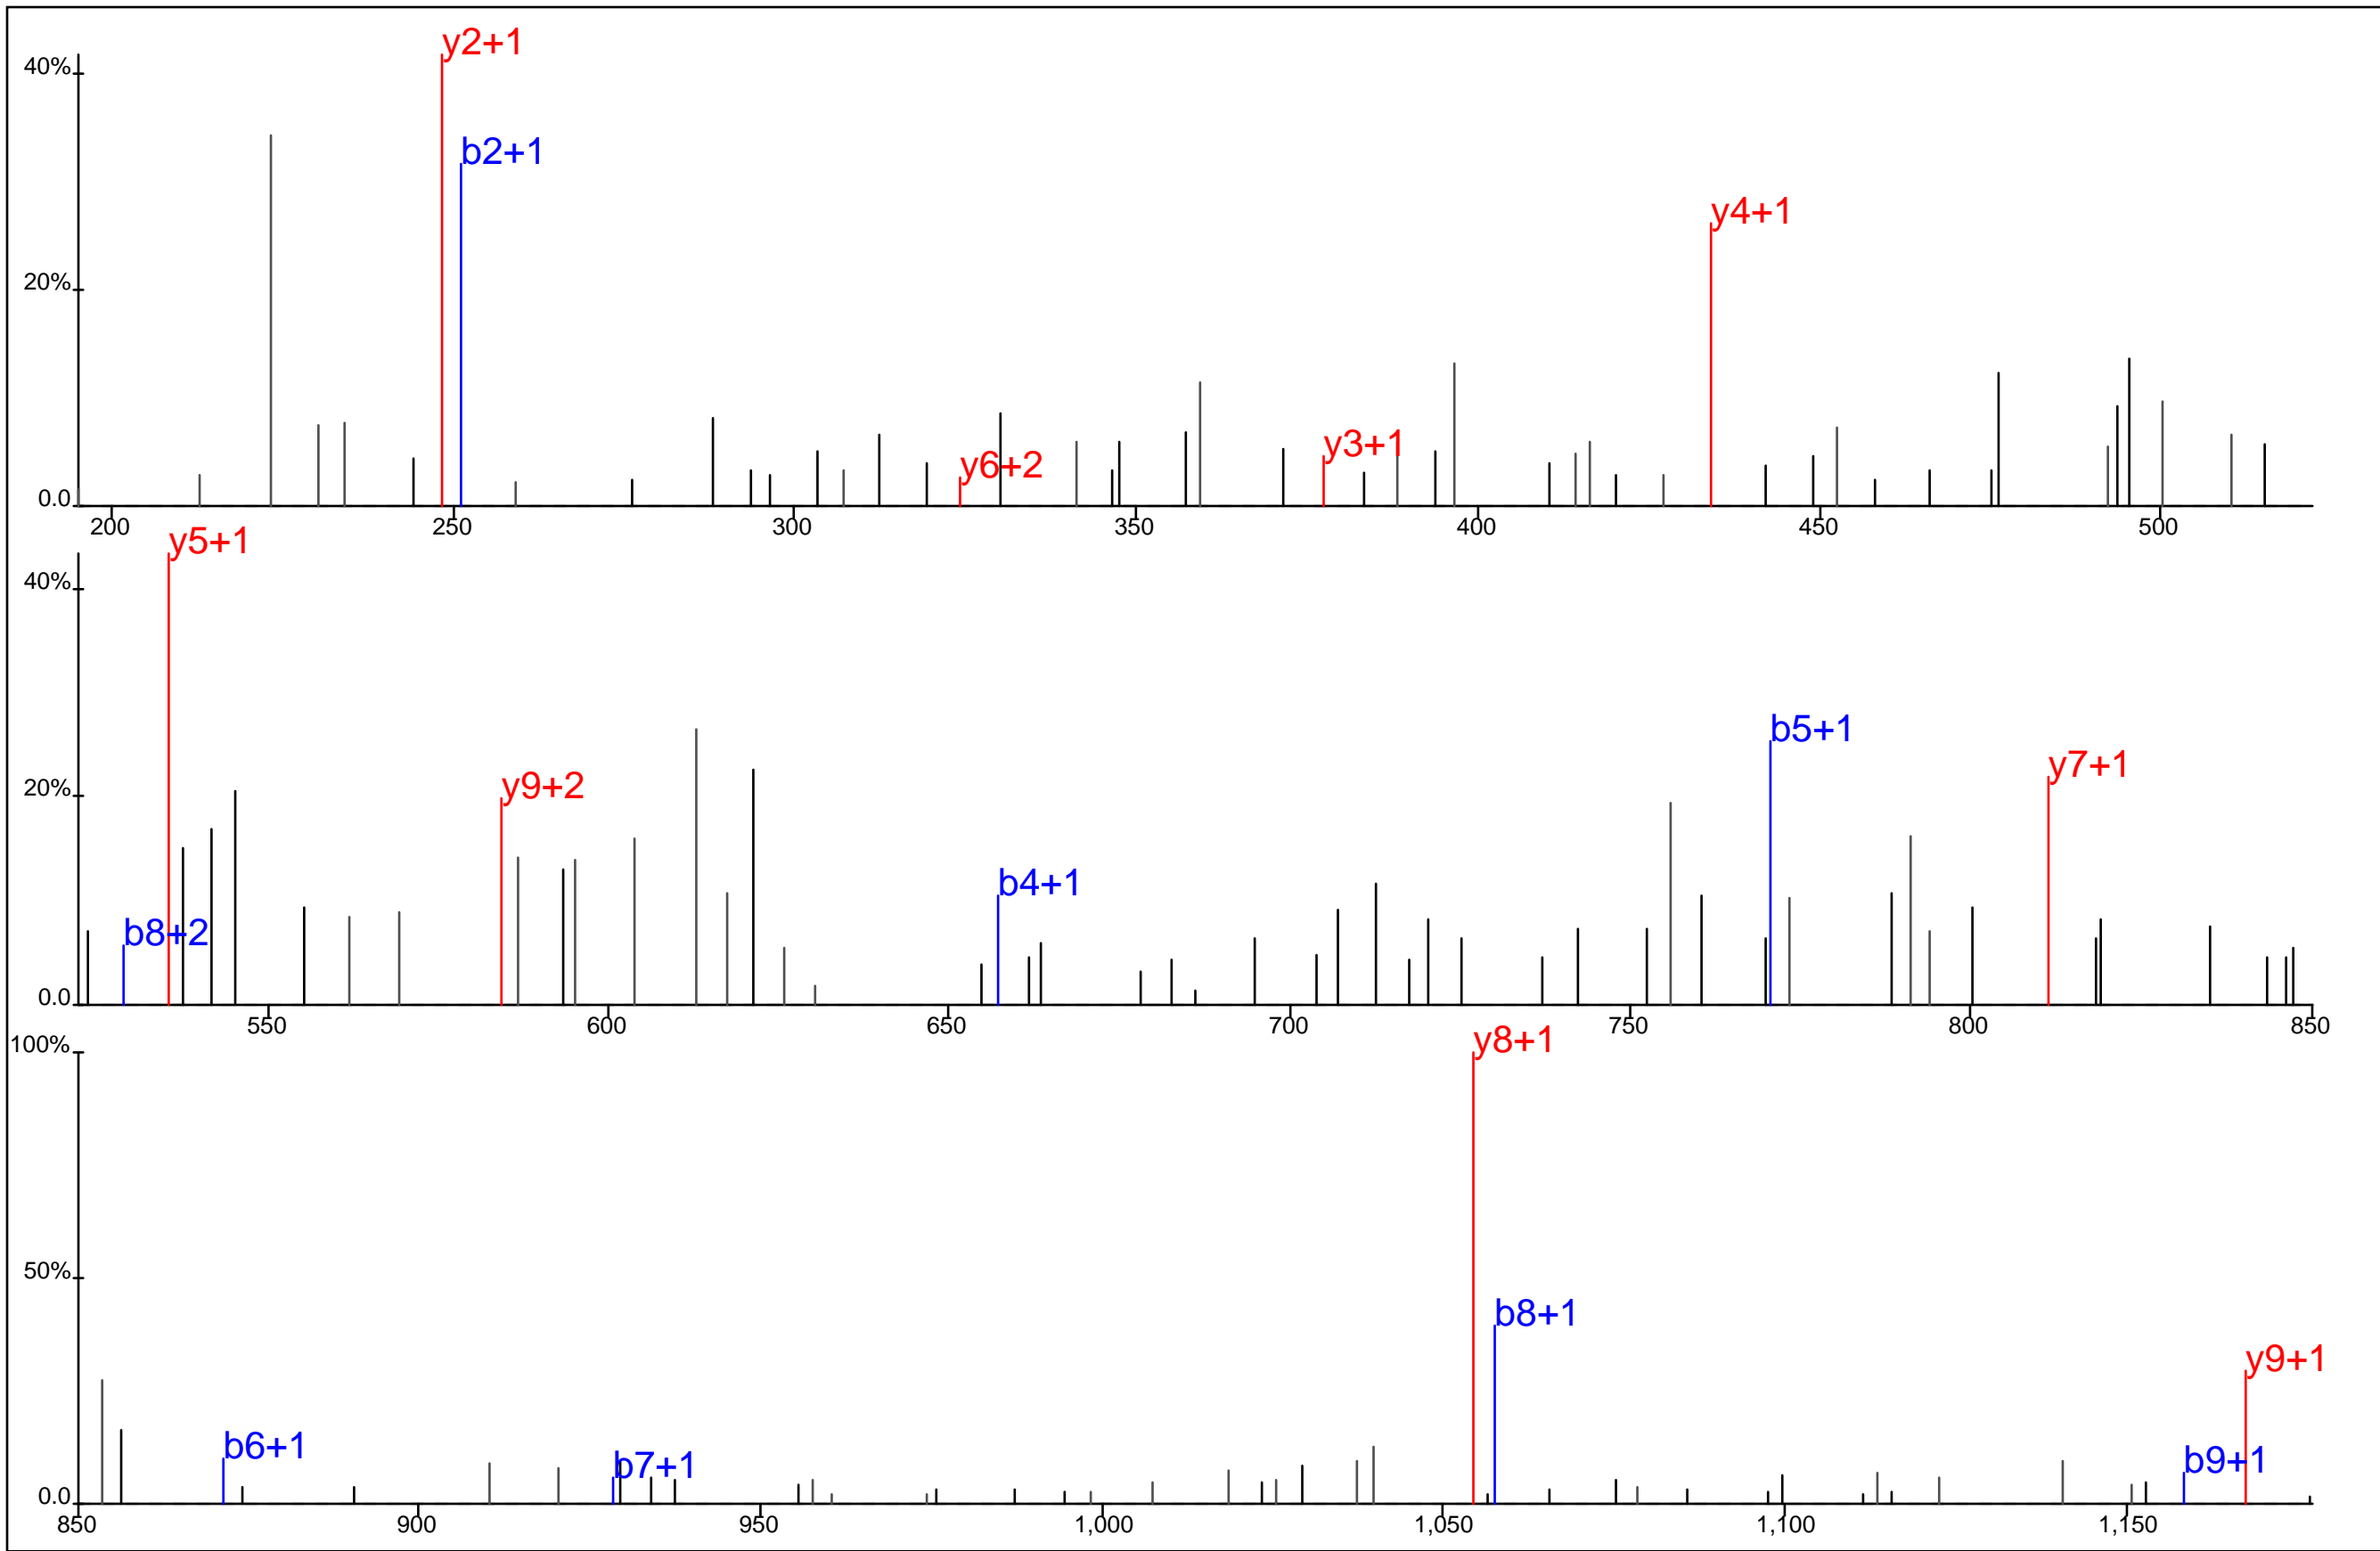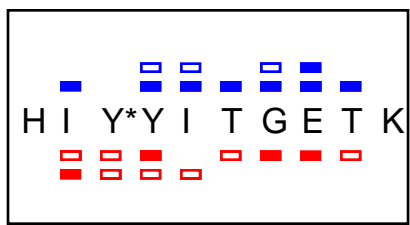

Protein Name: HSP90A  
 gi Accession: 0  
 Precursor Mass: 652.8014+2  
 Delta Mass: 2.519 ppm  
 XCorr: 36.01

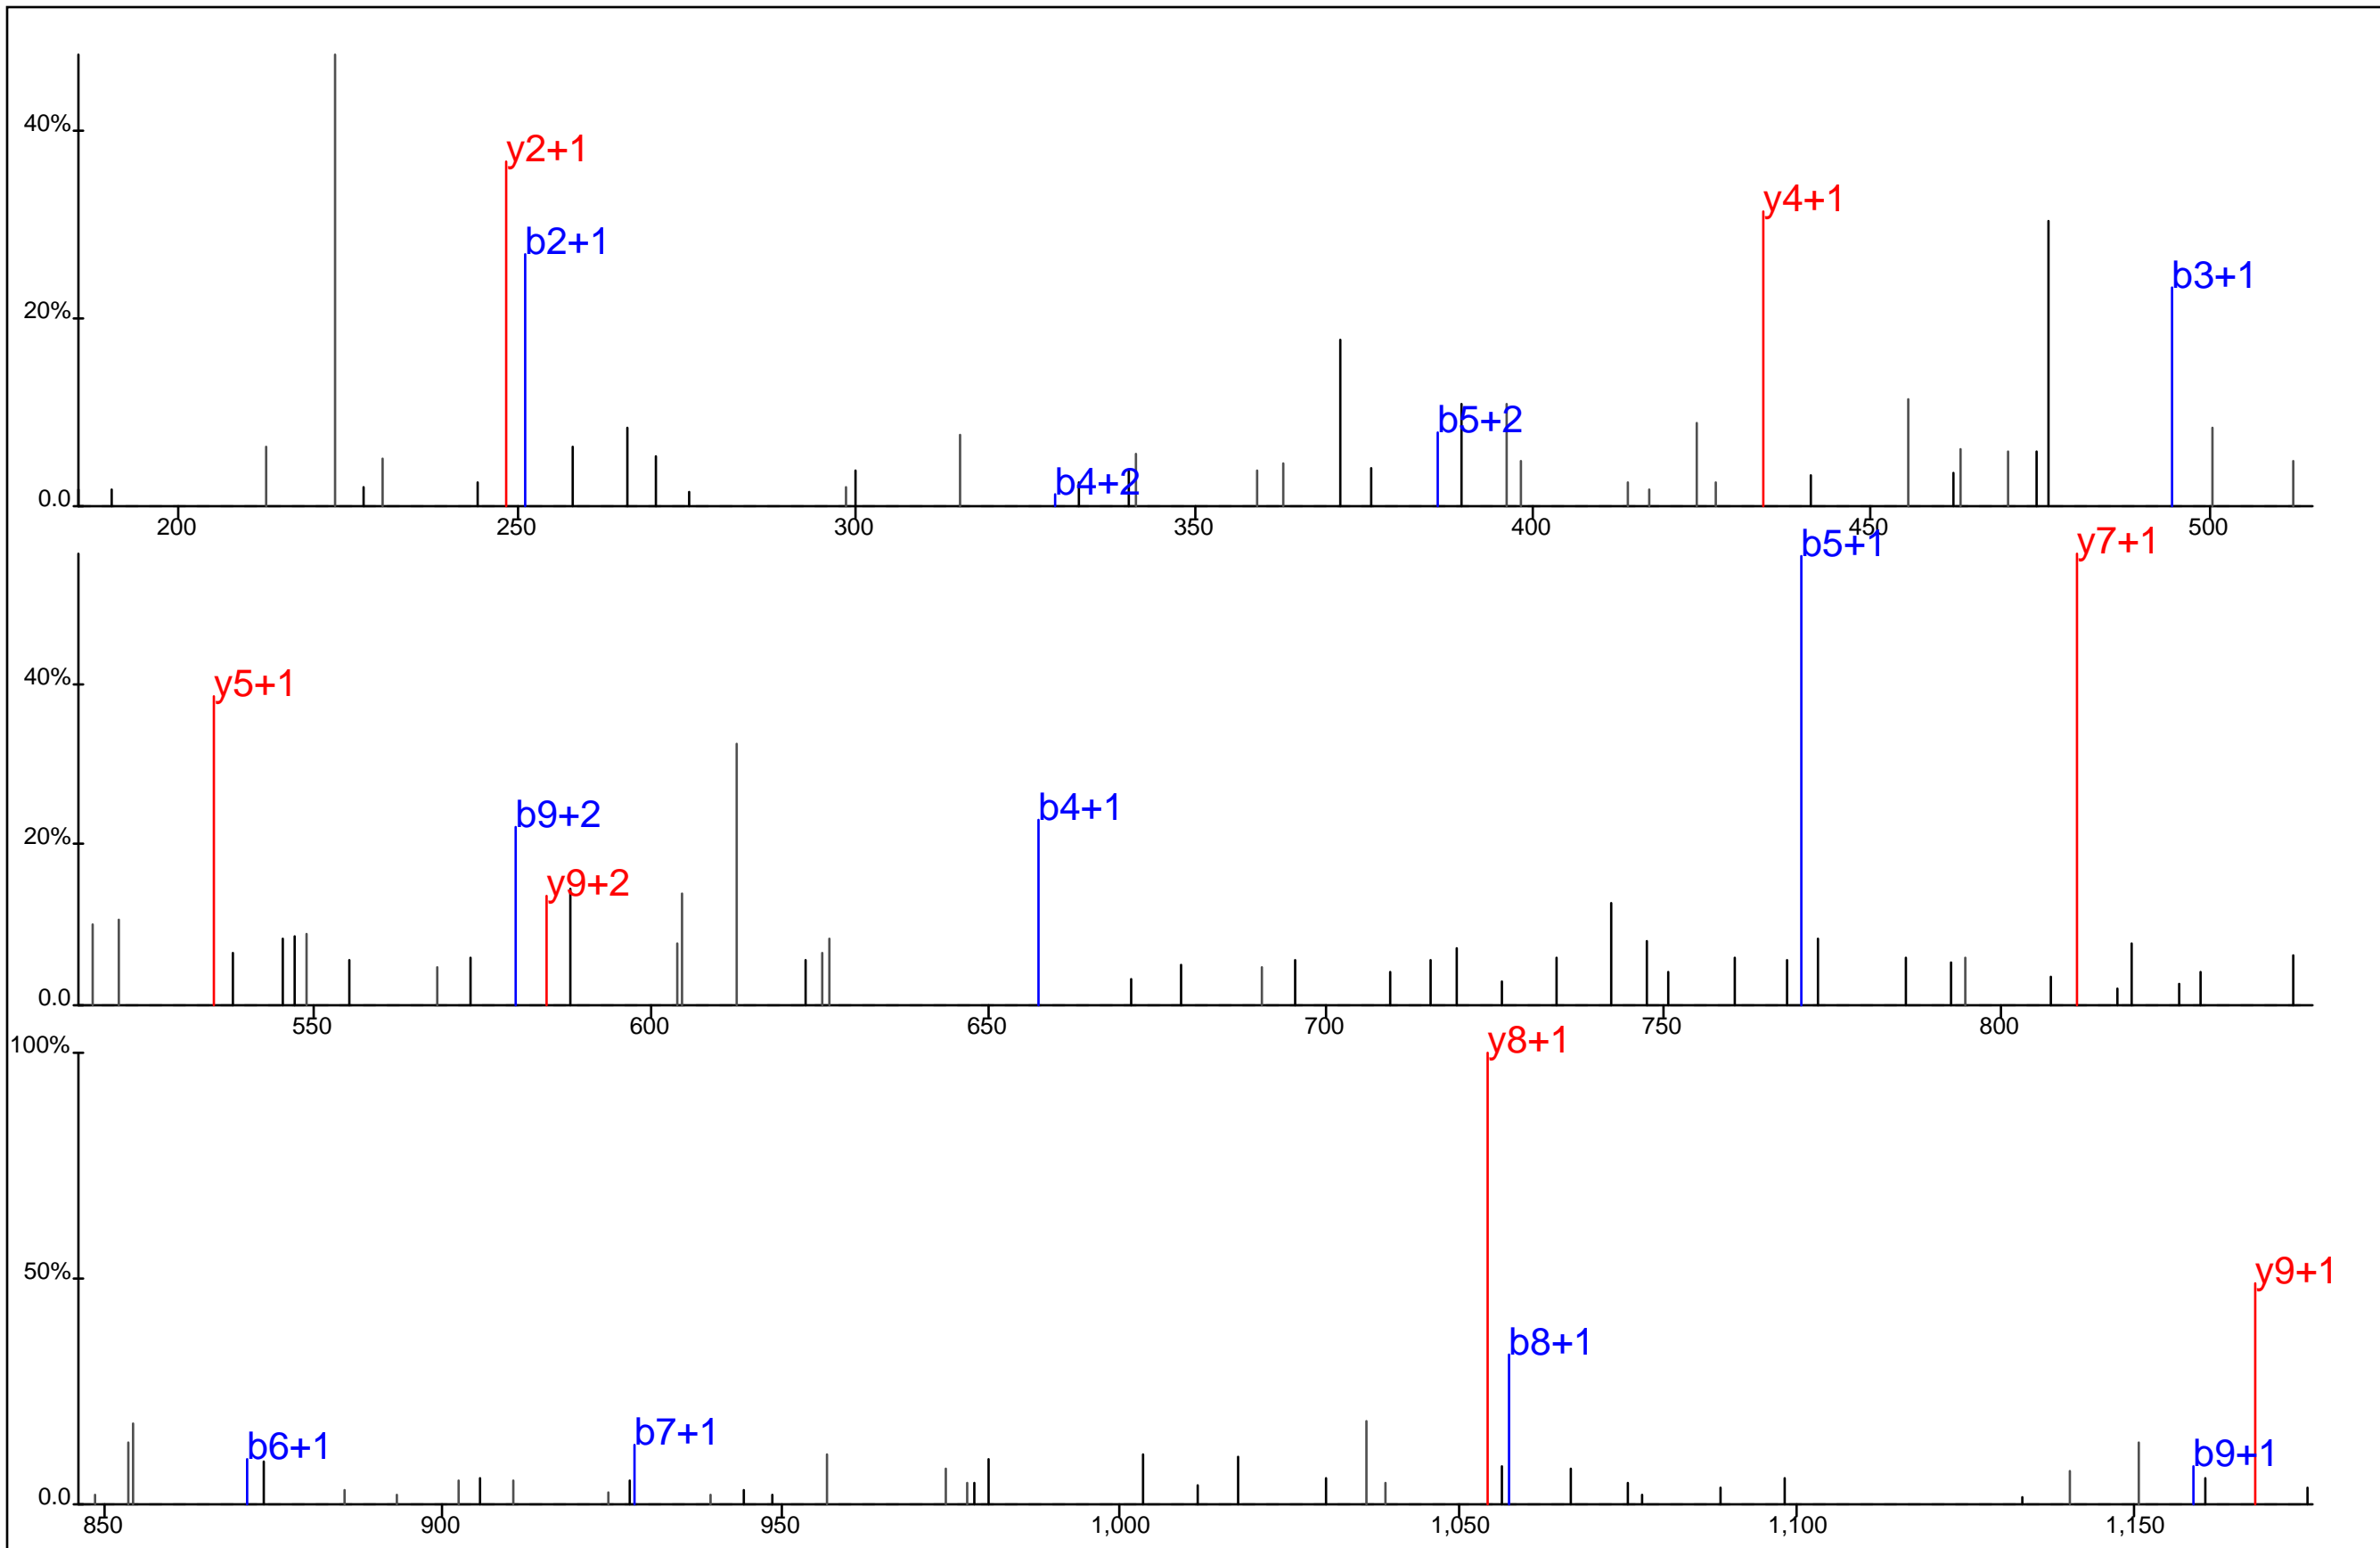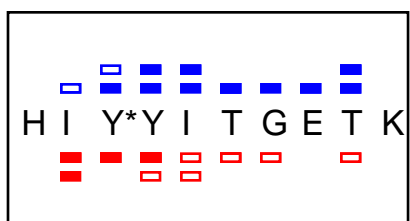

Protein Name: HSP90A  
 gi Accession: 0  
 Precursor Mass: 652.7998+2  
 Delta Mass: 0.086 ppm  
 XCorr: 49.47

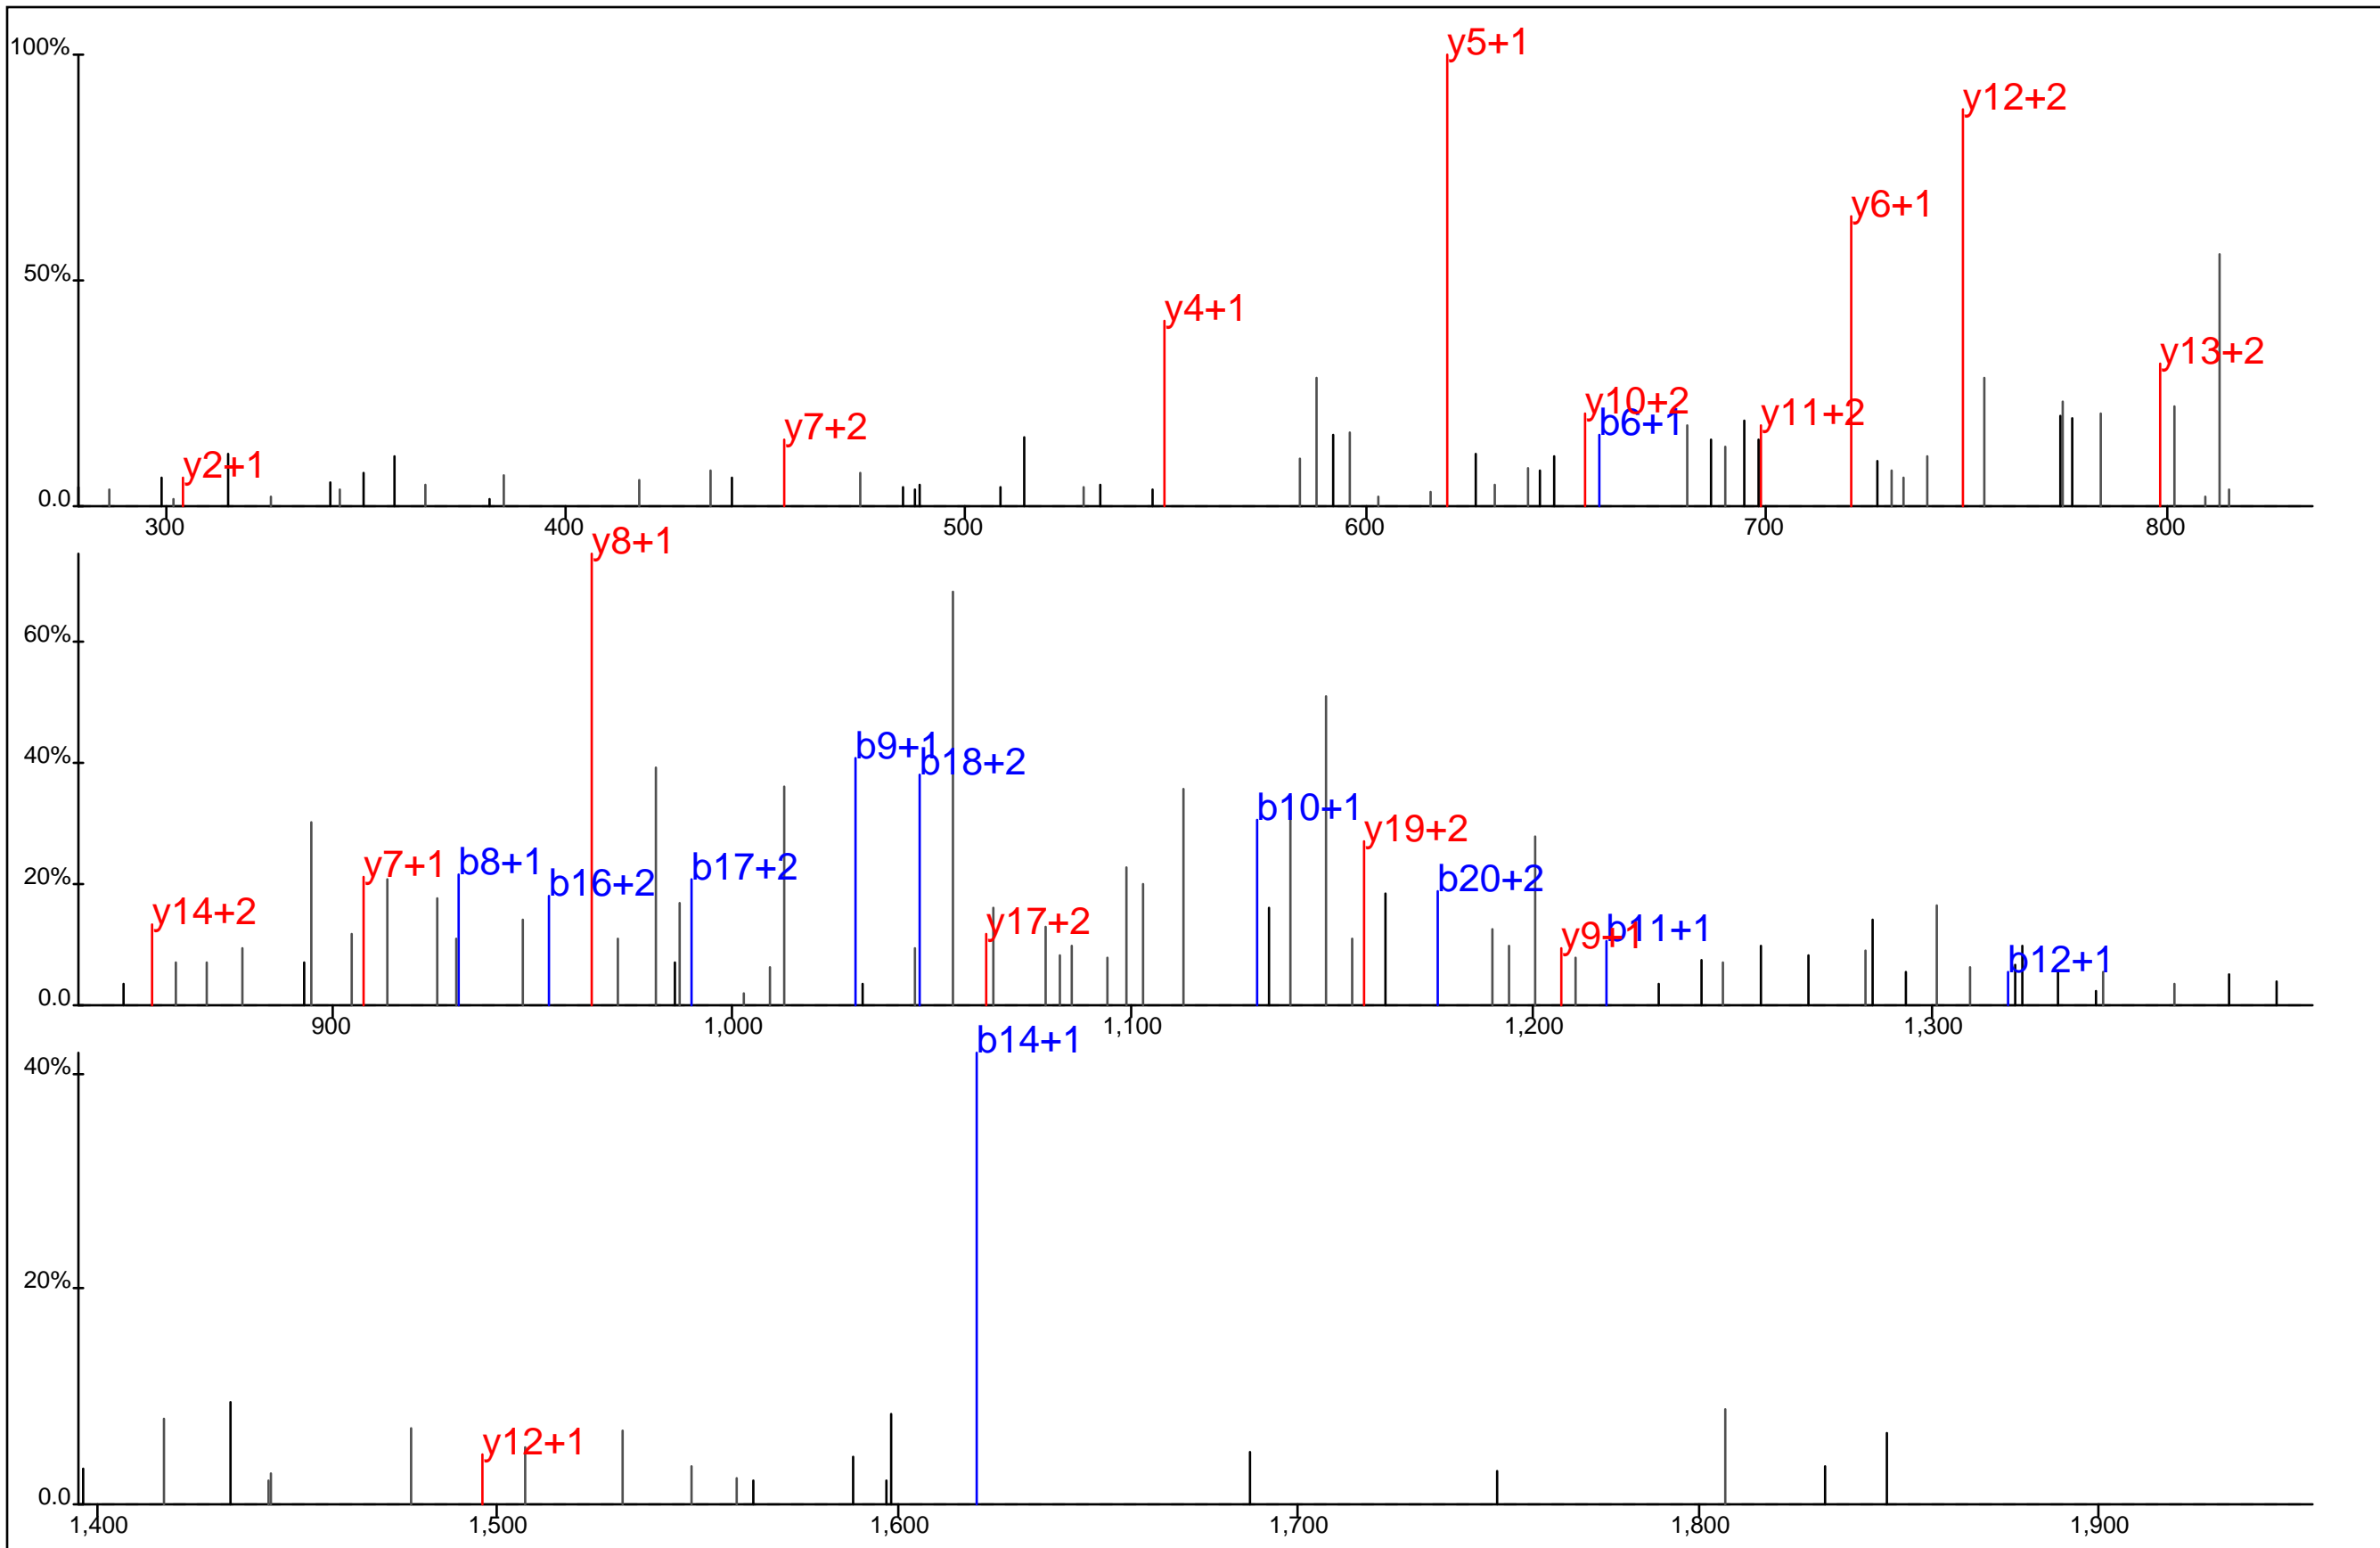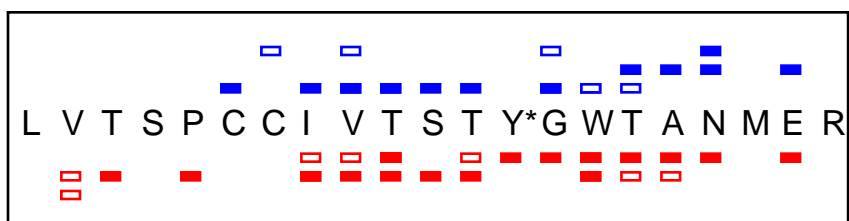

Protein Name: HSP90A  
 gi Accession: 0  
 Precursor Mass: 842.6989+3  
 Delta Mass: 1.628 ppm  
 XCorr: 31.36



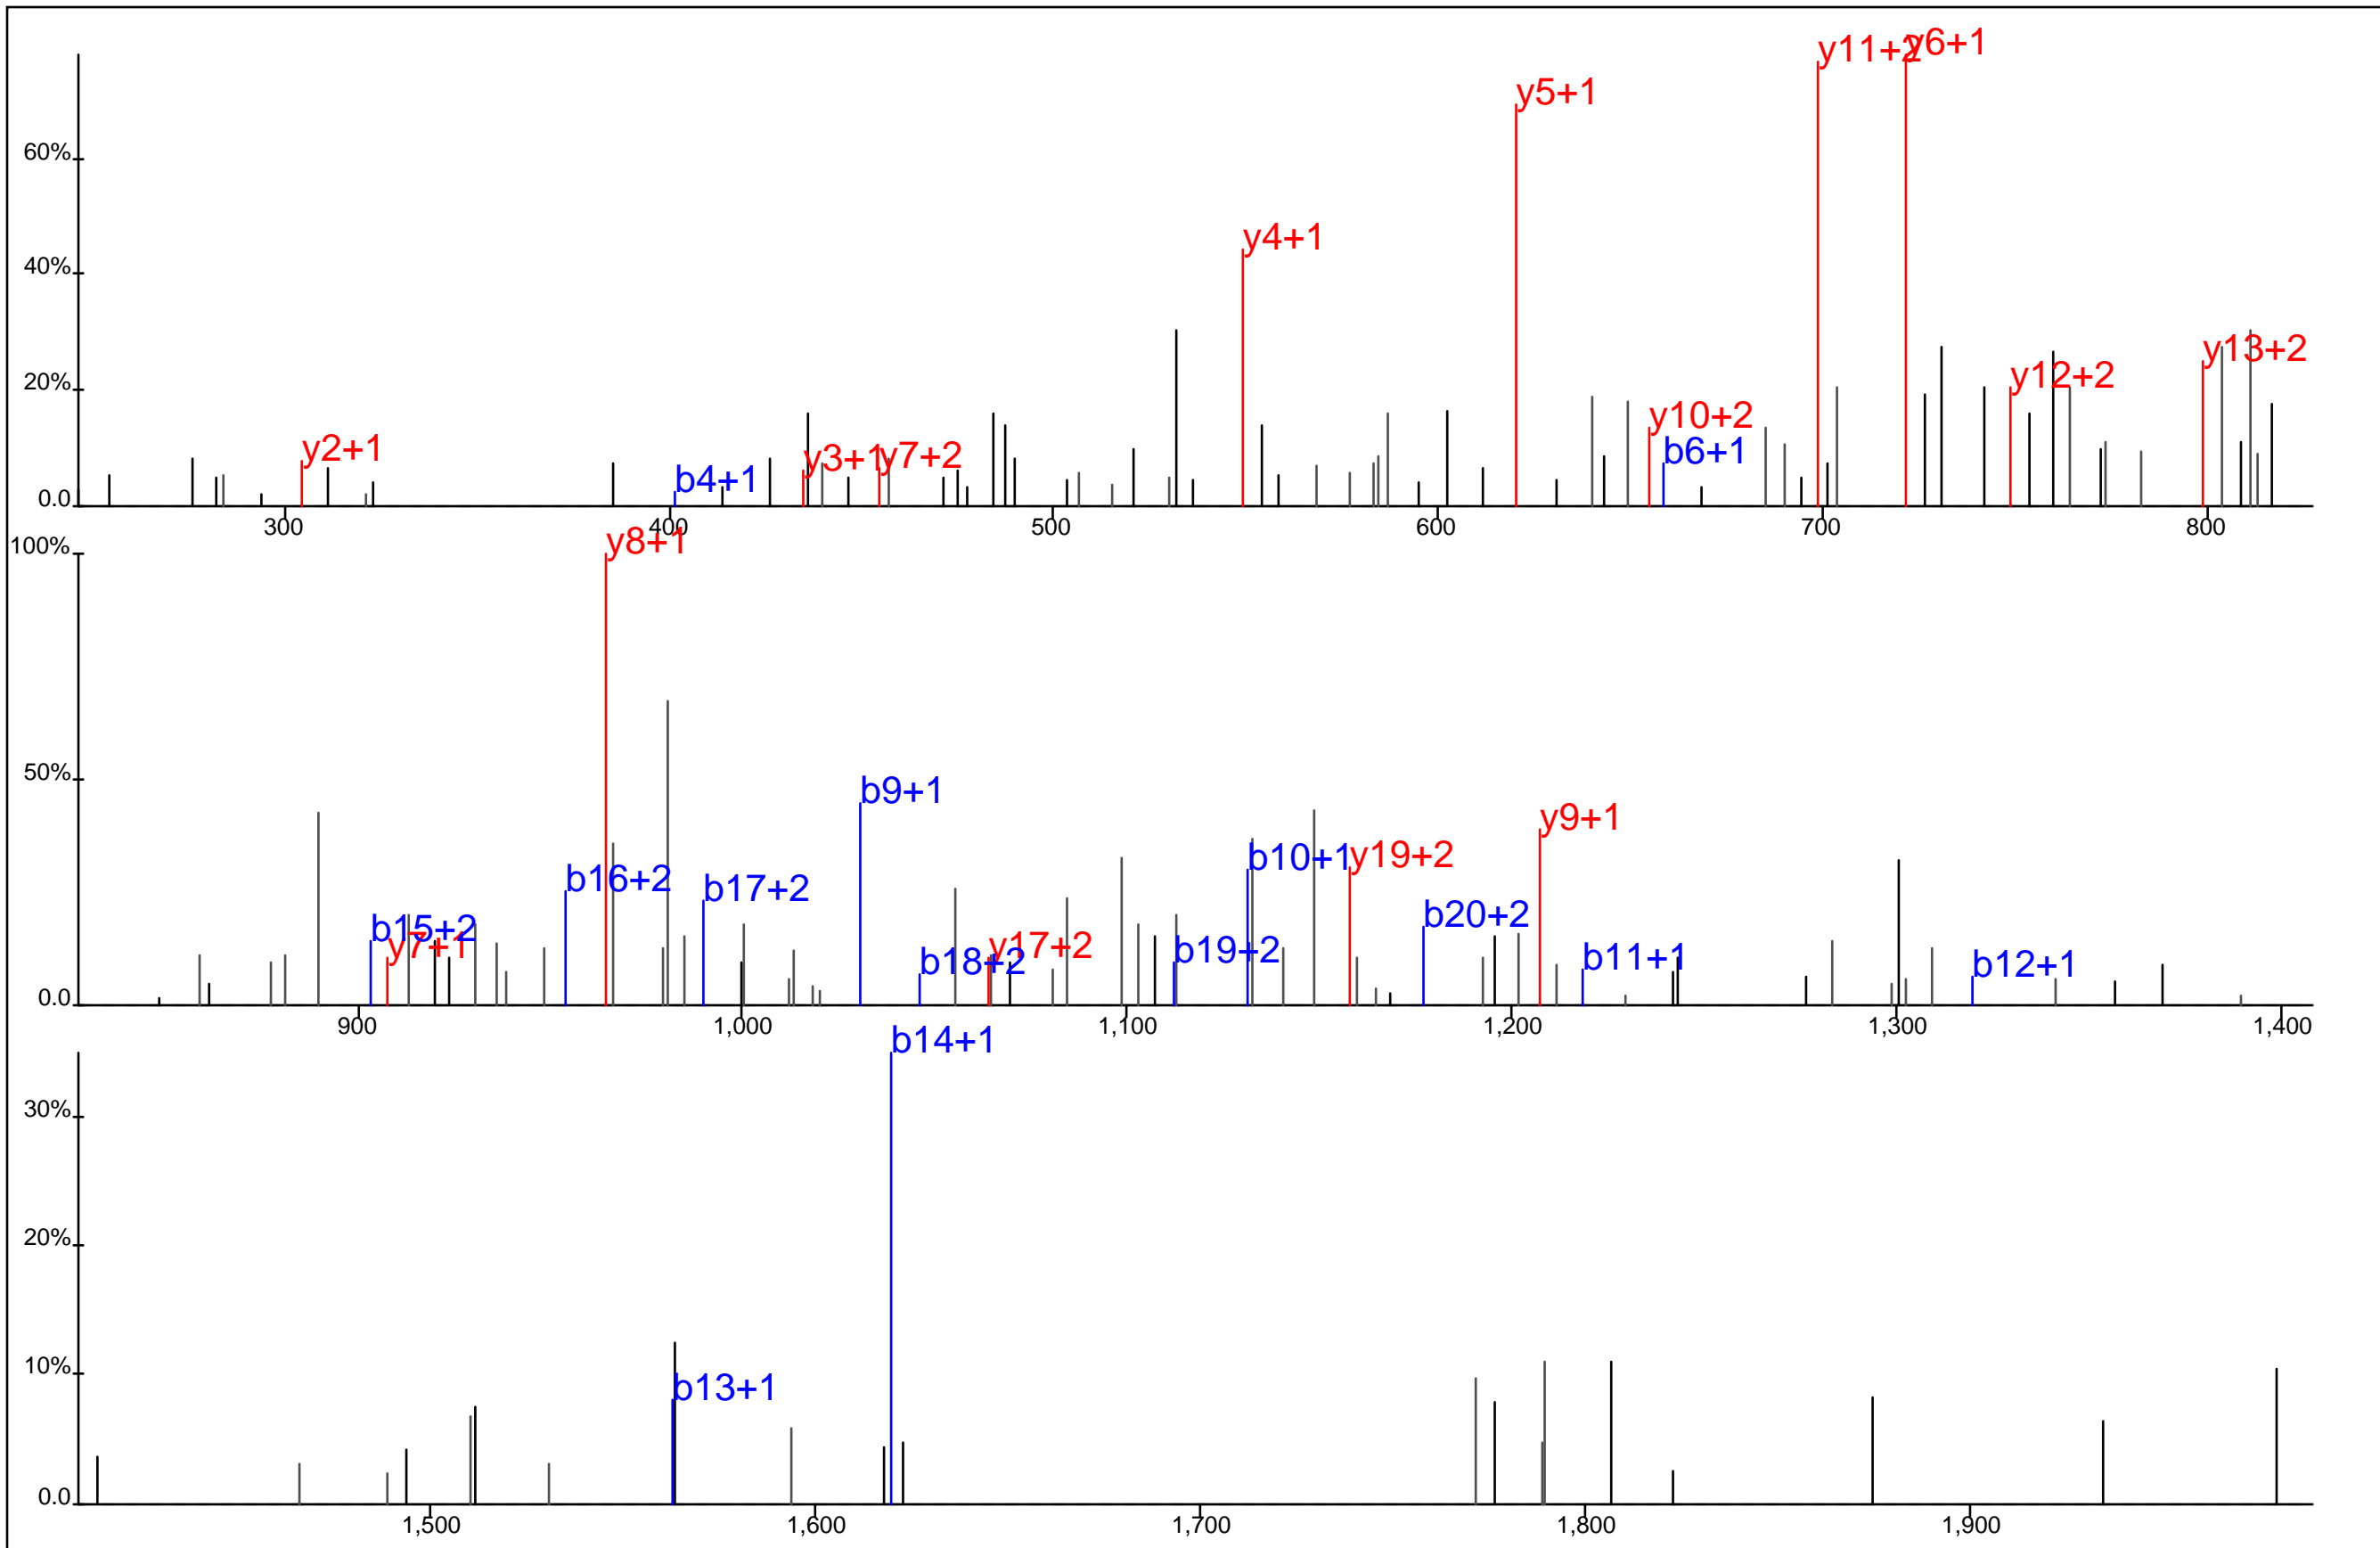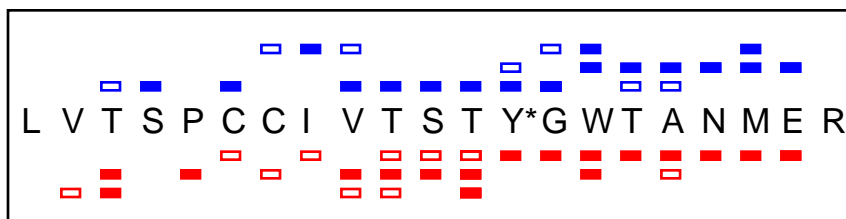

Protein Name: HSP90A  
 gi Accession: 0  
 Precursor Mass: 842.6990+3  
 Delta Mass: 1.555 ppm  
 XCorr: 20.85

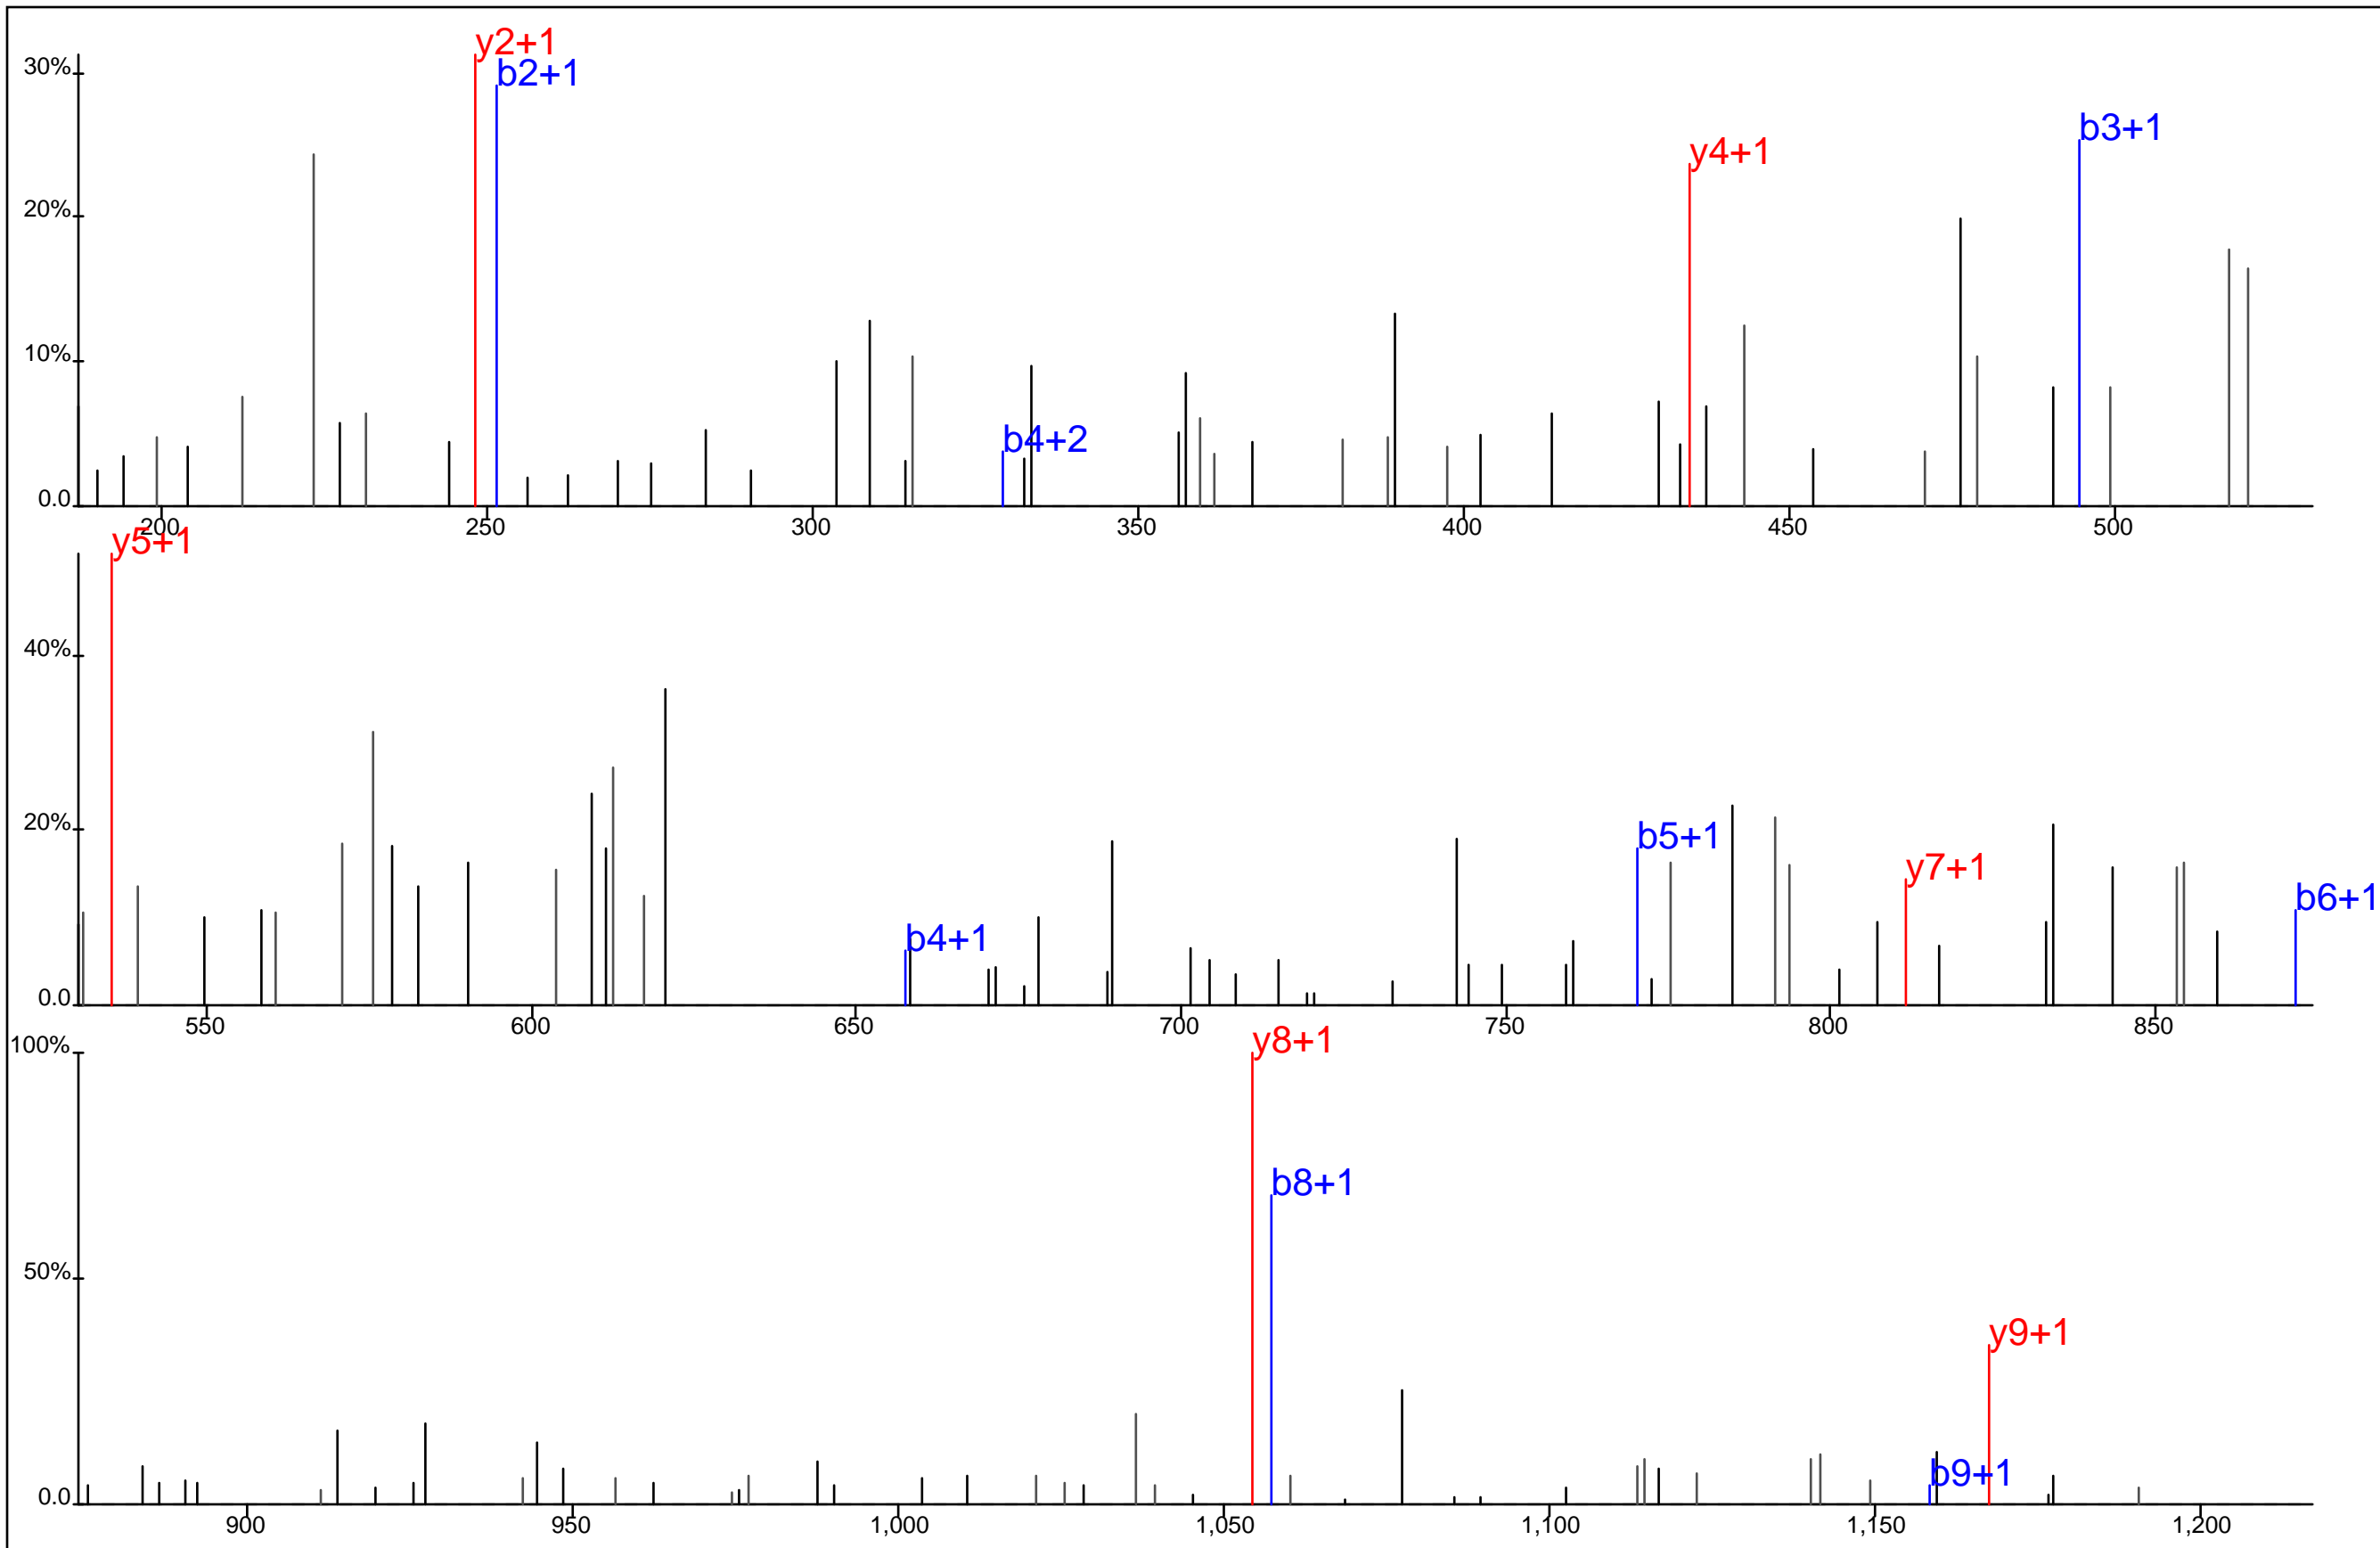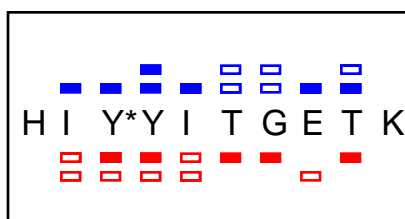

Protein Name: HSP90A  
 gi Accession: 0  
 Precursor Mass: 652.7996+2  
 Delta Mass: 0.195 ppm  
 XCorr: 23.1

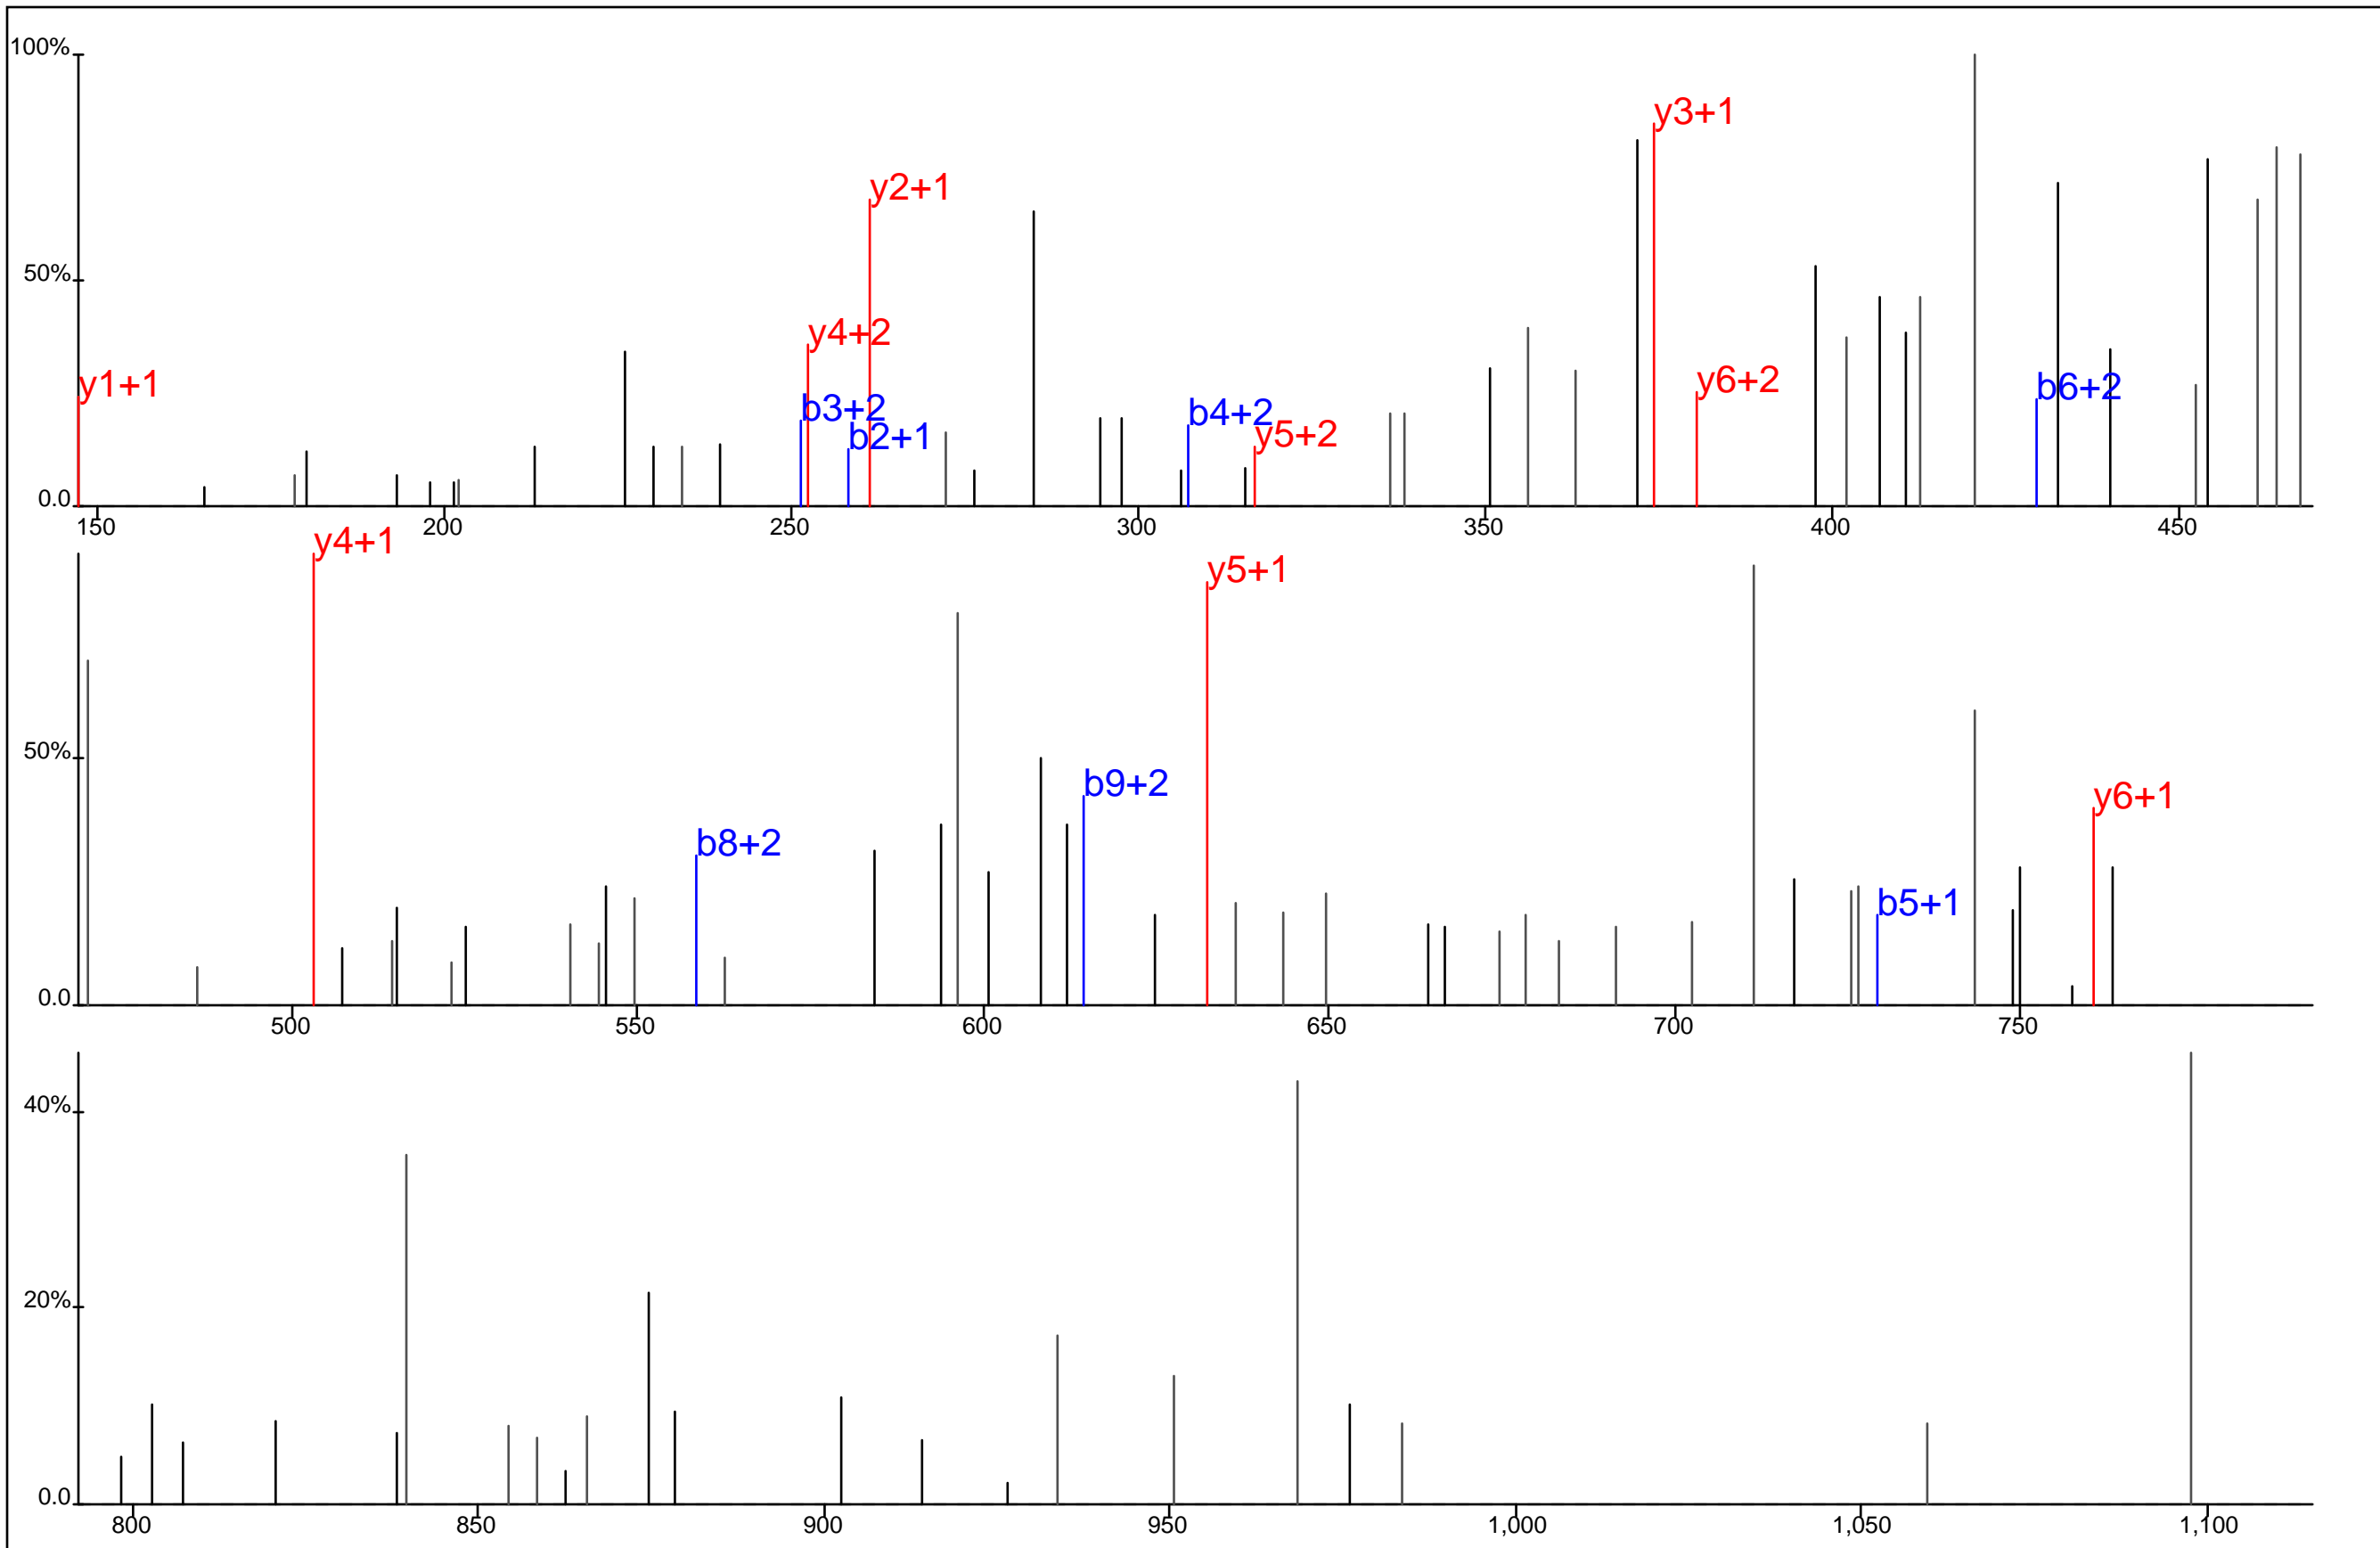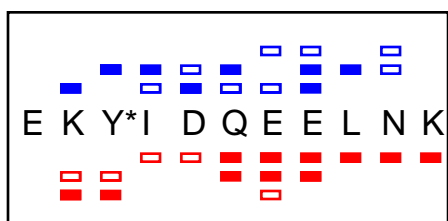

Protein Name: HSP90A  
 gi Accession: 0  
 Precursor Mass: 496.8931+3  
 Delta Mass: 2.027 ppm  
 XCorr: 23.49

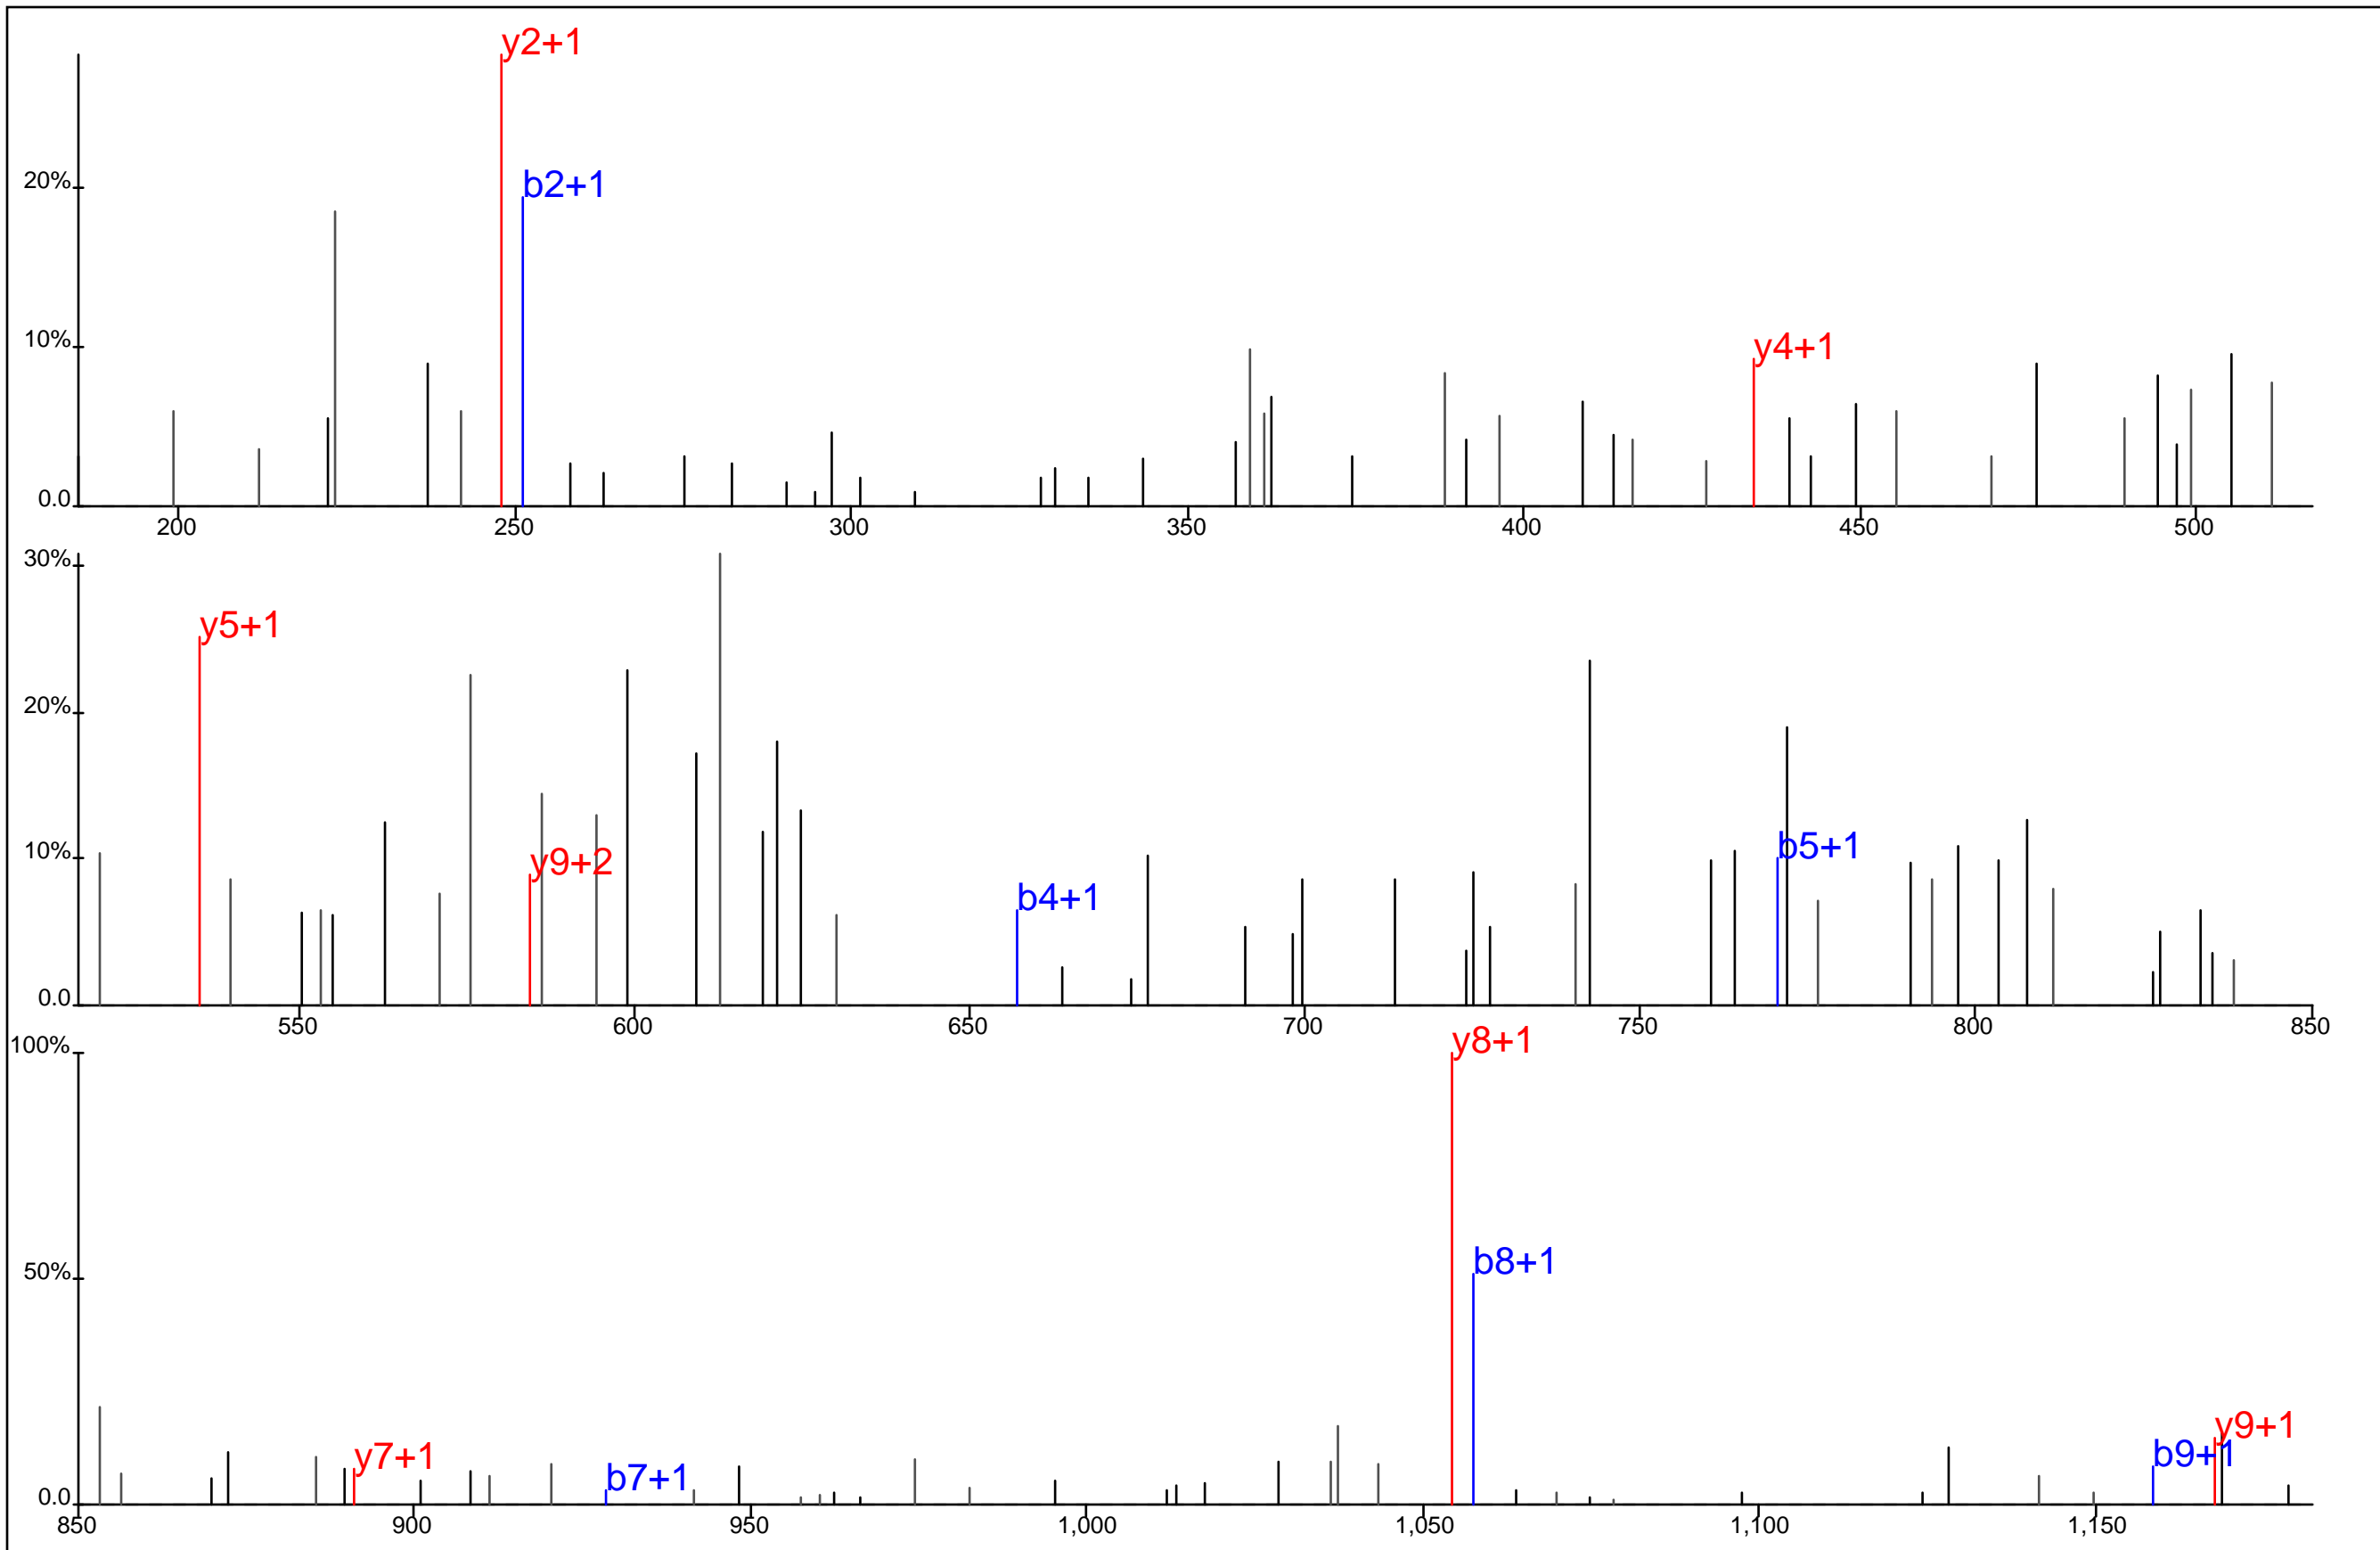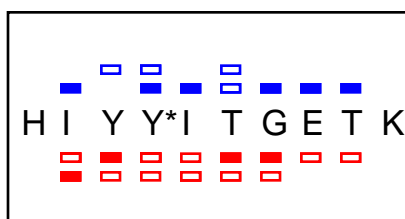

Protein Name: HSP90A  
 gi Accession: 0  
 Precursor Mass: 652.8005+2  
 Delta Mass: 1.115 ppm  
 XCorr: 22.58

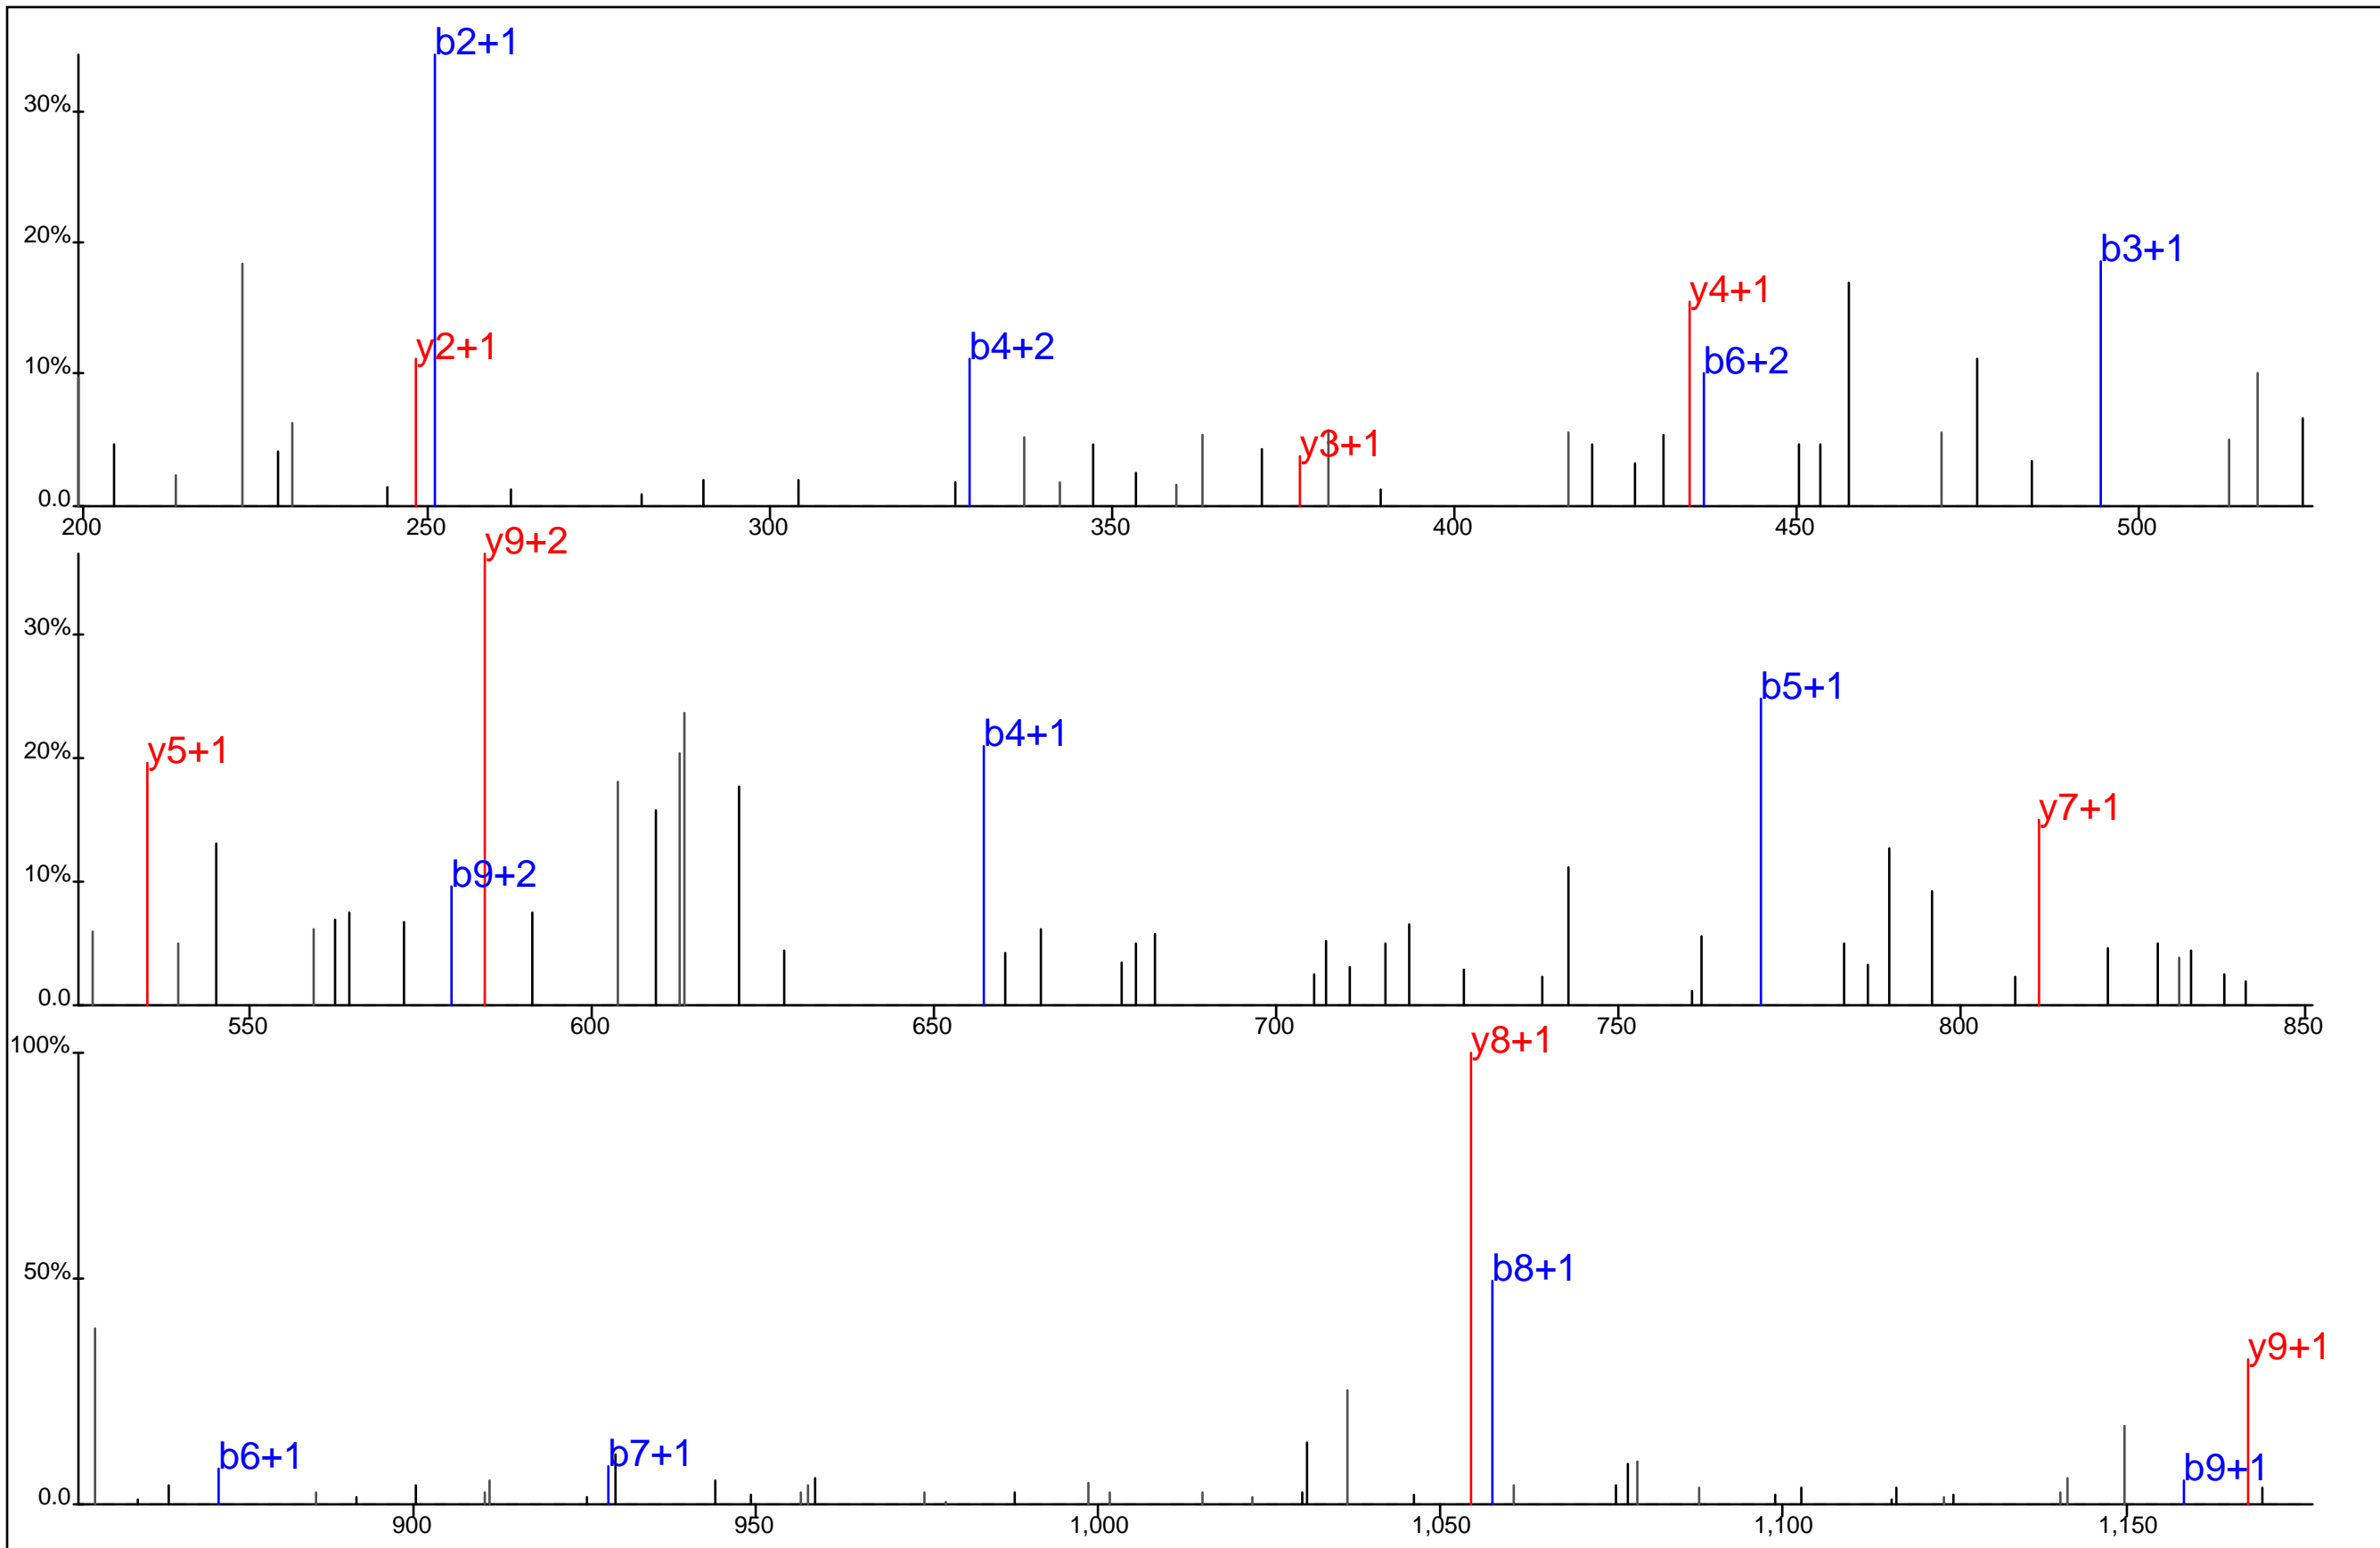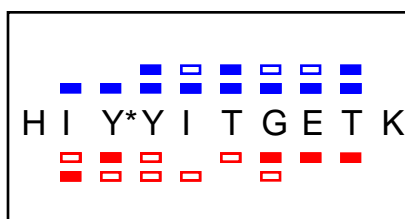

Protein Name: HSP90A  
 gi Accession: 0  
 Precursor Mass: 652.8004+2  
 Delta Mass: 0.927 ppm  
 XCorr: 42.78

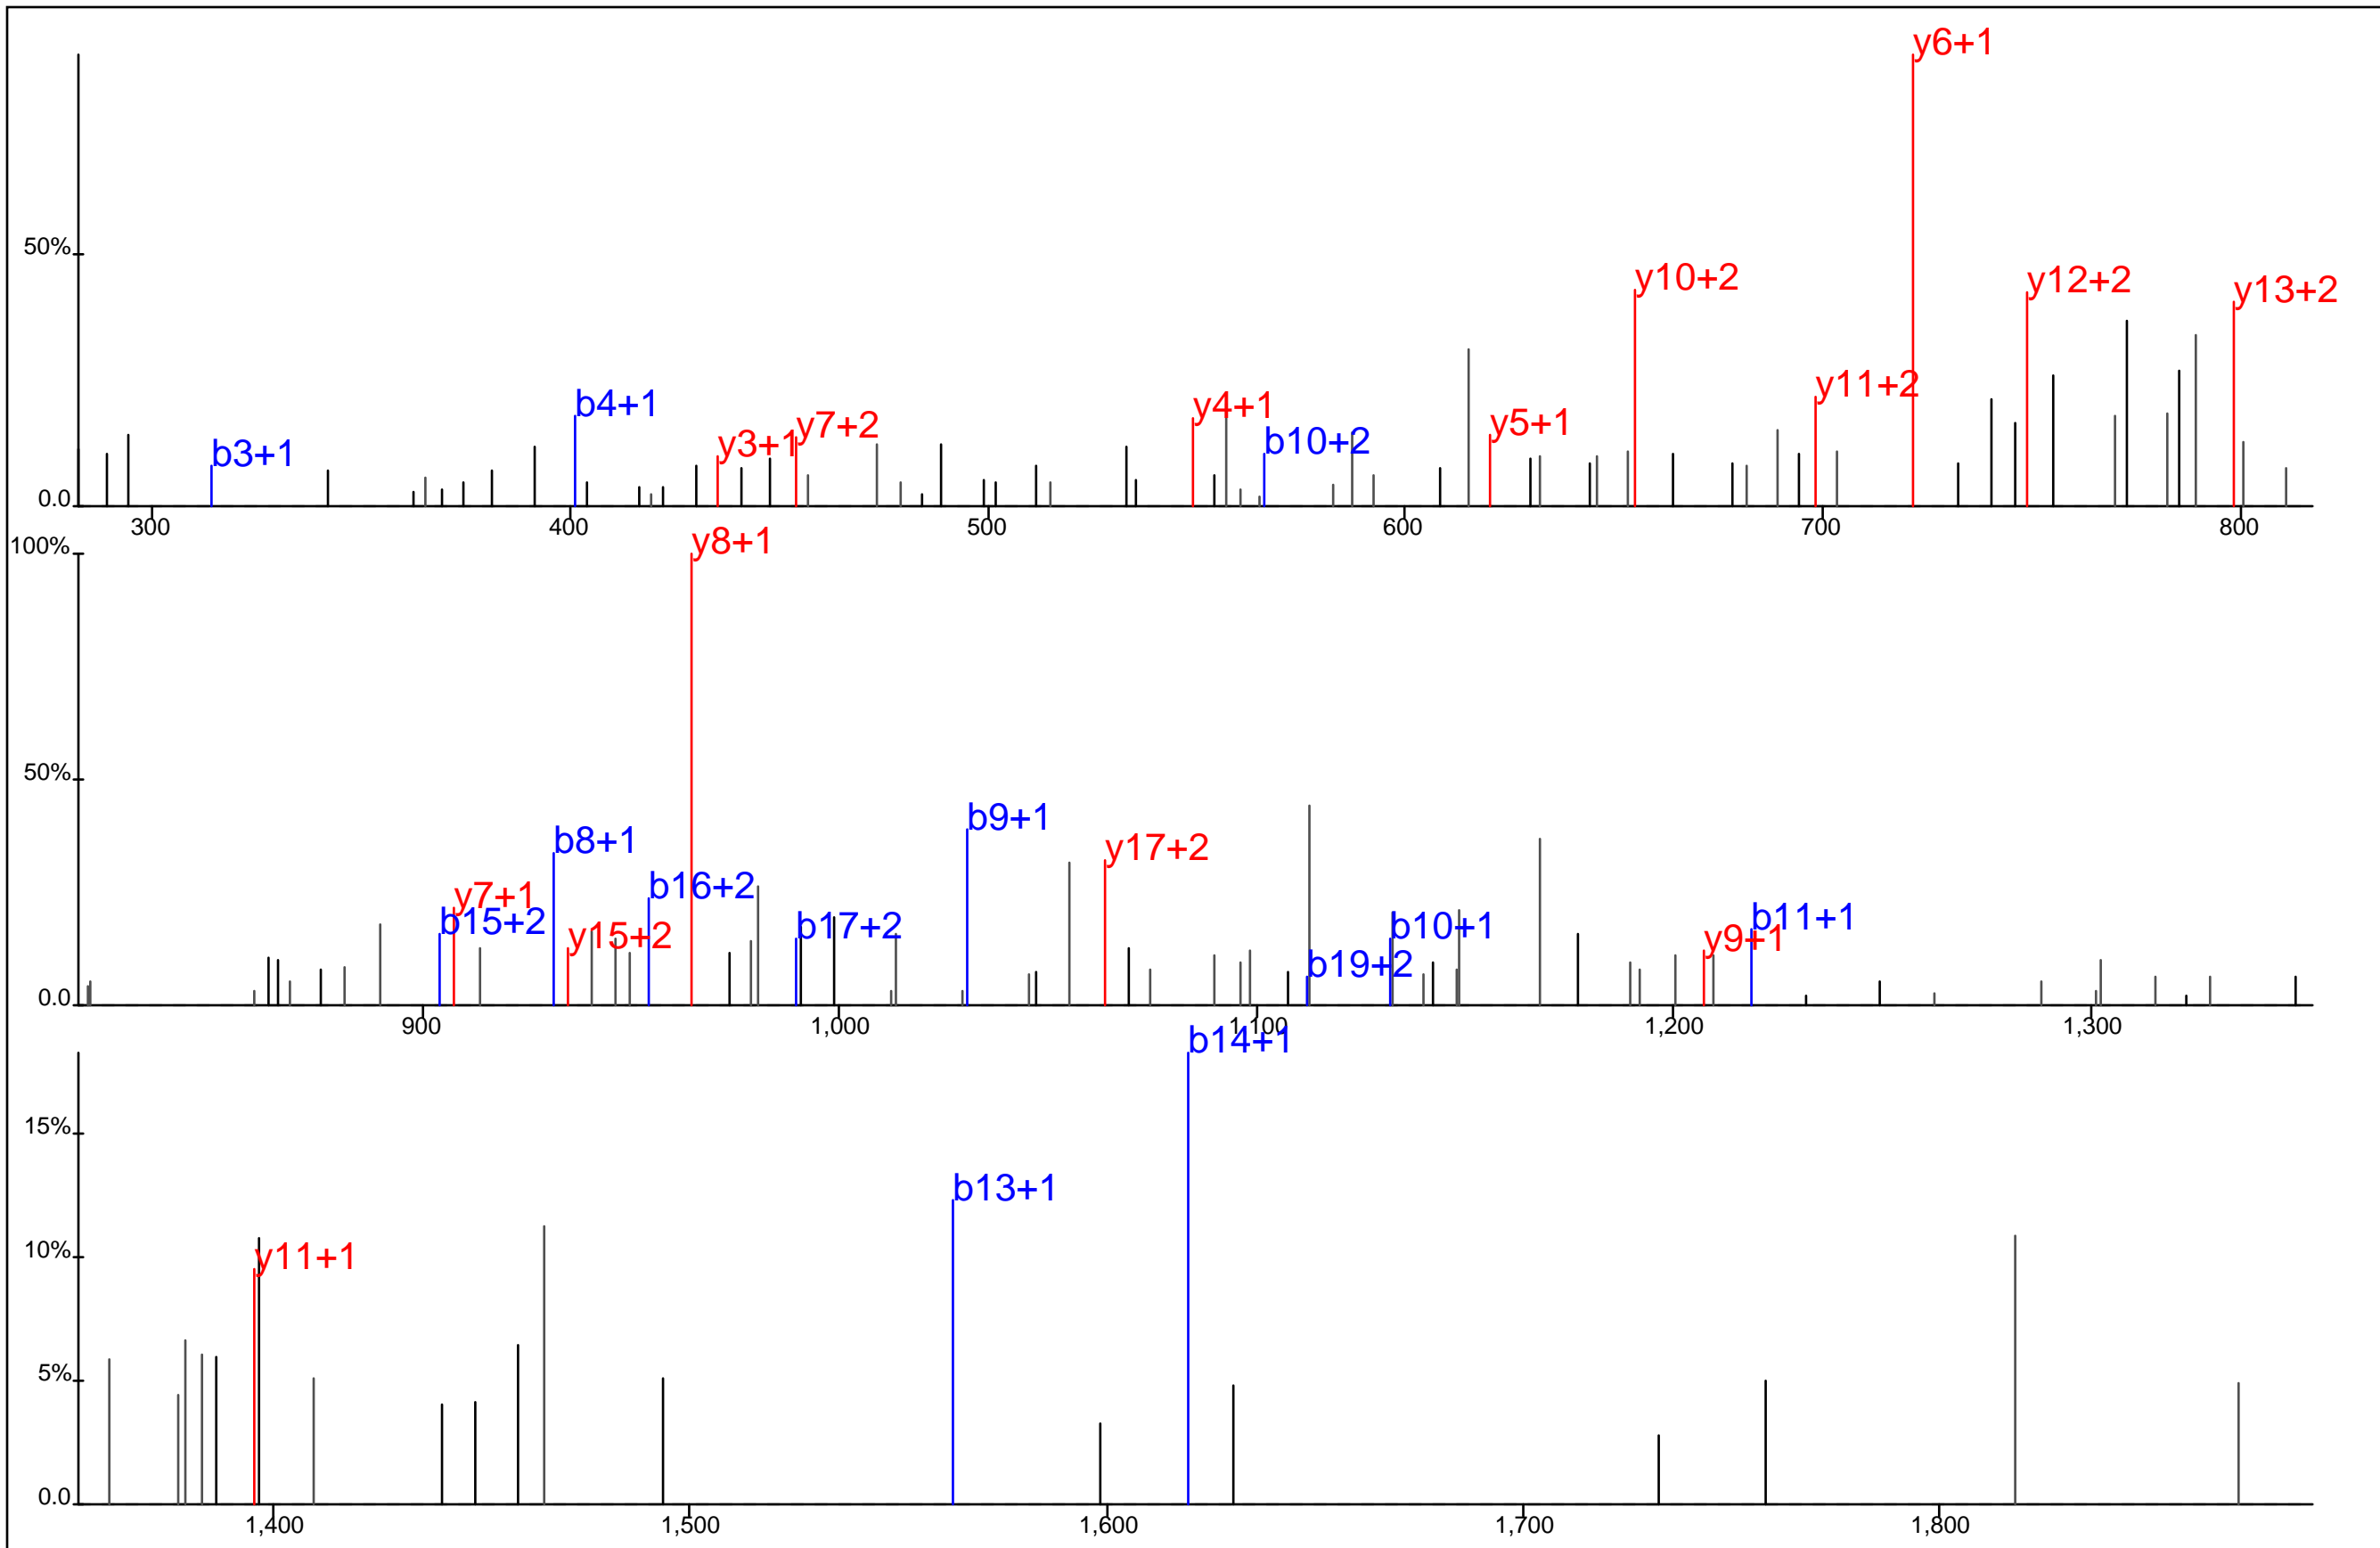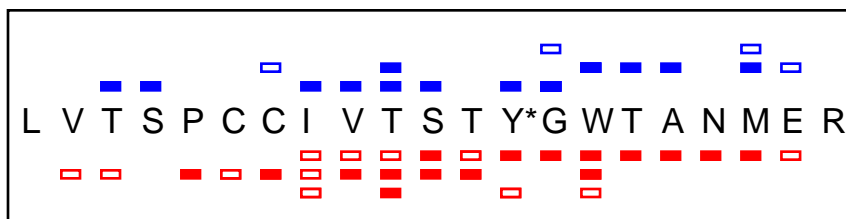

Protein Name: HSP90A  
 gi Accession: 0  
 Precursor Mass: 842.7005+3  
 Delta Mass: 0.256 ppm  
 XCorr: 37.52

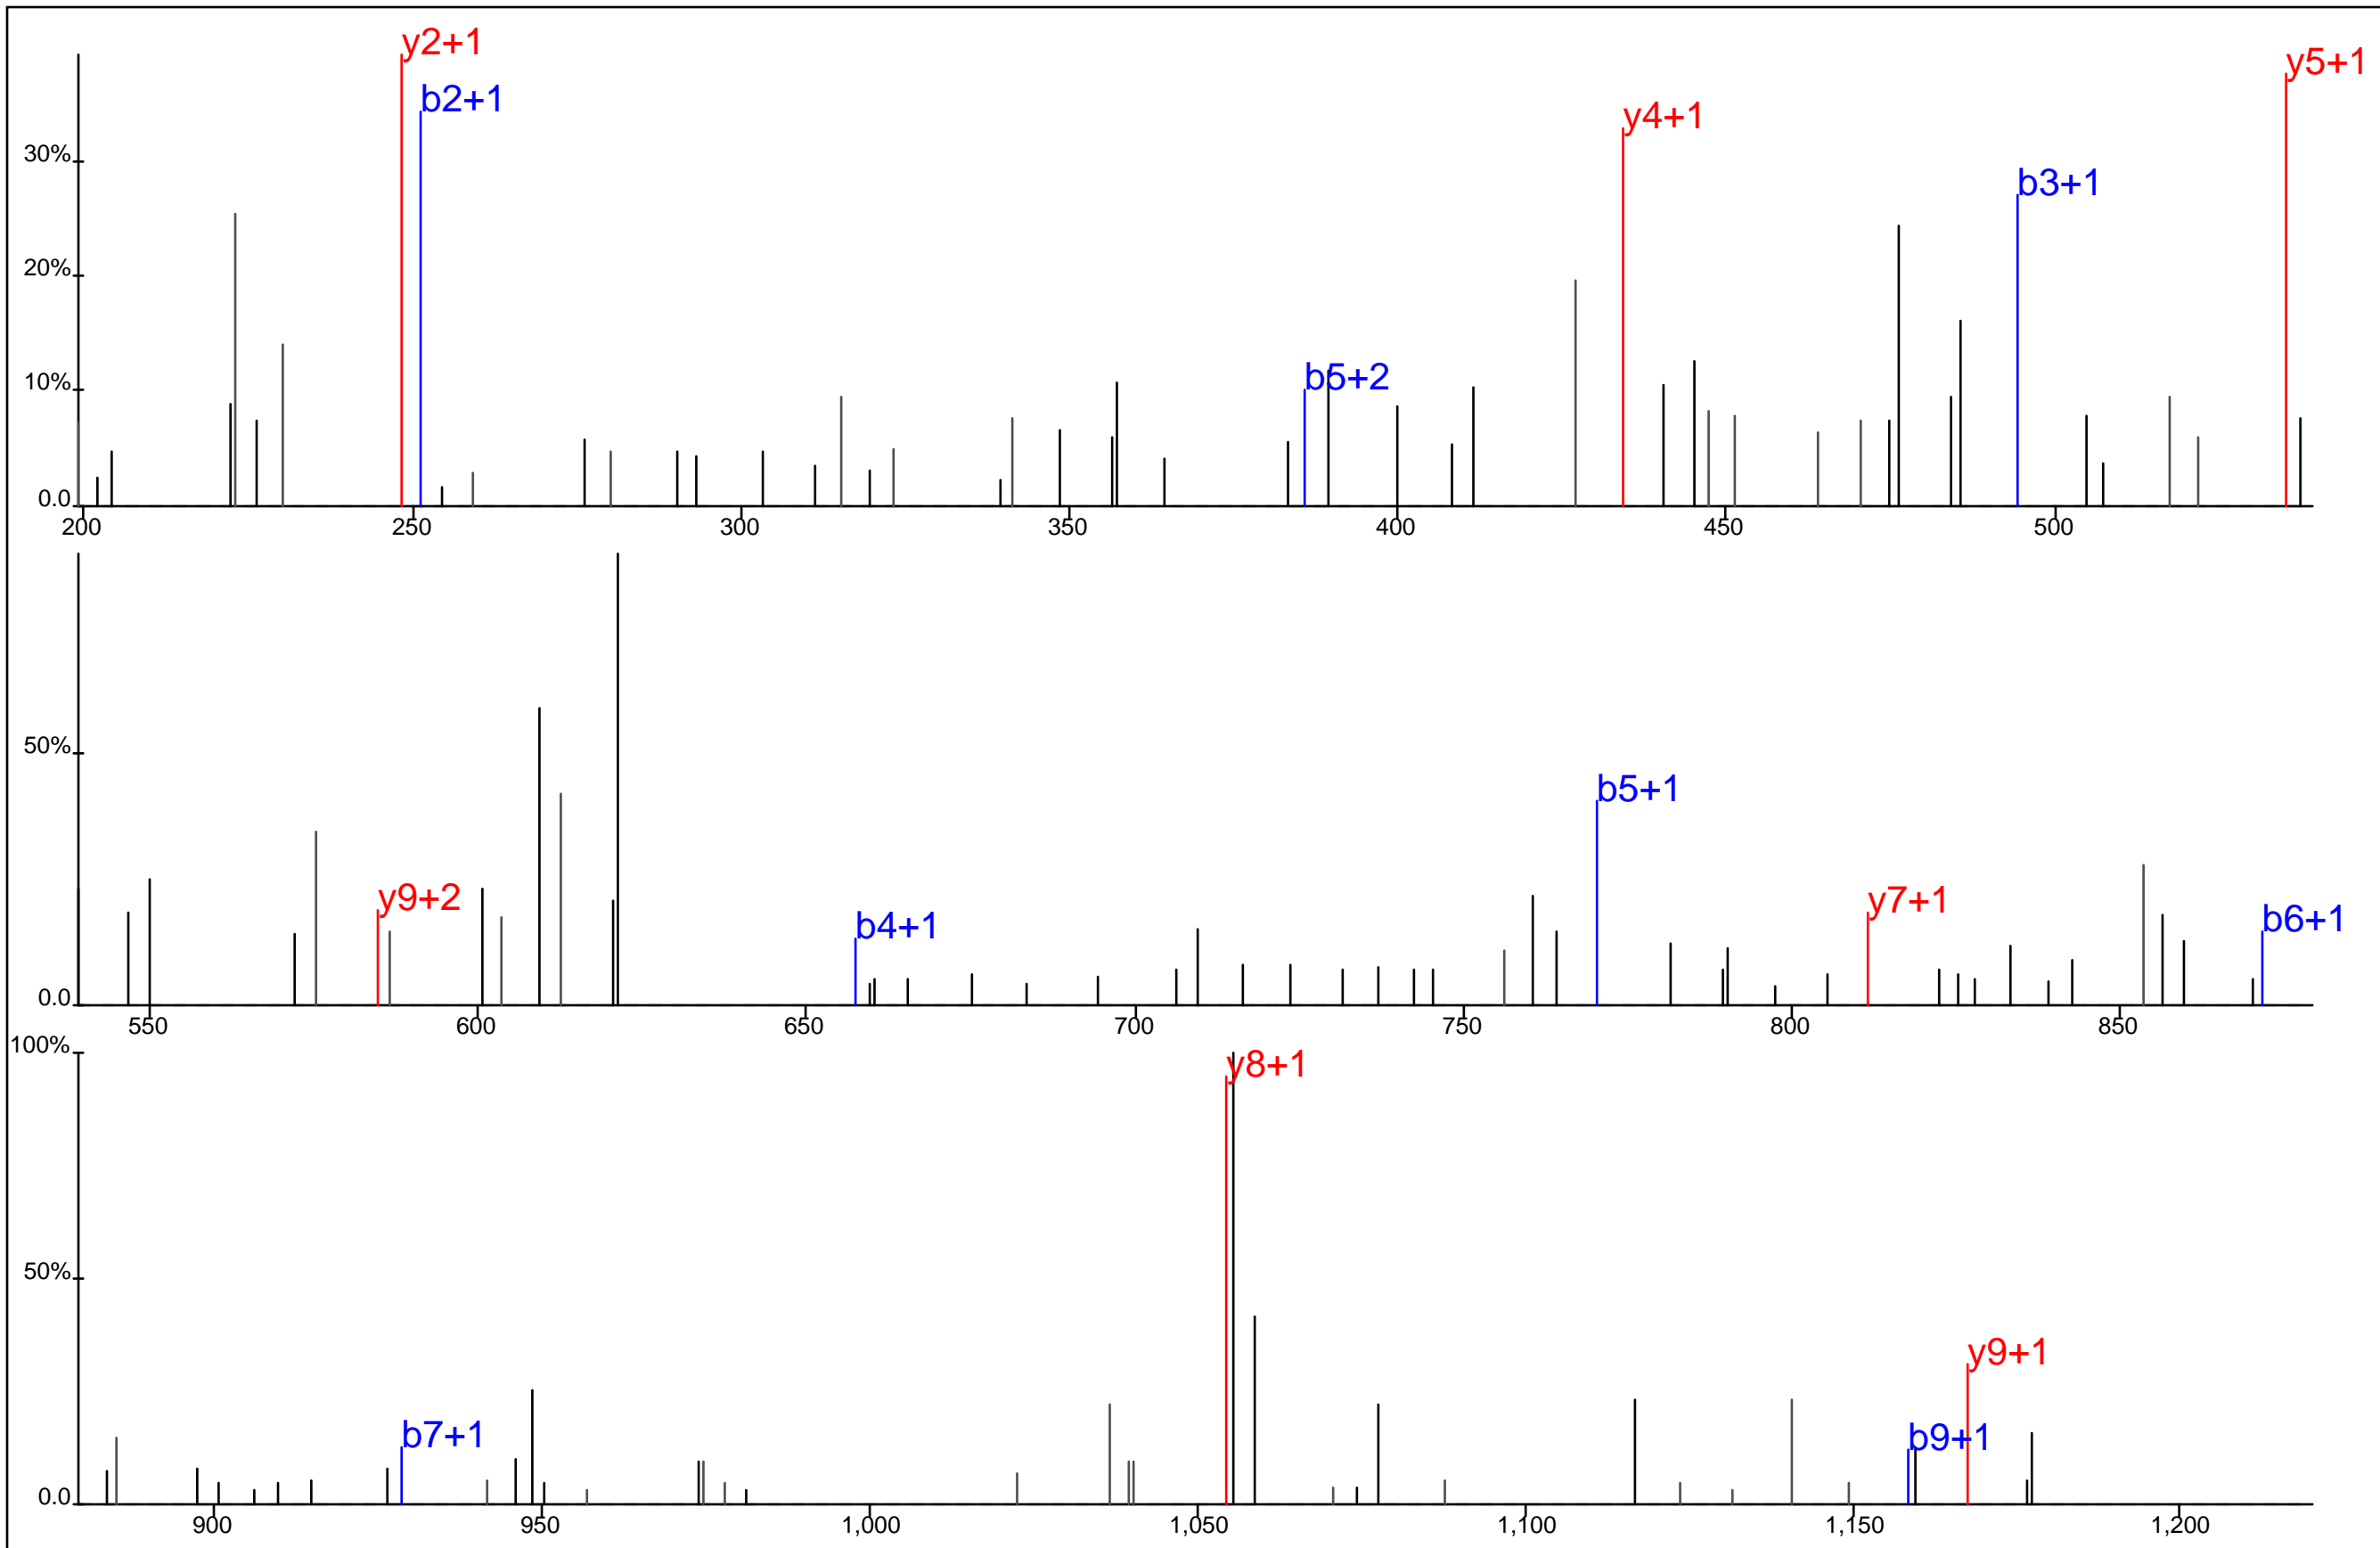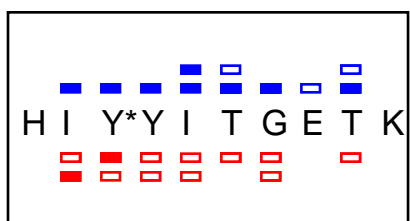

Protein Name: HSP90A  
 gi Accession: 0  
 Precursor Mass: 652.8004+2  
 Delta Mass: 1.021 ppm  
 XCorr: 33.26

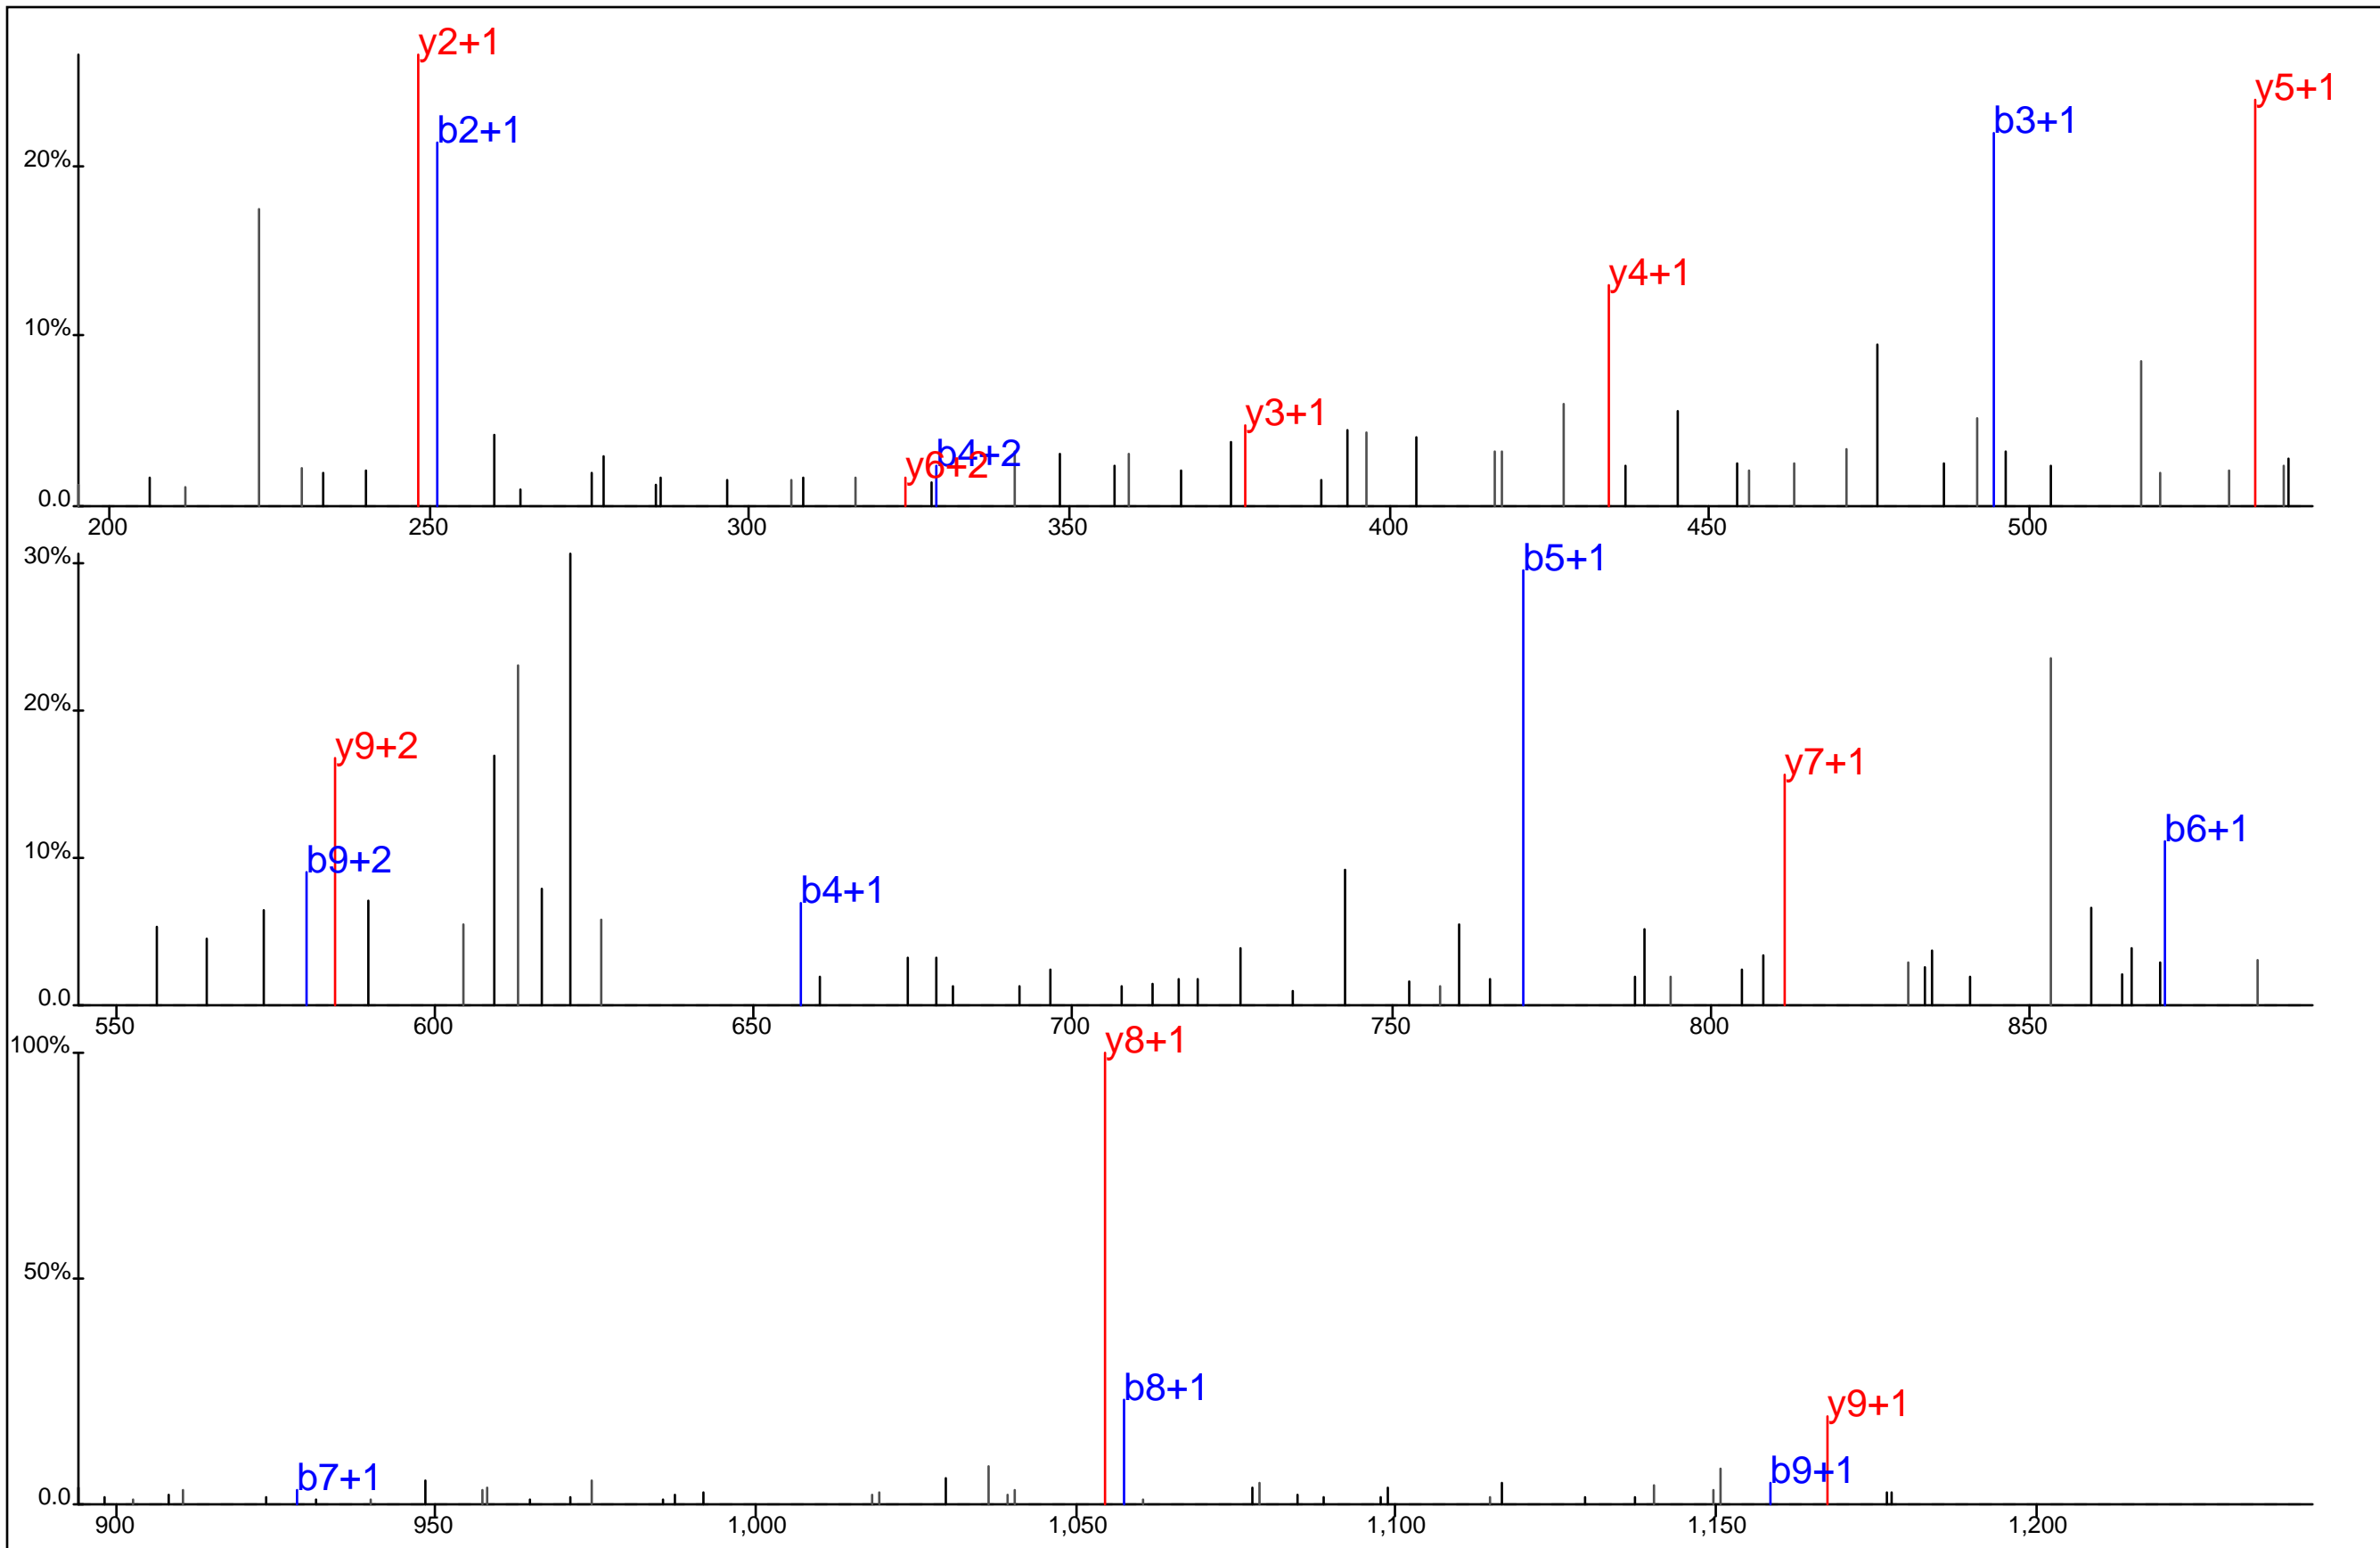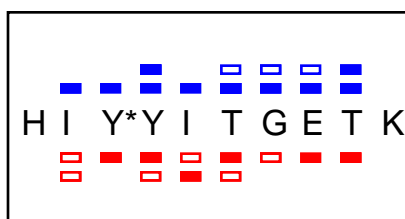

Protein Name: HSP90A  
 gi Accession: 0  
 Precursor Mass: 652.8020+2  
 Delta Mass: 3.454 ppm  
 XCorr: 48.21



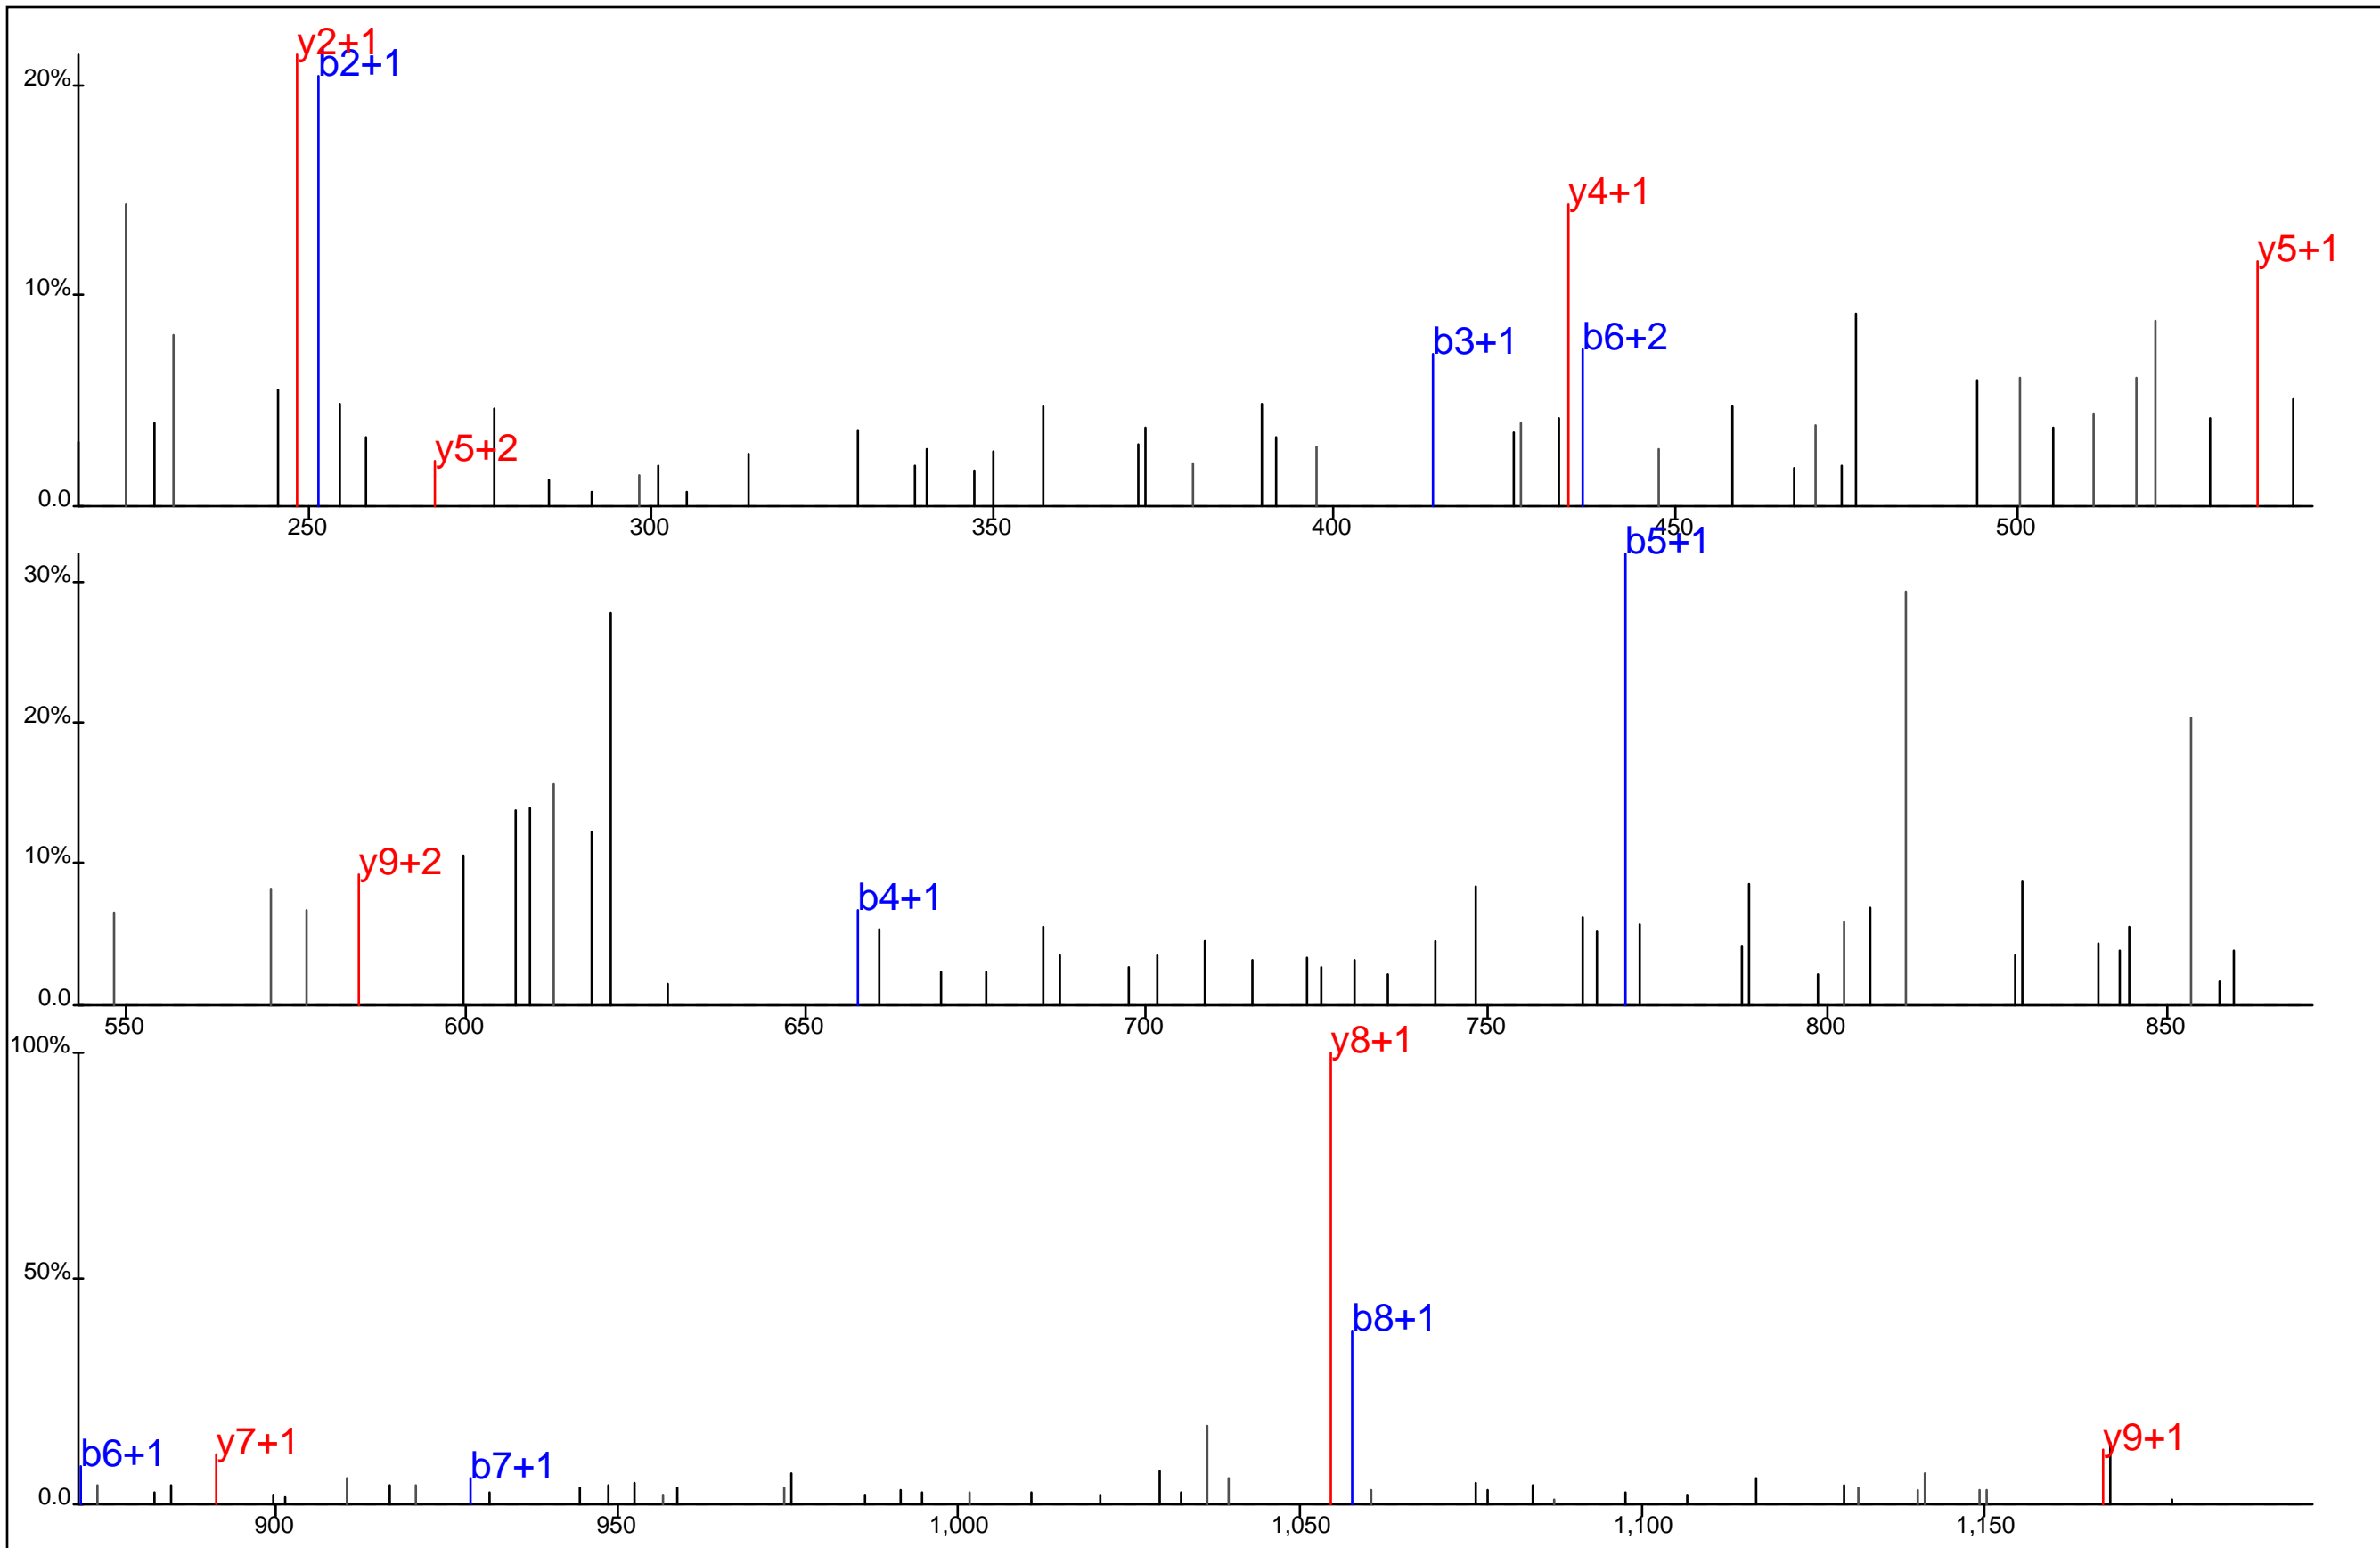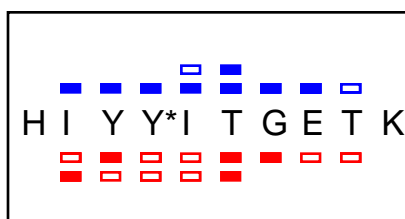

Protein Name: HSP90A  
 gi Accession: 0  
 Precursor Mass: 652.8023+2  
 Delta Mass: 3.922 ppm  
 XCorr: 32.91

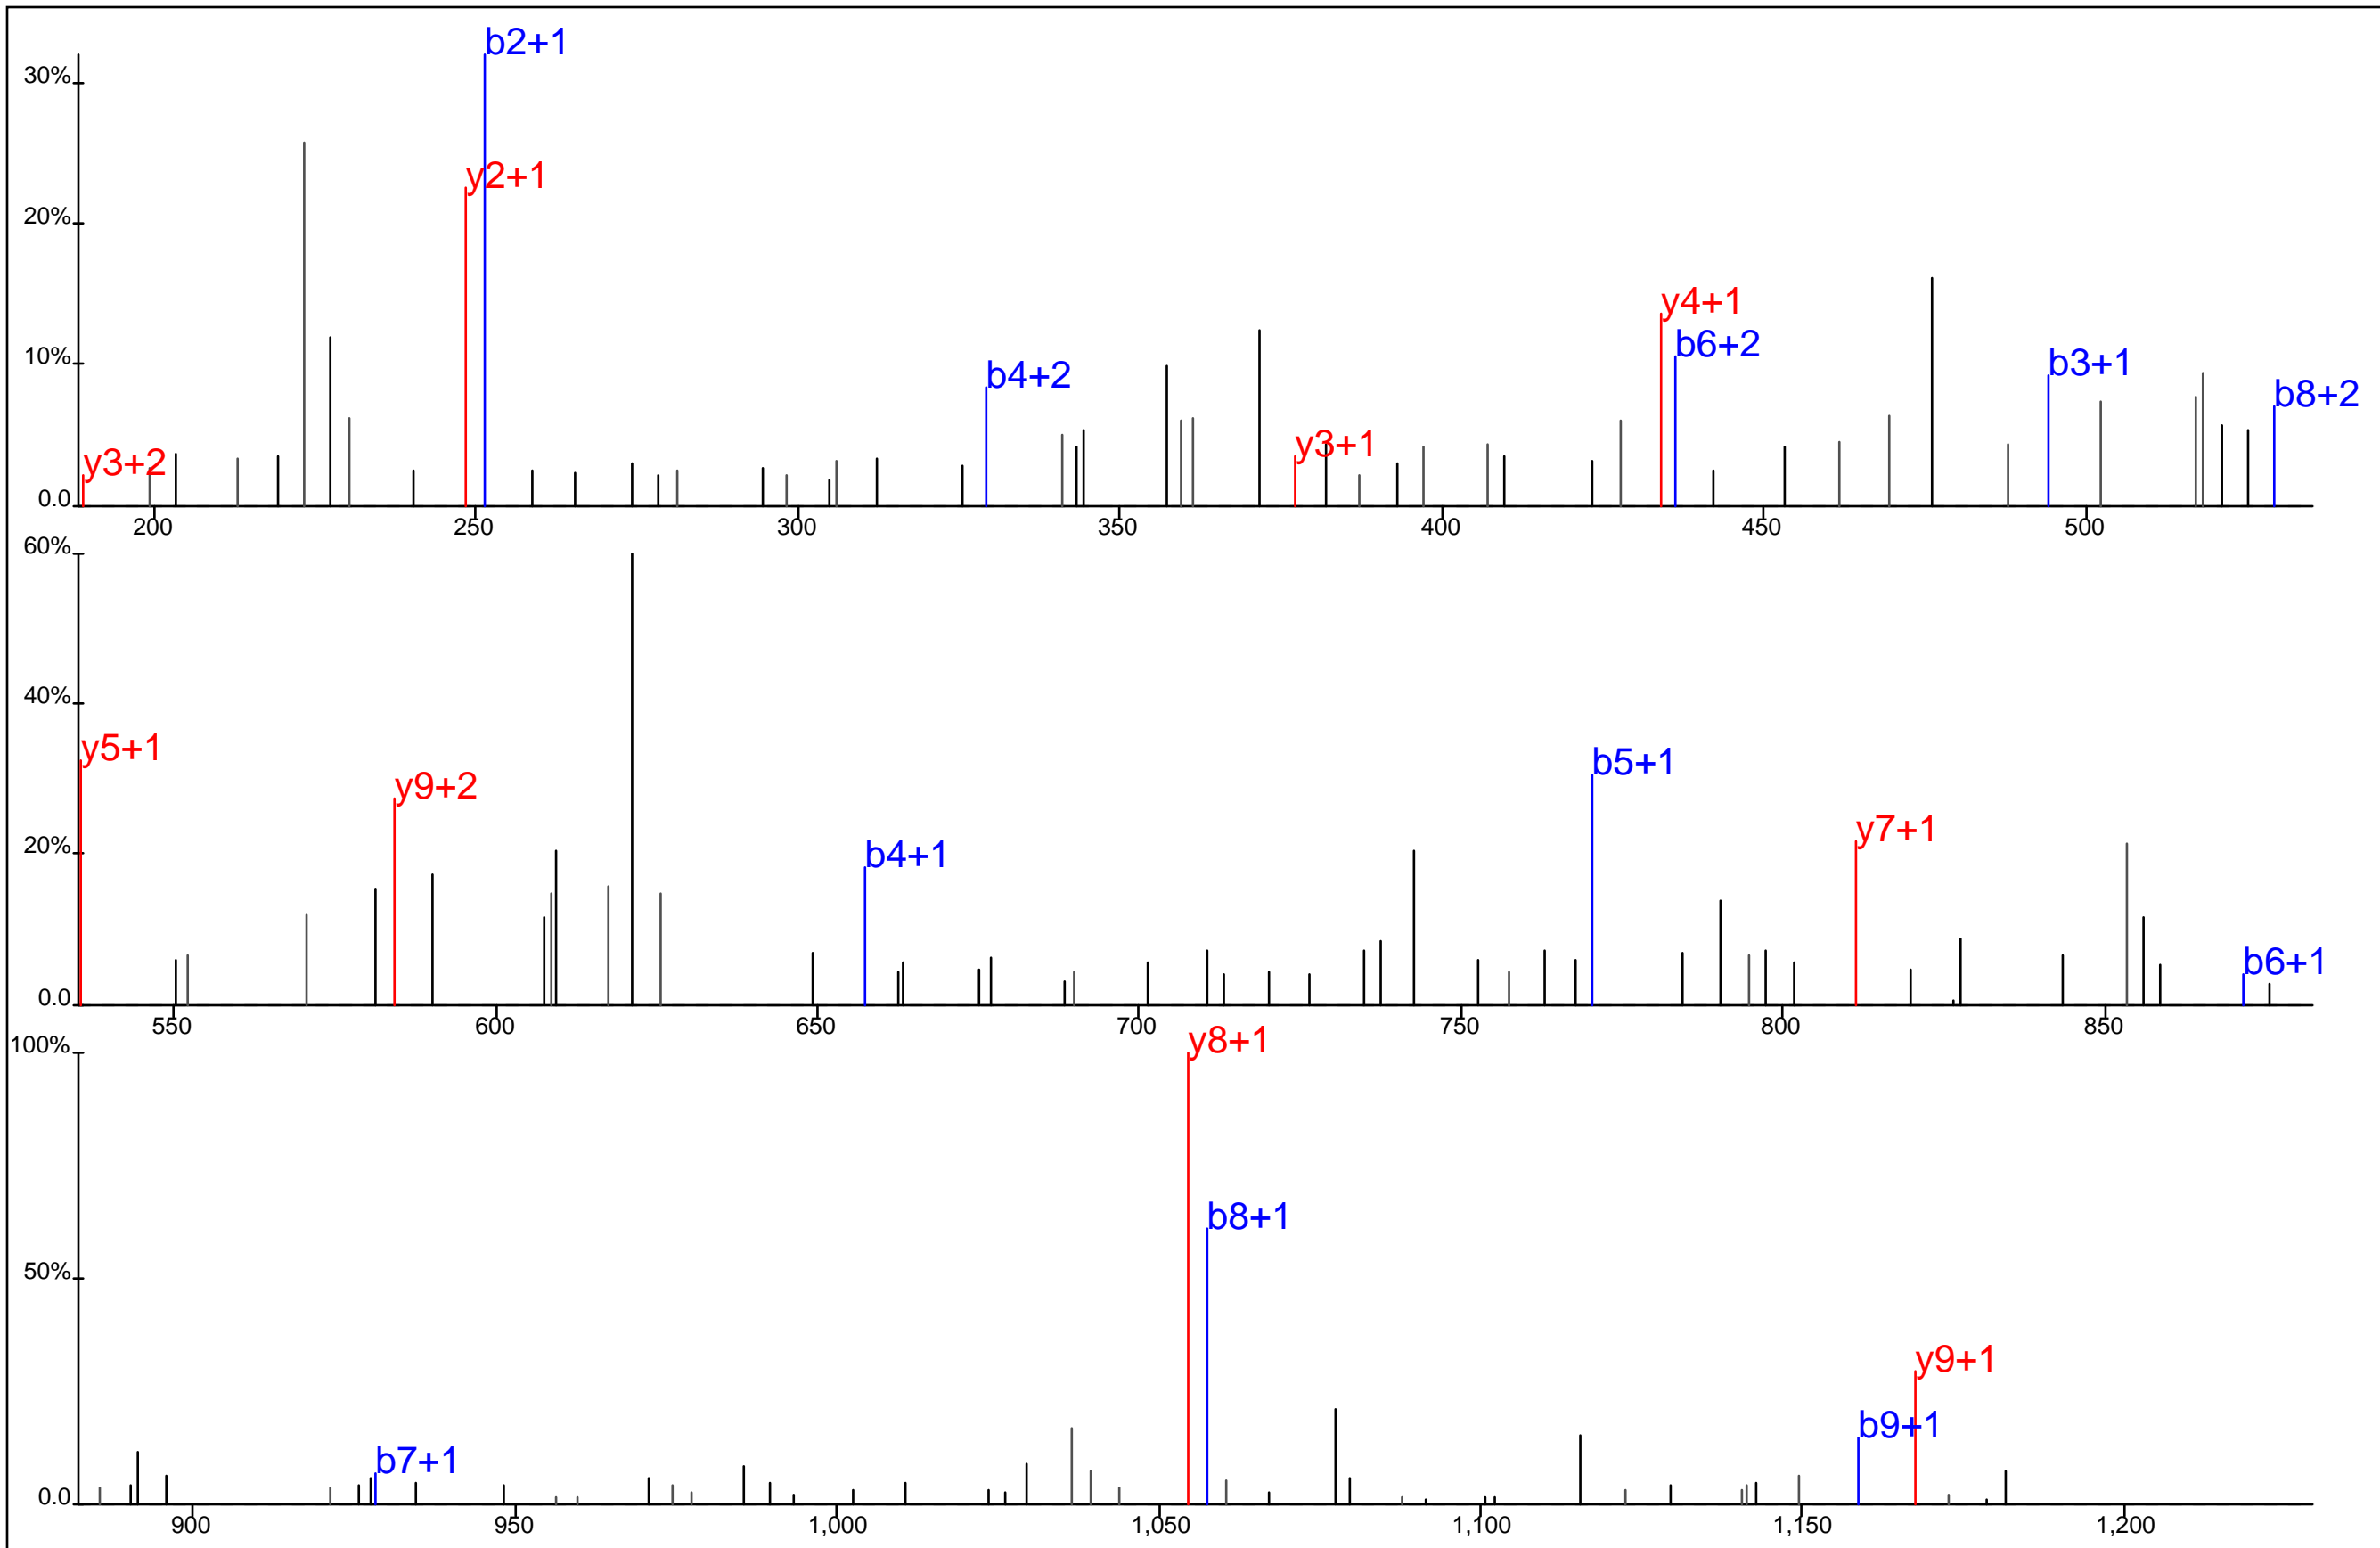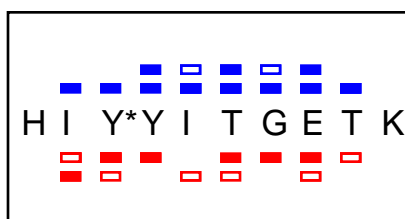

Protein Name: HSP90A  
 gi Accession: 0  
 Precursor Mass: 652.7991+2  
 Delta Mass: 1.038 ppm  
 XCorr: 39.57

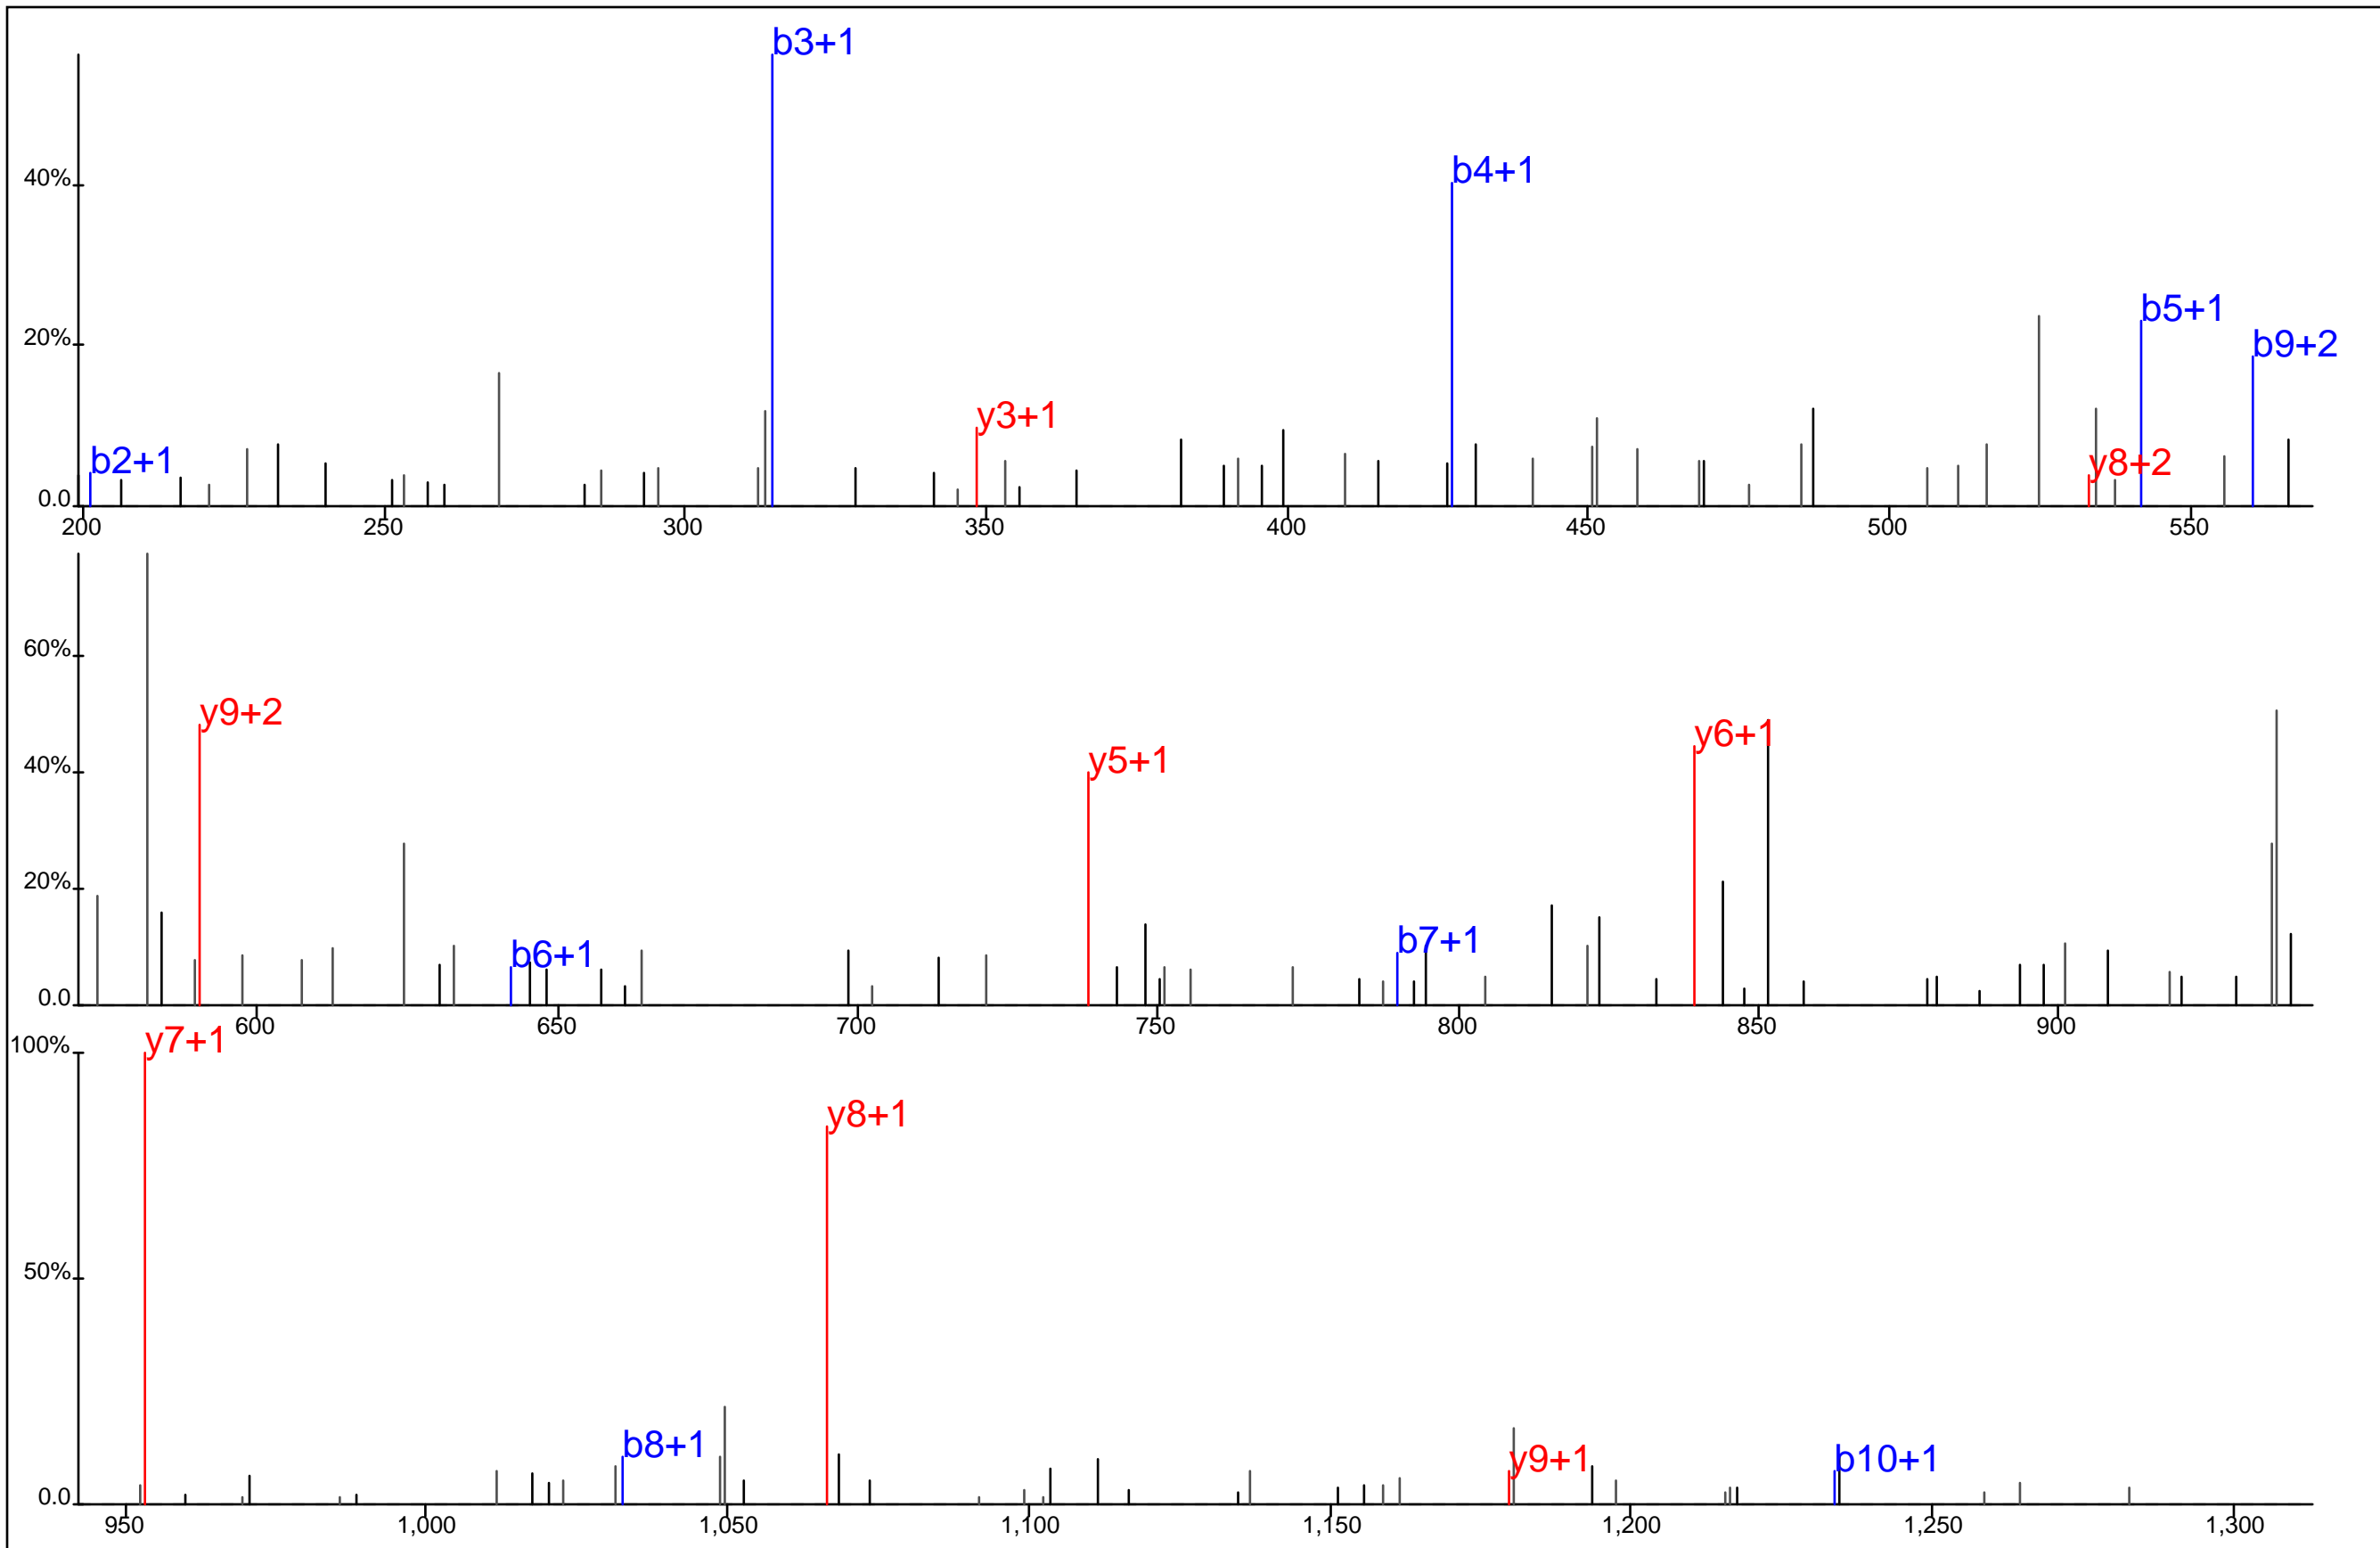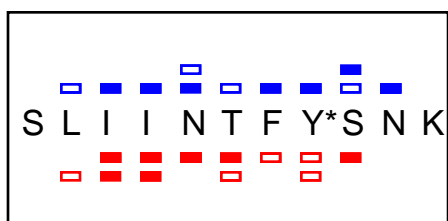

Protein Name: HSP90AB1 Heat shock protein beta  
 gi Accession: 0  
 Precursor Mass: 690.3336+2  
 Delta Mass: 0.568 ppm  
 XCorr: 25.3

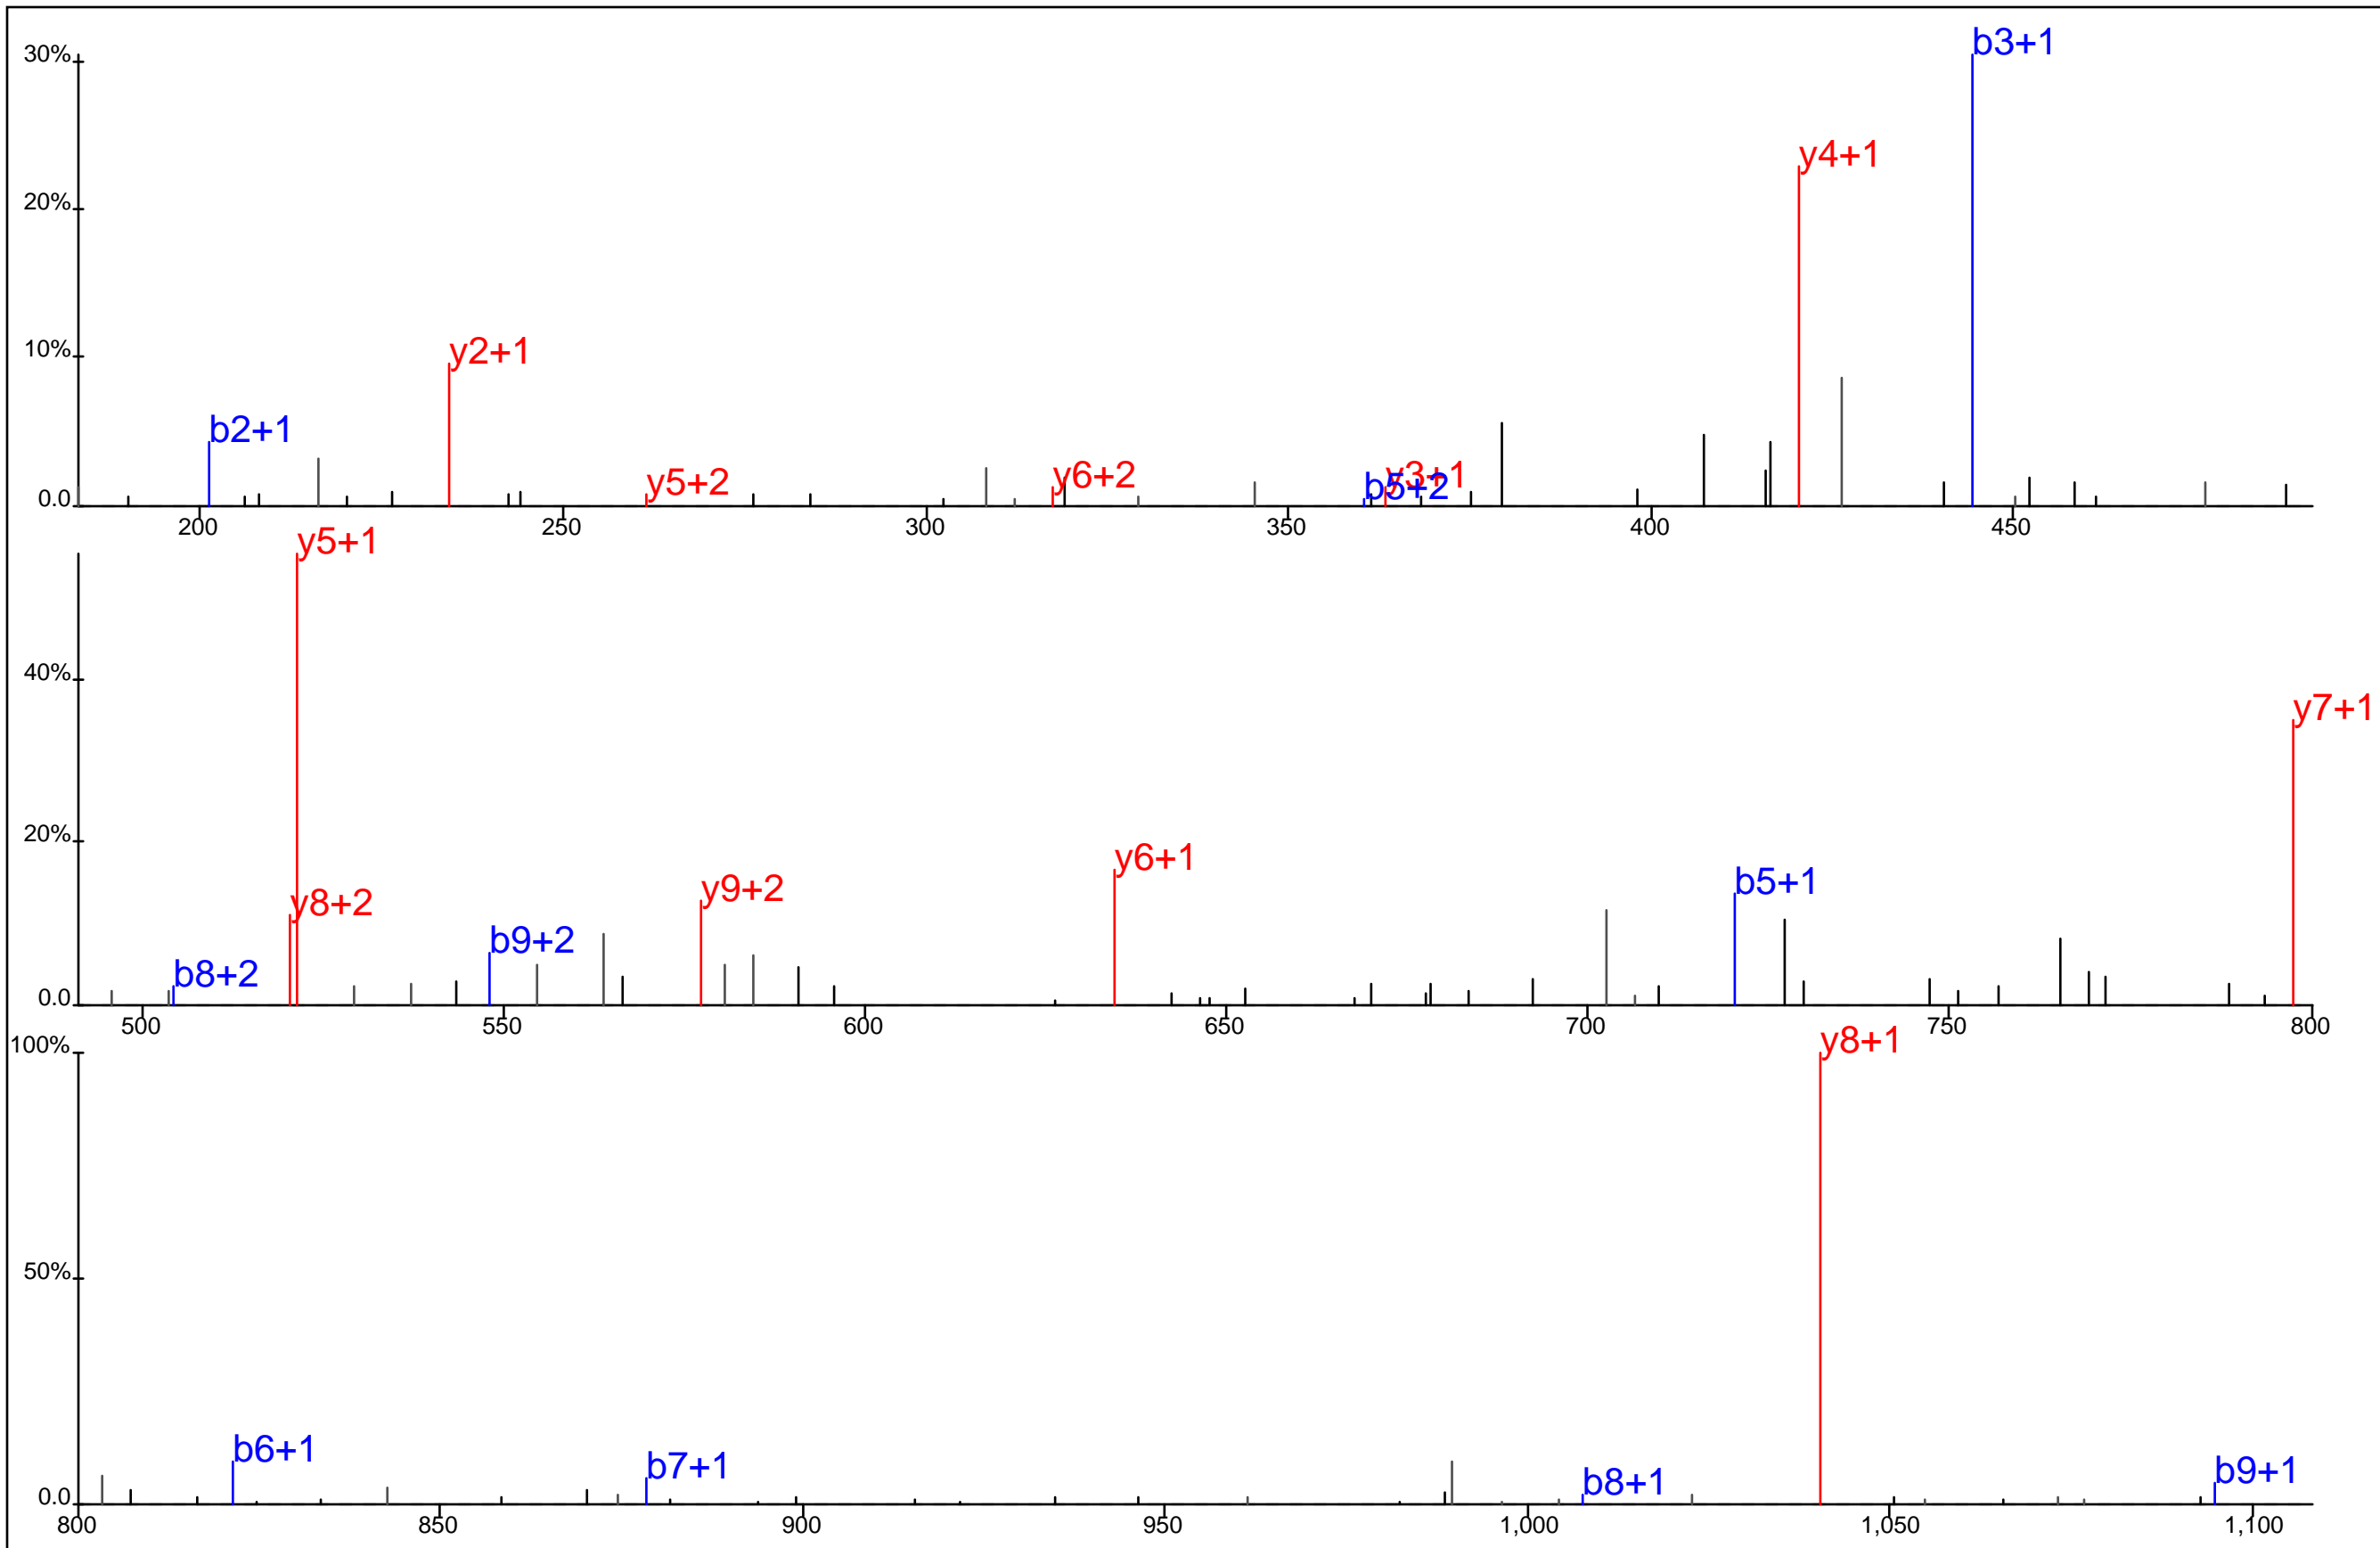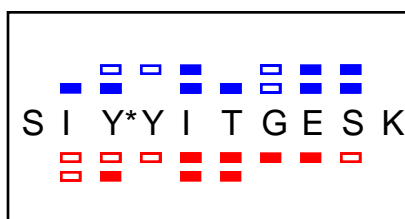

Protein Name: HSP90B  
 gi Accession: 0  
 Precursor Mass: 620.7786+2  
 Delta Mass: 0.137 ppm  
 XCorr: 44.99

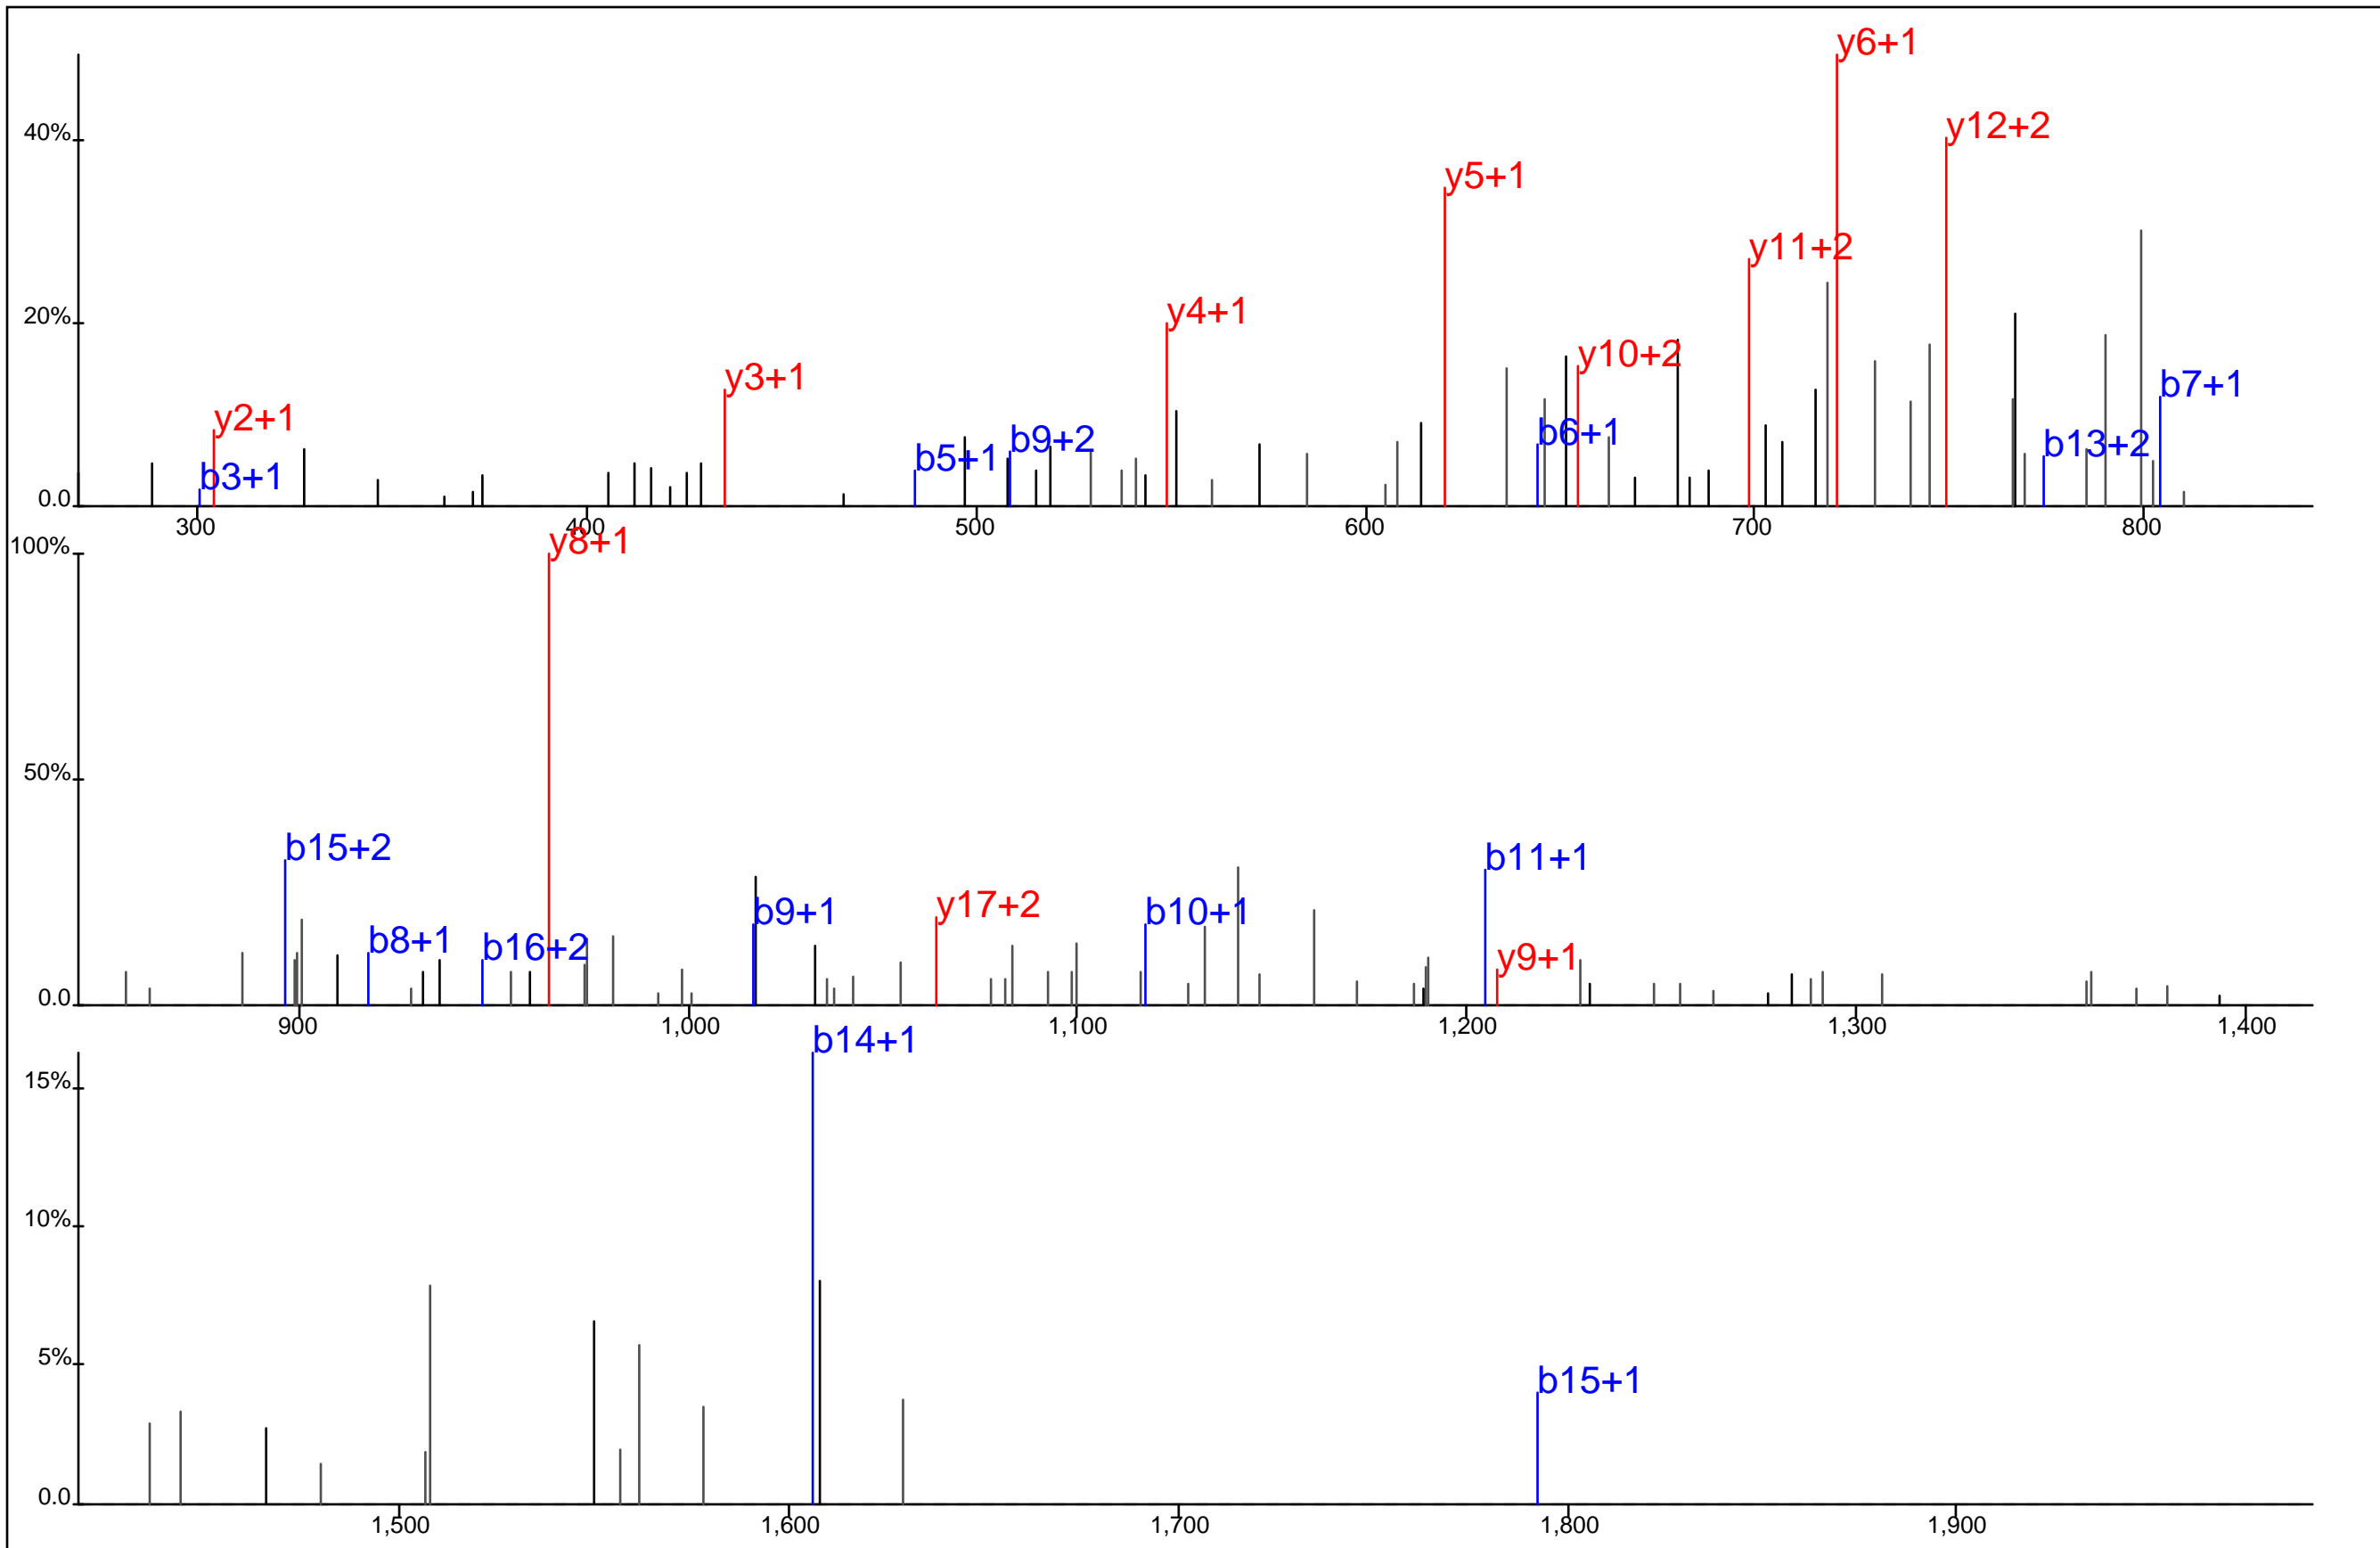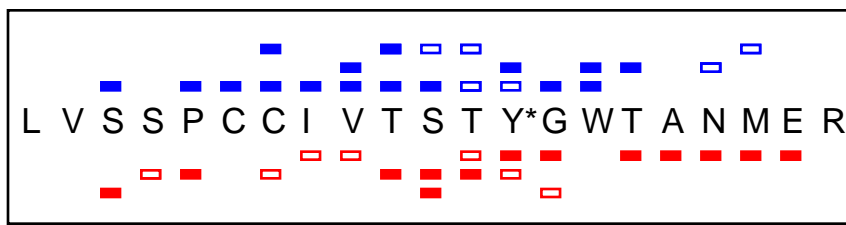

Protein Name: HSP90B  
 gi Accession: 0  
 Precursor Mass: 838.0302+3  
 Delta Mass: 2.093 ppm  
 XCorr: 36.81

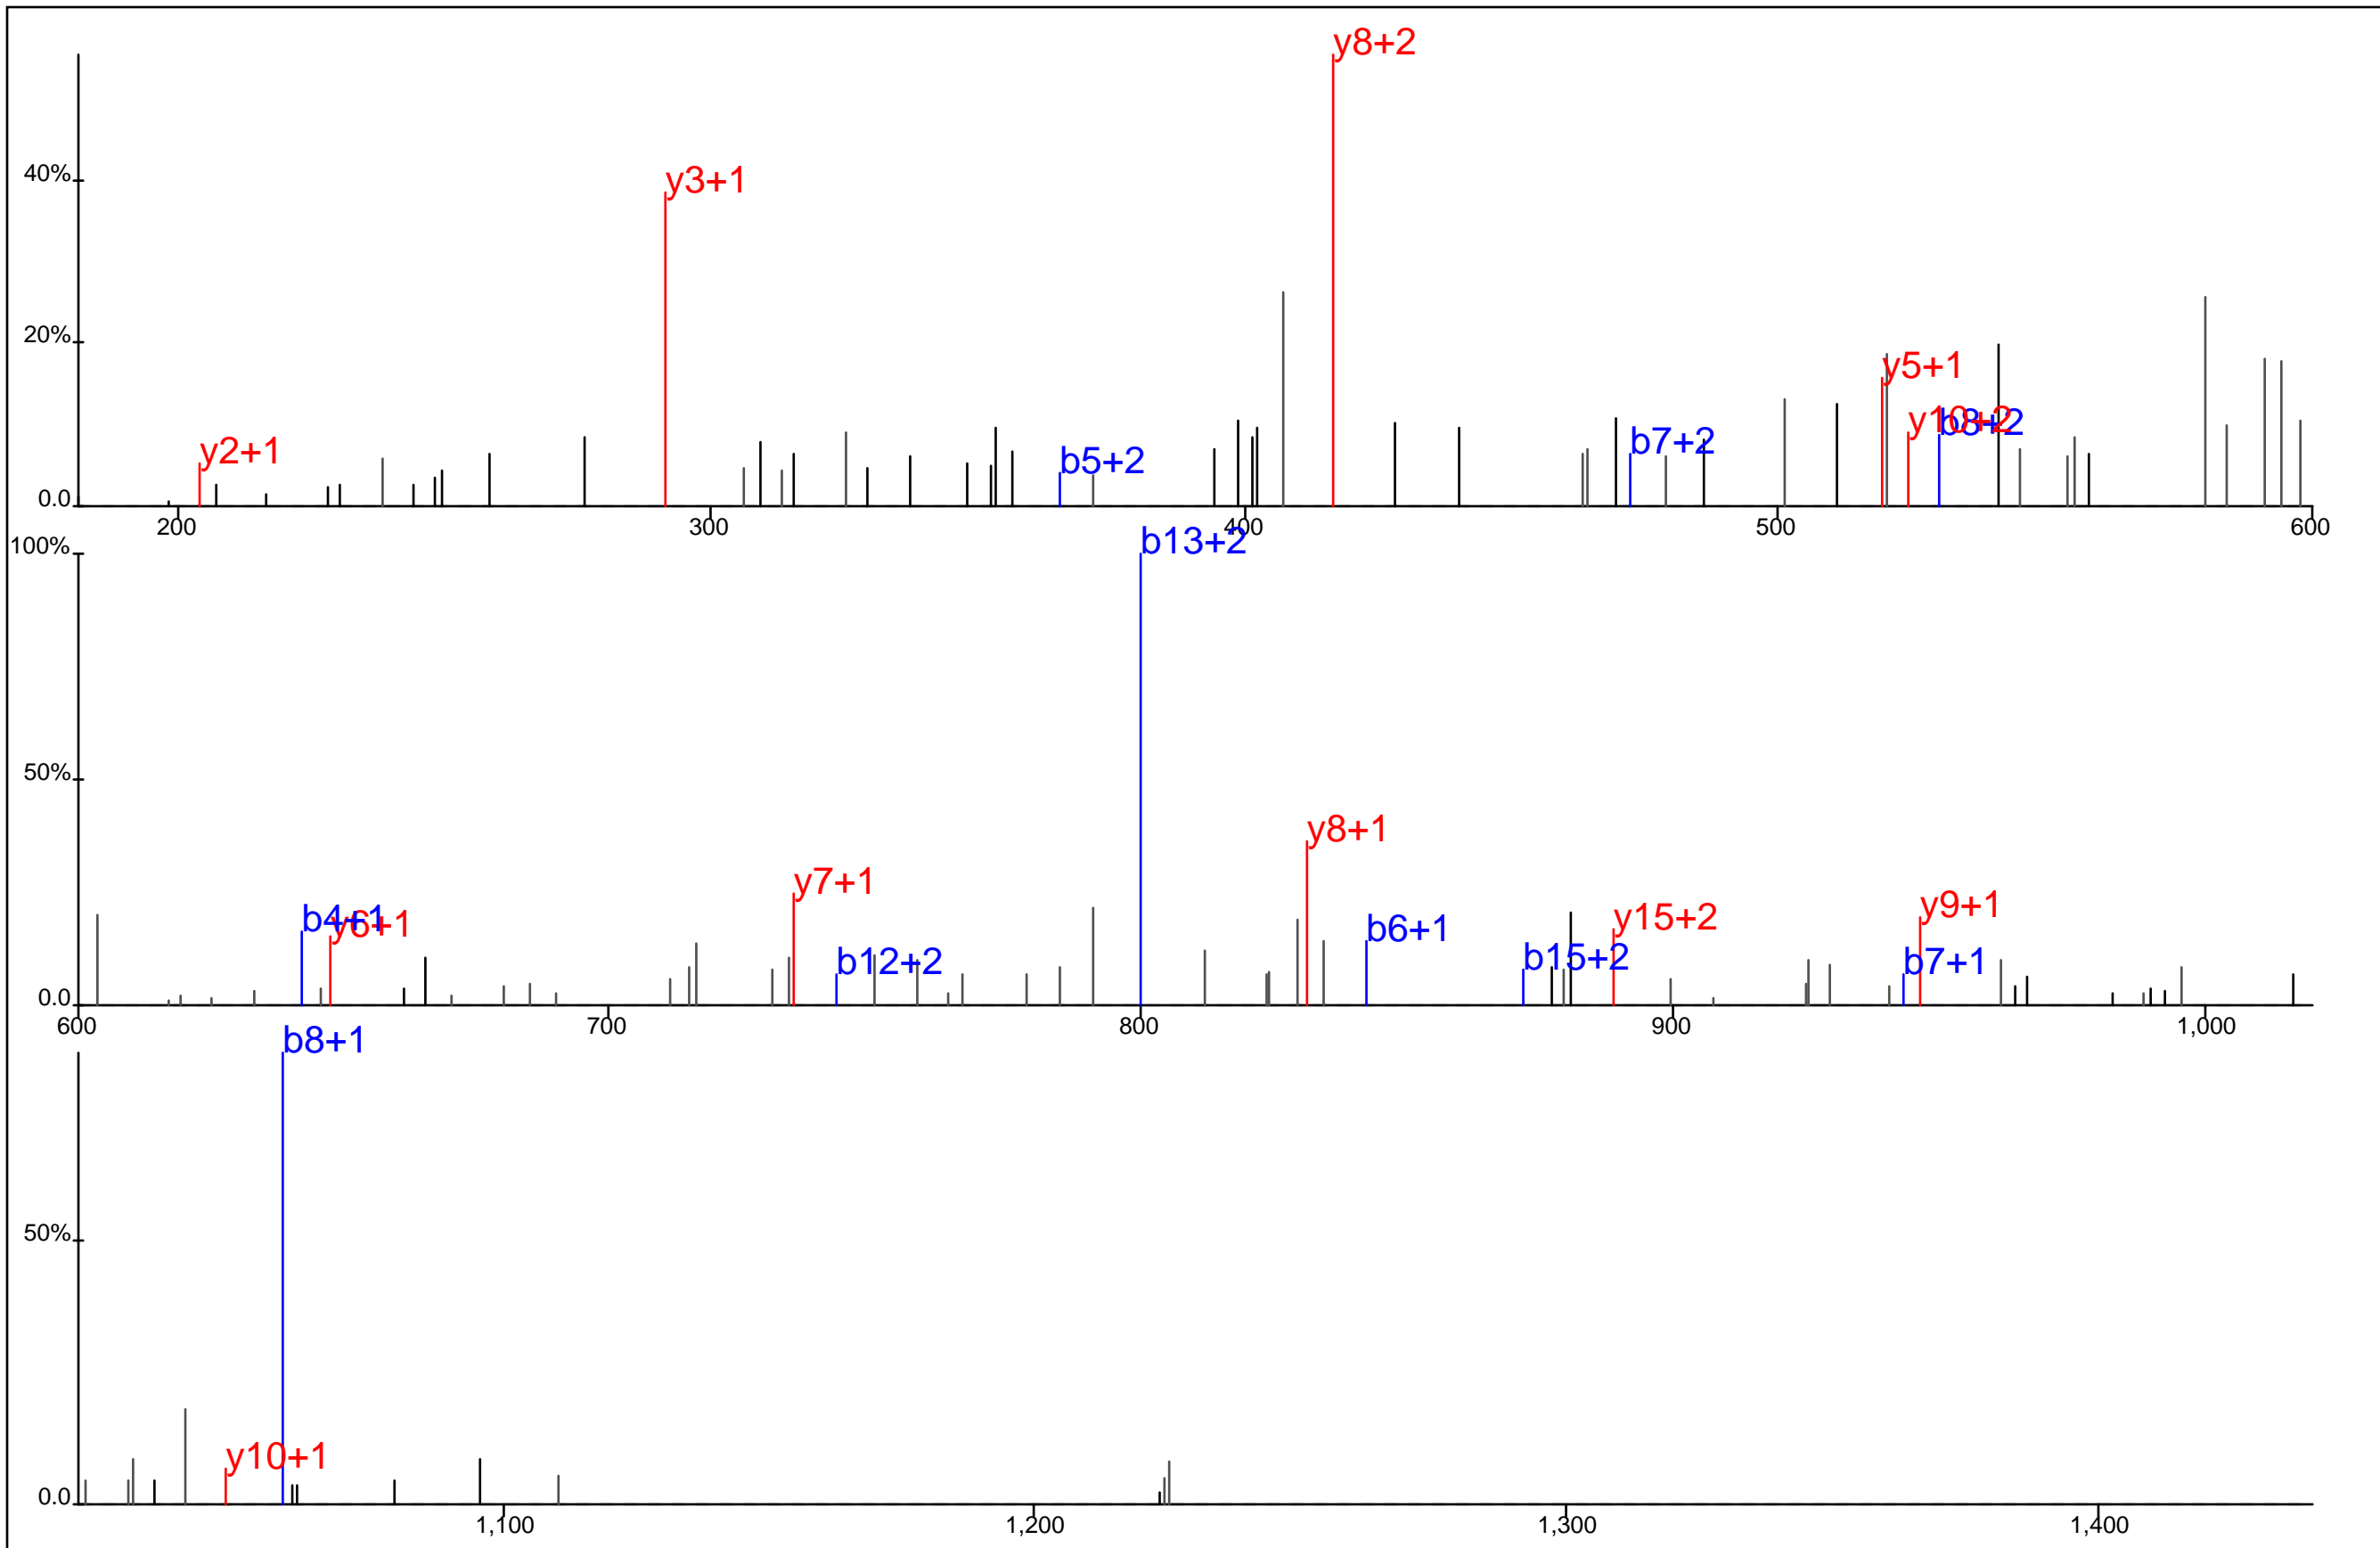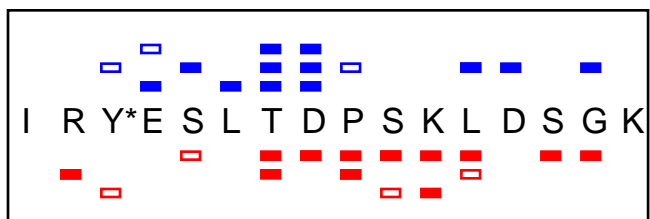

Protein Name: HSP90B  
 gi Accession: 0  
 Precursor Mass: 630.3061+3  
 Delta Mass: 0.763 ppm  
 XCorr: 30.14

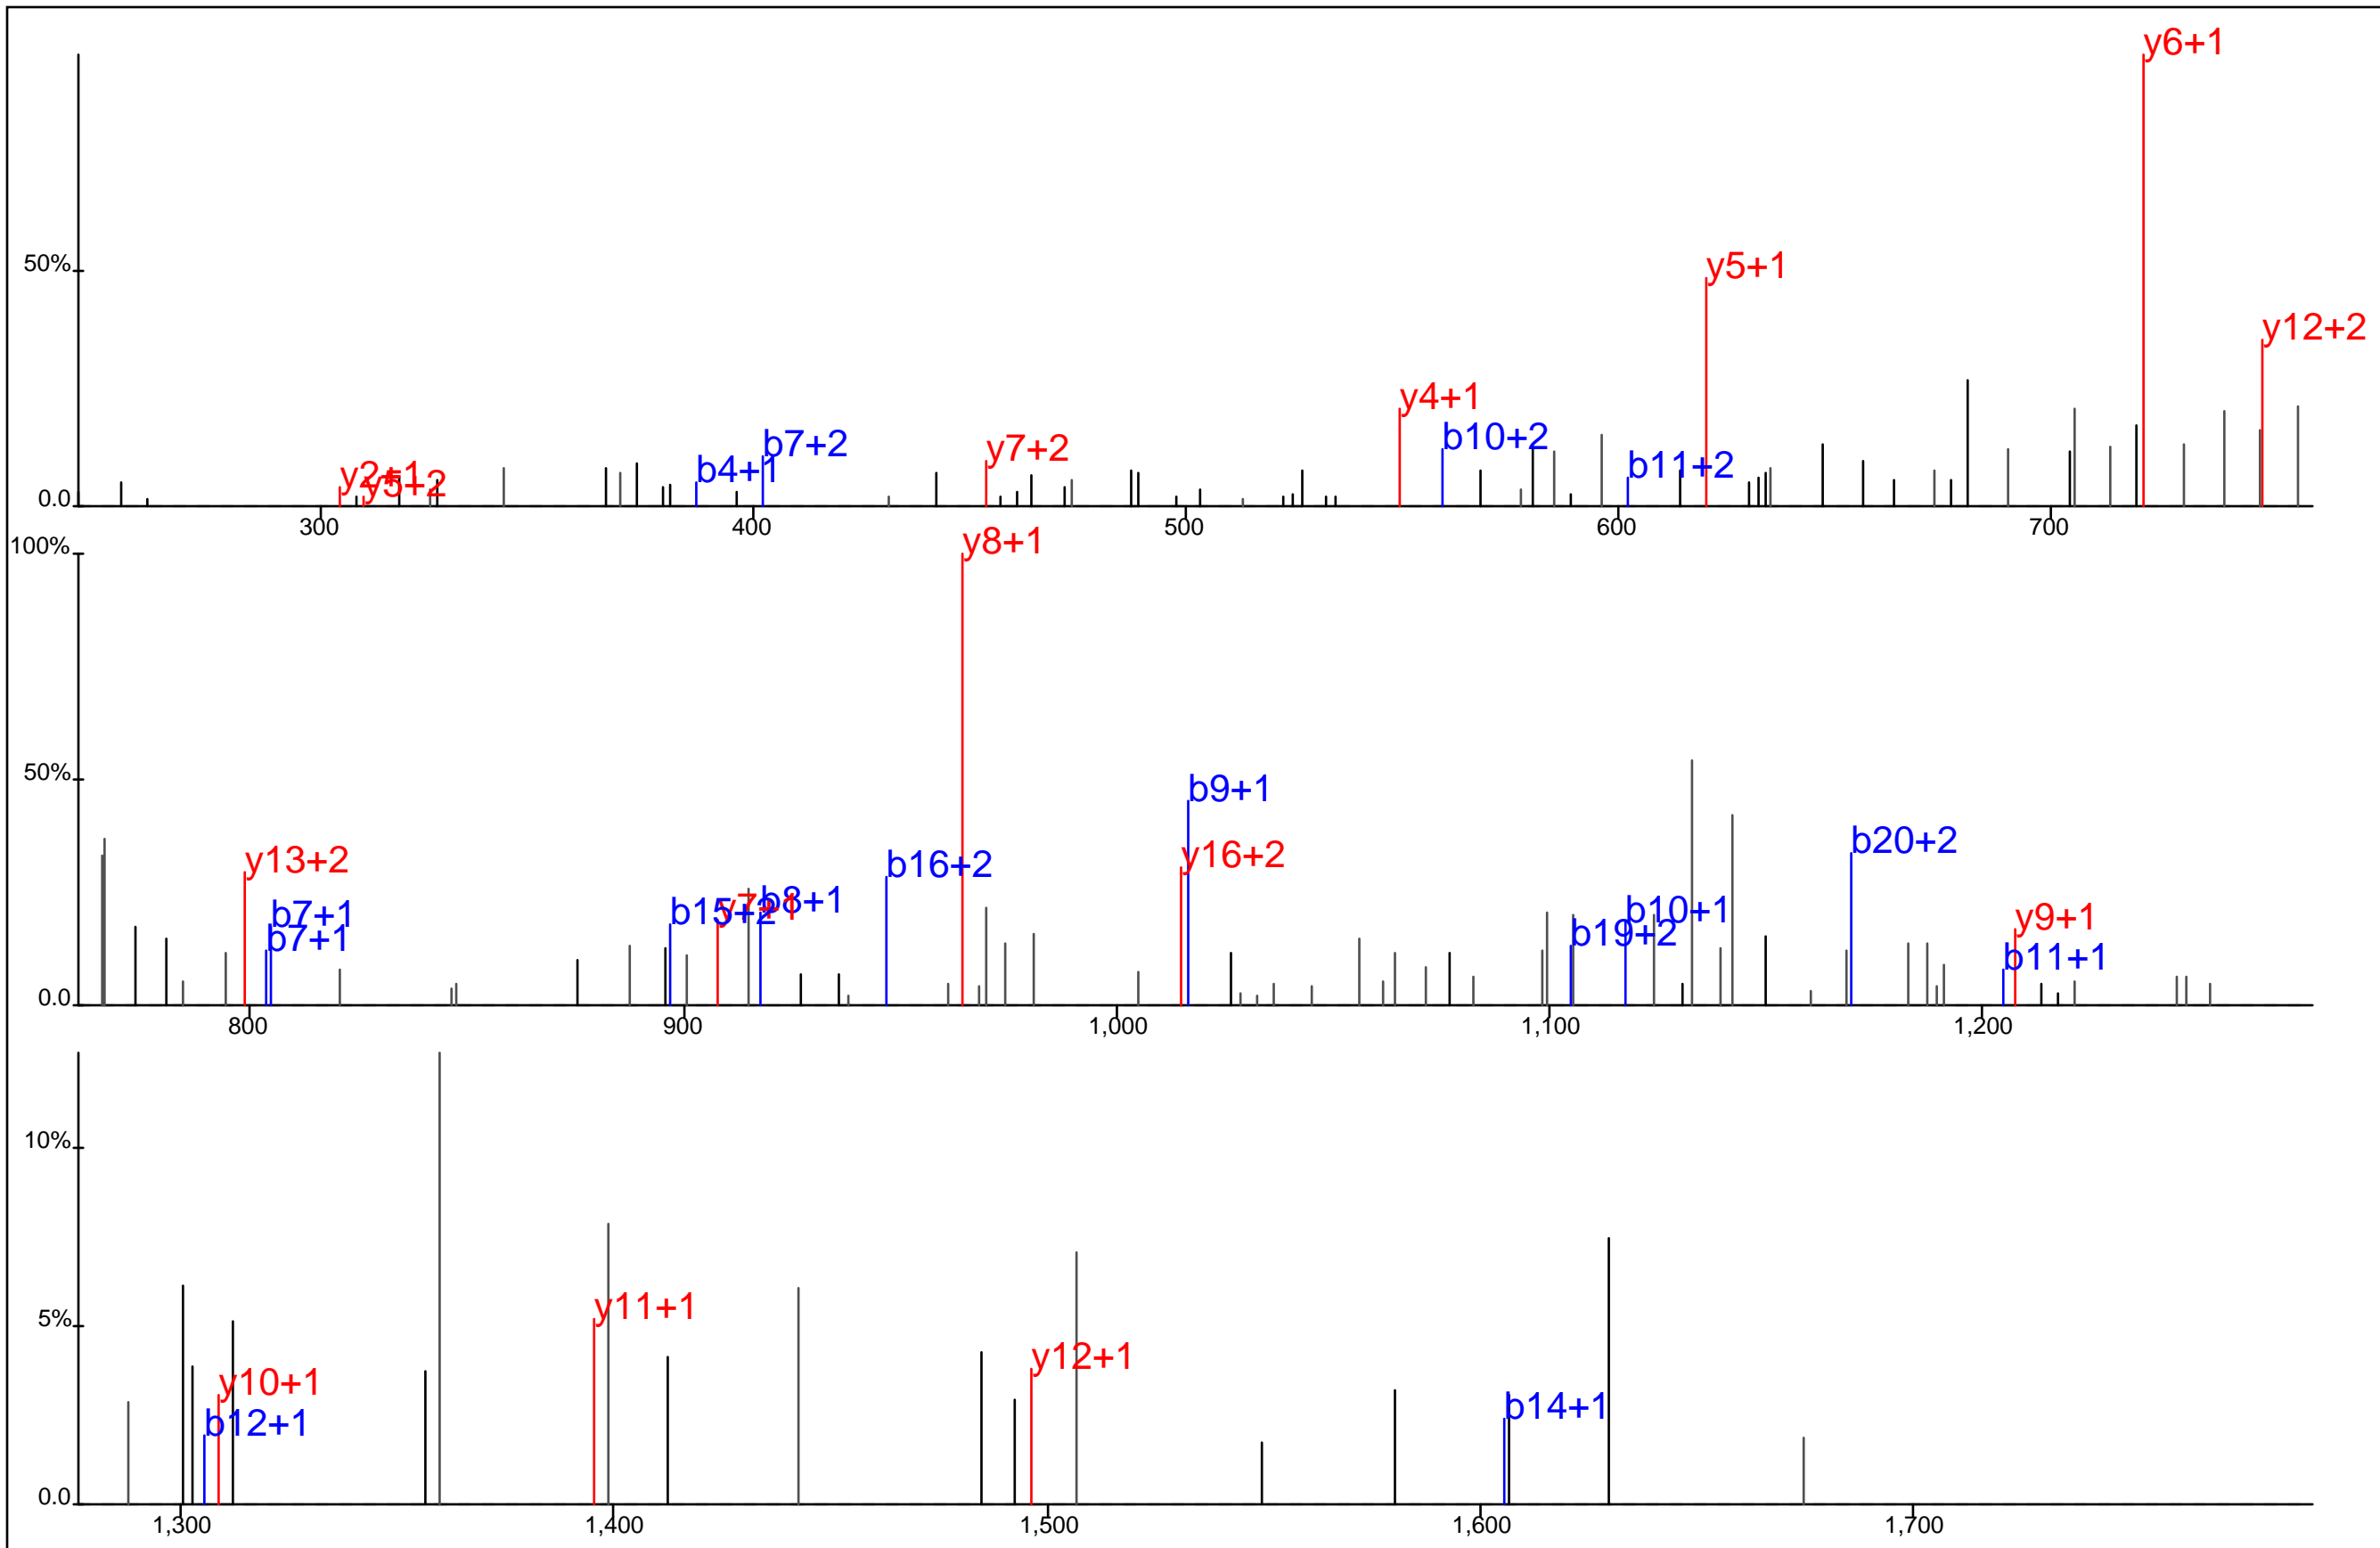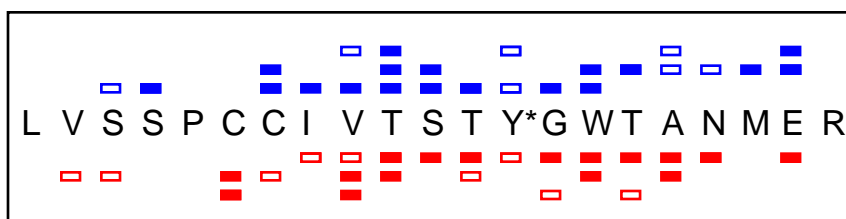

Protein Name: HSP90B  
 gi Accession: 0  
 Precursor Mass: 838.0308+3  
 Delta Mass: 2.896 ppm  
 XCorr: 30.33

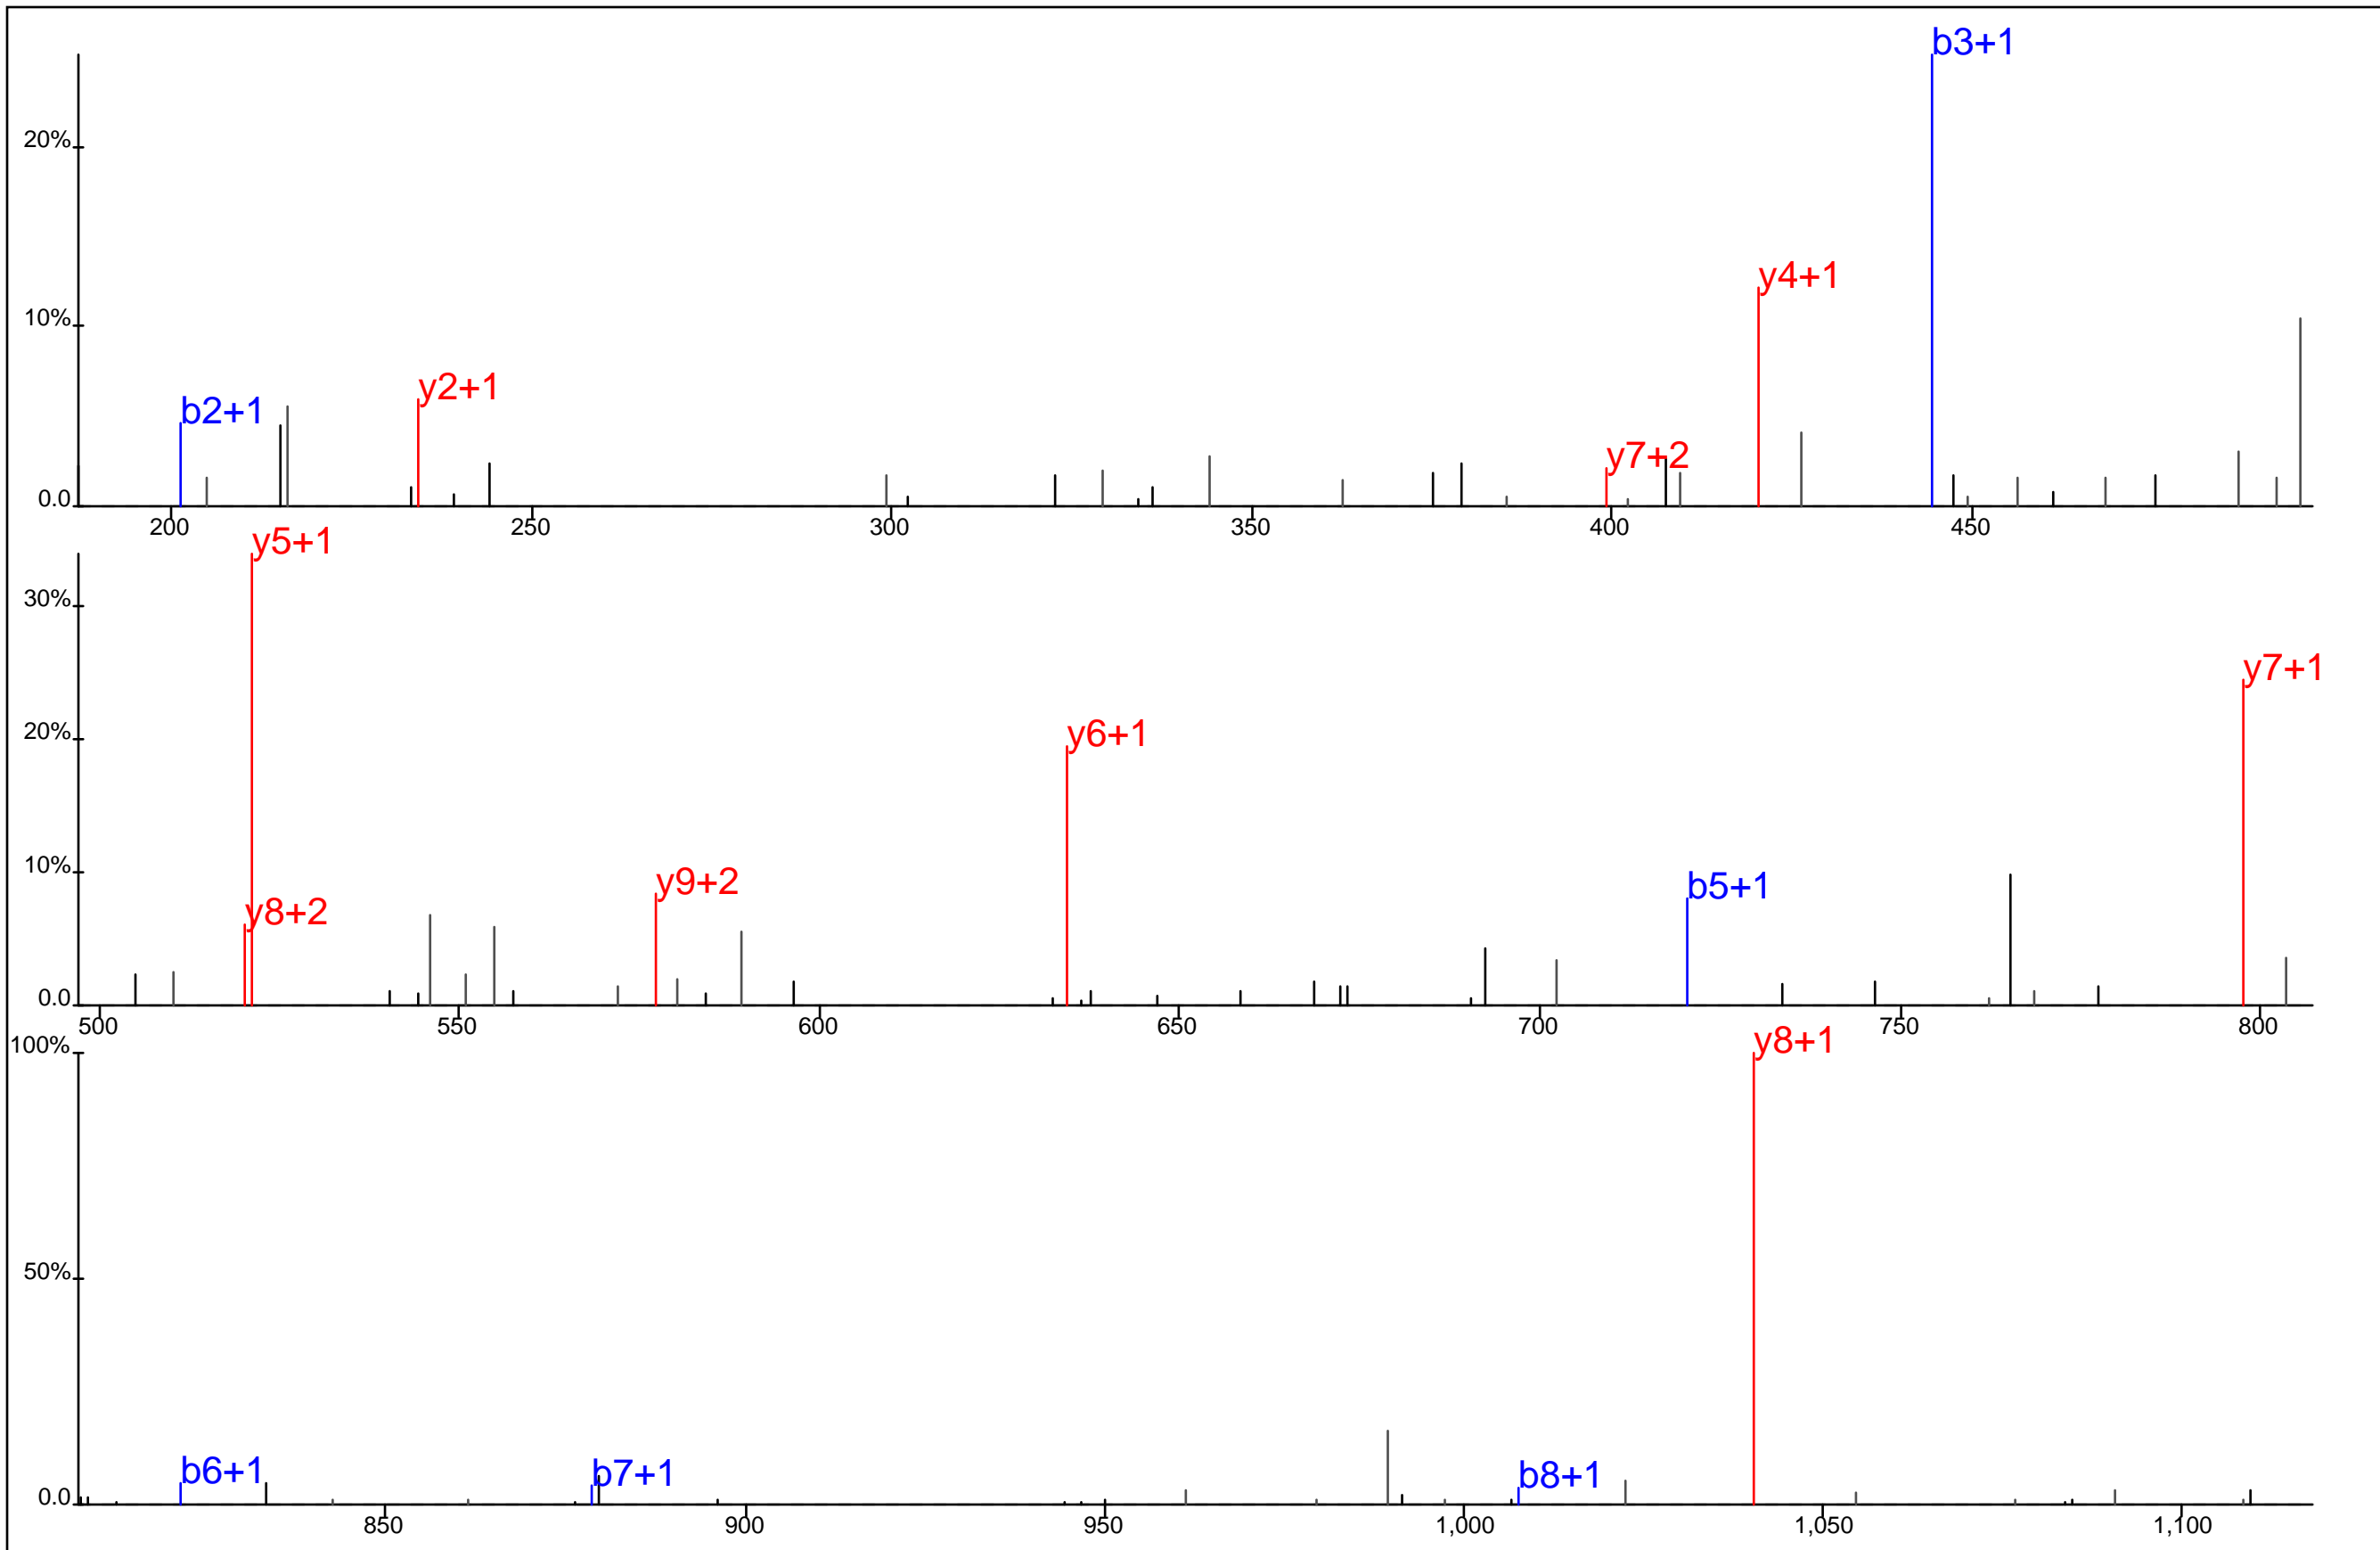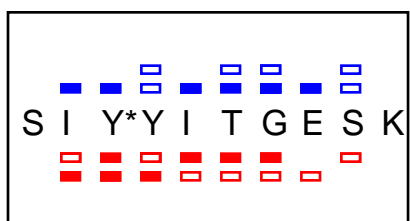

Protein Name: HSP90B  
 gi Accession: 0  
 Precursor Mass: 620.7823+2  
 Delta Mass: 6.239 ppm  
 XCorr: 38.63



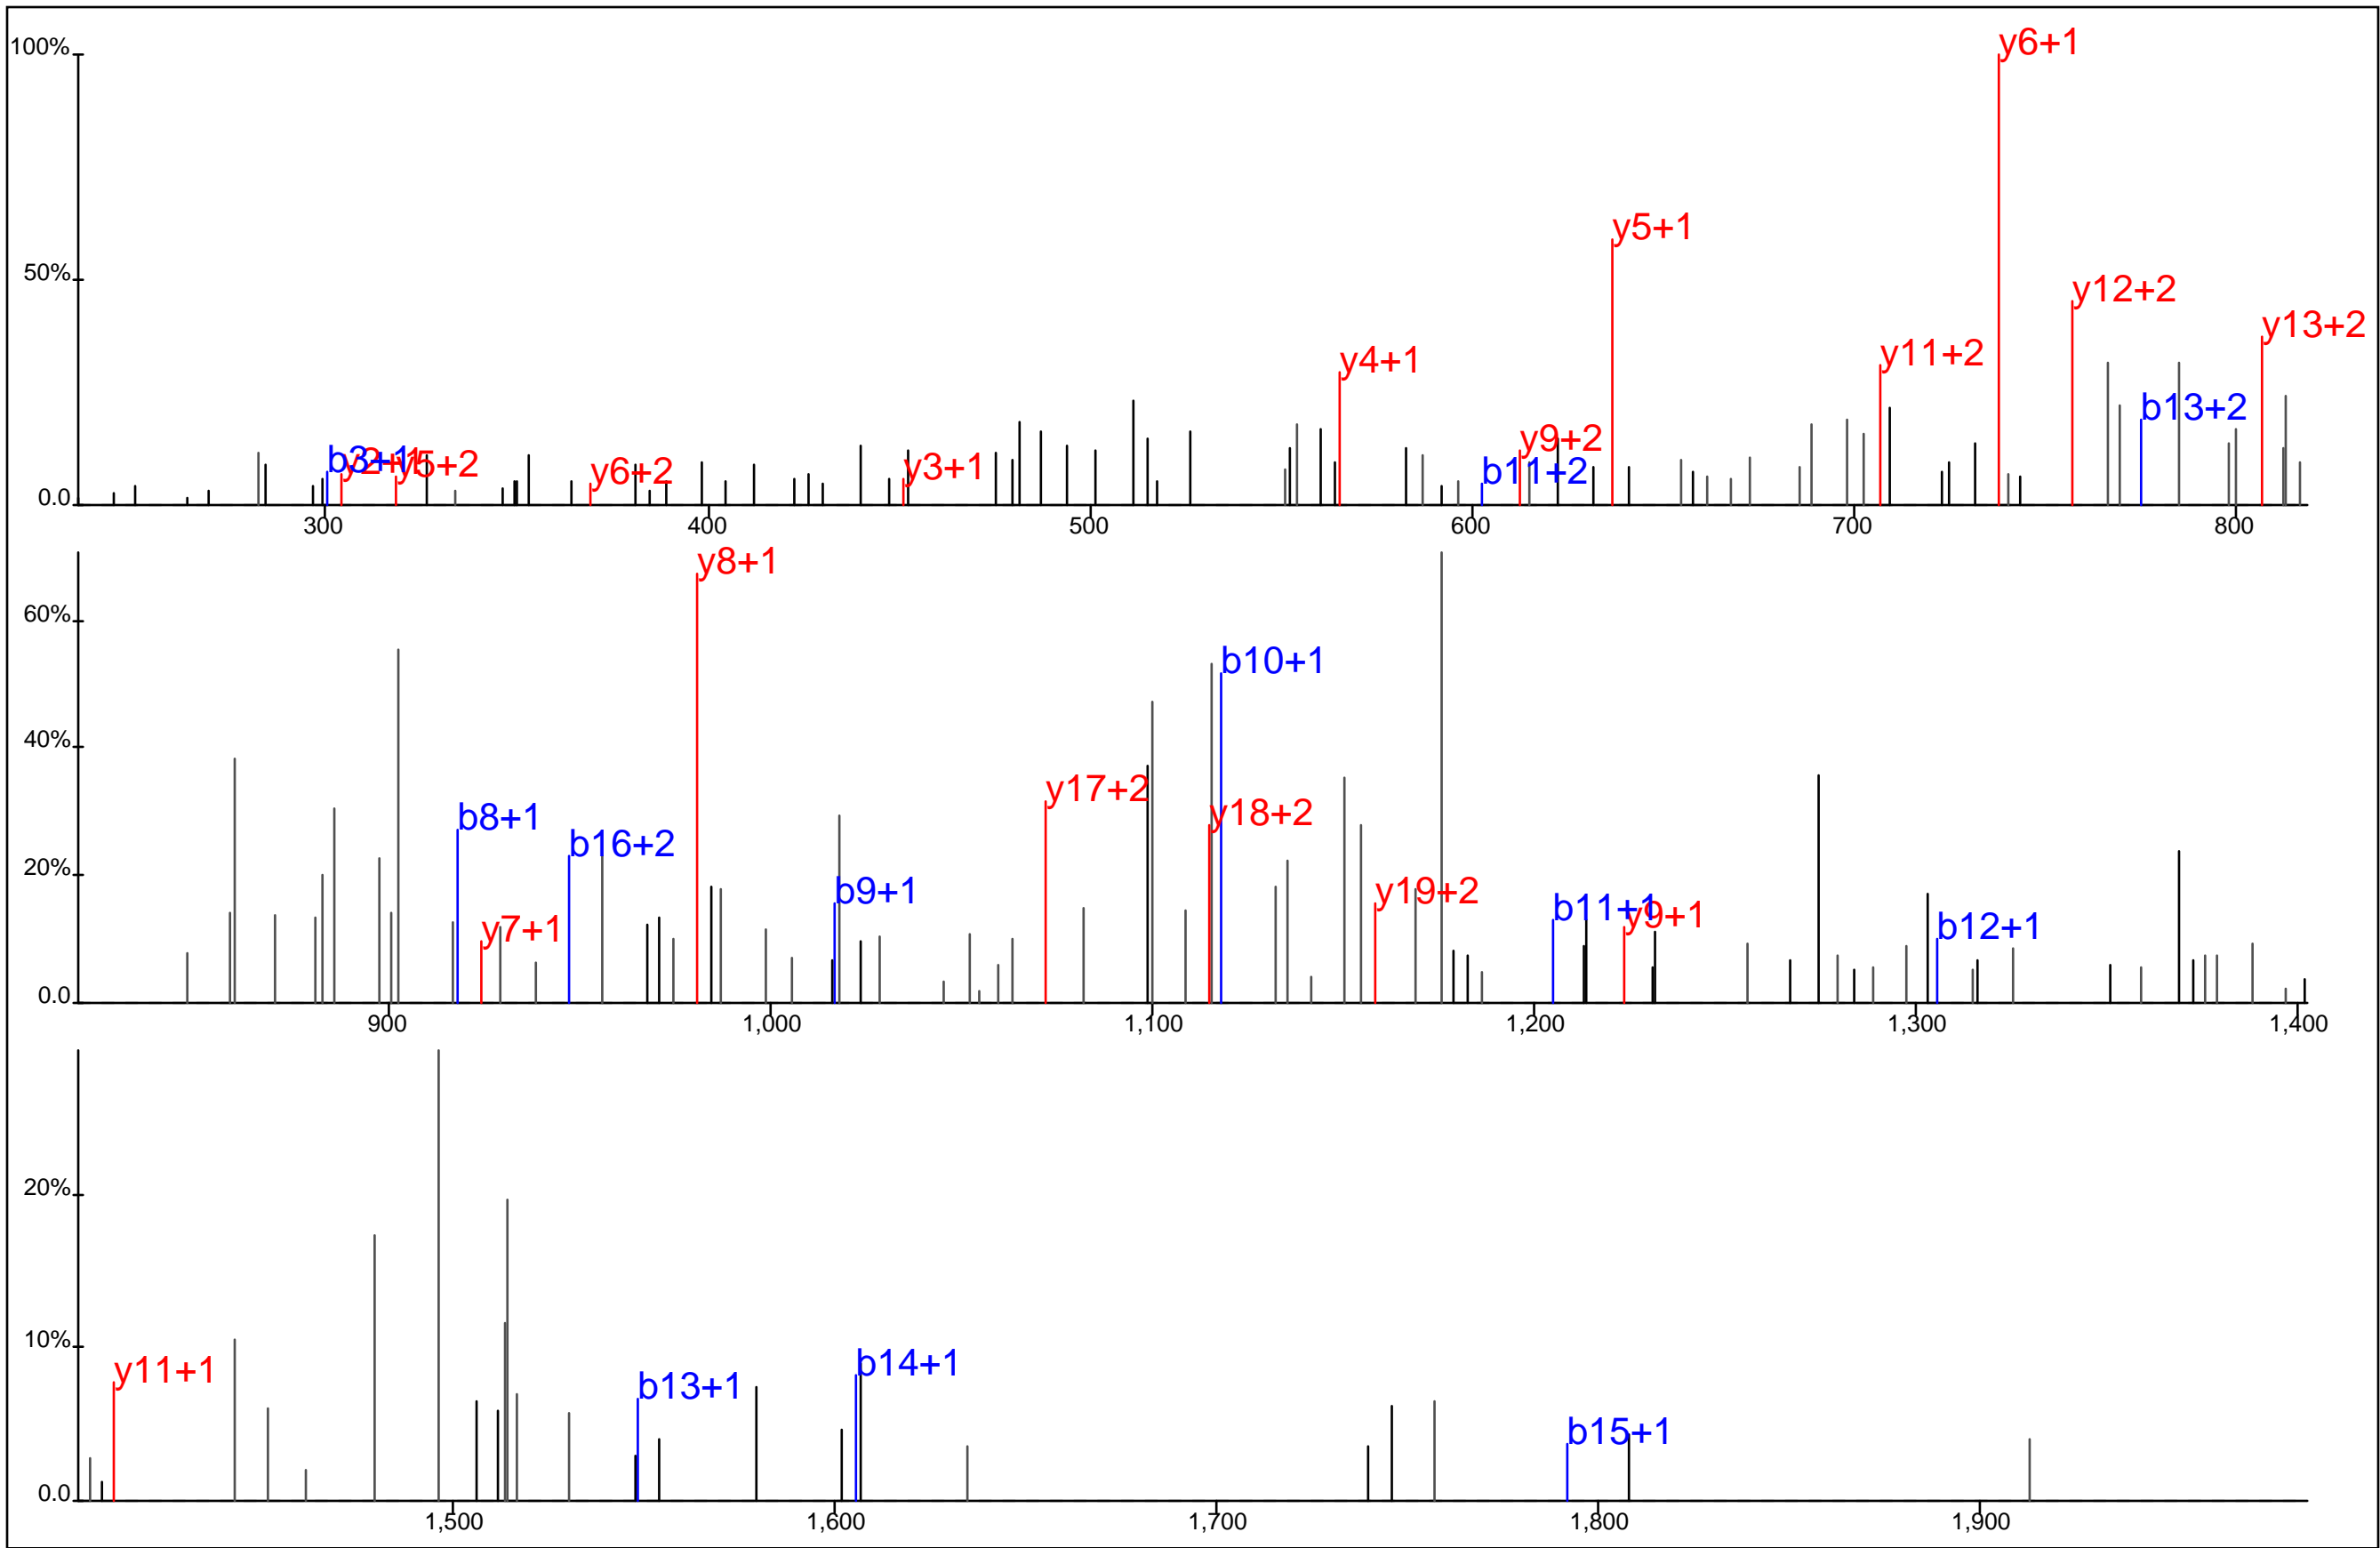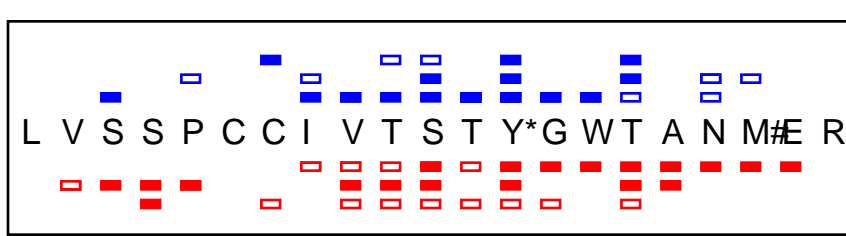

Protein Name: HSP90B  
 gi Accession: 0  
 Precursor Mass: 843.3586+3  
 Delta Mass: 1.655 ppm  
 XCorr: 21.98

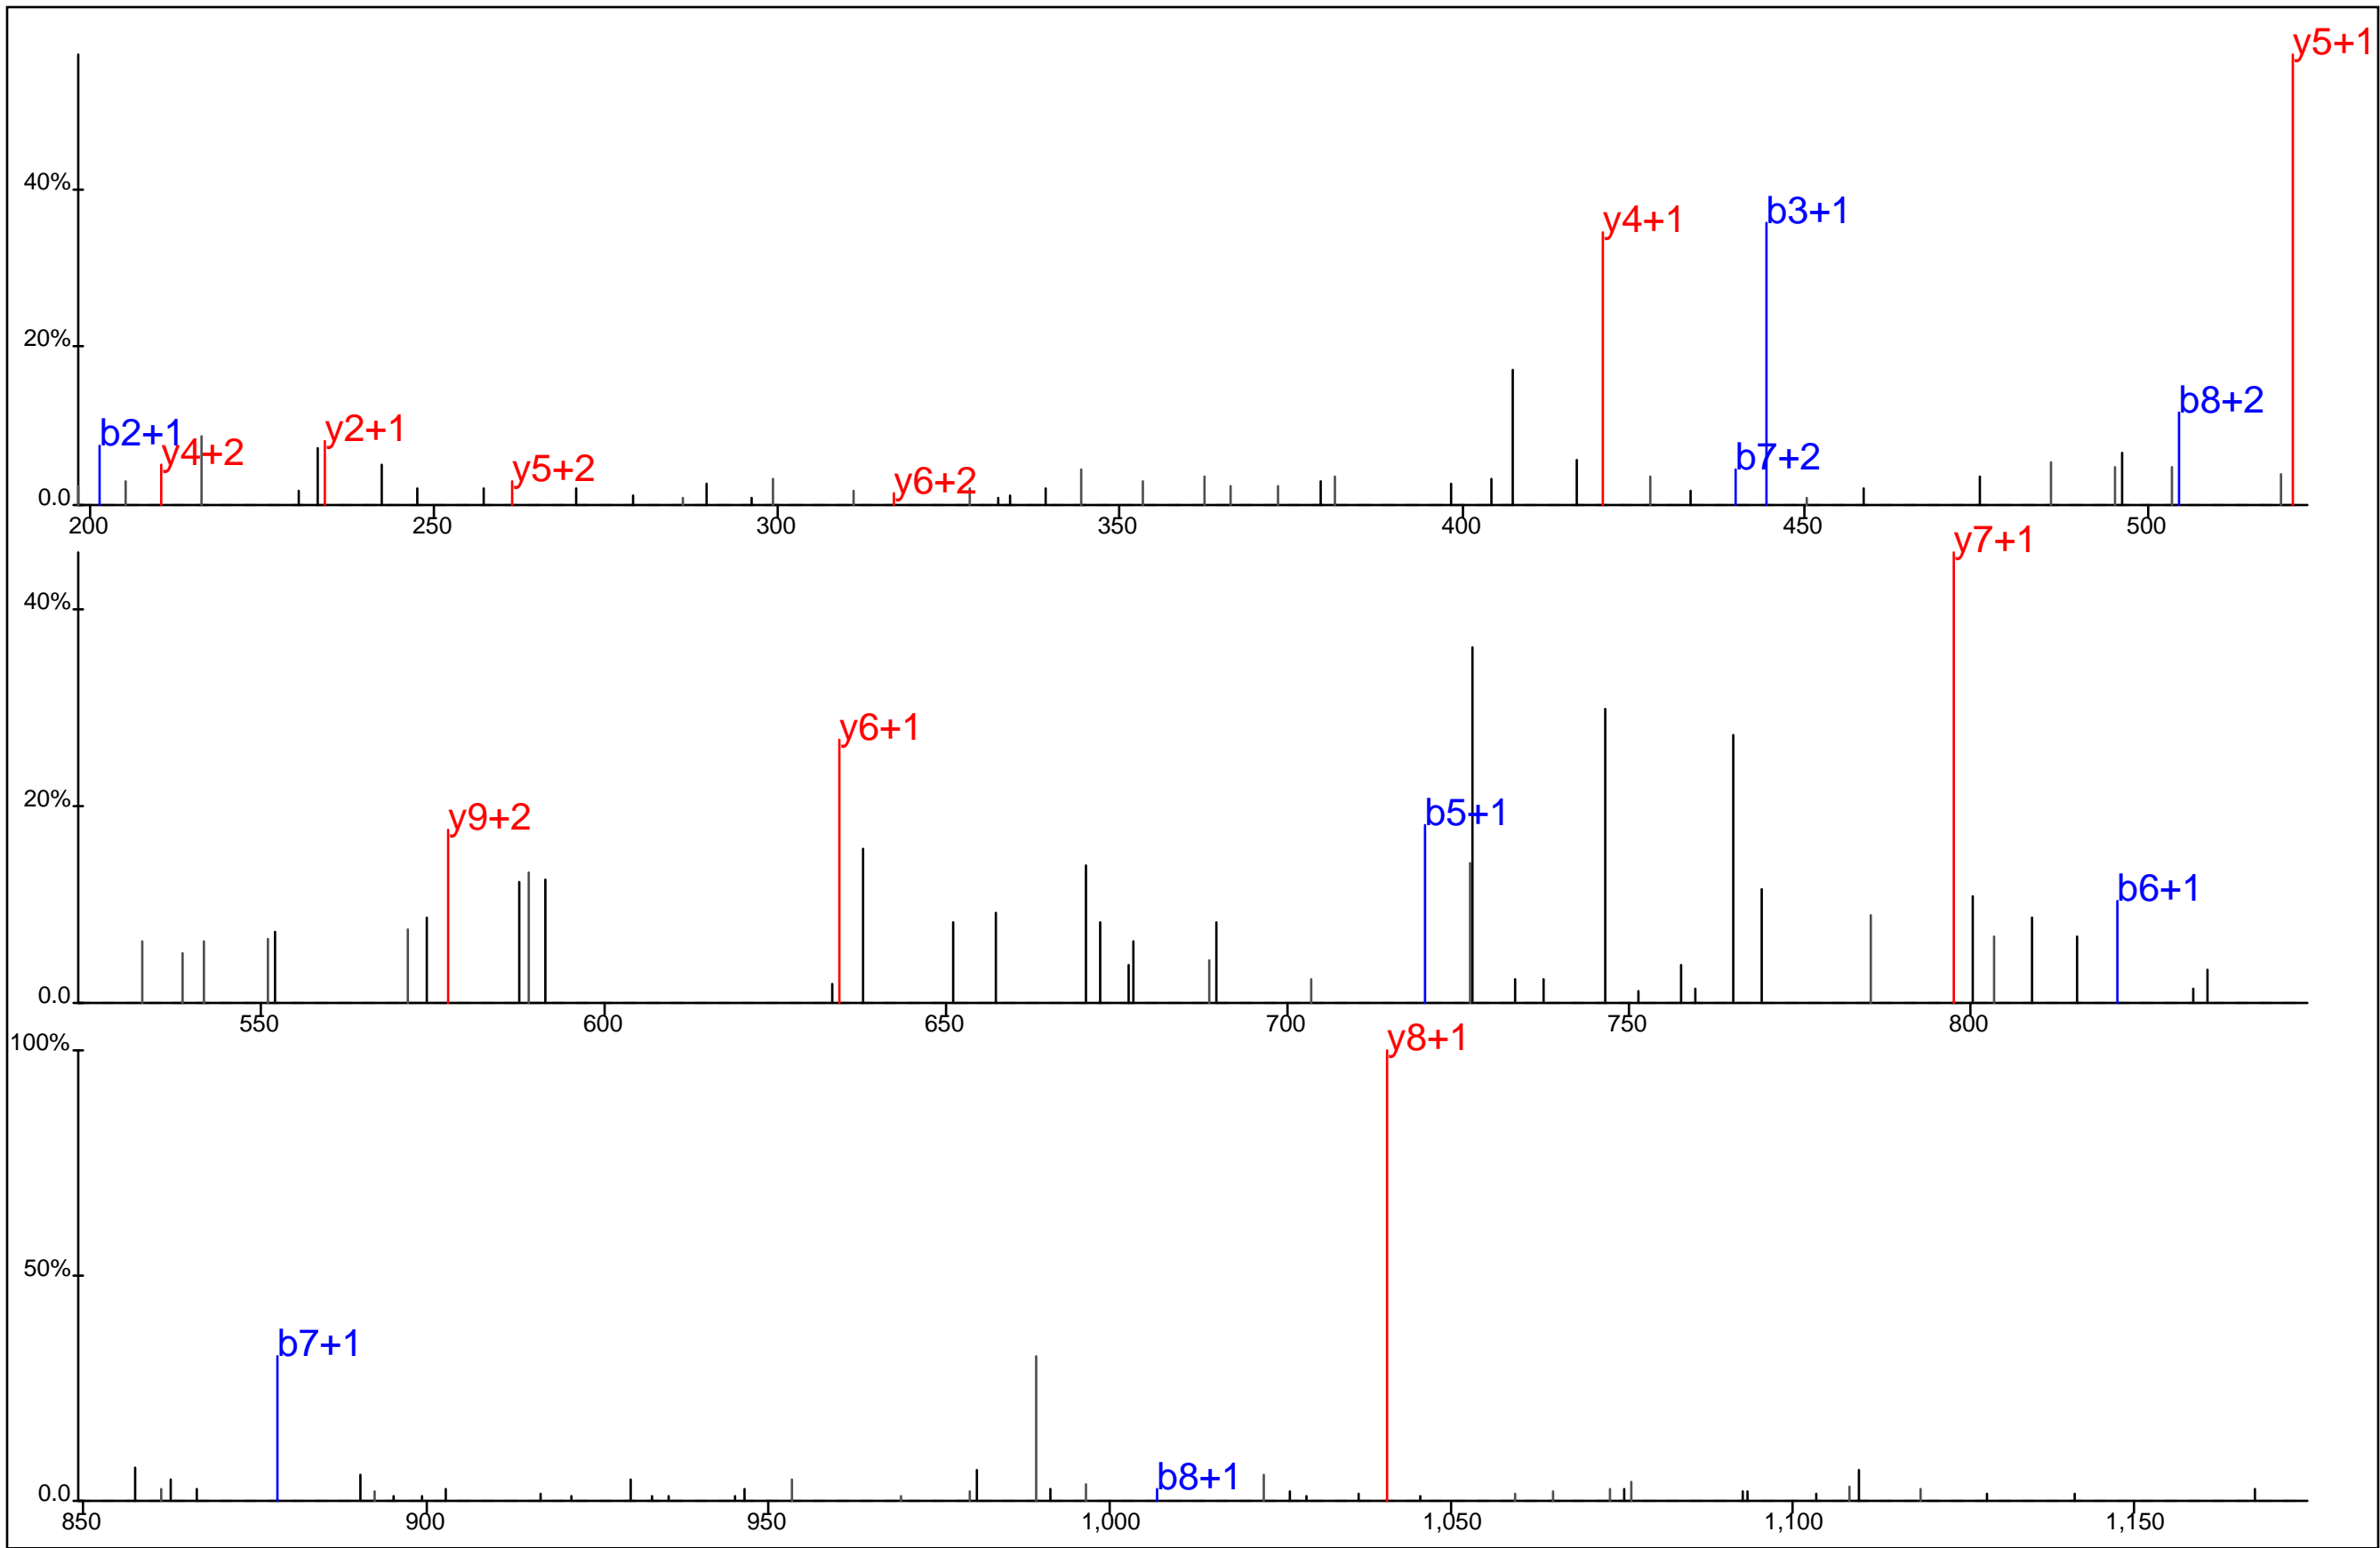

■ ▢ ▣ ■ ▢ ▣ ■ ▢ ▣  
 S I Y\*Y I T G E S K  
▢ ▣ ▢ ▣ ▢ ▣ ▢

Protein Name: HSP90B  
 gi Accession: 0  
 Precursor Mass: 620.7808+2  
 Delta Mass: 3.681 ppm  
 XCorr: 35.07

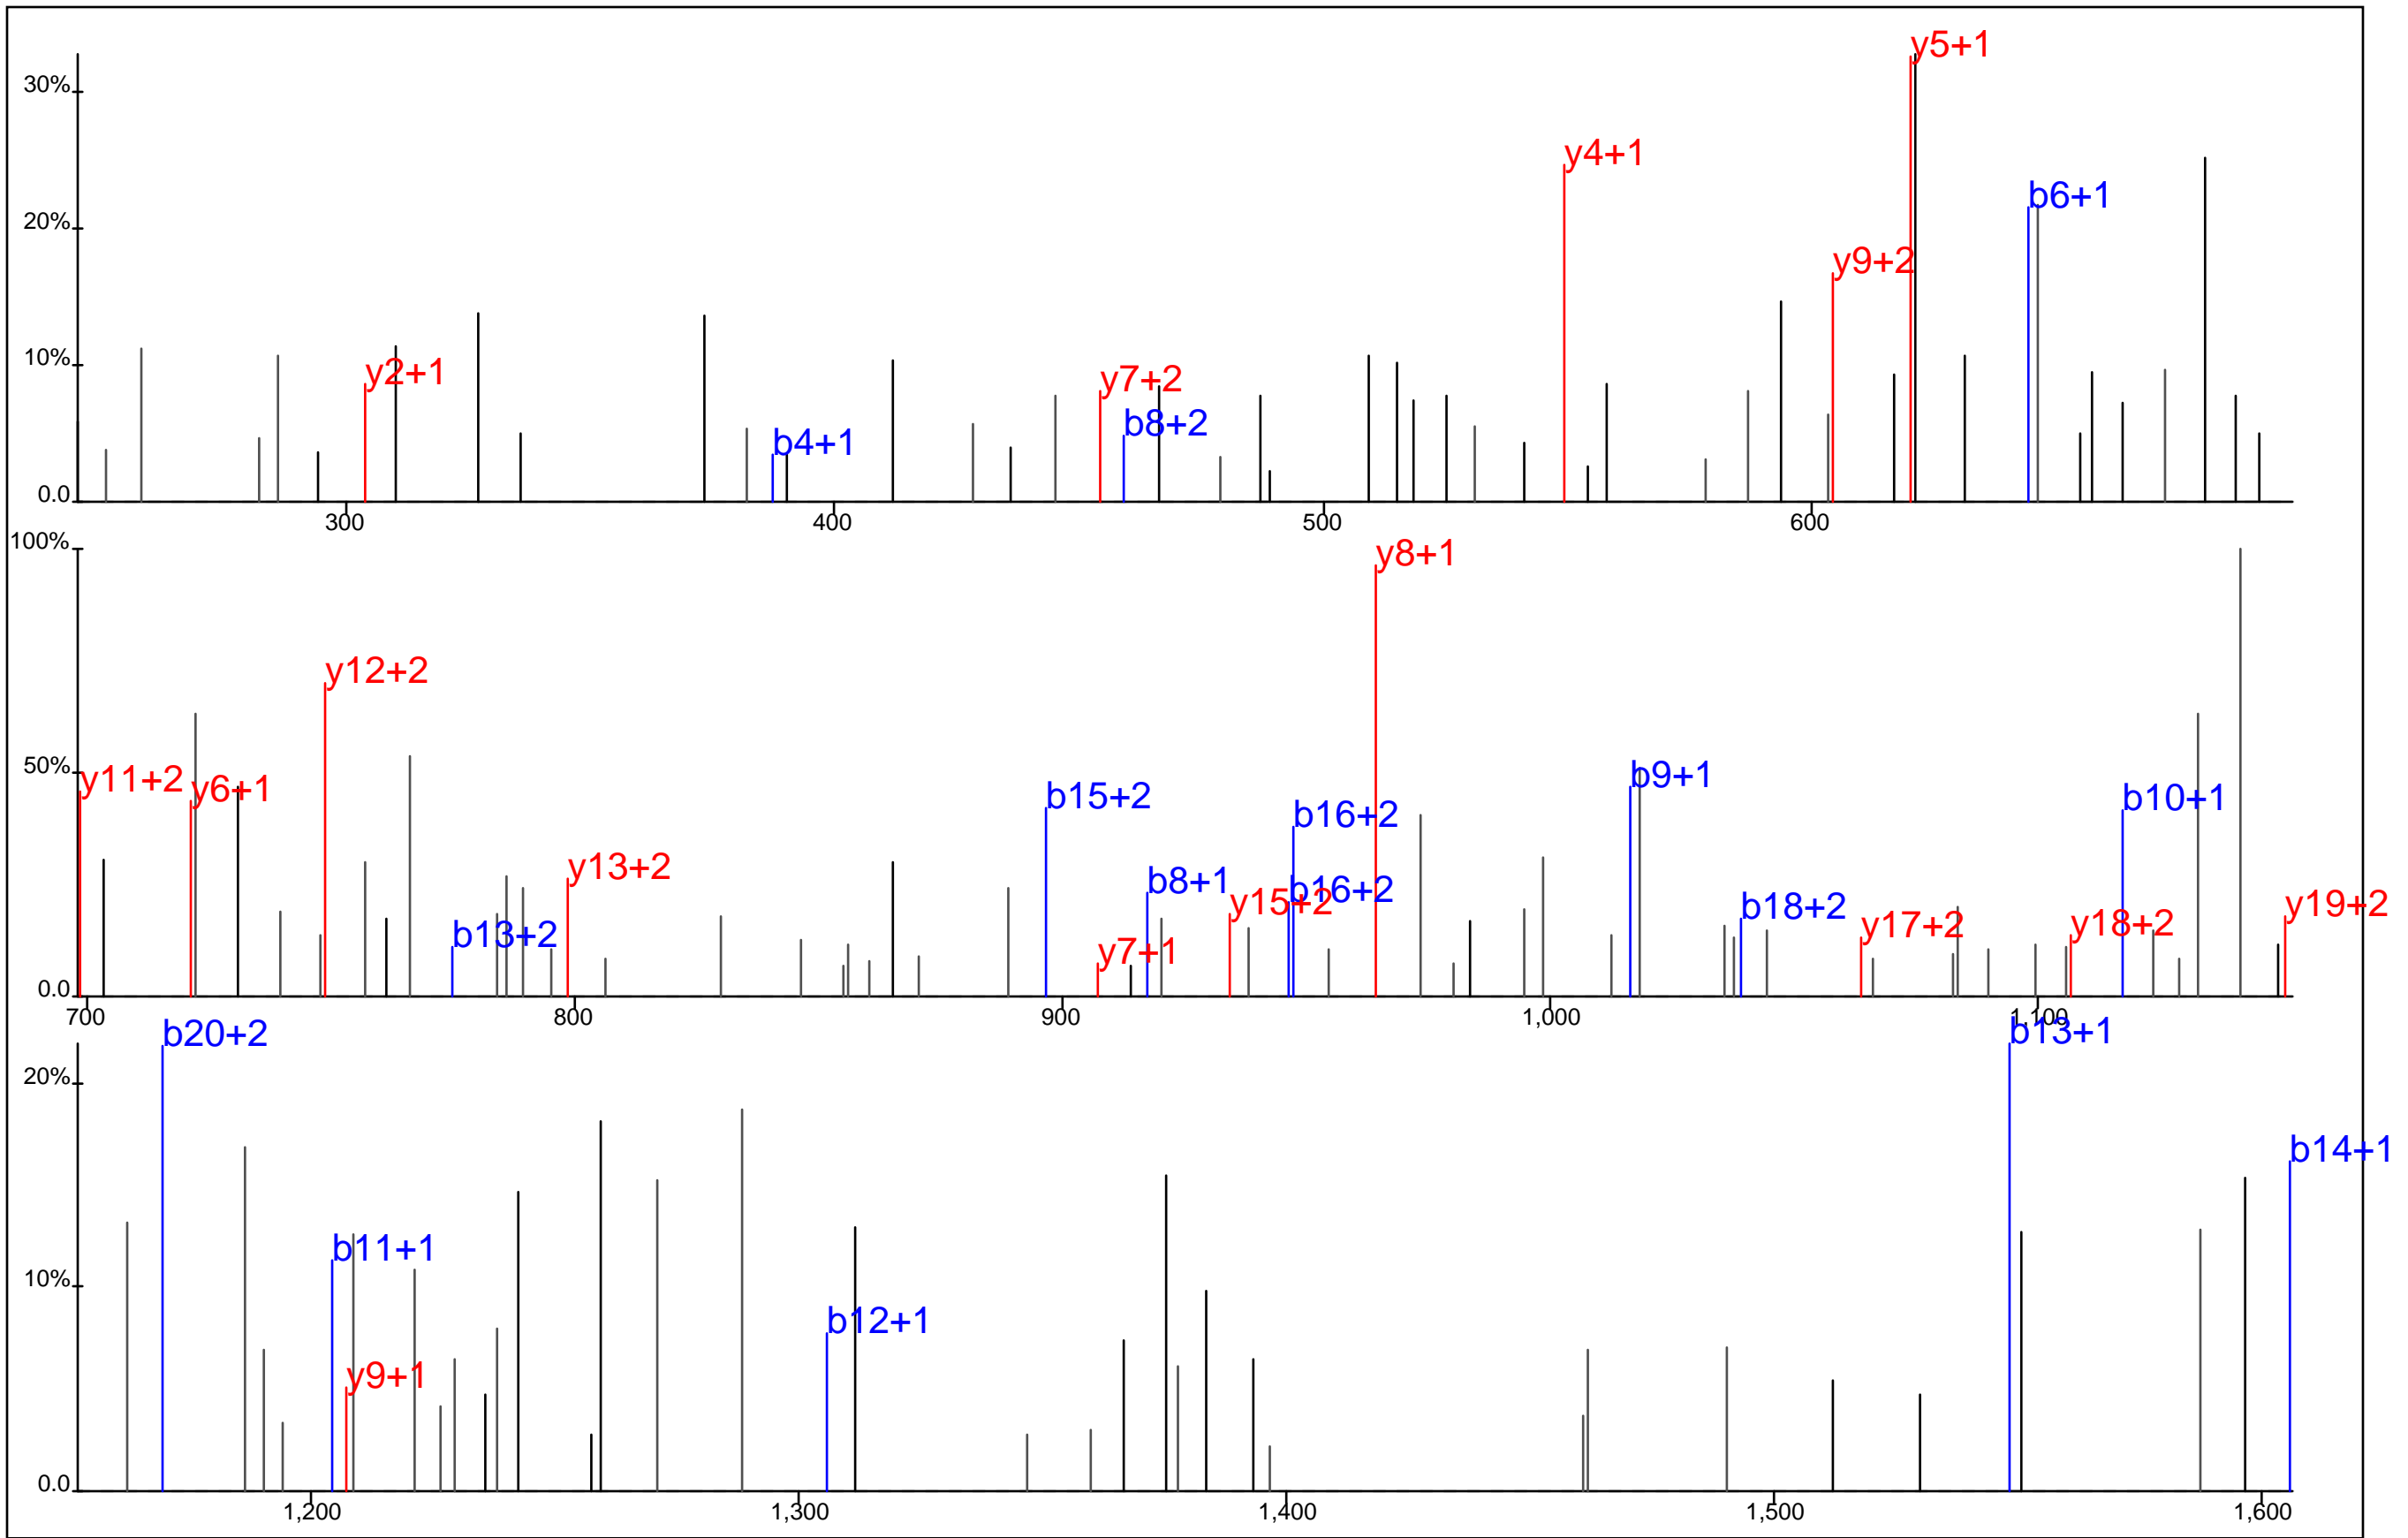

L V S S P C C I V T S T Y\*G W T A N M E R  
 - - - - - - - - - - - - - - - - - - - -  
 - - - - - - - - - - - - - - - - - - - -  
 - - - - - - - - - - - - - - - - - - - -

Protein Name: HSP90B  
 gi Accession: 0  
 Precursor Mass: 838.0282+3  
 Delta Mass: 0.239 ppm  
 XCorr: 36.48

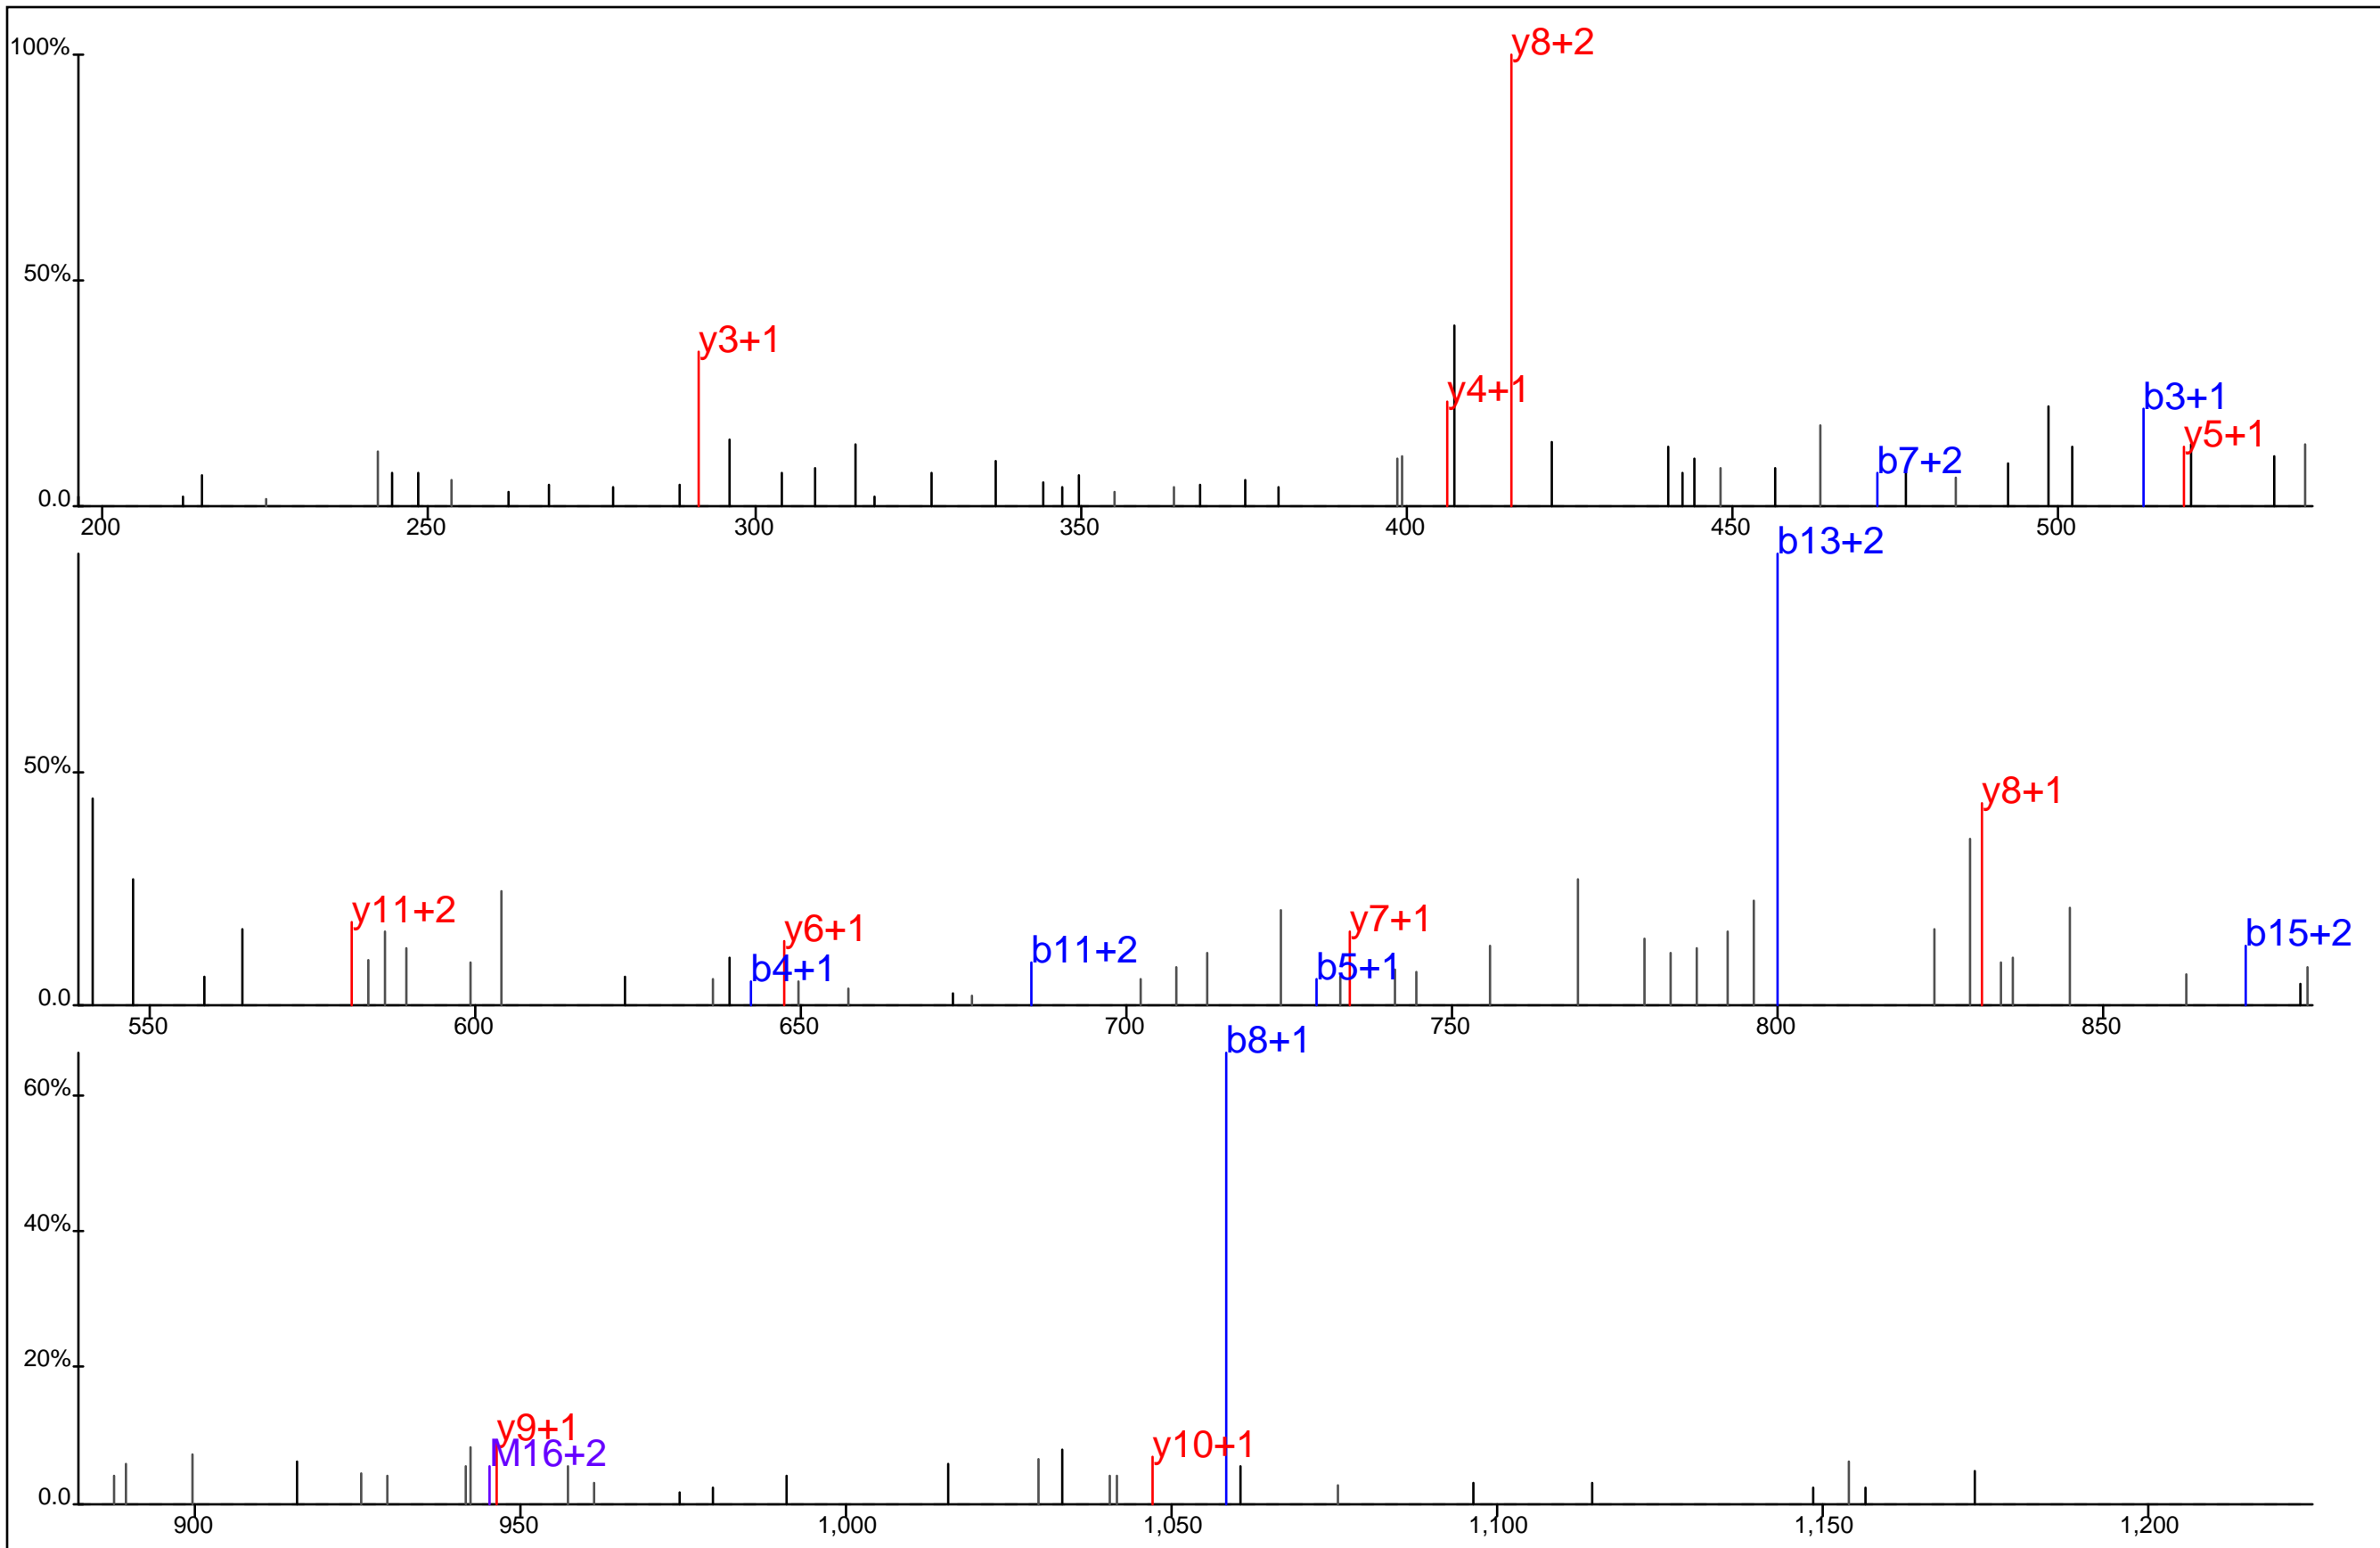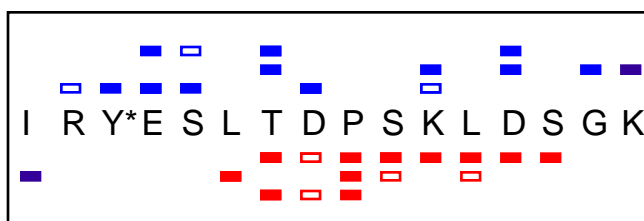

Protein Name: HSP90B  
 gi Accession: 0  
 Precursor Mass: 630.3084+3  
 Delta Mass: 2.922 ppm  
 XCorr: 22.12

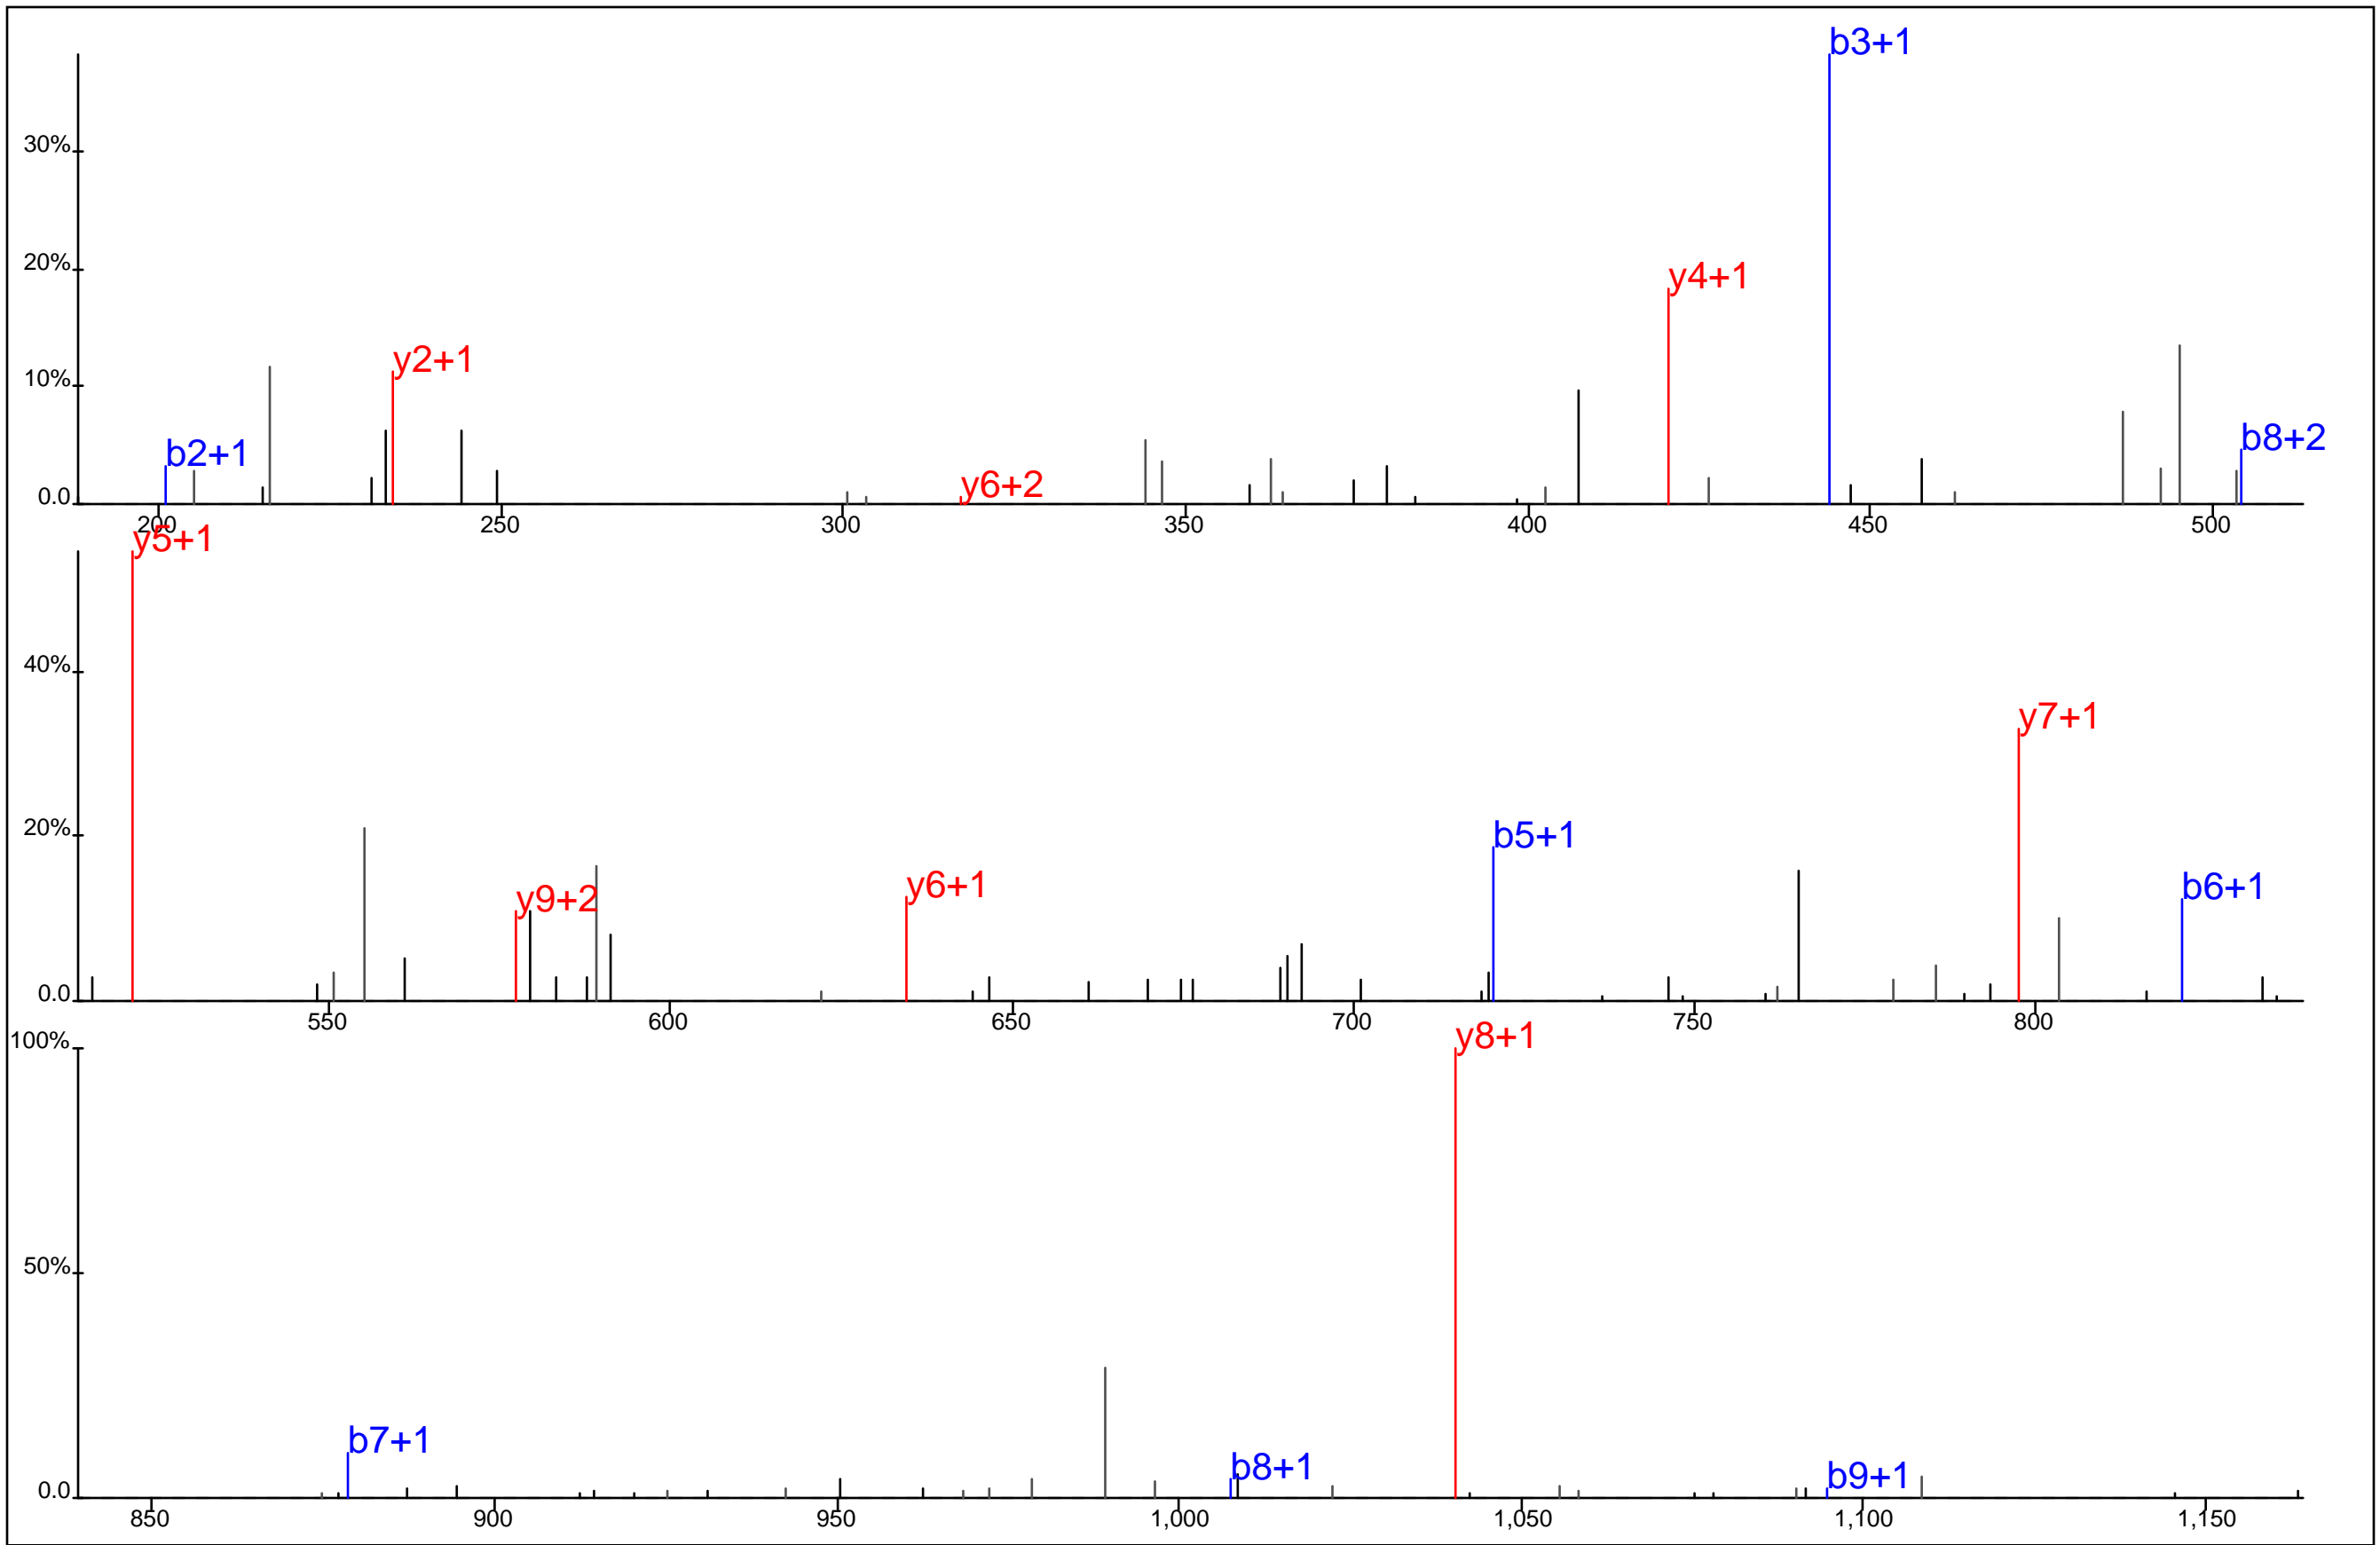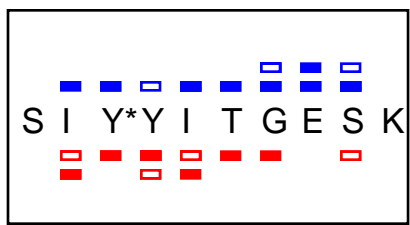

Protein Name: HSP90B  
 gi Accession: 0  
 Precursor Mass: 620.7823+2  
 Delta Mass: 6.239 ppm  
 XCorr: 38.17

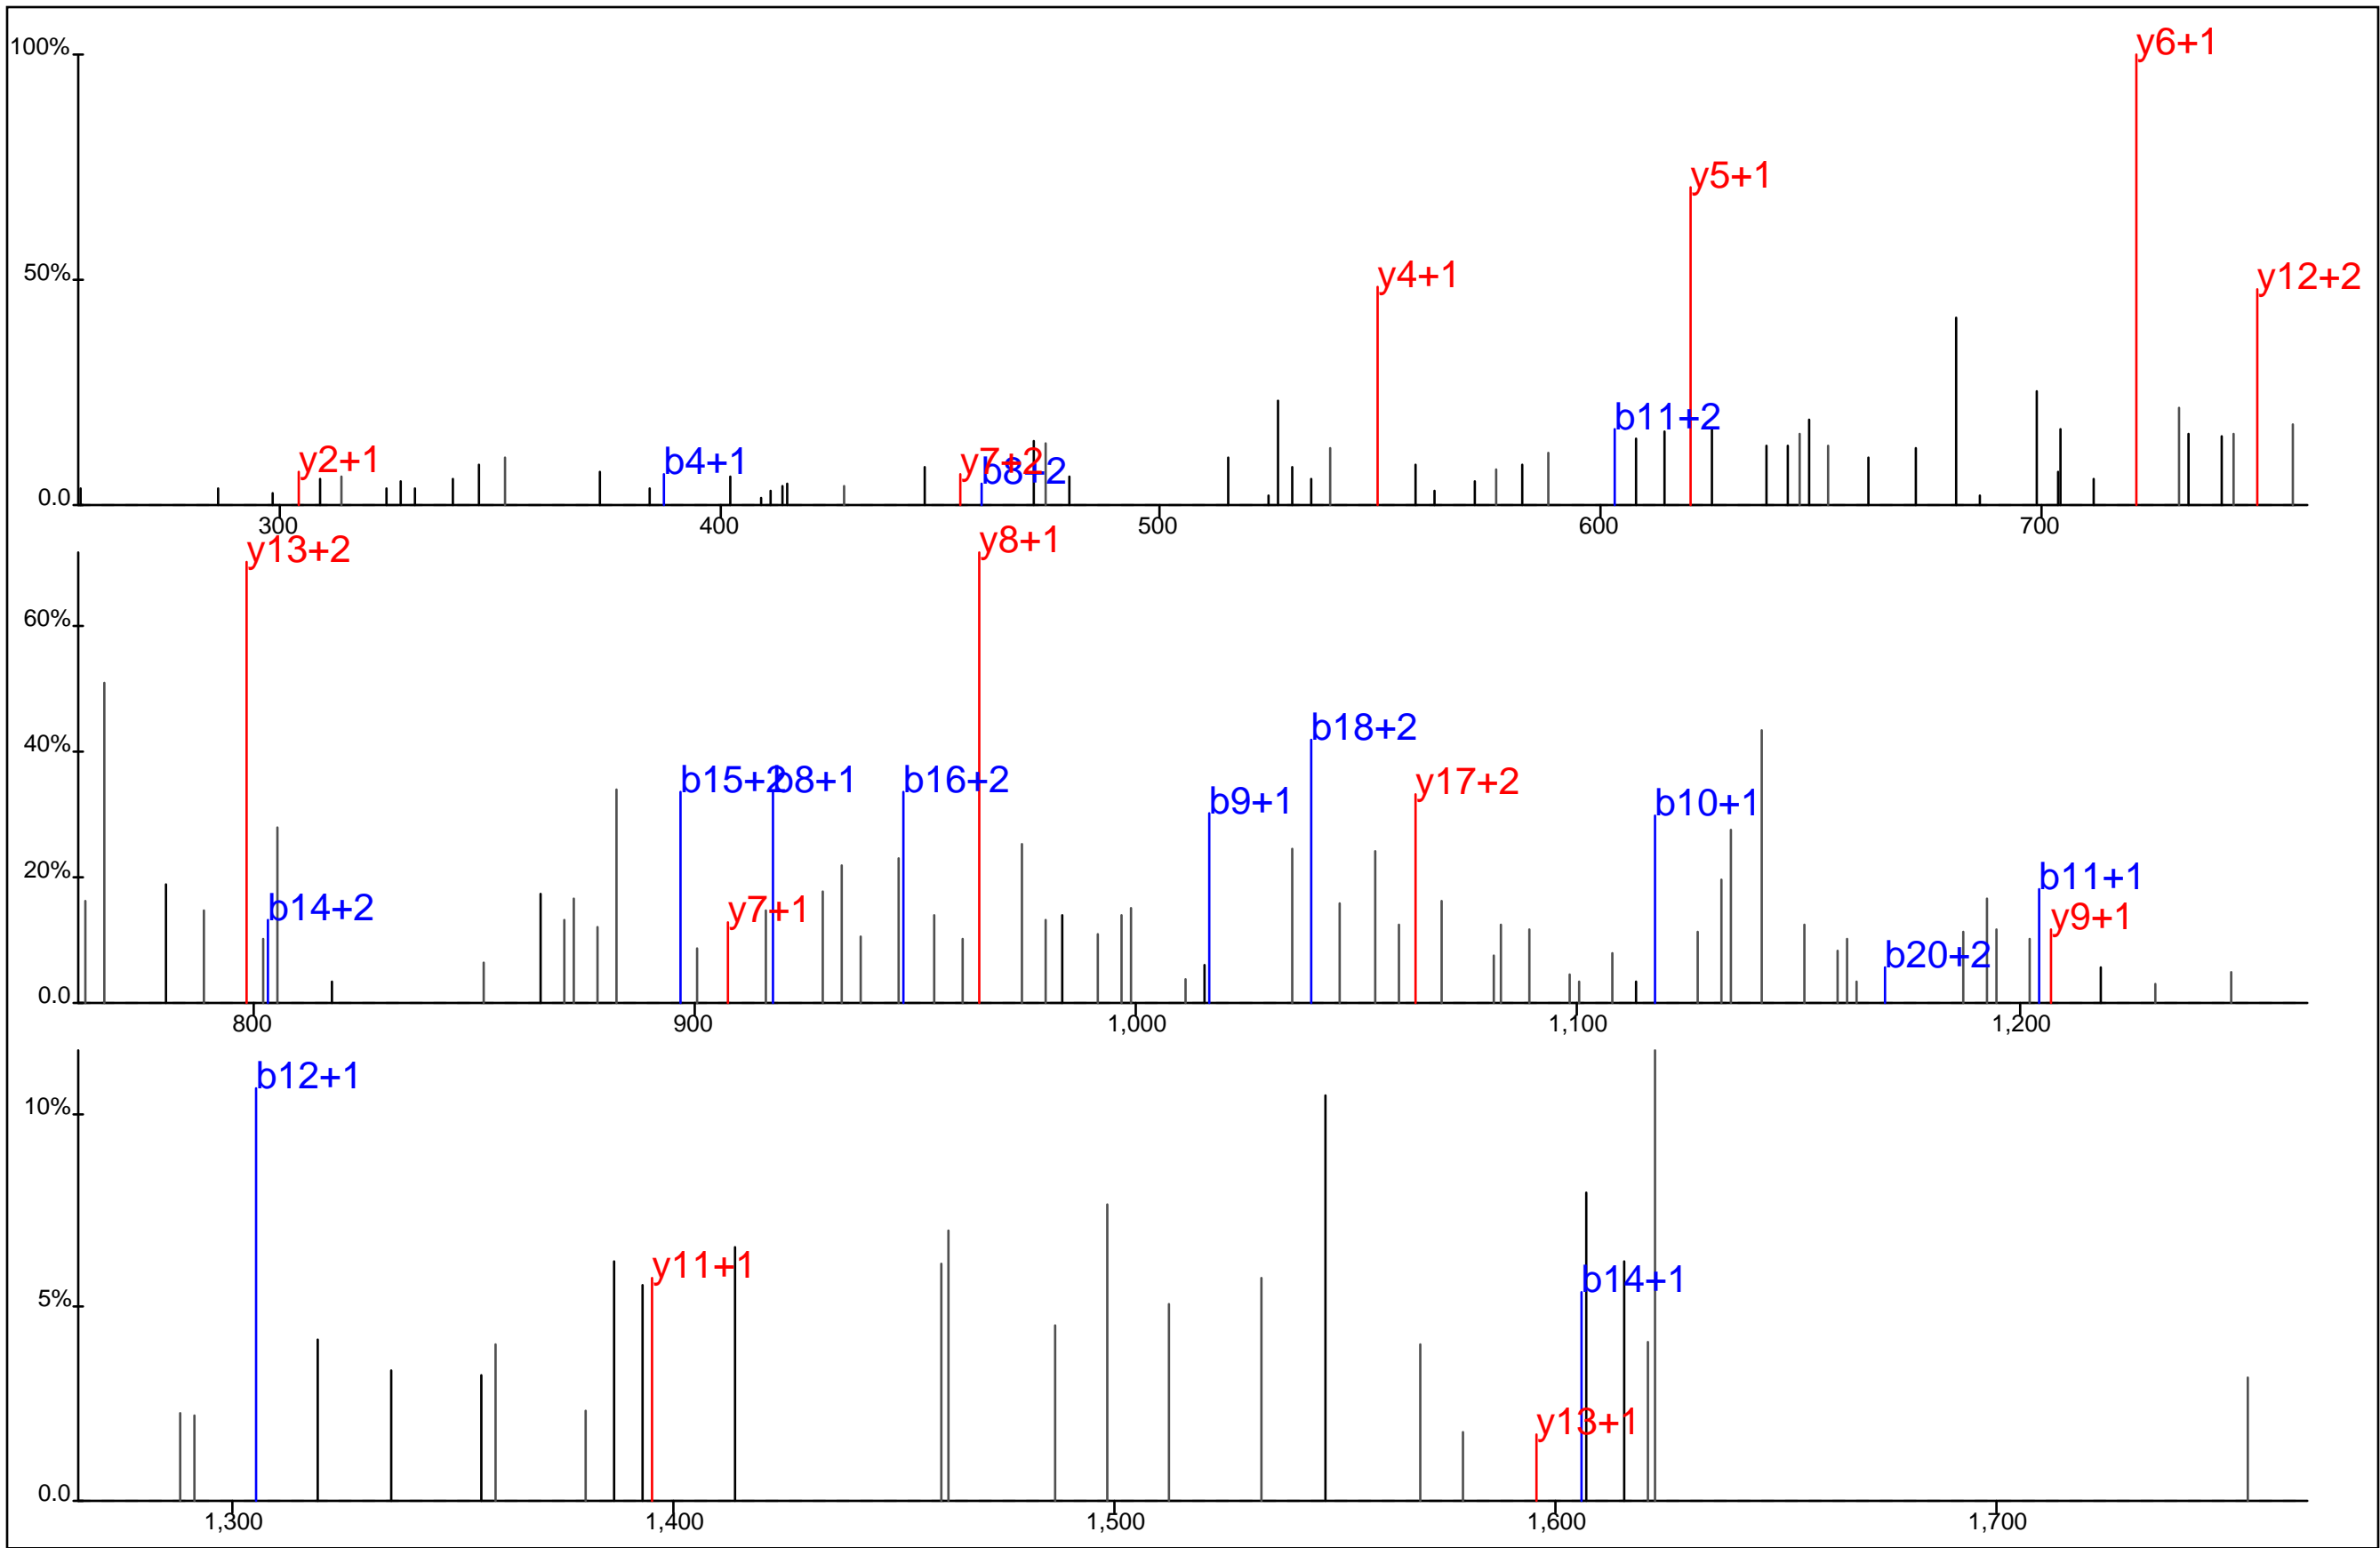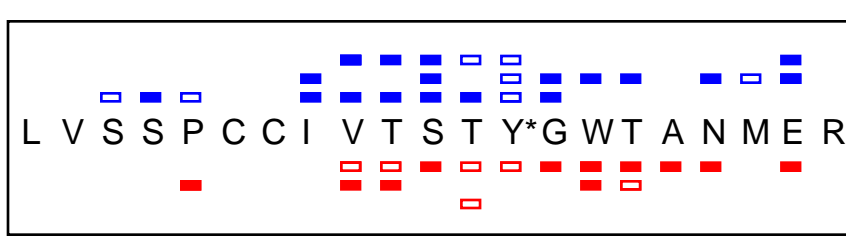

Protein Name: HSP90B  
 gi Accession: 0  
 Precursor Mass: 838.0272+3  
 Delta Mass: 1.477 ppm  
 XCorr: 30.51

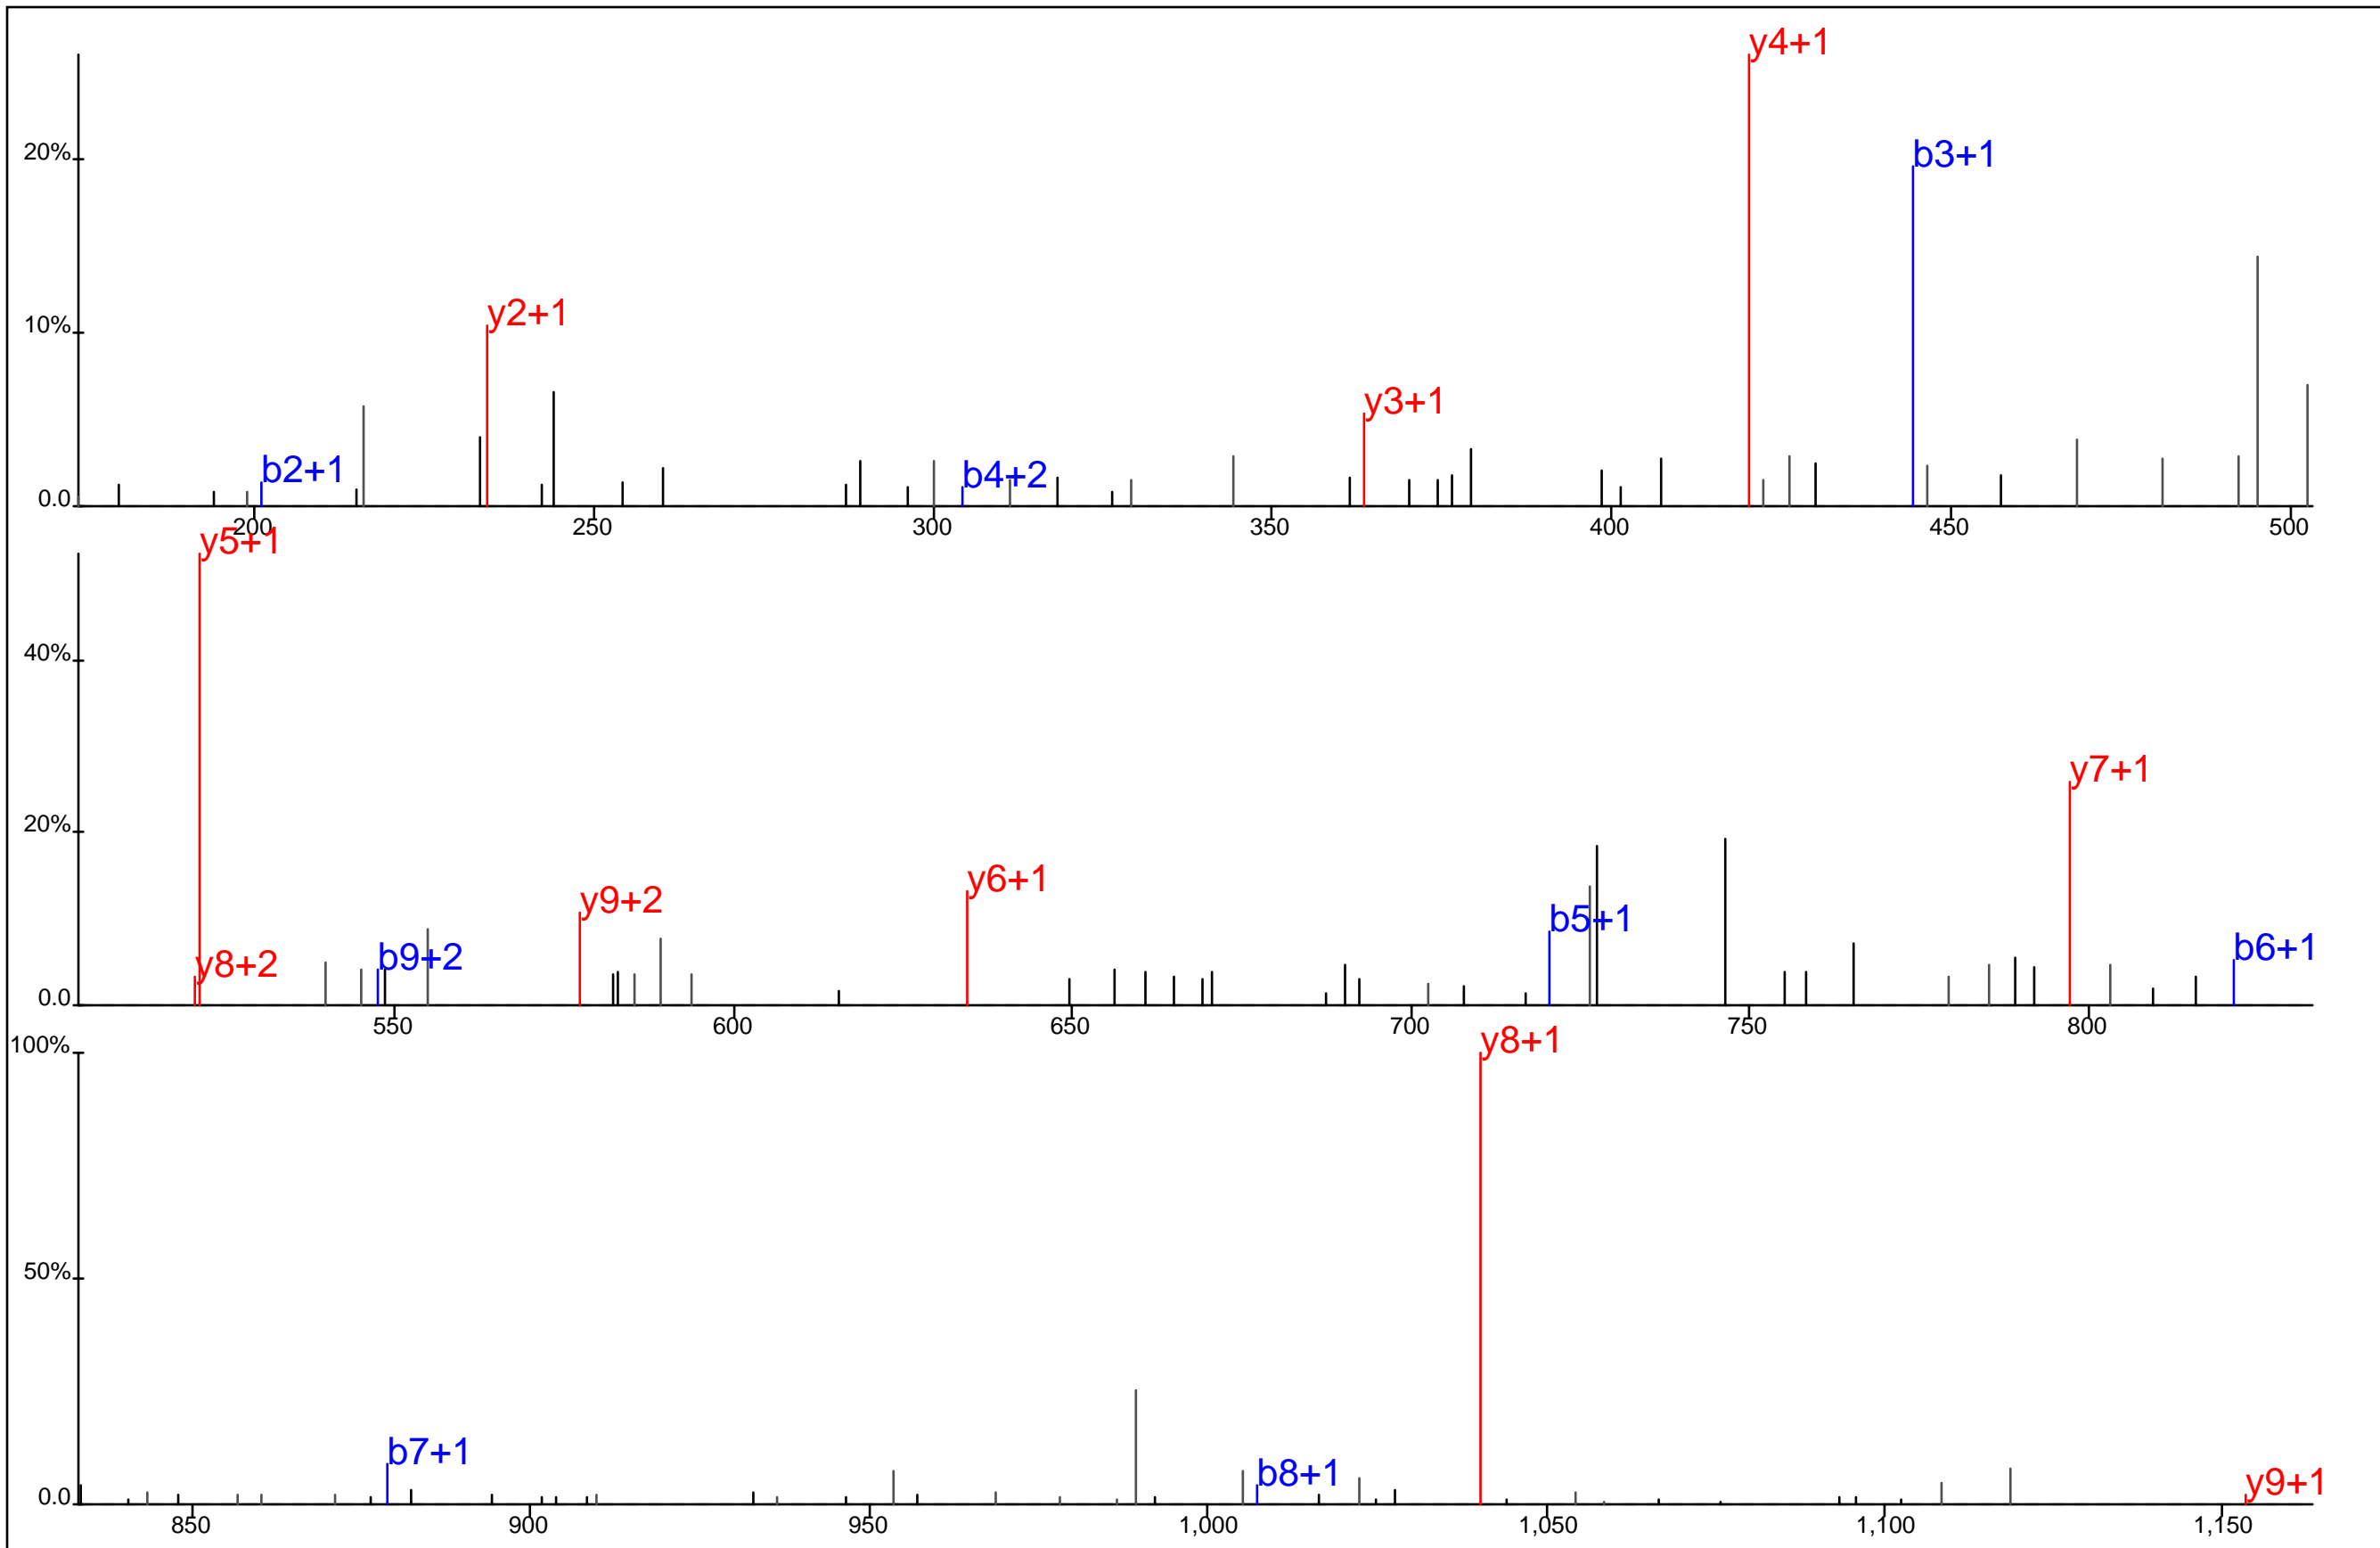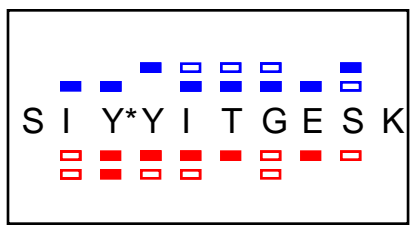

Protein Name: HSP90B  
 gi Accession: 0  
 Precursor Mass: 620.7807+2  
 Delta Mass: 3.582 ppm  
 XCorr: 57.24

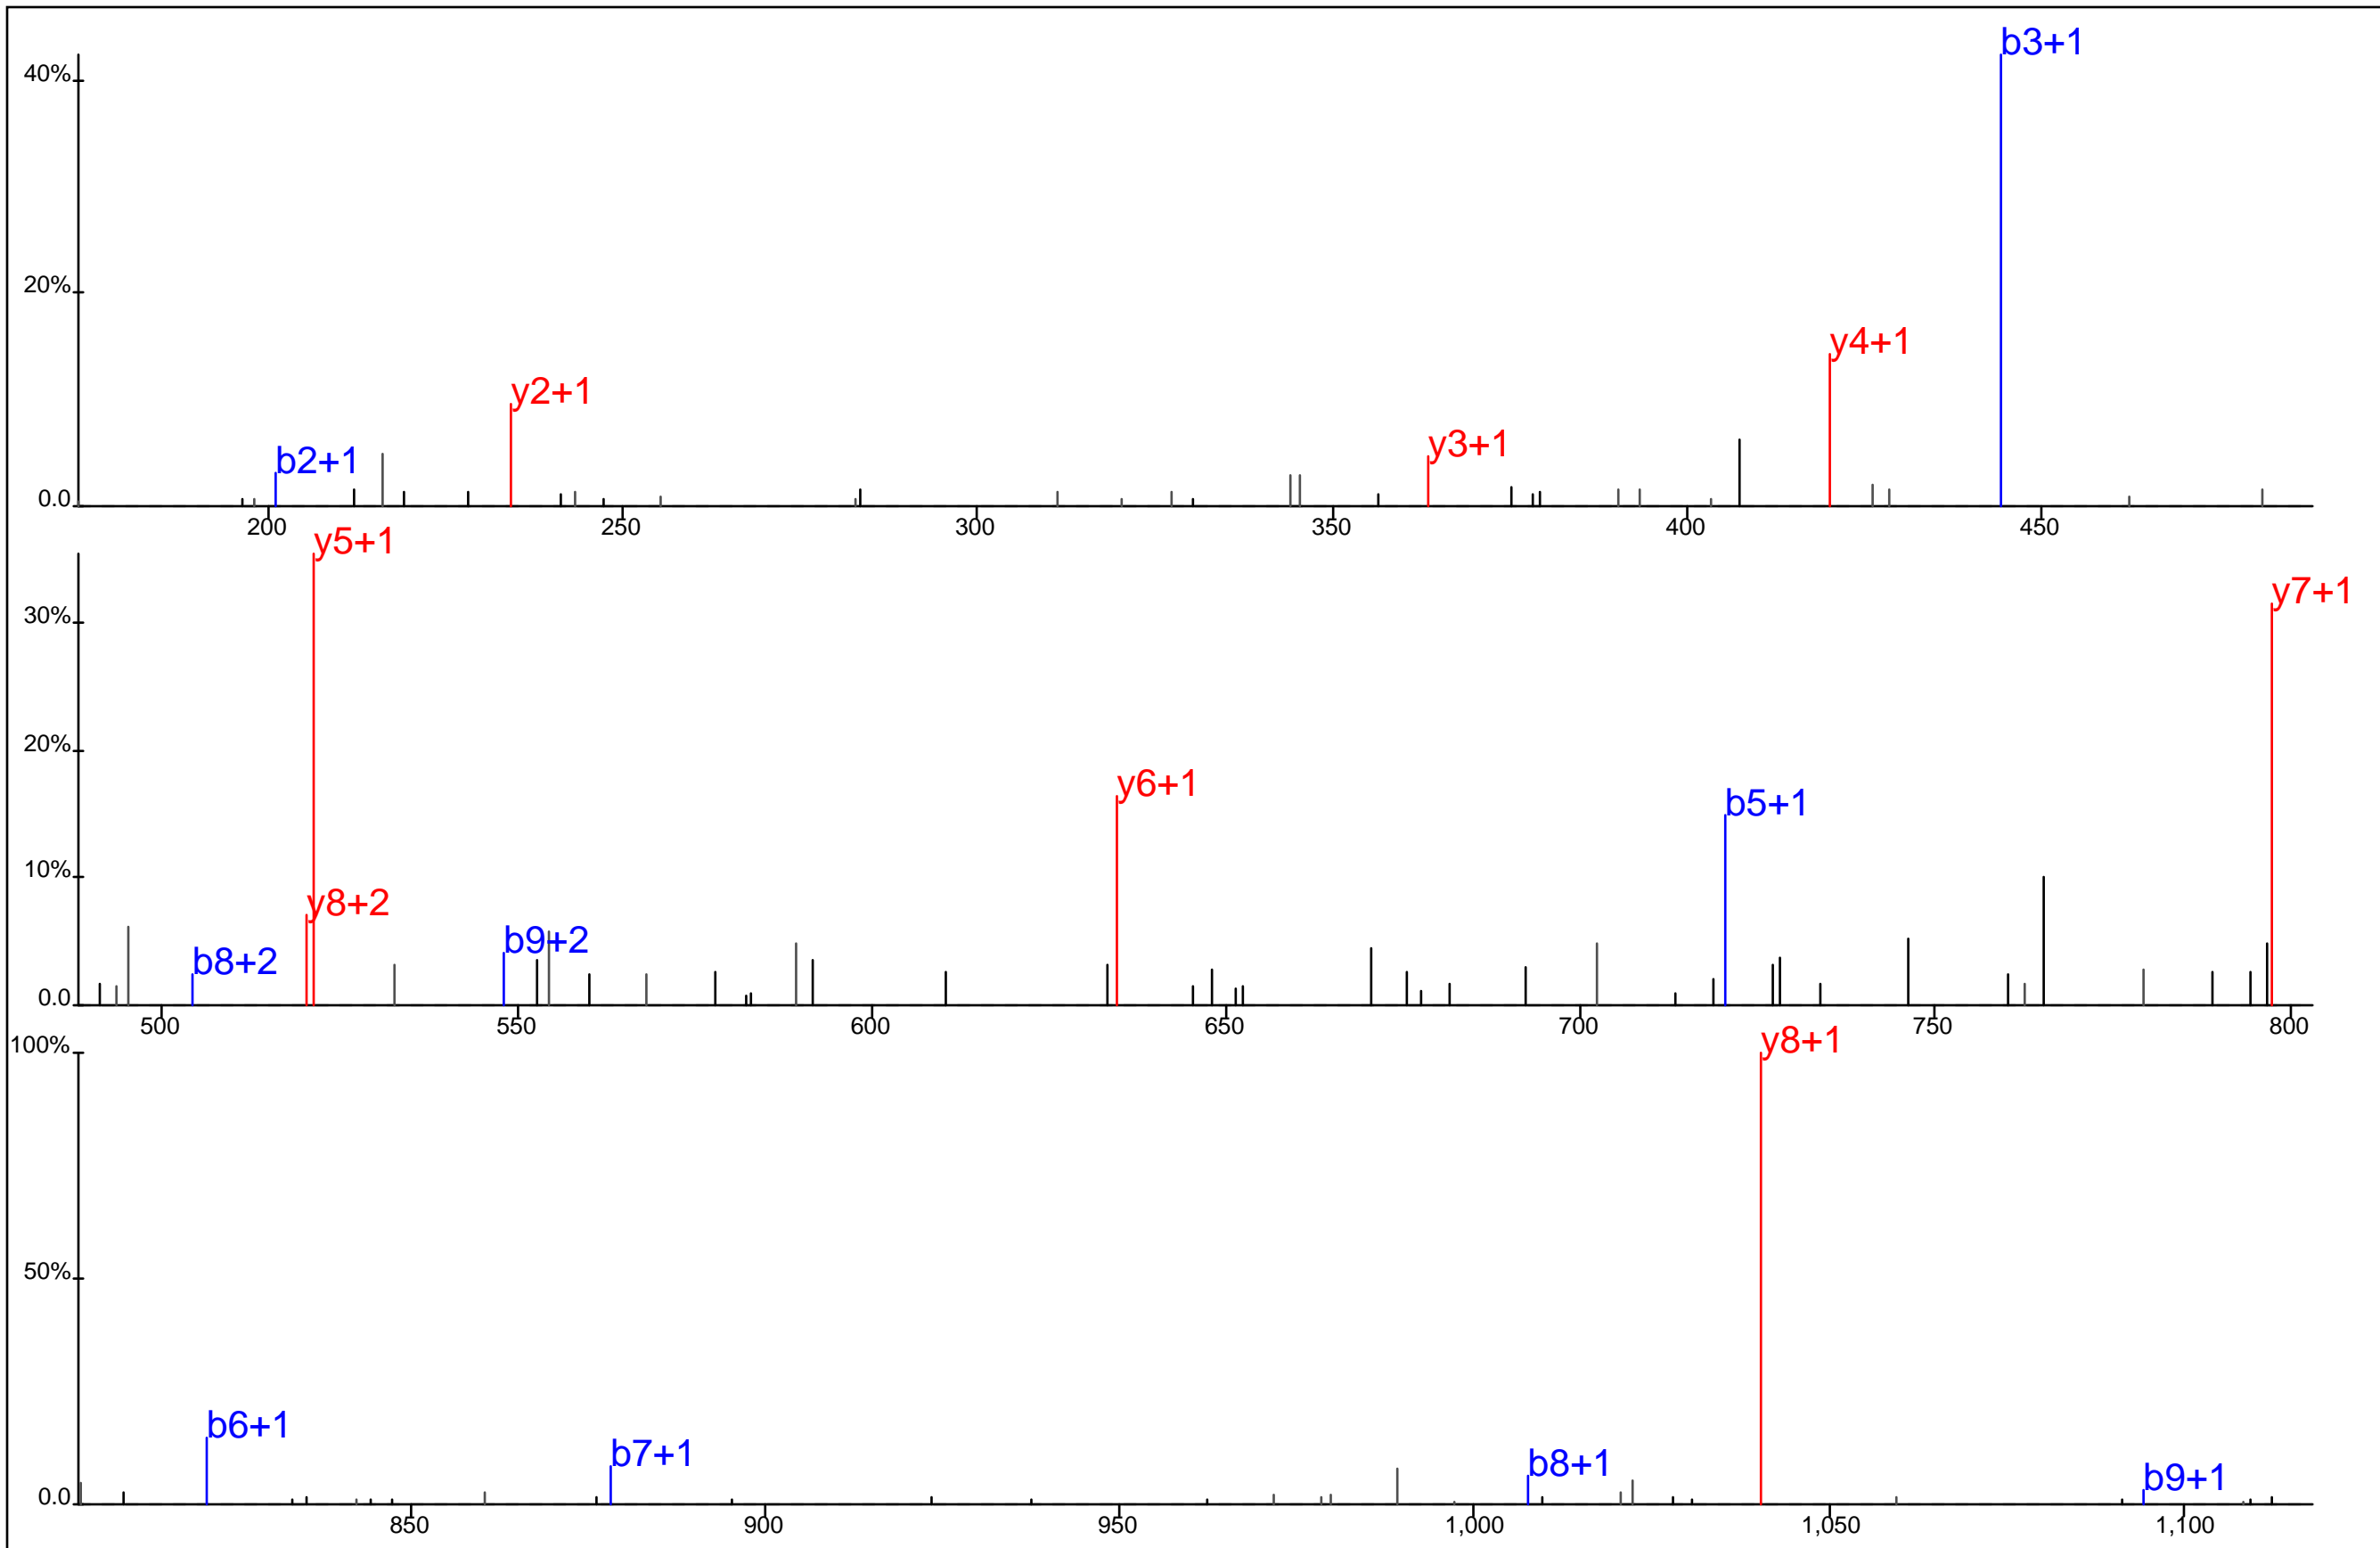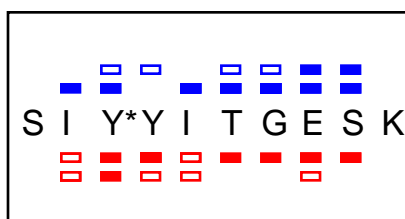

Protein Name: HSP90B  
 gi Accession: 0  
 Precursor Mass: 620.7803+2  
 Delta Mass: 2.892 ppm  
 XCorr: 61.29



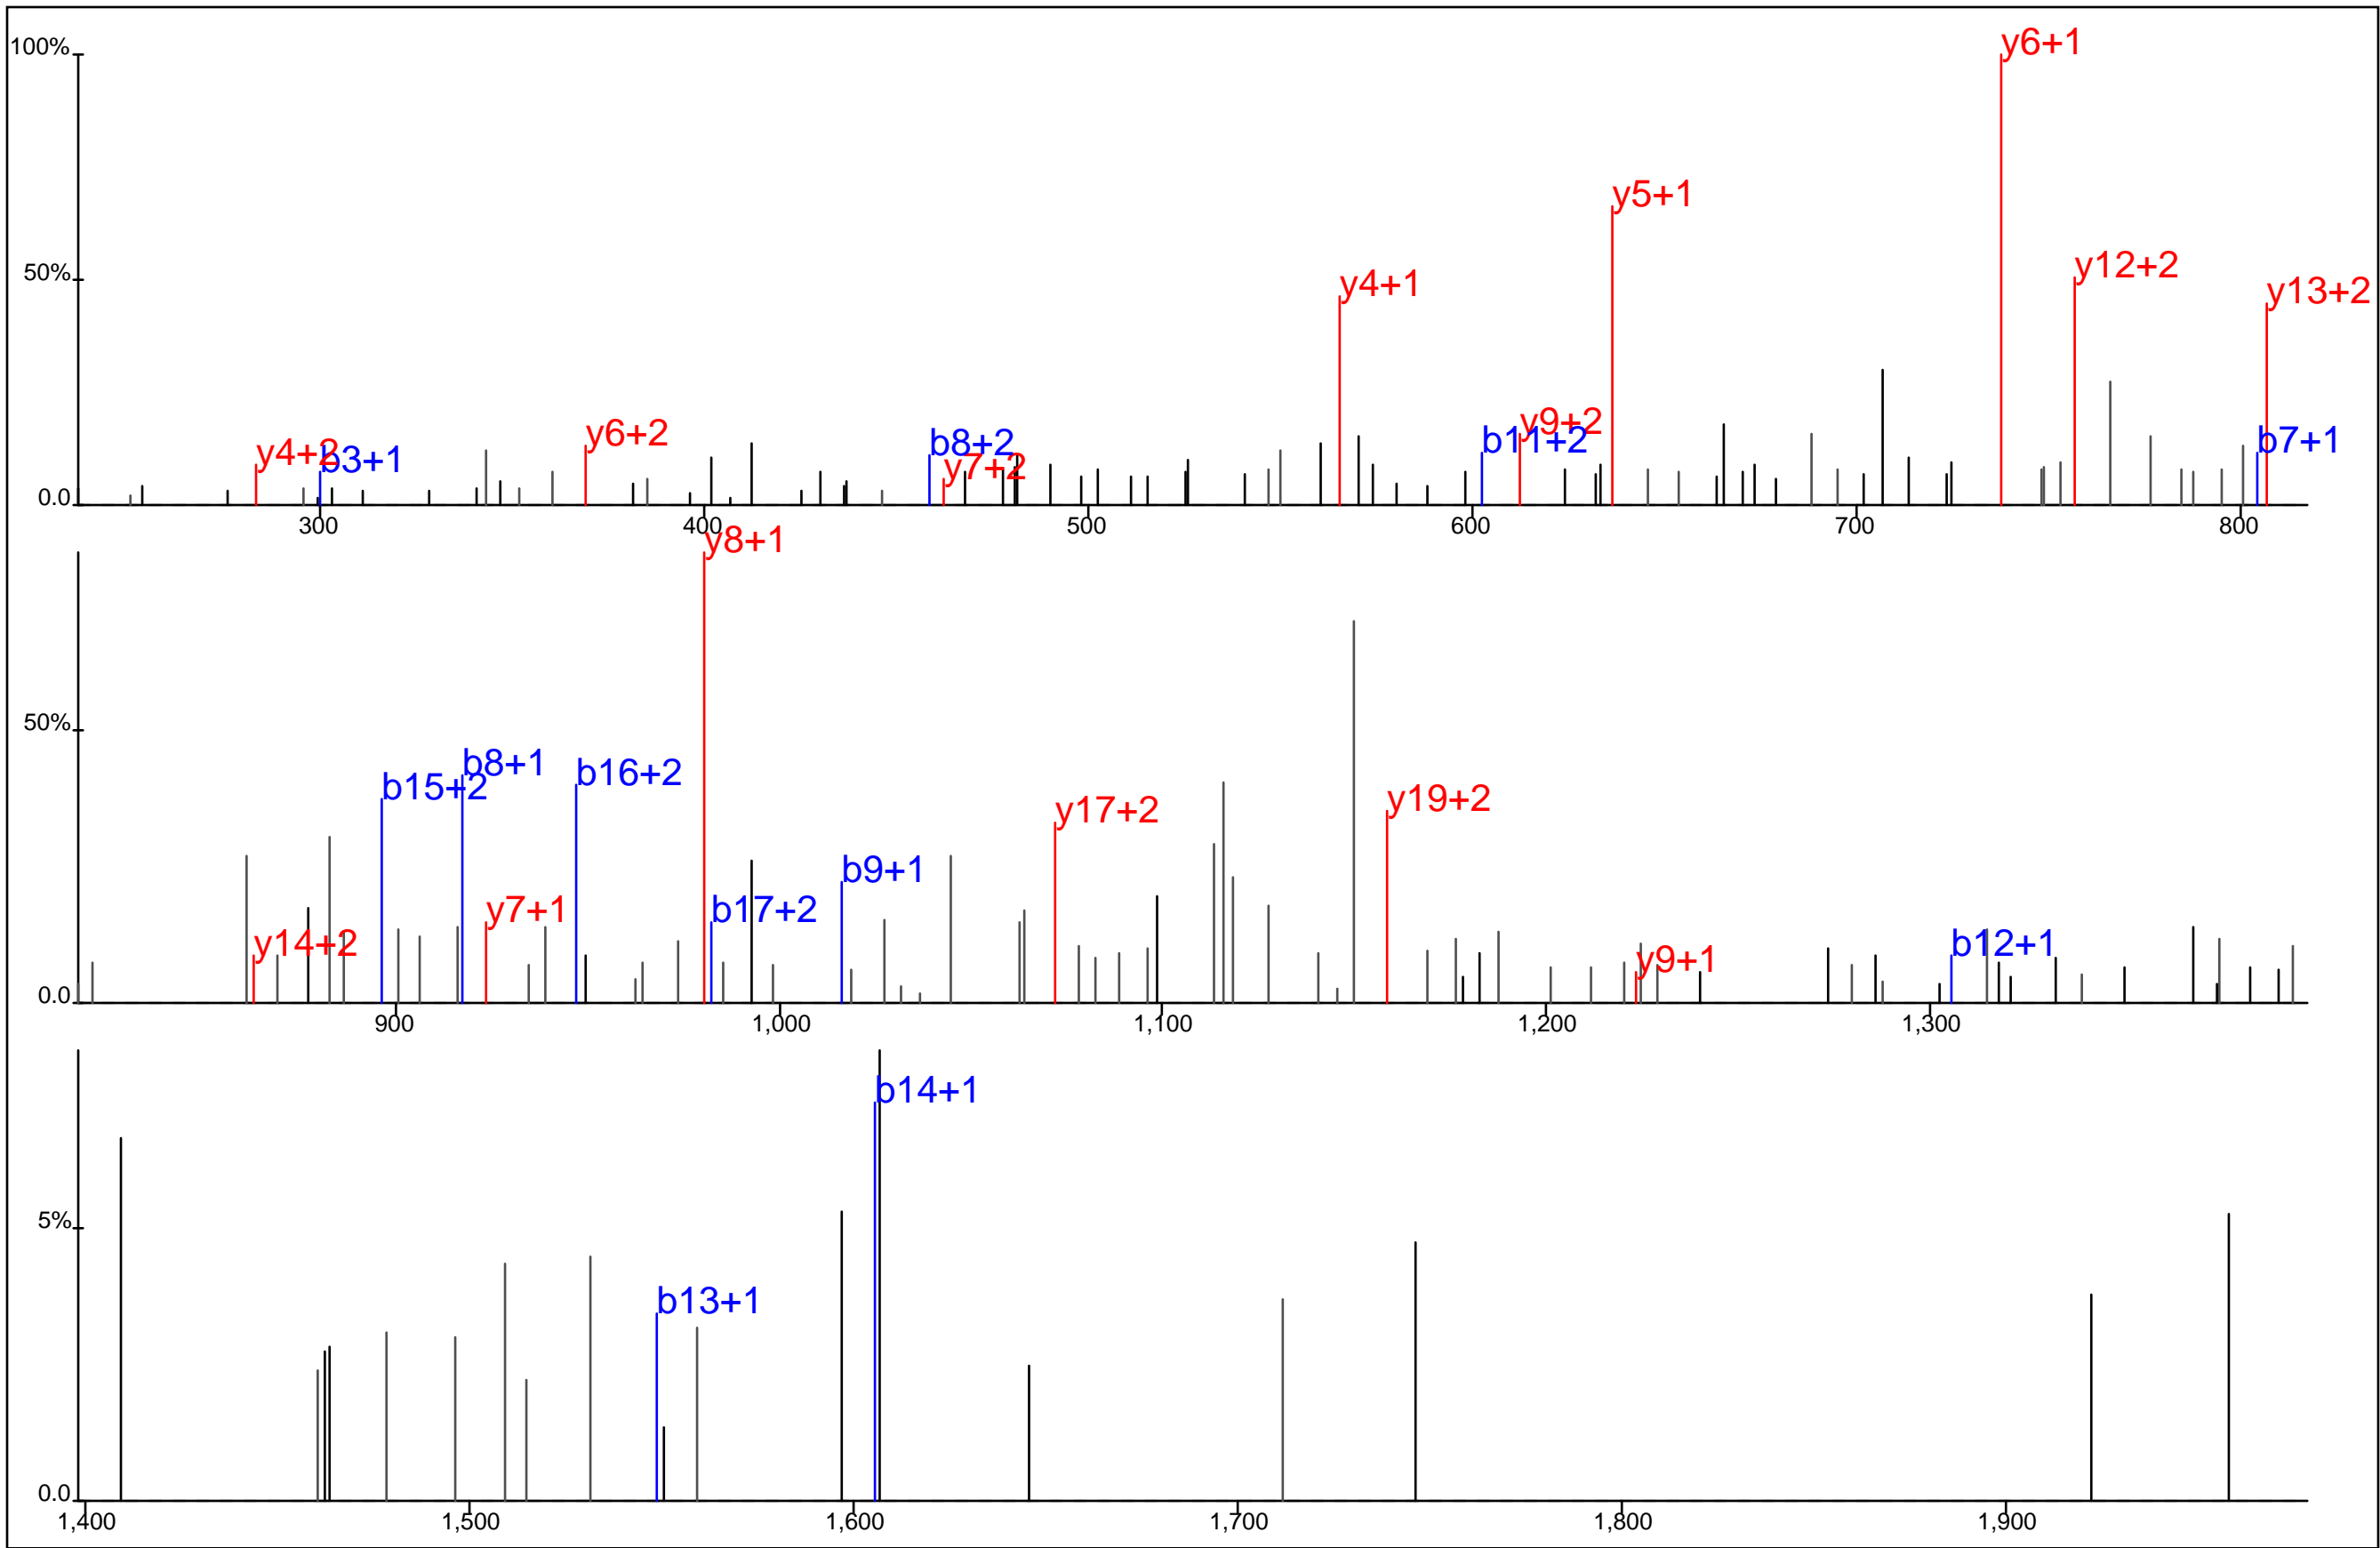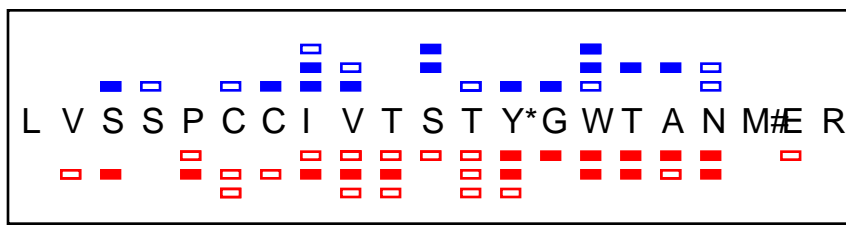

Protein Name: HSP90B  
 gi Accession: 0  
 Precursor Mass: 843.3580+3  
 Delta Mass: 2.380 ppm  
 XCorr: 23.16

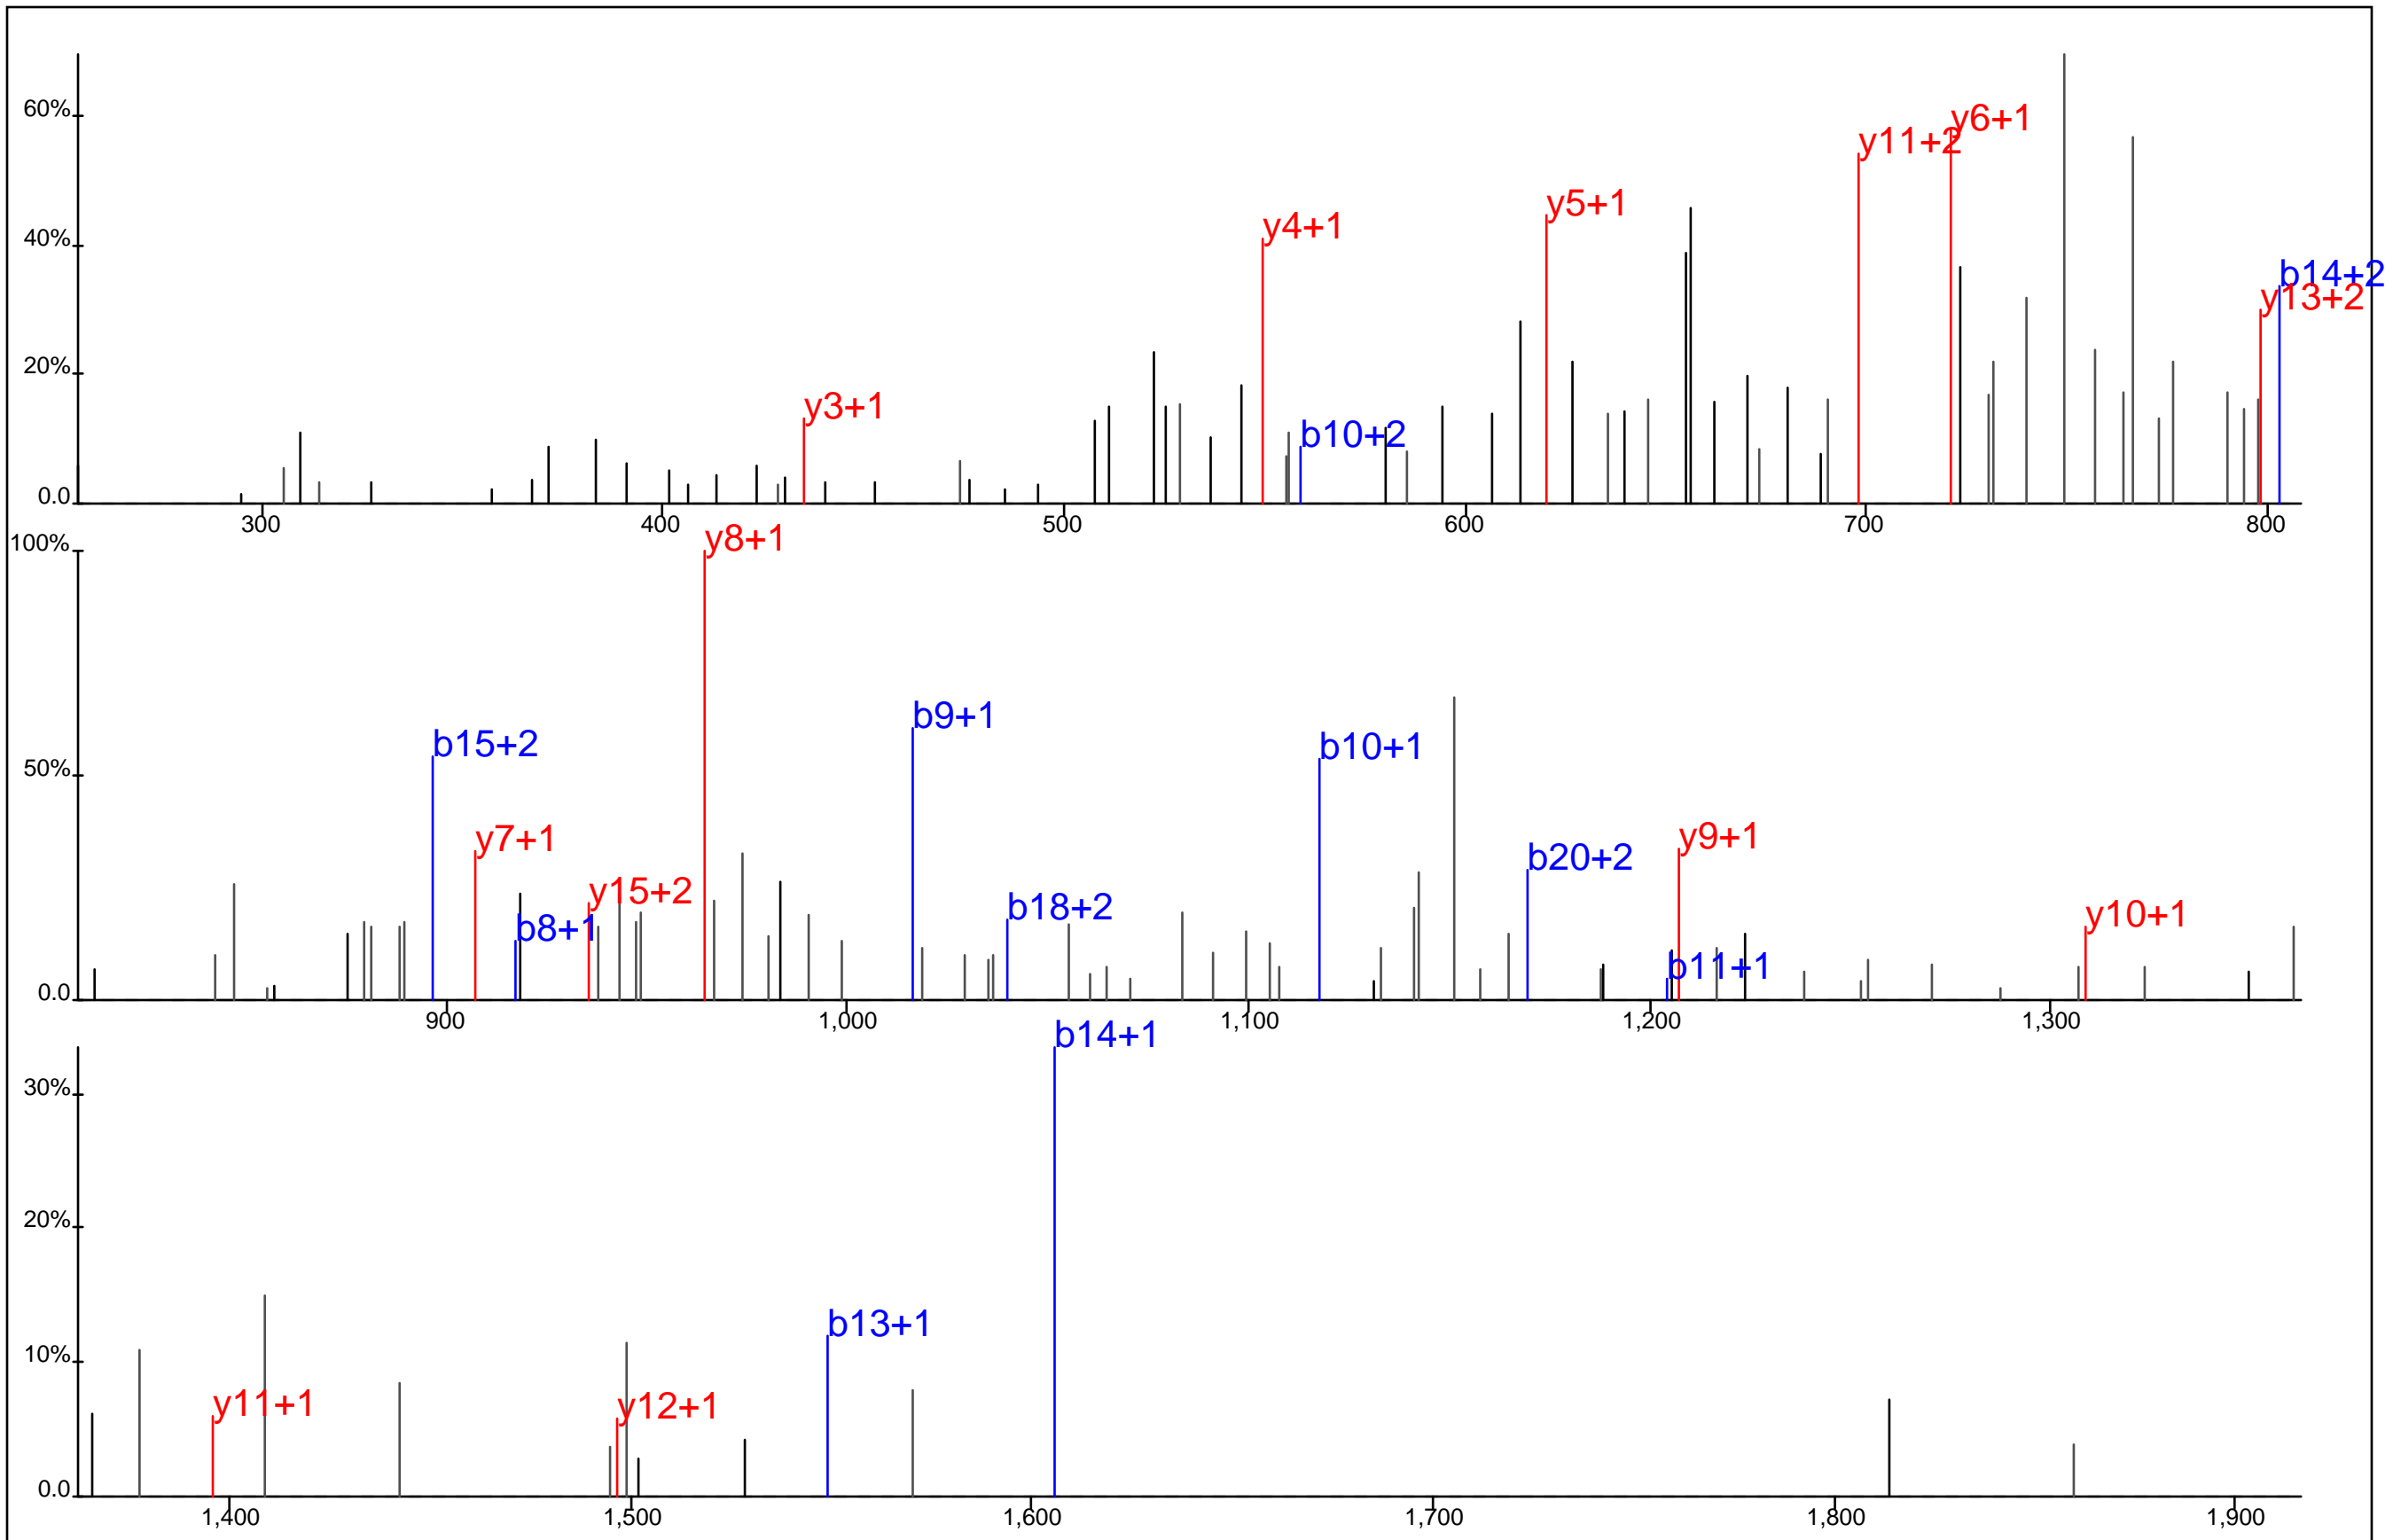

L V S S P C C I V T S T Y\*G W T A N M E R  
■ ■

Protein Name: HSP90B  
 gi Accession: 0  
 Precursor Mass: 838.0257+3  
 Delta Mass: 3.227 ppm  
 XCorr: 37.01

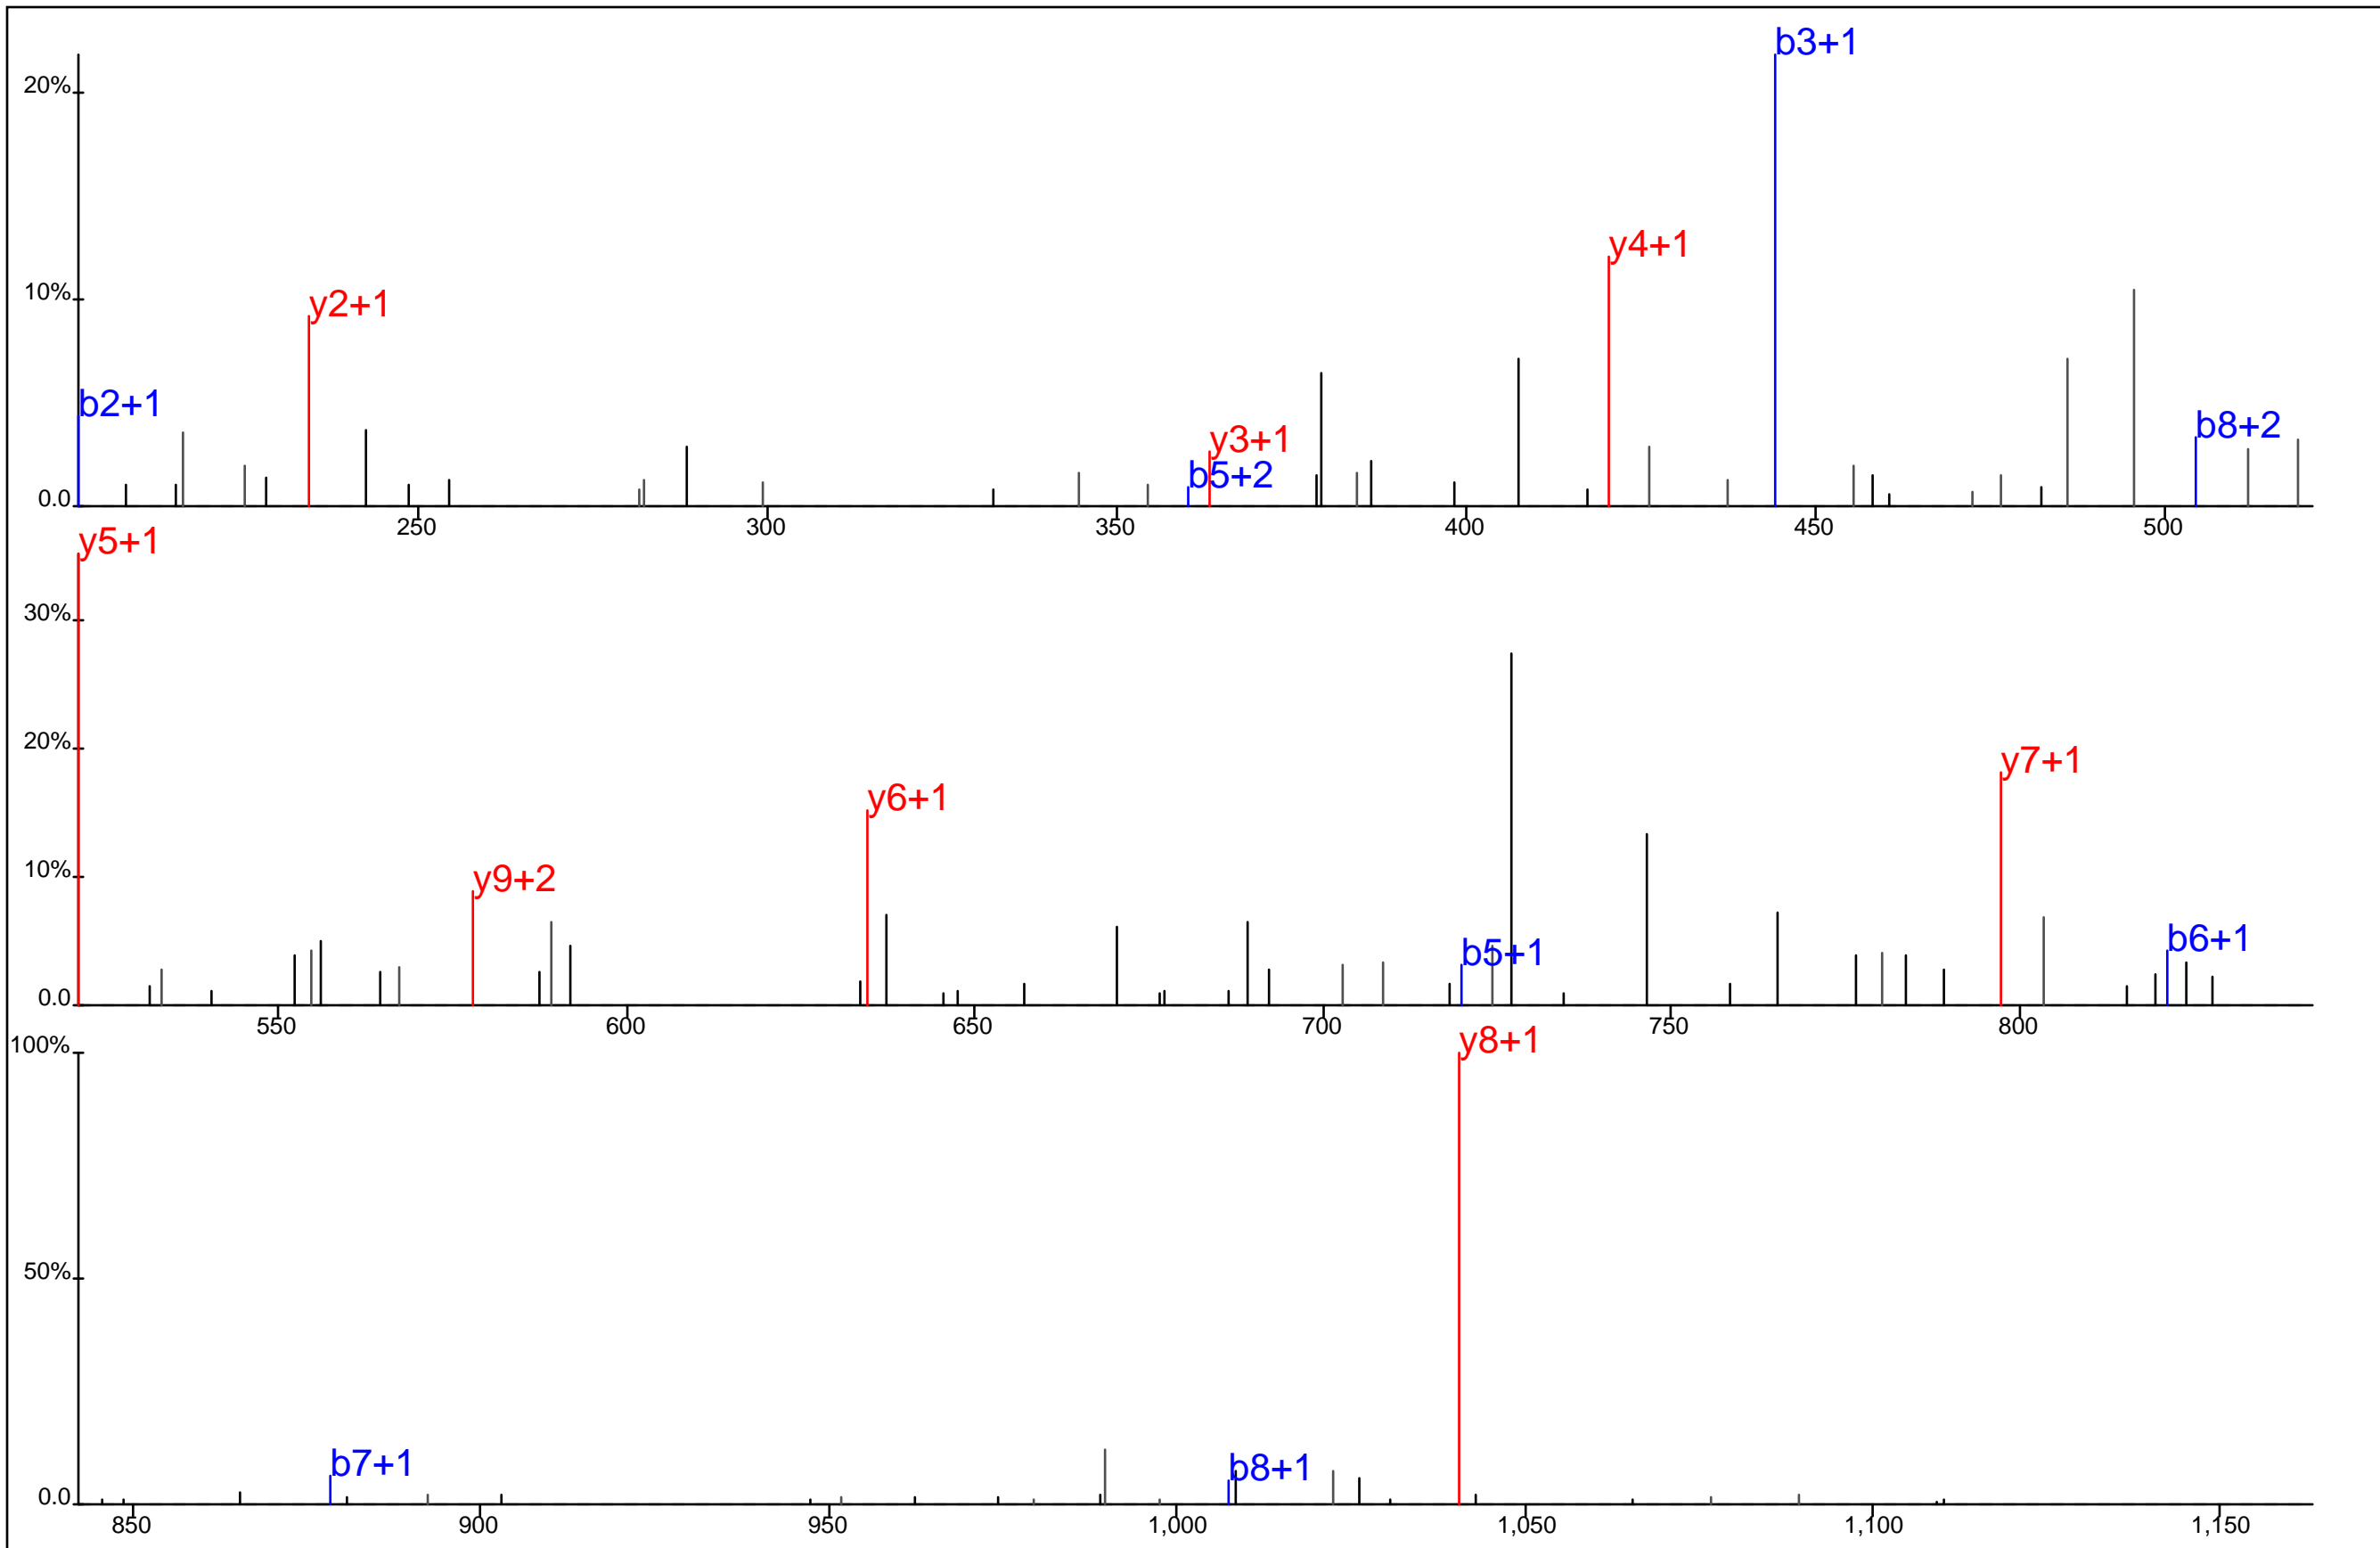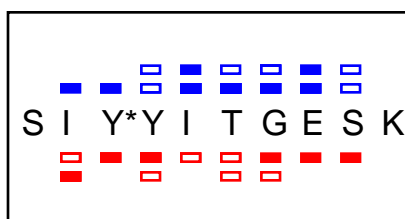

Protein Name: HSP90B  
 gi Accession: 0  
 Precursor Mass: 620.7801+2  
 Delta Mass: 2.597 ppm  
 XCorr: 50.58

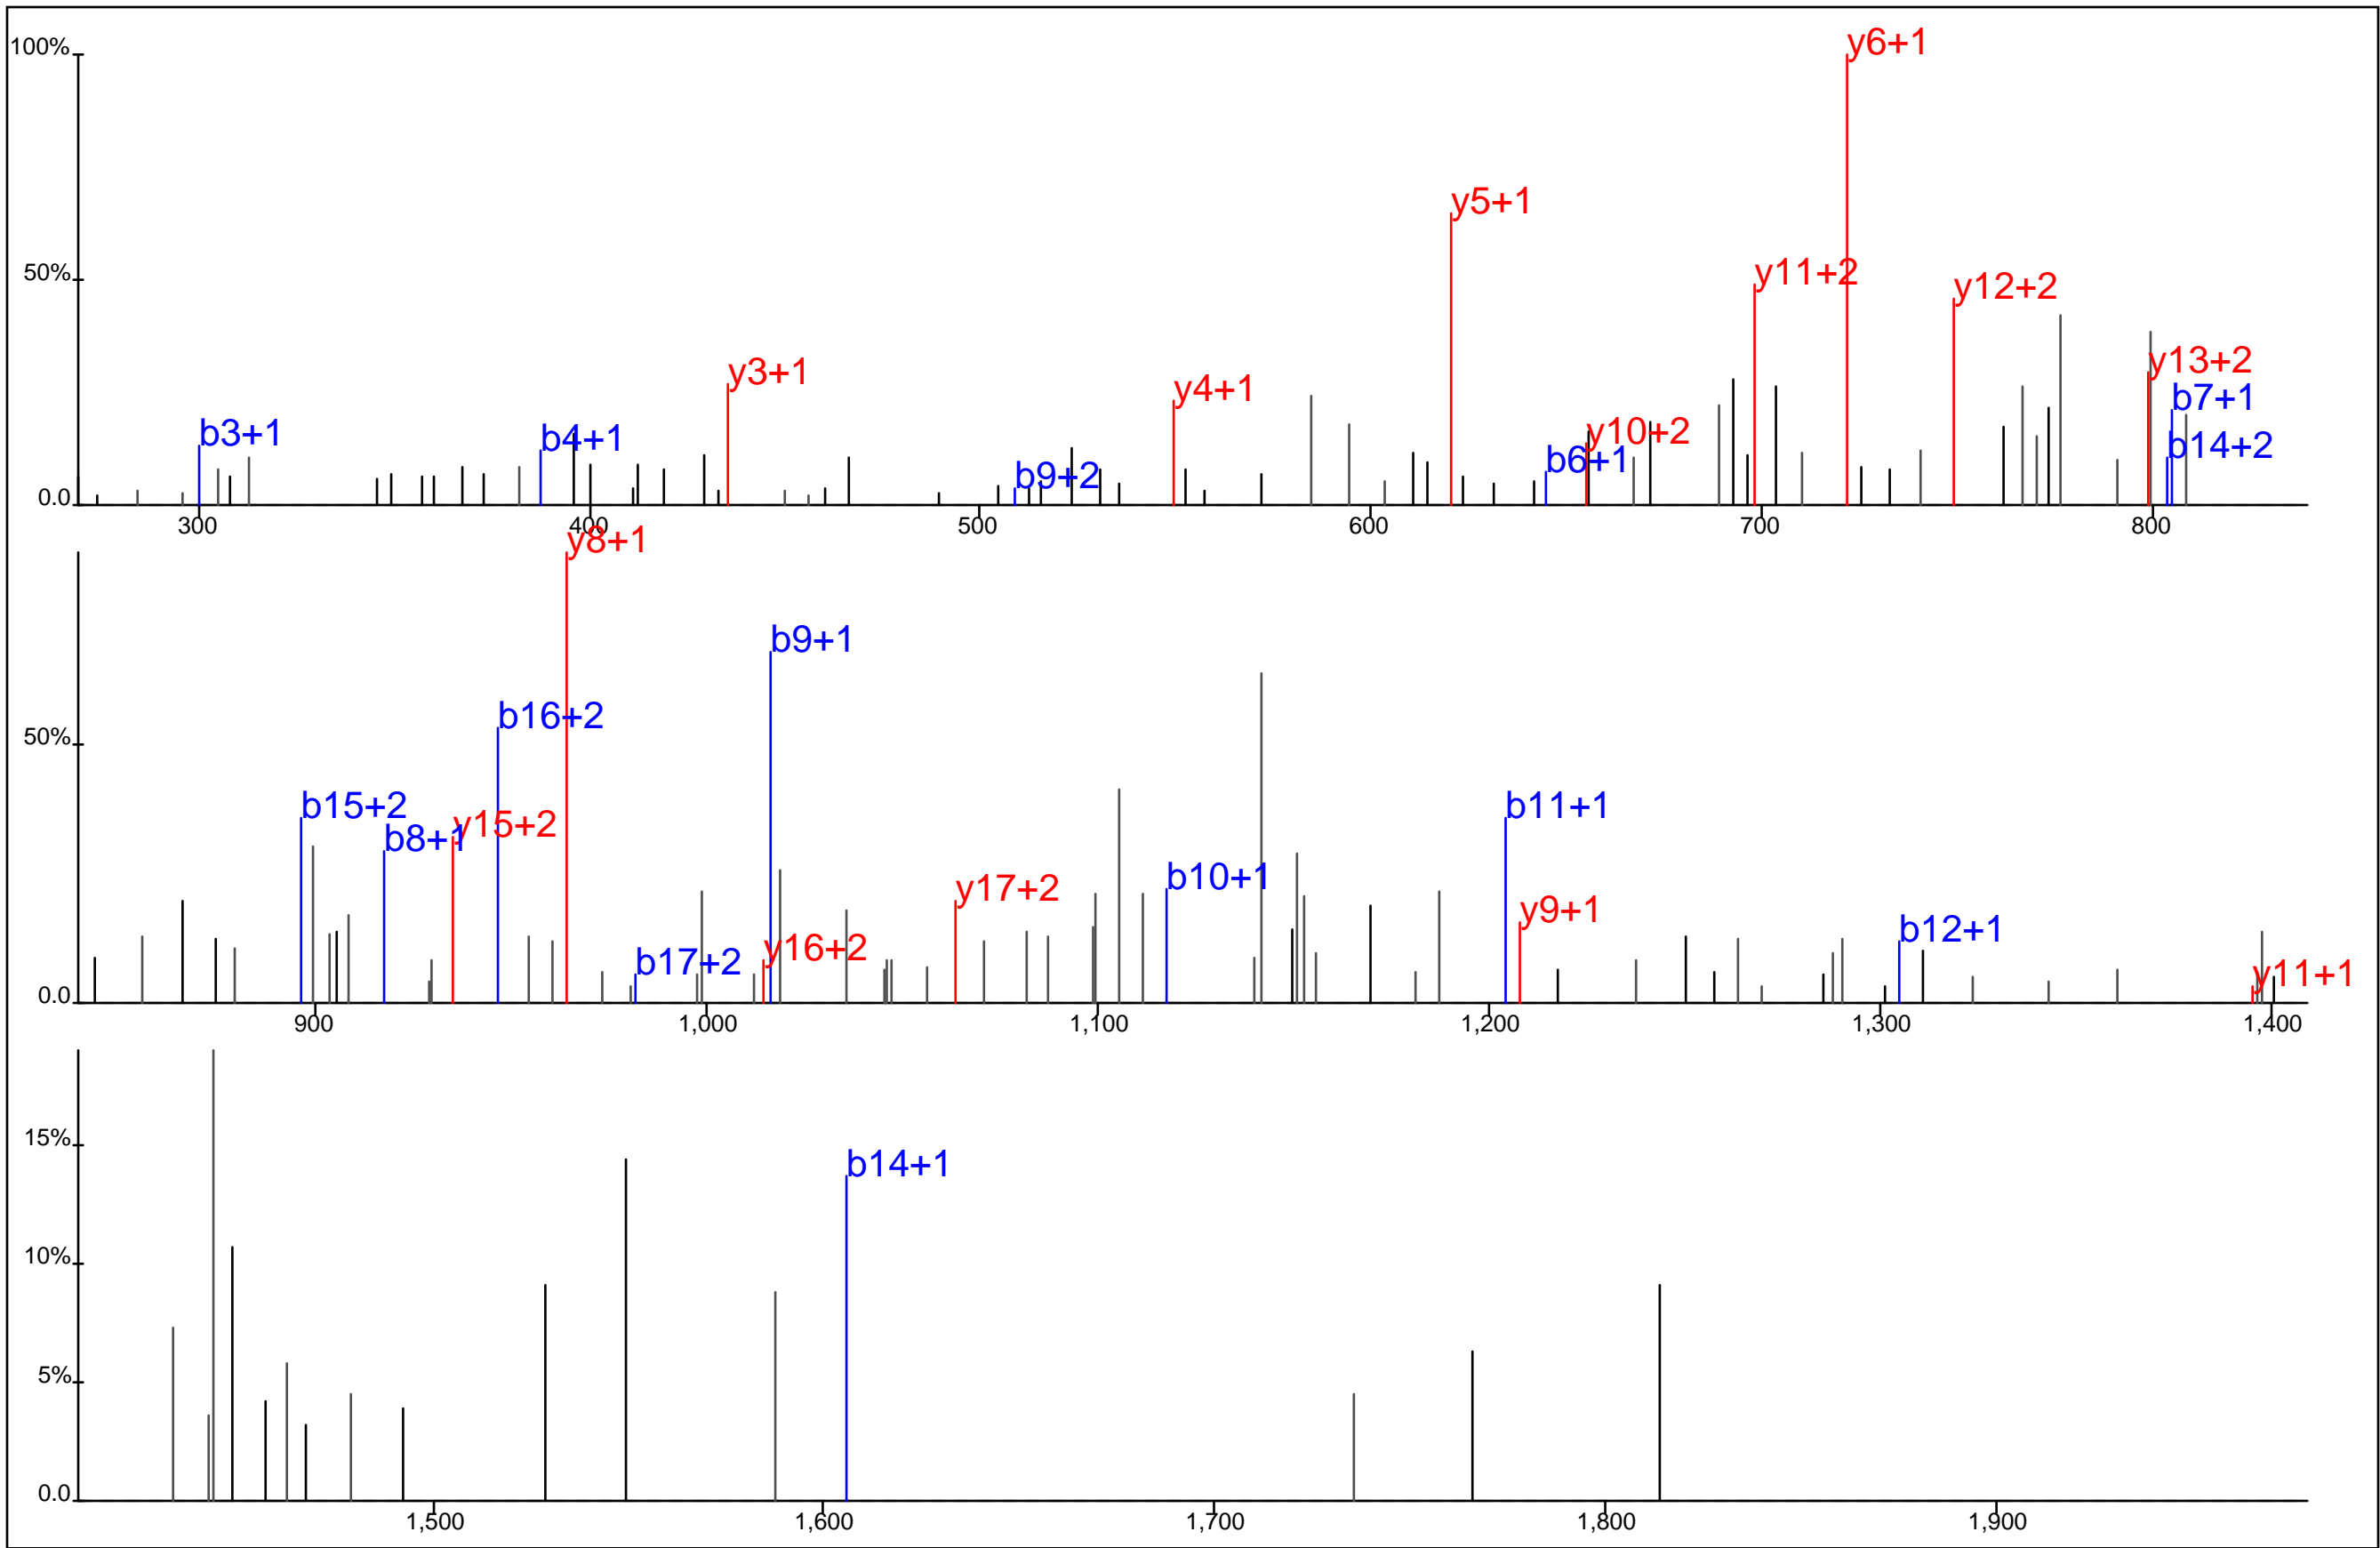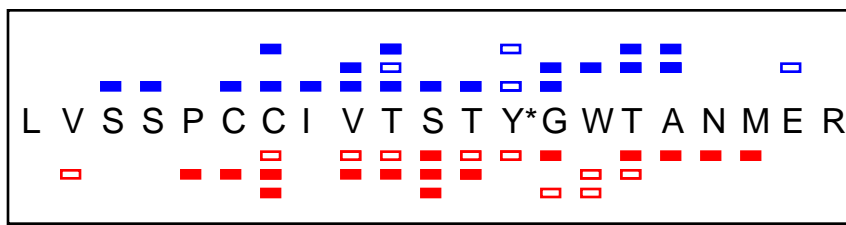

Protein Name: HSP90B  
 gi Accession: 0  
 Precursor Mass: 838.0256+3  
 Delta Mass: 3.300 ppm  
 XCorr: 35.54

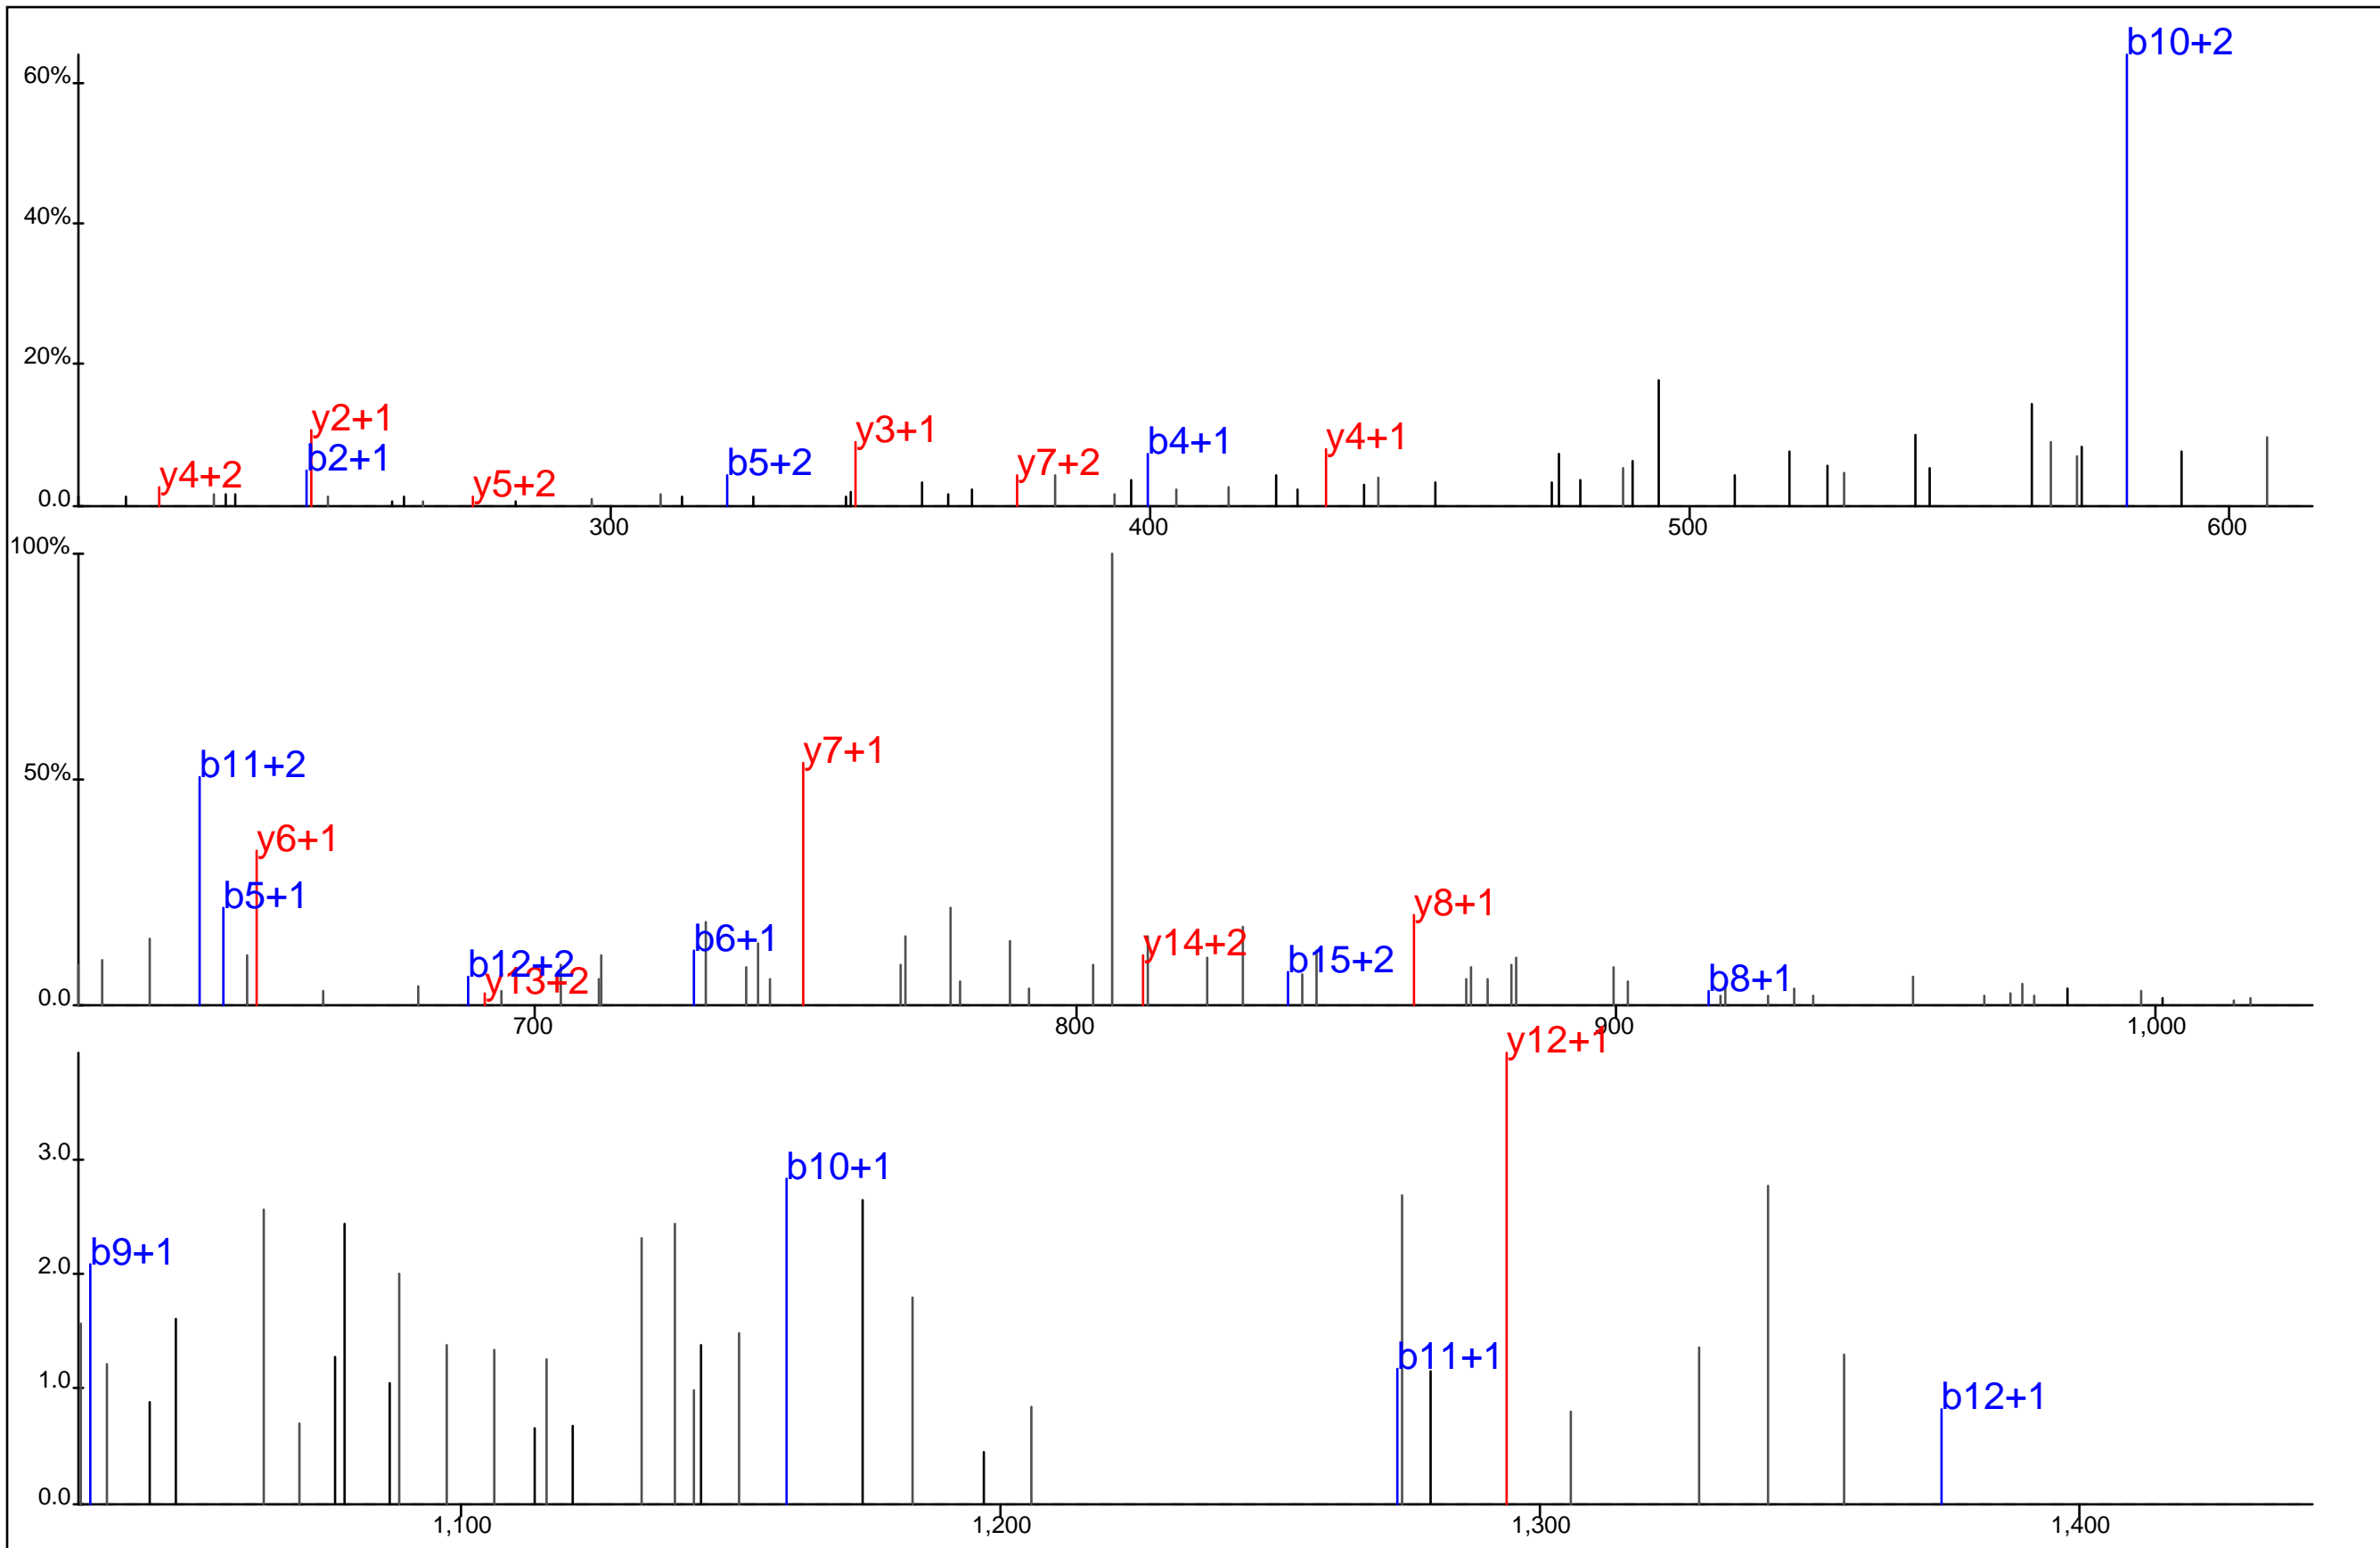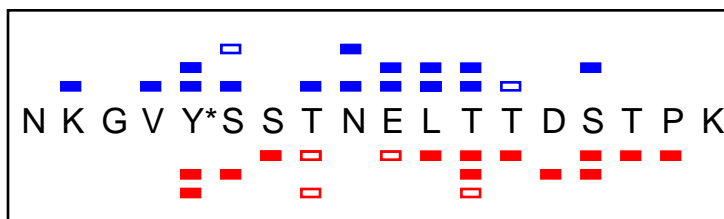

Protein Name: Hypothetical protein FLJ31821  
 gi Accession: 0  
 Precursor Mass: 674.6409+3  
 Delta Mass: 0.953 ppm  
 XCorr: 40.19

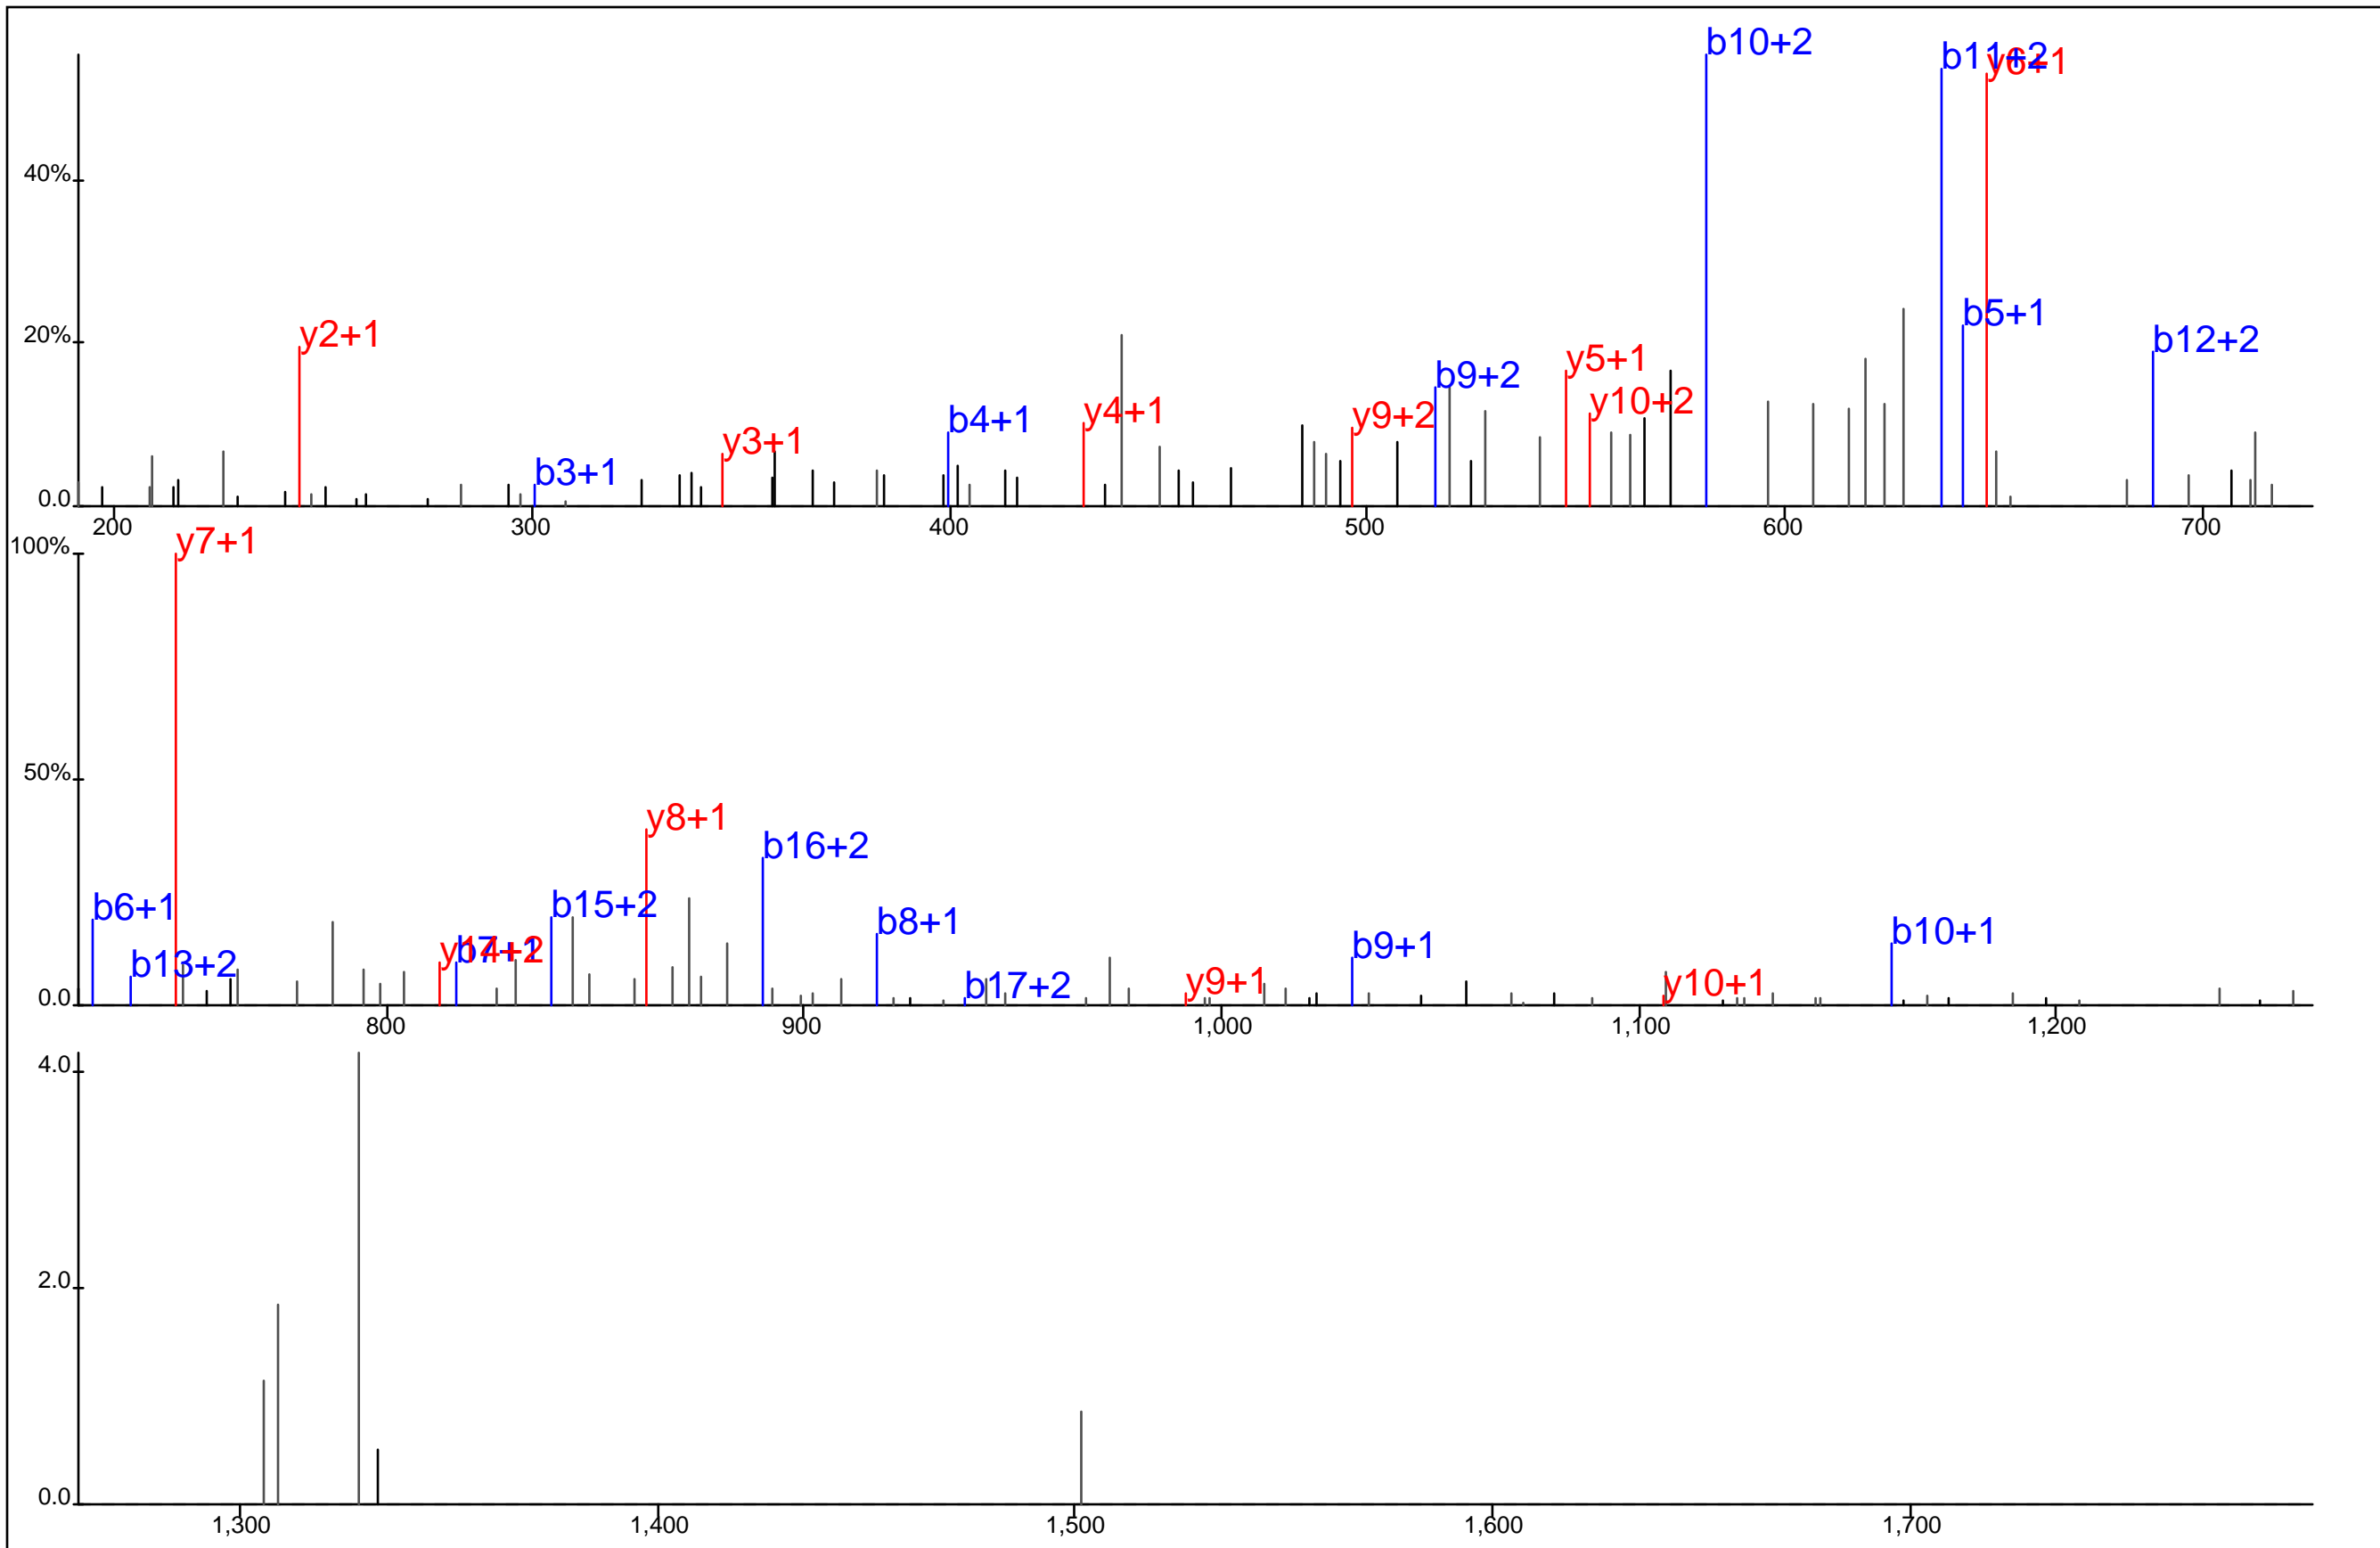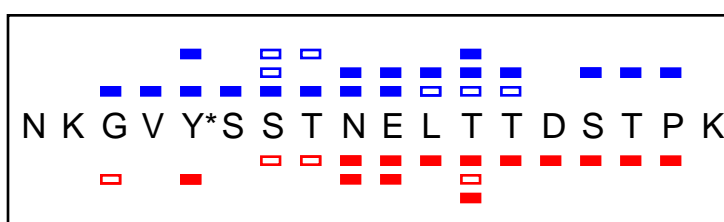

Protein Name: Hypothetical protein FLJ31821  
 gi Accession: 0  
 Precursor Mass: 674.6386+3  
 Delta Mass: 2.488 ppm  
 XCorr: 43.52

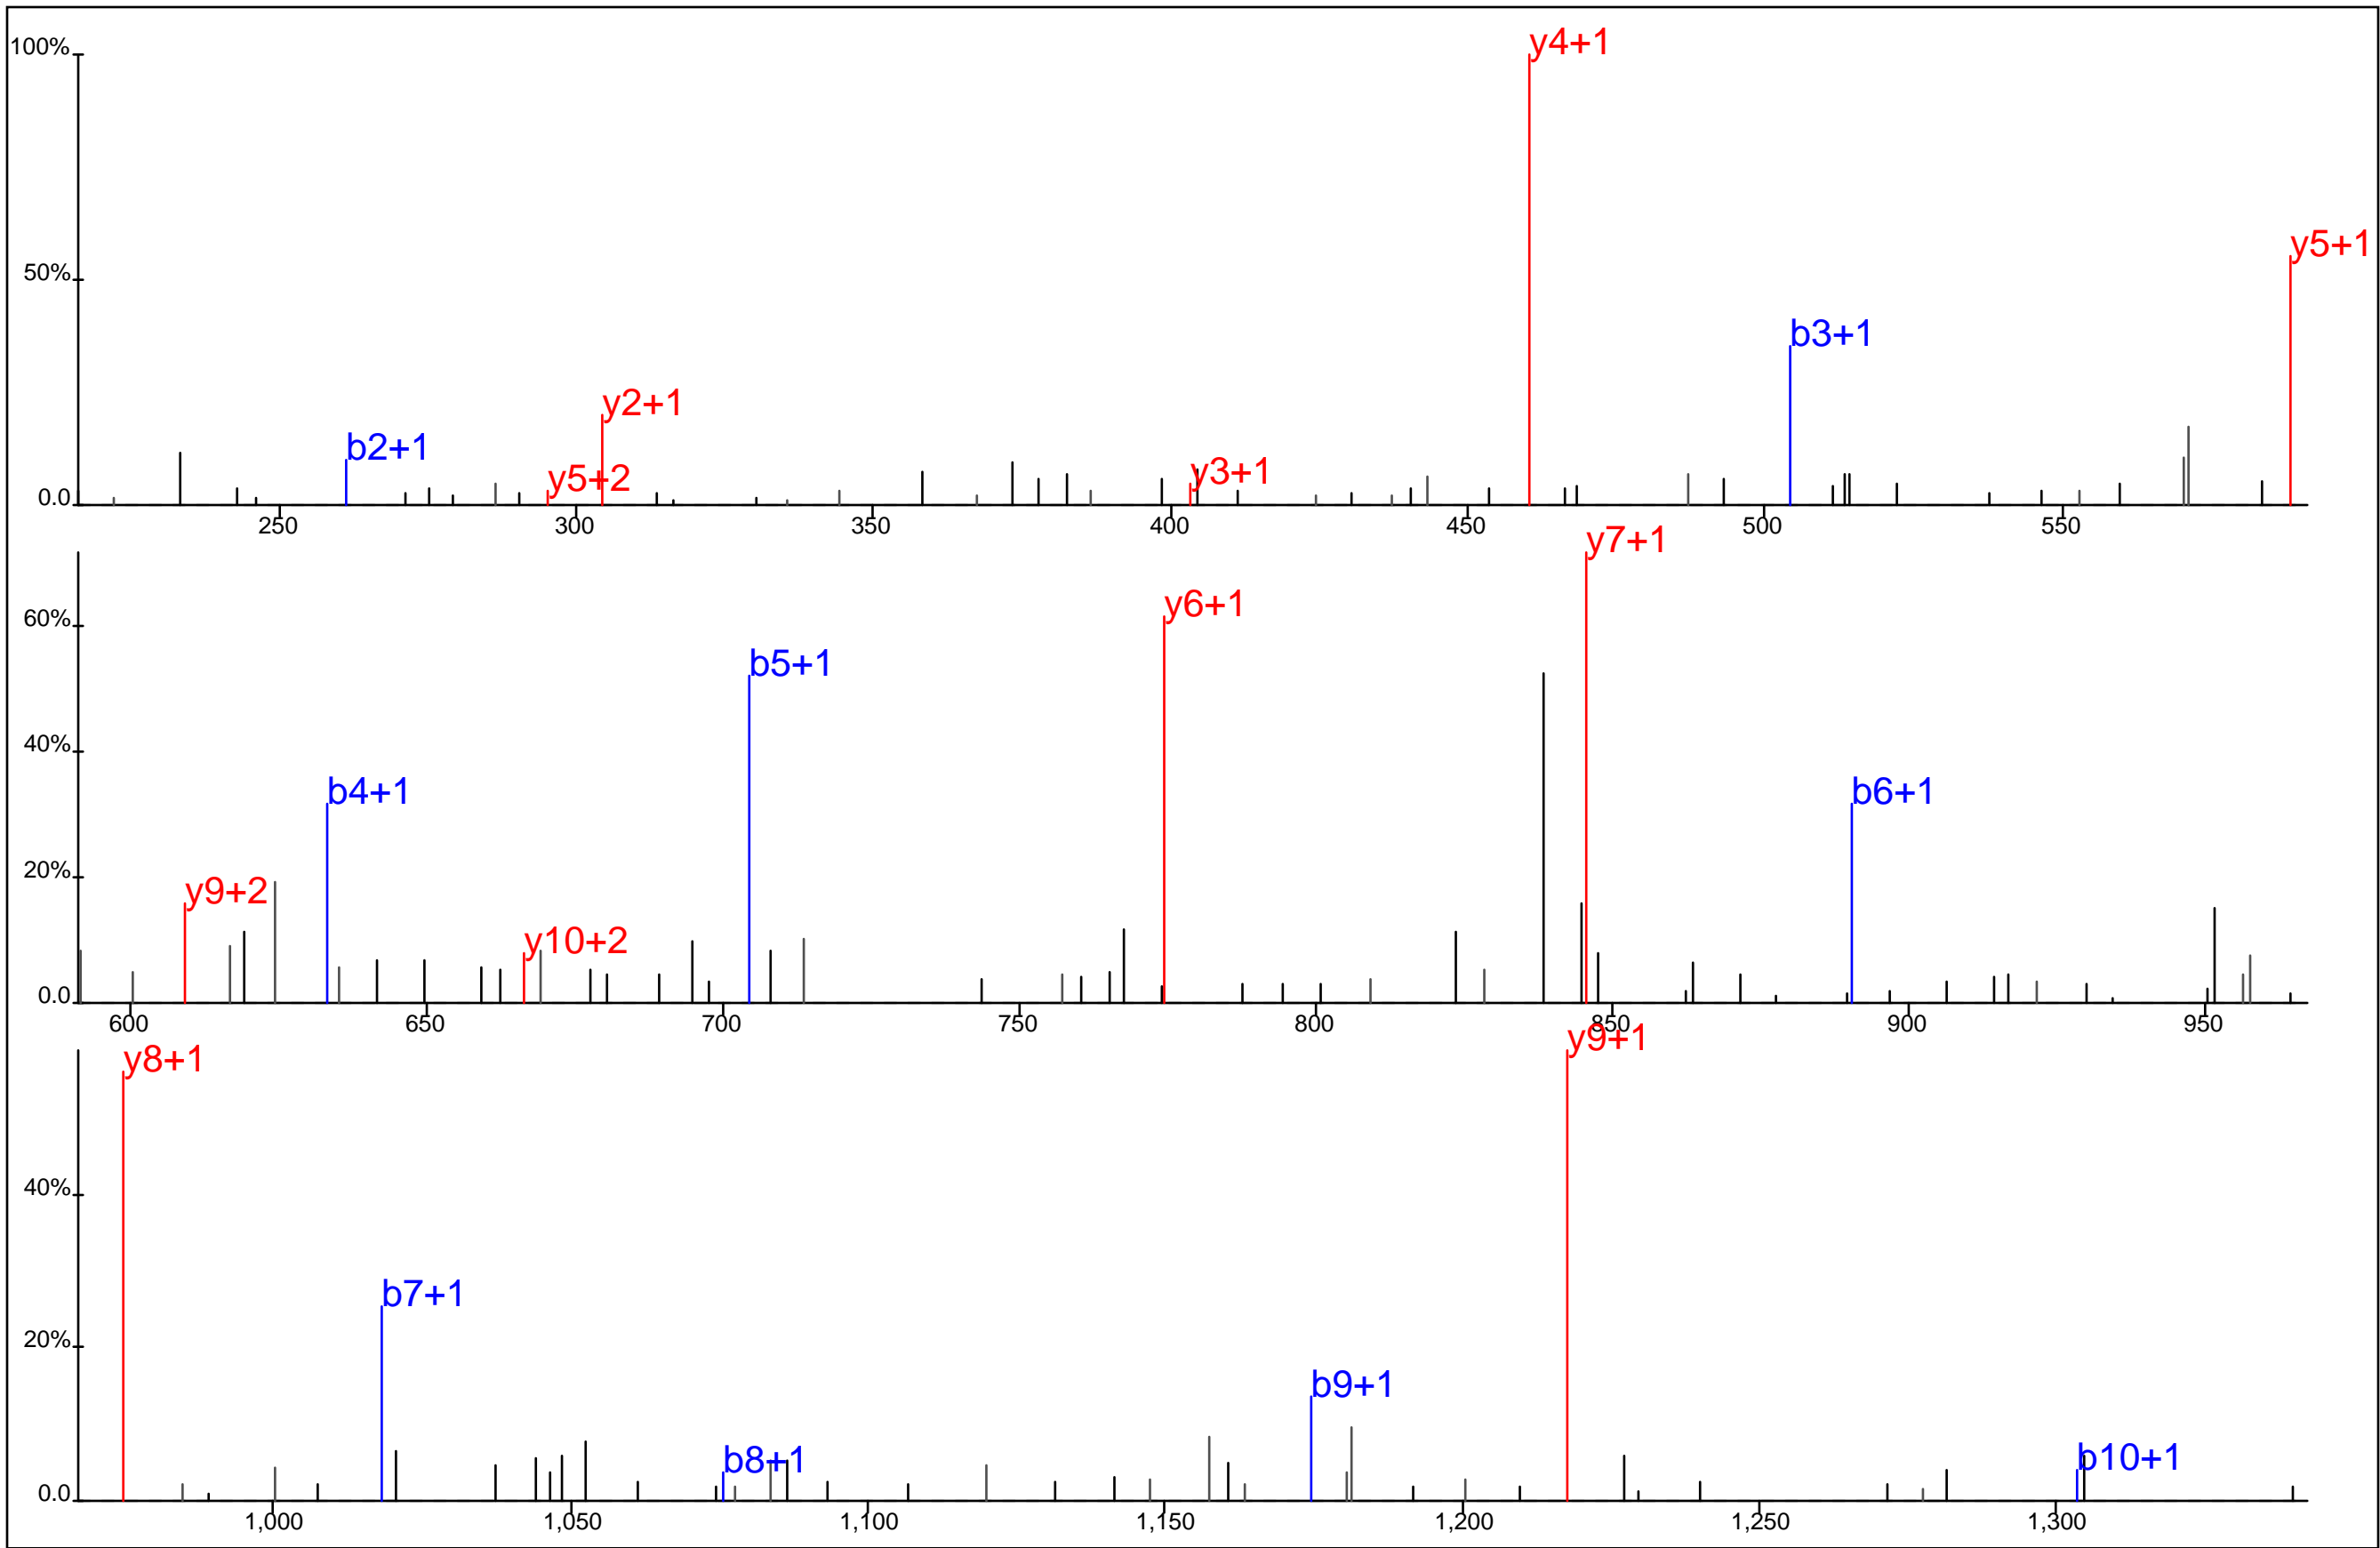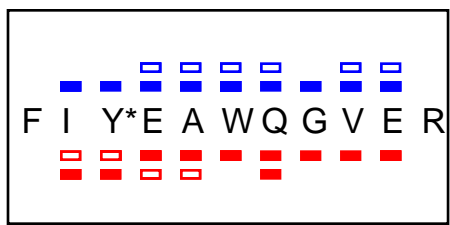

Protein Name: Hypothetical protein LOC348262  
 gi Accession: 0  
 Precursor Mass: 739.3323+2  
 Delta Mass: 4.239 ppm  
 XCorr: 59.79

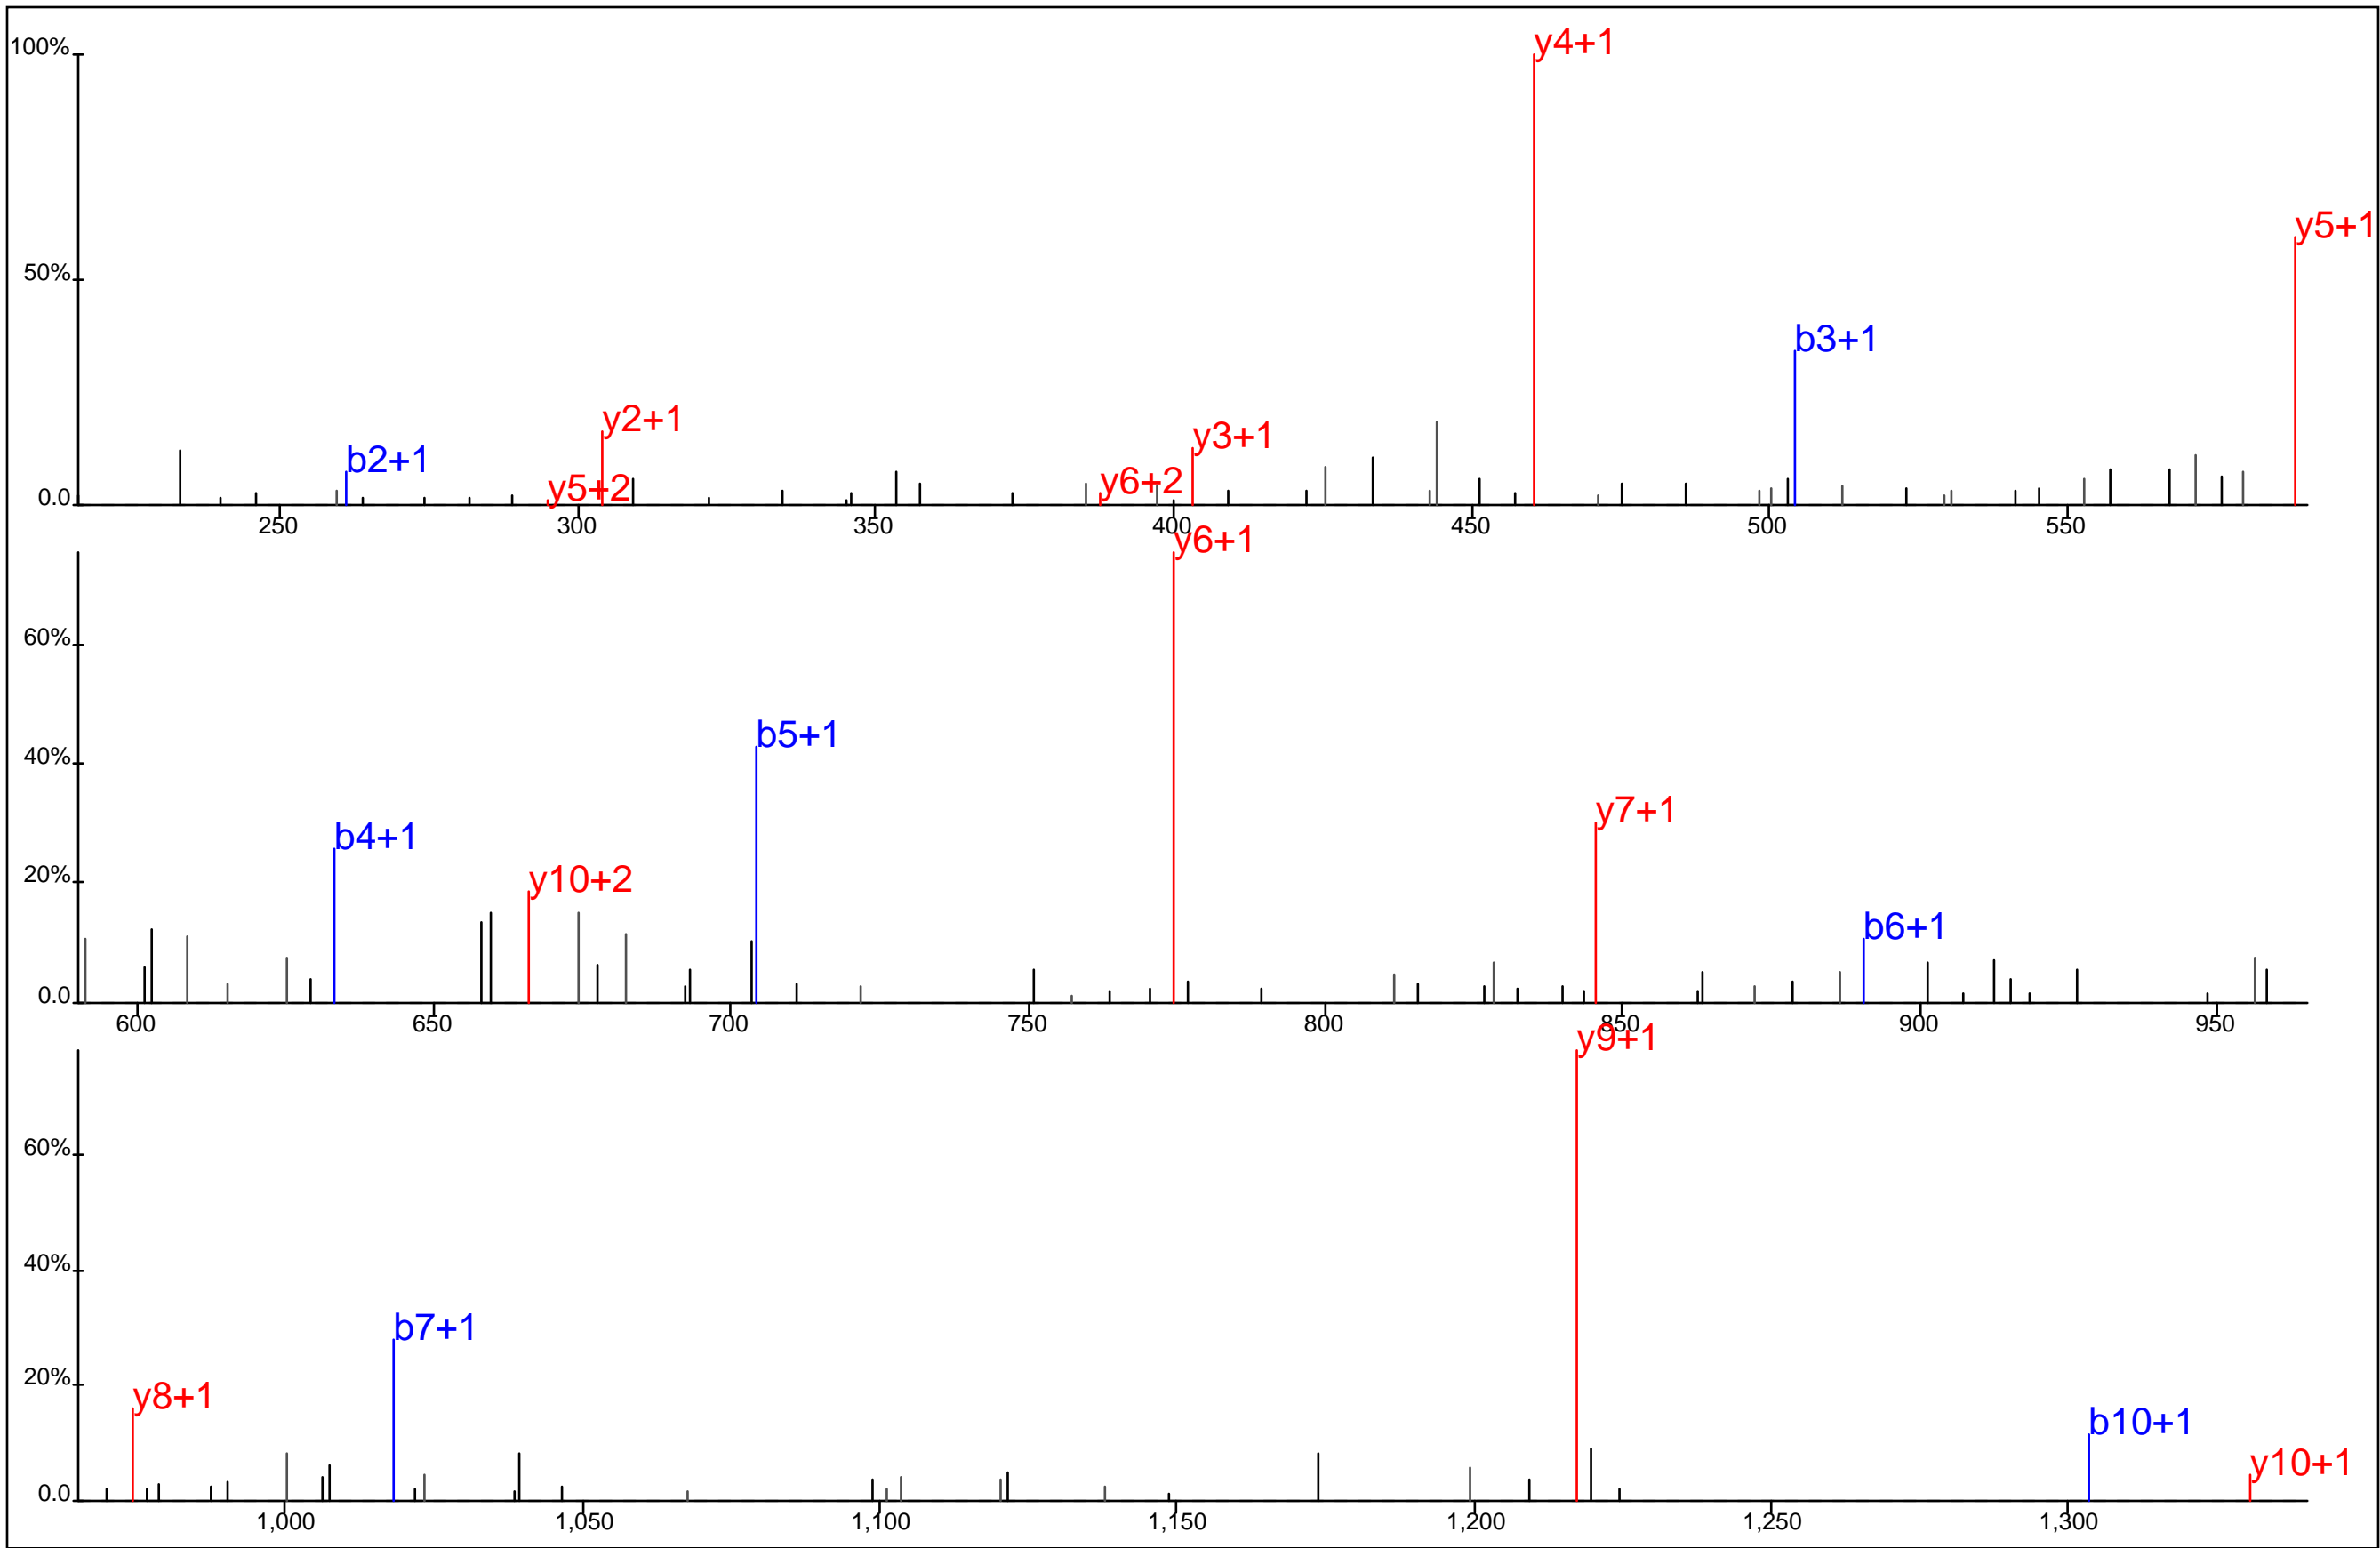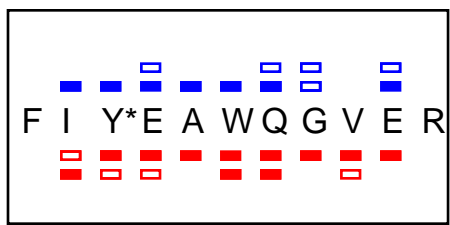

Protein Name: Hypothetical protein LOC348262  
 gi Accession: 0  
 Precursor Mass: 739.3286+2  
 Delta Mass: 0.882 ppm  
 XCorr: 90.54



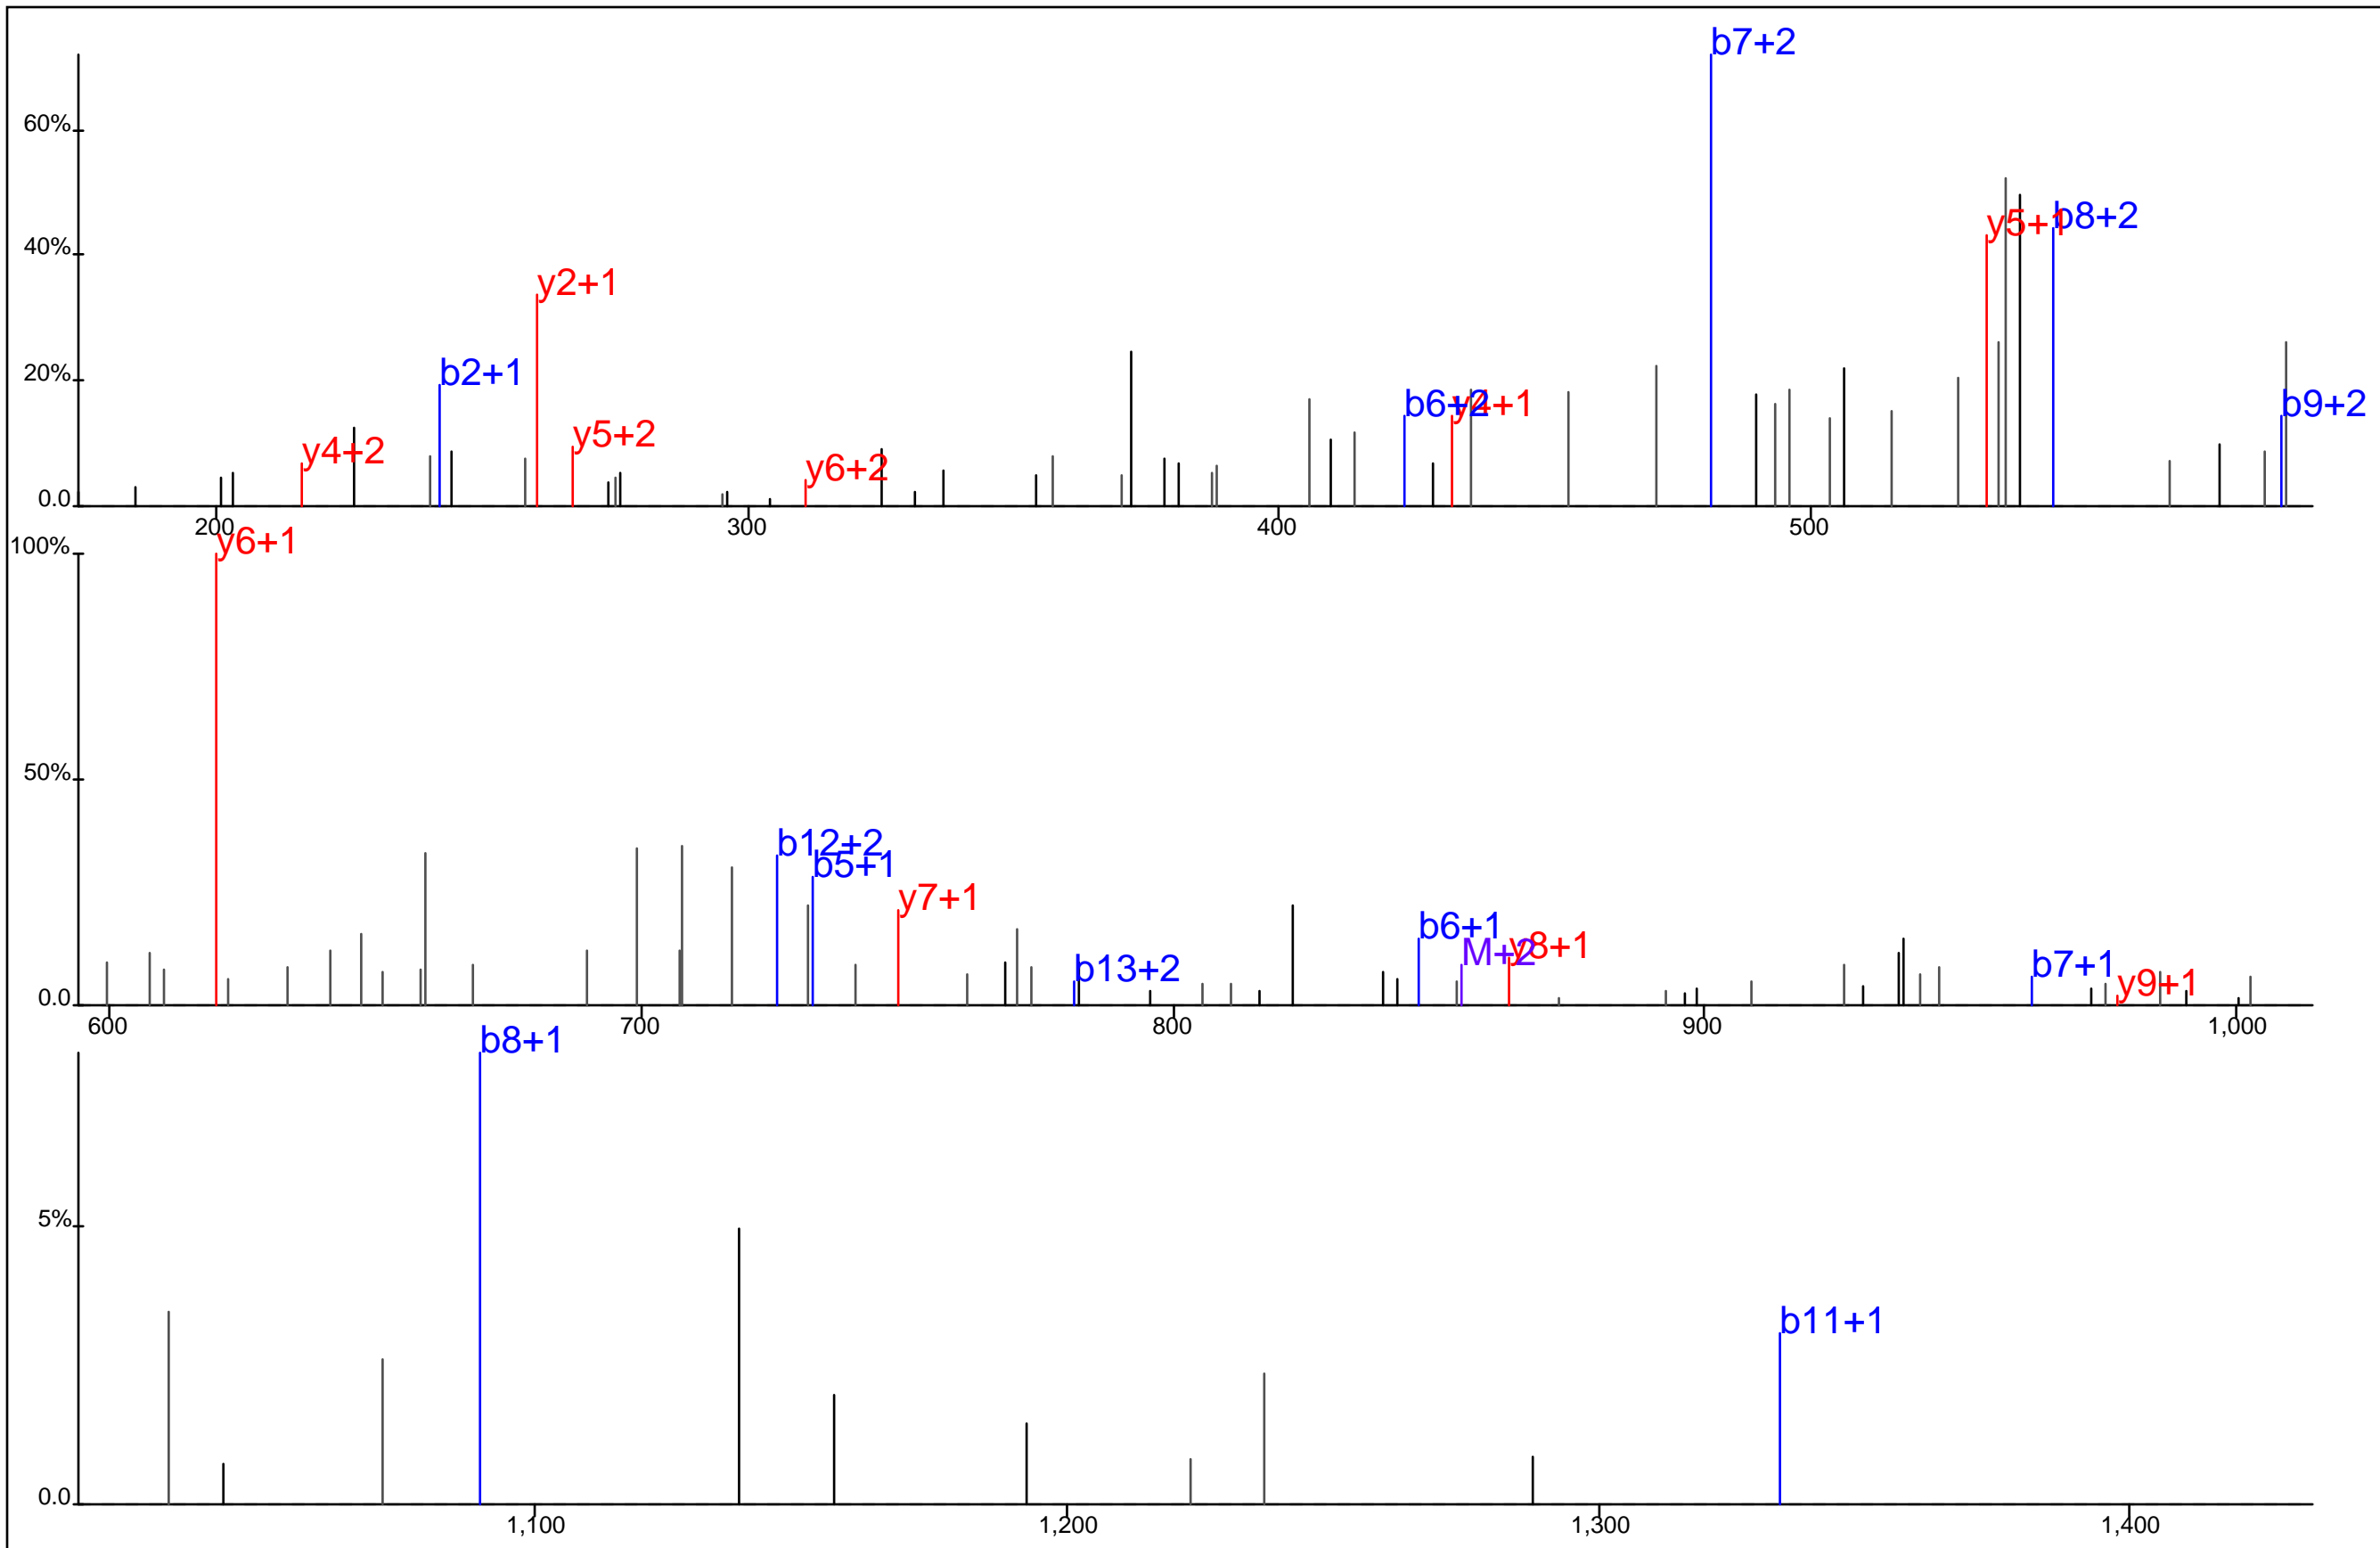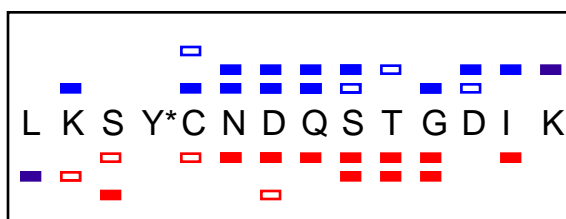

Protein Name: Hypoxanthine phosphoribosyltransferase 1  
 gi Accession: 0  
 Precursor Mass: 570.2475+3  
 Delta Mass: 1.855 ppm  
 XCorr: 24.44

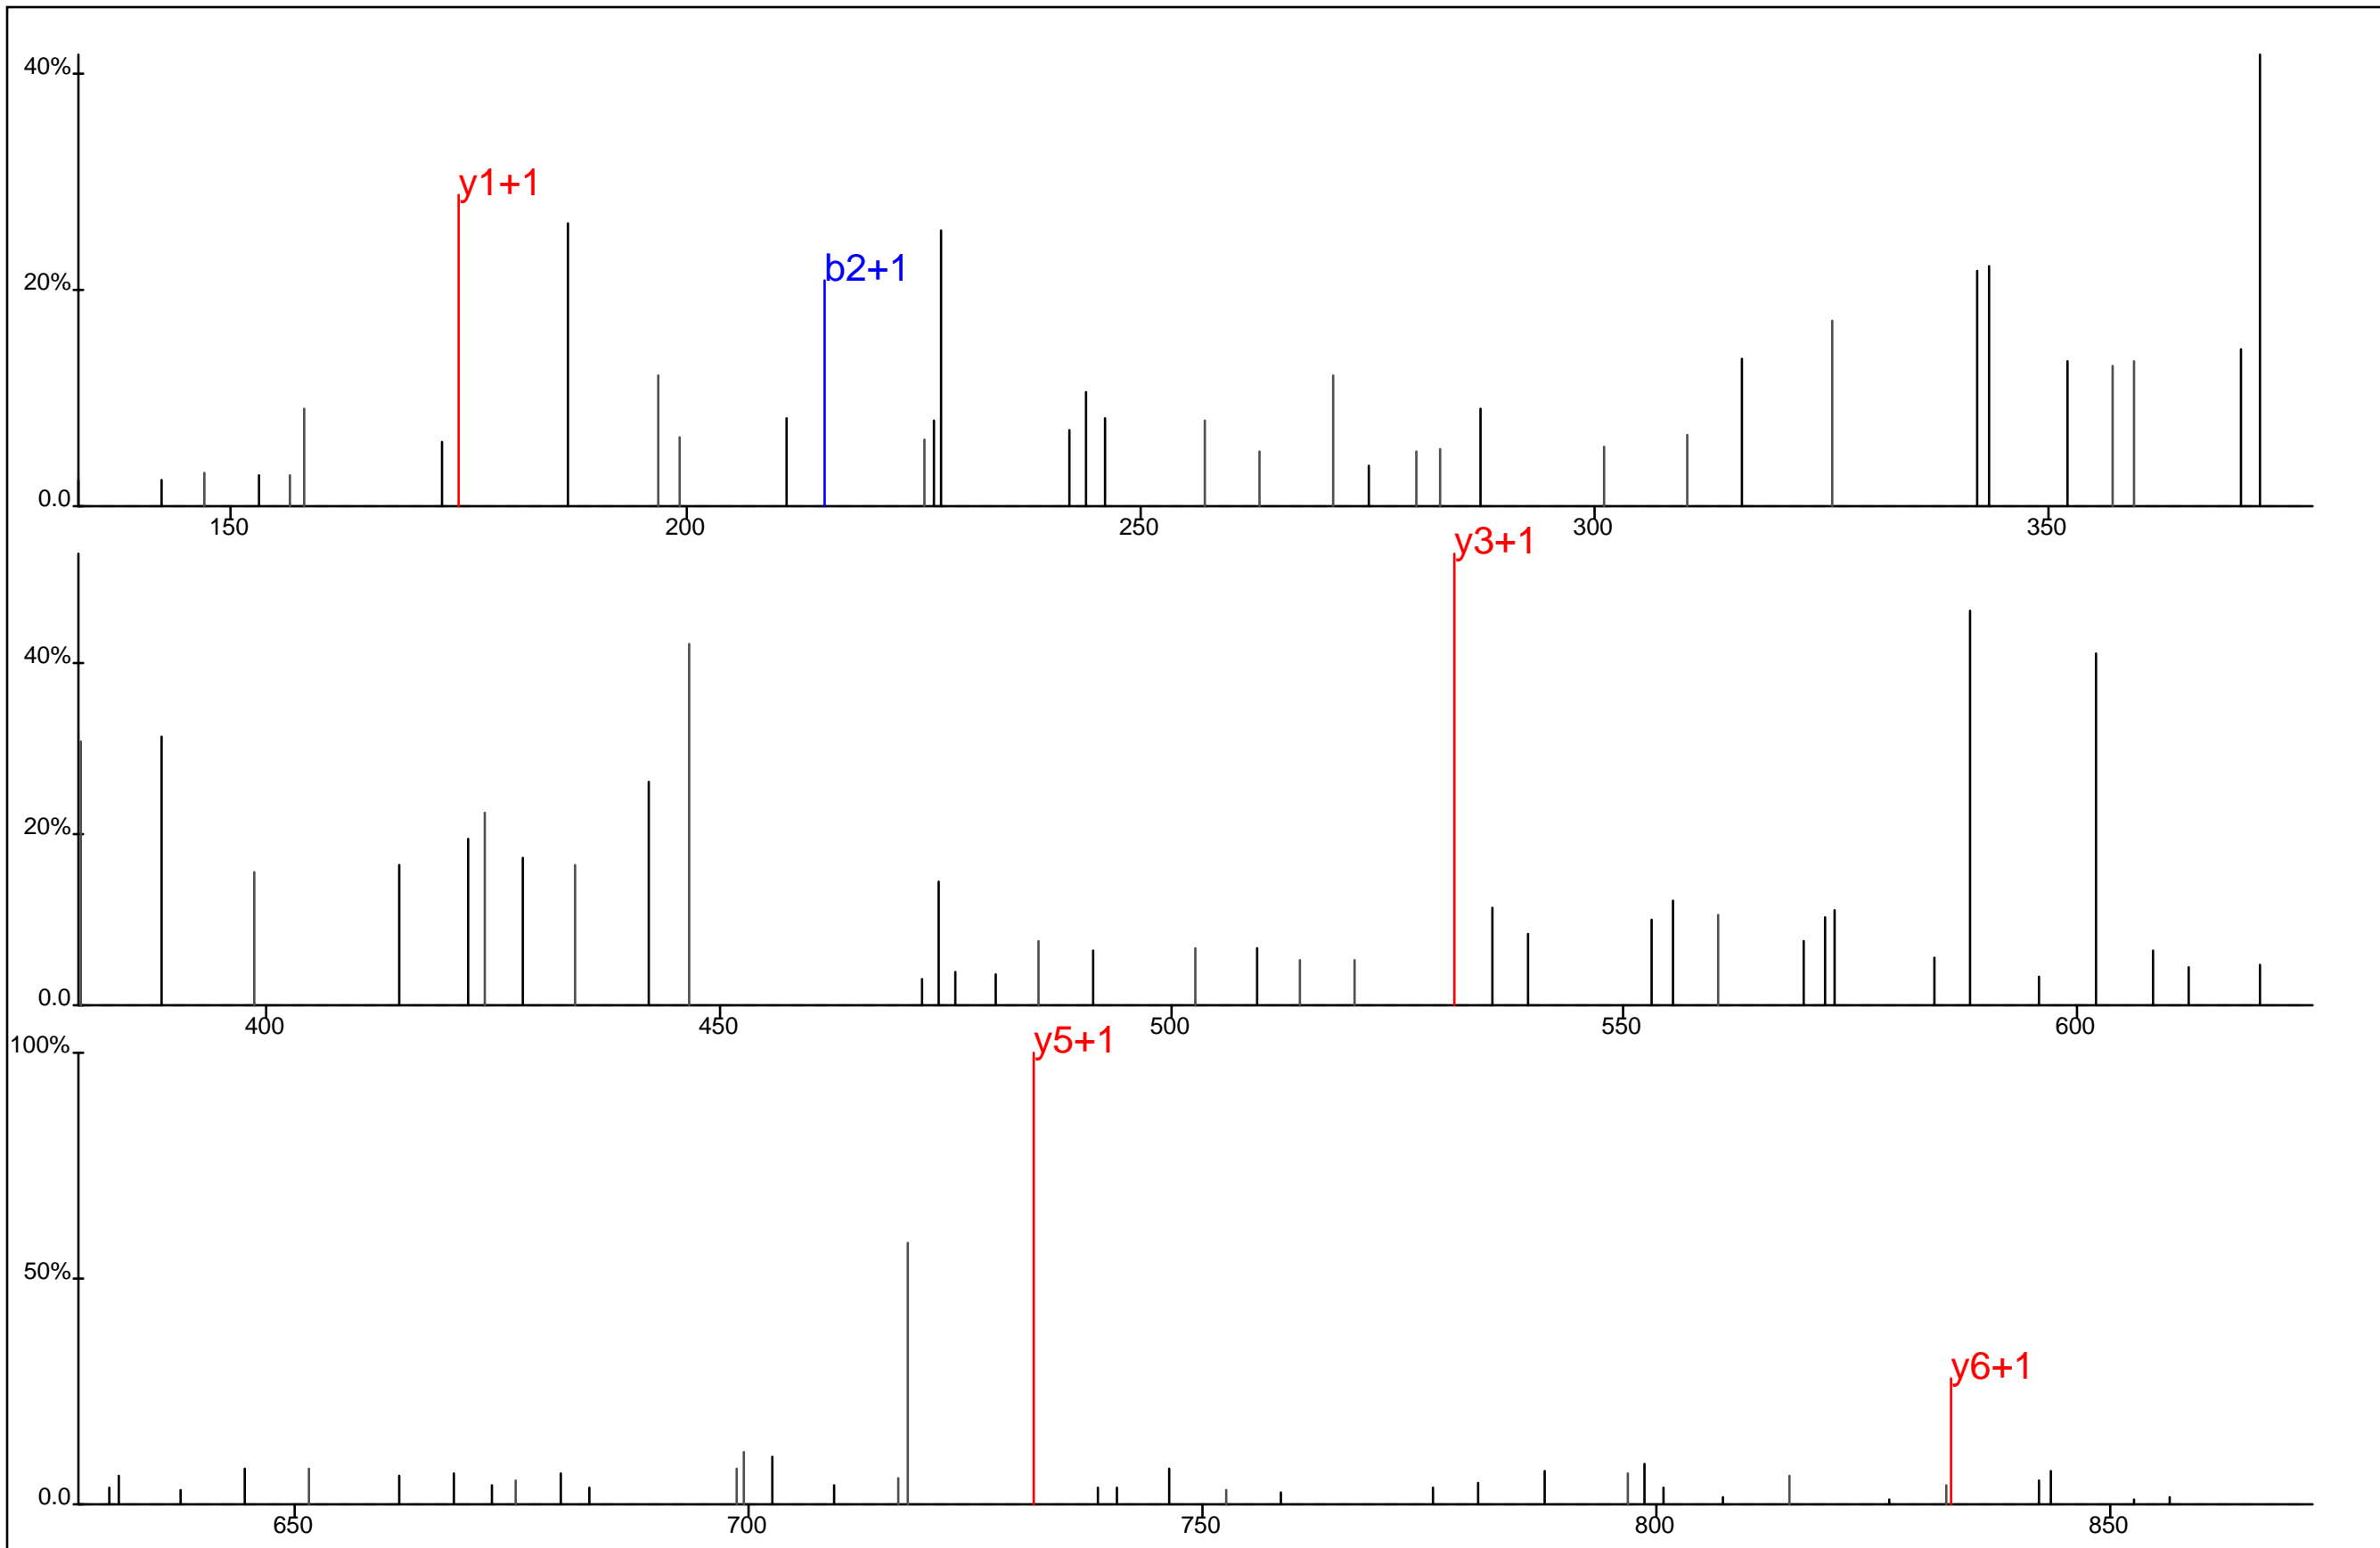


  

  
**L T I S Y\* L R**

Protein Name: Hypoxia inducible factor 1 alpha subunit  
 gi Accession: 0  
 Precursor Mass: 473.2461+2  
 Delta Mass: 4.685 ppm  
 XCorr: 20.27





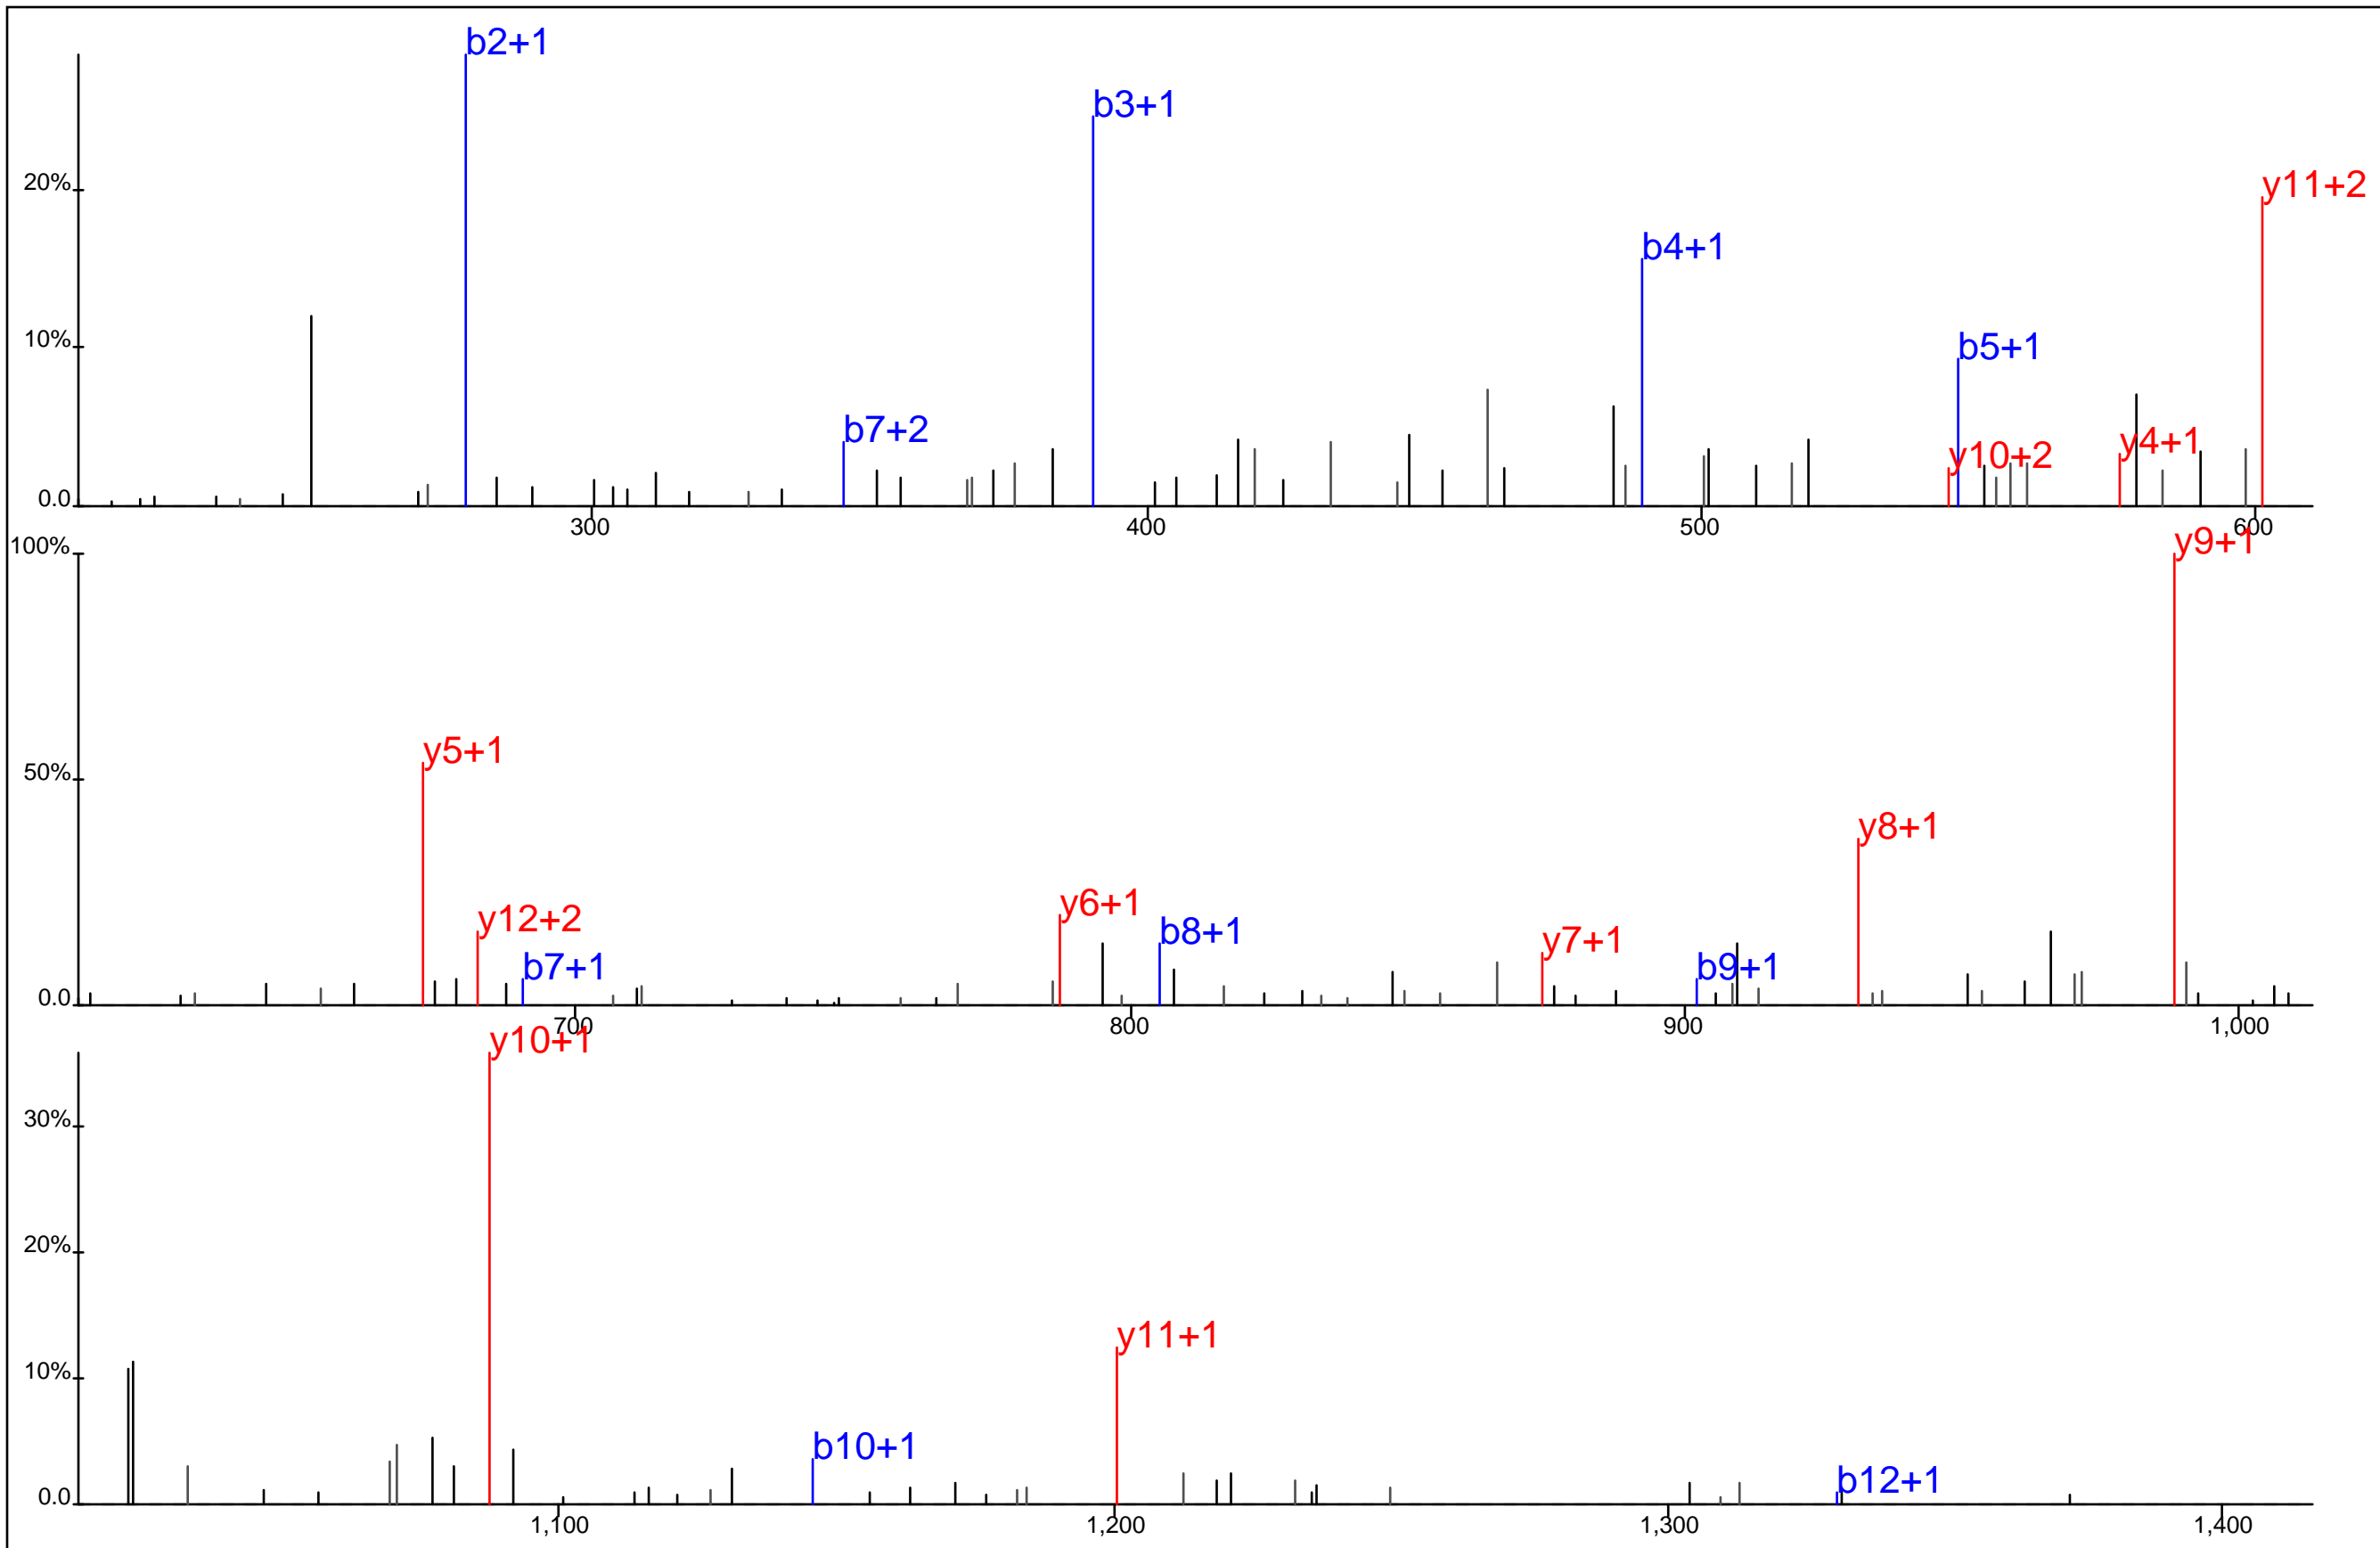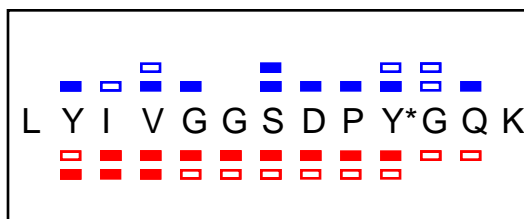

Protein Name: Influenza virus NS1A binding protein  
 gi Accession: 0  
 Precursor Mass: 738.8419+2  
 Delta Mass: 0.401 ppm  
 XCorr: 47.24

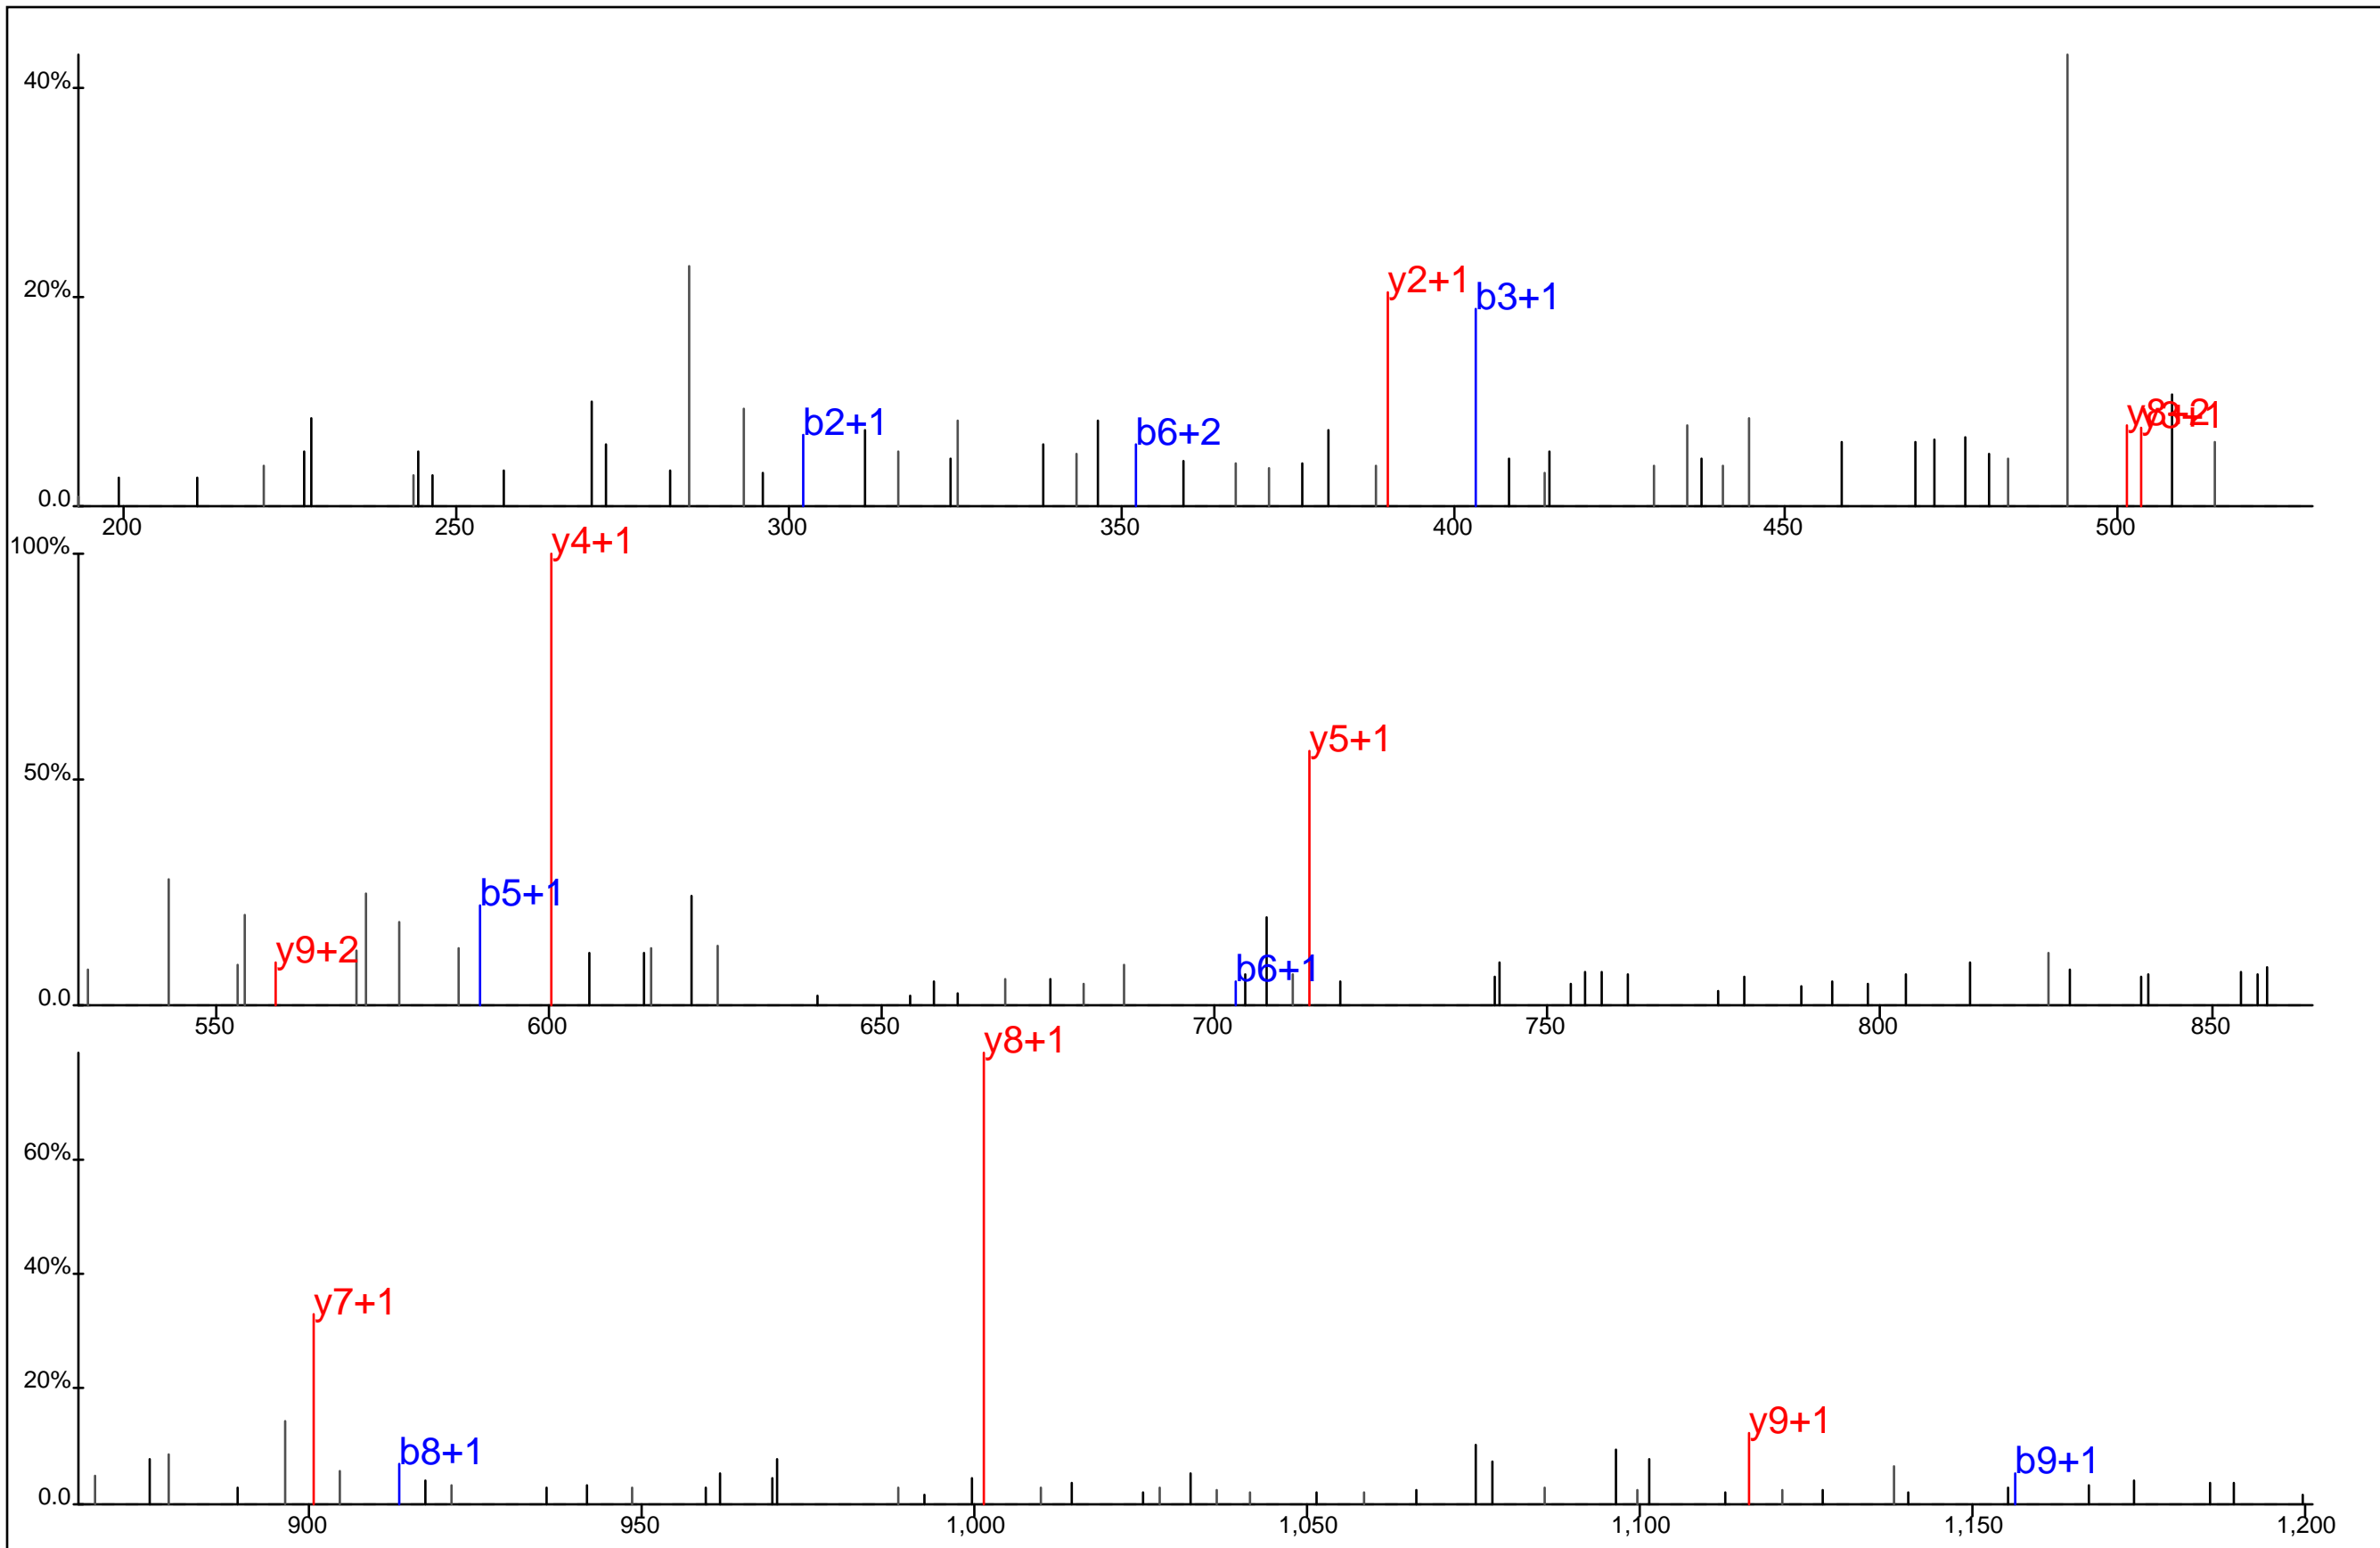

■ ■ ■ ■ ■ ■ ■ ■  
 W D T G E N P I Y\* K  
■ ■ ■ ■ ■ ■ ■ ■

Protein Name: Integrin beta 1  
 gi Accession: 0  
 Precursor Mass: 651.7766+2  
 Delta Mass: 4.324 ppm  
 XCorr: 45.39

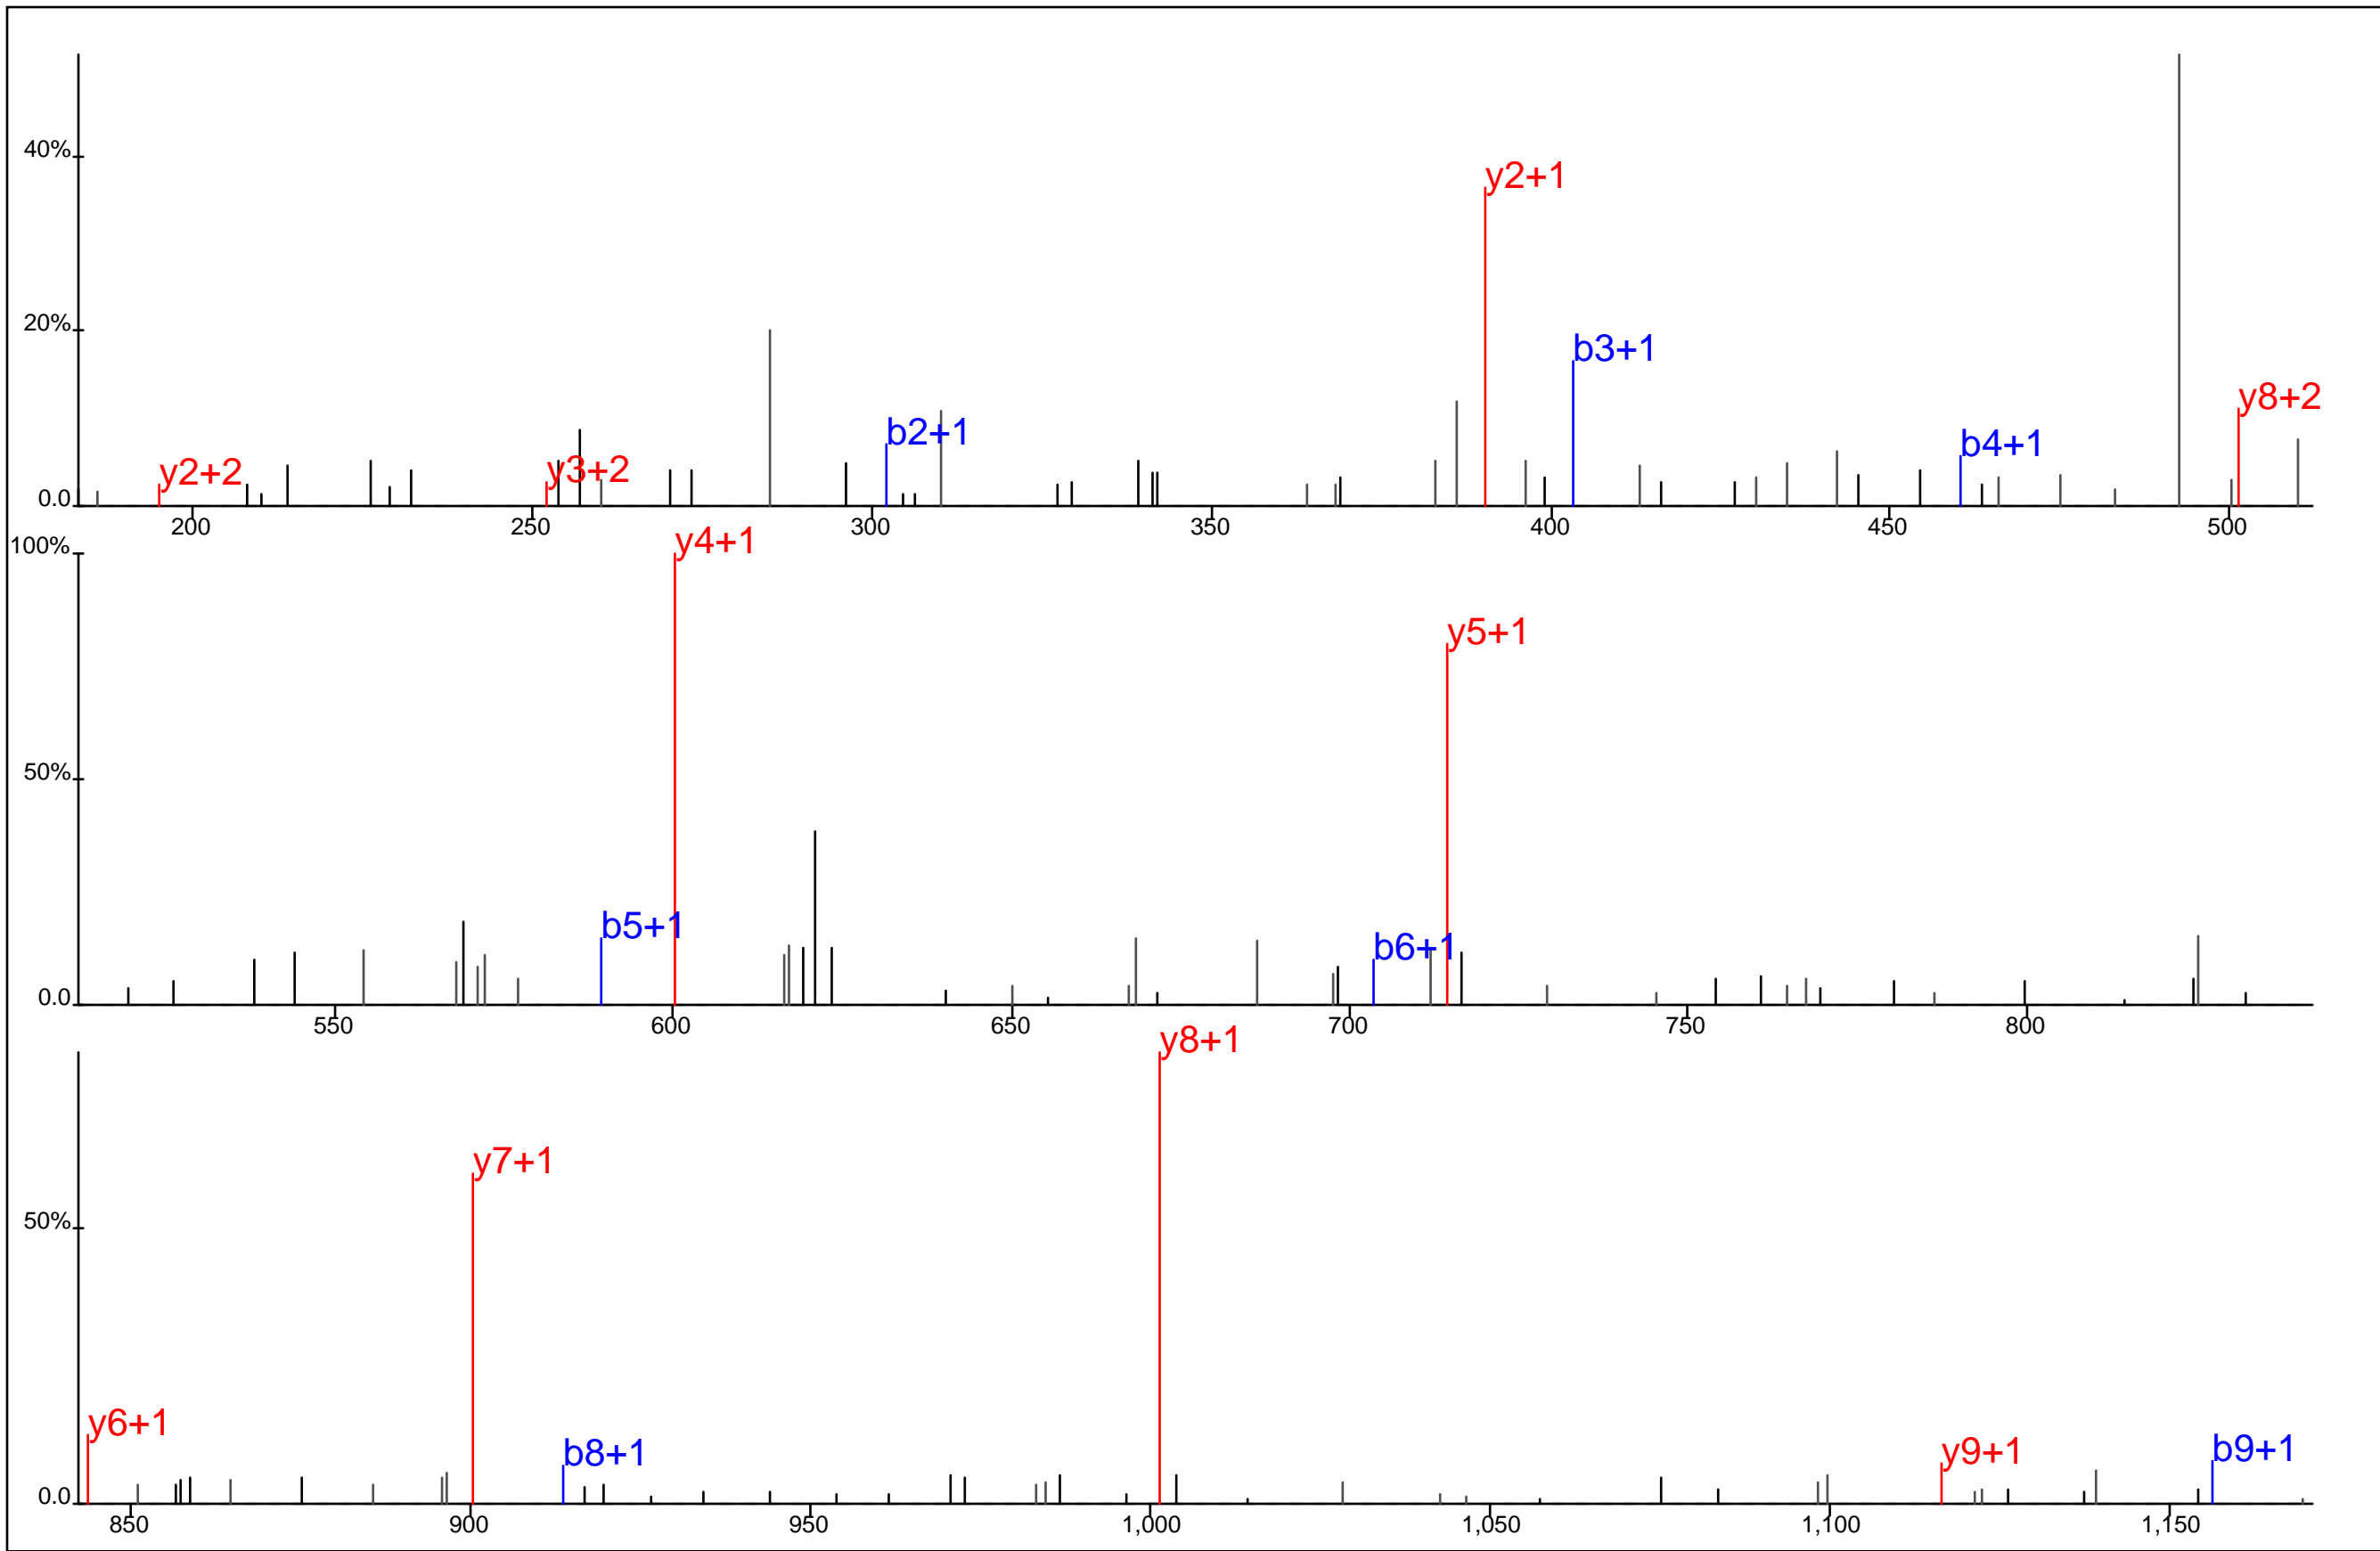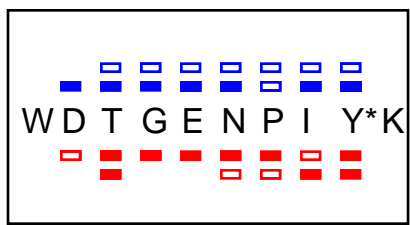

Protein Name: Integrin beta 1  
 gi Accession: 0  
 Precursor Mass: 651.7731+2  
 Delta Mass: 1.018 ppm  
 XCorr: 50.23

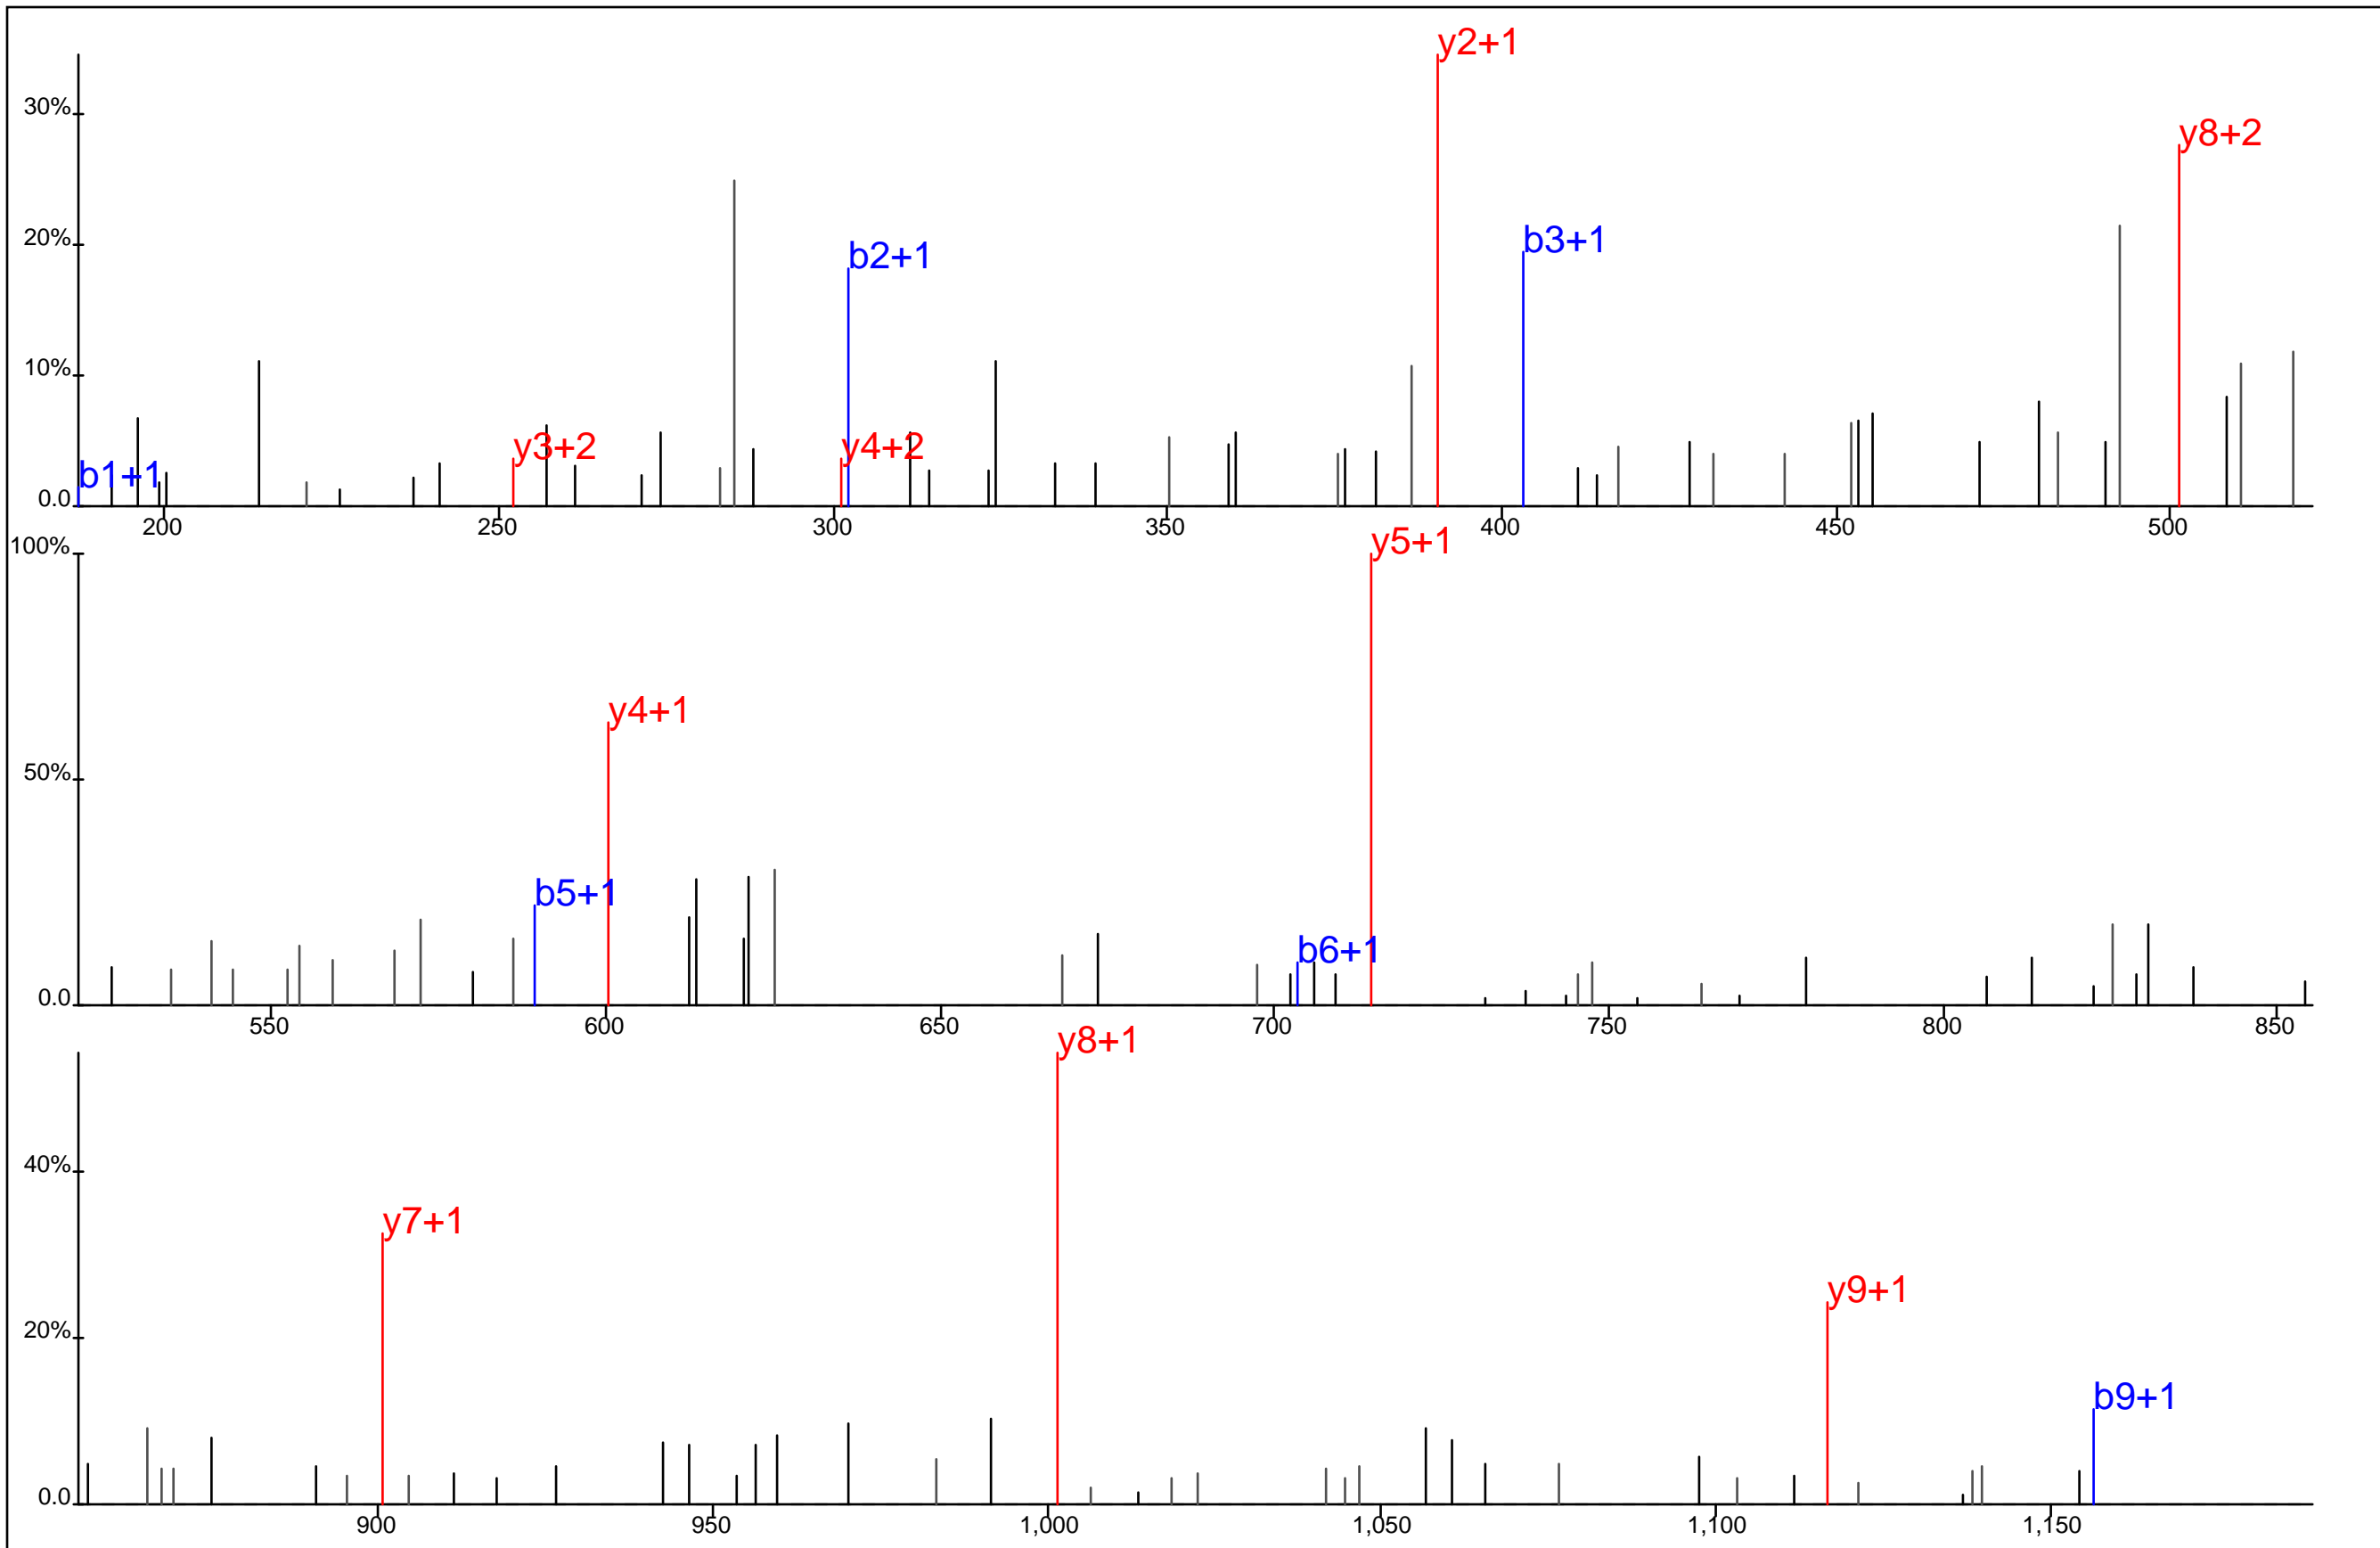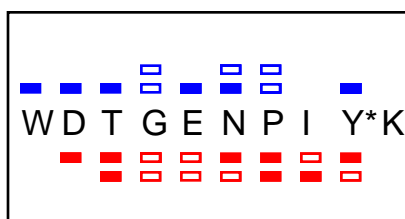

Protein Name: Integrin beta 1  
 gi Accession: 0  
 Precursor Mass: 651.7731+2  
 Delta Mass: 1.018 ppm  
 XCorr: 41.93





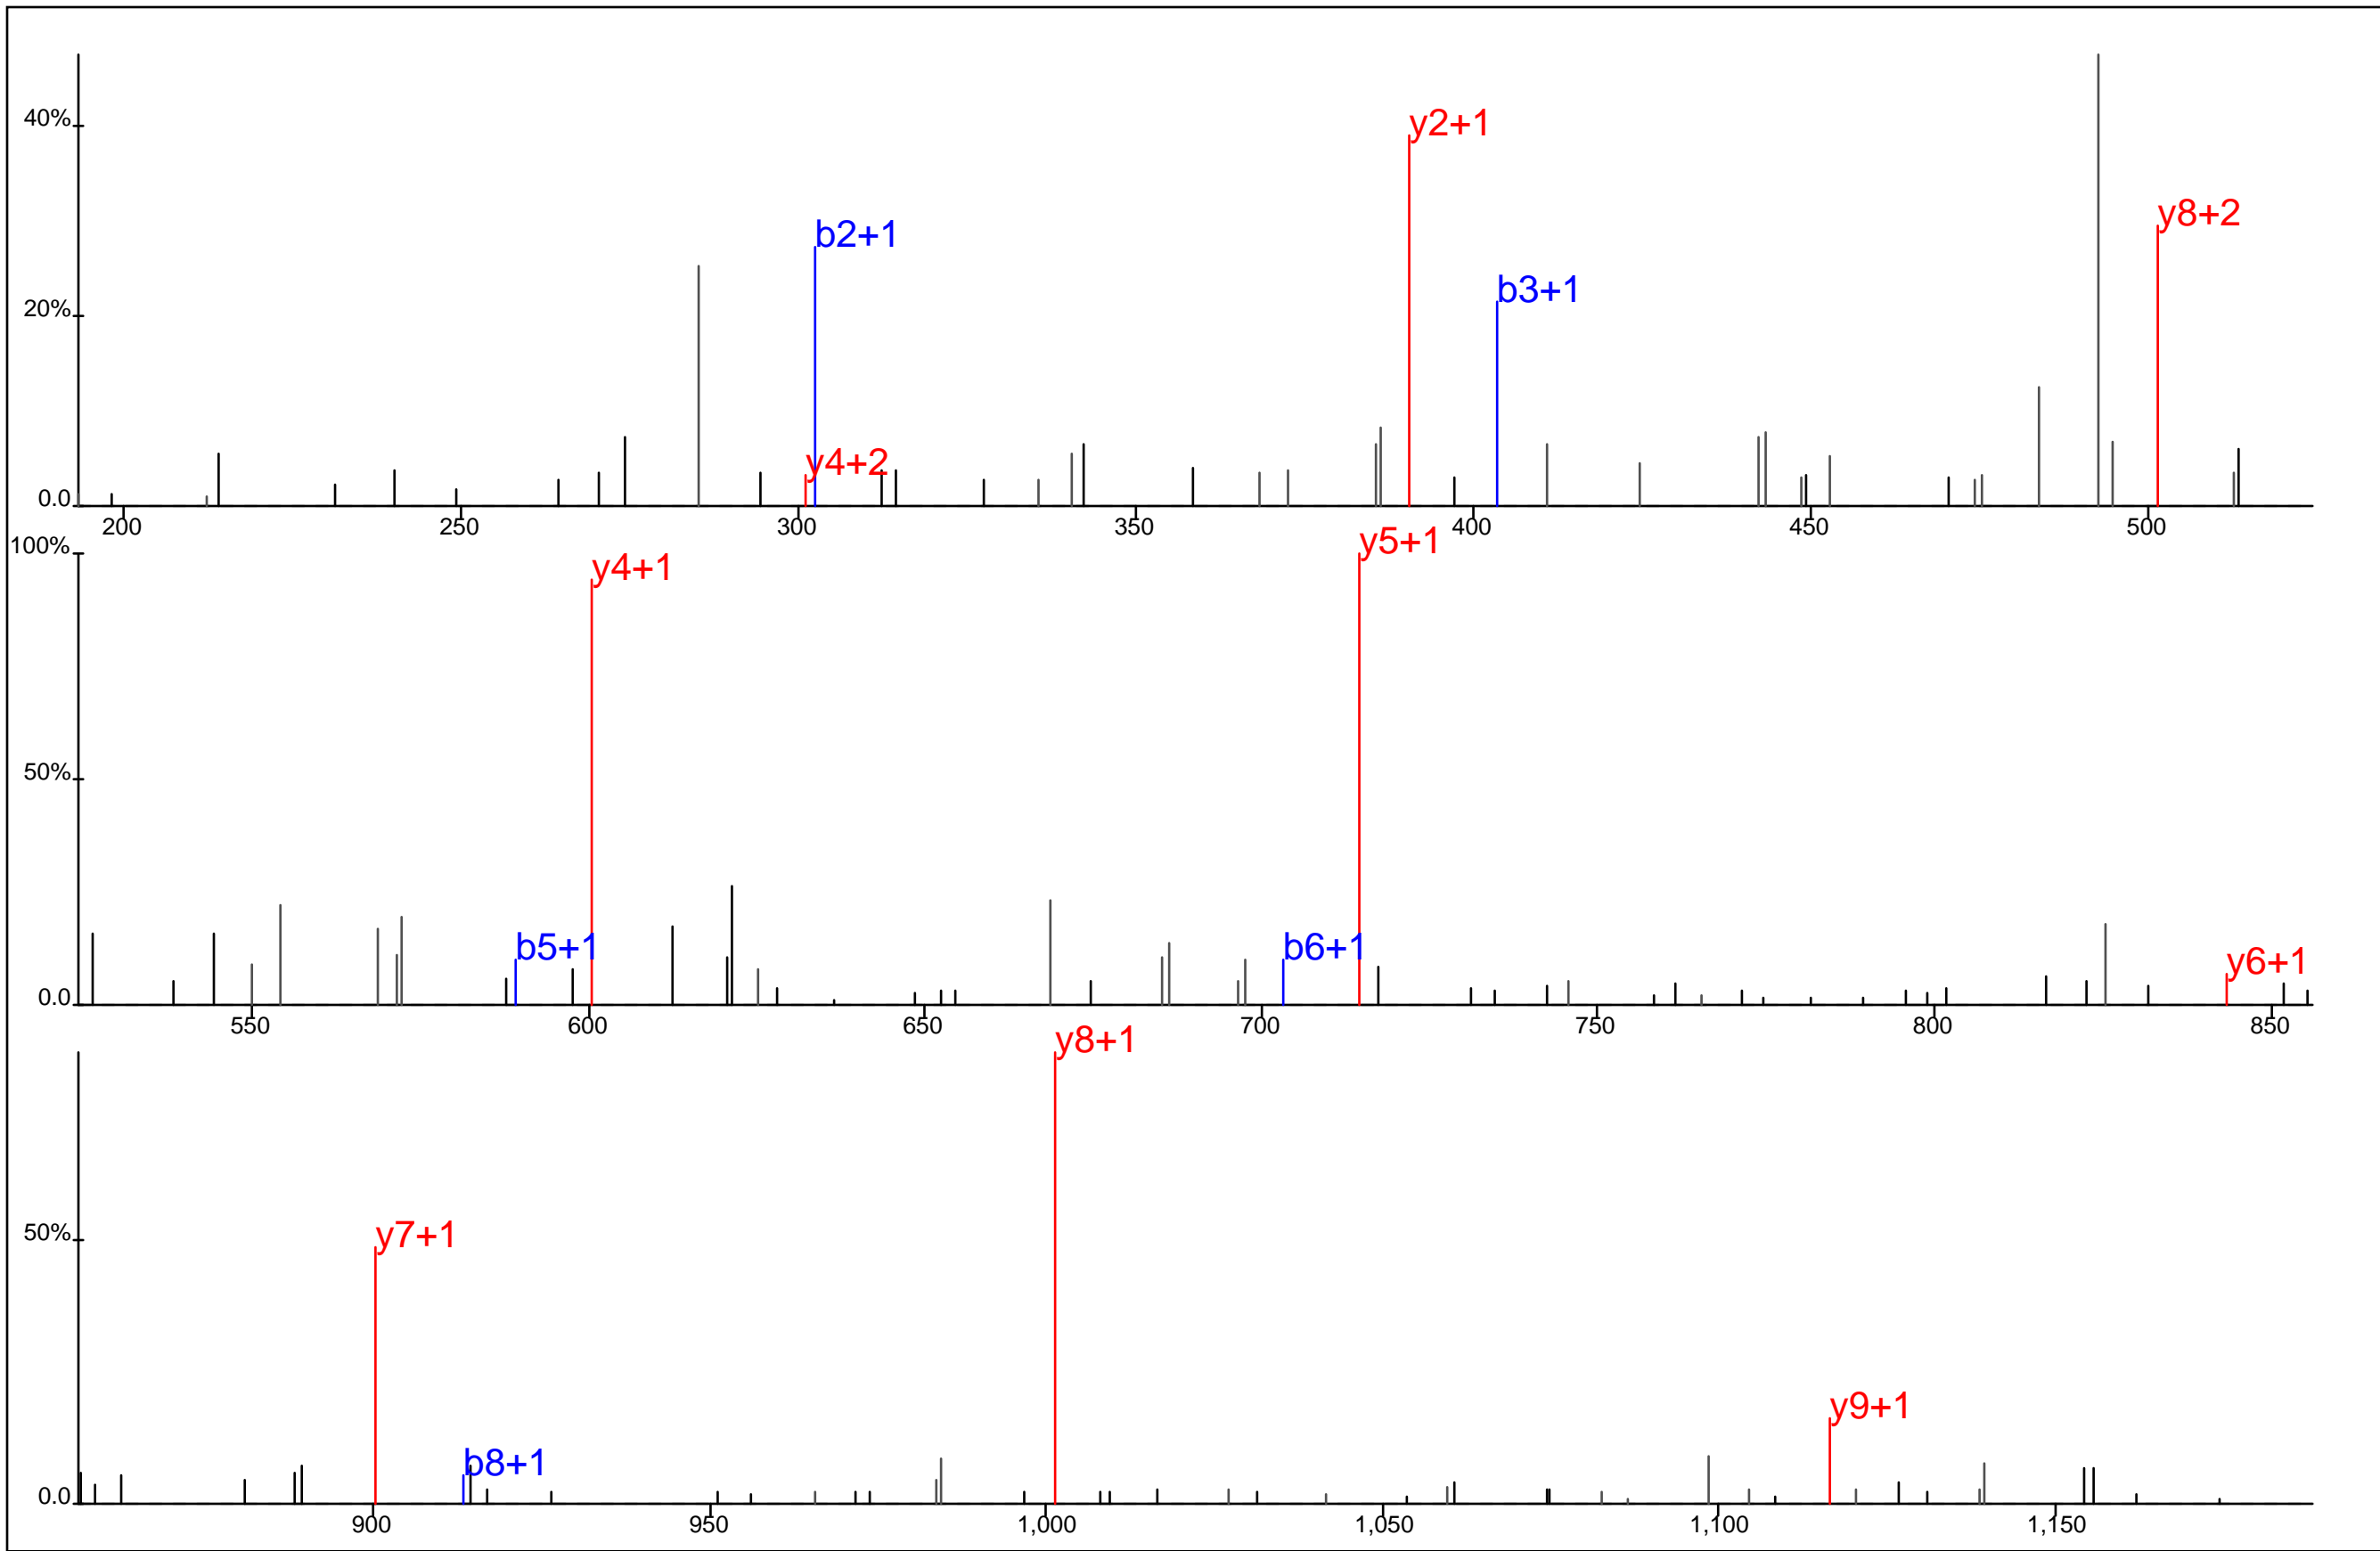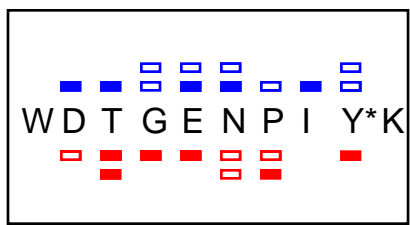

Protein Name: Integrin beta 1  
 gi Accession: 0  
 Precursor Mass: 651.7770+2  
 Delta Mass: 5.075 ppm  
 XCorr: 50.06

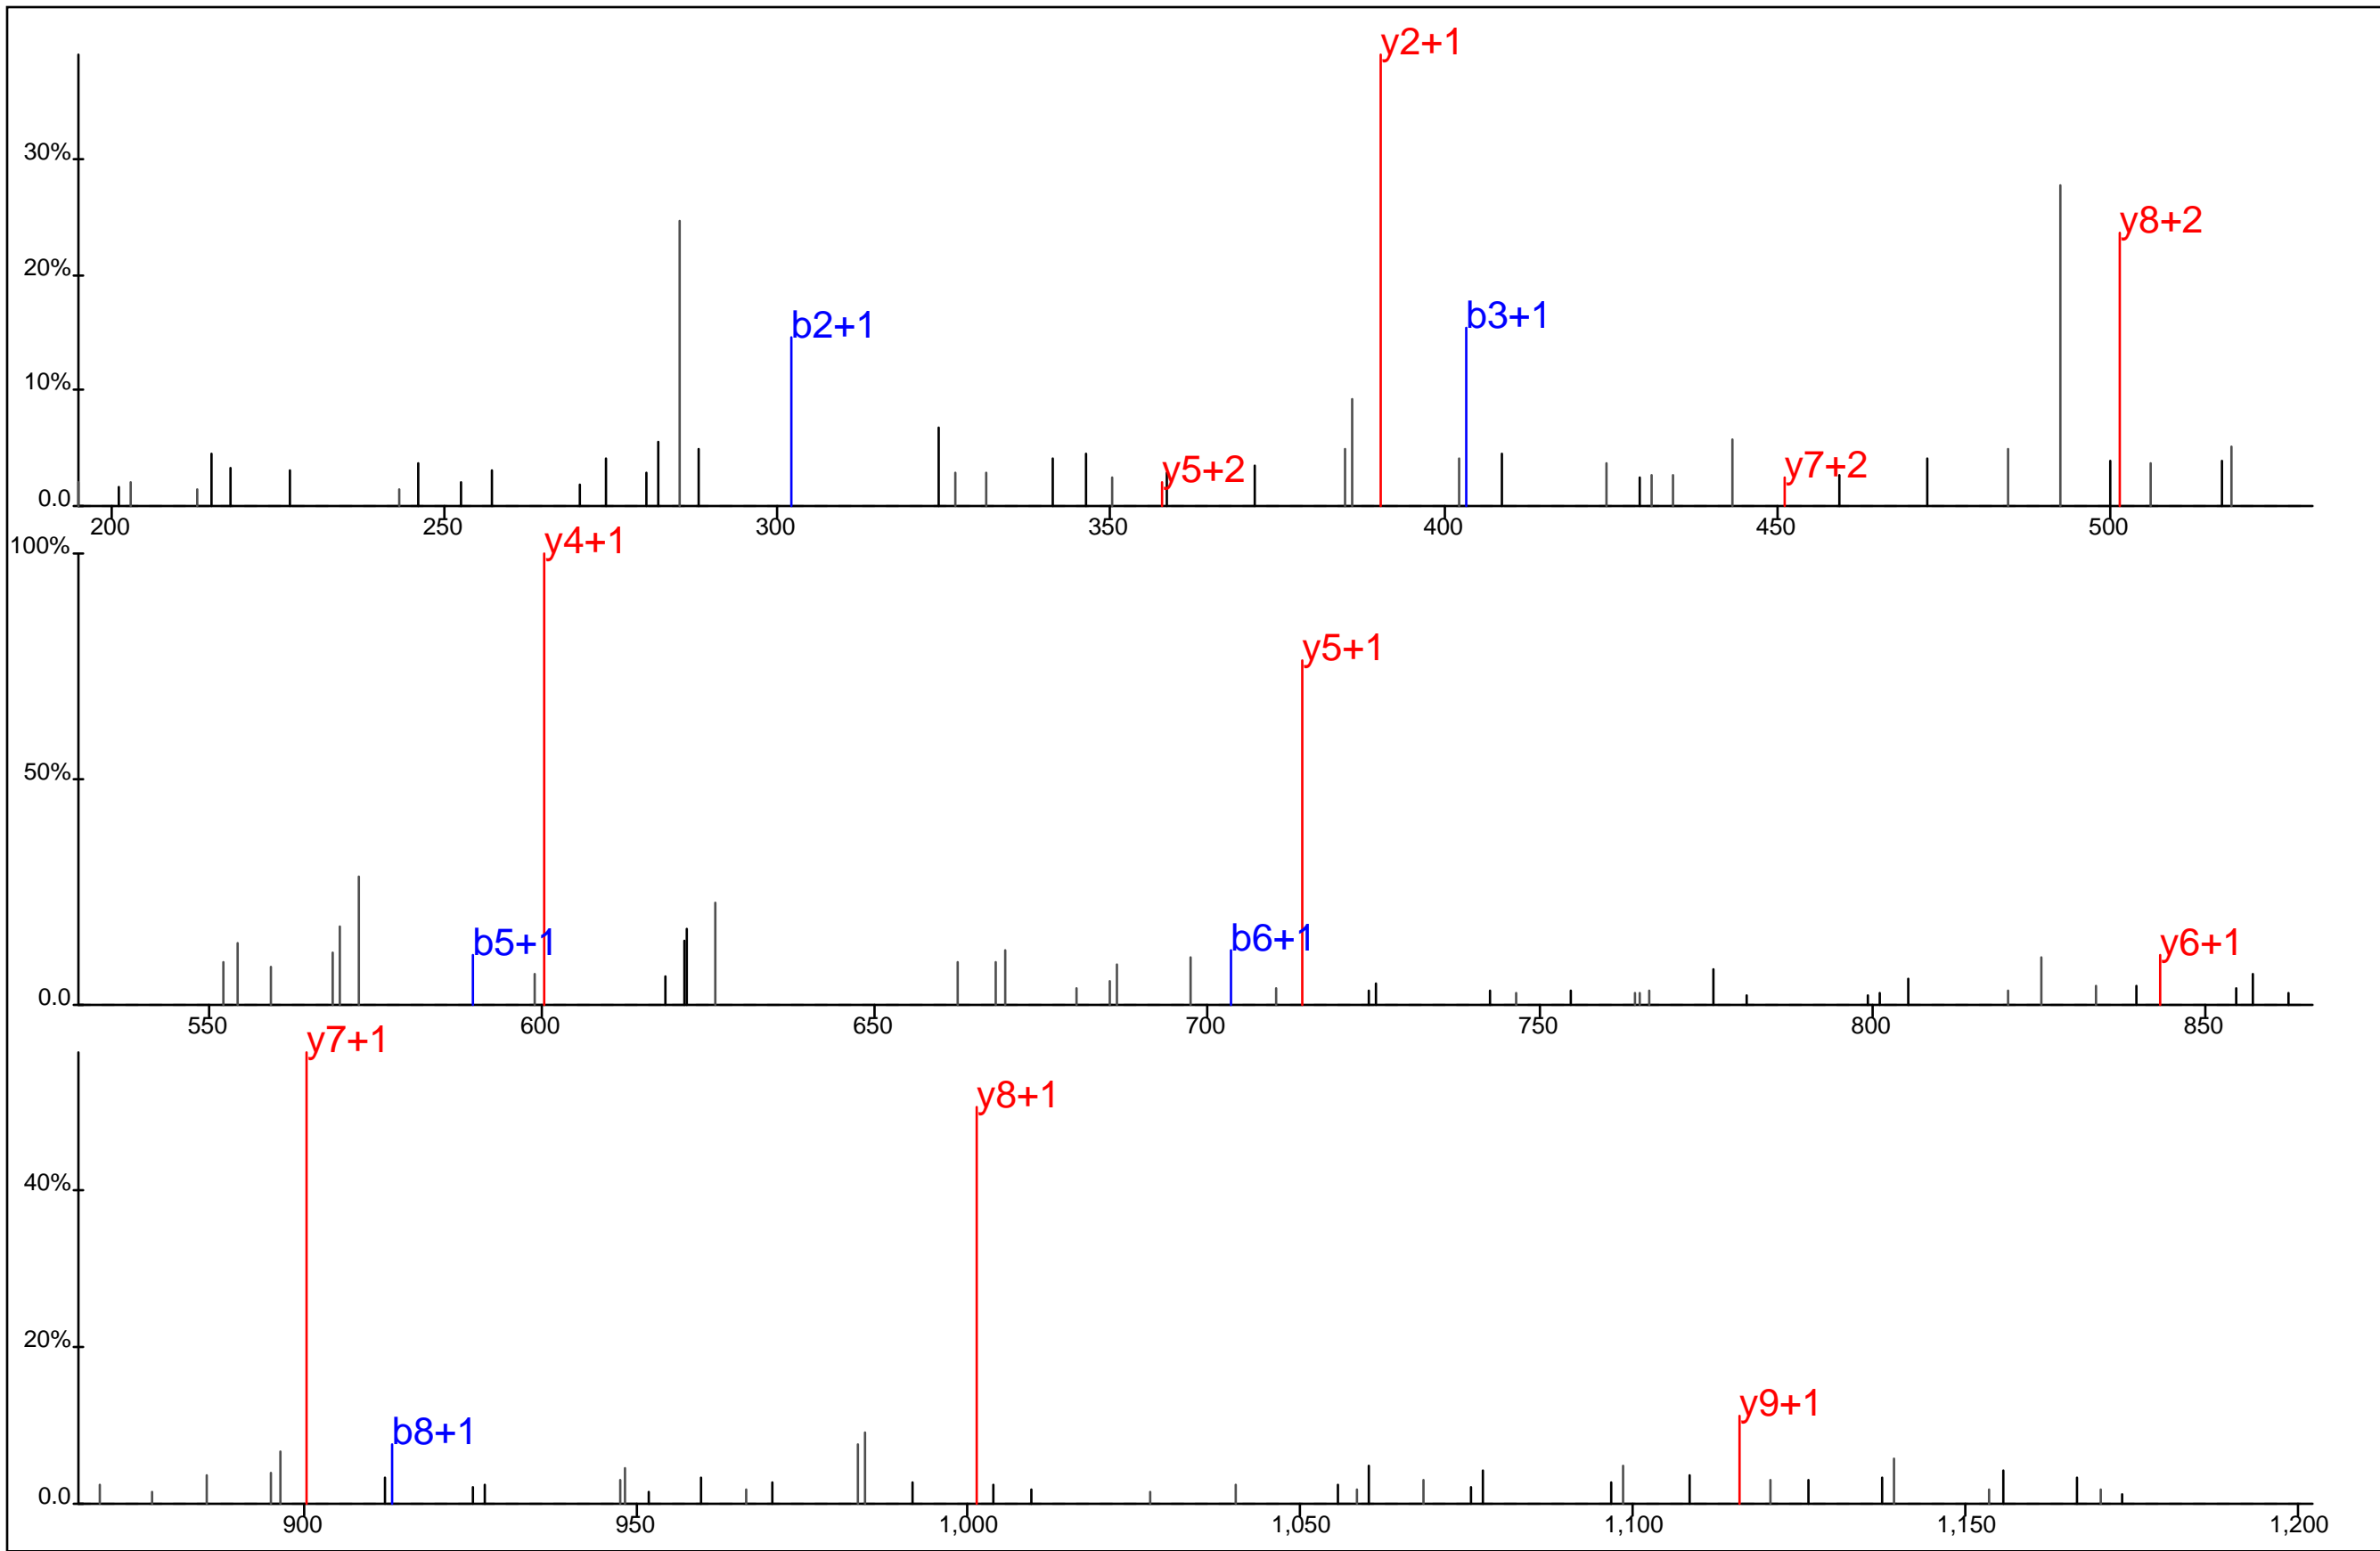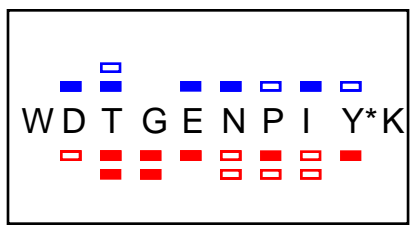

Protein Name: Integrin beta 1  
 gi Accession: 0  
 Precursor Mass: 651.7741+2  
 Delta Mass: 0.576 ppm  
 XCorr: 57.86

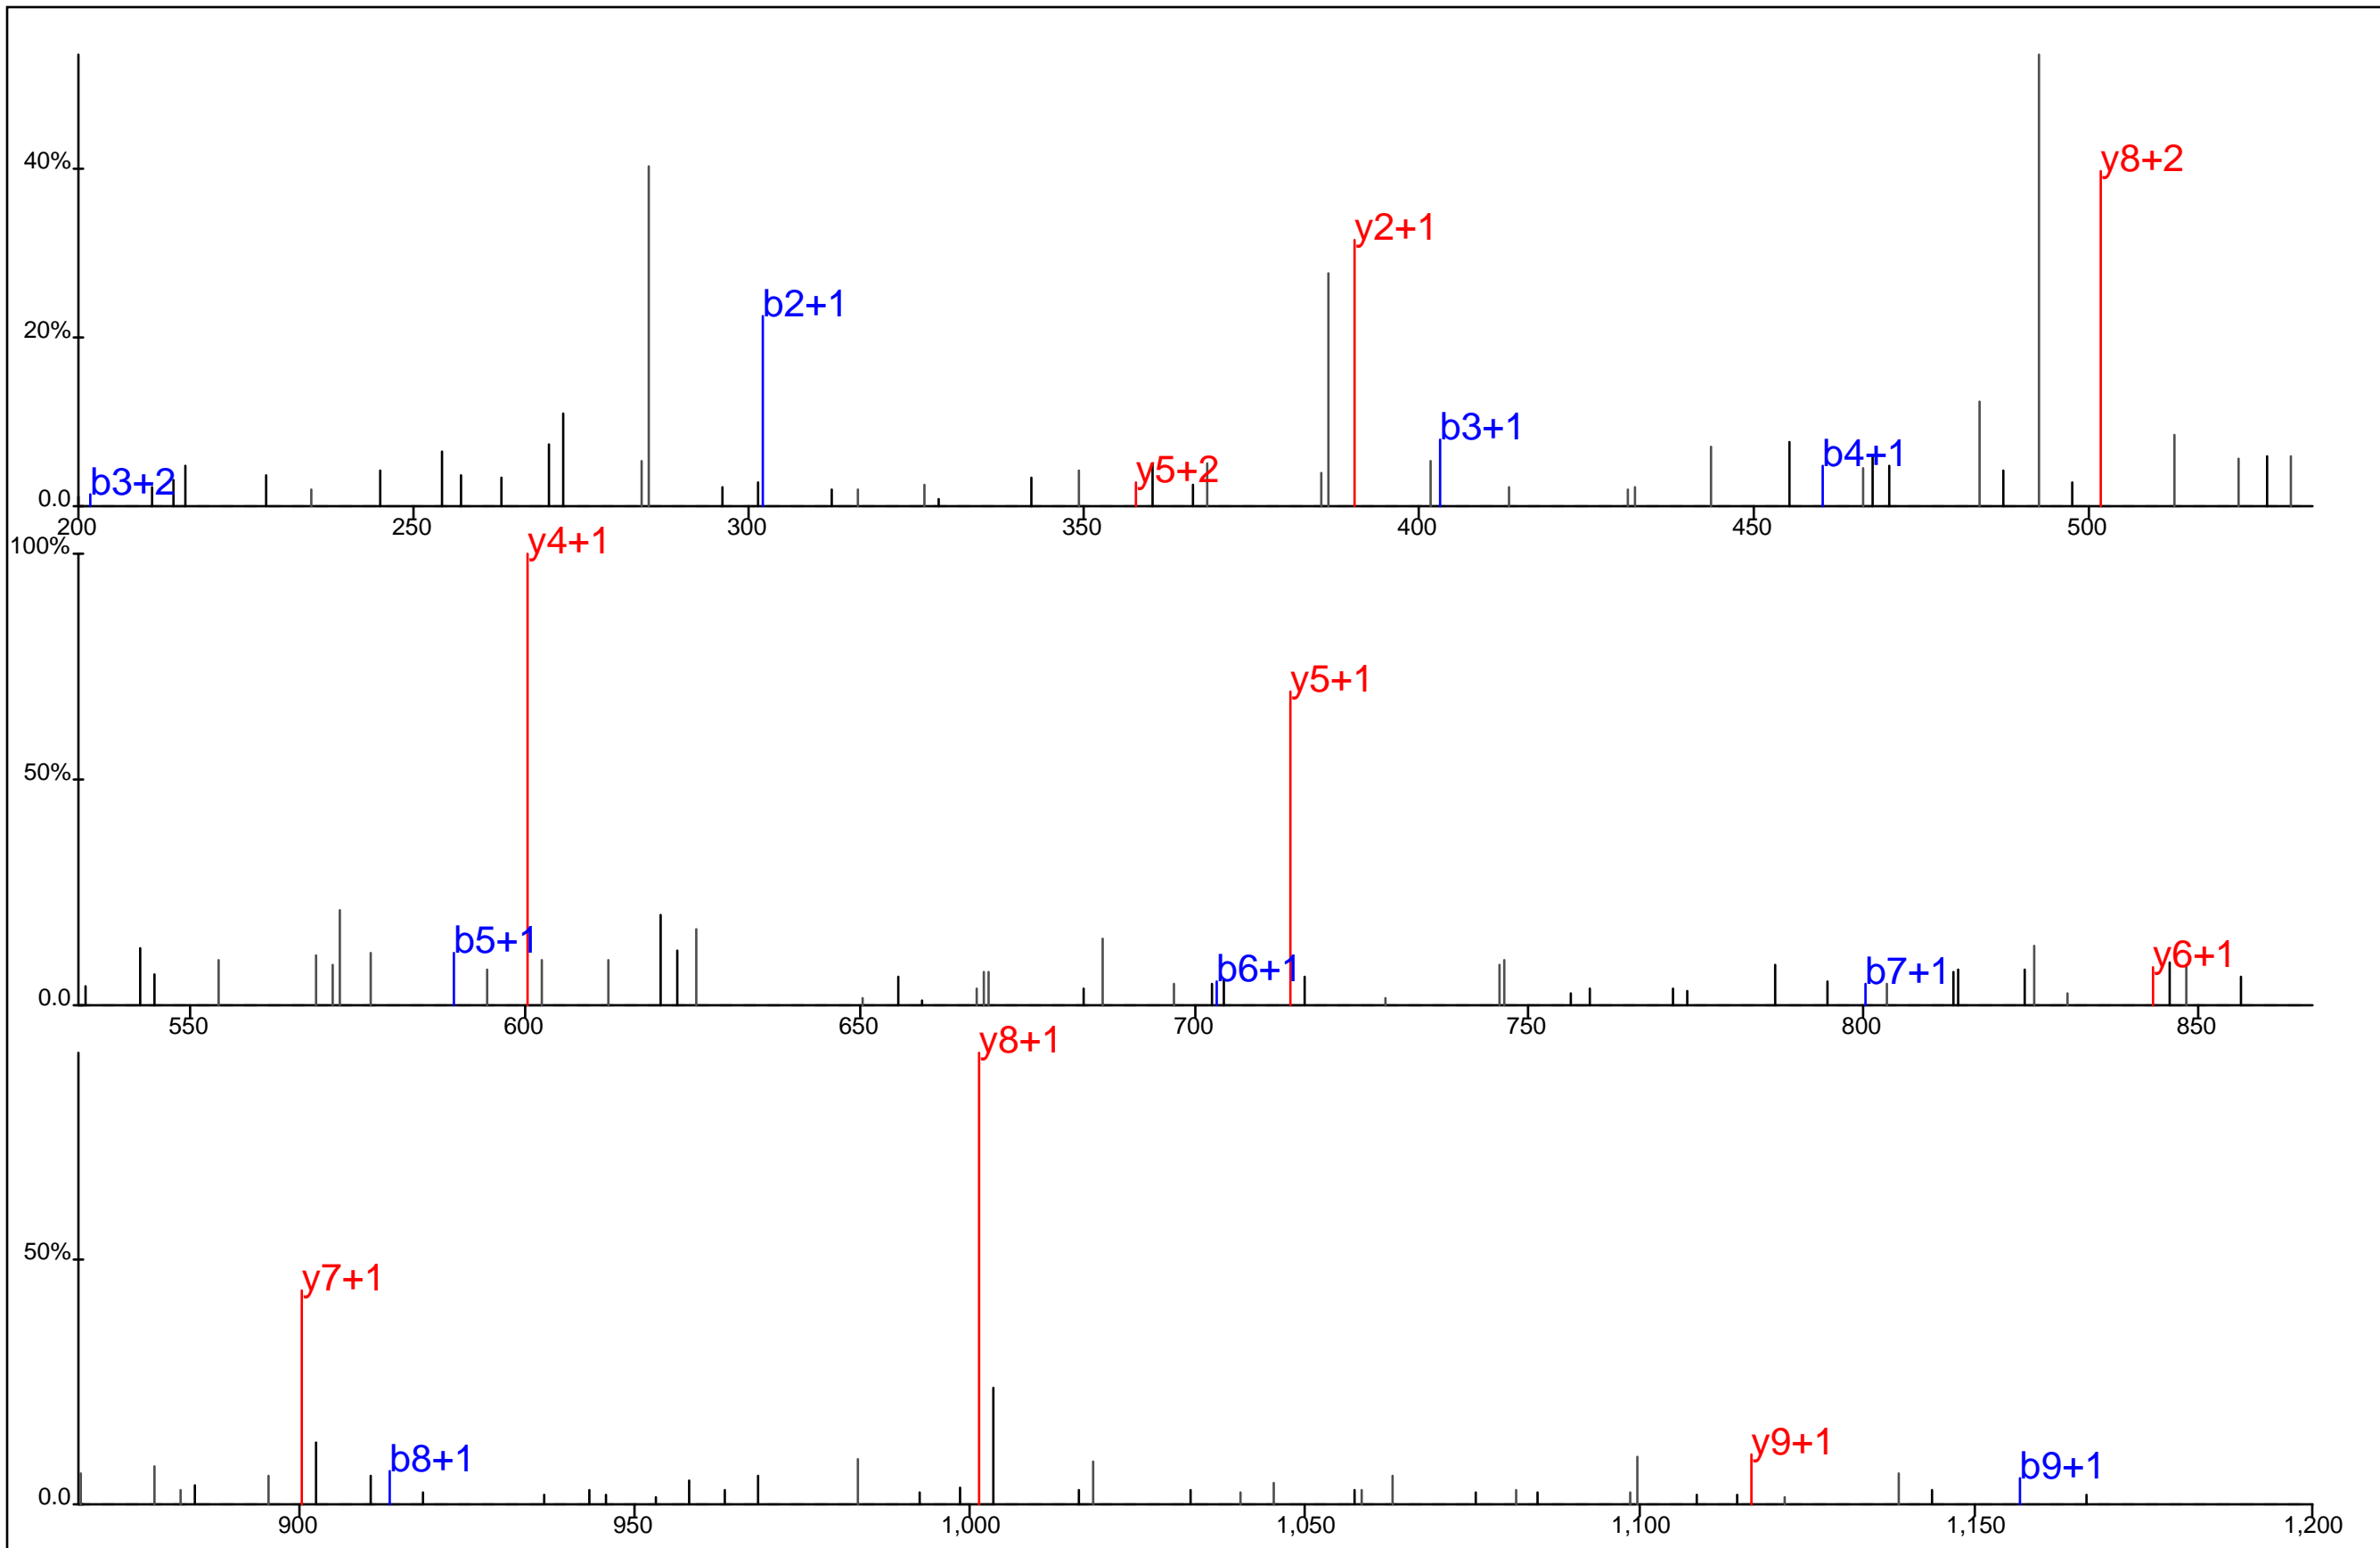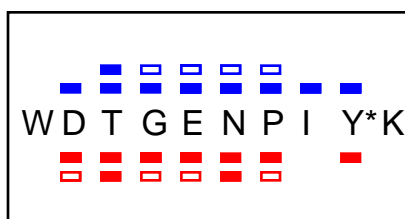

Protein Name: Integrin beta 1  
 gi Accession: 0  
 Precursor Mass: 651.7745+2  
 Delta Mass: 1.231 ppm  
 XCorr: 46.31

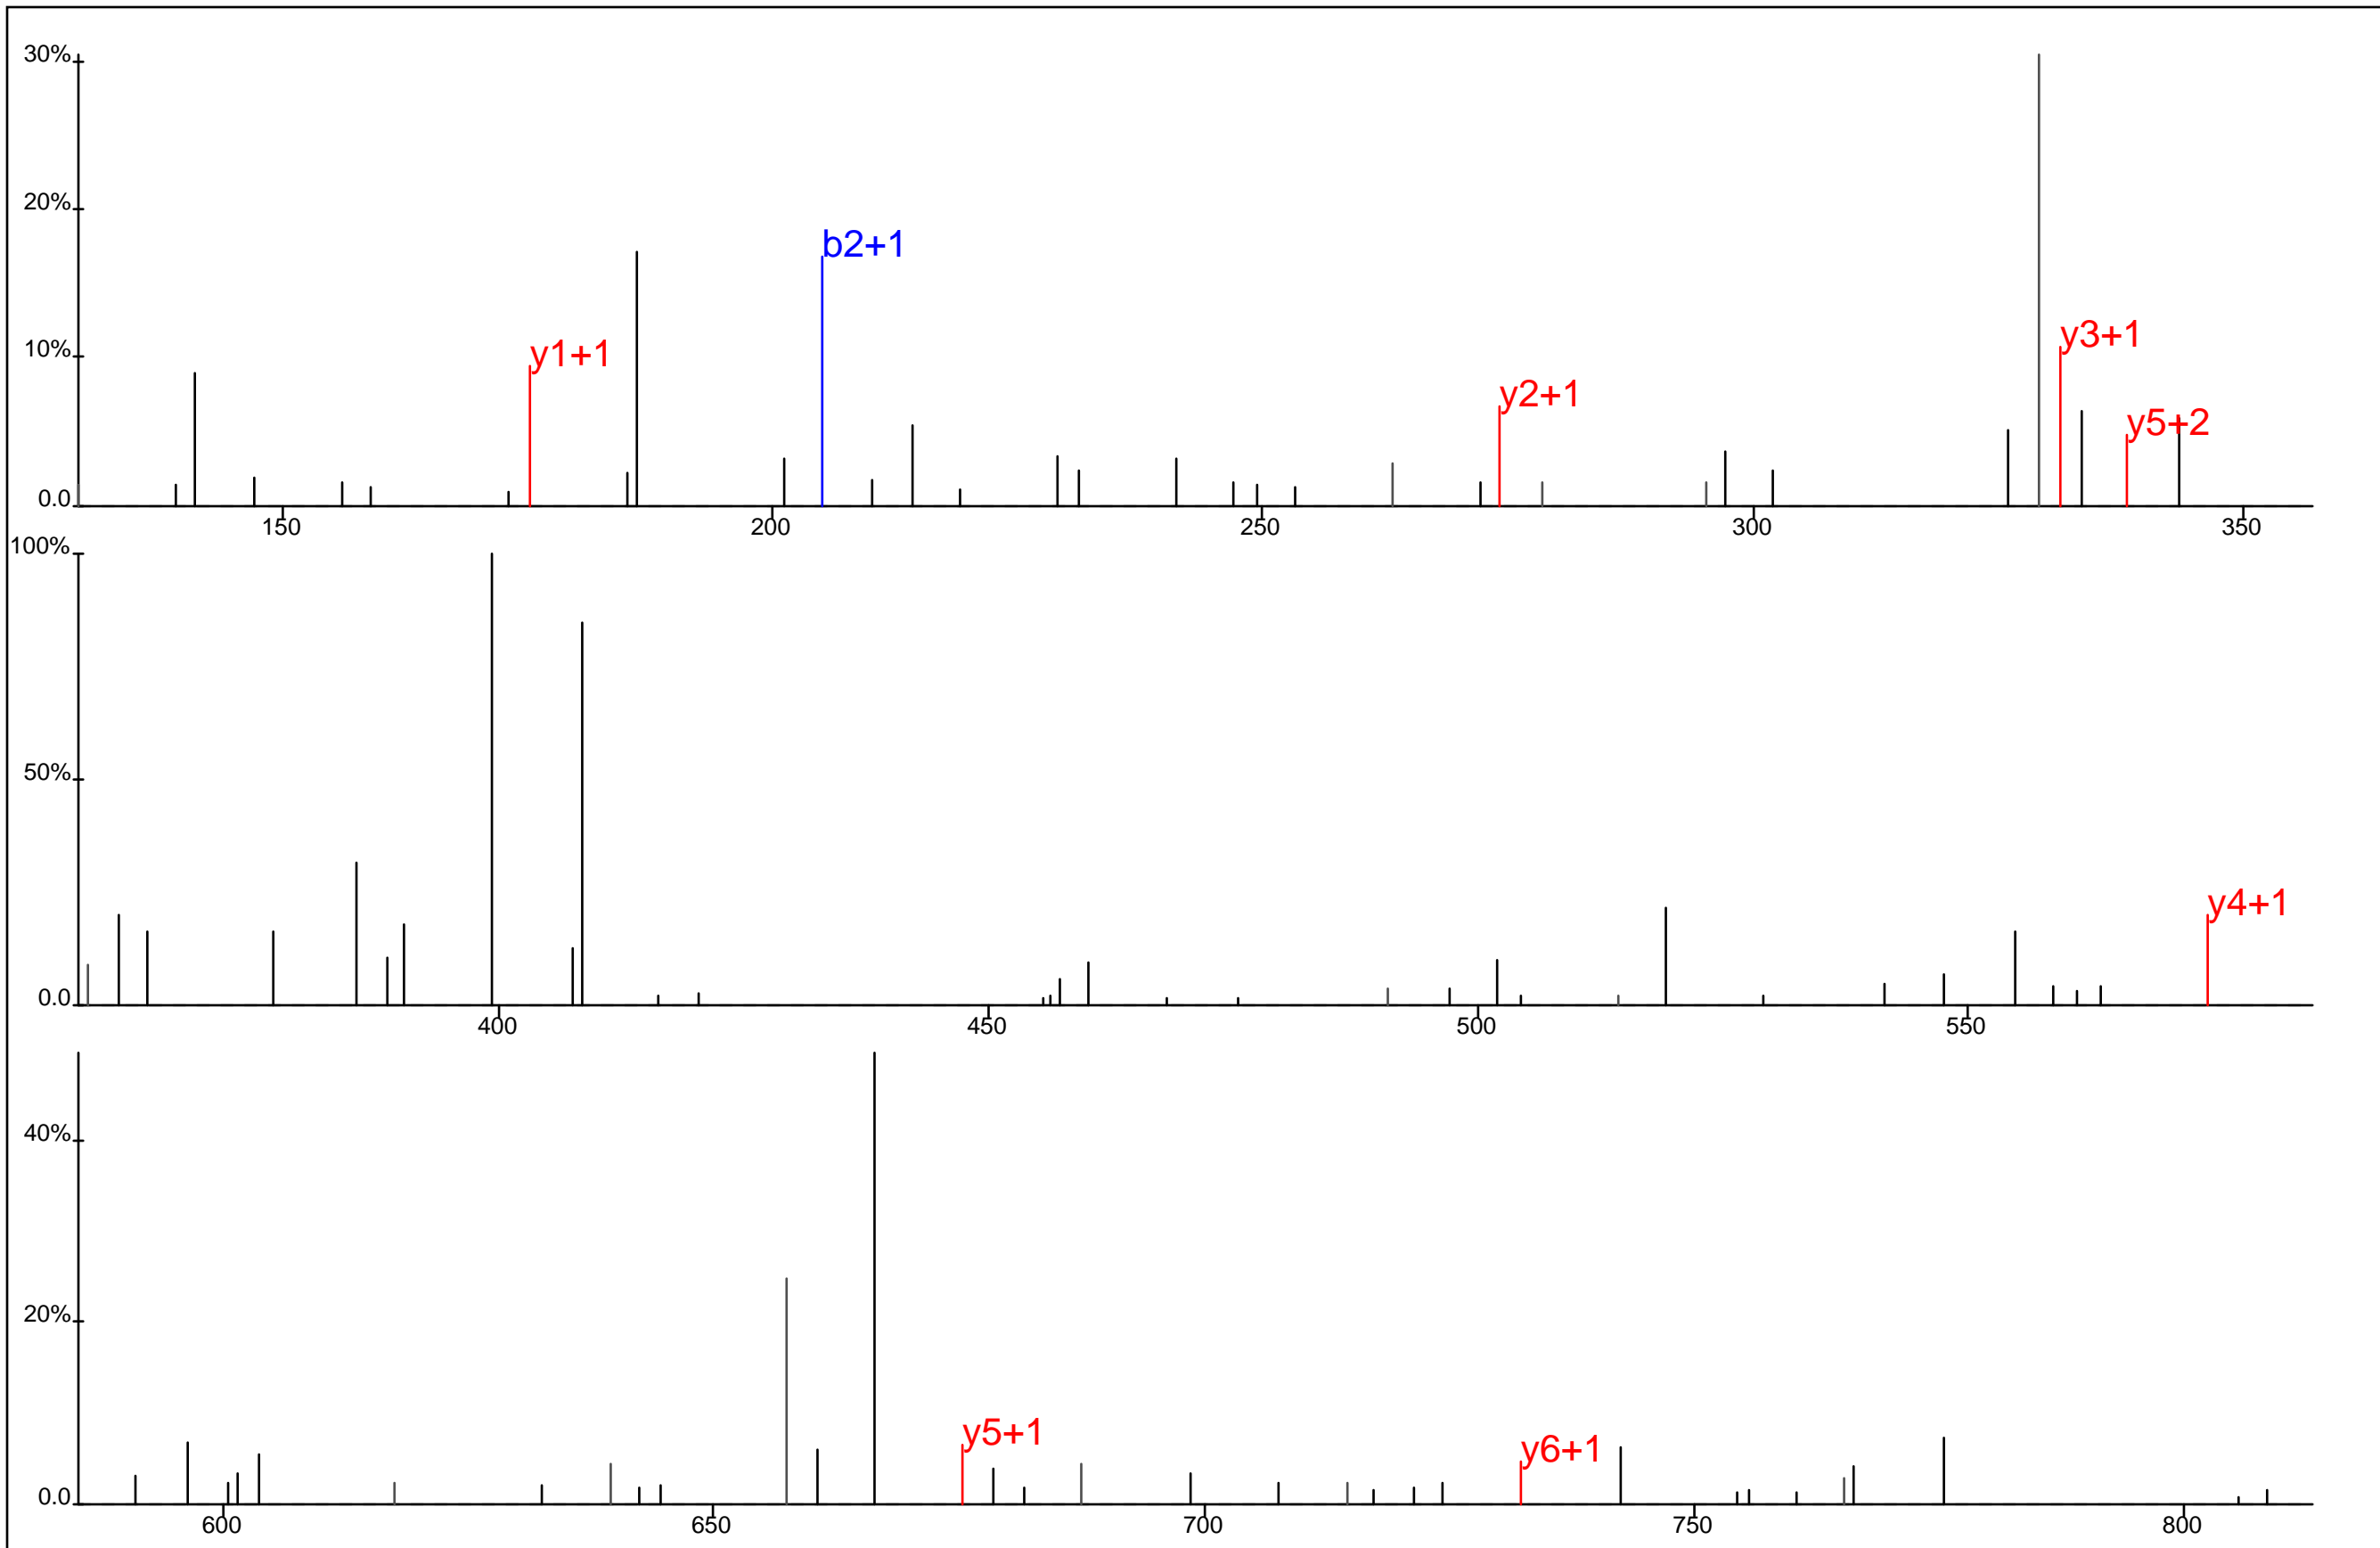

■    □    □  
M#G T Y\*G V R  
□   □   □   □   □

Protein Name: Intercellular adhesion molecule 2  
gi Accession: 0  
Precursor Mass: 440.1751+2  
Delta Mass: 0.100 ppm  
XCorr: 25.98

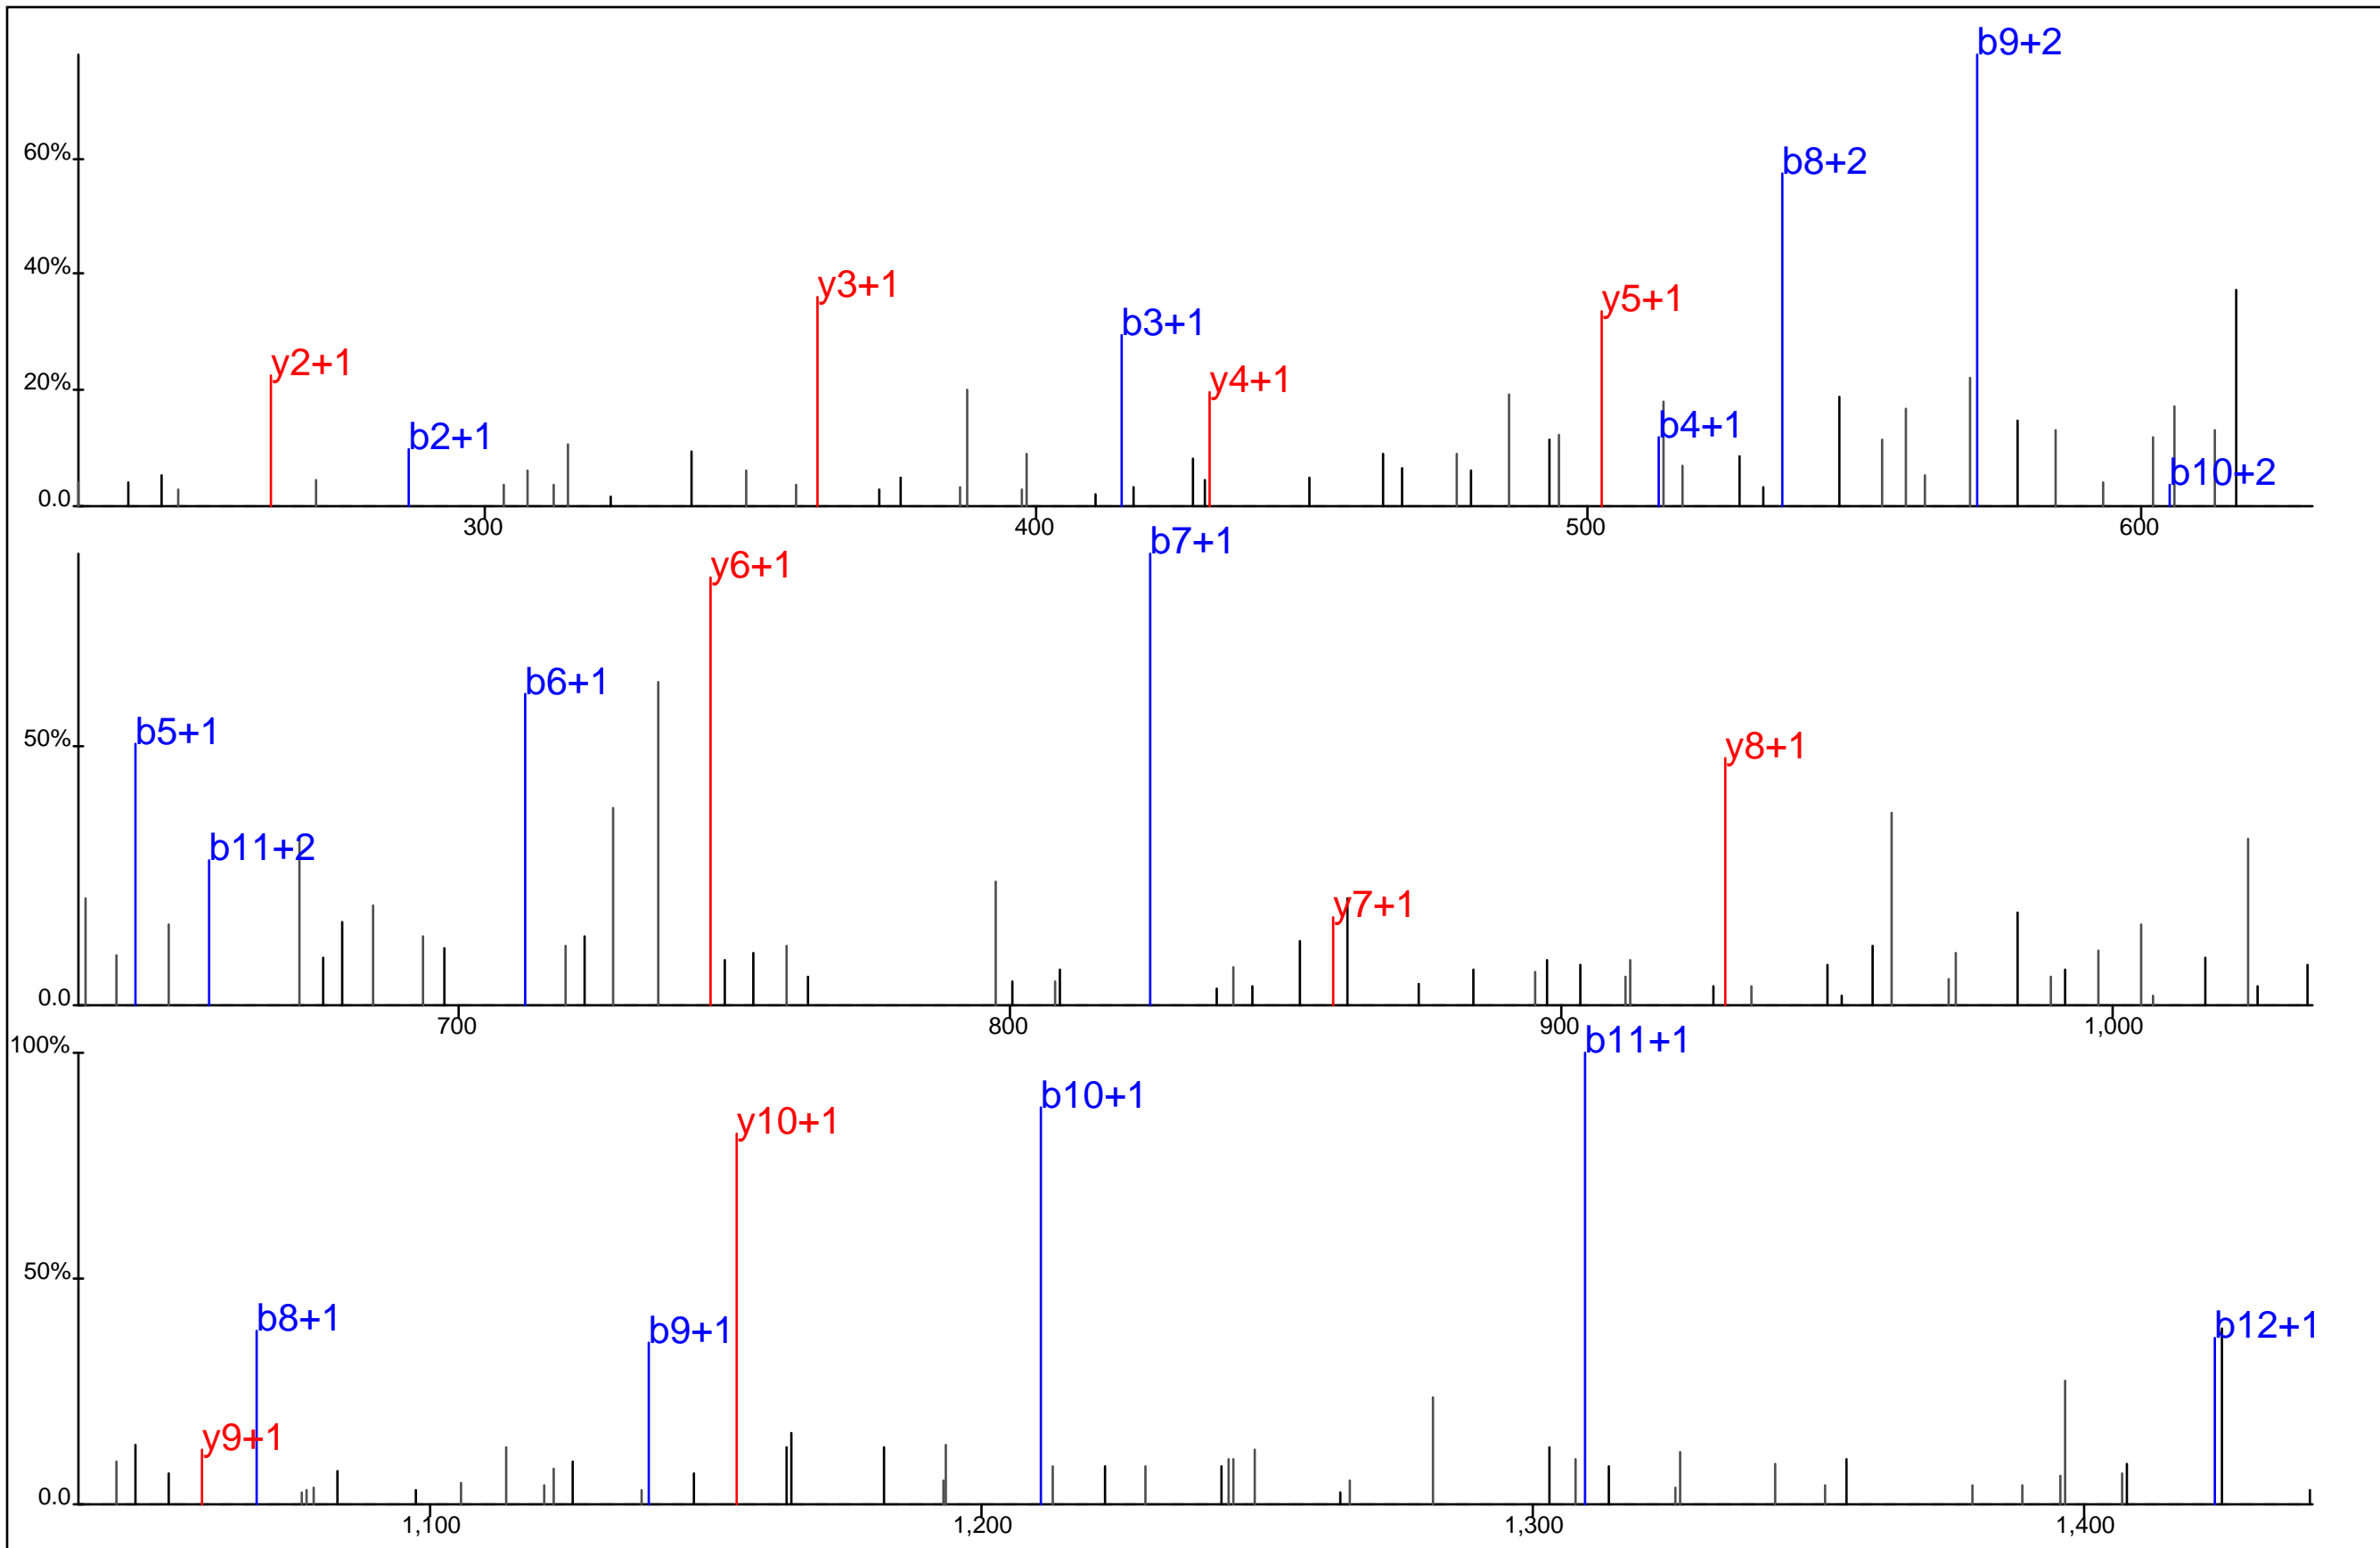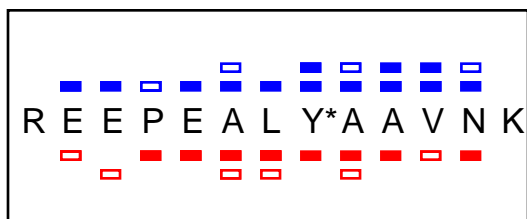

Protein Name: Intersectin 2  
 gi Accession: 0  
 Precursor Mass: 785.3669+2  
 Delta Mass: 2.748 ppm  
 XCorr: 64.01

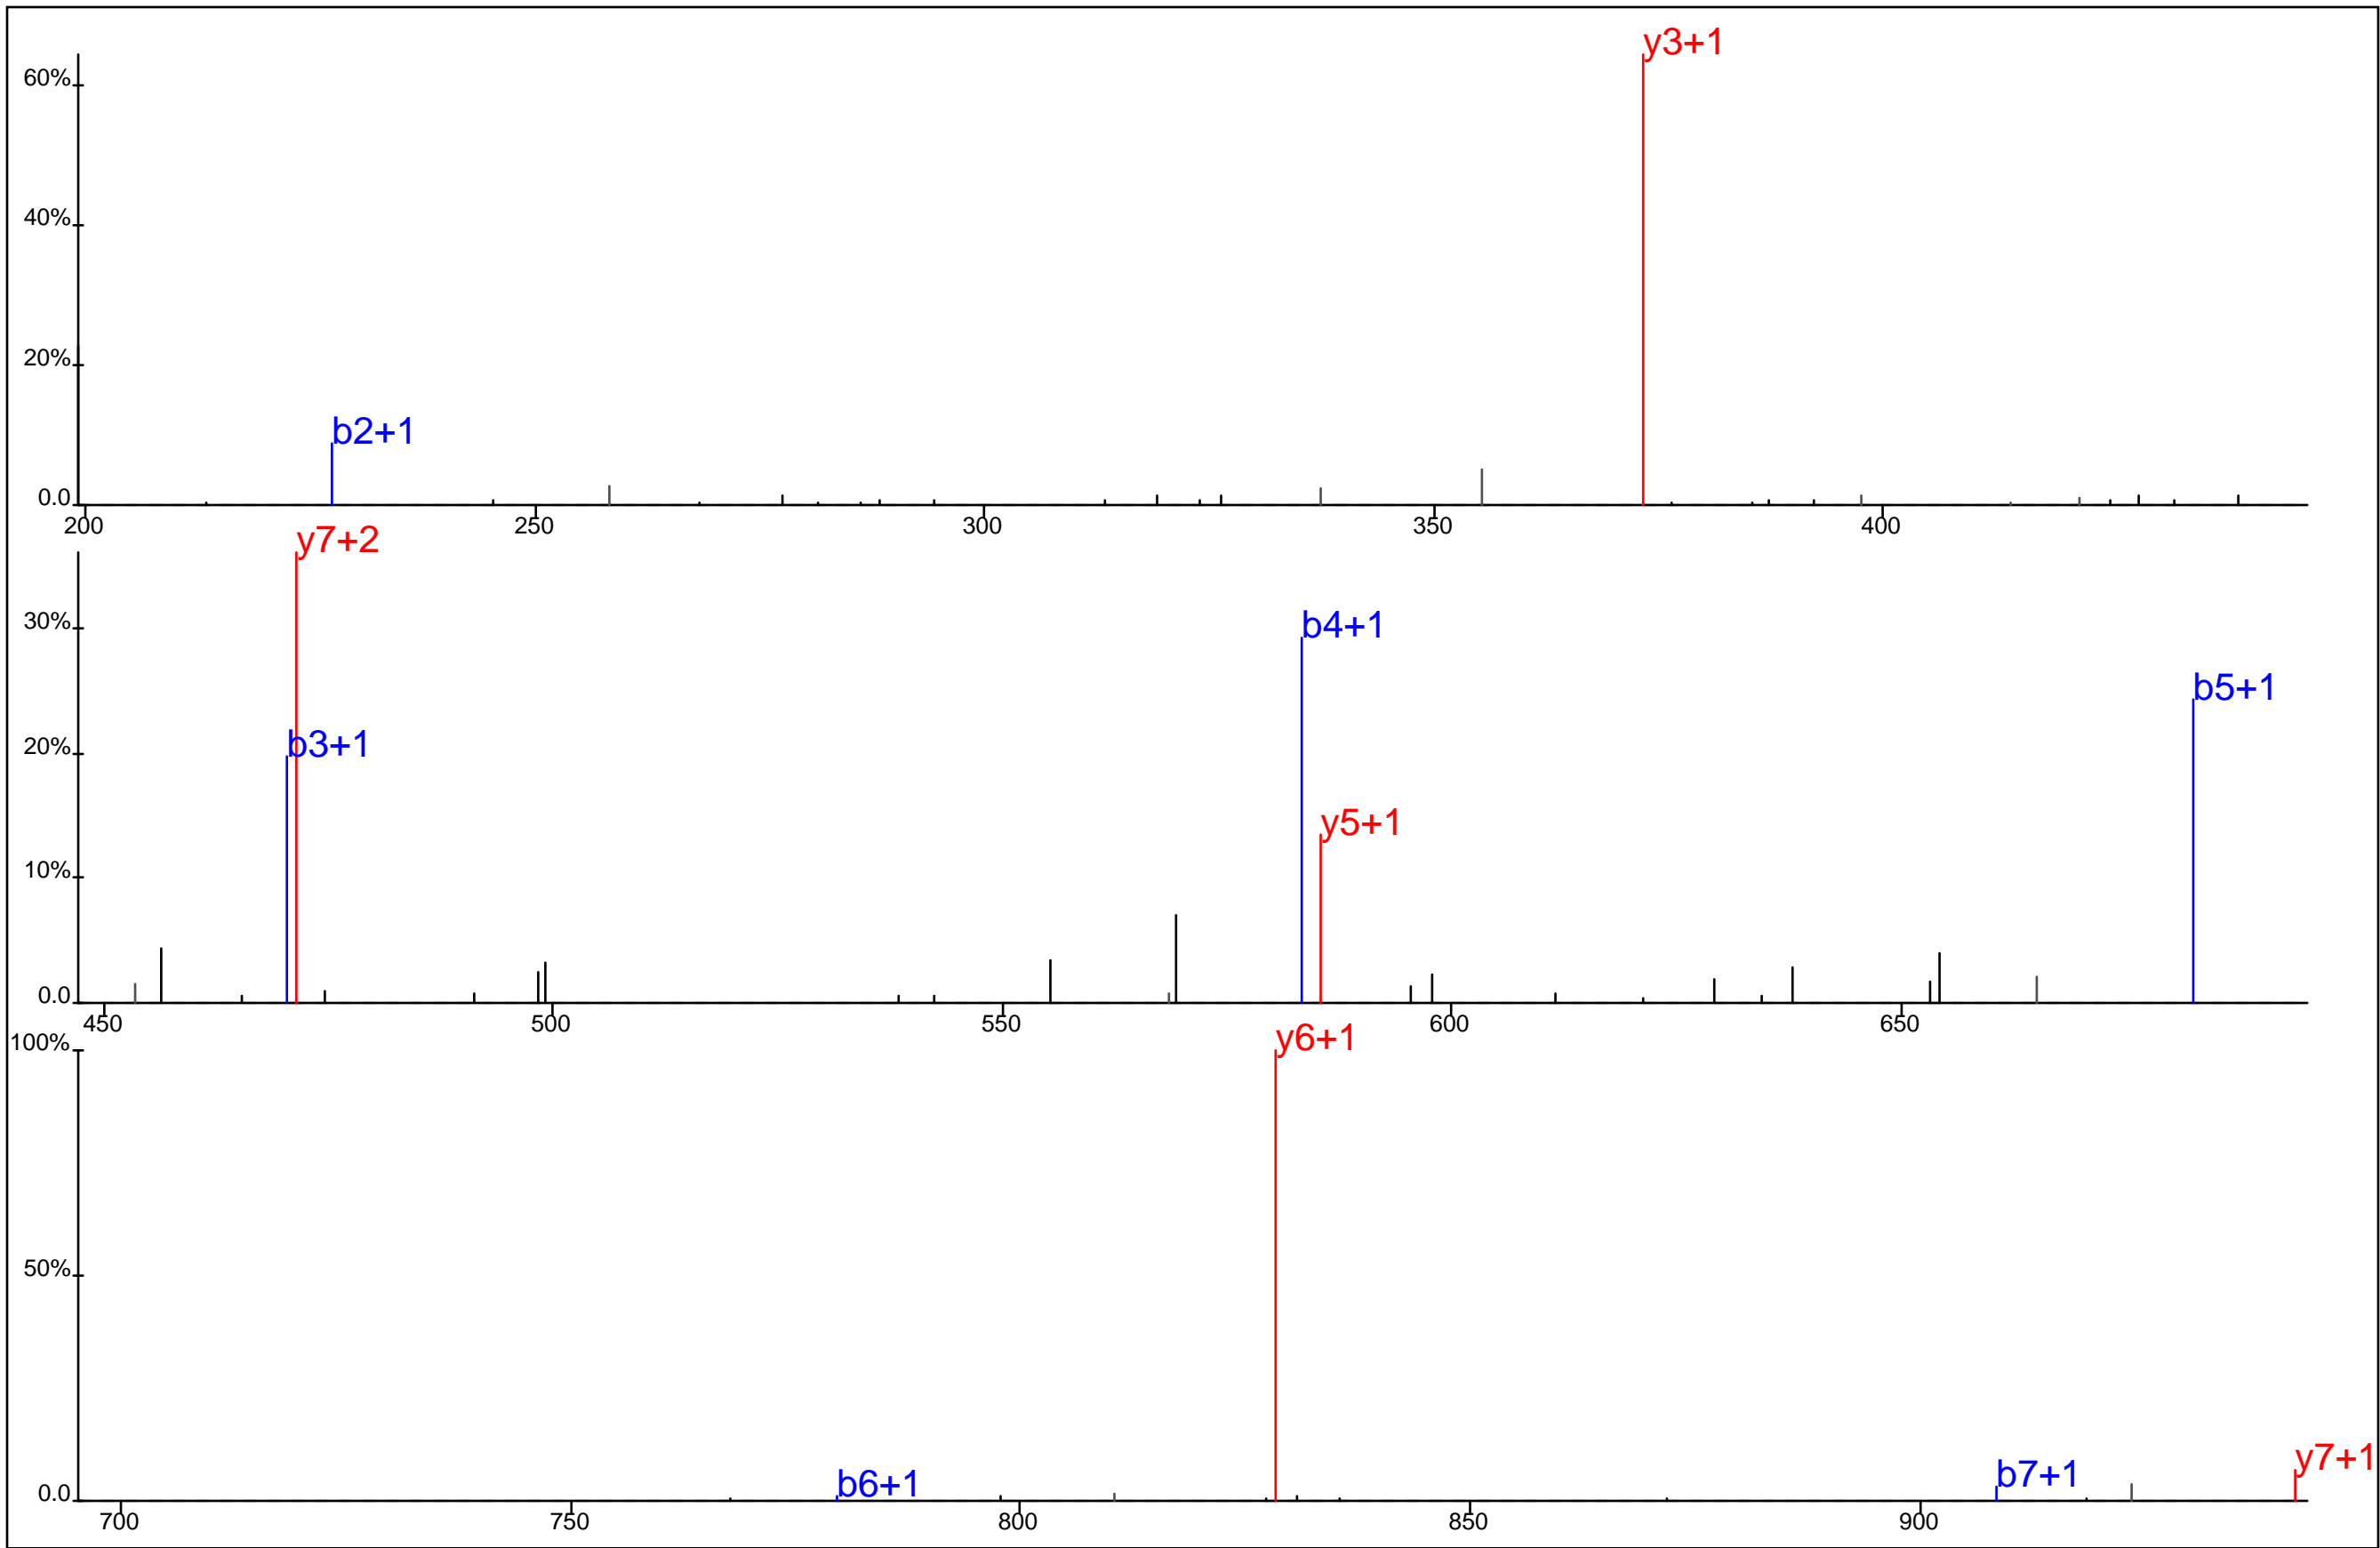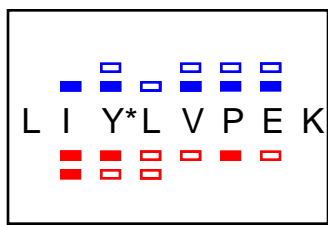

Protein Name: Intersectin 2  
 gi Accession: 0  
 Precursor Mass: 527.7839+2  
 Delta Mass: 1.974 ppm  
 XCorr: 41.24





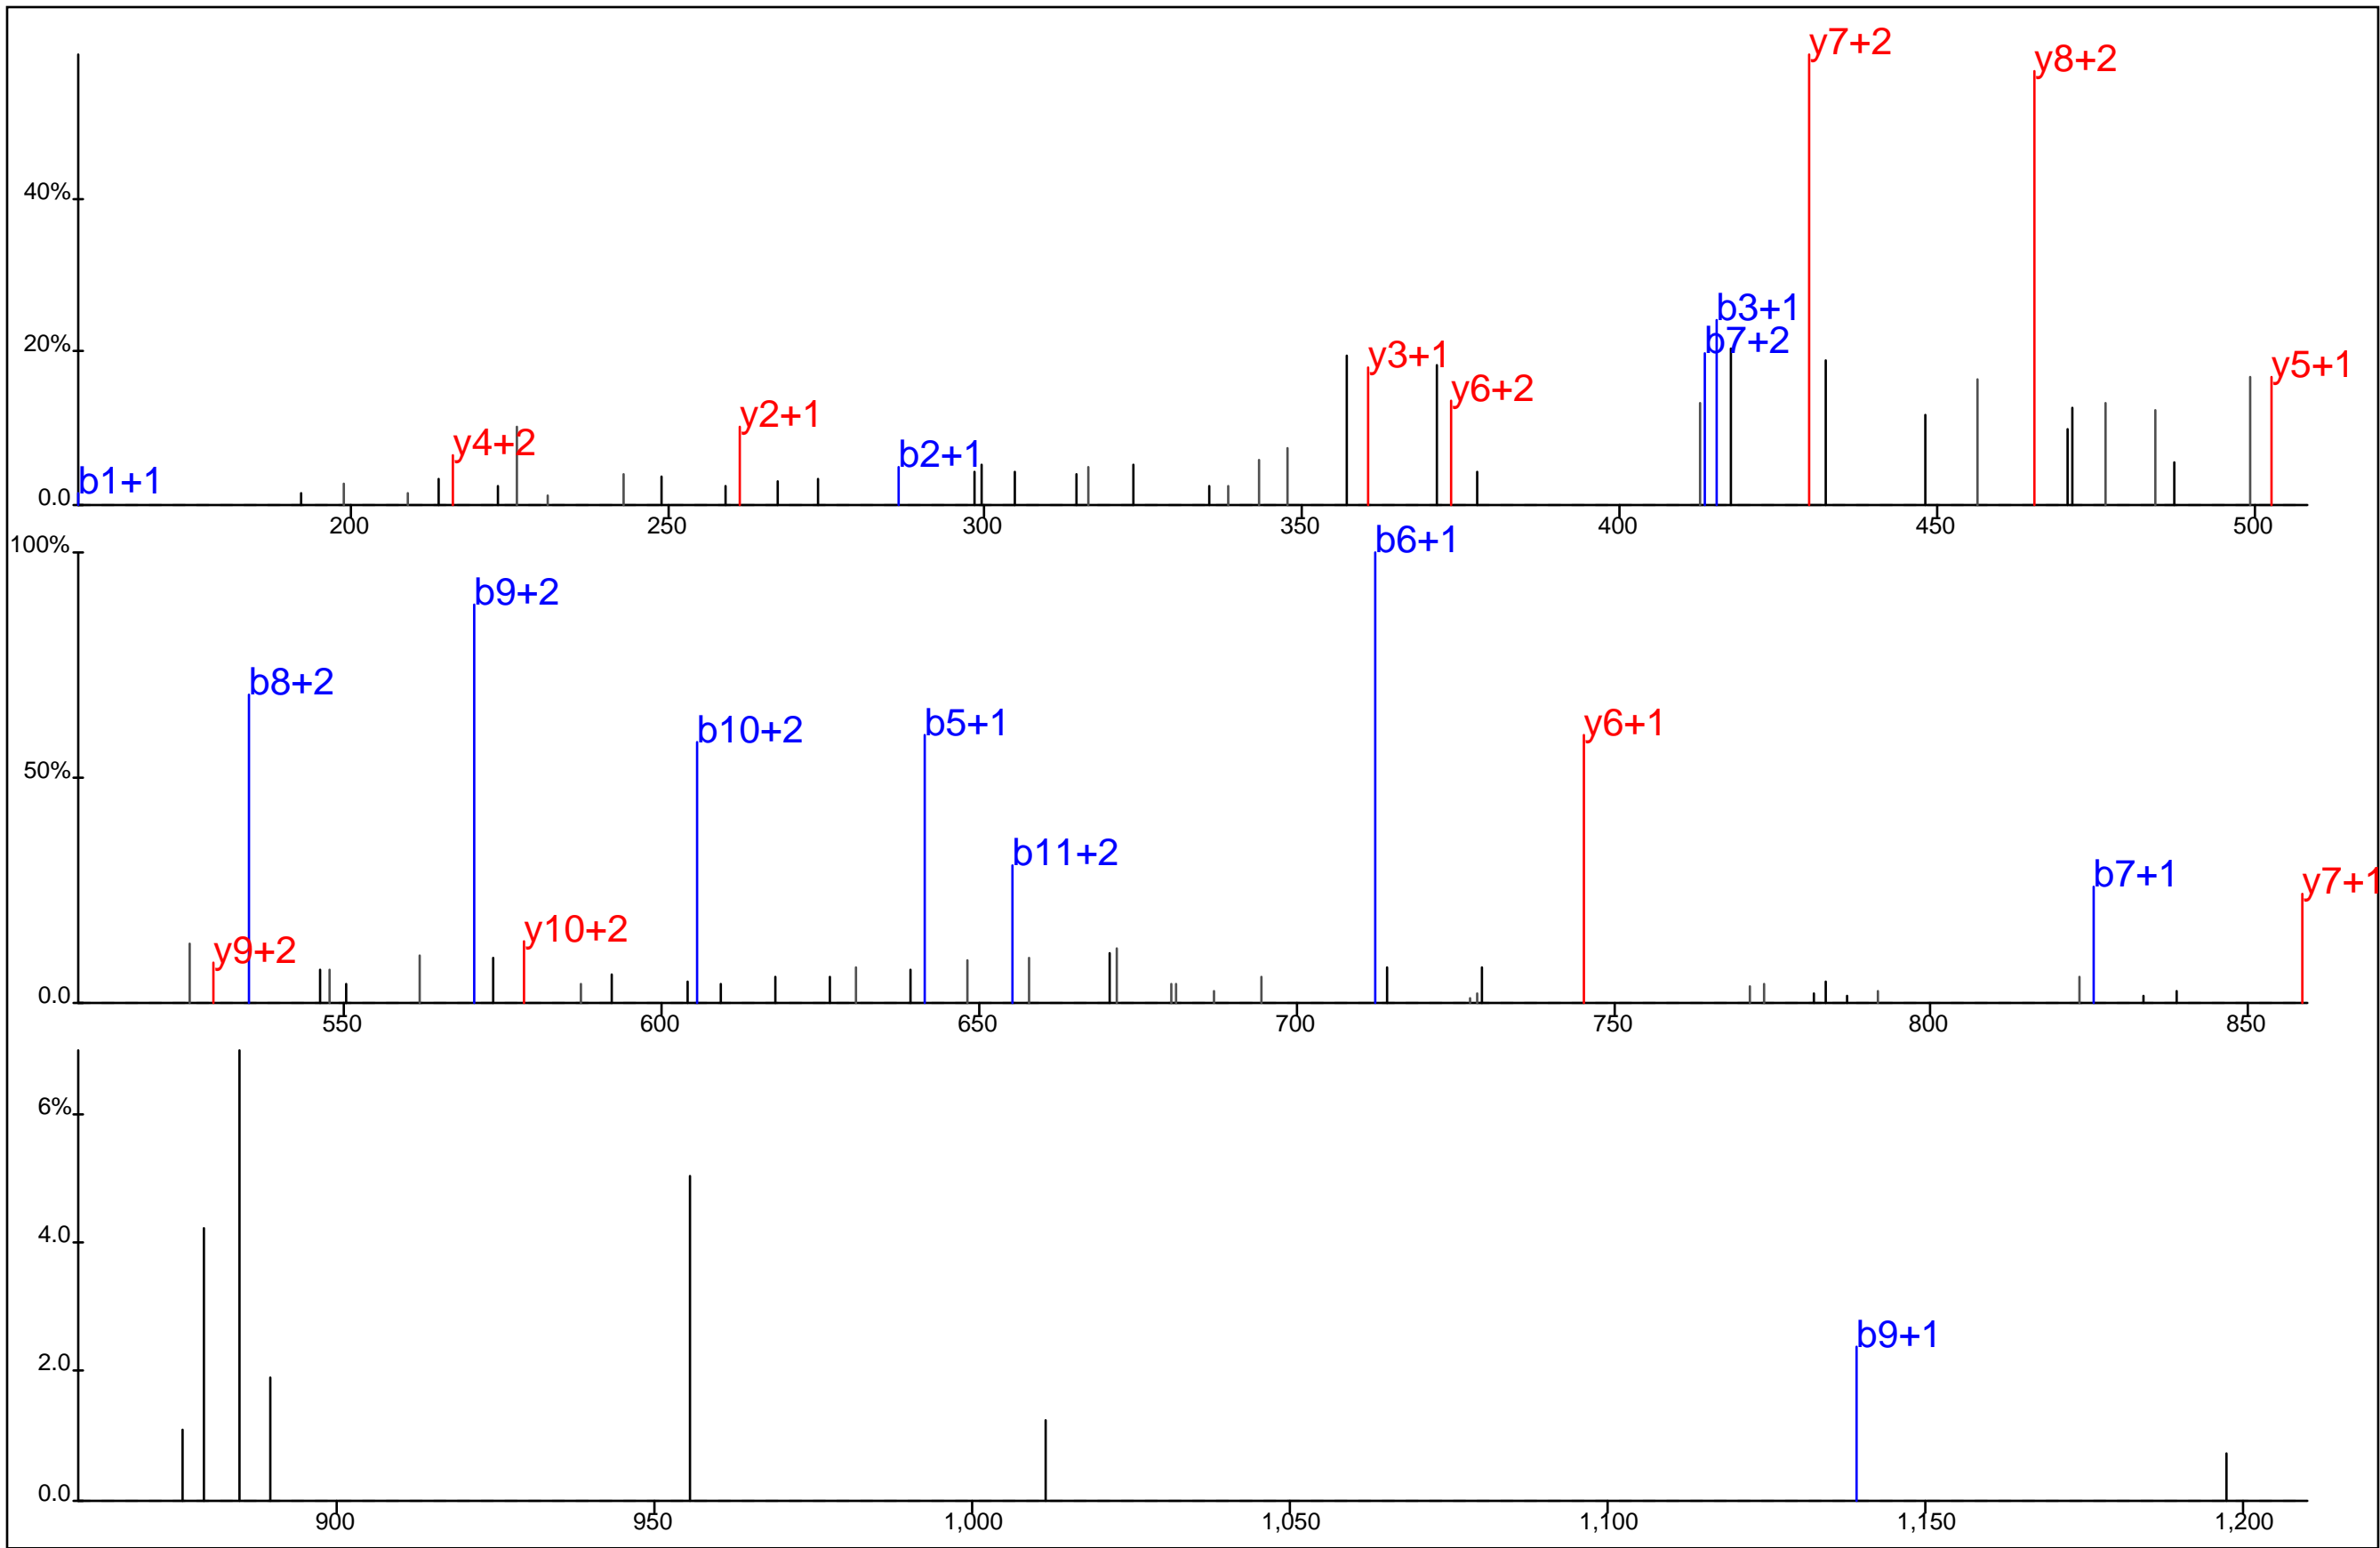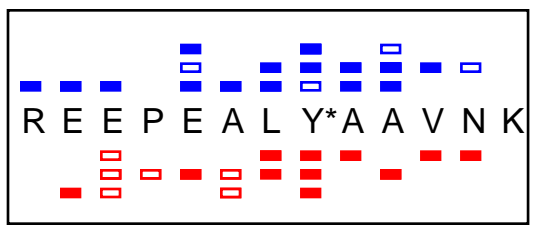

Protein Name: Intersectin 2  
 gi Accession: 0  
 Precursor Mass: 523.9154+3  
 Delta Mass: 0.549 ppm  
 XCorr: 44.9



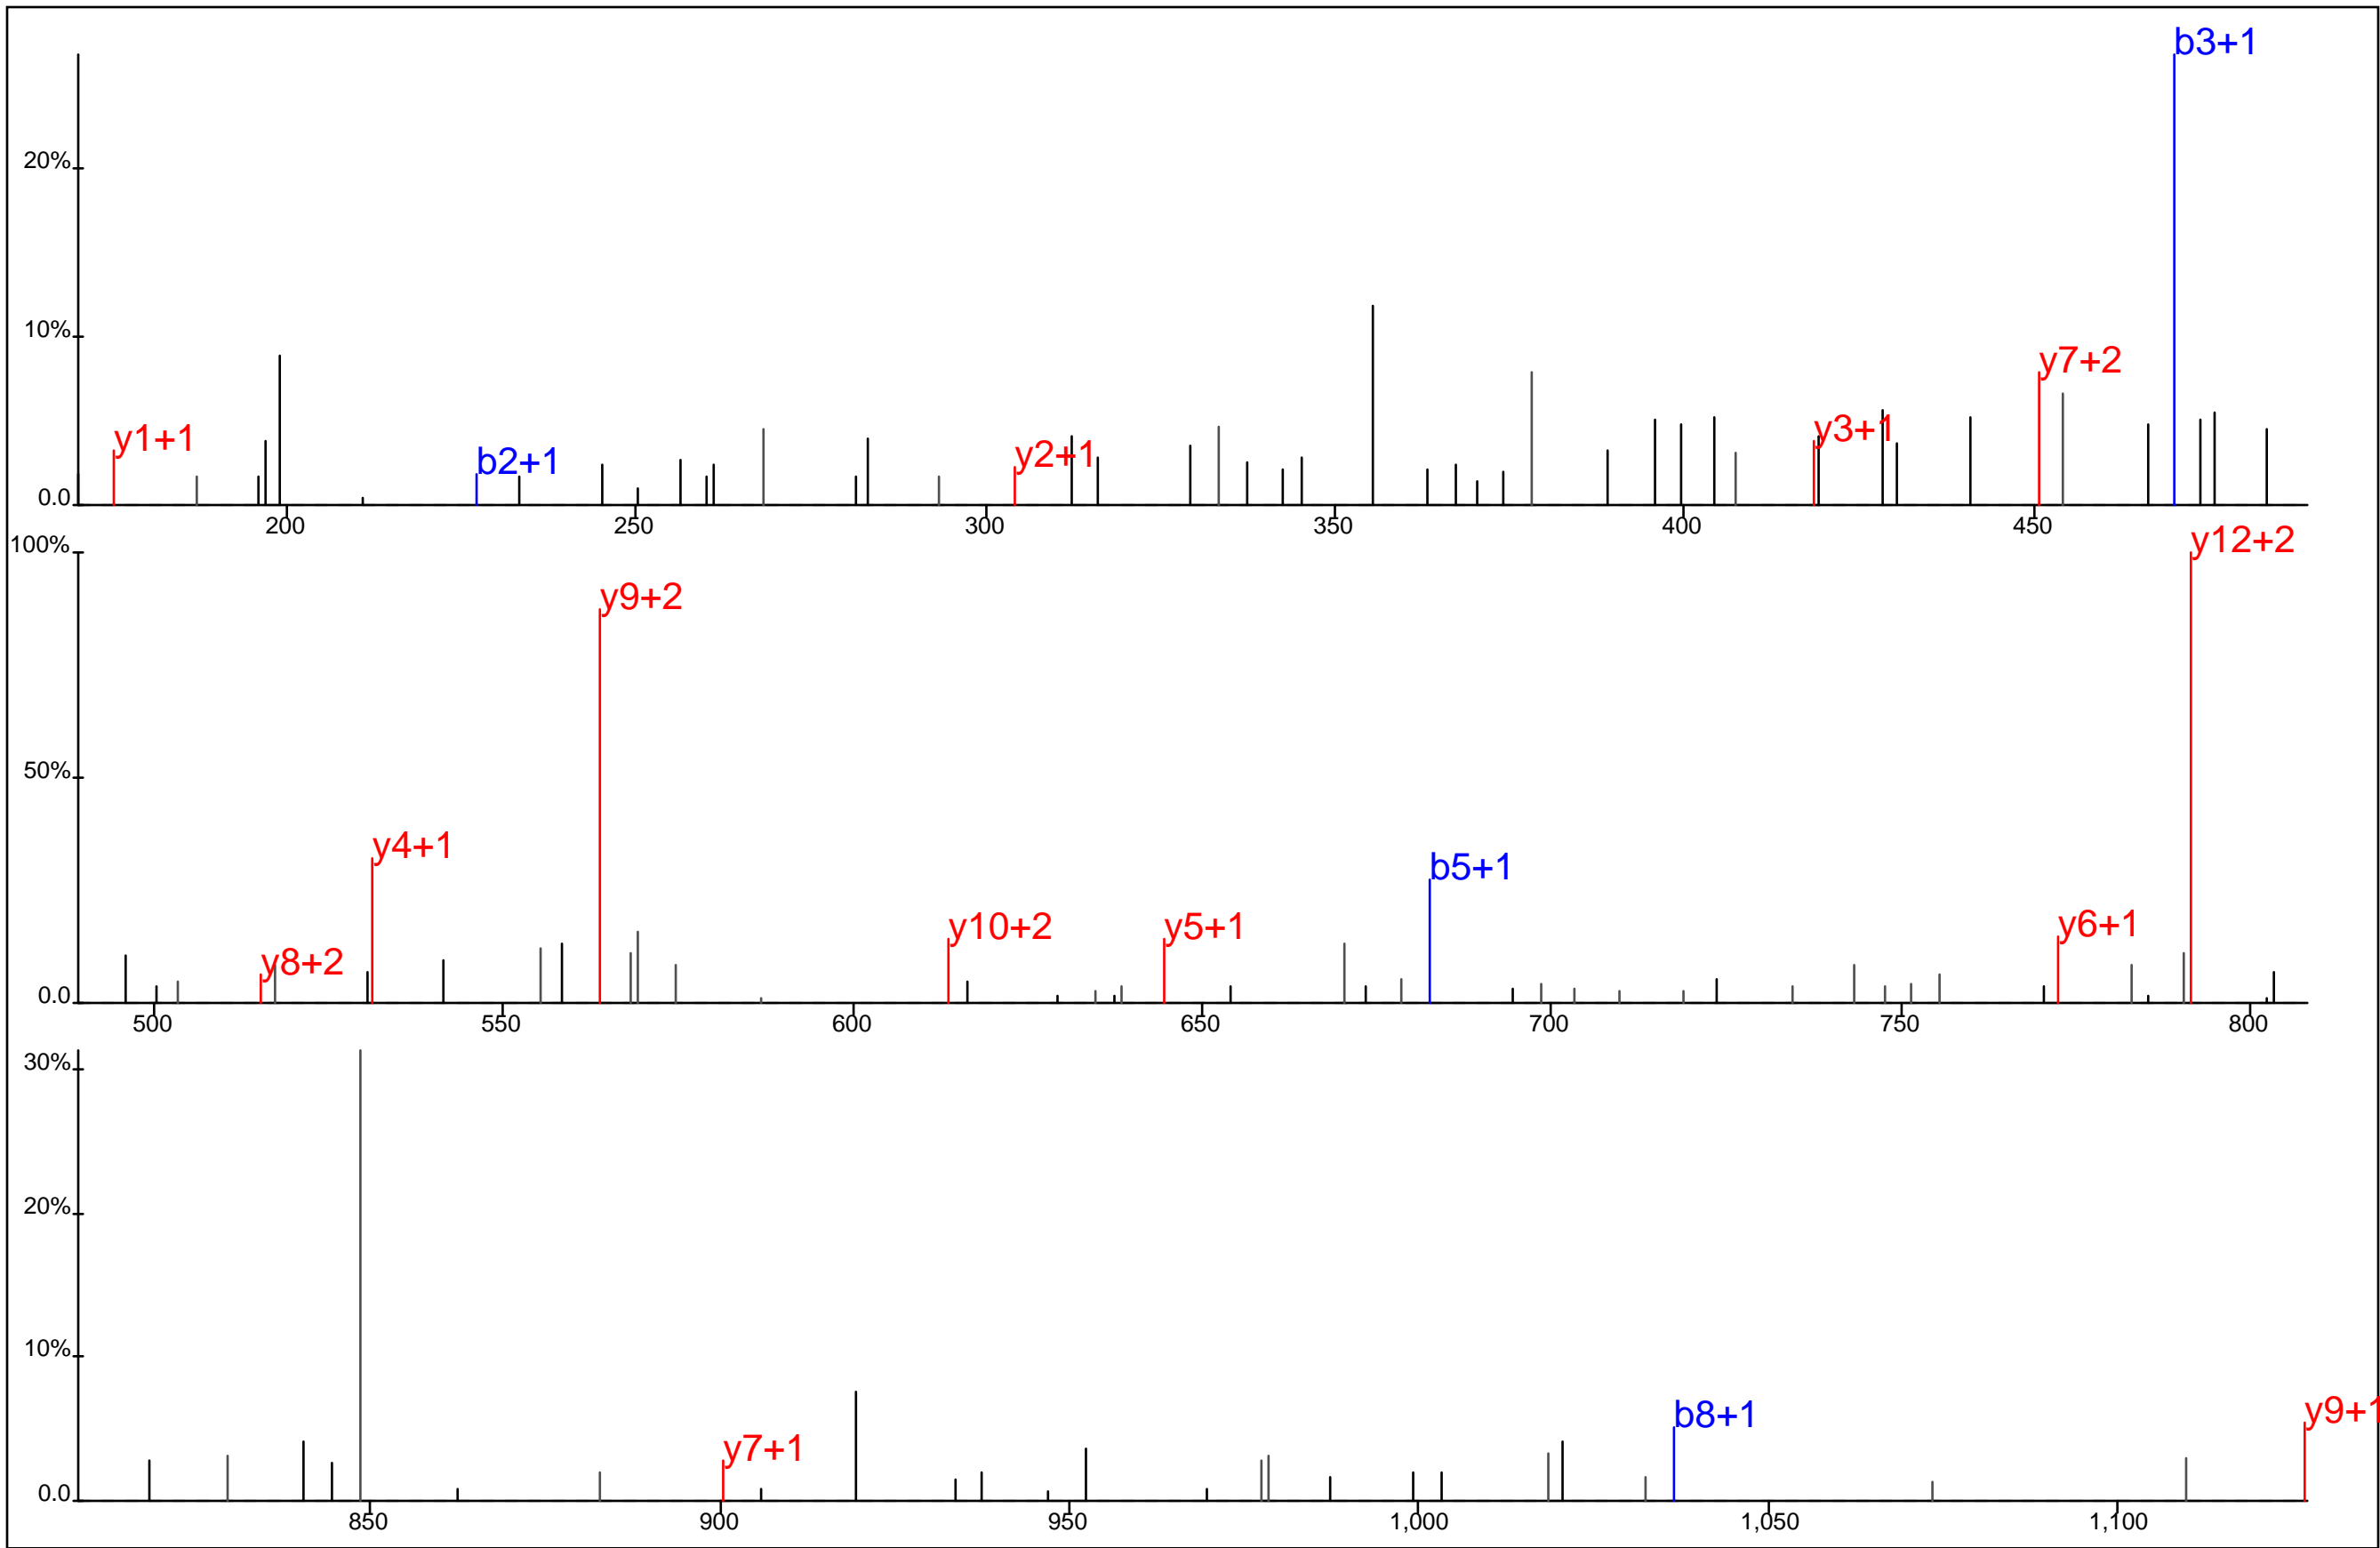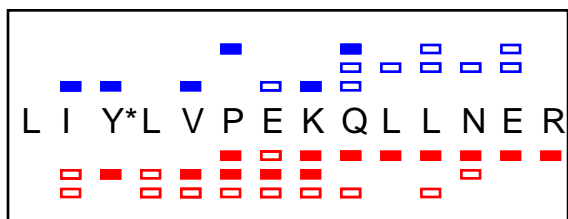

Protein Name: Intersectin 2  
 gi Accession: 0  
 Precursor Mass: 603.3295+3  
 Delta Mass: 1.184 ppm  
 XCorr: 23.64

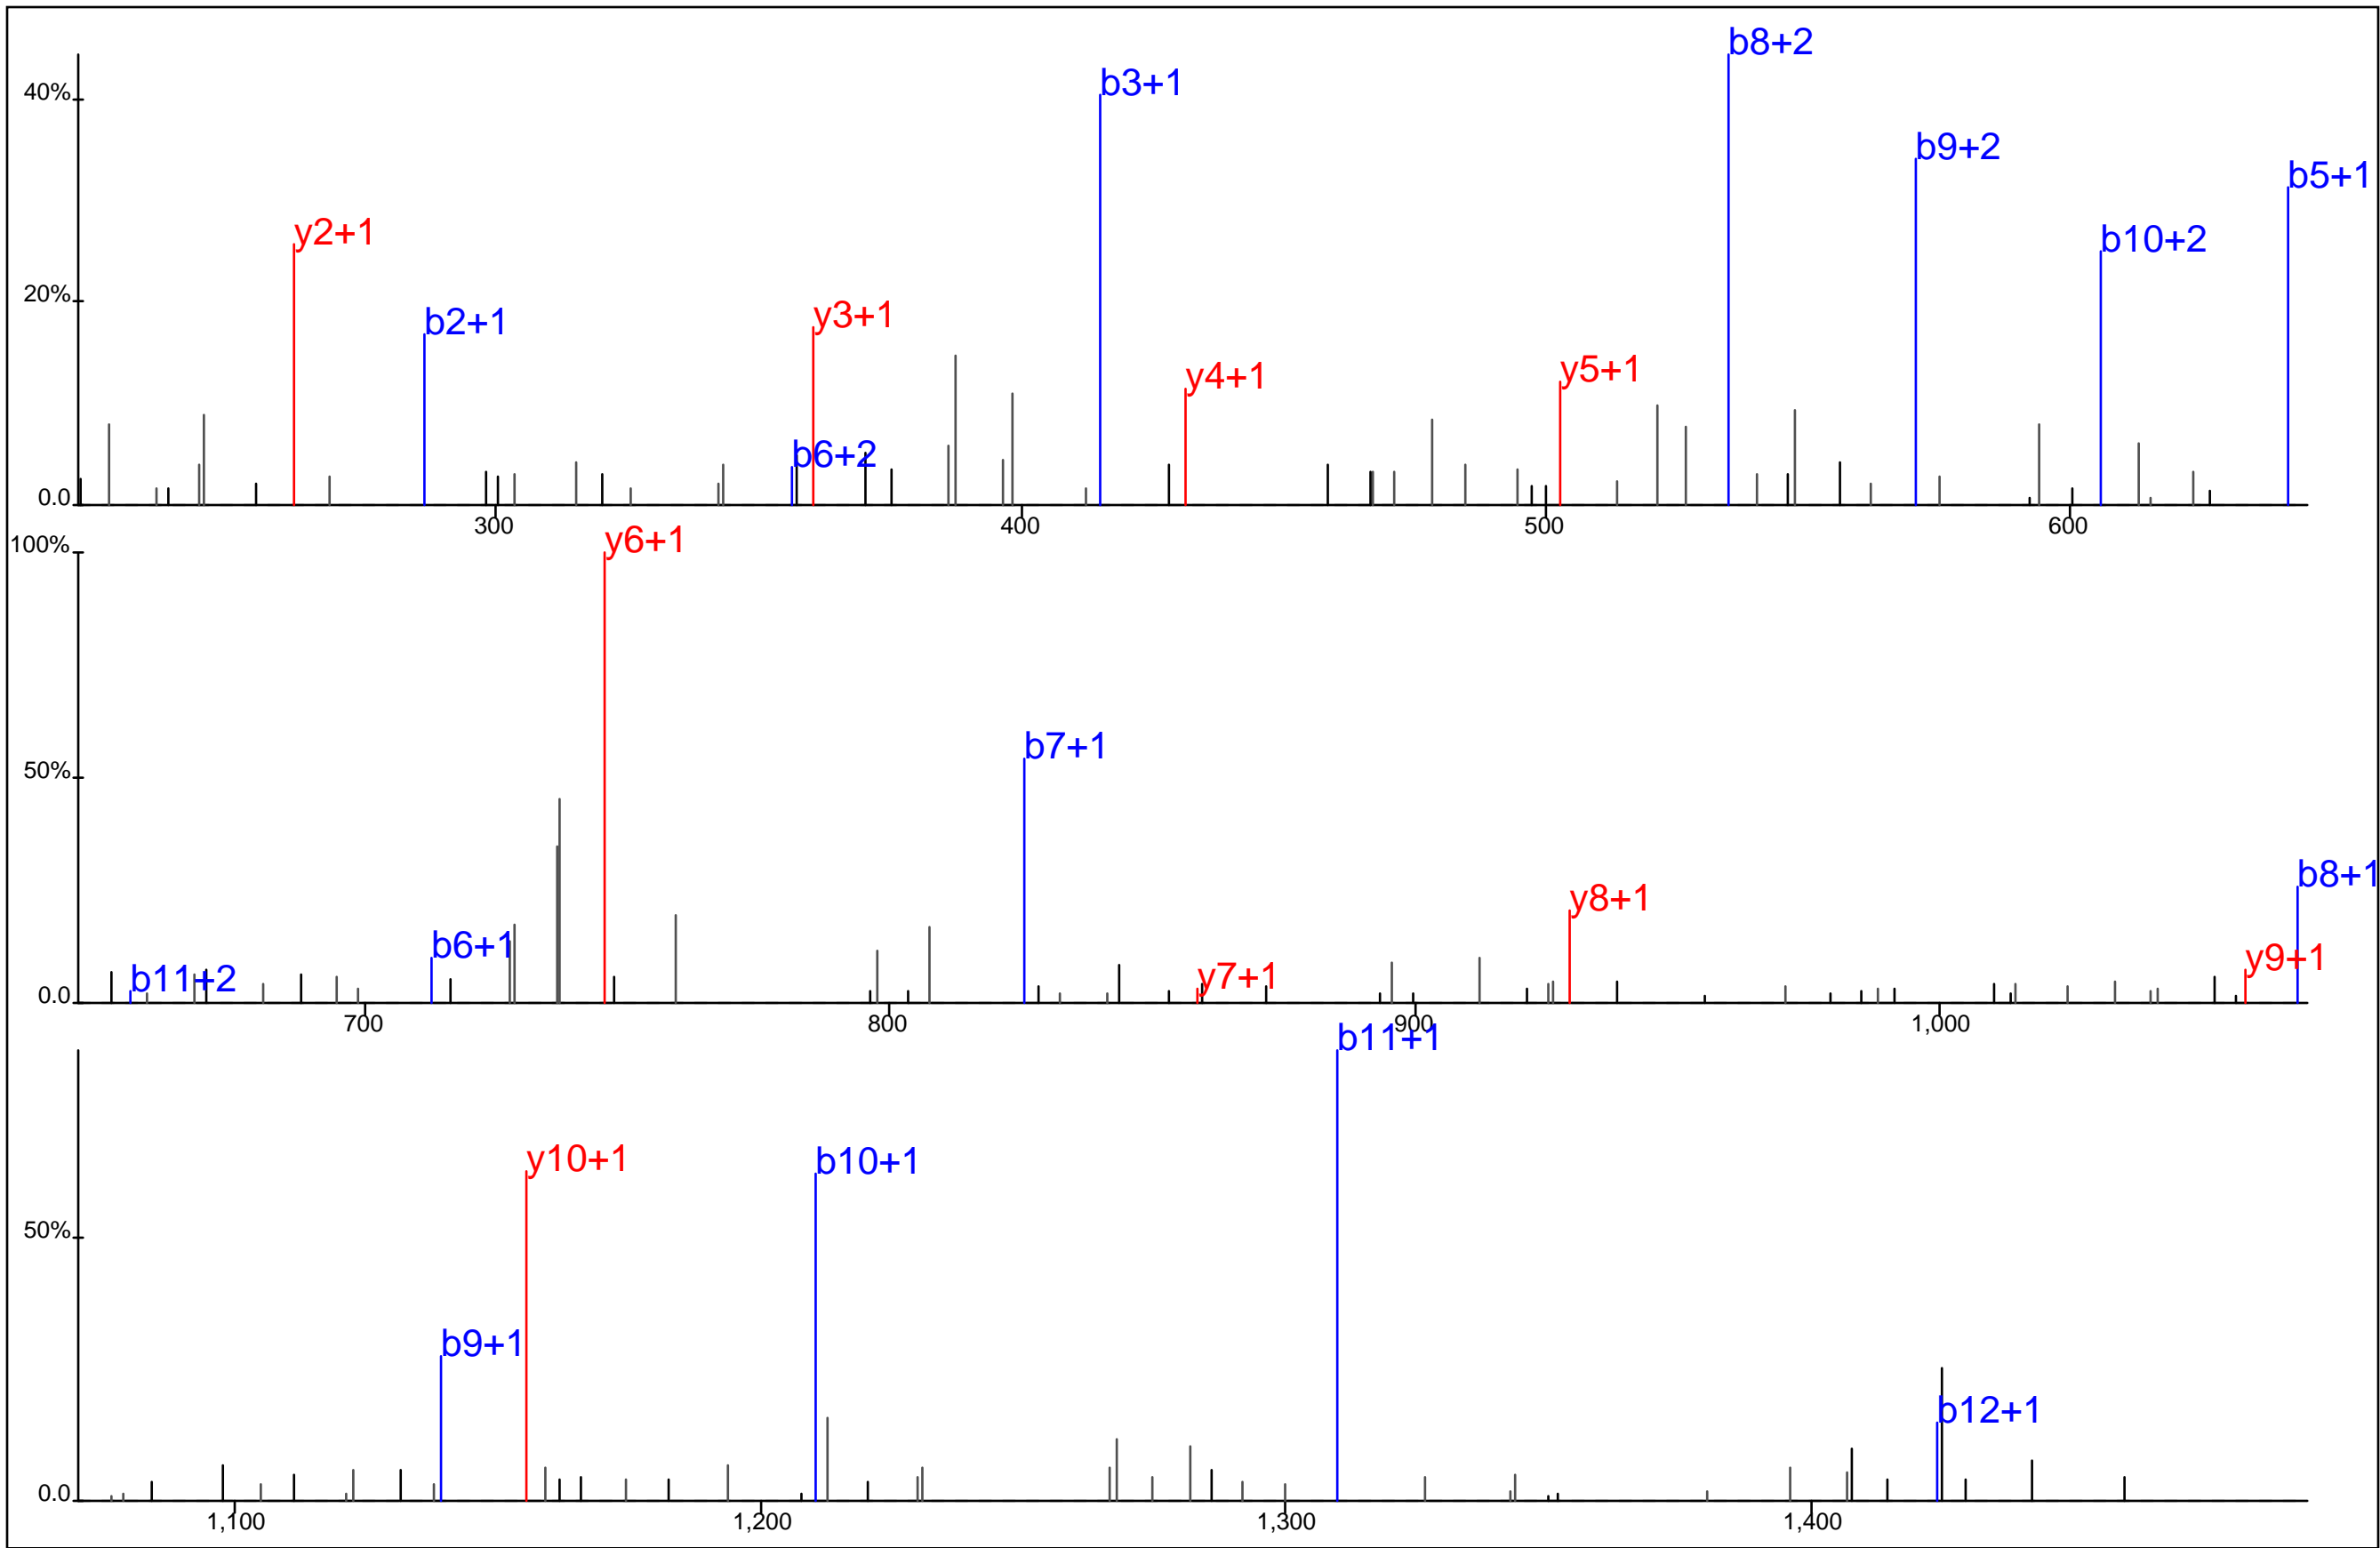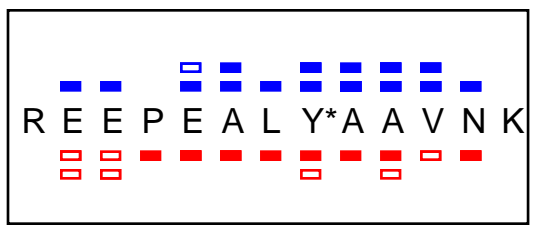

Protein Name: Intersectin 2  
 gi Accession: 0  
 Precursor Mass: 785.3681+2  
 Delta Mass: 1.193 ppm  
 XCorr: 82.02

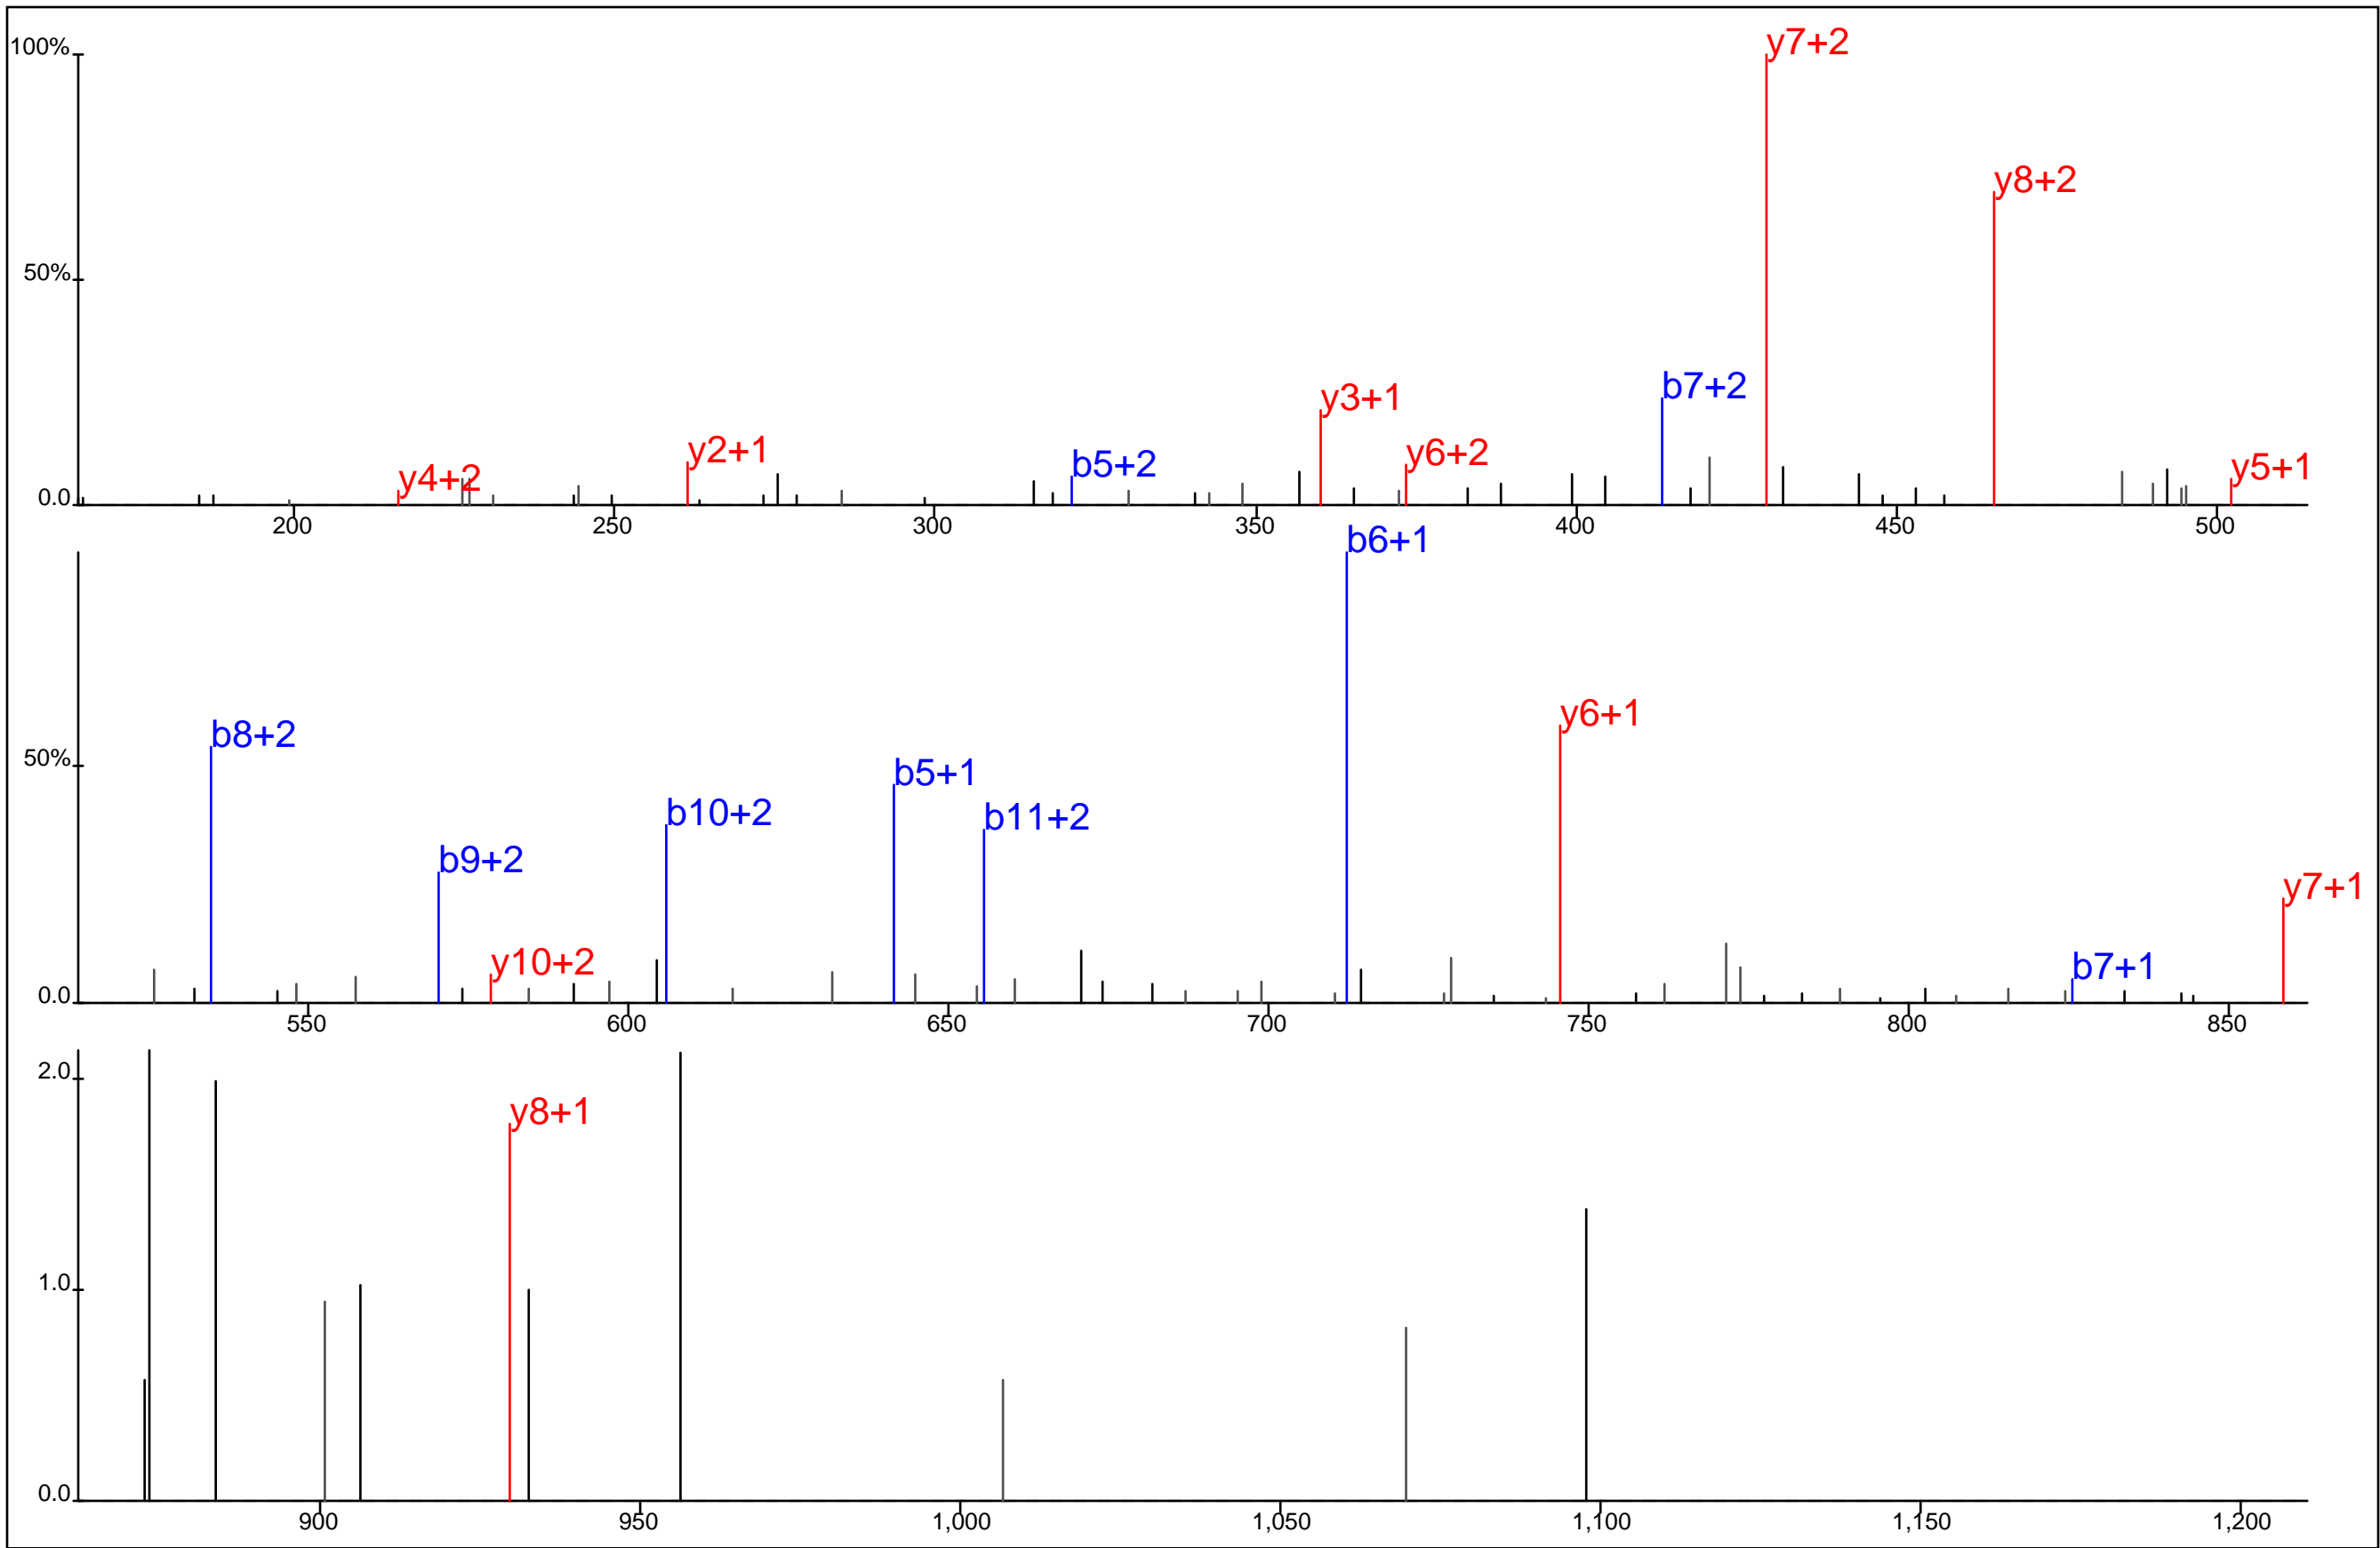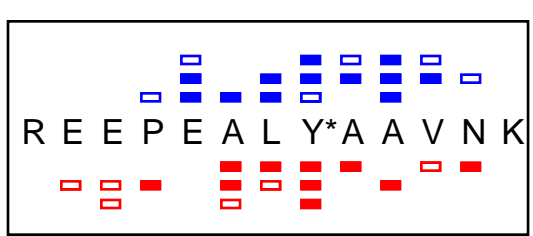

Protein Name: Intersectin 2  
 gi Accession: 0  
 Precursor Mass: 523.9149+3  
 Delta Mass: 0.384 ppm  
 XCorr: 51.54

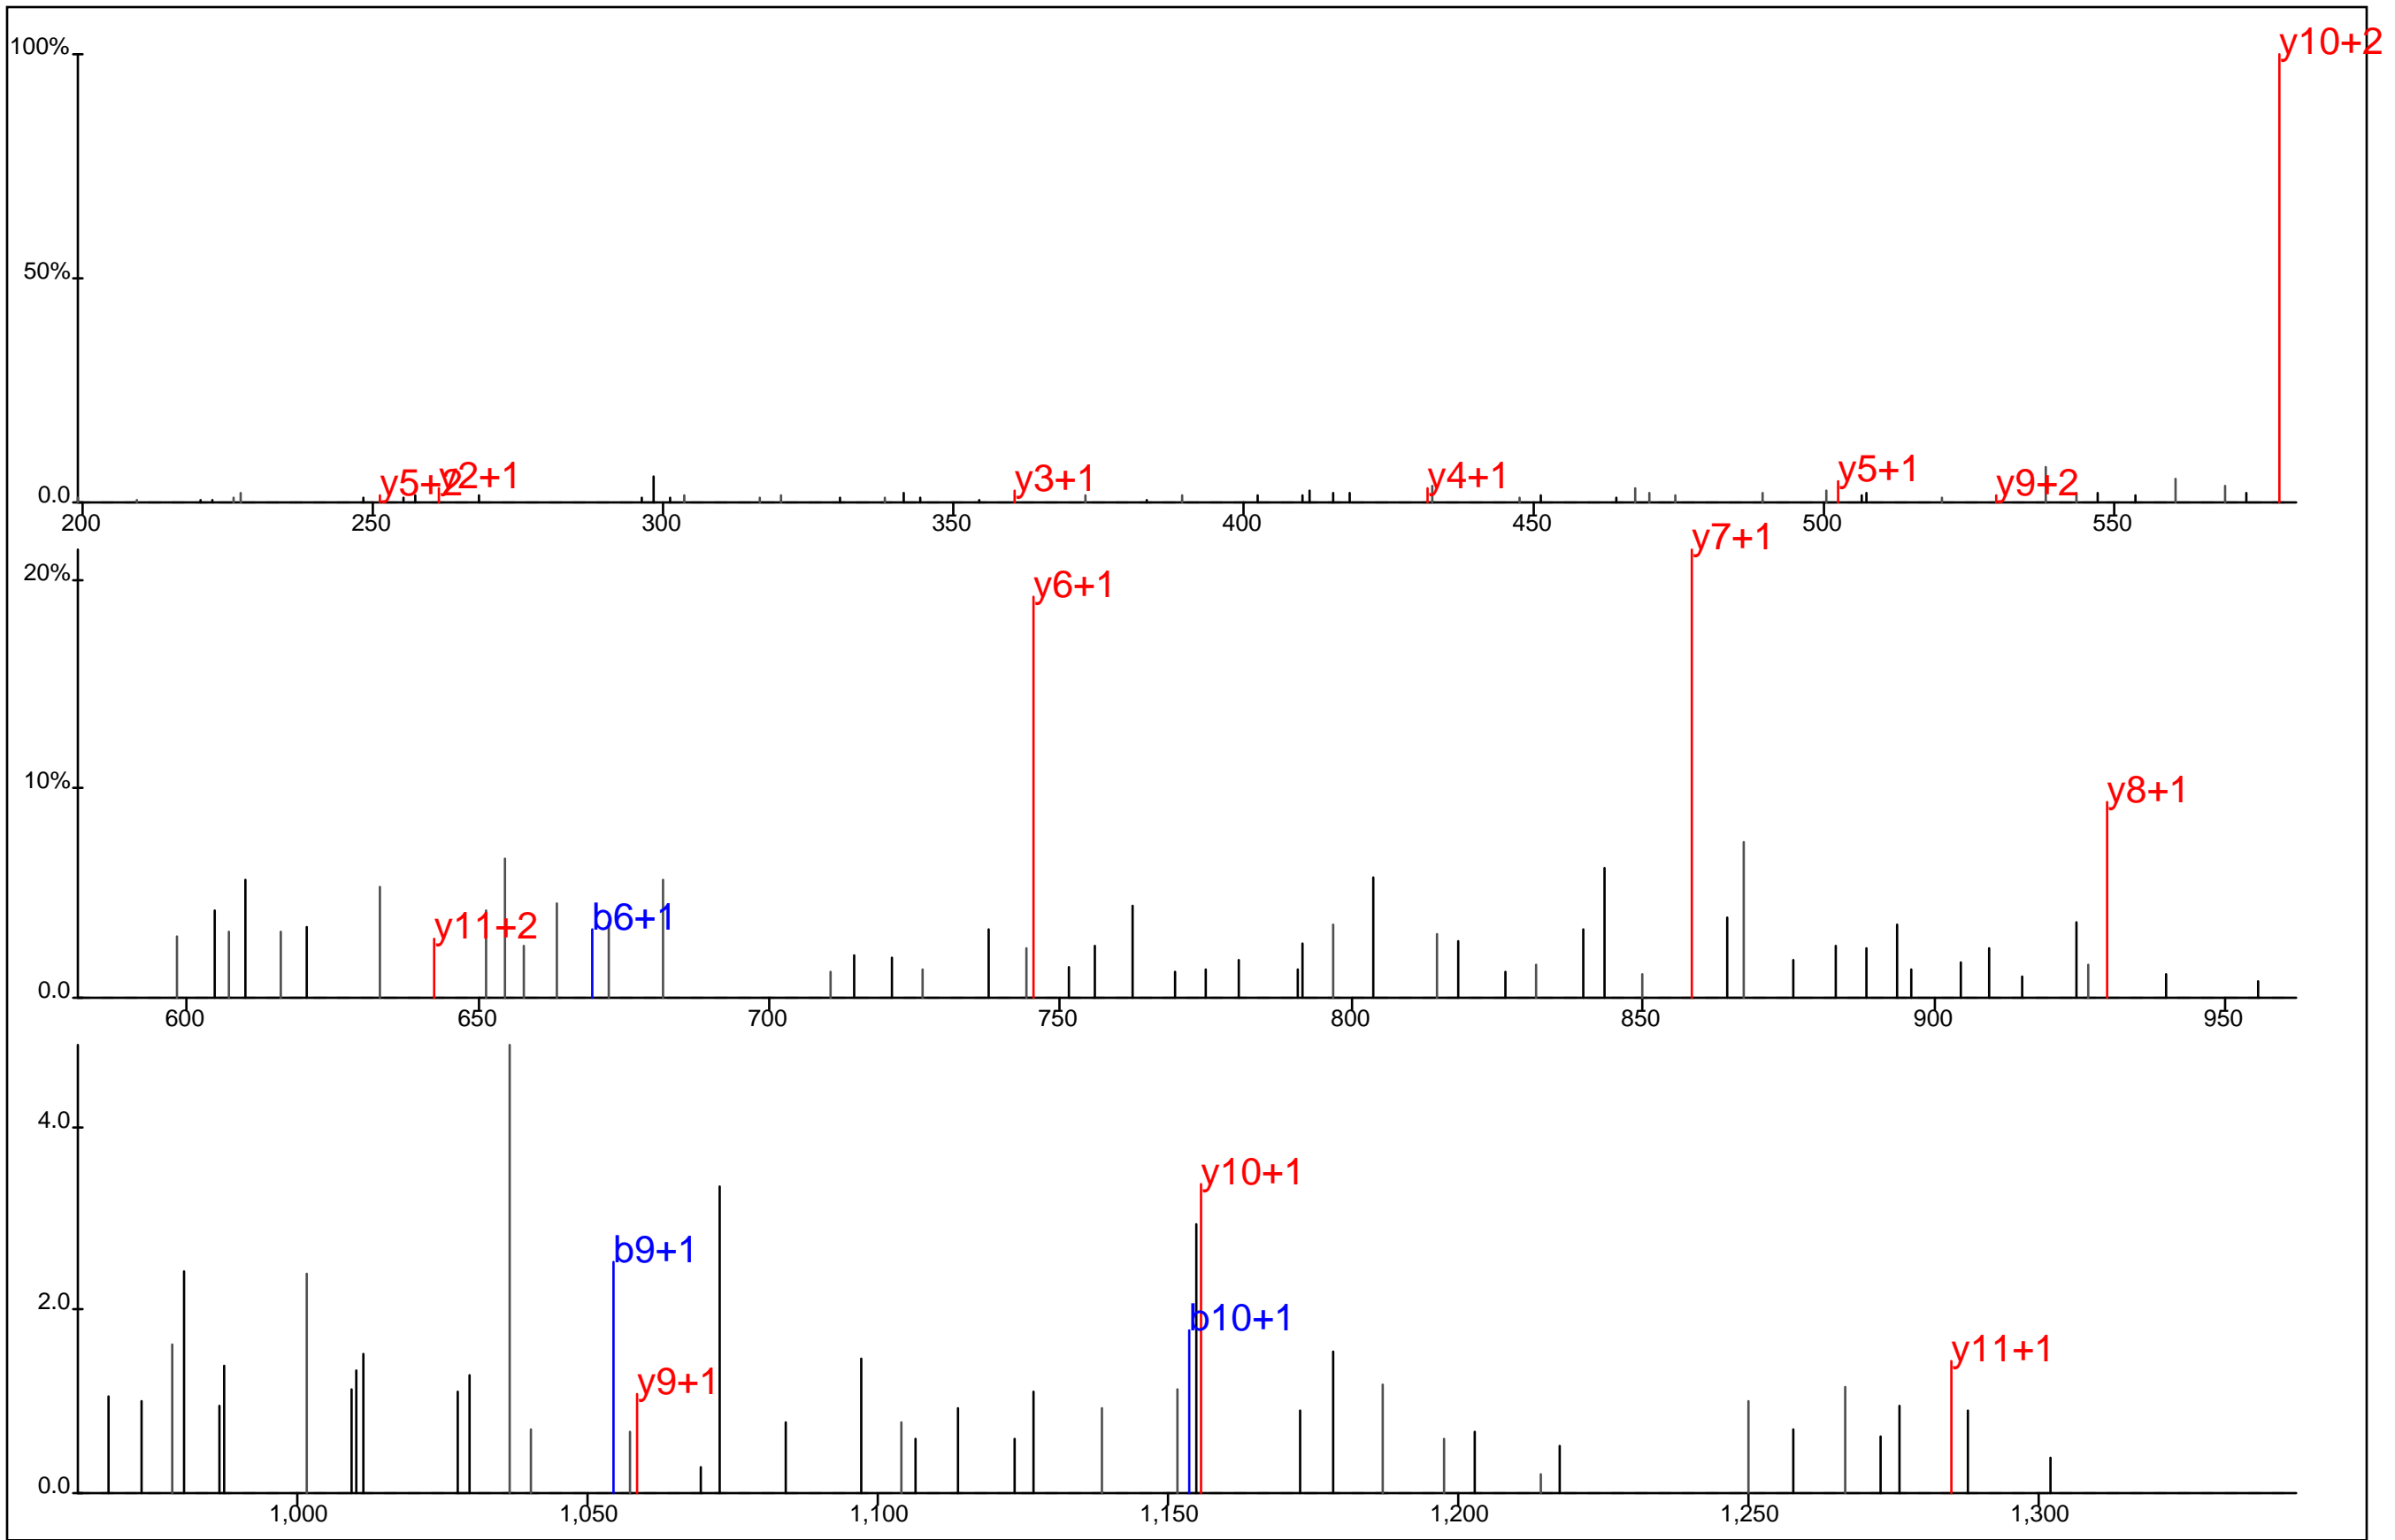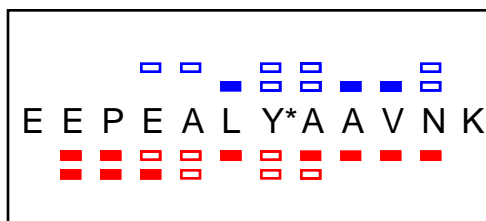

Protein Name: Intersectin 2  
 gi Accession: 0  
 Precursor Mass: 707.3152+2  
 Delta Mass: 4.587 ppm  
 XCorr: 41.04

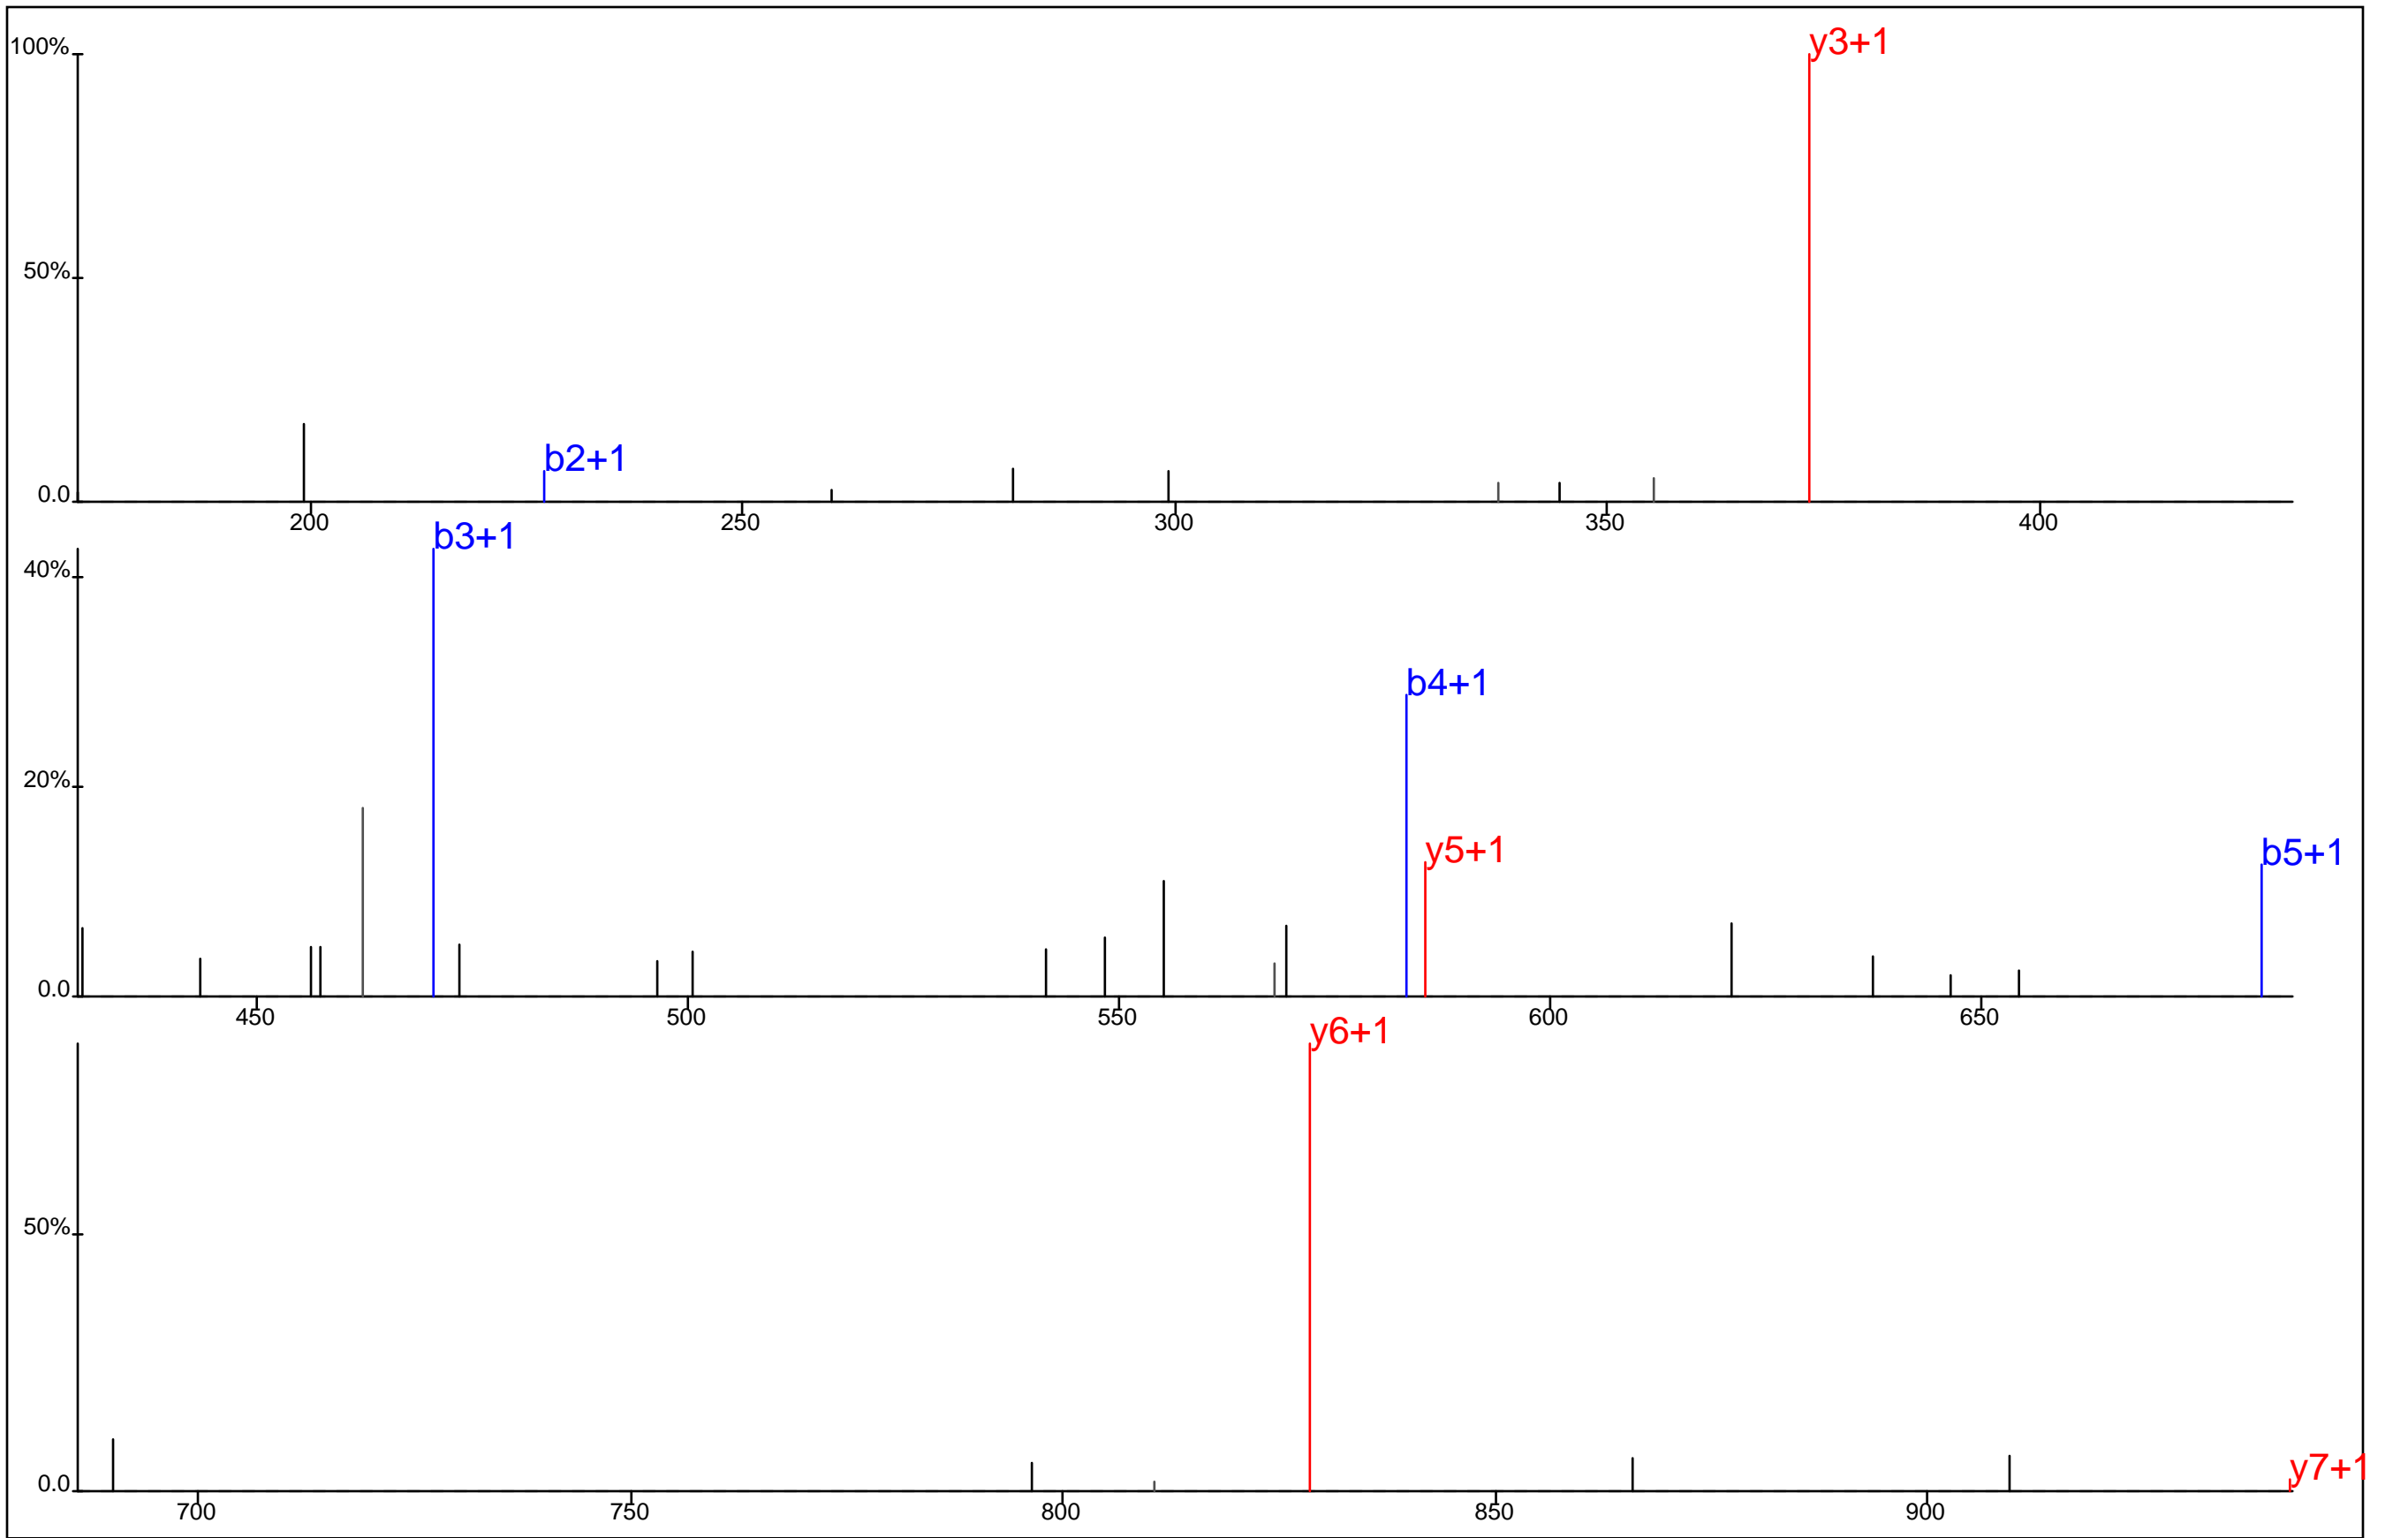

L I Y\* L V P E K

Protein Name: Intersectin 2  
 gi Accession: 0  
 Precursor Mass: 527.7845+2  
 Delta Mass: 3.131 ppm  
 XCorr: 20.69

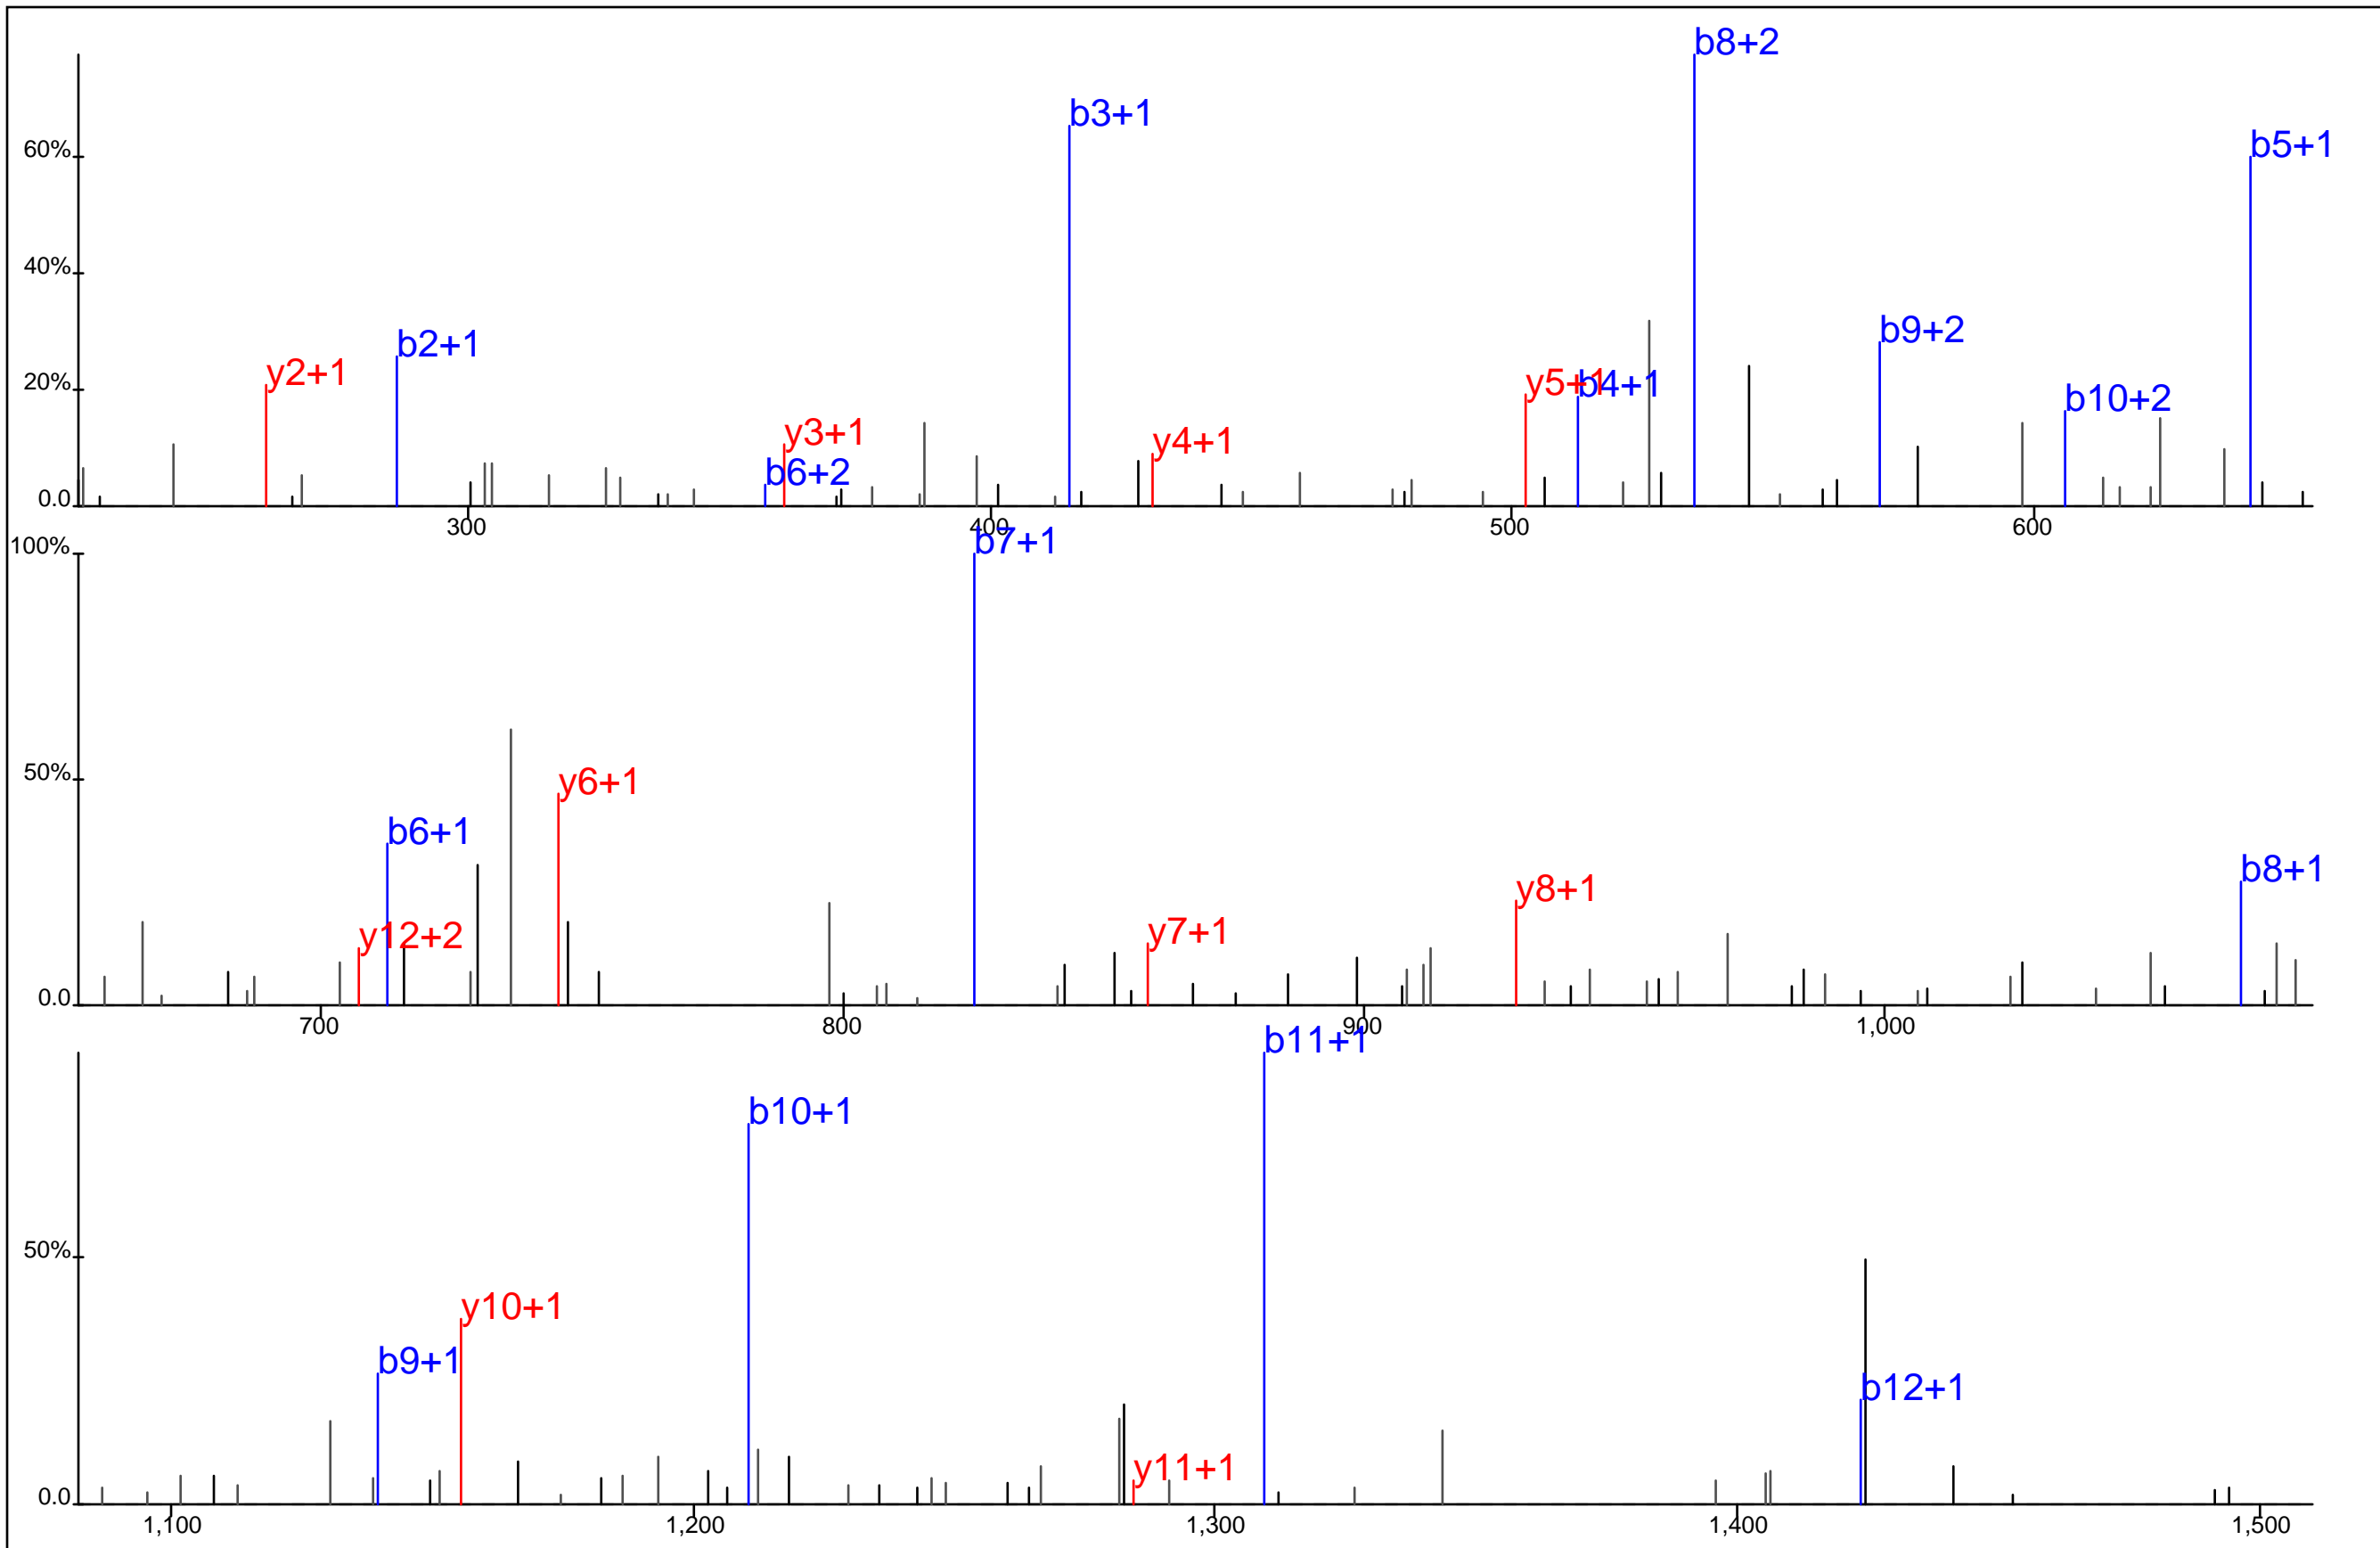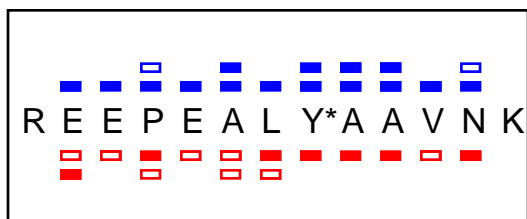

Protein Name: Intersectin 2  
 gi Accession: 0  
 Precursor Mass: 785.3668+2  
 Delta Mass: 2.826 ppm  
 XCorr: 82.18



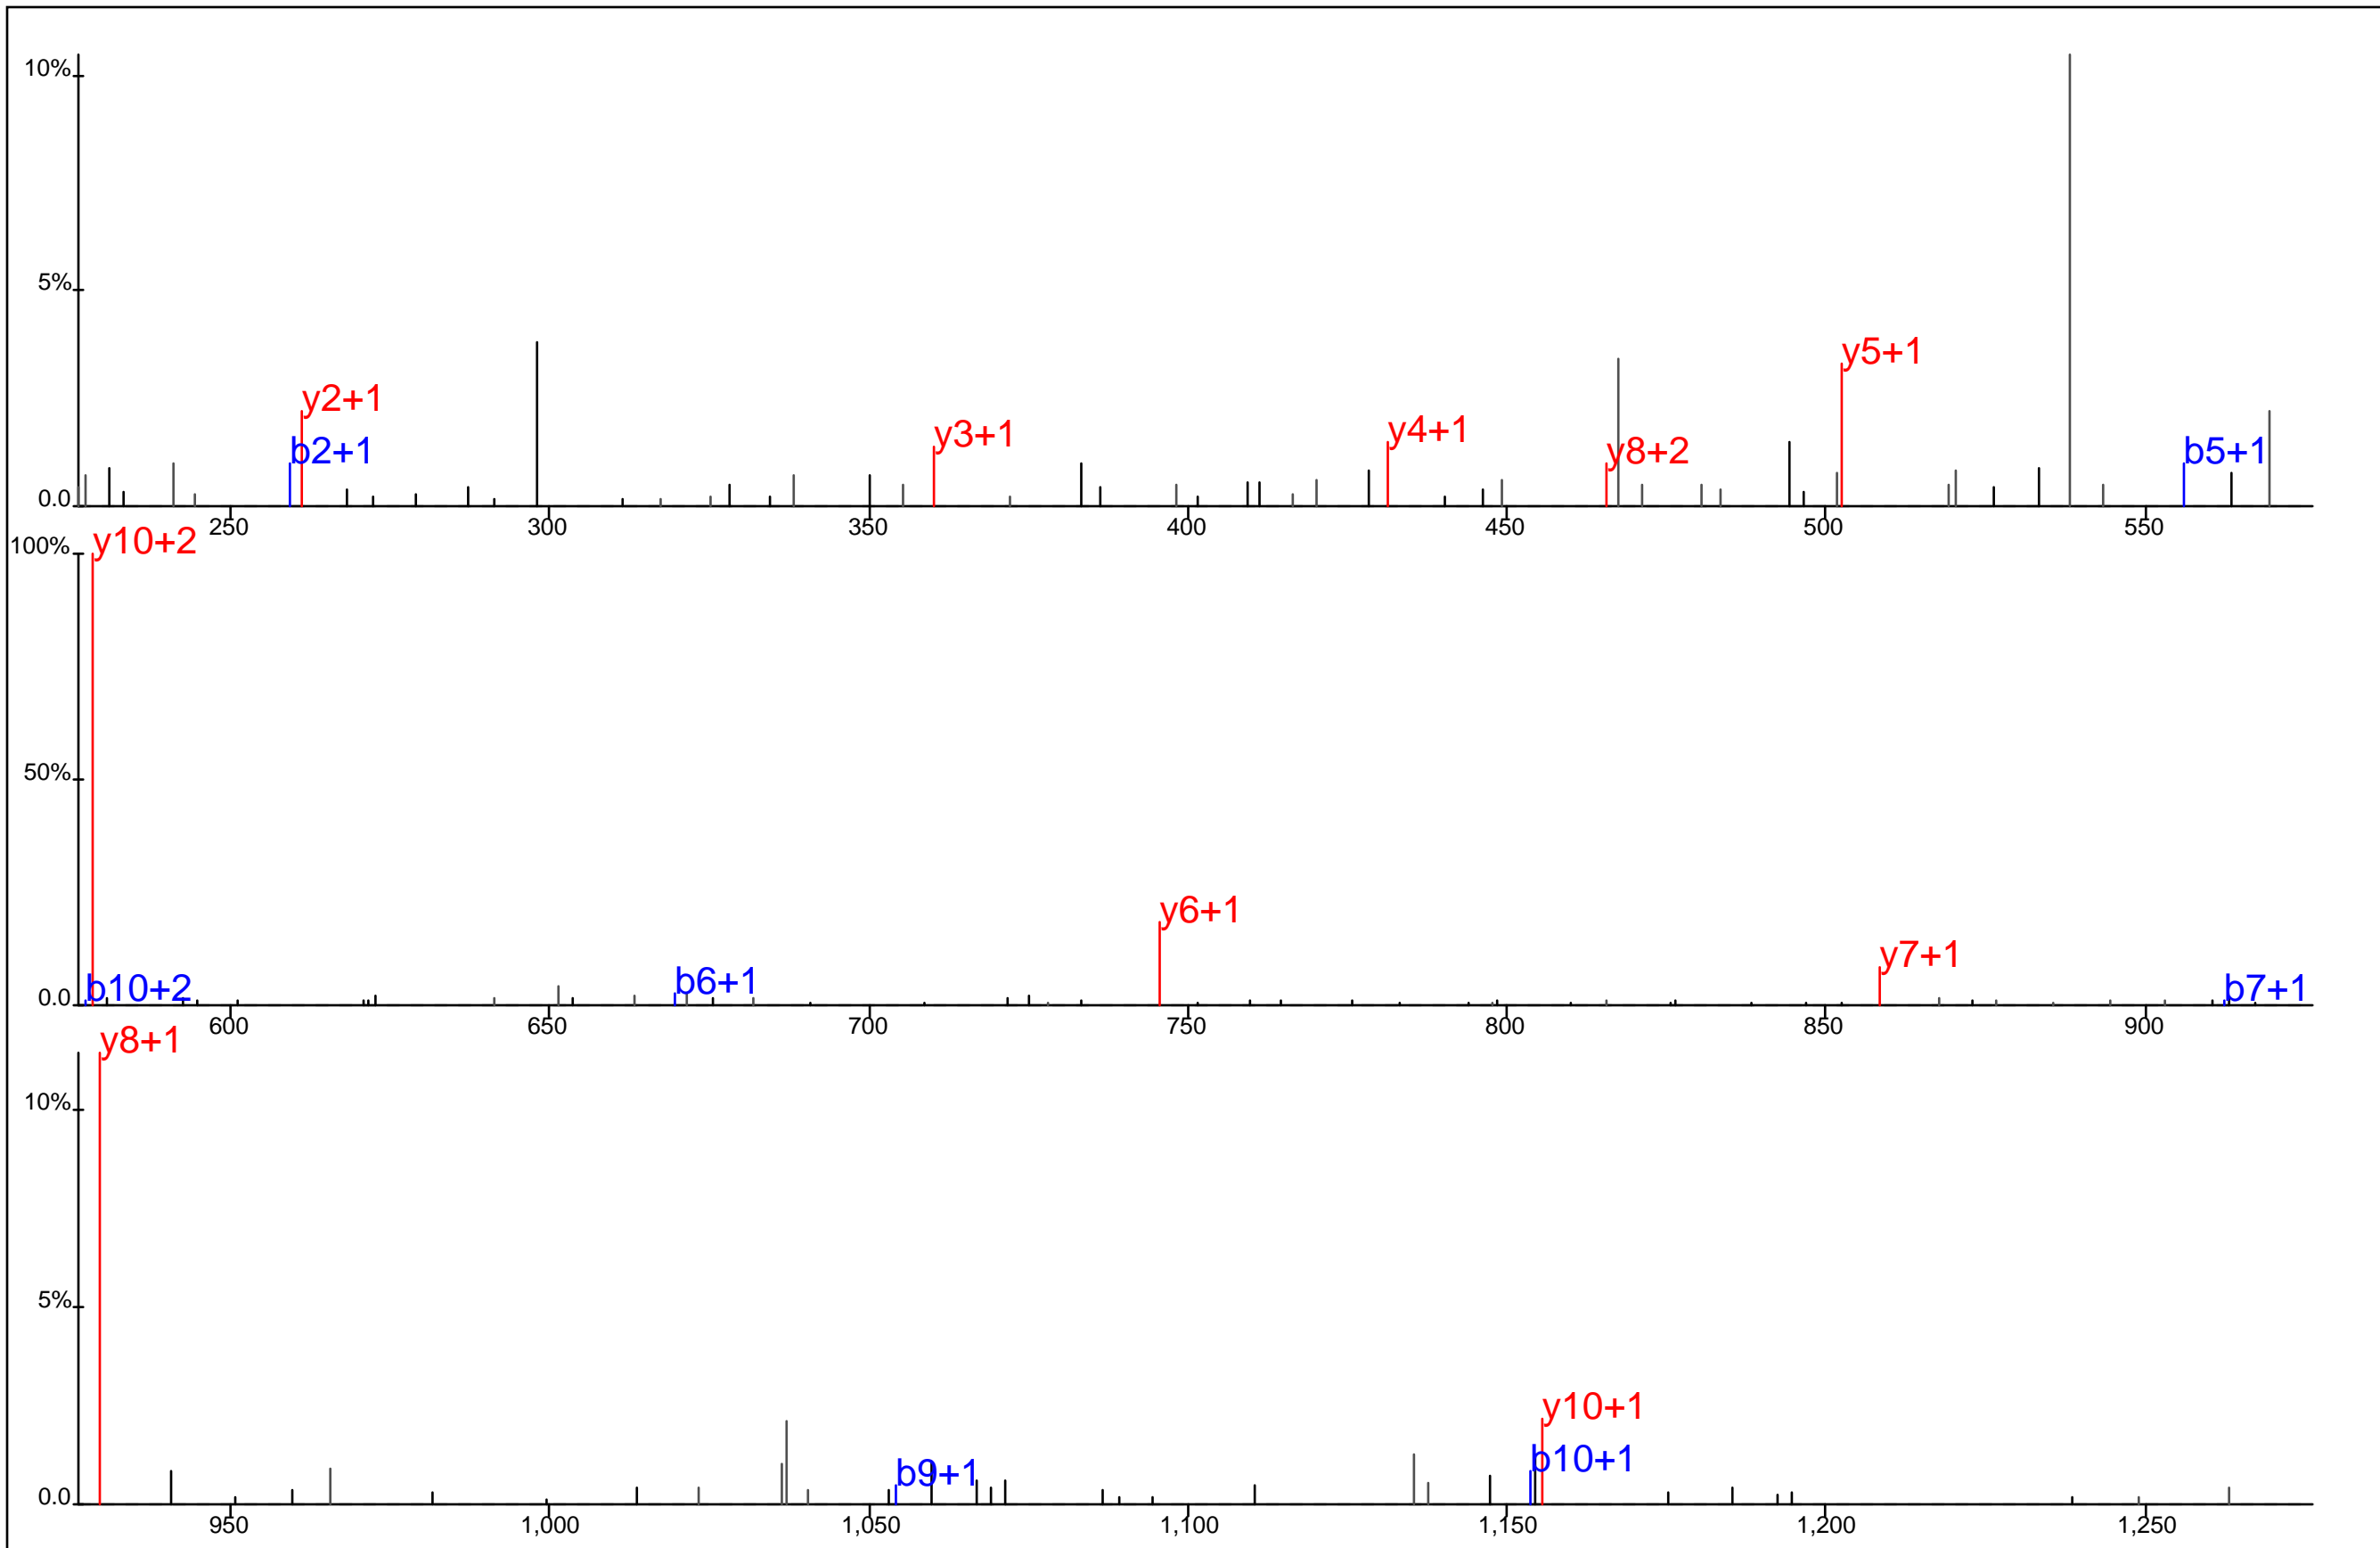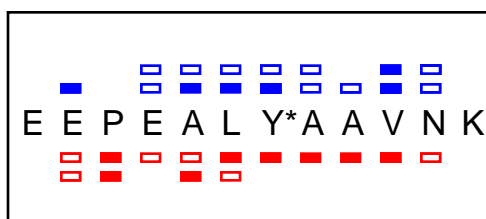

Protein Name: Intersectin 2  
 gi Accession: 0  
 Precursor Mass: 707.3178+2  
 Delta Mass: 0.961 ppm  
 XCorr: 50.39

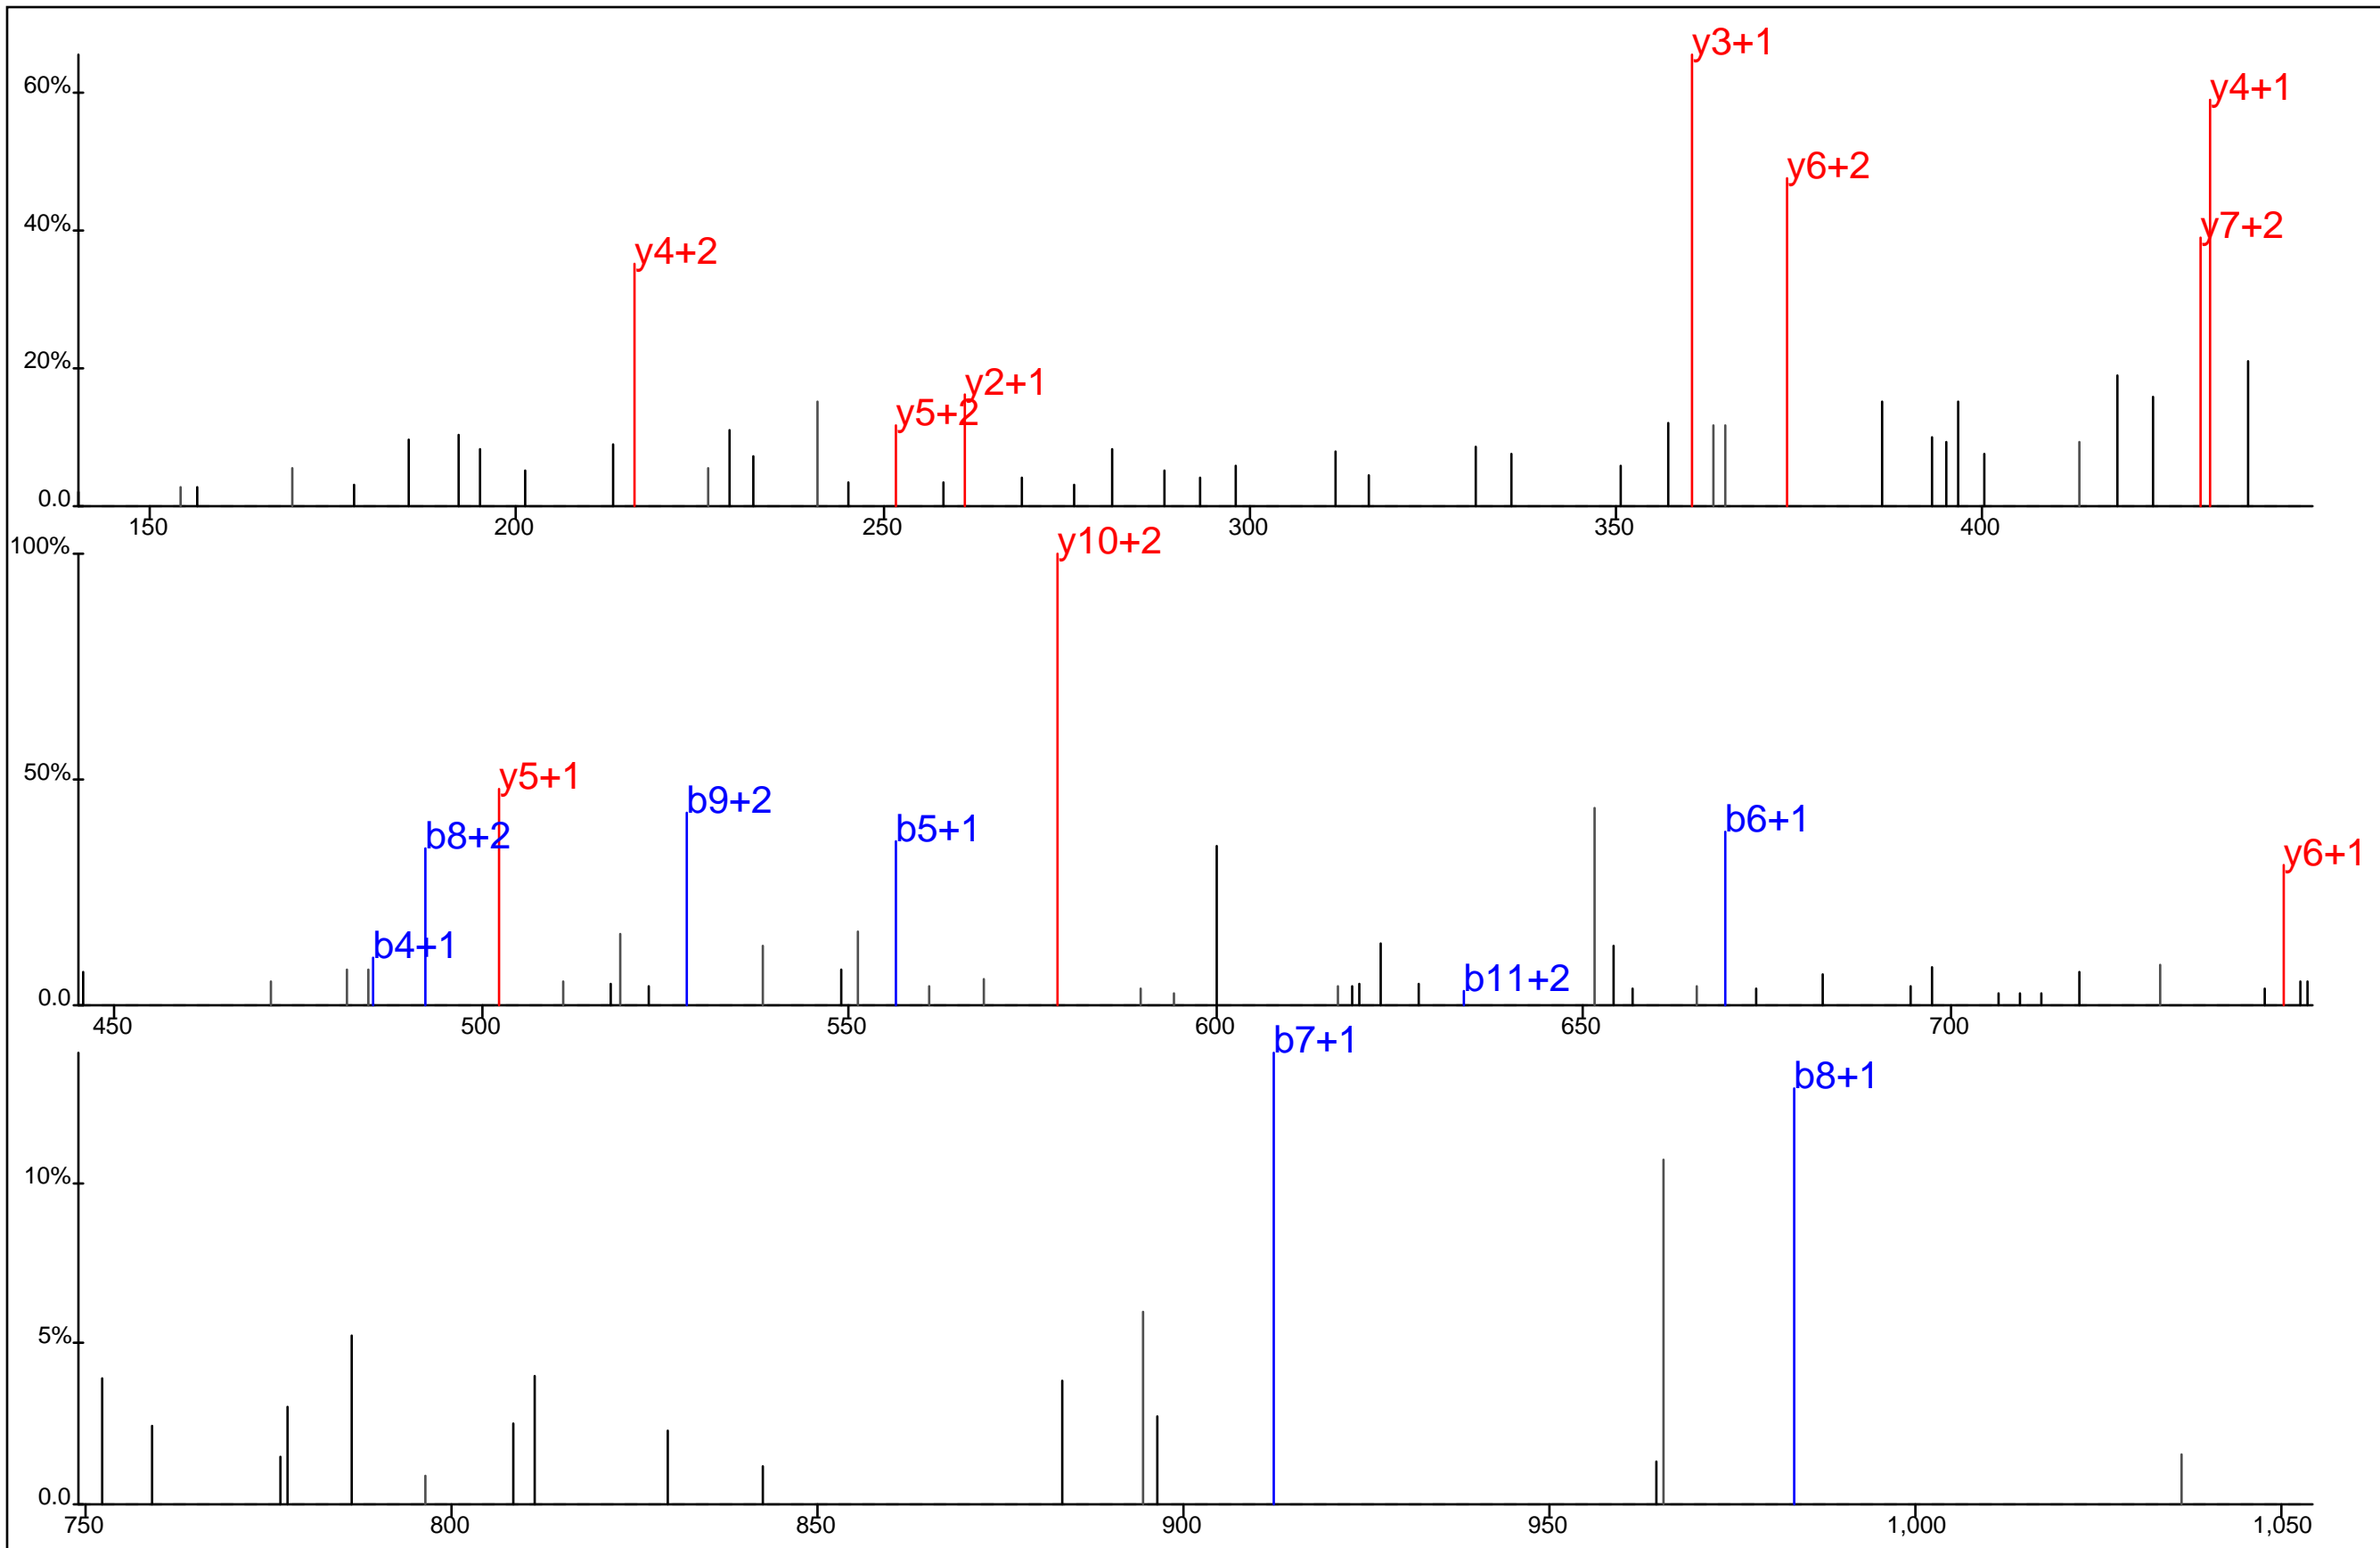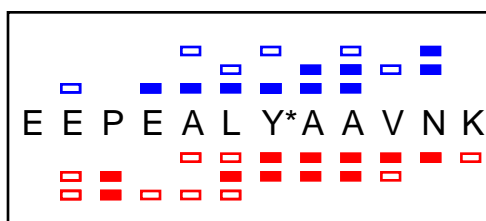

Protein Name: Intersectin 2  
 gi Accession: 0  
 Precursor Mass: 471.8809+3  
 Delta Mass: 1.121 ppm  
 XCorr: 43.06

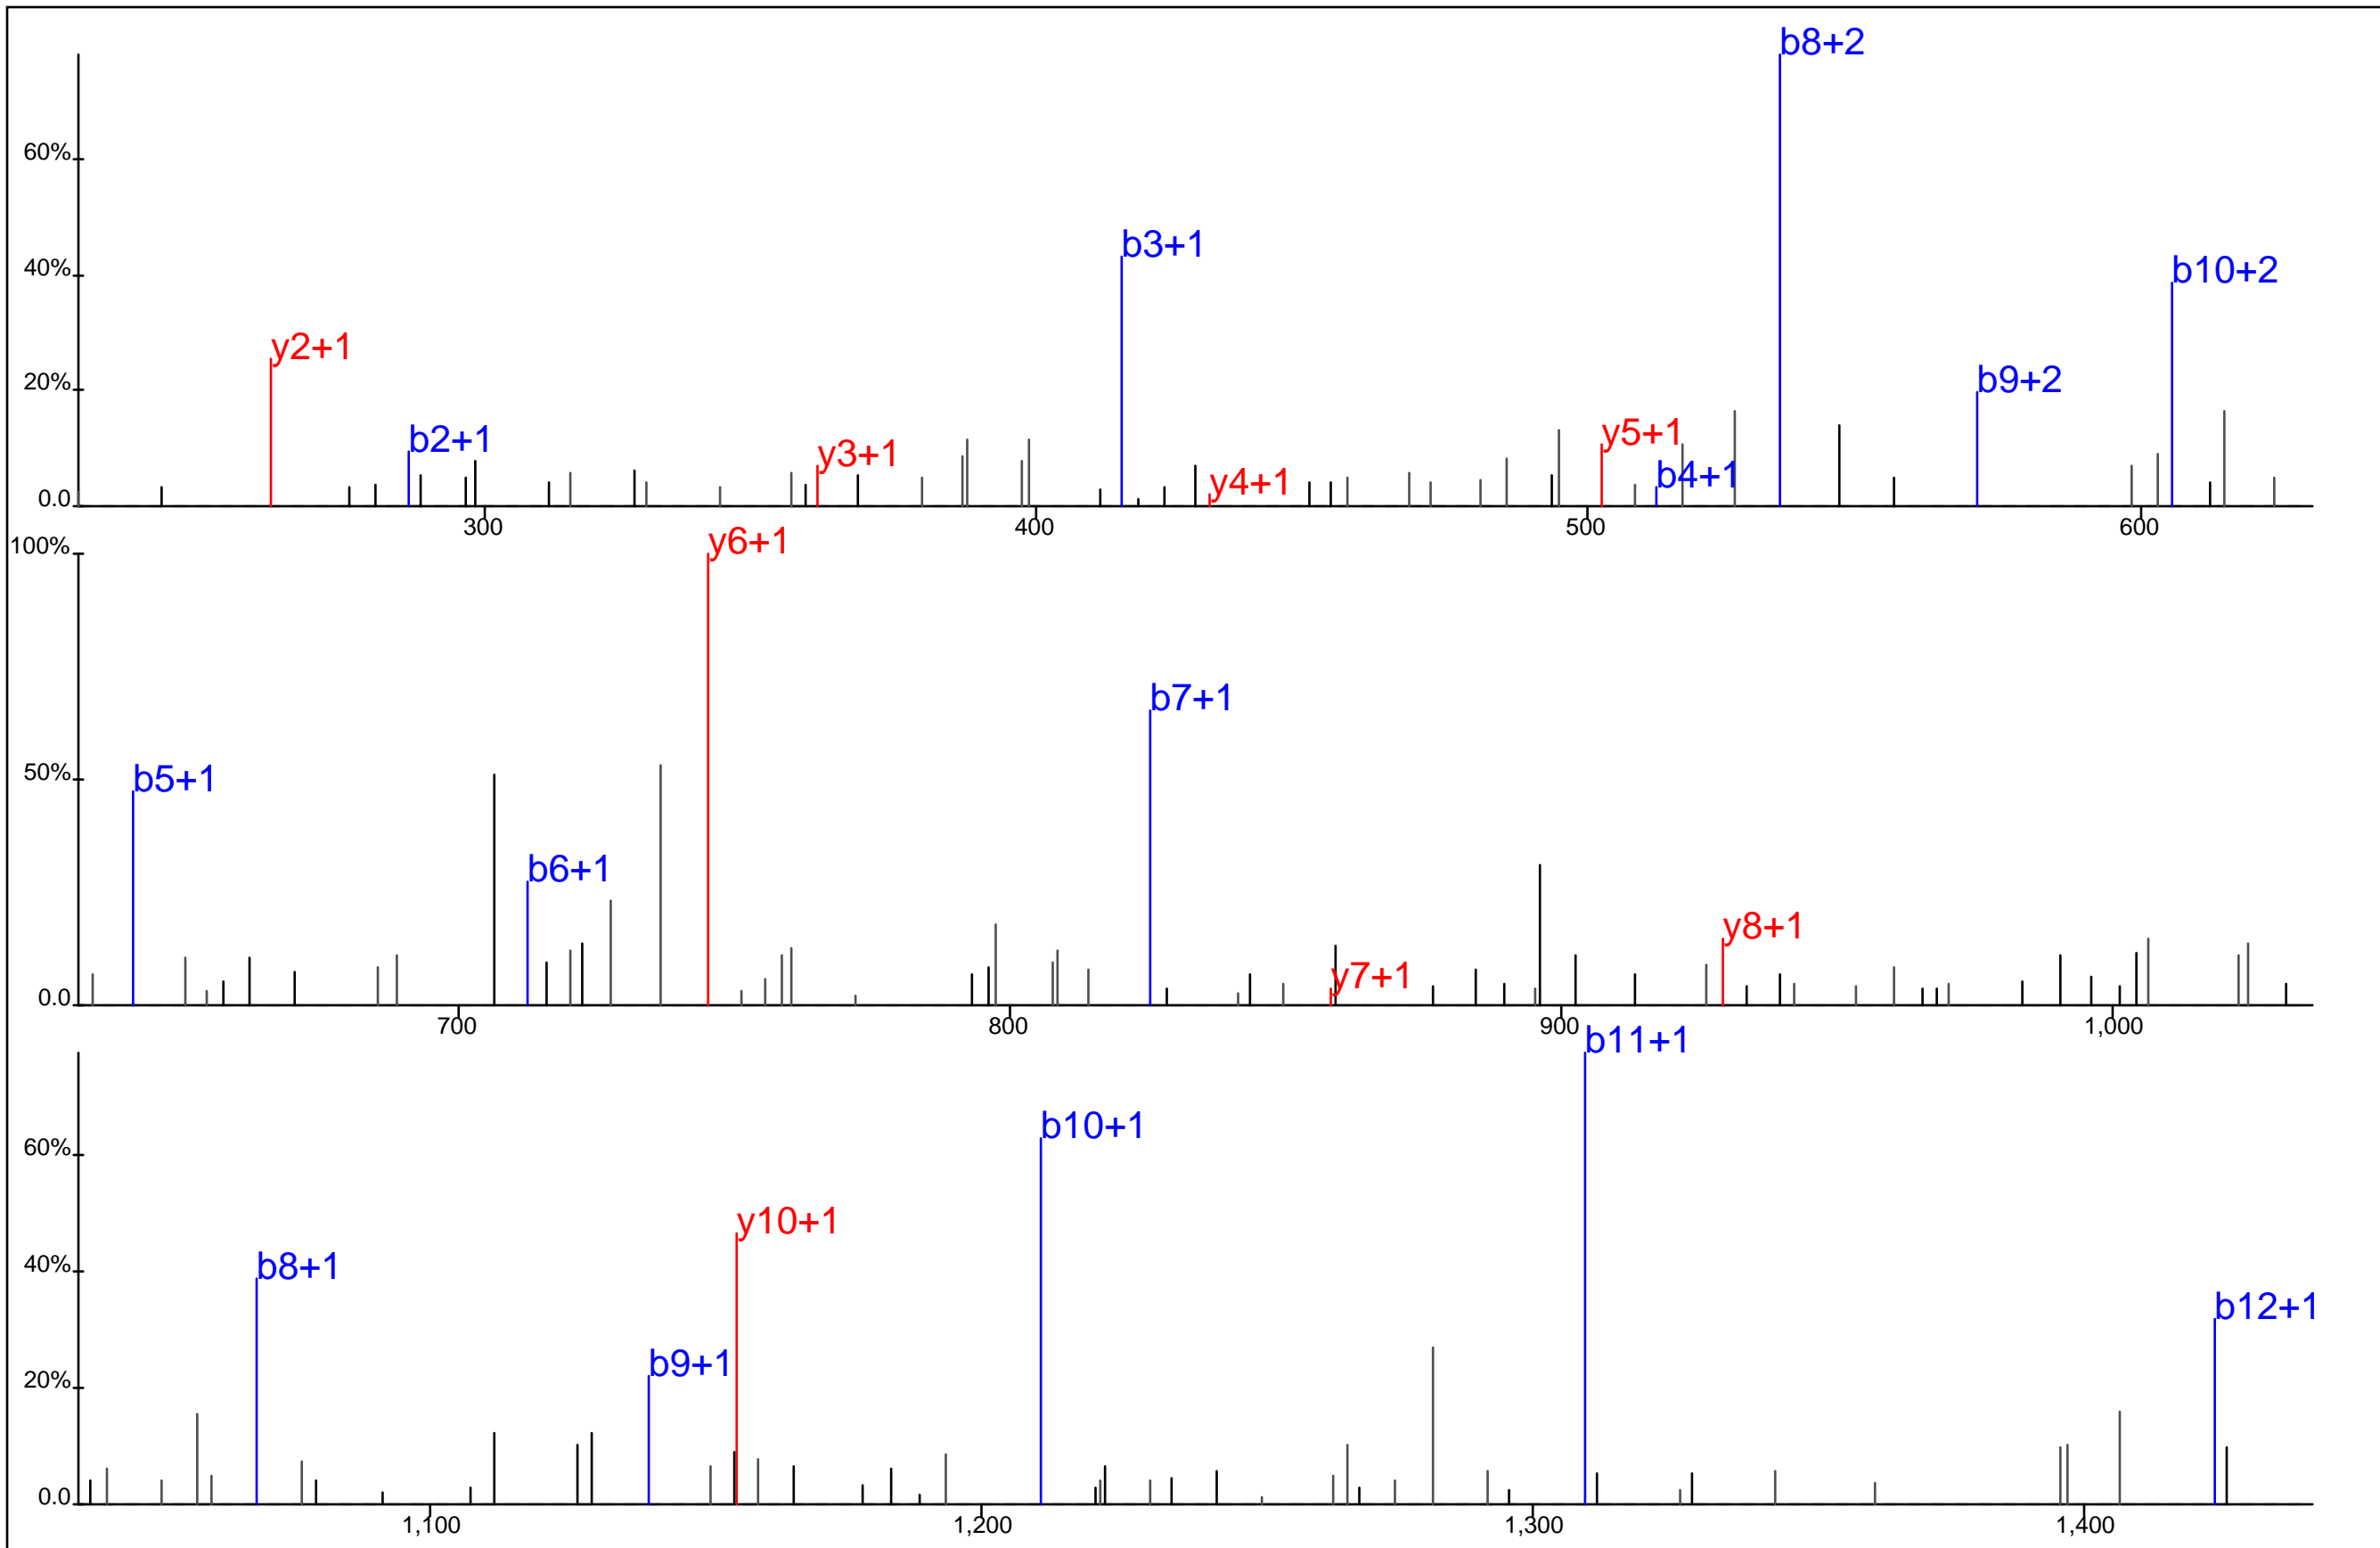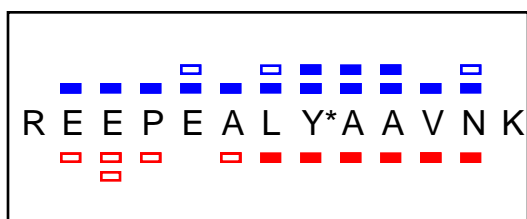

Protein Name: Intersectin 2  
 gi Accession: 0  
 Precursor Mass: 785.3658+2  
 Delta Mass: 4.069 ppm  
 XCorr: 69.55

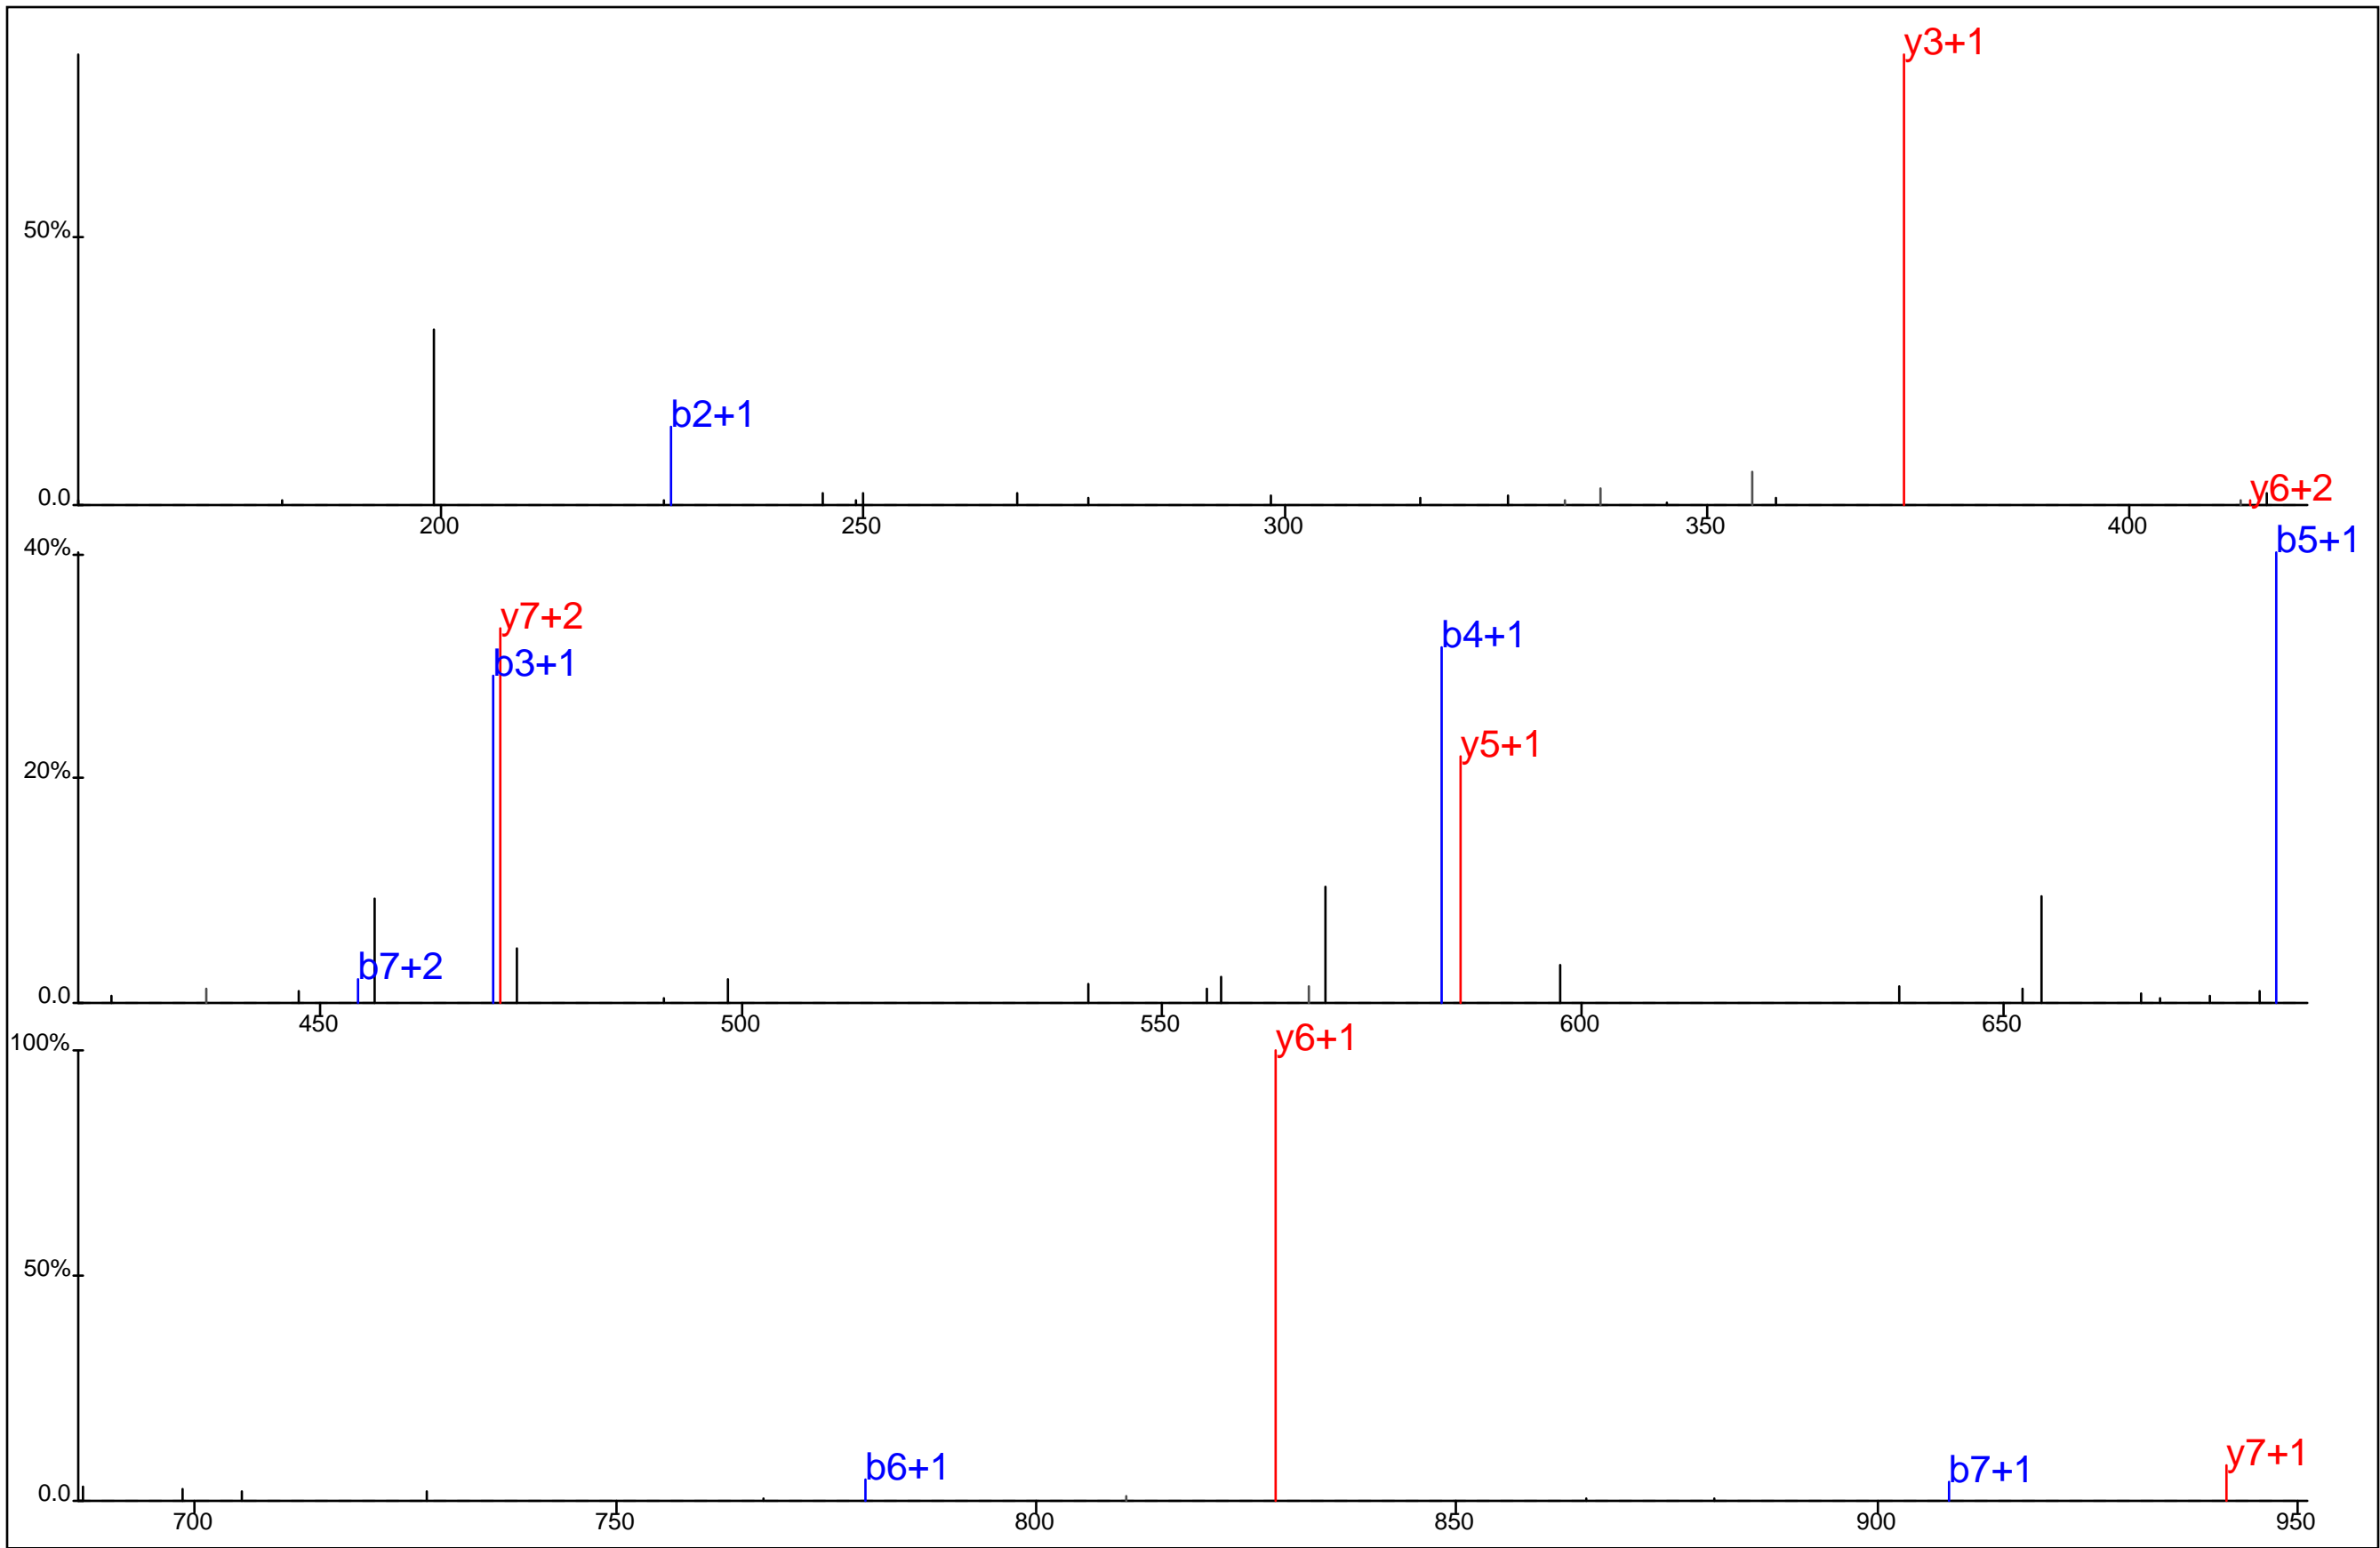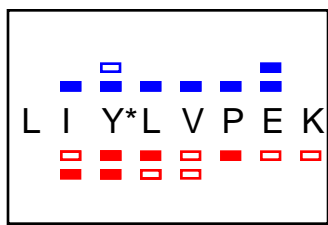

Protein Name: Intersectin 2  
 gi Accession: 0  
 Precursor Mass: 527.7838+2  
 Delta Mass: 1.741 ppm  
 XCorr: 47.82

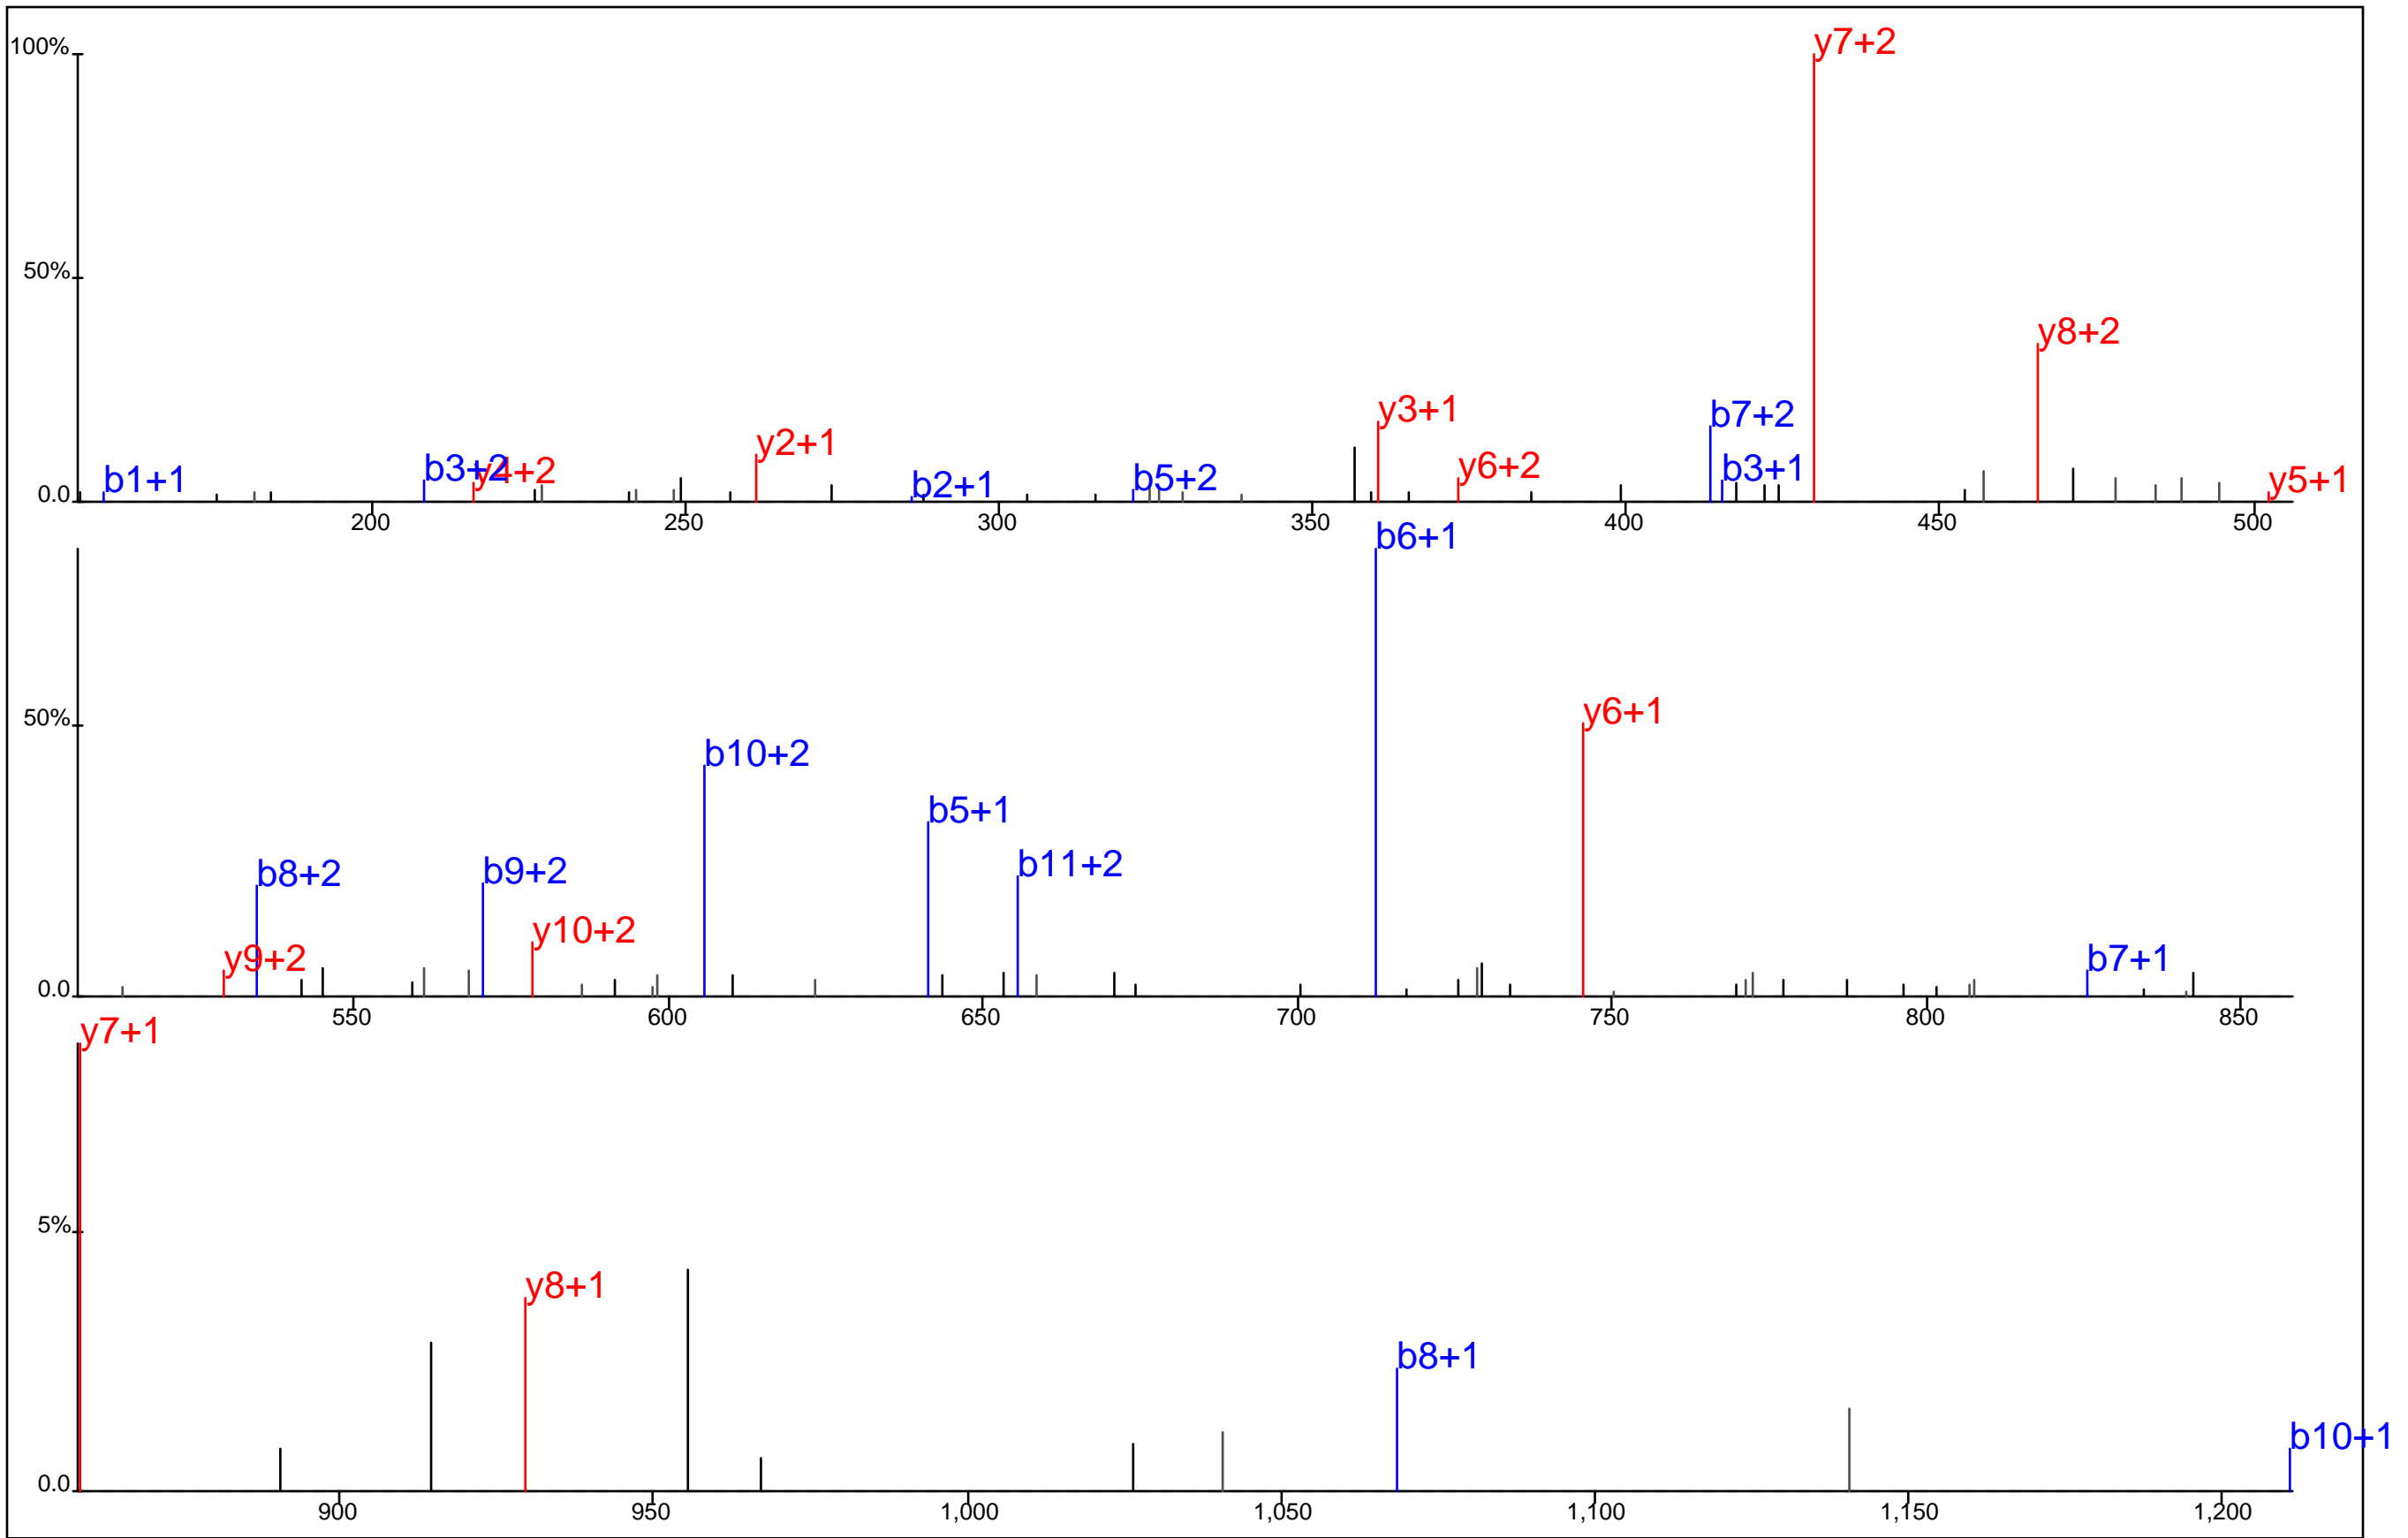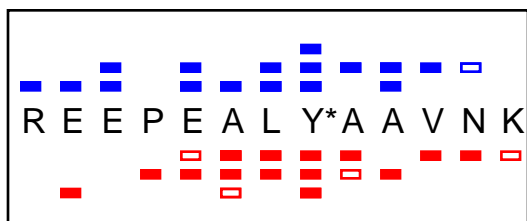

Protein Name: Intersectin 2  
 gi Accession: 0  
 Precursor Mass: 523.9147+3  
 Delta Mass: 0.734 ppm  
 XCorr: 55.77

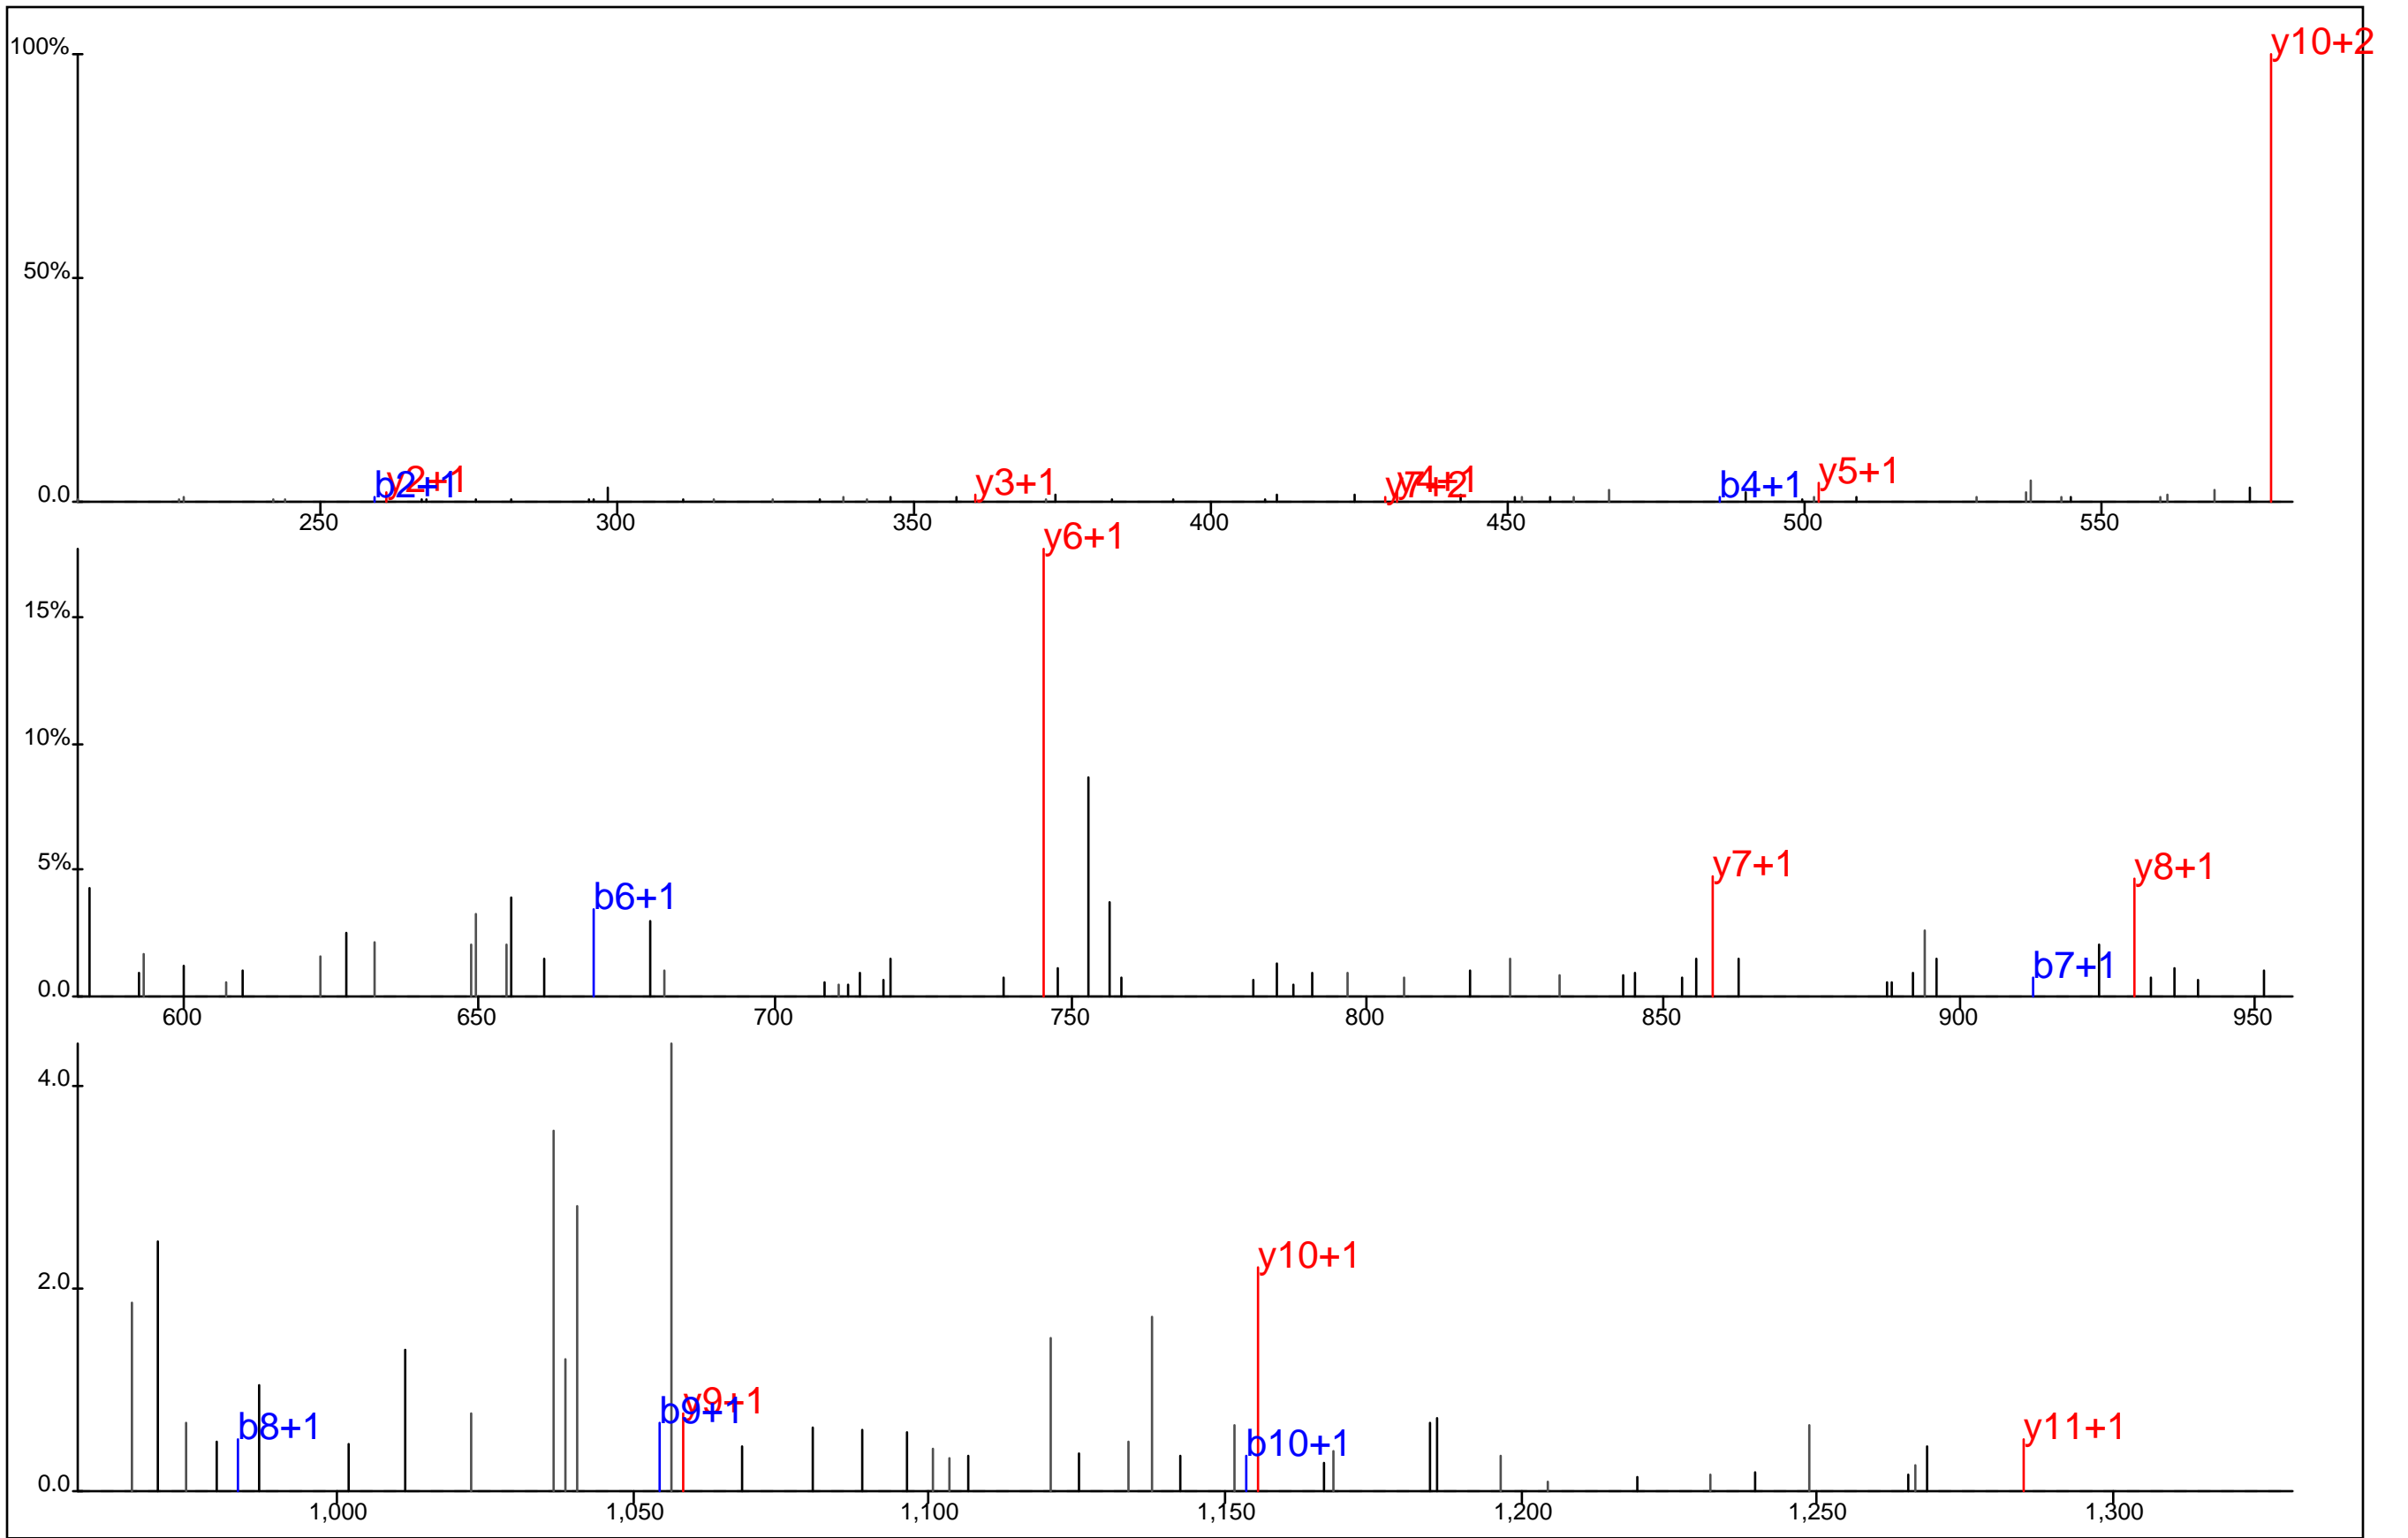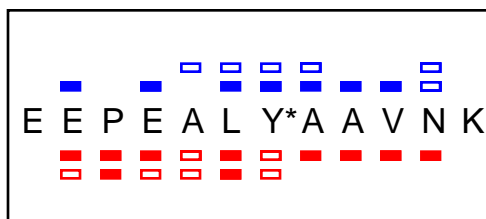

Protein Name: Intersectin 2  
 gi Accession: 0  
 Precursor Mass: 707.3158+2  
 Delta Mass: 3.810 ppm  
 XCorr: 44.75

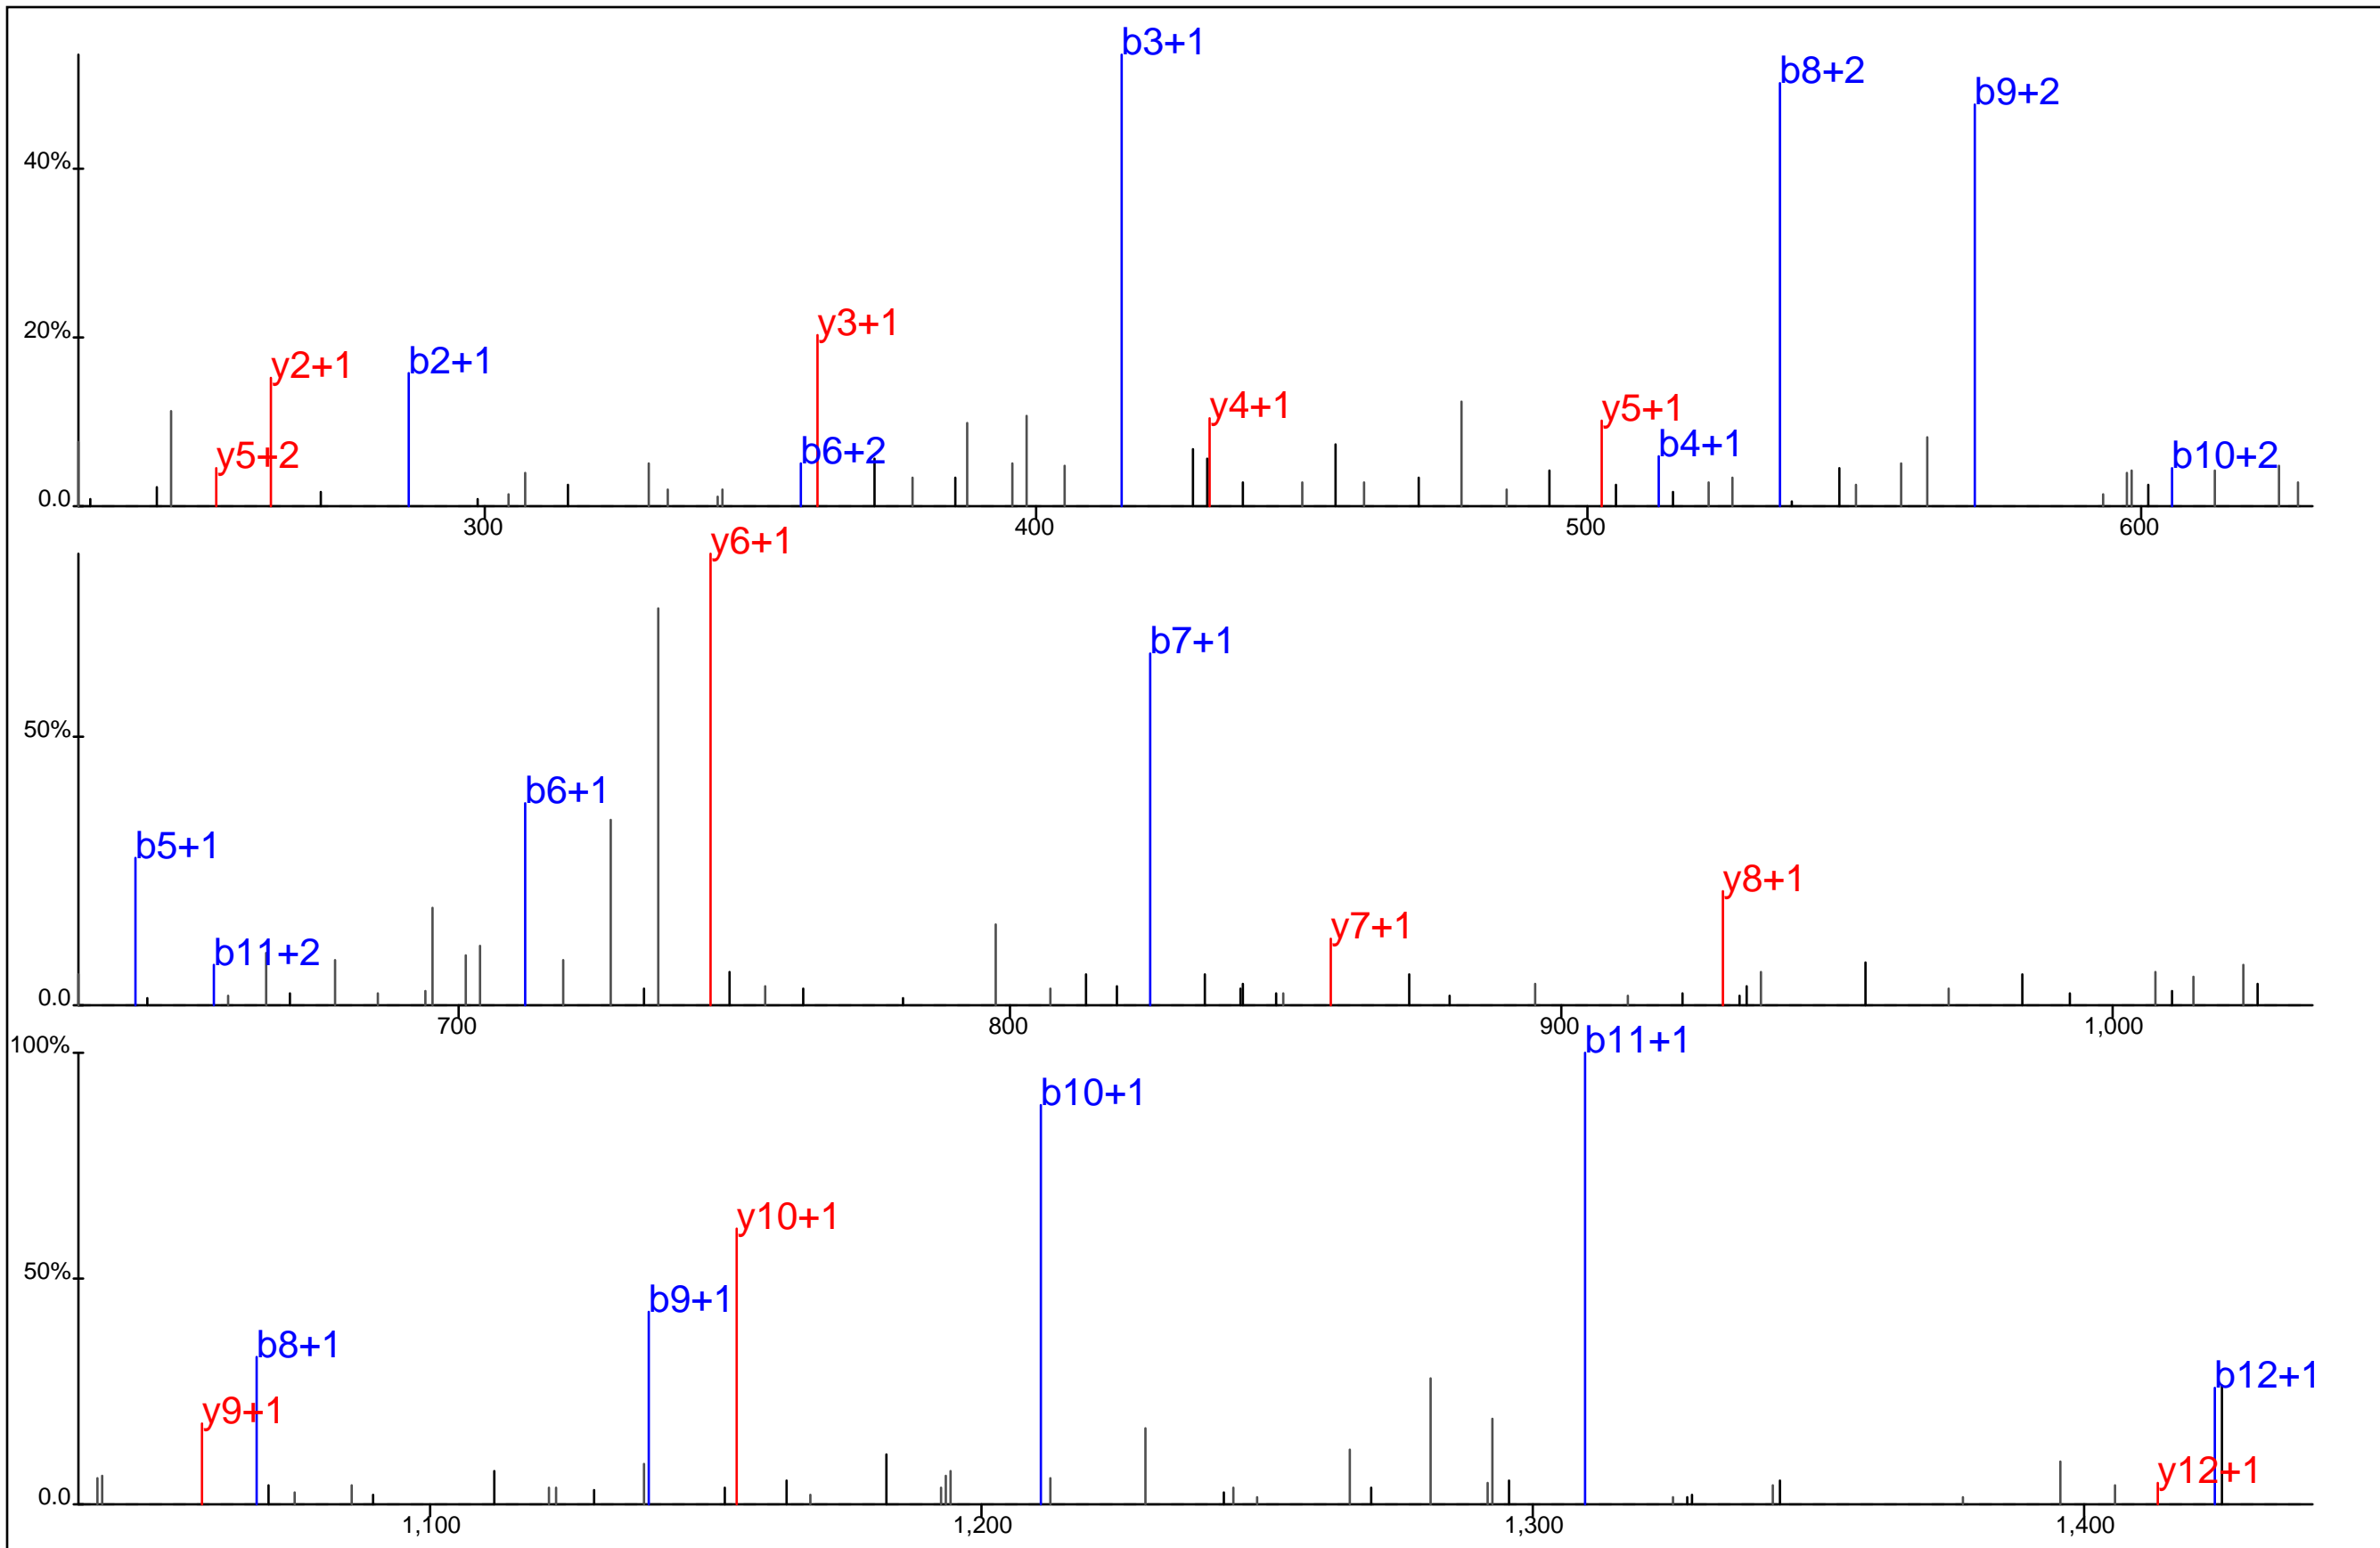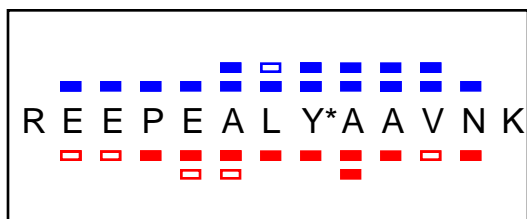

Protein Name: Intersectin 2  
 gi Accession: 0  
 Precursor Mass: 785.3680+2  
 Delta Mass: 1.270 ppm  
 XCorr: 79.49

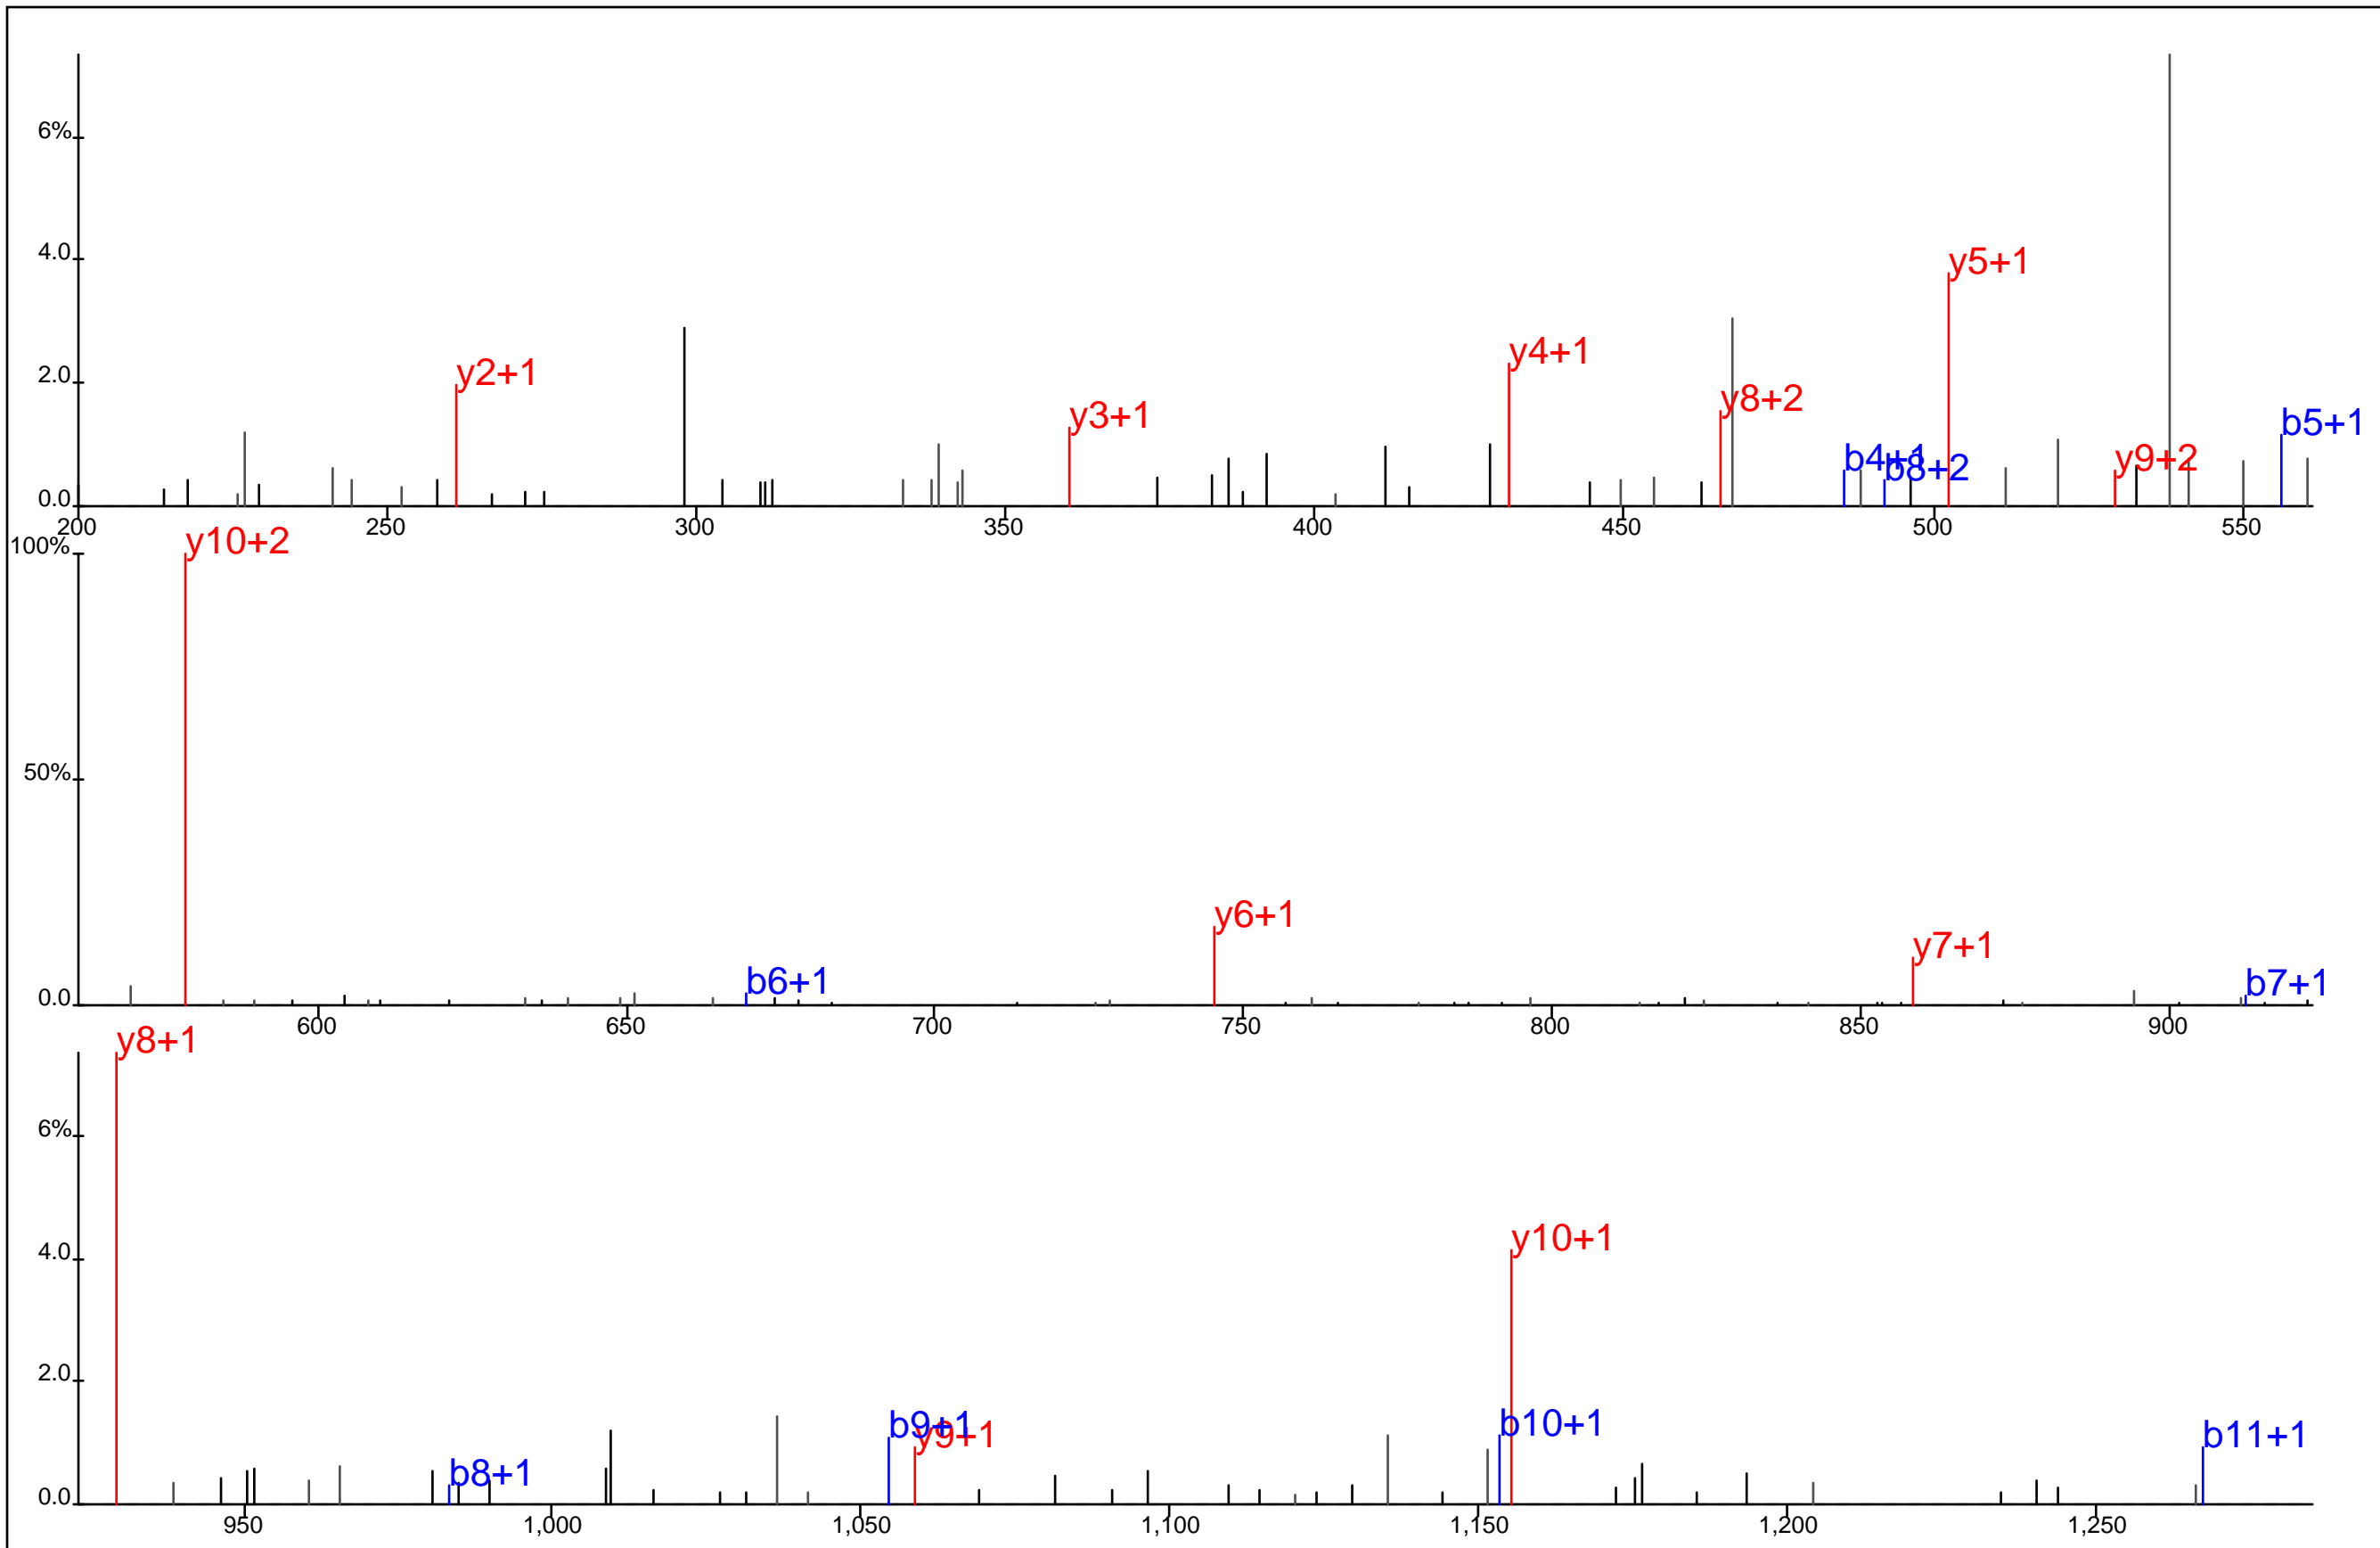

□ □ ■ ■ ■ ■ ■ ■ ■ ■ ■ ■  
 E E P E A L Y\* A A V N K  
□ □ □ □ □ □ □ □ □ □

Protein Name: Intersectin 2  
 gi Accession: 0  
 Precursor Mass: 707.3171+2  
 Delta Mass: 1.910 ppm  
 XCorr: 55.87



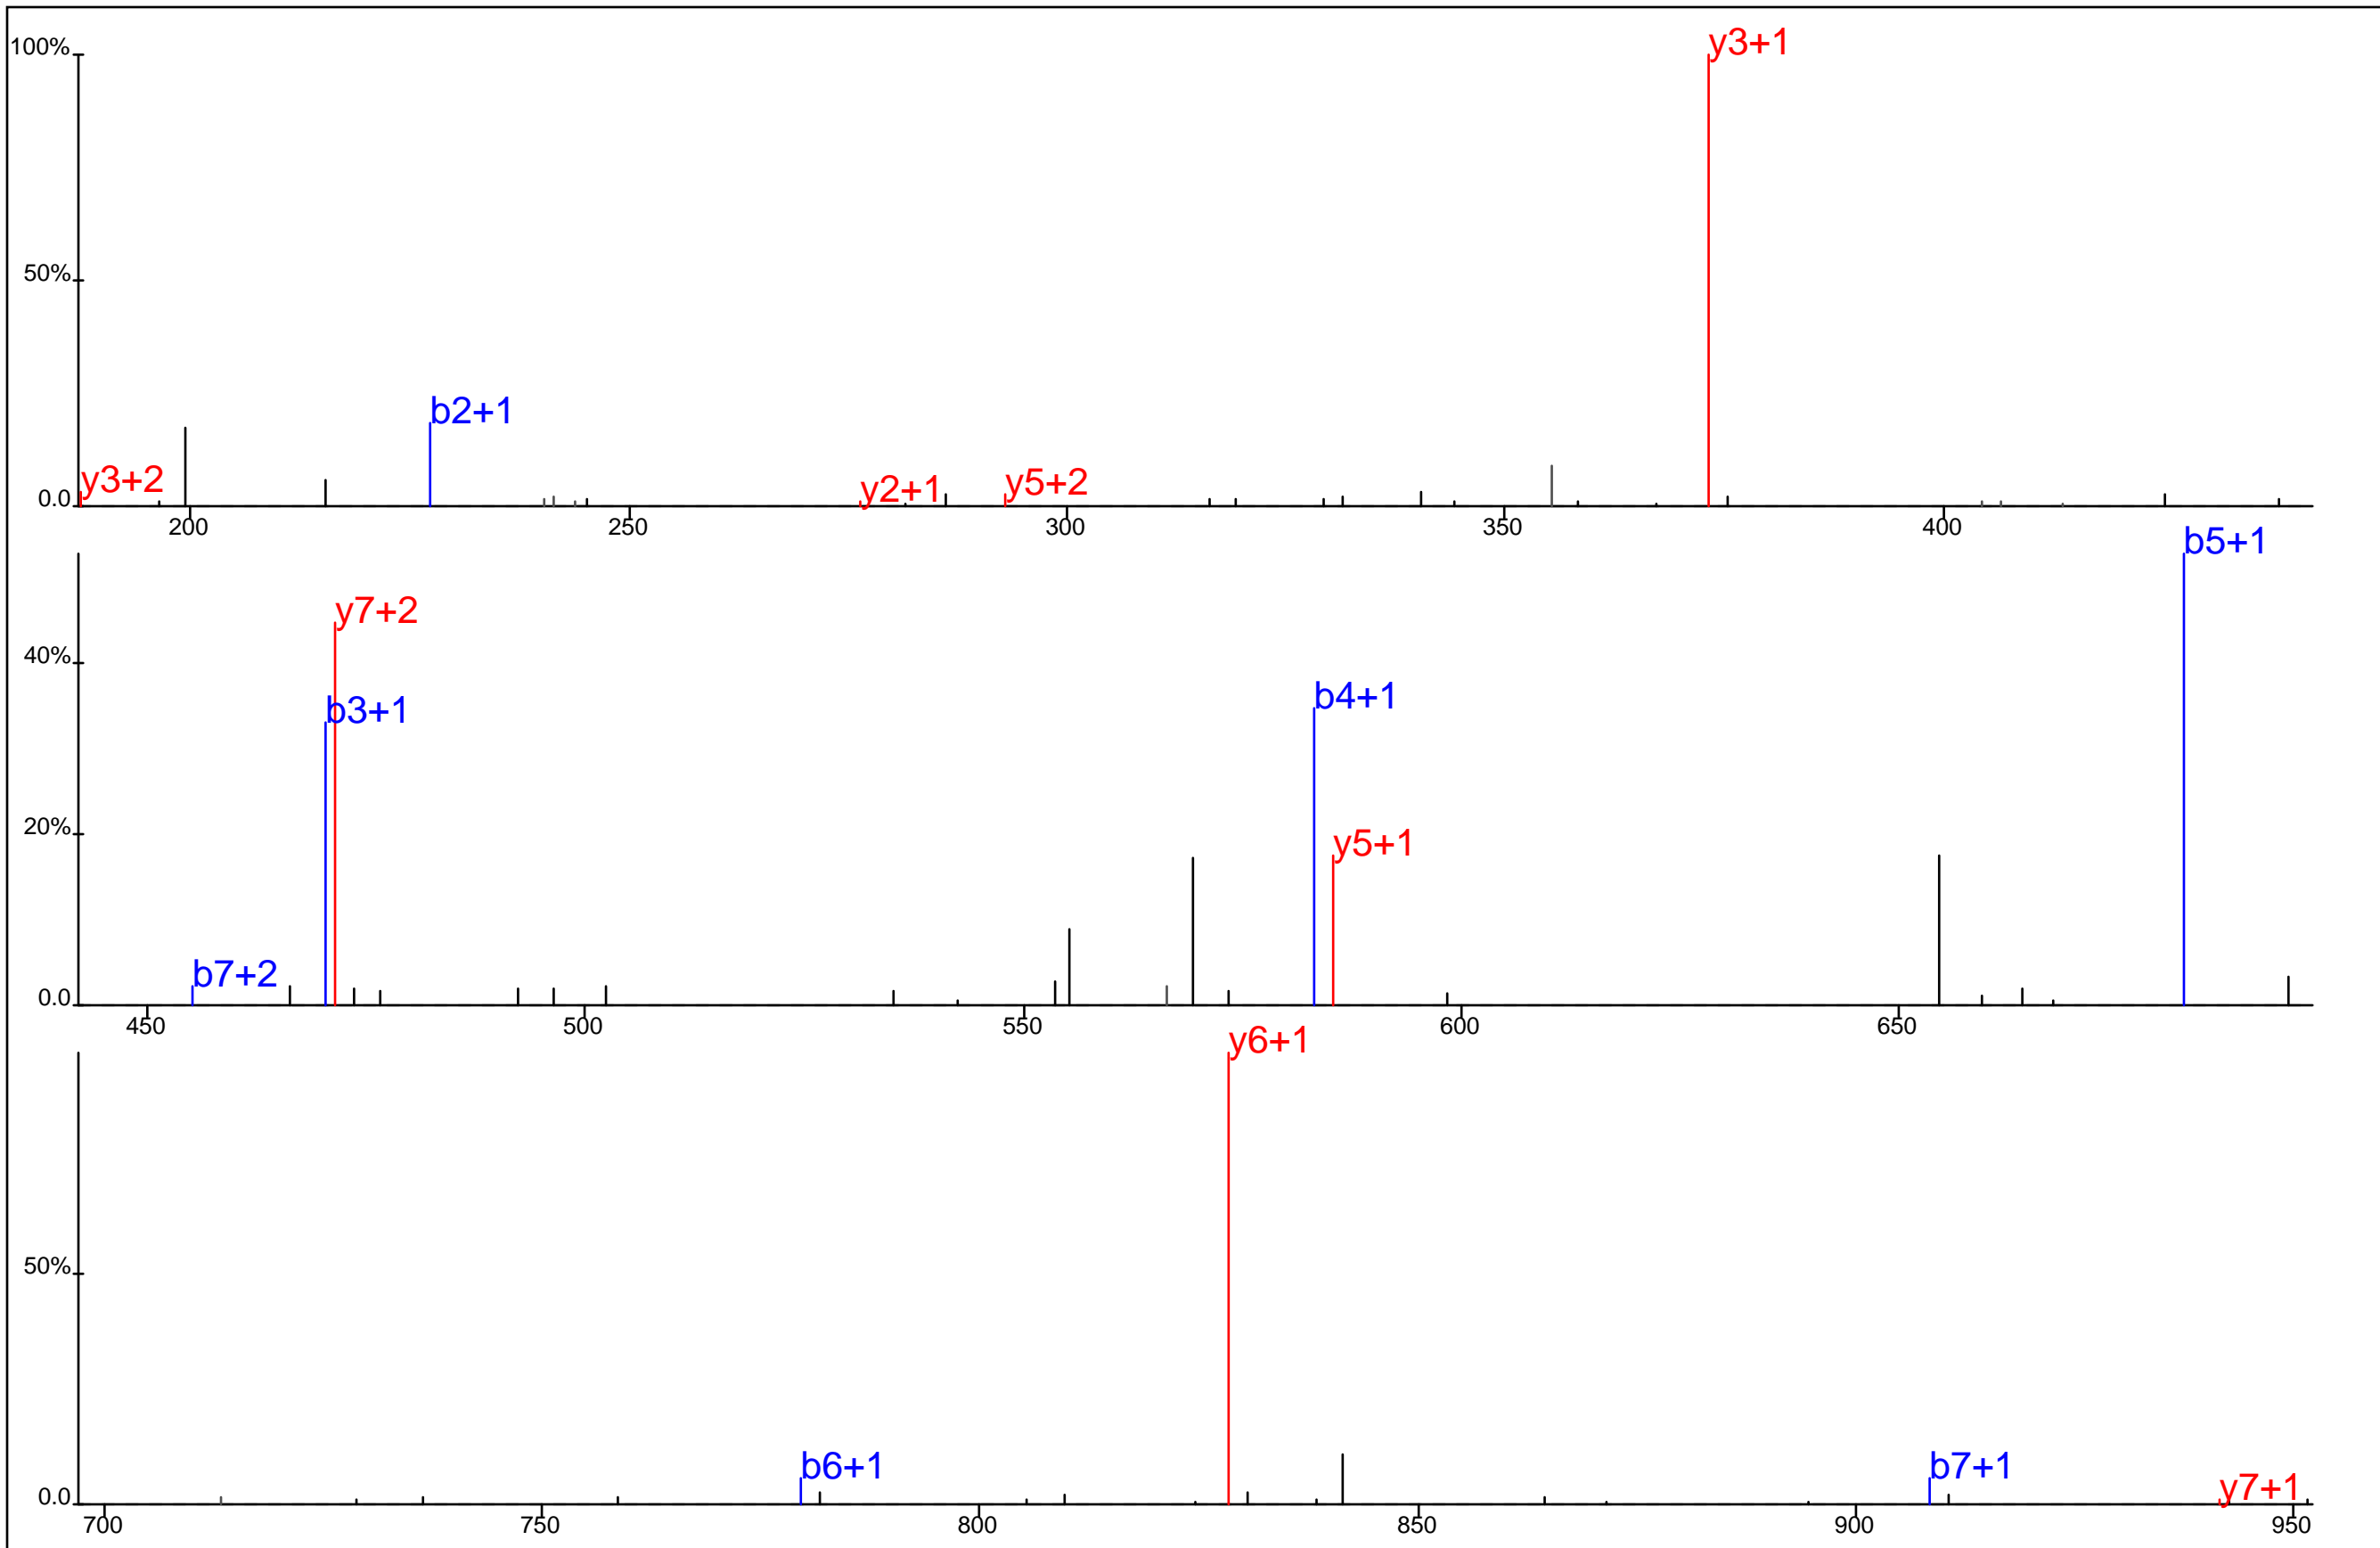

L I Y\* L V P E K

Protein Name: Intersectin 2  
 gi Accession: 0  
 Precursor Mass: 527.7833+2  
 Delta Mass: 0.931 ppm  
 XCorr: 46.09

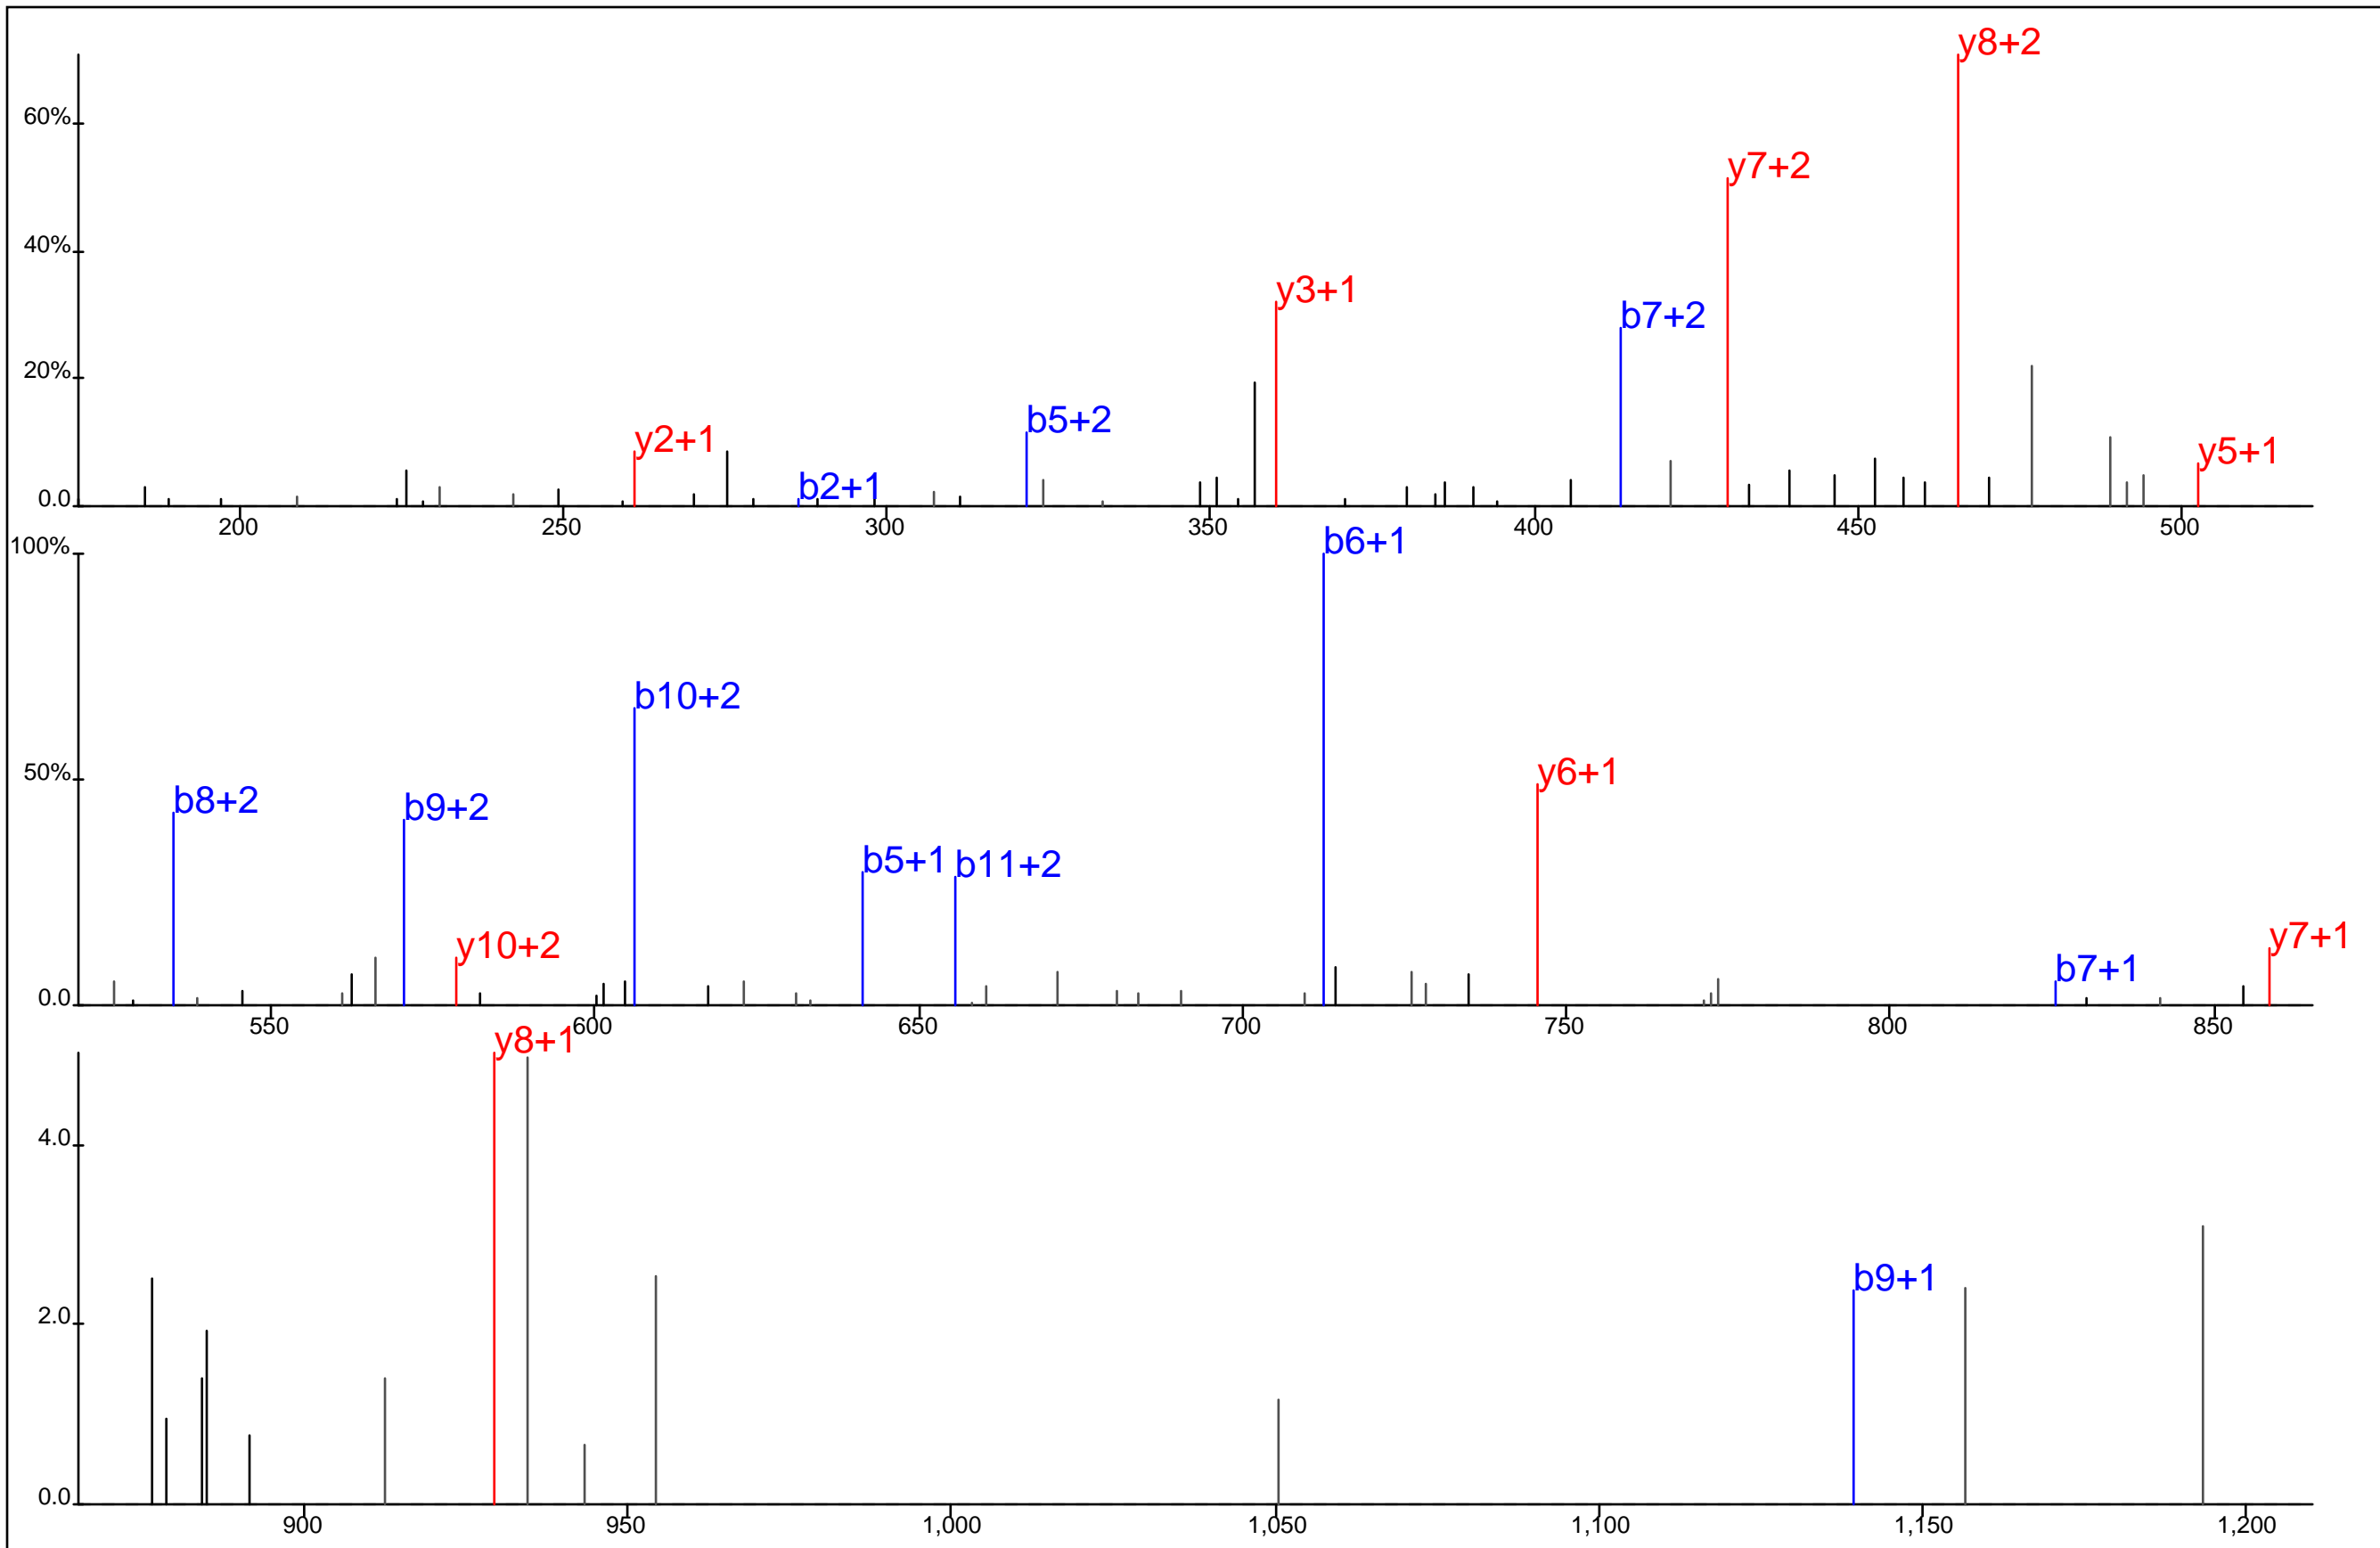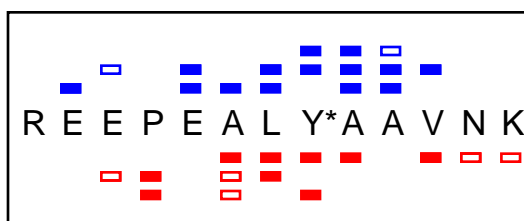

Protein Name: Intersectin 2  
 gi Accession: 0  
 Precursor Mass: 523.9156+3  
 Delta Mass: 1.015 ppm  
 XCorr: 58.8

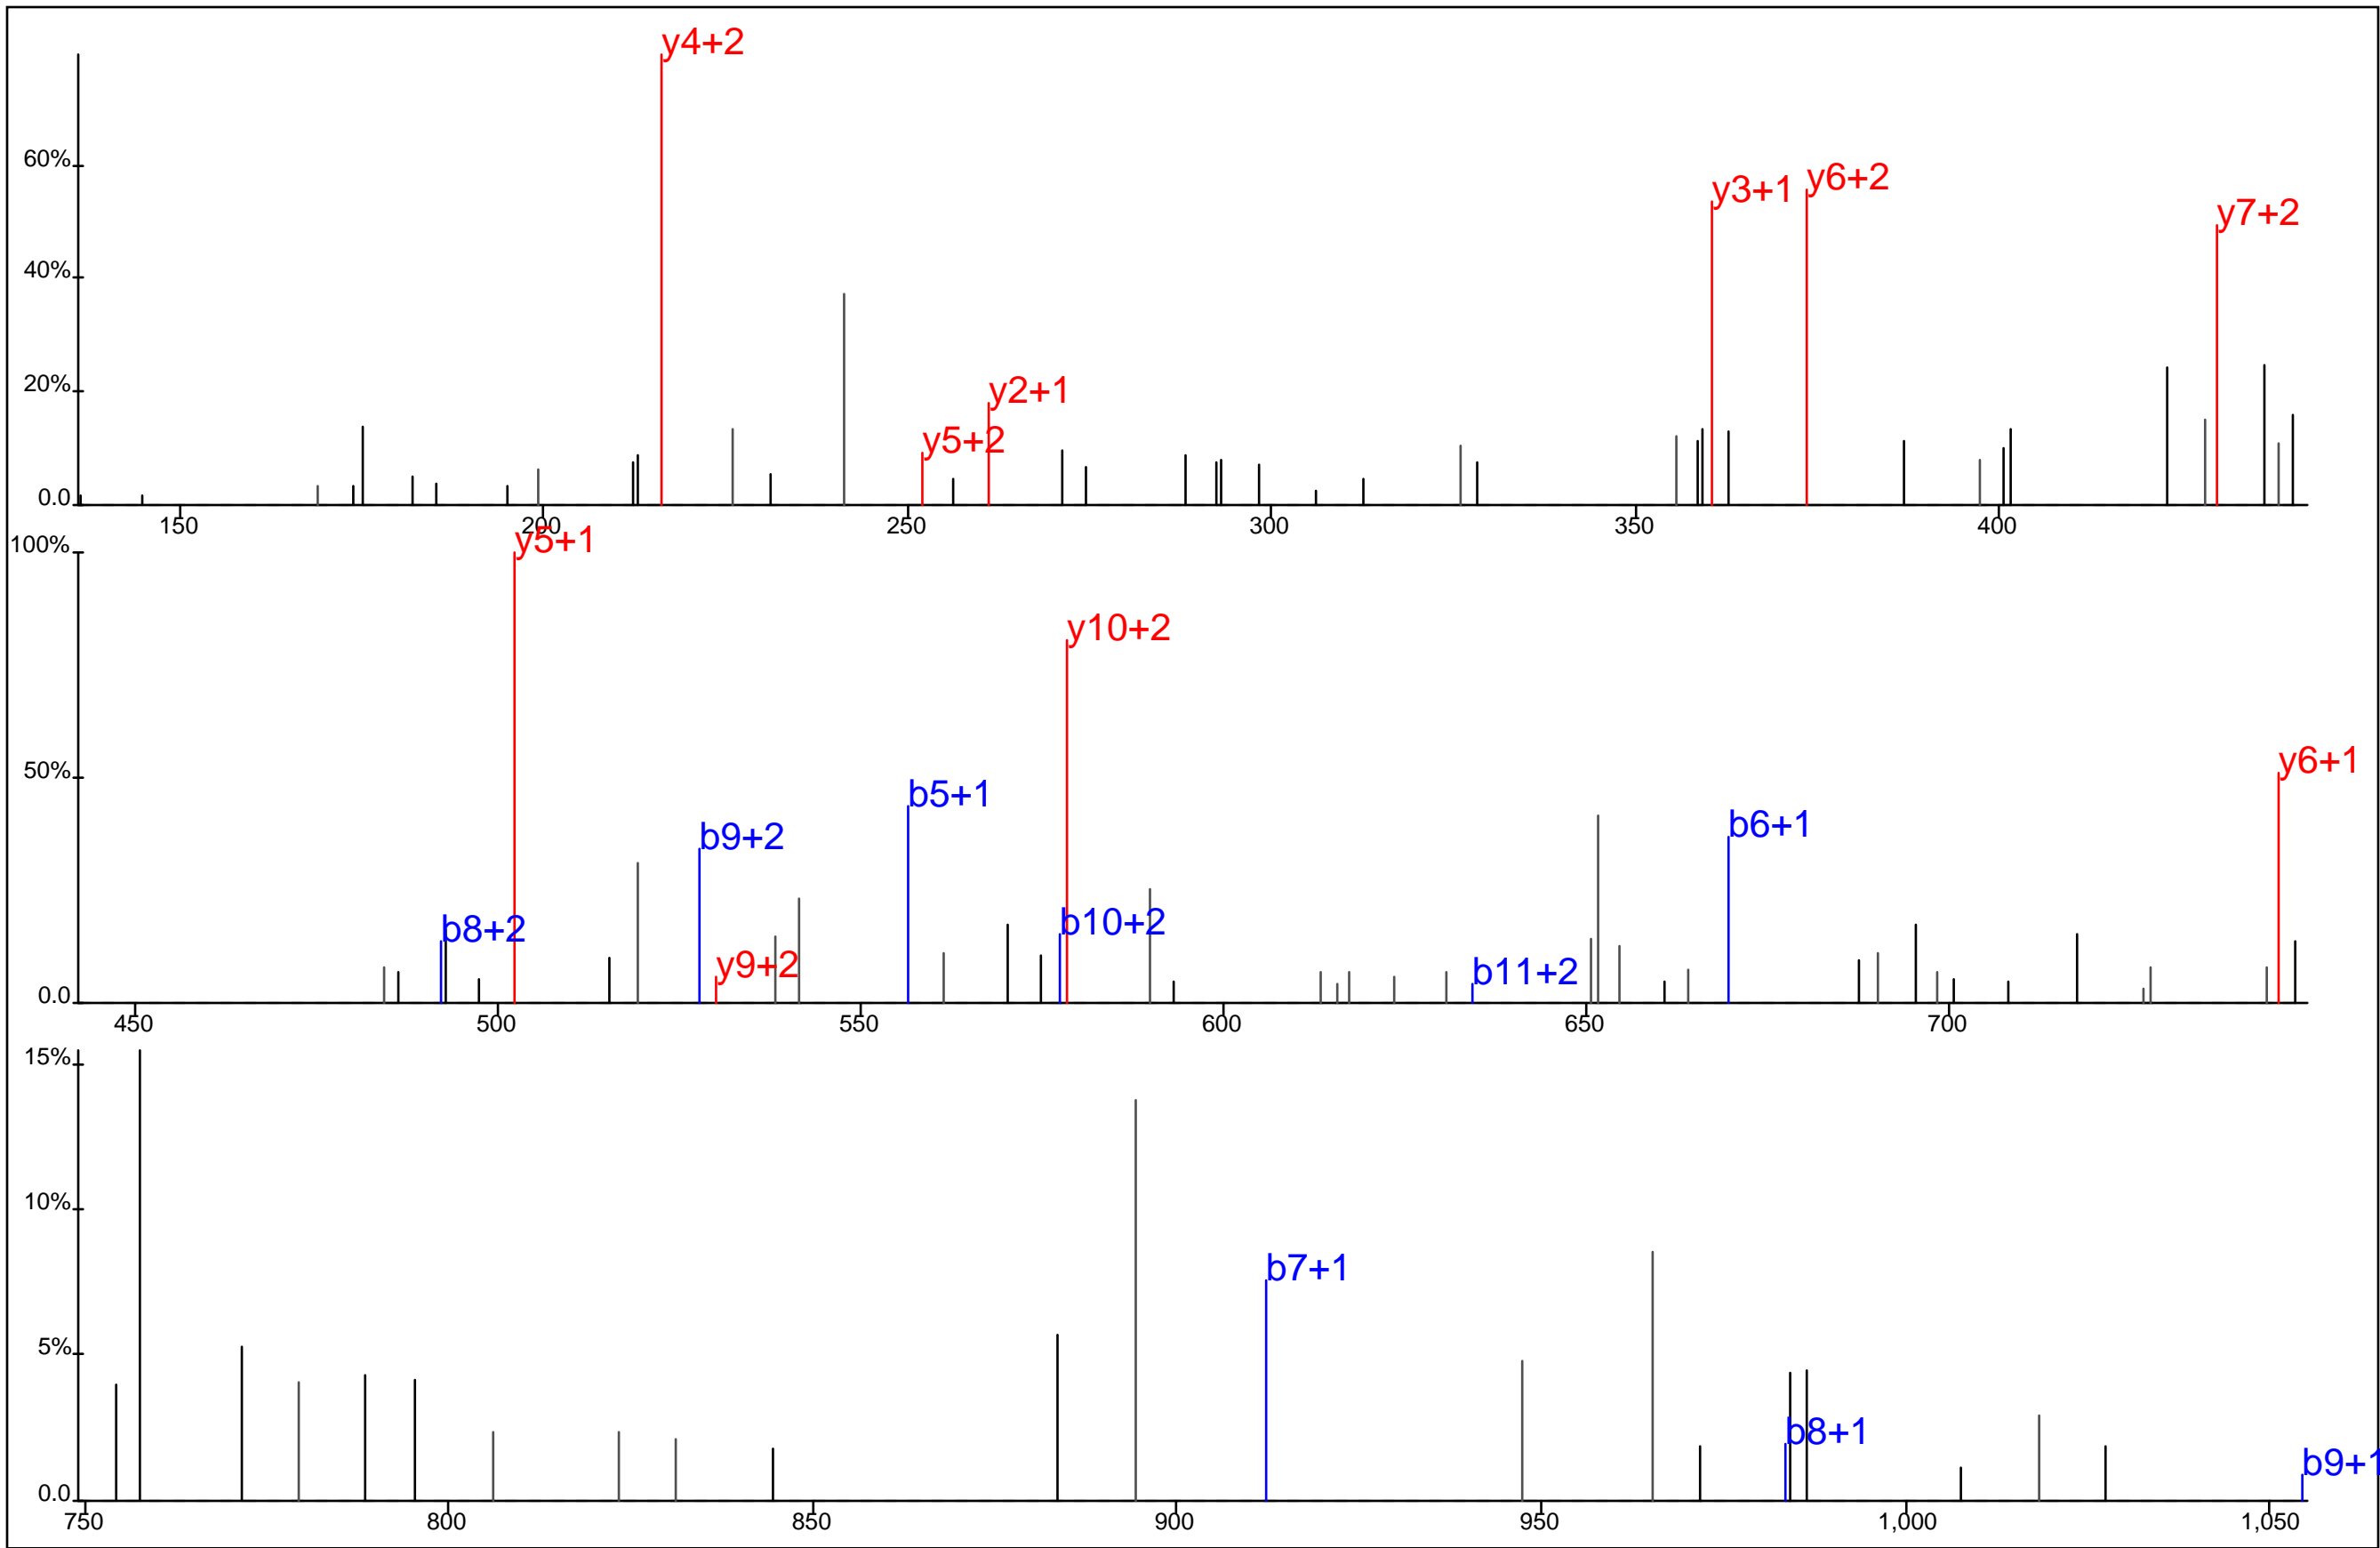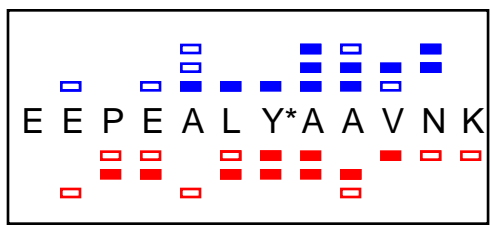

Protein Name: Intersectin 2  
 gi Accession: 0  
 Precursor Mass: 471.8815+3  
 Delta Mass: 0.110 ppm  
 XCorr: 31.17

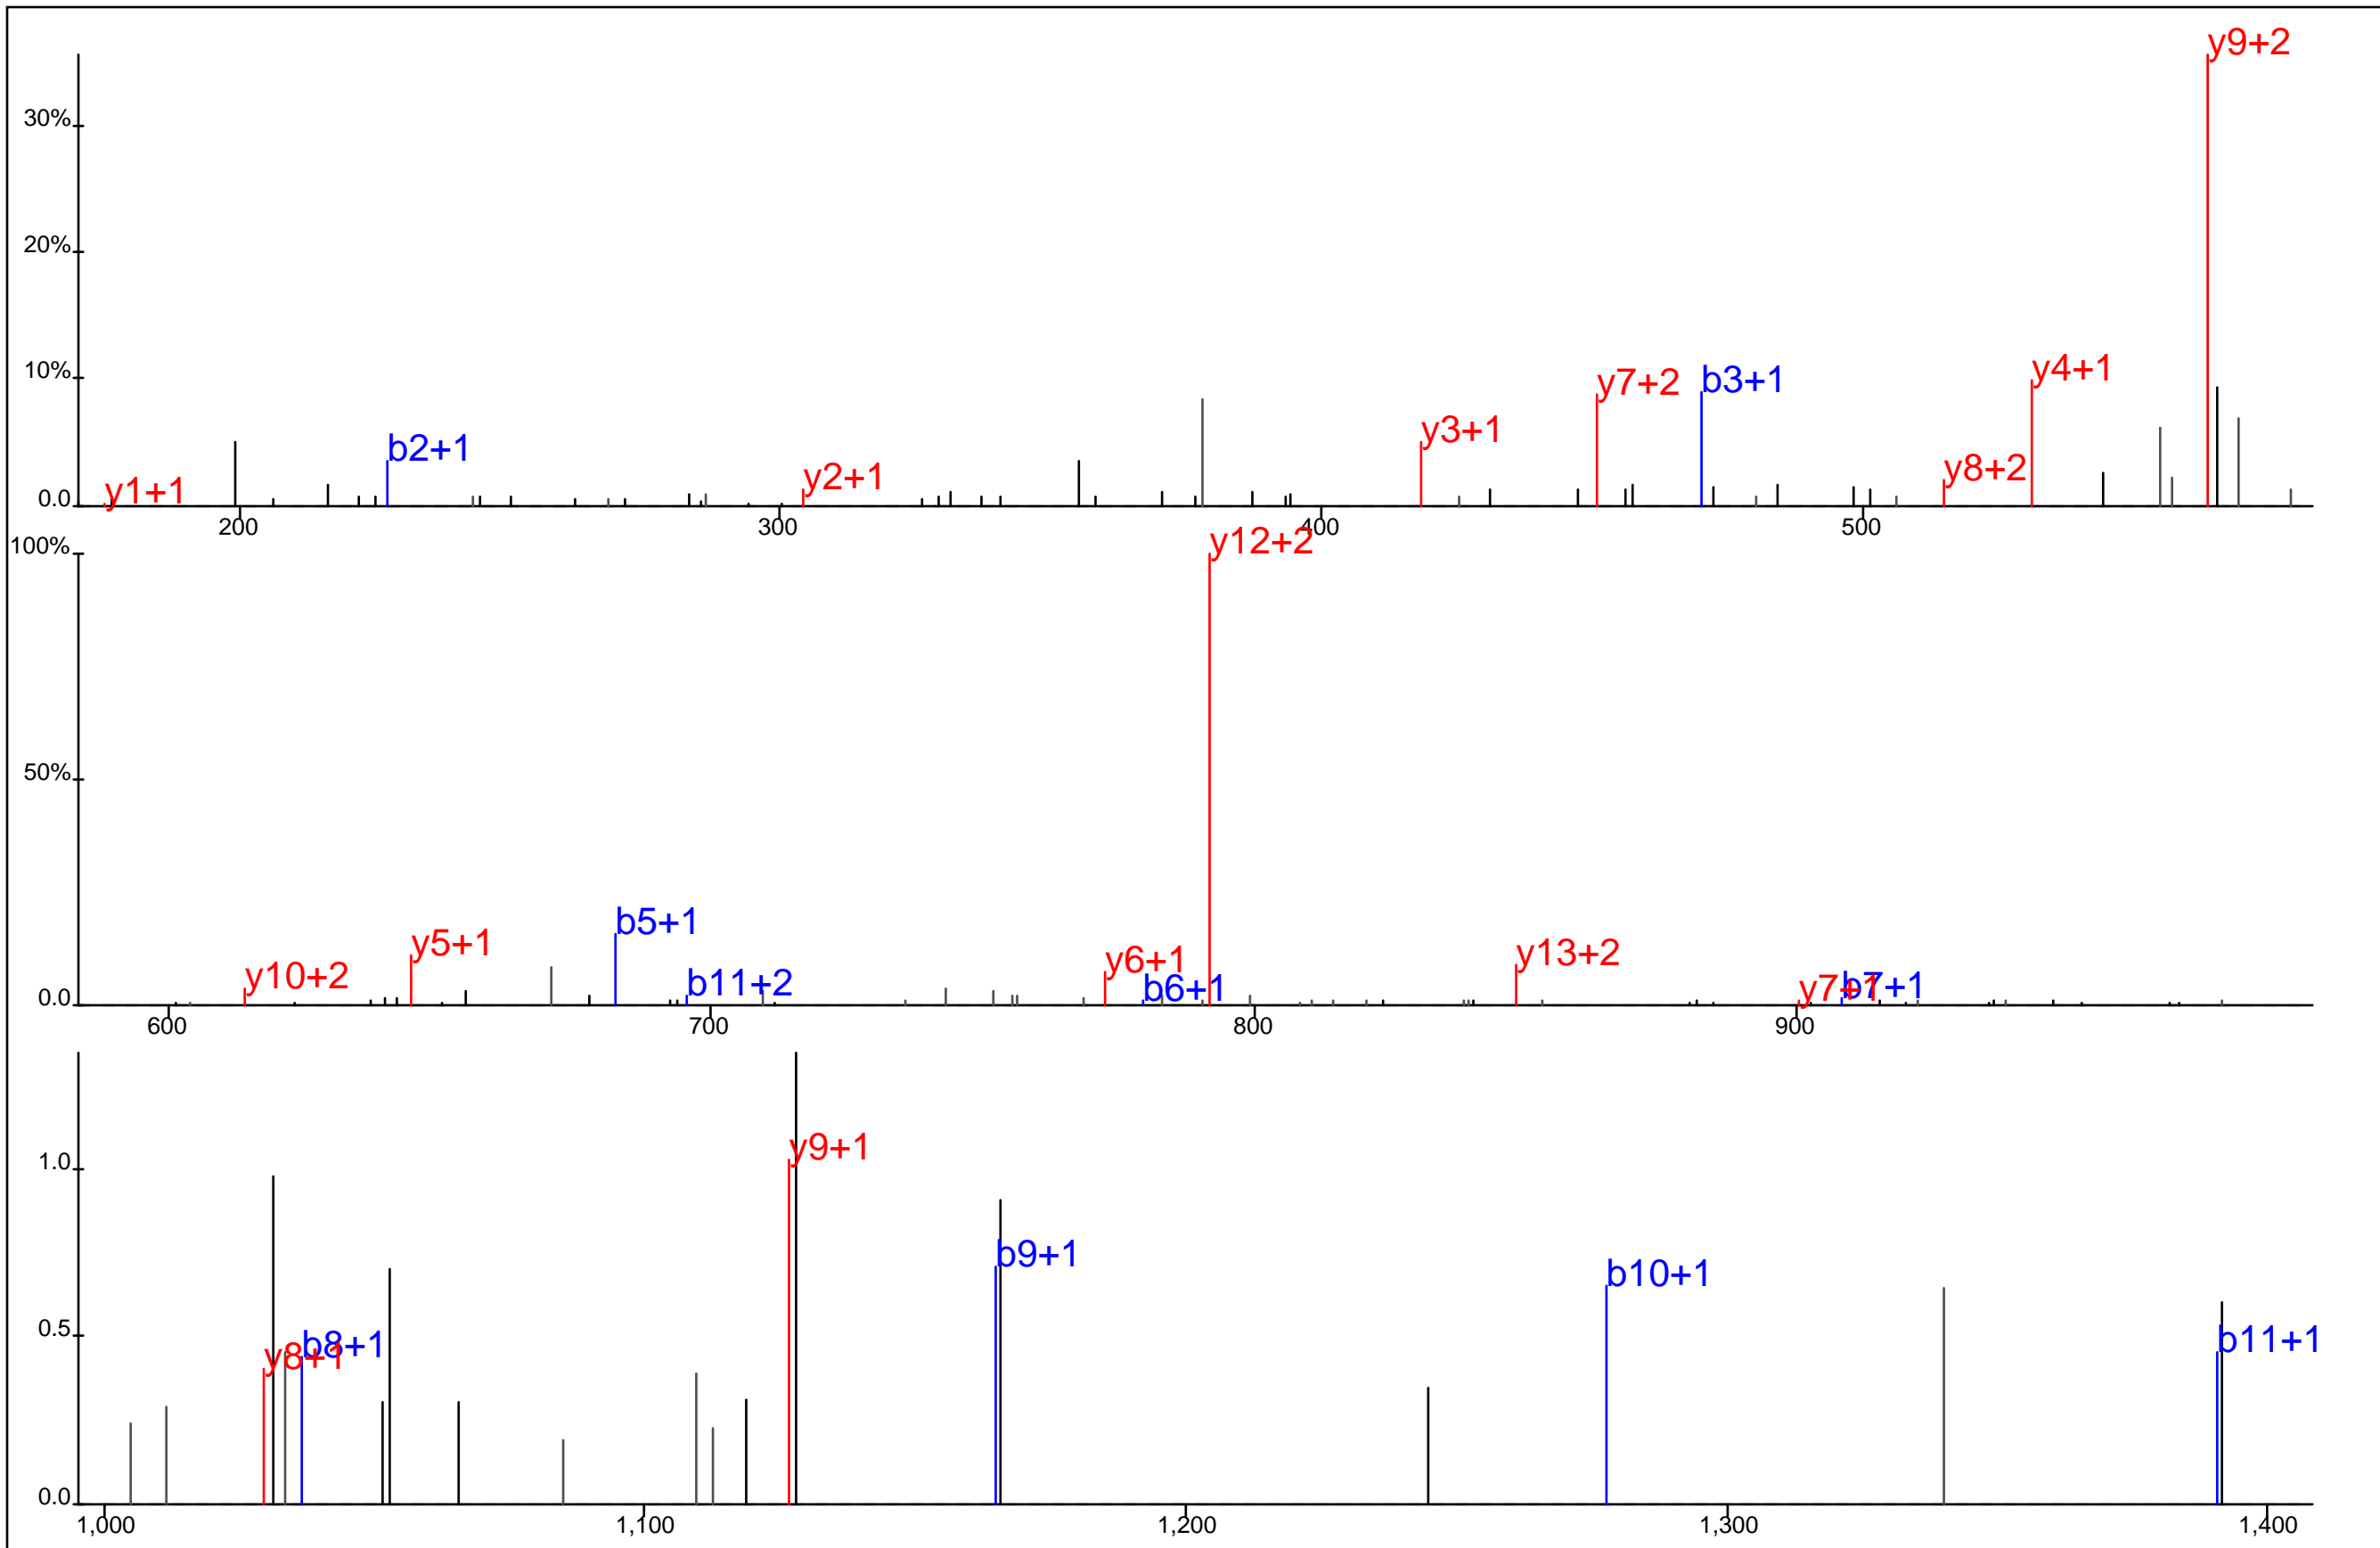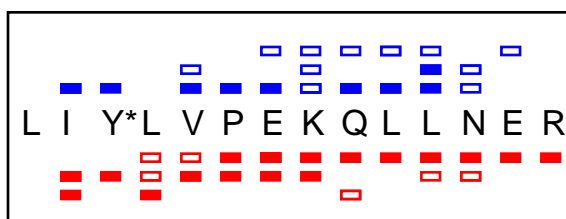

Protein Name: Intersectin 2  
 gi Accession: 0  
 Precursor Mass: 603.3320+3  
 Delta Mass: 5.335 ppm  
 XCorr: 36.97

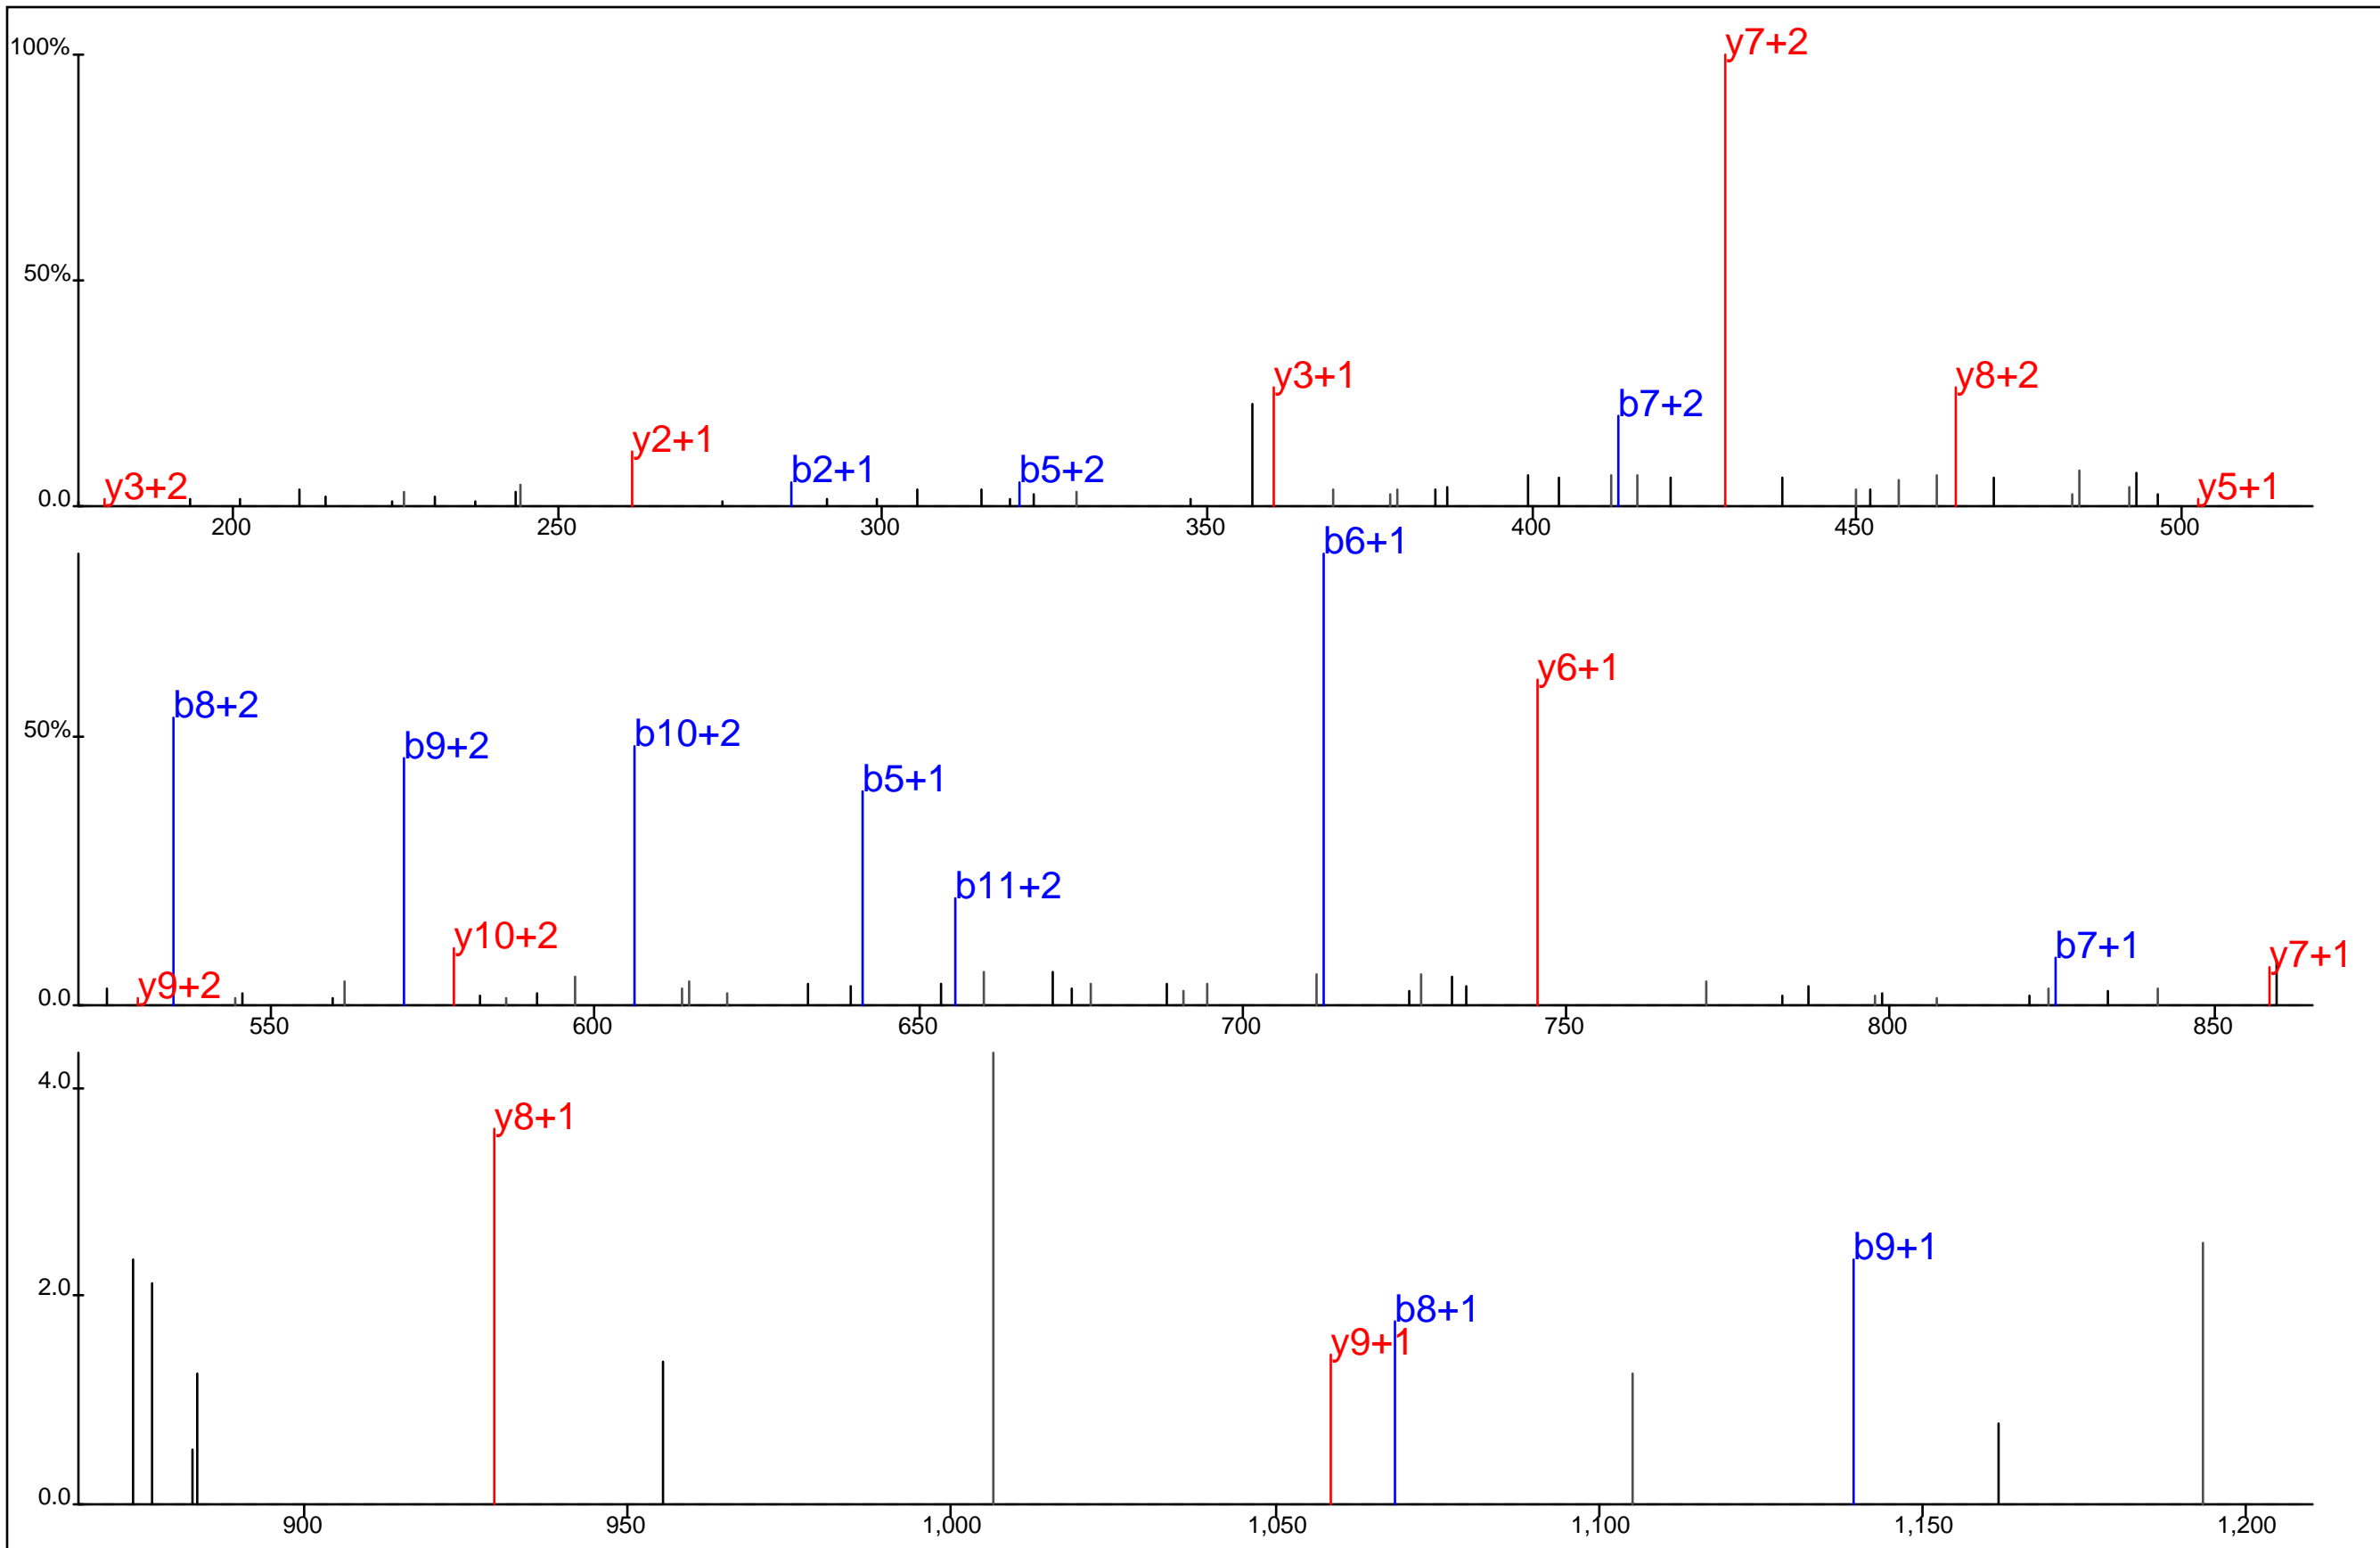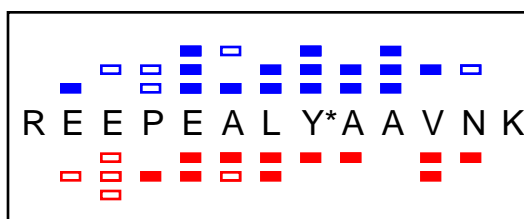

Protein Name: Intersectin 2  
 gi Accession: 0  
 Precursor Mass: 523.9156+3  
 Delta Mass: 1.015 ppm  
 XCorr: 57.57

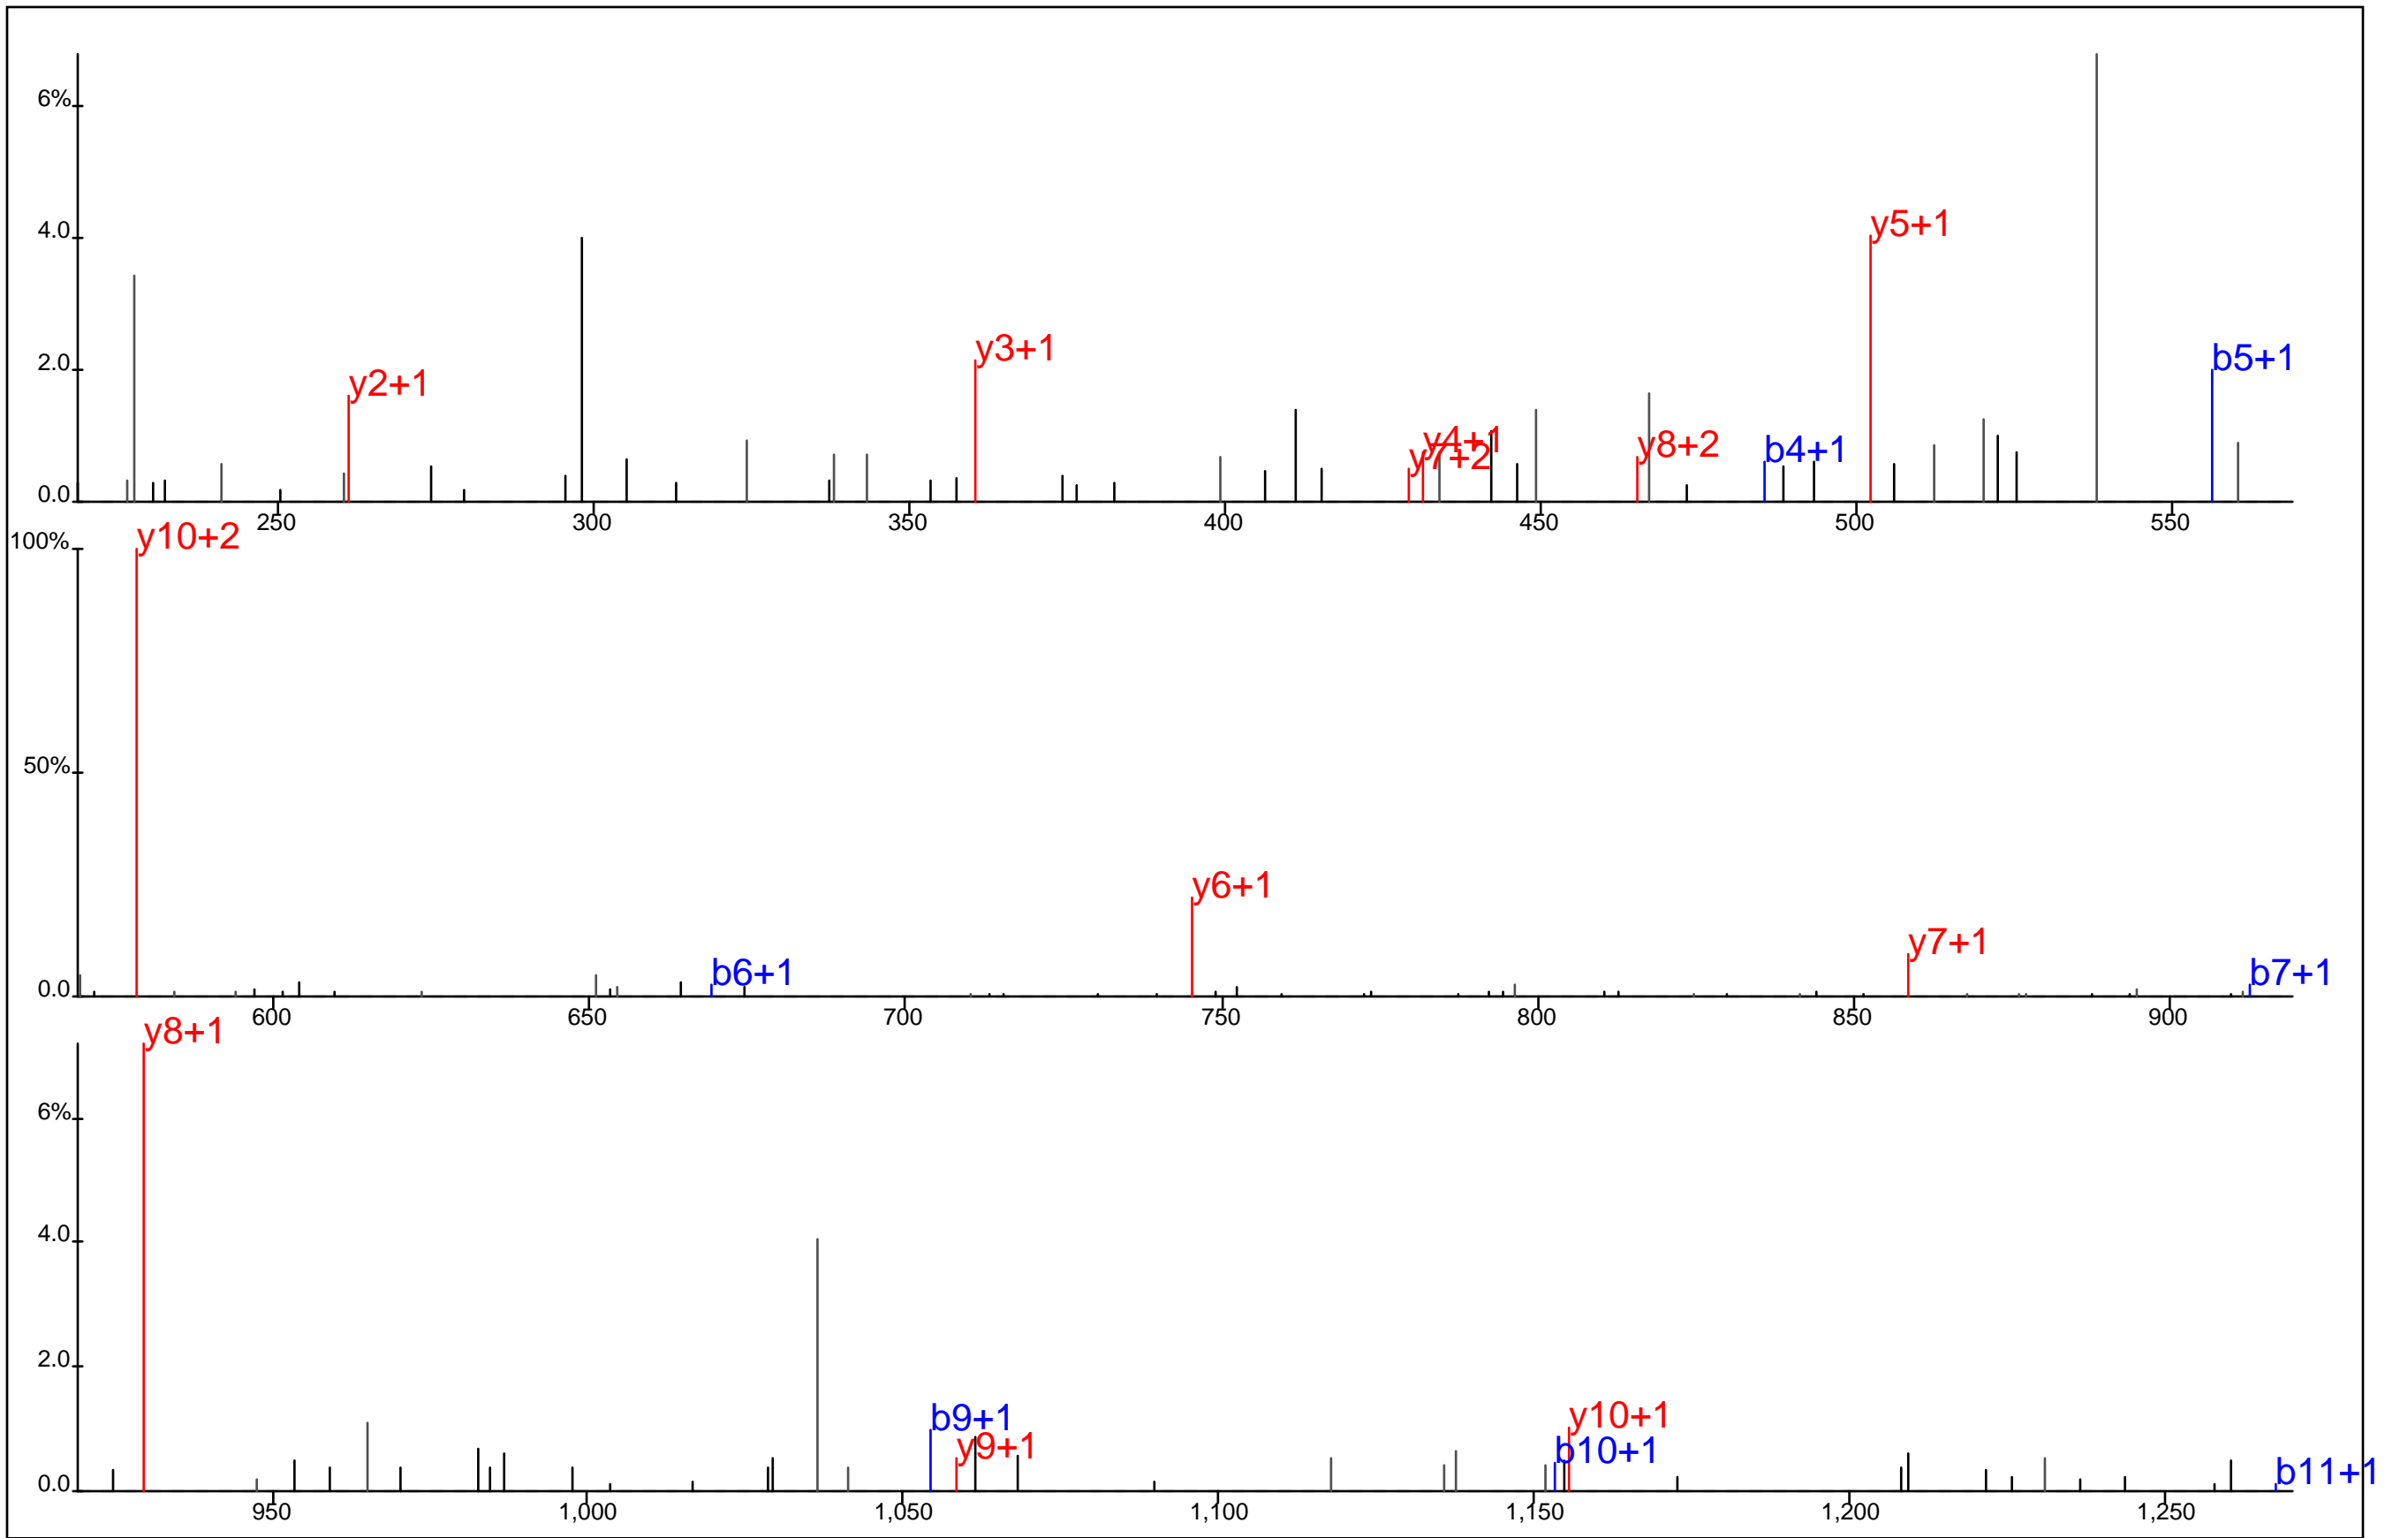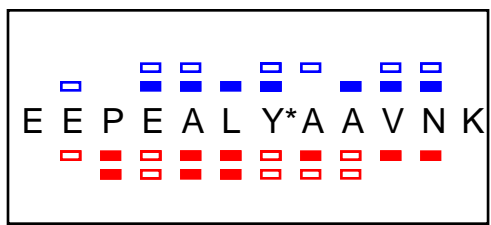

Protein Name: Intersectin 2  
 gi Accession: 0  
 Precursor Mass: 707.3172+2  
 Delta Mass: 1.824 ppm  
 XCorr: 40.61

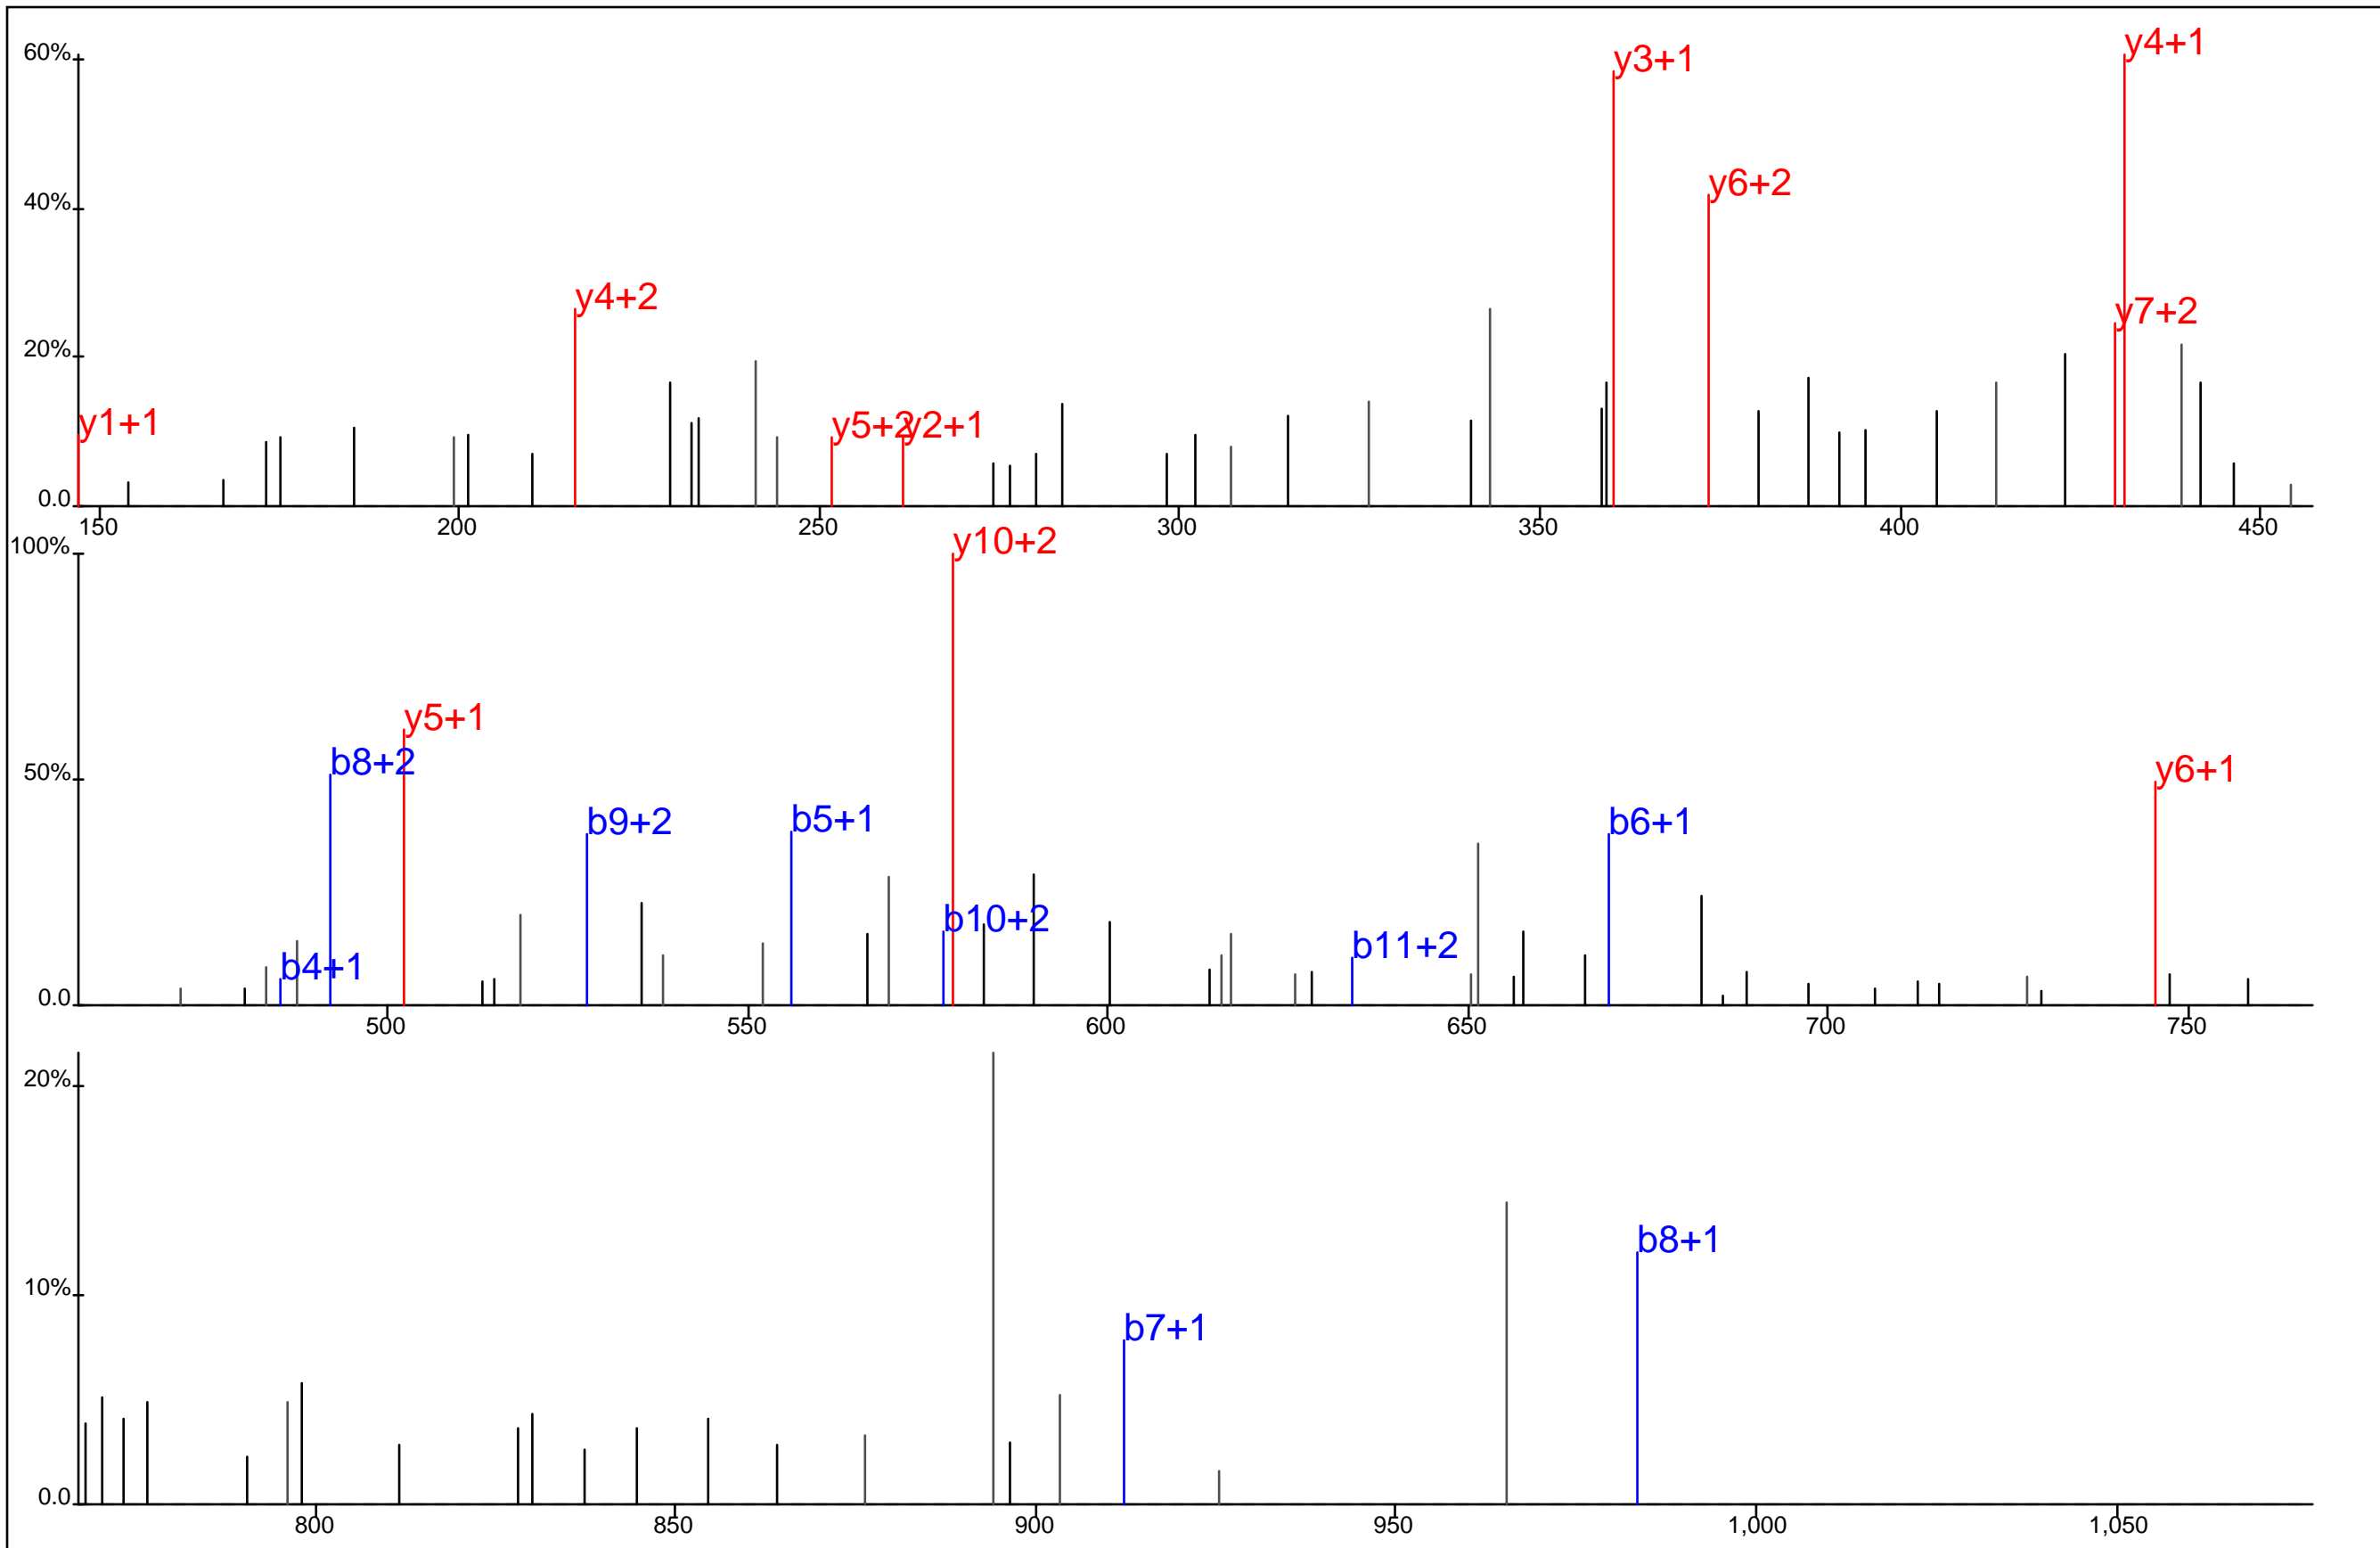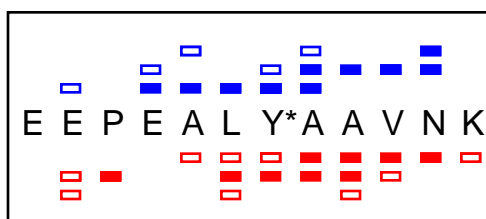

Protein Name: Intersectin 2  
 gi Accession: 0  
 Precursor Mass: 471.8808+3  
 Delta Mass: 1.250 ppm  
 XCorr: 29.39

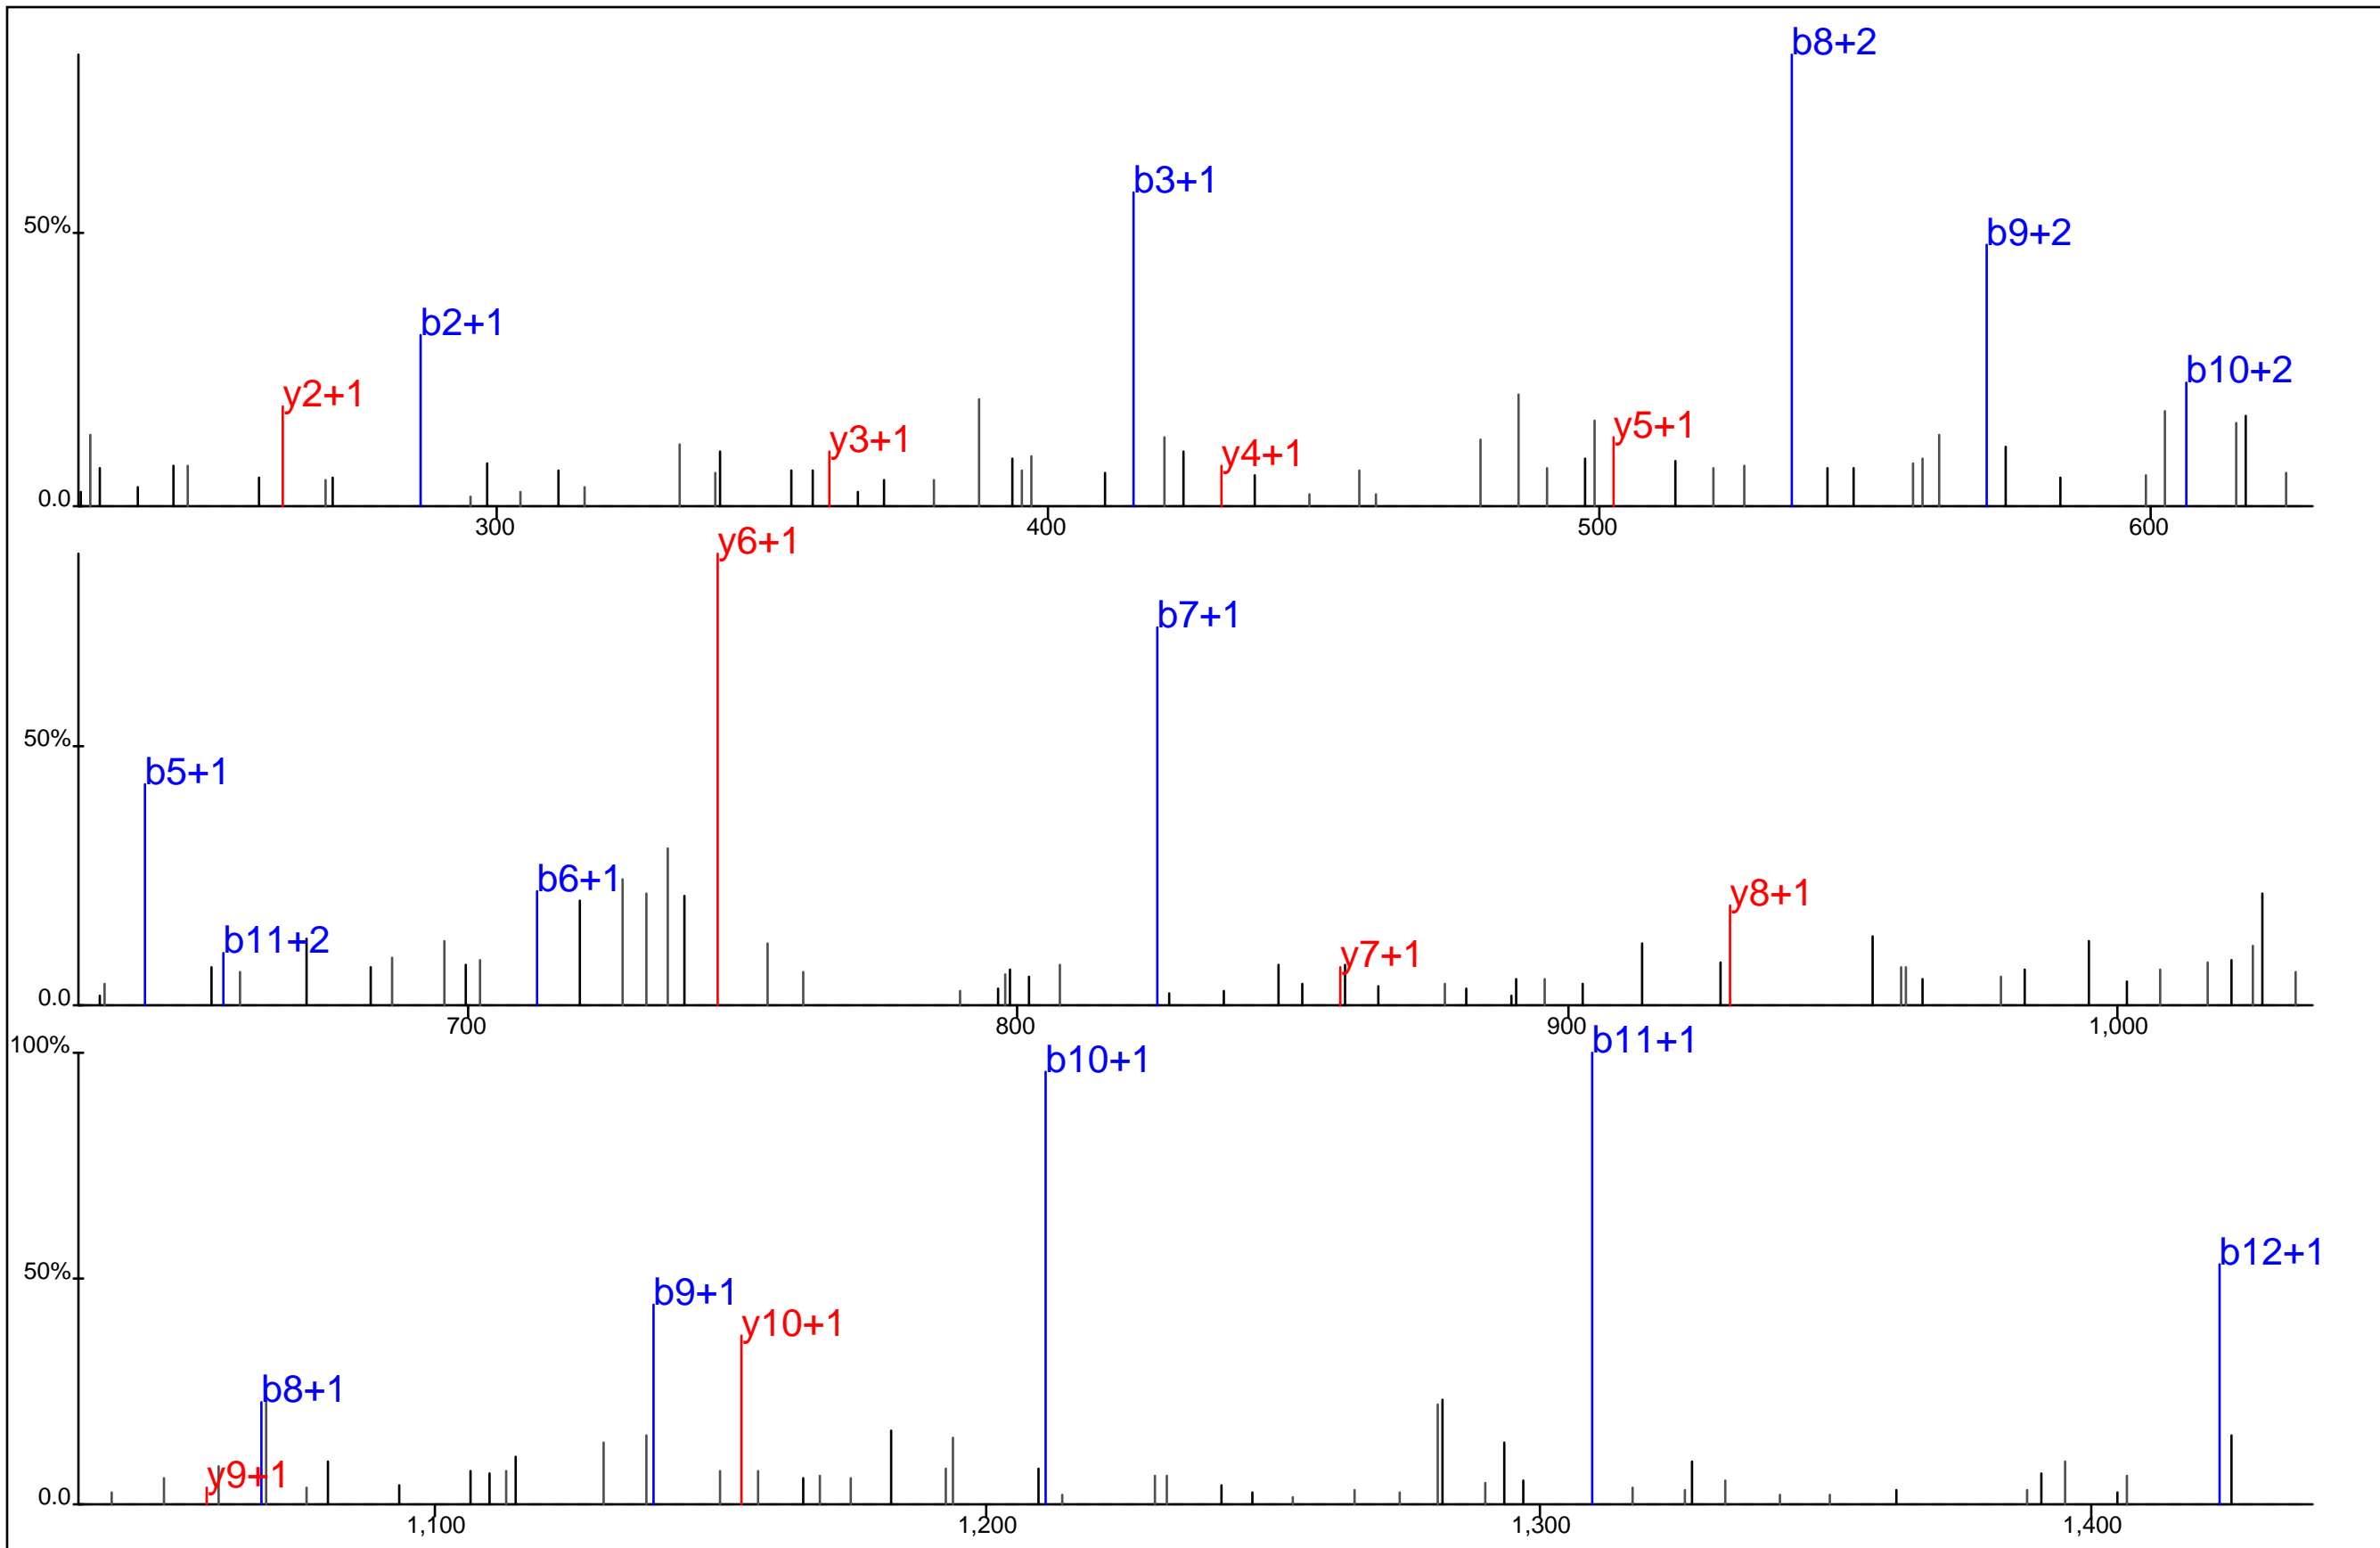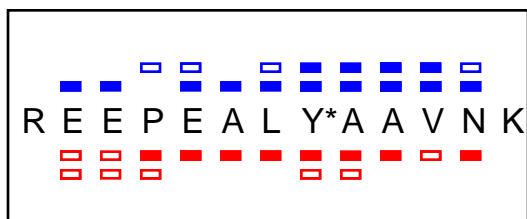

Protein Name: Intersectin 2  
 gi Accession: 0  
 Precursor Mass: 785.3655+2  
 Delta Mass: 4.536 ppm  
 XCorr: 73.54



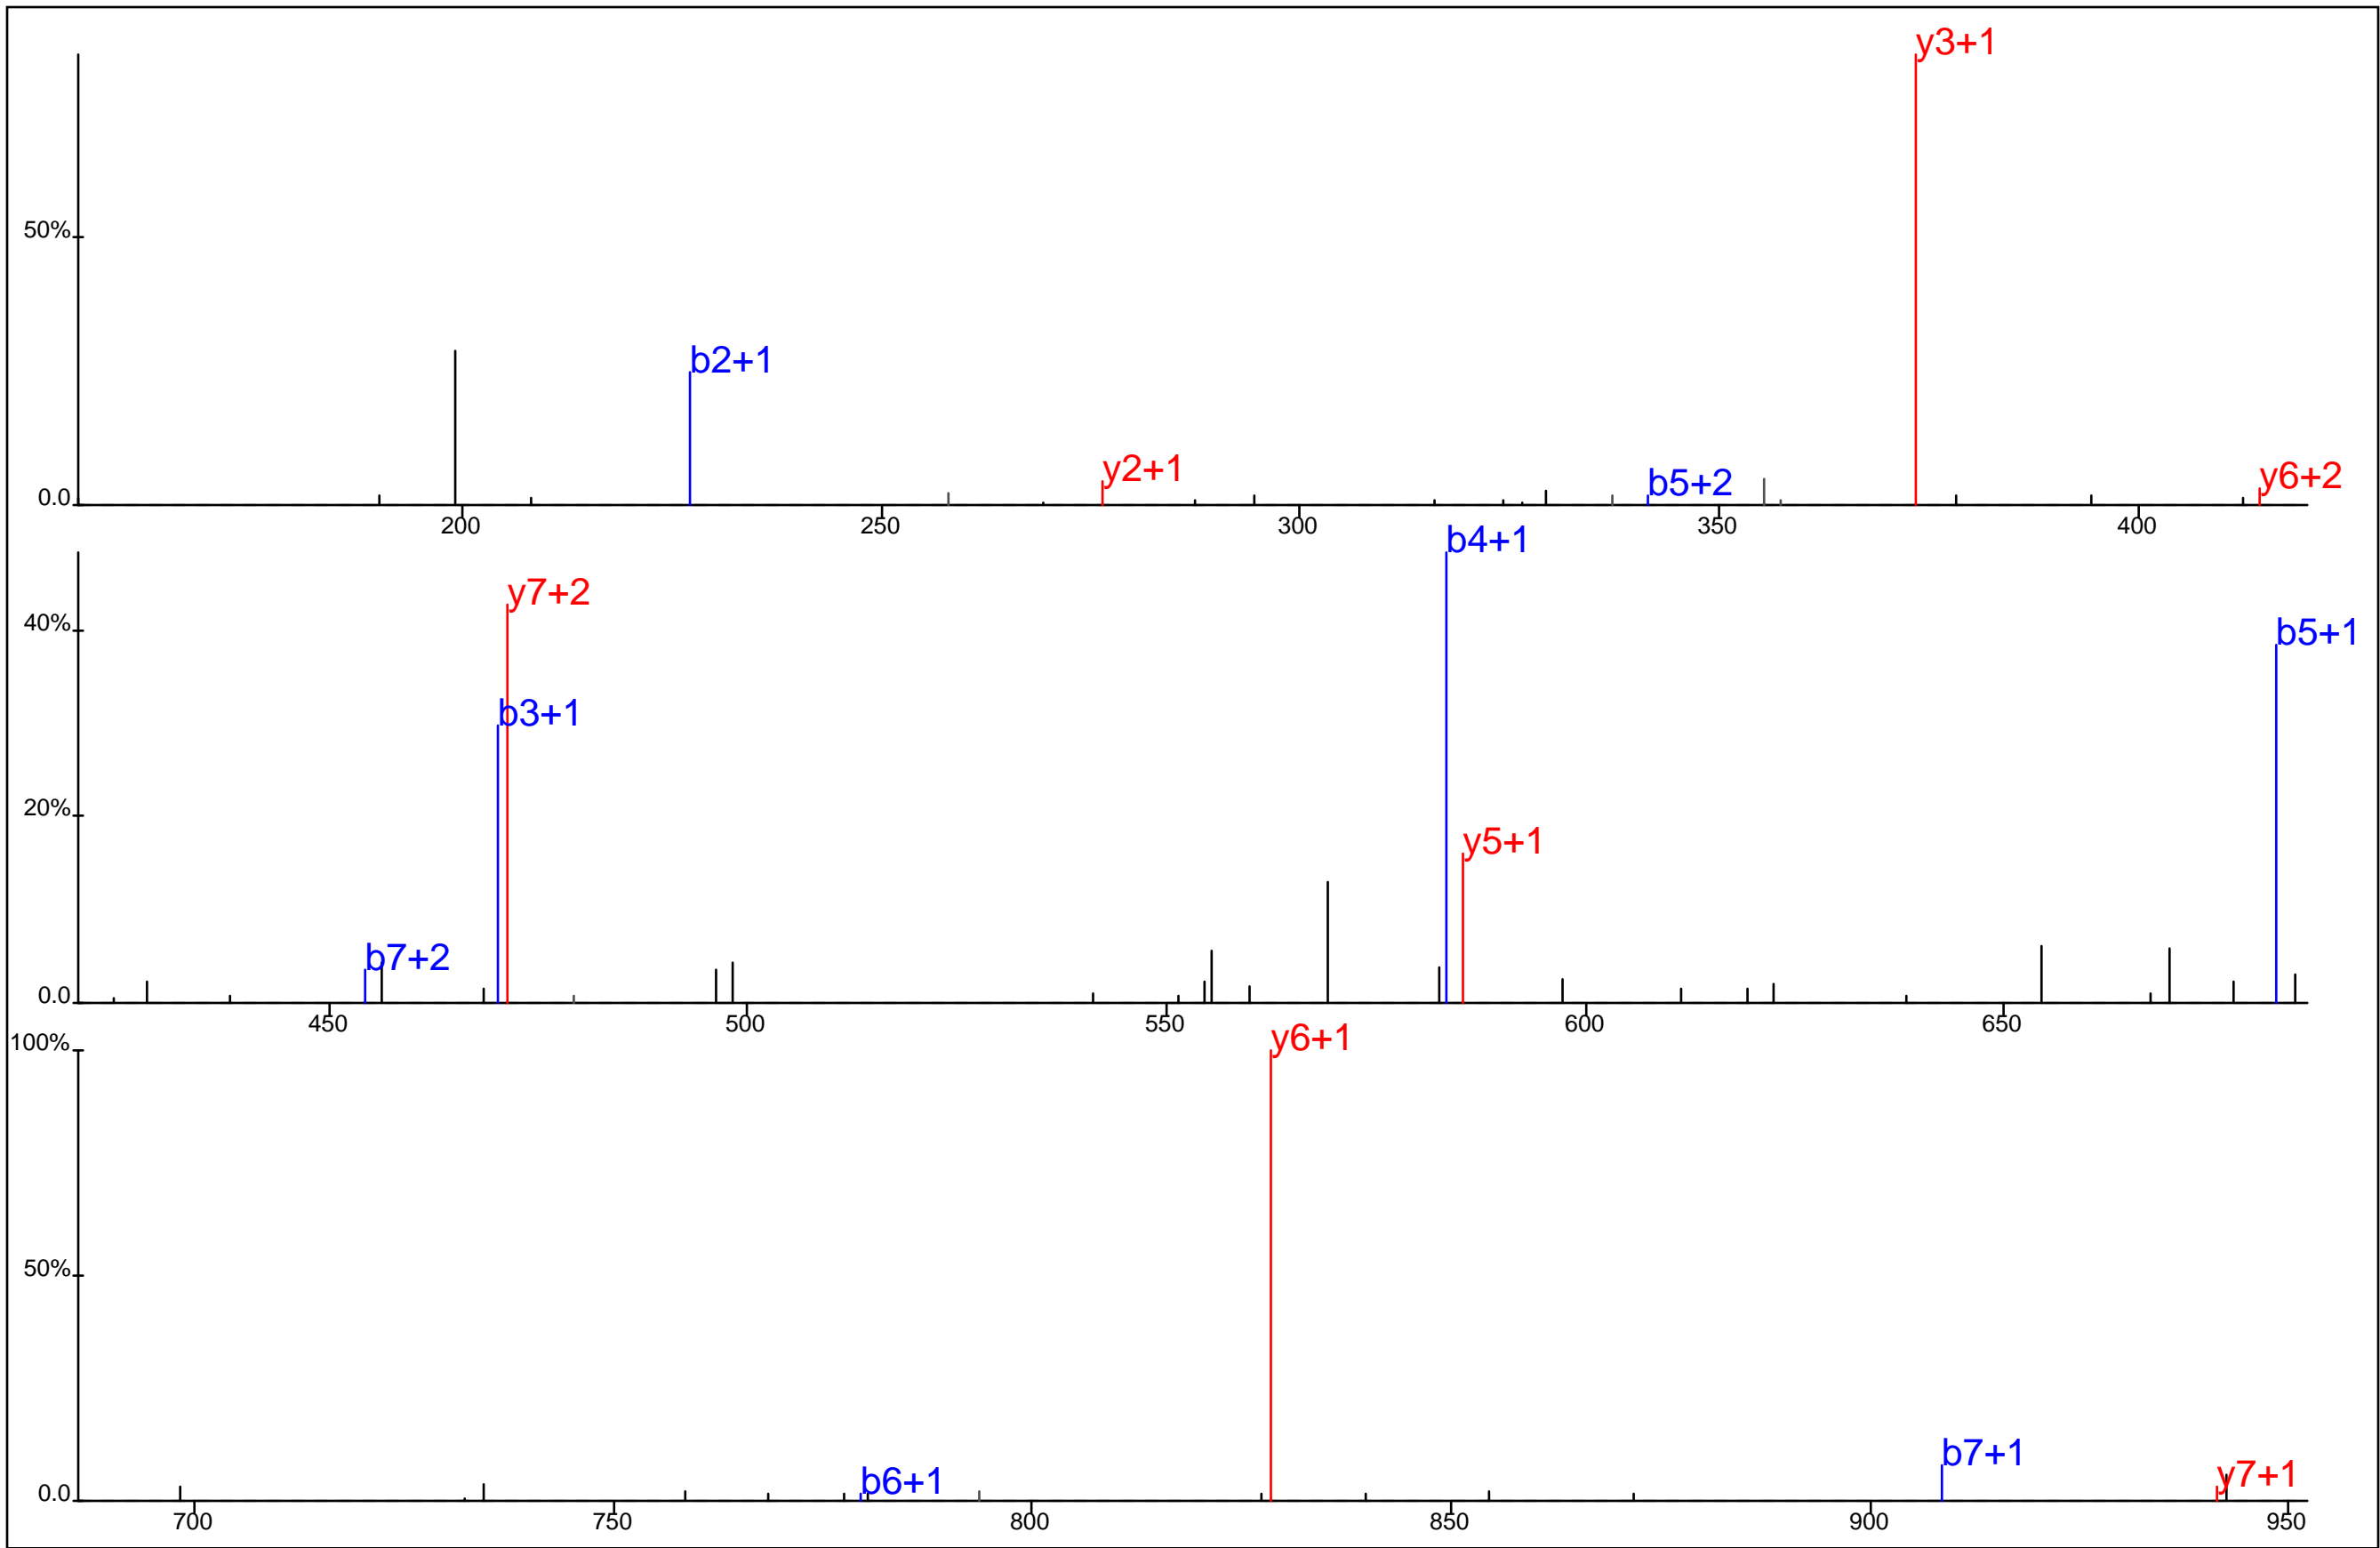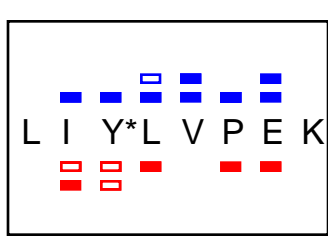

Protein Name: Intersectin 2  
 gi Accession: 0  
 Precursor Mass: 527.7841+2  
 Delta Mass: 2.321 ppm  
 XCorr: 36.23

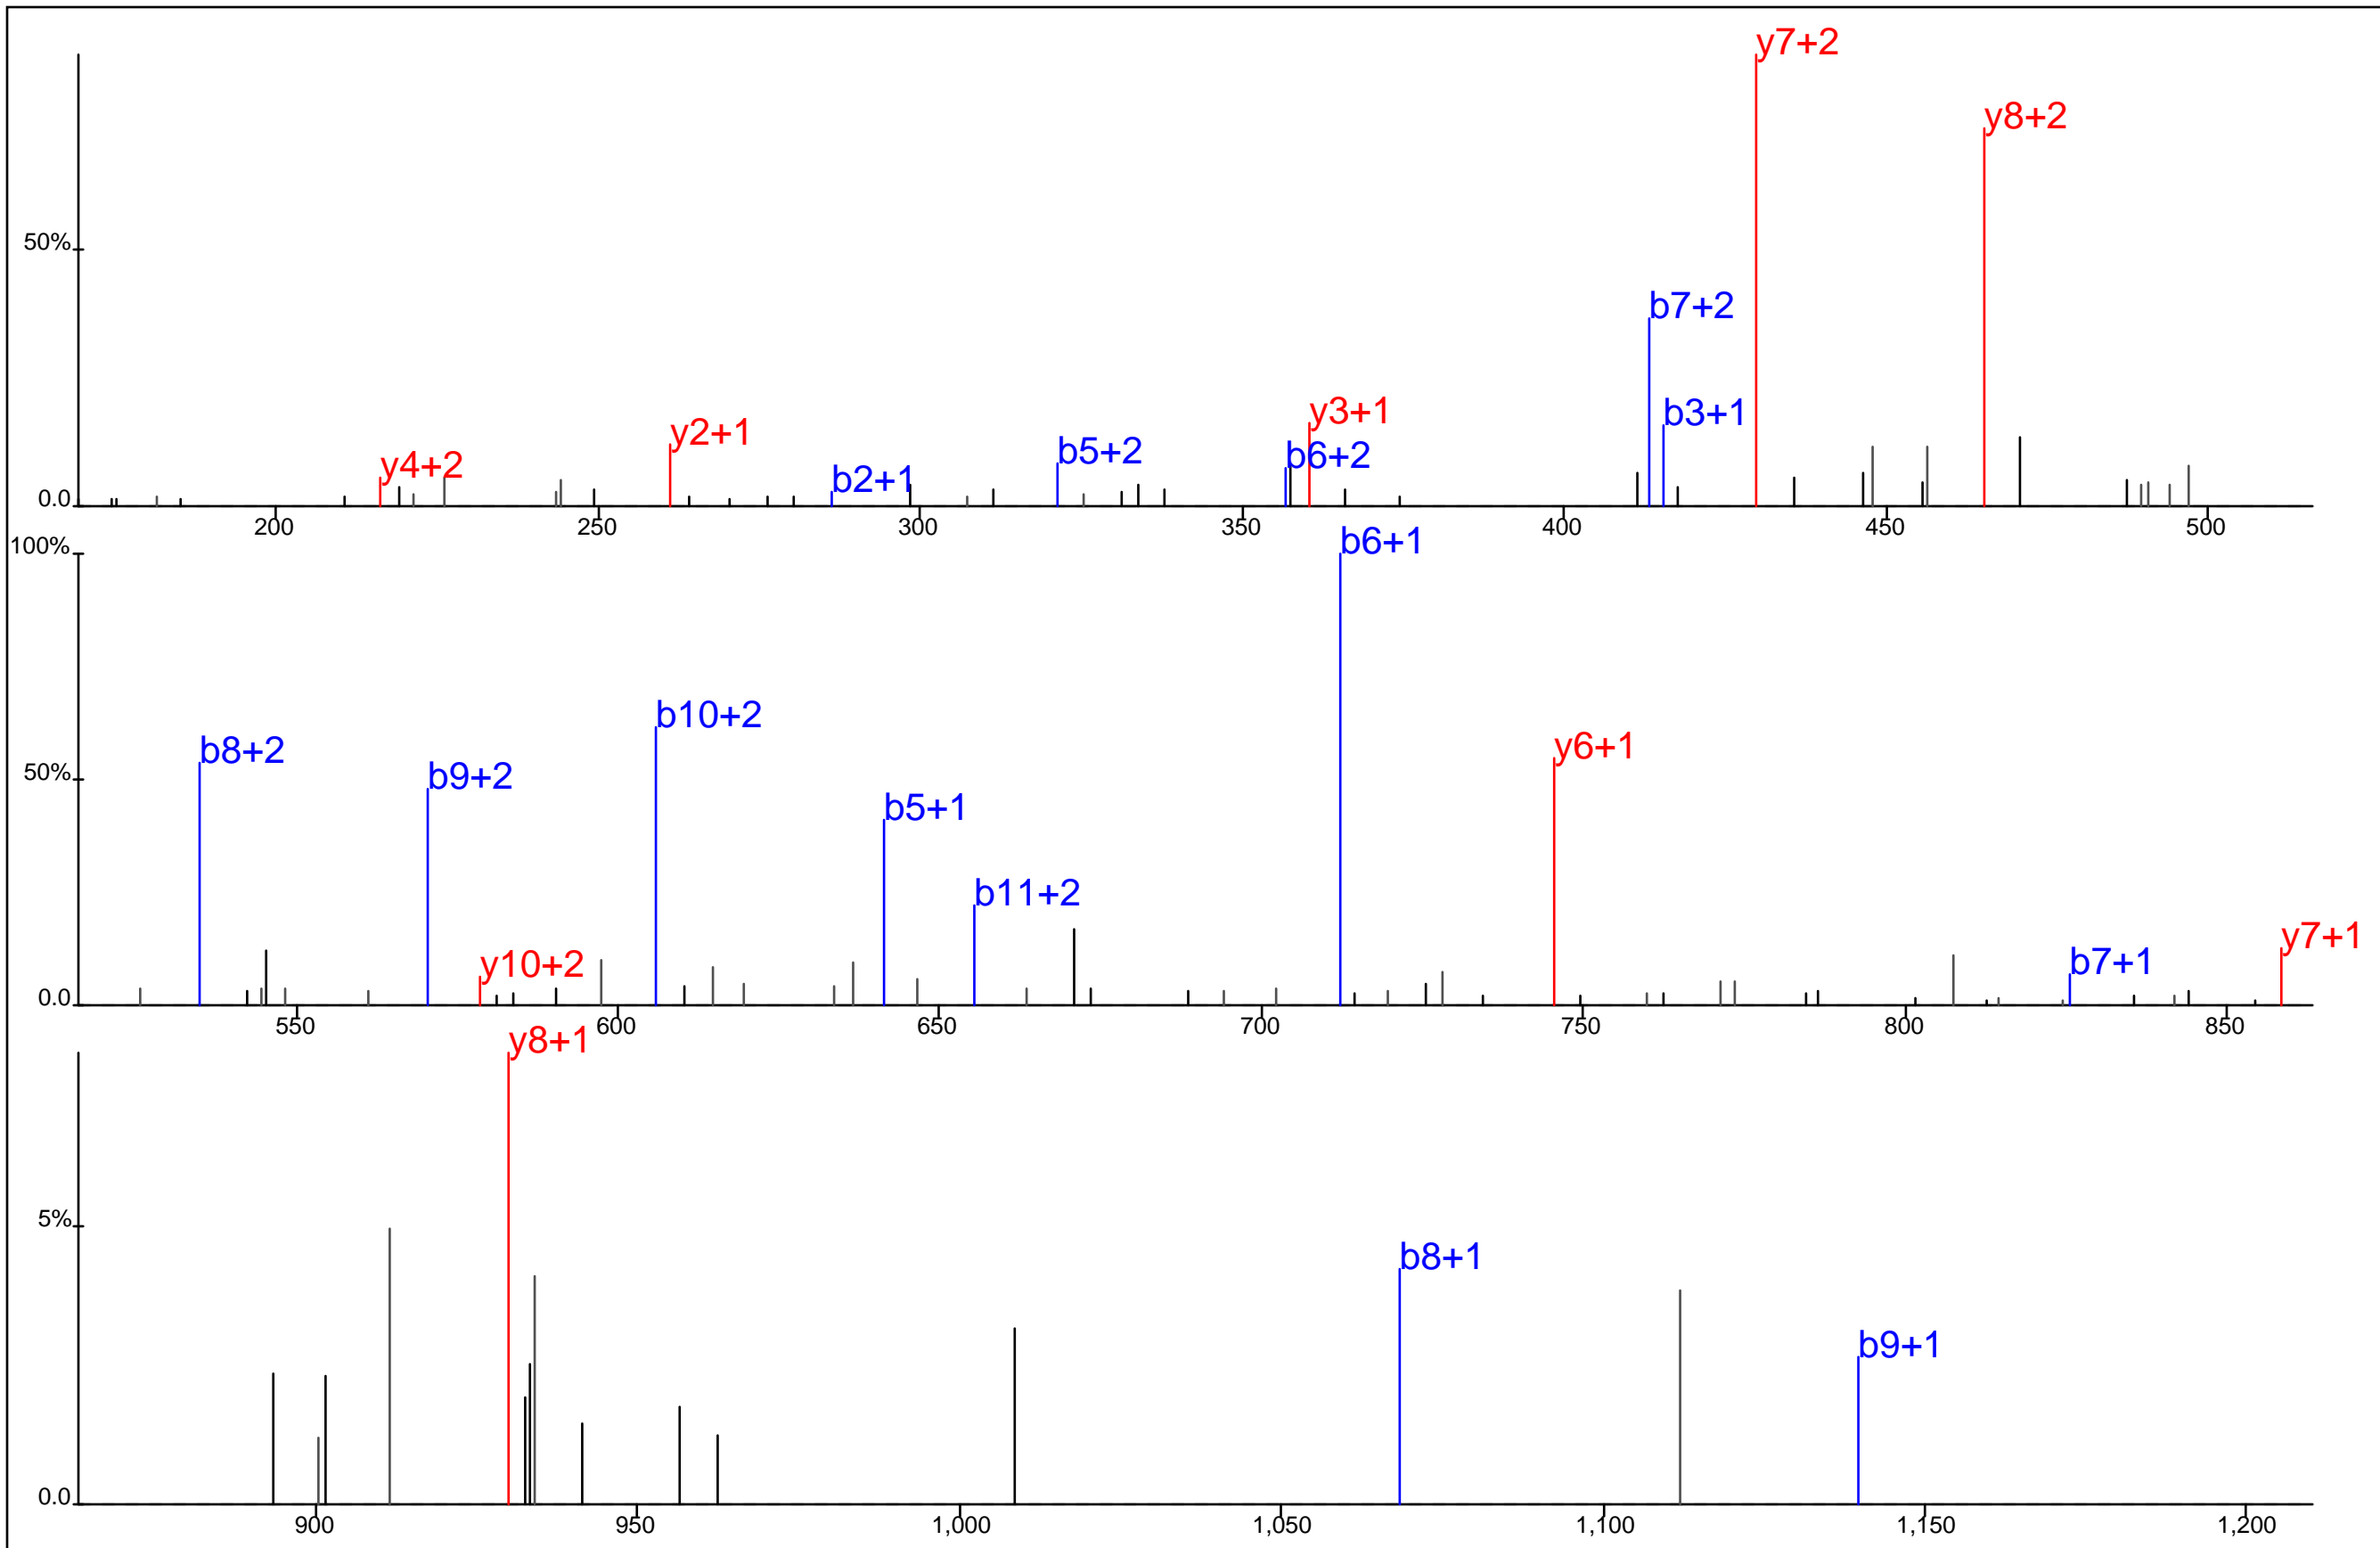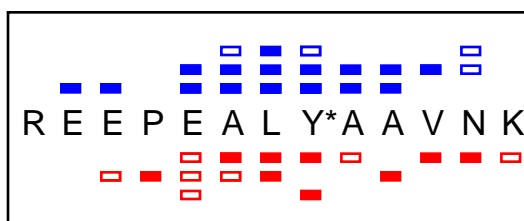

Protein Name: Intersectin 2  
 gi Accession: 0  
 Precursor Mass: 523.9162+3  
 Delta Mass: 2.066 ppm  
 XCorr: 54.45

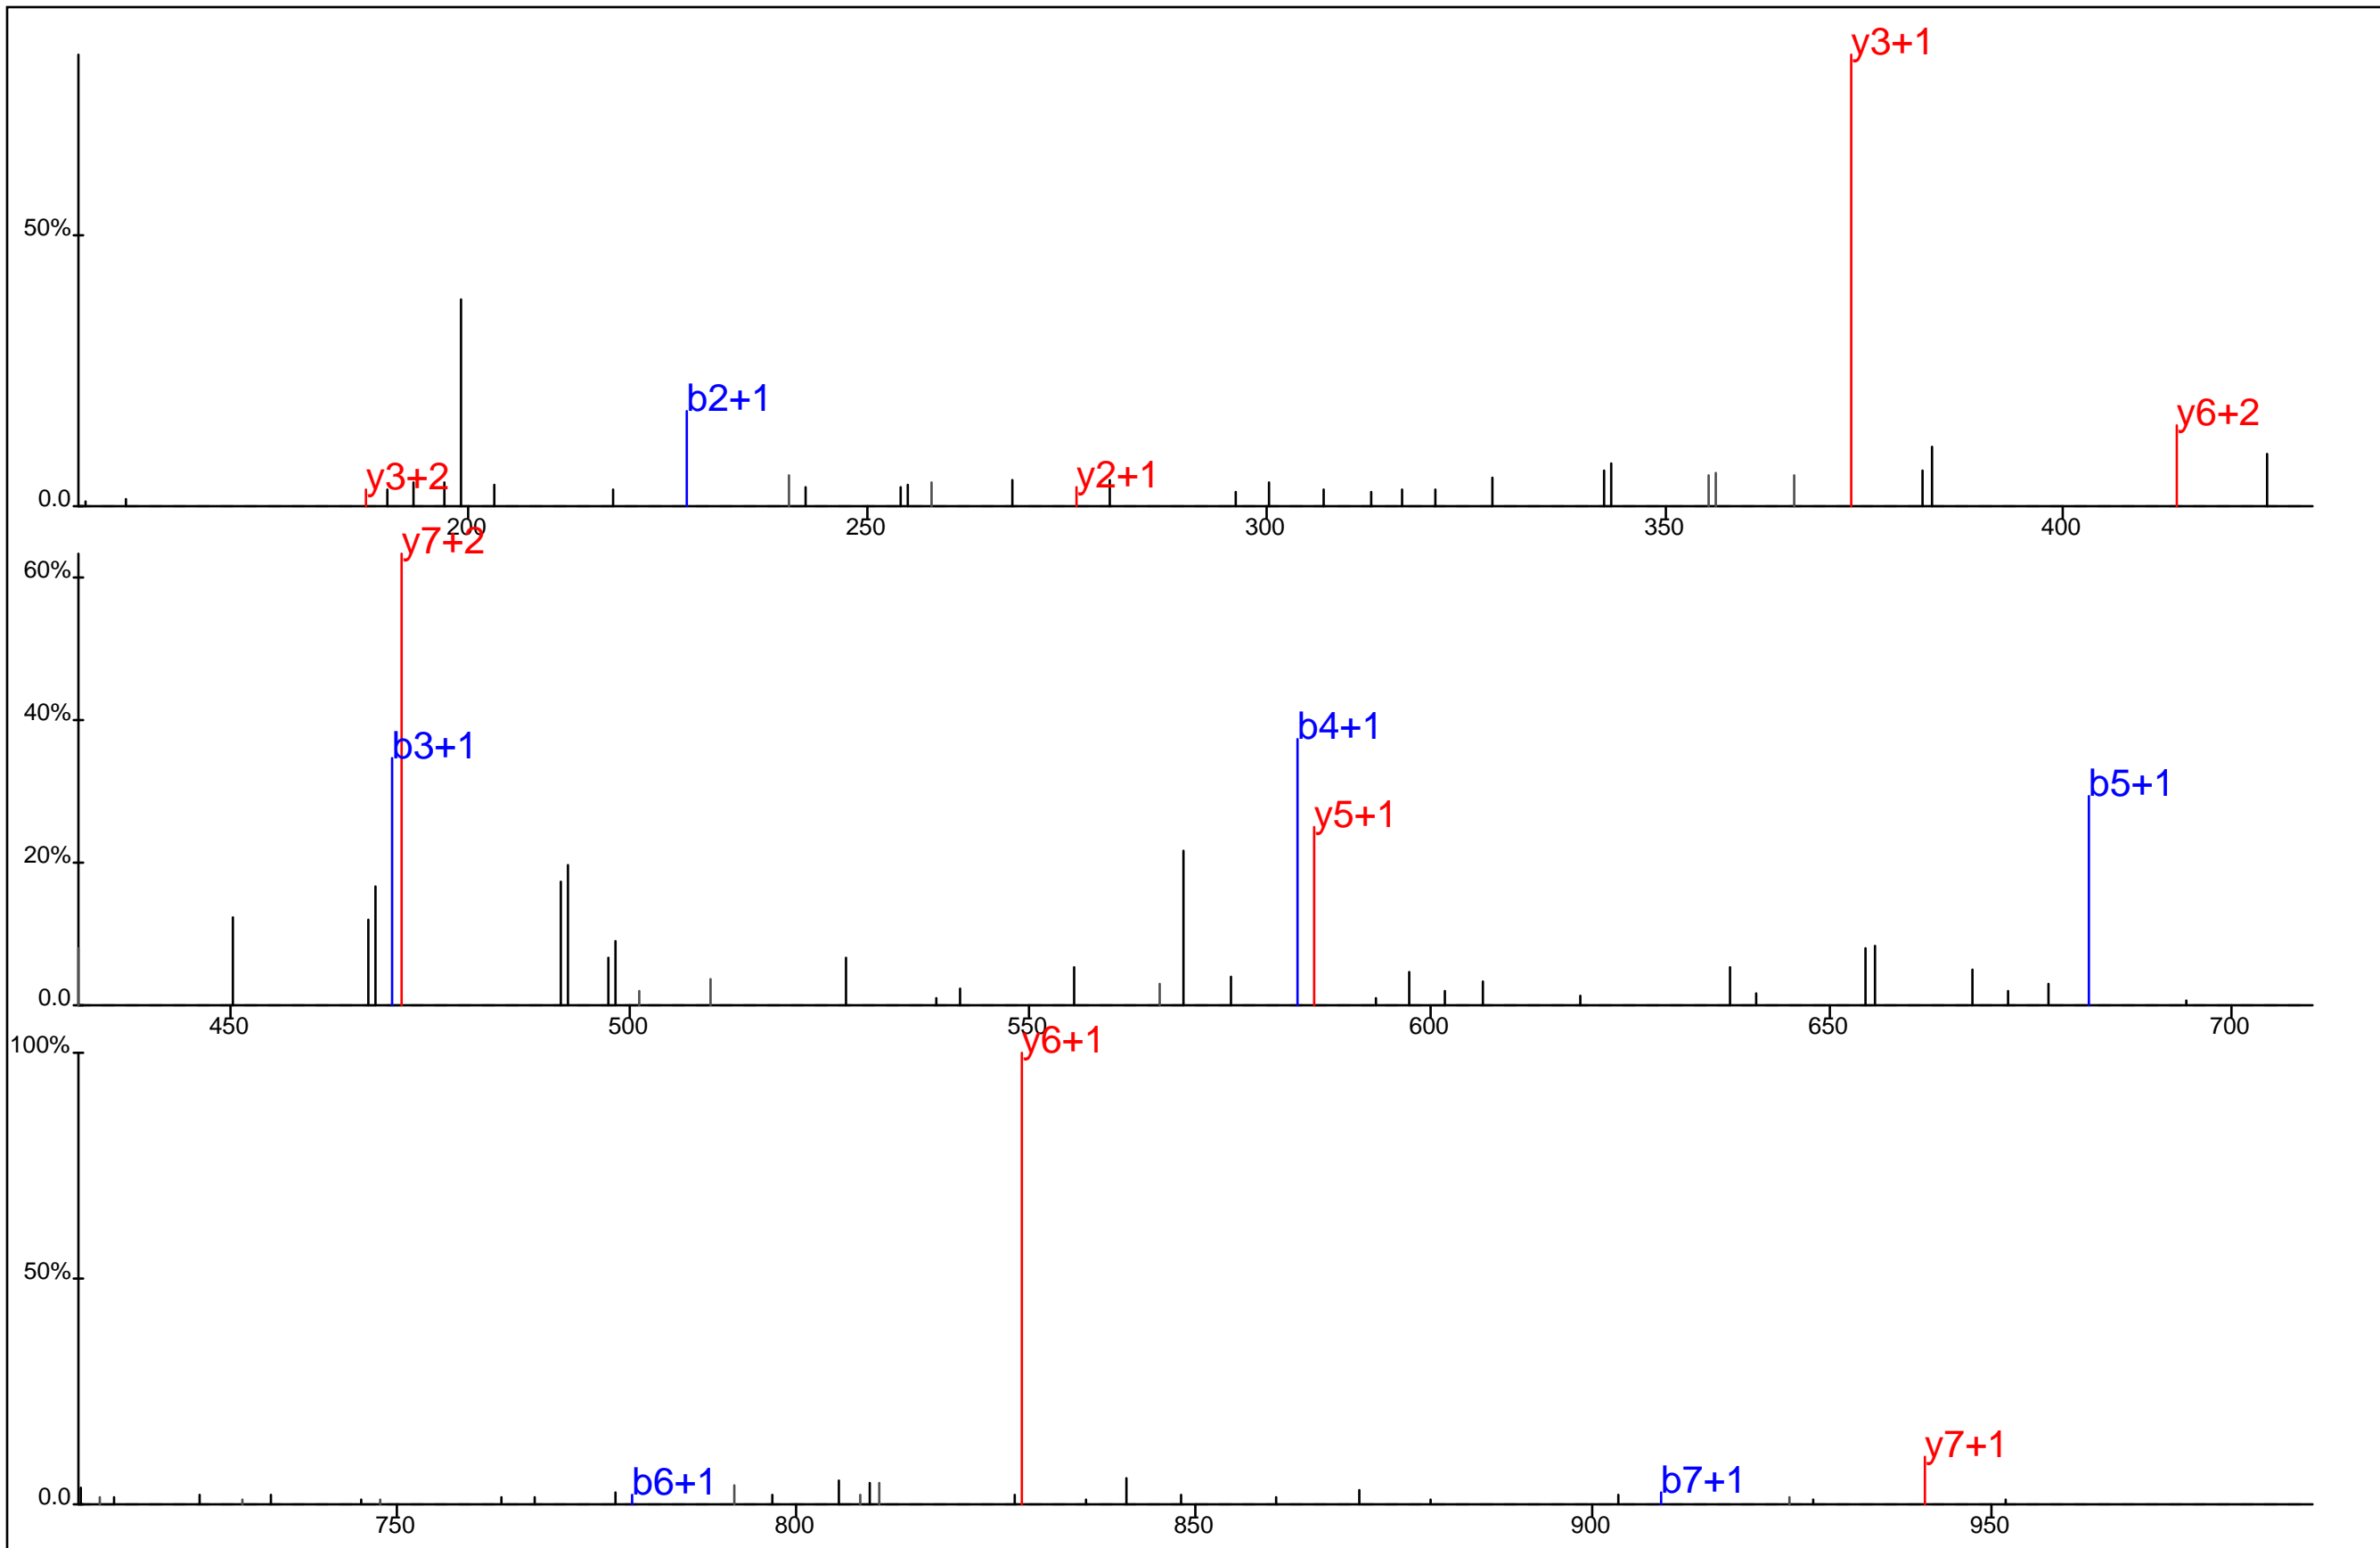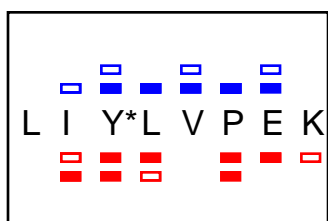

Protein Name: Intersectin 2  
 gi Accession: 0  
 Precursor Mass: 527.7839+2  
 Delta Mass: 2.090 ppm  
 XCorr: 26.24

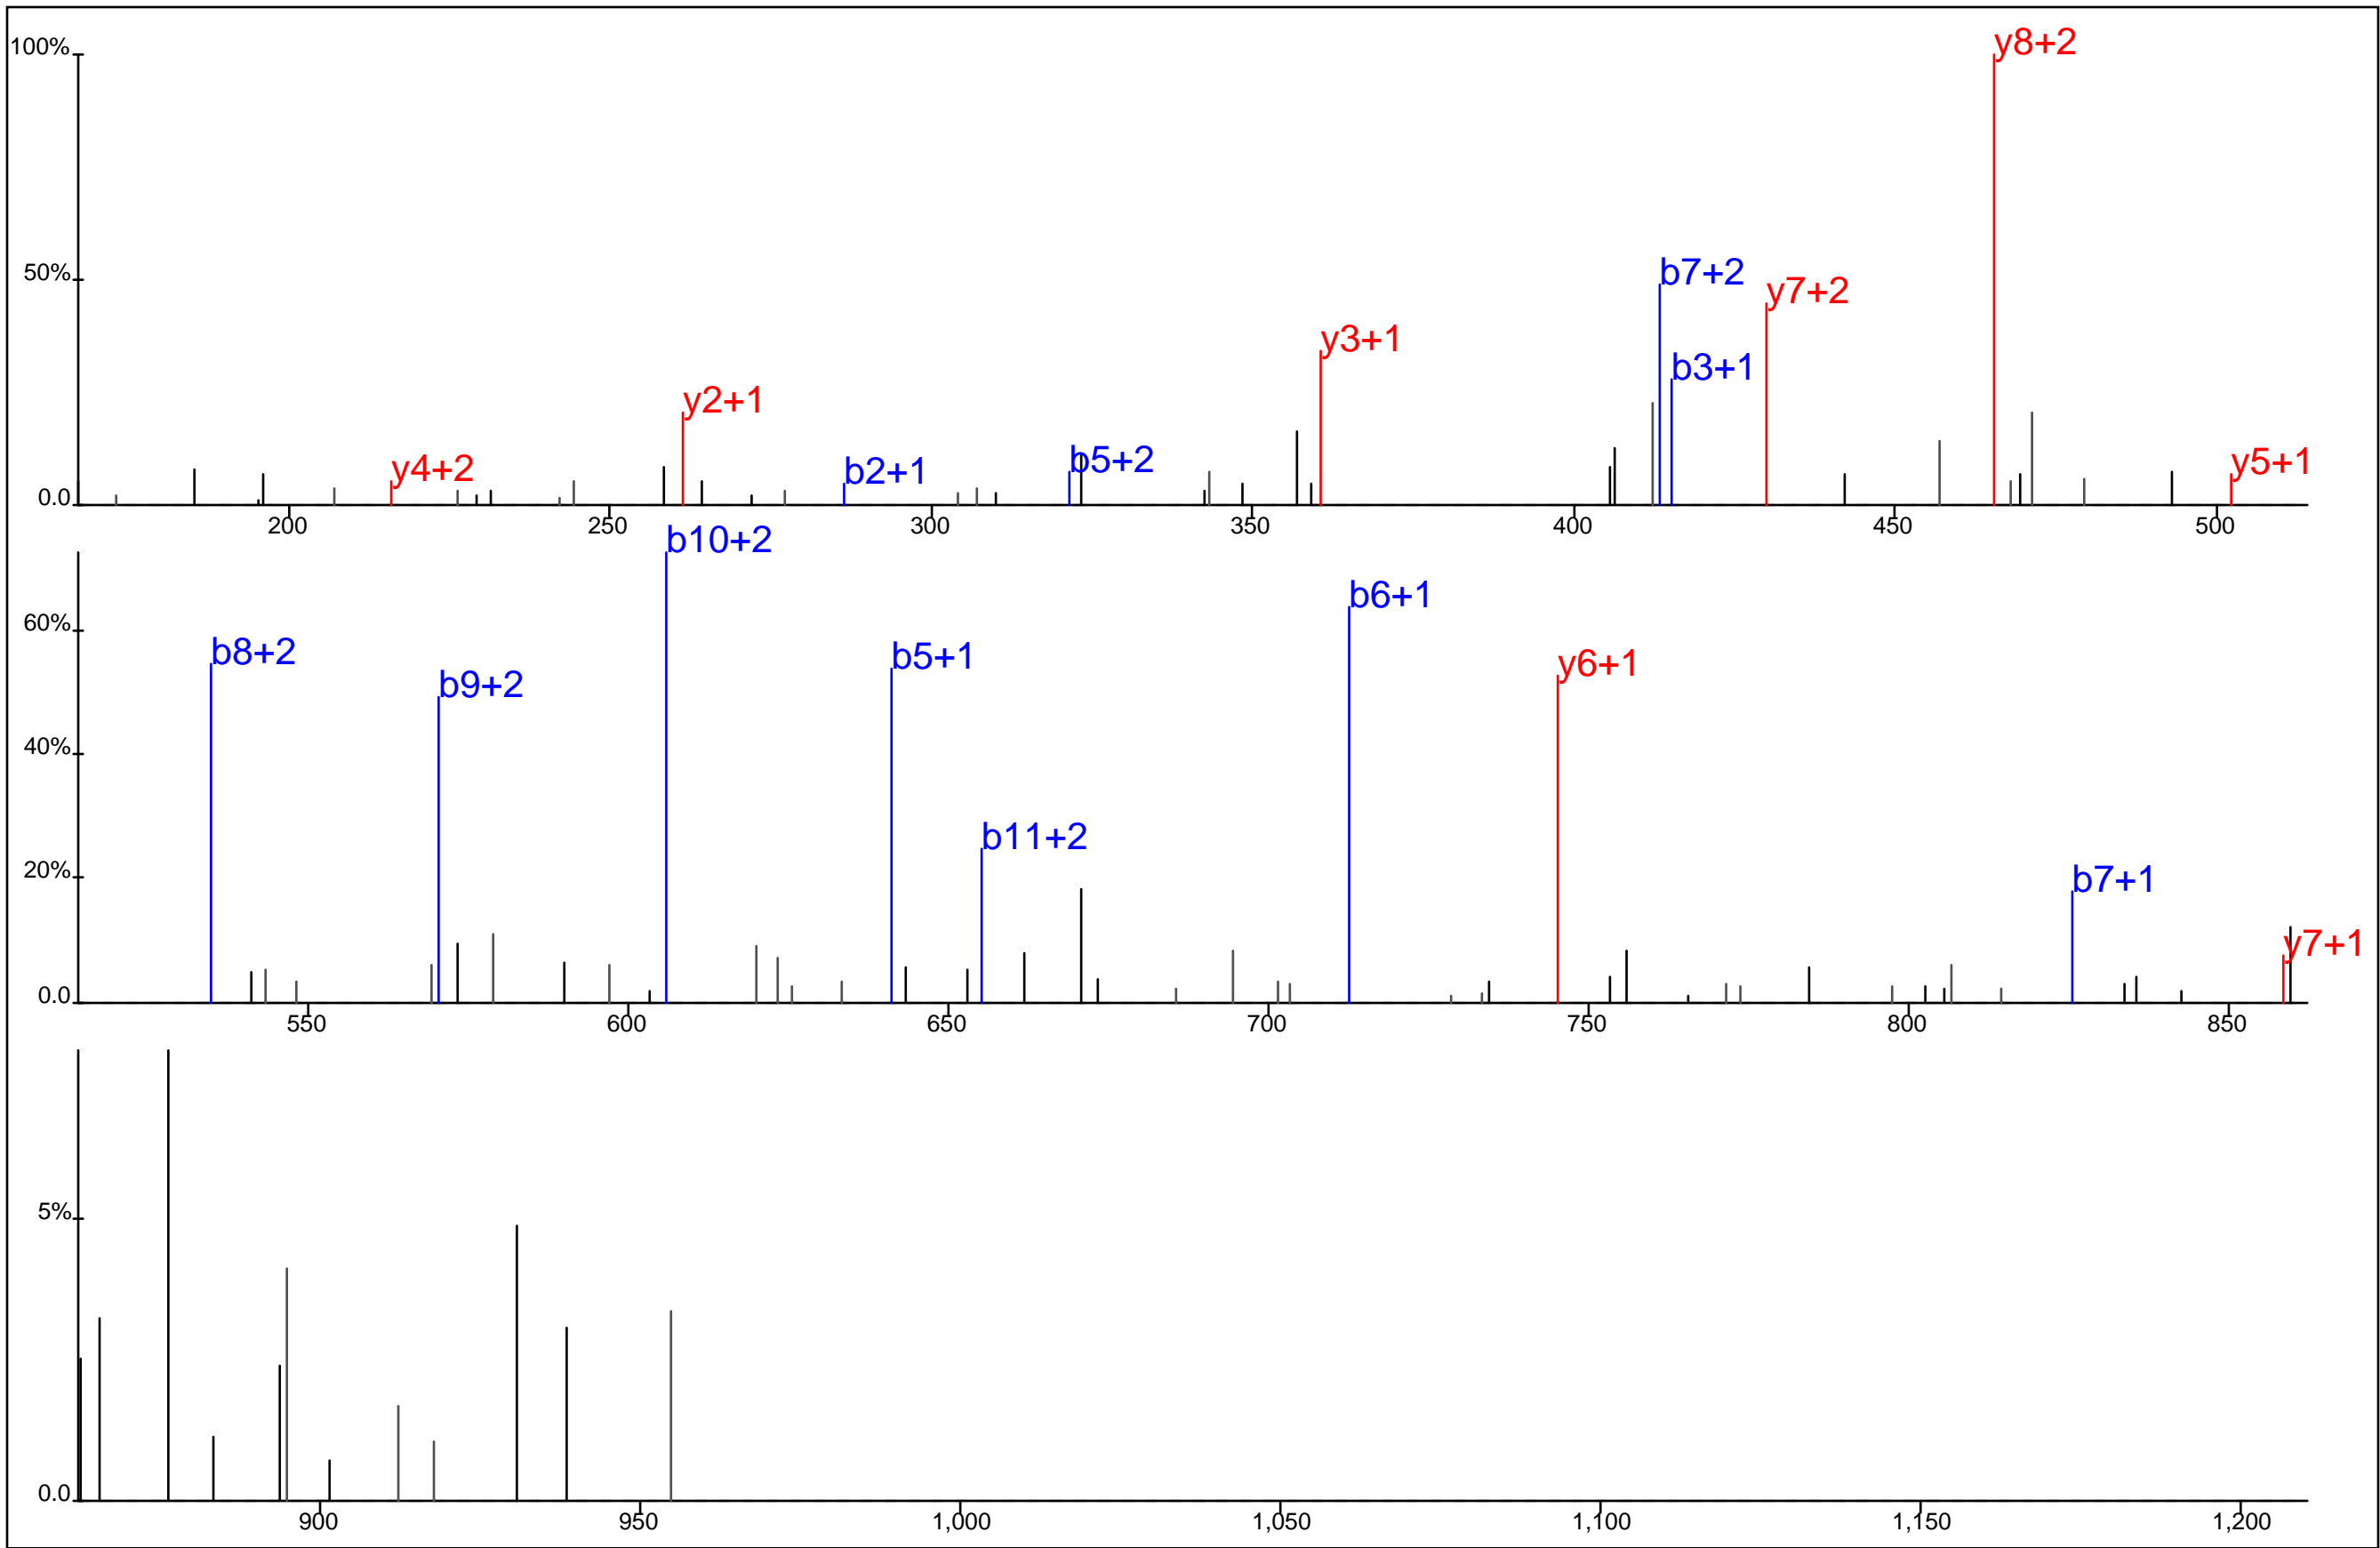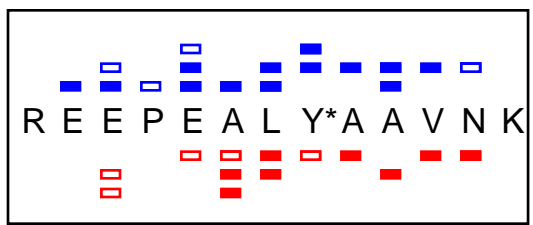

Protein Name: Intersectin 2  
 gi Accession: 0  
 Precursor Mass: 523.9153+3  
 Delta Mass: 0.432 ppm  
 XCorr: 43.86

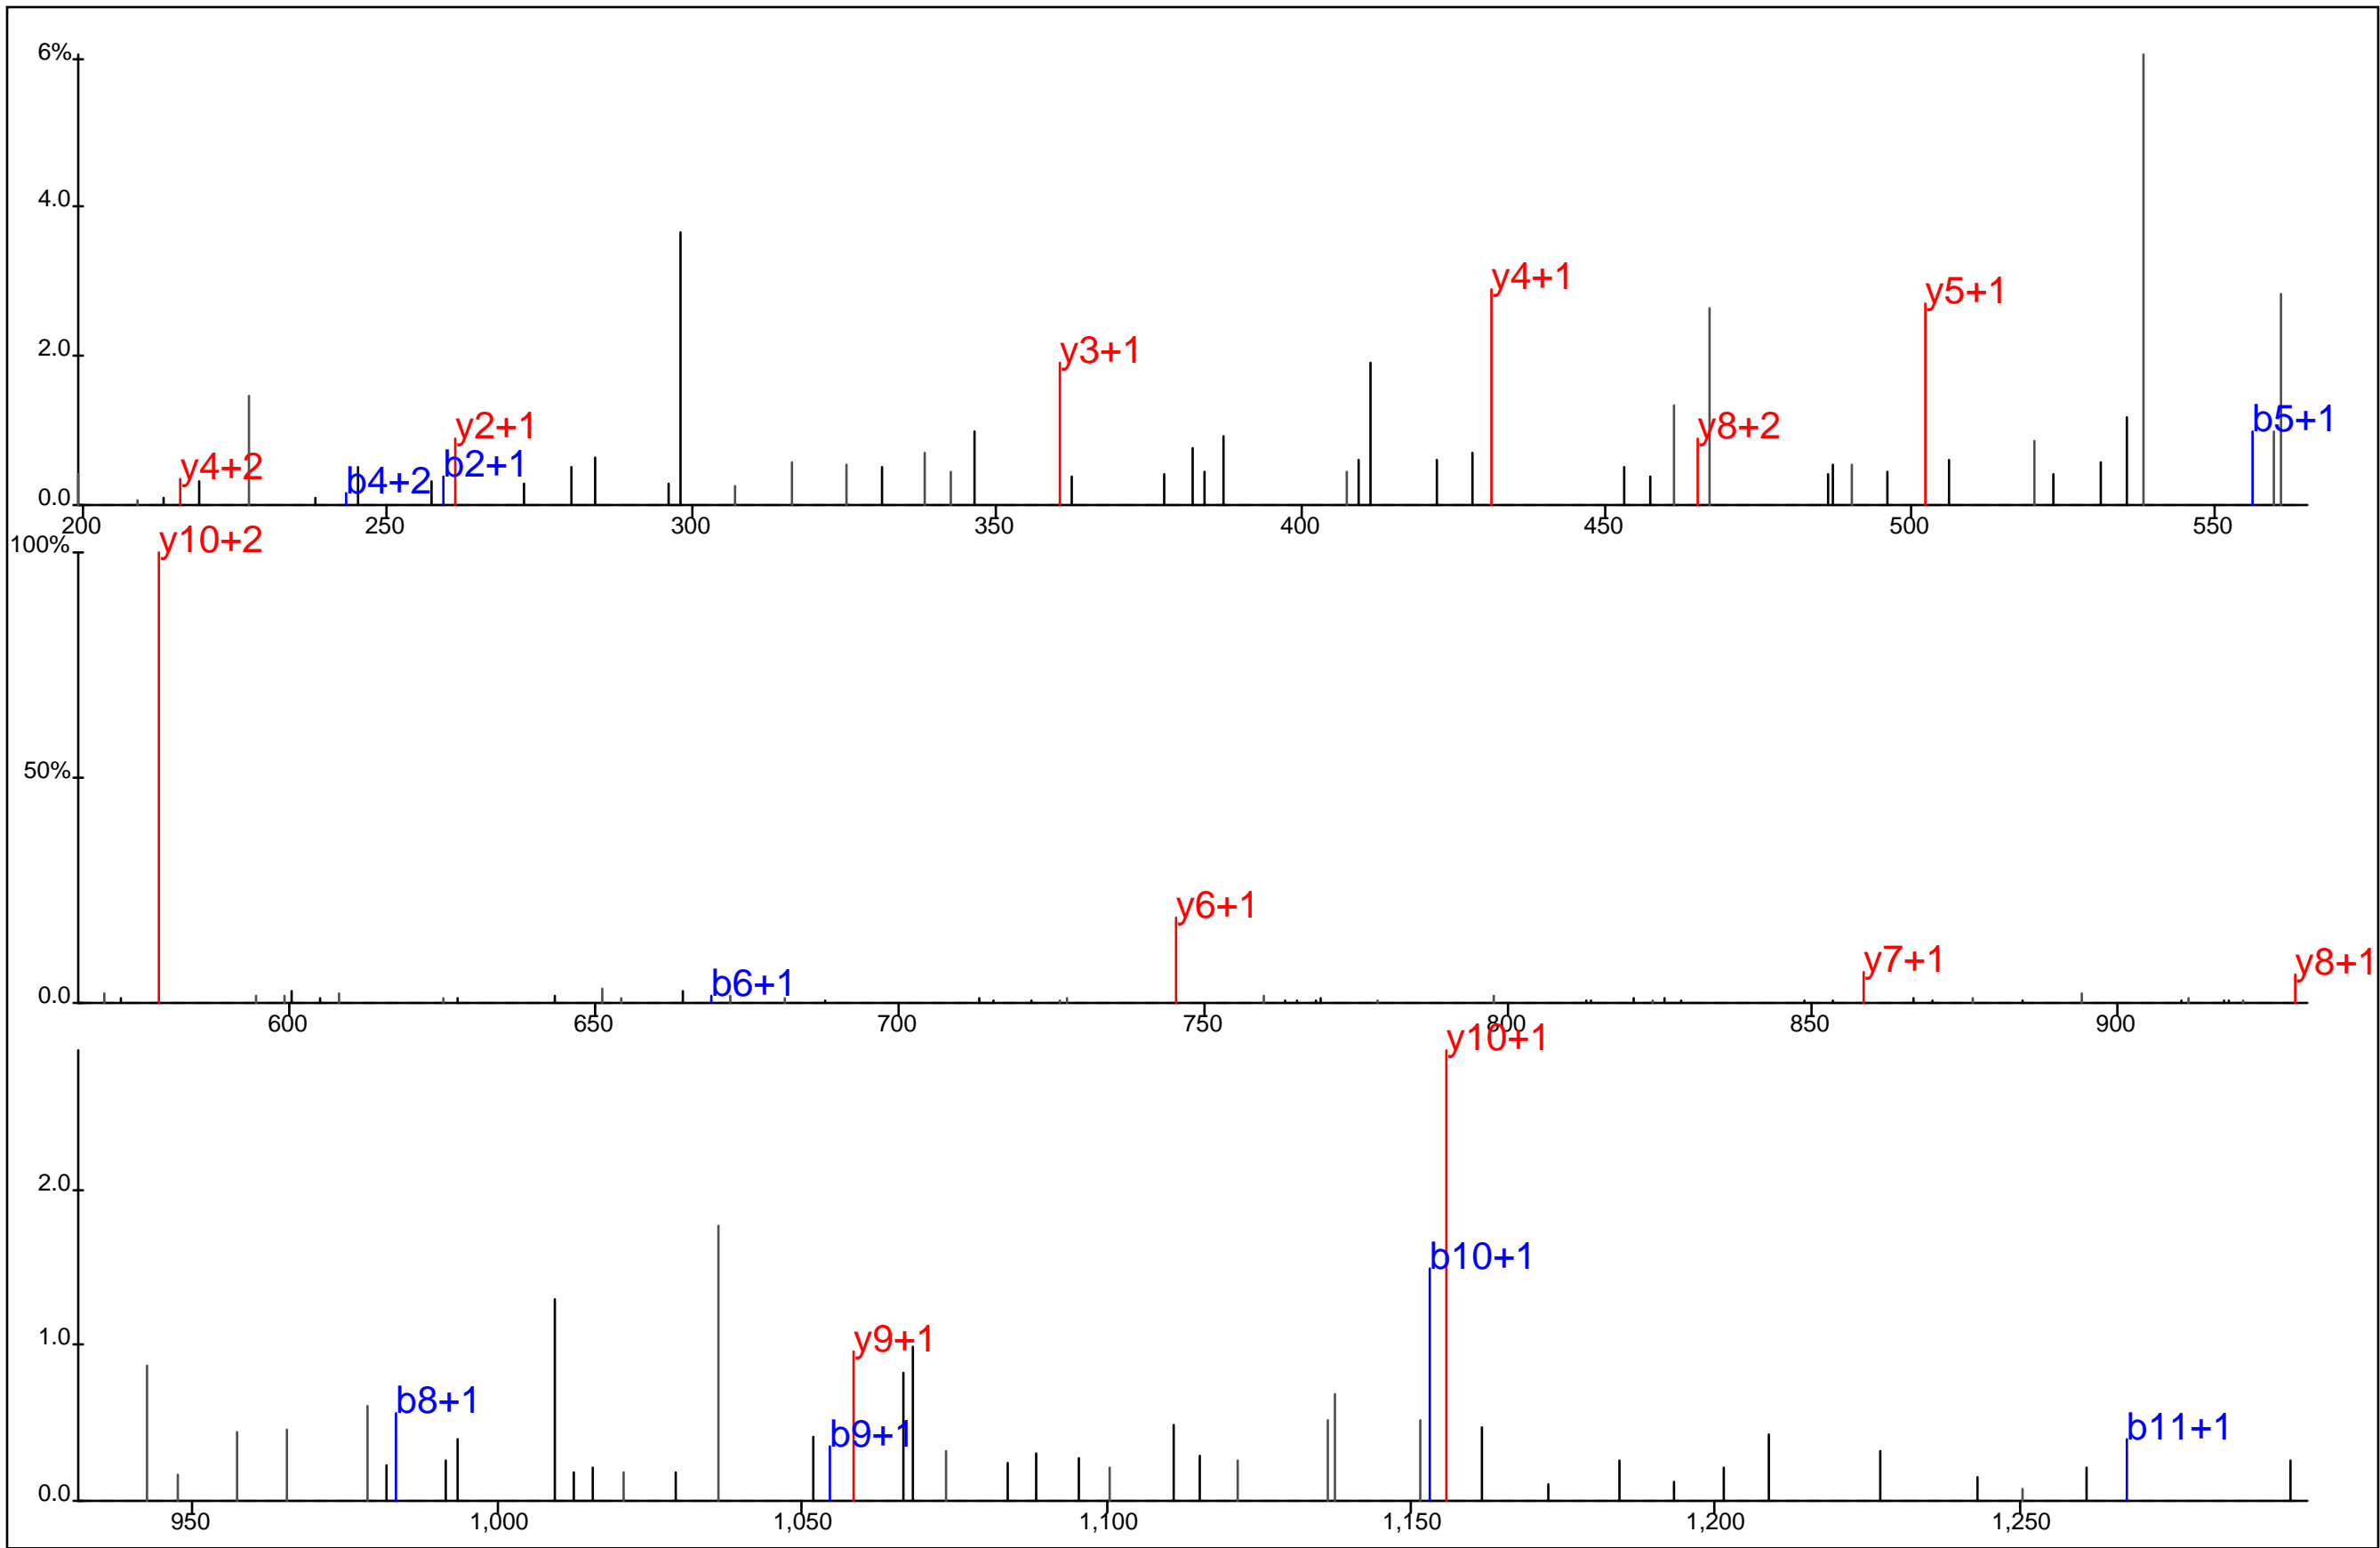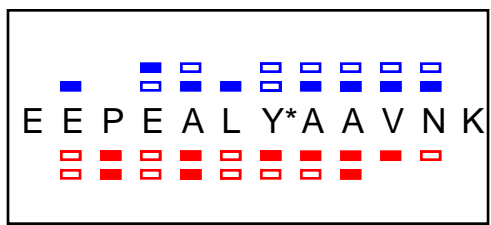

Protein Name: Intersectin 2  
 gi Accession: 0  
 Precursor Mass: 707.3184+2  
 Delta Mass: 0.098 ppm  
 XCorr: 43.31

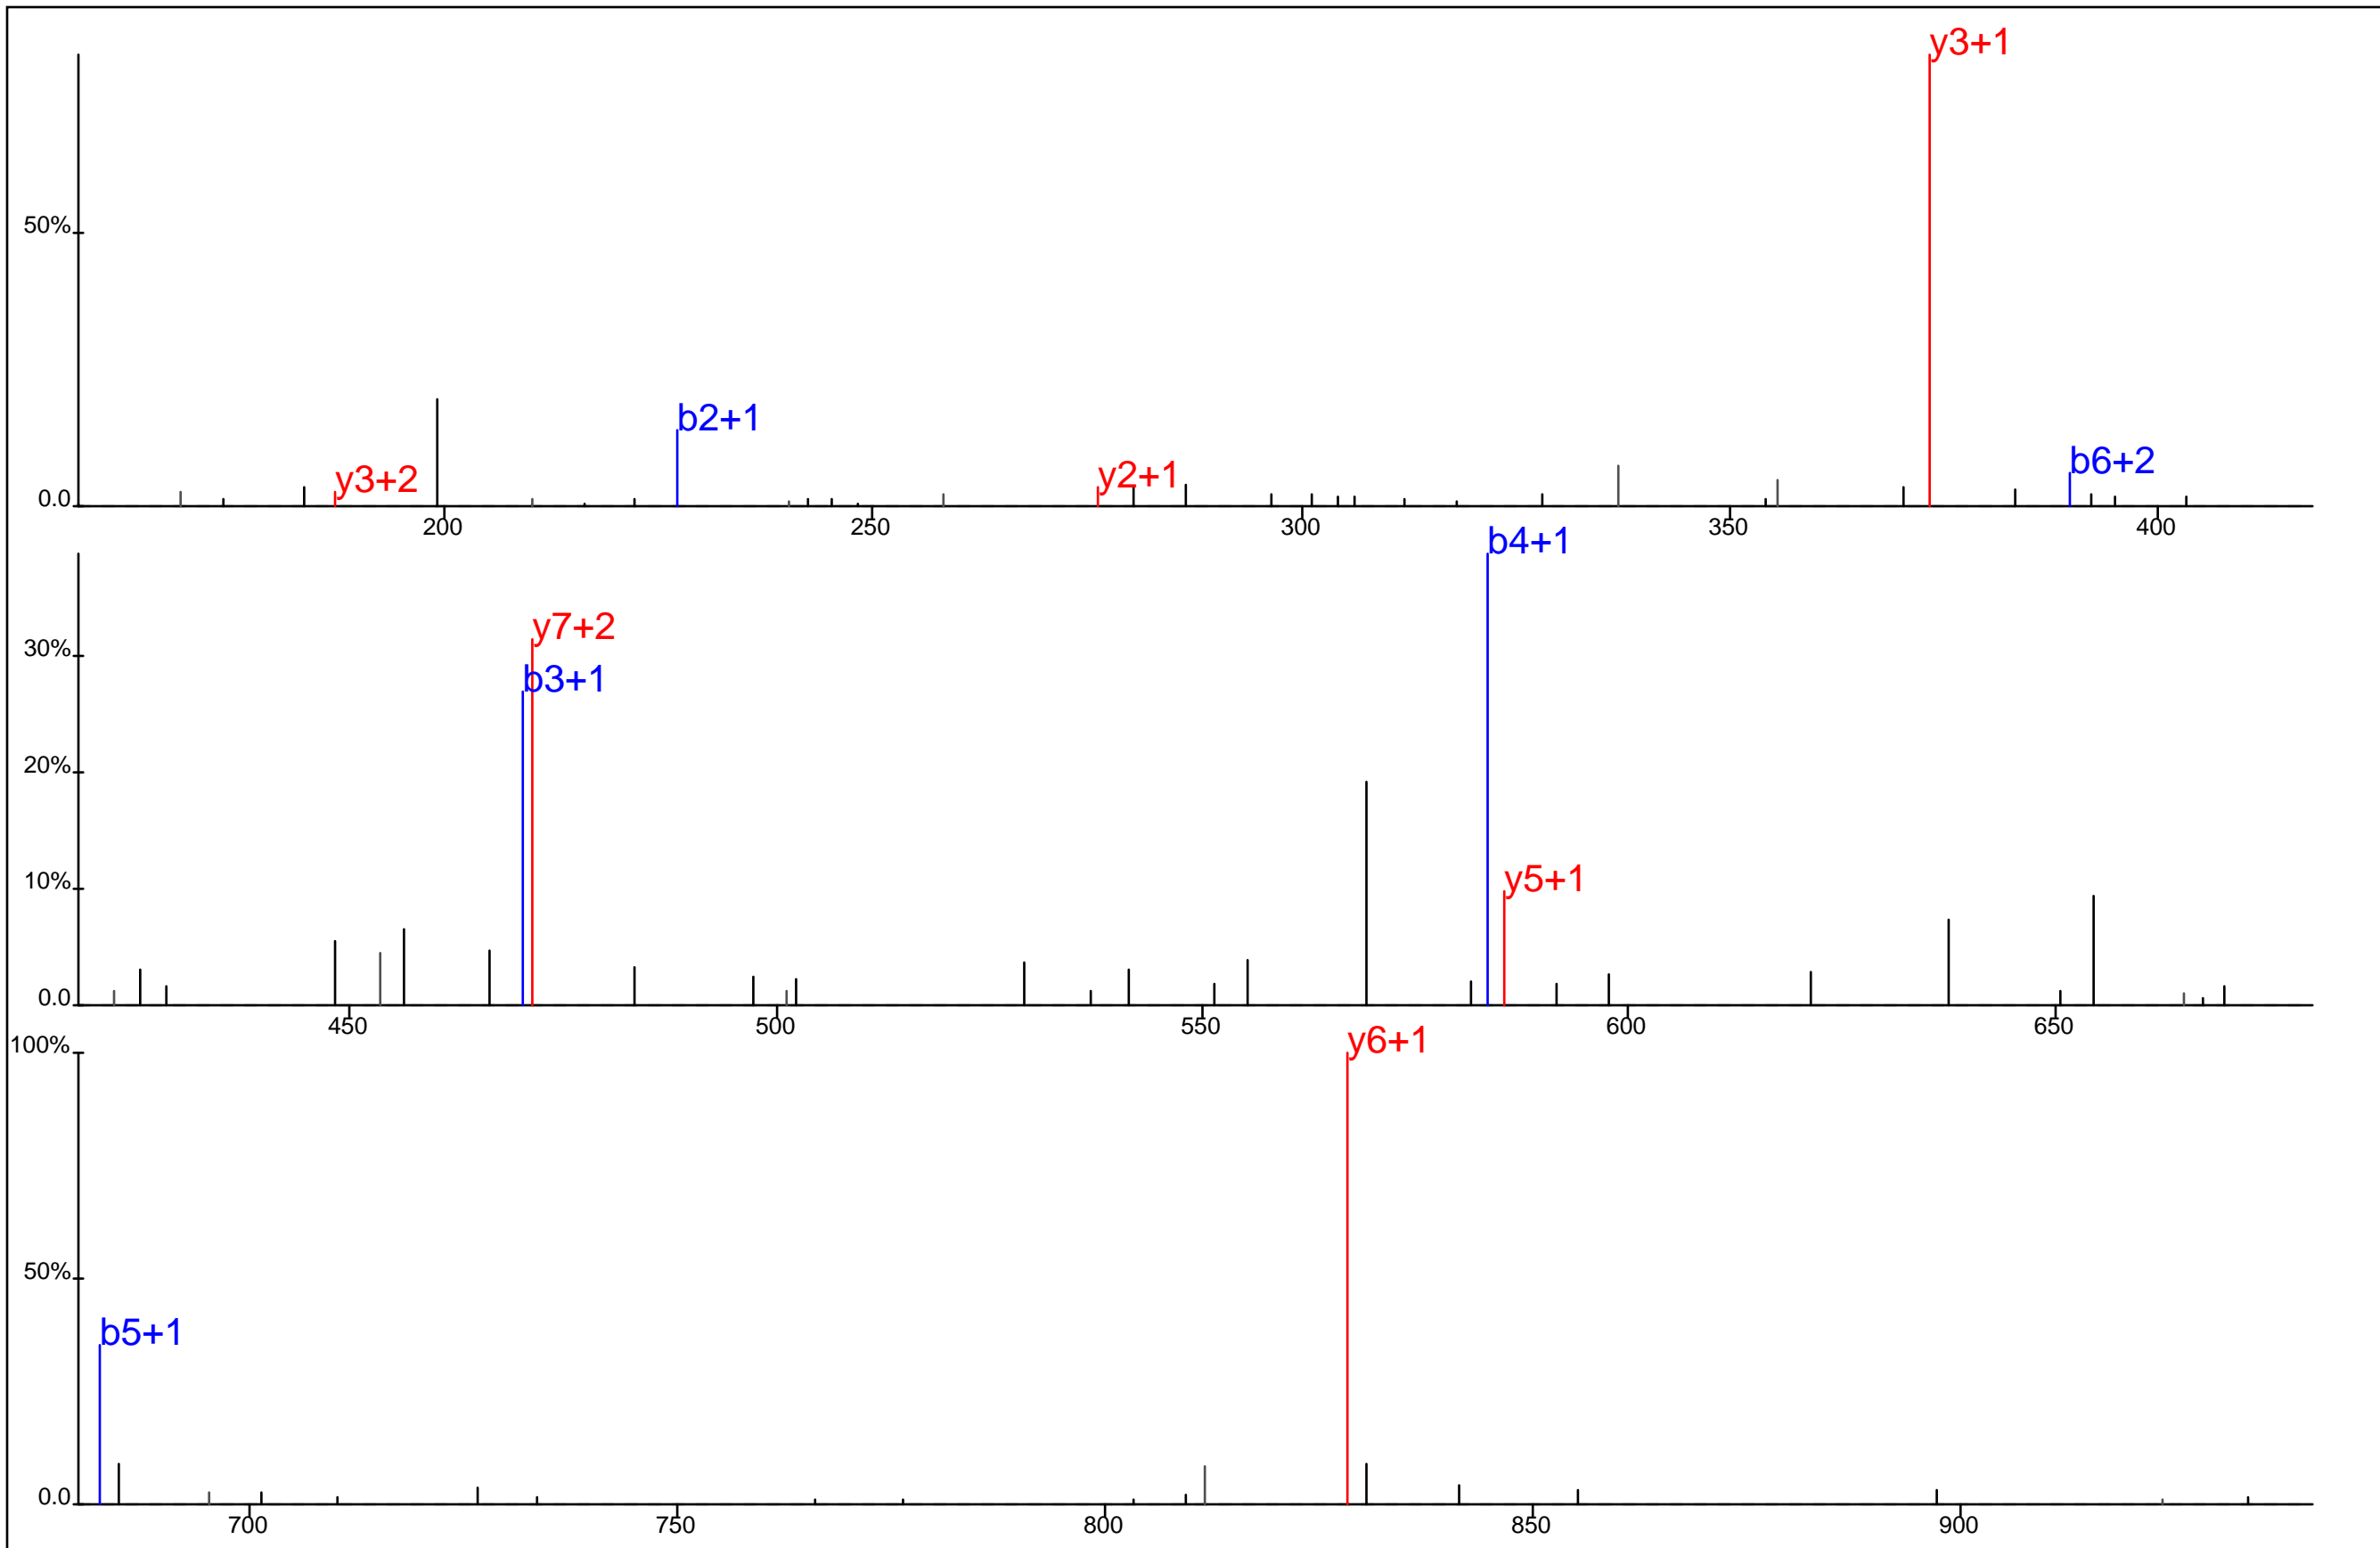


  

  
 L I Y\* L V P E K

Protein Name: Intersectin 2  
 gi Accession: 0  
 Precursor Mass: 527.7830+2  
 Delta Mass: 0.237 ppm  
 XCorr: 22.14

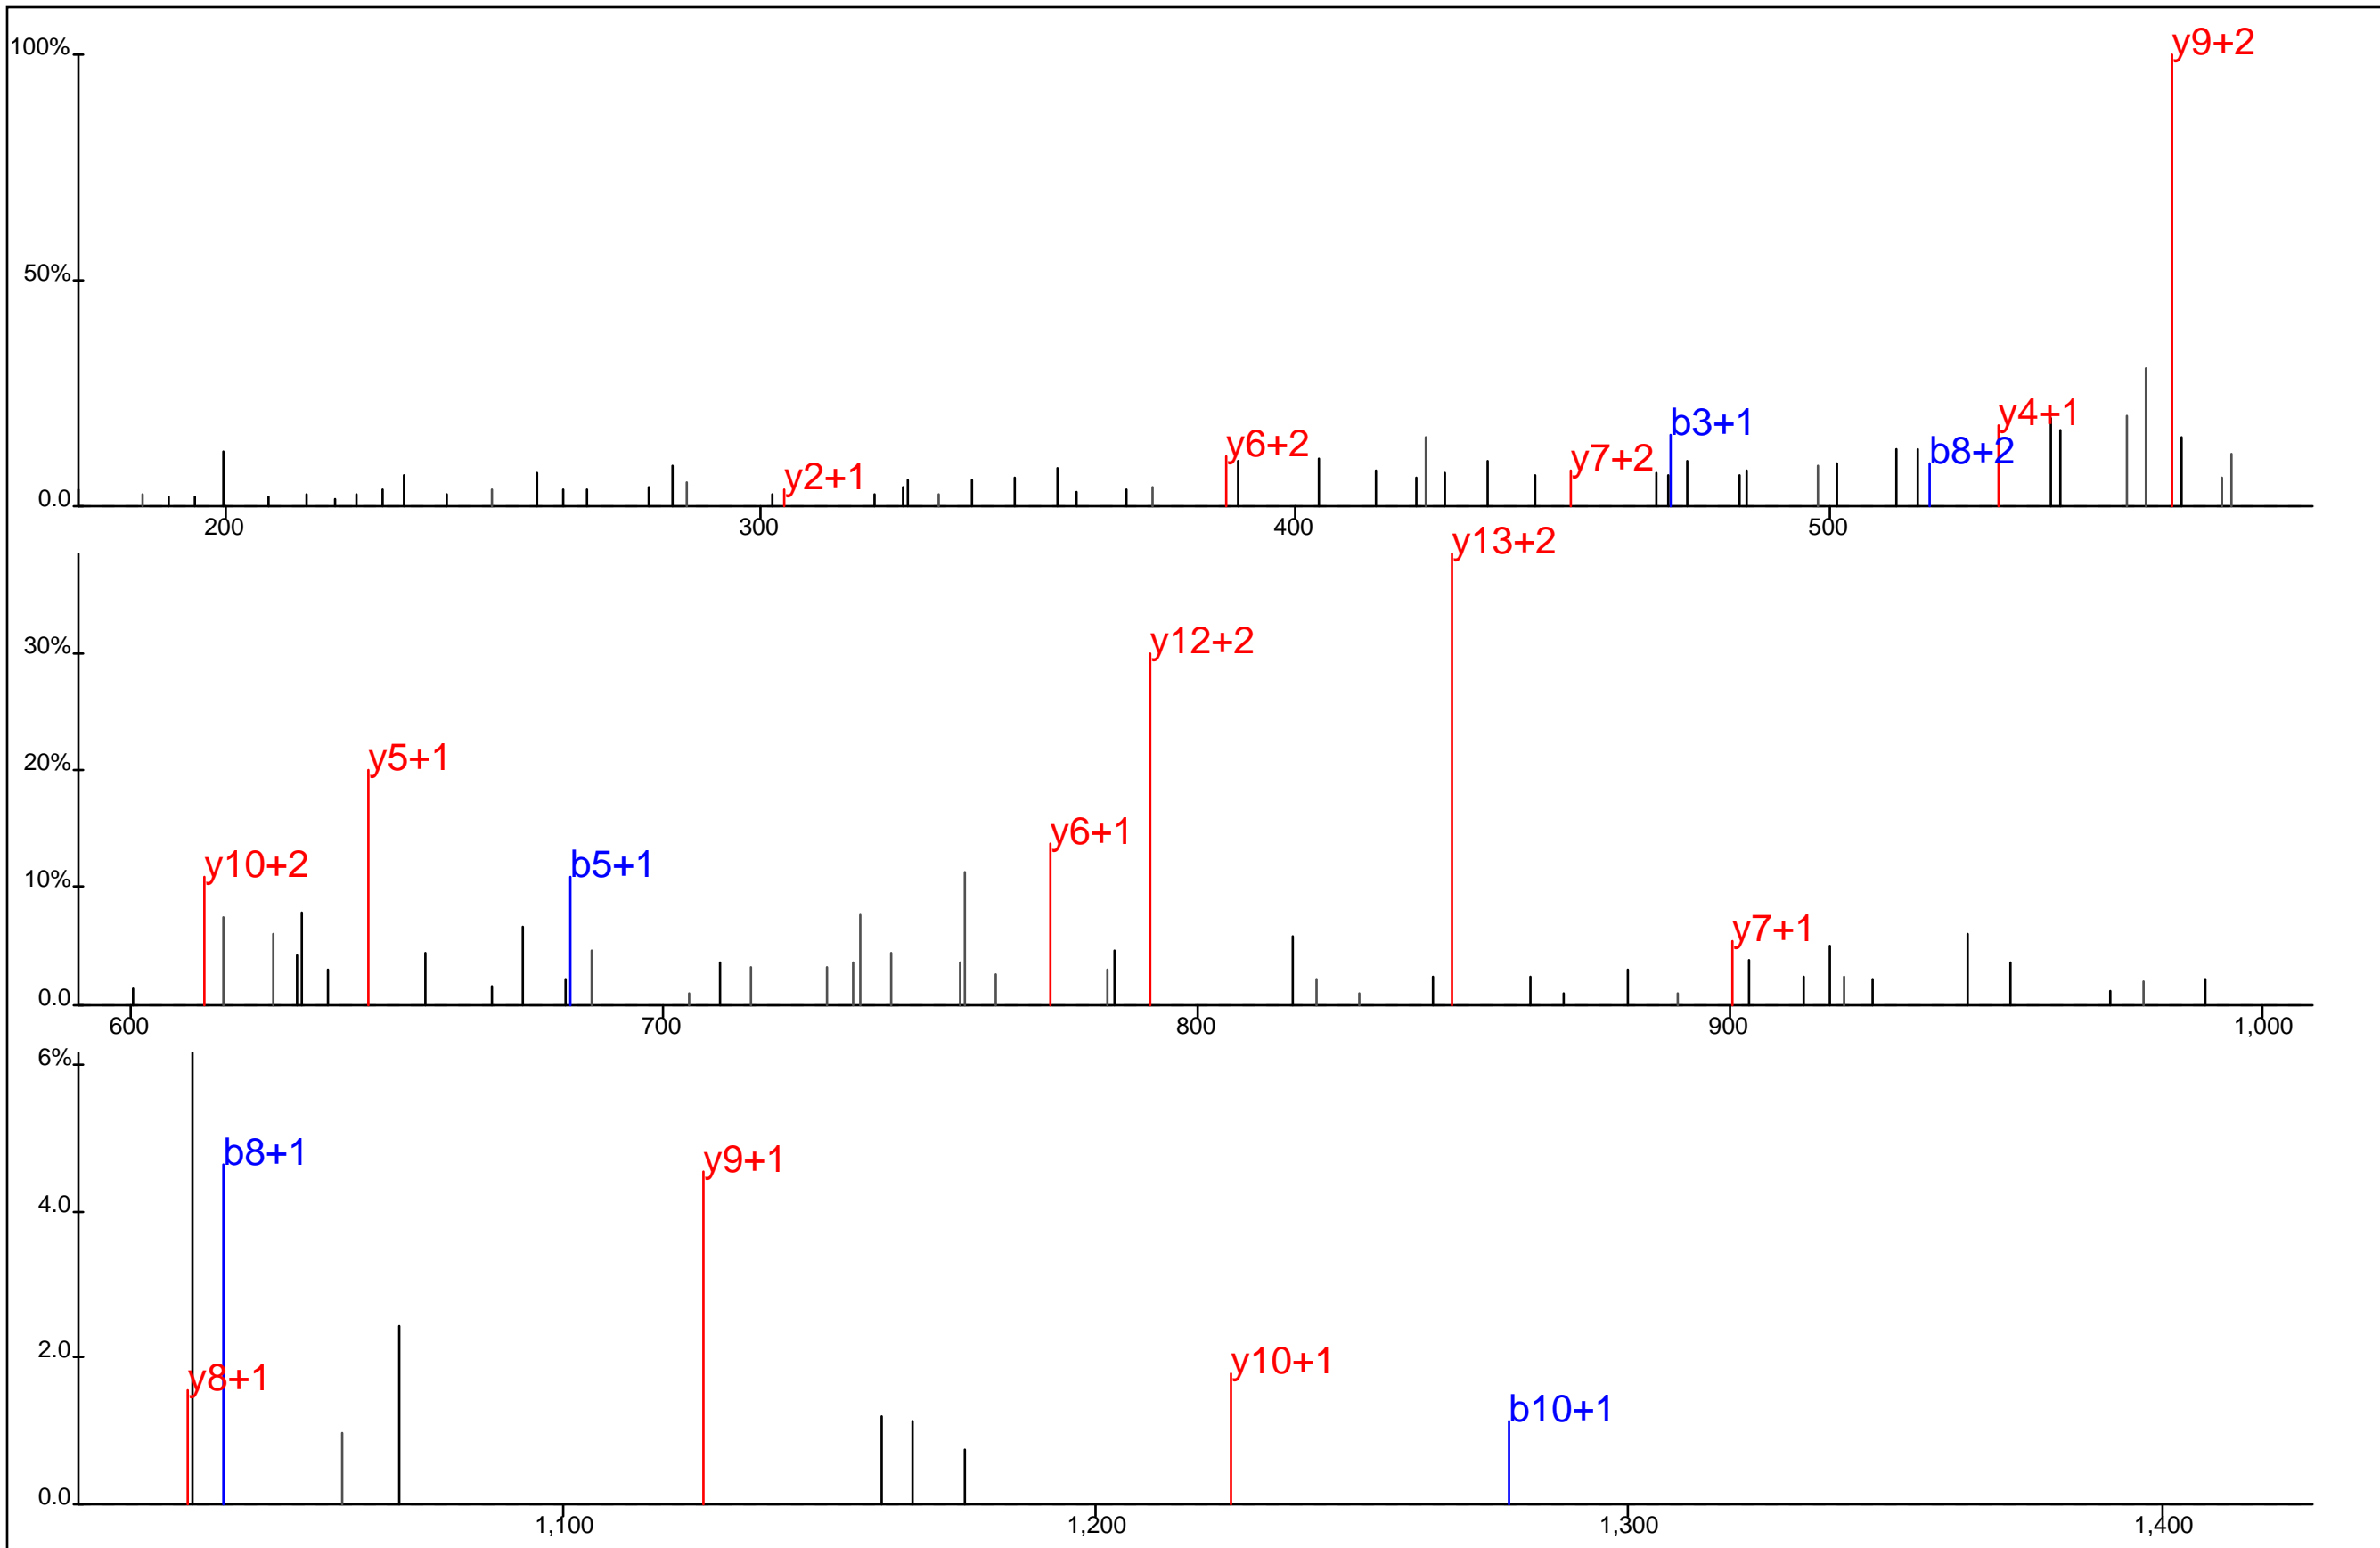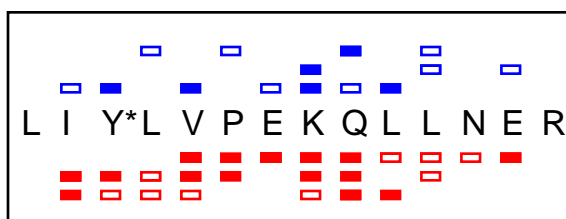

Protein Name: Intersectin 2  
 gi Accession: 0  
 Precursor Mass: 603.3265+3  
 Delta Mass: 3.779 ppm  
 XCorr: 22.47

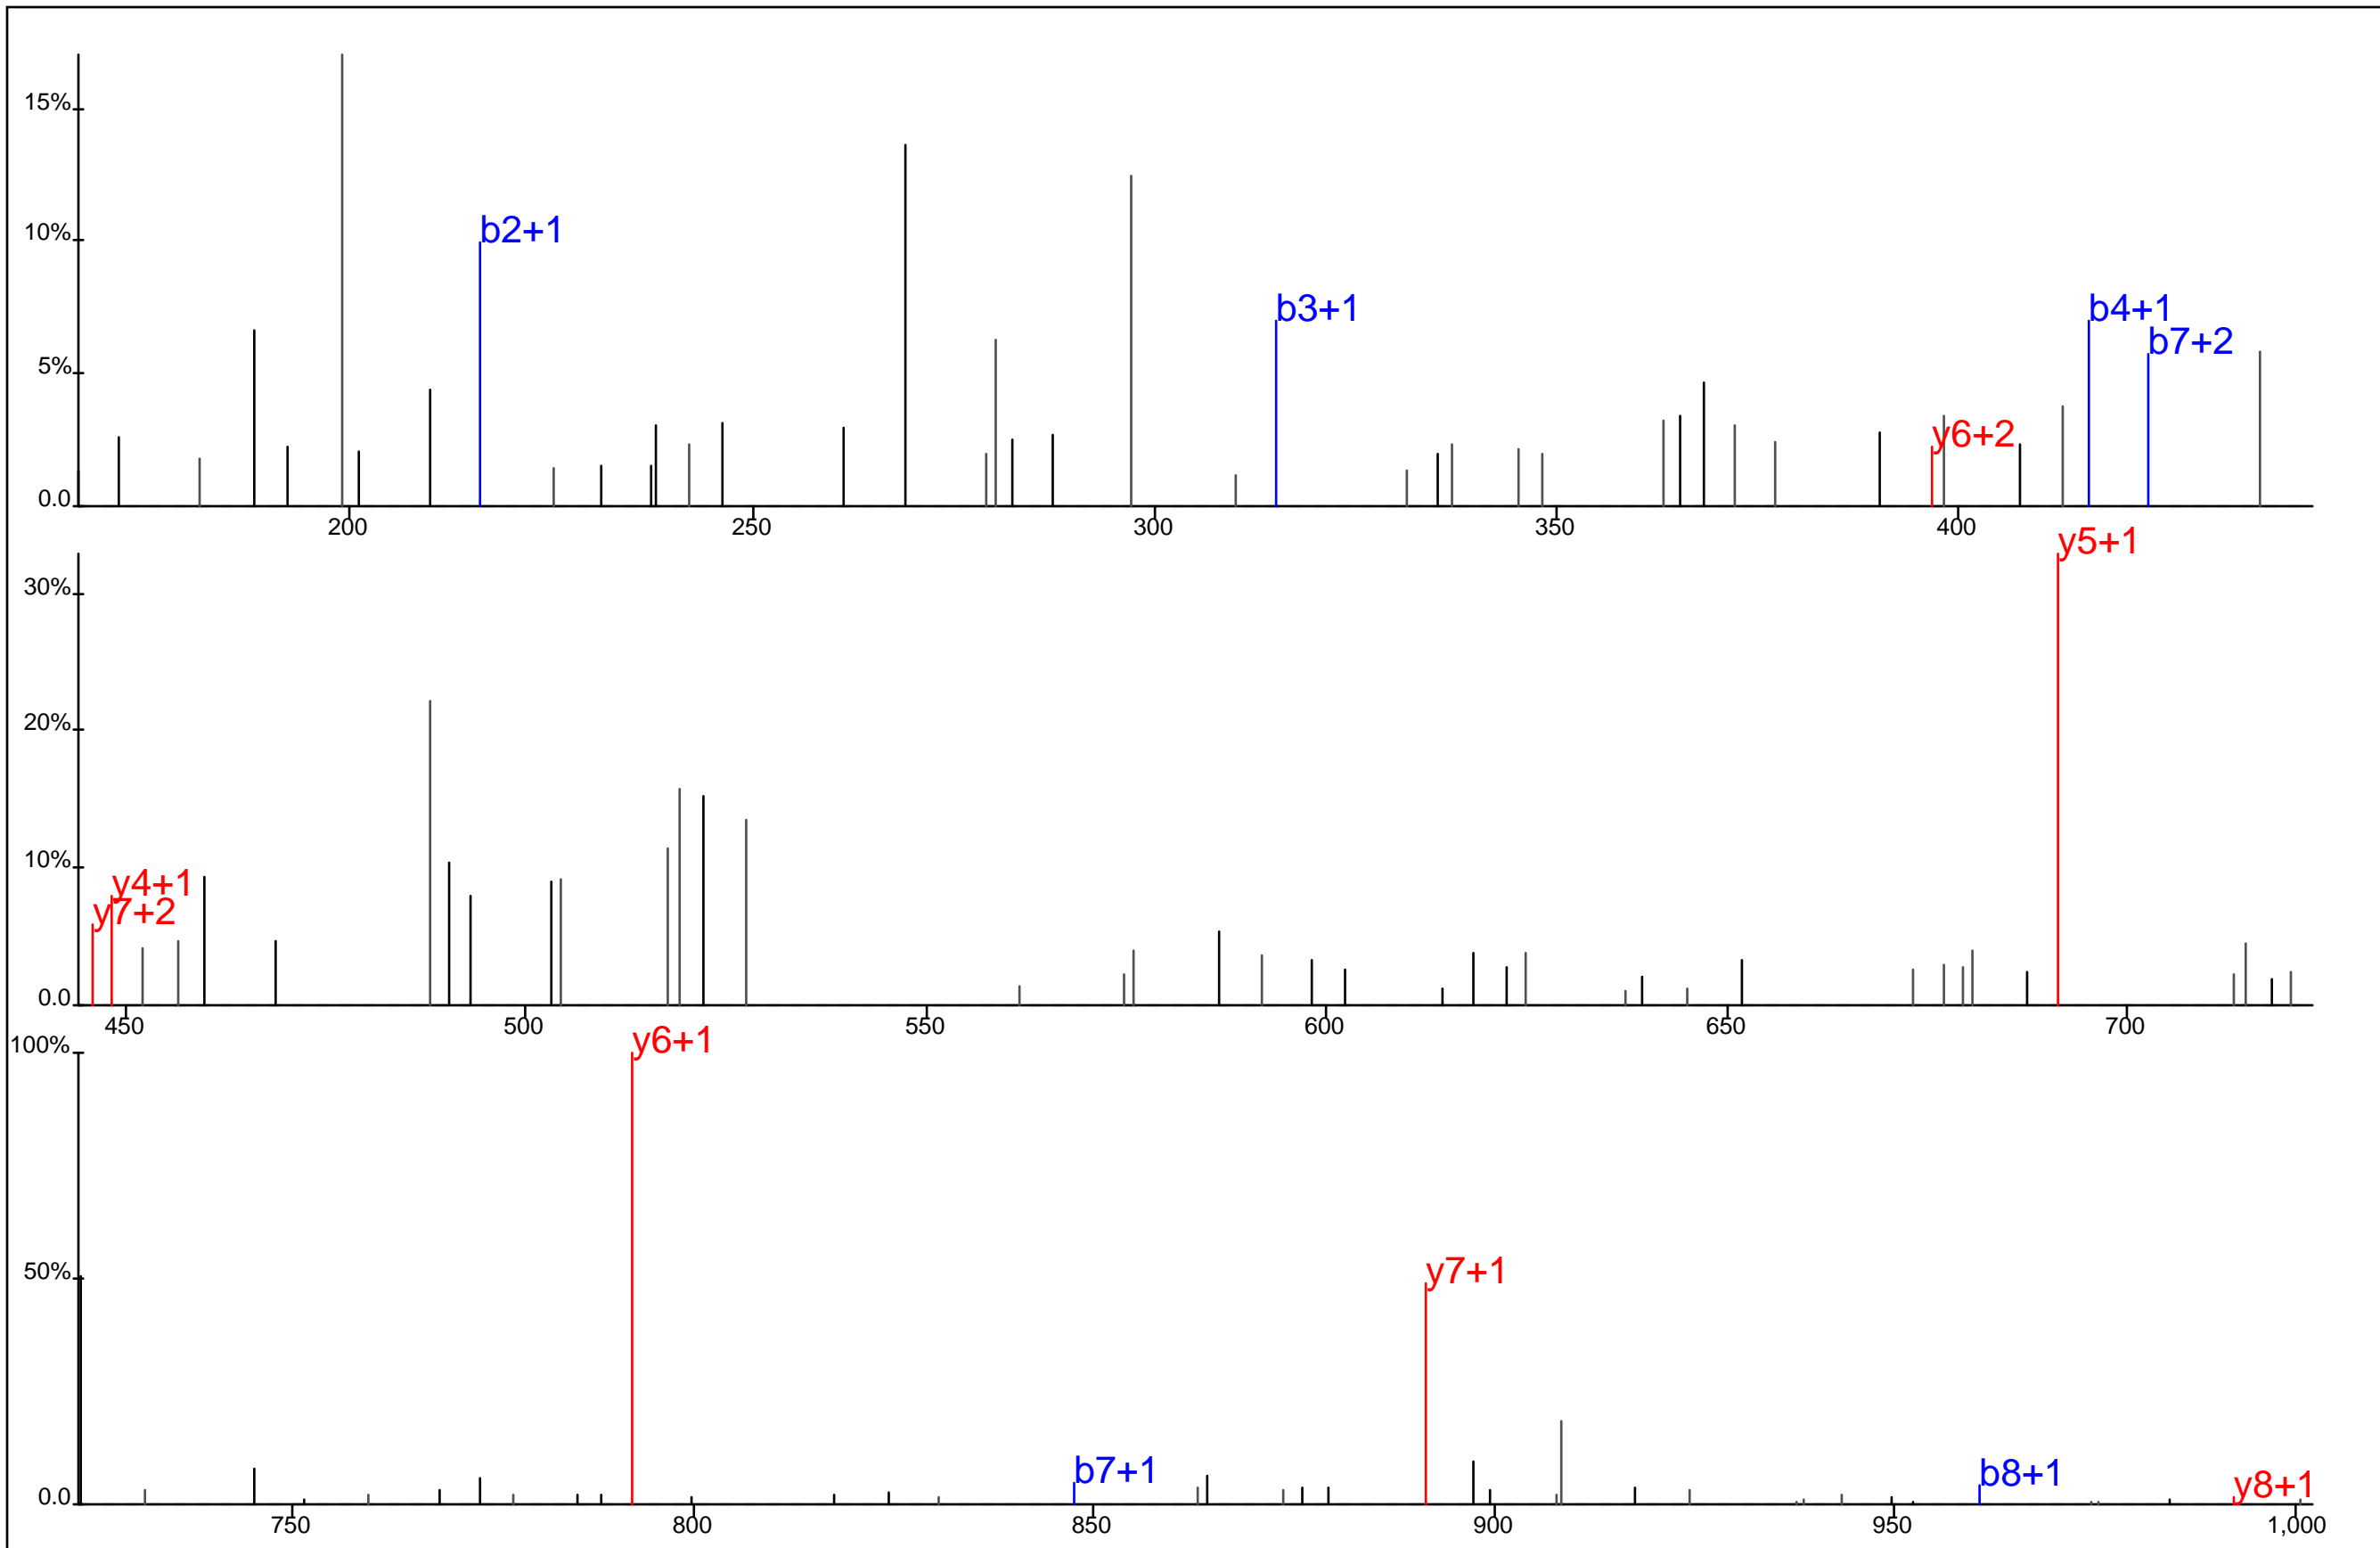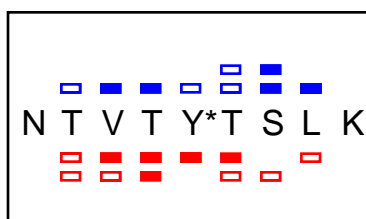

Protein Name: Intracellular membrane associated calcium independent phospholipase A2 gamma  
 gi Accession: 0  
 Precursor Mass: 553.7599+2  
 Delta Mass: 0.381 ppm  
 XCorr: 23.56



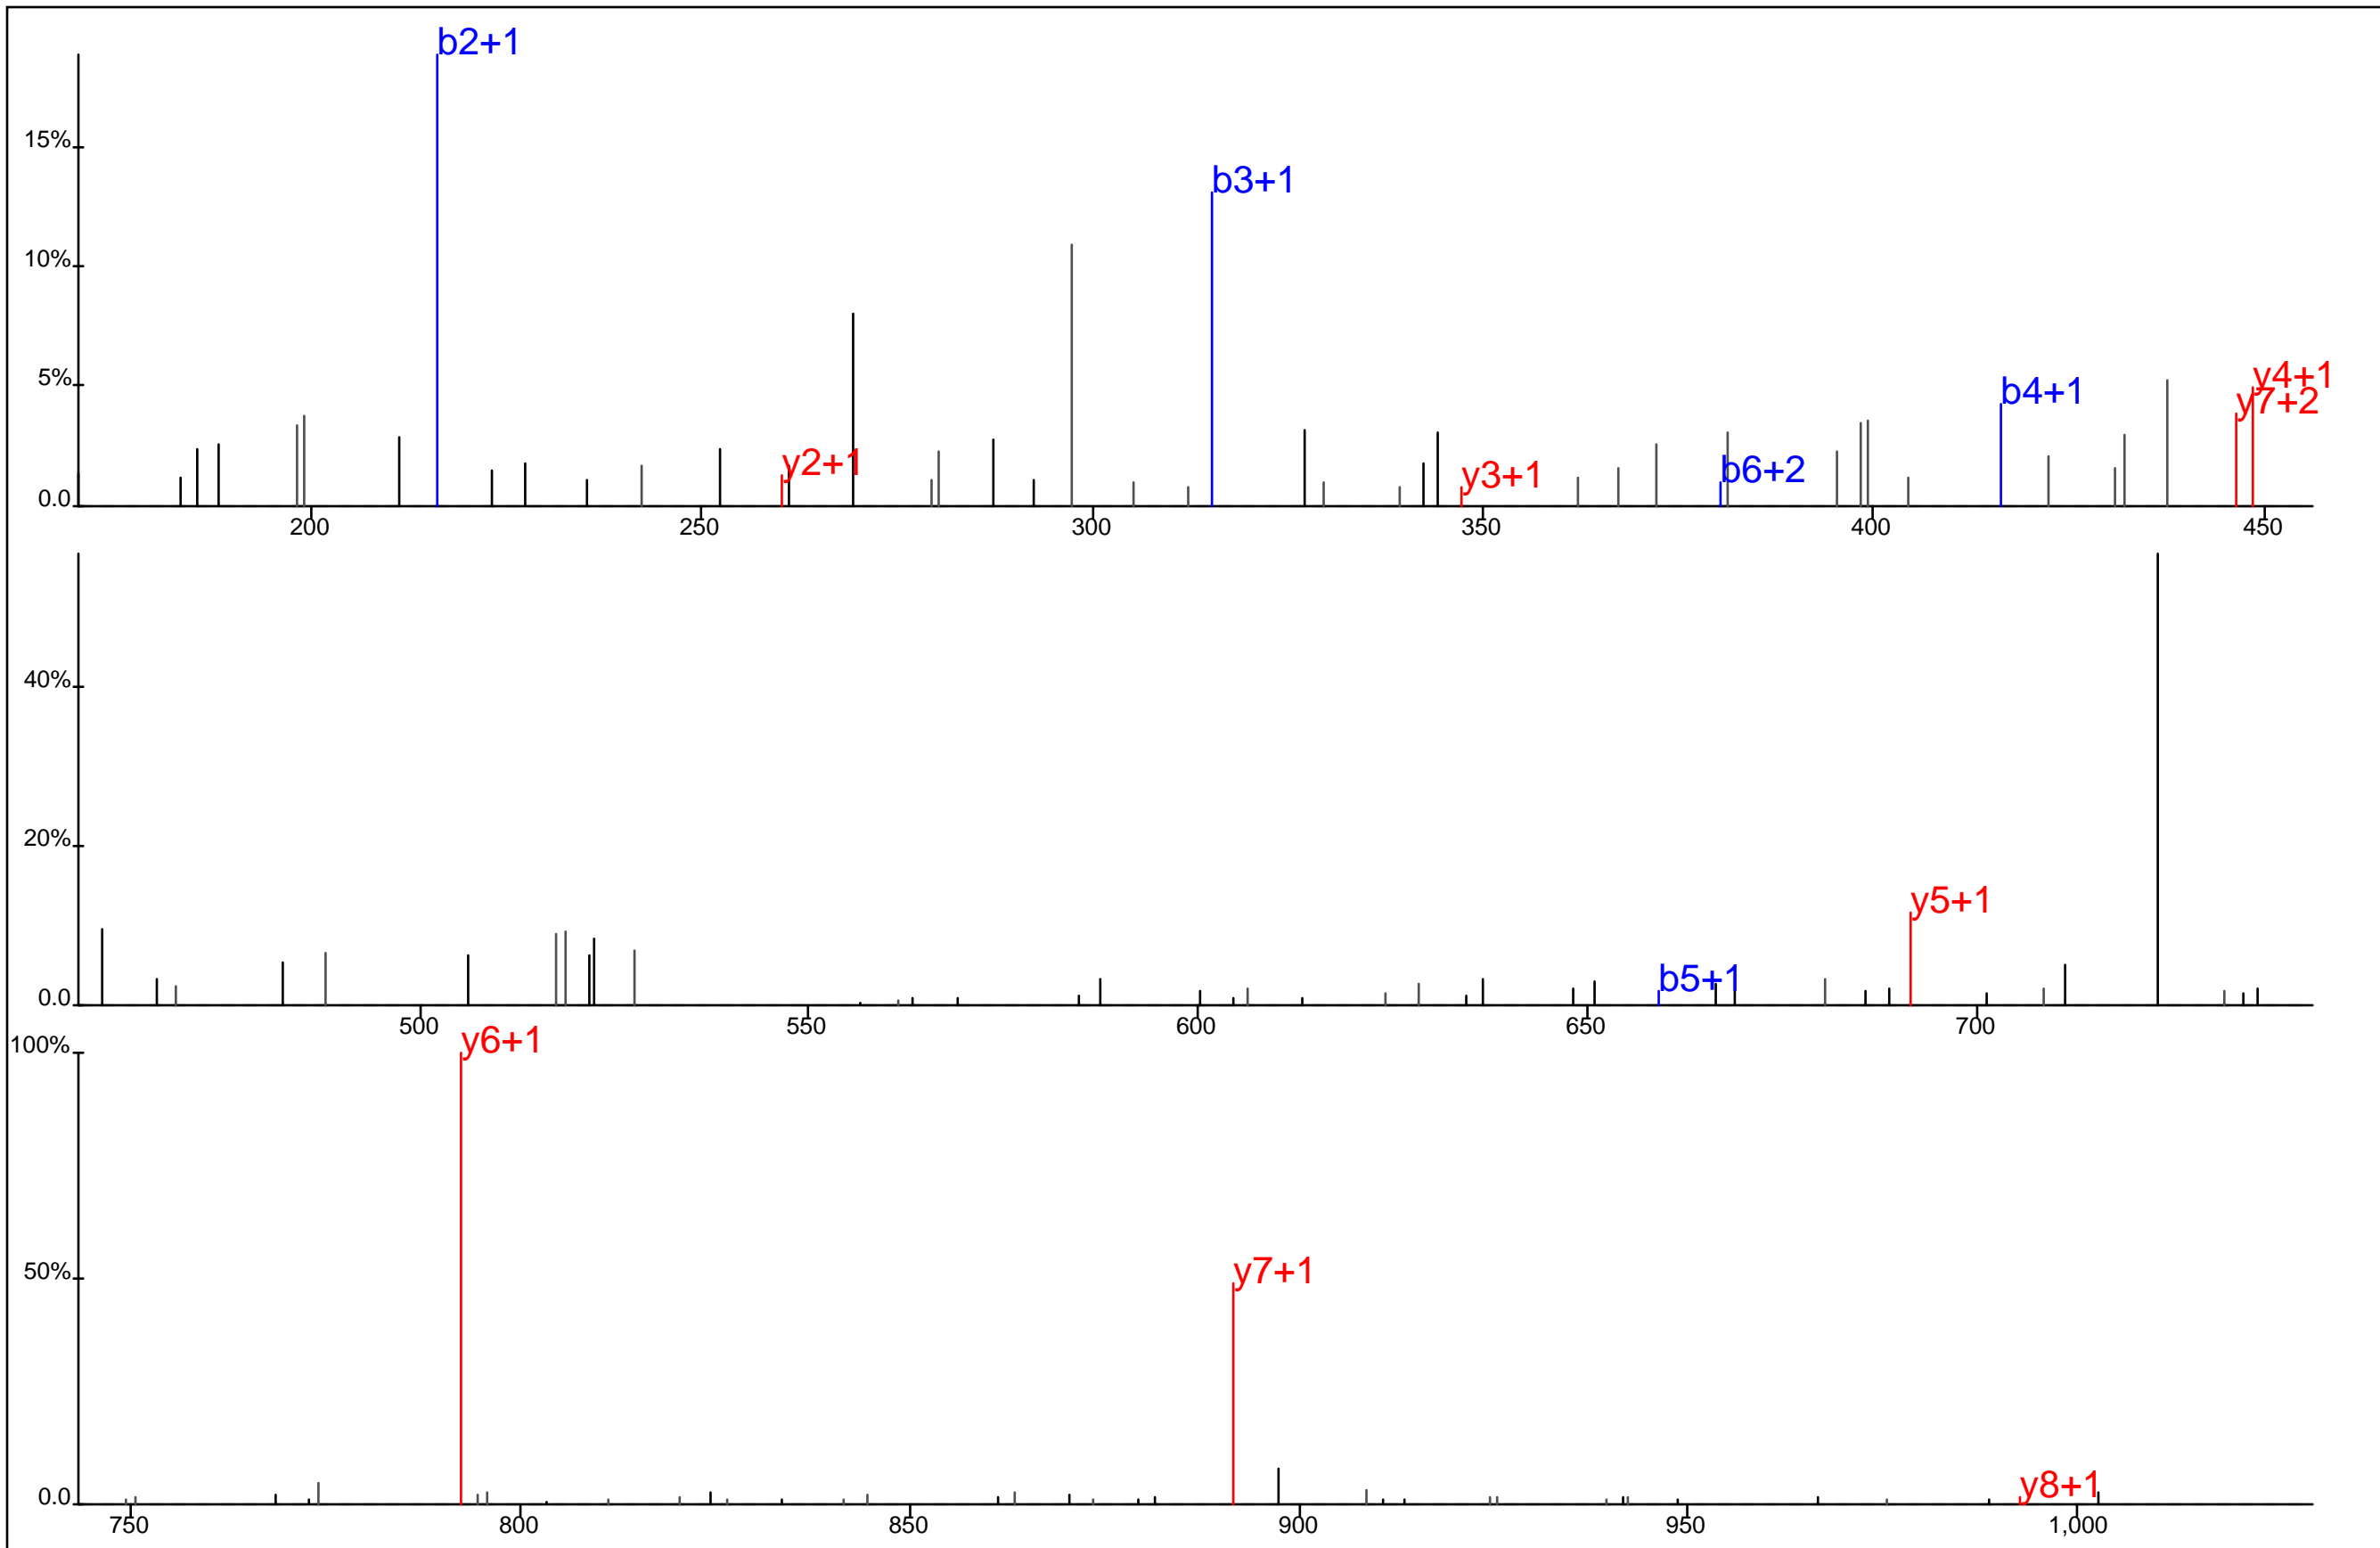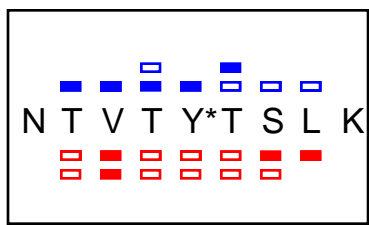

Protein Name: Intracellular membrane associated calcium independent phospholipase A2 gamma  
 gi Accession: 0  
 Precursor Mass: 553.7596+2  
 Delta Mass: 0.822 ppm  
 XCorr: 21.21

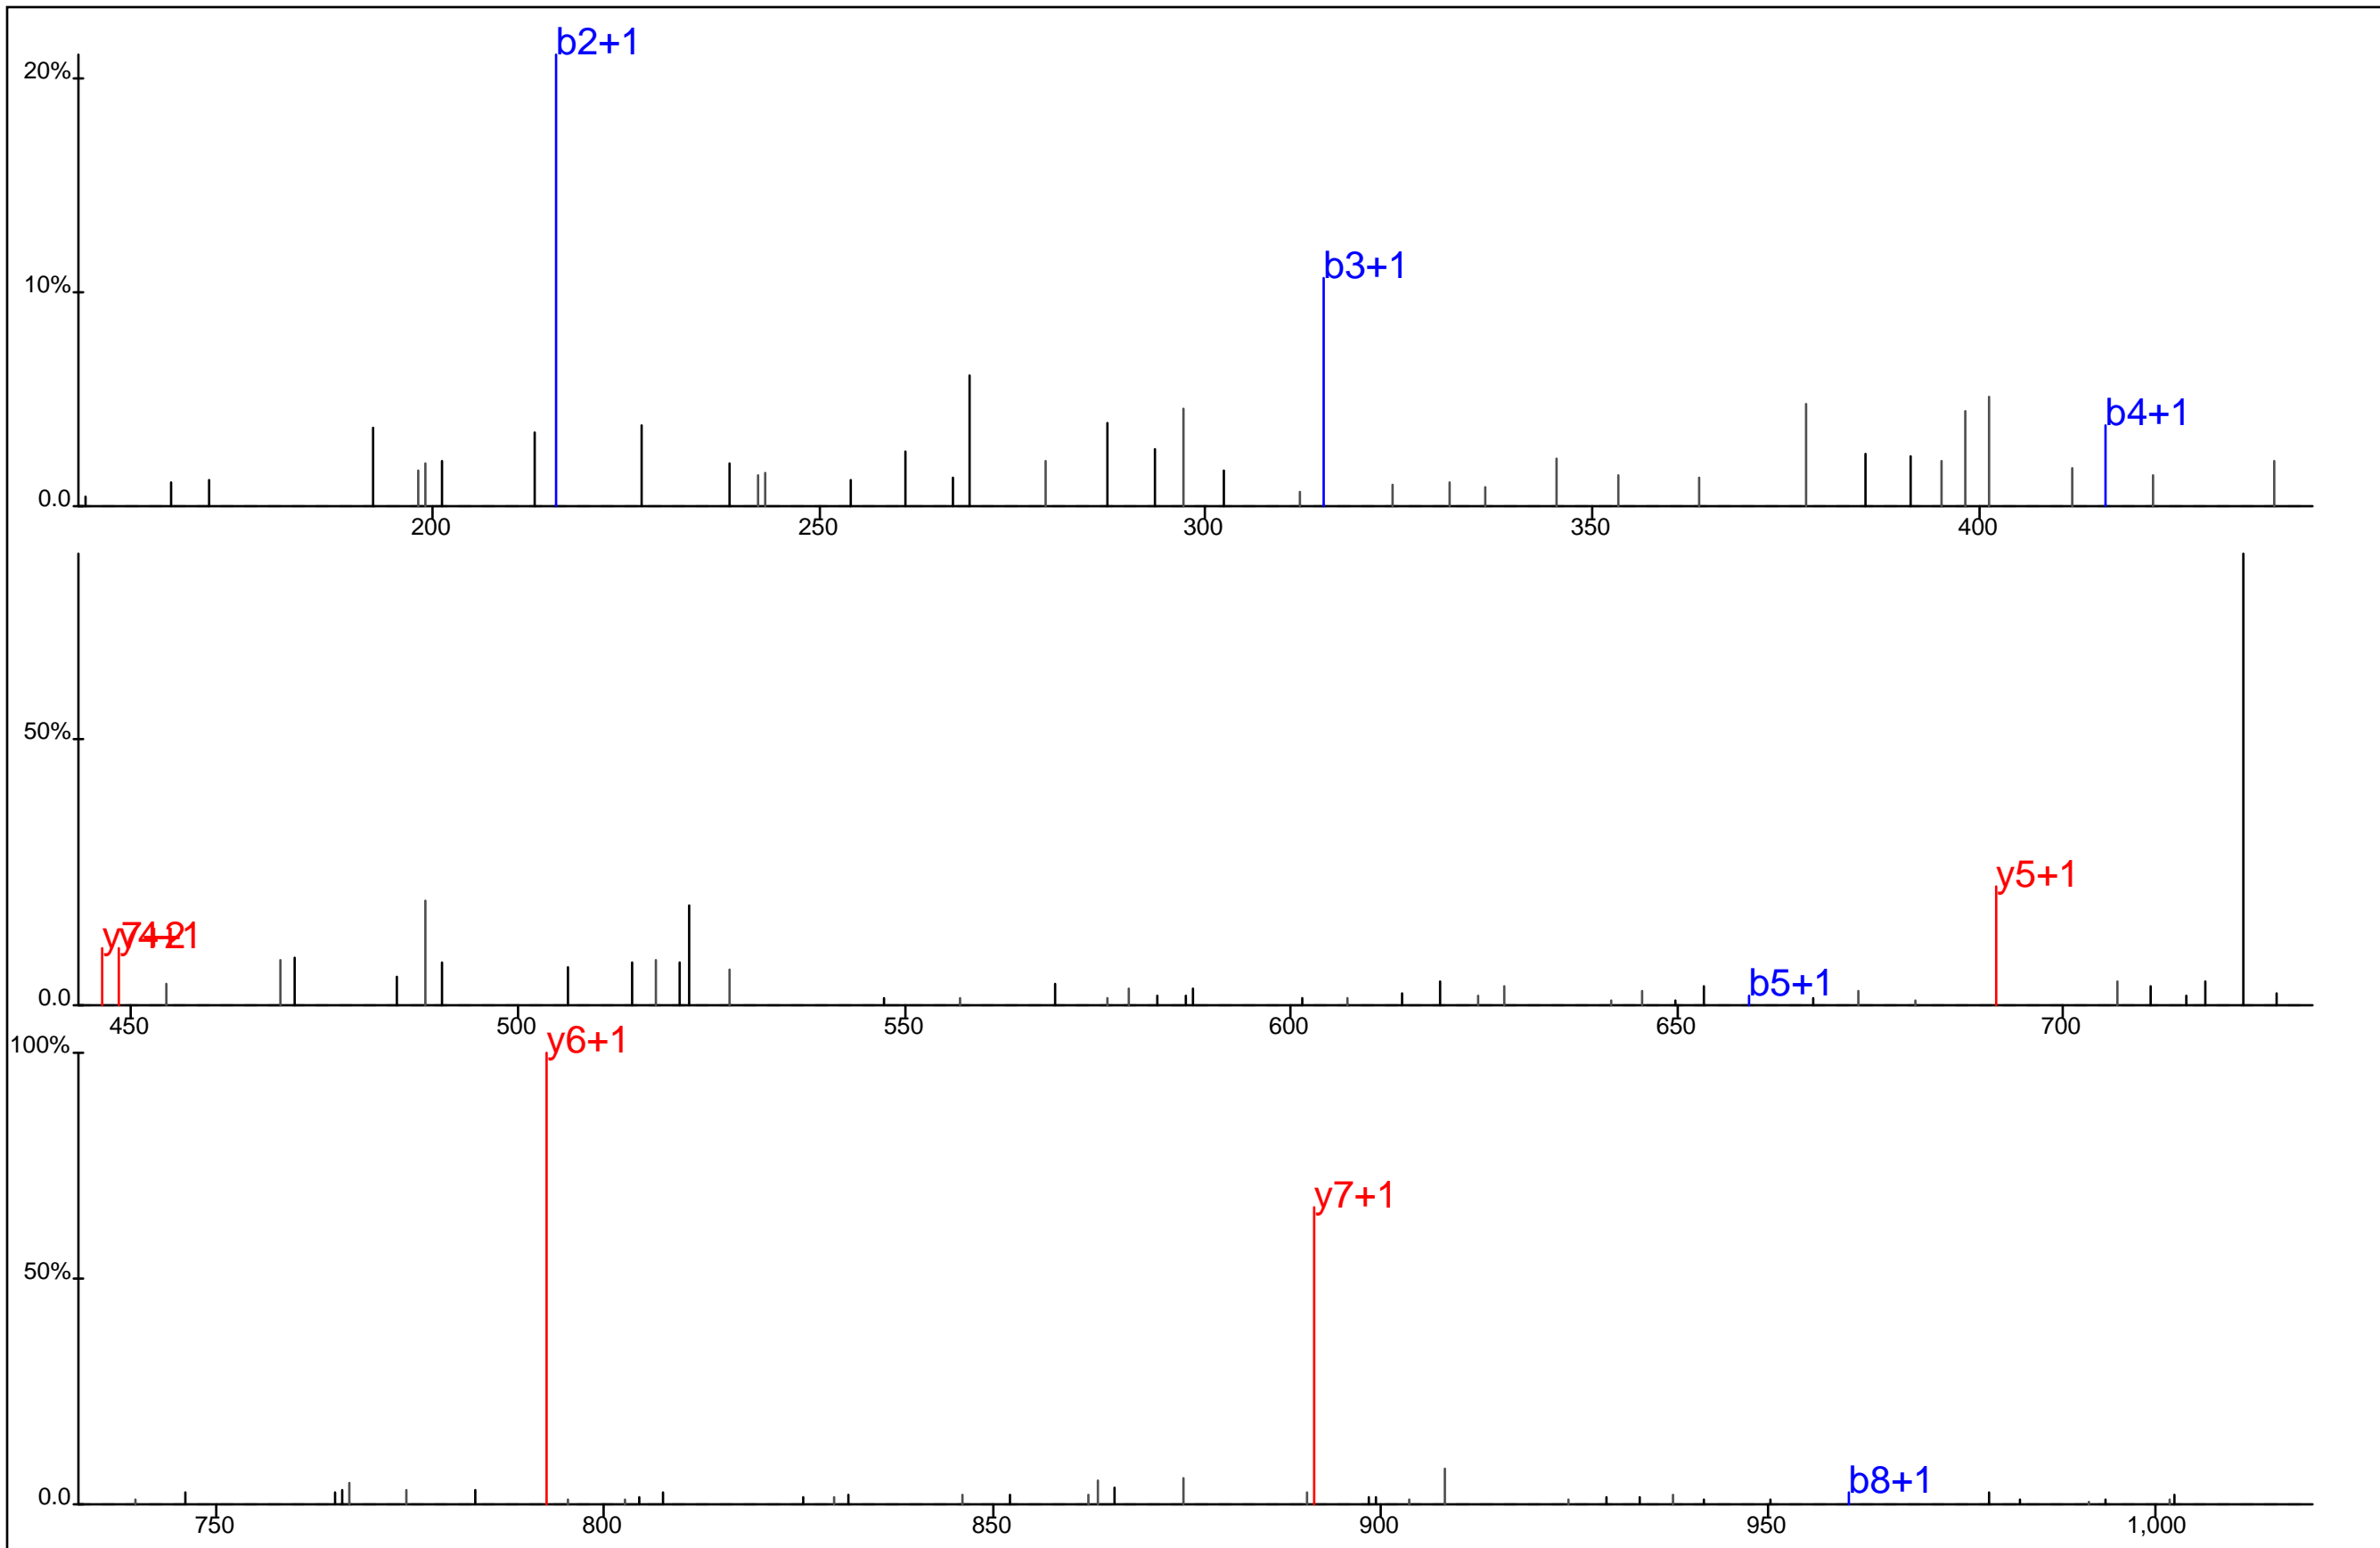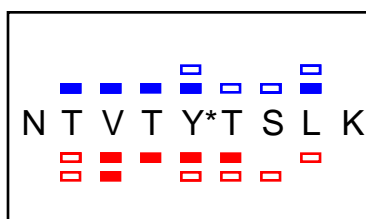

Protein Name: Intracellular membrane associated calcium independent phospholipase A2 gamma  
 gi Accession: 0  
 Precursor Mass: 553.7600+2  
 Delta Mass: 0.179 ppm  
 XCorr: 23.88

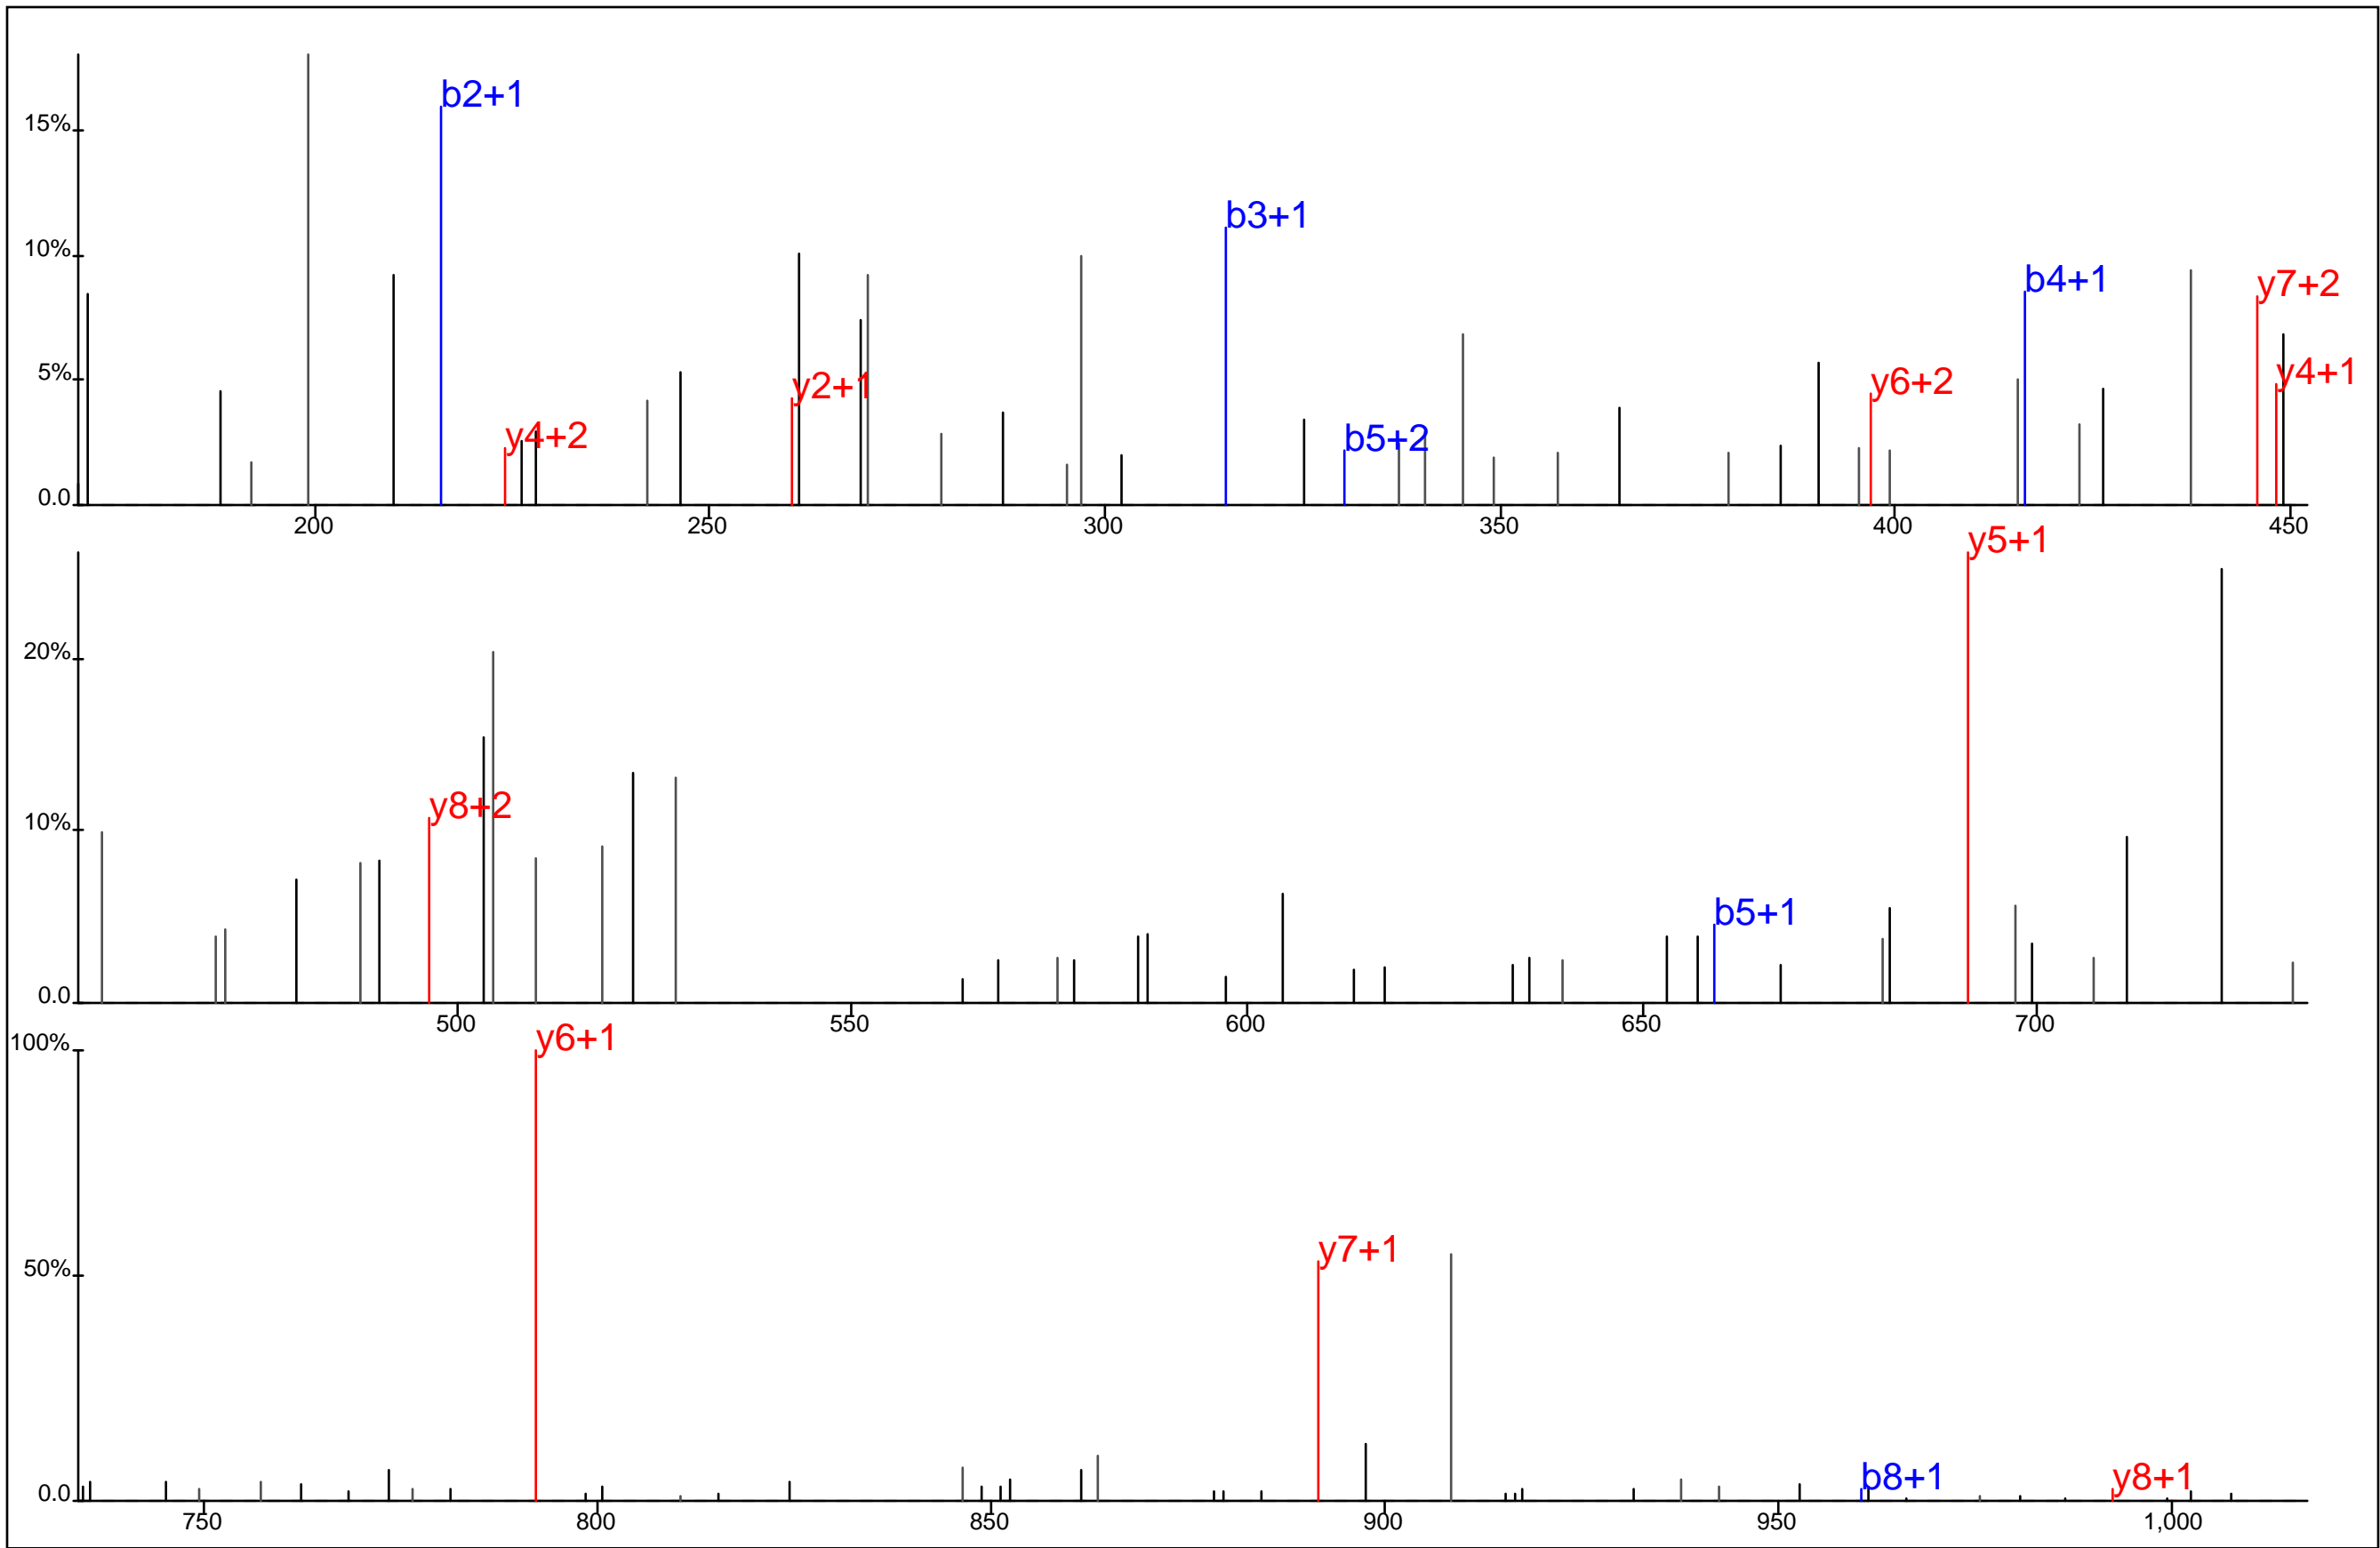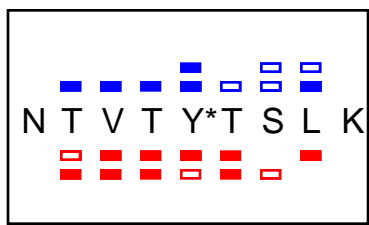

Protein Name: Intracellular membrane associated calcium independent phospholipase A2 gamma  
 gi Accession: 0  
 Precursor Mass: 553.7599+2  
 Delta Mass: 0.271 ppm  
 XCorr: 20.28





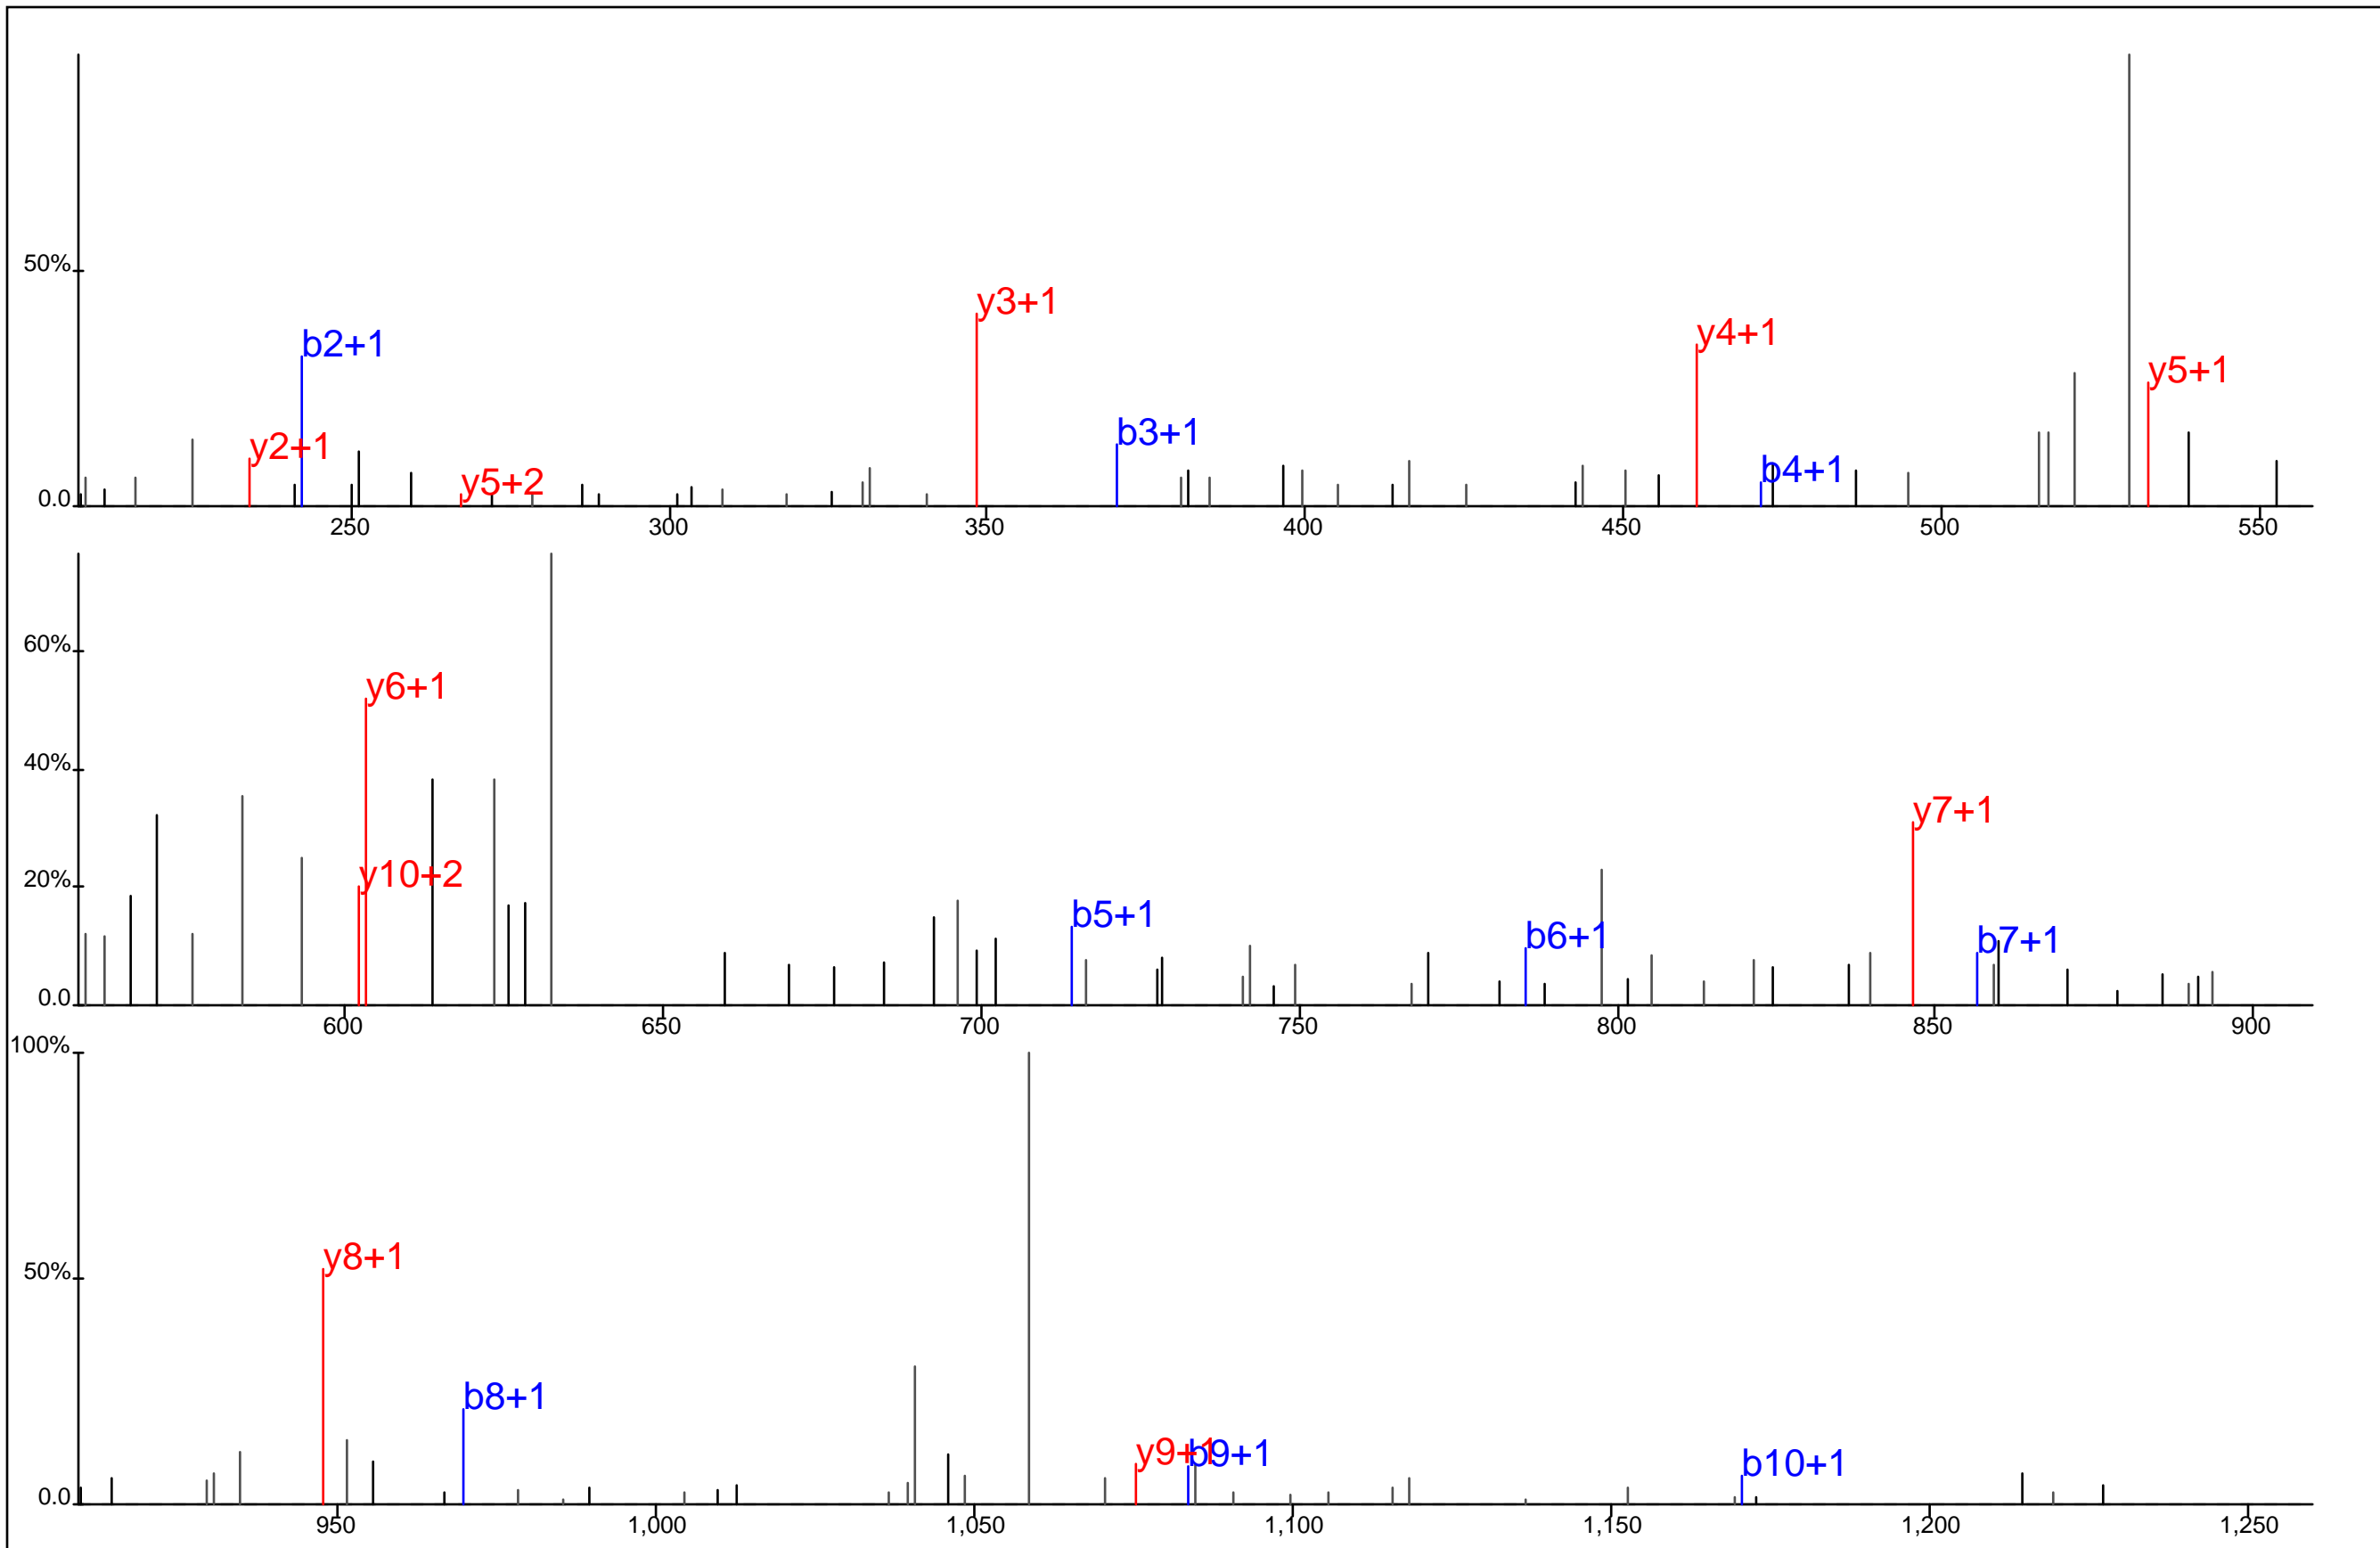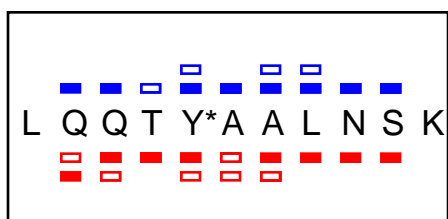

Protein Name: IQ motif containing GTPase activating protein 1  
 gi Accession: 0  
 Precursor Mass: 658.8178+2  
 Delta Mass: 2.865 ppm  
 XCorr: 42.26

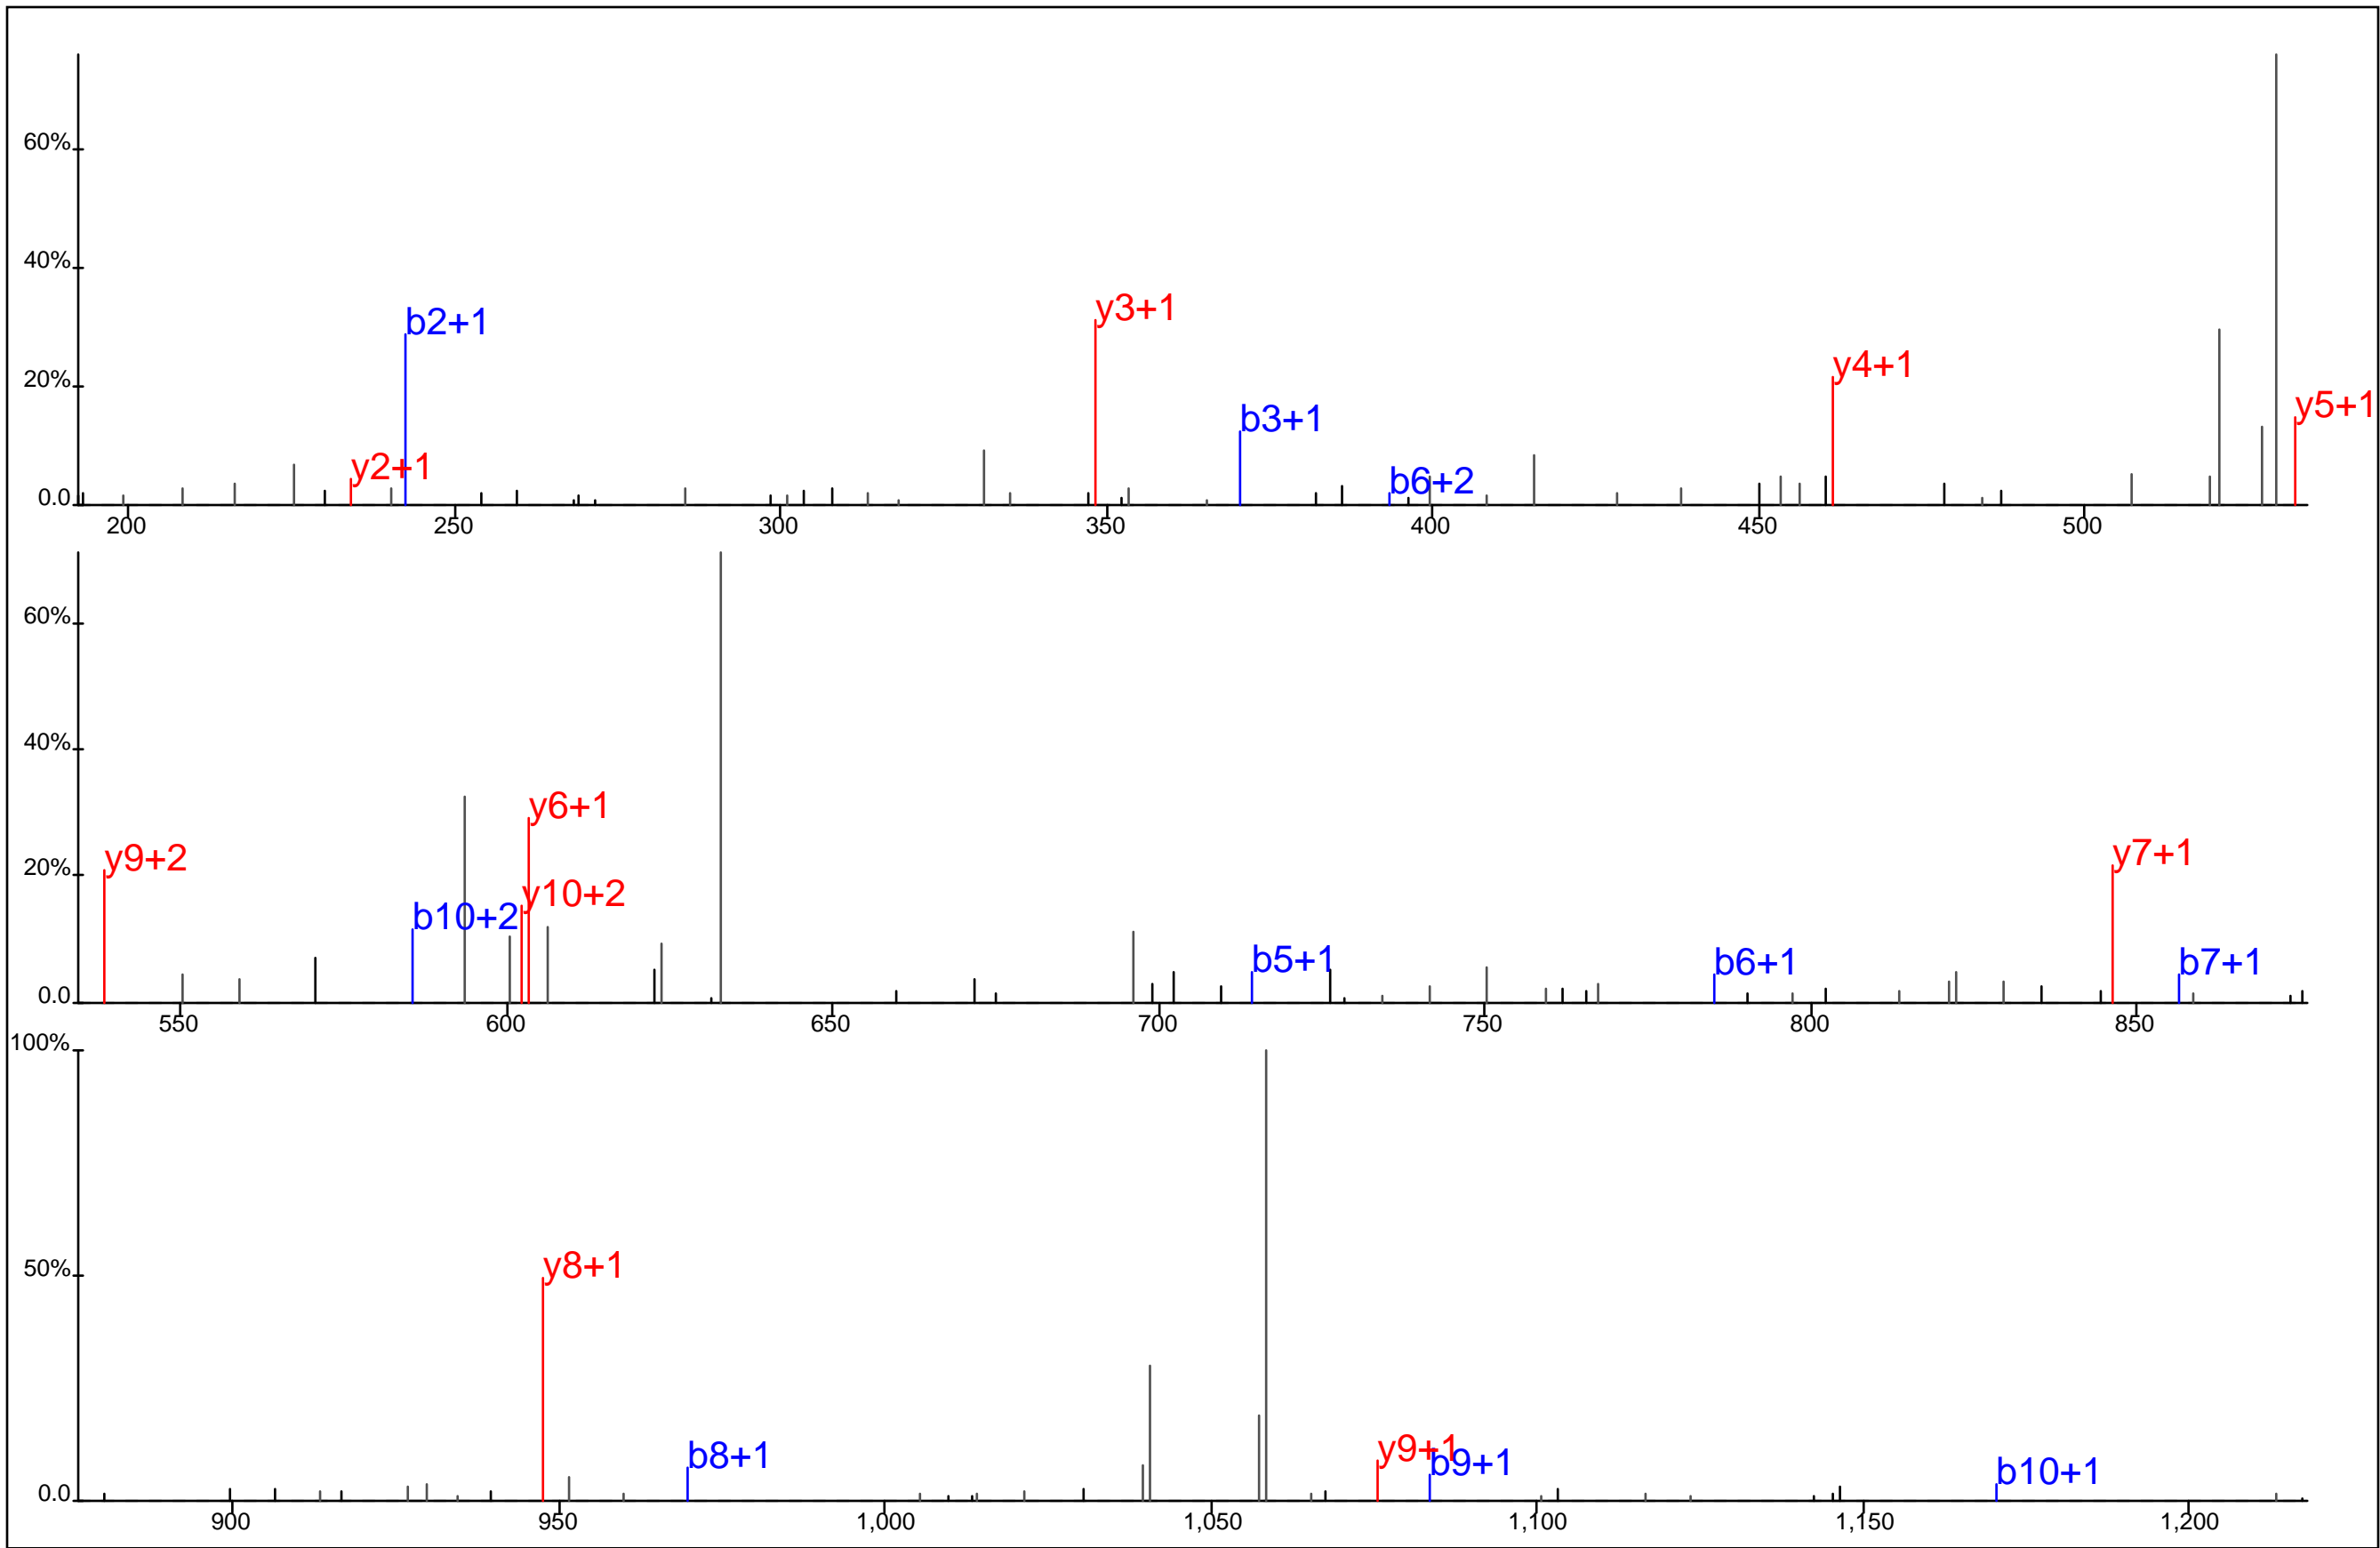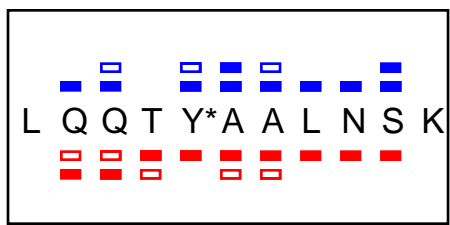

Protein Name: IQ motif containing GTPase activating protein 1  
 gi Accession: 0  
 Precursor Mass: 658.8168+2  
 Delta Mass: 1.288 ppm  
 XCorr: 48.87

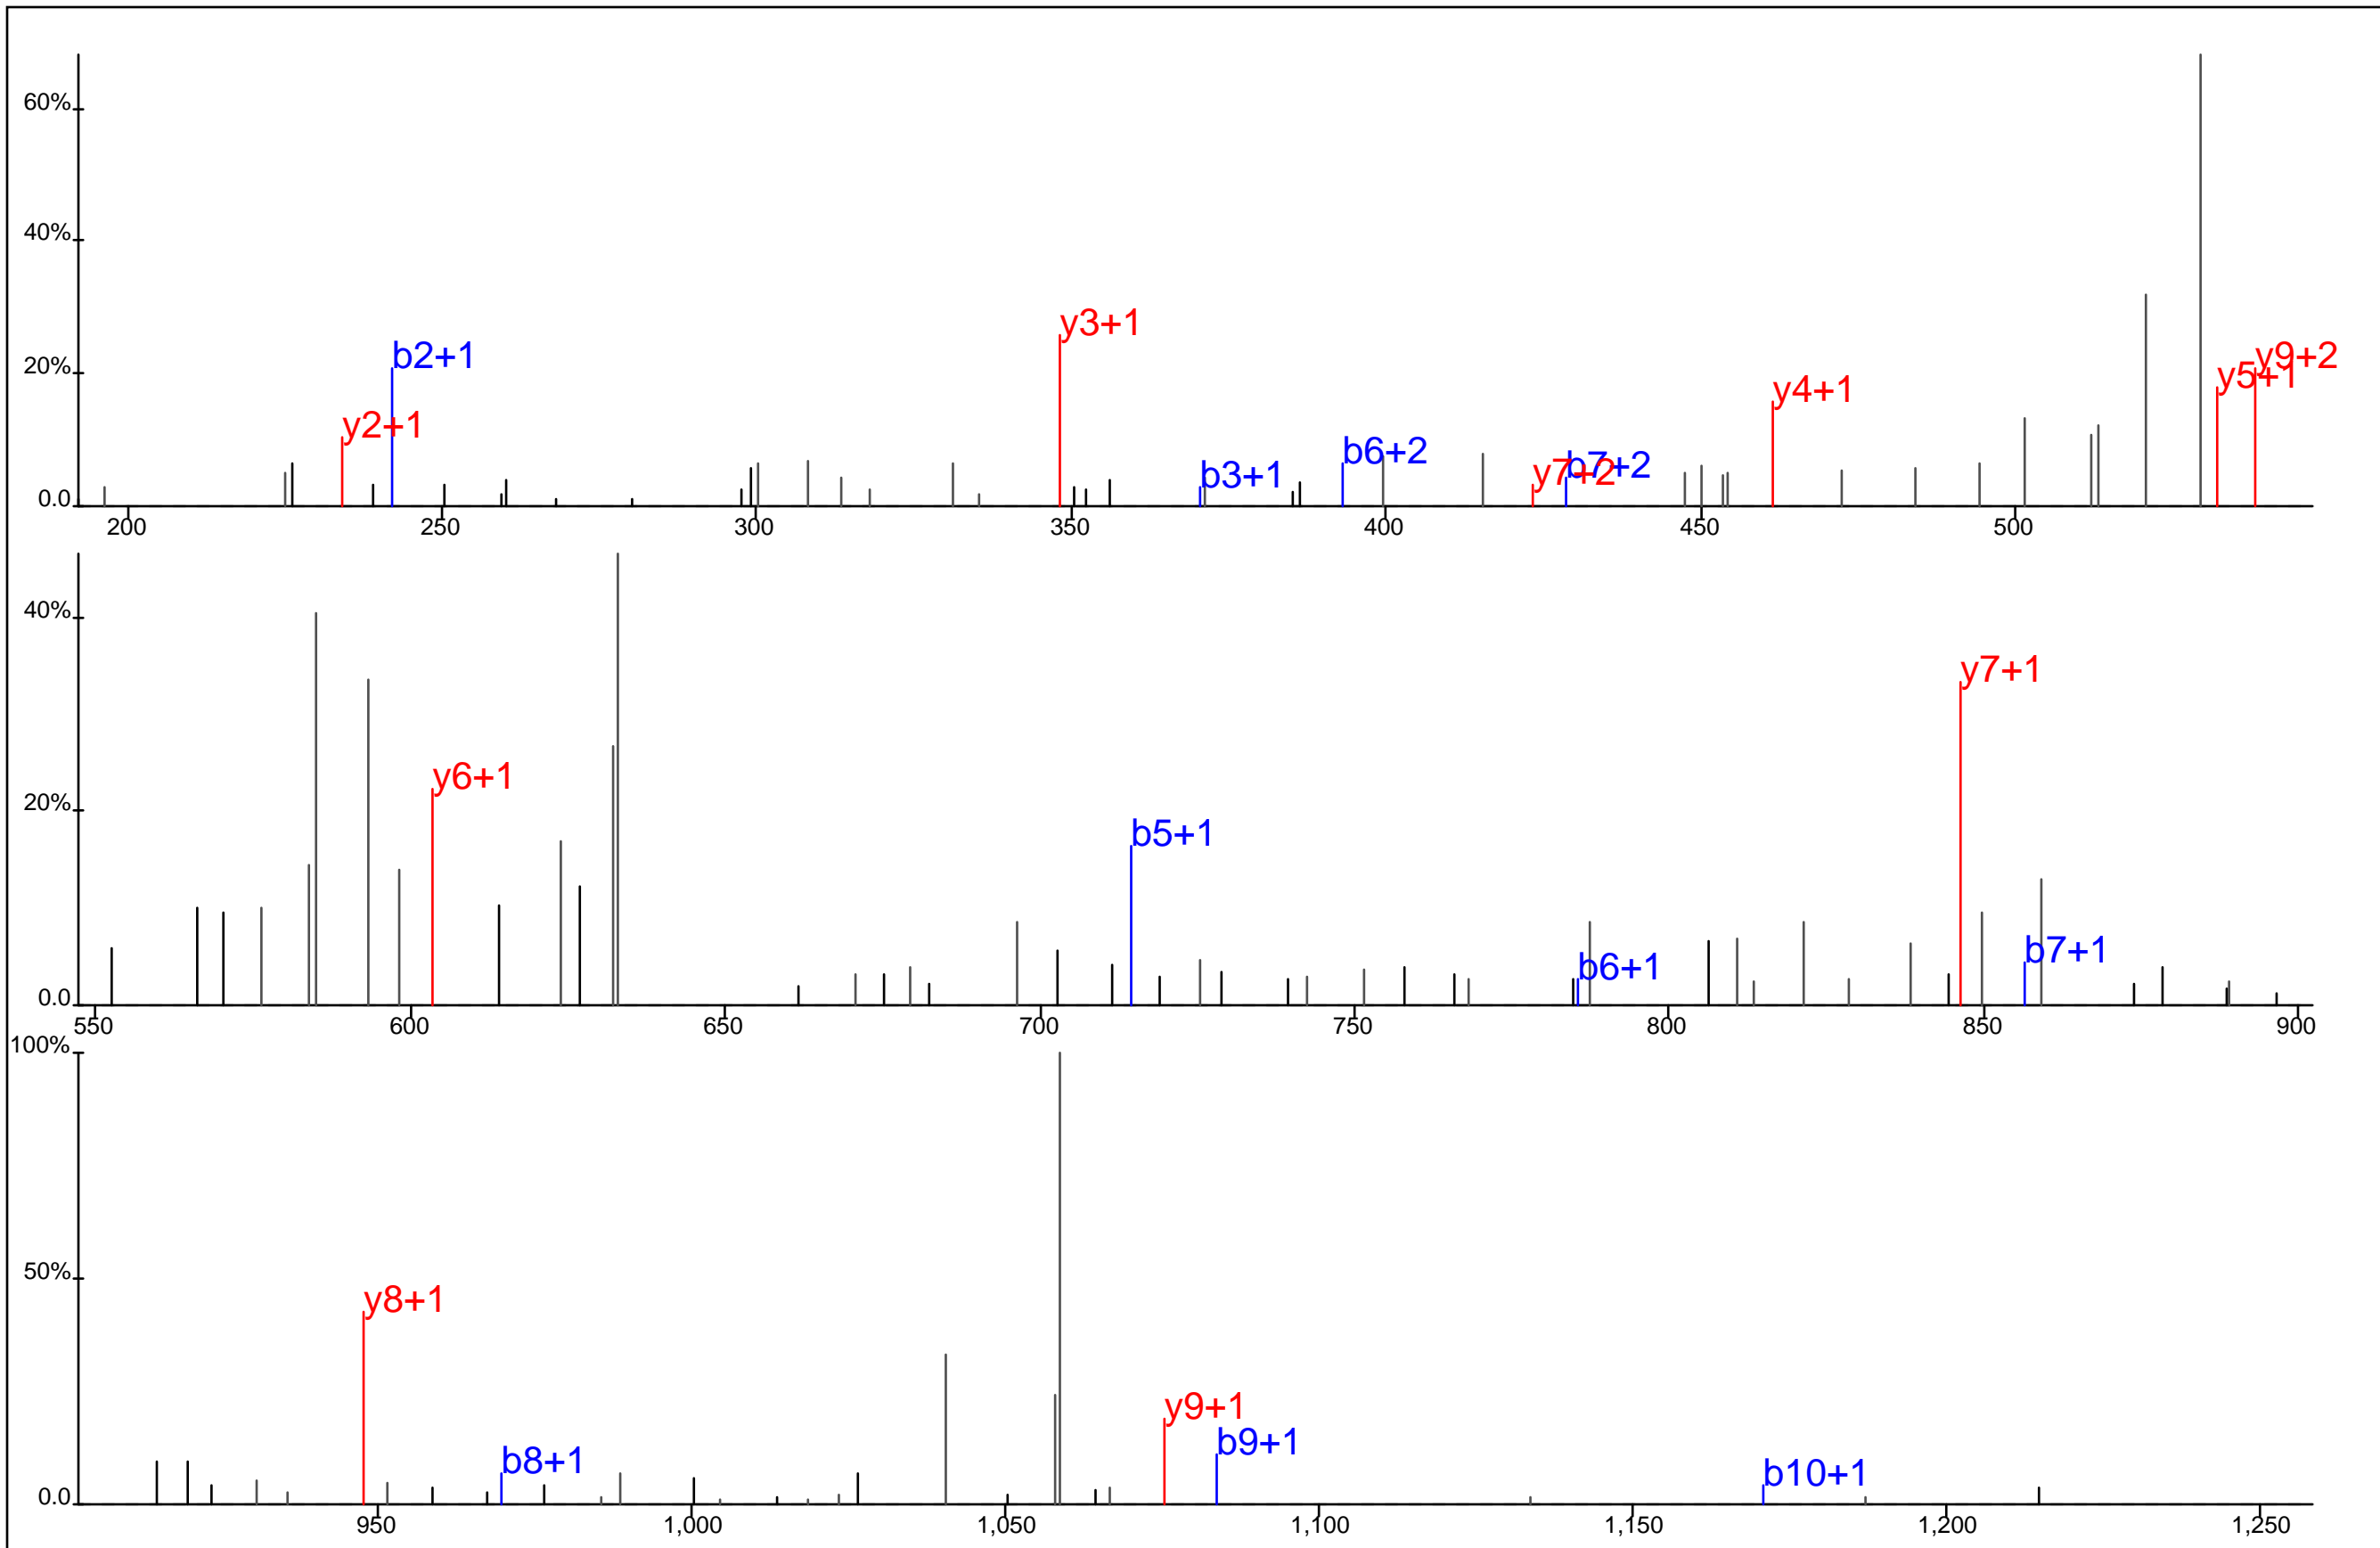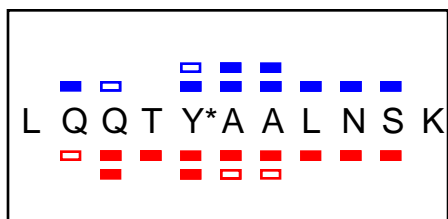

Protein Name: IQ motif containing GTPase activating protein 1  
 gi Accession: 0  
 Precursor Mass: 658.8147+2  
 Delta Mass: 1.864 ppm  
 XCorr: 40.92



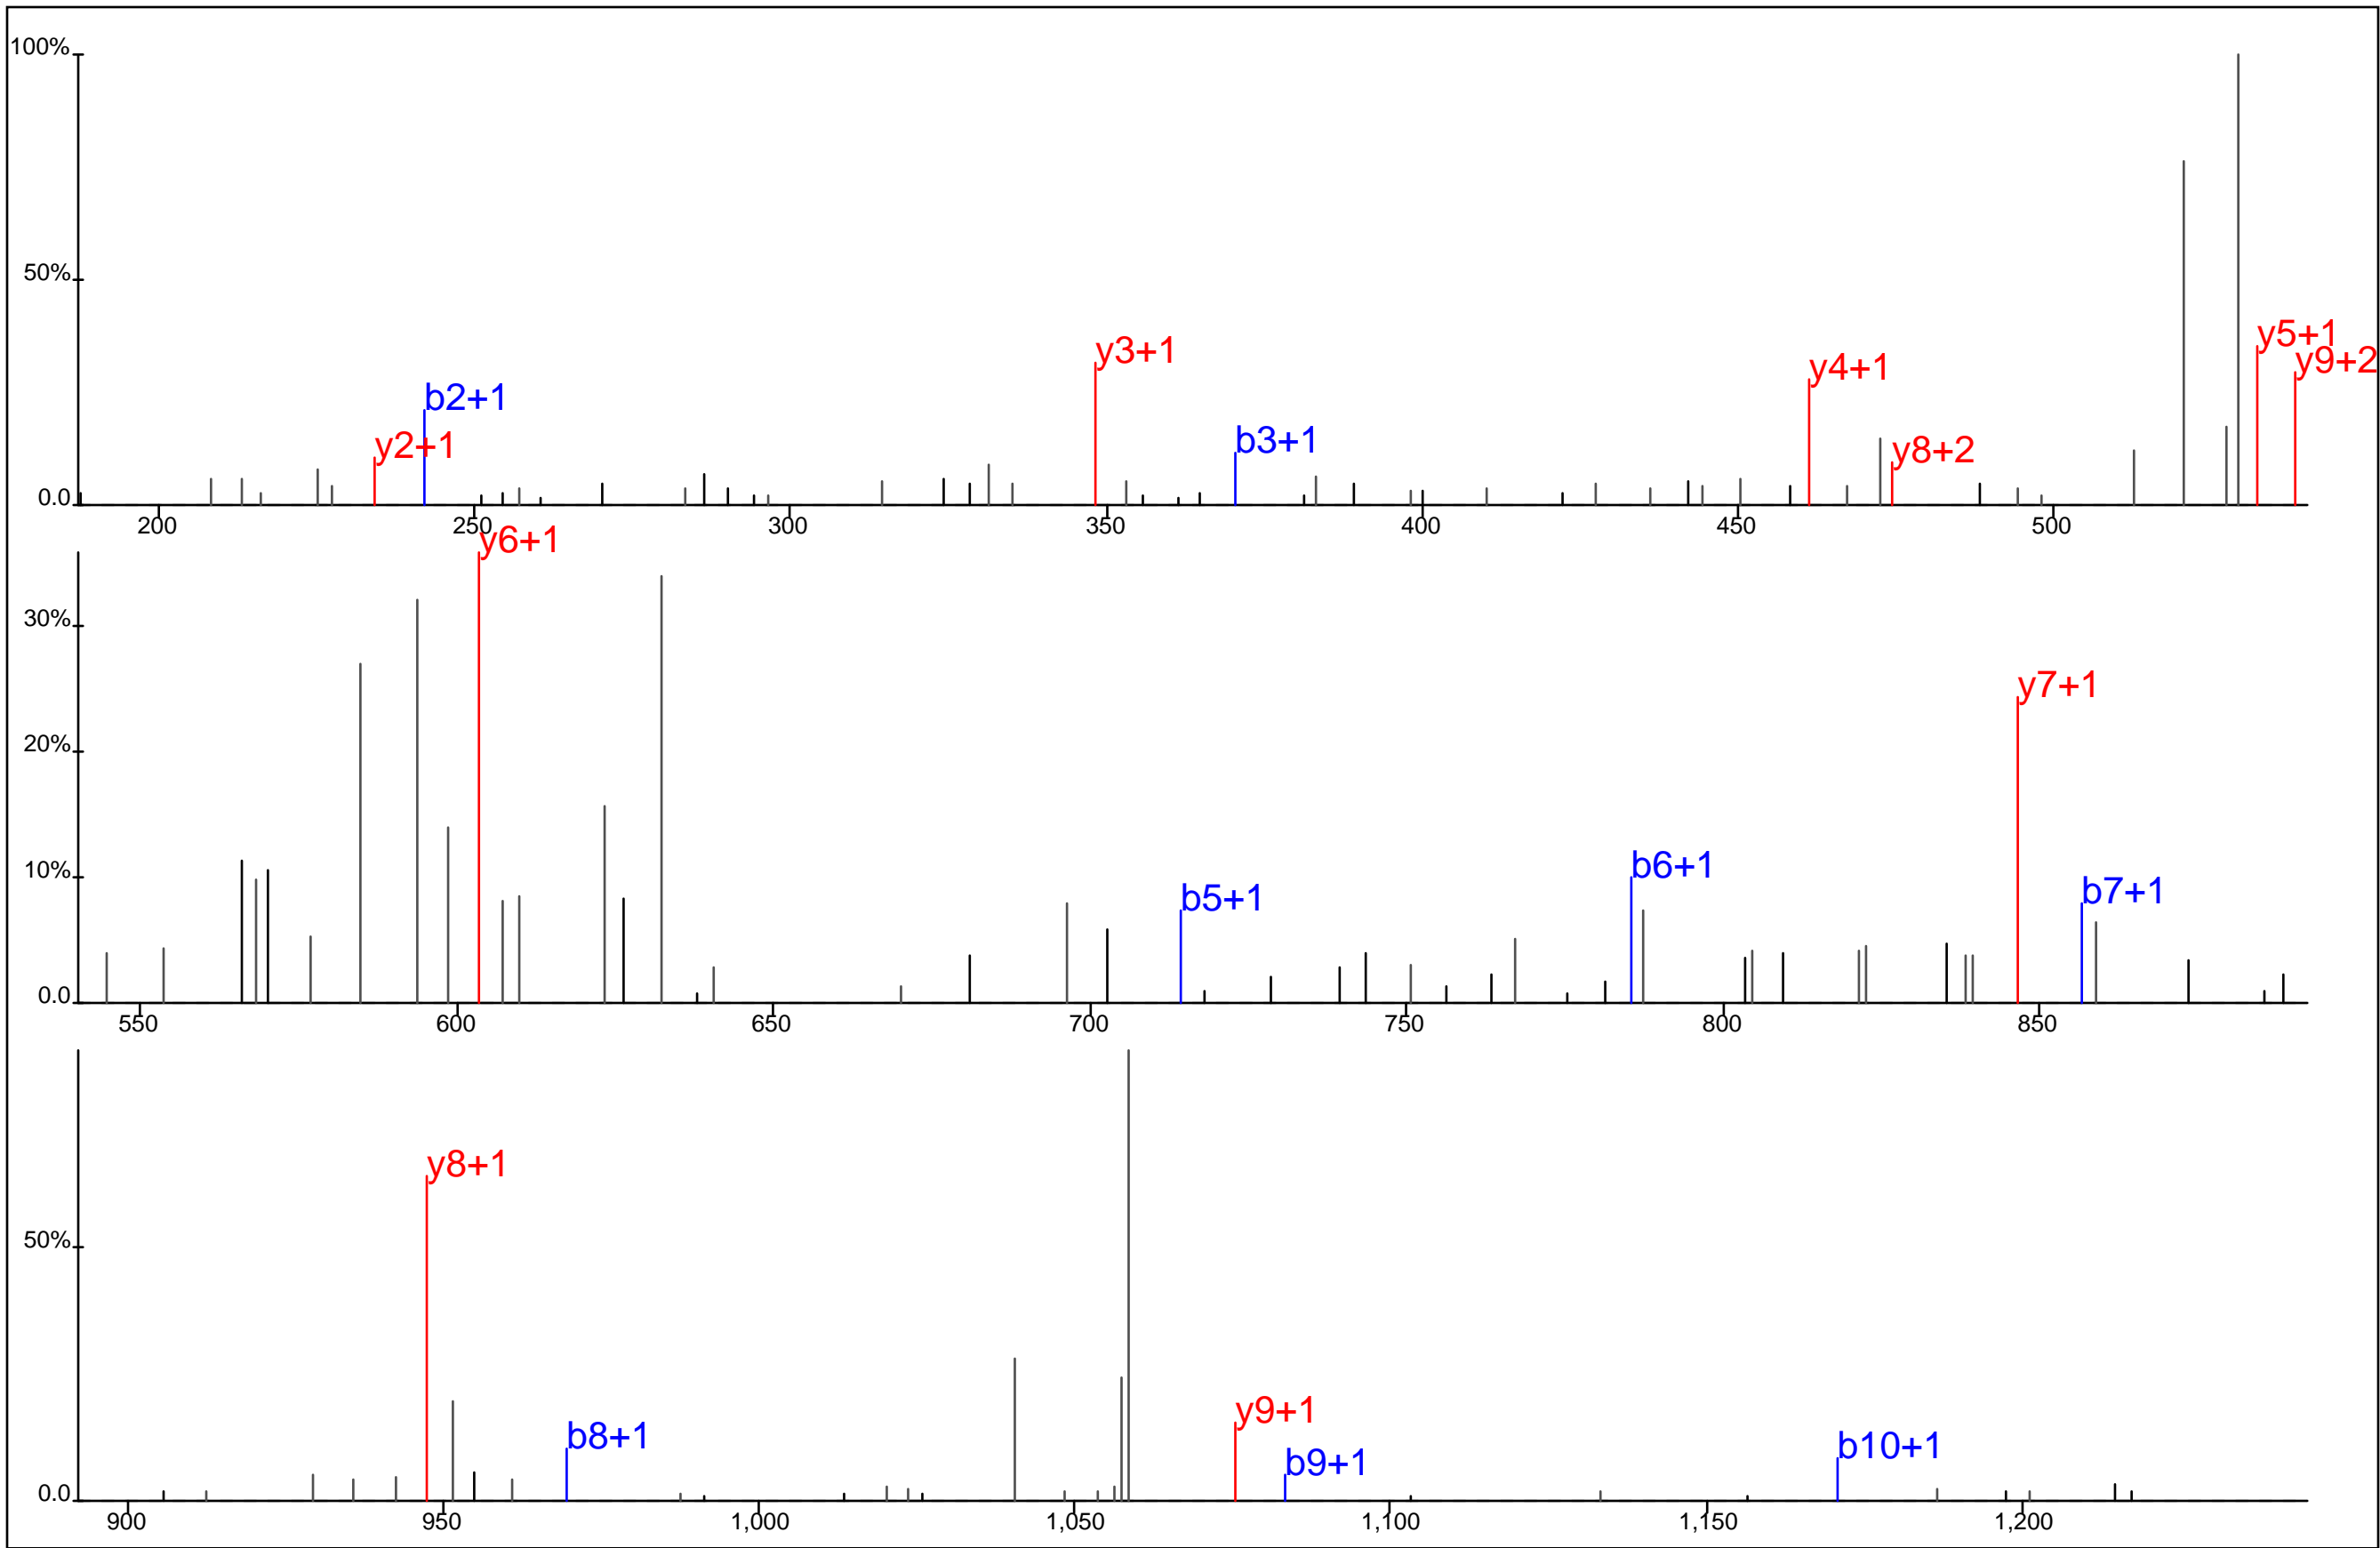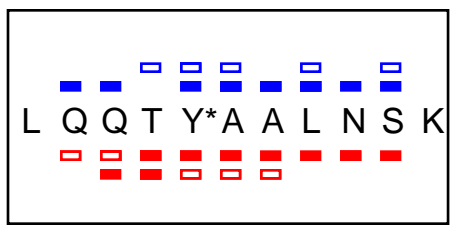

Protein Name: IQ motif containing GTPase activating protein 1  
 gi Accession: 0  
 Precursor Mass: 658.8161+2  
 Delta Mass: 0.269 ppm  
 XCorr: 57.1



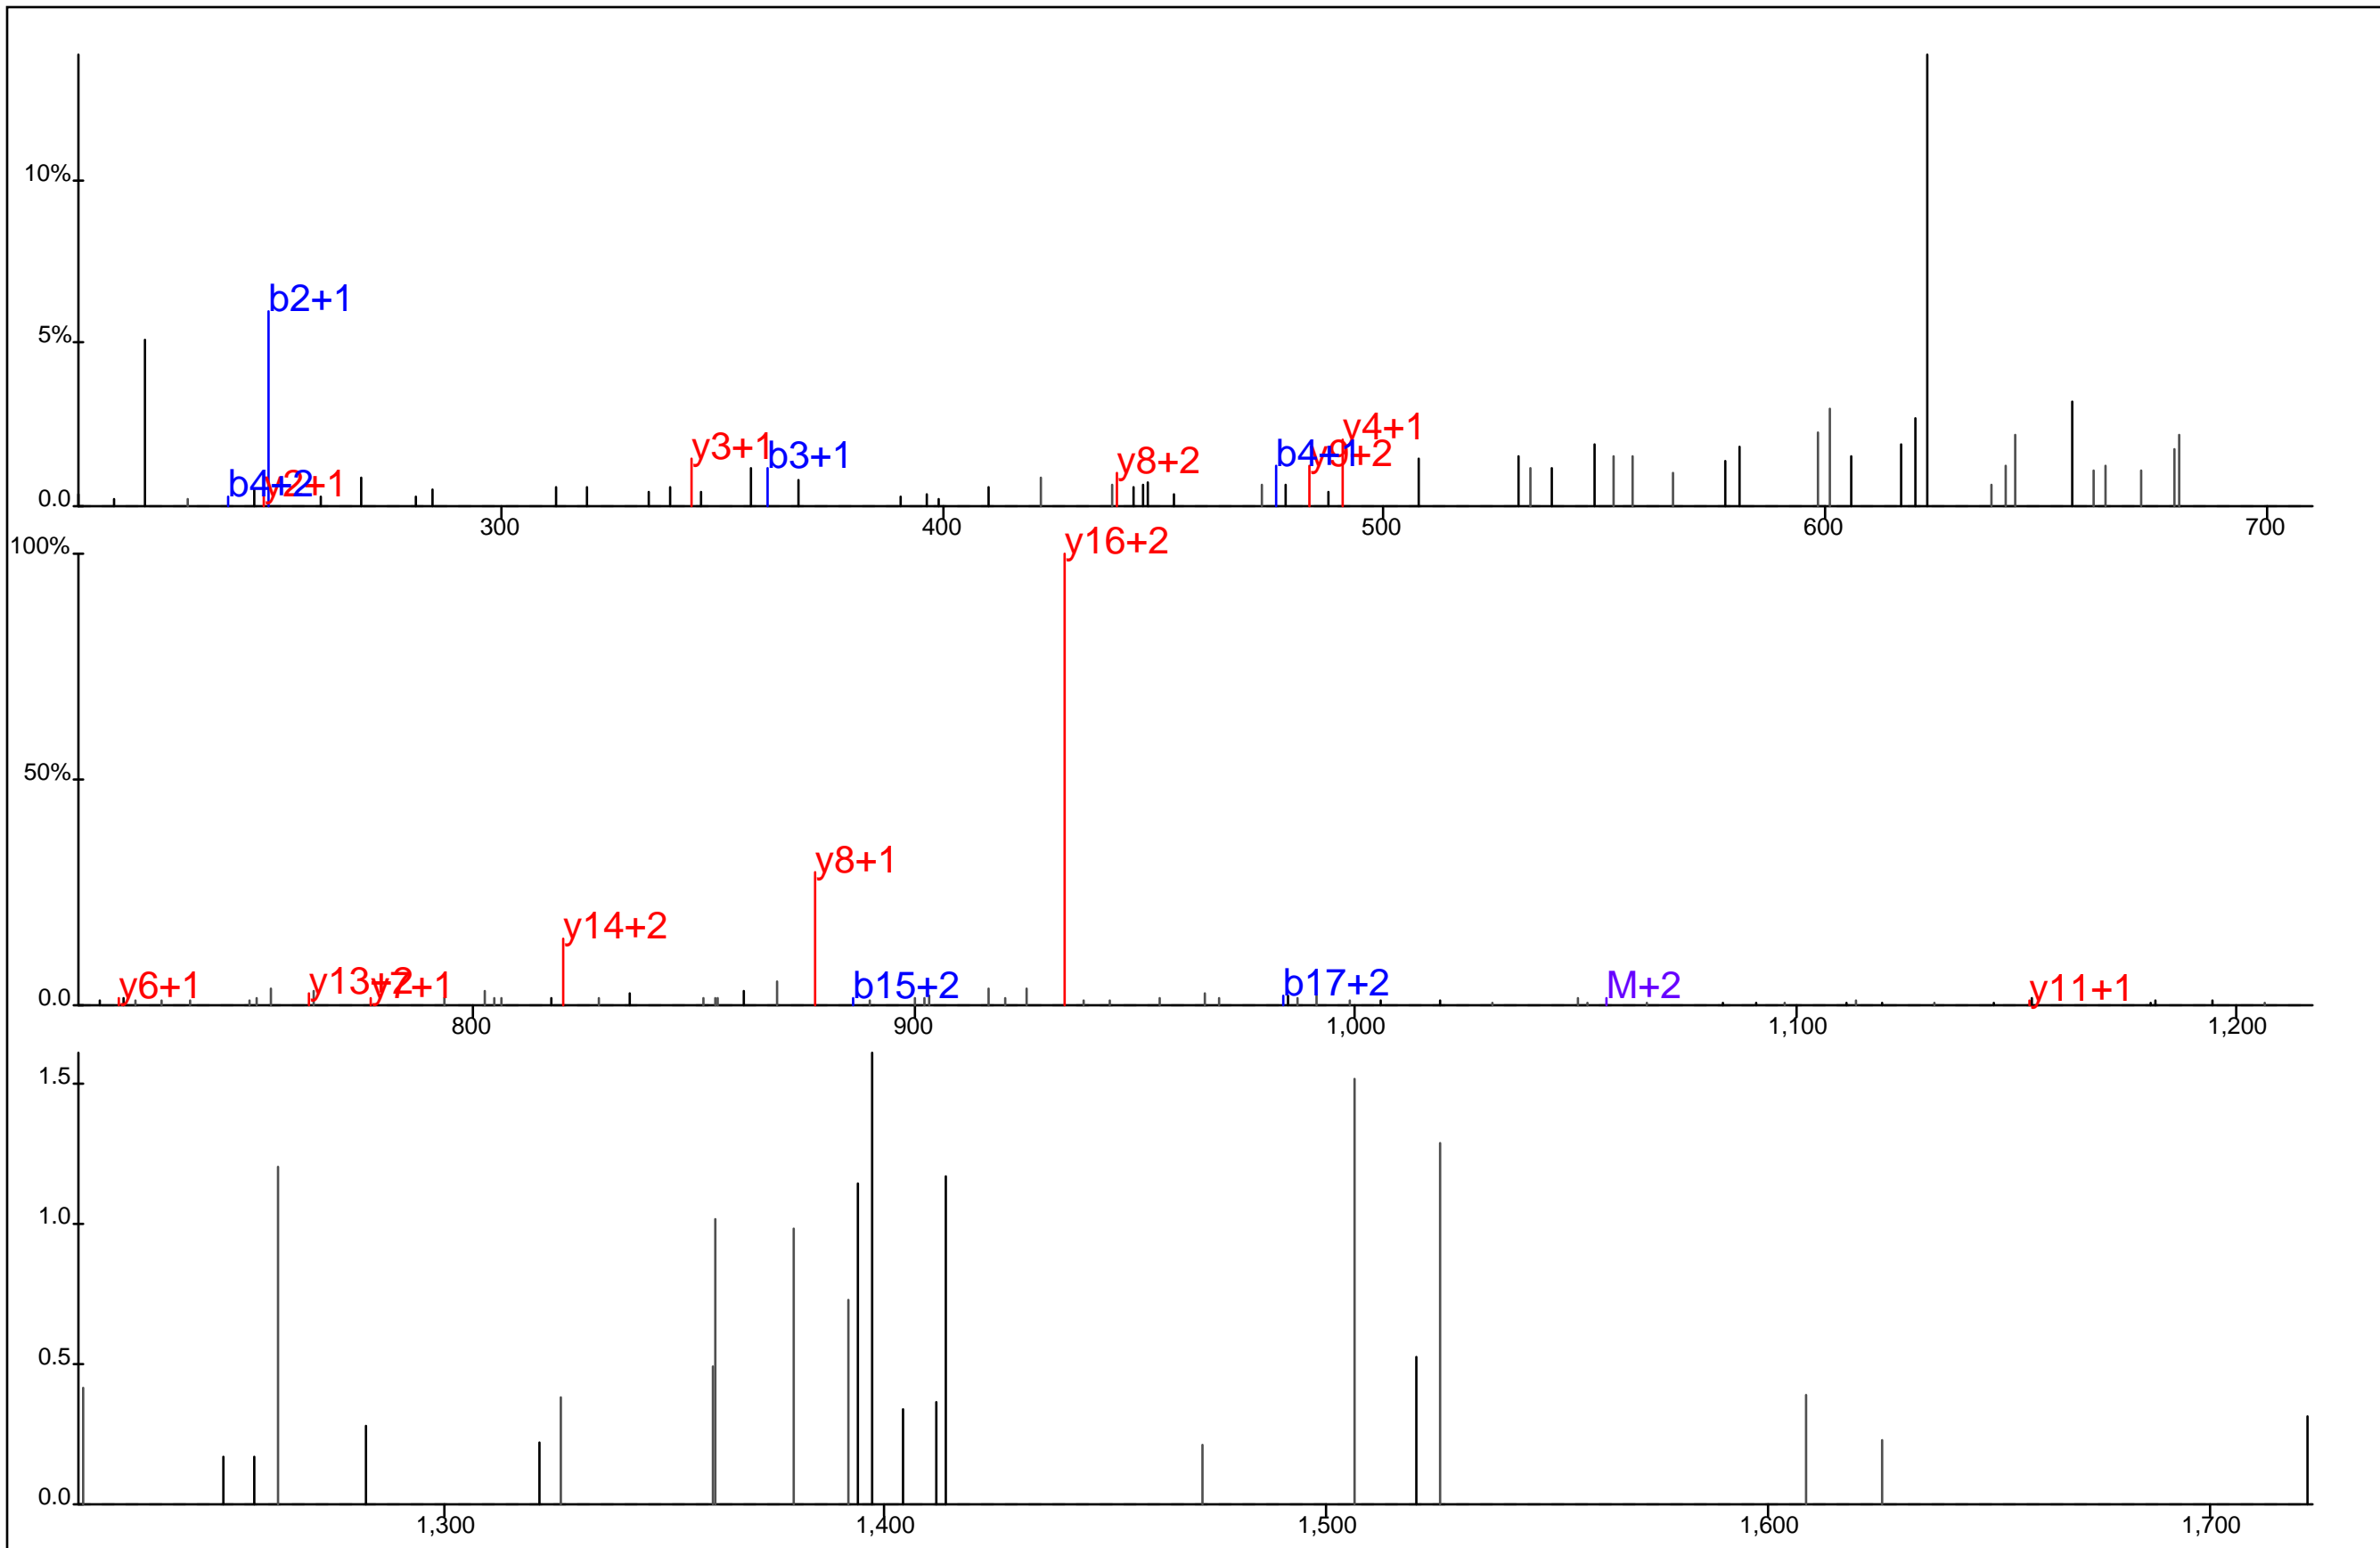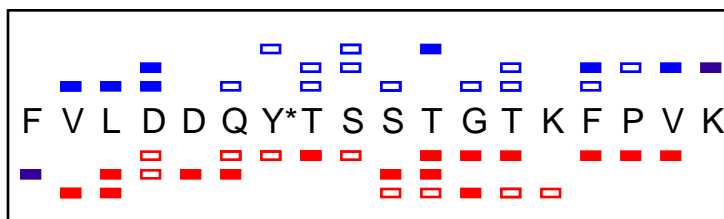

Protein Name: ITK  
 gi Accession: 0  
 Precursor Mass: 705.0006+3  
 Delta Mass: 0.792 ppm  
 XCorr: 23.3

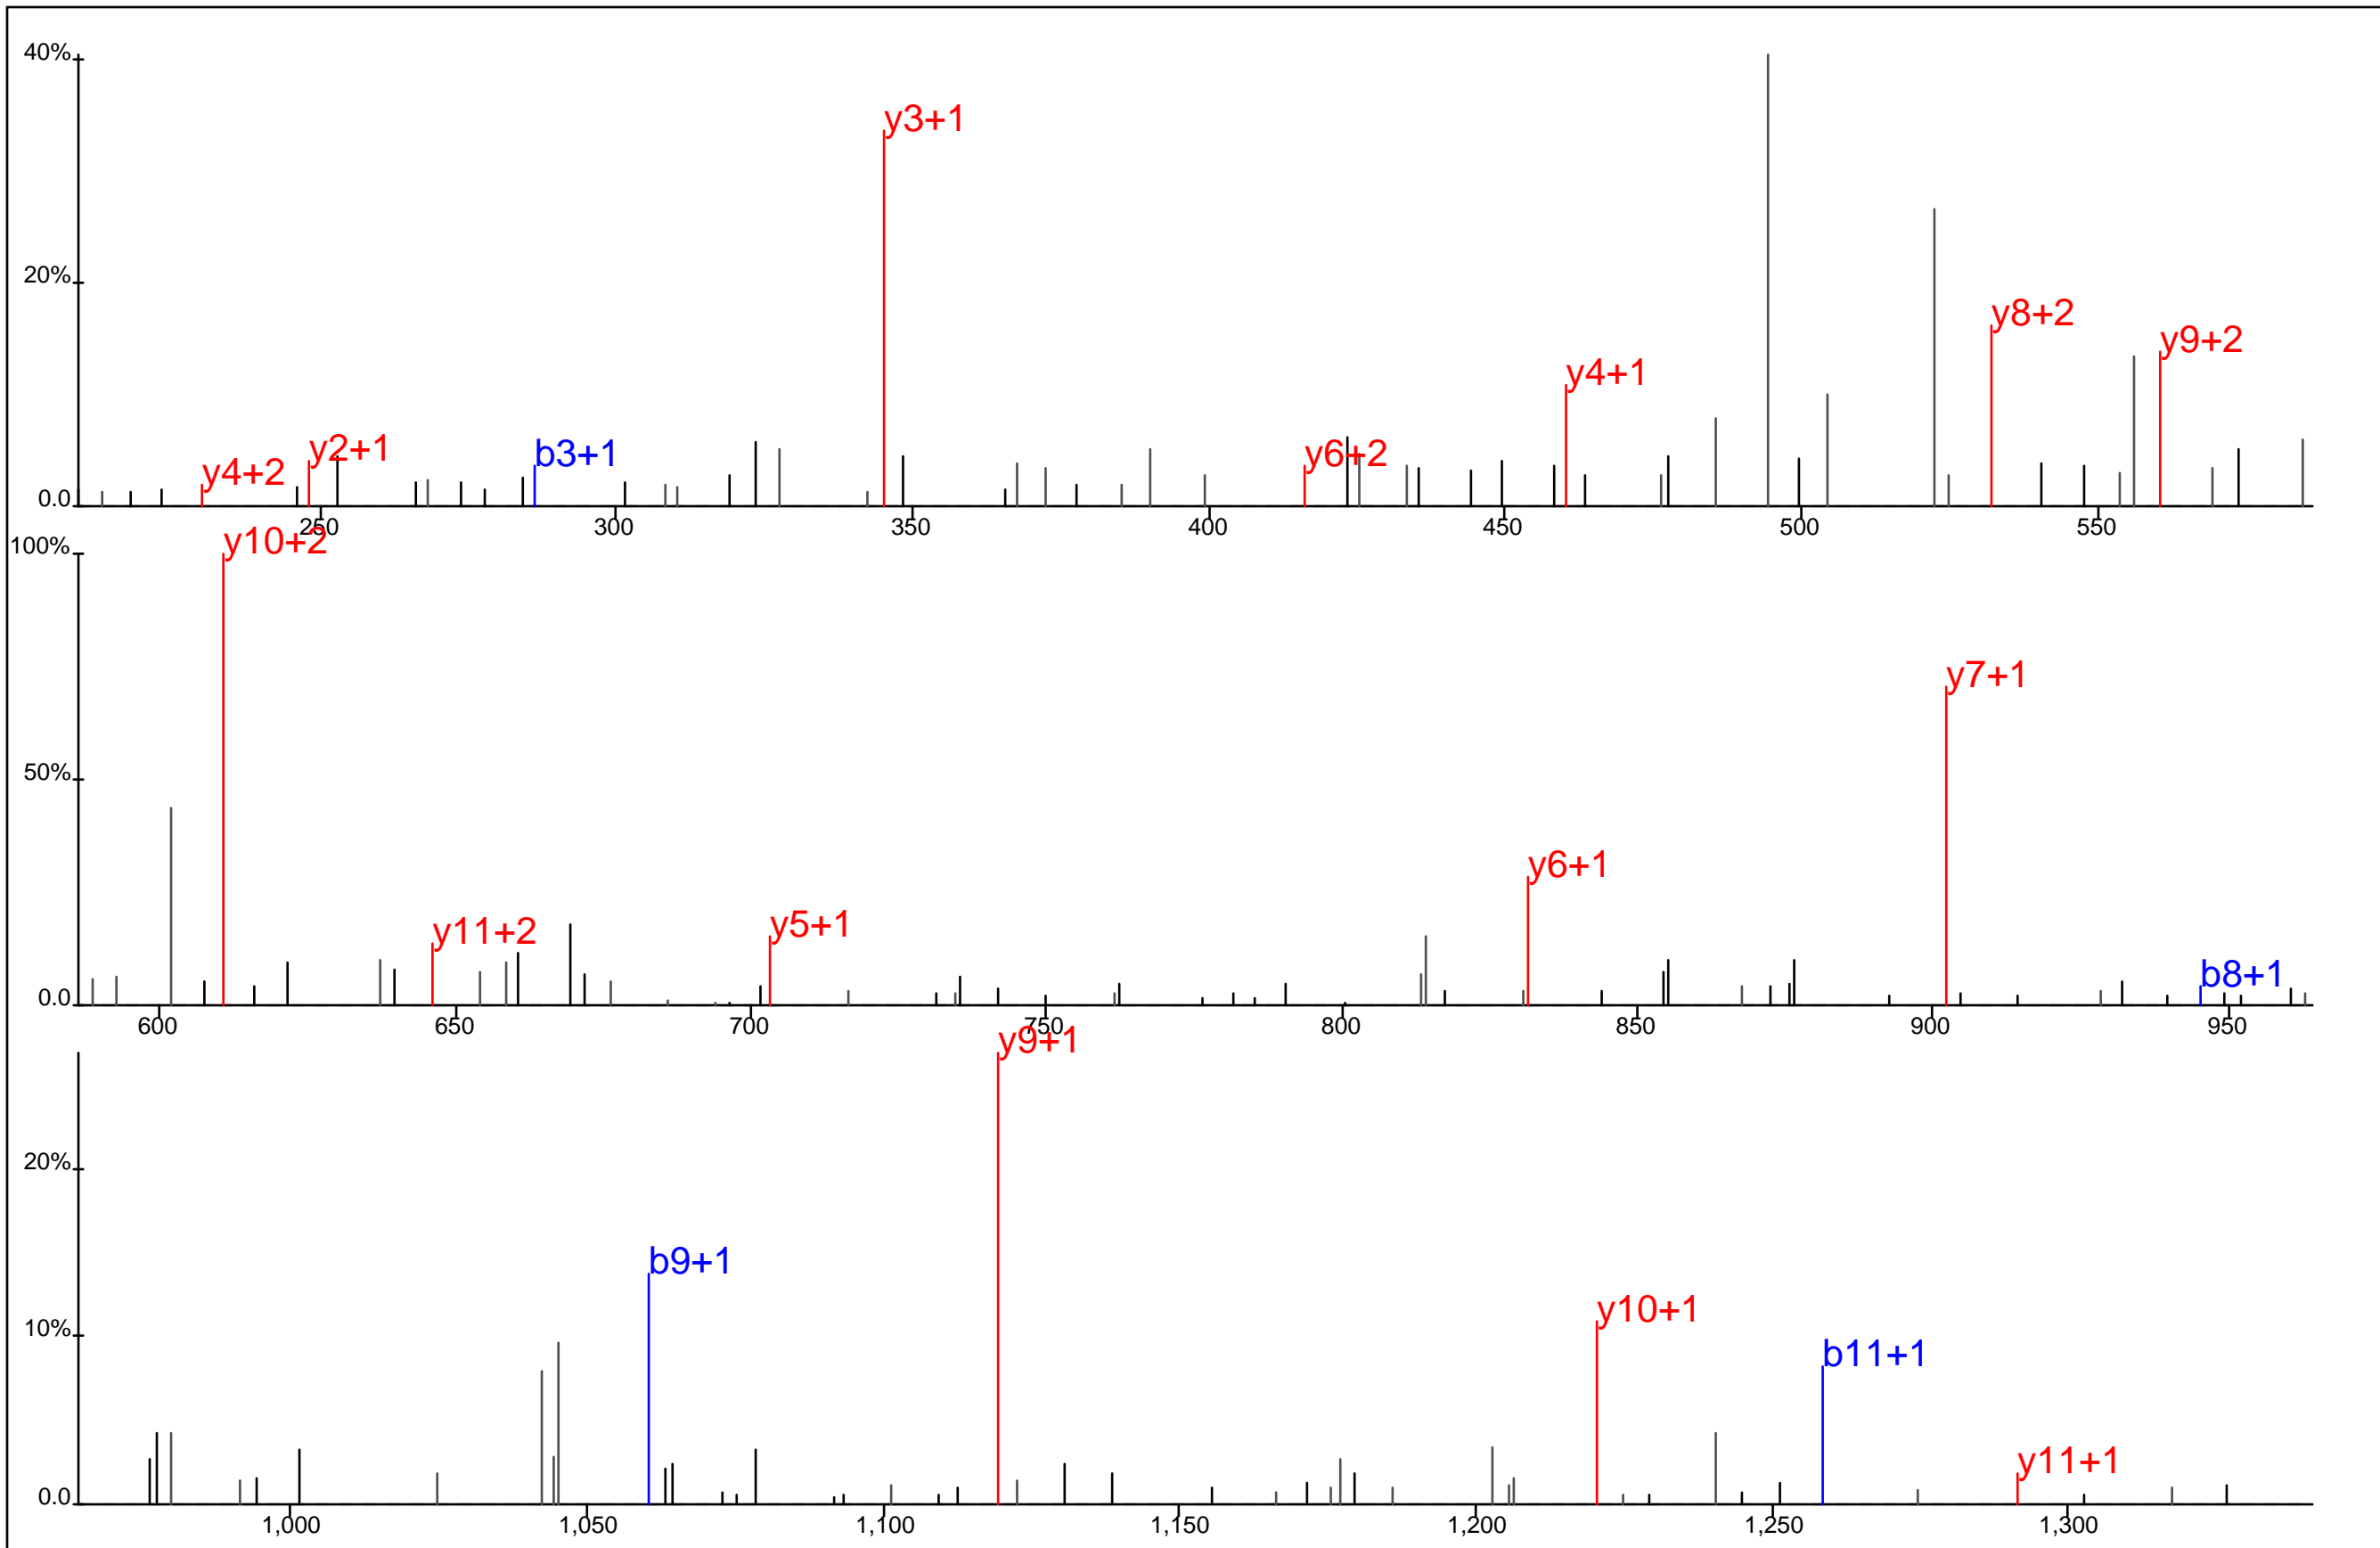

▢ ▢ ▢ ▢ ▢ ▢ ▢ ▢ ▢ ▢  
 L A T G C A Q Y\* D P T K  
▢ ▢ ▢ ▢ ▢ ▢ ▢ ▢ ▢ ▢

Protein Name: ITK  
 gi Accession: 0  
 Precursor Mass: 702.7972+2  
 Delta Mass: 0.501 ppm  
 XCorr: 44.2

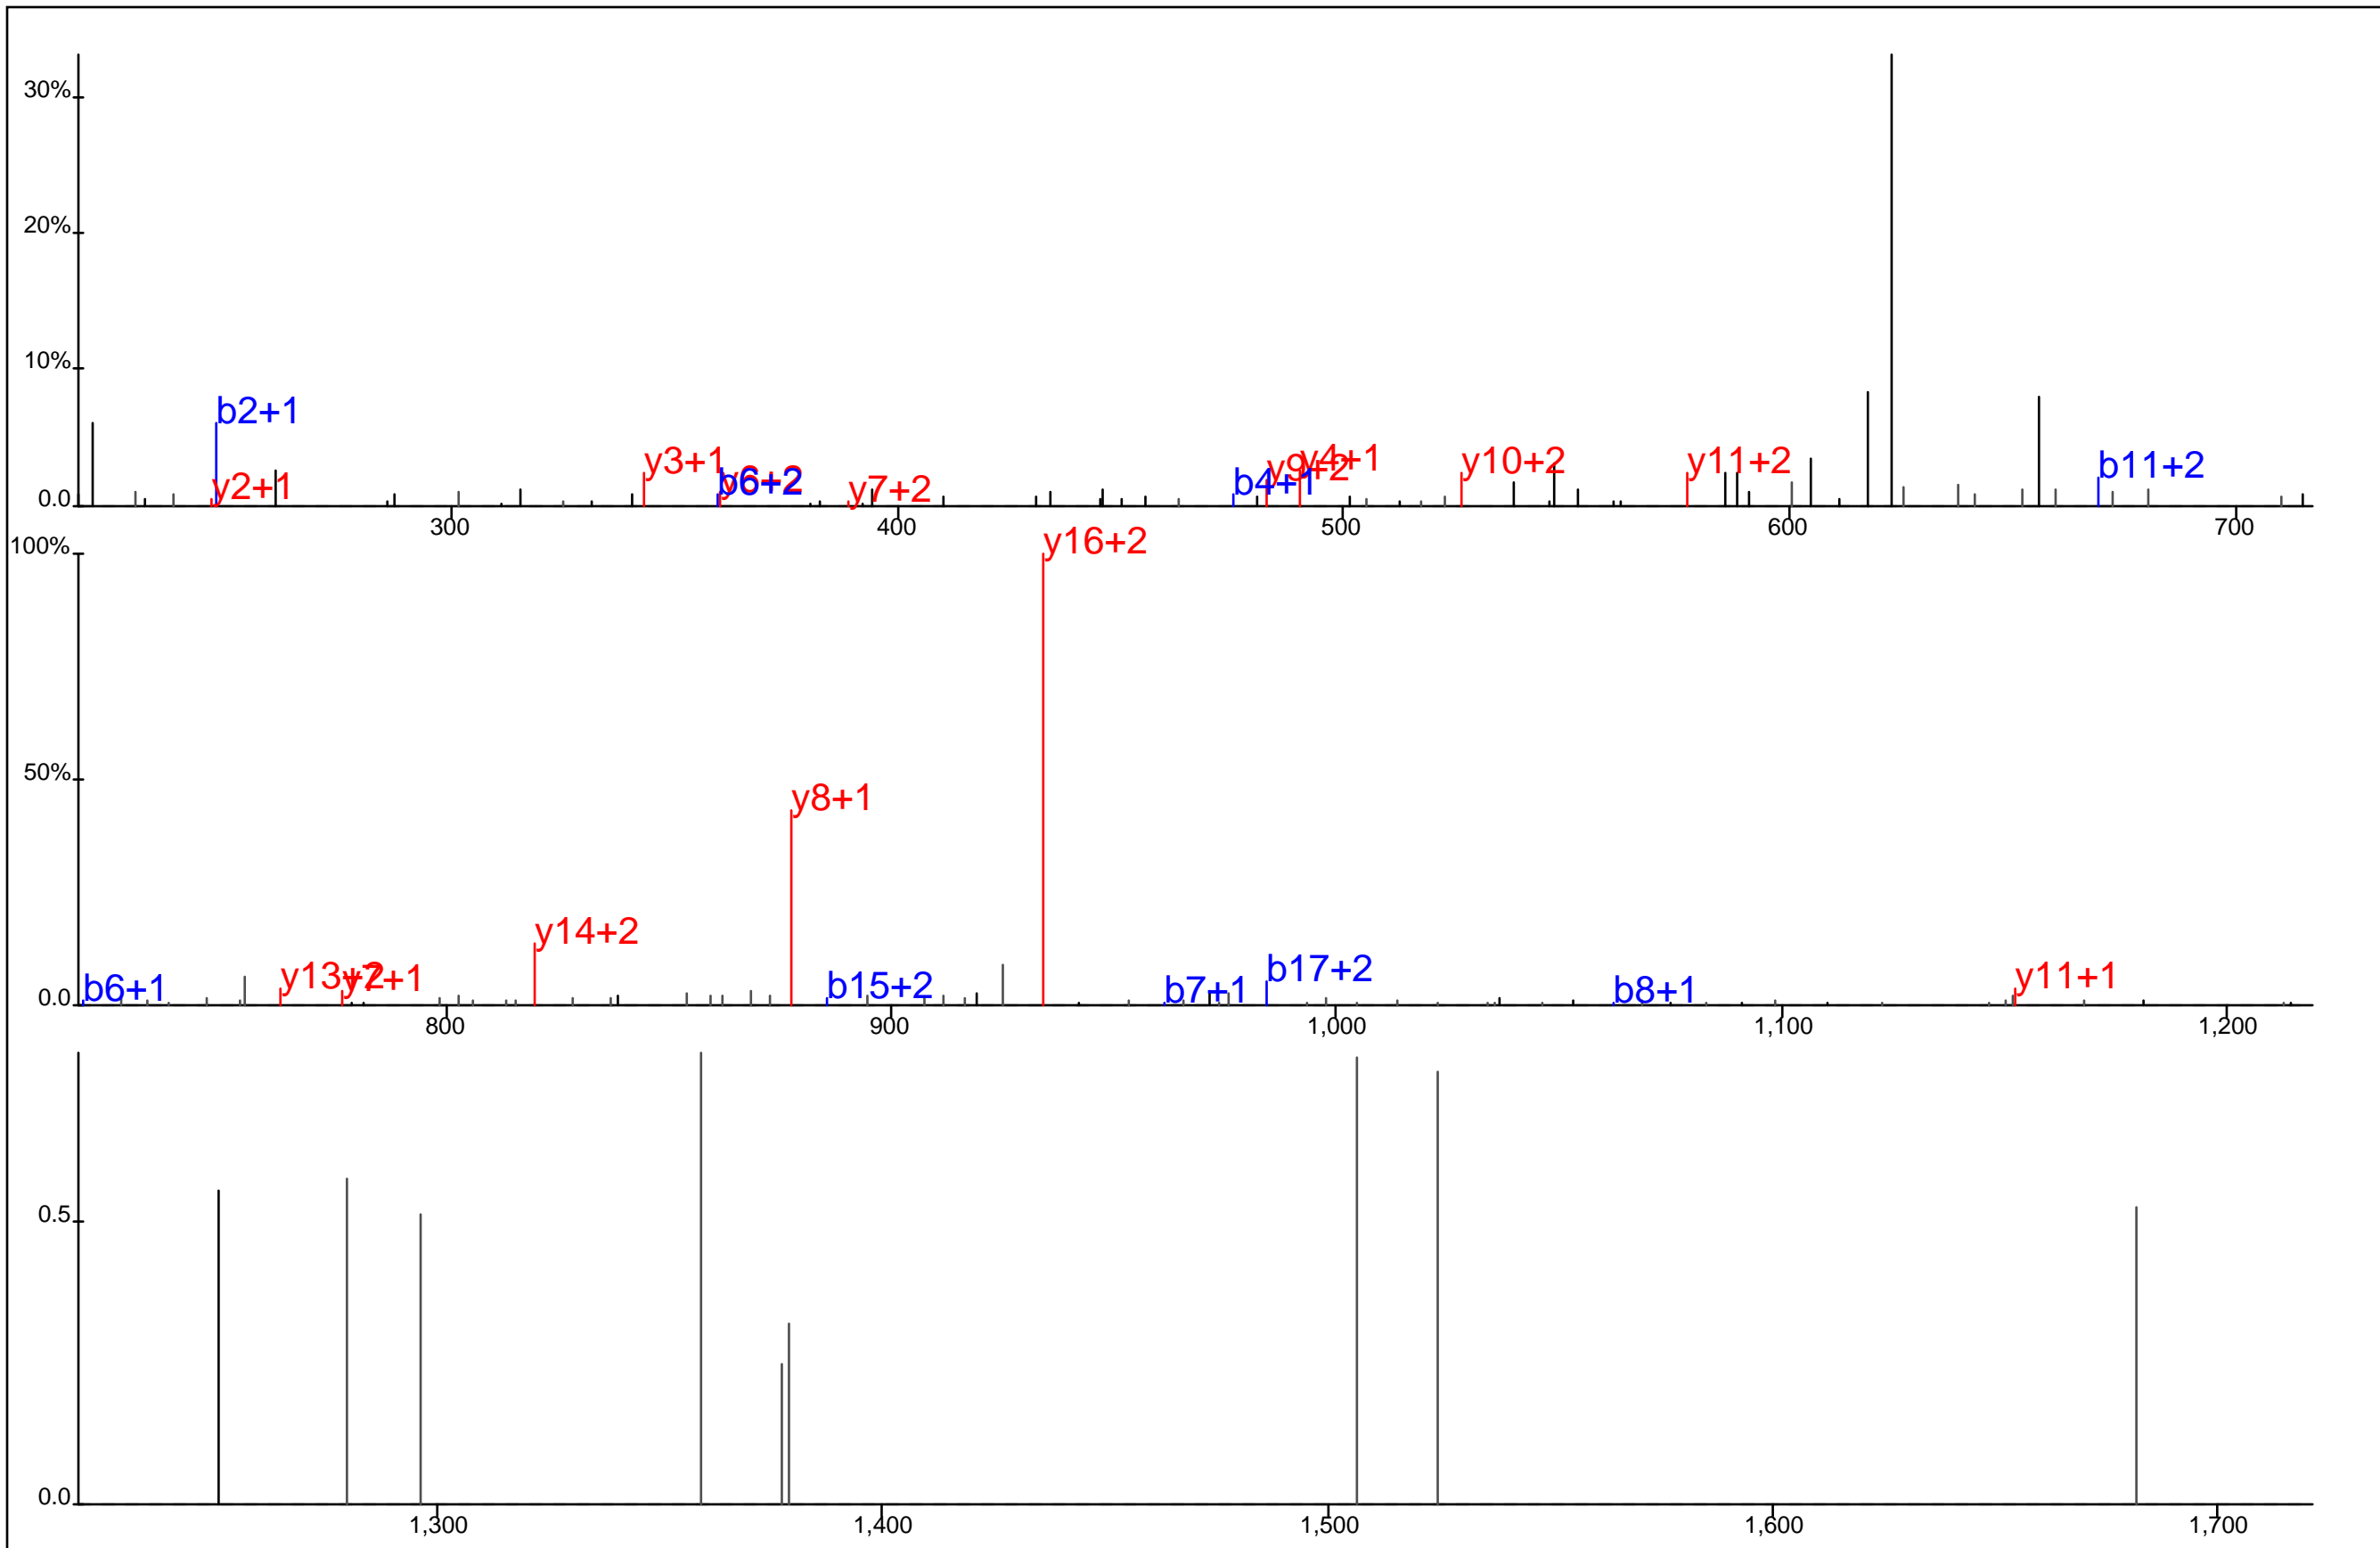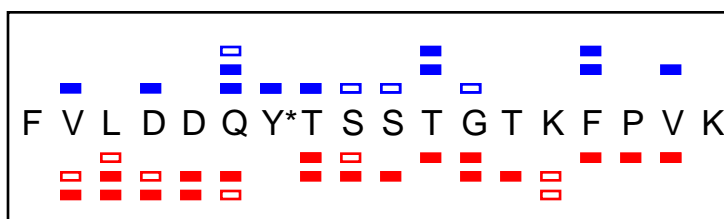

Protein Name: ITK  
 gi Accession: 0  
 Precursor Mass: 705.0023+3  
 Delta Mass: 1.548 ppm  
 XCorr: 34.43

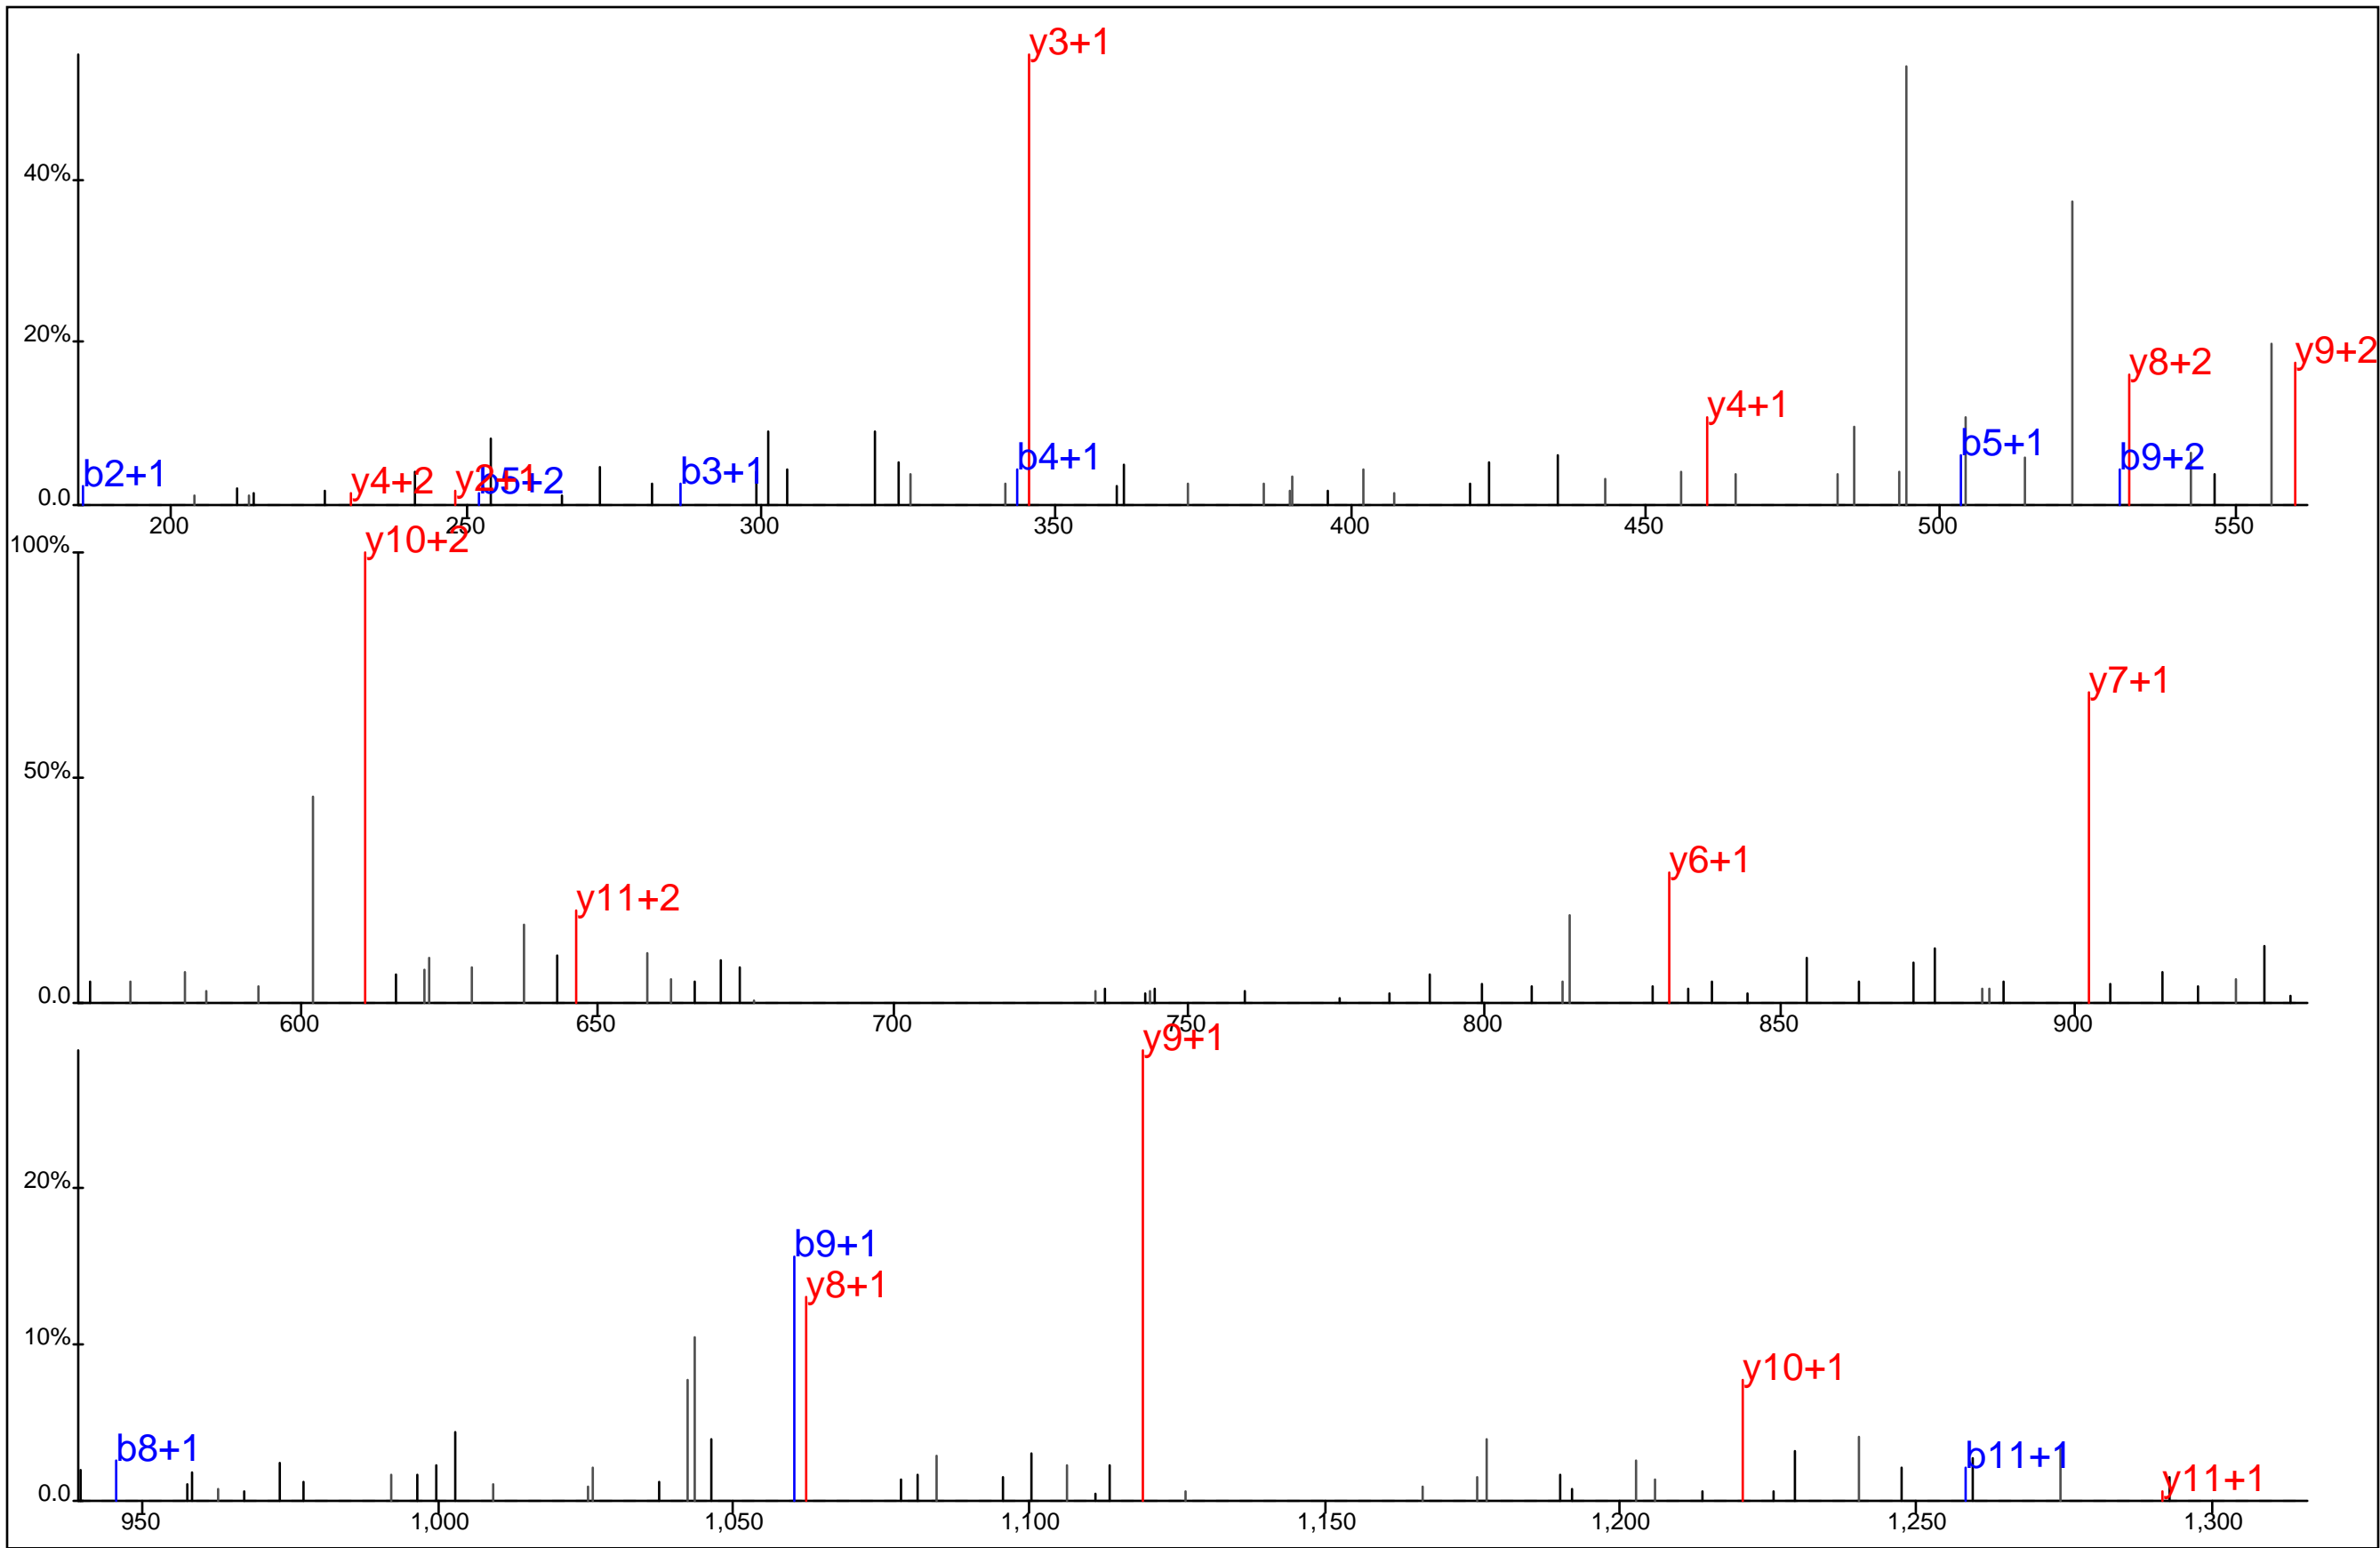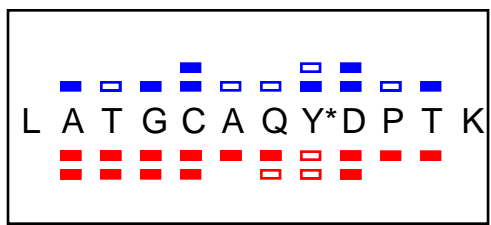

Protein Name: ITK  
 gi Accession: 0  
 Precursor Mass: 702.7946+2  
 Delta Mass: 3.235 ppm  
 XCorr: 38.77

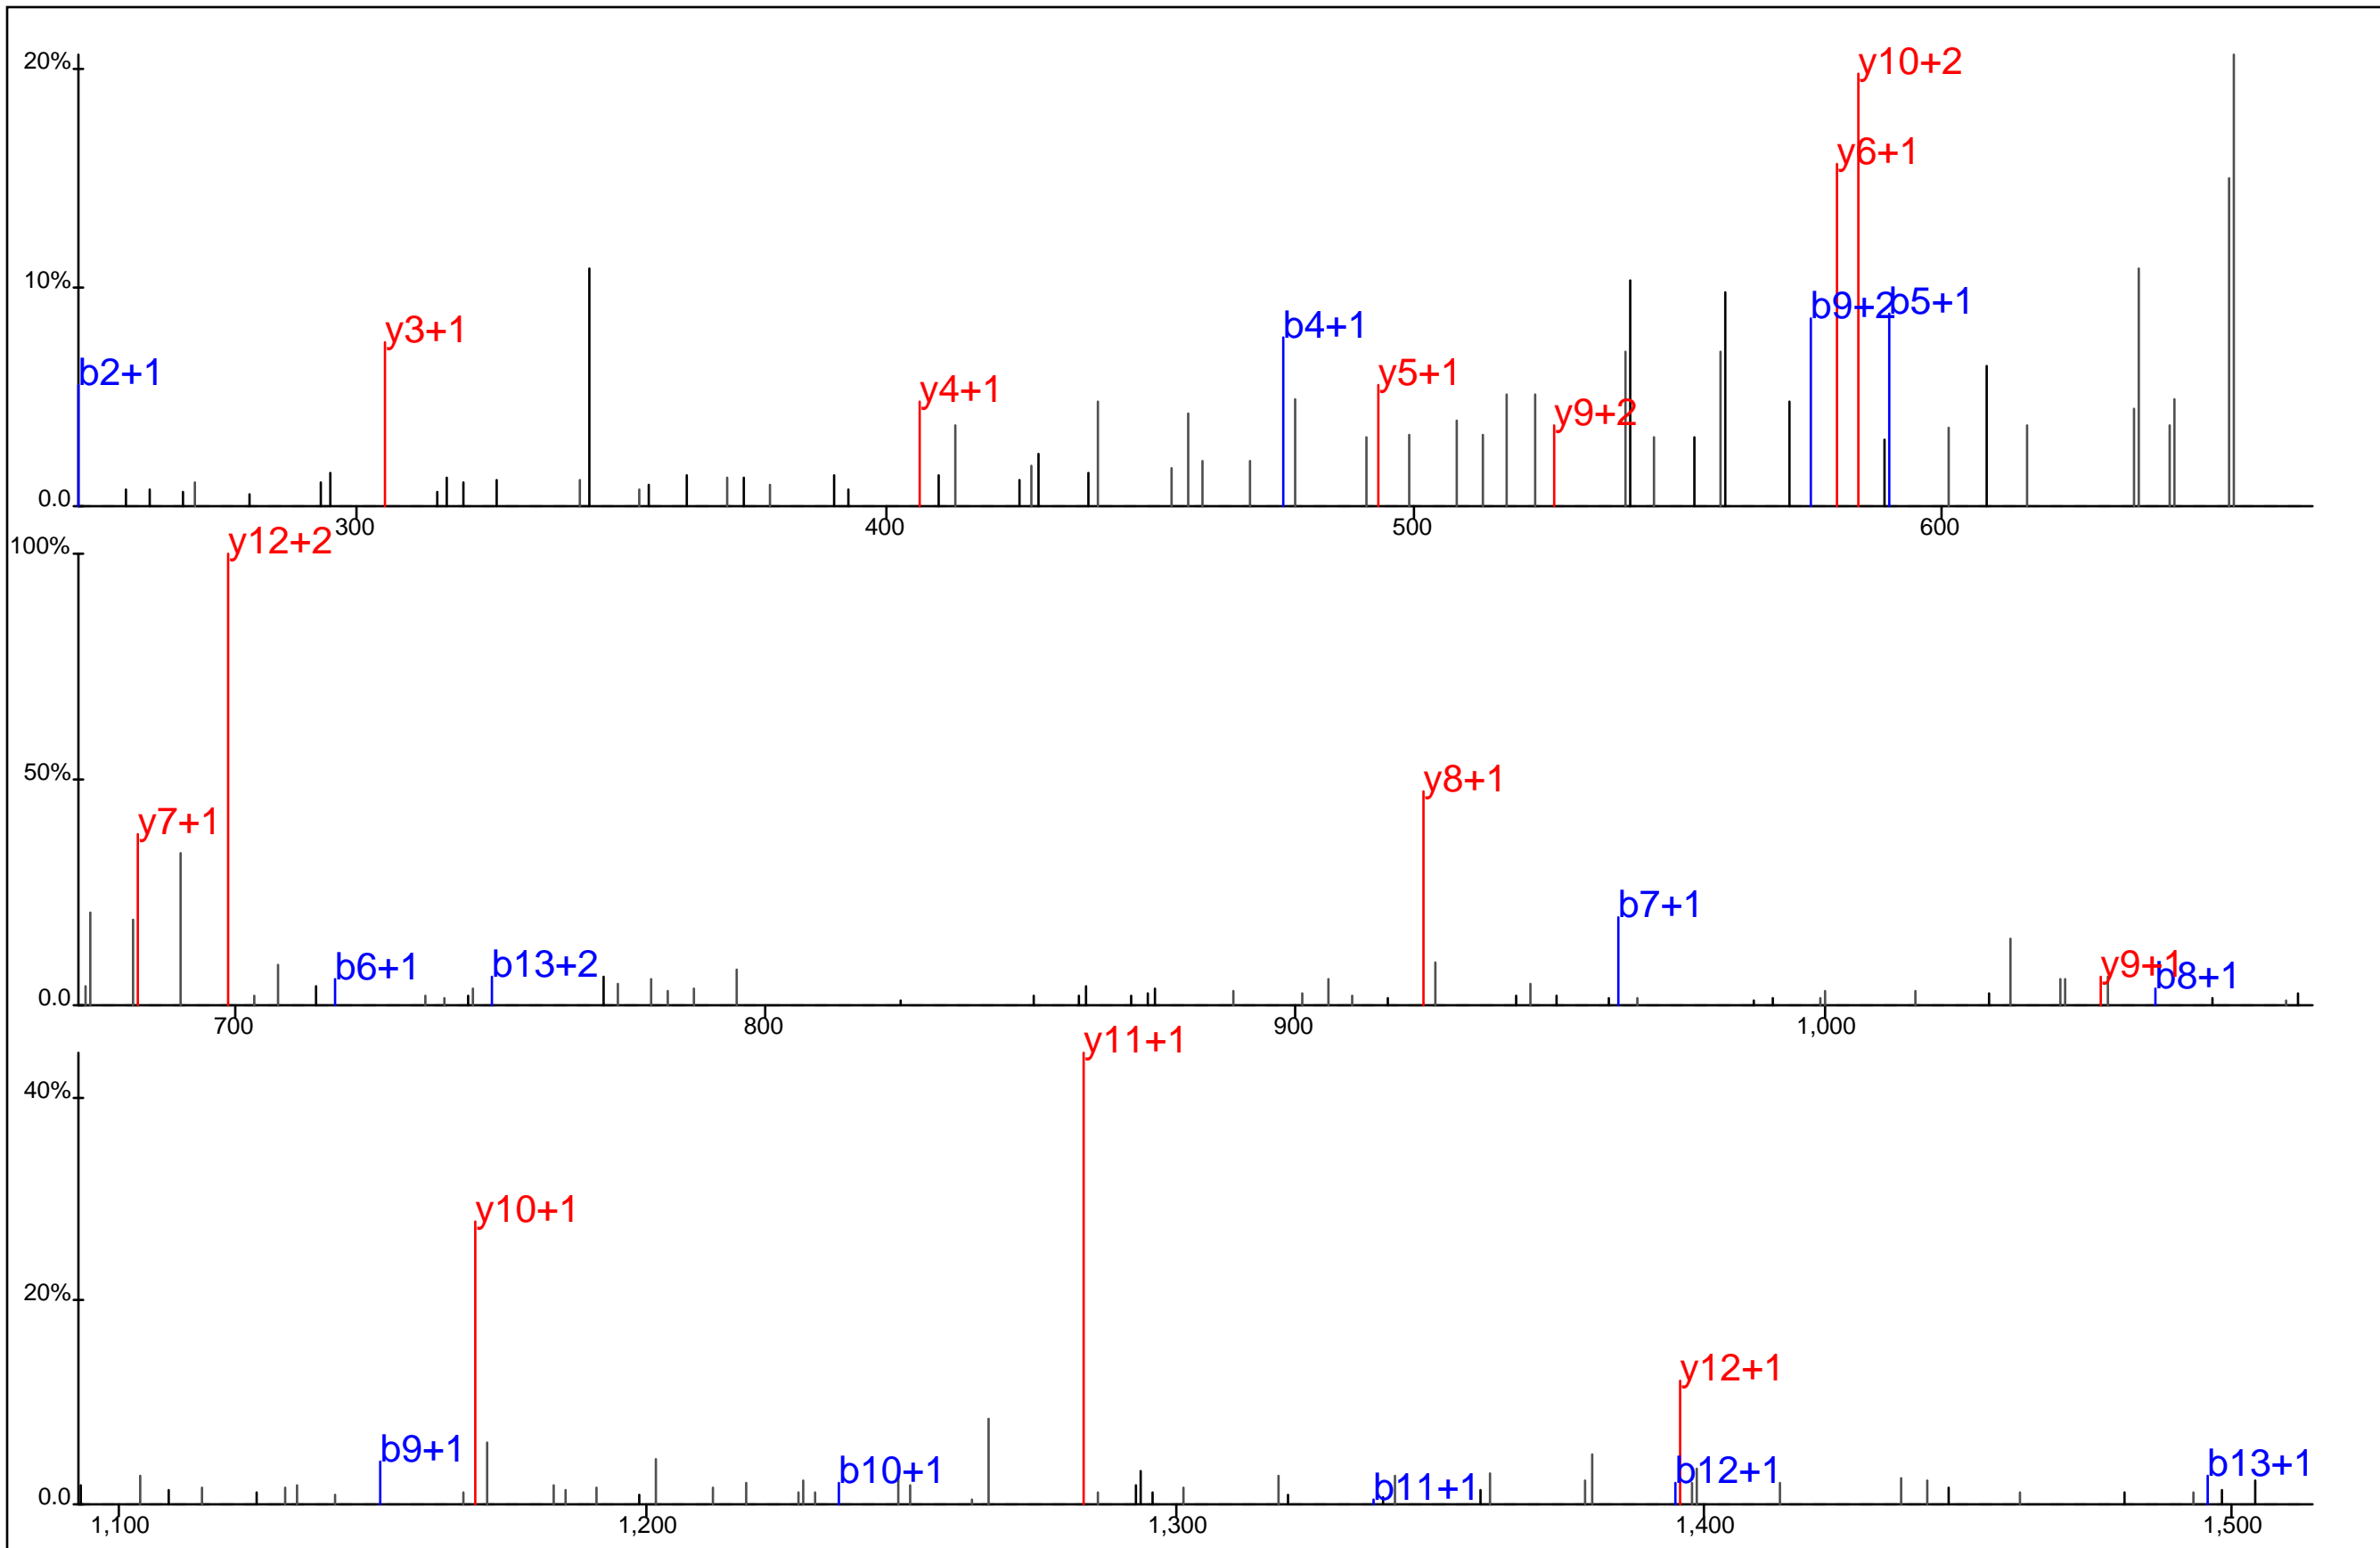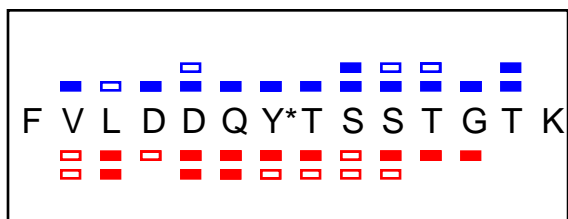

Protein Name: ITK  
 gi Accession: 0  
 Precursor Mass: 821.3517+2  
 Delta Mass: 5.055 ppm  
 XCorr: 64.81

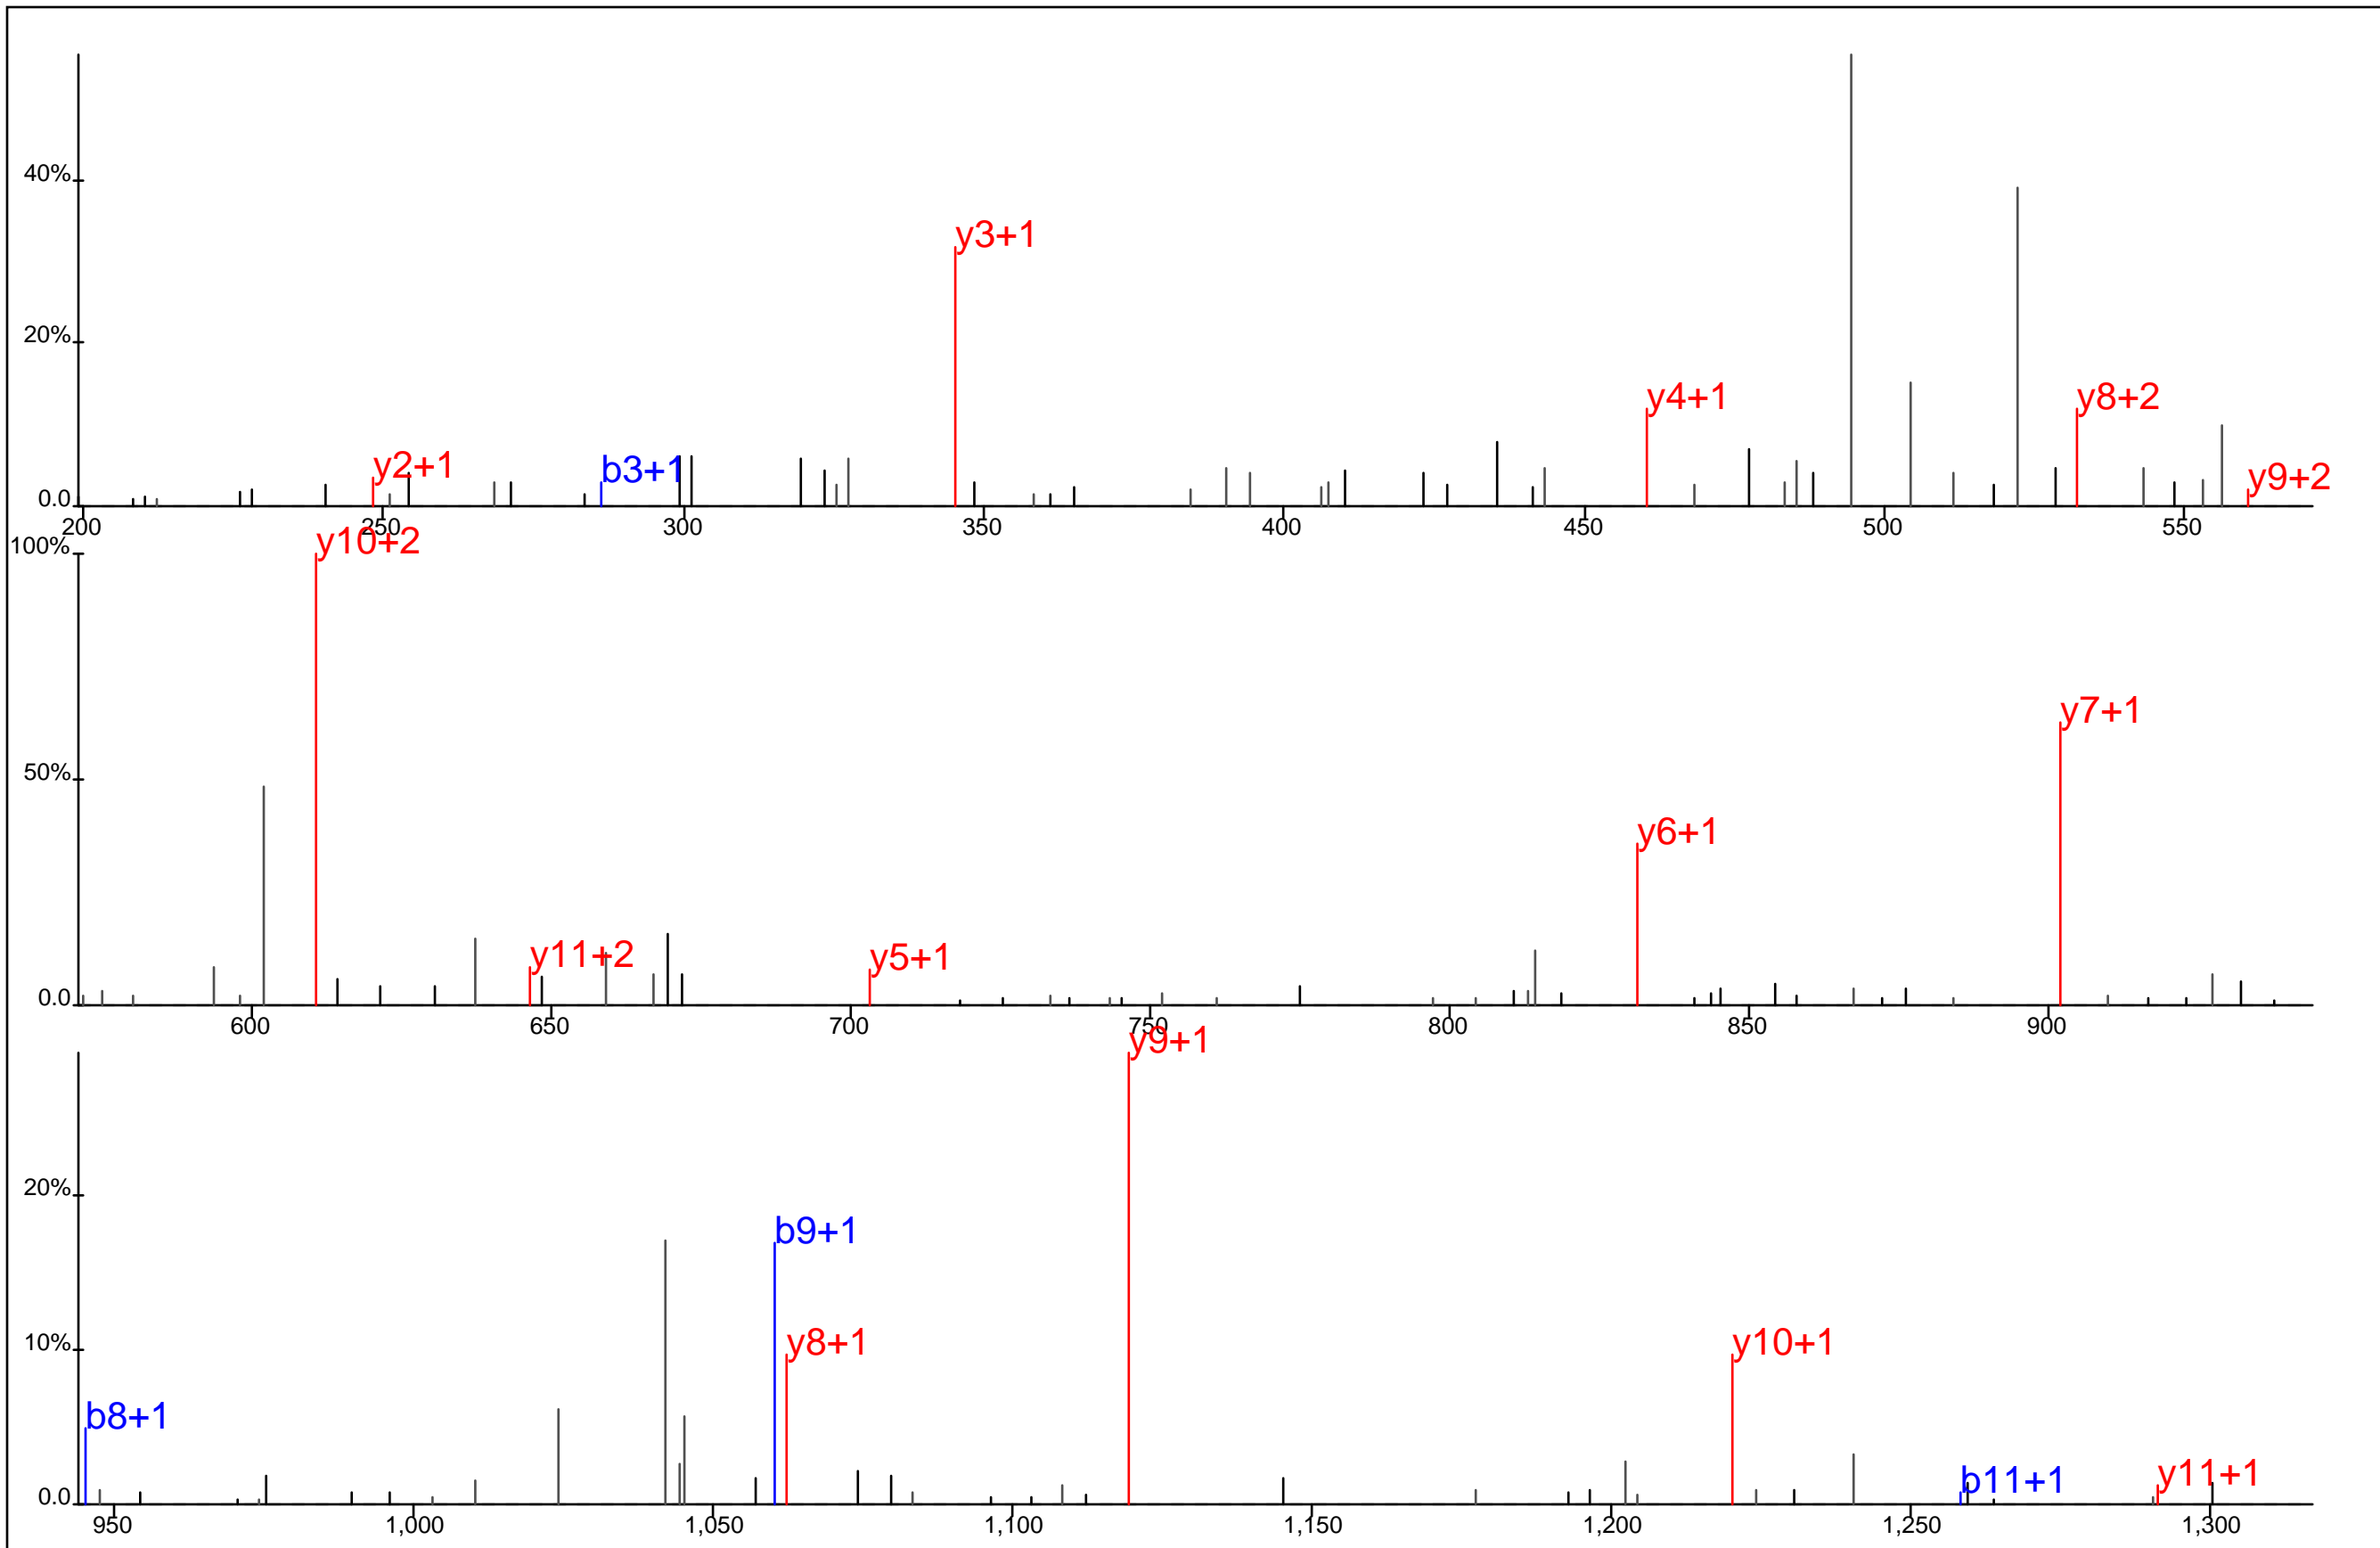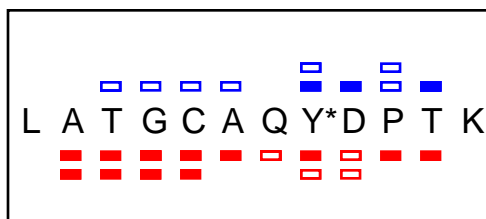

Protein Name: ITK  
 gi Accession: 0  
 Precursor Mass: 702.7974+2  
 Delta Mass: 0.675 ppm  
 XCorr: 45.89



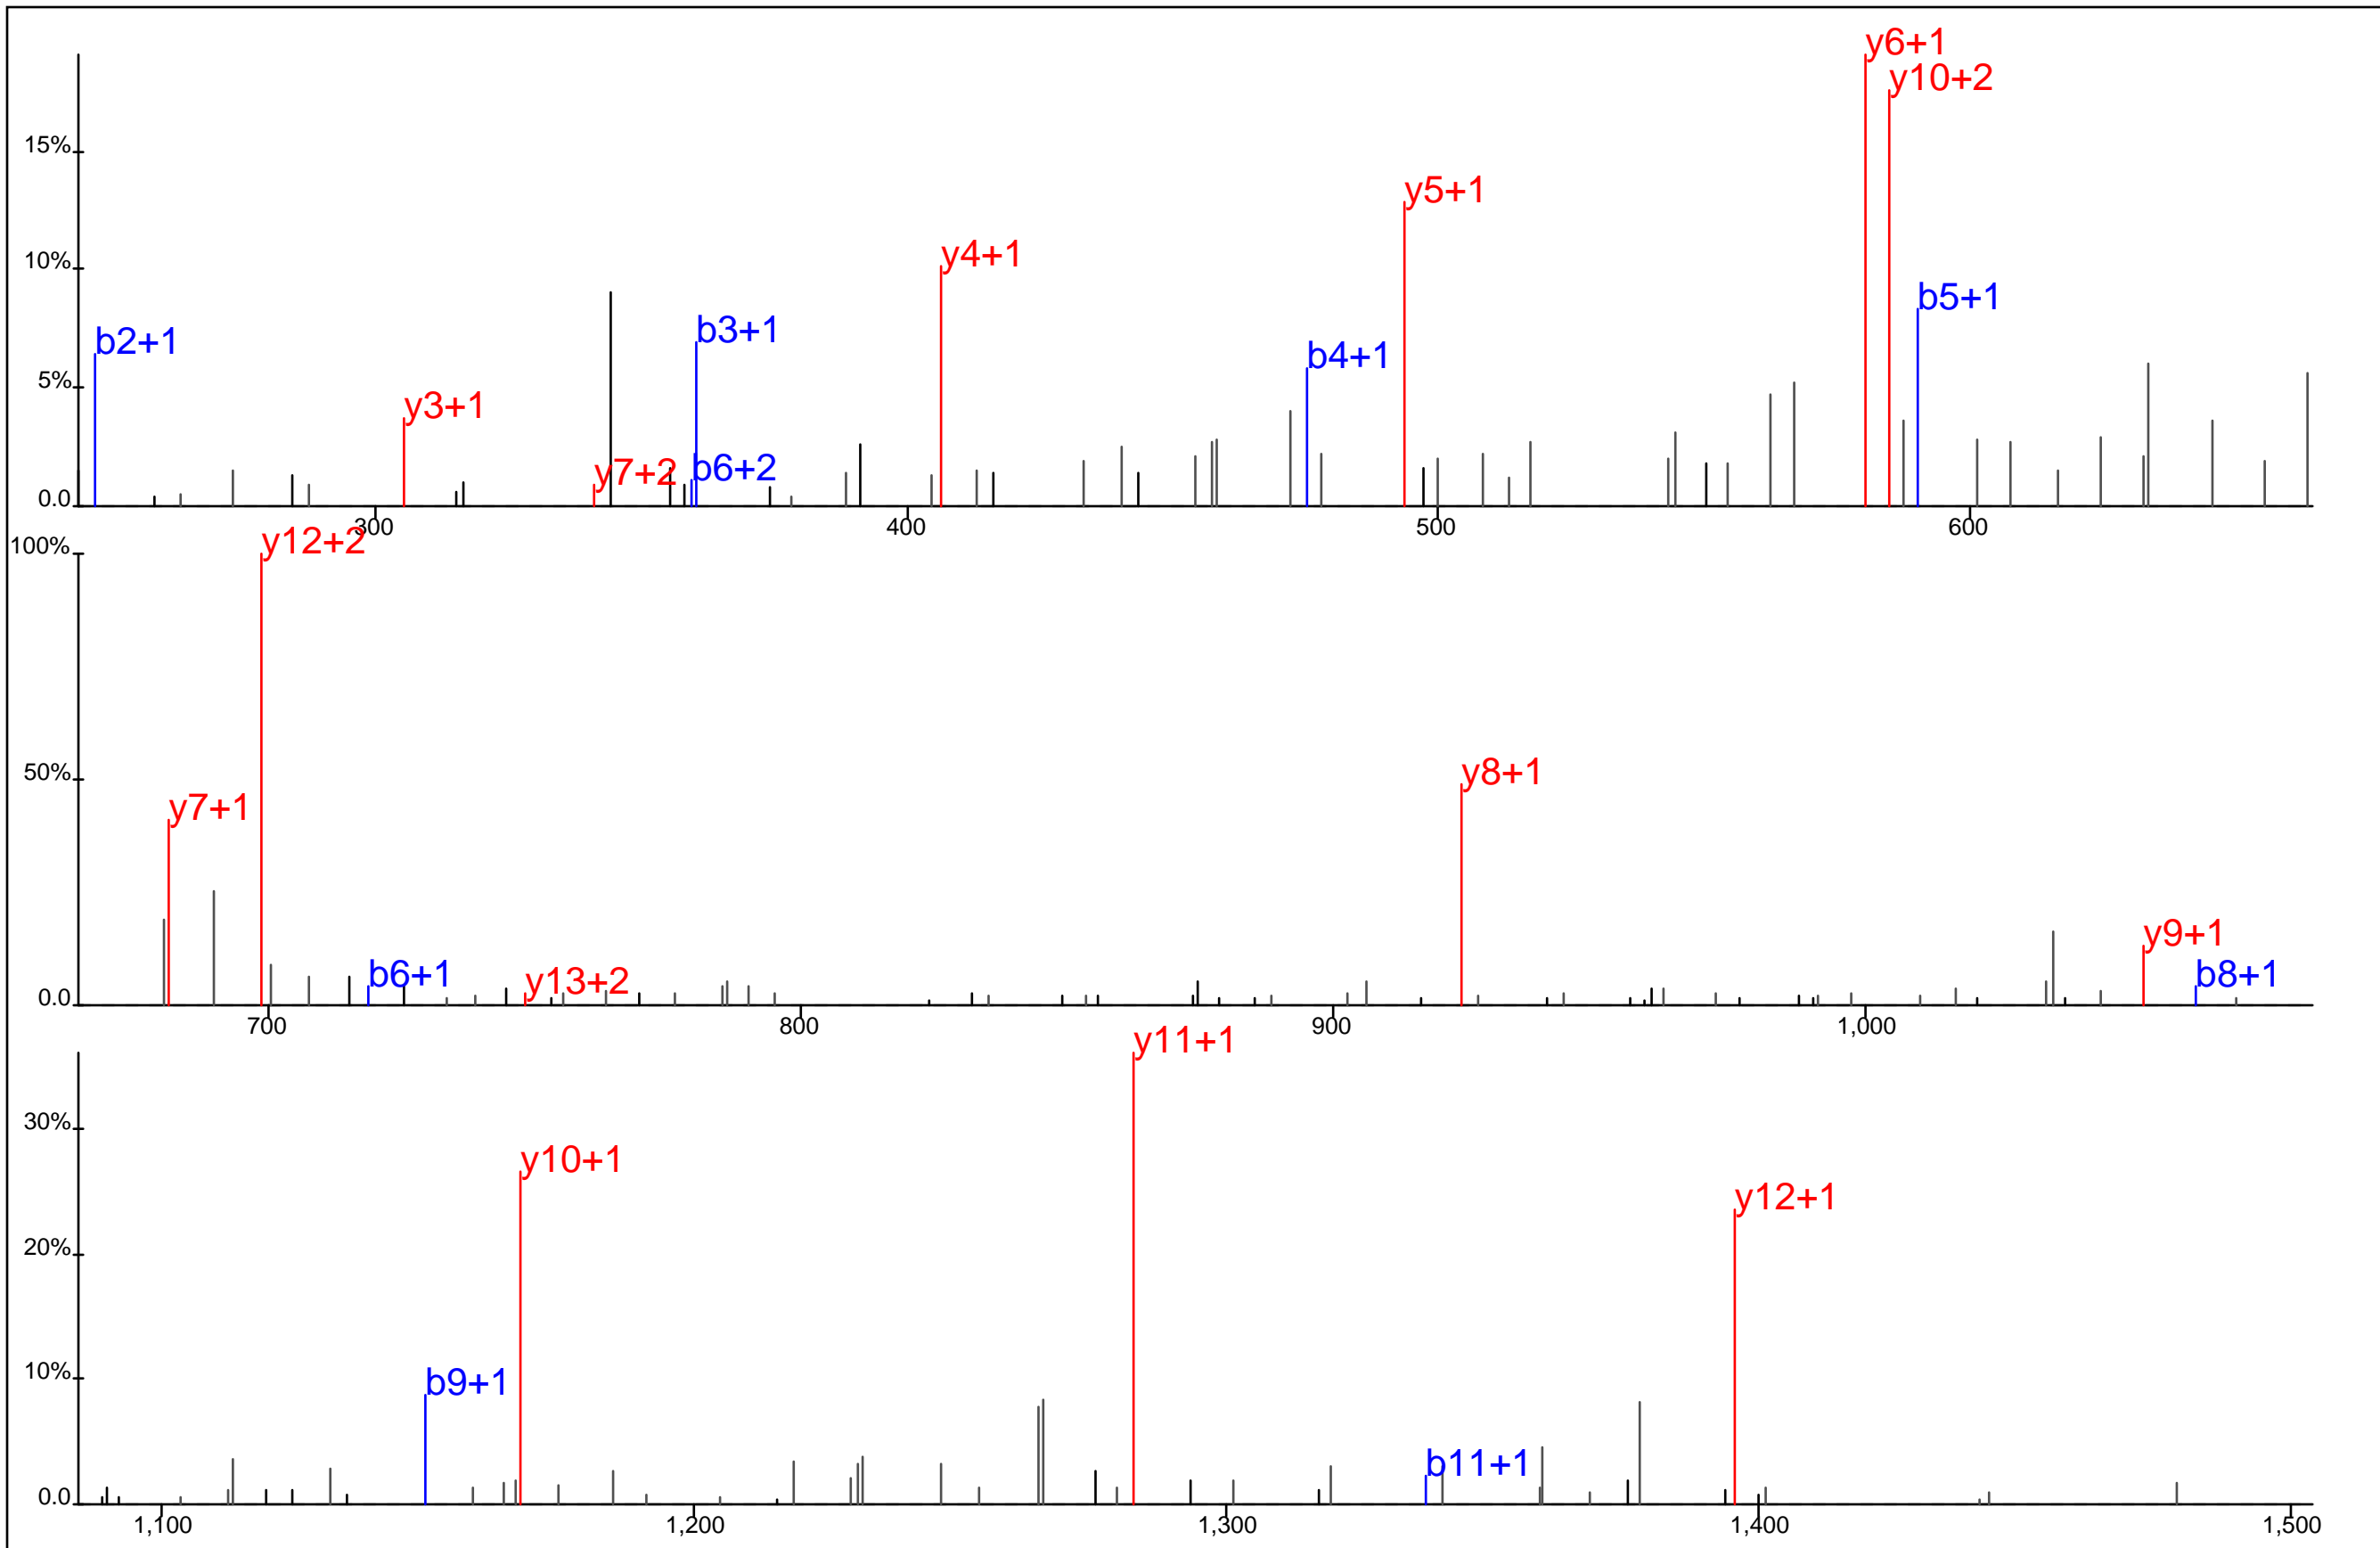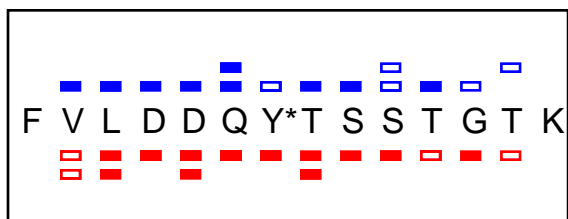

Protein Name: ITK  
 gi Accession: 0  
 Precursor Mass: 821.3535+2  
 Delta Mass: 2.898 ppm  
 XCorr: 92.09

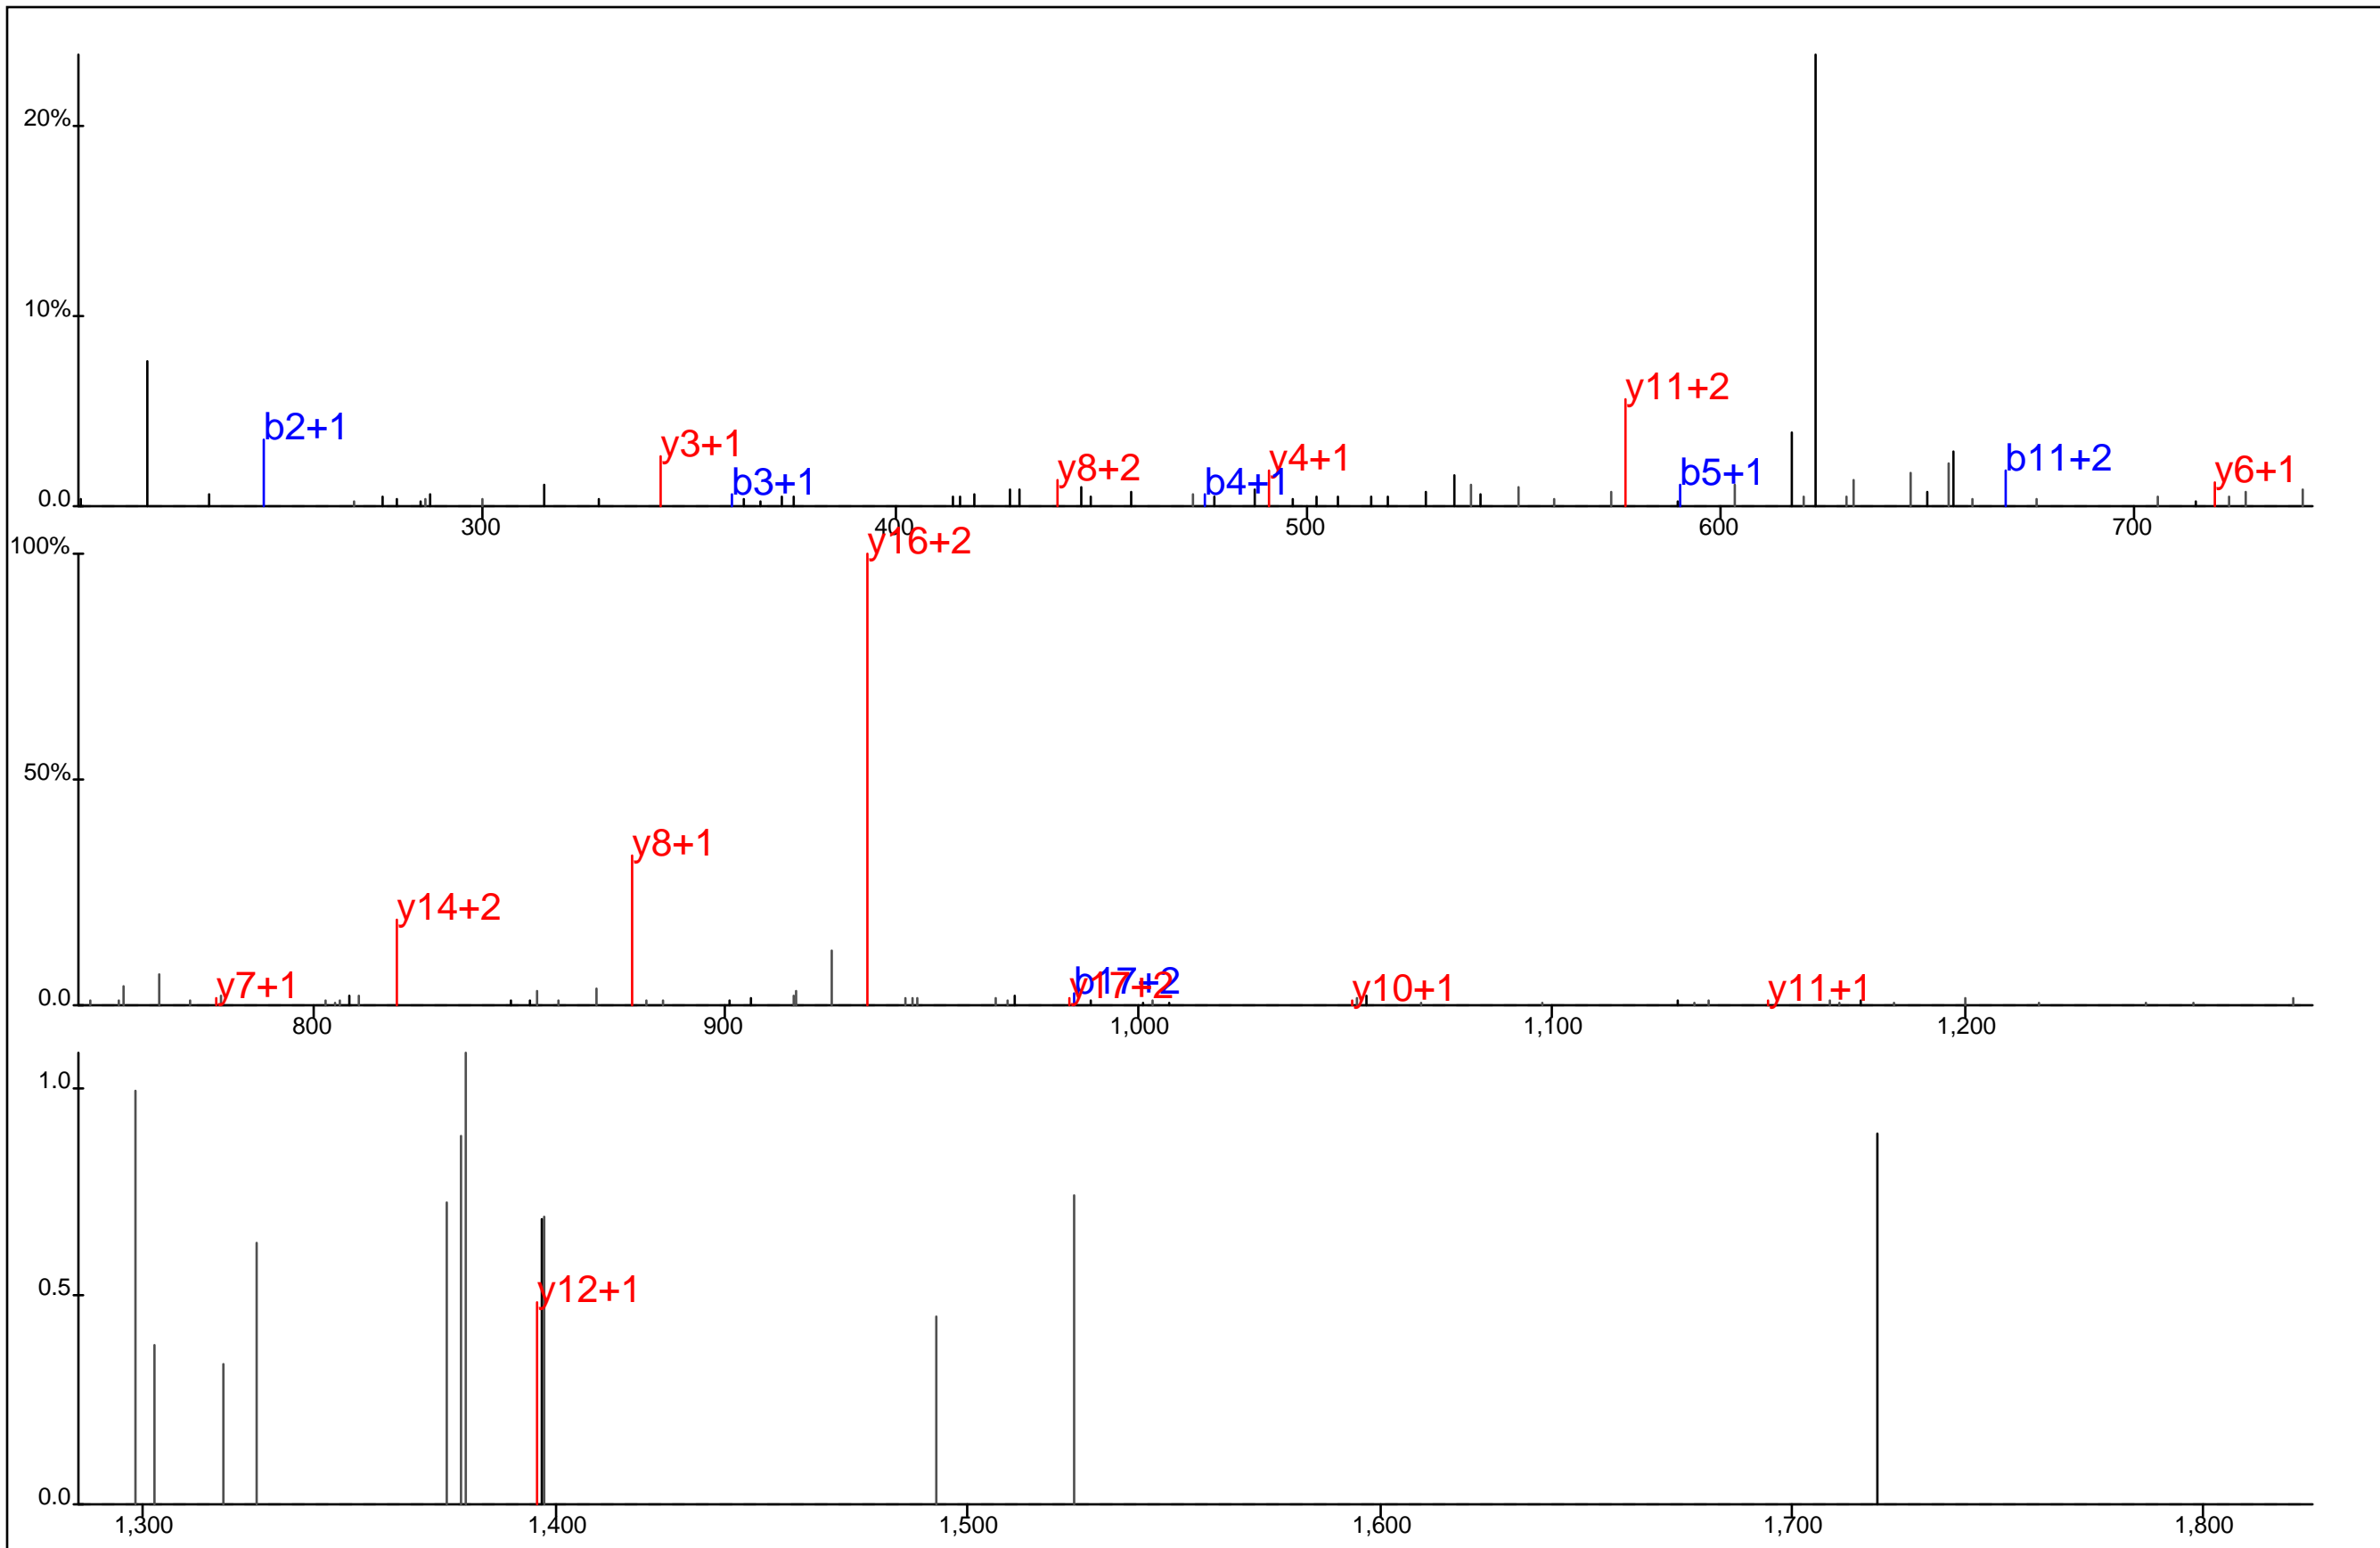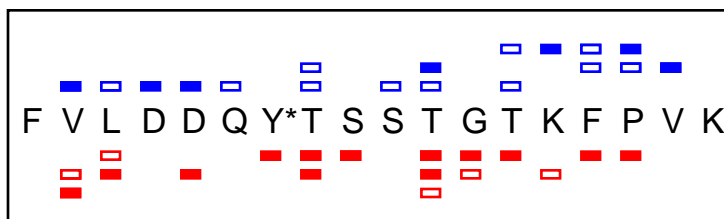

Protein Name: ITK  
 gi Accession: 0  
 Precursor Mass: 705.0016+3  
 Delta Mass: 0.681 ppm  
 XCorr: 25.13

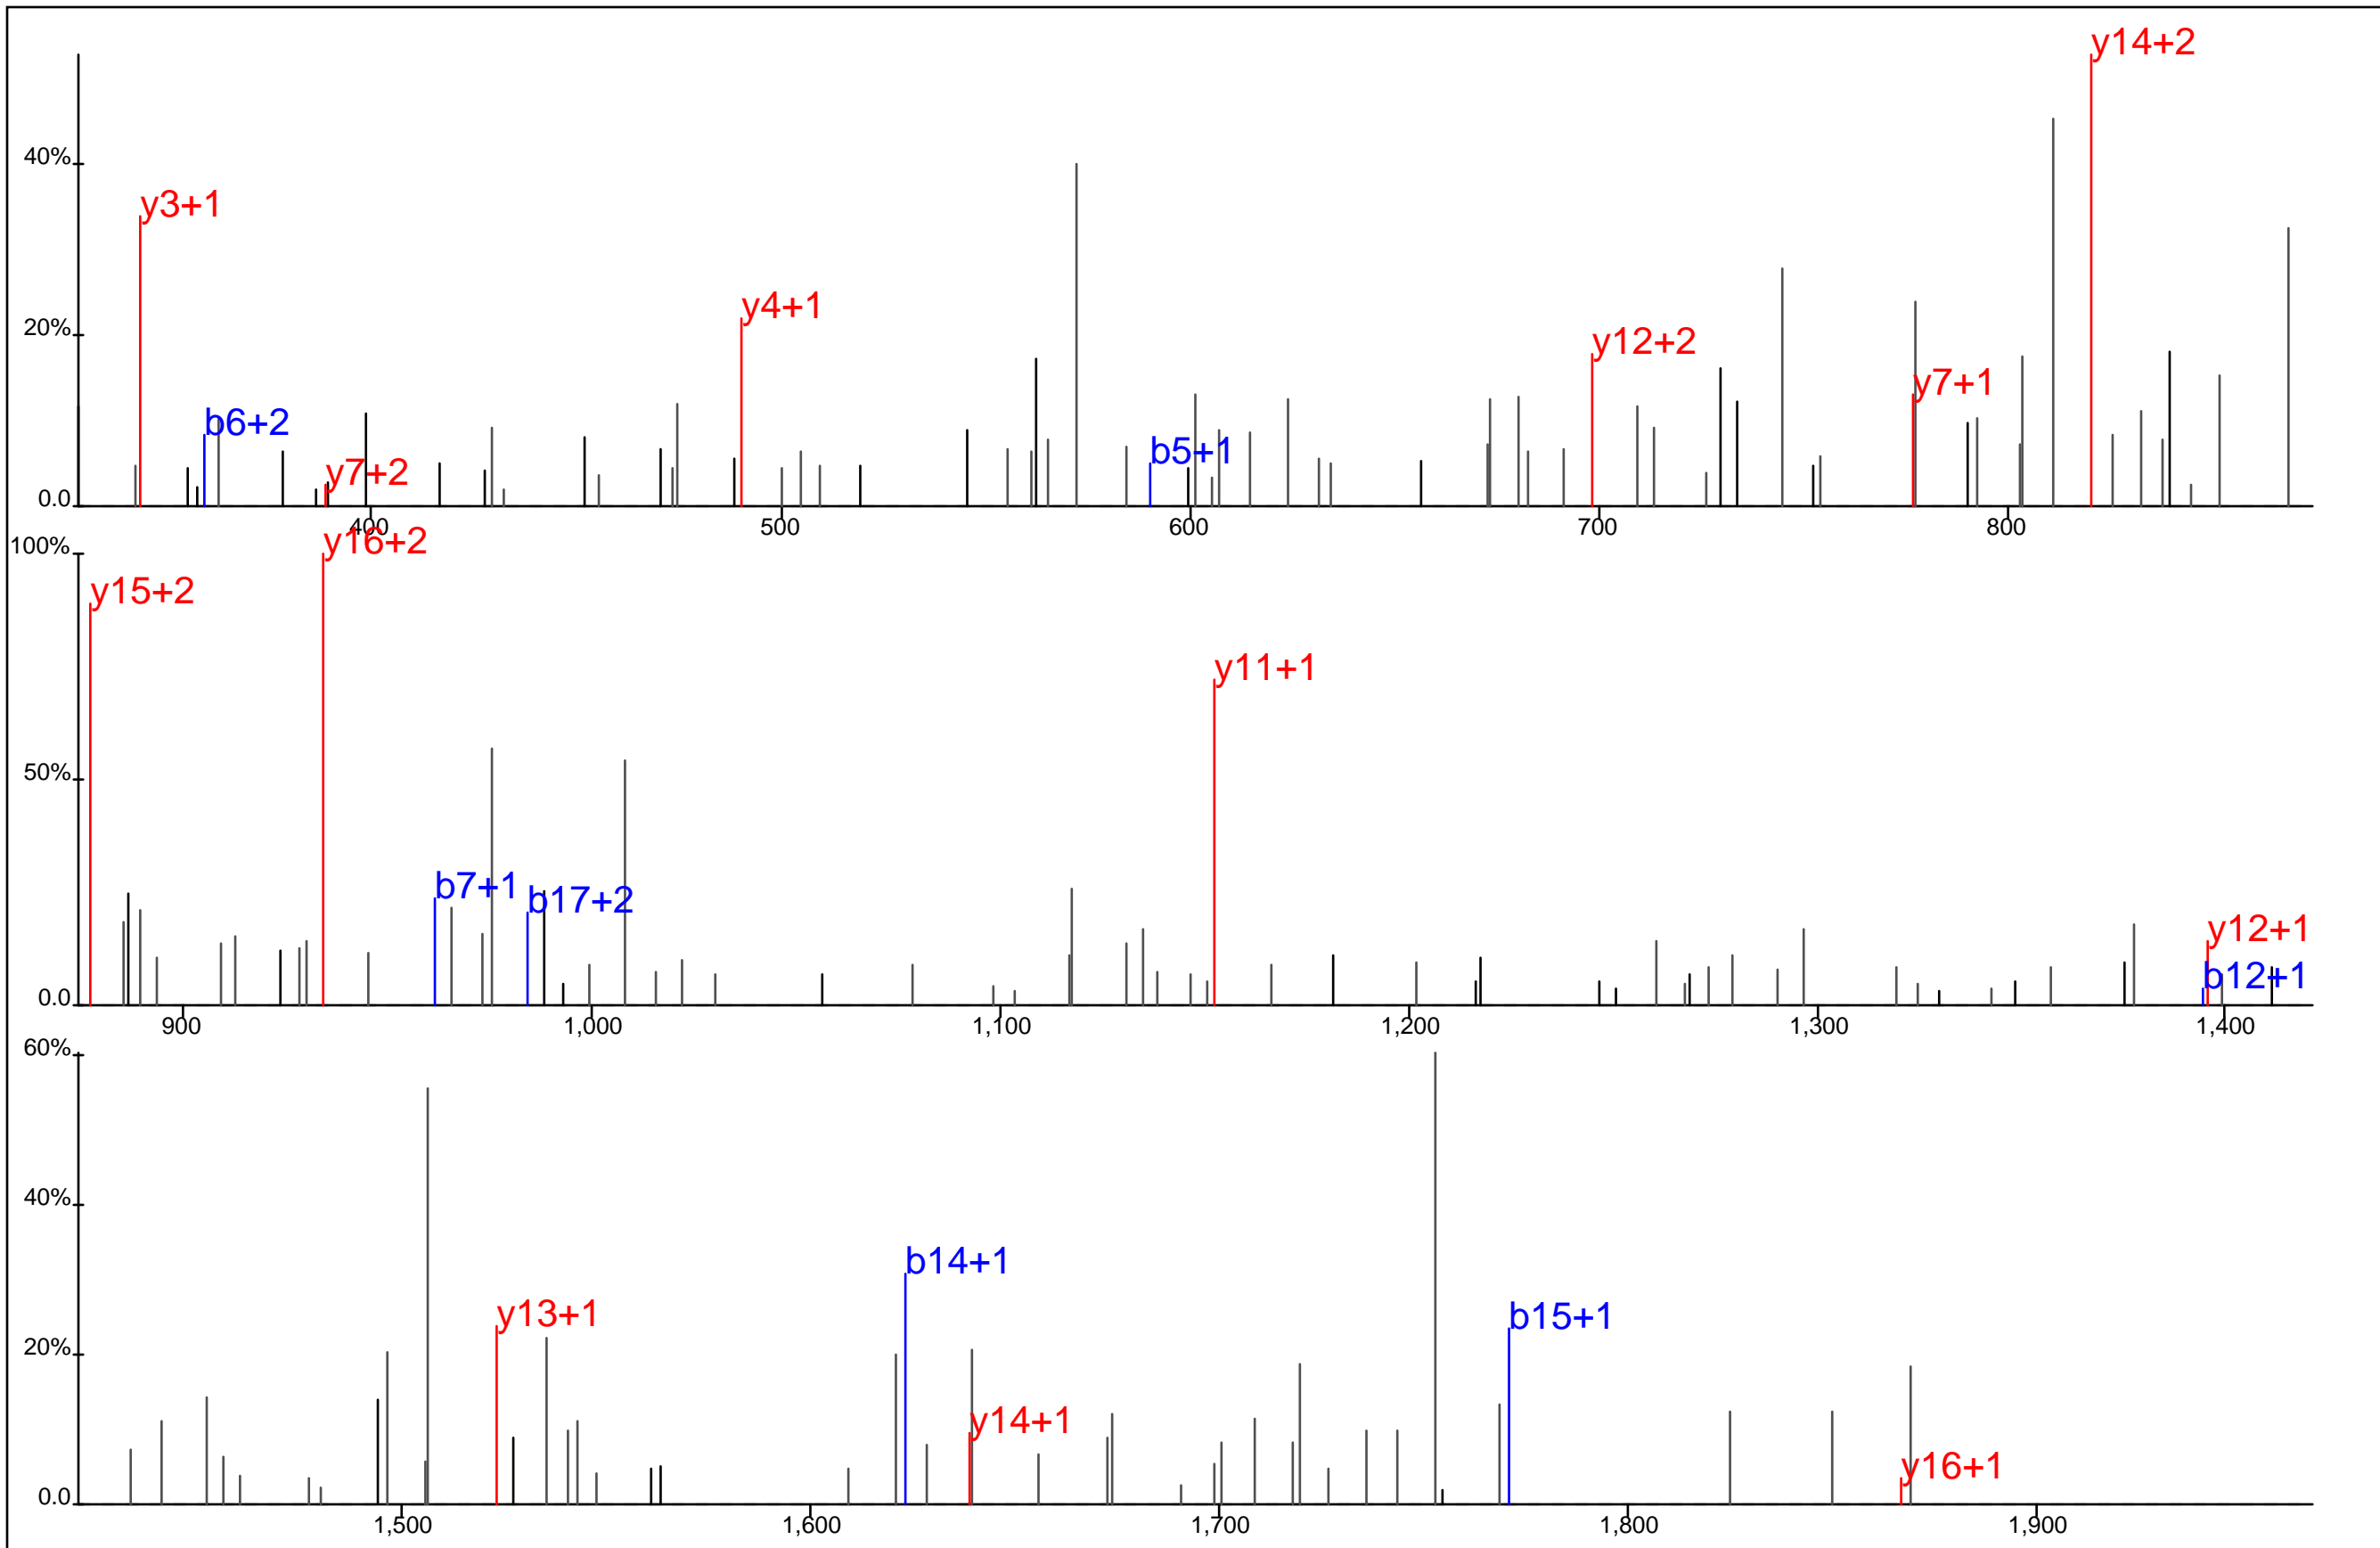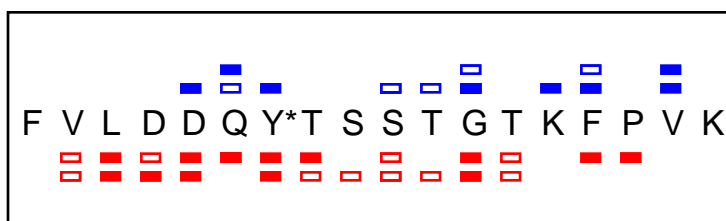

Protein Name: ITK  
 gi Accession: 0  
 Precursor Mass: 1,057.0020+2  
 Delta Mass: 3.634 ppm  
 XCorr: 29.54

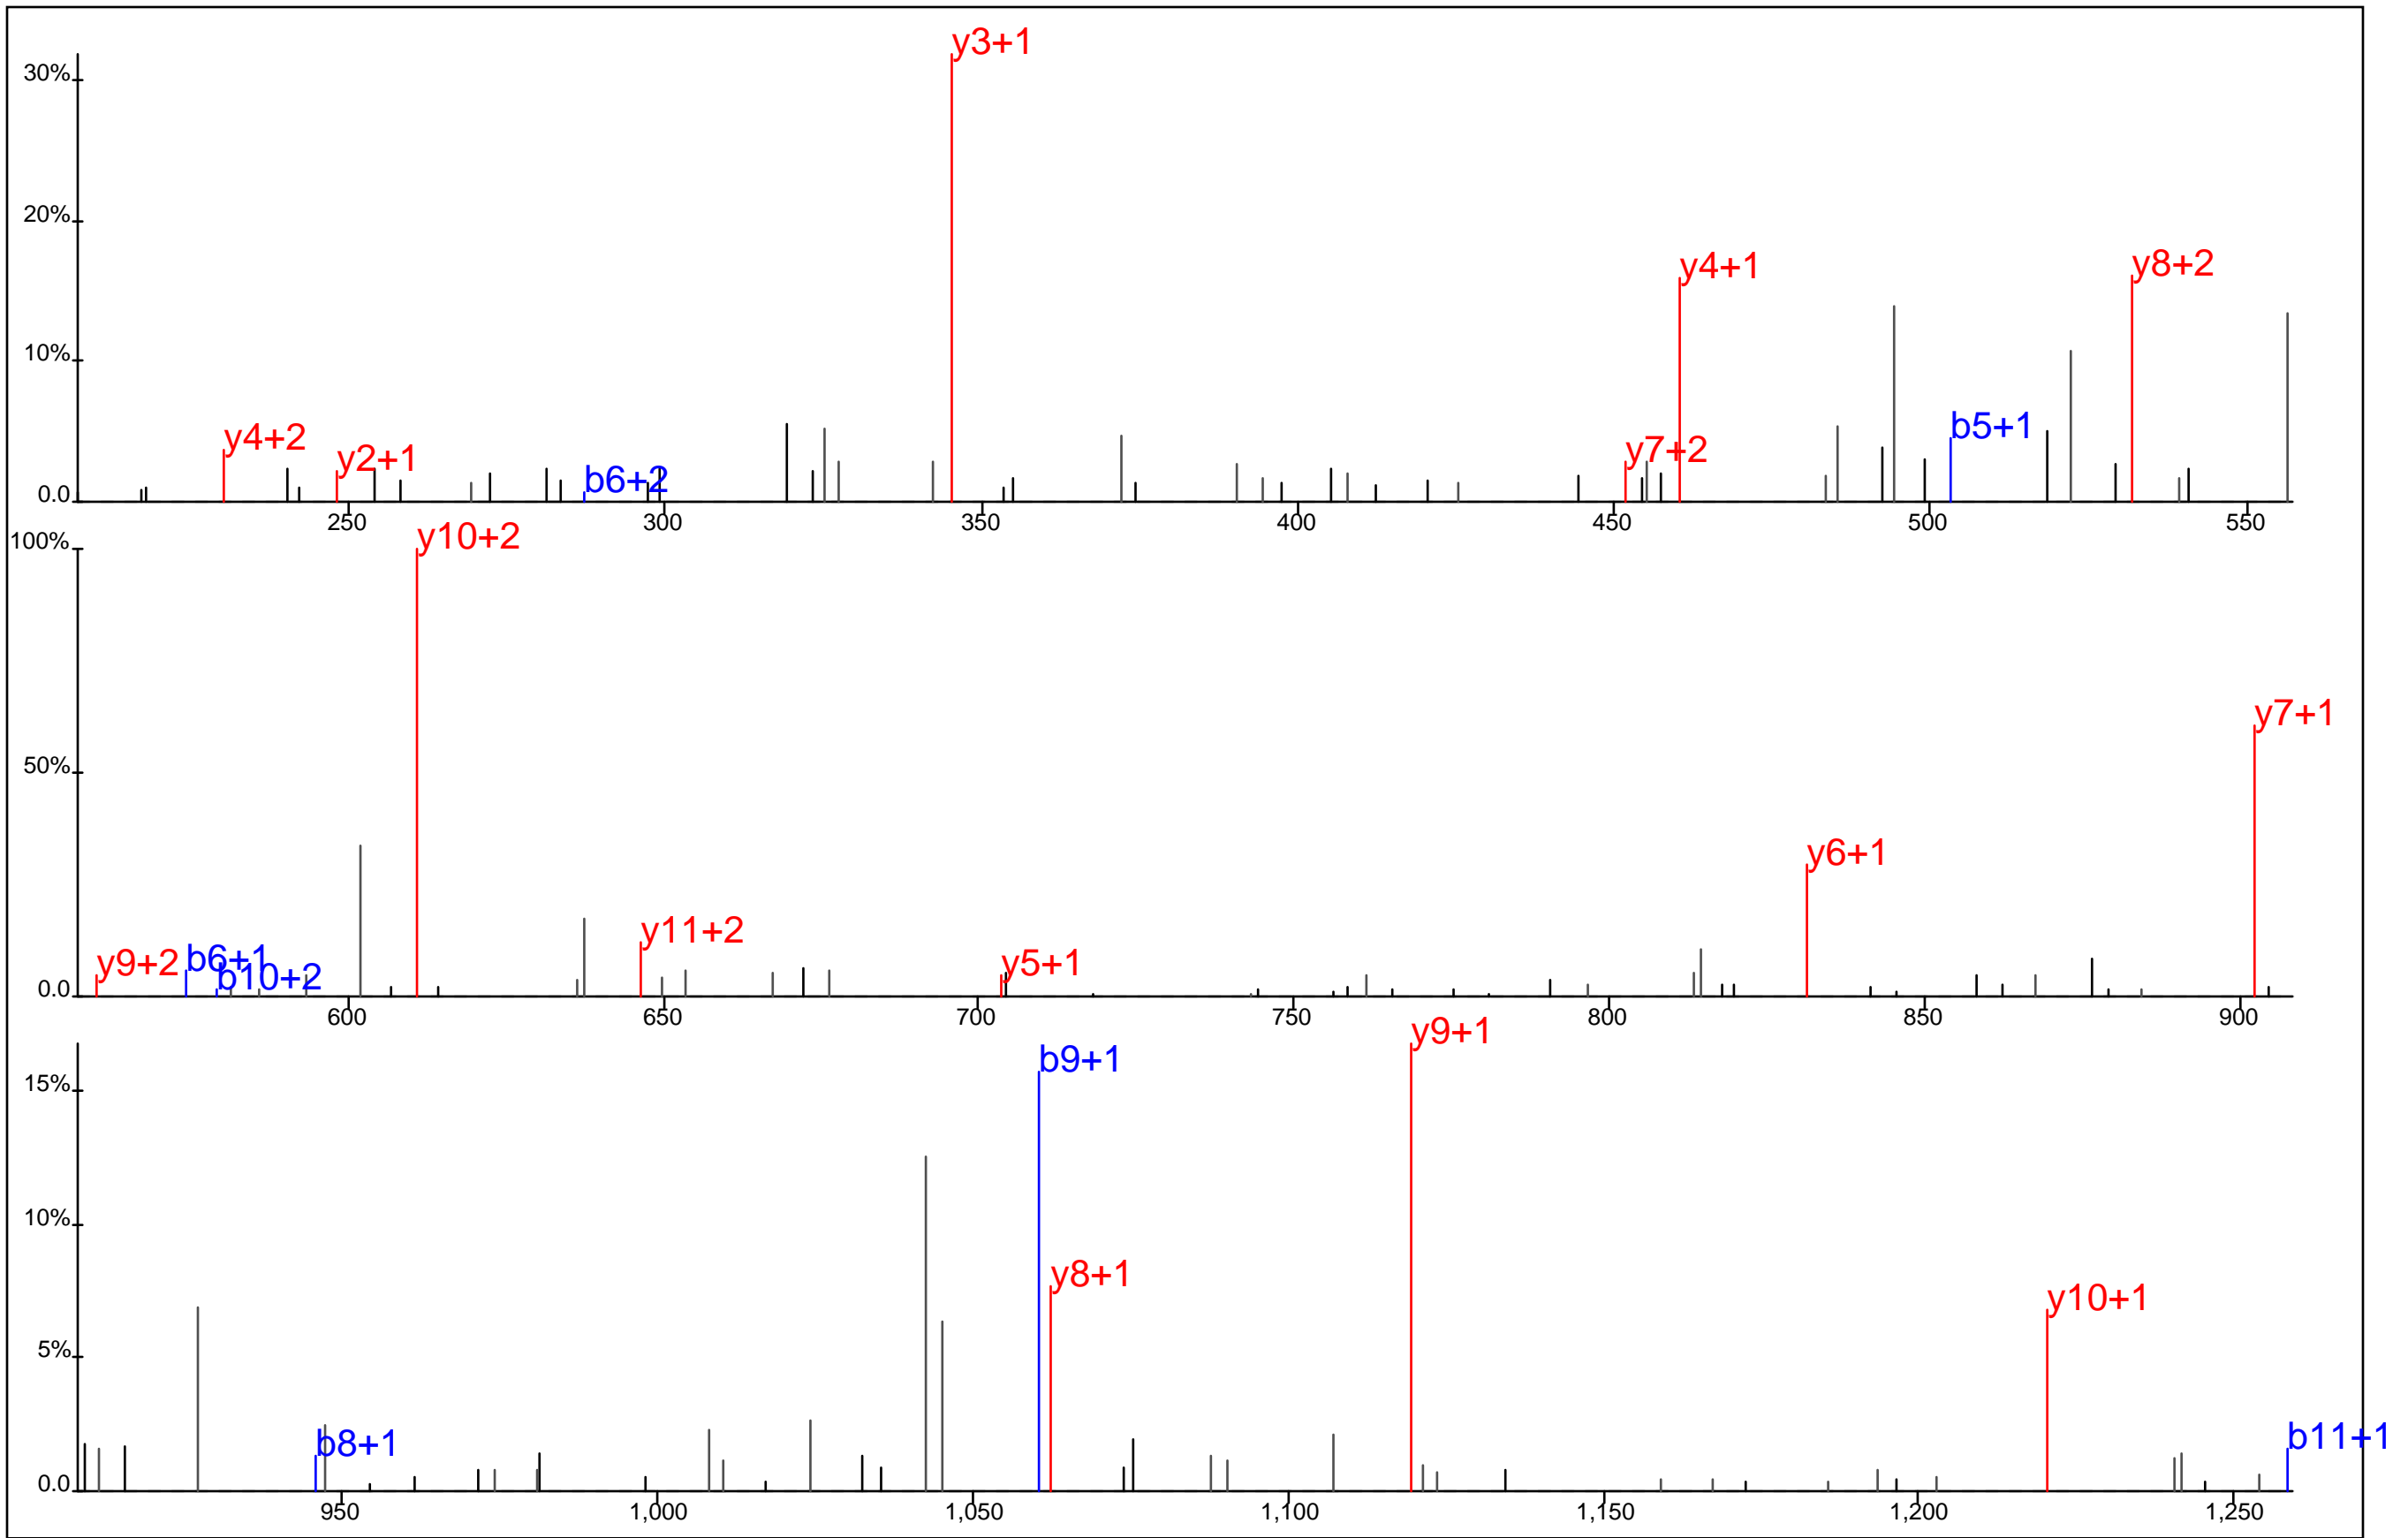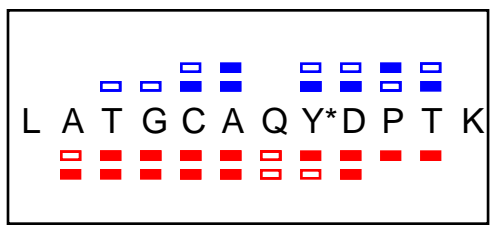

Protein Name: ITK  
 gi Accession: 0  
 Precursor Mass: 702.7967+2  
 Delta Mass: 0.281 ppm  
 XCorr: 44.58

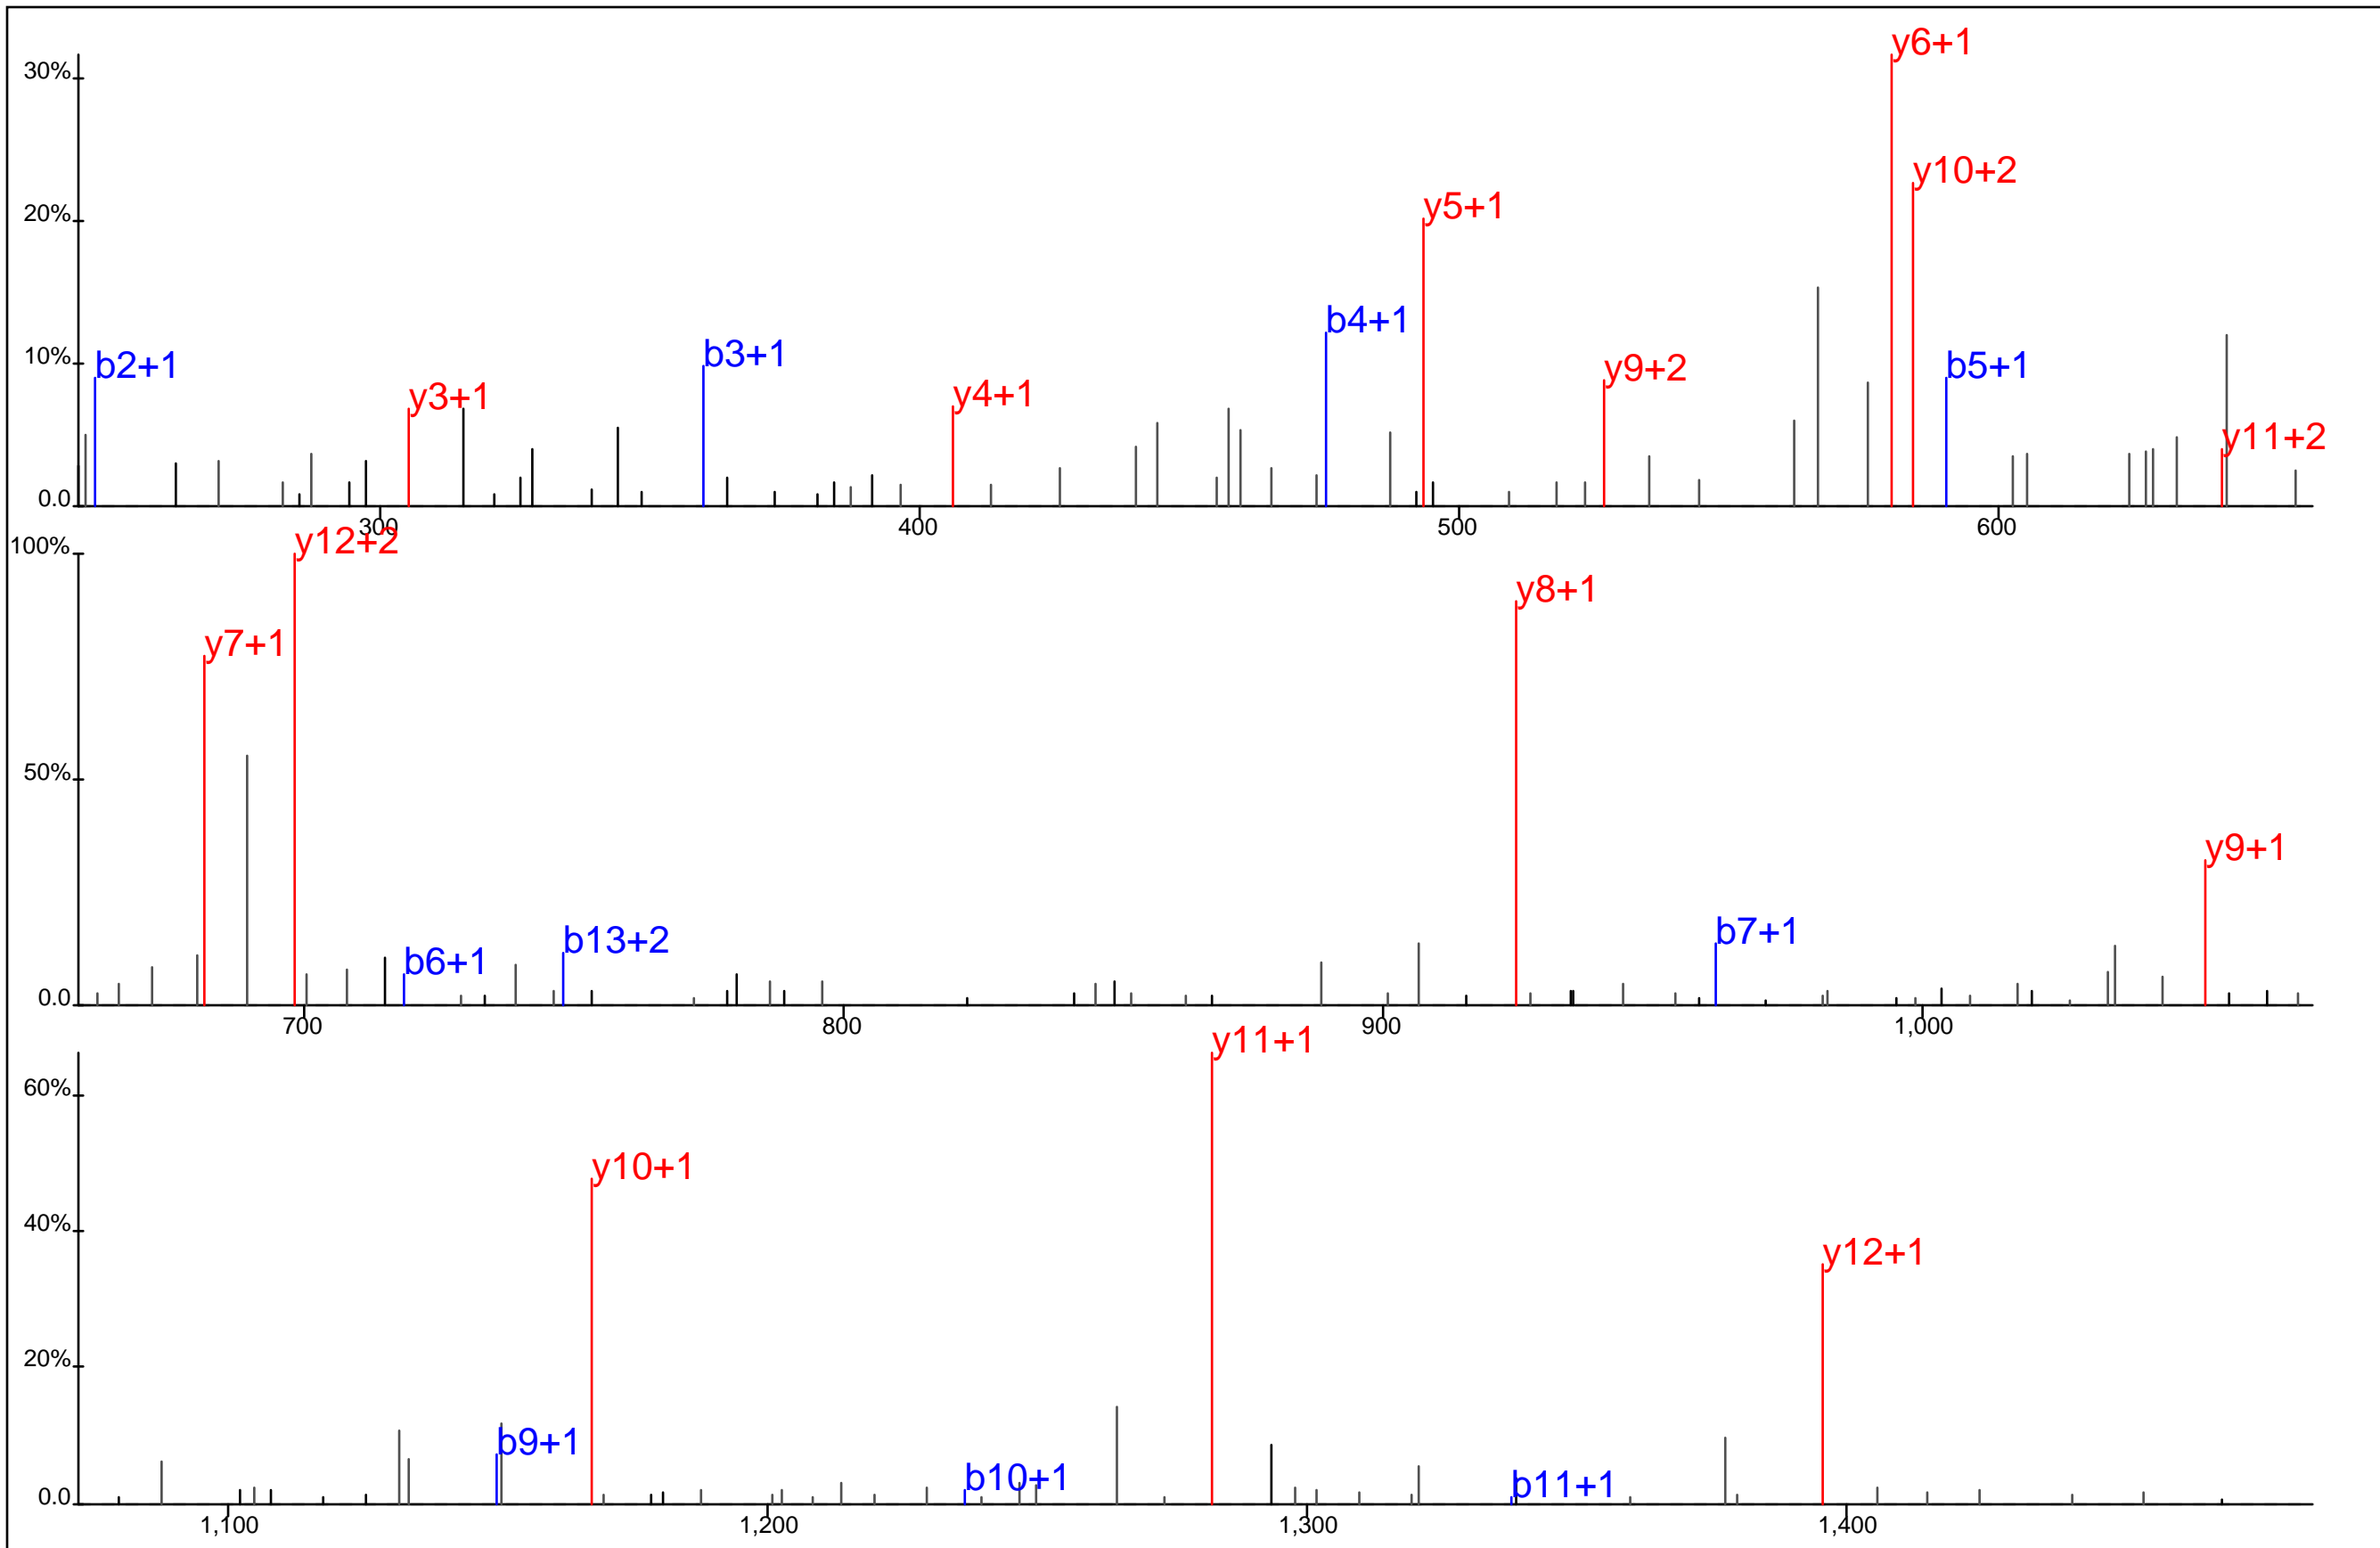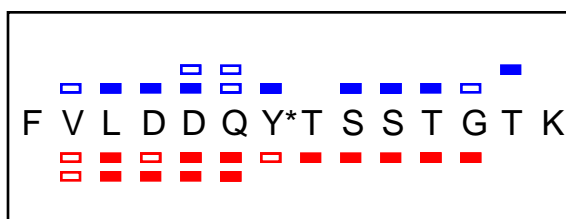

Protein Name: ITK  
 gi Accession: 0  
 Precursor Mass: 821.3537+2  
 Delta Mass: 2.601 ppm  
 XCorr: 95.8

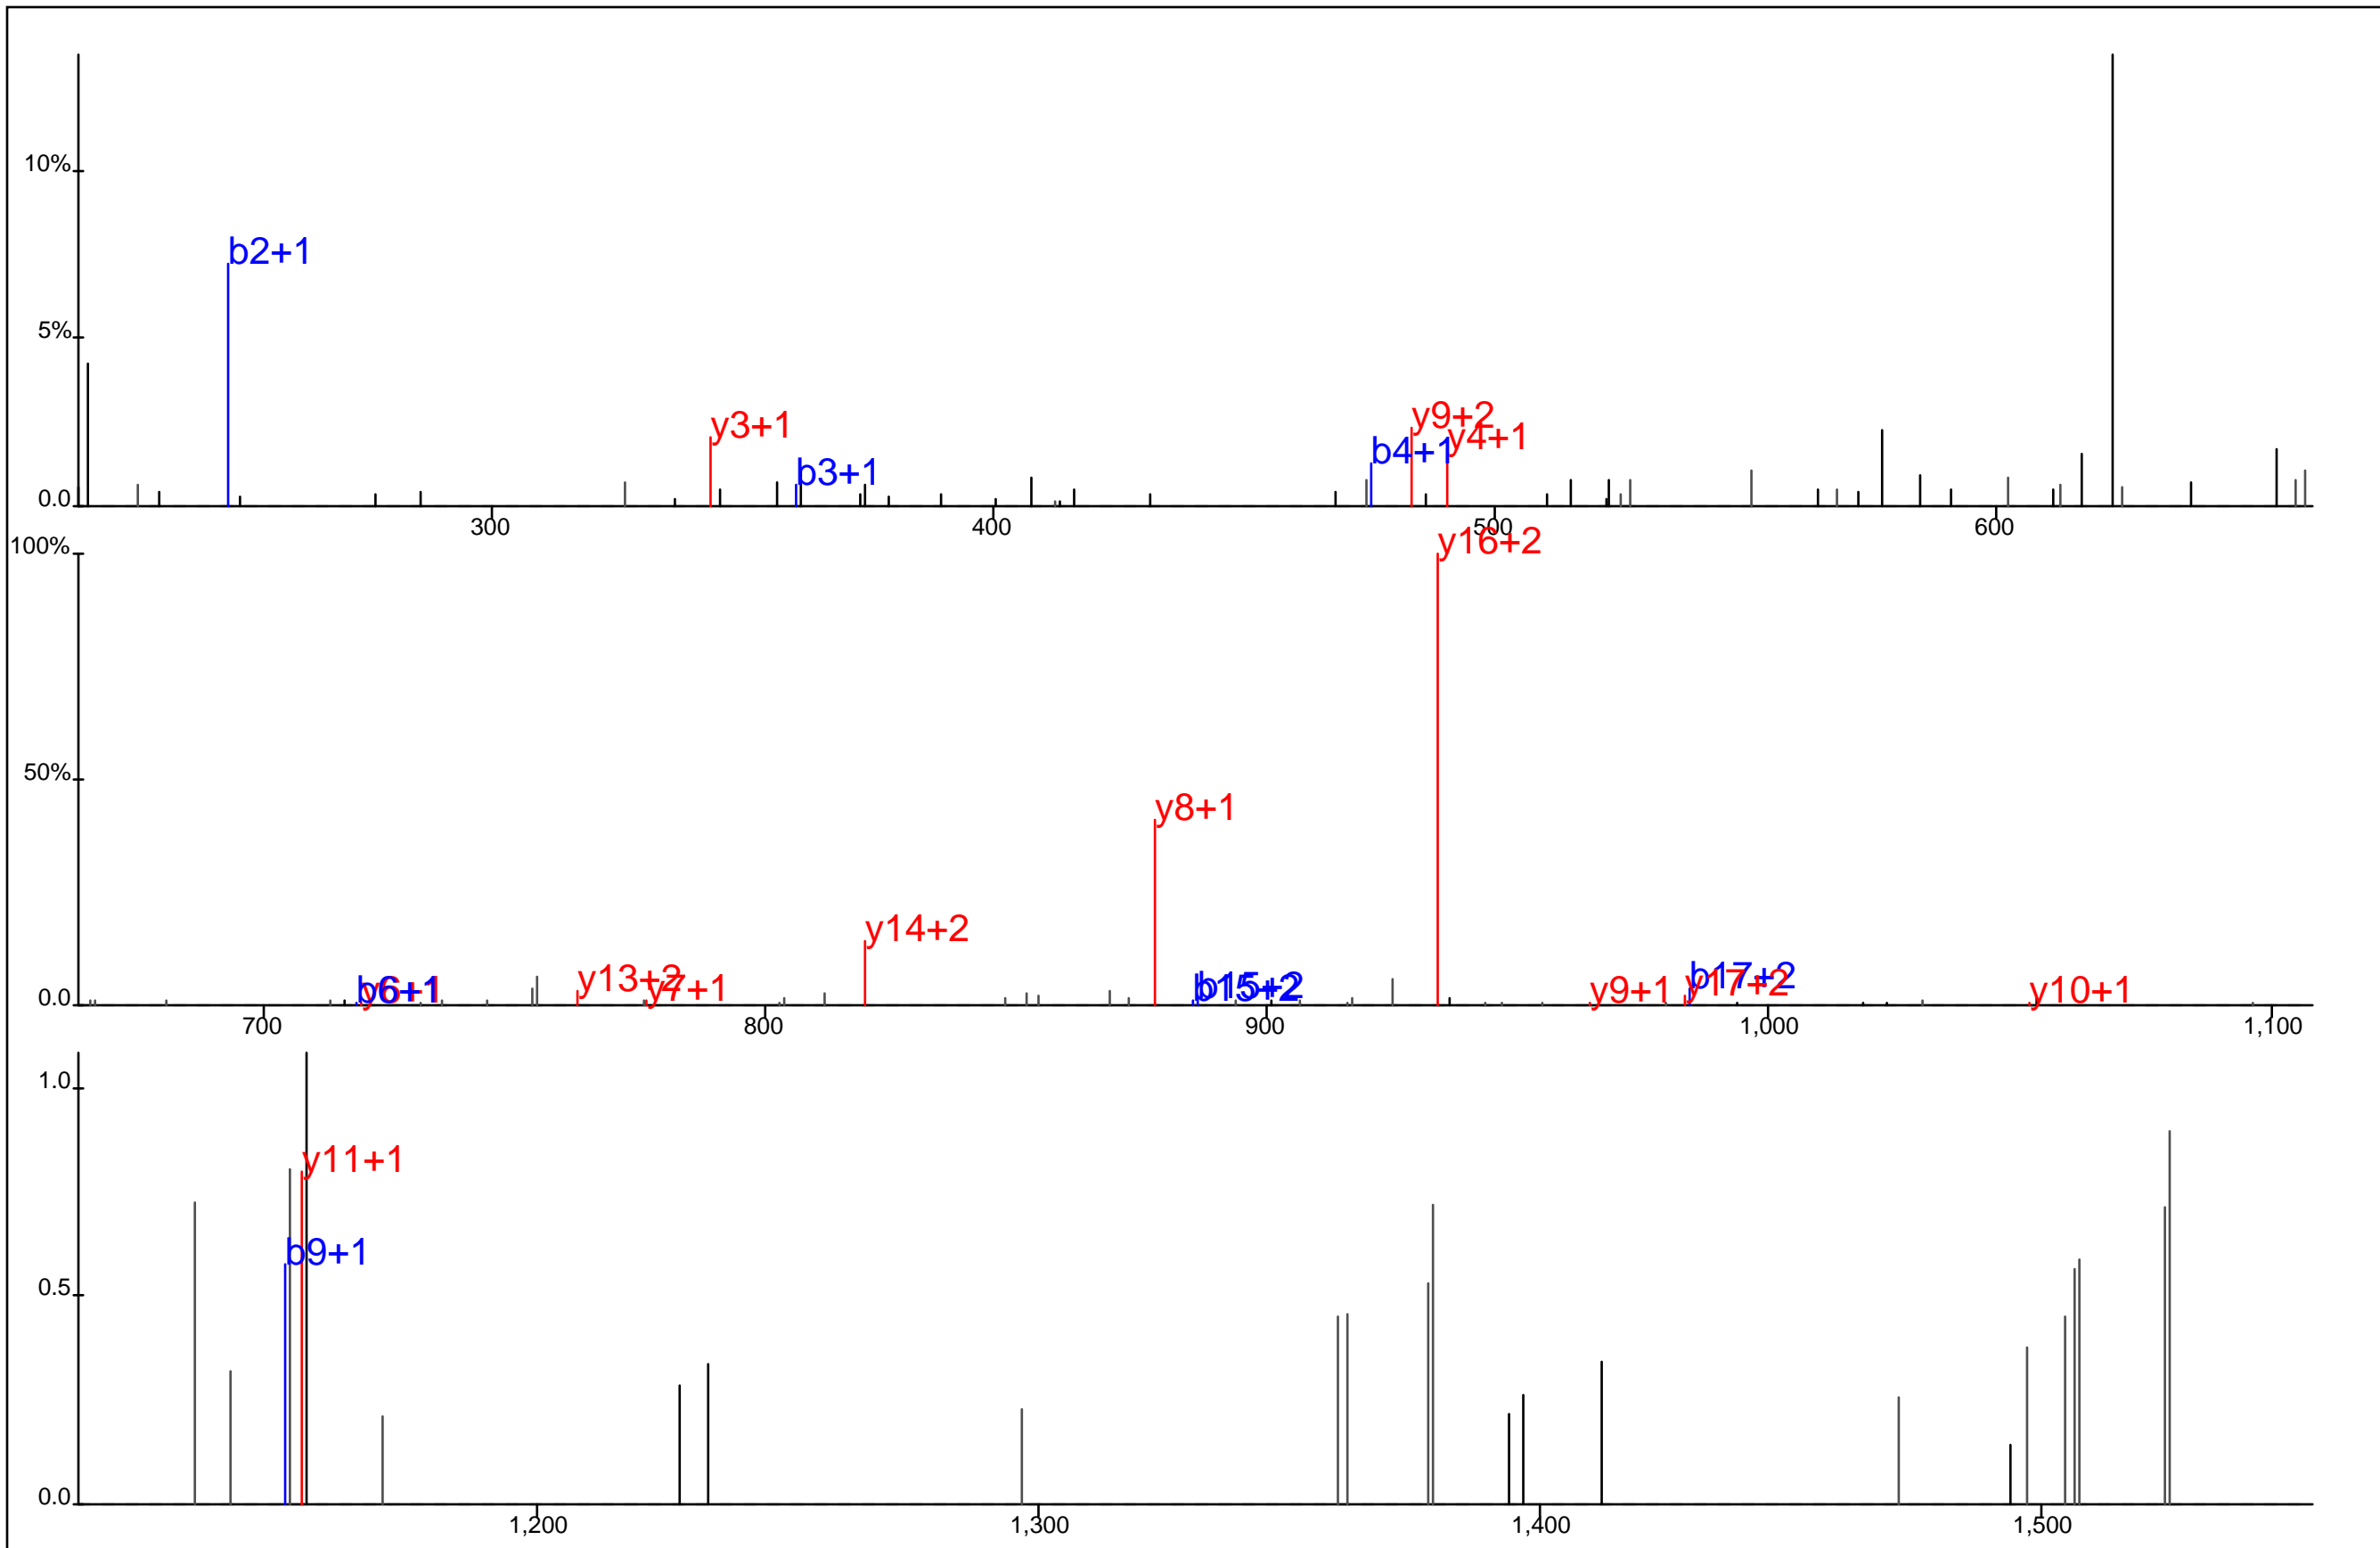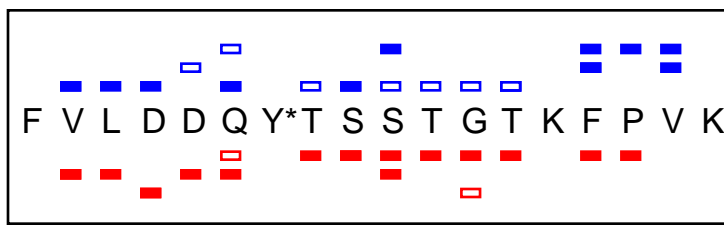

Protein Name: ITK  
 gi Accession: 0  
 Precursor Mass: 705.0005+3  
 Delta Mass: 0.965 ppm  
 XCorr: 27.54

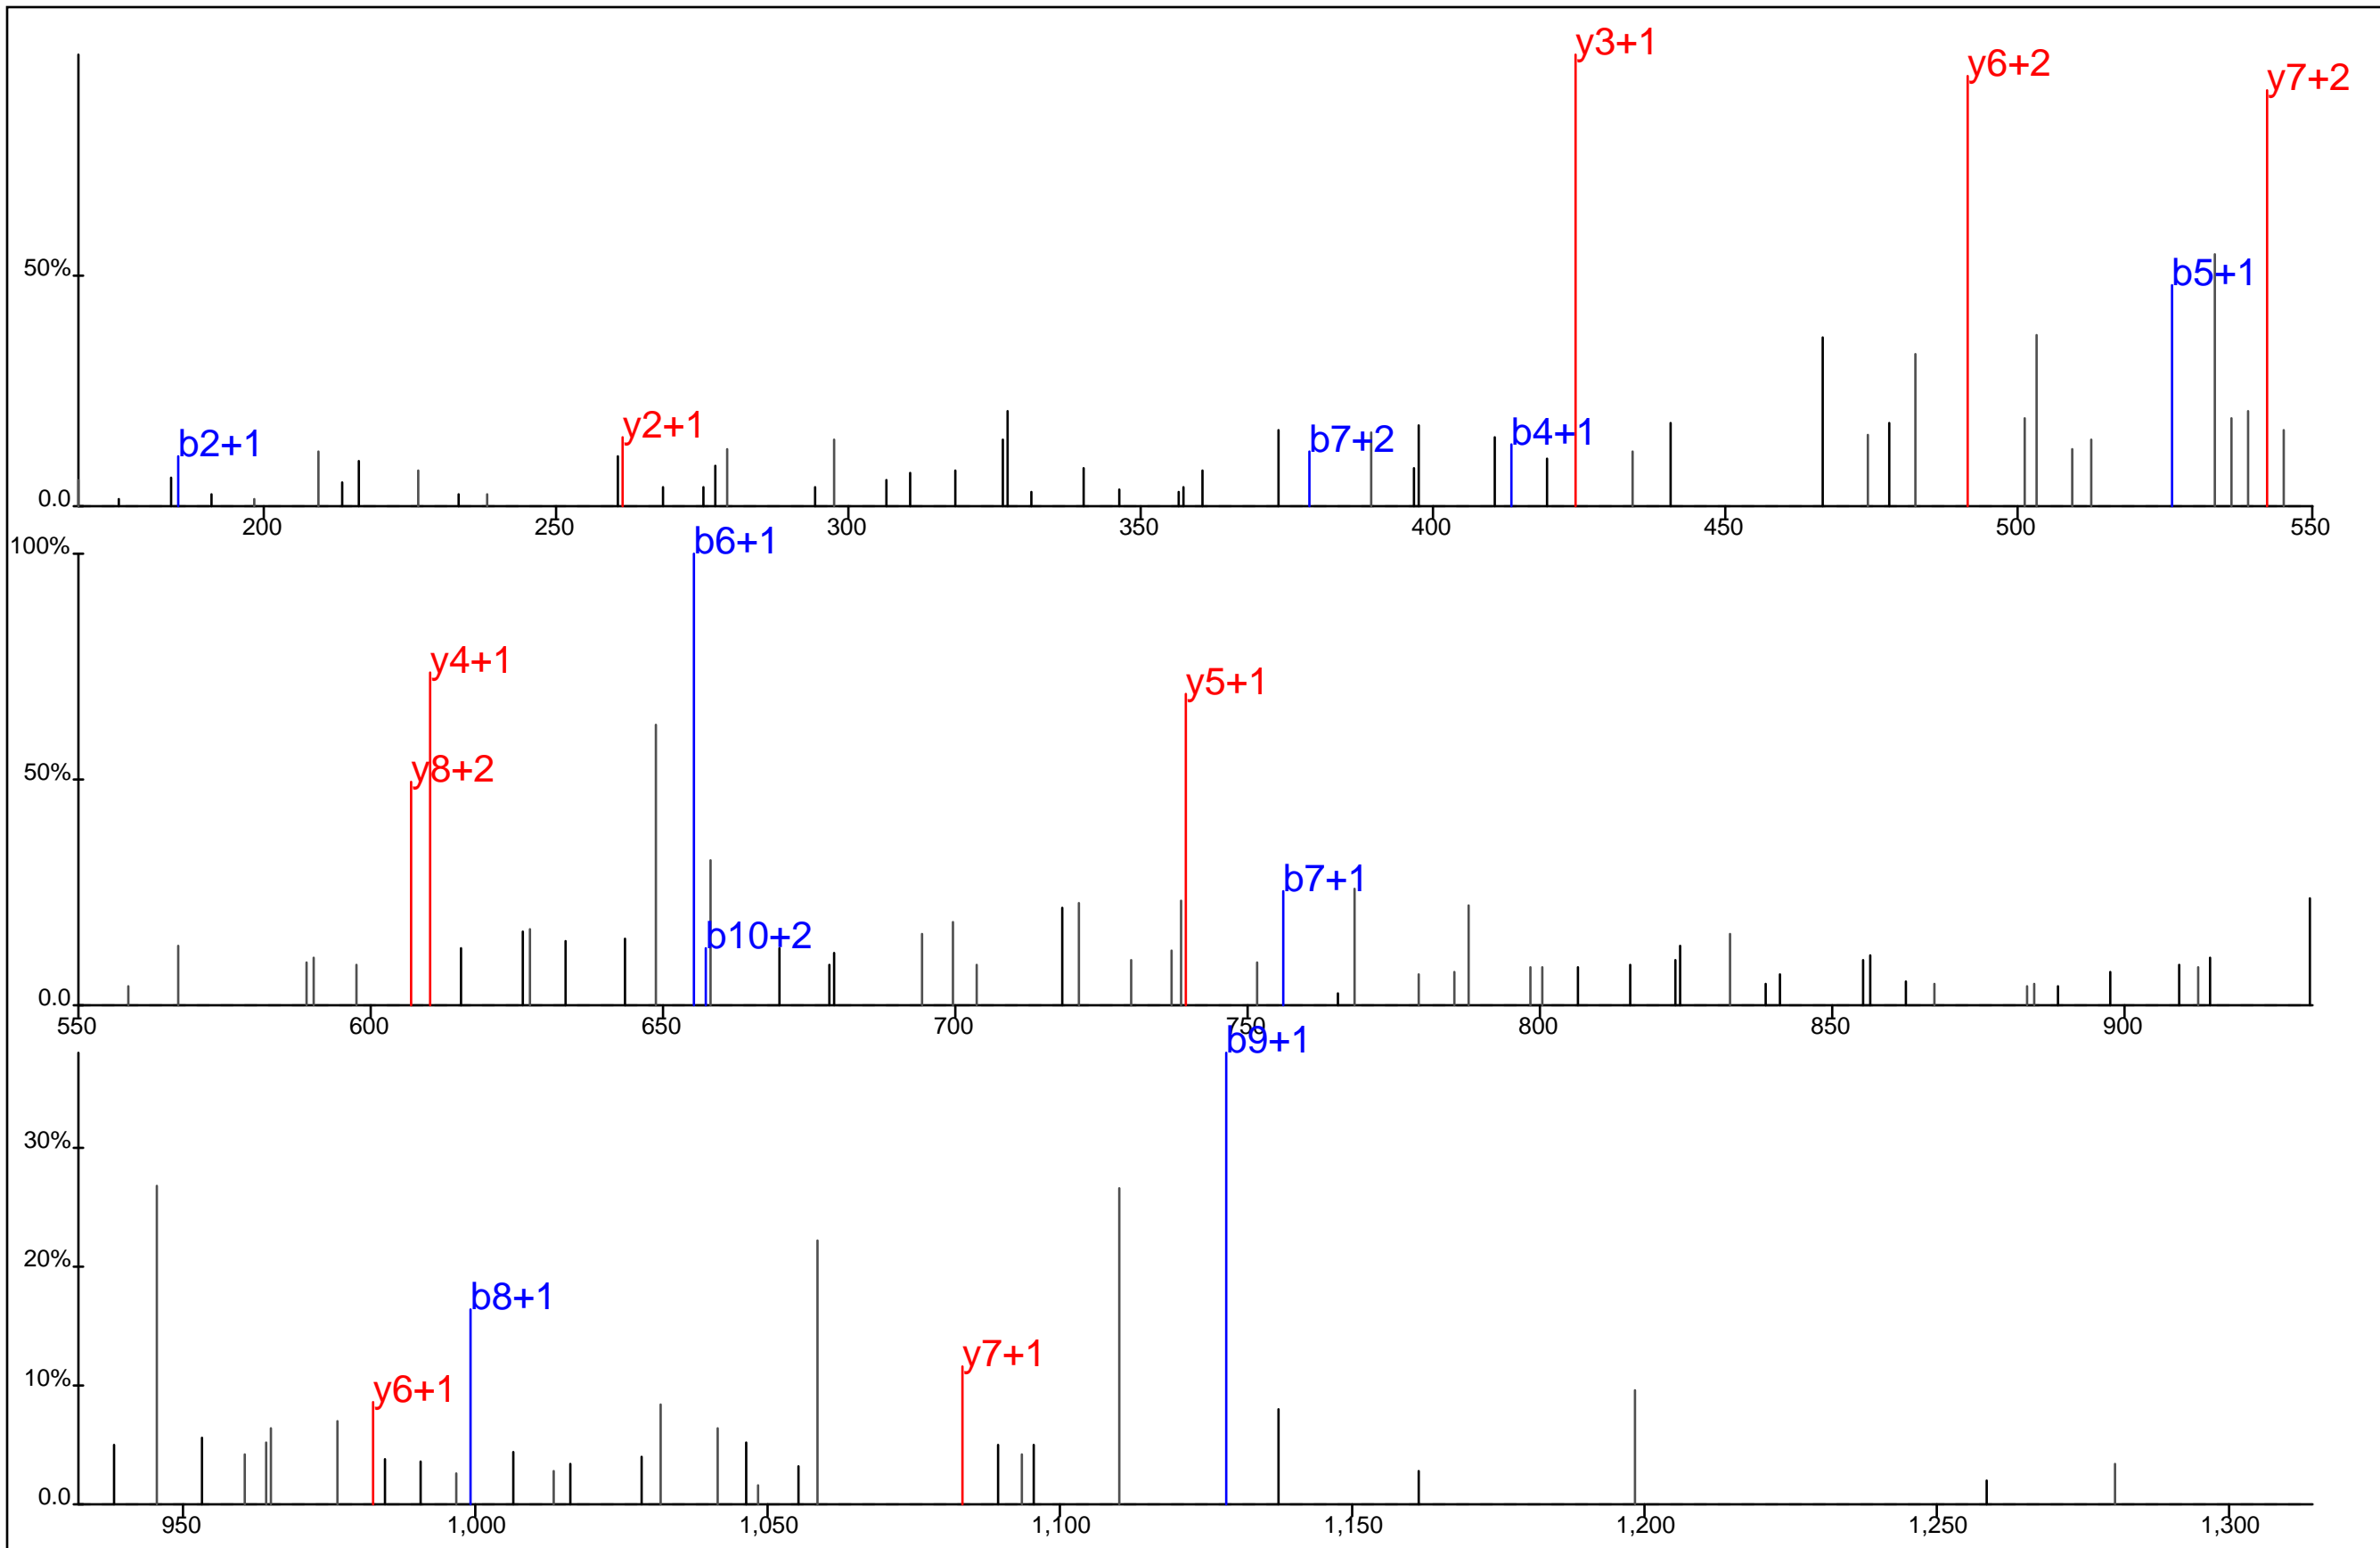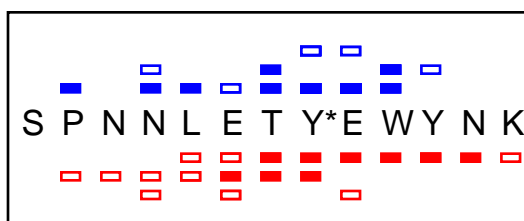

Protein Name: ITK  
 gi Accession: 0  
 Precursor Mass: 579.9104+3  
 Delta Mass: 0.625 ppm  
 XCorr: 33.72

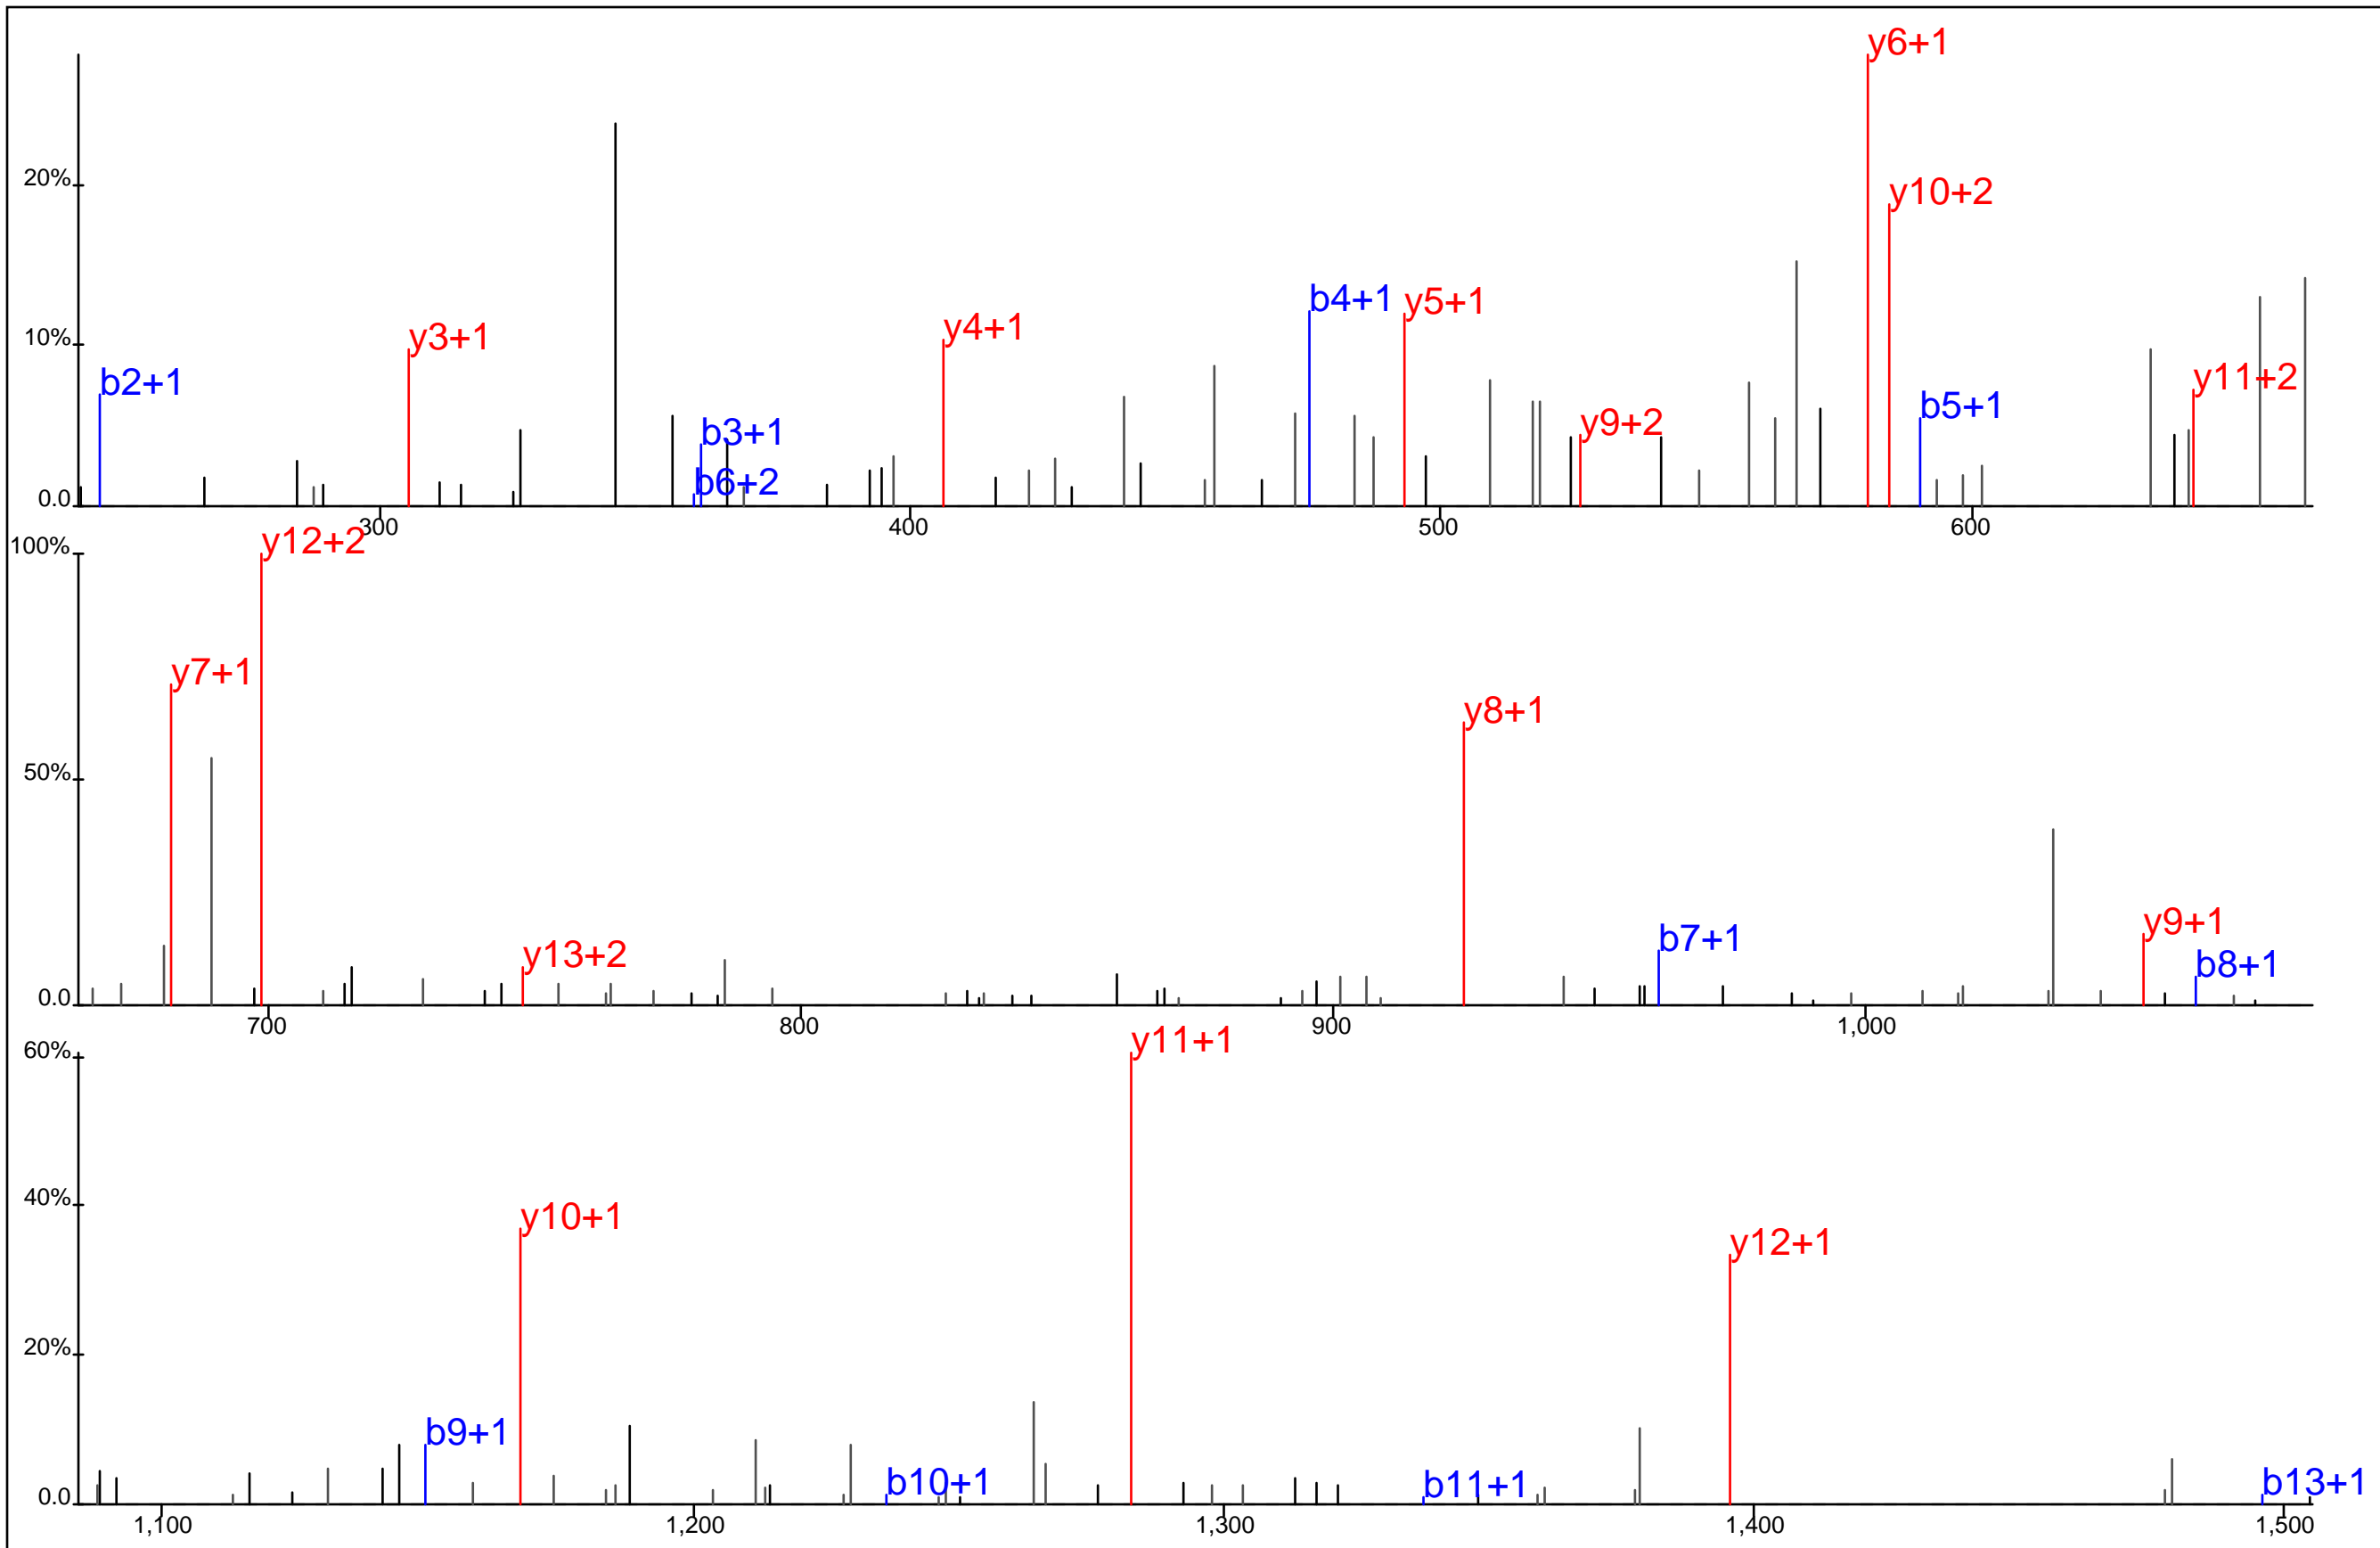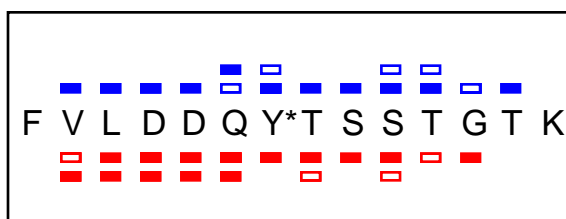

Protein Name: ITK  
 gi Accession: 0  
 Precursor Mass: 821.3560+2  
 Delta Mass: 0.224 ppm  
 XCorr: 88.44



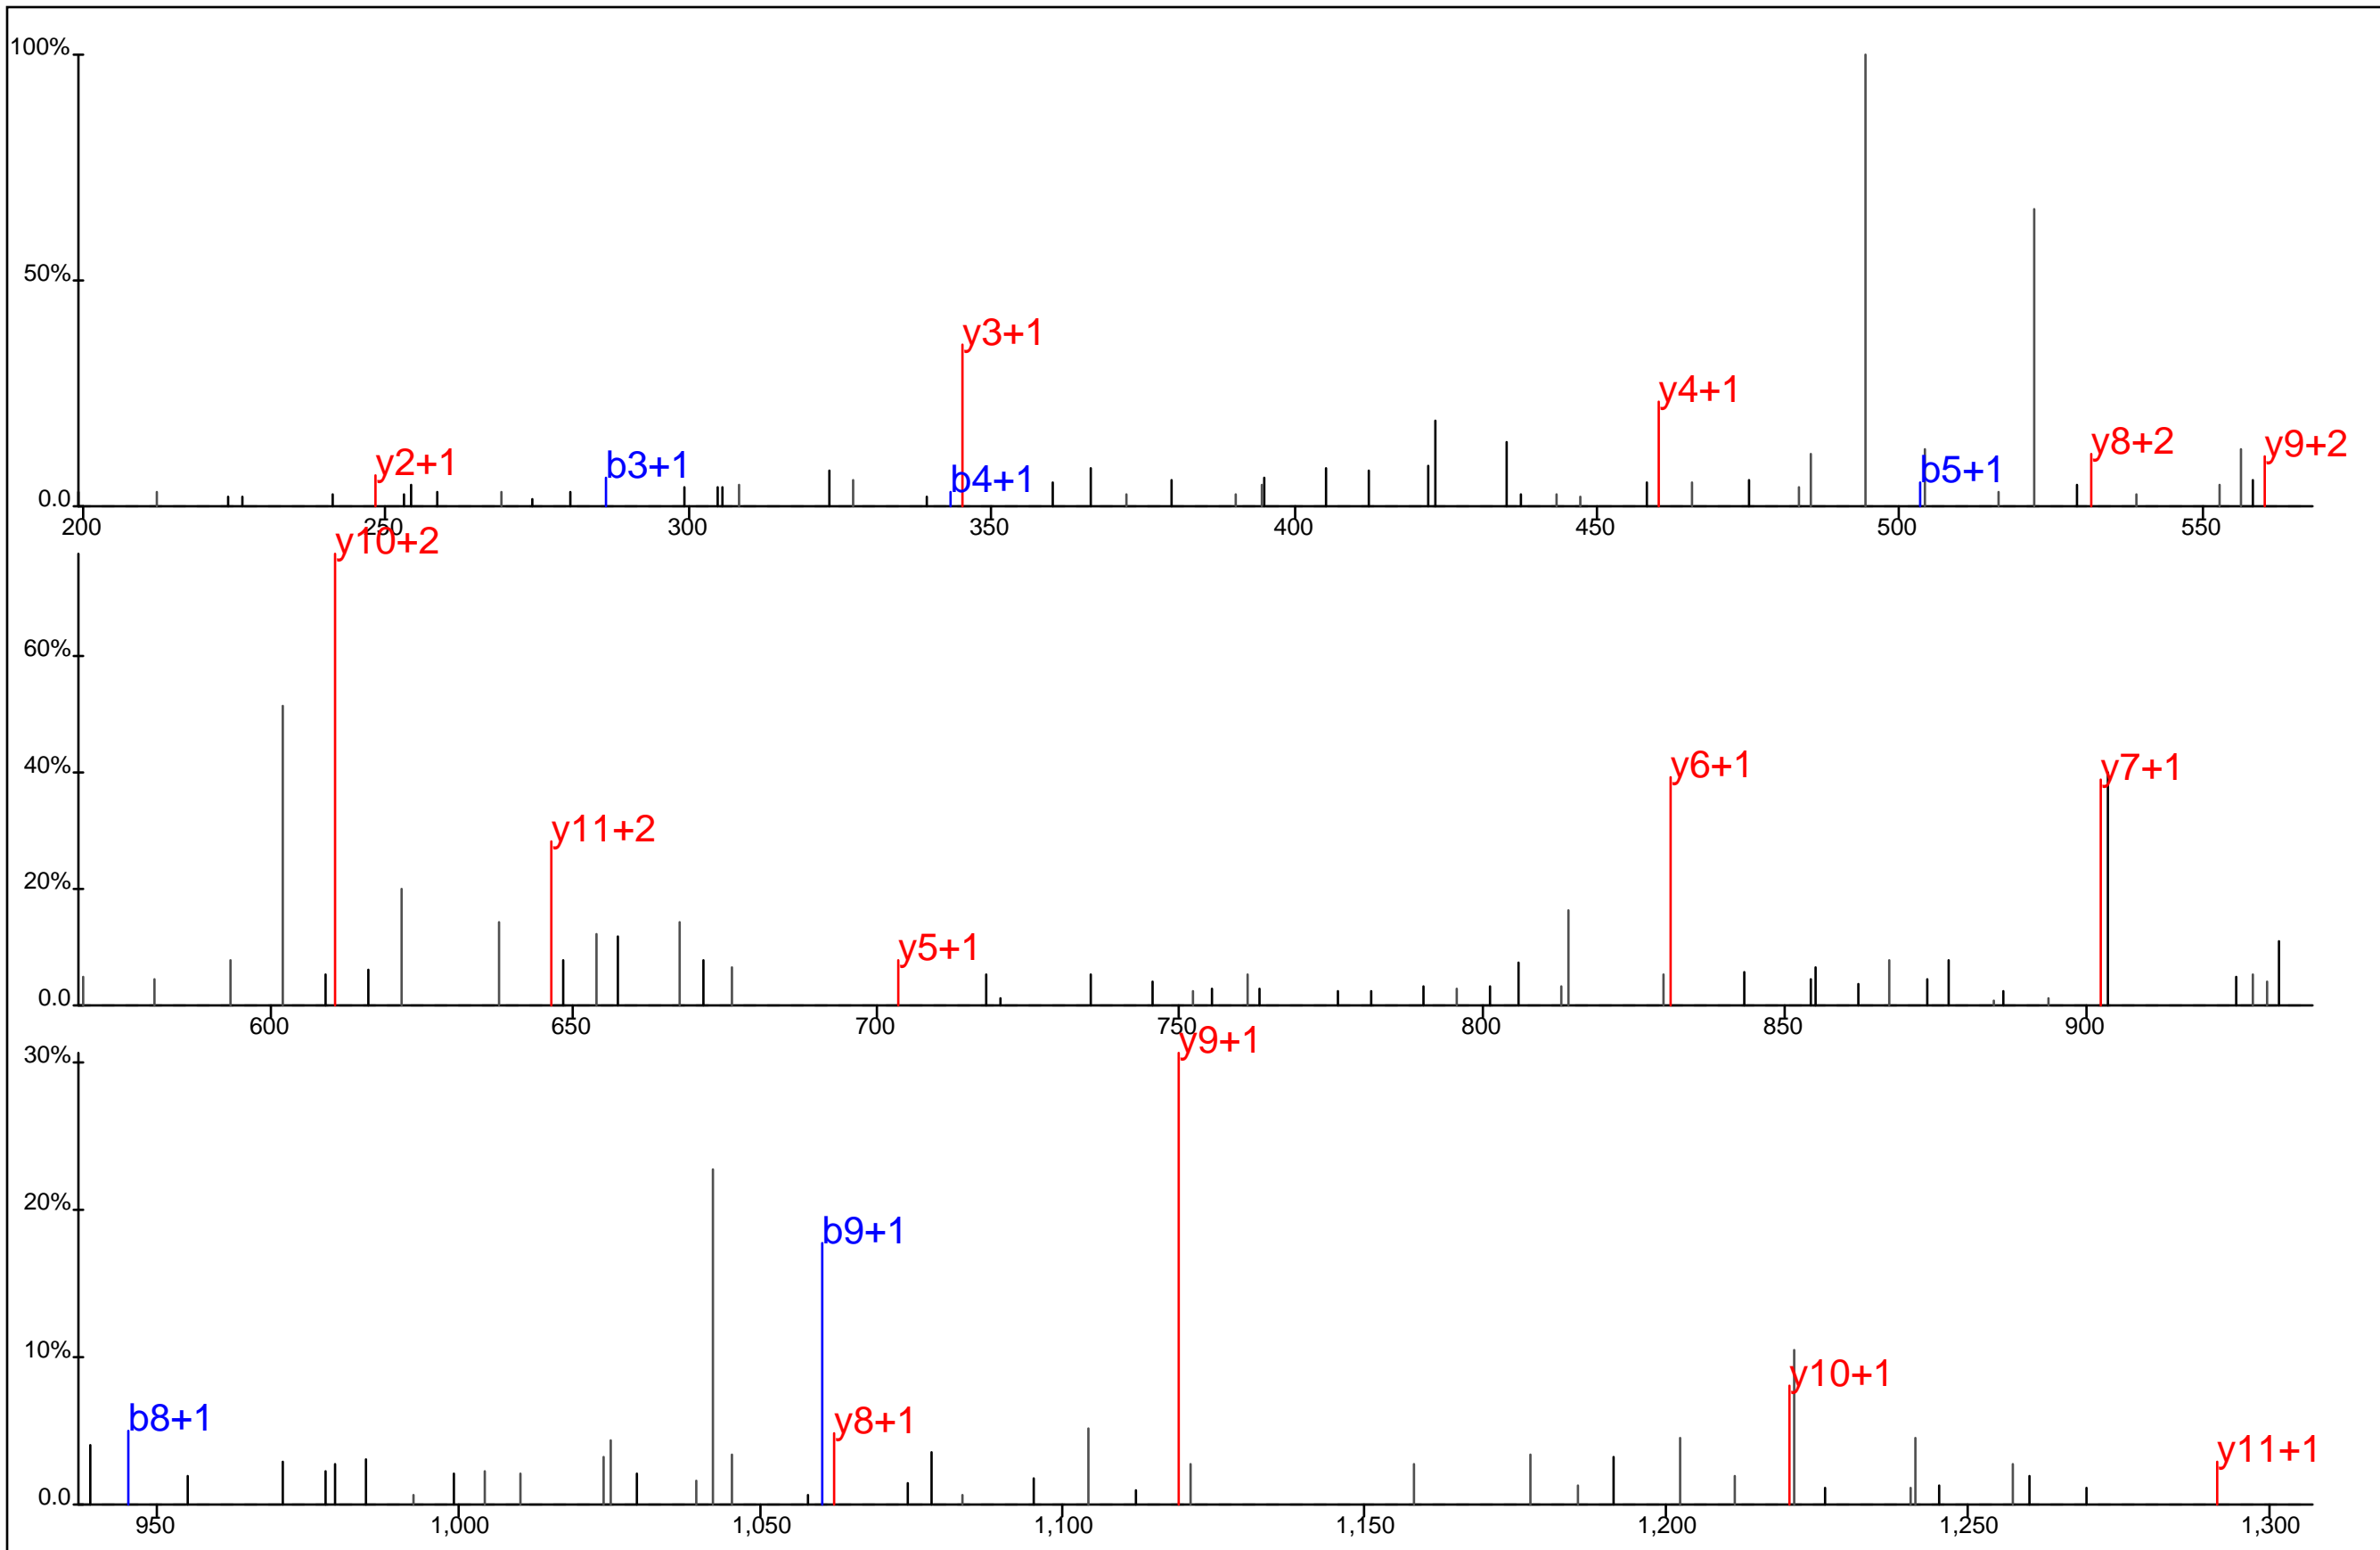

■ ■  
■ ■ □ □ □ □ □ □ □ □  
**L A T G C A Q Y\* D P T K**  
■ ■ ■ ■ ■ ■ ■ ■ ■ ■

Protein Name: ITK  
 gi Accession: 0  
 Precursor Mass: 702.7979+2  
 Delta Mass: 1.371 ppm  
 XCorr: 49.4

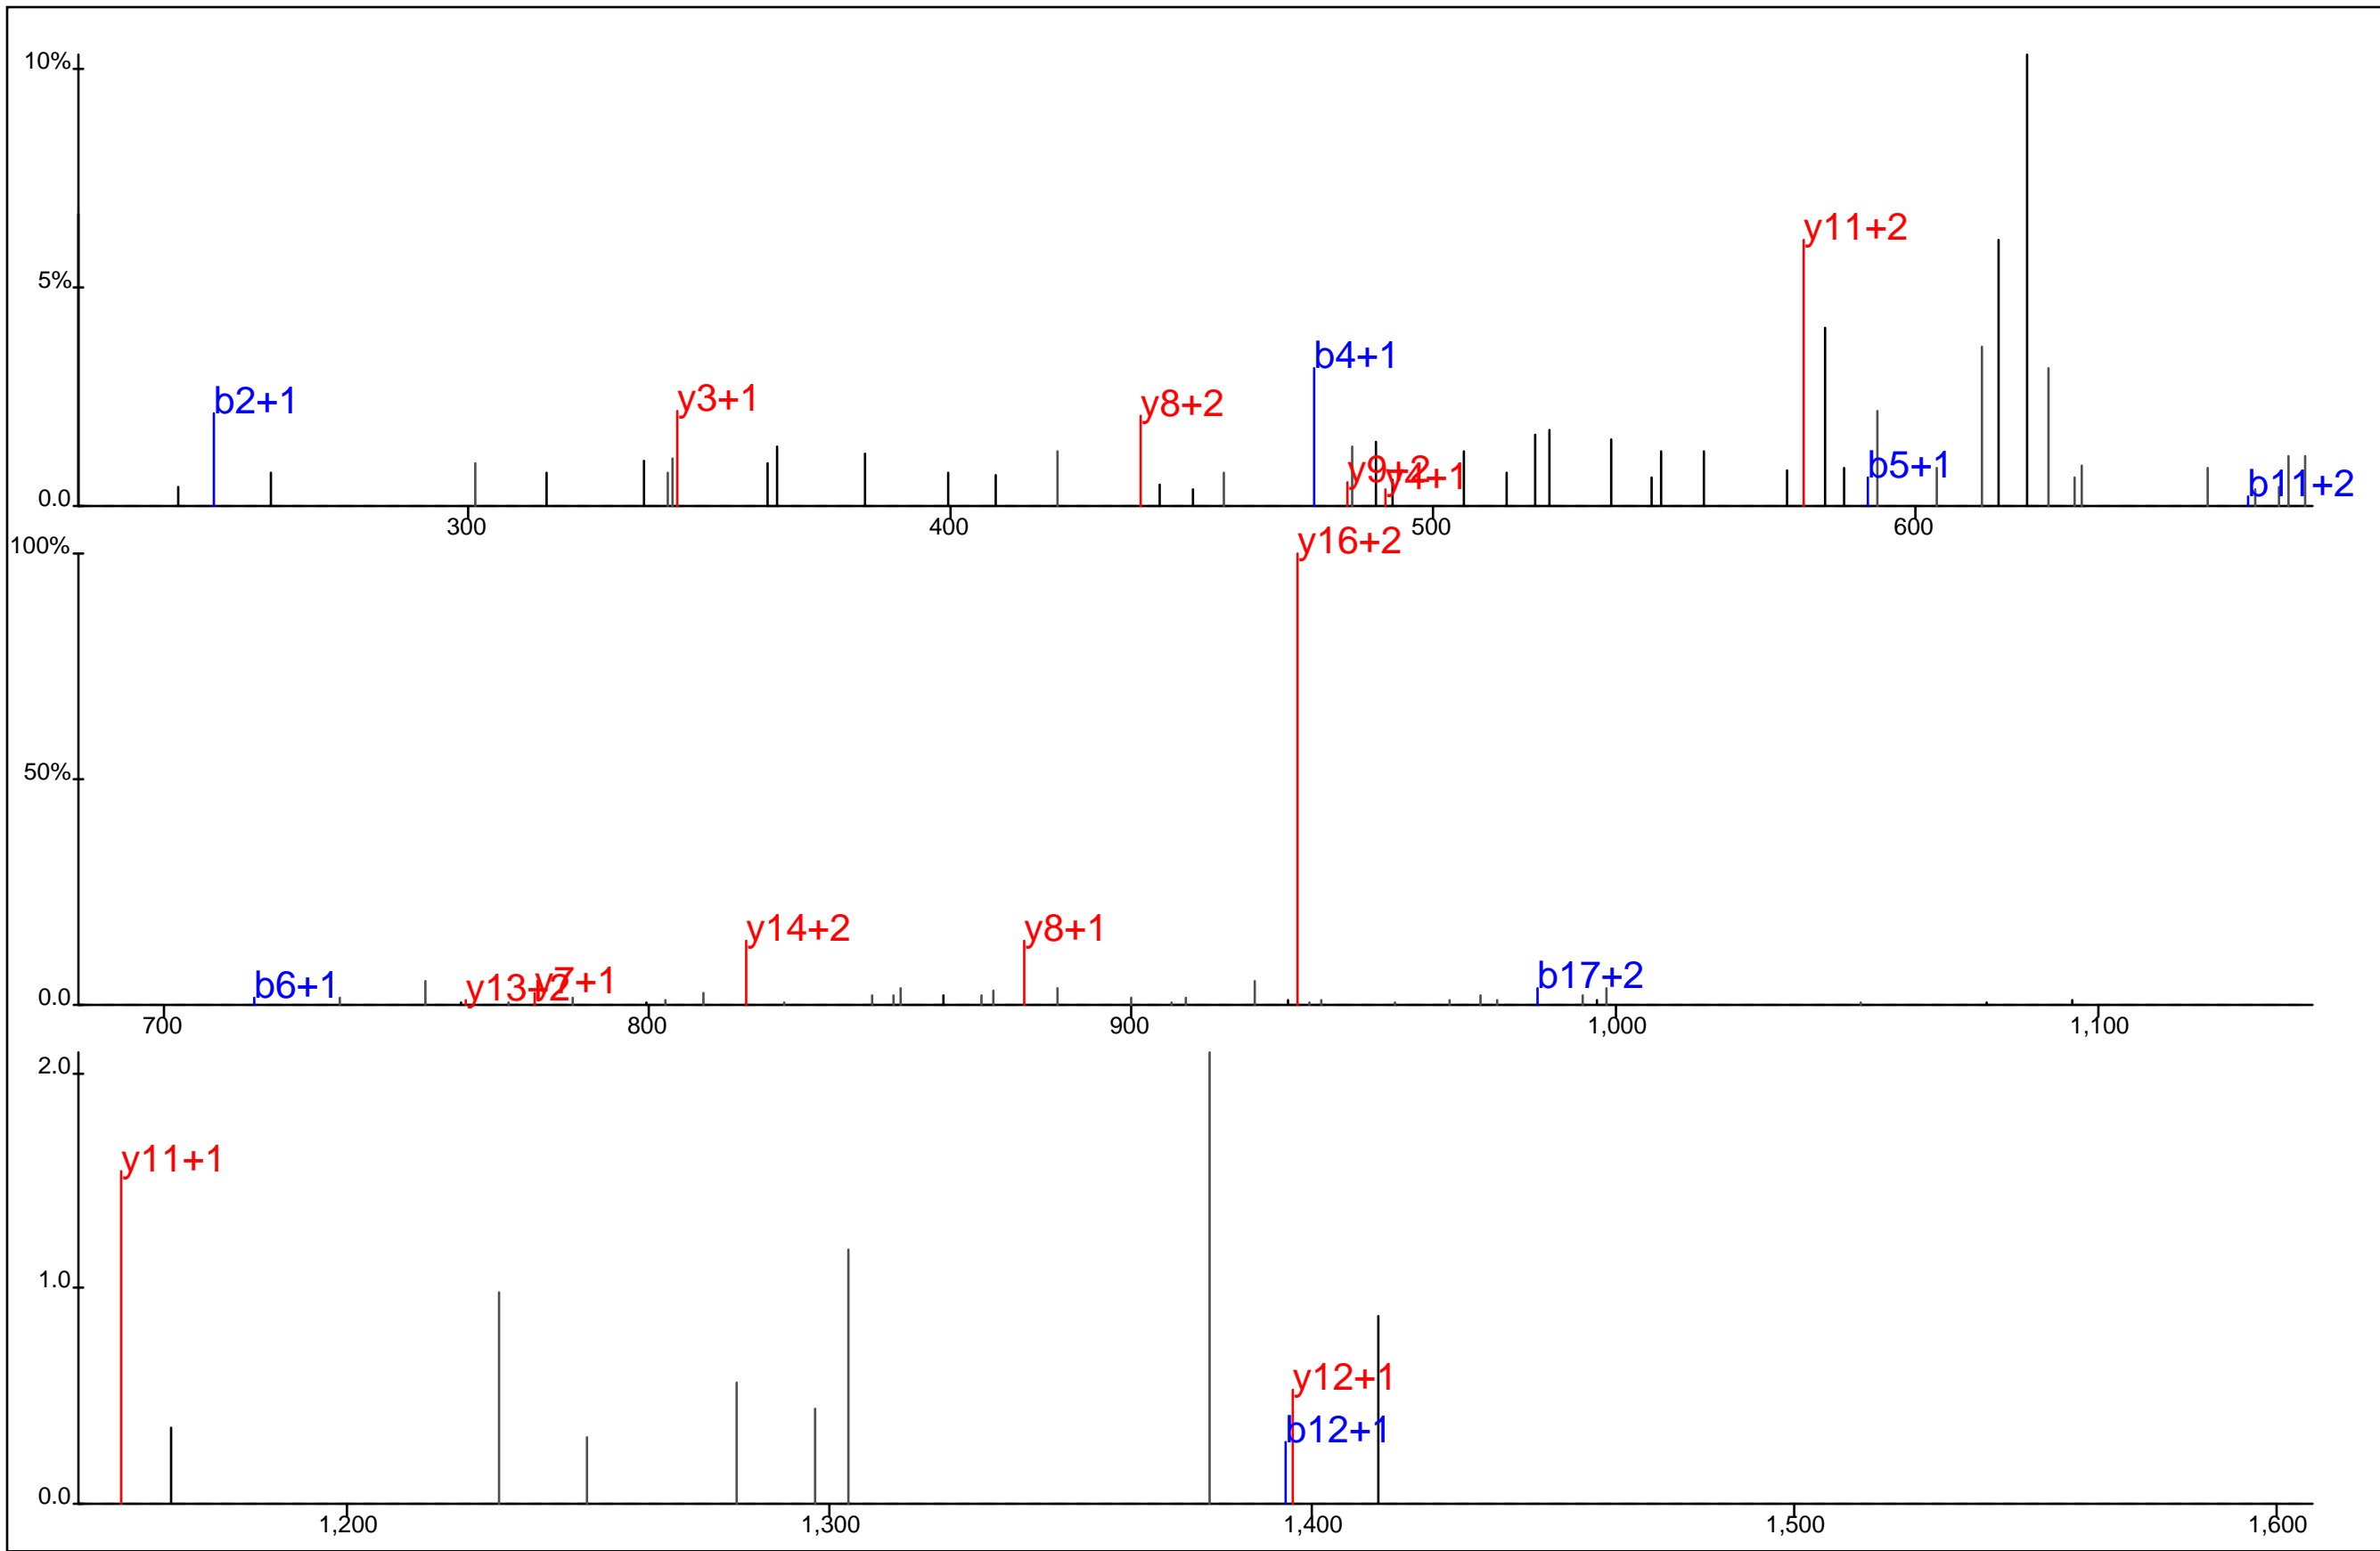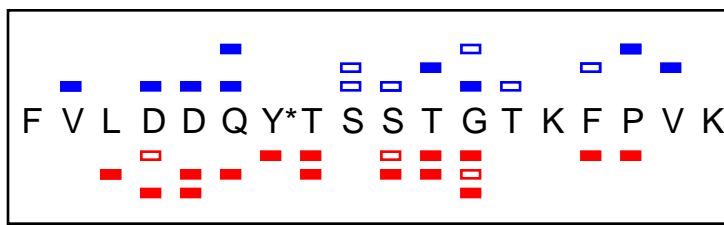

Protein Name: ITK  
 gi Accession: 0  
 Precursor Mass: 705.0007+3  
 Delta Mass: 0.706 ppm  
 XCorr: 23.95

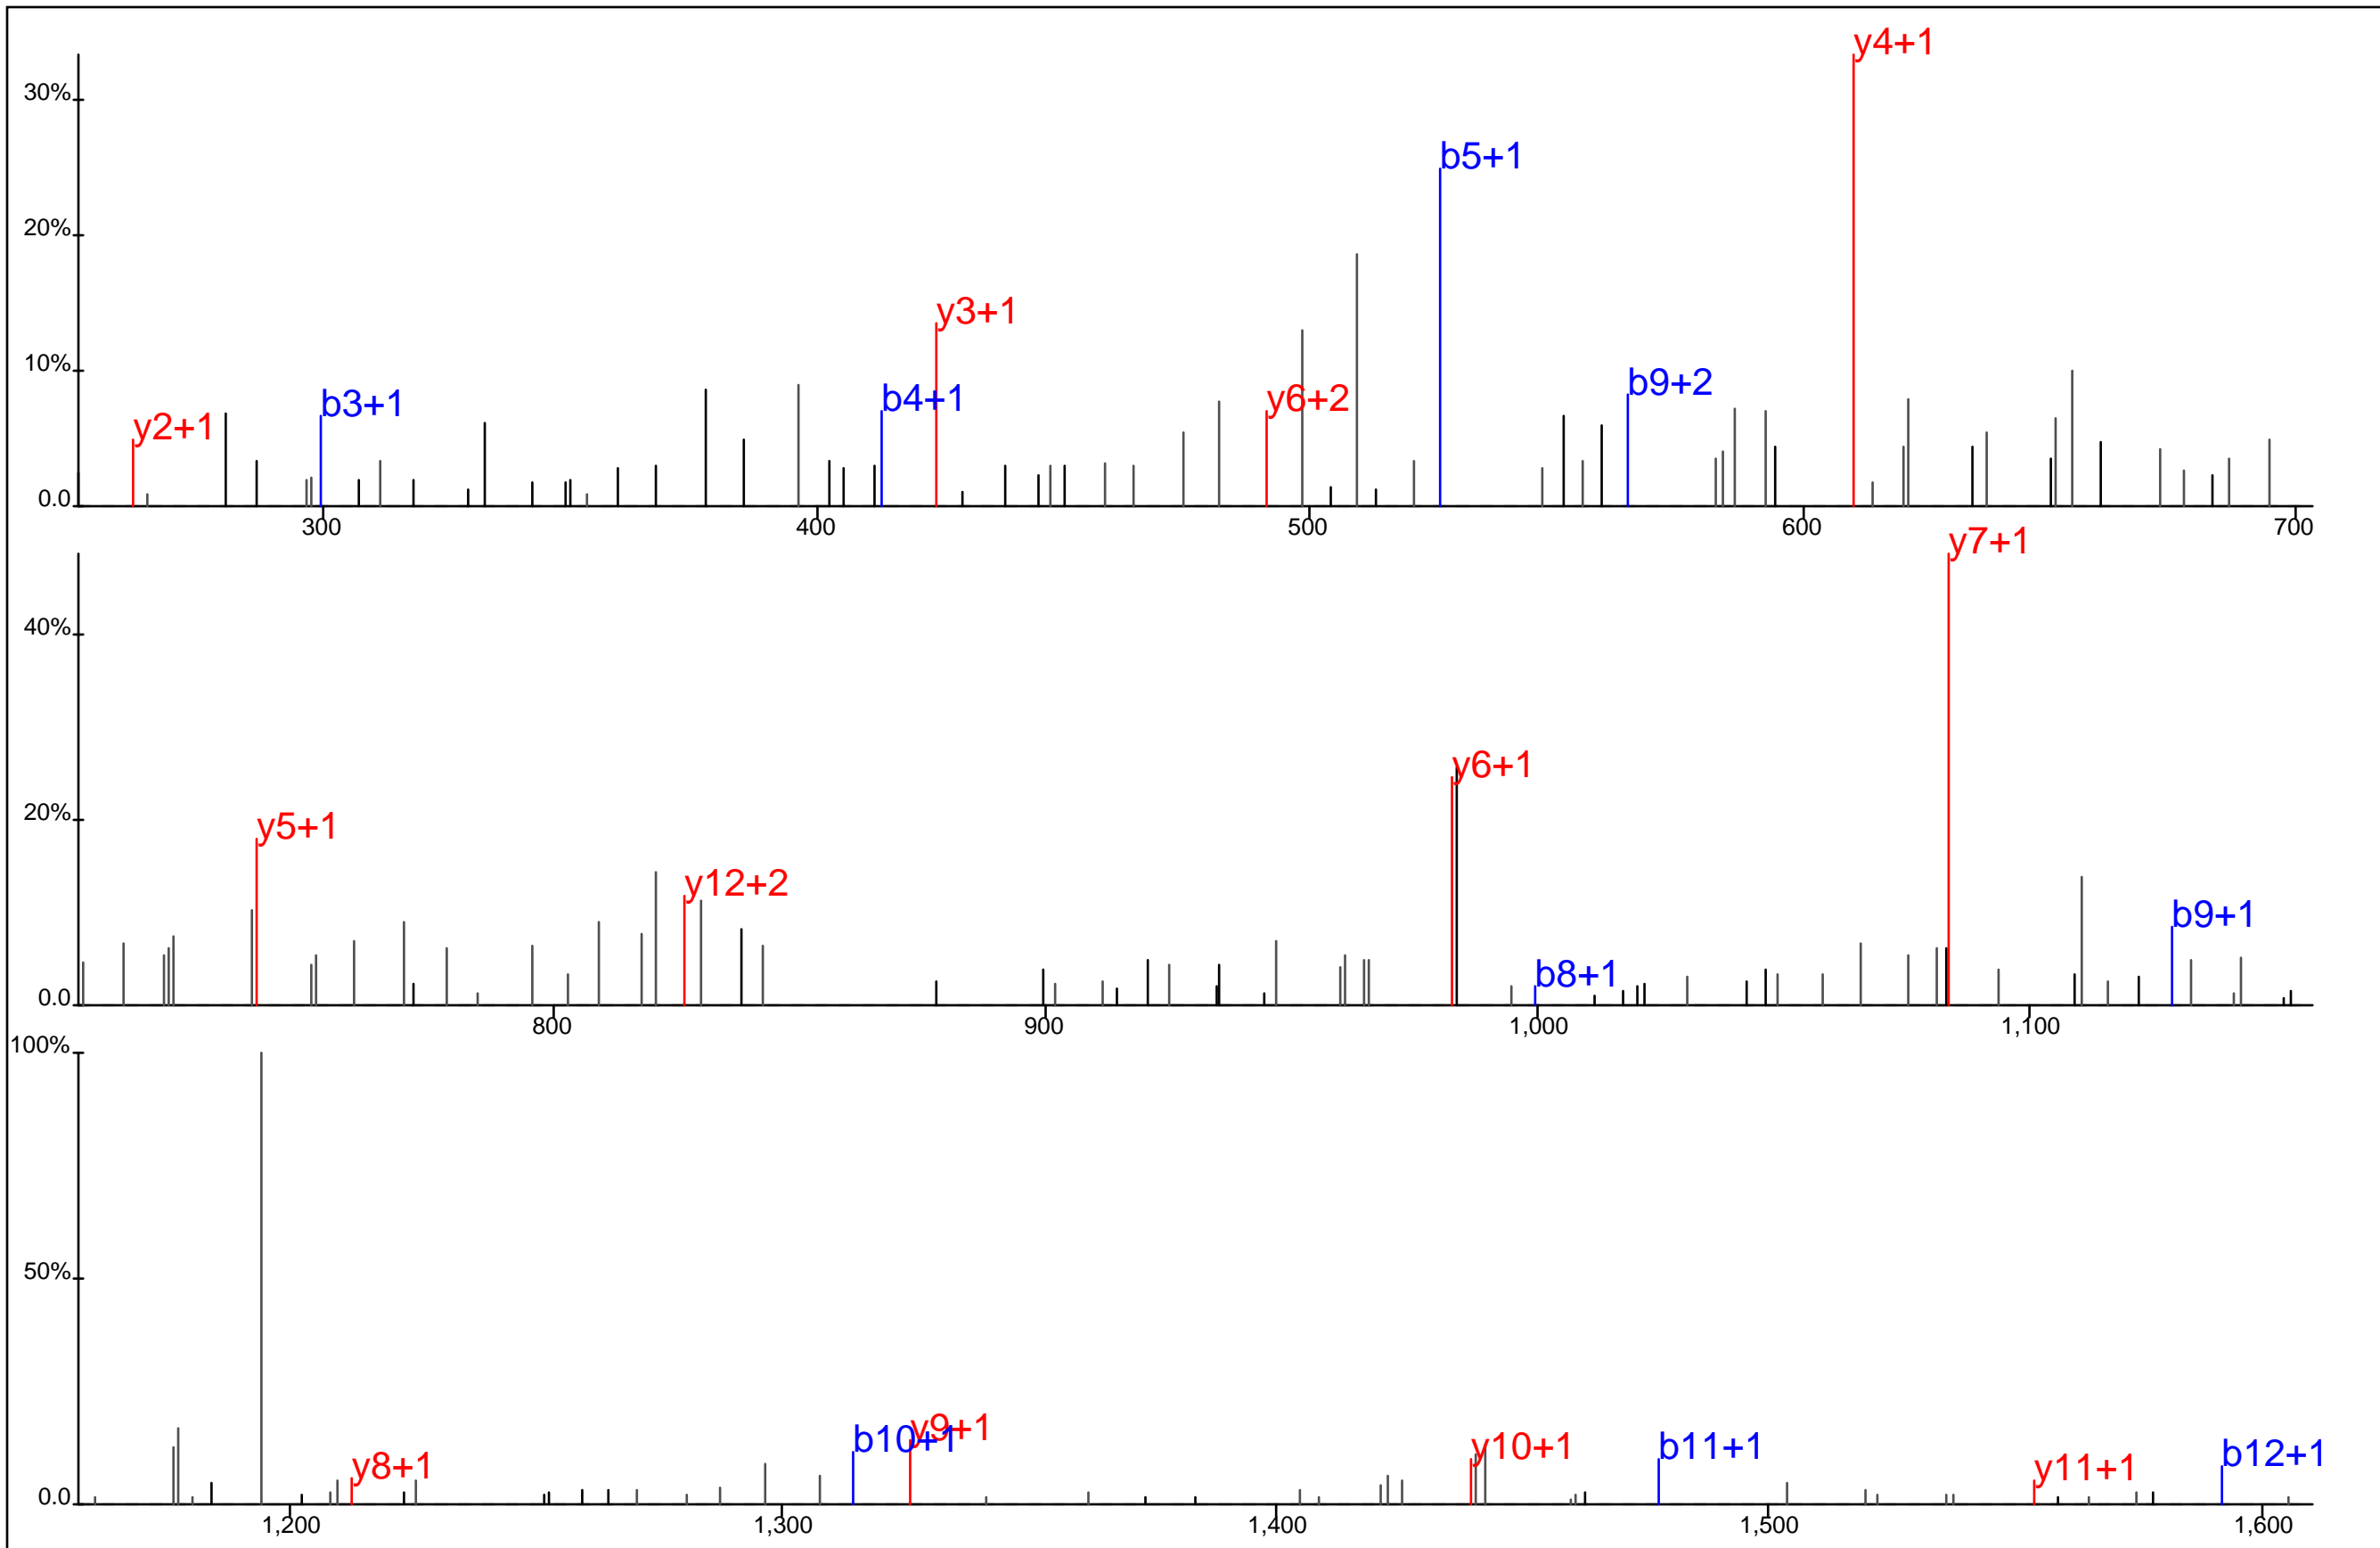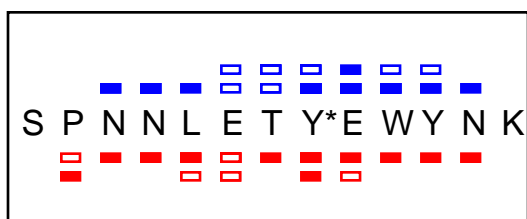

Protein Name: ITK  
 gi Accession: 0  
 Precursor Mass: 869.3623+2  
 Delta Mass: 1.020 ppm  
 XCorr: 55.38

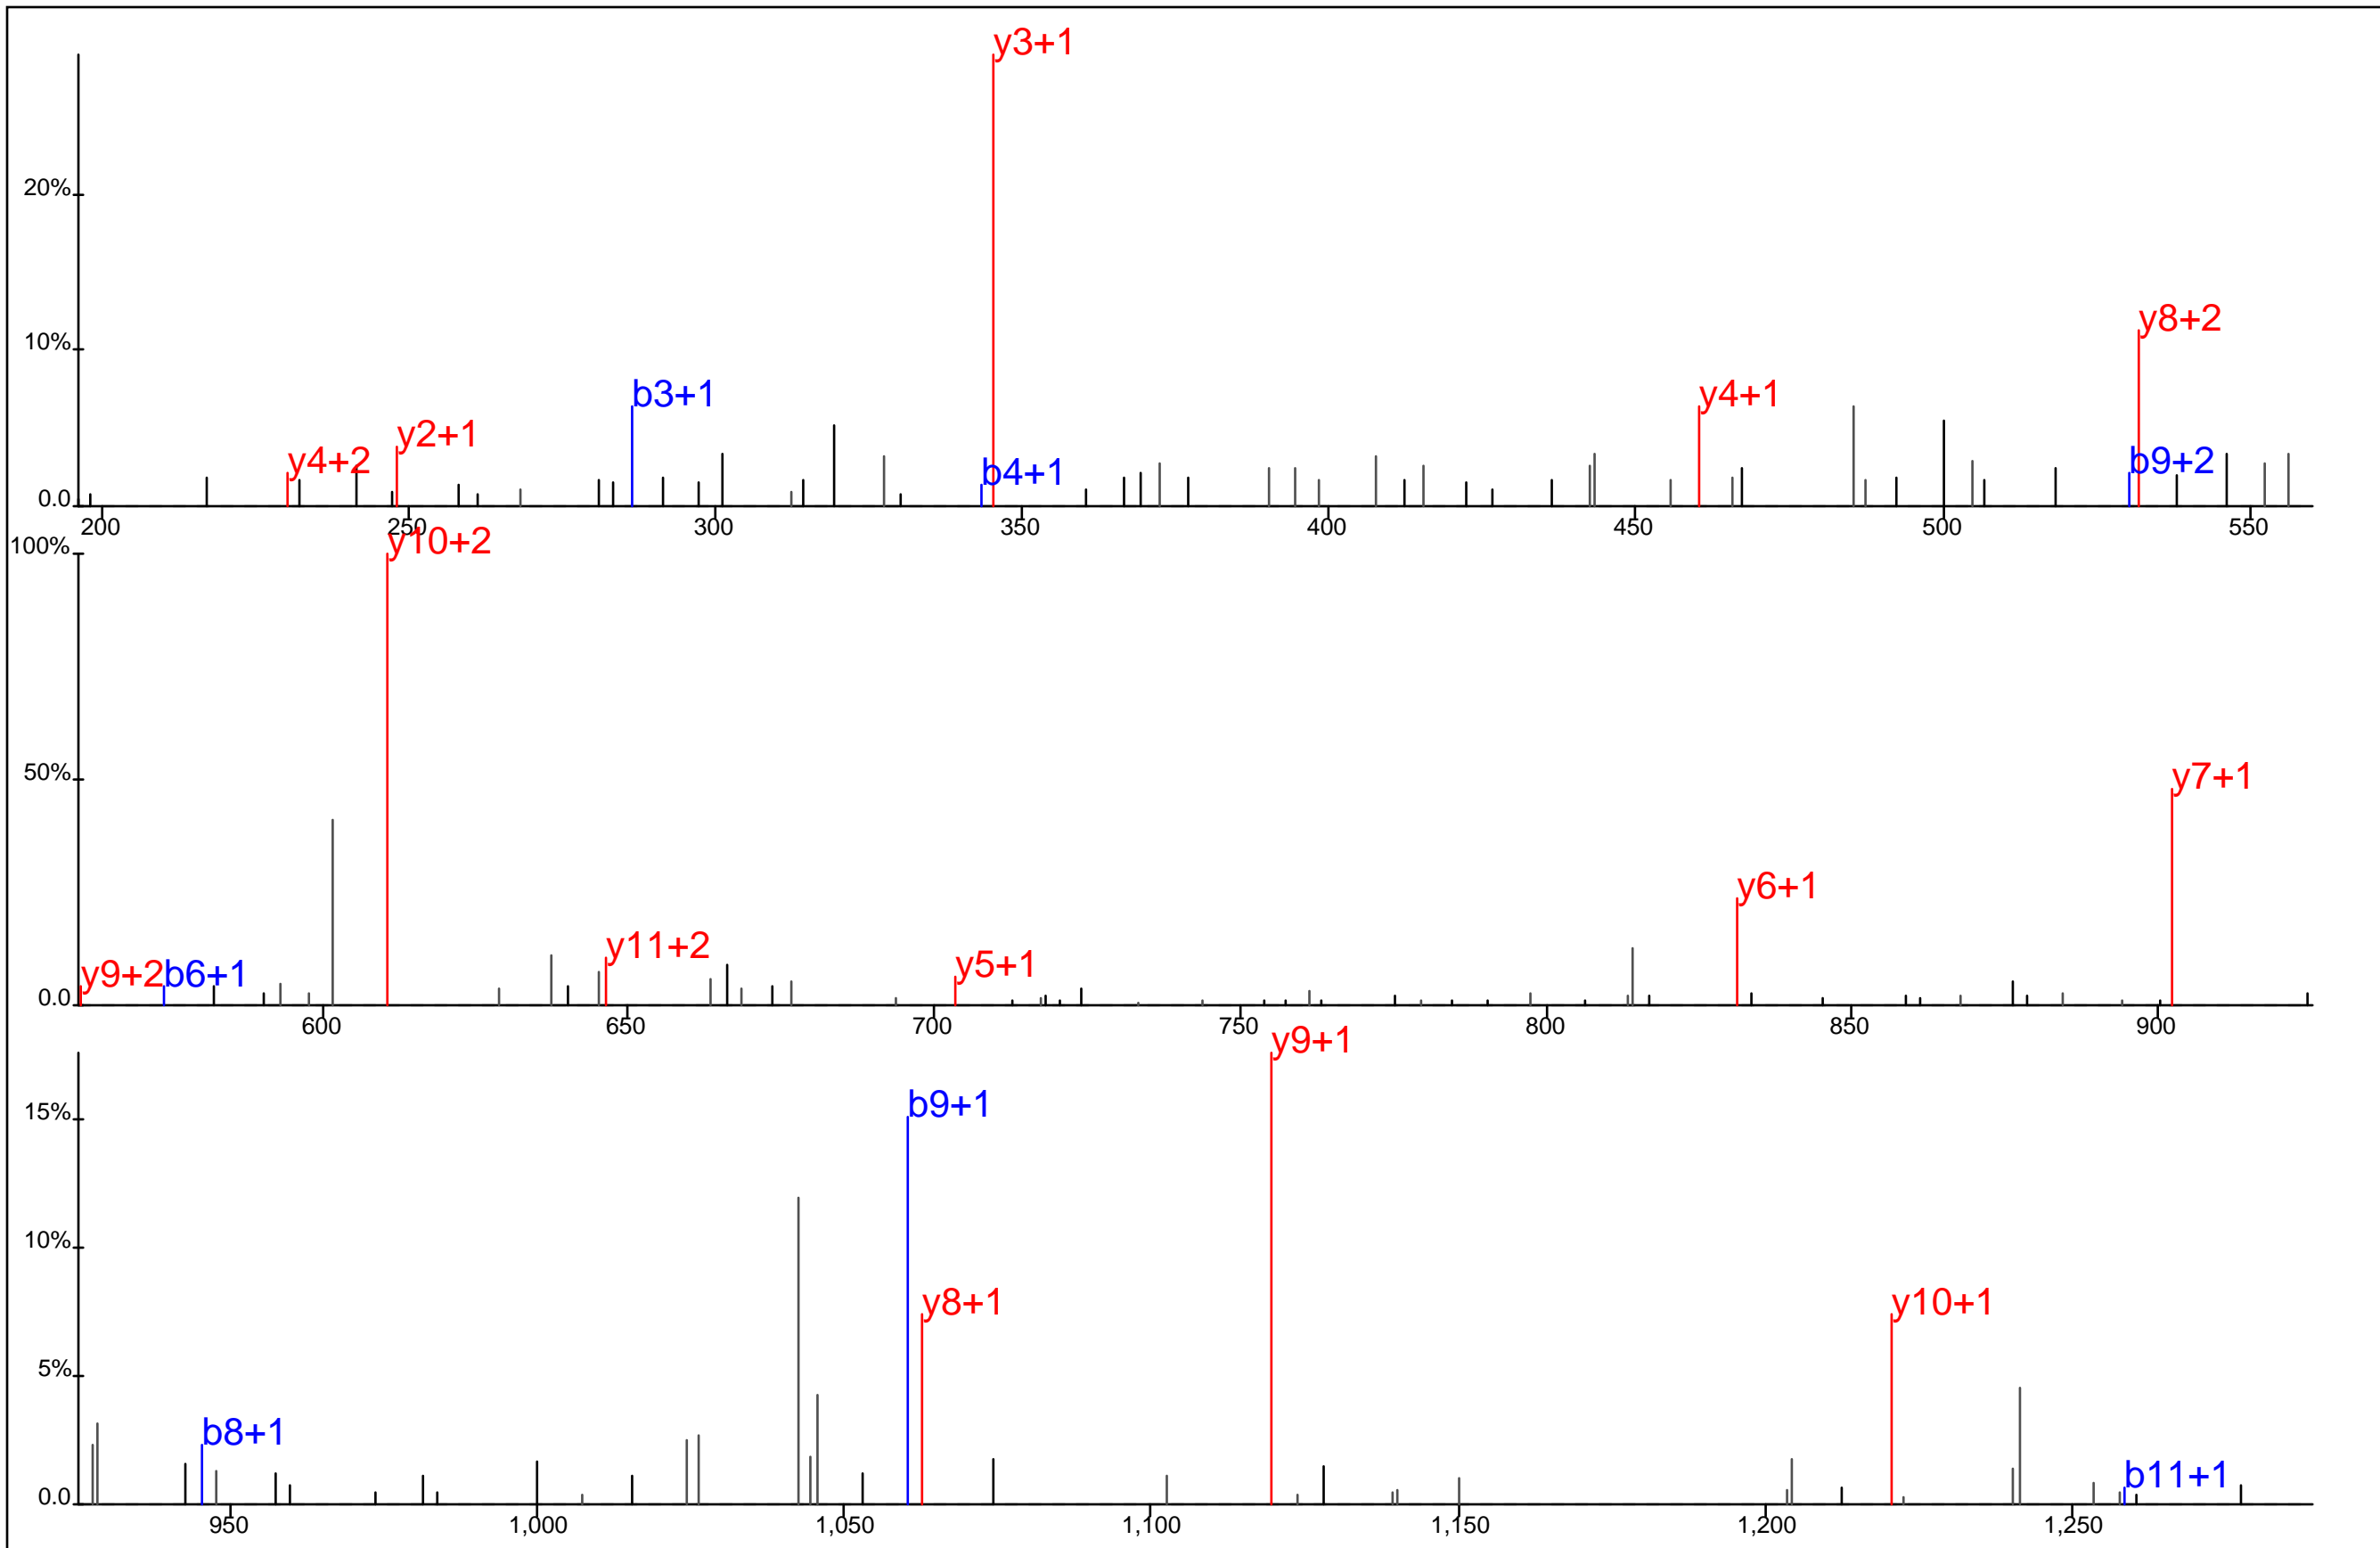

□ □ □ □ □ □ □ □  
 L A T G C A Q Y\* D P T K  
■ ■ ■ ■ ■ ■ ■ ■

Protein Name: ITK  
 gi Accession: 0  
 Precursor Mass: 702.7975+2  
 Delta Mass: 0.936 ppm  
 XCorr: 56.75

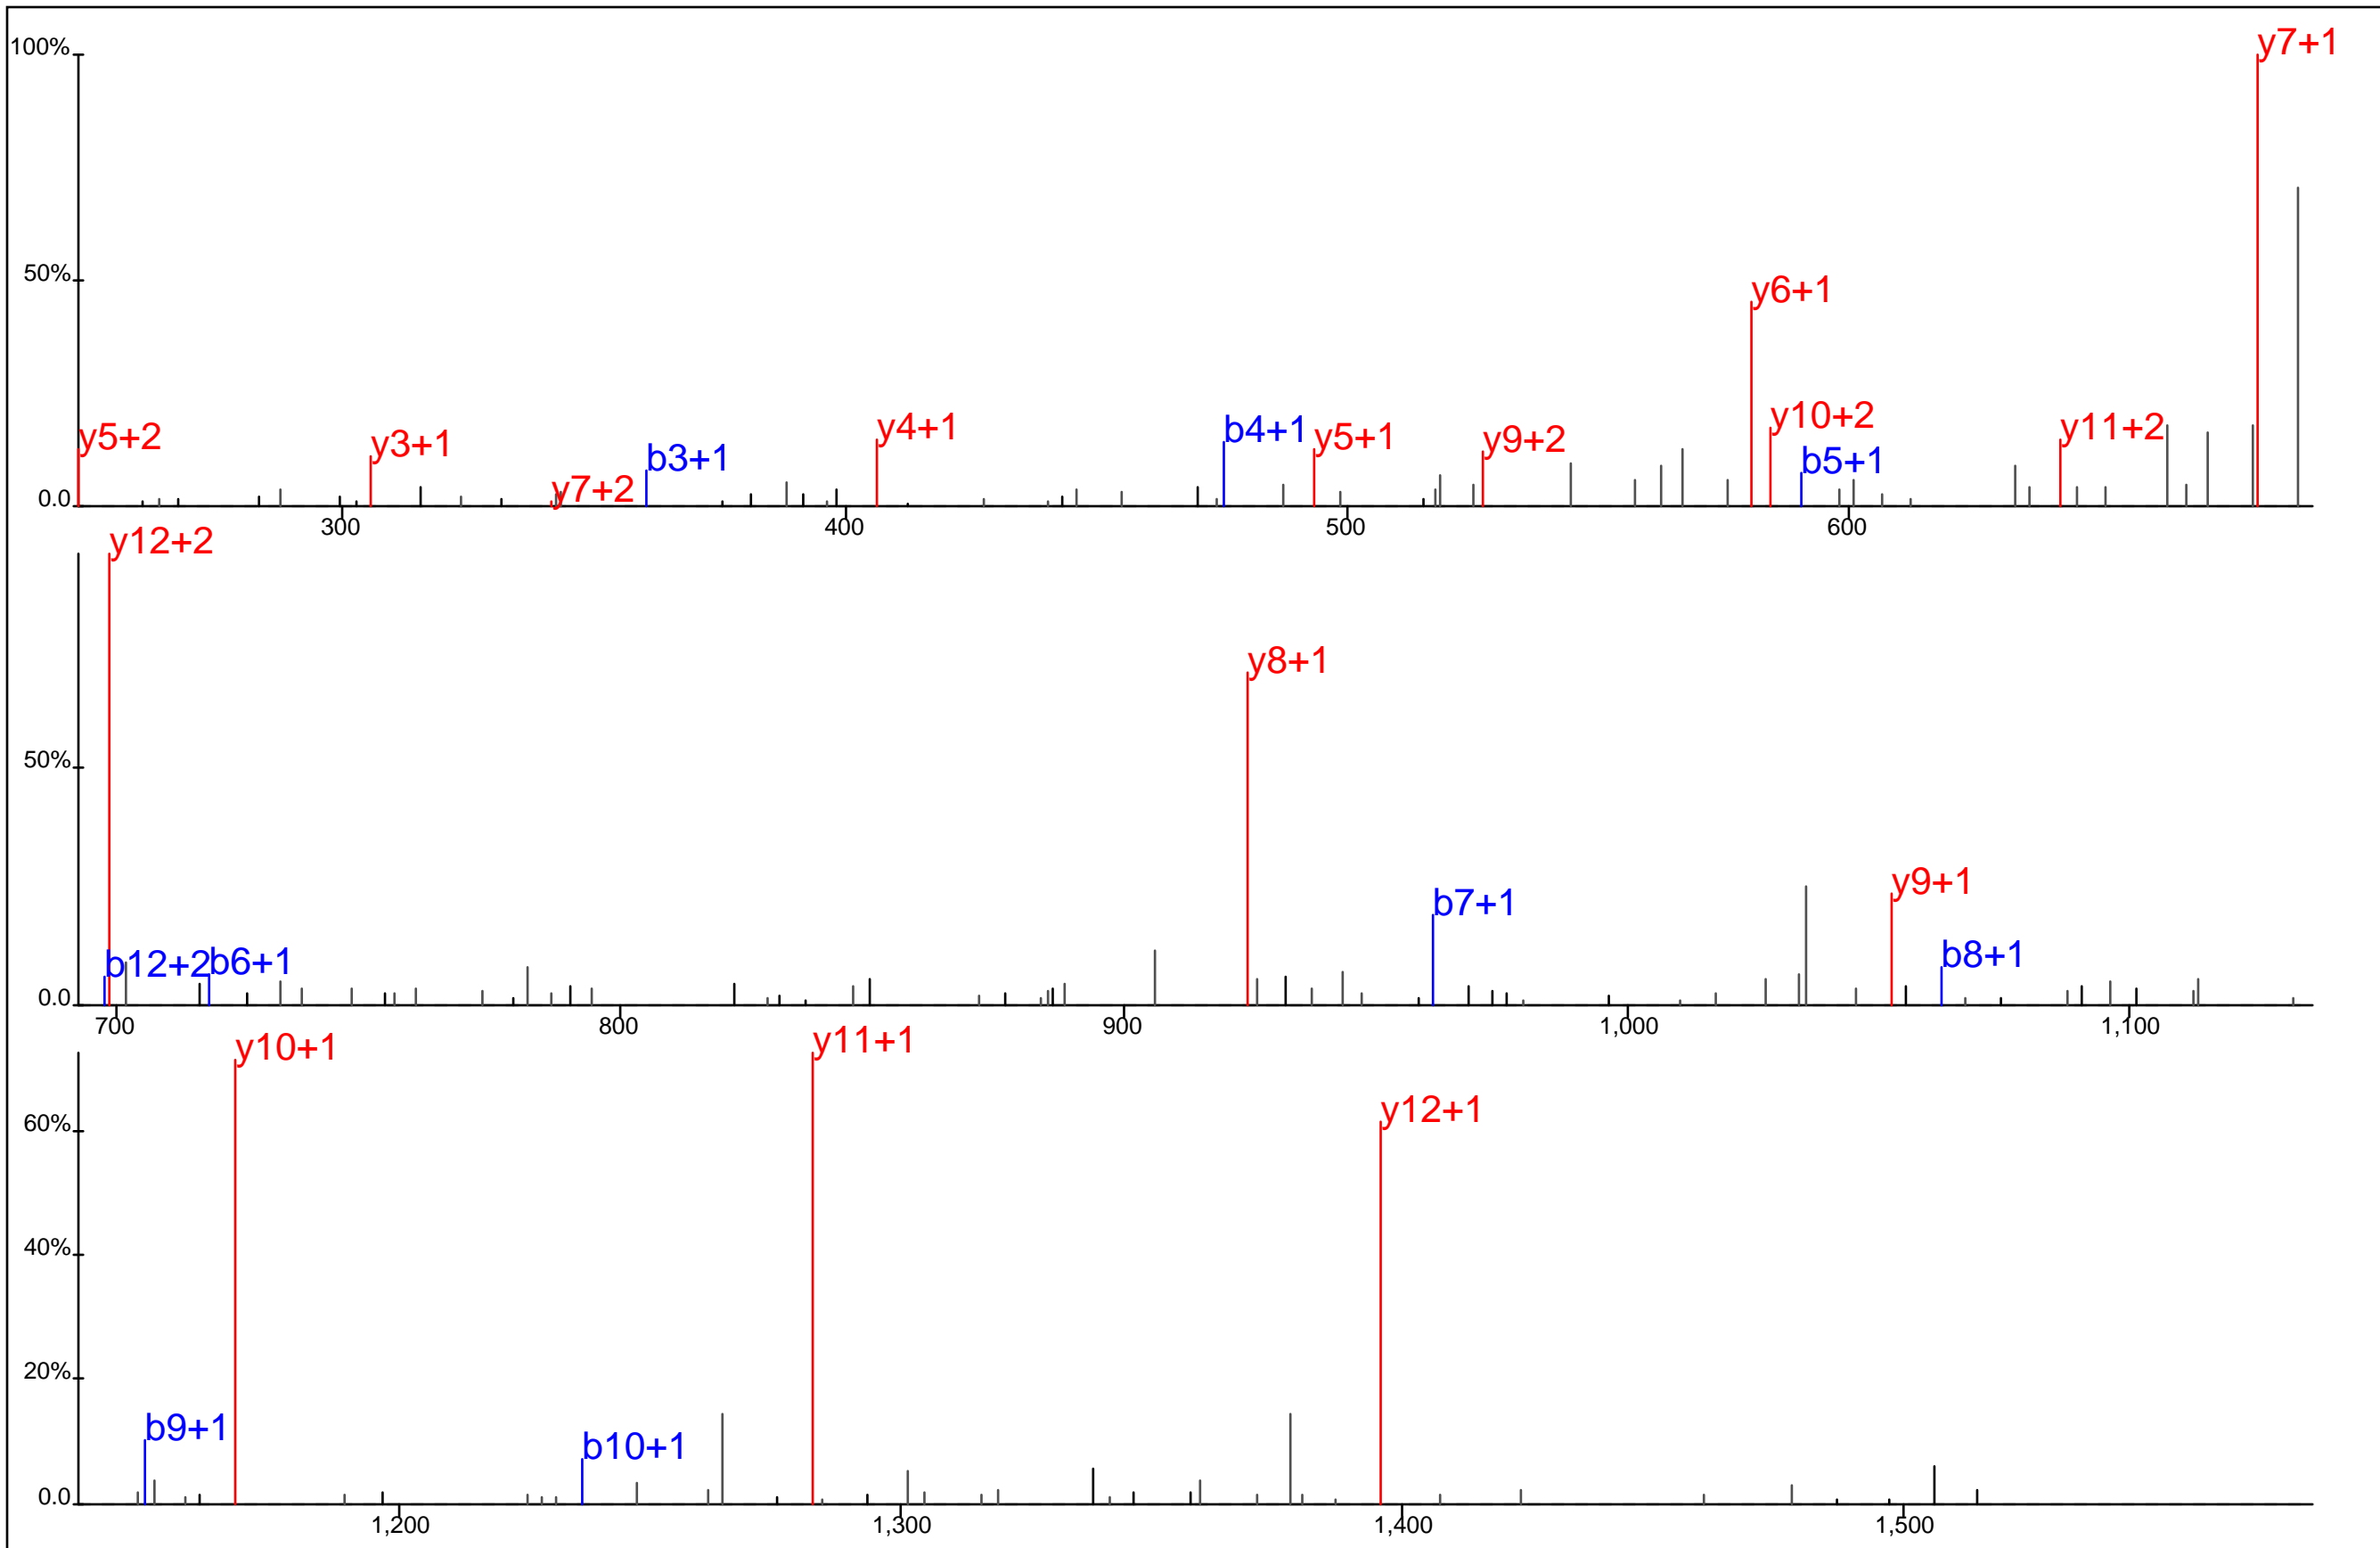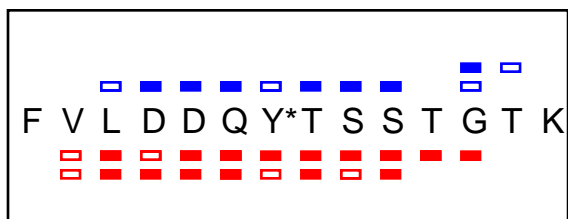

Protein Name: ITK  
 gi Accession: 0  
 Precursor Mass: 821.3549+2  
 Delta Mass: 1.115 ppm  
 XCorr: 92.42

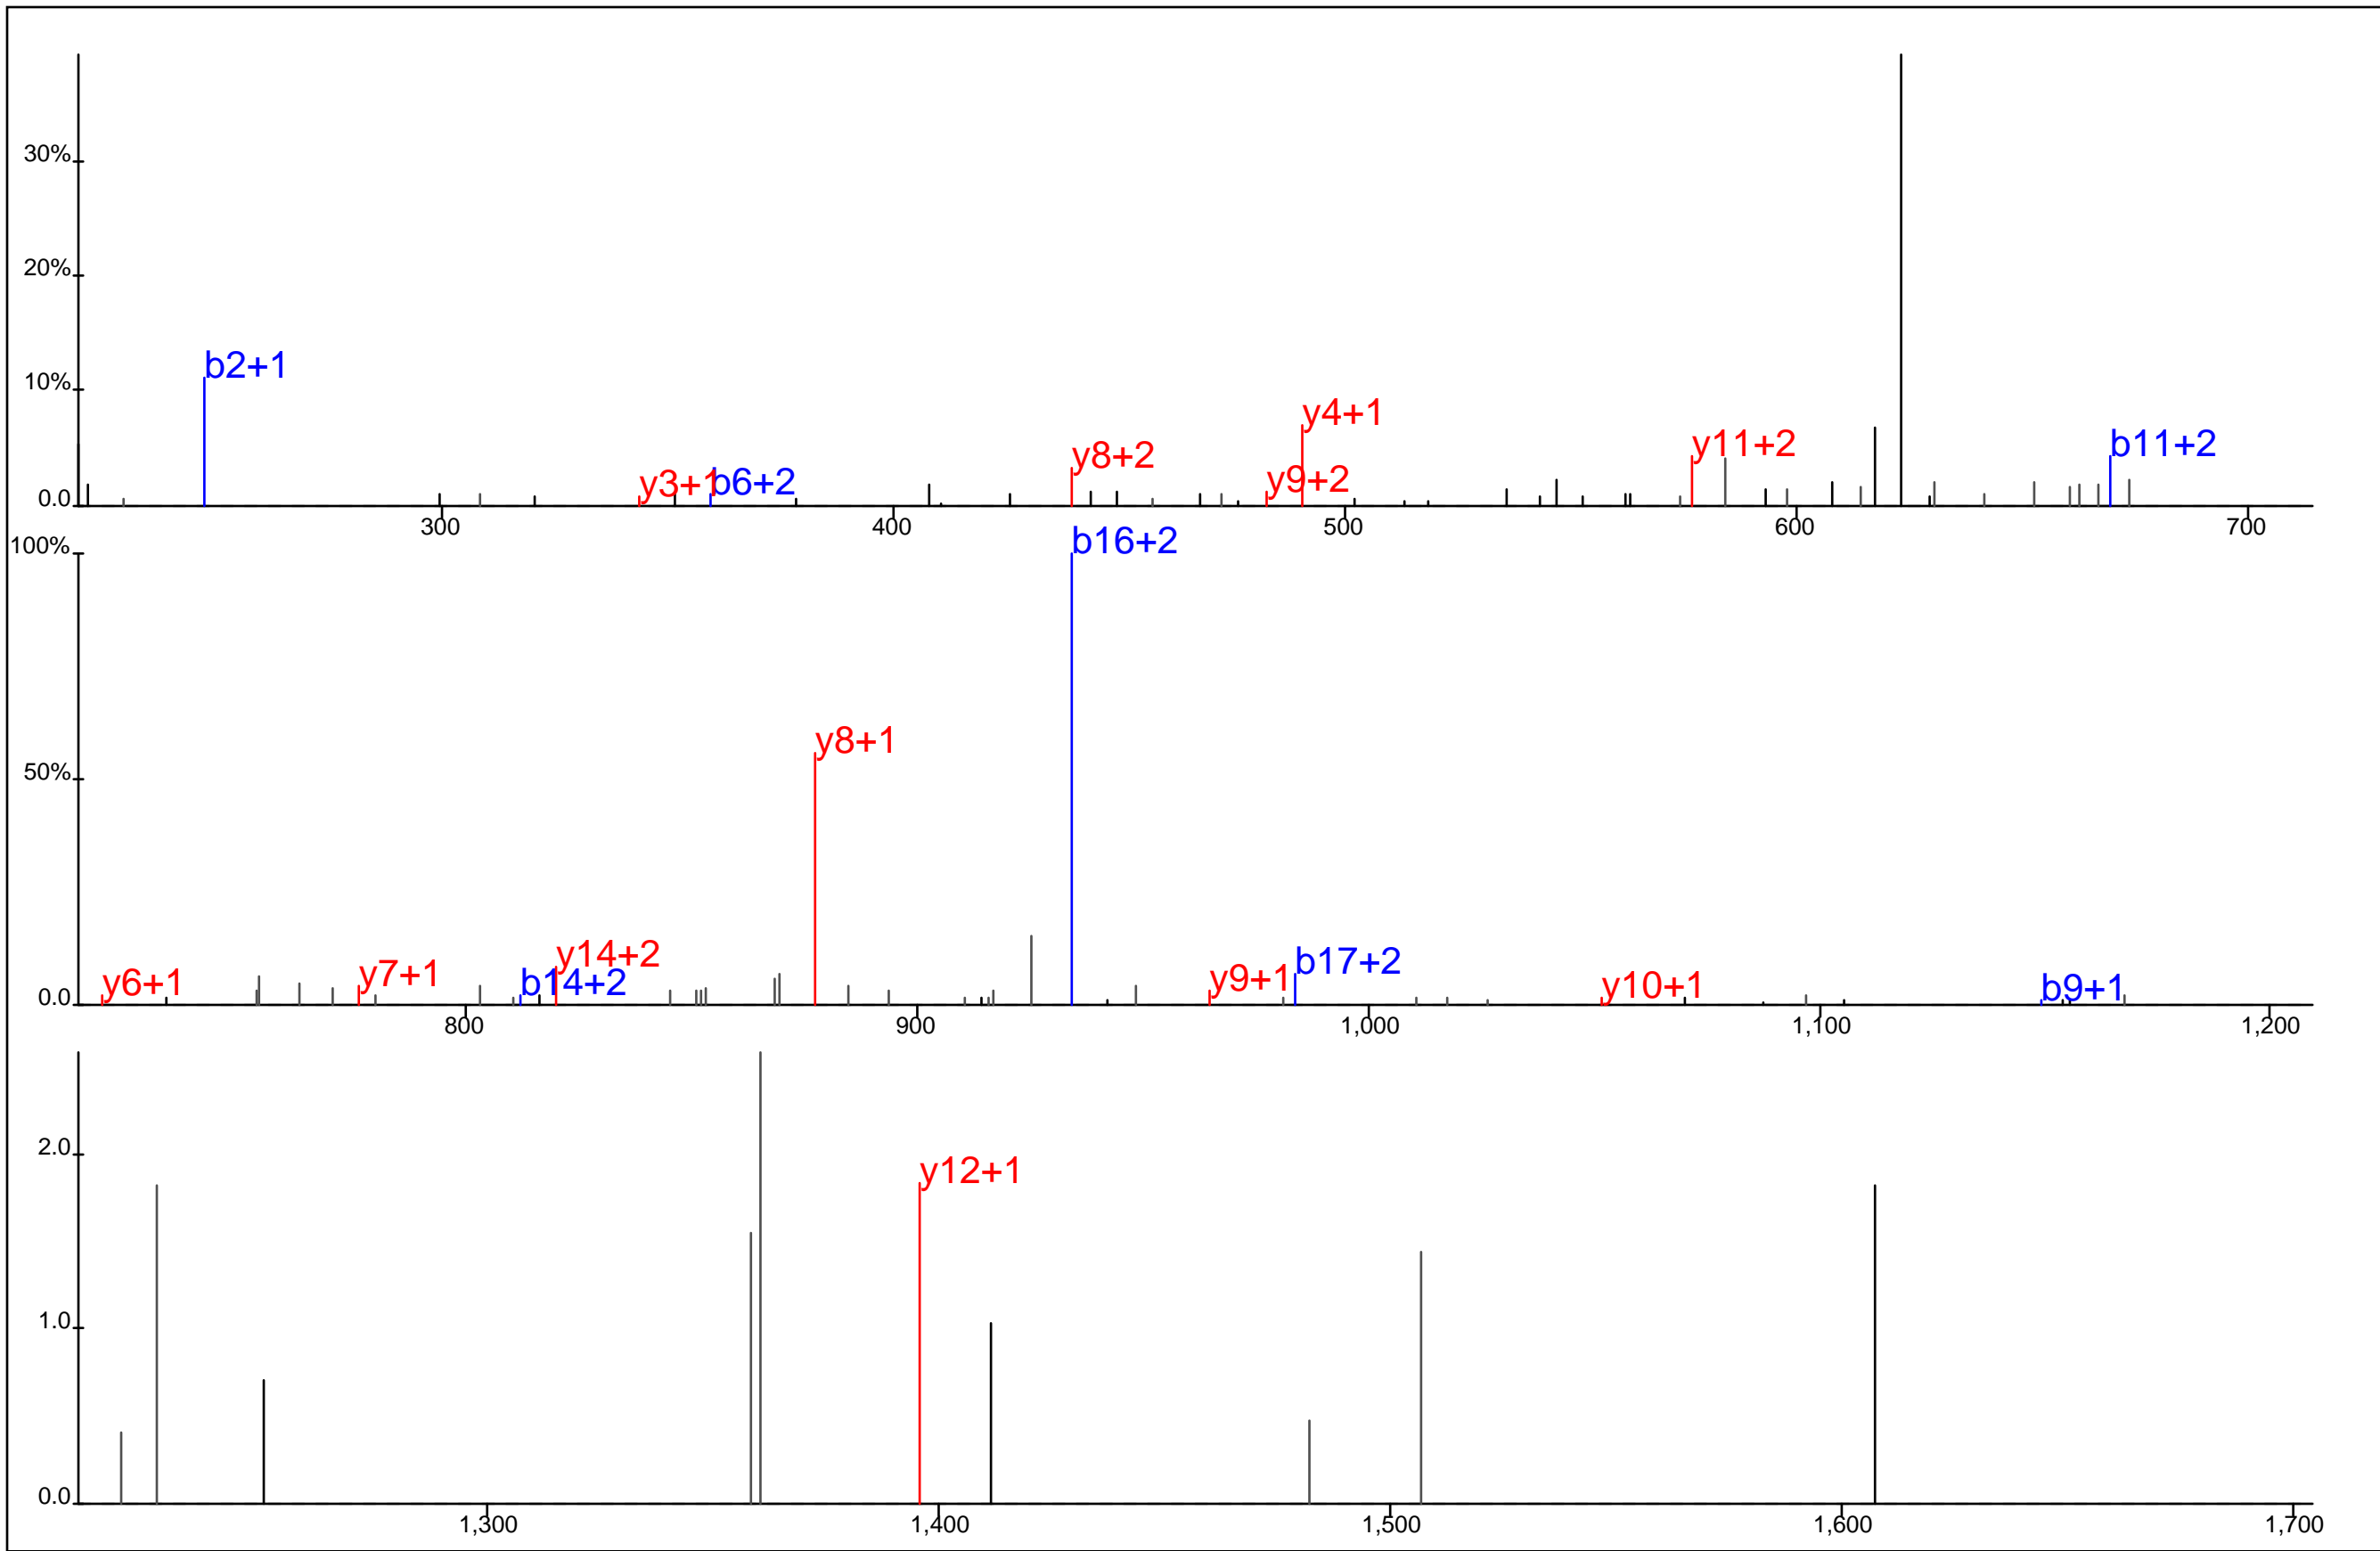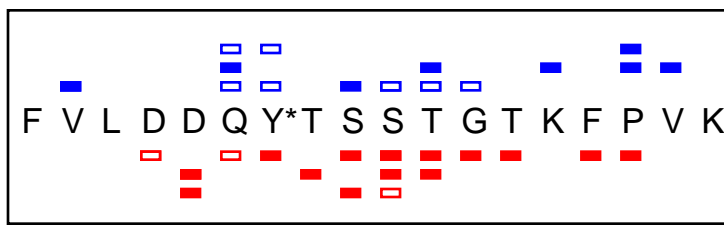

Protein Name: ITK  
 gi Accession: 0  
 Precursor Mass: 705.0026+3  
 Delta Mass: 2.069 ppm  
 XCorr: 36.77

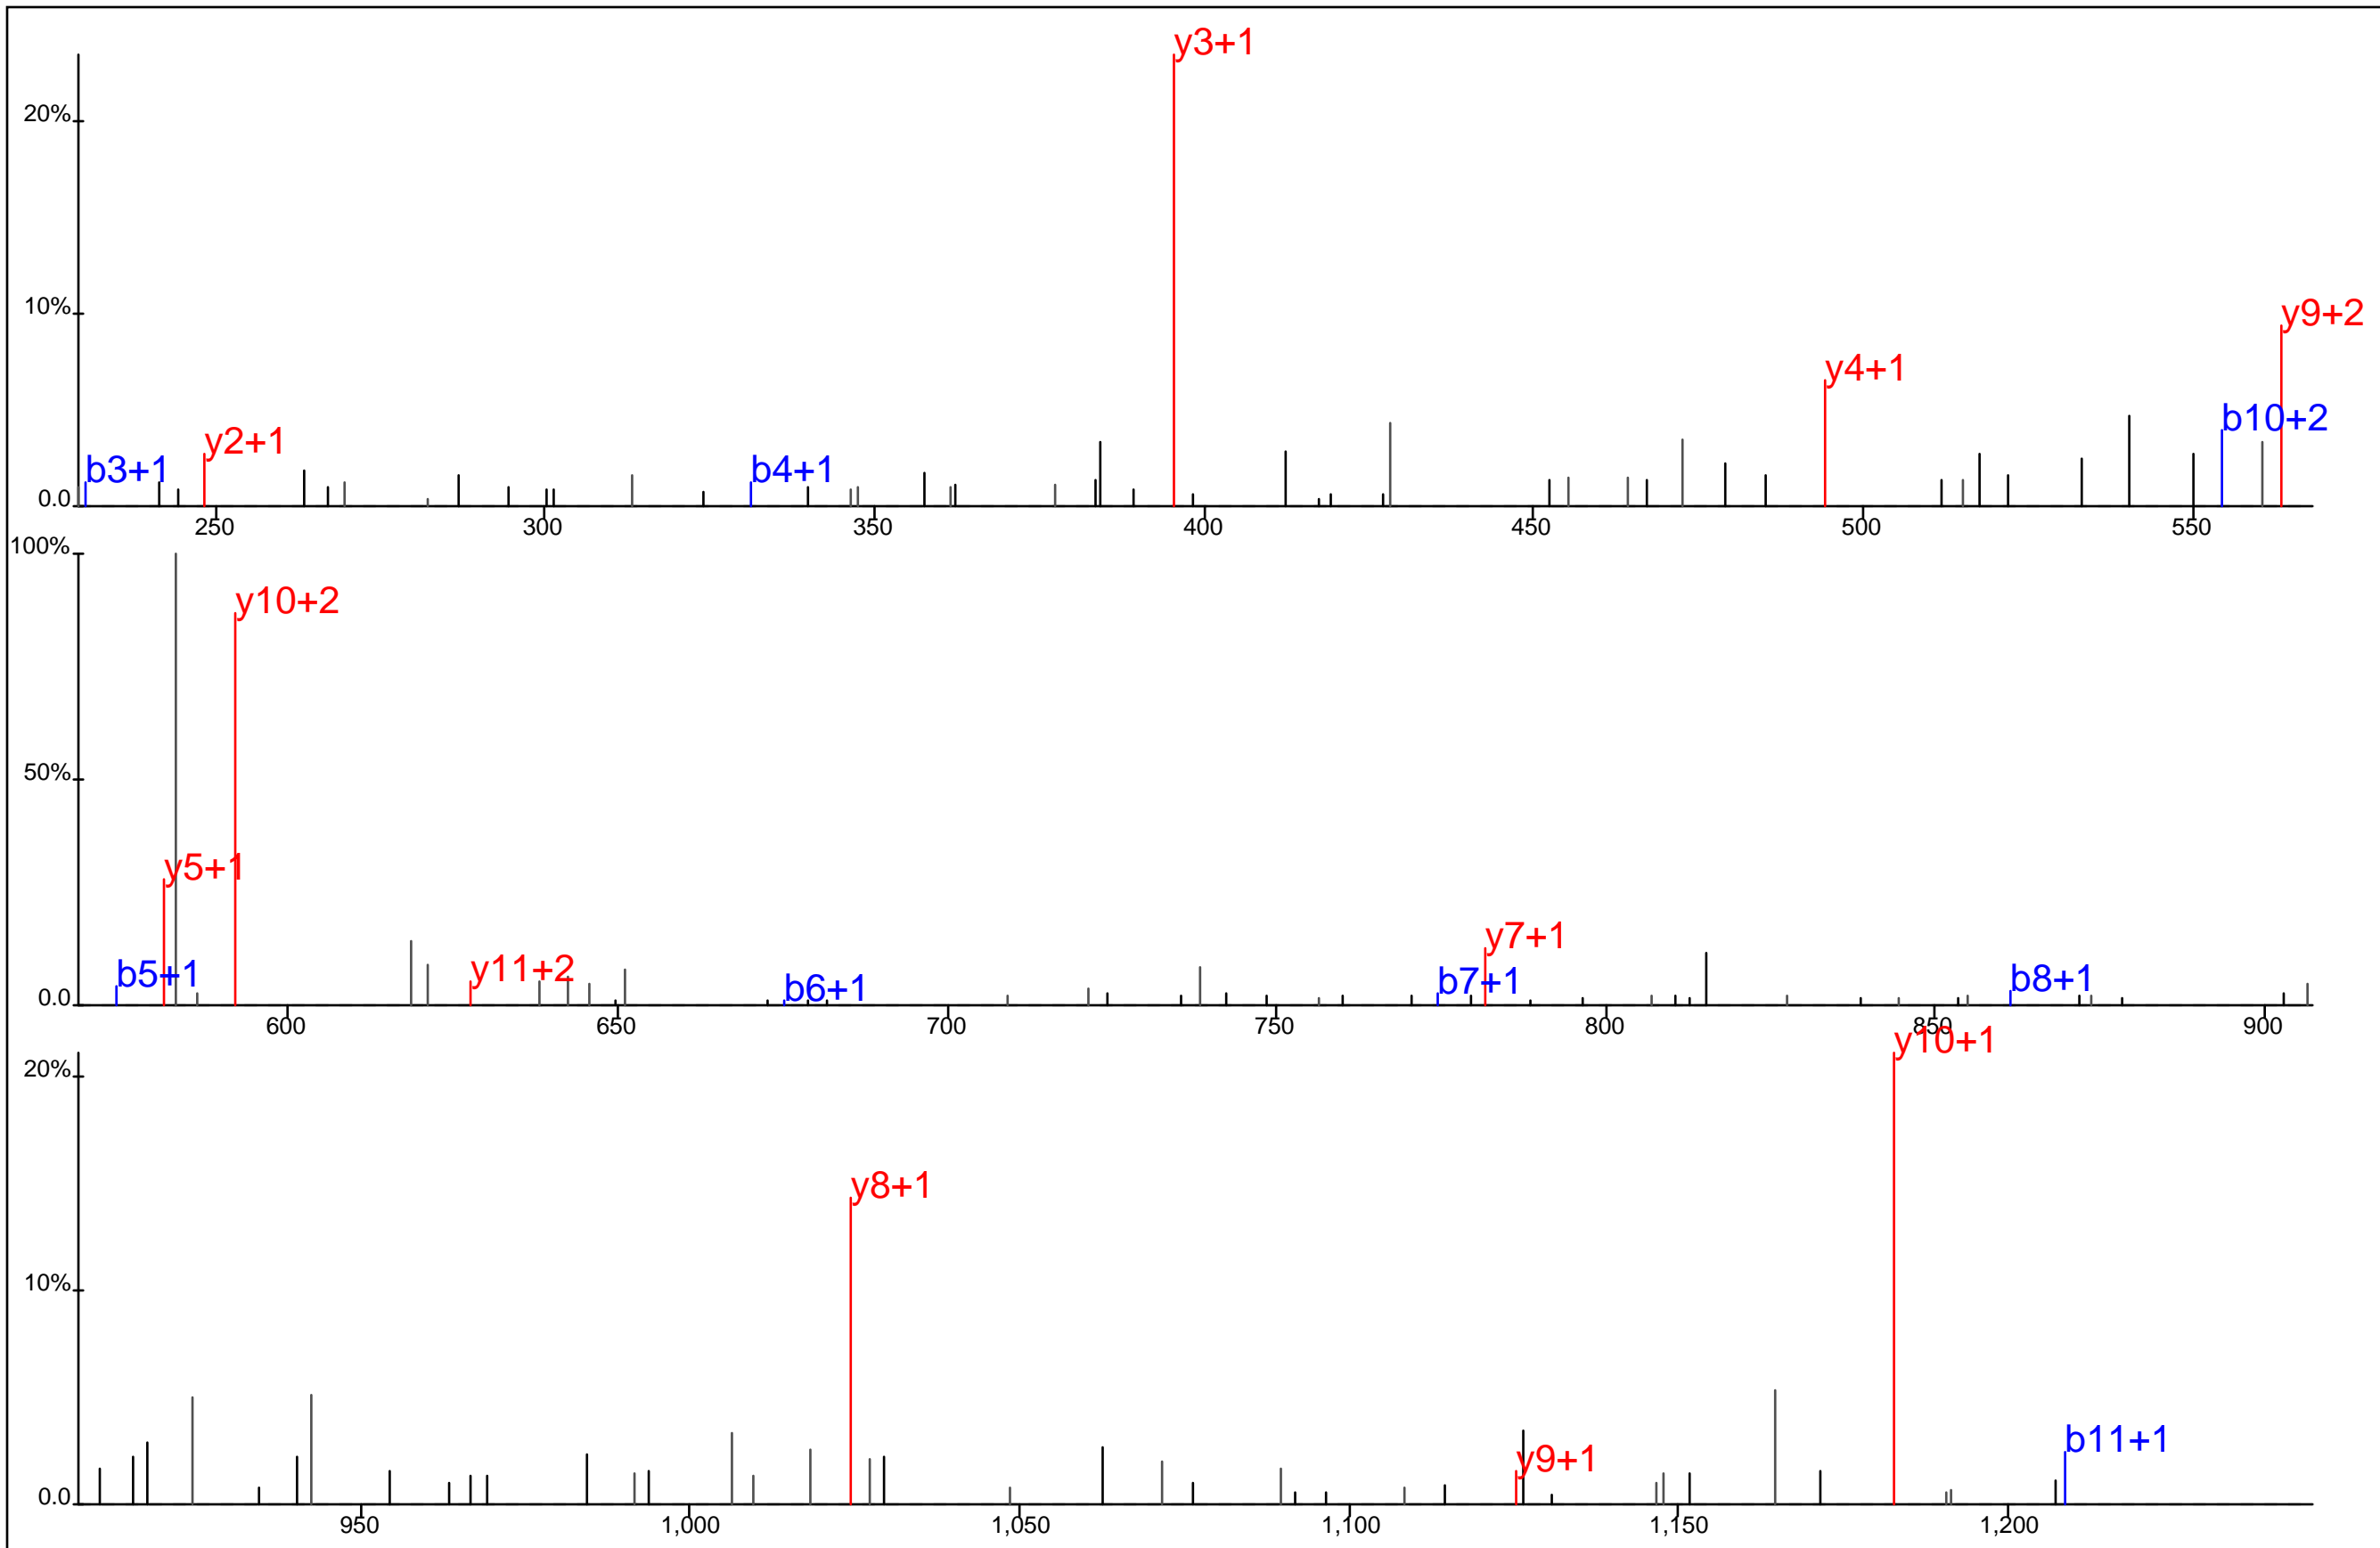

■ ■ ■ ■ ■ ■ ■ ■  
 T A G T Y\* T V S V F T K  
■ ■ ■ ■ ■ ■ ■ ■

Protein Name: ITK  
 gi Accession: 0  
 Precursor Mass: 677.8192+2  
 Delta Mass: 1.468 ppm  
 XCorr: 40.96

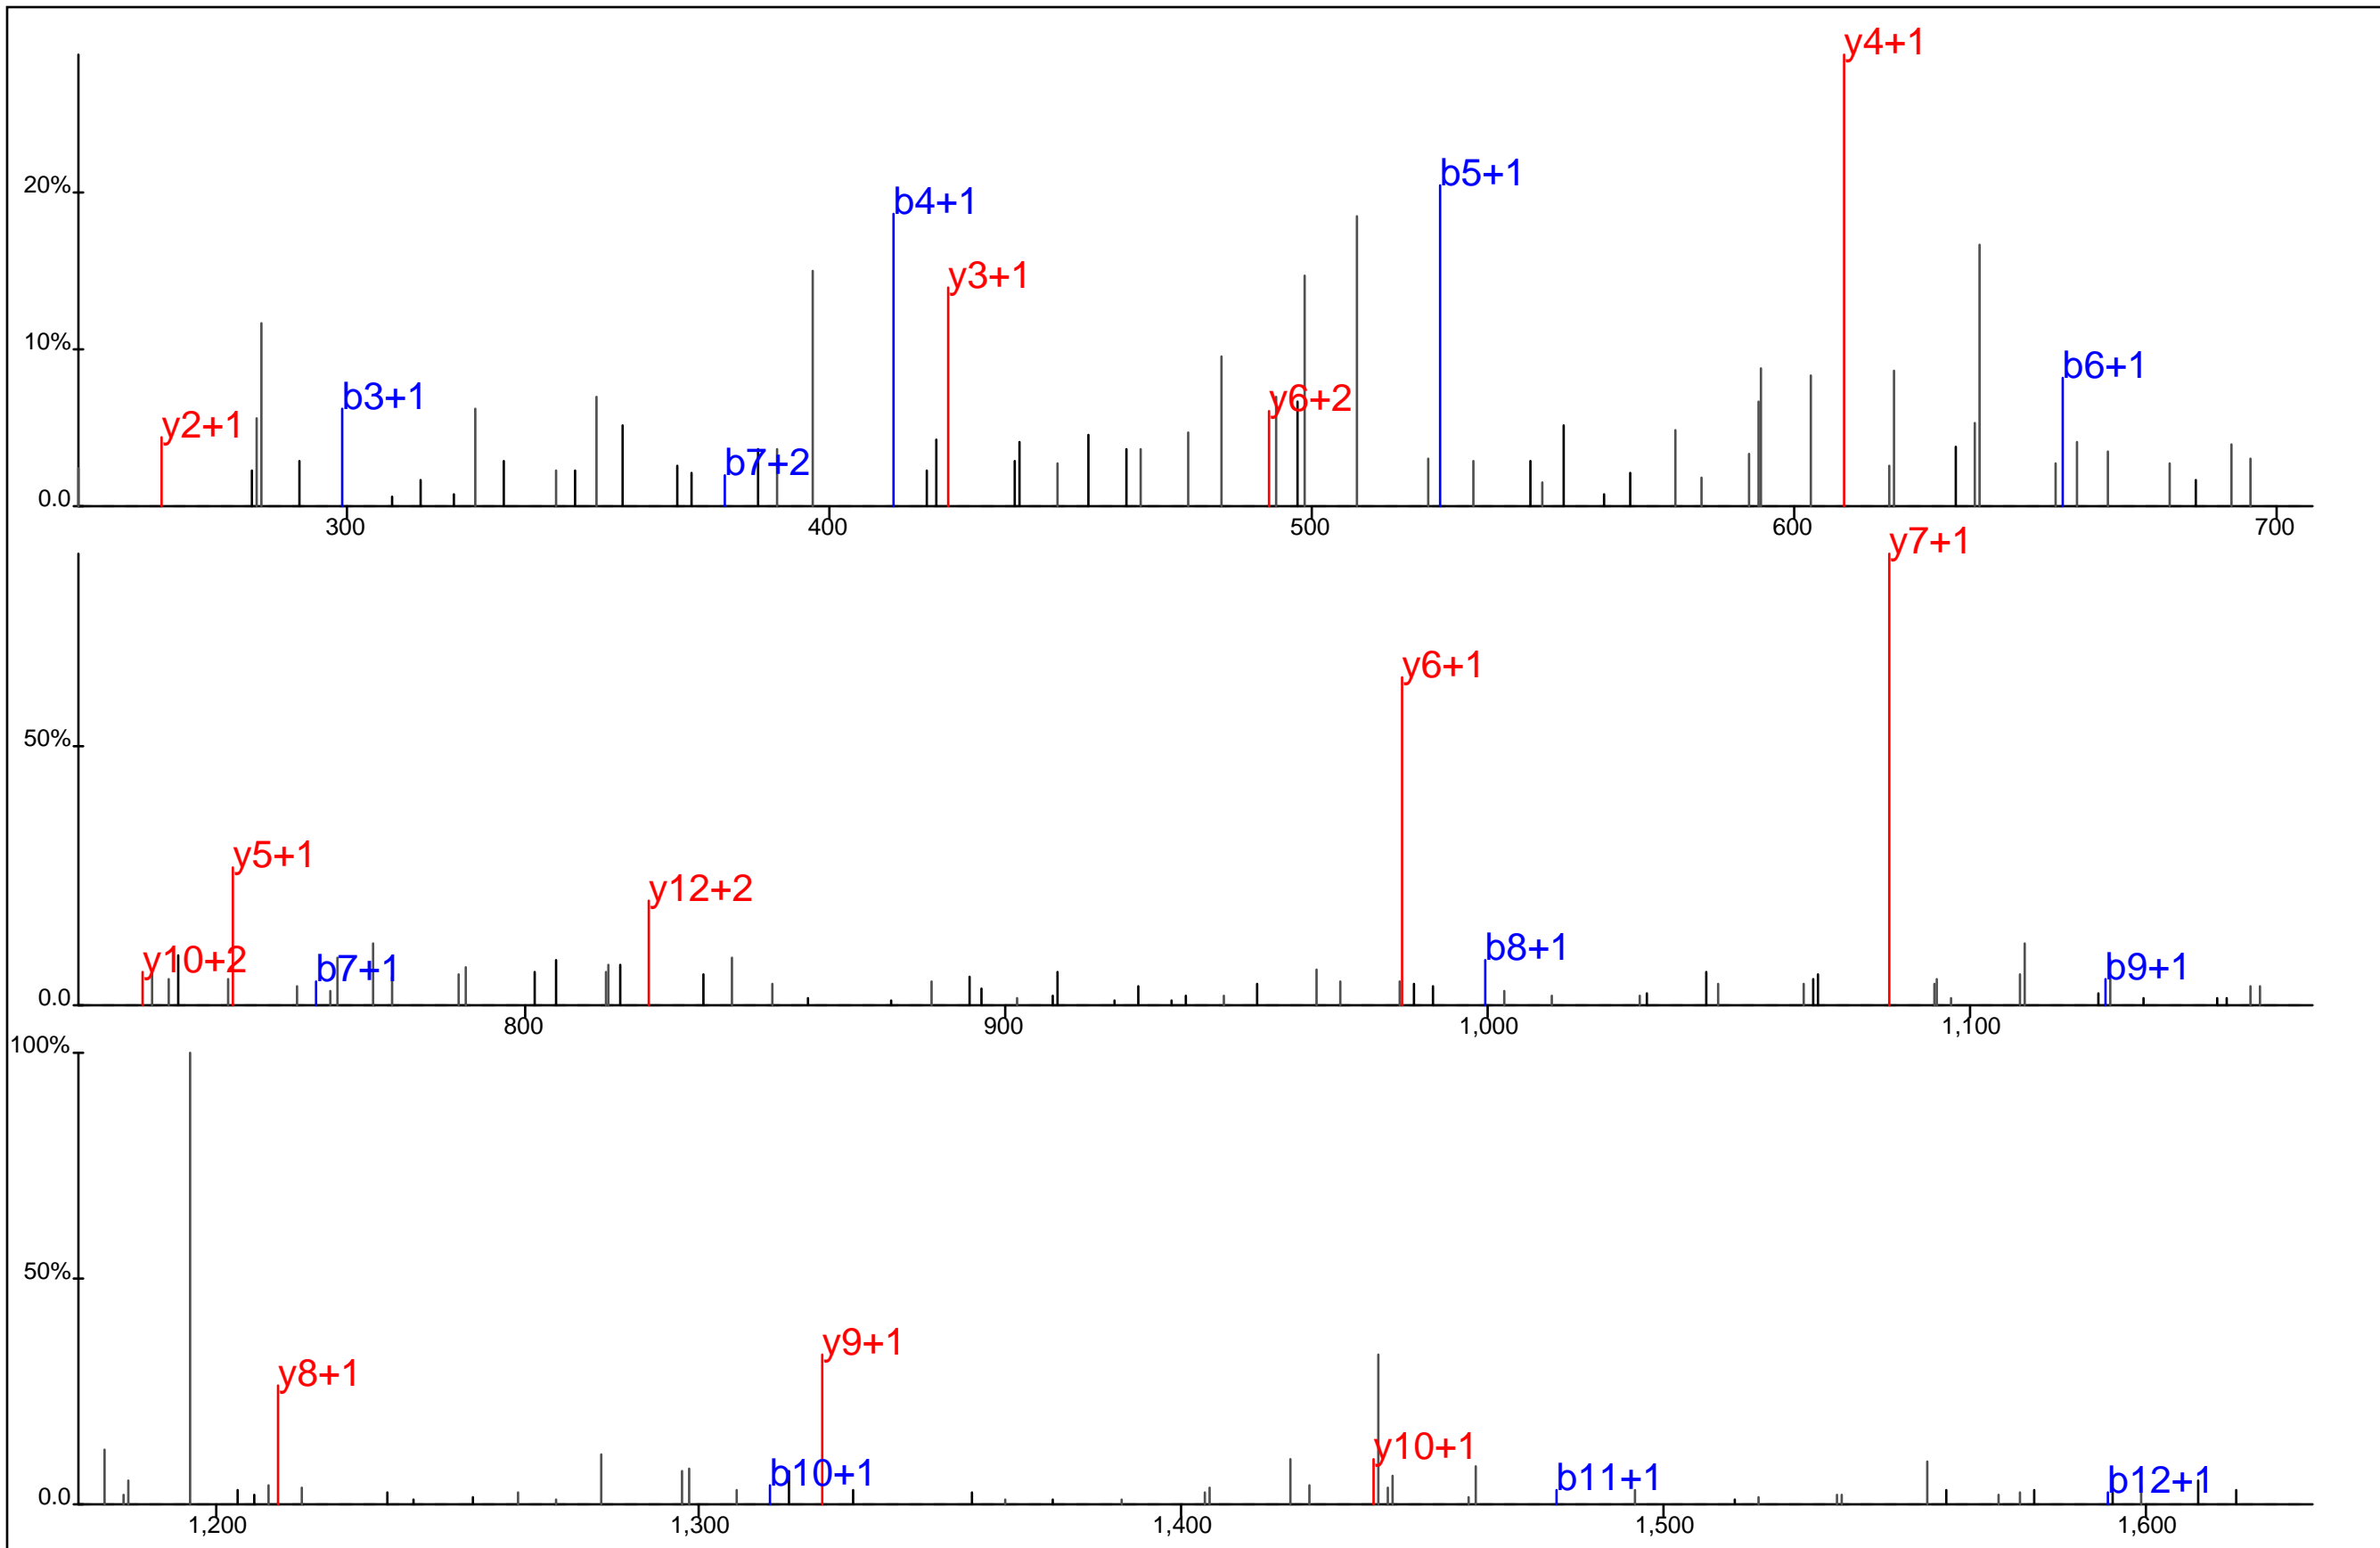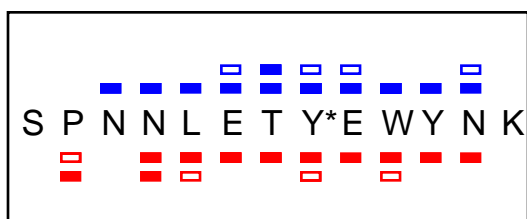

Protein Name: ITK  
 gi Accession: 0  
 Precursor Mass: 869.3621+2  
 Delta Mass: 0.809 ppm  
 XCorr: 45.81





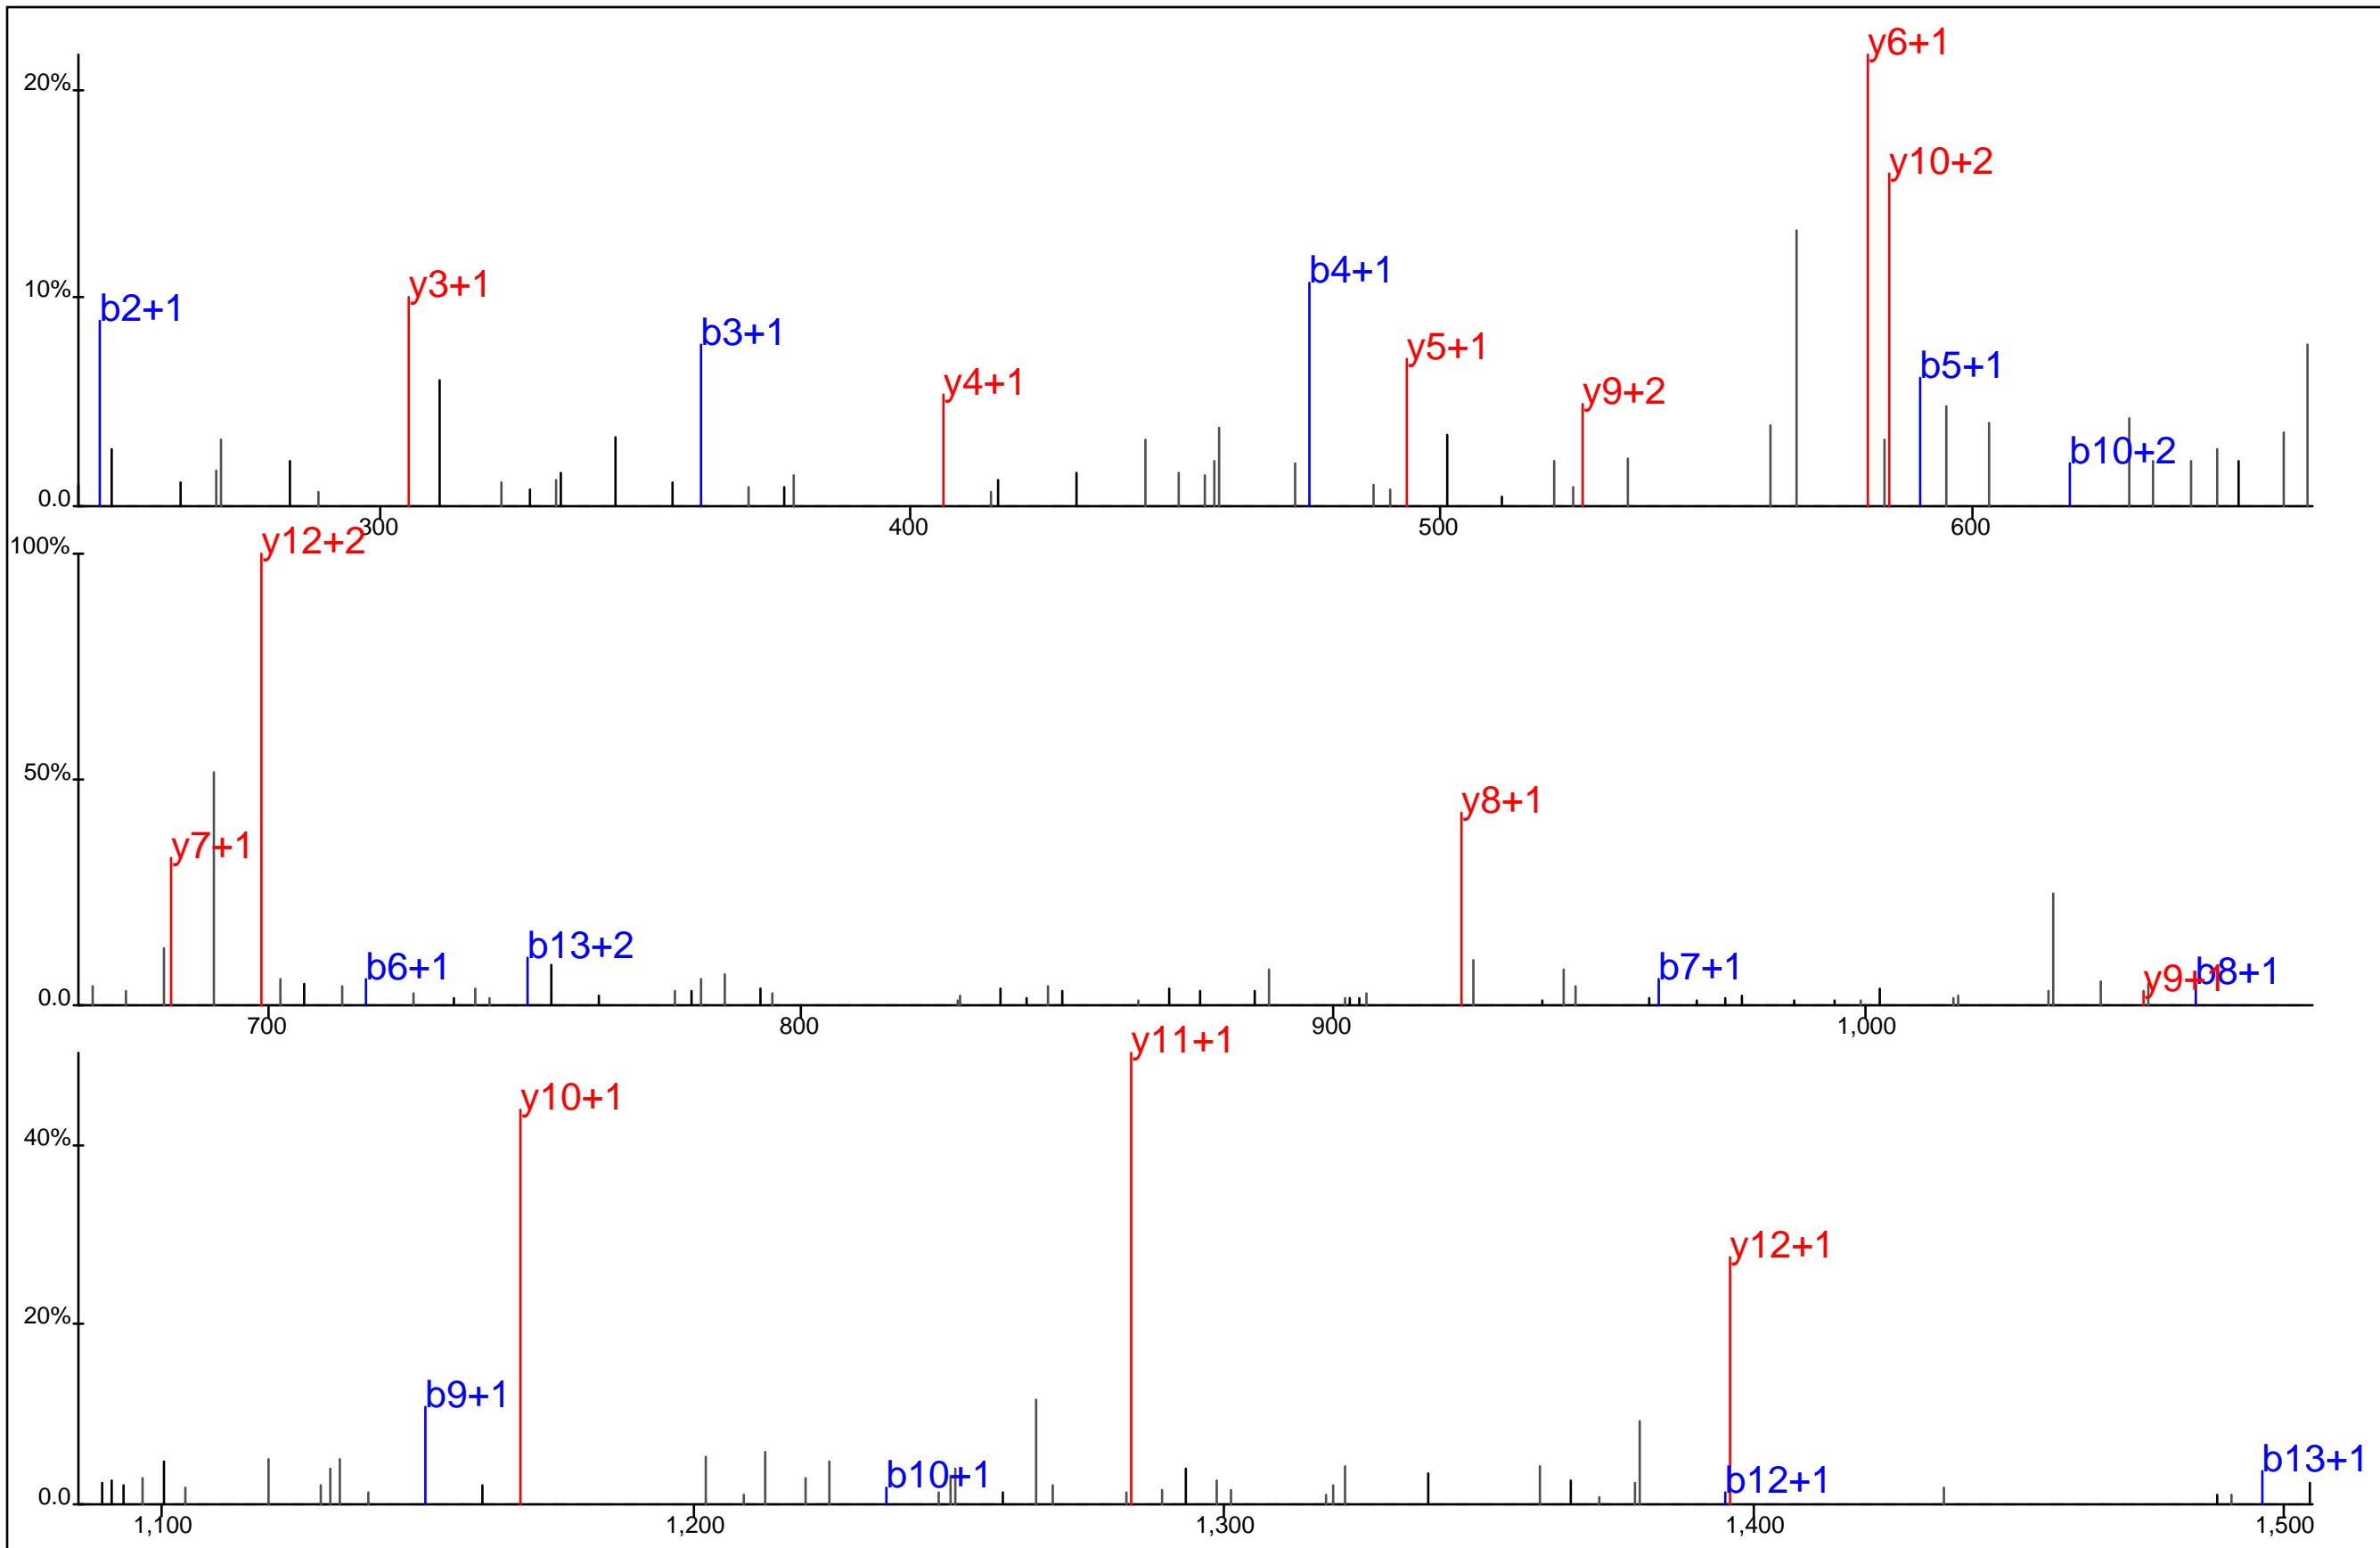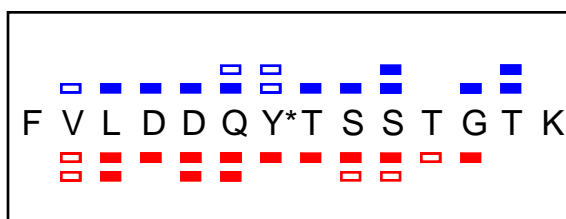

Protein Name: ITK  
 gi Accession: 0  
 Precursor Mass: 821.3541+2  
 Delta Mass: 2.155 ppm  
 XCorr: 61.75

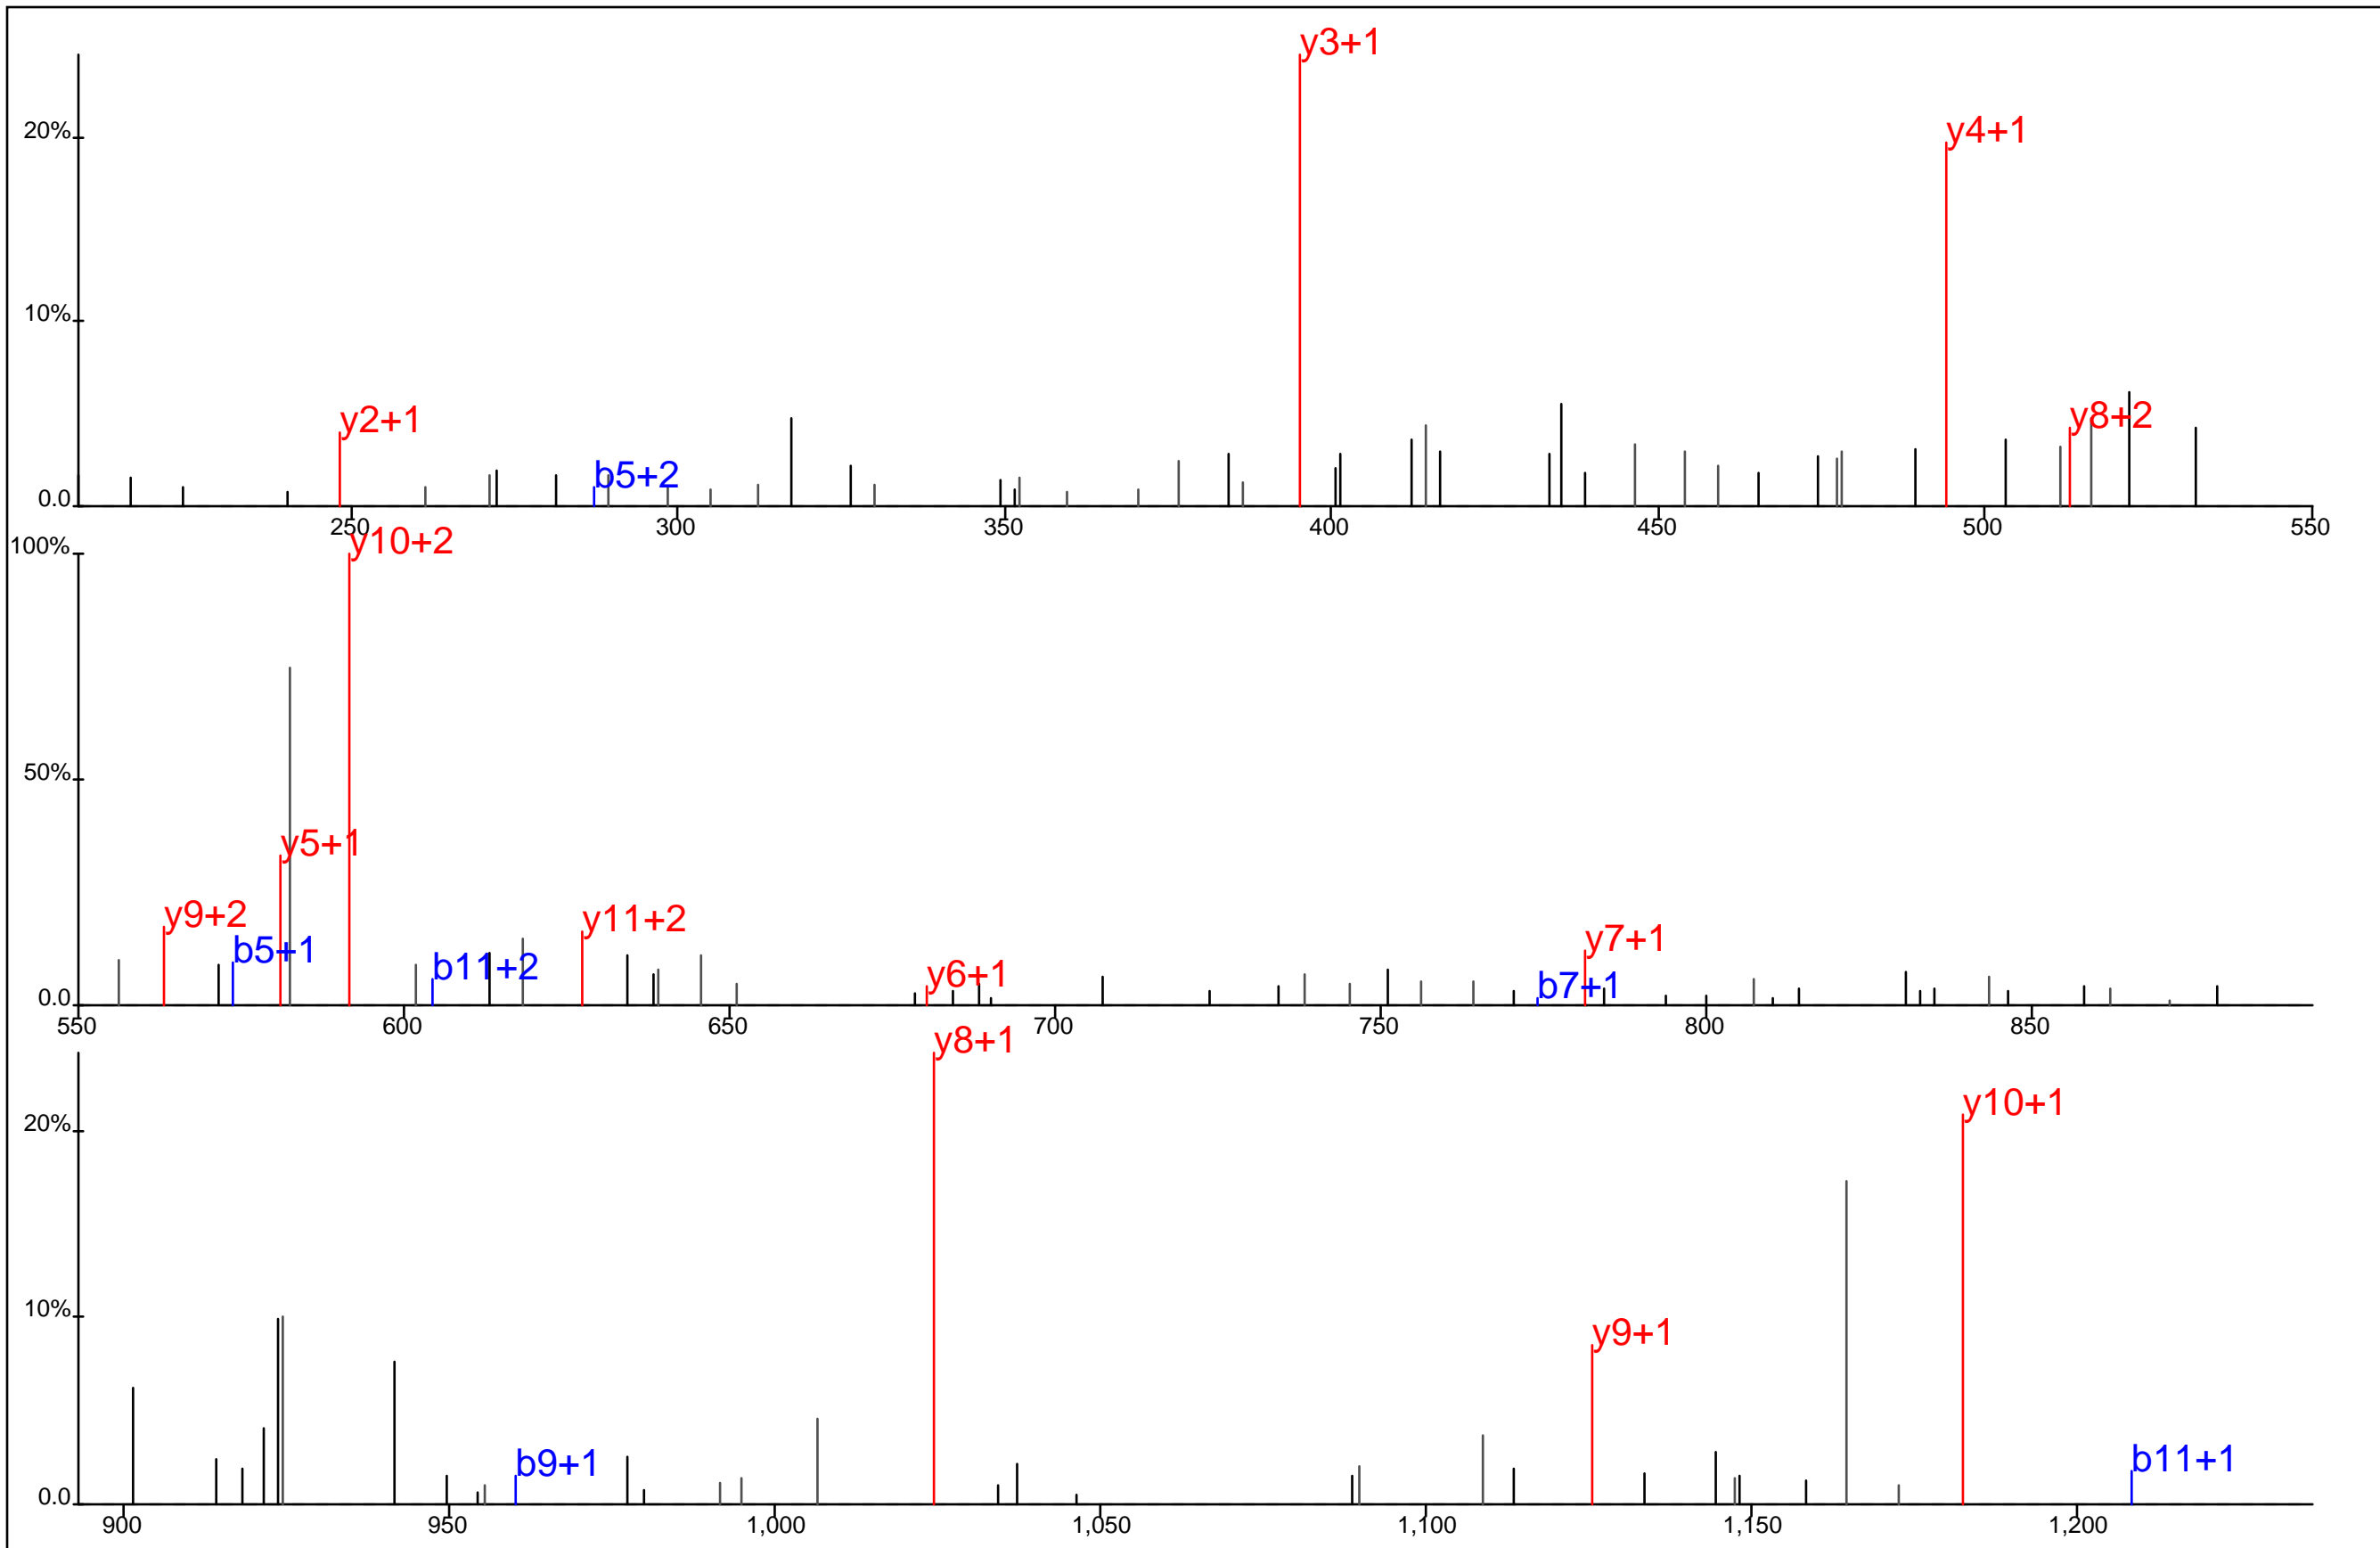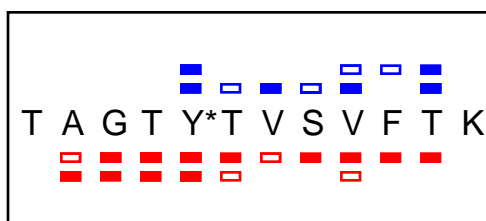

Protein Name: ITK  
 gi Accession: 0  
 Precursor Mass: 677.8183+2  
 Delta Mass: 0.205 ppm  
 XCorr: 44.07

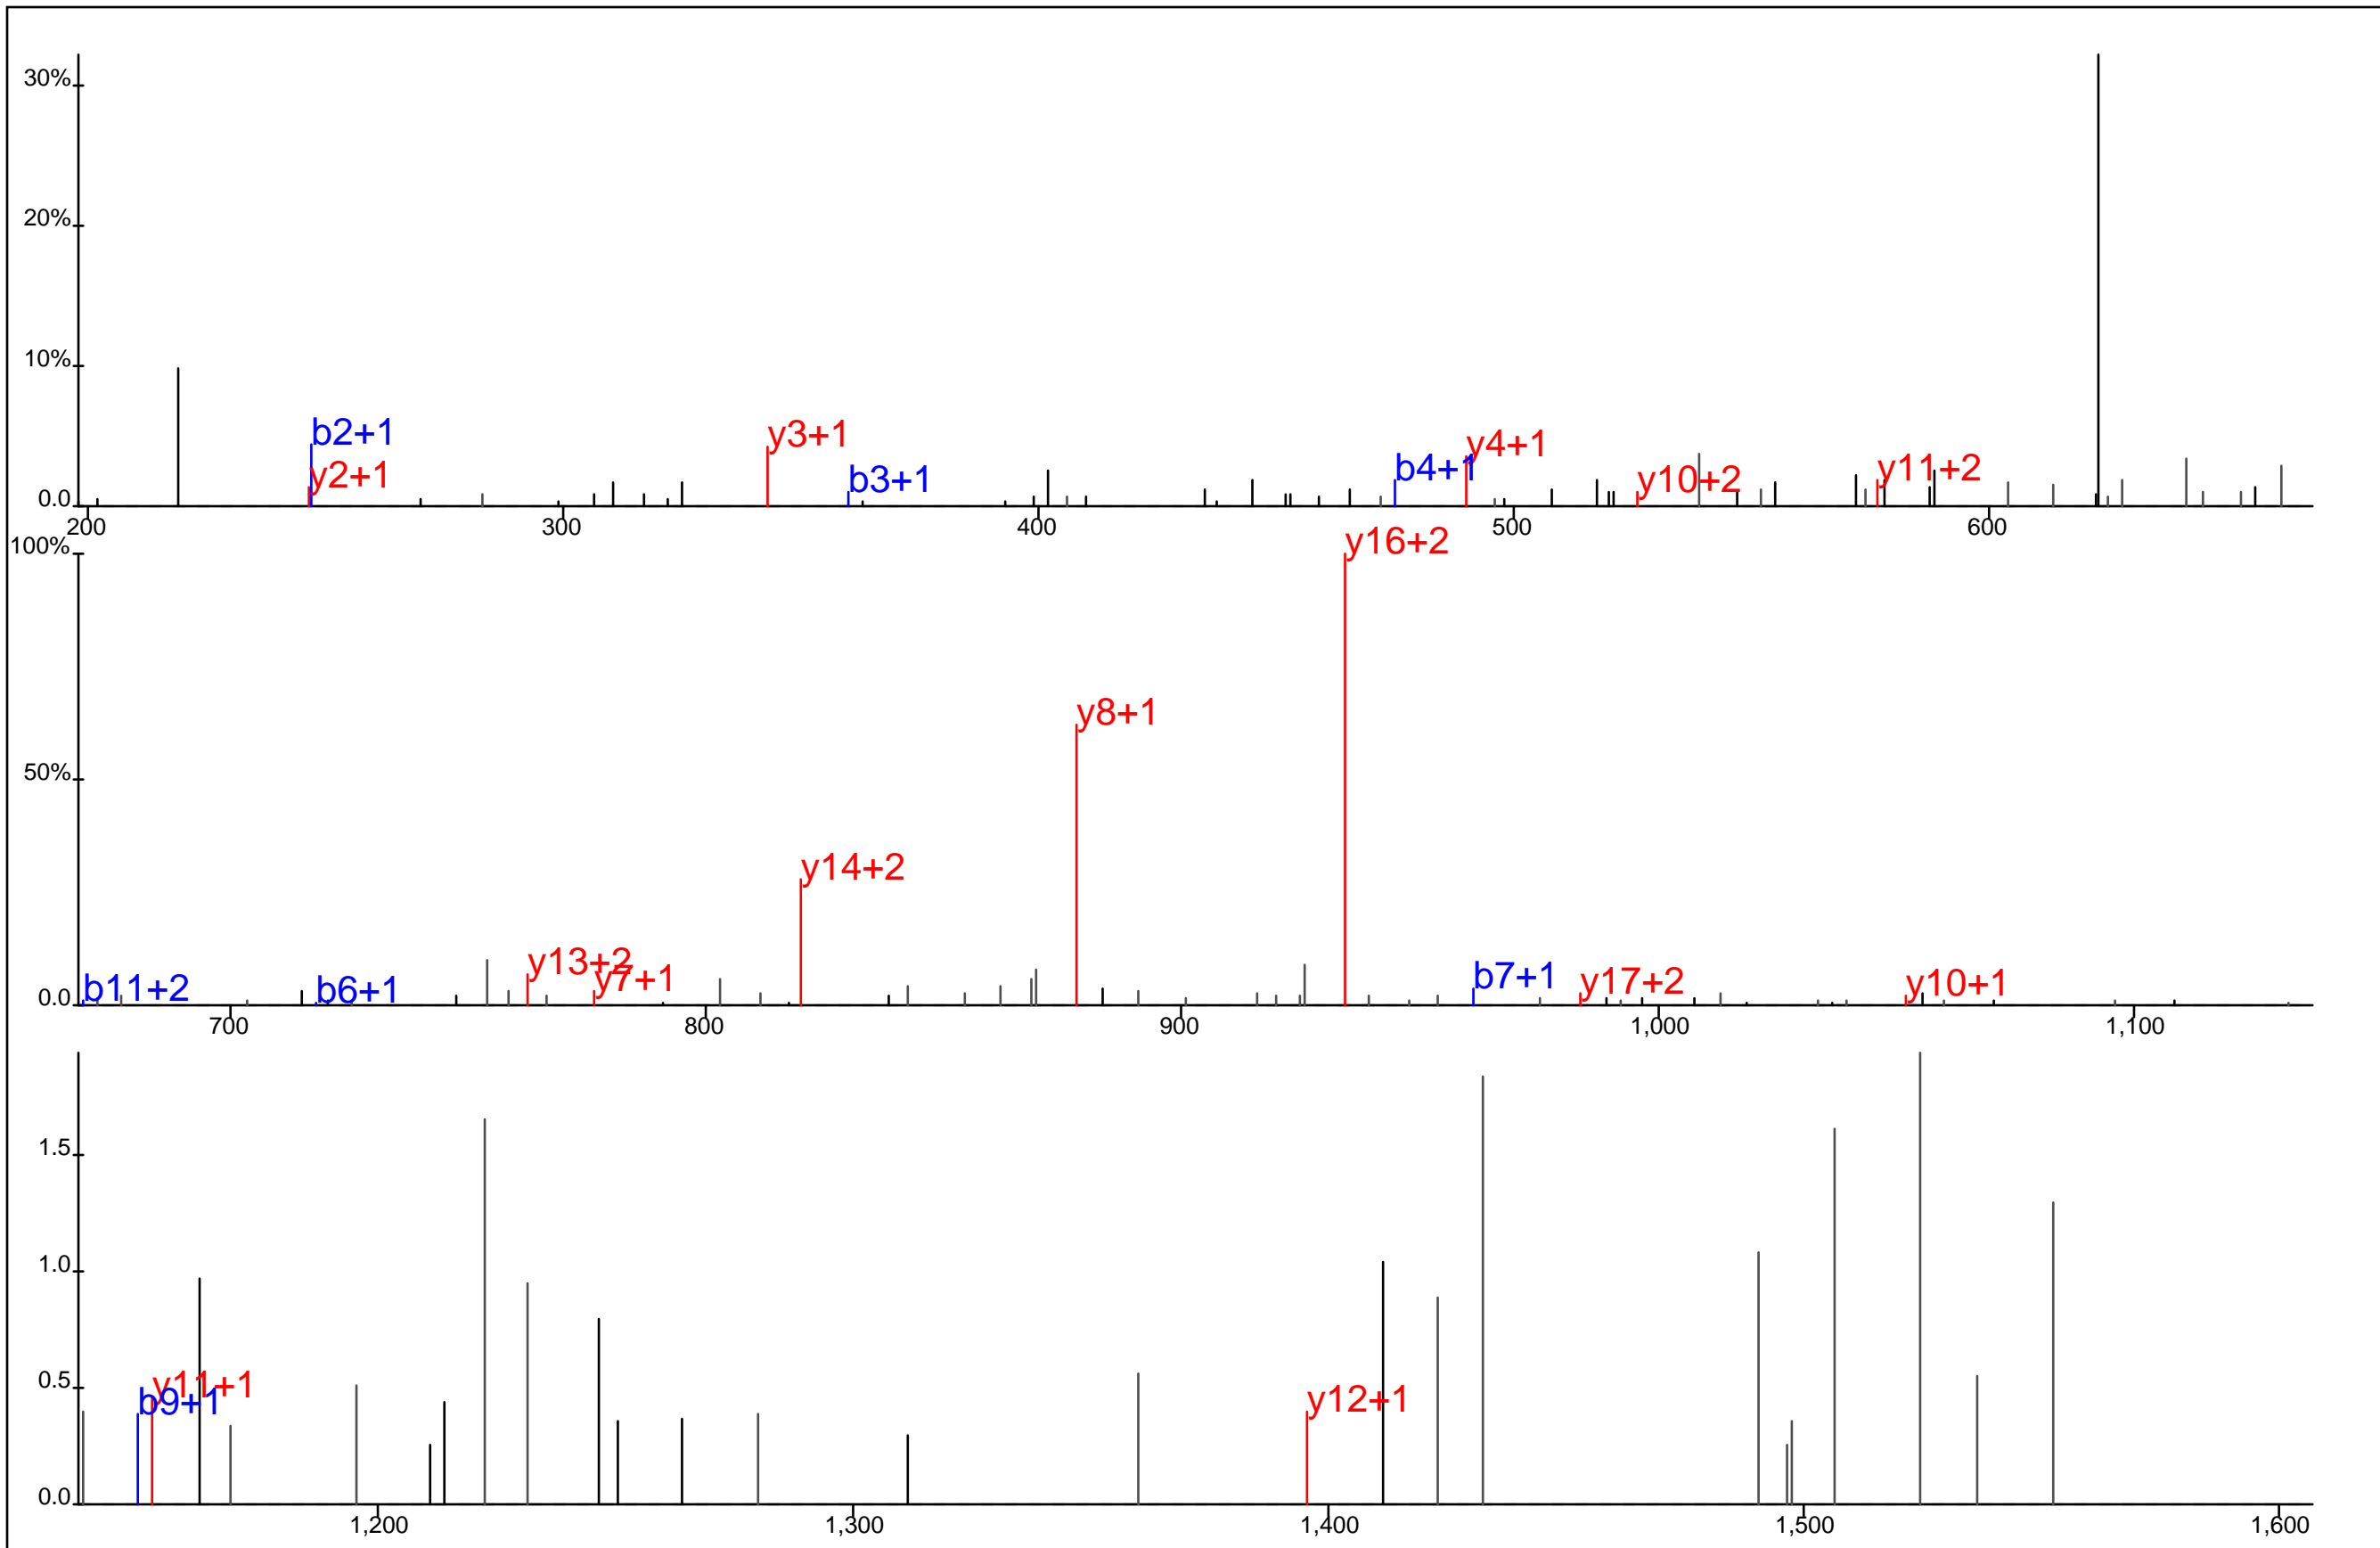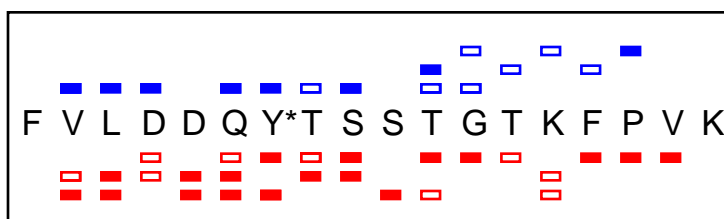

Protein Name: ITK  
 gi Accession: 0  
 Precursor Mass: 705.0019+3  
 Delta Mass: 1.028 ppm  
 XCorr: 34.54

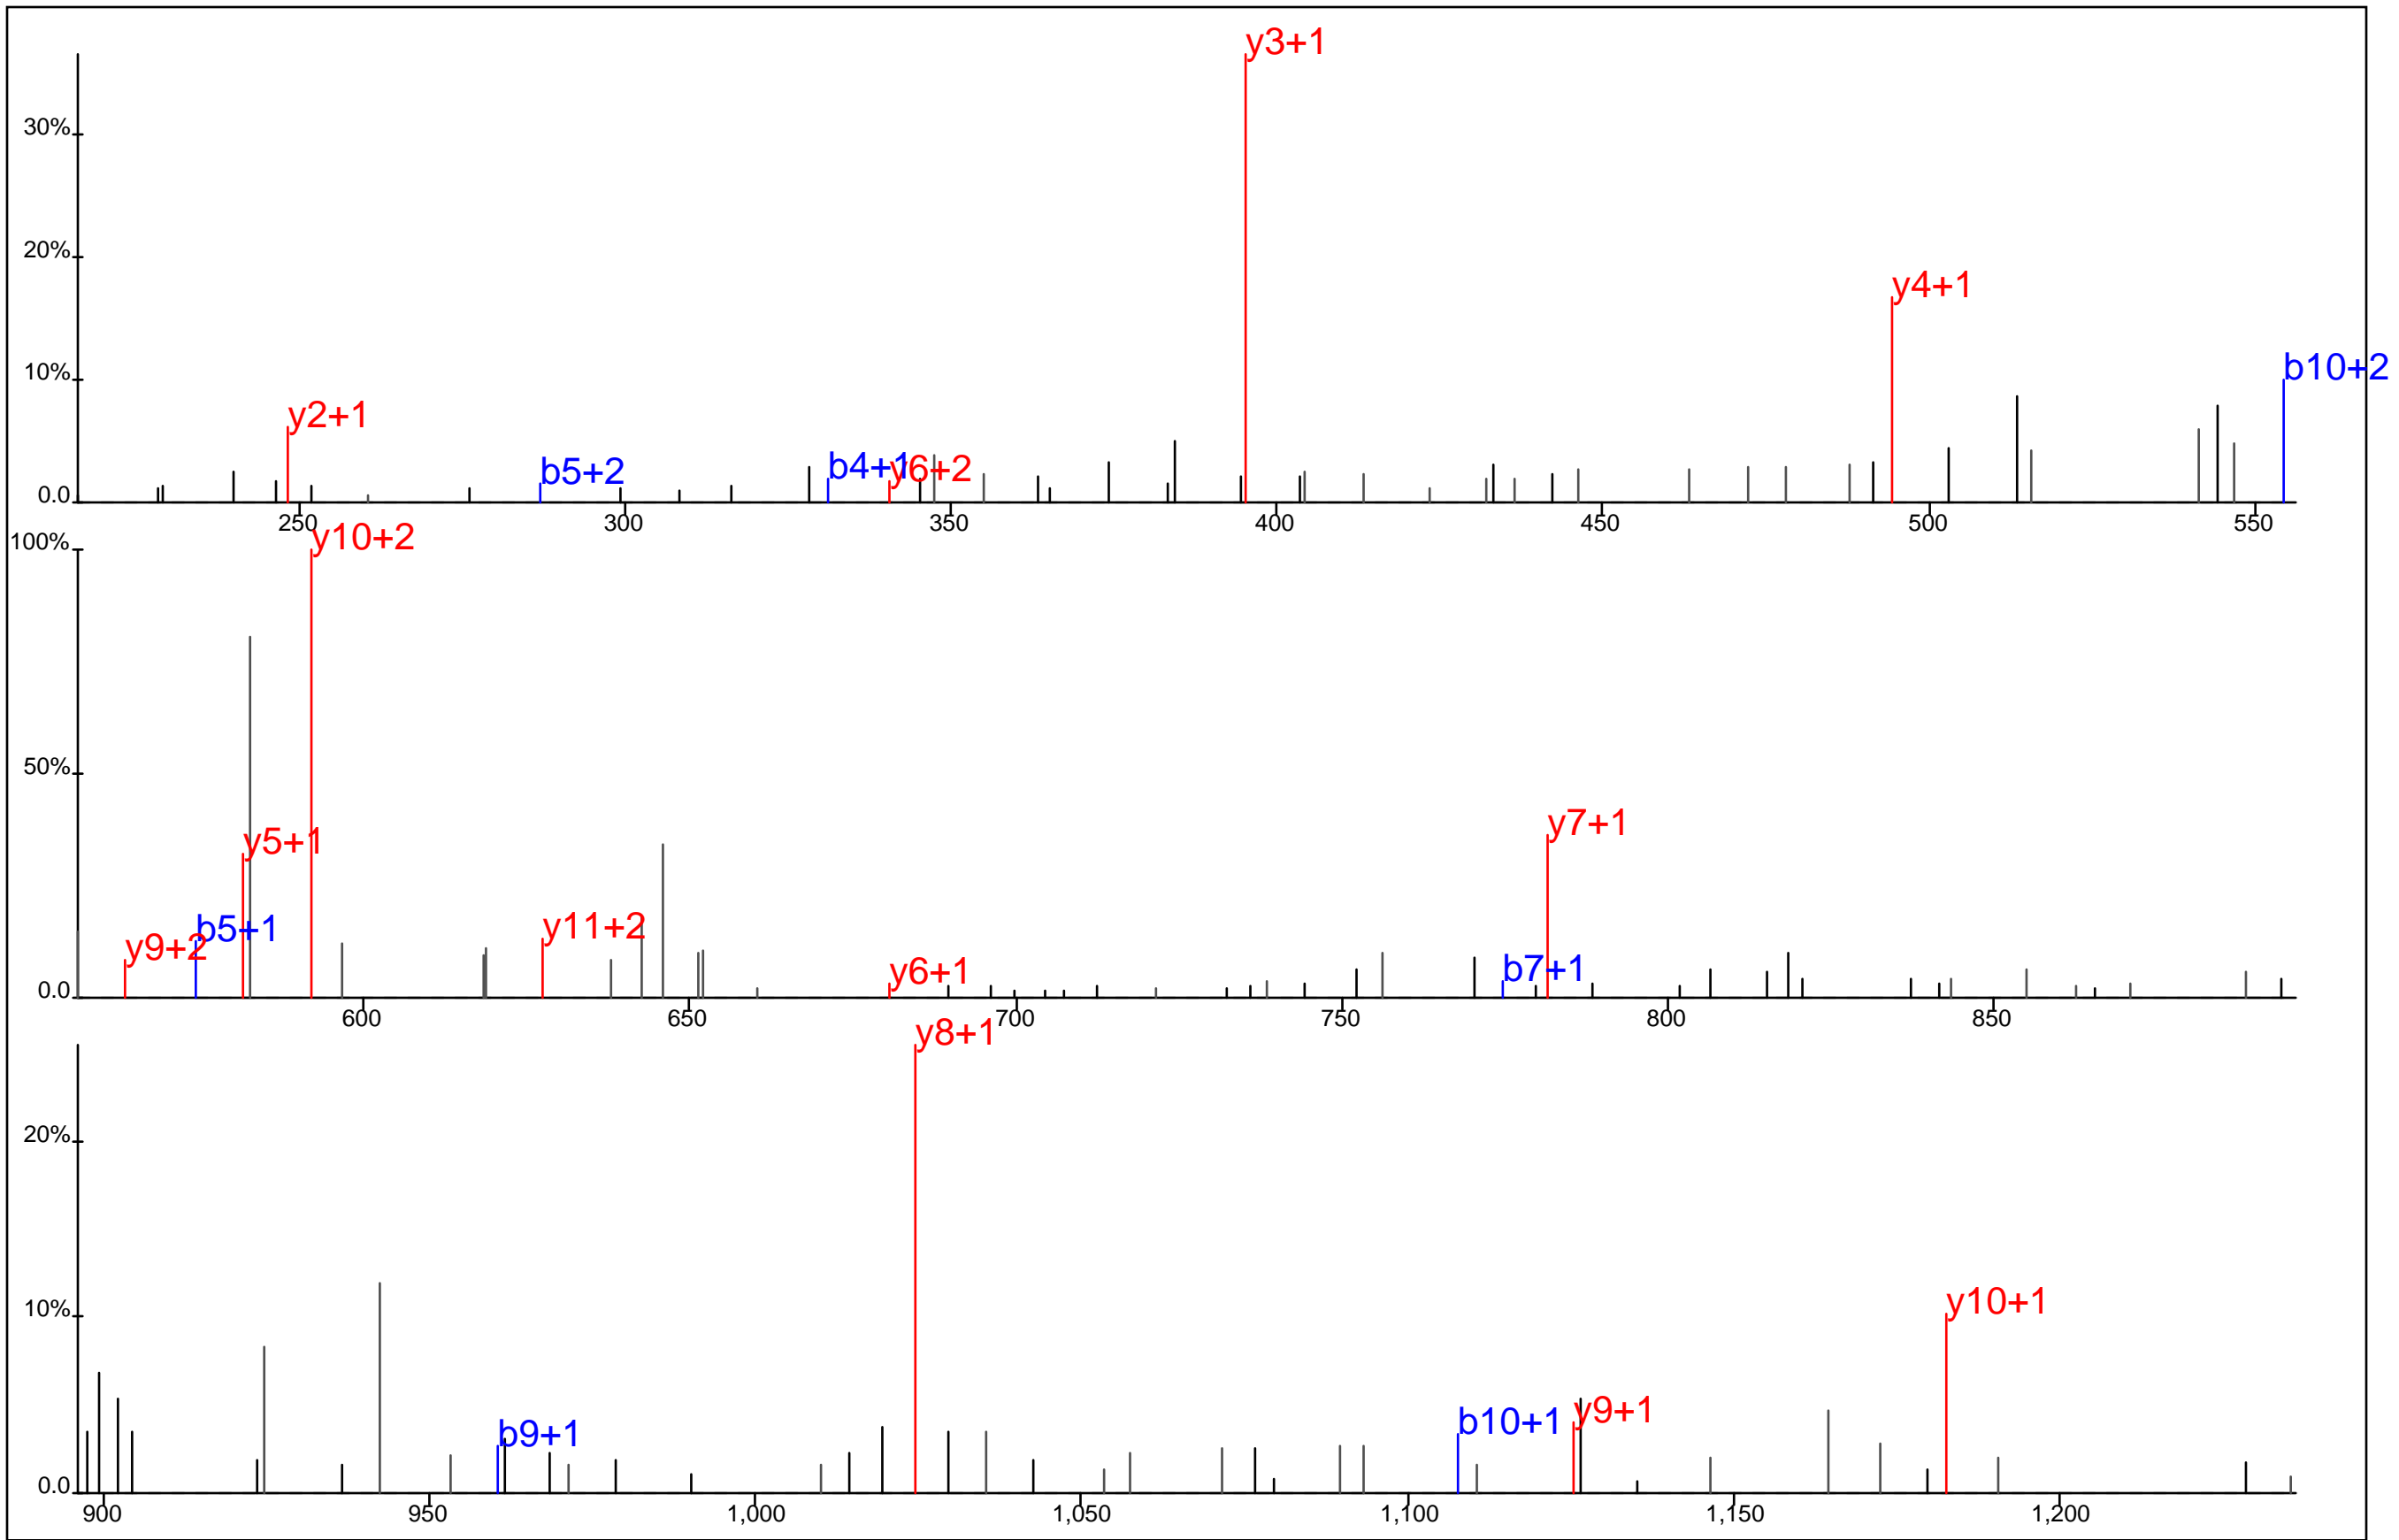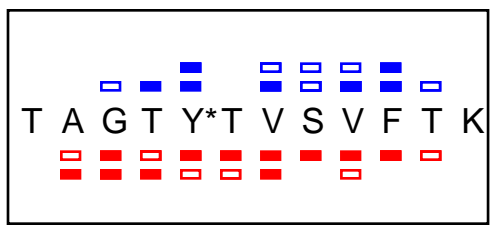

Protein Name: ITK  
 gi Accession: 0  
 Precursor Mass: 677.8186+2  
 Delta Mass: 0.657 ppm  
 XCorr: 40.58

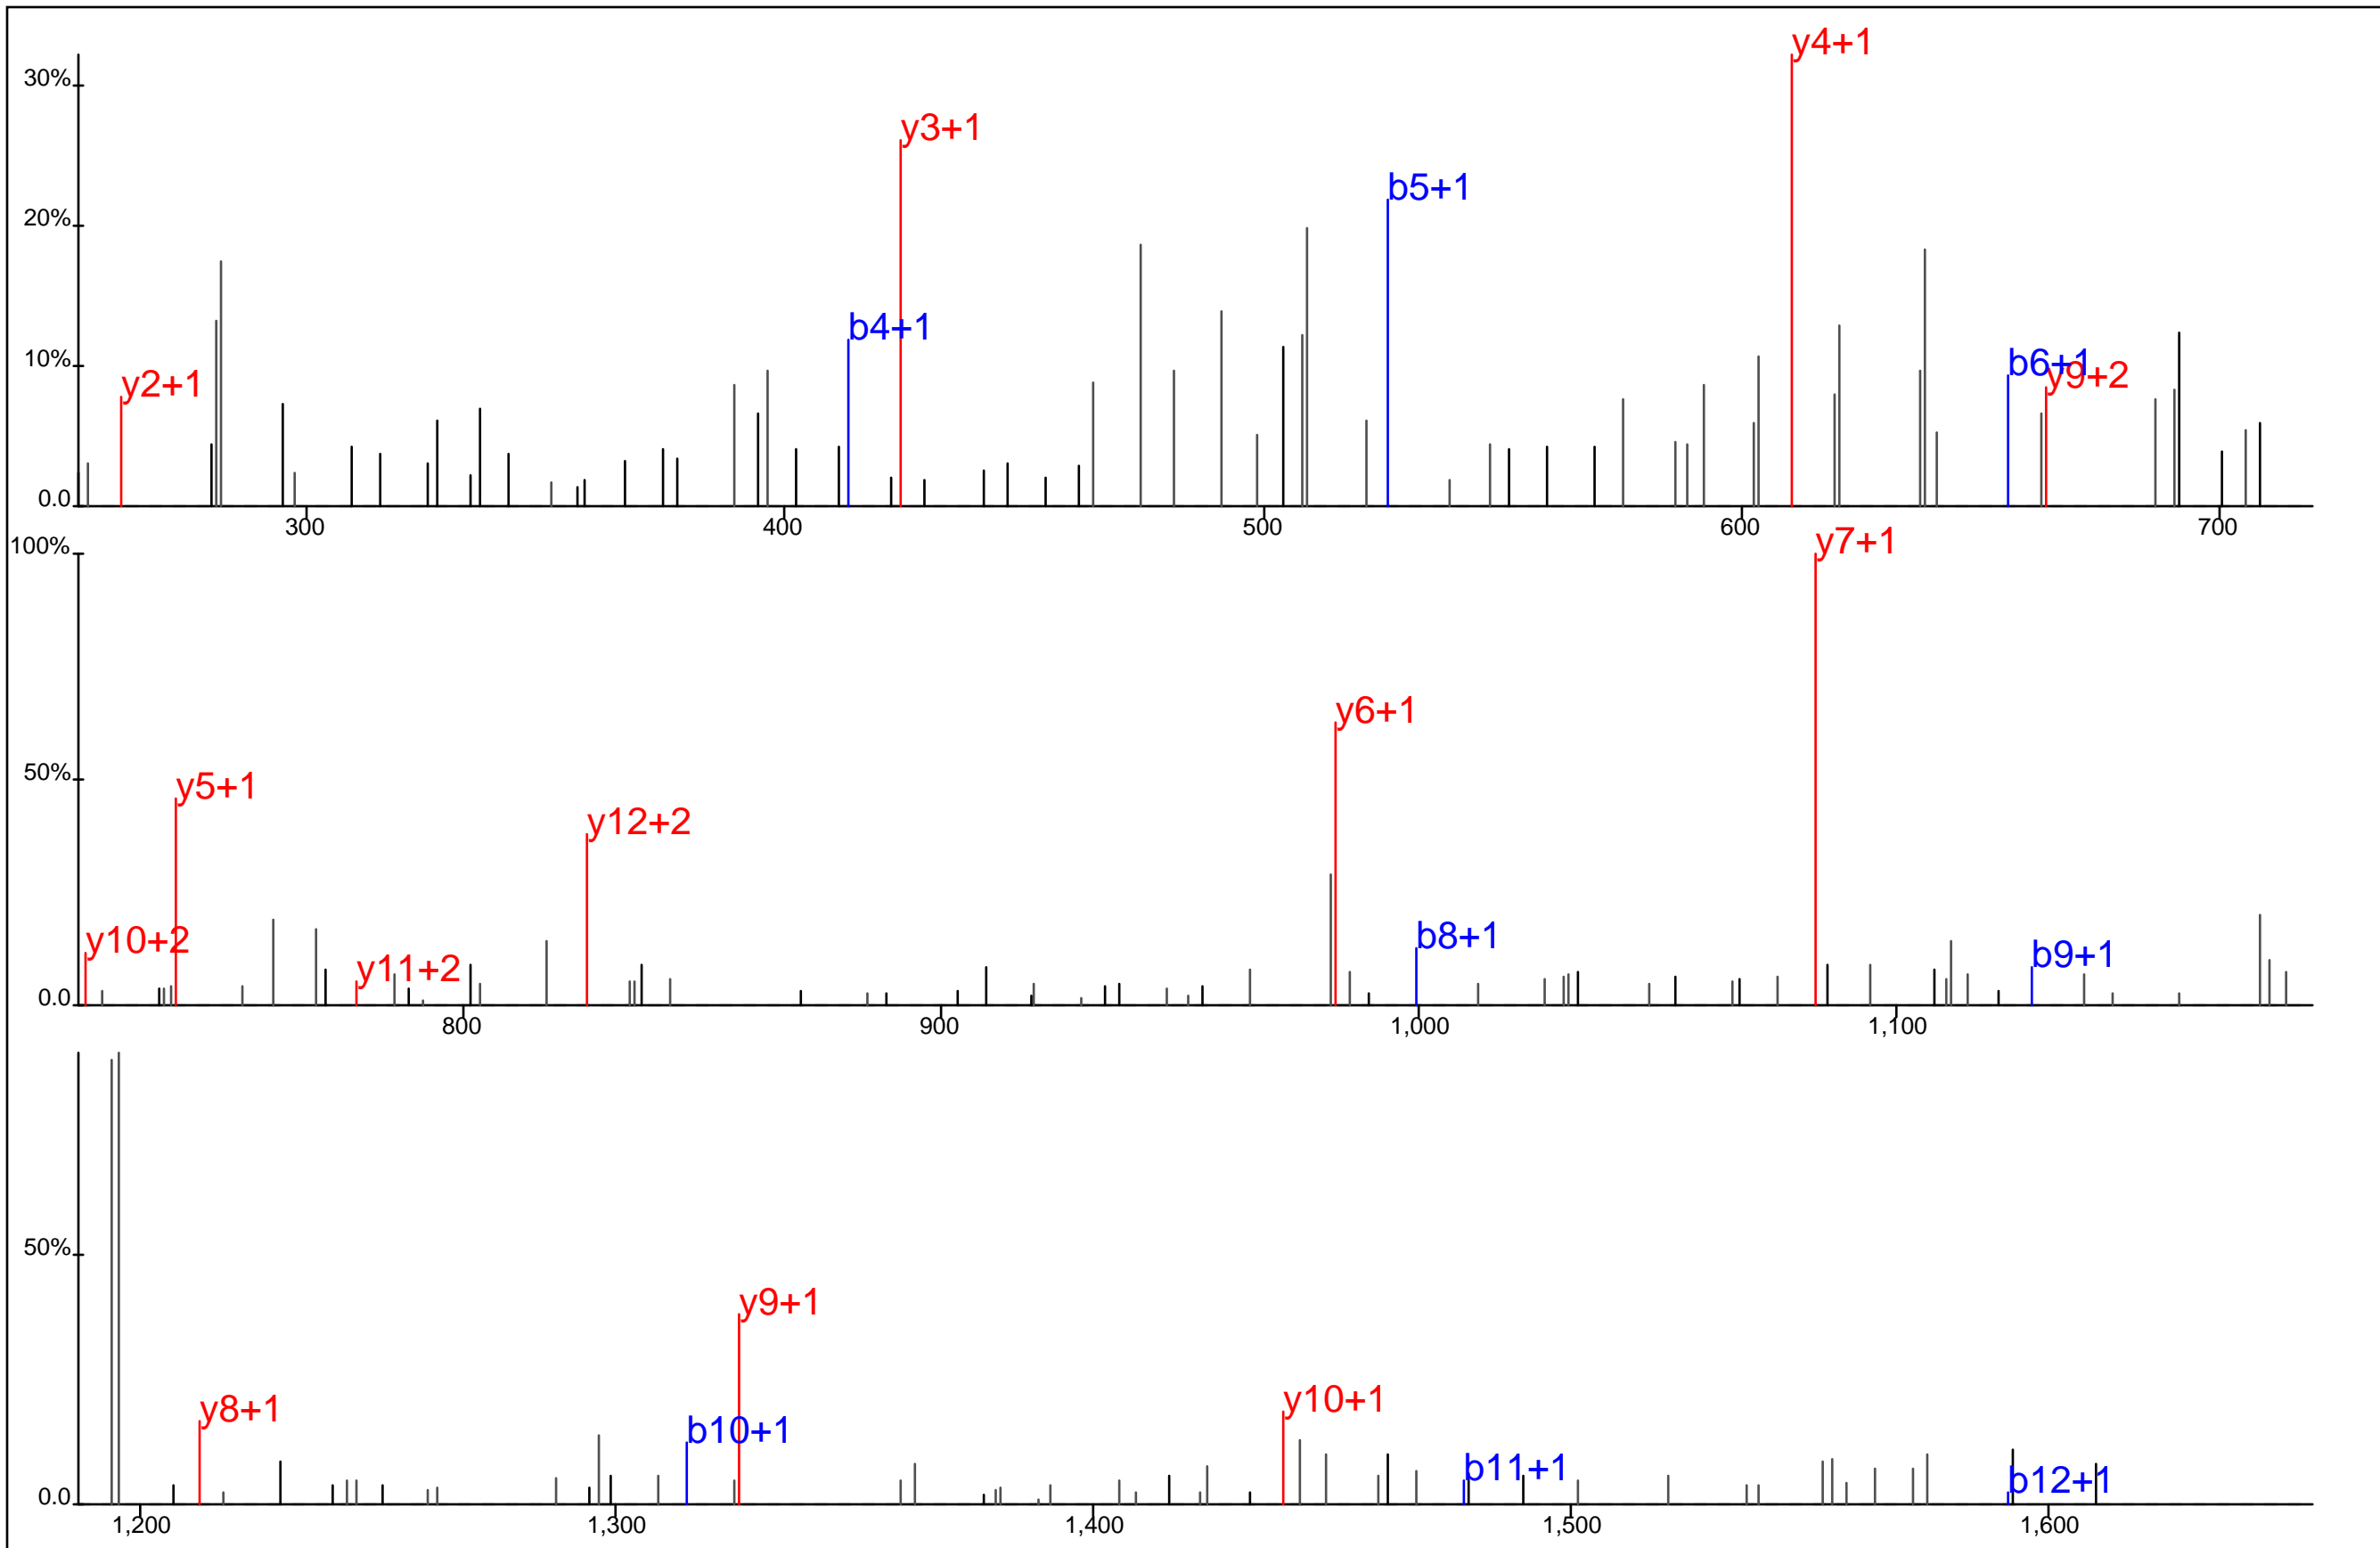

□ □ □ □ □ □ □ □ □ □  
 S P N N L E T Y\*E W Y N K  
□ □ □ □ □ □ □ □ □ □ □

Protein Name: ITK  
 gi Accession: 0  
 Precursor Mass: 869.3612+2  
 Delta Mass: 0.245 ppm  
 XCorr: 44.59

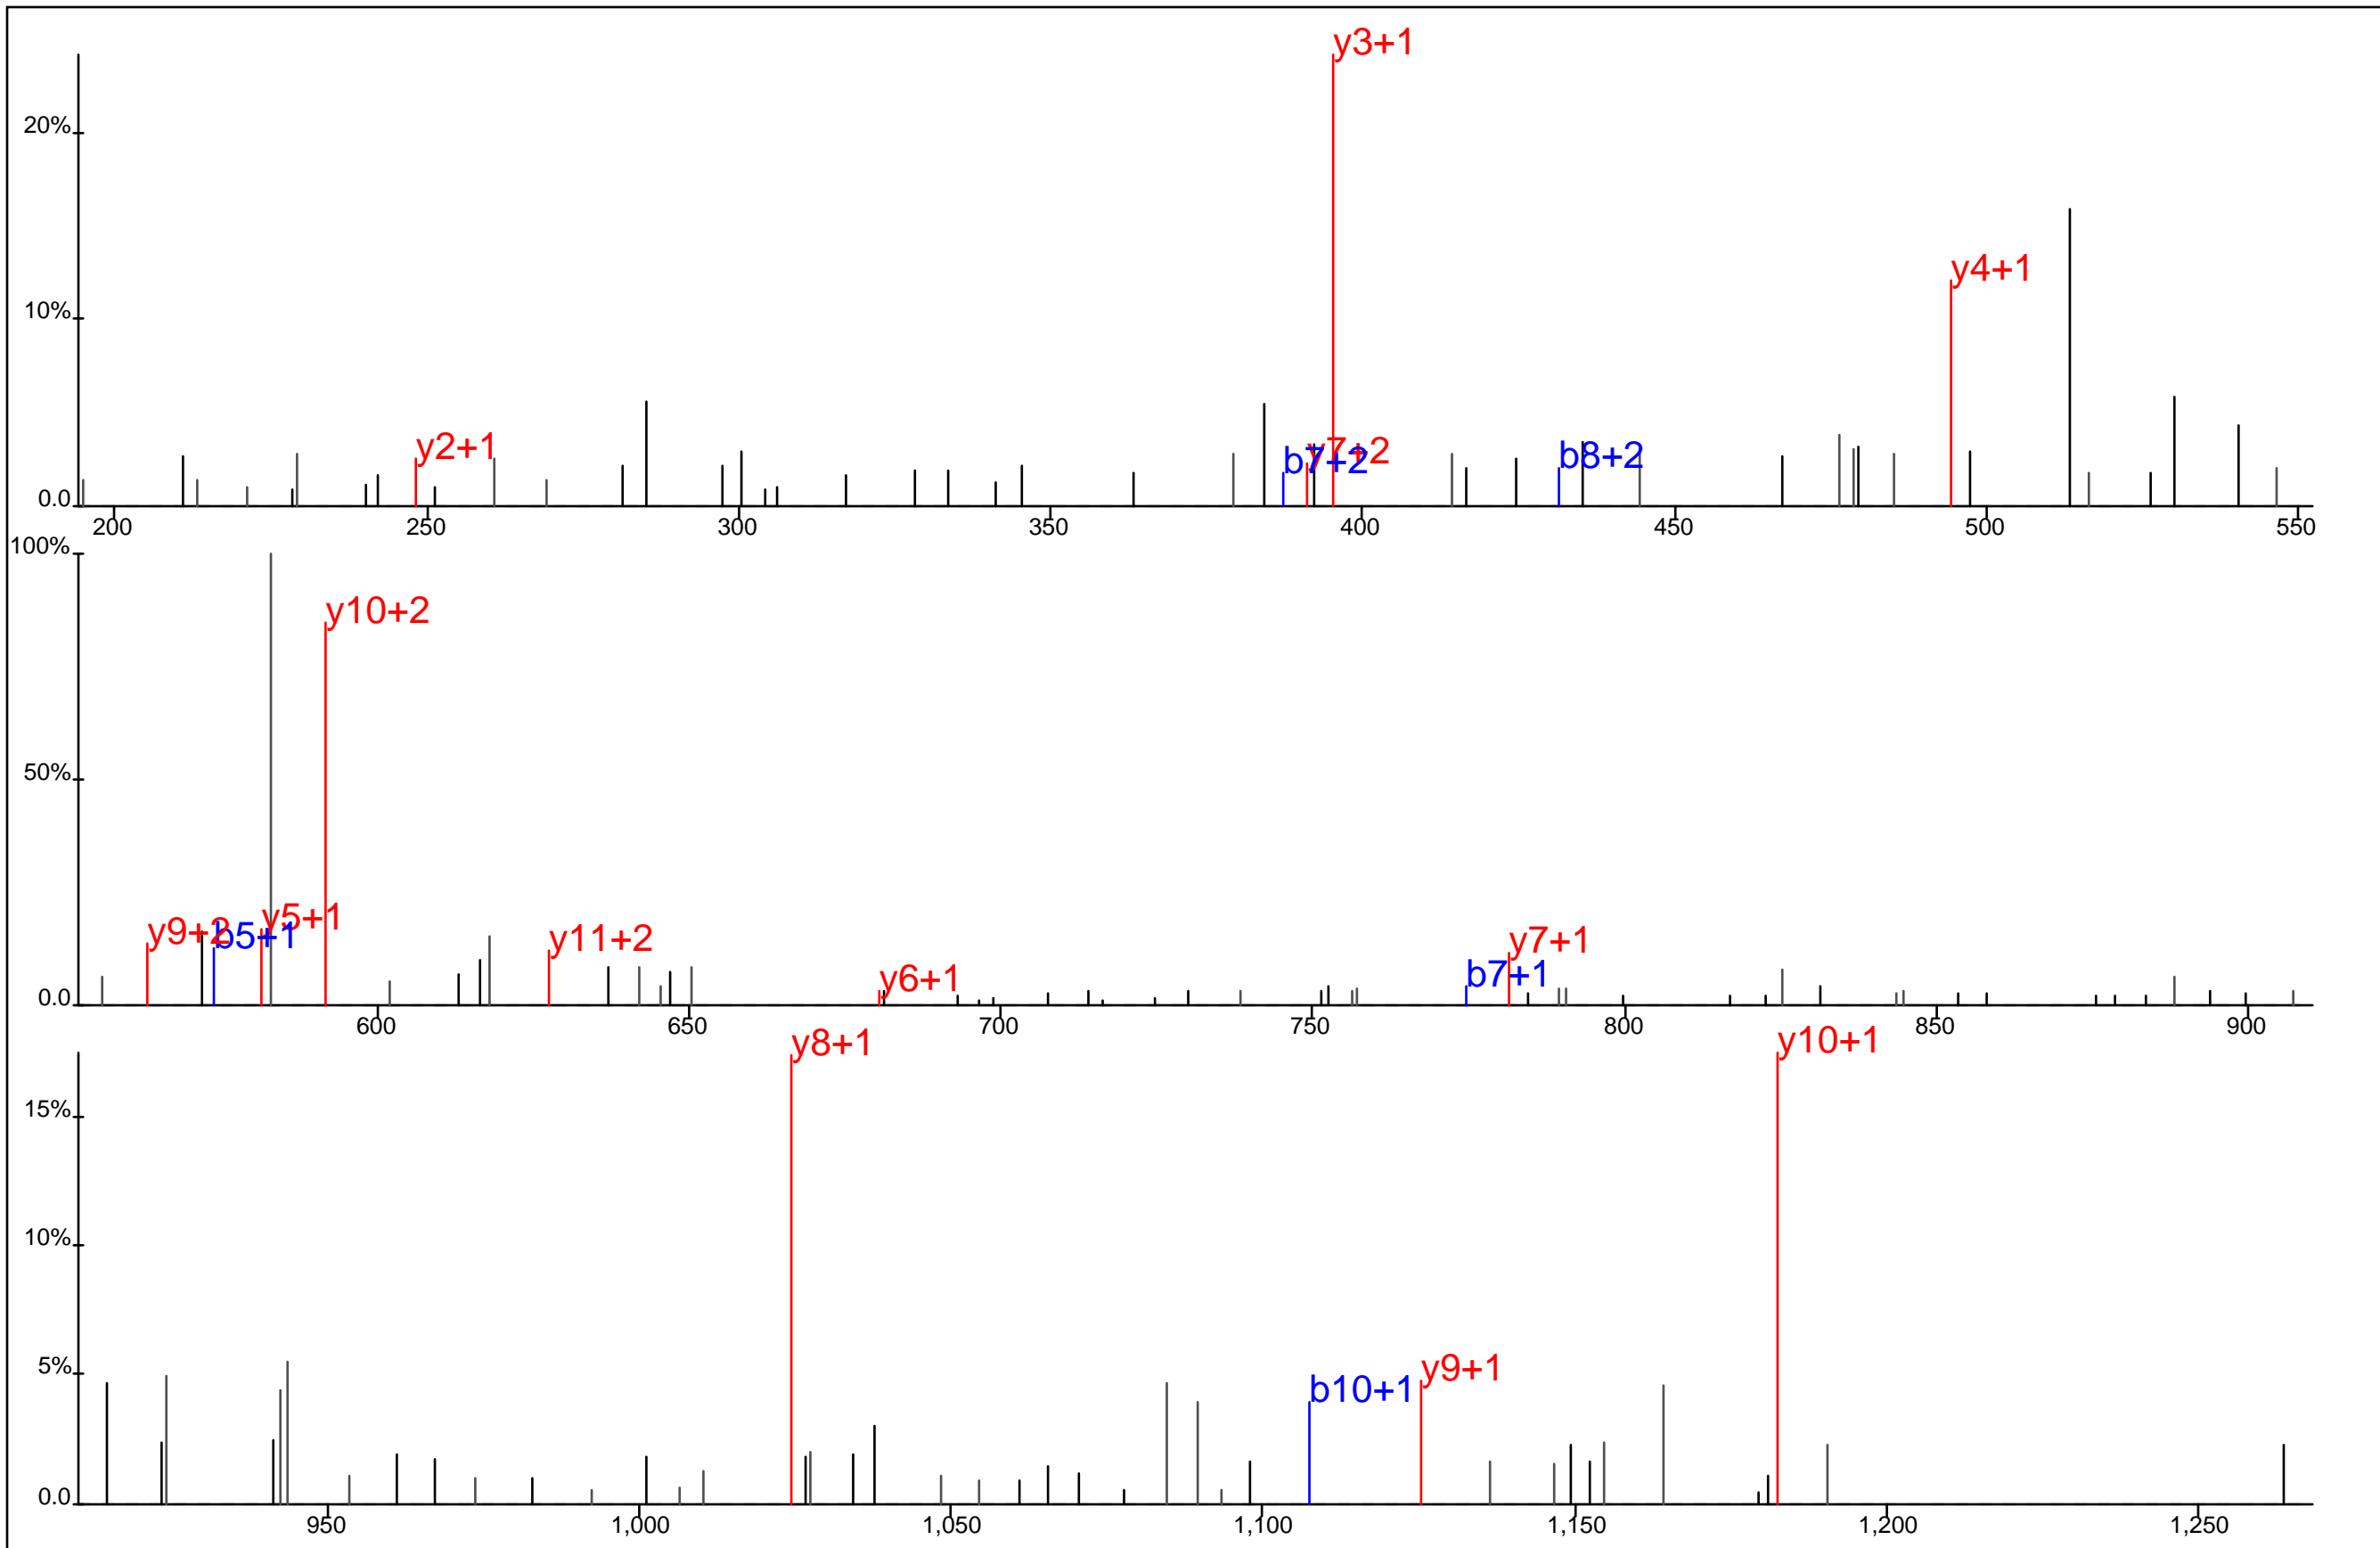

▢ ▢ ▢ ▢ ▢ ▢ ▢  
 T A G T Y\* T V S V F T K  
▢ ▢ ▢ ▢ ▢ ▢ ▢ ▢

Protein Name: ITK  
 gi Accession: 0  
 Precursor Mass: 677.8171+2  
 Delta Mass: 1.506 ppm  
 XCorr: 39.36

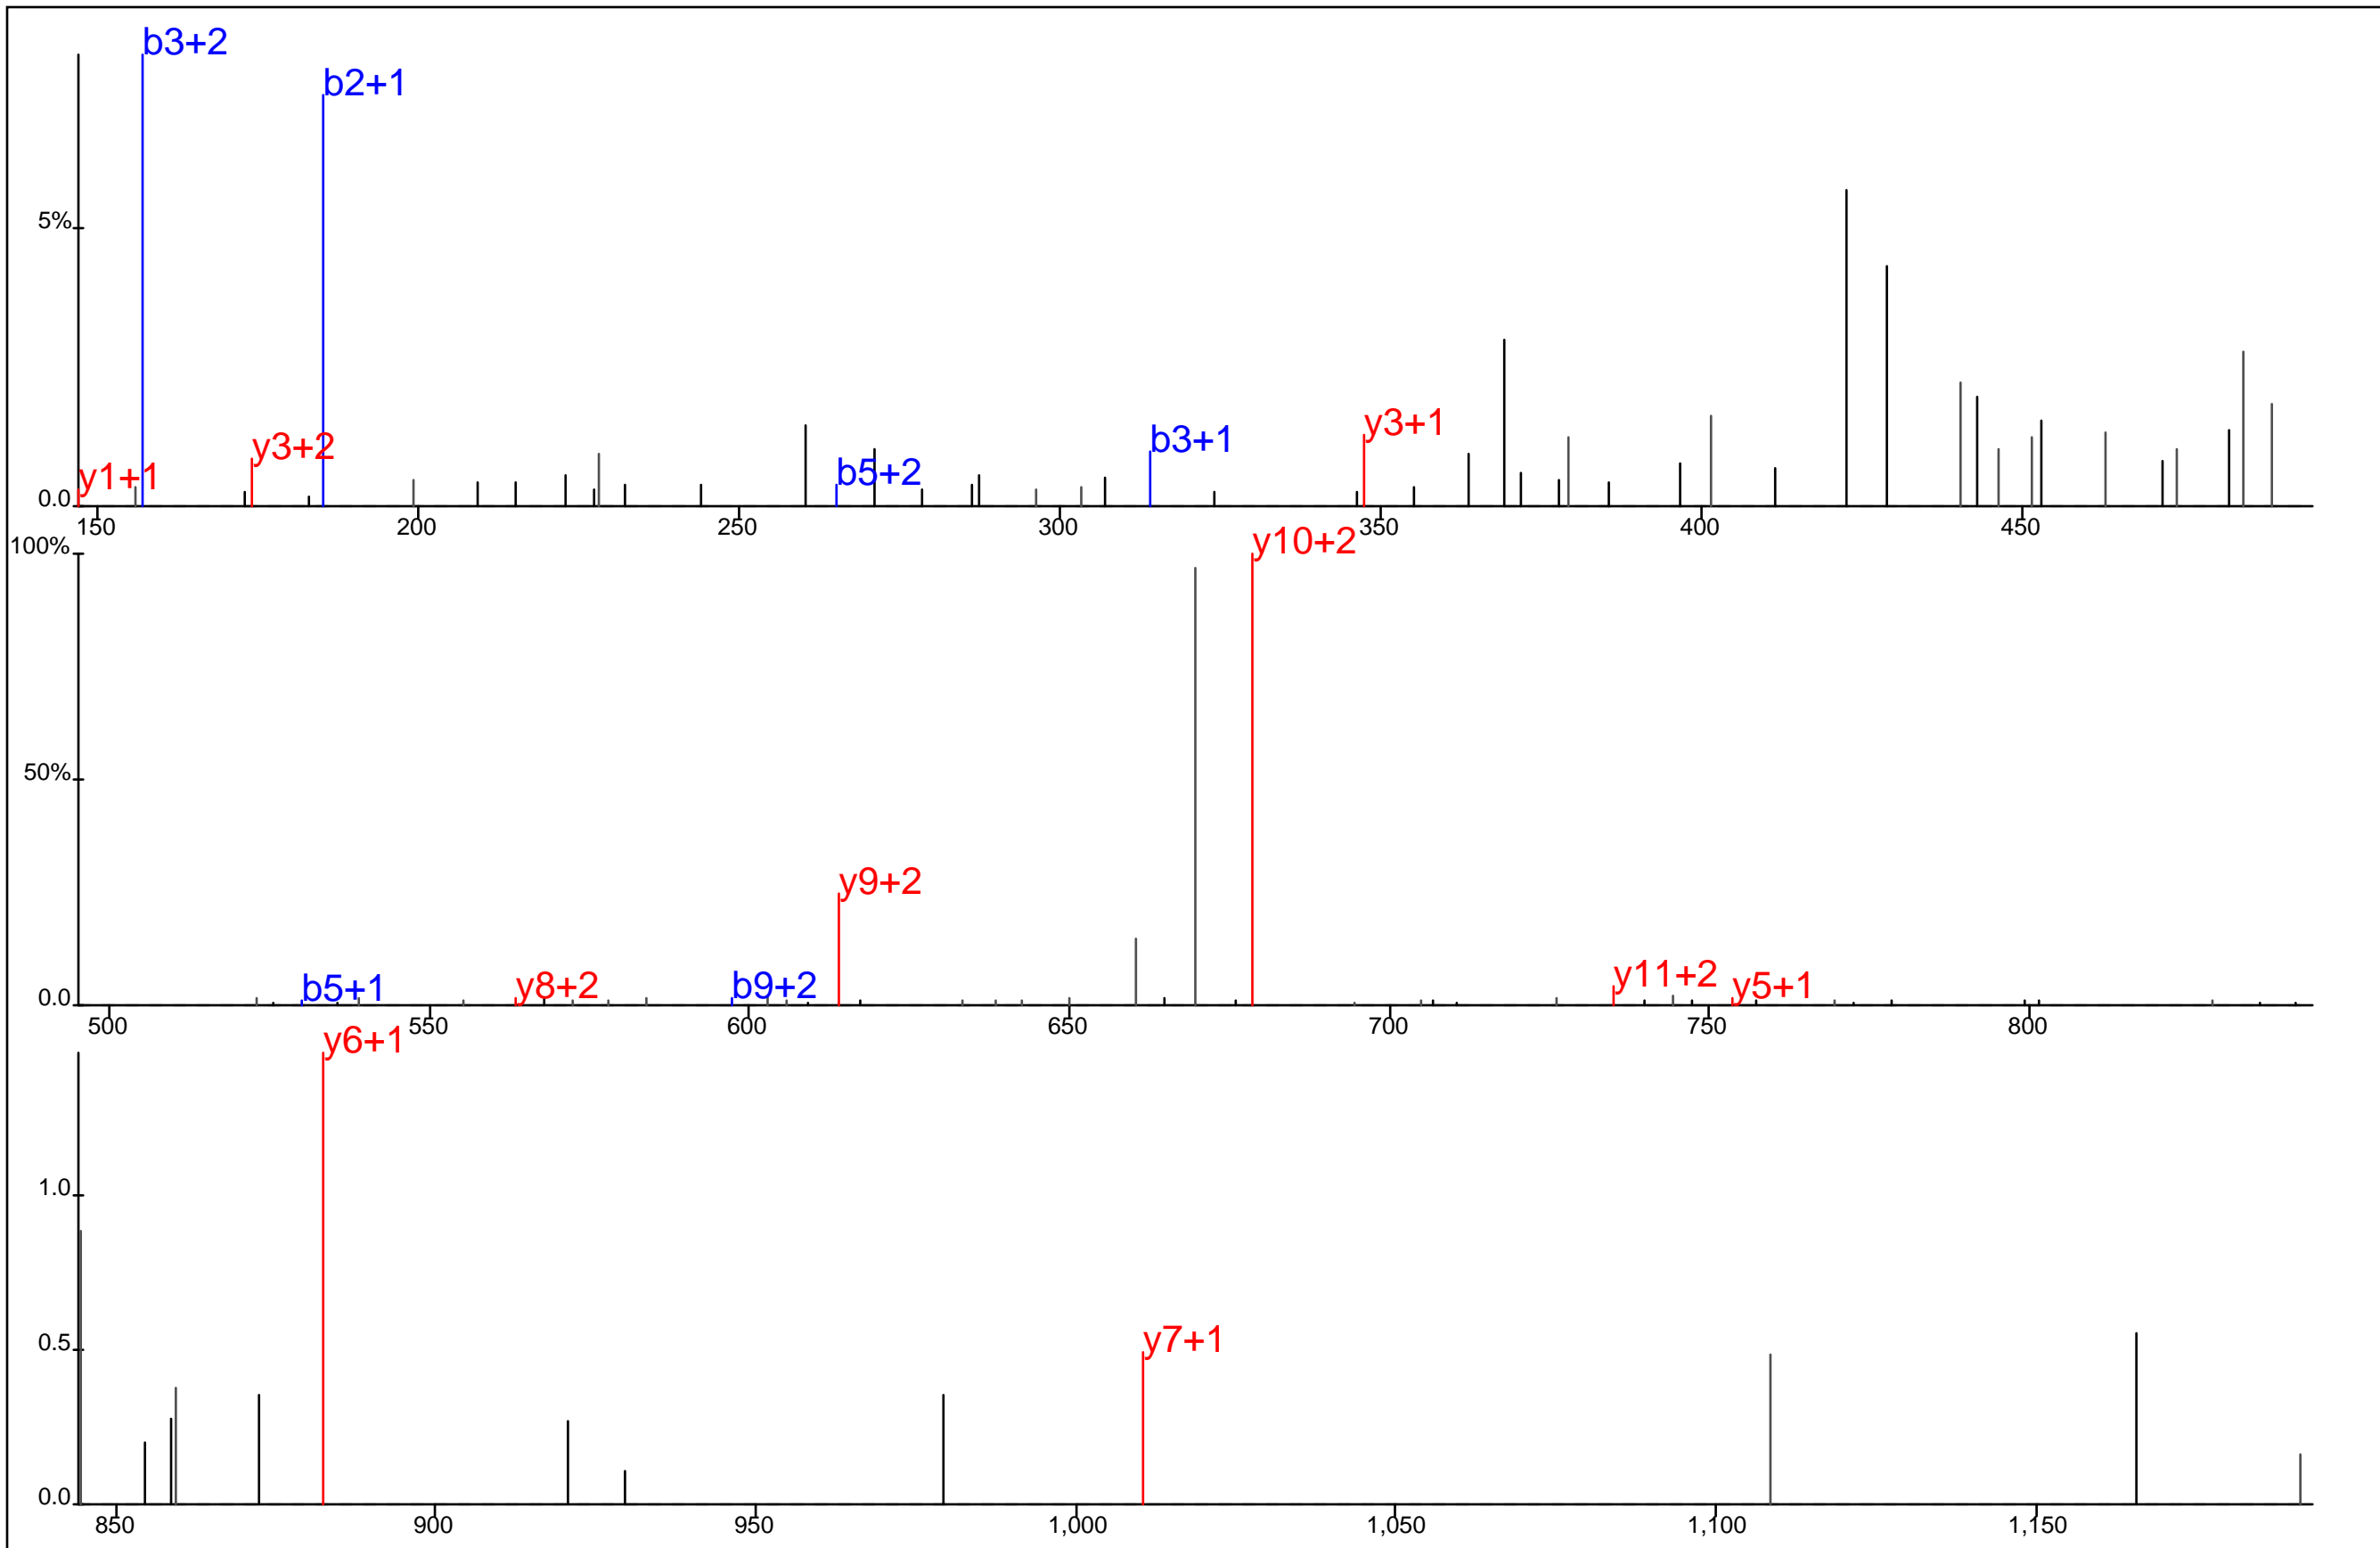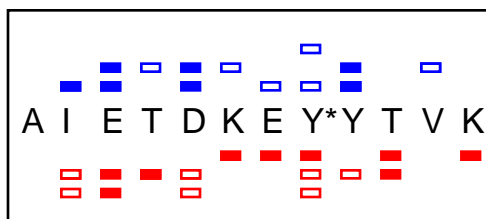

Protein Name: Janus kinase 1  
 gi Accession: 0  
 Precursor Mass: 513.9037+3  
 Delta Mass: 0.721 ppm  
 XCorr: 21.02



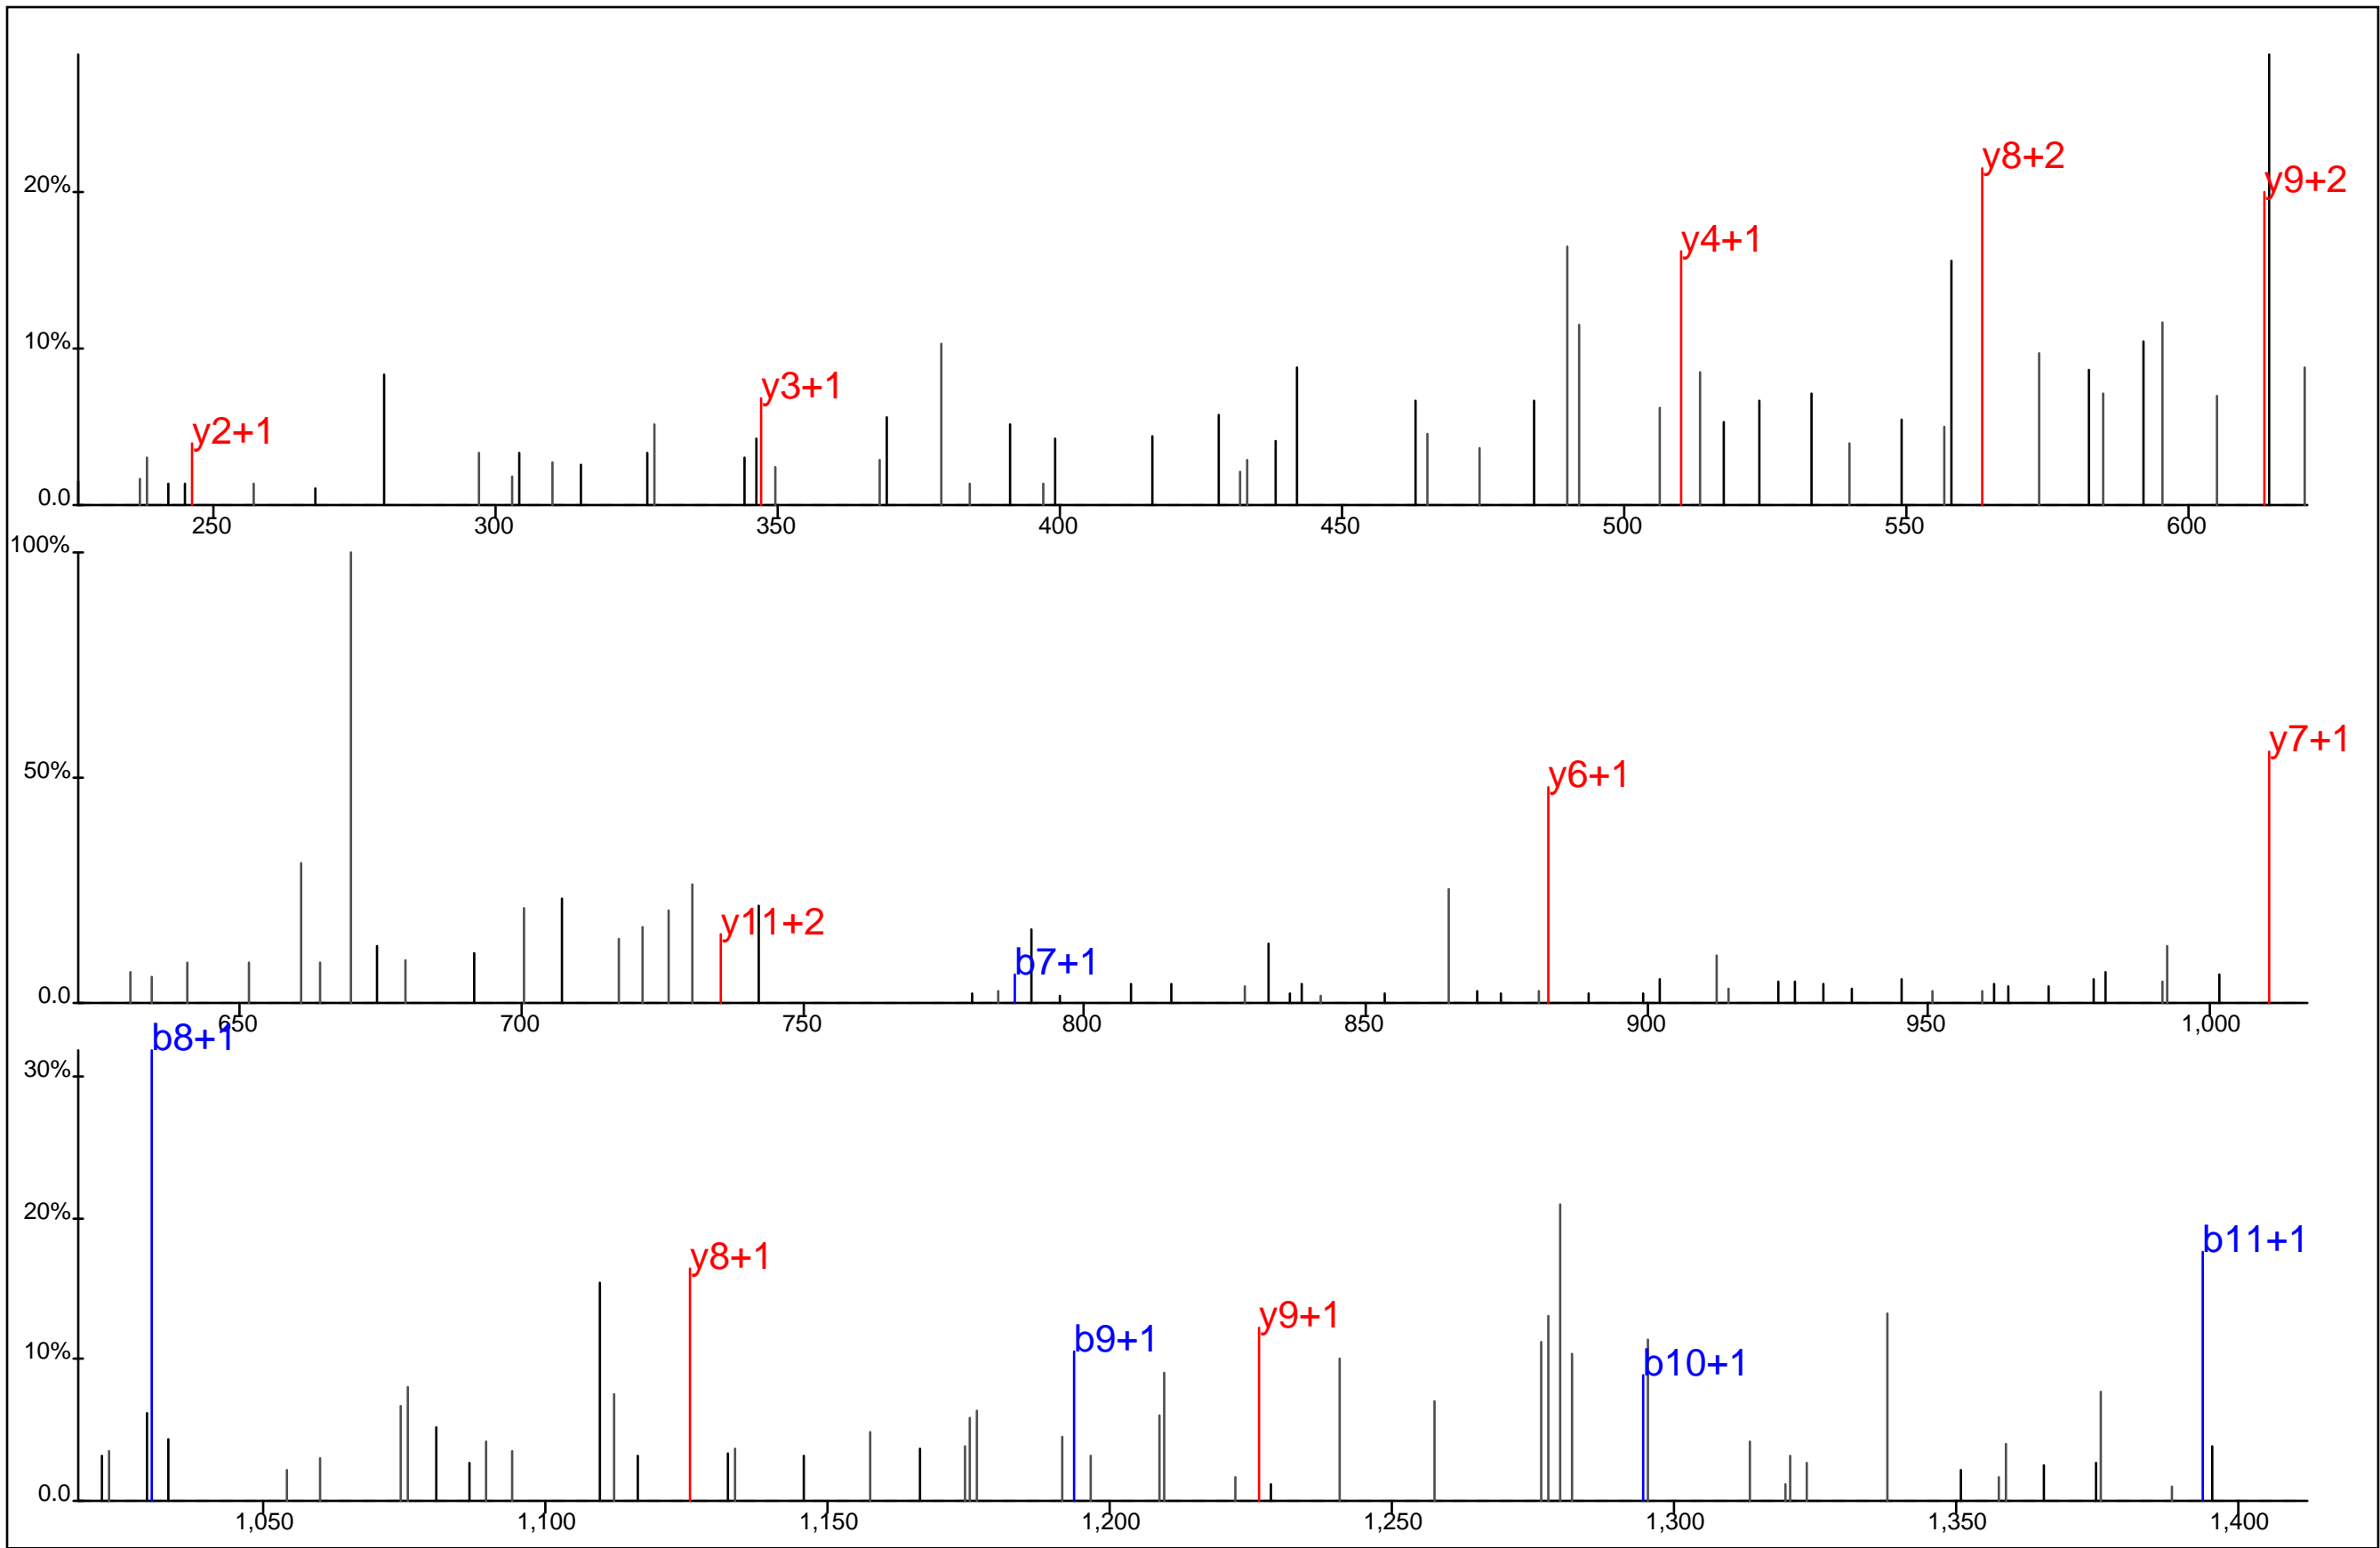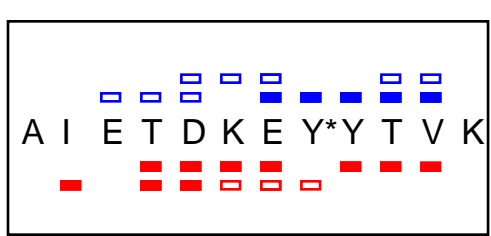

Protein Name: Janus kinase 1  
 gi Accession: 0  
 Precursor Mass: 770.3528+2  
 Delta Mass: 0.396 ppm  
 XCorr: 37.34

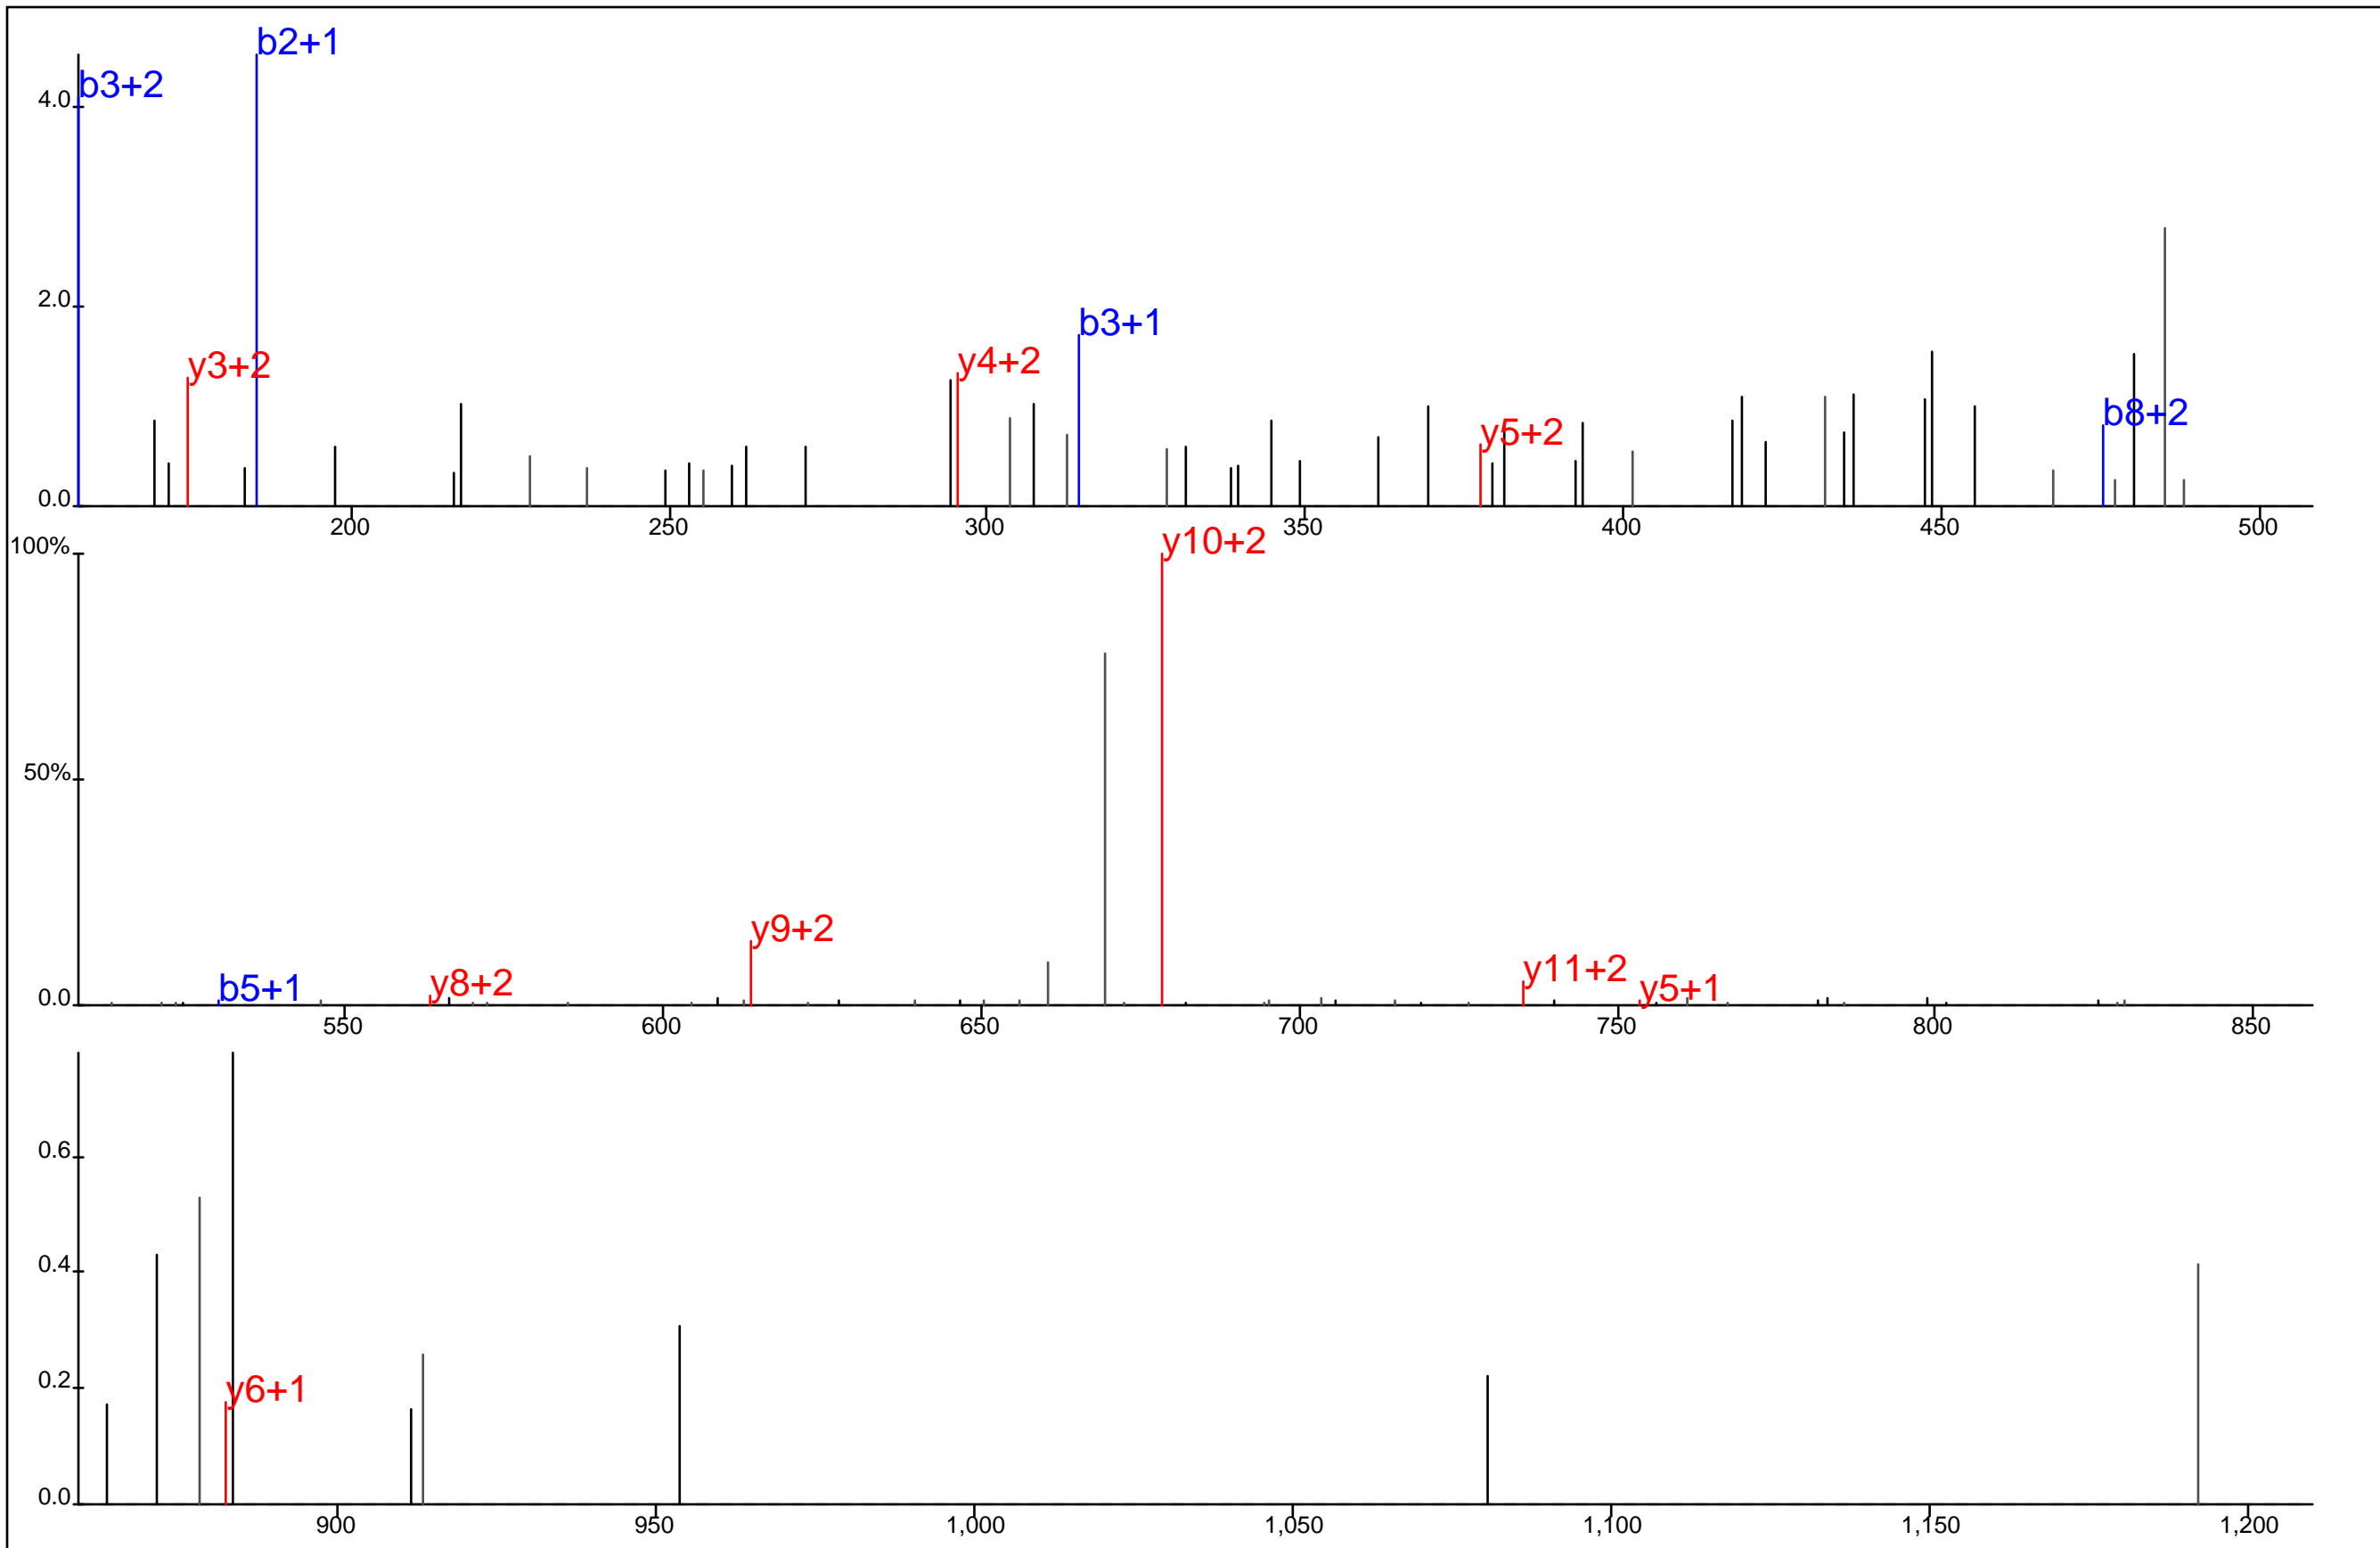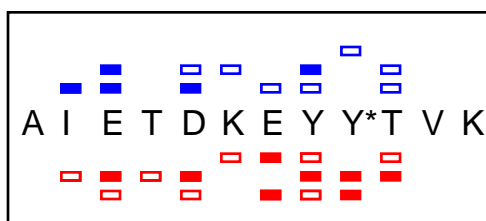

Protein Name: Janus kinase 1  
 gi Accession: 0  
 Precursor Mass: 513.9064+3  
 Delta Mass: 4.511 ppm  
 XCorr: 20.29

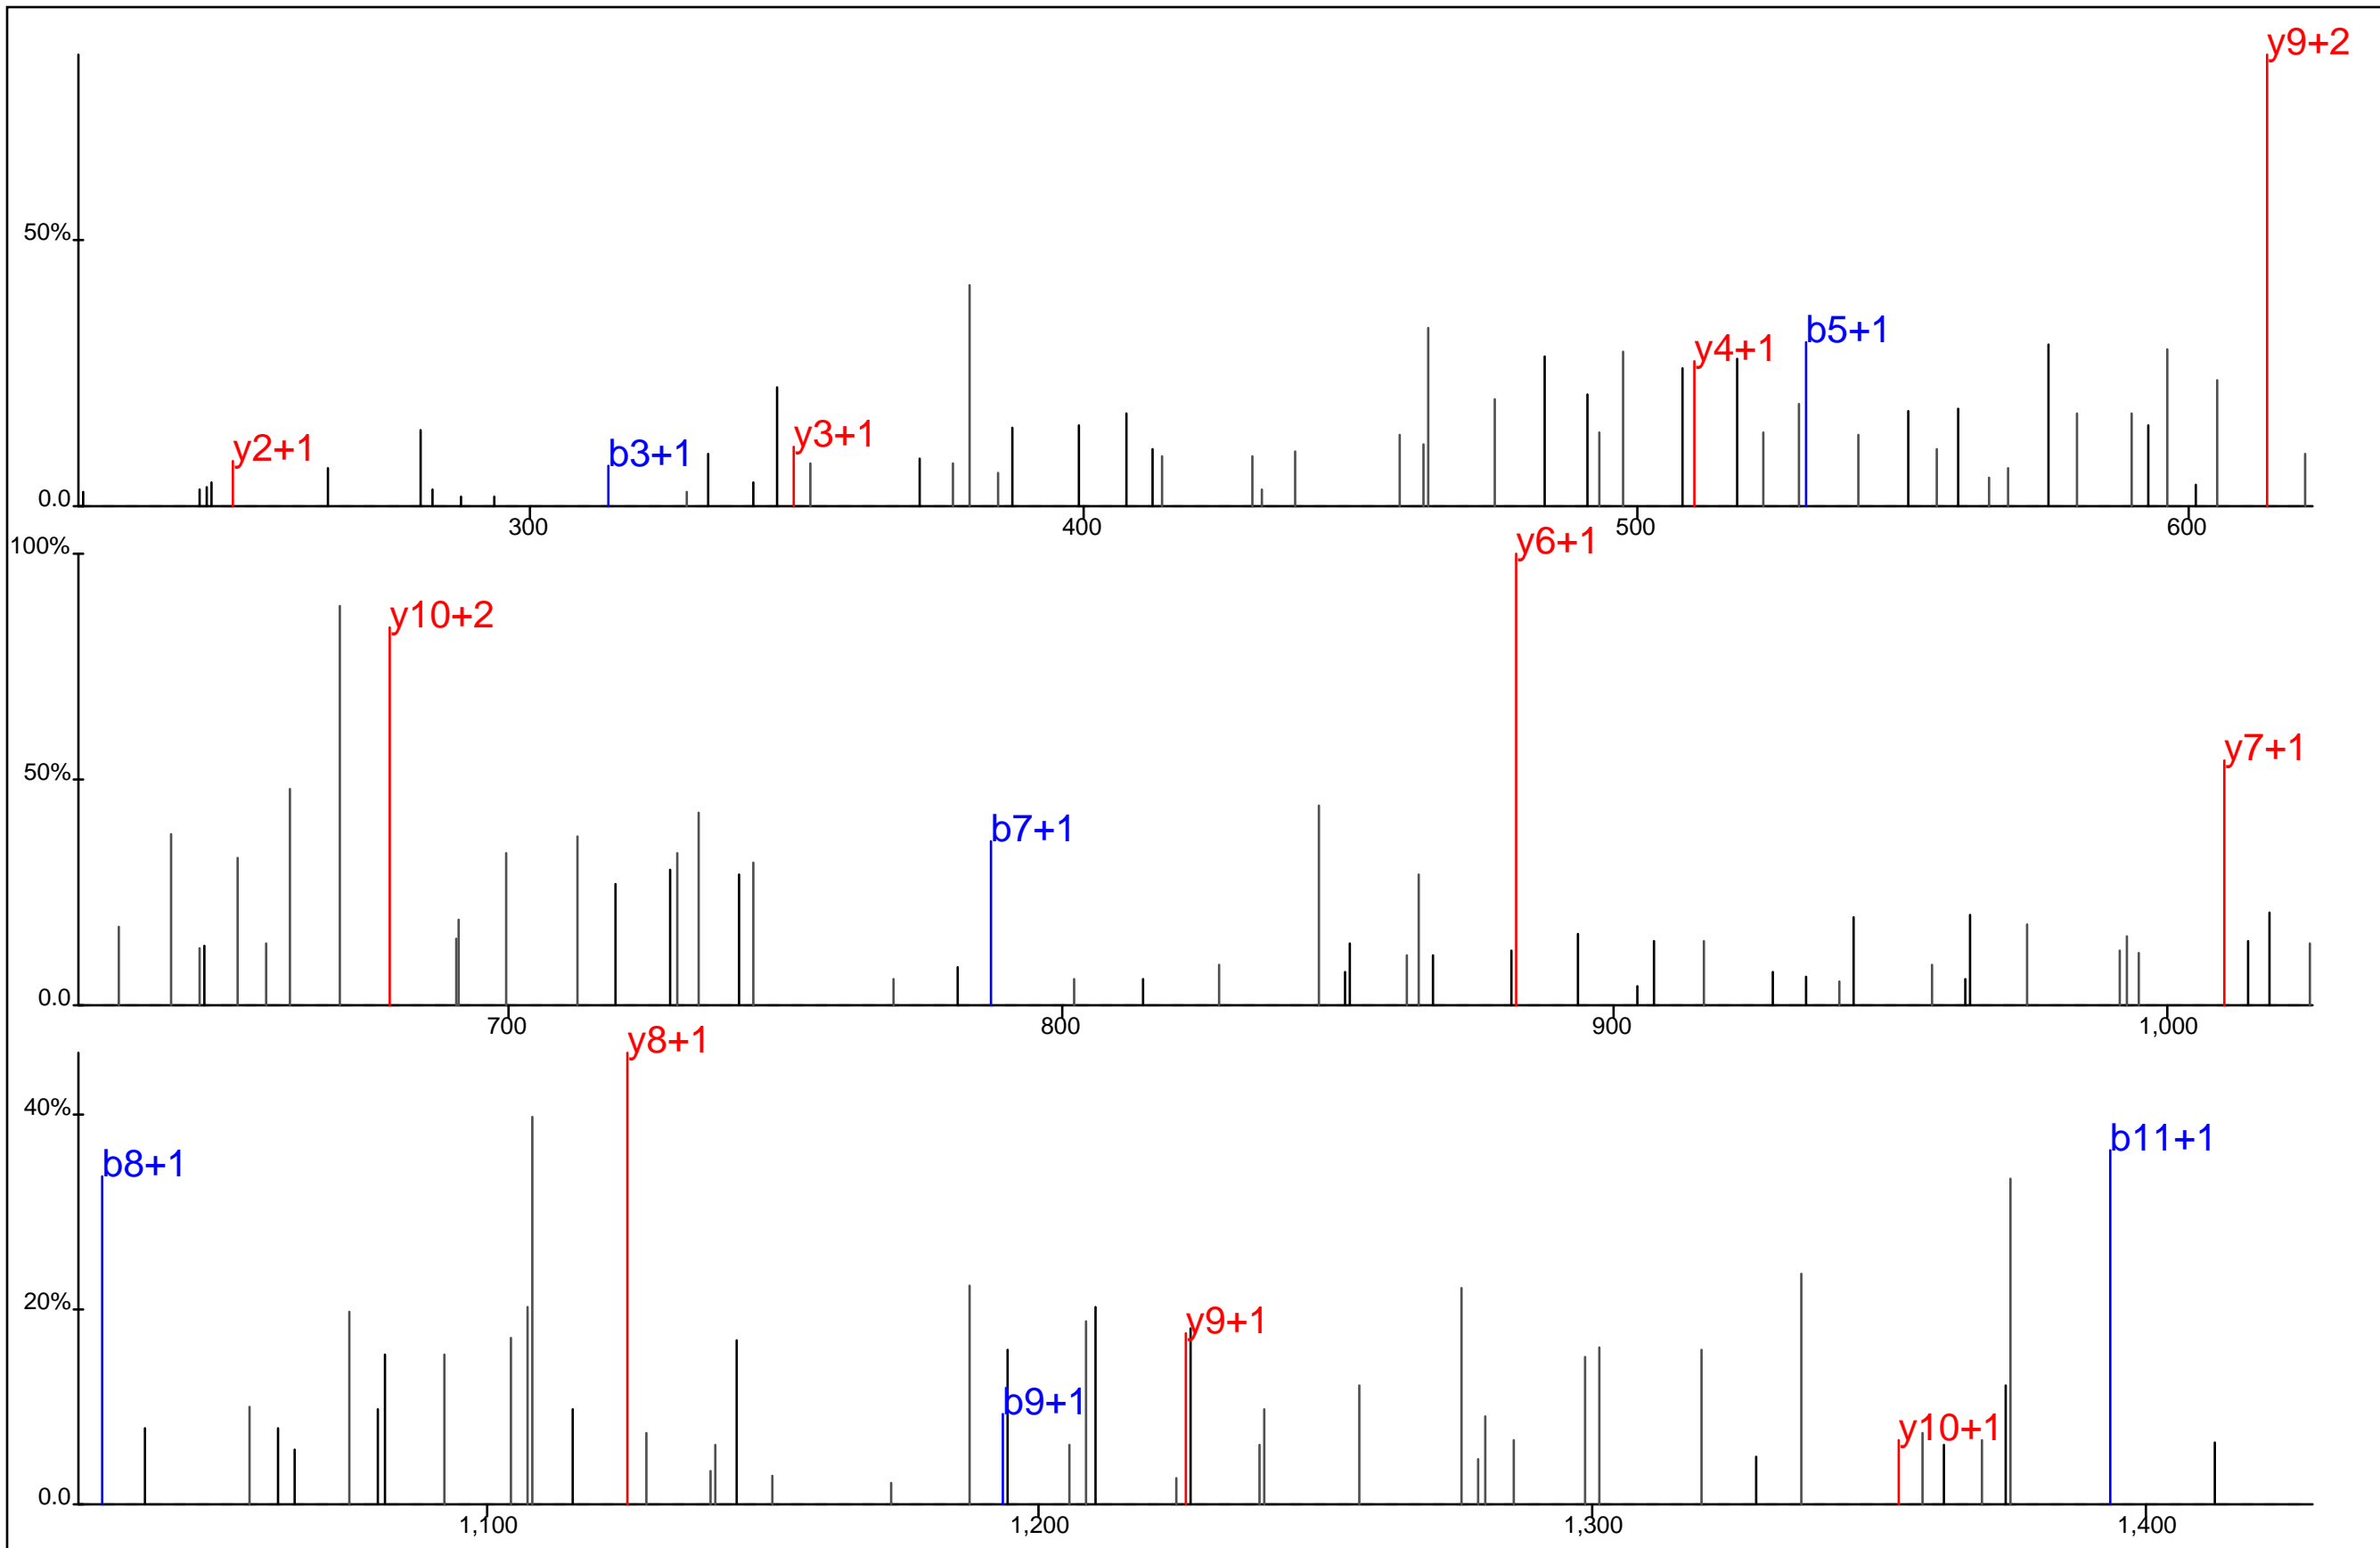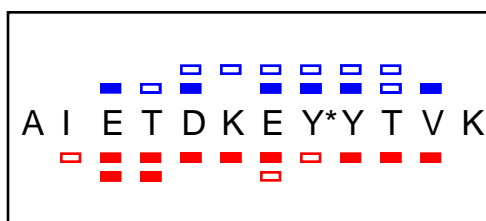

Protein Name: Janus kinase 1  
 gi Accession: 0  
 Precursor Mass: 770.3521+2  
 Delta Mass: 0.634 ppm  
 XCorr: 28.05

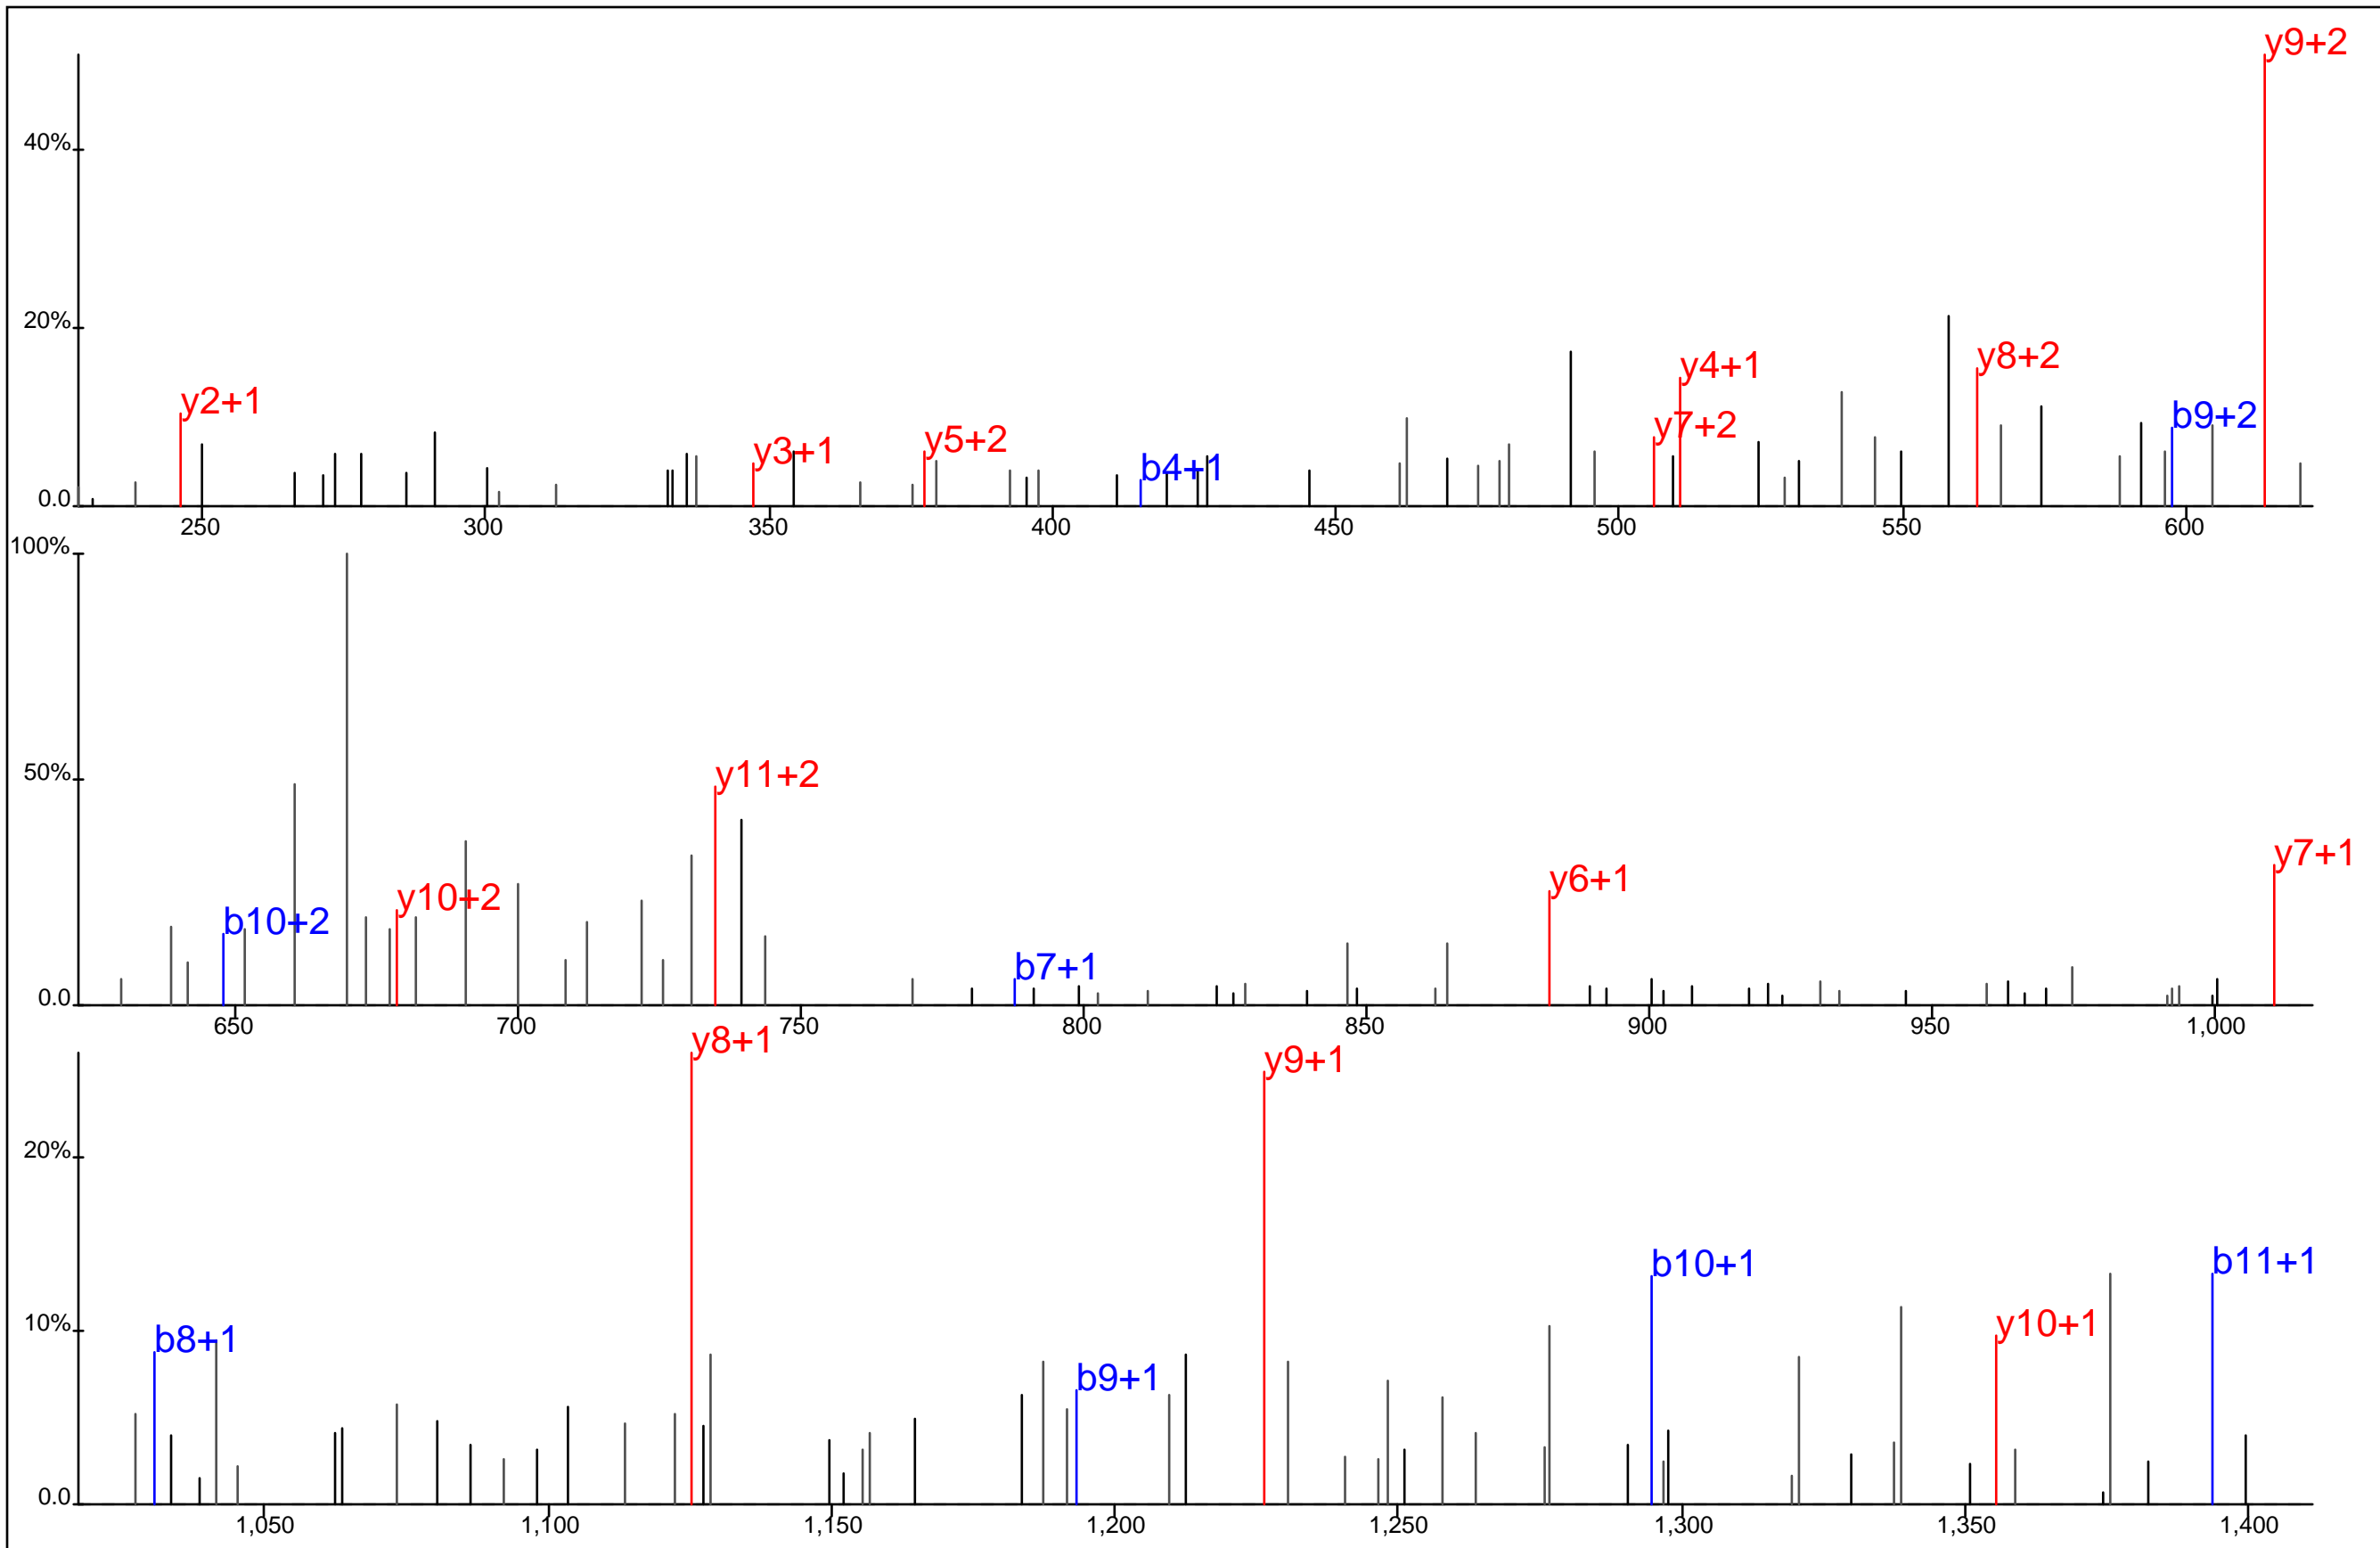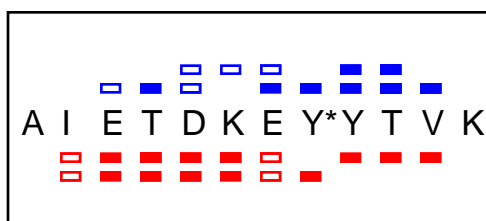

Protein Name: Janus kinase 1  
 gi Accession: 0  
 Precursor Mass: 770.3490+2  
 Delta Mass: 4.598 ppm  
 XCorr: 31.37

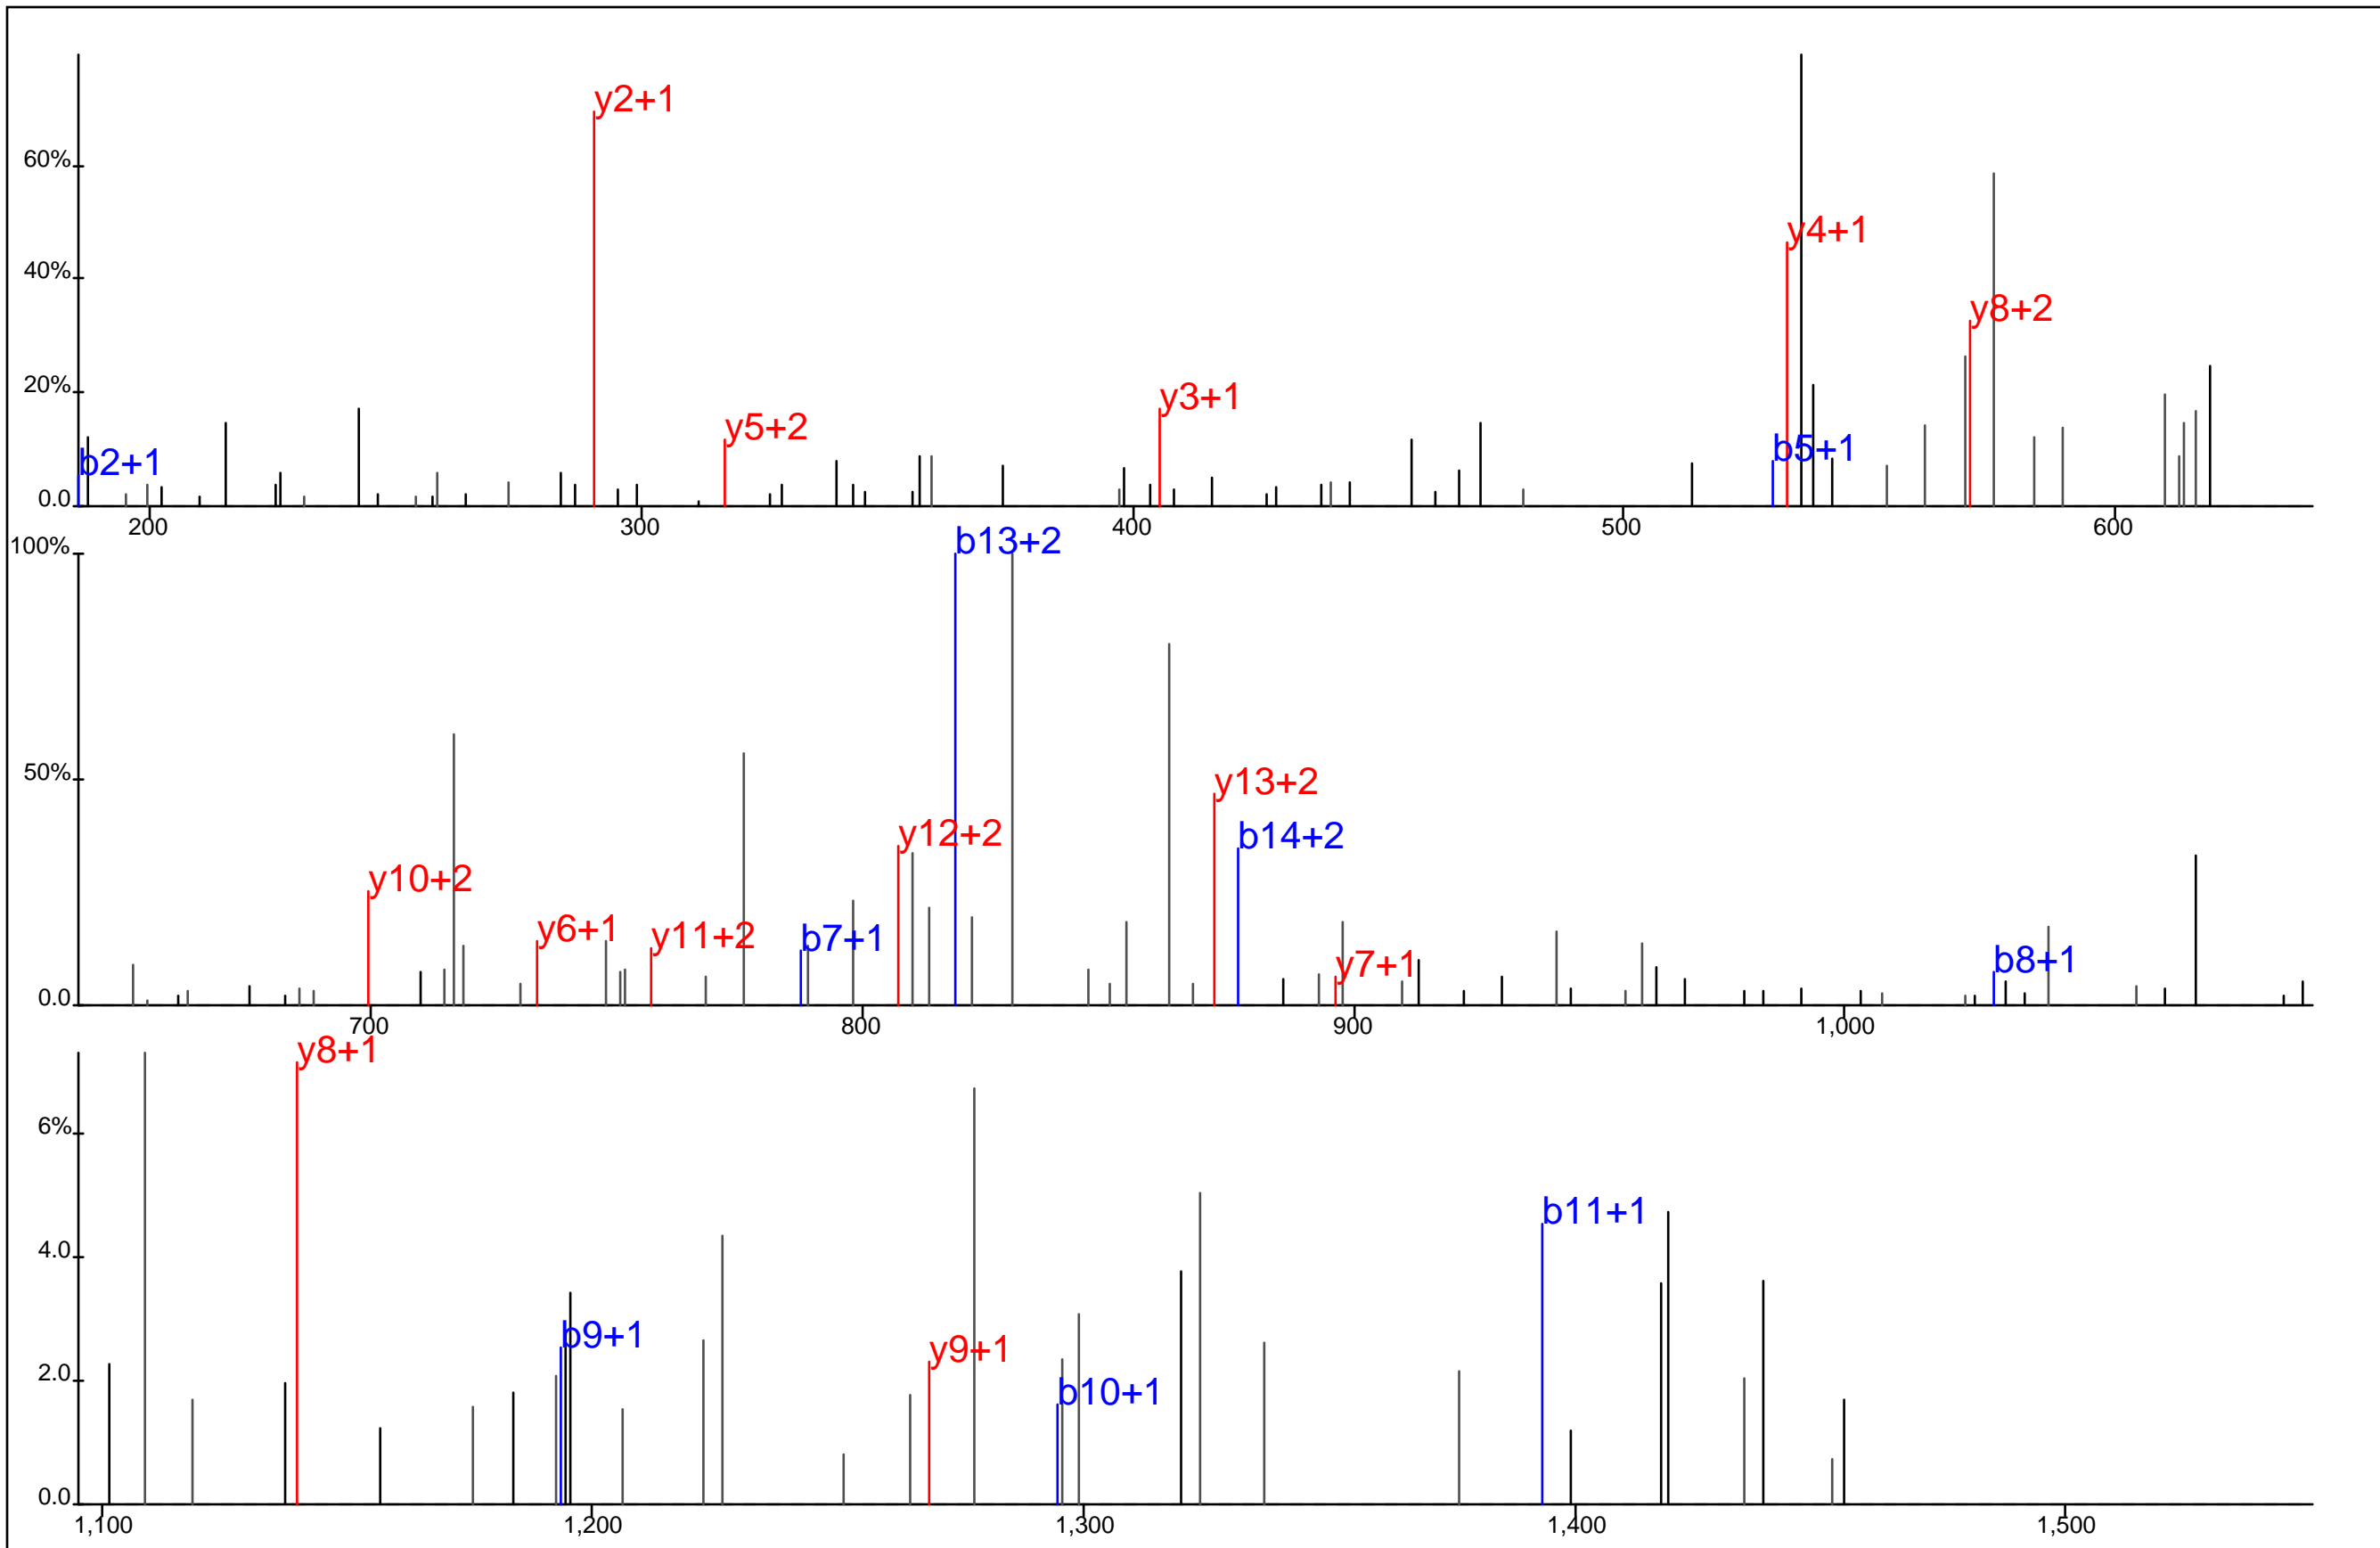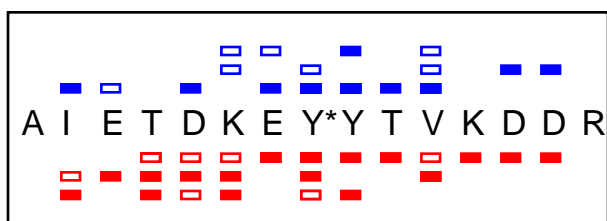

Protein Name: Janus kinase 1  
 gi Accession: 0  
 Precursor Mass: 642.6222+3  
 Delta Mass: 0.399 ppm  
 XCorr: 23.0

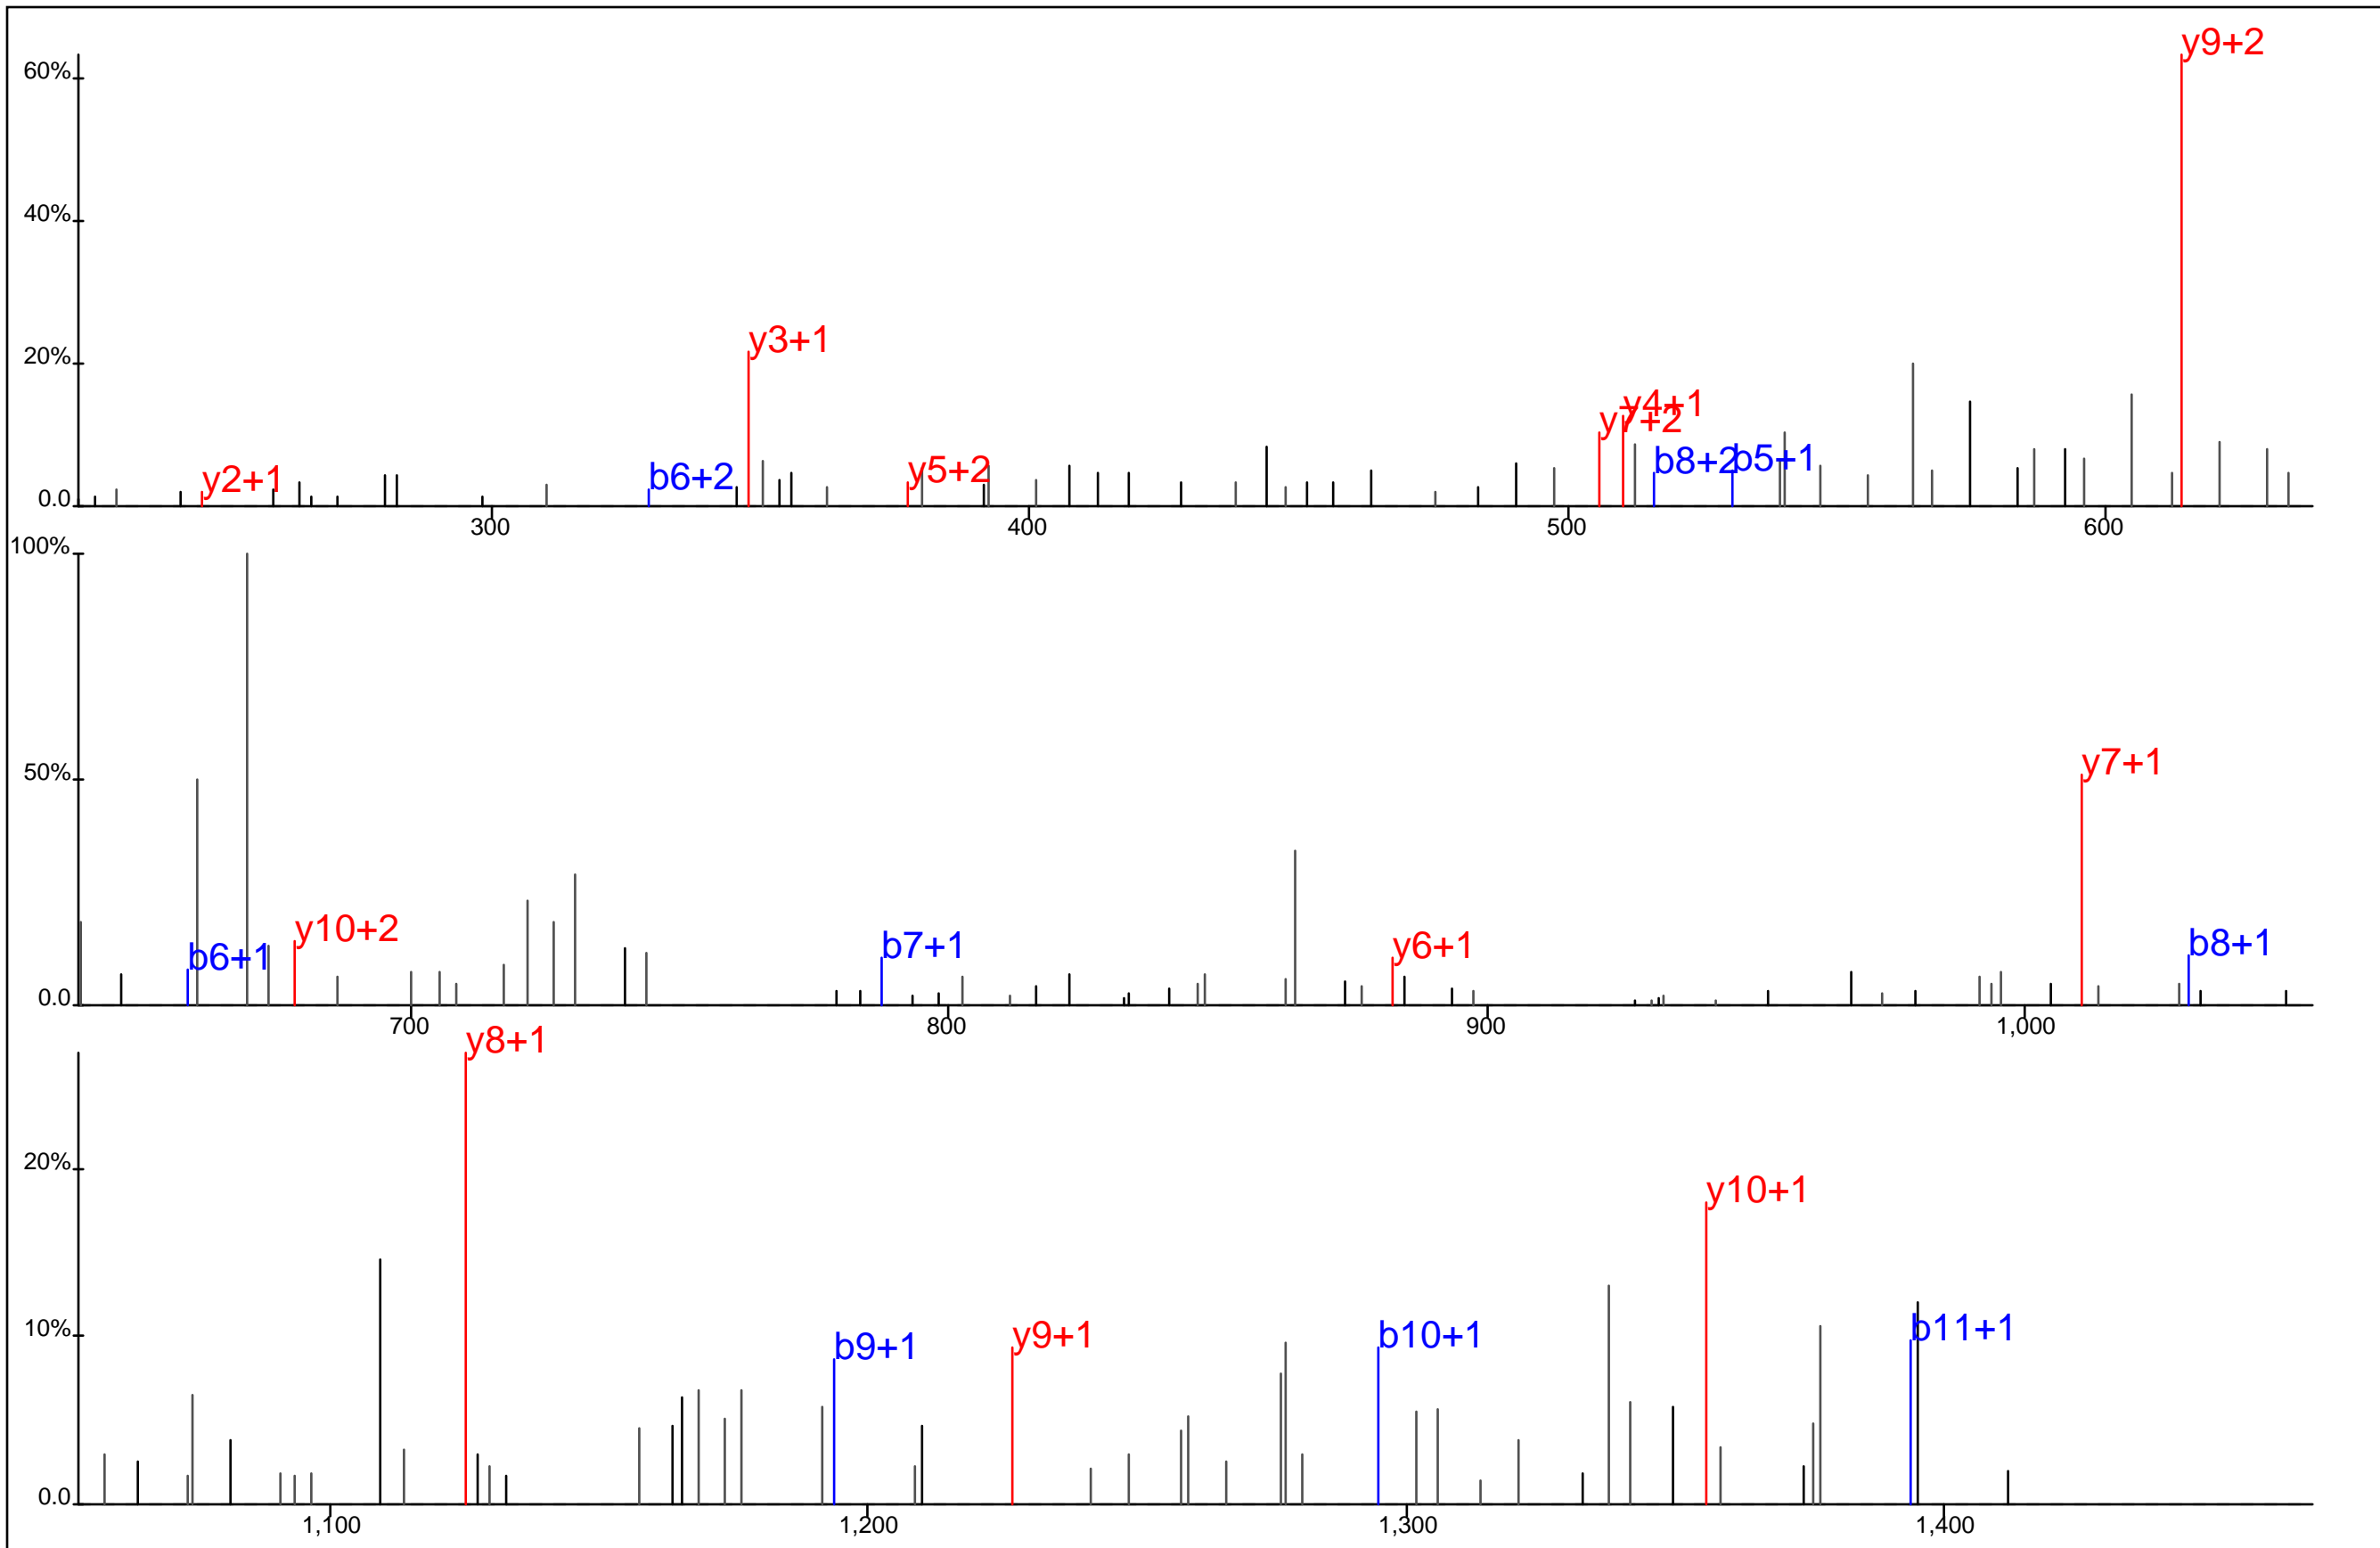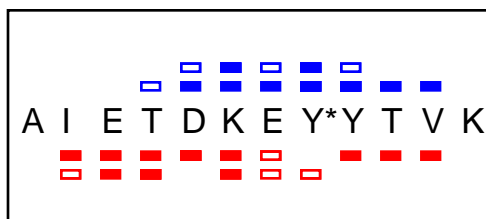

Protein Name: Janus kinase 1  
 gi Accession: 0  
 Precursor Mass: 770.3513+2  
 Delta Mass: 1.586 ppm  
 XCorr: 56.53

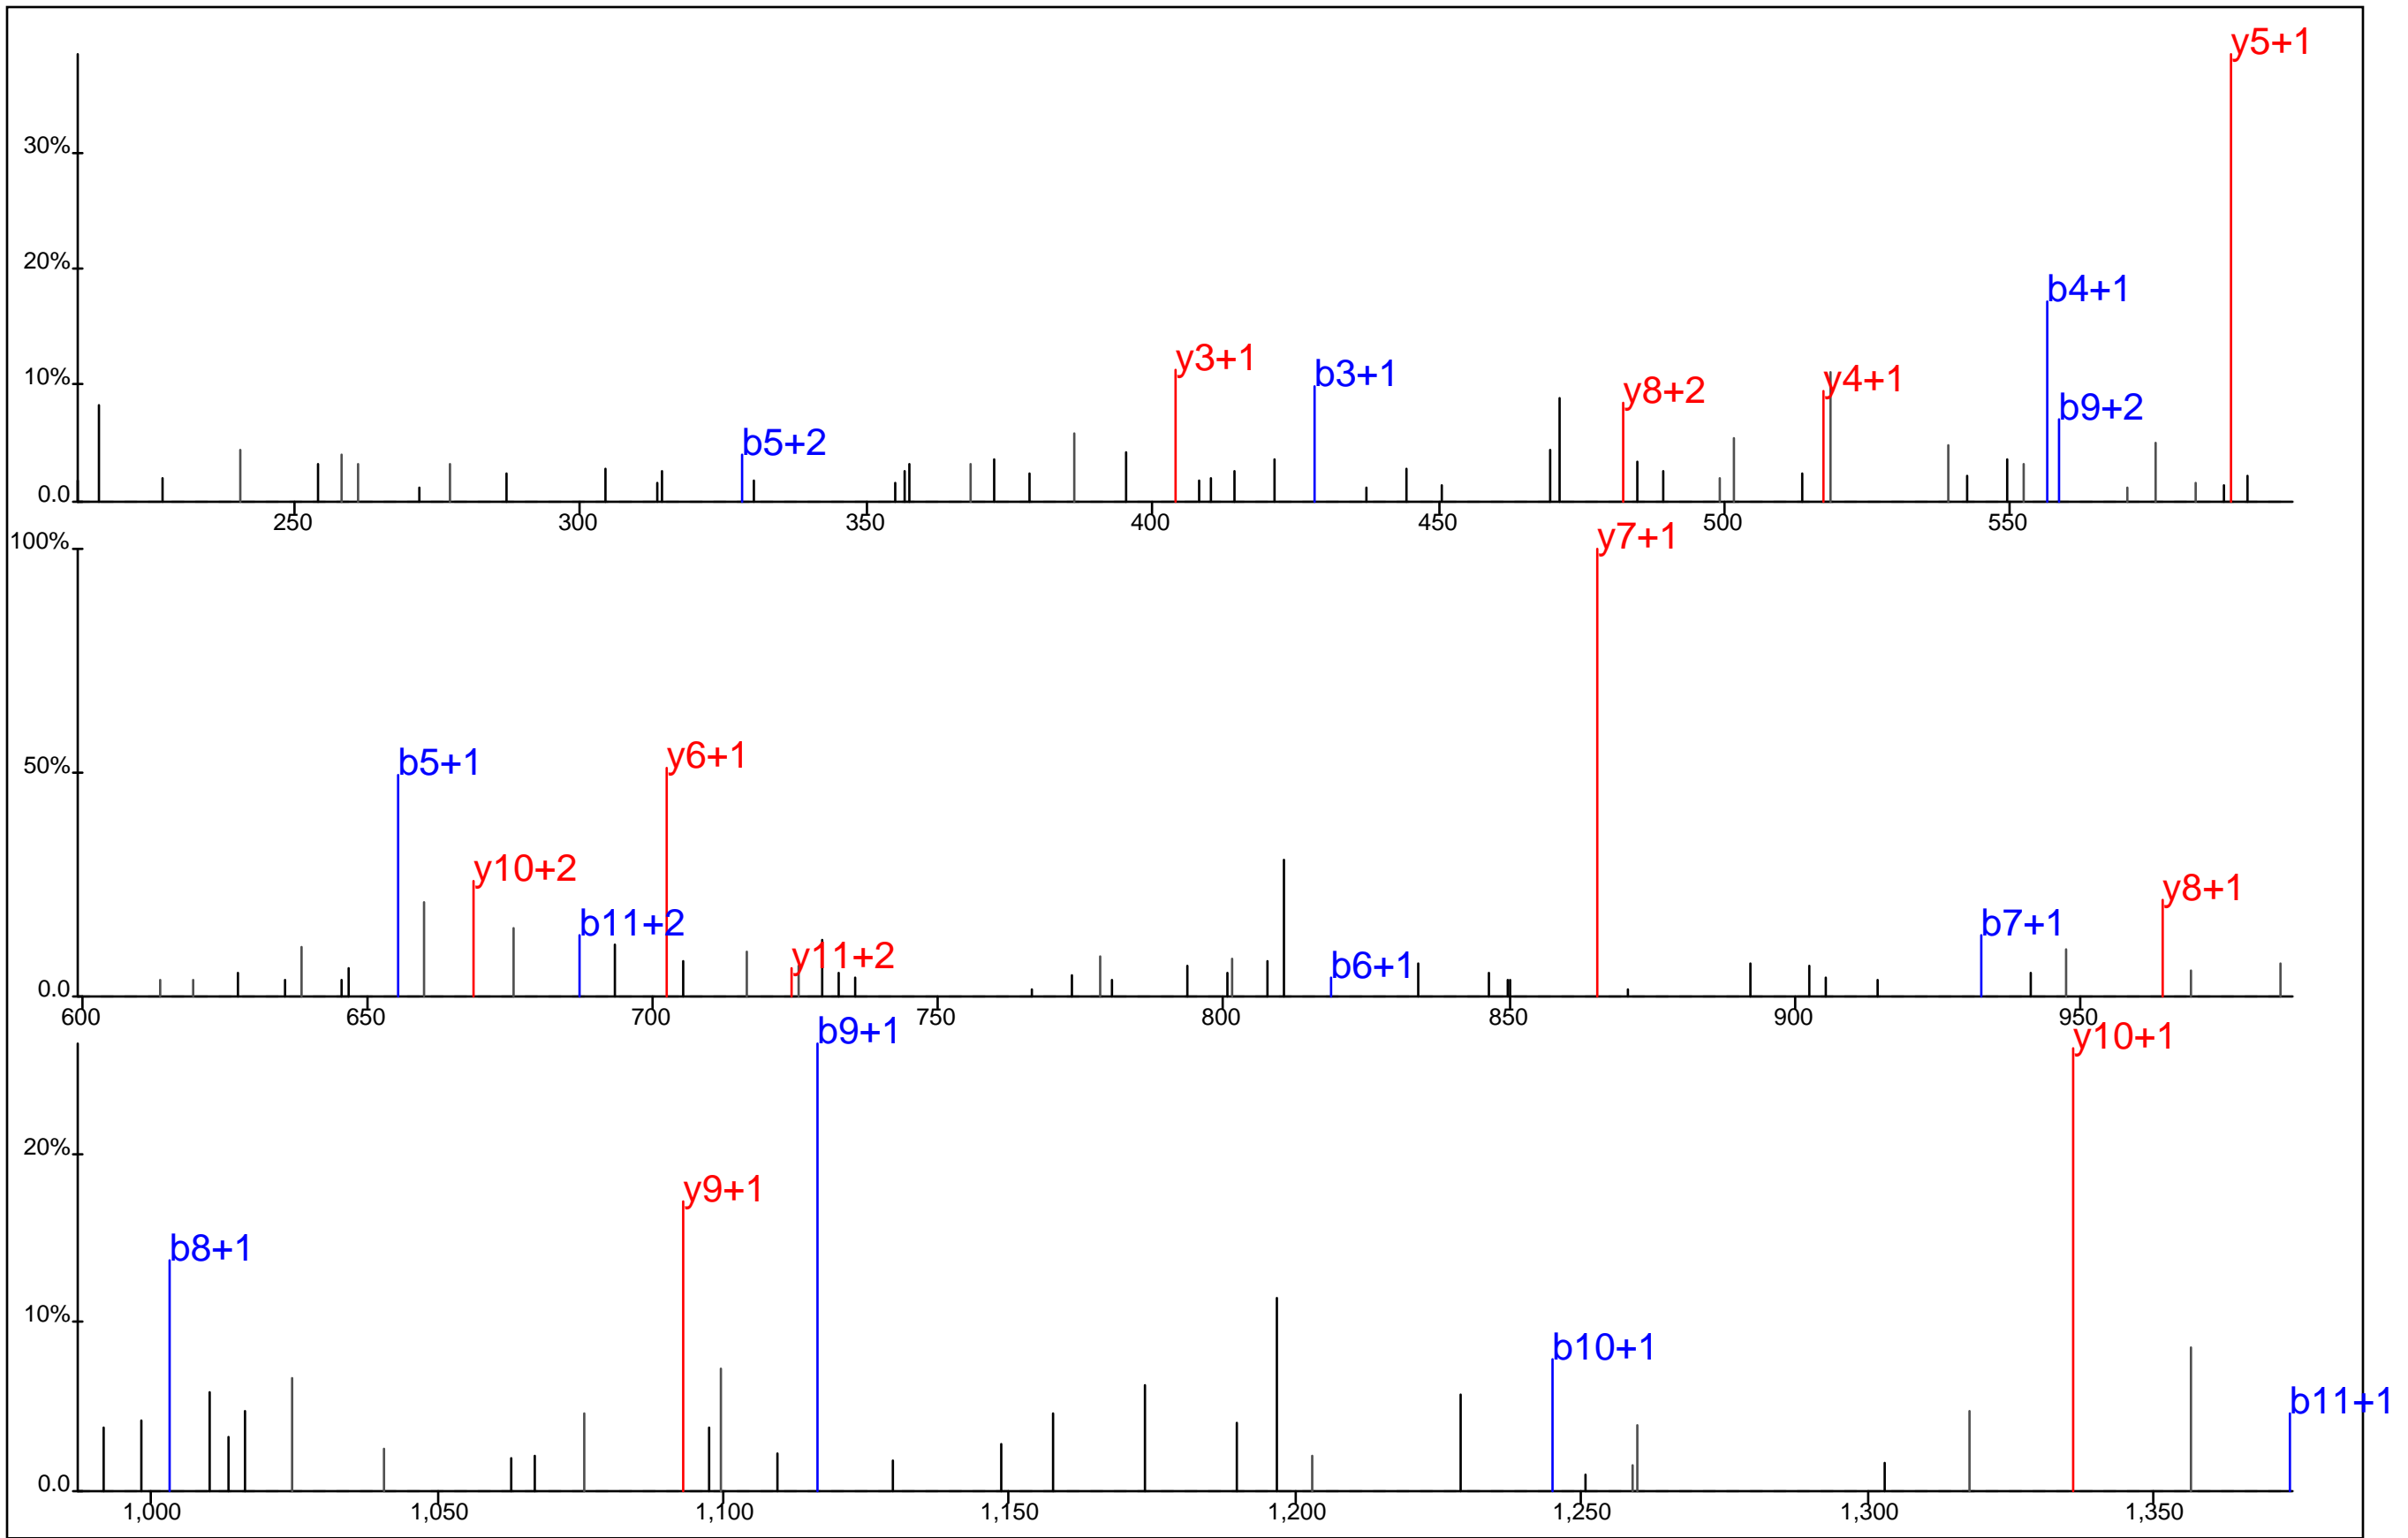

■ ■ ■ ■ ■ ■ ■ ■  
 A I Y\* Q V Y N A L Q E K  
■ ■ ■ ■ ■ ■ ■ ■

Protein Name: KIAA0157  
 gi Accession: 0  
 Precursor Mass: 760.3633+2  
 Delta Mass: 0.062 ppm  
 XCorr: 58.64

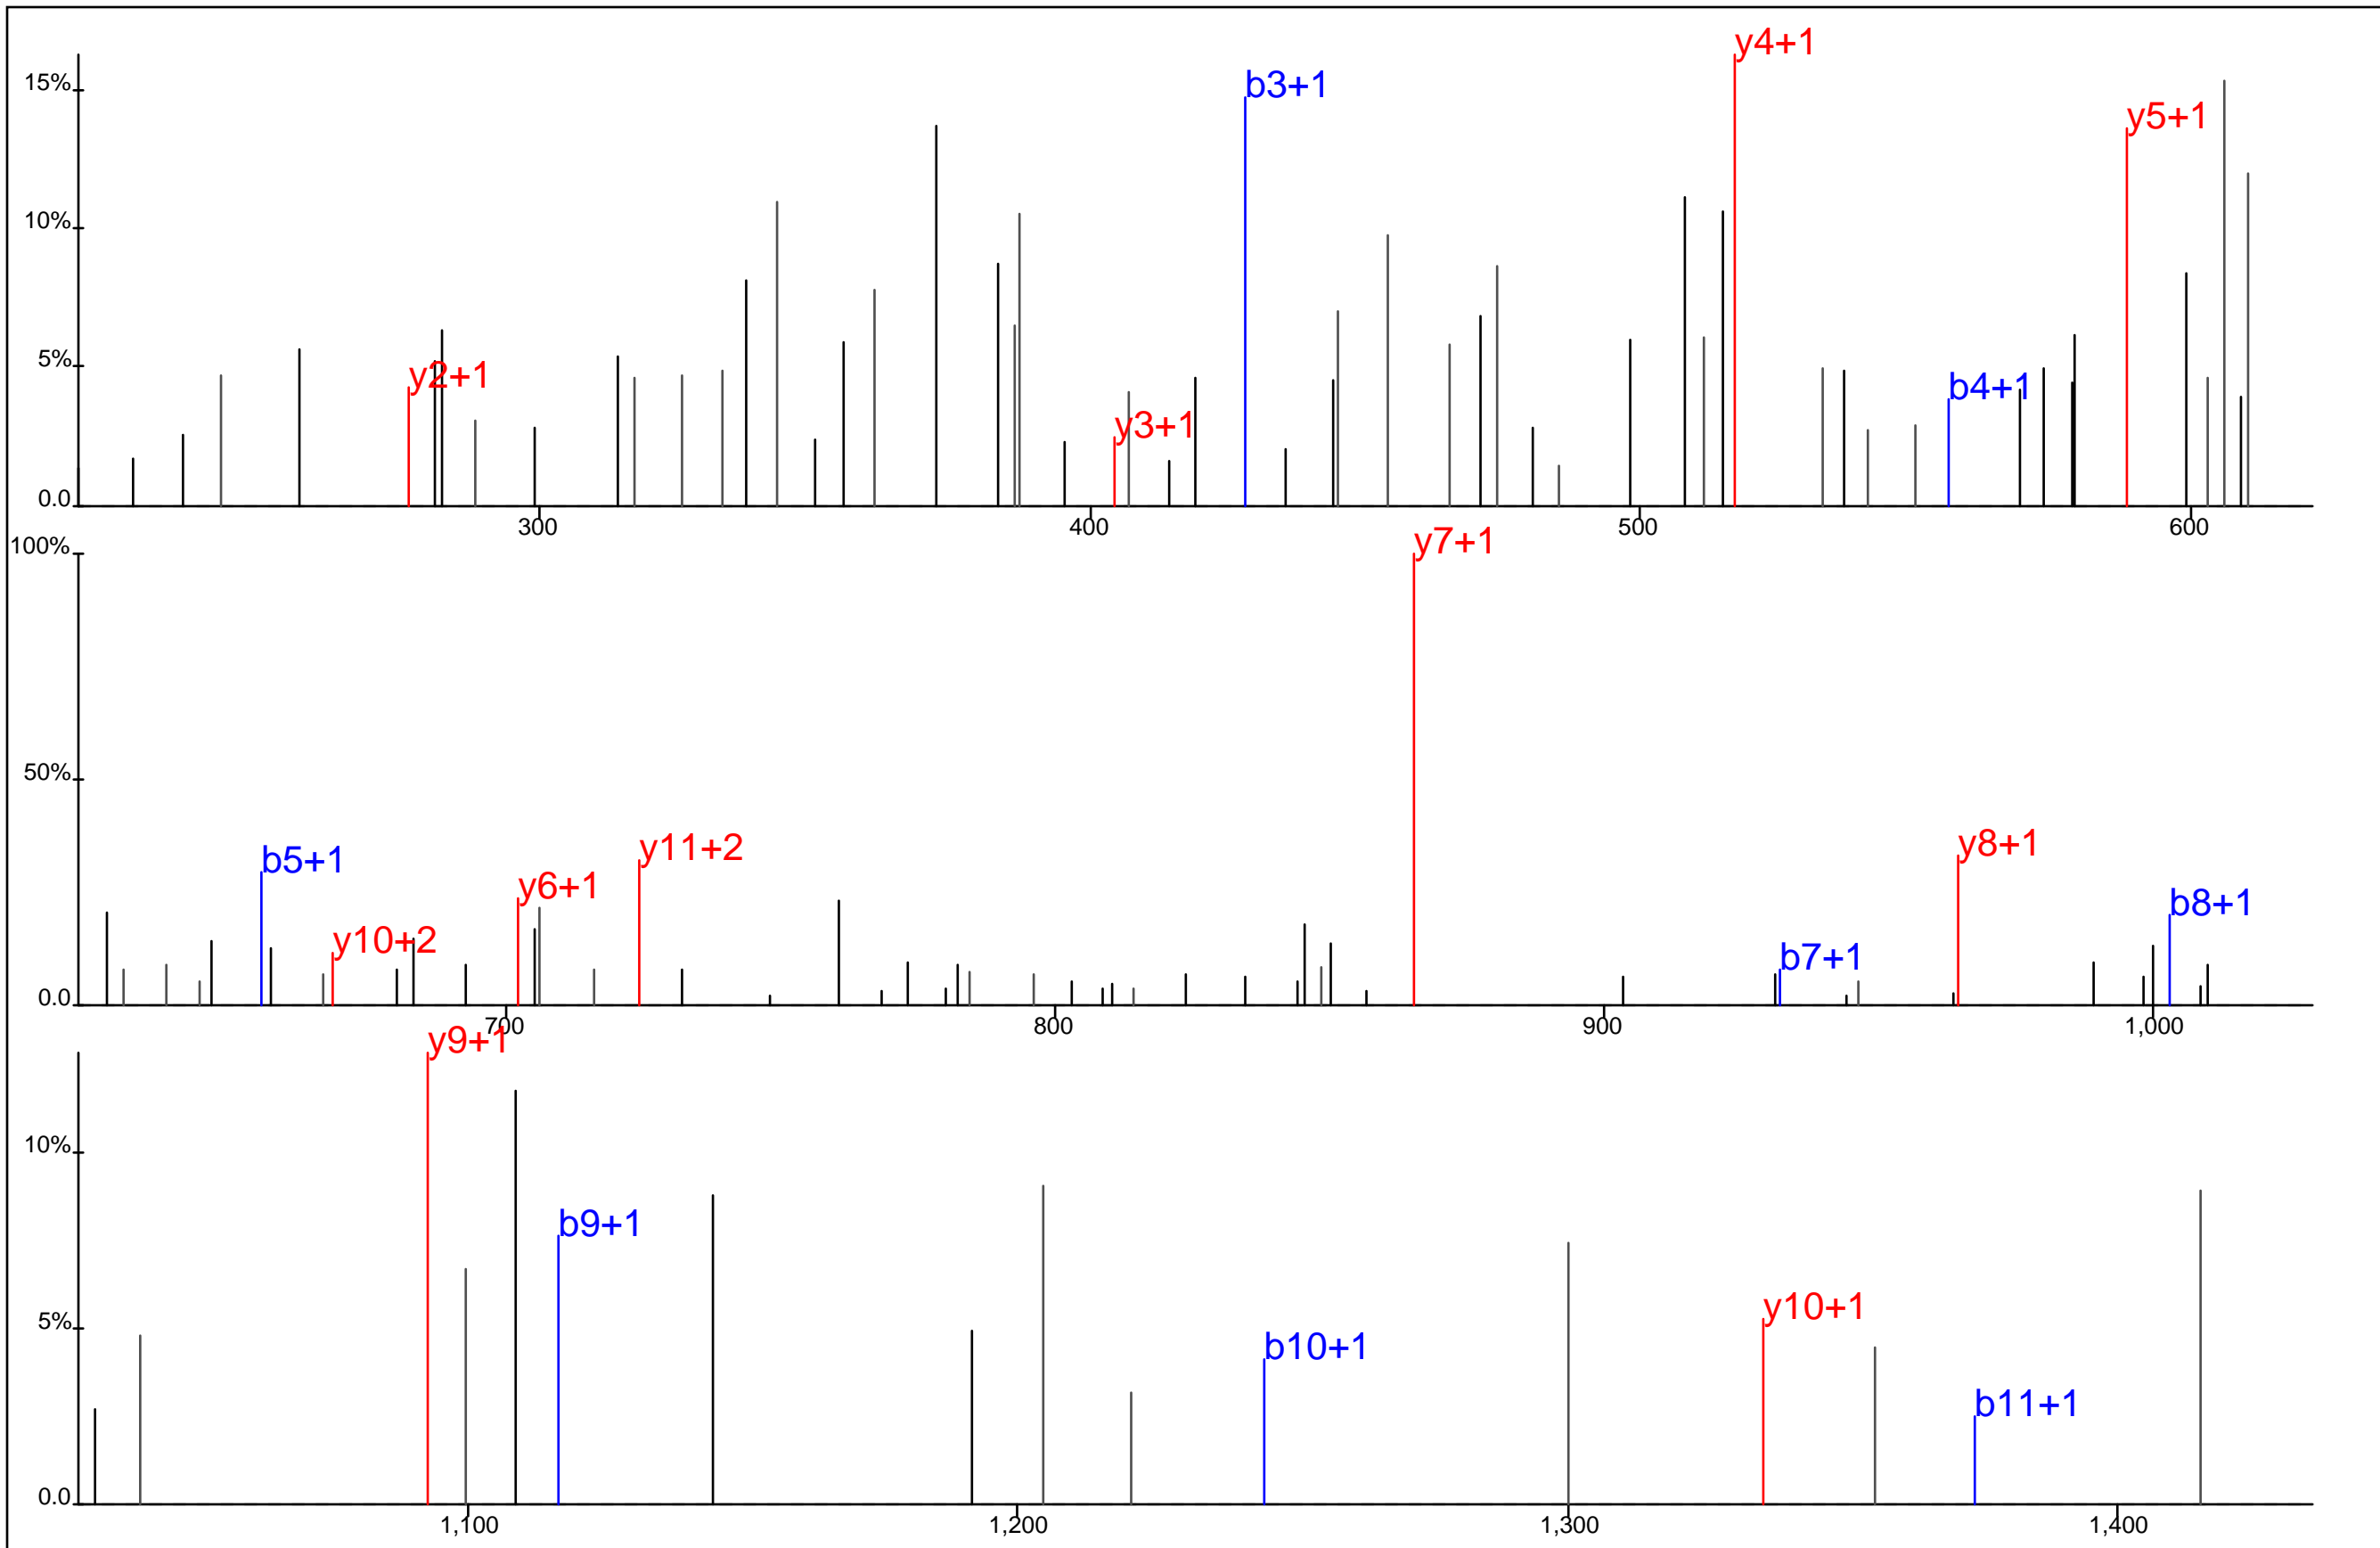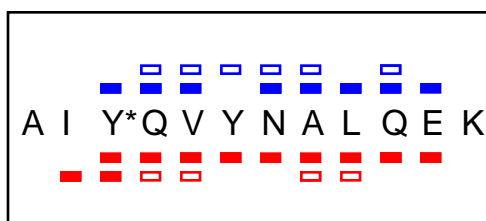

Protein Name: KIAA0157  
 gi Accession: 0  
 Precursor Mass: 760.3644+2  
 Delta Mass: 1.588 ppm  
 XCorr: 32.01



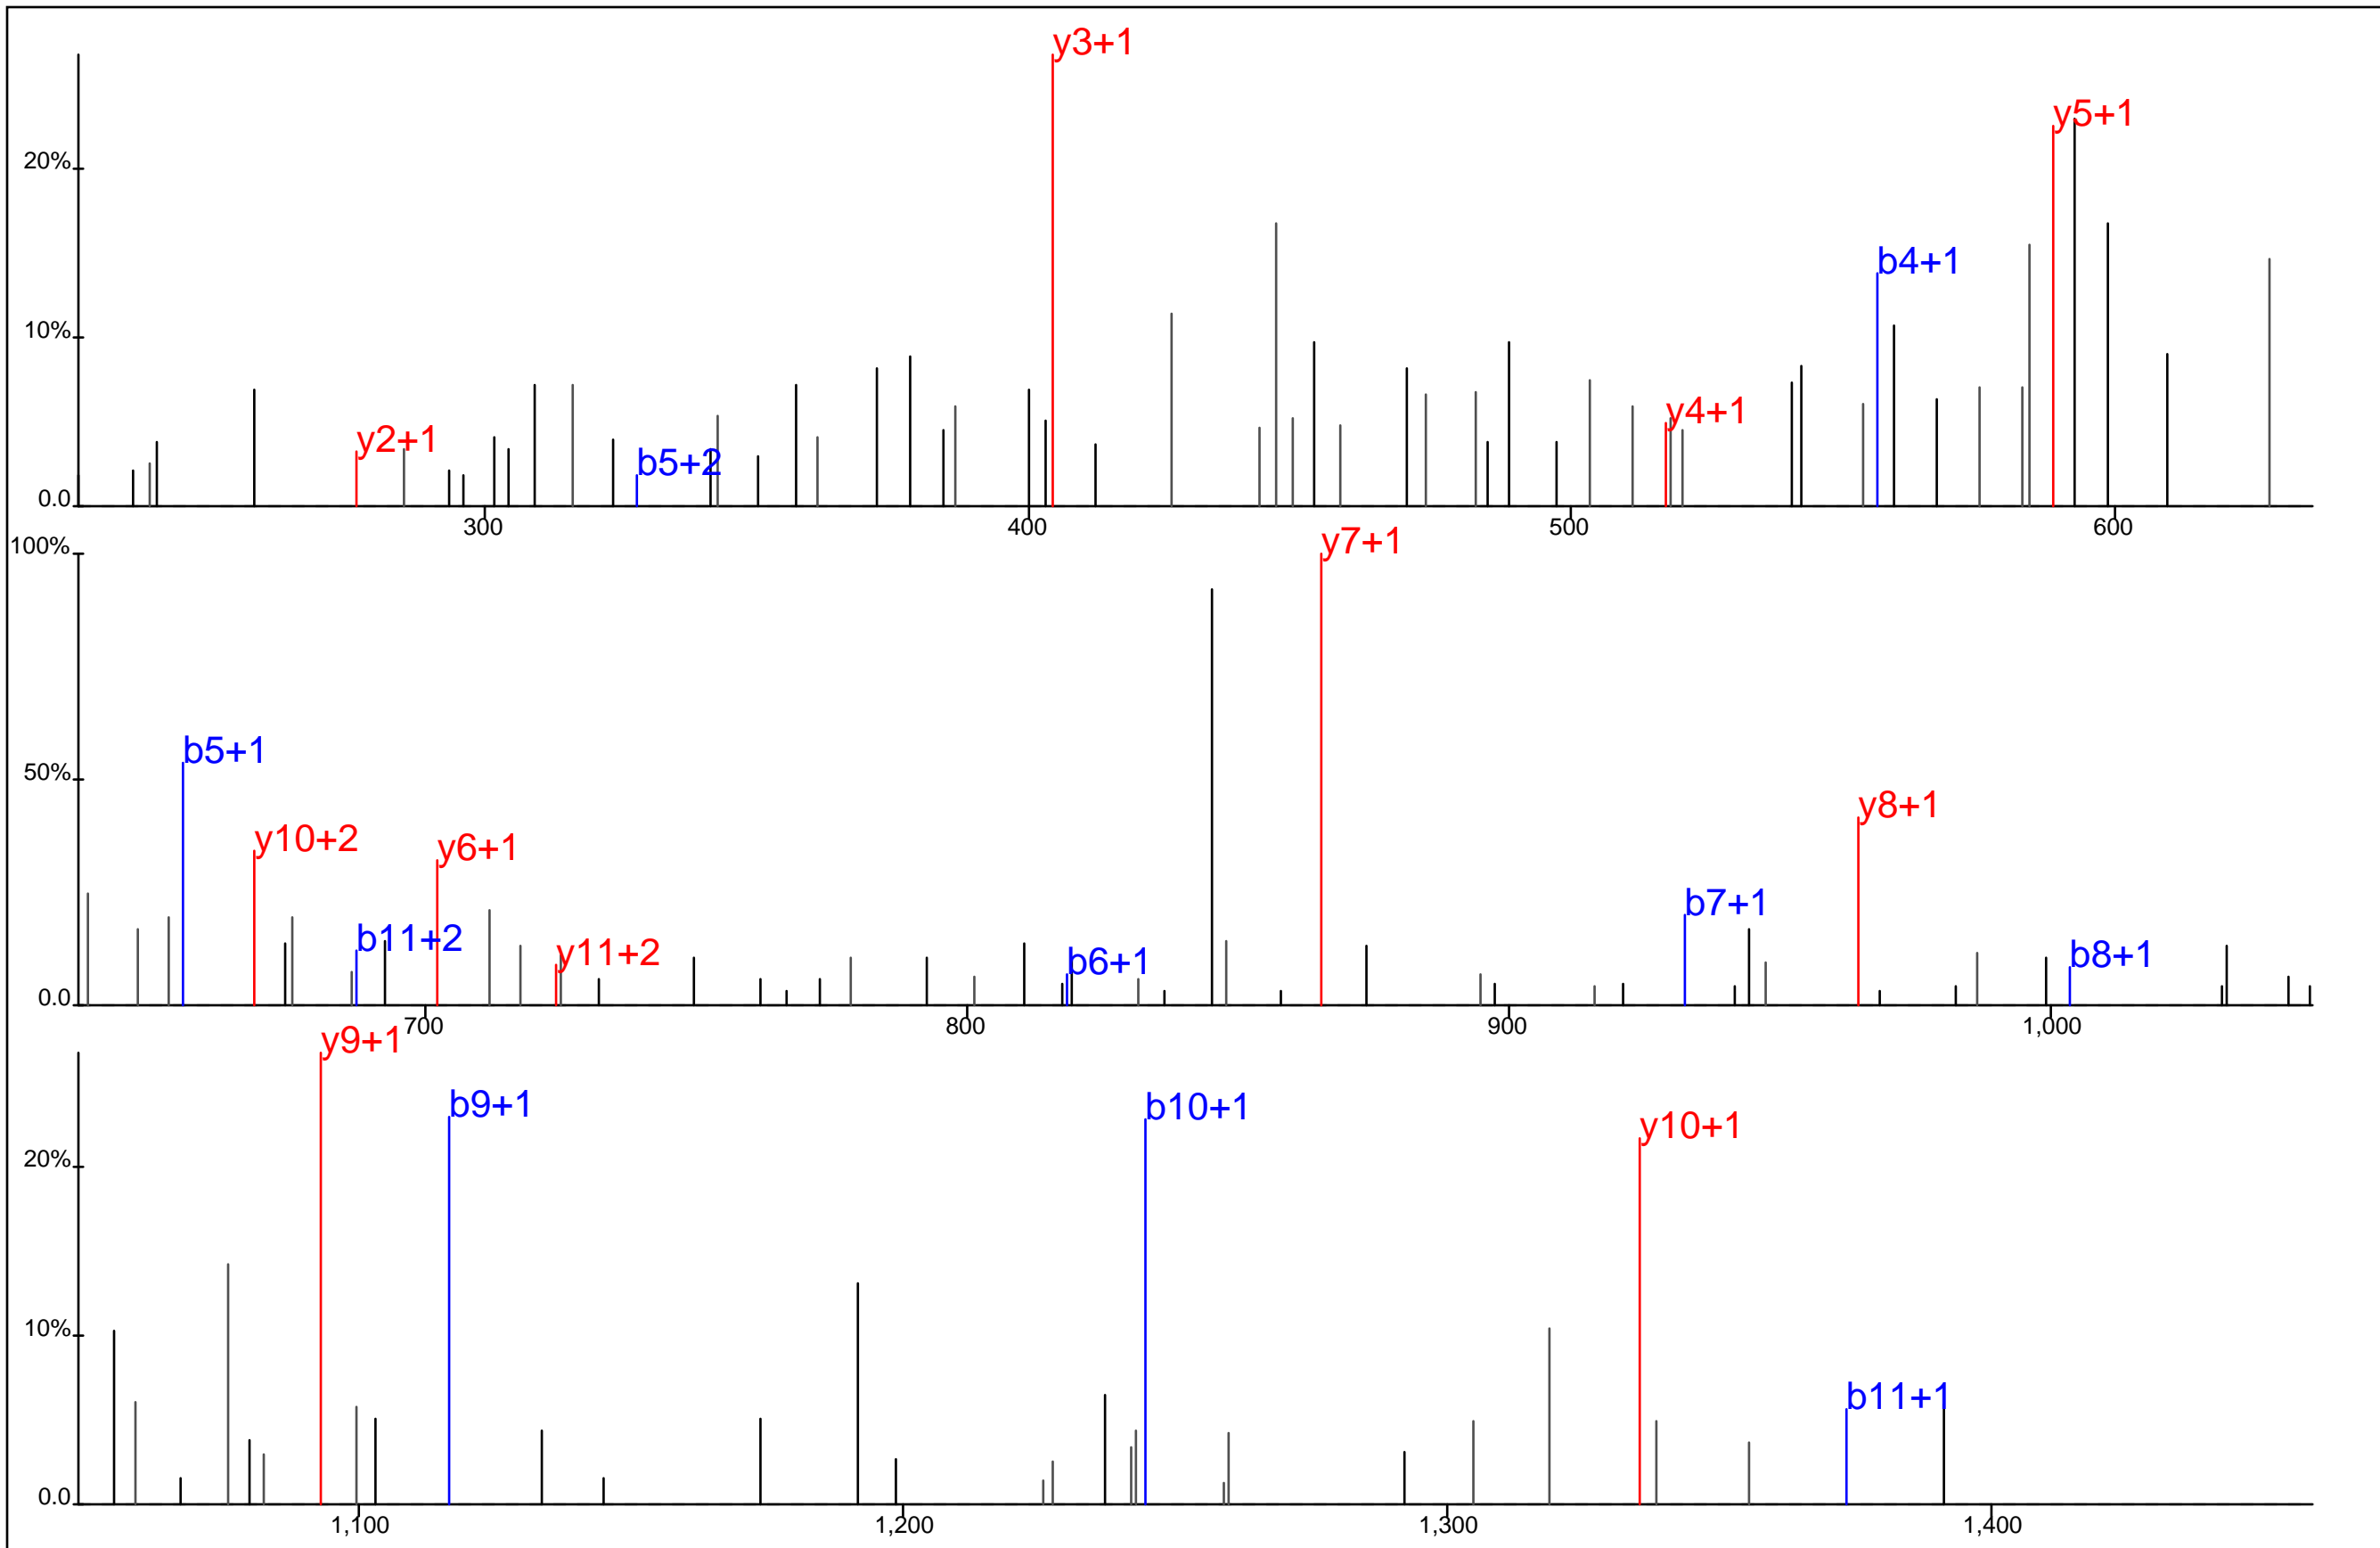

■ □  
■ □ ■ □ ■ □ ■ □  
■ □ ■ □ ■ □ ■ □ ■ □

Protein Name: KIAA0157  
 gi Accession: 0  
 Precursor Mass: 760.3674+2  
 Delta Mass: 5.444 ppm  
 XCorr: 30.64

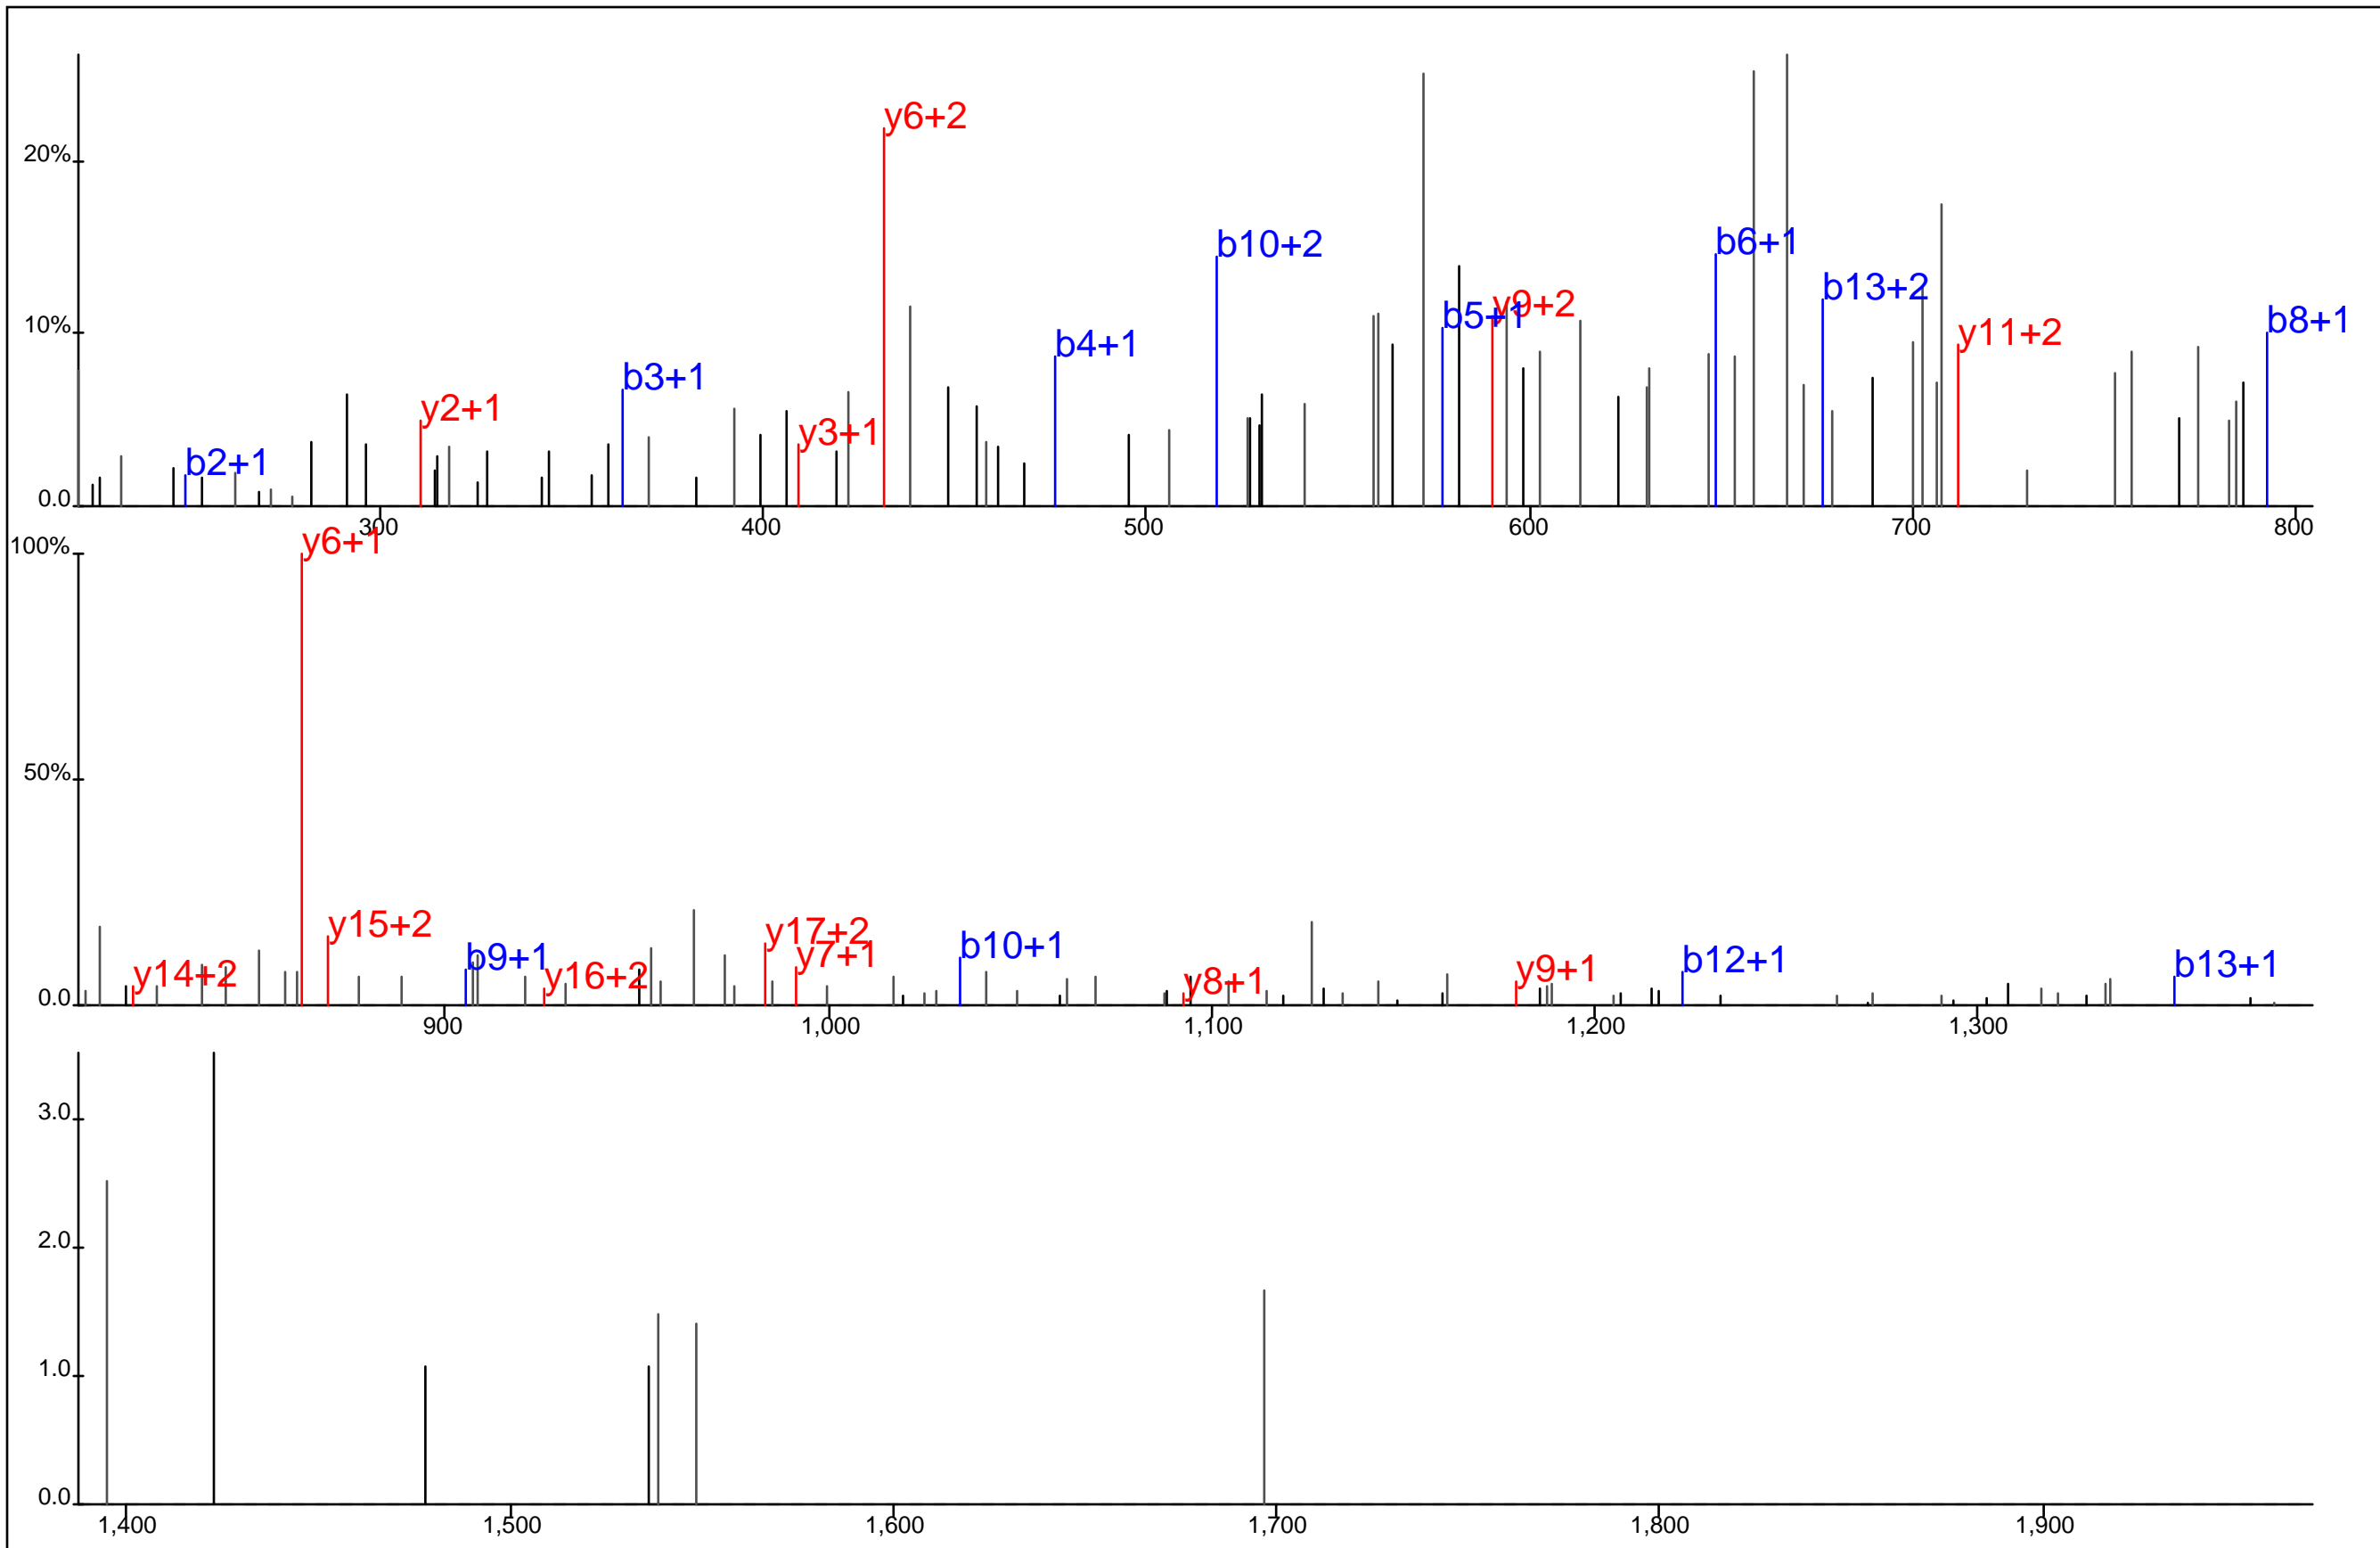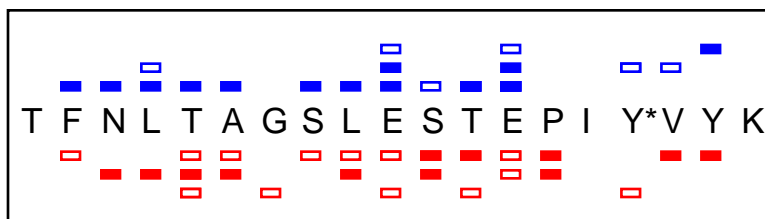

Protein Name: KIAA0251 protein  
 gi Accession: 0  
 Precursor Mass: 738.3528+3  
 Delta Mass: 1.197 ppm  
 XCorr: 22.99

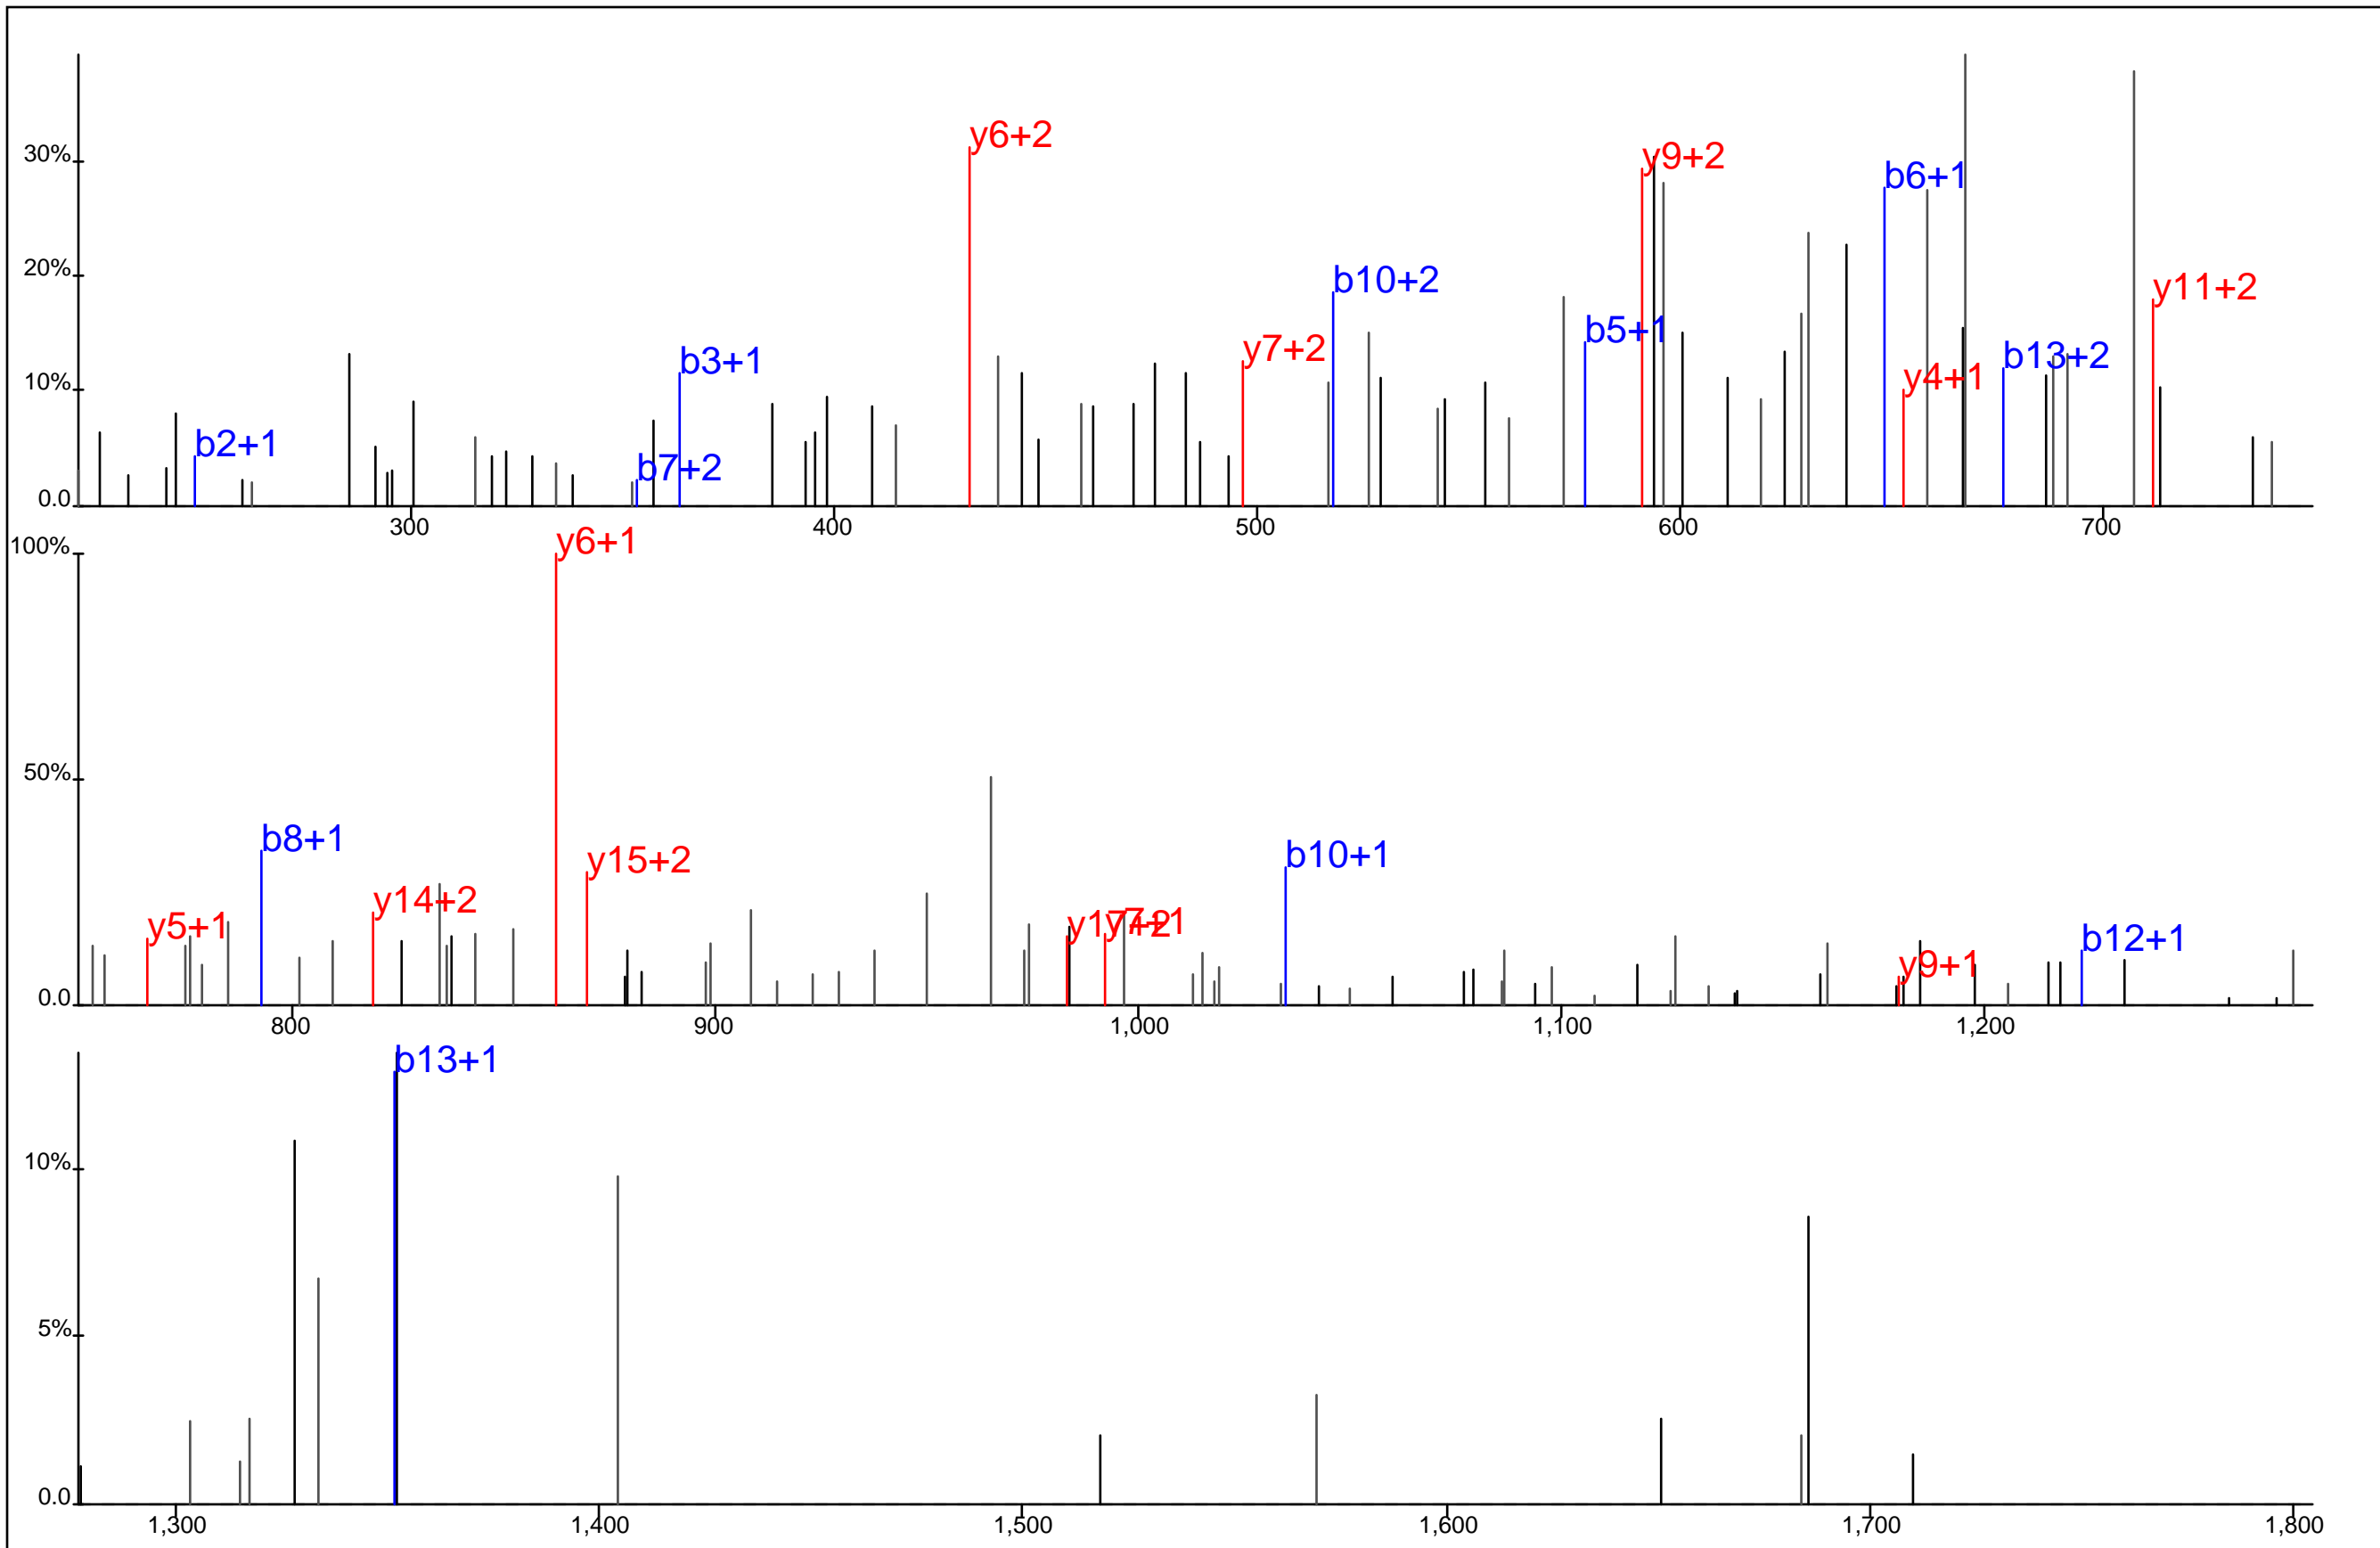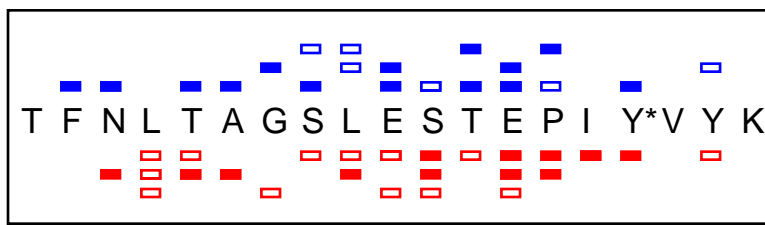

Protein Name: KIAA0251 protein  
 gi Accession: 0  
 Precursor Mass: 738.3513+3  
 Delta Mass: 0.872 ppm  
 XCorr: 21.26

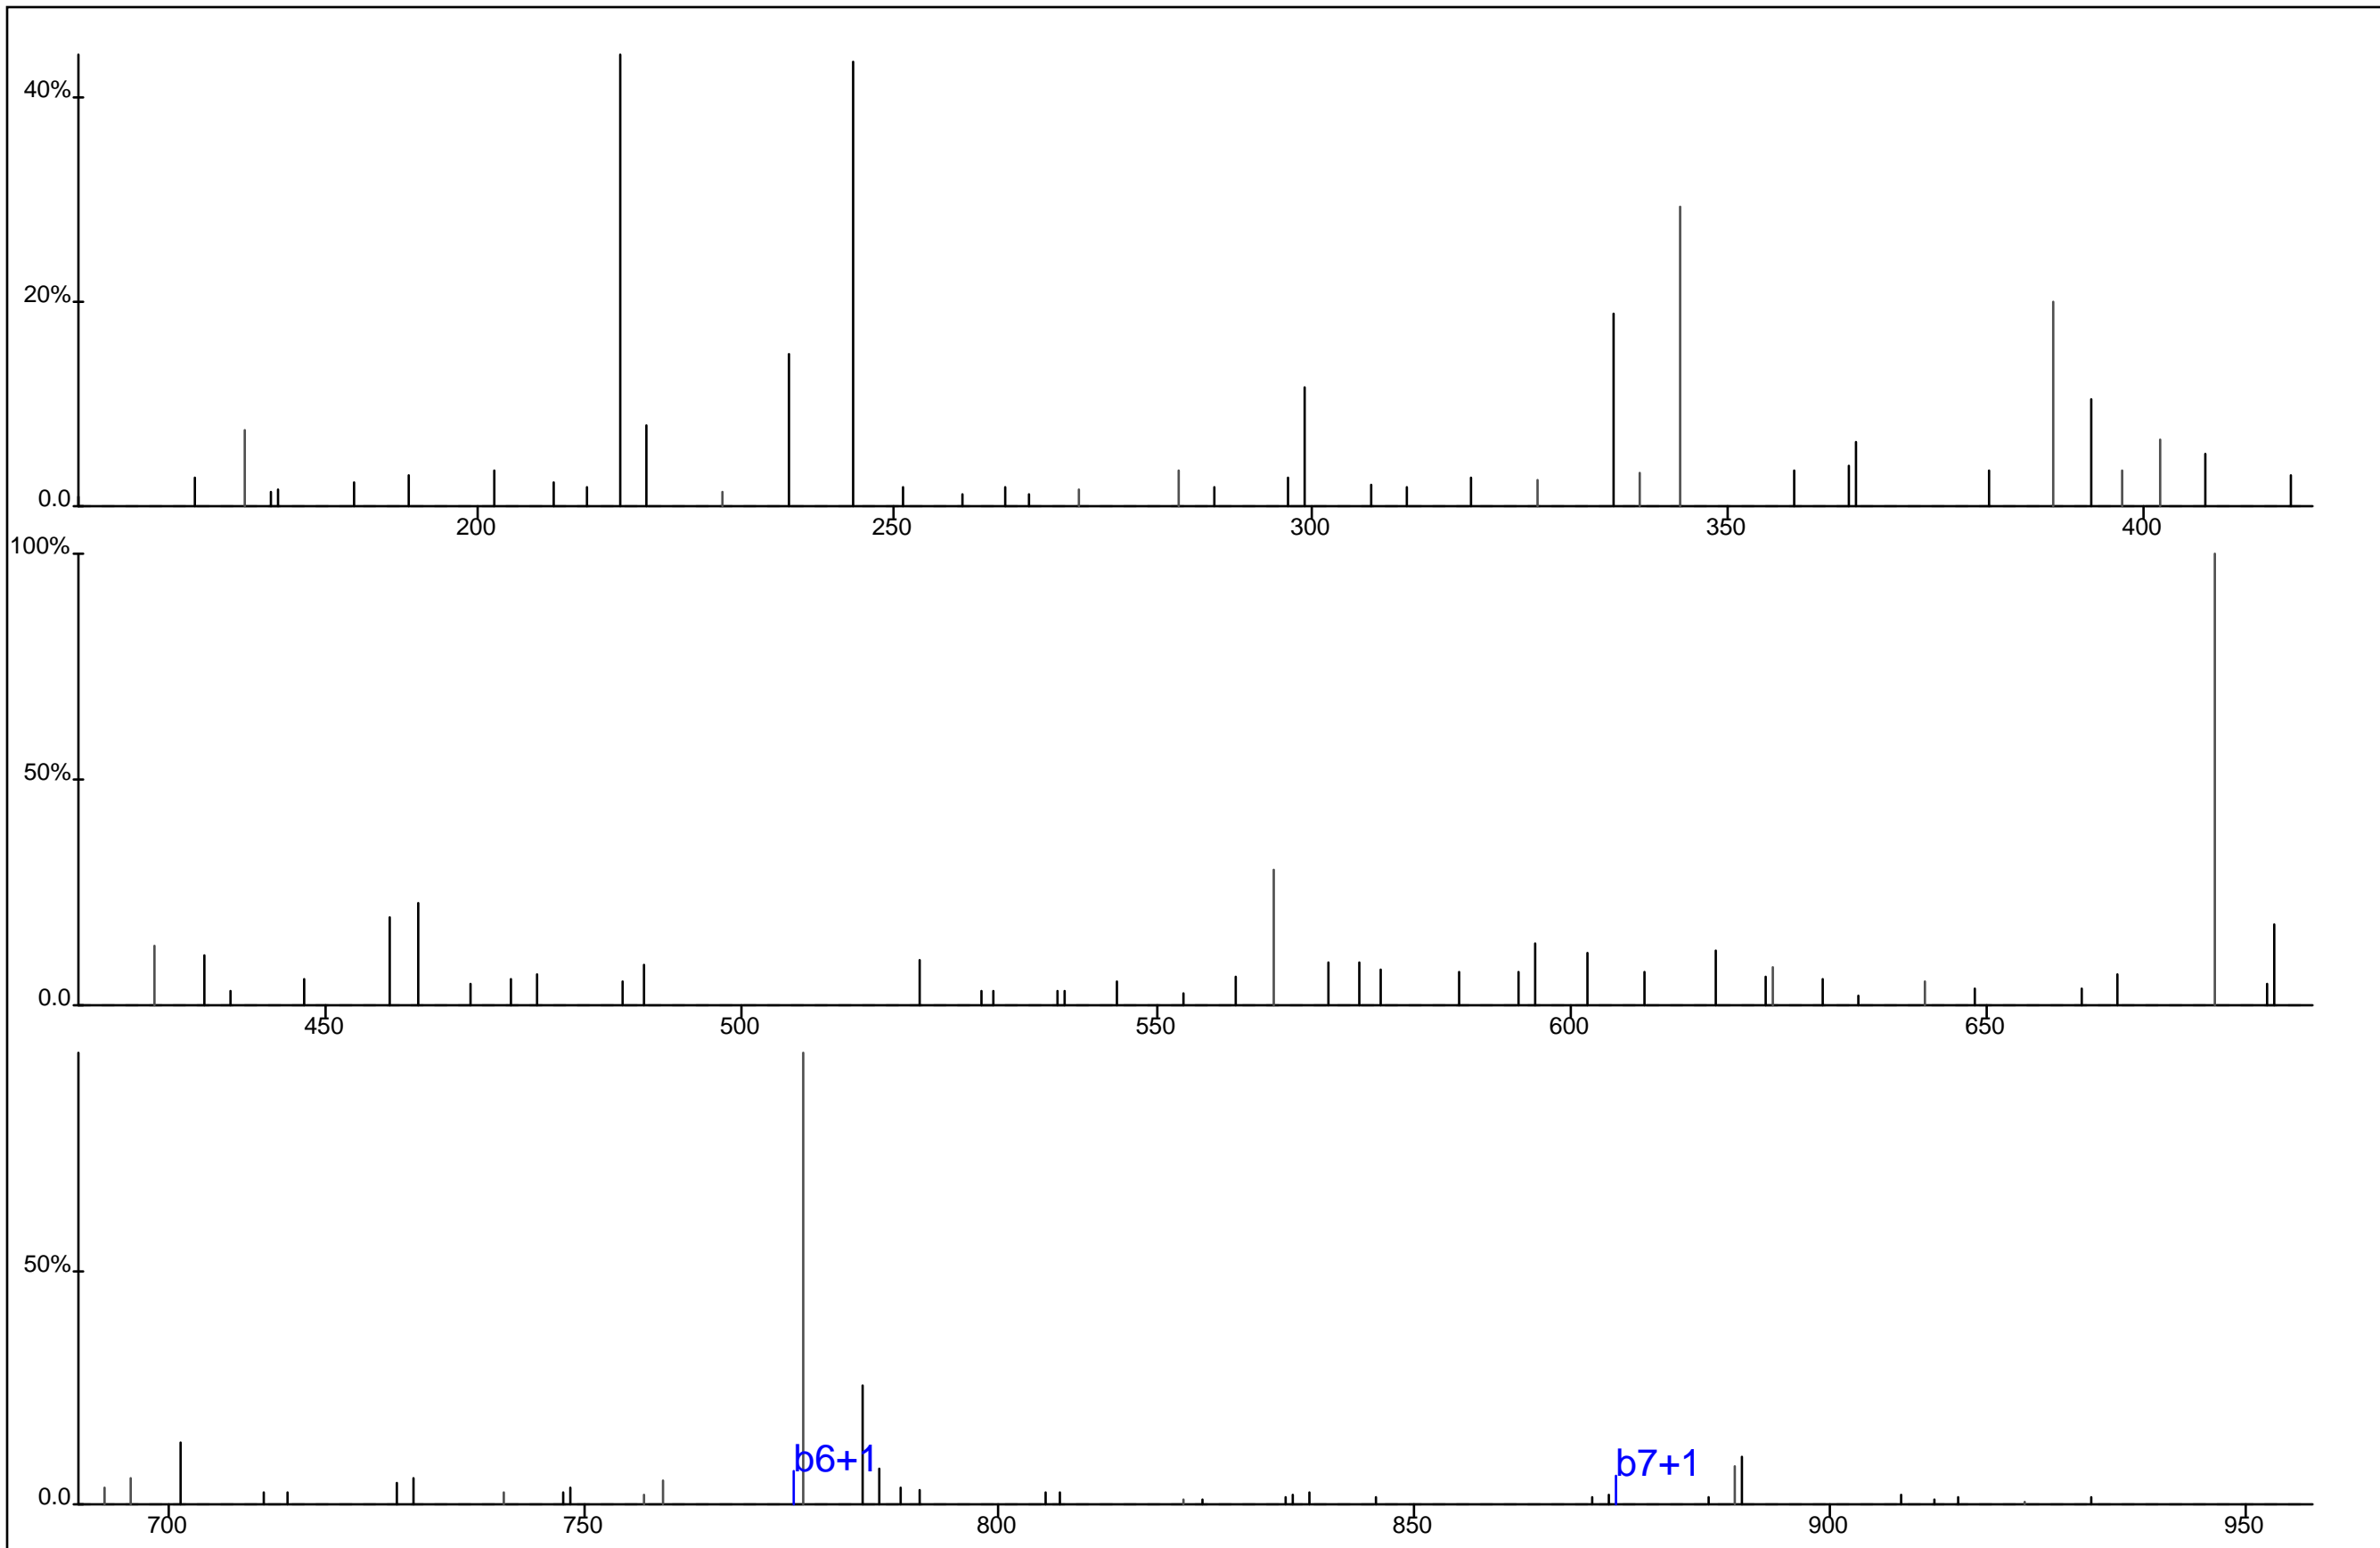

T F L G Y\* L V K

Protein Name: KIAA1632  
 gi Accession: 0  
 Precursor Mass: 510.7637+2  
 Delta Mass: 3.504 ppm  
 XCorr: 22.64

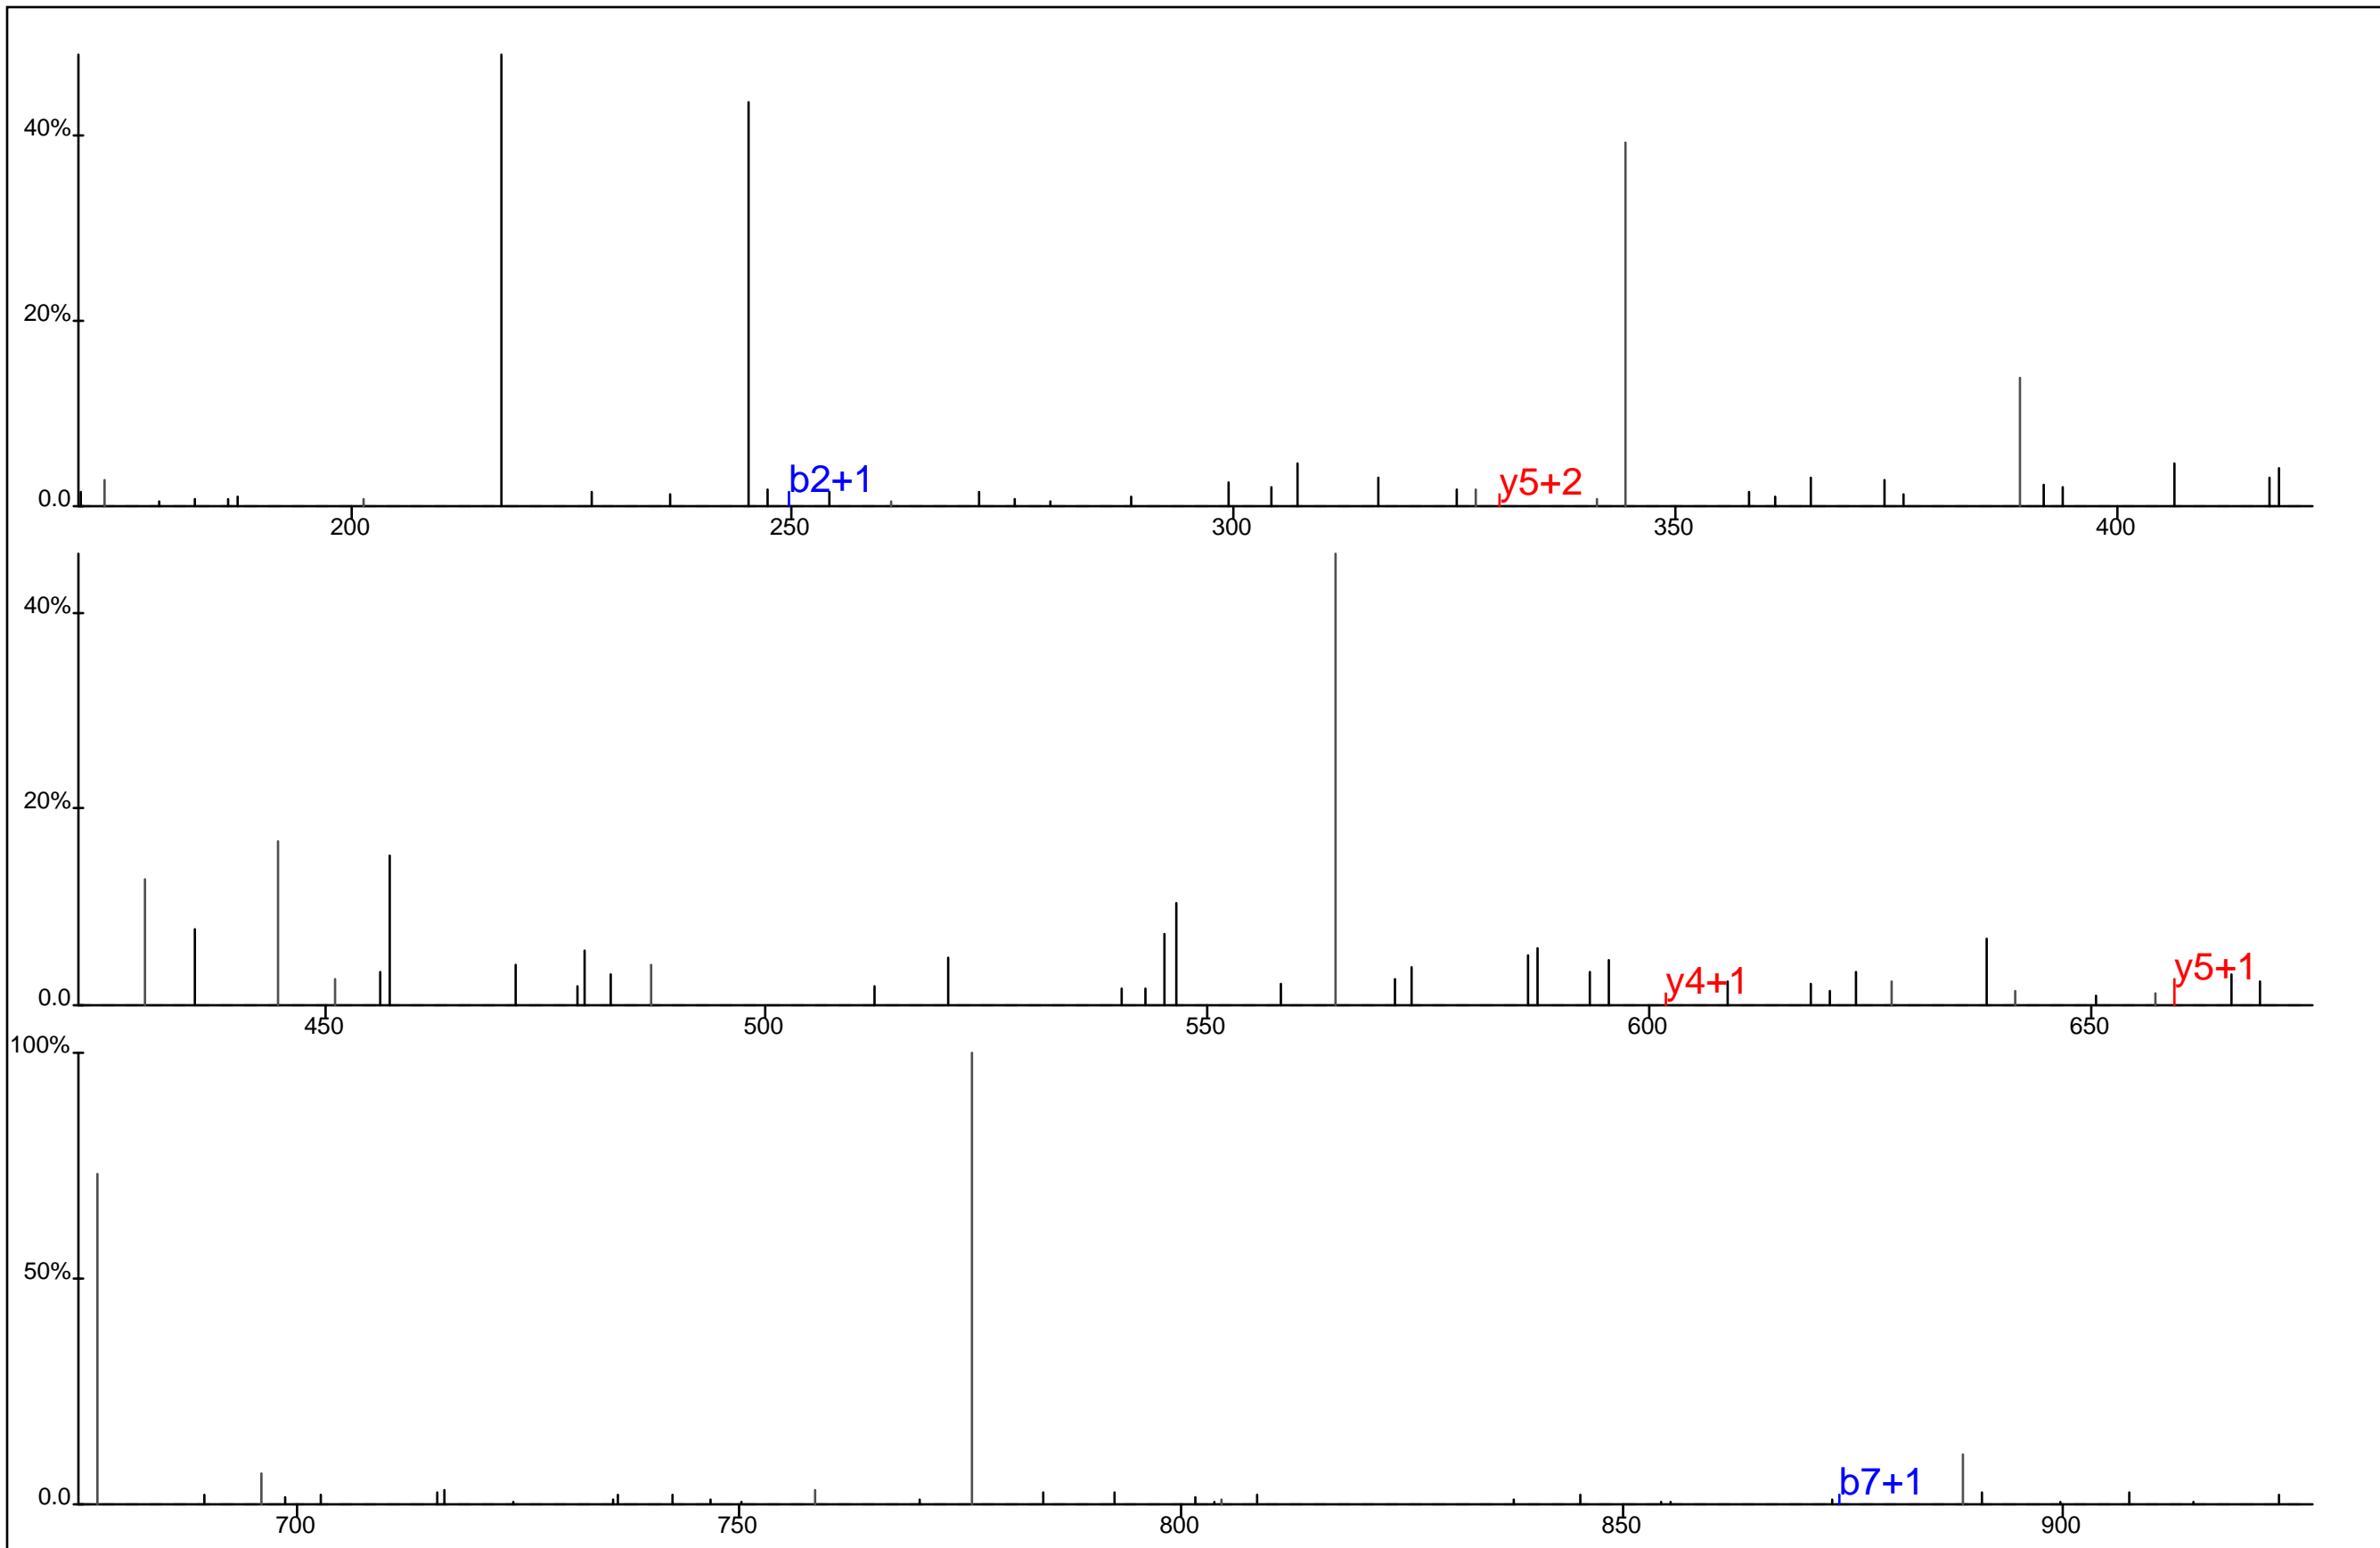

**T F L G Y\* L V K**

Protein Name: KIAA1632  
 gi Accession: 0  
 Precursor Mass: 510.7642+2  
 Delta Mass: 4.402 ppm  
 XCorr: 23.05

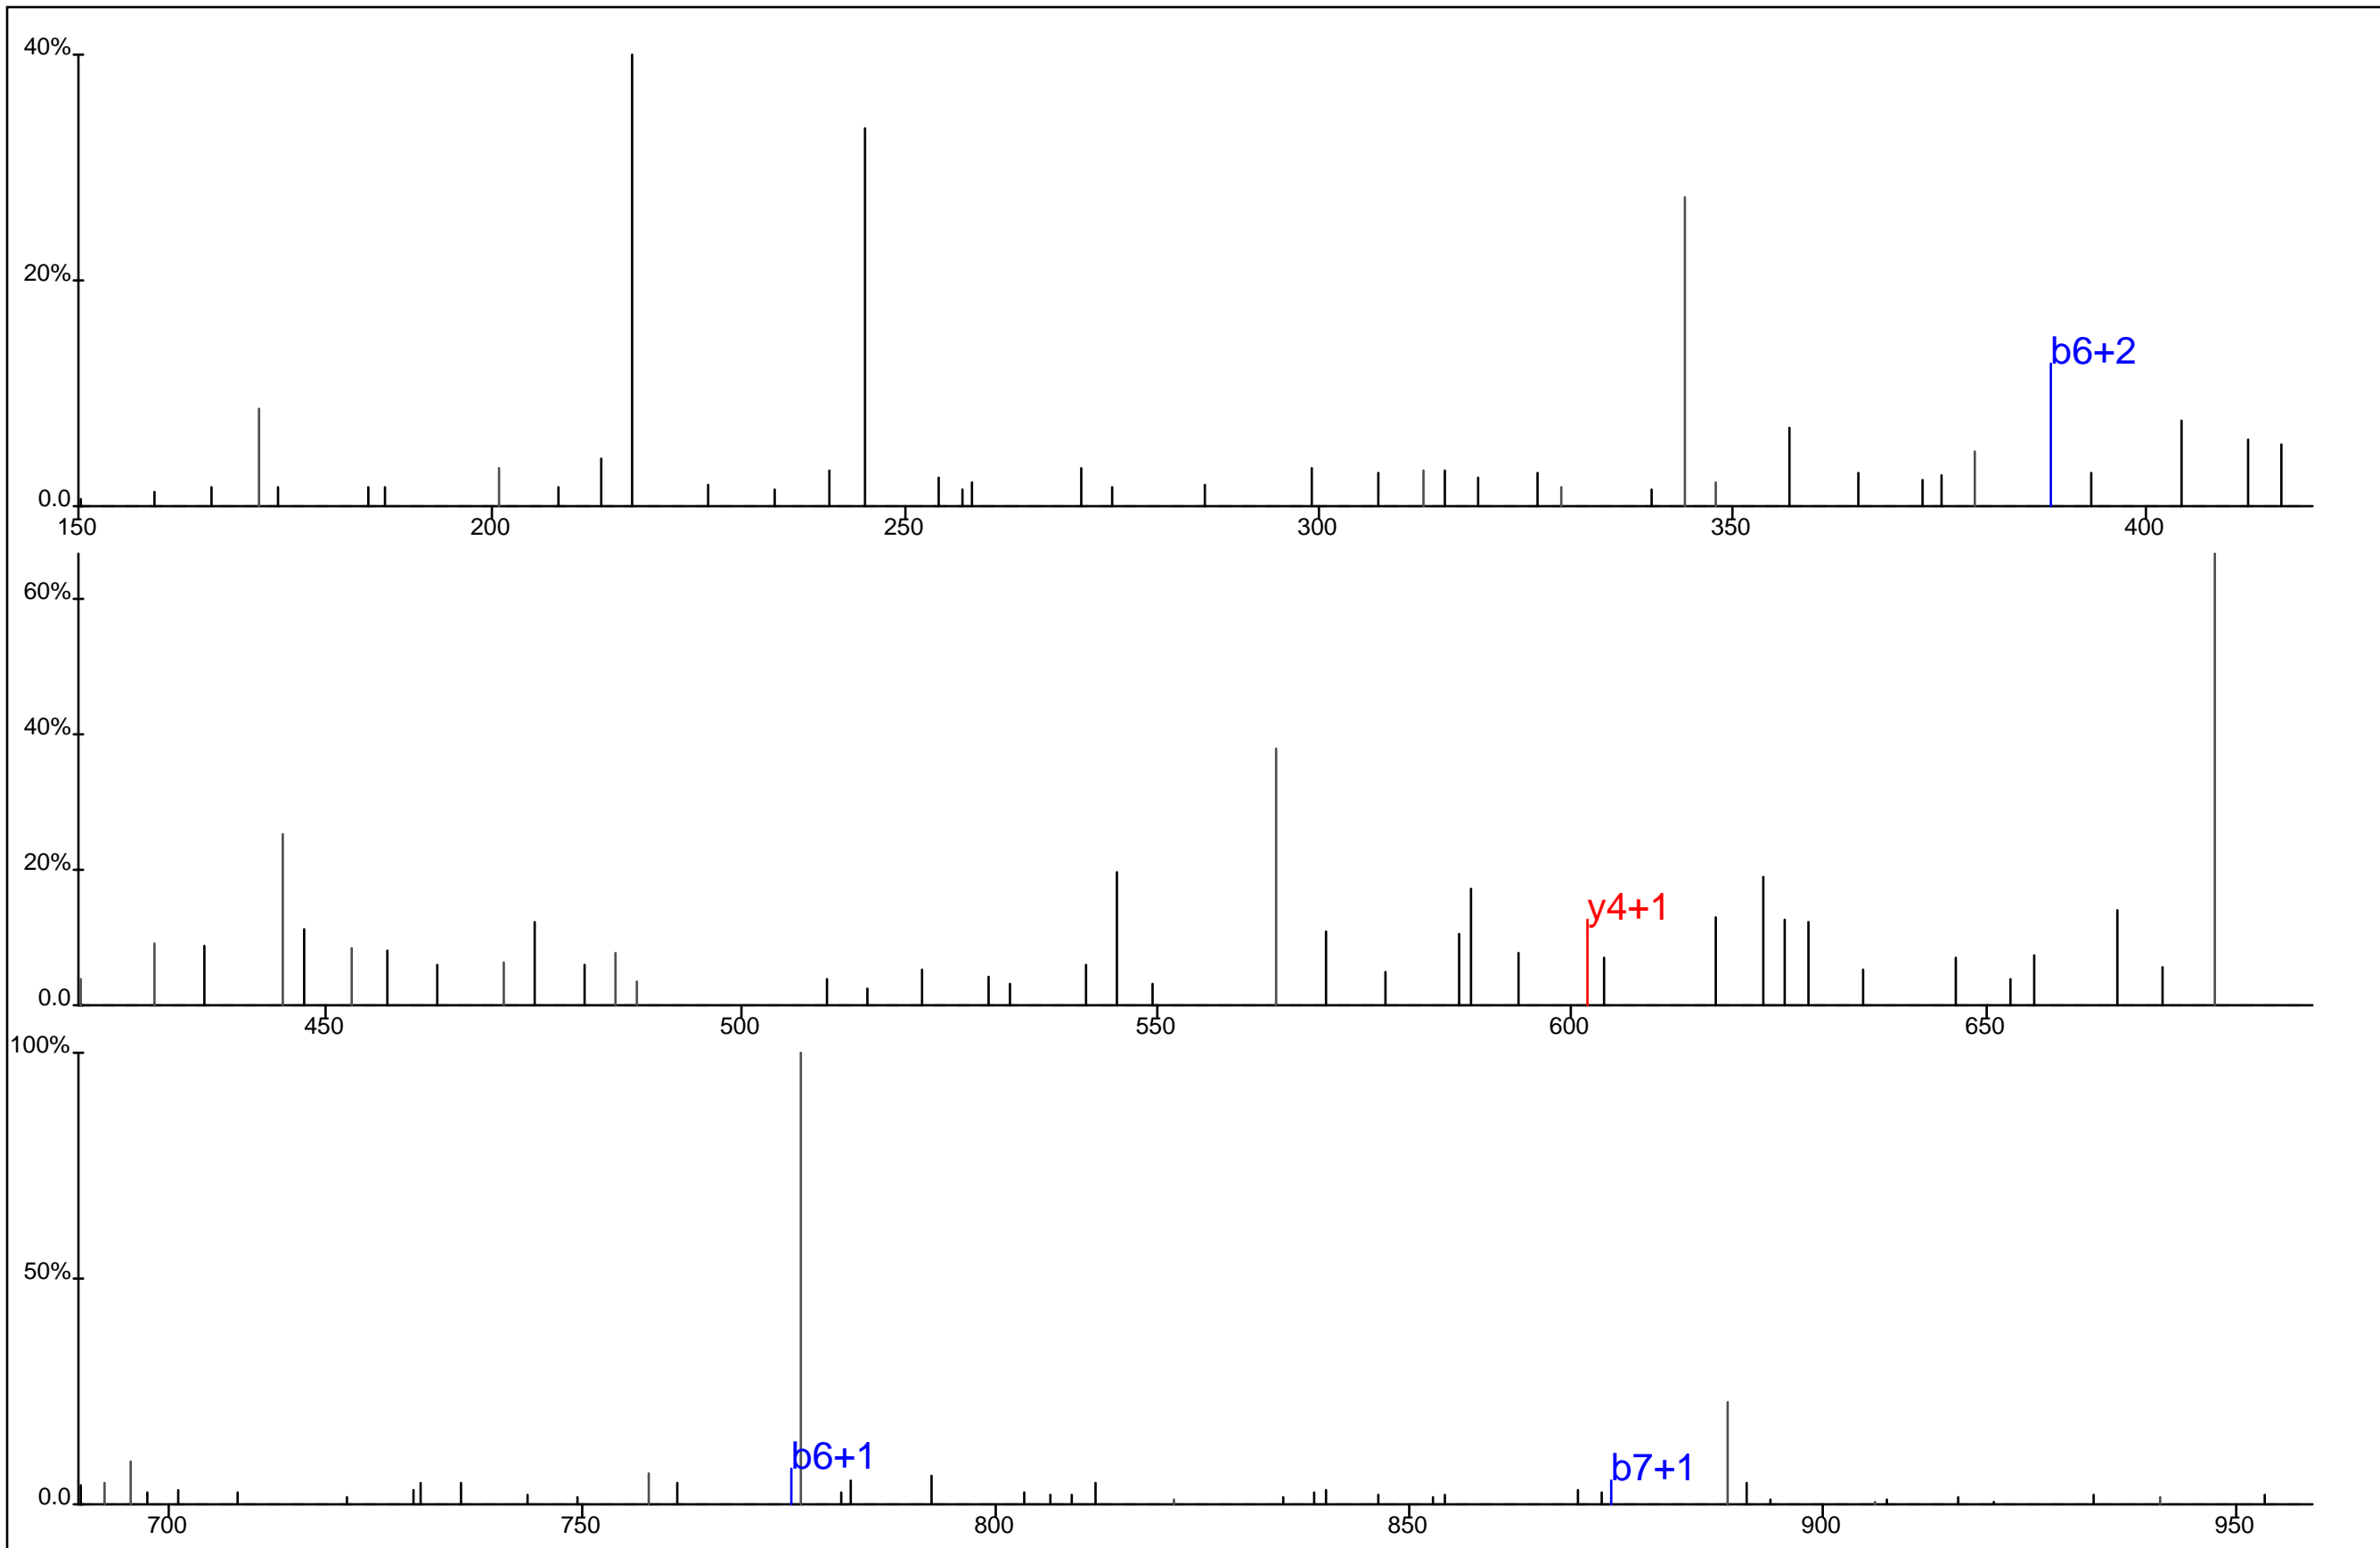

■ ■ ■ ■ ■  
■ ■ ■ ■ ■  
**T F L G Y\* L V K**

Protein Name: KIAA1632  
 gi Accession: 0  
 Precursor Mass: 510.7636+2  
 Delta Mass: 3.385 ppm  
 XCorr: 22.6

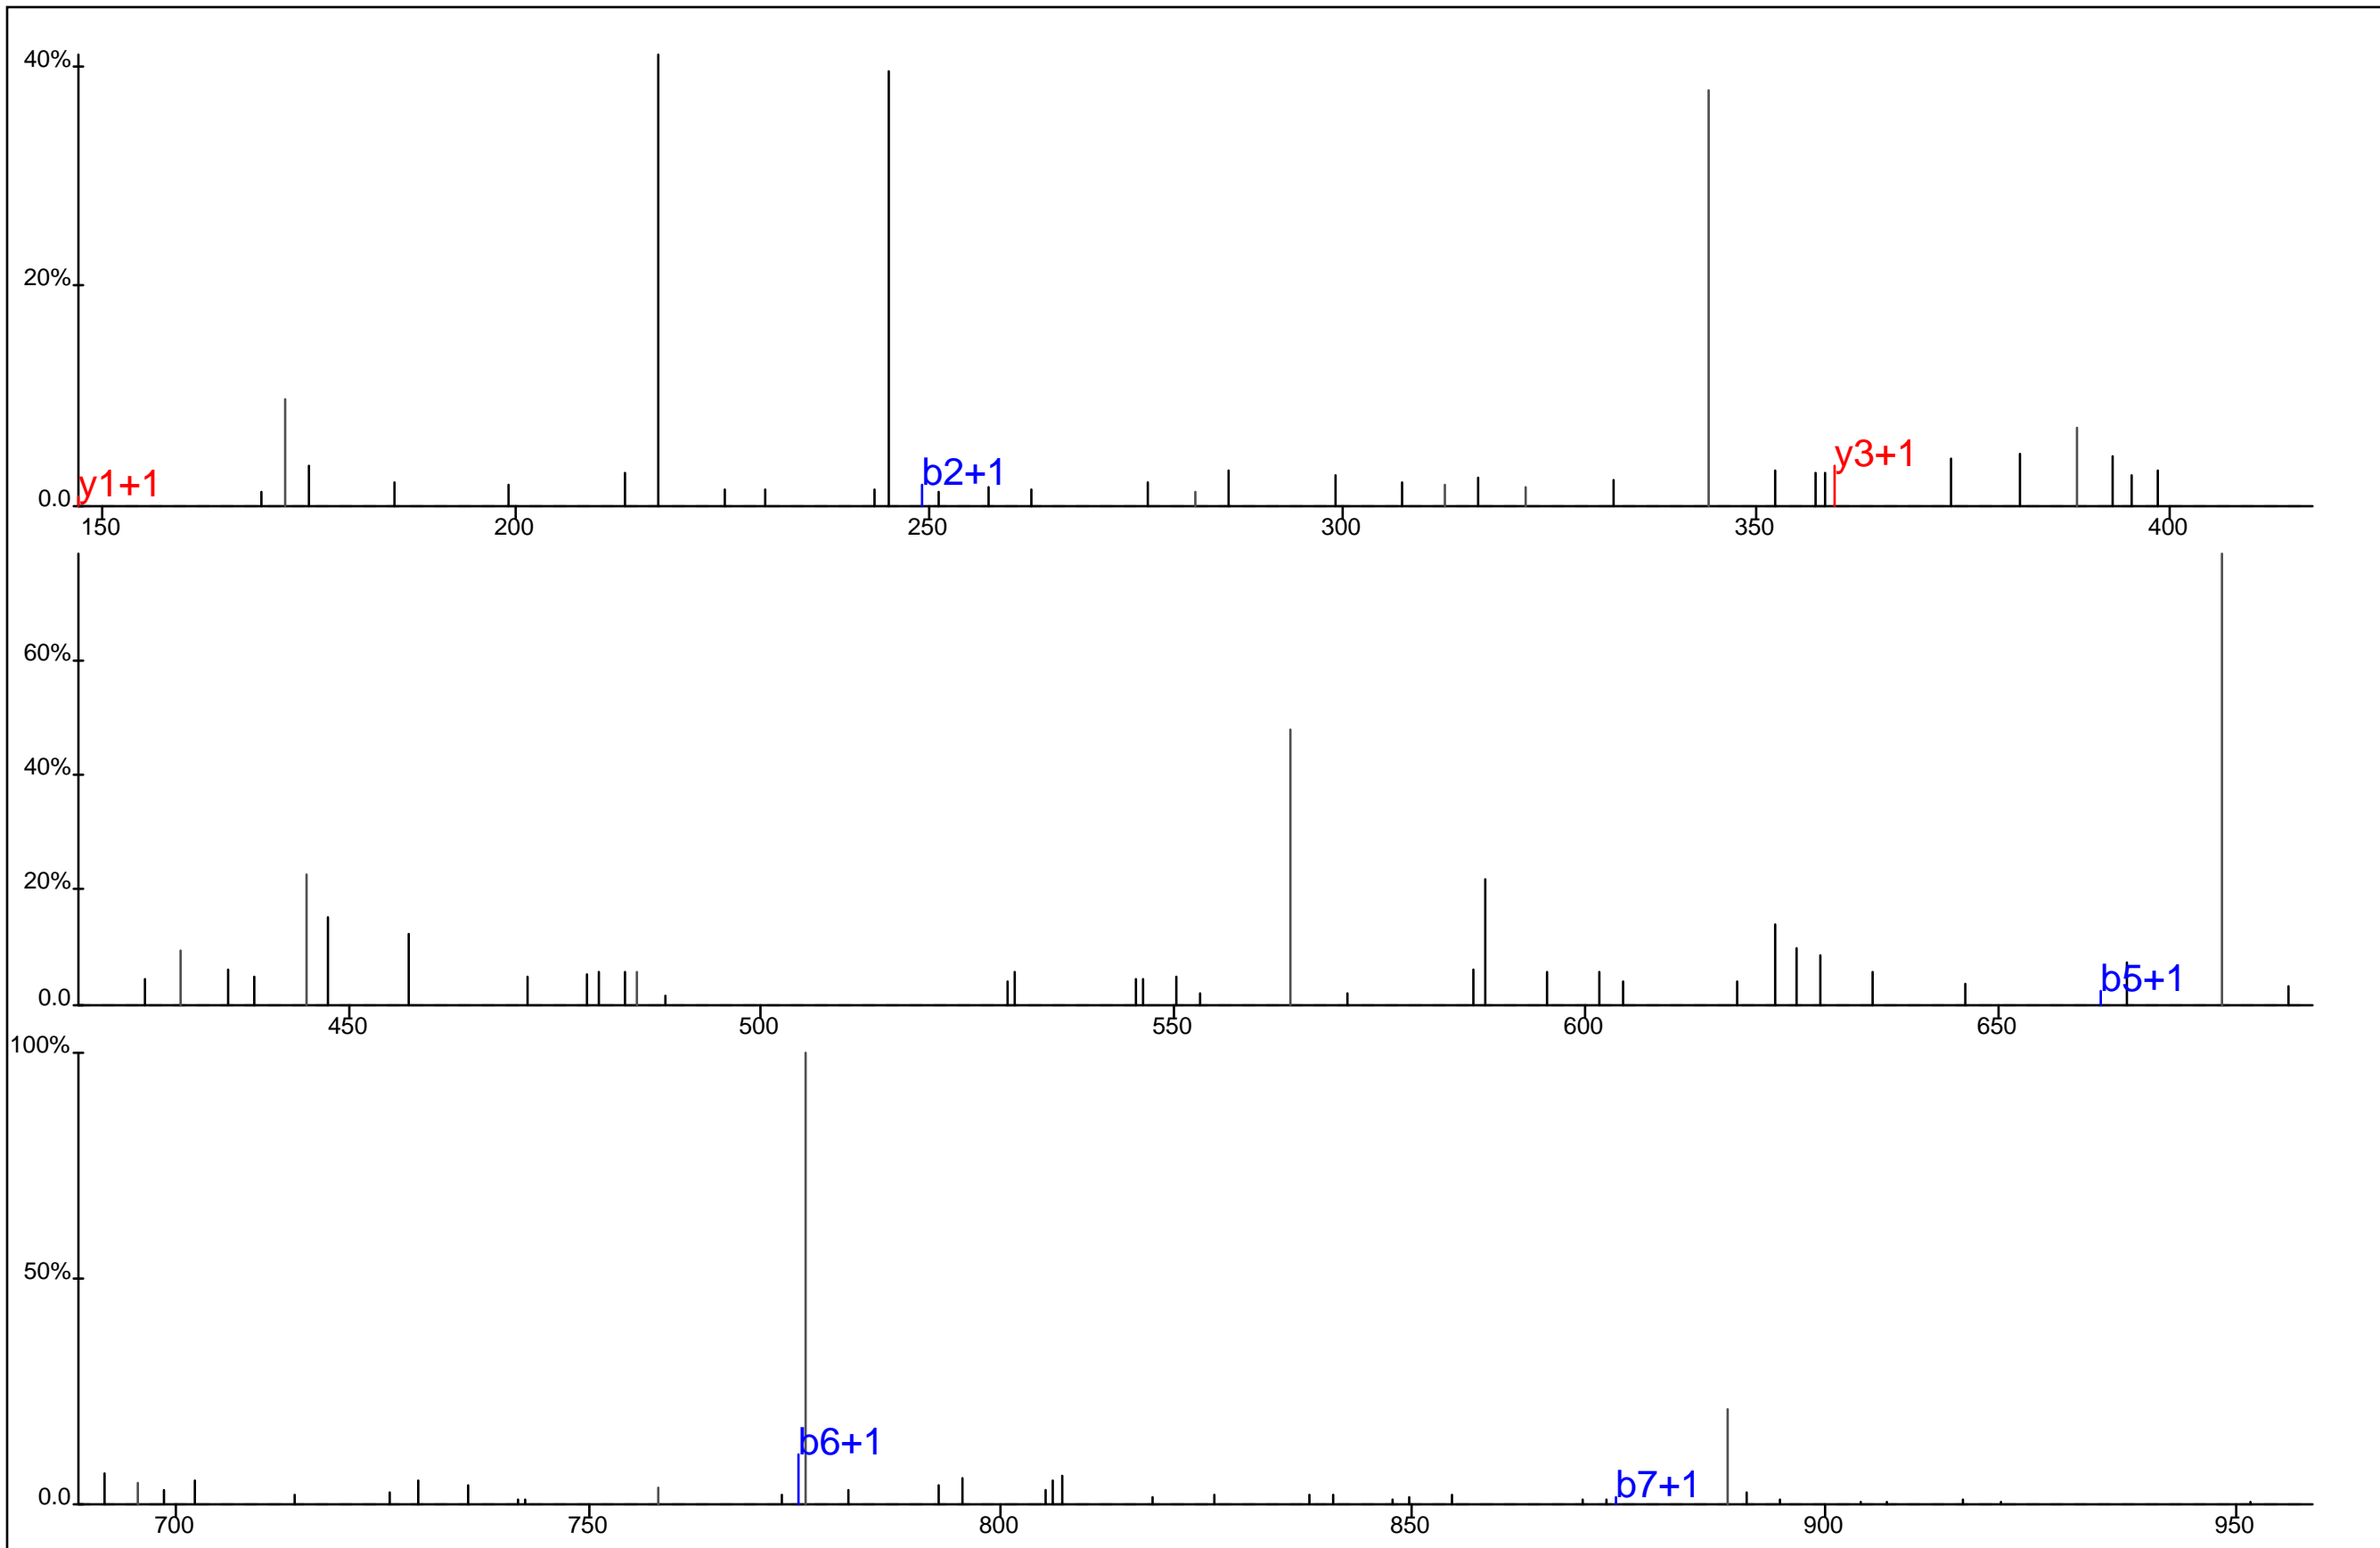

■ □ ▤ ■ ▤ ■  
**T F L G Y\* L V K**  
▤ ▤ ▤ ▤ ■ ▤ ▤

Protein Name: KIAA1632  
 gi Accession: 0  
 Precursor Mass: 510.7600+2  
 Delta Mass: 3.751 ppm  
 XCorr: 20.36

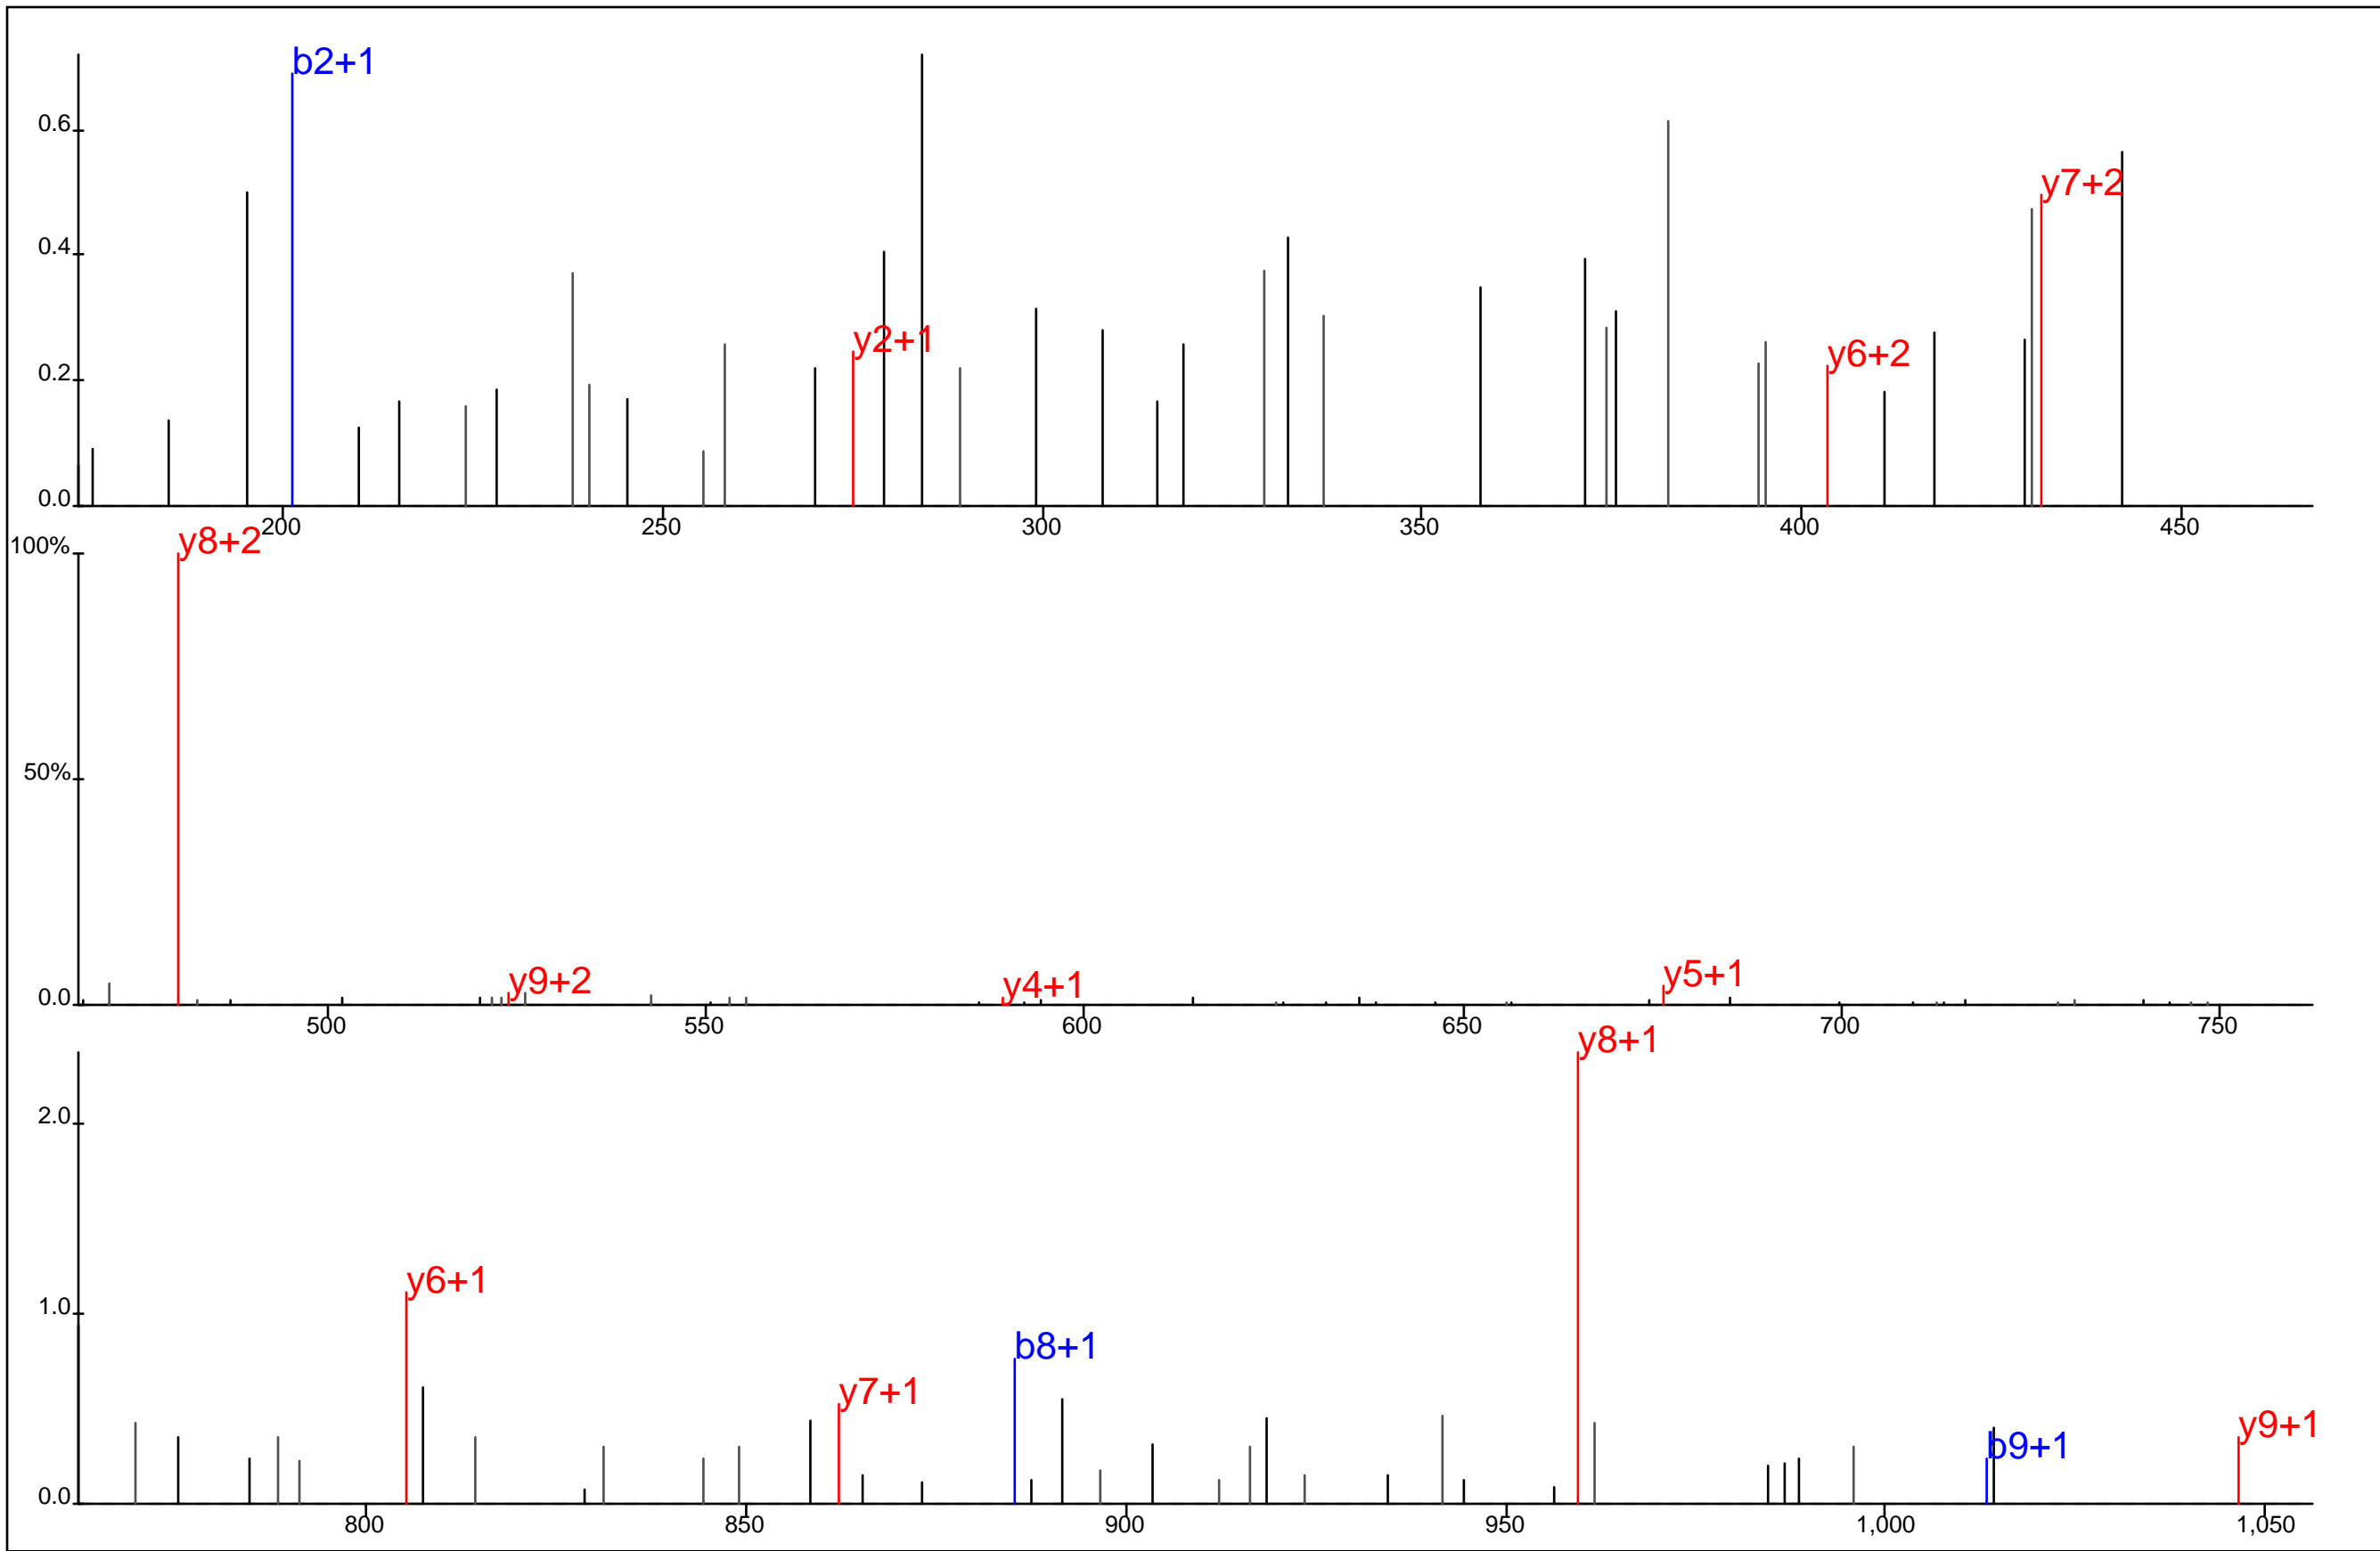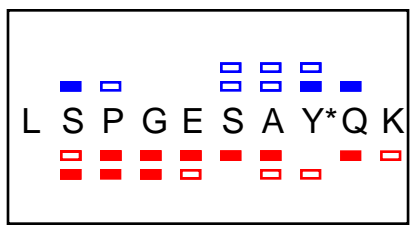

Protein Name: KIAA1949  
 gi Accession: 0  
 Precursor Mass: 580.2545+2  
 Delta Mass: 1.125 ppm  
 XCorr: 30.2



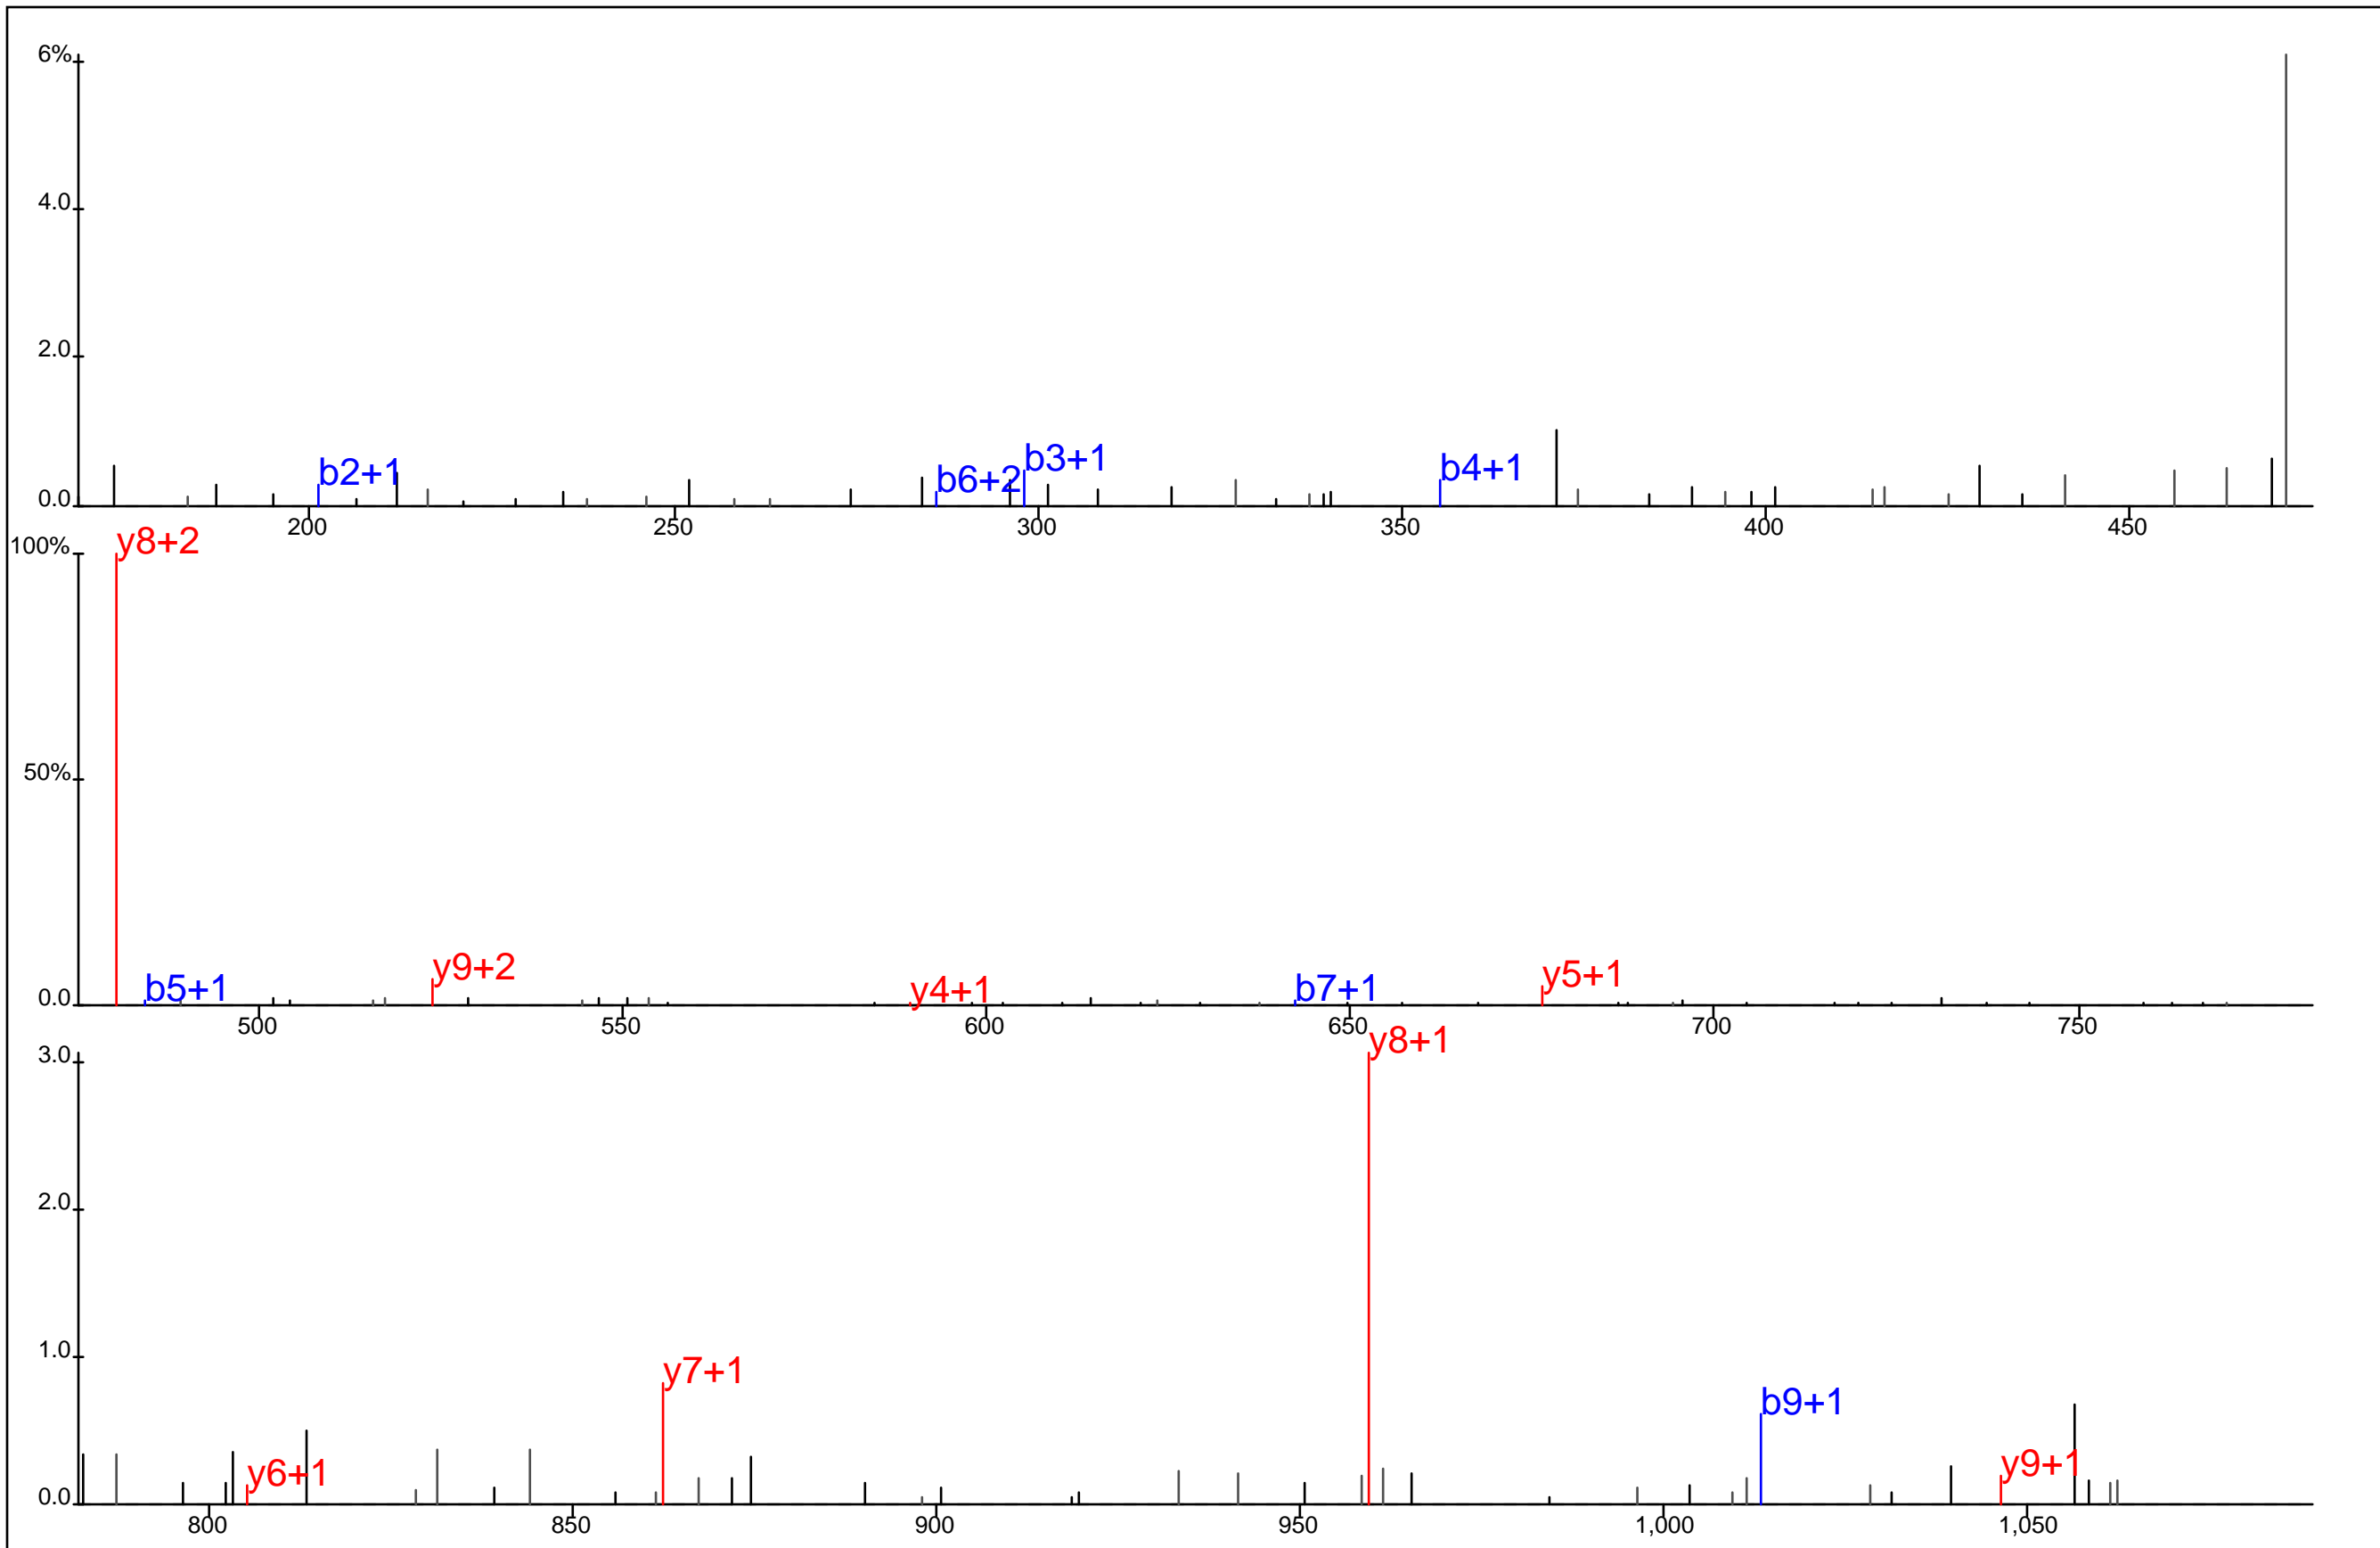

■ ■ ■ ■ ■ ■ ■ ■  
 L S P G E S A Y\*Q K  
■ ■ ■ ■ ■ ■ ■

Protein Name: KIAA1949  
 gi Accession: 0  
 Precursor Mass: 580.2556+2  
 Delta Mass: 0.769 ppm  
 XCorr: 27.58

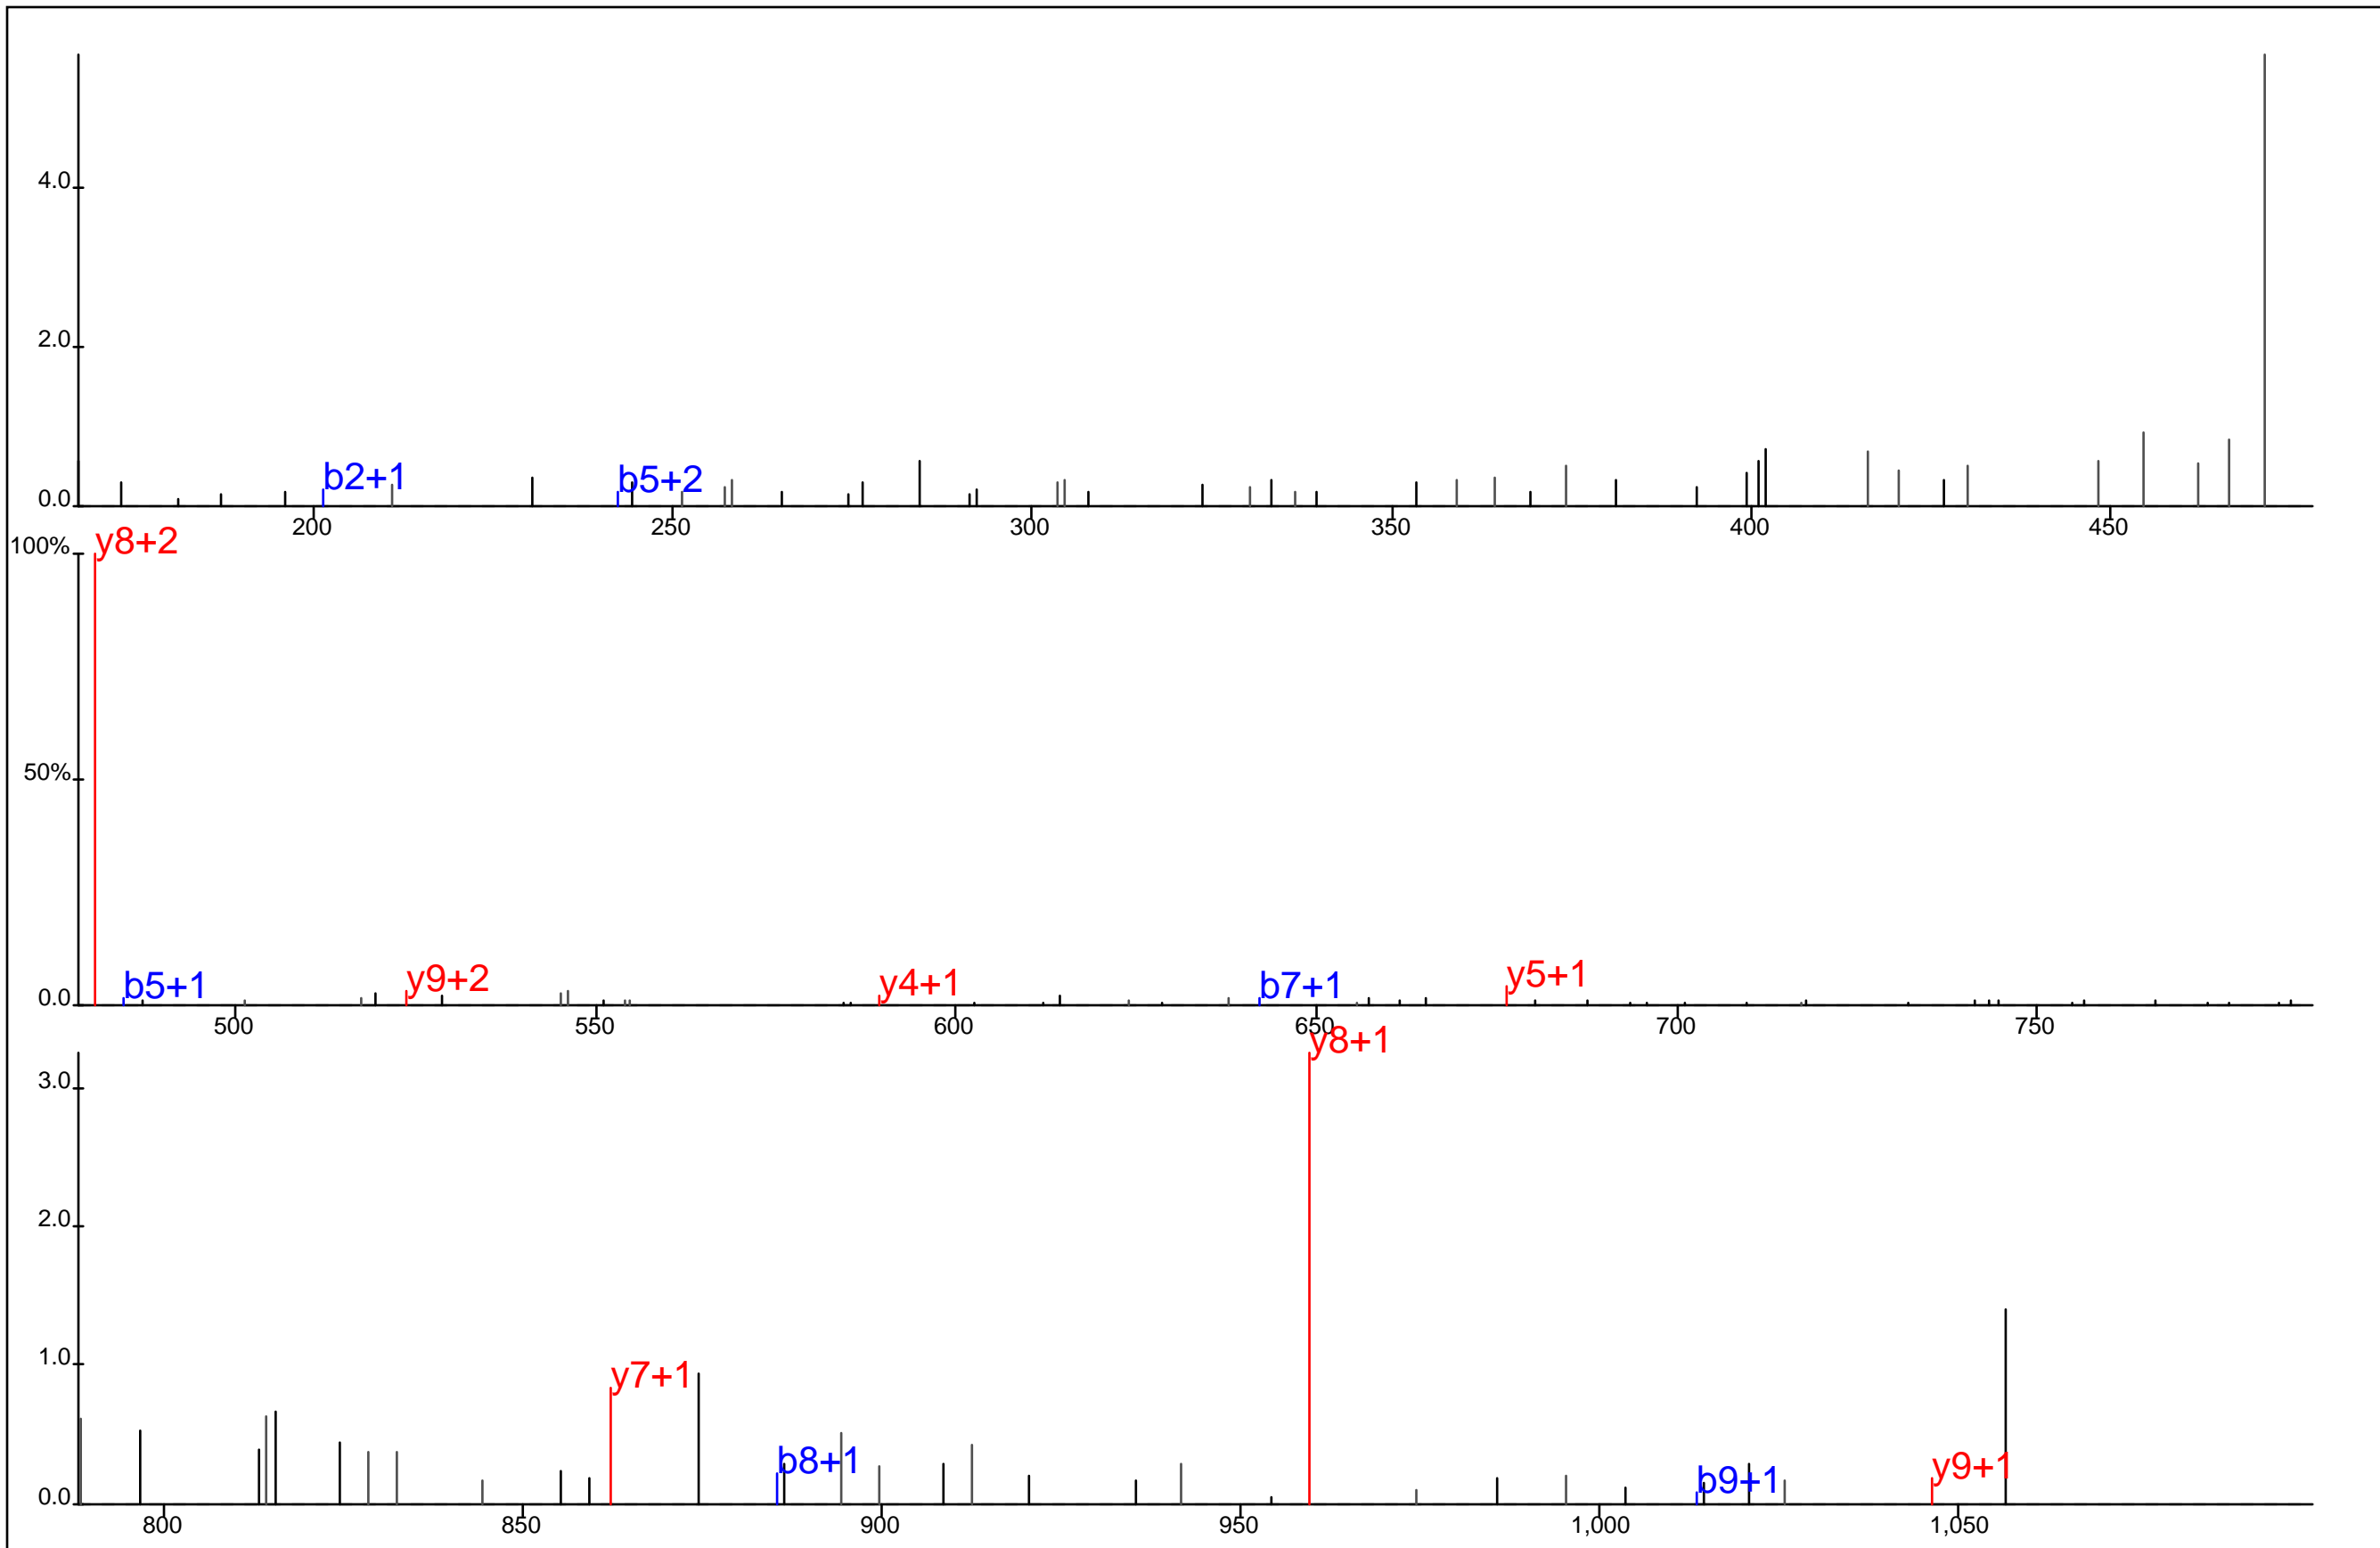

■ ▢ ■ ▢ ▢ ▢  
 L S P G E S A Y\*Q K  
▢ ▢ ▢ ▢ ▢

Protein Name: KIAA1949  
 gi Accession: 0  
 Precursor Mass: 580.2551+2  
 Delta Mass: 0.178 ppm  
 XCorr: 20.43



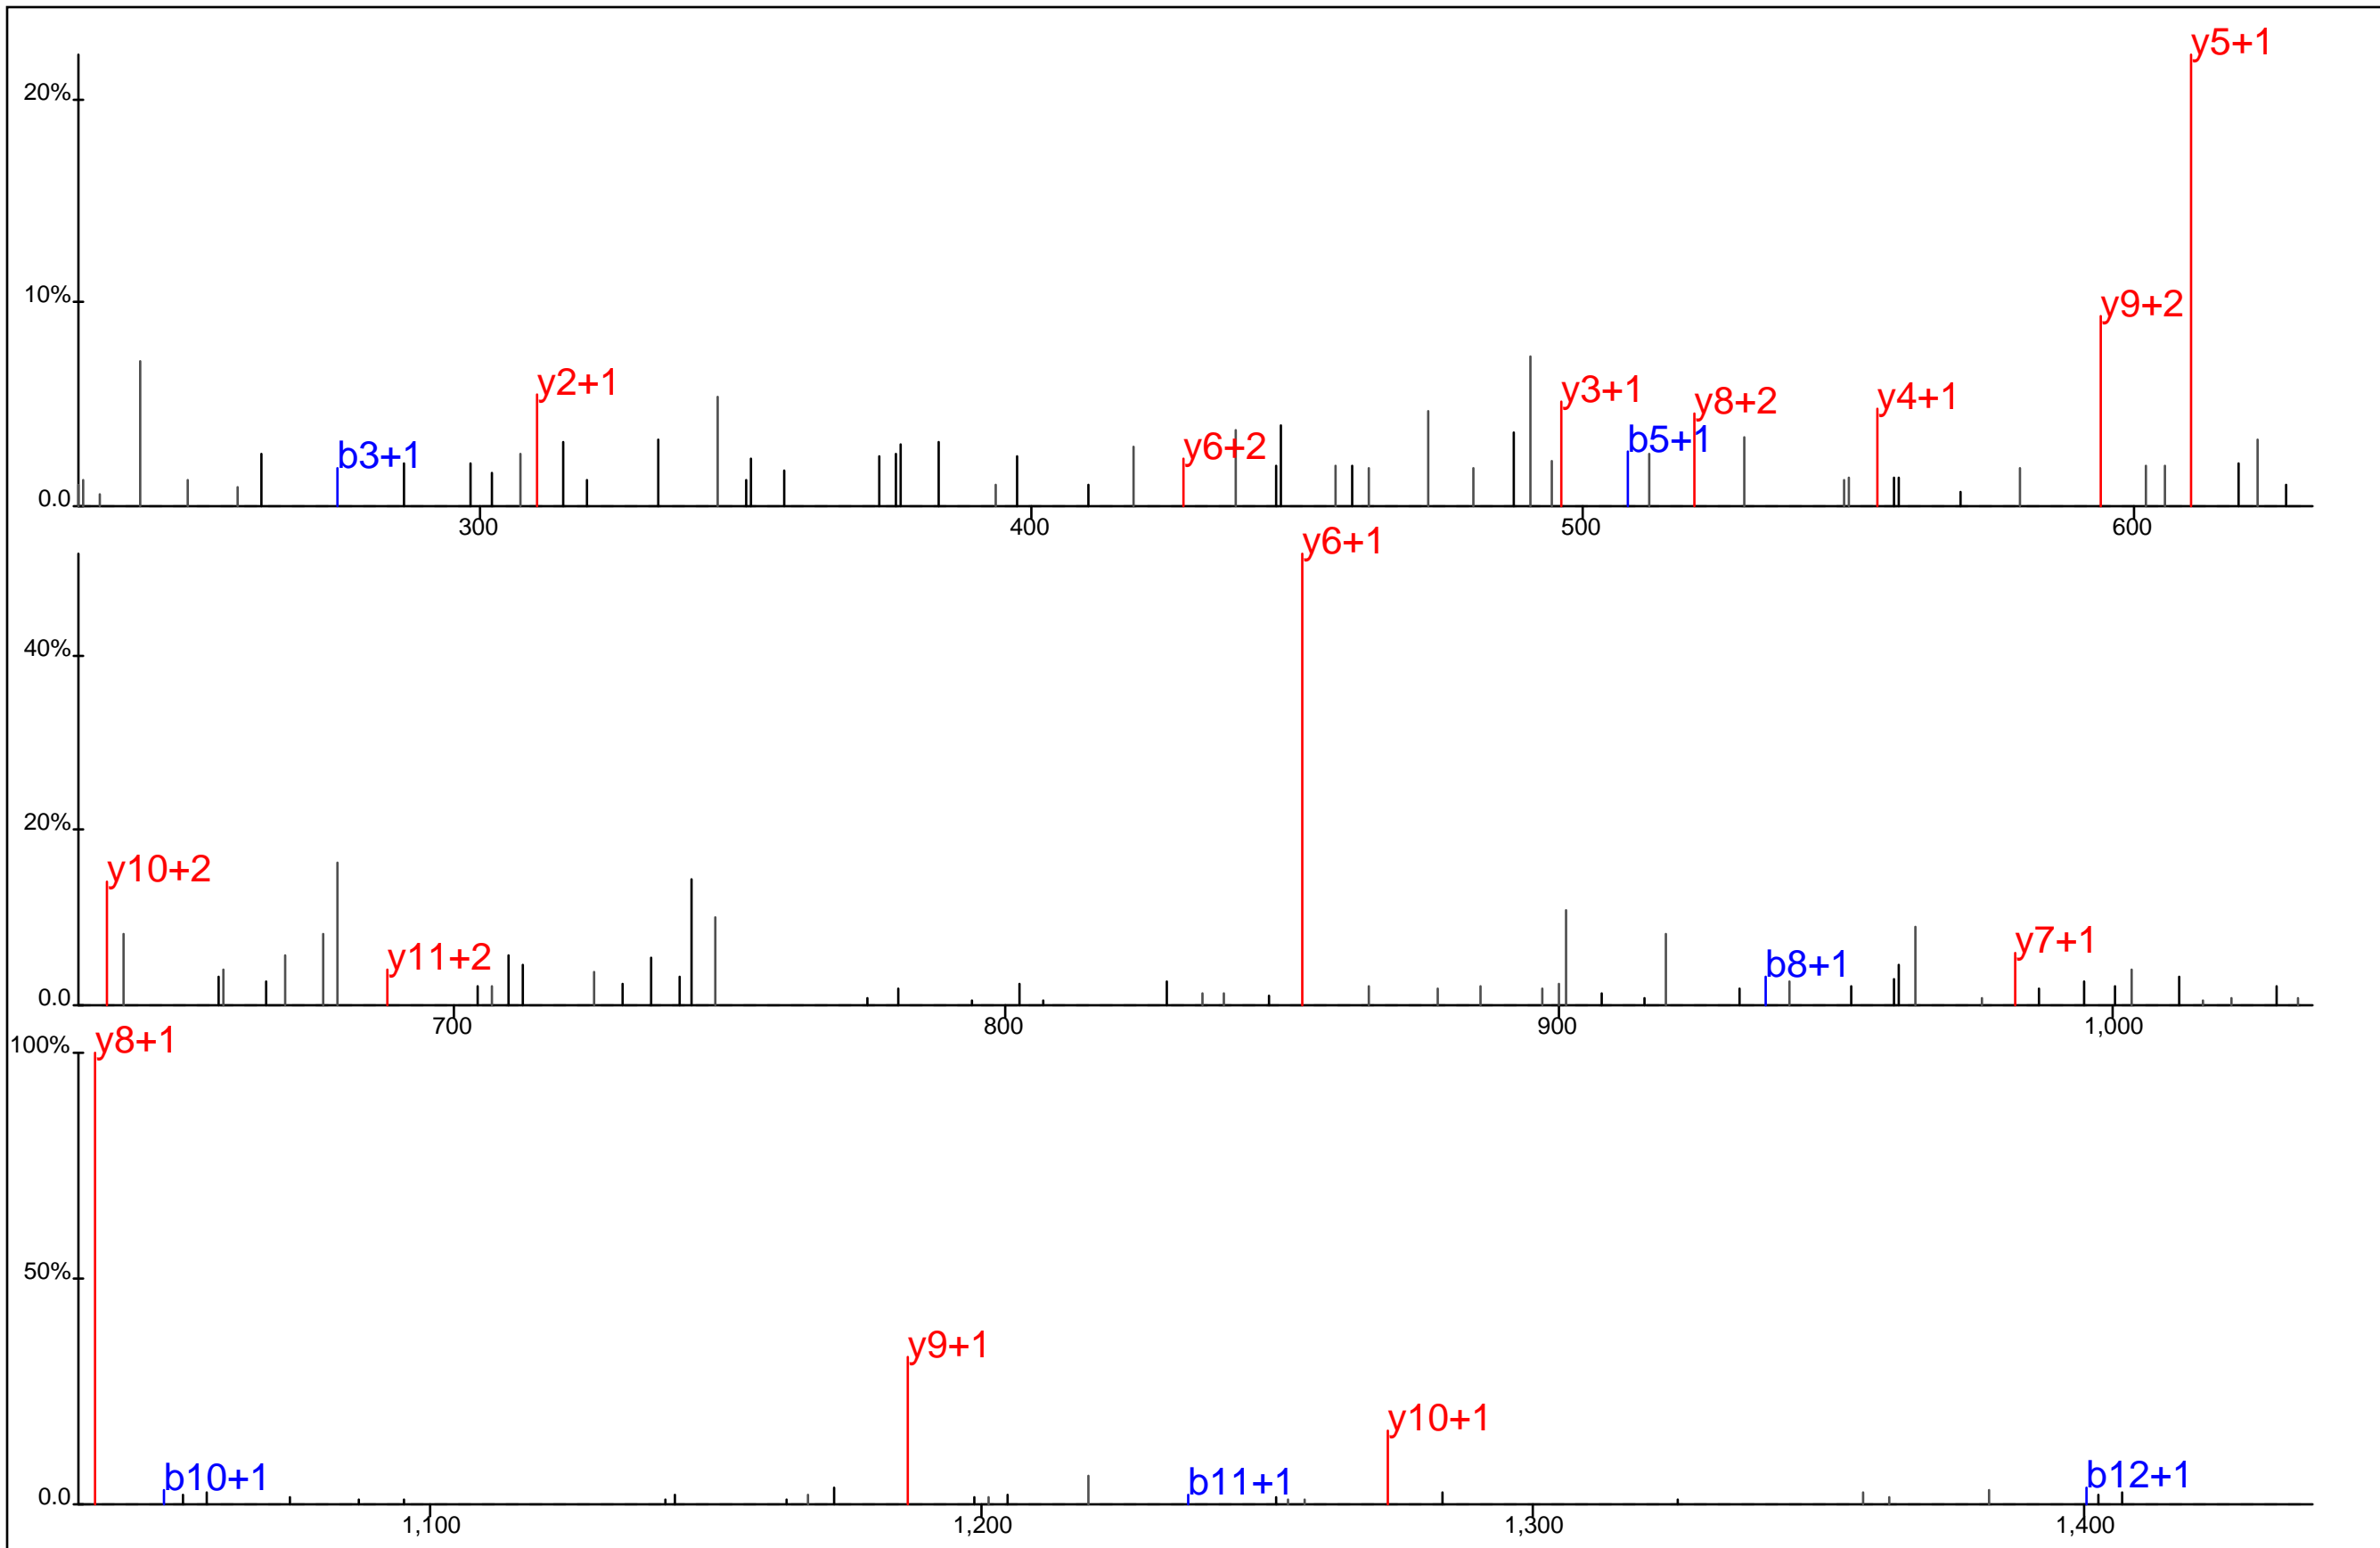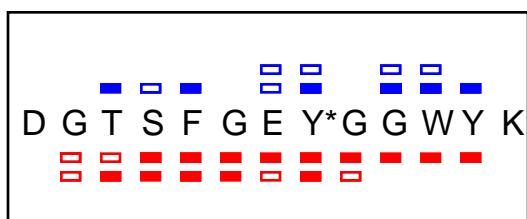

Protein Name: Kinesin 2  
 gi Accession: 0  
 Precursor Mass: 773.7977+2  
 Delta Mass: 0.363 ppm  
 XCorr: 60.38

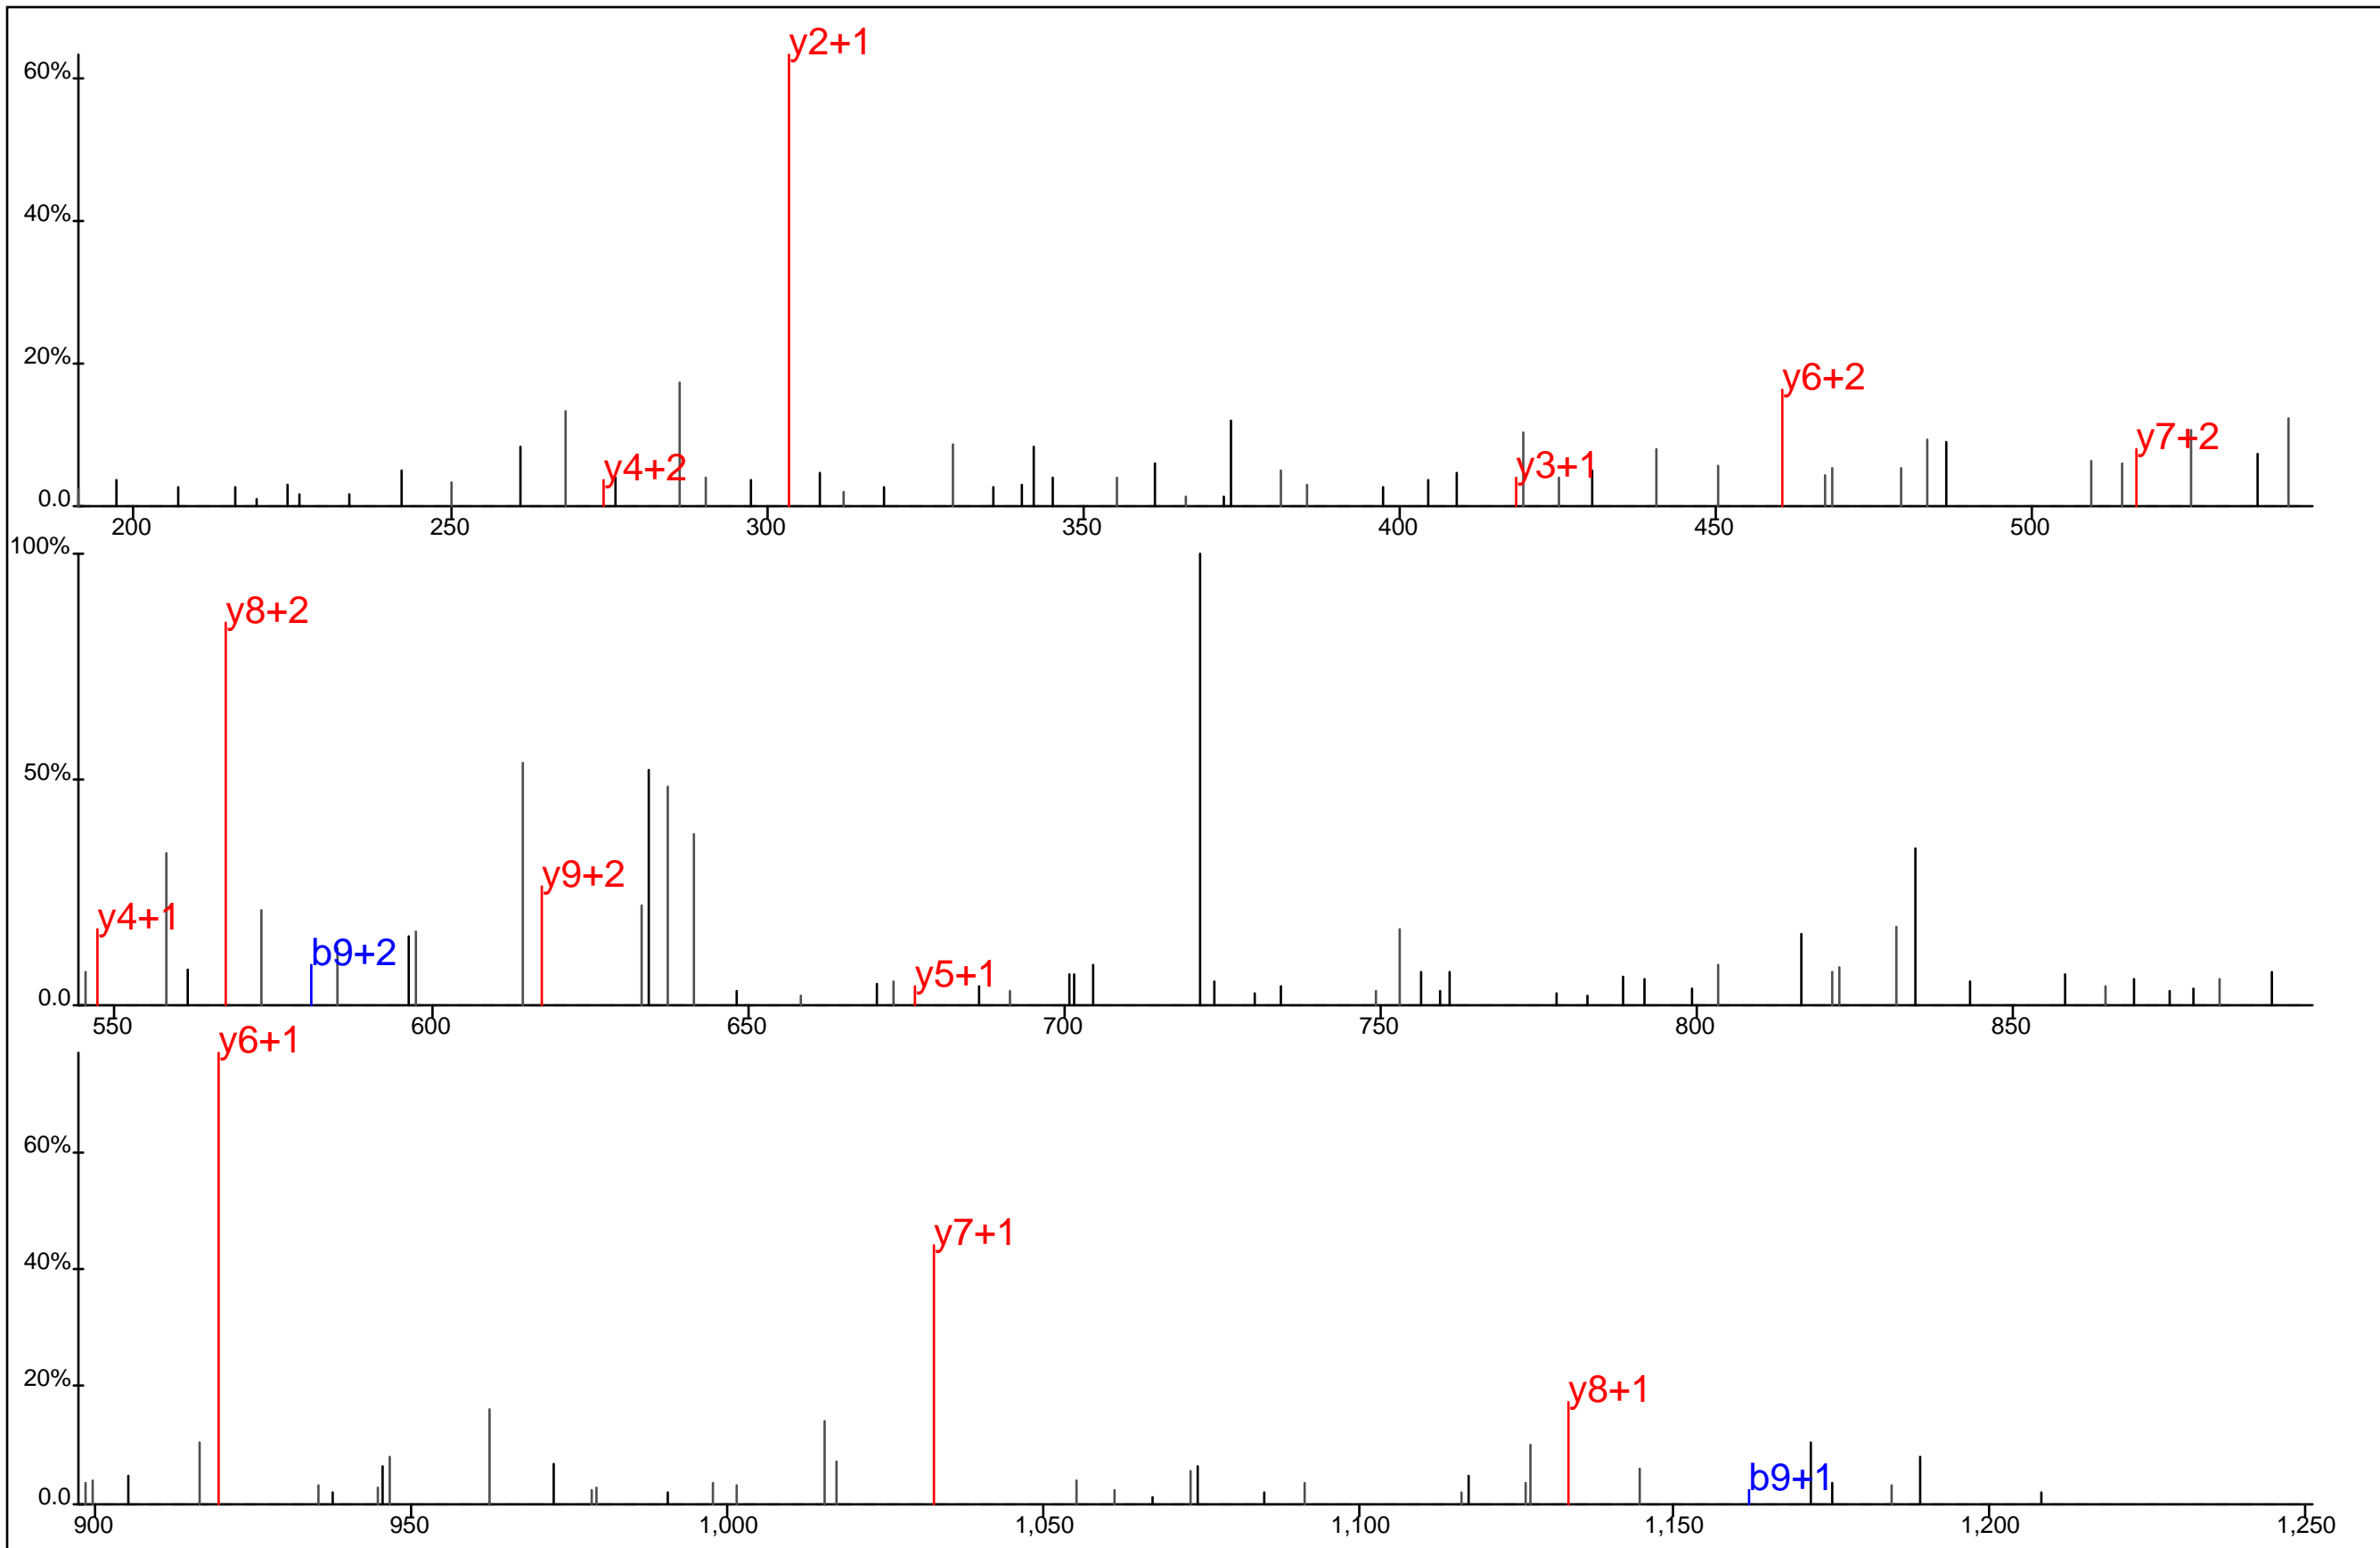

T T T I Y\* E E D K R

Protein Name: Kinesin family member 23  
 gi Accession: 0  
 Precursor Mass: 668.2955+2  
 Delta Mass: 0.669 ppm  
 XCorr: 20.19

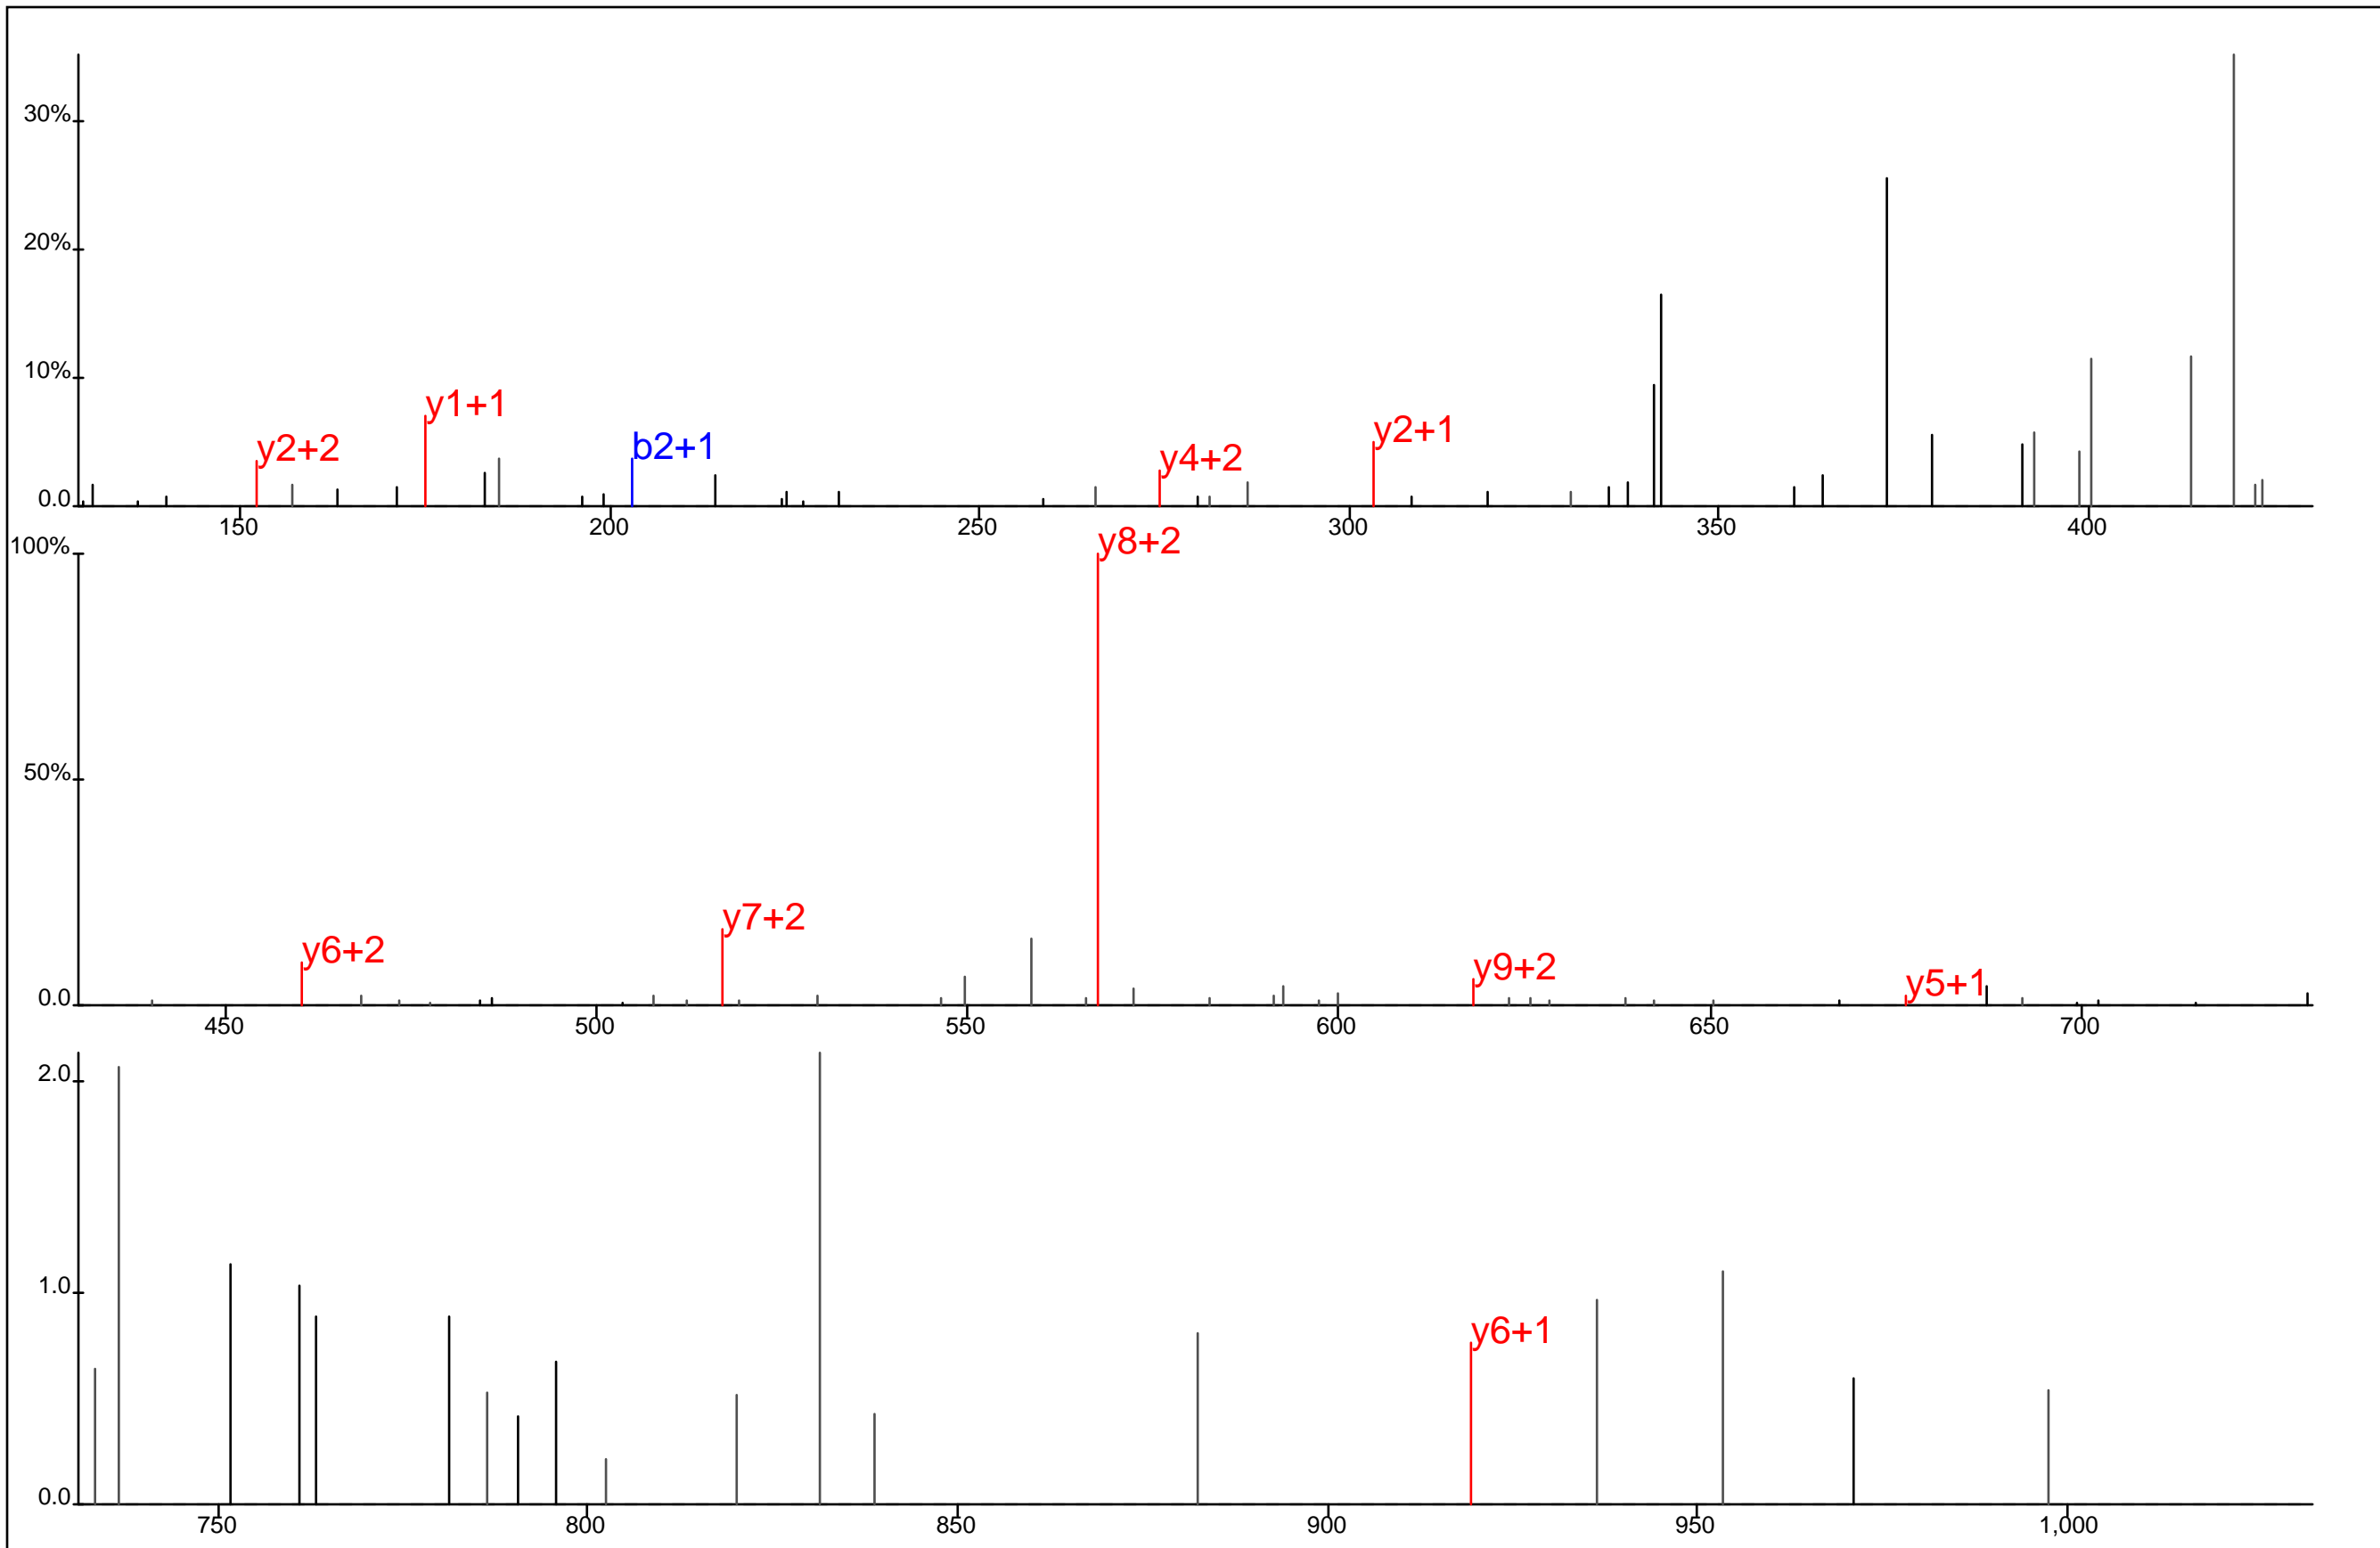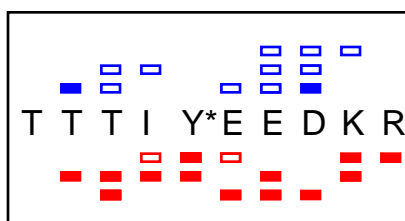

Protein Name: Kinesin family member 23  
 gi Accession: 0  
 Precursor Mass: 445.8658+3  
 Delta Mass: 0.158 ppm  
 XCorr: 27.62

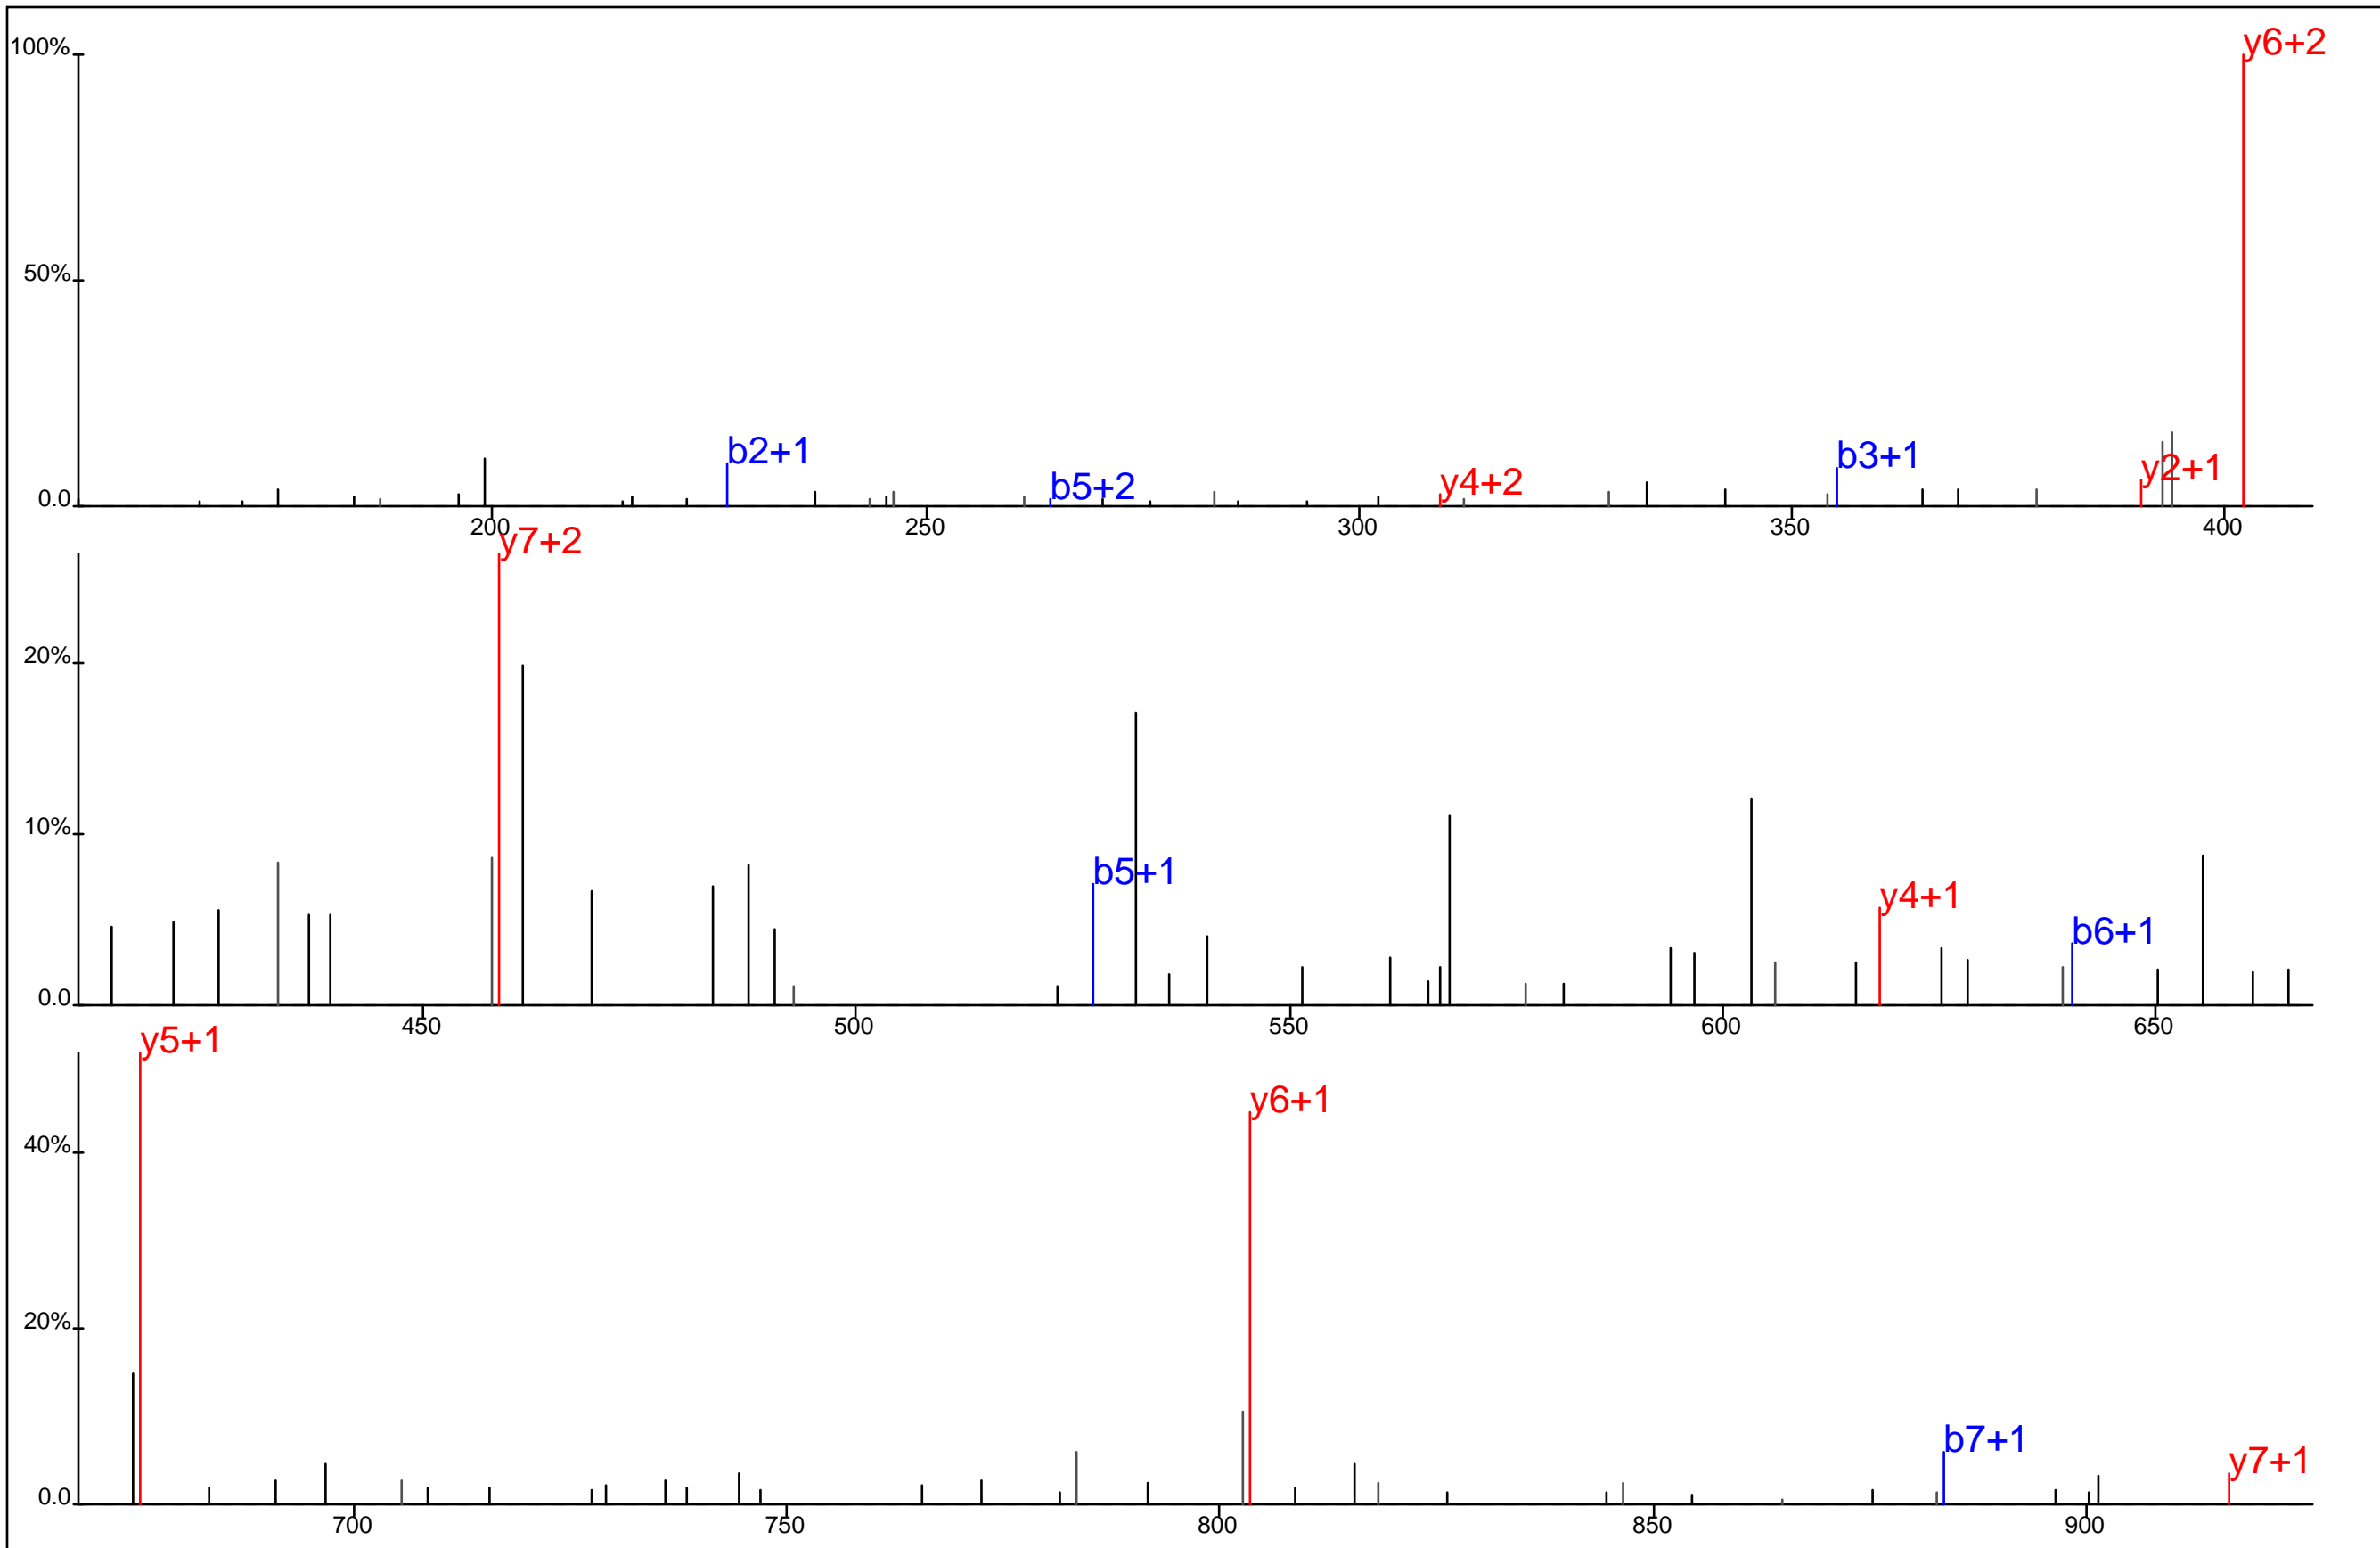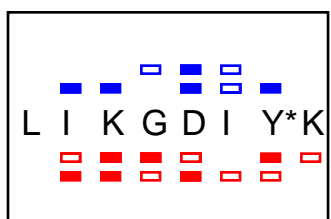

Protein Name: Kinesin family member 23  
 gi Accession: 0  
 Precursor Mass: 515.2719+2  
 Delta Mass: 1.403 ppm  
 XCorr: 21.36

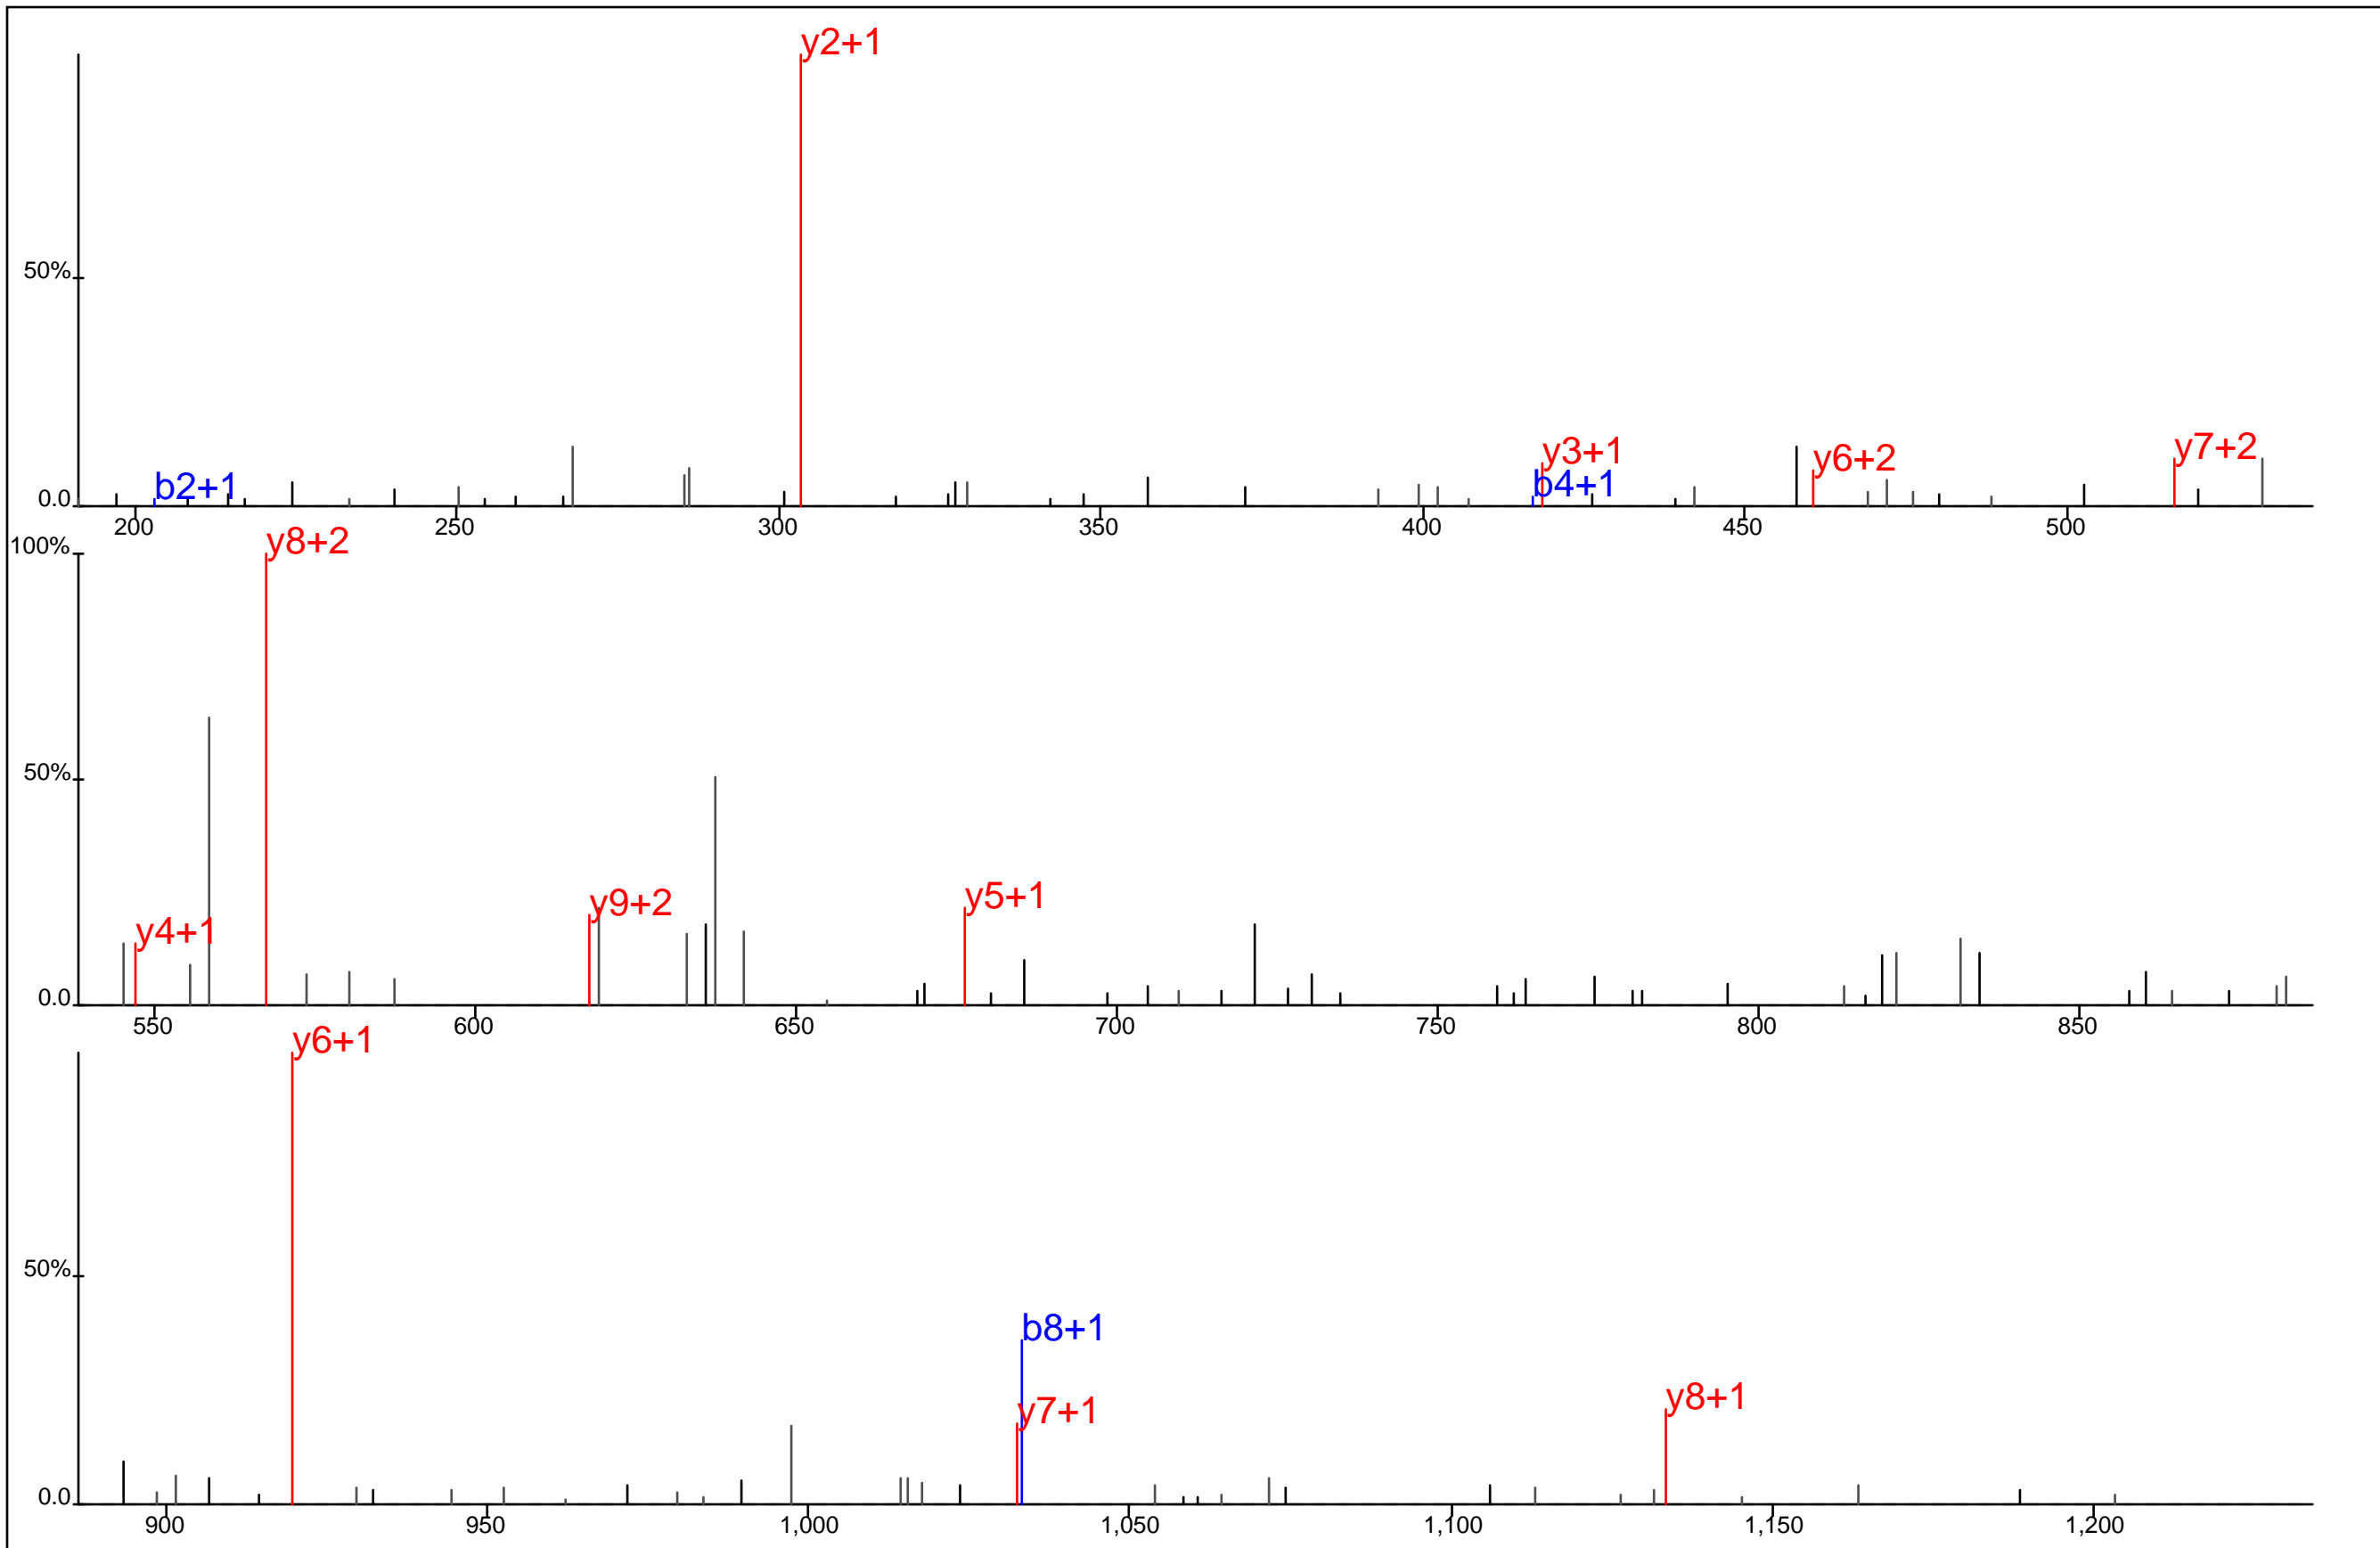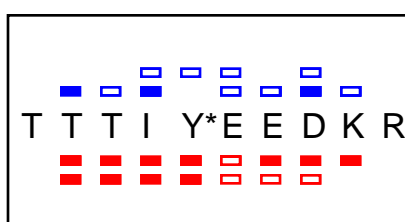

Protein Name: Kinesin family member 23  
 gi Accession: 0  
 Precursor Mass: 668.2945+2  
 Delta Mass: 0.792 ppm  
 XCorr: 40.93



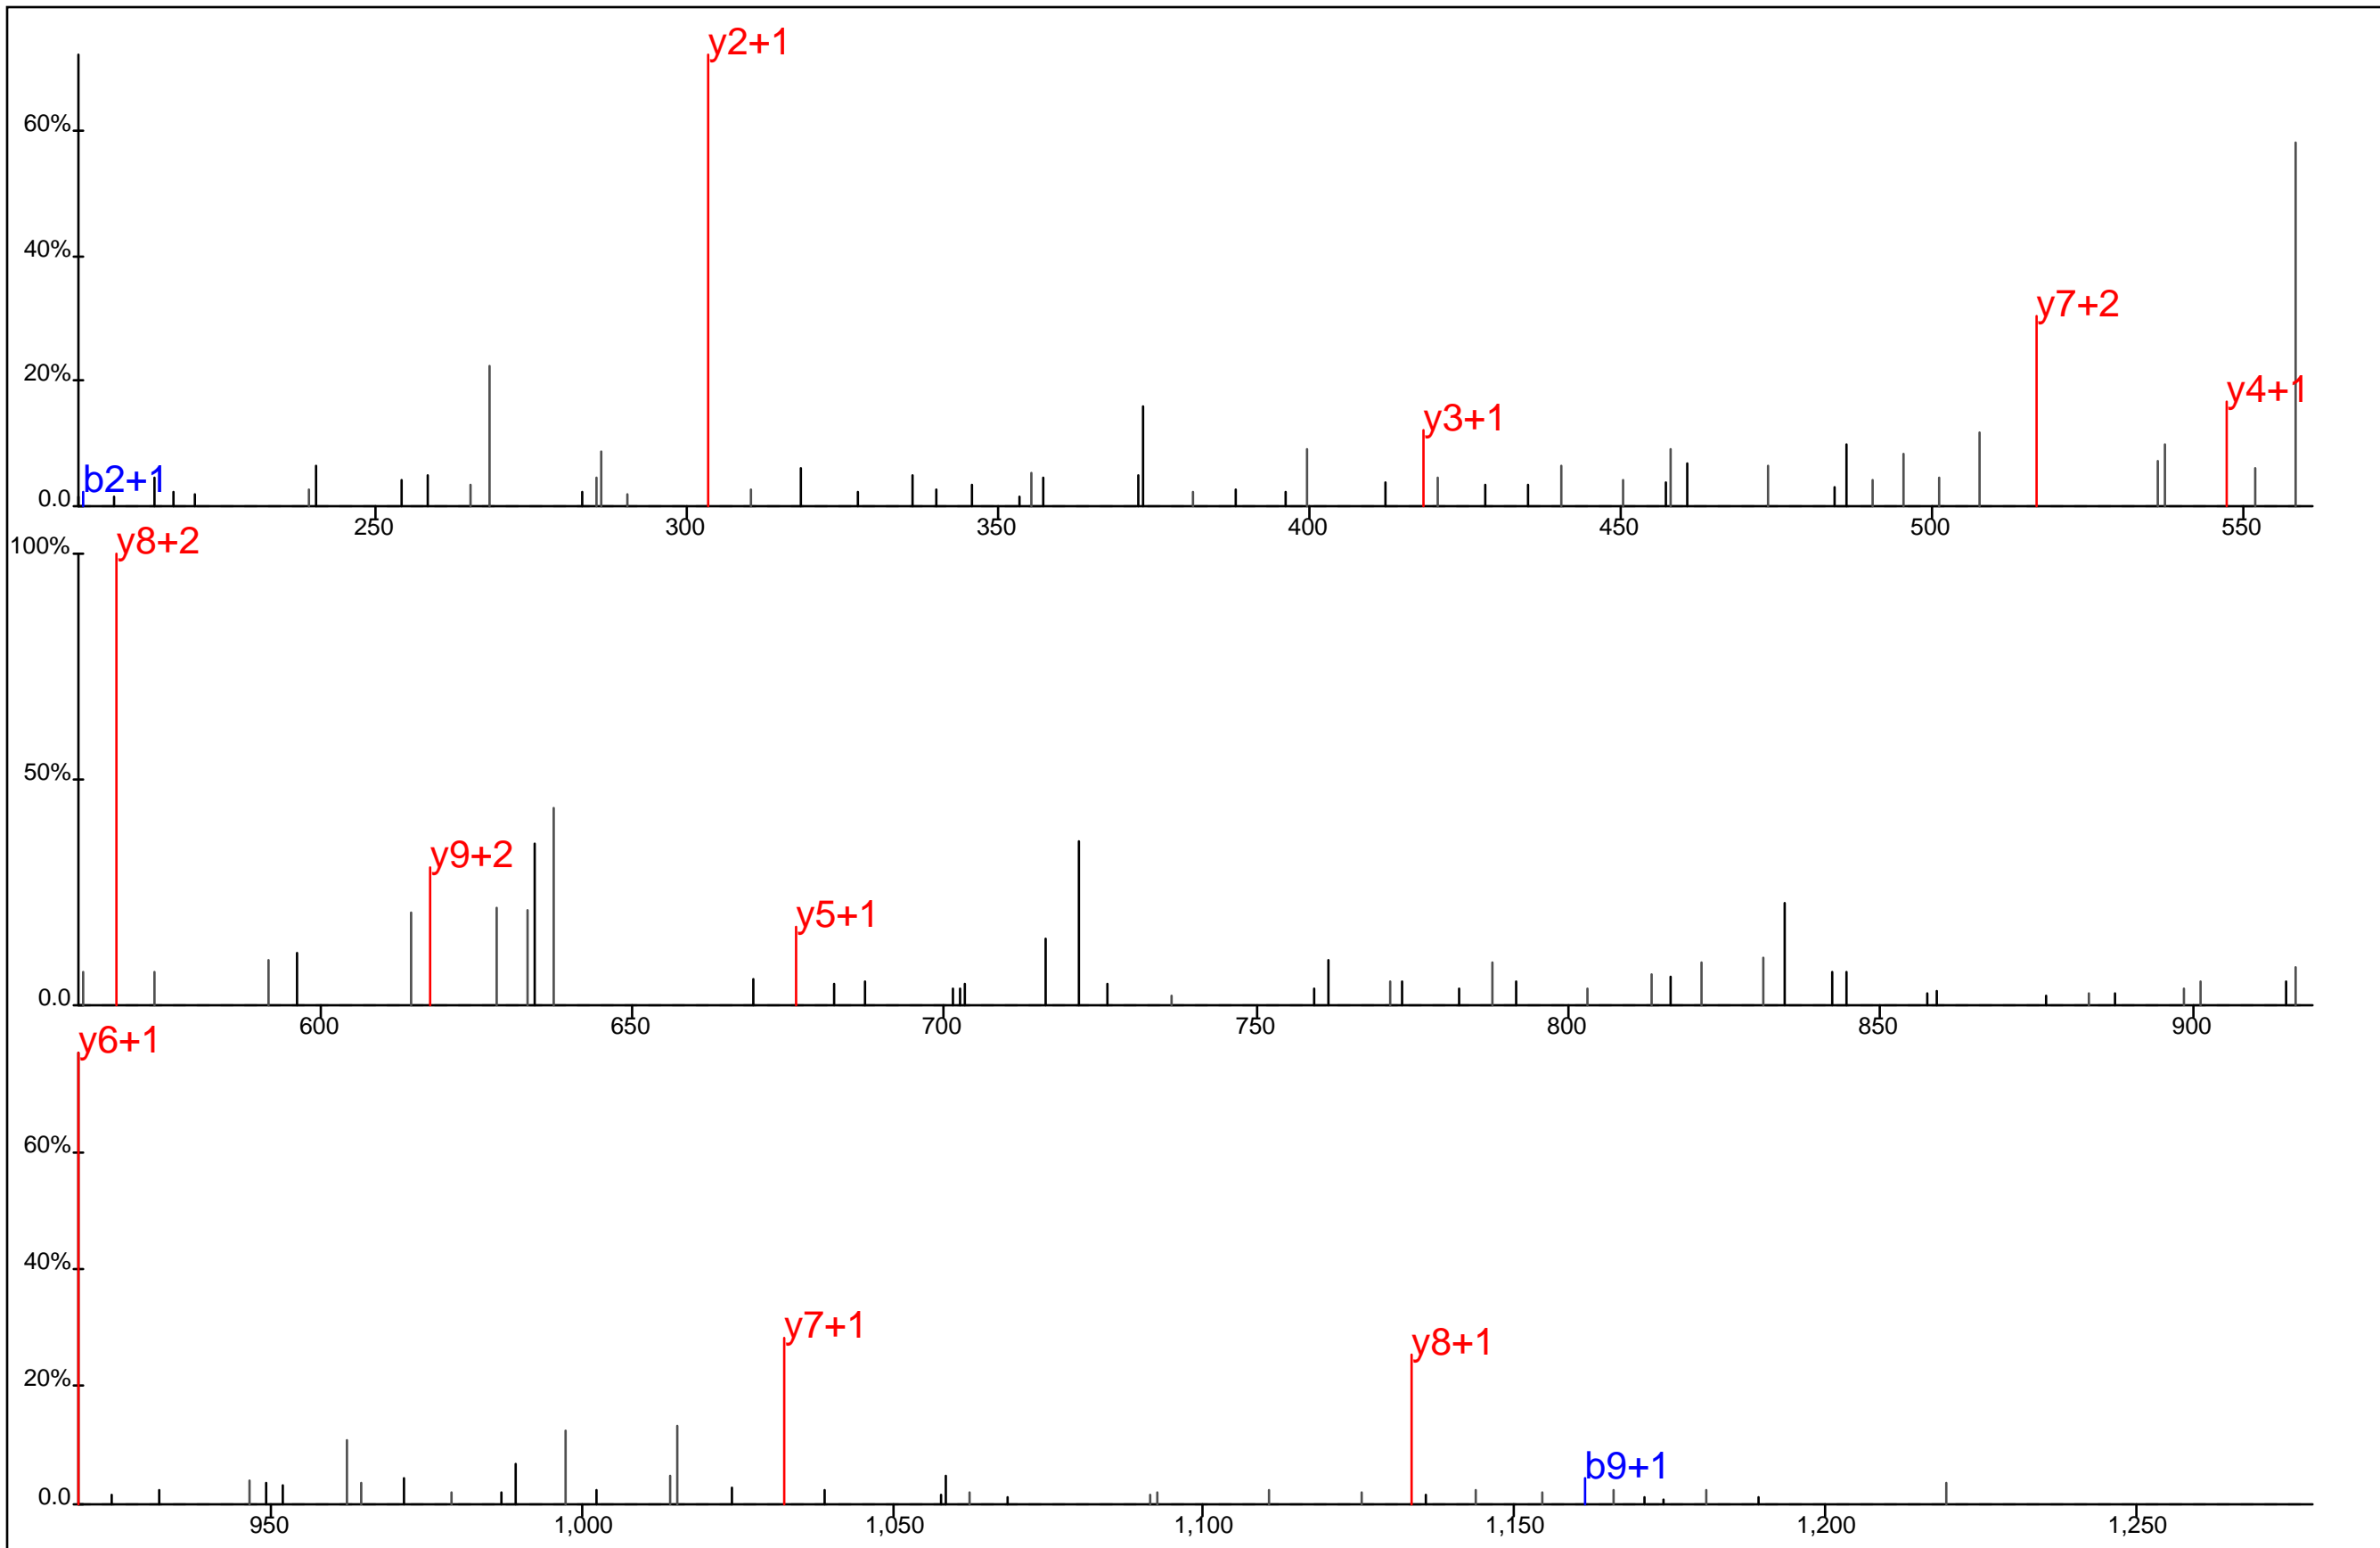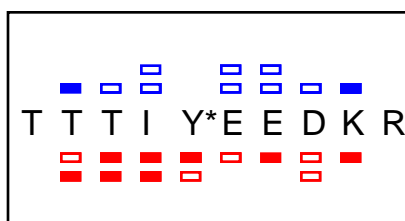

Protein Name: Kinesin family member 23  
 gi Accession: 0  
 Precursor Mass: 668.2941+2  
 Delta Mass: 1.342 ppm  
 XCorr: 24.4

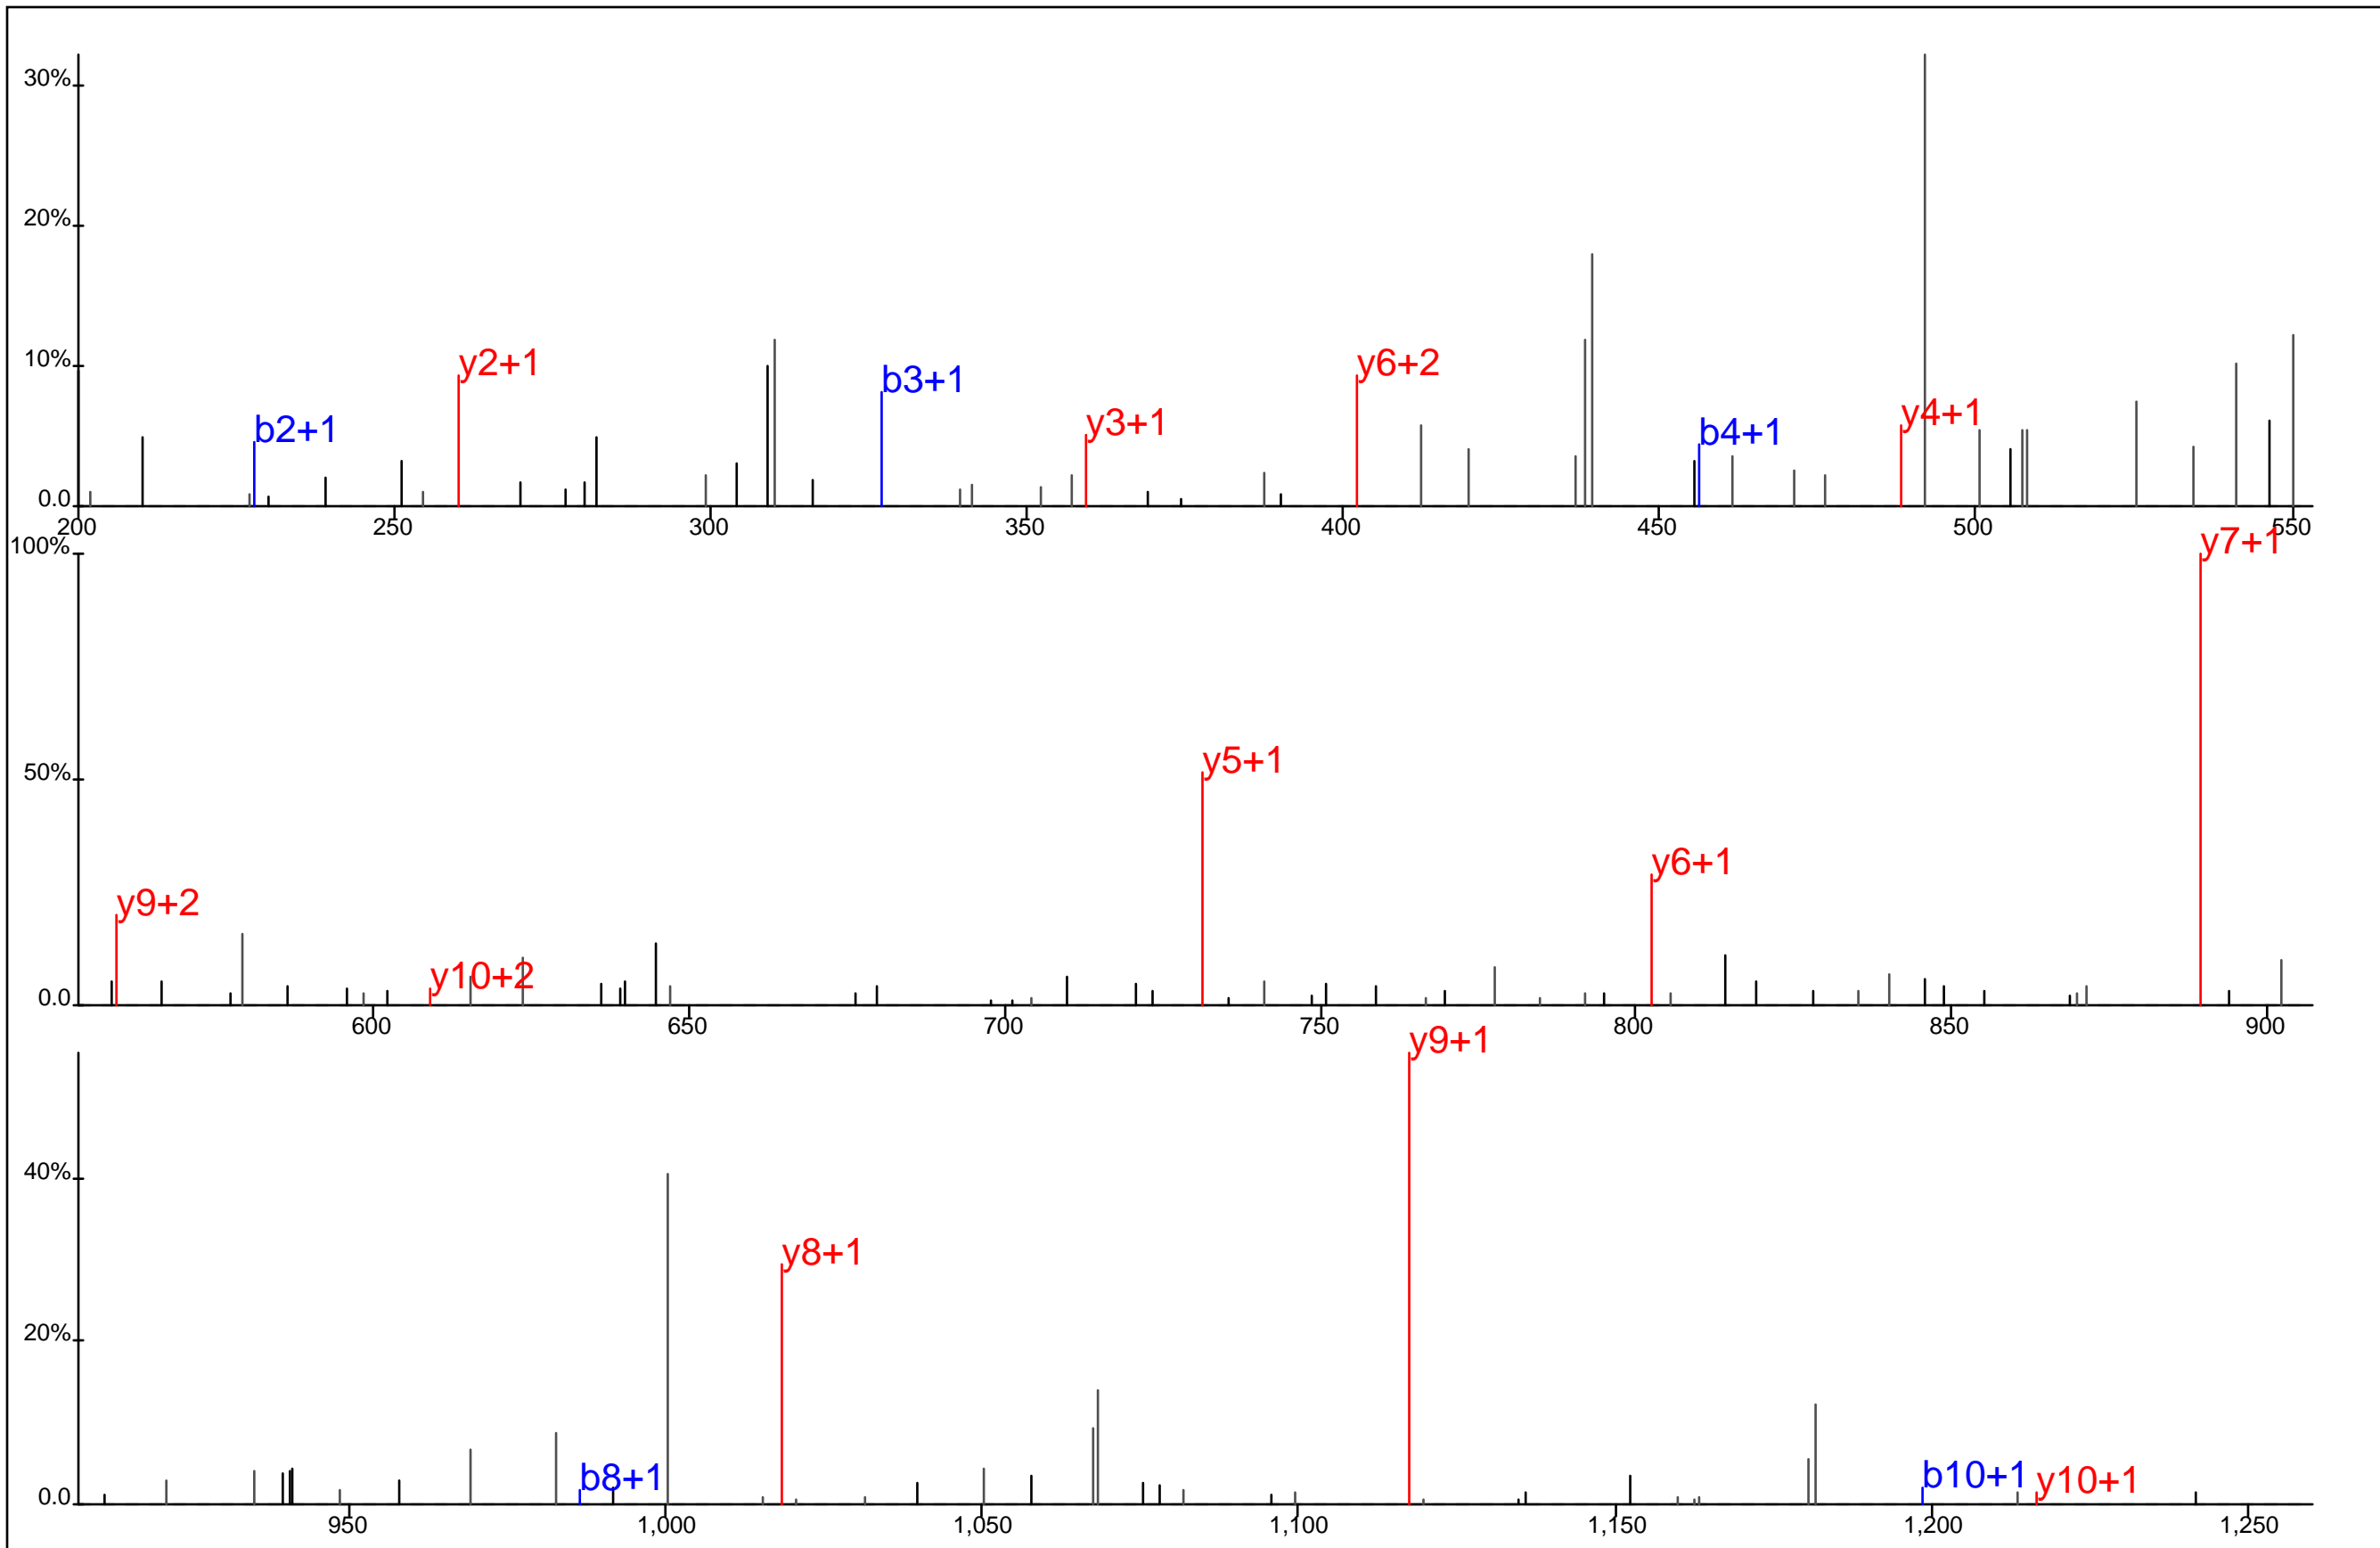

■ ■ ■ □ □ ■ □ □ ■  
 Q V V E S A Y\* E V I K  
■ ■ ■ ■ ■ ■ ■ ■ ■

Protein Name: Lactate dehydrogenase A  
 gi Accession: 0  
 Precursor Mass: 672.8266+2  
 Delta Mass: 0.944 ppm  
 XCorr: 39.85

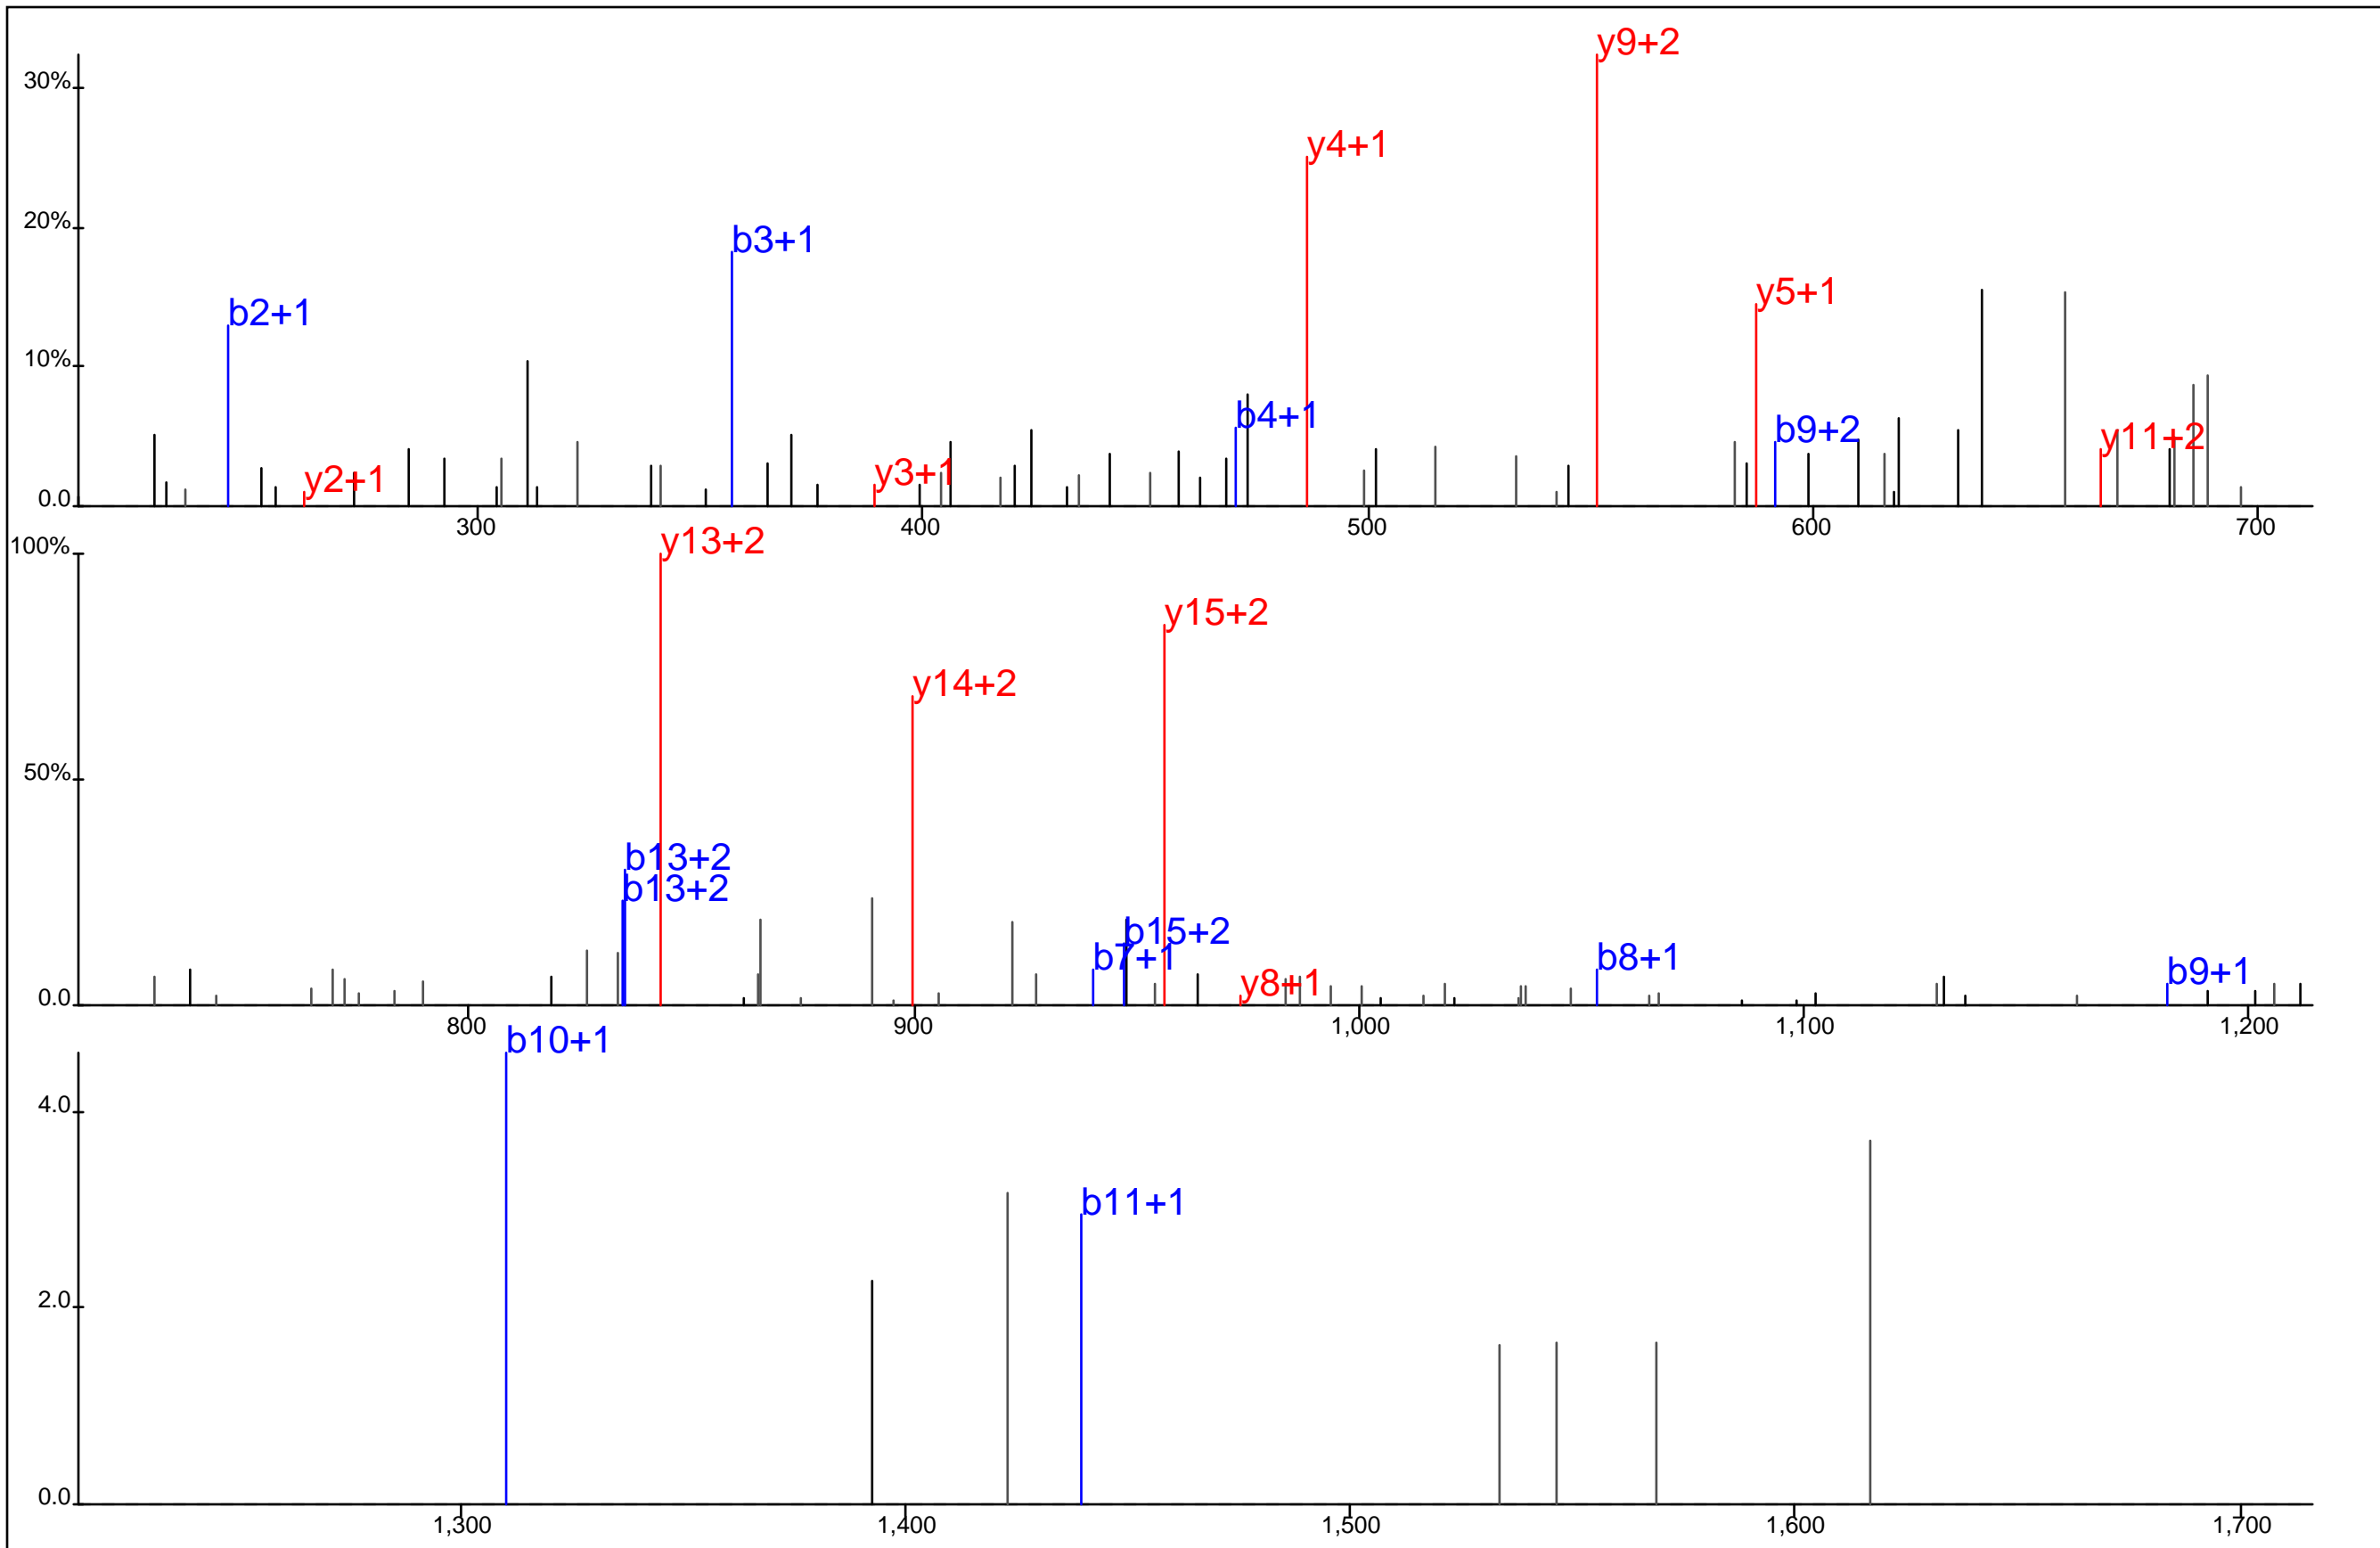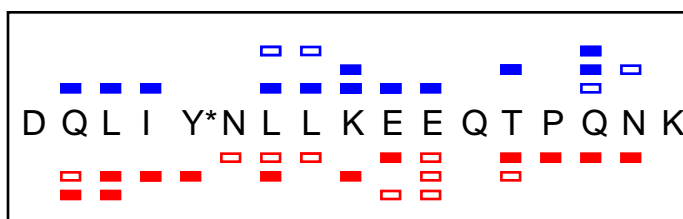

Protein Name: Lactate dehydrogenase A  
 gi Accession: 0  
 Precursor Mass: 718.6879+3  
 Delta Mass: 0.667 ppm  
 XCorr: 25.74

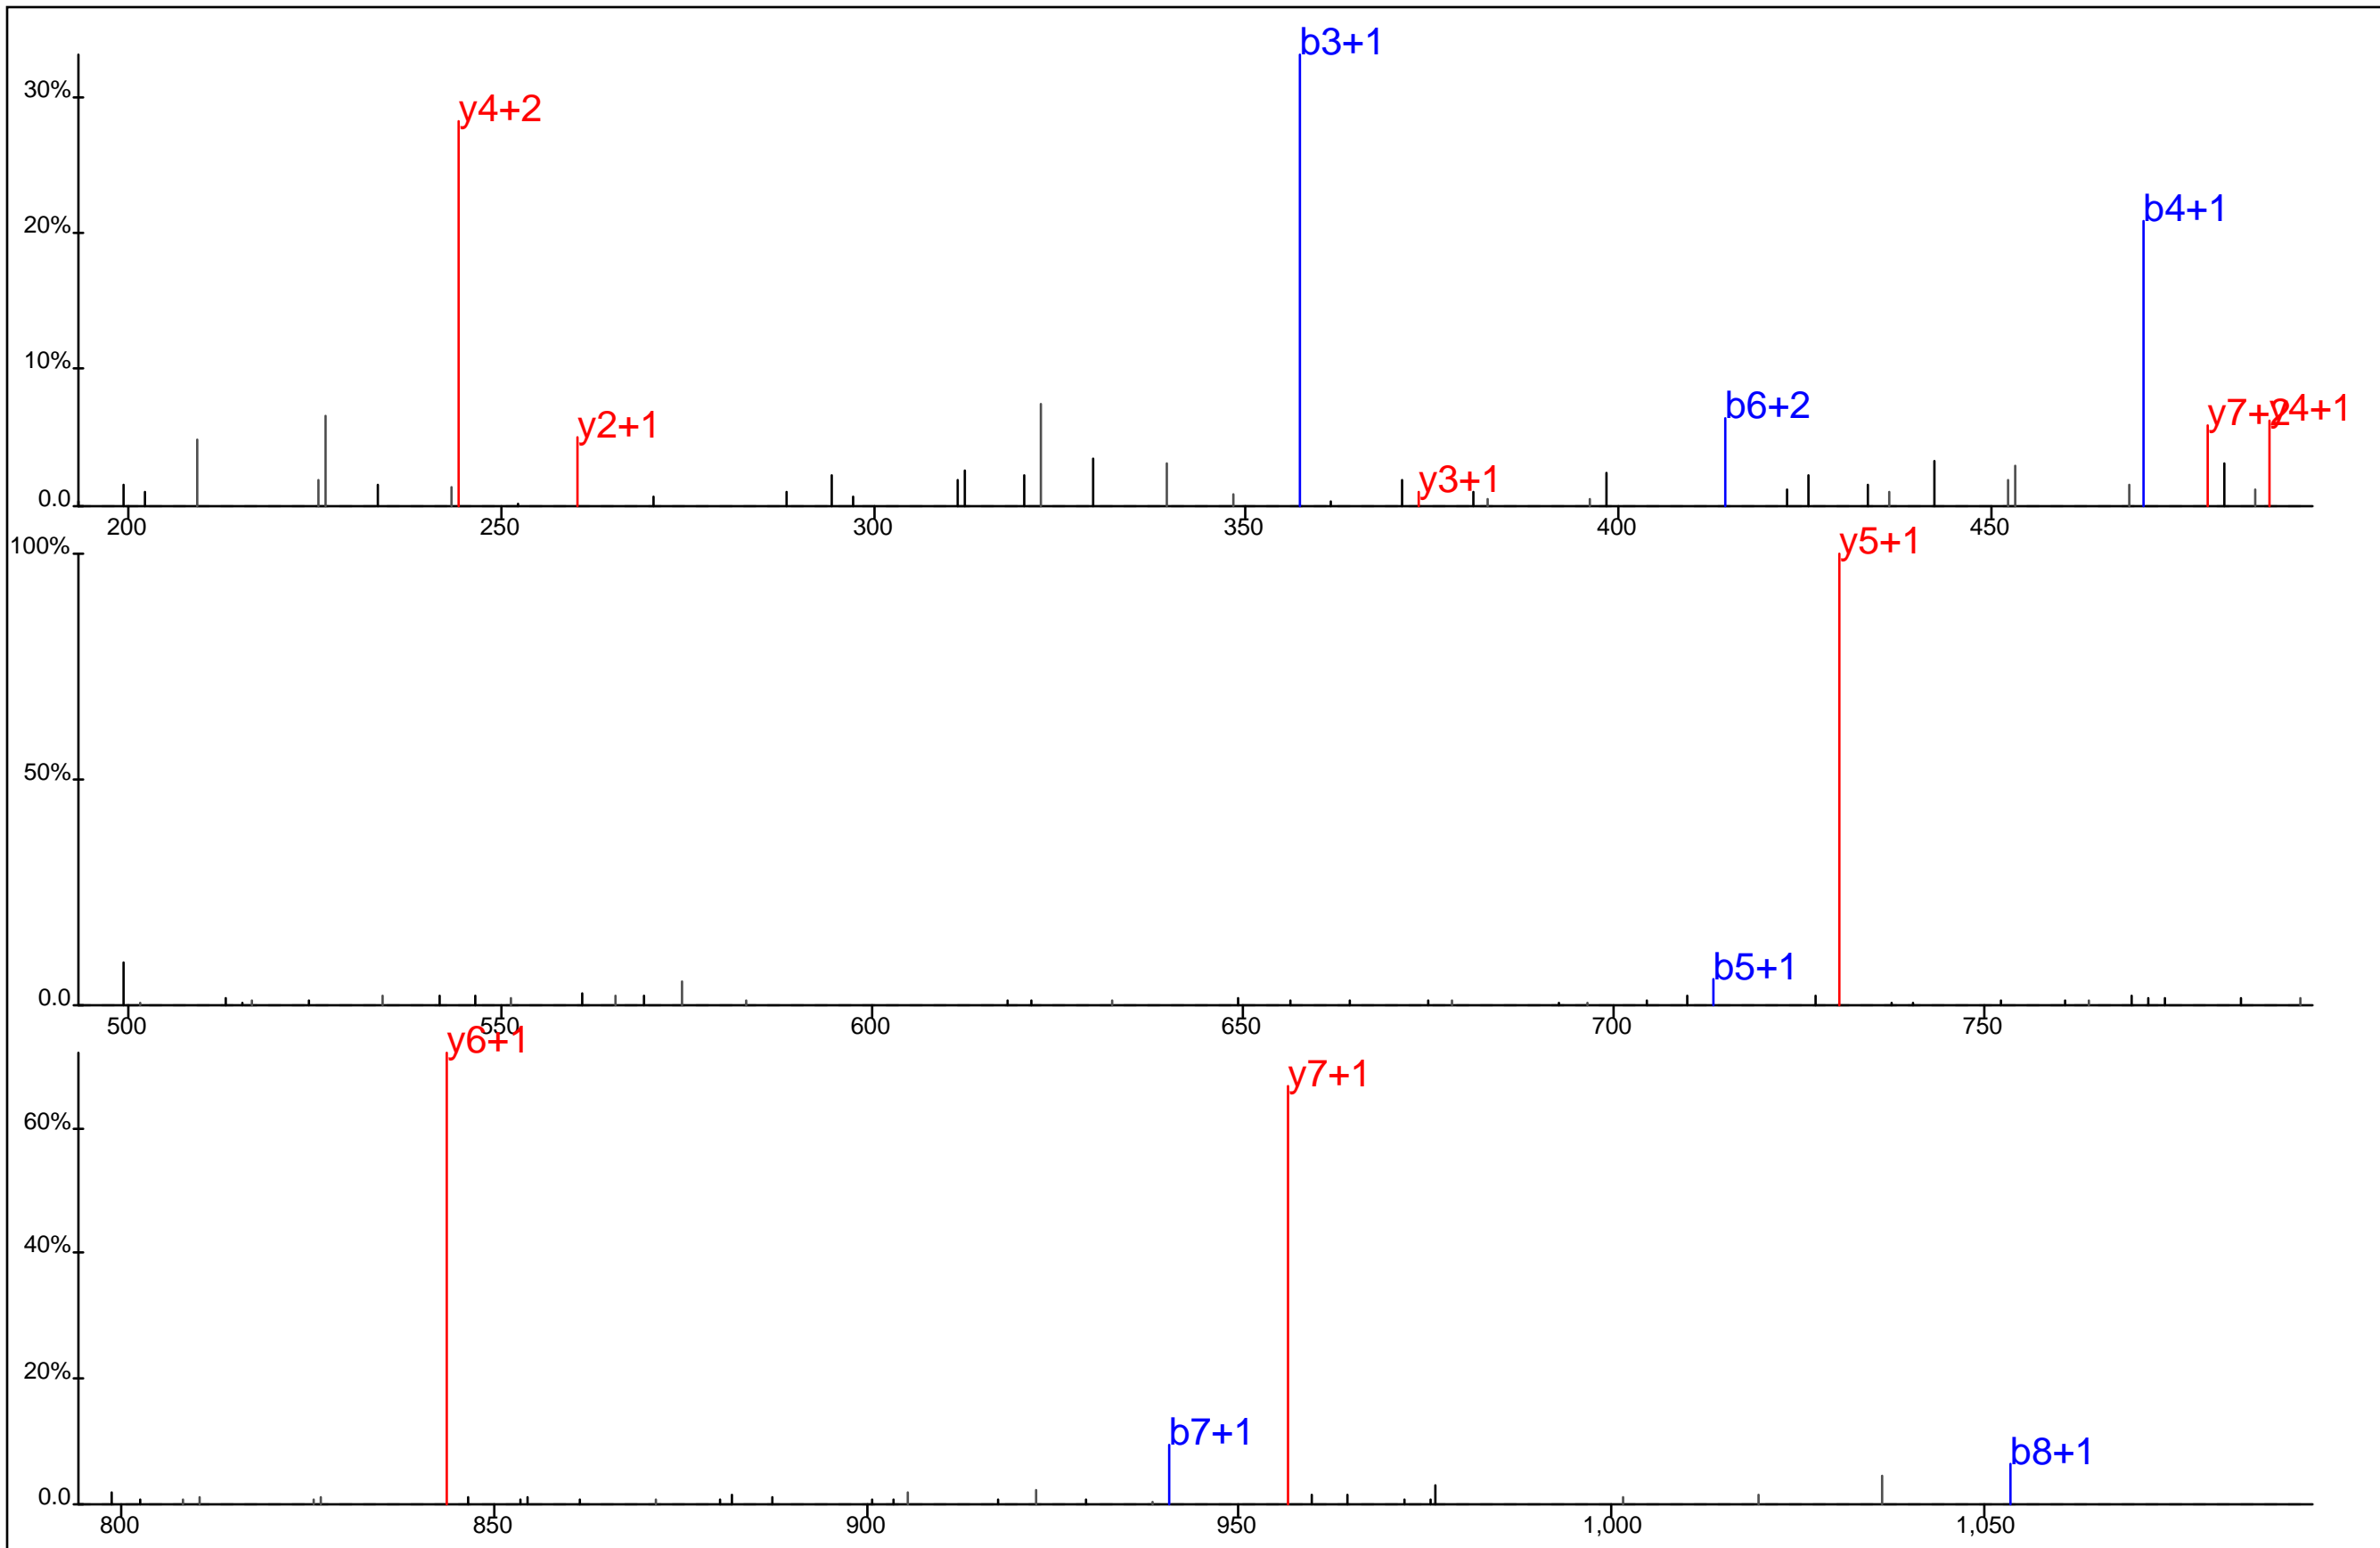

D Q L I Y\* N L L K

Protein Name: Lactate dehydrogenase A  
 gi Accession: 0  
 Precursor Mass: 600.3071+2  
 Delta Mass: 0.227 ppm  
 XCorr: 42.43

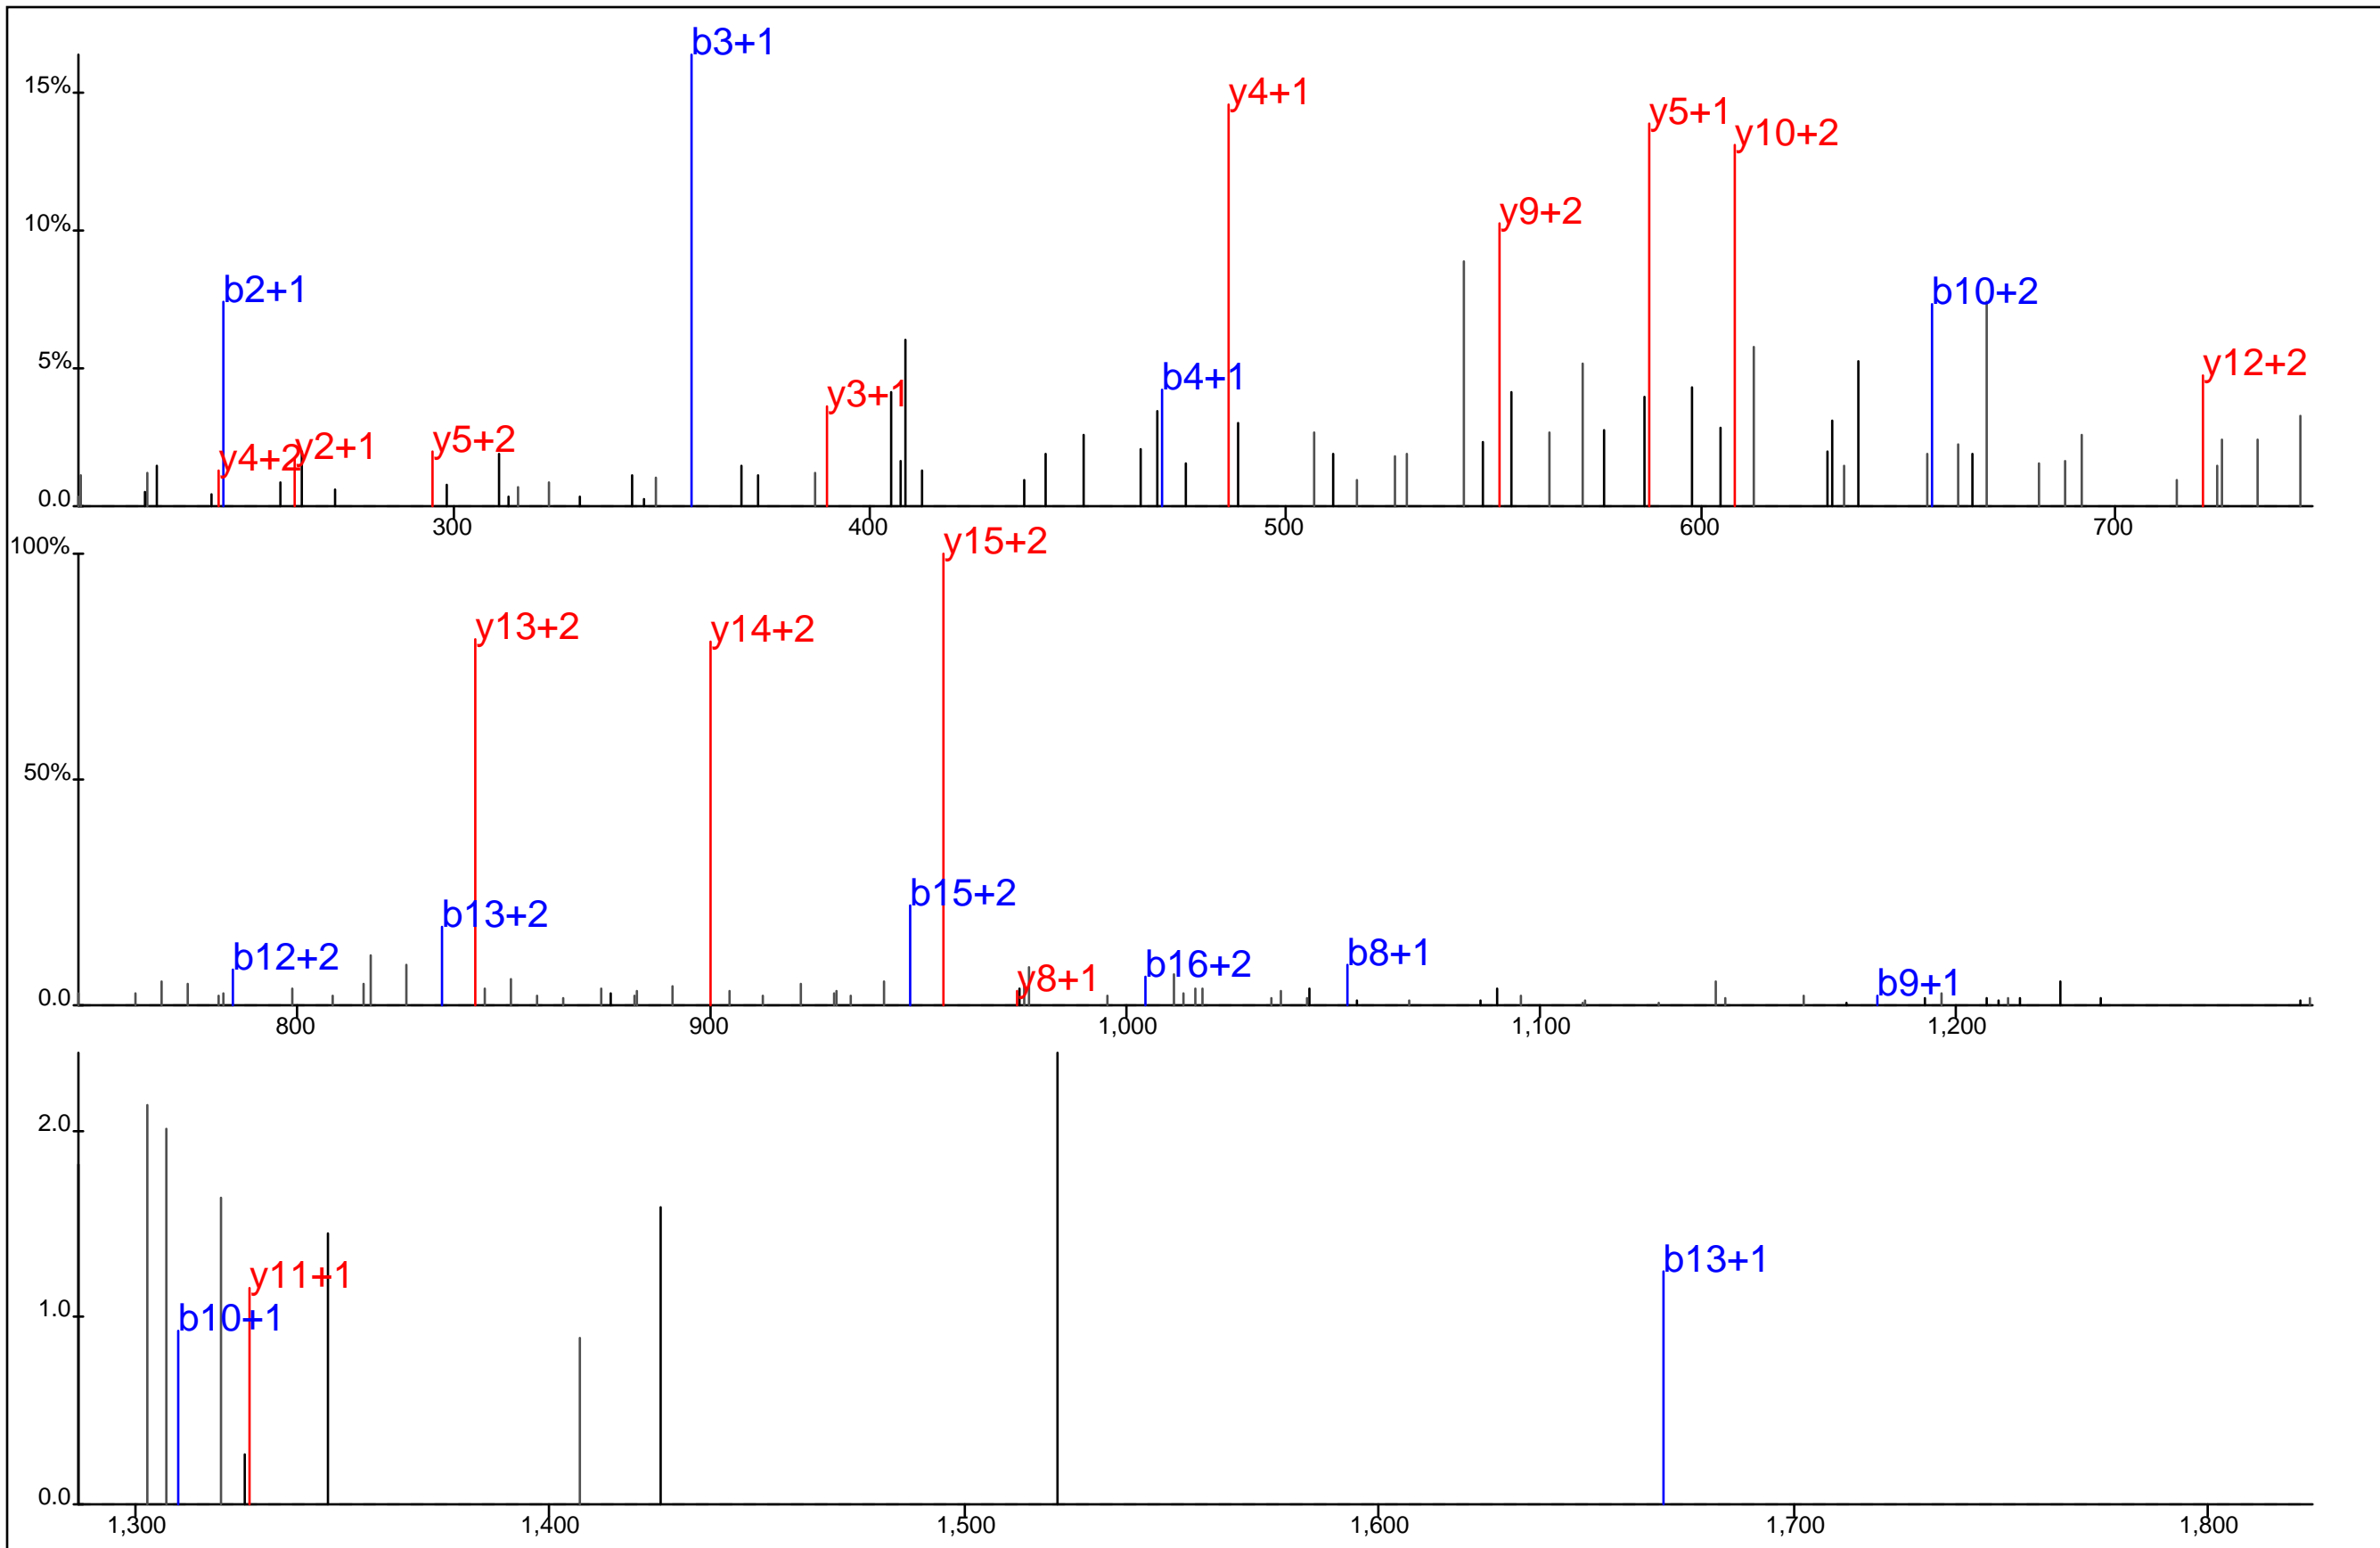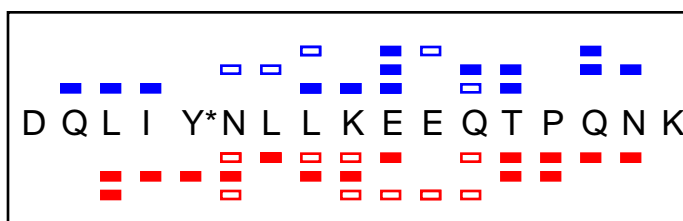

Protein Name: Lactate dehydrogenase A  
 gi Accession: 0  
 Precursor Mass: 718.6841+3  
 Delta Mass: 4.688 ppm  
 XCorr: 43.26

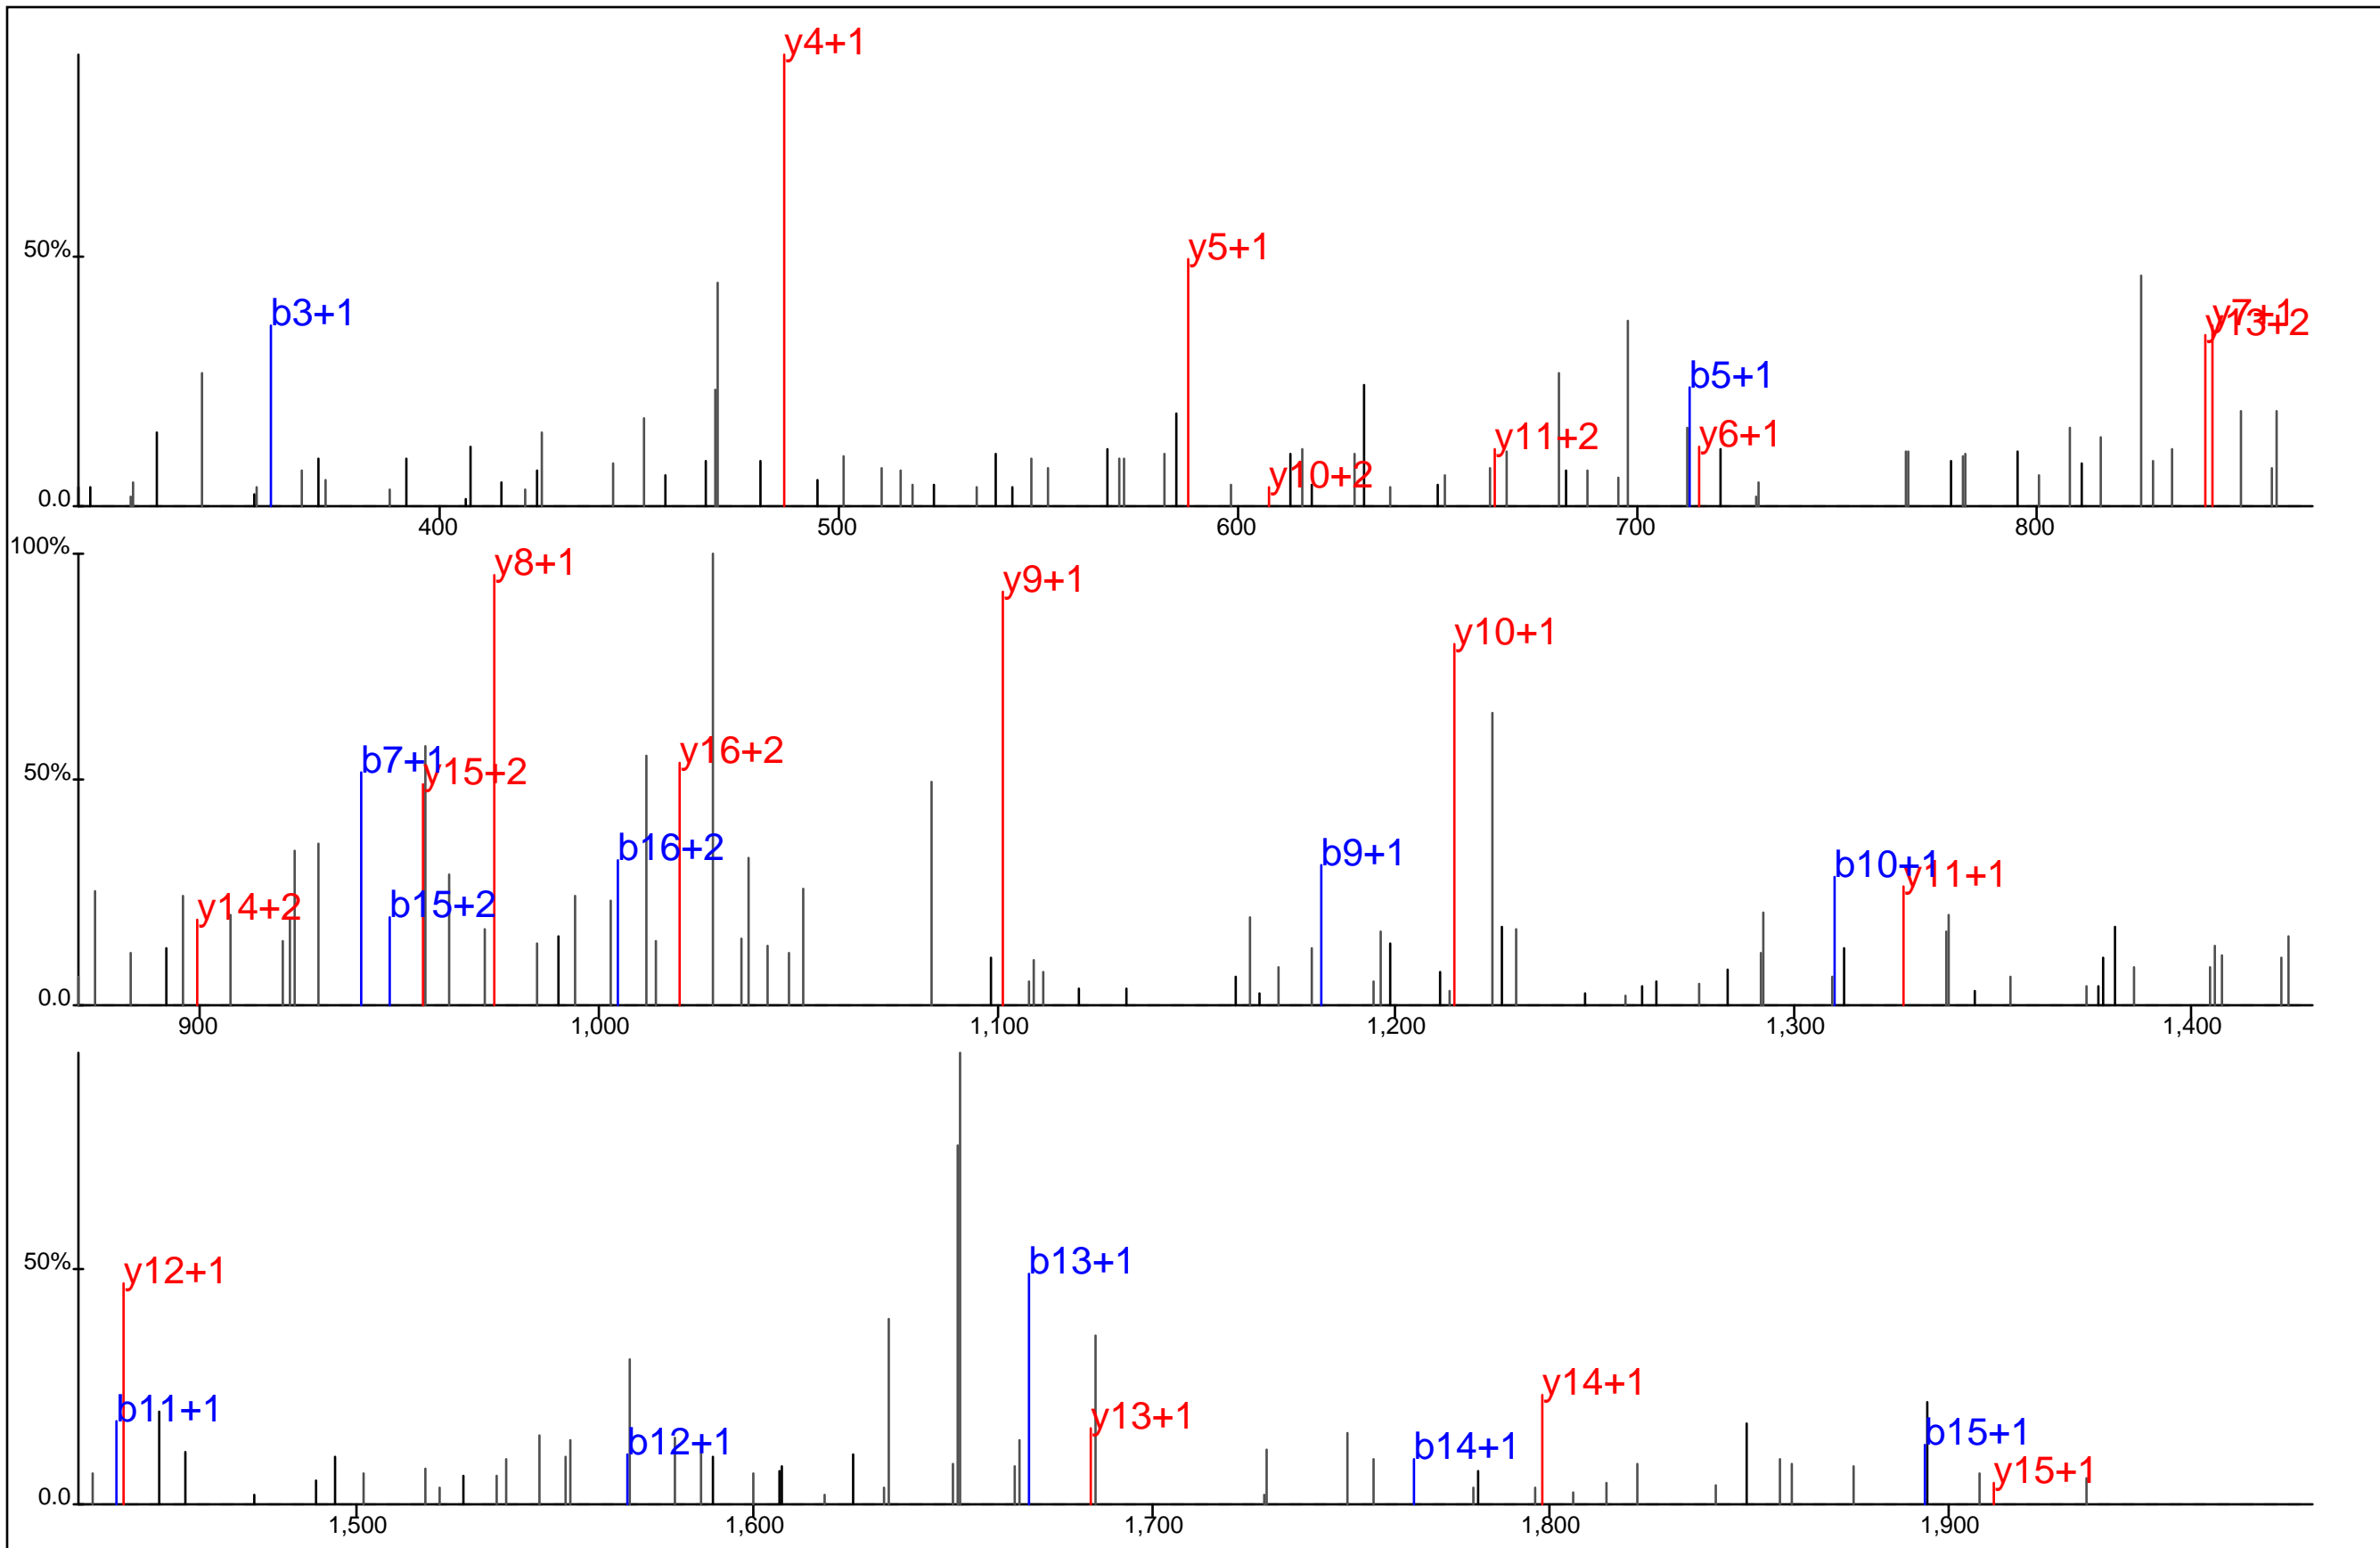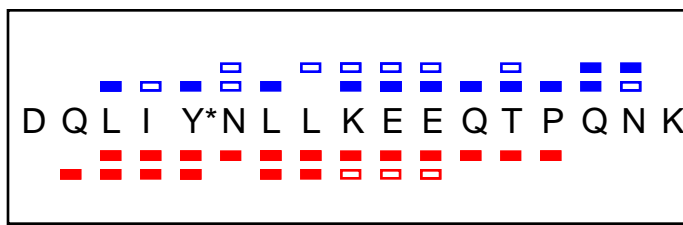

Protein Name: Lactate dehydrogenase A  
 gi Accession: 0  
 Precursor Mass: 1,077.5260+2  
 Delta Mass: 1.423 ppm  
 XCorr: 60.39

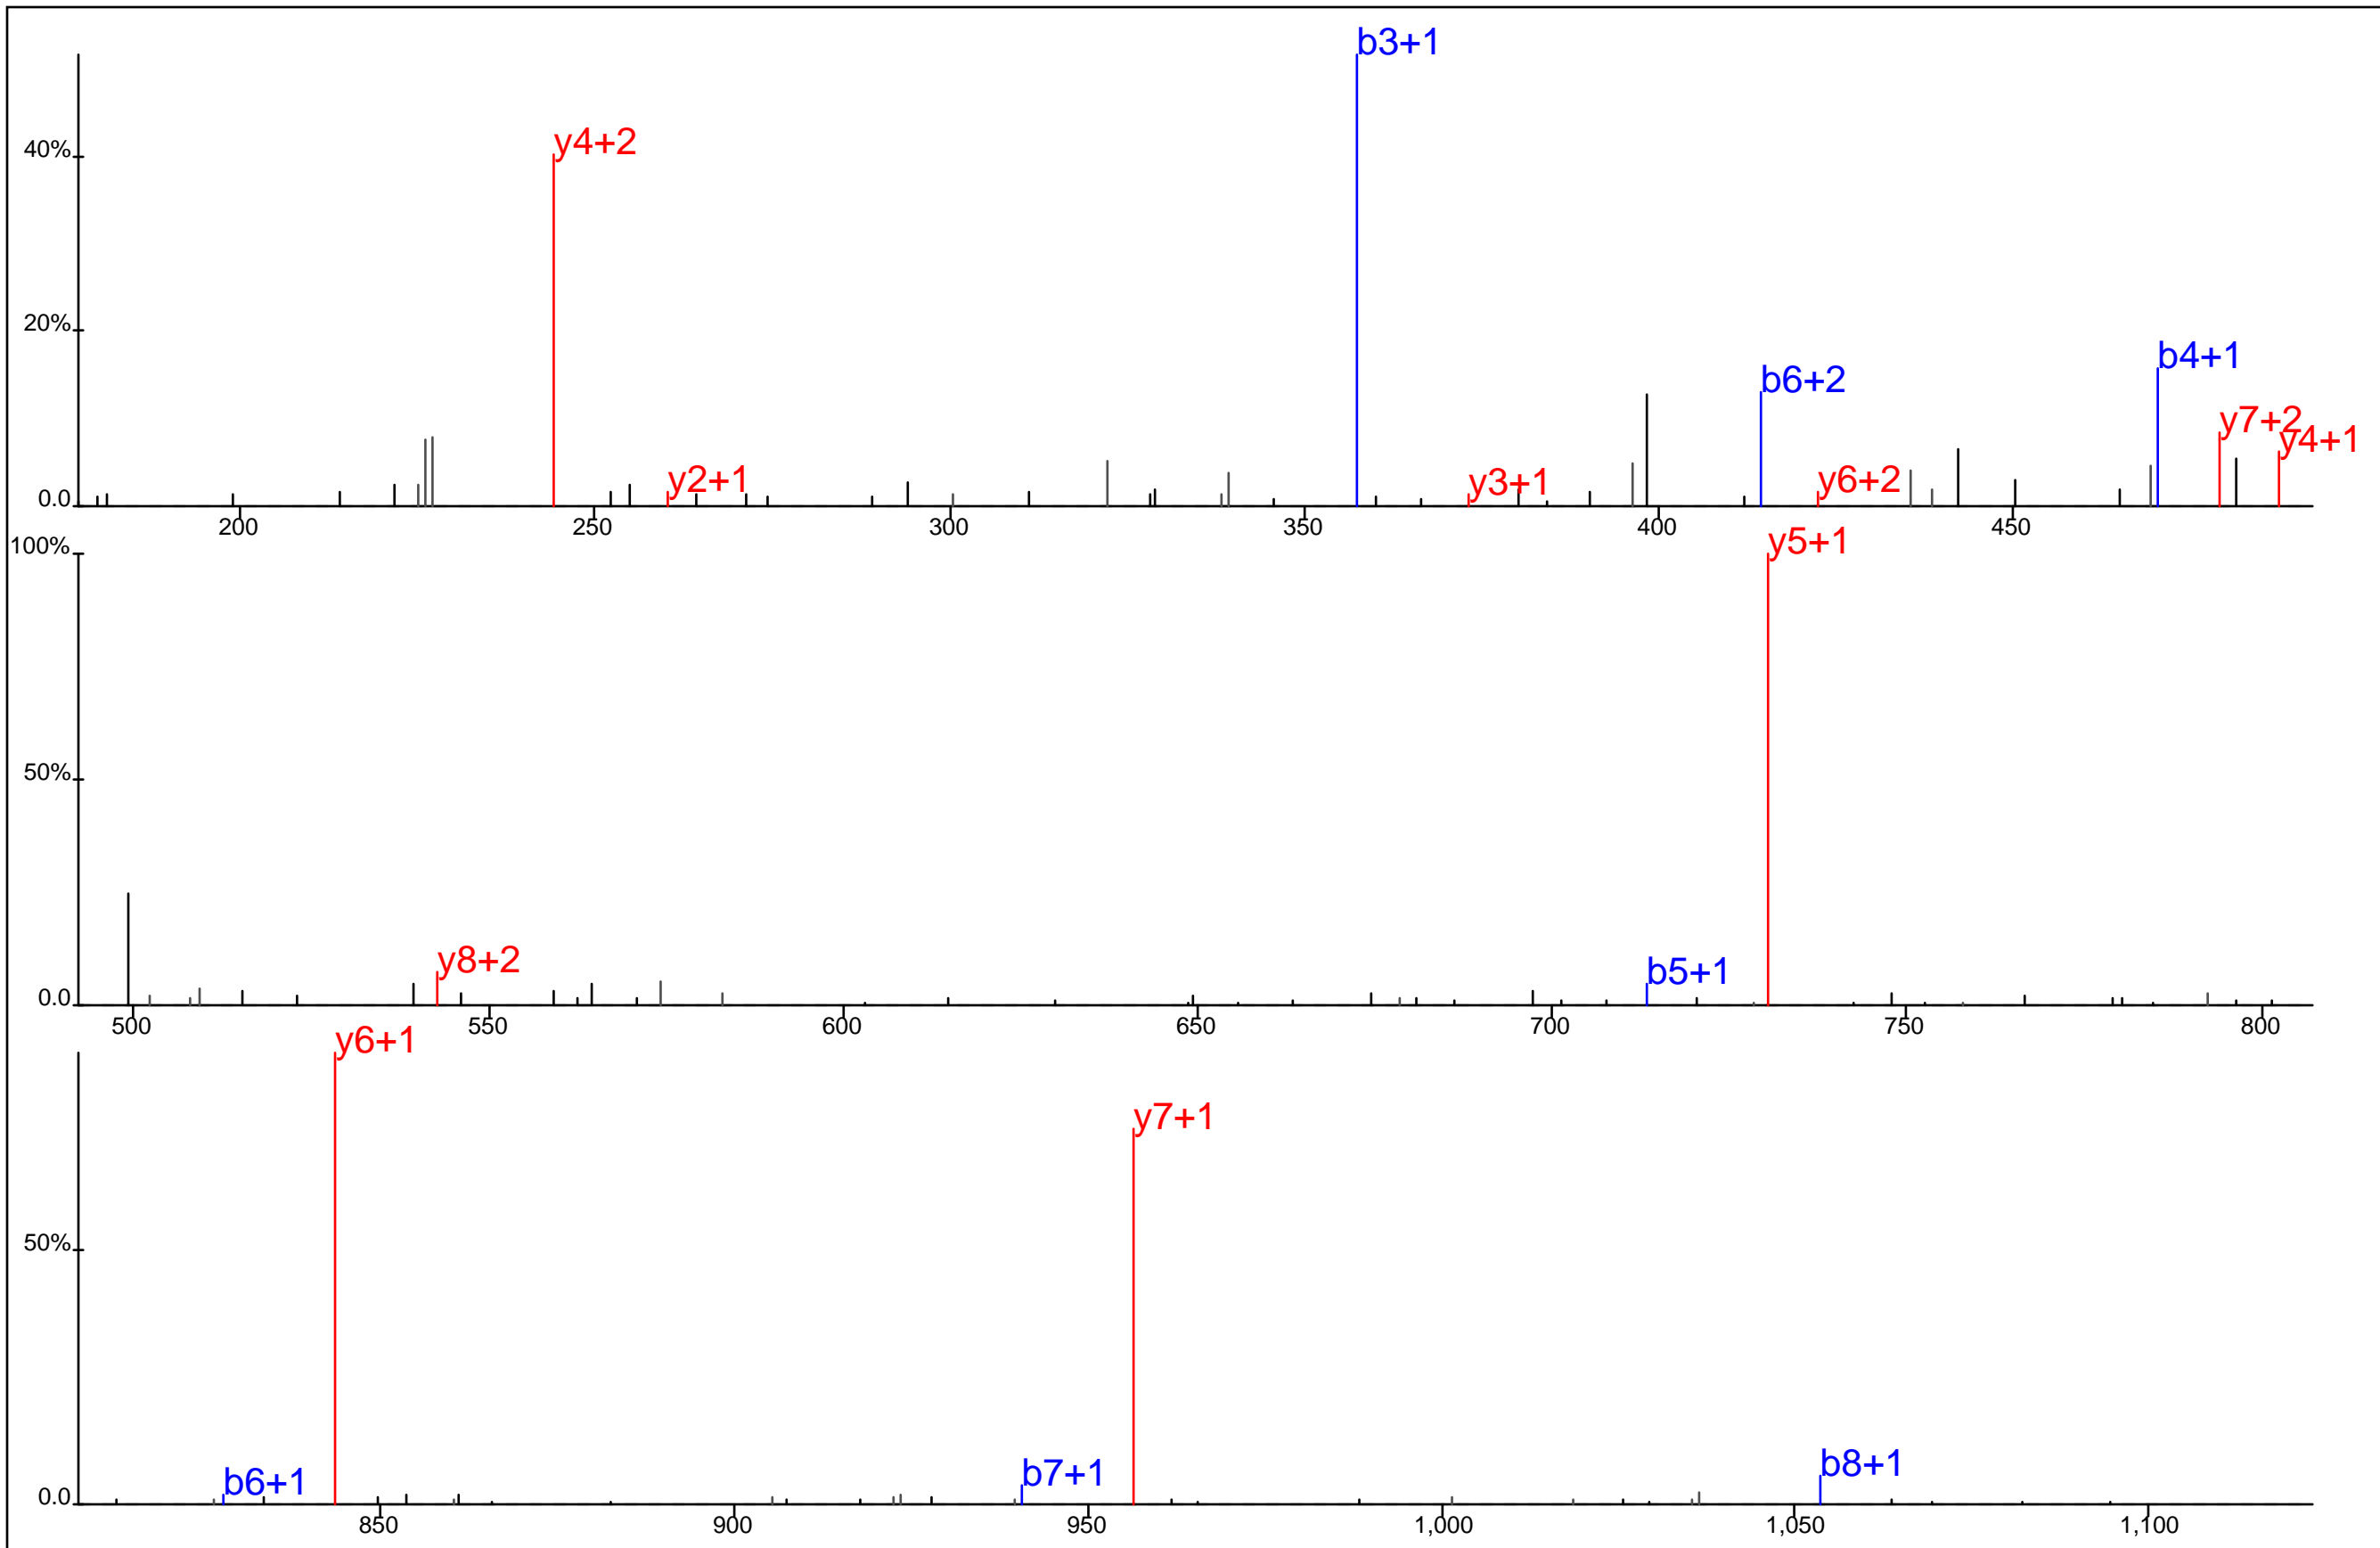

D Q L I Y\* N L L K

Protein Name: Lactate dehydrogenase A  
 gi Accession: 0  
 Precursor Mass: 600.3067+2  
 Delta Mass: 0.837 ppm  
 XCorr: 44.72

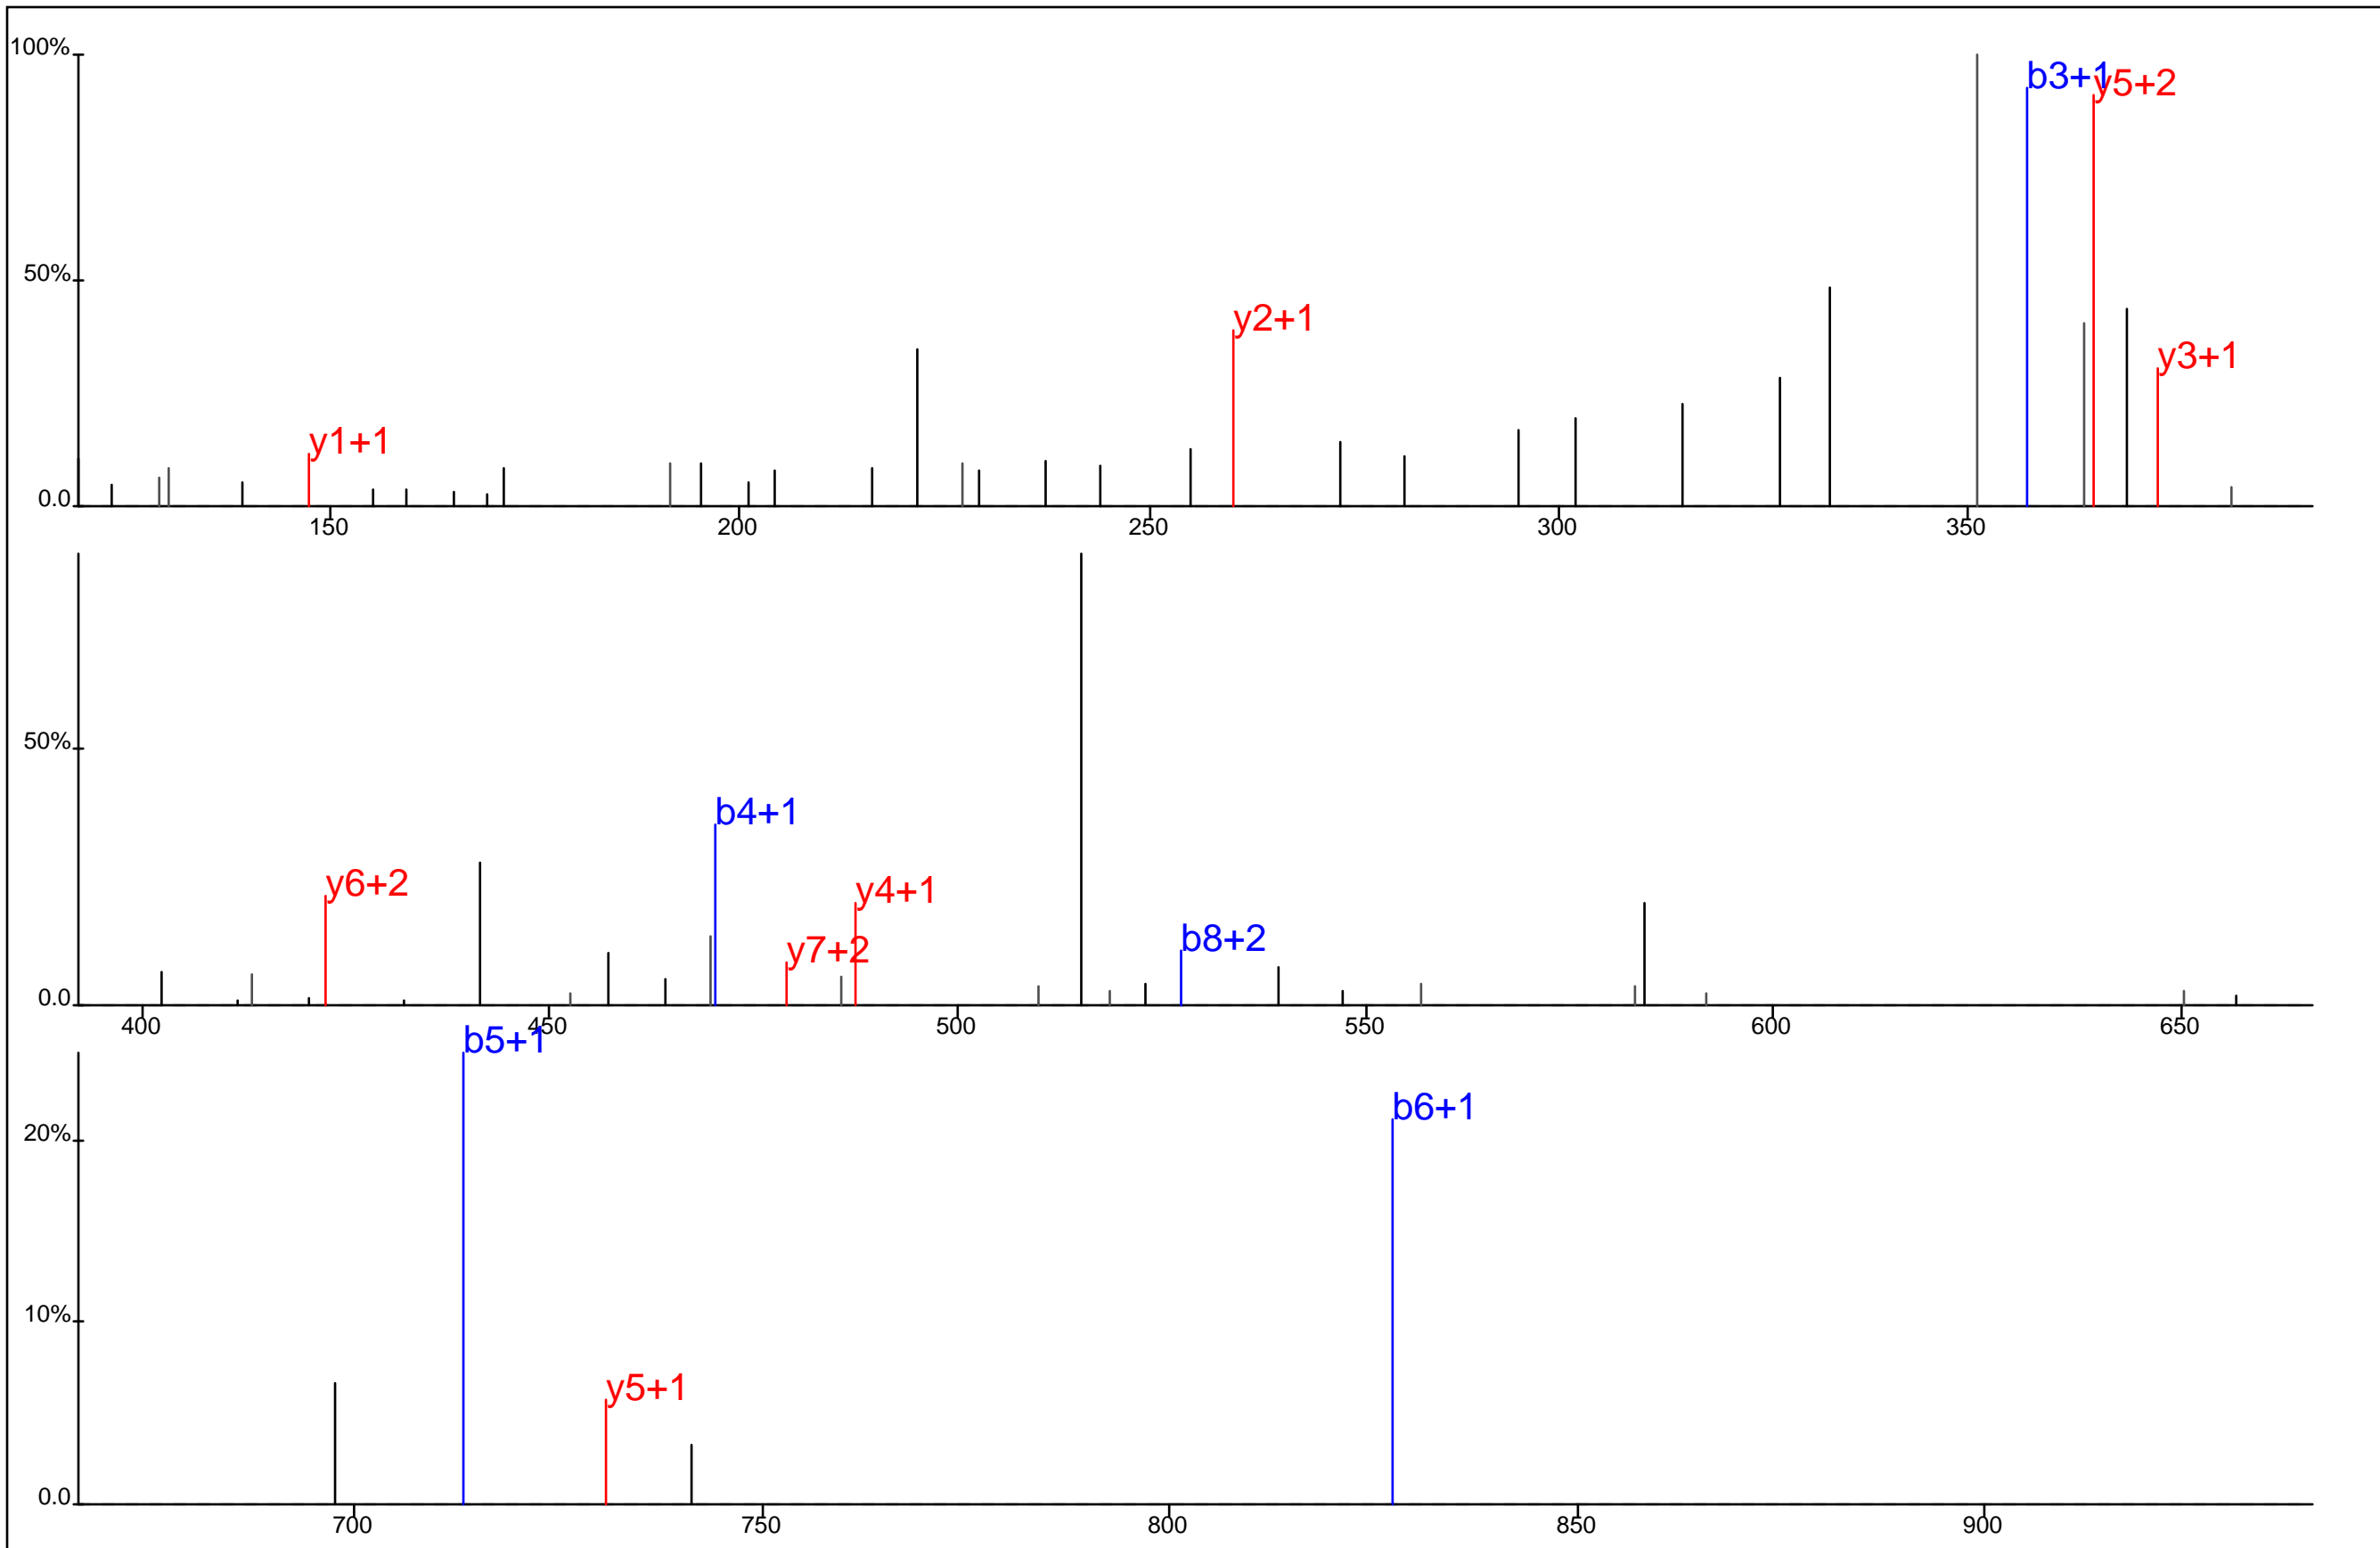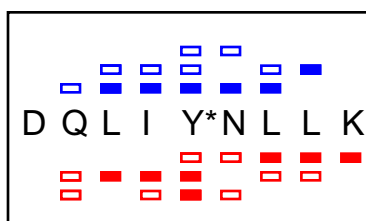

Protein Name: Lactate dehydrogenase A  
 gi Accession: 0  
 Precursor Mass: 400.5404+3  
 Delta Mass: 0.466 ppm  
 XCorr: 26.06



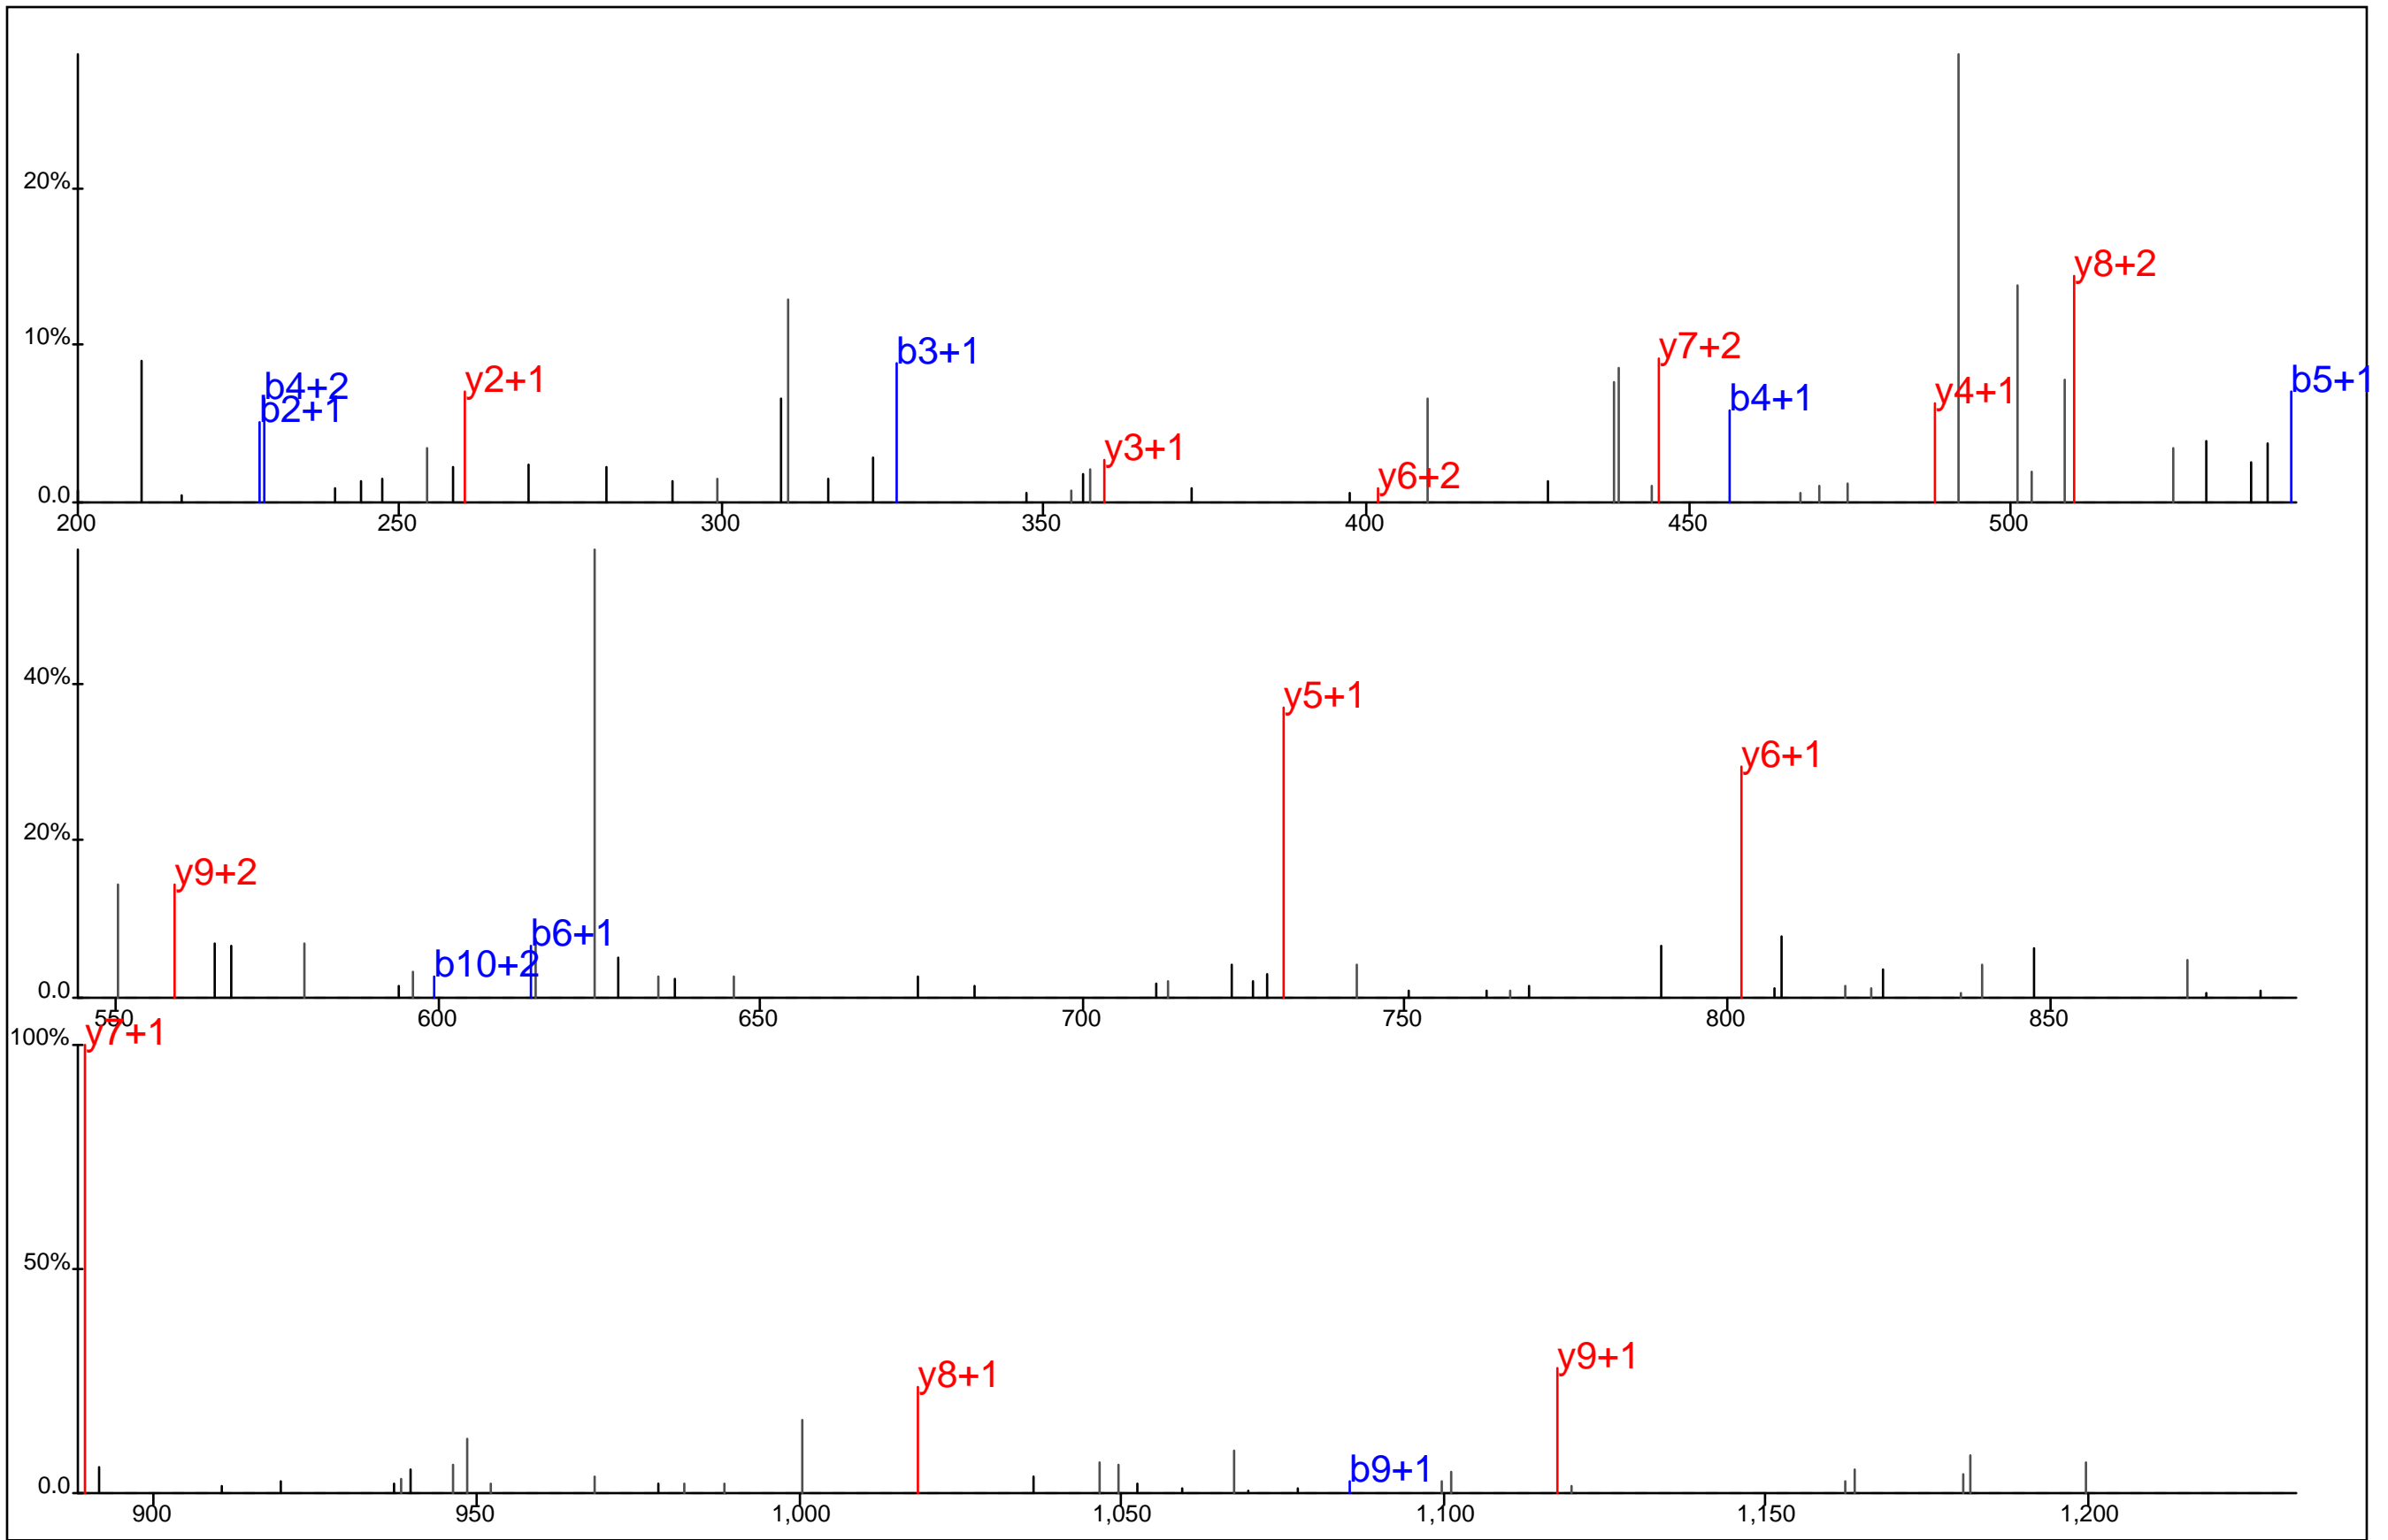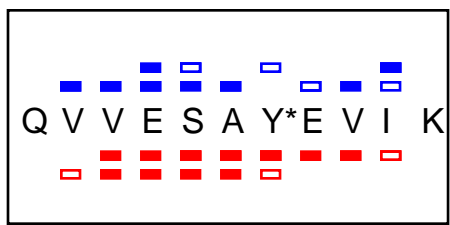

Protein Name: Lactate dehydrogenase A  
 gi Accession: 0  
 Precursor Mass: 672.8260+2  
 Delta Mass: 0.128 ppm  
 XCorr: 37.07

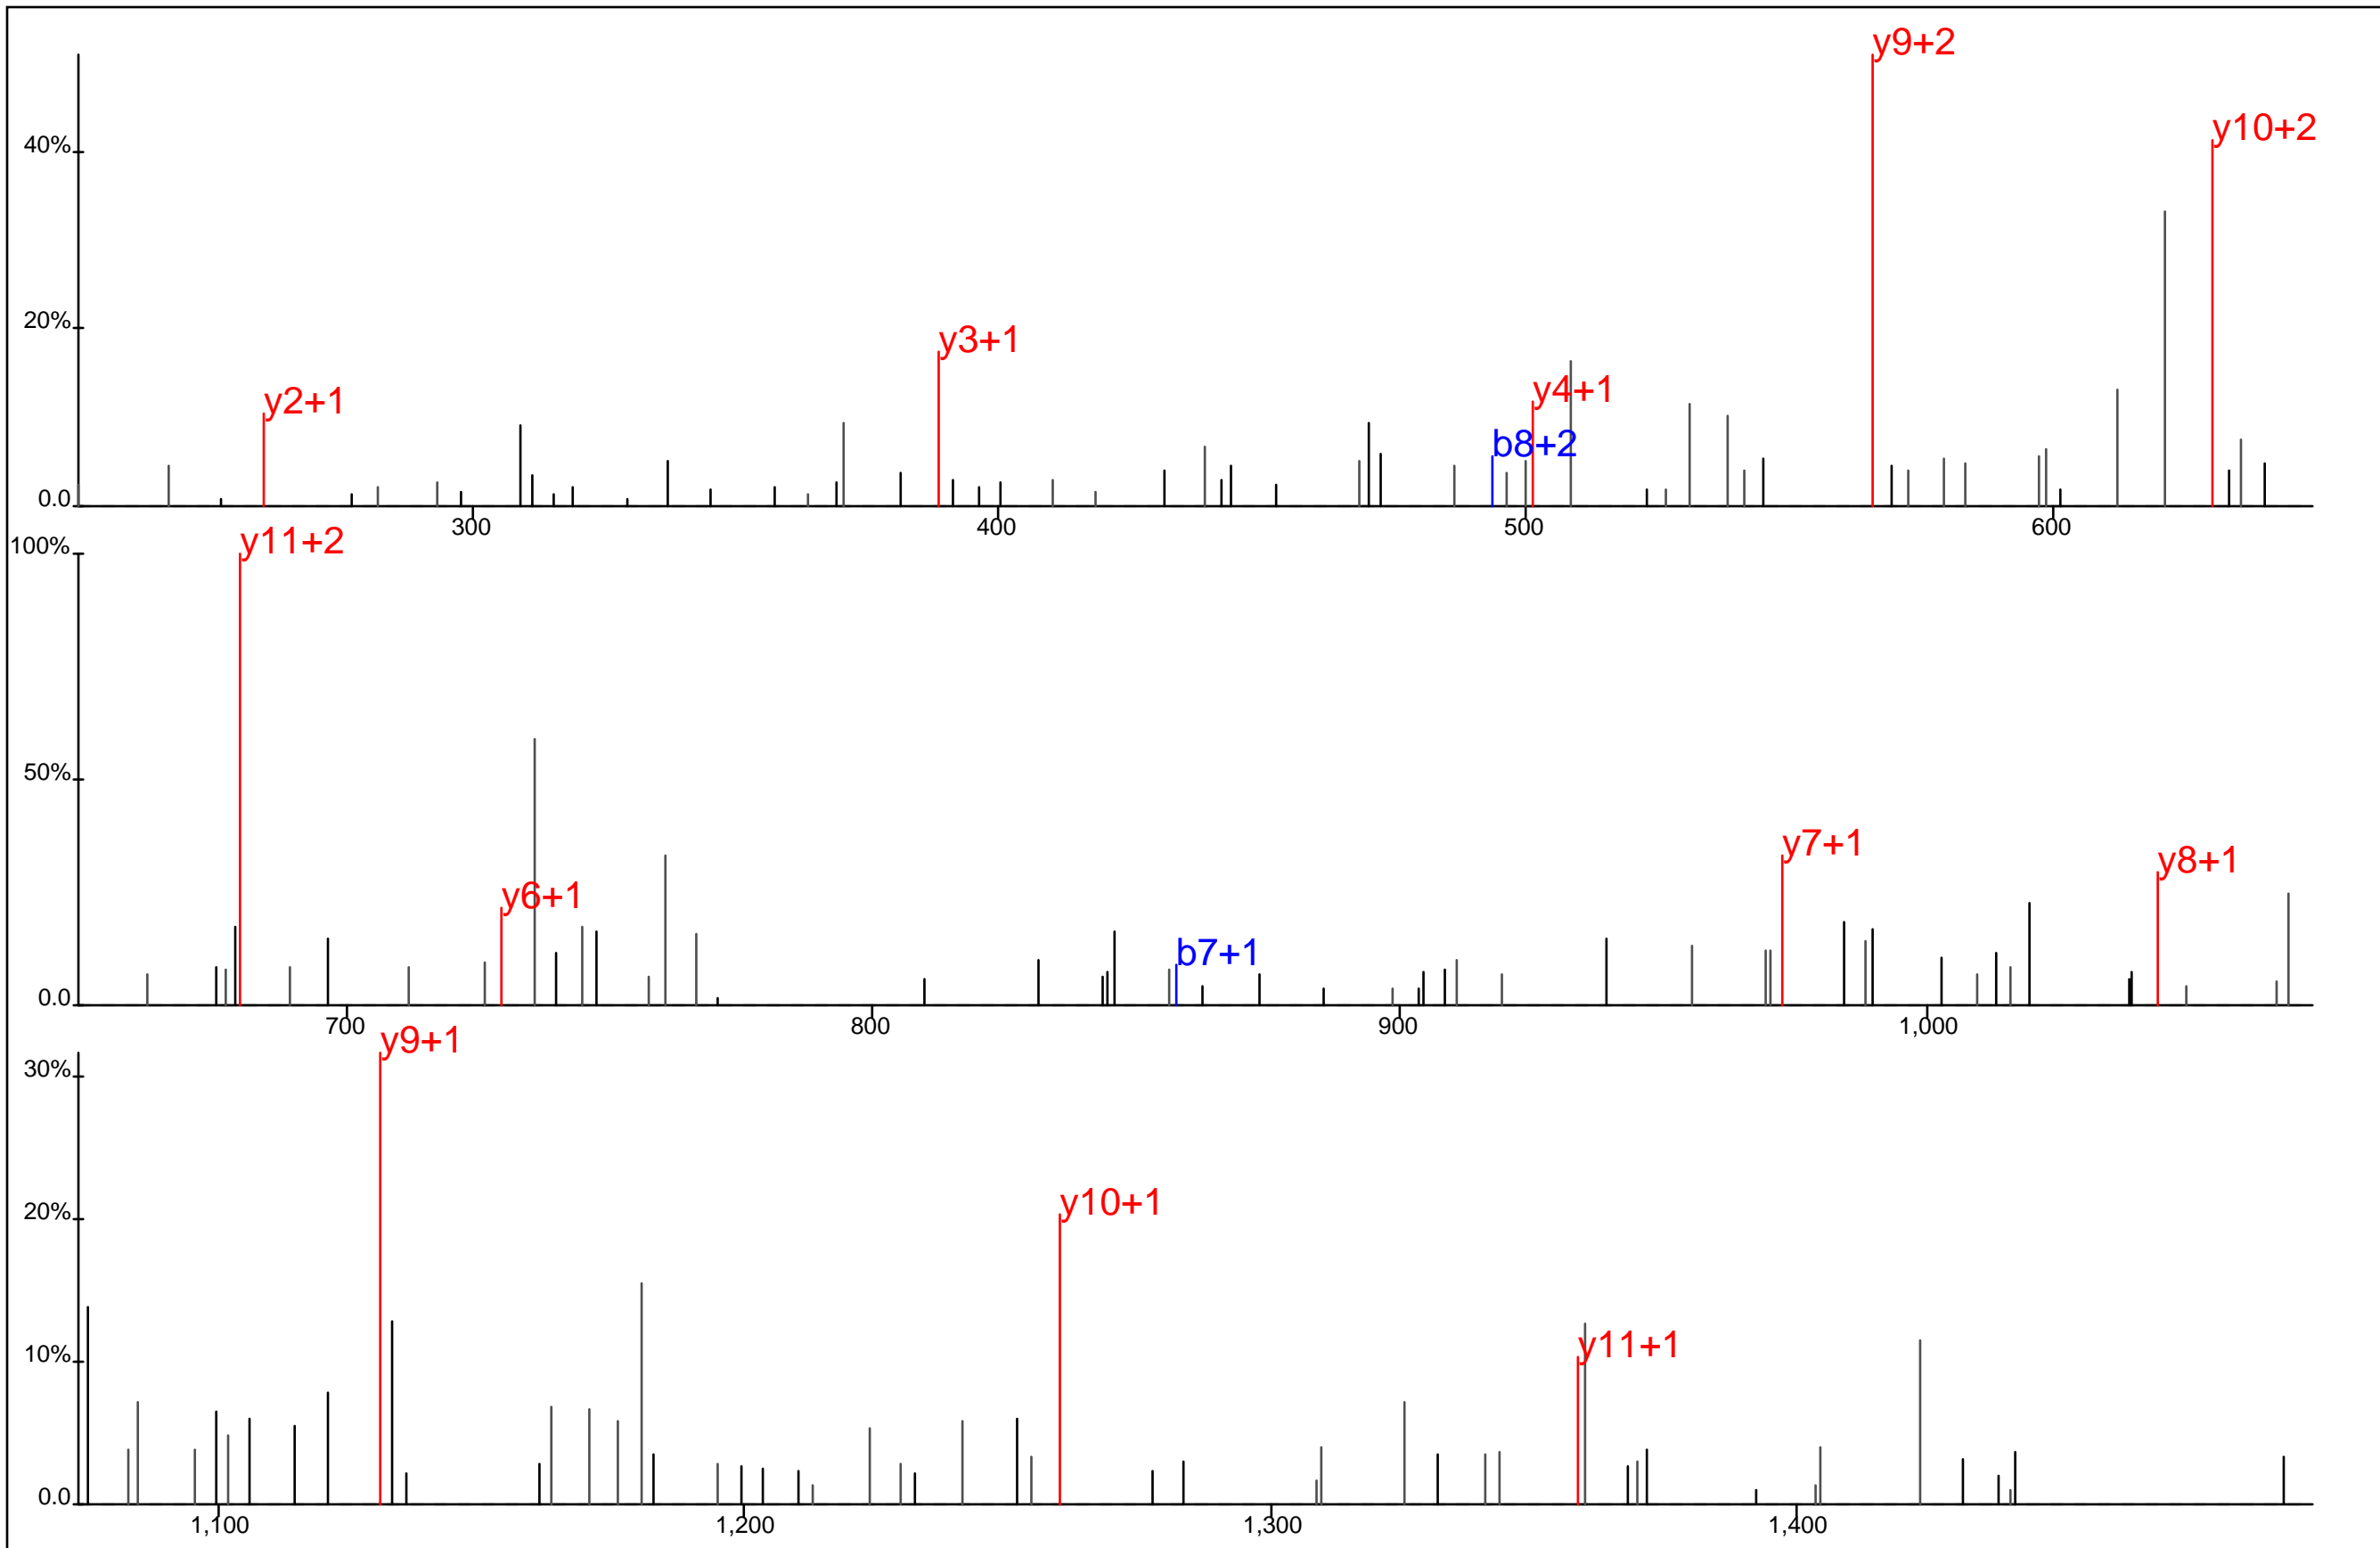

□ □ □ □ □ □  
 Q V V E S A Y\*E V I K L K  
□ □ □ □ □ □ □ □

Protein Name: Lactate dehydrogenase A  
 gi Accession: 0  
 Precursor Mass: 793.4140+2  
 Delta Mass: 1.858 ppm  
 XCorr: 41.0

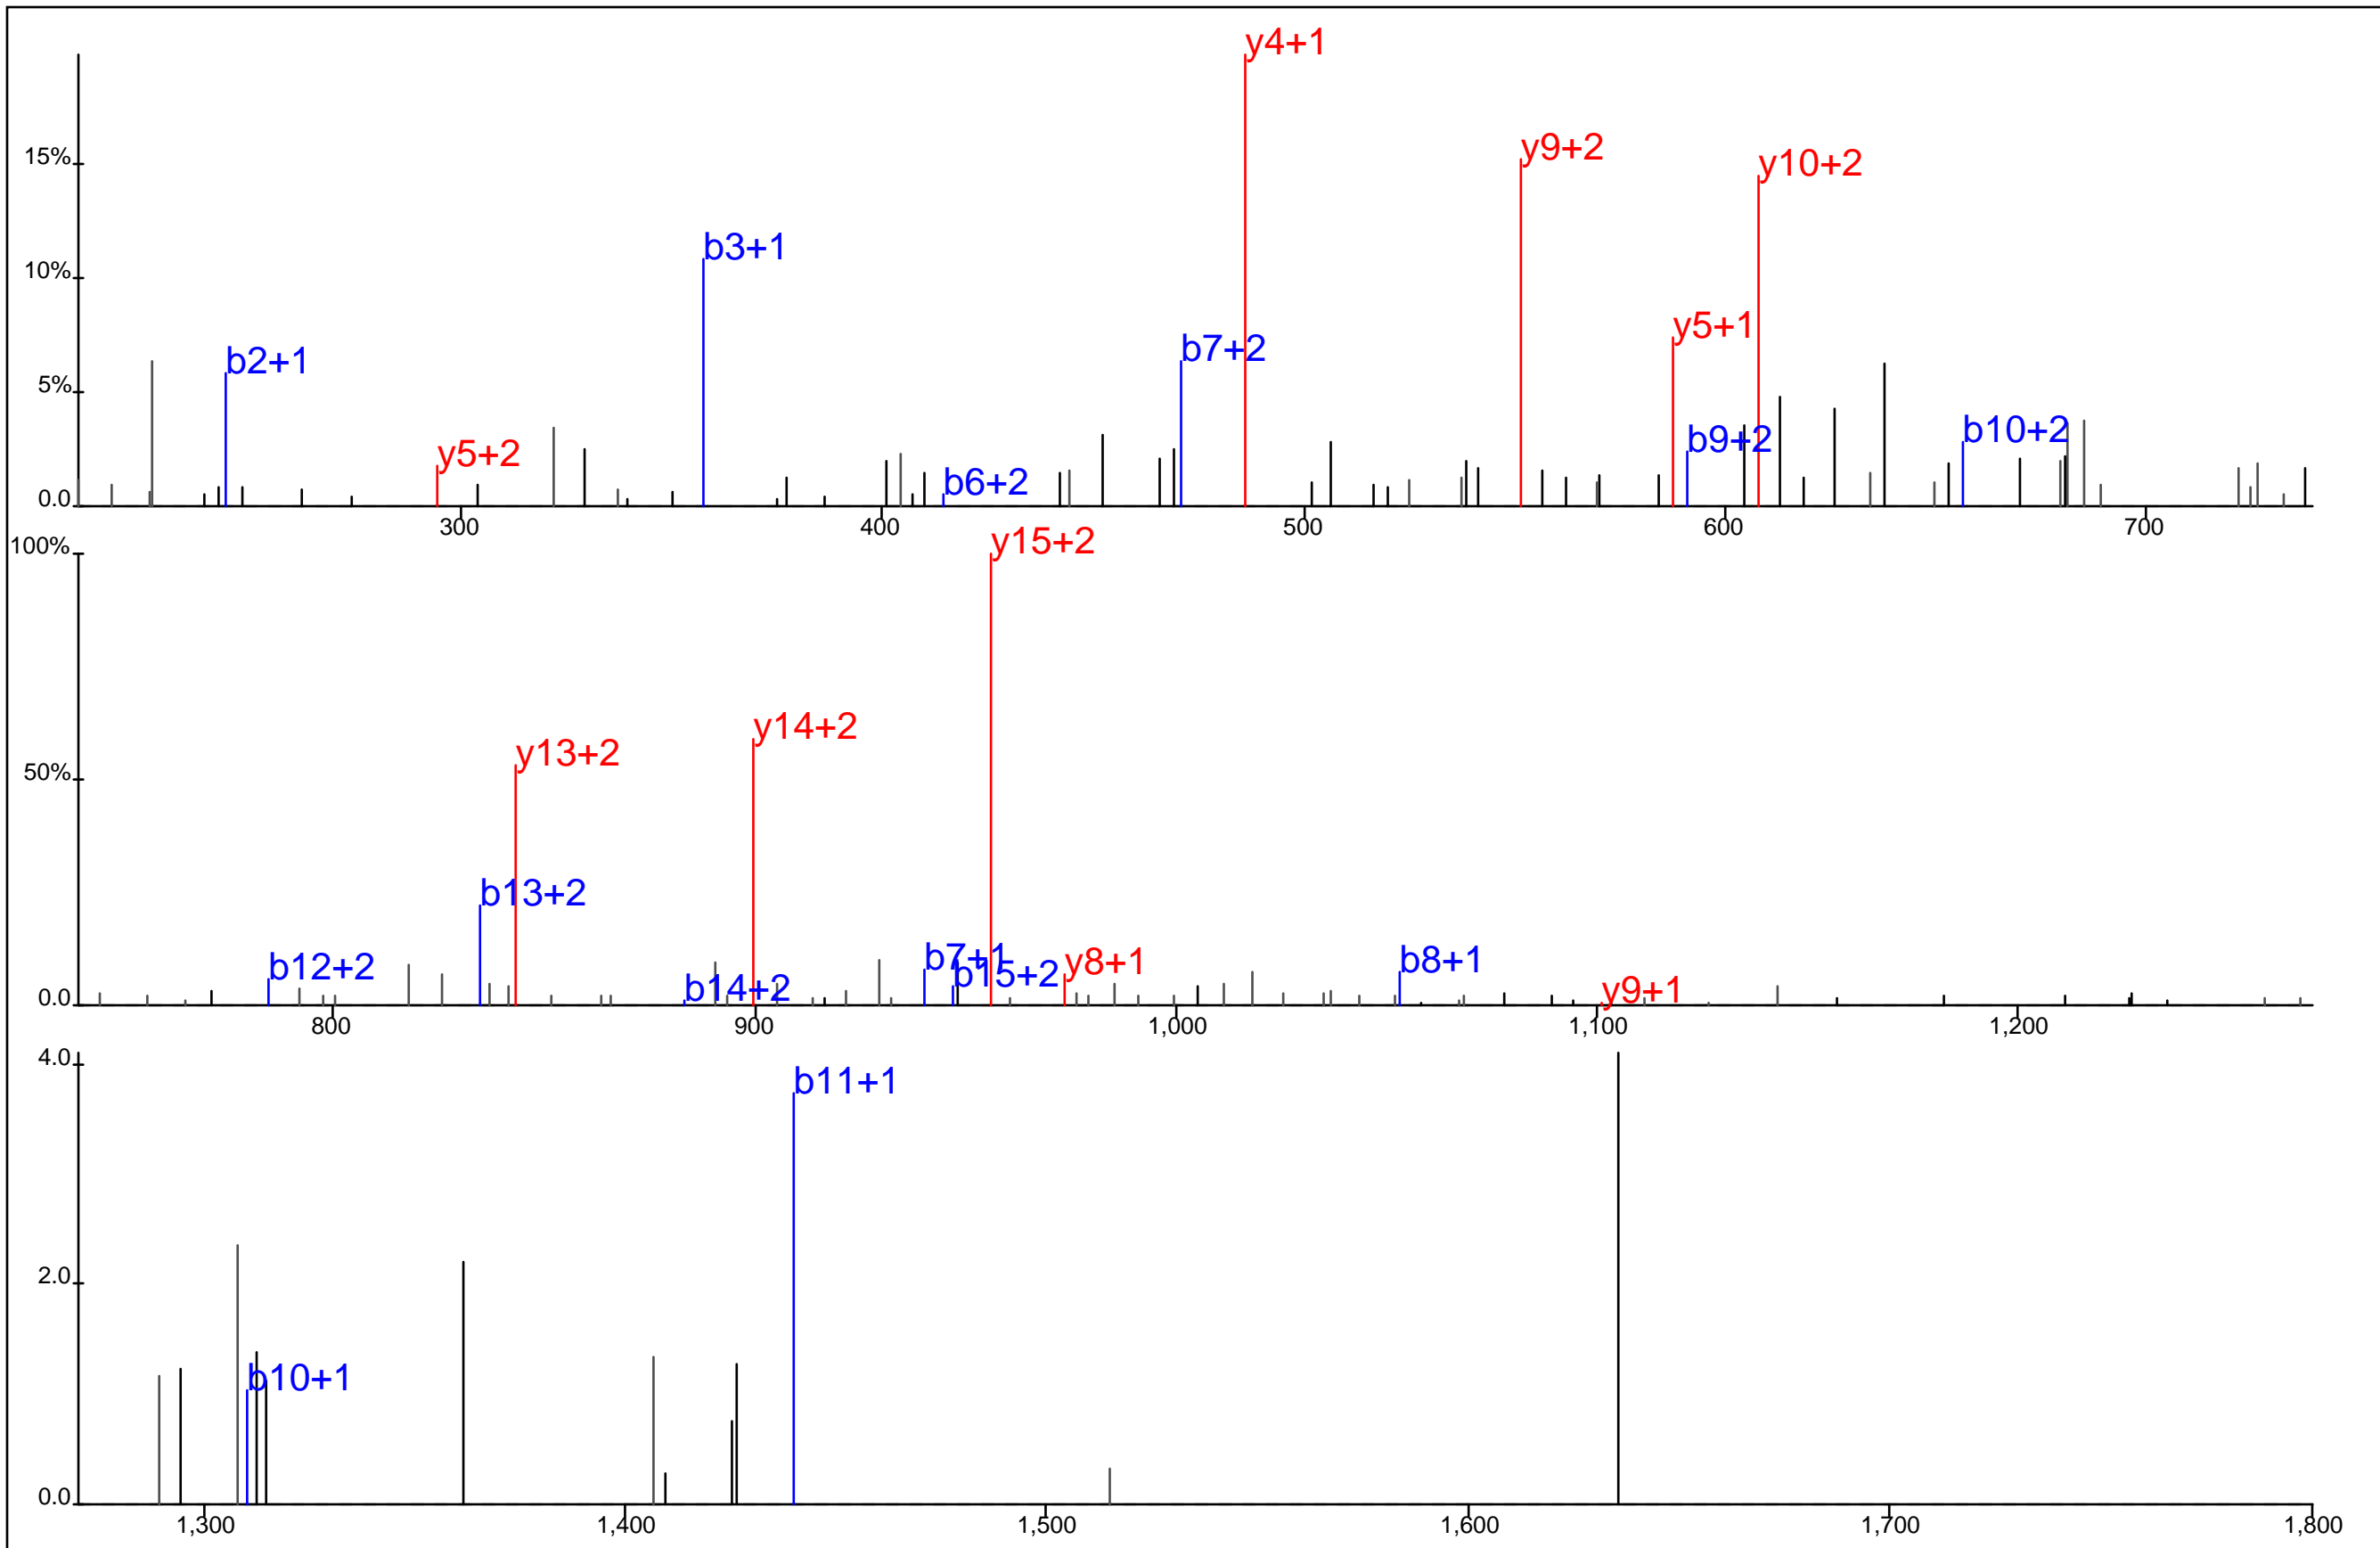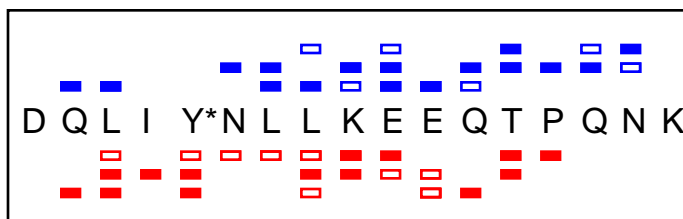

Protein Name: Lactate dehydrogenase A  
 gi Accession: 0  
 Precursor Mass: 718.6860+3  
 Delta Mass: 2.053 ppm  
 XCorr: 22.56



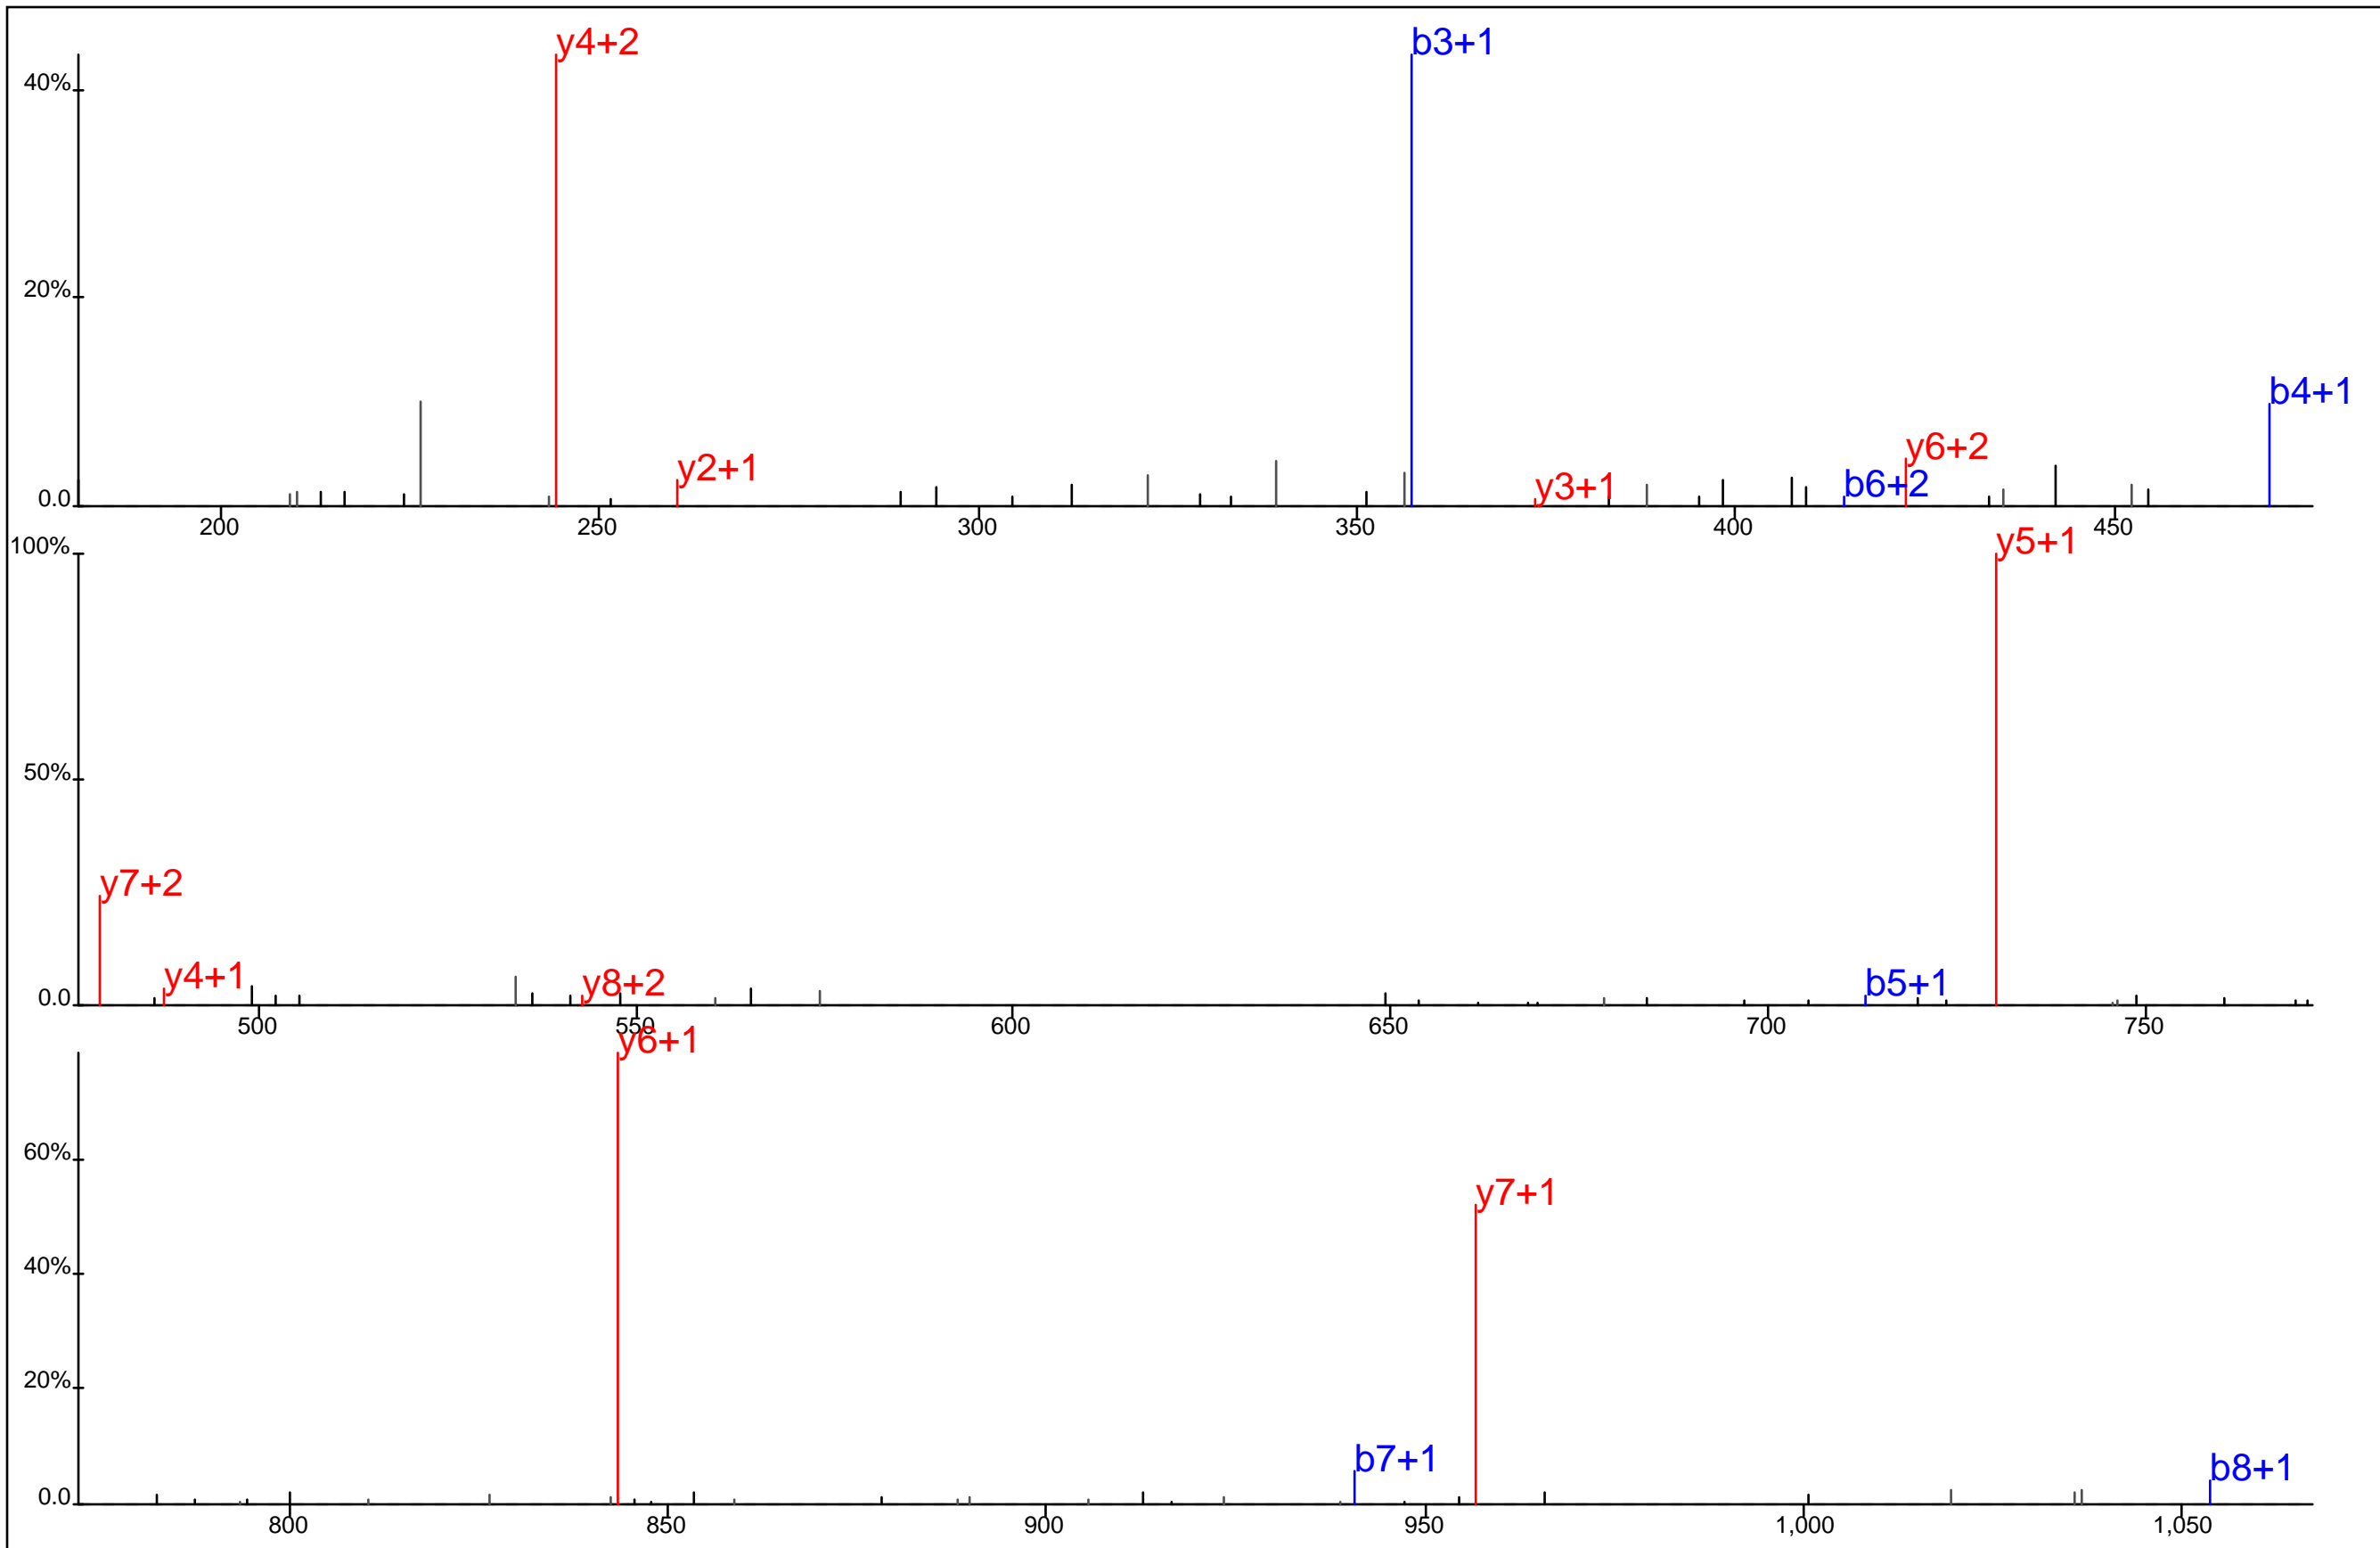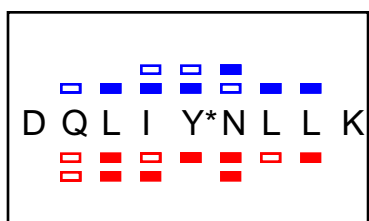

Protein Name: Lactate dehydrogenase A  
 gi Accession: 0  
 Precursor Mass: 600.3075+2  
 Delta Mass: 0.485 ppm  
 XCorr: 49.53



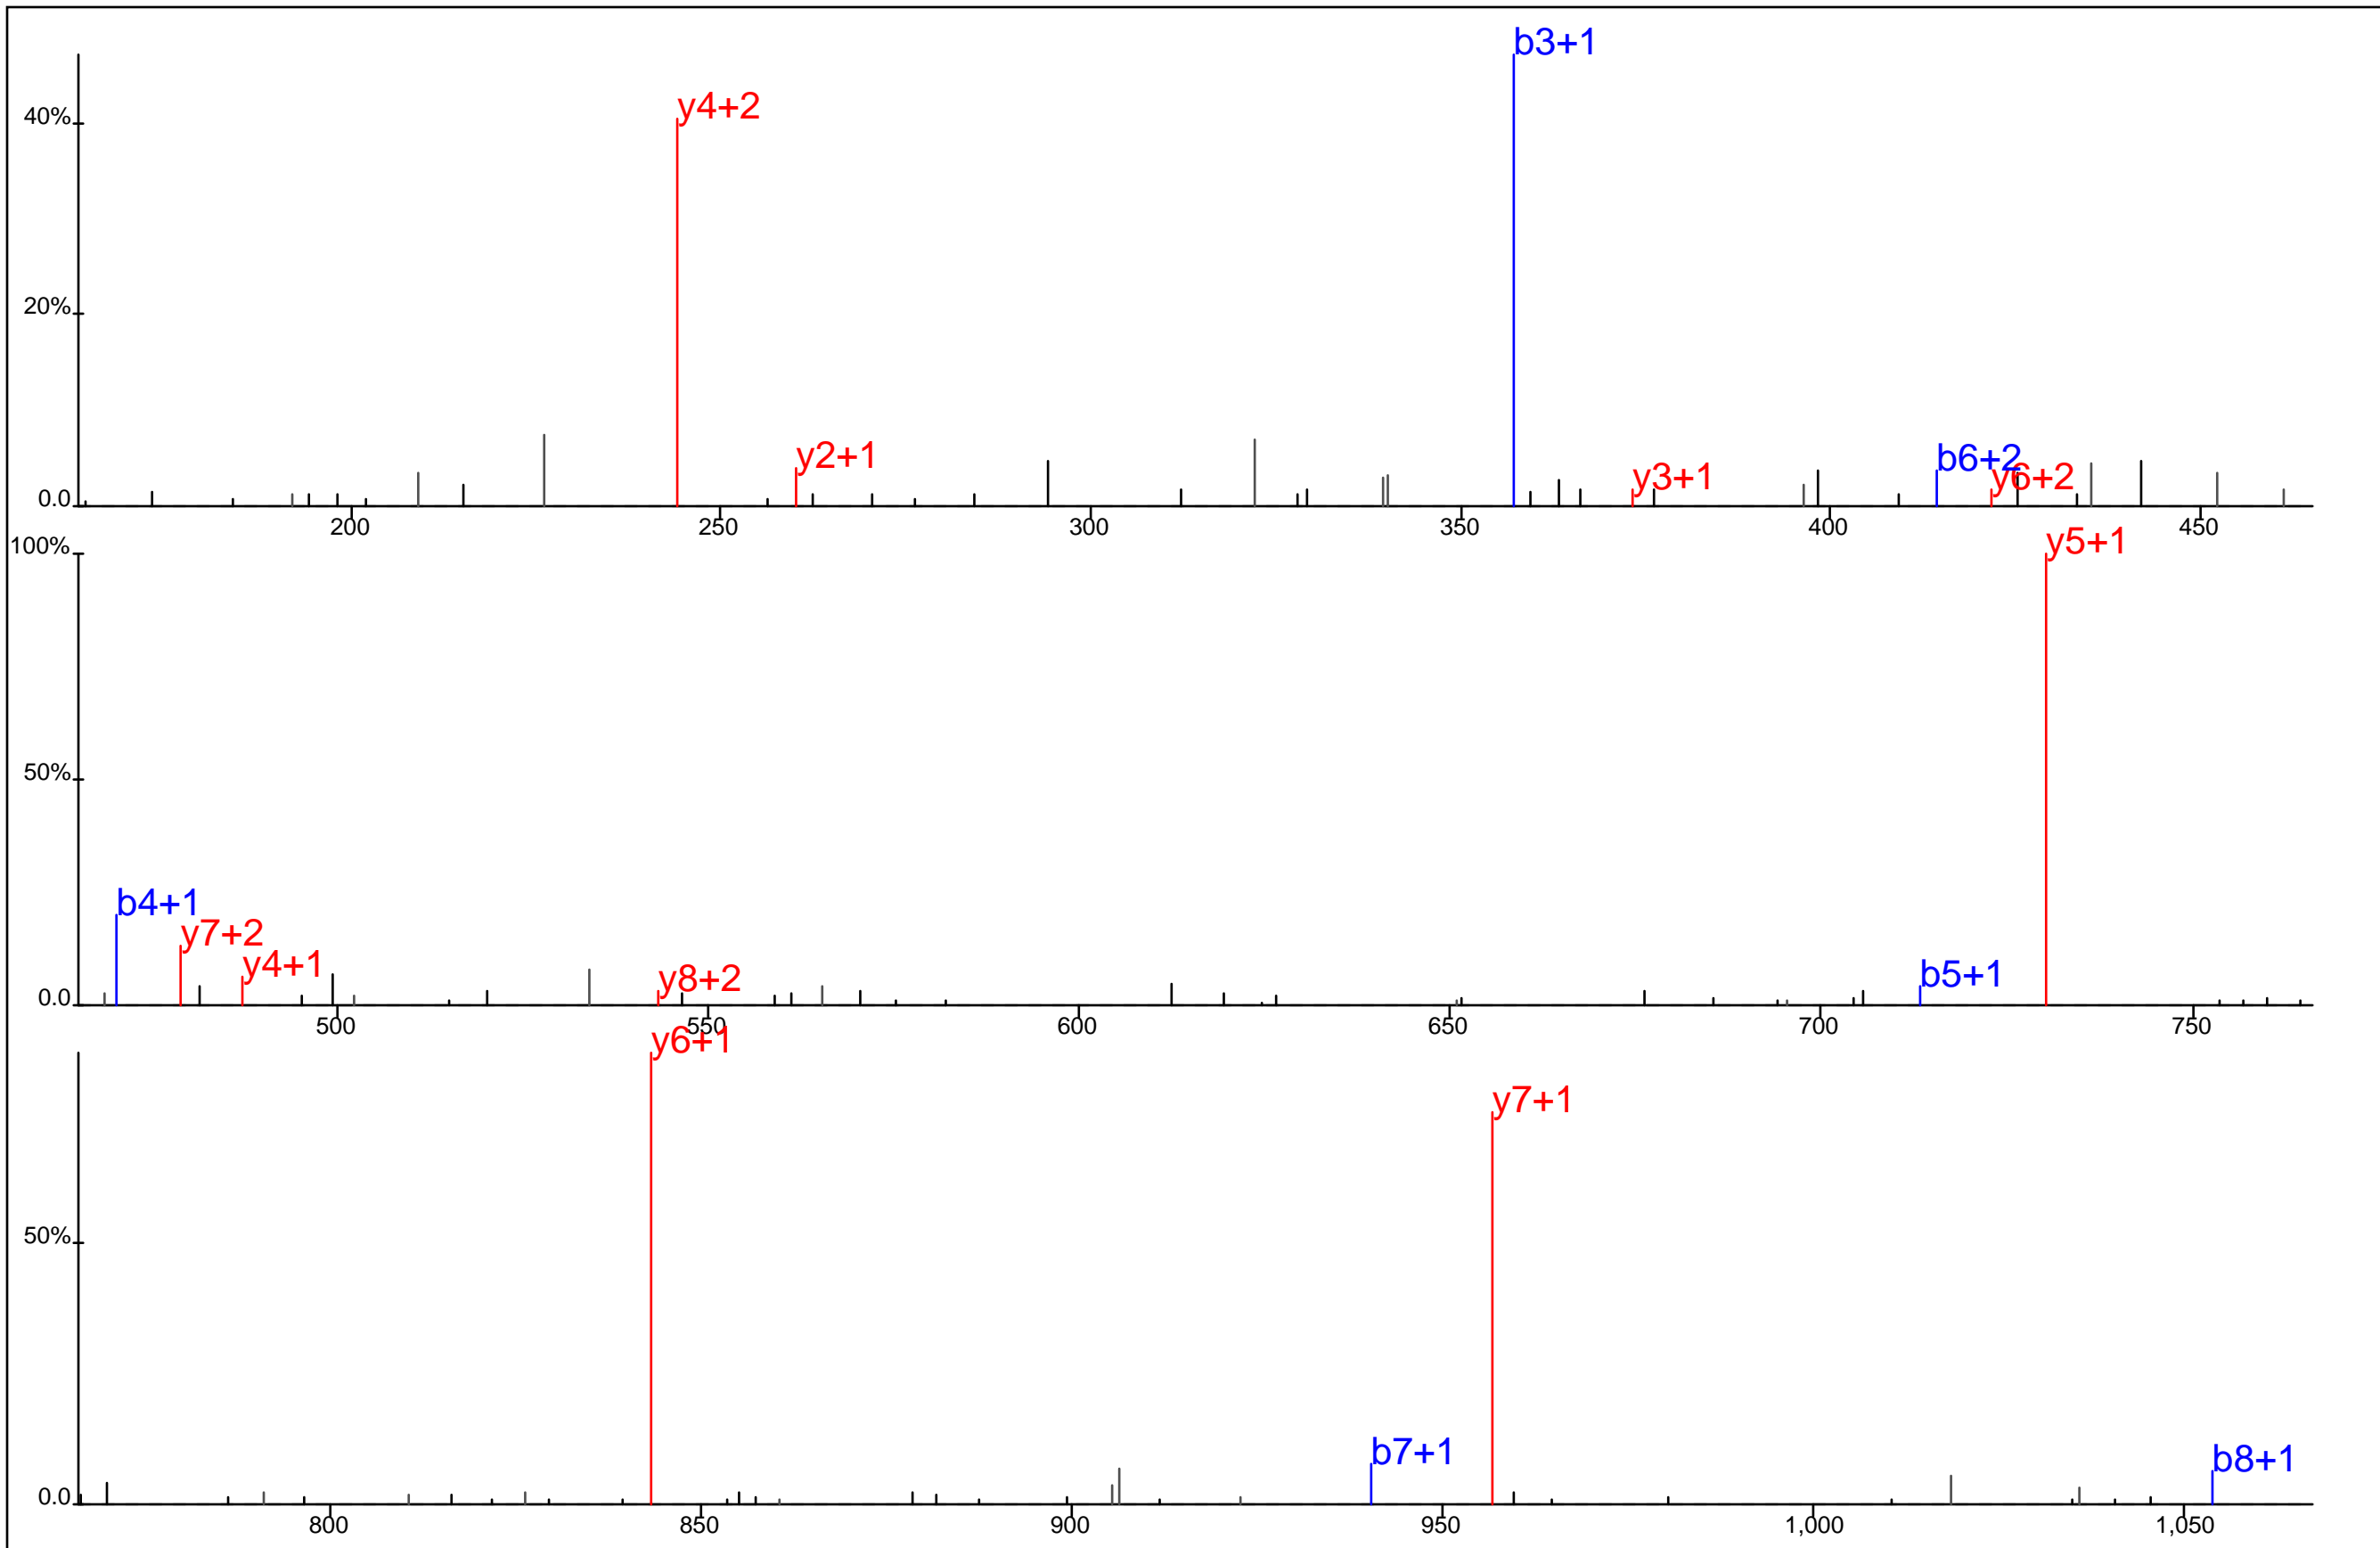

□ □ □ □ □ □ □ □  
□ □ □ □ □ □ □ □  
 D Q L I Y\* N L L K

Protein Name: Lactate dehydrogenase A  
 gi Accession: 0  
 Precursor Mass: 600.3071+2  
 Delta Mass: 0.125 ppm  
 XCorr: 42.25

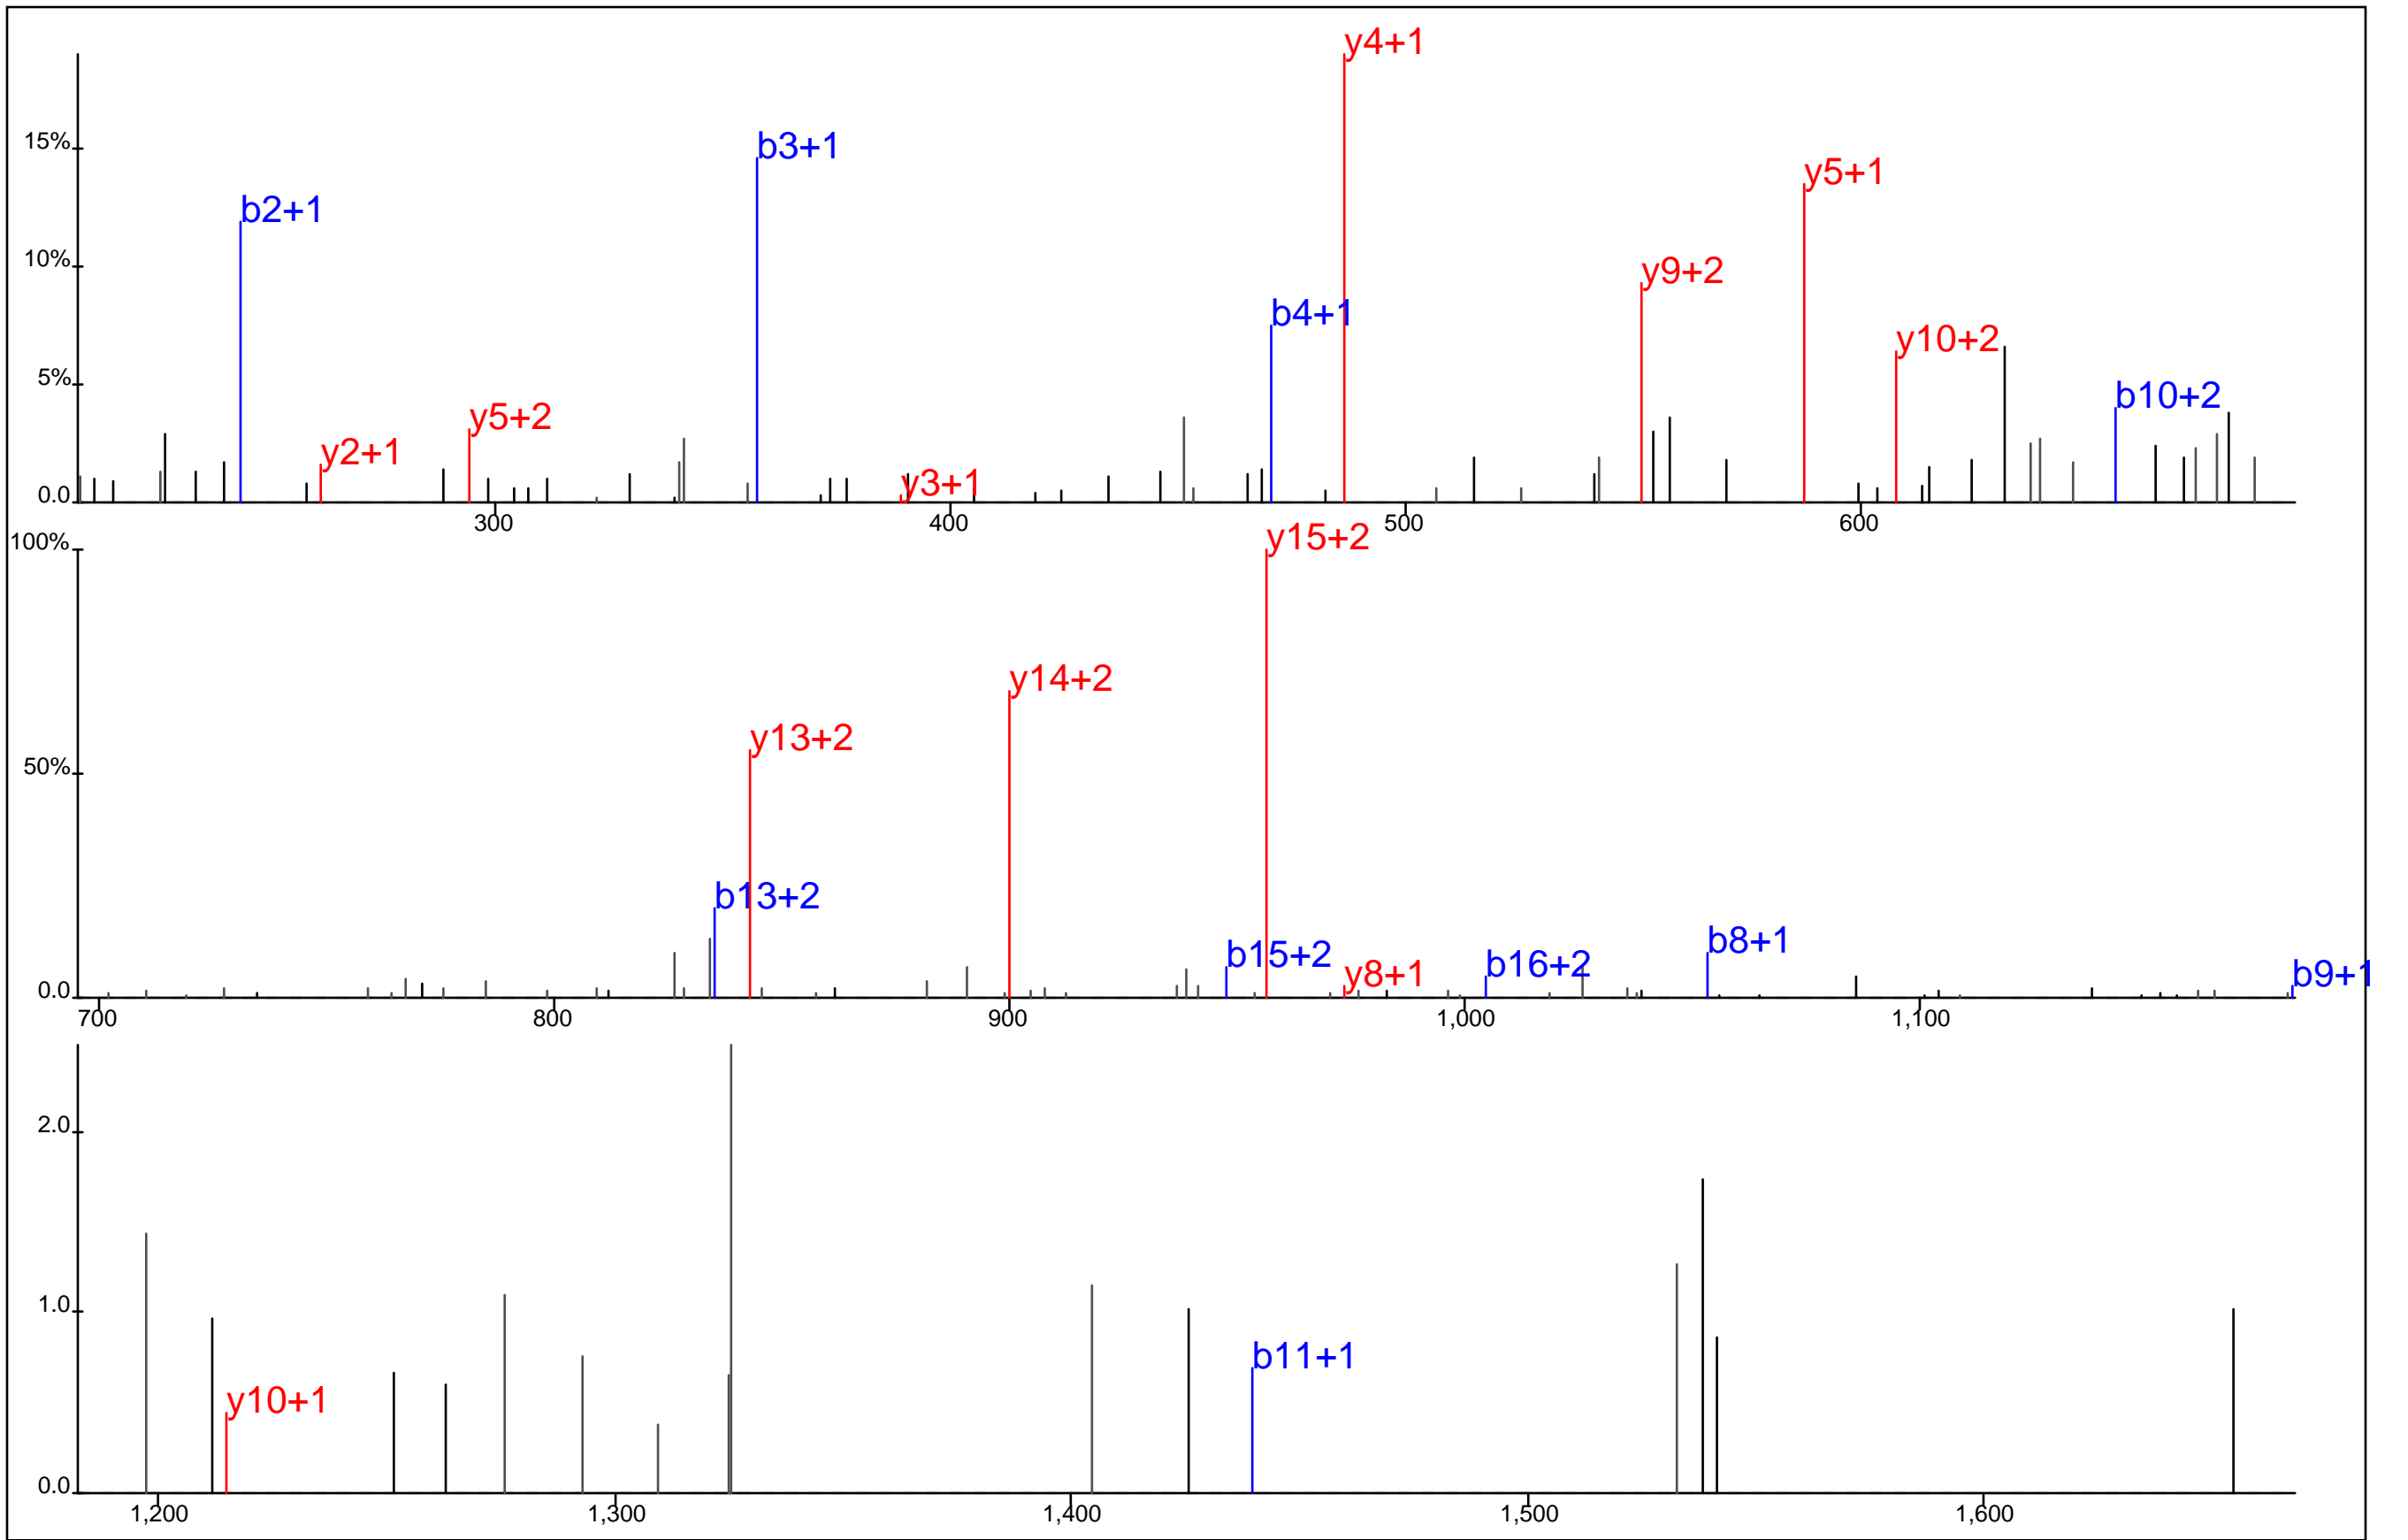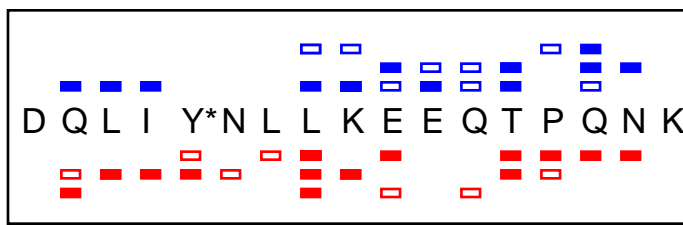

Protein Name: Lactate dehydrogenase A  
 gi Accession: 0  
 Precursor Mass: 718.6879+3  
 Delta Mass: 0.582 ppm  
 XCorr: 36.34





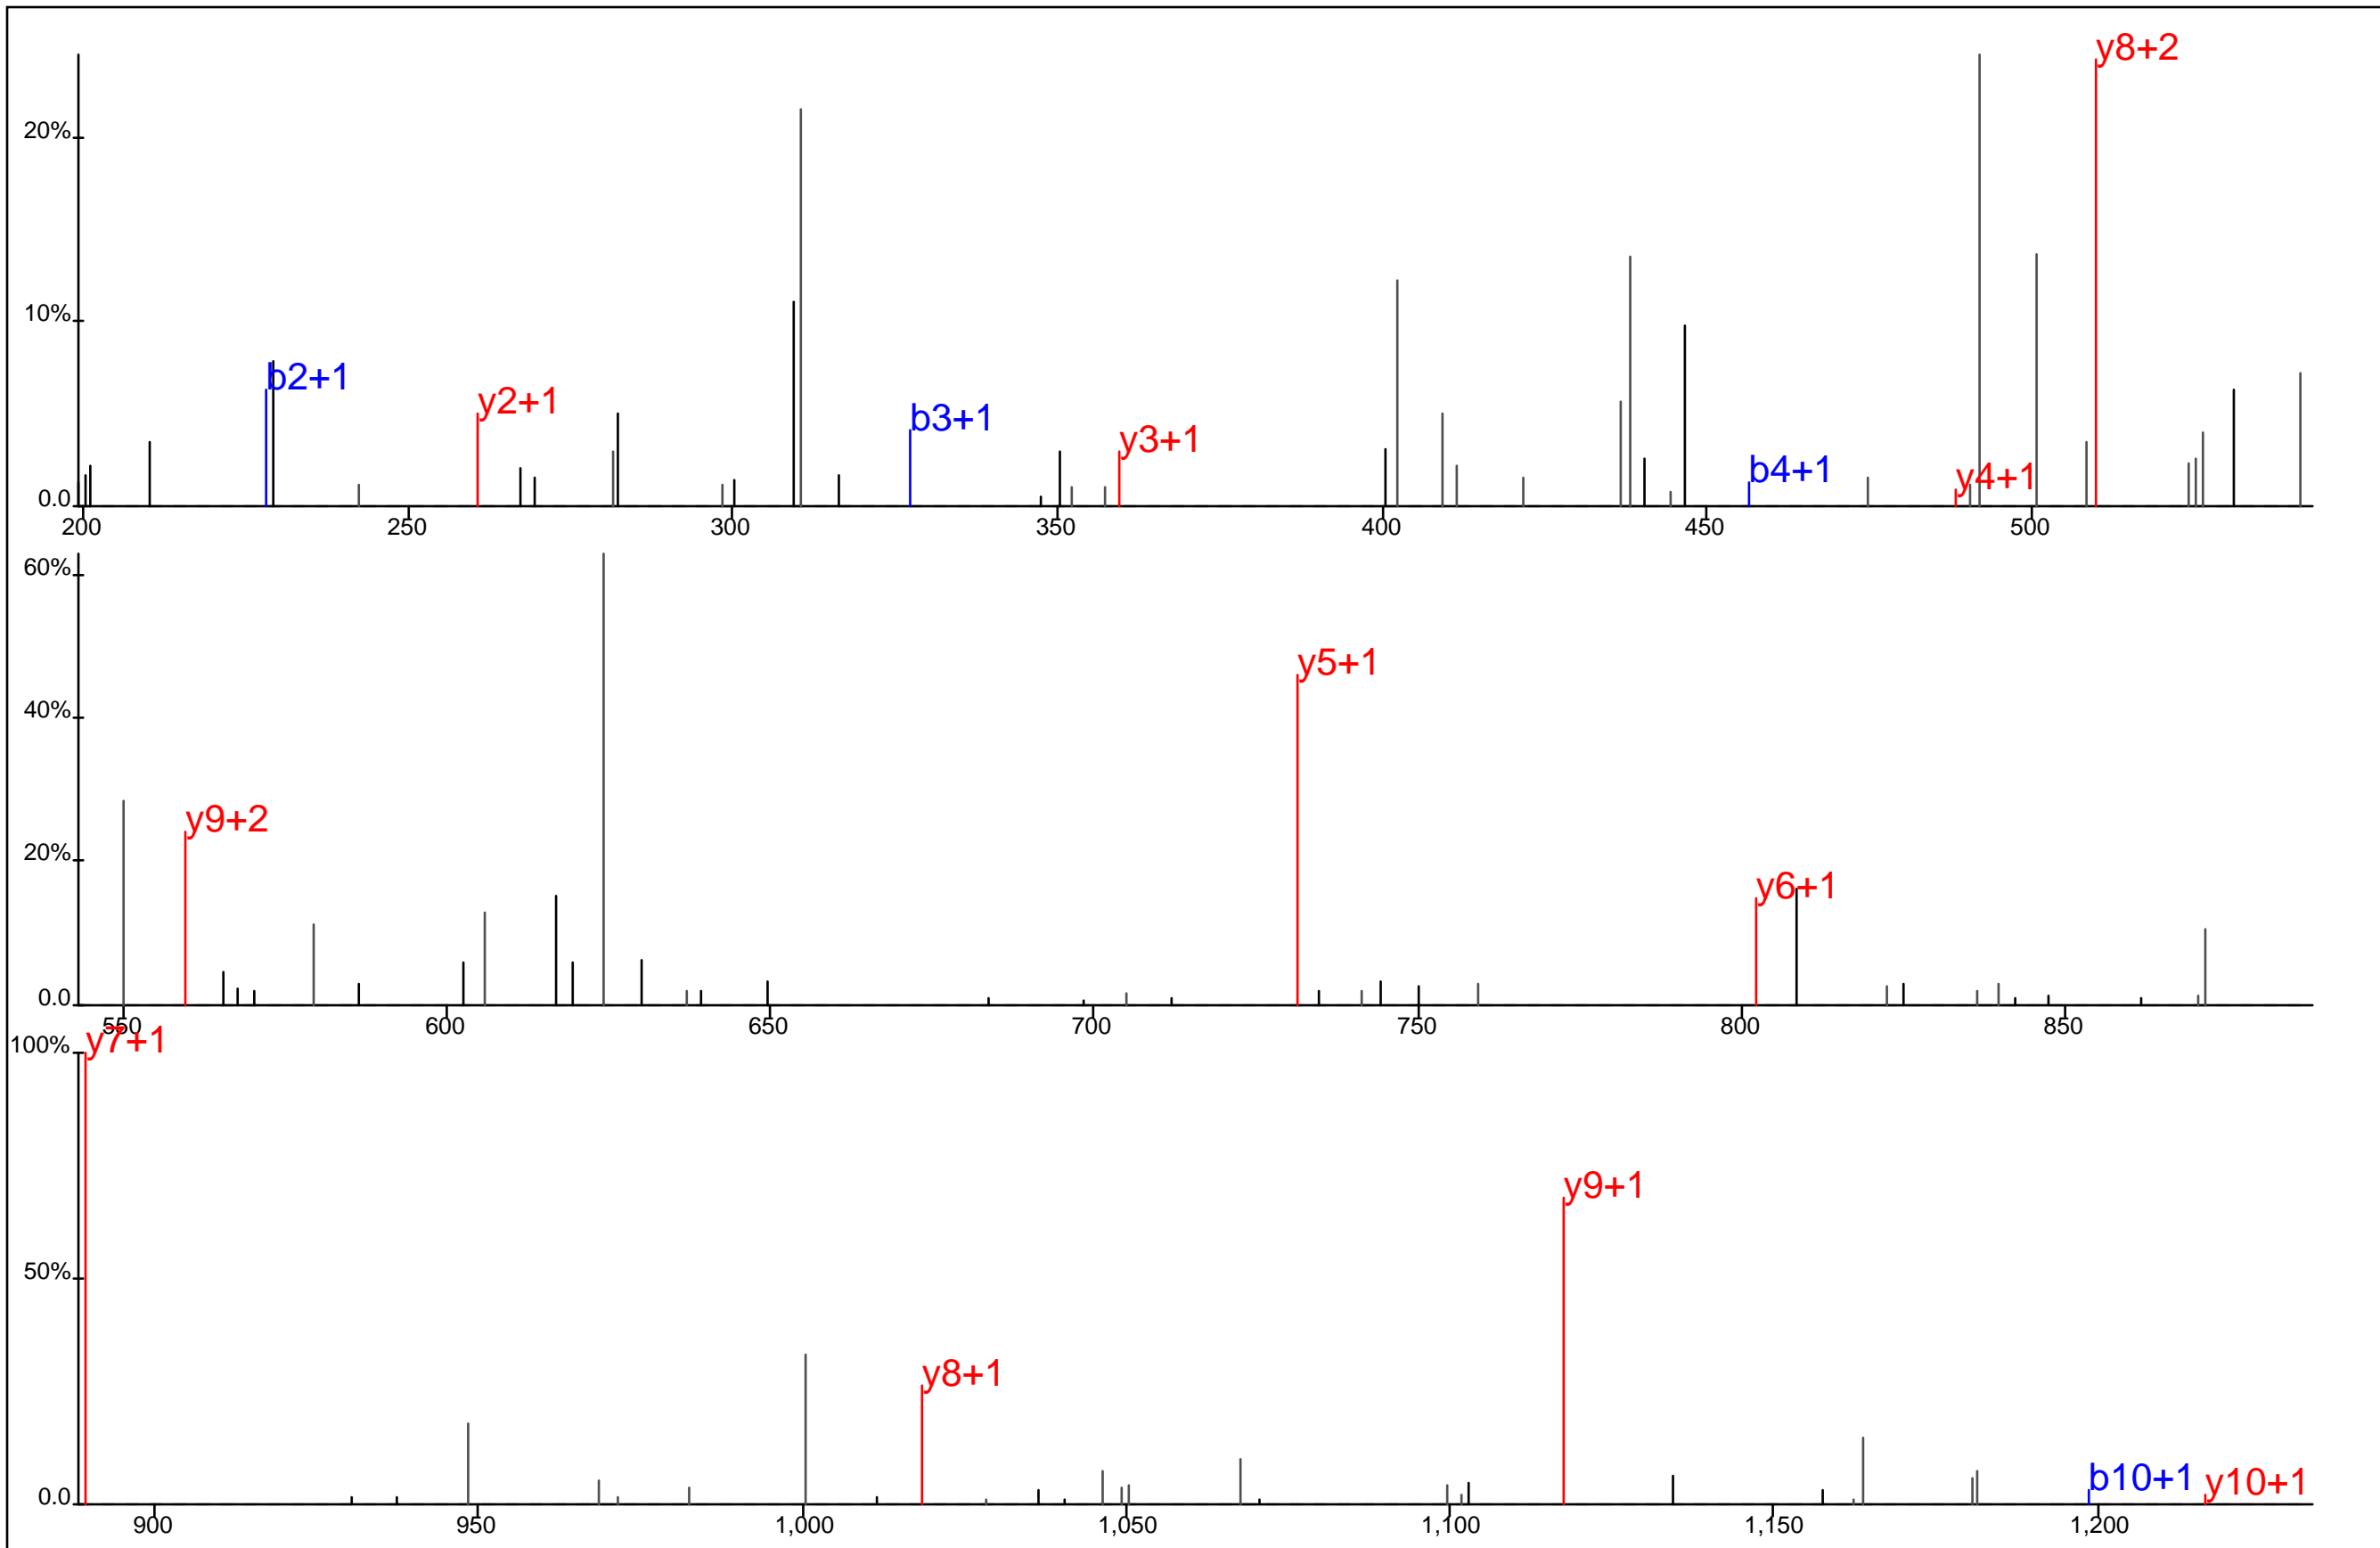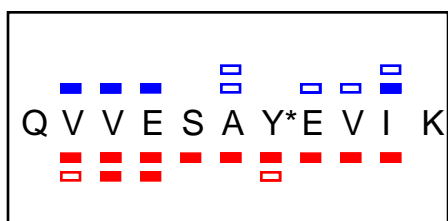

Protein Name: Lactate dehydrogenase A  
 gi Accession: 0  
 Precursor Mass: 672.8259+2  
 Delta Mass: 0.144 ppm  
 XCorr: 33.42

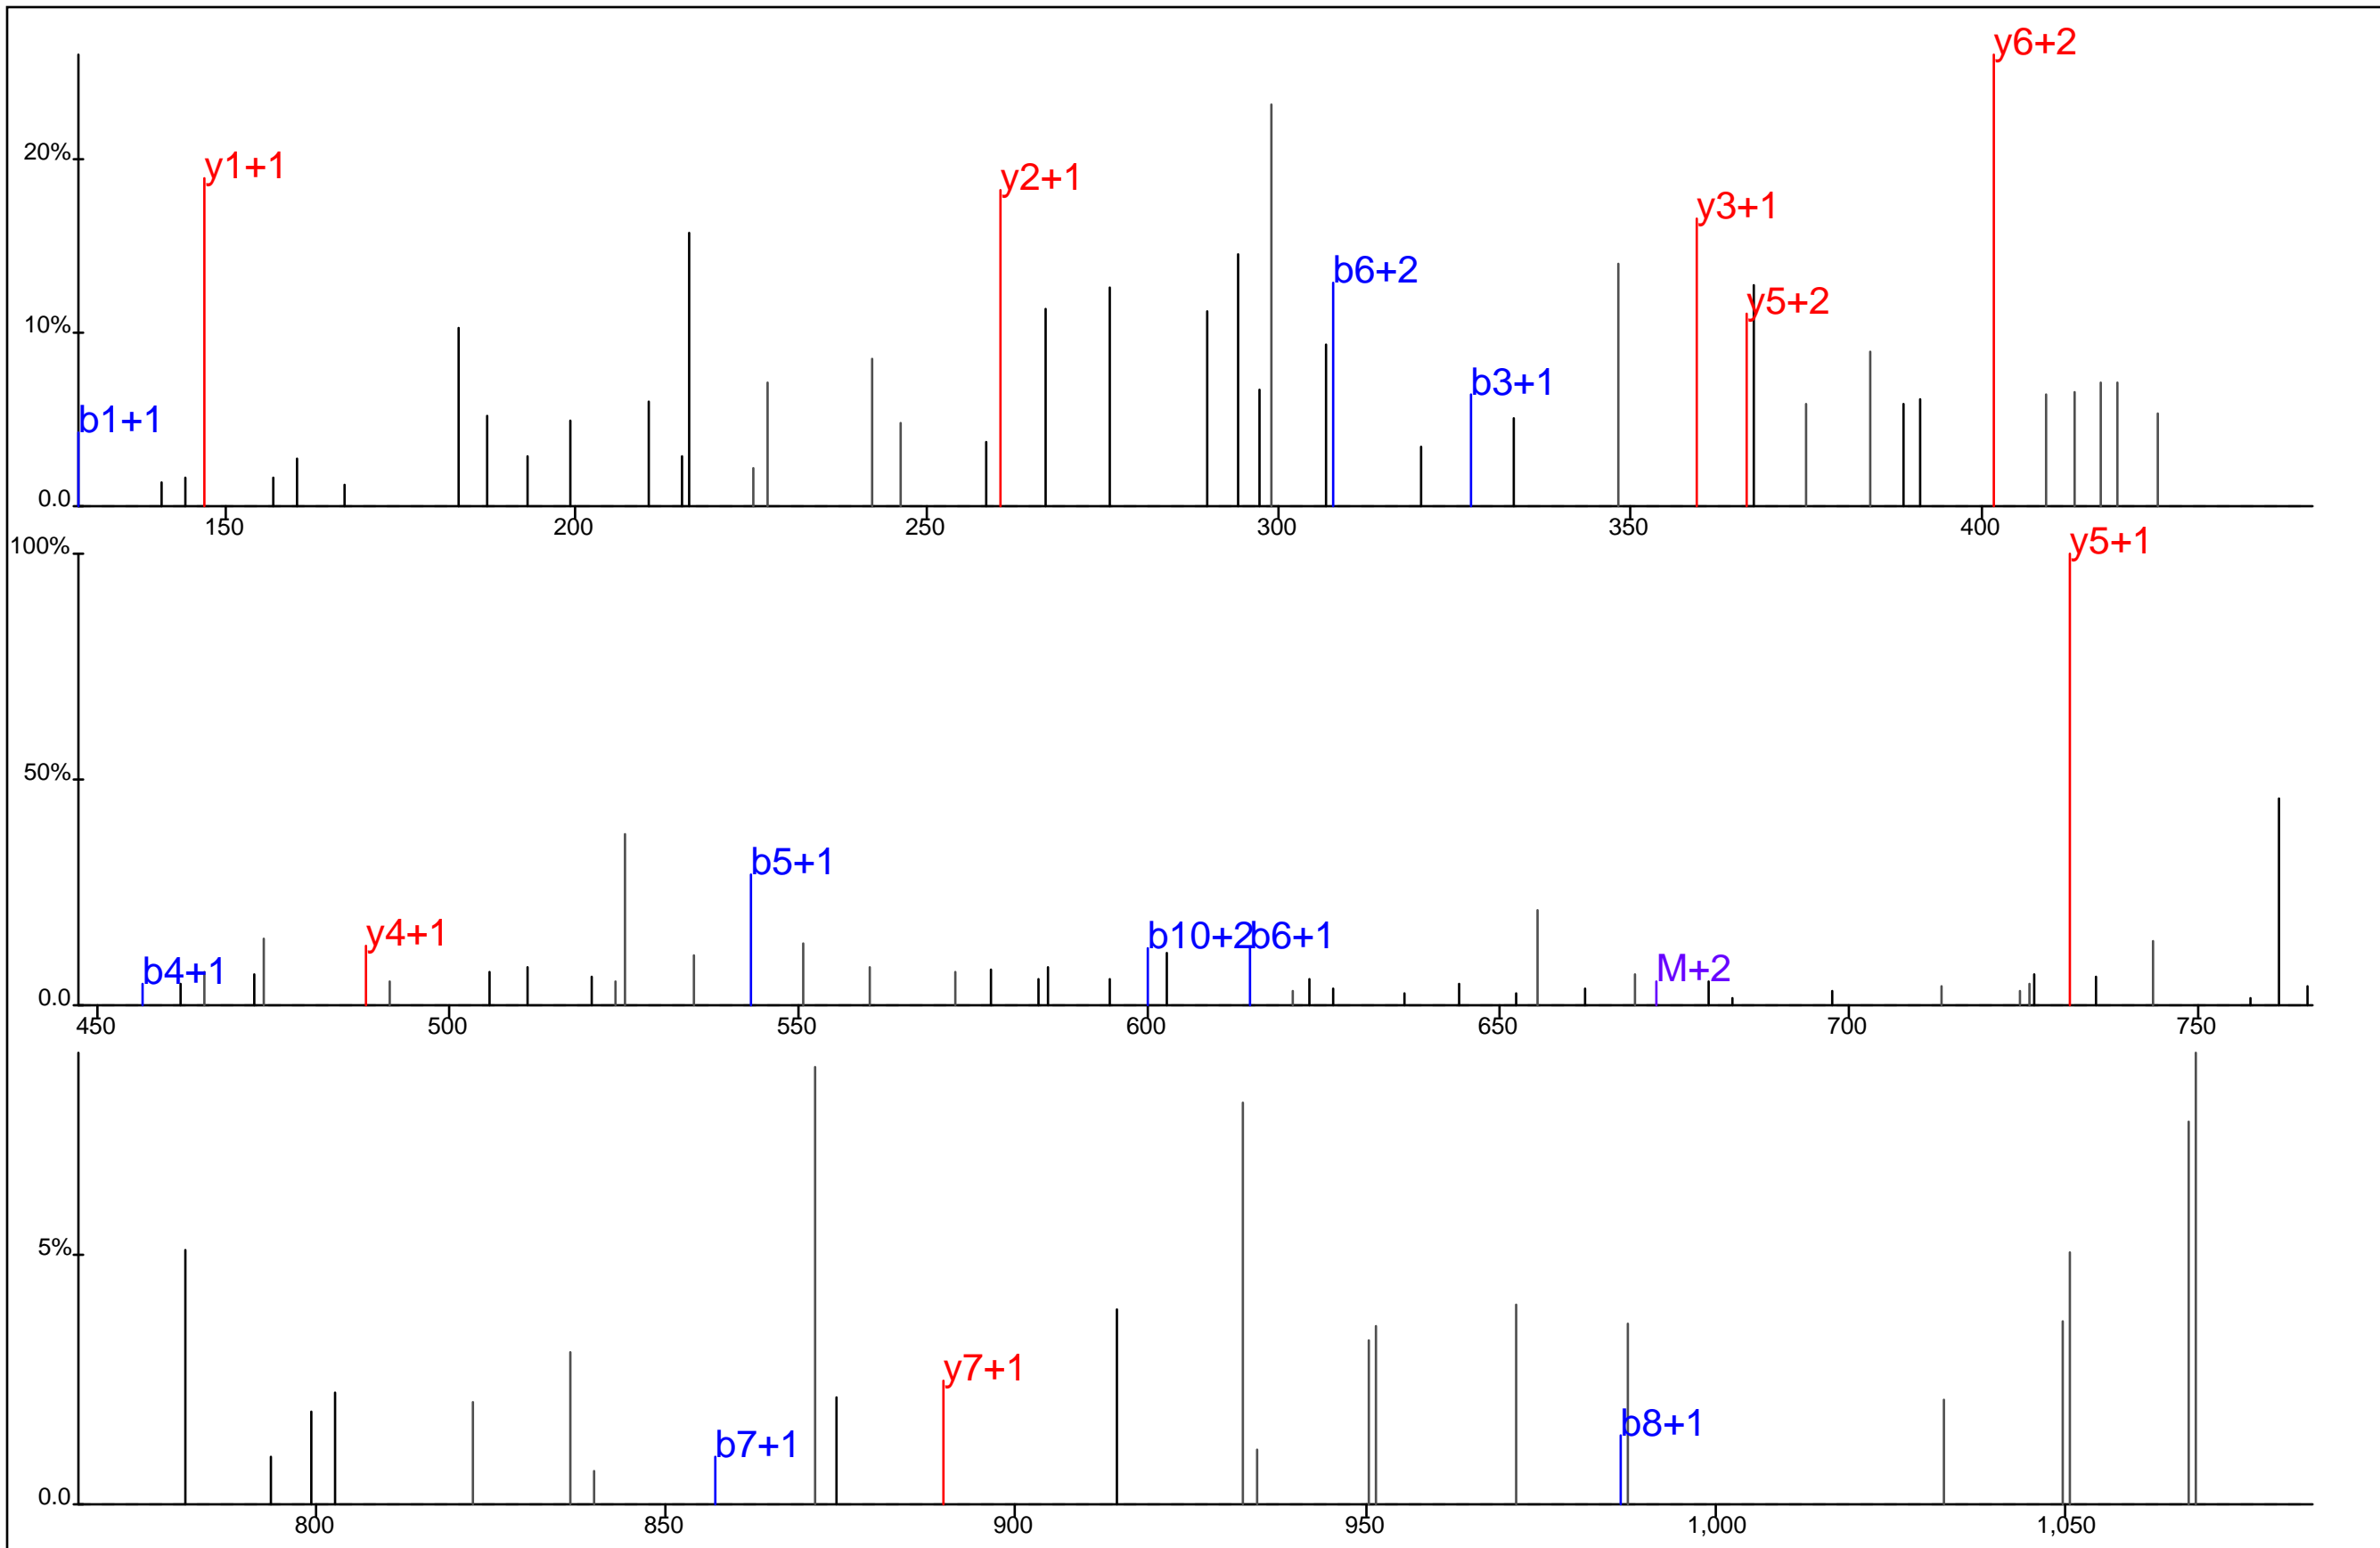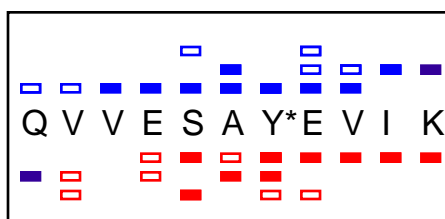

Protein Name: Lactate dehydrogenase A  
 gi Accession: 0  
 Precursor Mass: 448.8866+3  
 Delta Mass: 0.367 ppm  
 XCorr: 23.96

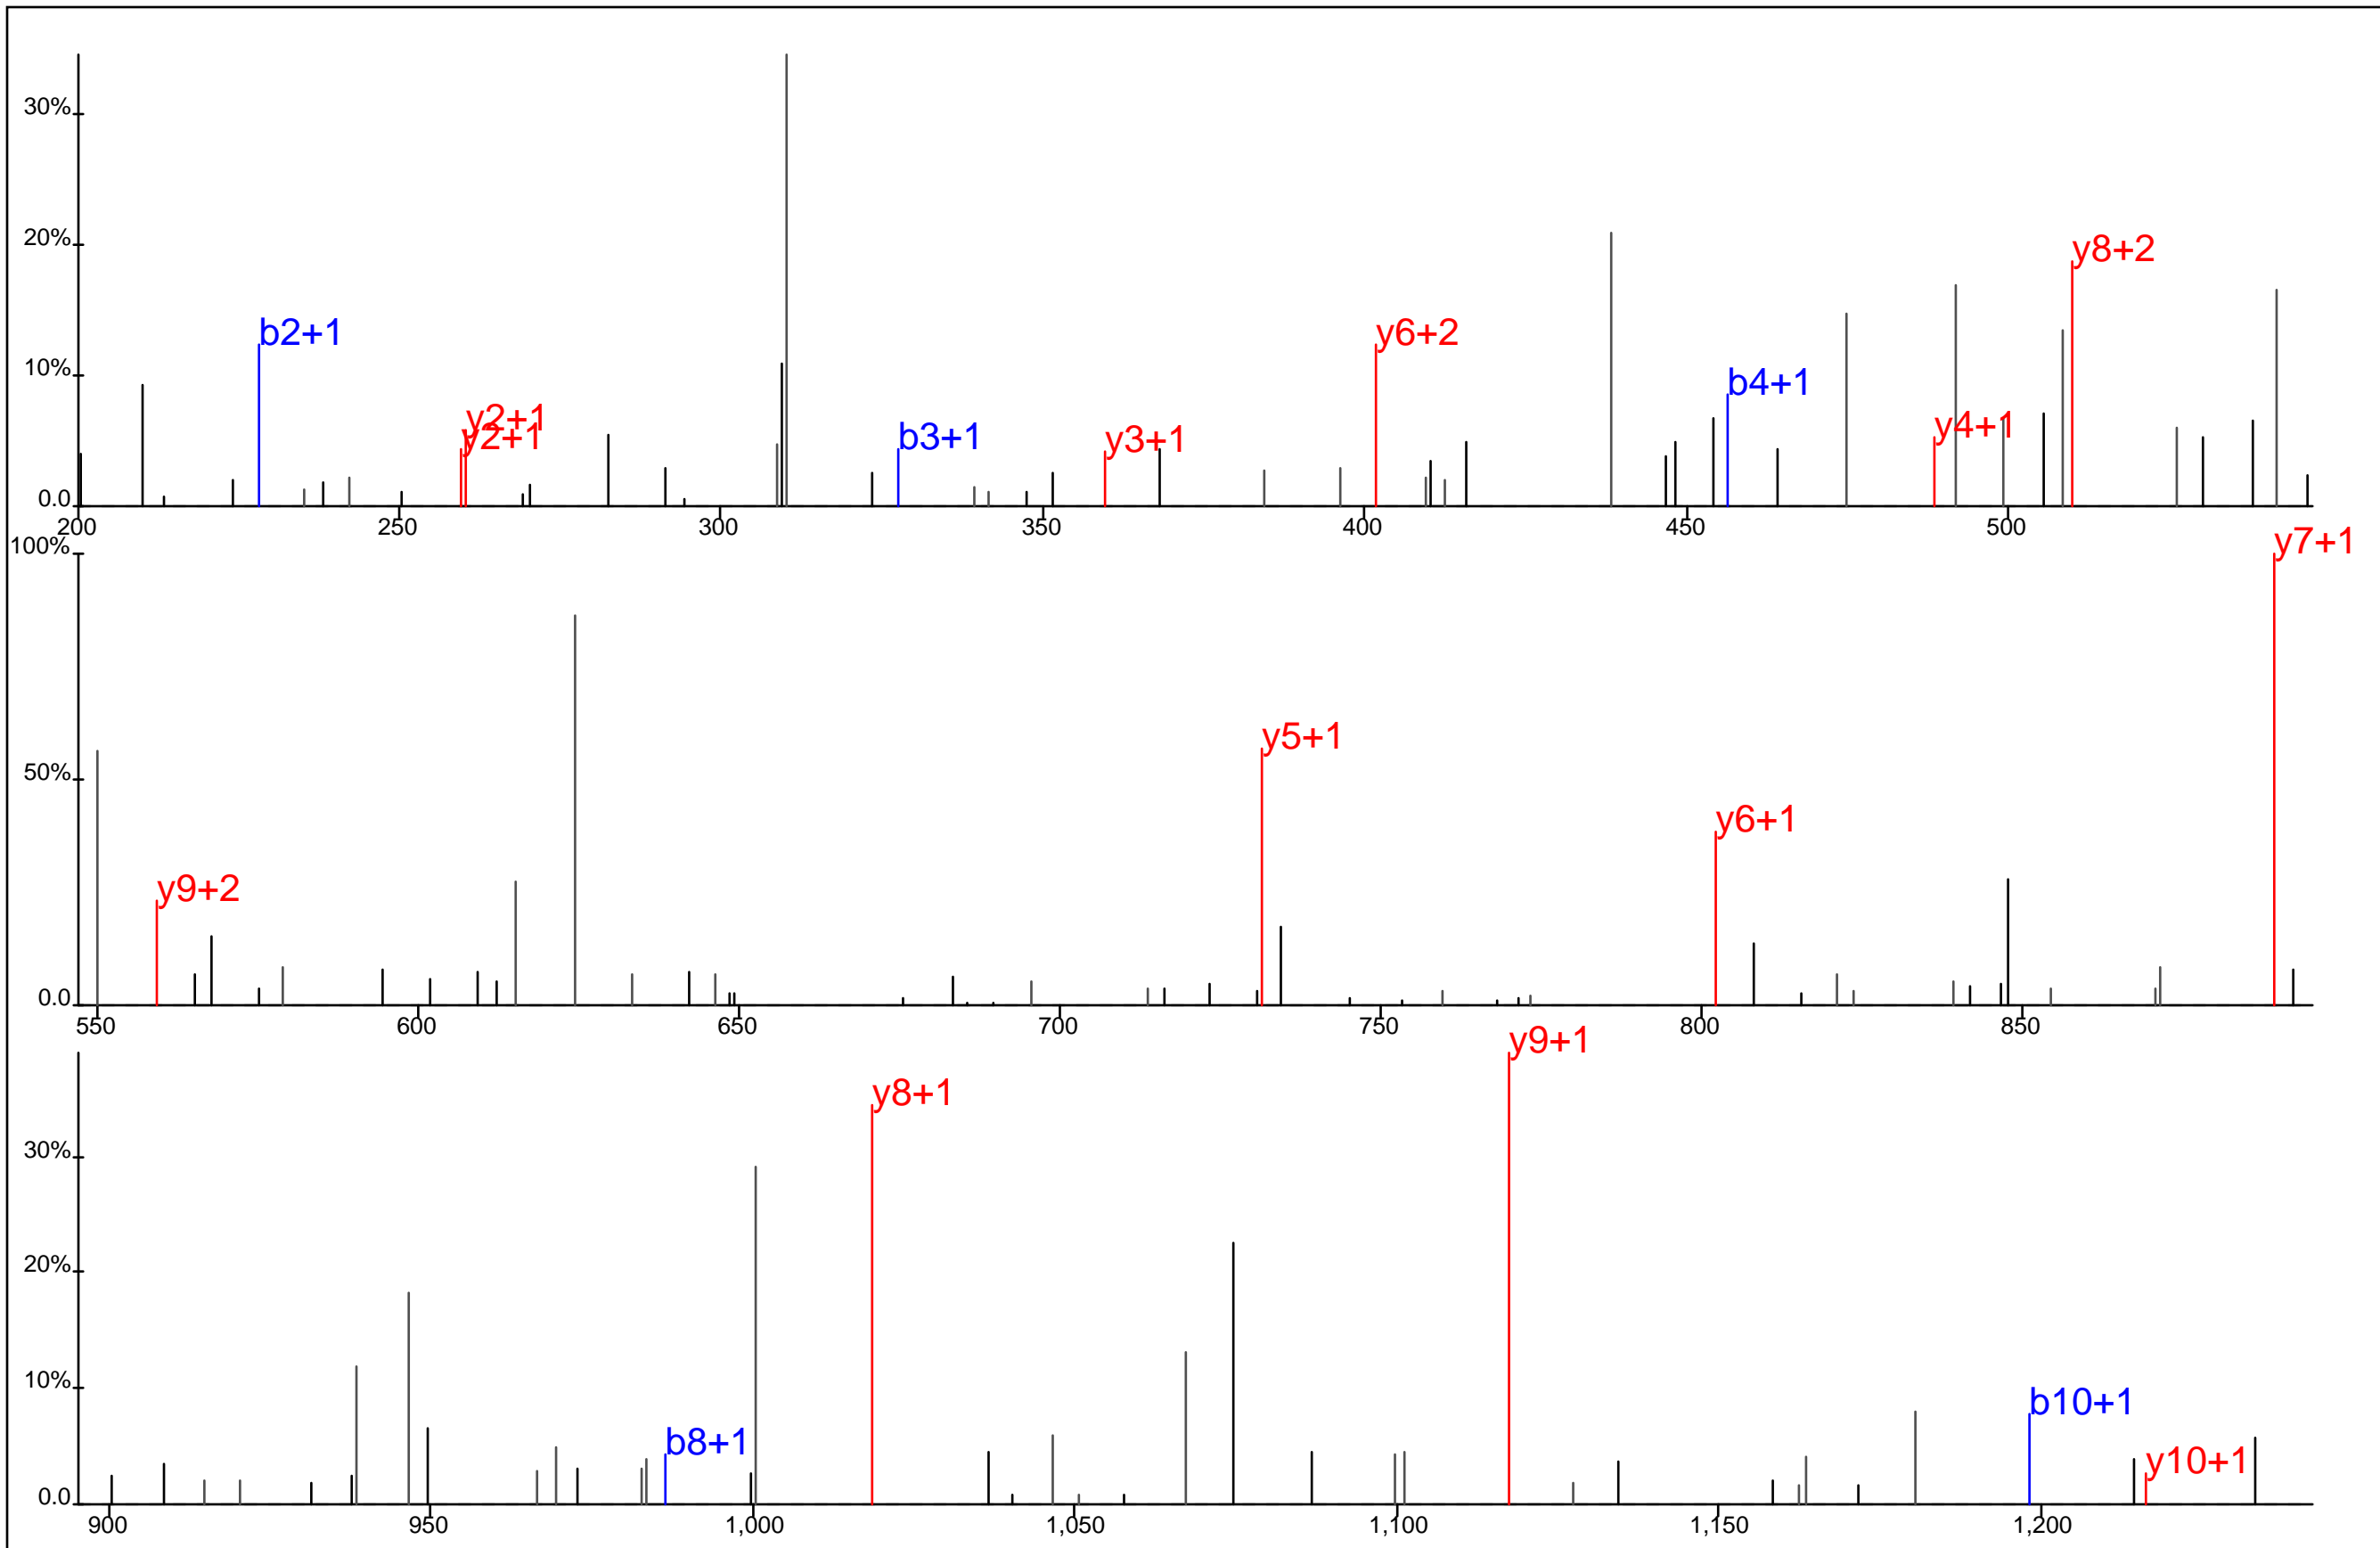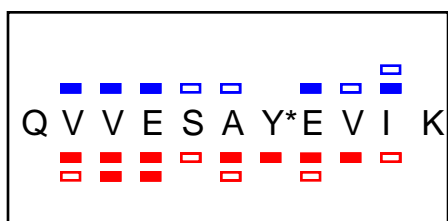

Protein Name: Lactate dehydrogenase A  
 gi Accession: 0  
 Precursor Mass: 672.8265+2  
 Delta Mass: 0.763 ppm  
 XCorr: 33.81

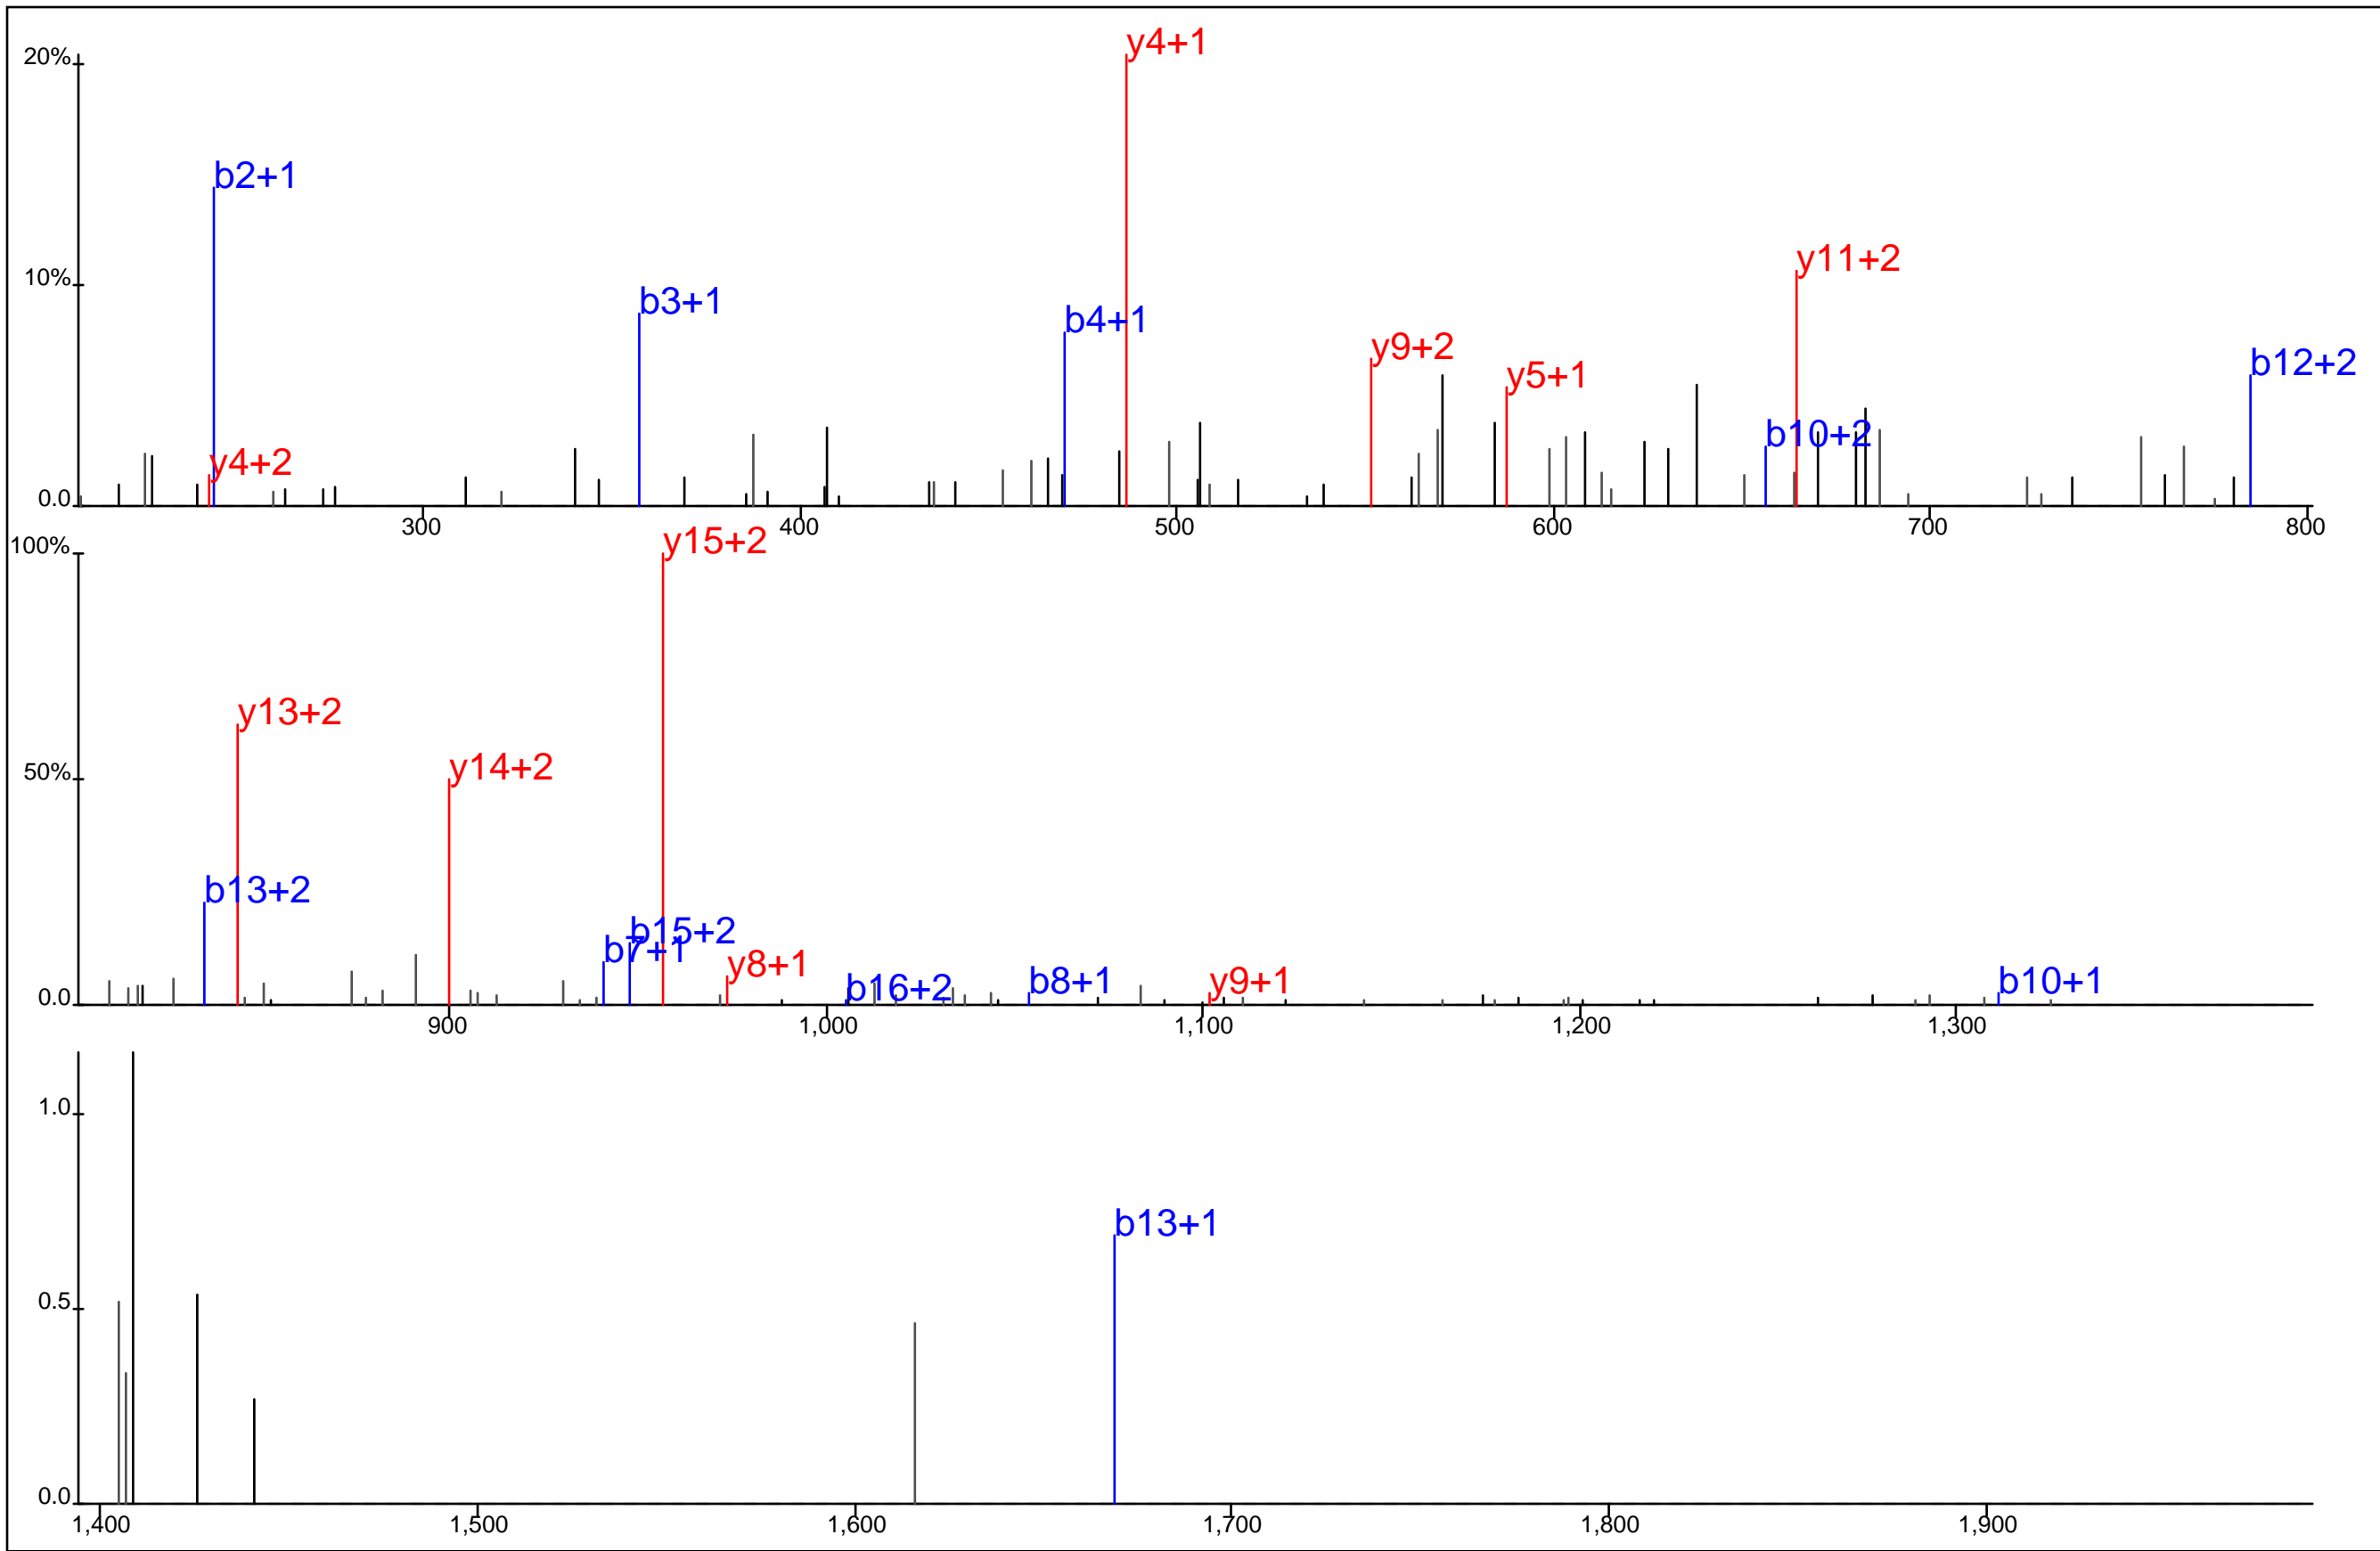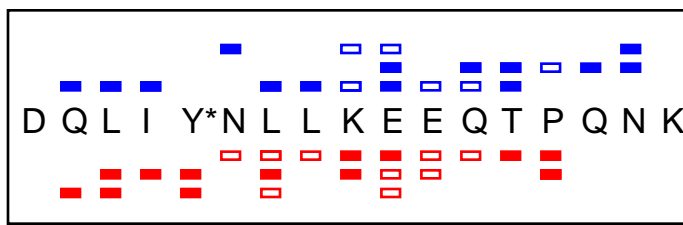

Protein Name: Lactate dehydrogenase A  
 gi Accession: 0  
 Precursor Mass: 718.6868+3  
 Delta Mass: 0.947 ppm  
 XCorr: 31.72

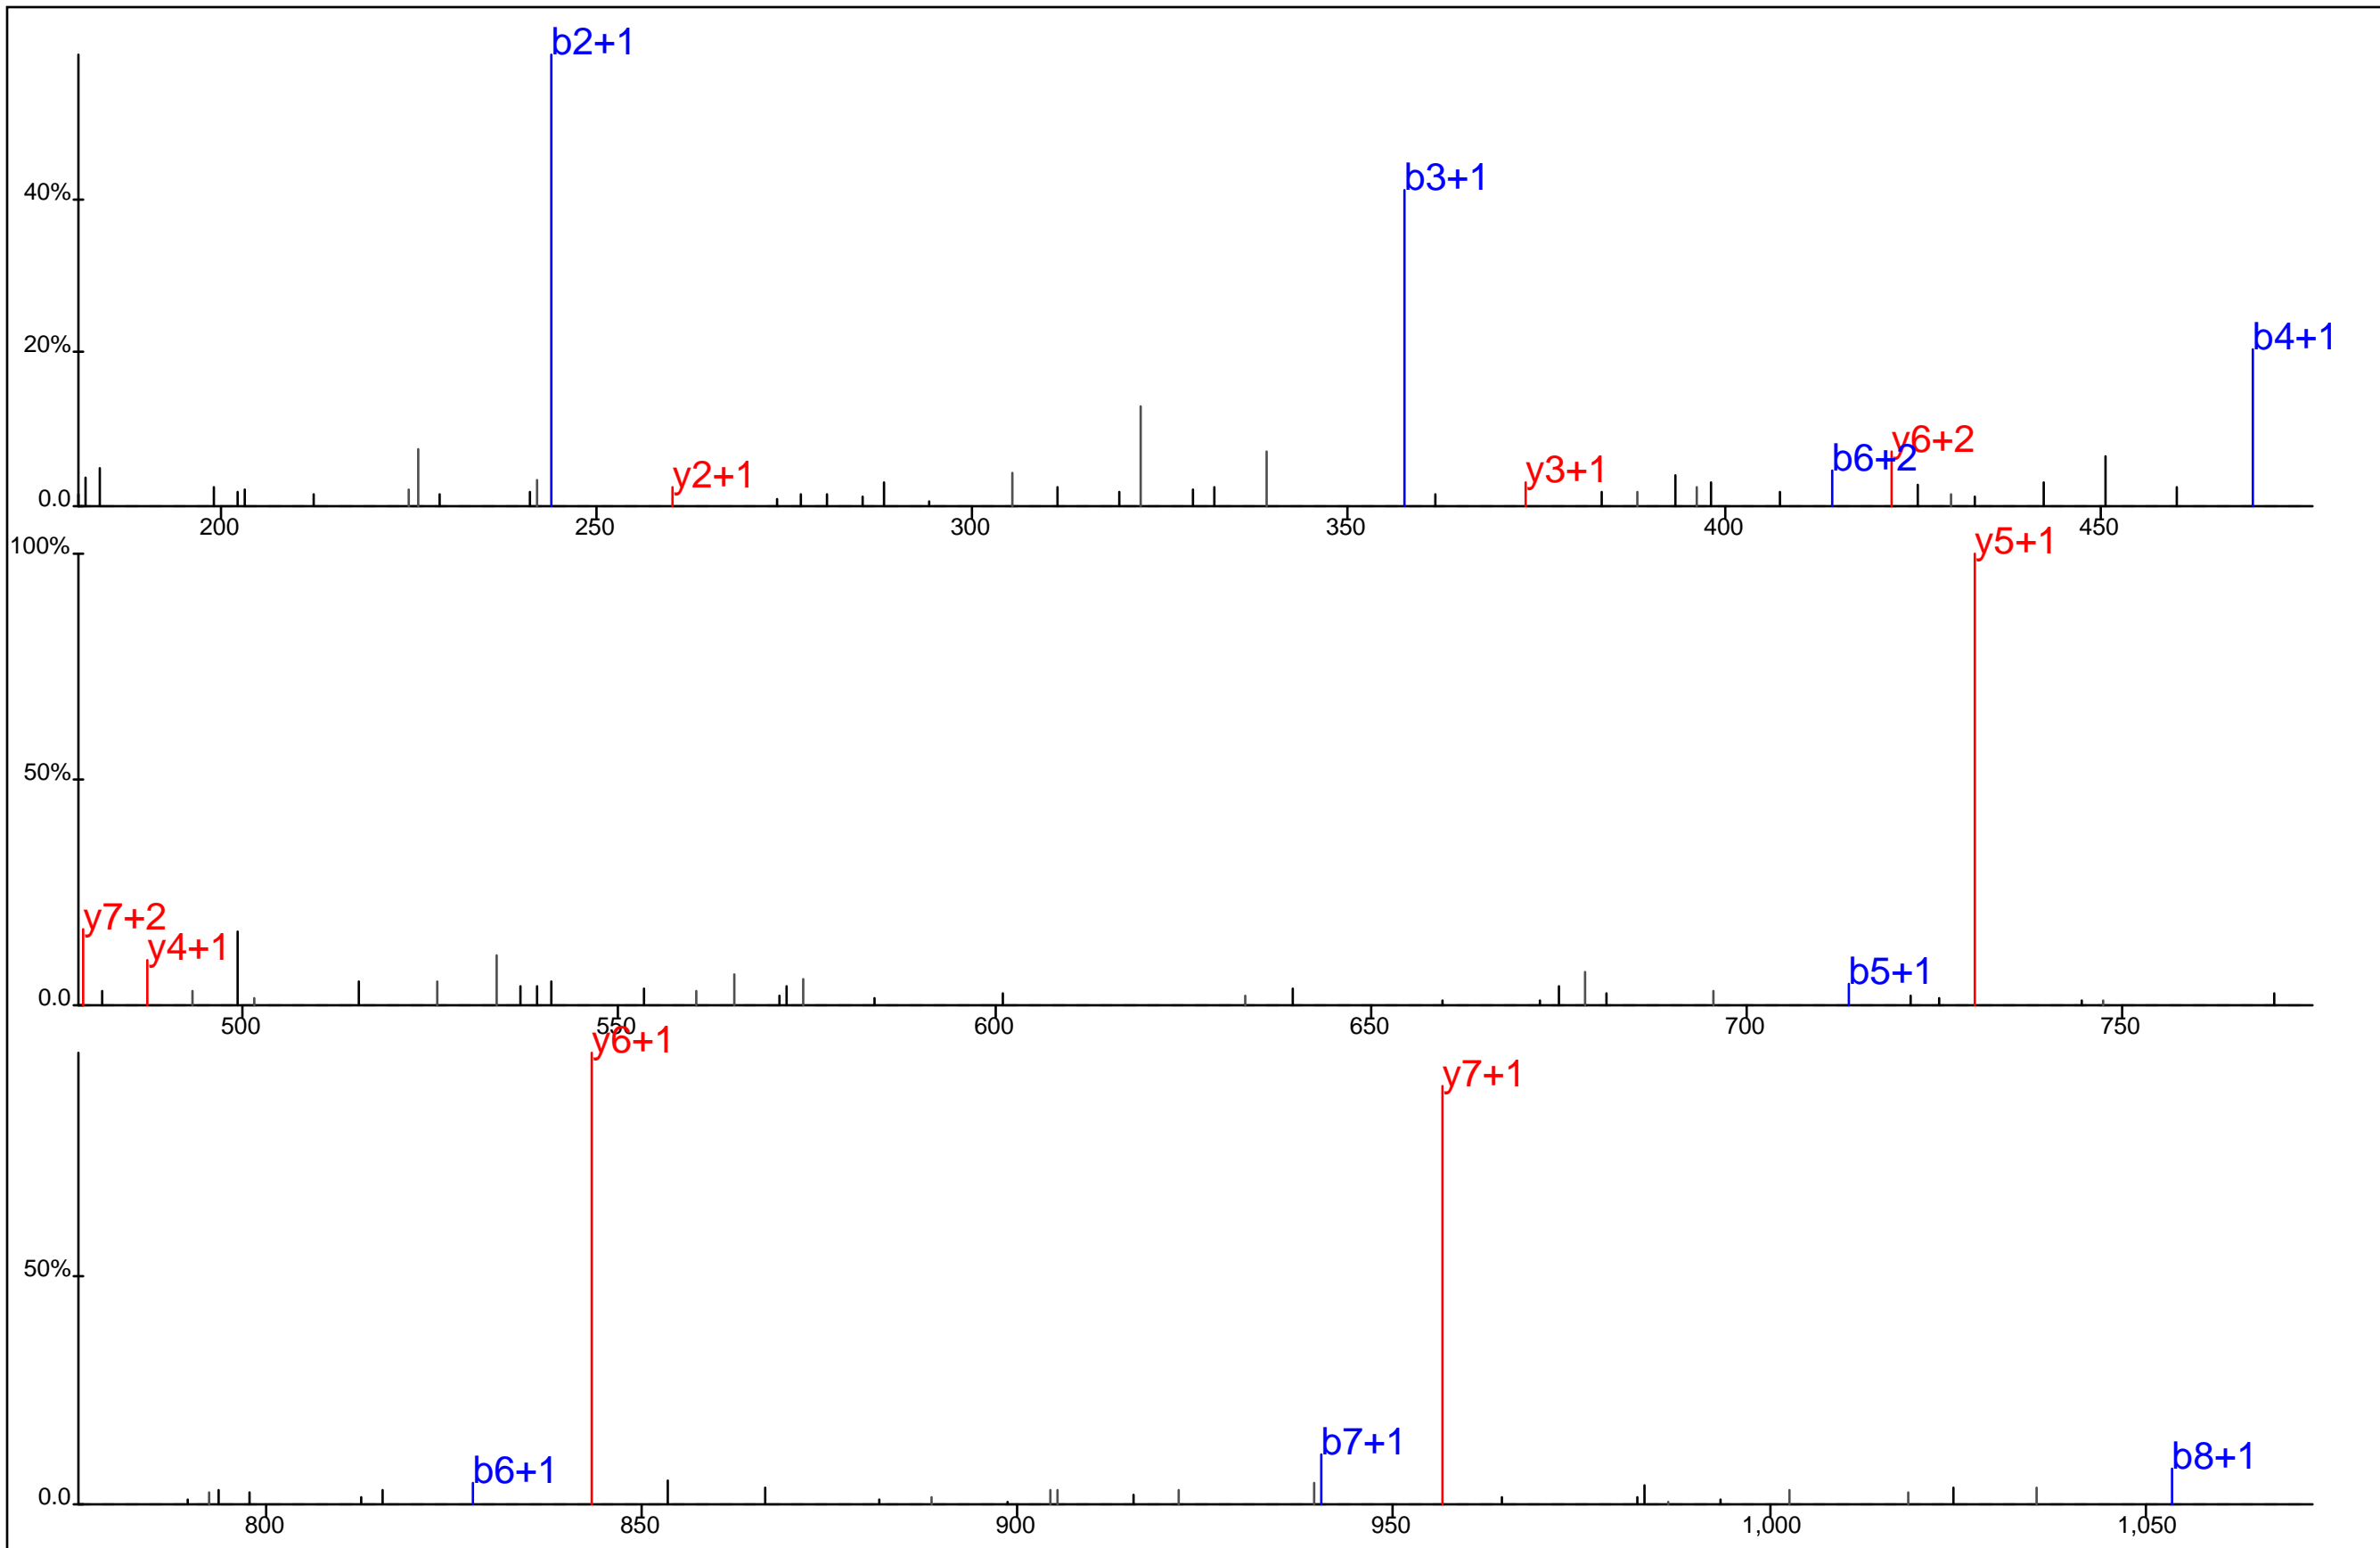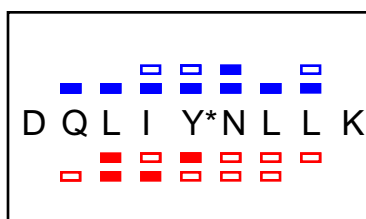

Protein Name: Lactate dehydrogenase A  
 gi Accession: 0  
 Precursor Mass: 600.3065+2  
 Delta Mass: 1.244 ppm  
 XCorr: 53.66

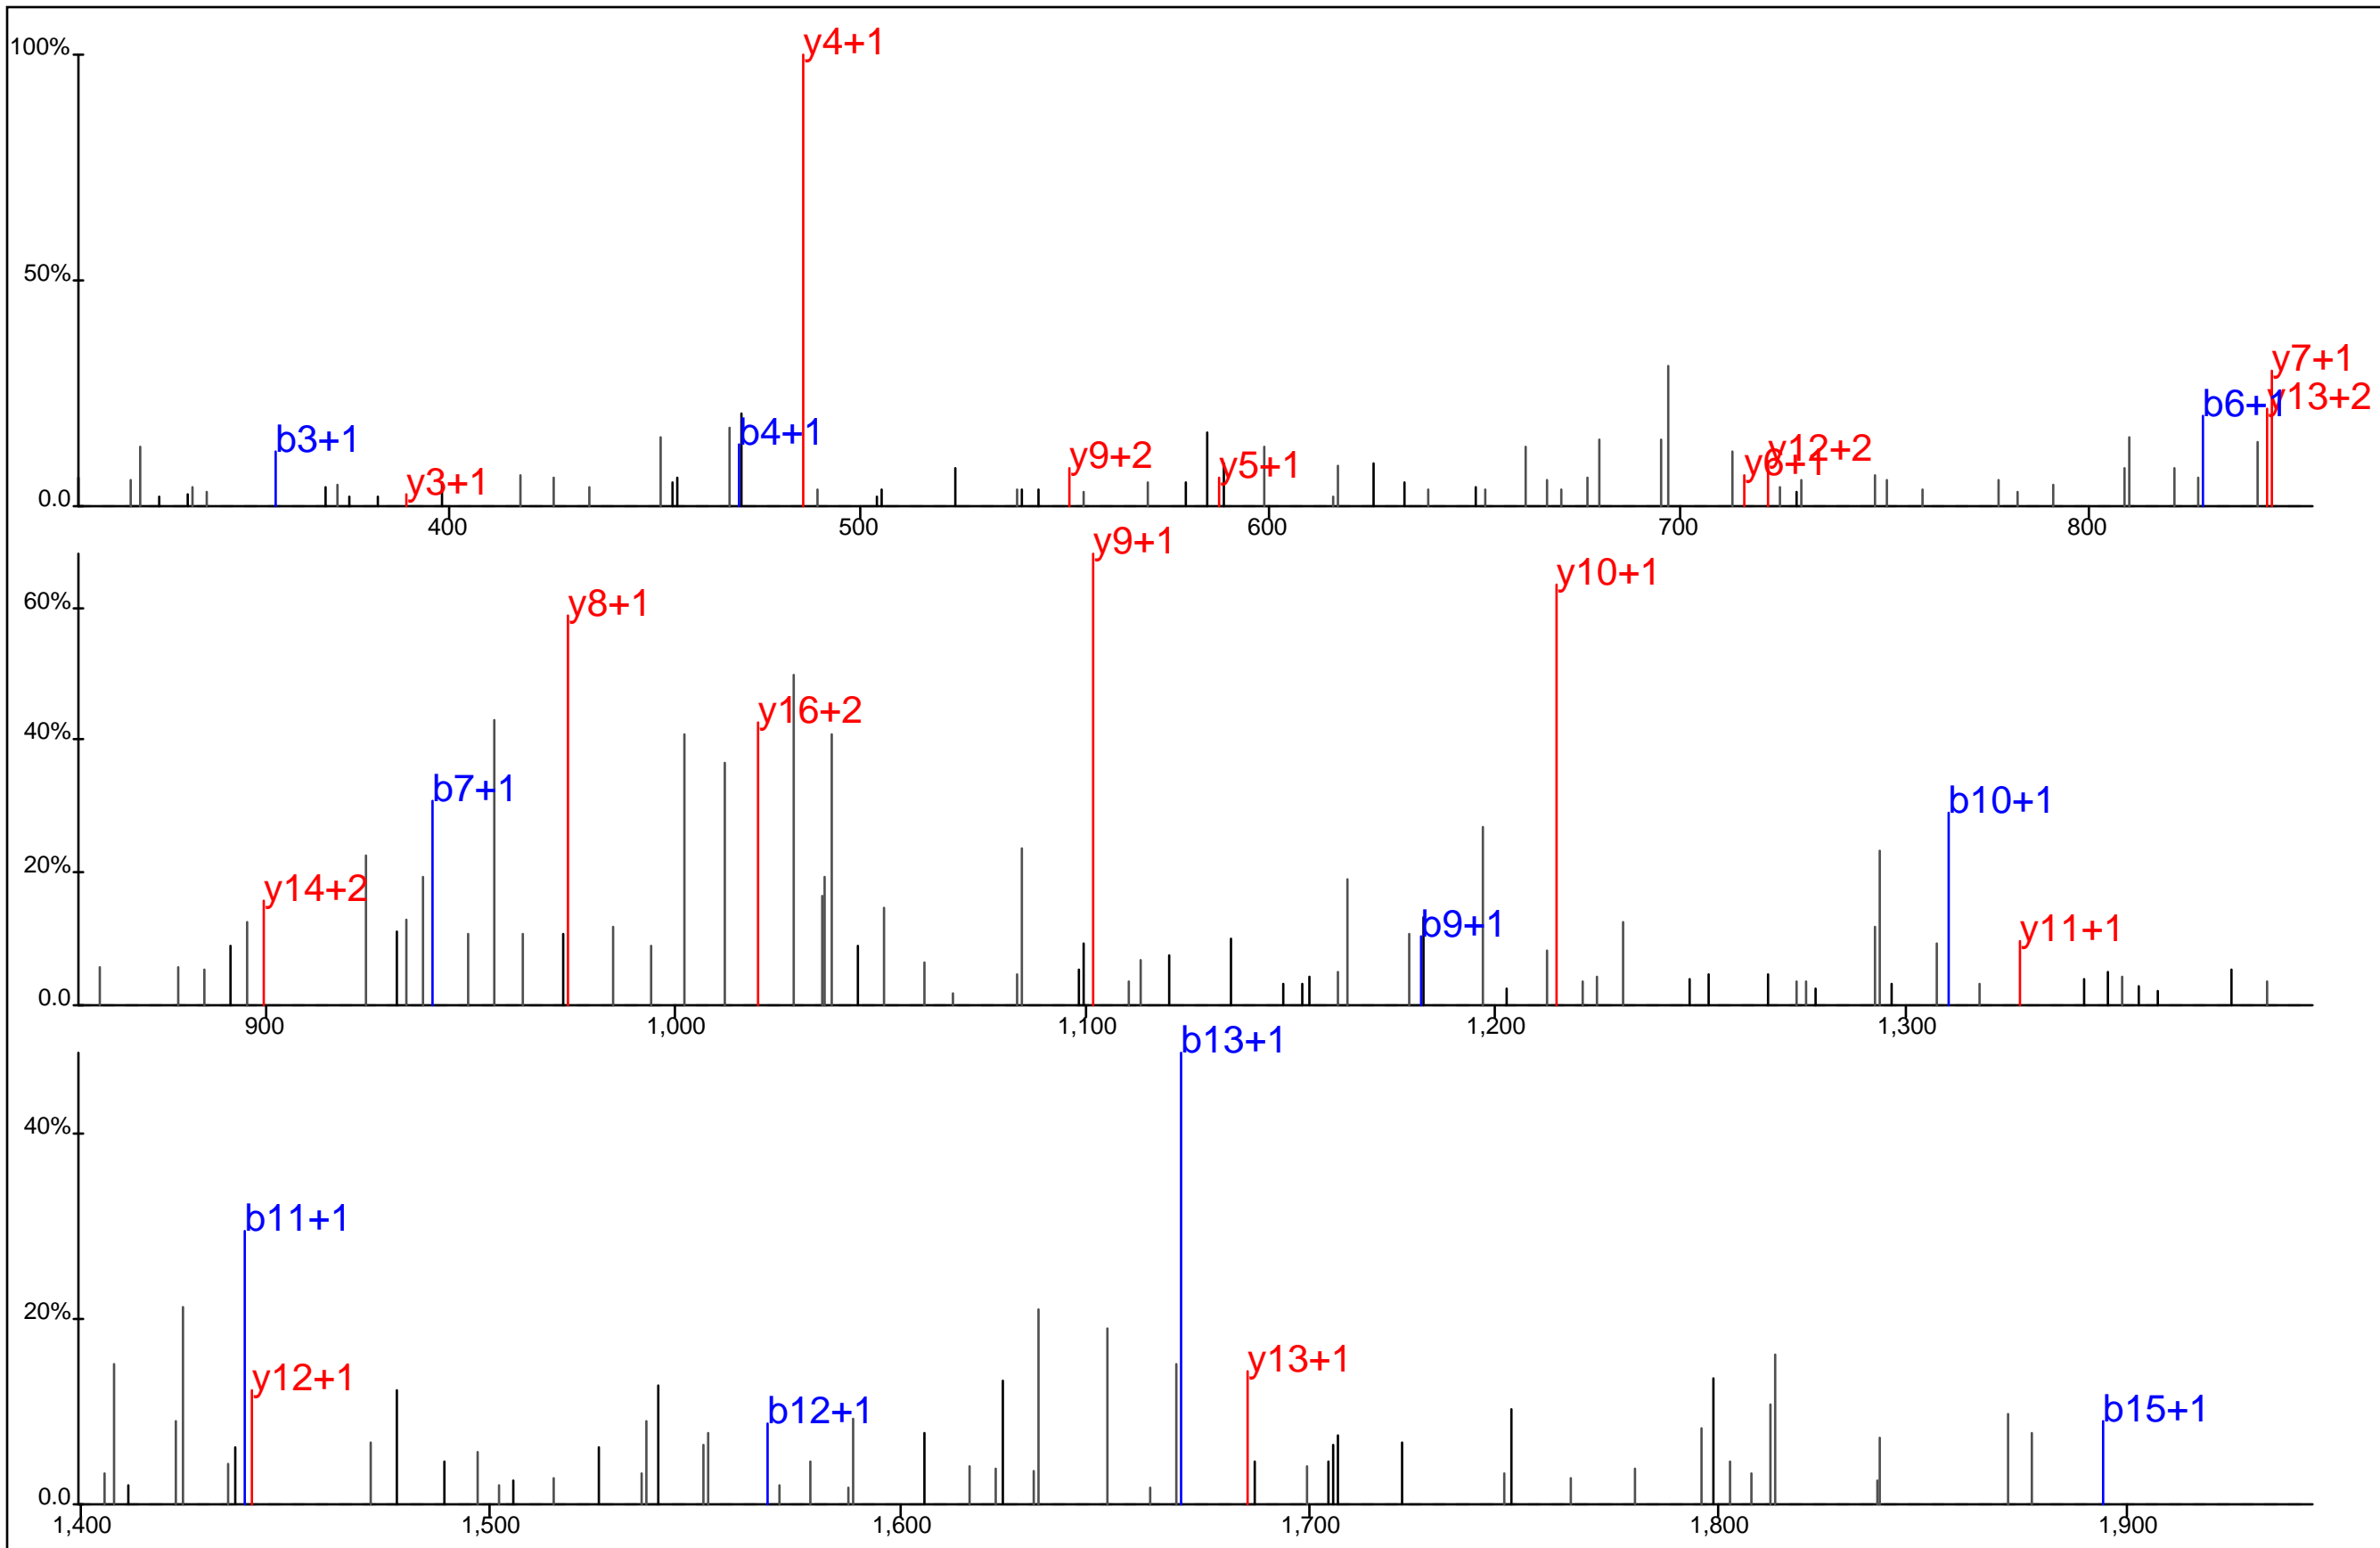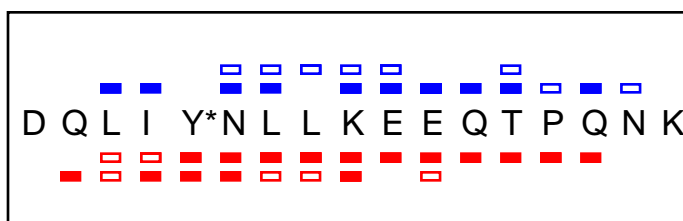

Protein Name: Lactate dehydrogenase A  
 gi Accession: 0  
 Precursor Mass: 1,077.5264+2  
 Delta Mass: 1.084 ppm  
 XCorr: 41.2

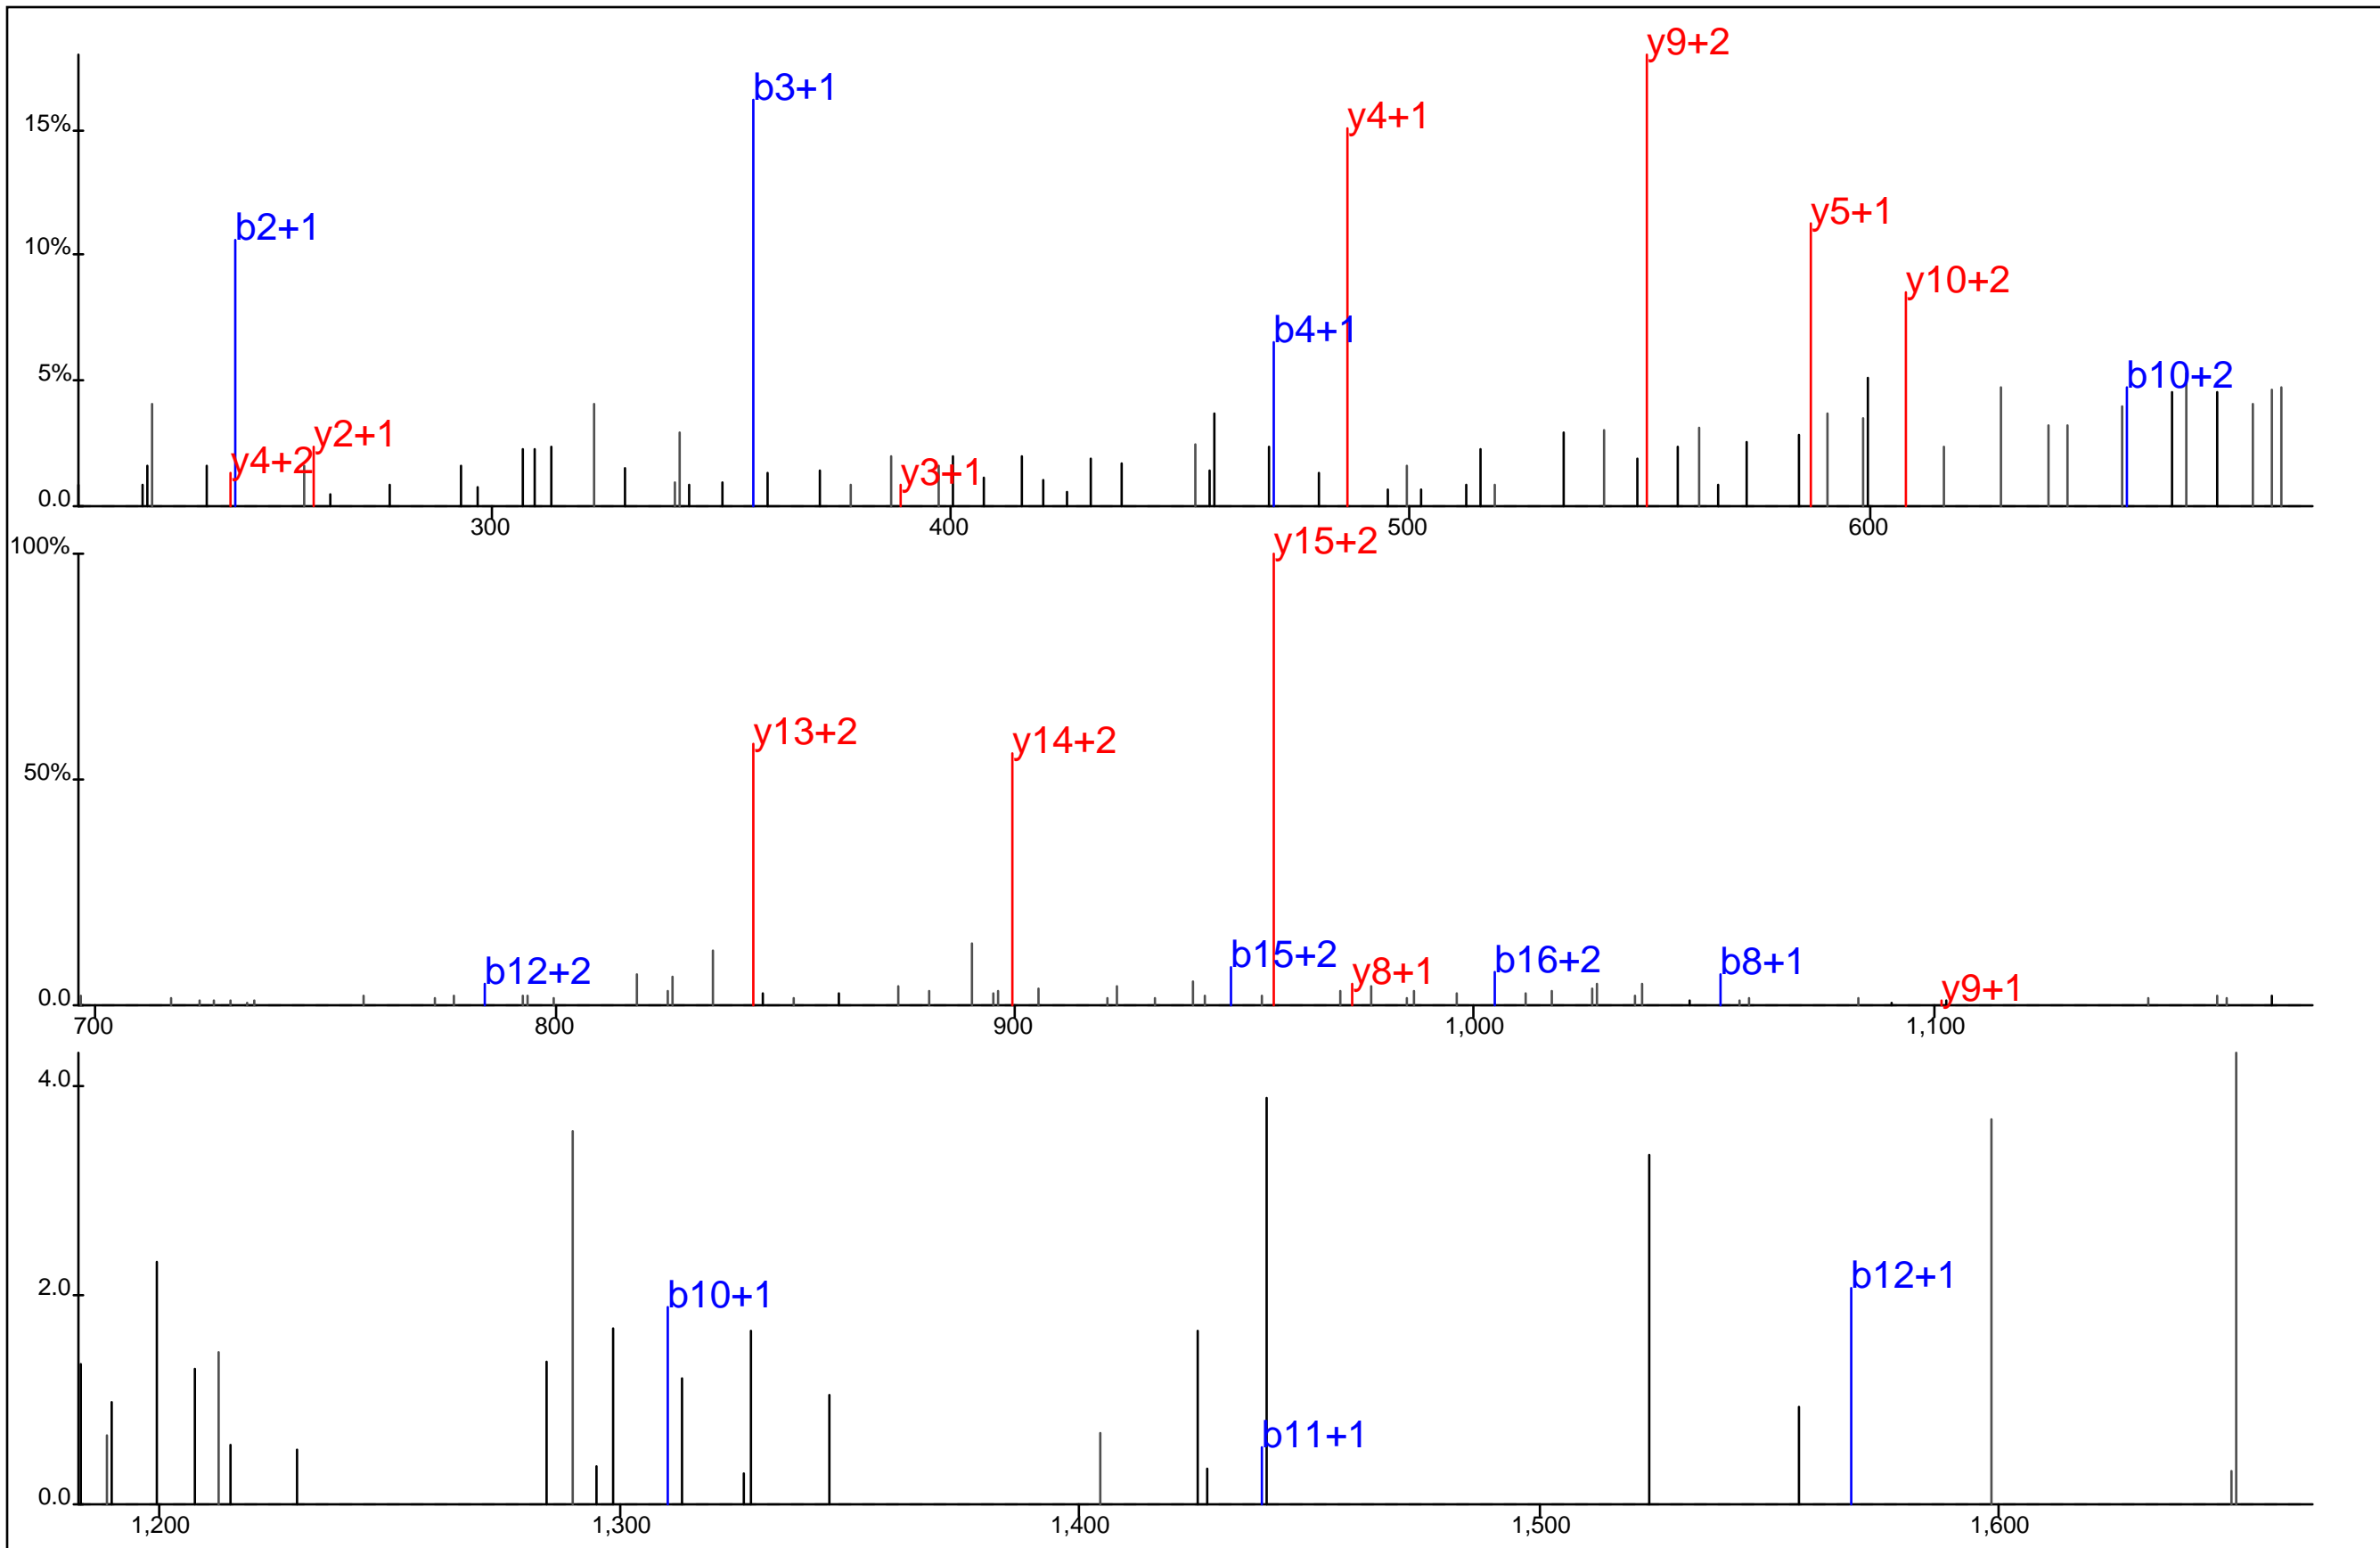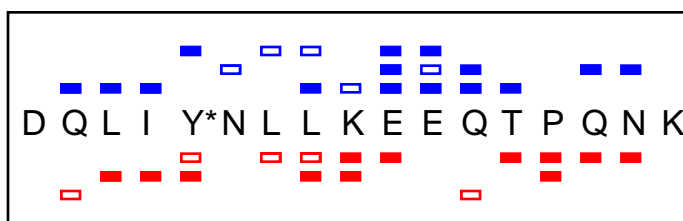

Protein Name: Lactate dehydrogenase A  
 gi Accession: 0  
 Precursor Mass: 718.6864+3  
 Delta Mass: 1.458 ppm  
 XCorr: 40.42



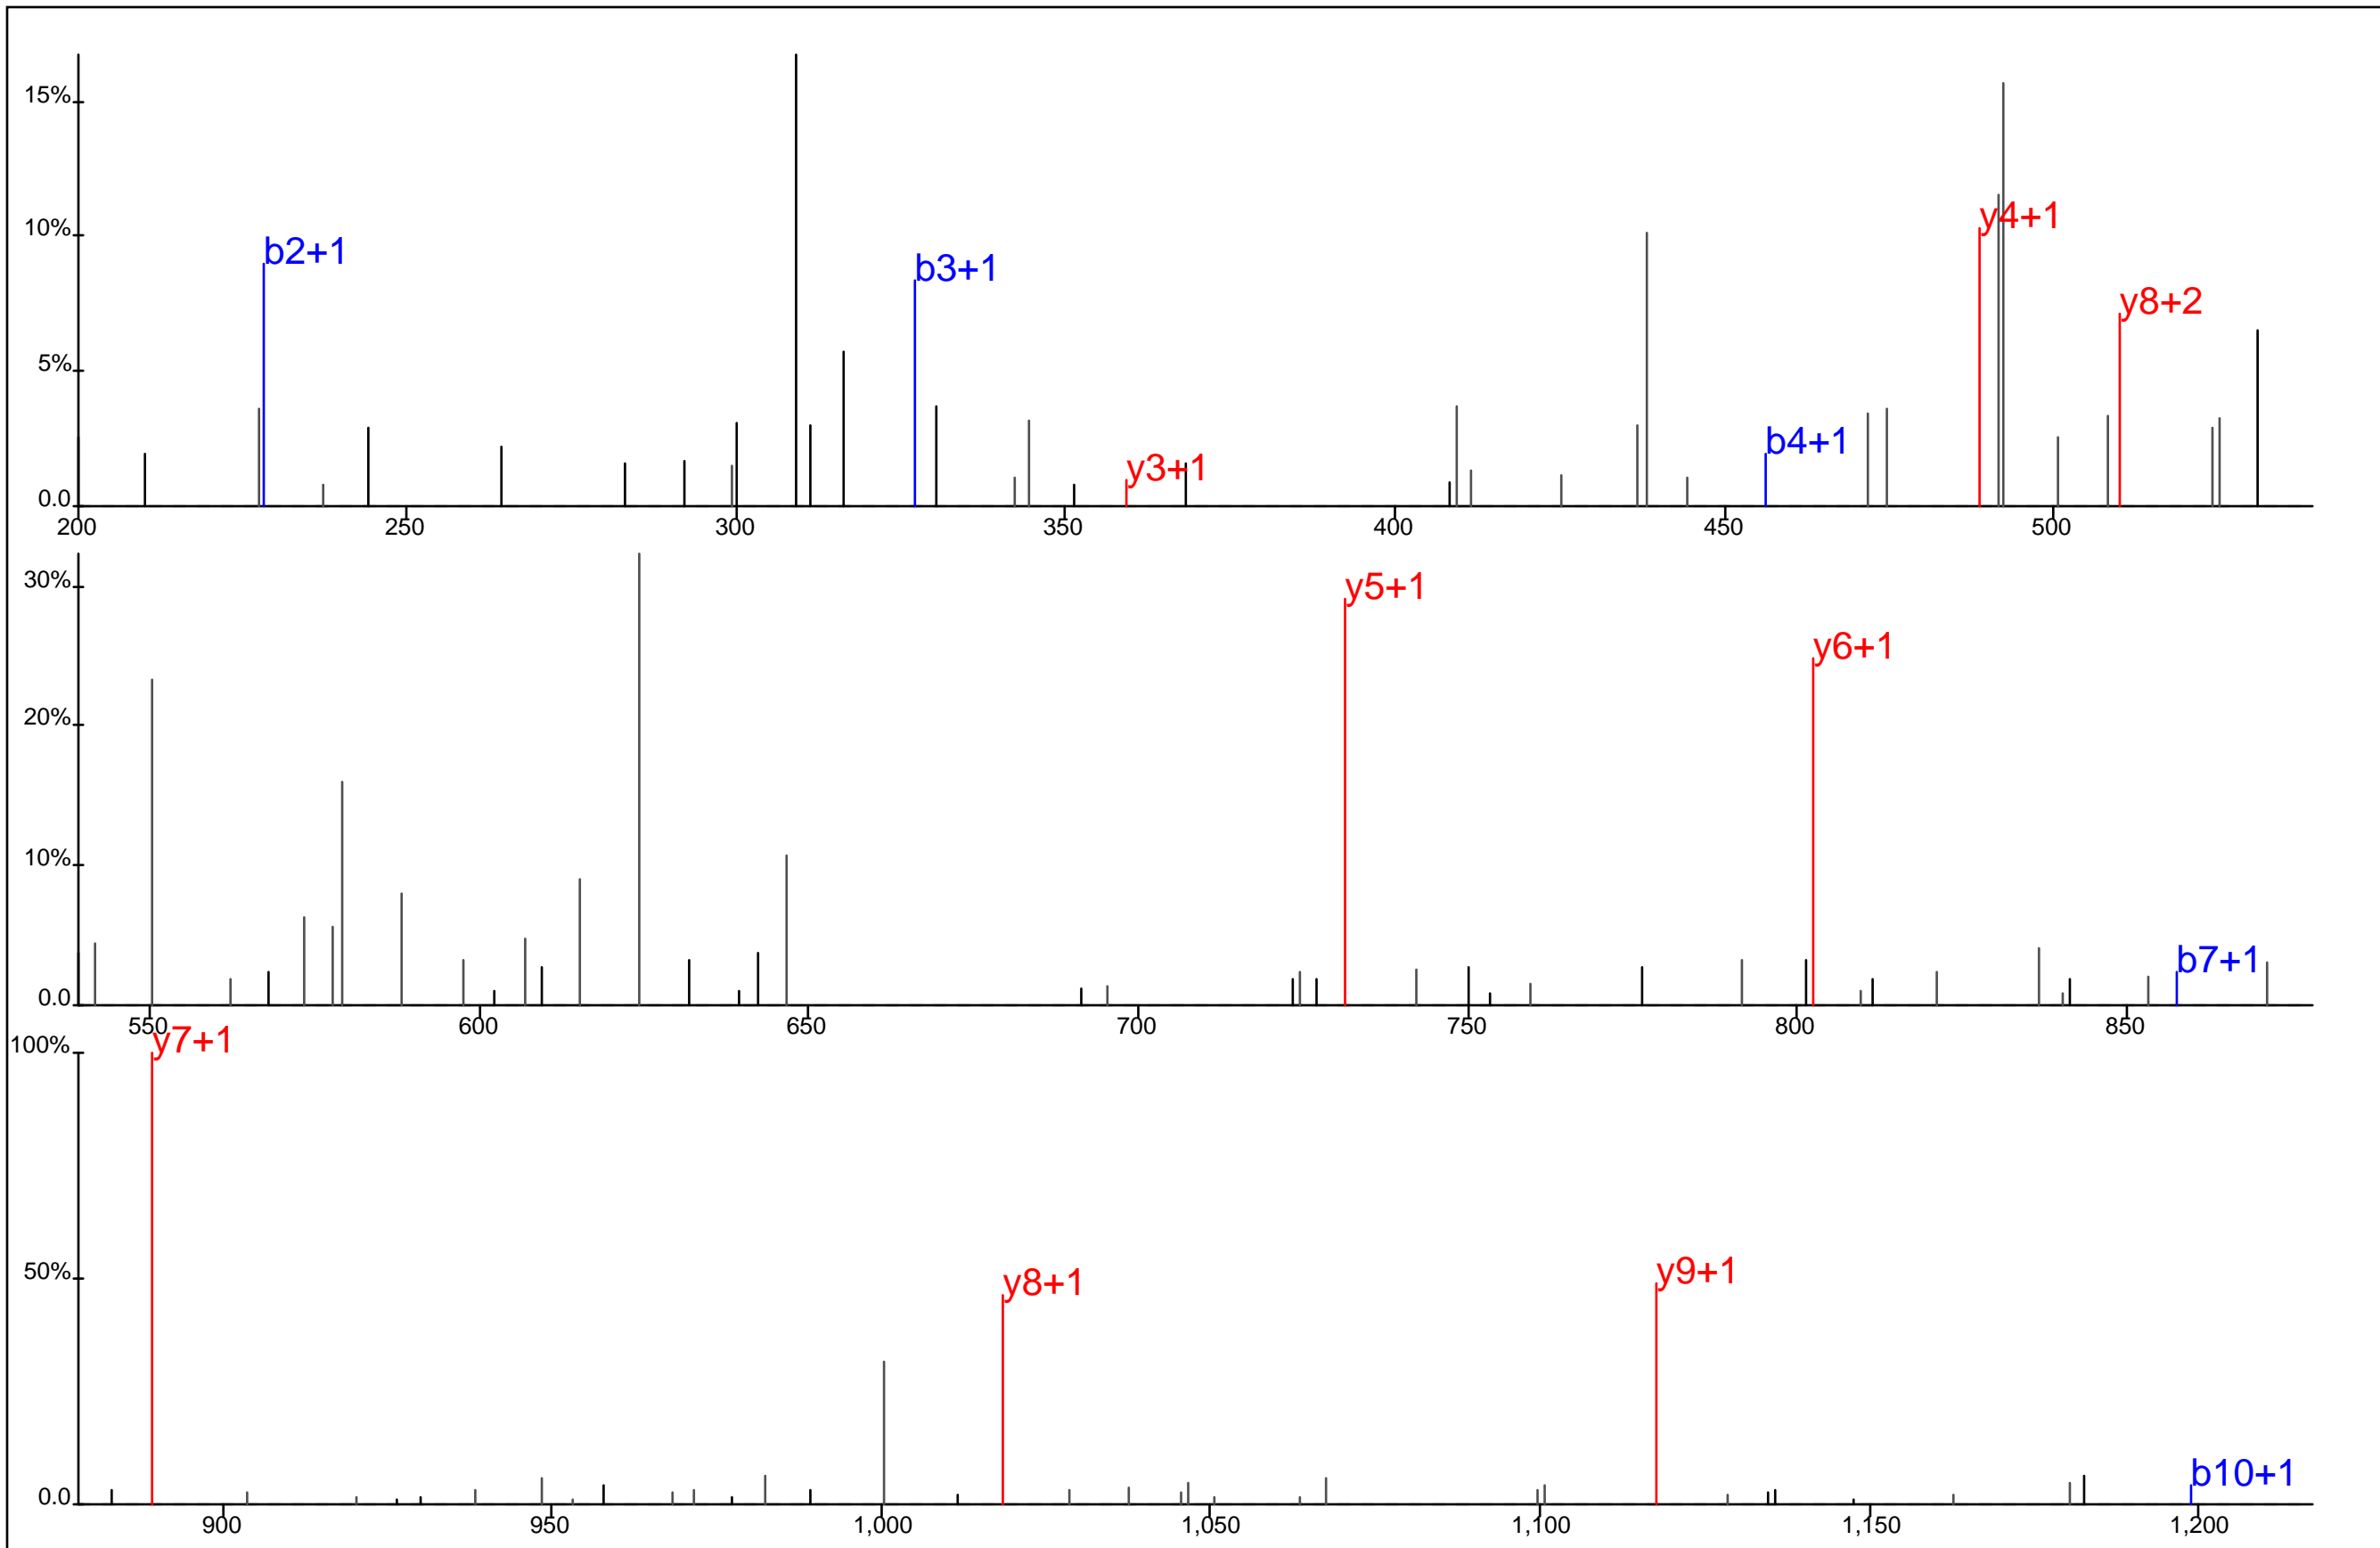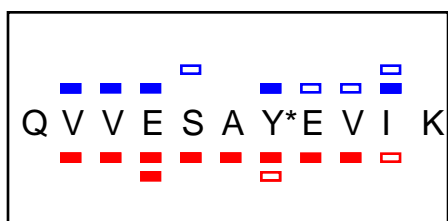

Protein Name: Lactate dehydrogenase A  
 gi Accession: 0  
 Precursor Mass: 672.8259+2  
 Delta Mass: 0.144 ppm  
 XCorr: 33.43

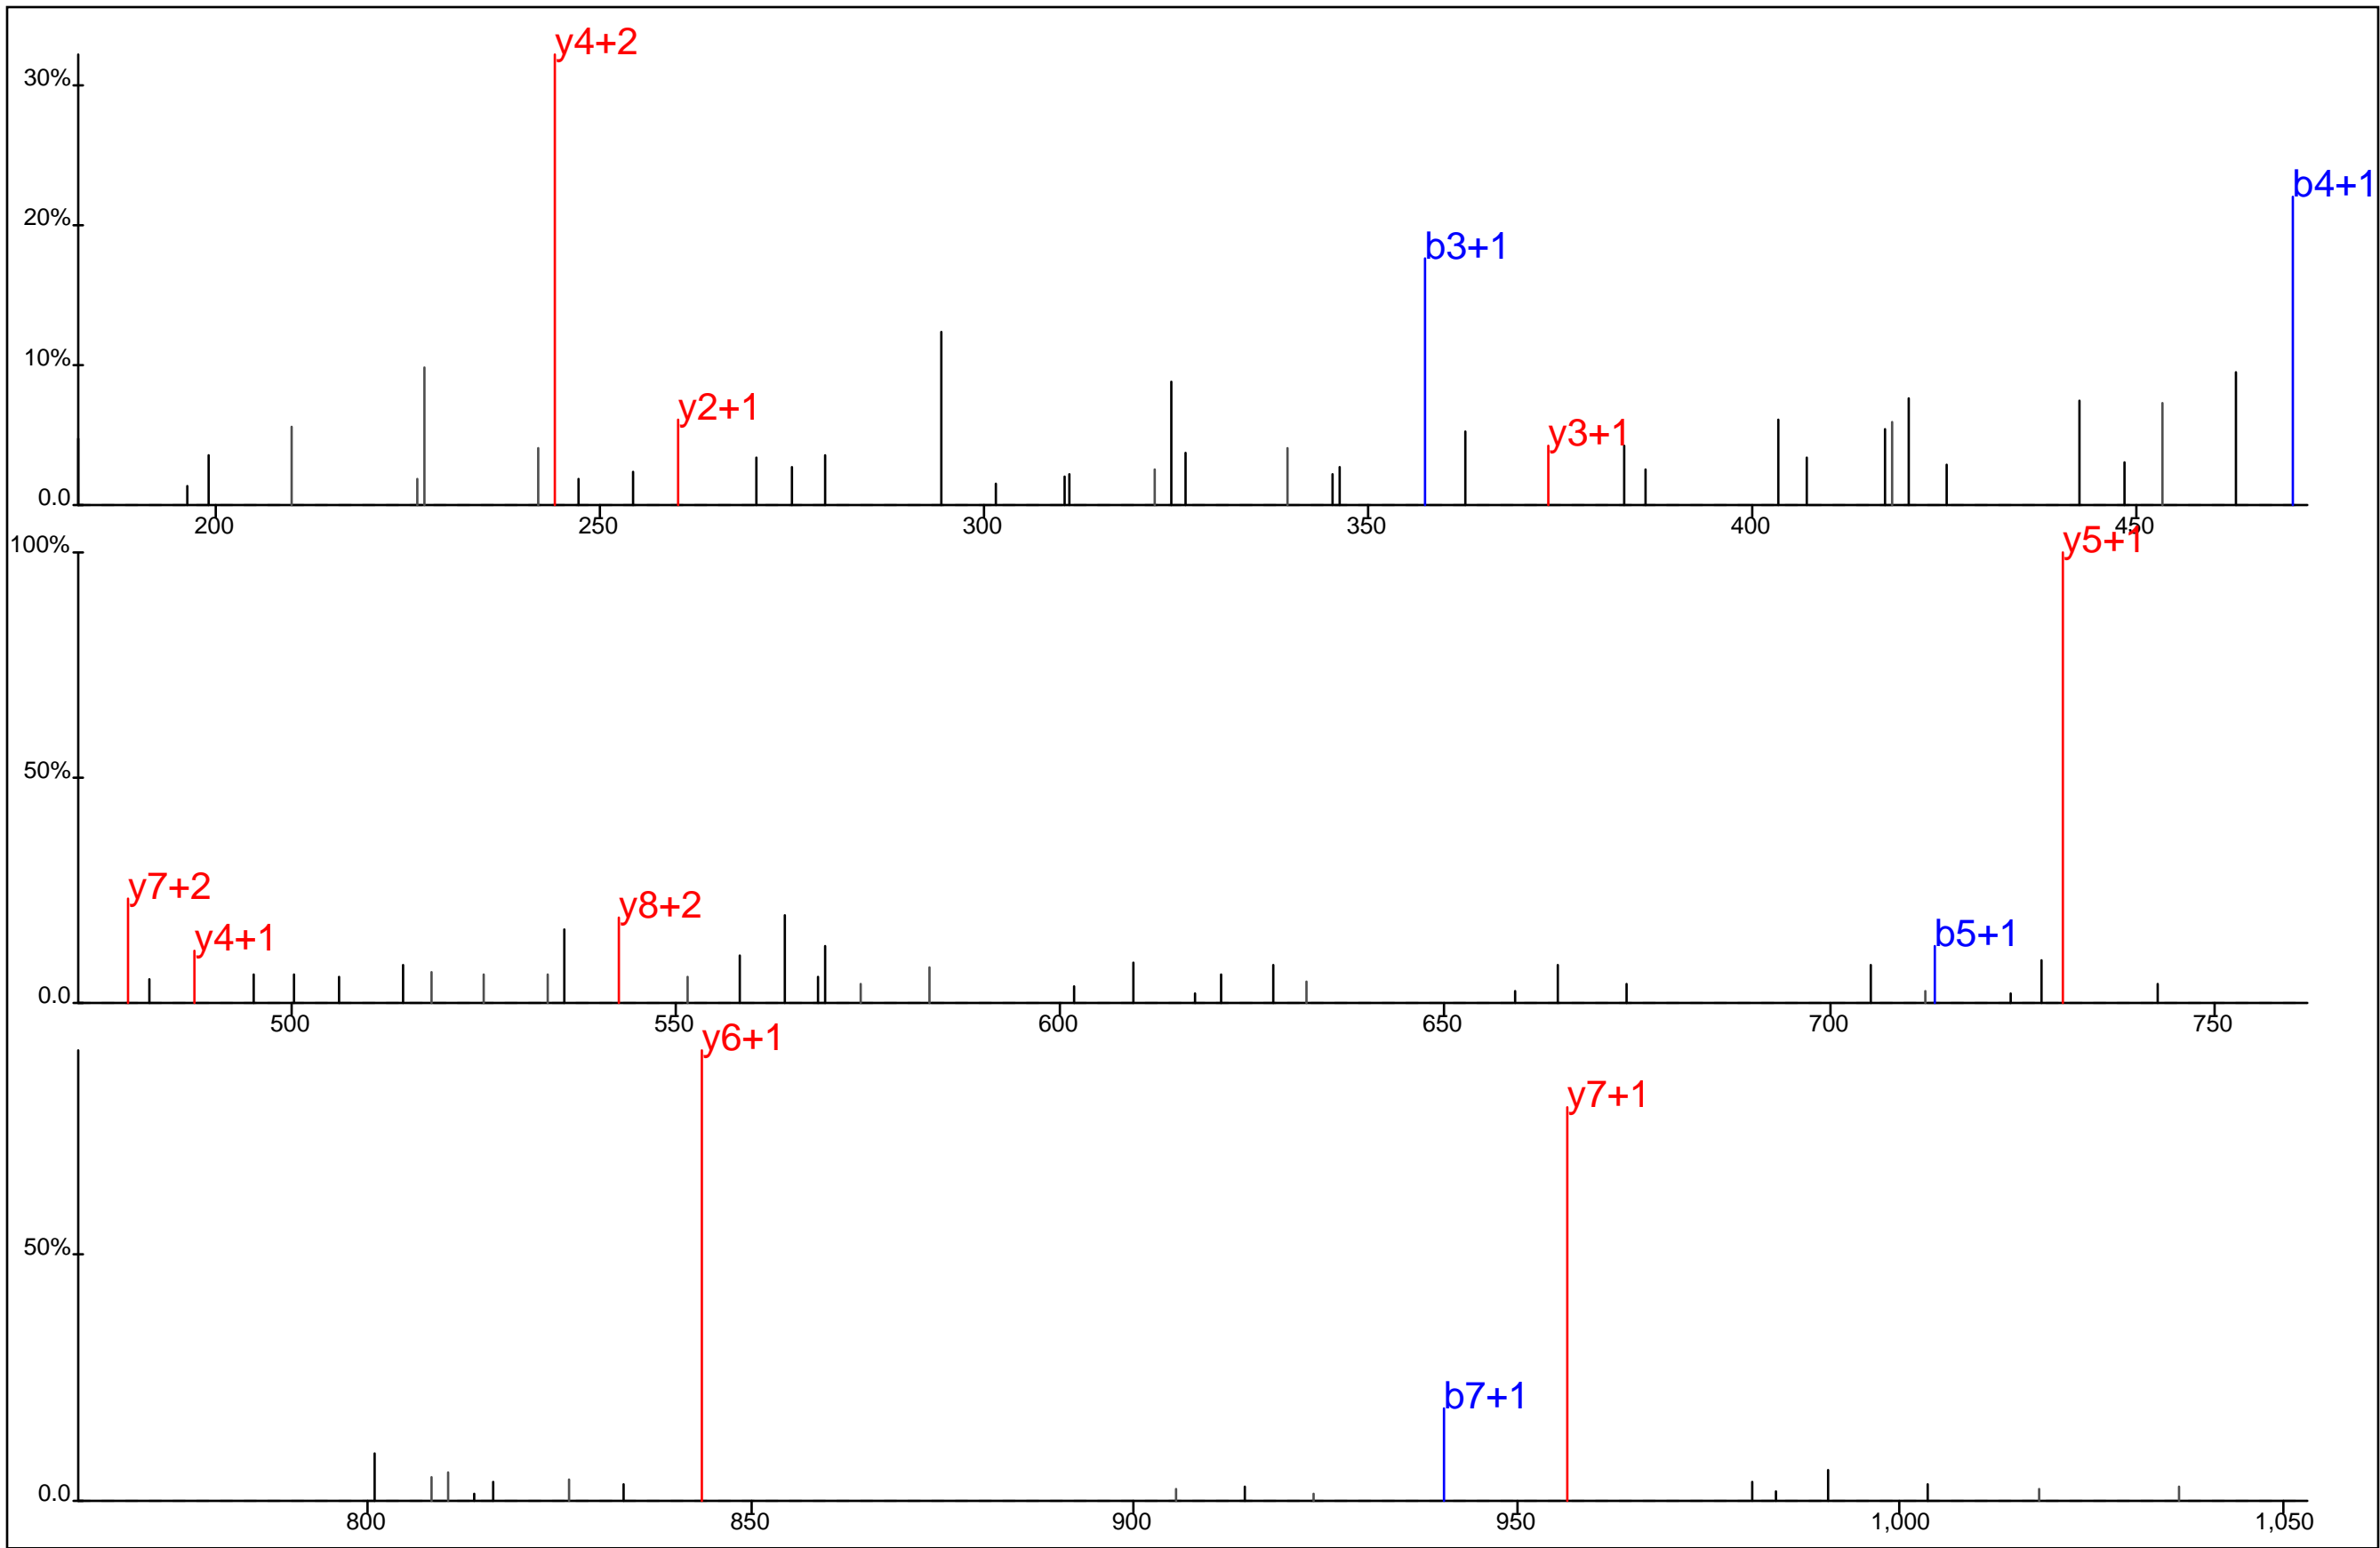

□ □ □ □ □ □ □  
□ □ □ □ □ □ □  
**D Q L I Y\* N L L K**

Protein Name: Lactate dehydrogenase A  
 gi Accession: 0  
 Precursor Mass: 600.3075+2  
 Delta Mass: 0.485 ppm  
 XCorr: 43.16

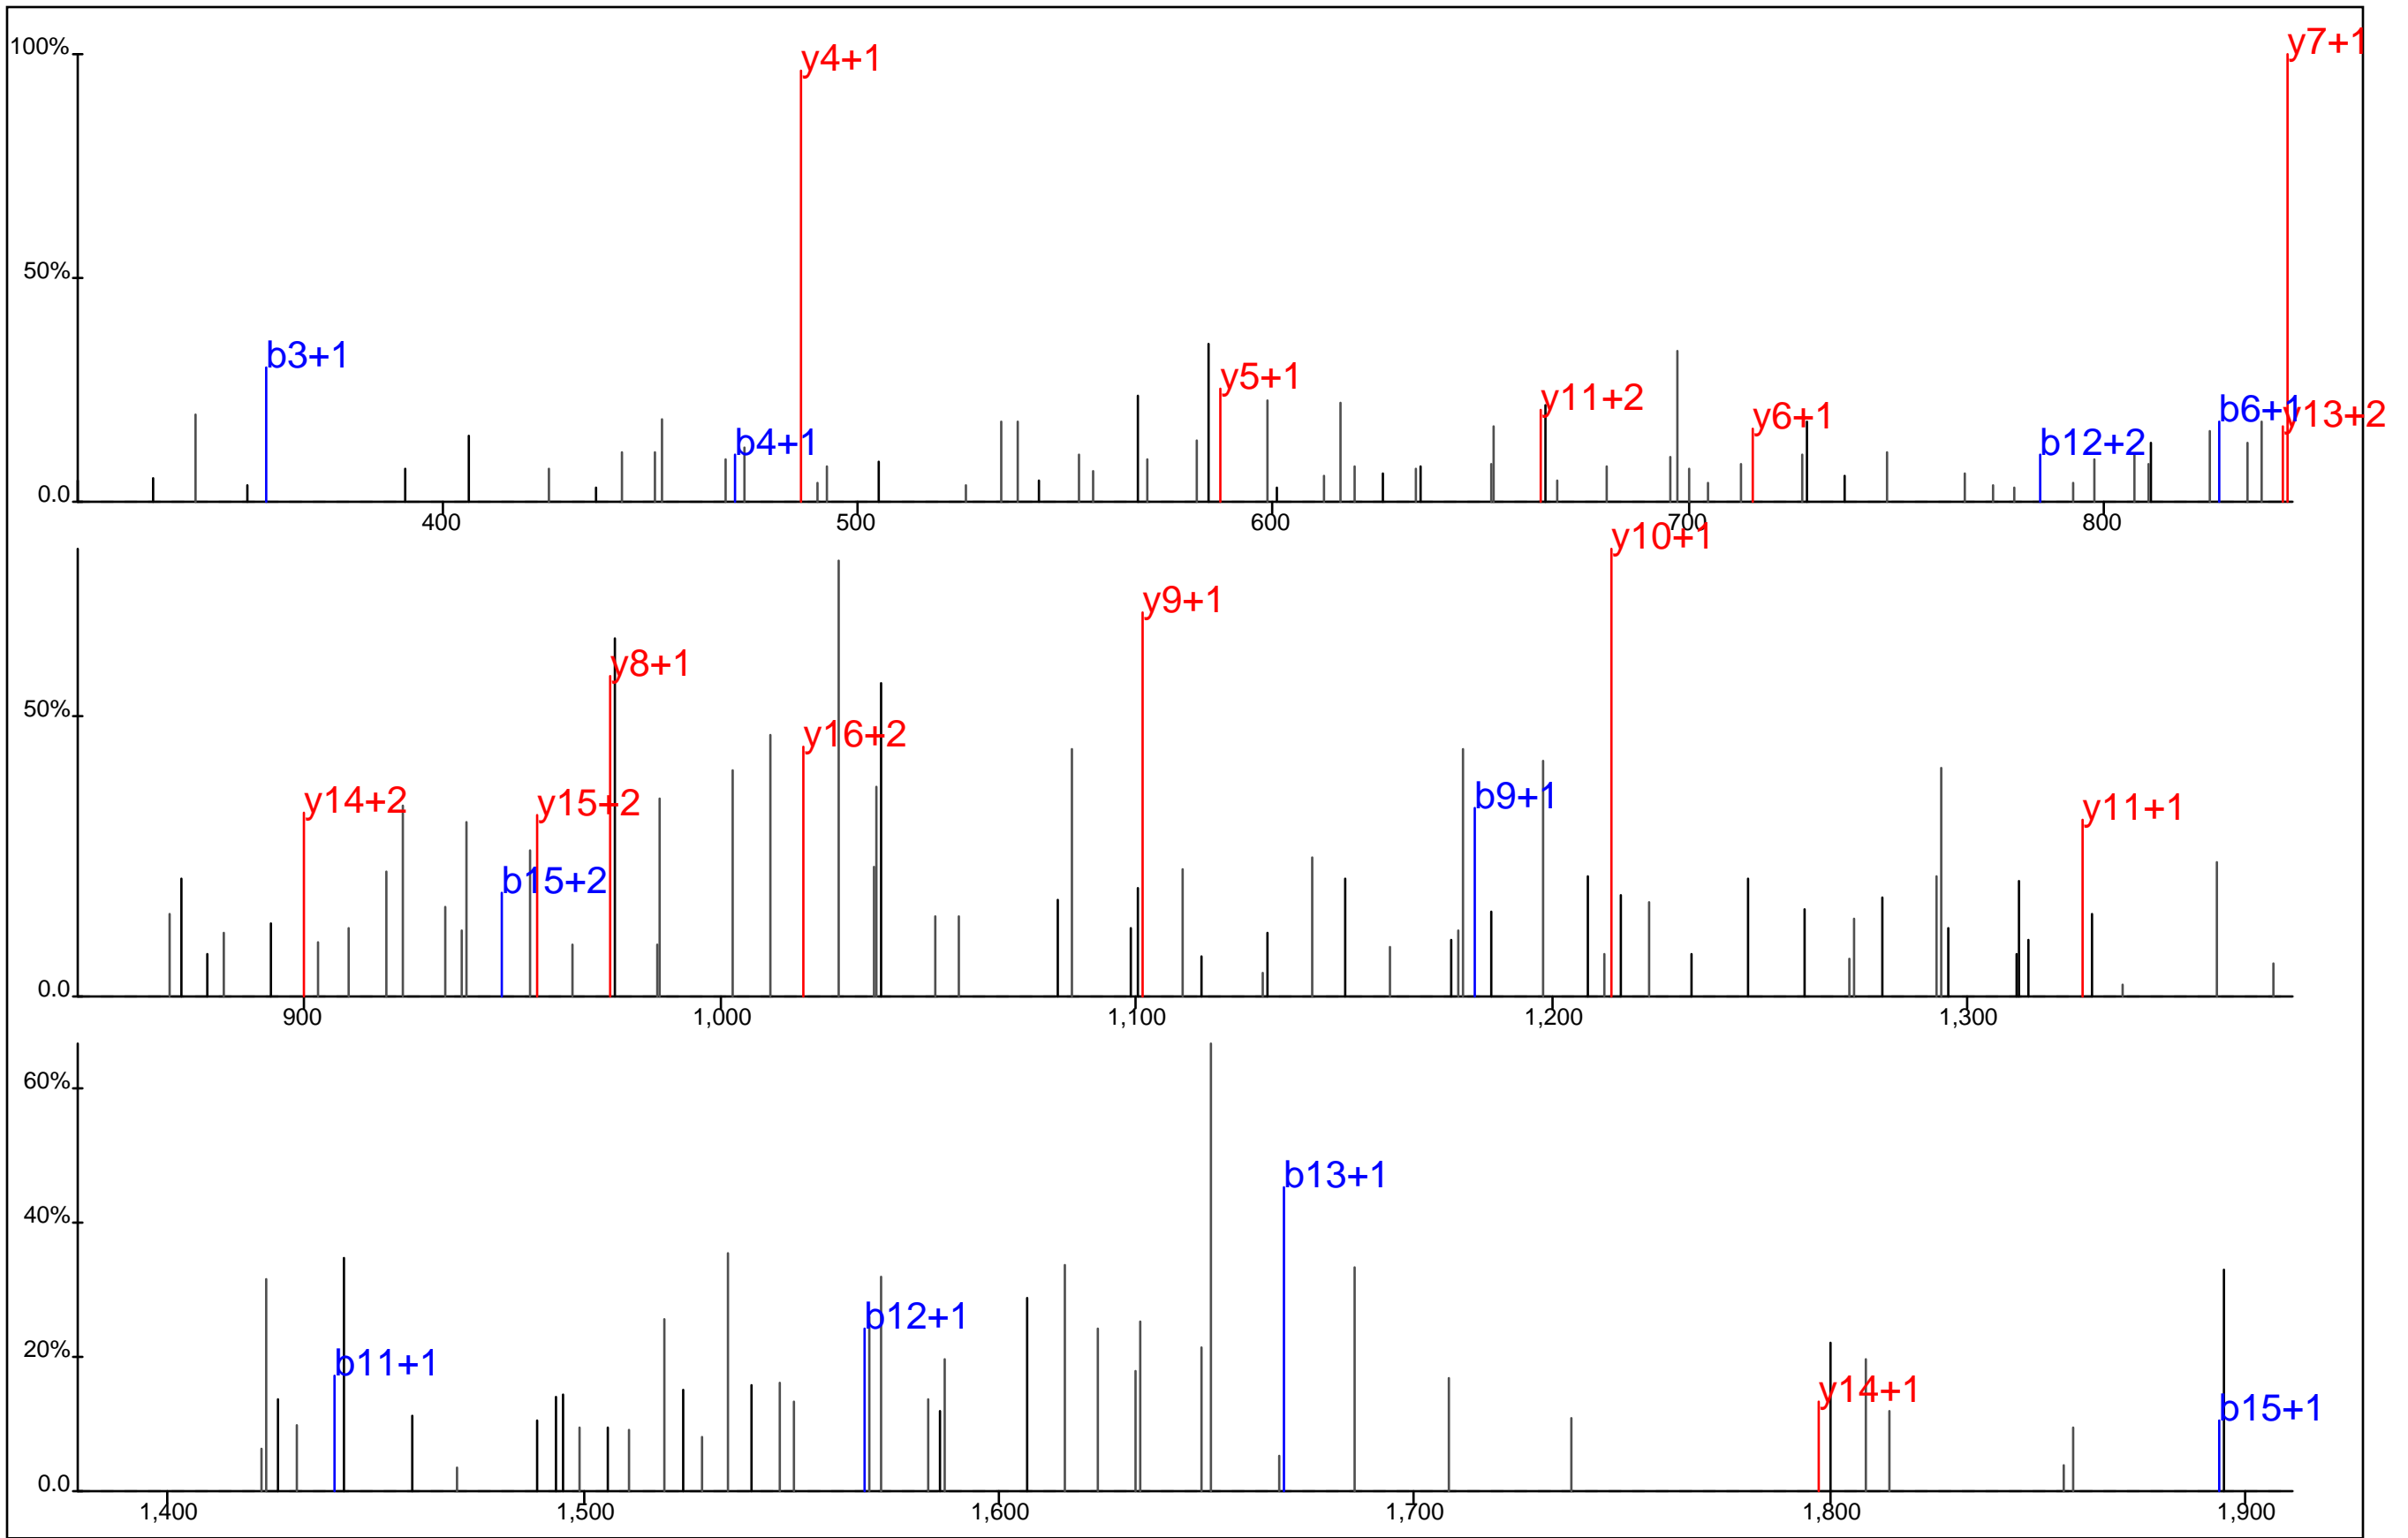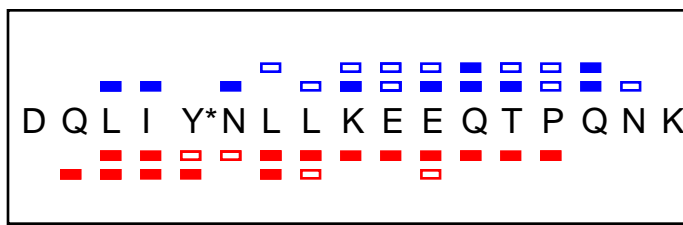

Protein Name: Lactate dehydrogenase A  
 gi Accession: 0  
 Precursor Mass: 1,077.5250+2  
 Delta Mass: 2.330 ppm  
 XCorr: 45.62

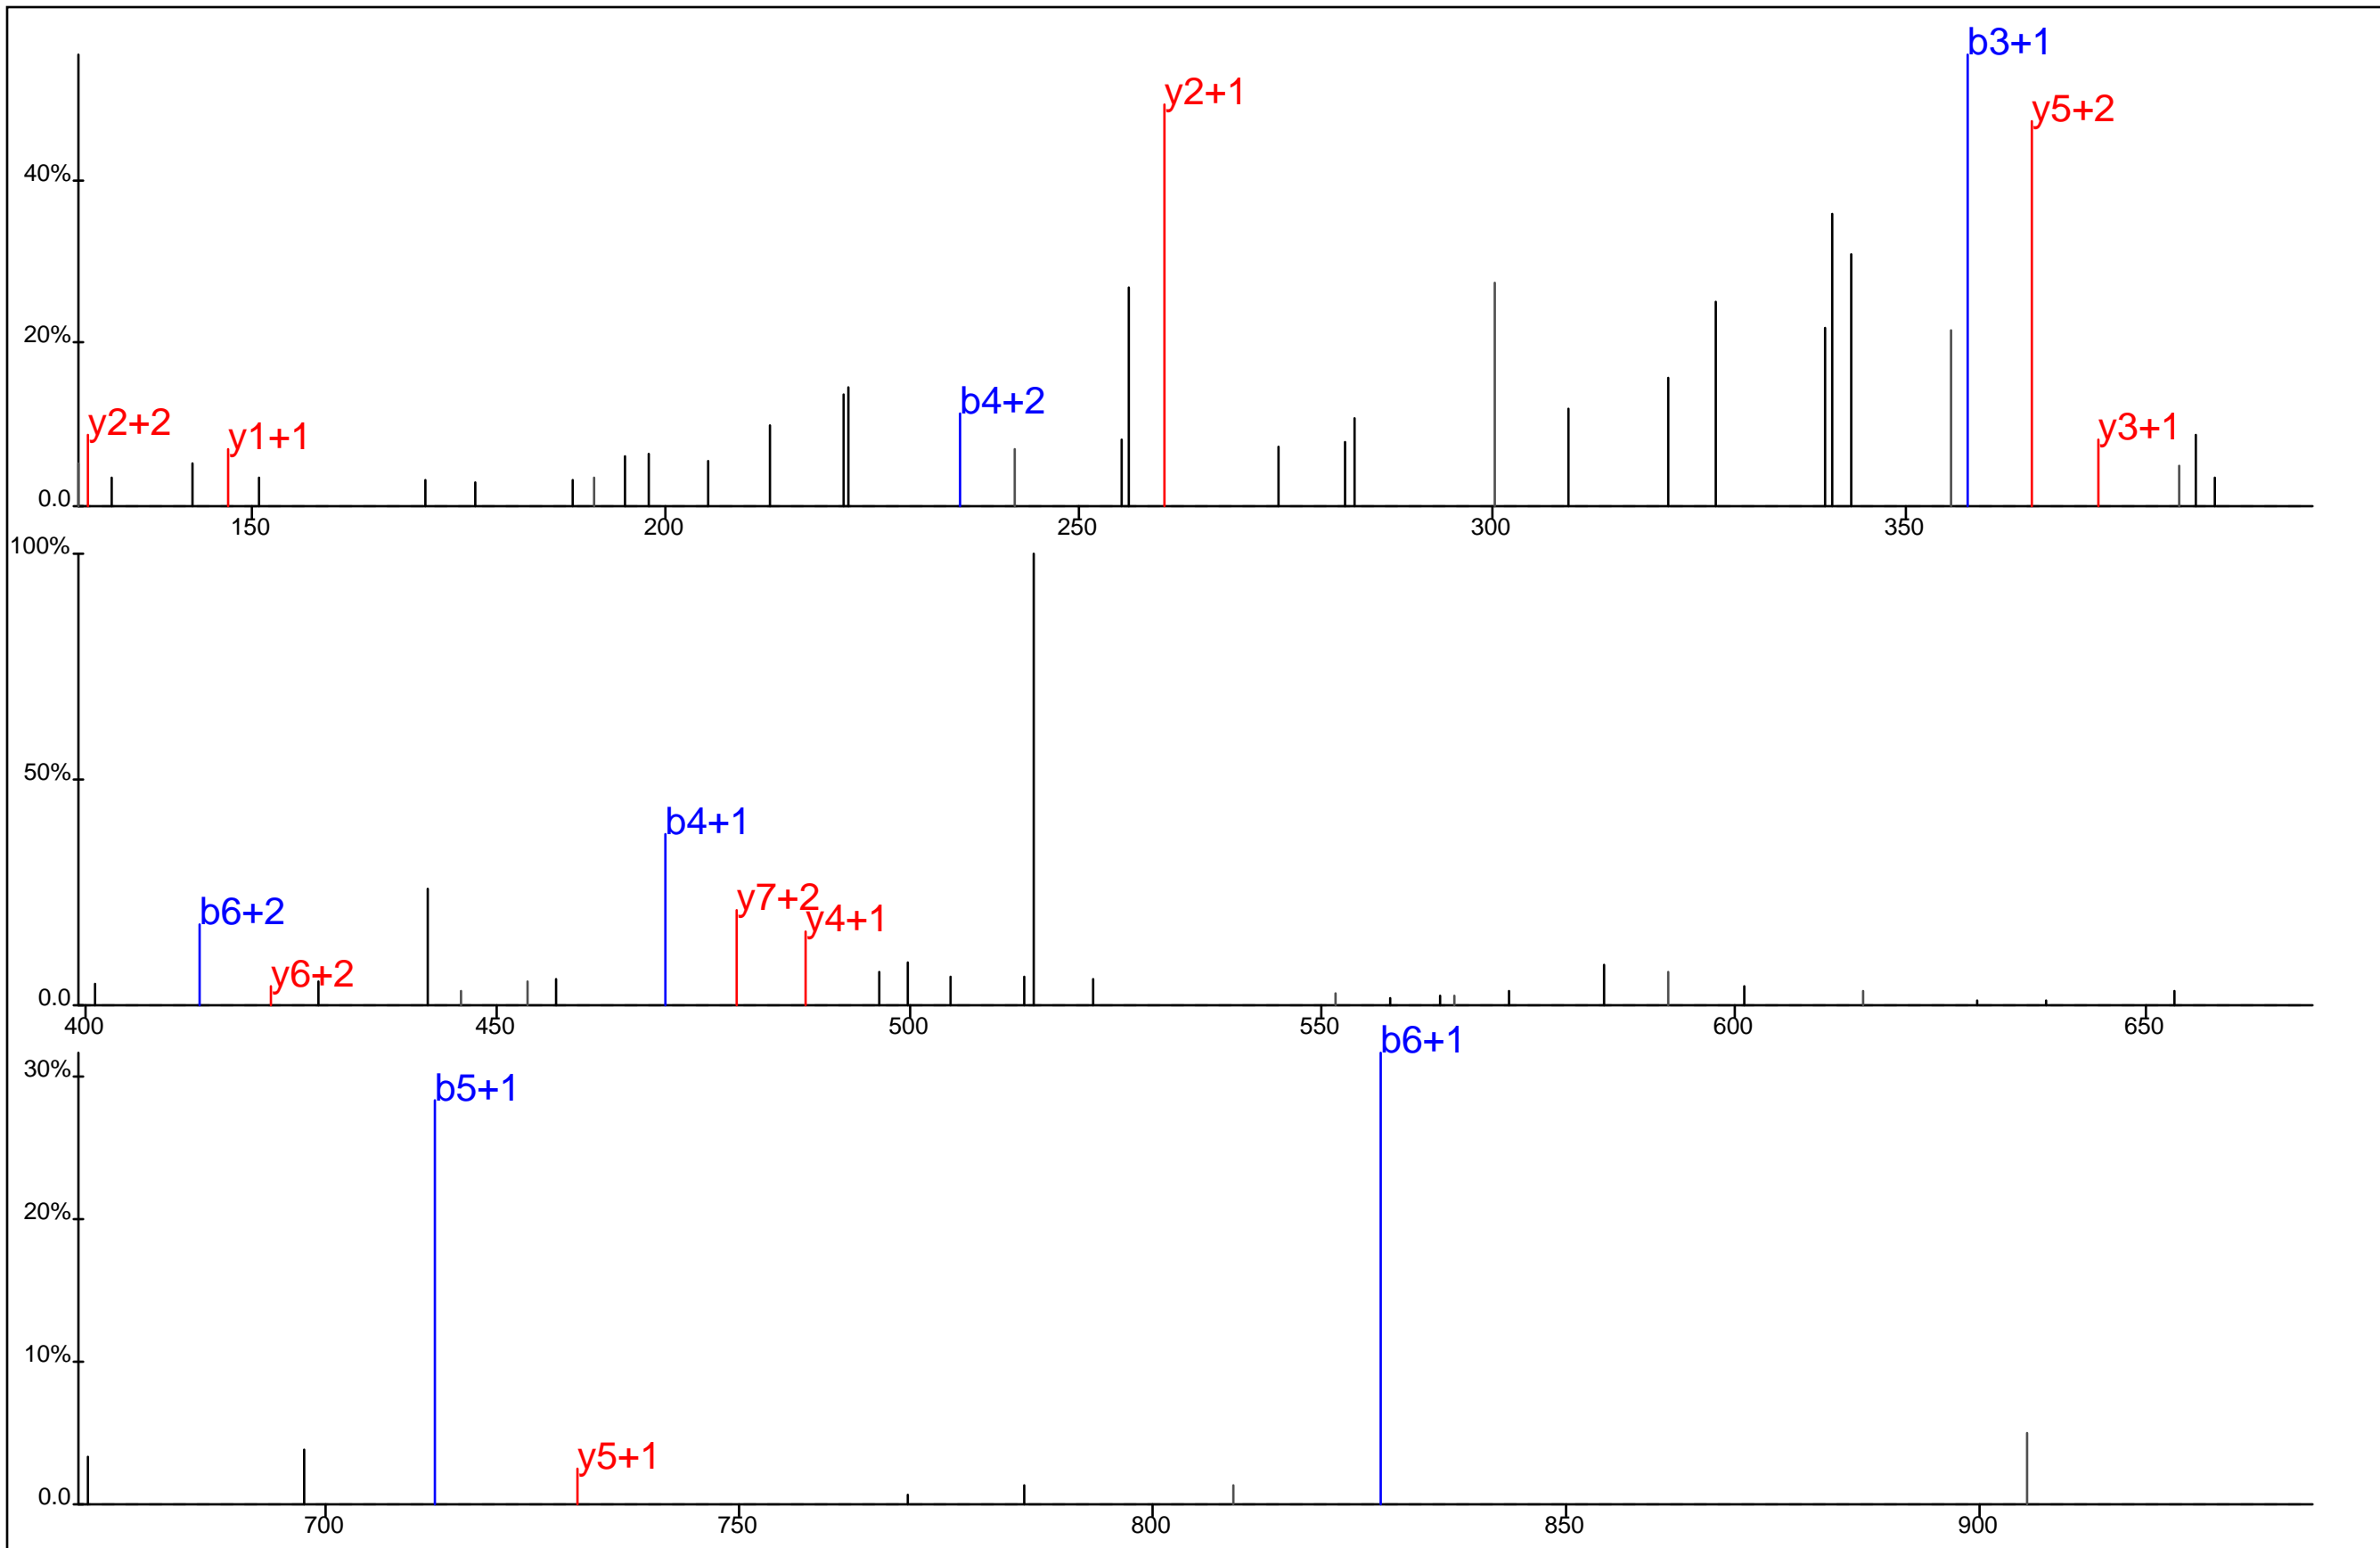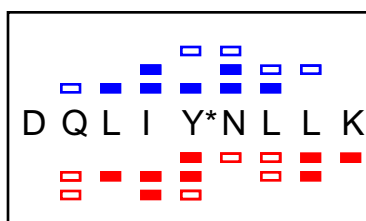

Protein Name: Lactate dehydrogenase A  
 gi Accession: 0  
 Precursor Mass: 400.5406+3  
 Delta Mass: 0.067 ppm  
 XCorr: 25.34

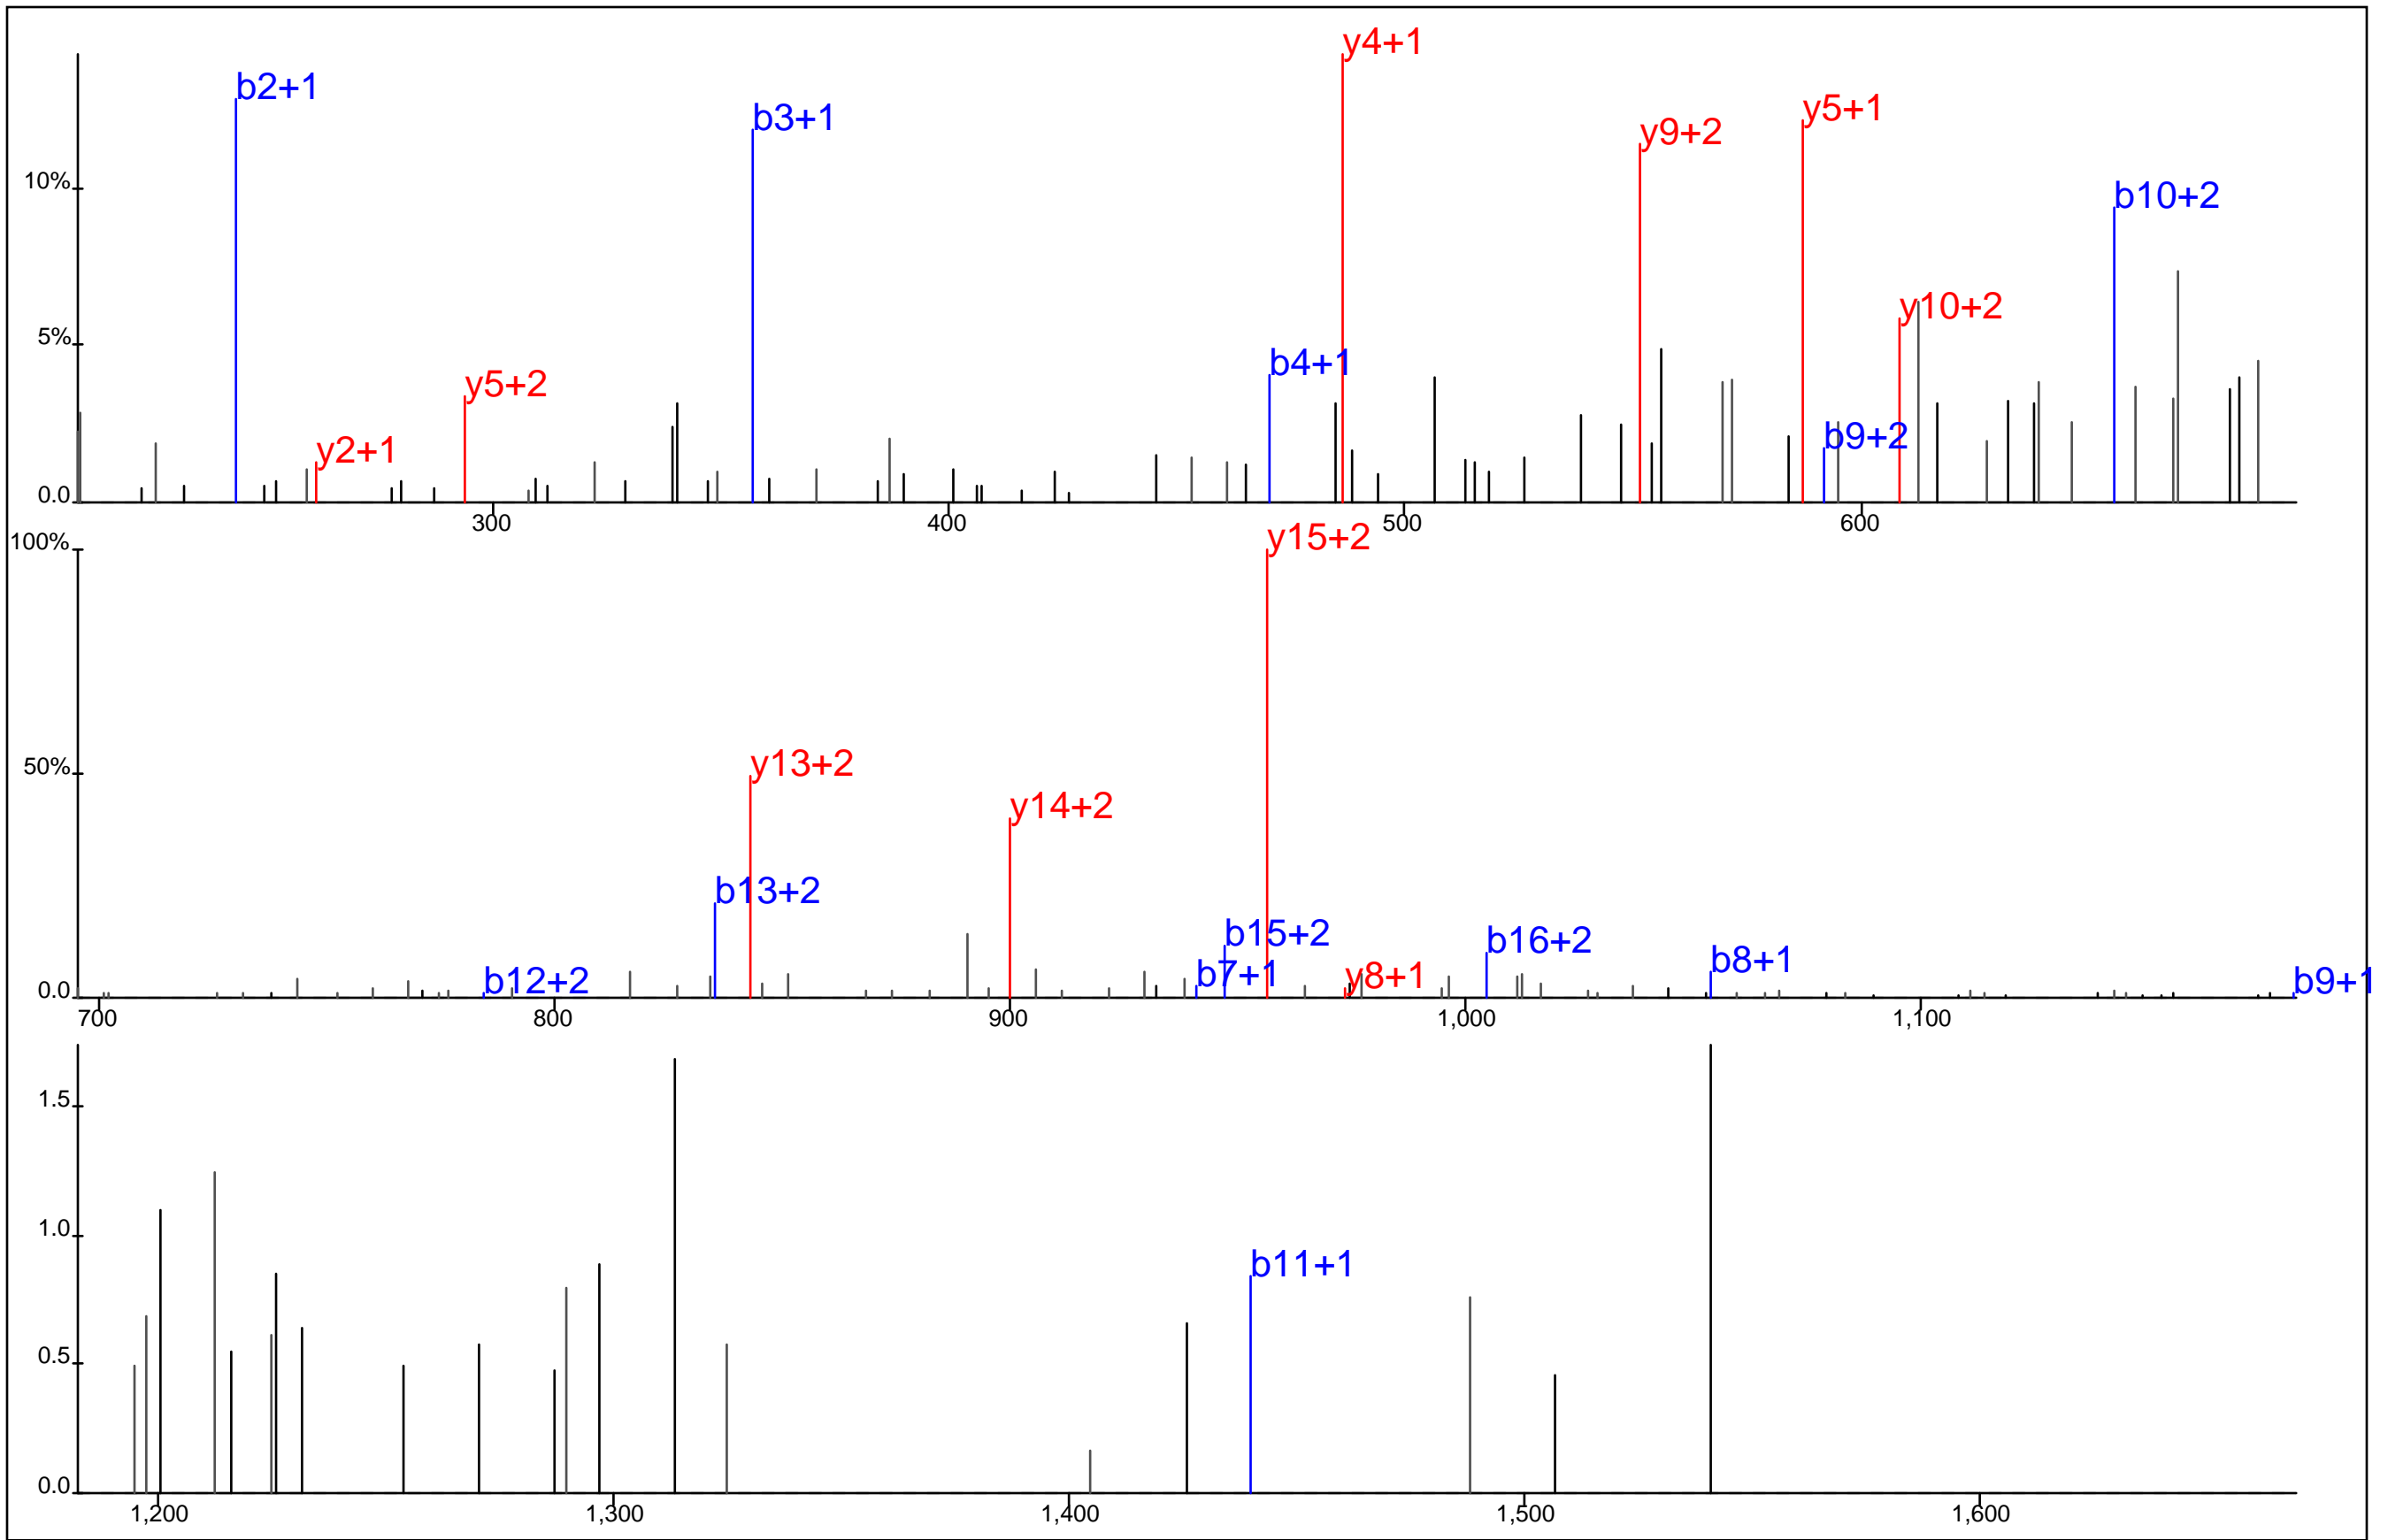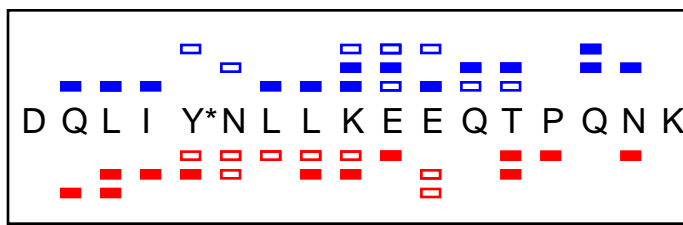

Protein Name: Lactate dehydrogenase A  
 gi Accession: 0  
 Precursor Mass: 718.6827+3  
 Delta Mass: 6.643 ppm  
 XCorr: 38.6

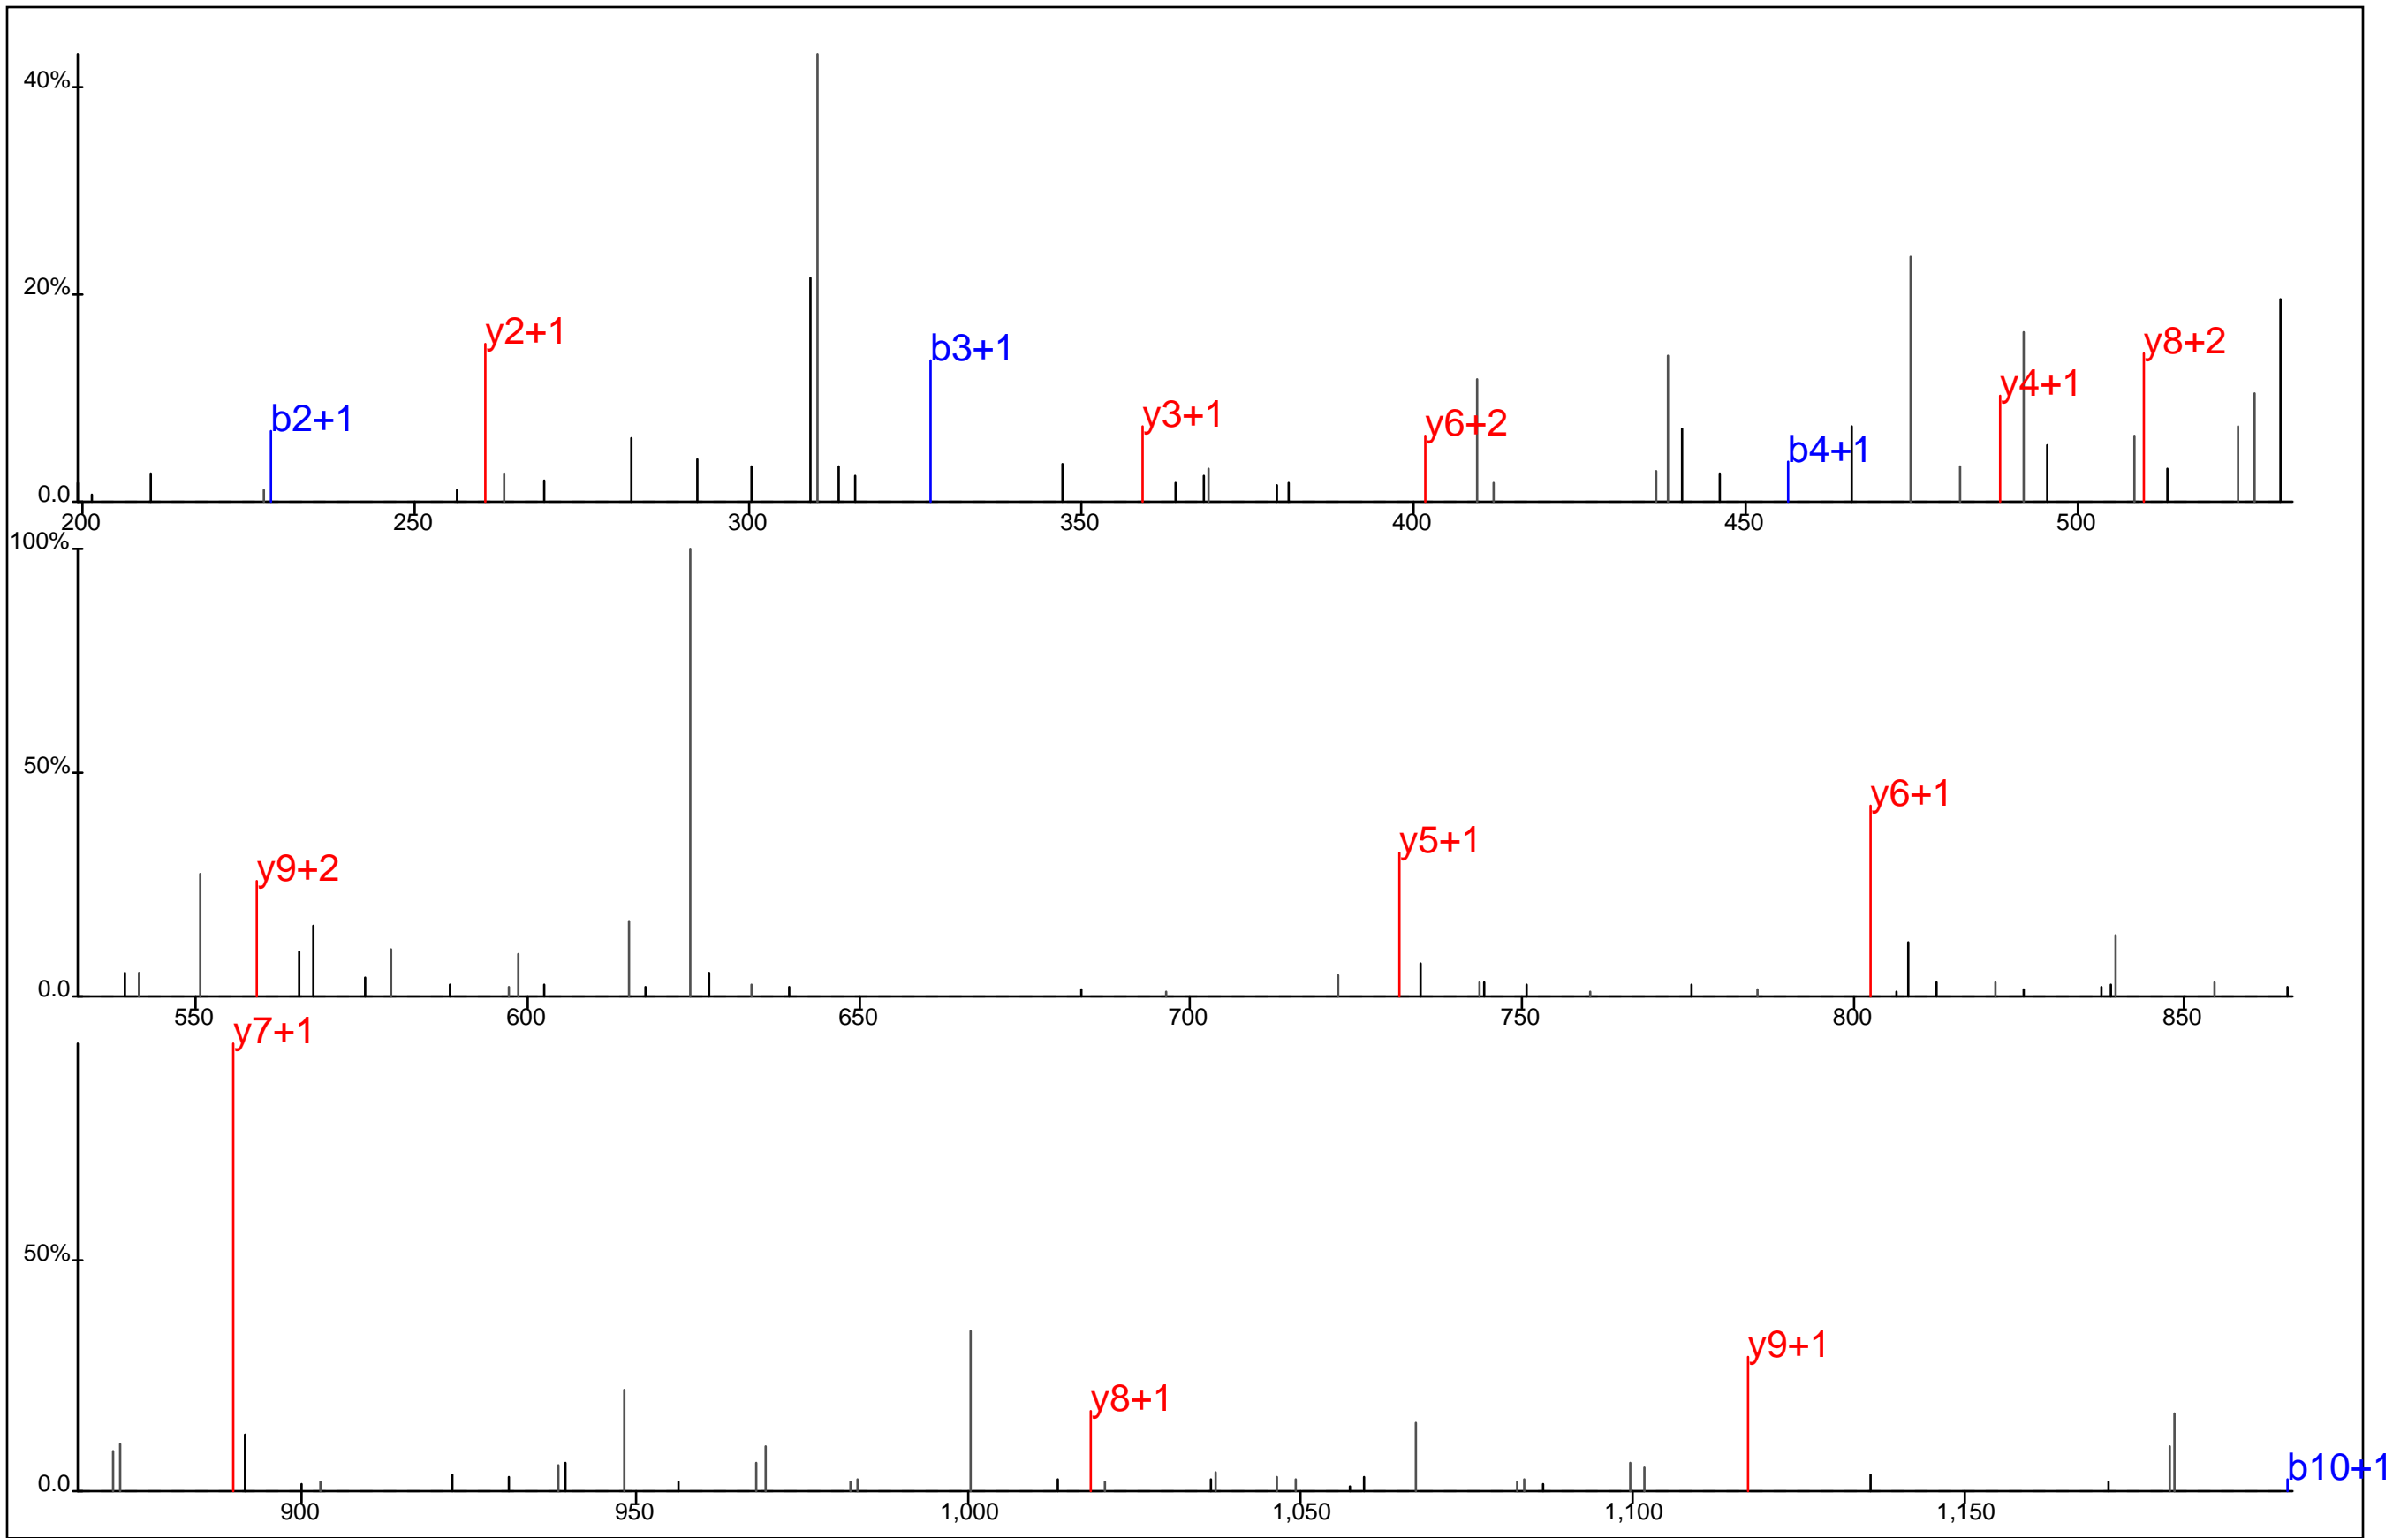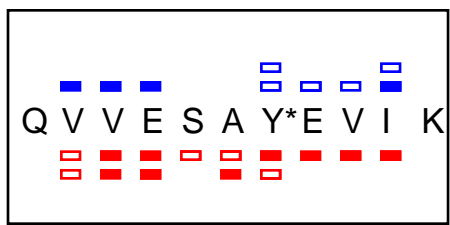

Protein Name: Lactate dehydrogenase A  
 gi Accession: 0  
 Precursor Mass: 672.8259+2  
 Delta Mass: 0.054 ppm  
 XCorr: 34.92

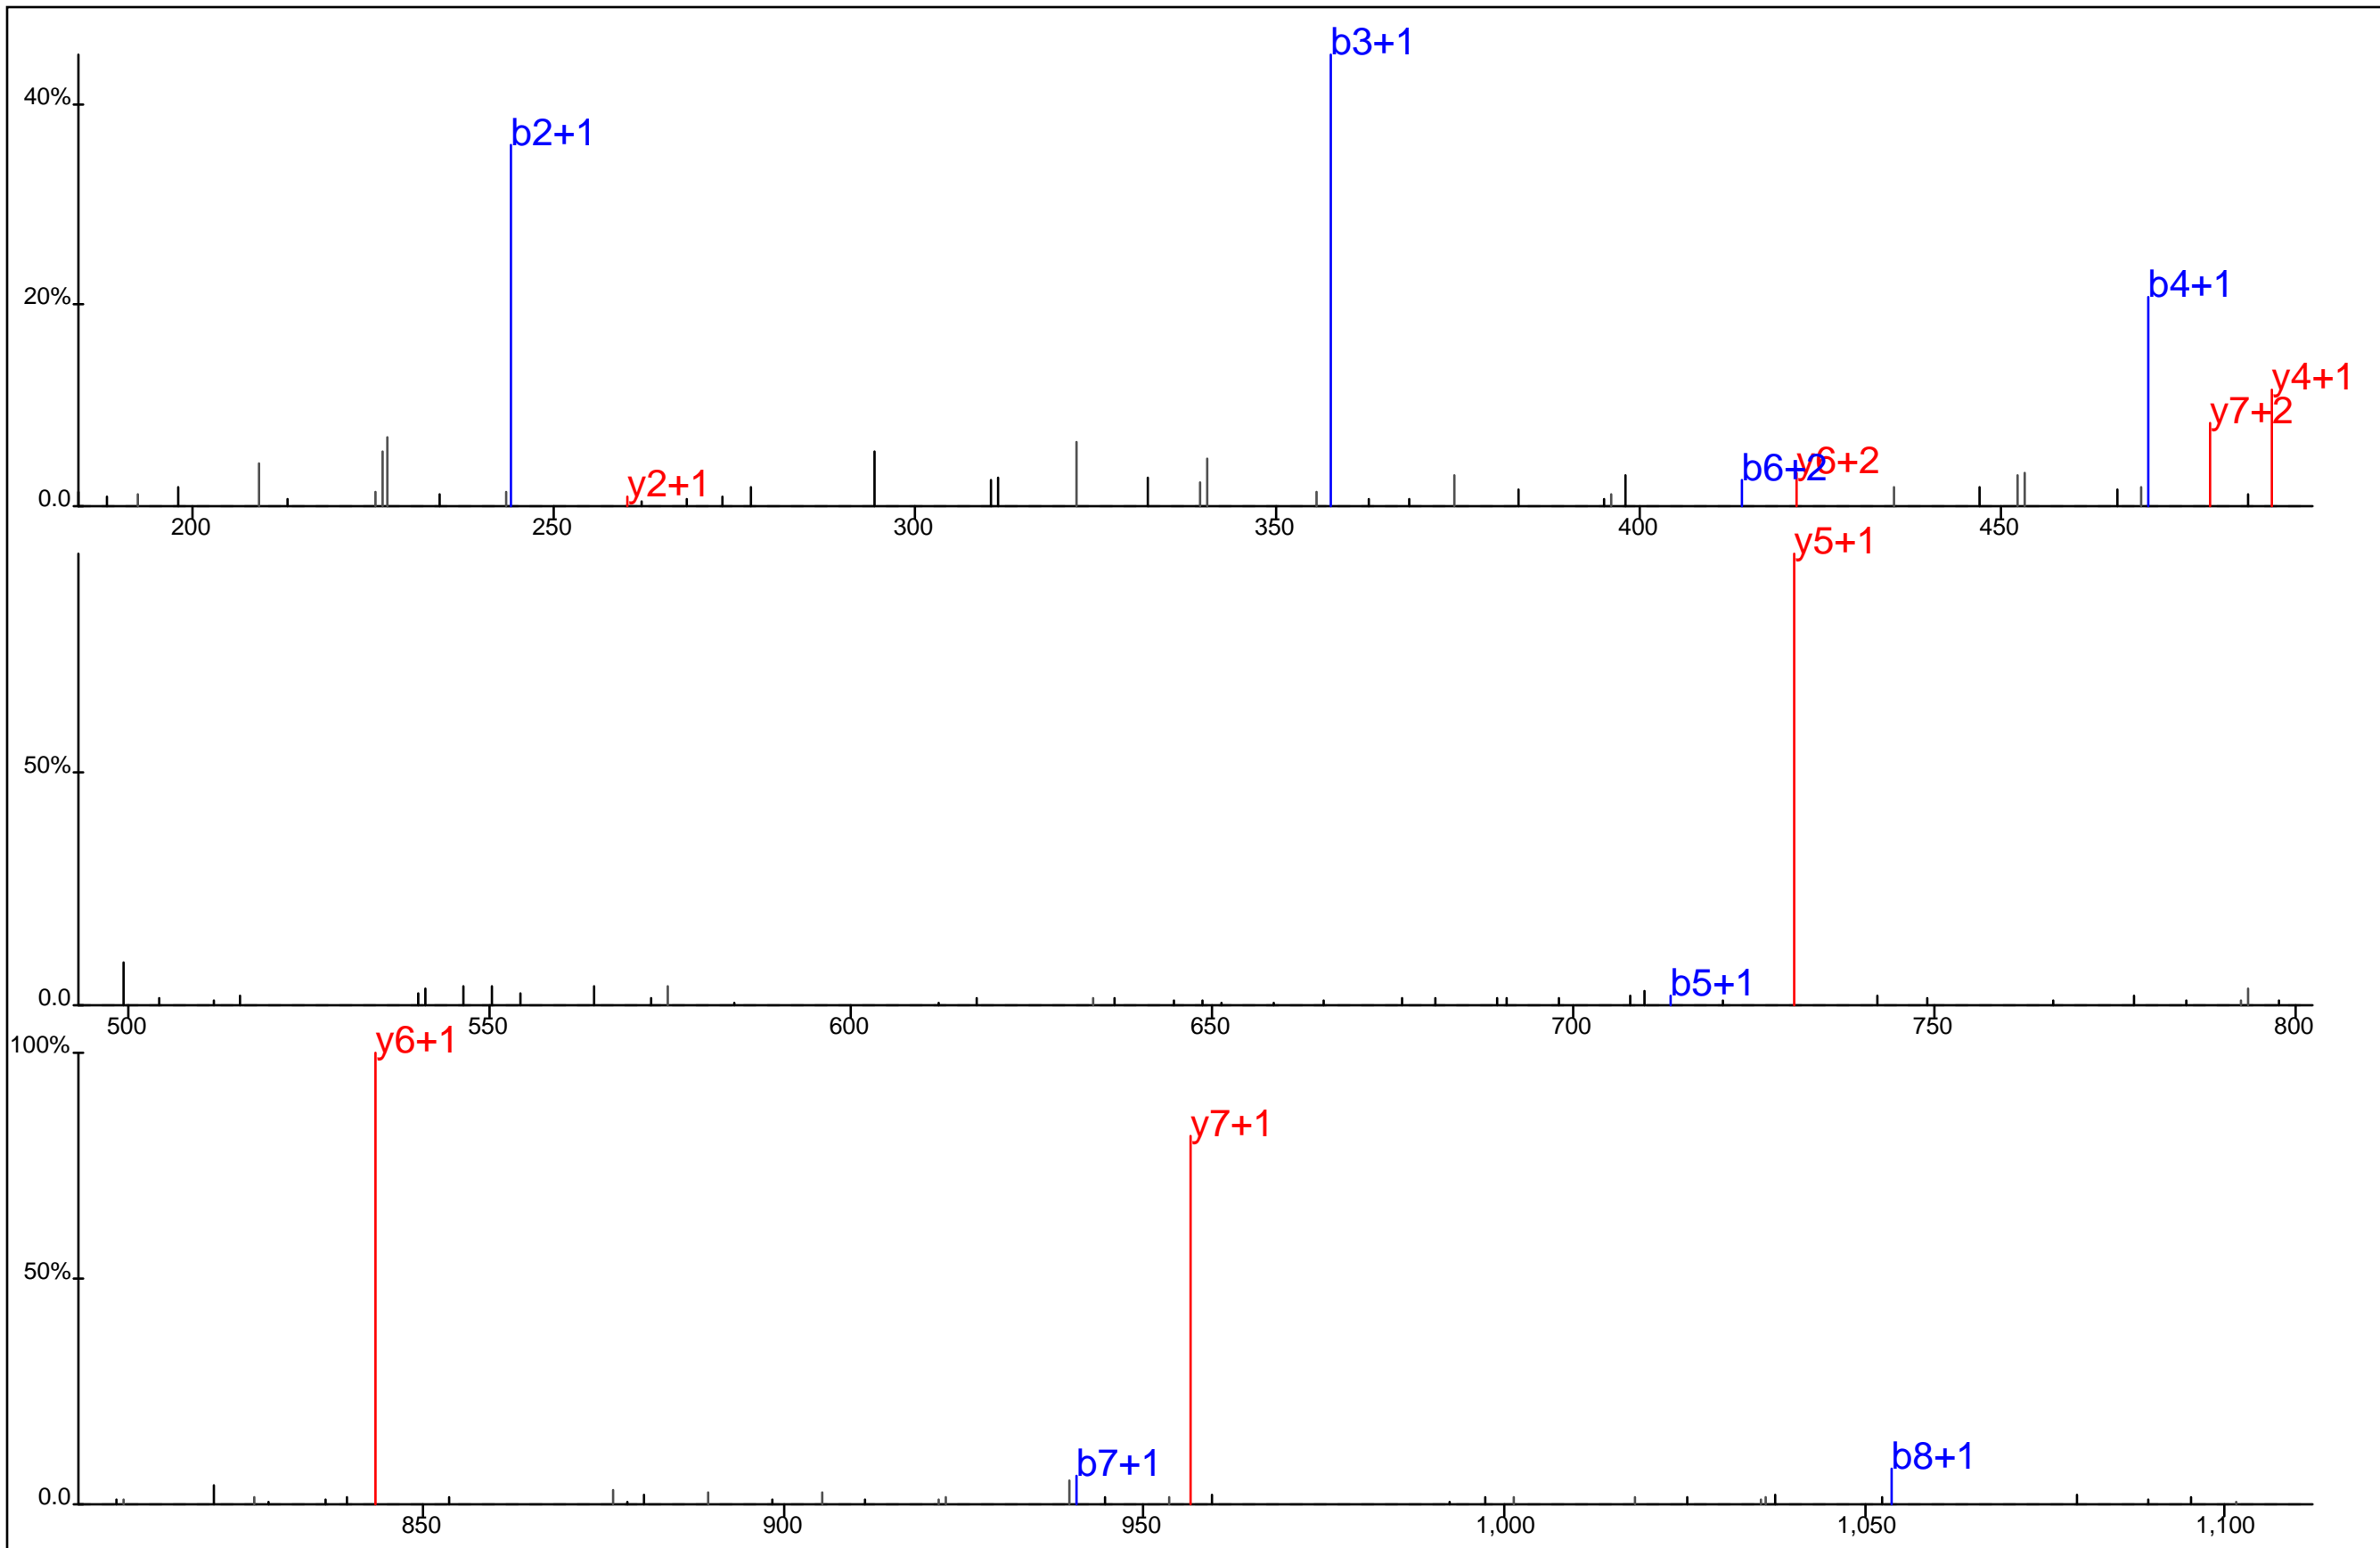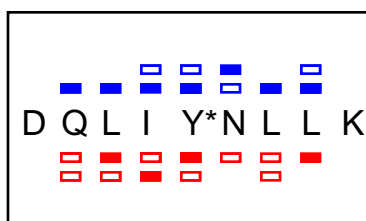

Protein Name: Lactate dehydrogenase A  
 gi Accession: 0  
 Precursor Mass: 600.3073+2  
 Delta Mass: 0.180 ppm  
 XCorr: 36.85

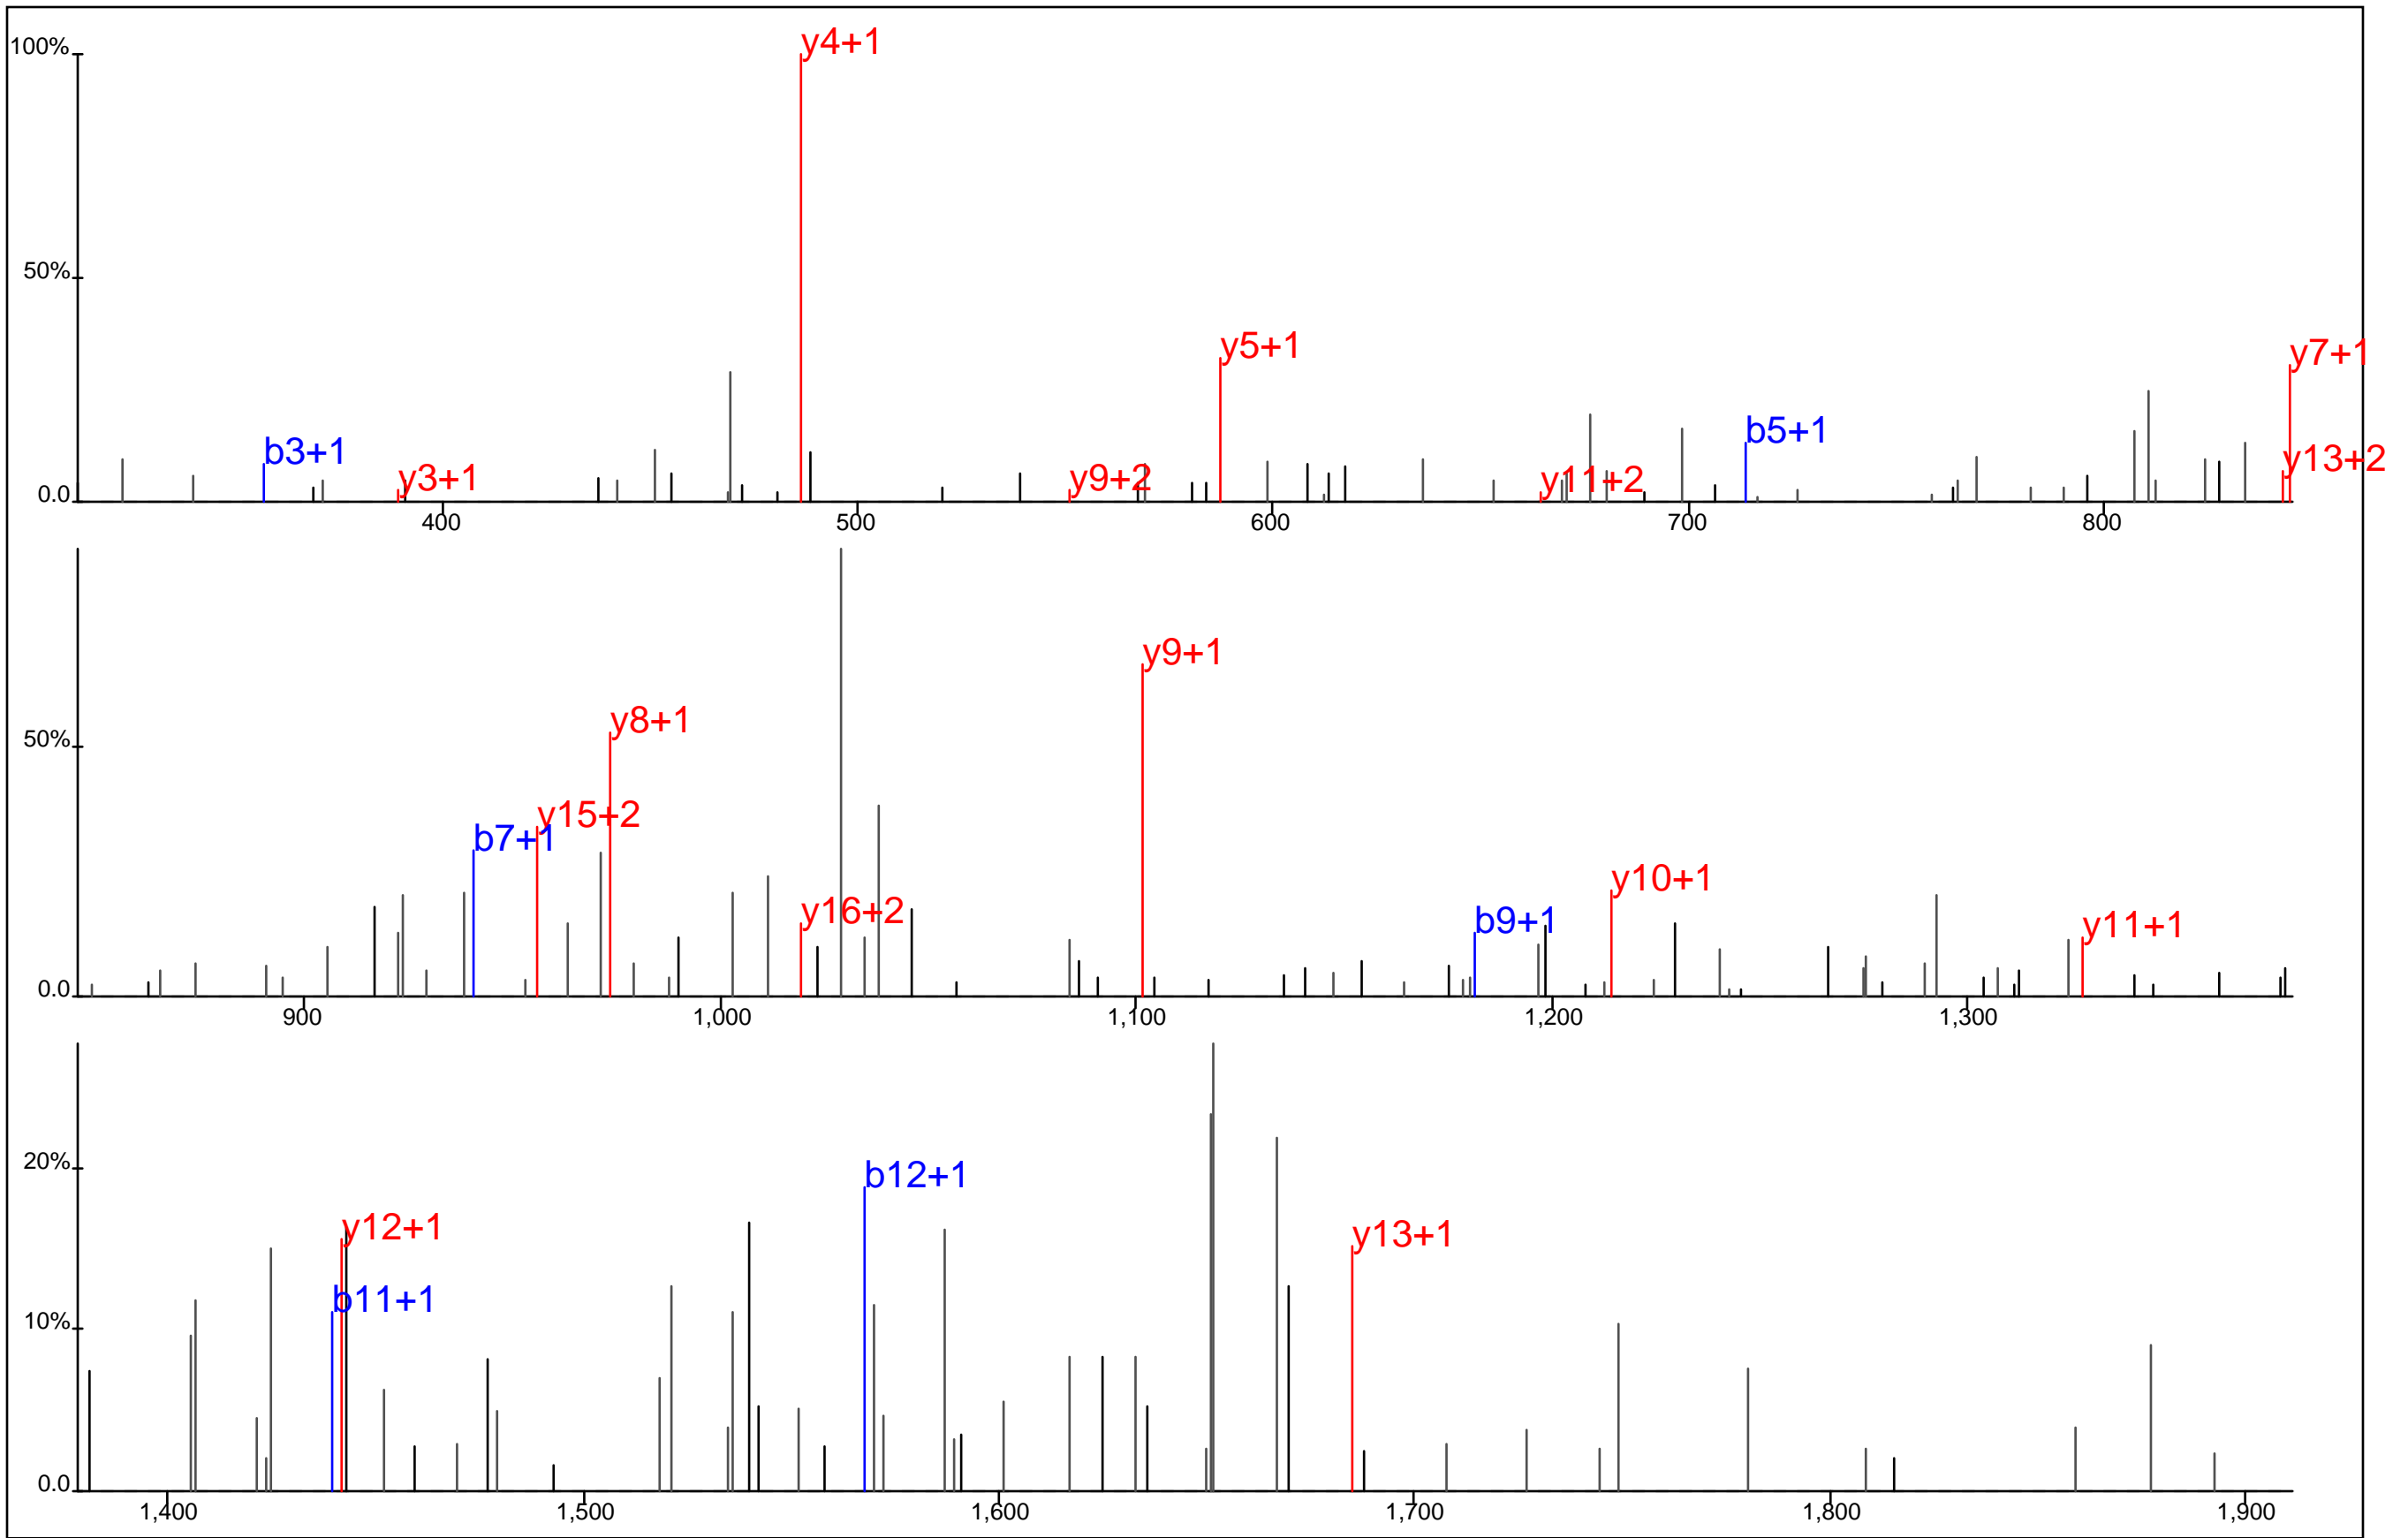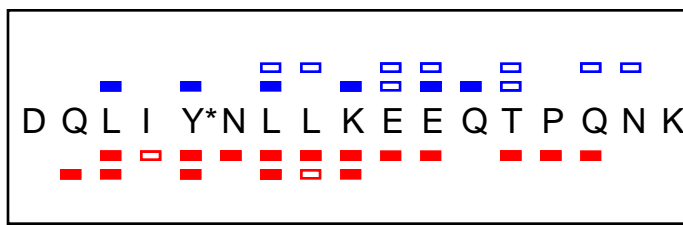

Protein Name: Lactate dehydrogenase A  
 gi Accession: 0  
 Precursor Mass: 1,077.5250+2  
 Delta Mass: 2.330 ppm  
 XCorr: 60.81



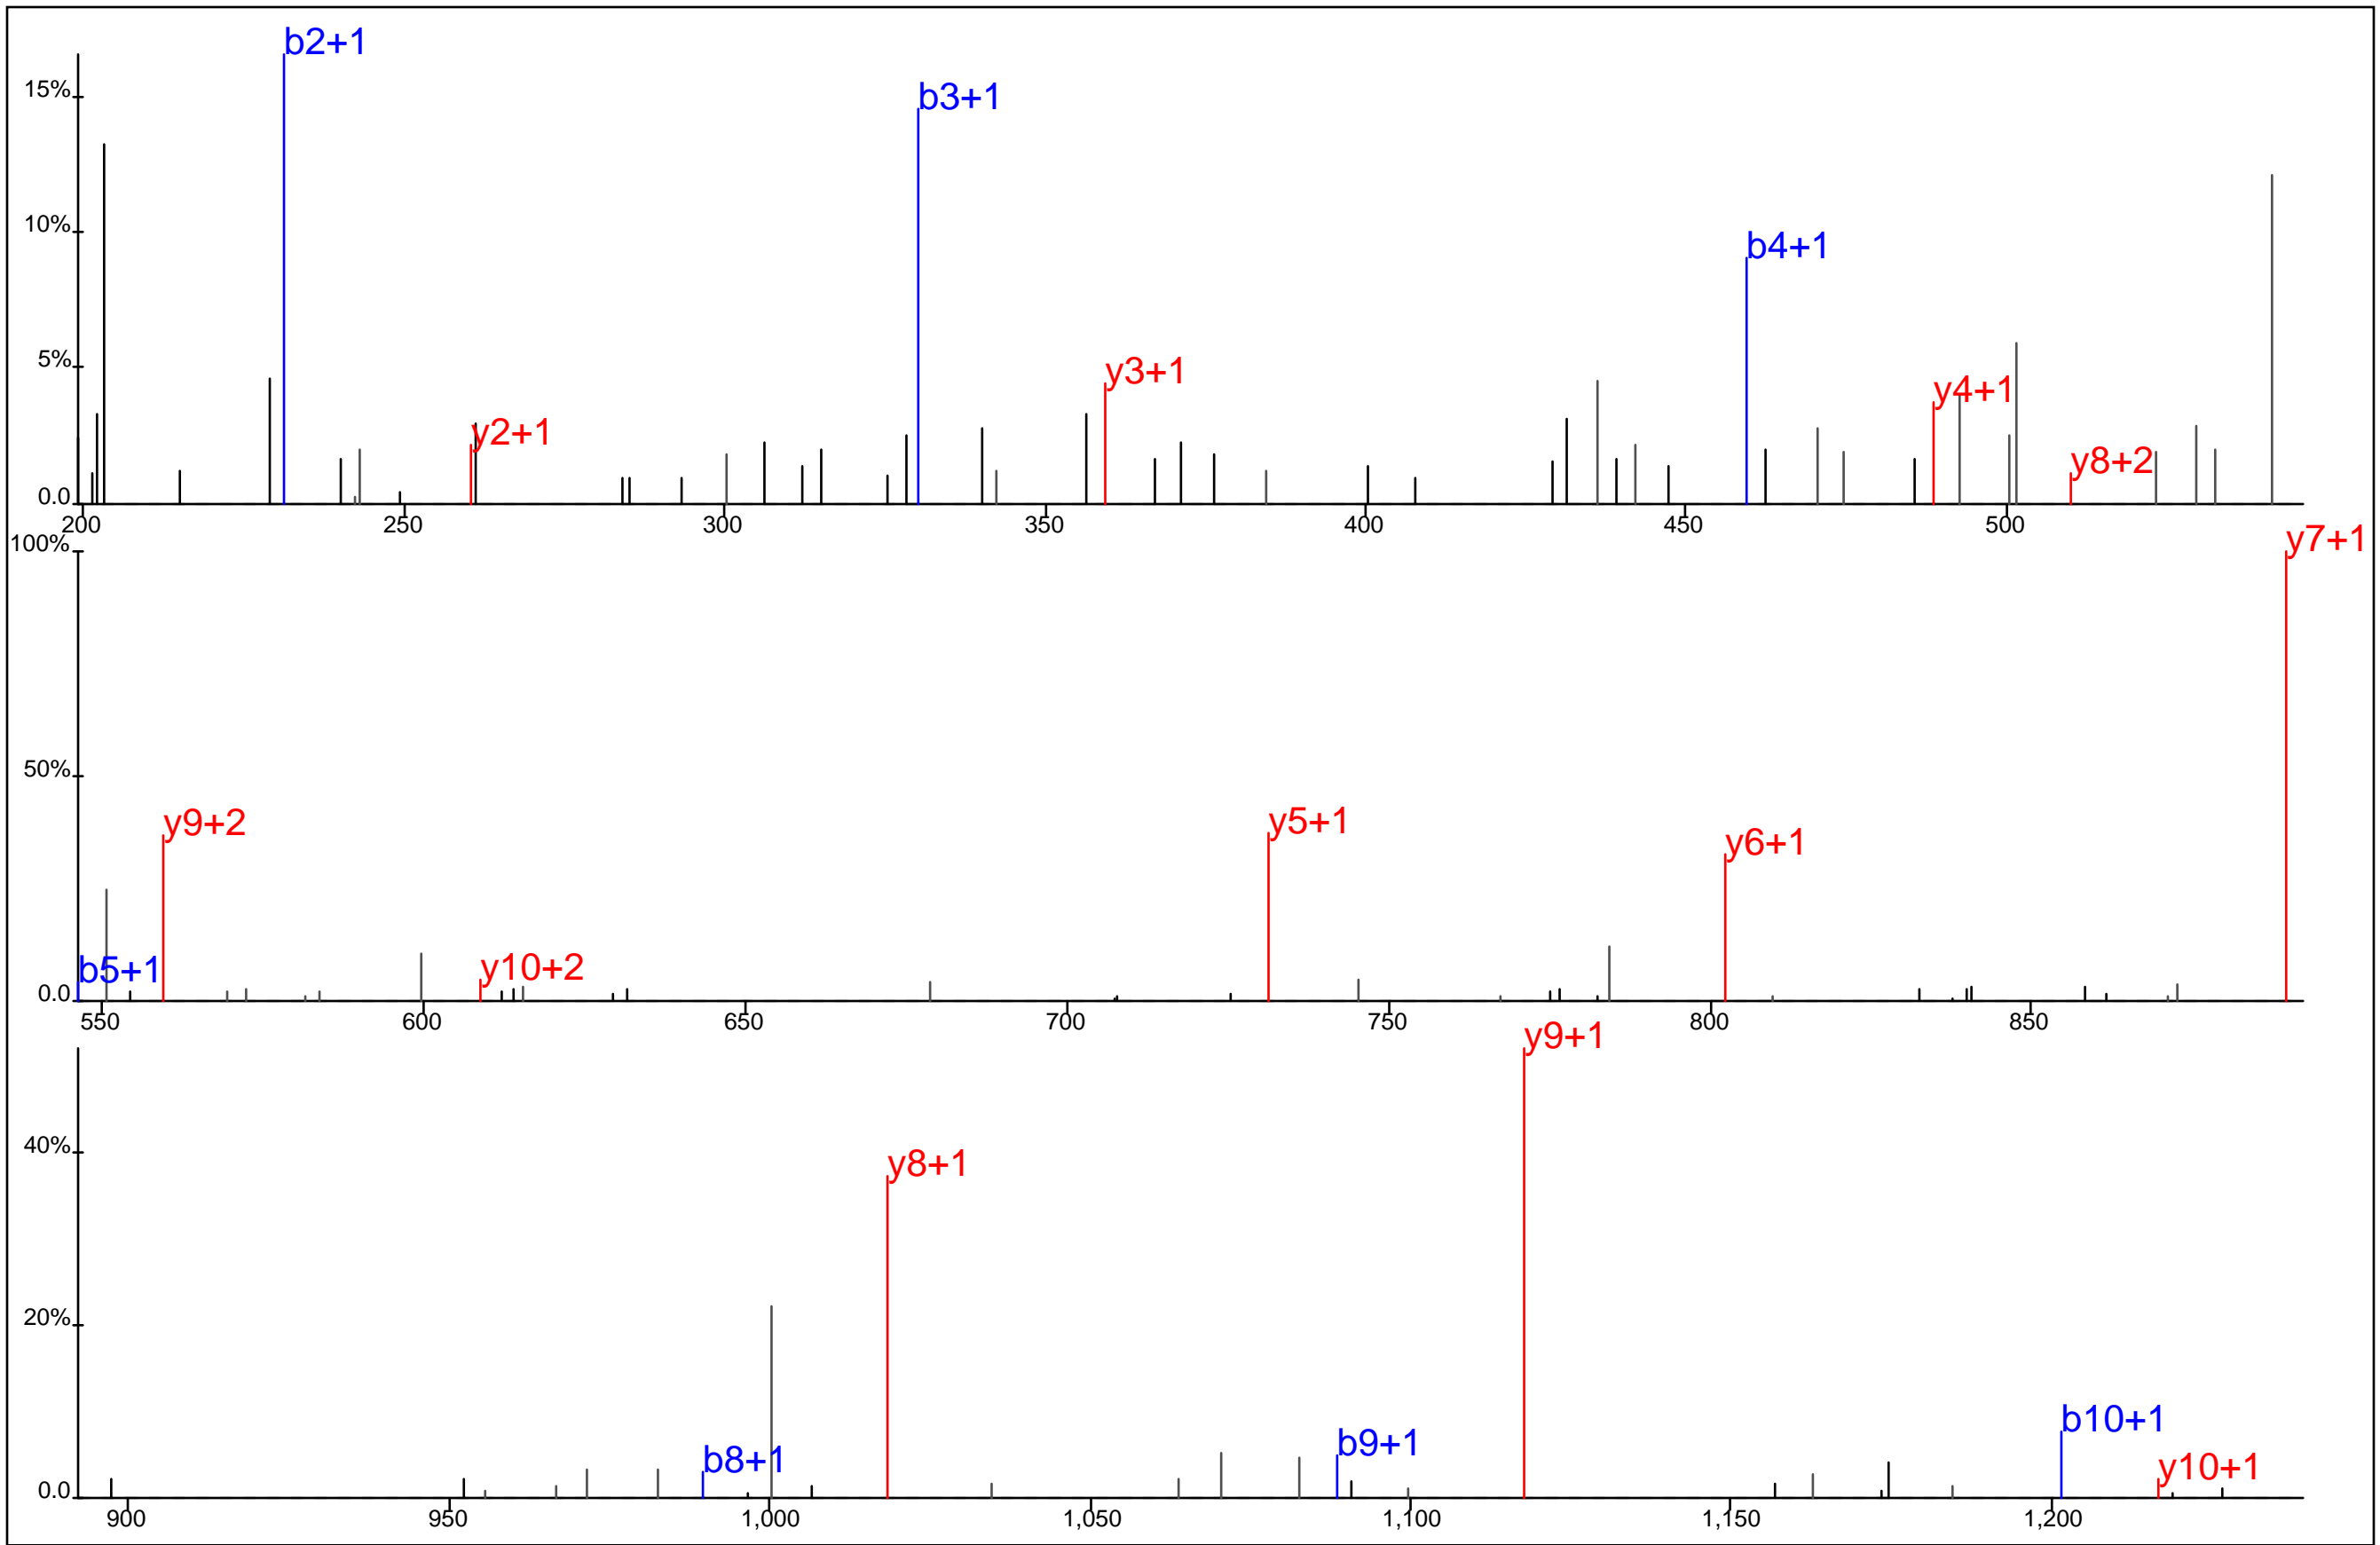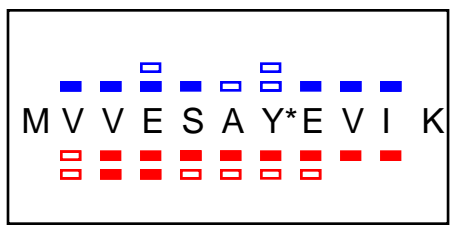

Protein Name: Lactate dehydrogenase B  
 gi Accession: 0  
 Precursor Mass: 674.3164+2  
 Delta Mass: 0.754 ppm  
 XCorr: 61.28

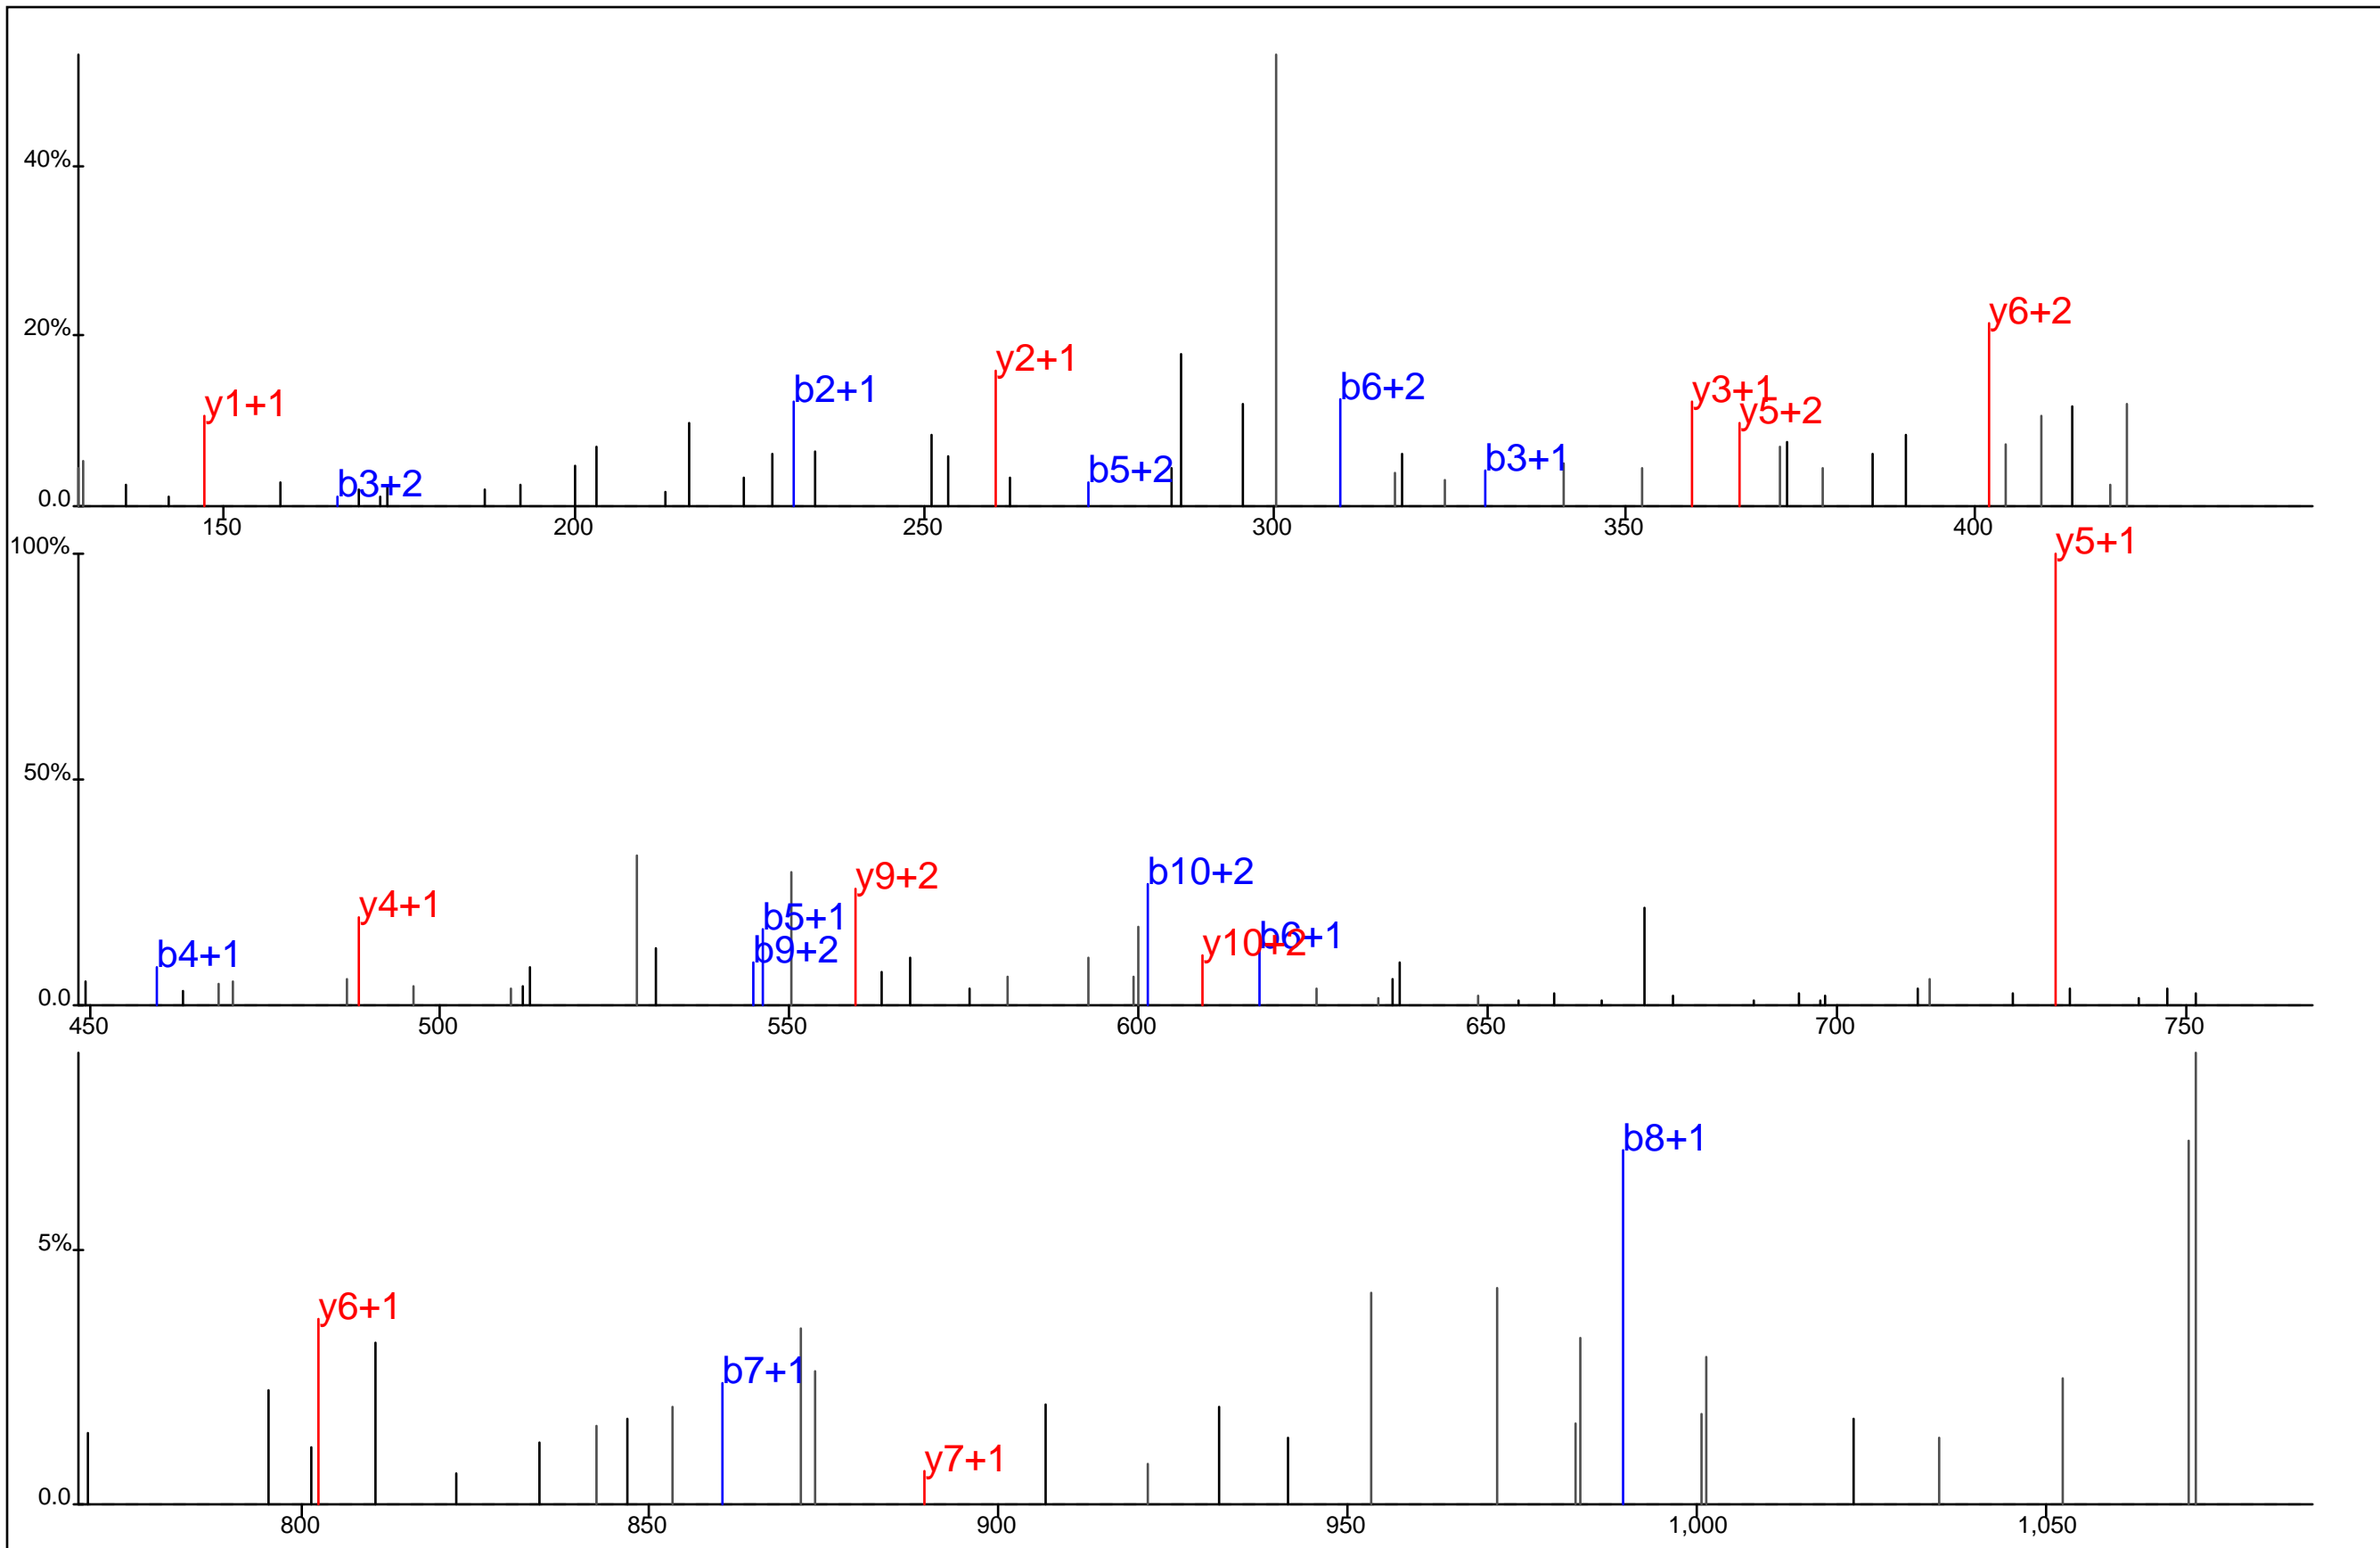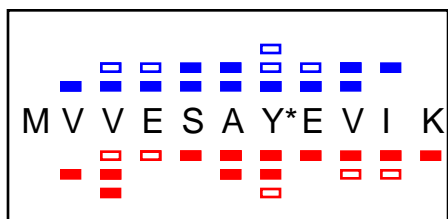

Protein Name: Lactate dehydrogenase B  
 gi Accession: 0  
 Precursor Mass: 449.8803+3  
 Delta Mass: 0.060 ppm  
 XCorr: 34.48



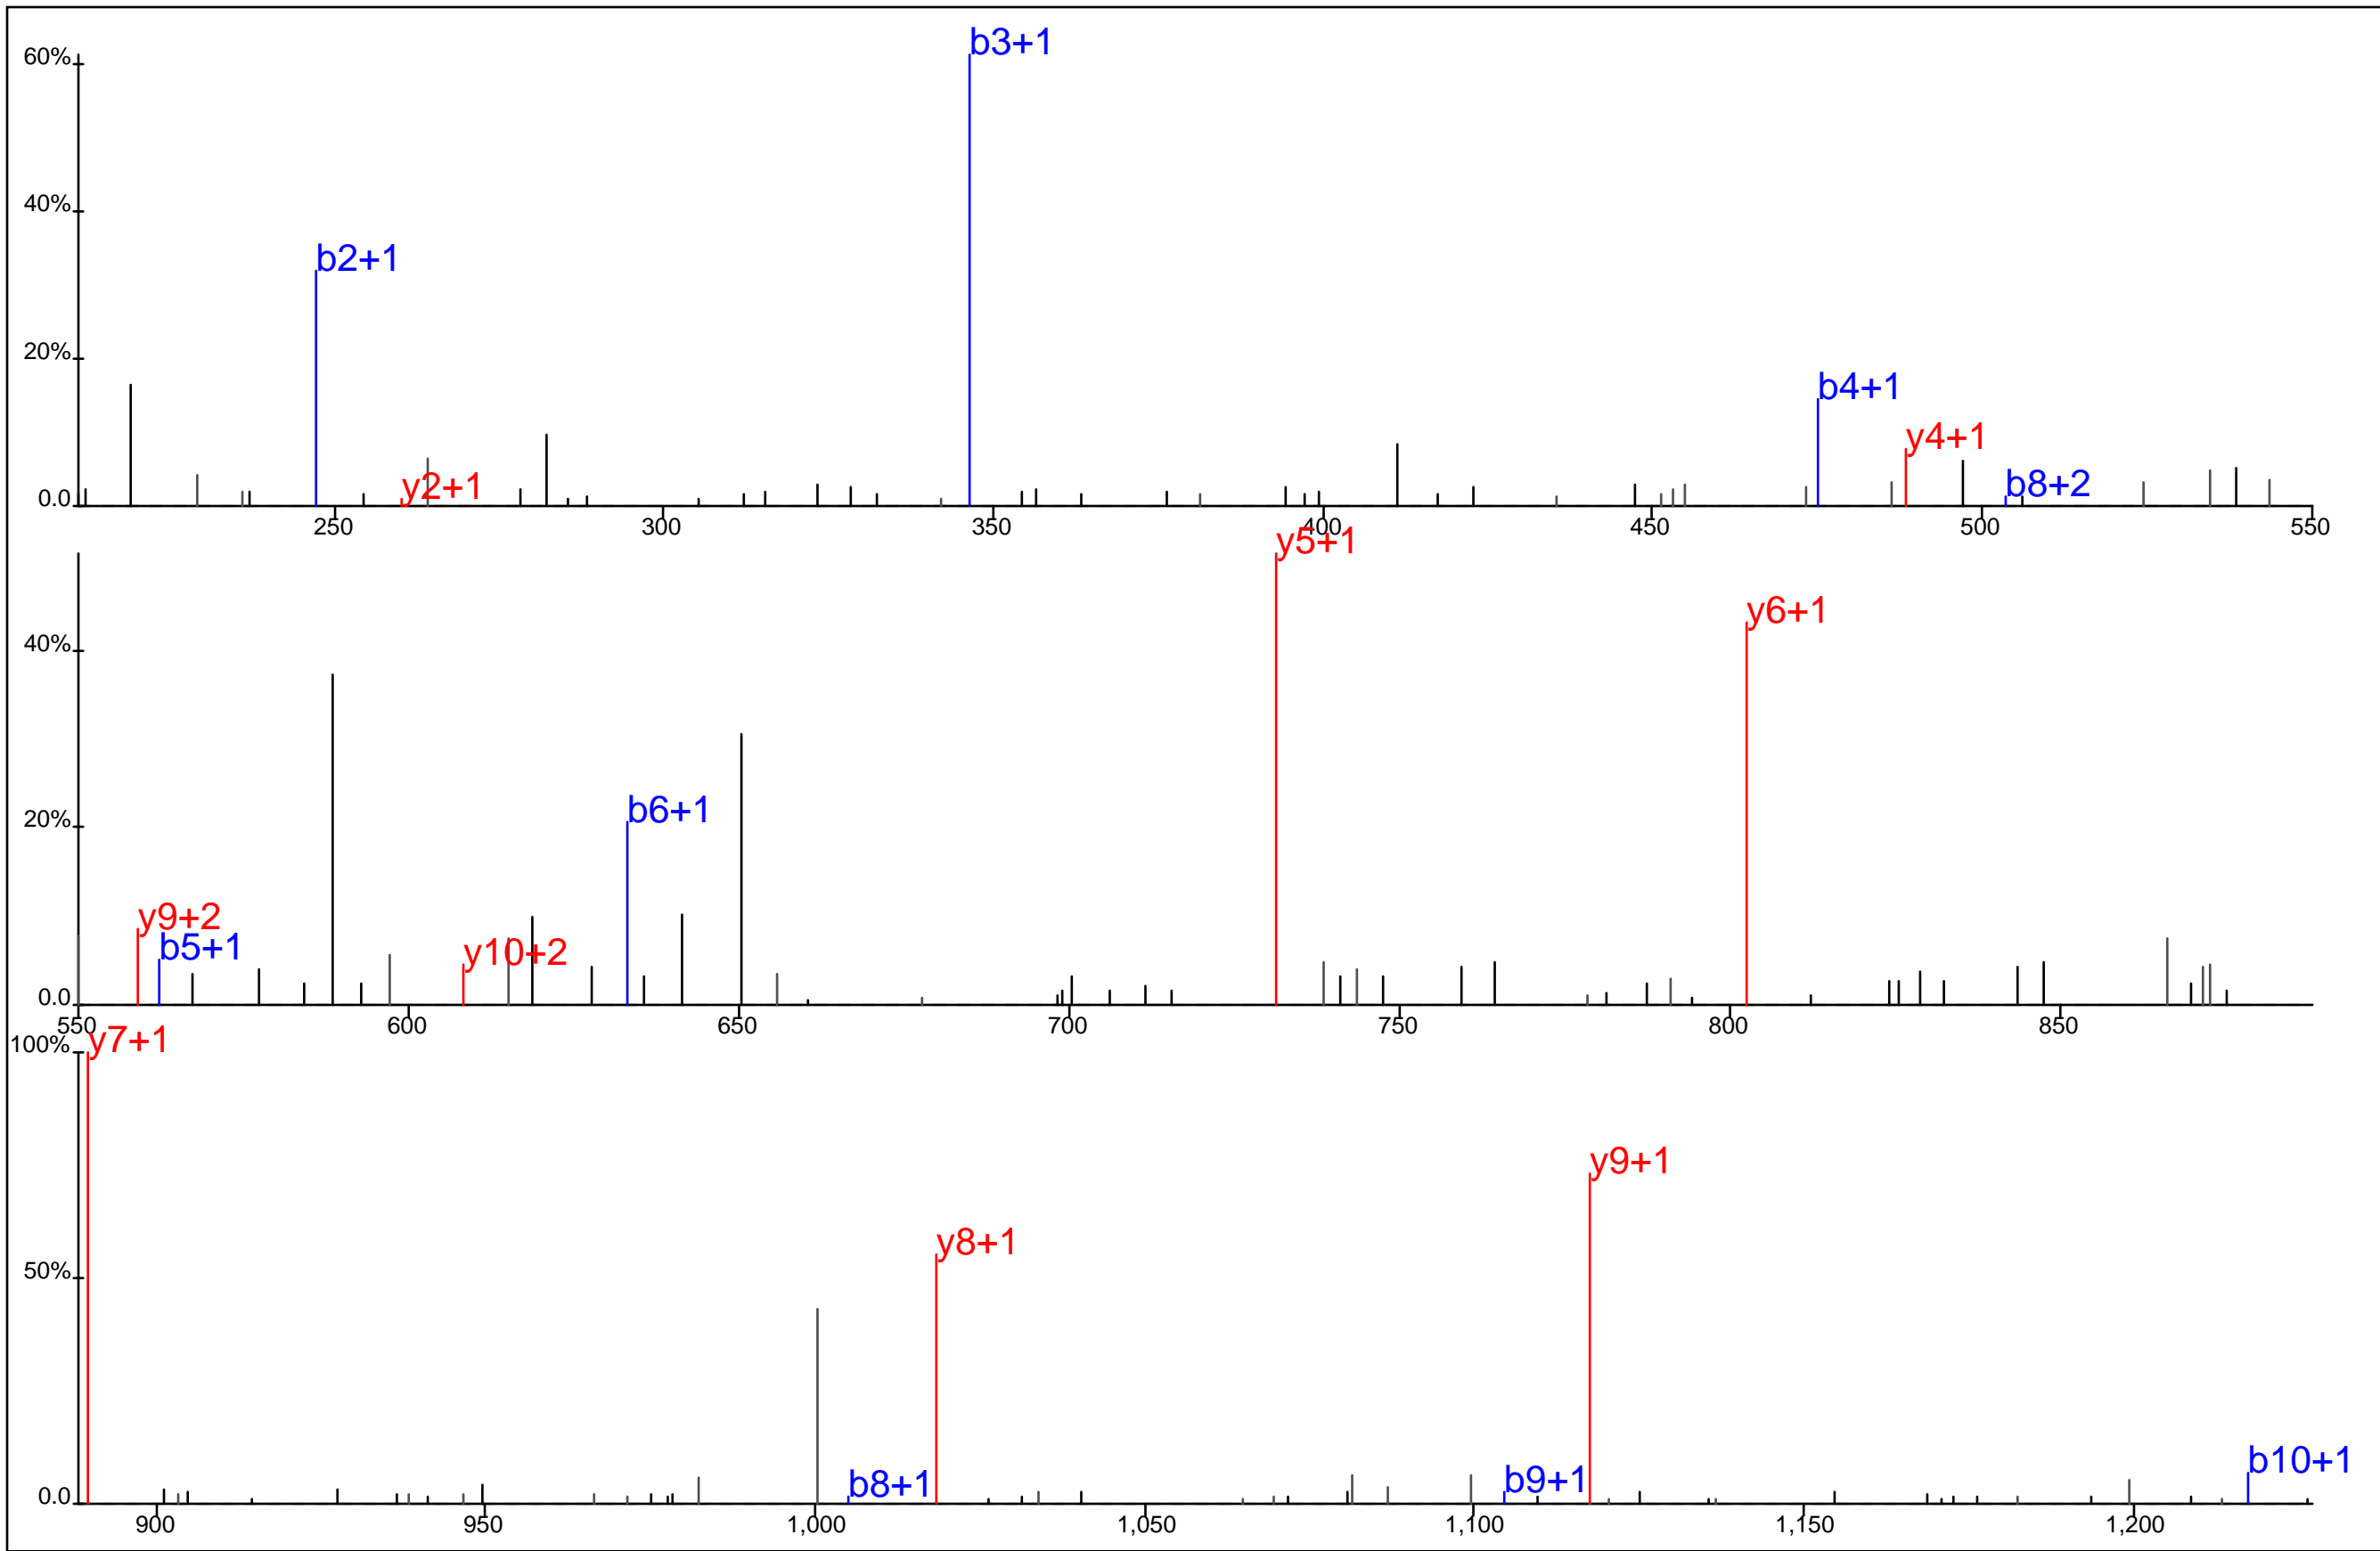

|    |   |   |   |   |    |   |   |   |   |
|----|---|---|---|---|----|---|---|---|---|
|    | ■ | ■ | ■ | ■ | ■  | ■ | ■ | ■ | ■ |
| M# | V | E | S | A | Y* | E | V | I | K |
|    | □ | □ | □ | □ | □  | □ | □ | □ | □ |

Protein Name: Lactate dehydrogenase B  
 gi Accession: 0  
 Precursor Mass: 682.3159+2  
 Delta Mass: 2.265 ppm  
 XCorr: 38.34

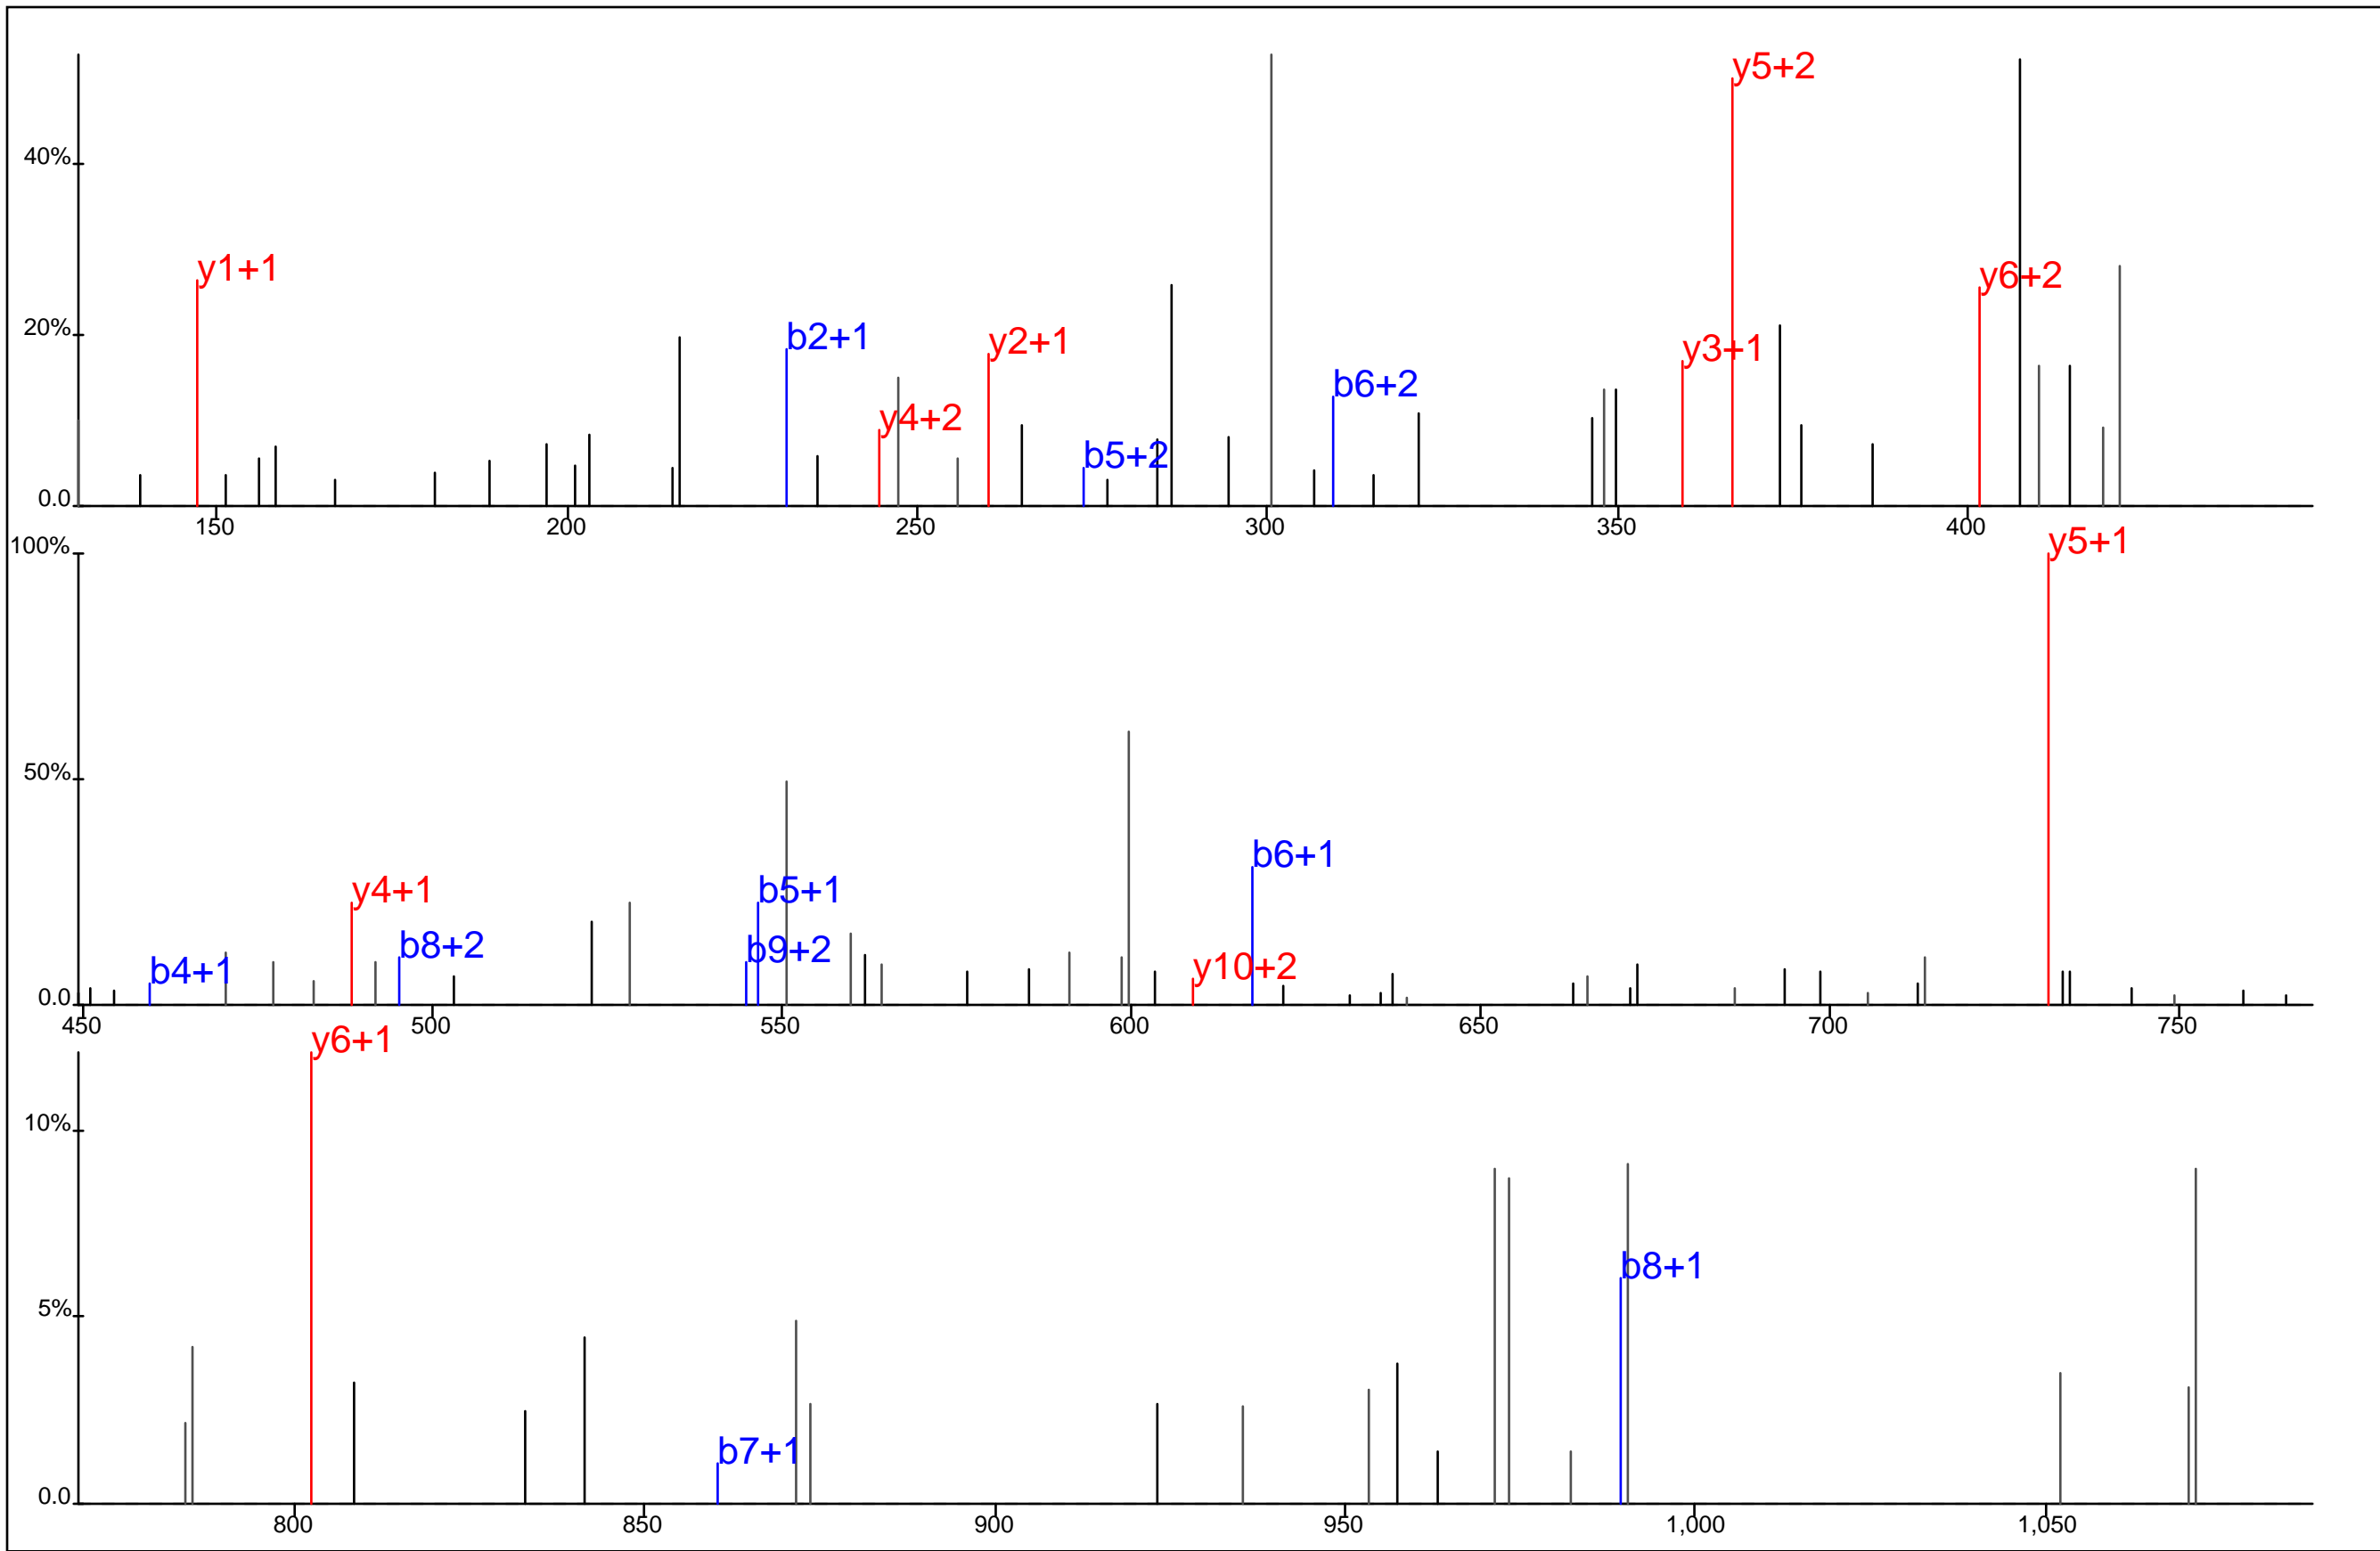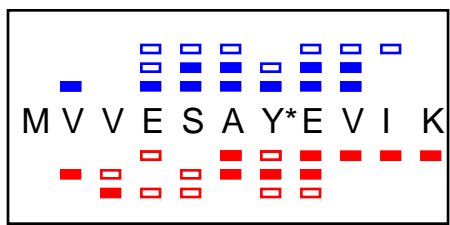

Protein Name: Lactate dehydrogenase B  
 gi Accession: 0  
 Precursor Mass: 449.8804+3  
 Delta Mass: 0.007 ppm  
 XCorr: 27.96

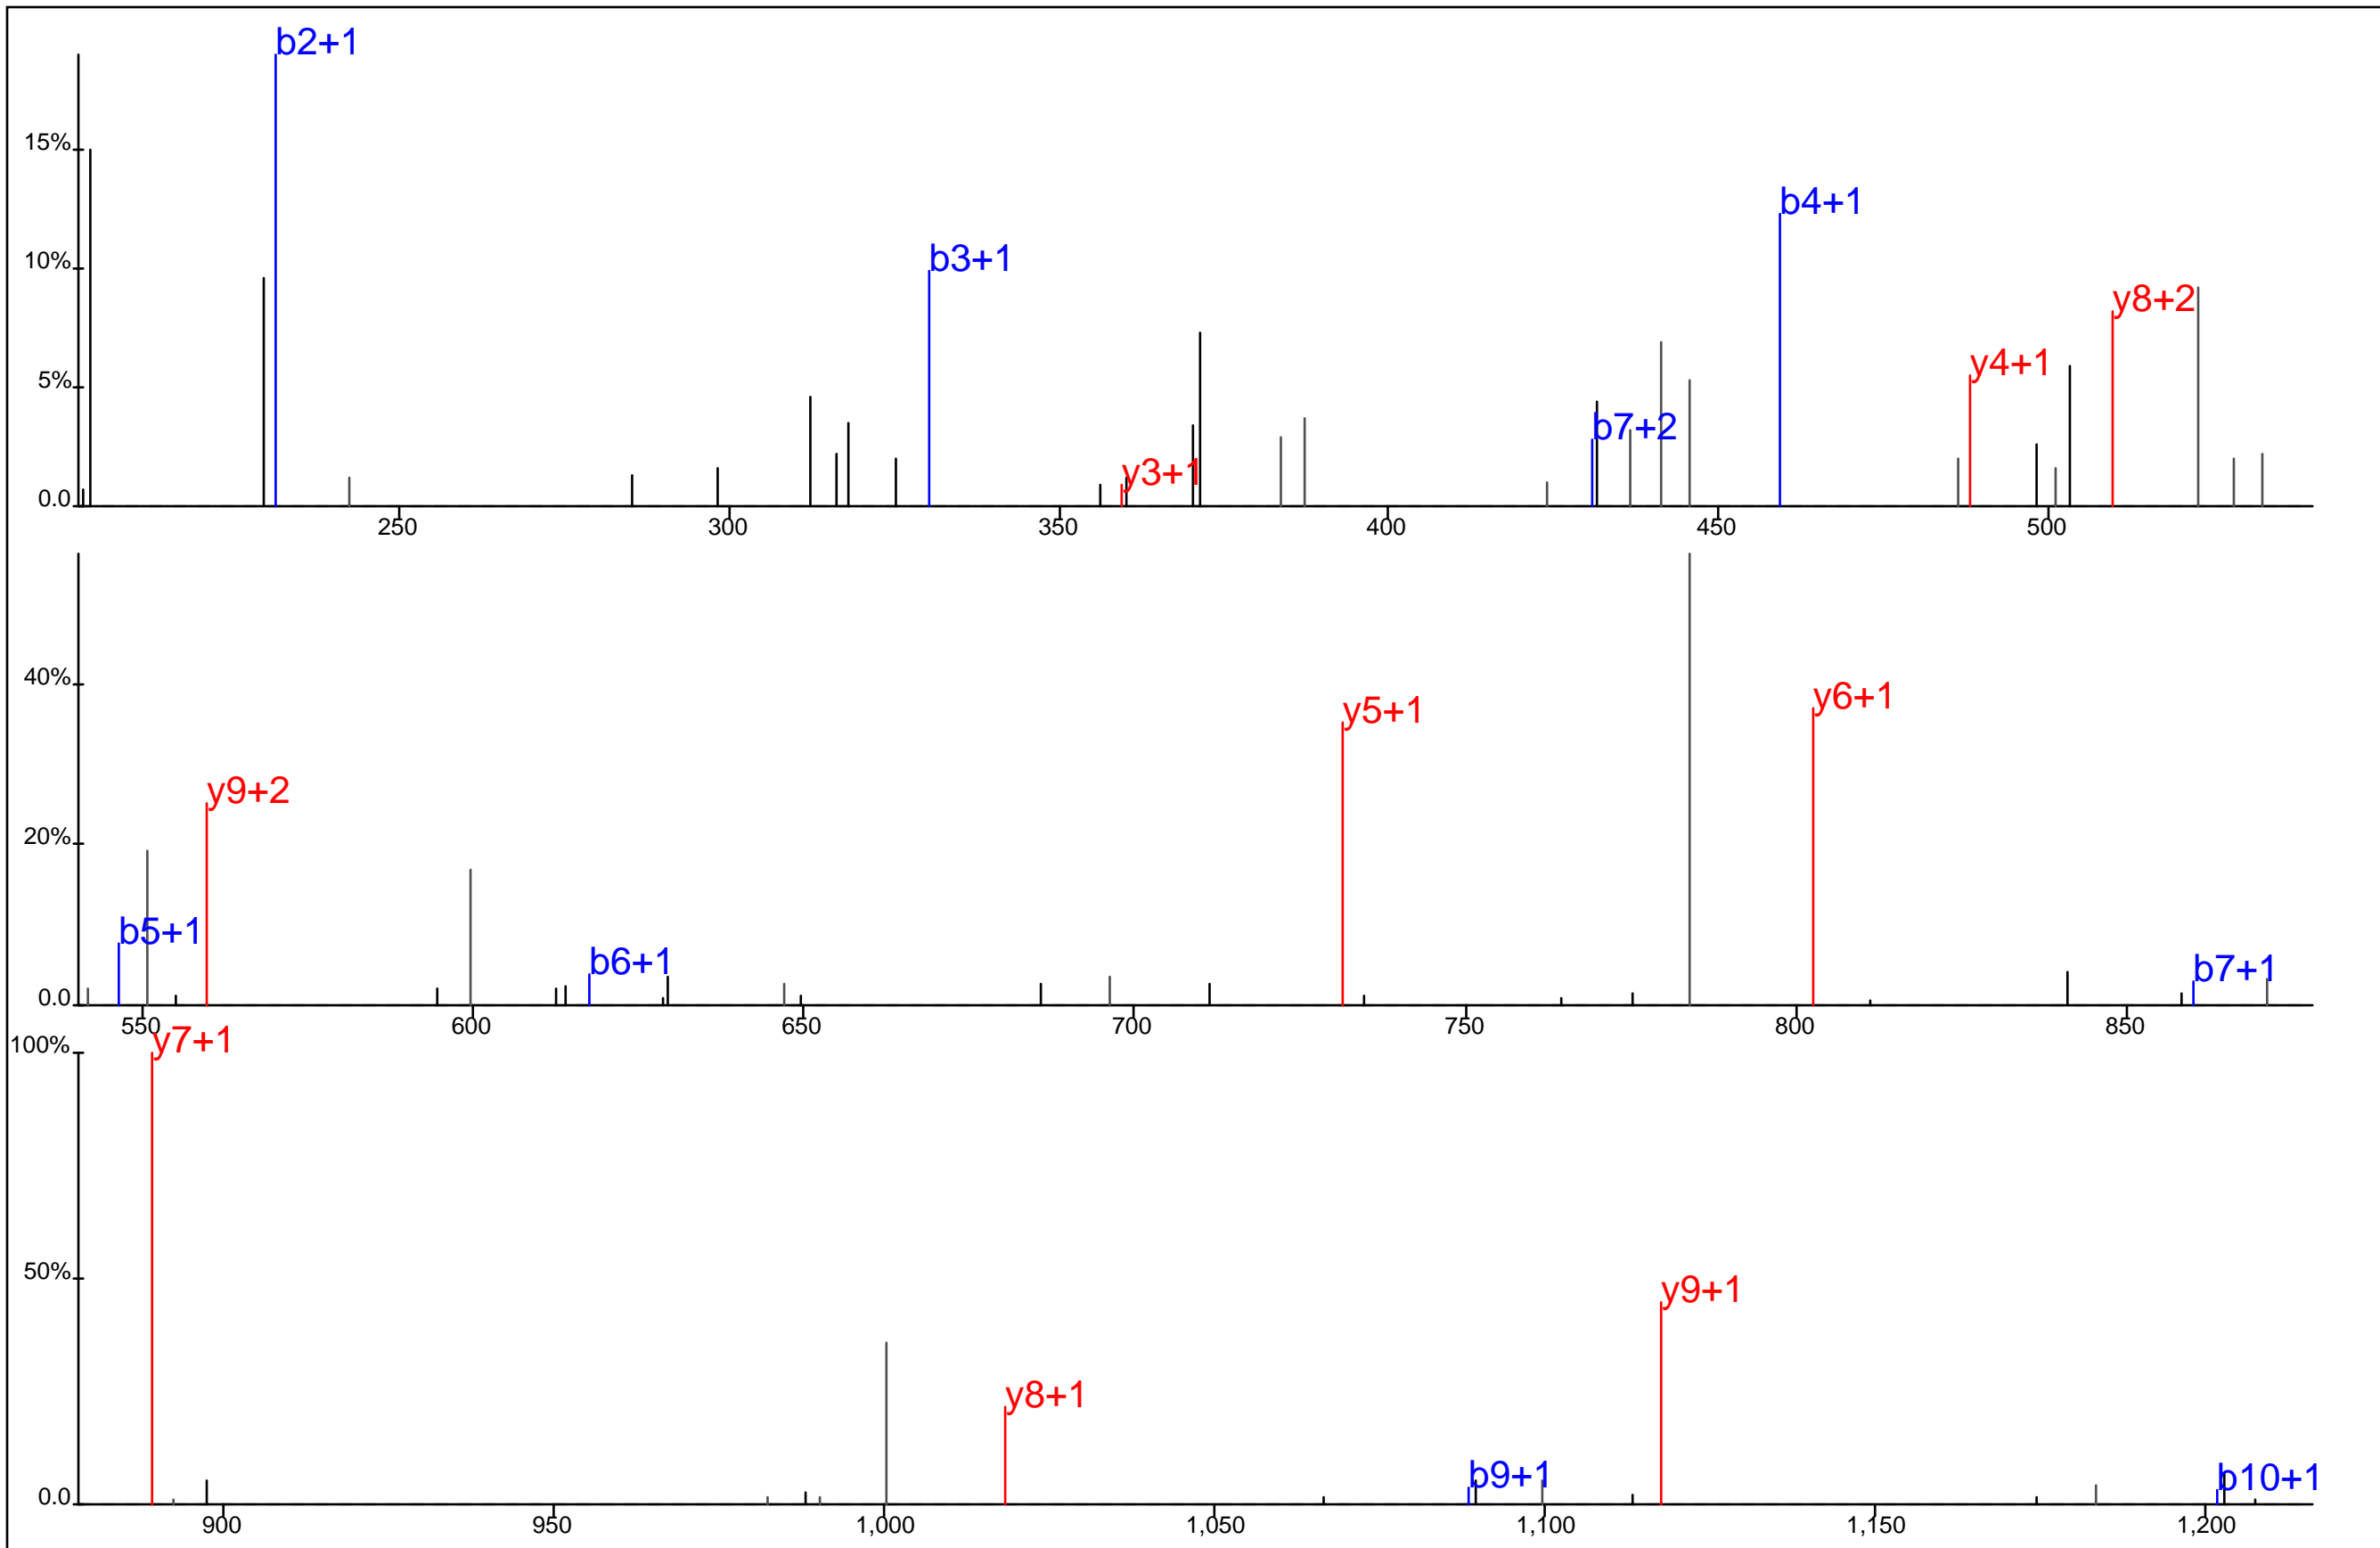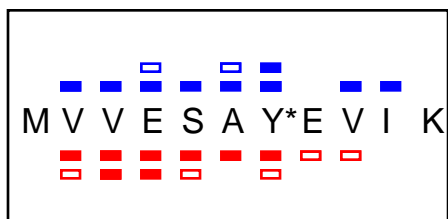

Protein Name: Lactate dehydrogenase B  
 gi Accession: 0  
 Precursor Mass: 674.3173+2  
 Delta Mass: 0.515 ppm  
 XCorr: 42.59

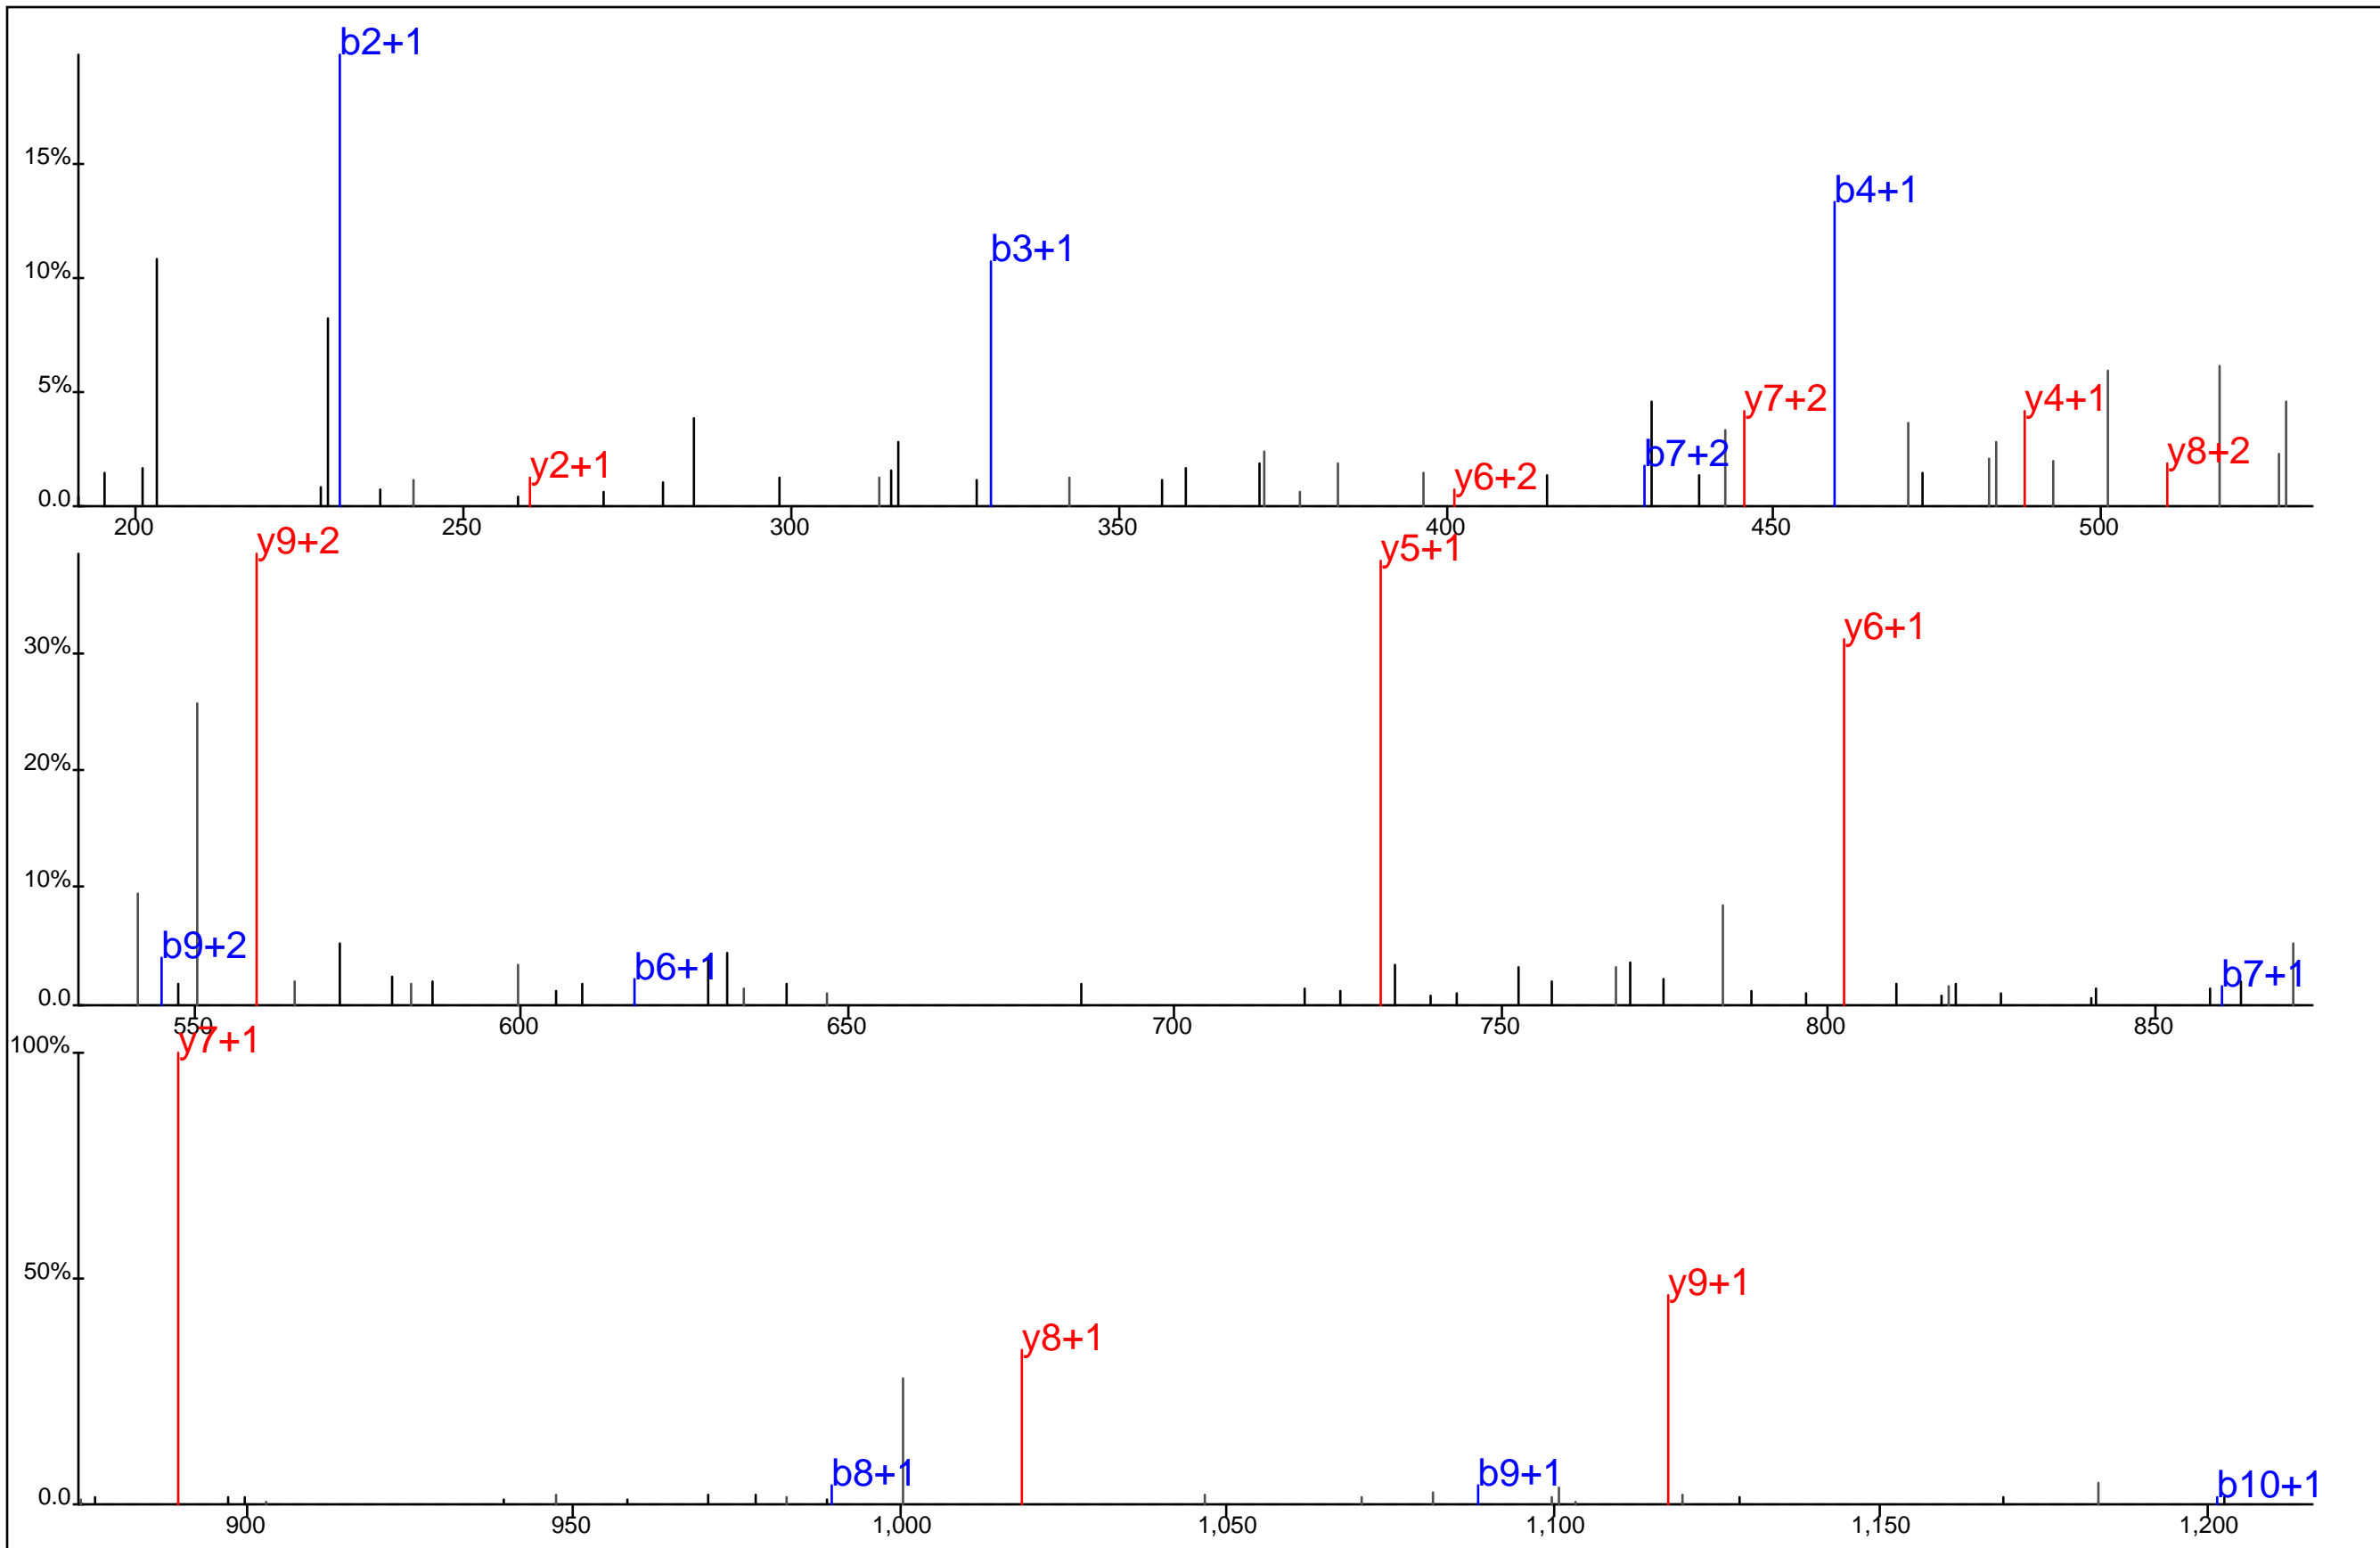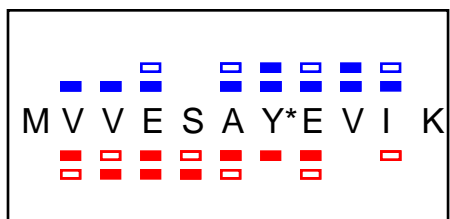

Protein Name: Lactate dehydrogenase B  
 gi Accession: 0  
 Precursor Mass: 674.3162+2  
 Delta Mass: 1.116 ppm  
 XCorr: 53.48

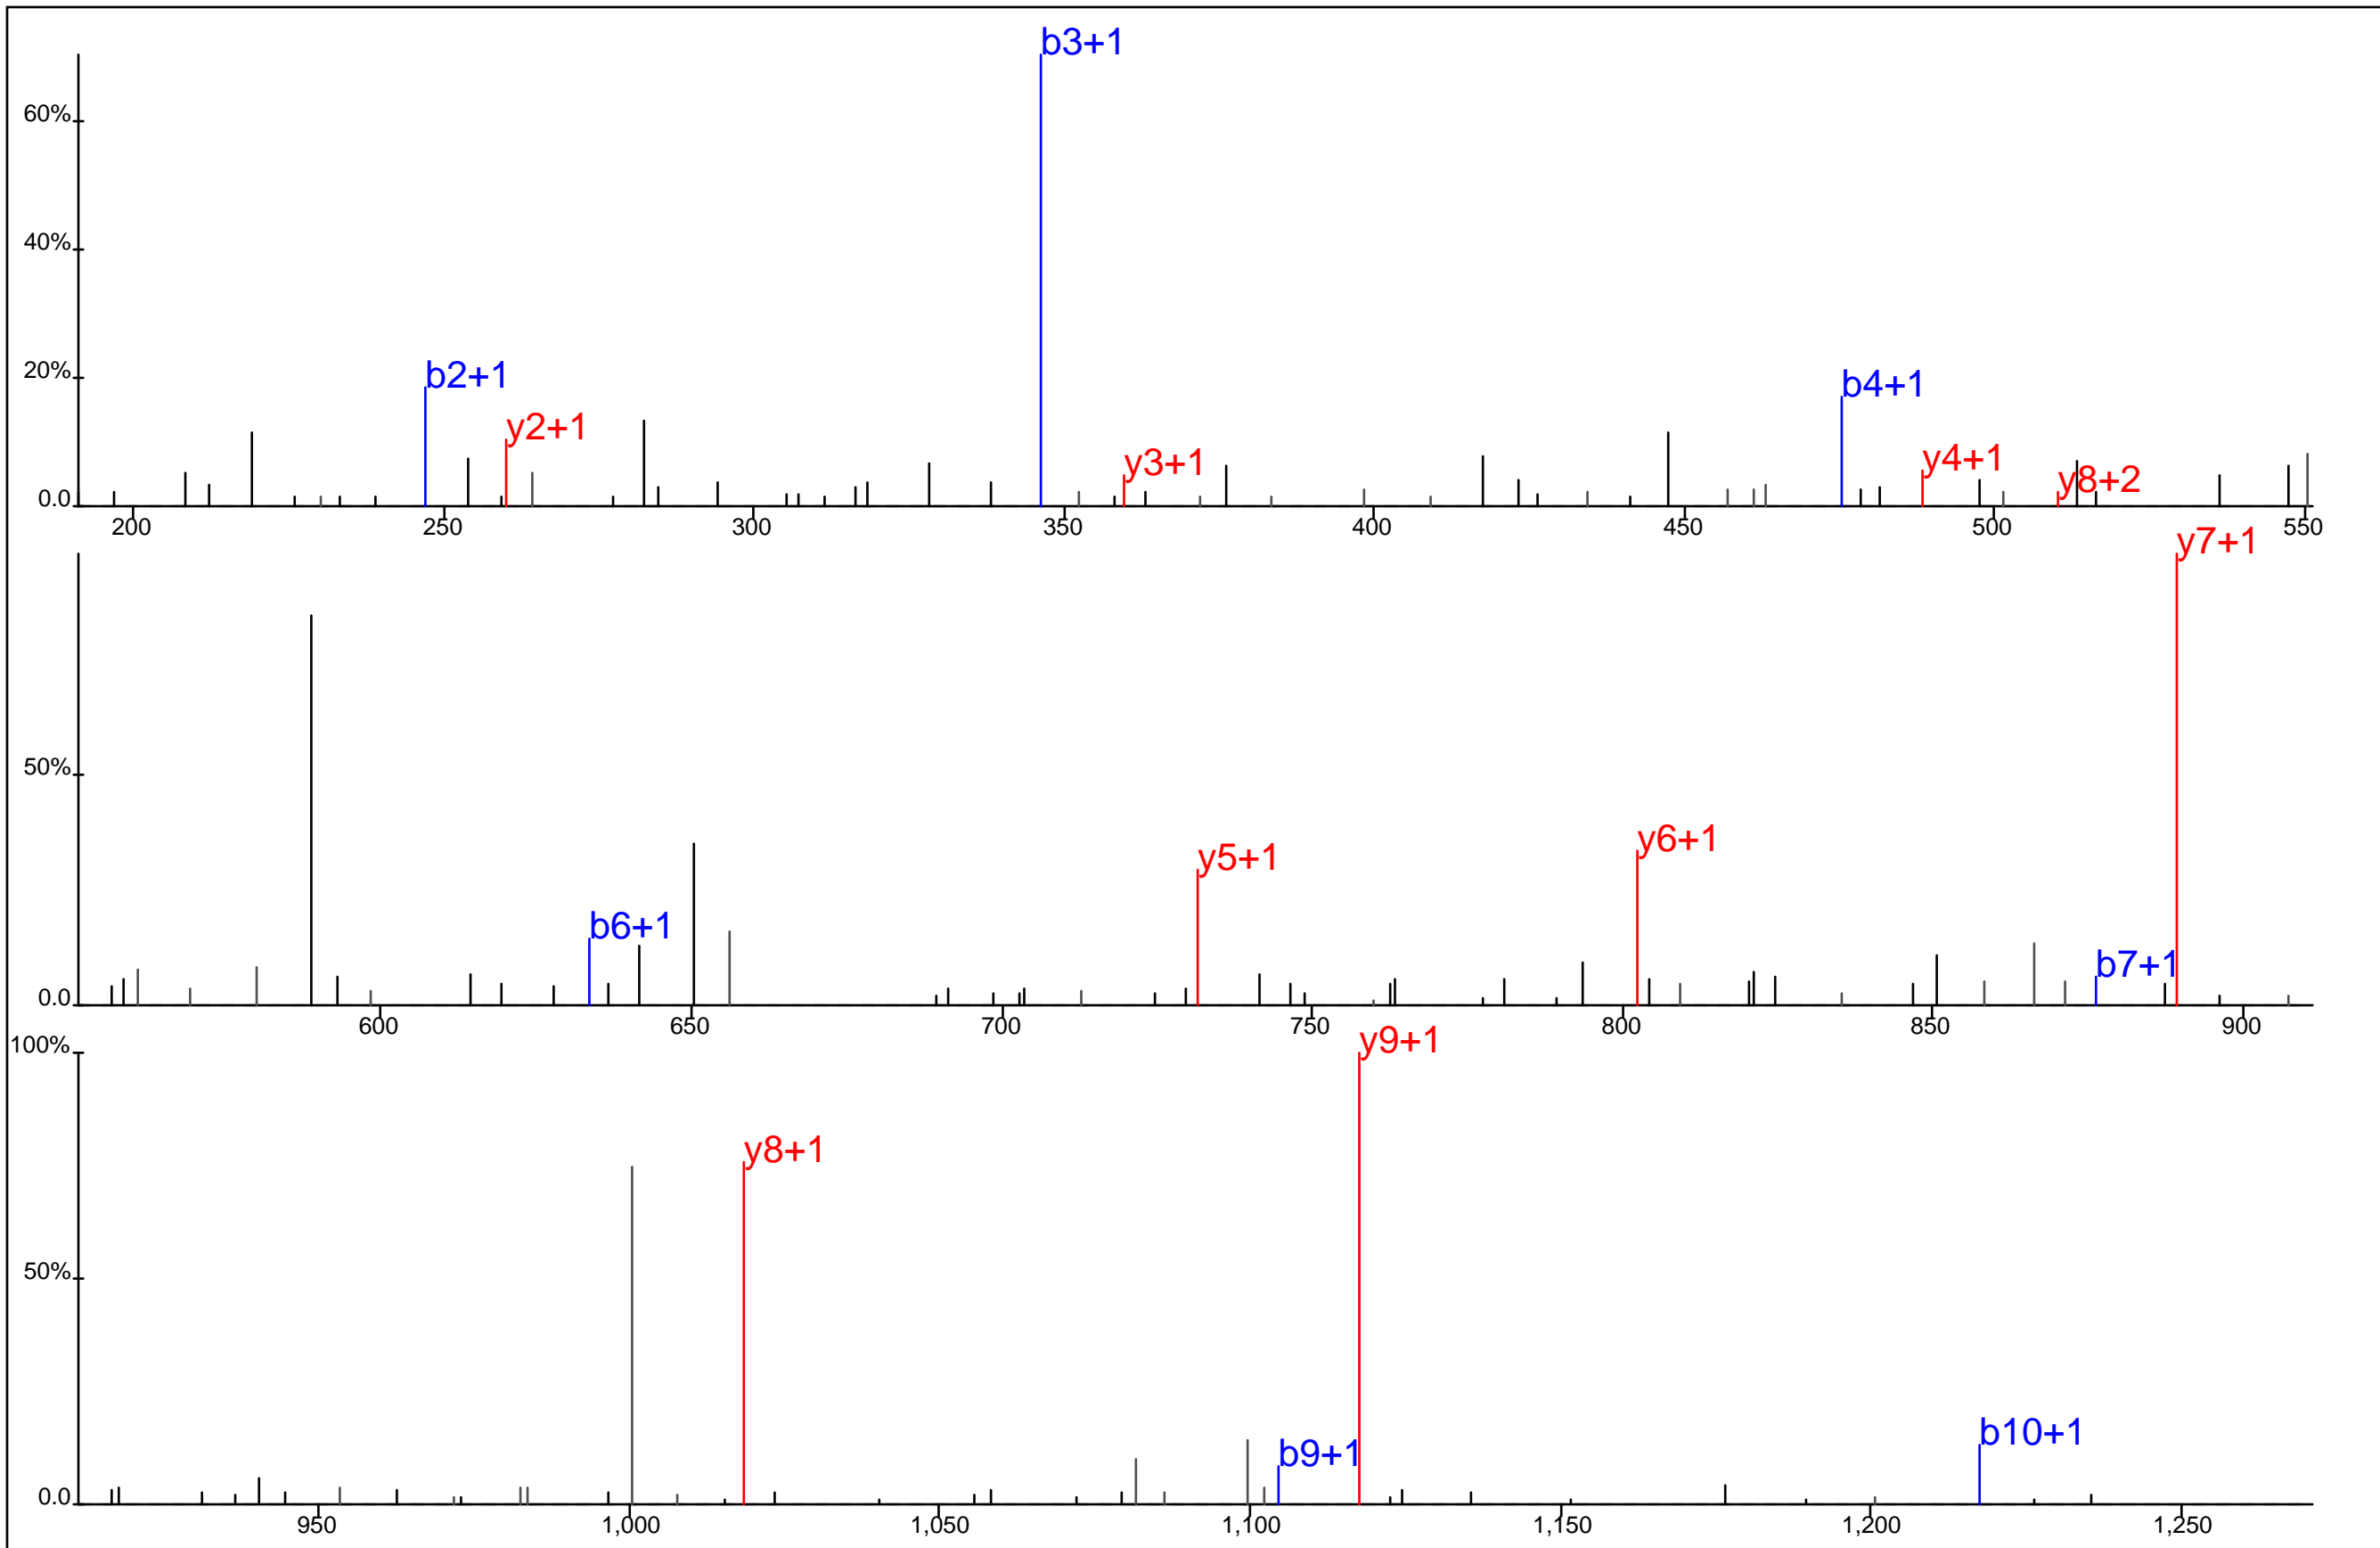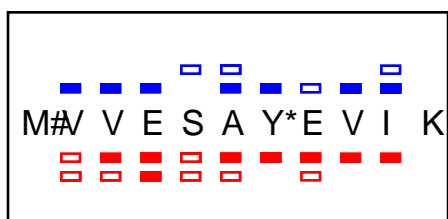

Protein Name: Lactate dehydrogenase B  
 gi Accession: 0  
 Precursor Mass: 682.3145+2  
 Delta Mass: 0.205 ppm  
 XCorr: 40.87



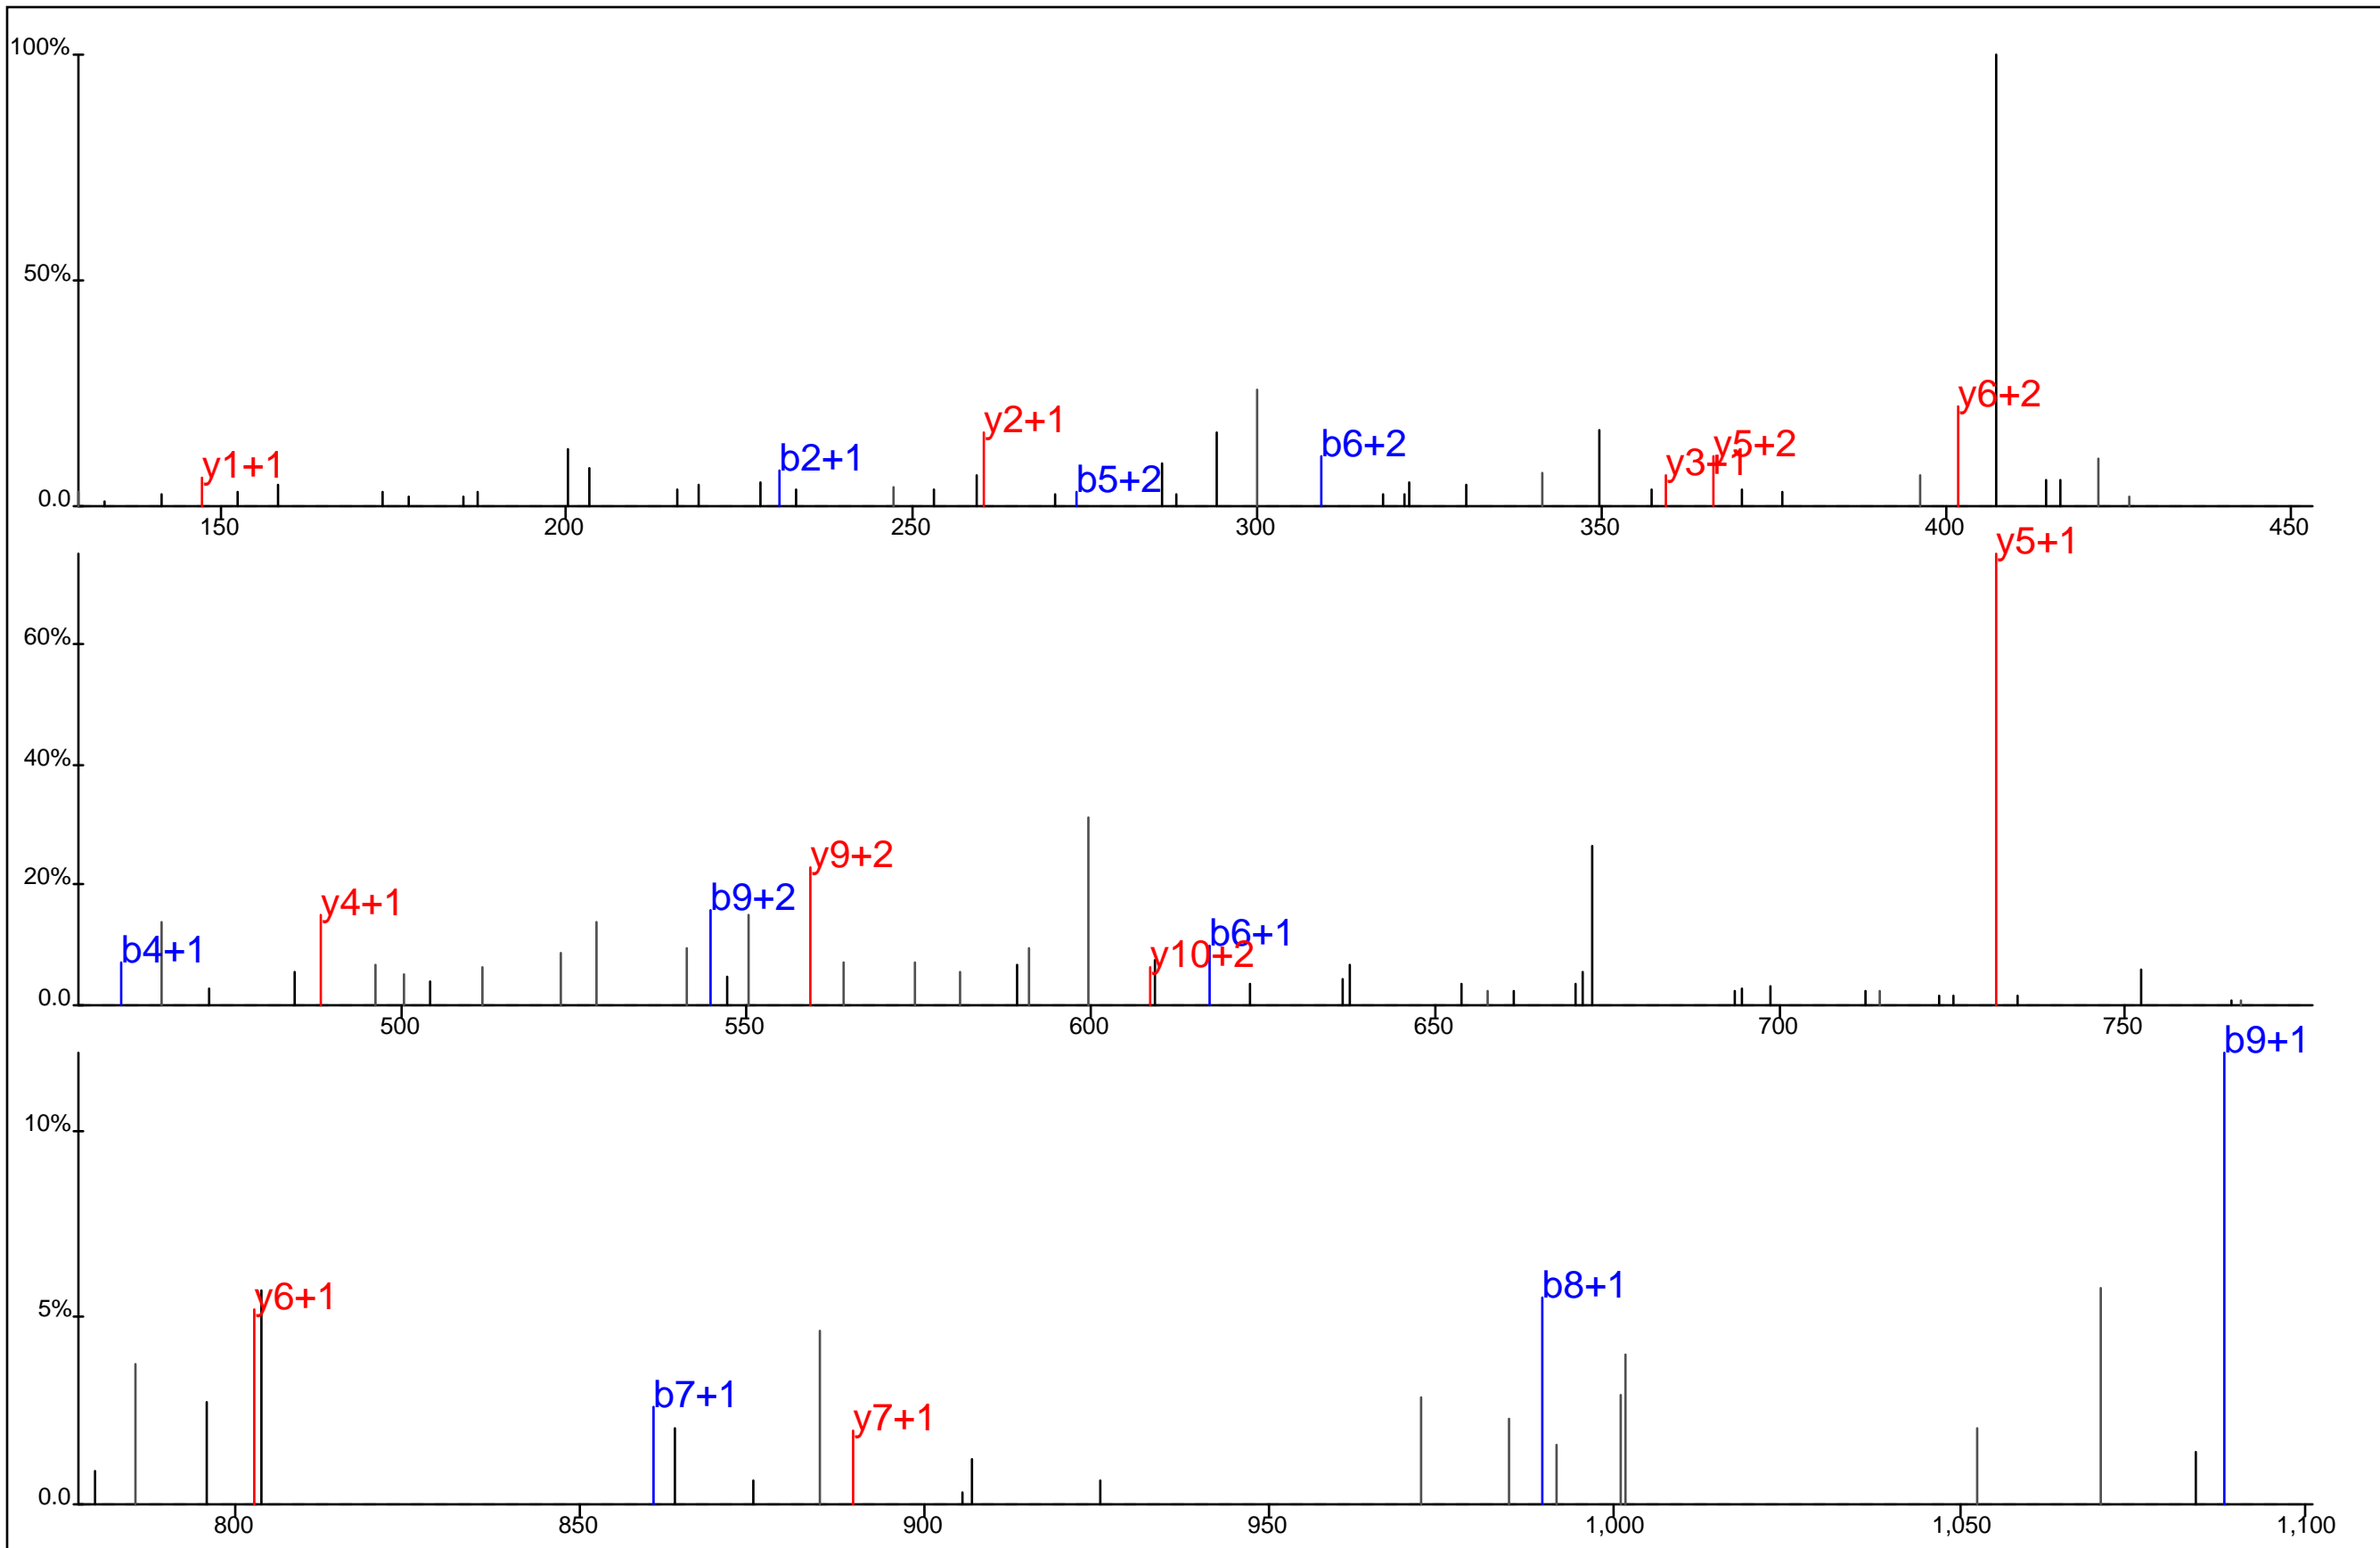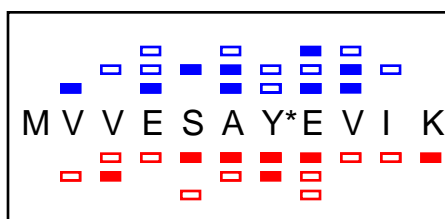

Protein Name: Lactate dehydrogenase B  
 gi Accession: 0  
 Precursor Mass: 449.8805+3  
 Delta Mass: 0.278 ppm  
 XCorr: 26.64

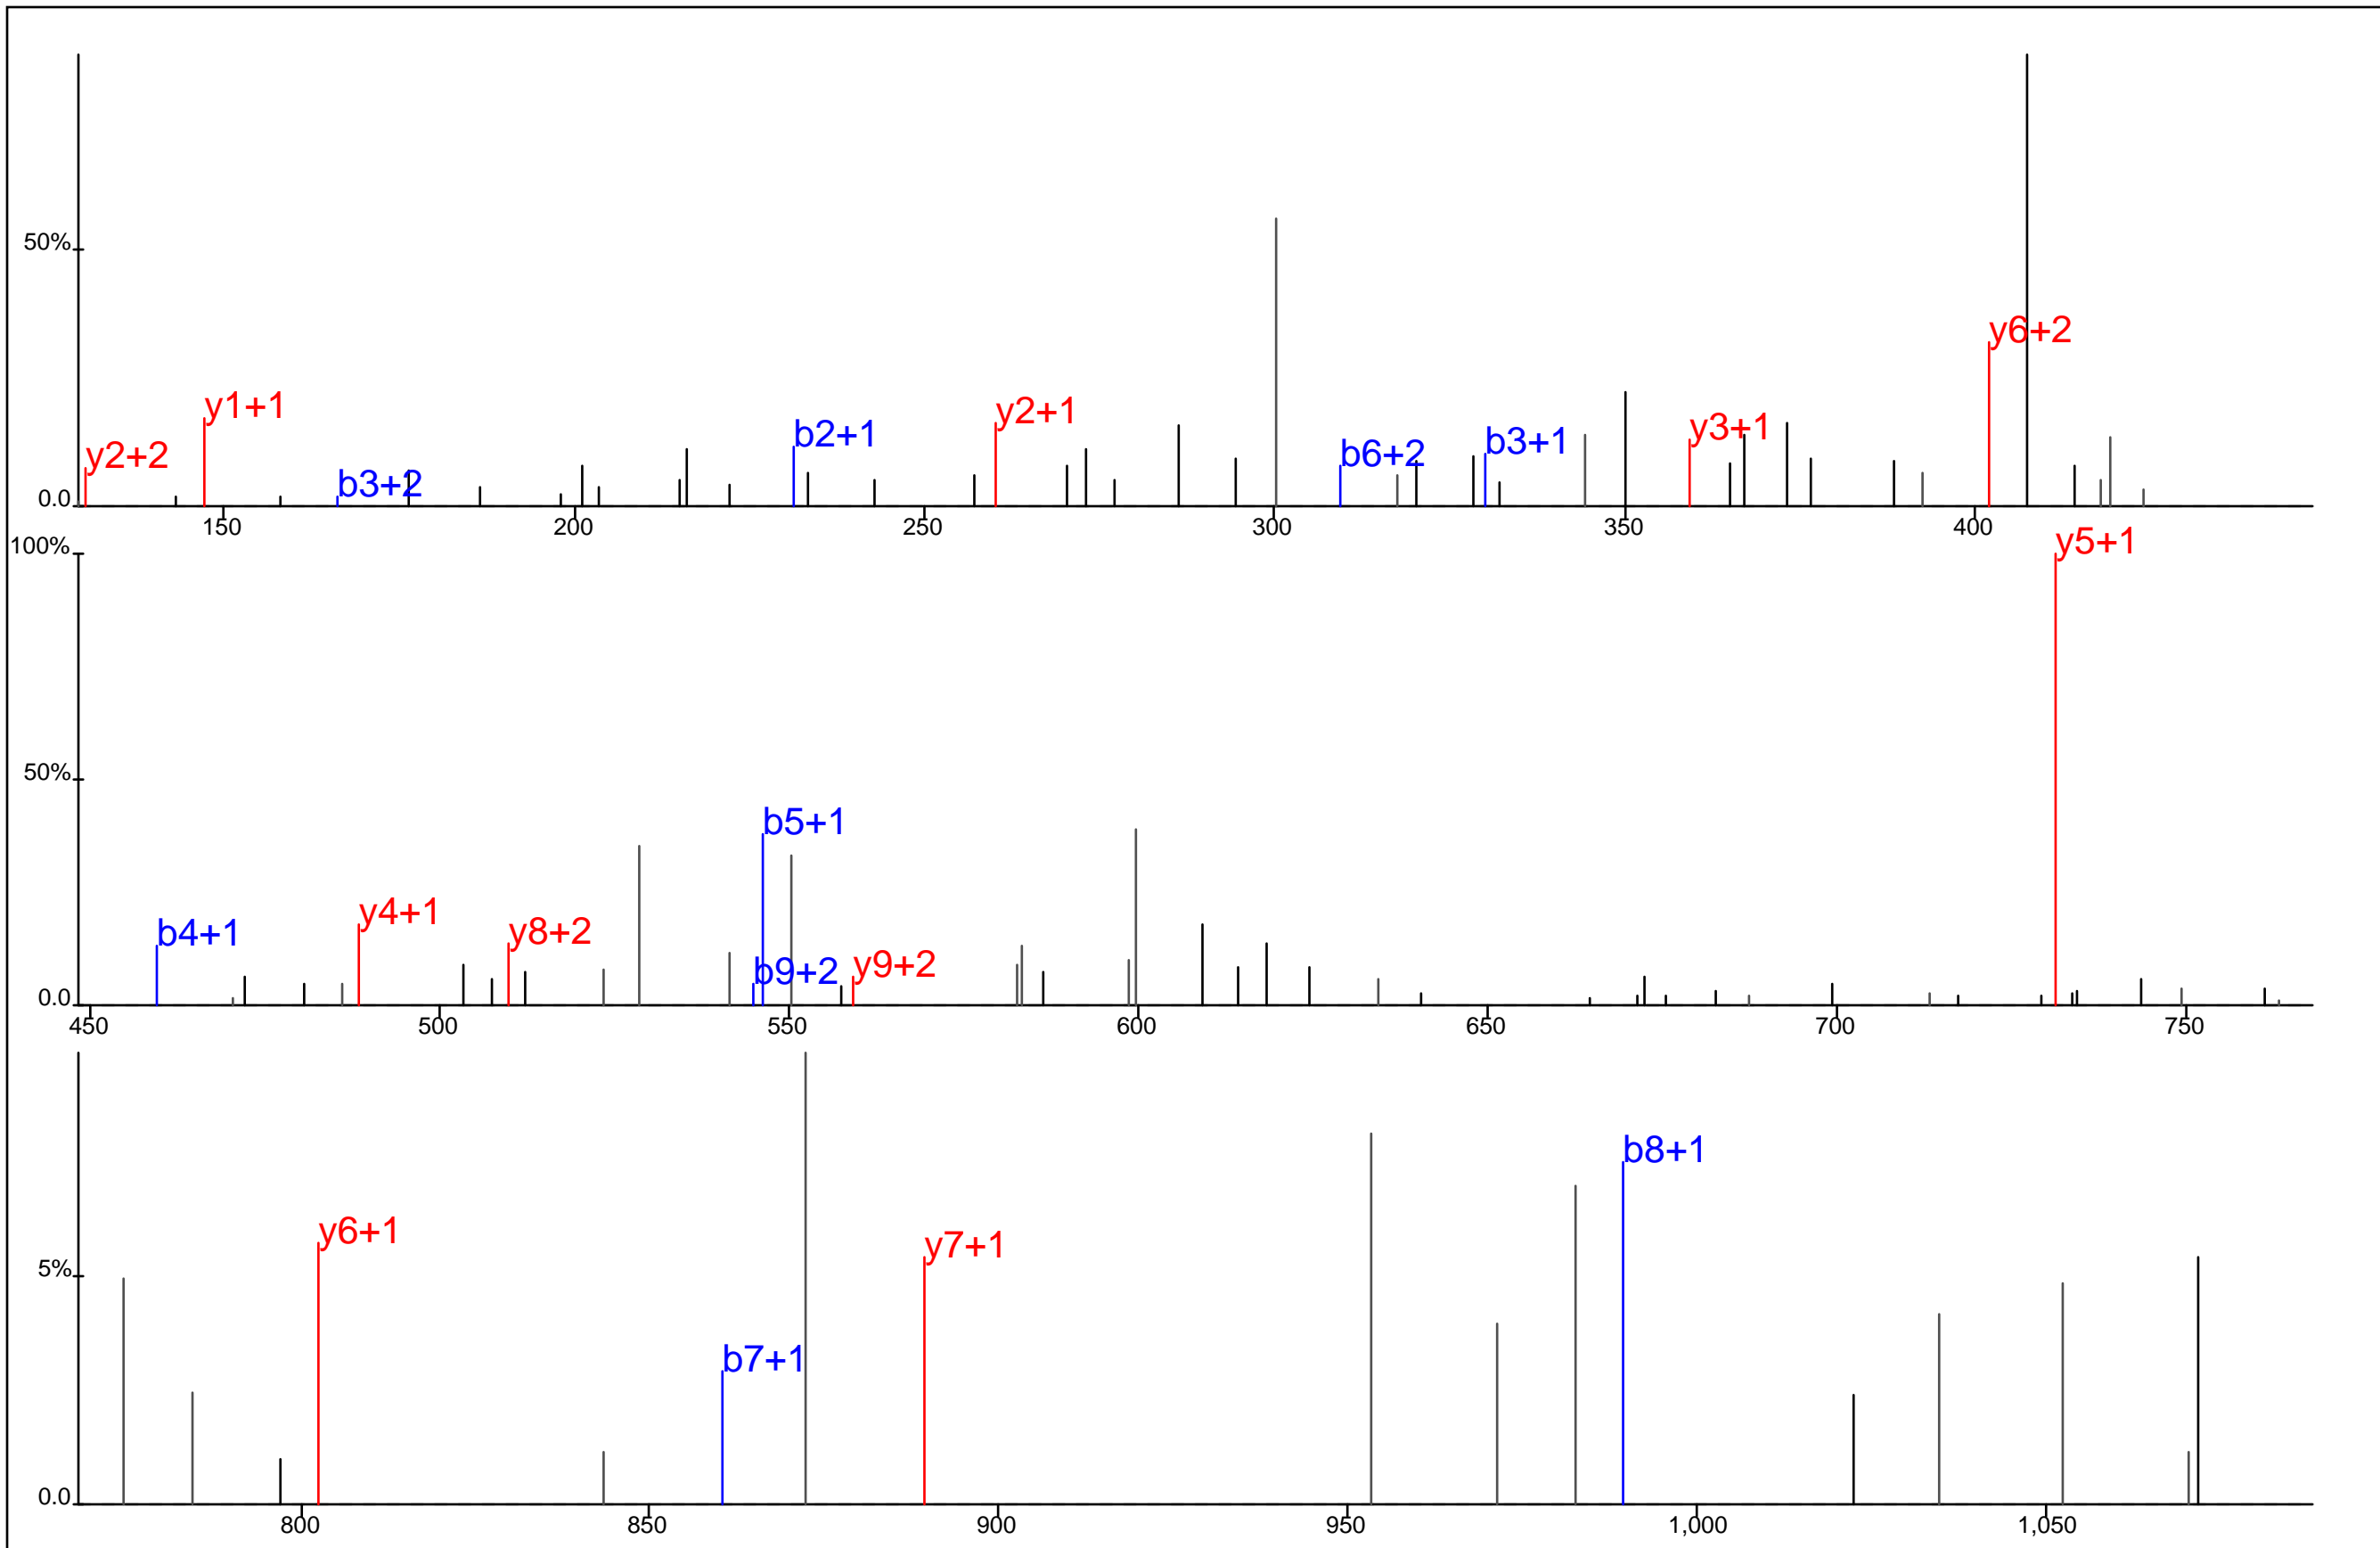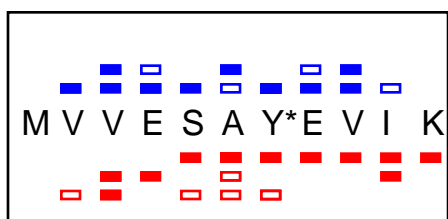

Protein Name: Lactate dehydrogenase B  
 gi Accession: 0  
 Precursor Mass: 449.8802+3  
 Delta Mass: 0.470 ppm  
 XCorr: 37.62

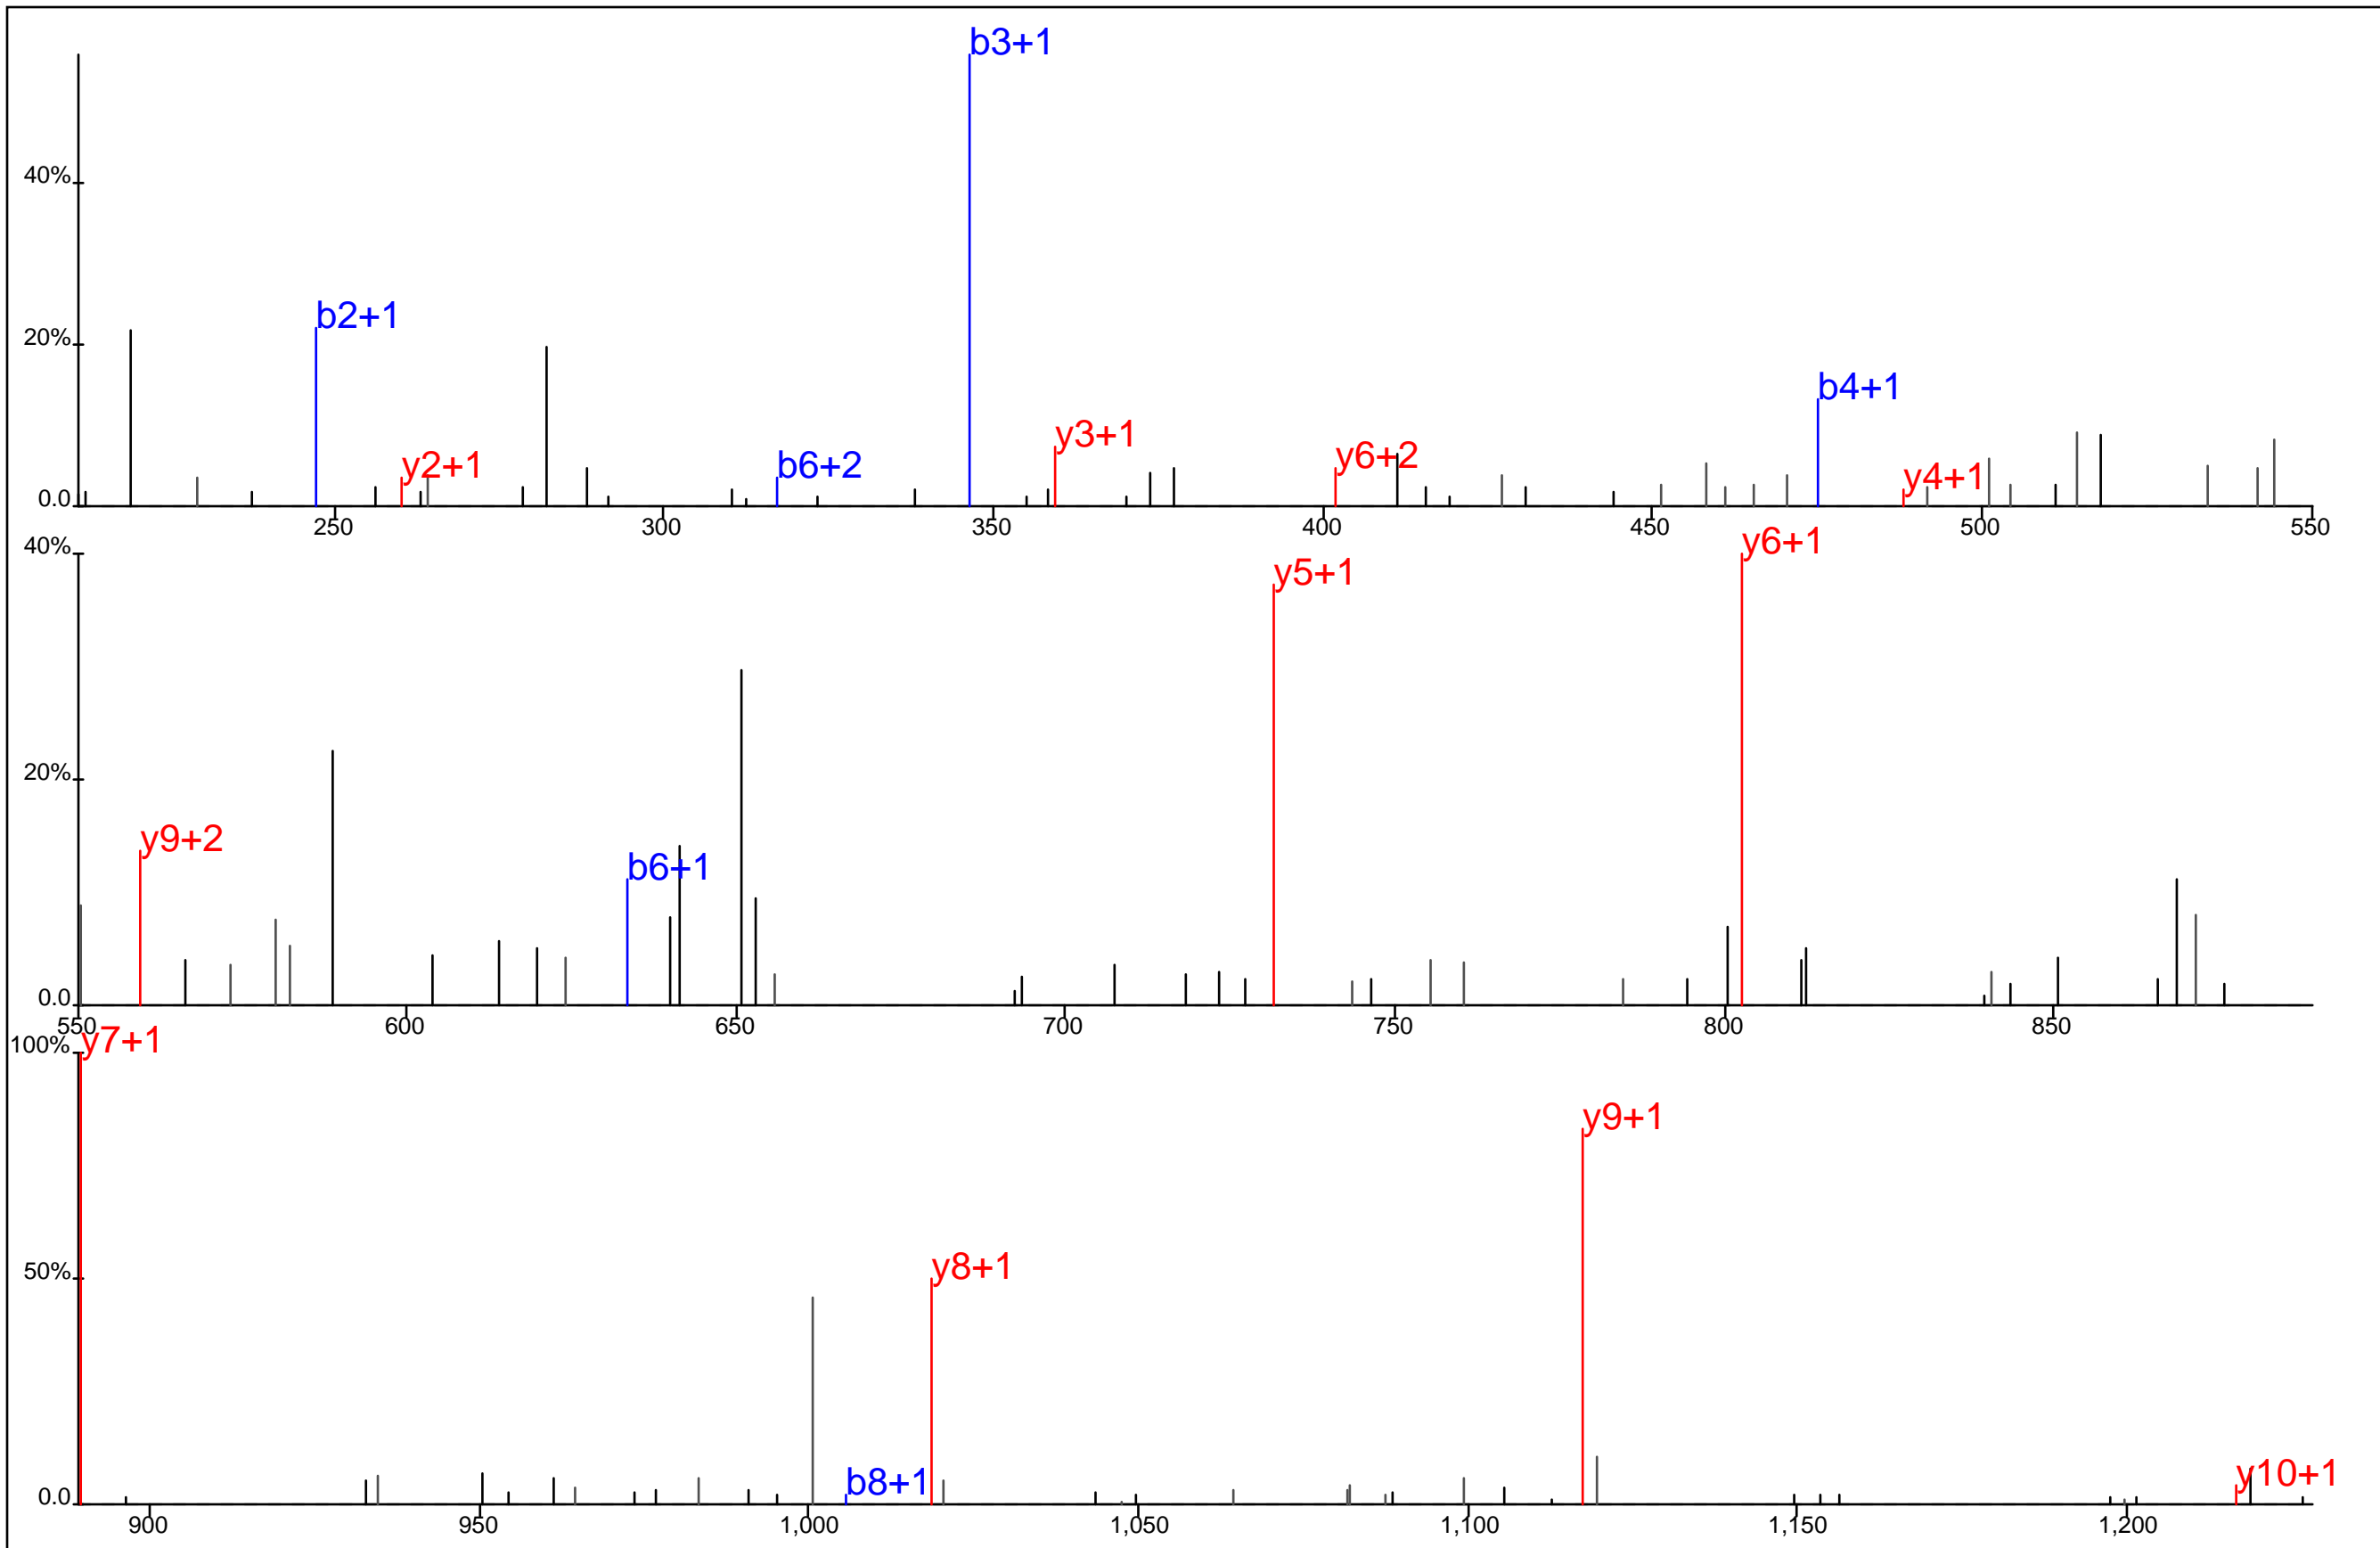

|    |   |   |   |   |    |   |   |   |   |
|----|---|---|---|---|----|---|---|---|---|
|    | ■ | ■ | ■ | □ | ■  | □ | □ | □ | □ |
| M# | V | E | S | A | Y* | E | V | I | K |
|    | □ | □ | □ | □ | □  | □ | □ | □ | □ |

Protein Name: Lactate dehydrogenase B  
 gi Accession: 0  
 Precursor Mass: 682.3153+2  
 Delta Mass: 1.370 ppm  
 XCorr: 50.24

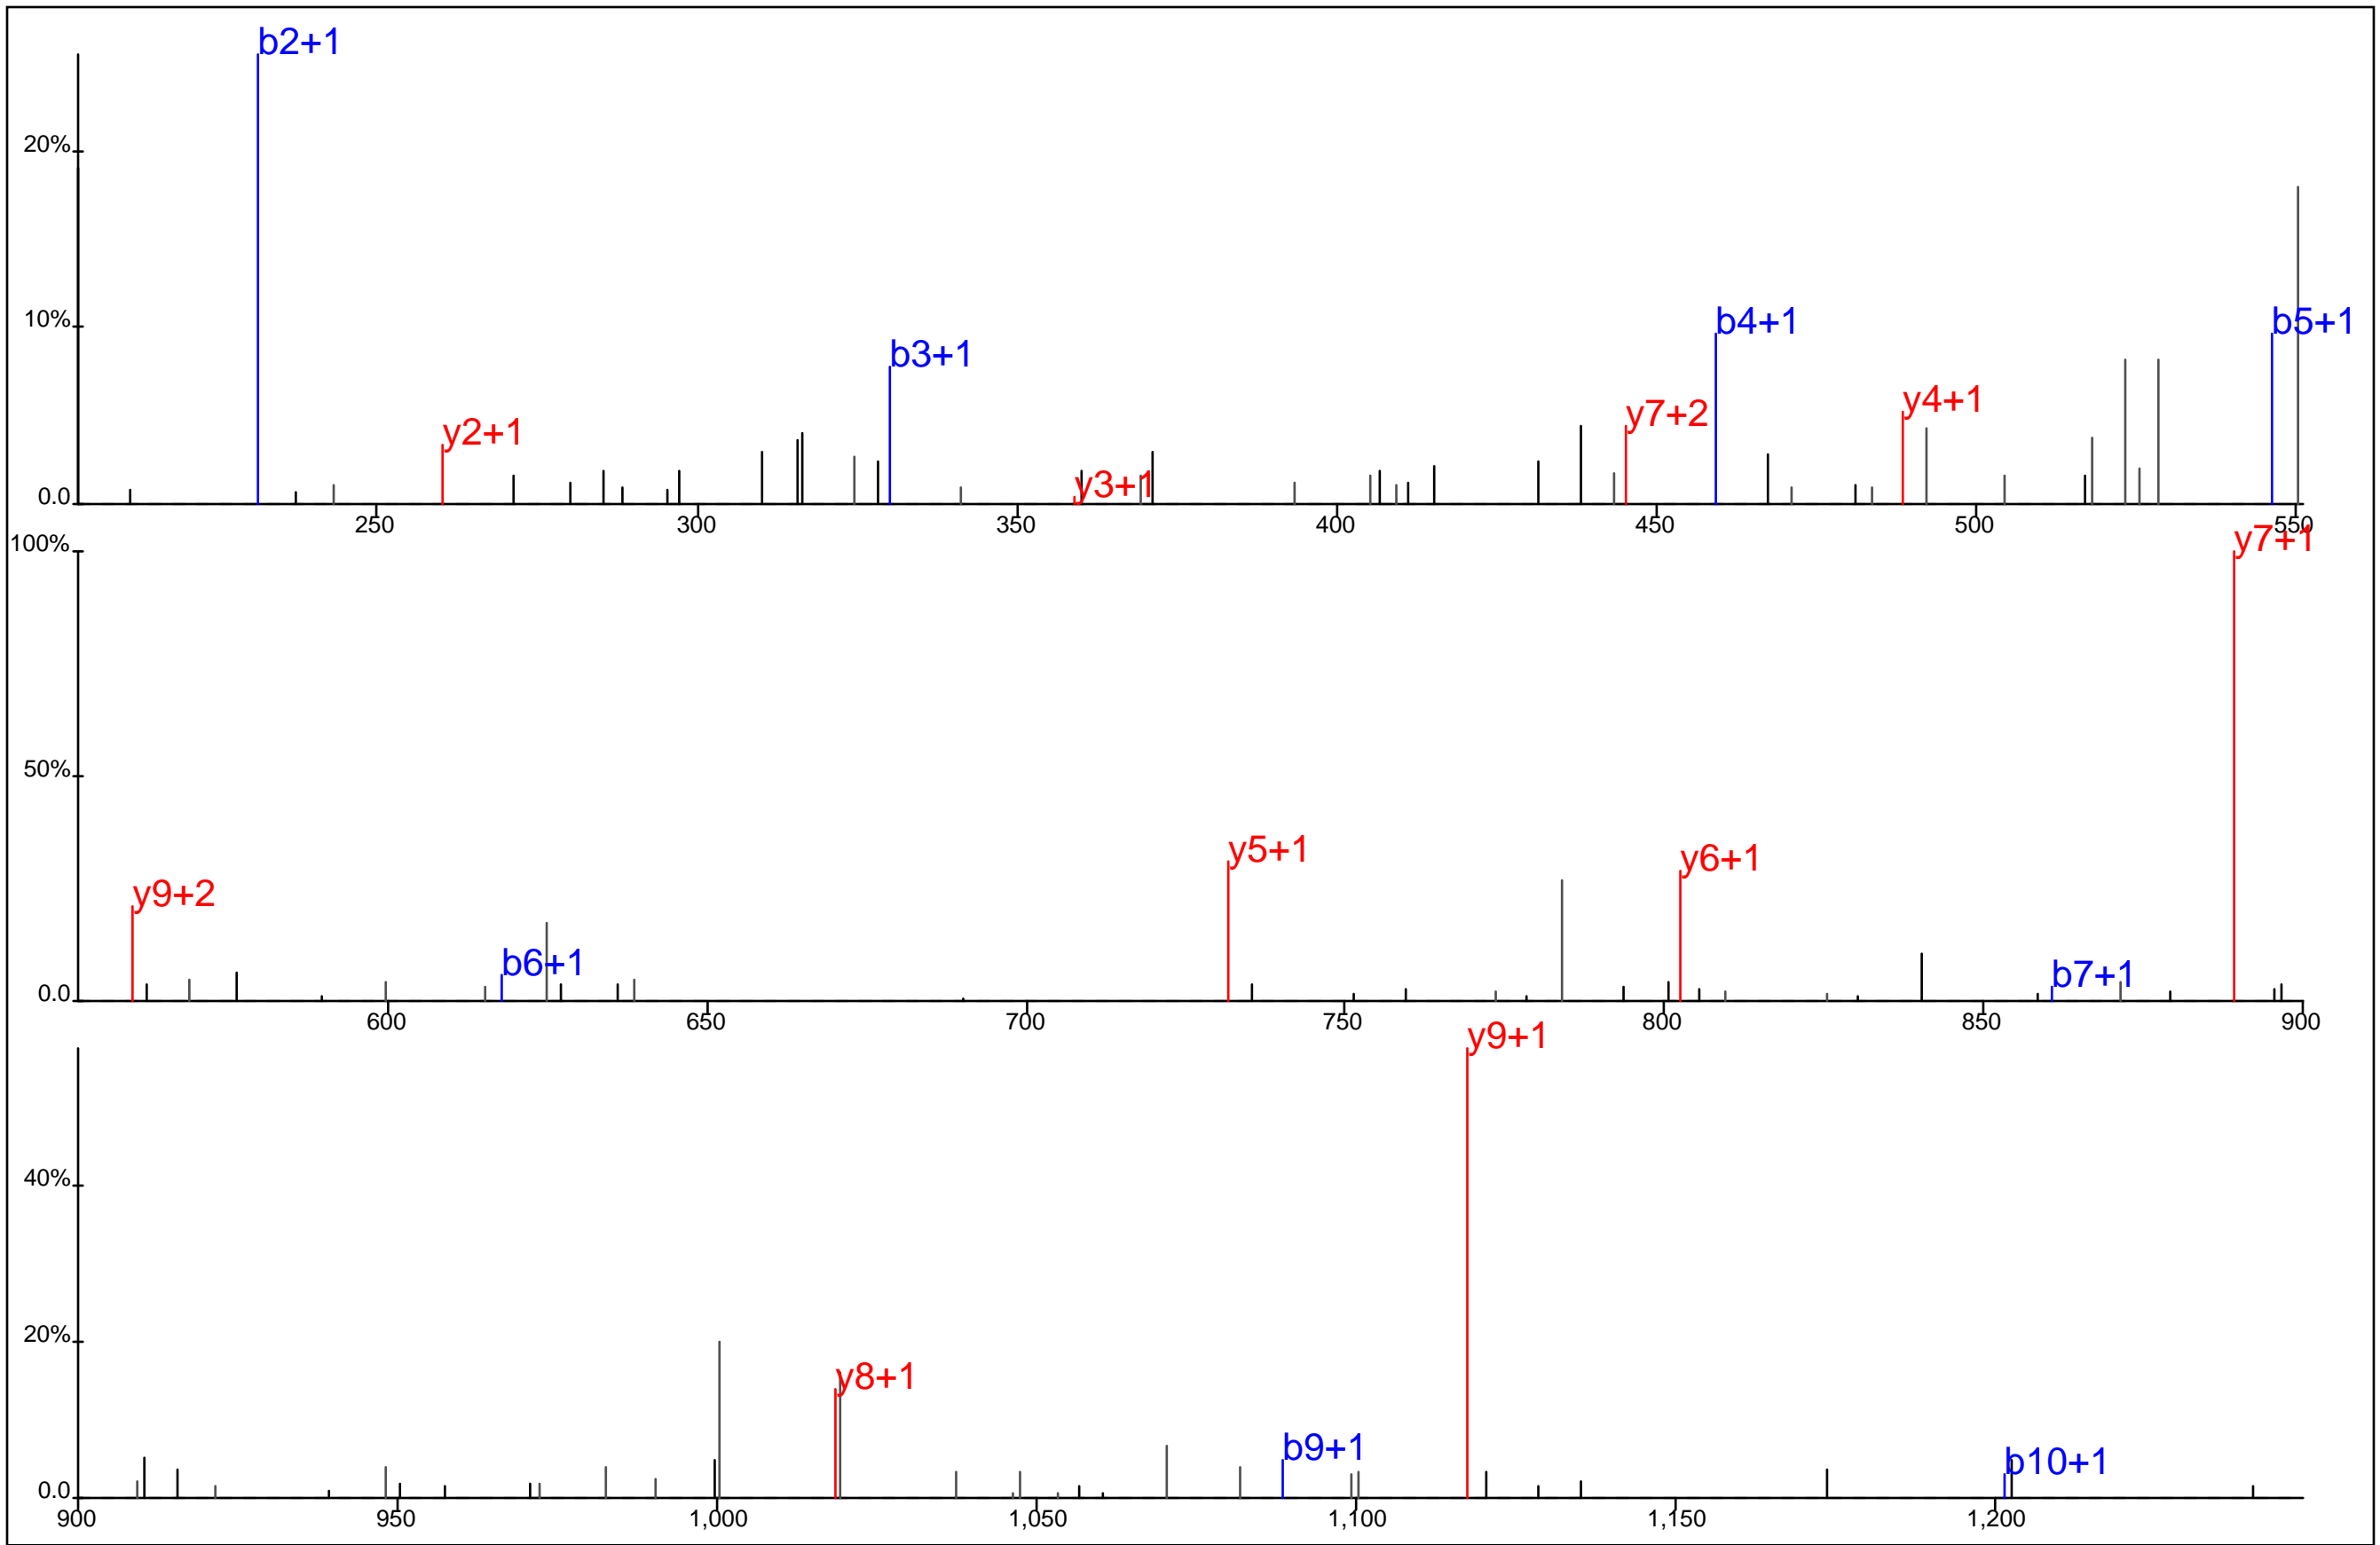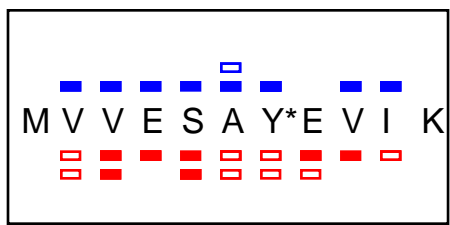

Protein Name: Lactate dehydrogenase B  
 gi Accession: 0  
 Precursor Mass: 674.3160+2  
 Delta Mass: 1.388 ppm  
 XCorr: 39.34

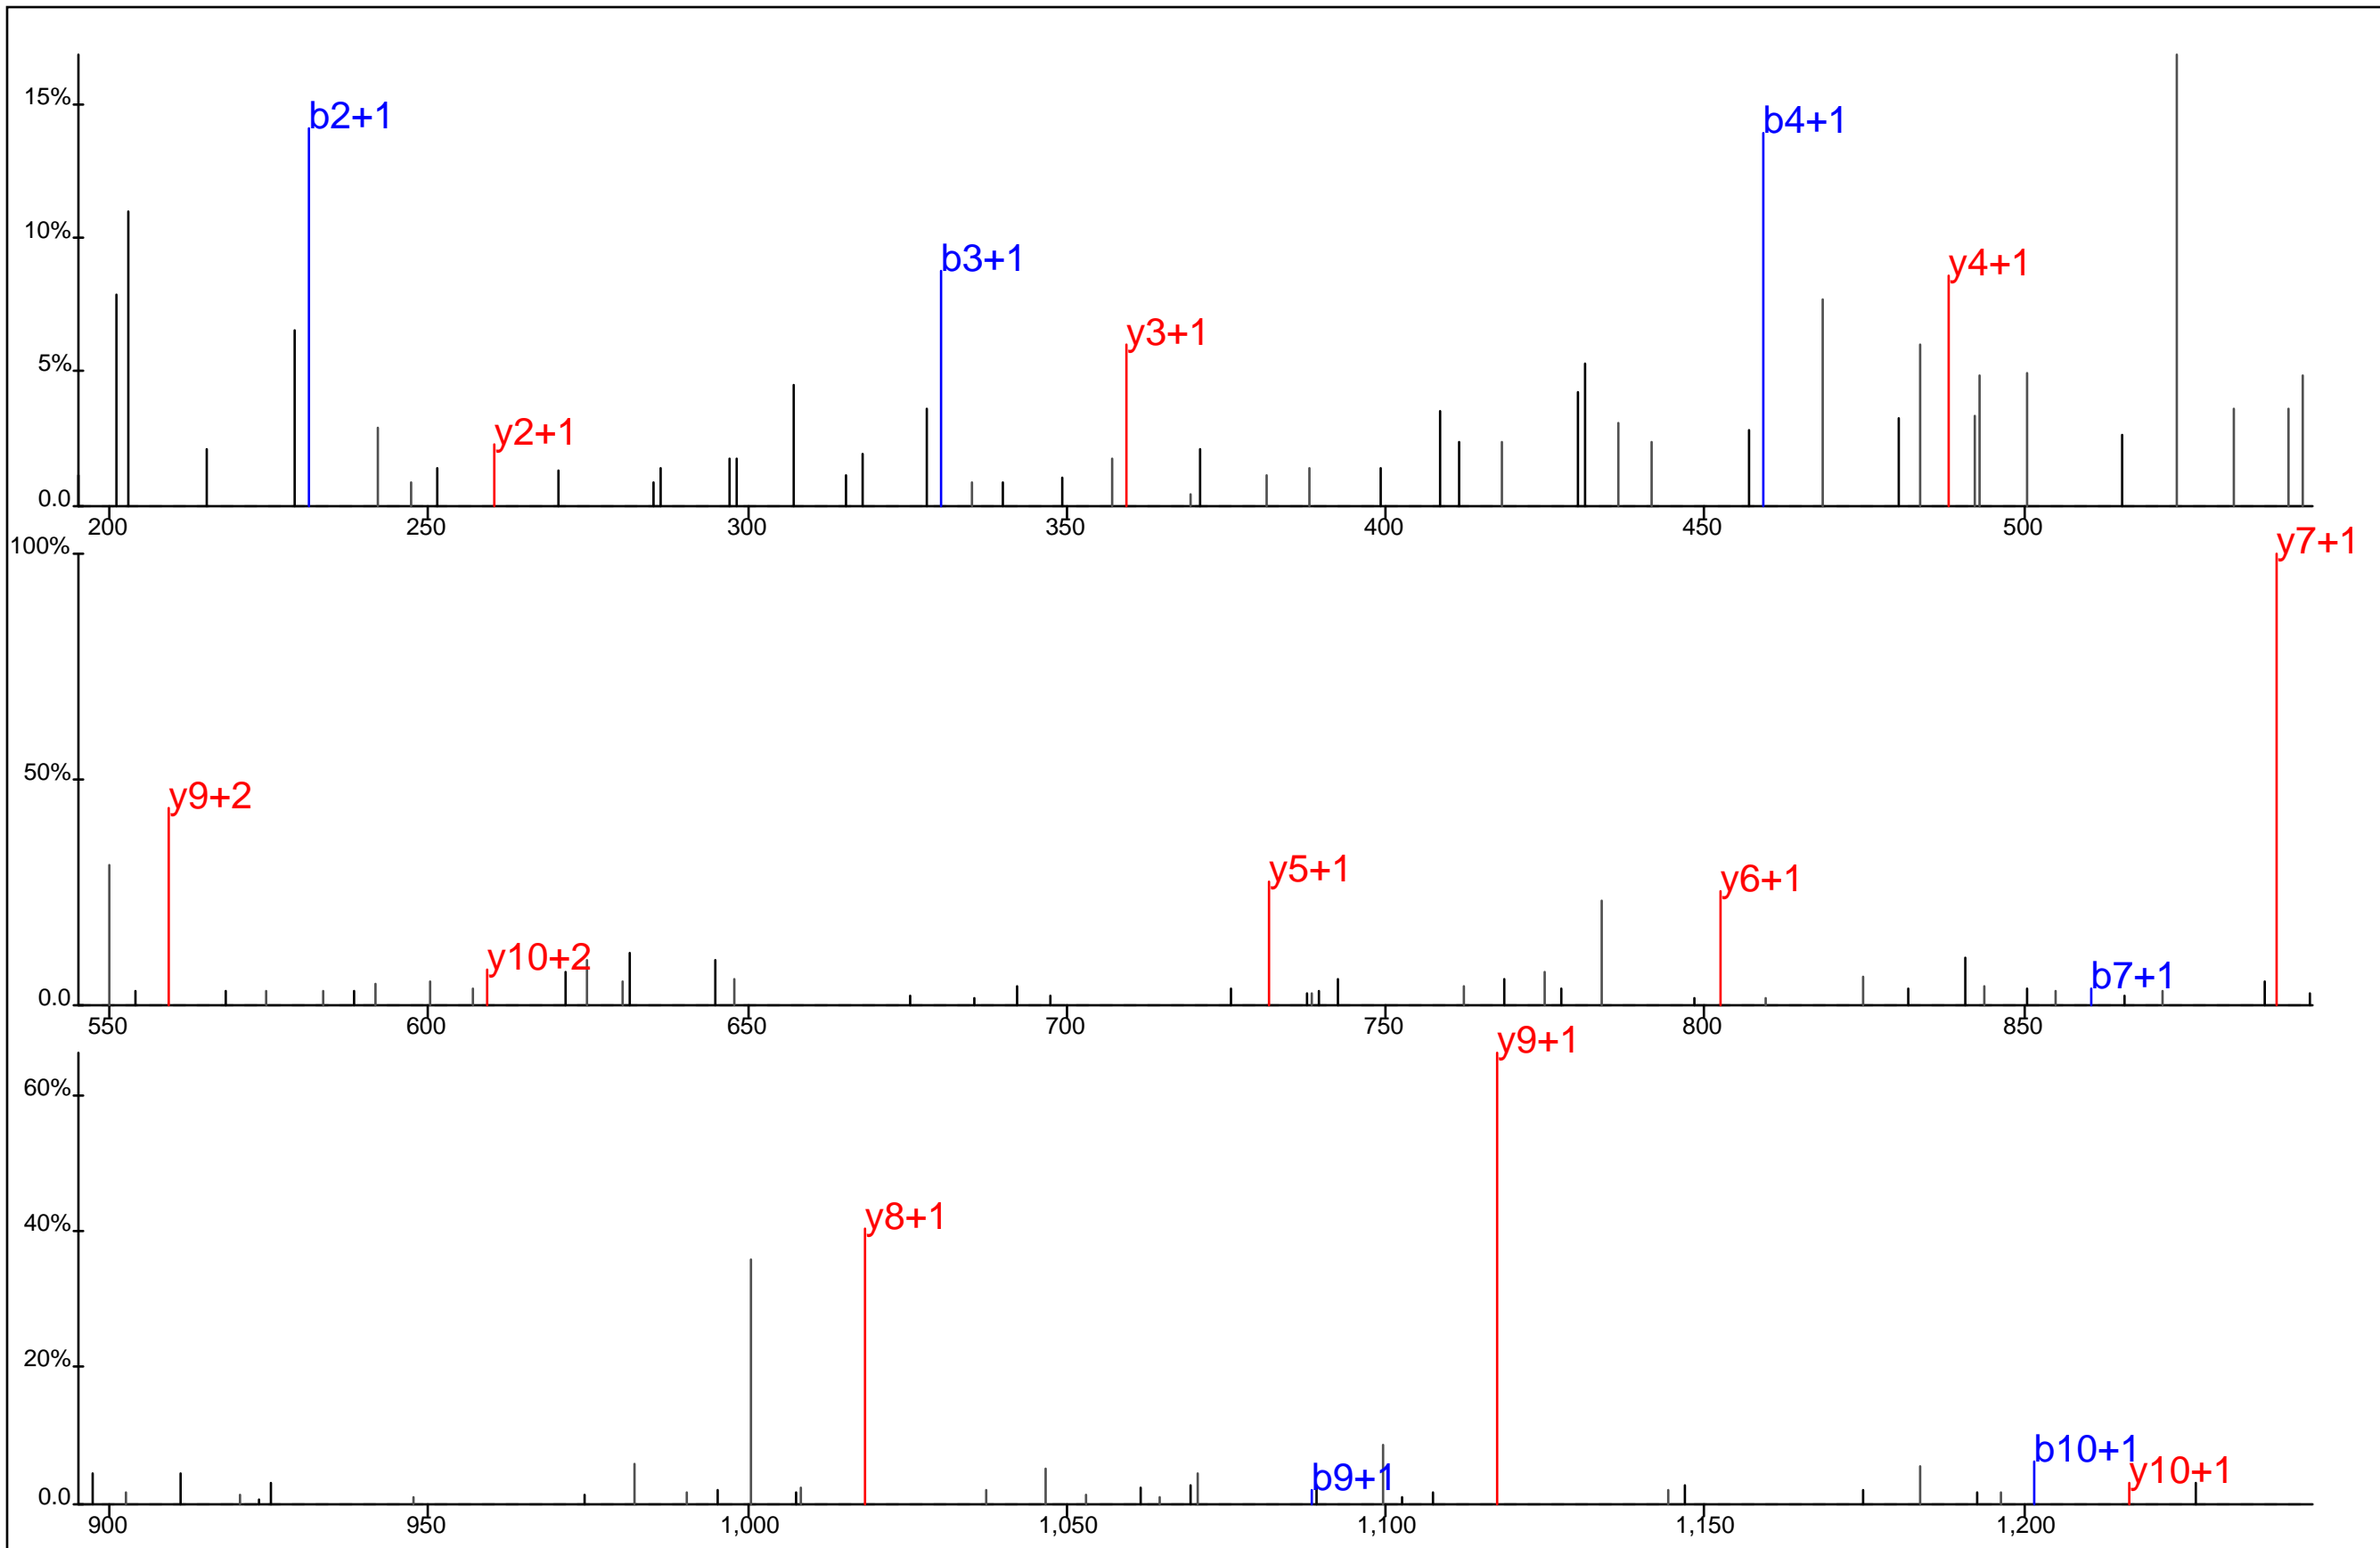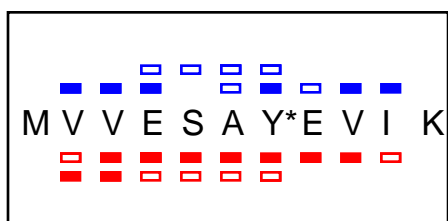

Protein Name: Lactate dehydrogenase B  
 gi Accession: 0  
 Precursor Mass: 674.3154+2  
 Delta Mass: 2.202 ppm  
 XCorr: 64.08

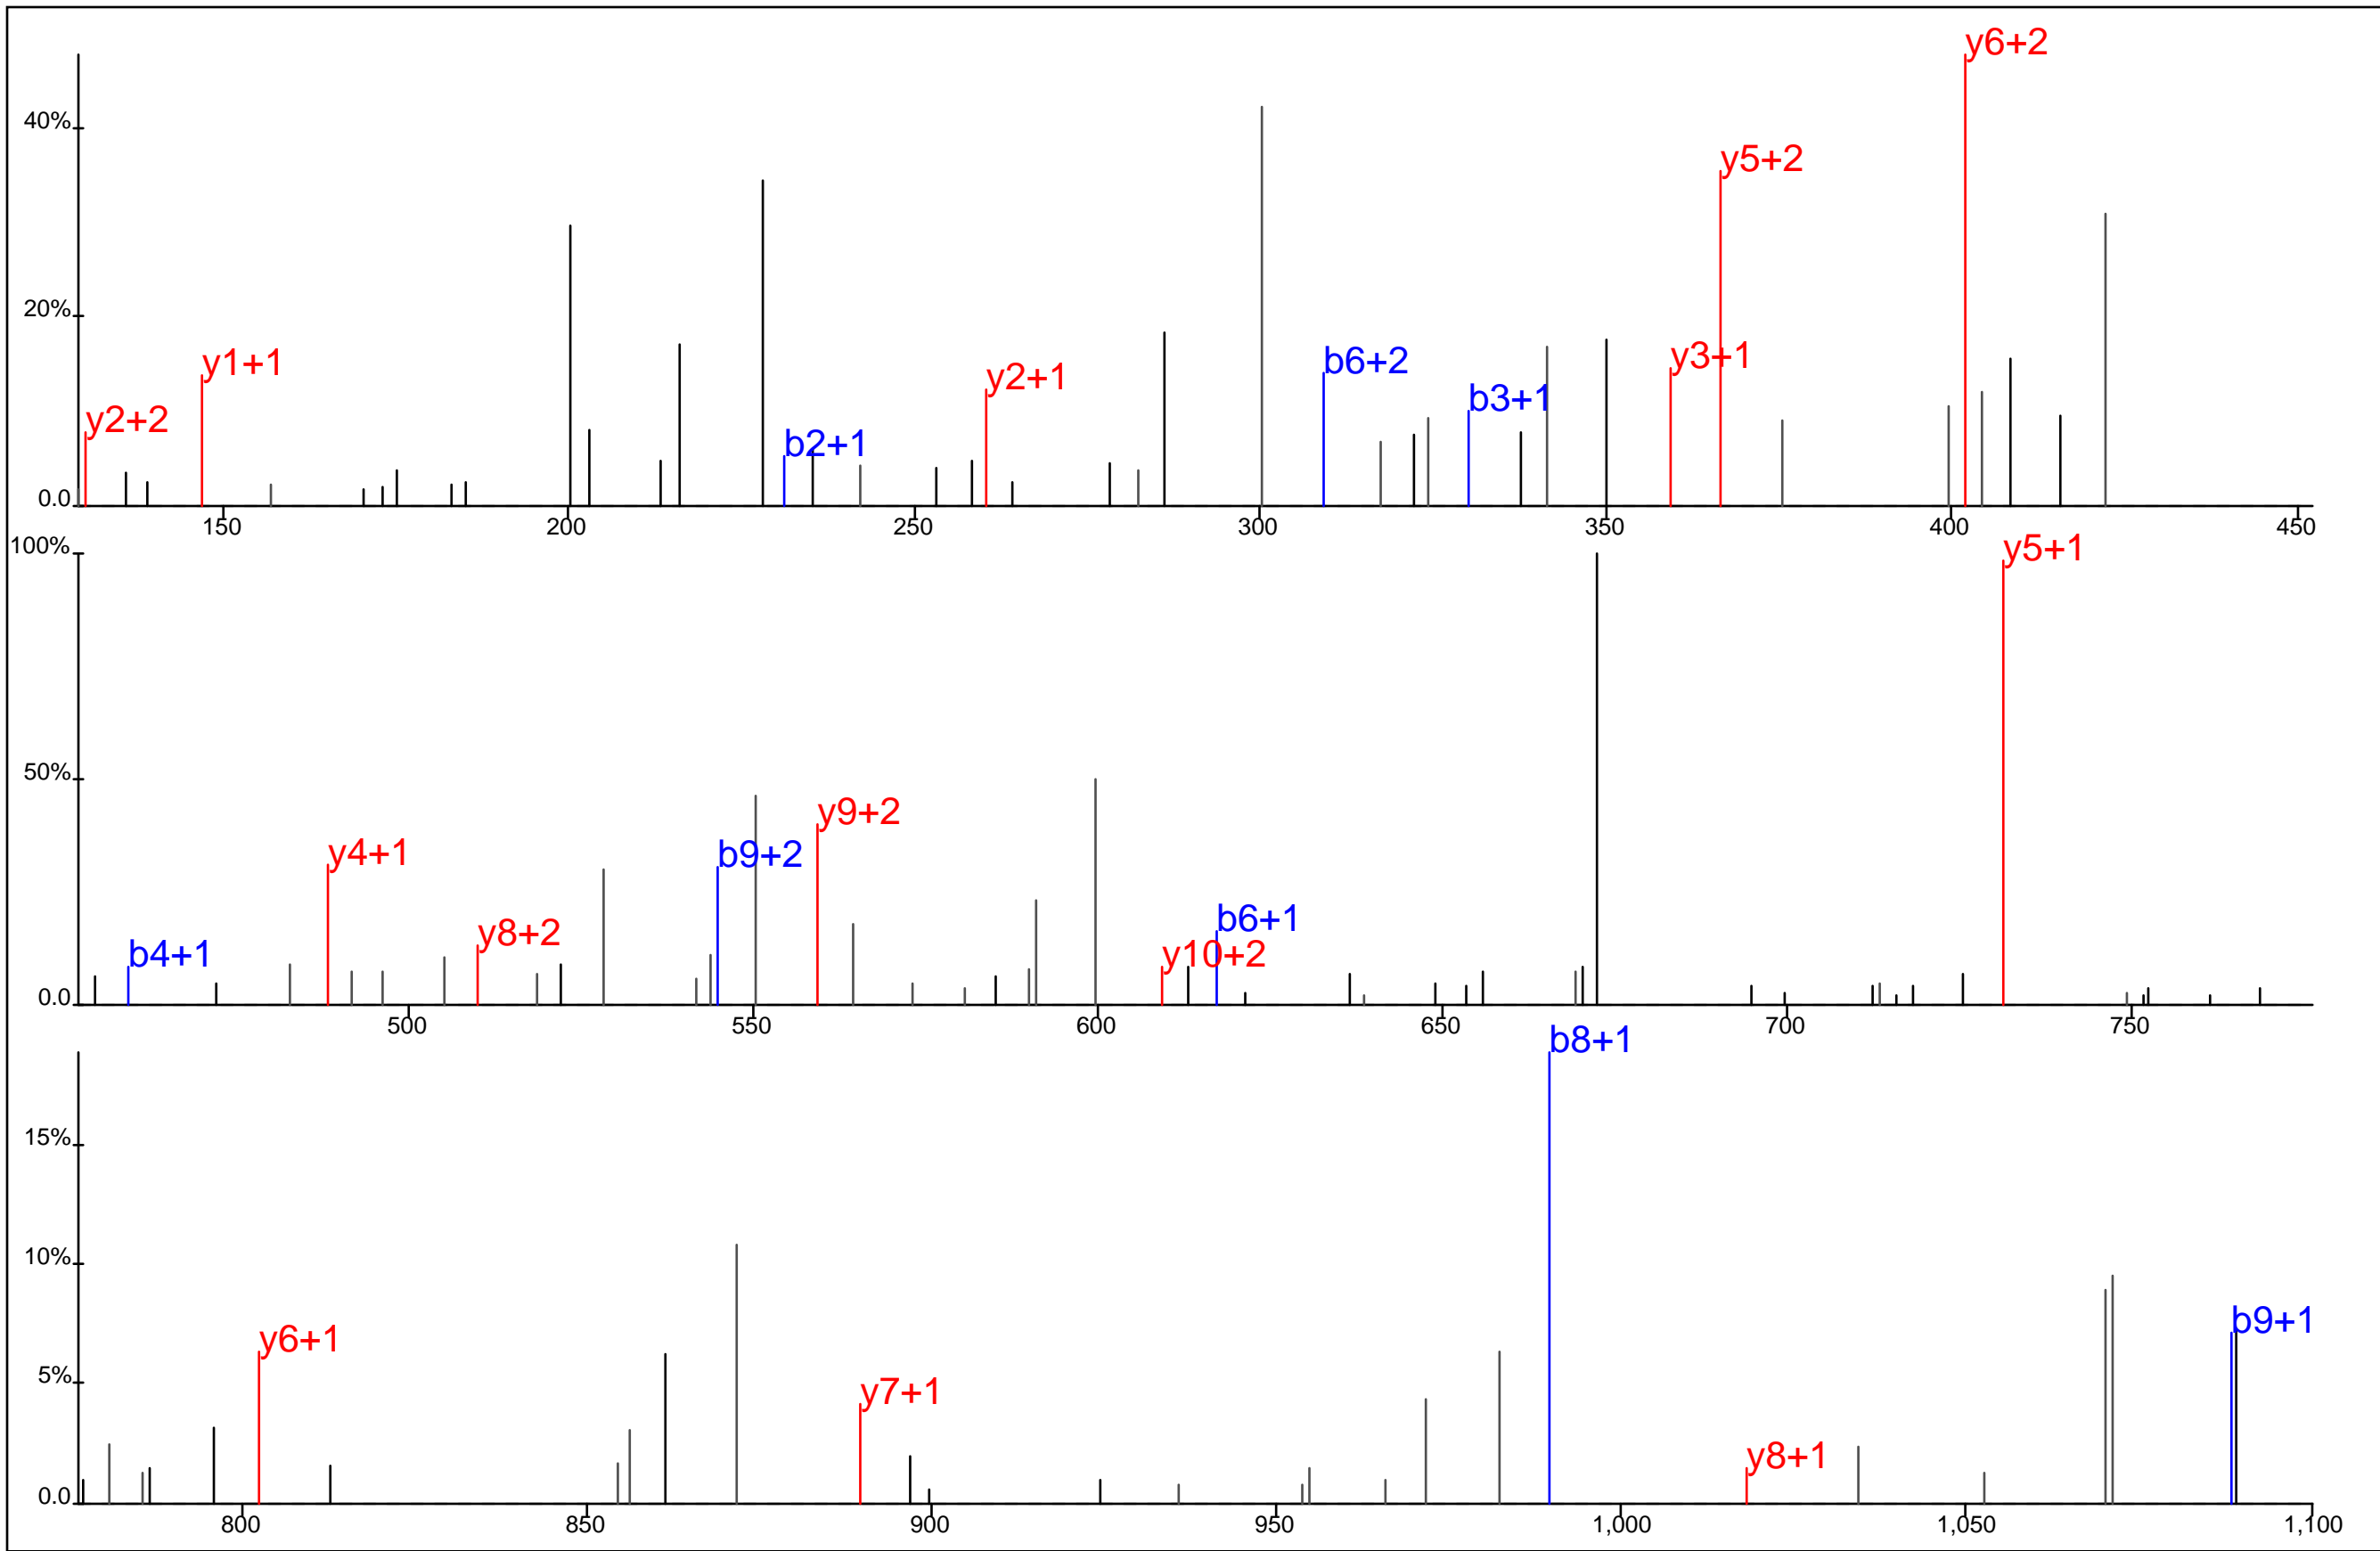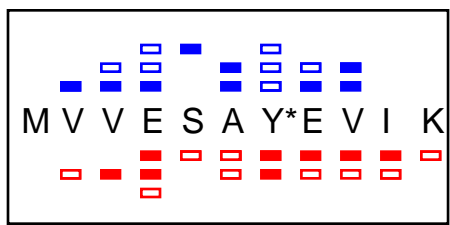

Protein Name: Lactate dehydrogenase B  
 gi Accession: 0  
 Precursor Mass: 449.8809+3  
 Delta Mass: 1.162 ppm  
 XCorr: 31.07

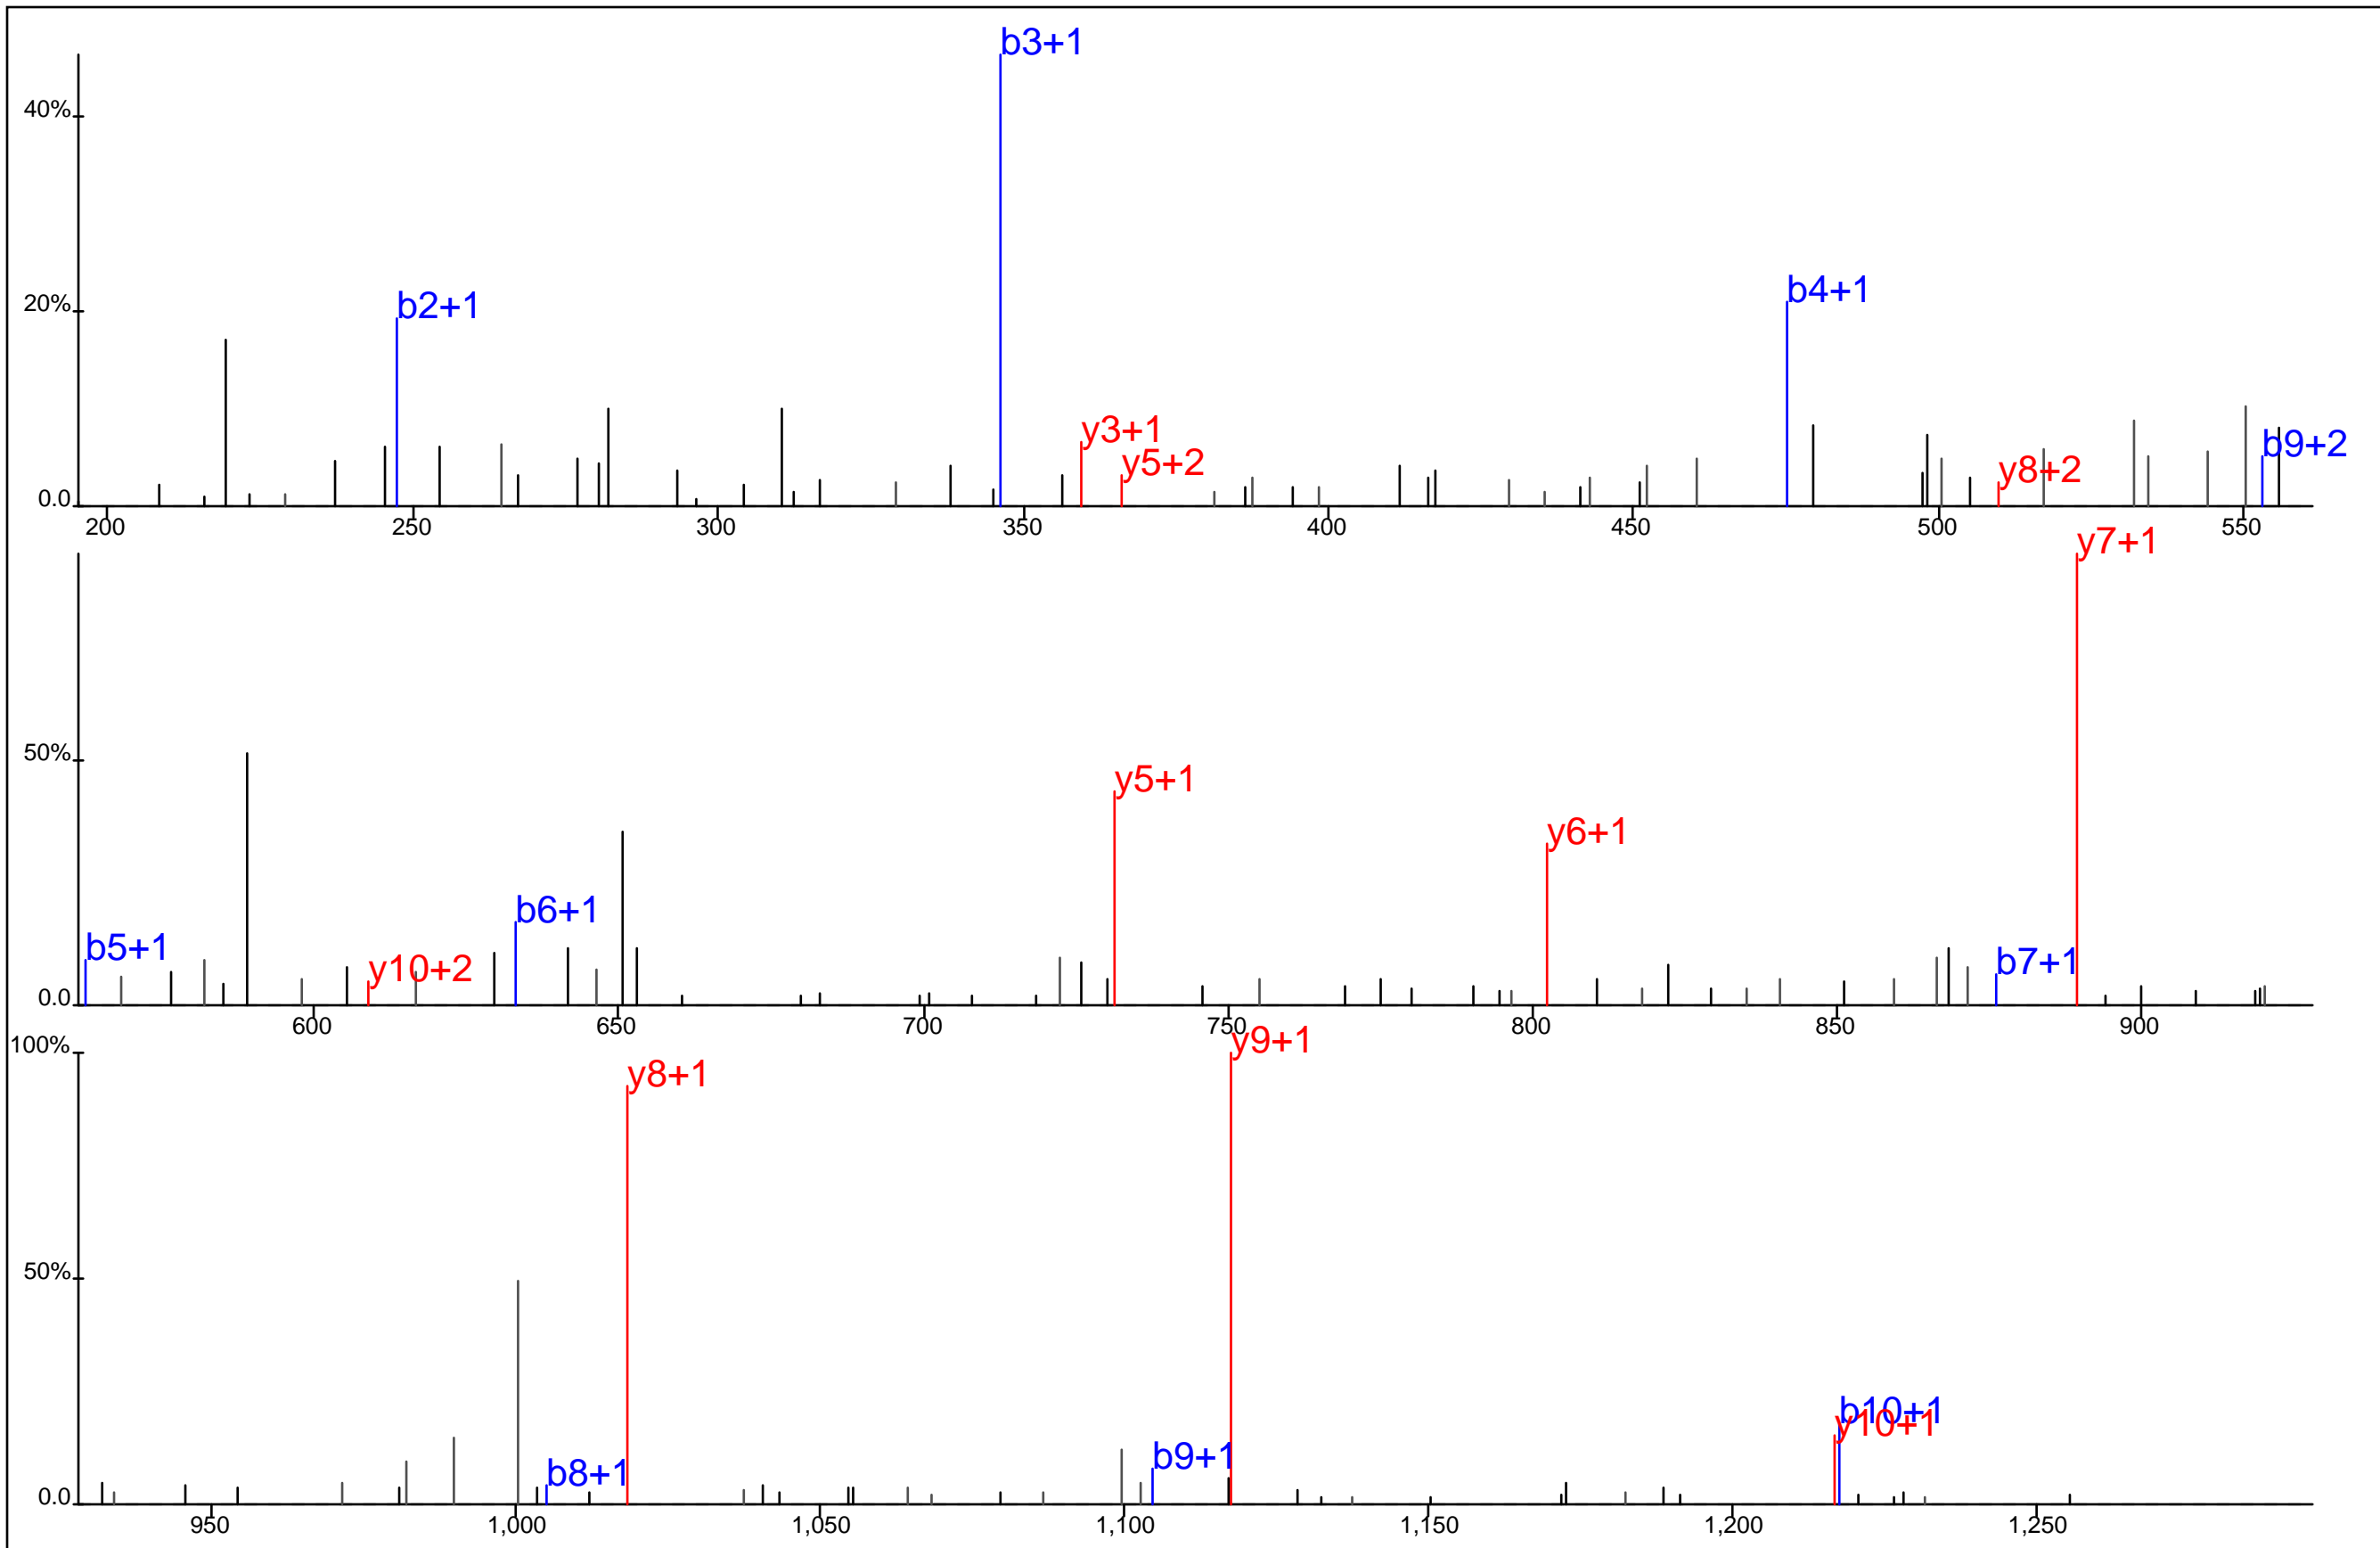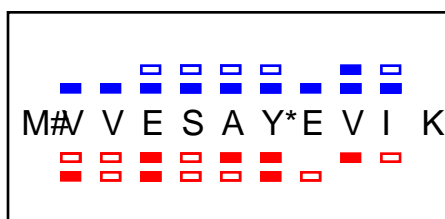

Protein Name: Lactate dehydrogenase B  
 gi Accession: 0  
 Precursor Mass: 682.3140+2  
 Delta Mass: 0.600 ppm  
 XCorr: 46.44

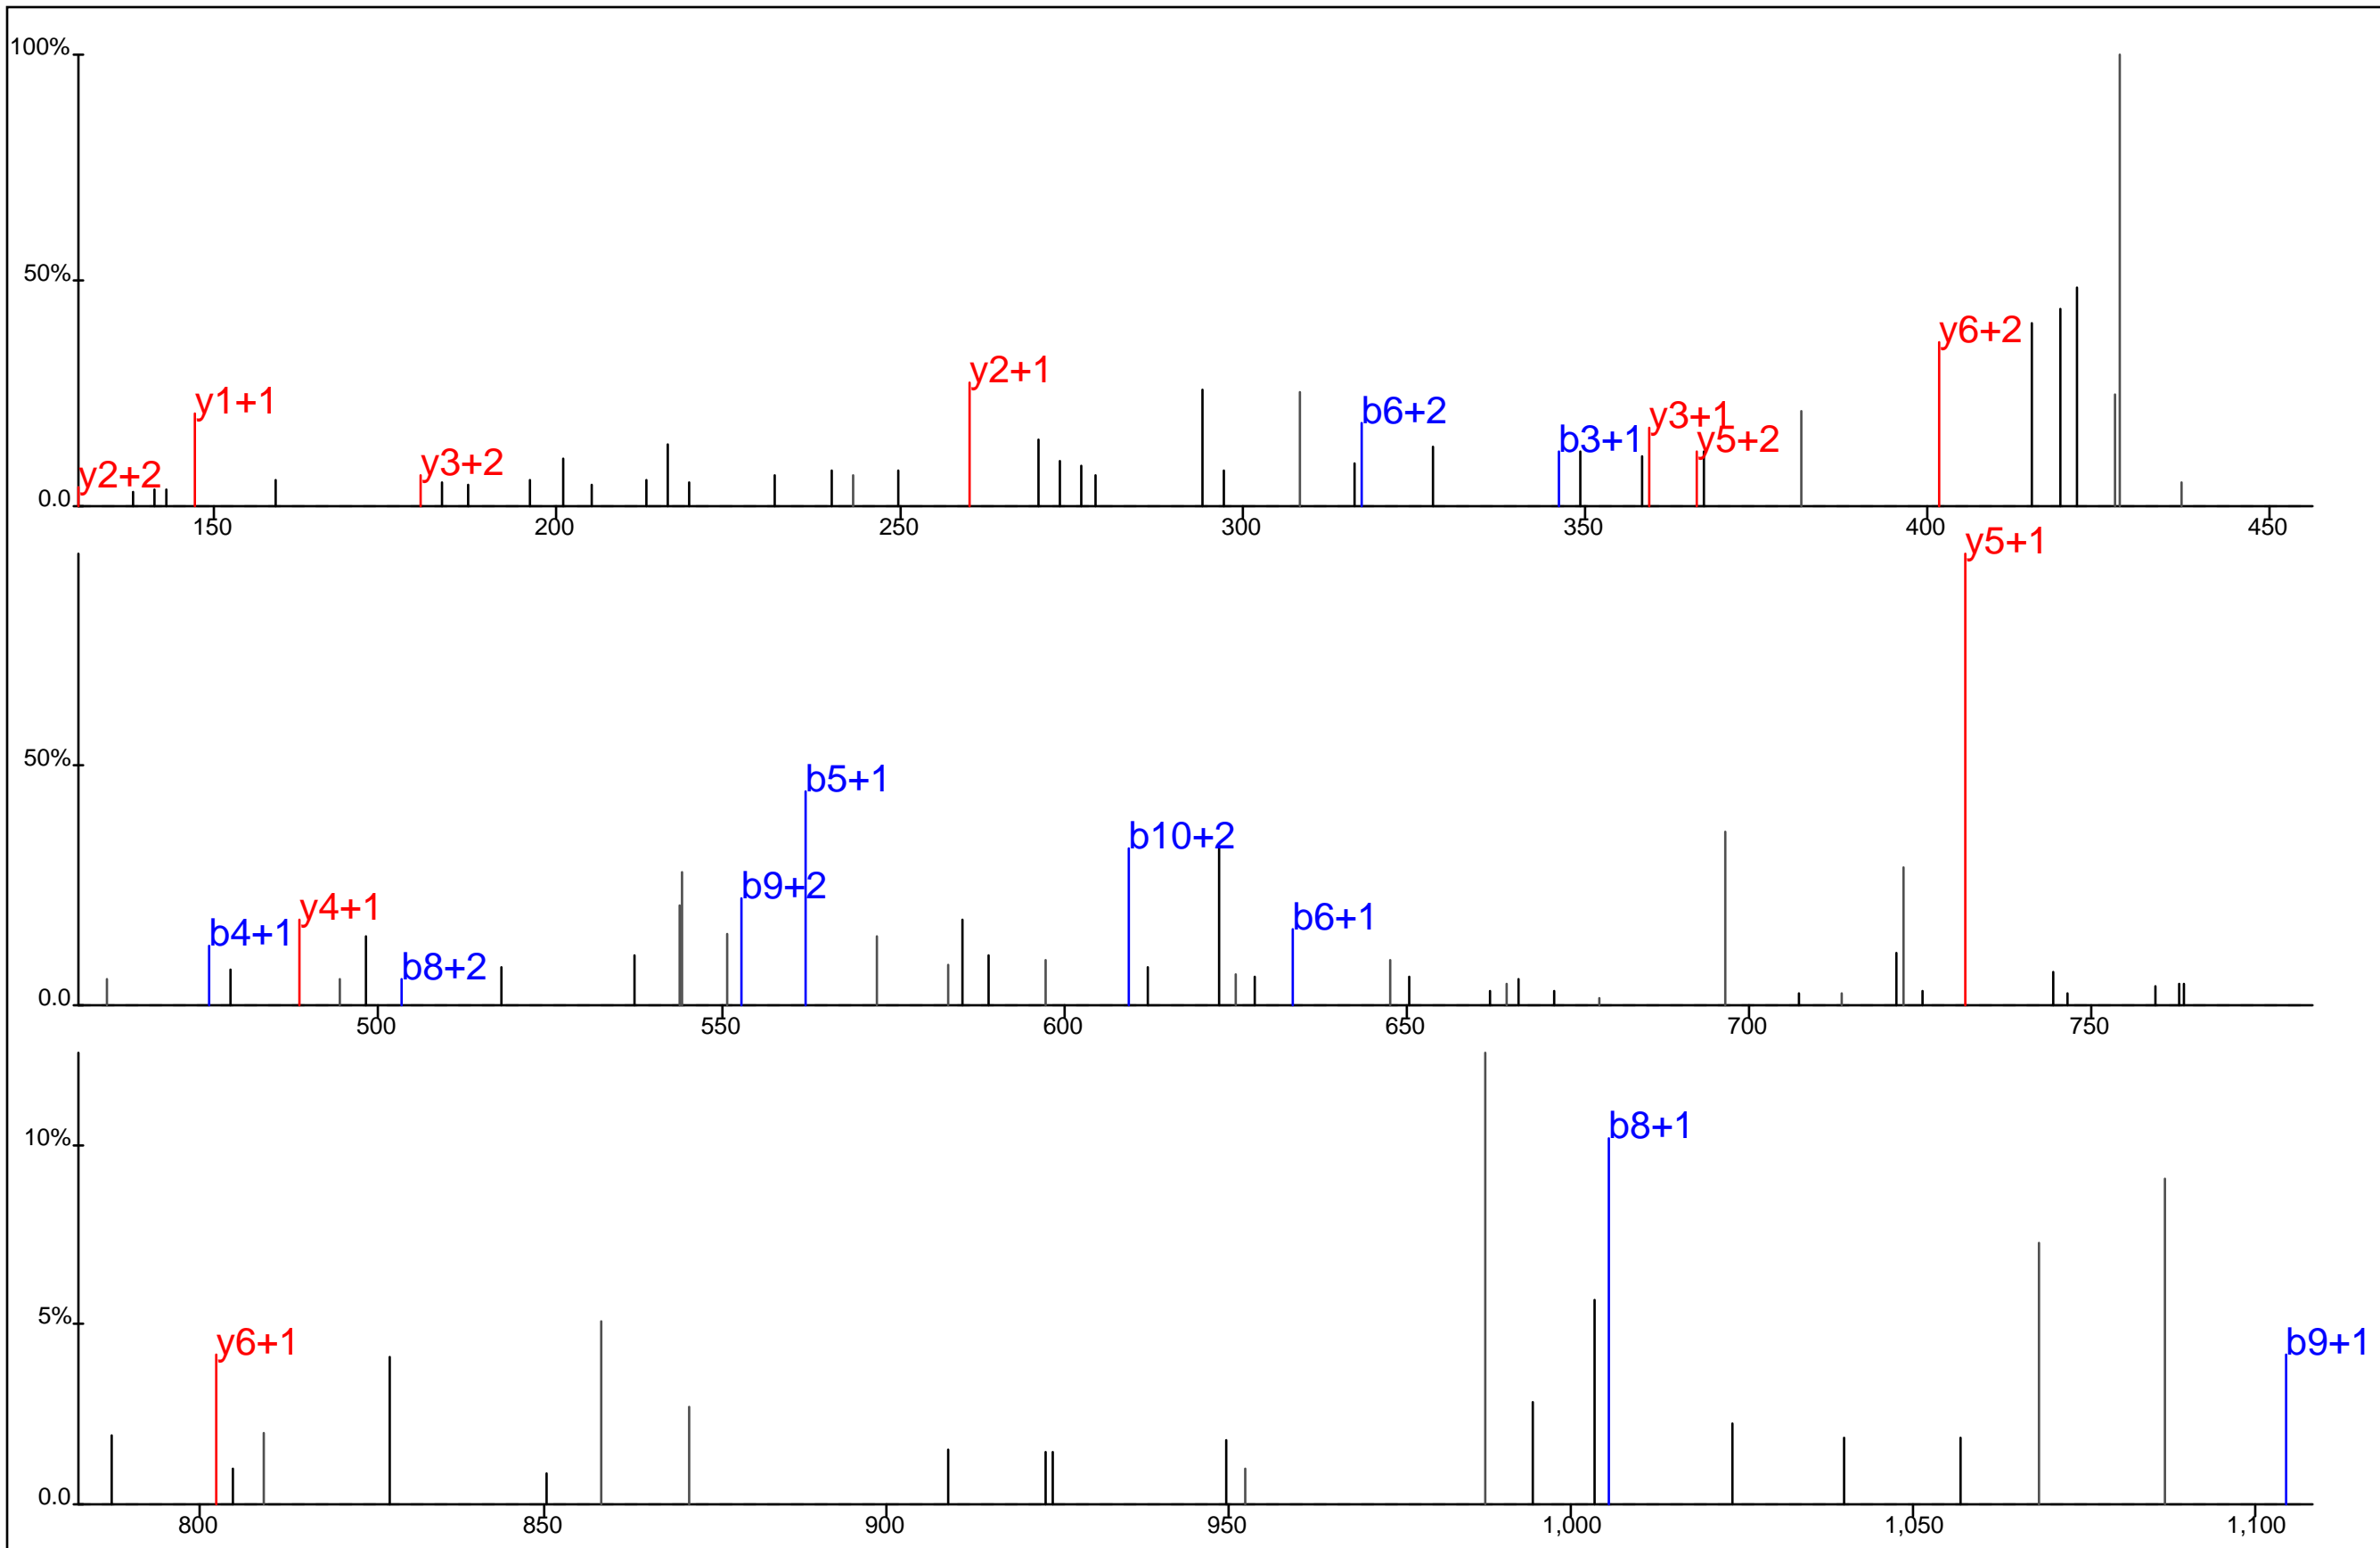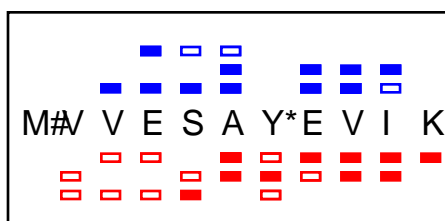

Protein Name: Lactate dehydrogenase B  
 gi Accession: 0  
 Precursor Mass: 455.2108+3  
 Delta Mass: 2.556 ppm  
 XCorr: 22.96



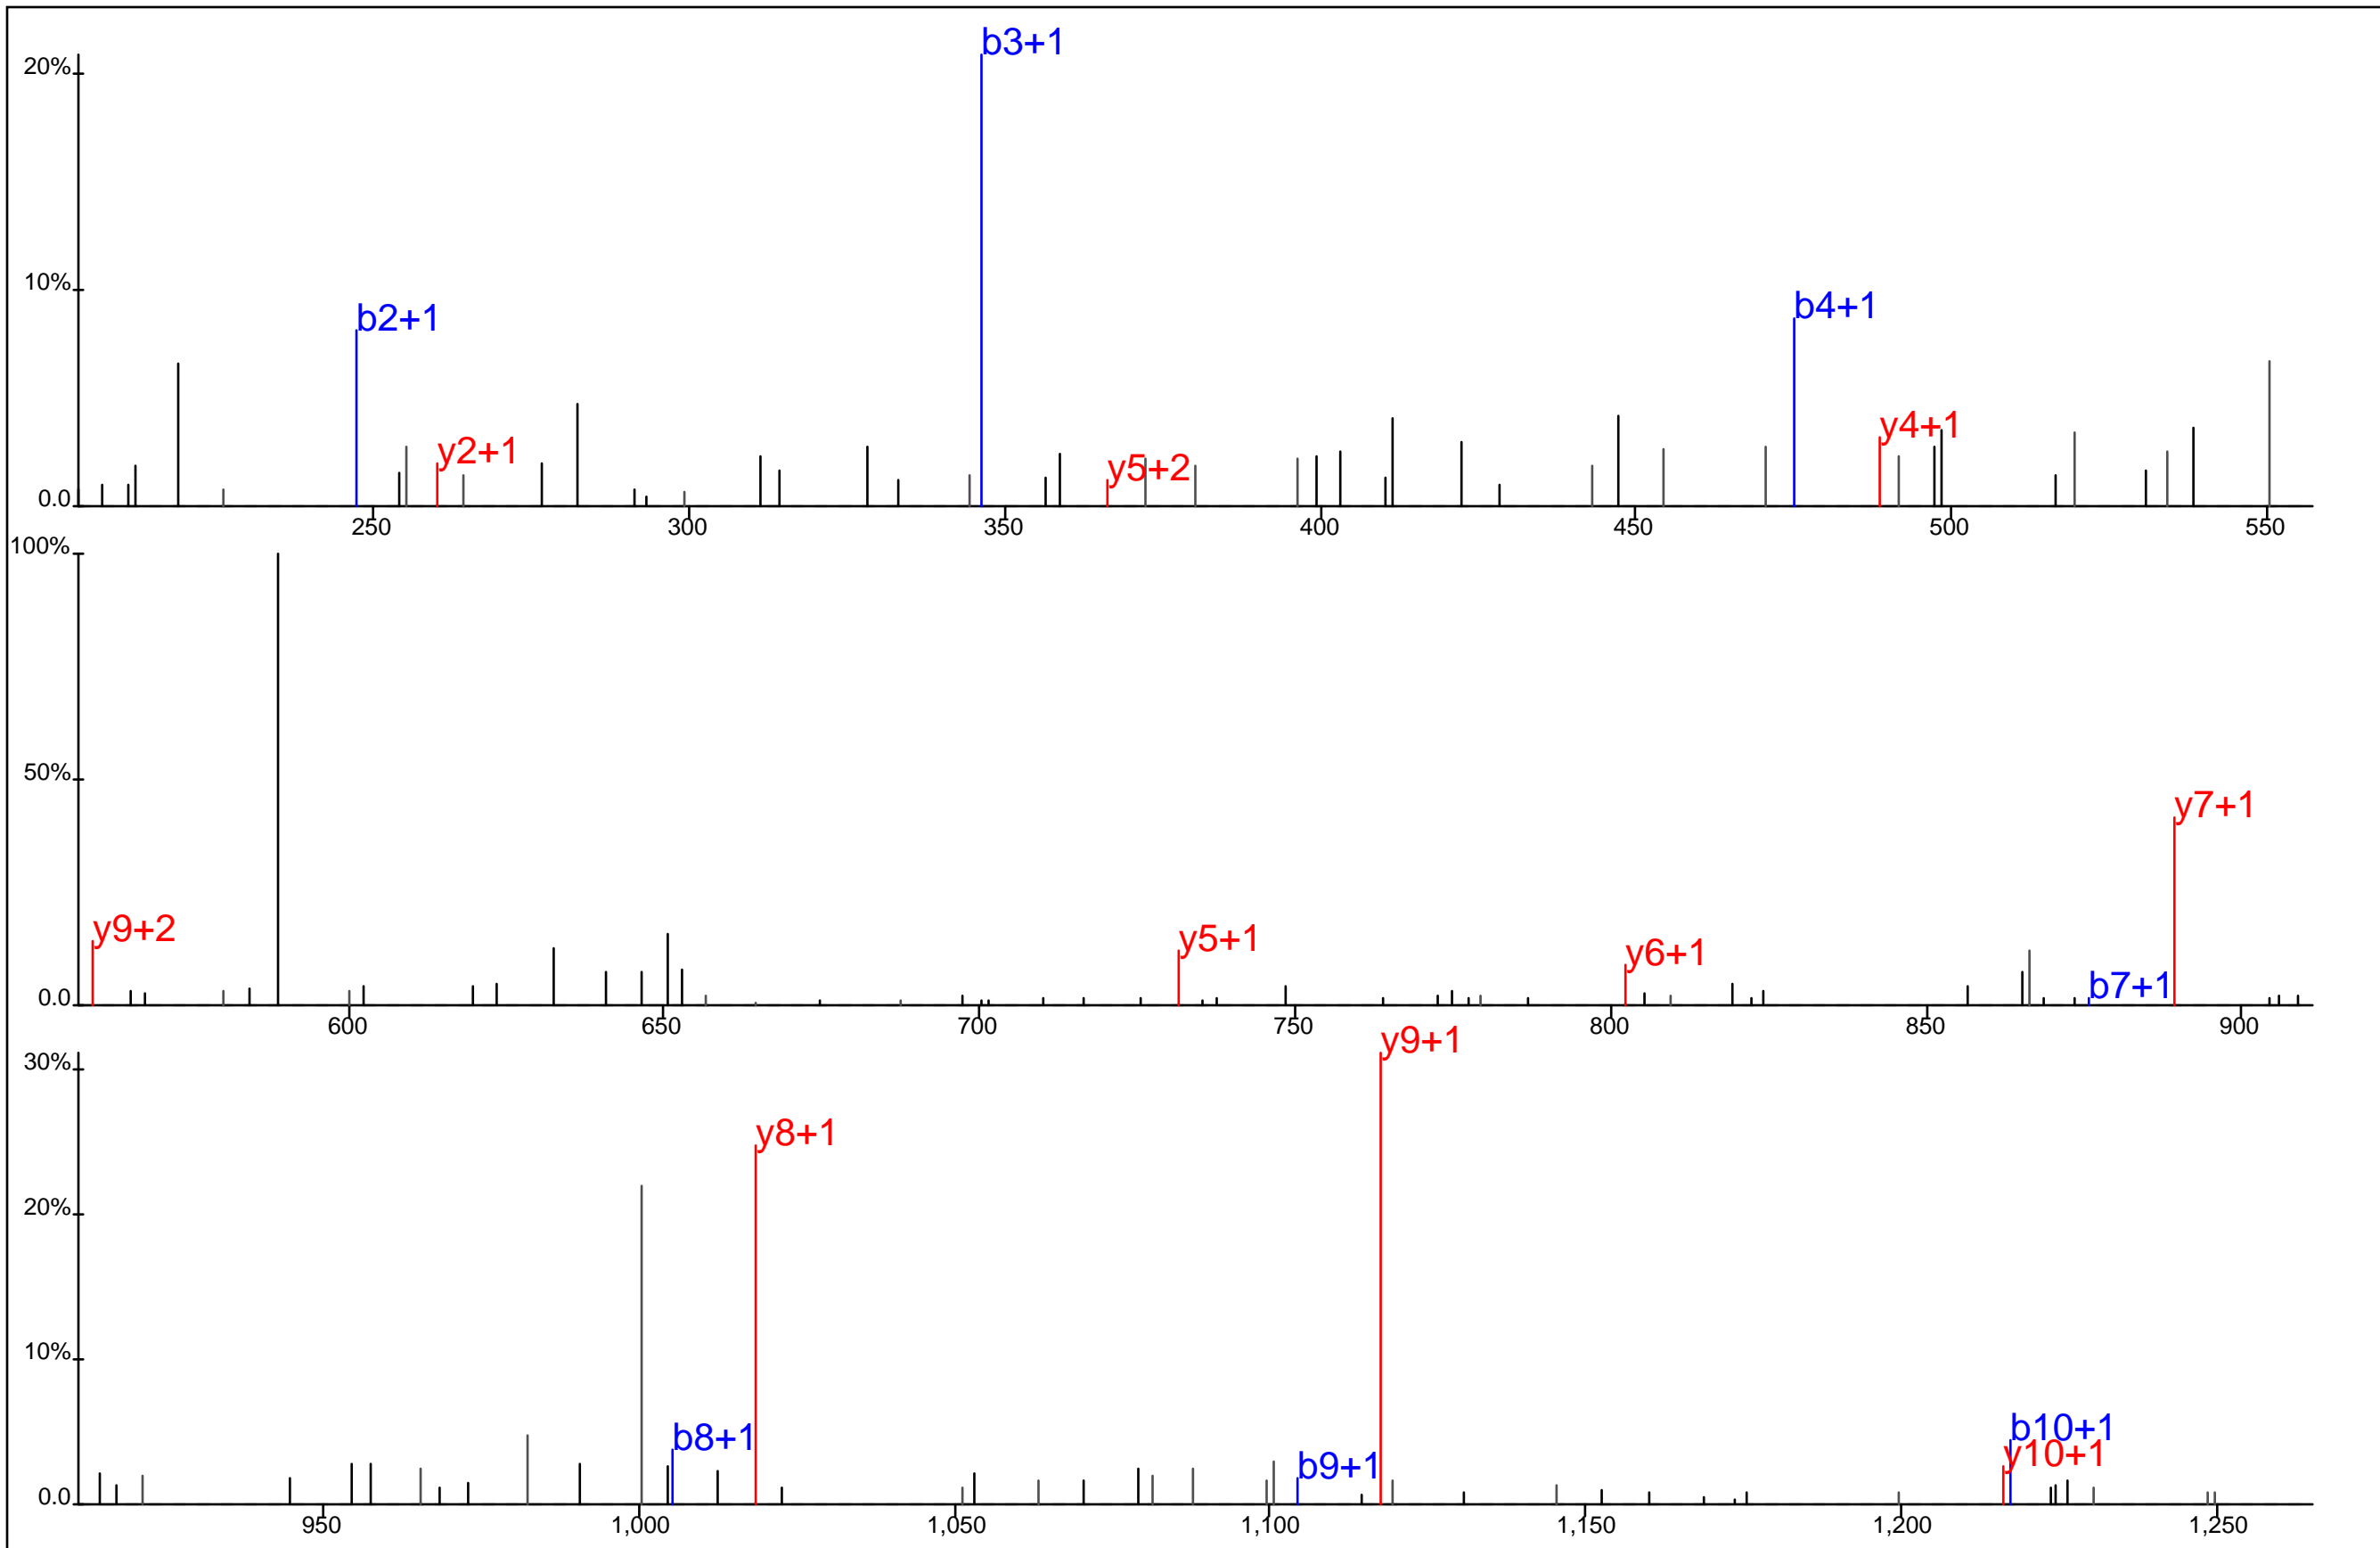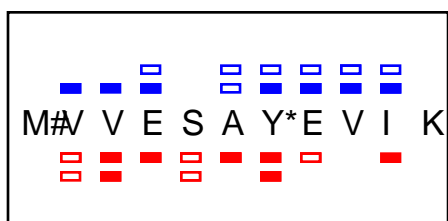

Protein Name: Lactate dehydrogenase B  
 gi Accession: 0  
 Precursor Mass: 682.3140+2  
 Delta Mass: 0.600 ppm  
 XCorr: 49.49

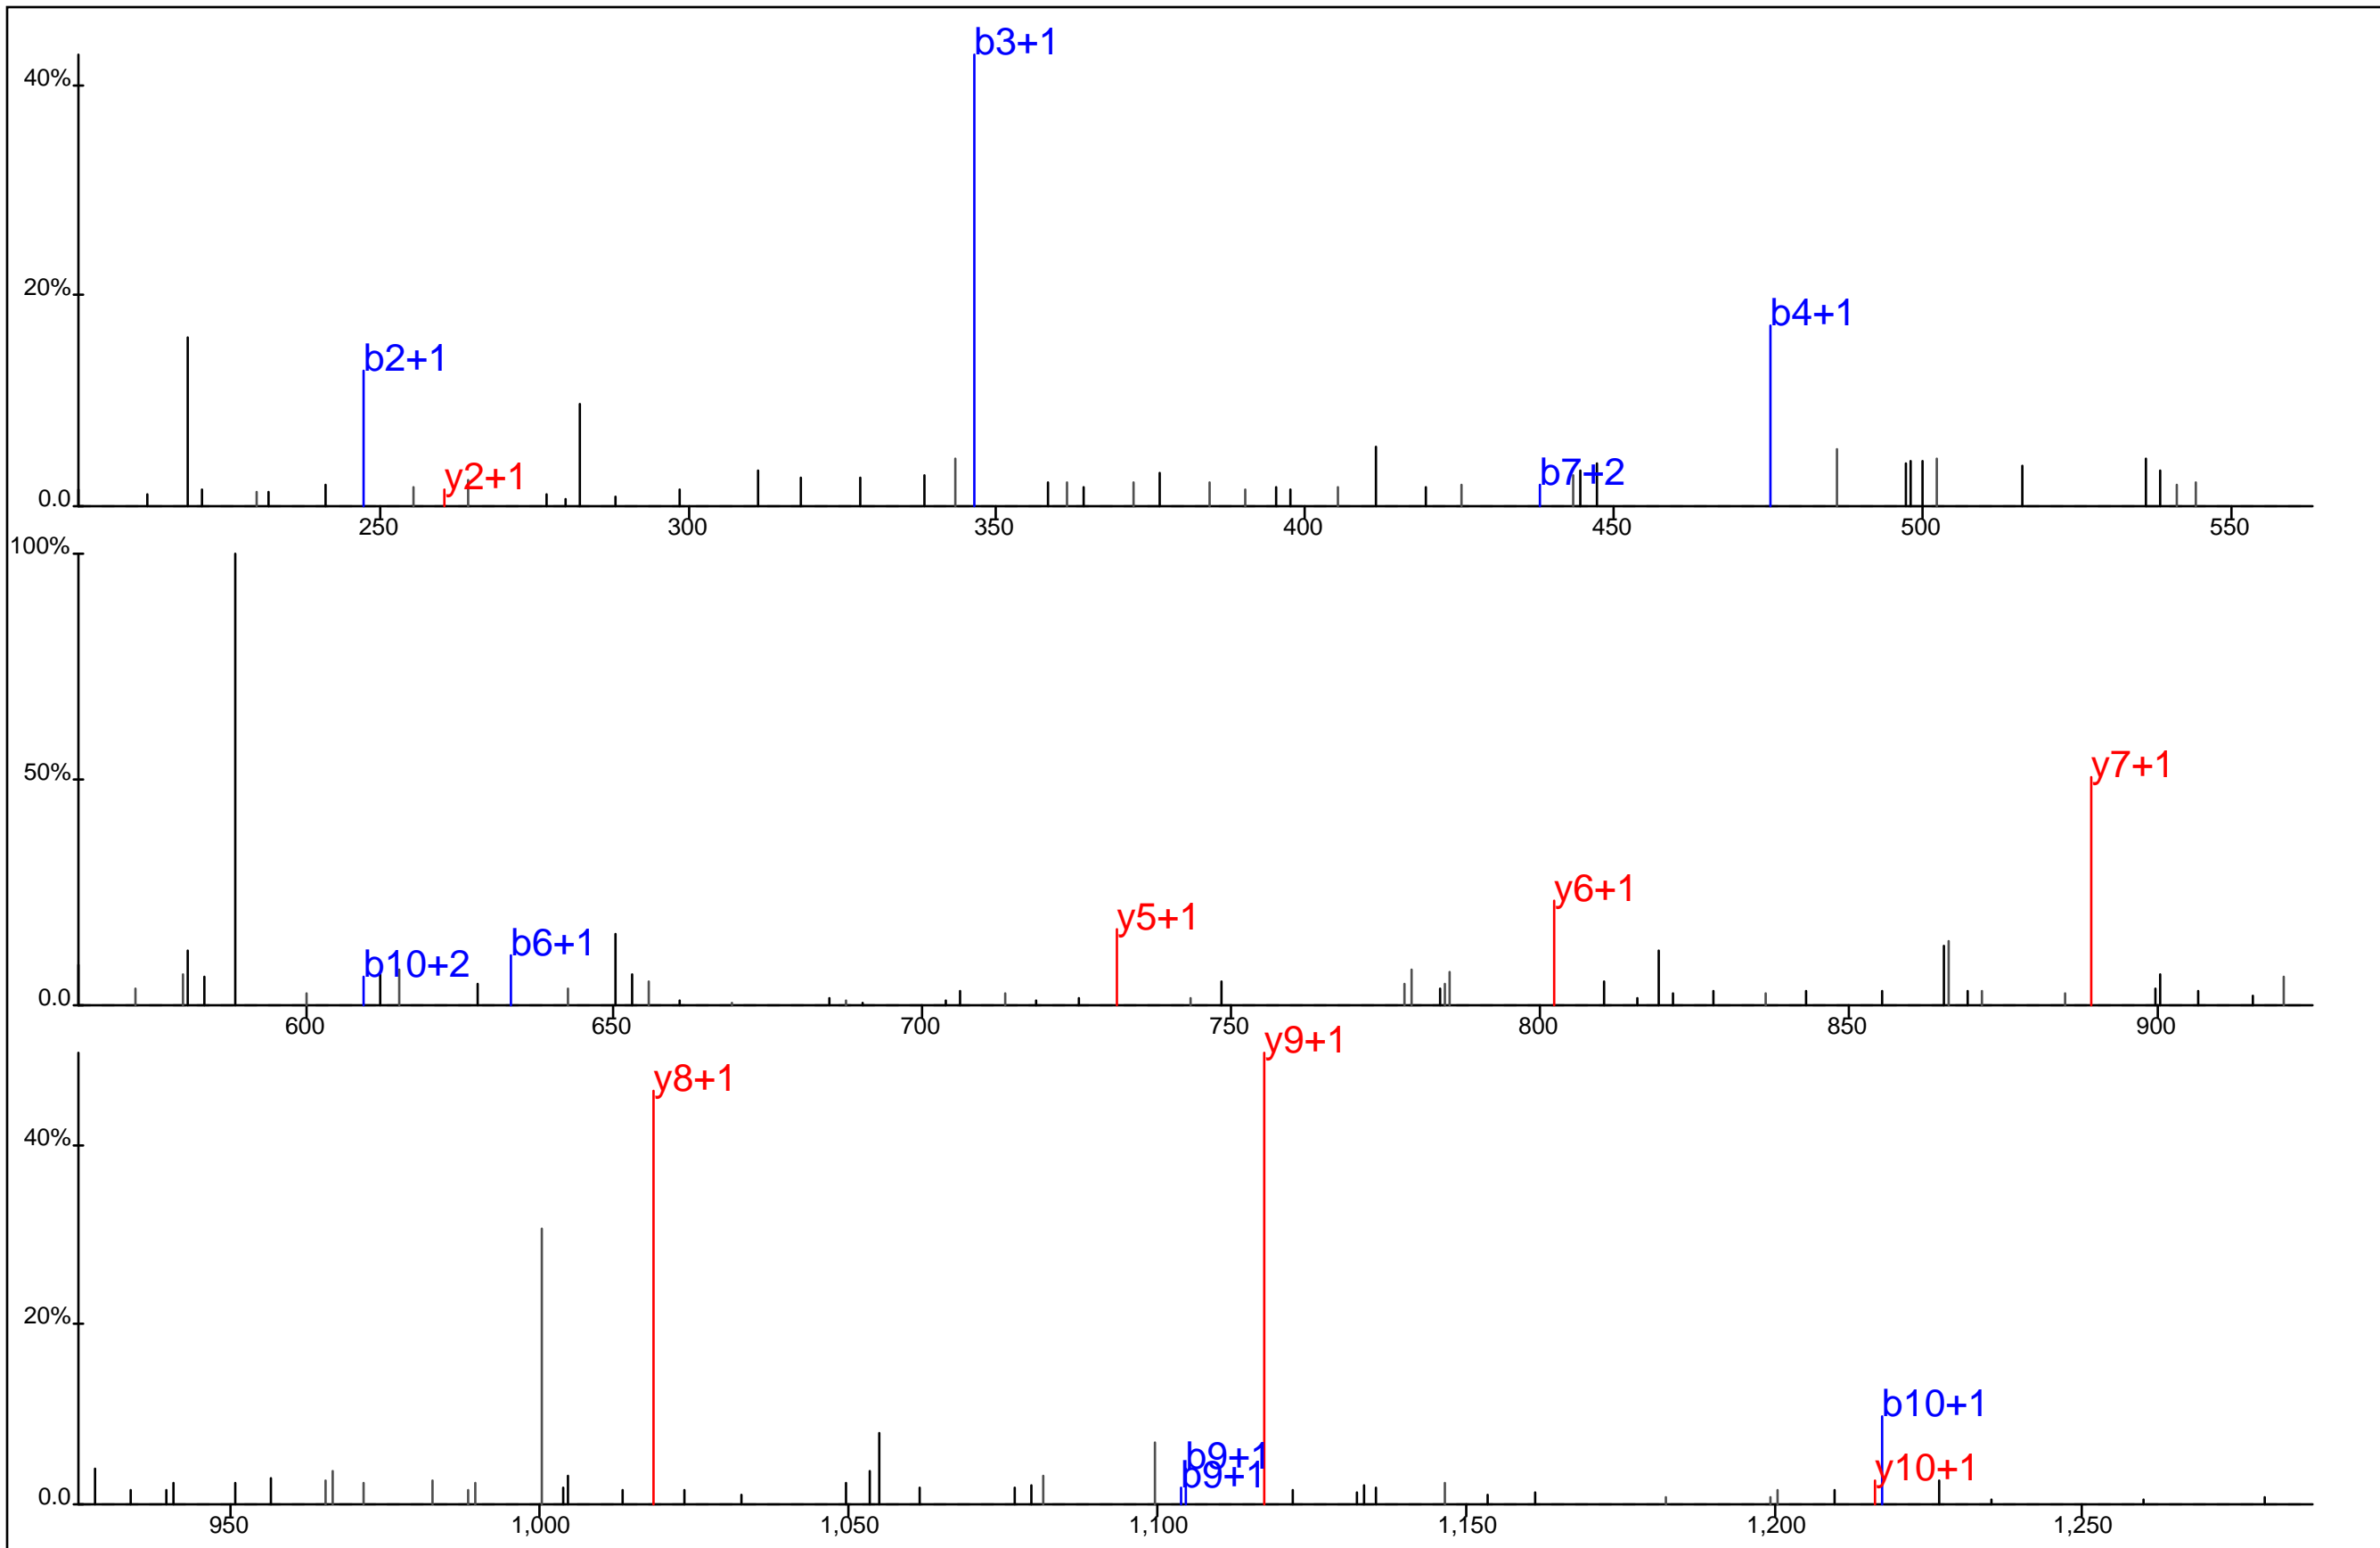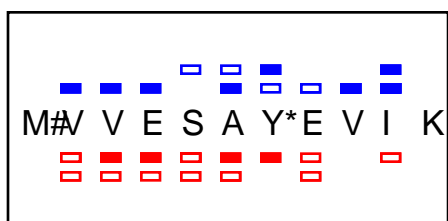

Protein Name: Lactate dehydrogenase B  
 gi Accession: 0  
 Precursor Mass: 682.3118+2  
 Delta Mass: 3.822 ppm  
 XCorr: 47.77

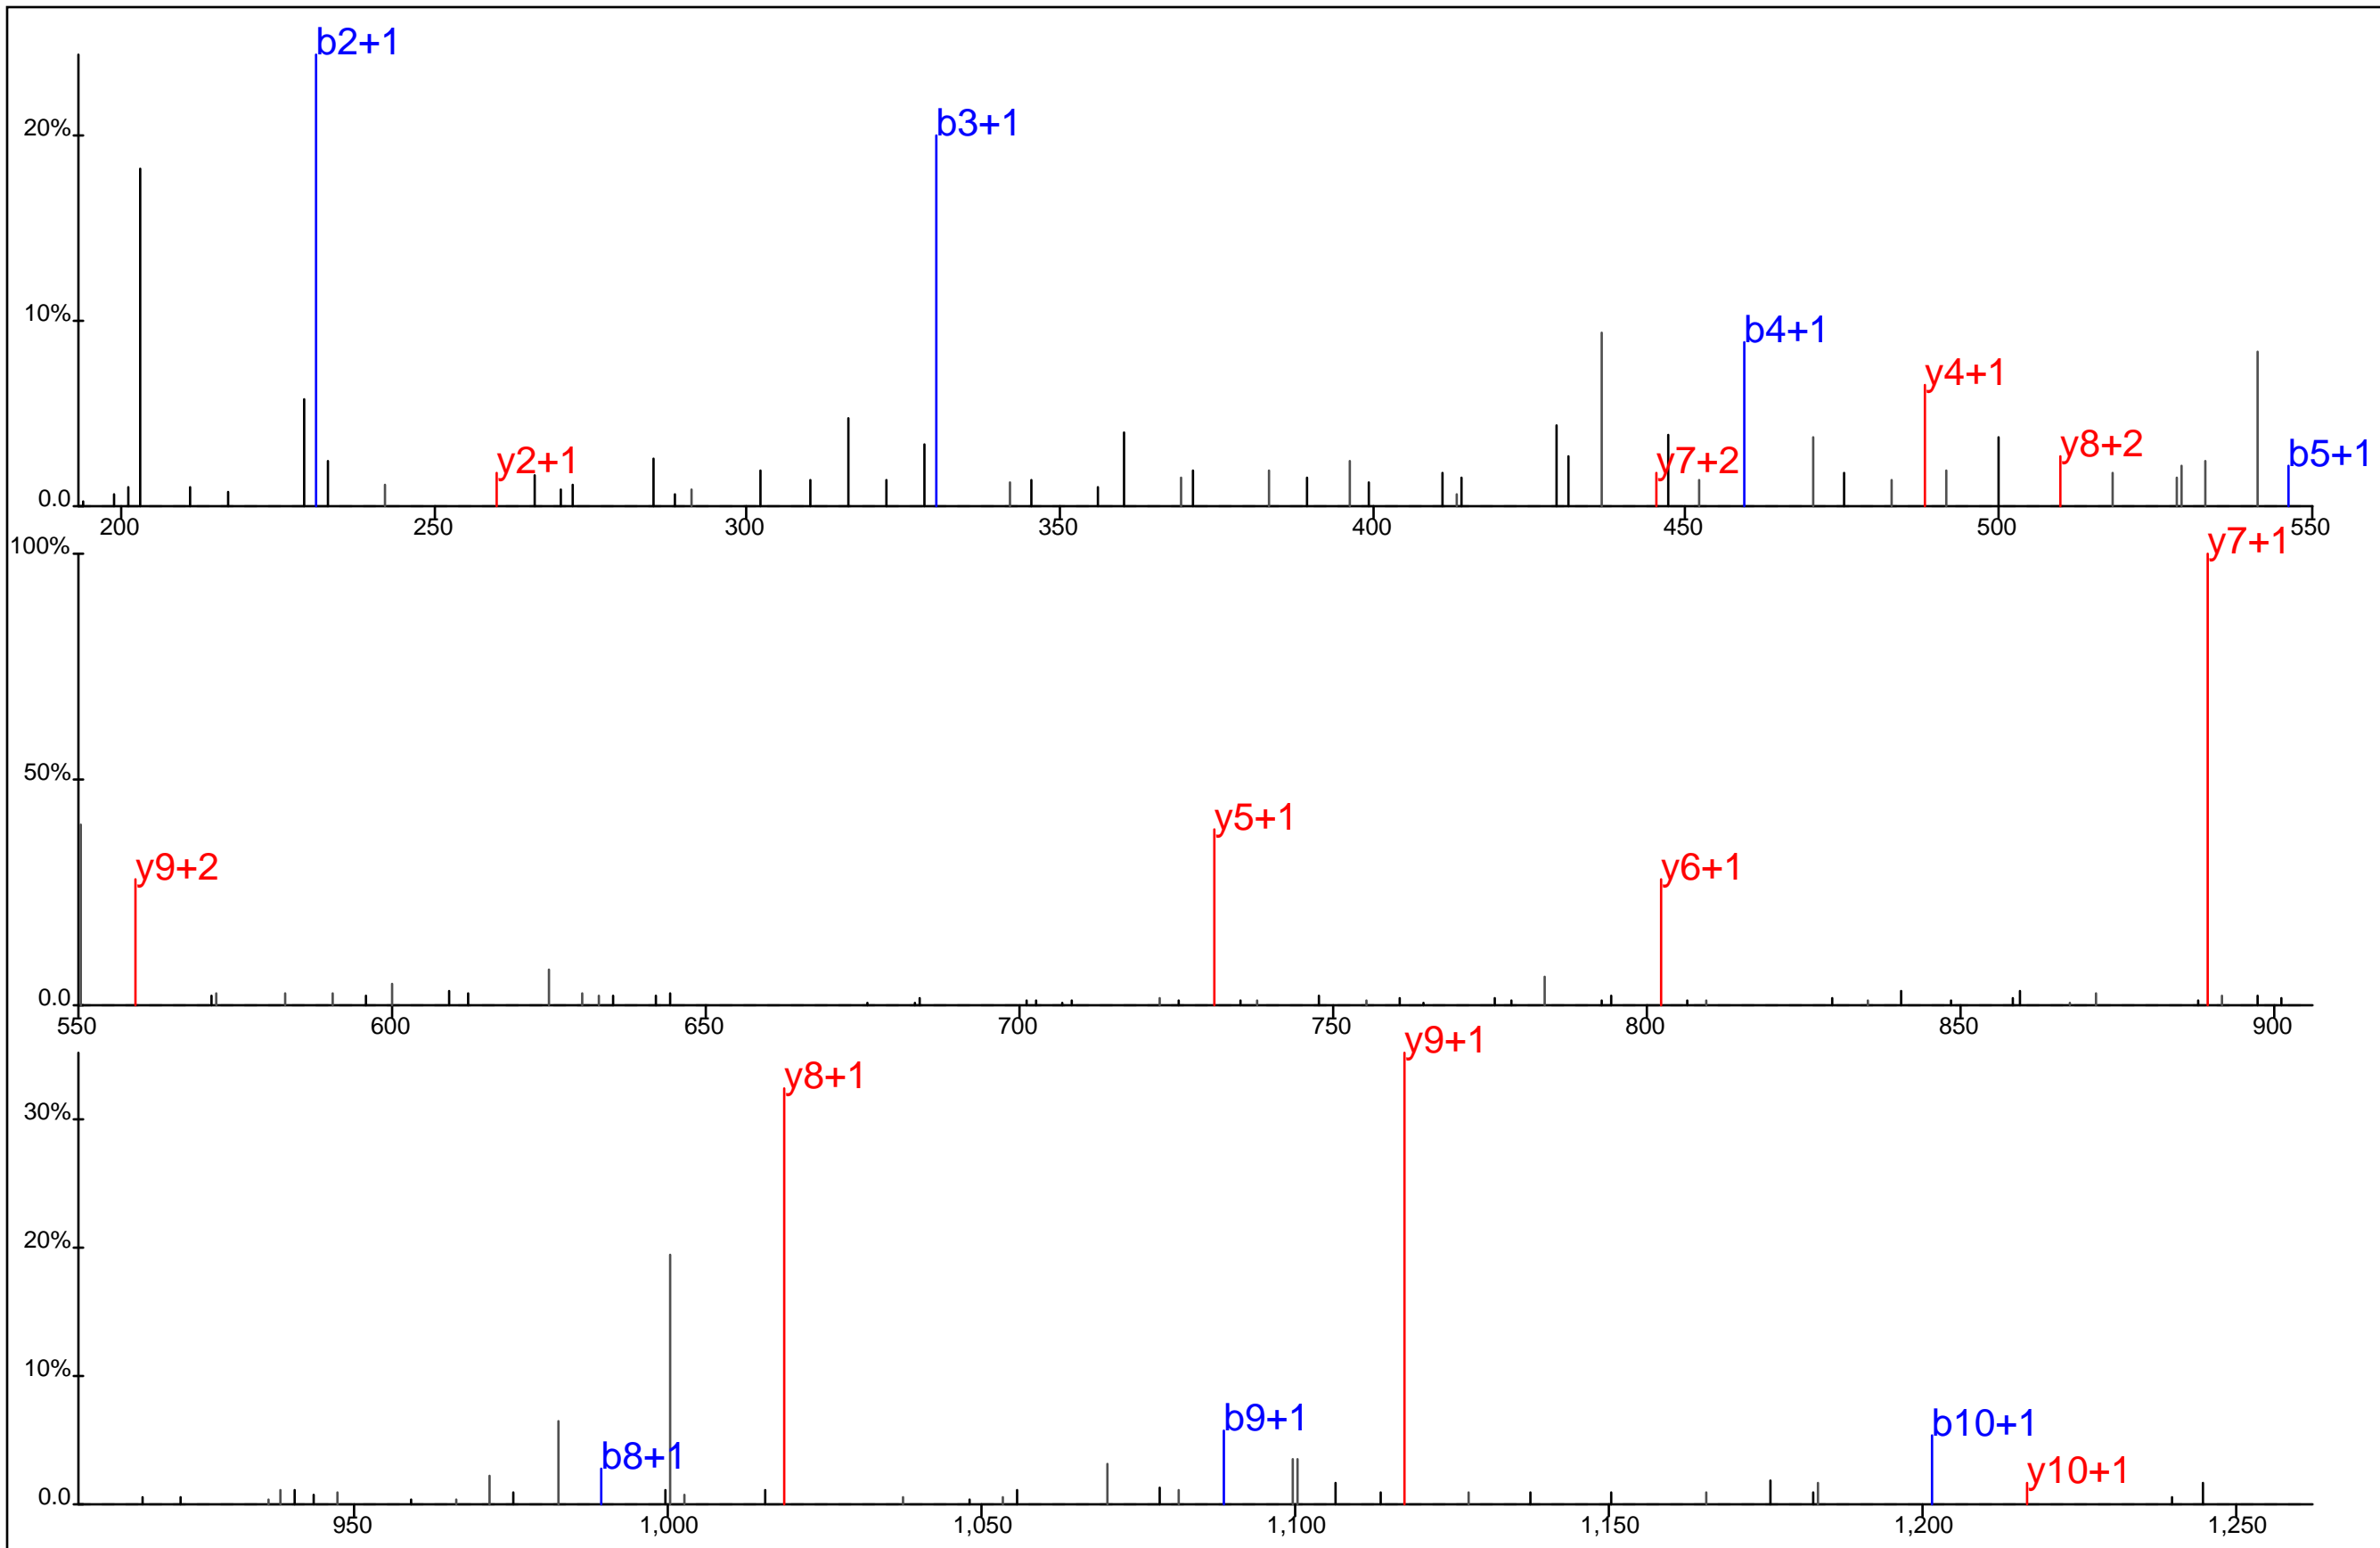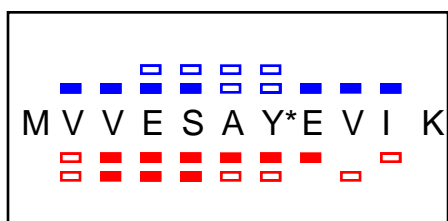

Protein Name: Lactate dehydrogenase B  
 gi Accession: 0  
 Precursor Mass: 674.3167+2  
 Delta Mass: 0.301 ppm  
 XCorr: 55.18

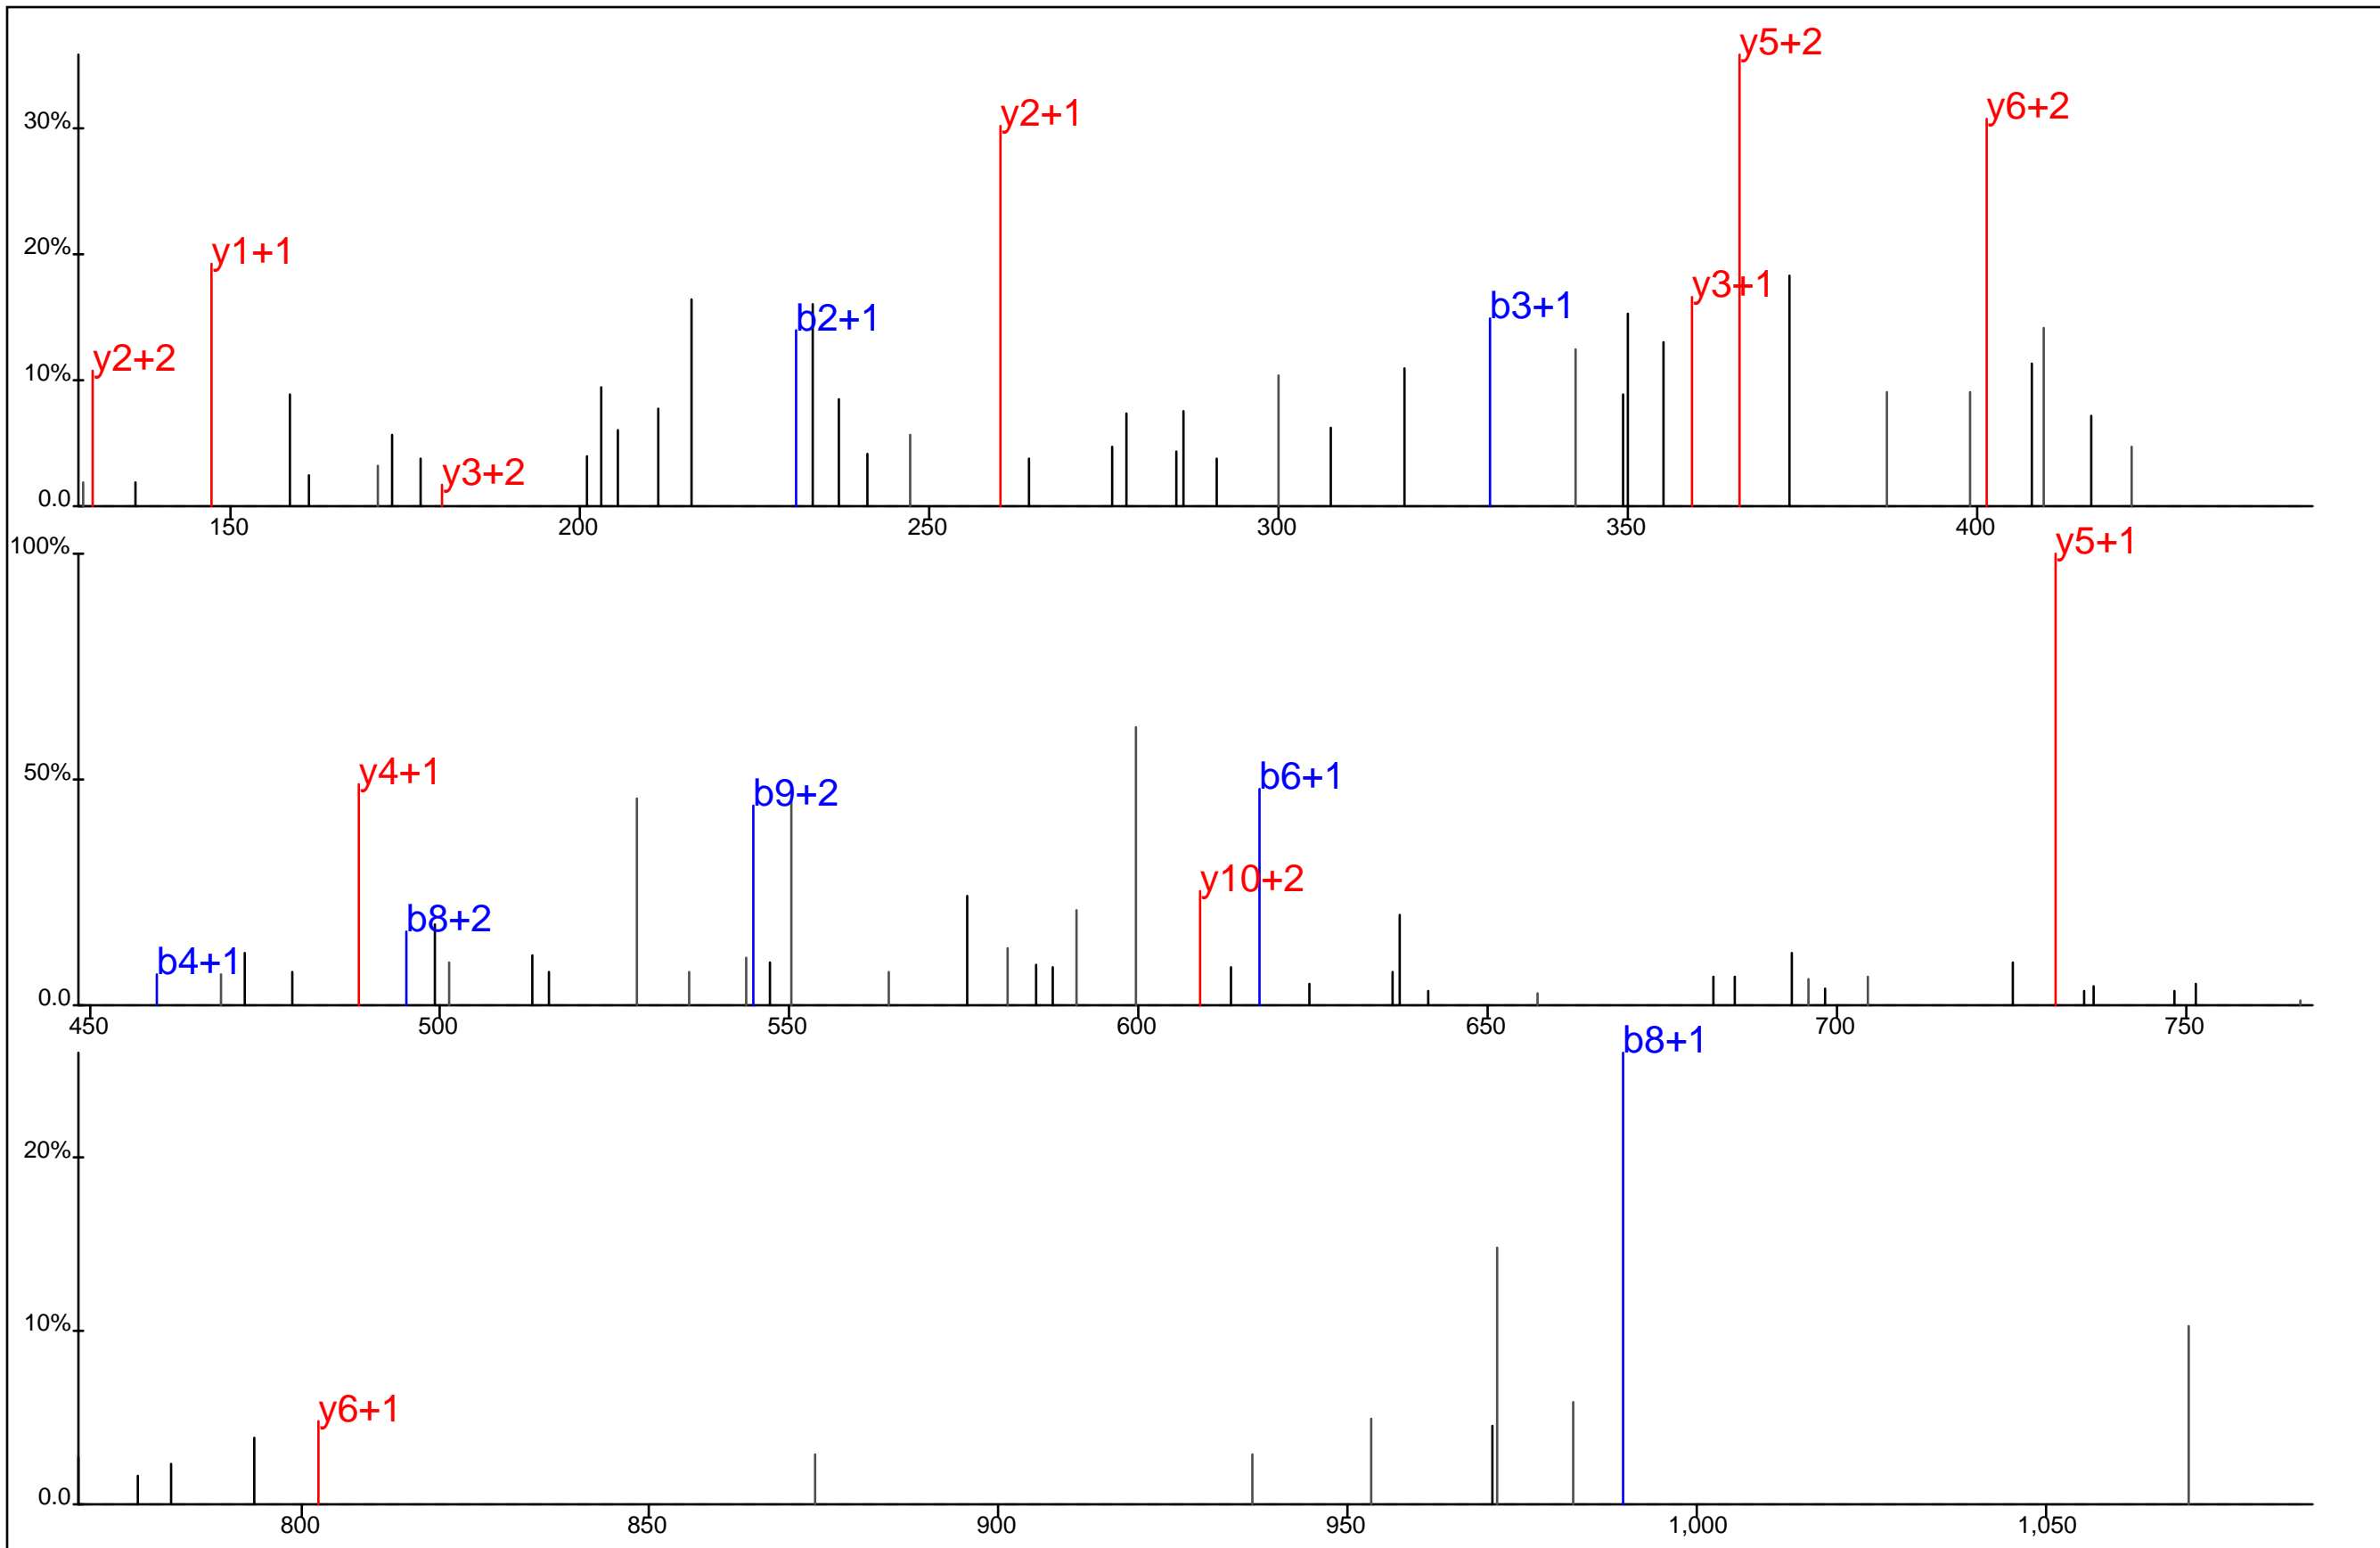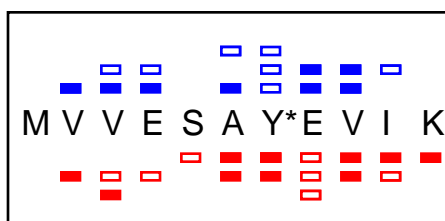

Protein Name: Lactate dehydrogenase B  
 gi Accession: 0  
 Precursor Mass: 449.8802+3  
 Delta Mass: 0.401 ppm  
 XCorr: 31.94

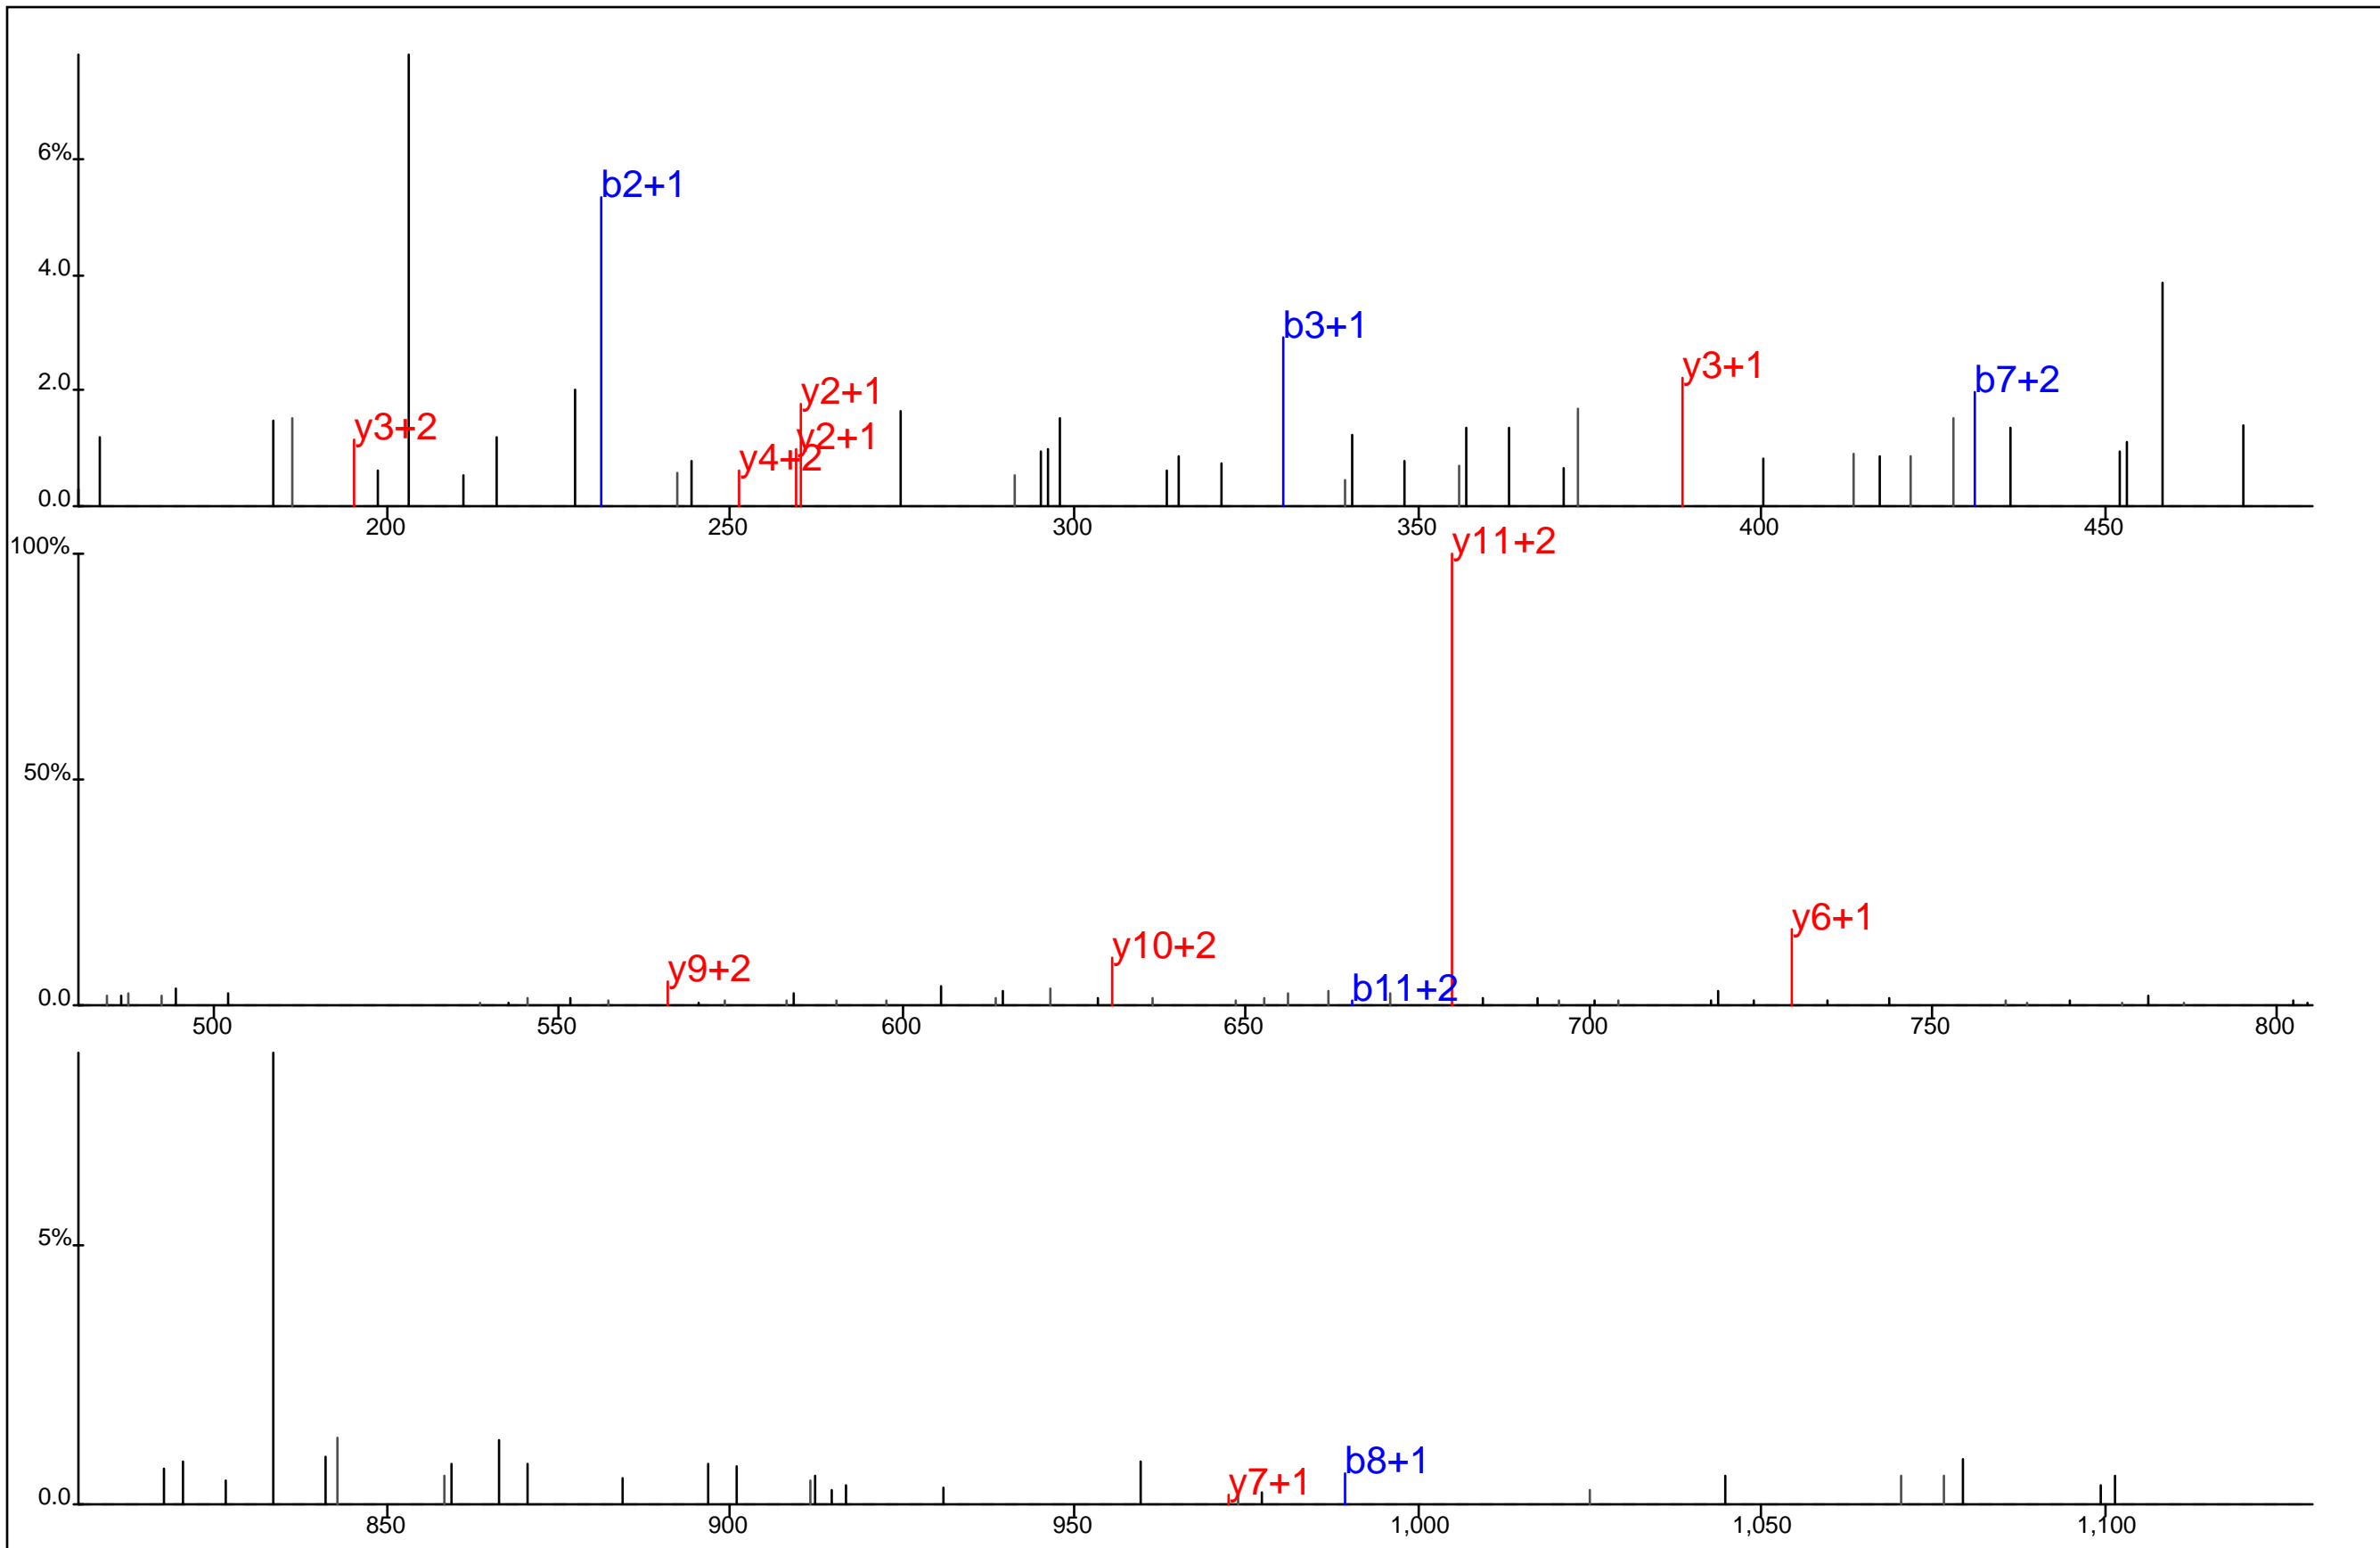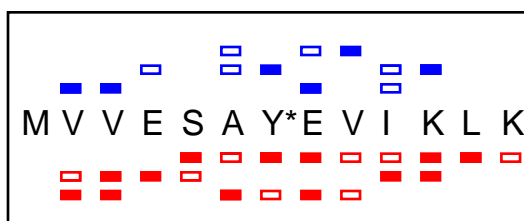

Protein Name: Lactate dehydrogenase B  
 gi Accession: 0  
 Precursor Mass: 530.2746+3  
 Delta Mass: 2.308 ppm  
 XCorr: 22.35

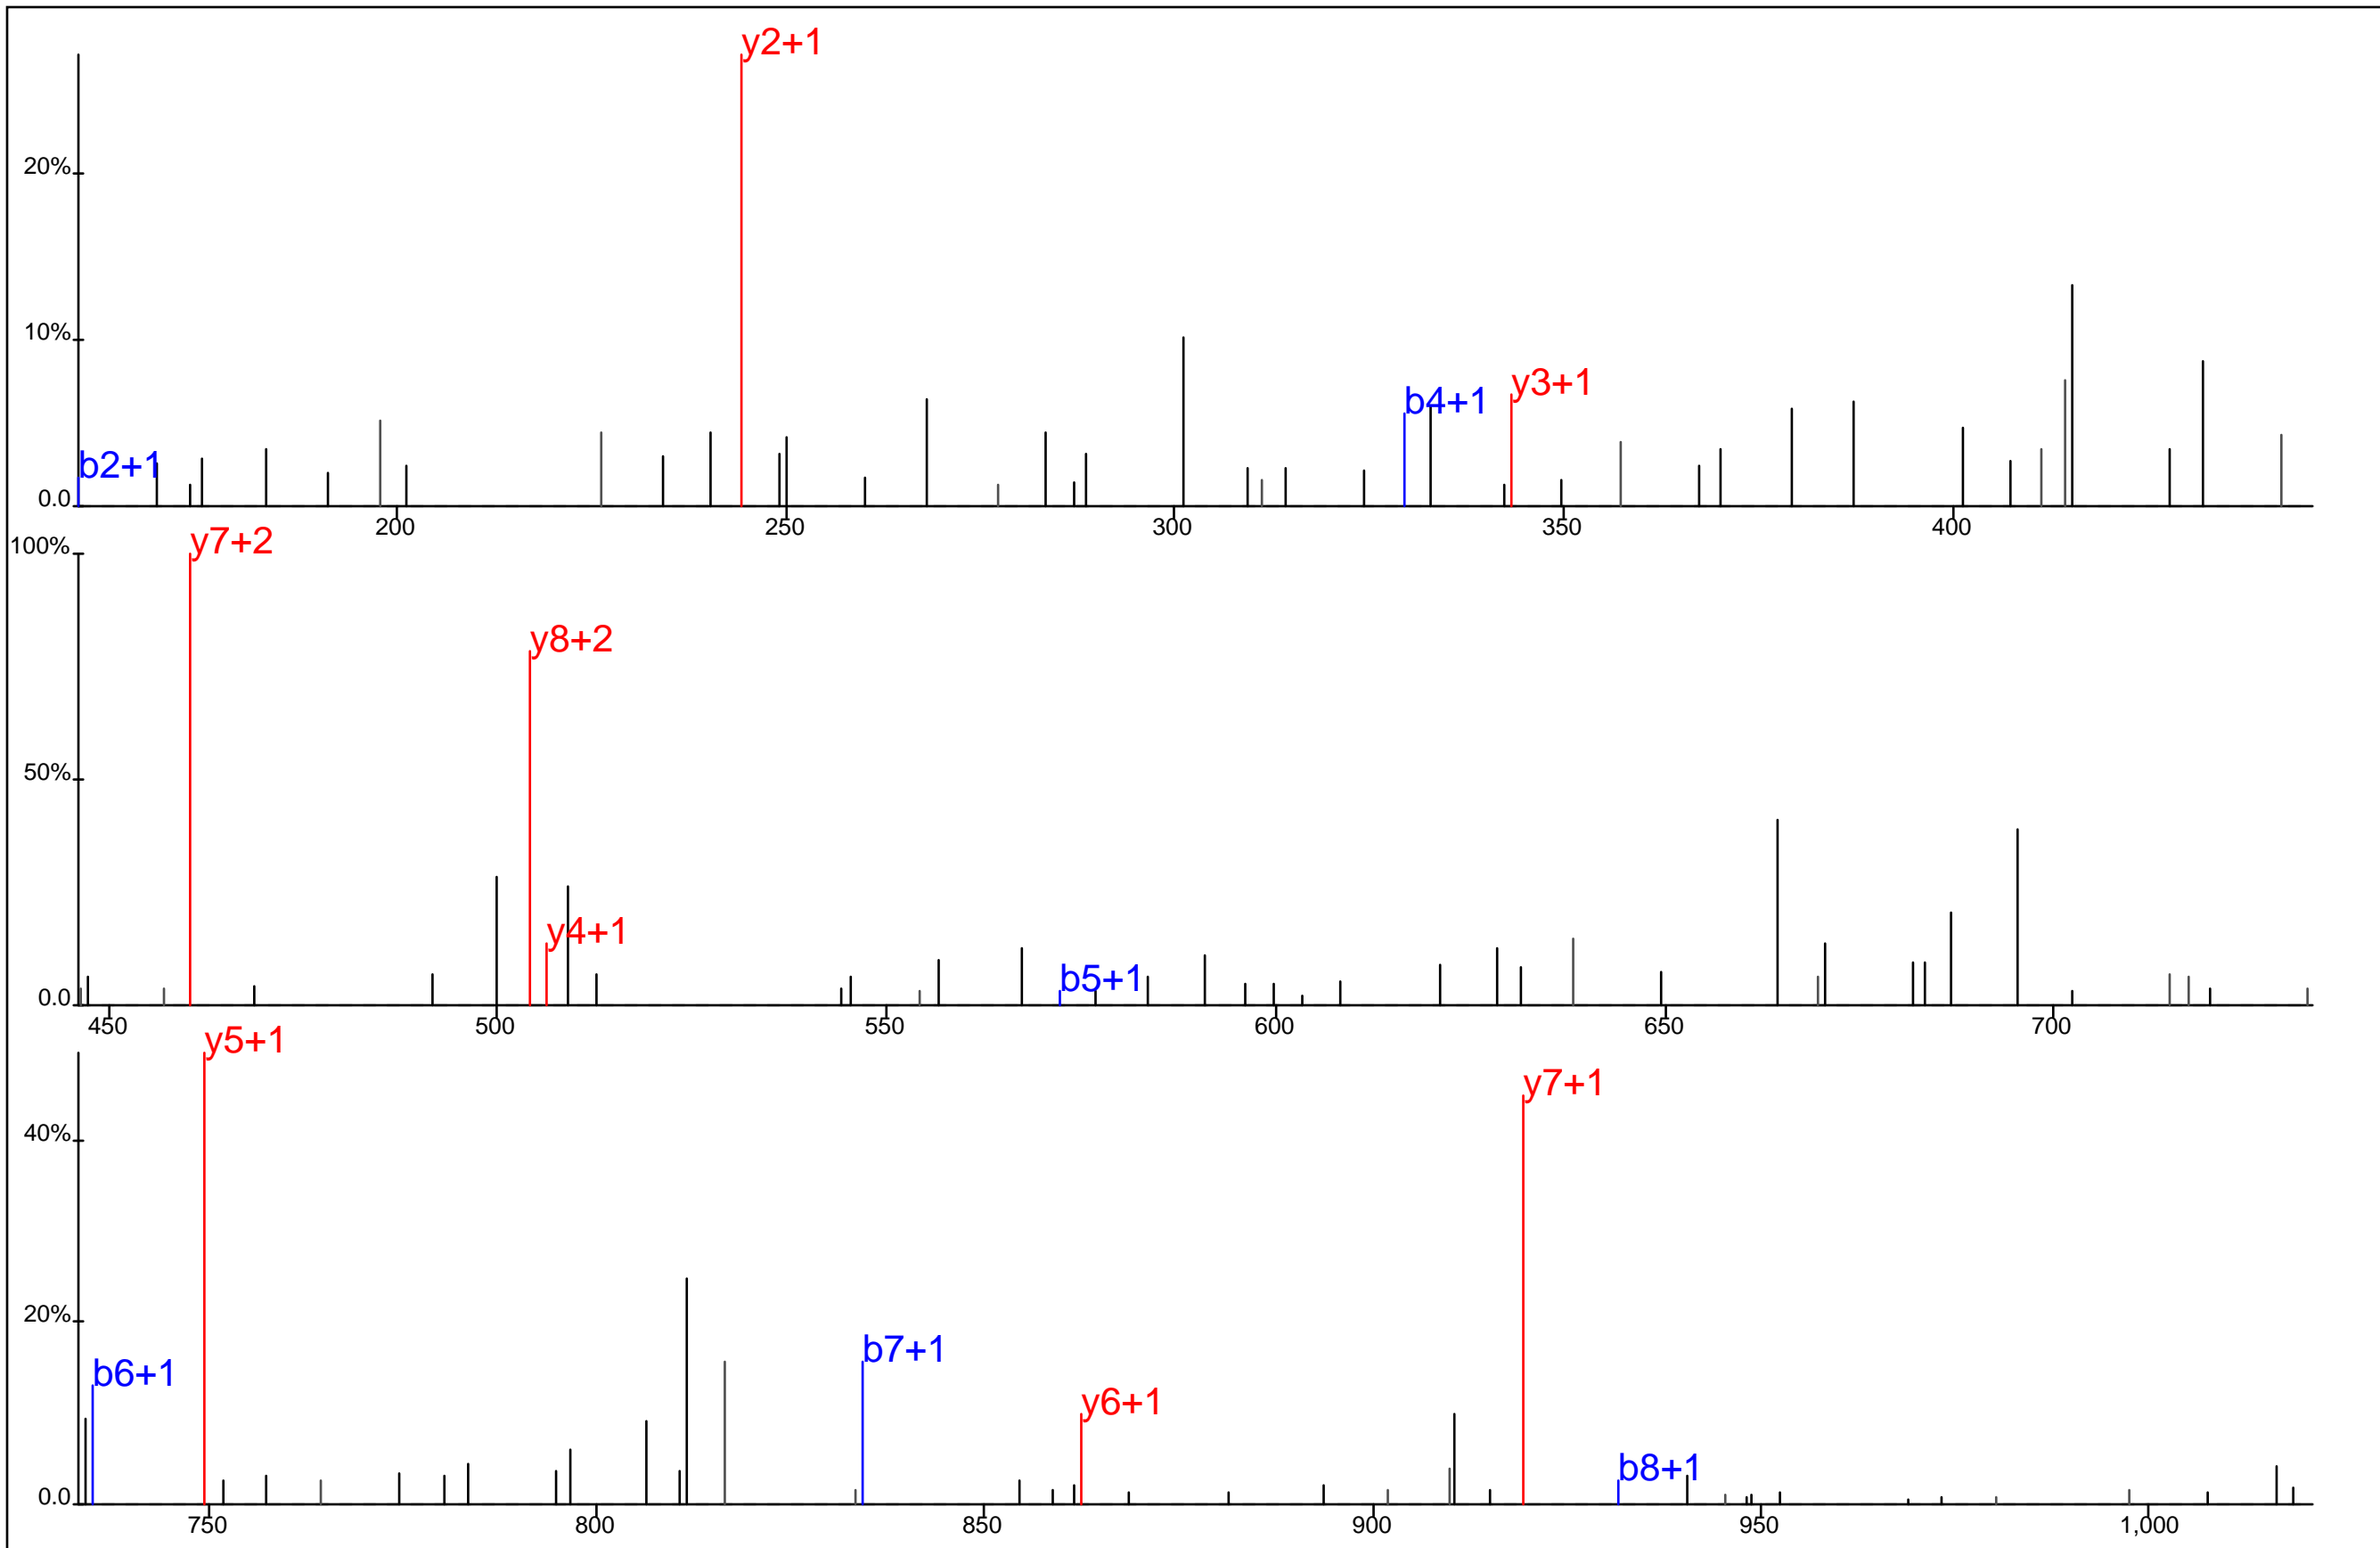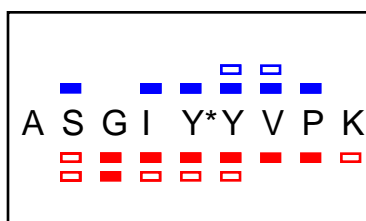

Protein Name: Lamellipodin  
 gi Accession: 0  
 Precursor Mass: 539.2551+2  
 Delta Mass: 1.155 ppm  
 XCorr: 22.6

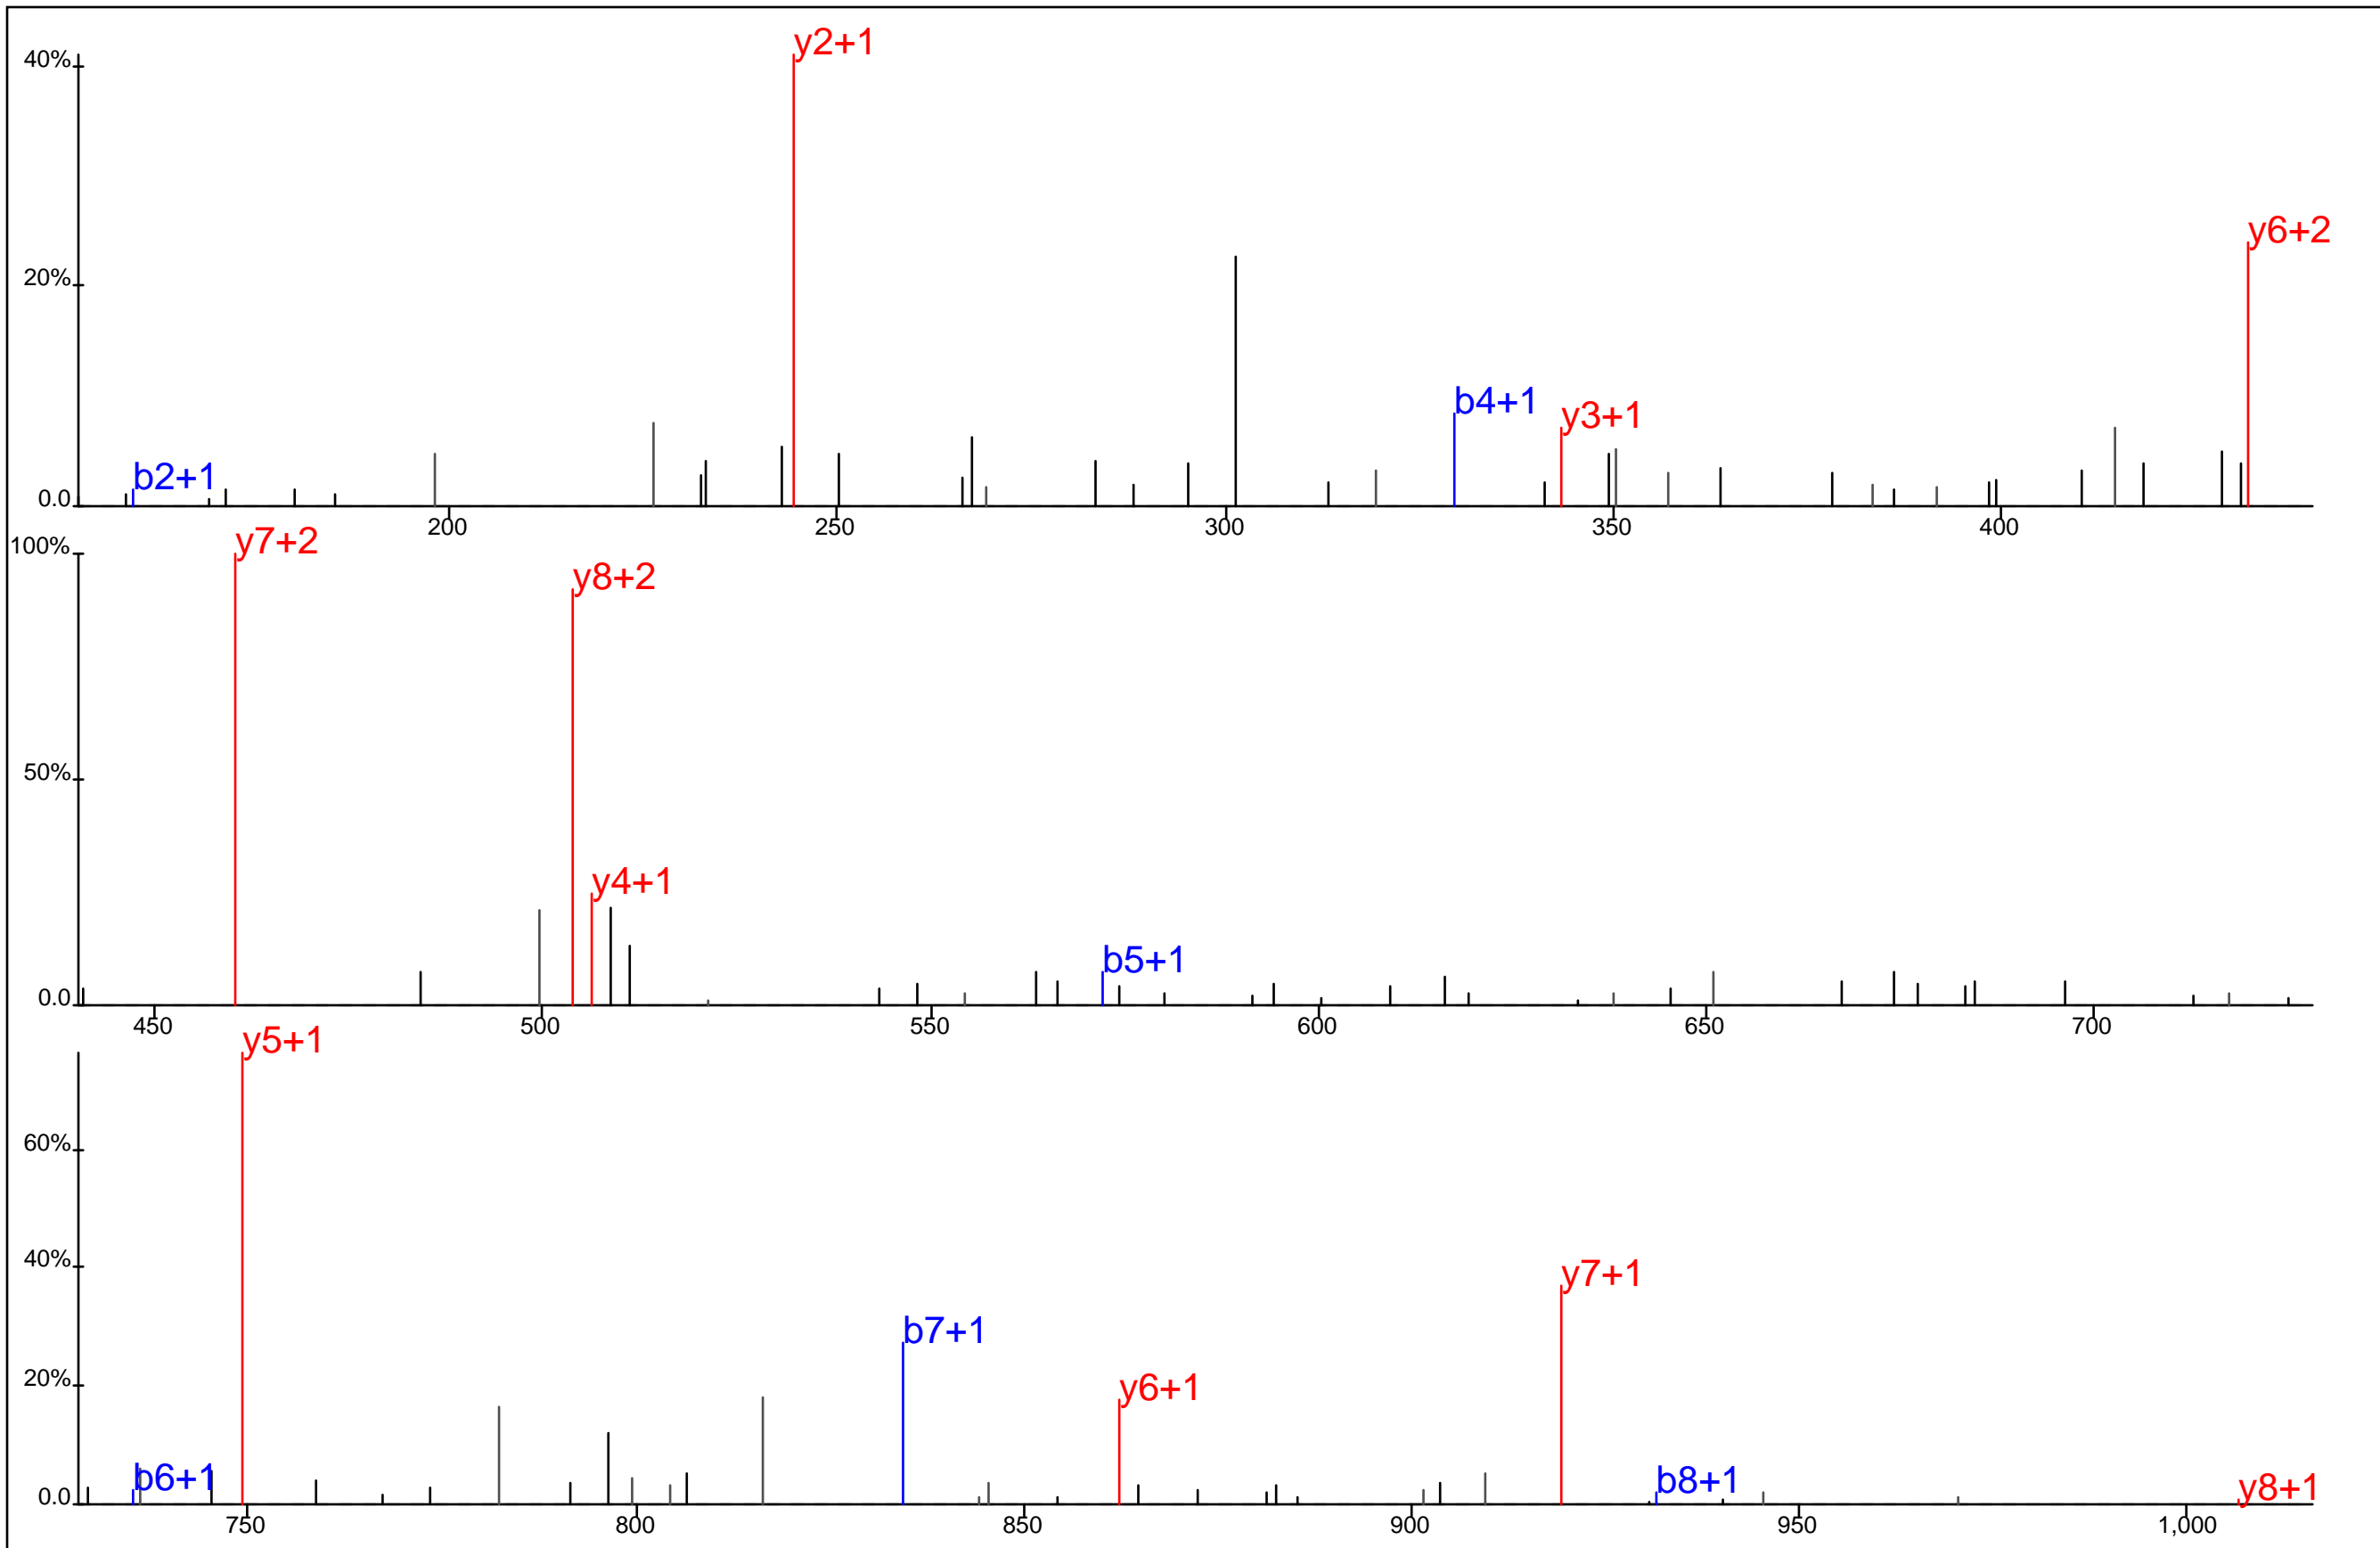

**A S G I Y\*Y V P K**

Protein Name: Lamellipodin  
 gi Accession: 0  
 Precursor Mass: 539.2545+2  
 Delta Mass: 0.135 ppm  
 XCorr: 45.45





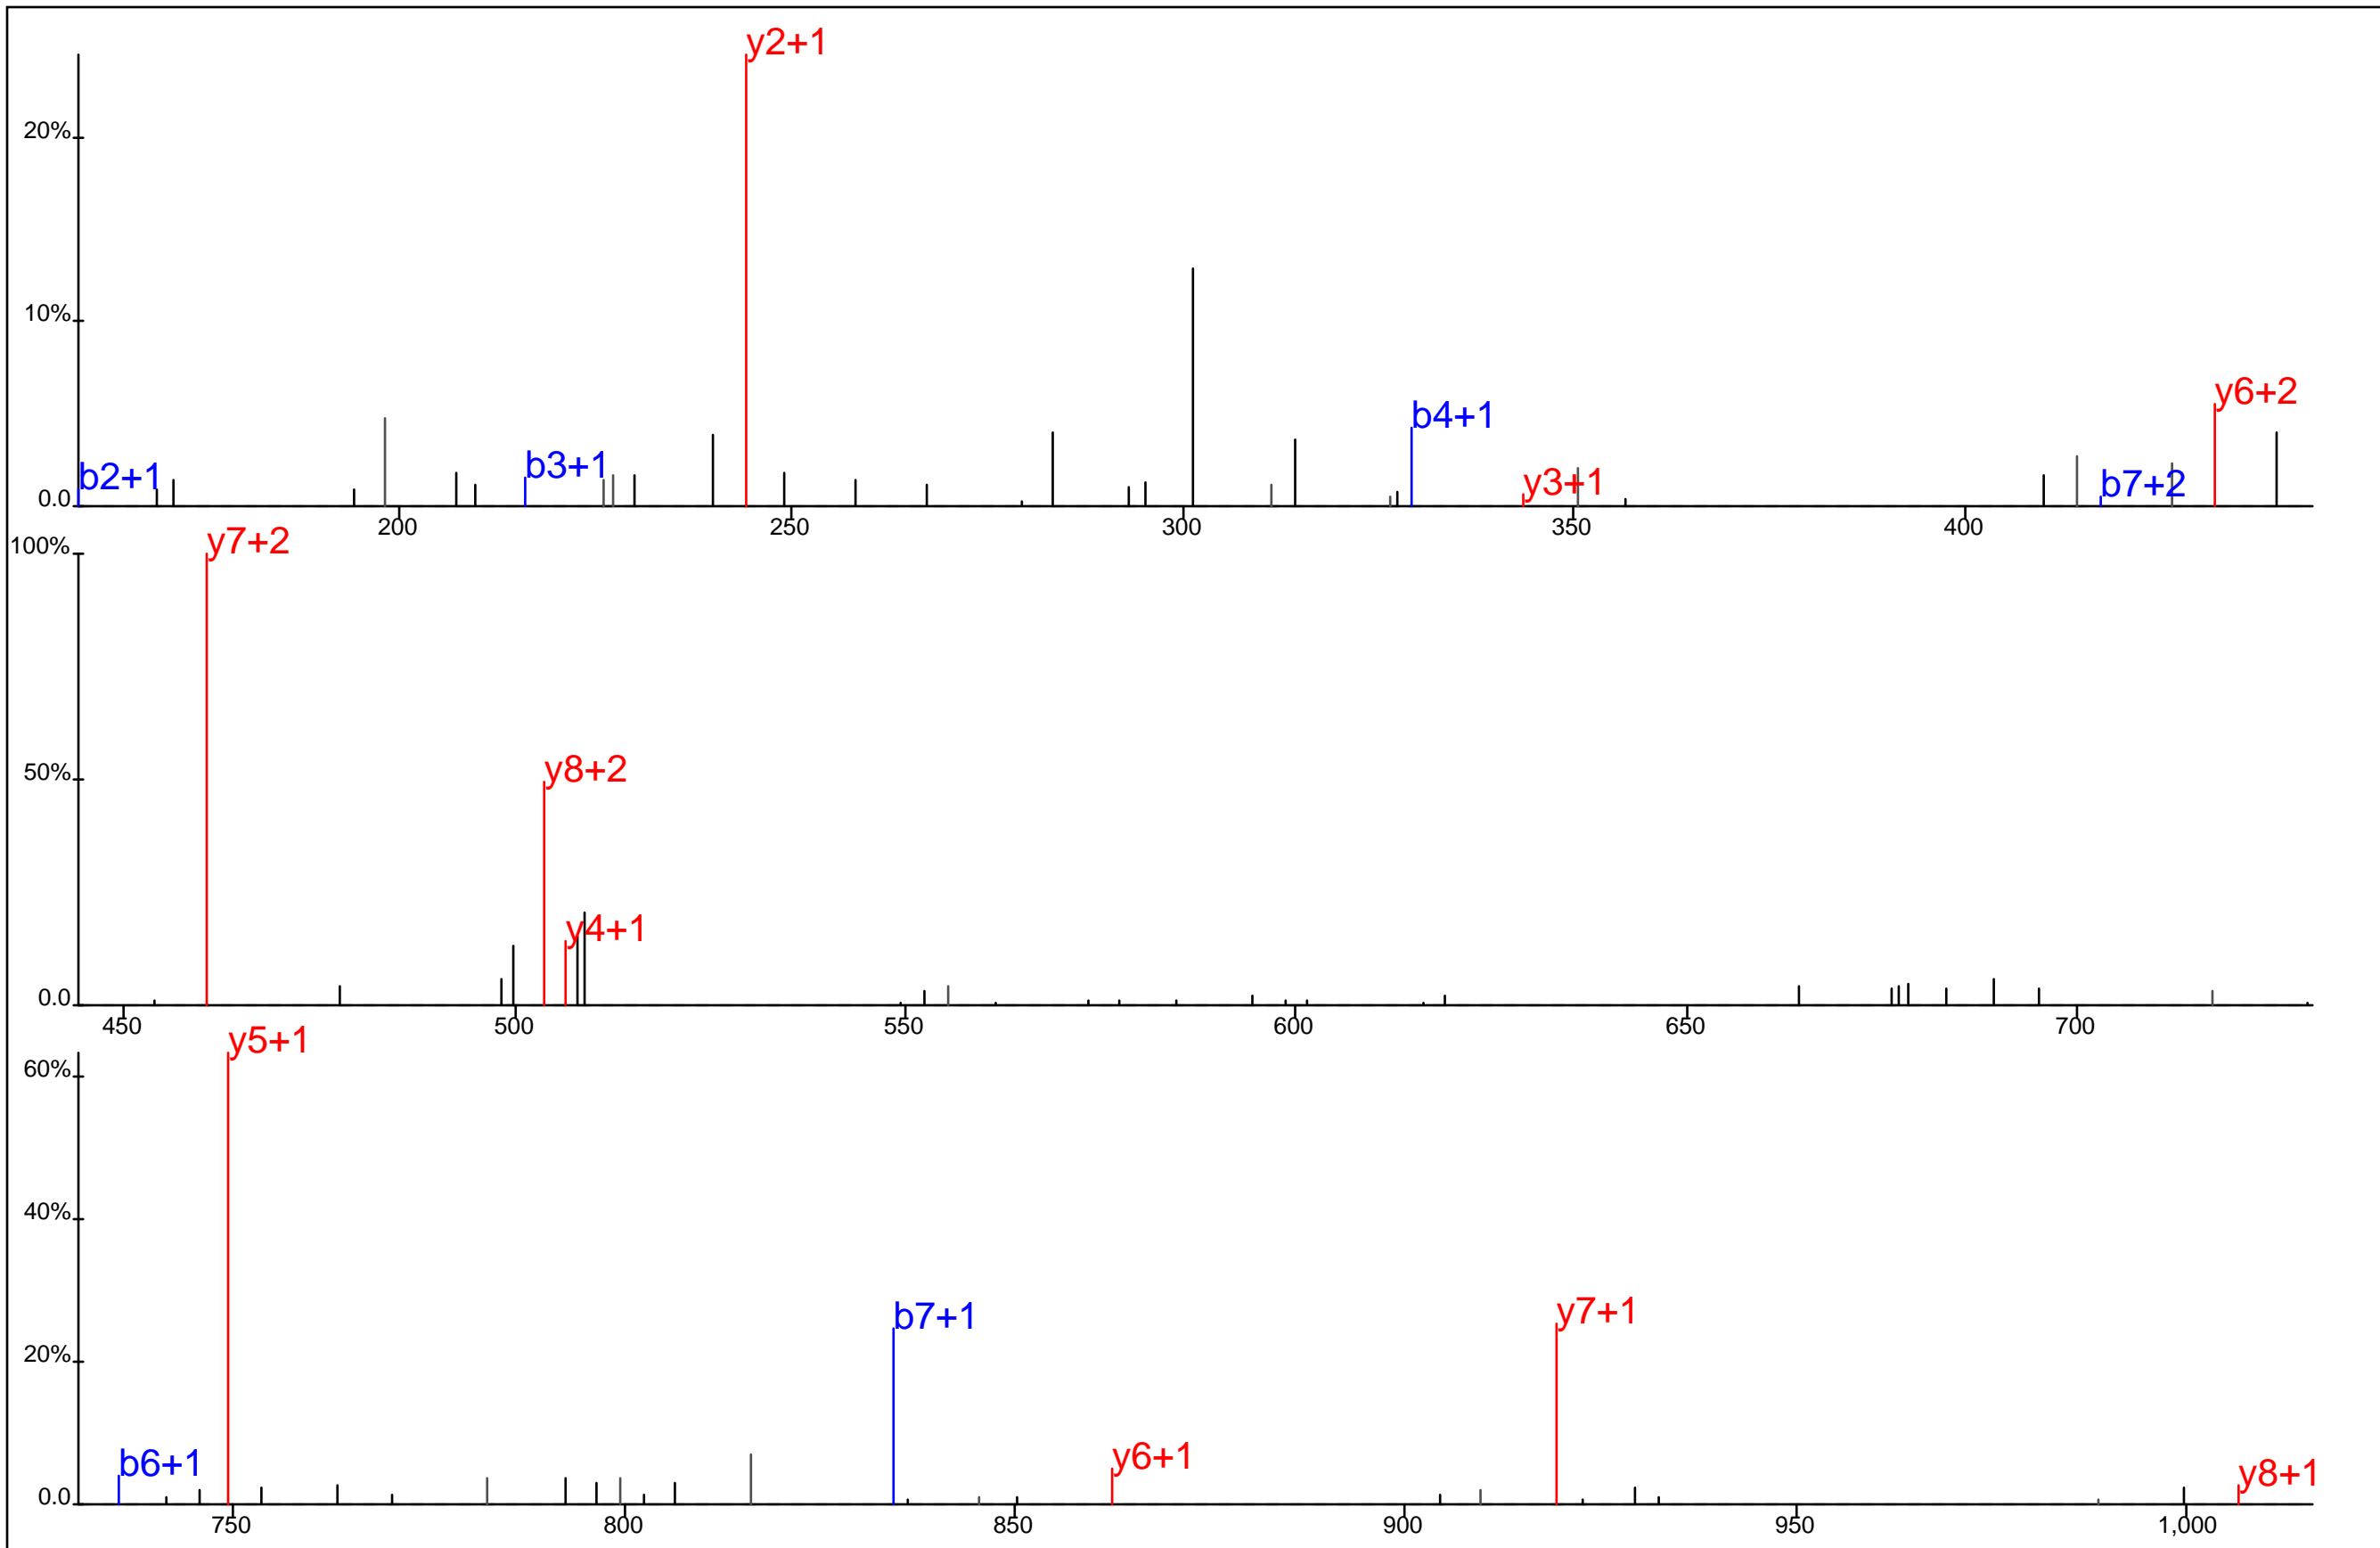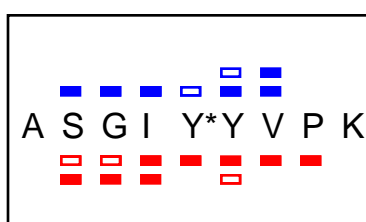

Protein Name: Lamellipodin  
 gi Accession: 0  
 Precursor Mass: 539.2551+2  
 Delta Mass: 1.268 ppm  
 XCorr: 34.28

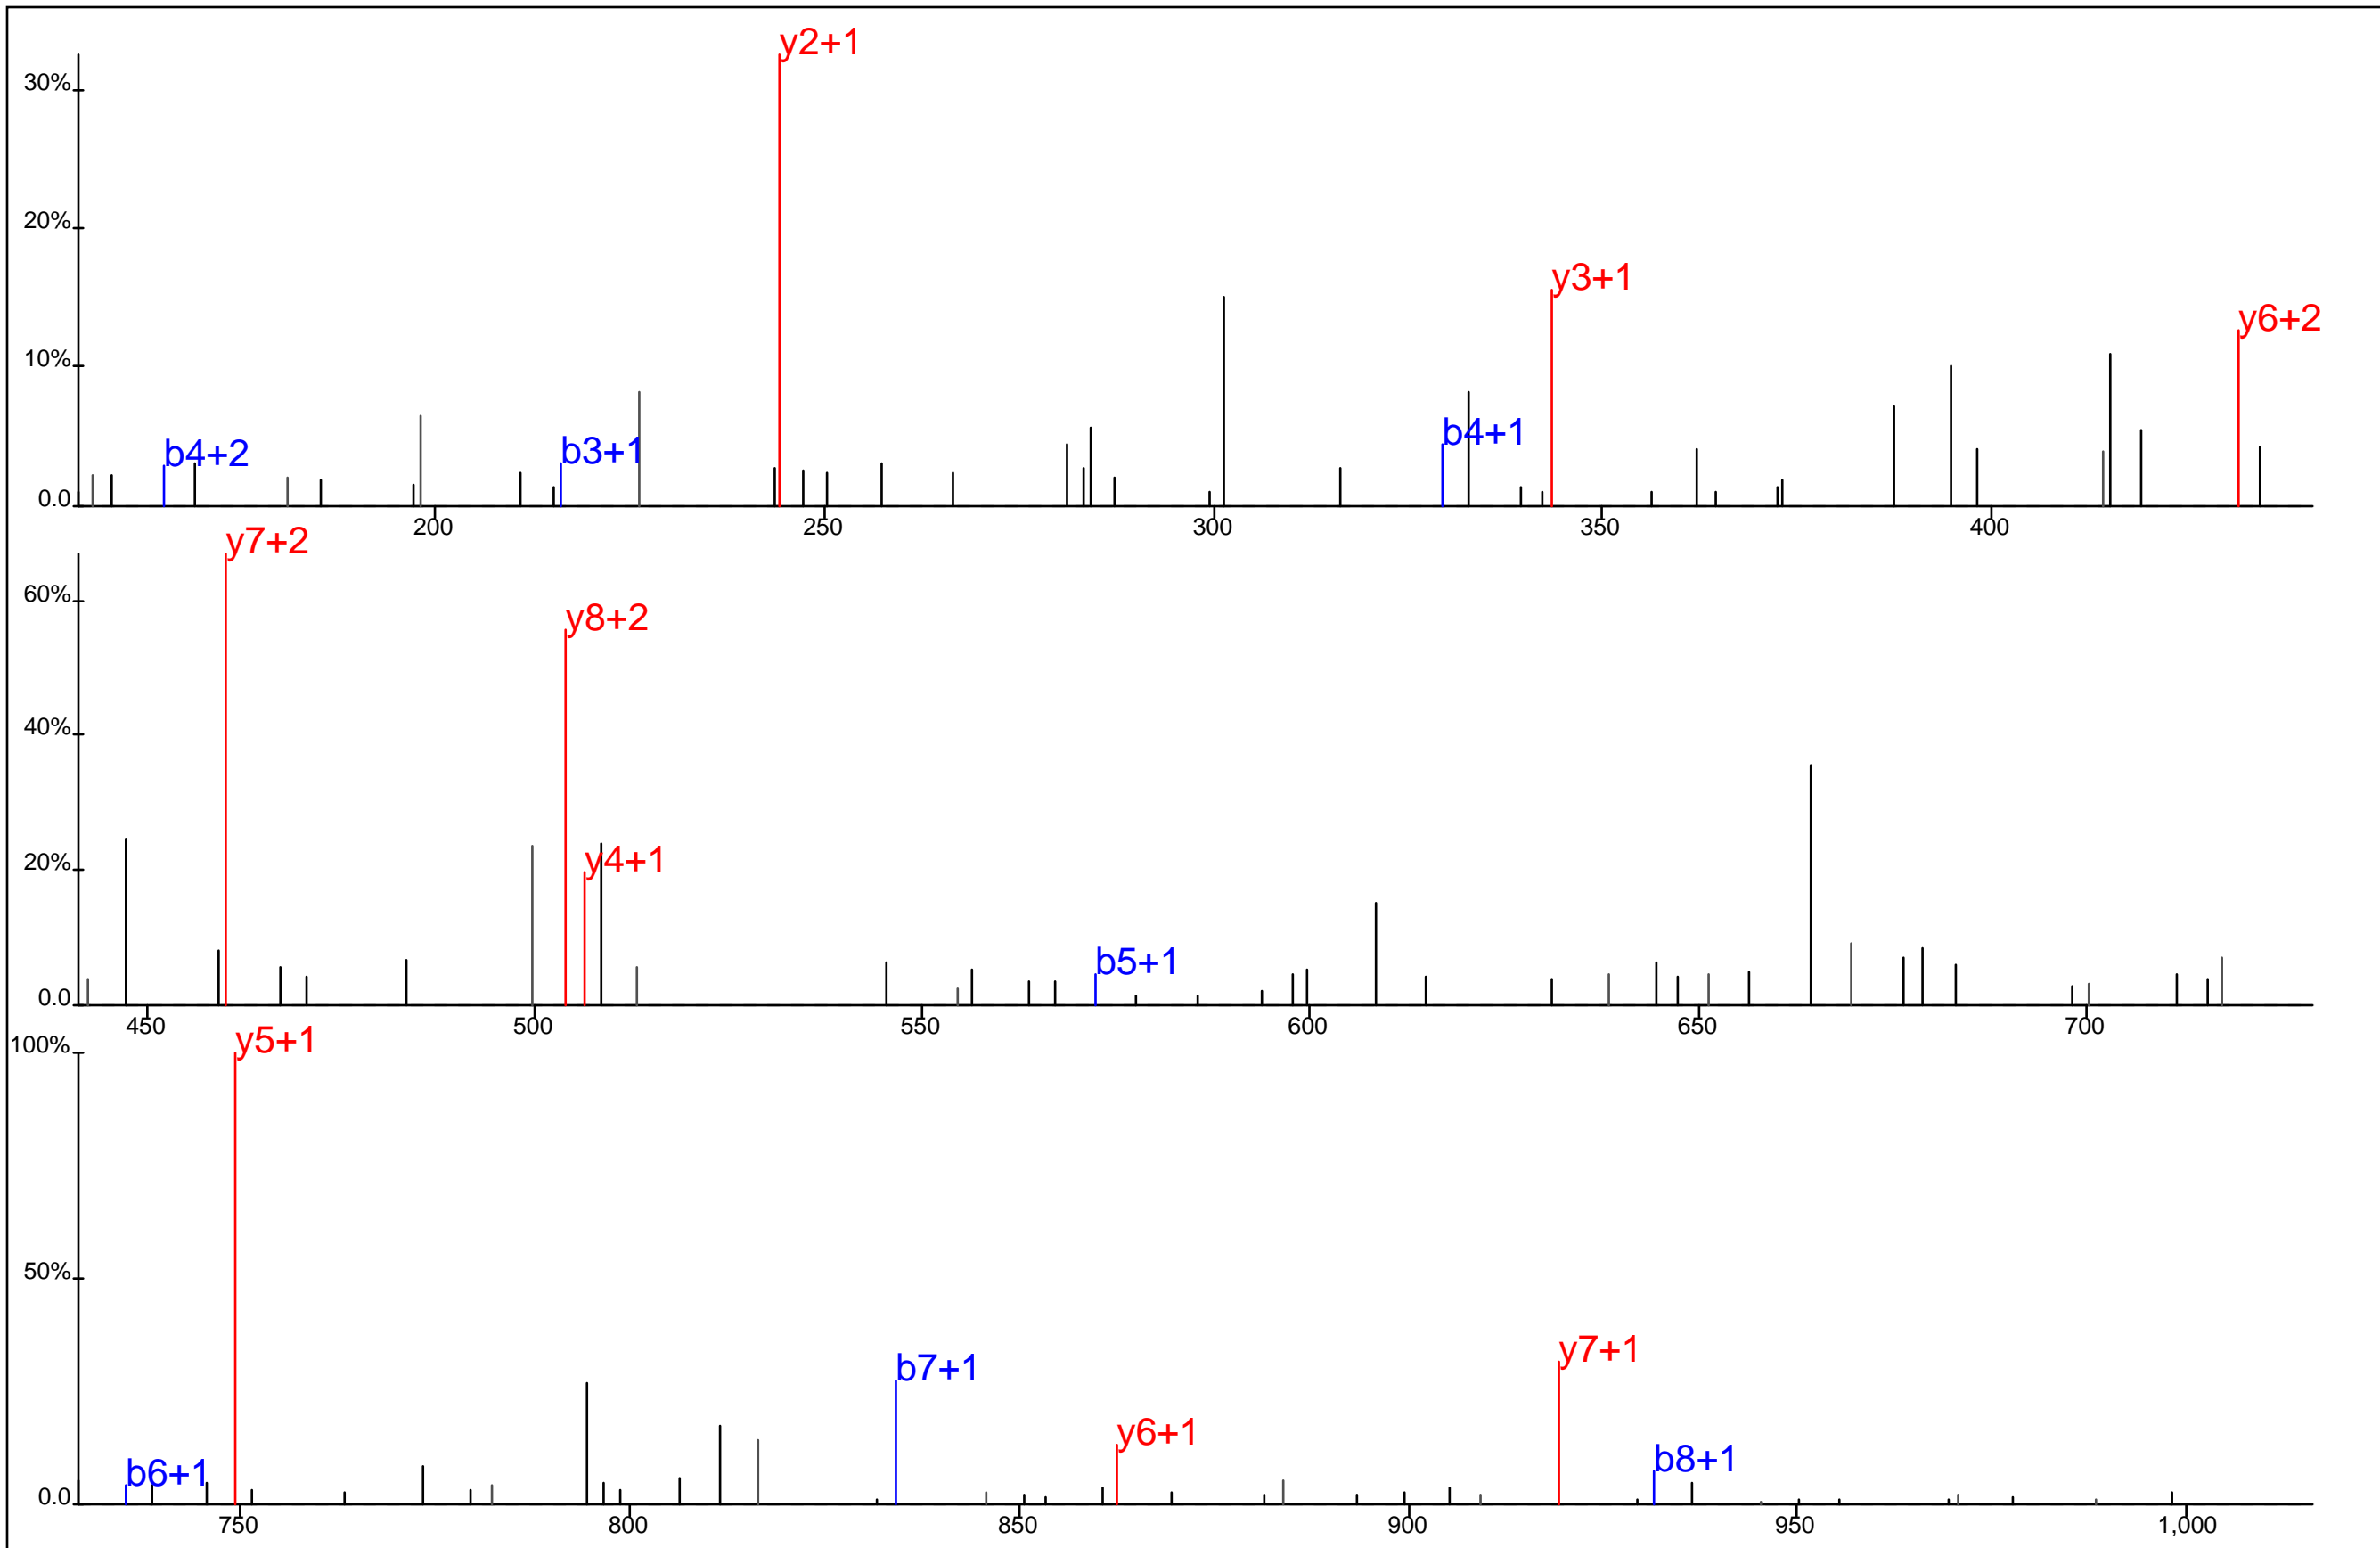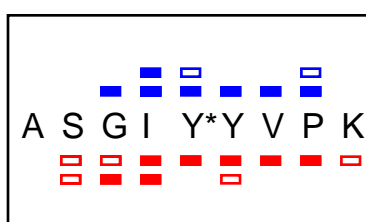

Protein Name: Lamellipodin  
 gi Accession: 0  
 Precursor Mass: 539.2529+2  
 Delta Mass: 2.923 ppm  
 XCorr: 25.0

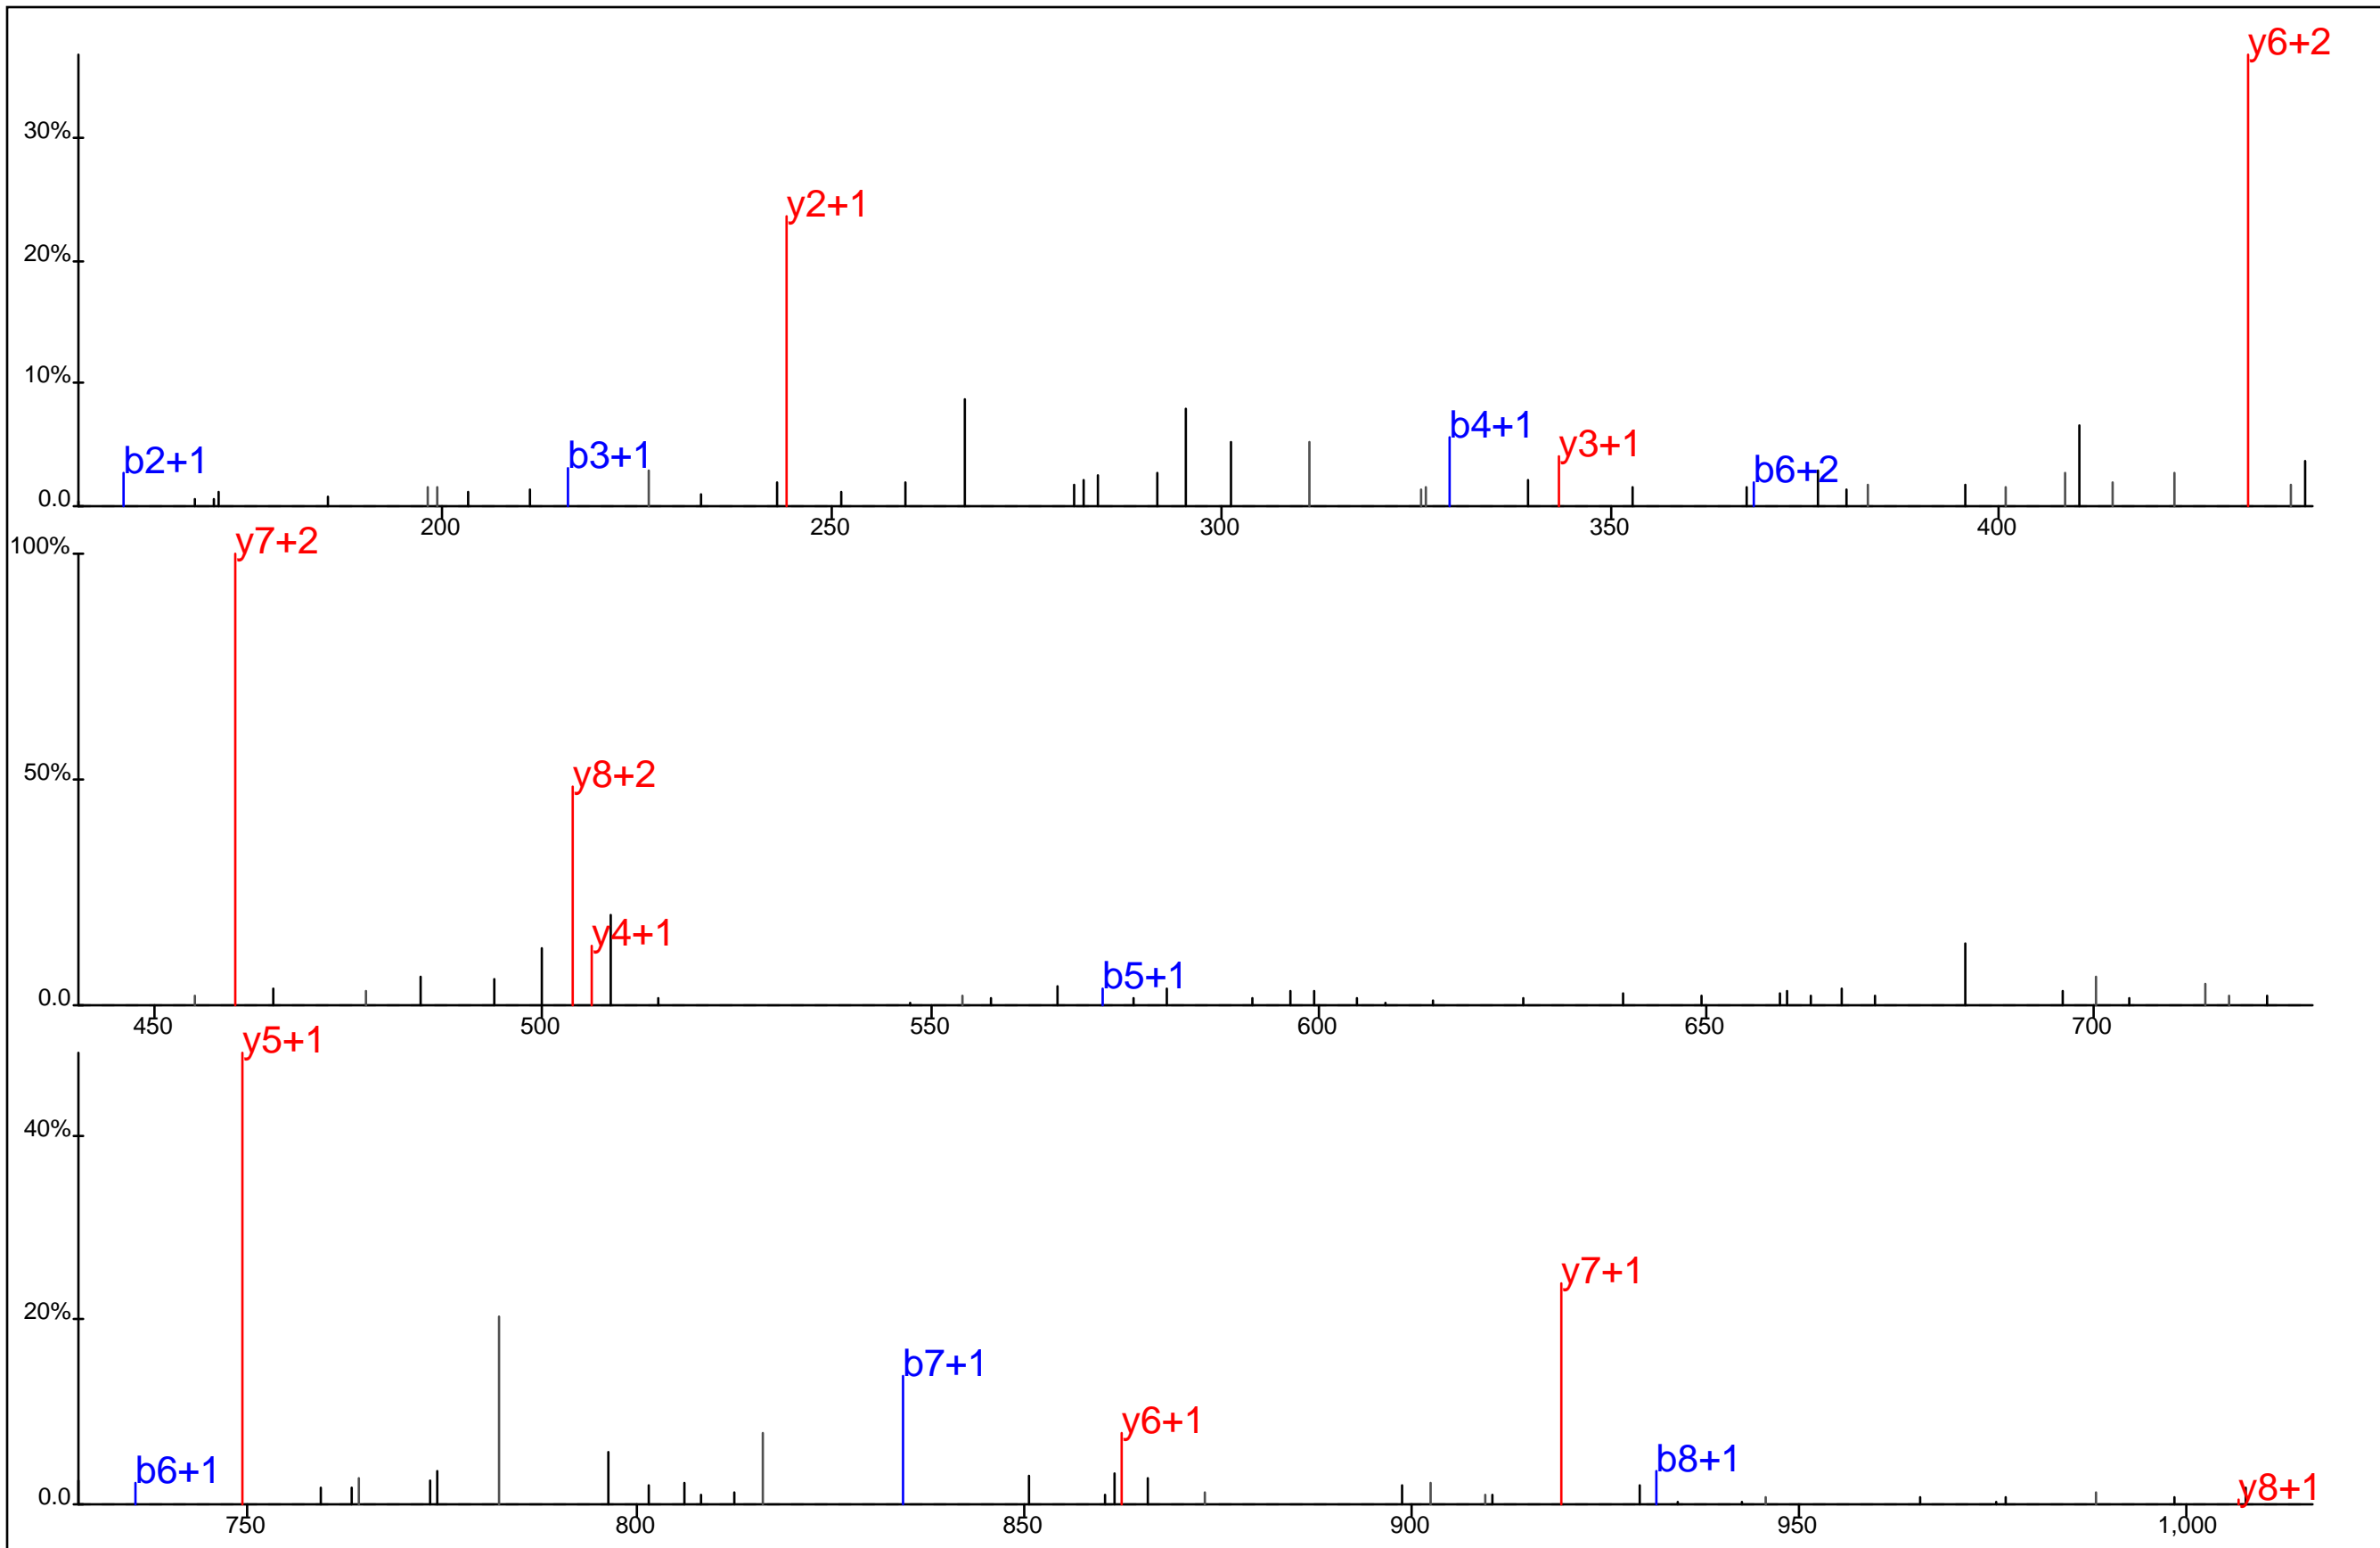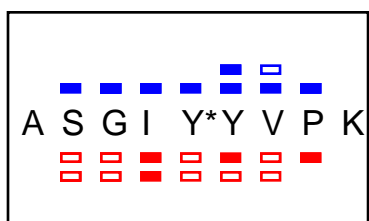

Protein Name: Lamellipodin  
 gi Accession: 0  
 Precursor Mass: 539.2562+2  
 Delta Mass: 3.194 ppm  
 XCorr: 29.55

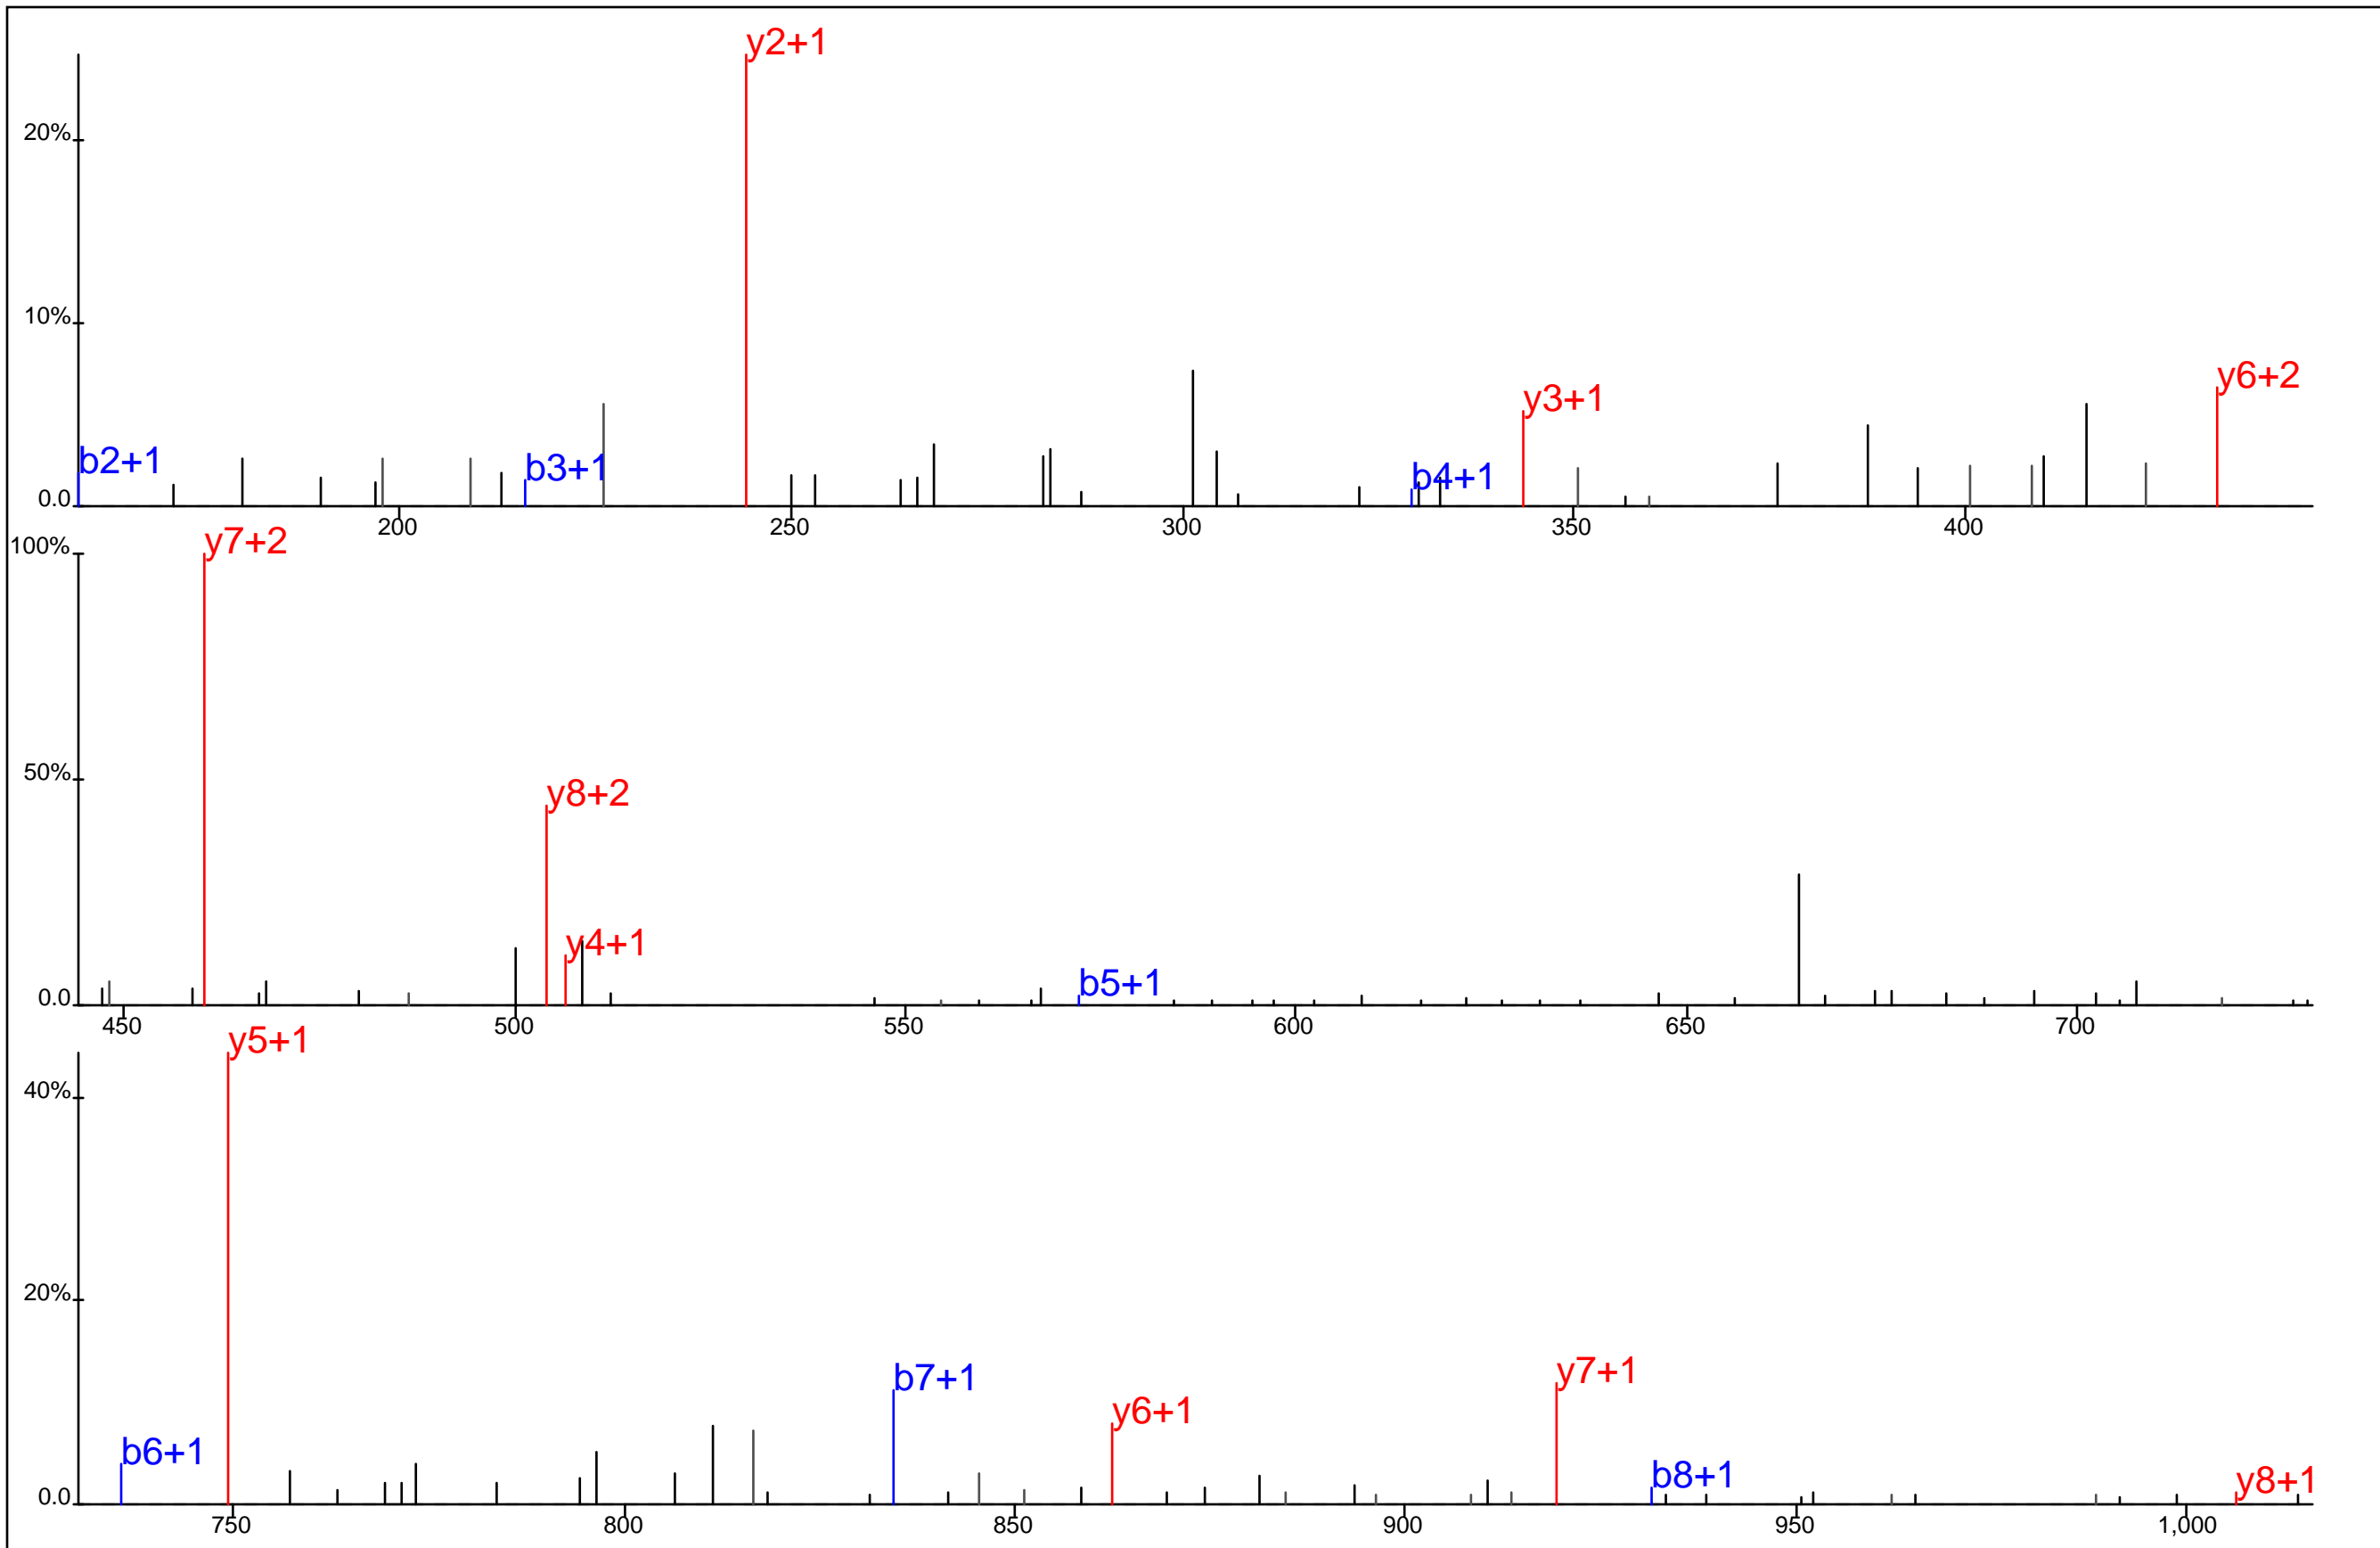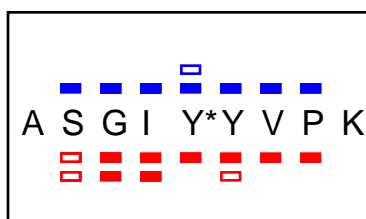

Protein Name: Lamellipodin  
 gi Accession: 0  
 Precursor Mass: 539.2538+2  
 Delta Mass: 1.112 ppm  
 XCorr: 37.41

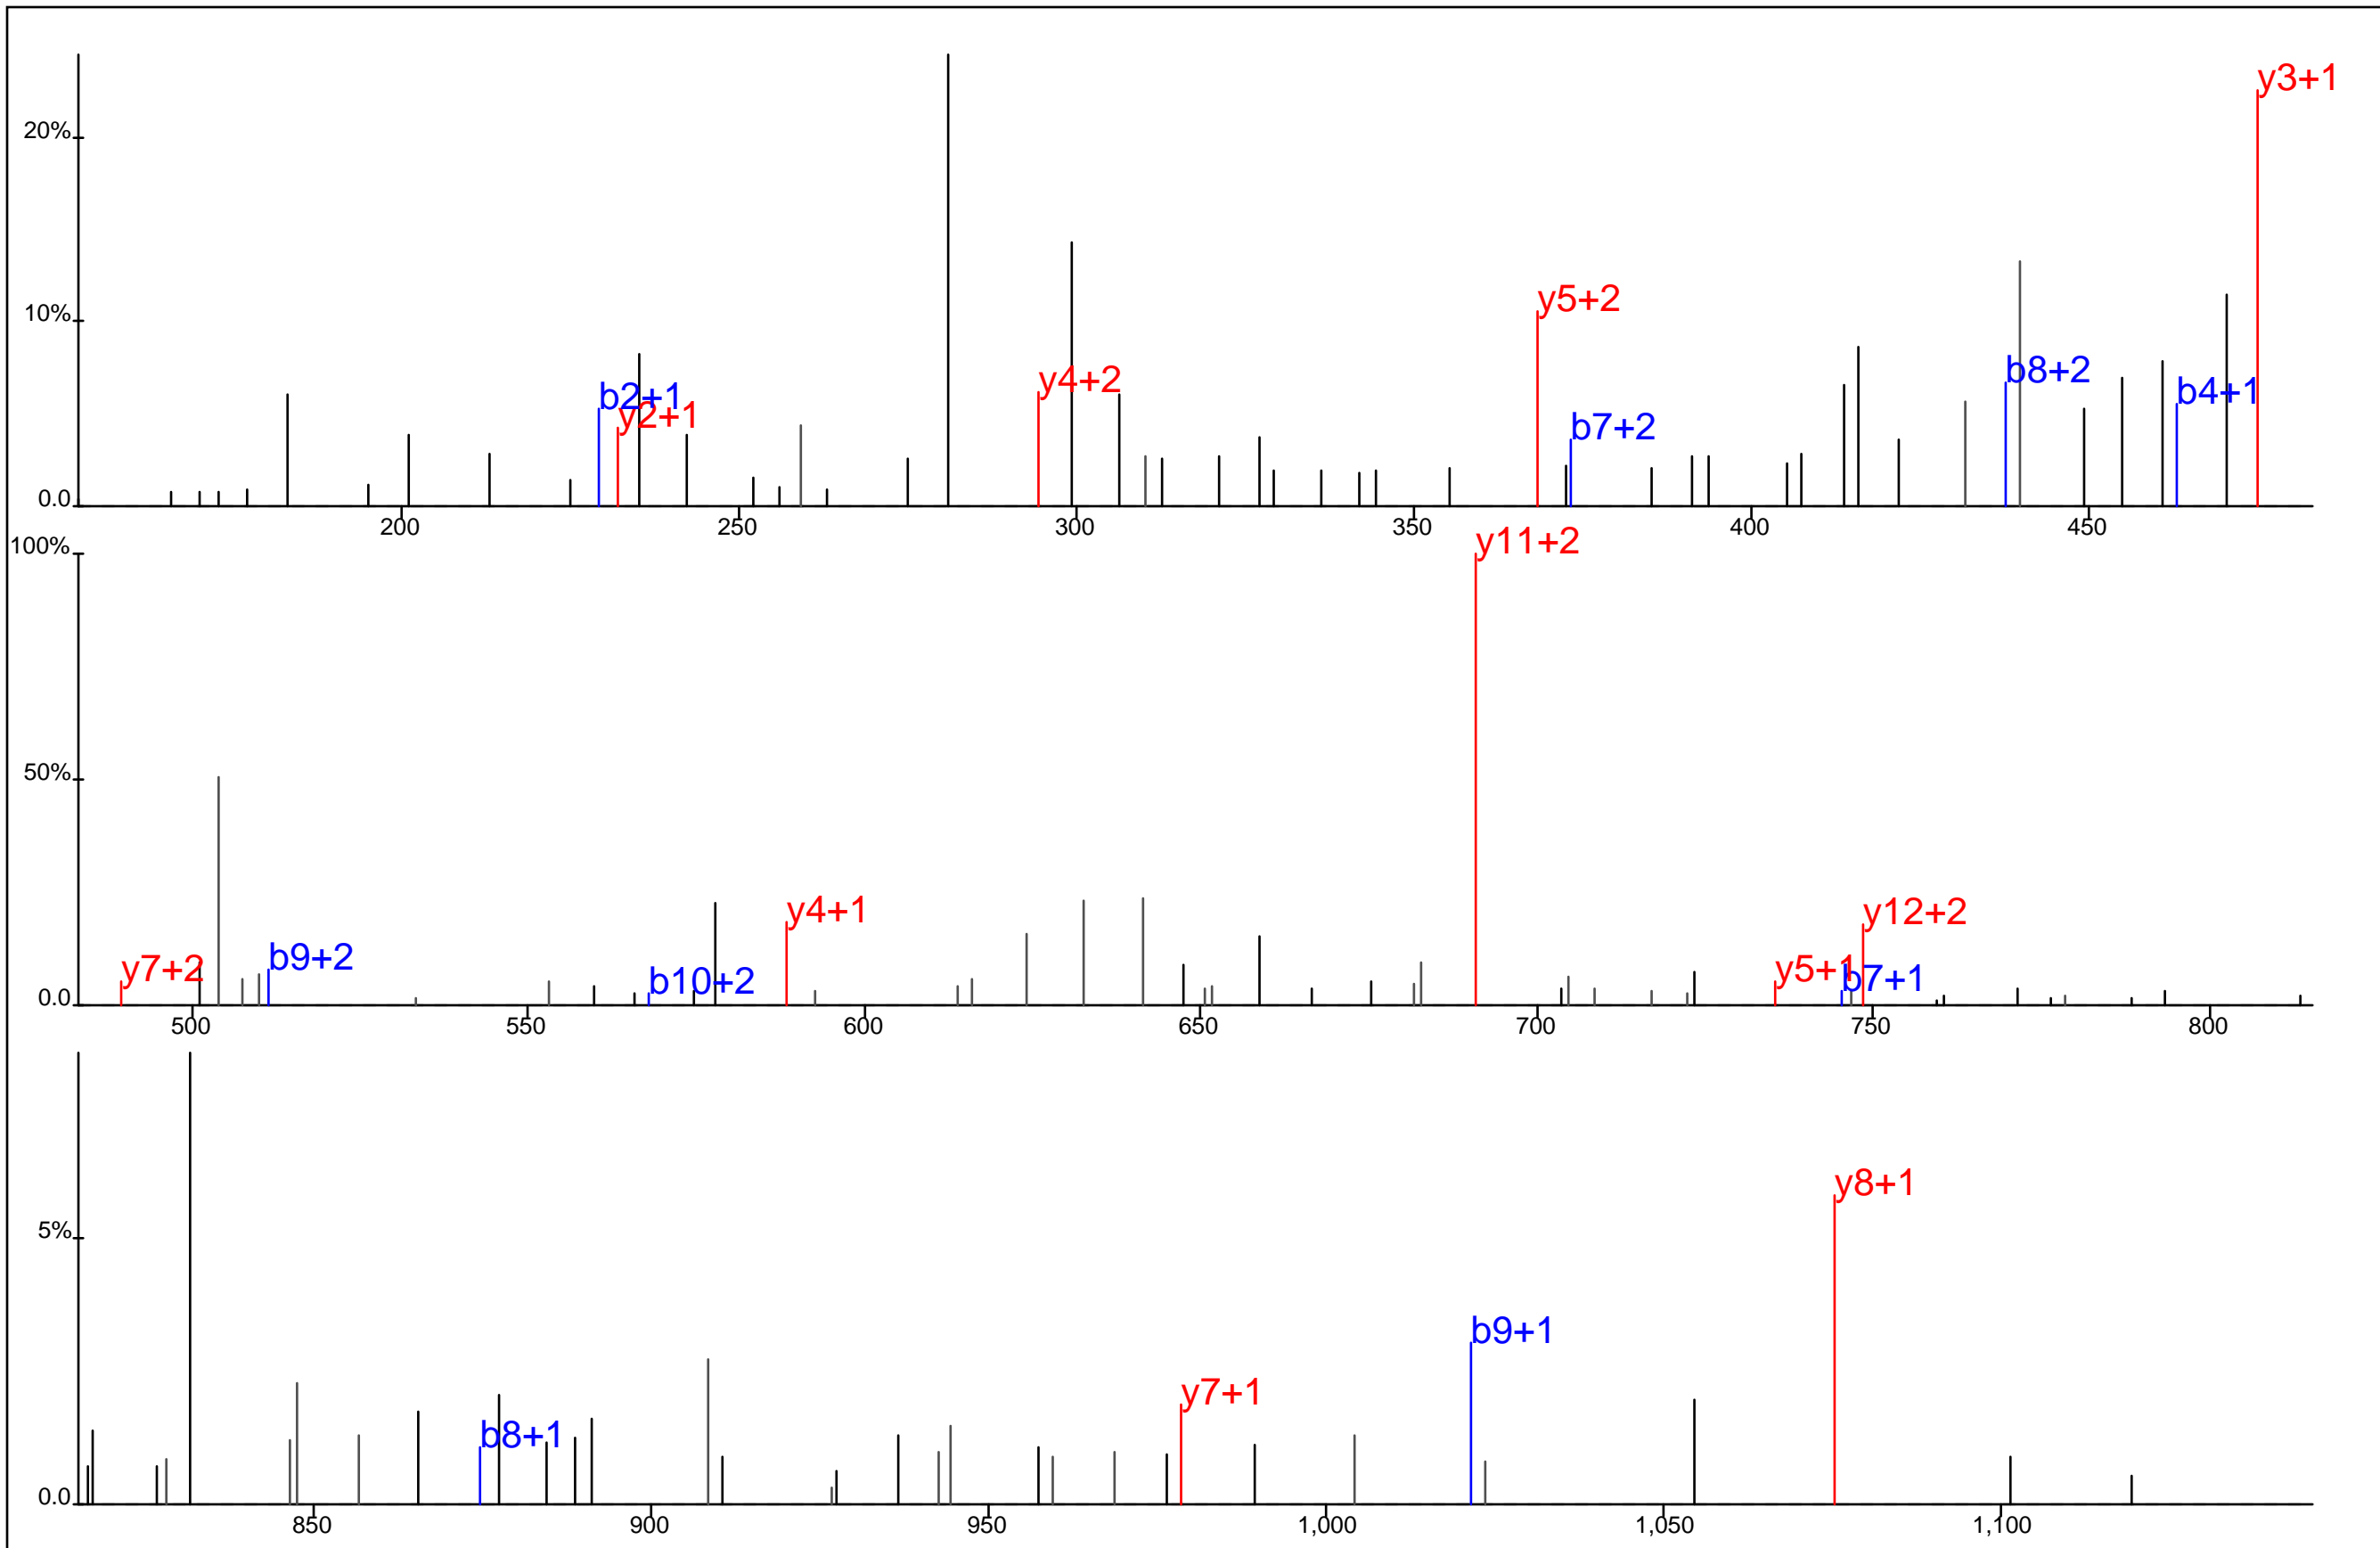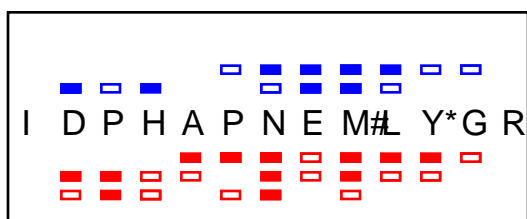

Protein Name: Lanthionine synthetase C like protein 1  
 gi Accession: 0  
 Precursor Mass: 536.8979+3  
 Delta Mass: 5.271 ppm  
 XCorr: 22.09

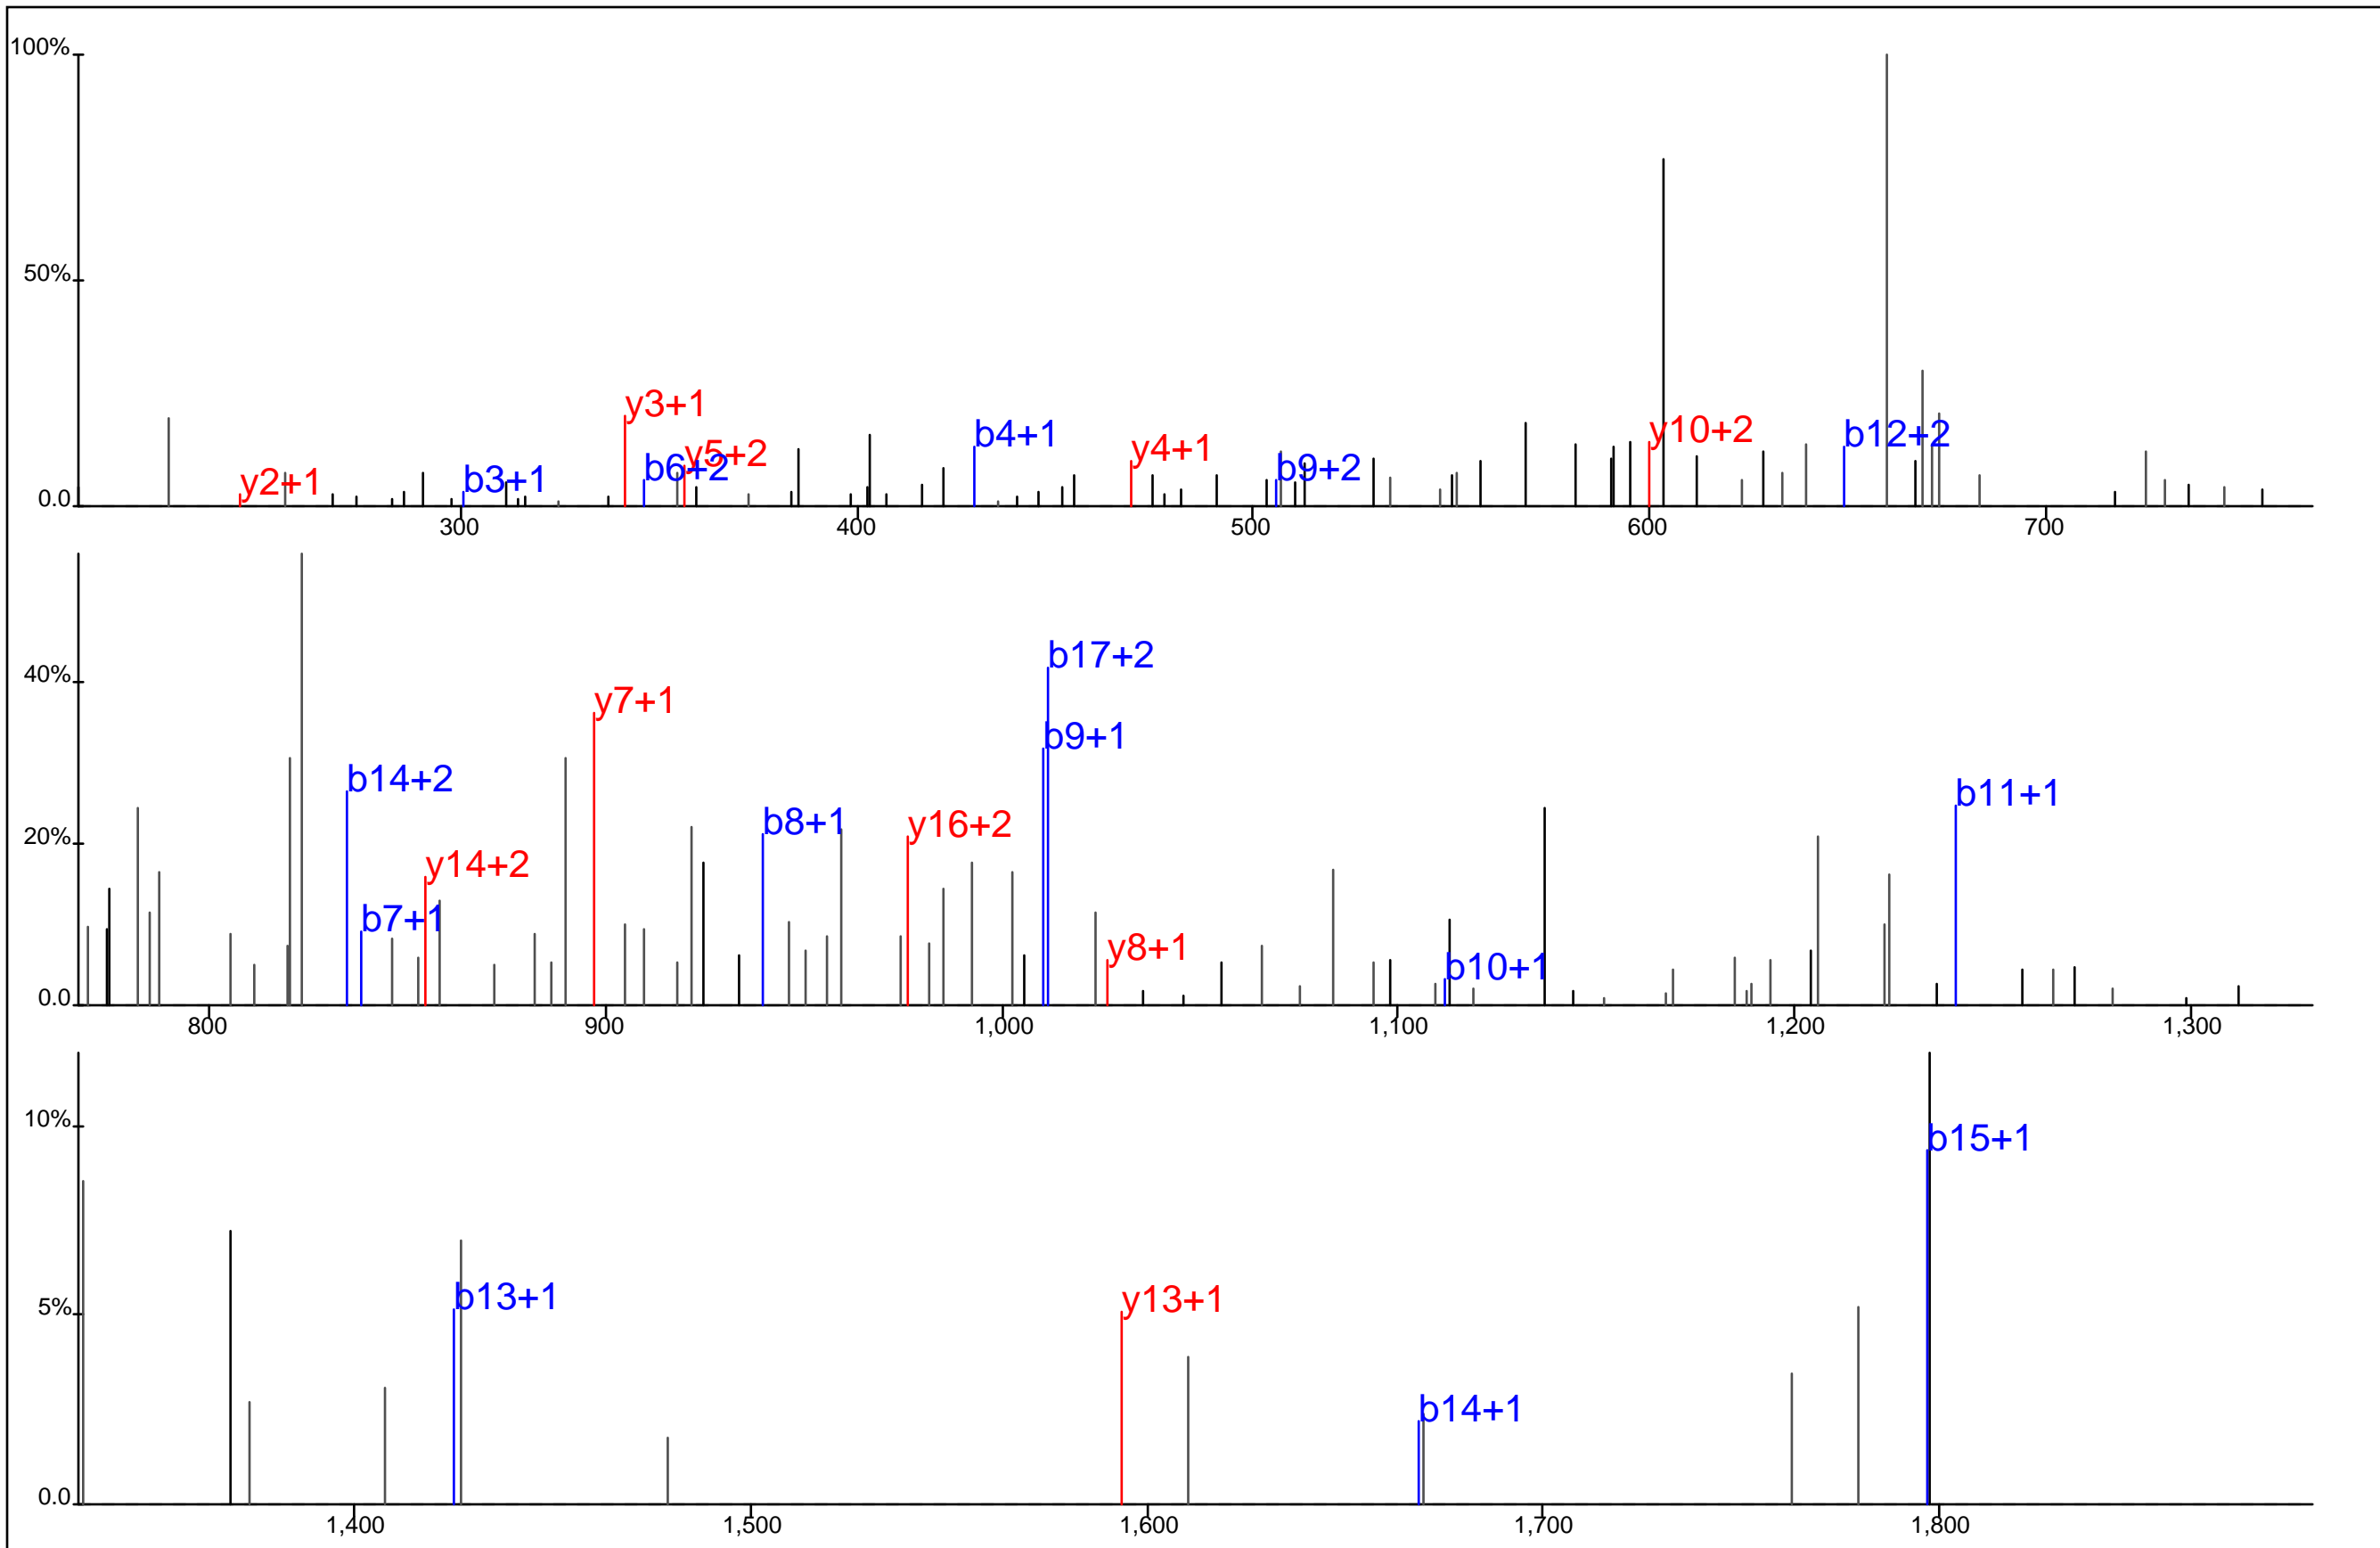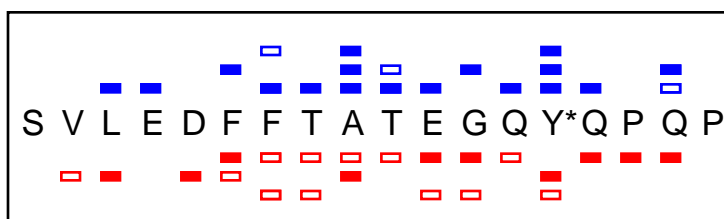

Protein Name: Lck  
 gi Accession: 0  
 Precursor Mass: 712.9785+3  
 Delta Mass: 2.262 ppm  
 XCorr: 26.92

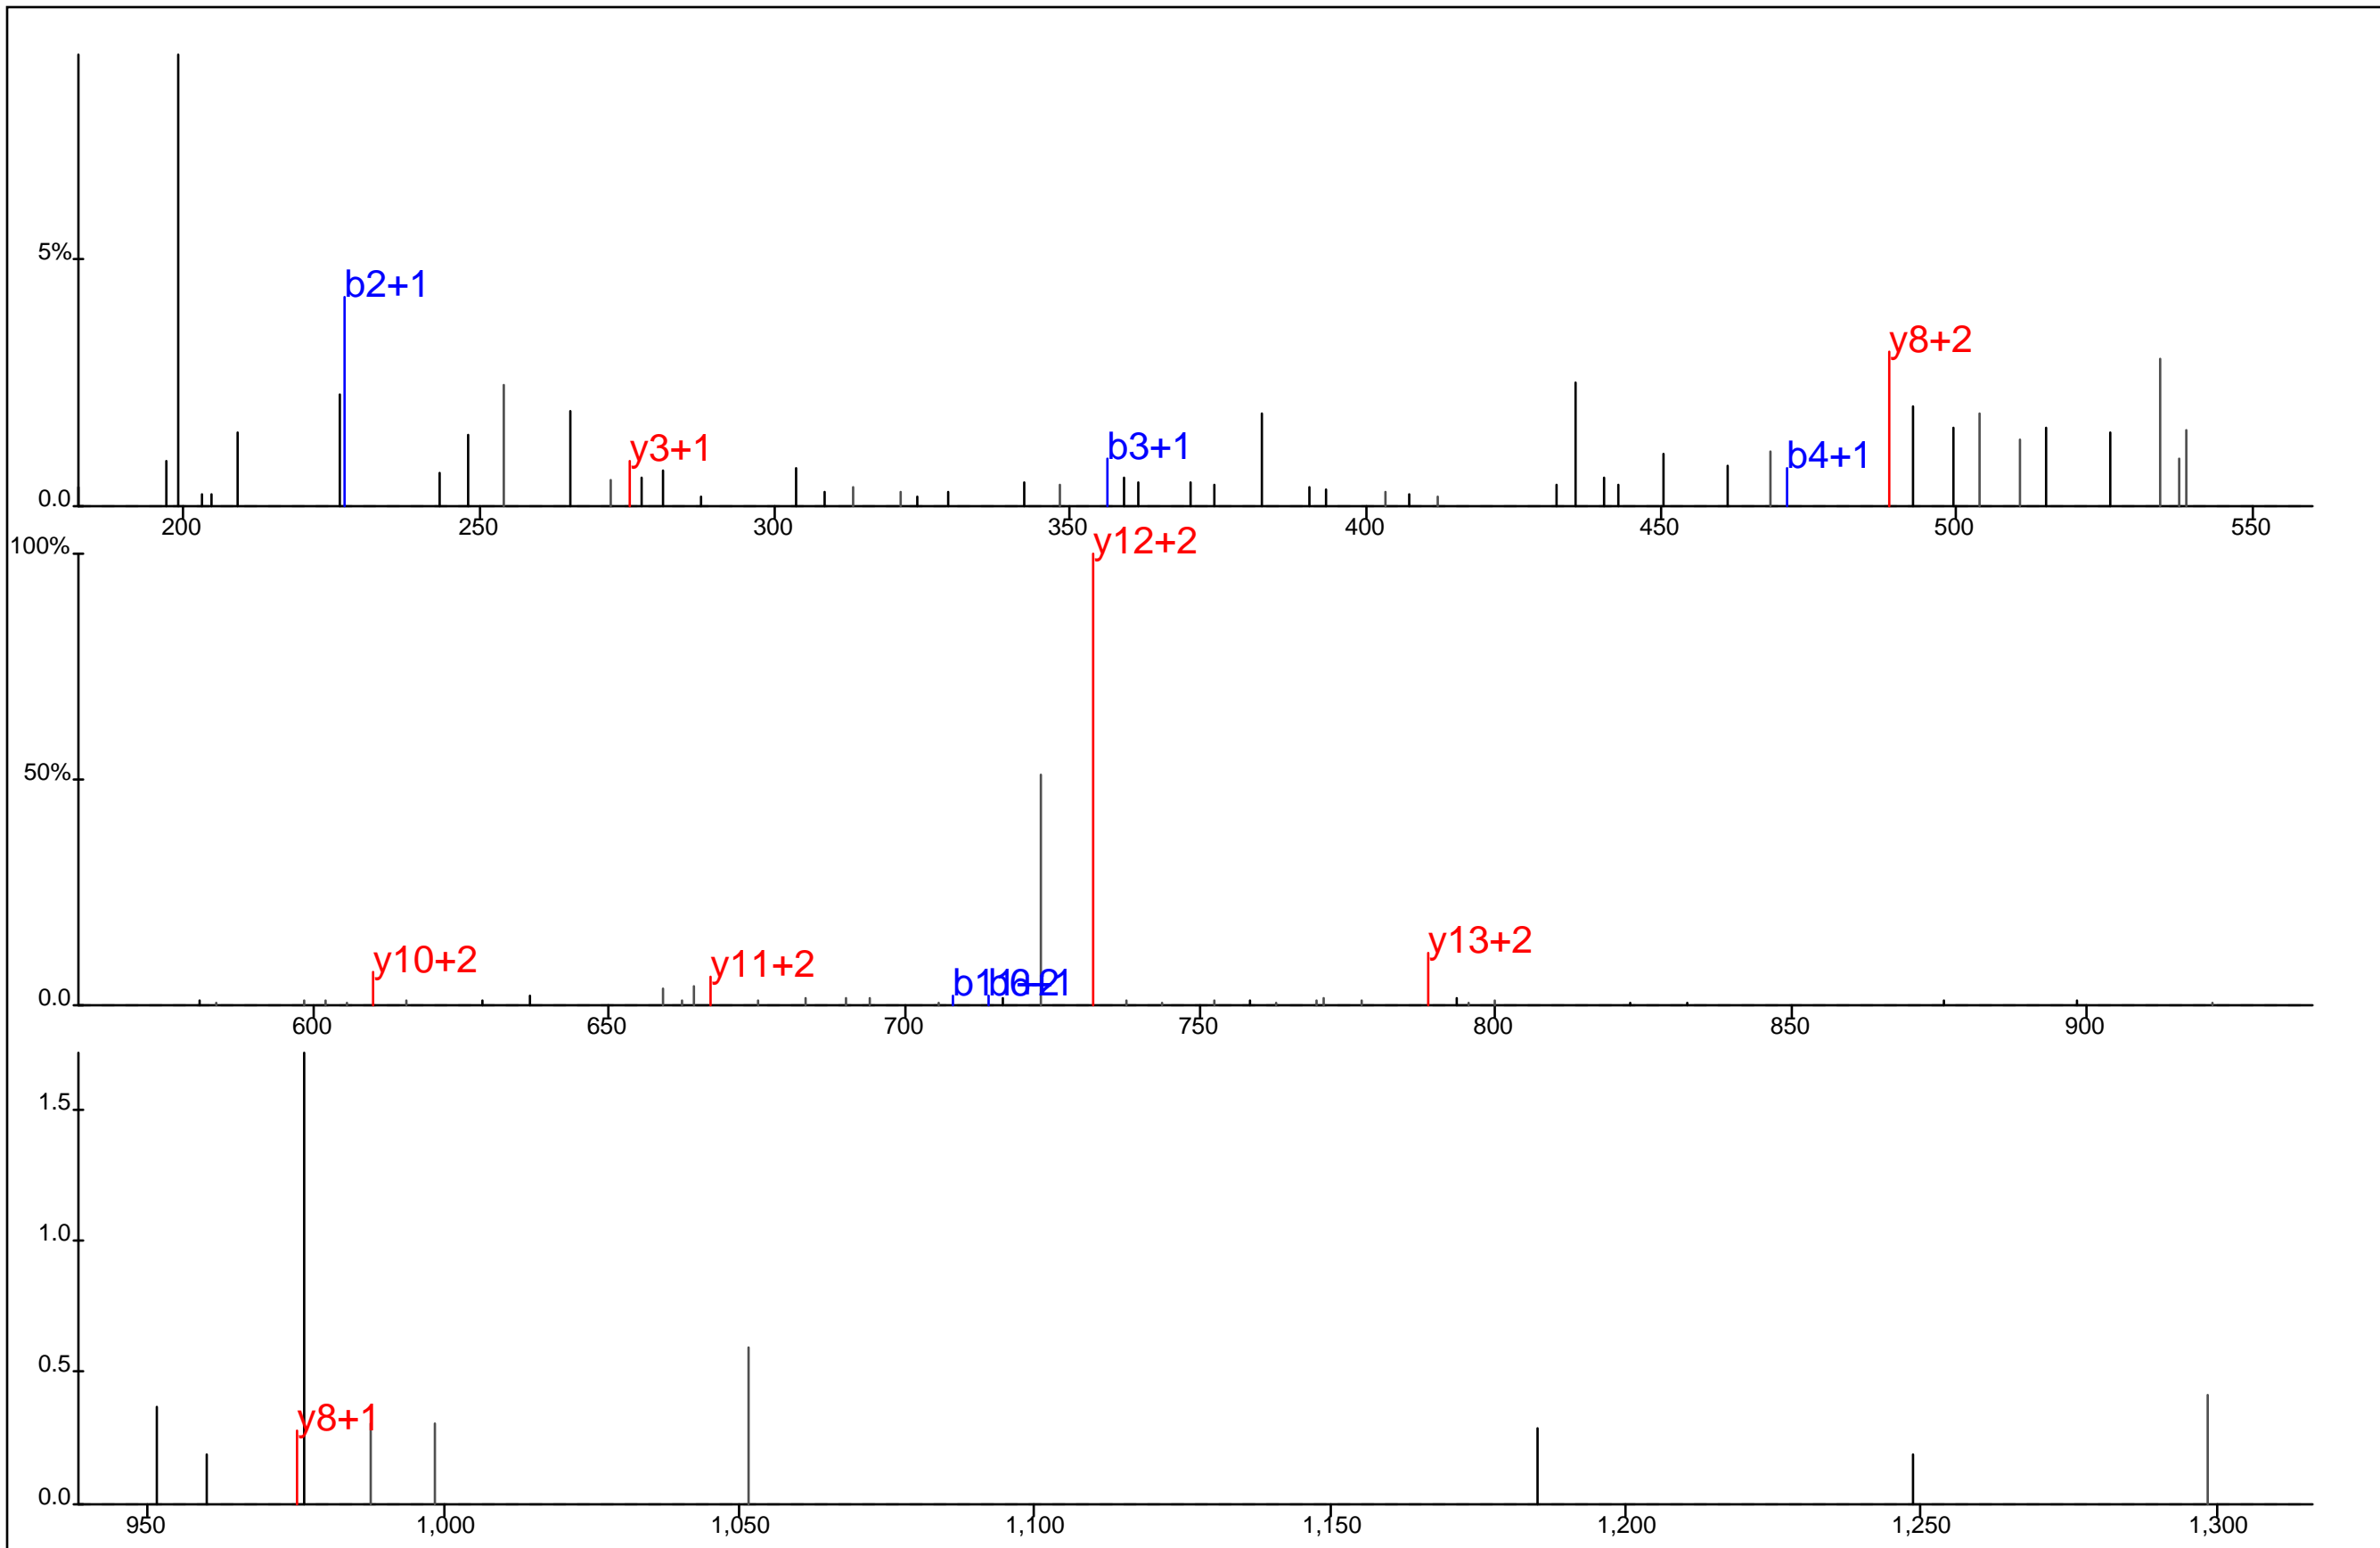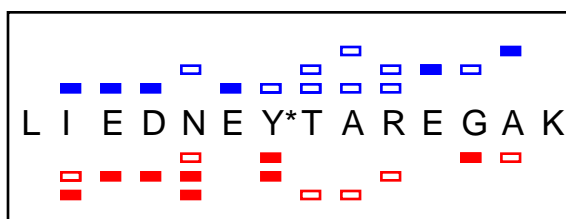

Protein Name: Lck  
 gi Accession: 0  
 Precursor Mass: 563.5885+3  
 Delta Mass: 1.019 ppm  
 XCorr: 20.15

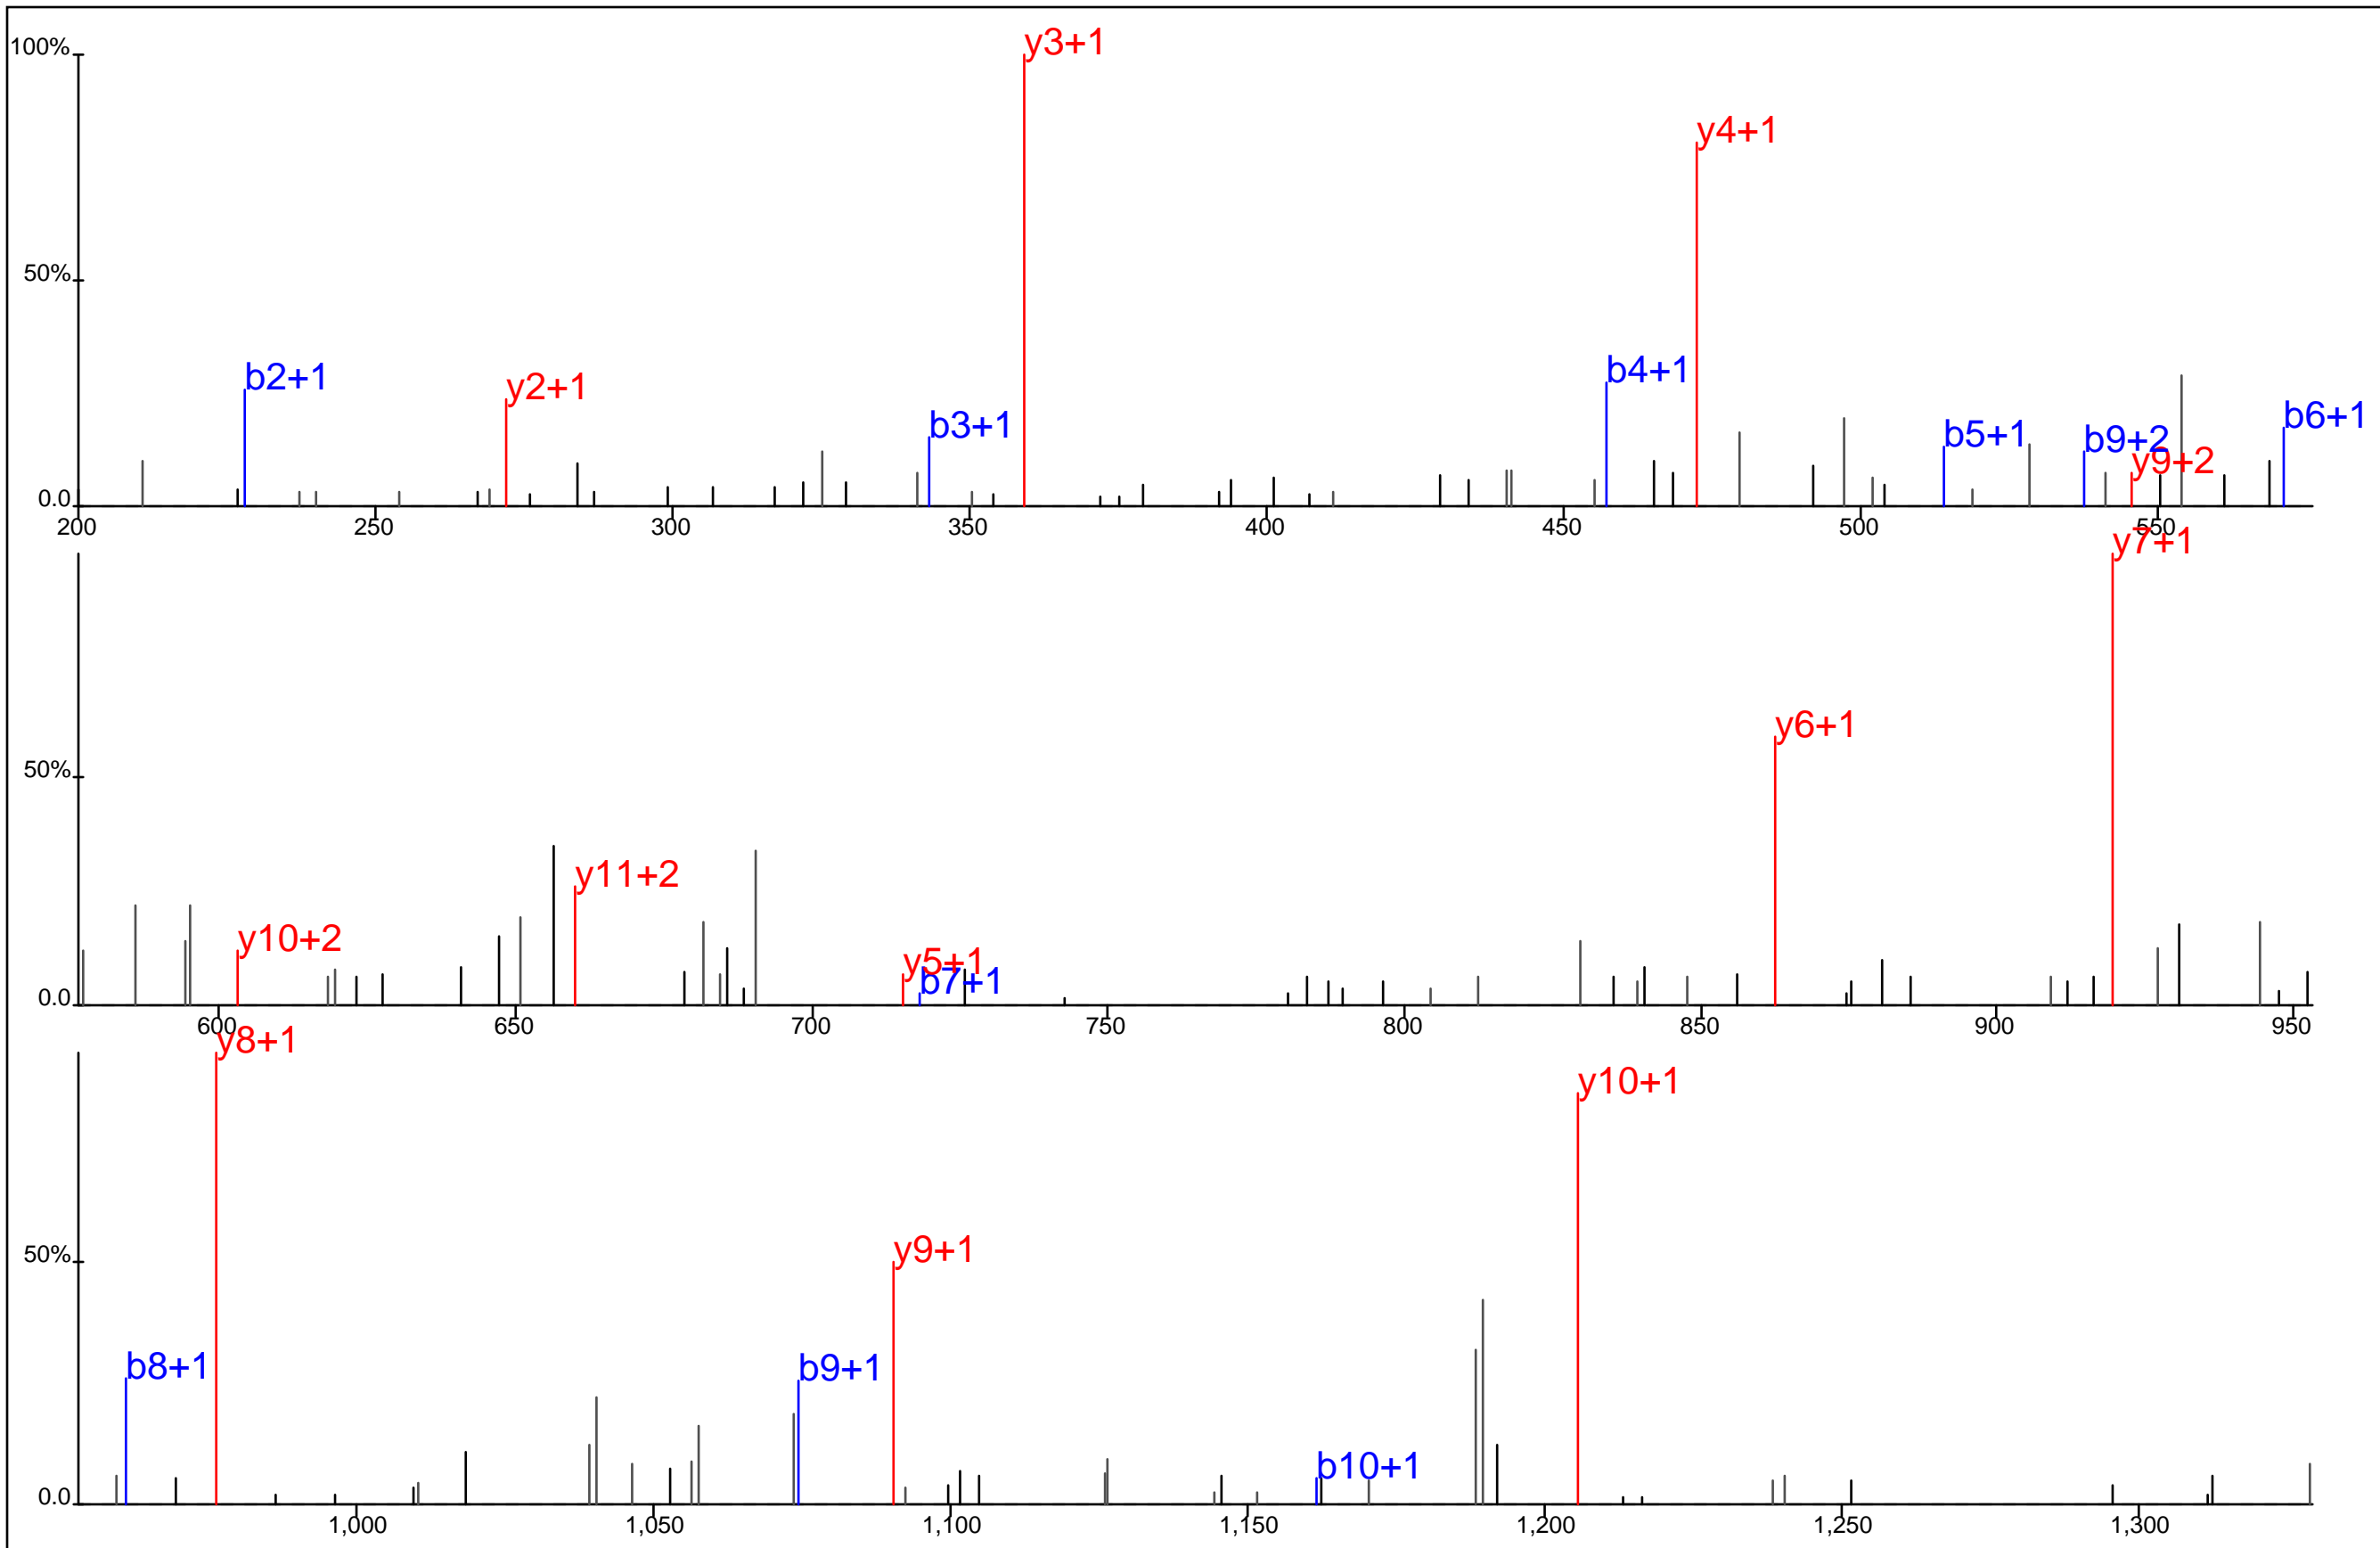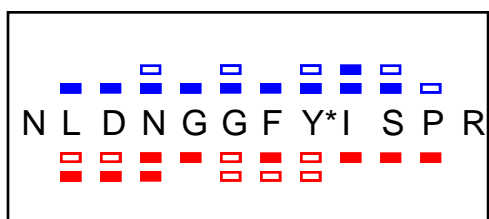

Protein Name: Lck  
 gi Accession: 0  
 Precursor Mass: 716.8181+2  
 Delta Mass: 2.305 ppm  
 XCorr: 70.46



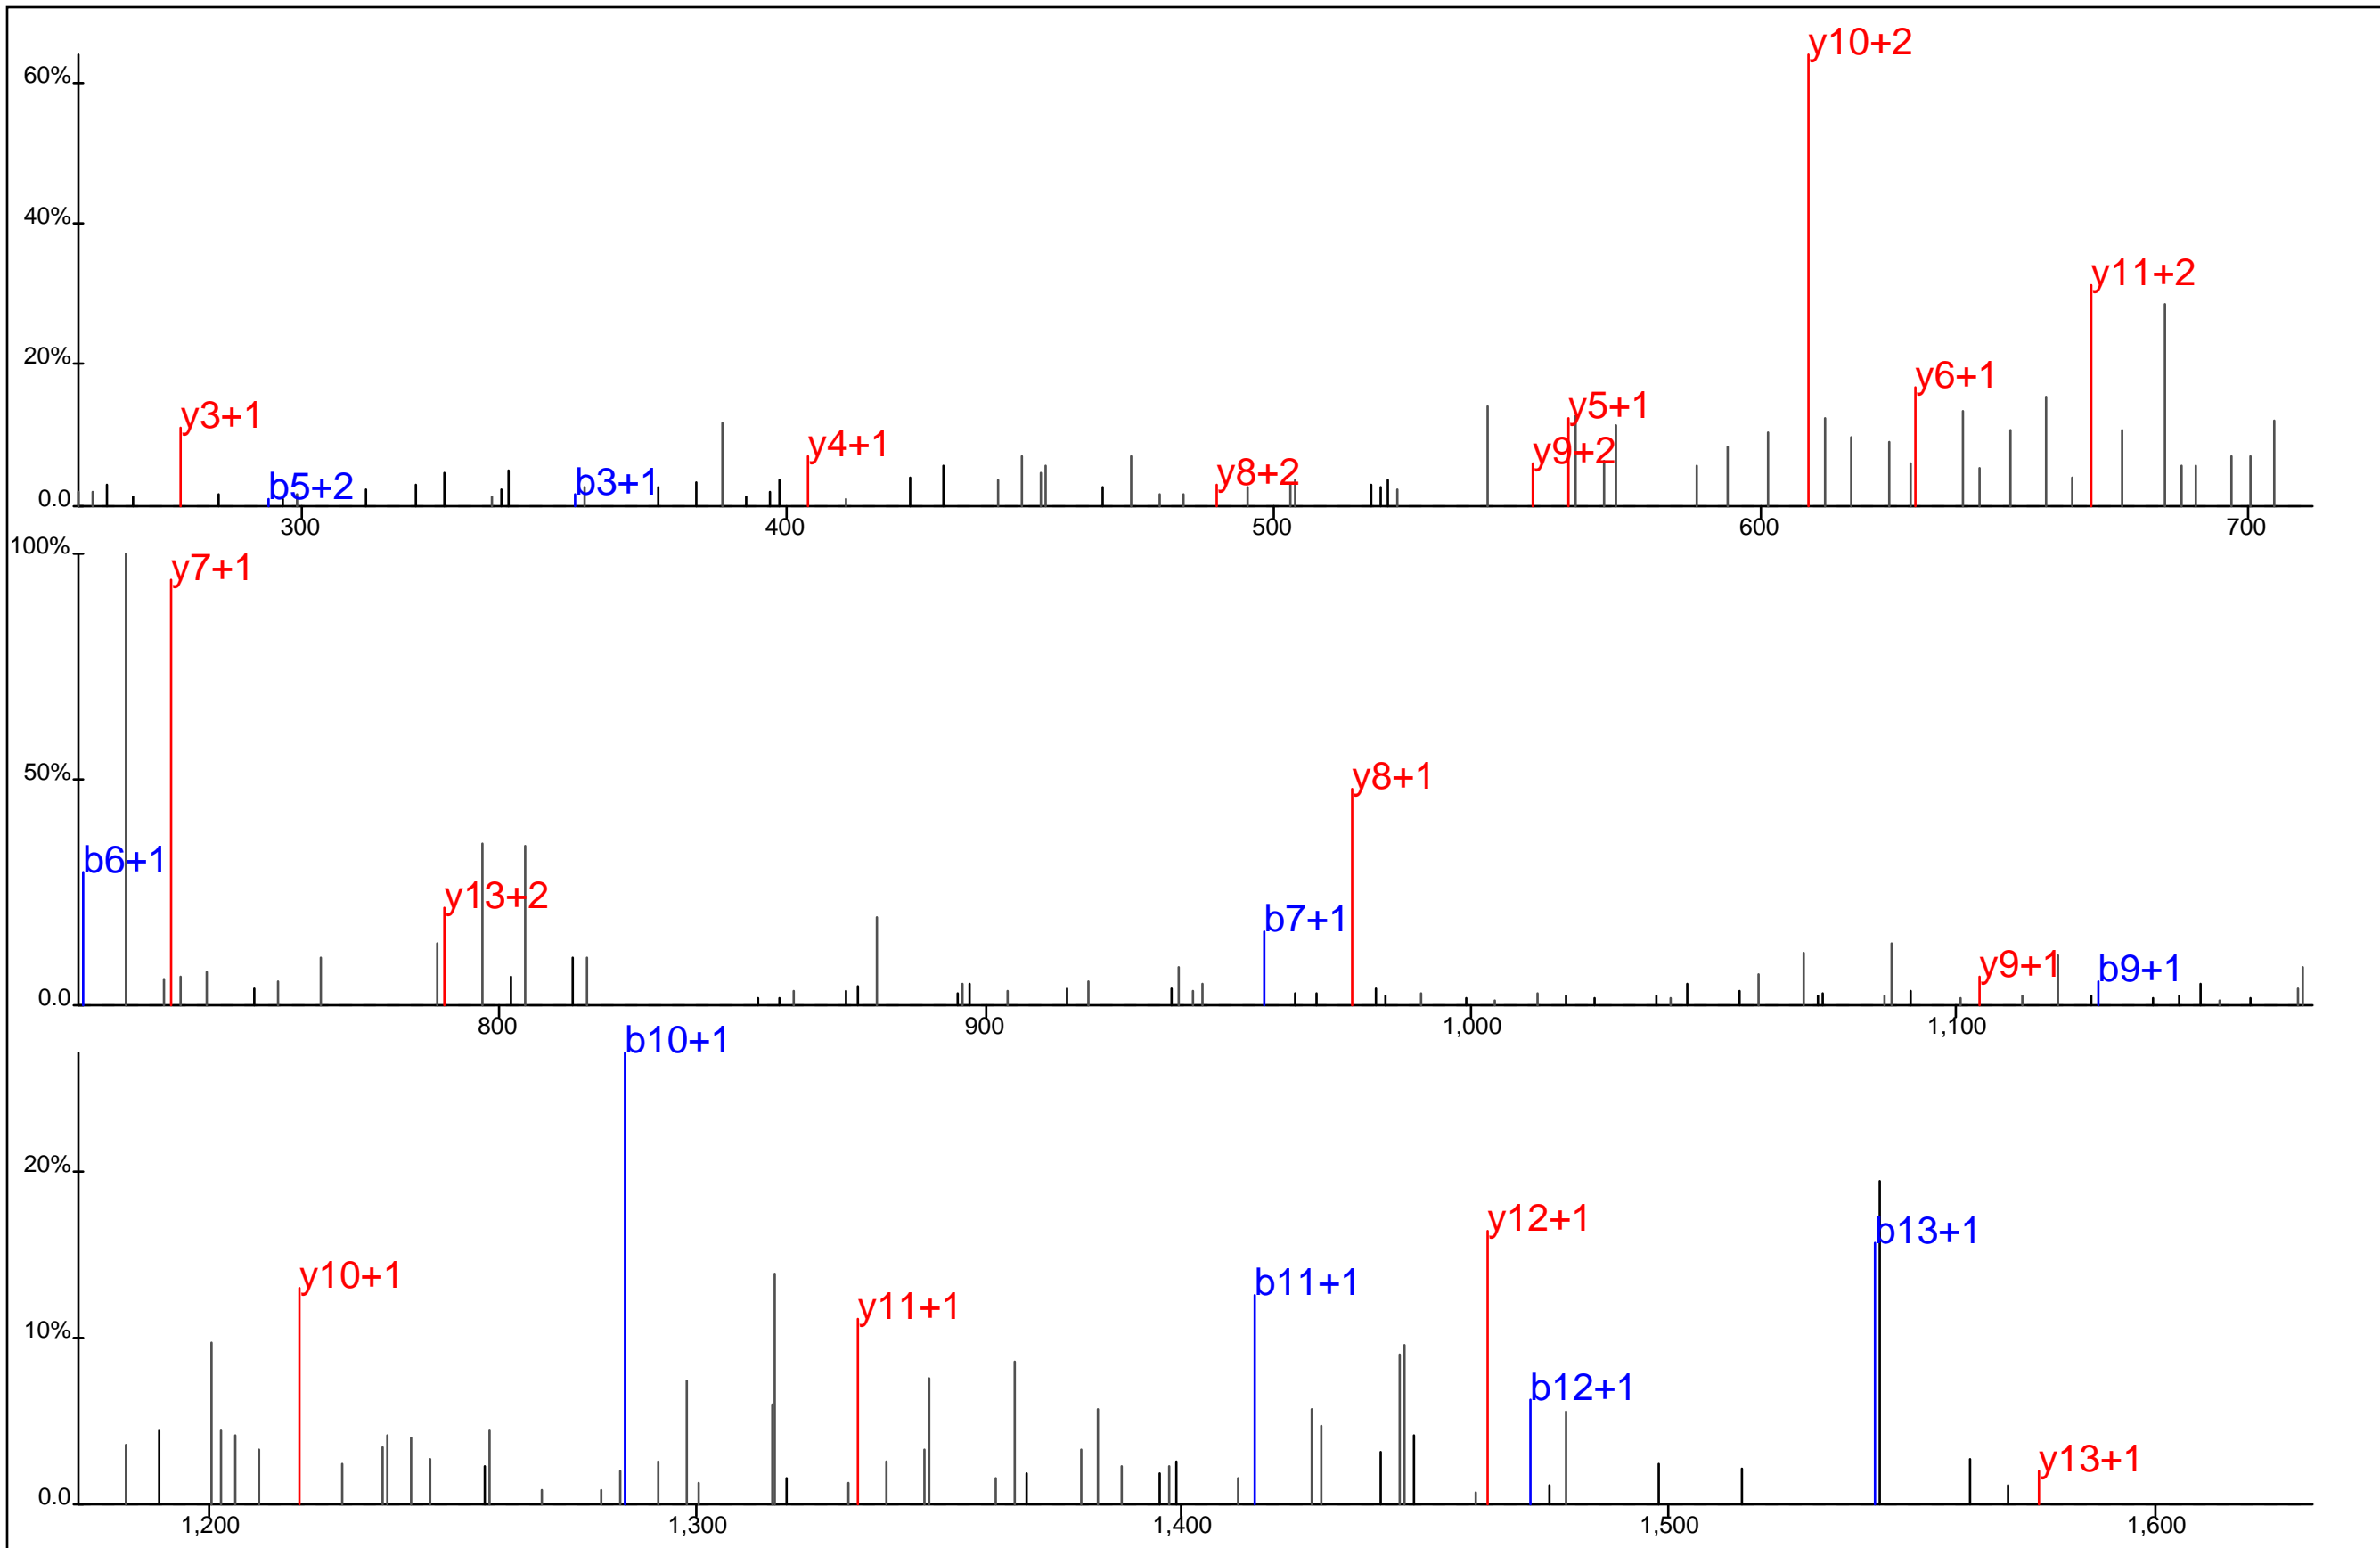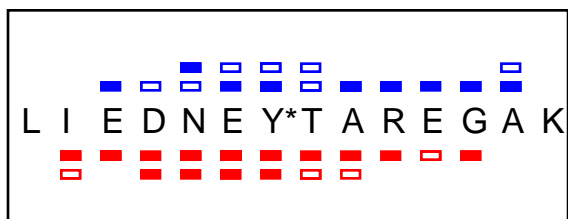

Protein Name: Lck  
 gi Accession: 0  
 Precursor Mass: 844.8814+2  
 Delta Mass: 1.699 ppm  
 XCorr: 56.64

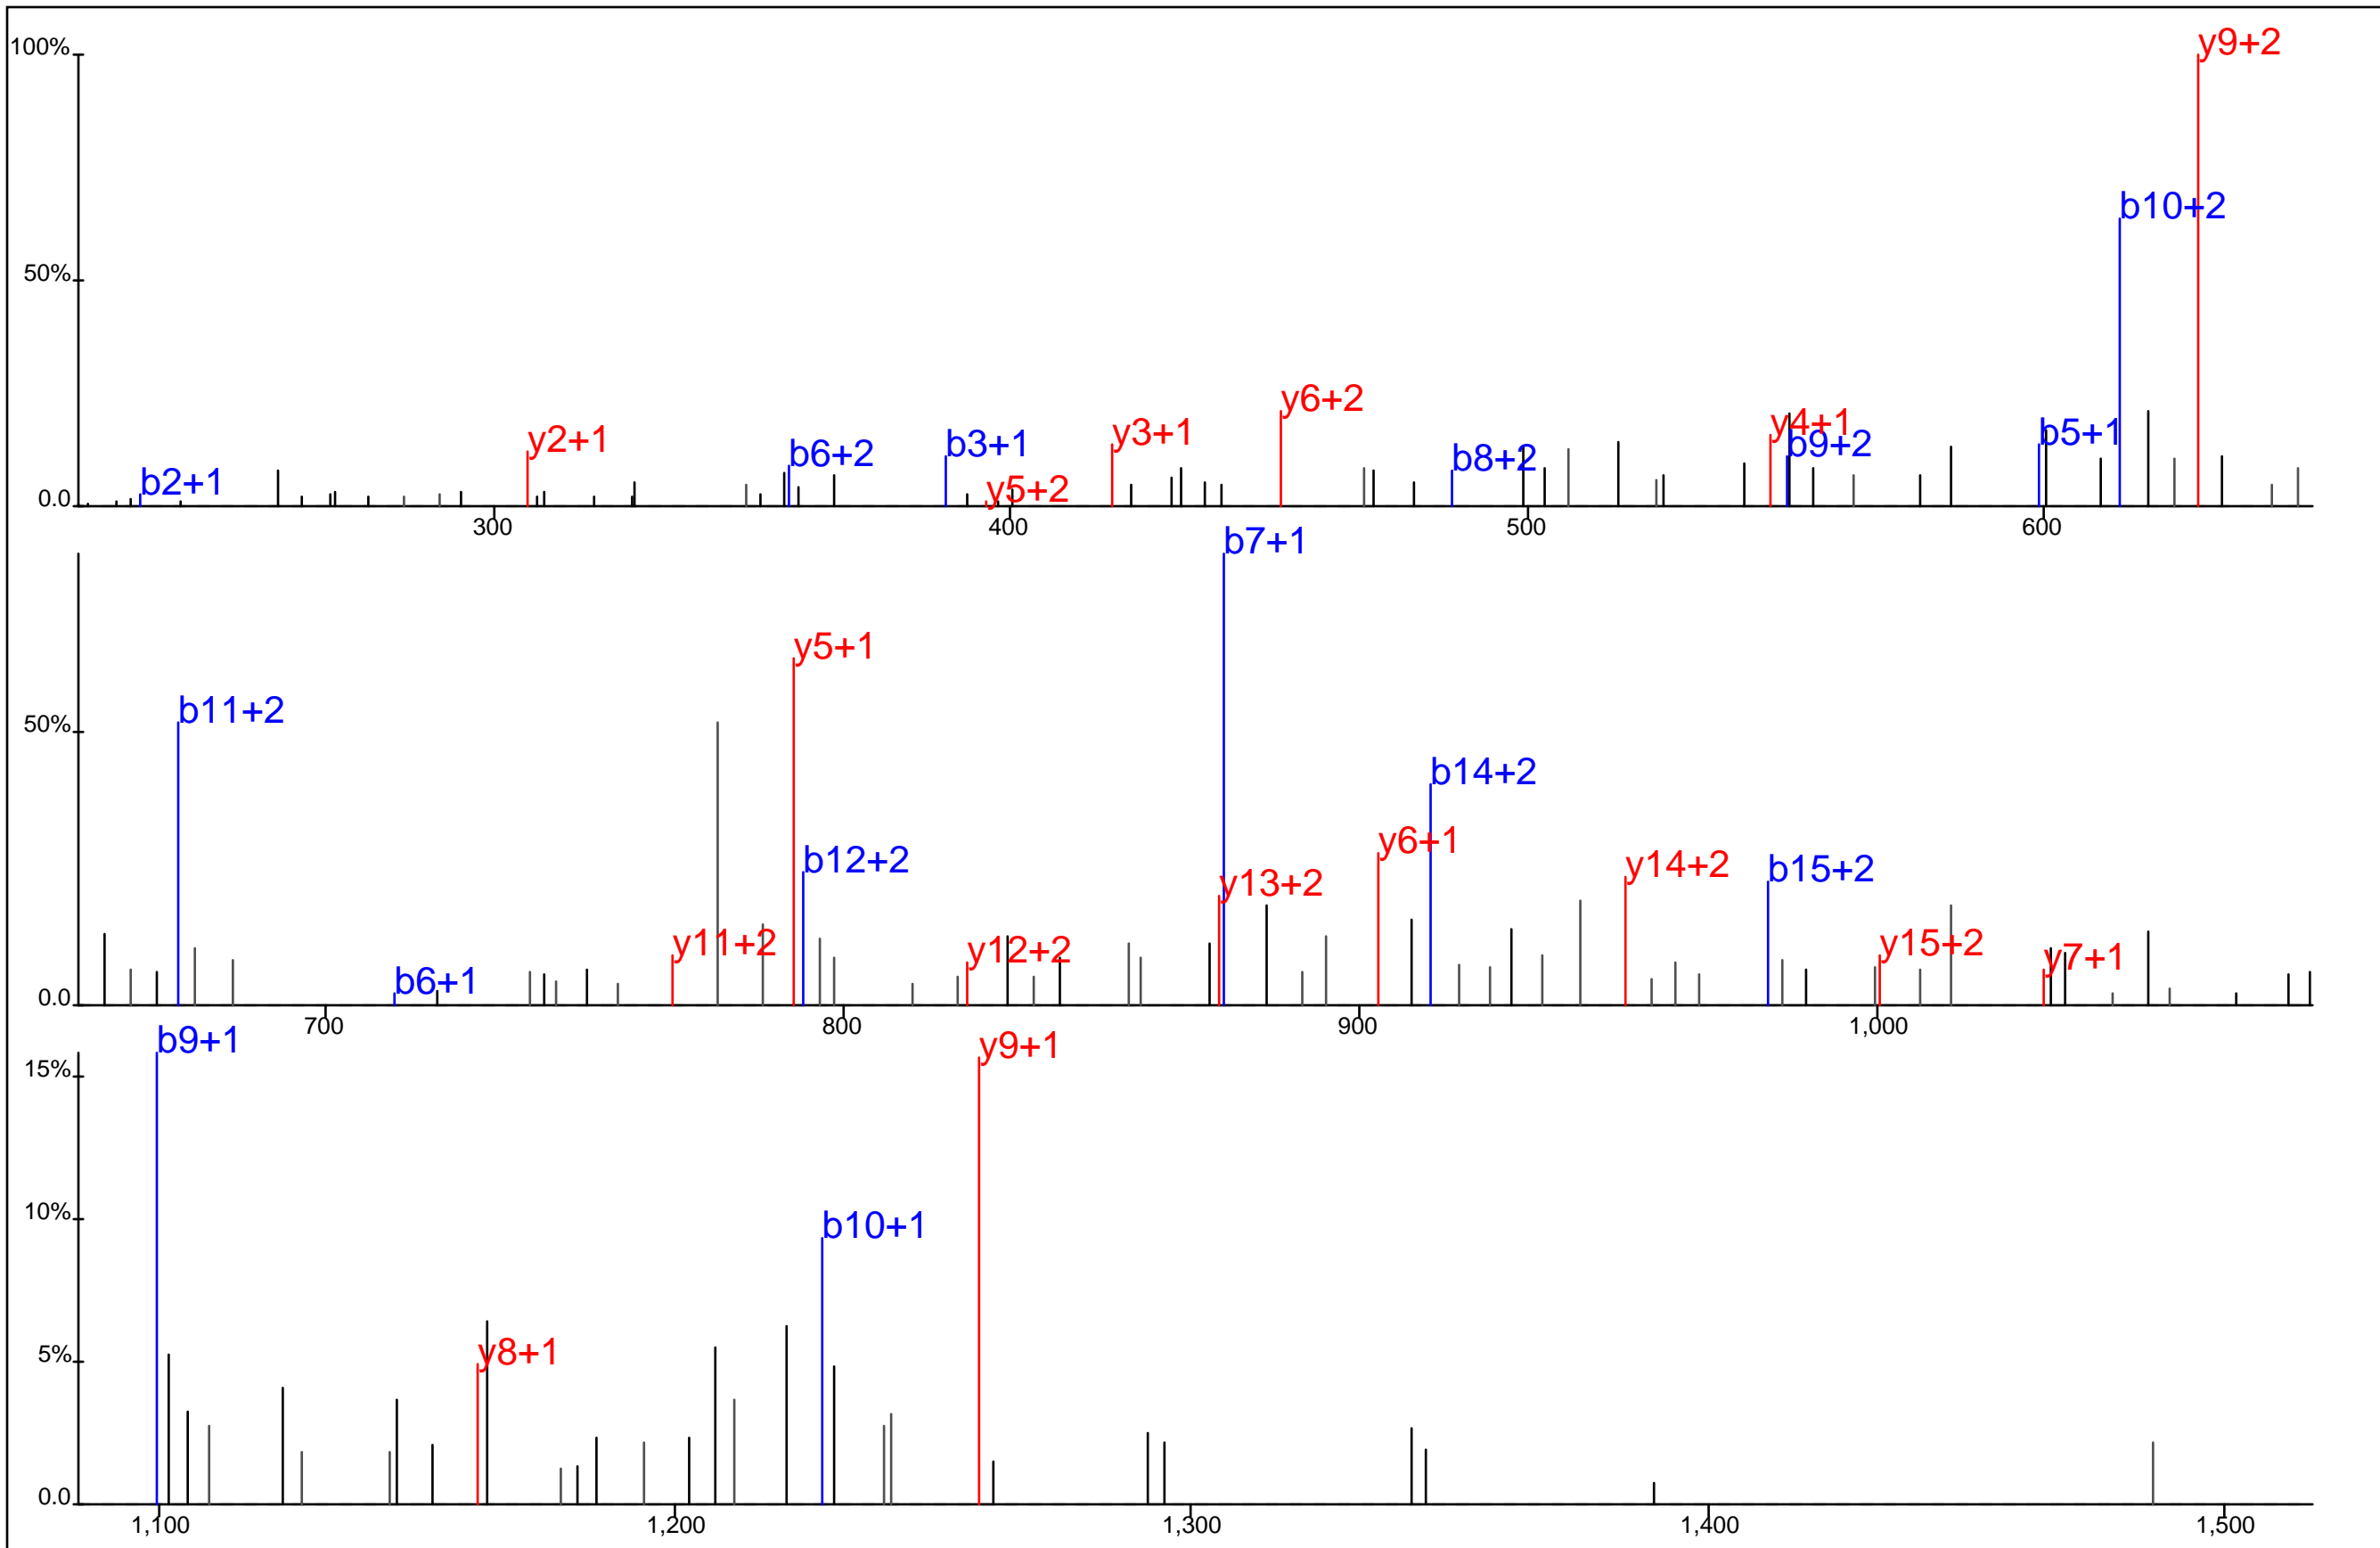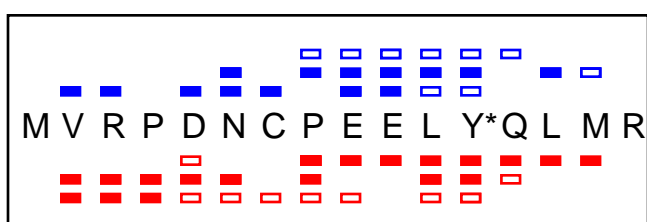

Protein Name: Lck  
 gi Accession: 0  
 Precursor Mass: 710.9779+3  
 Delta Mass: 1.014 ppm  
 XCorr: 34.91

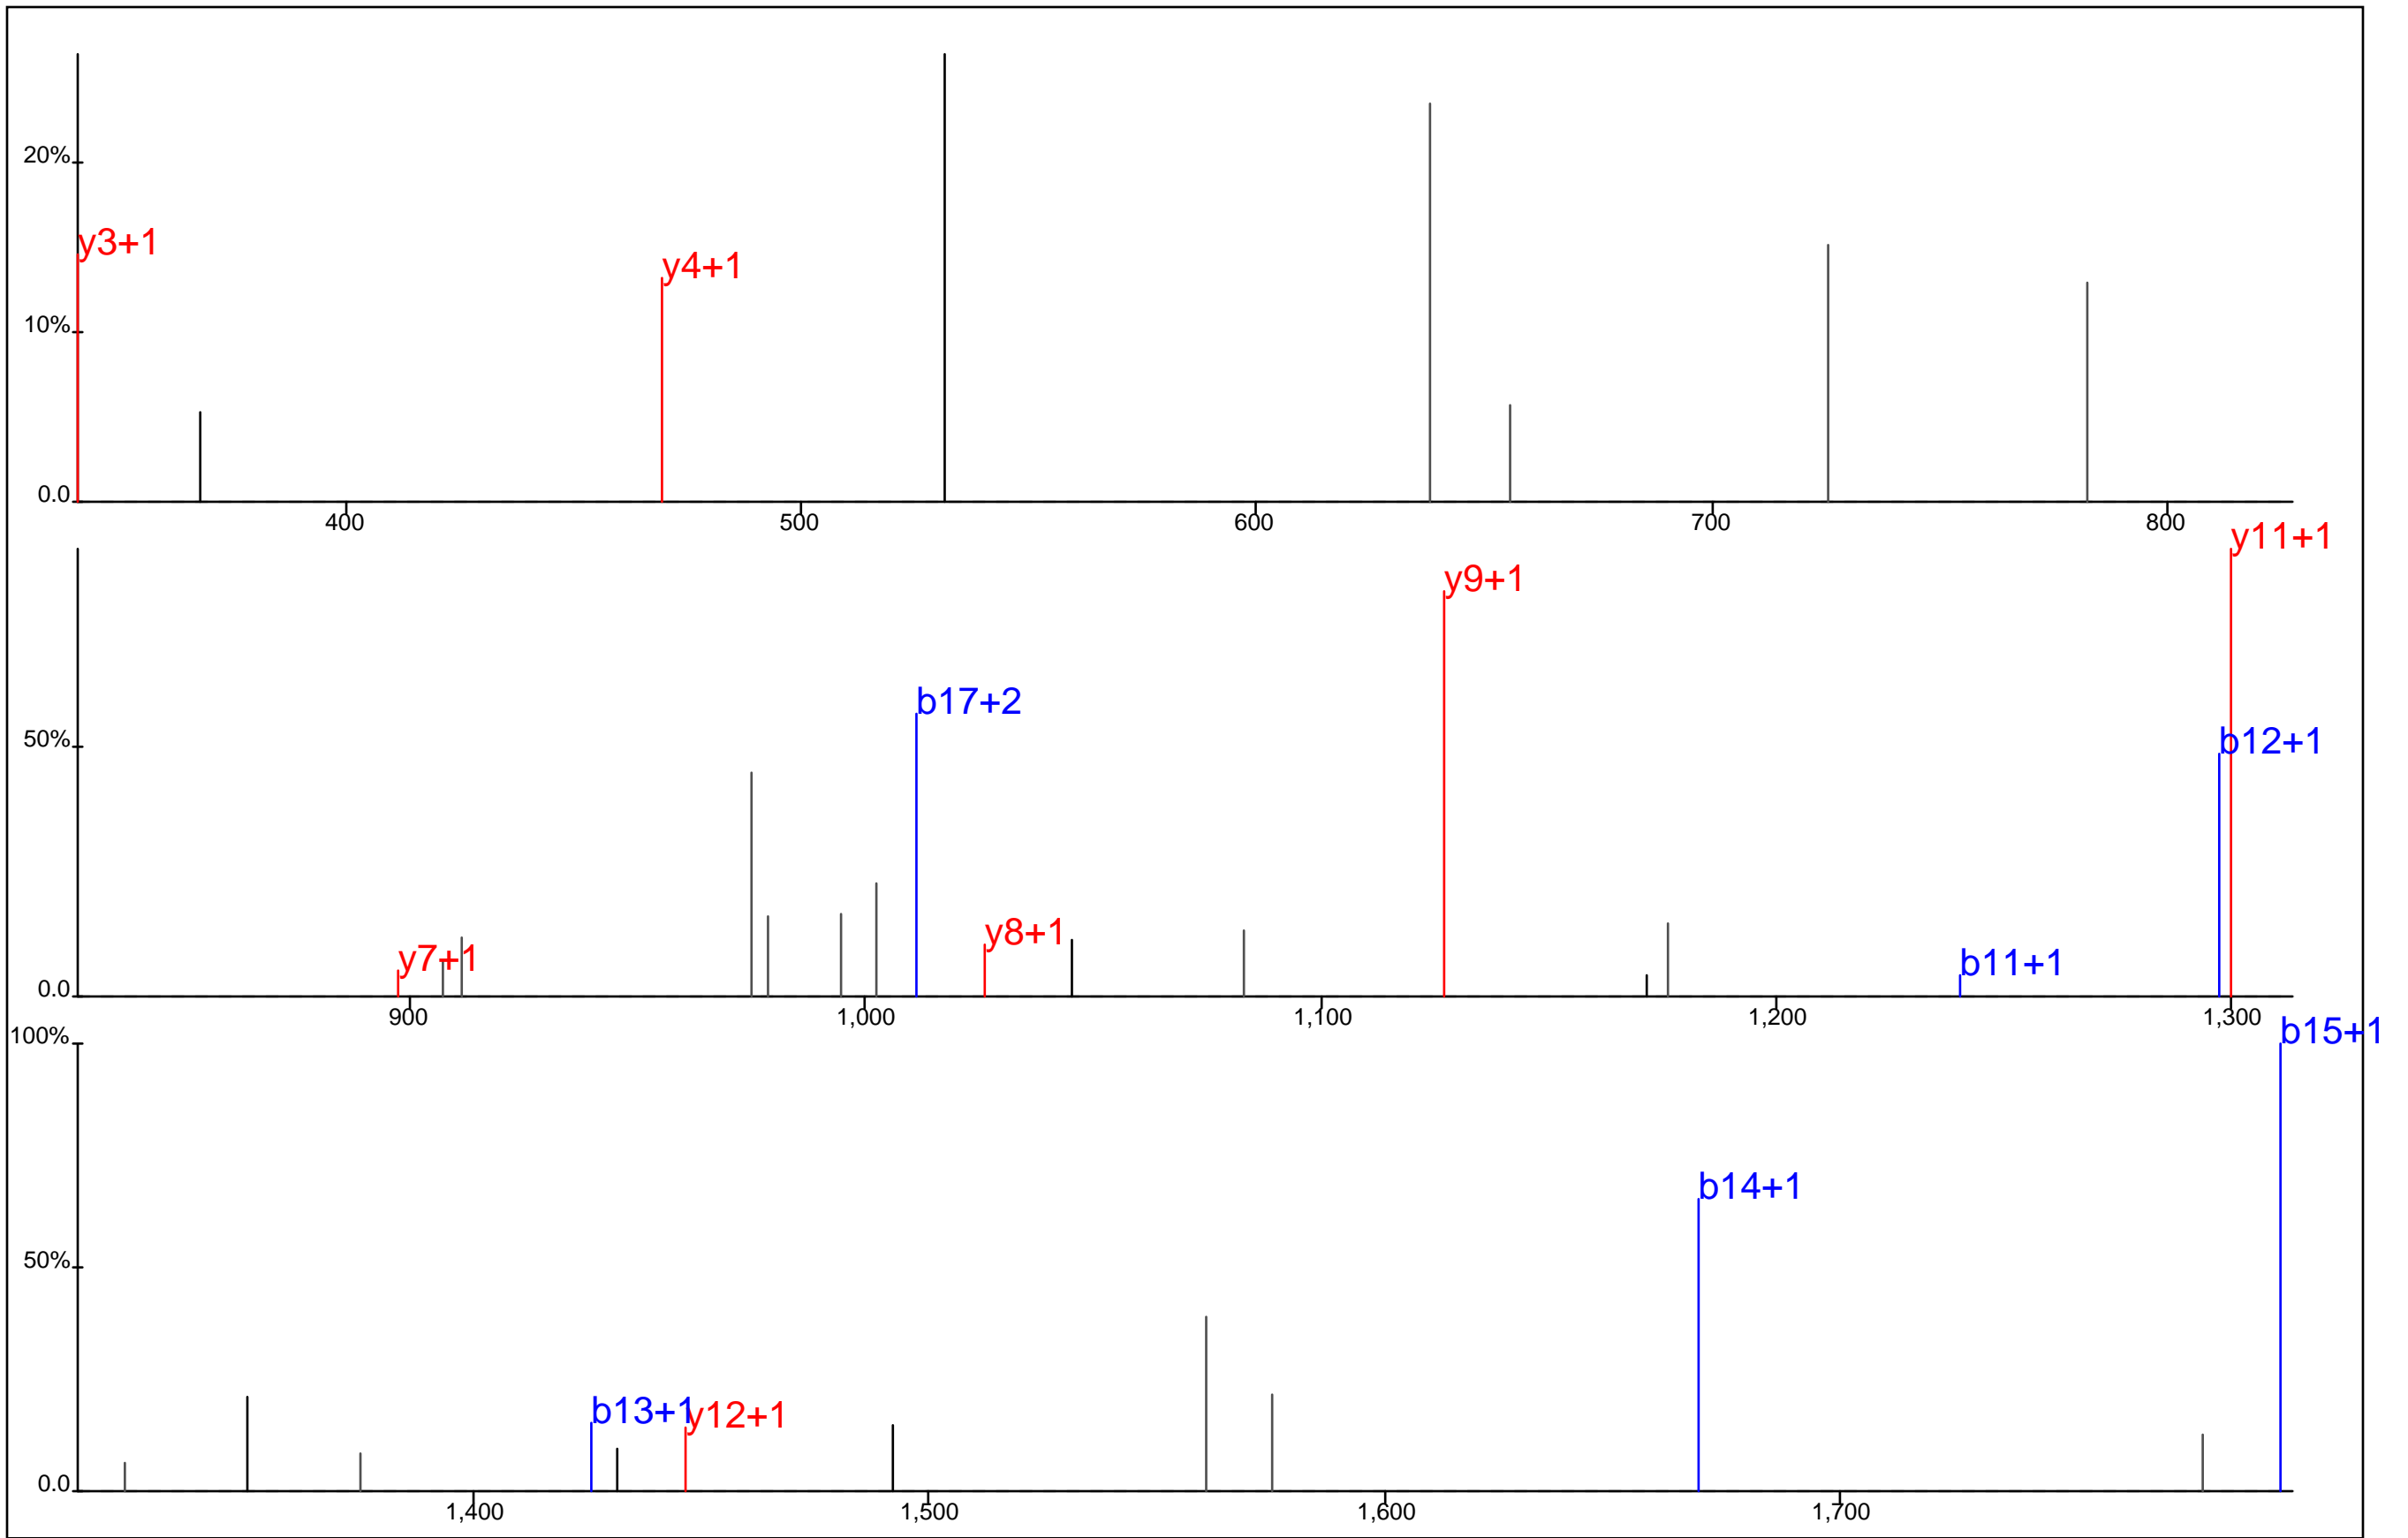

S V L E D F F T A T E G Q Y\* Q P Q P

Red dashed boxes highlight the following residues: F, F, T, A, T, E, G, Q, Y, Q, P.

Protein Name: Lck  
 gi Accession: 0  
 Precursor Mass: 1,068.9612+2  
 Delta Mass: 0.503 ppm  
 XCorr: 27.01

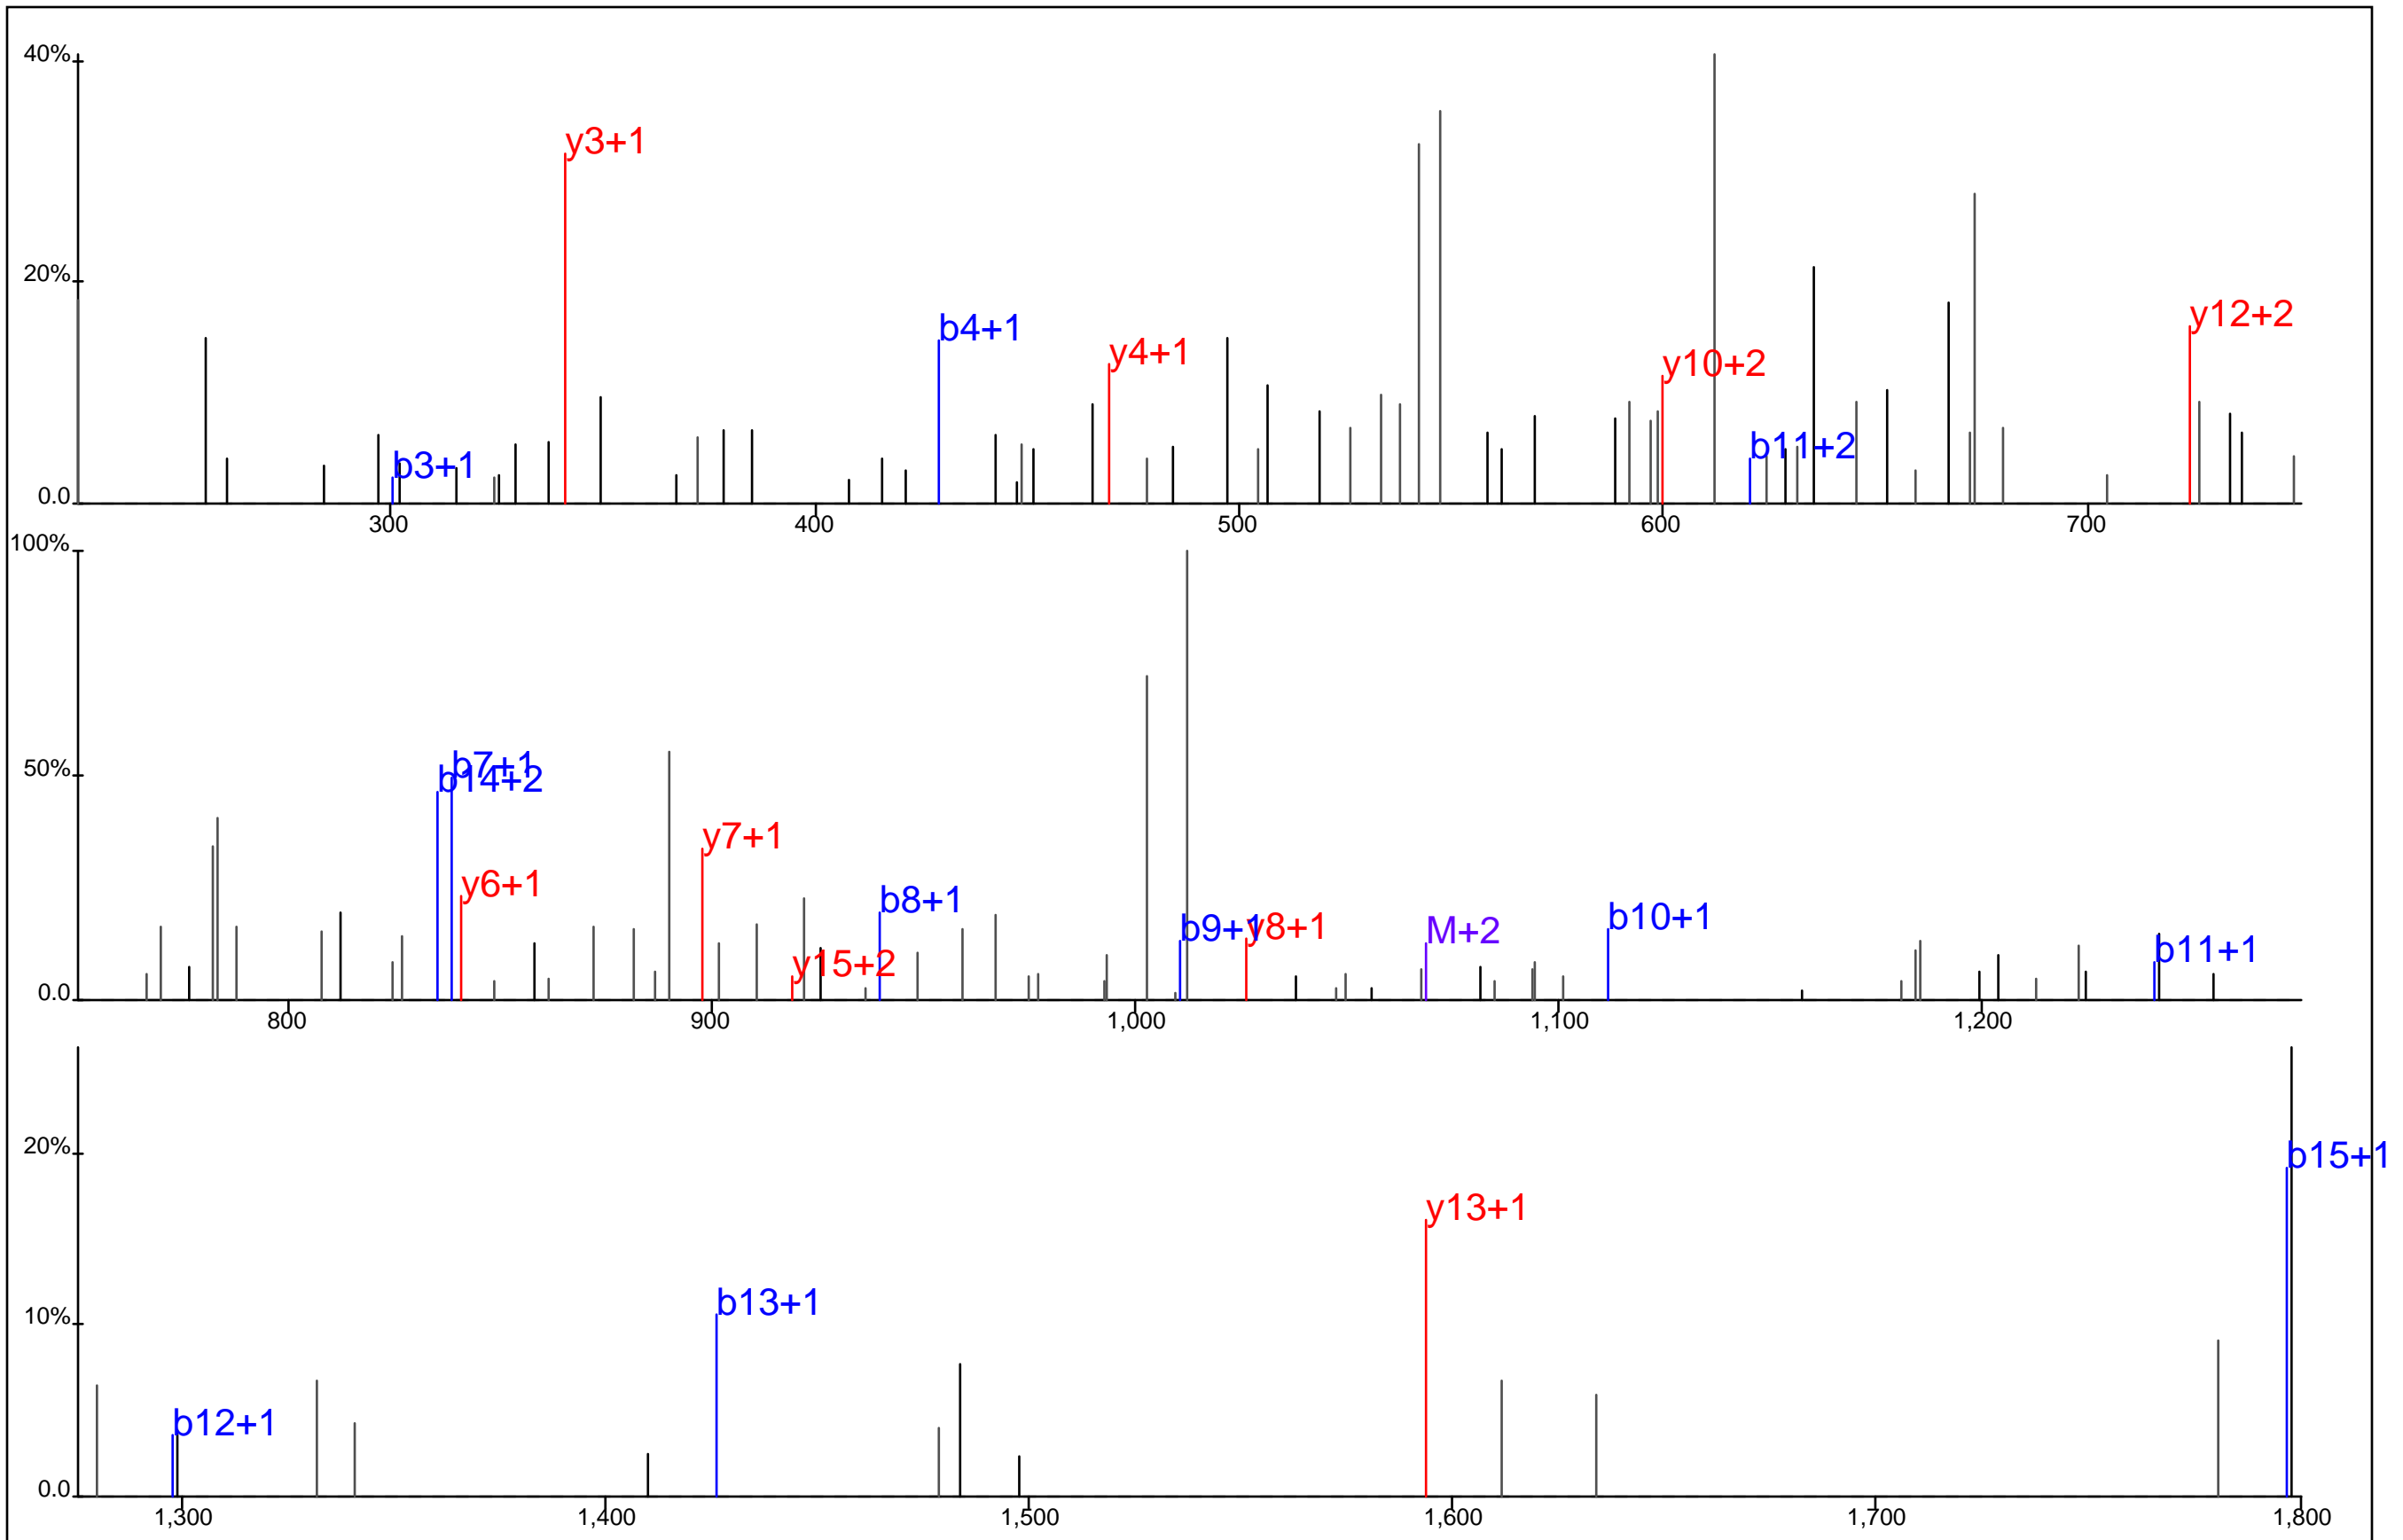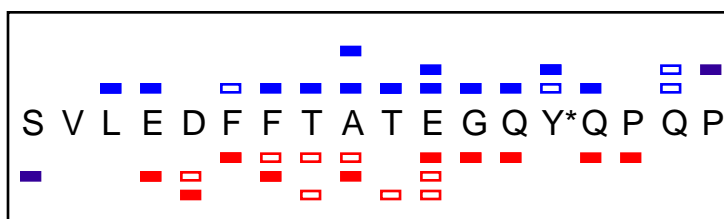

Protein Name: Lck  
 gi Accession: 0  
 Precursor Mass: 712.9774+3  
 Delta Mass: 0.719 ppm  
 XCorr: 23.23

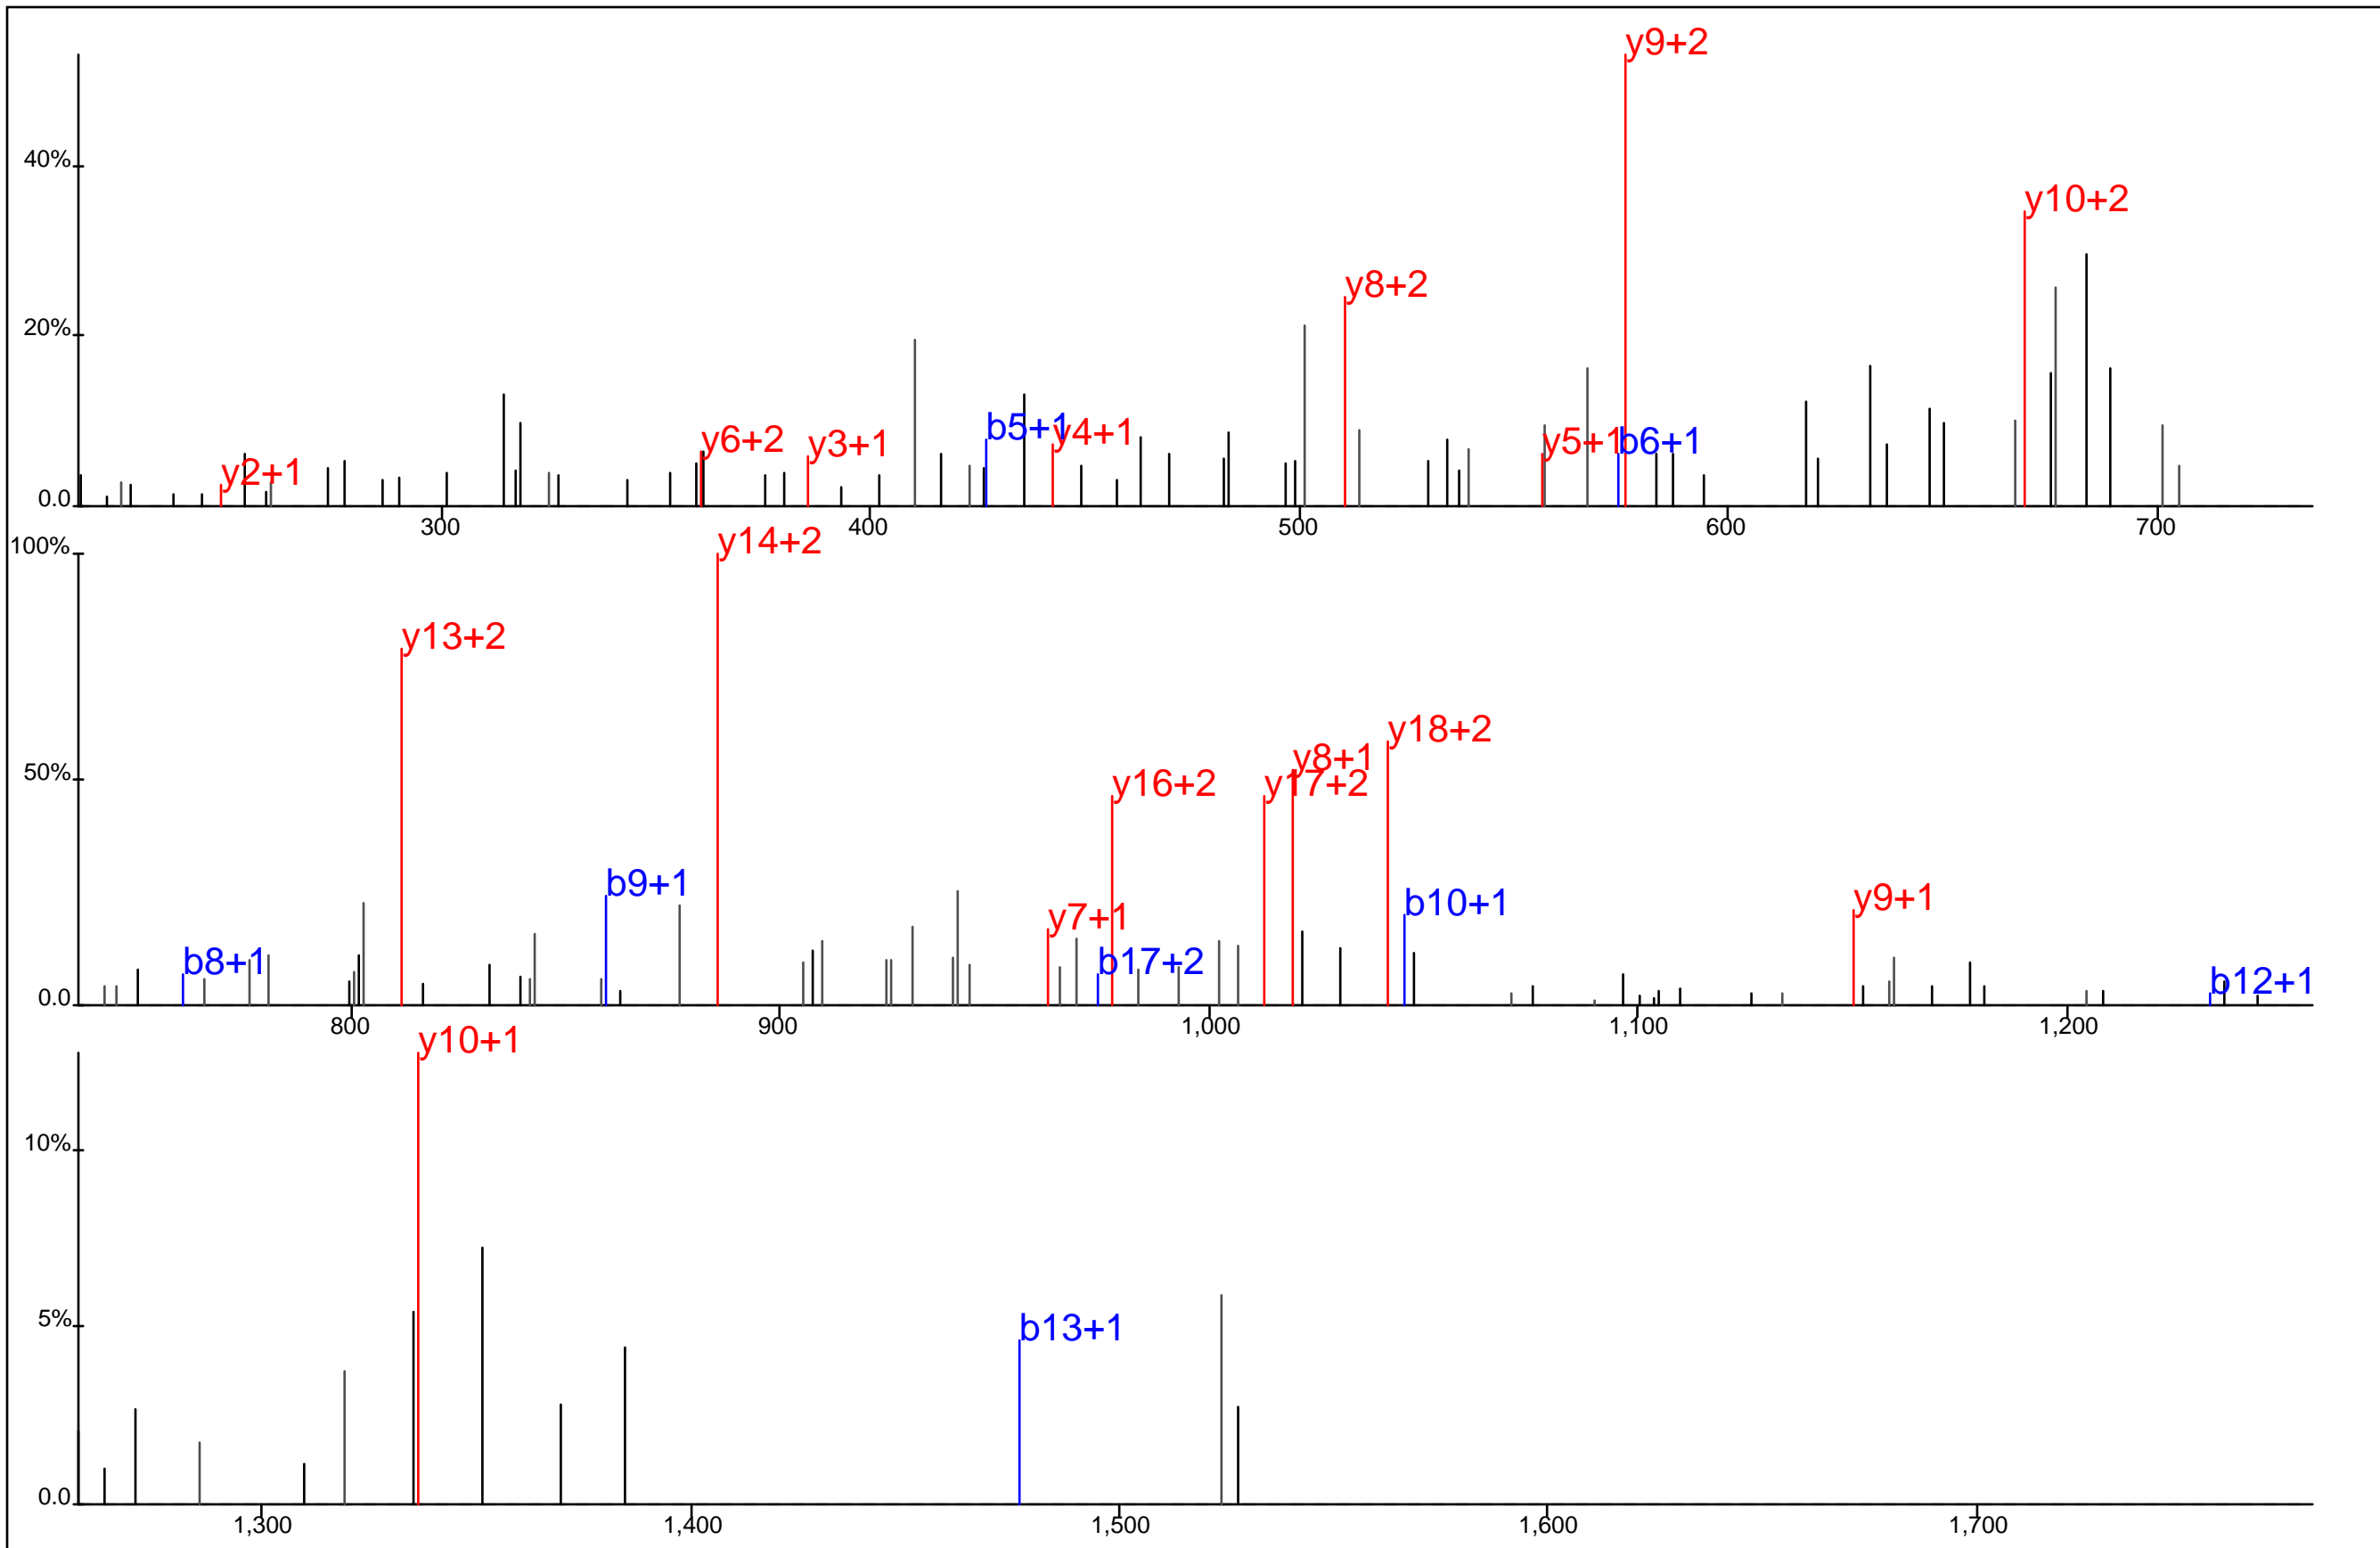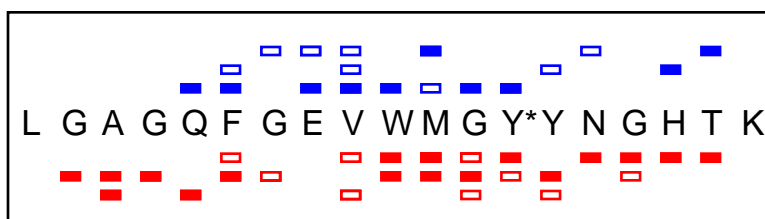

Protein Name: Lck  
 gi Accession: 0  
 Precursor Mass: 732.3212+3  
 Delta Mass: 3.347 ppm  
 XCorr: 52.21

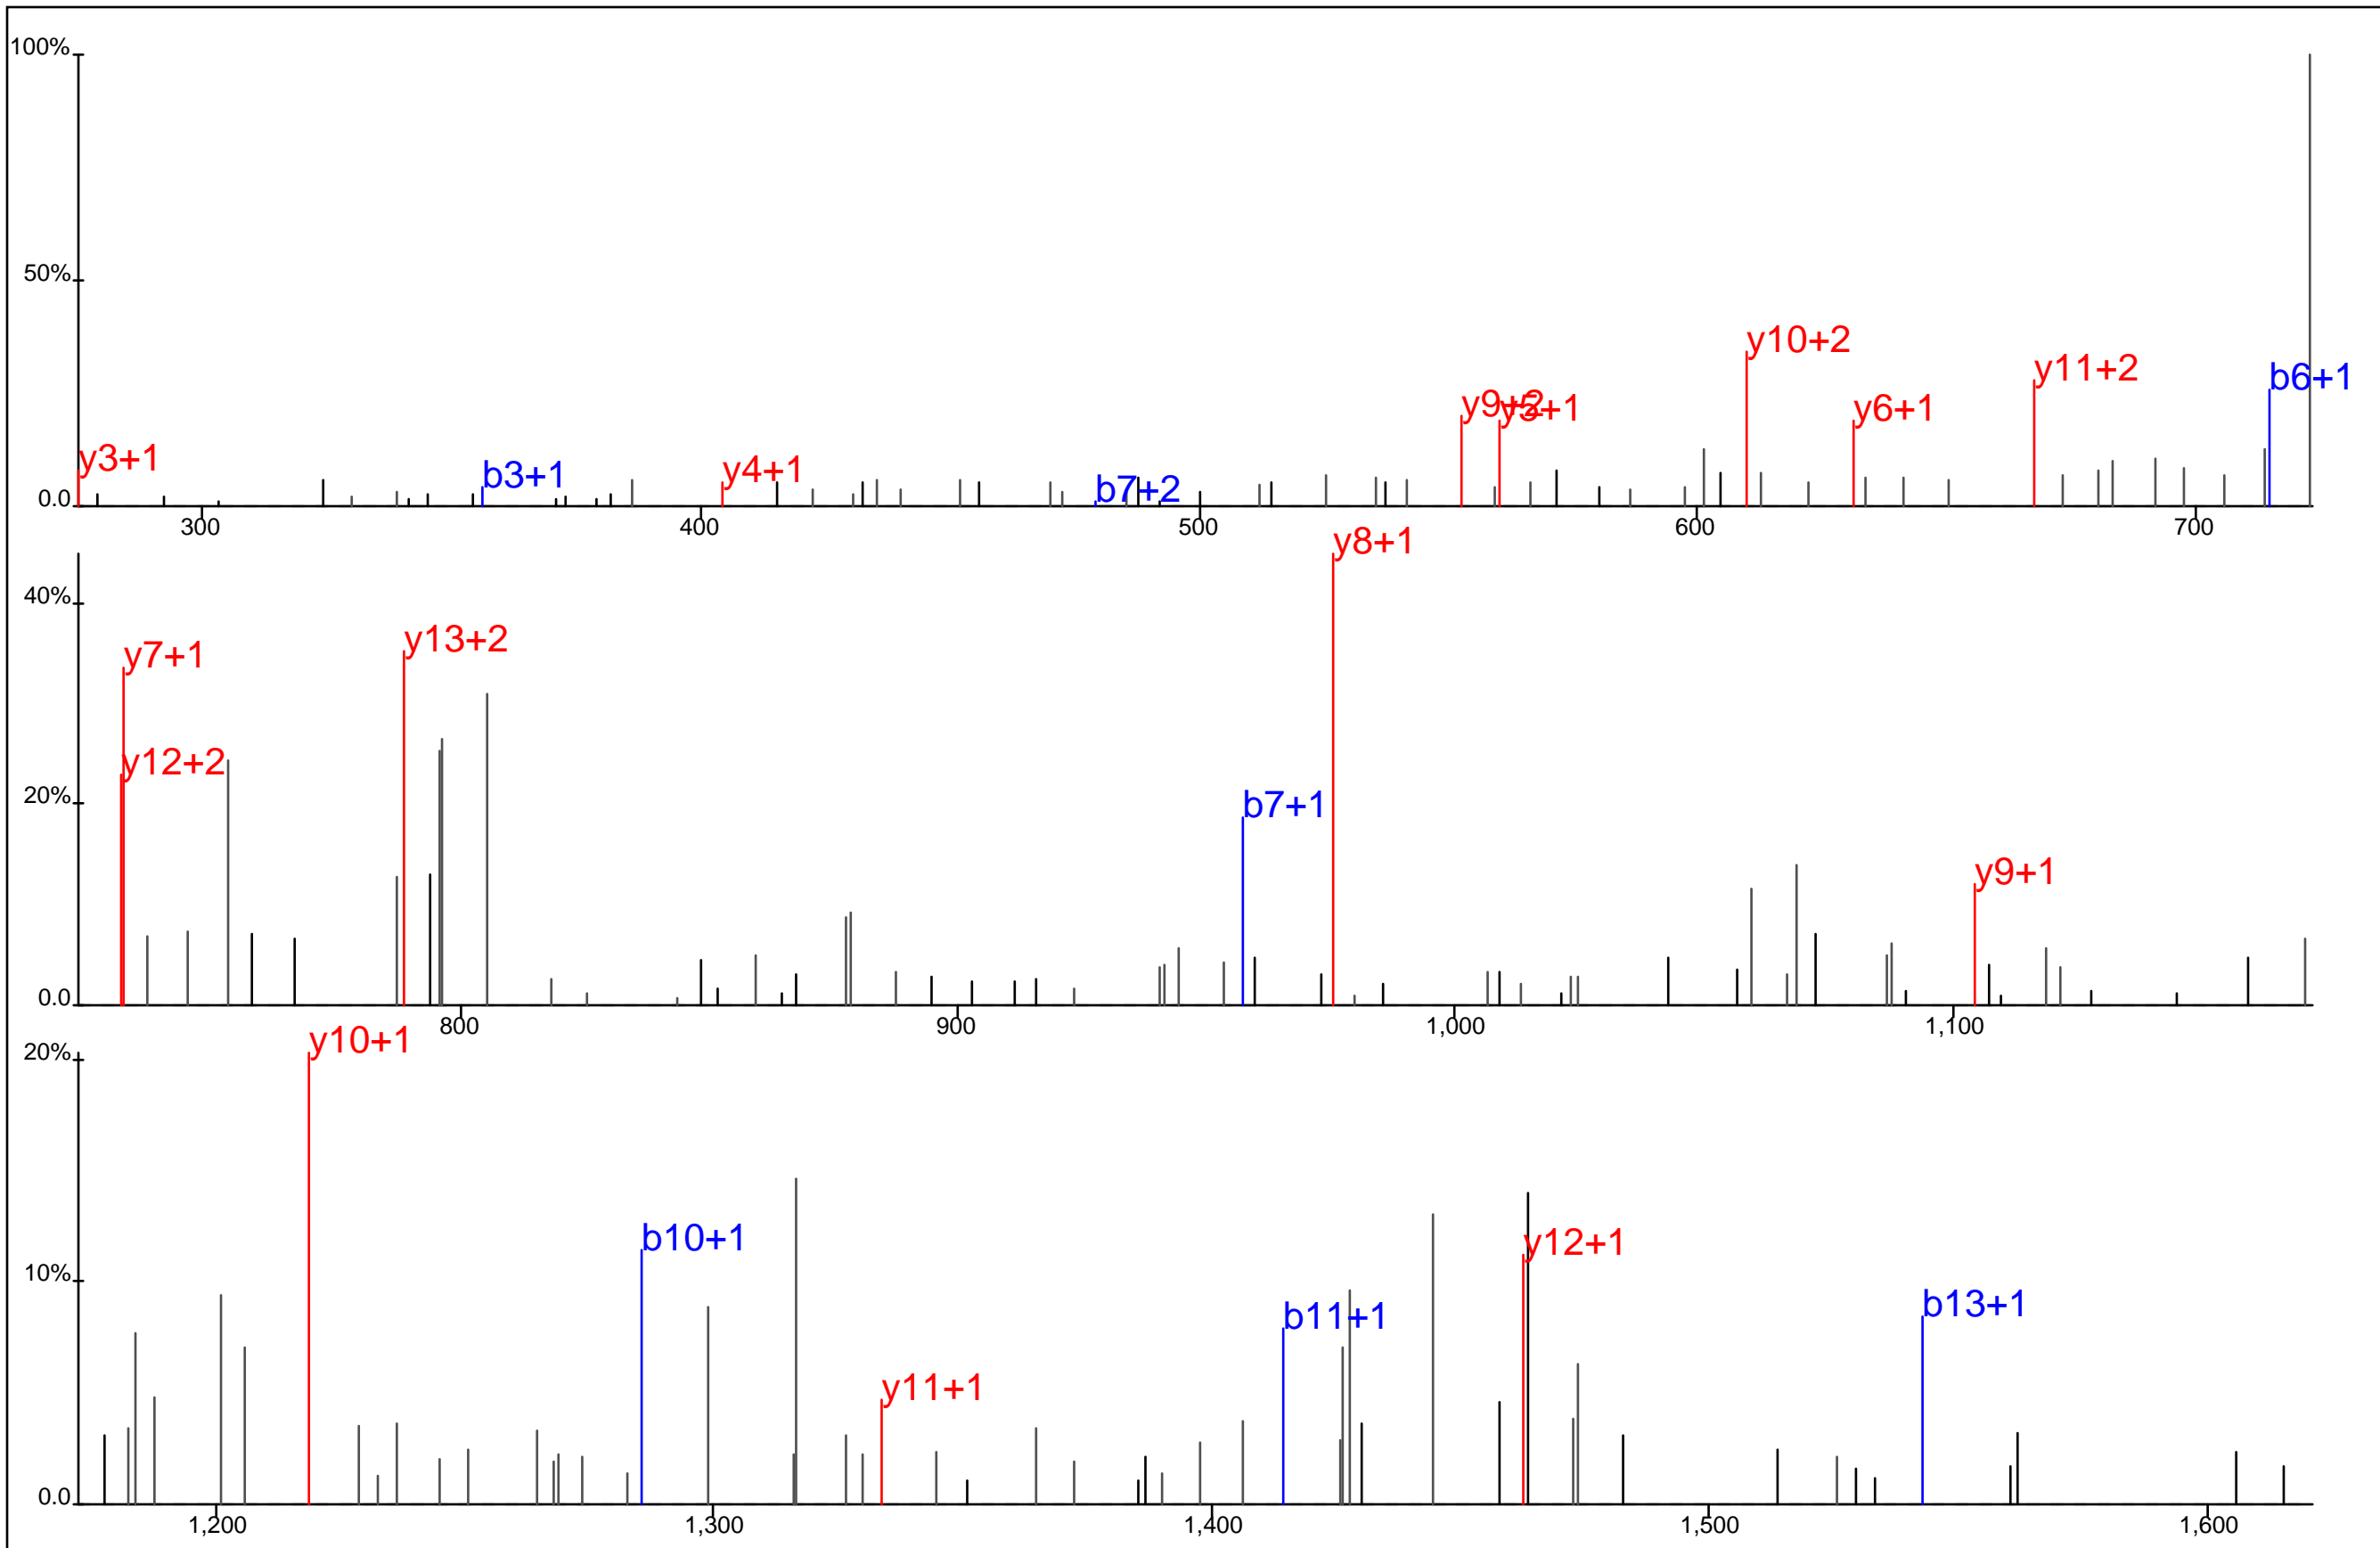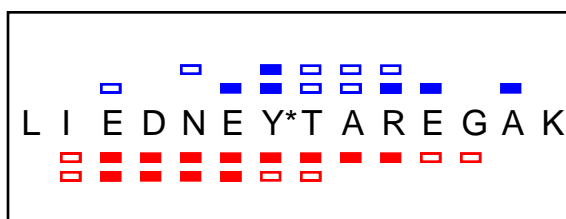

Protein Name: Lck  
 gi Accession: 0  
 Precursor Mass: 844.8789+2  
 Delta Mass: 1.265 ppm  
 XCorr: 45.17

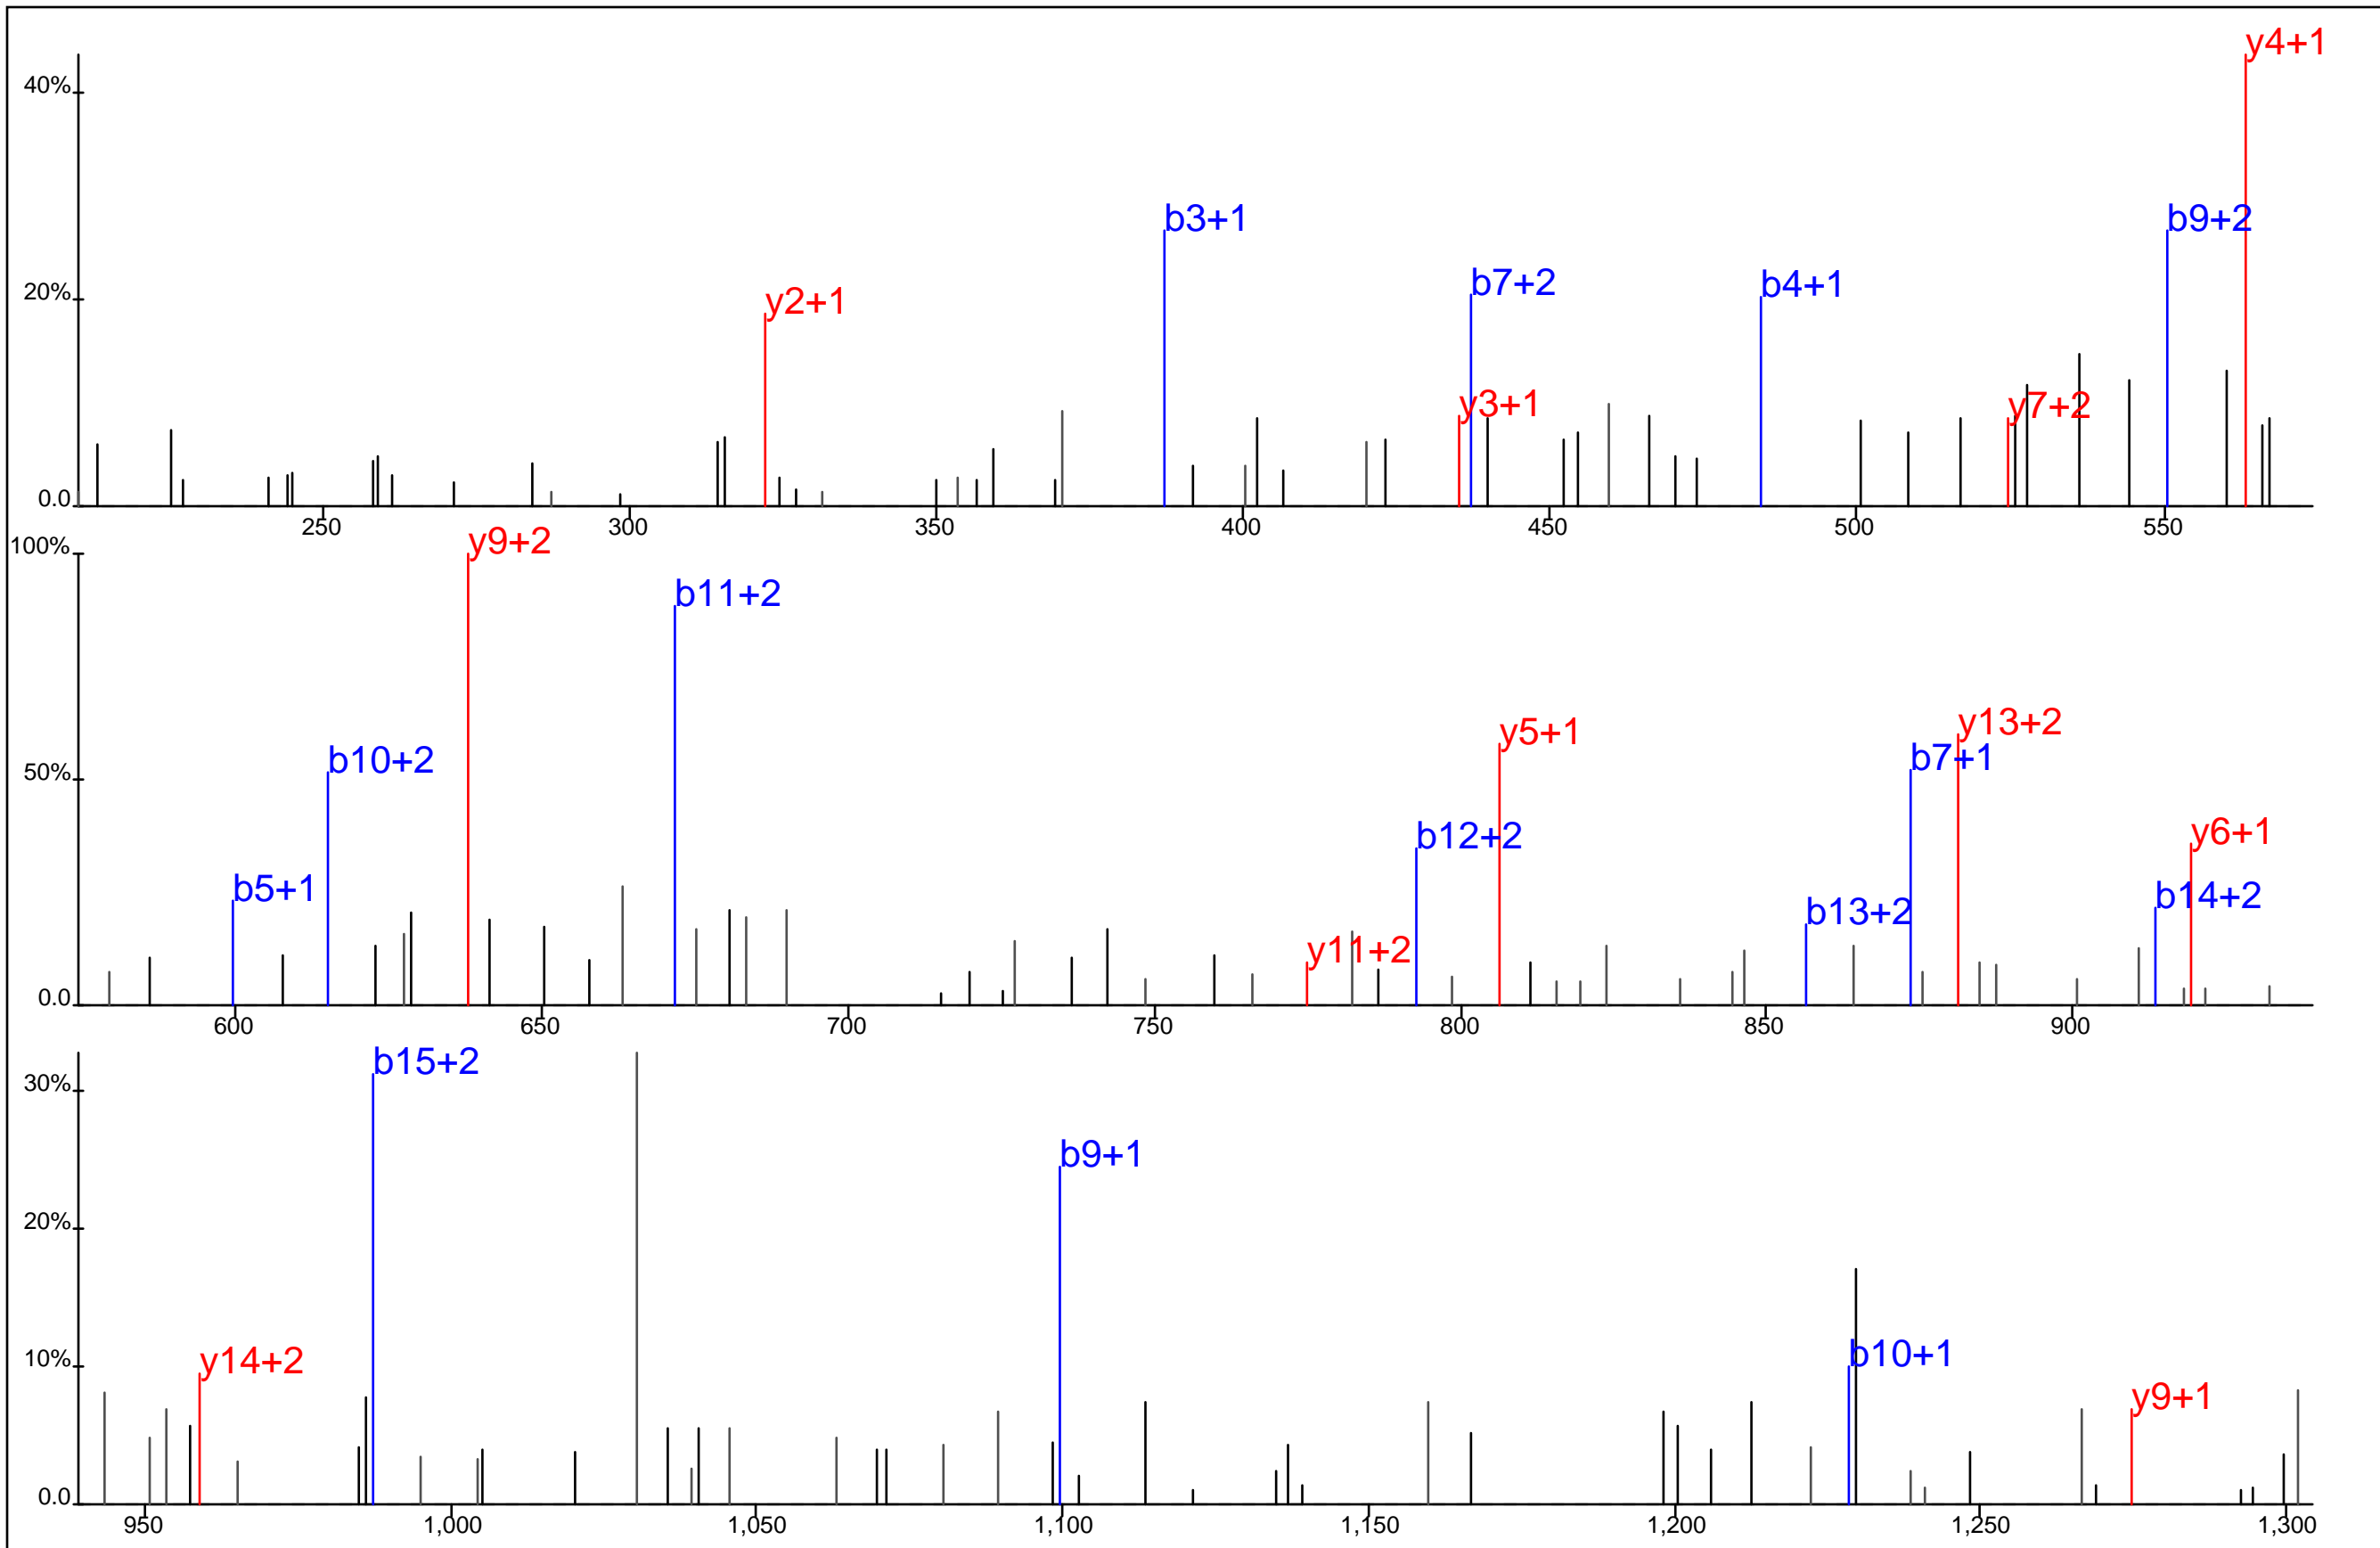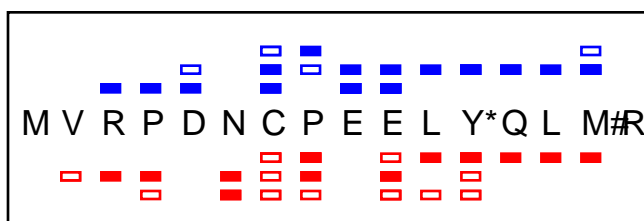

Protein Name: Lck  
 gi Accession: 0  
 Precursor Mass: 716.3091+3  
 Delta Mass: 0.445 ppm  
 XCorr: 60.19

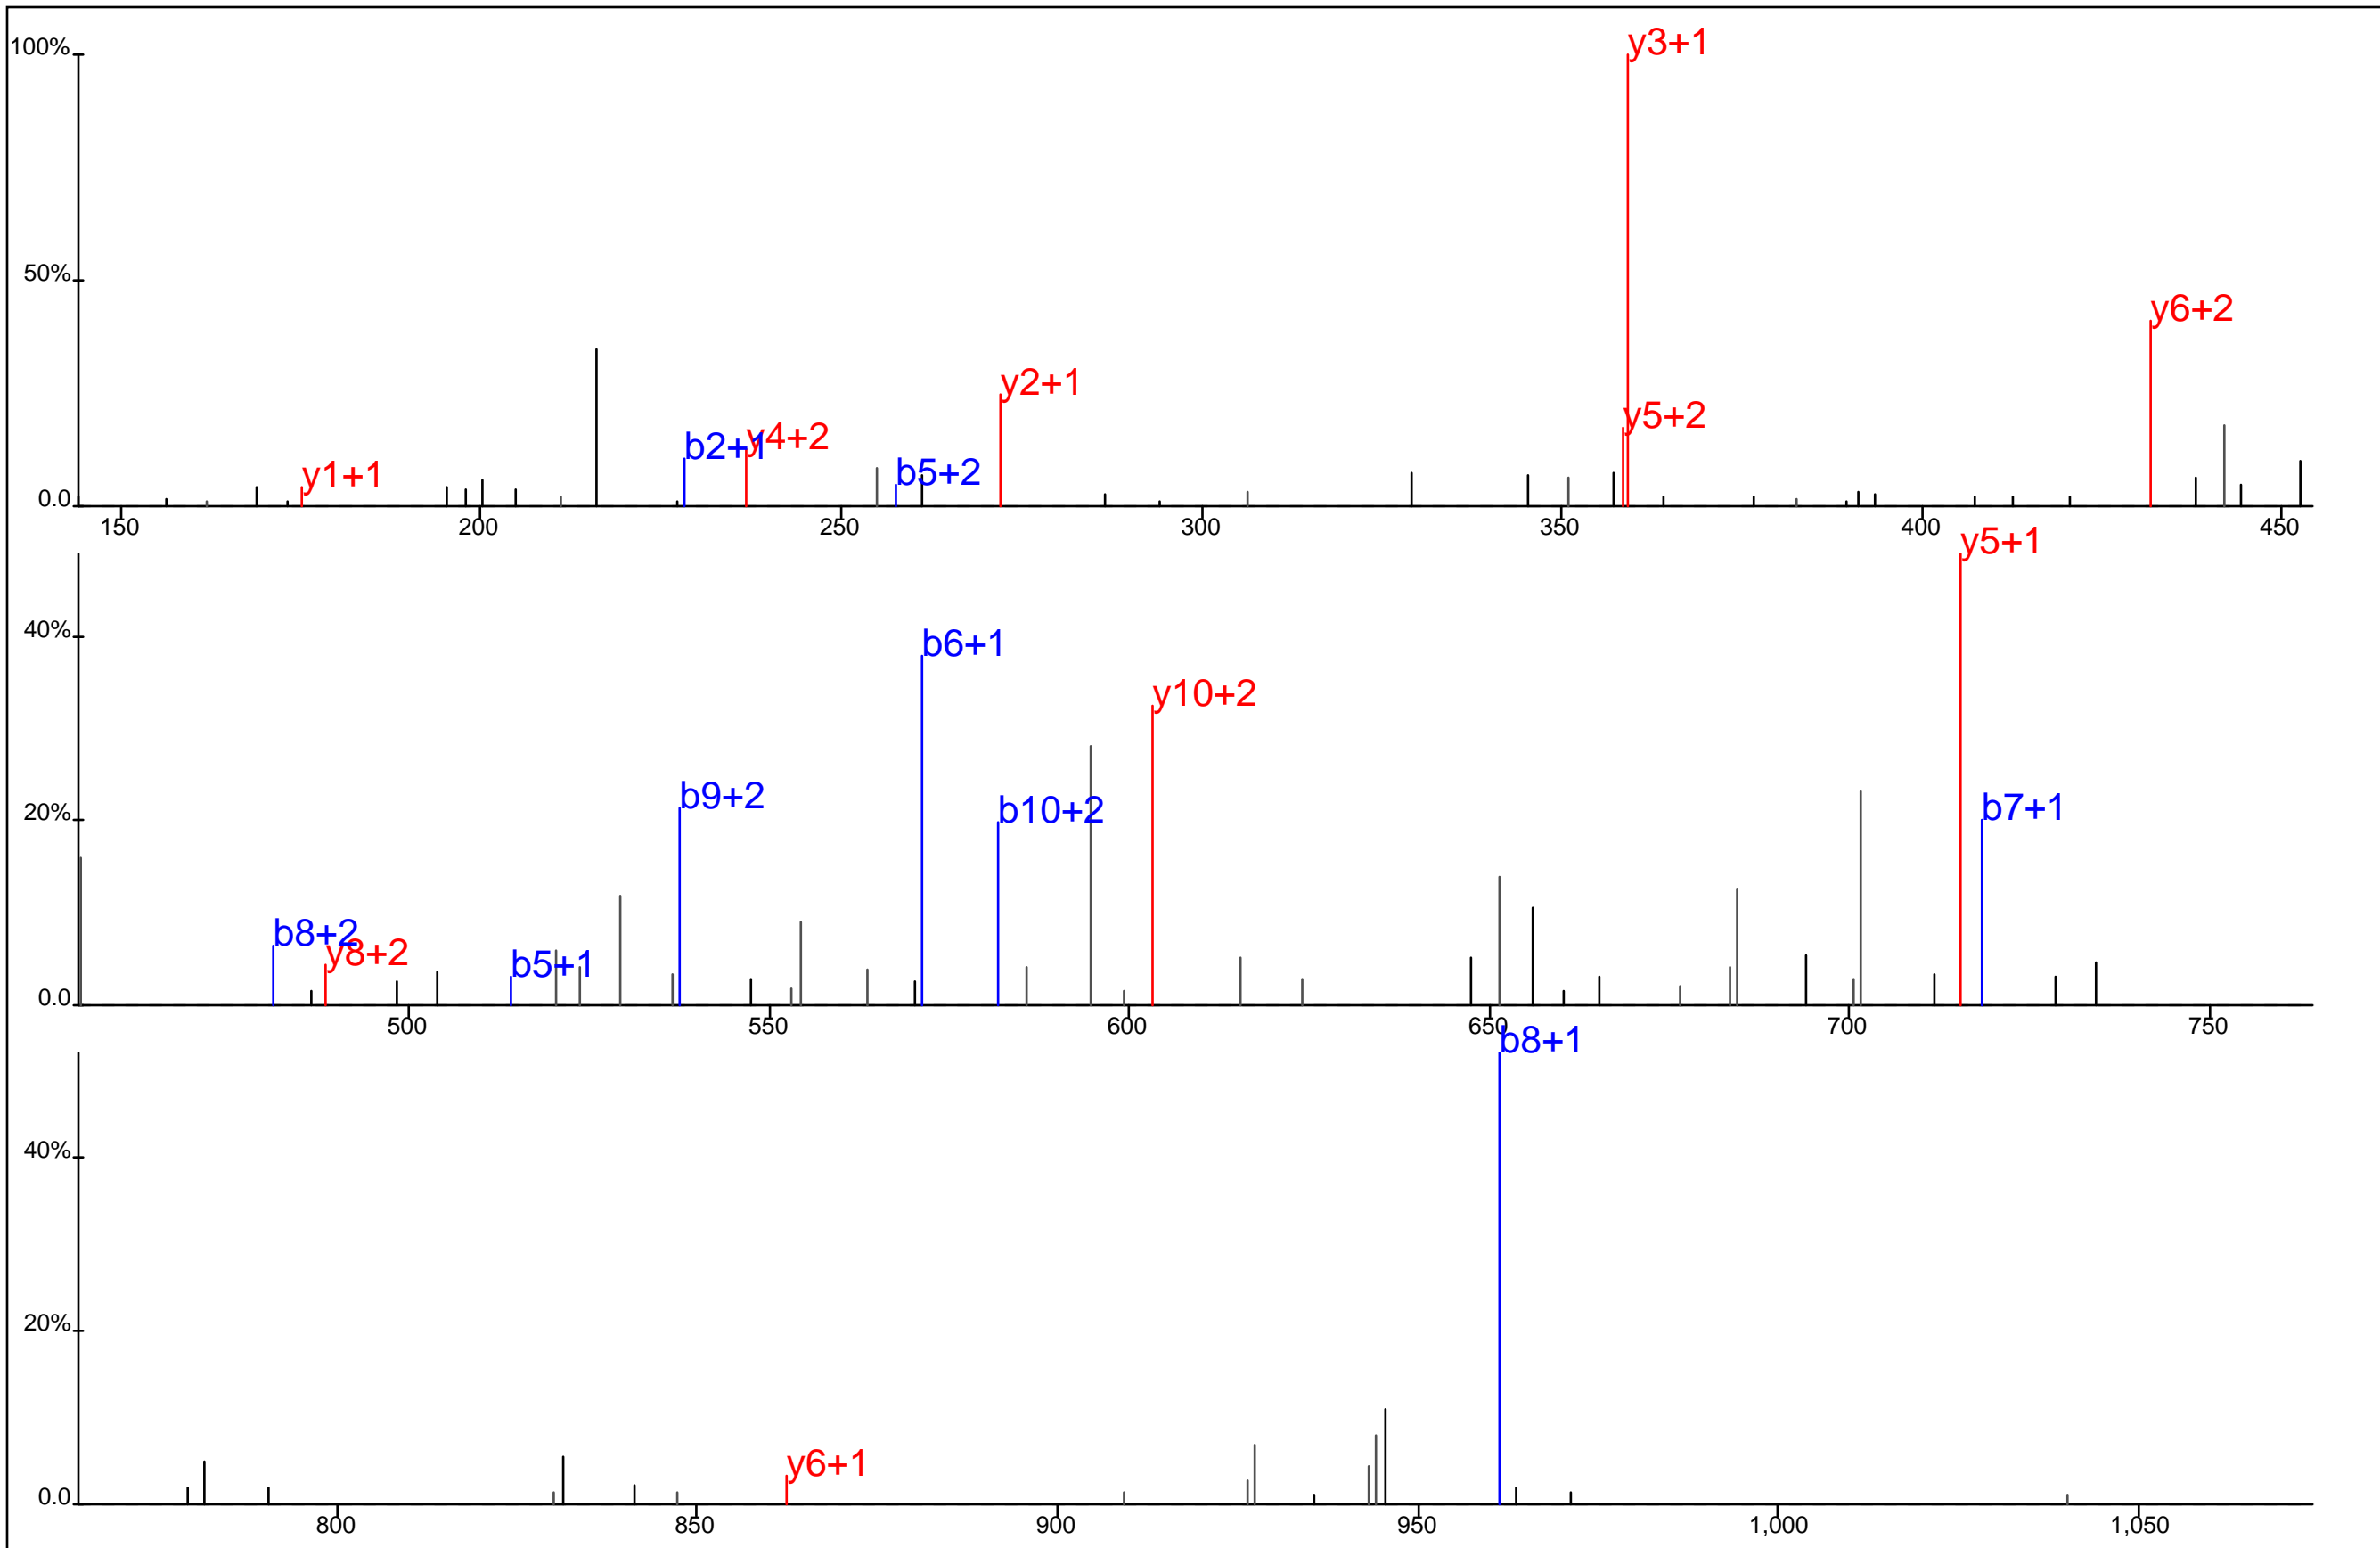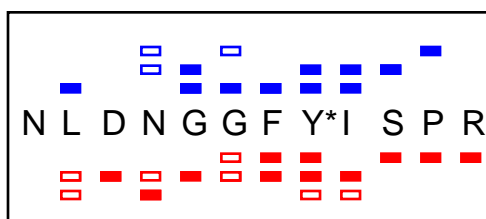

Protein Name: Lck  
 gi Accession: 0  
 Precursor Mass: 478.2132+3  
 Delta Mass: 0.367 ppm  
 XCorr: 31.4



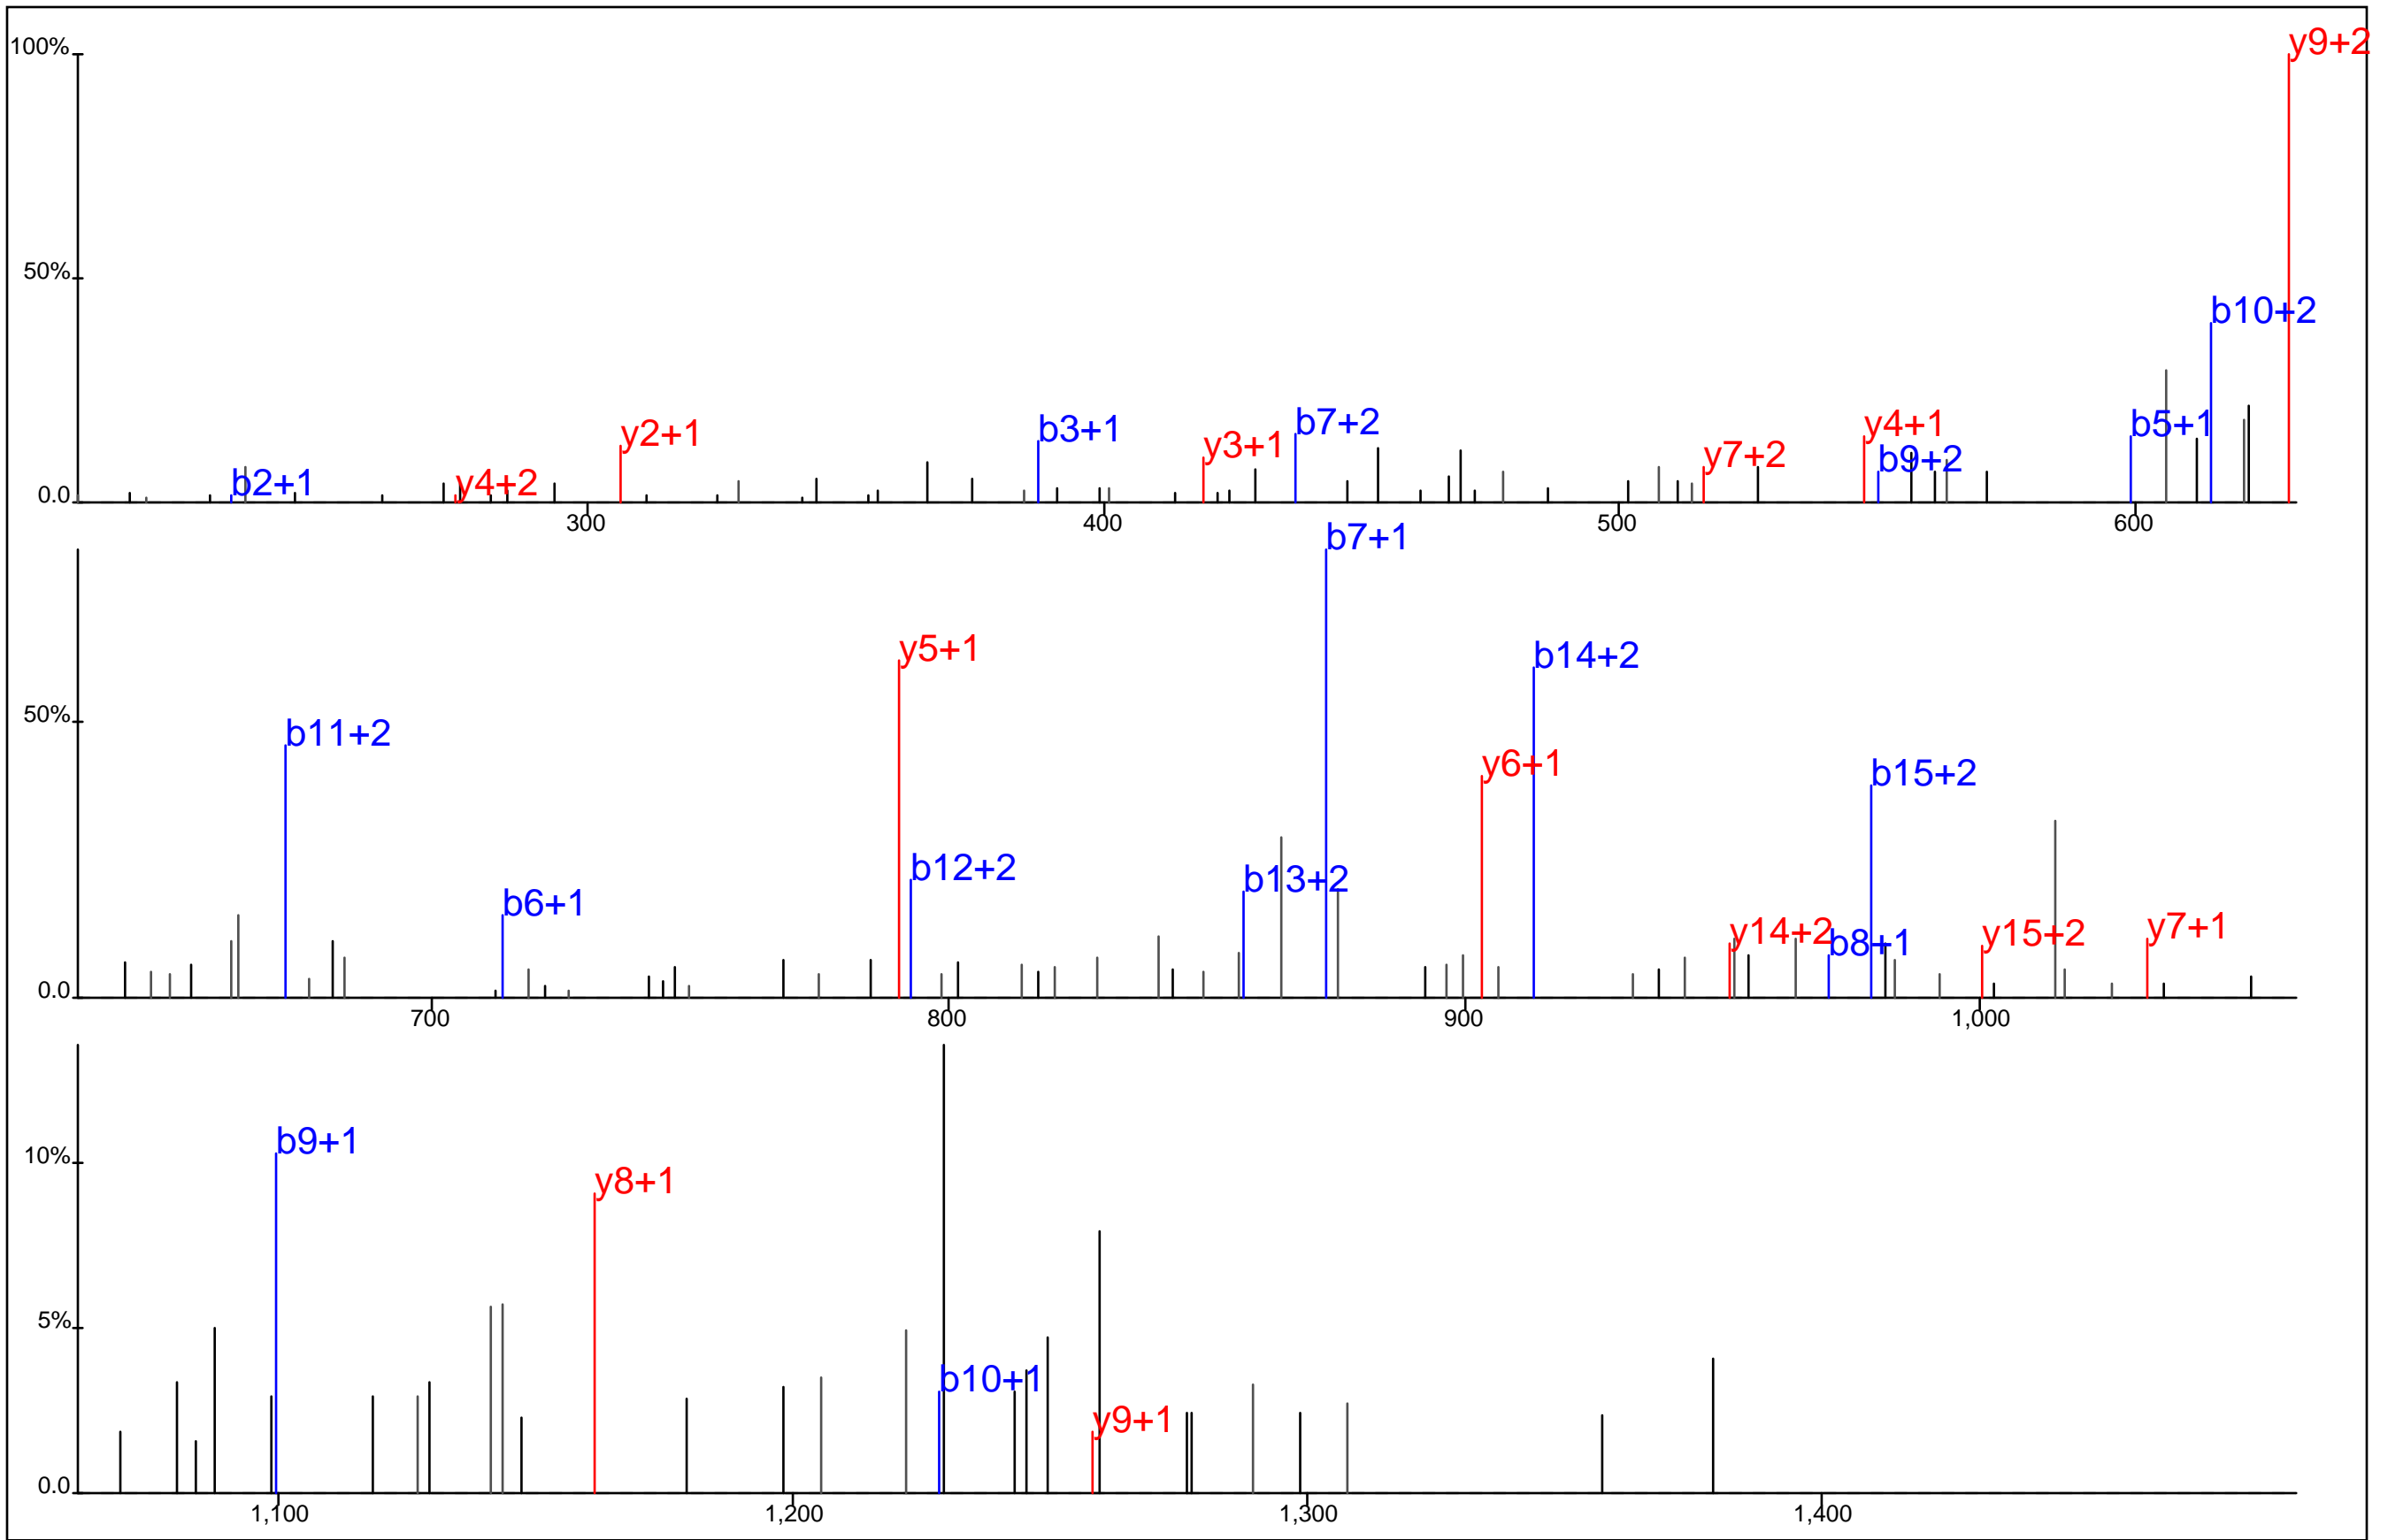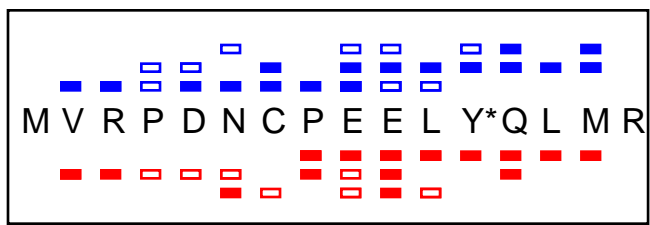

Protein Name: Lck  
 gi Accession: 0  
 Precursor Mass: 710.9782+3  
 Delta Mass: 1.444 ppm  
 XCorr: 37.86

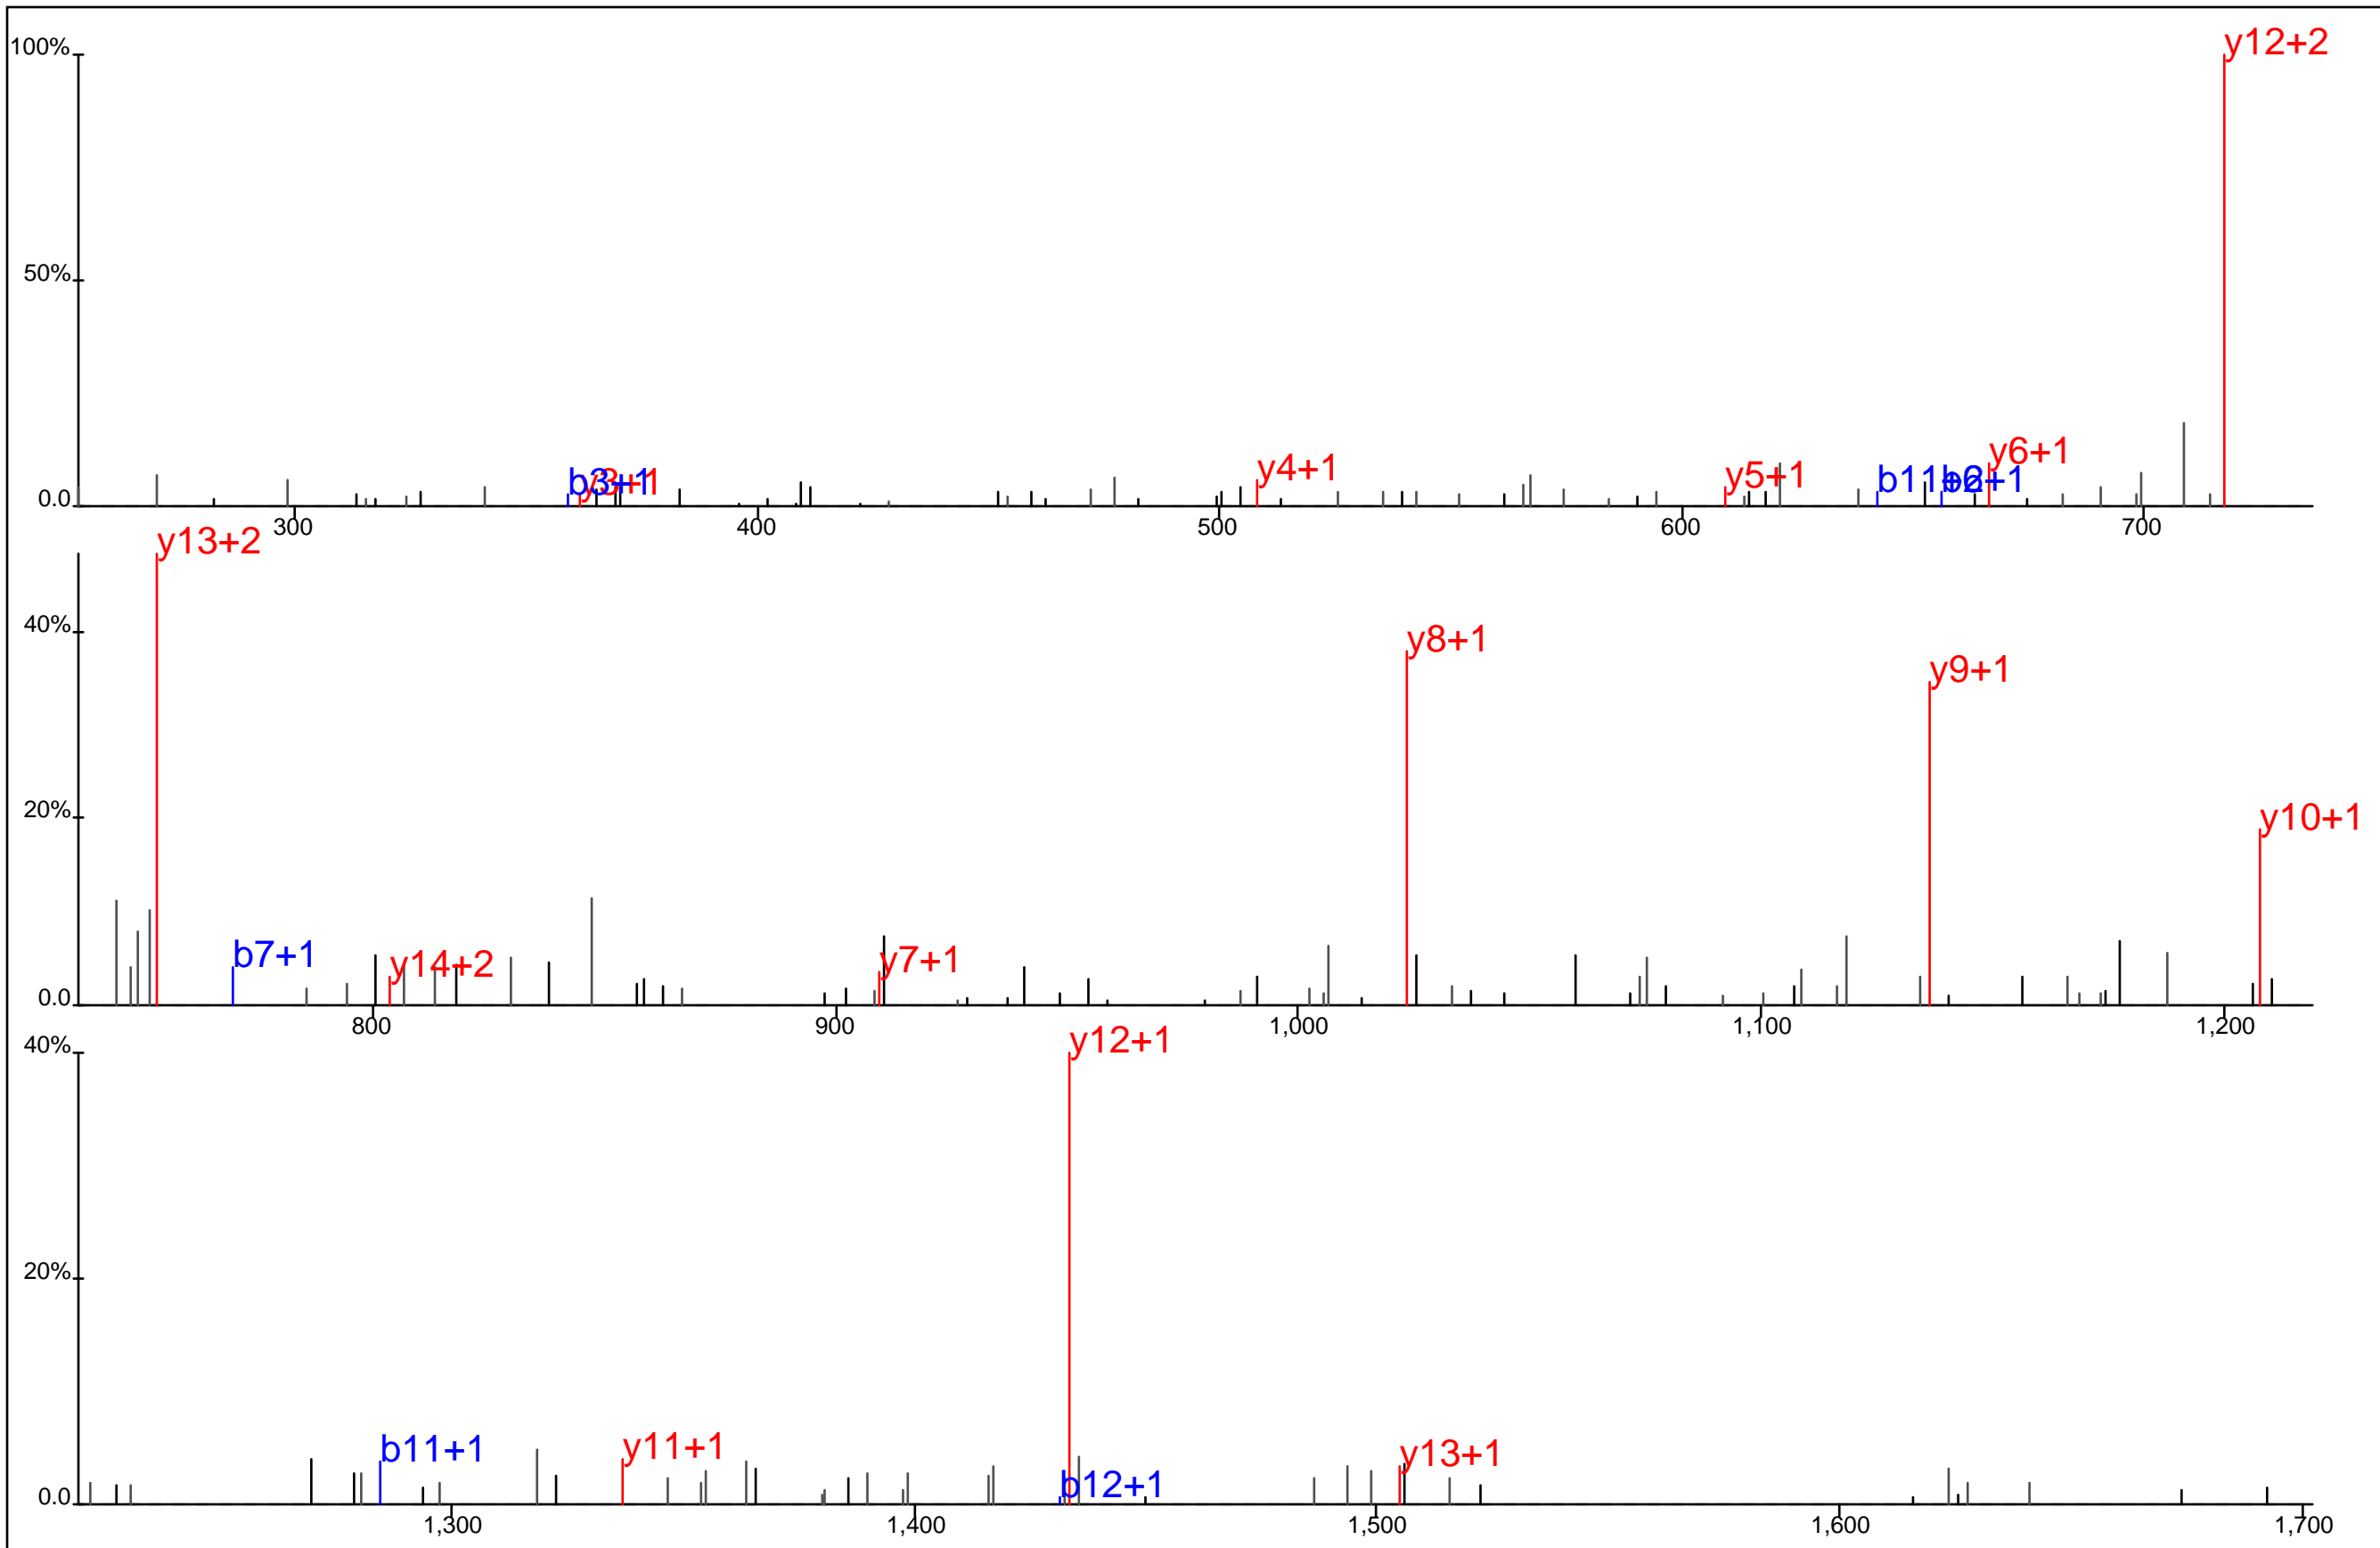

WT A P E A I N Y\* G T F T I K

Red dashed boxes indicate the fragmentation sites corresponding to the labeled peaks in the spectra.

Protein Name: Lck  
 gi Accession: 0  
 Precursor Mass: 896.4202+2  
 Delta Mass: 1.191 ppm  
 XCorr: 27.34





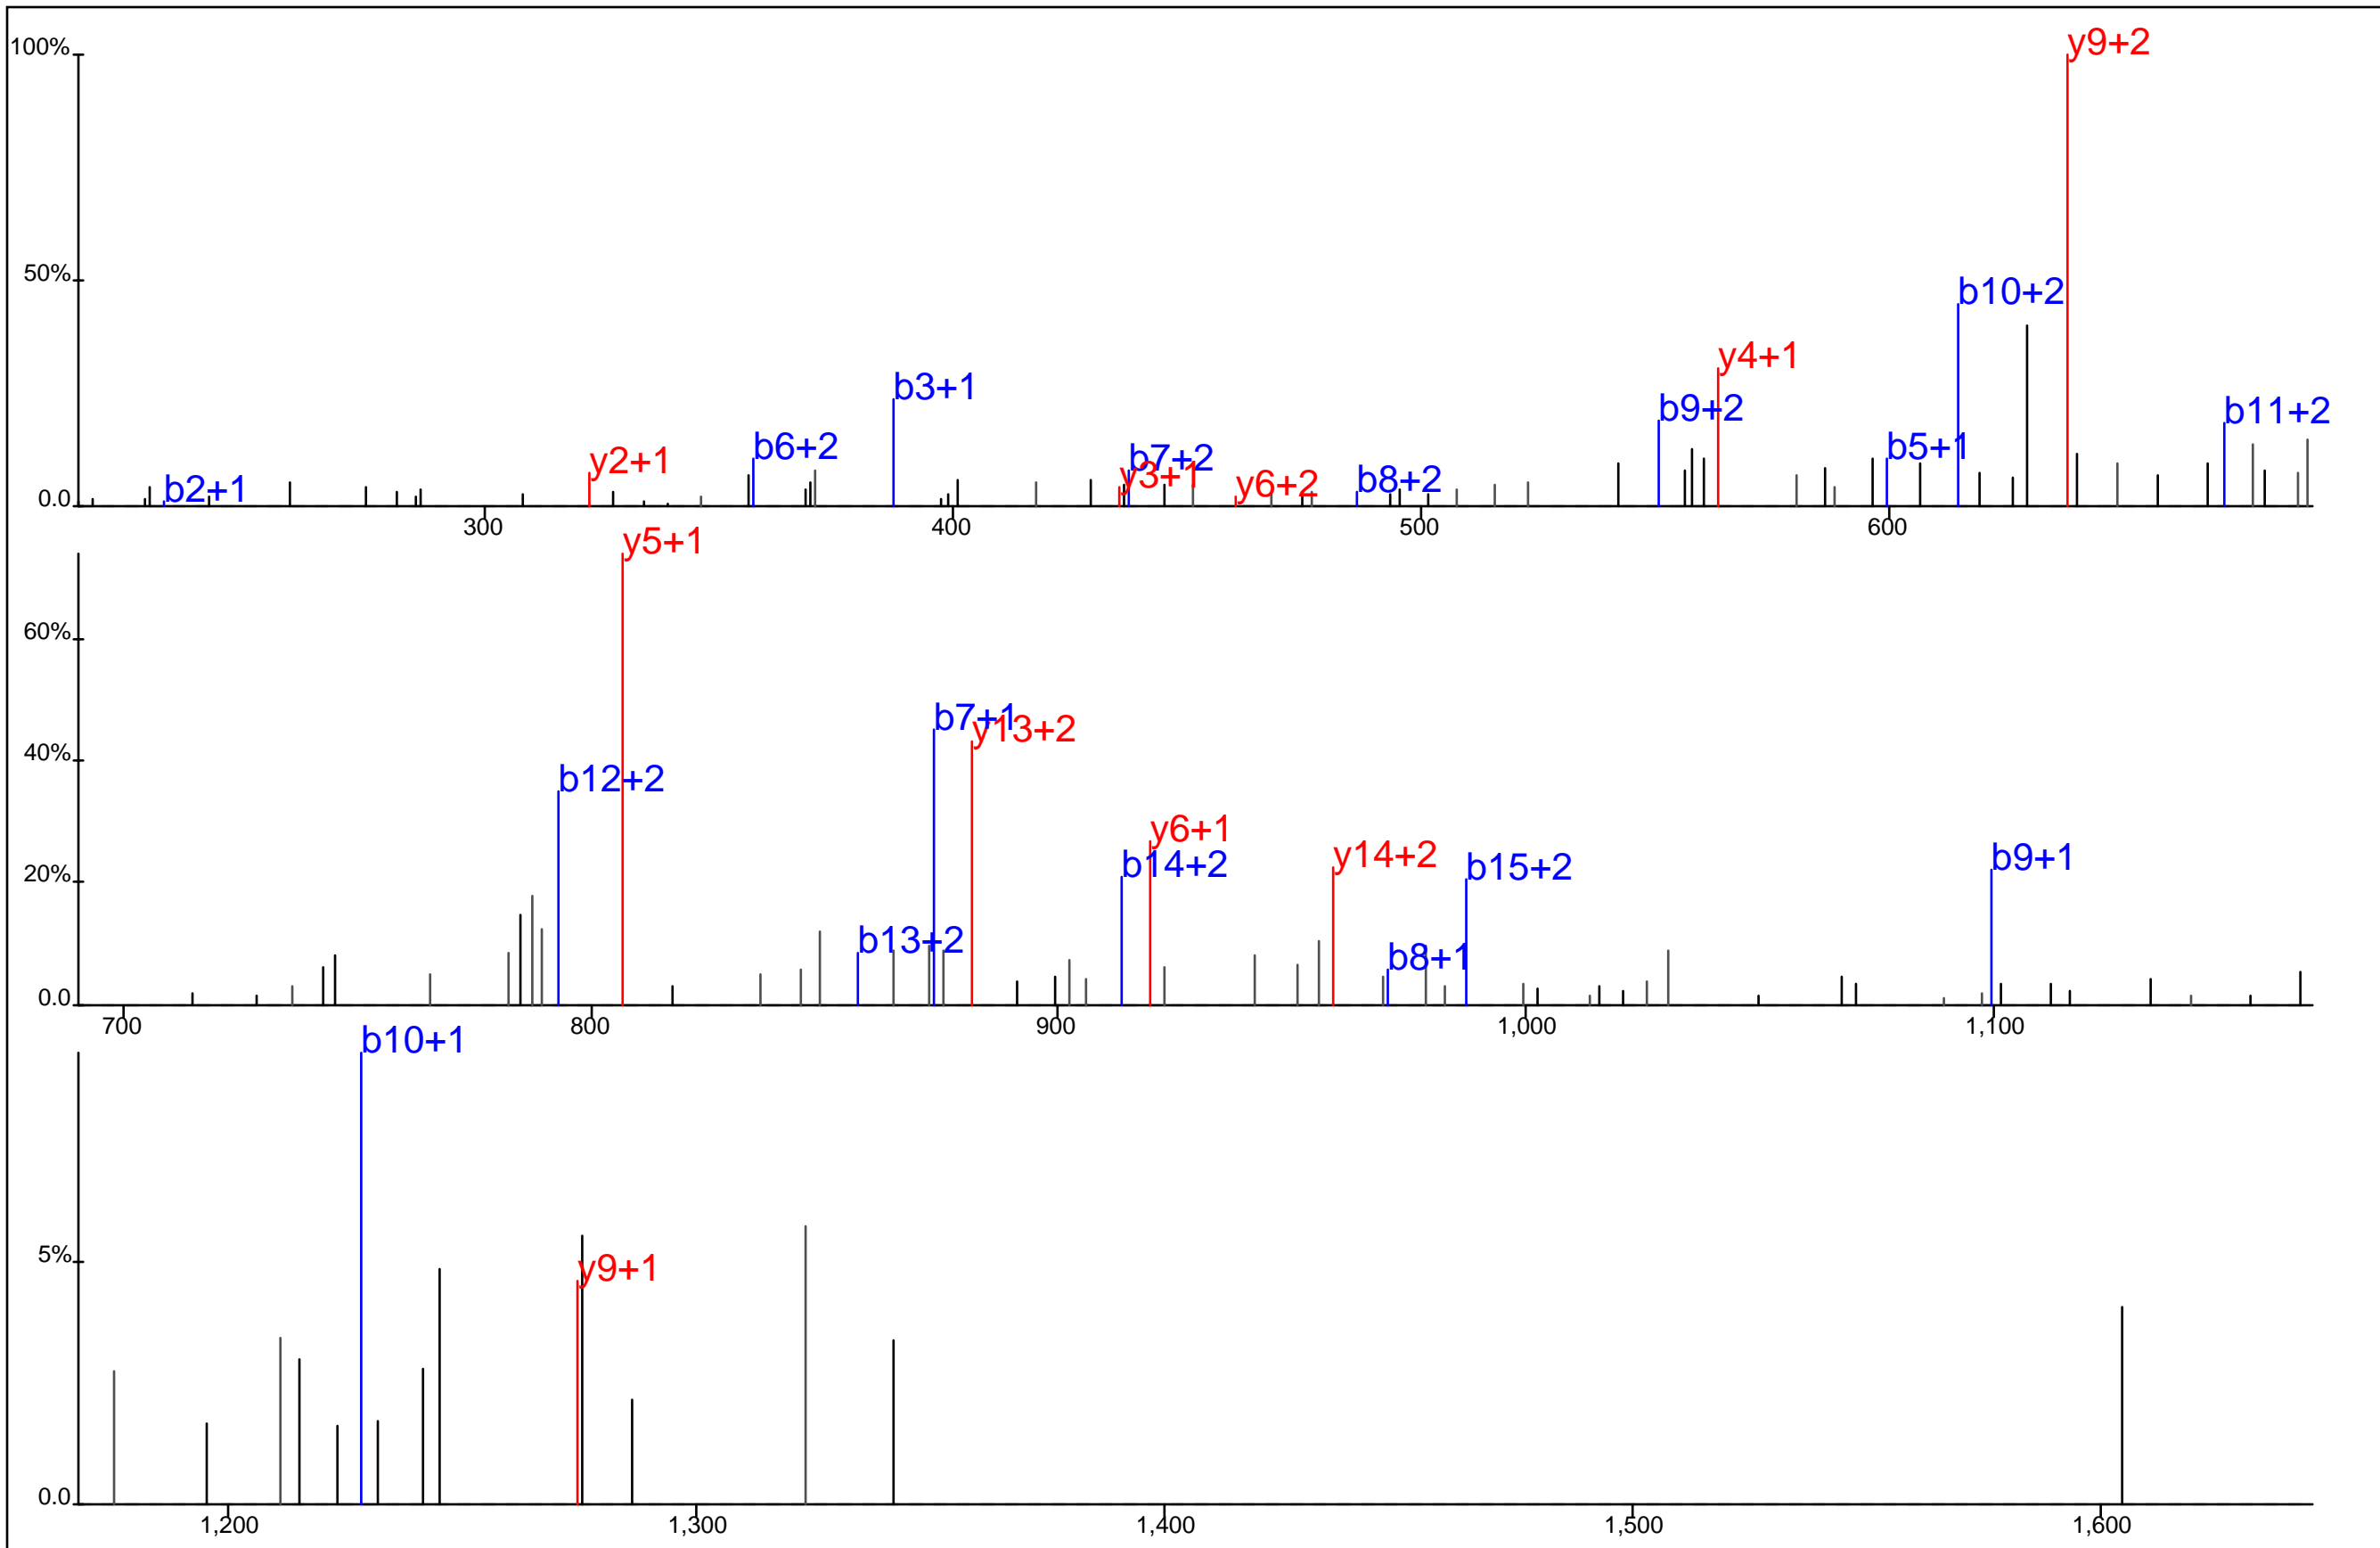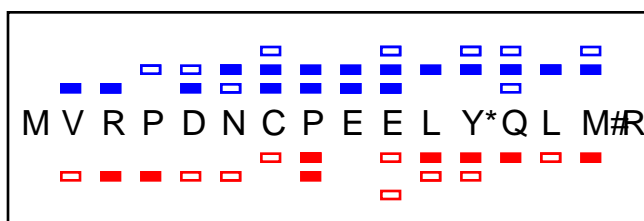

Protein Name: Lck  
 gi Accession: 0  
 Precursor Mass: 716.3085+3  
 Delta Mass: 0.408 ppm  
 XCorr: 43.43

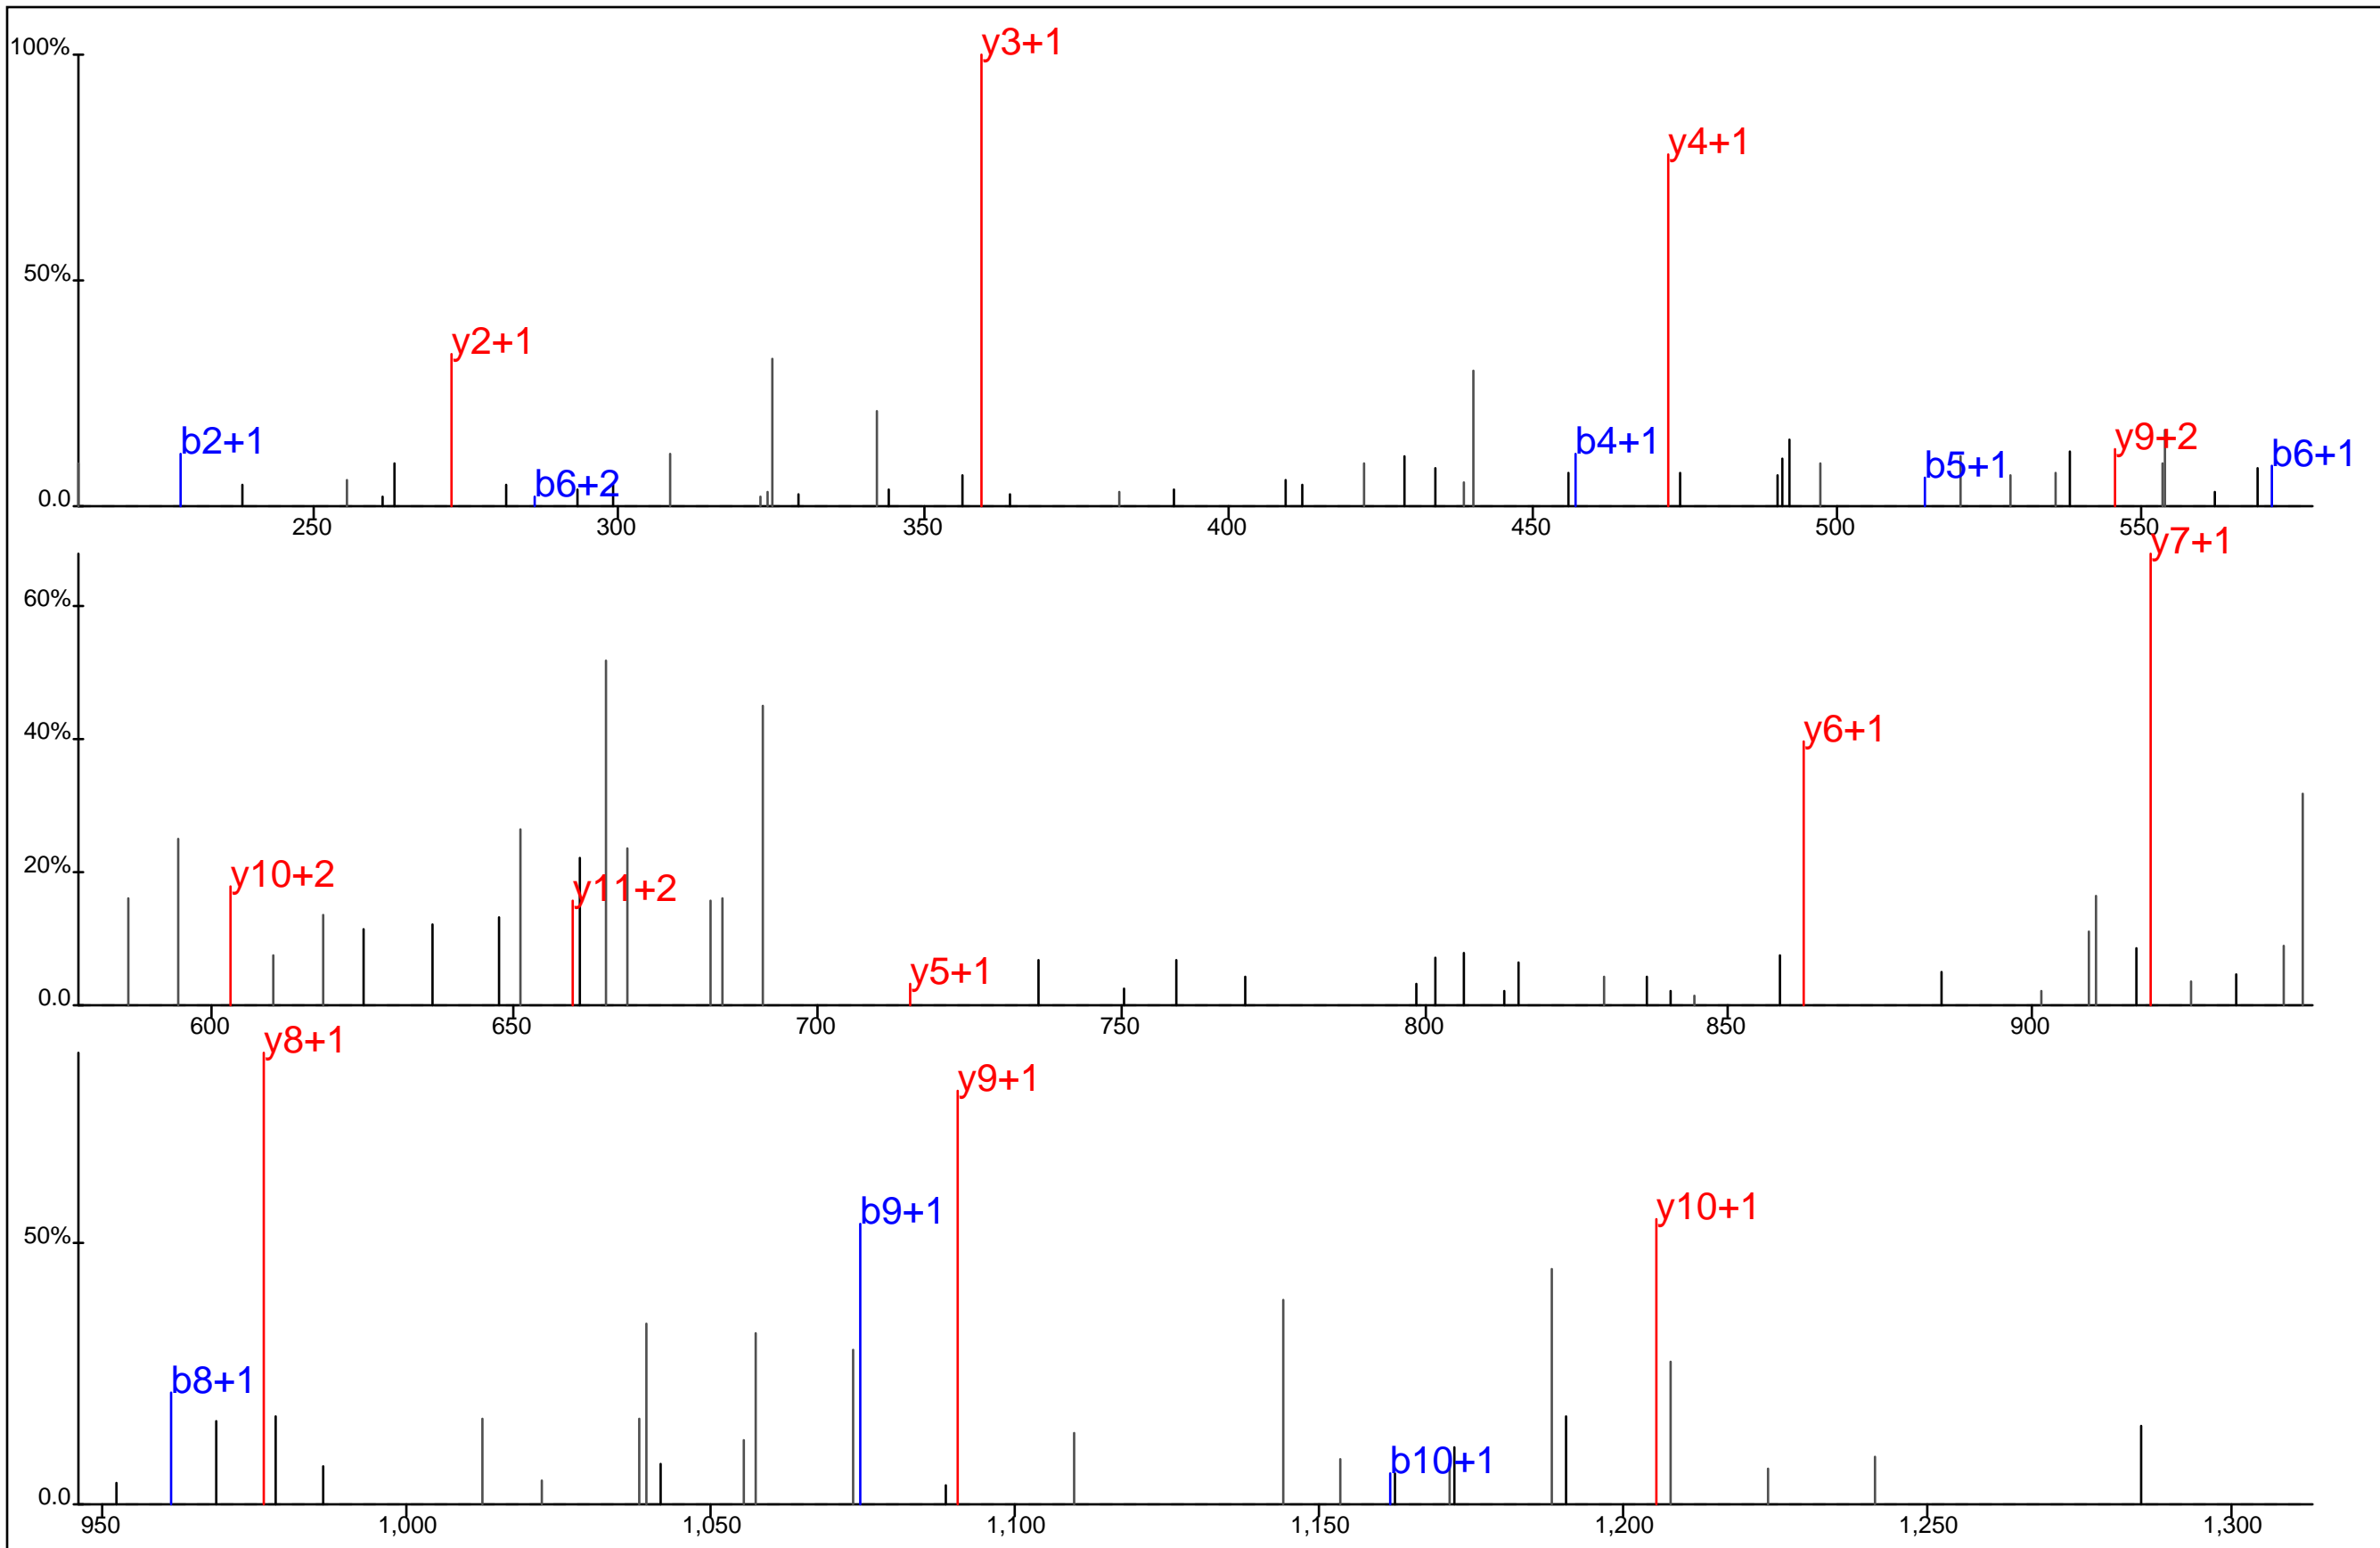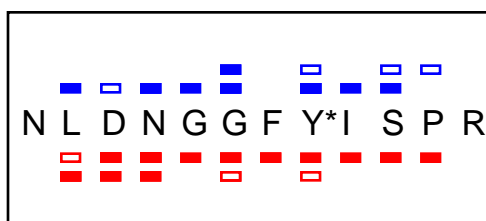

Protein Name: Lck  
 gi Accession: 0  
 Precursor Mass: 716.8185+2  
 Delta Mass: 2.901 ppm  
 XCorr: 51.54

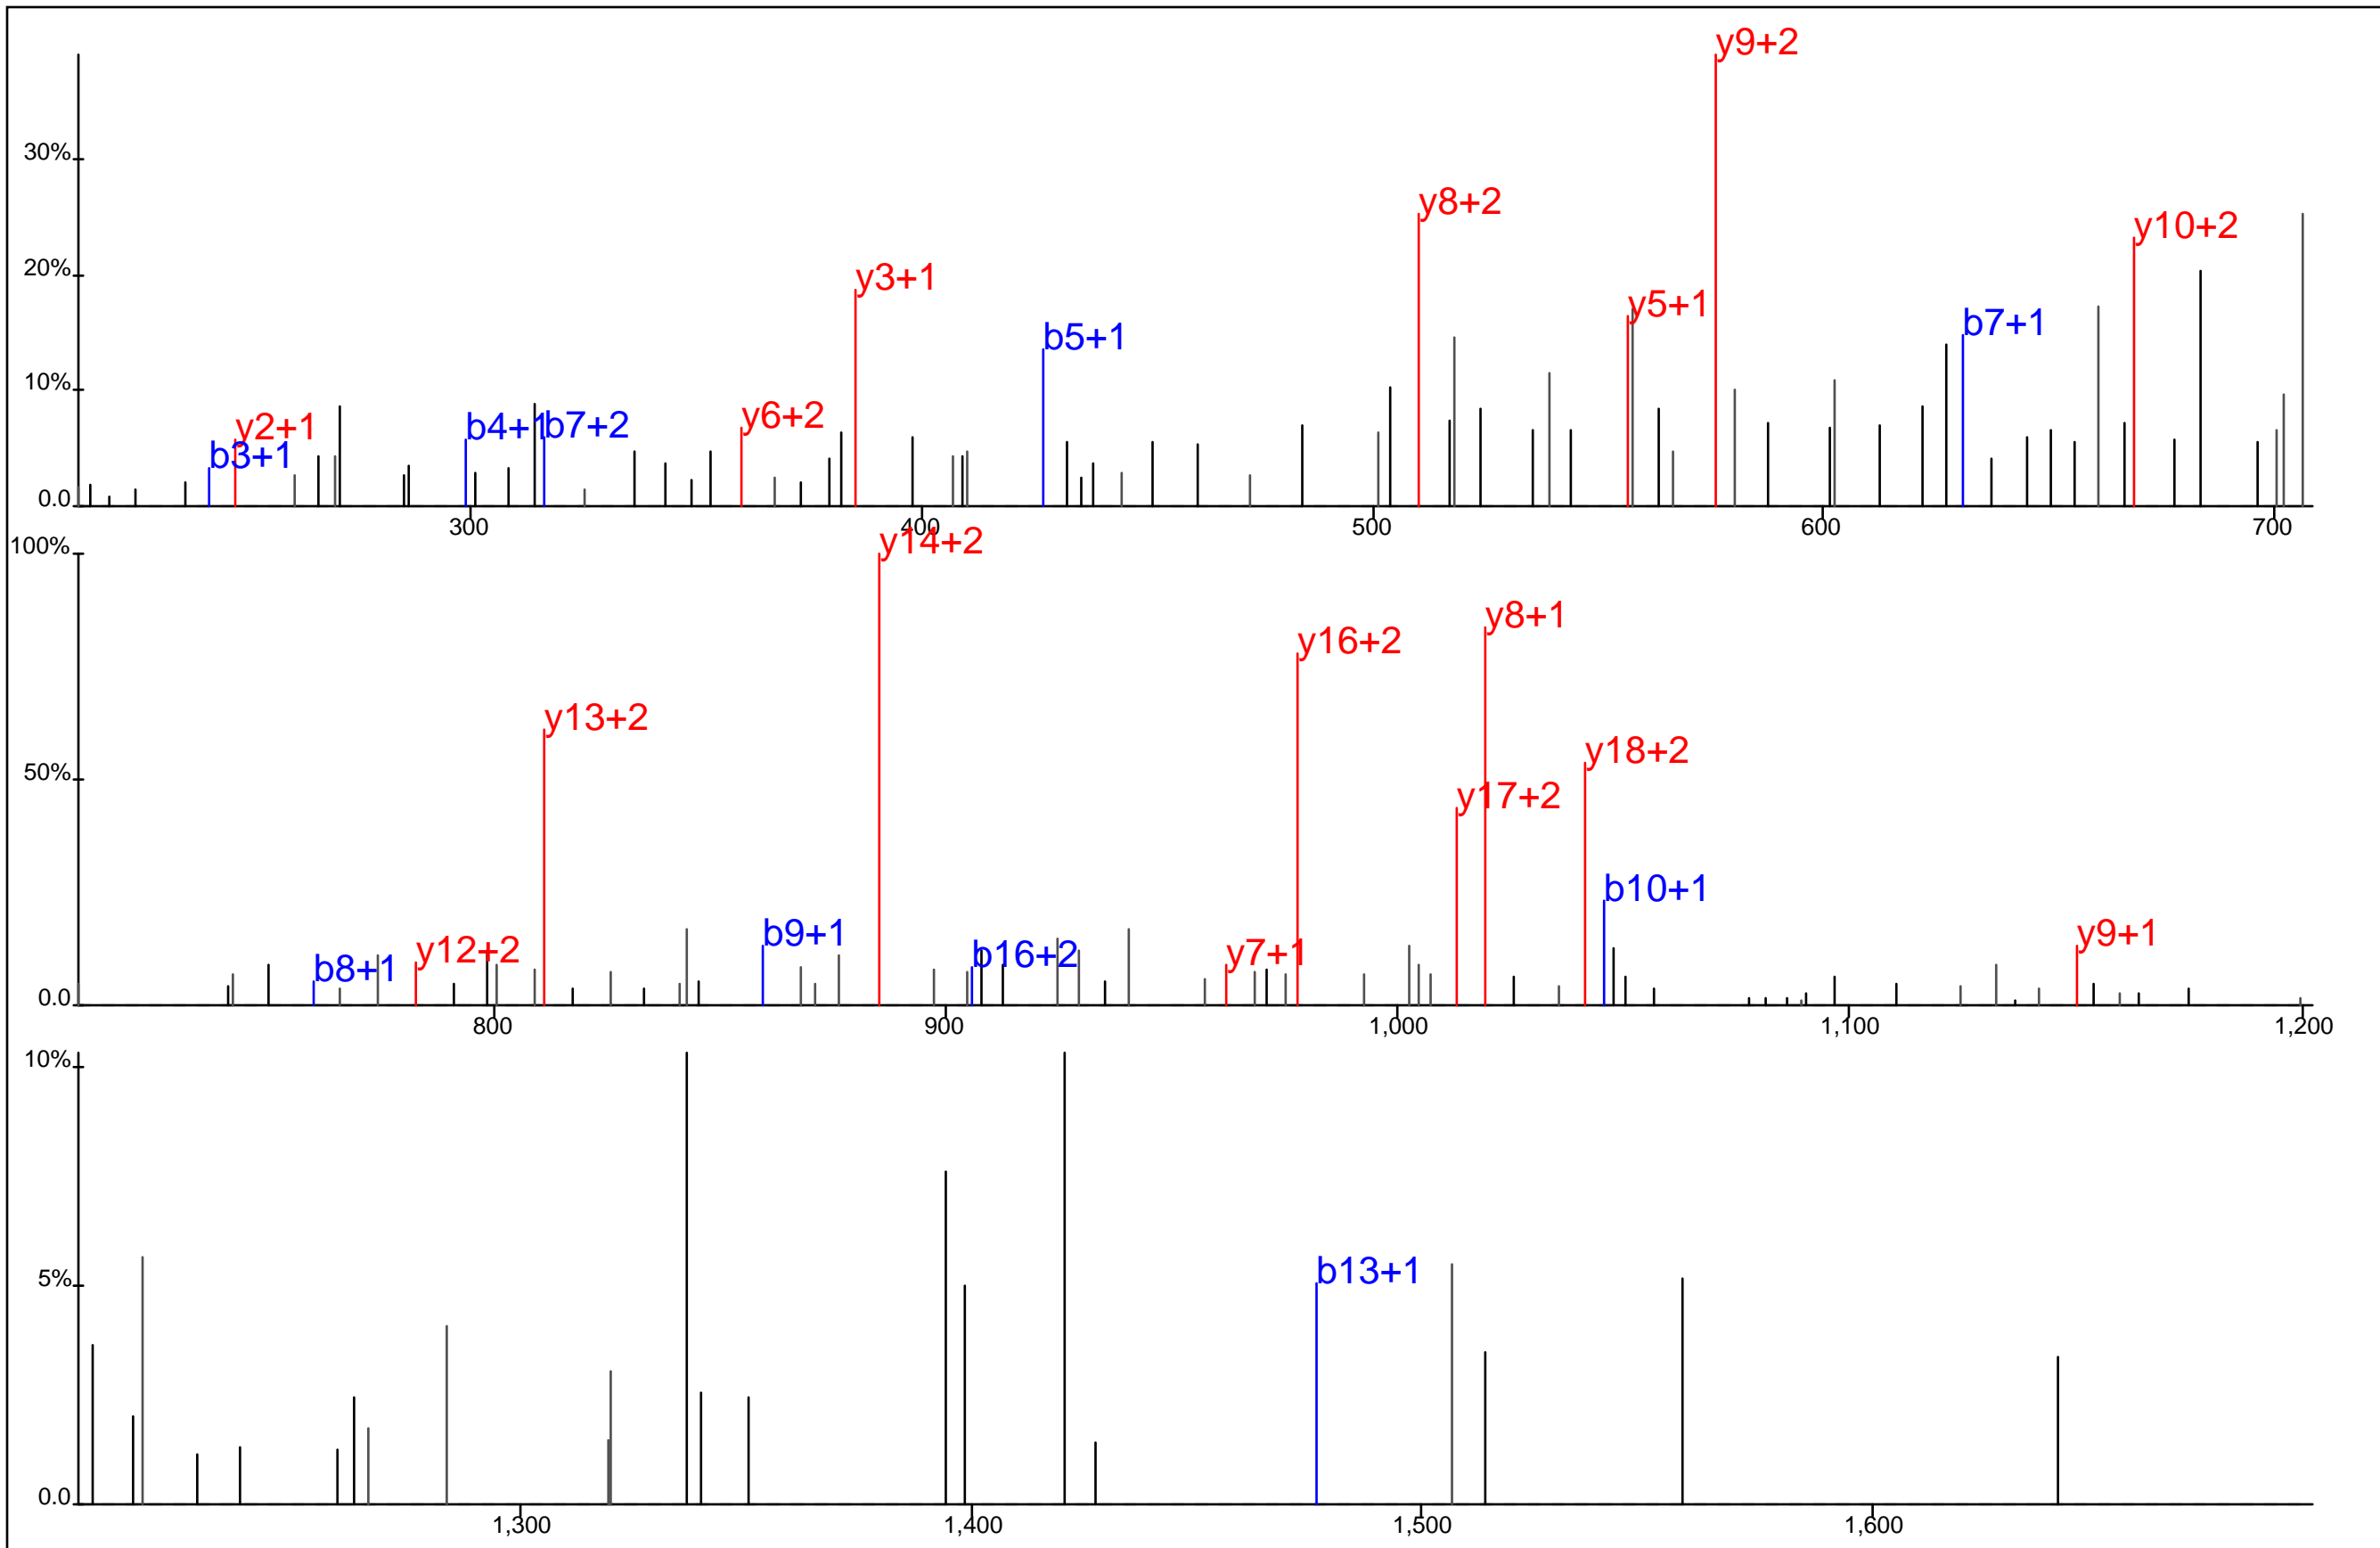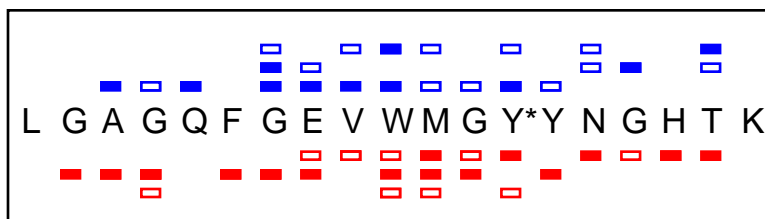

Protein Name: Lck  
 gi Accession: 0  
 Precursor Mass: 732.3192+3  
 Delta Mass: 0.678 ppm  
 XCorr: 48.74

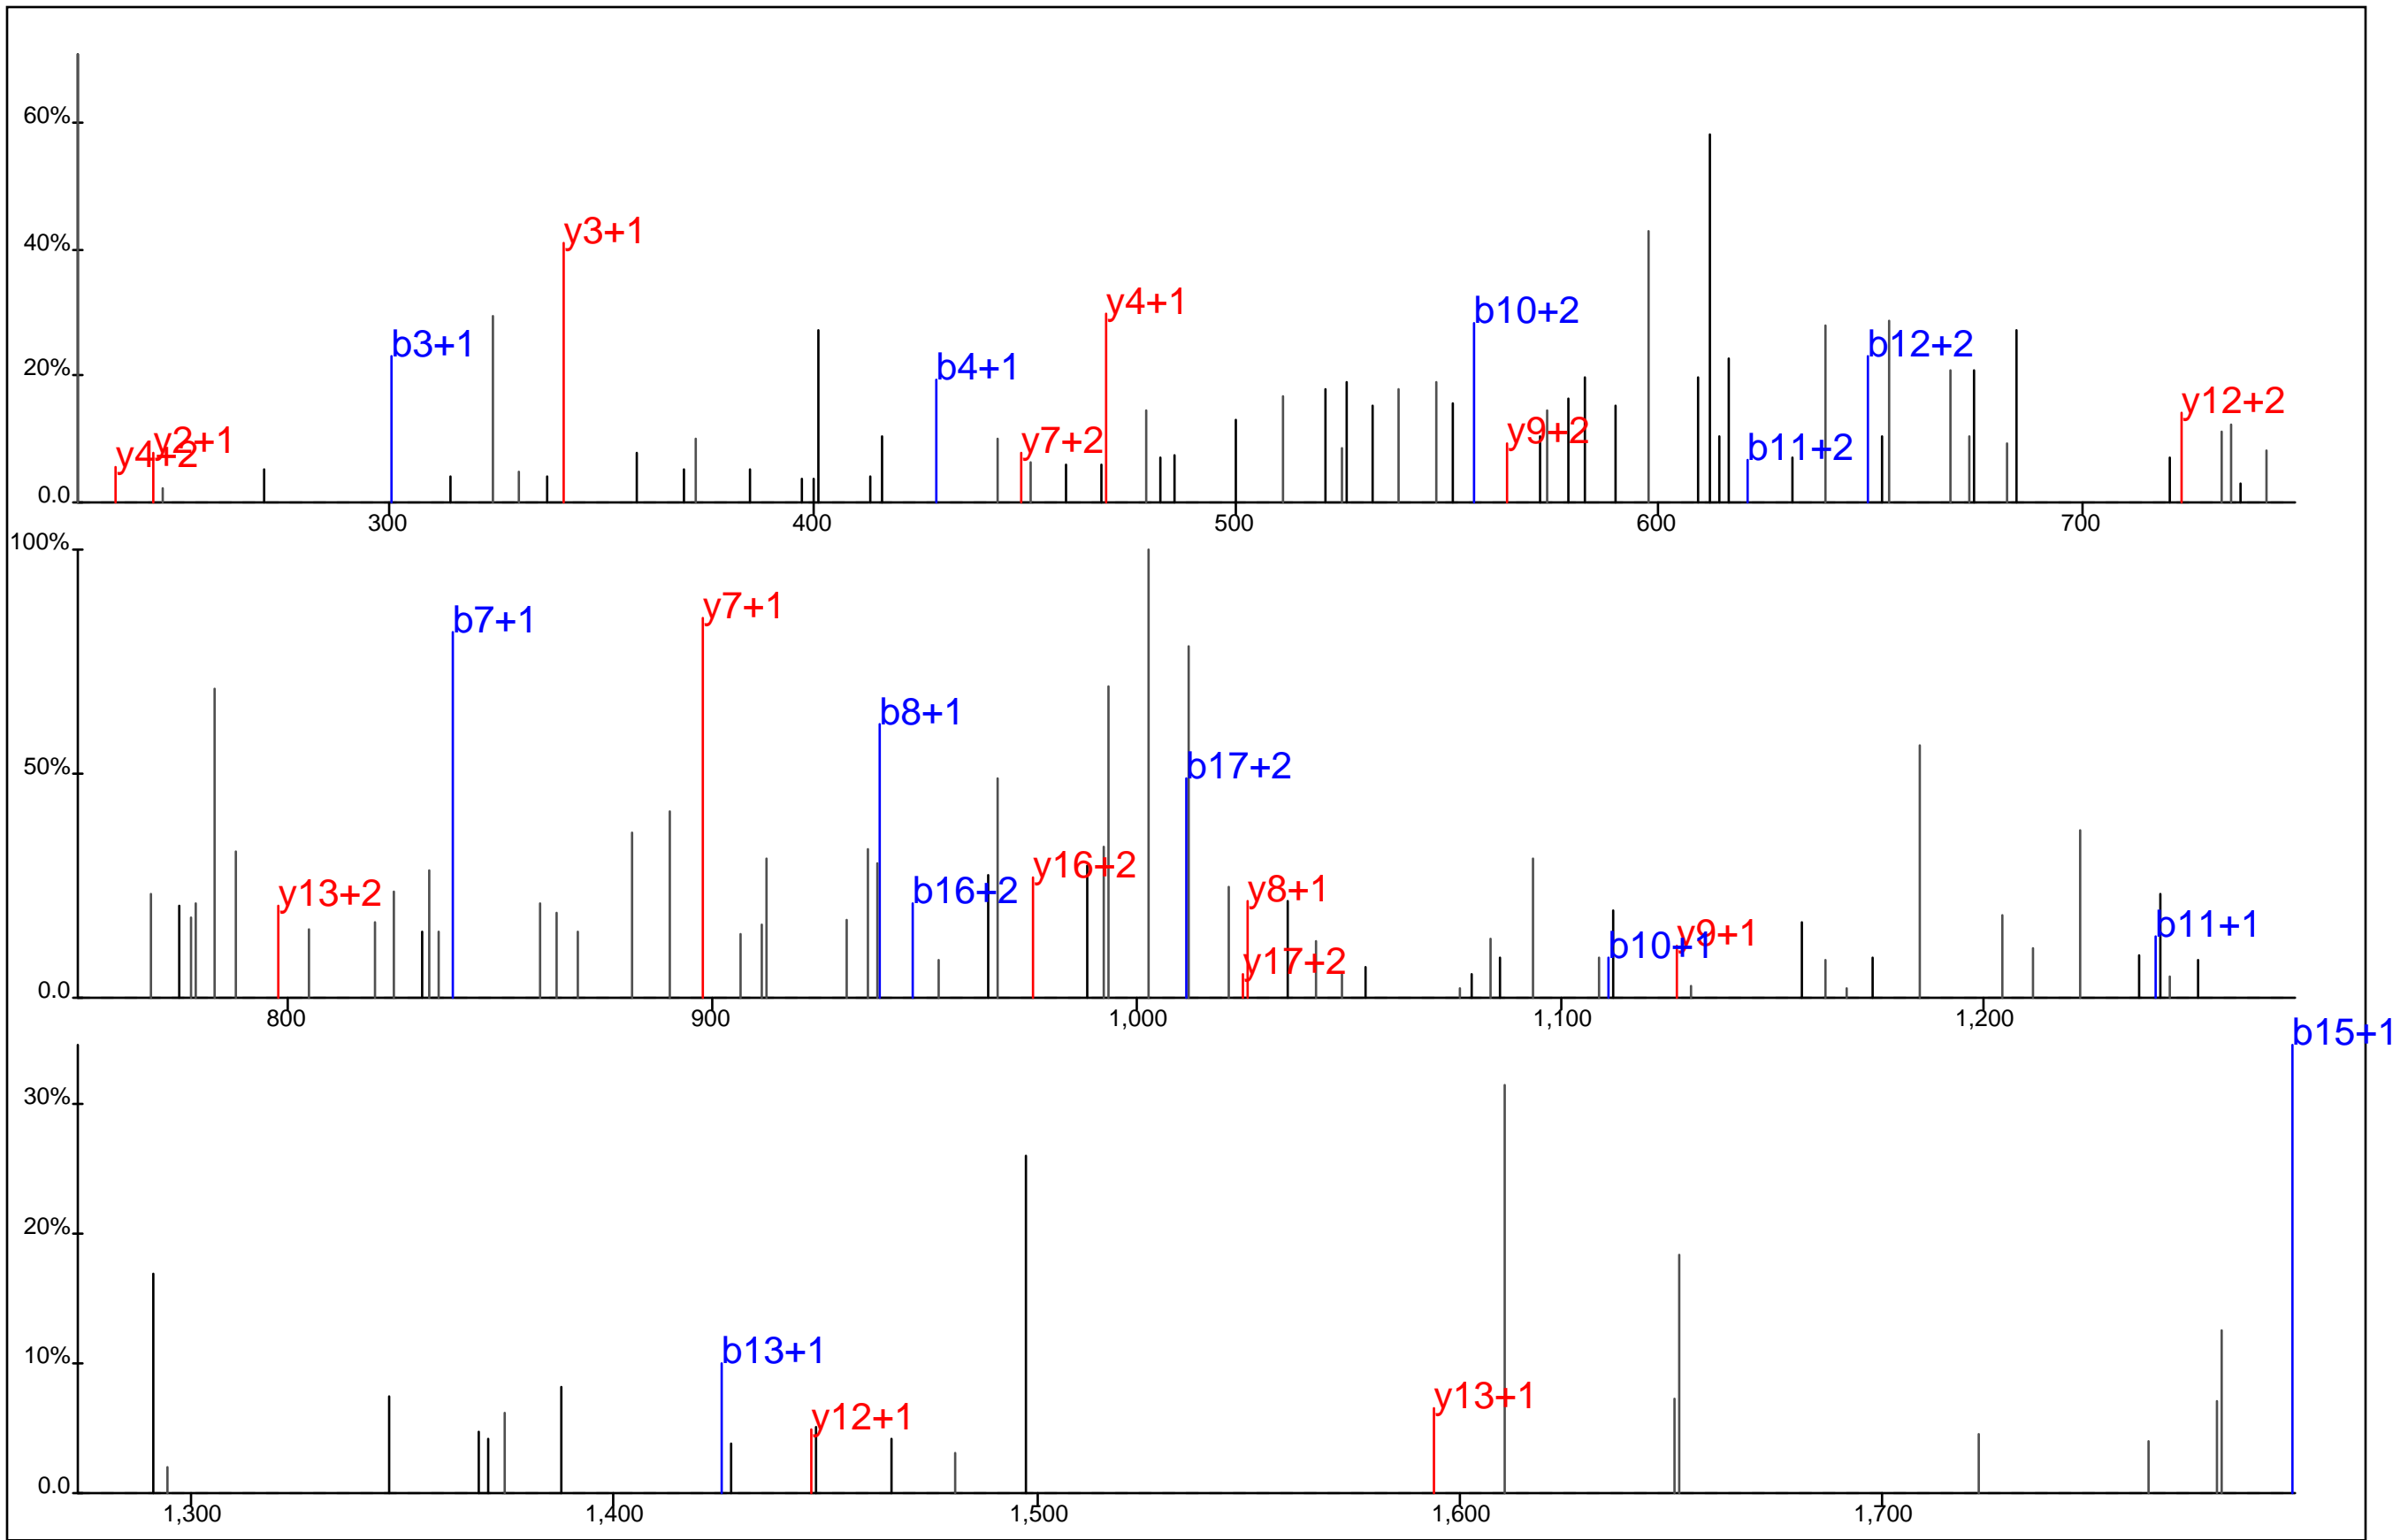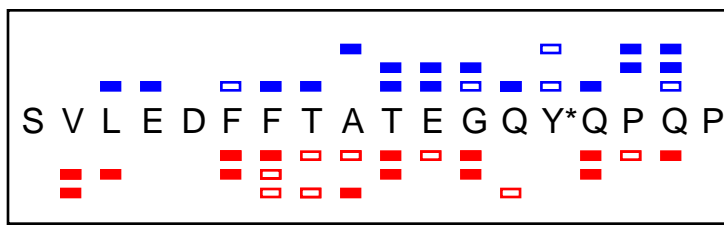

Protein Name: Lck  
 gi Accession: 0  
 Precursor Mass: 712.9772+3  
 Delta Mass: 0.377 ppm  
 XCorr: 34.15



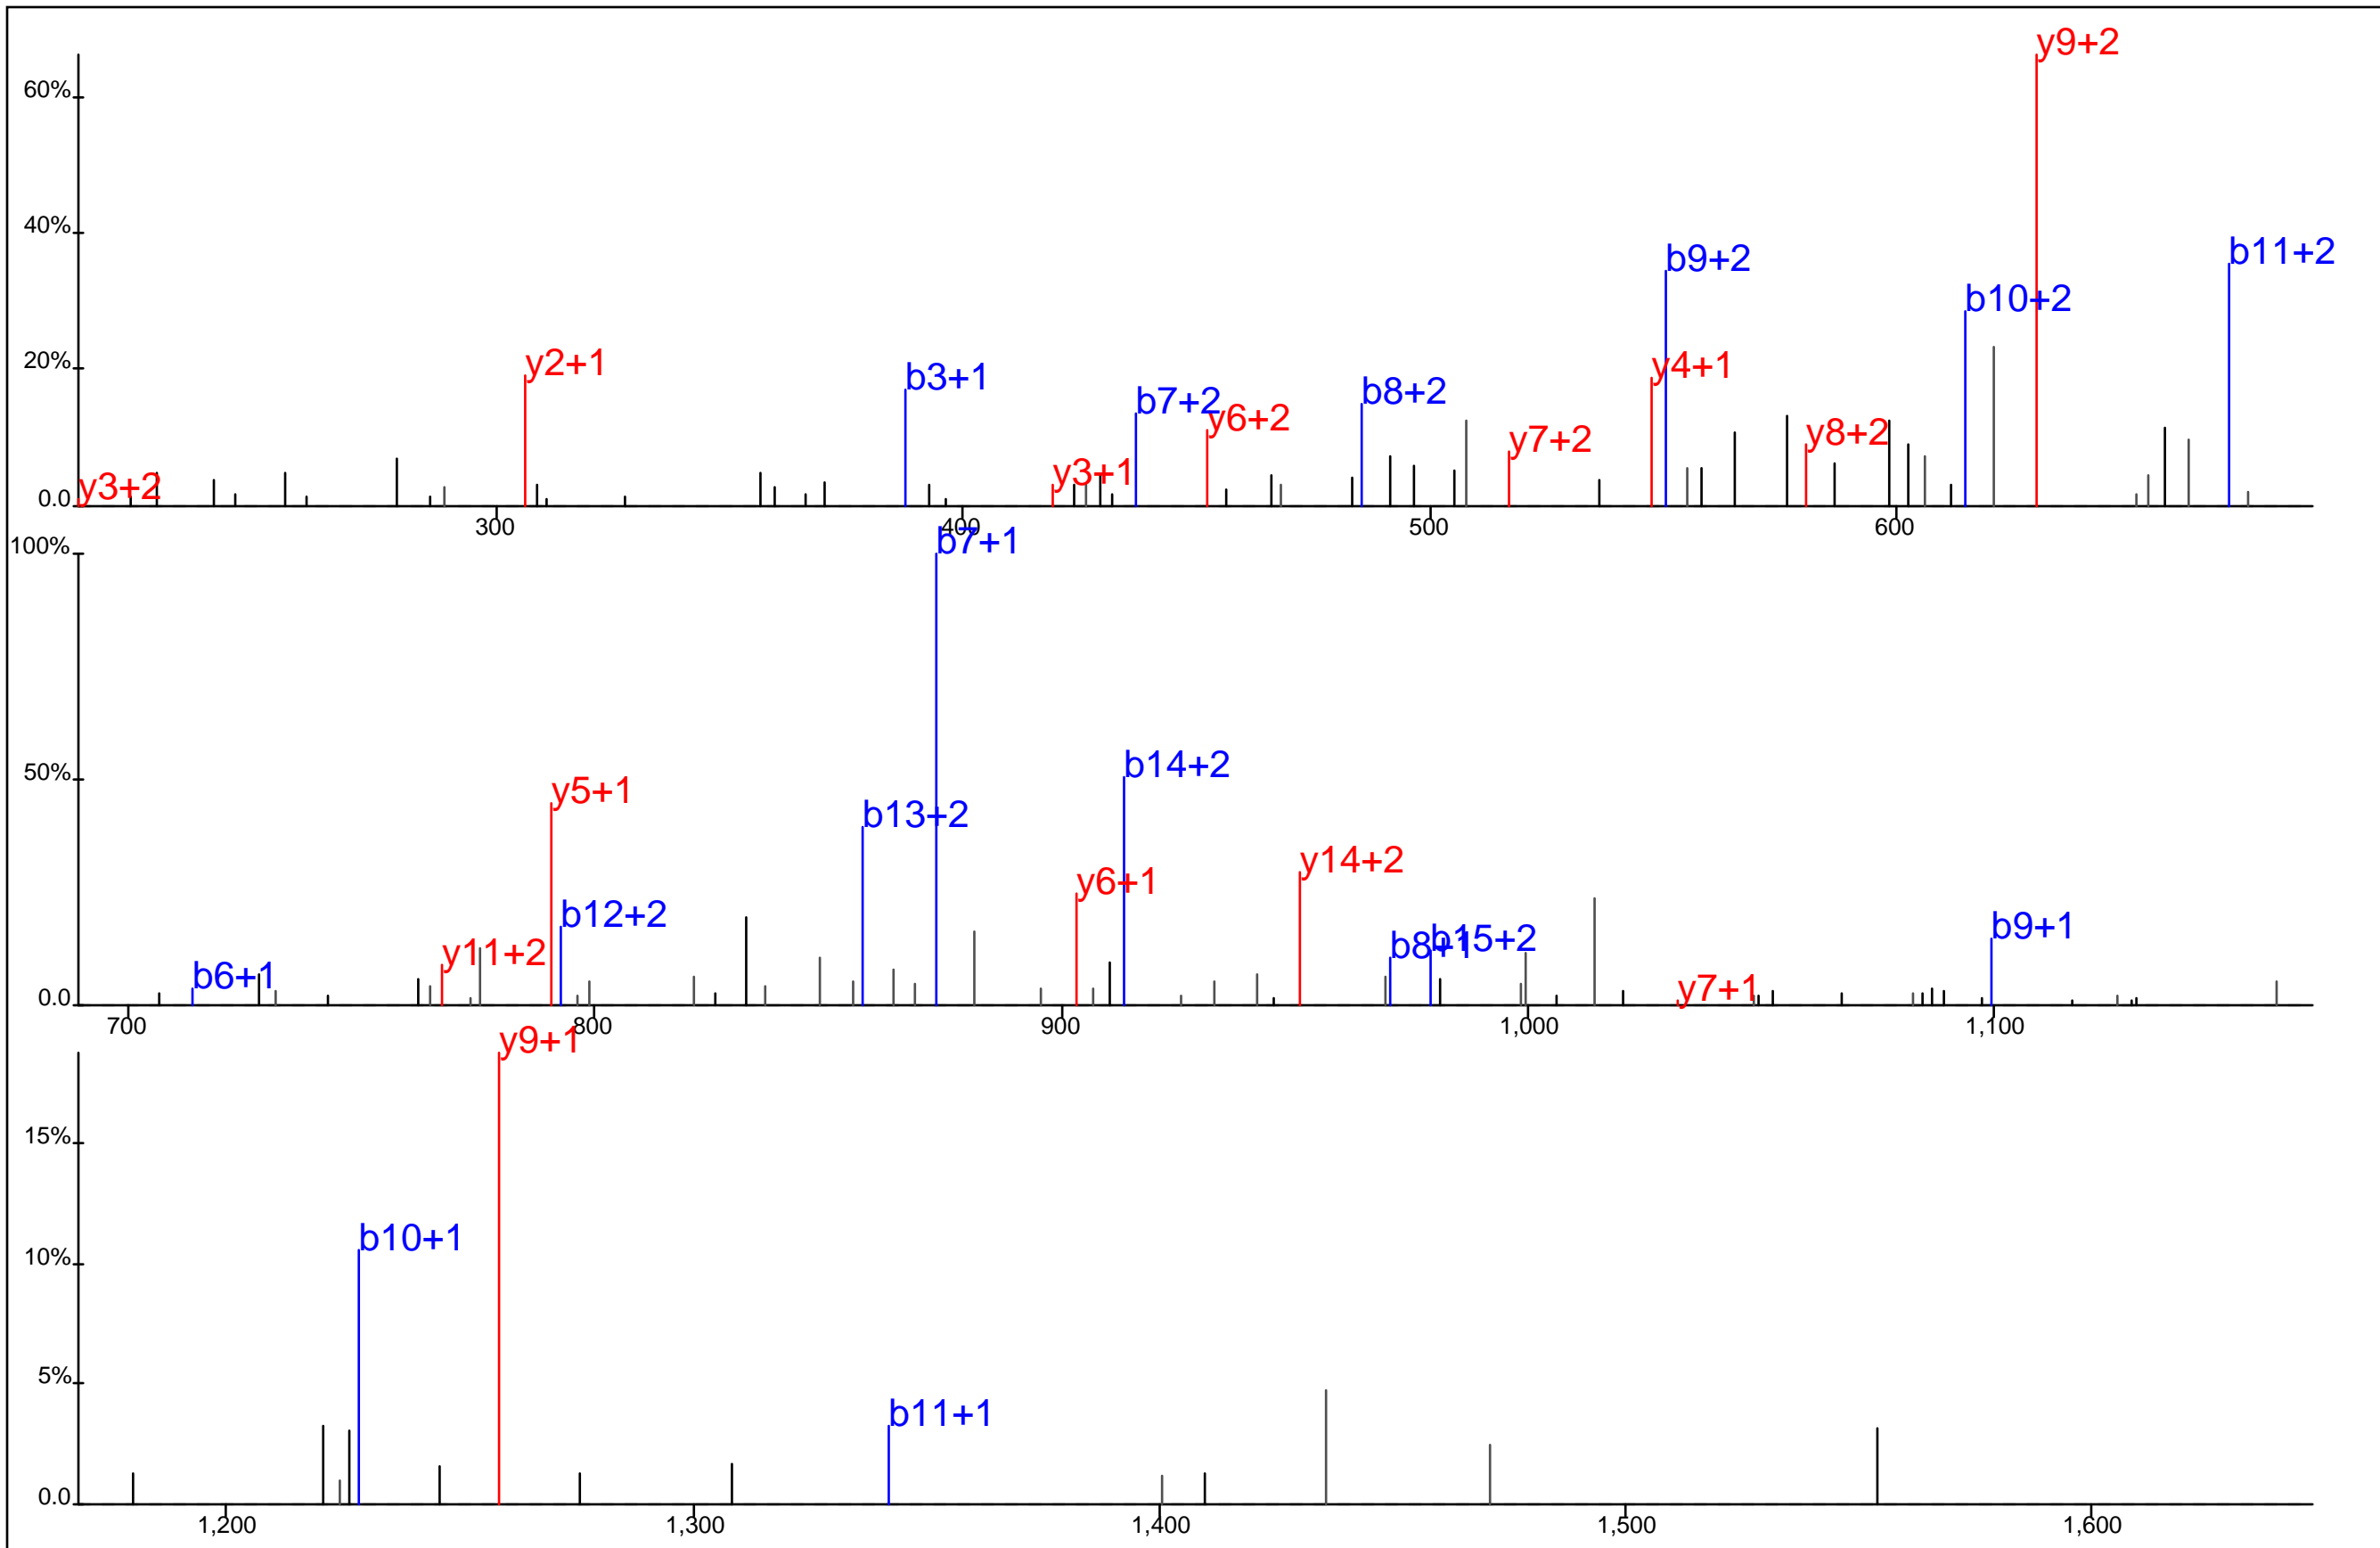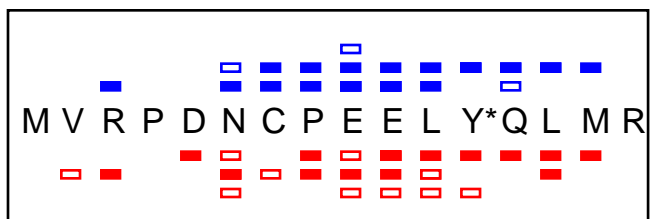

Protein Name: Lck  
 gi Accession: 0  
 Precursor Mass: 710.9805+3  
 Delta Mass: 4.710 ppm  
 XCorr: 53.65

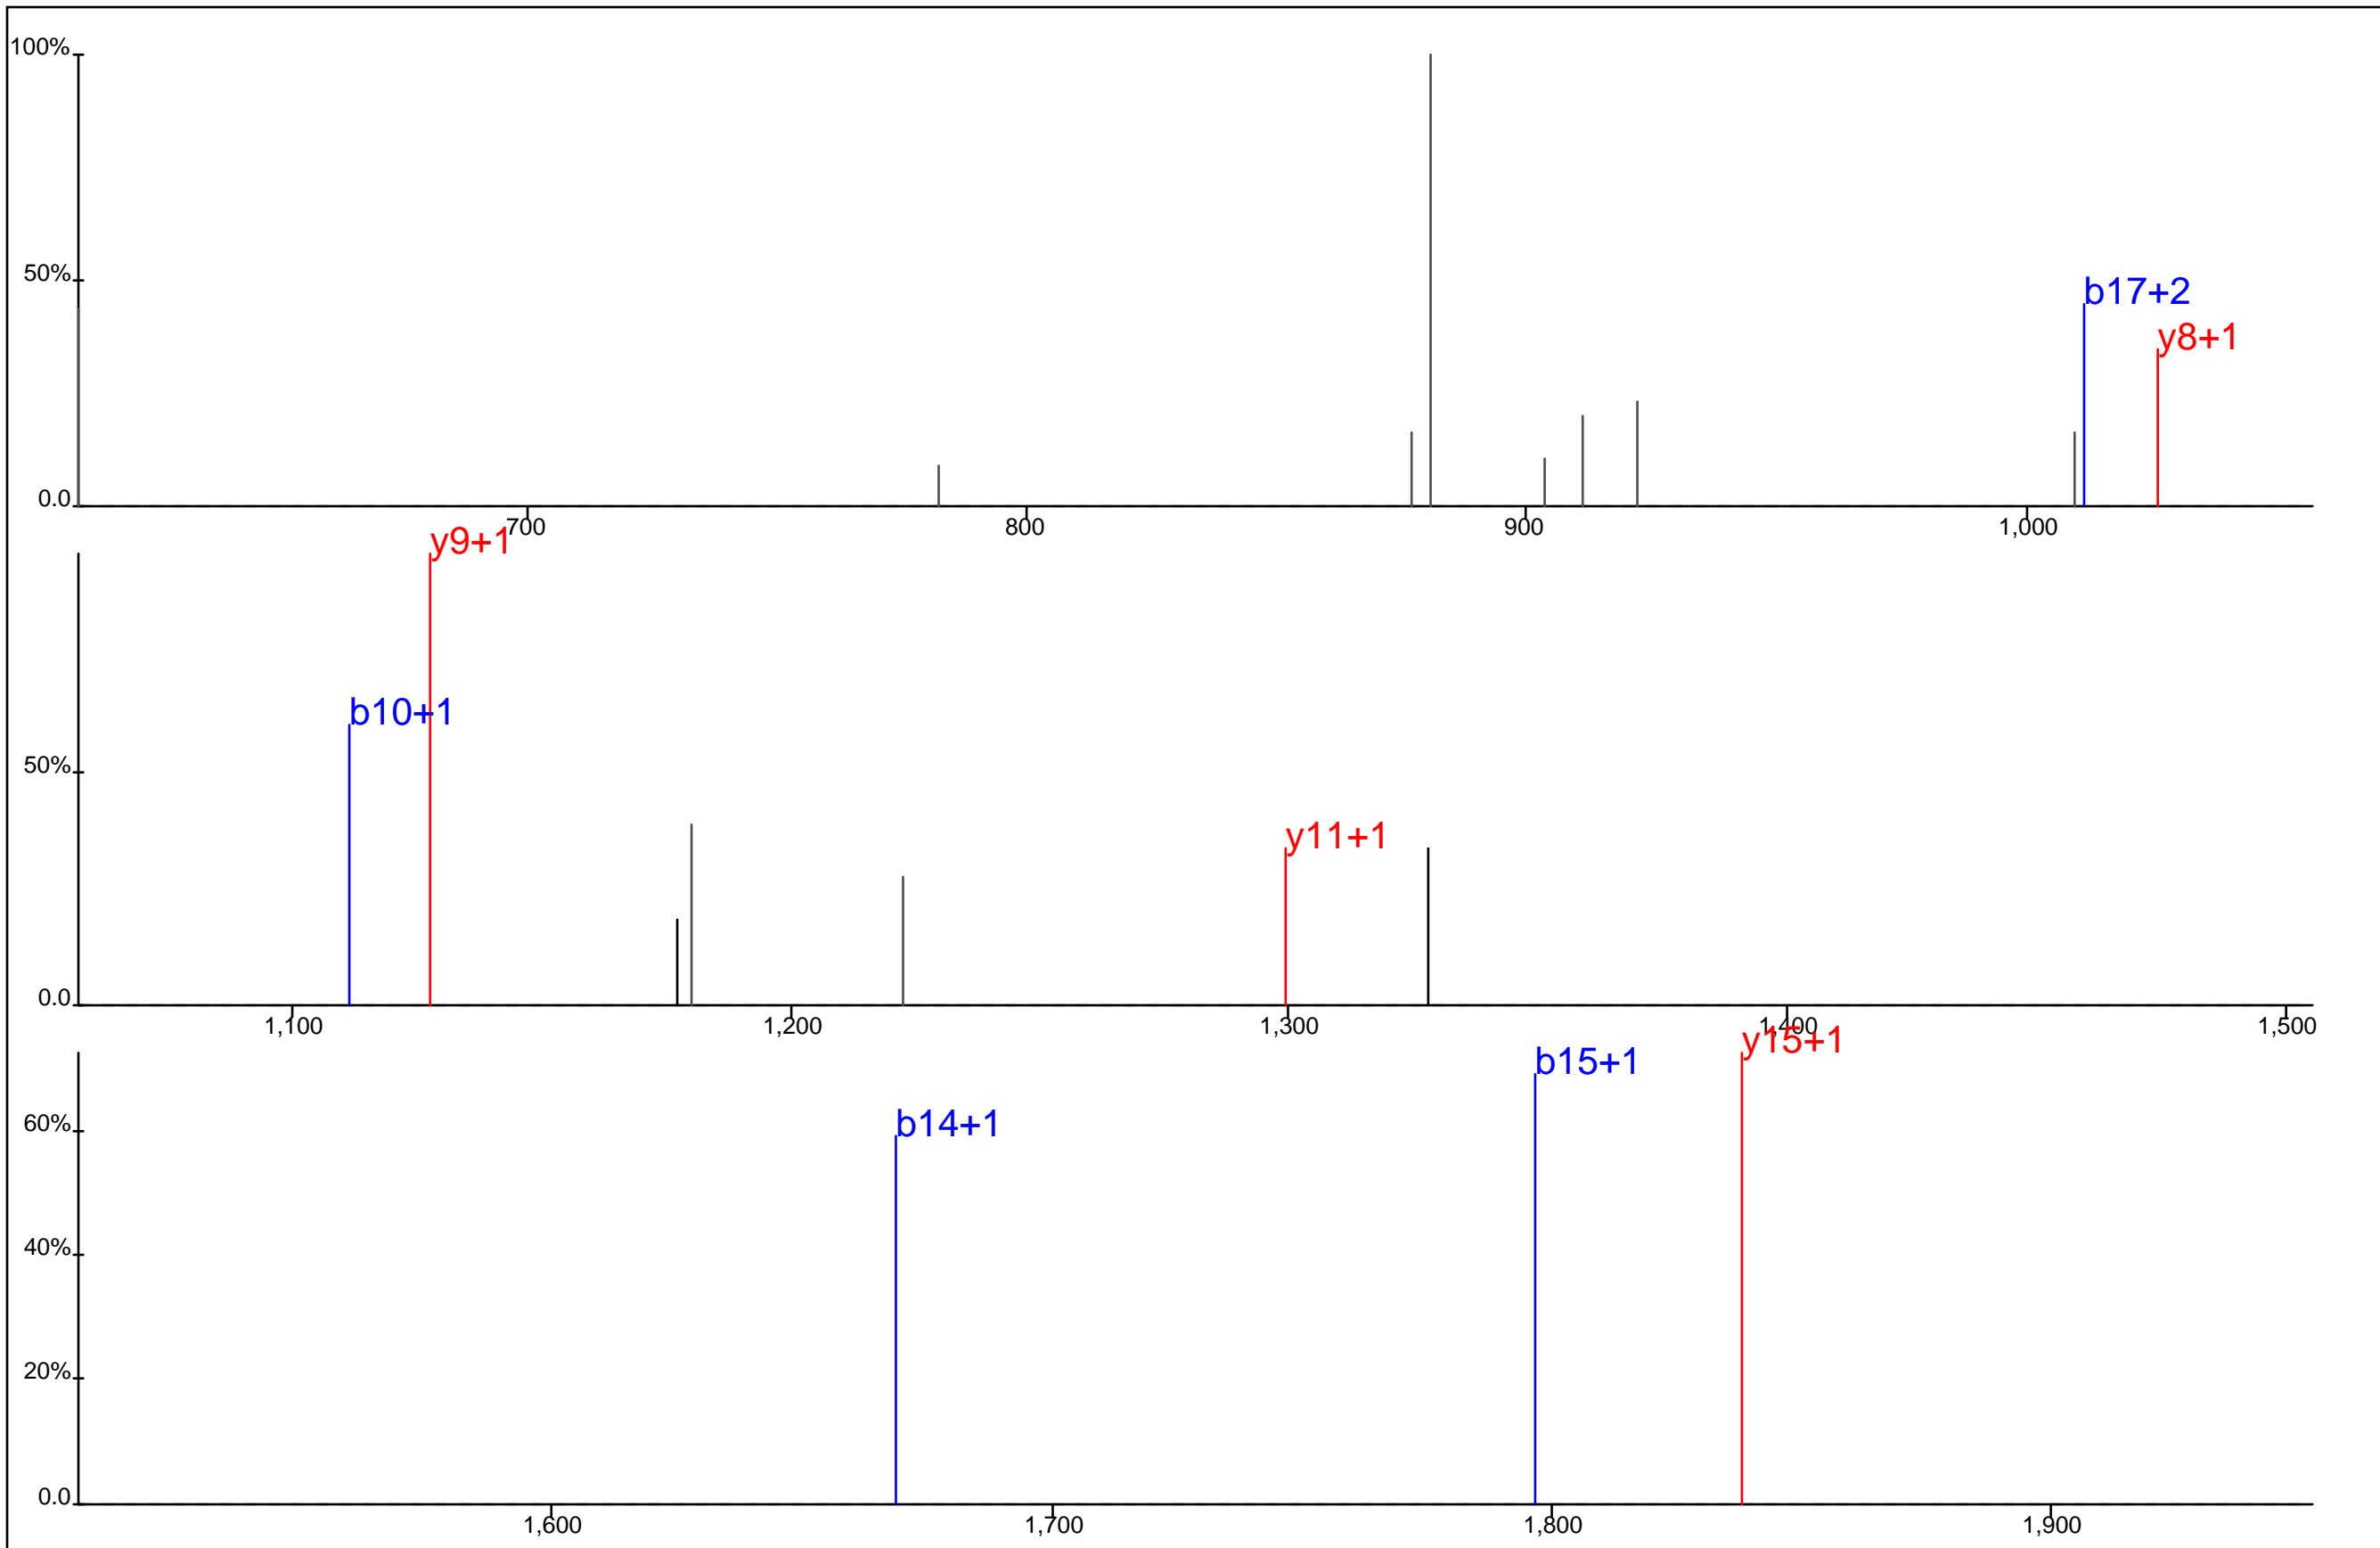

S V L E D F F T A T E G Q Y\* Q P Q P

Red dashes are under E, F, T, A, E. Blue dashes are under T, G, Y, Q, P.

Protein Name: Lck  
 gi Accession: 0  
 Precursor Mass: 1,068.9595+2  
 Delta Mass: 2.102 ppm  
 XCorr: 20.07

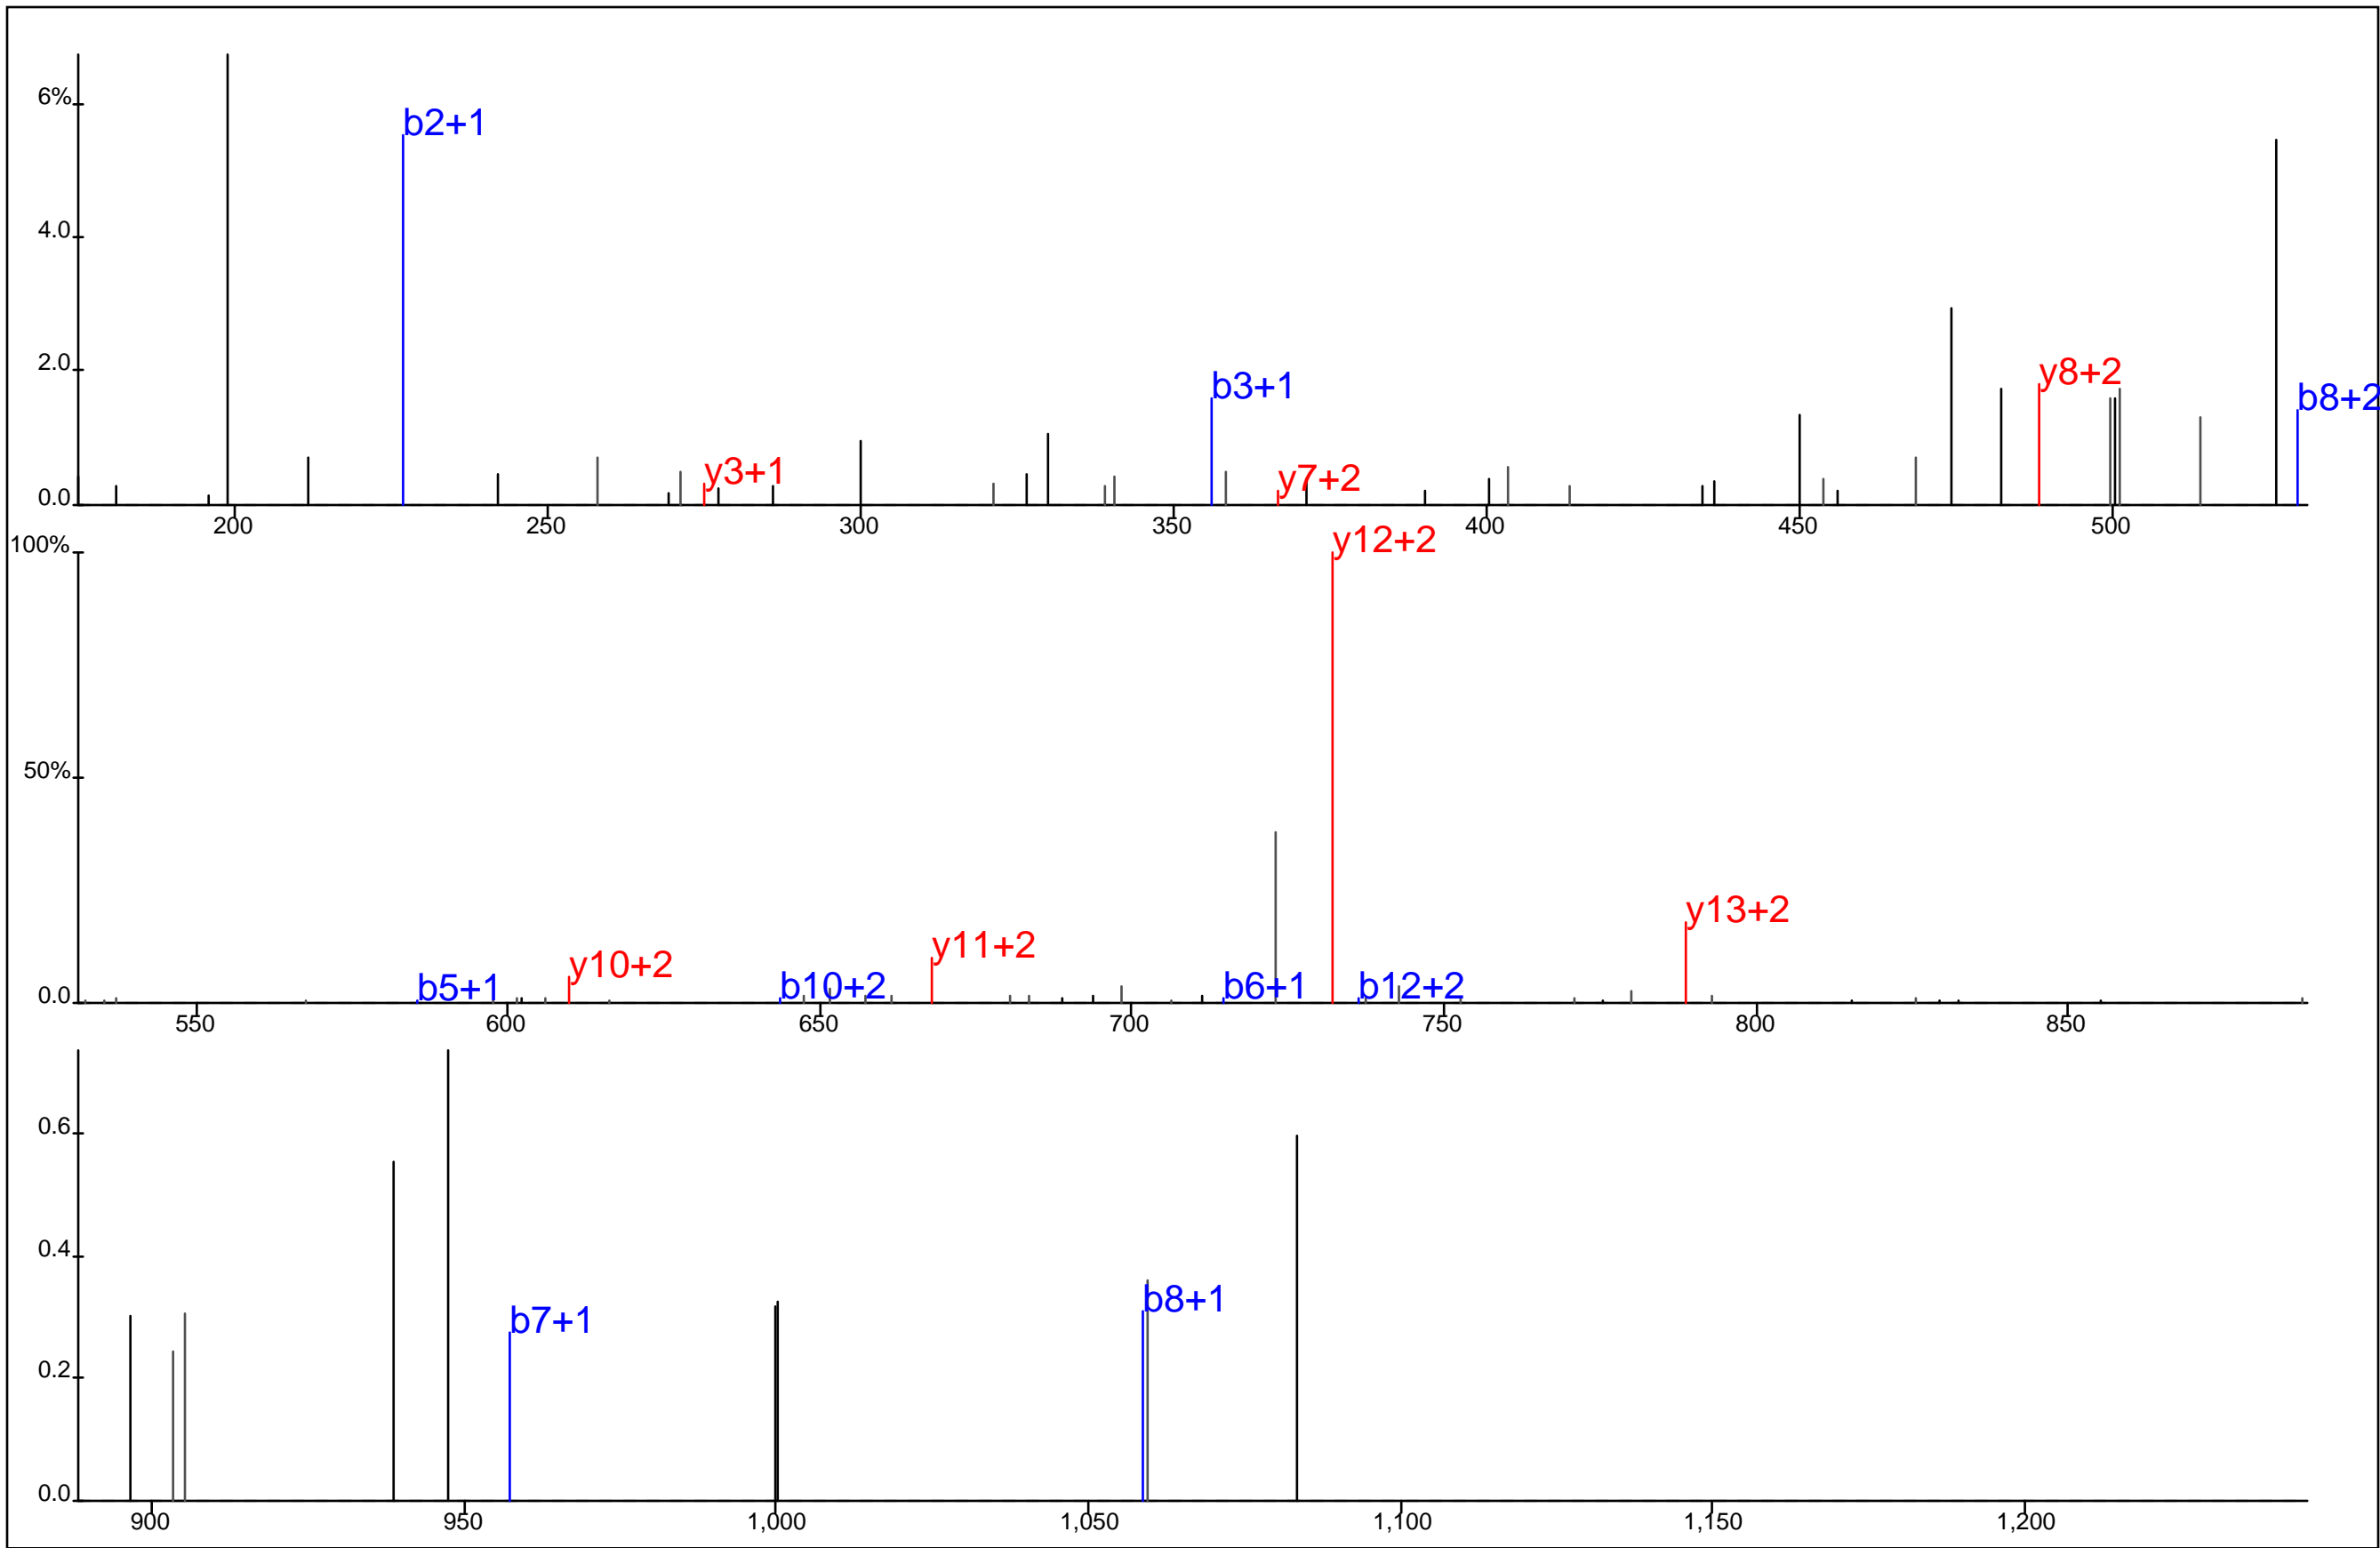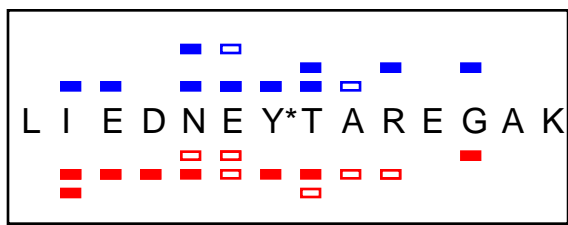

Protein Name: Lck  
 gi Accession: 0  
 Precursor Mass: 563.5894+3  
 Delta Mass: 0.498 ppm  
 XCorr: 20.71

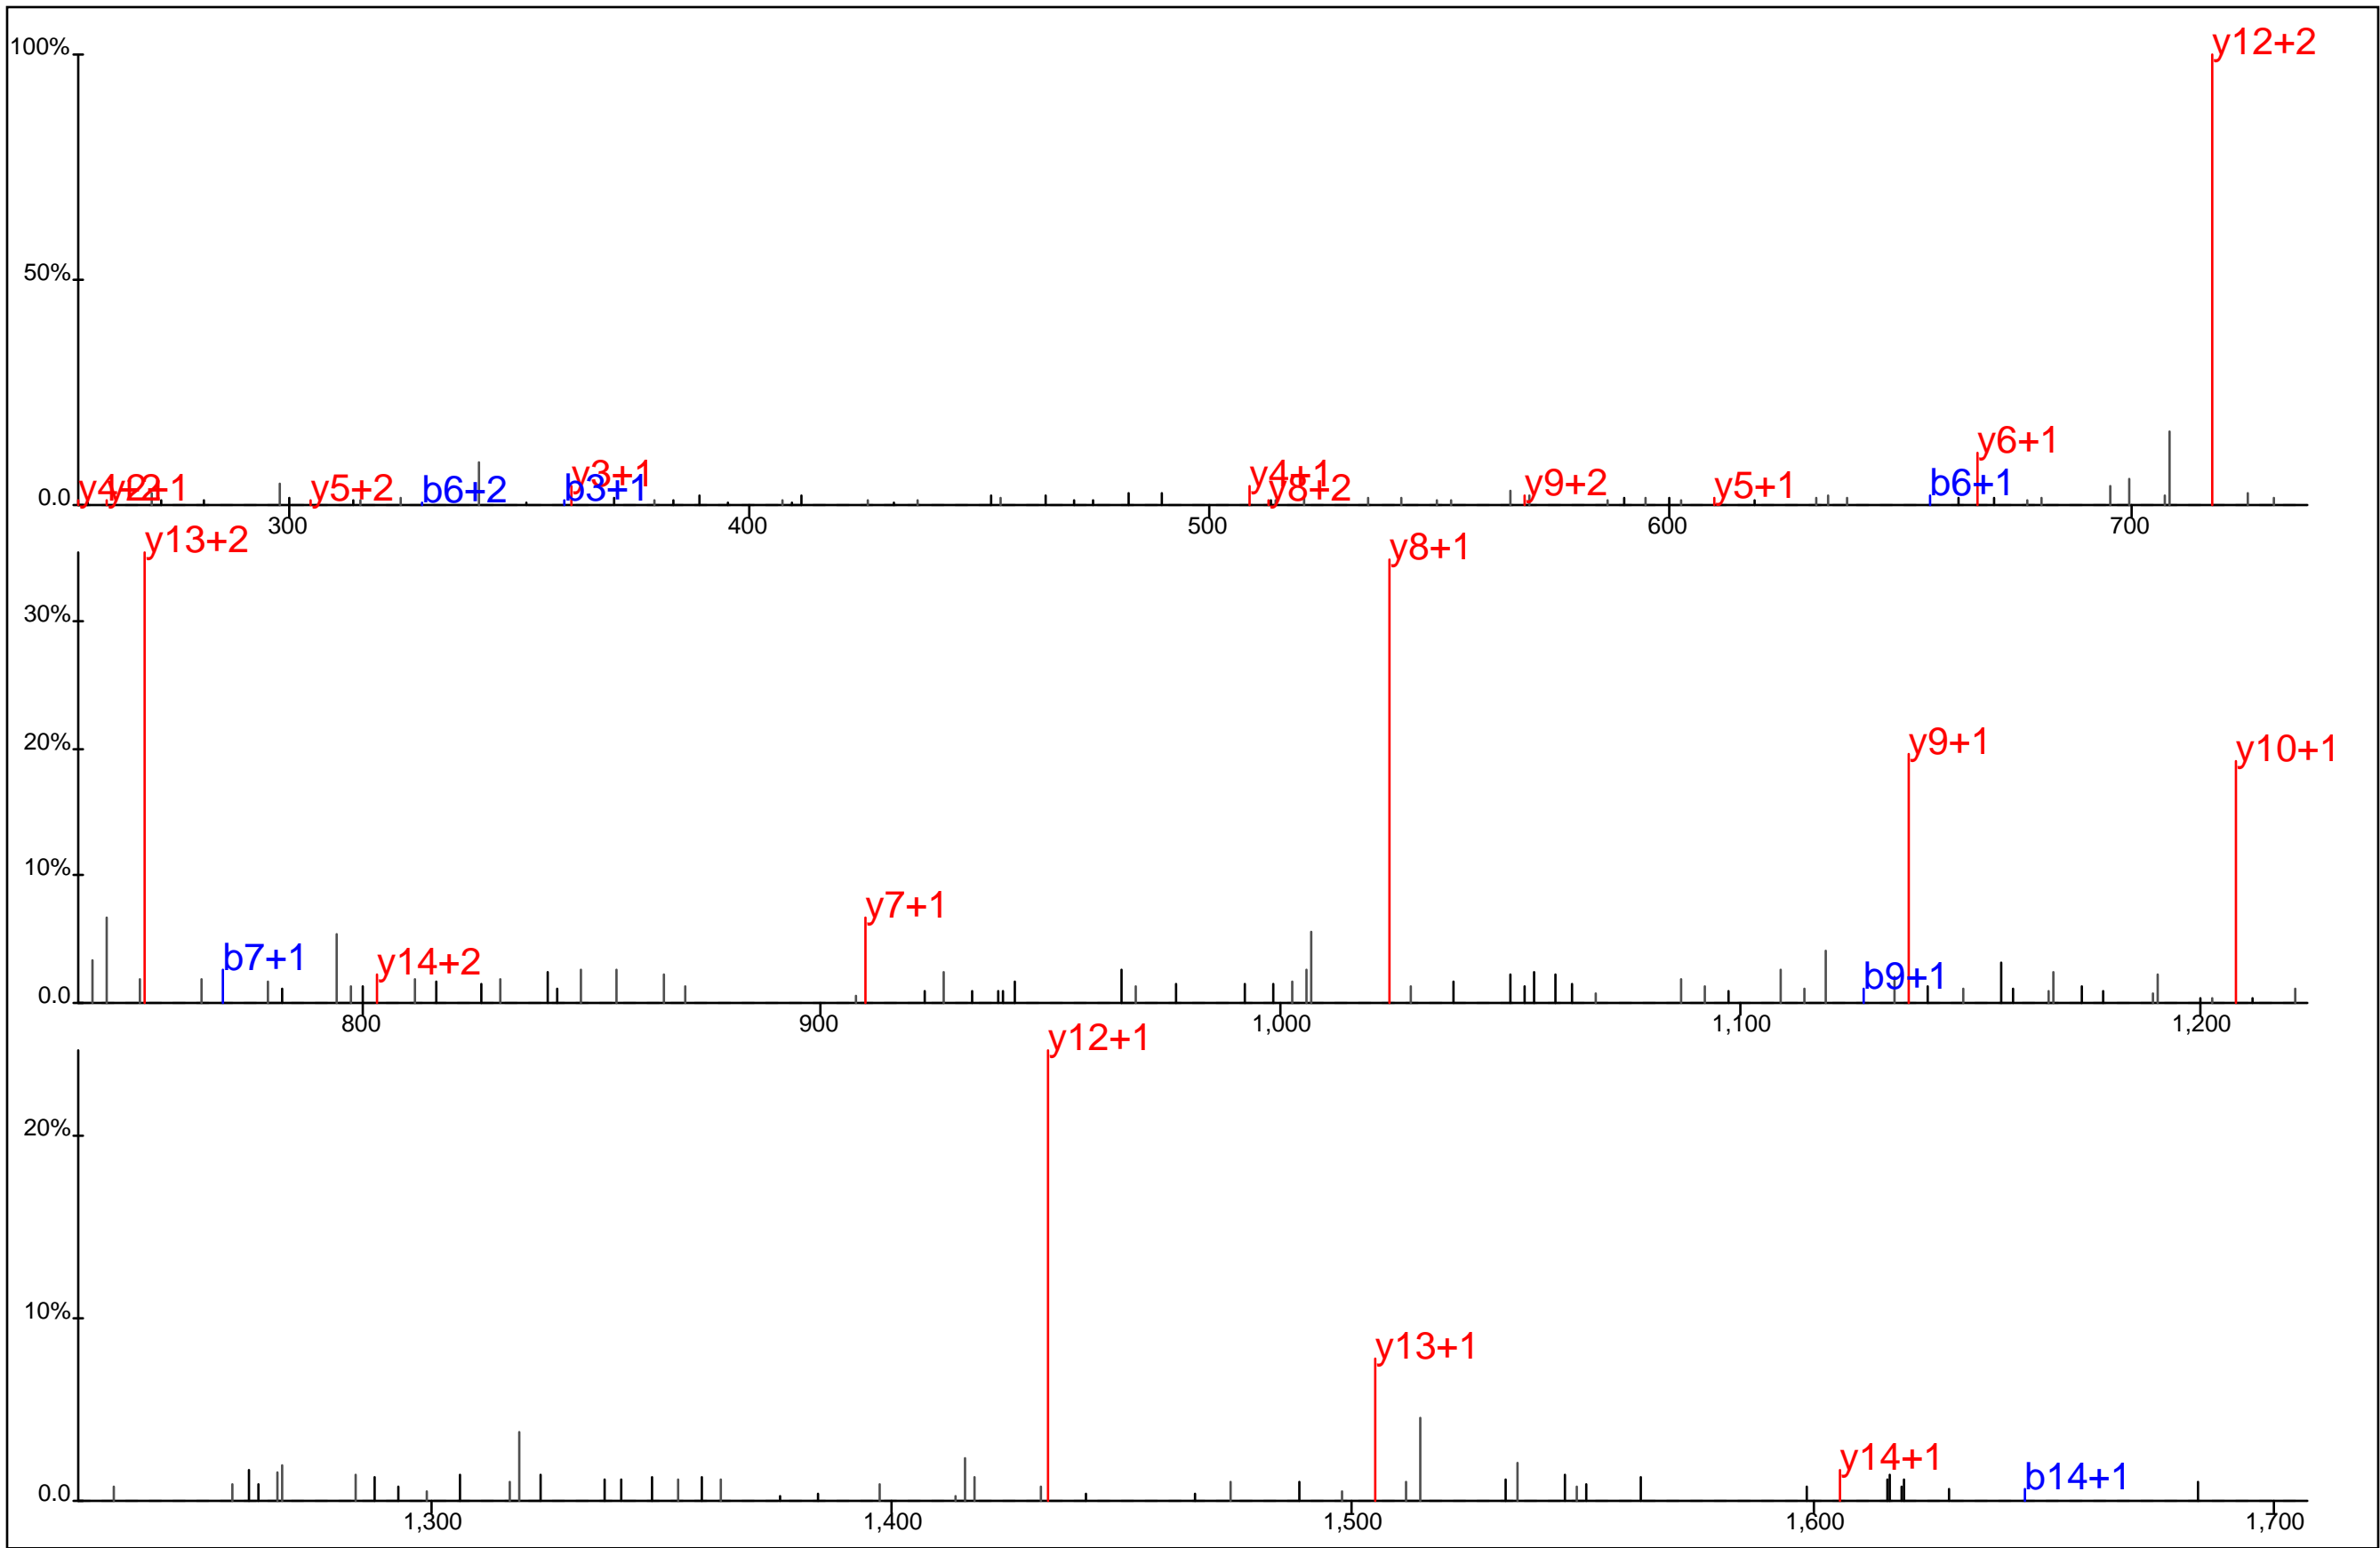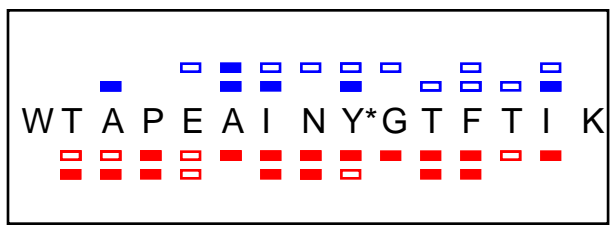

Protein Name: Lck  
 gi Accession: 0  
 Precursor Mass: 896.4231+2  
 Delta Mass: 2.011 ppm  
 XCorr: 72.5



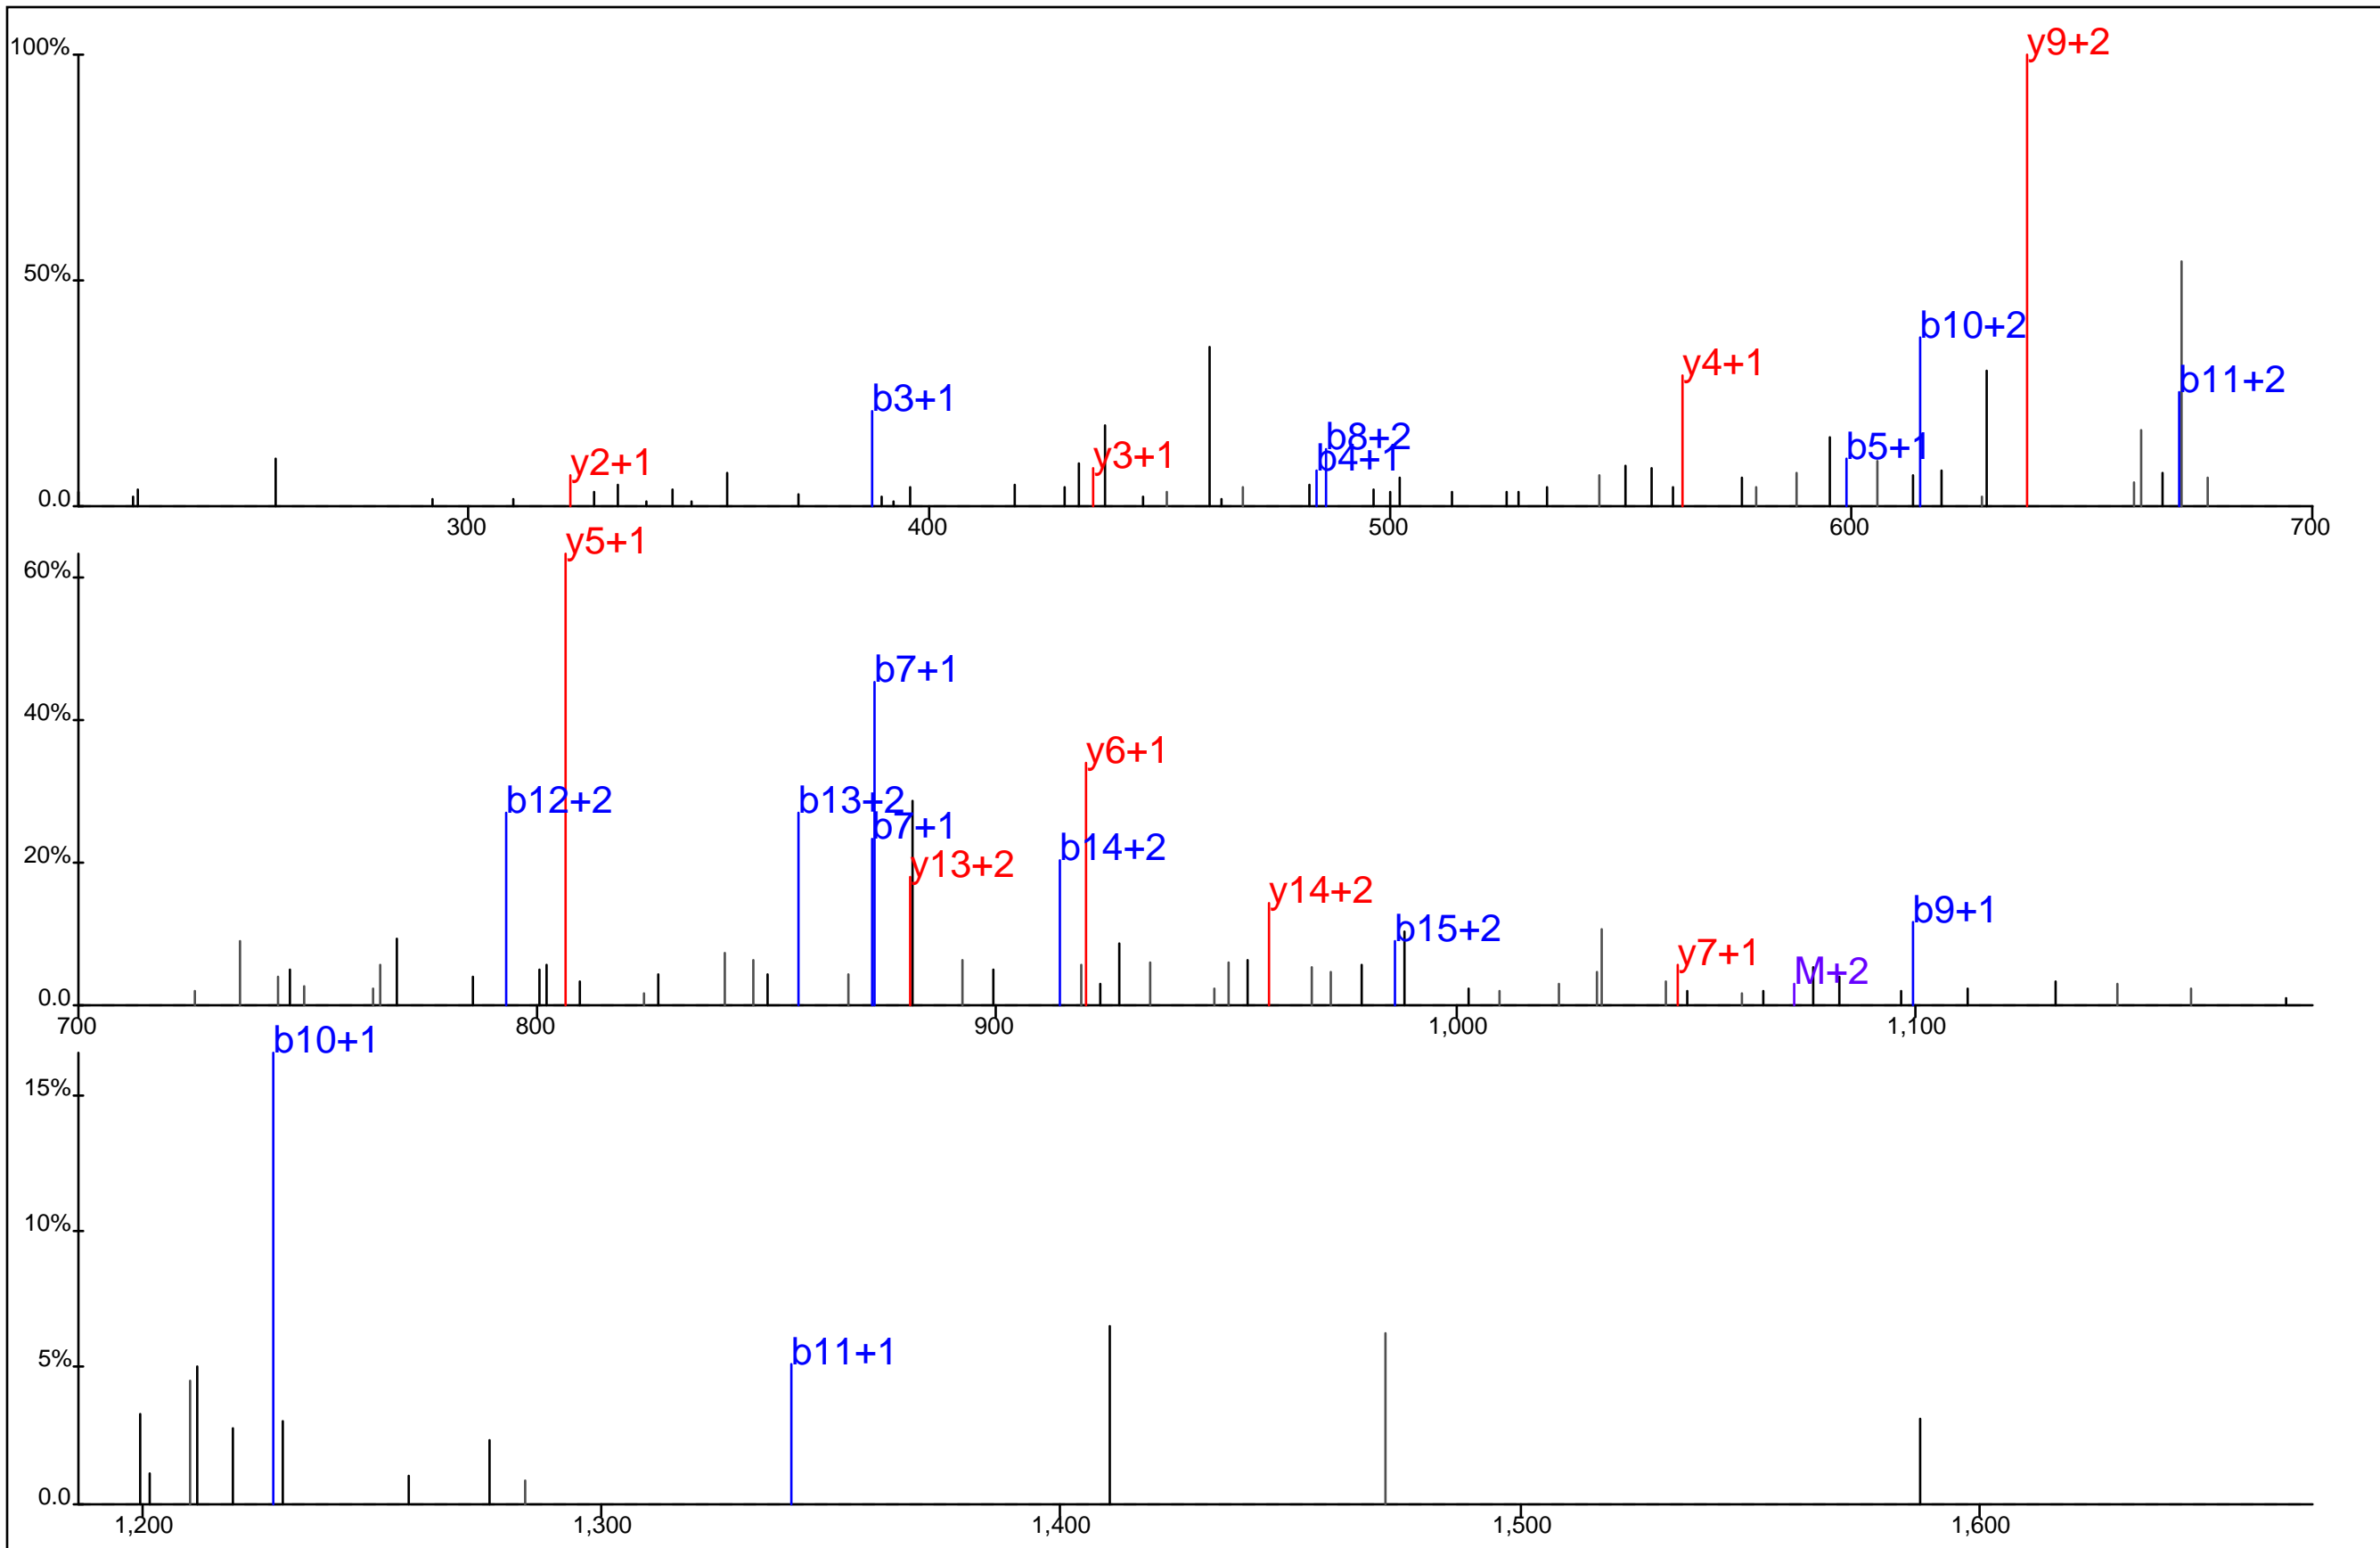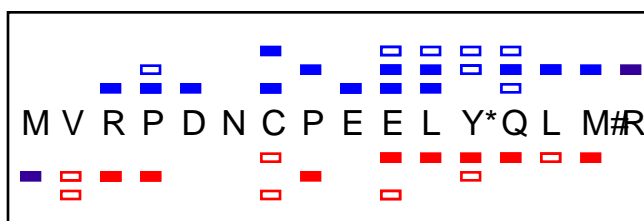

Protein Name: Lck  
 gi Accession: 0  
 Precursor Mass: 716.3080+3  
 Delta Mass: 1.091 ppm  
 XCorr: 37.34

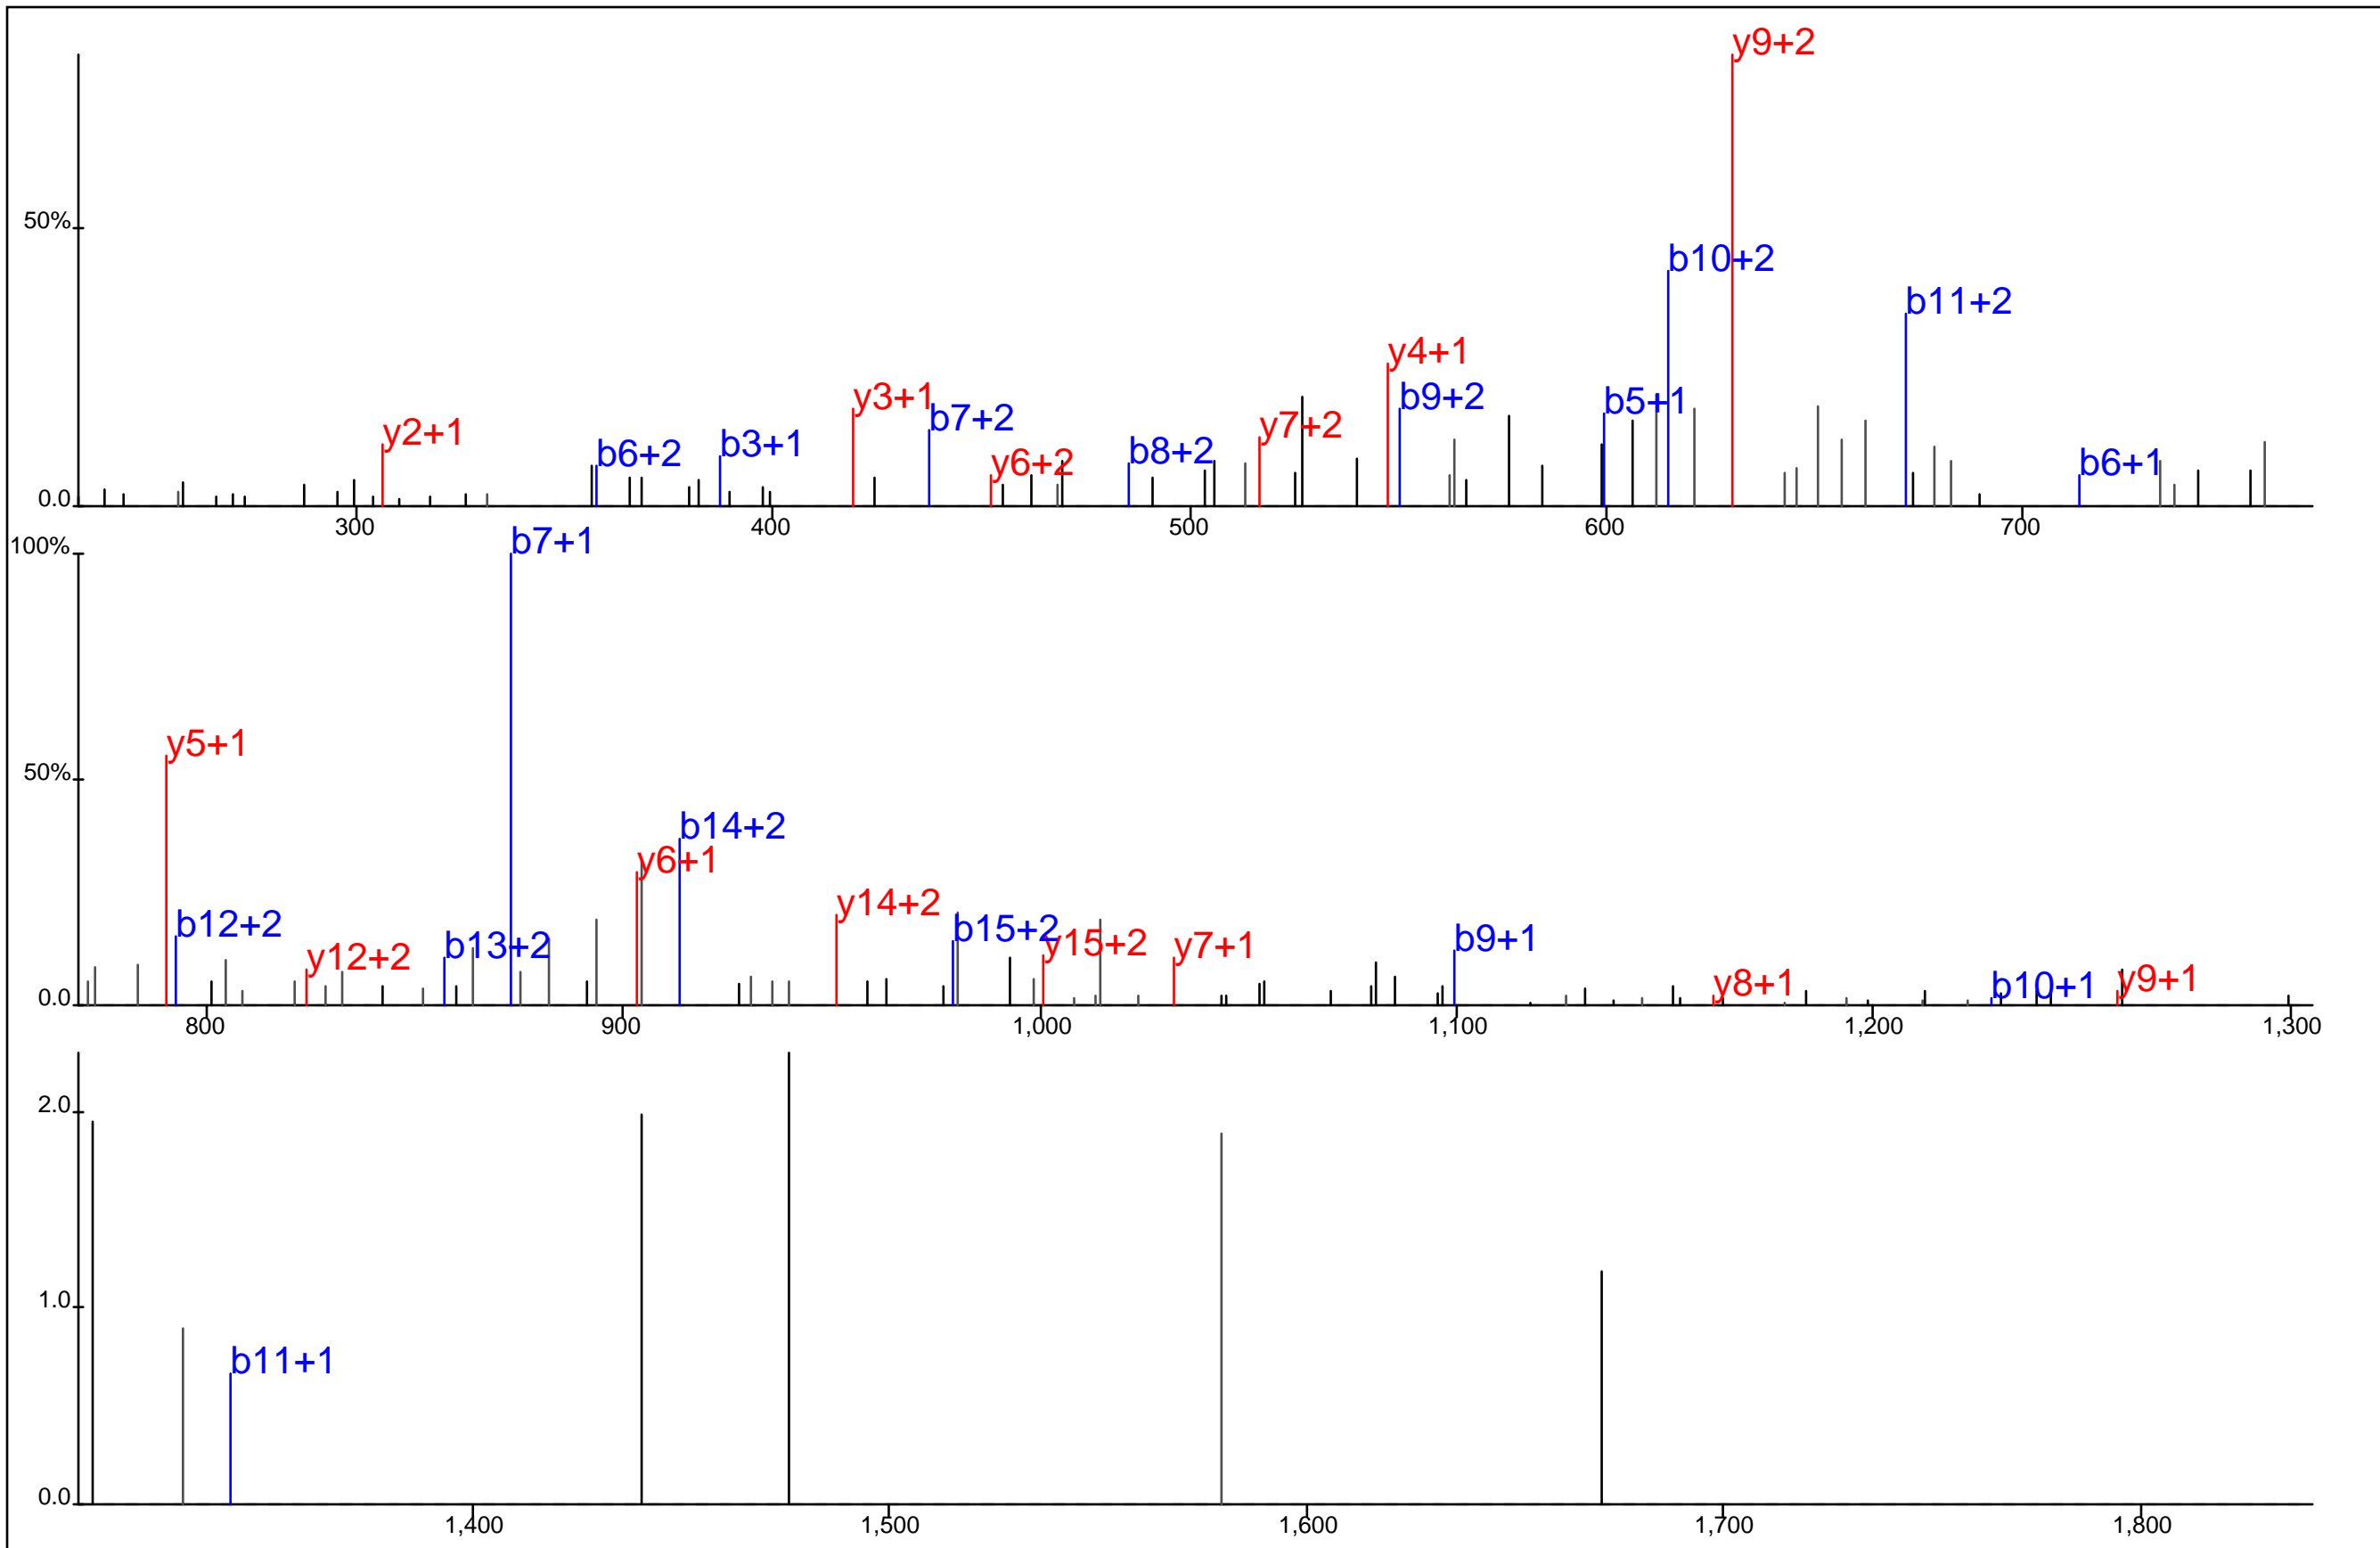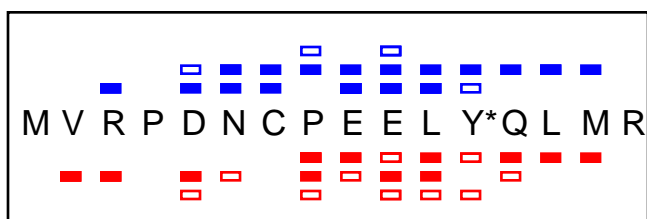

Protein Name: Lck  
 gi Accession: 0  
 Precursor Mass: 710.9794+3  
 Delta Mass: 3.077 ppm  
 XCorr: 39.27

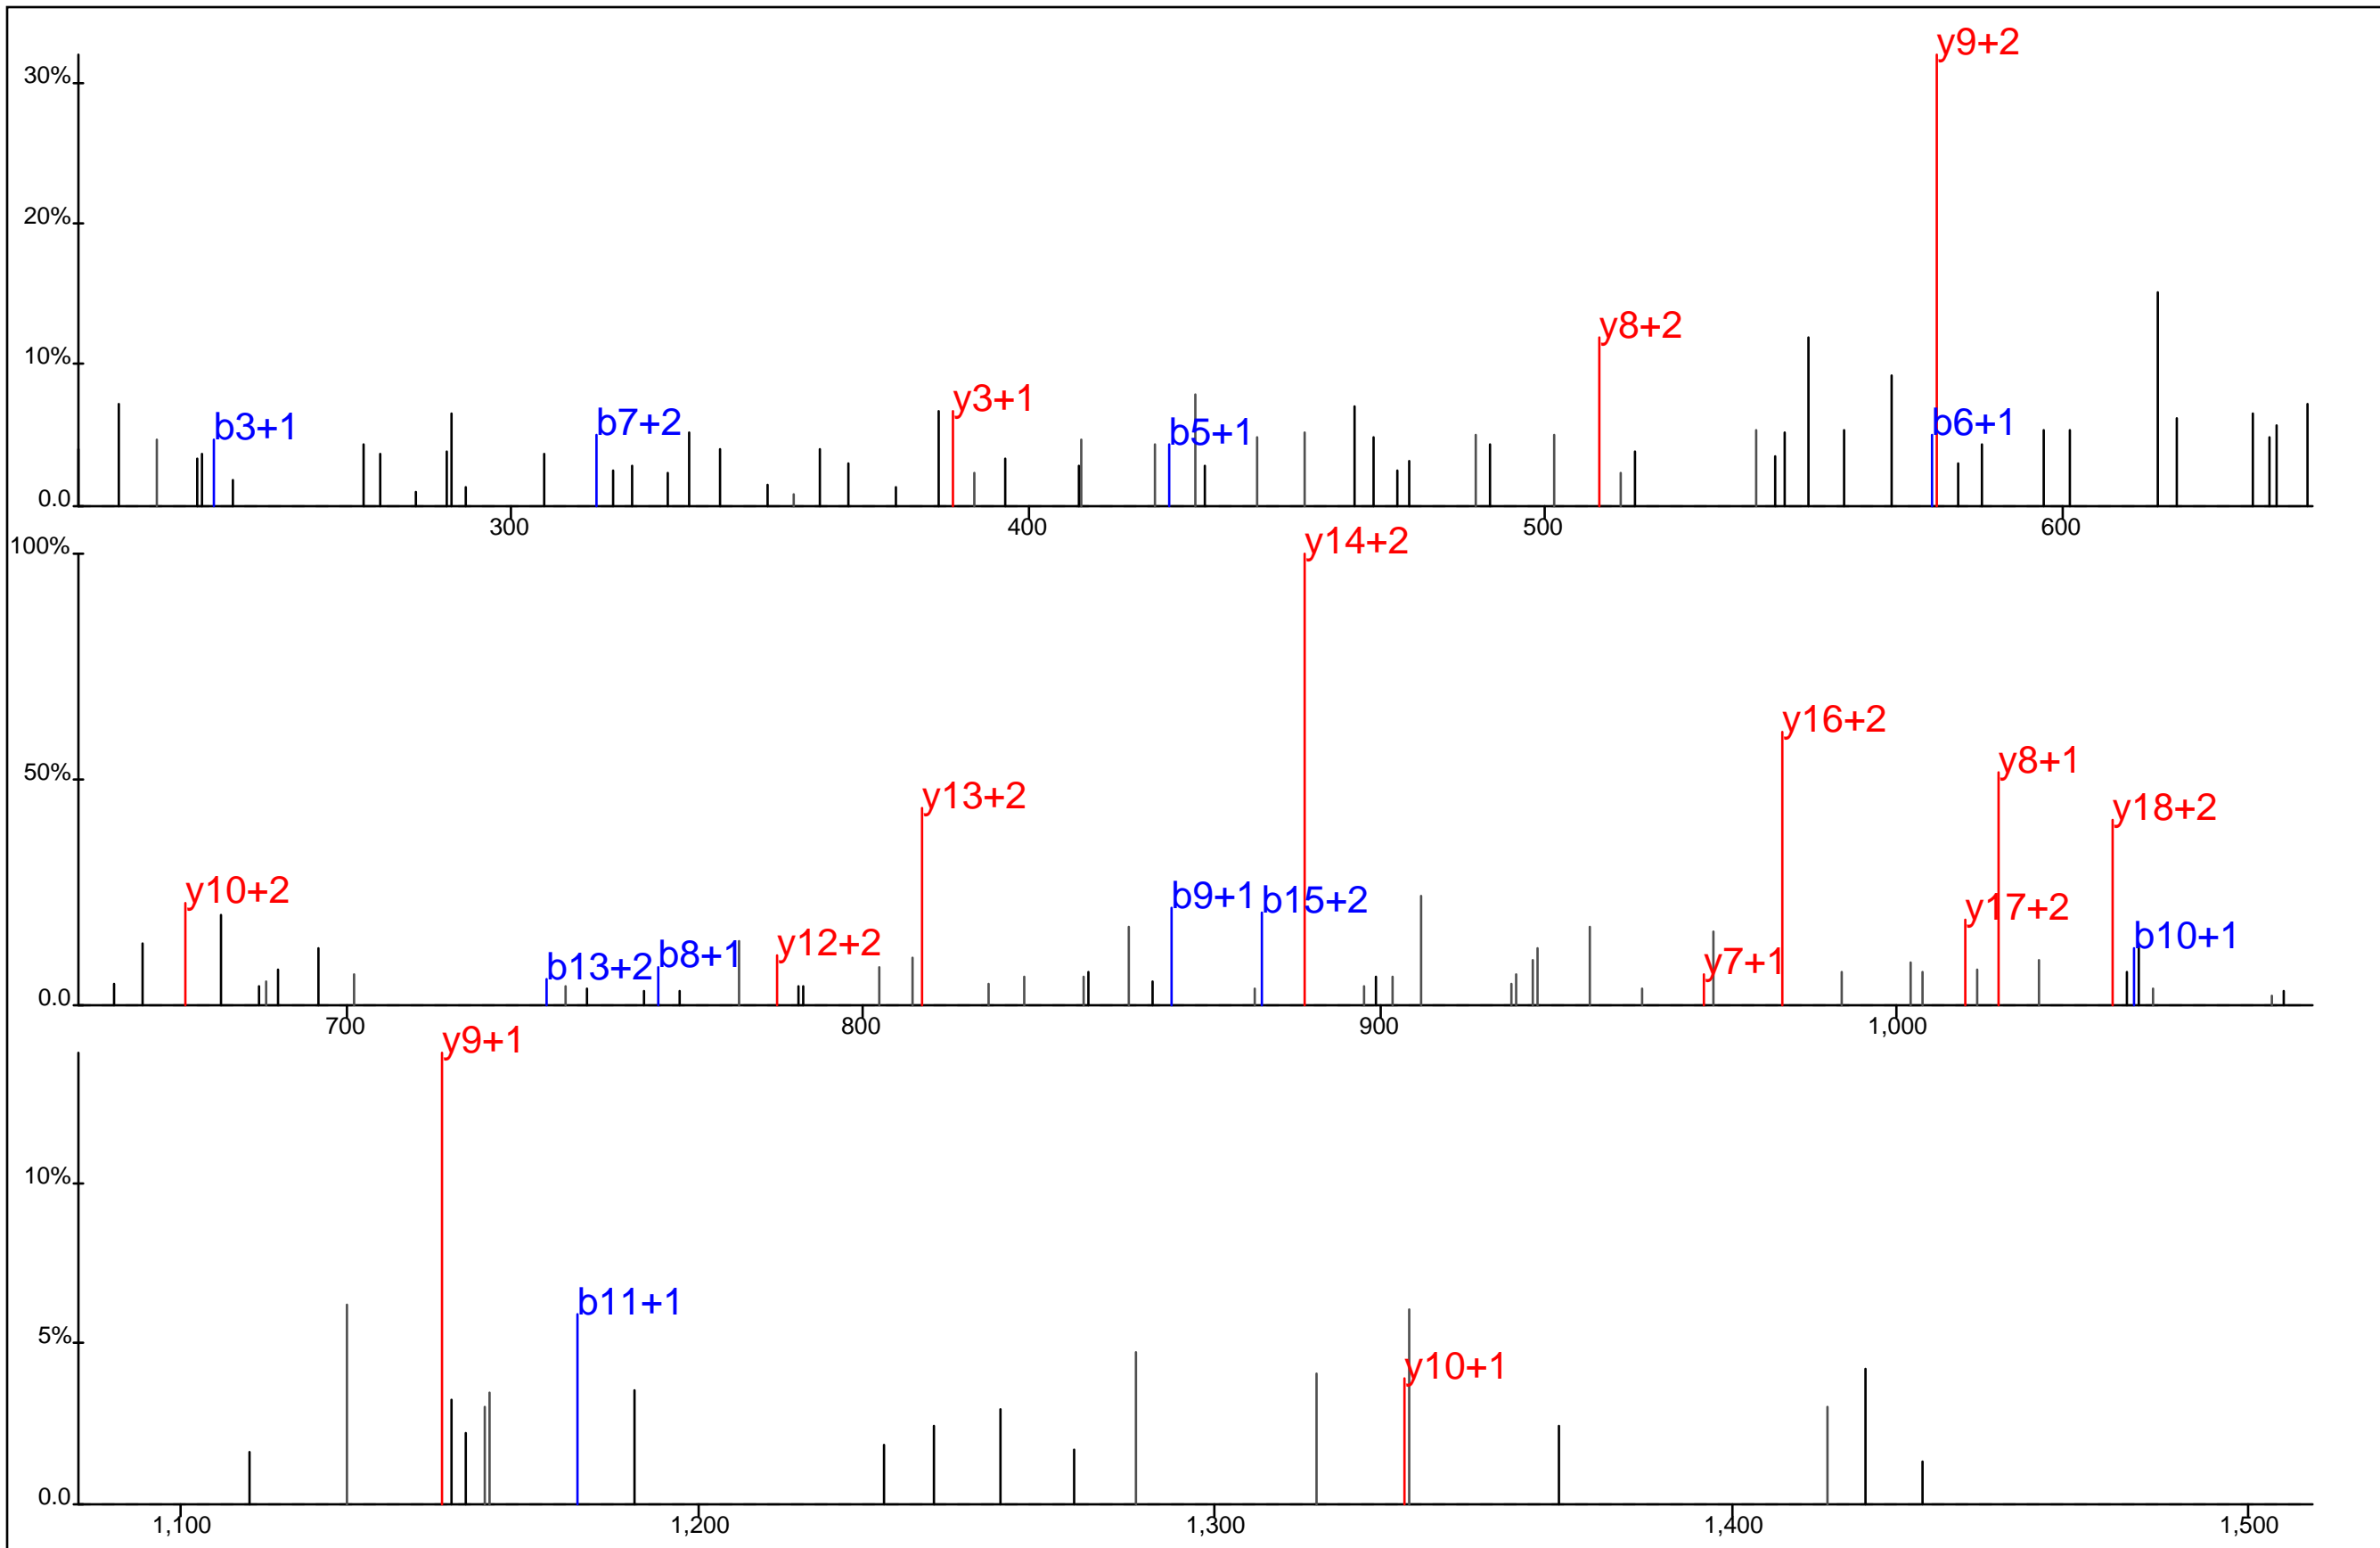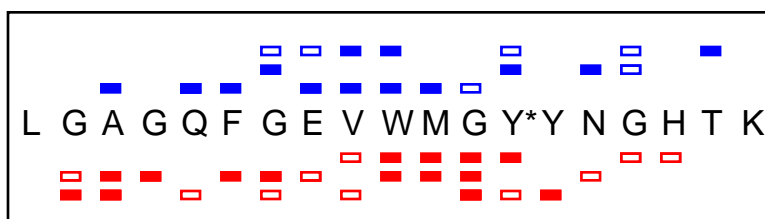

Protein Name: Lck  
 gi Accession: 0  
 Precursor Mass: 732.3143+3  
 Delta Mass: 6.079 ppm  
 XCorr: 50.84





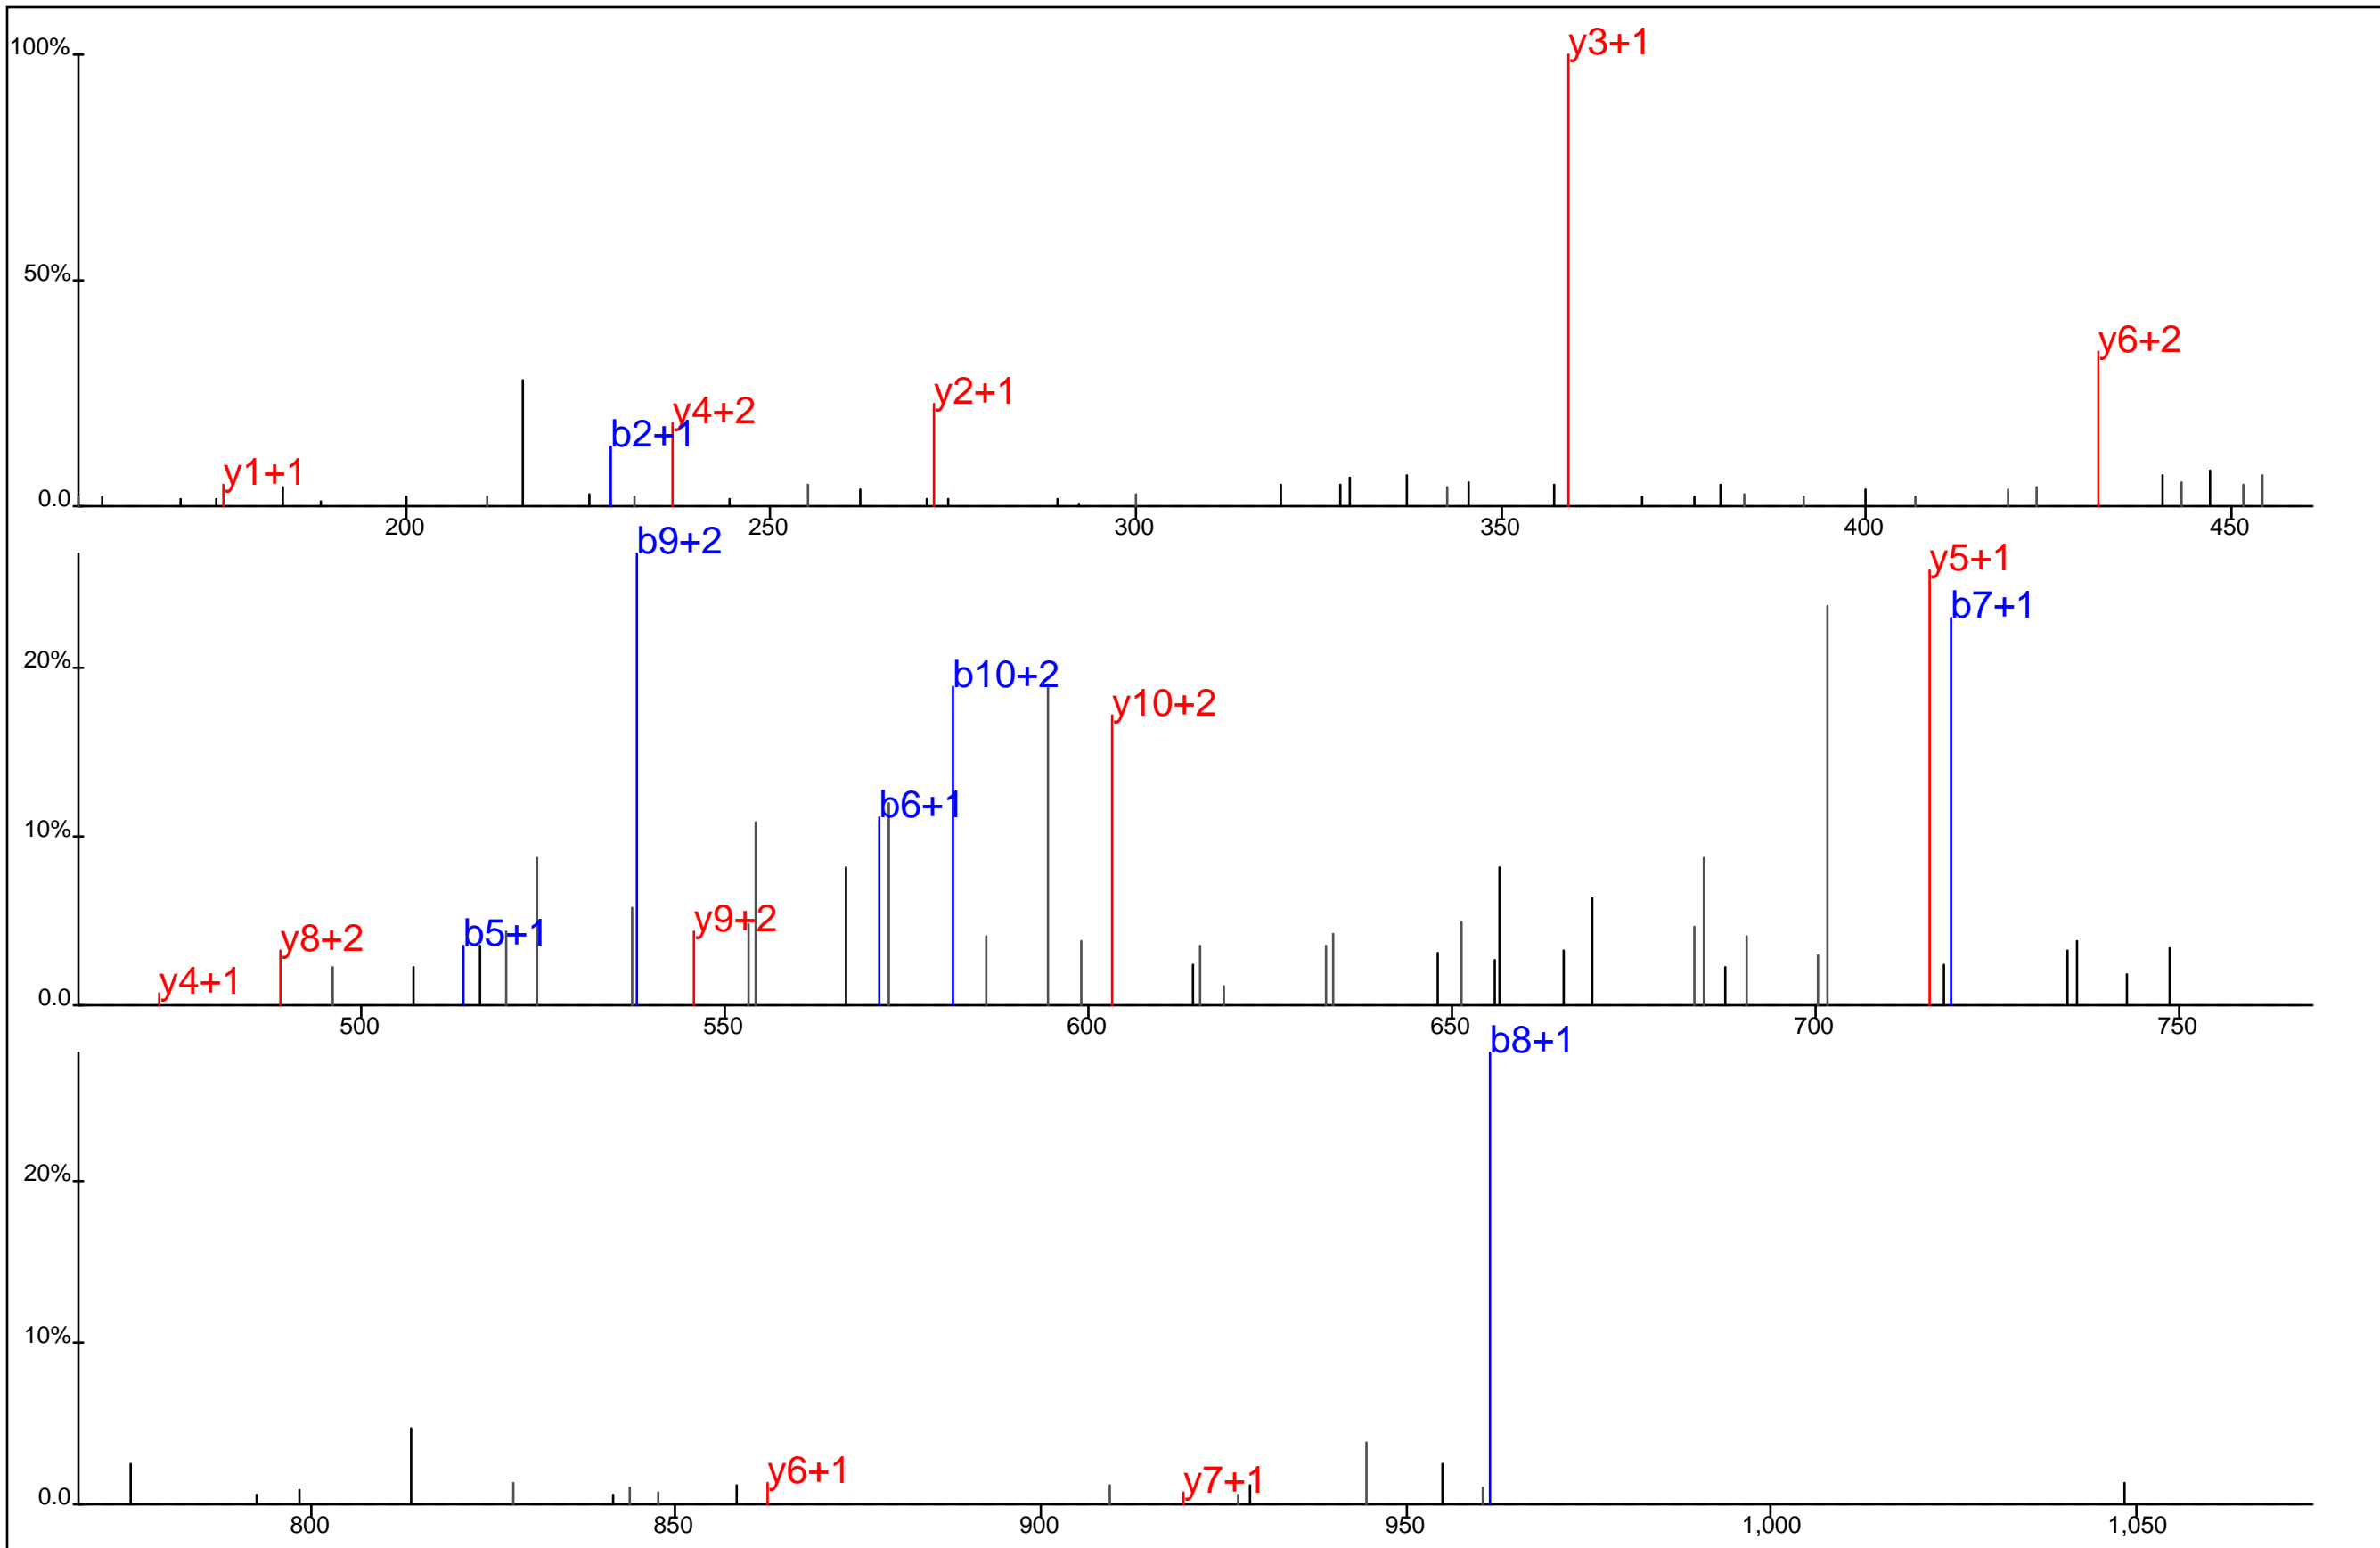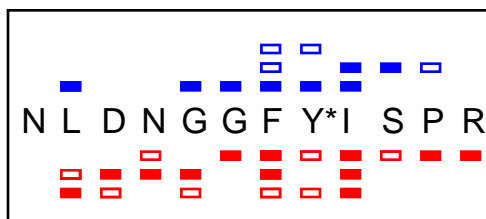

Protein Name: Lck  
 gi Accession: 0  
 Precursor Mass: 478.2138+3  
 Delta Mass: 0.847 ppm  
 XCorr: 31.06



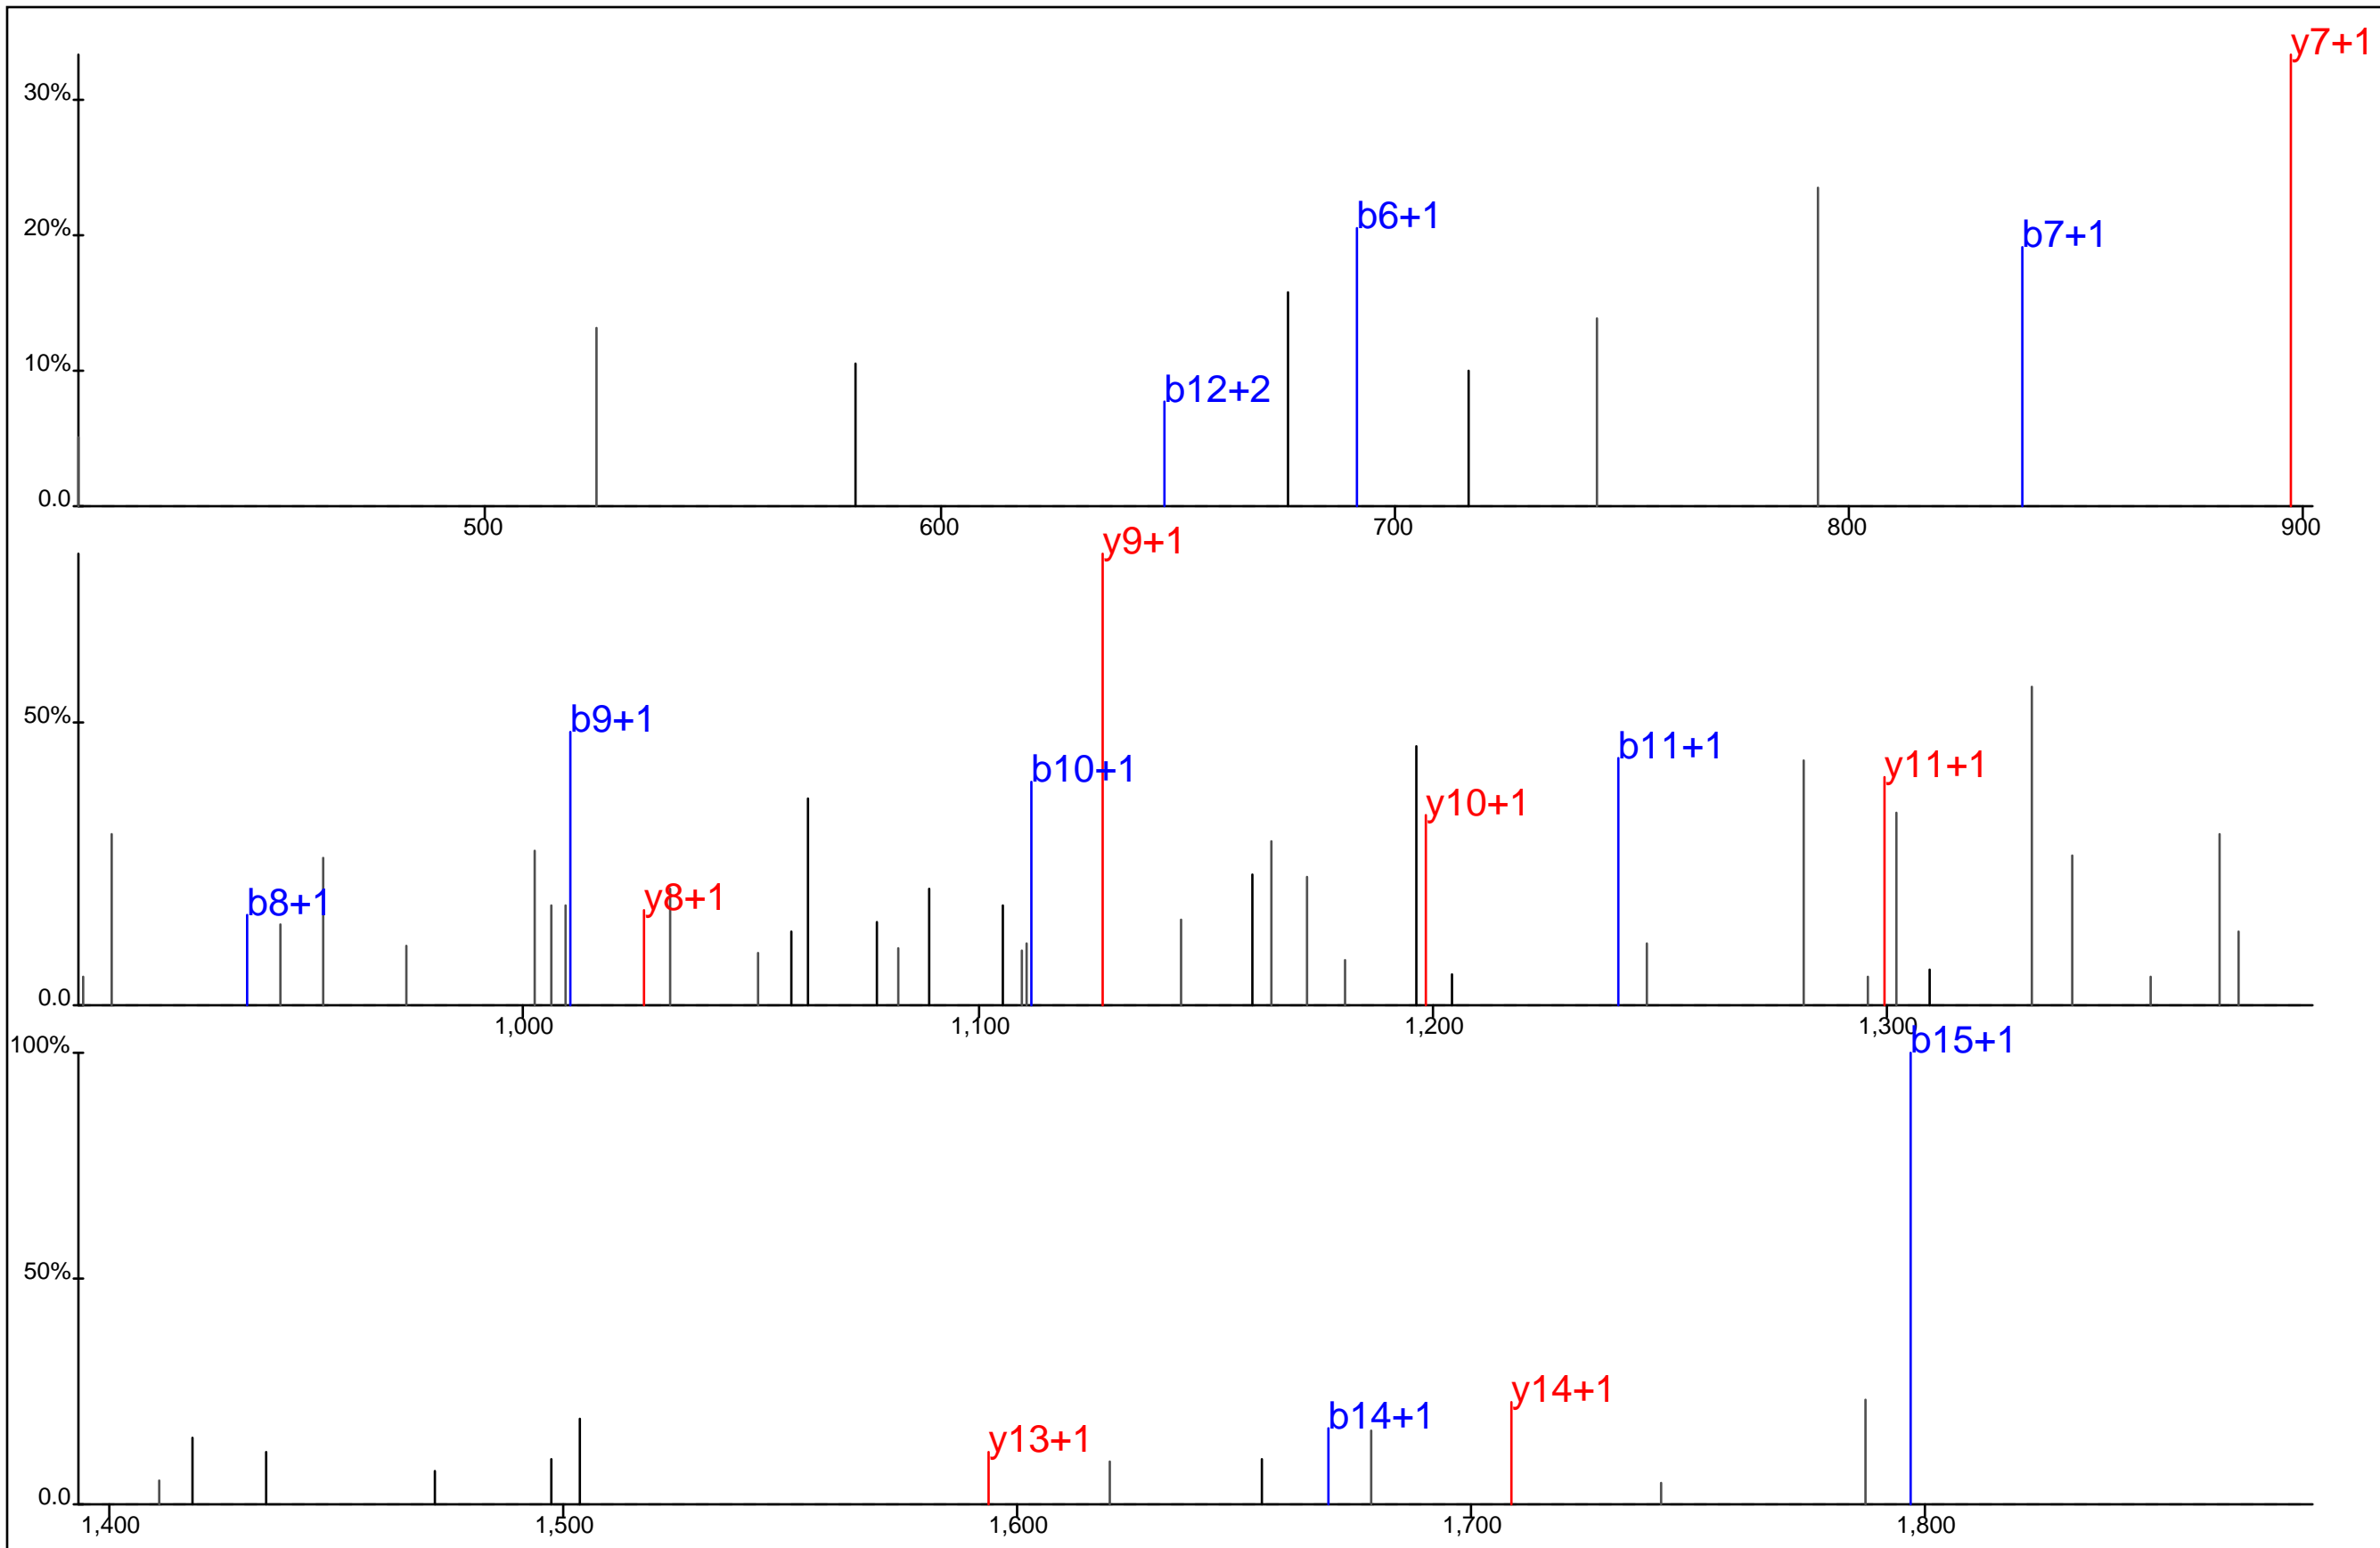

S V L E D F F T A T E G Q Y\* Q P Q P  
█ █ █ █ █ █ █ █ █ █ █ █

Protein Name: Lck  
 gi Accession: 0  
 Precursor Mass: 1,068.9581+2  
 Delta Mass: 3.359 ppm  
 XCorr: 26.17

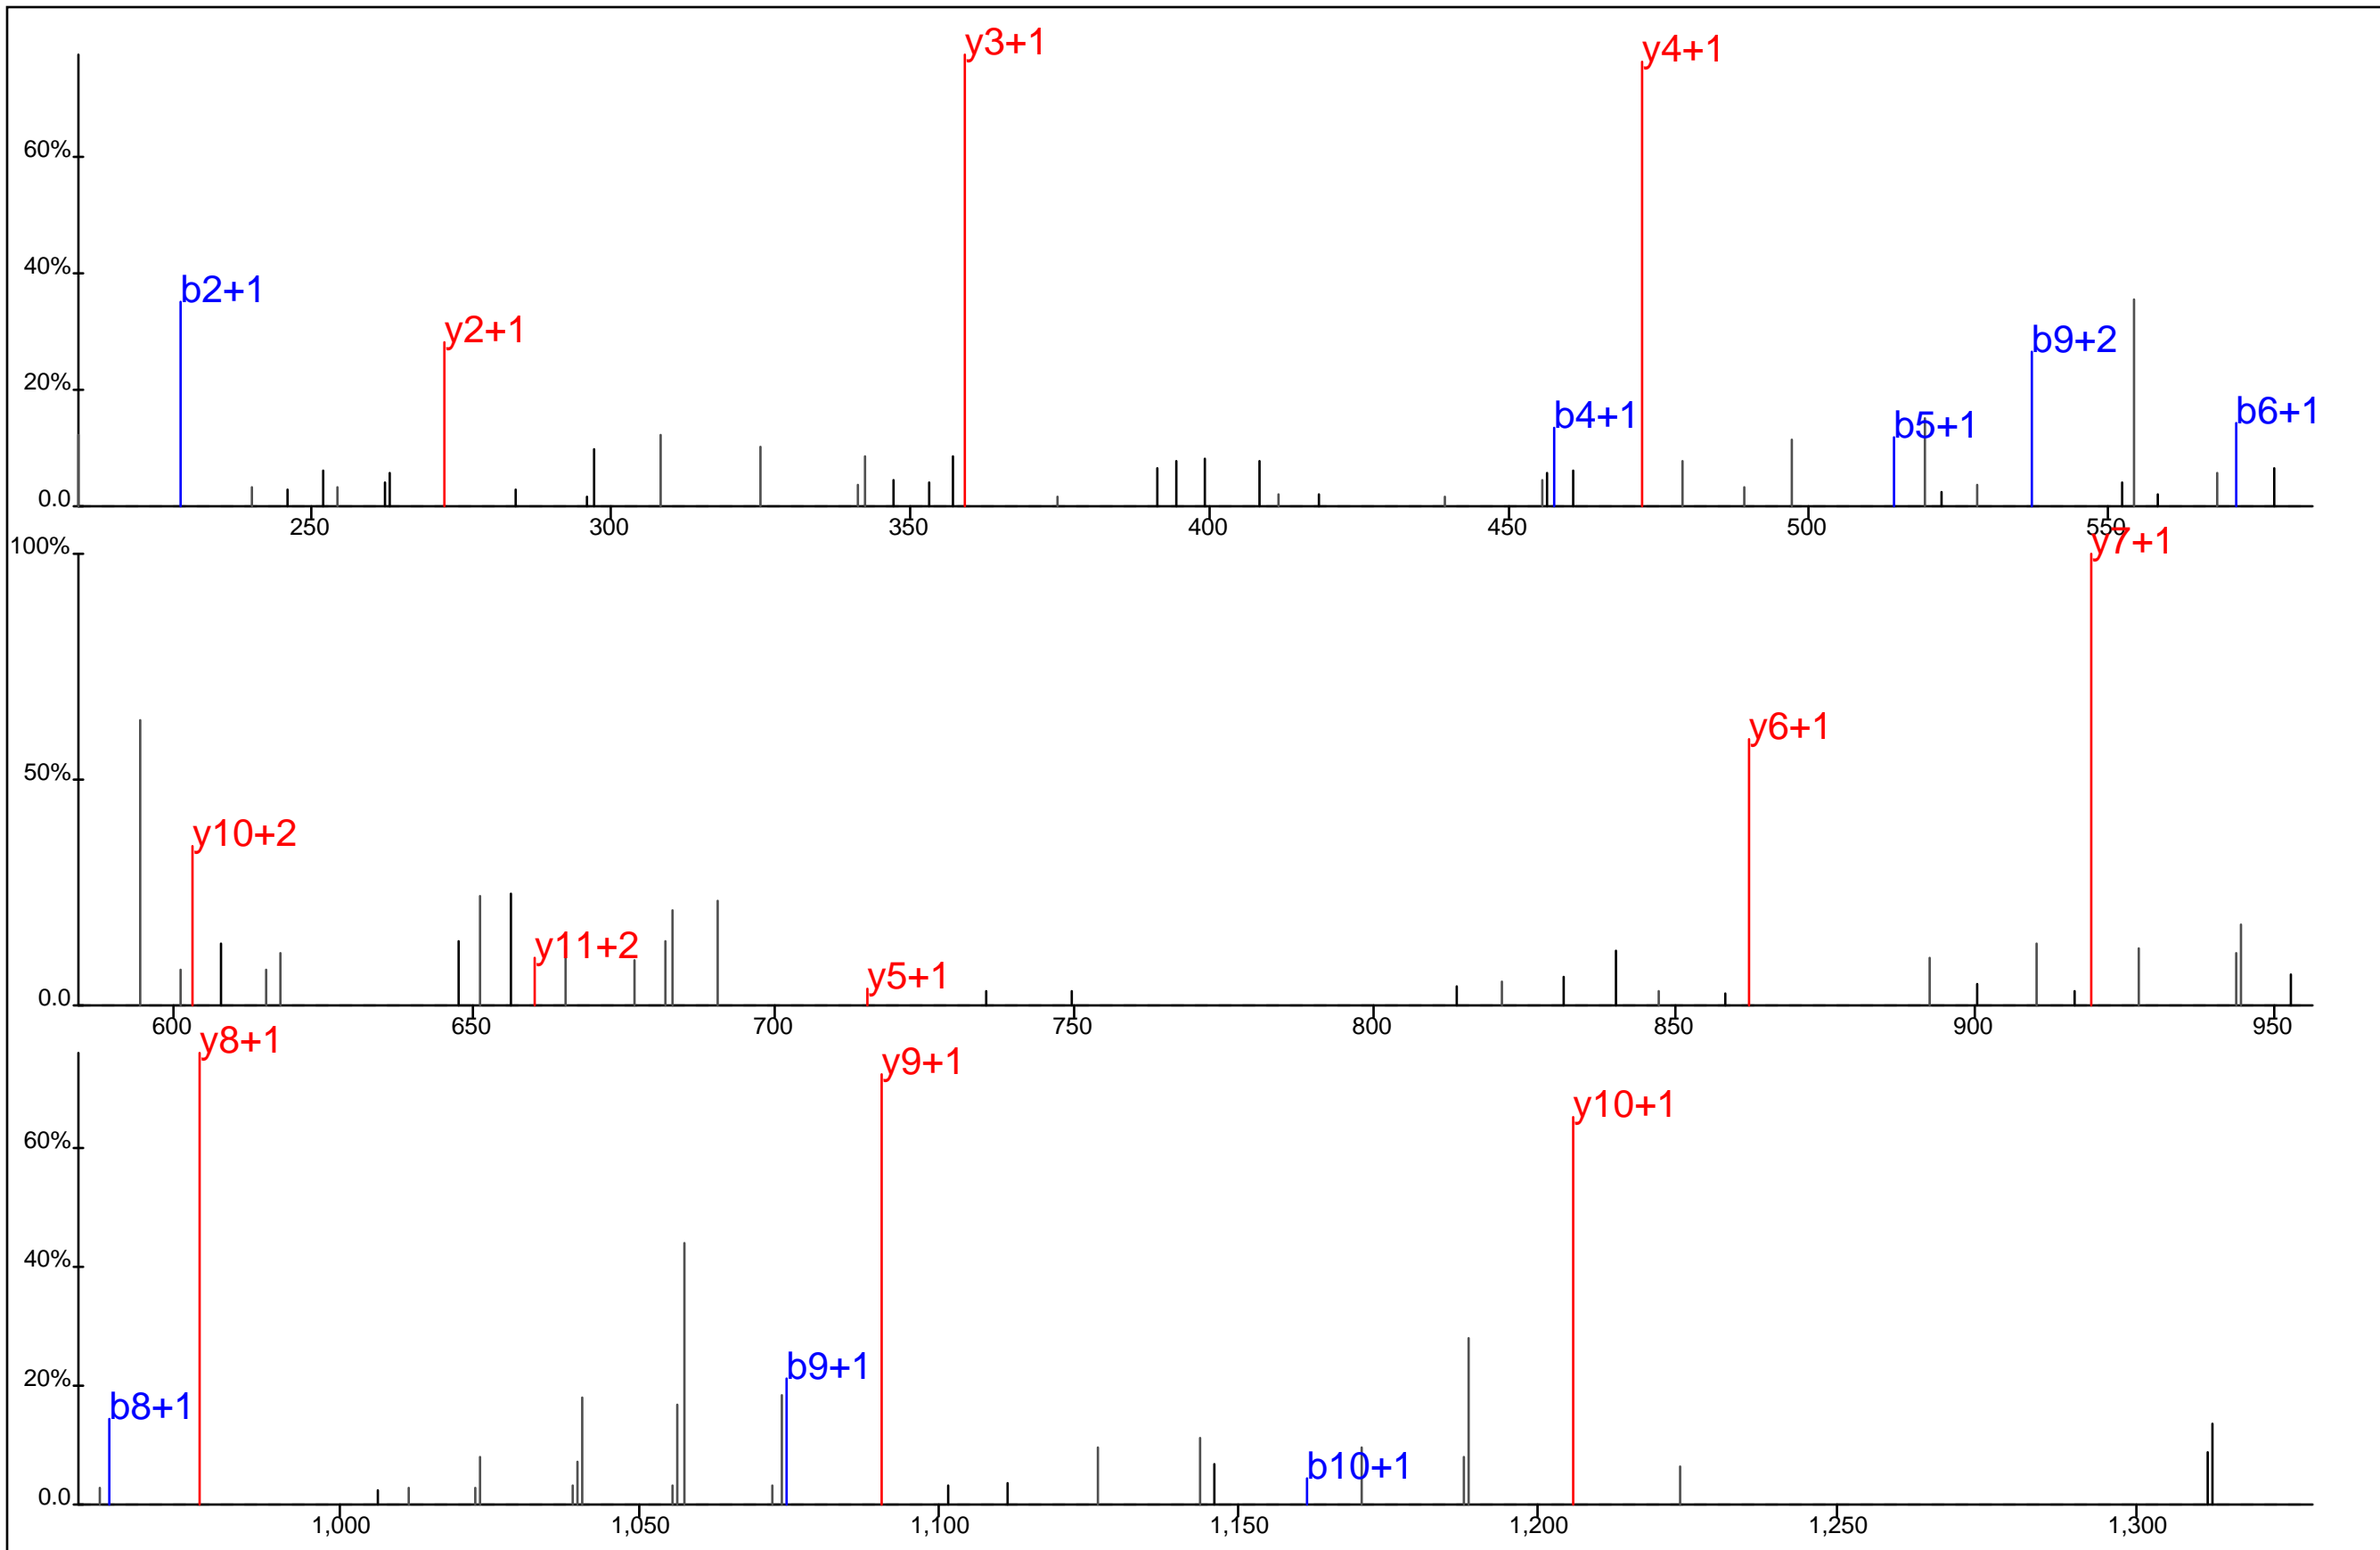

■ ■ ■ ■ ■ ■ ■ ■ ■ ■  
 N L D N G G F Y\*I S P R  
■ ■ ■ ■ ■ ■ ■ ■ ■ ■

Protein Name: Lck  
 gi Accession: 0  
 Precursor Mass: 716.8192+2  
 Delta Mass: 3.754 ppm  
 XCorr: 76.27

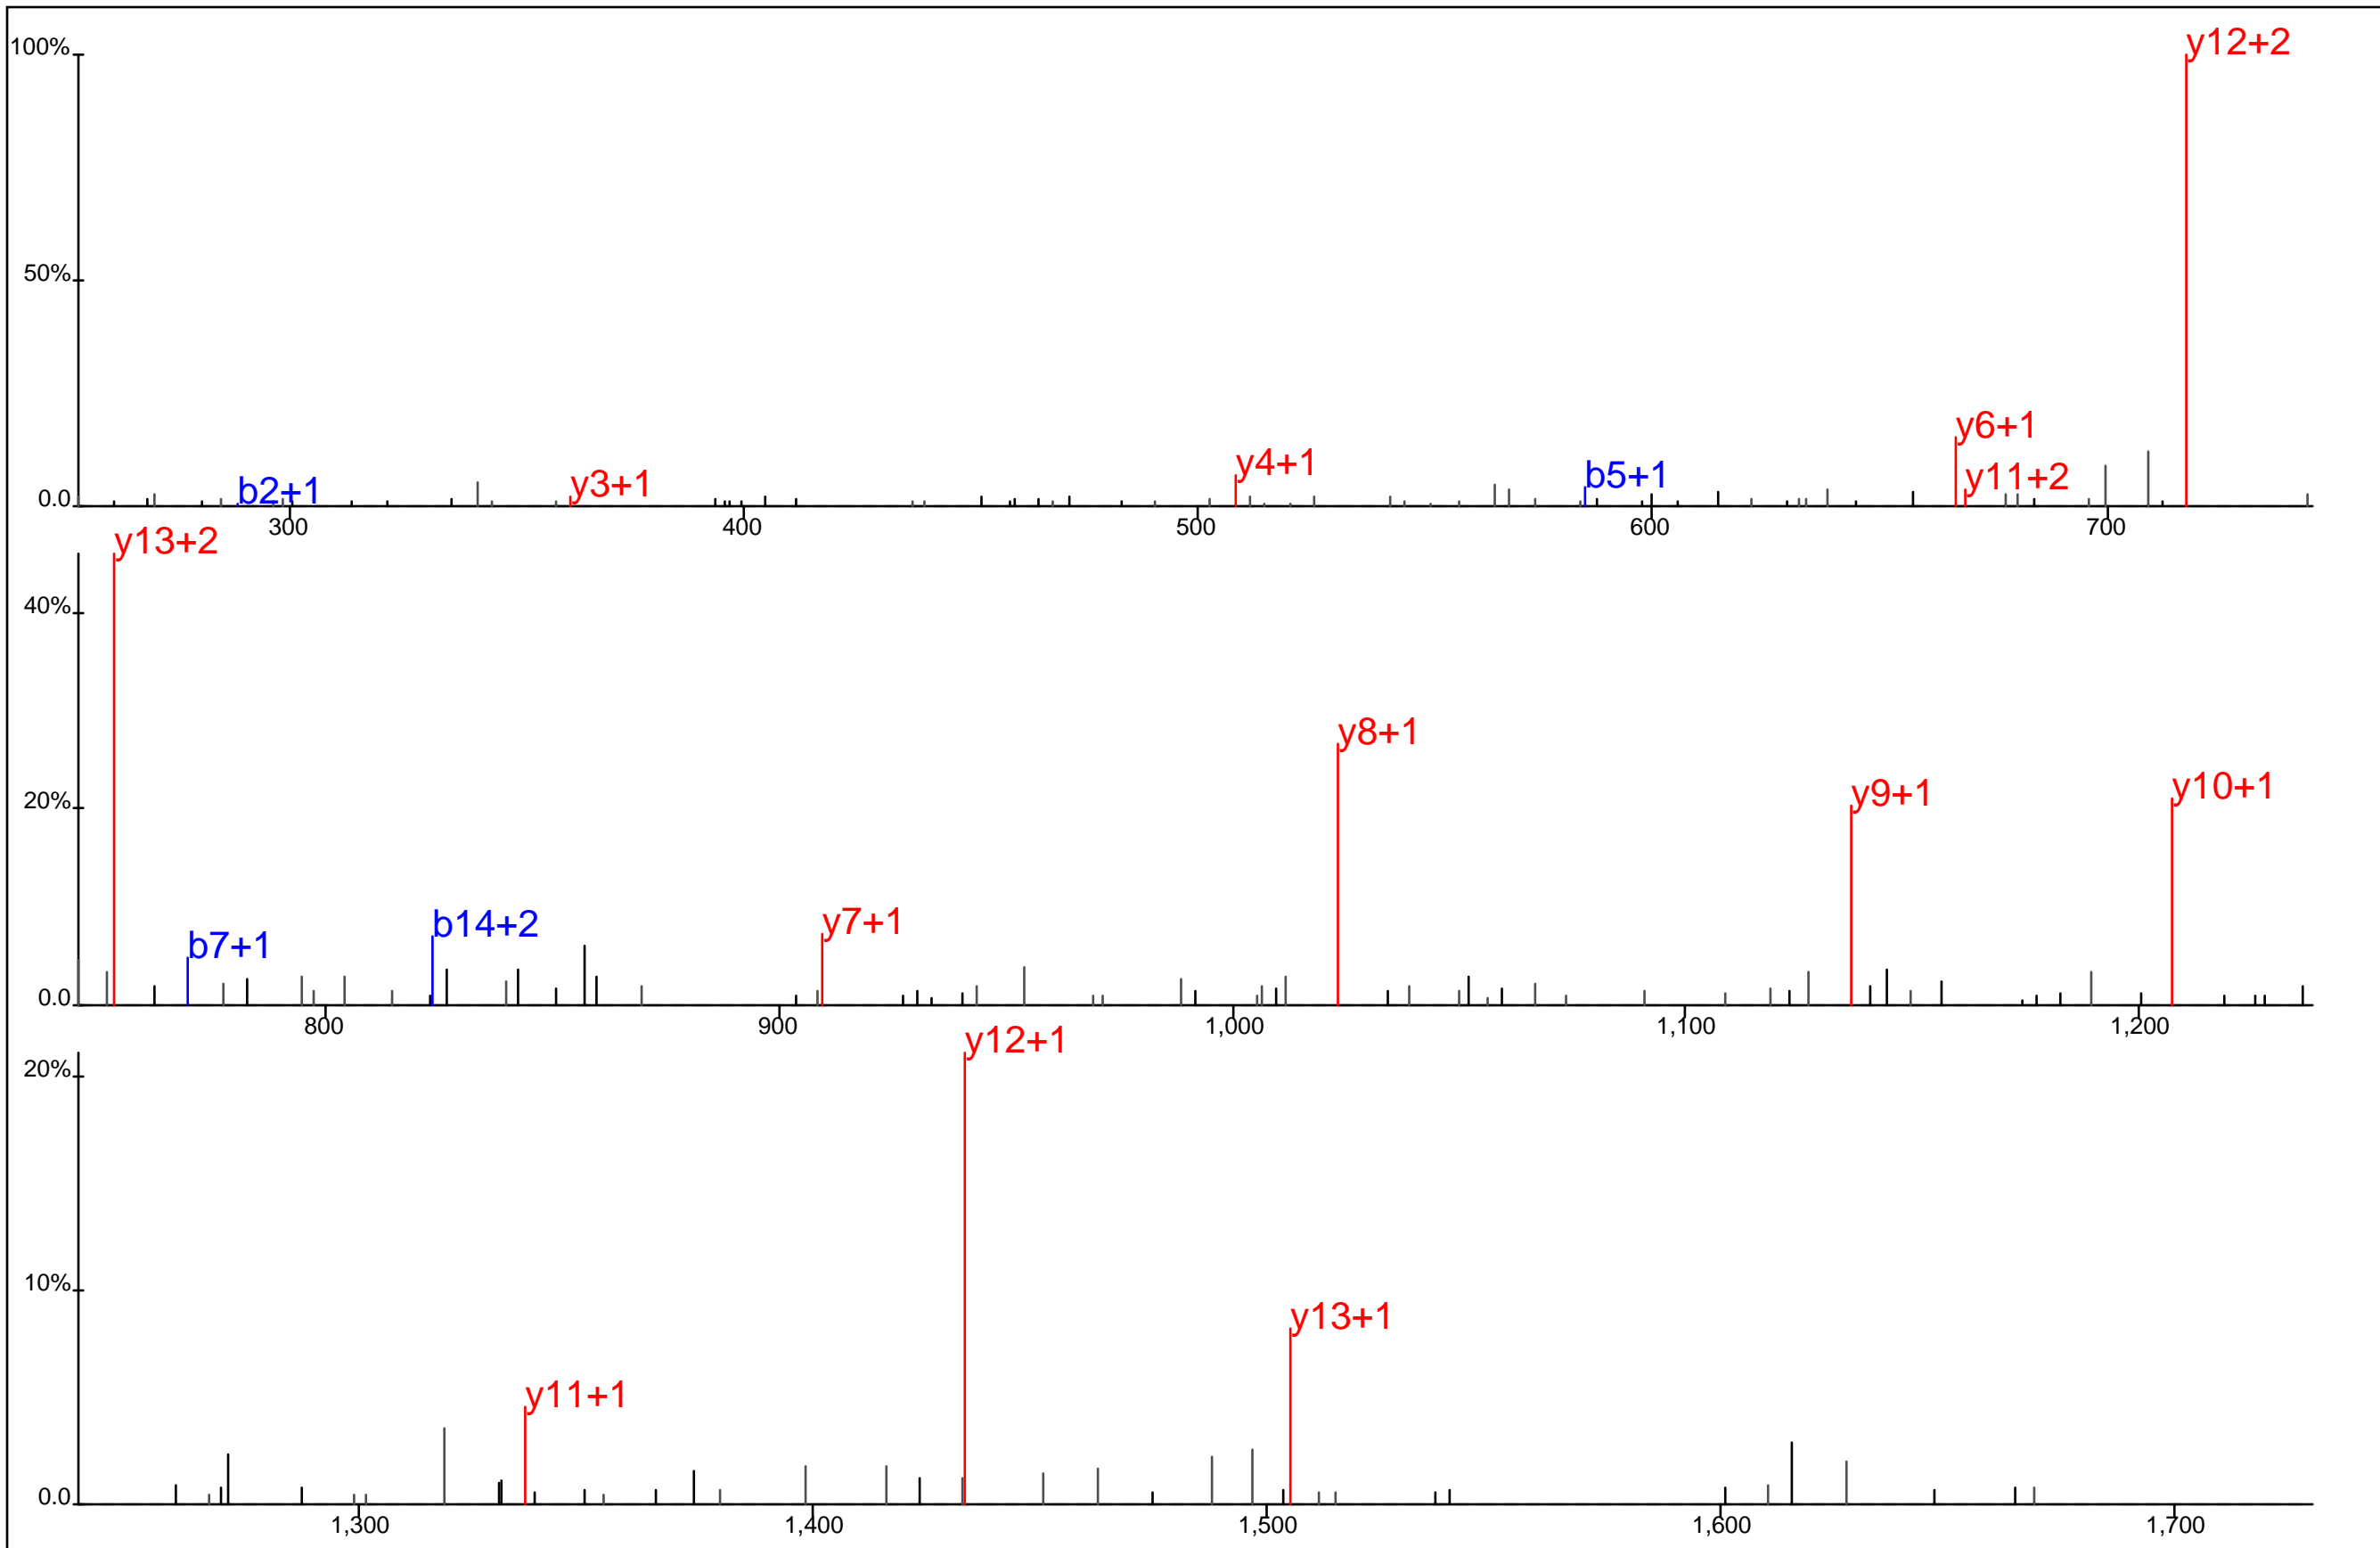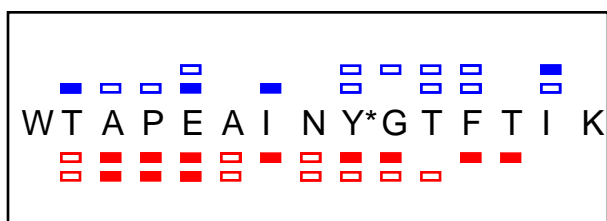

Protein Name: Lck  
 gi Accession: 0  
 Precursor Mass: 896.4207+2  
 Delta Mass: 0.714 ppm  
 XCorr: 64.66

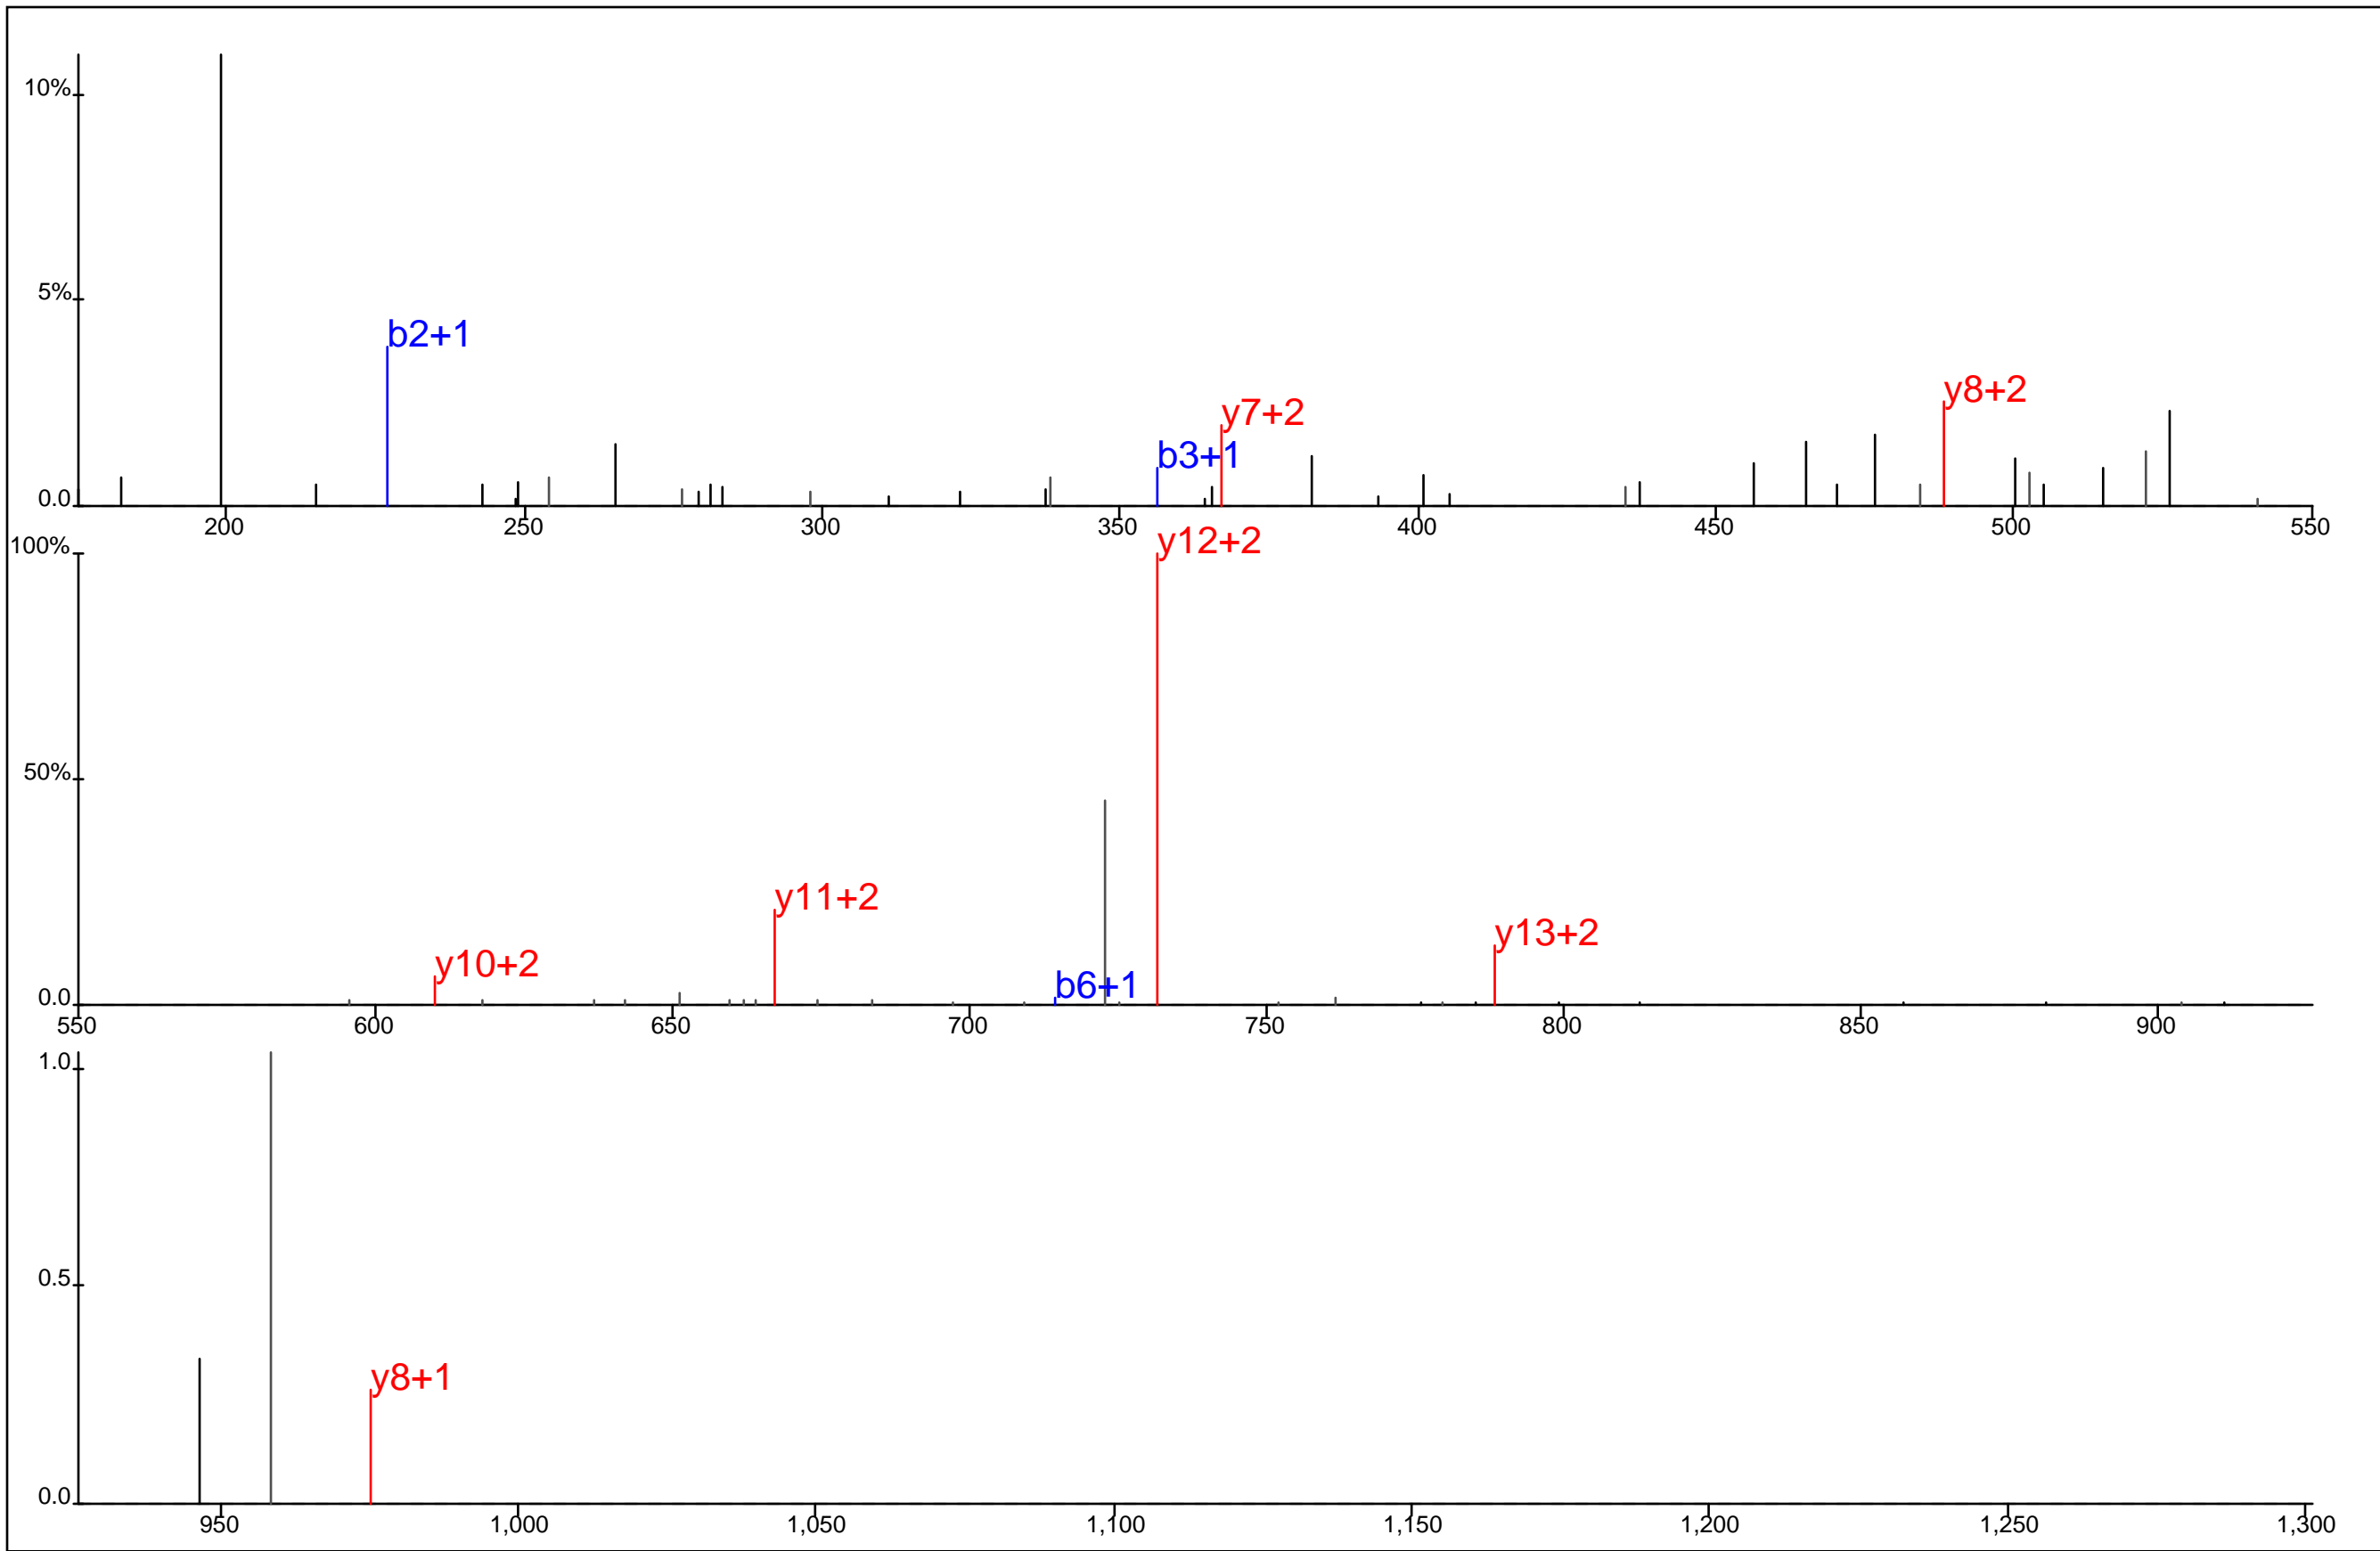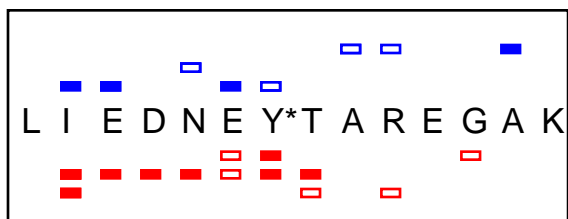

Protein Name: Lck  
 gi Accession: 0  
 Precursor Mass: 563.5885+3  
 Delta Mass: 1.019 ppm  
 XCorr: 37.21

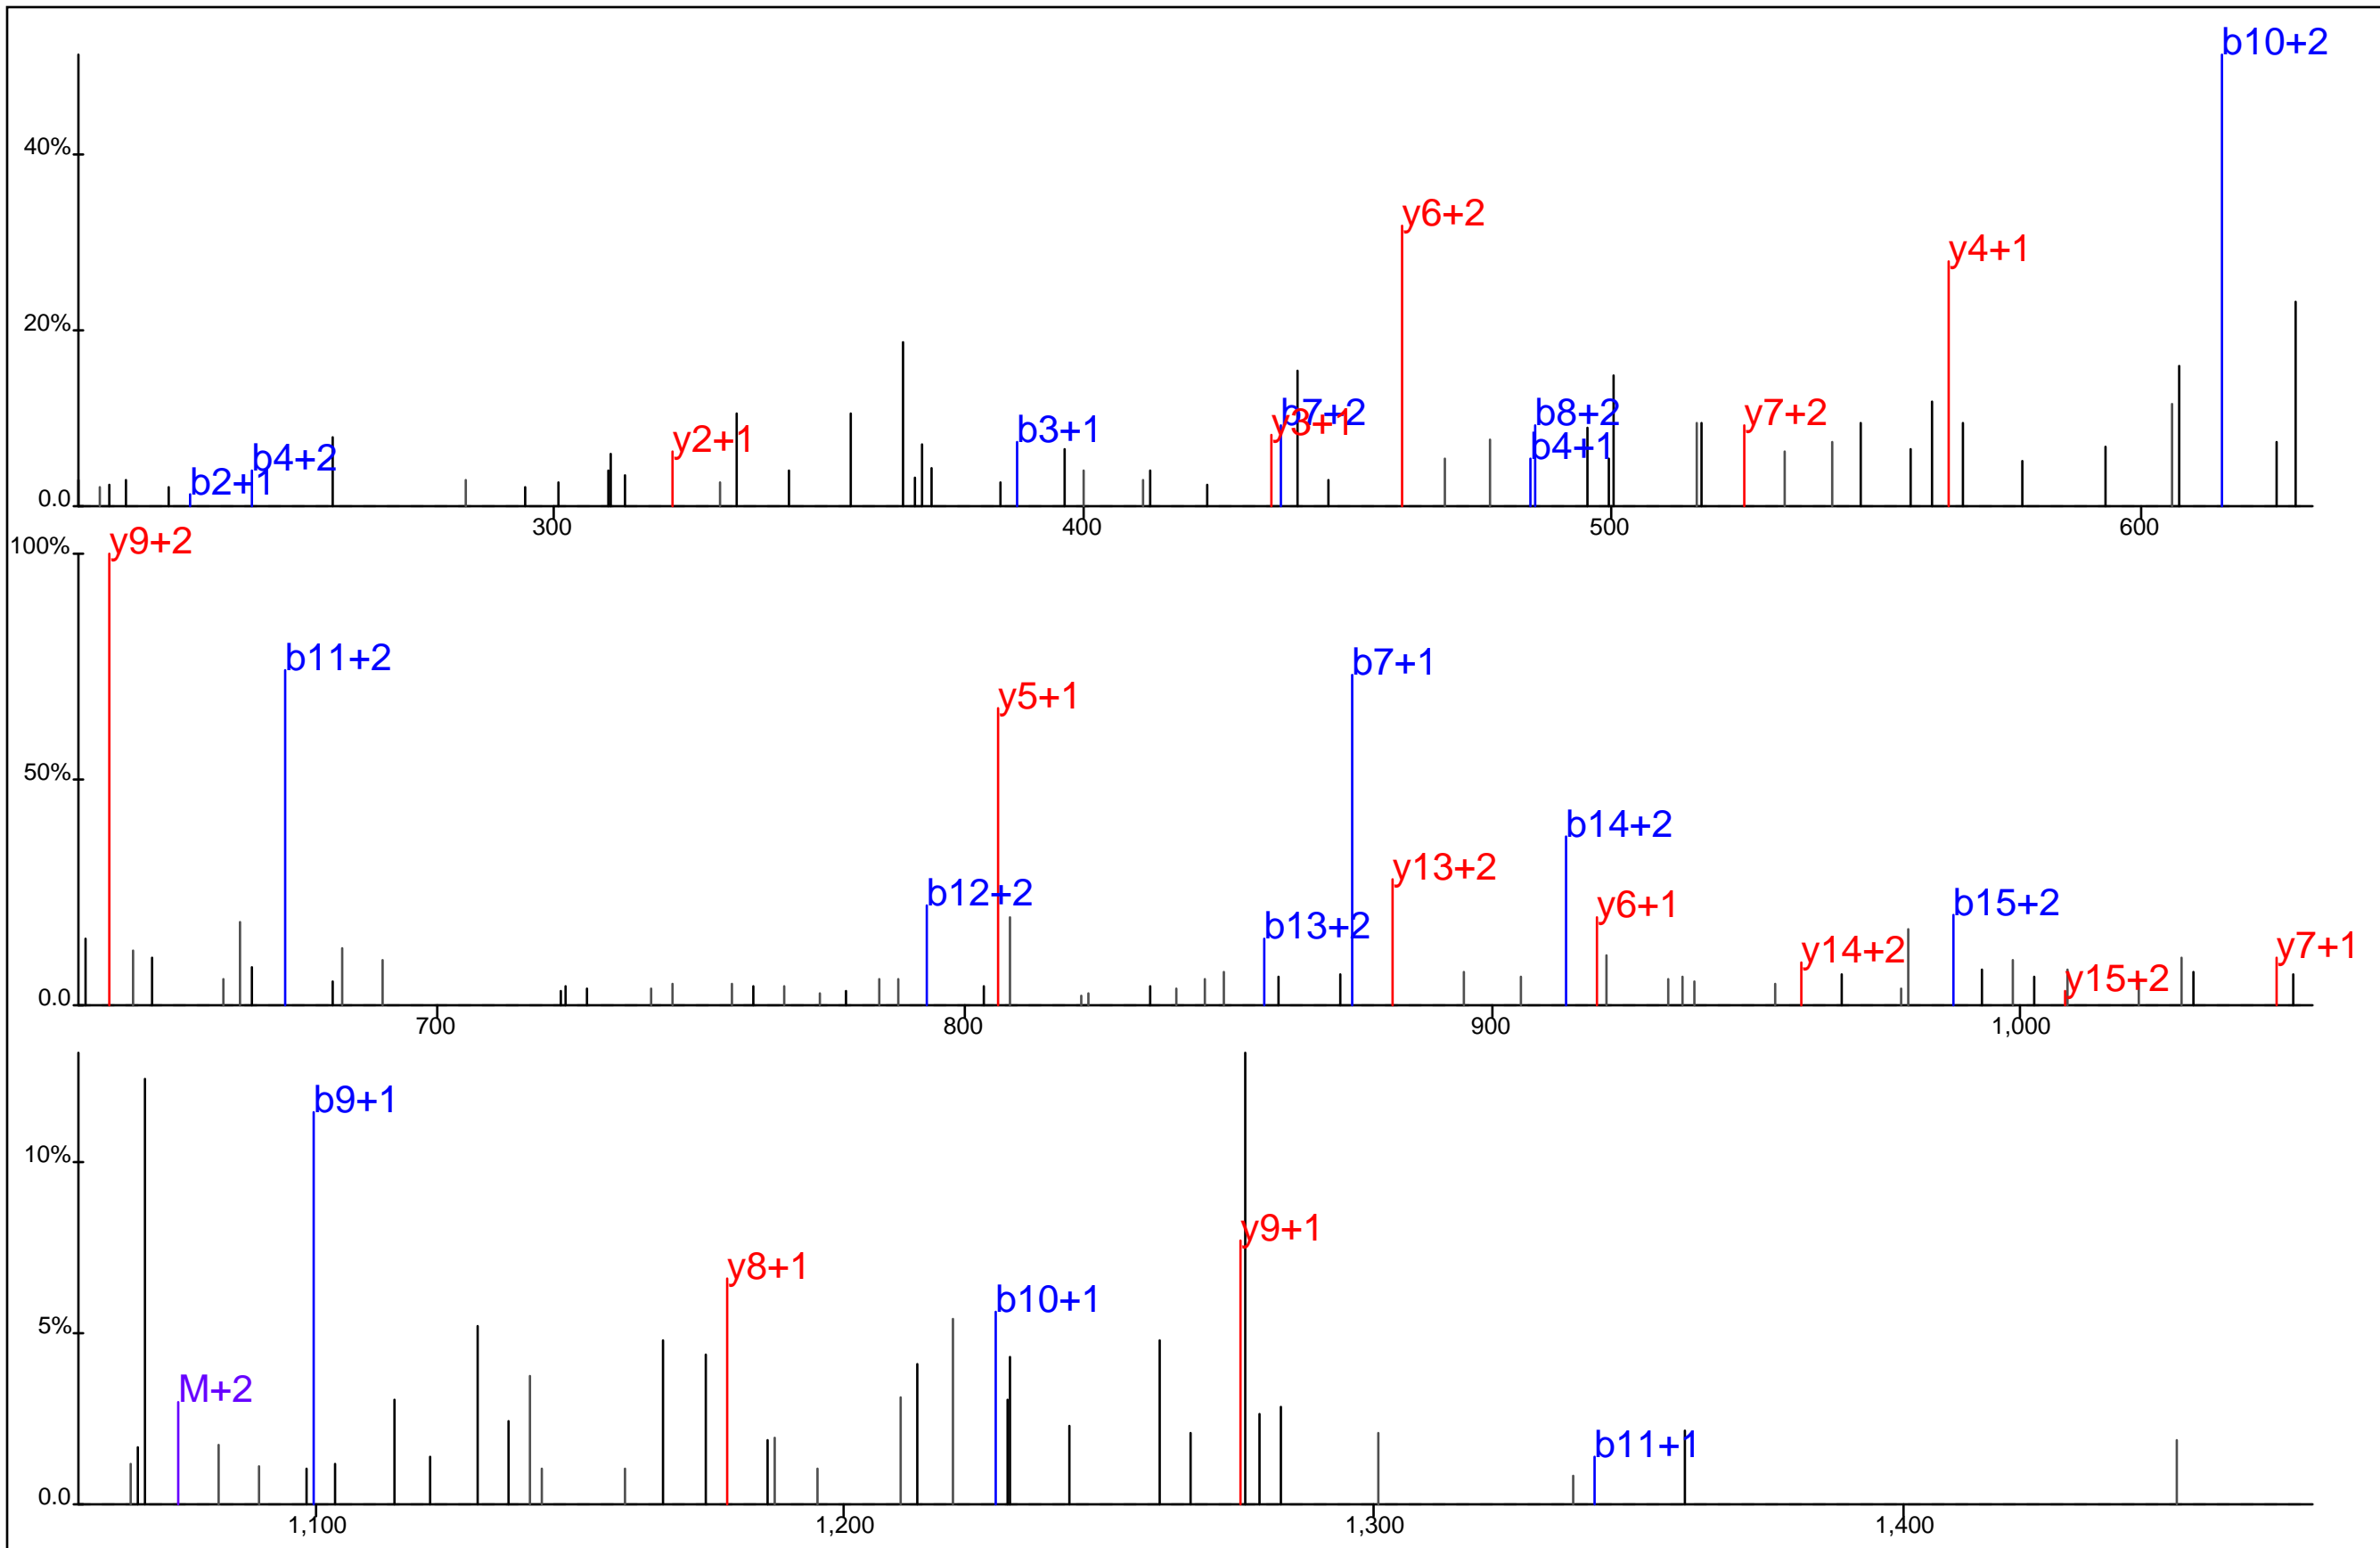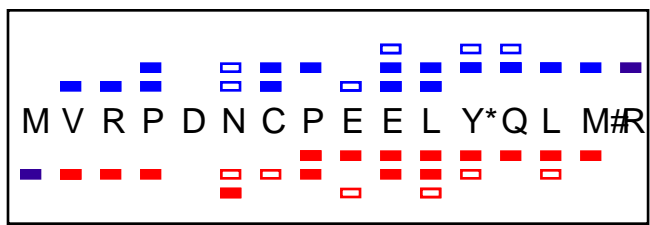

Protein Name: Lck  
 gi Accession: 0  
 Precursor Mass: 716.3083+3  
 Delta Mass: 0.749 ppm  
 XCorr: 40.78



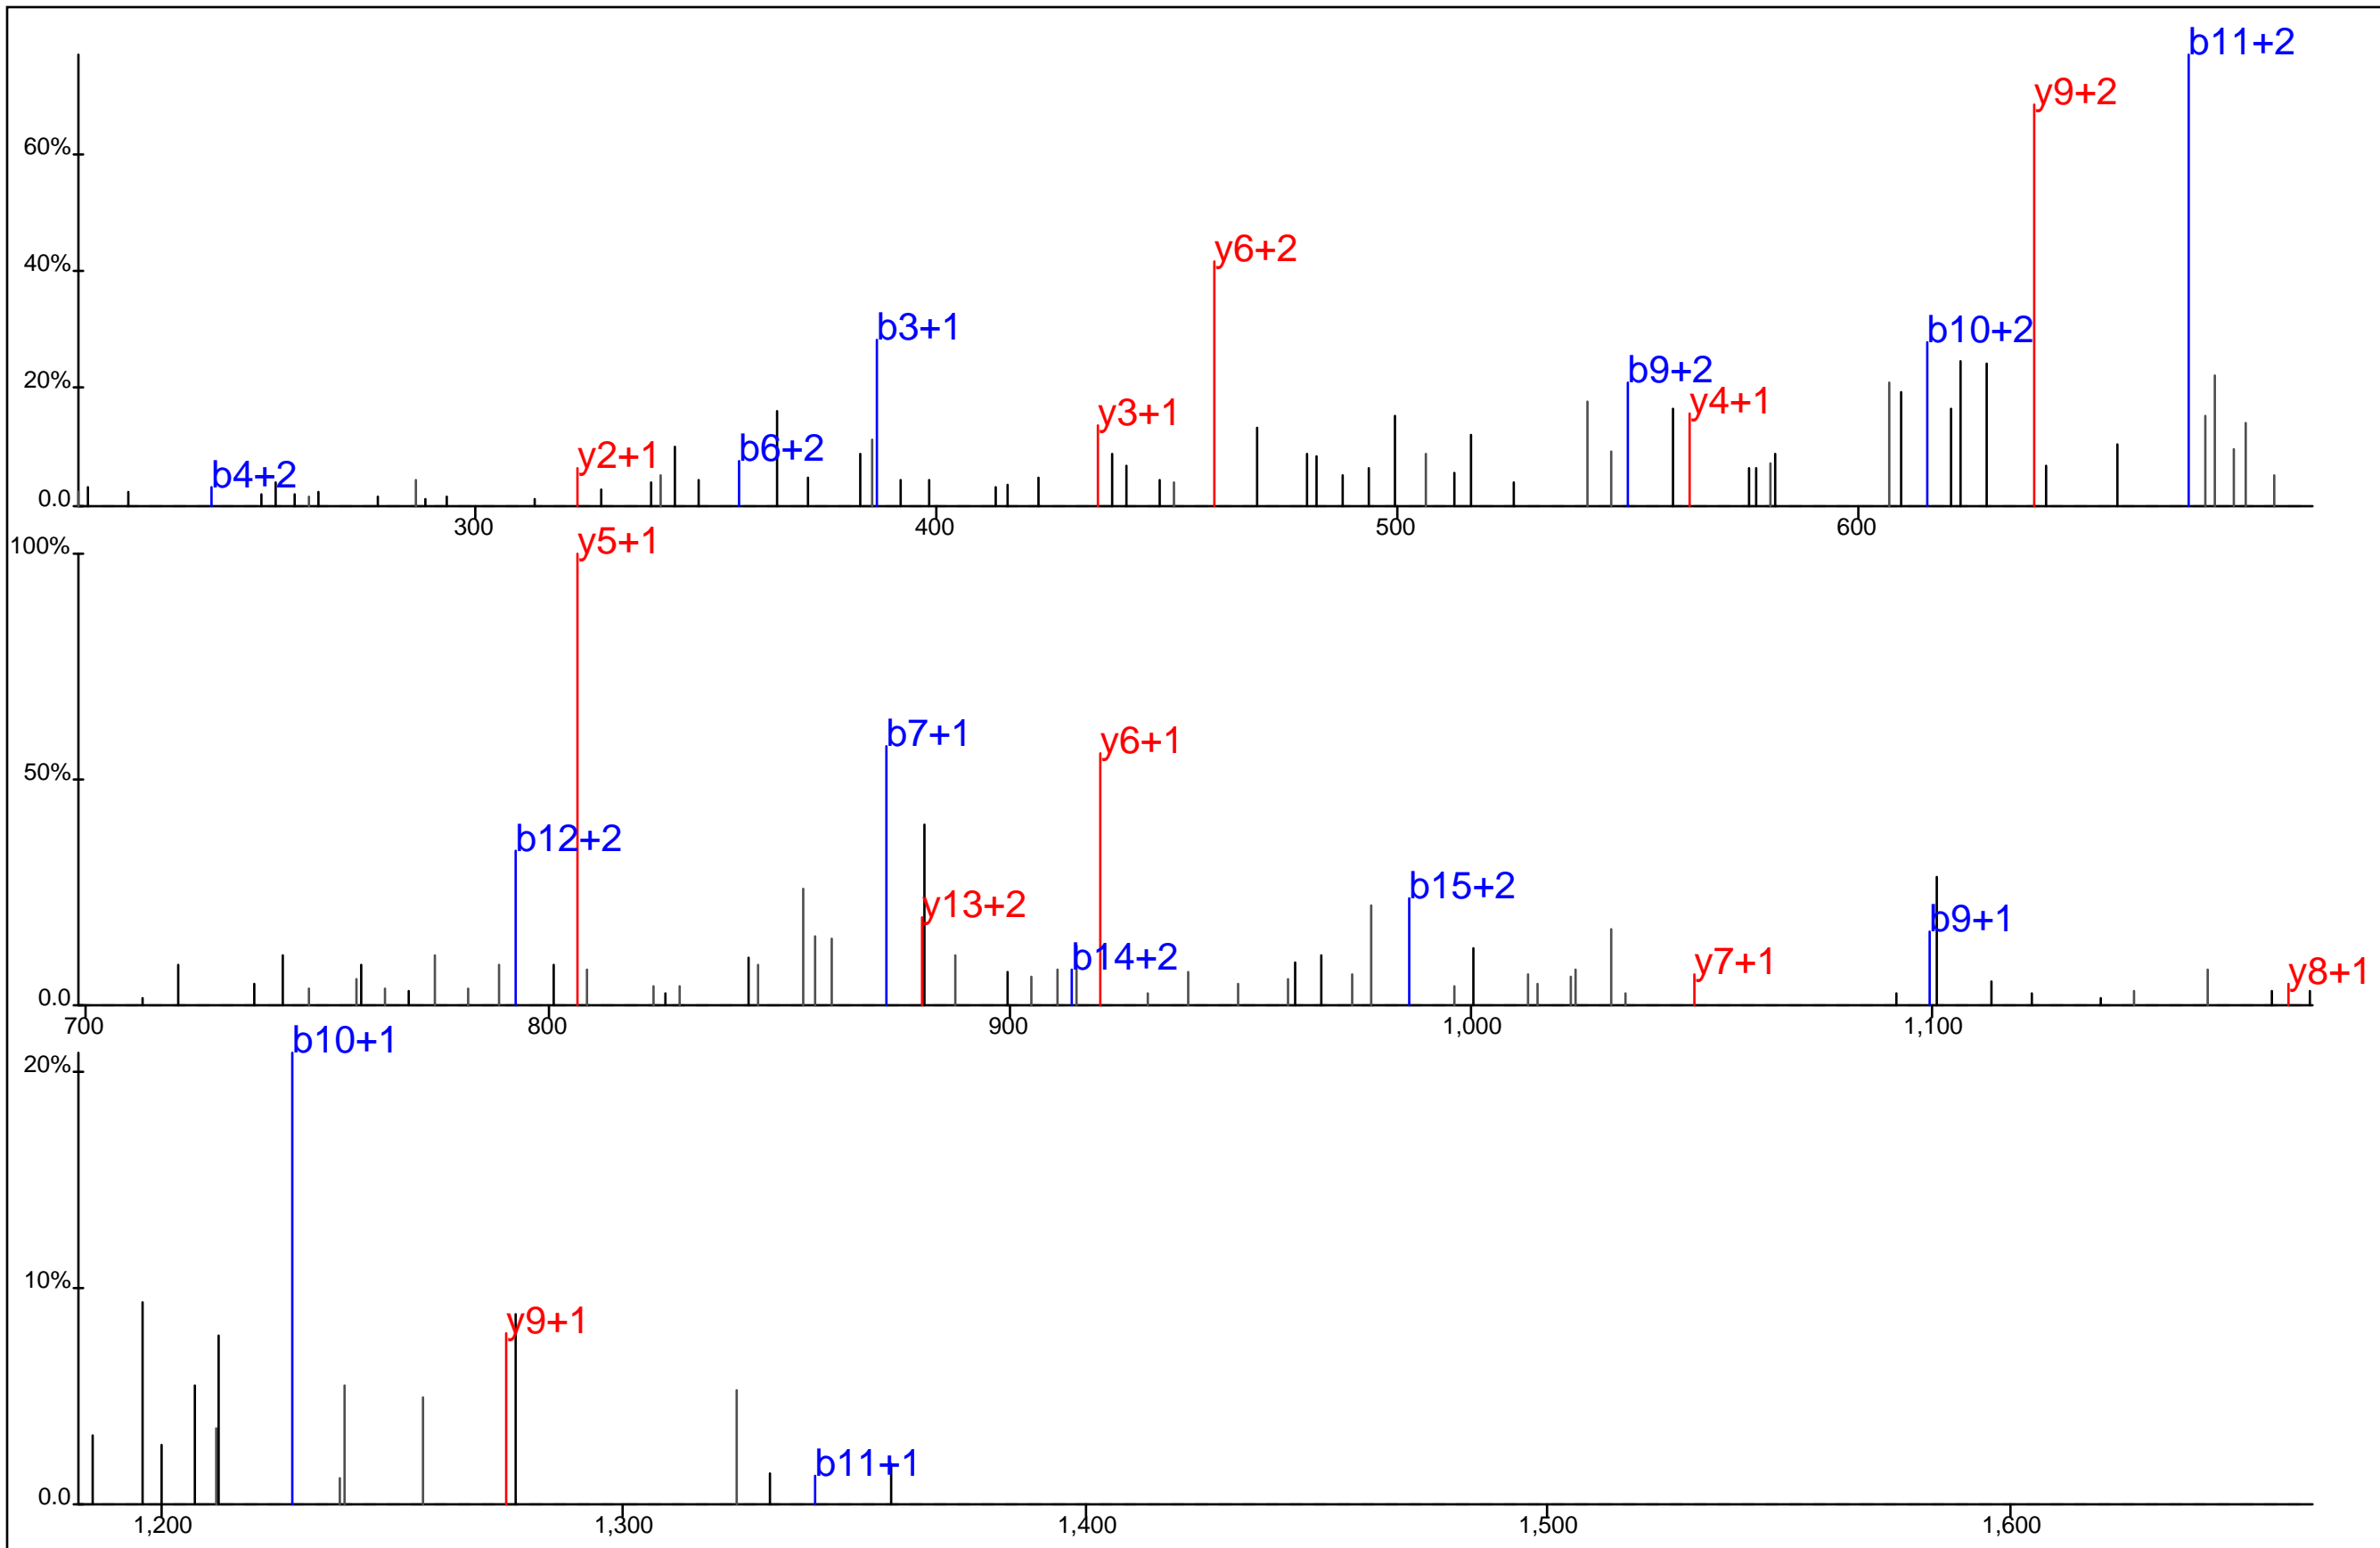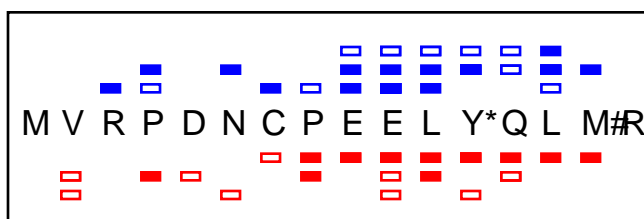

Protein Name: Lck  
 gi Accession: 0  
 Precursor Mass: 716.3093+3  
 Delta Mass: 0.615 ppm  
 XCorr: 30.72



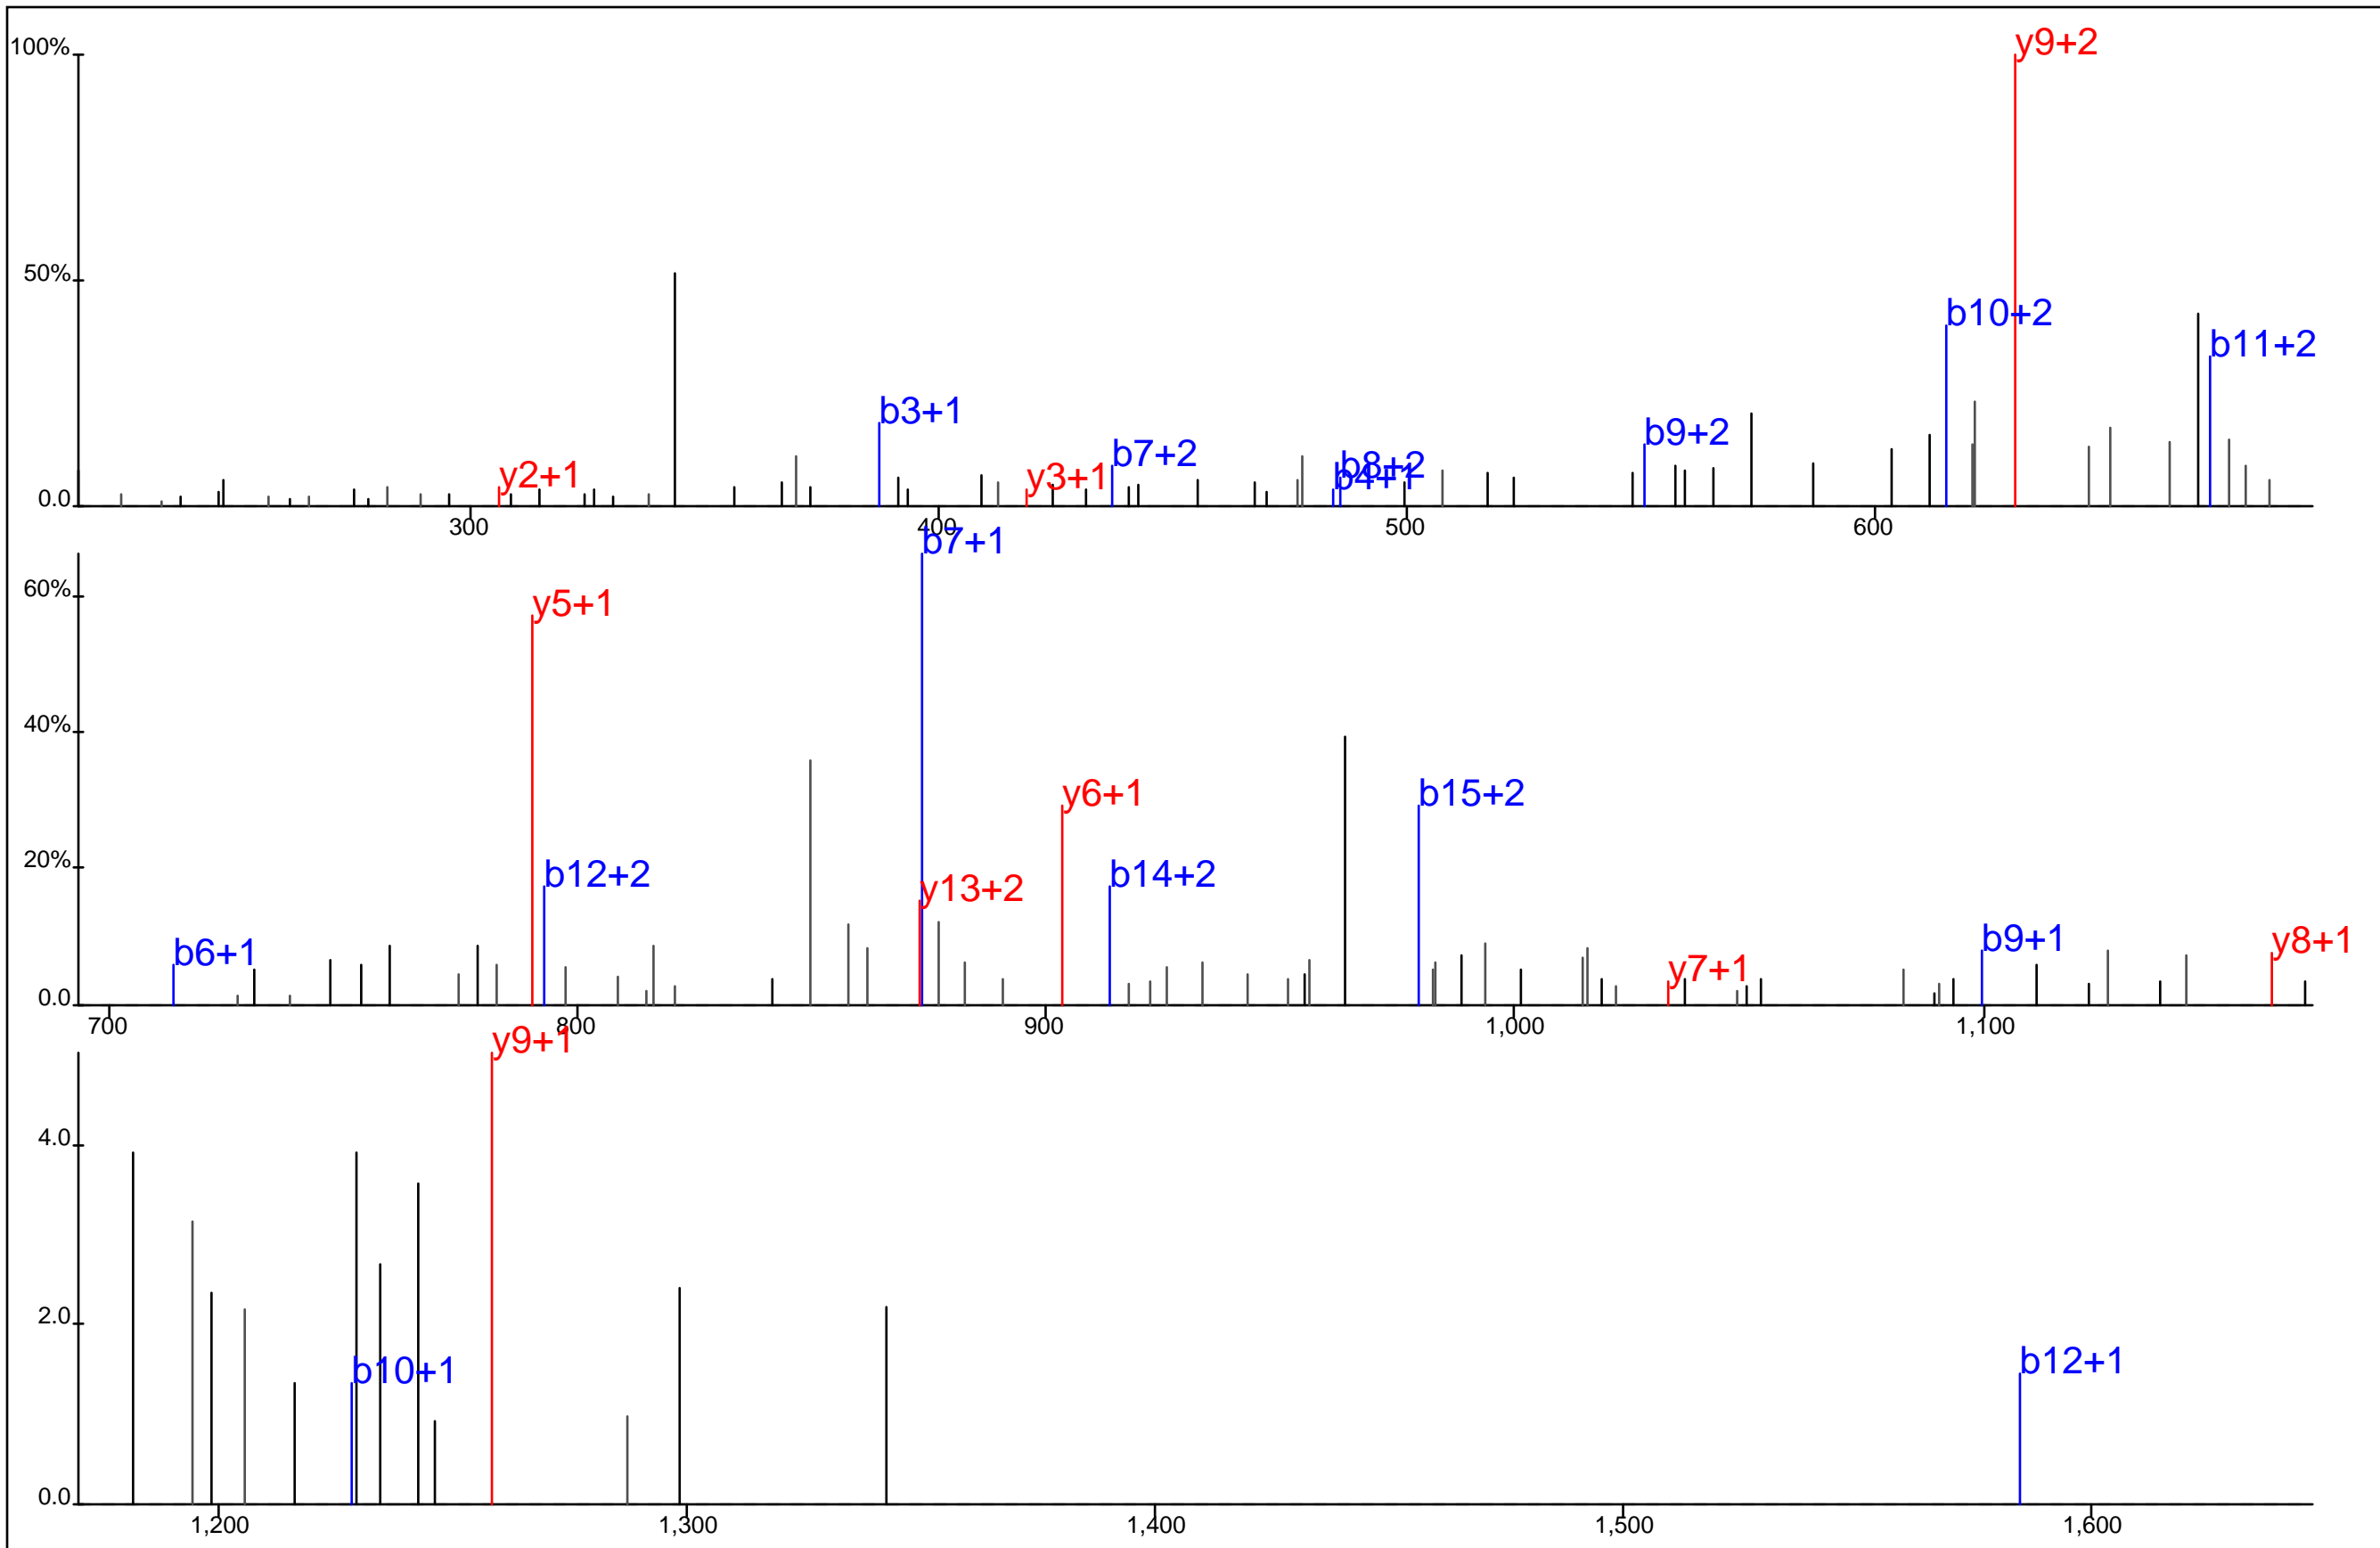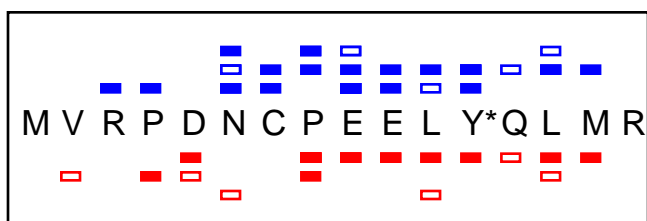

Protein Name: Lck  
 gi Accession: 0  
 Precursor Mass: 710.9766+3  
 Delta Mass: 0.789 ppm  
 XCorr: 33.58



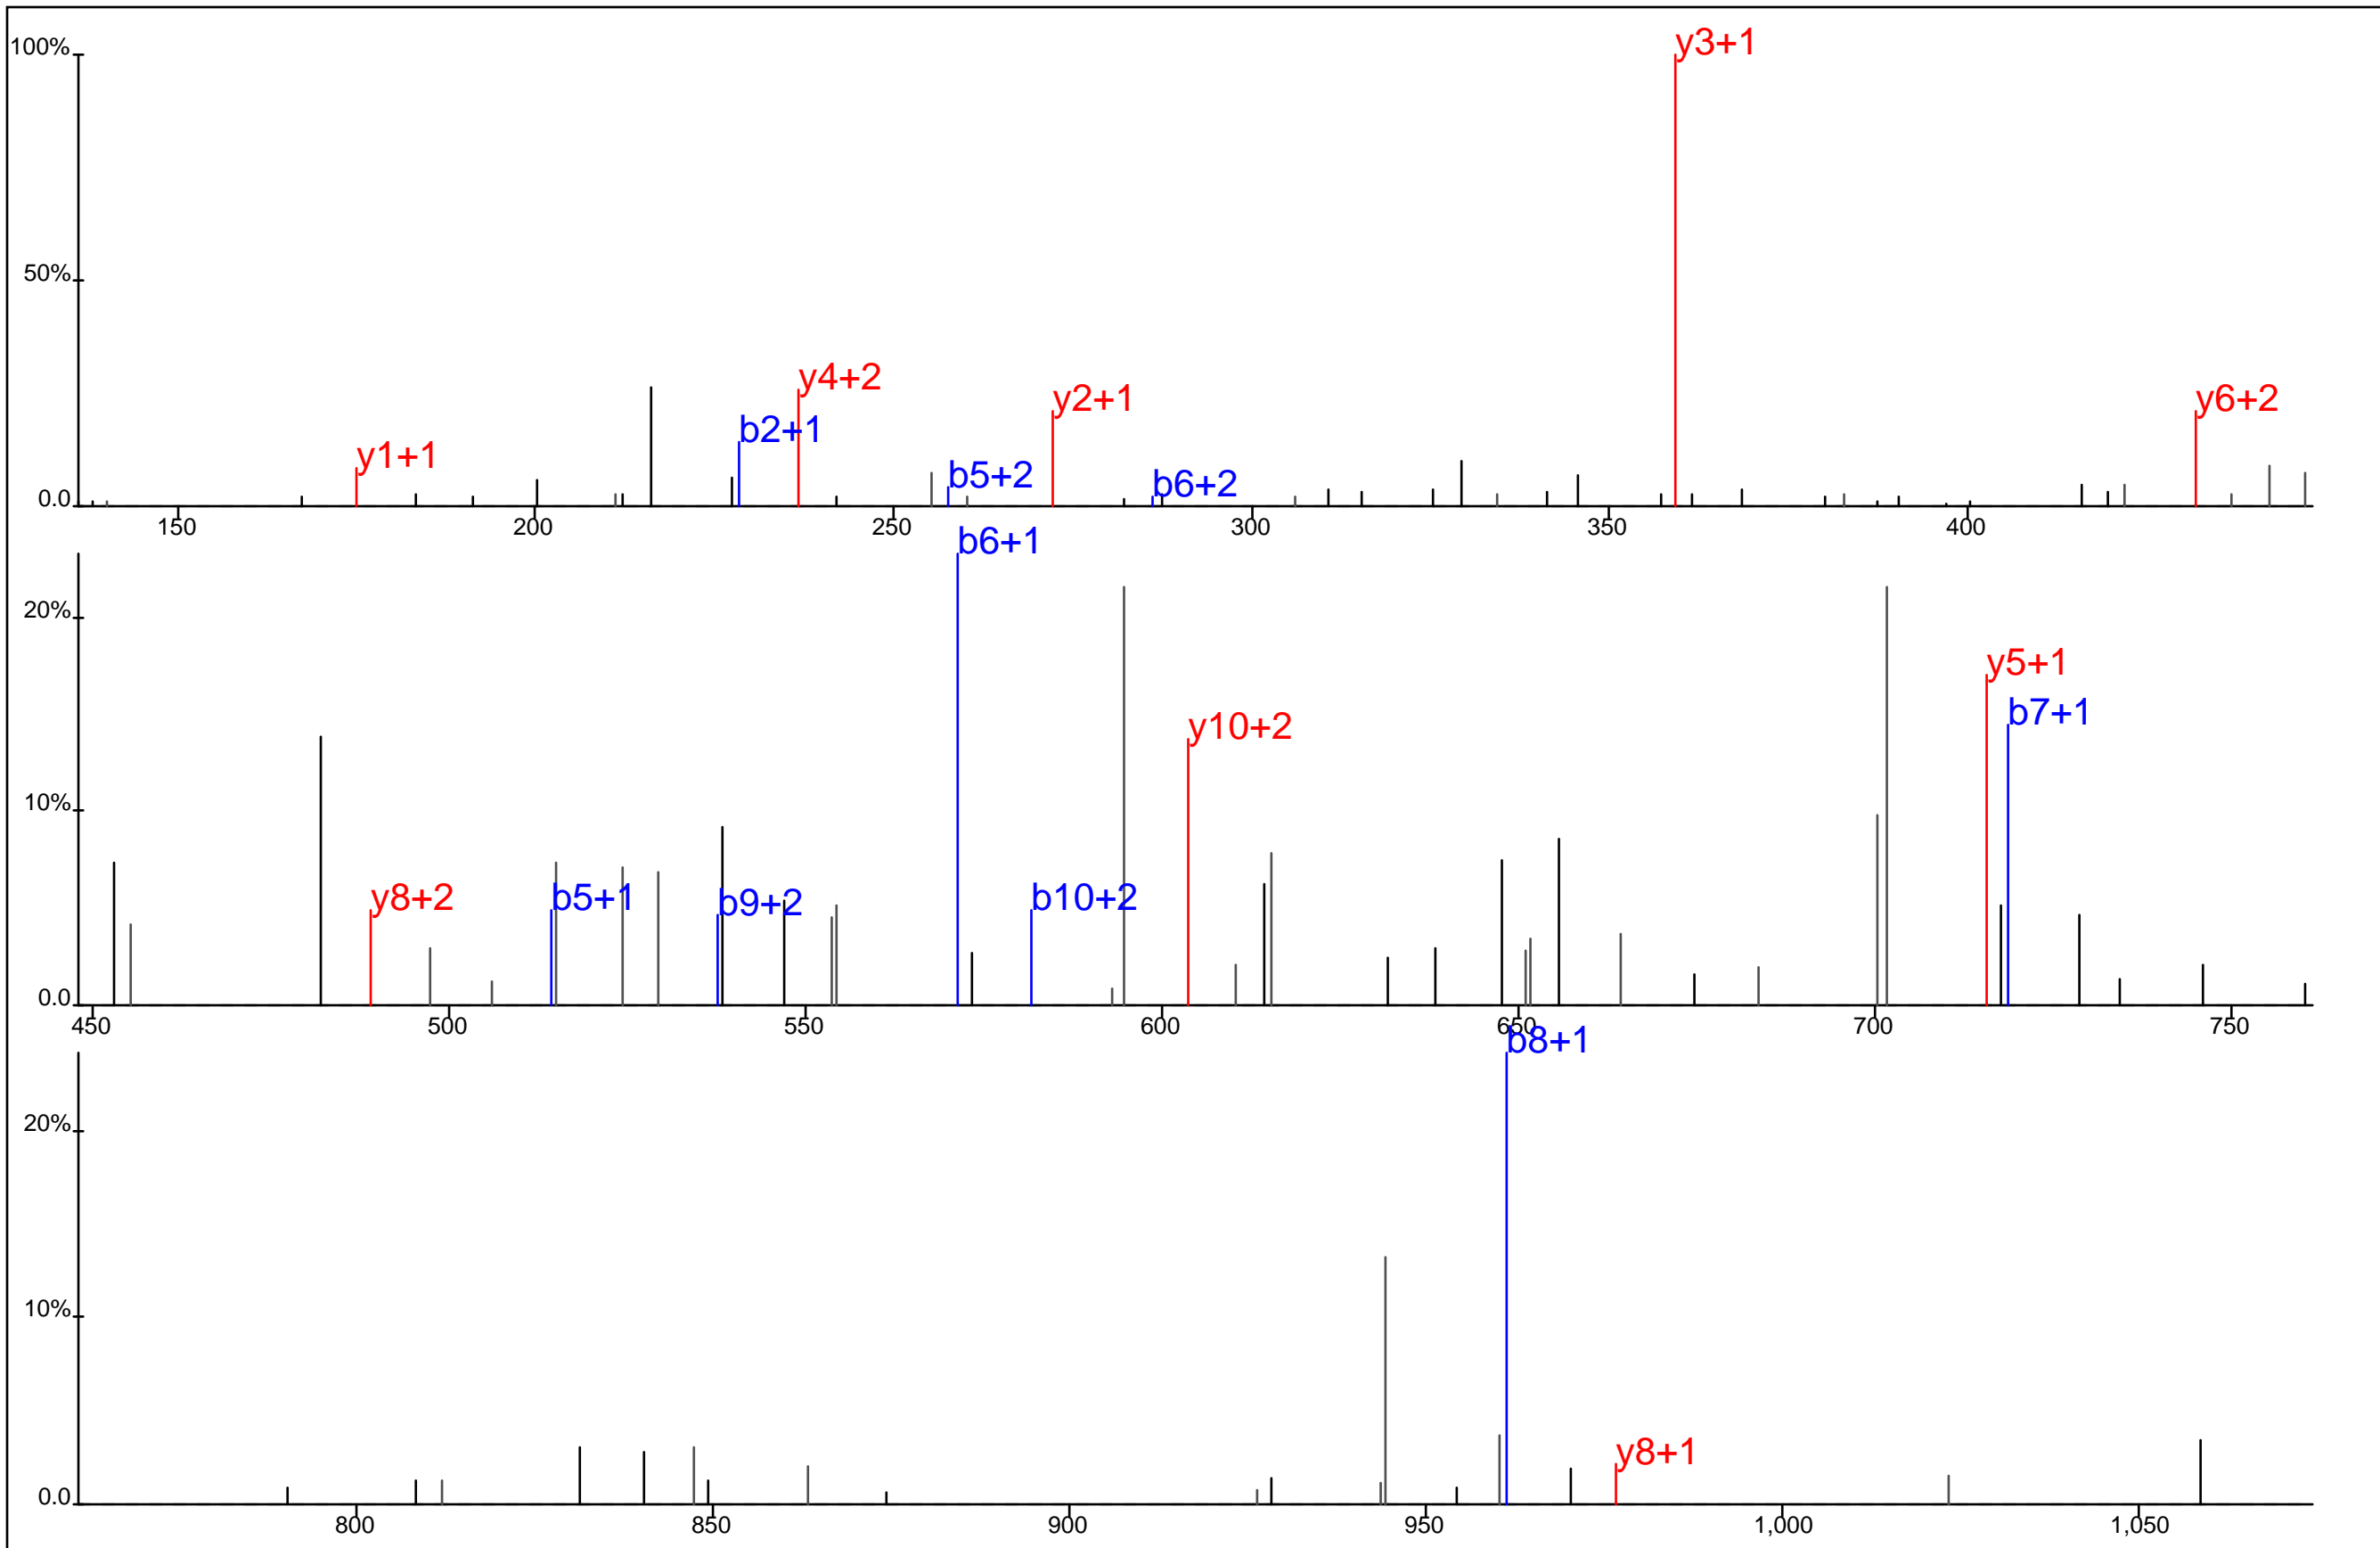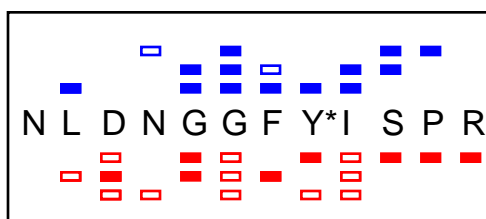

Protein Name: Lck  
 gi Accession: 0  
 Precursor Mass: 478.2140+3  
 Delta Mass: 1.231 ppm  
 XCorr: 29.59

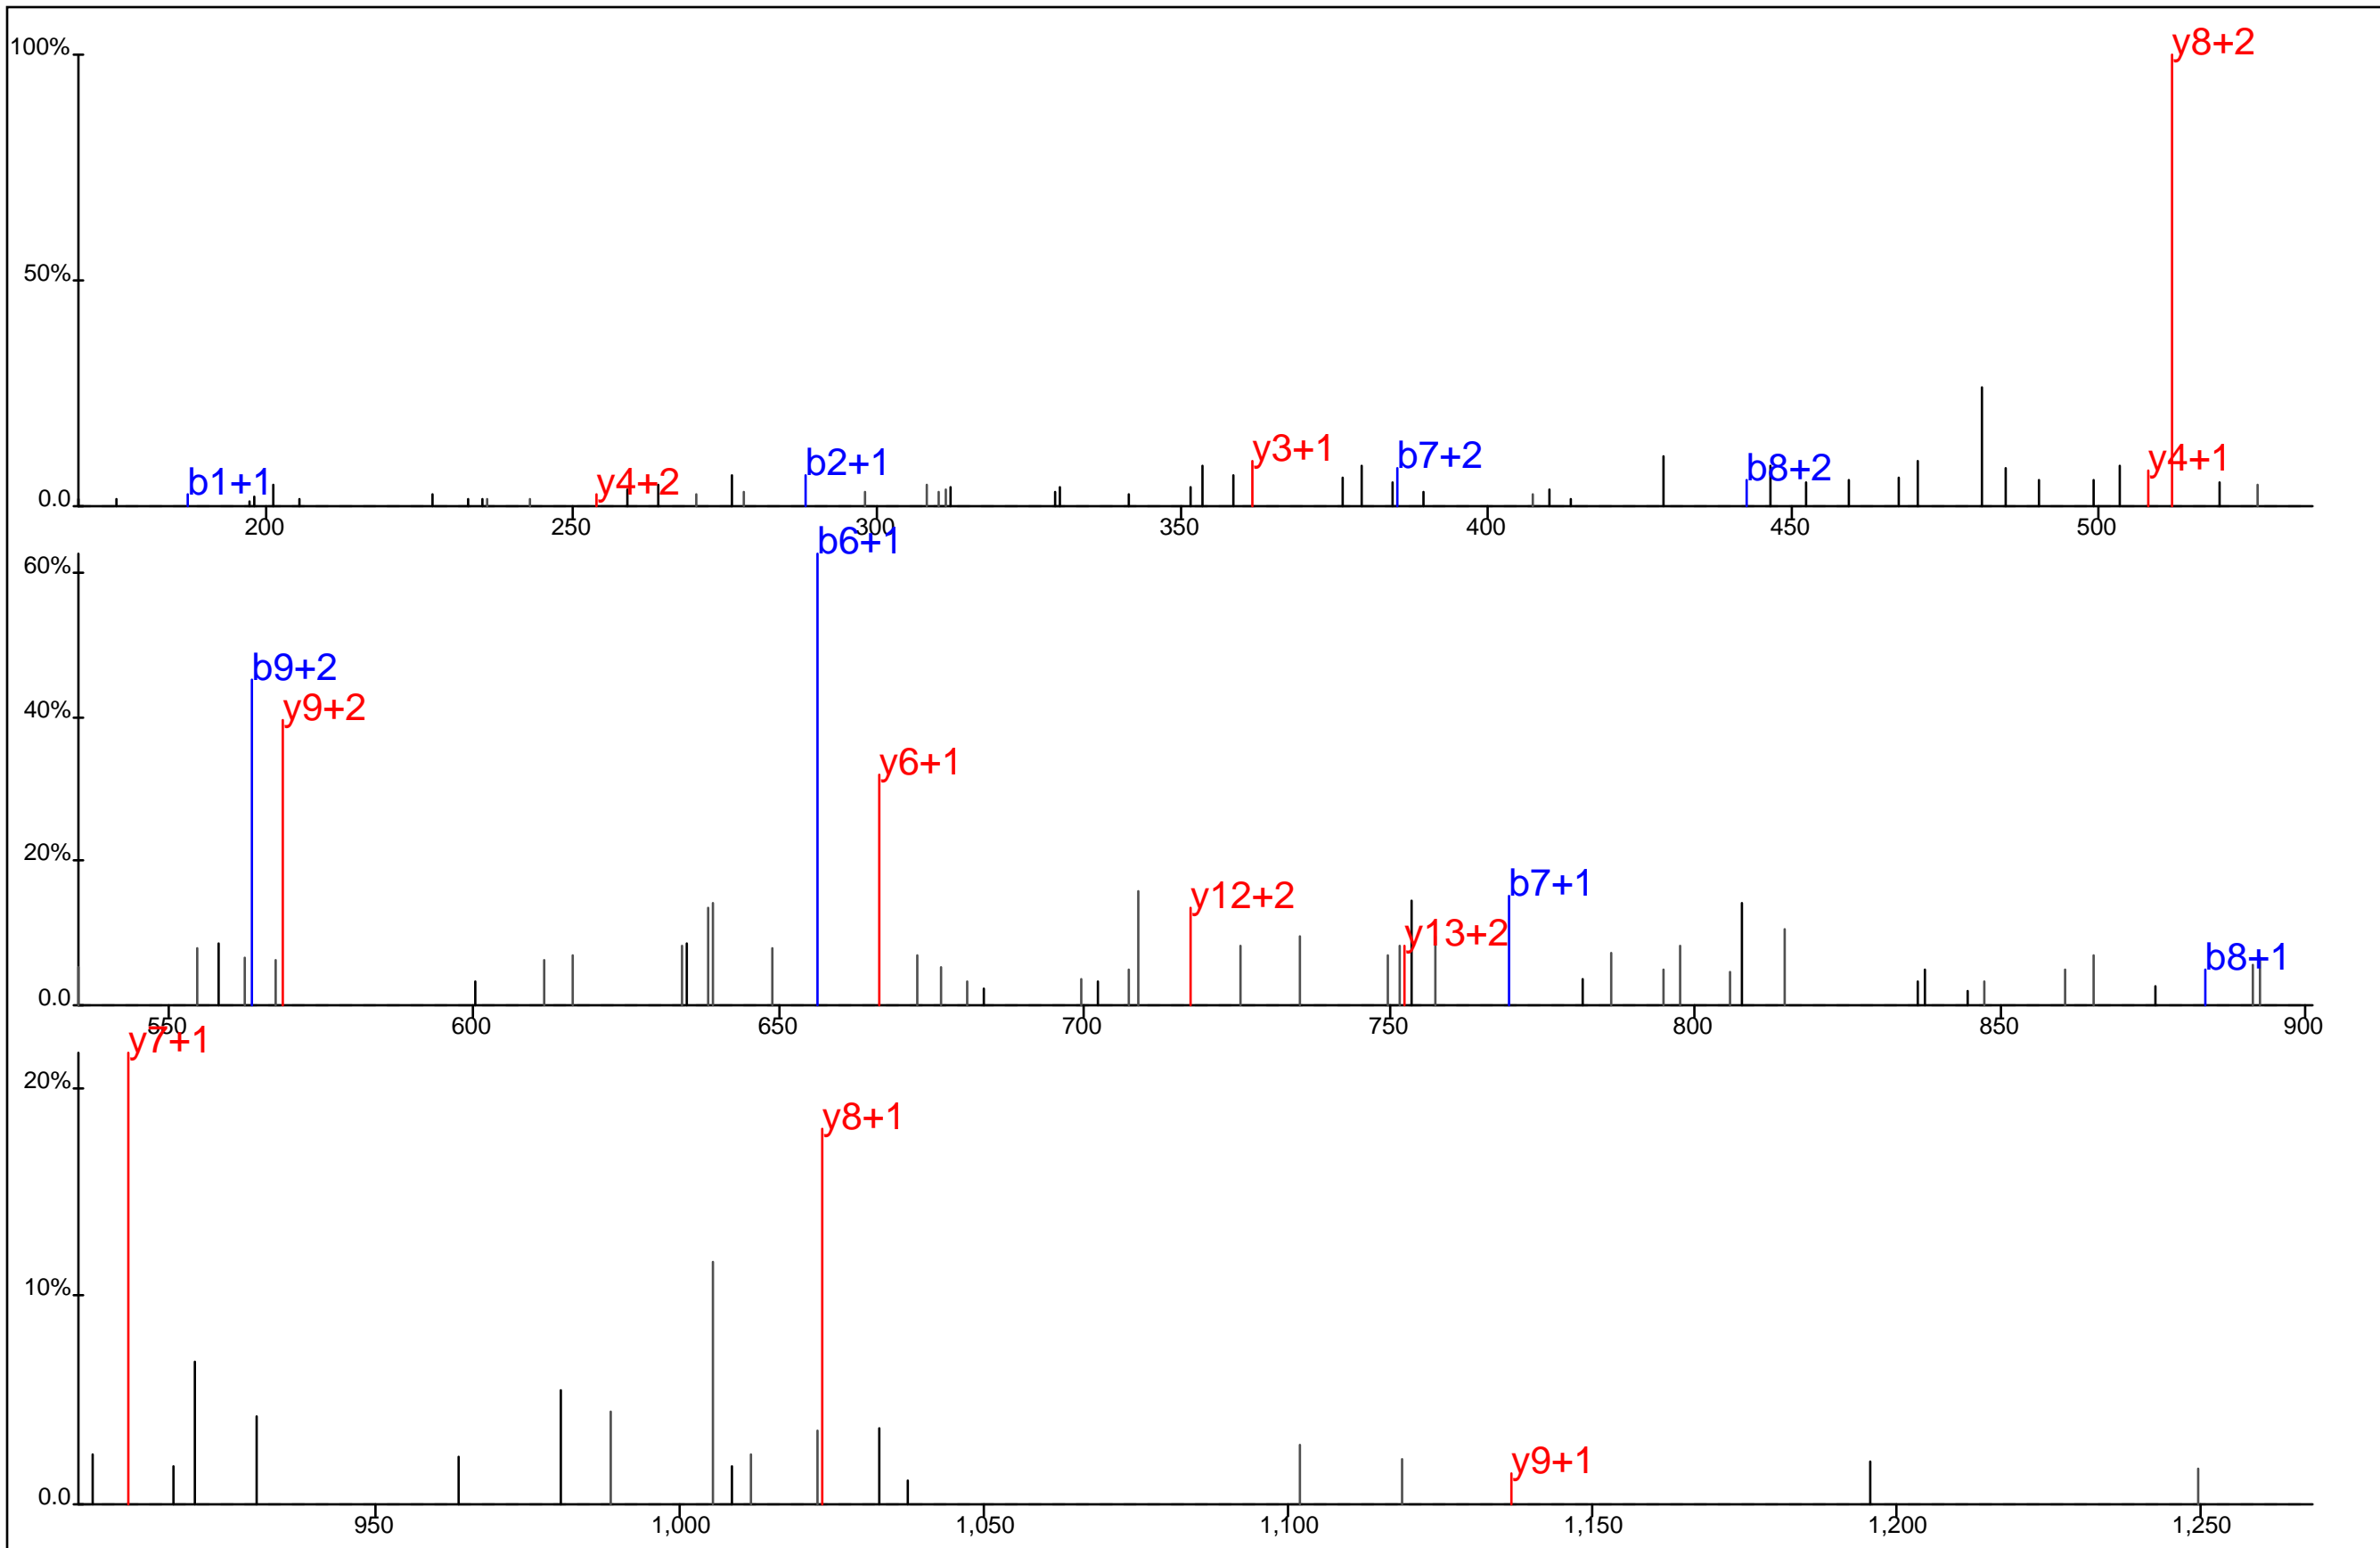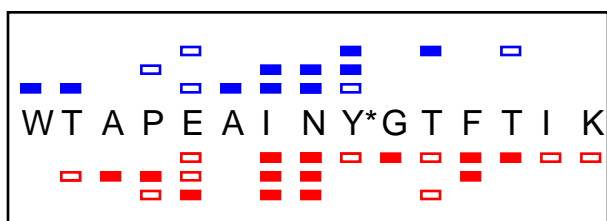

Protein Name: Lck  
 gi Accession: 0  
 Precursor Mass: 597.9499+3  
 Delta Mass: 0.108 ppm  
 XCorr: 20.96

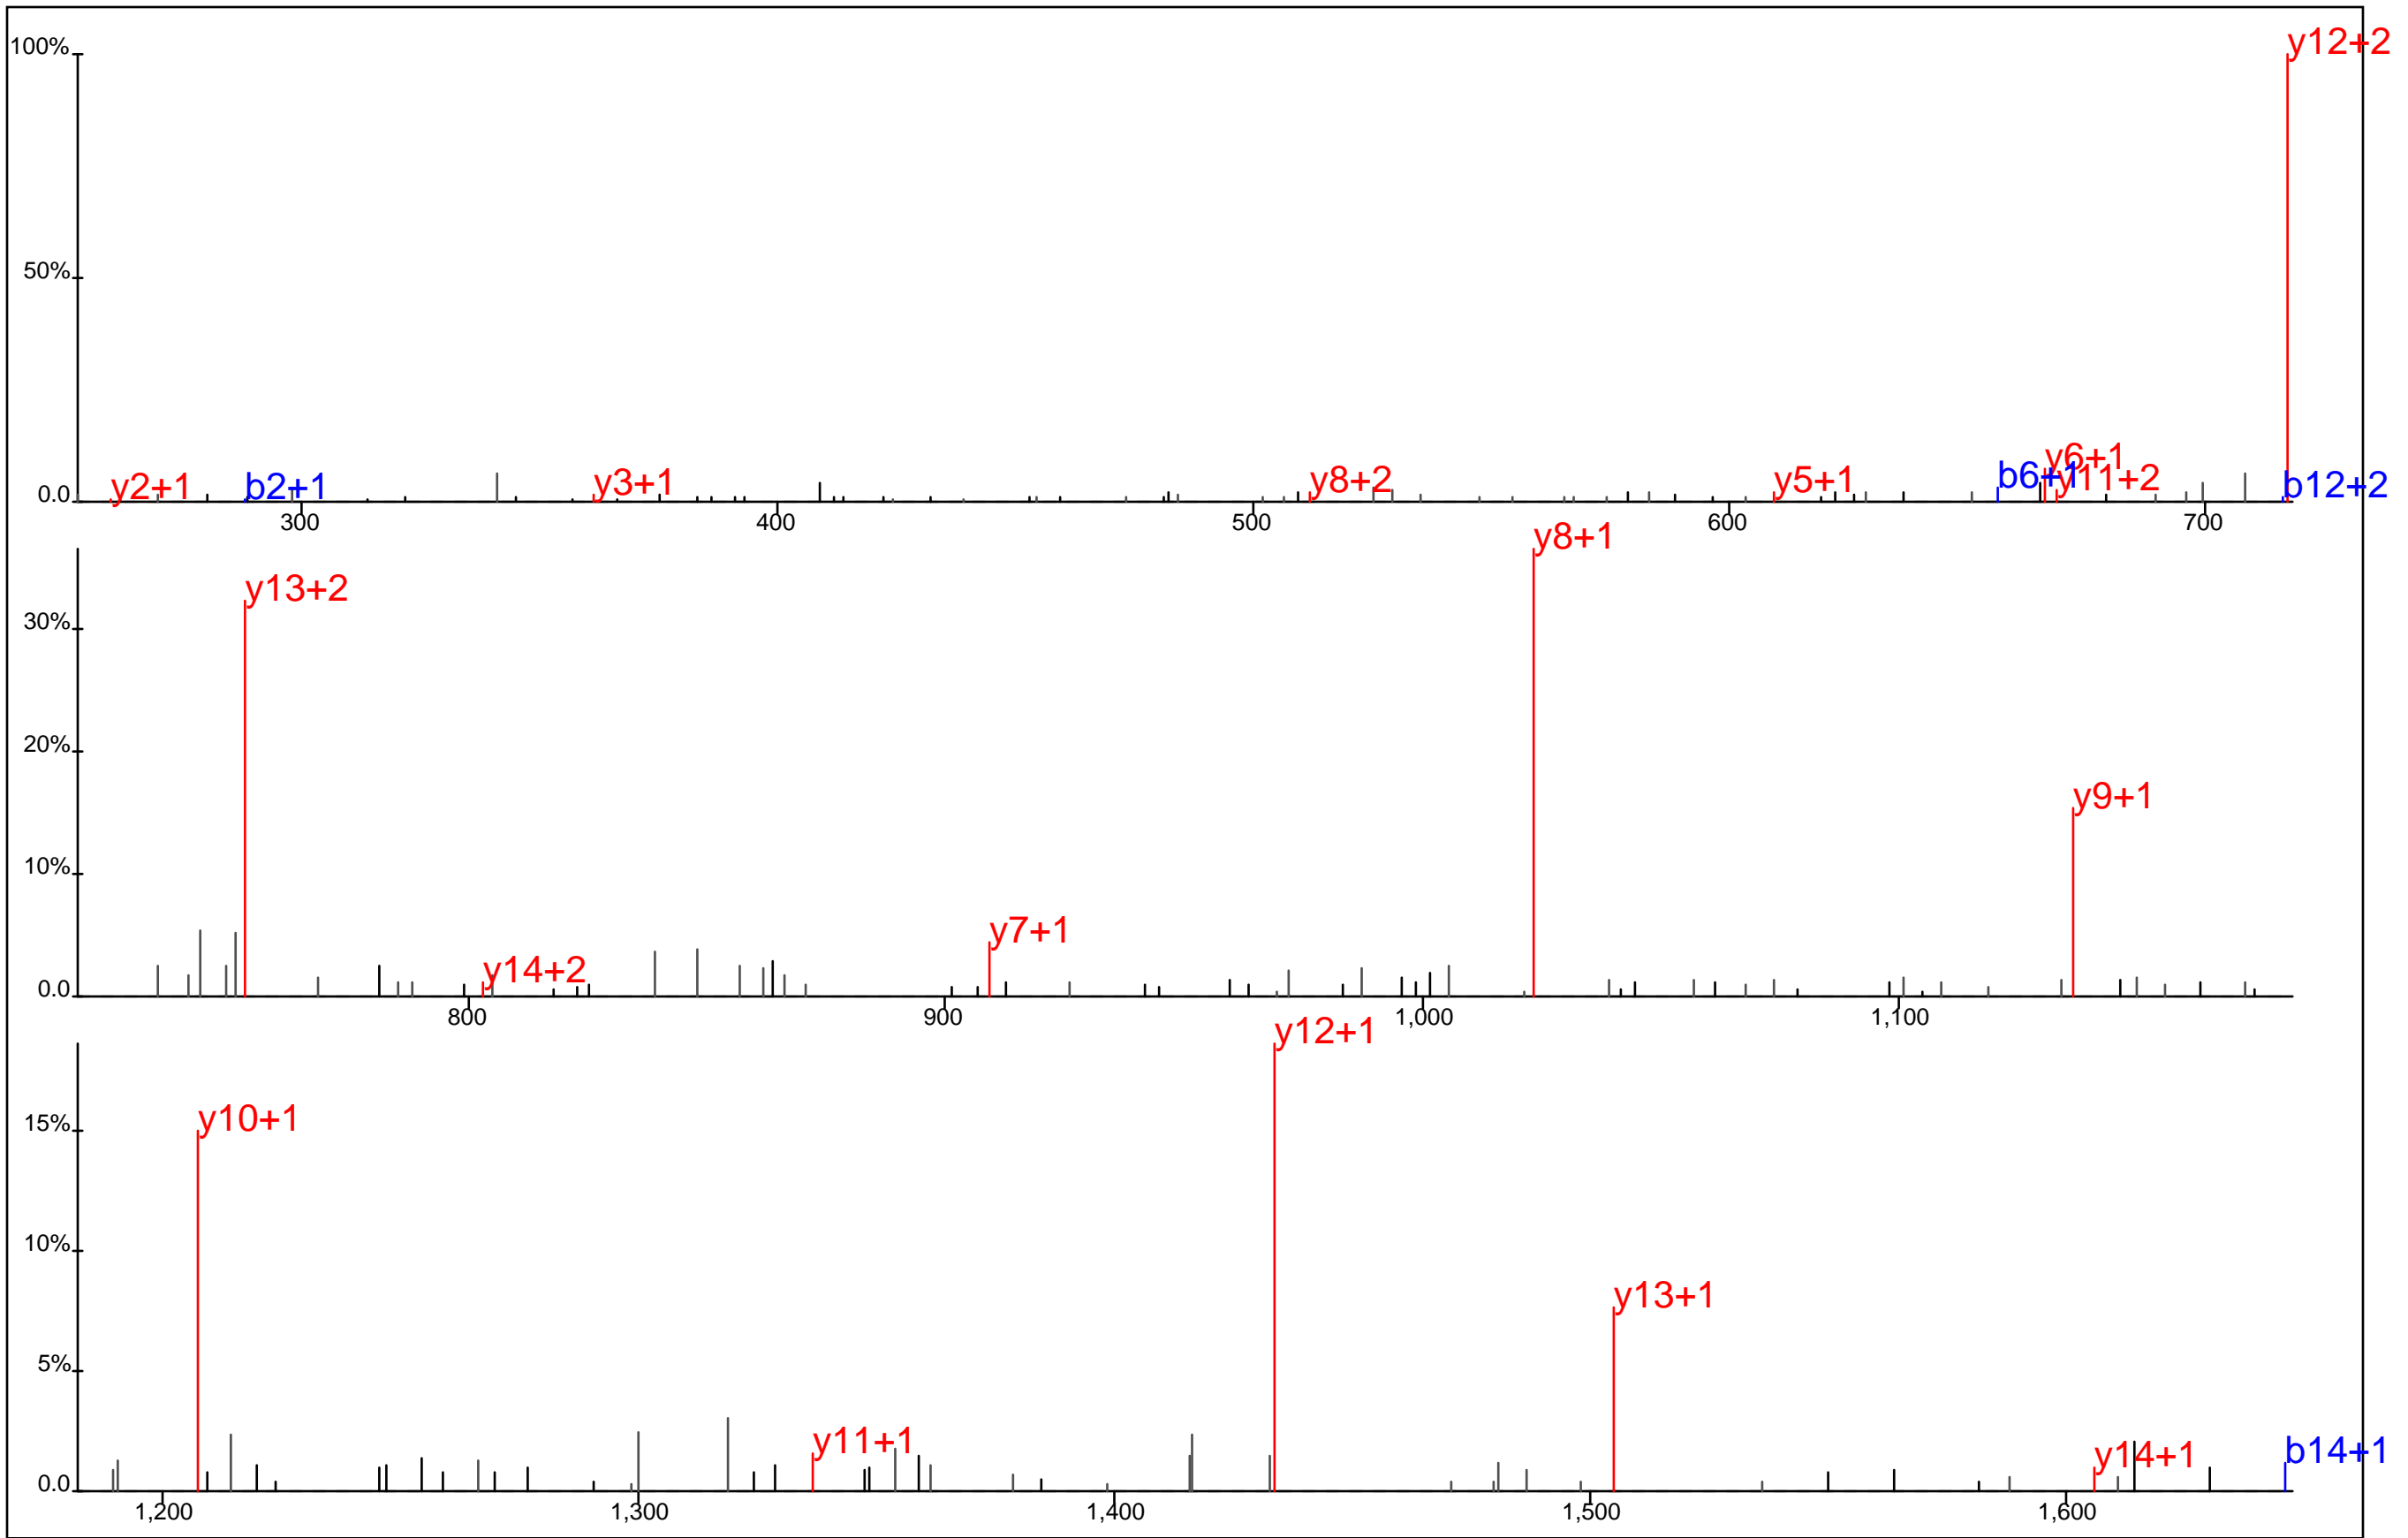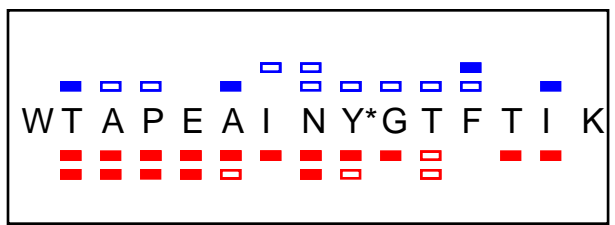

Protein Name: Lck  
 gi Accession: 0  
 Precursor Mass: 896.4207+2  
 Delta Mass: 0.714 ppm  
 XCorr: 49.55





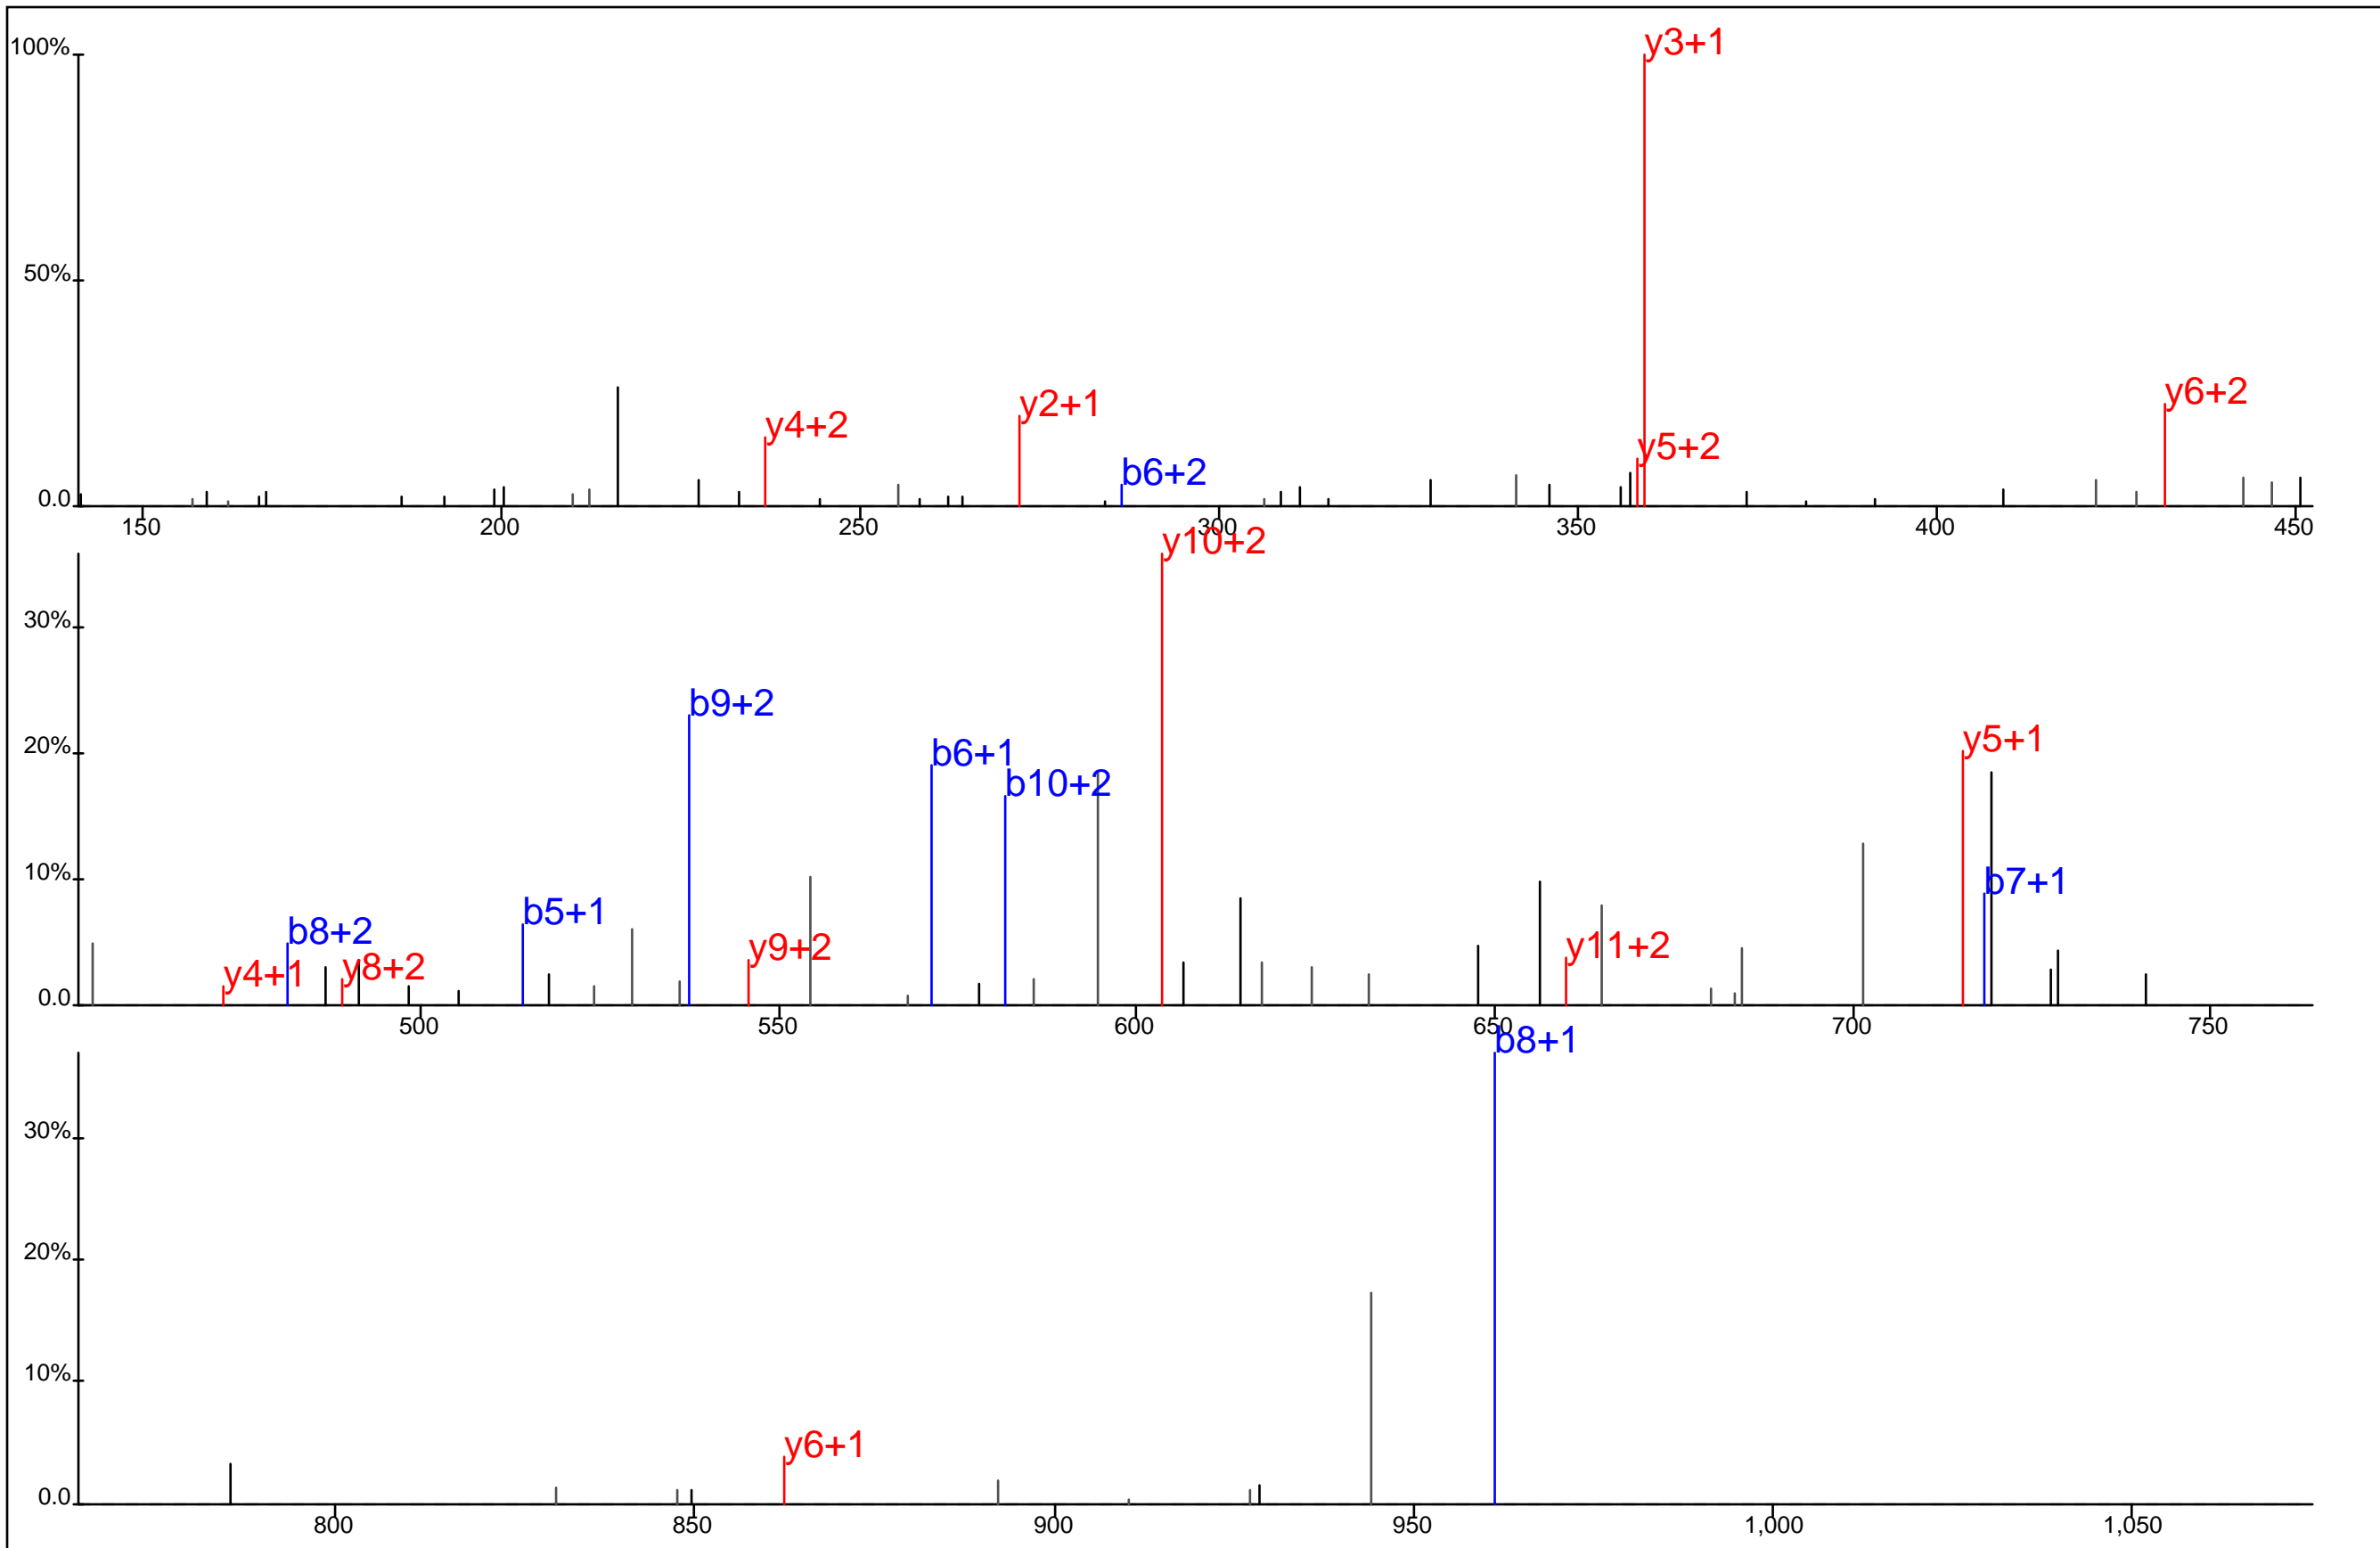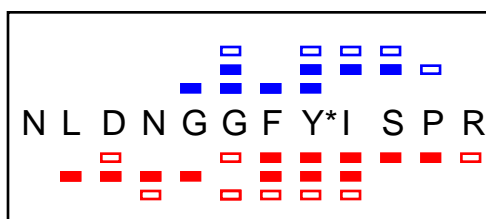

Protein Name: Lck  
 gi Accession: 0  
 Precursor Mass: 478.2134+3  
 Delta Mass: 0.047 ppm  
 XCorr: 27.2

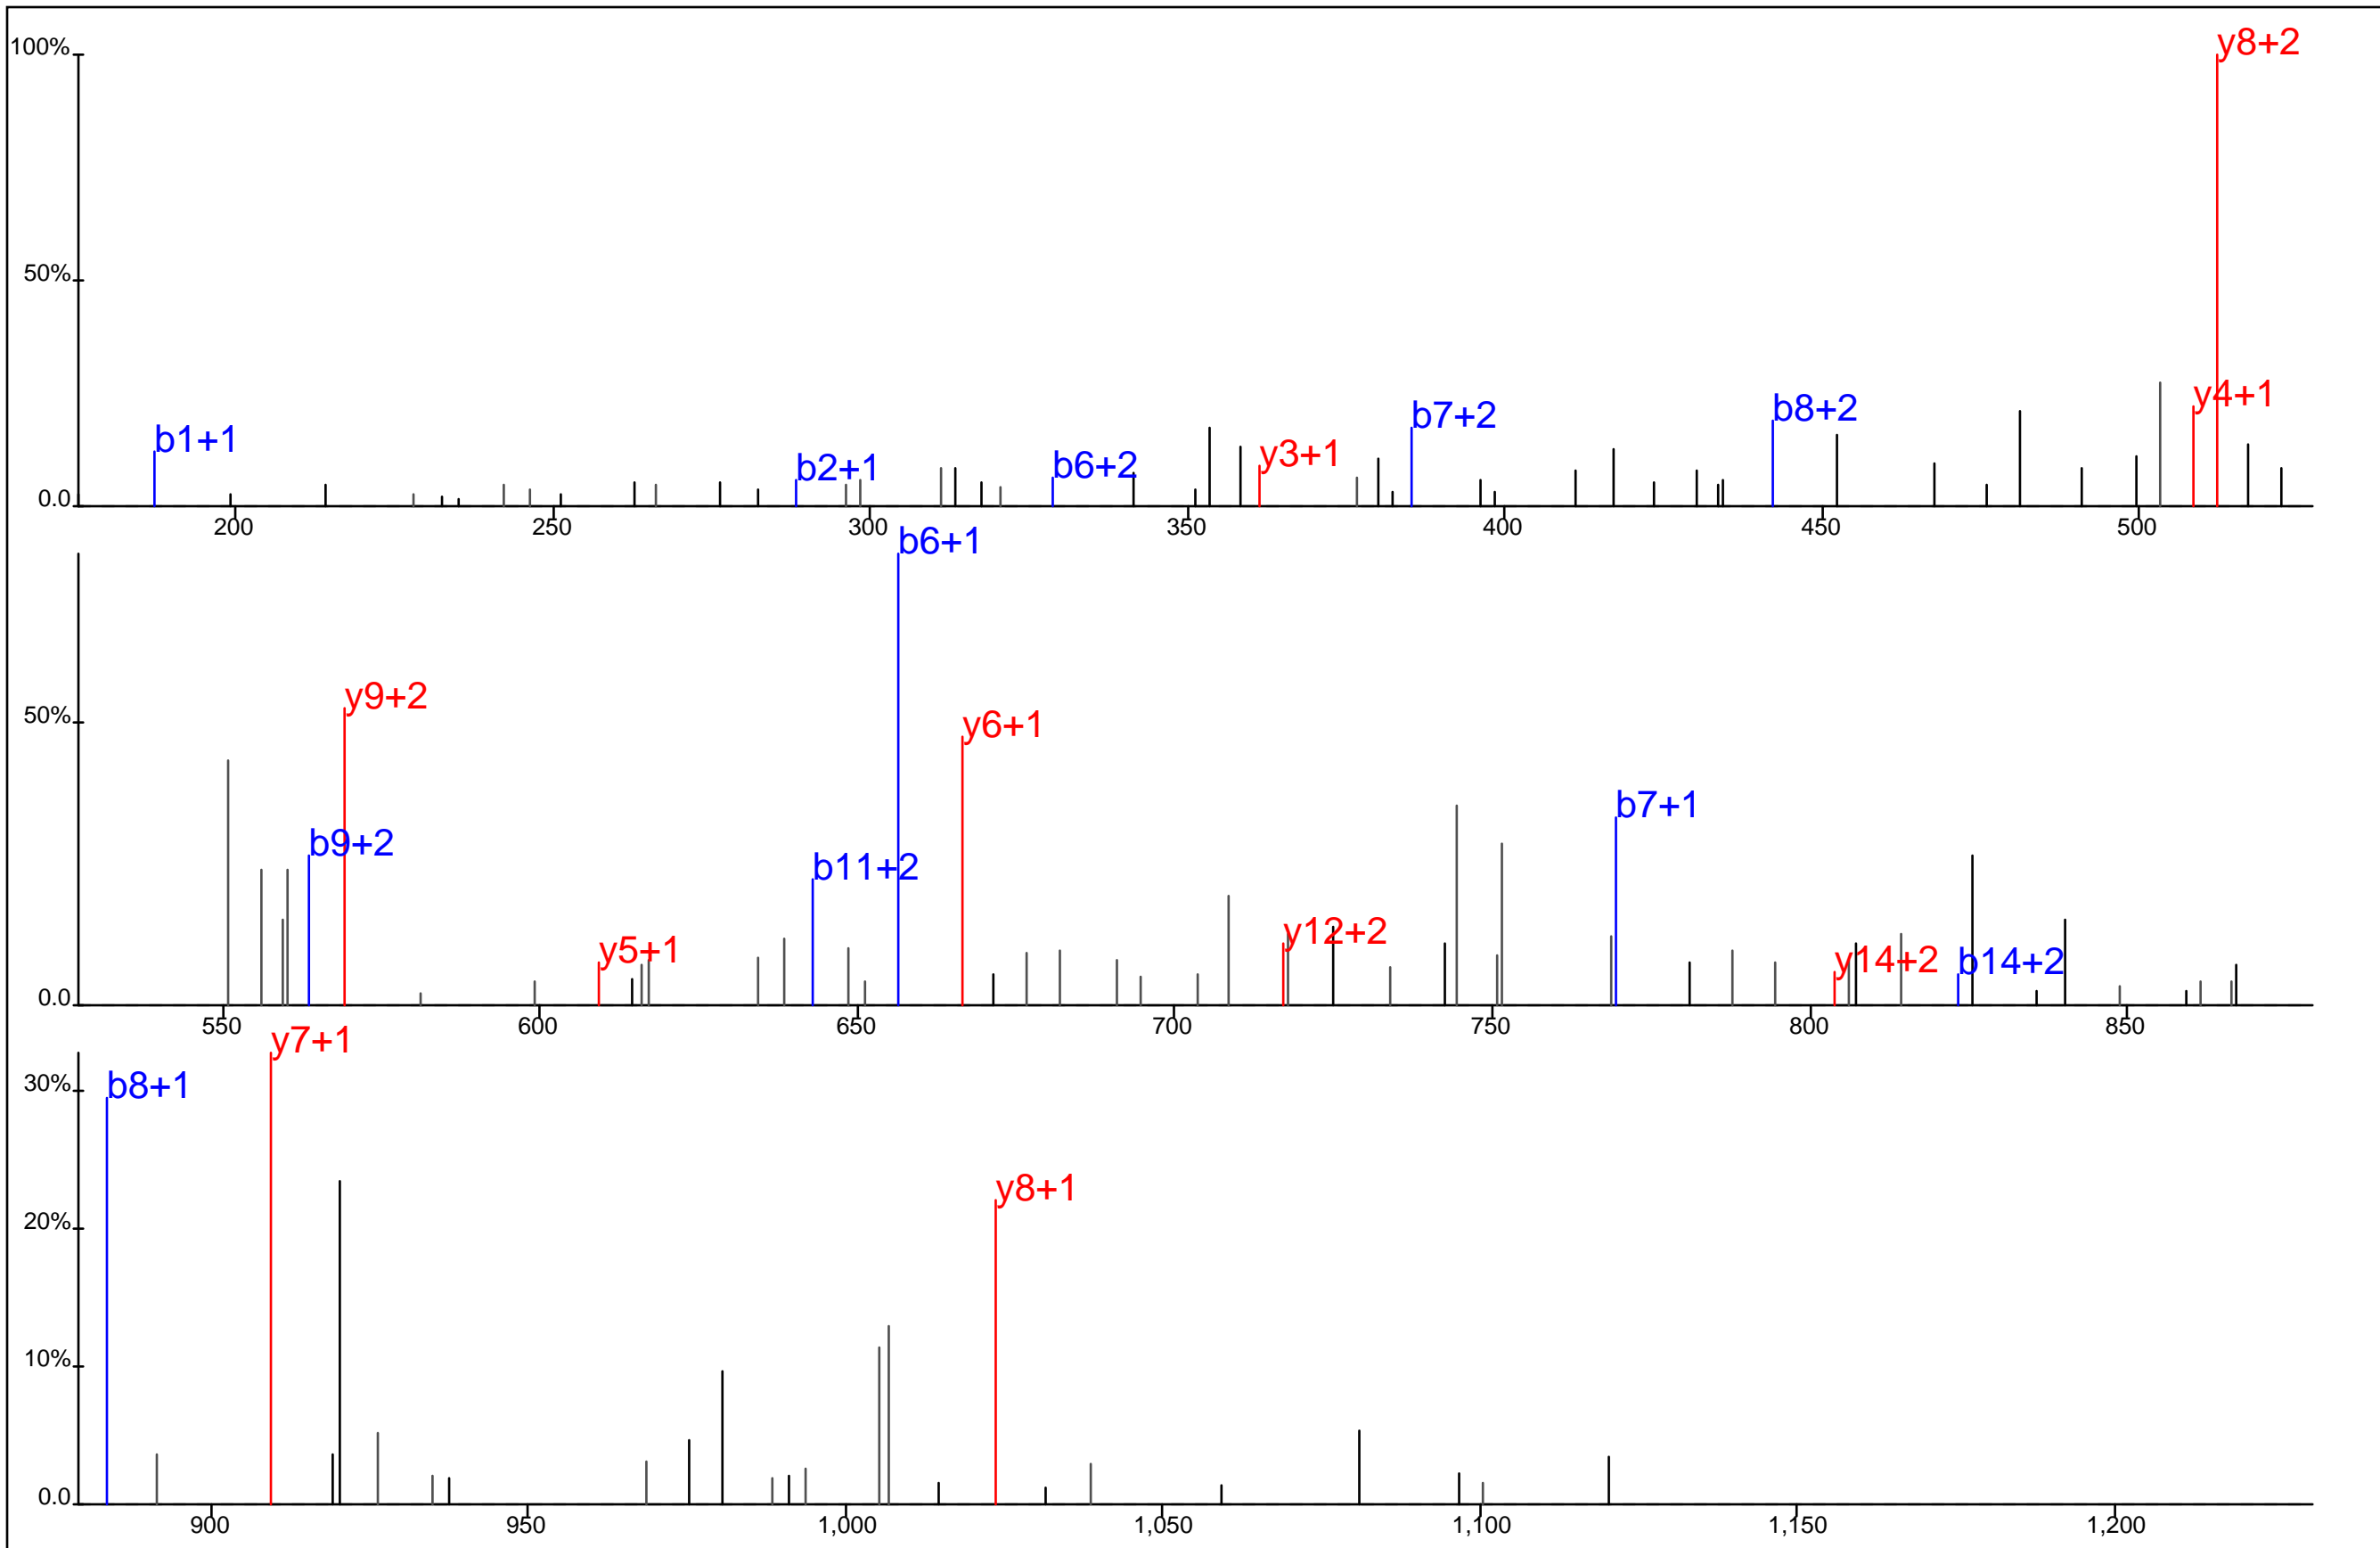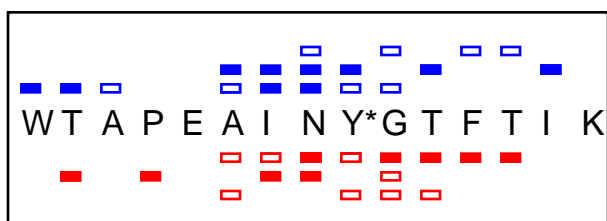

Protein Name: Lck  
 gi Accession: 0  
 Precursor Mass: 597.9514+3  
 Delta Mass: 2.345 ppm  
 XCorr: 22.12

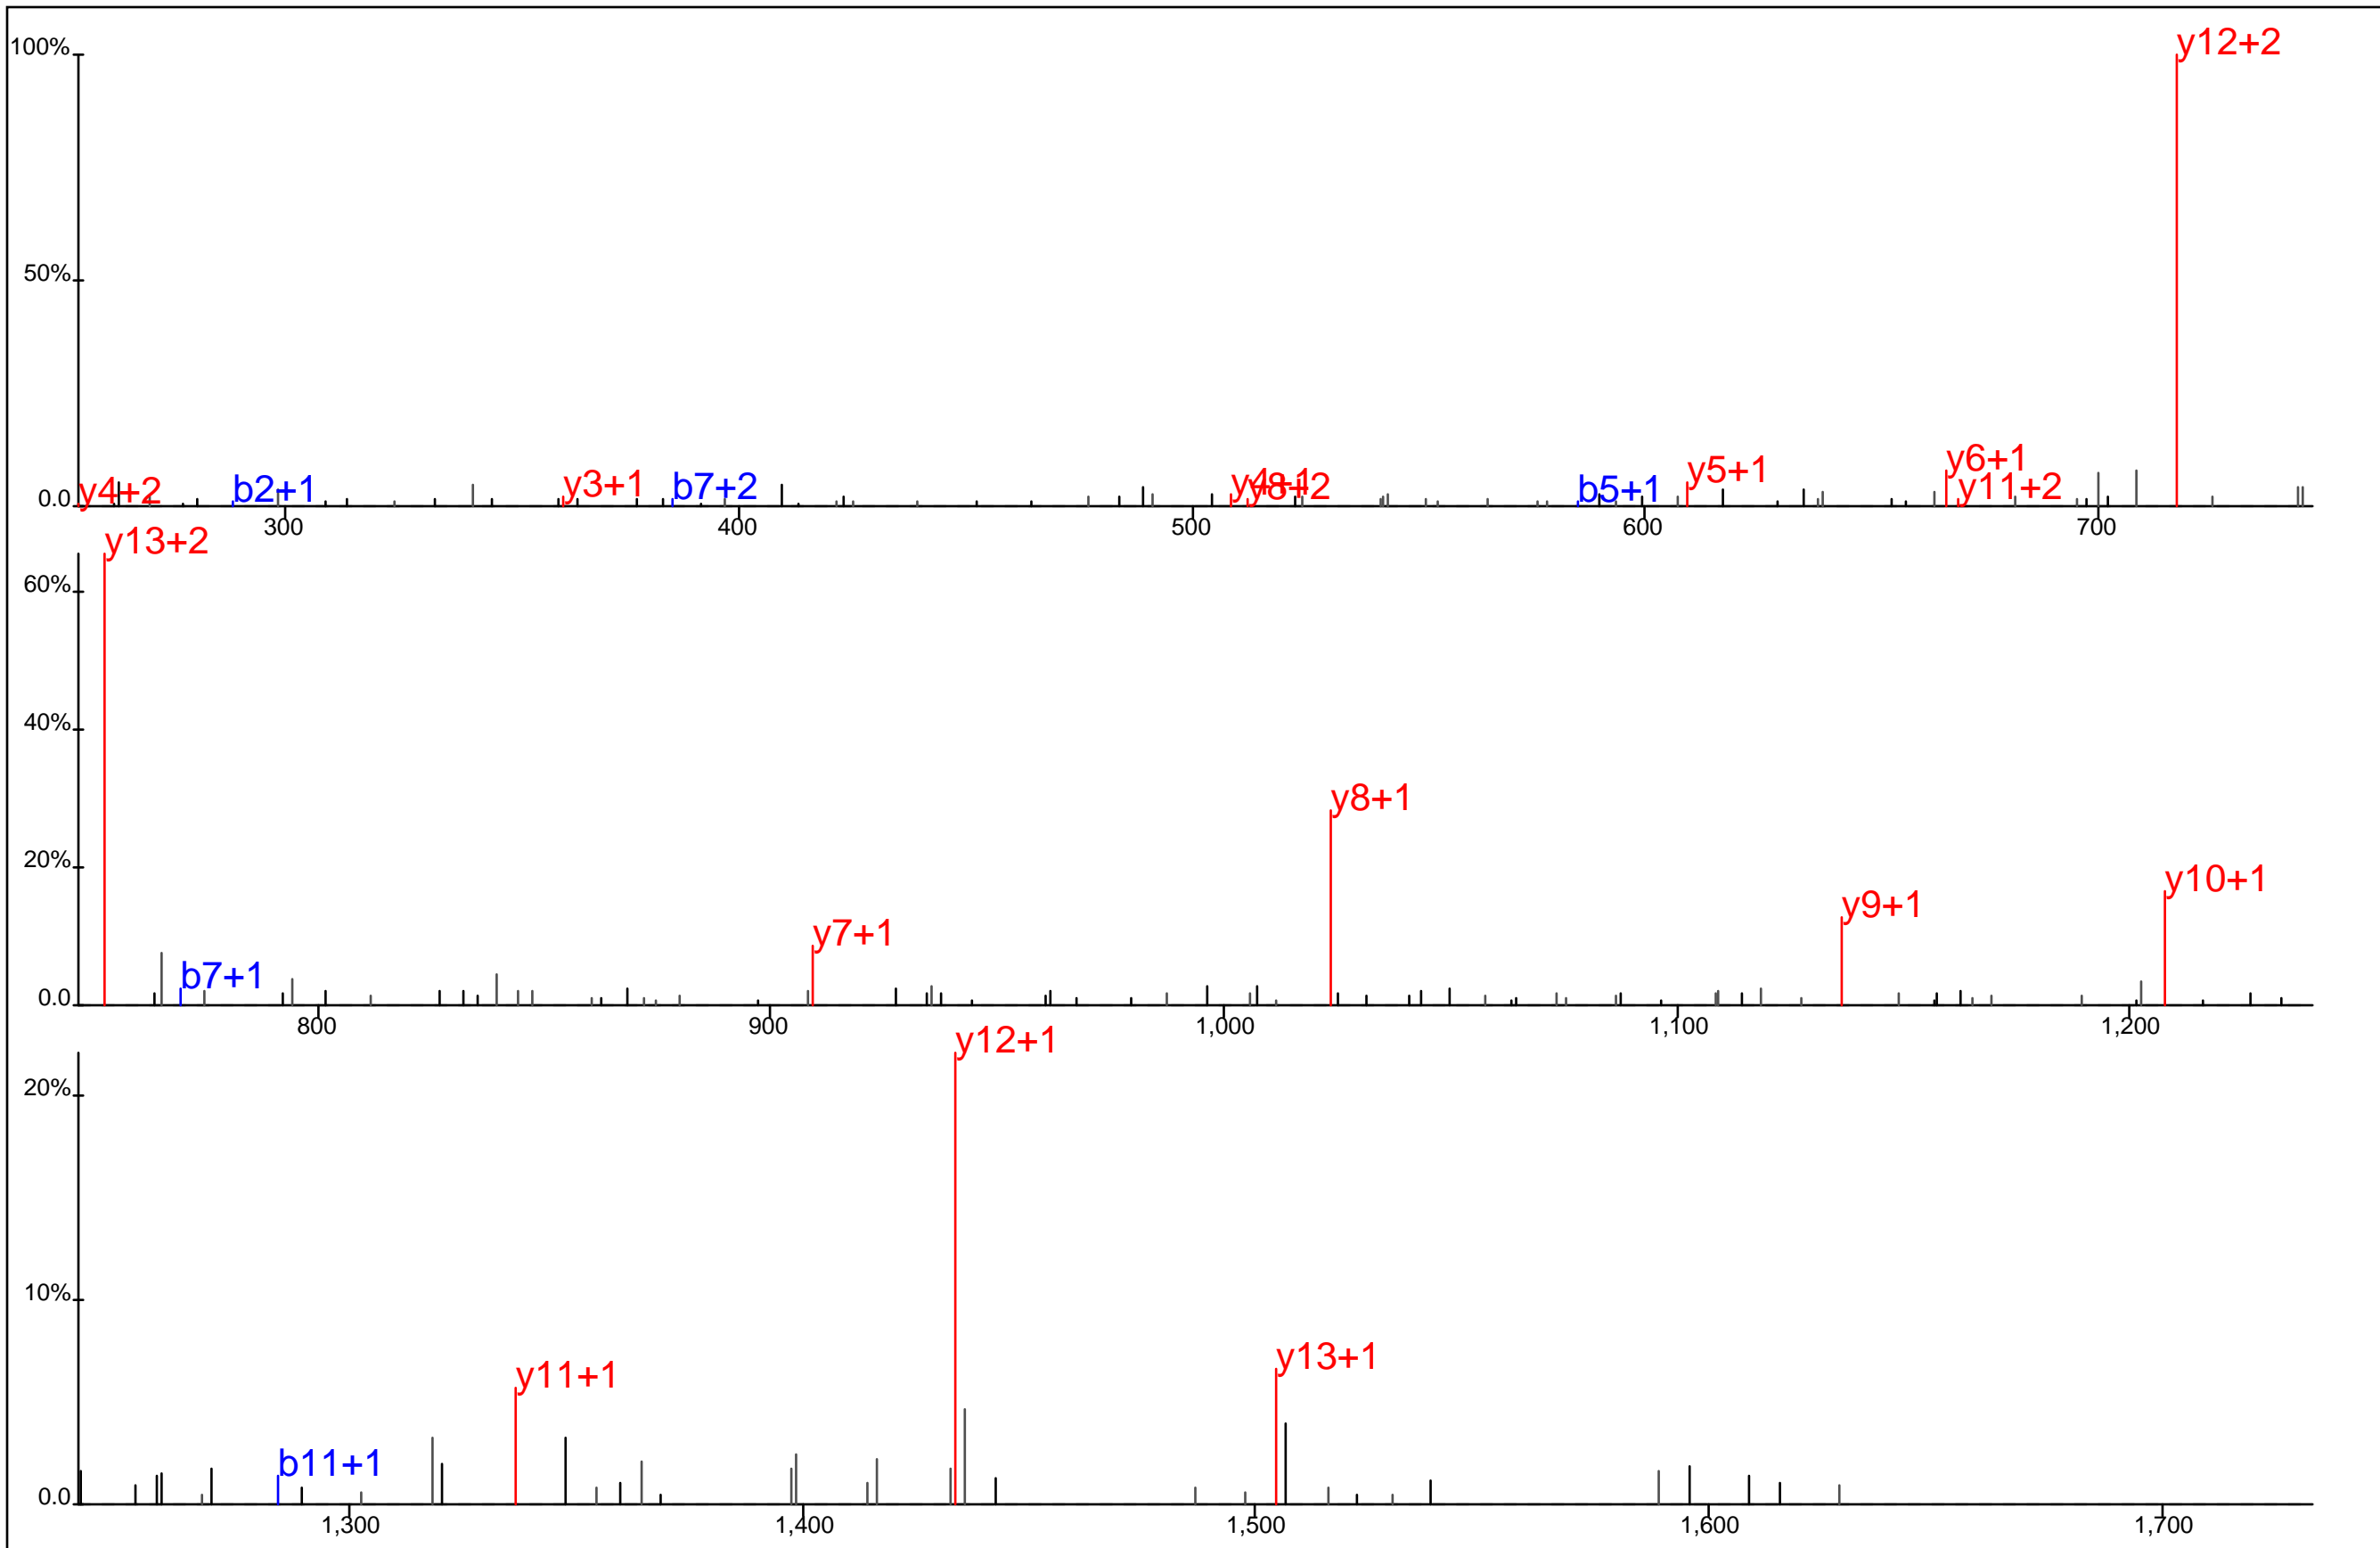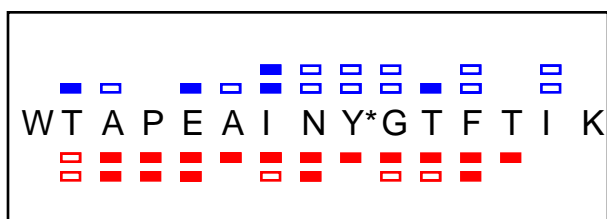

Protein Name: Lck  
 gi Accession: 0  
 Precursor Mass: 896.4202+2  
 Delta Mass: 1.259 ppm  
 XCorr: 62.63

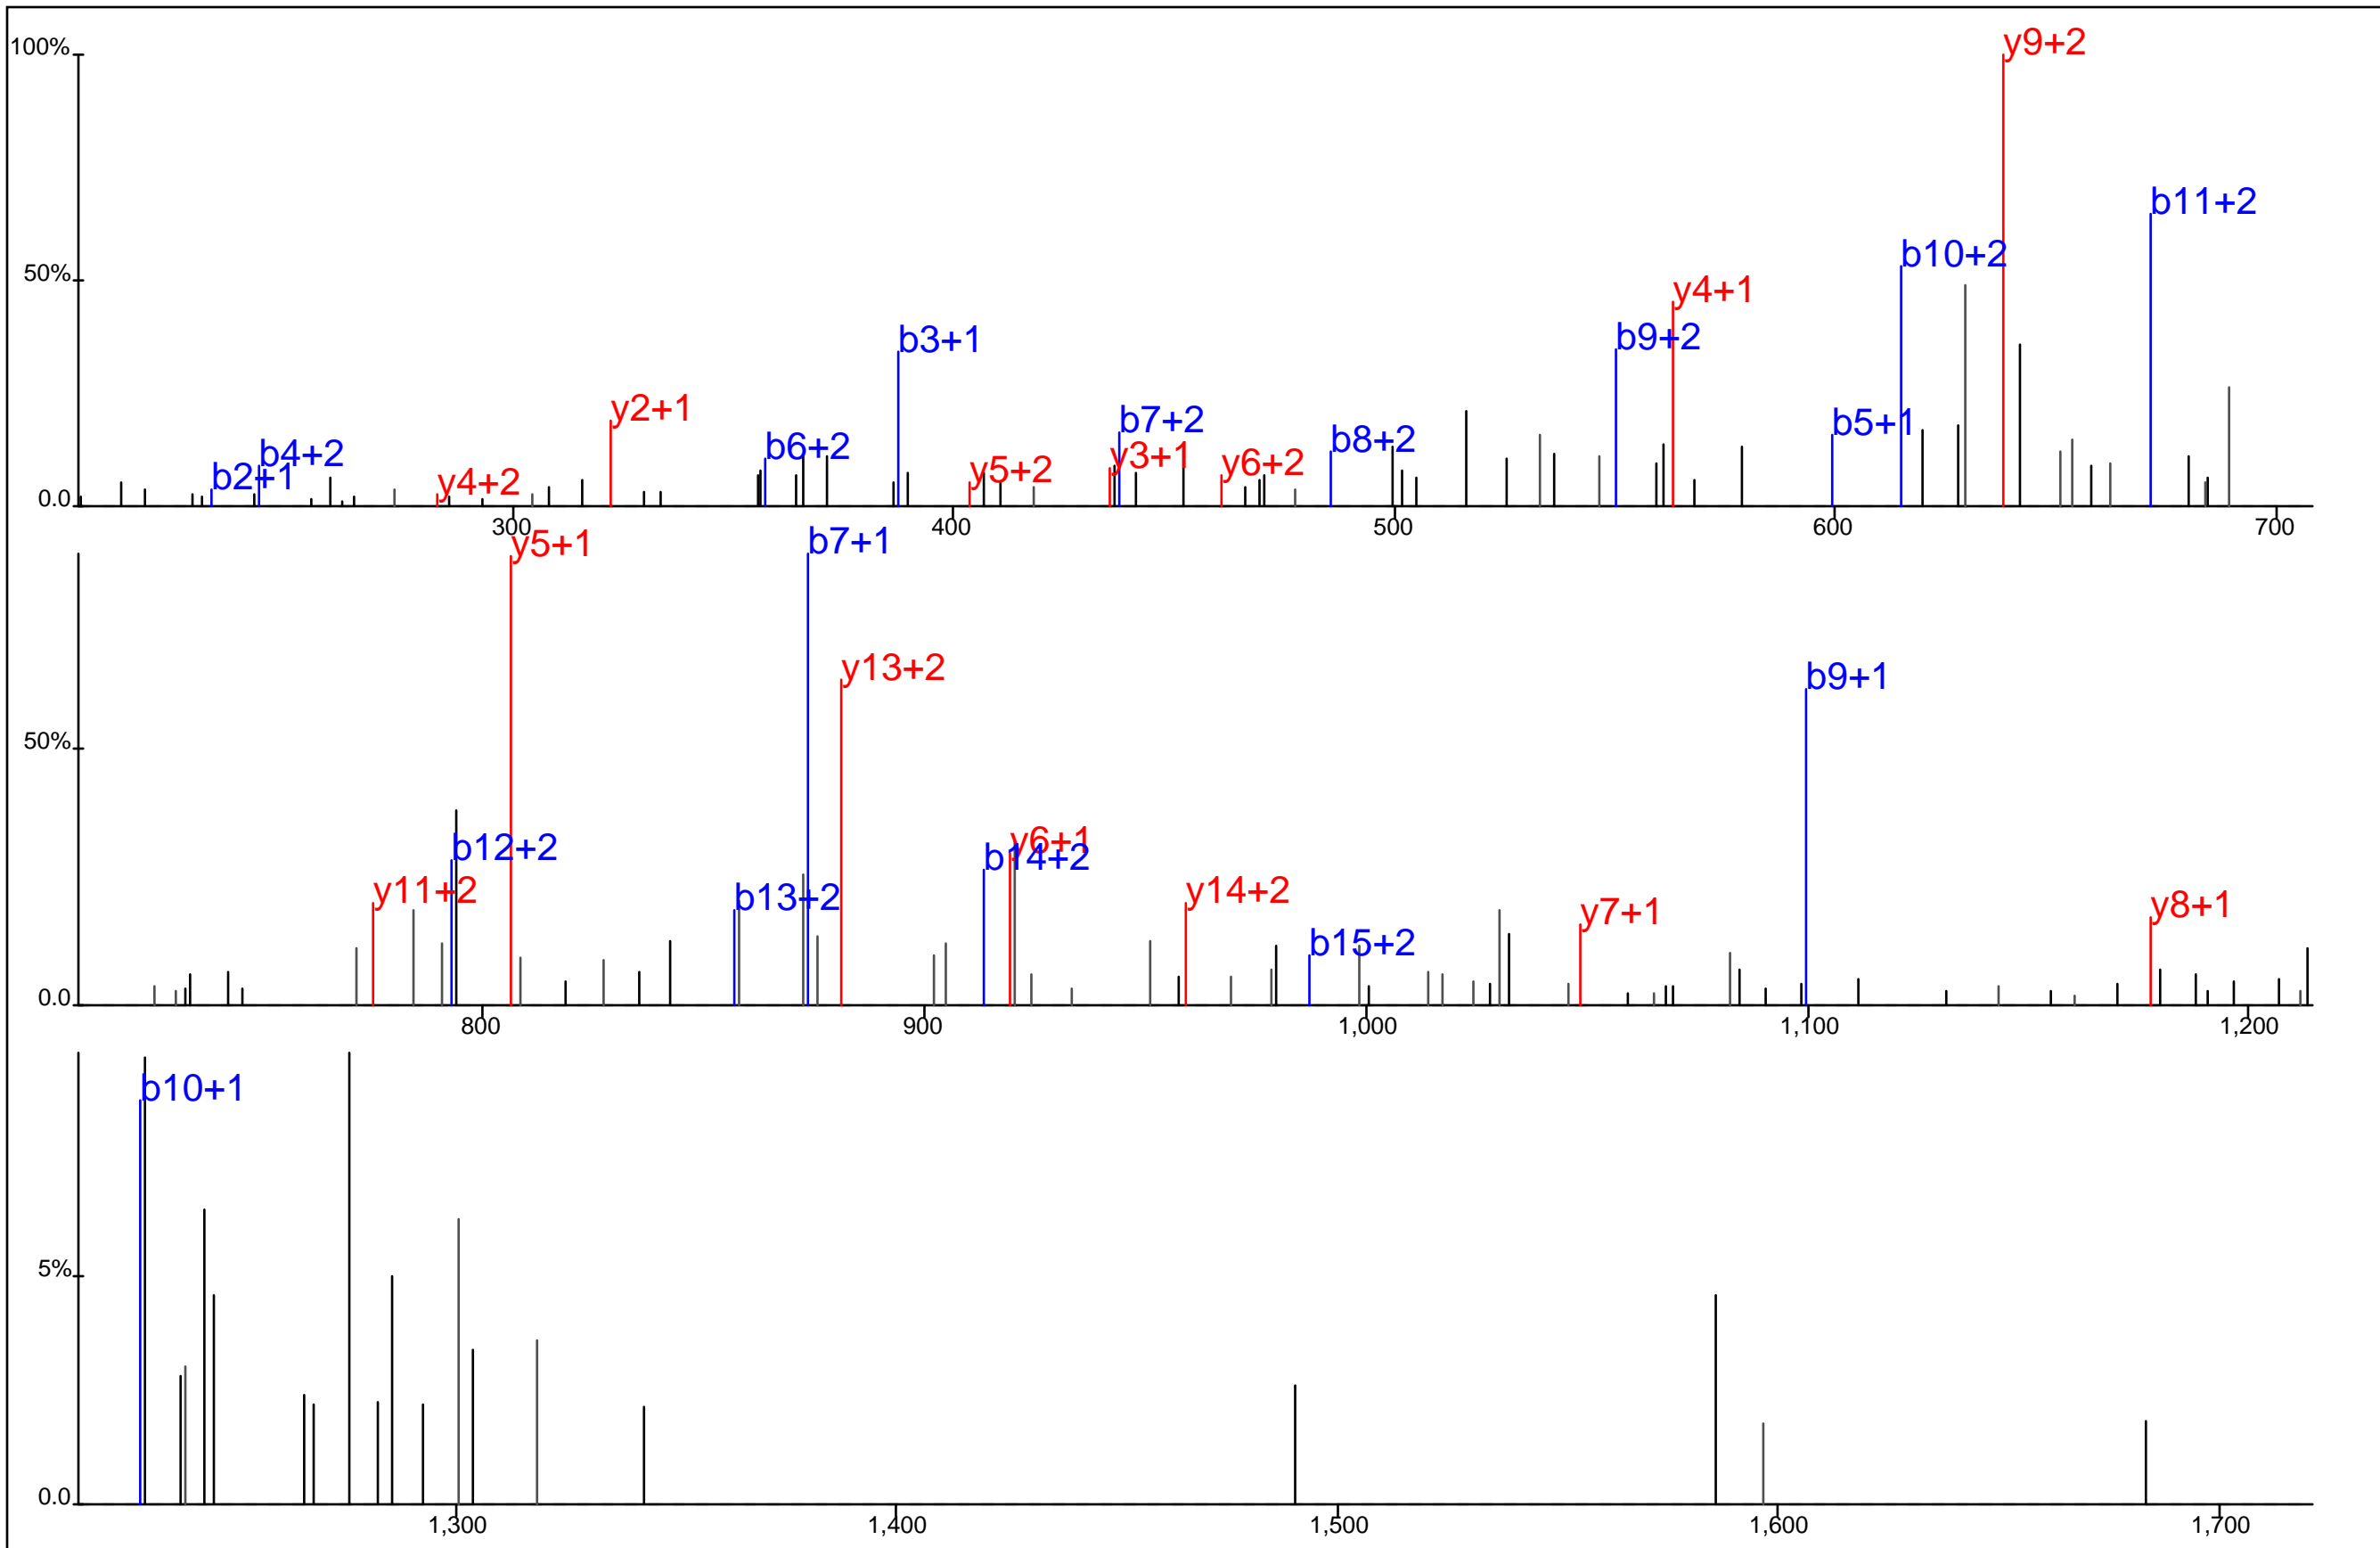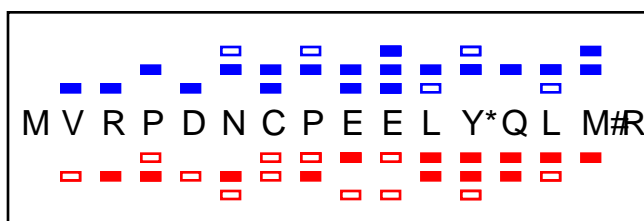

Protein Name: Lck  
 gi Accession: 0  
 Precursor Mass: 716.3098+3  
 Delta Mass: 1.382 ppm  
 XCorr: 48.04



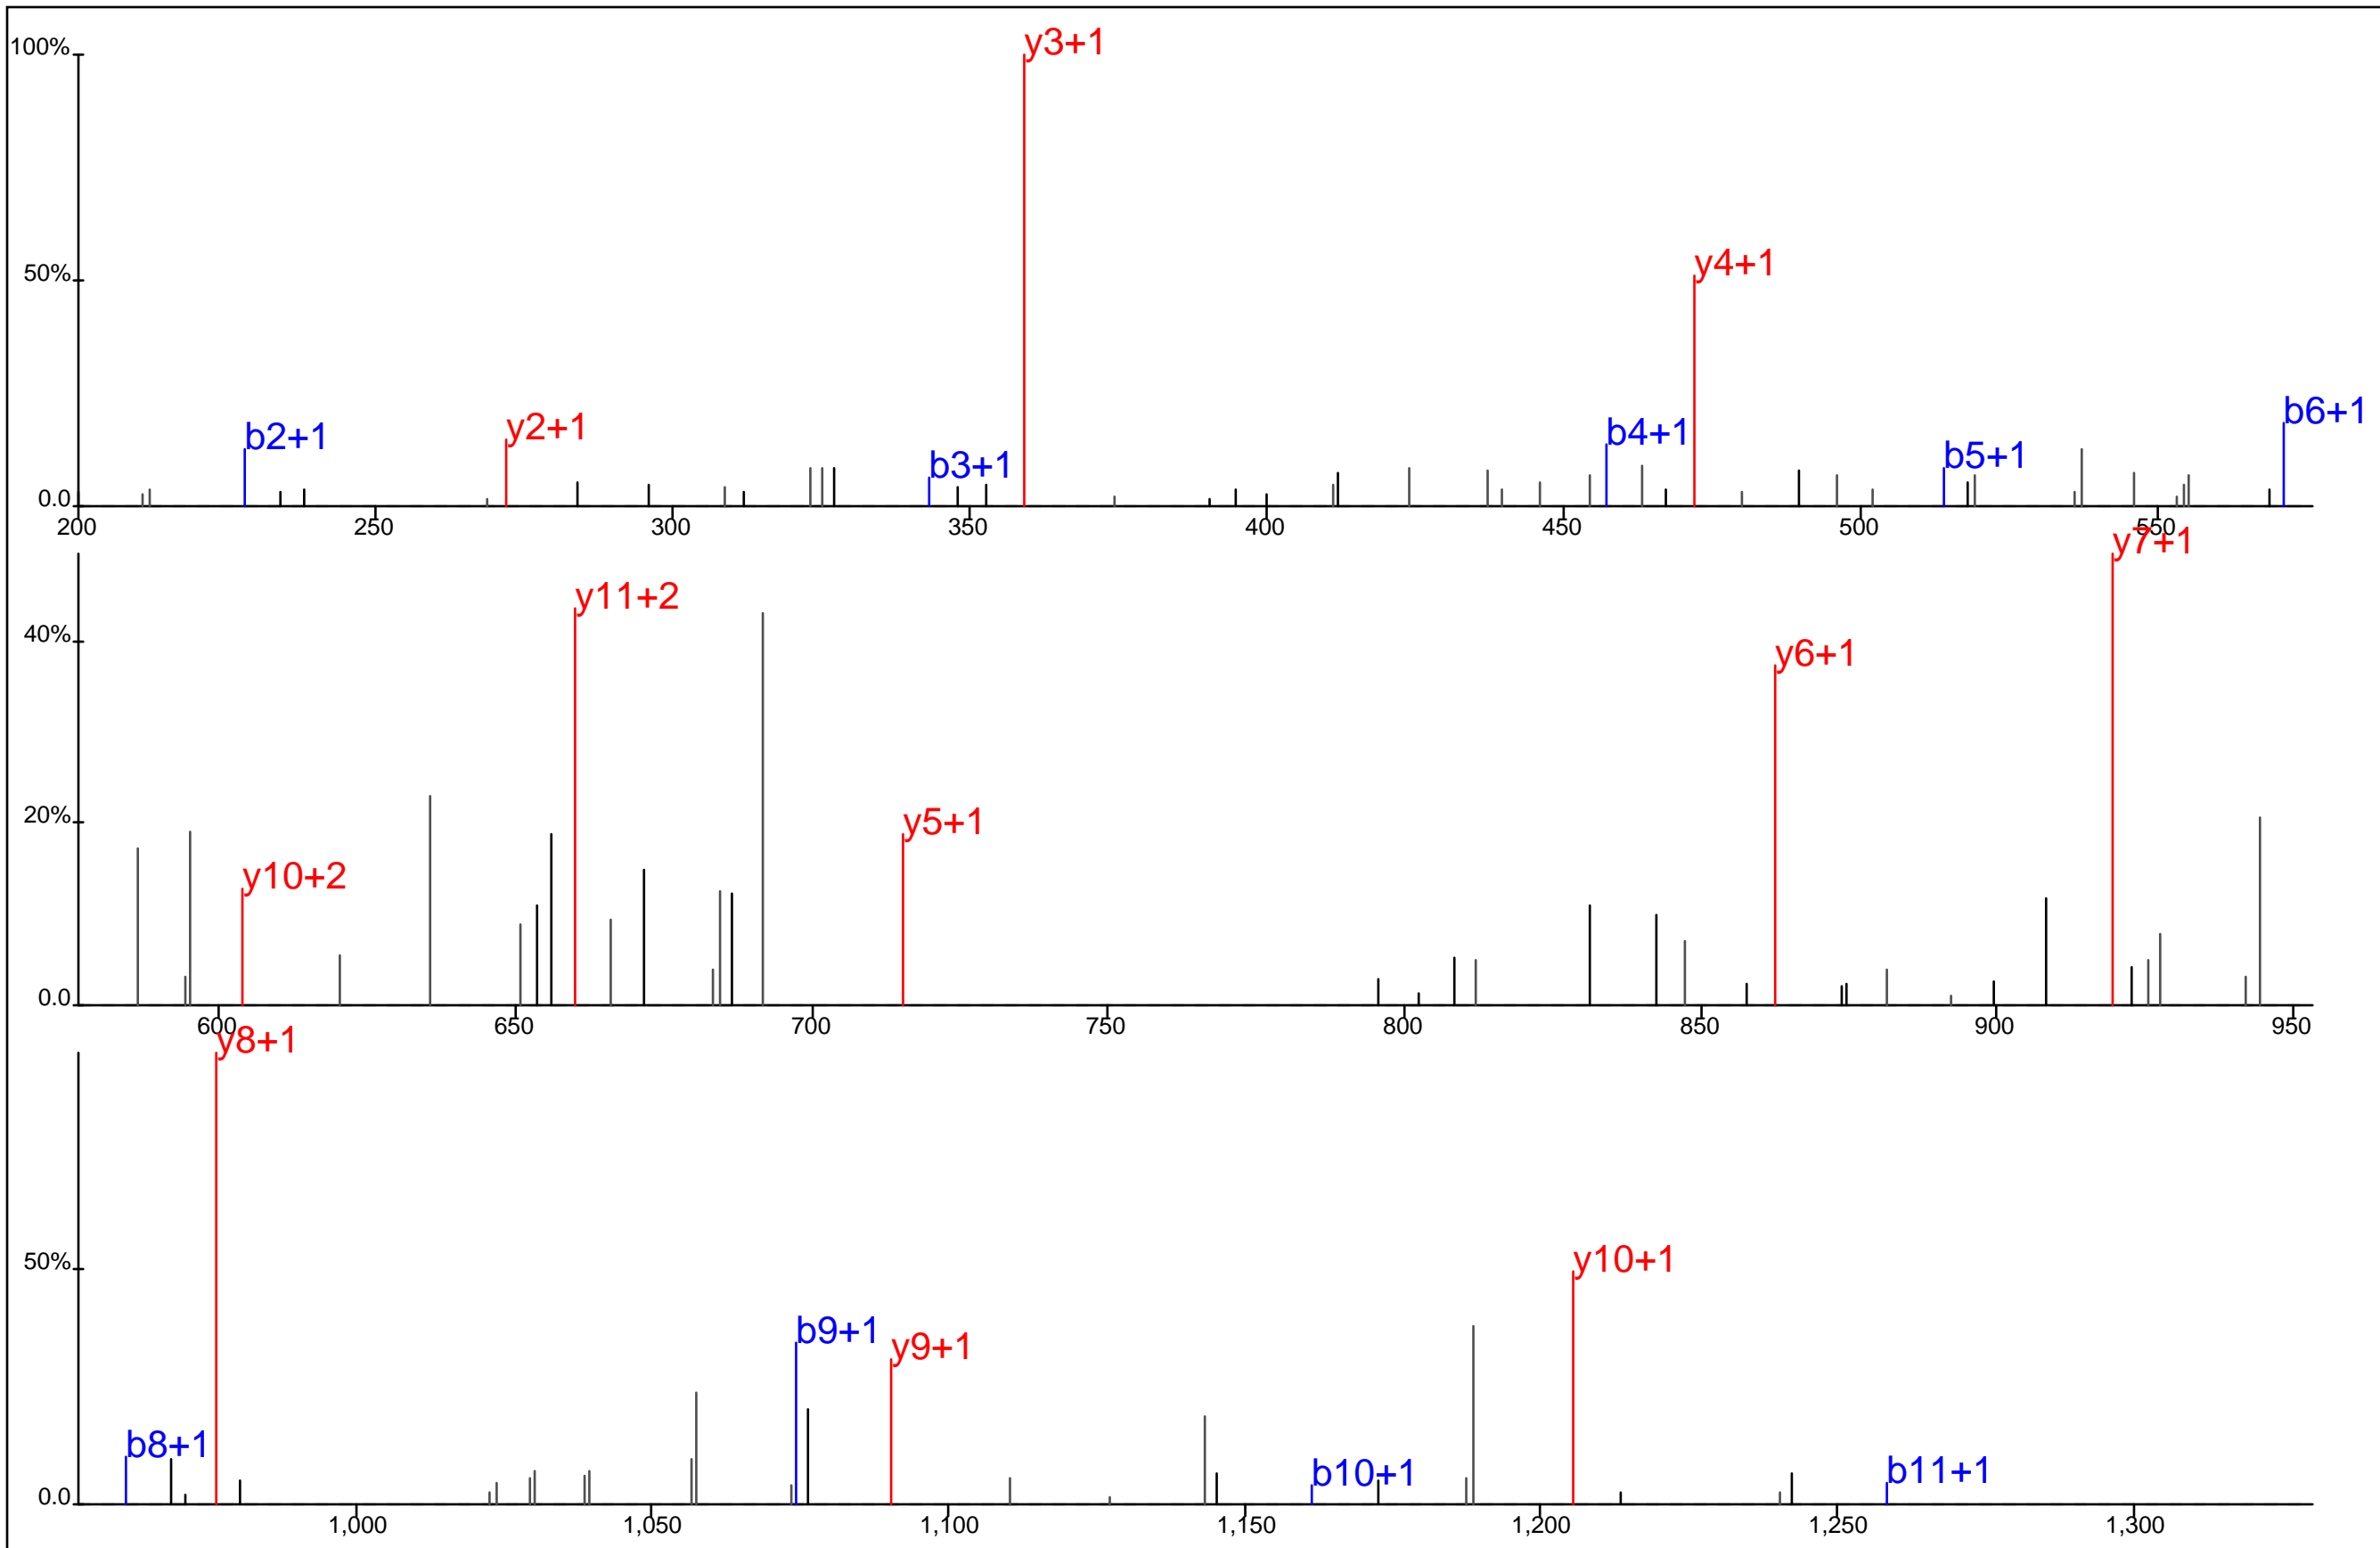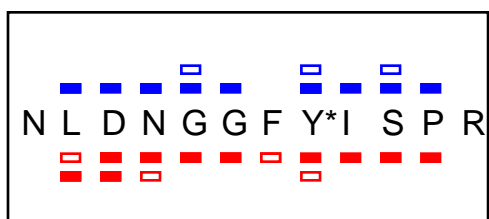

Protein Name: Lck  
 gi Accession: 0  
 Precursor Mass: 716.8157+2  
 Delta Mass: 1.103 ppm  
 XCorr: 76.26

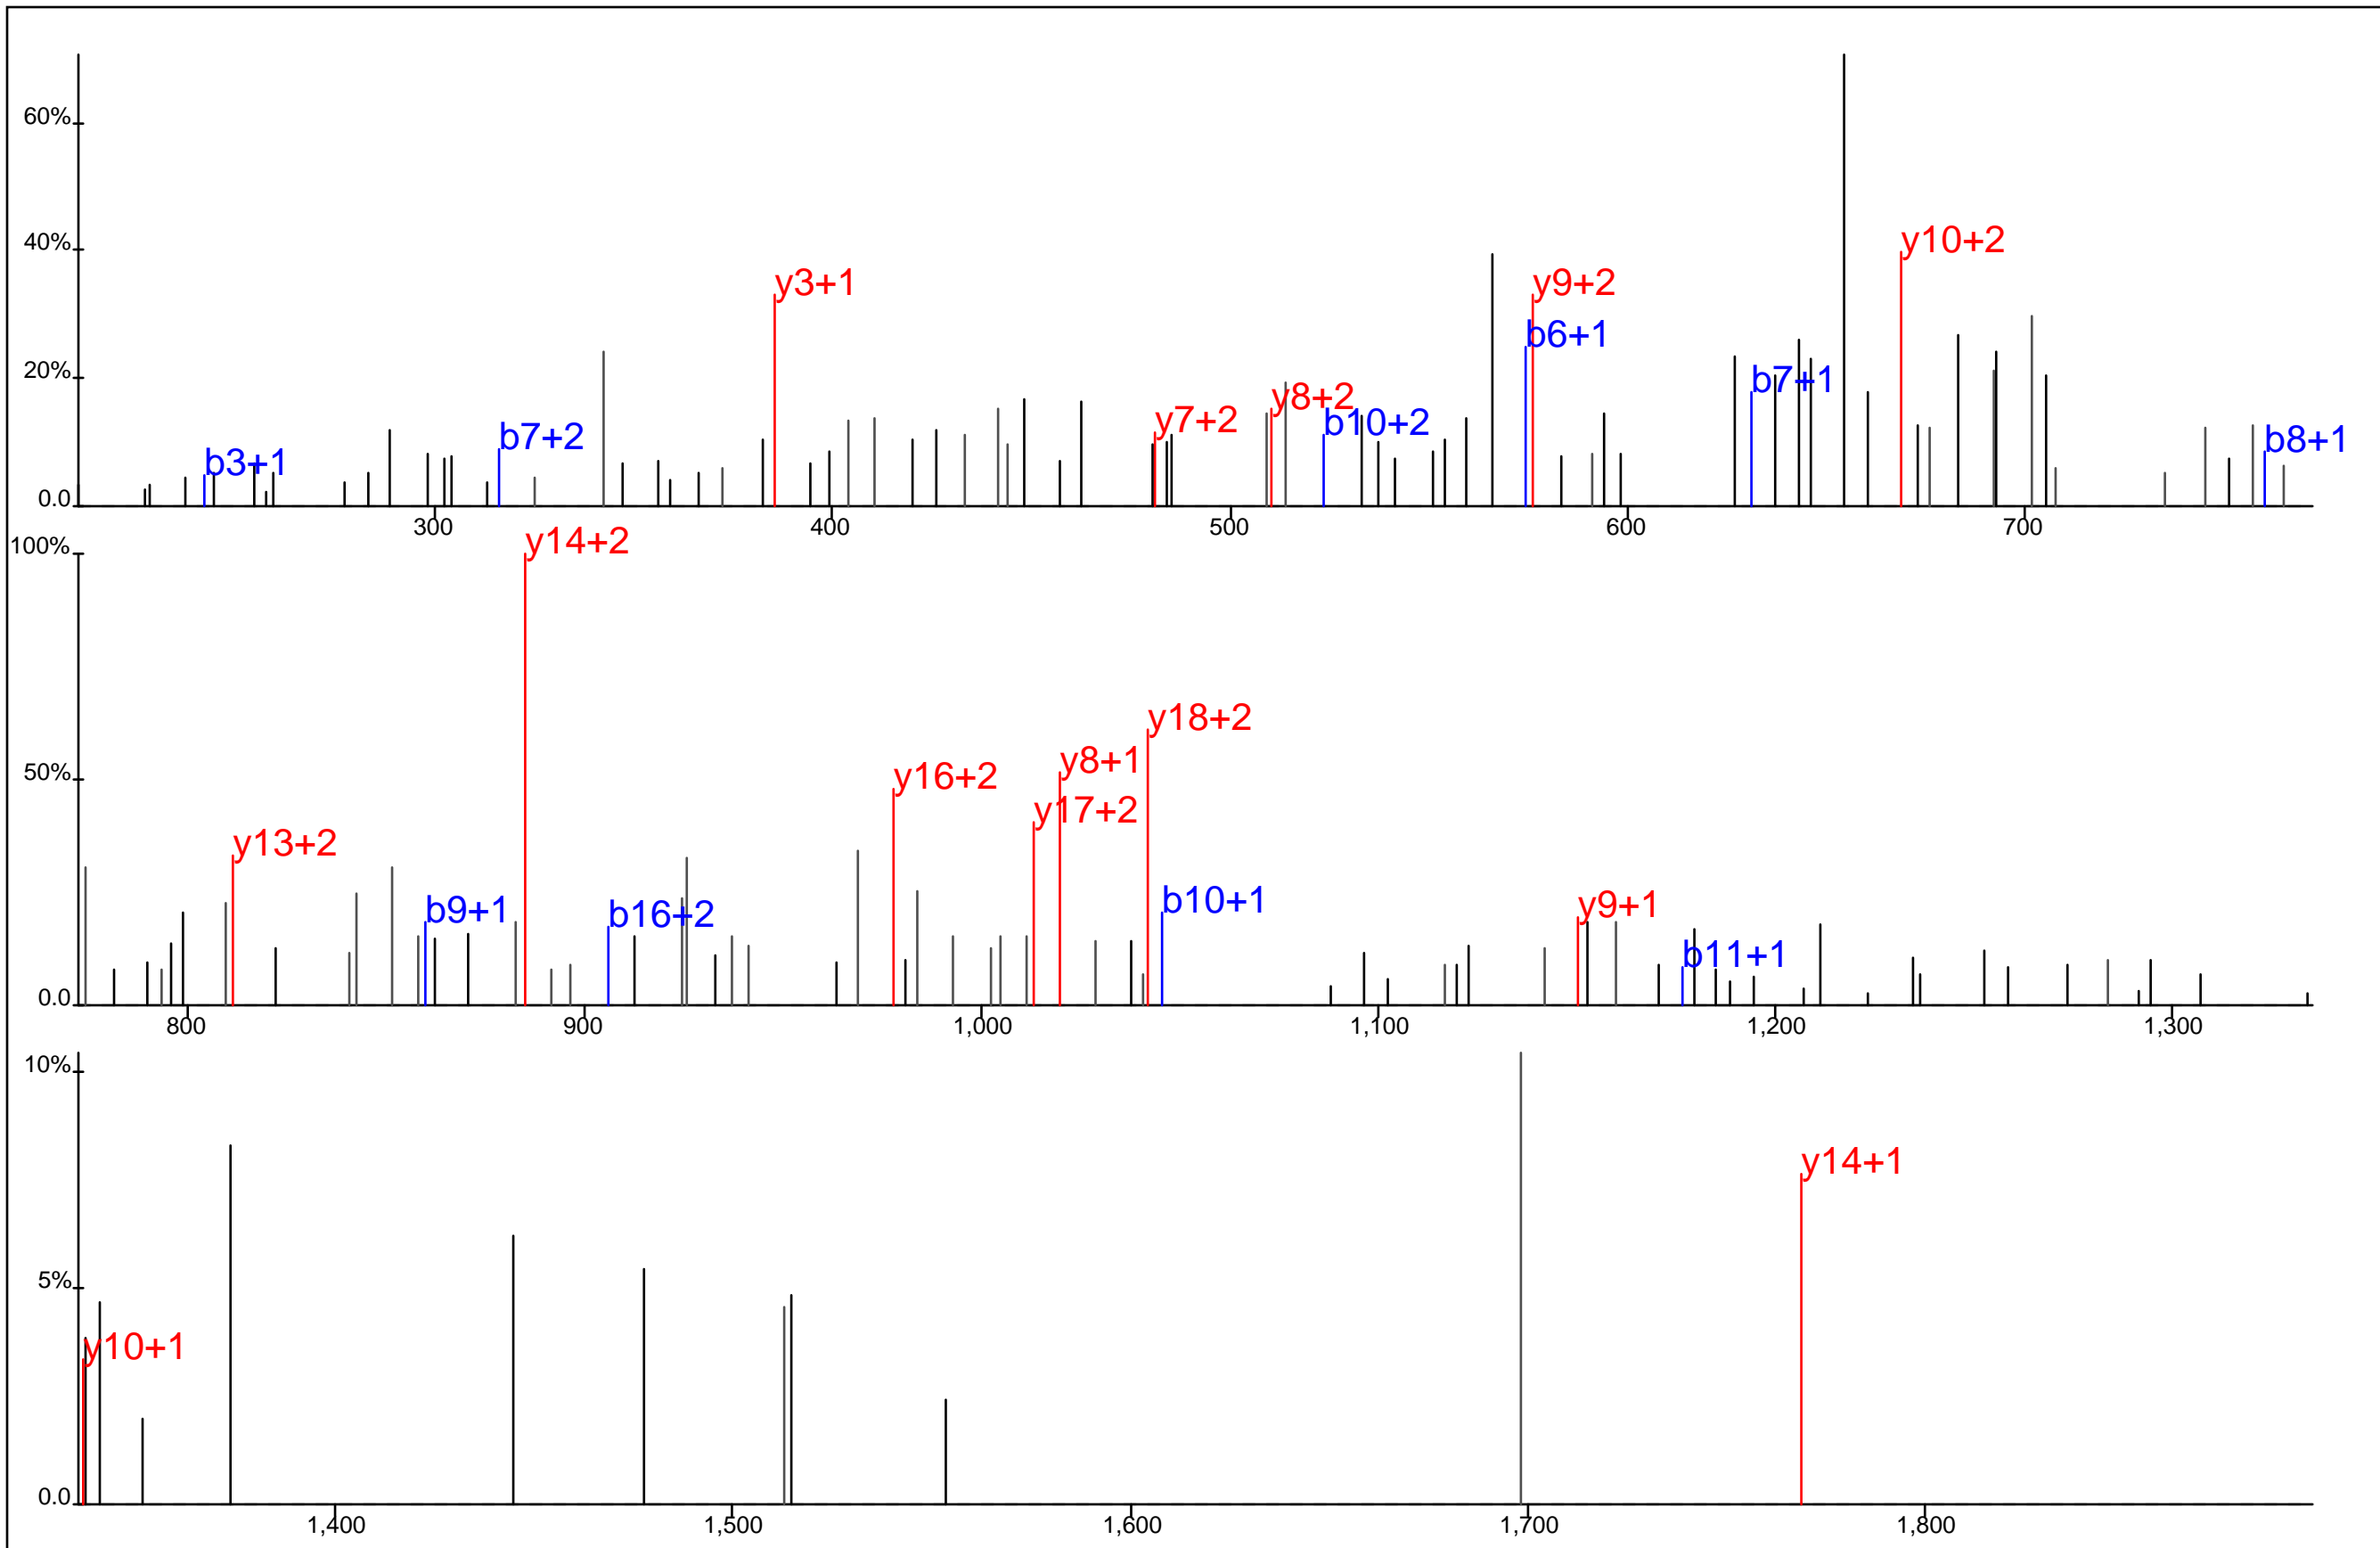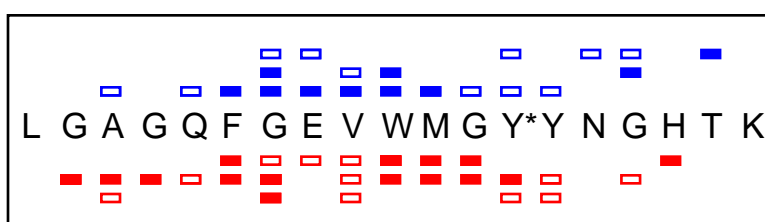

Protein Name: Lck  
 gi Accession: 0  
 Precursor Mass: 732.3175+3  
 Delta Mass: 1.658 ppm  
 XCorr: 25.44

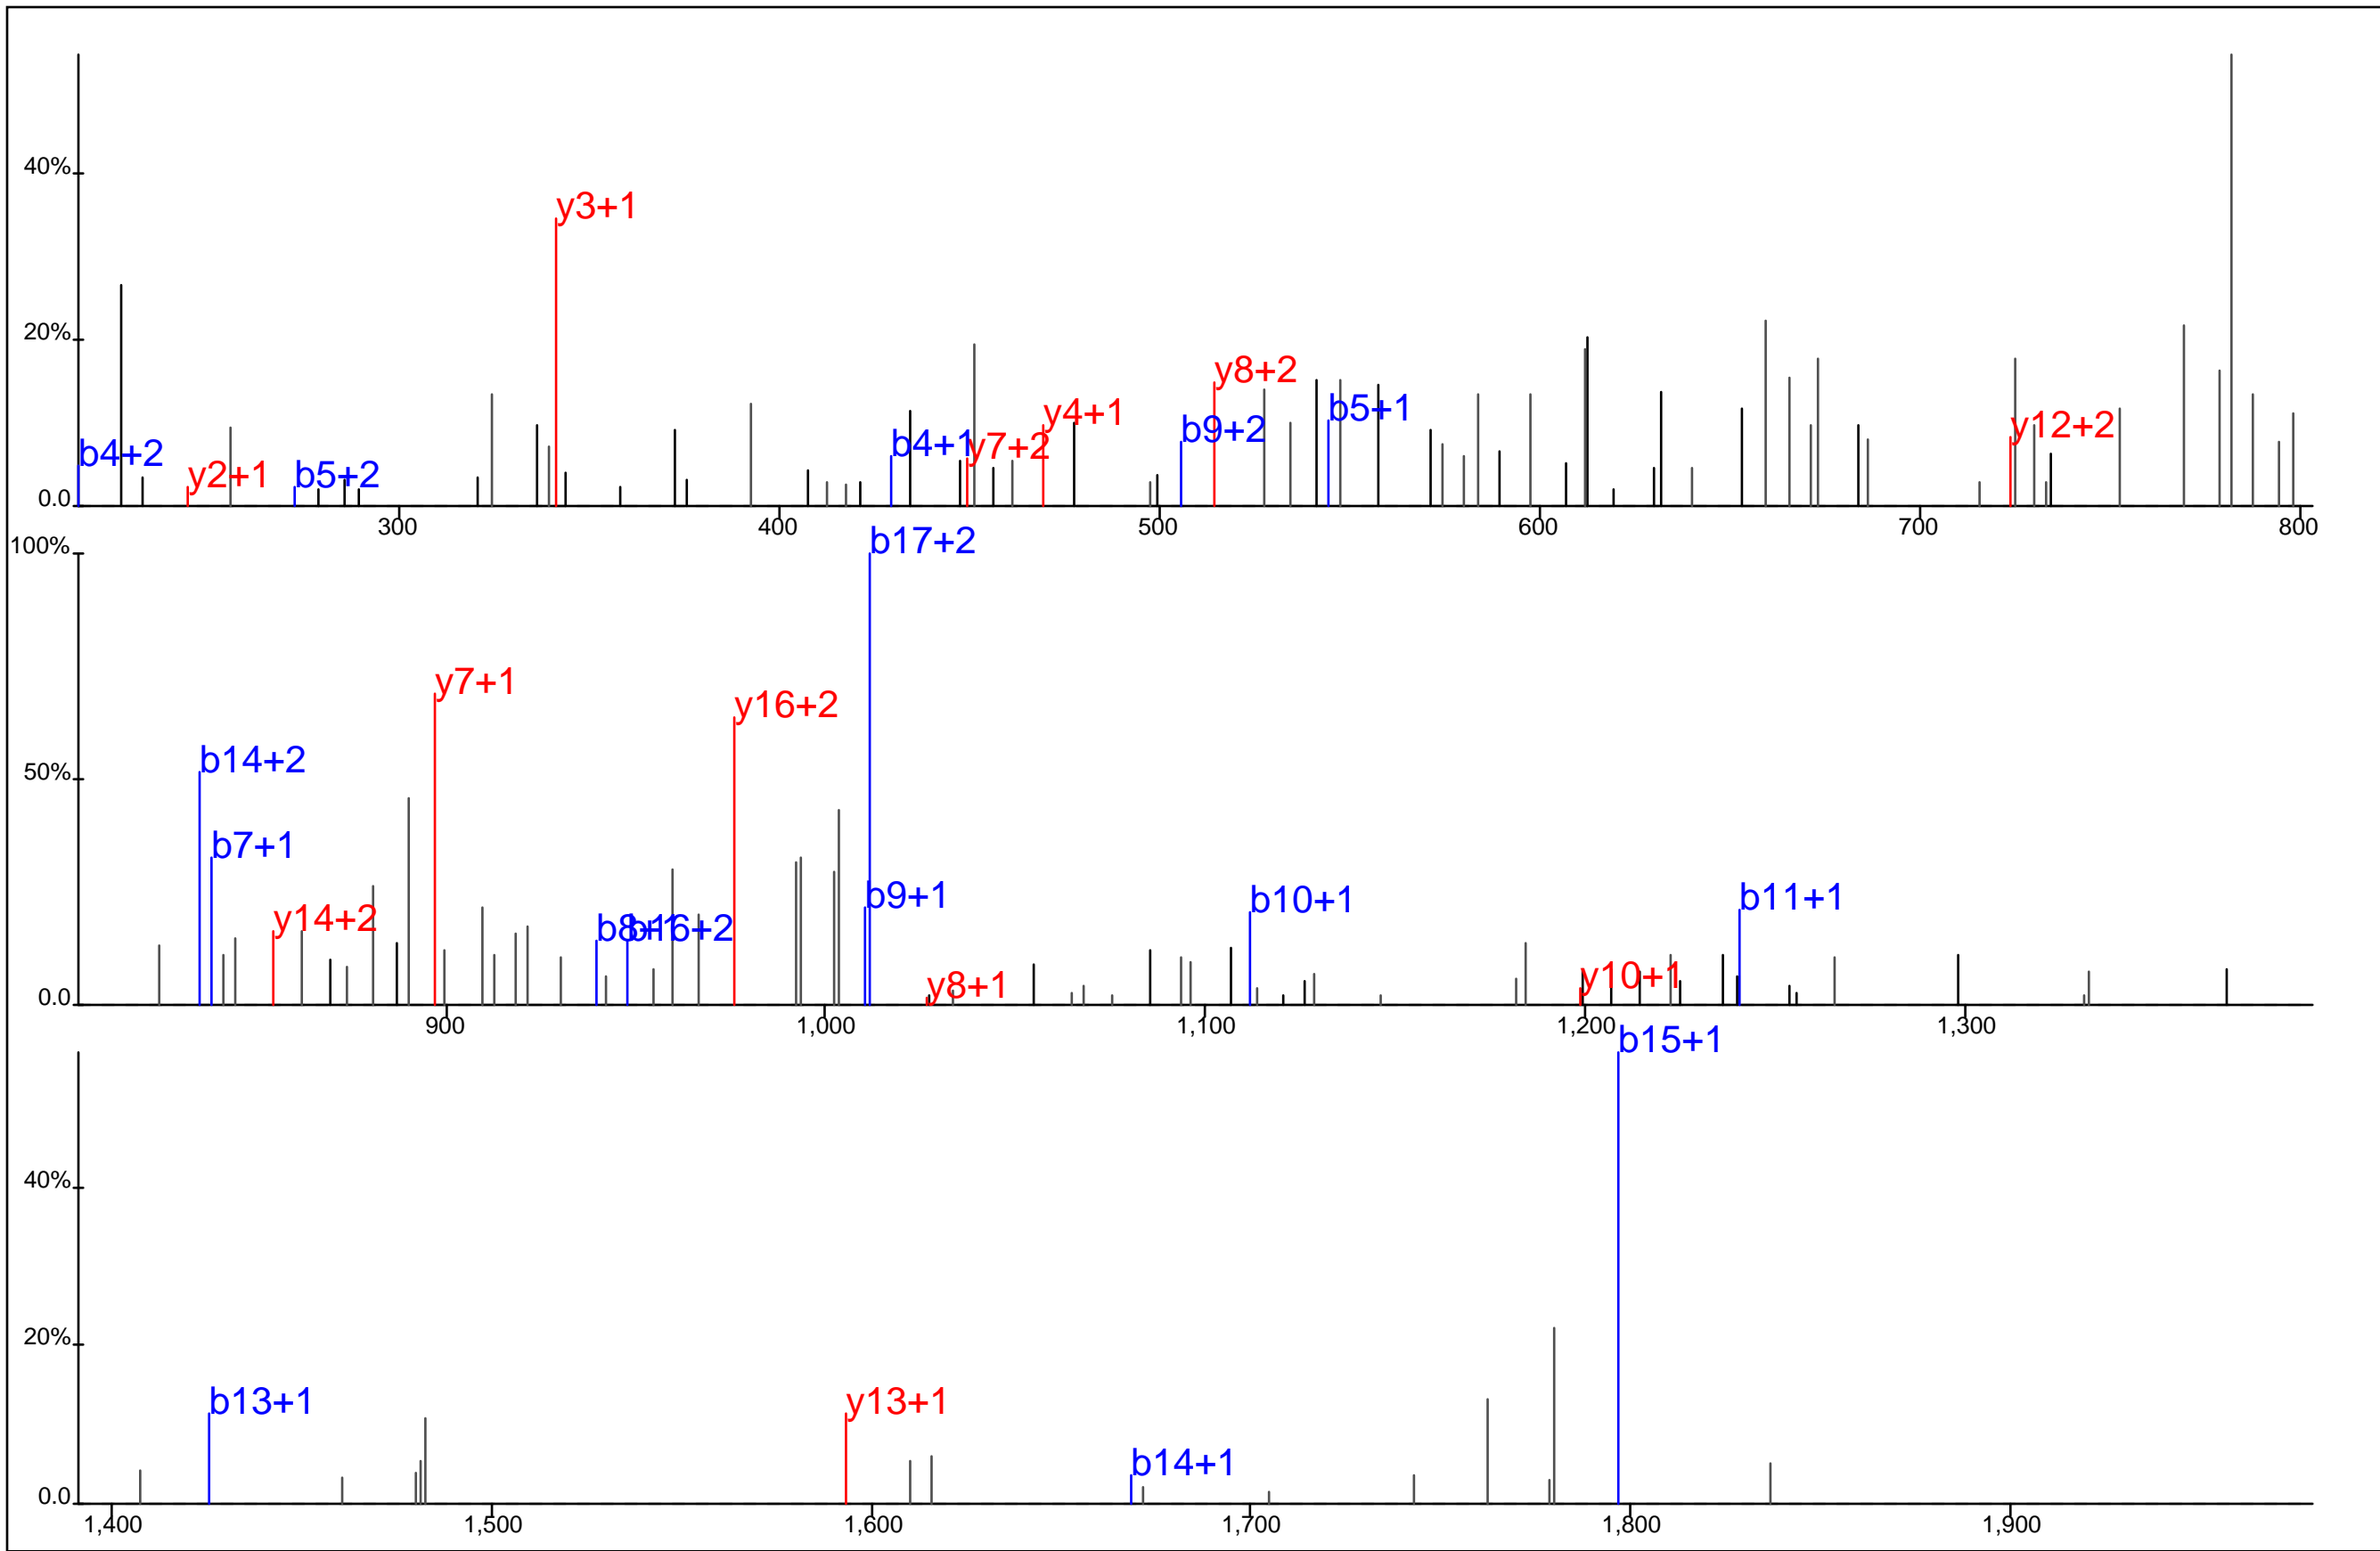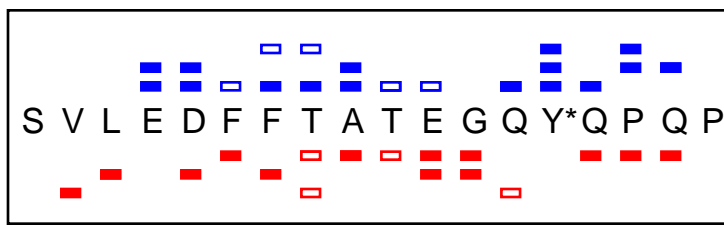

Protein Name: Lck  
 gi Accession: 0  
 Precursor Mass: 712.9779+3  
 Delta Mass: 1.404 ppm  
 XCorr: 21.28



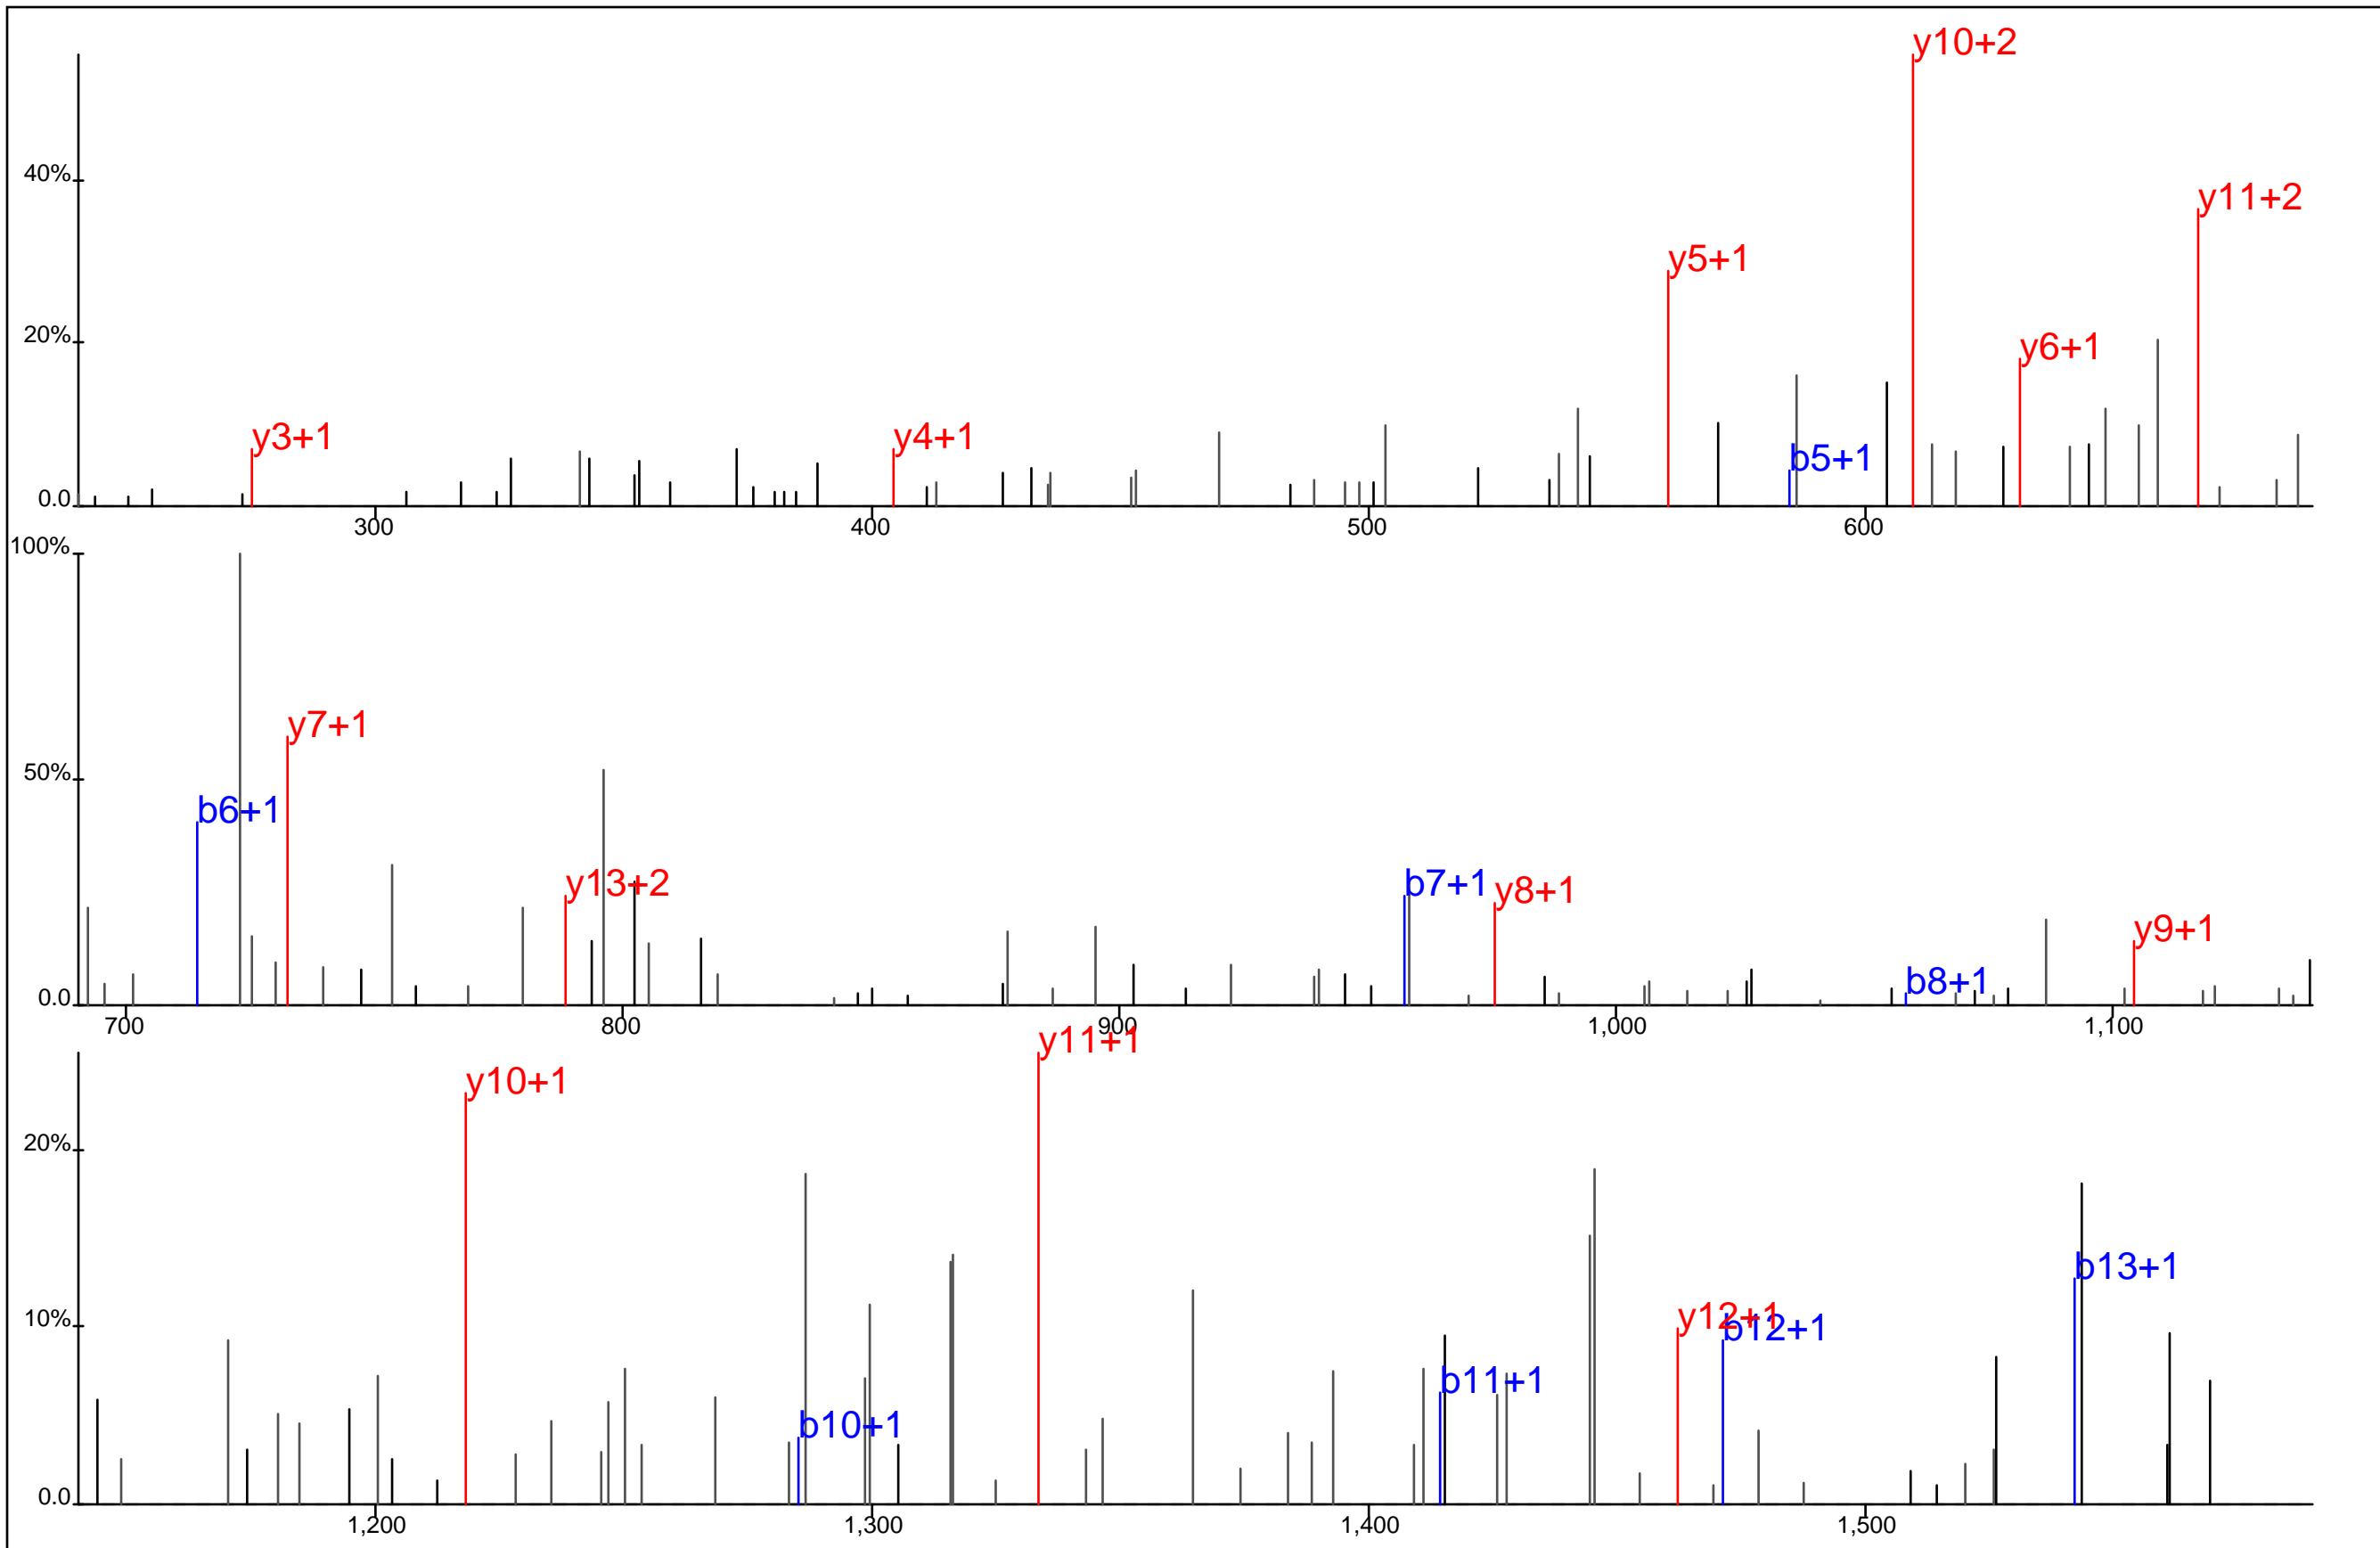

▢ ▢ ▢ ▢ ▢ ▢ ▢ ▢ ▢ ▢  
**L I E D N E Y\* T A R E G A K**  
▢ ▢ ▢ ▢ ▢ ▢ ▢ ▢ ▢ ▢

Protein Name: Lck  
 gi Accession: 0  
 Precursor Mass: 844.8795+2  
 Delta Mass: 0.541 ppm  
 XCorr: 56.16

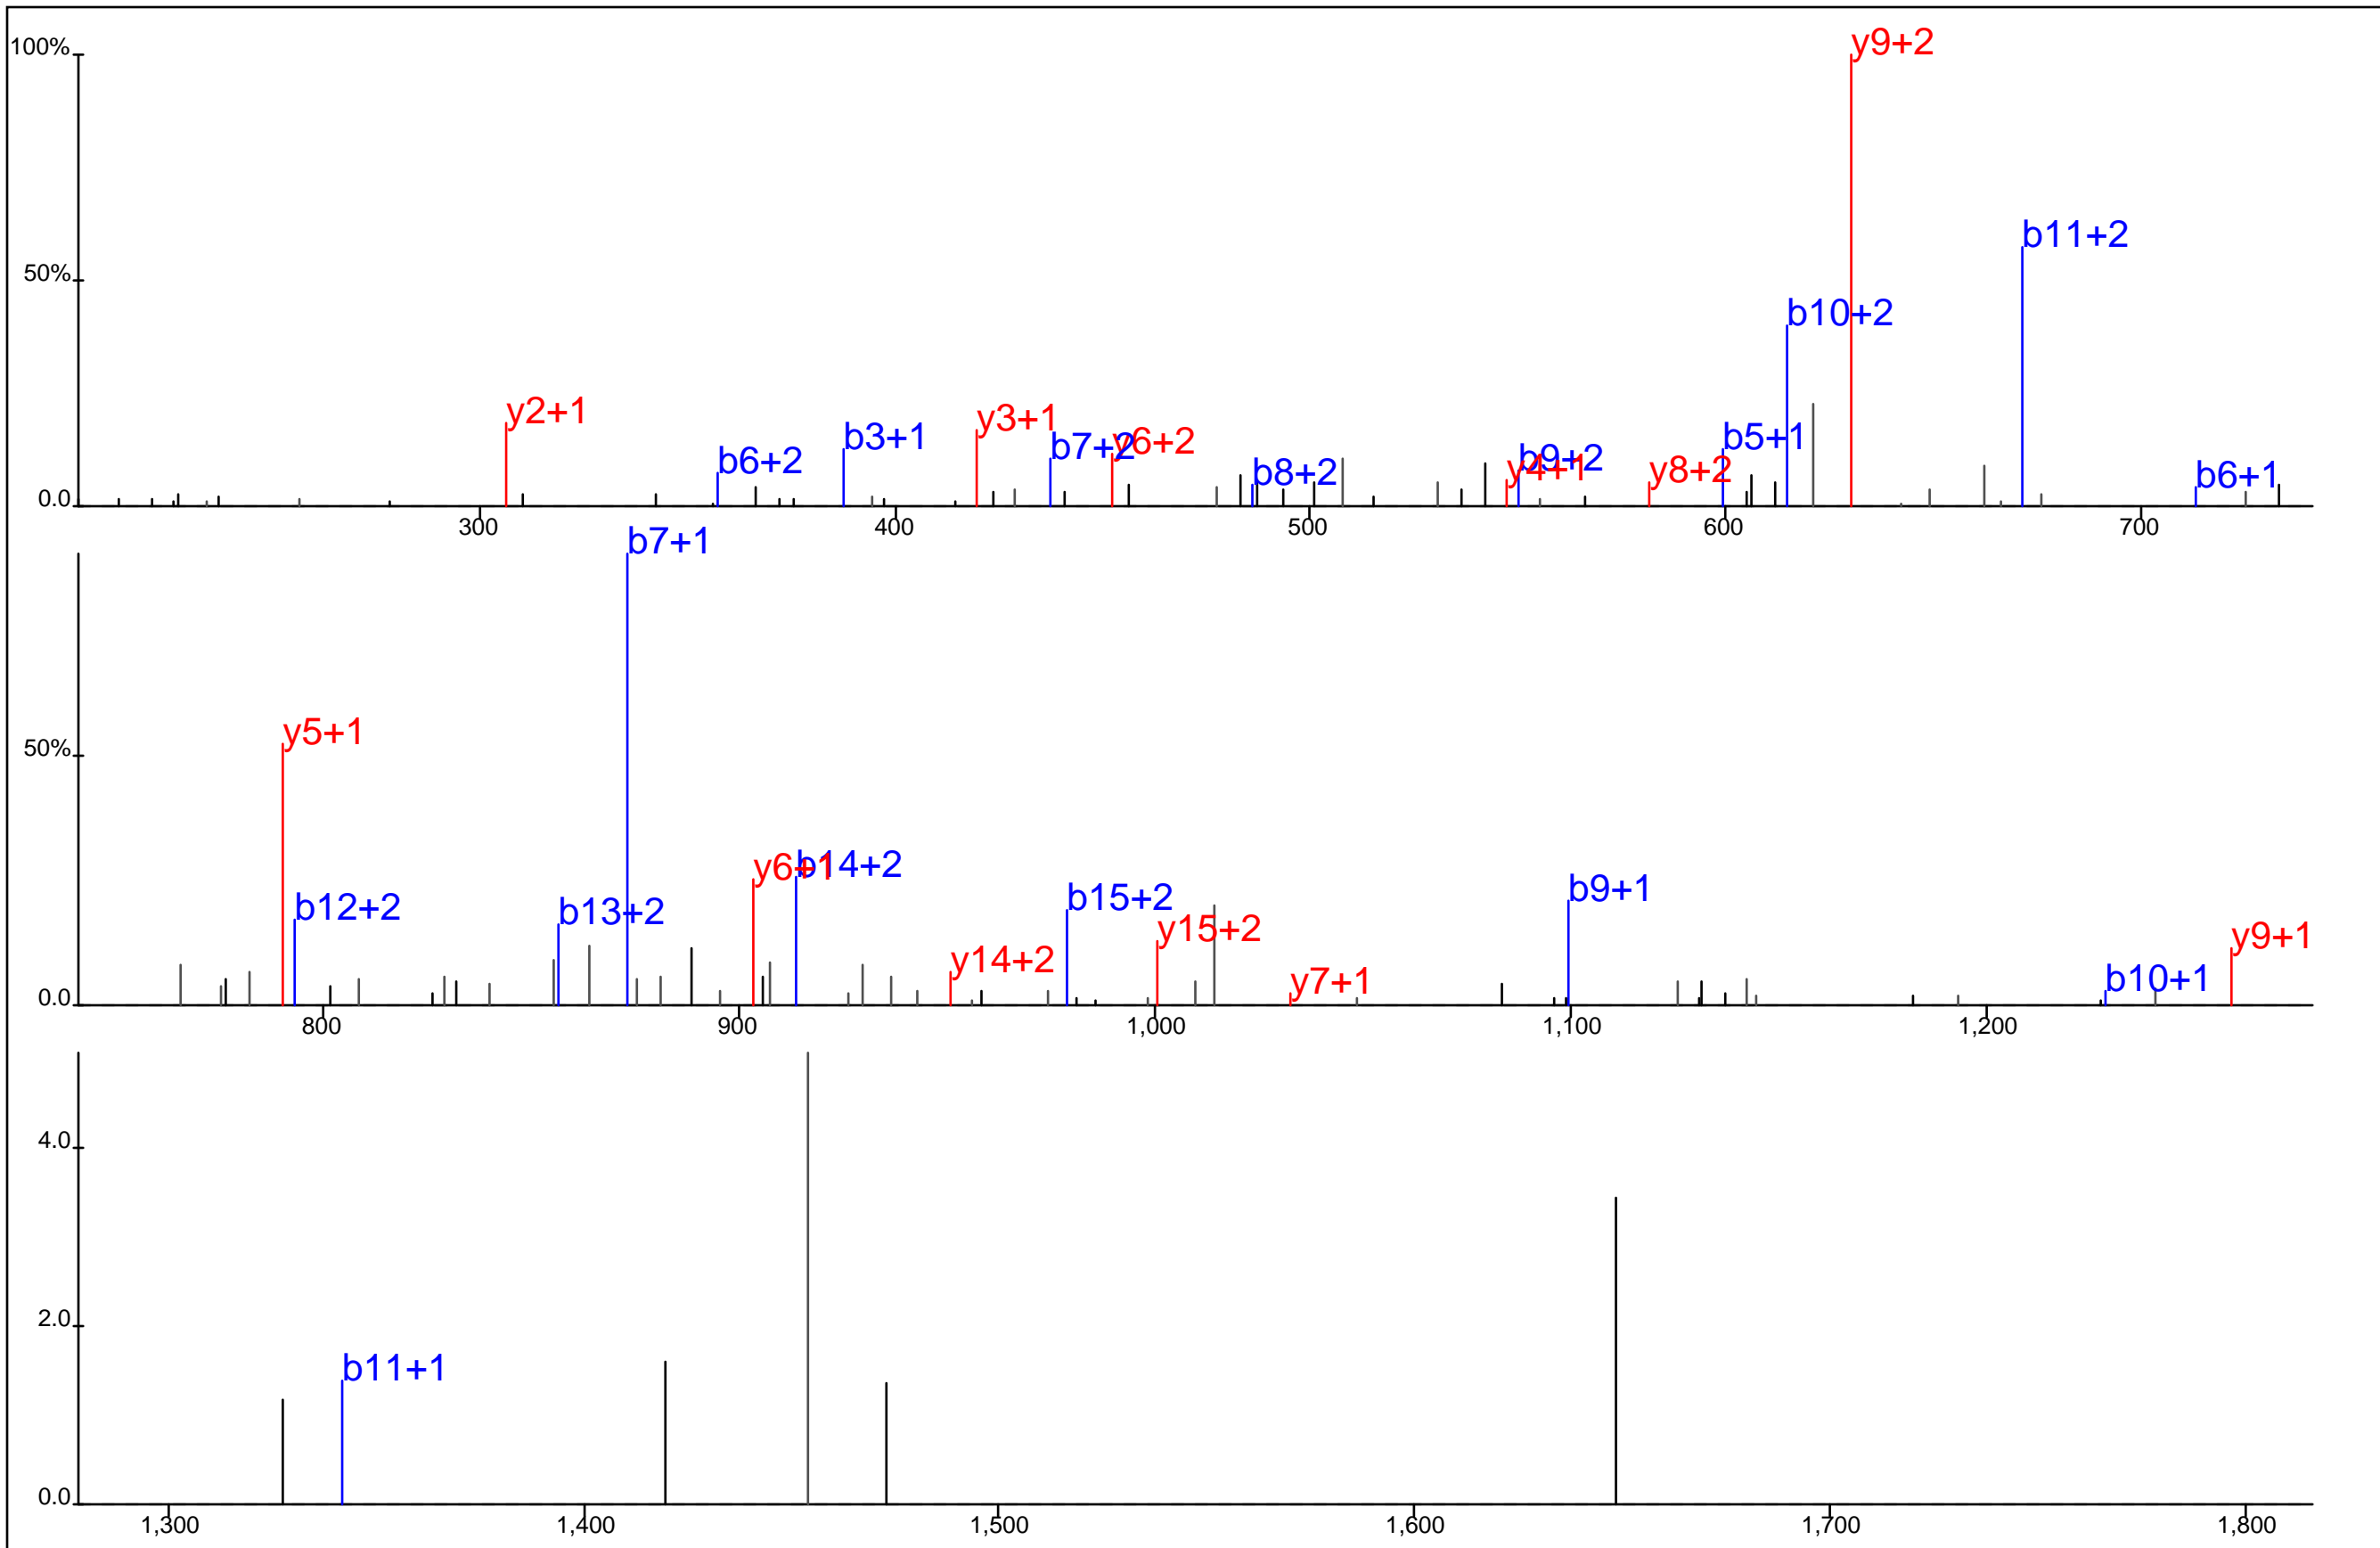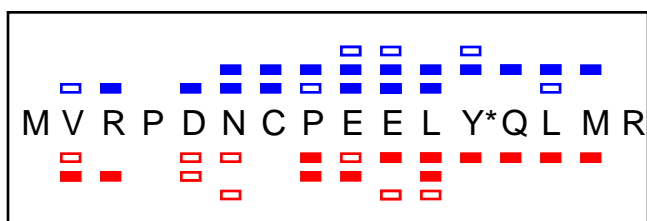

Protein Name: Lck  
 gi Accession: 0  
 Precursor Mass: 710.9791+3  
 Delta Mass: 2.647 ppm  
 XCorr: 51.27

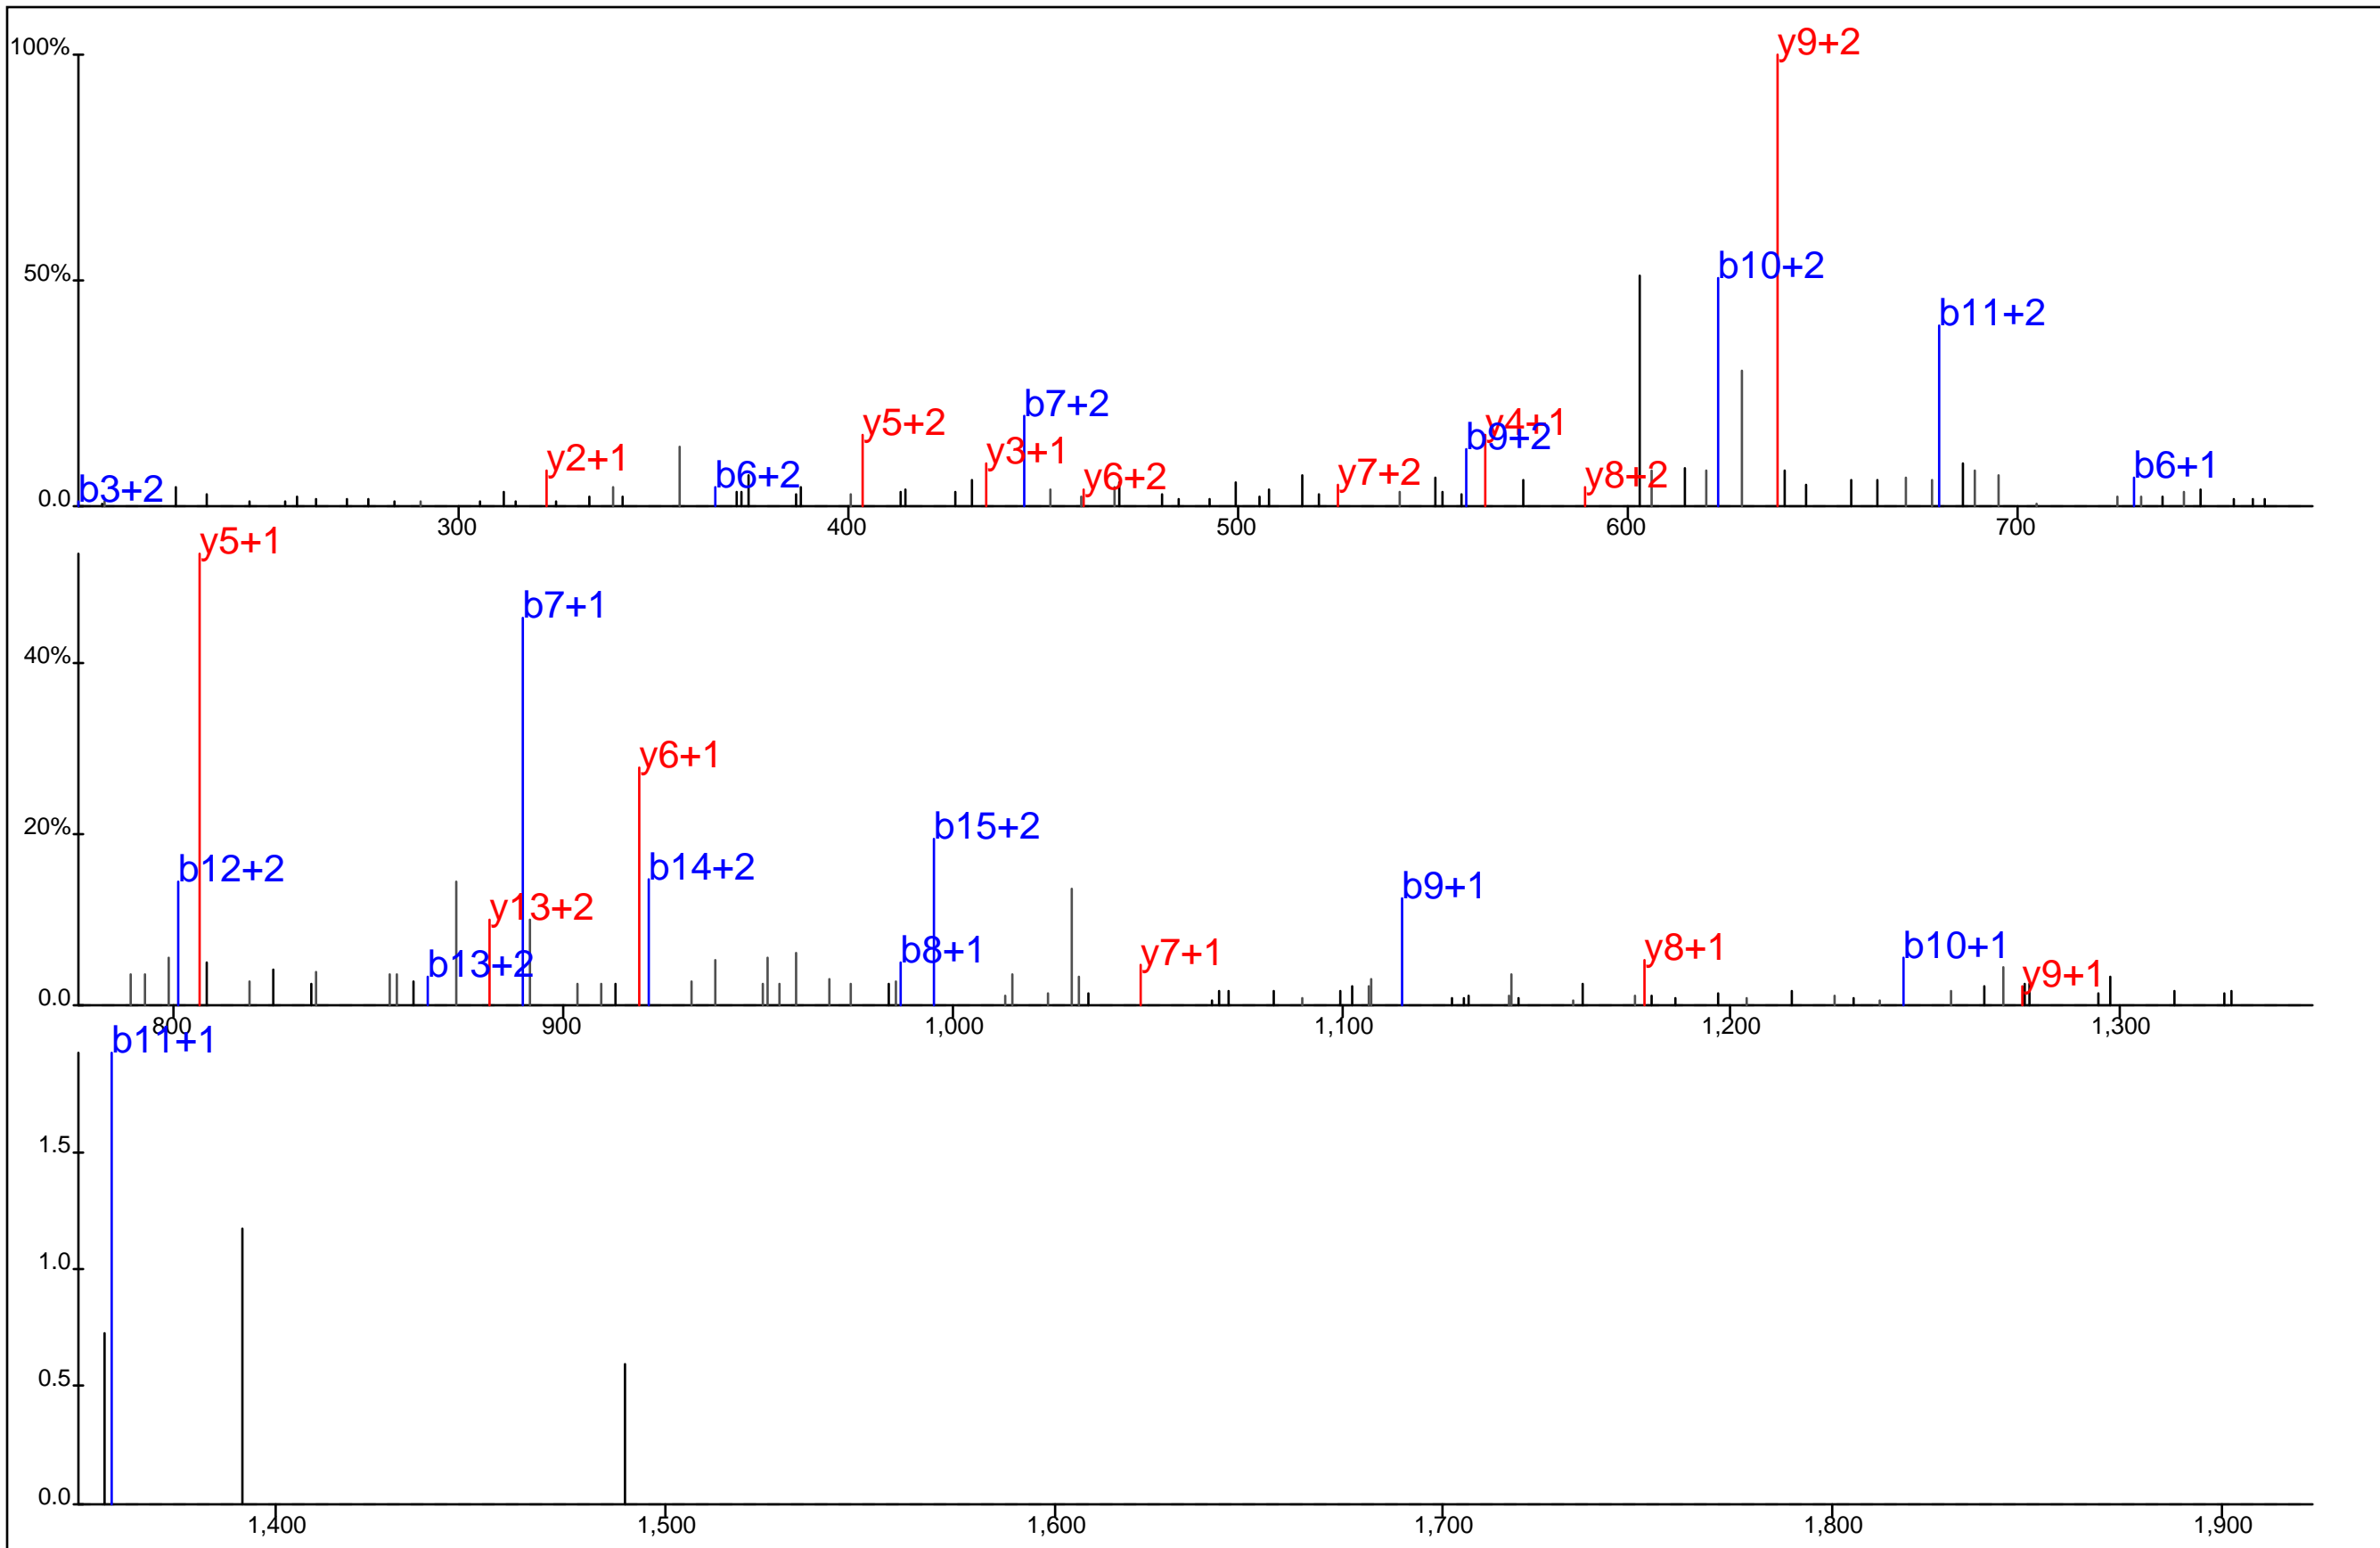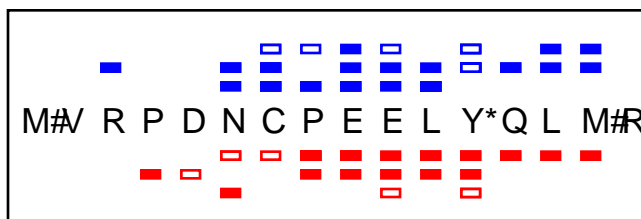

Protein Name: Lck  
 gi Accession: 0  
 Precursor Mass: 721.6392+3  
 Delta Mass: 1.810 ppm  
 XCorr: 46.1

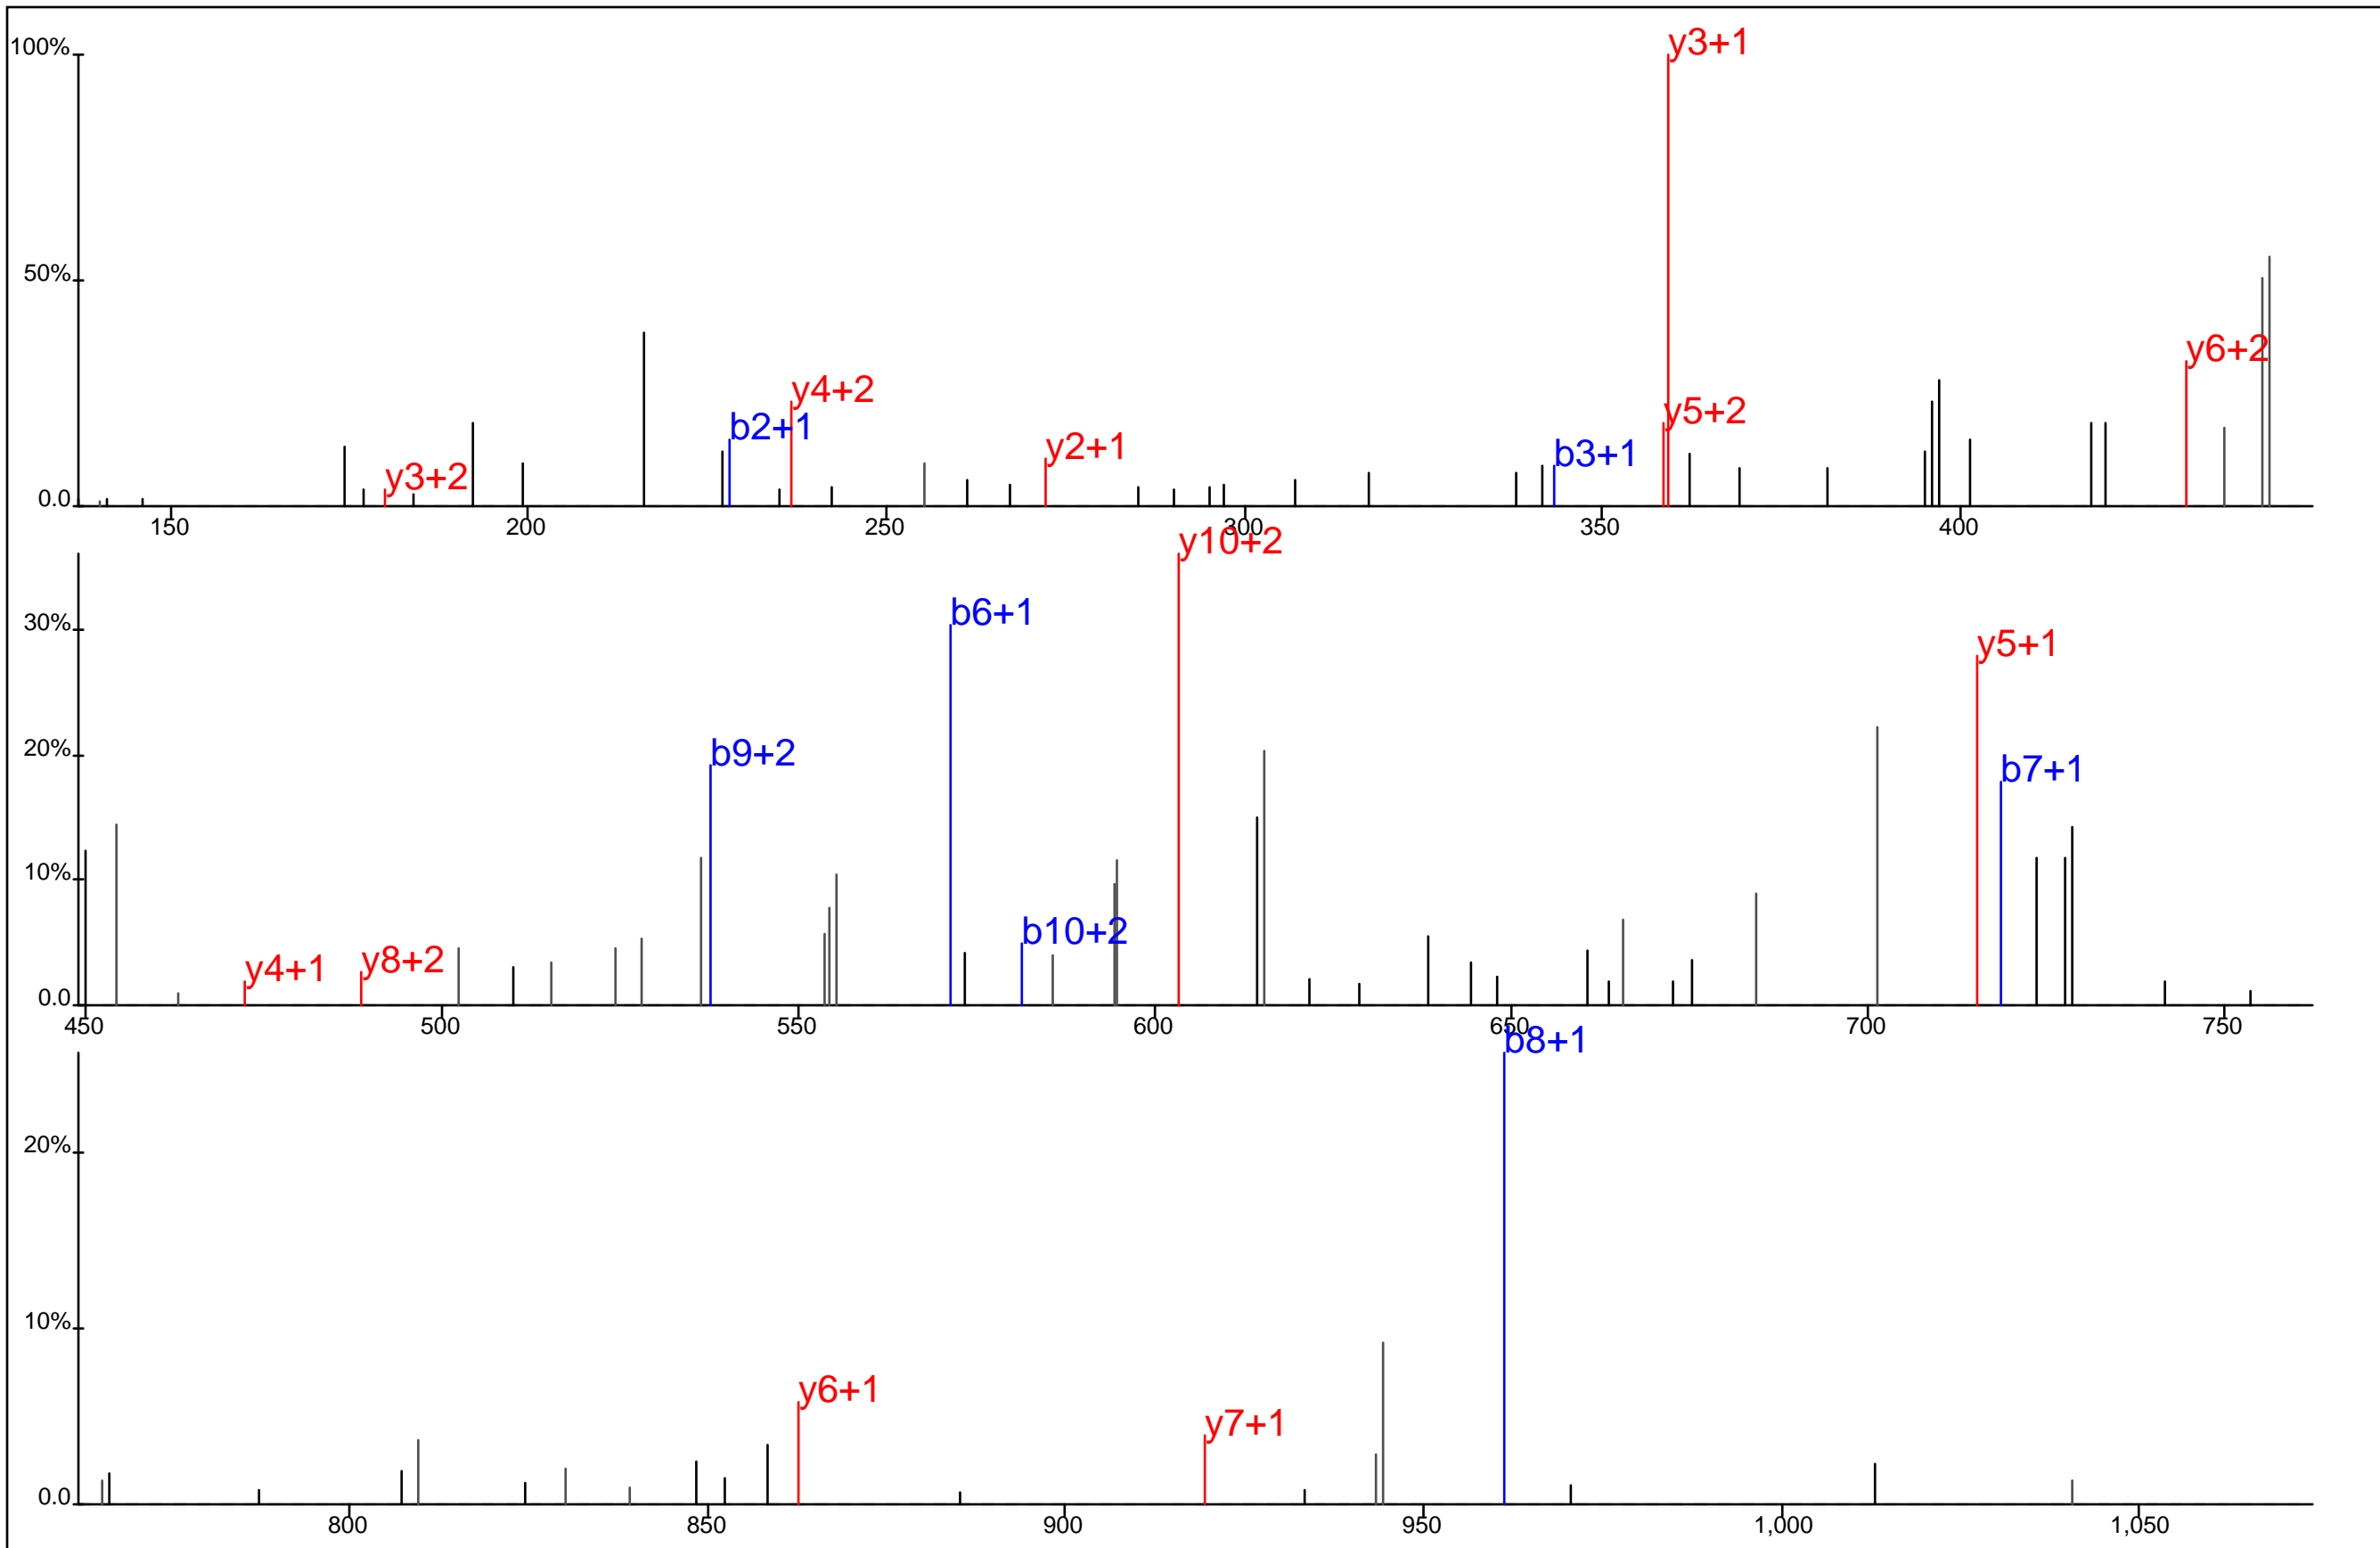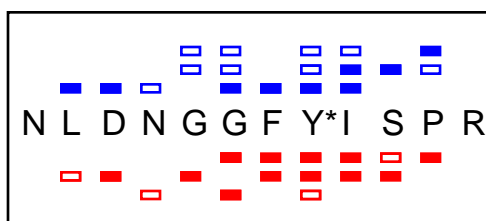

Protein Name: Lck  
 gi Accession: 0  
 Precursor Mass: 478.2121+3  
 Delta Mass: 2.666 ppm  
 XCorr: 31.78

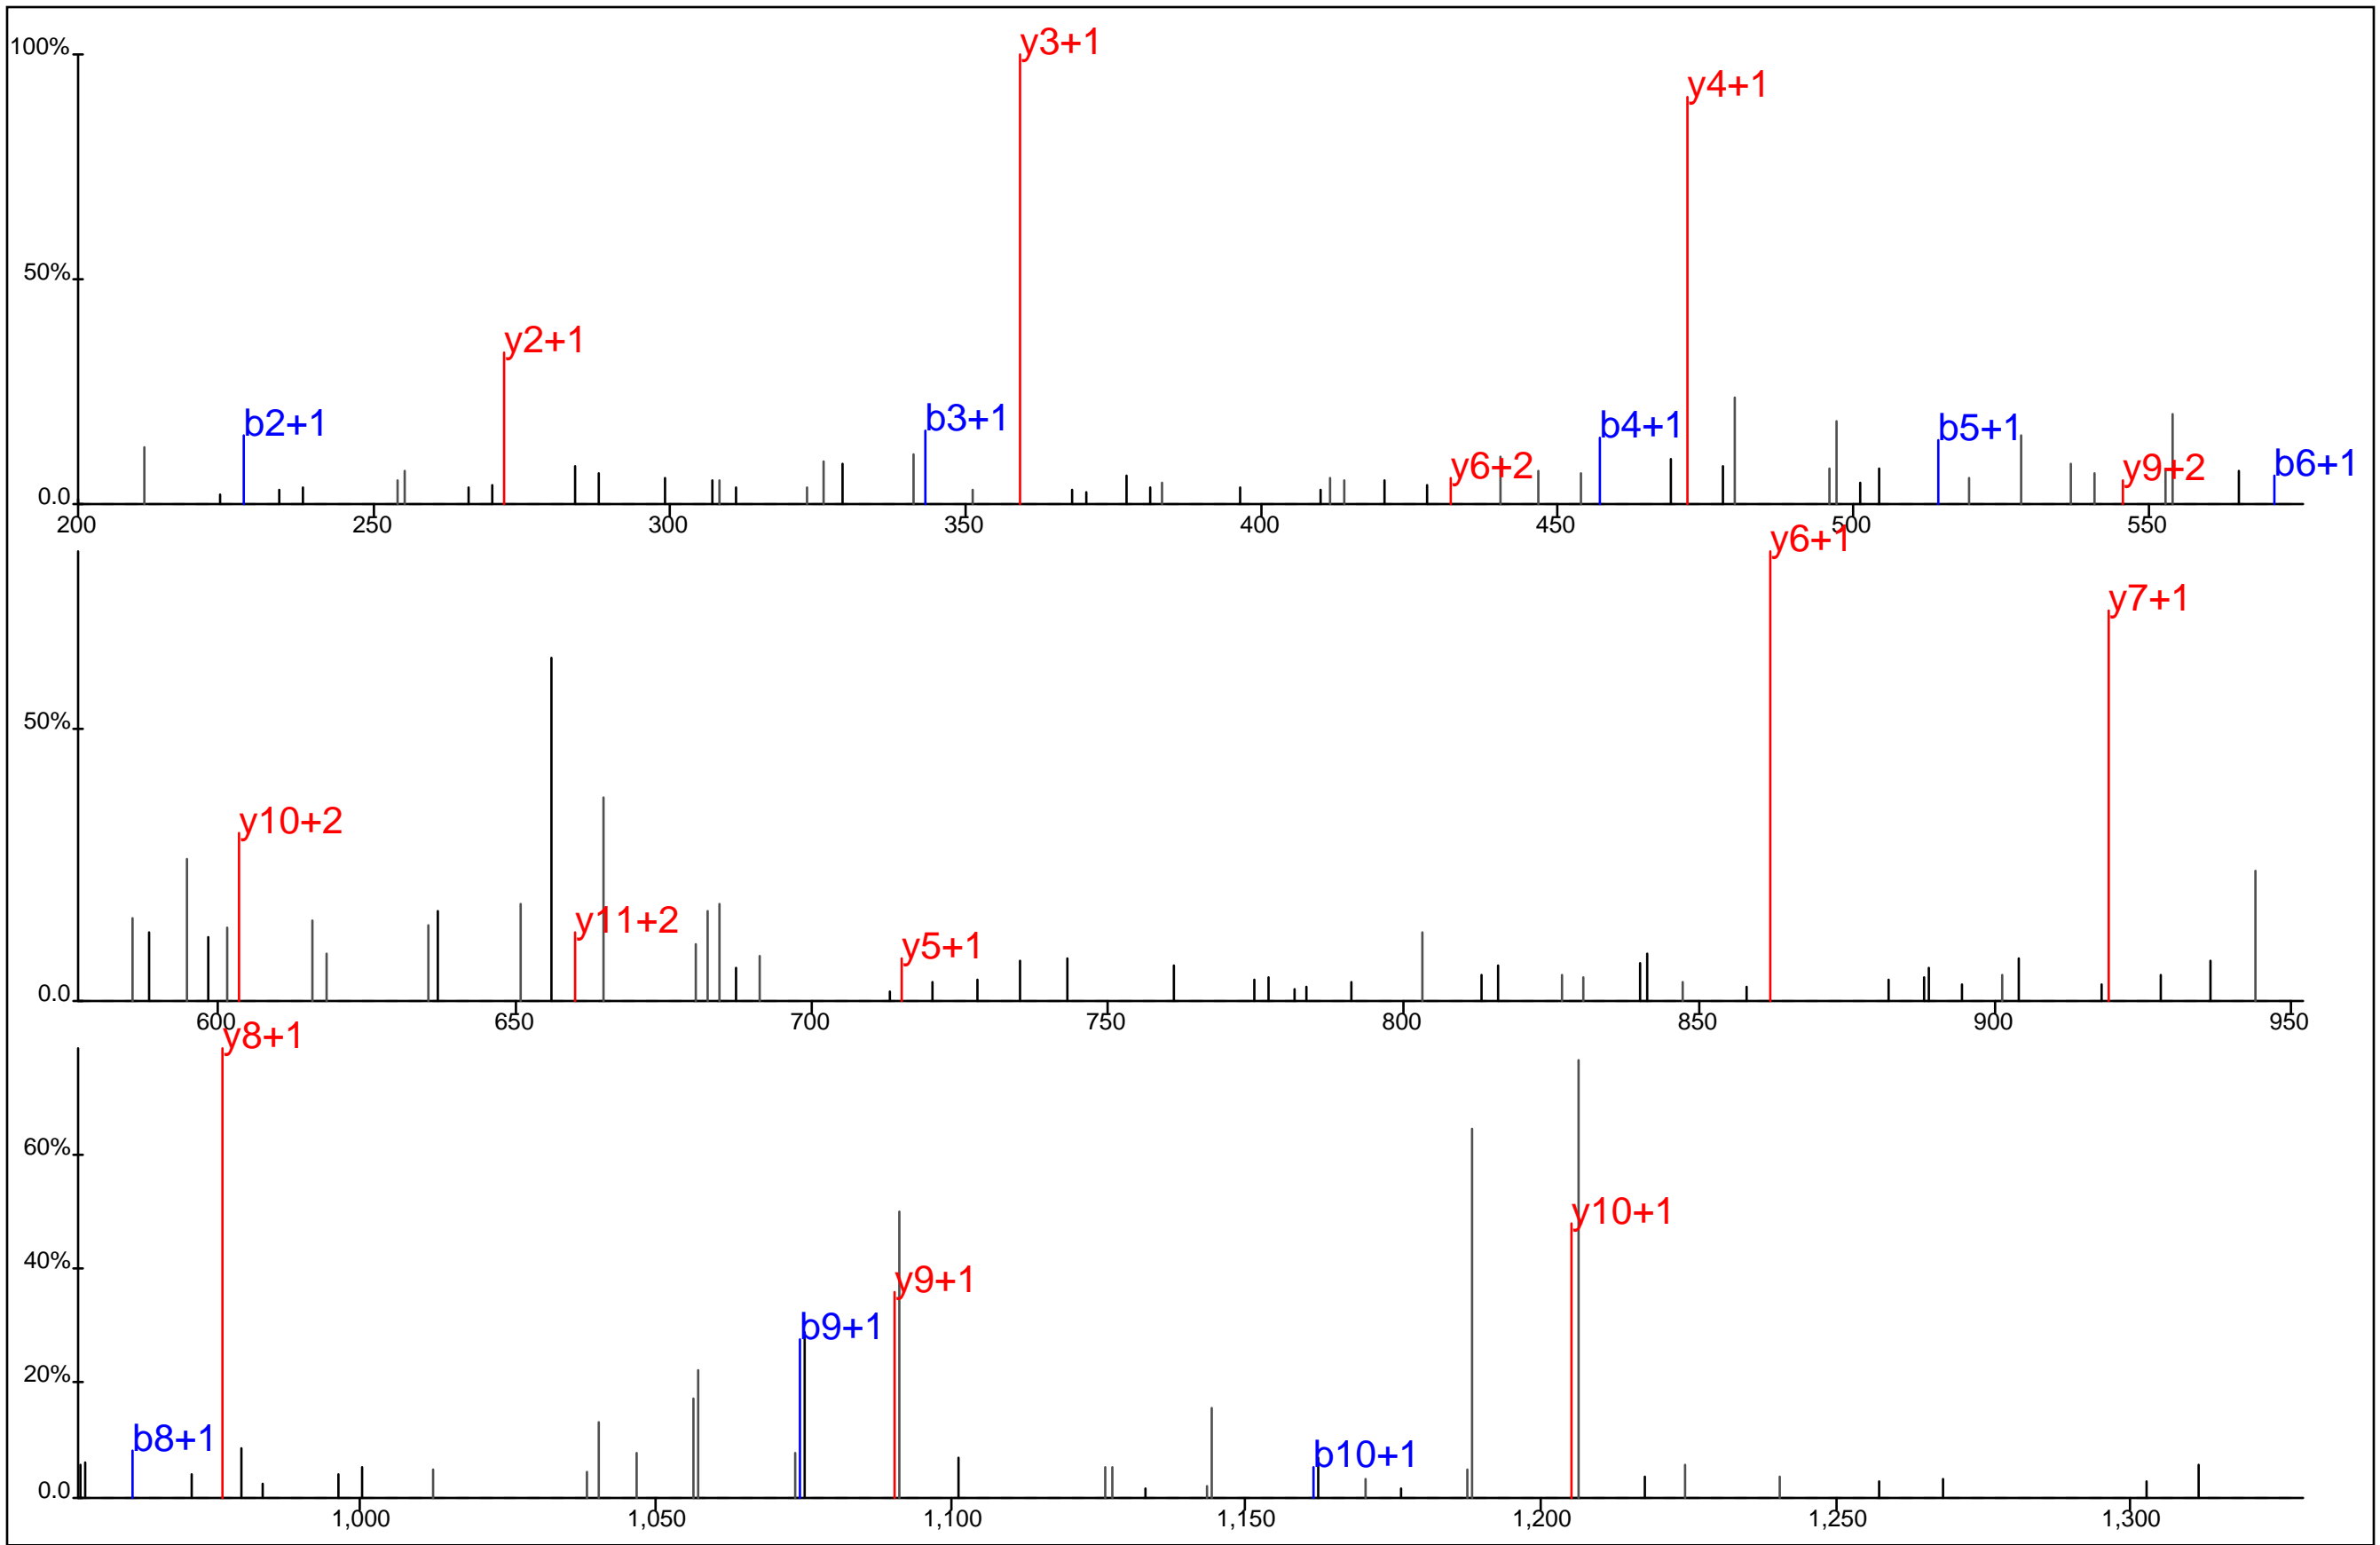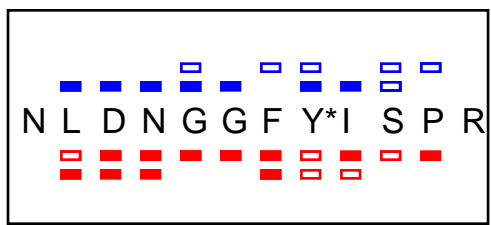

Protein Name: Lck  
 gi Accession: 0  
 Precursor Mass: 716.8166+2  
 Delta Mass: 0.175 ppm  
 XCorr: 70.15

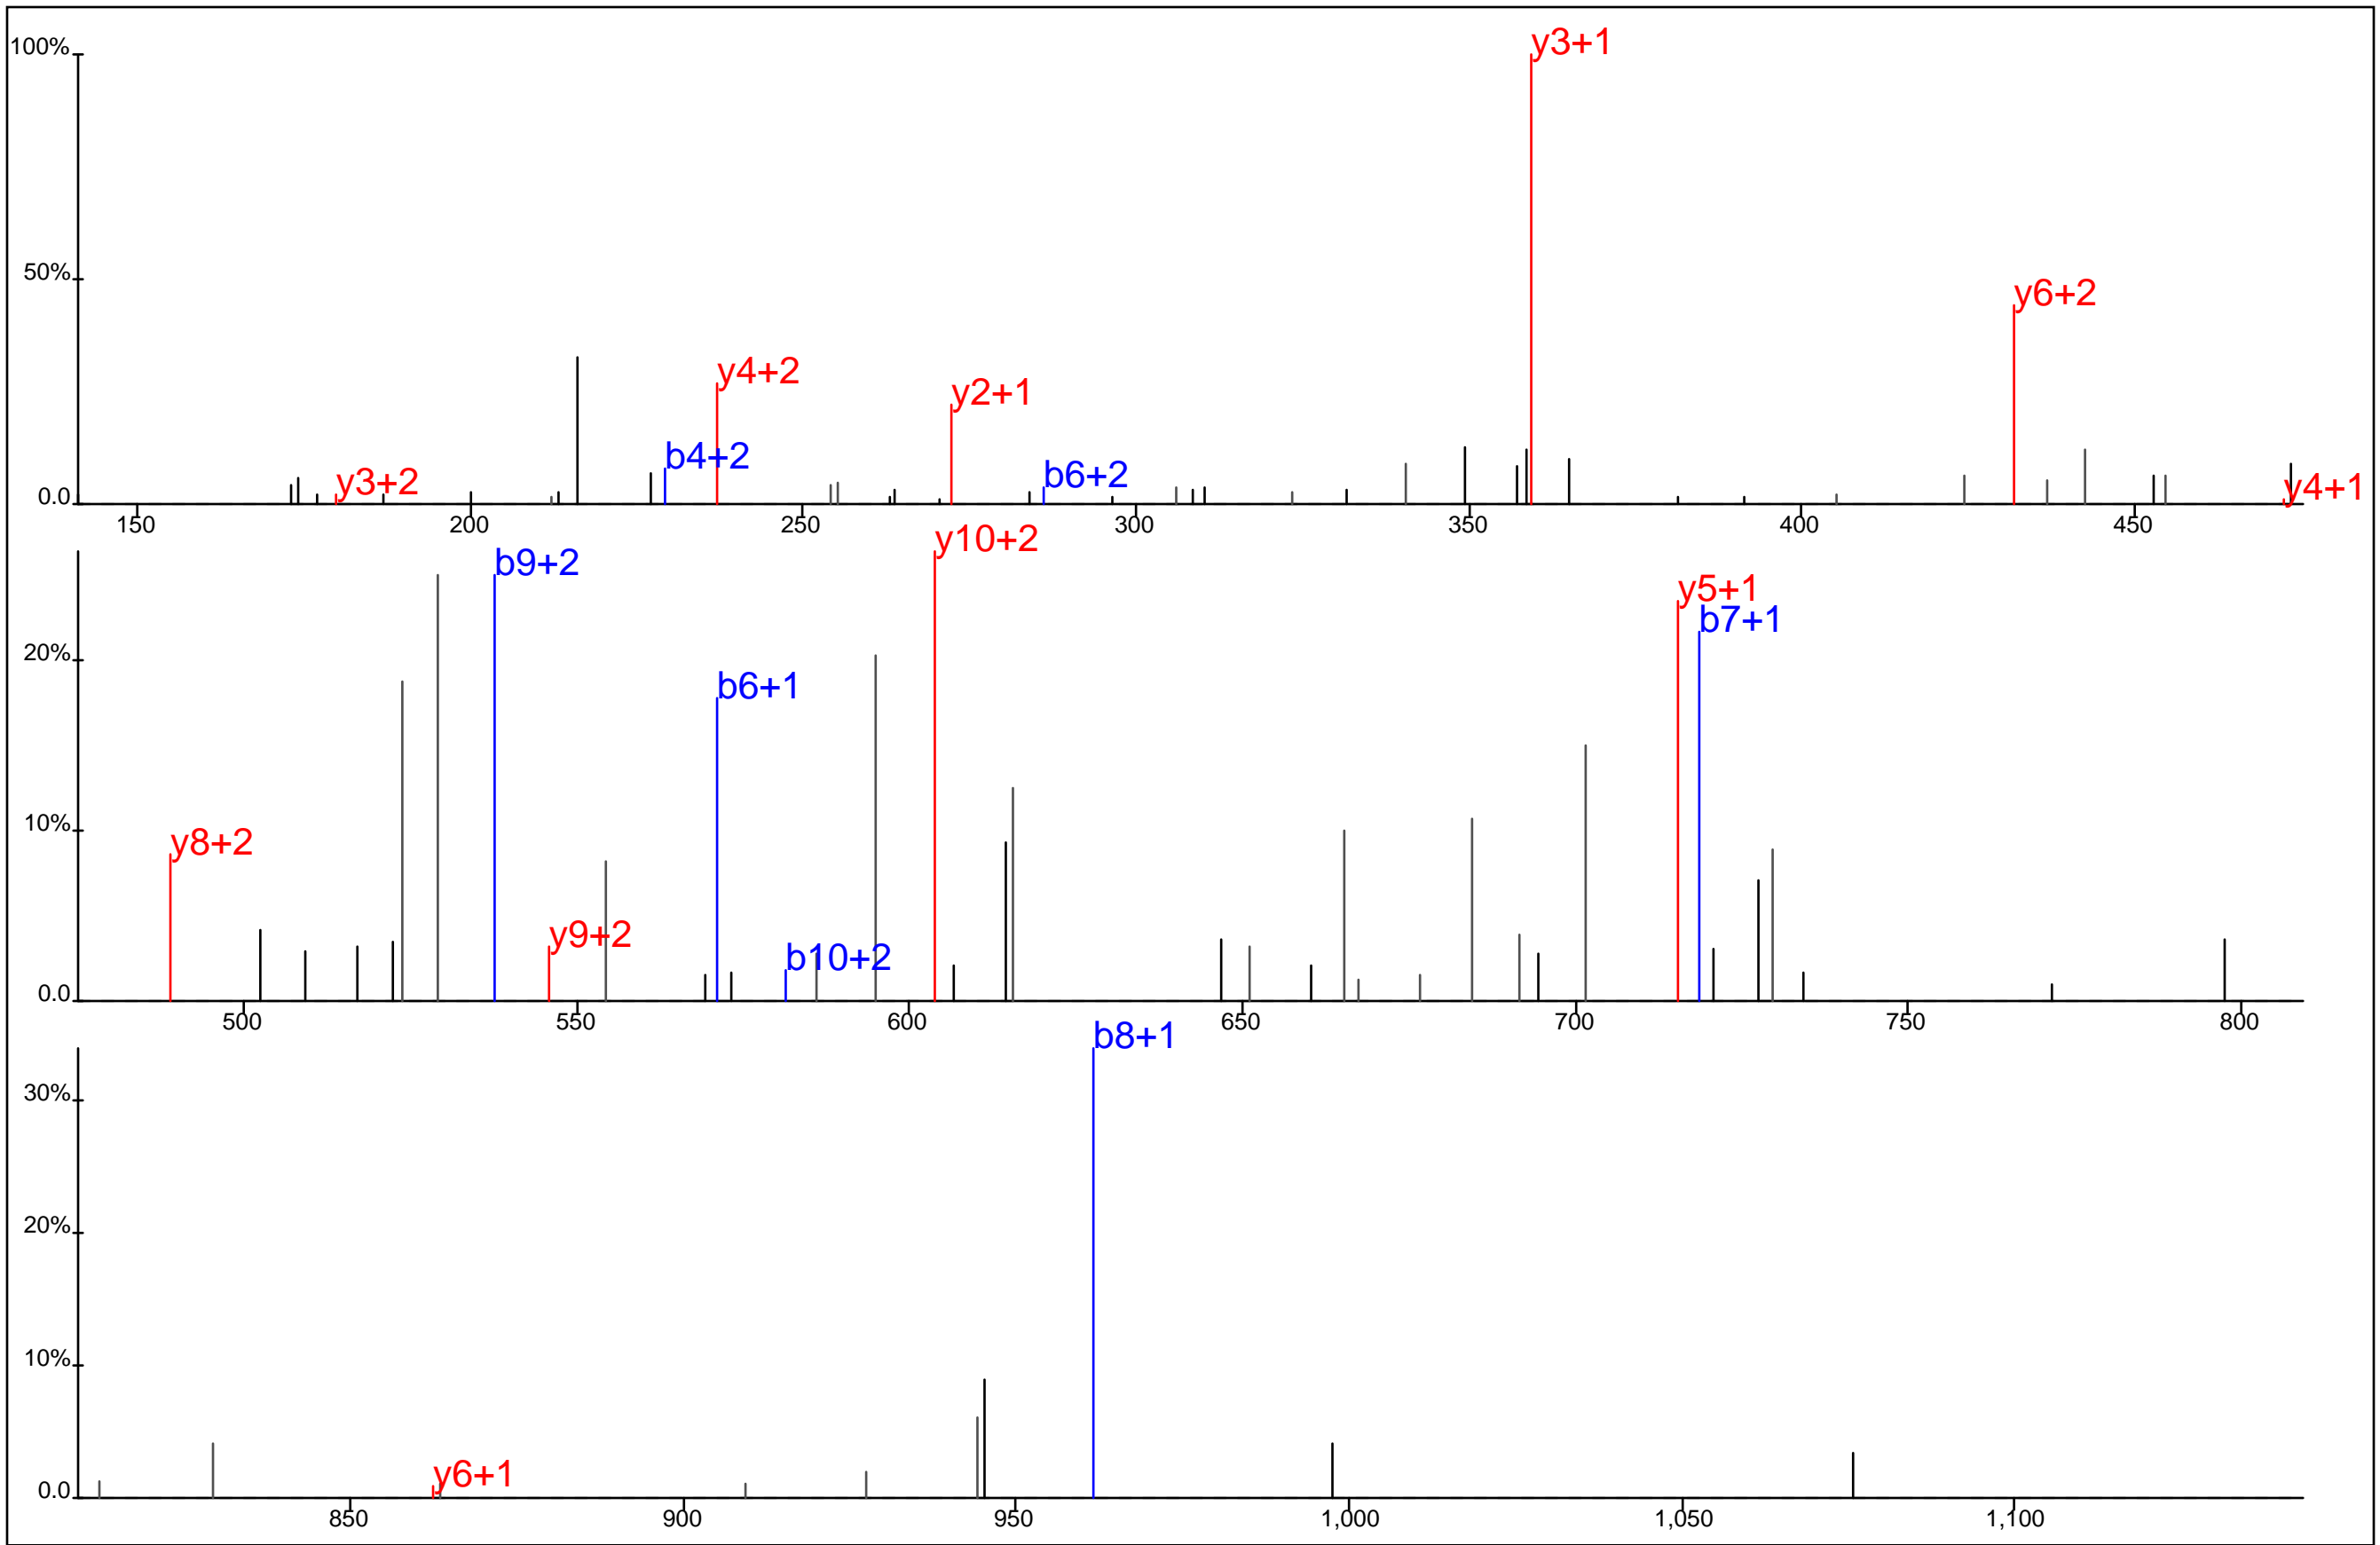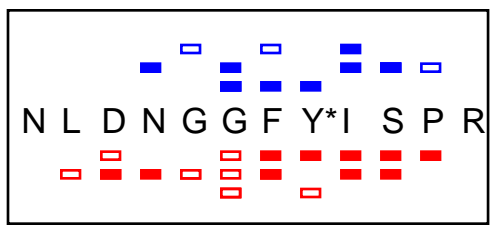

Protein Name: Lck  
 gi Accession: 0  
 Precursor Mass: 478.2134+3  
 Delta Mass: 0.016 ppm  
 XCorr: 25.56

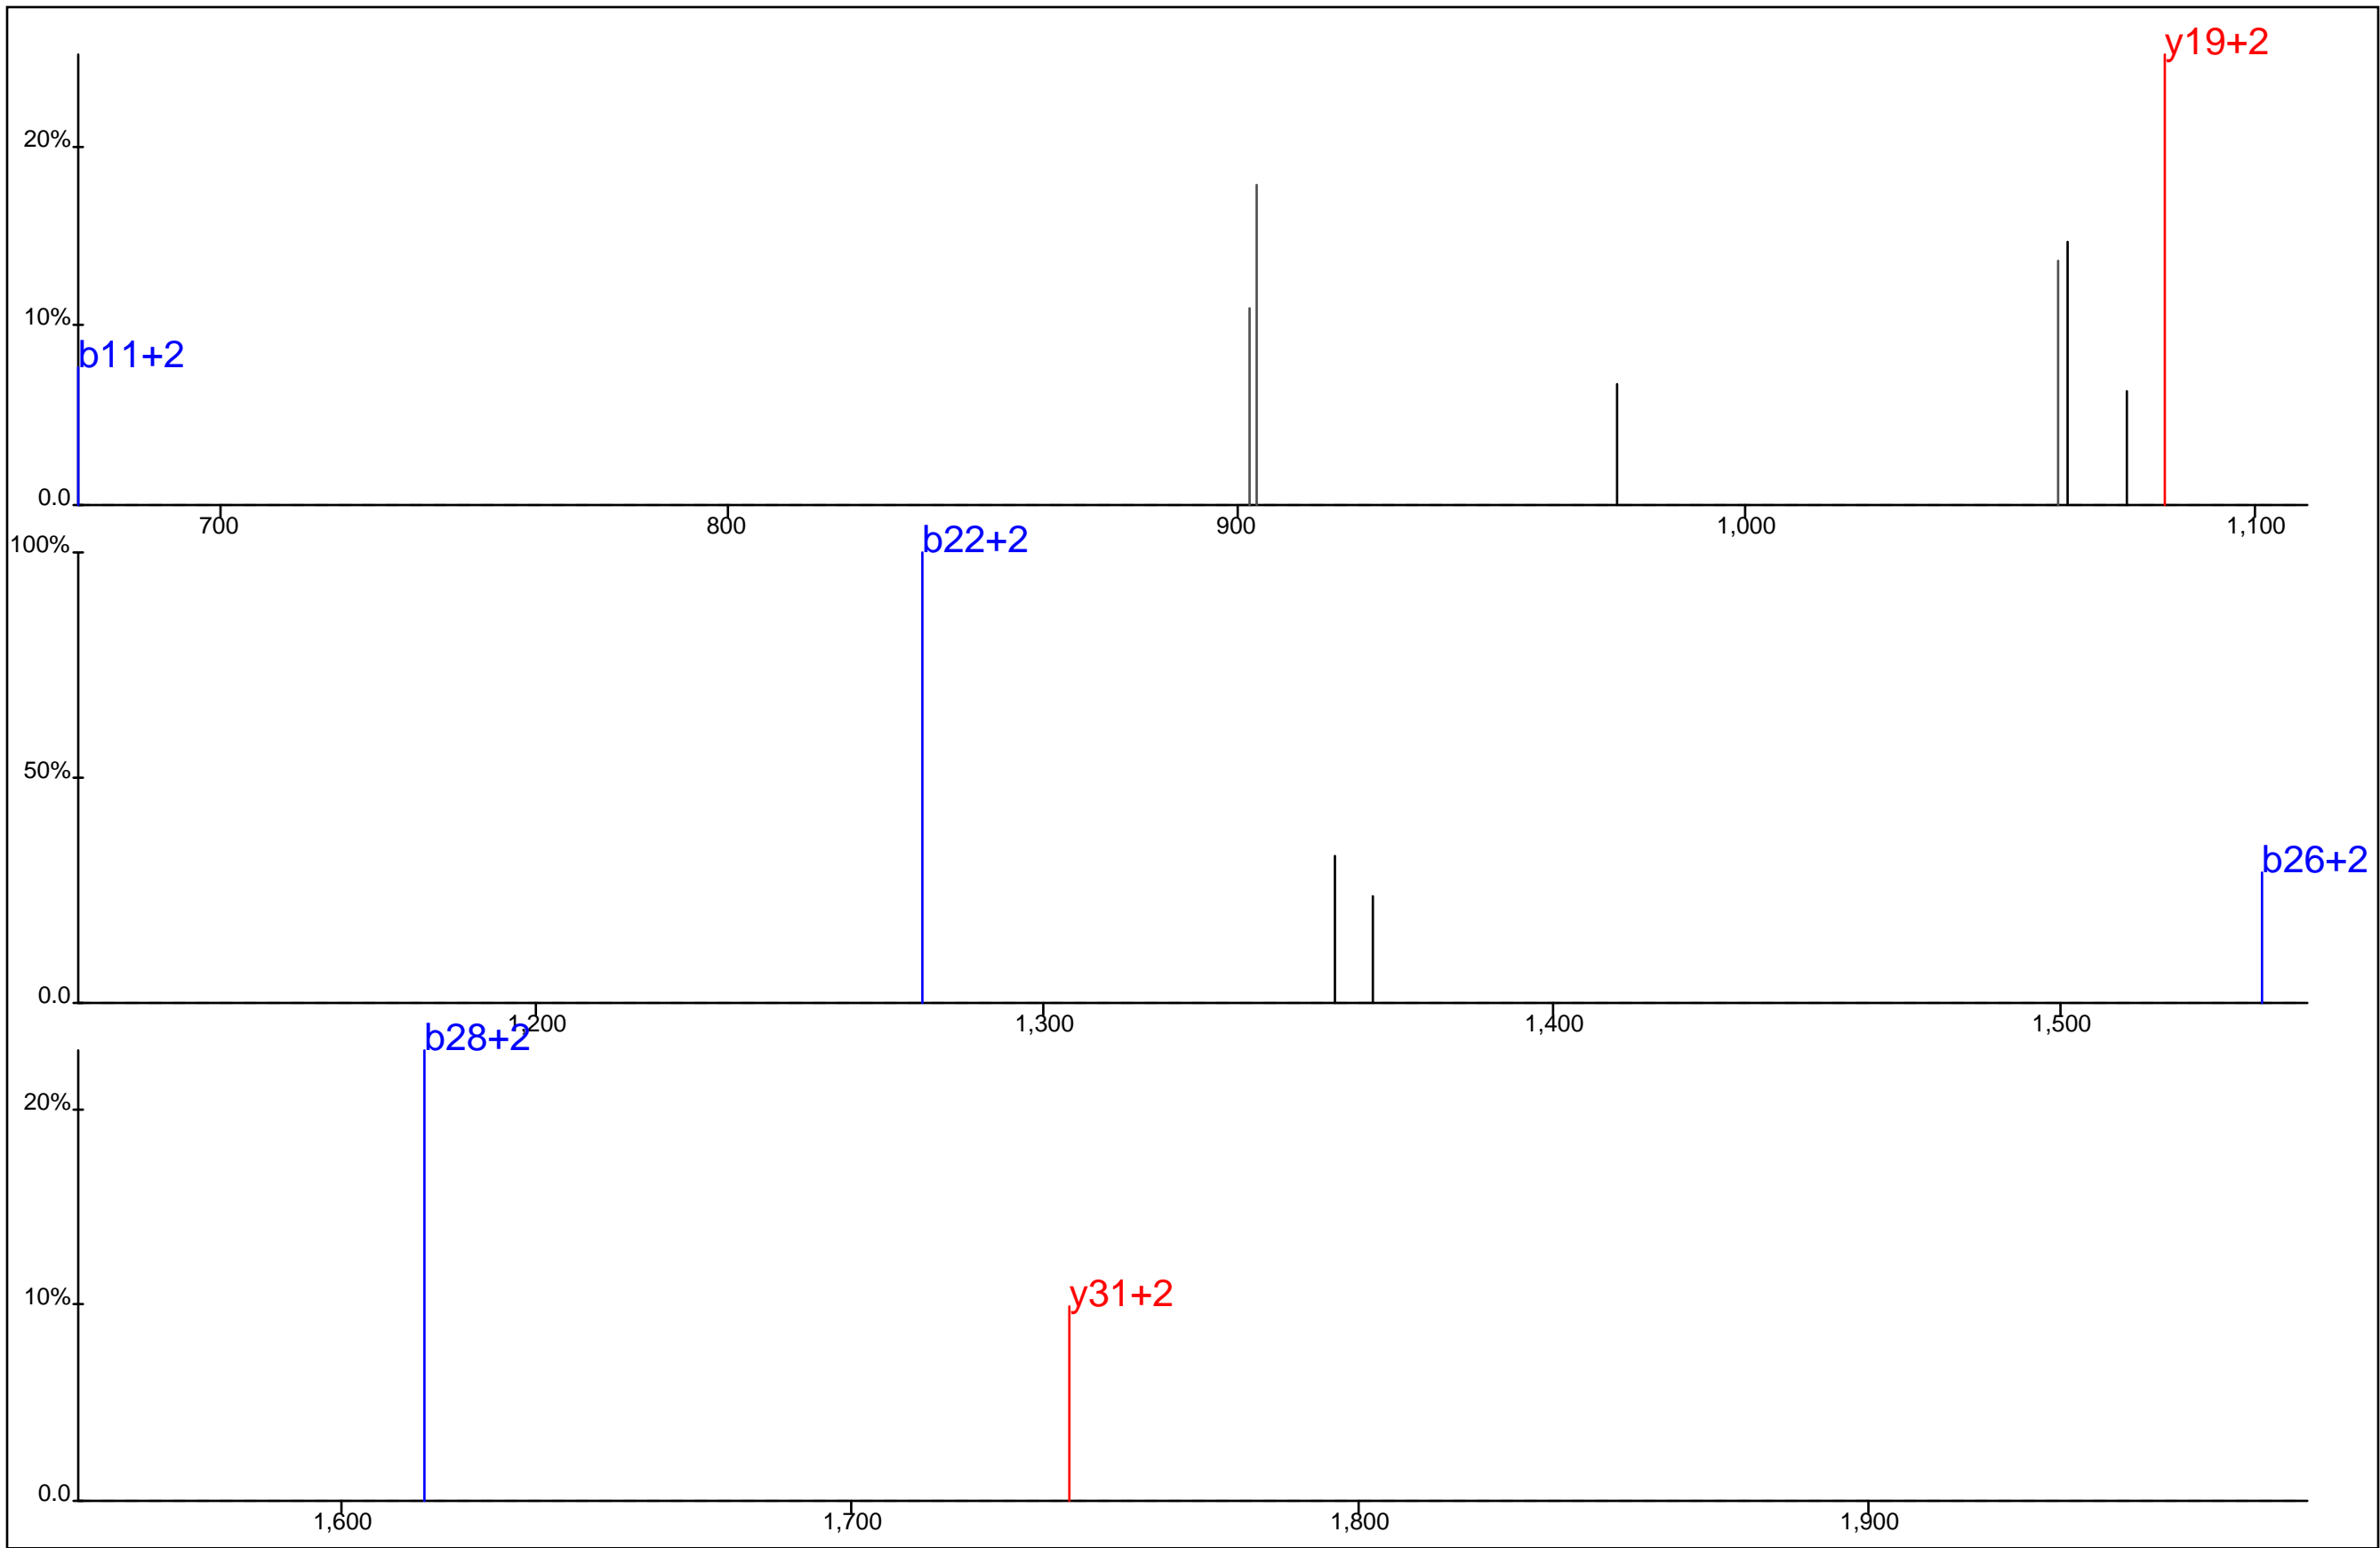

■ ■ ■ ■ ■  
 C E S L N I V H N Y I L P S \* K A G H I N P L I I Y \* G G P C T \* G K T L L L A E V A K  
■ ■

Protein Name: Leucine-rich repeat and WD repeat-containing protein KIAA1  
 gi Accession: 0  
 Precursor Mass: 1,572.1016+3  
 Delta Mass: 1.632 ppm  
 XCorr: 29.41

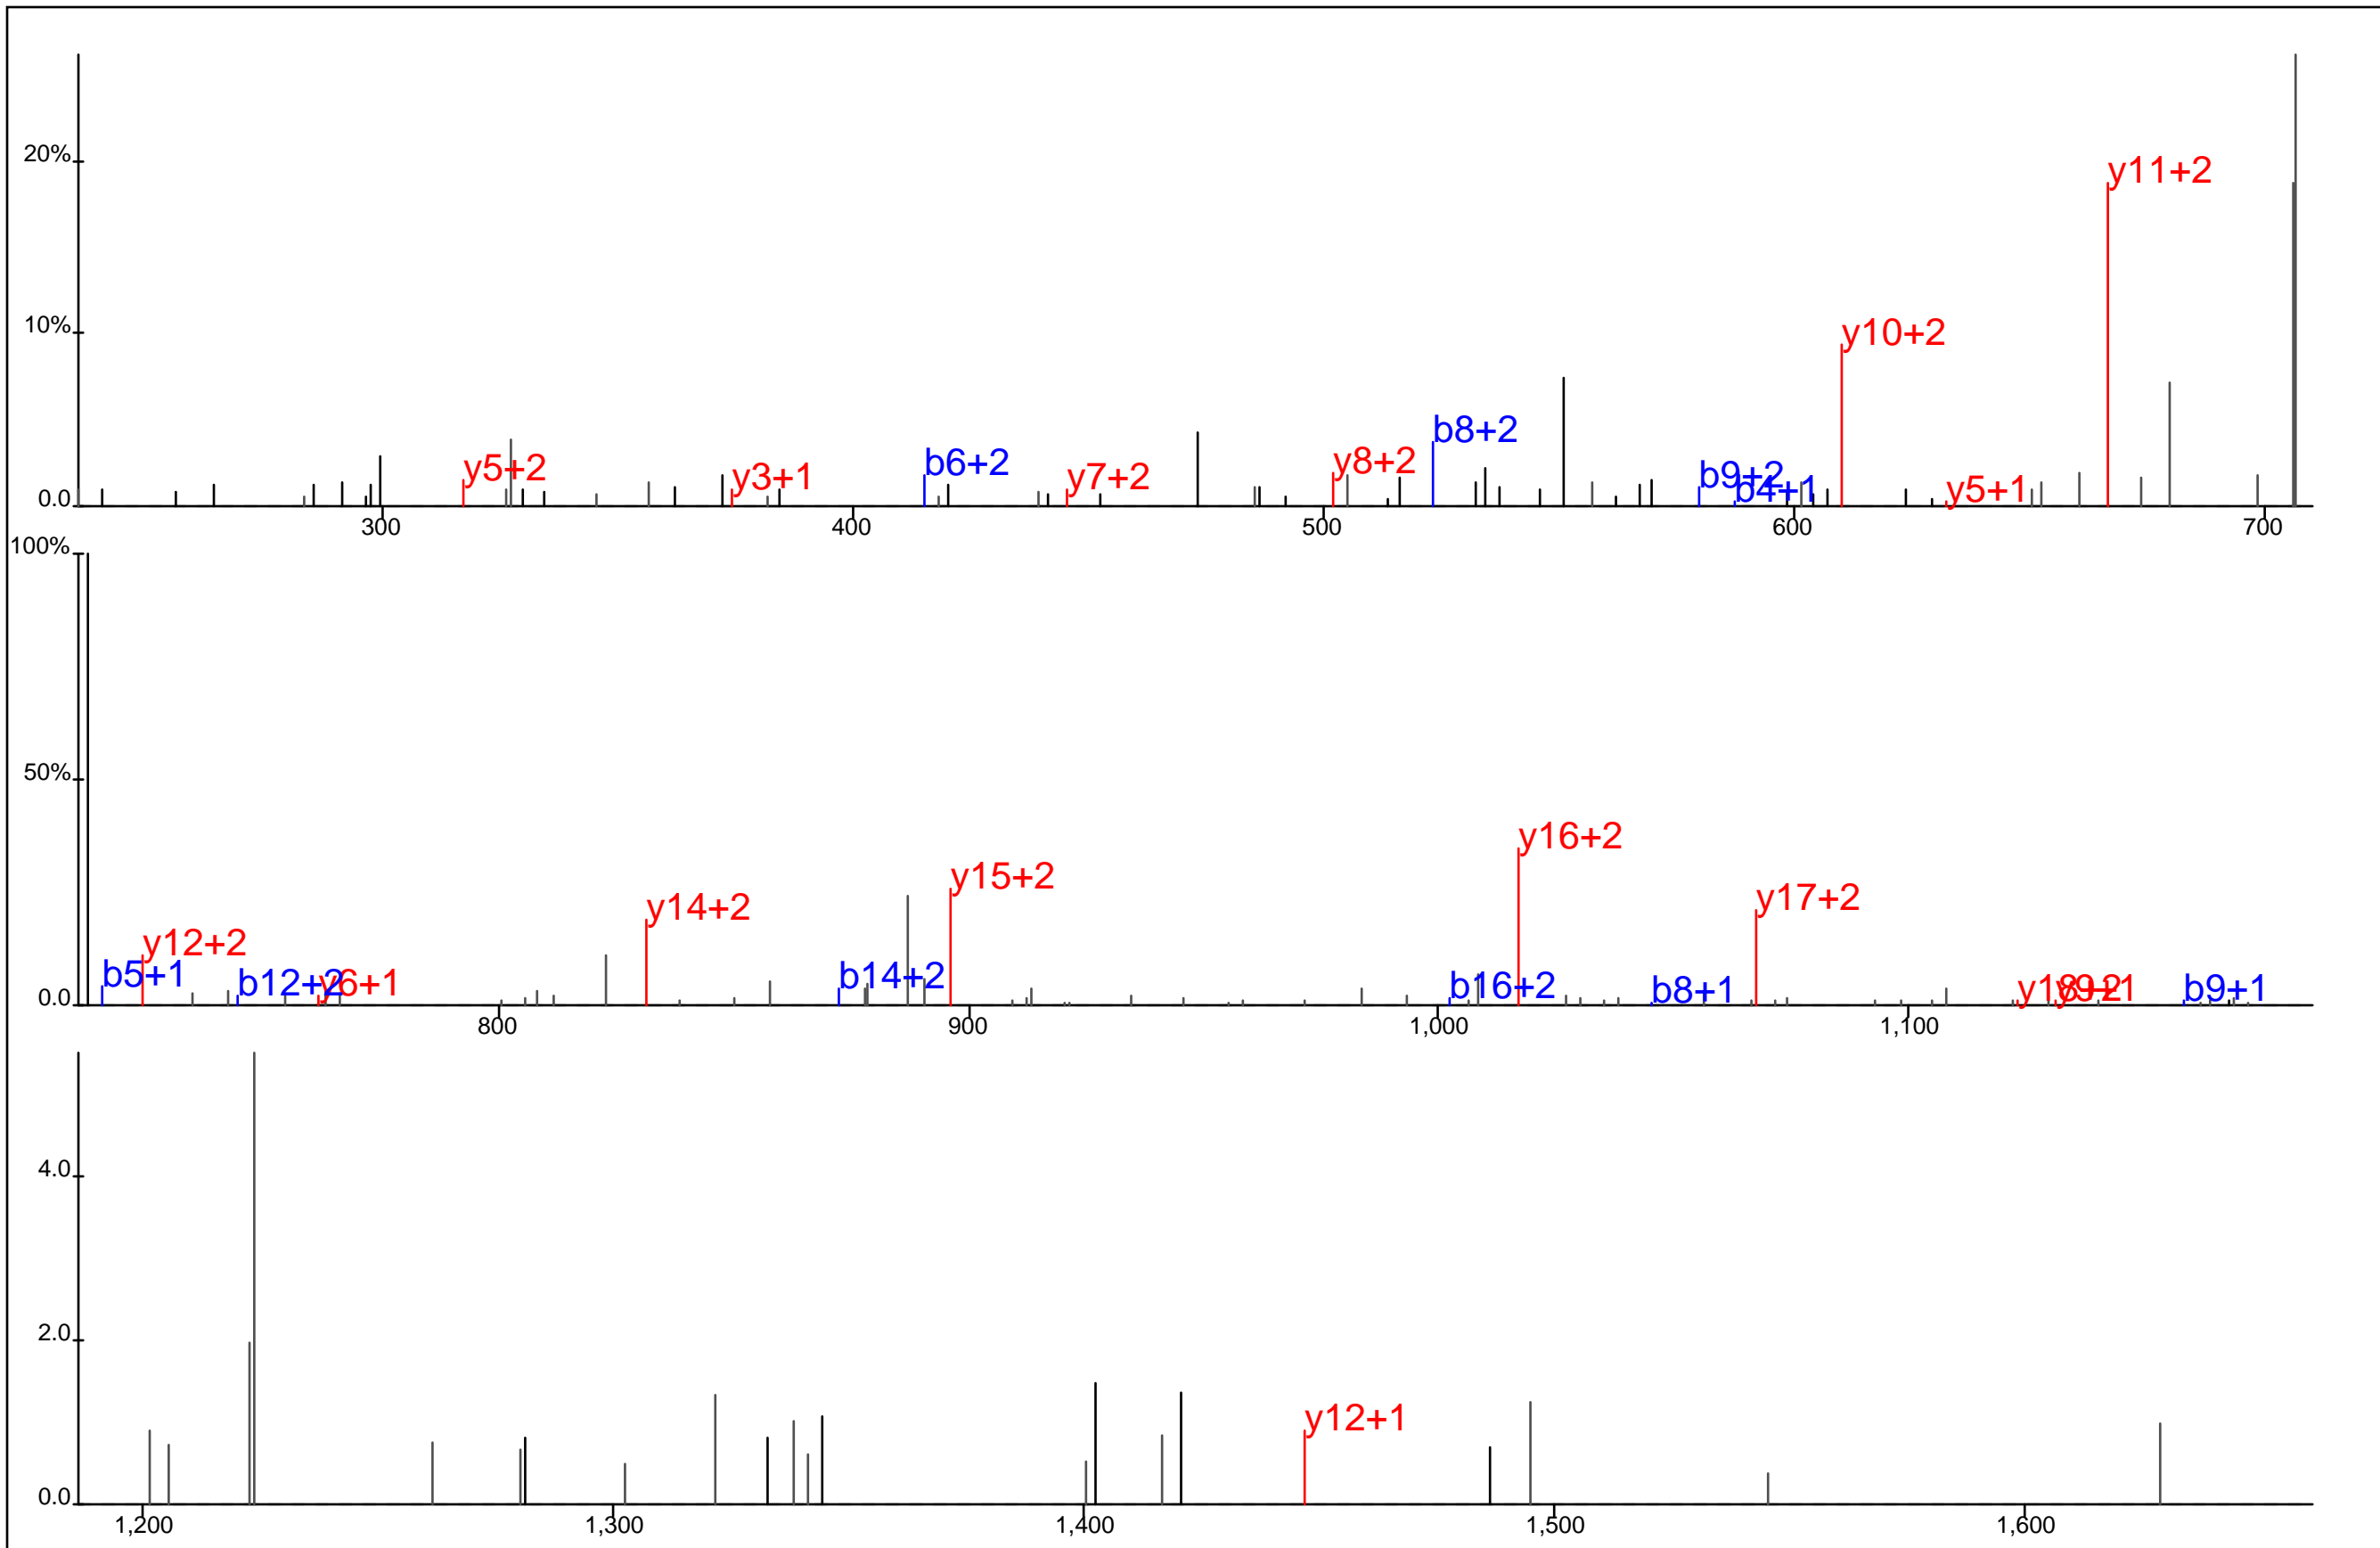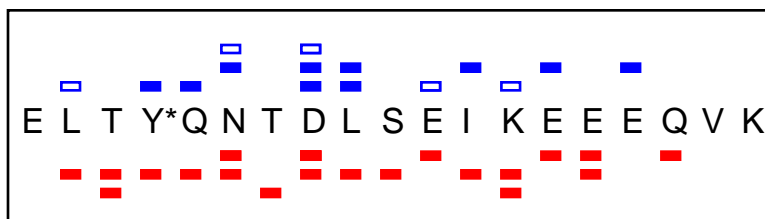

Protein Name: Leucine rich repeat in FLII interacting protein 1  
 gi Accession: 0  
 Precursor Mass: 792.6989+3  
 Delta Mass: 1.408 ppm  
 XCorr: 24.9





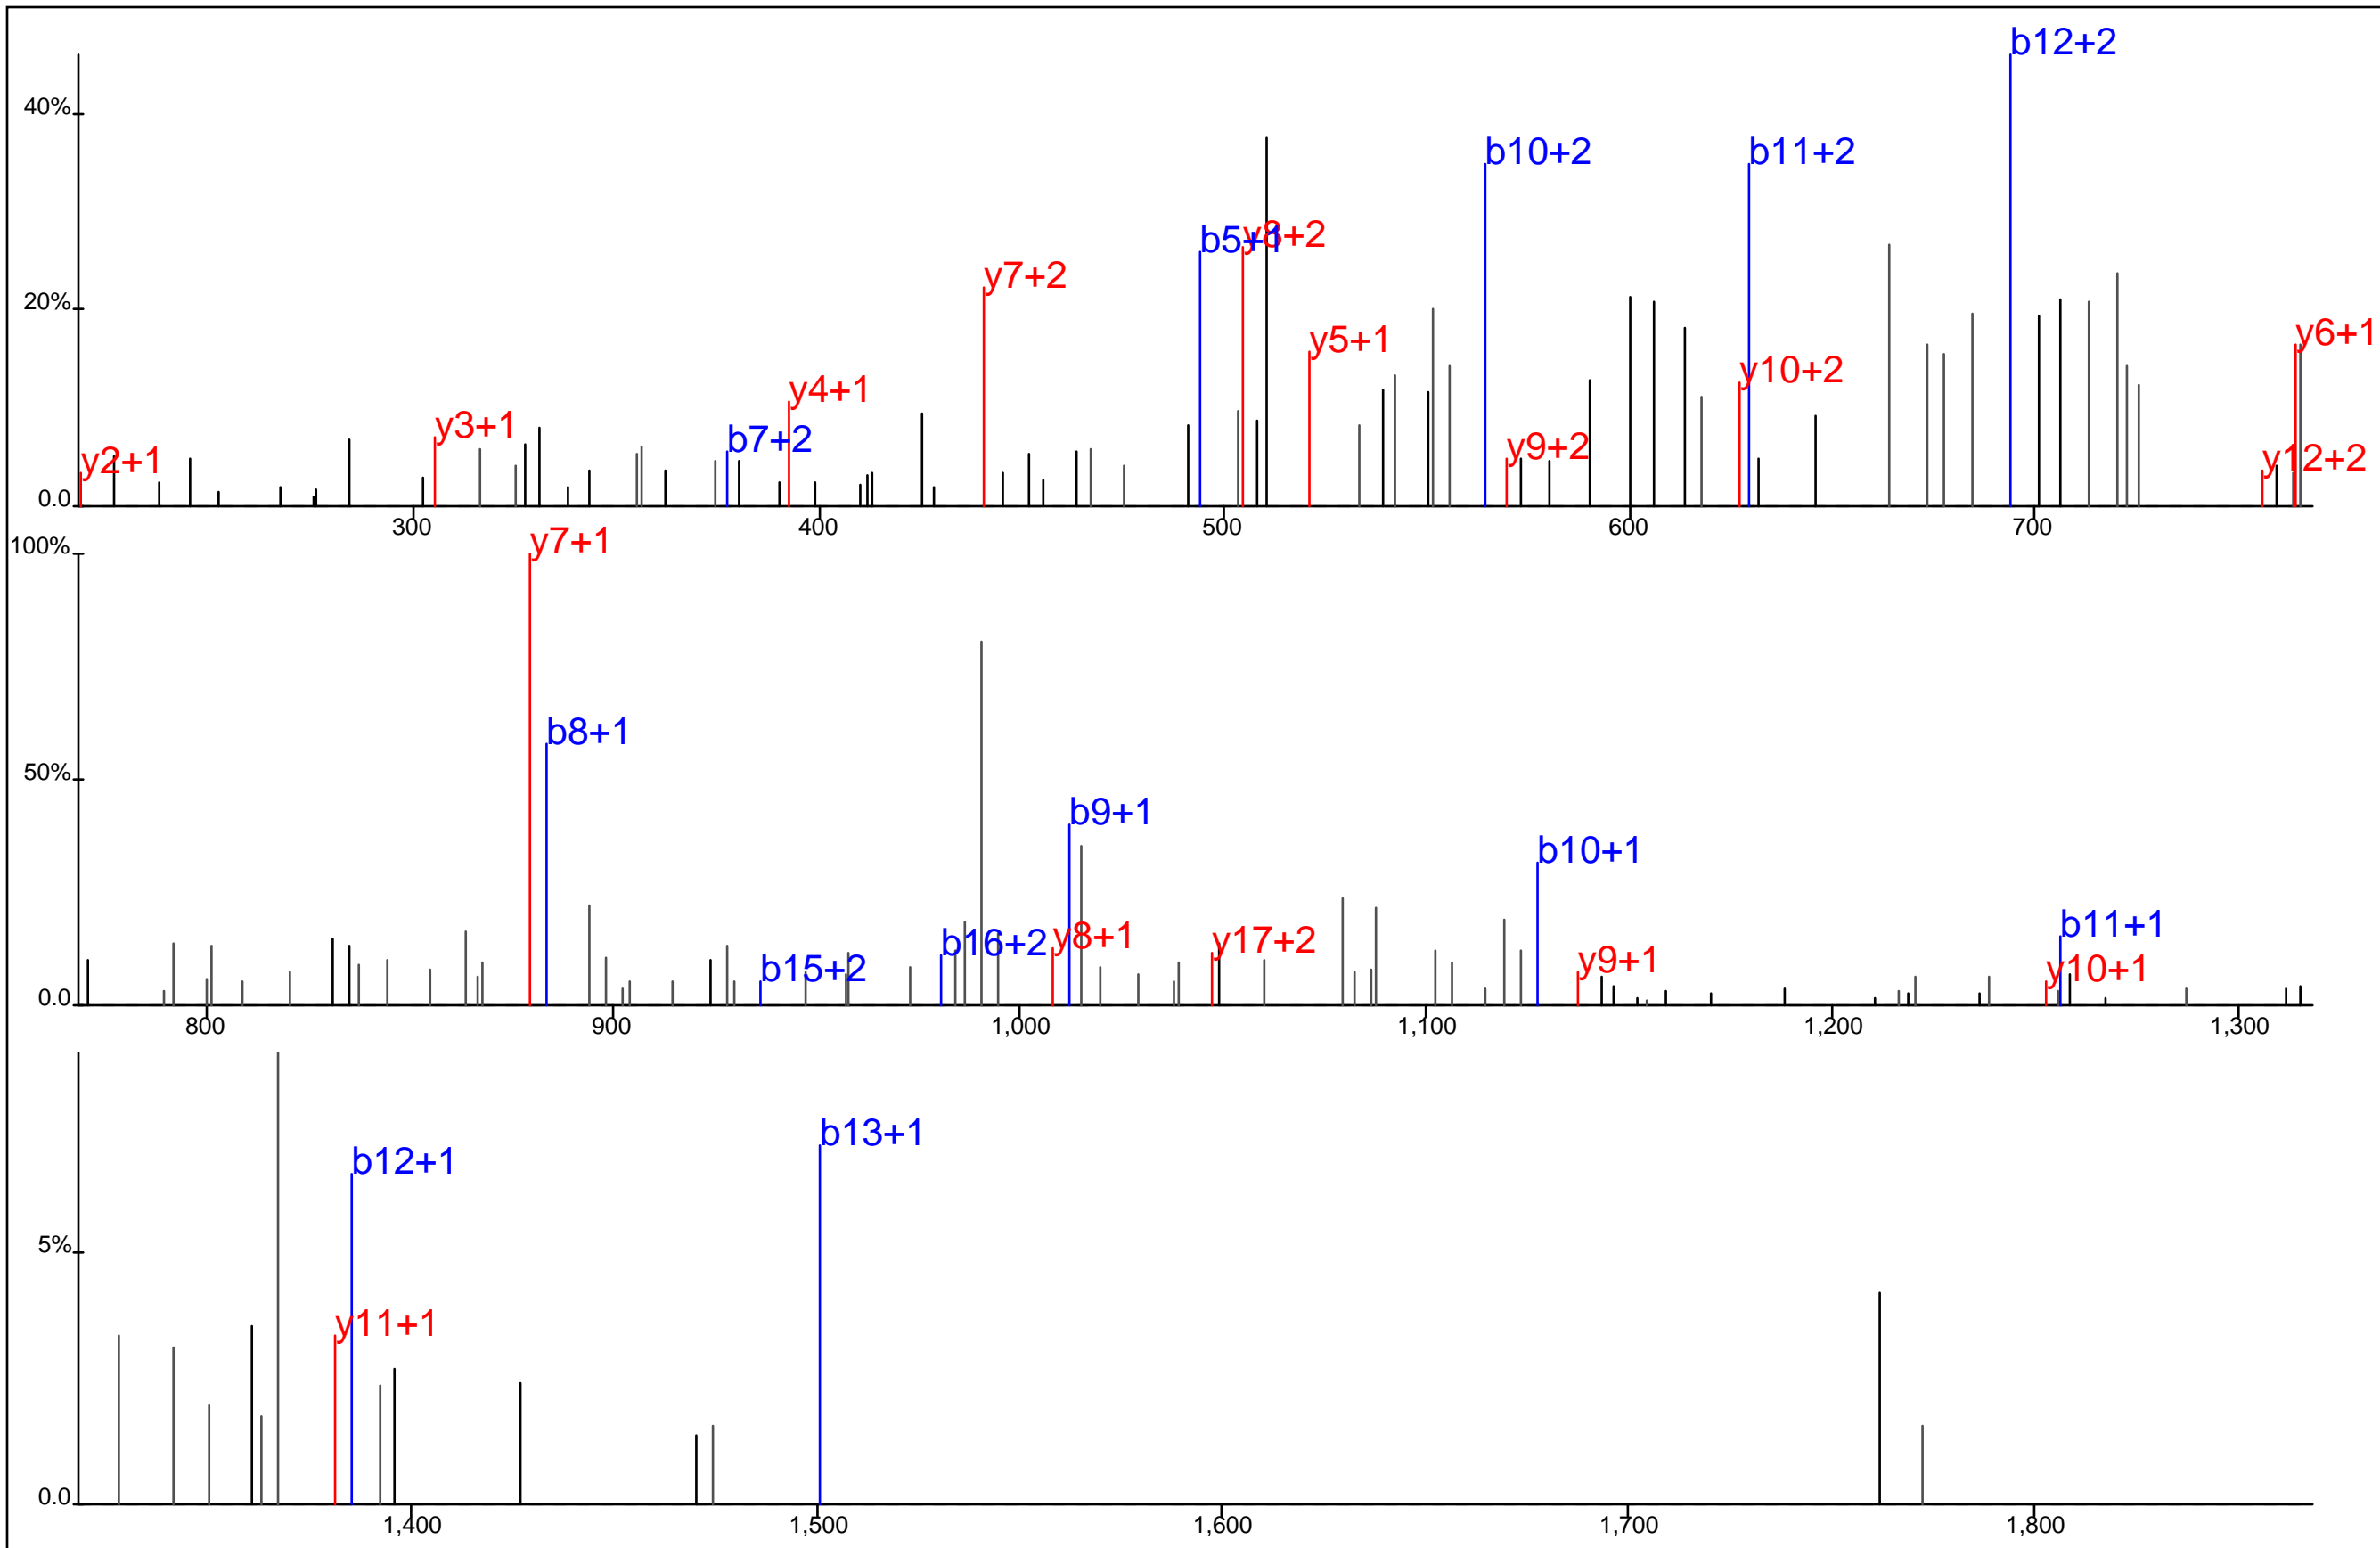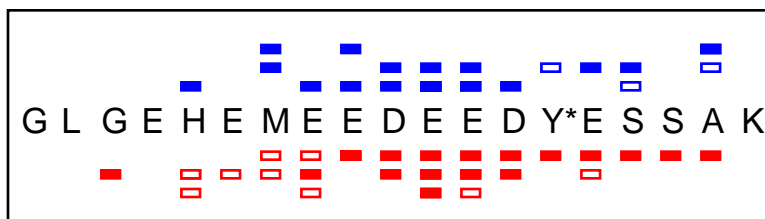

Protein Name: Leucyl cystinyl aminopeptidase  
 gi Accession: 0  
 Precursor Mass: 755.2797+3  
 Delta Mass: 1.156 ppm  
 XCorr: 31.56



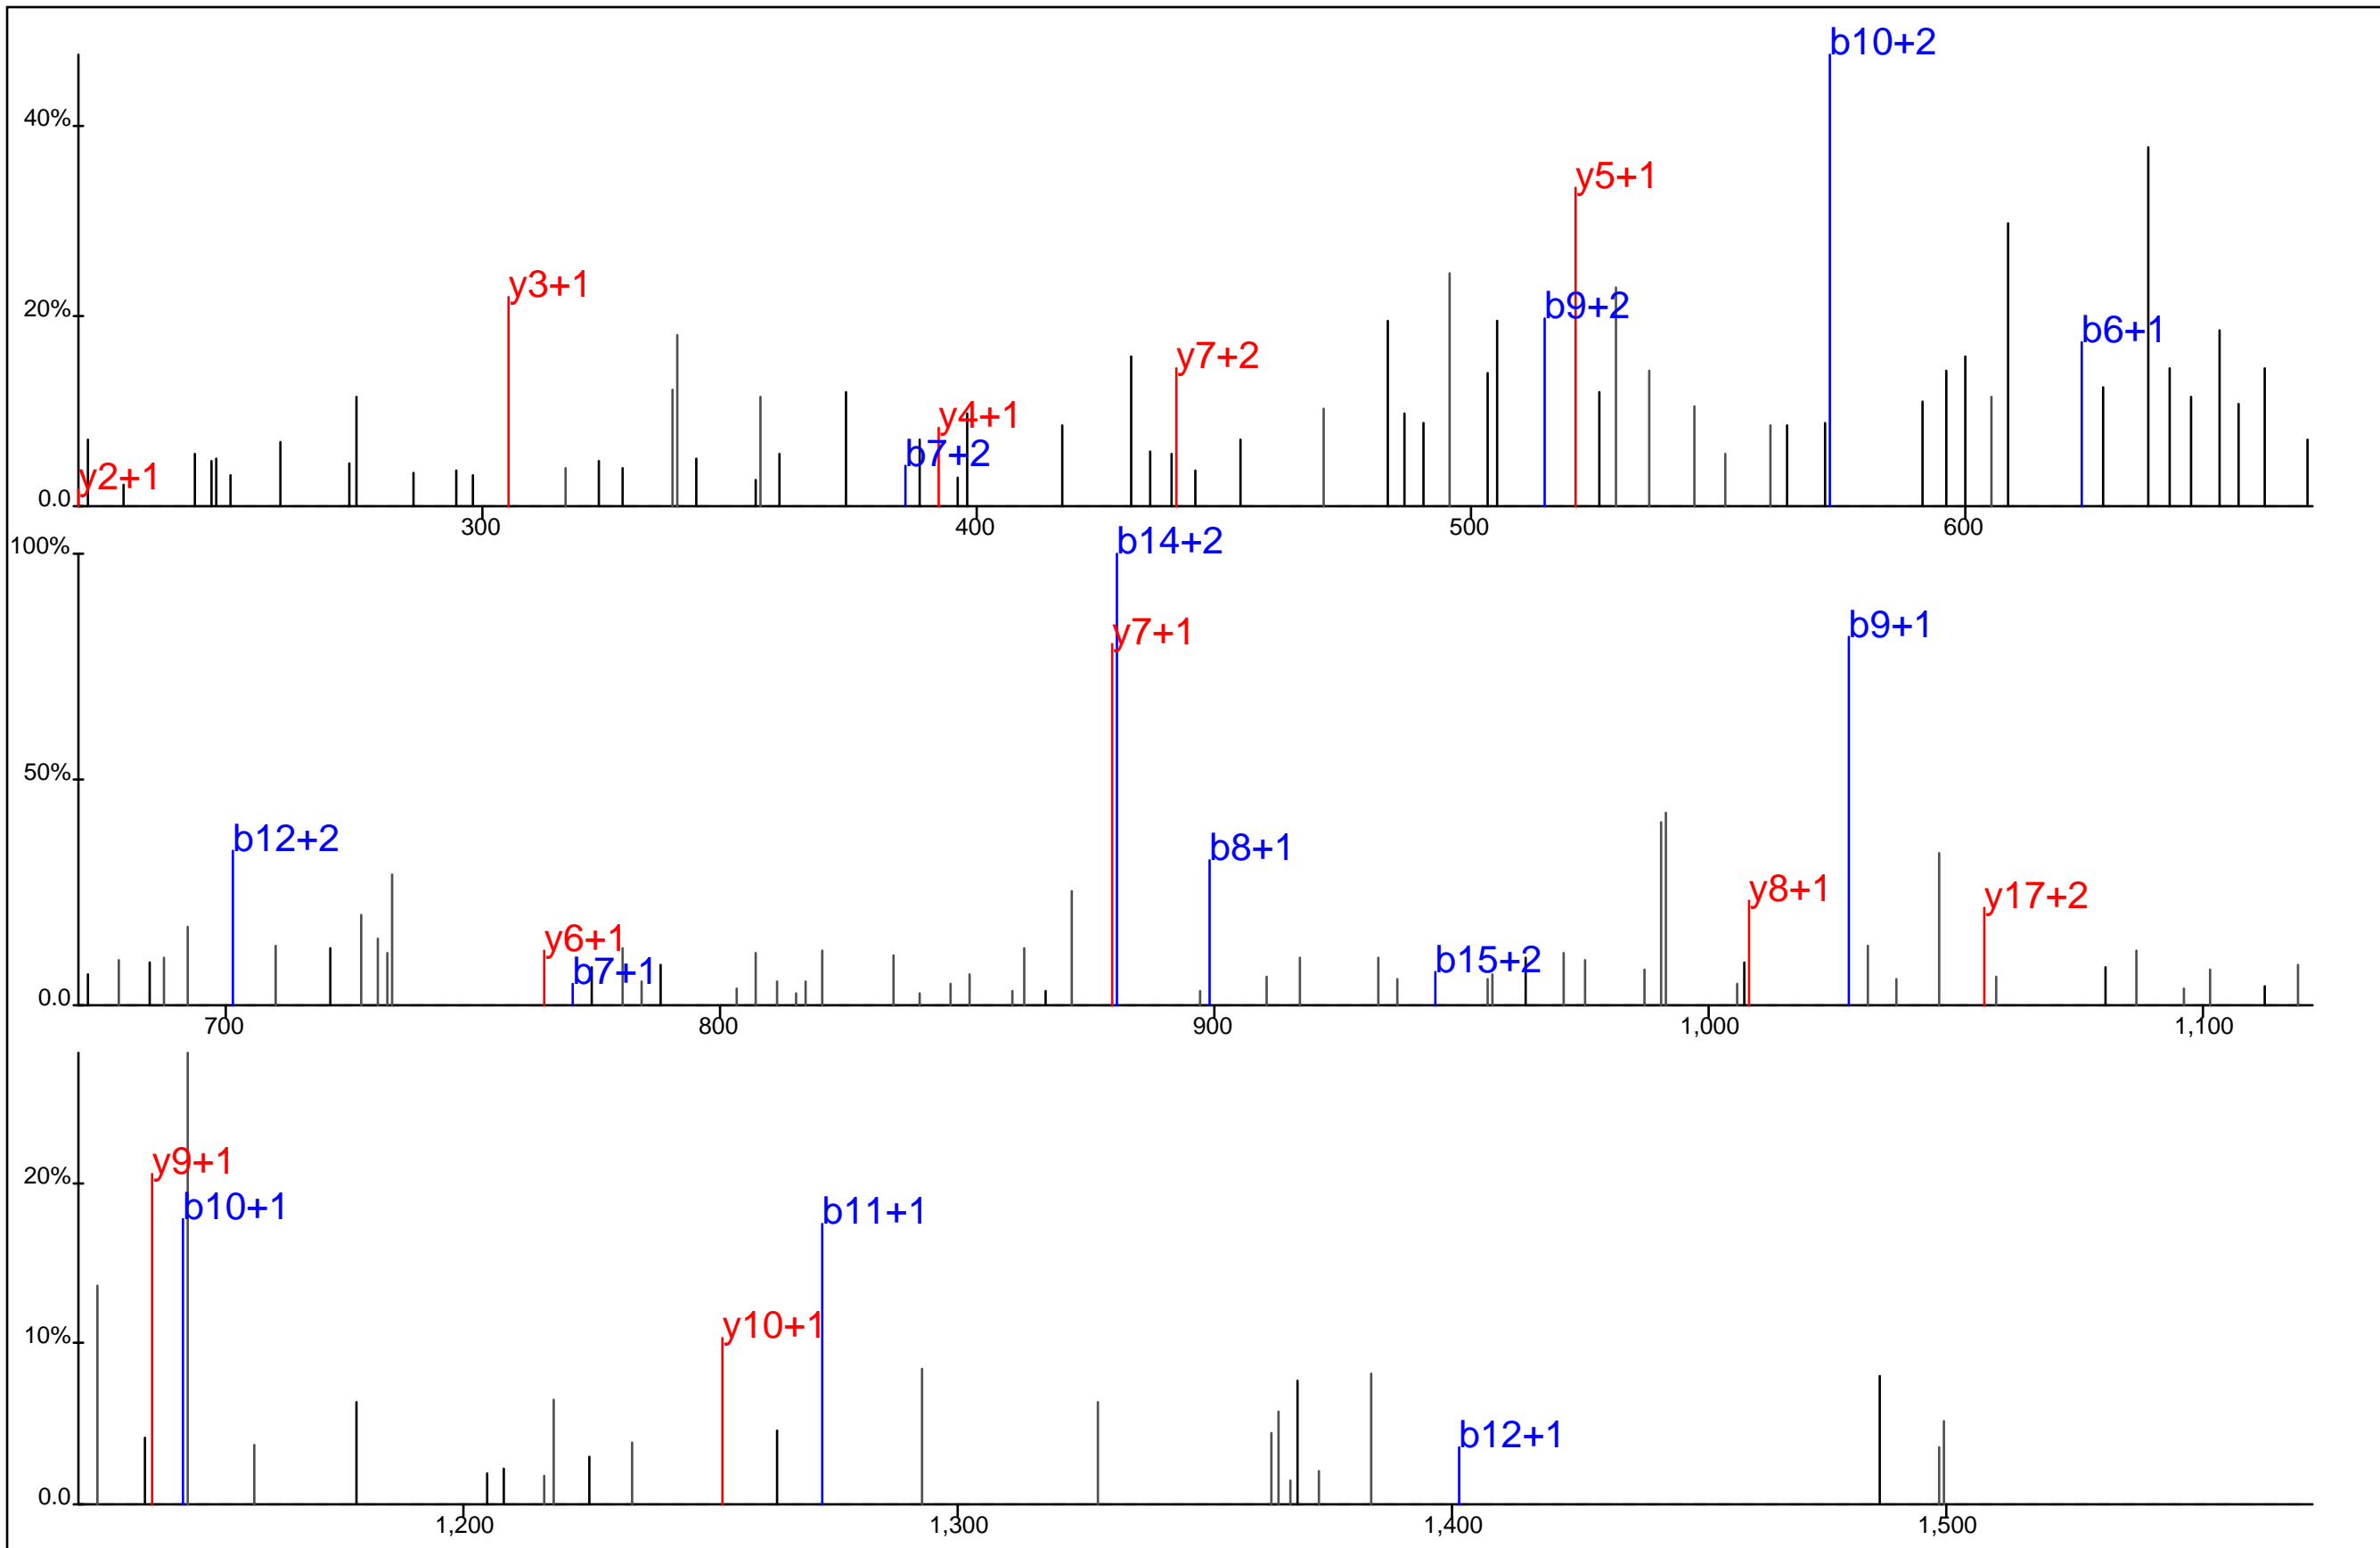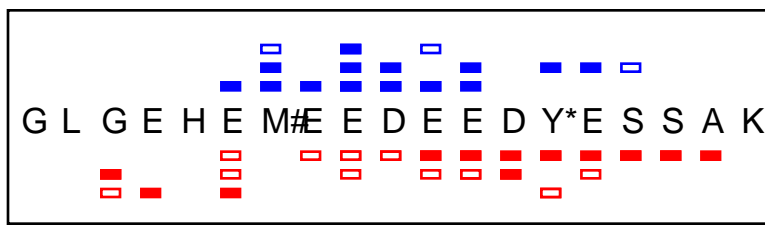

Protein Name: Leucyl cystinyl aminopeptidase  
 gi Accession: 0  
 Precursor Mass: 760.6094+3  
 Delta Mass: 1.469 ppm  
 XCorr: 23.85

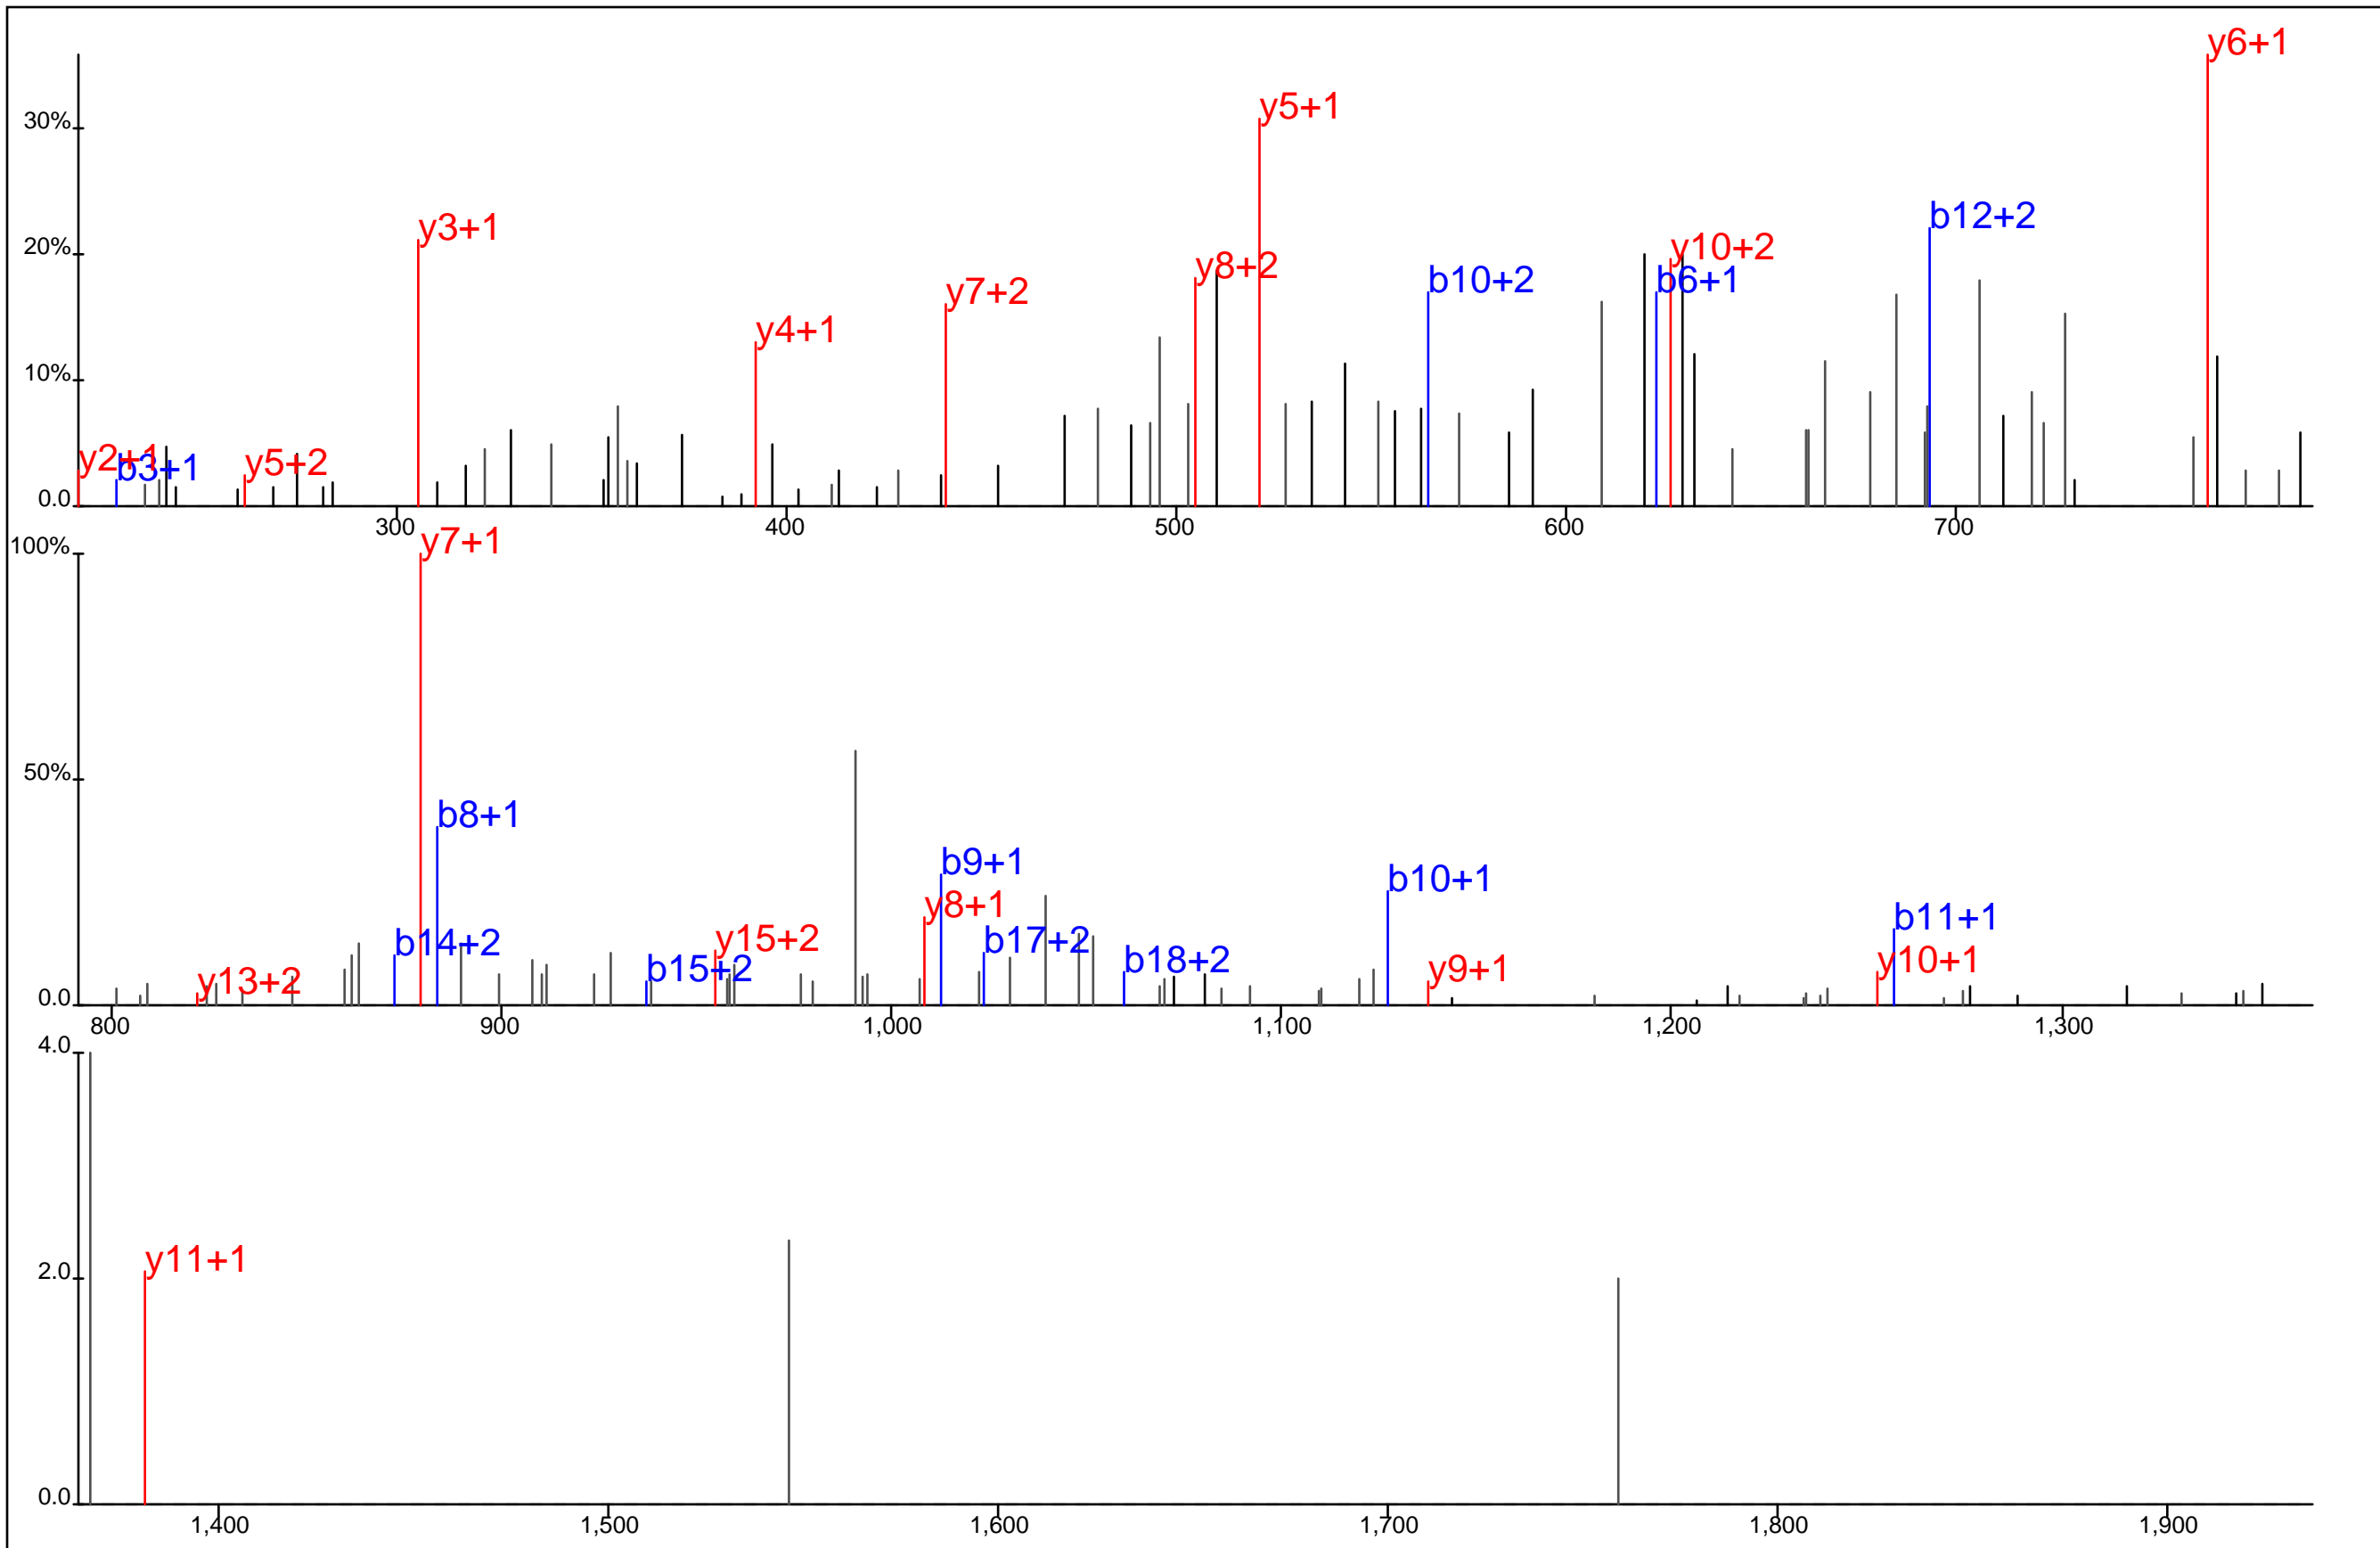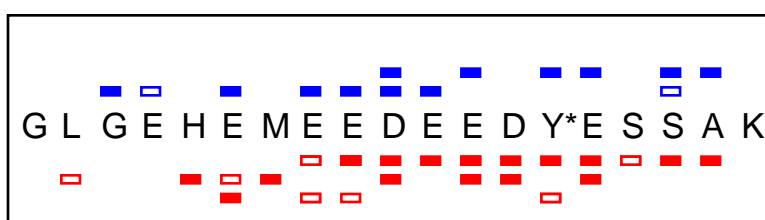

Protein Name: Leucyl cystinyl aminopeptidase  
 gi Accession: 0  
 Precursor Mass: 755.2777+3  
 Delta Mass: 1.512 ppm  
 XCorr: 41.51



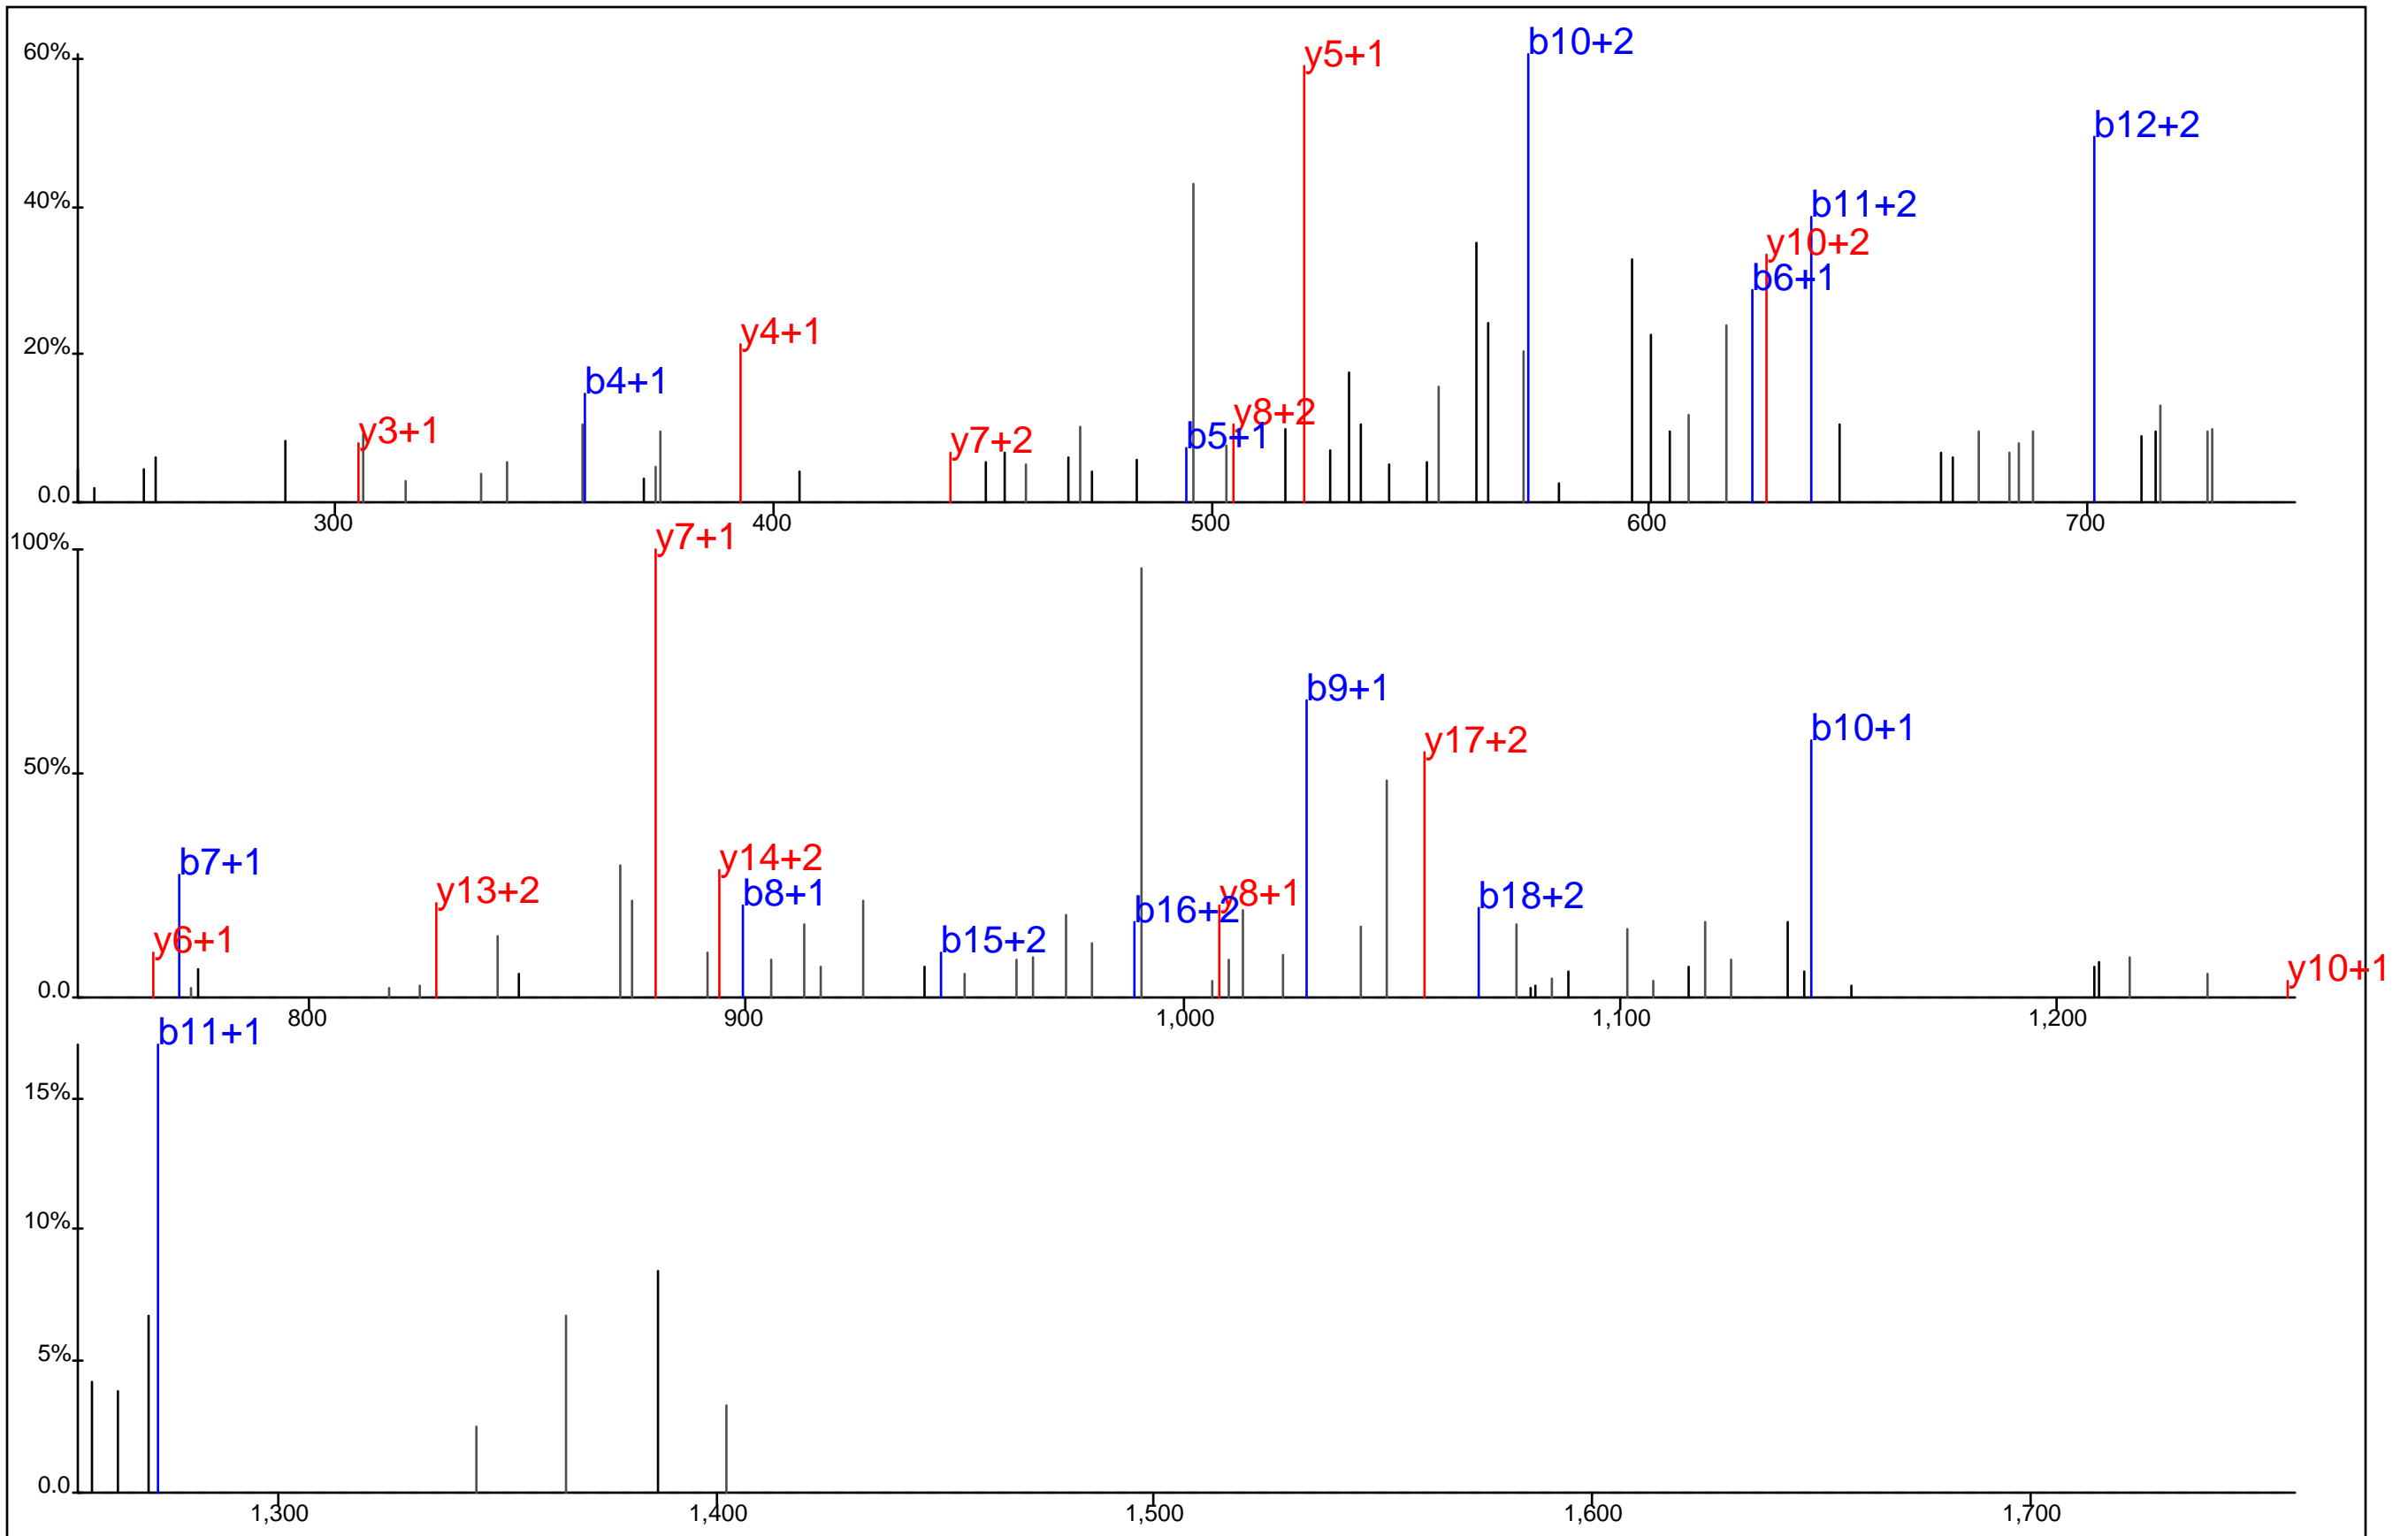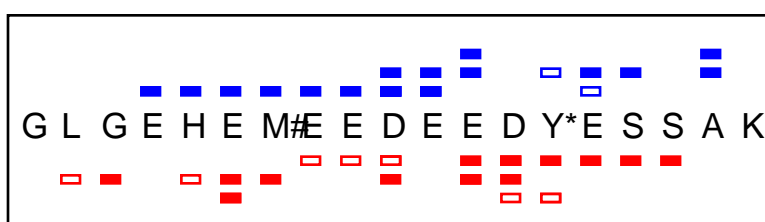

Protein Name: Leucyl cystinyl aminopeptidase  
 gi Accession: 0  
 Precursor Mass: 760.6119+3  
 Delta Mass: 1.823 ppm  
 XCorr: 40.36

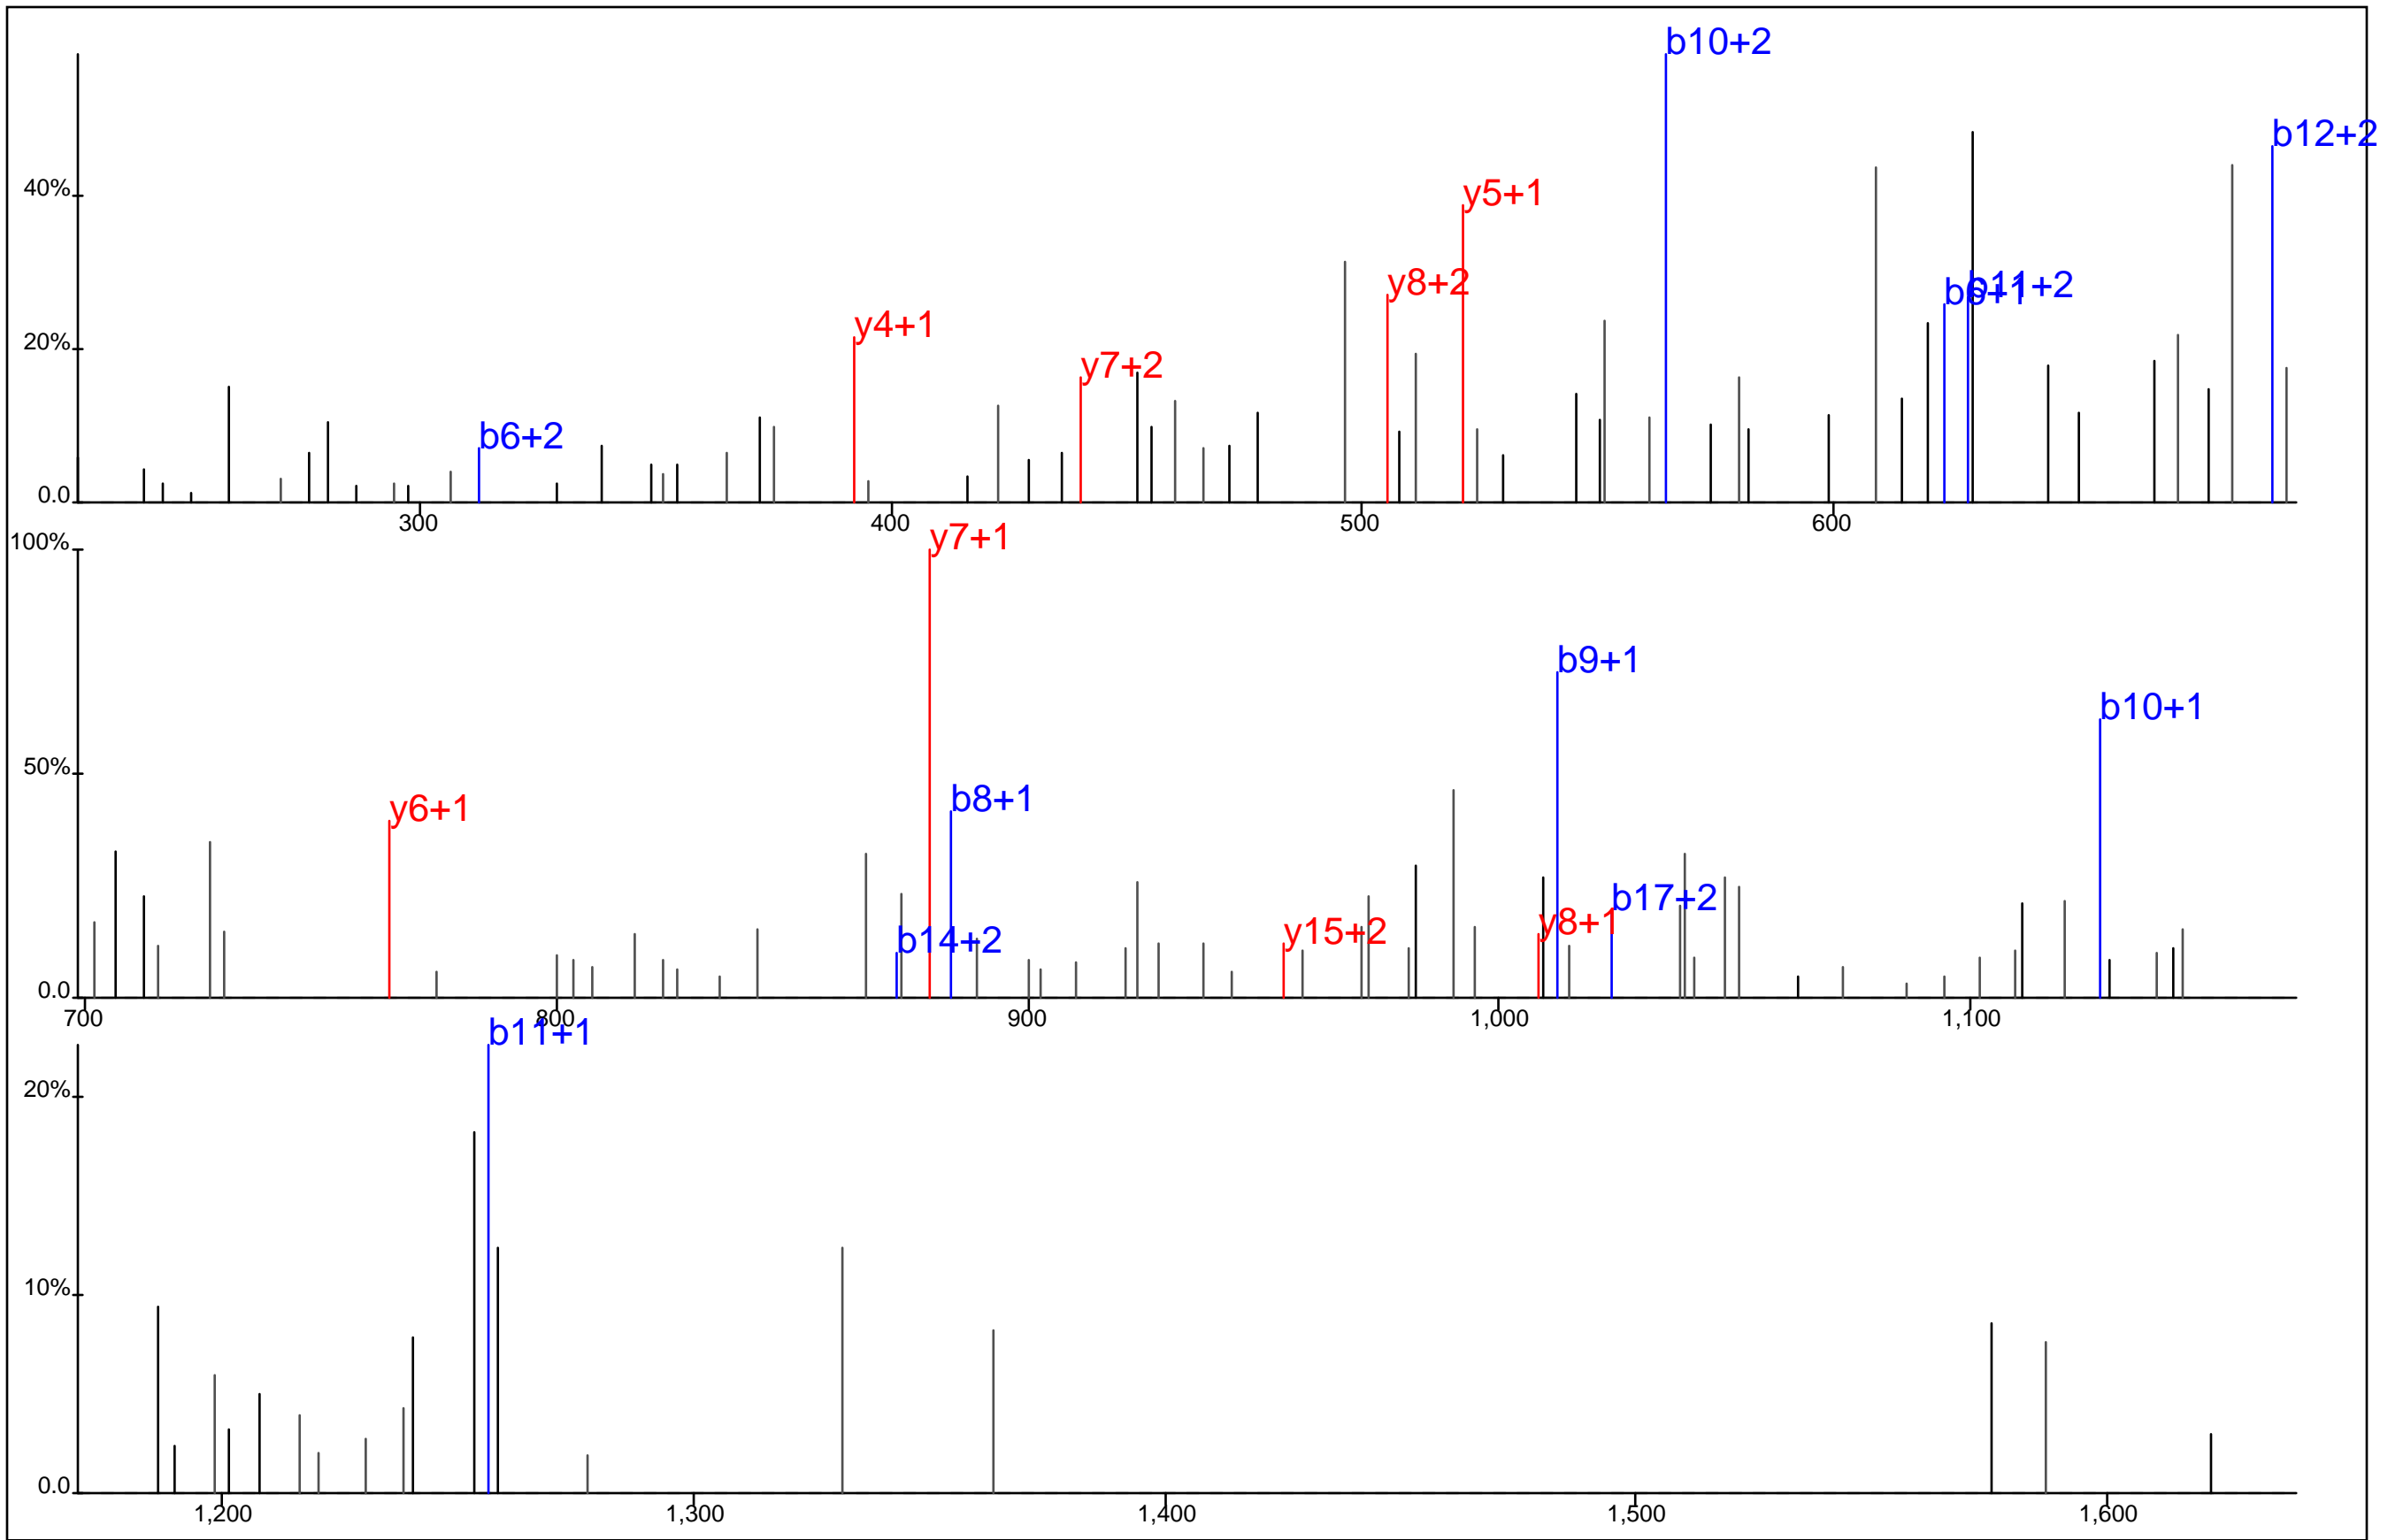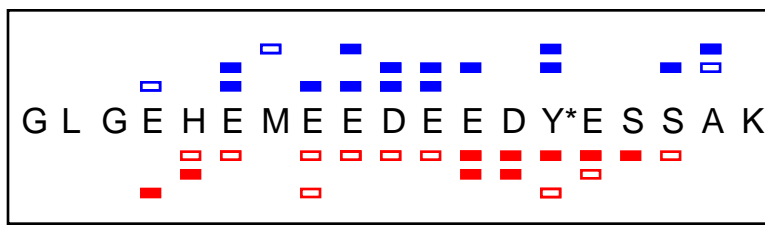

Protein Name: Leucyl cystinyl aminopeptidase  
 gi Accession: 0  
 Precursor Mass: 755.2791+3  
 Delta Mass: 0.267 ppm  
 XCorr: 20.59



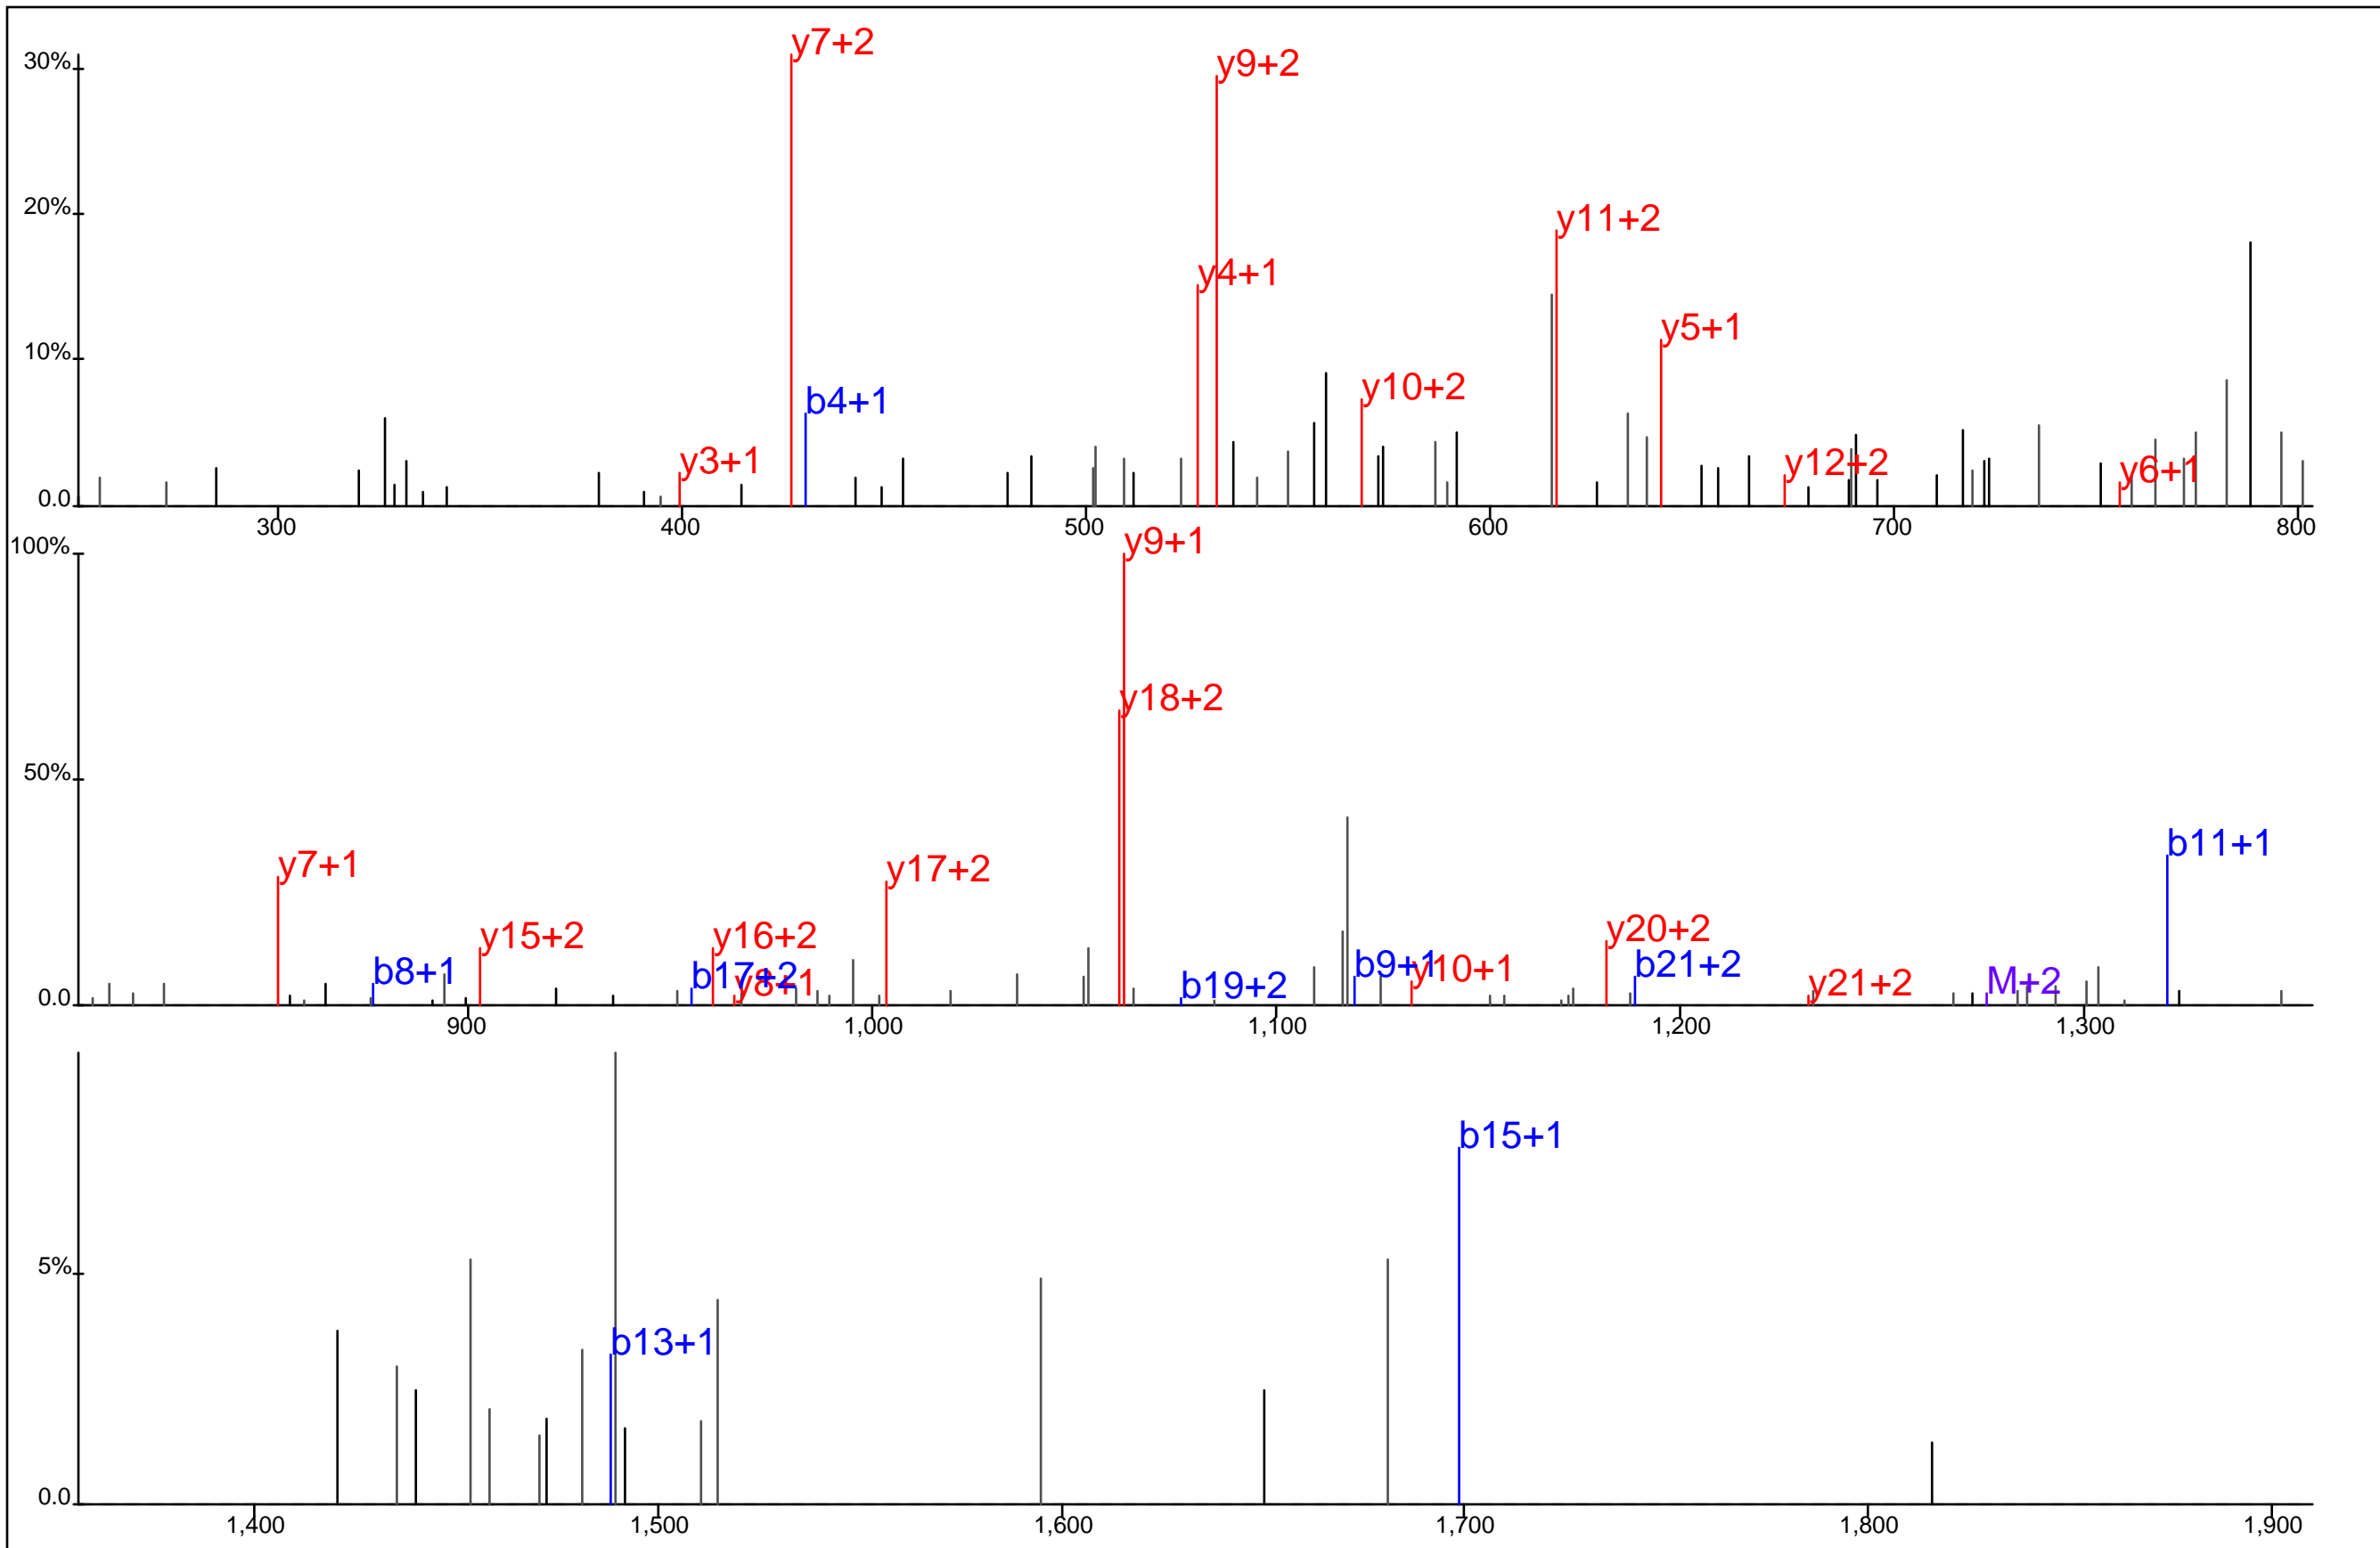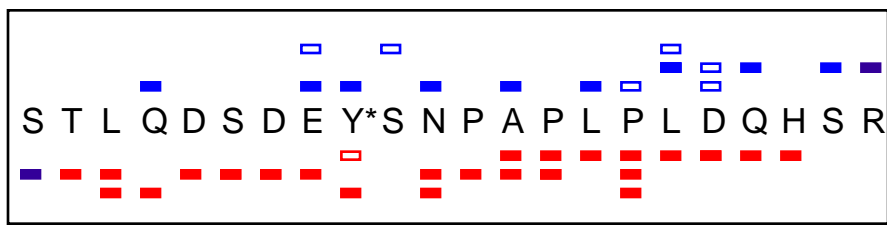

Protein Name: Leupaxin  
 gi Accession: 0  
 Precursor Mass: 850.7094+3  
 Delta Mass: 0.349 ppm  
 XCorr: 42.13

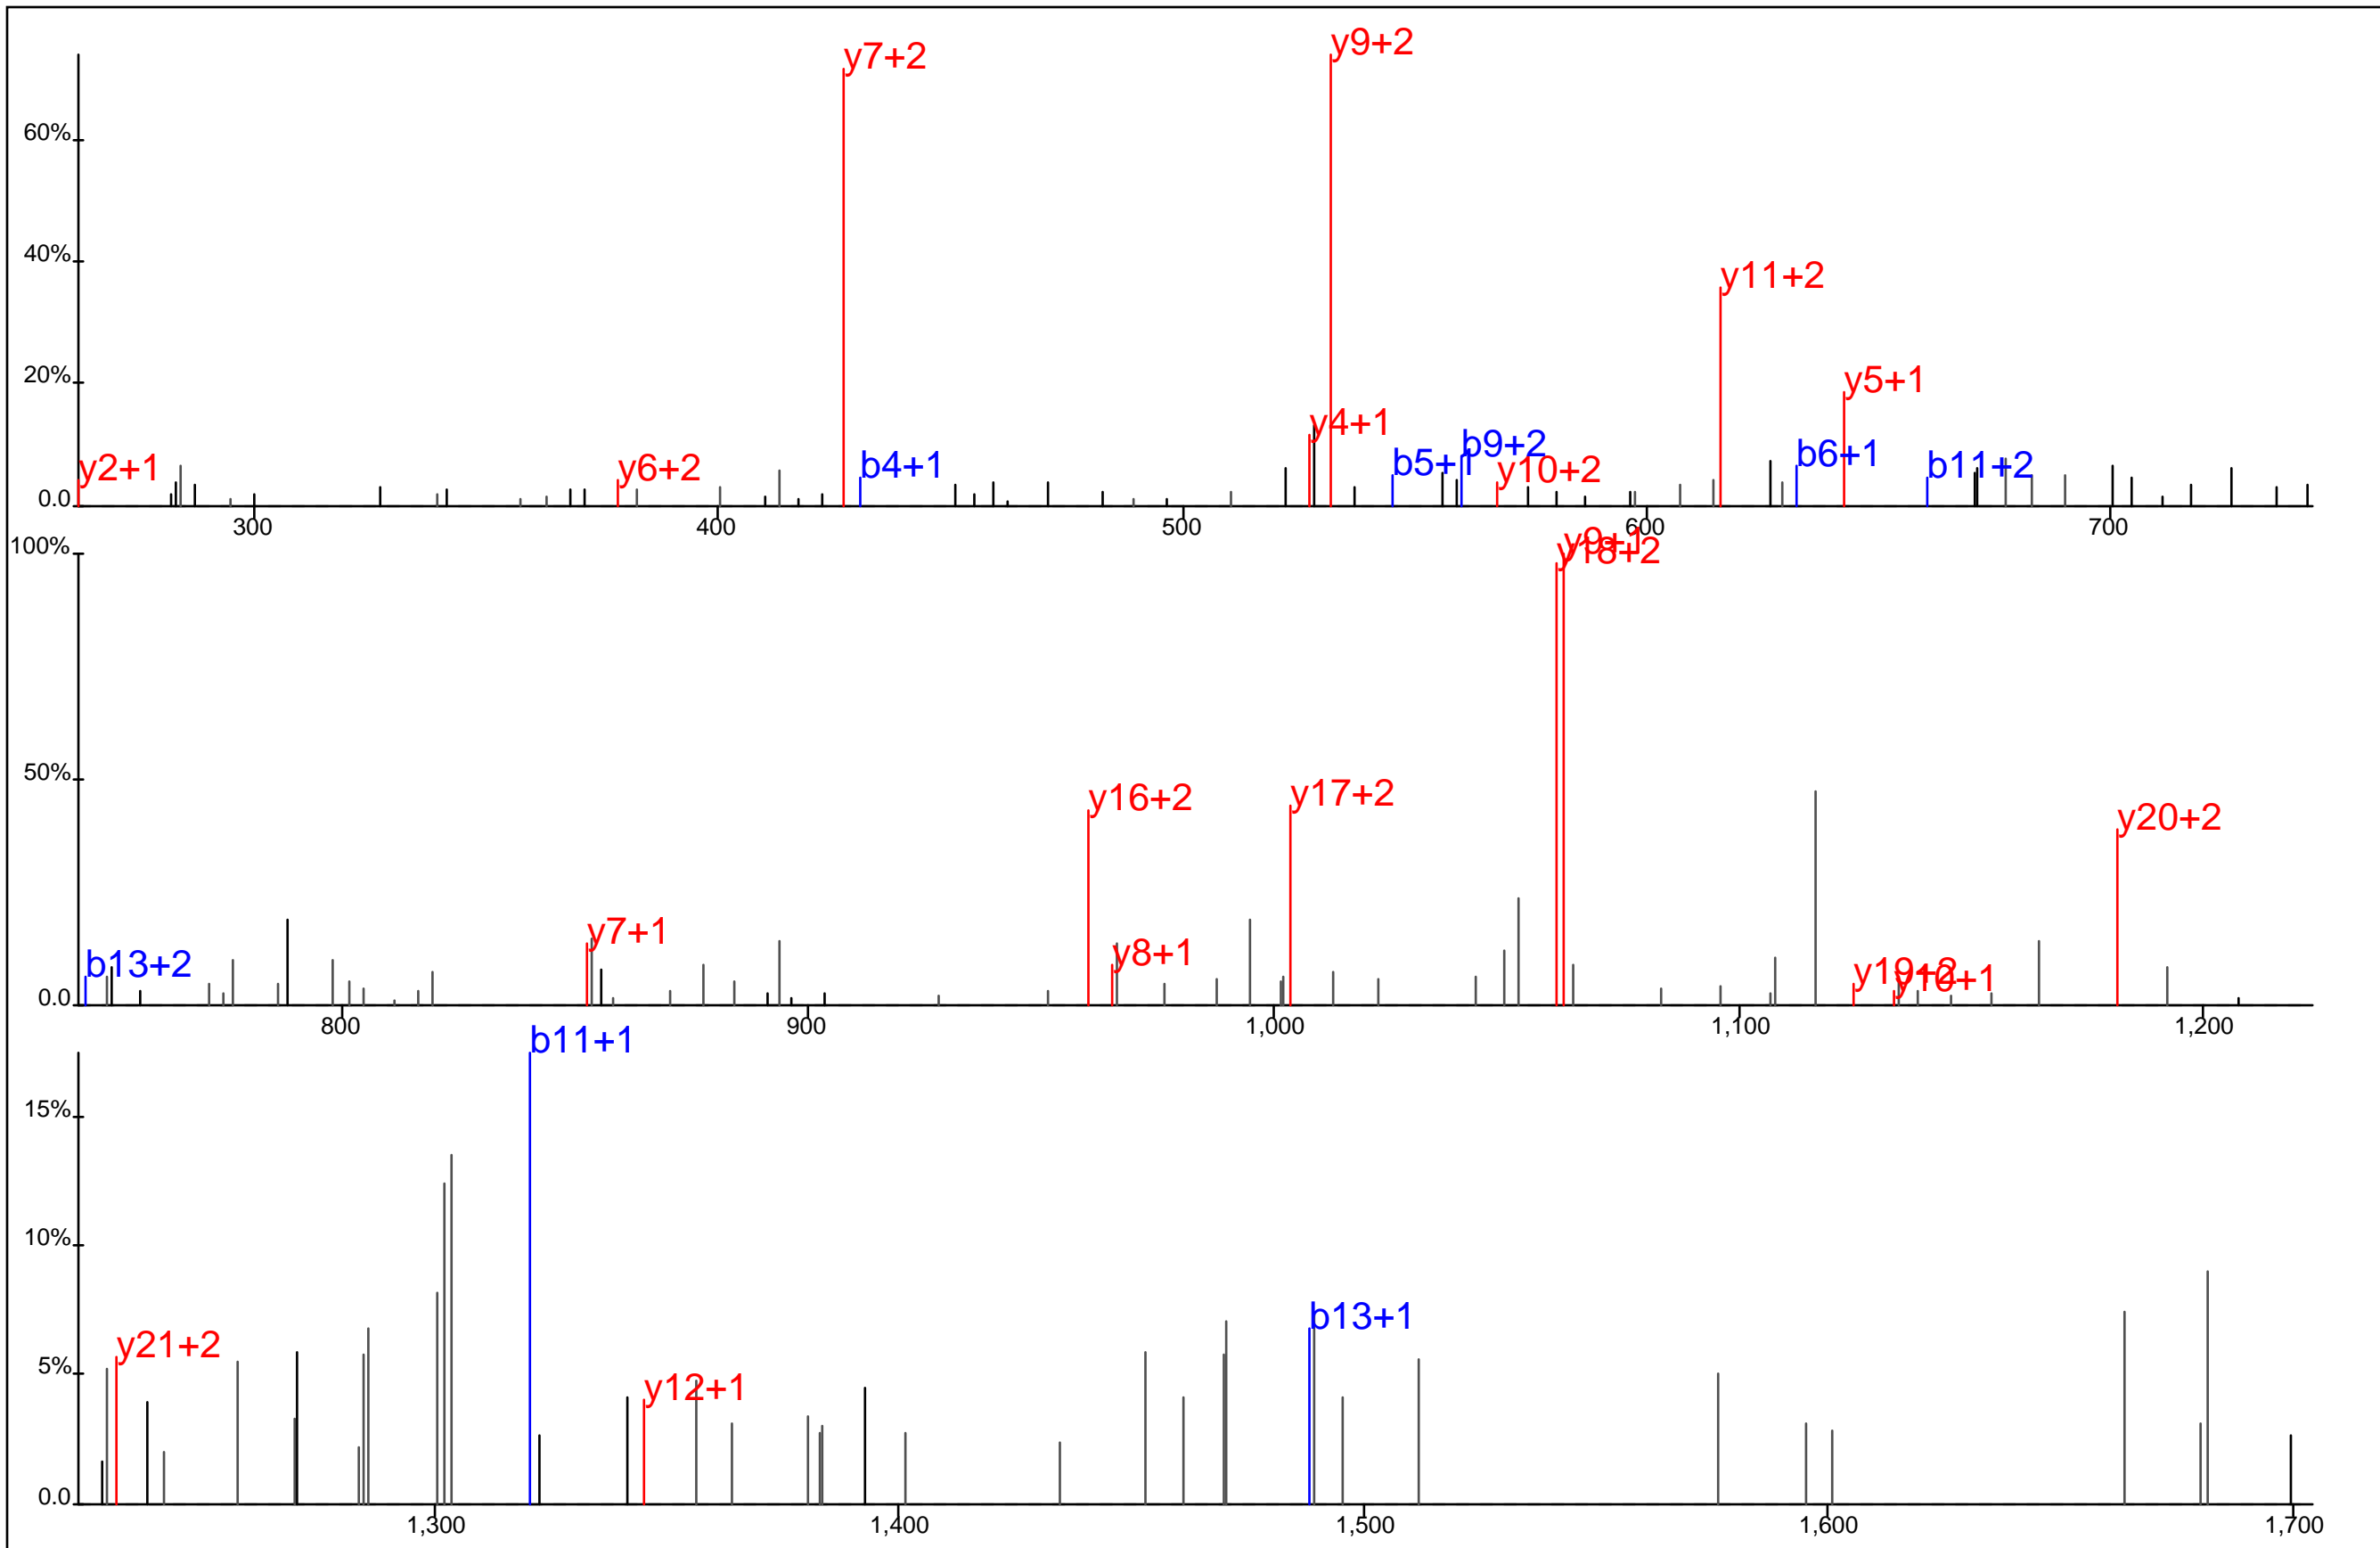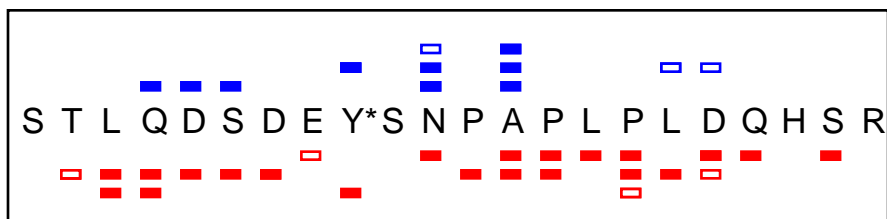

Protein Name: Leupaxin  
 gi Accession: 0  
 Precursor Mass: 850.7098+3  
 Delta Mass: 0.153 ppm  
 XCorr: 48.7

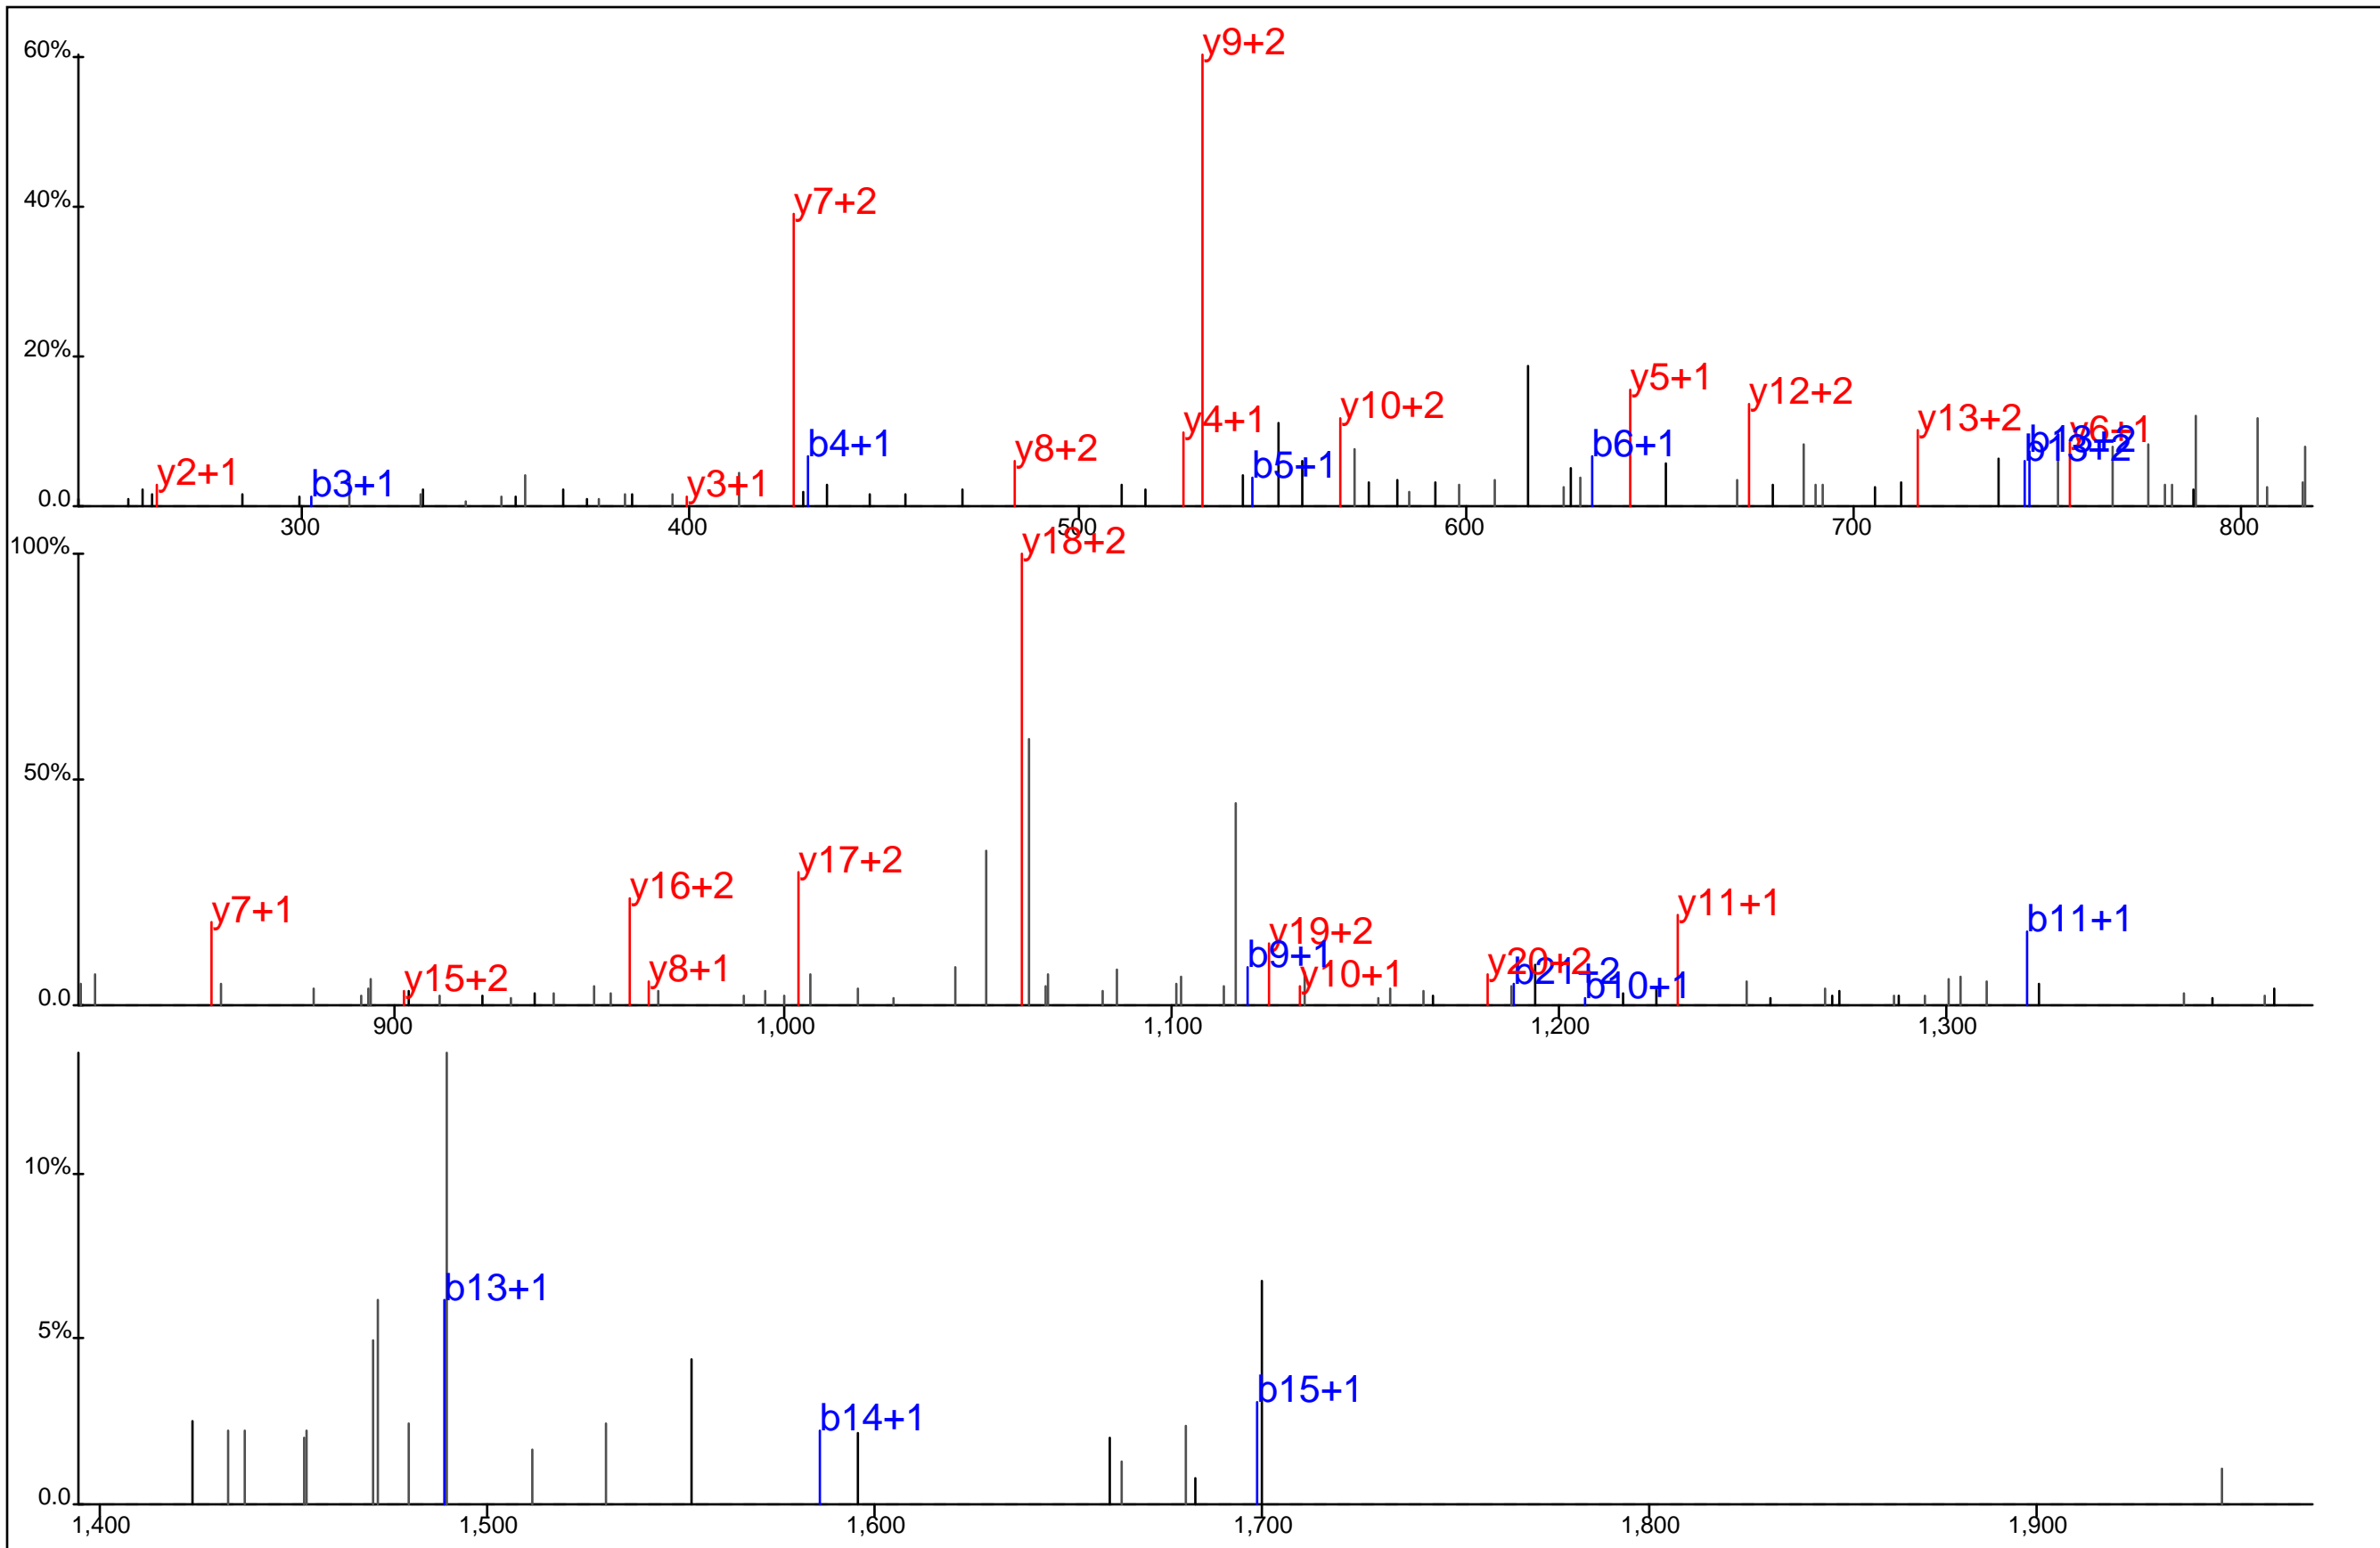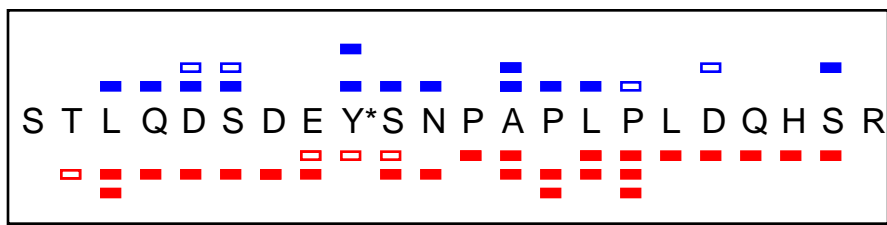

Protein Name: Leupaxin  
 gi Accession: 0  
 Precursor Mass: 850.7108+3  
 Delta Mass: 1.373 ppm  
 XCorr: 55.88

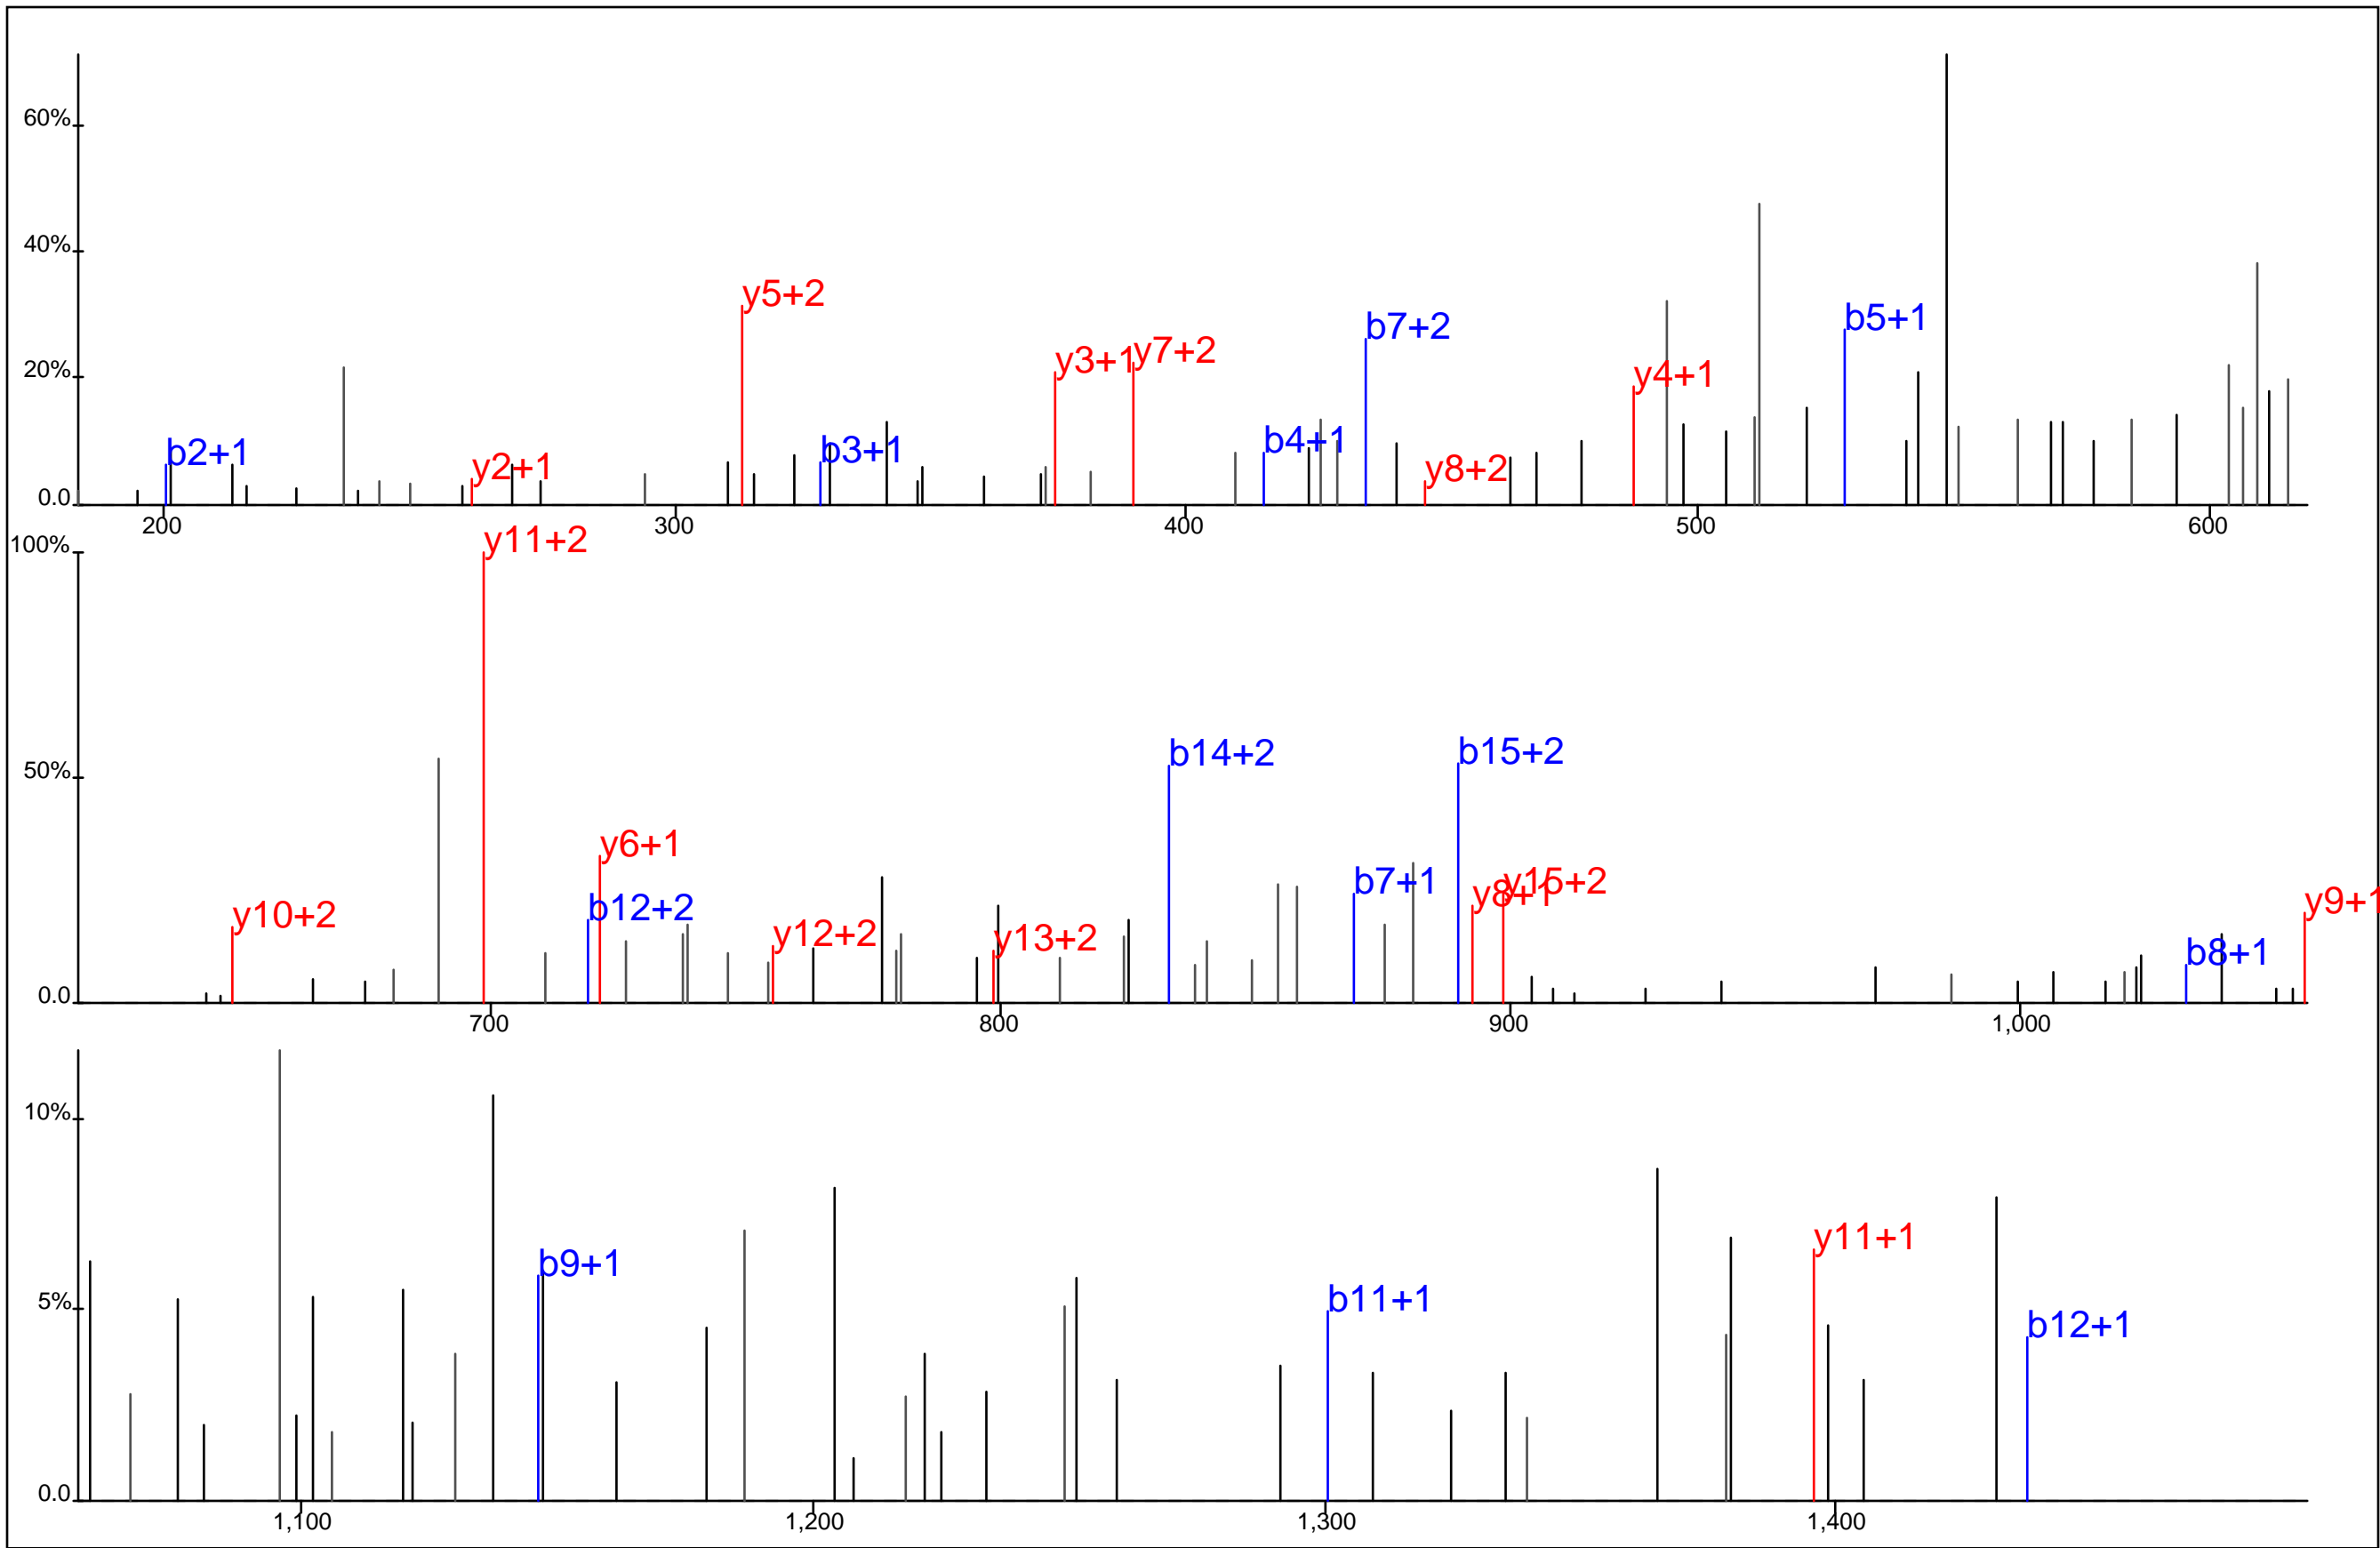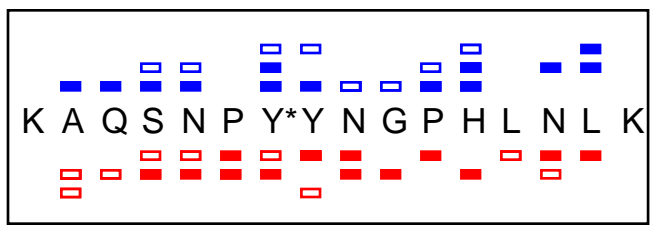

Protein Name: LIM domain only 7  
 gi Accession: 0  
 Precursor Mass: 641.9744+3  
 Delta Mass: 1.403 ppm  
 XCorr: 31.0

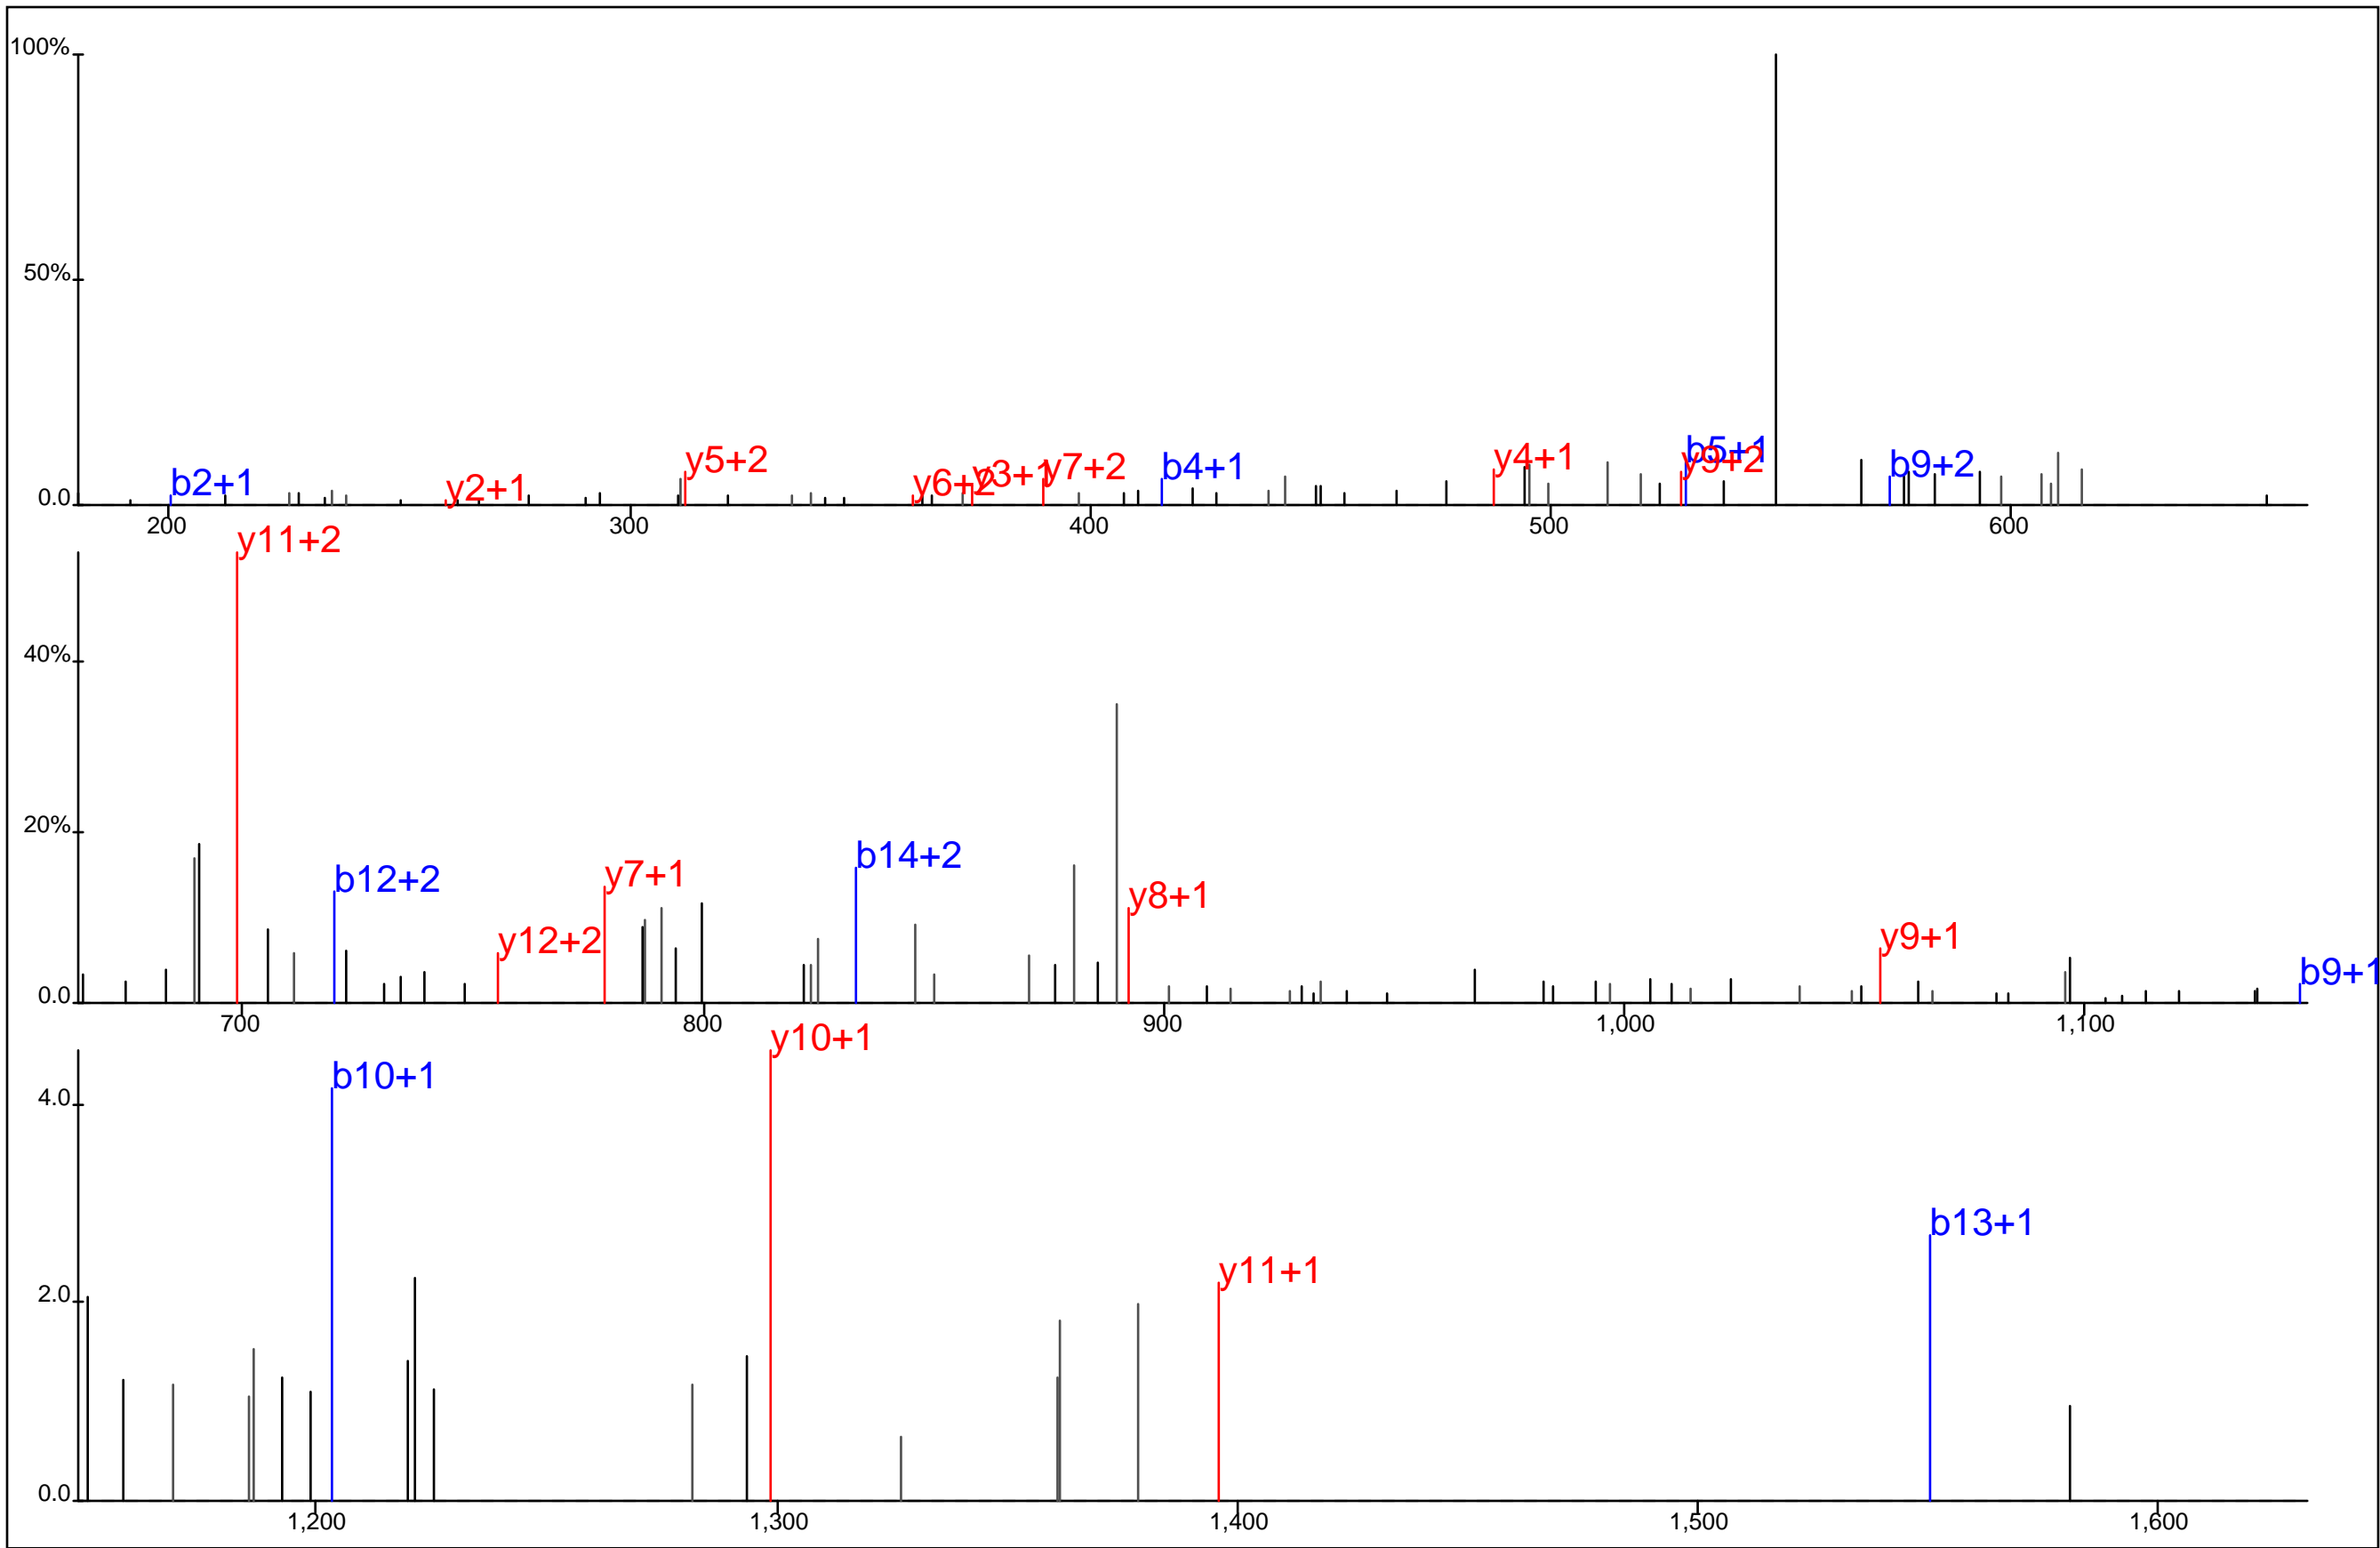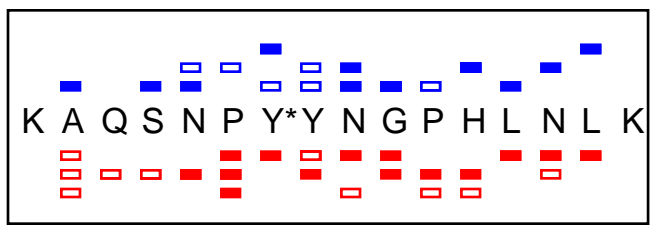

Protein Name: LIM domain only 7  
 gi Accession: 0  
 Precursor Mass: 641.9743+3  
 Delta Mass: 1.498 ppm  
 XCorr: 24.28

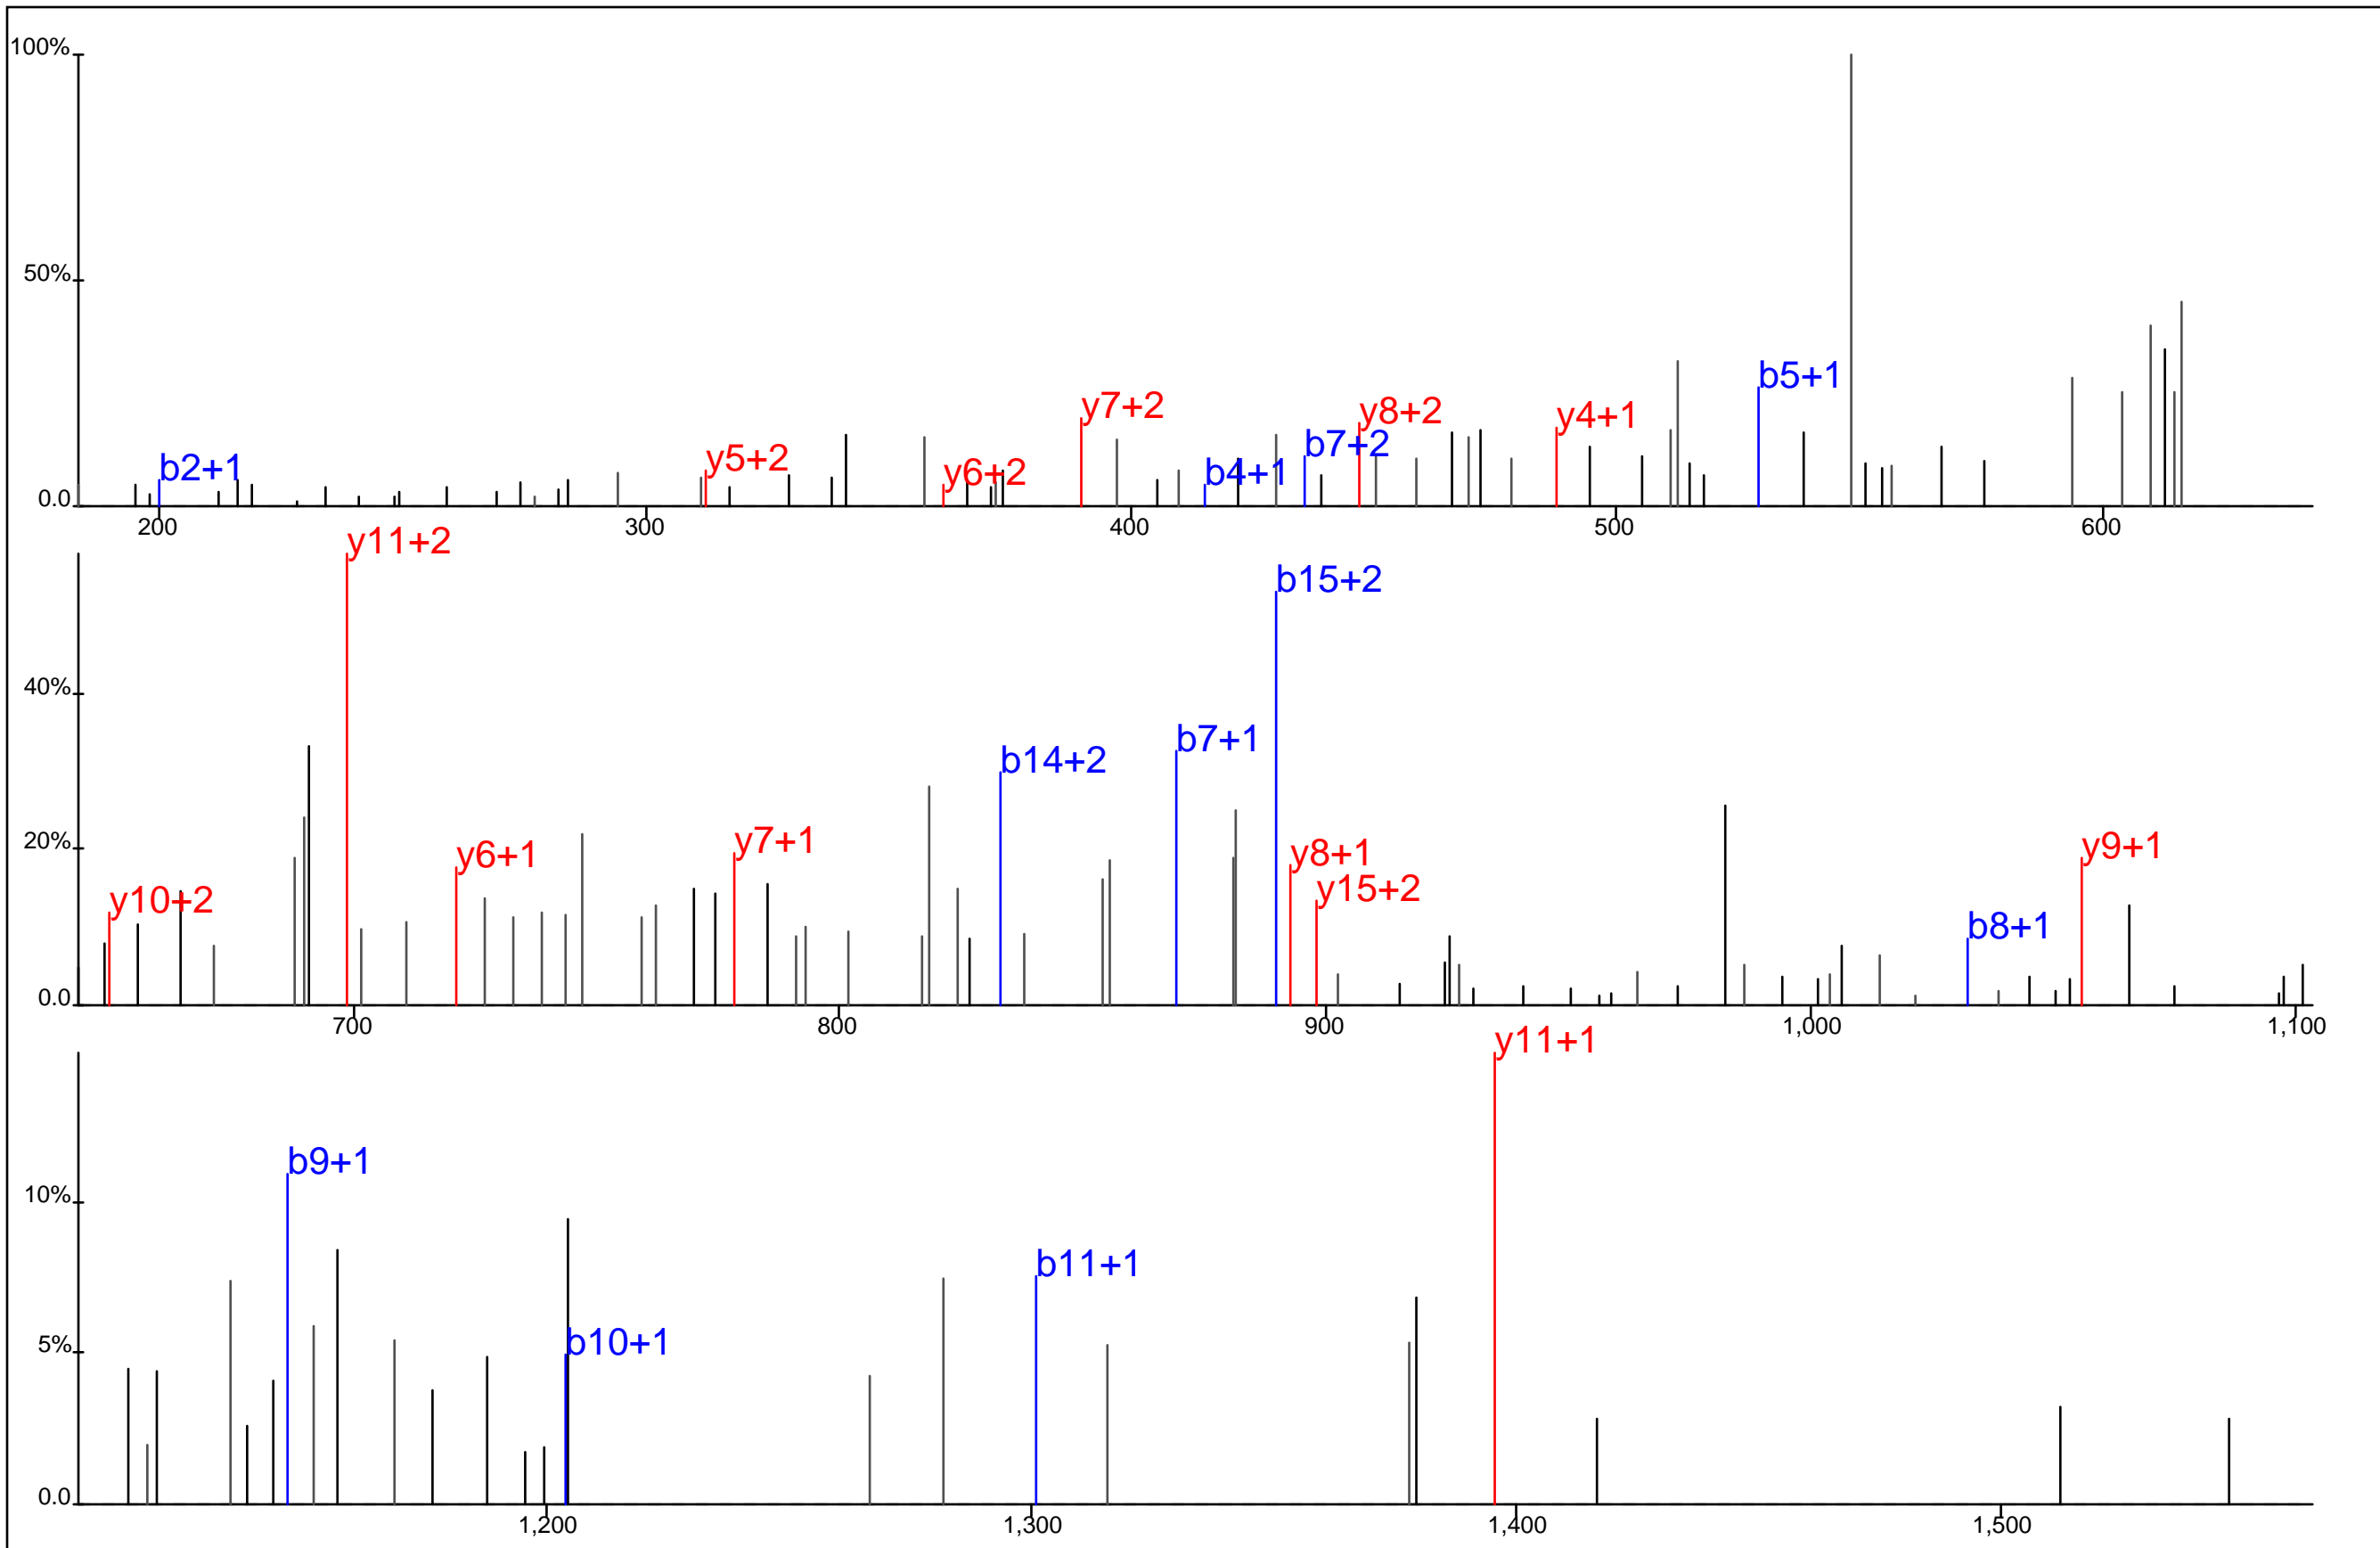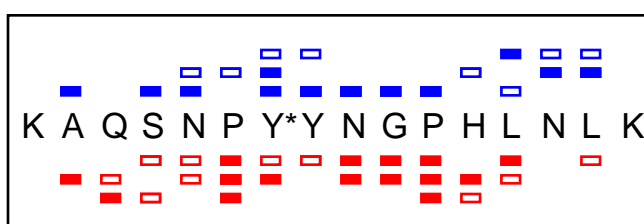

Protein Name: LIM domain only 7  
 gi Accession: 0  
 Precursor Mass: 641.9742+3  
 Delta Mass: 1.593 ppm  
 XCorr: 24.78

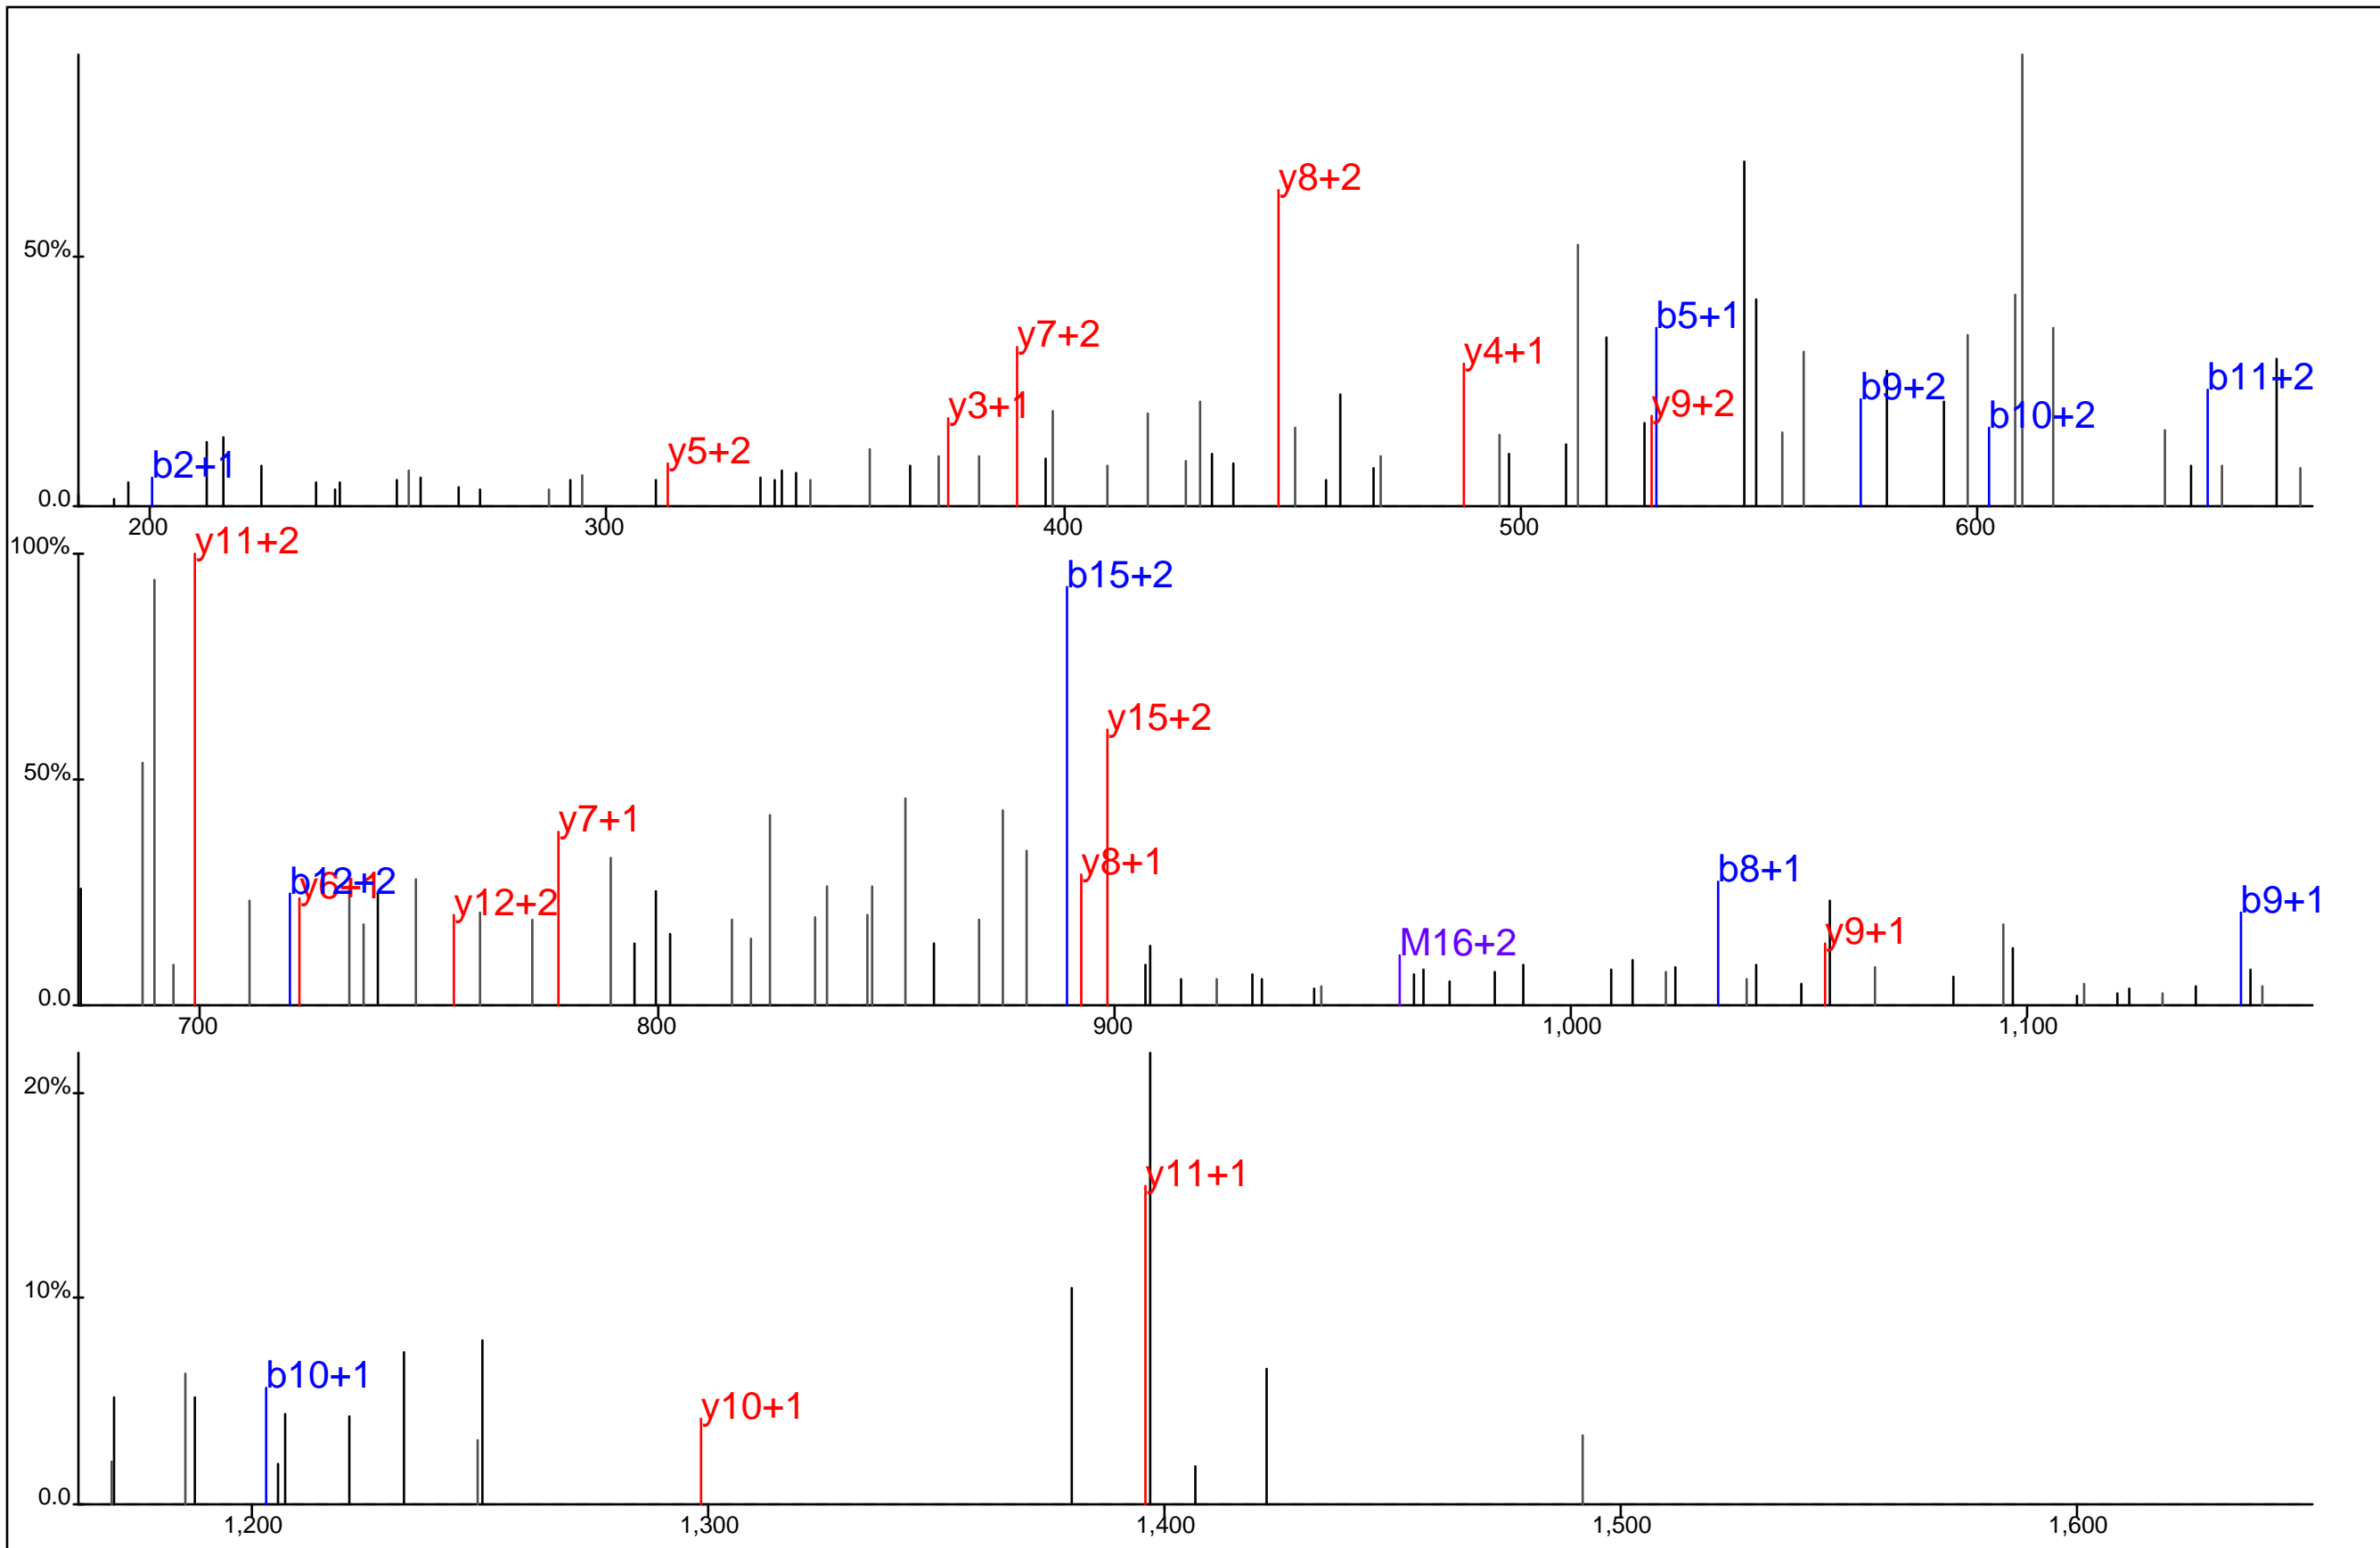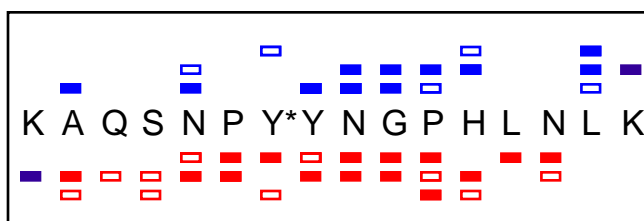

Protein Name: LIM domain only 7  
 gi Accession: 0  
 Precursor Mass: 641.9755+3  
 Delta Mass: 0.406 ppm  
 XCorr: 24.97

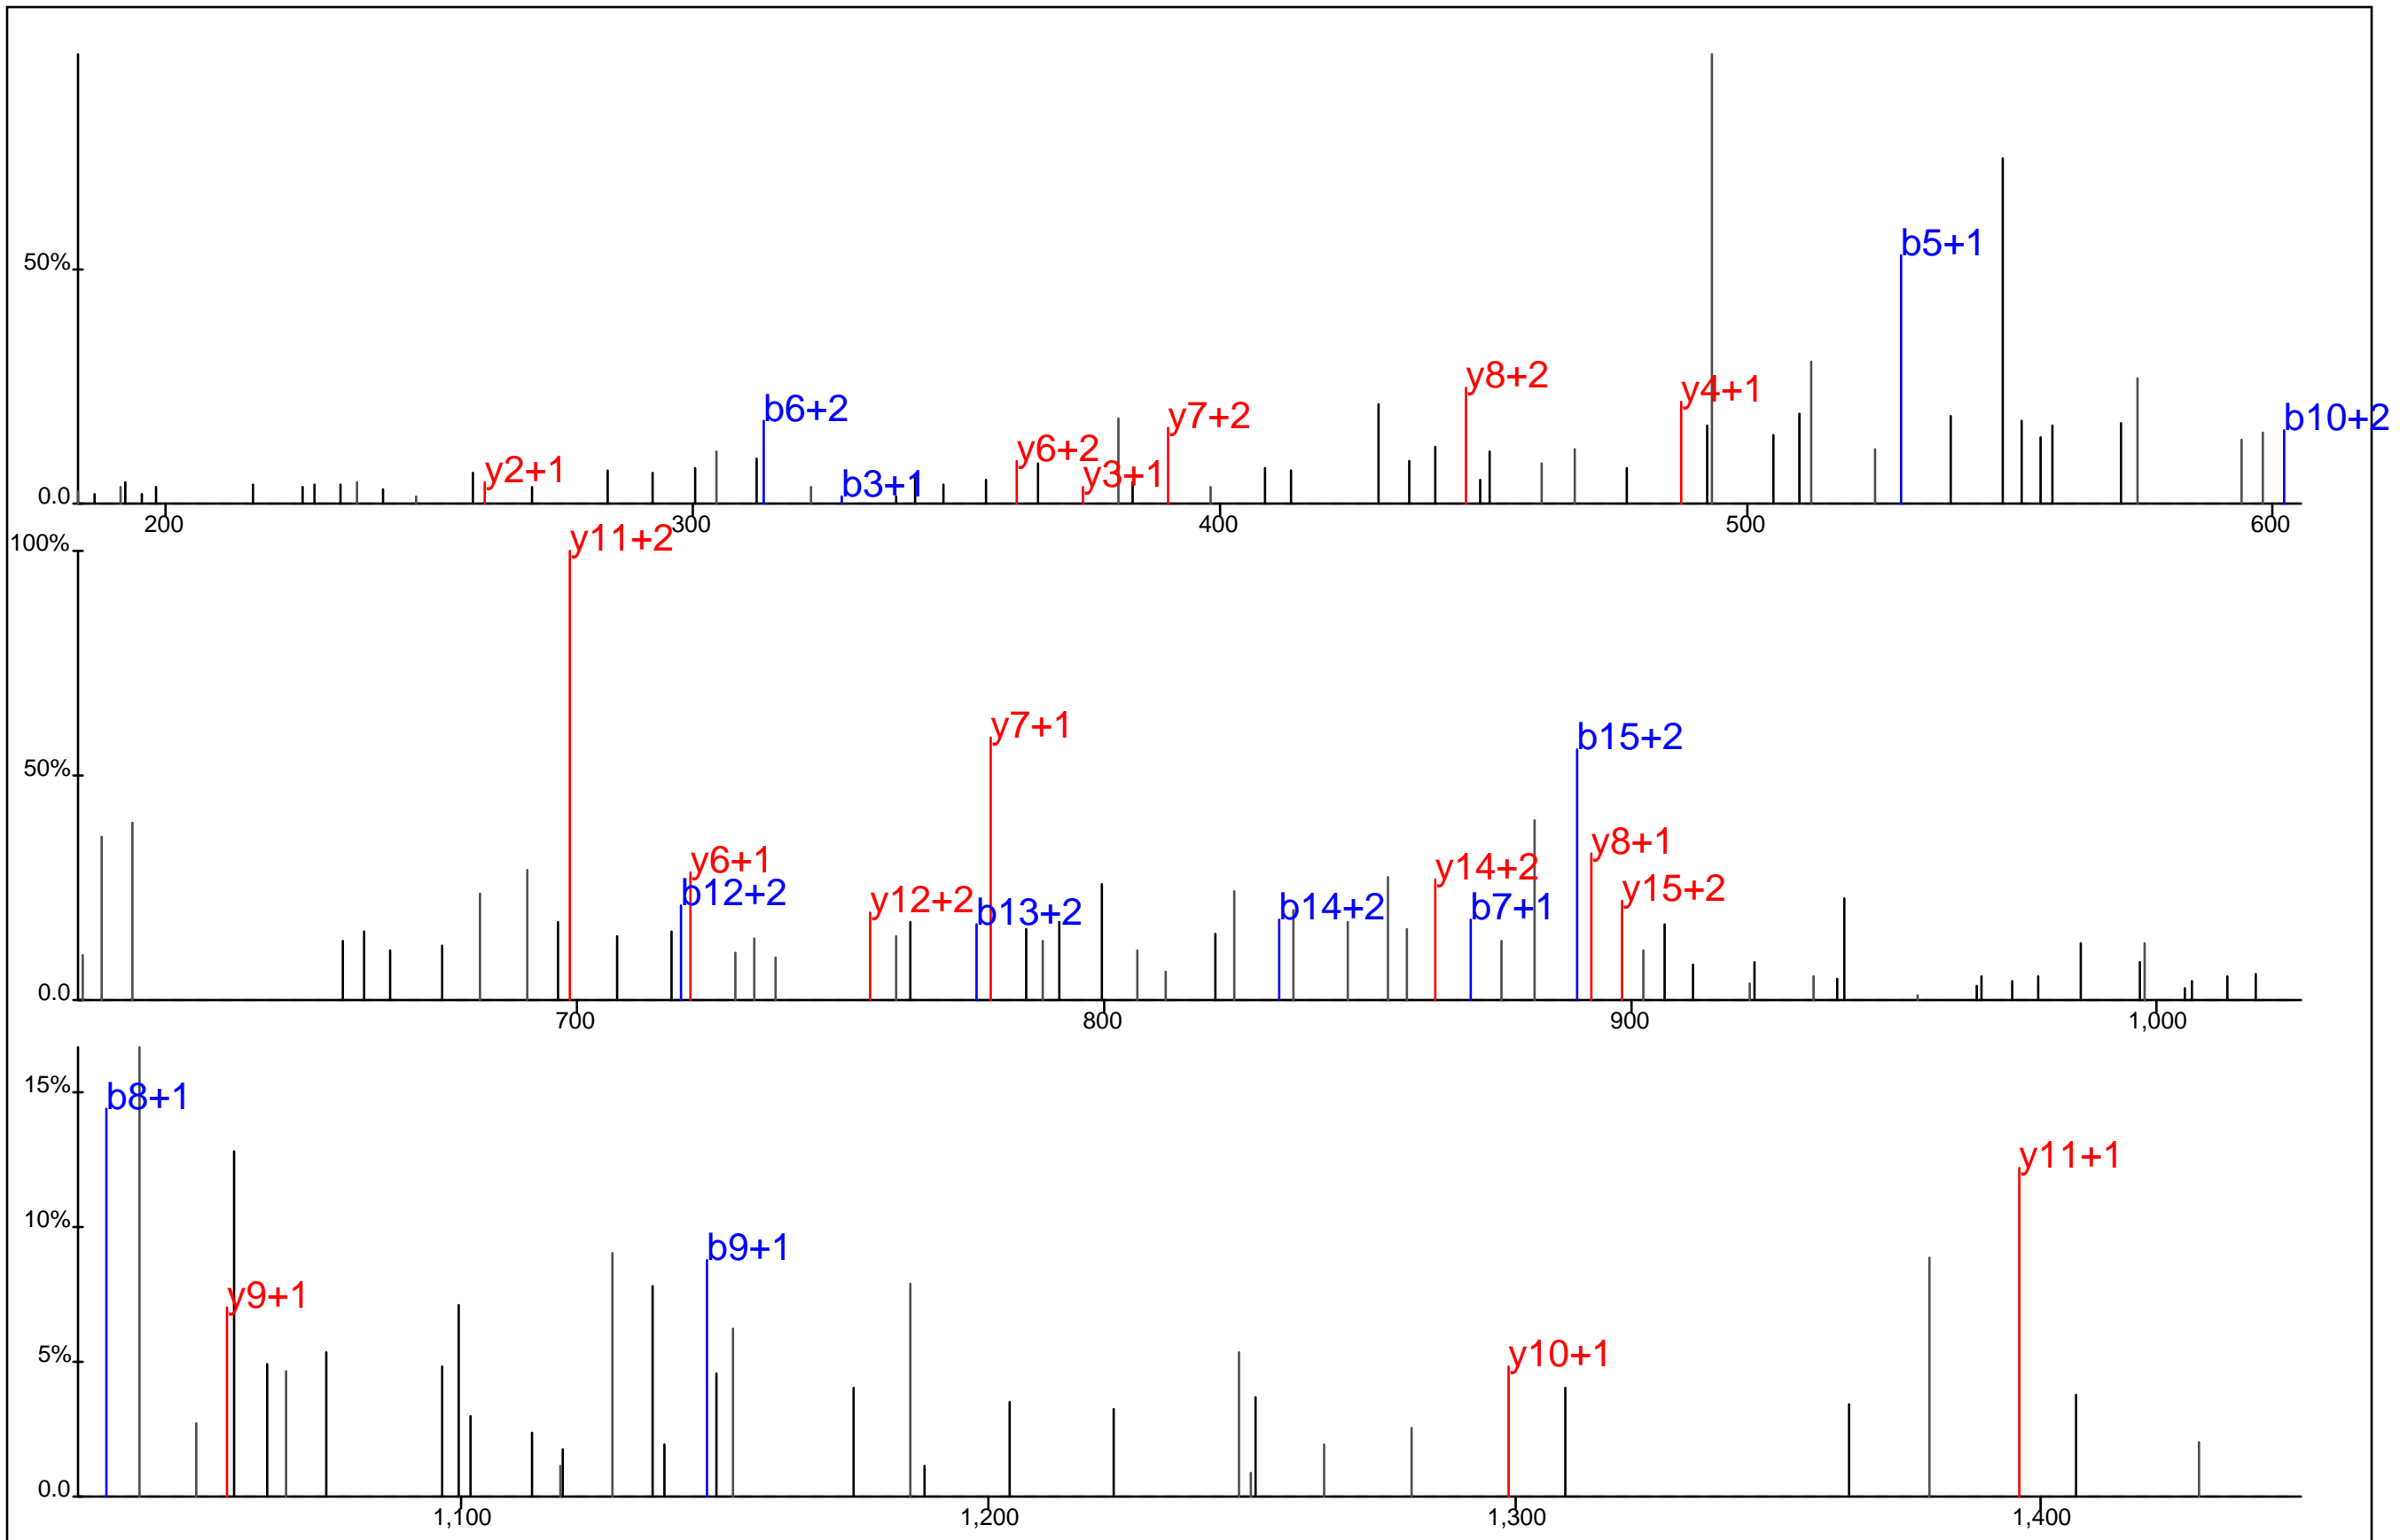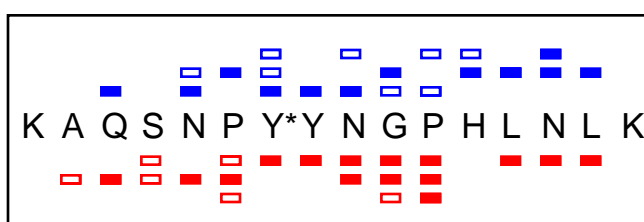

Protein Name: LIM domain only 7  
 gi Accession: 0  
 Precursor Mass: 641.9744+3  
 Delta Mass: 1.403 ppm  
 XCorr: 28.52



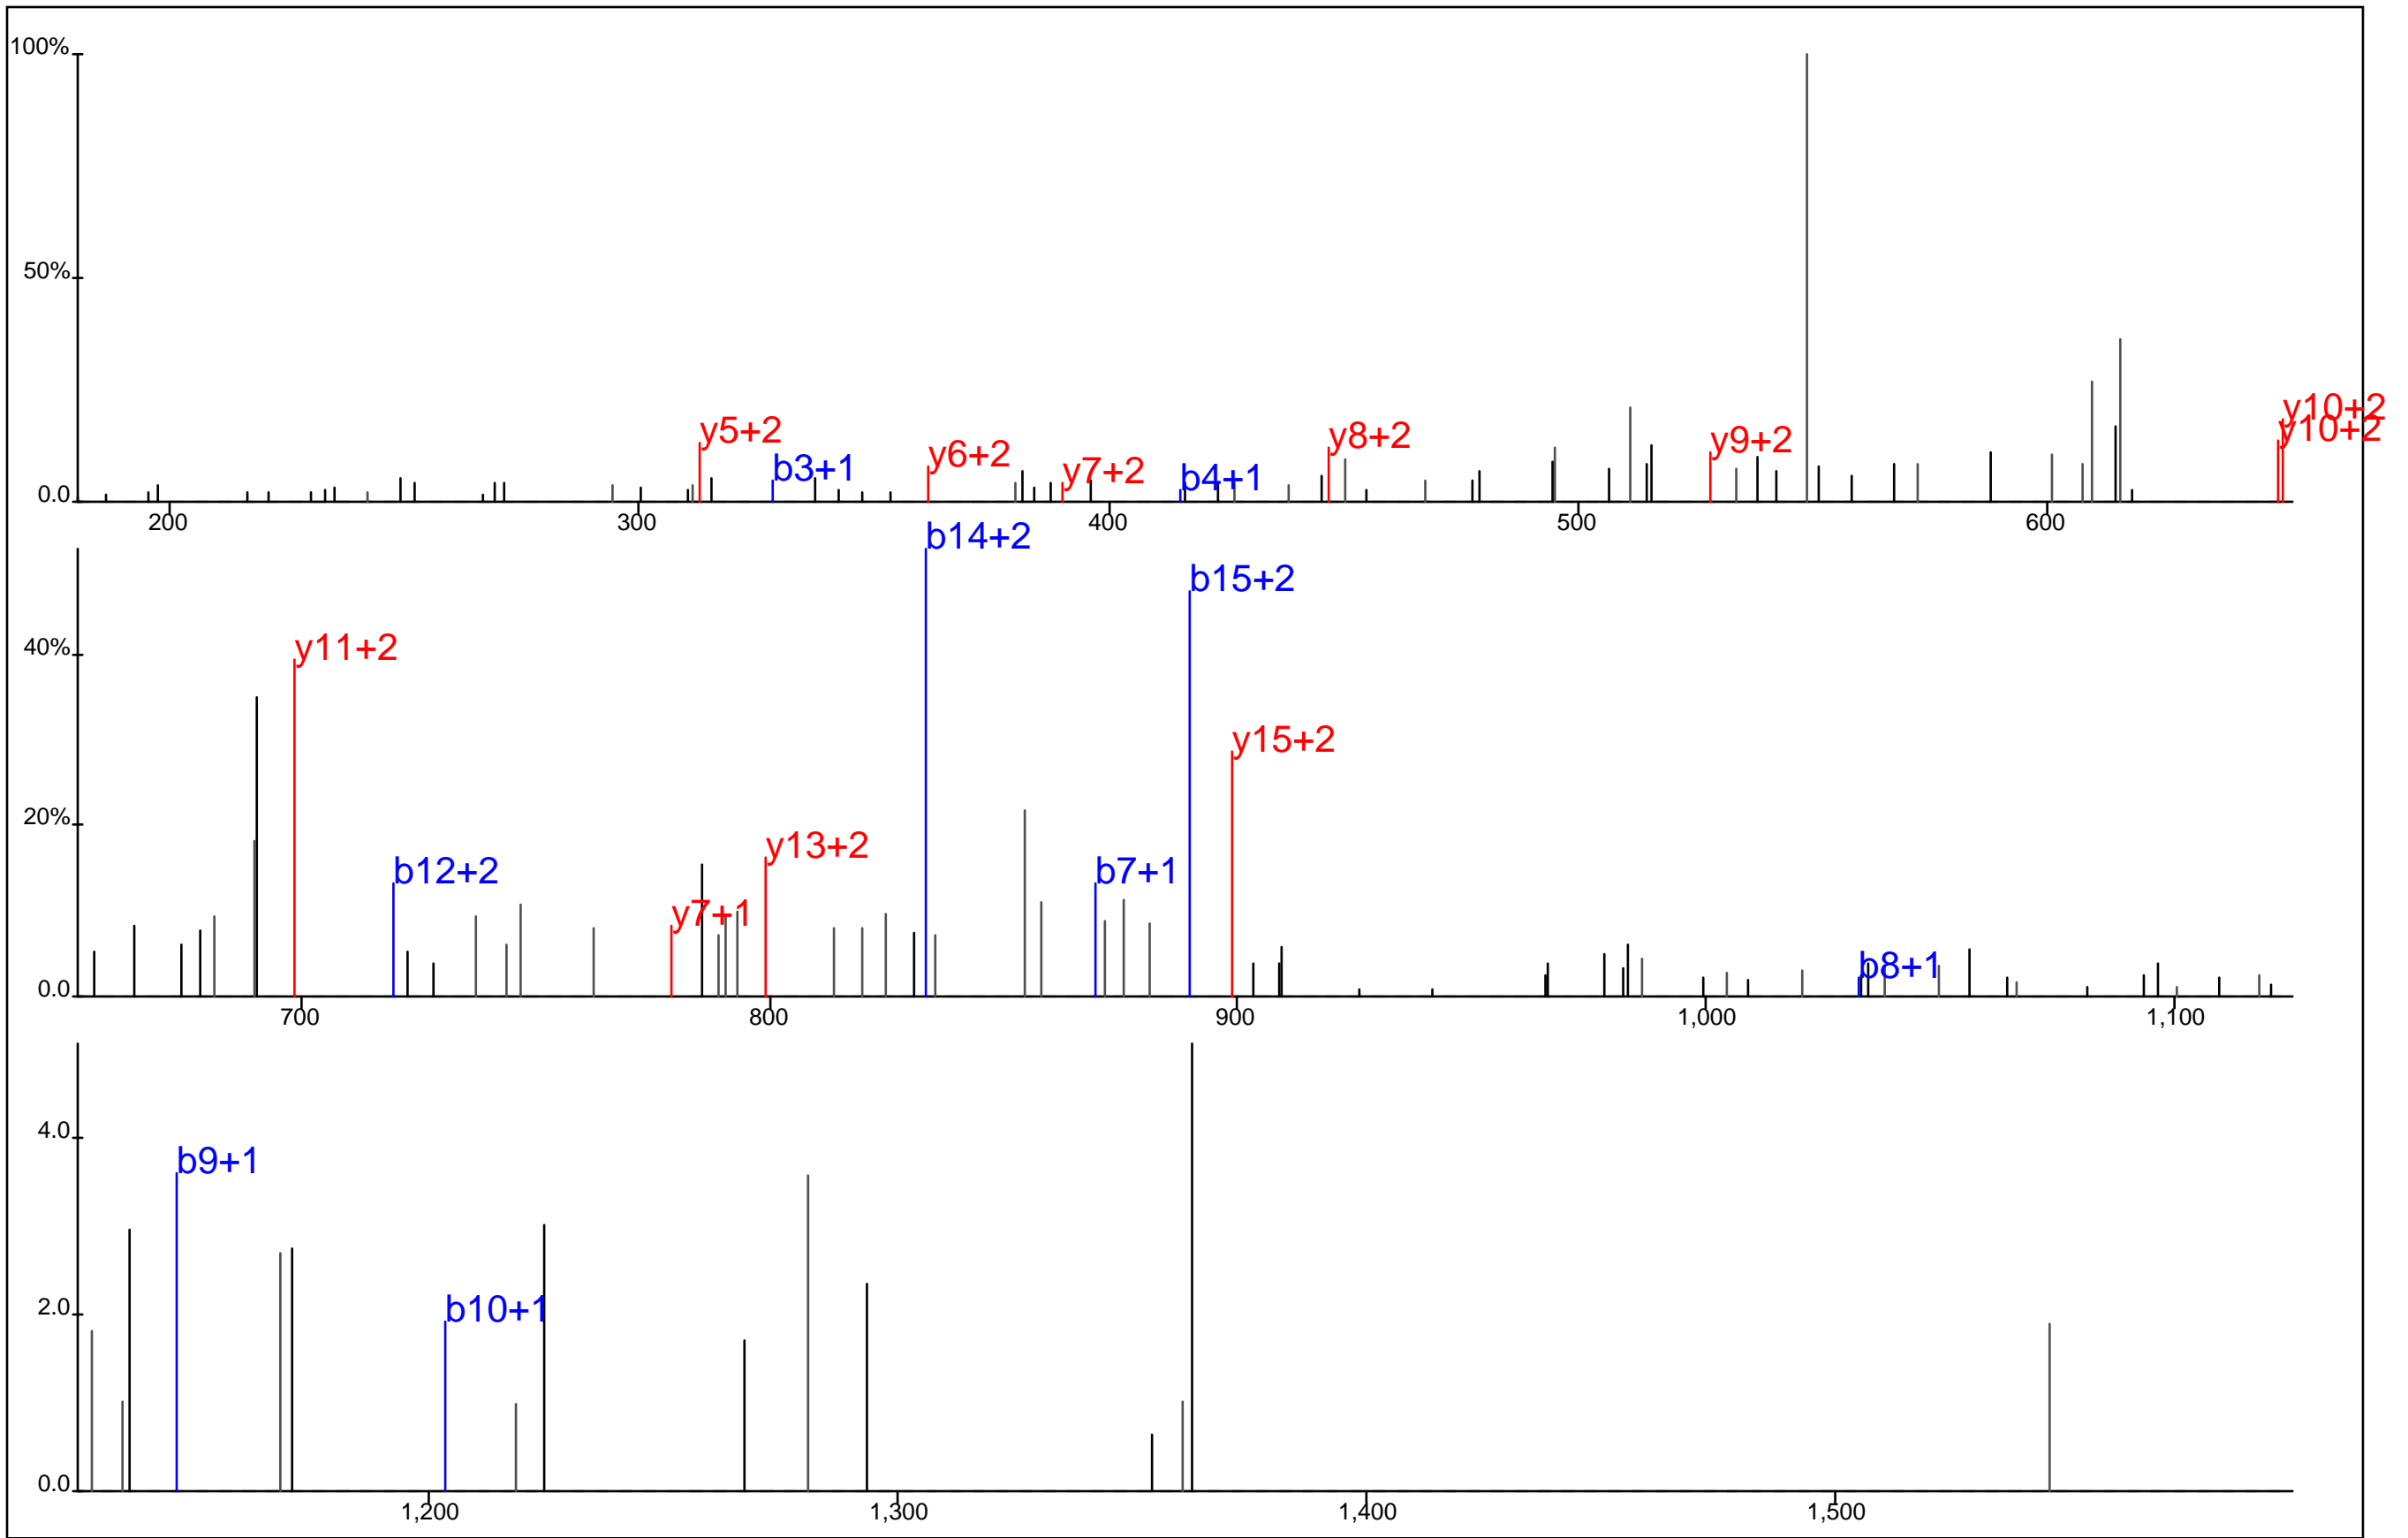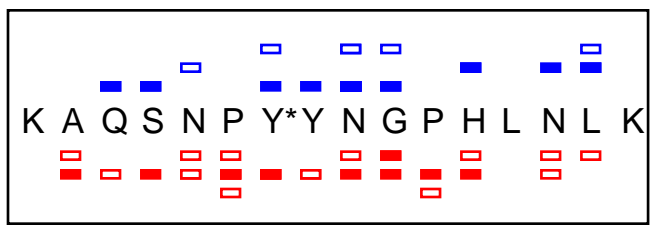

Protein Name: LIM domain only 7  
 gi Accession: 0  
 Precursor Mass: 641.9734+3  
 Delta Mass: 2.925 ppm  
 XCorr: 21.69

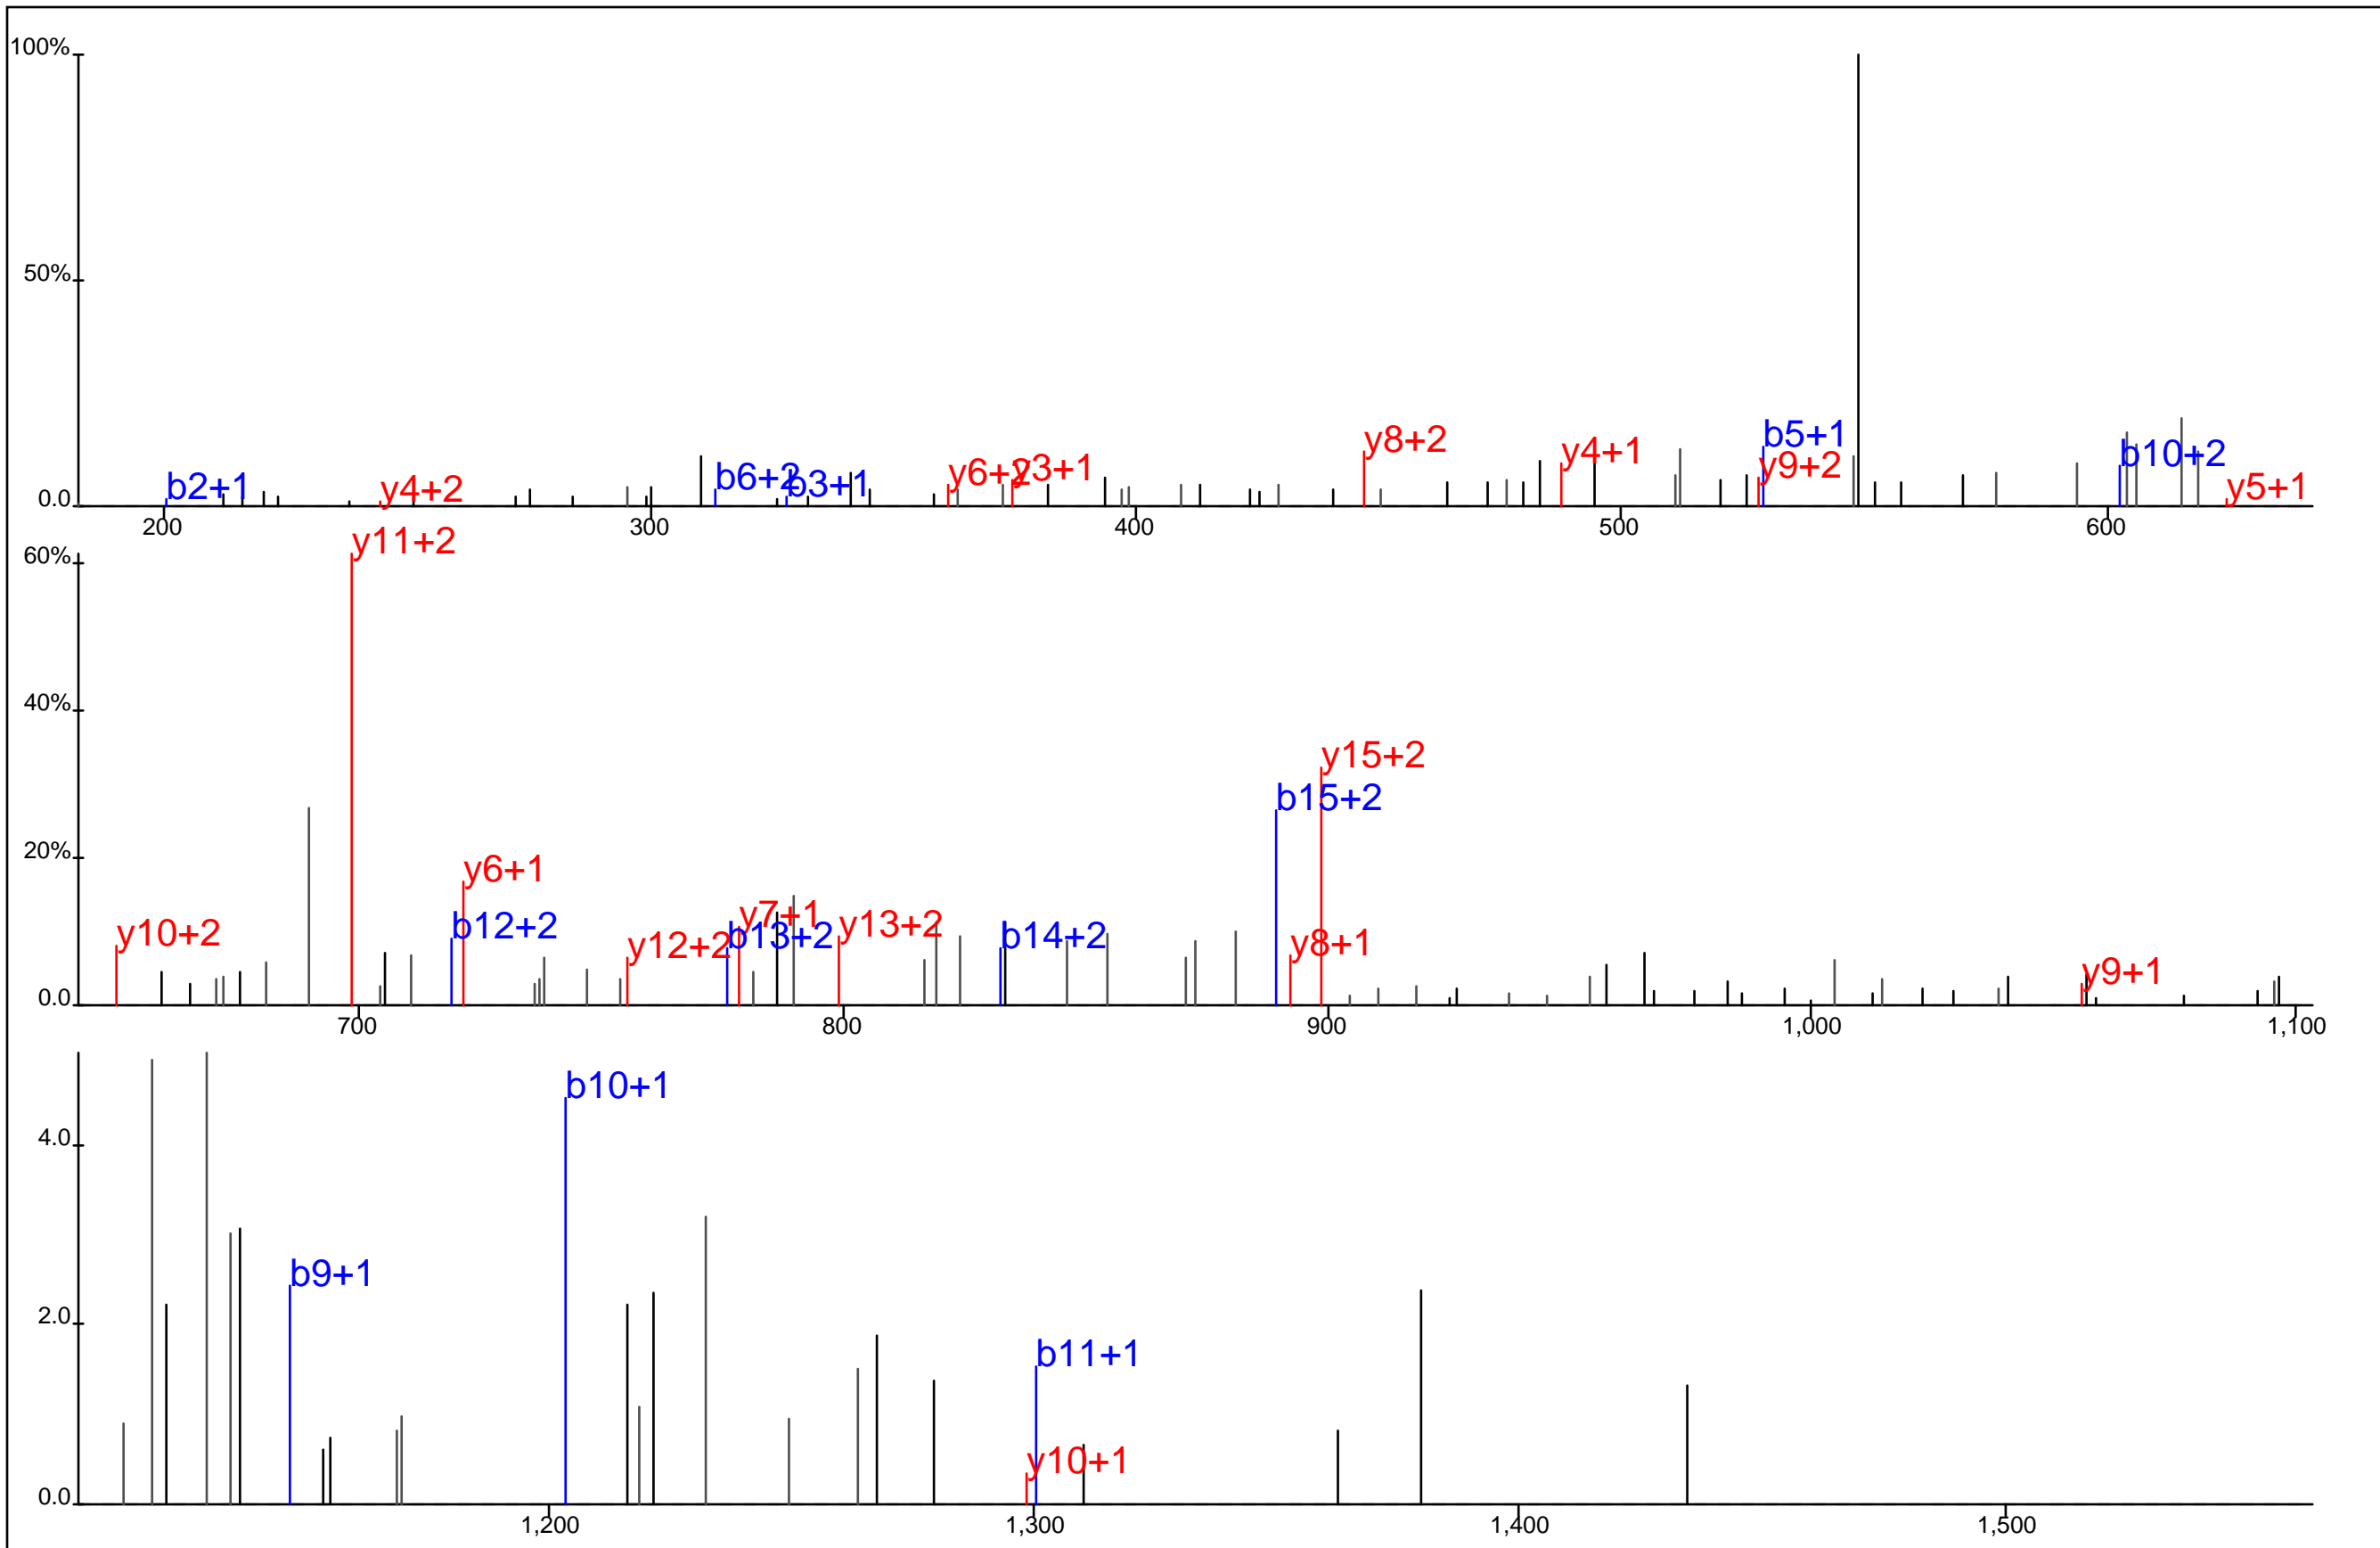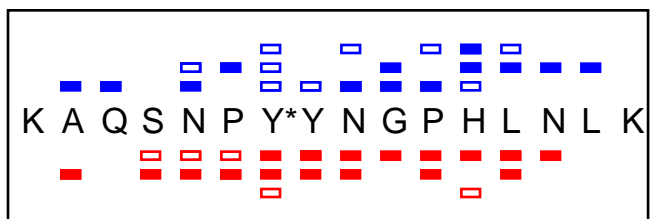

Protein Name: LIM domain only 7  
 gi Accession: 0  
 Precursor Mass: 641.9776+3  
 Delta Mass: 3.642 ppm  
 XCorr: 21.84







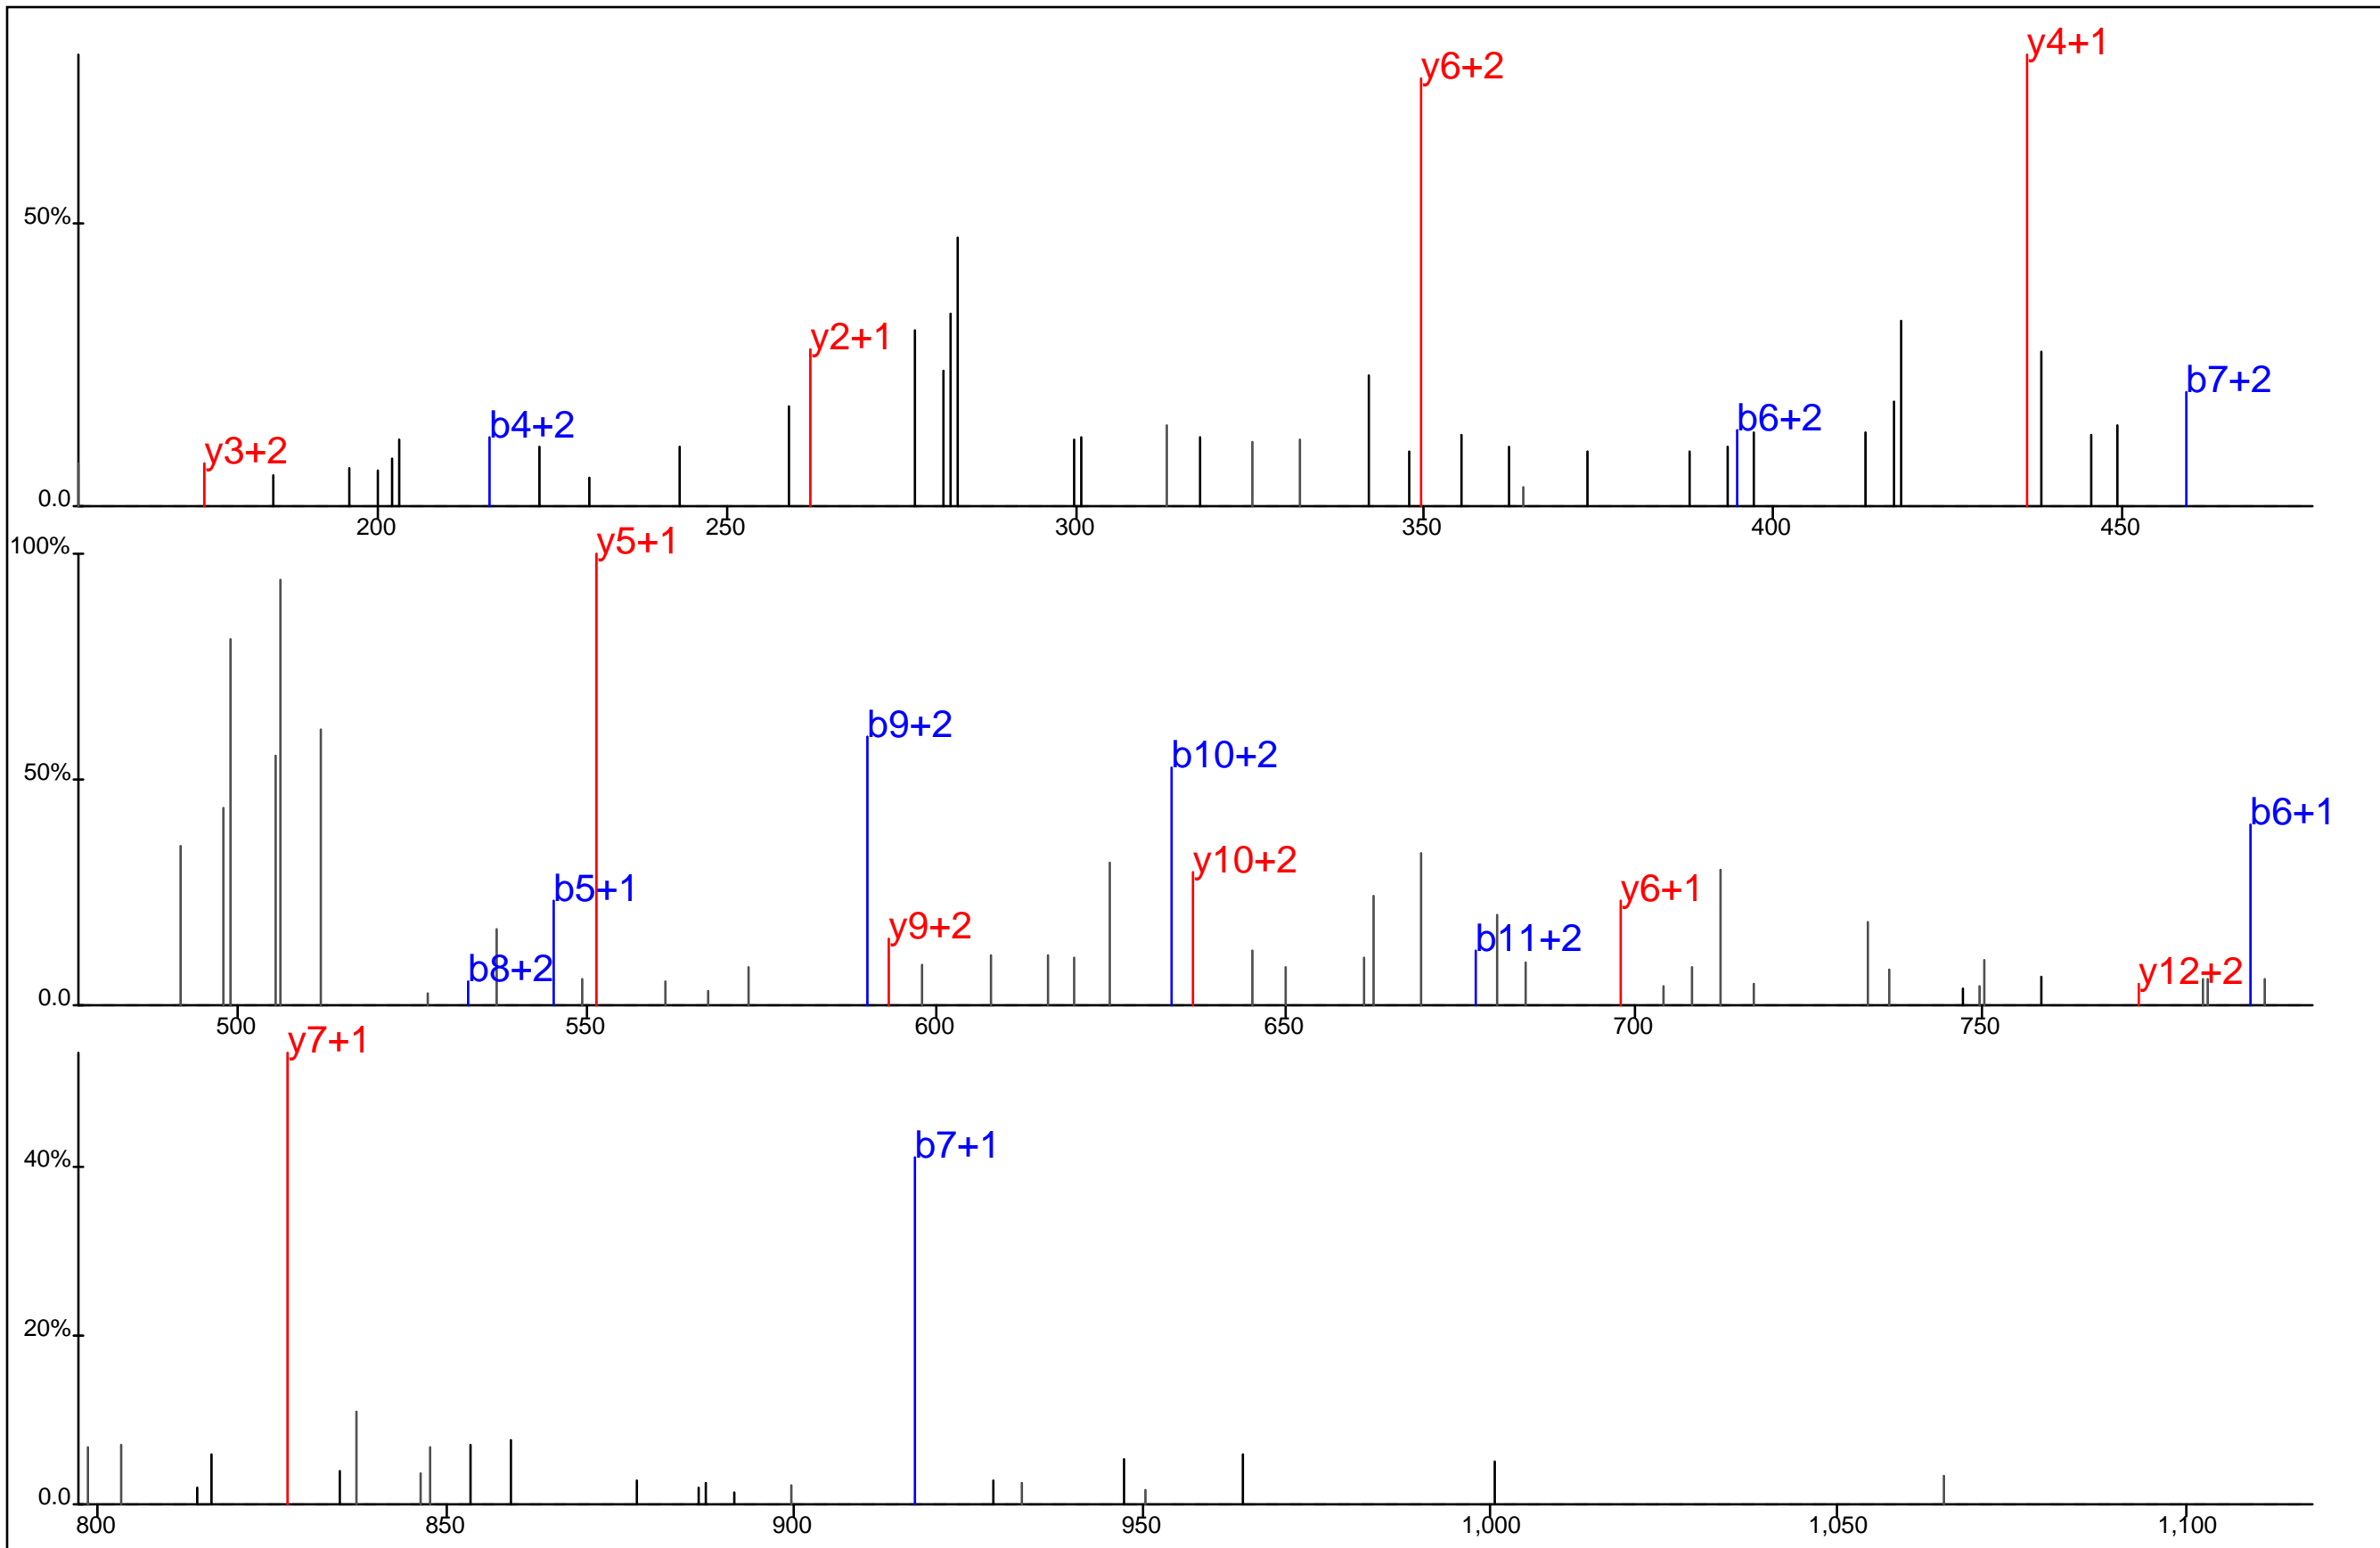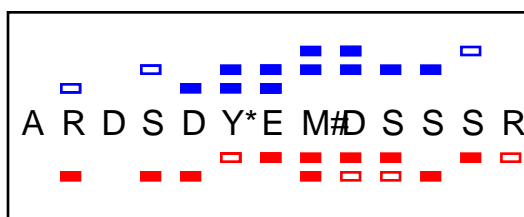

Protein Name: LNK  
 gi Accession: 0  
 Precursor Mass: 538.8619+3  
 Delta Mass: 1.649 ppm  
 XCorr: 21.01

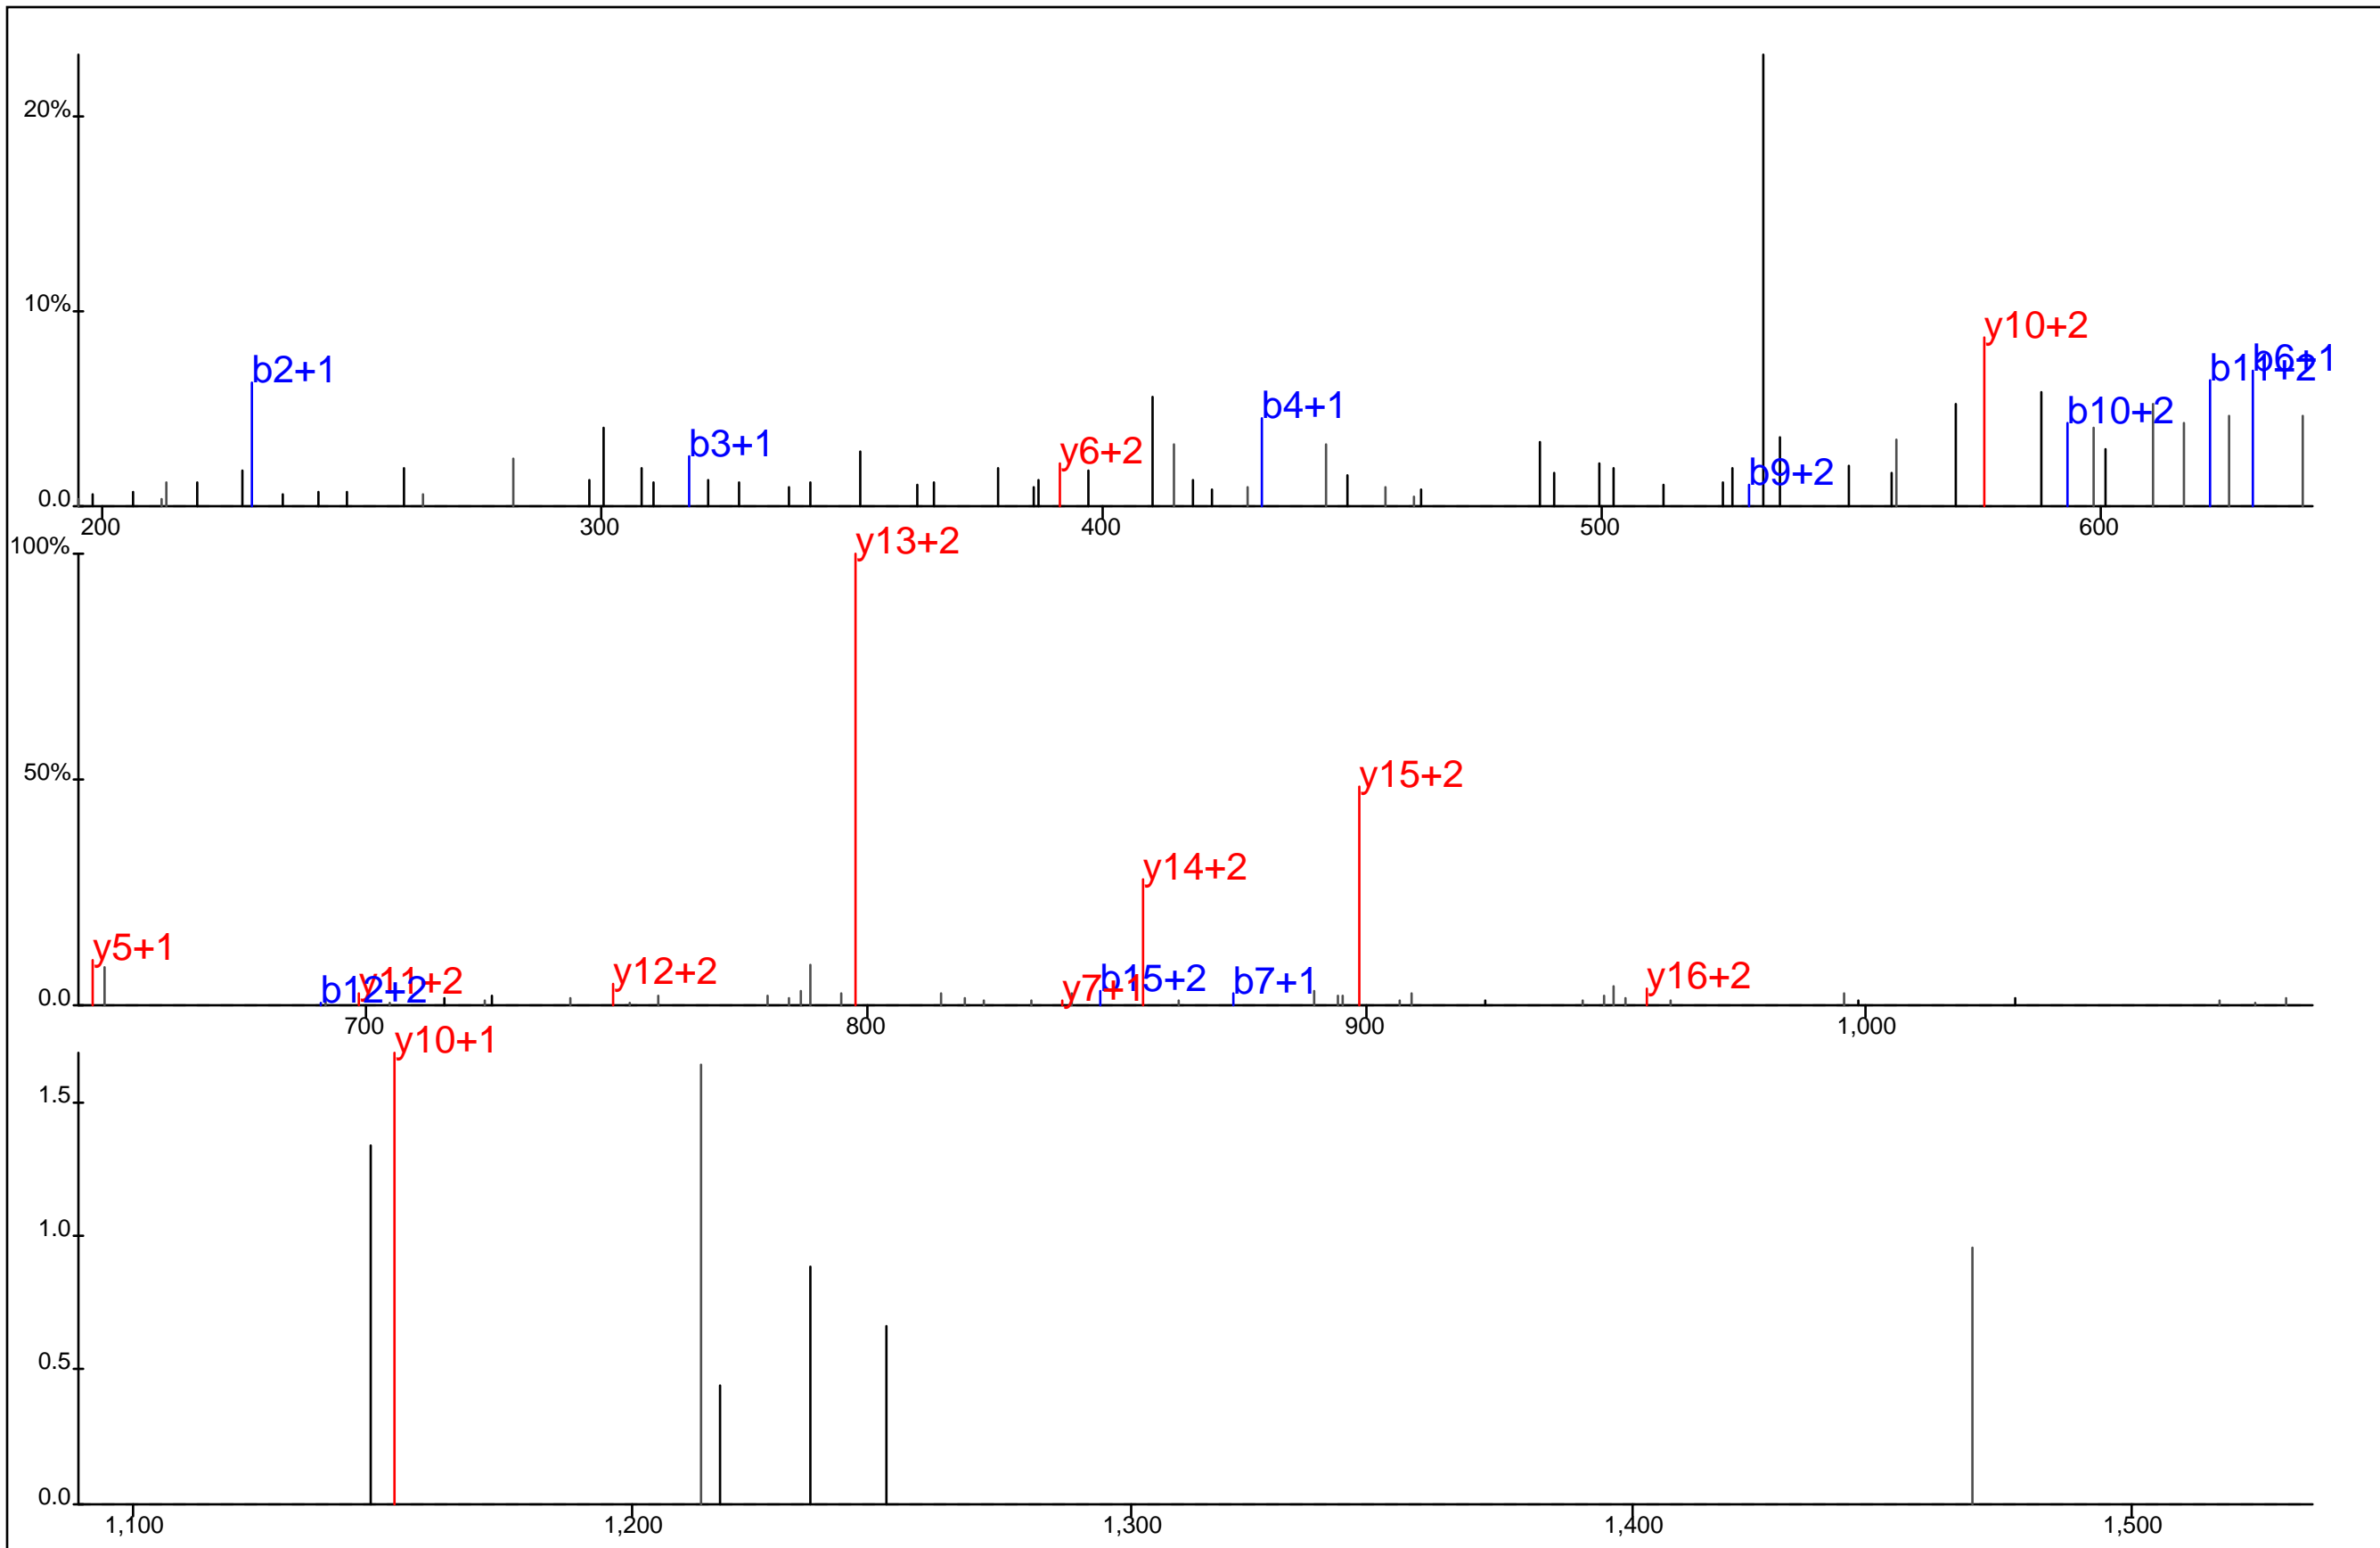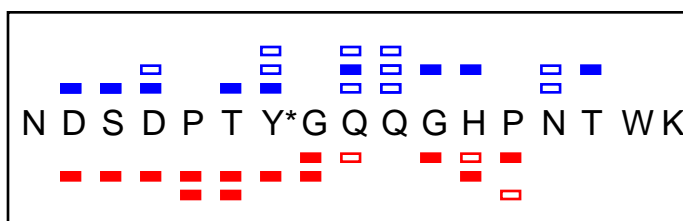

Protein Name: LPP  
 gi Accession: 0  
 Precursor Mass: 675.6094+3  
 Delta Mass: 0.160 ppm  
 XCorr: 26.41

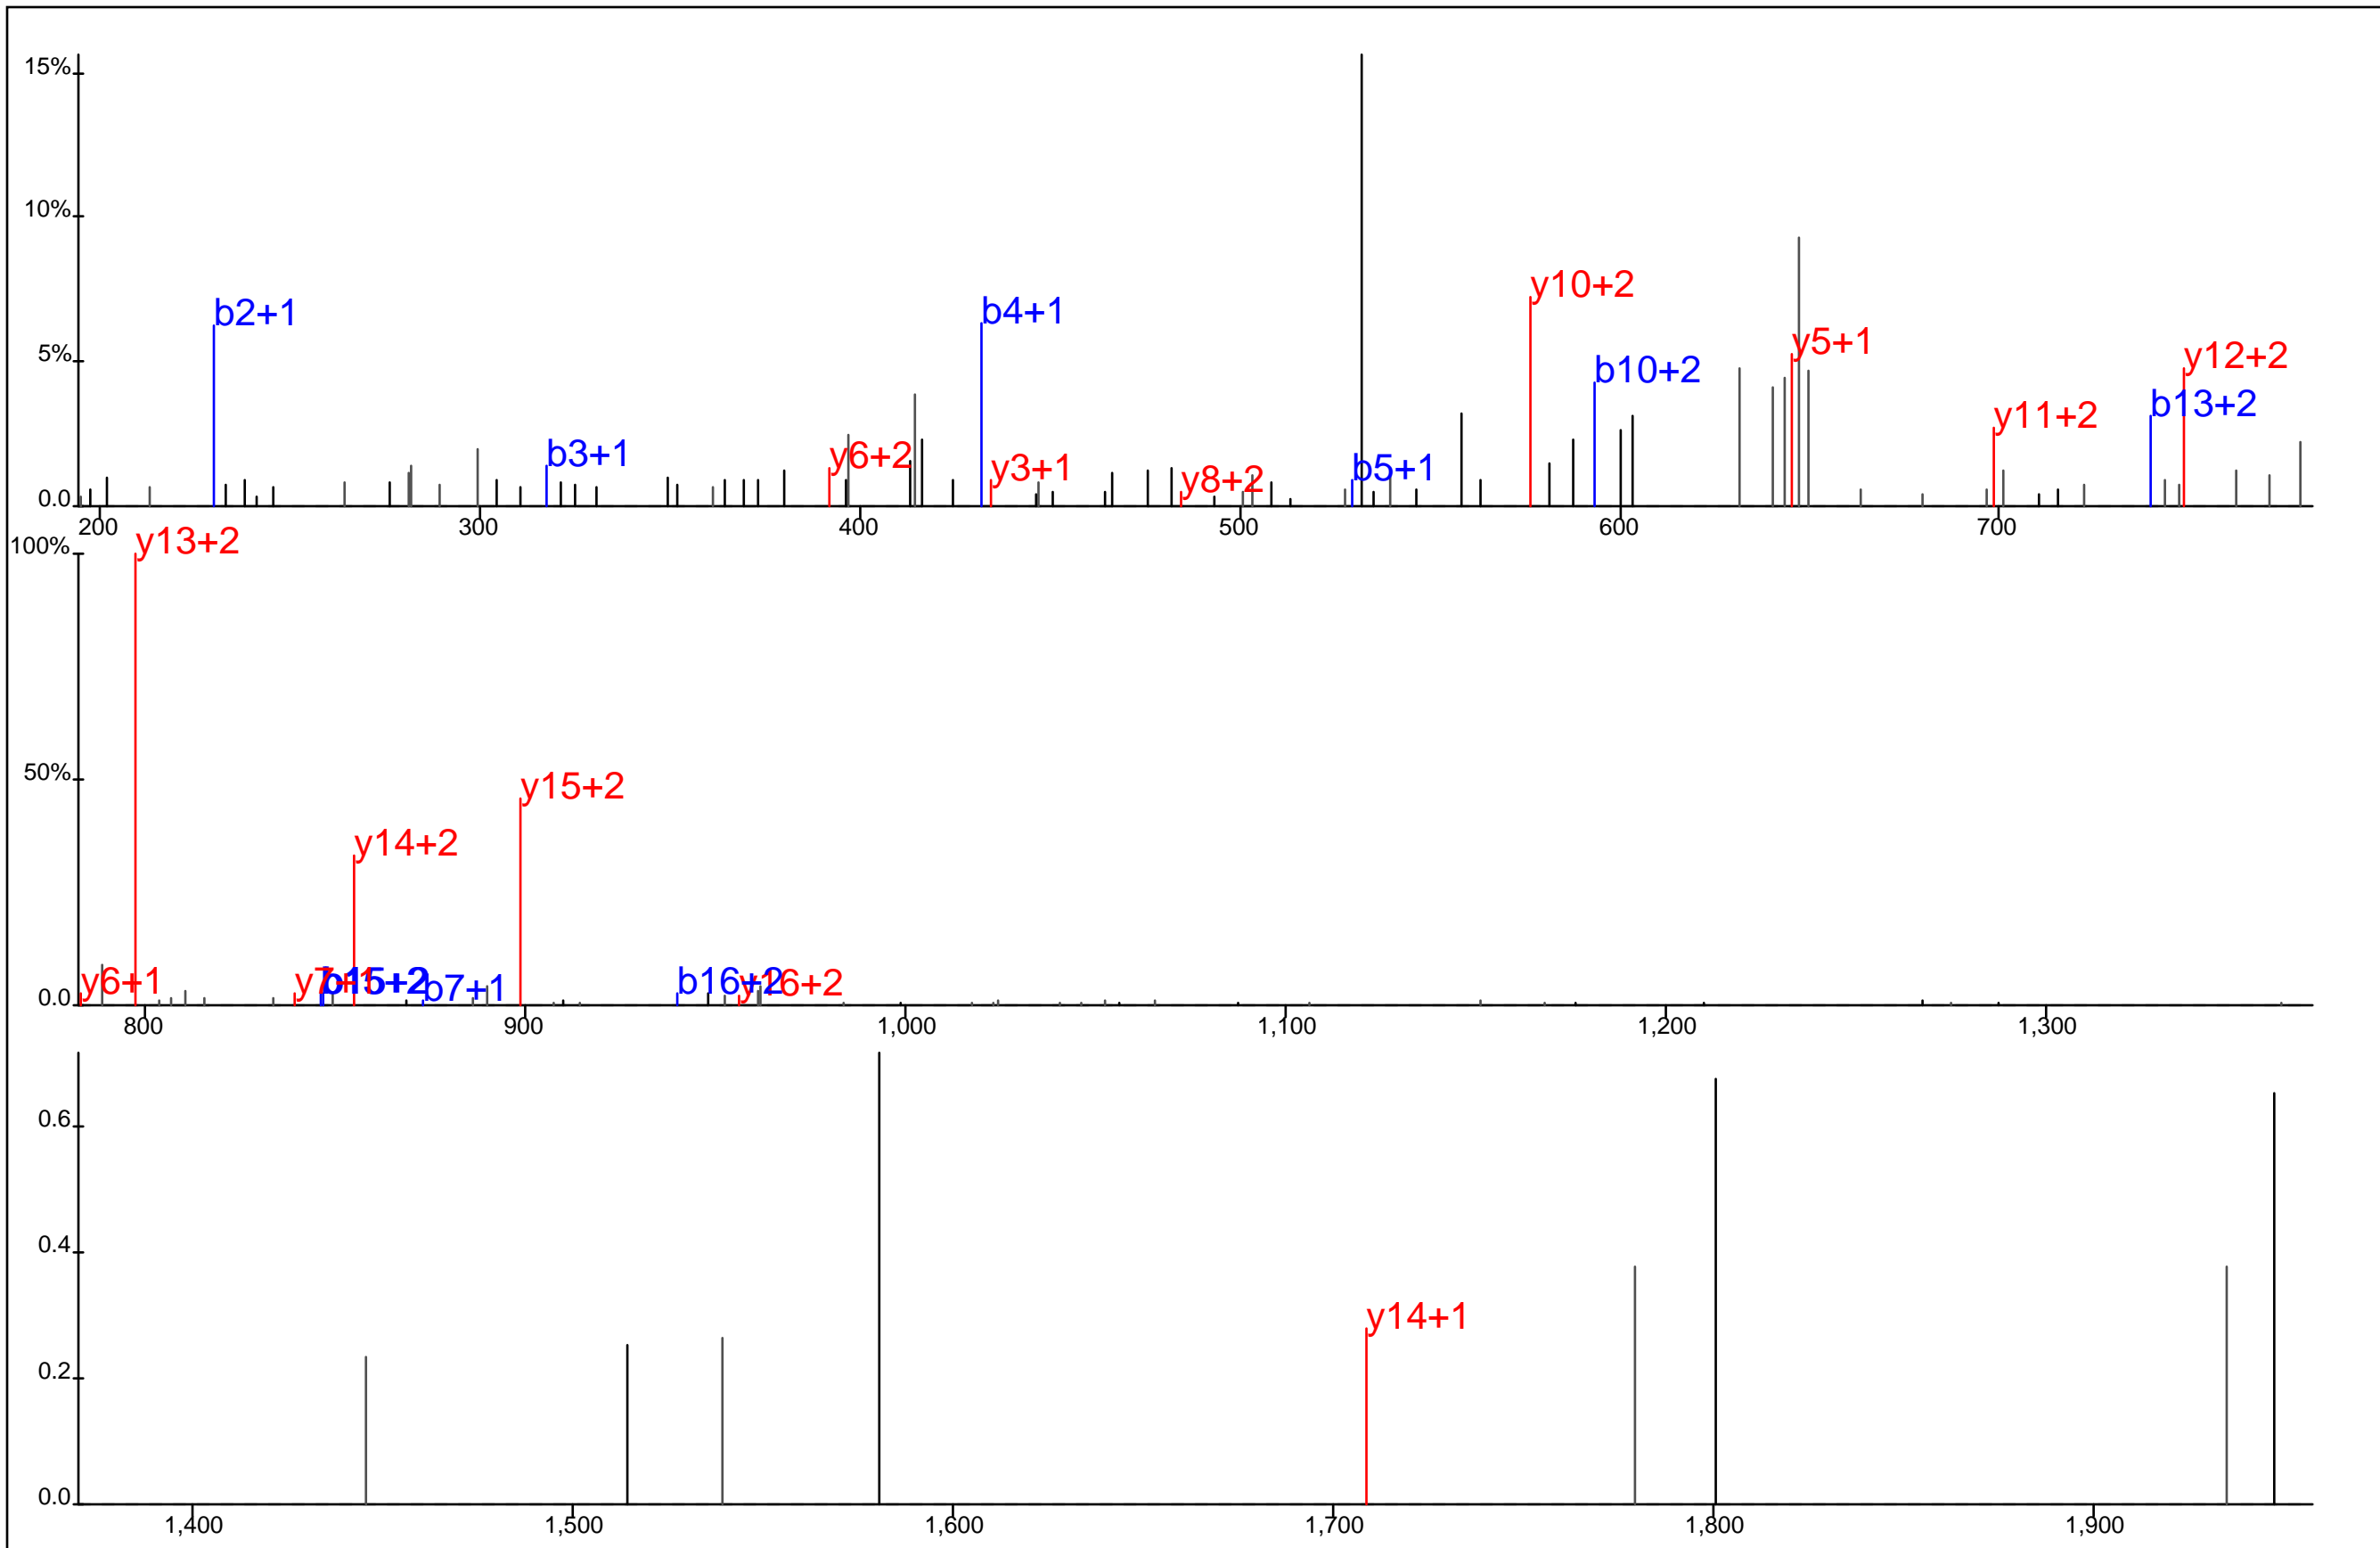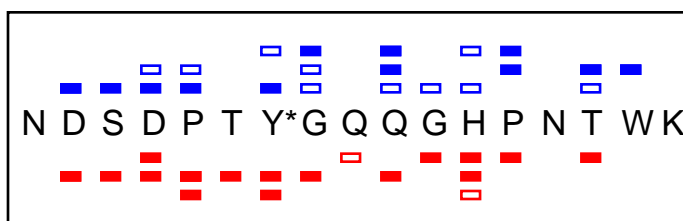

Protein Name: LPP  
 gi Accession: 0  
 Precursor Mass: 675.6097+3  
 Delta Mass: 0.522 ppm  
 XCorr: 27.73



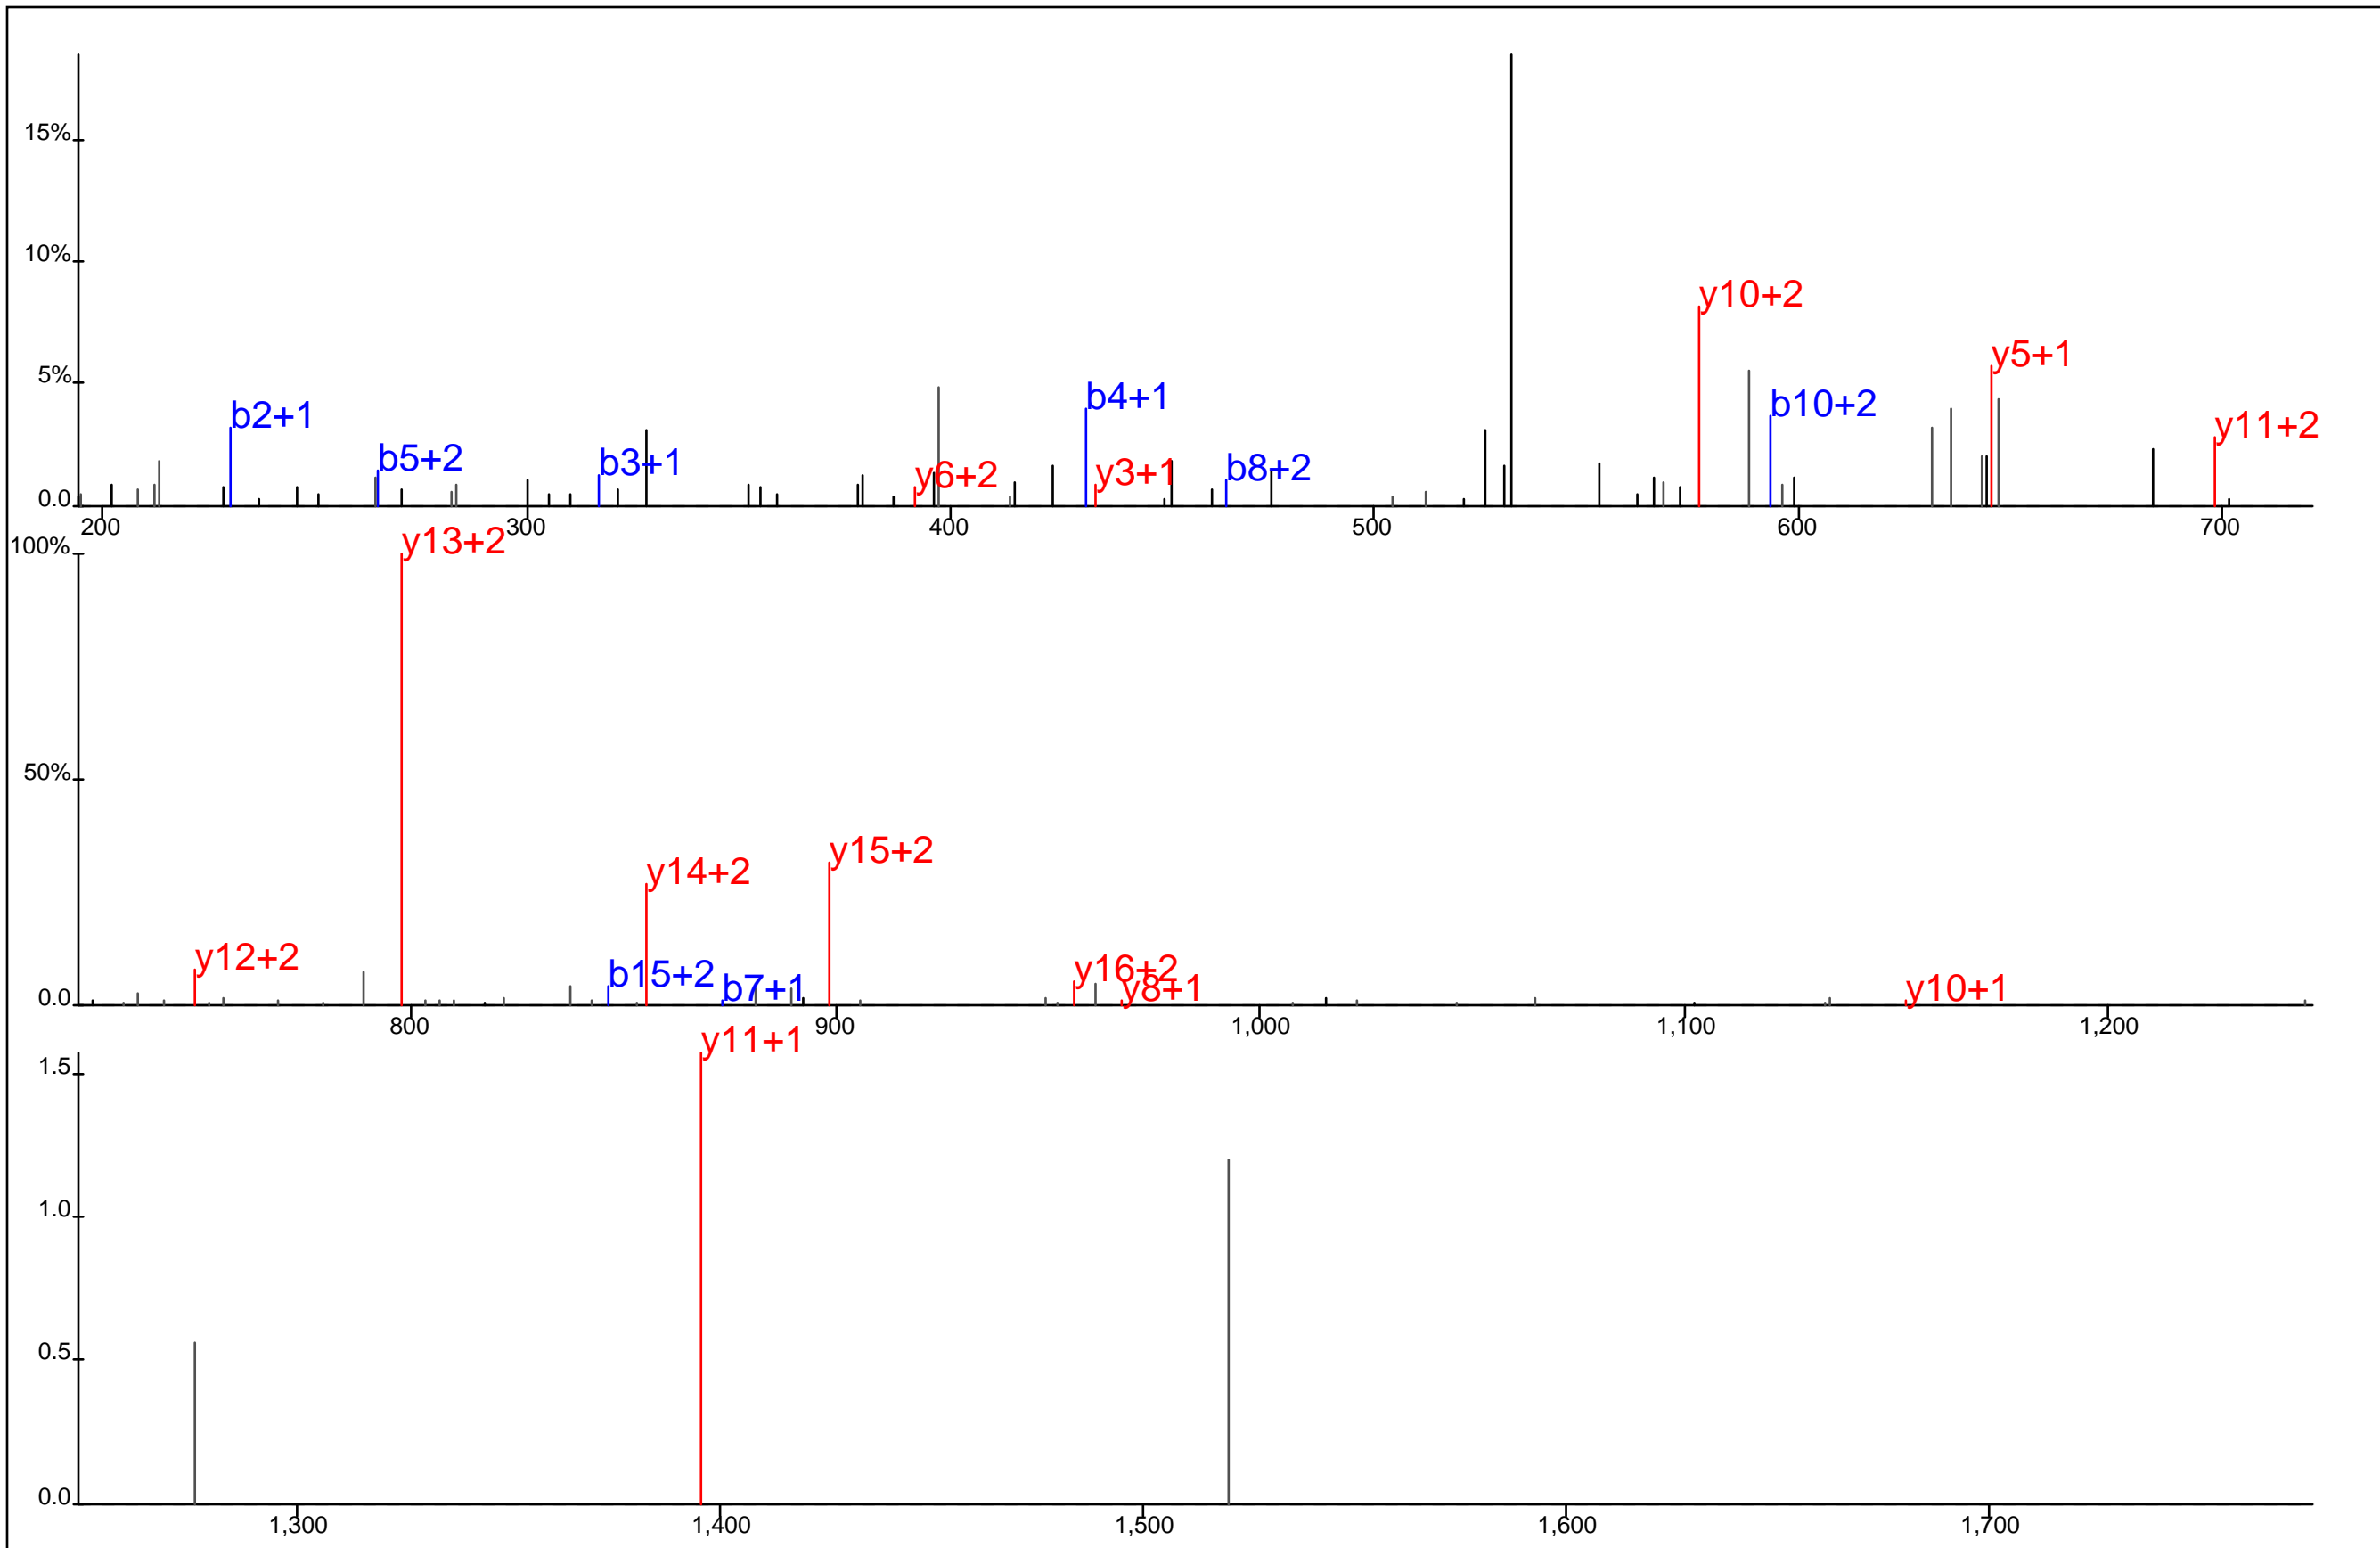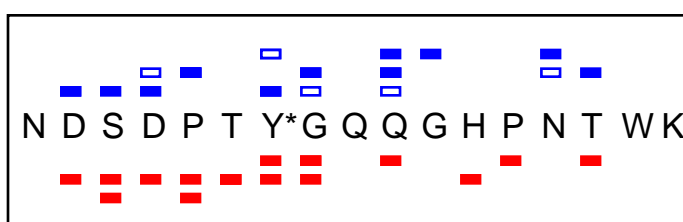

Protein Name: LPP  
 gi Accession: 0  
 Precursor Mass: 675.6088+3  
 Delta Mass: 0.744 ppm  
 XCorr: 35.09

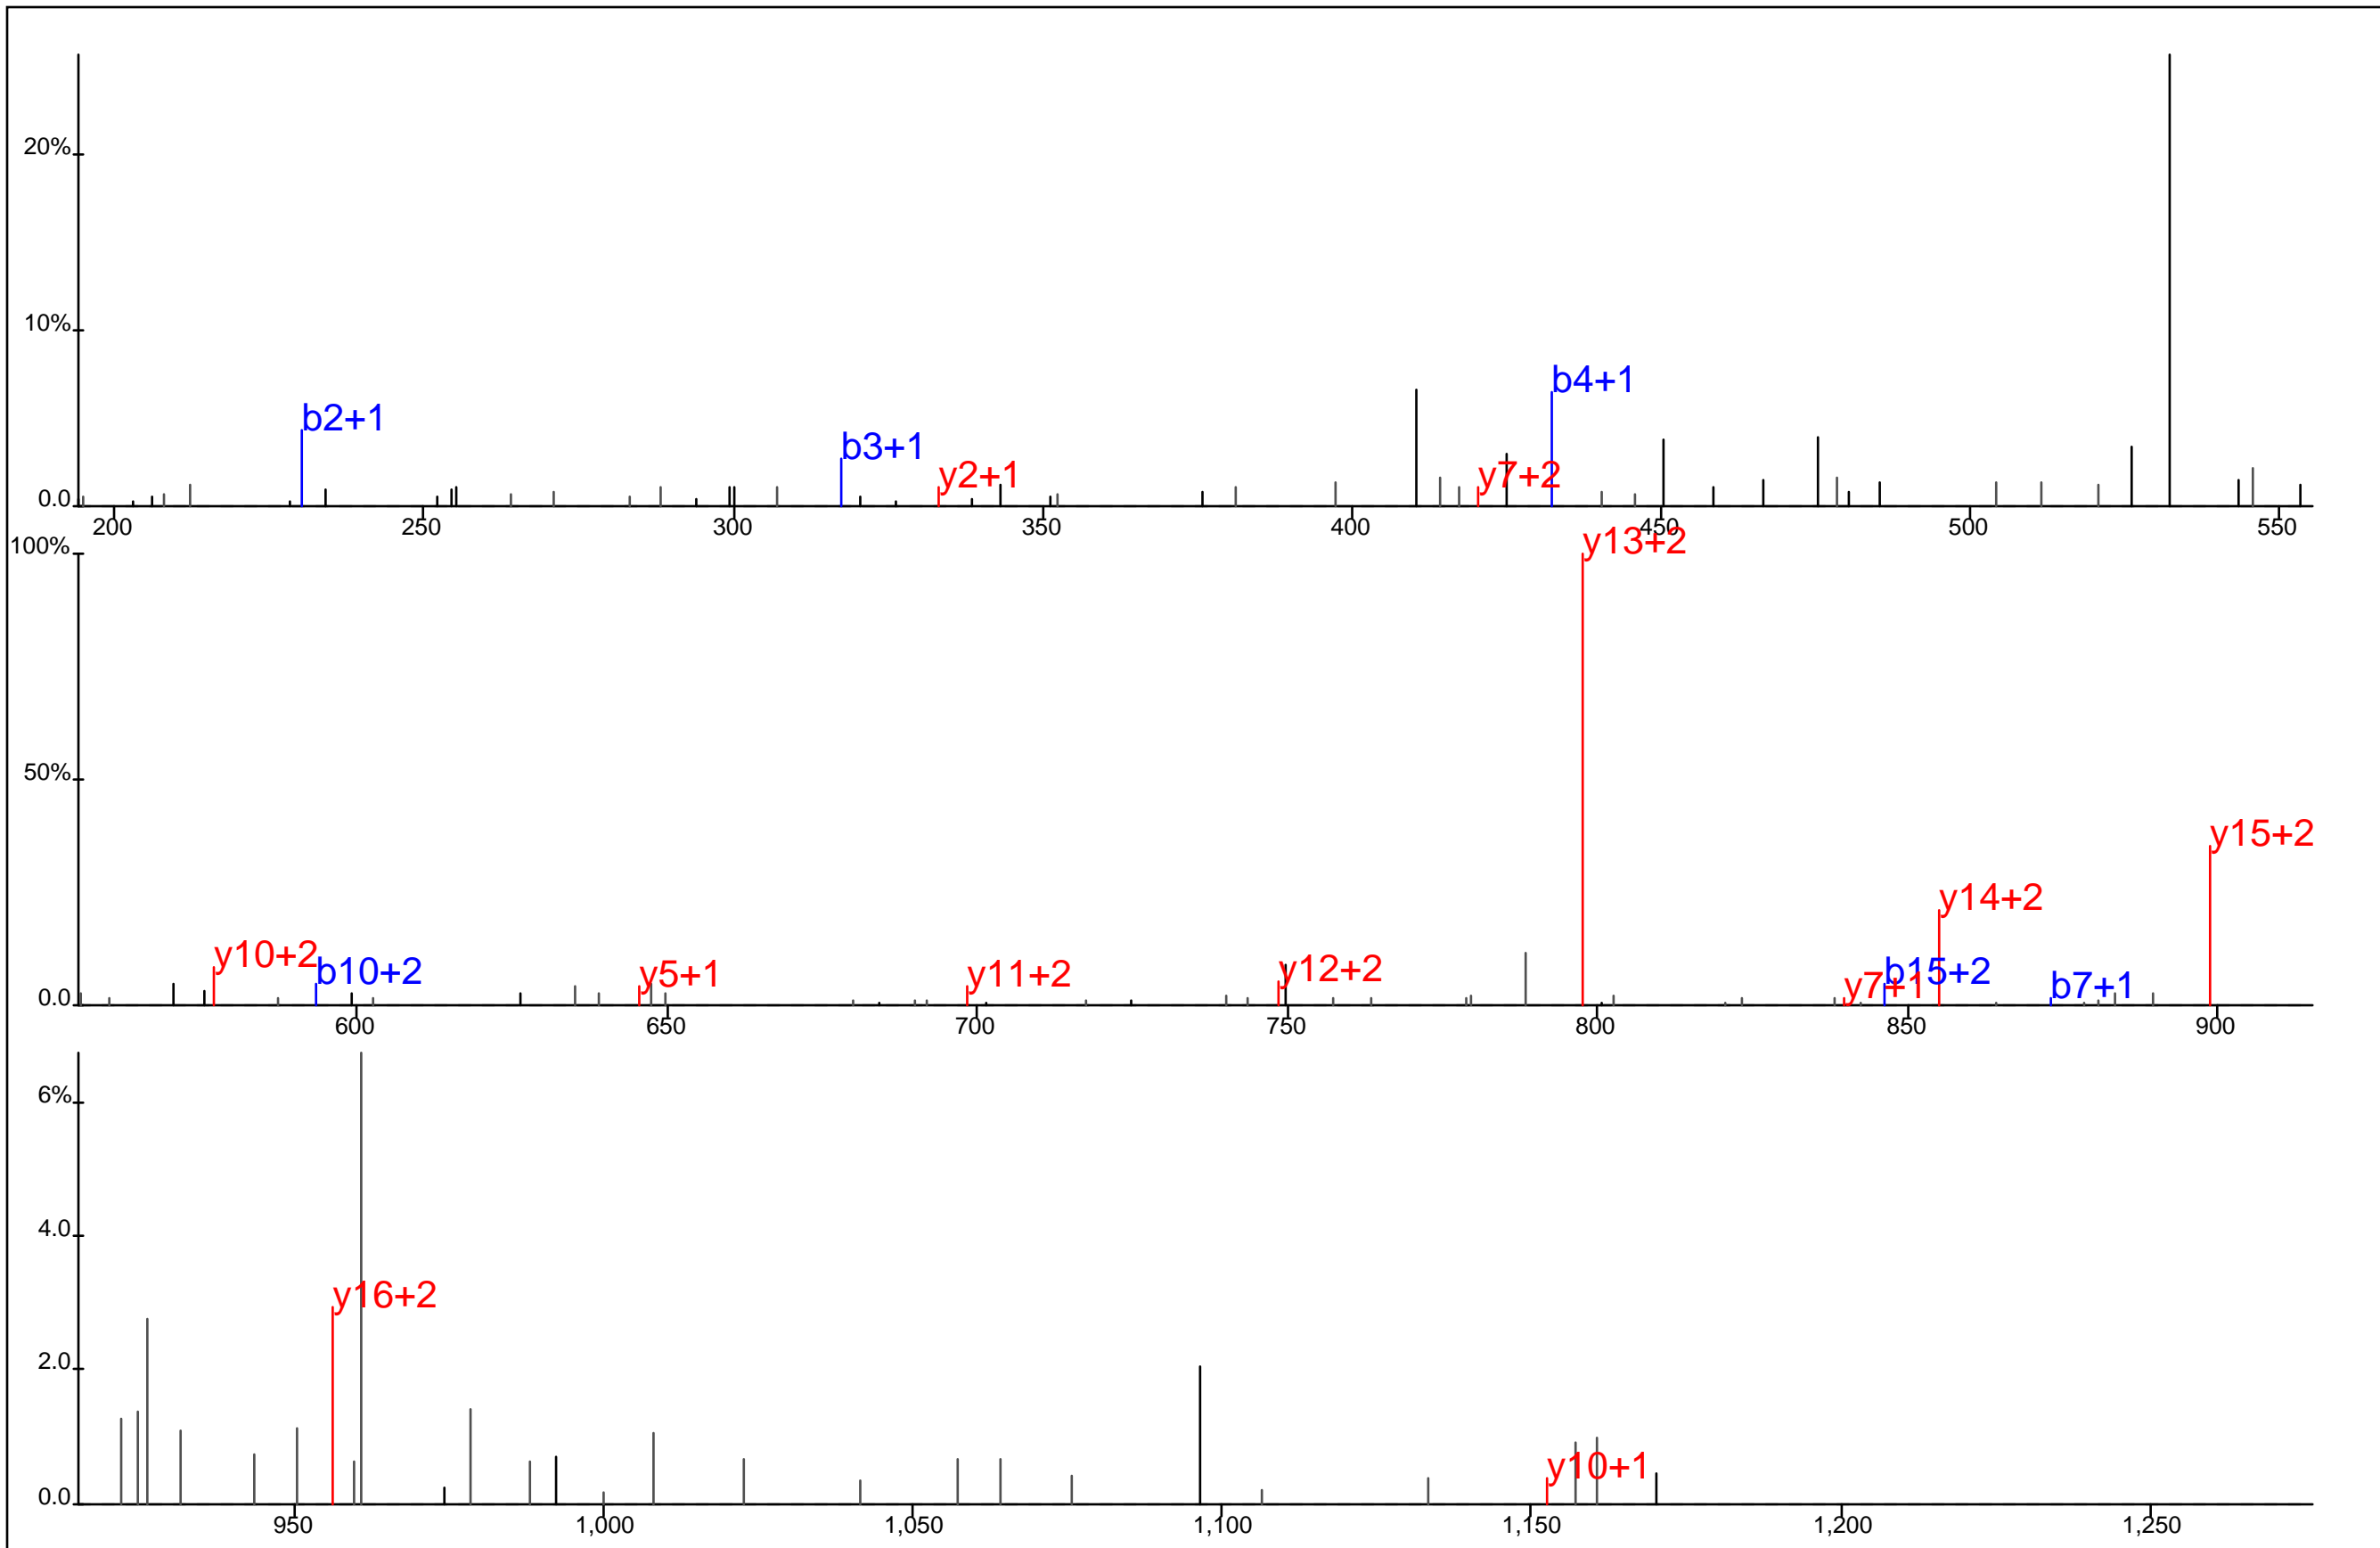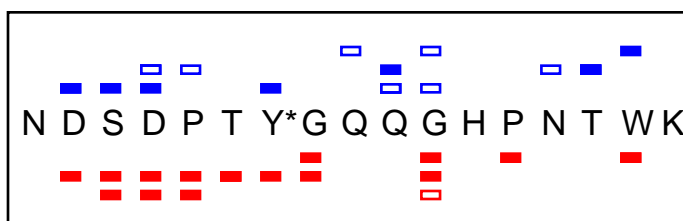

Protein Name: LPP  
 gi Accession: 0  
 Precursor Mass: 675.6102+3  
 Delta Mass: 1.335 ppm  
 XCorr: 27.7

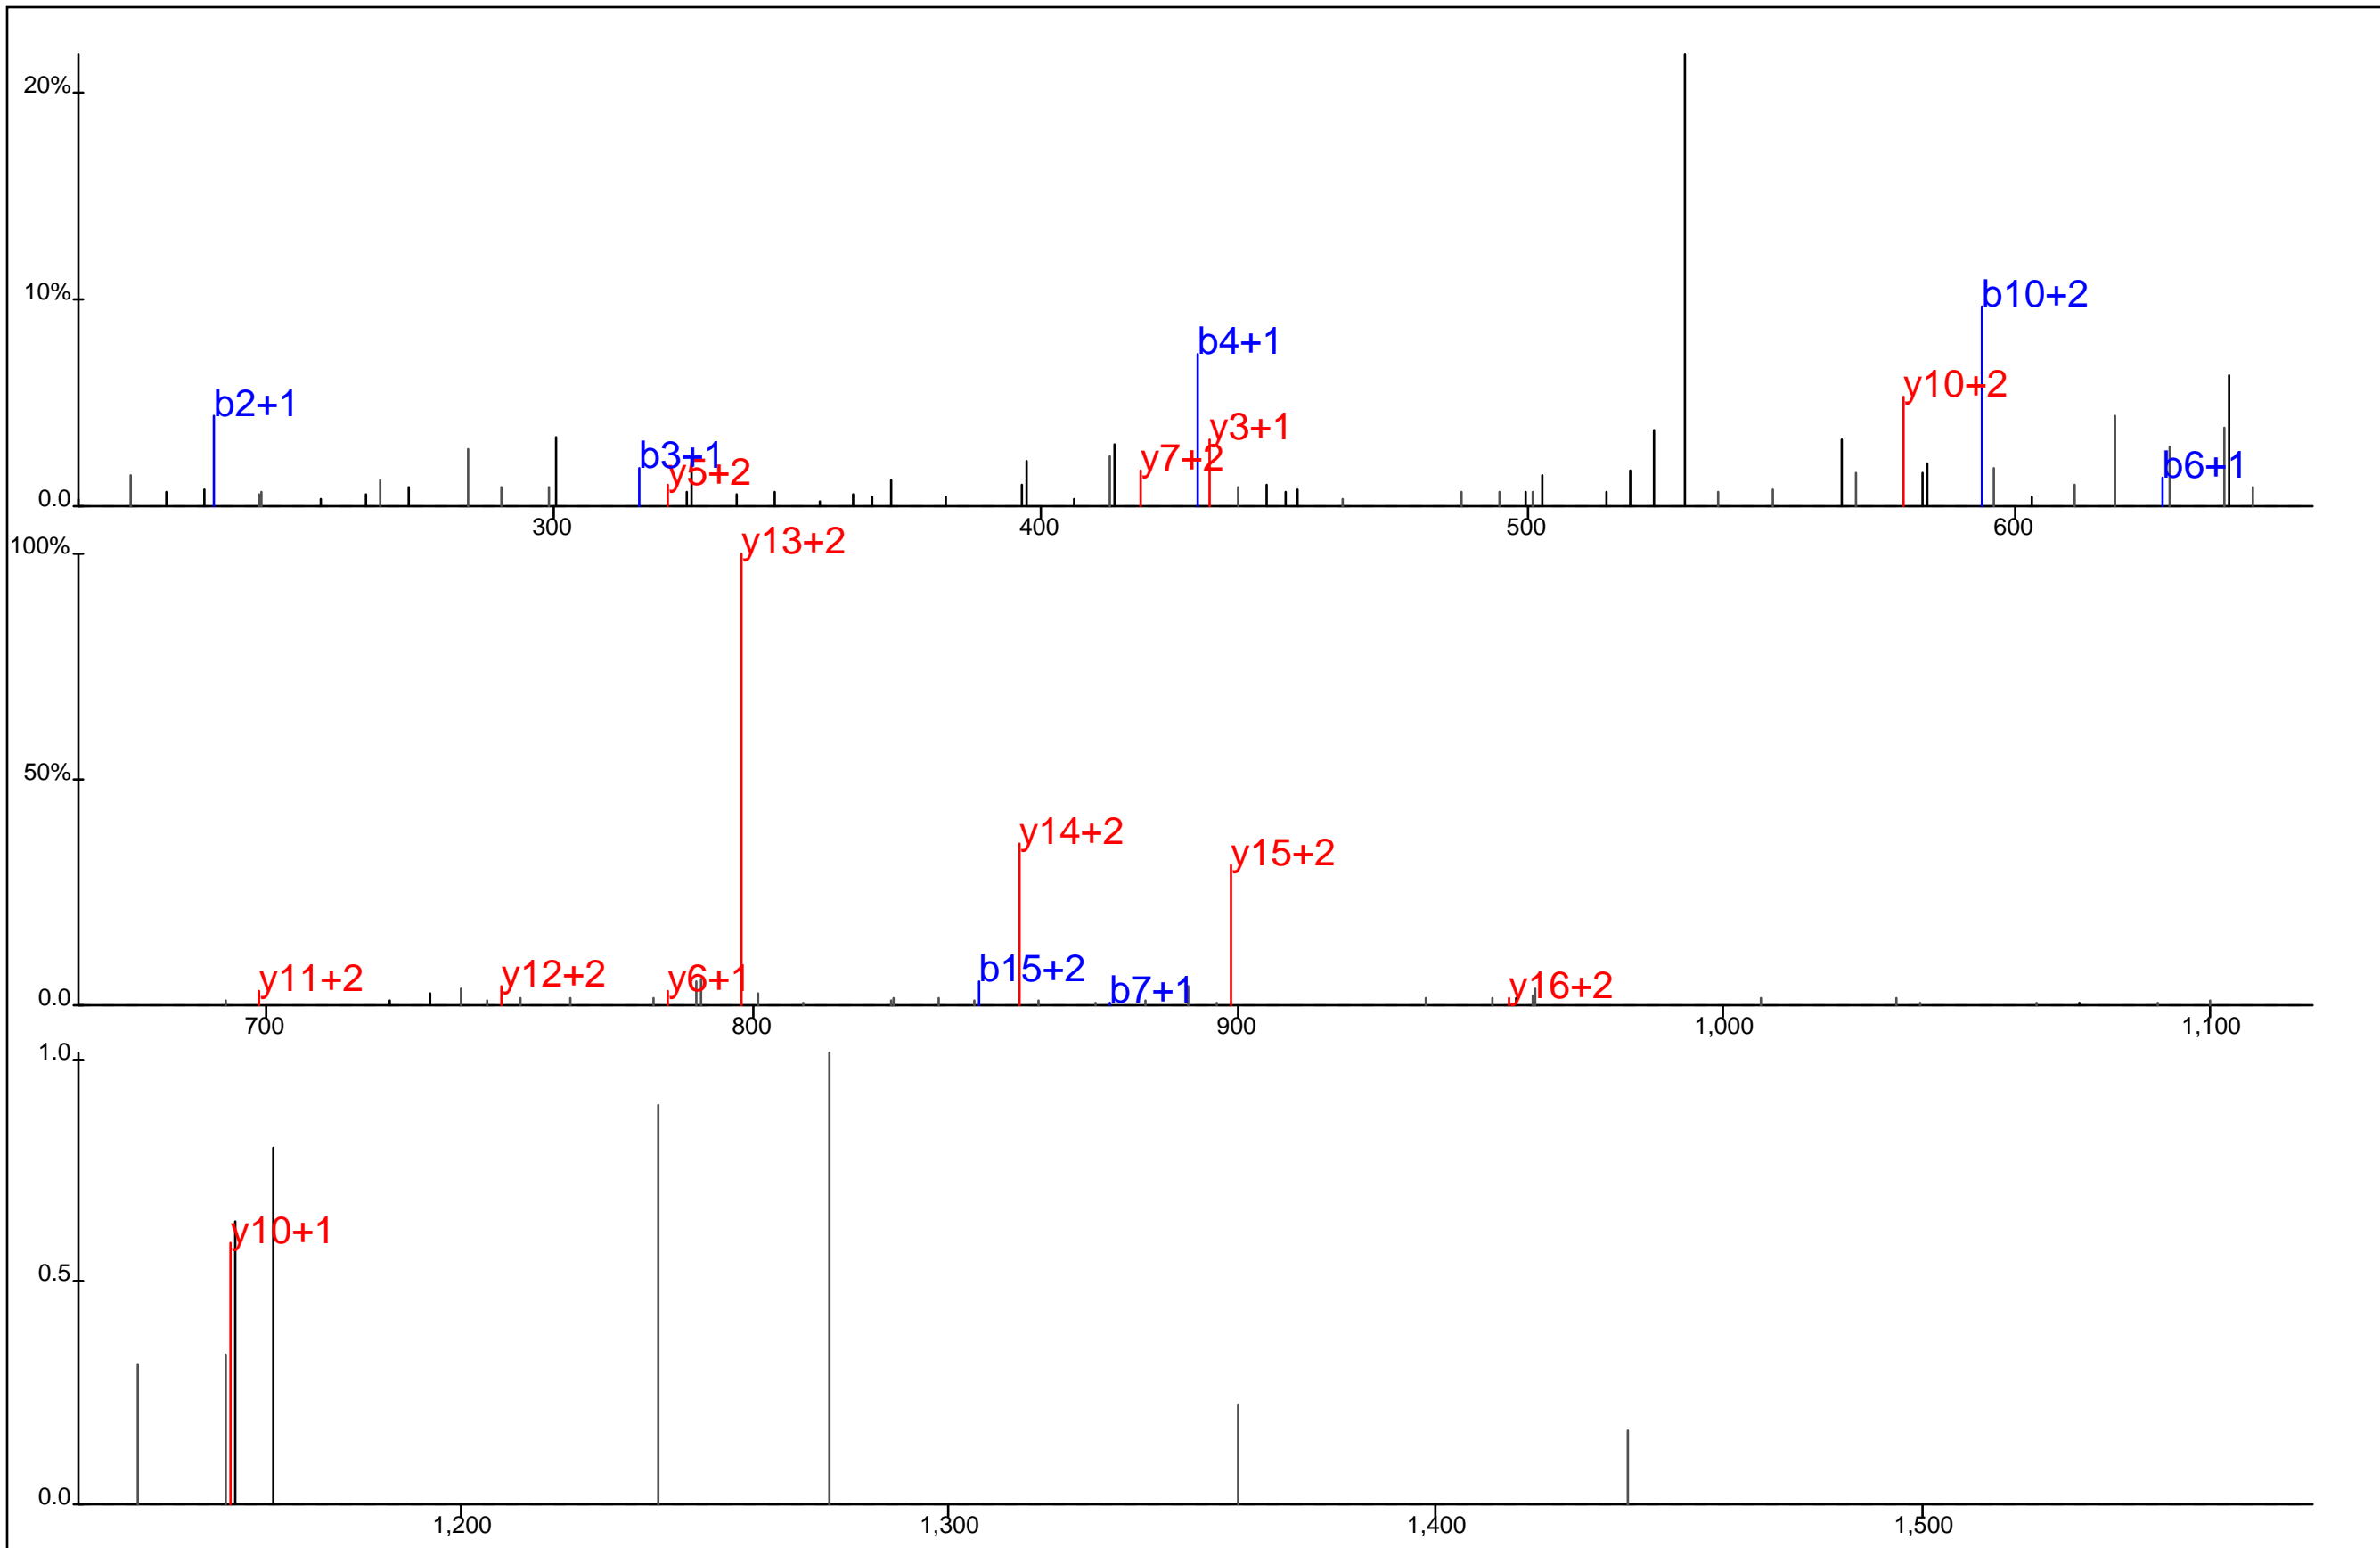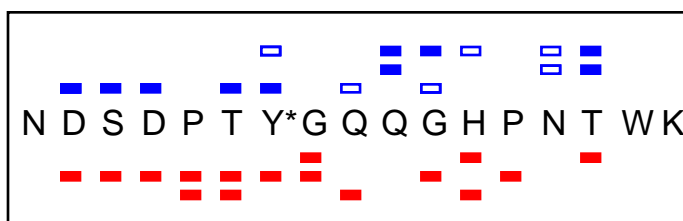

Protein Name: LPP  
 gi Accession: 0  
 Precursor Mass: 675.6105+3  
 Delta Mass: 1.788 ppm  
 XCorr: 33.9

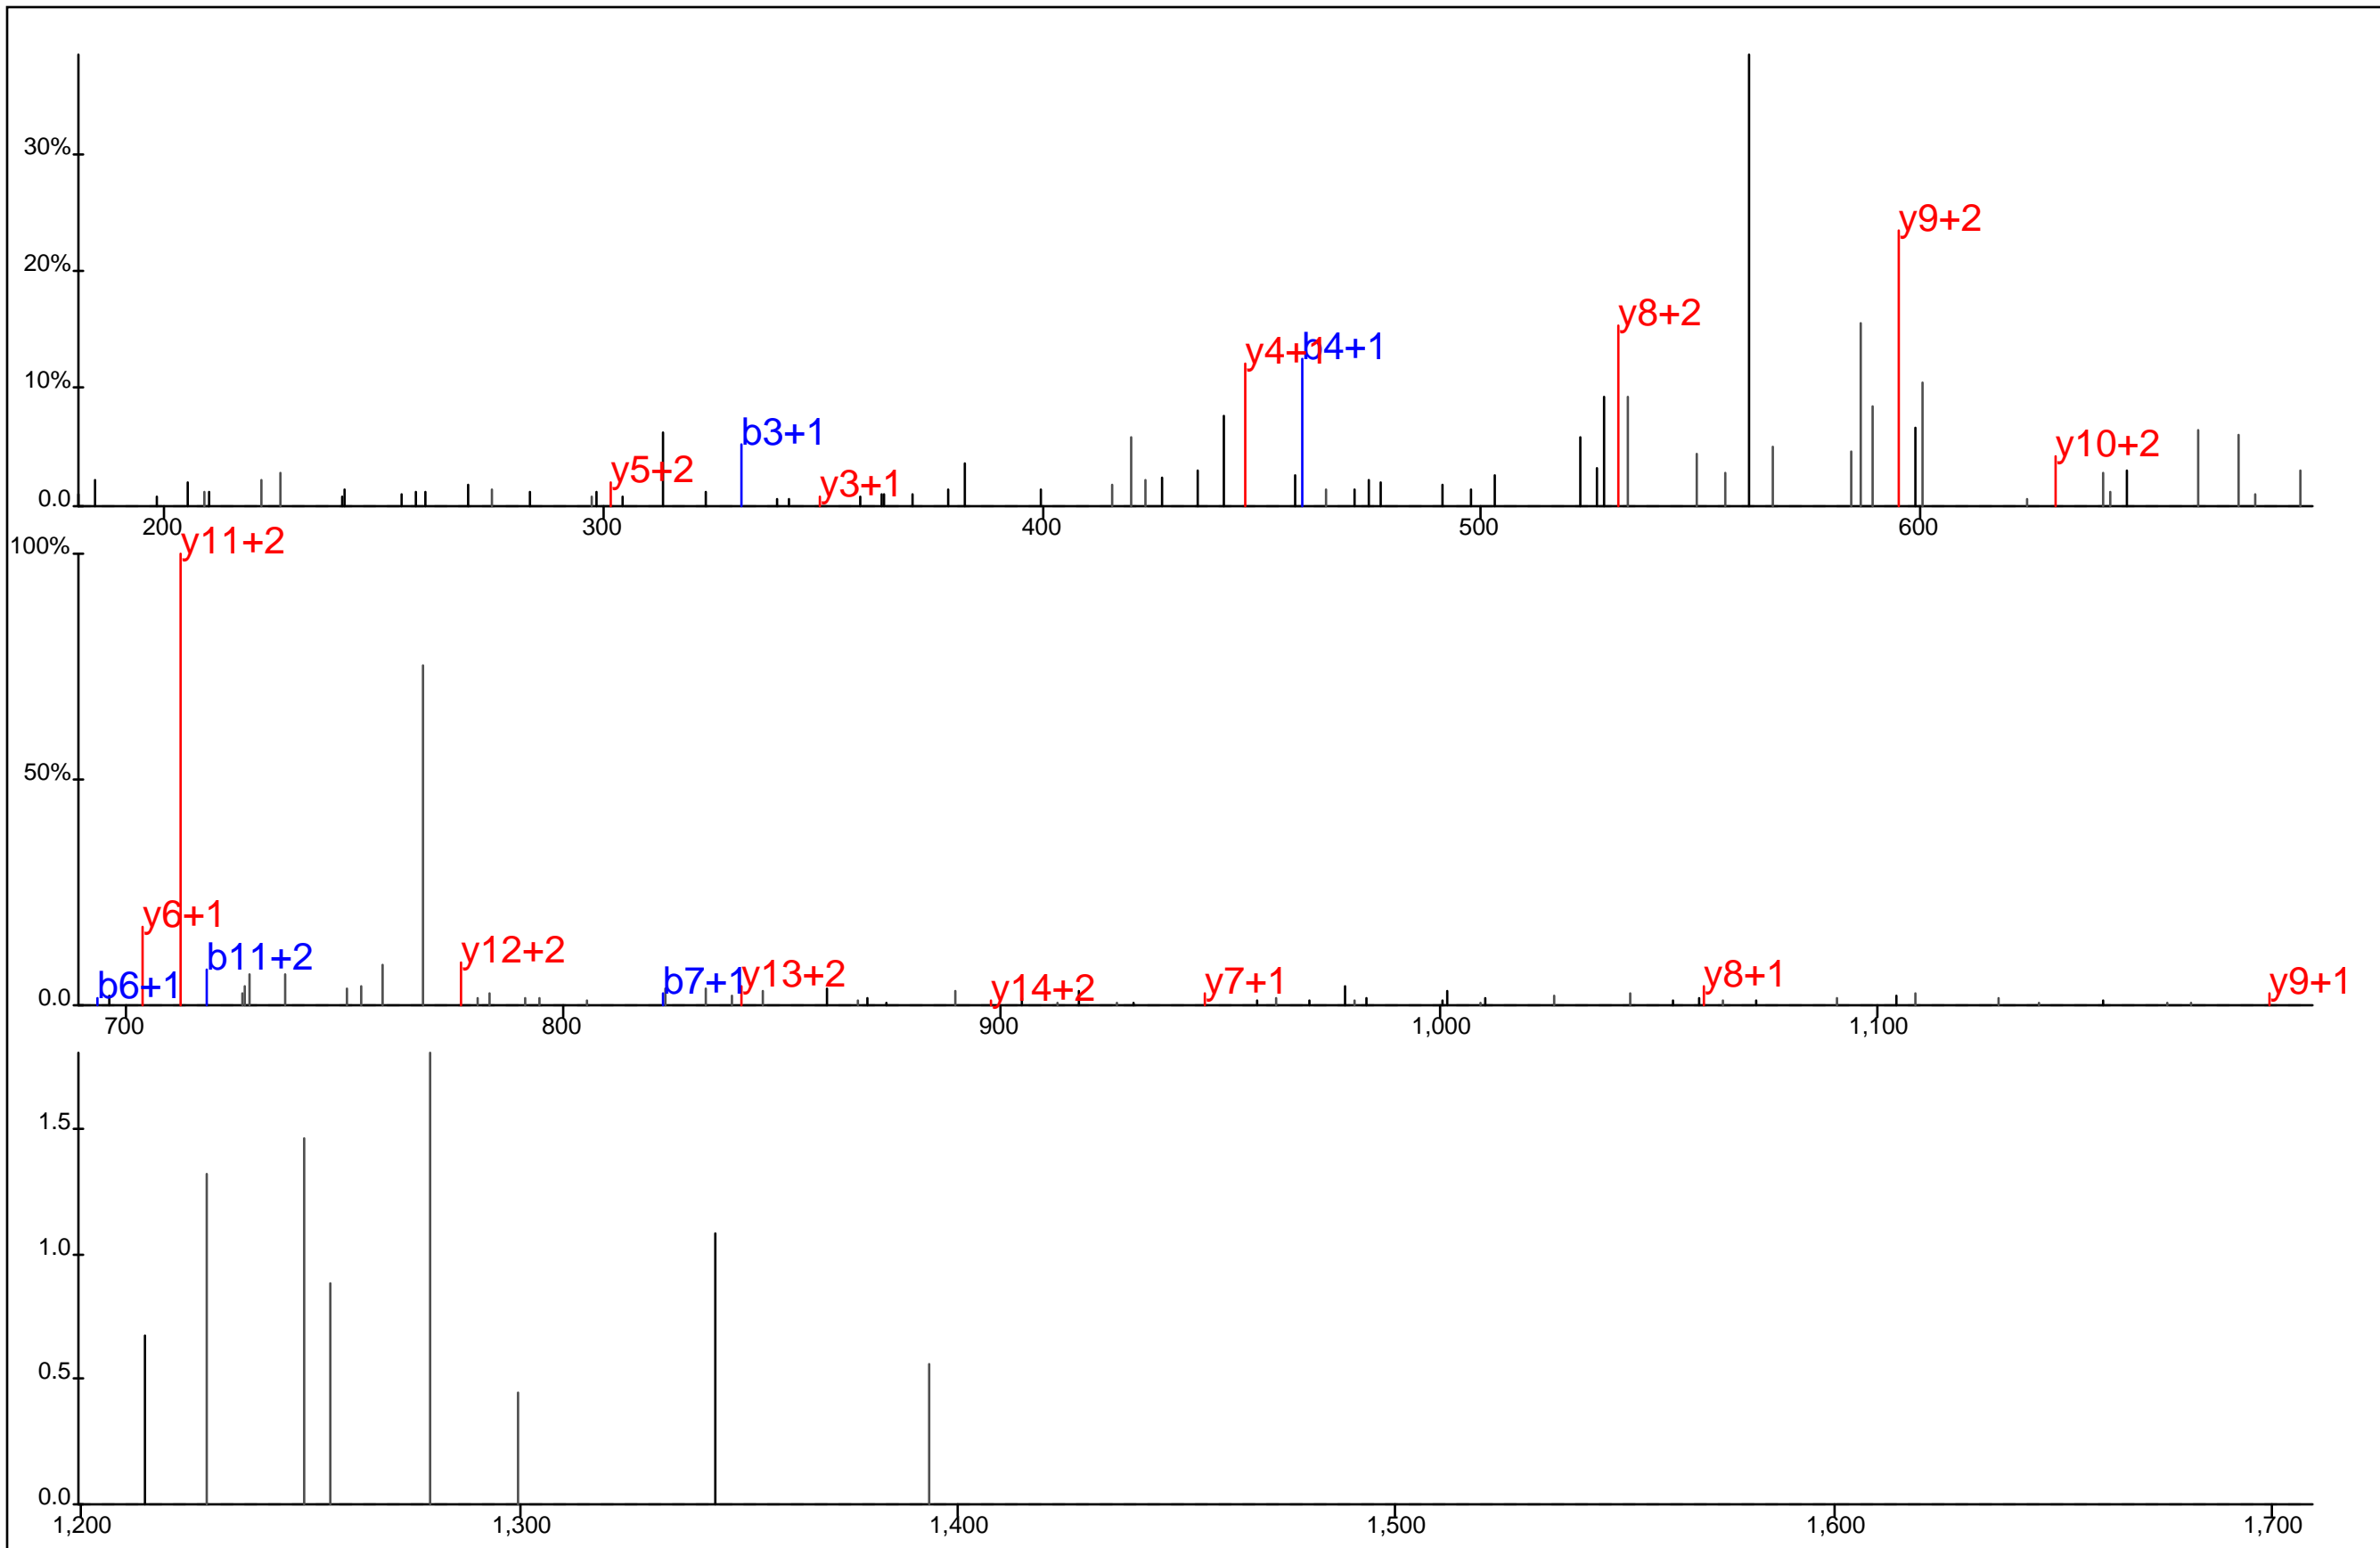

Protein Name: LRRFIP2  
 gi Accession: 0  
 Precursor Mass: 627.9421+3  
 Delta Mass: 0.515 ppm  
 XCorr: 23.5

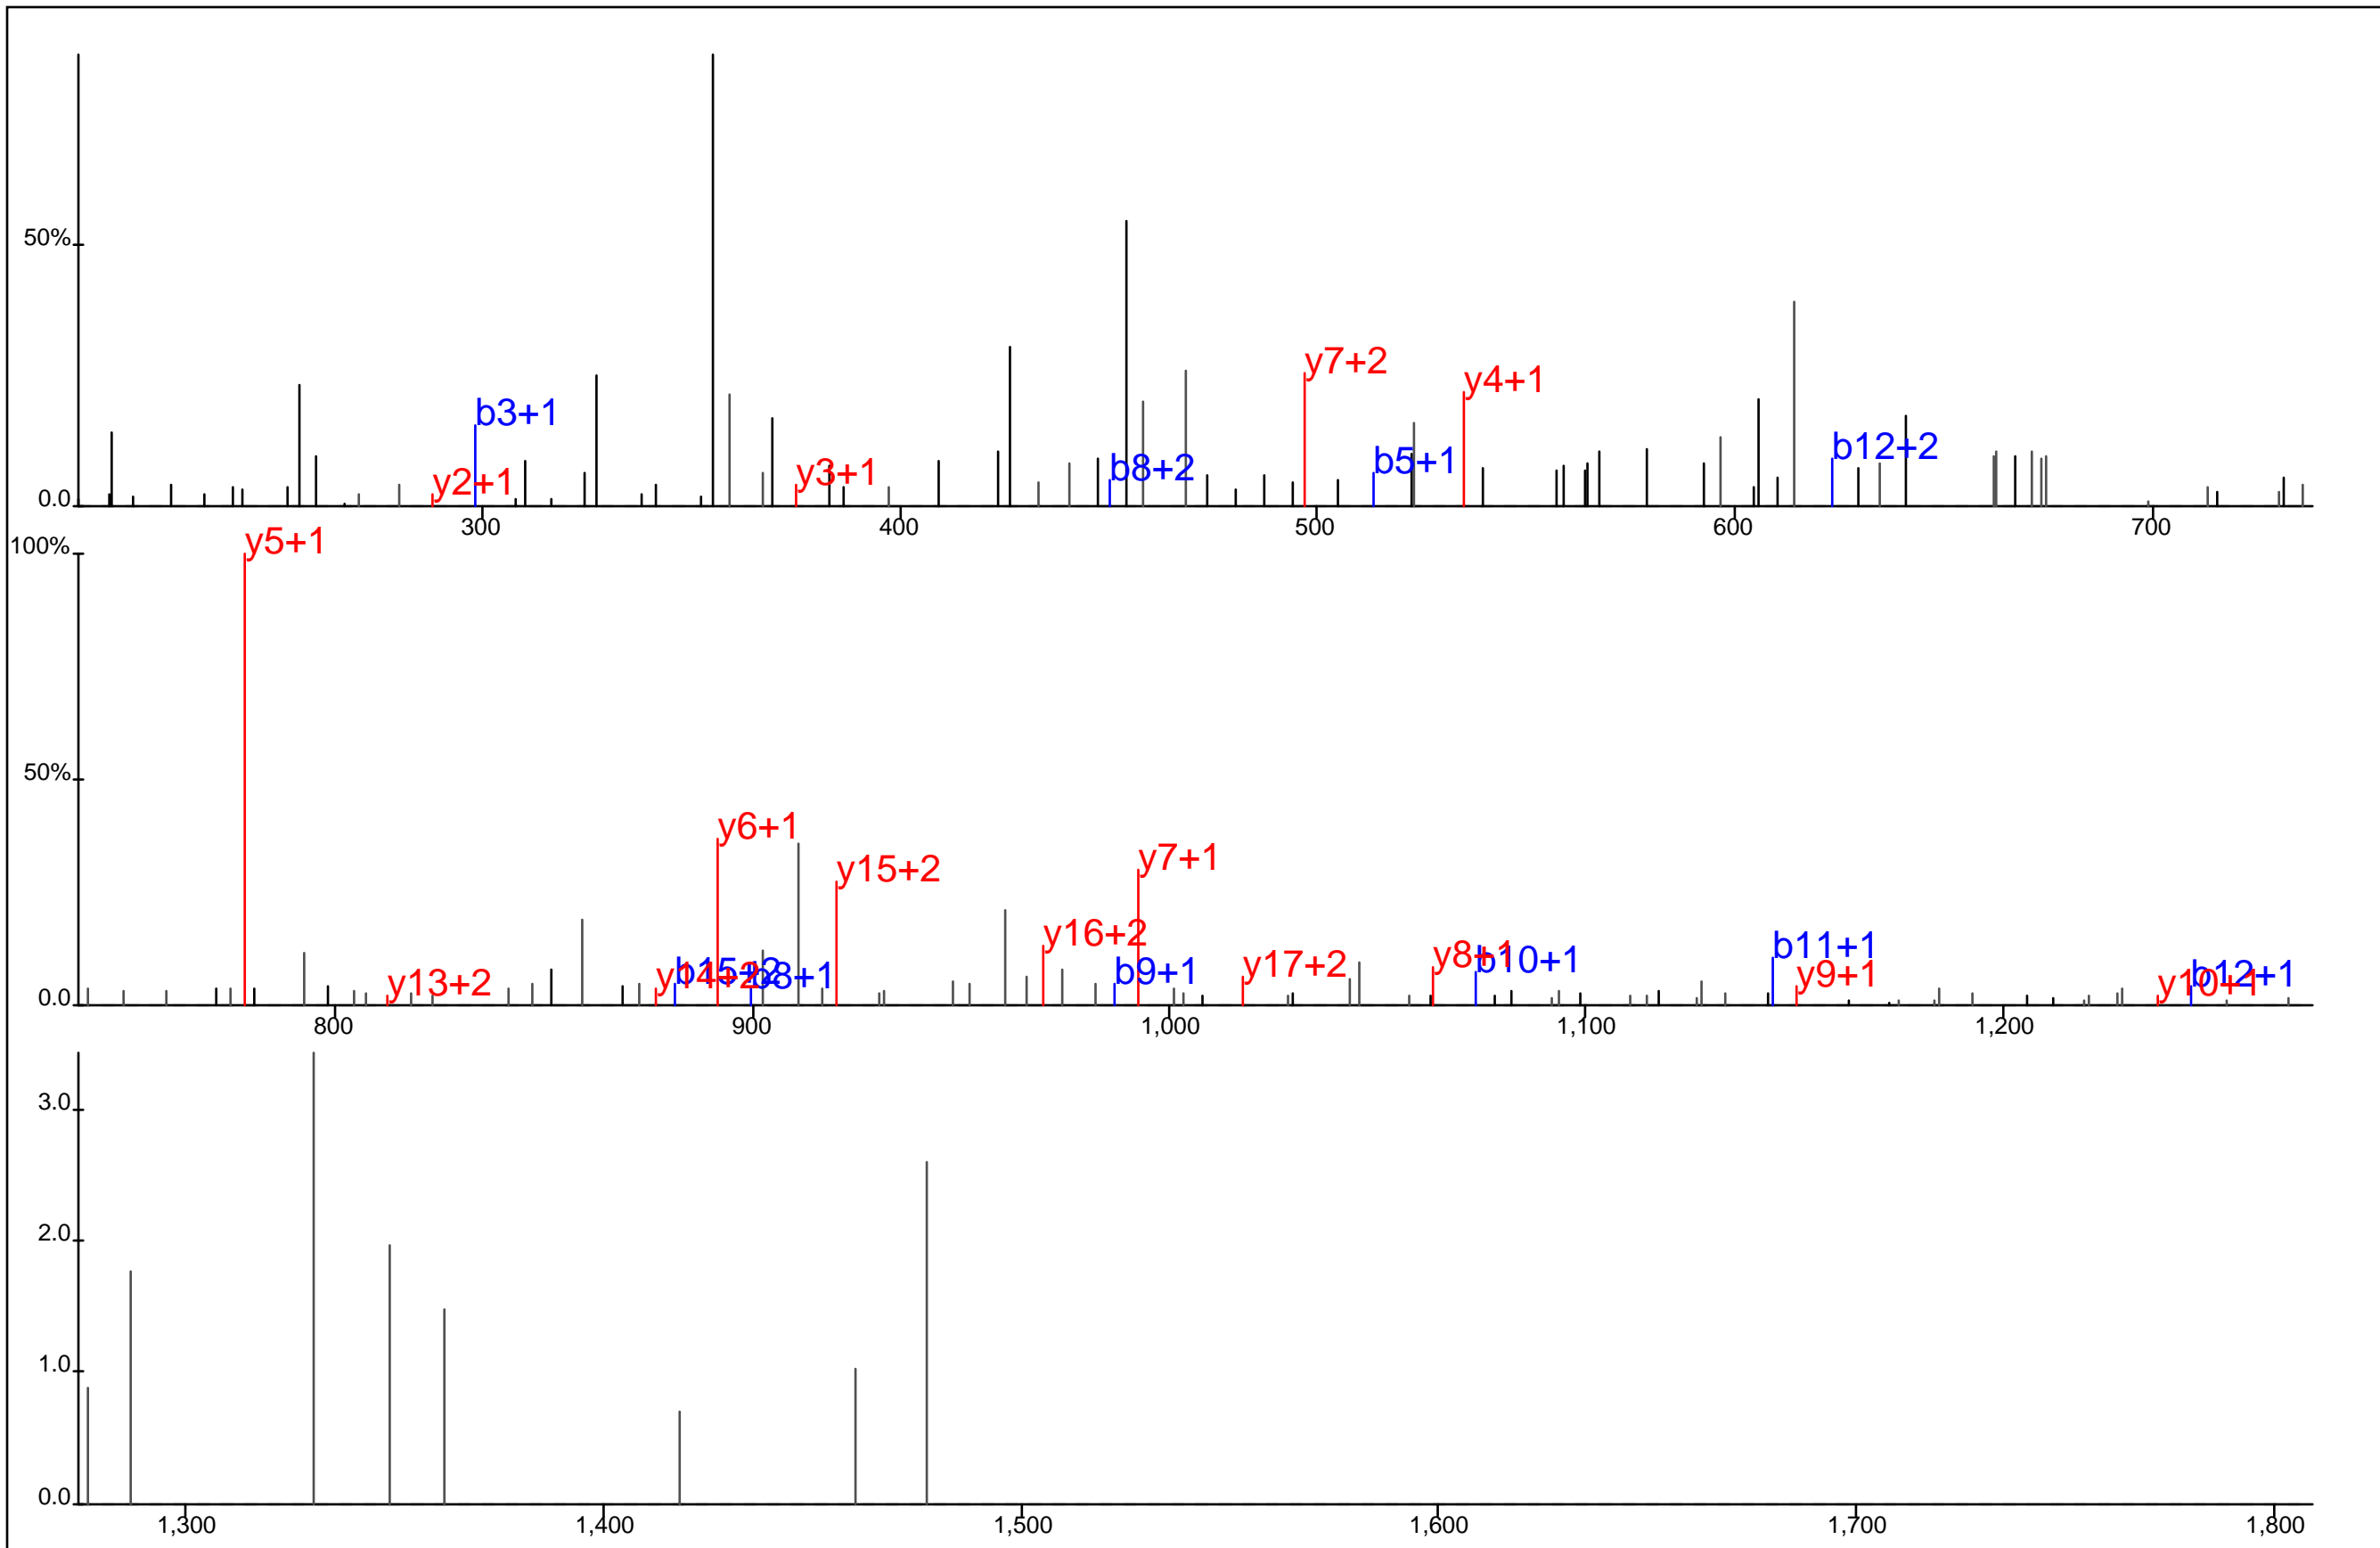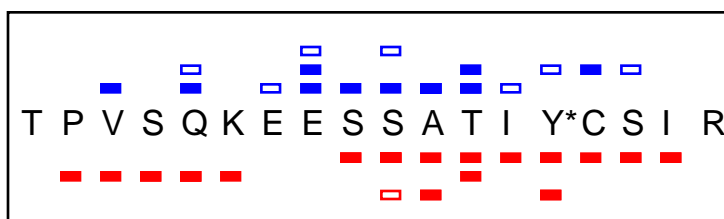

Protein Name: Lymphocyte antigen 9  
 gi Accession: 0  
 Precursor Mass: 712.6627+3  
 Delta Mass: 2.699 ppm  
 XCorr: 25.07

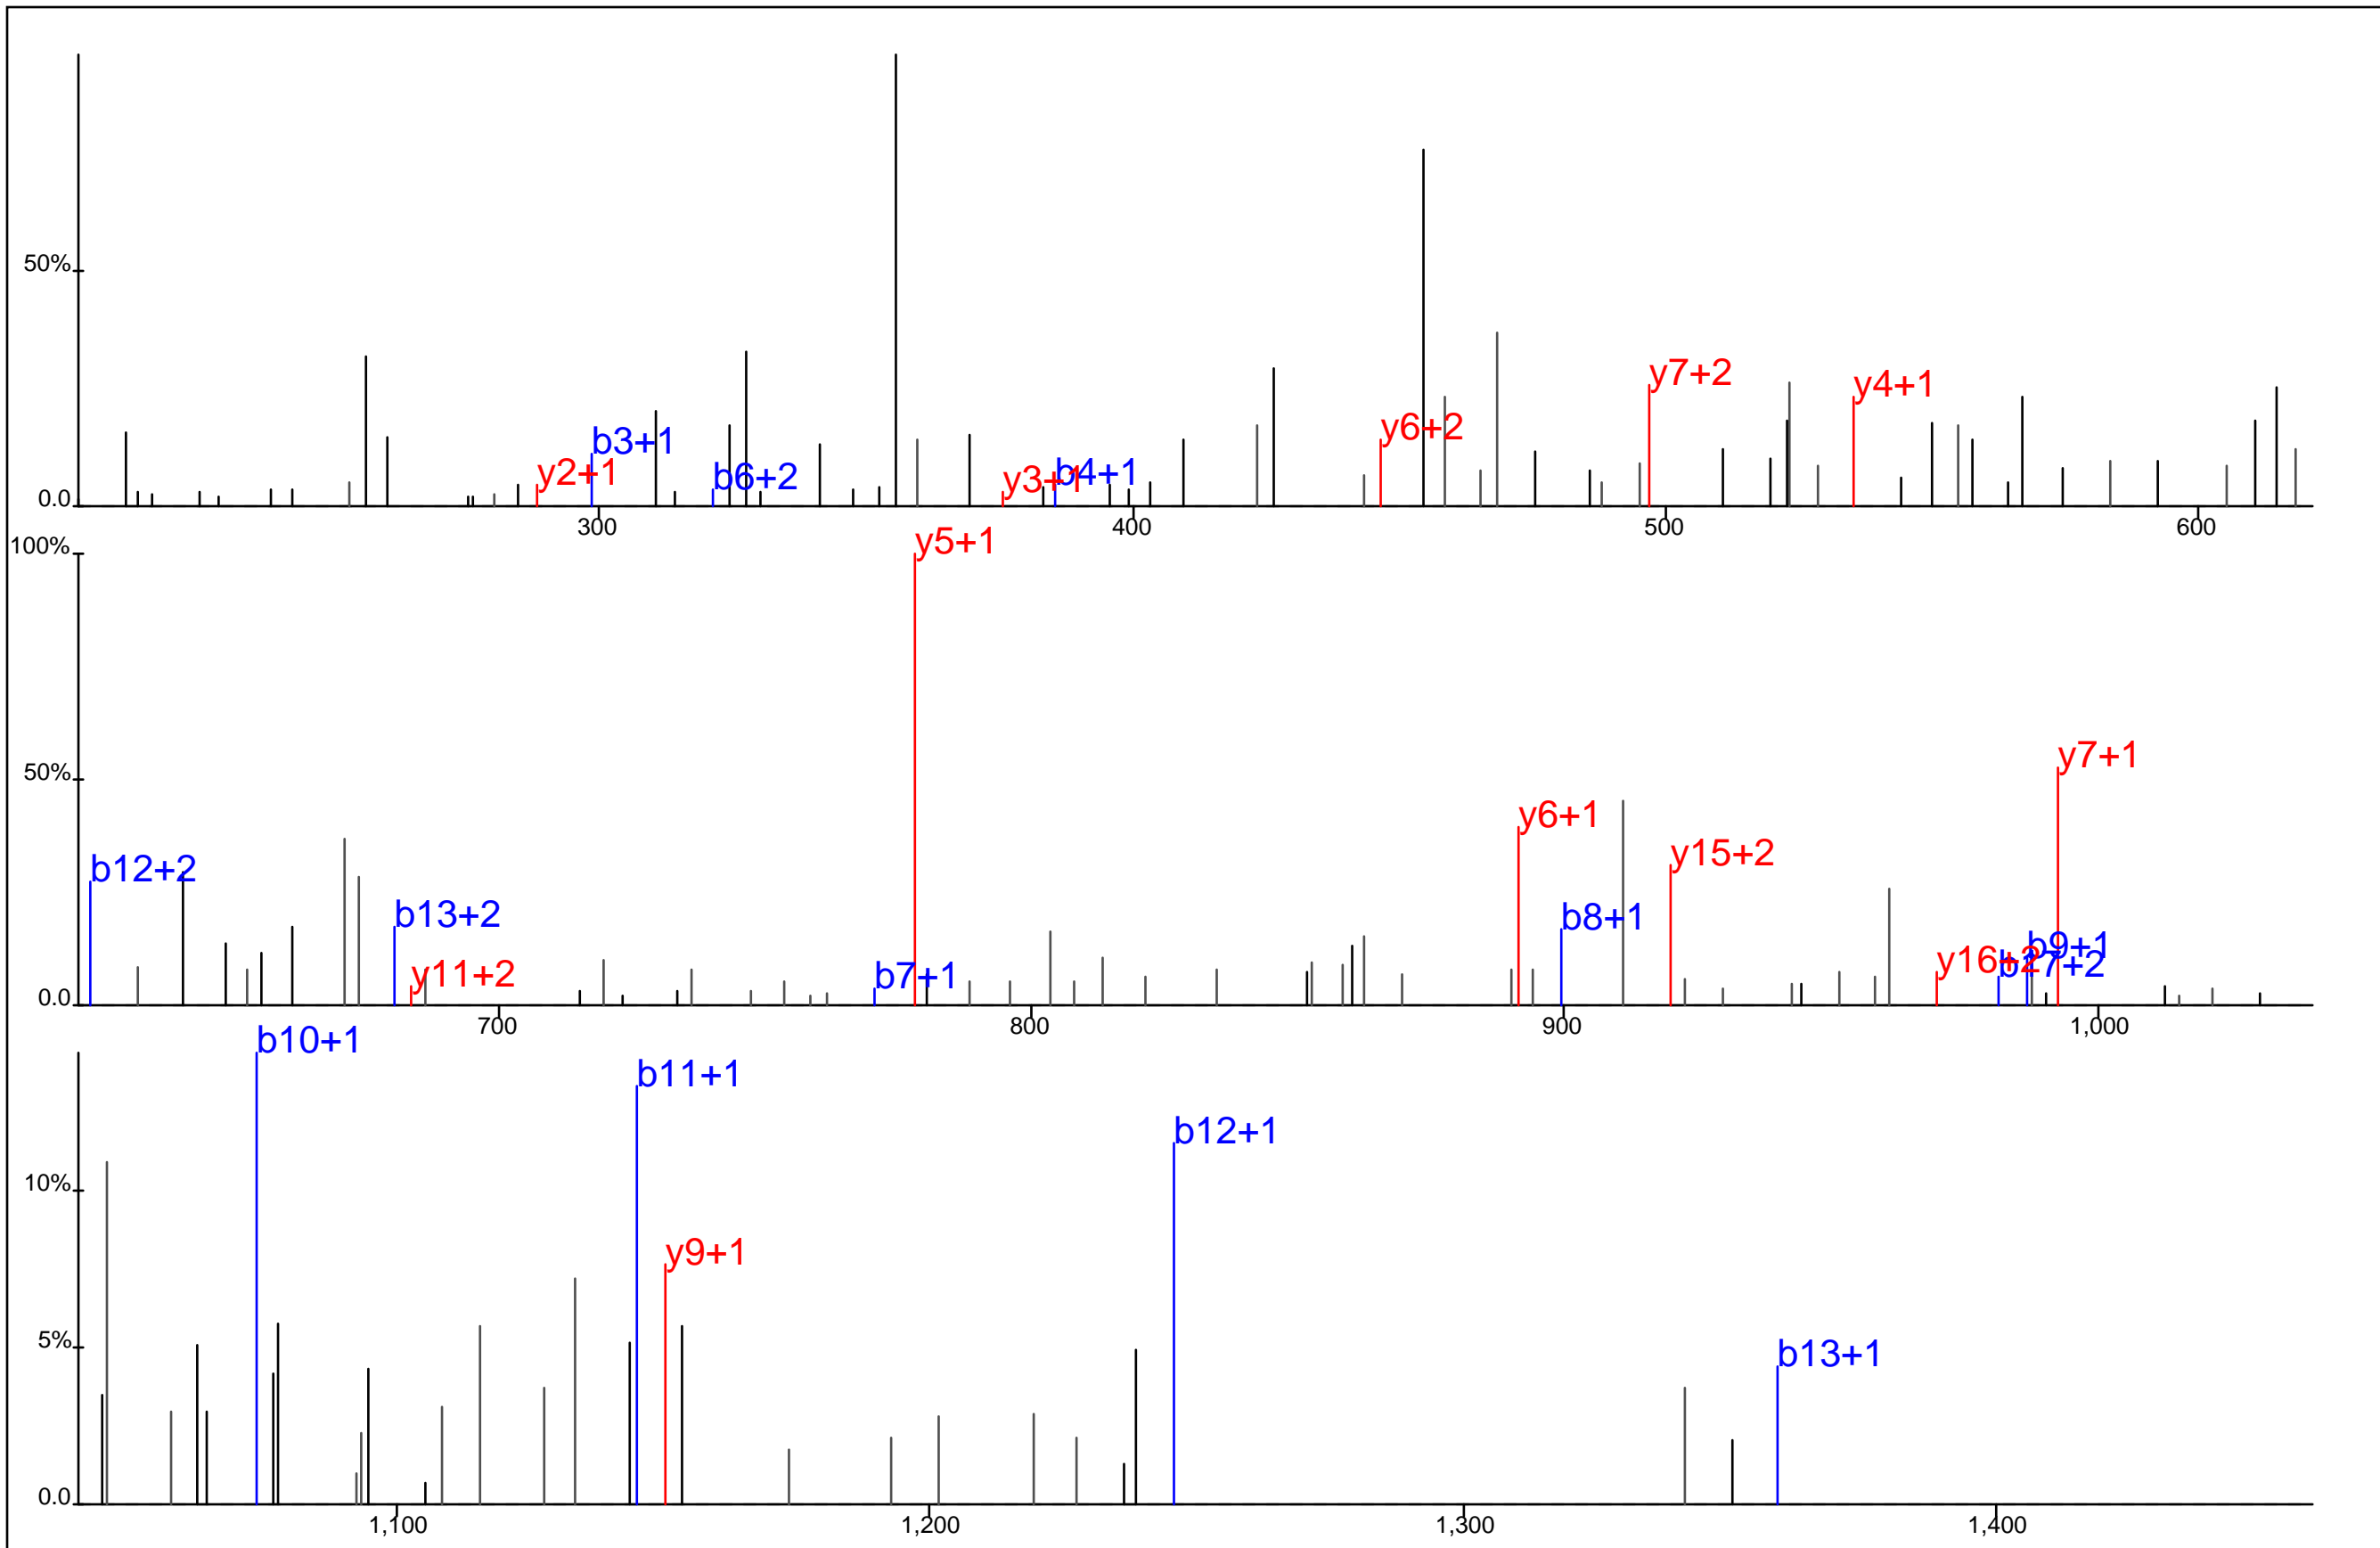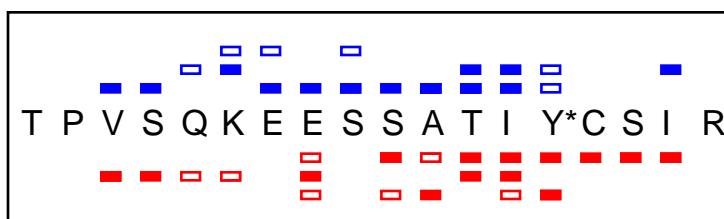

Protein Name: Lymphocyte antigen 9  
 gi Accession: 0  
 Precursor Mass: 712.6606+3  
 Delta Mass: 0.302 ppm  
 XCorr: 25.83



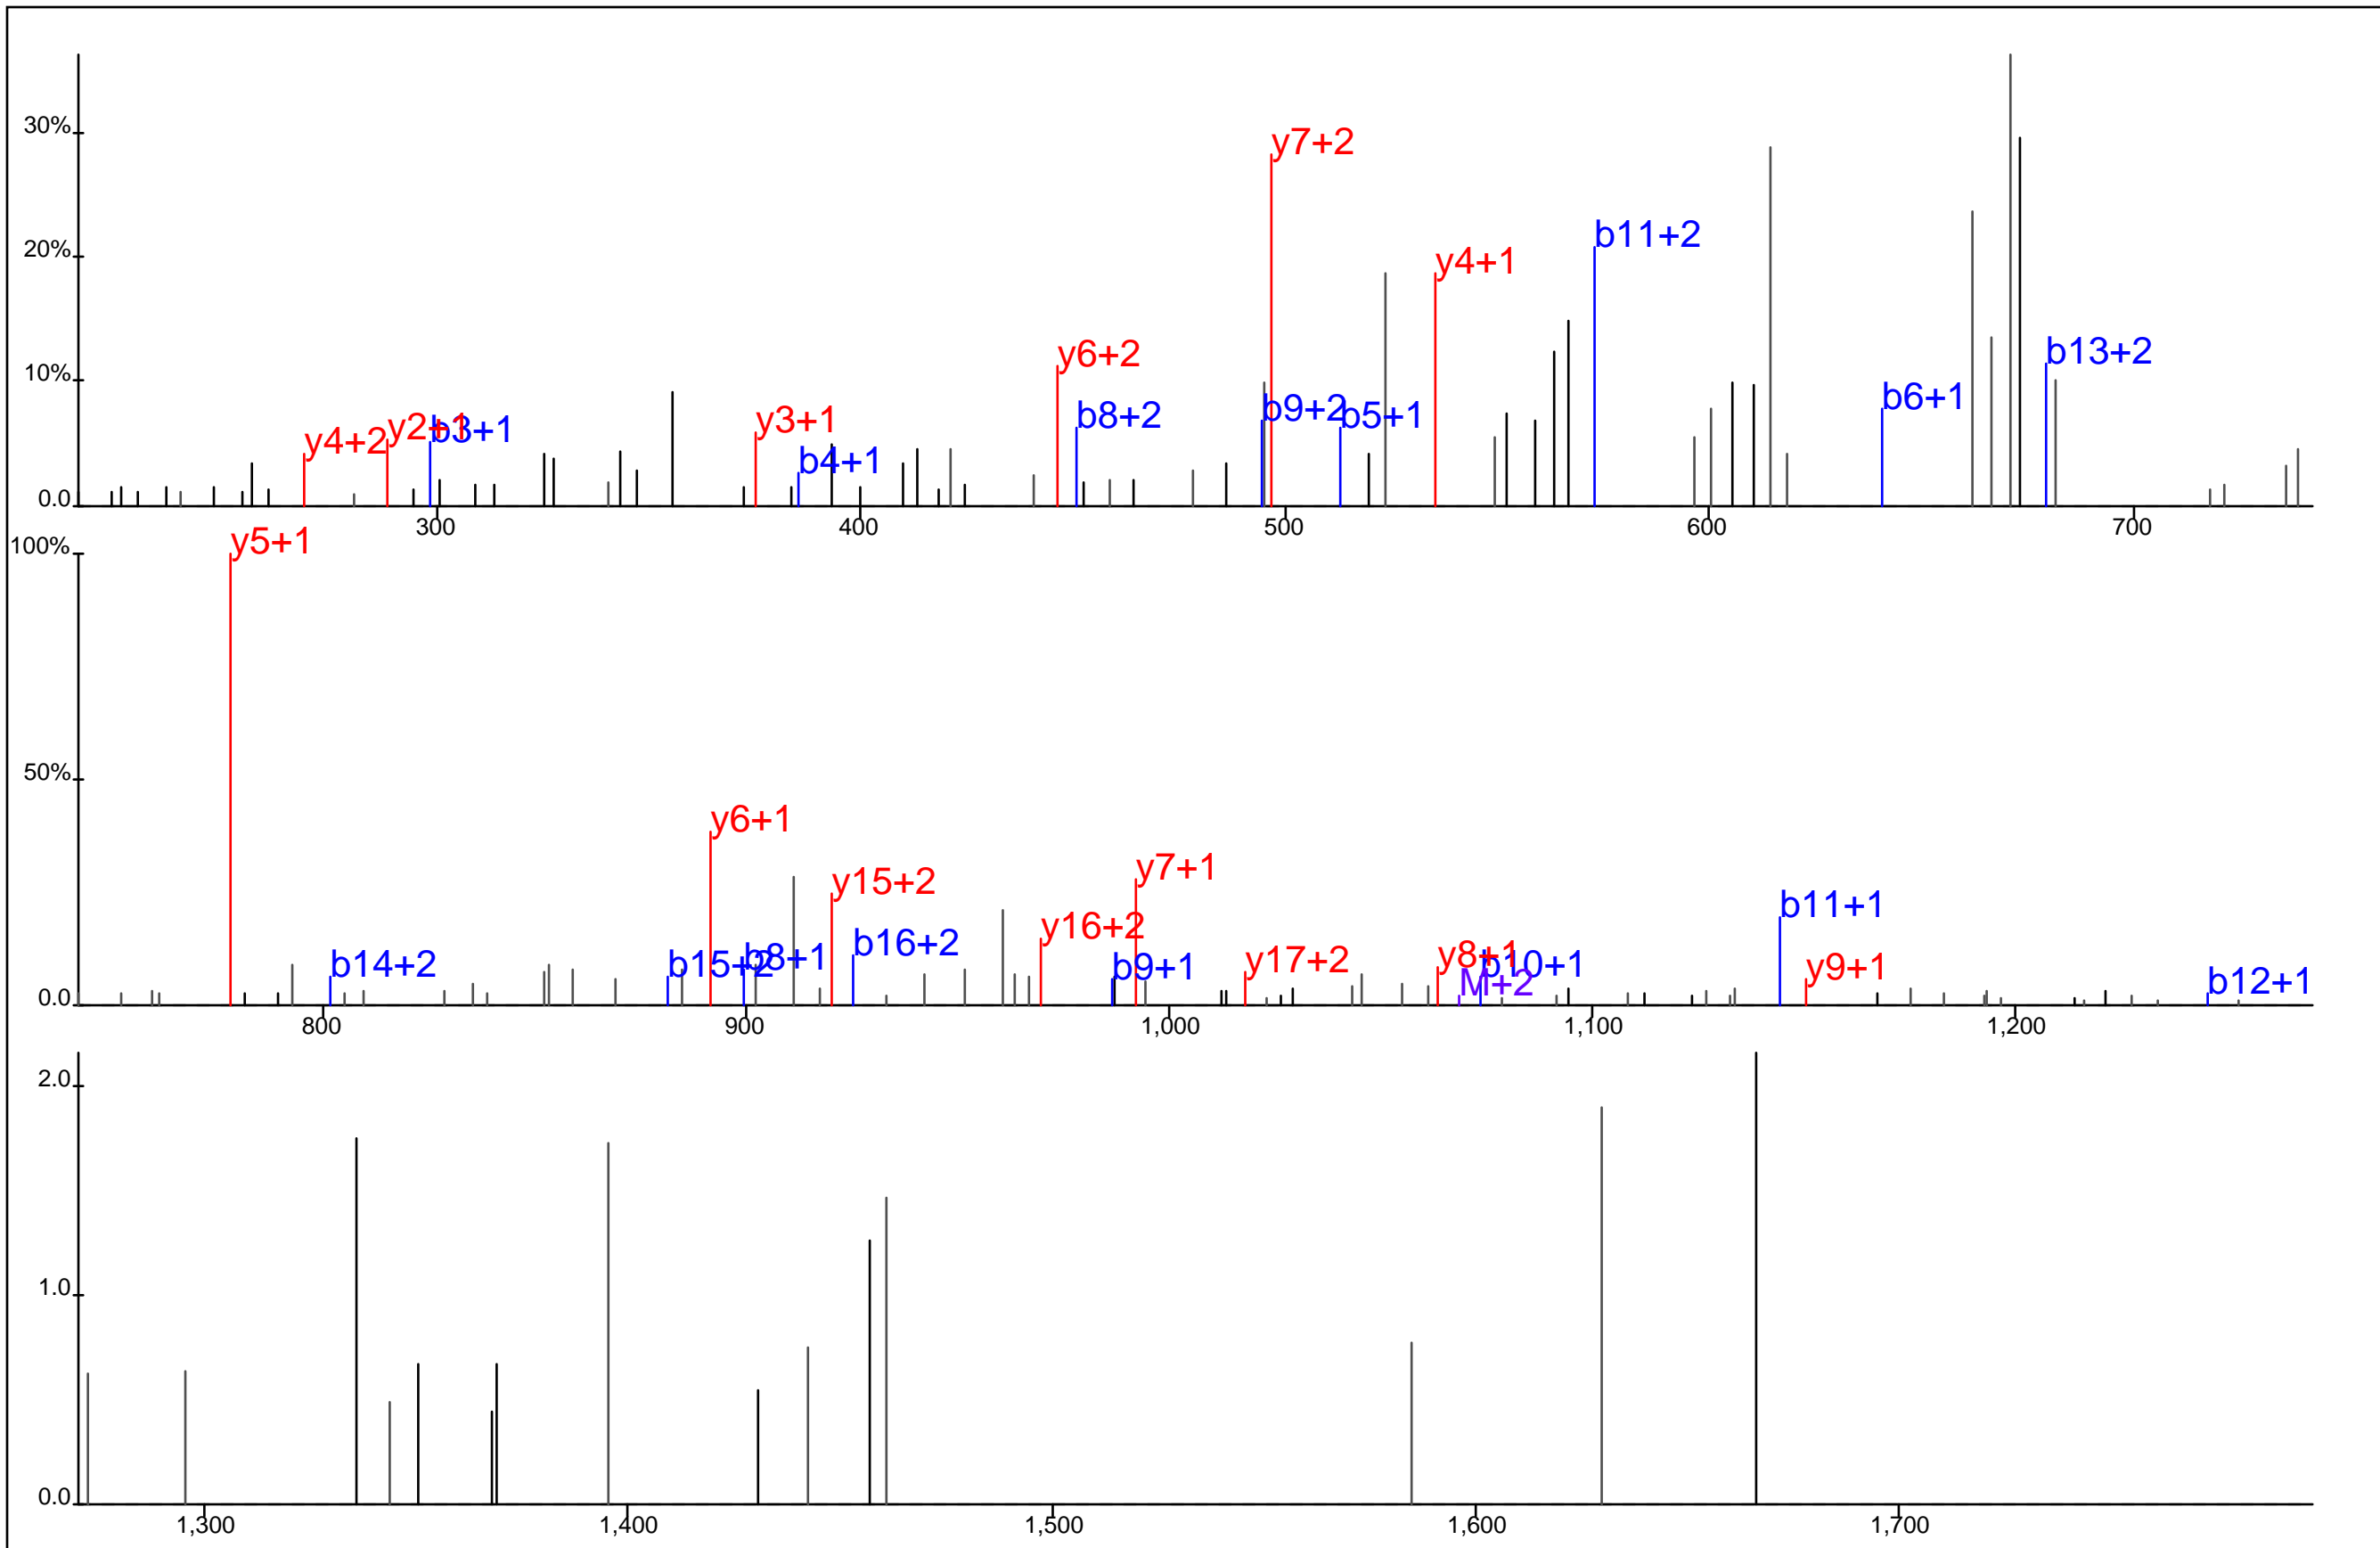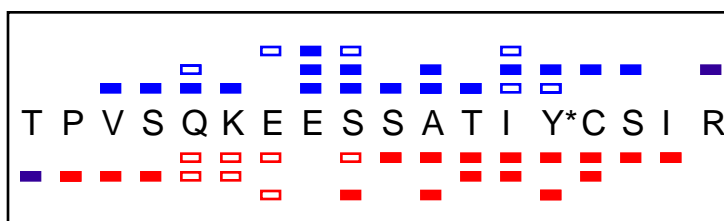

Protein Name: Lymphocyte antigen 9  
 gi Accession: 0  
 Precursor Mass: 712.6613+3  
 Delta Mass: 0.642 ppm  
 XCorr: 42.21



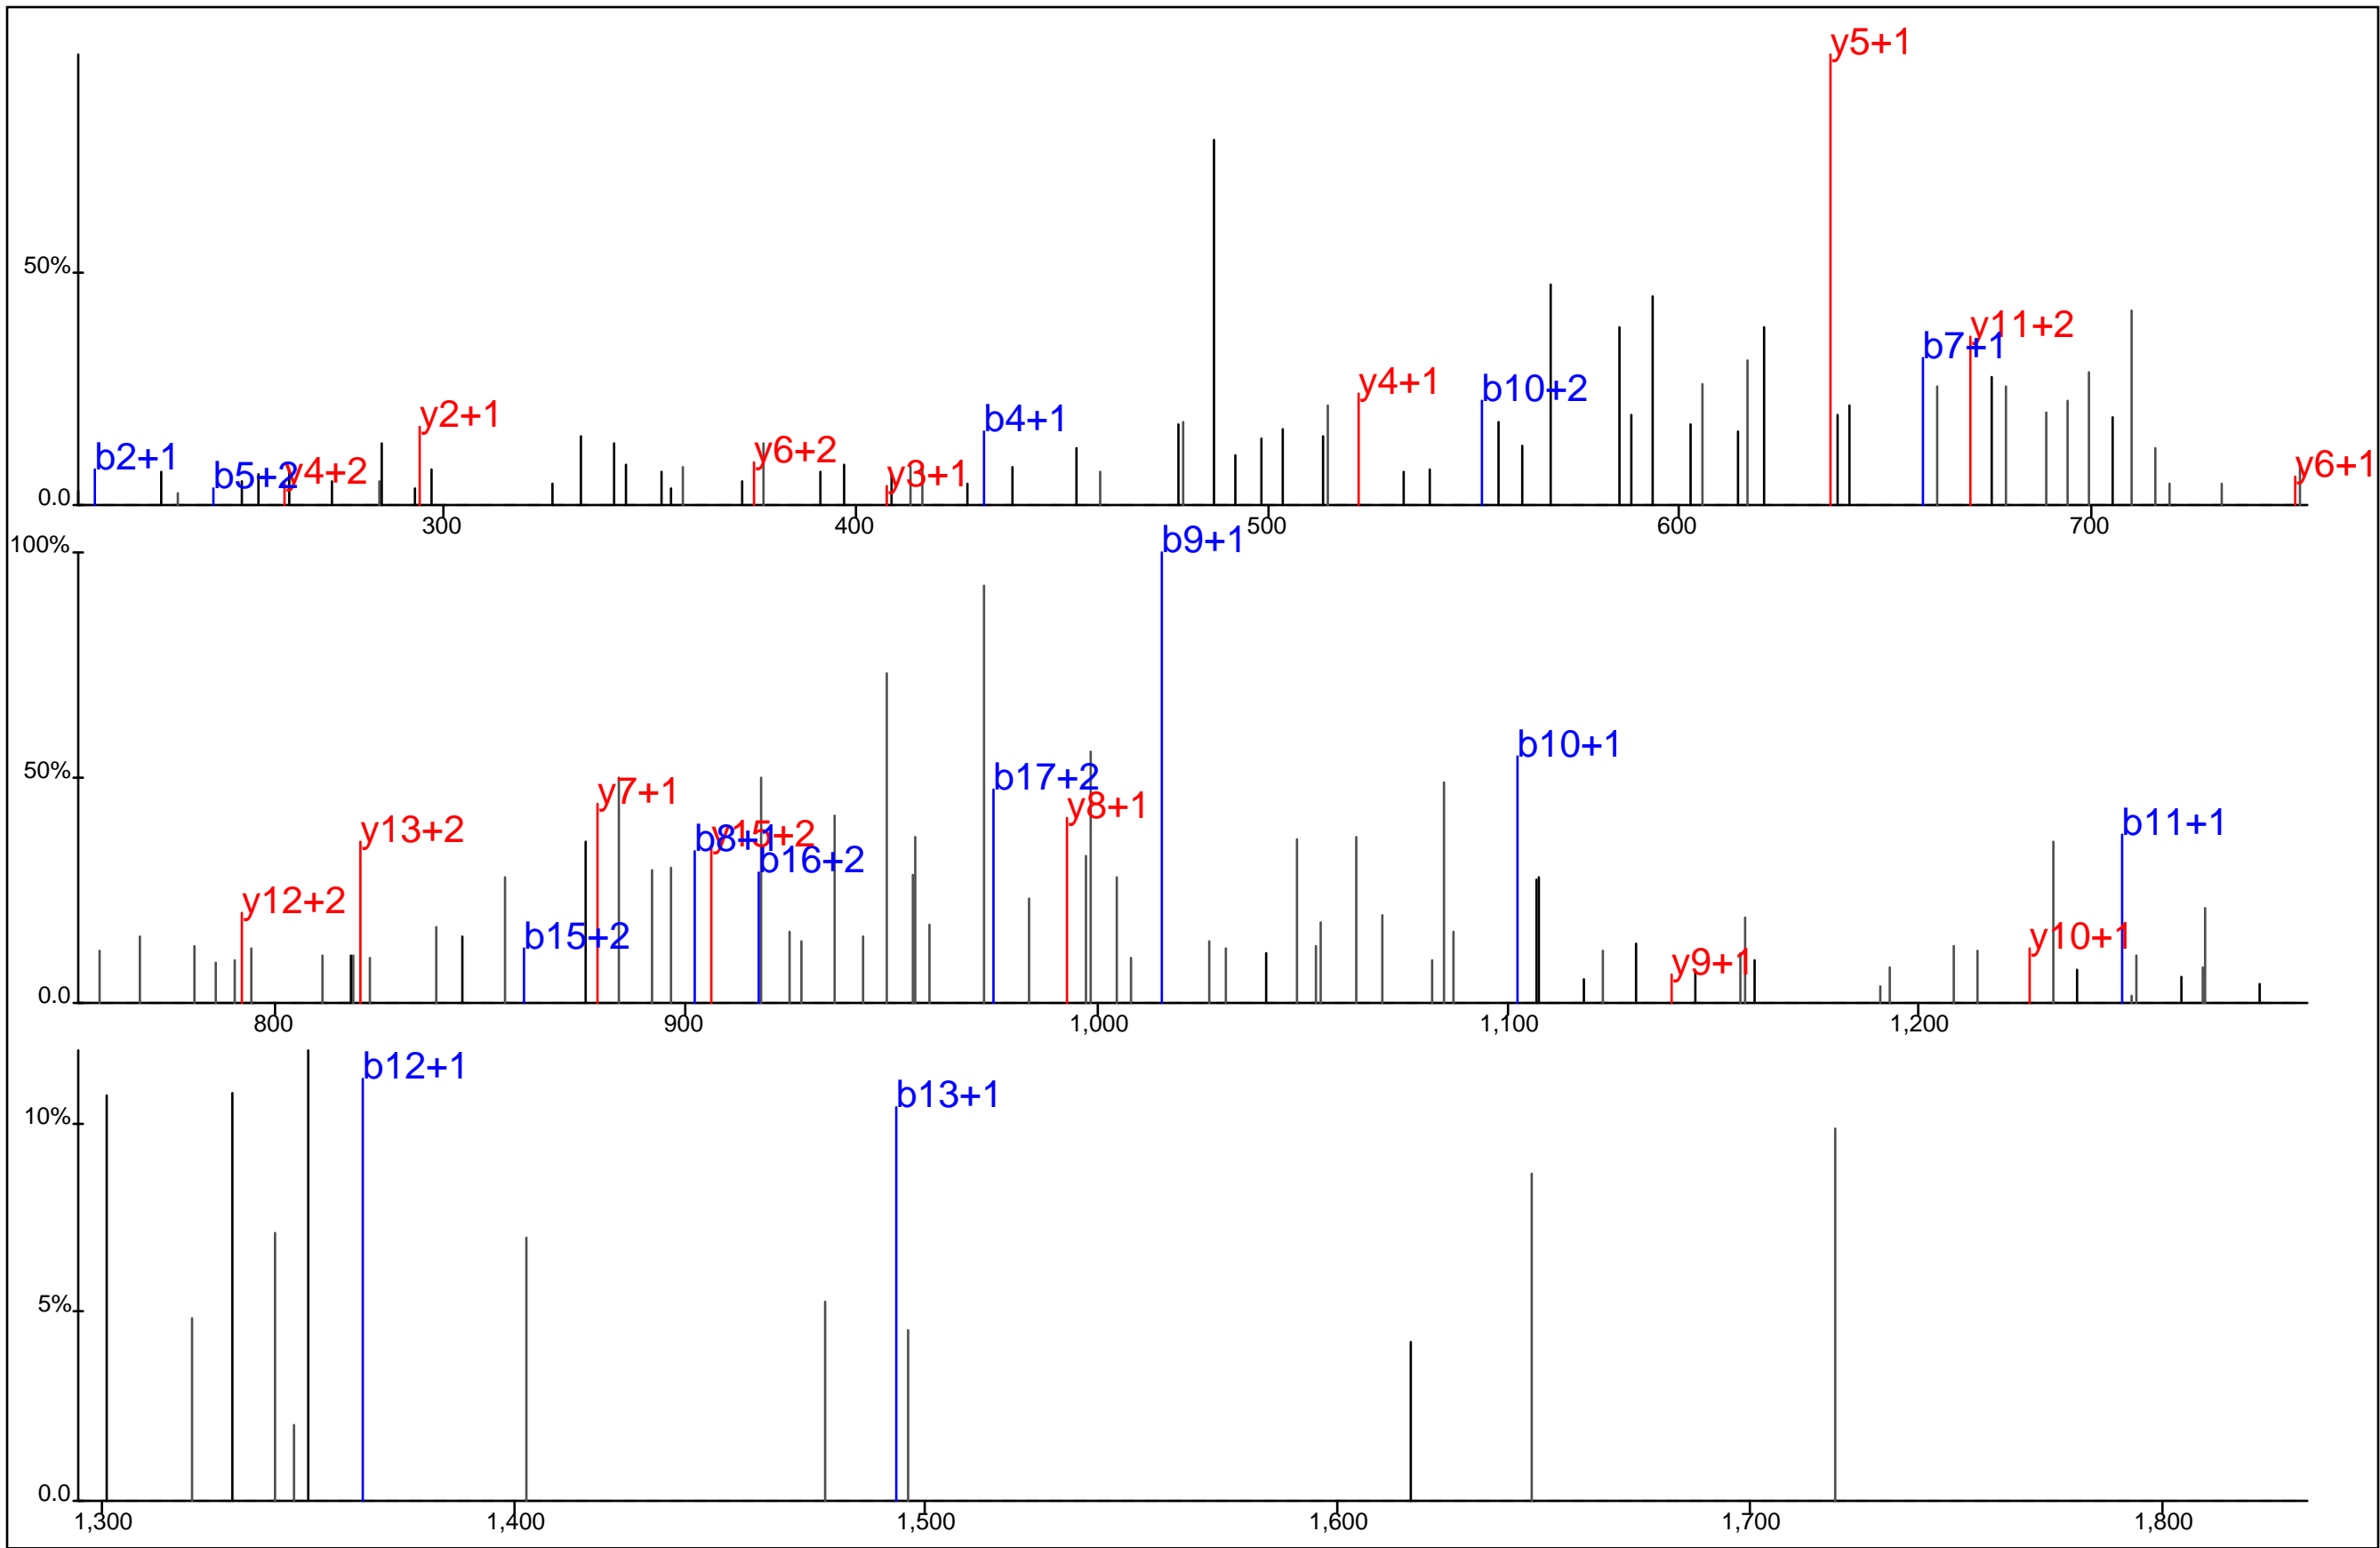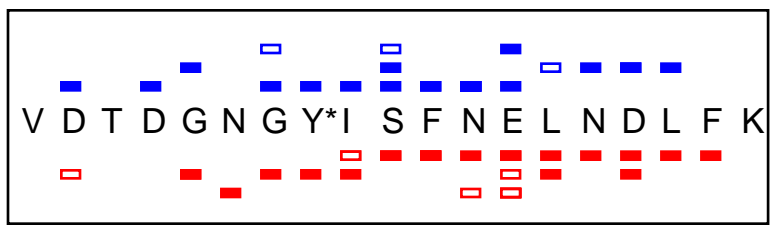

Protein Name: Lymphocyte cytosolic protein 1  
 gi Accession: 0  
 Precursor Mass: 747.6667+3  
 Delta Mass: 4.809 ppm  
 XCorr: 29.4

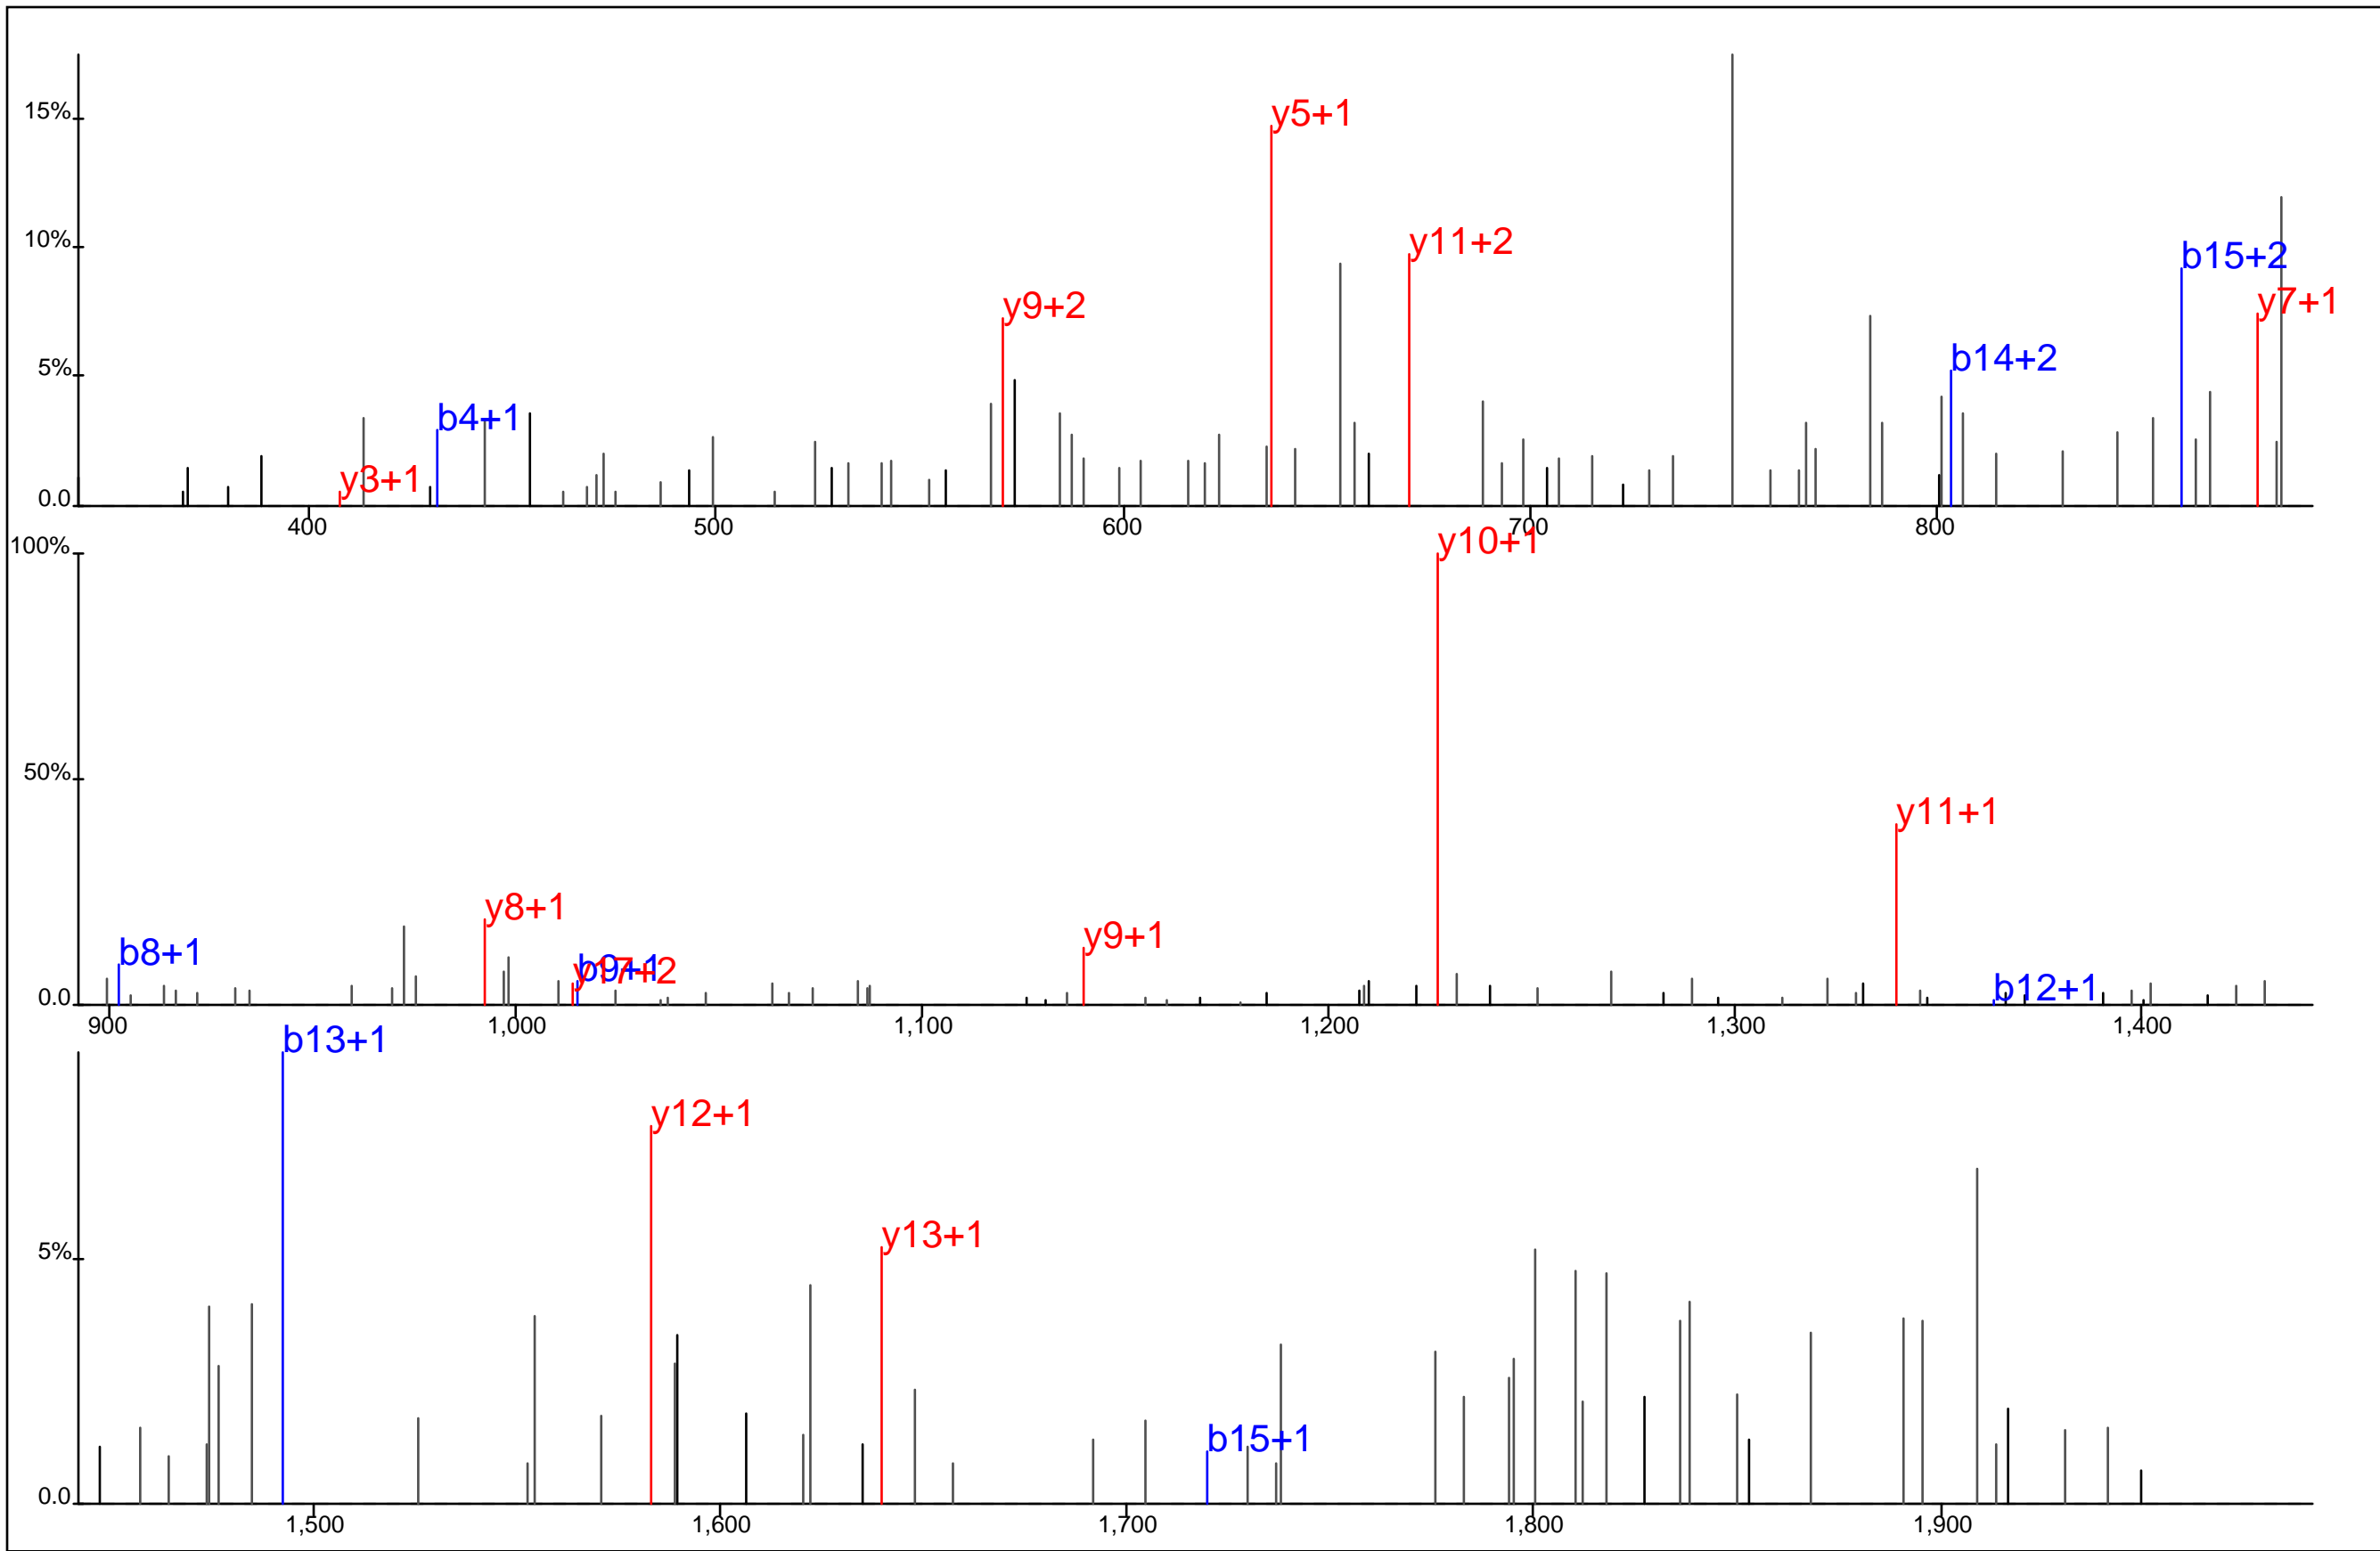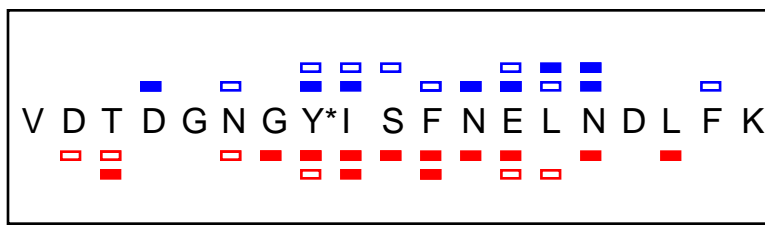

Protein Name: Lymphocyte cytosolic protein 1  
 gi Accession: 0  
 Precursor Mass: 1,120.9899+2  
 Delta Mass: 1.014 ppm  
 XCorr: 30.76

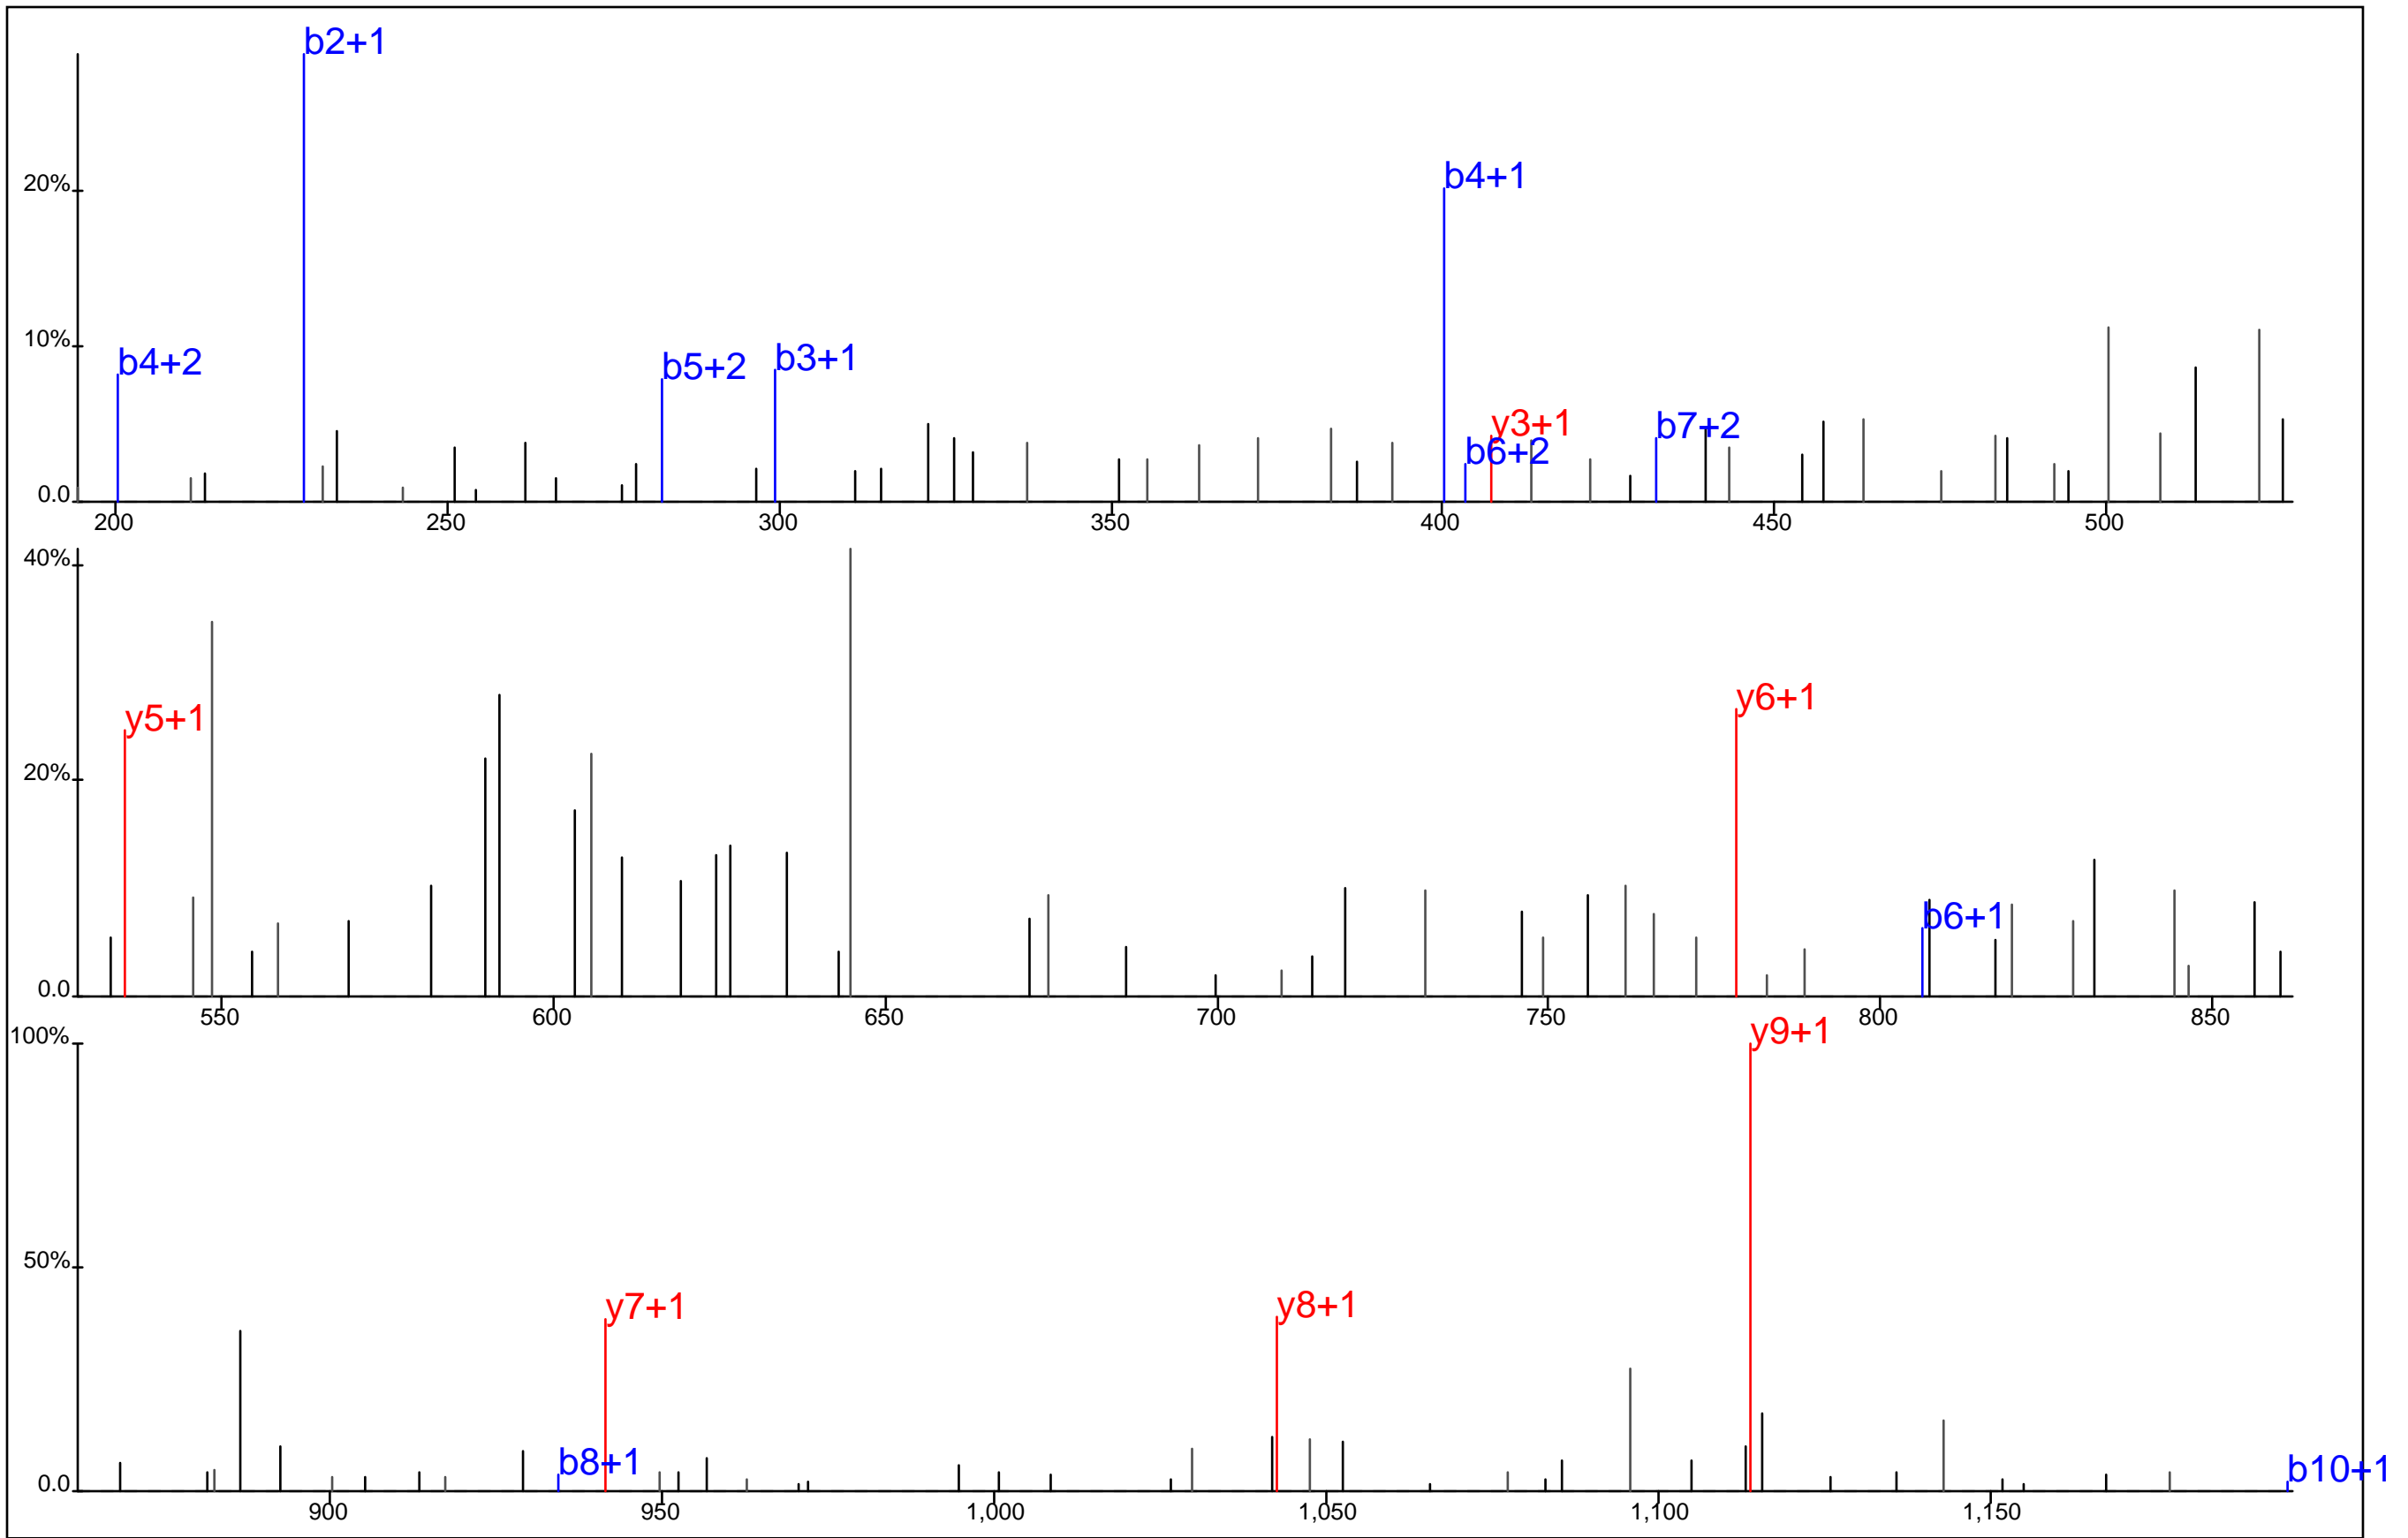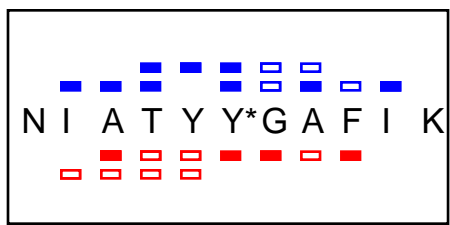

Protein Name: MAP4K4  
 gi Accession: 0  
 Precursor Mass: 670.8188+2  
 Delta Mass: 1.356 ppm  
 XCorr: 23.14

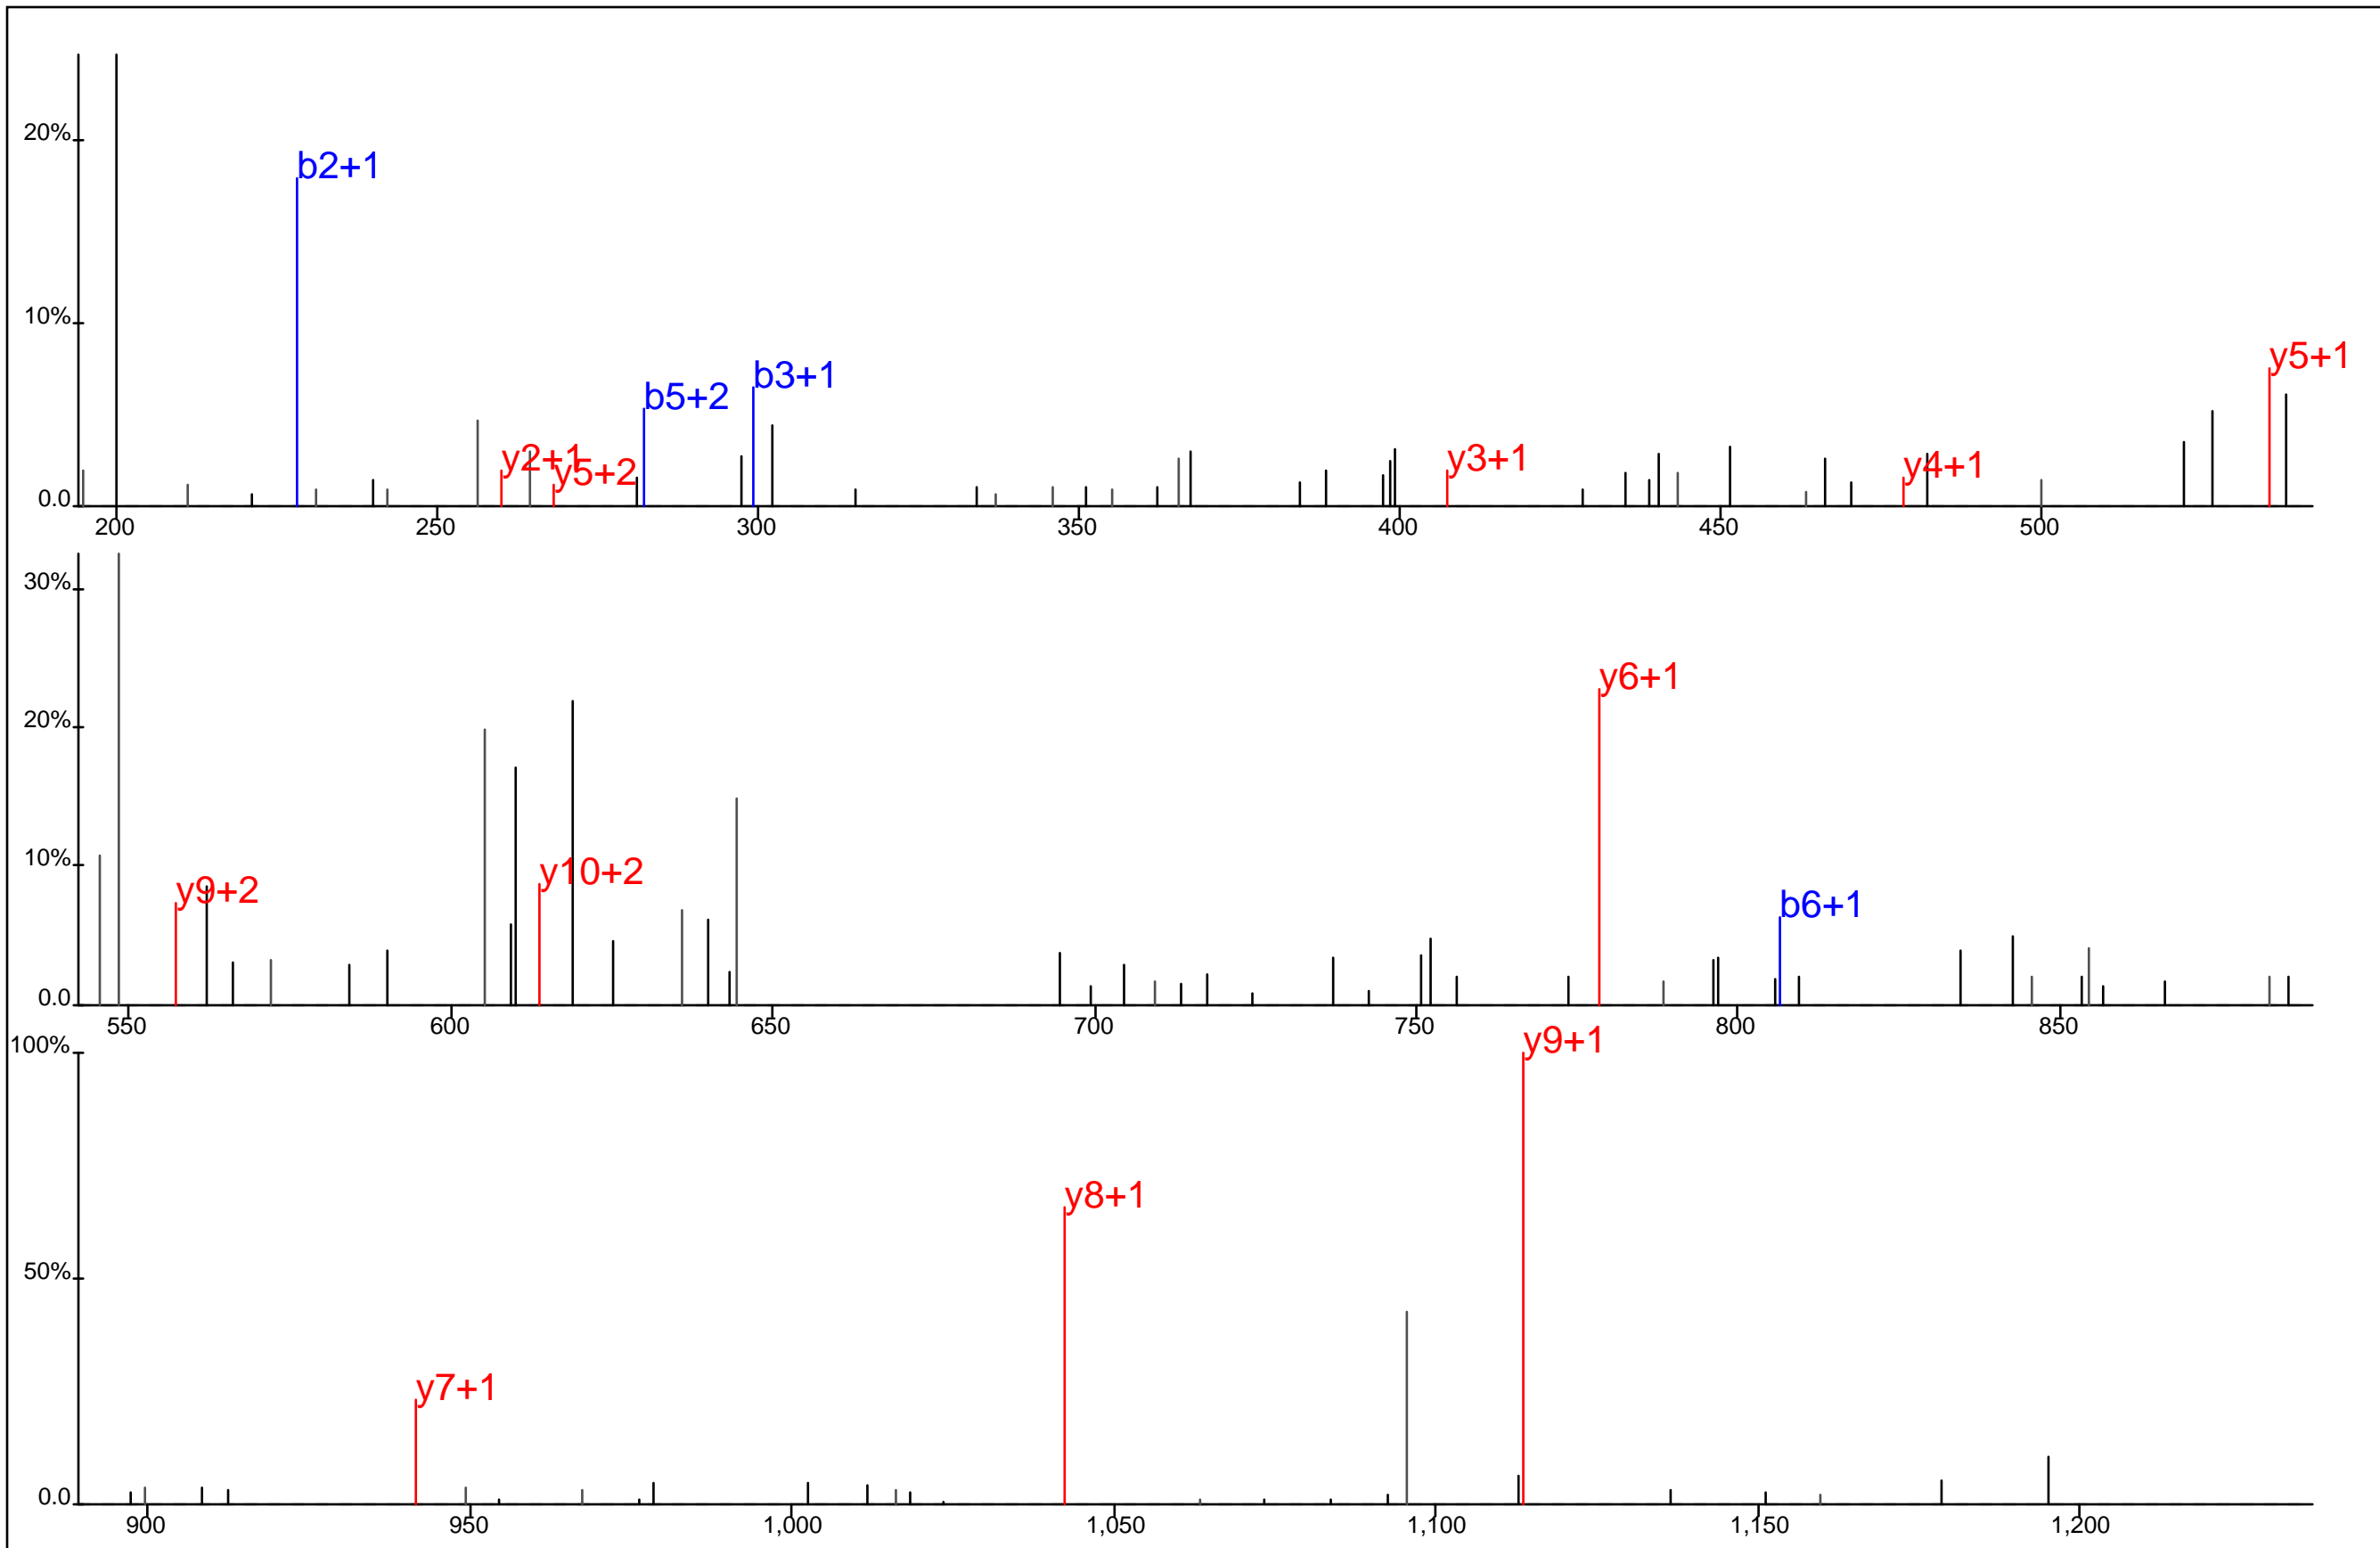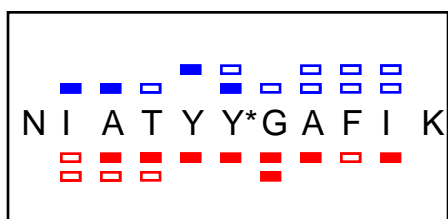

Protein Name: MAP4K4  
 gi Accession: 0  
 Precursor Mass: 670.8185+2  
 Delta Mass: 0.809 ppm  
 XCorr: 22.11

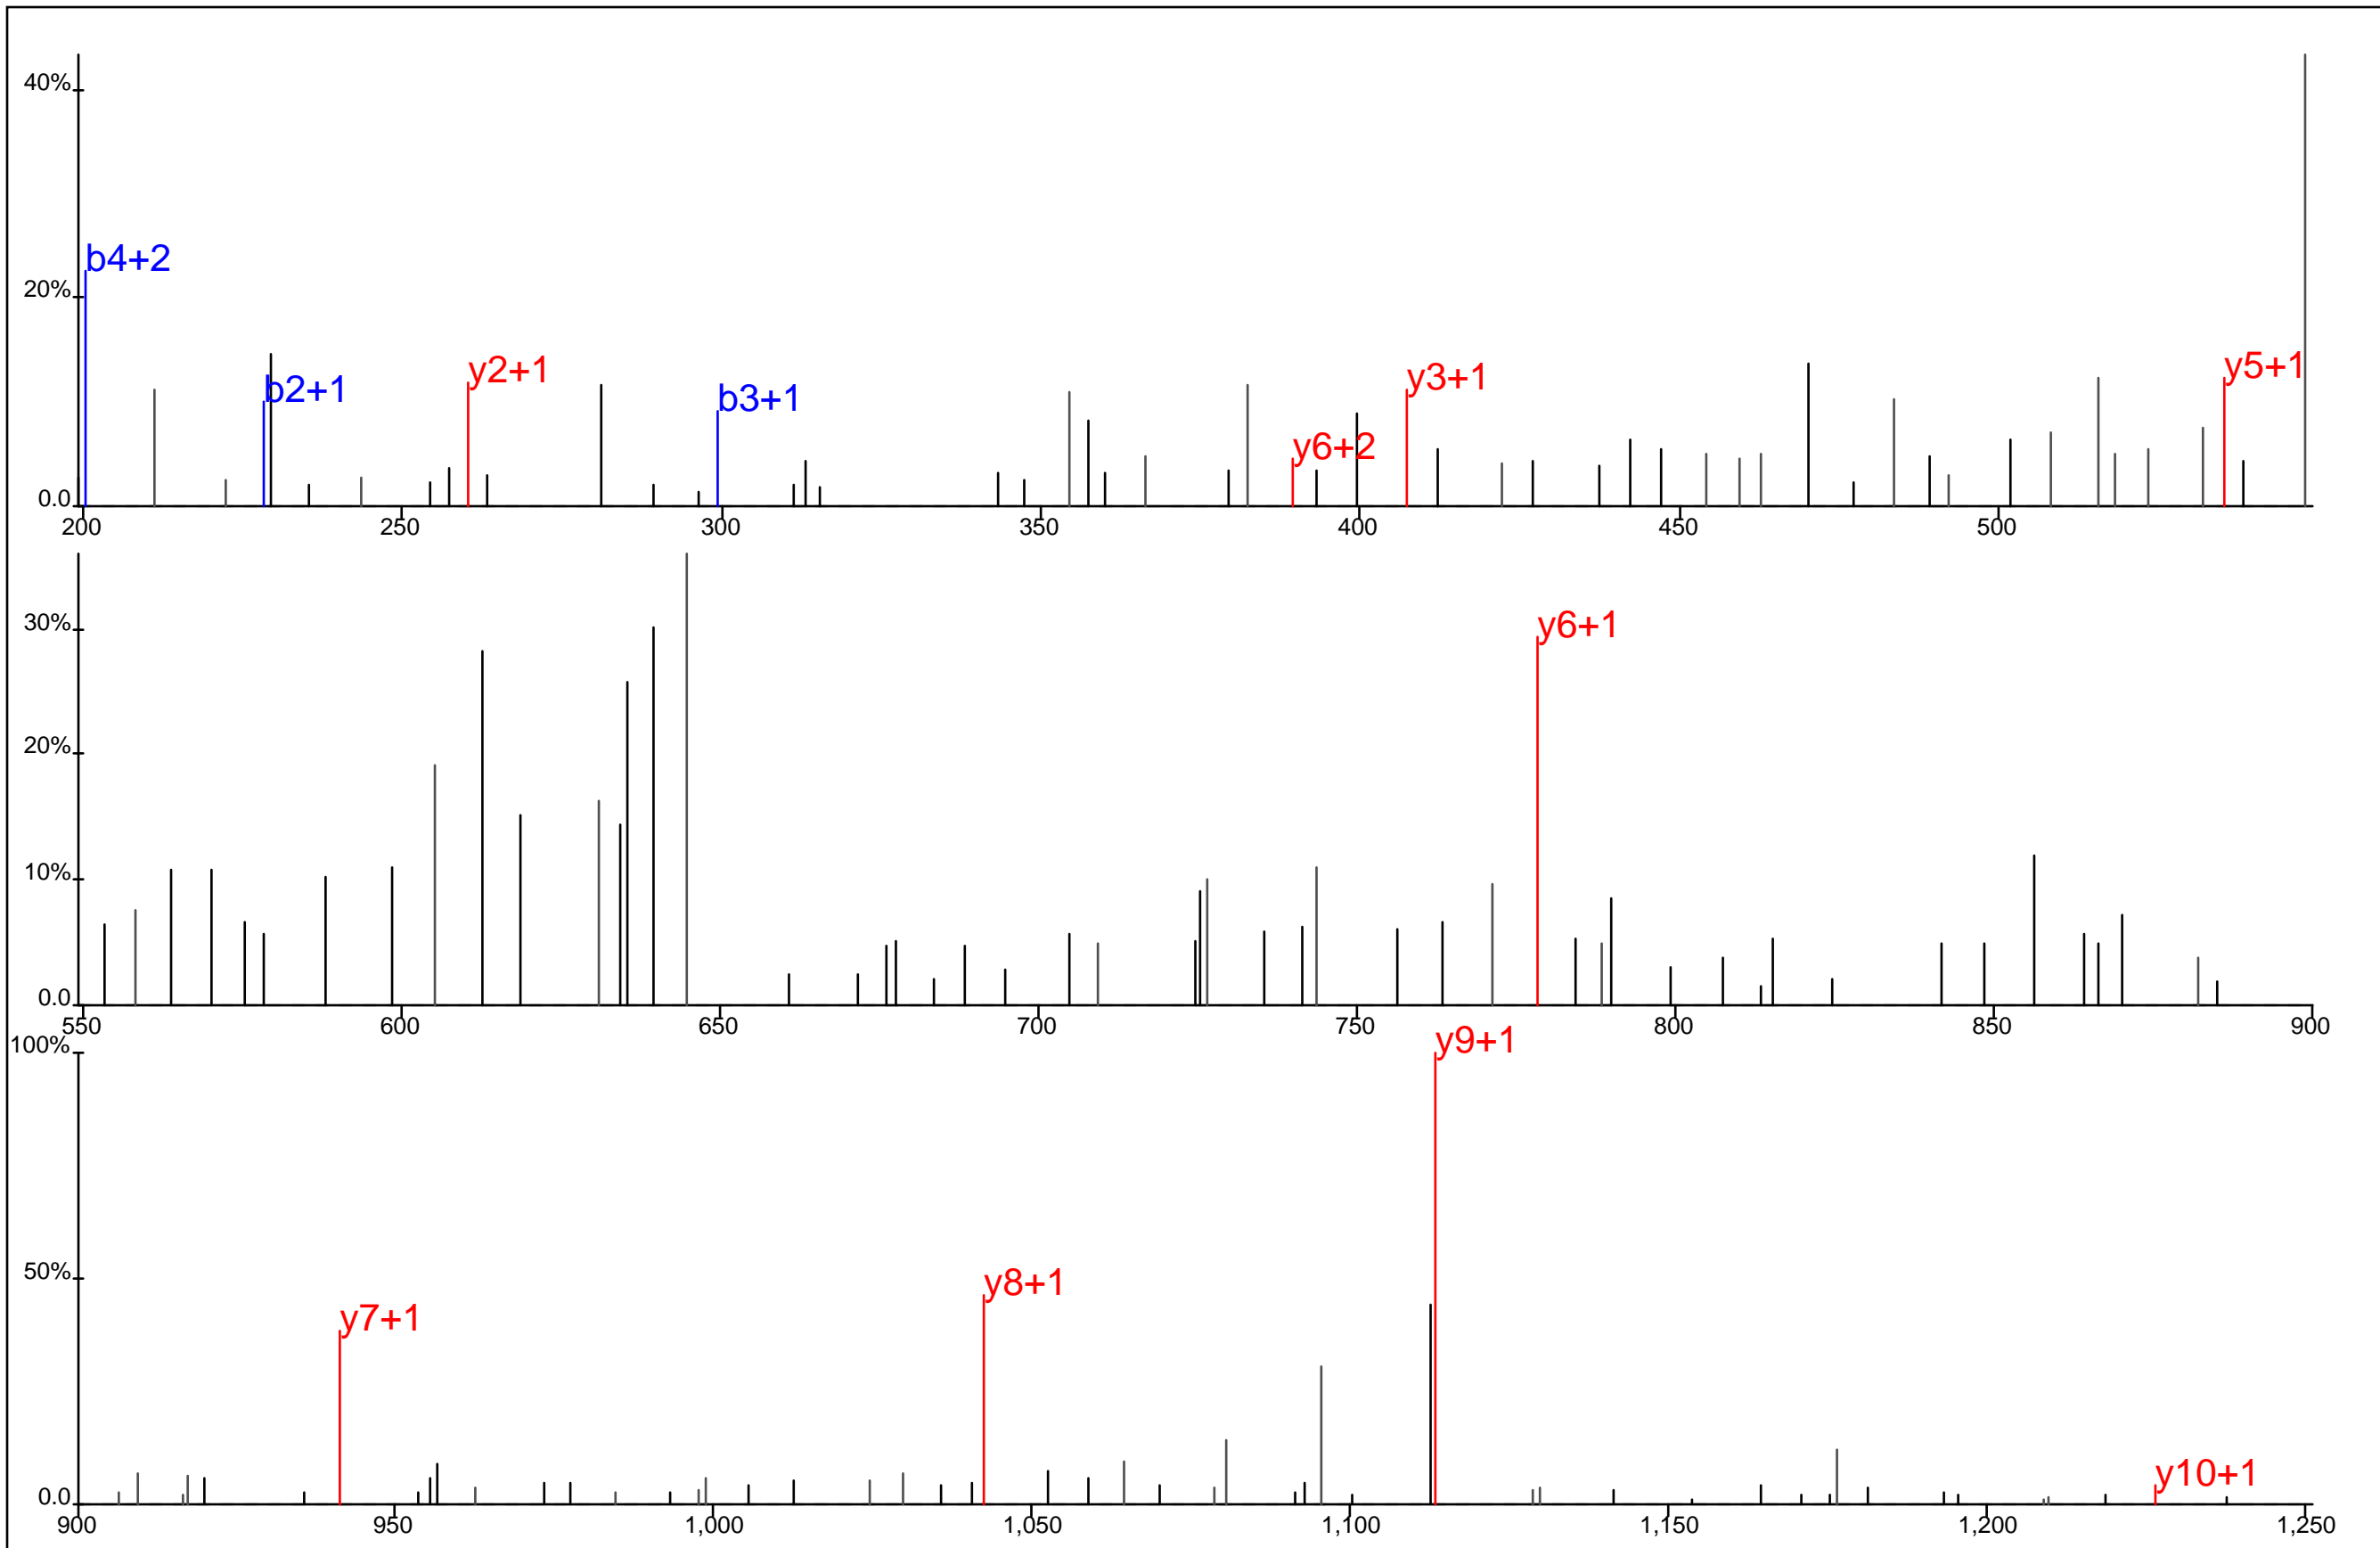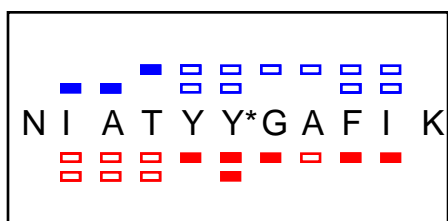

Protein Name: MAP4K4  
 gi Accession: 0  
 Precursor Mass: 670.8183+2  
 Delta Mass: 0.536 ppm  
 XCorr: 32.36

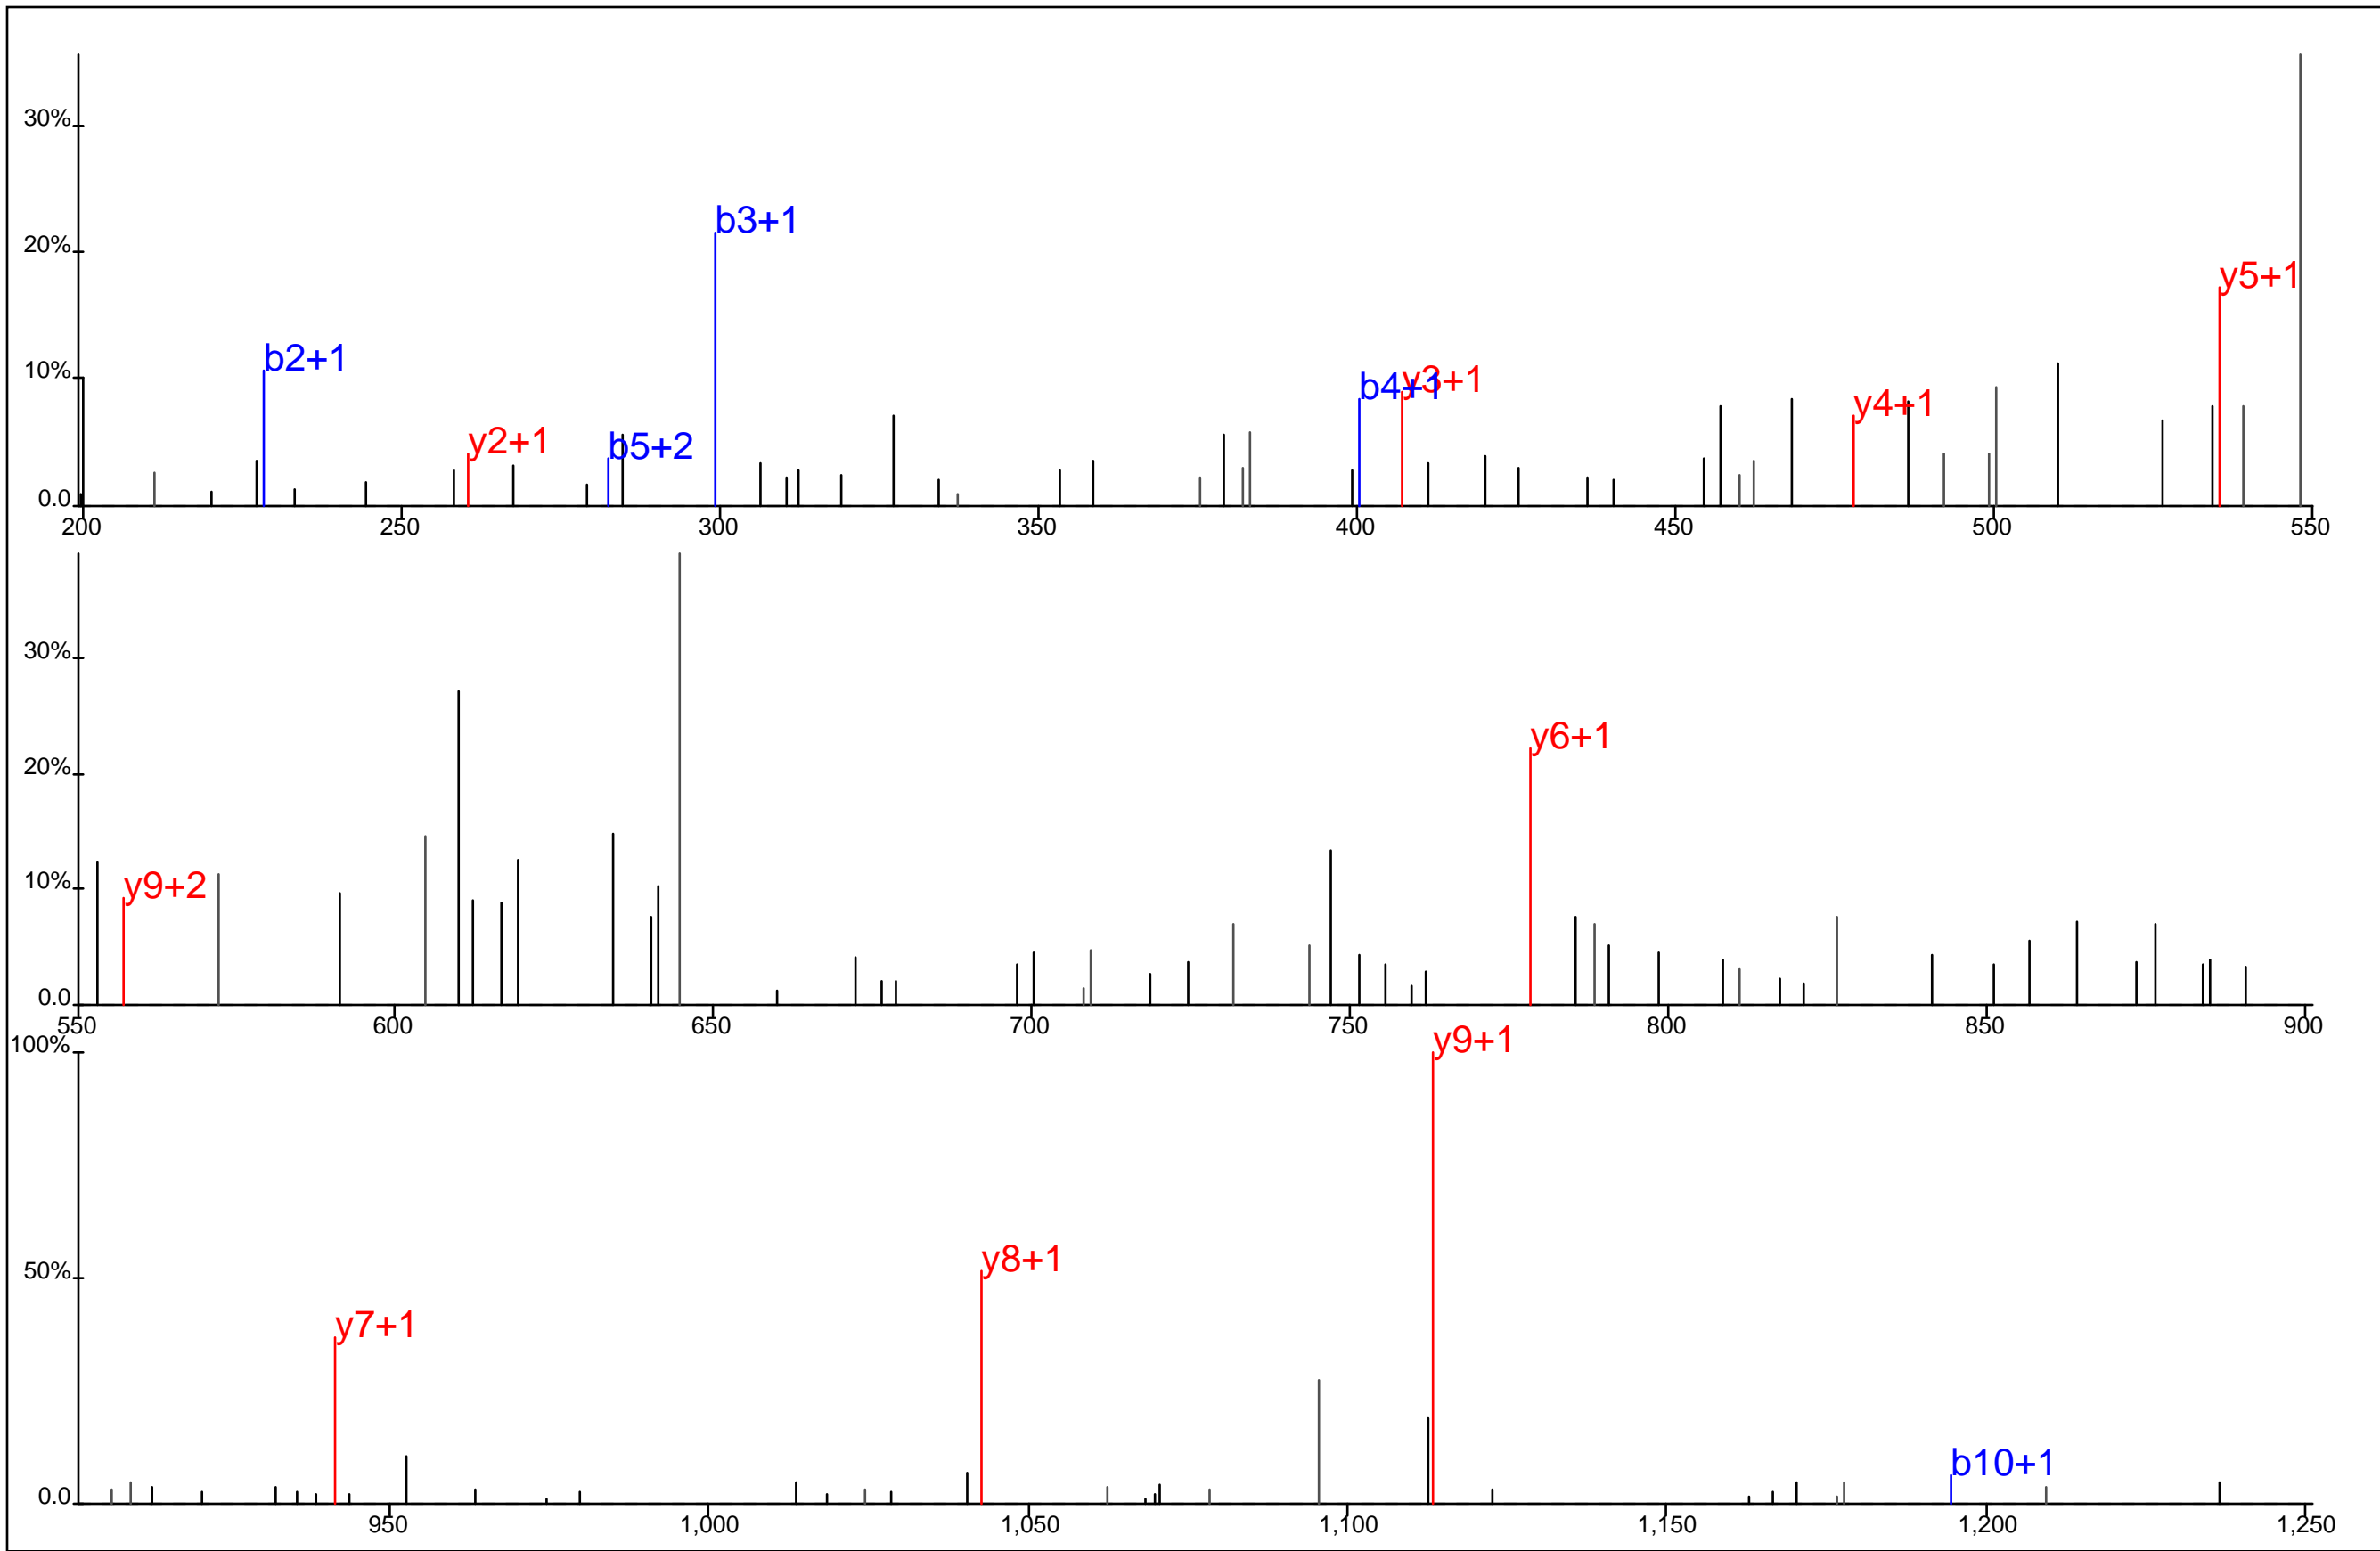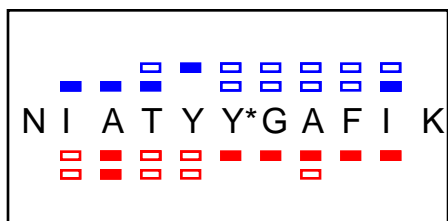

Protein Name: MAP4K4  
 gi Accession: 0  
 Precursor Mass: 670.8169+2  
 Delta Mass: 1.557 ppm  
 XCorr: 34.34

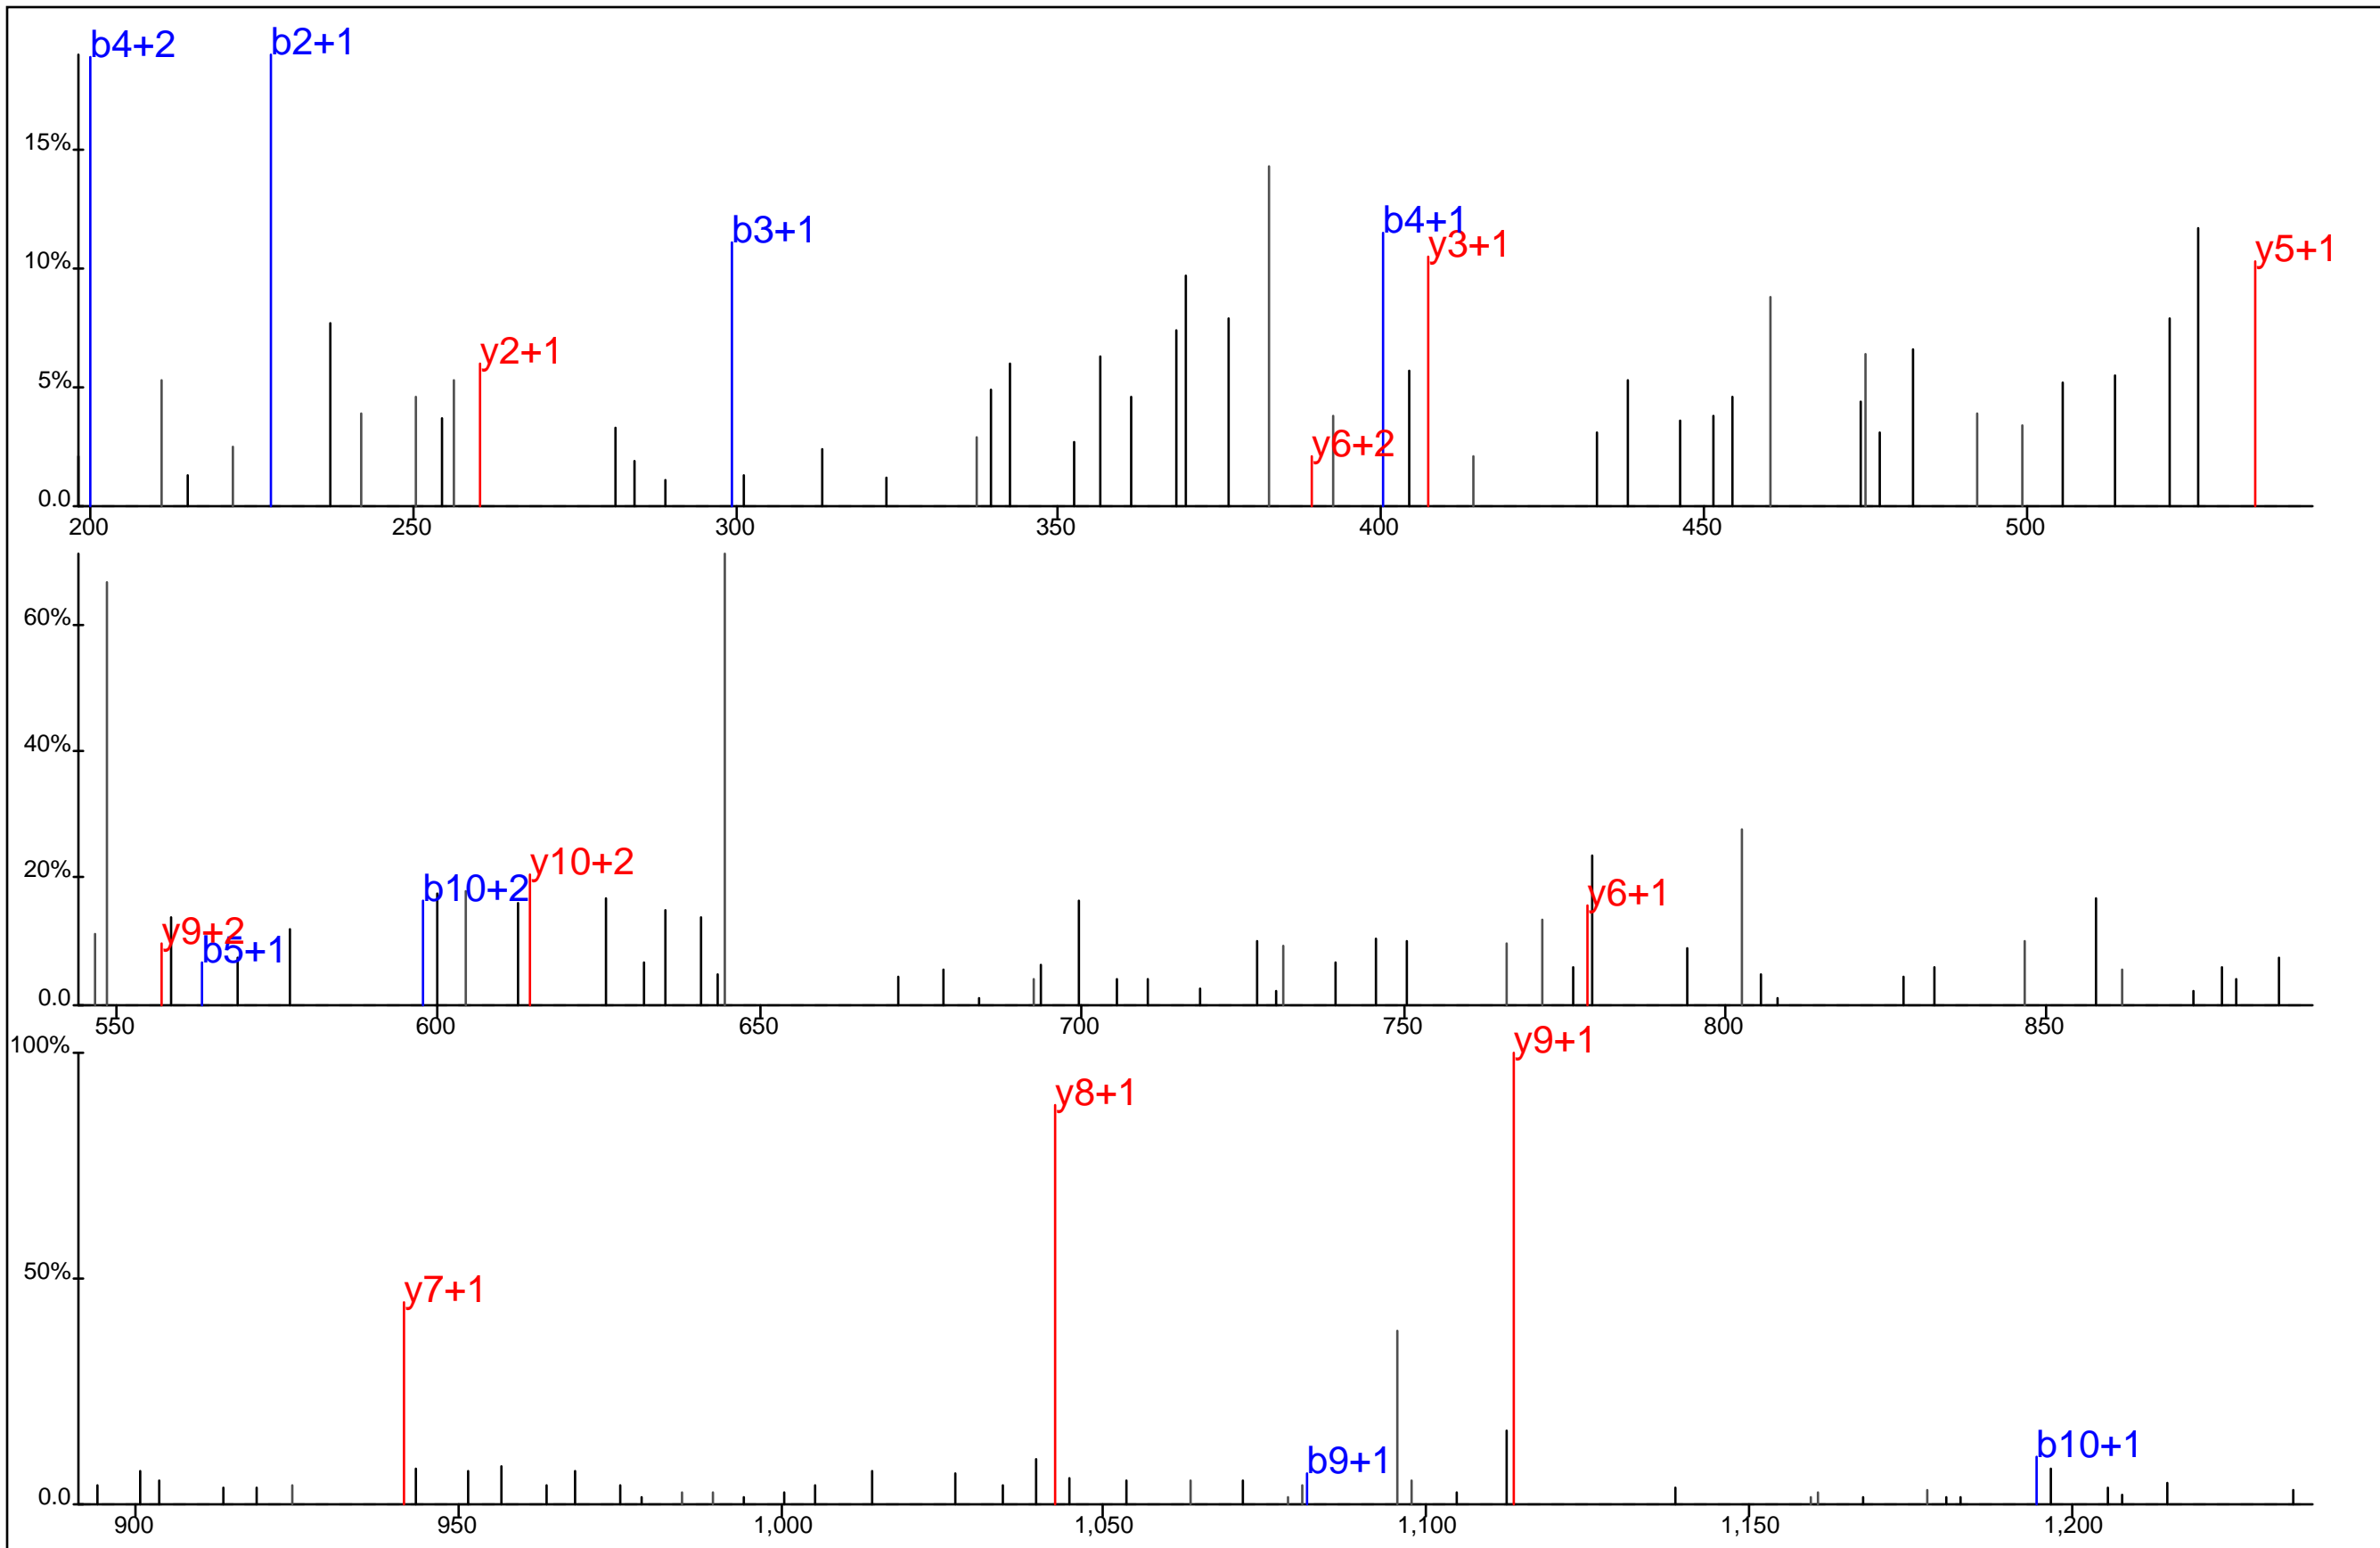

**N I A T Y Y\* G A F I K**

Protein Name: MAP4K4  
 gi Accession: 0  
 Precursor Mass: 670.8173+2  
 Delta Mass: 1.011 ppm  
 XCorr: 20.15





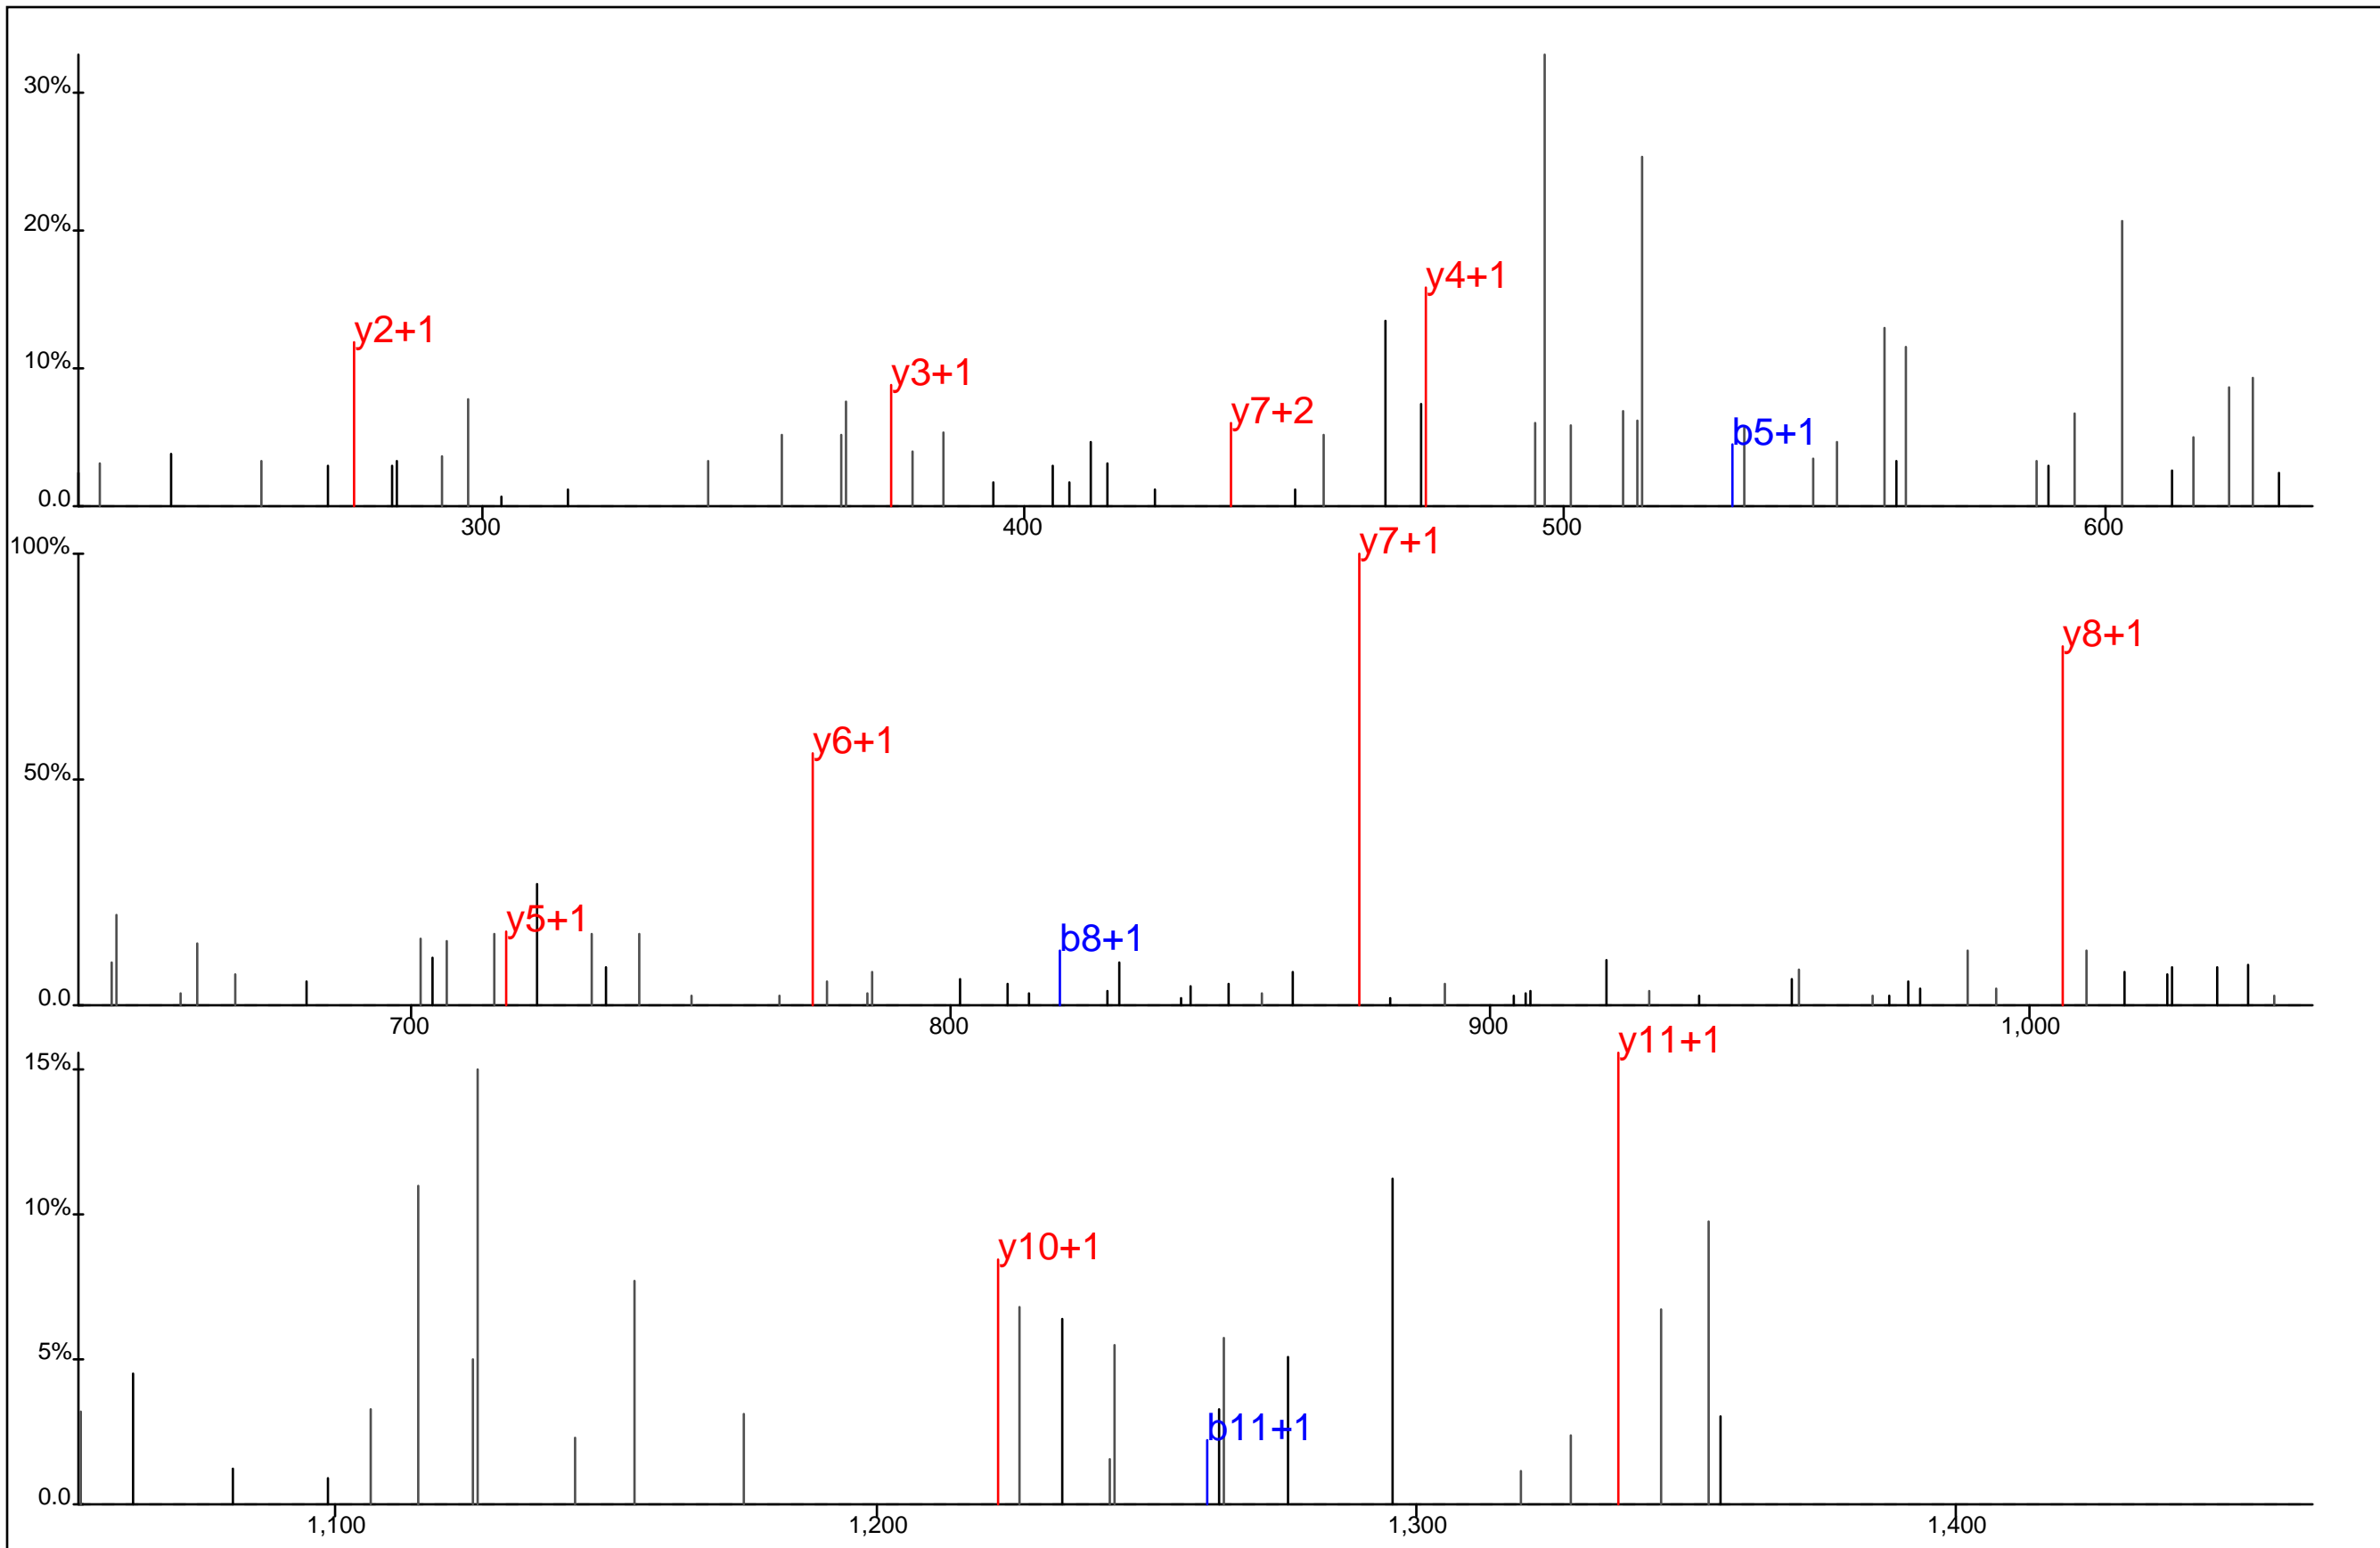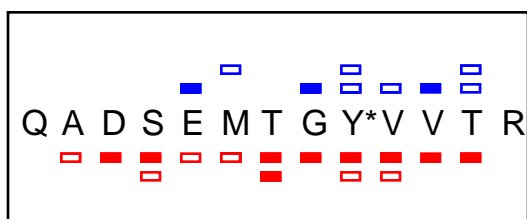

Protein Name: MAPK12  
 gi Accession: 0  
 Precursor Mass: 768.8215+2  
 Delta Mass: 2.741 ppm  
 XCorr: 39.34



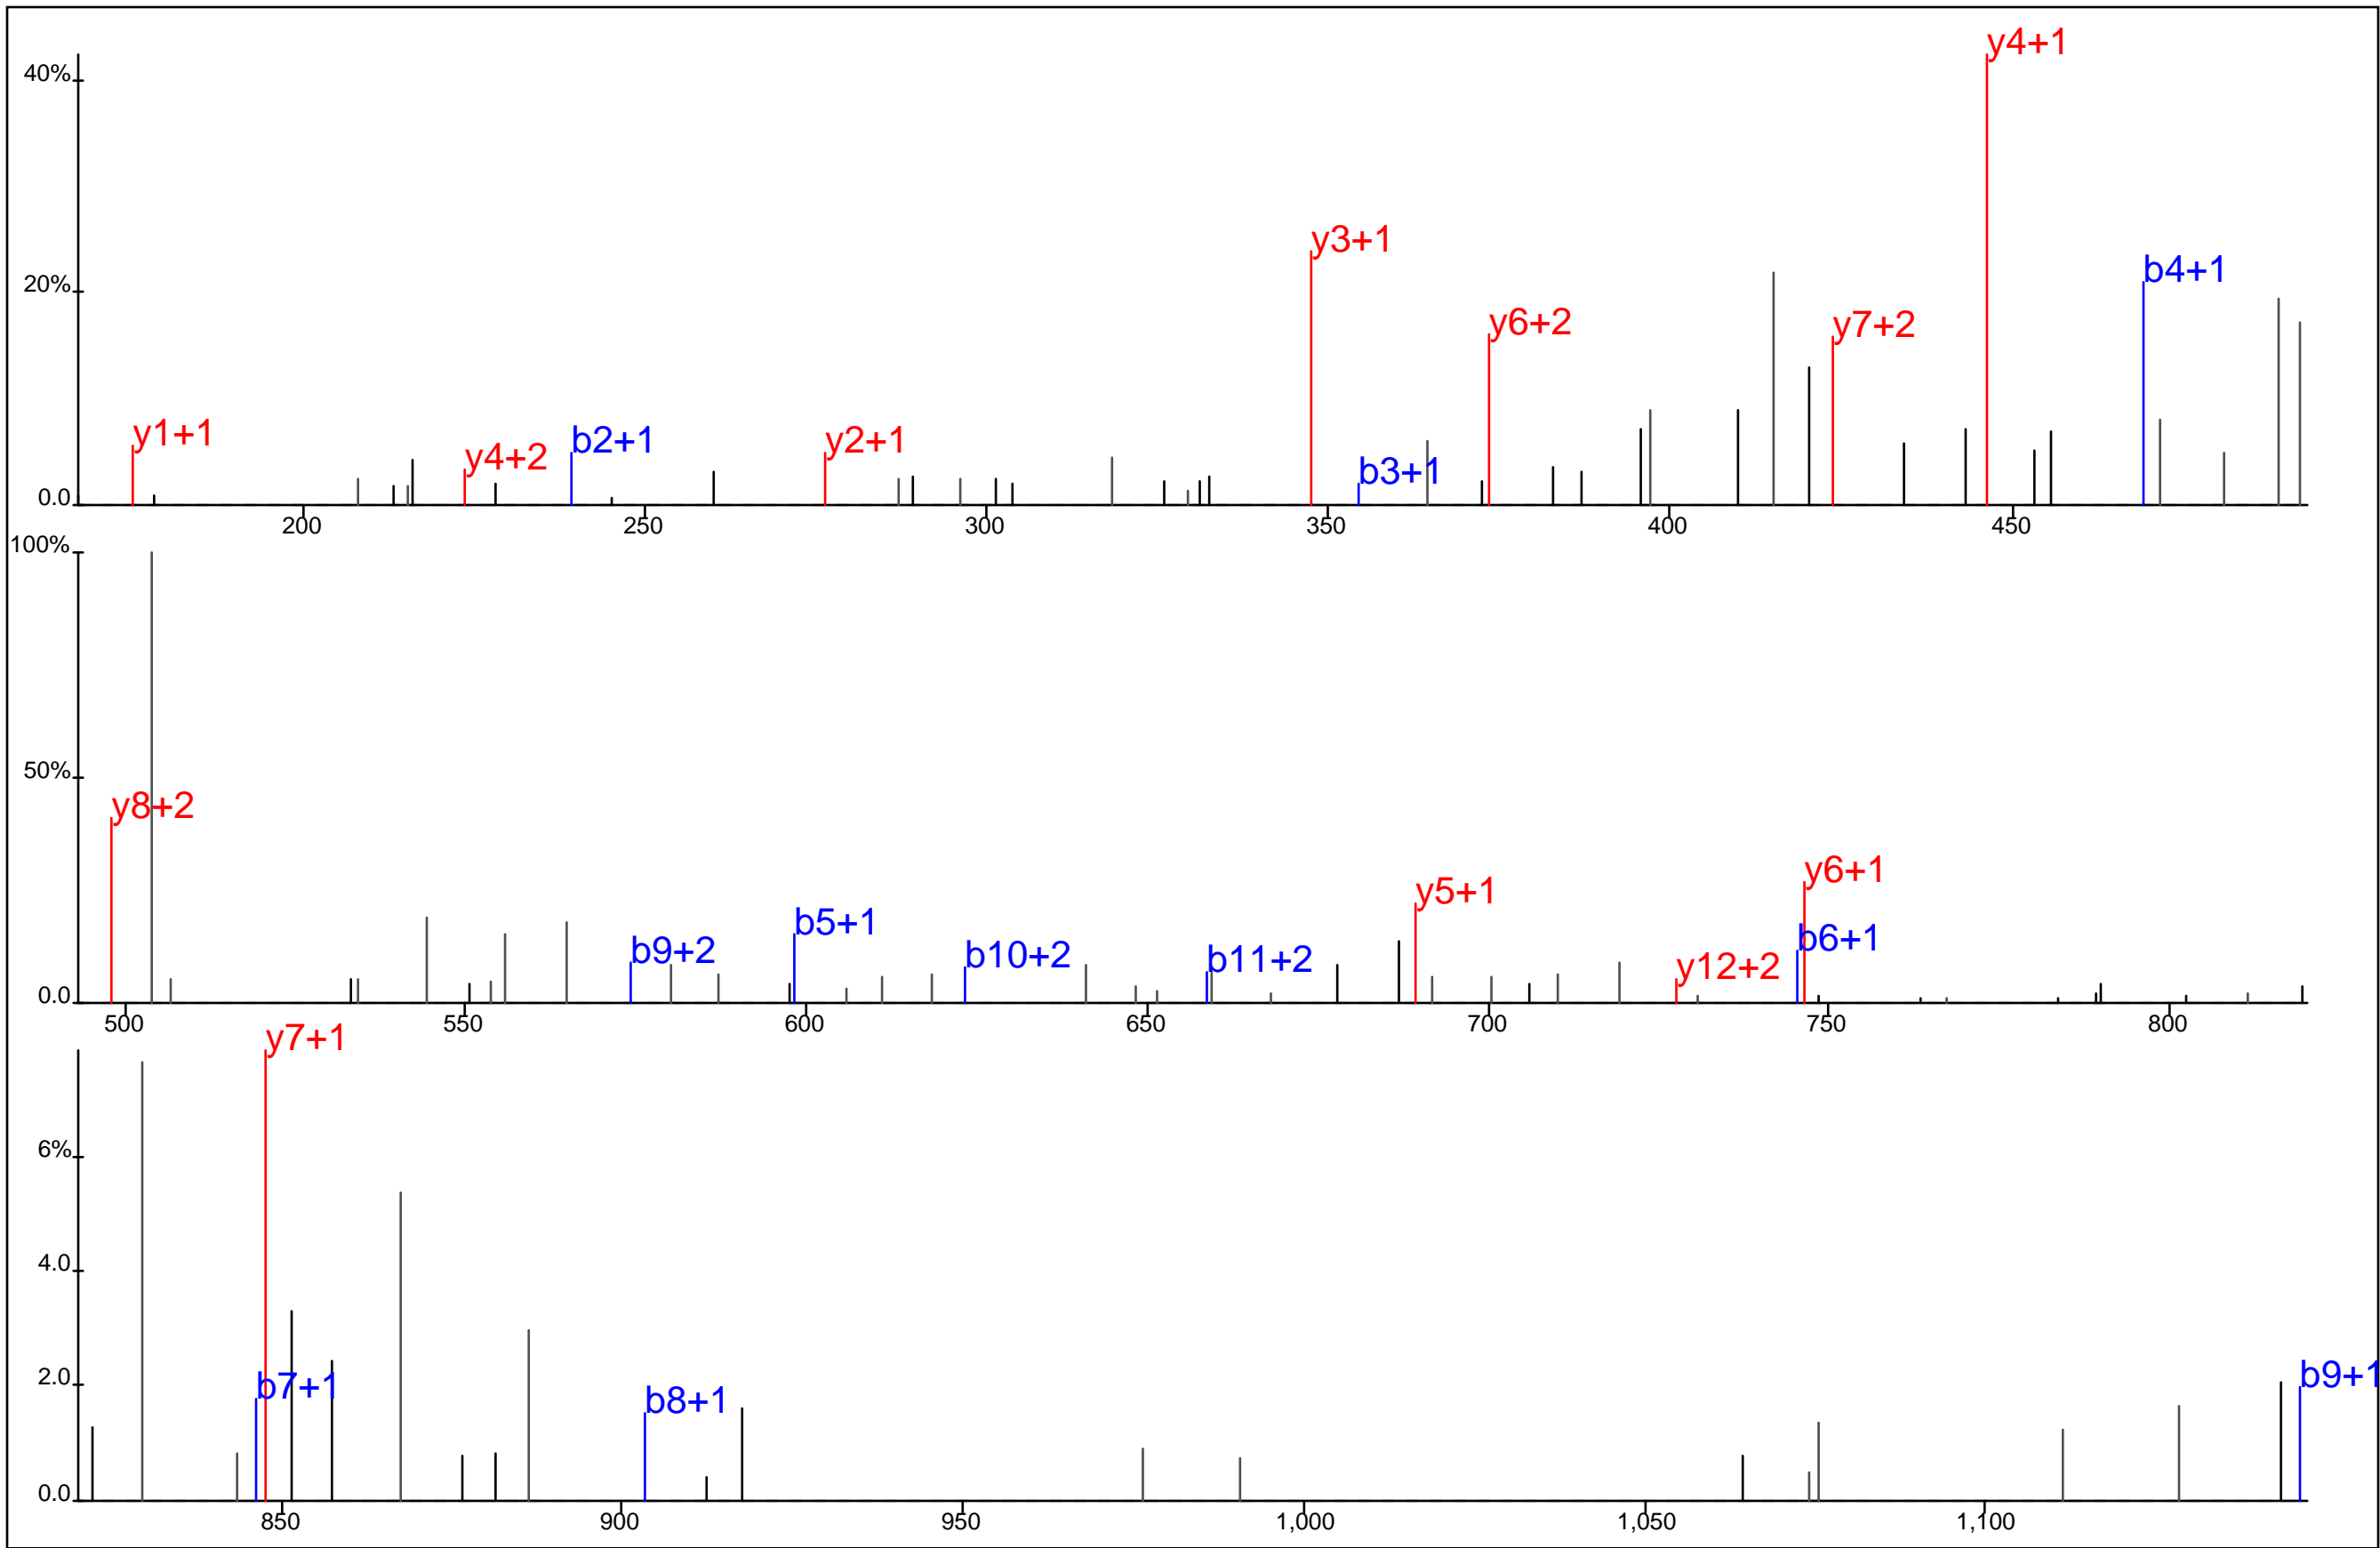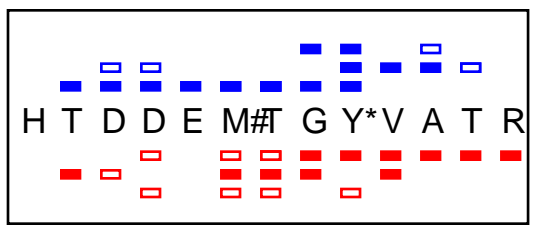

Protein Name: MAPK14  
 gi Accession: 0  
 Precursor Mass: 531.2079+3  
 Delta Mass: 0.090 ppm  
 XCorr: 48.28

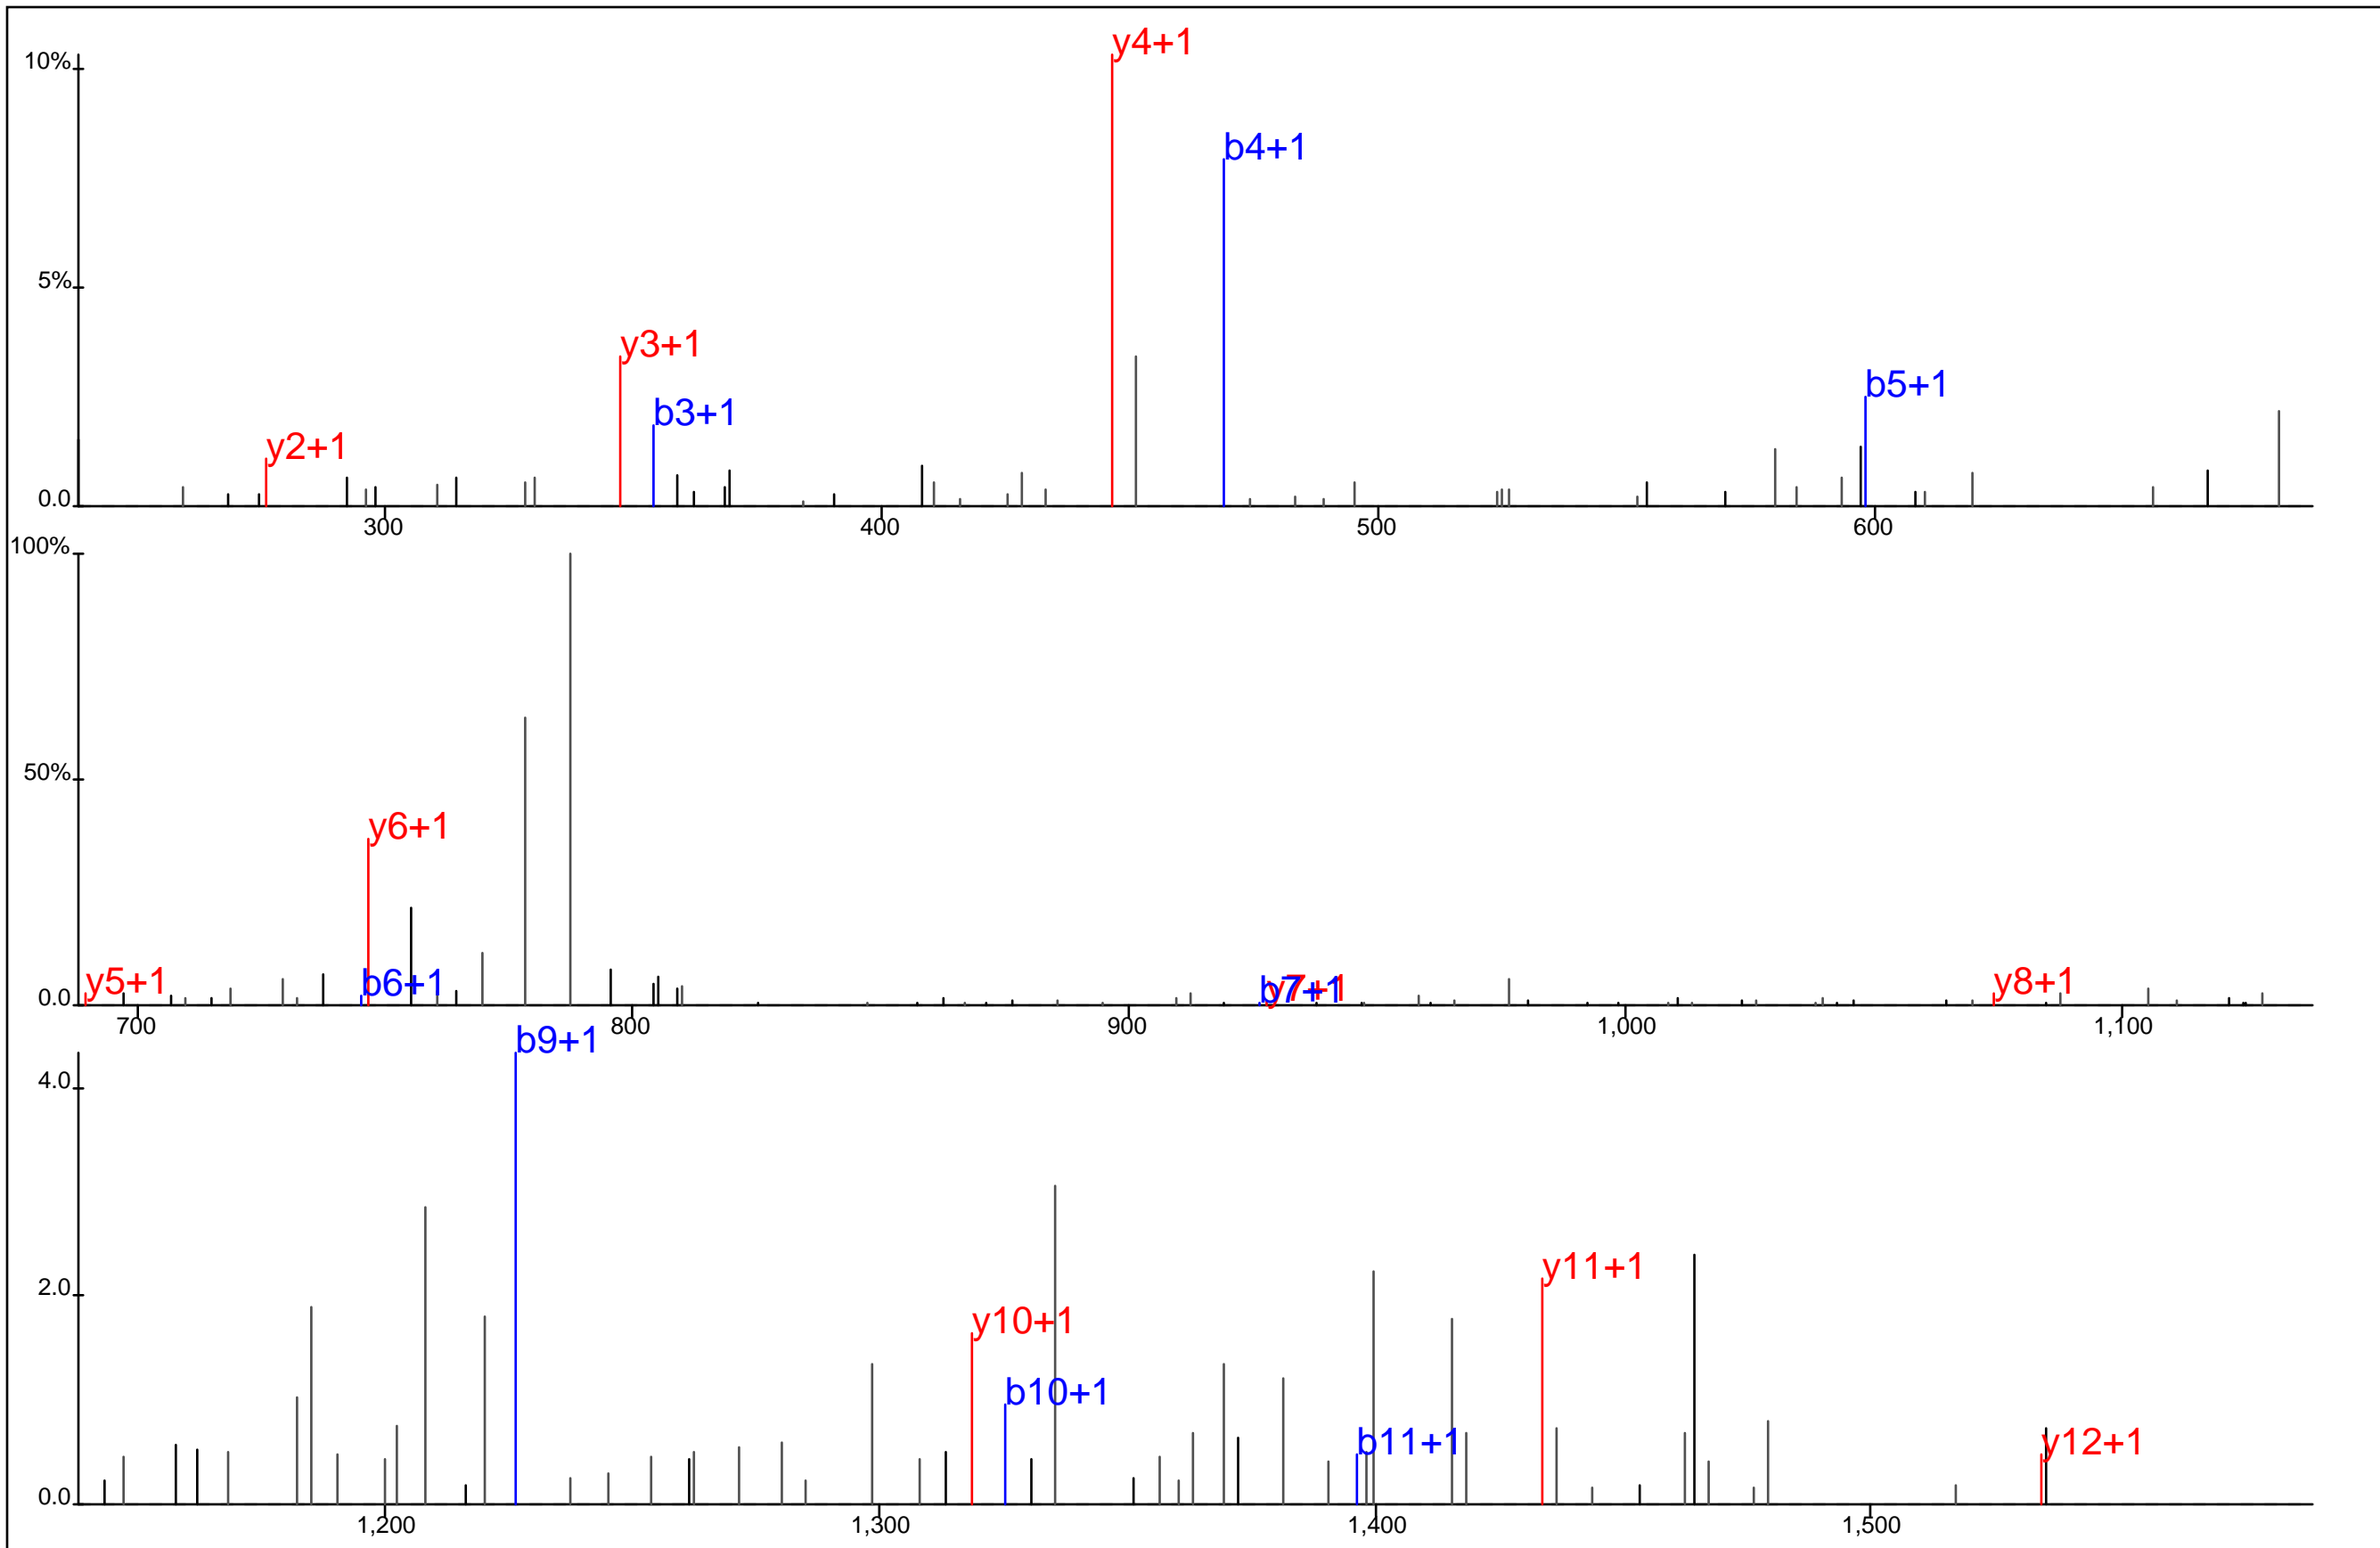

■ ■ ■ ■ ■ ■ ■ ■ ■ ■  
 H T D D E M # \* G Y \* V A T R  
■ ■ ■ ■ ■ ■ ■ ■ ■ ■

Protein Name: MAPK14  
 gi Accession: 0  
 Precursor Mass: 836.2896+2  
 Delta Mass: 2.355 ppm  
 XCorr: 44.74

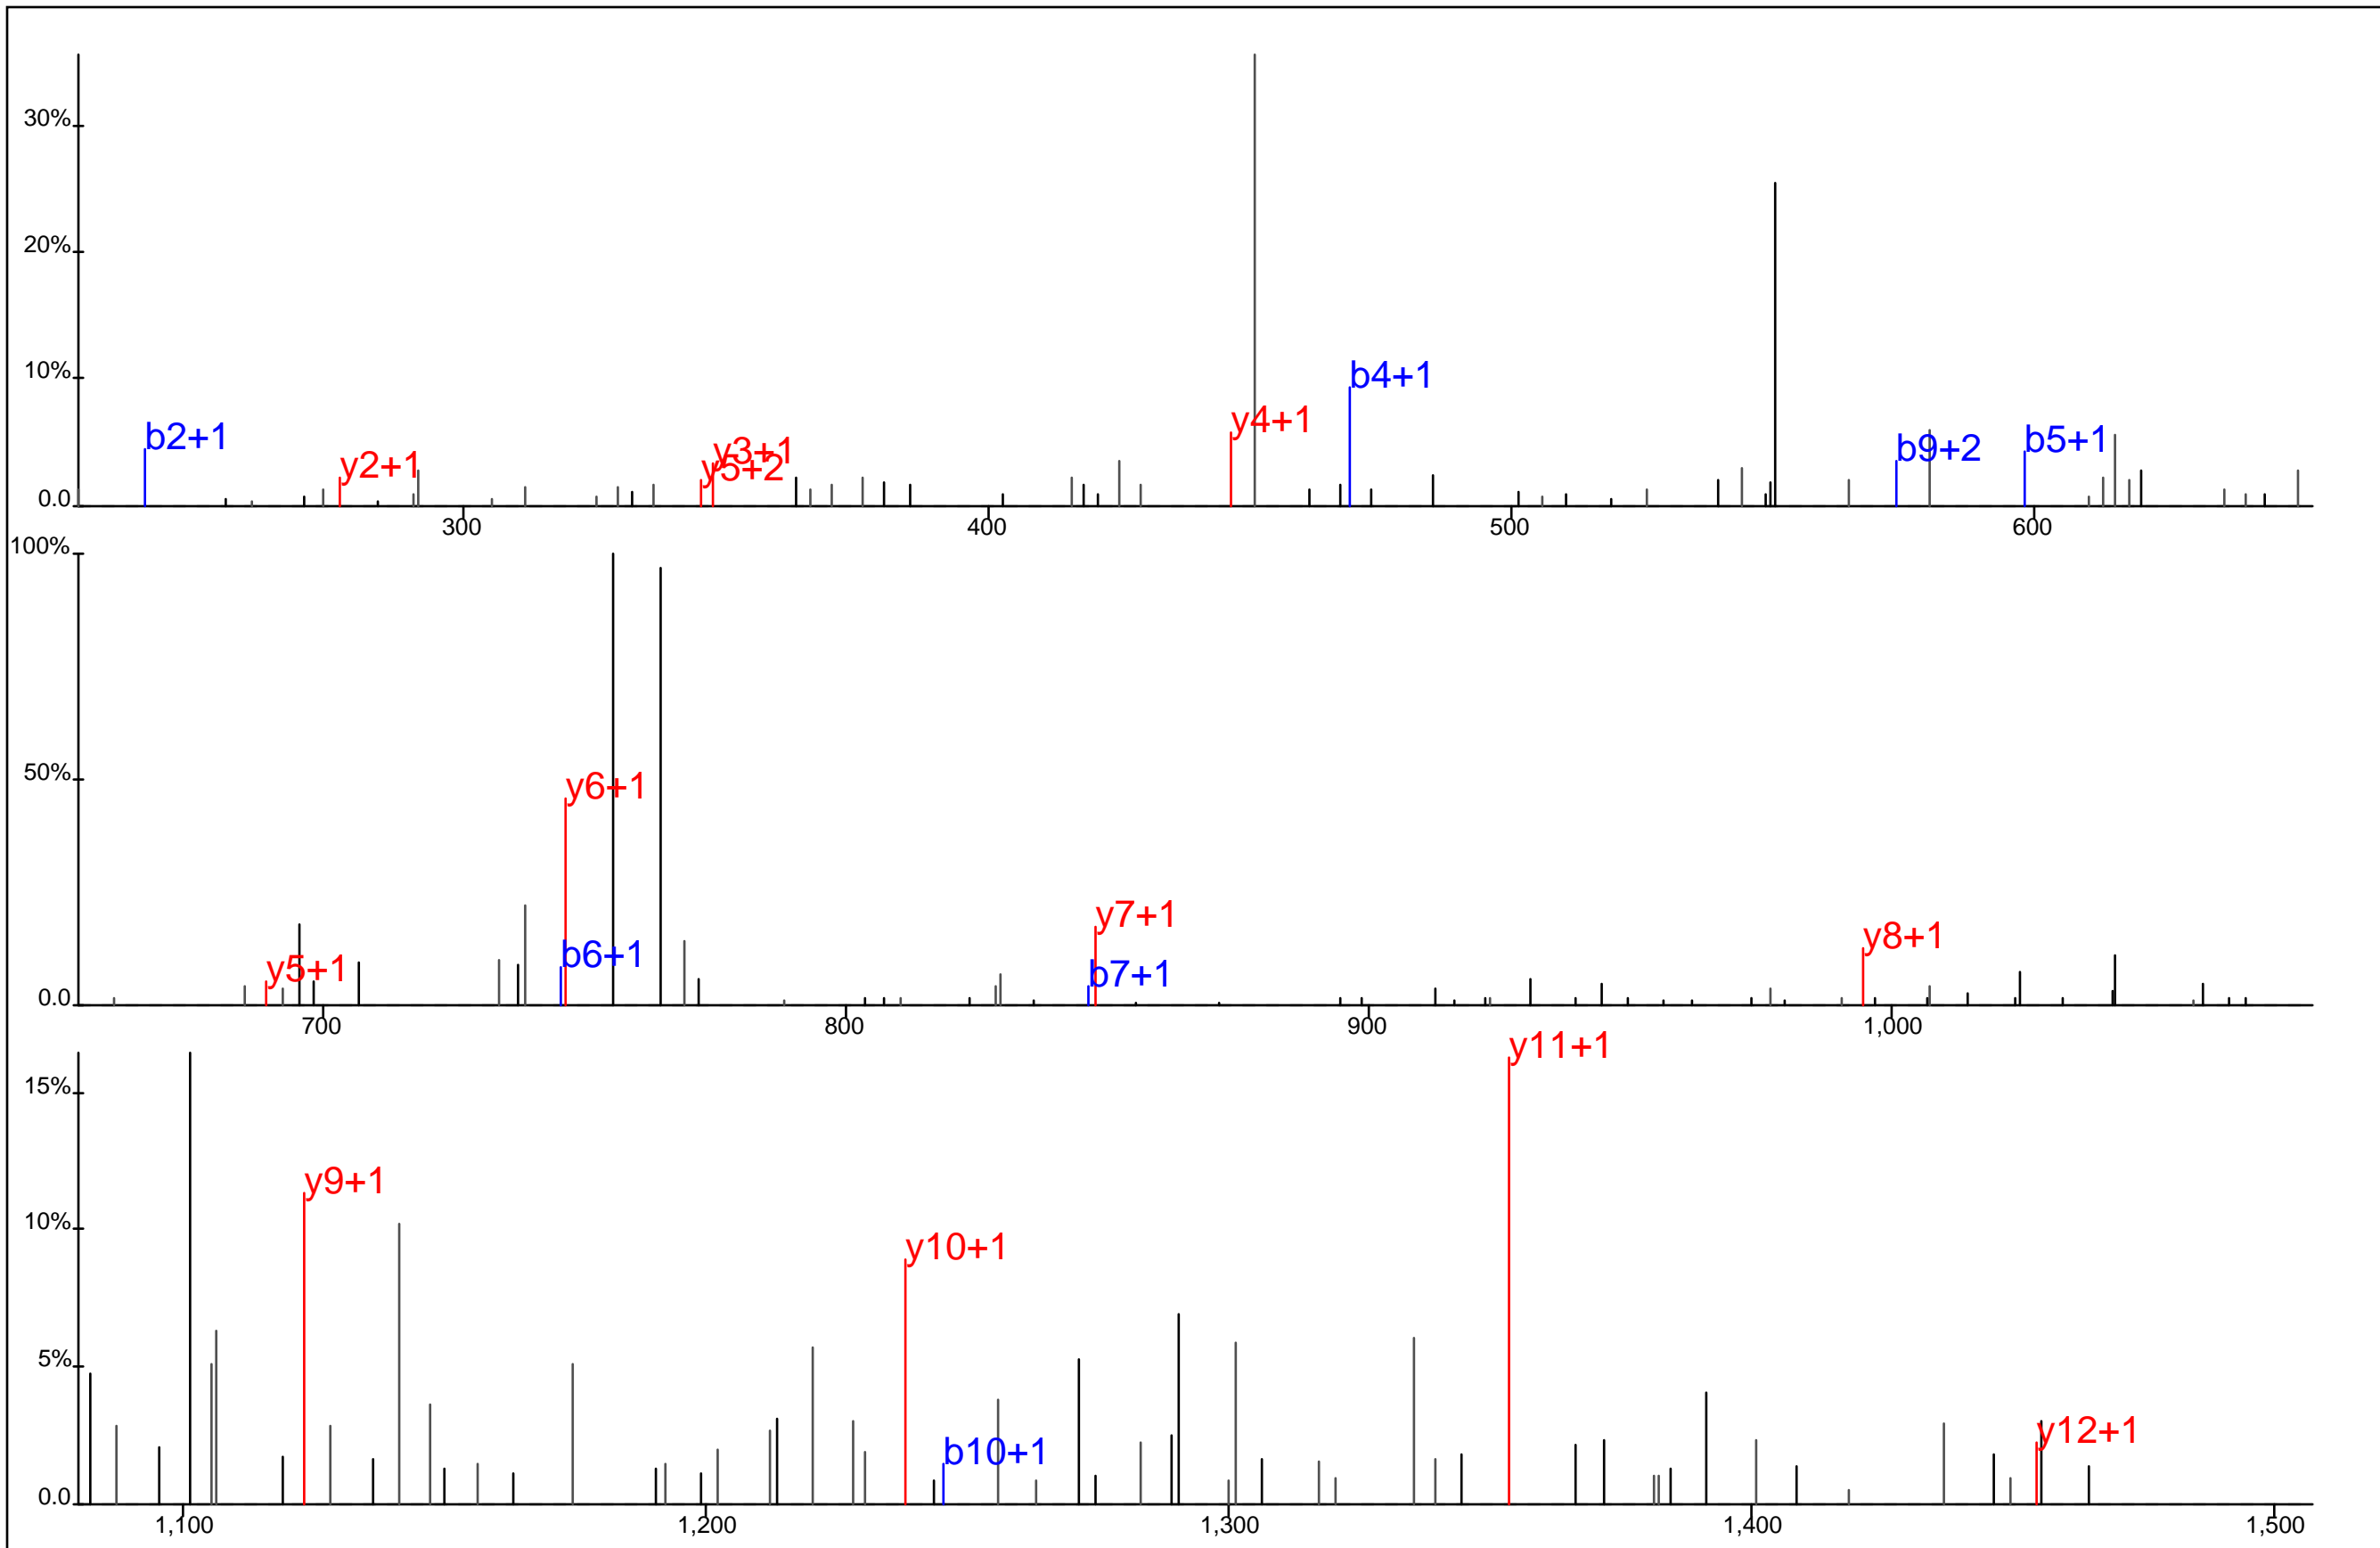

▢ ▢ ▢ ▢ ▢ ▢ ▢ ▢ ▢ ▢  
 H T D D E M # G Y \* V A T R  
▢ ▢ ▢ ▢ ▢ ▢ ▢ ▢ ▢ ▢

Protein Name: MAPK14  
 gi Accession: 0  
 Precursor Mass: 796.3073+2  
 Delta Mass: 1.309 ppm  
 XCorr: 82.46

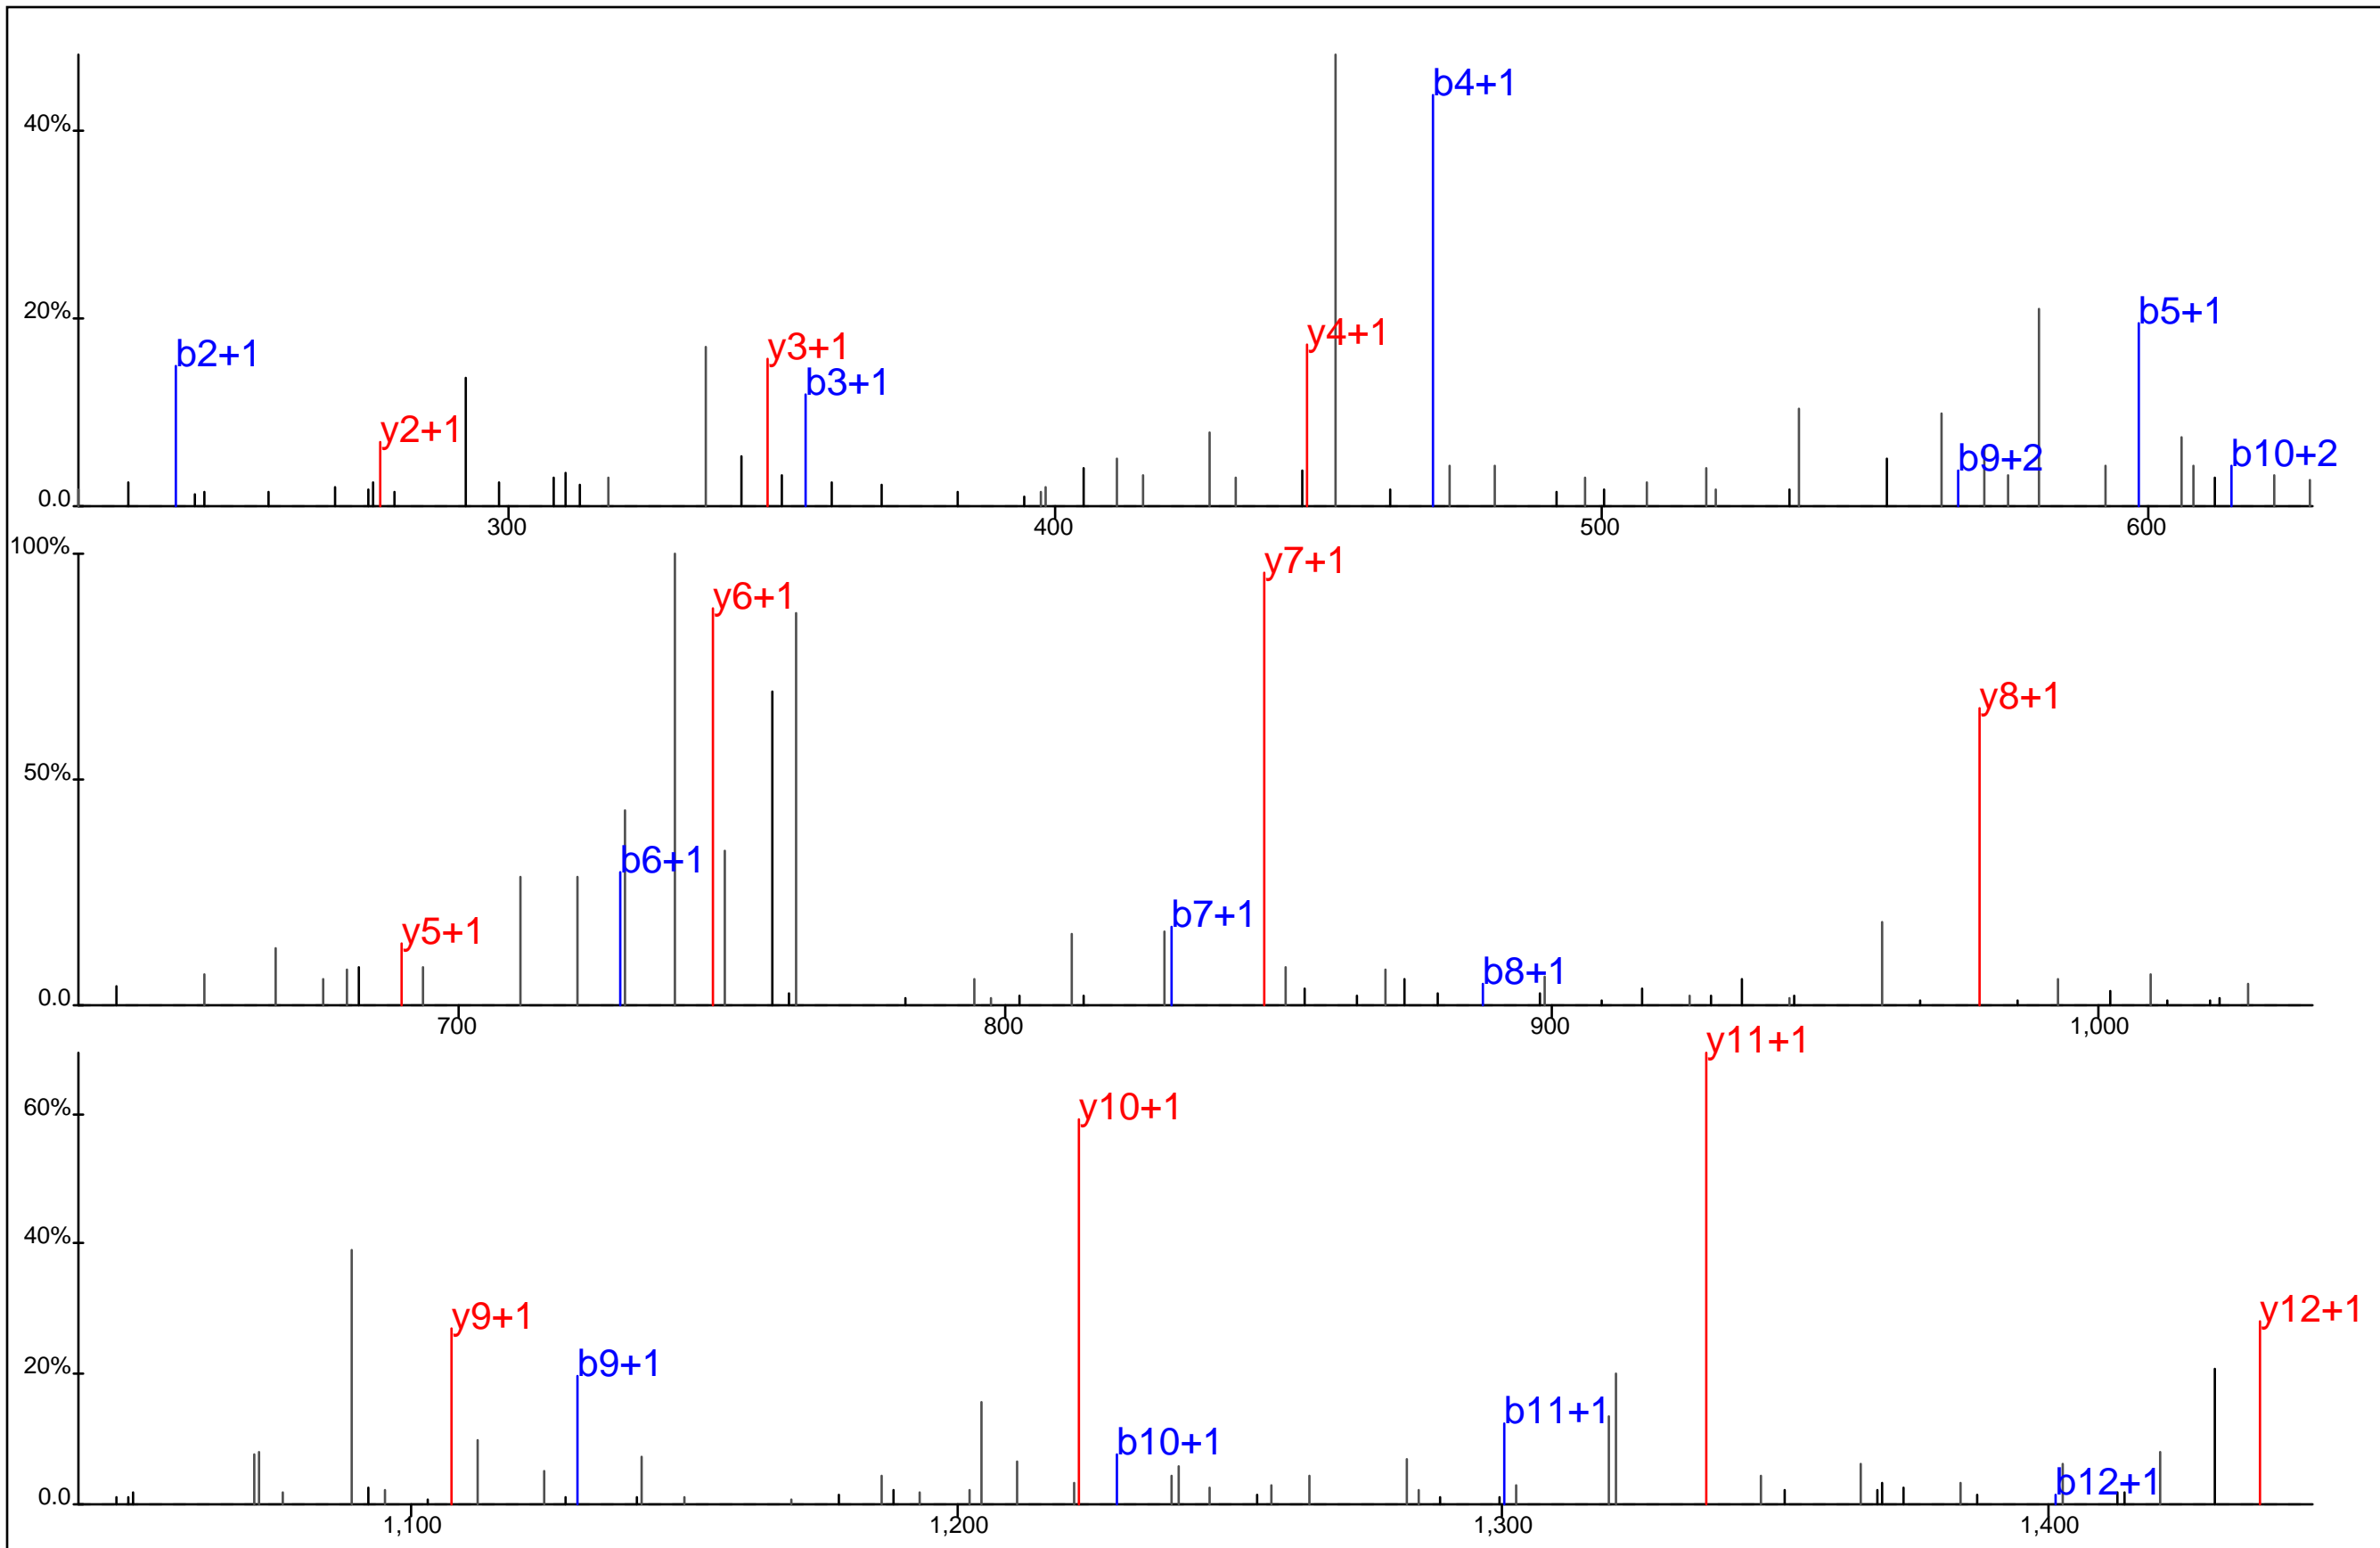

■ □  
■ □ ■ □ ■ □ ■ □ ■ □ ■ □ ■ □ ■ □ ■ □  
 H T D D E M T G Y\*V A T R

Protein Name: MAPK14  
 gi Accession: 0  
 Precursor Mass: 788.3133+2  
 Delta Mass: 3.045 ppm  
 XCorr: 90.65

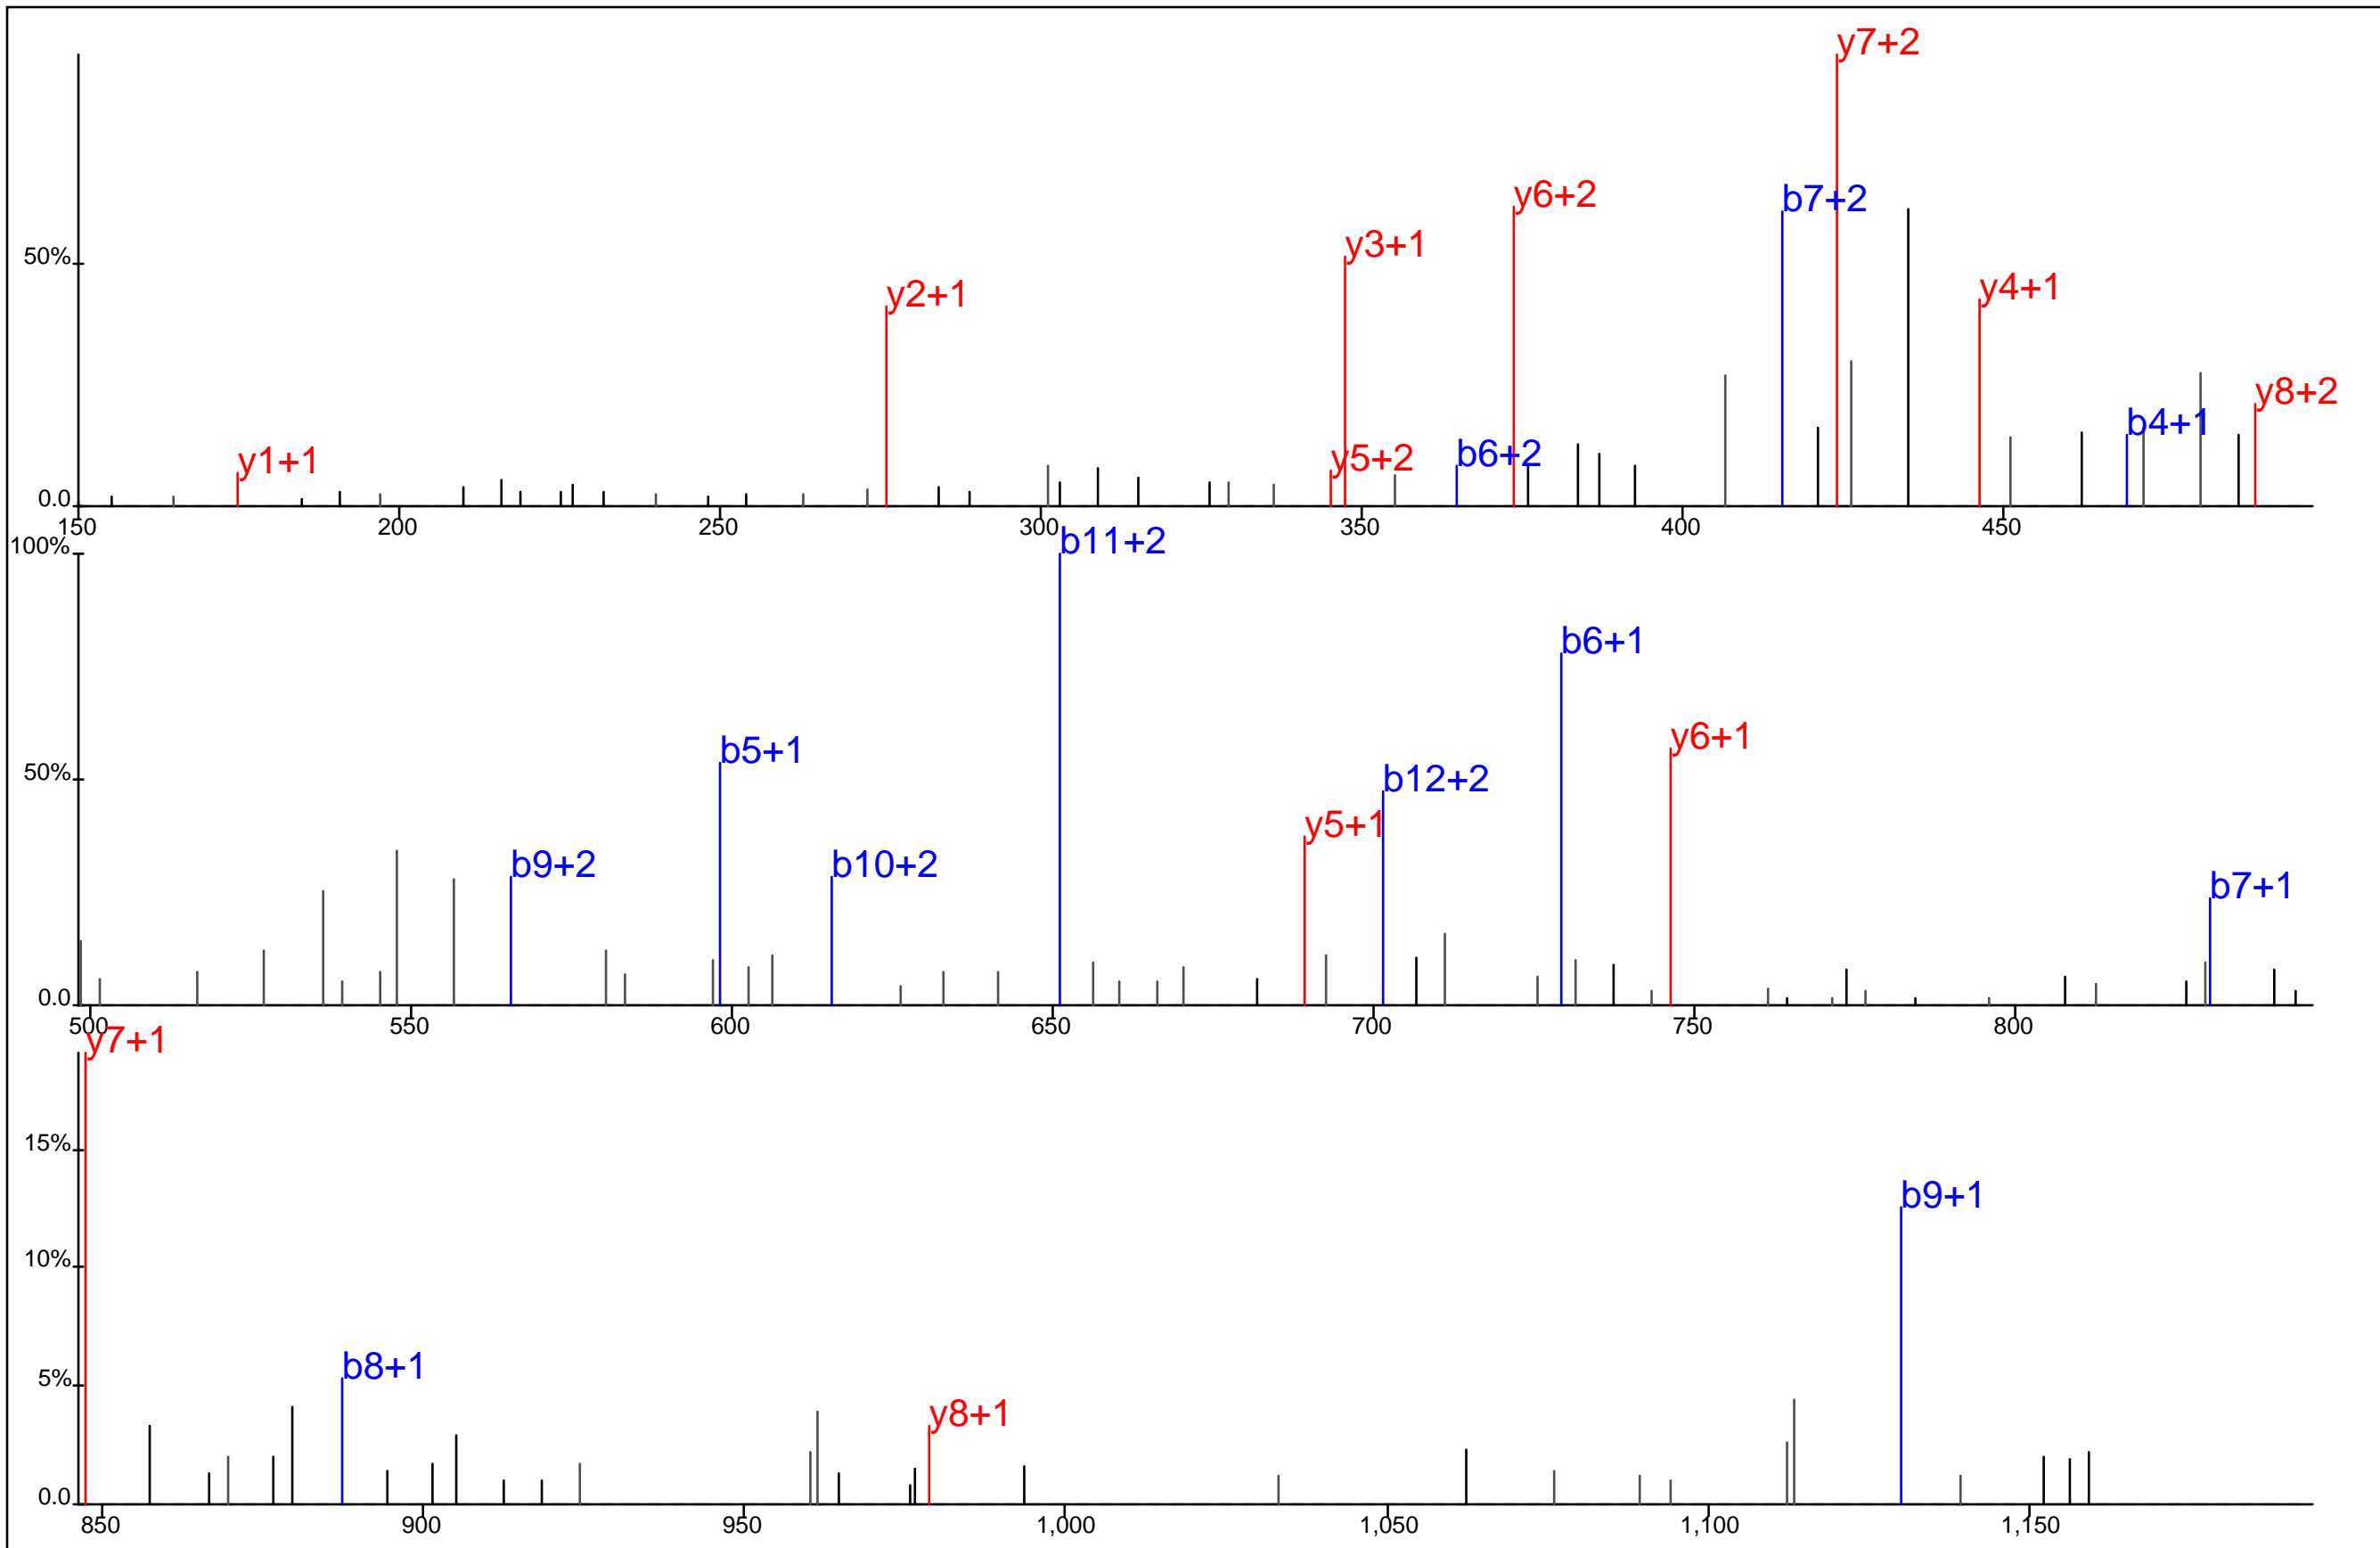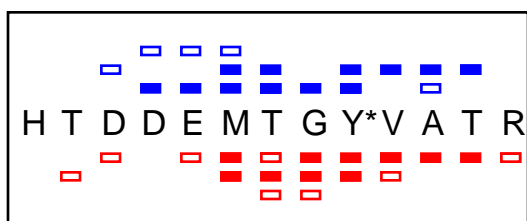

Protein Name: MAPK14  
 gi Accession: 0  
 Precursor Mass: 525.8752+3  
 Delta Mass: 2.115 ppm  
 XCorr: 42.68

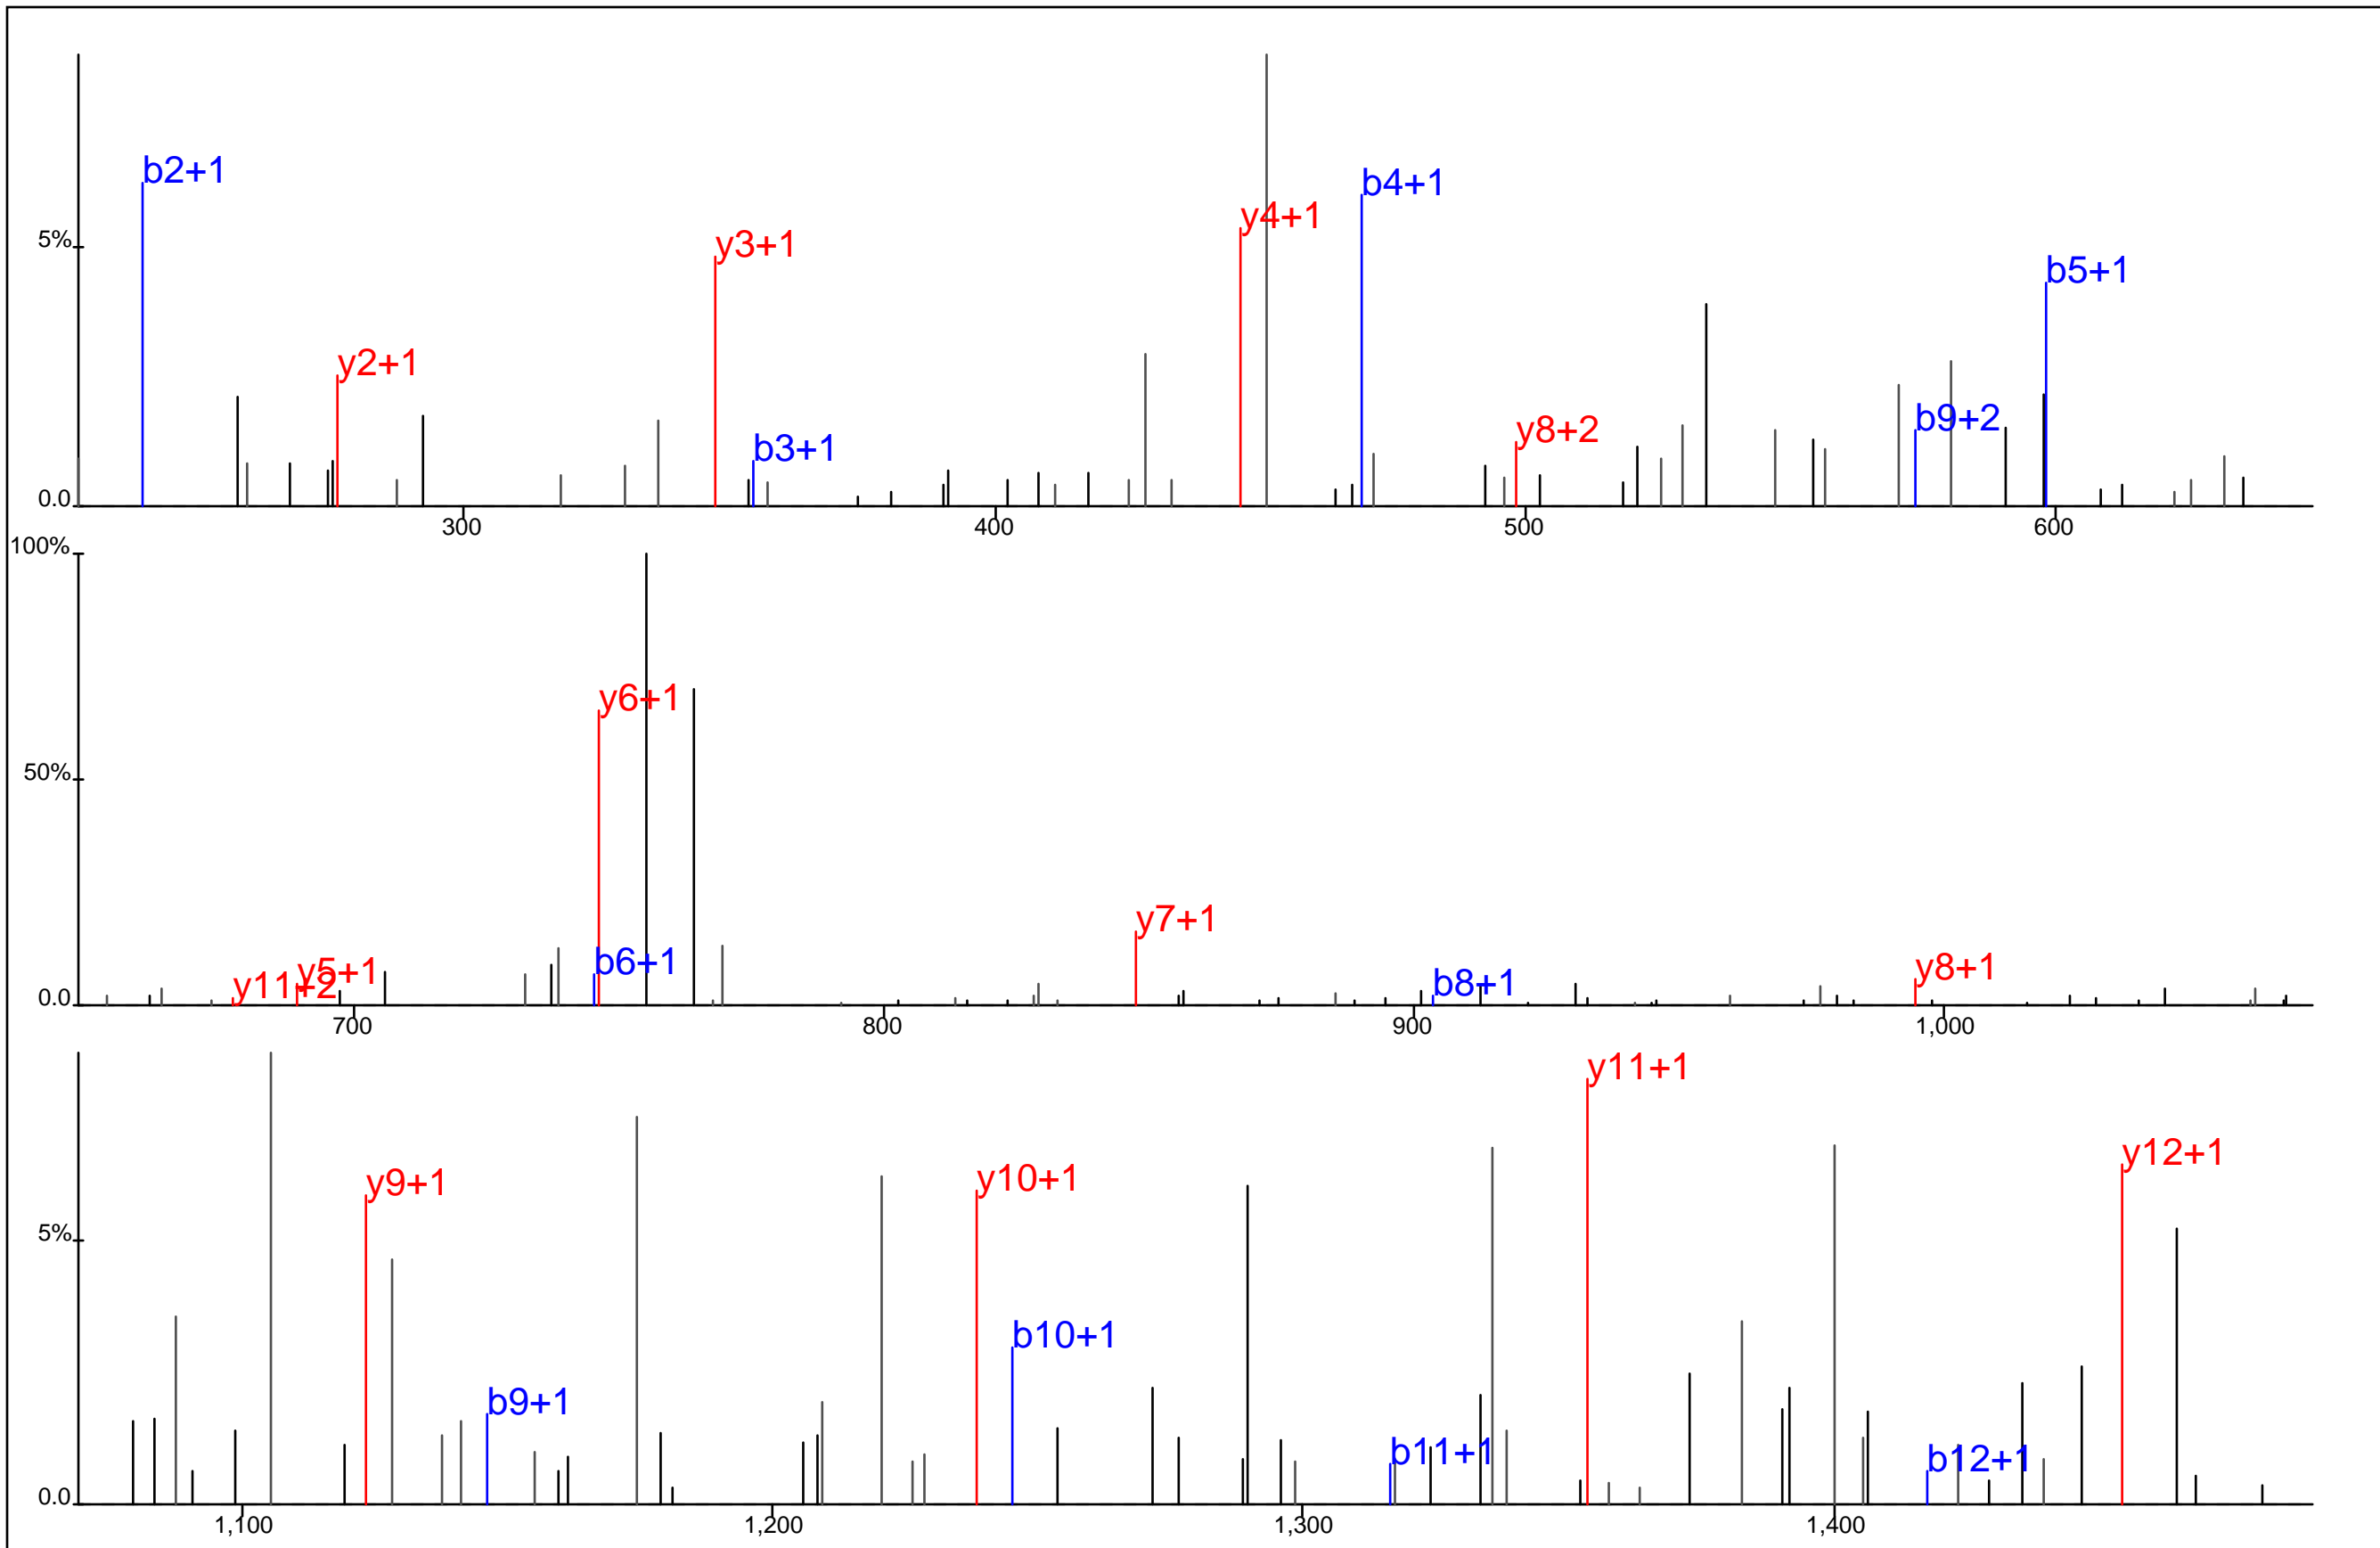

■ ■ ■ ■ ■ ■ ■ ■ ■ ■ ■ ■ ■ ■ ■ ■ ■ ■ ■ ■ ■
  
 H T D D E M ~~T~~ G Y\* V A T R

Protein Name: MAPK14  
 gi Accession: 0  
 Precursor Mass: 796.3058+2  
 Delta Mass: 3.227 ppm  
 XCorr: 94.04



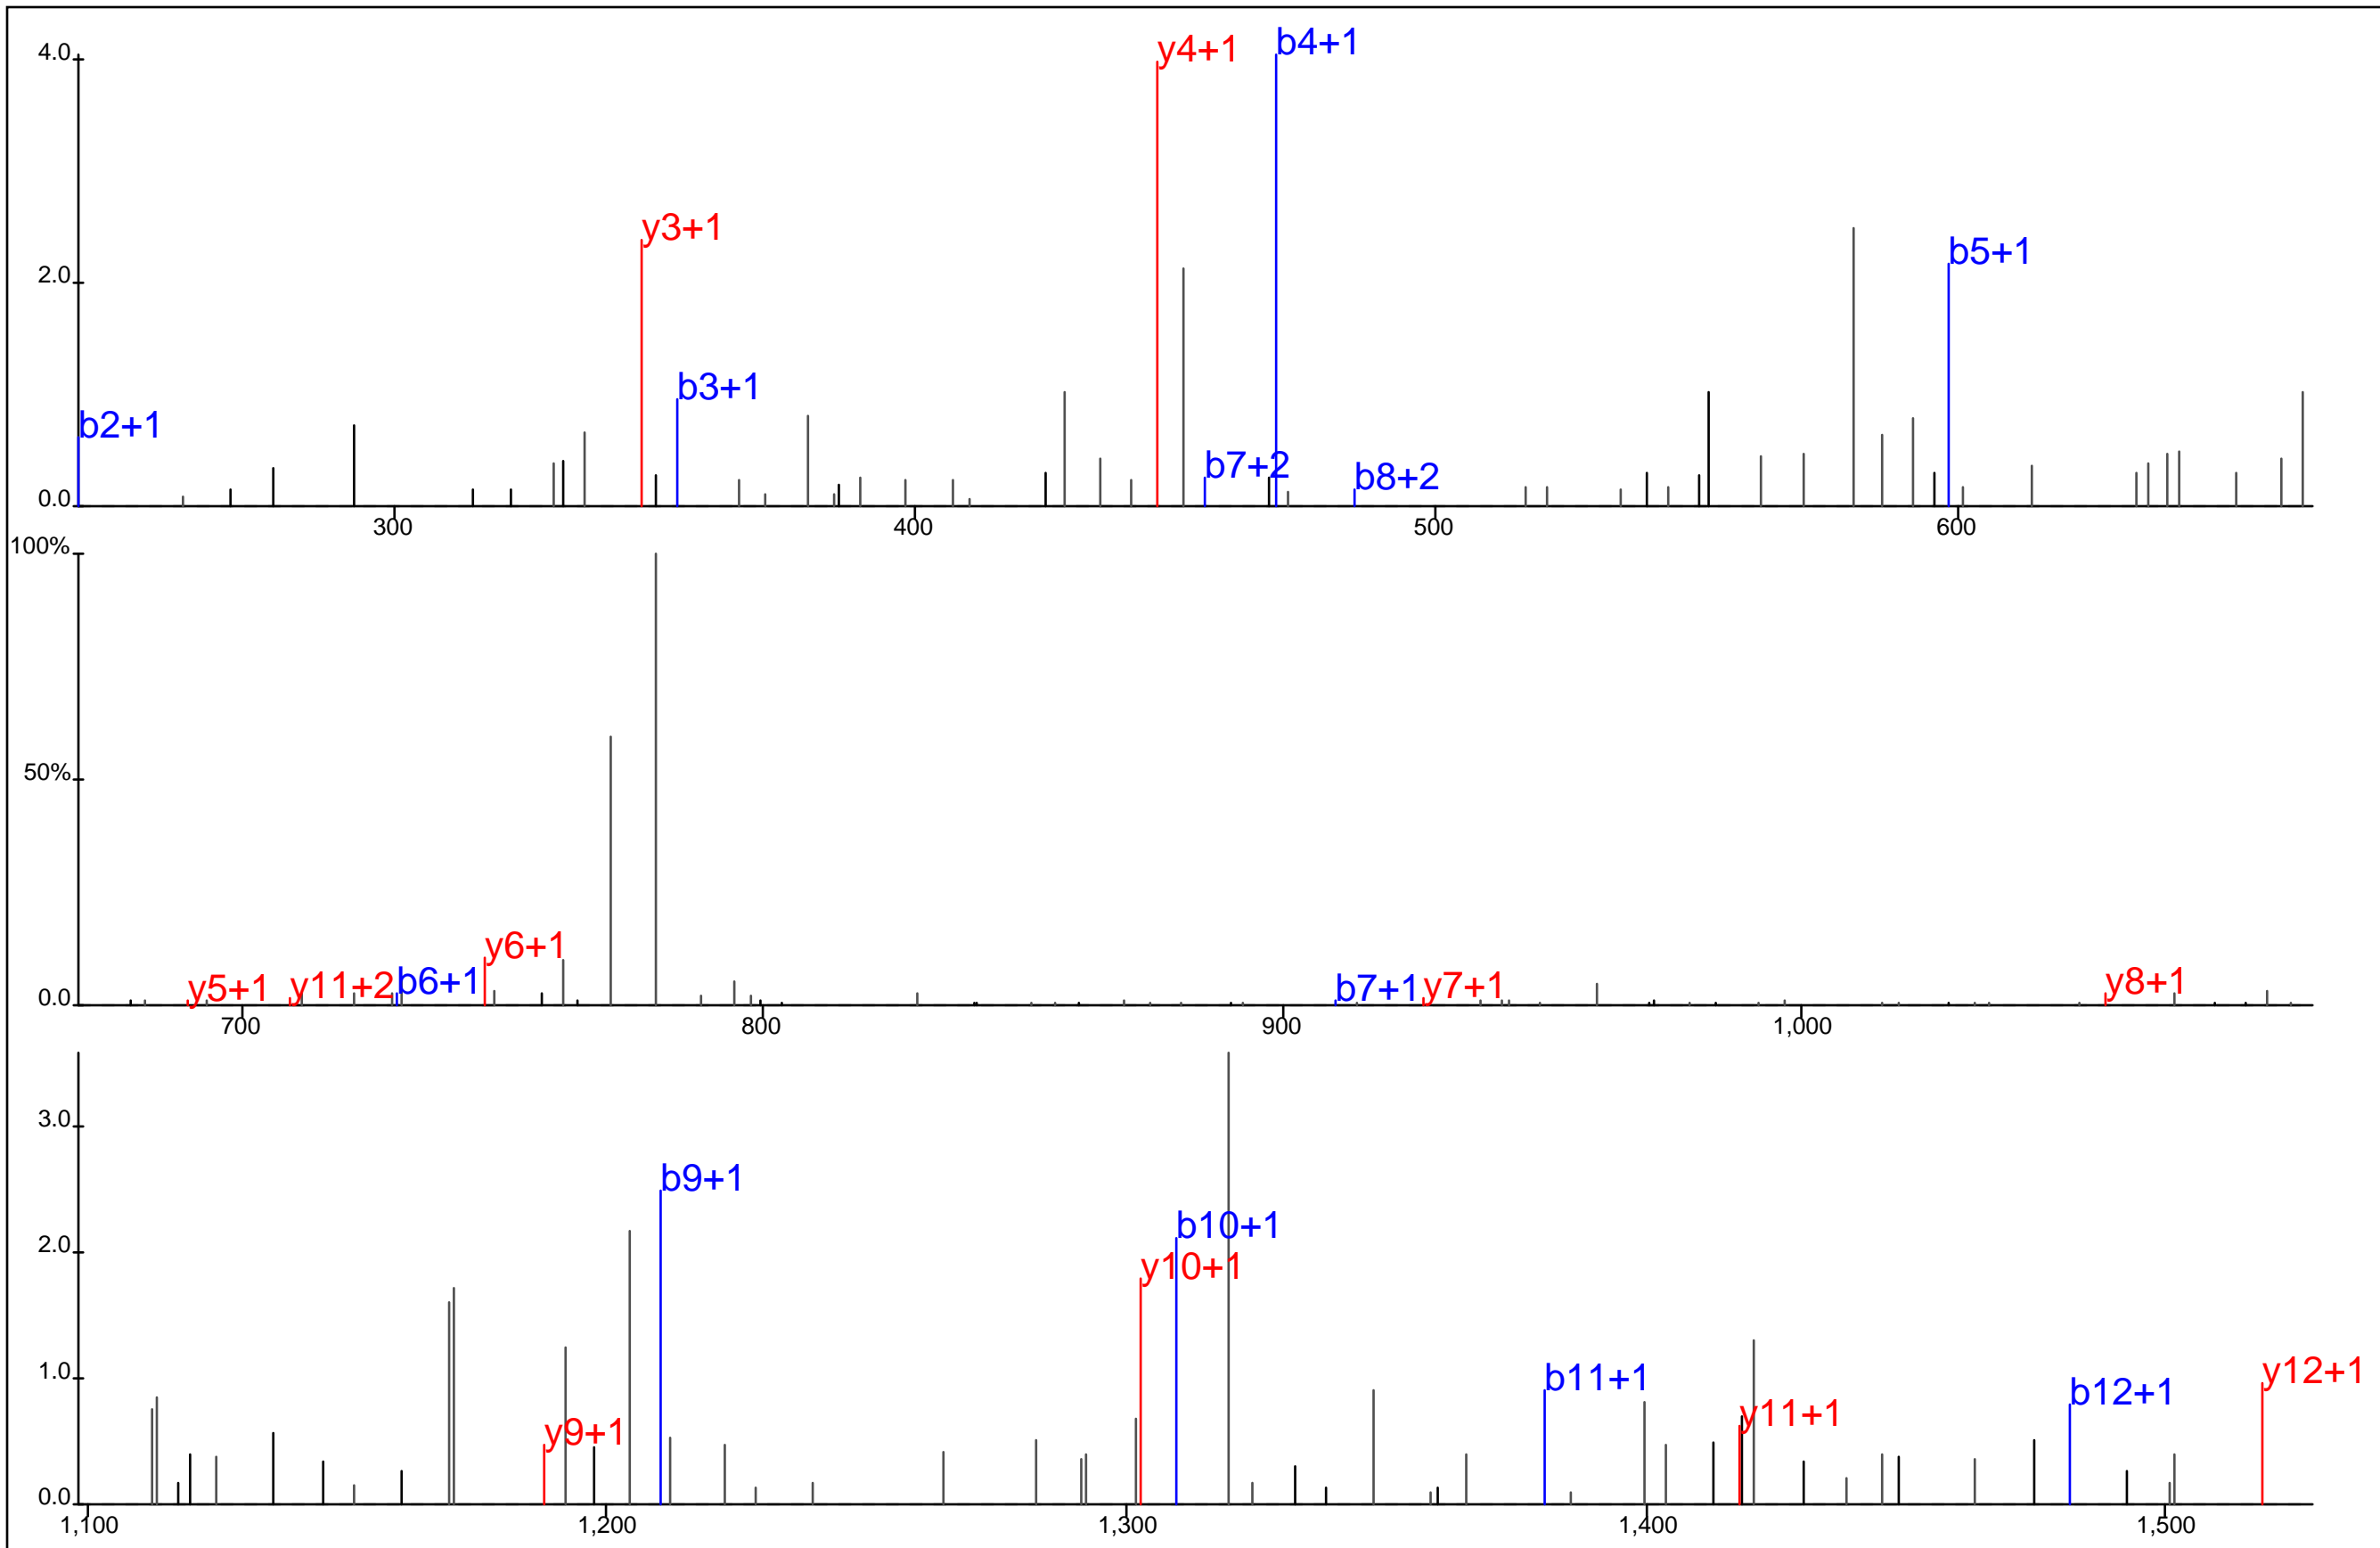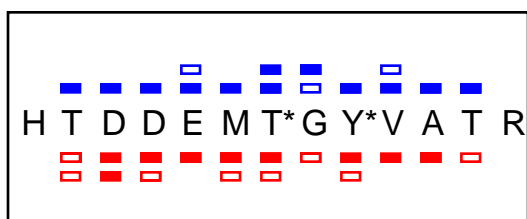

Protein Name: MAPK14  
 gi Accession: 0  
 Precursor Mass: 828.2950+2  
 Delta Mass: 1.116 ppm  
 XCorr: 73.13

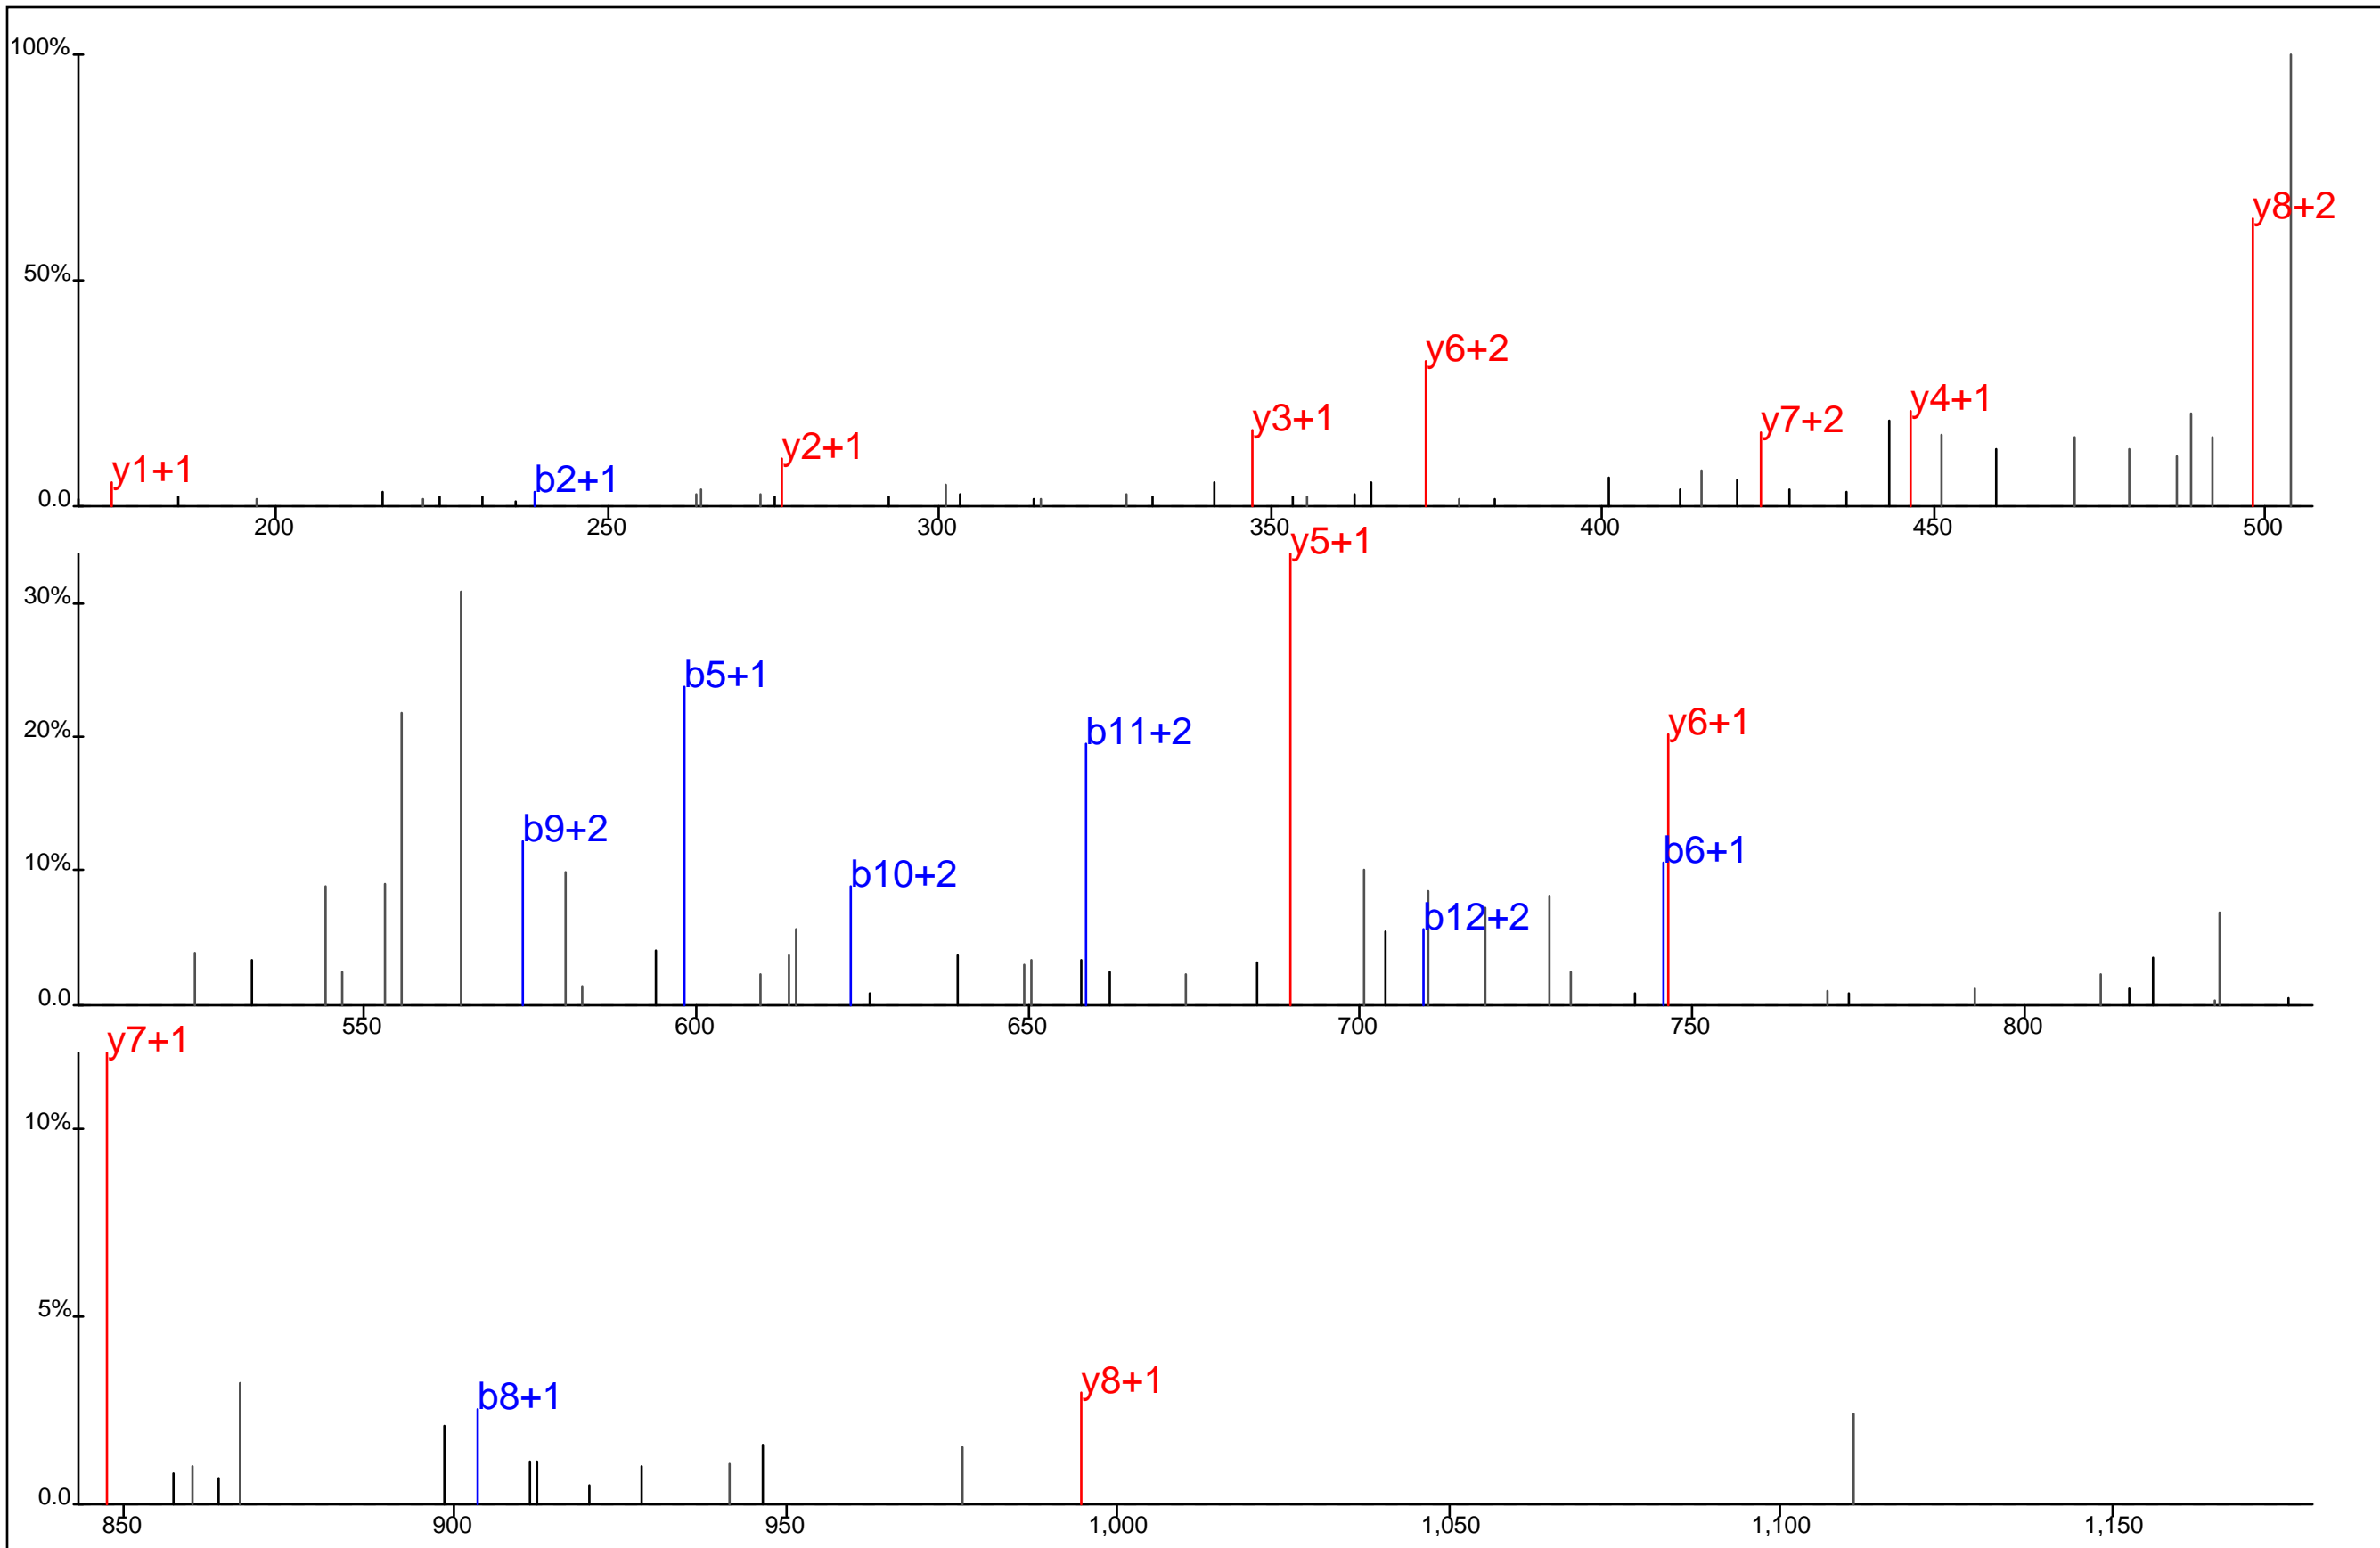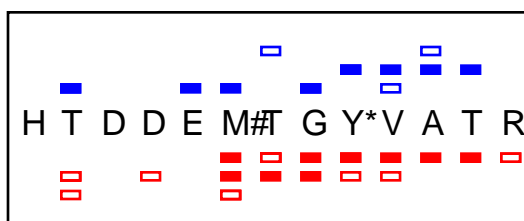

Protein Name: MAPK14  
 gi Accession: 0  
 Precursor Mass: 531.2083+3  
 Delta Mass: 0.485 ppm  
 XCorr: 61.02

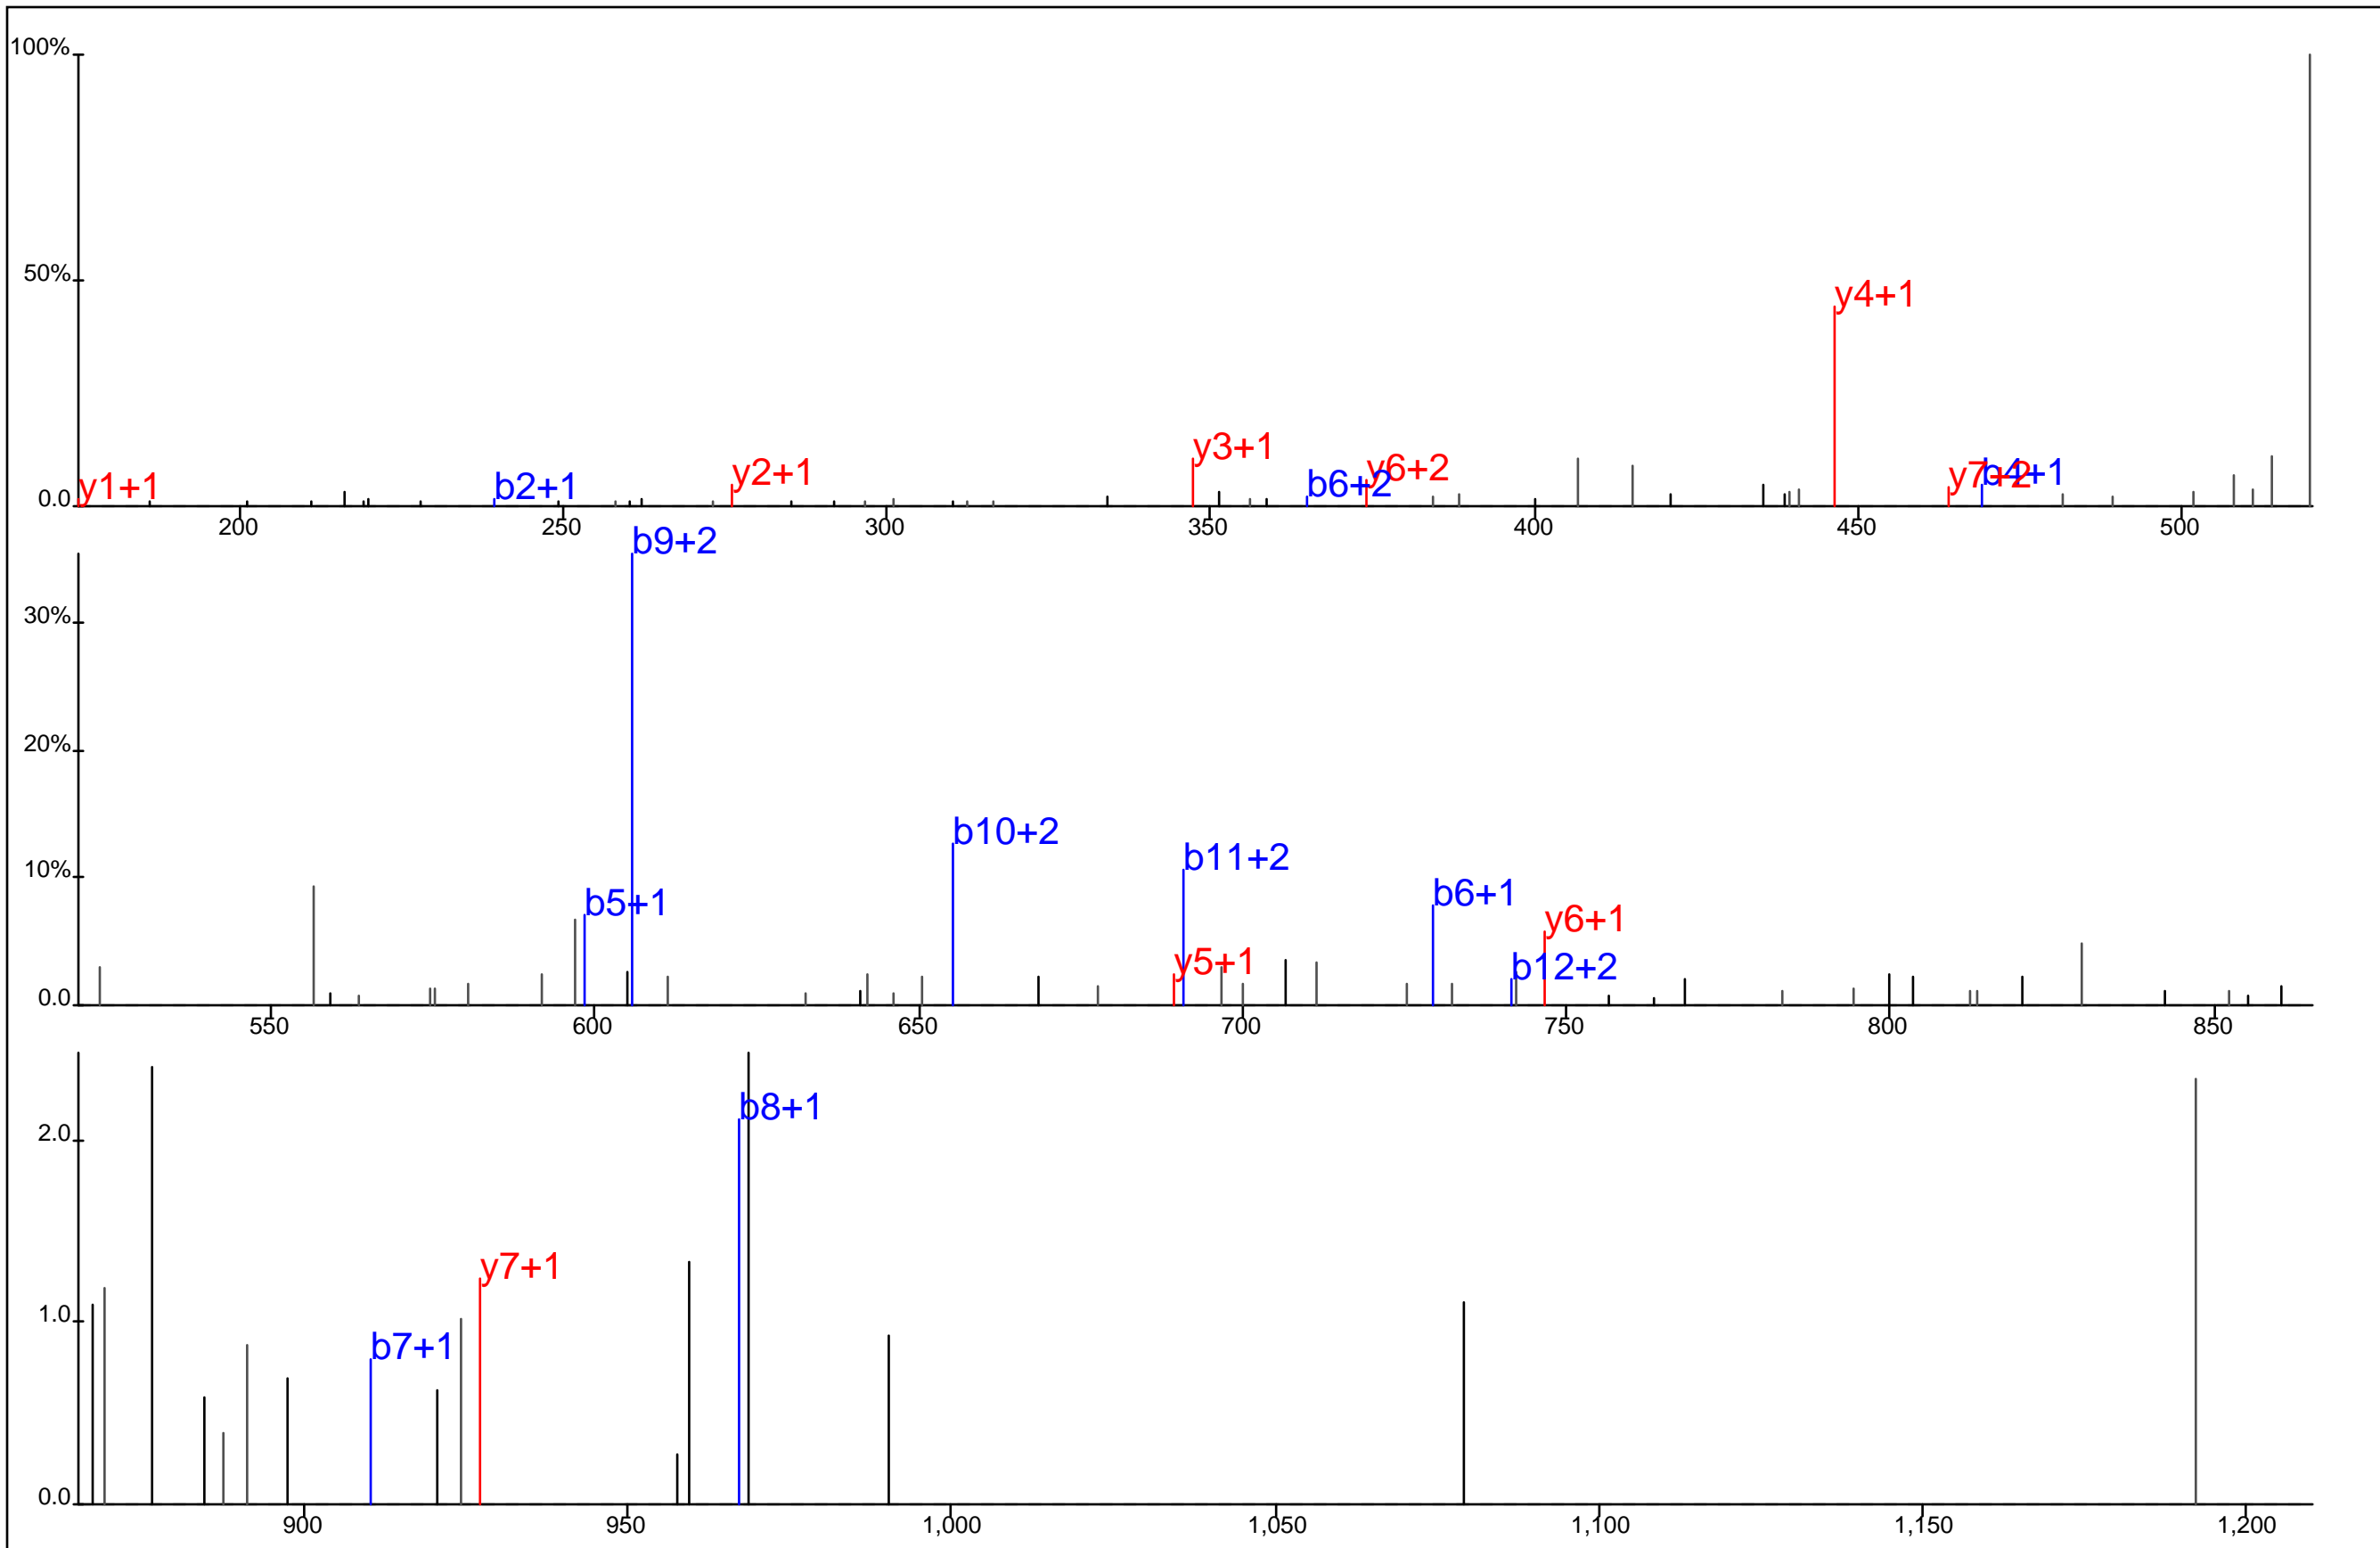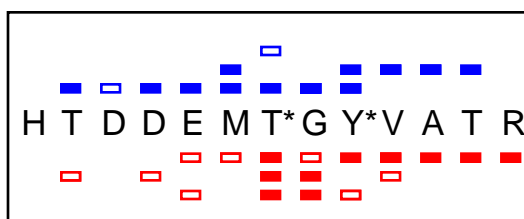

Protein Name: MAPK14  
 gi Accession: 0  
 Precursor Mass: 552.5316+3  
 Delta Mass: 0.440 ppm  
 XCorr: 39.43

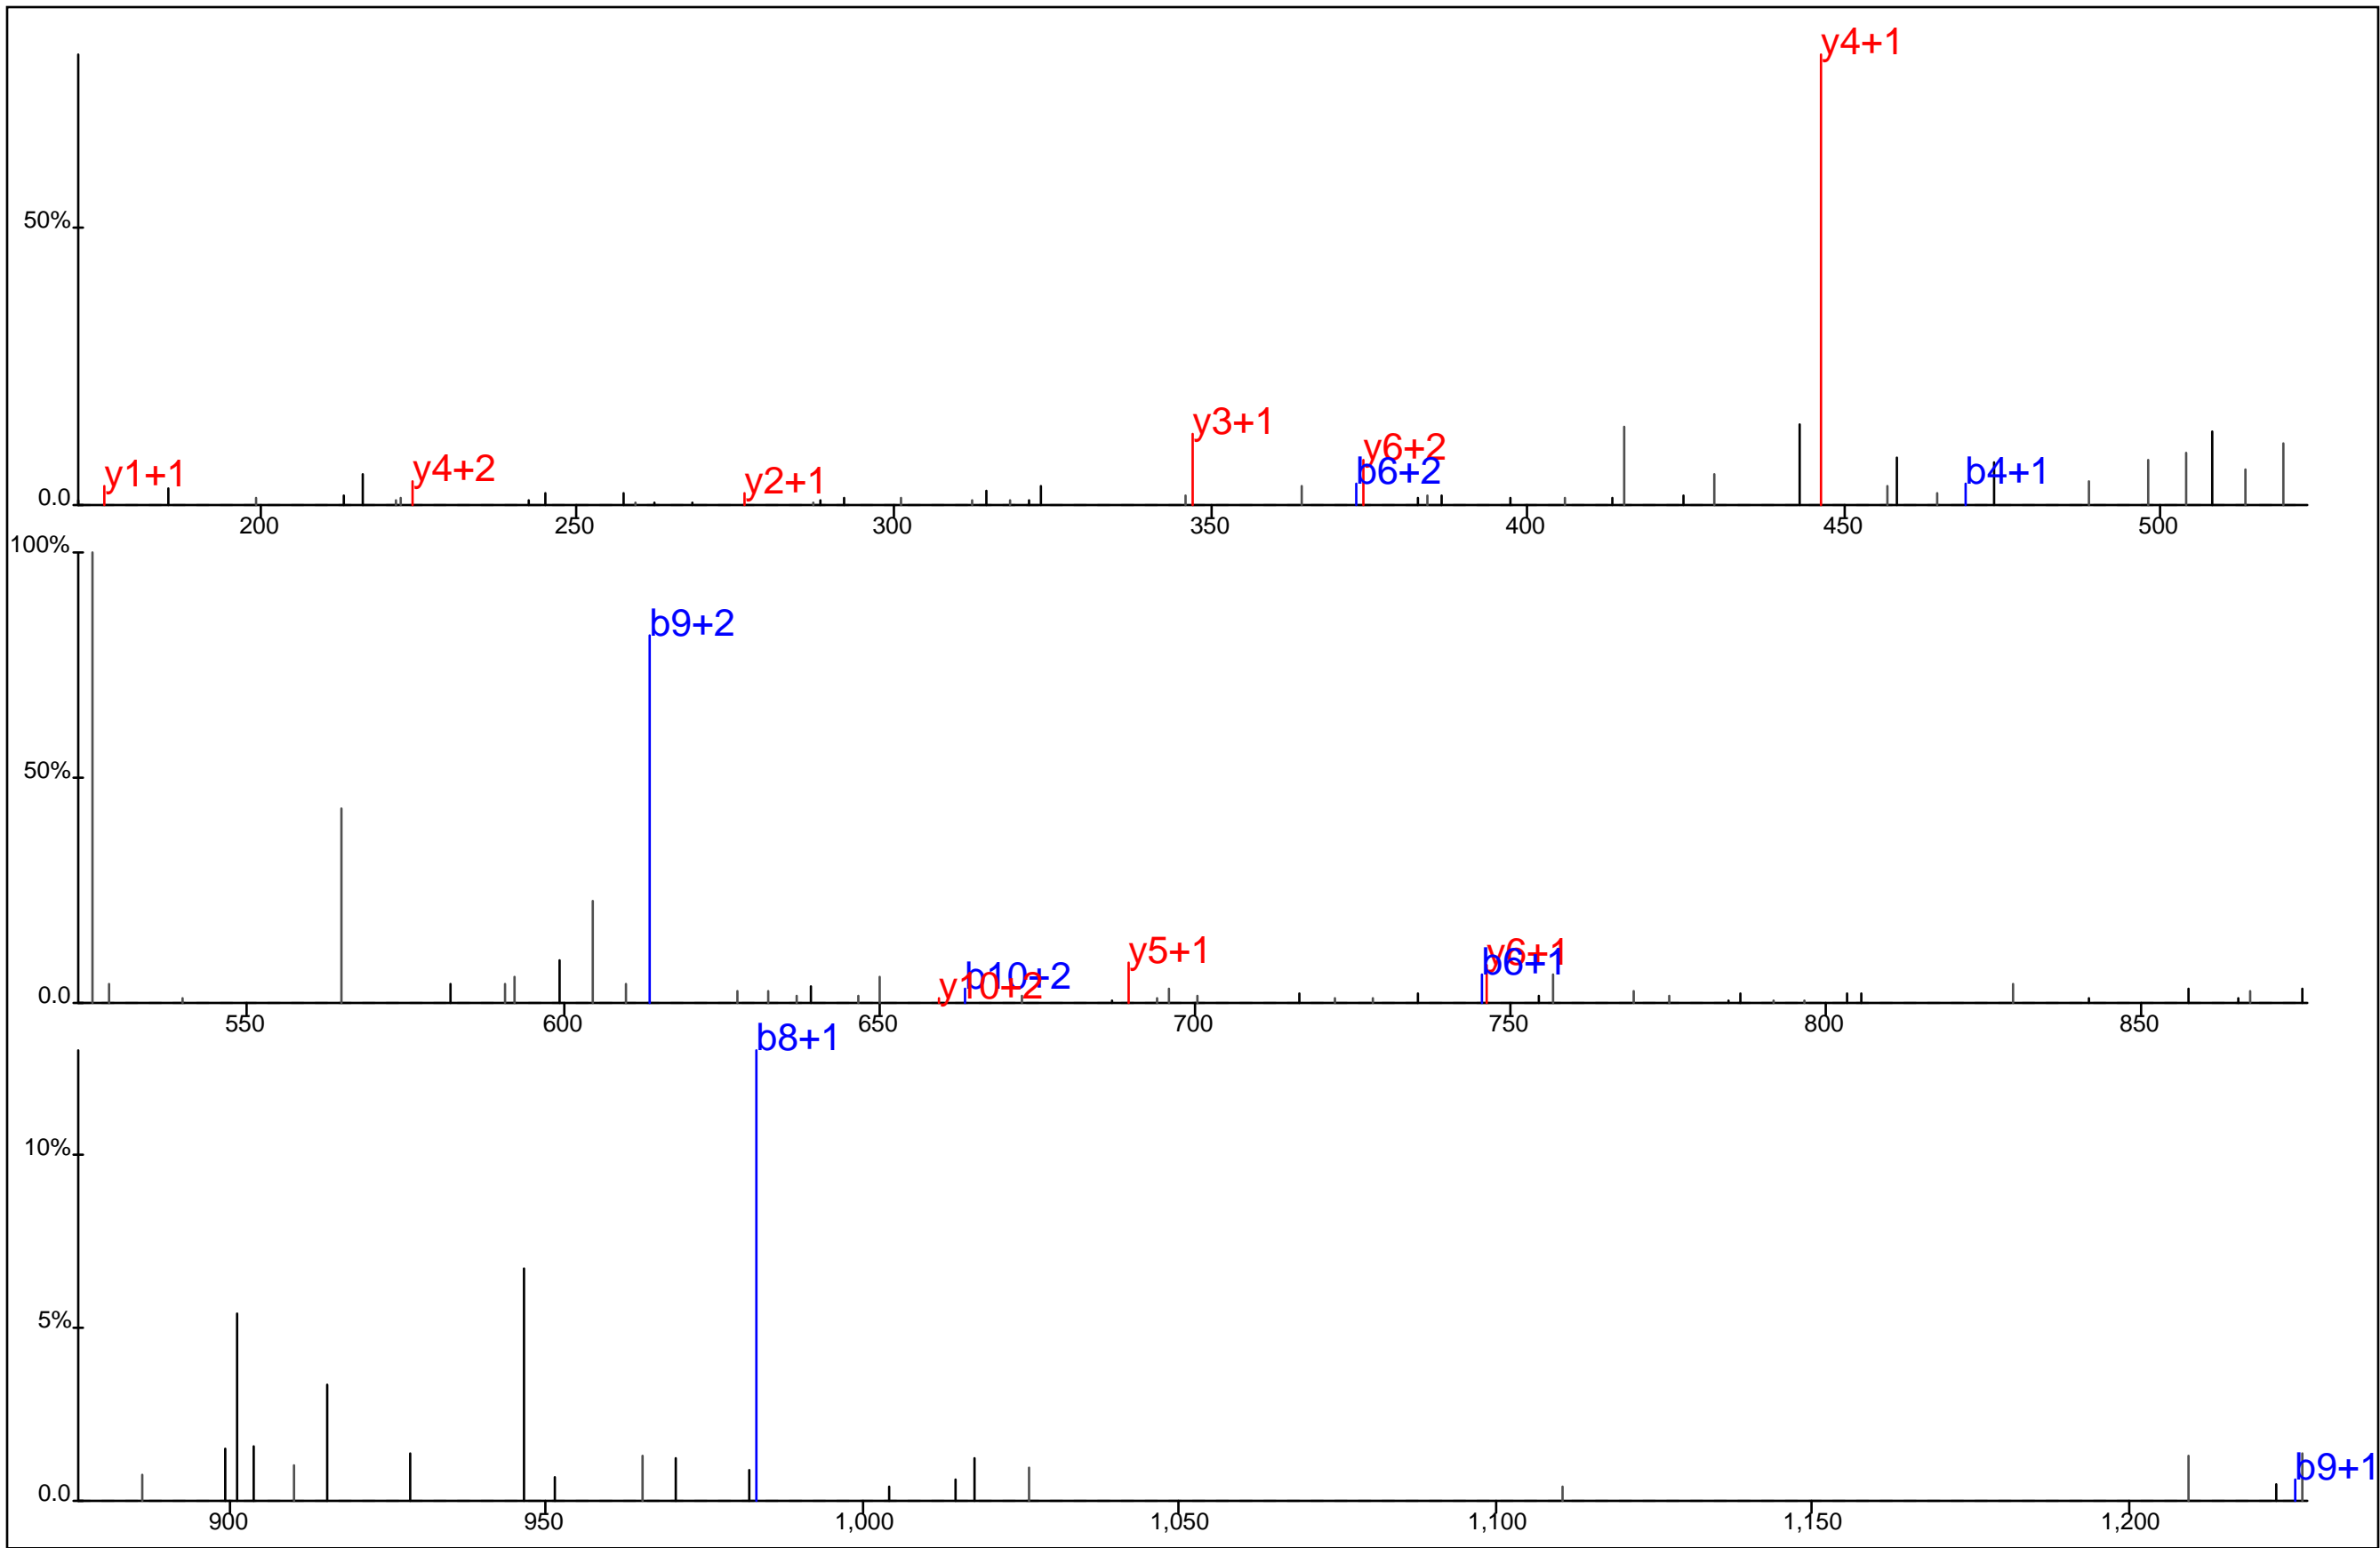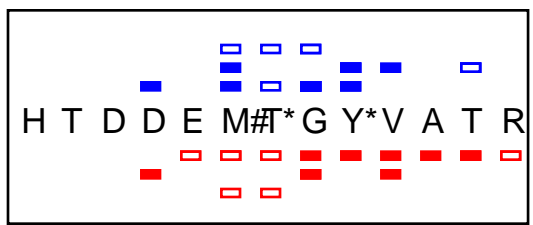

Protein Name: MAPK14  
 gi Accession: 0  
 Precursor Mass: 557.8637+3  
 Delta Mass: 0.485 ppm  
 XCorr: 29.14

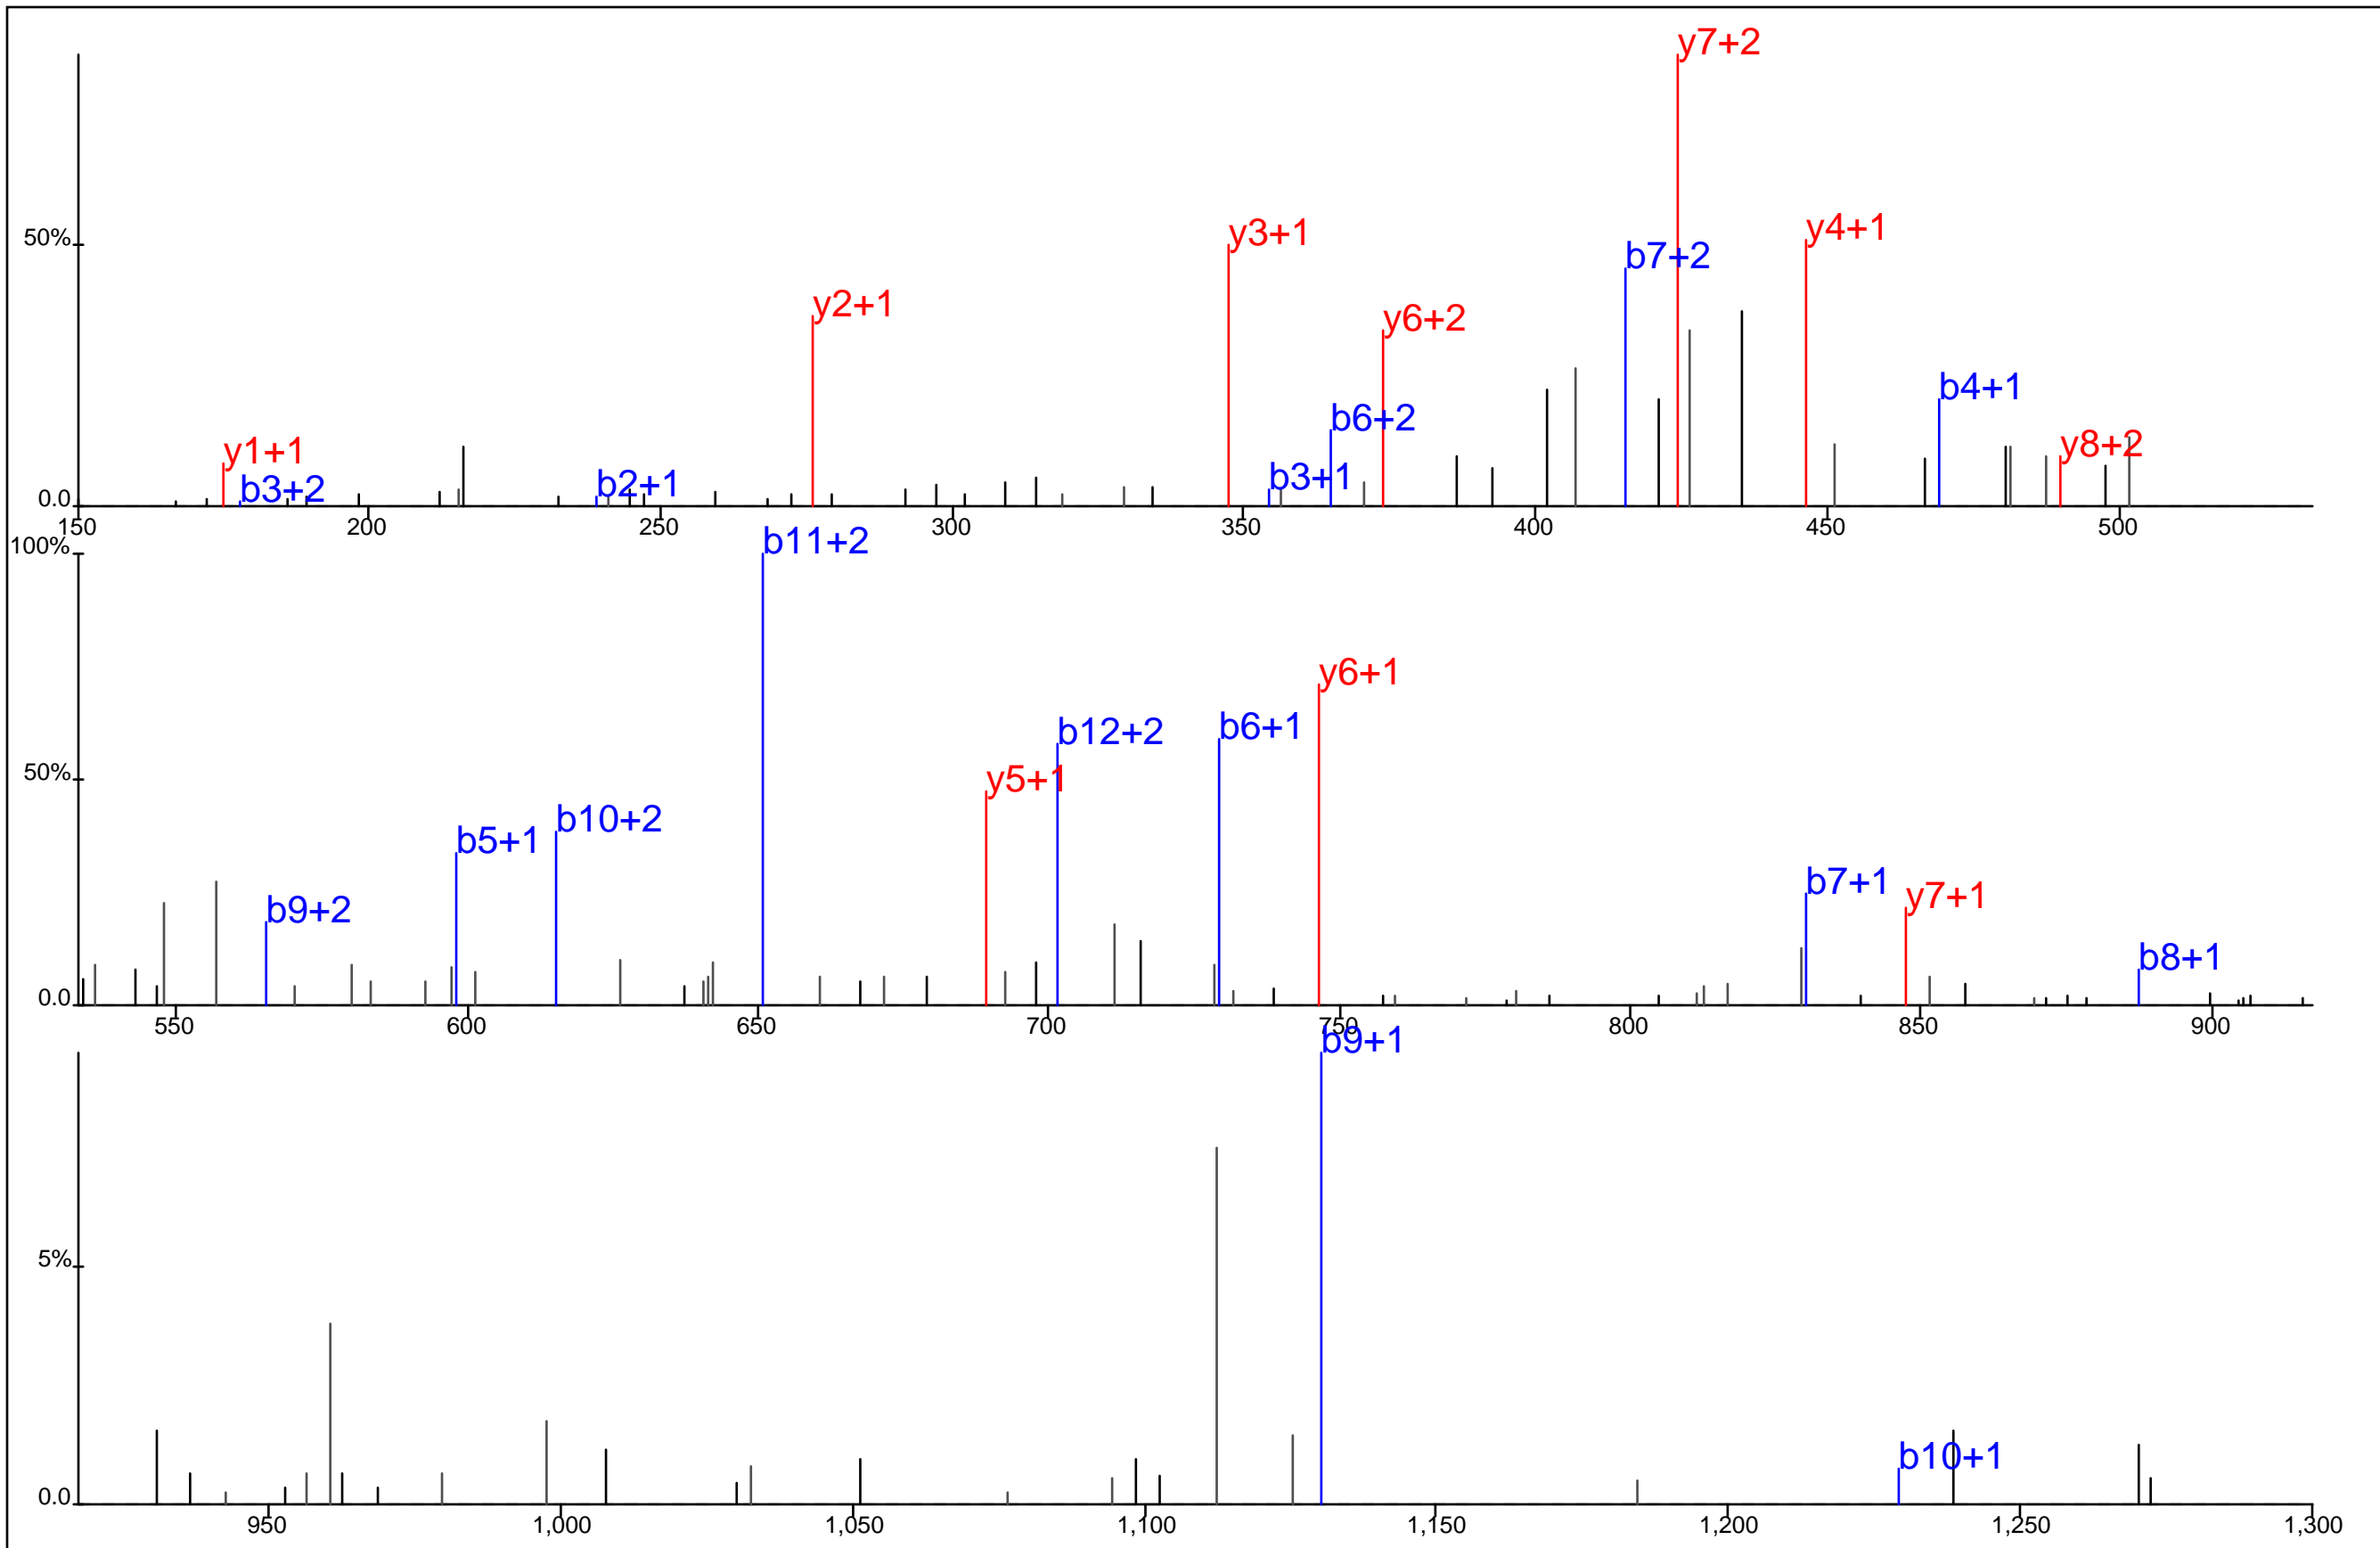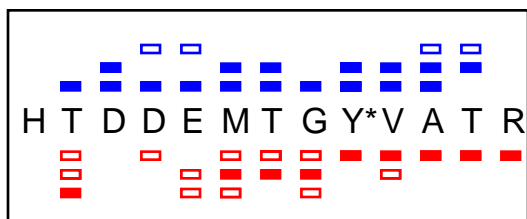

Protein Name: MAPK14  
 gi Accession: 0  
 Precursor Mass: 525.8762+3  
 Delta Mass: 0.371 ppm  
 XCorr: 53.48





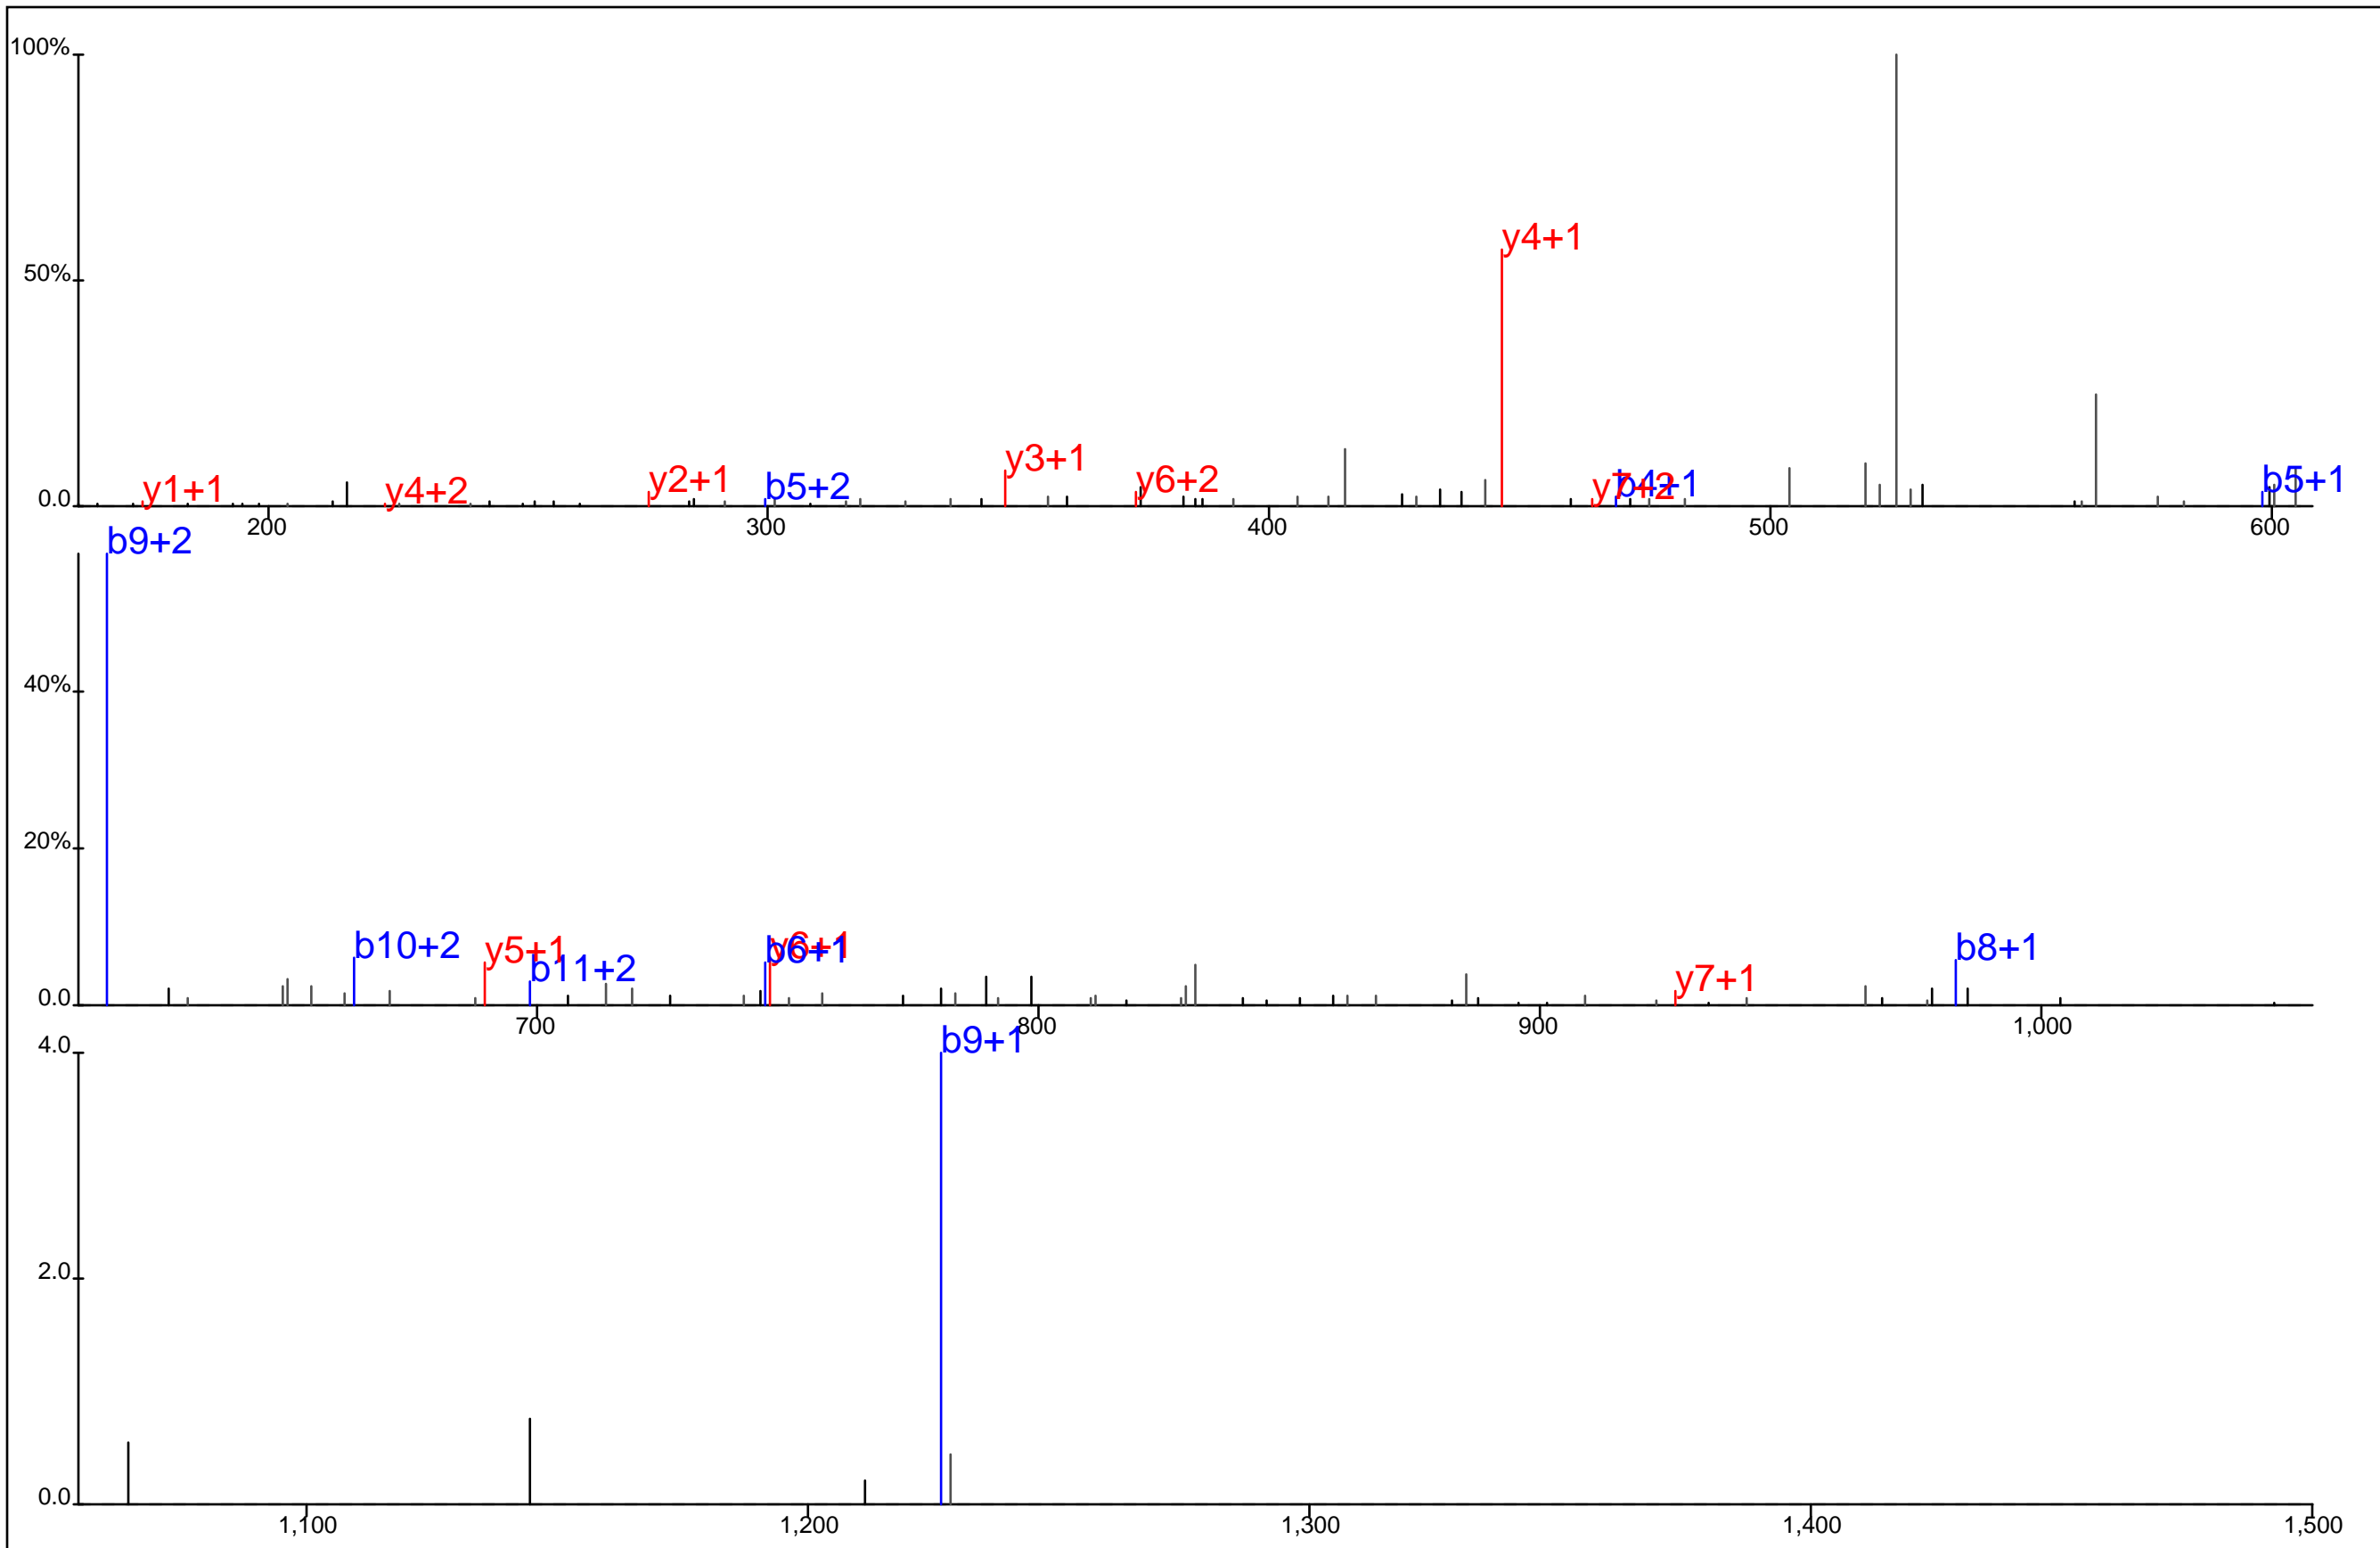

HTDDEMT\*GYVA TR  
 HTDDEMT\*GYVA TR

Protein Name: MAPK14  
 gi Accession: 0  
 Precursor Mass: 557.8641+3  
 Delta Mass: 1.143 ppm  
 XCorr: 26.56



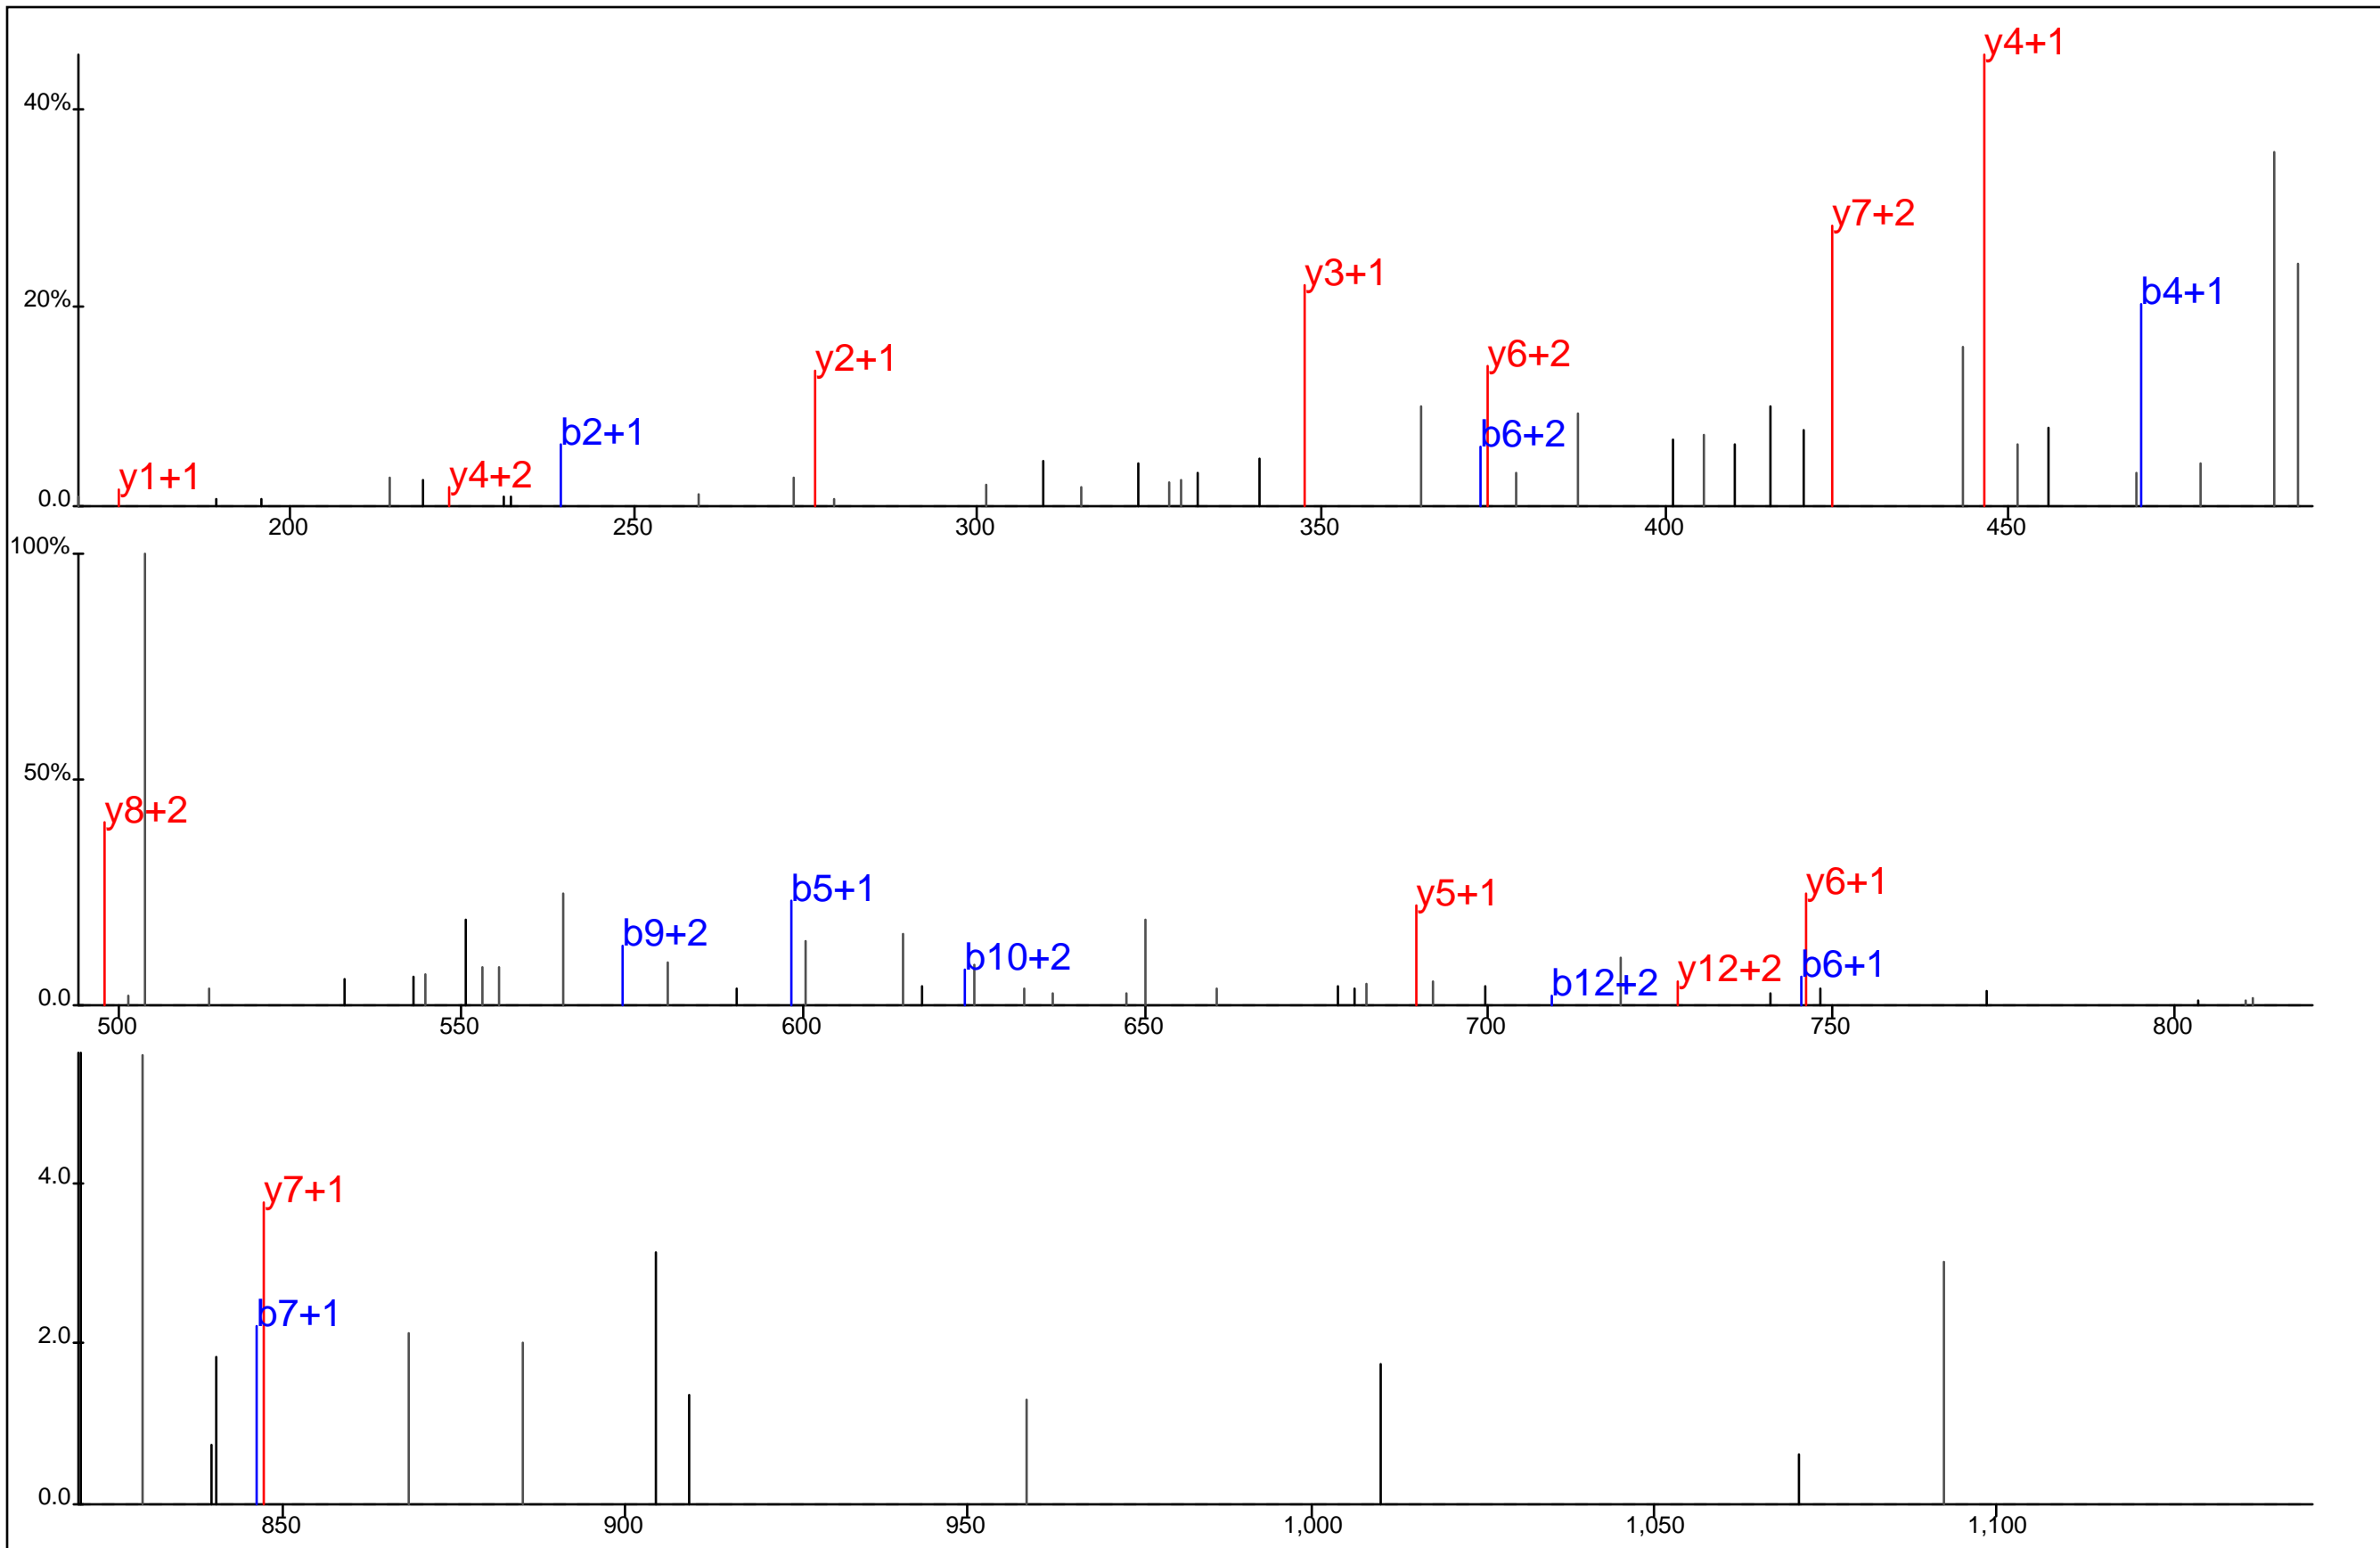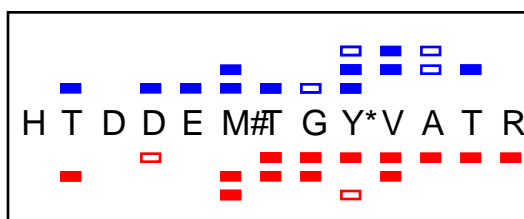

Protein Name: MAPK14  
 gi Accession: 0  
 Precursor Mass: 531.2081+3  
 Delta Mass: 0.255 ppm  
 XCorr: 46.18

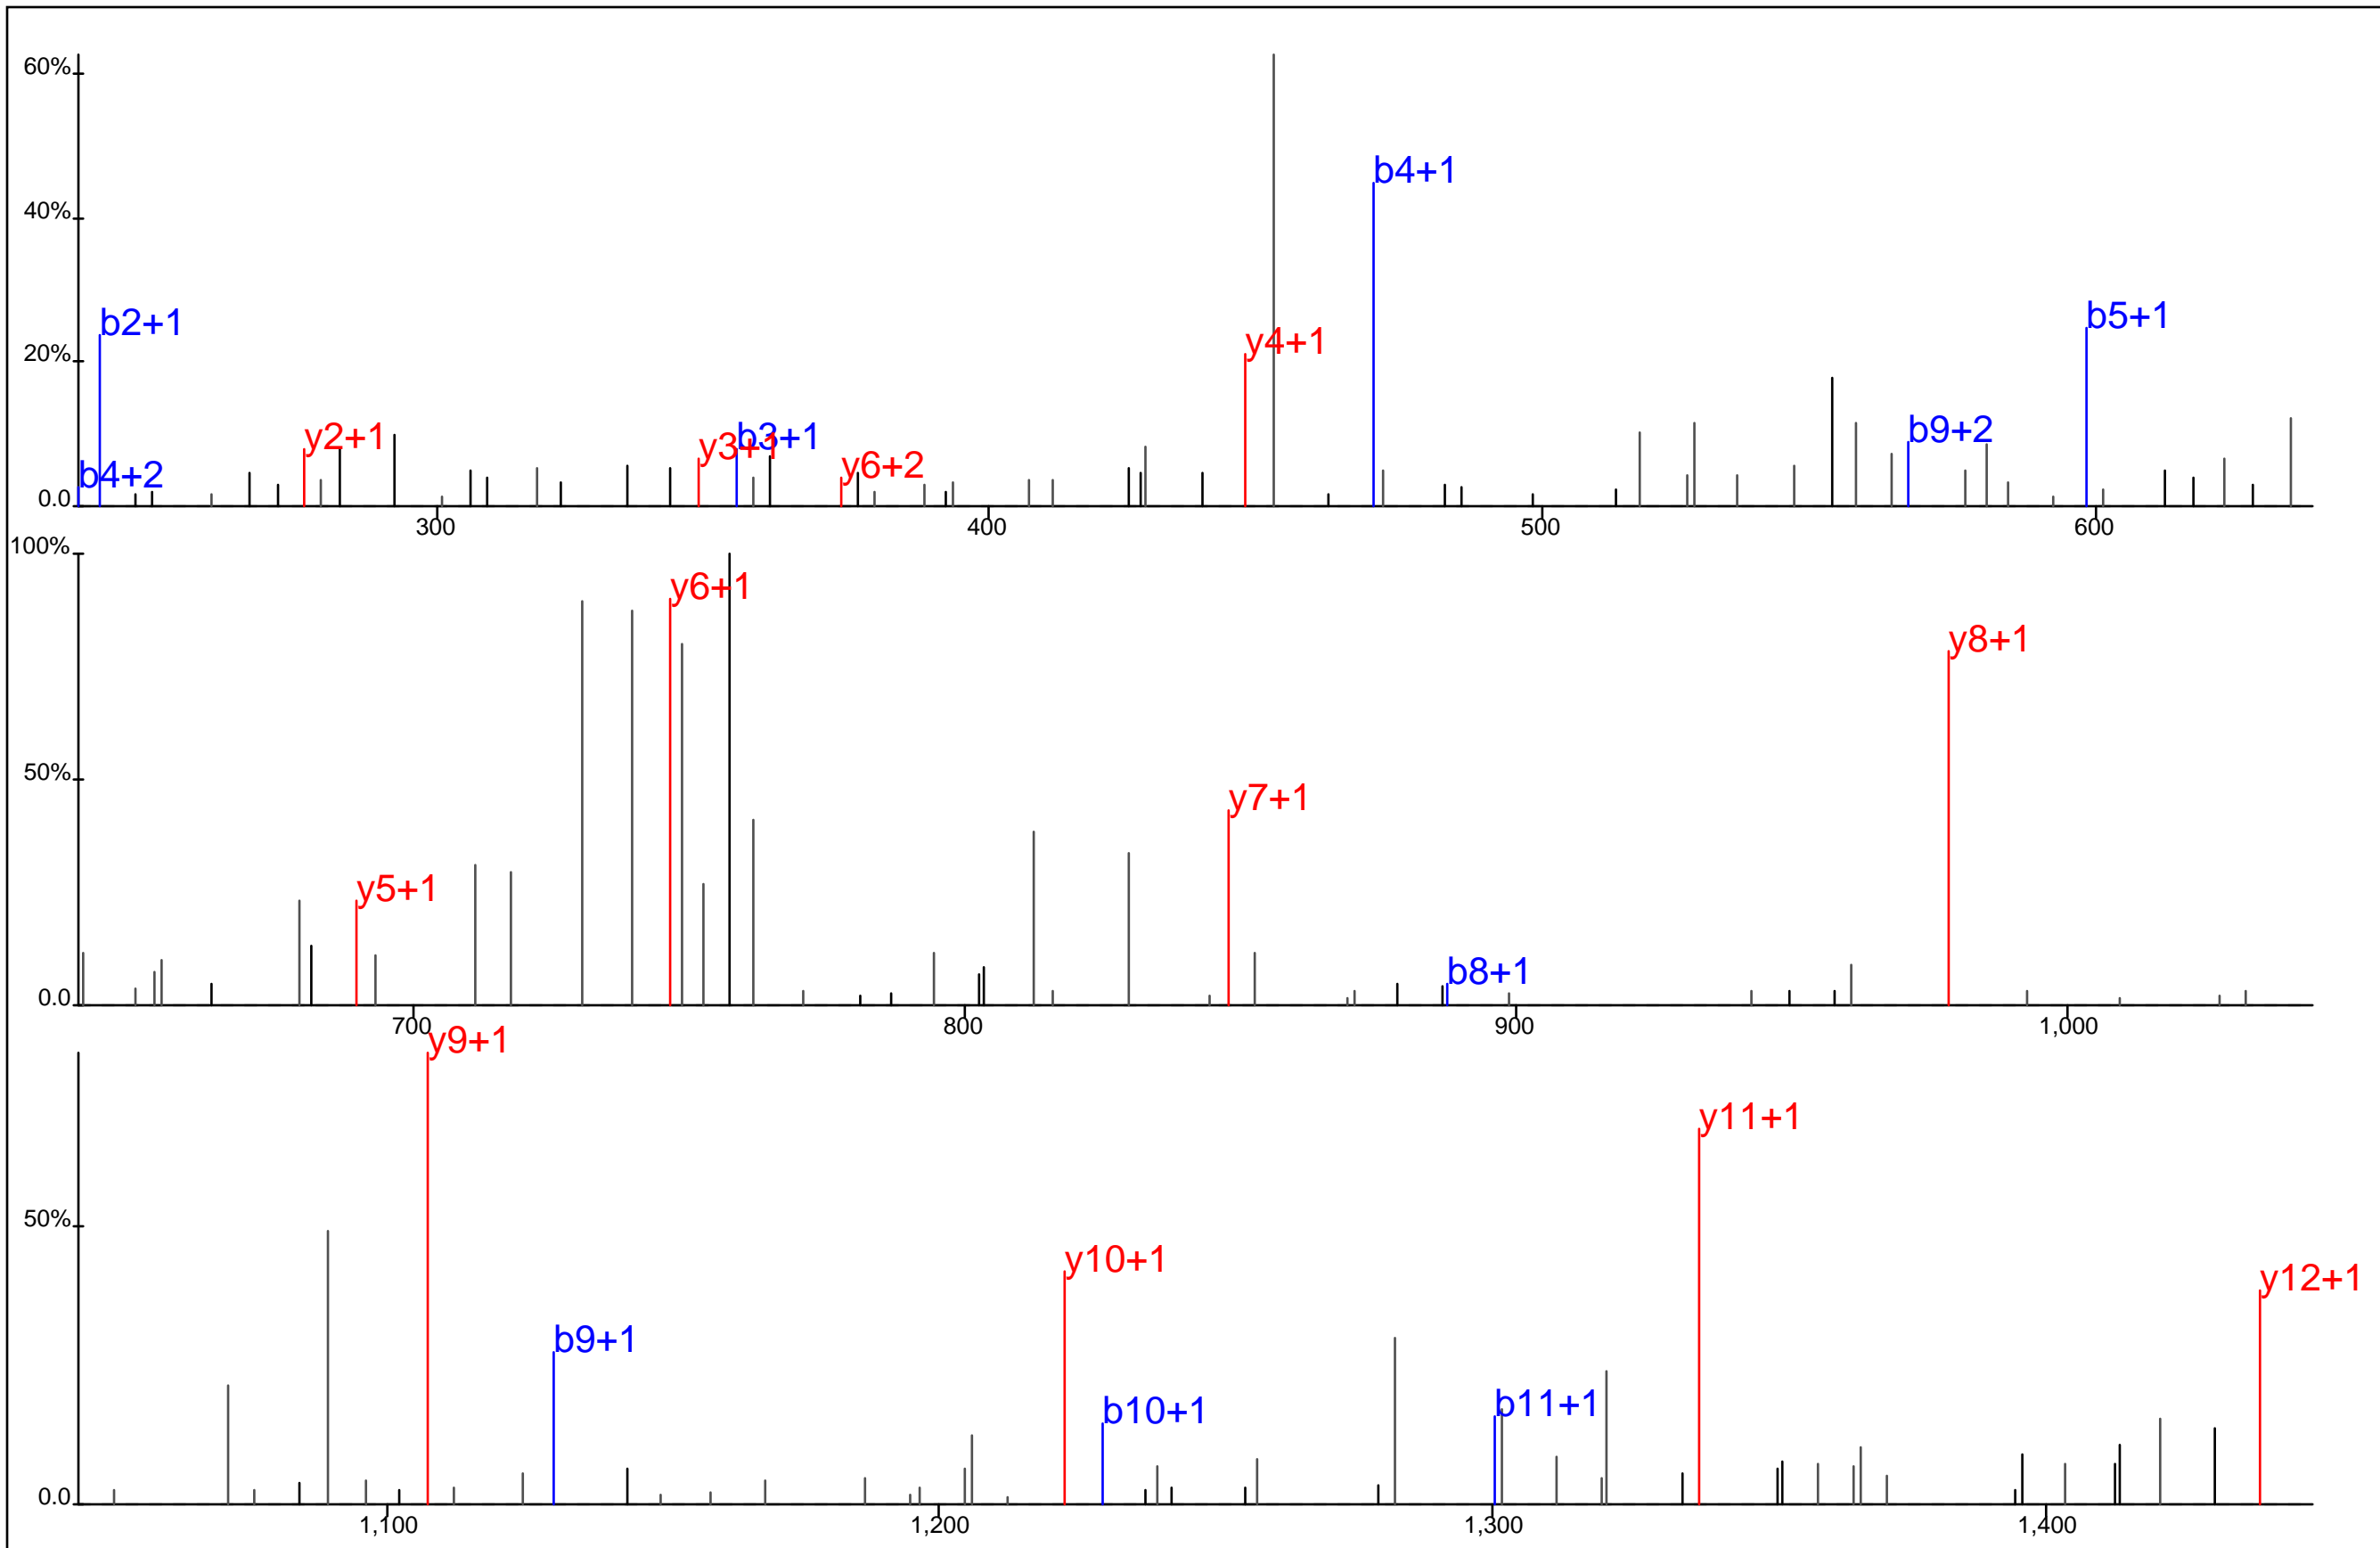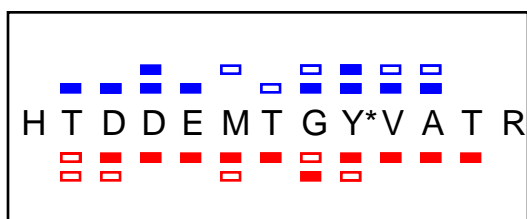

Protein Name: MAPK14  
 gi Accession: 0  
 Precursor Mass: 788.3116+2  
 Delta Mass: 0.955 ppm  
 XCorr: 74.58







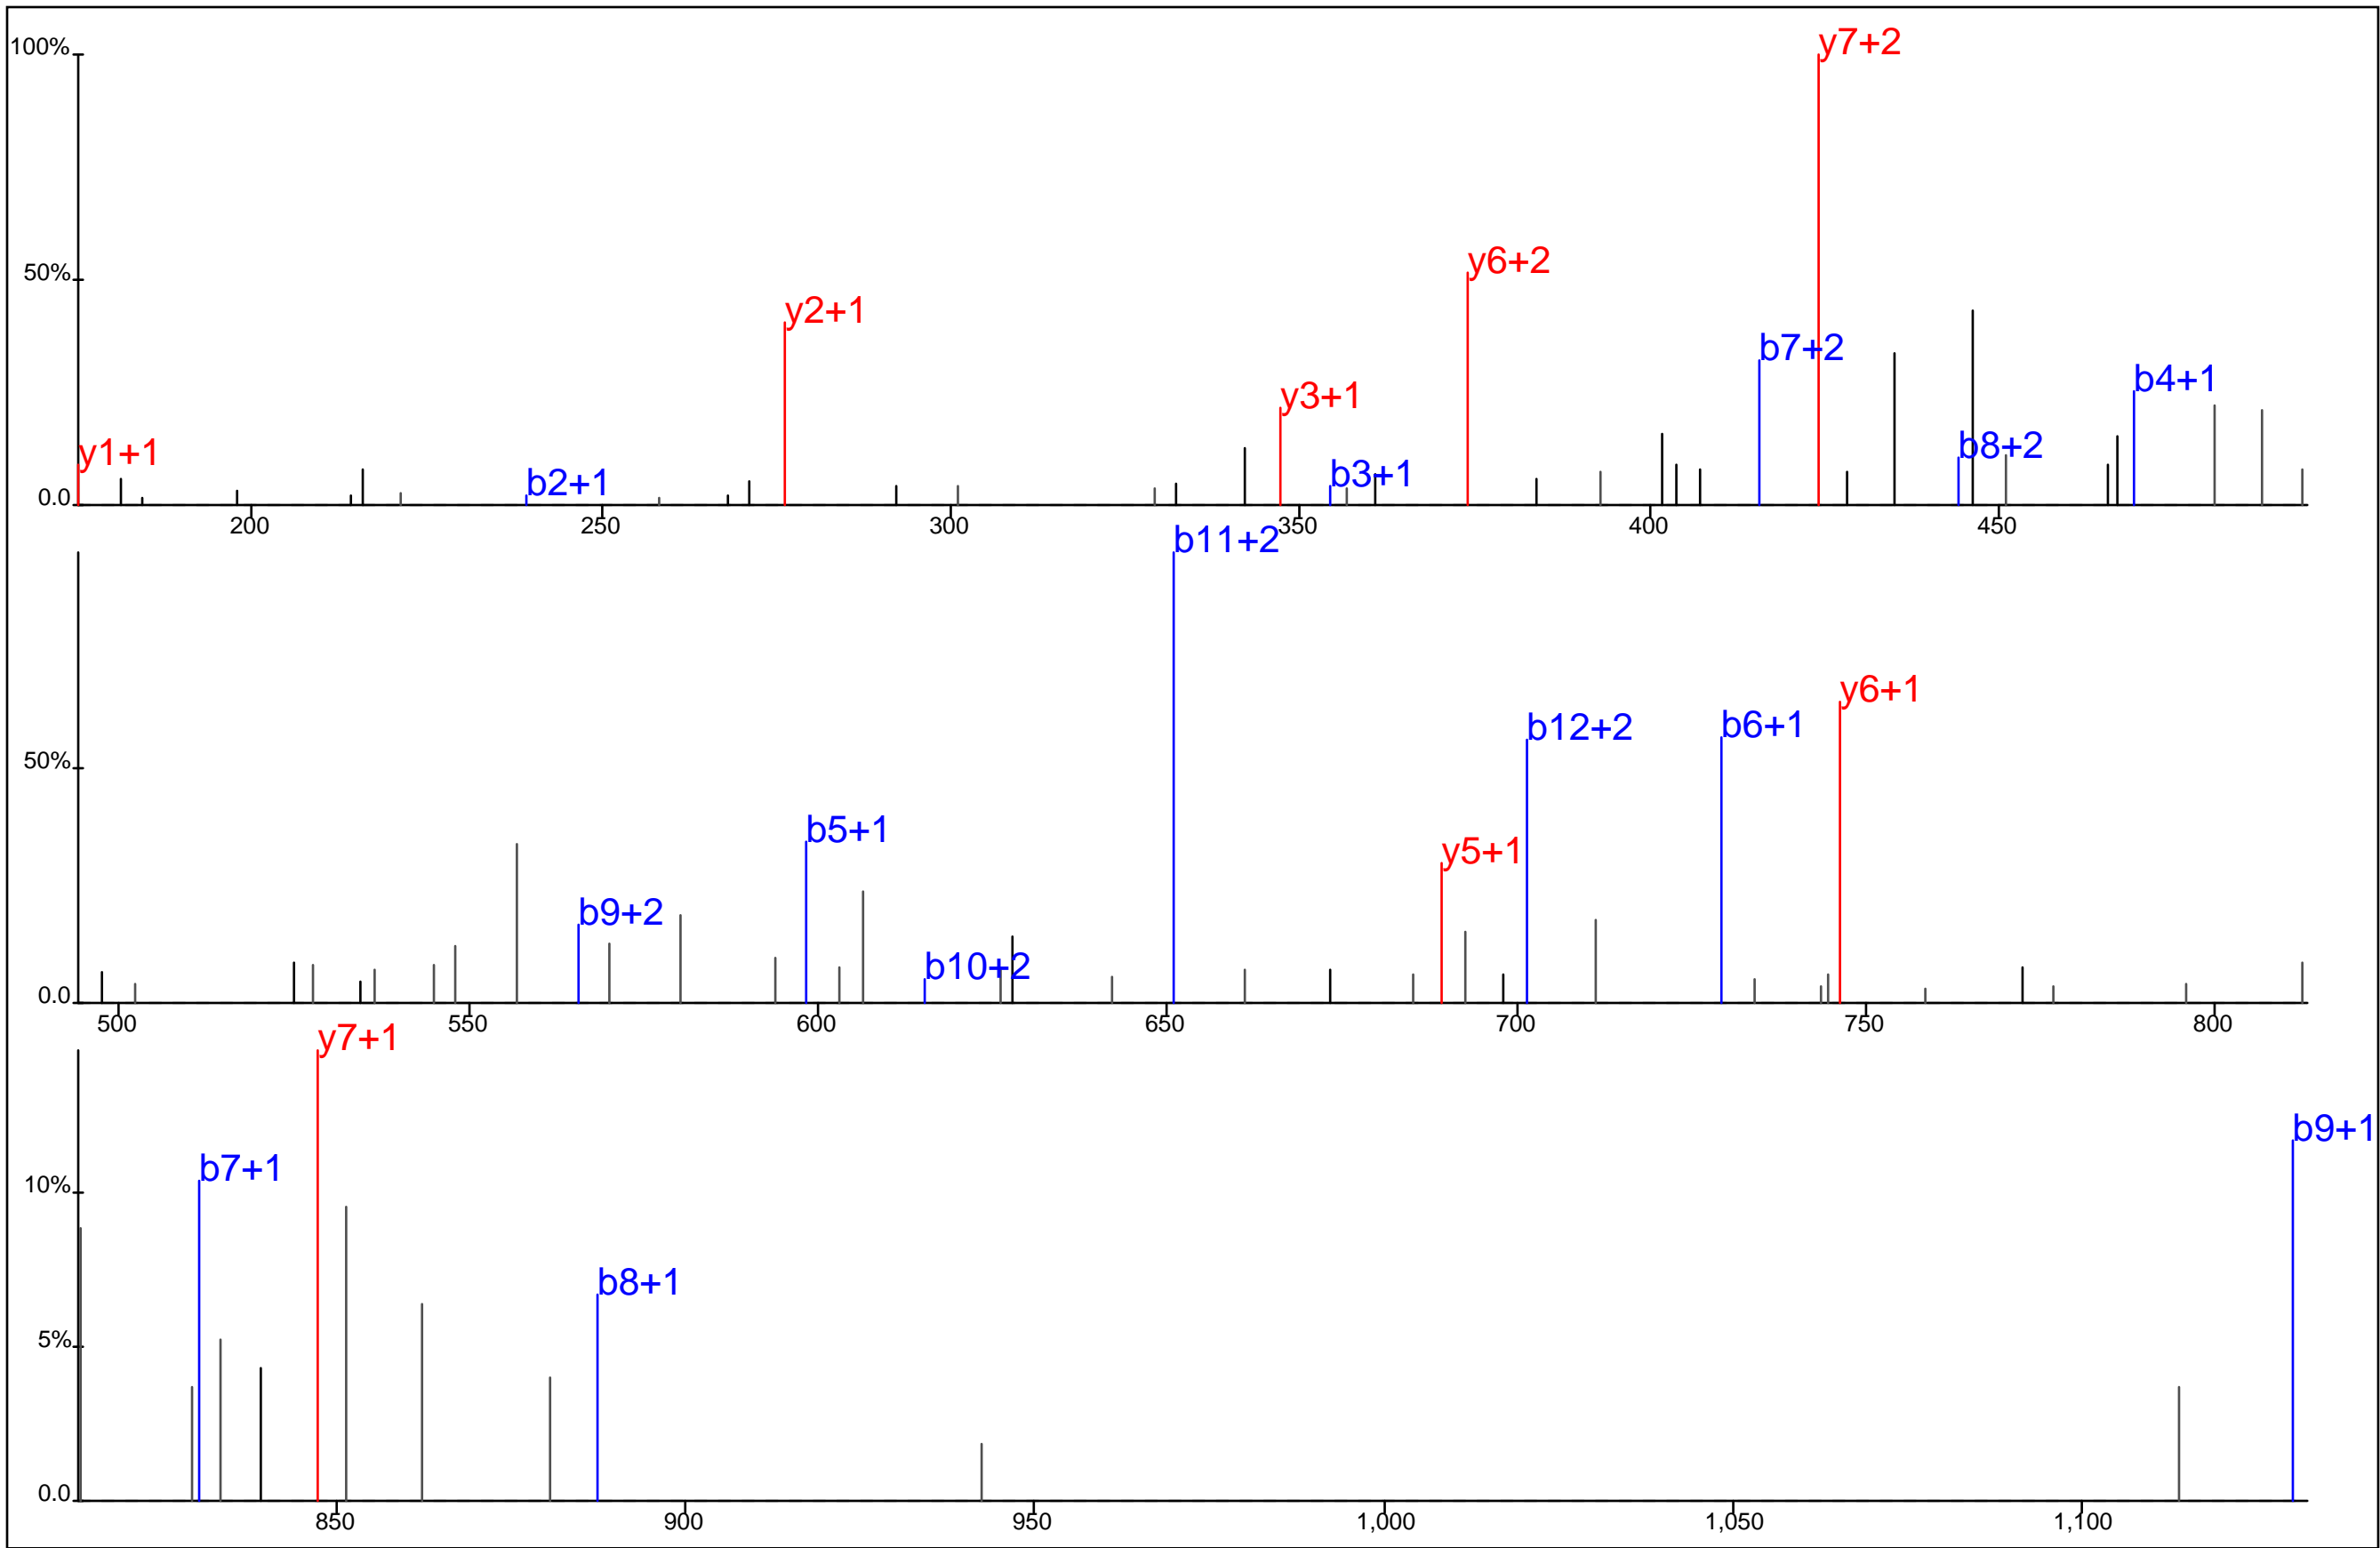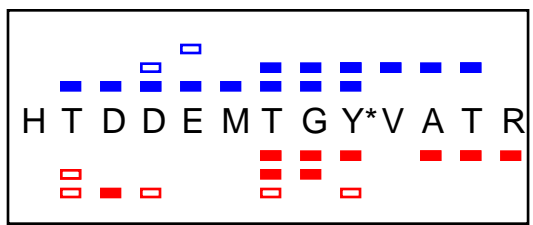

Protein Name: MAPK14  
 gi Accession: 0  
 Precursor Mass: 525.8763+3  
 Delta Mass: 0.022 ppm  
 XCorr: 44.94

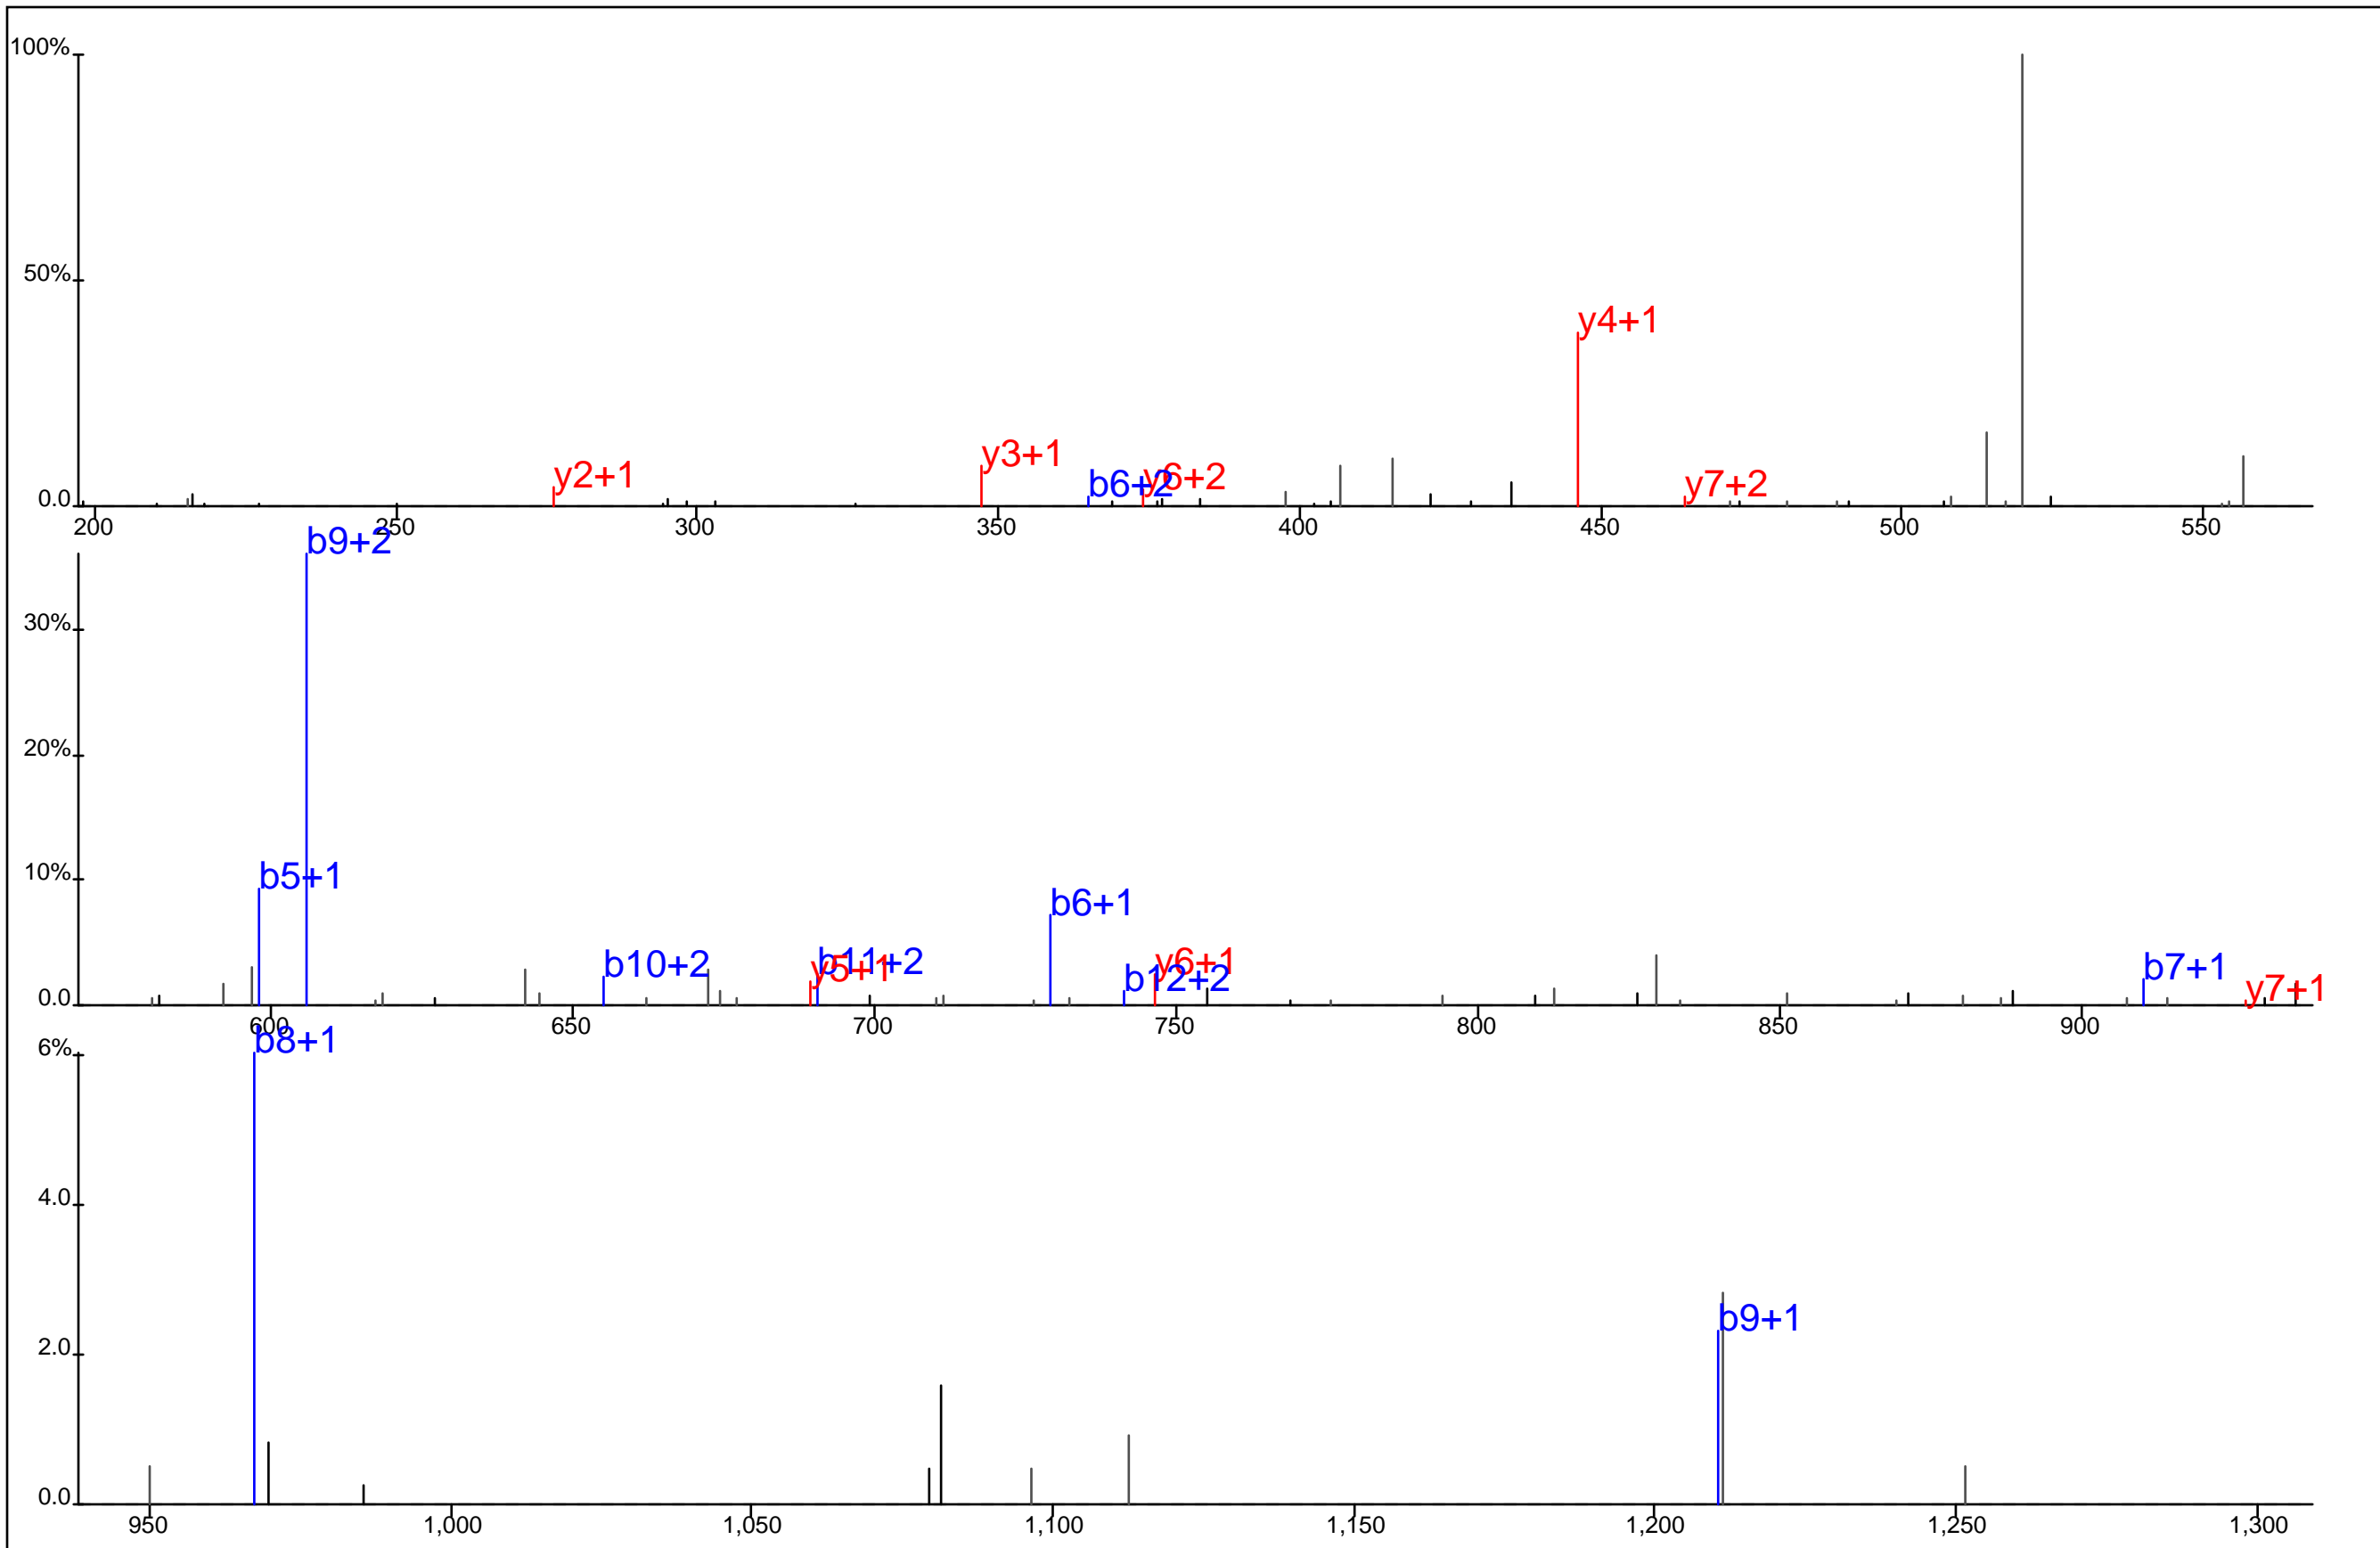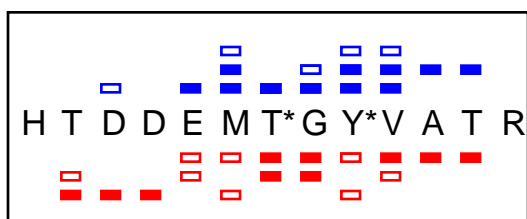

Protein Name: MAPK14  
 gi Accession: 0  
 Precursor Mass: 552.5319+3  
 Delta Mass: 0.112 ppm  
 XCorr: 38.26





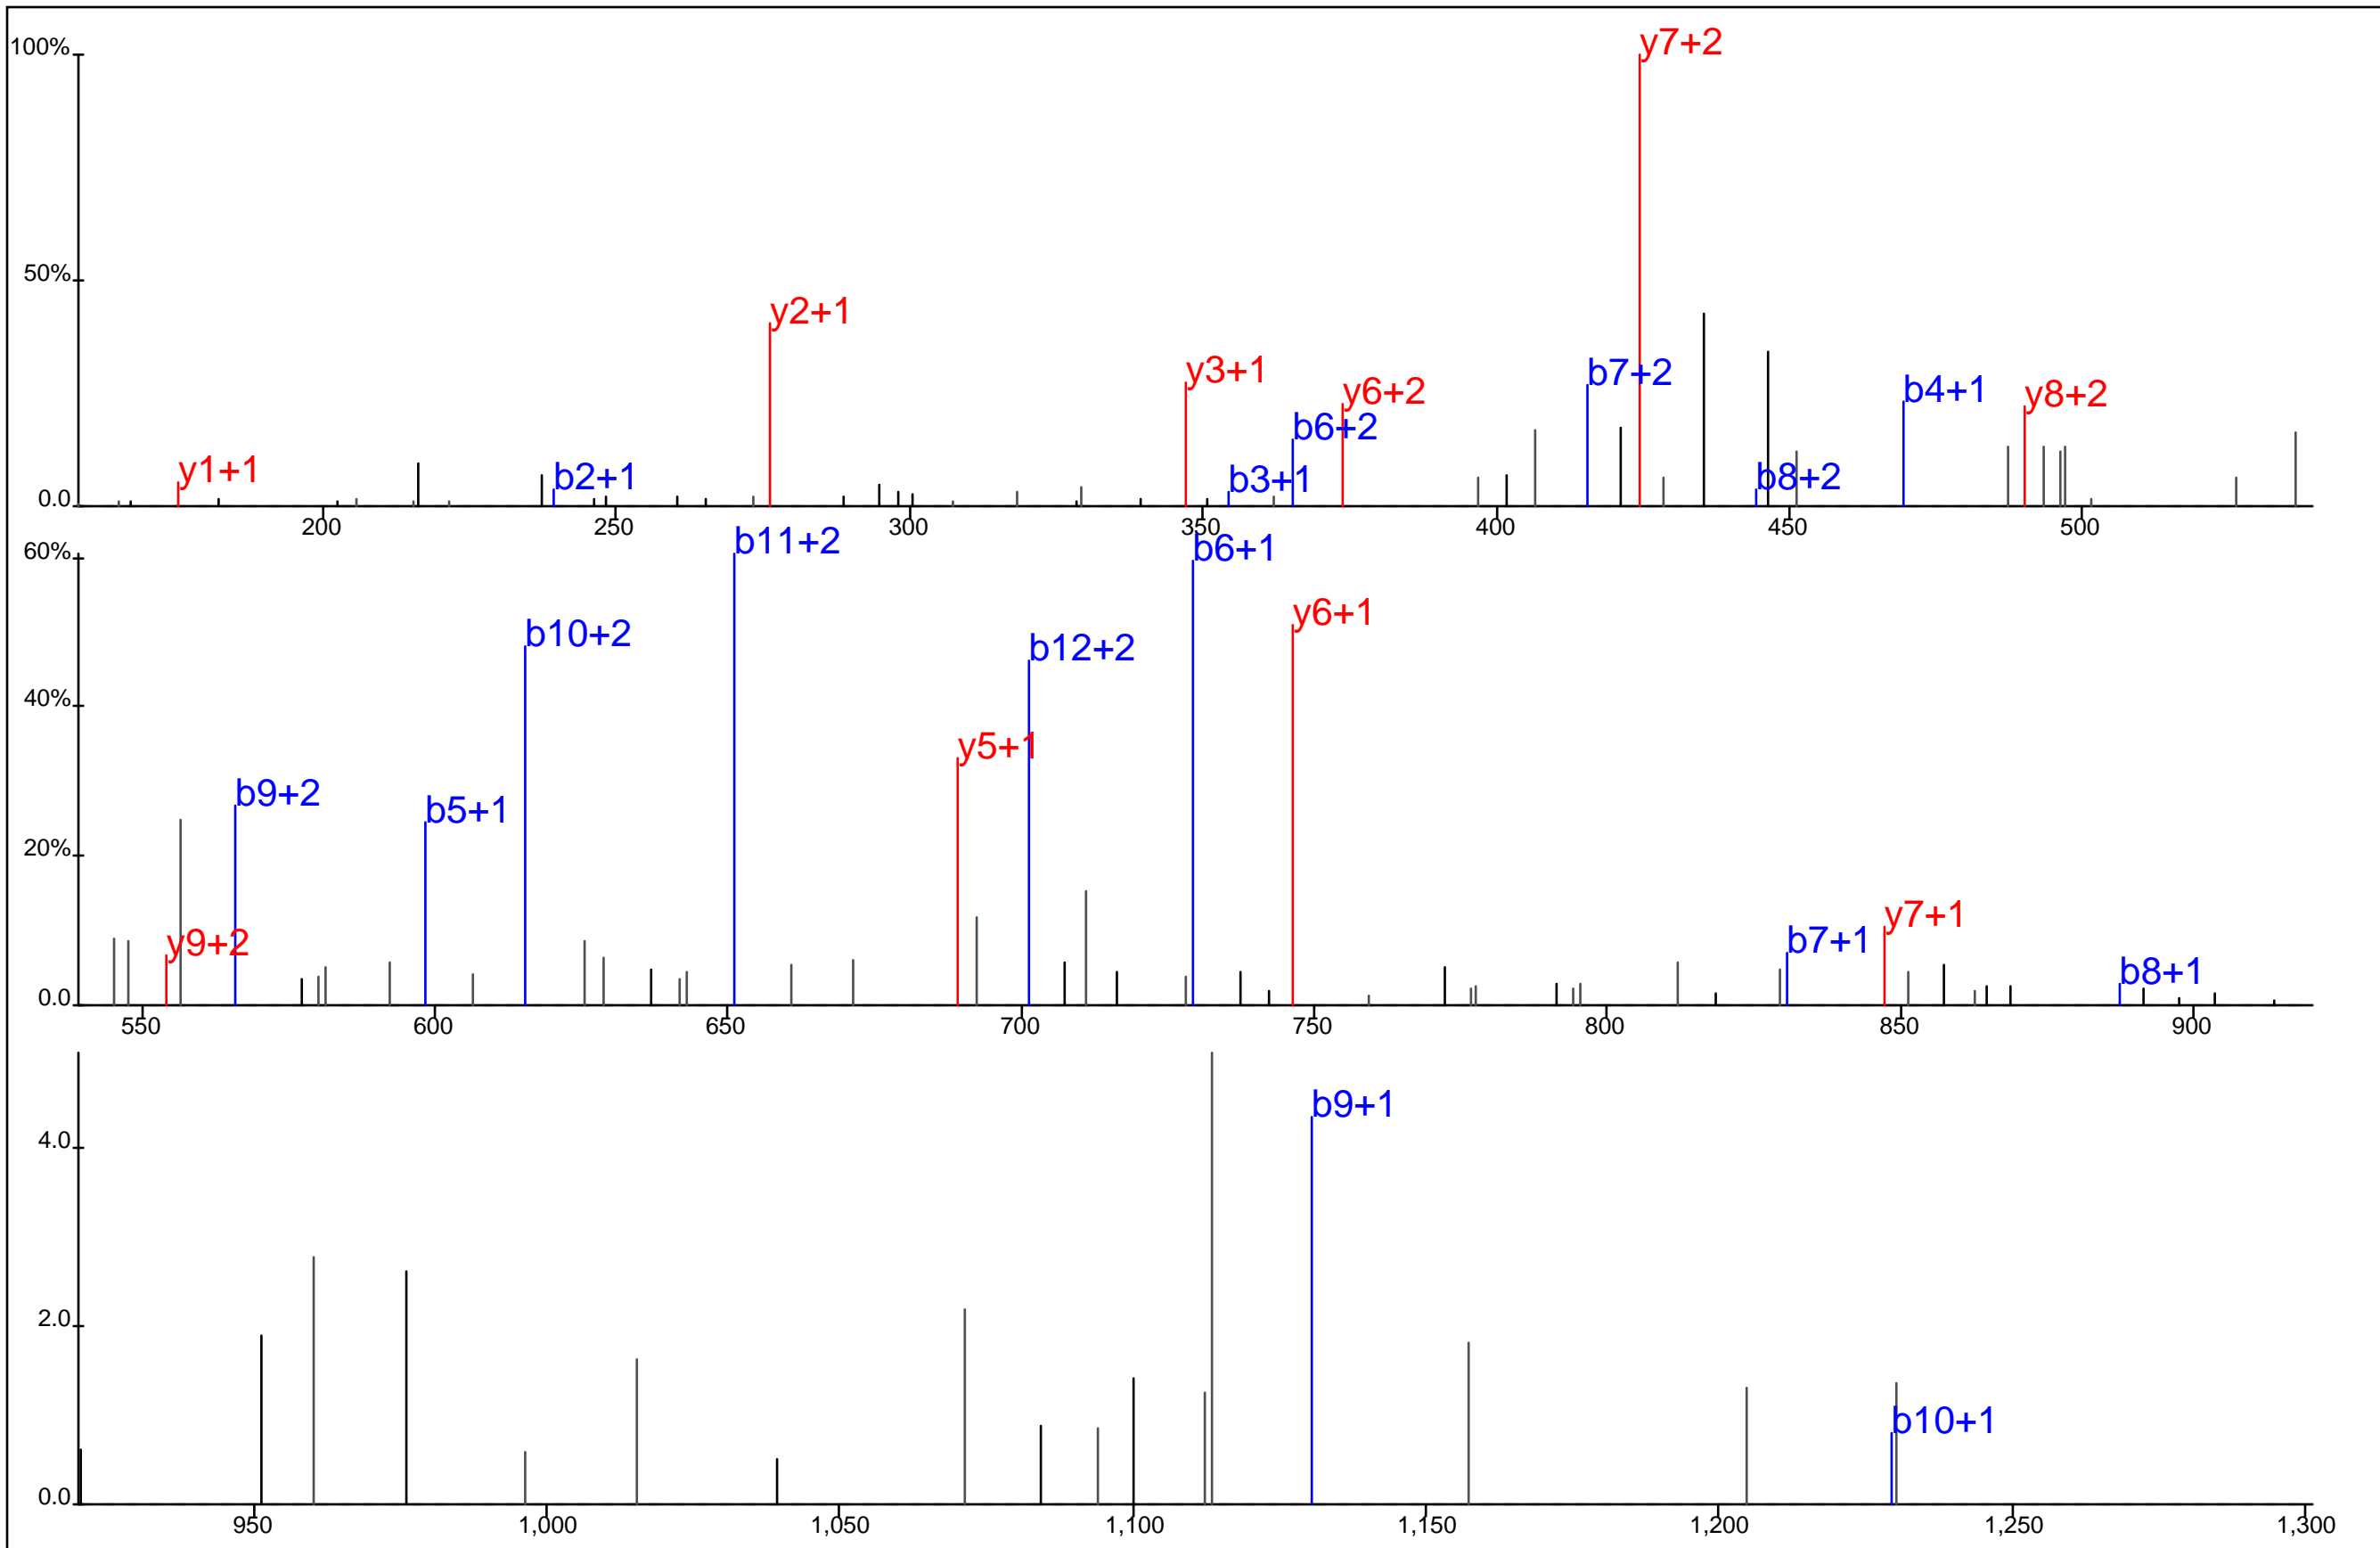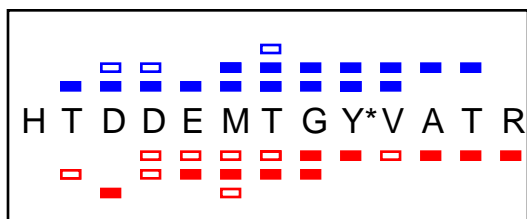

Protein Name: MAPK14  
 gi Accession: 0  
 Precursor Mass: 525.8759+3  
 Delta Mass: 0.835 ppm  
 XCorr: 53.84



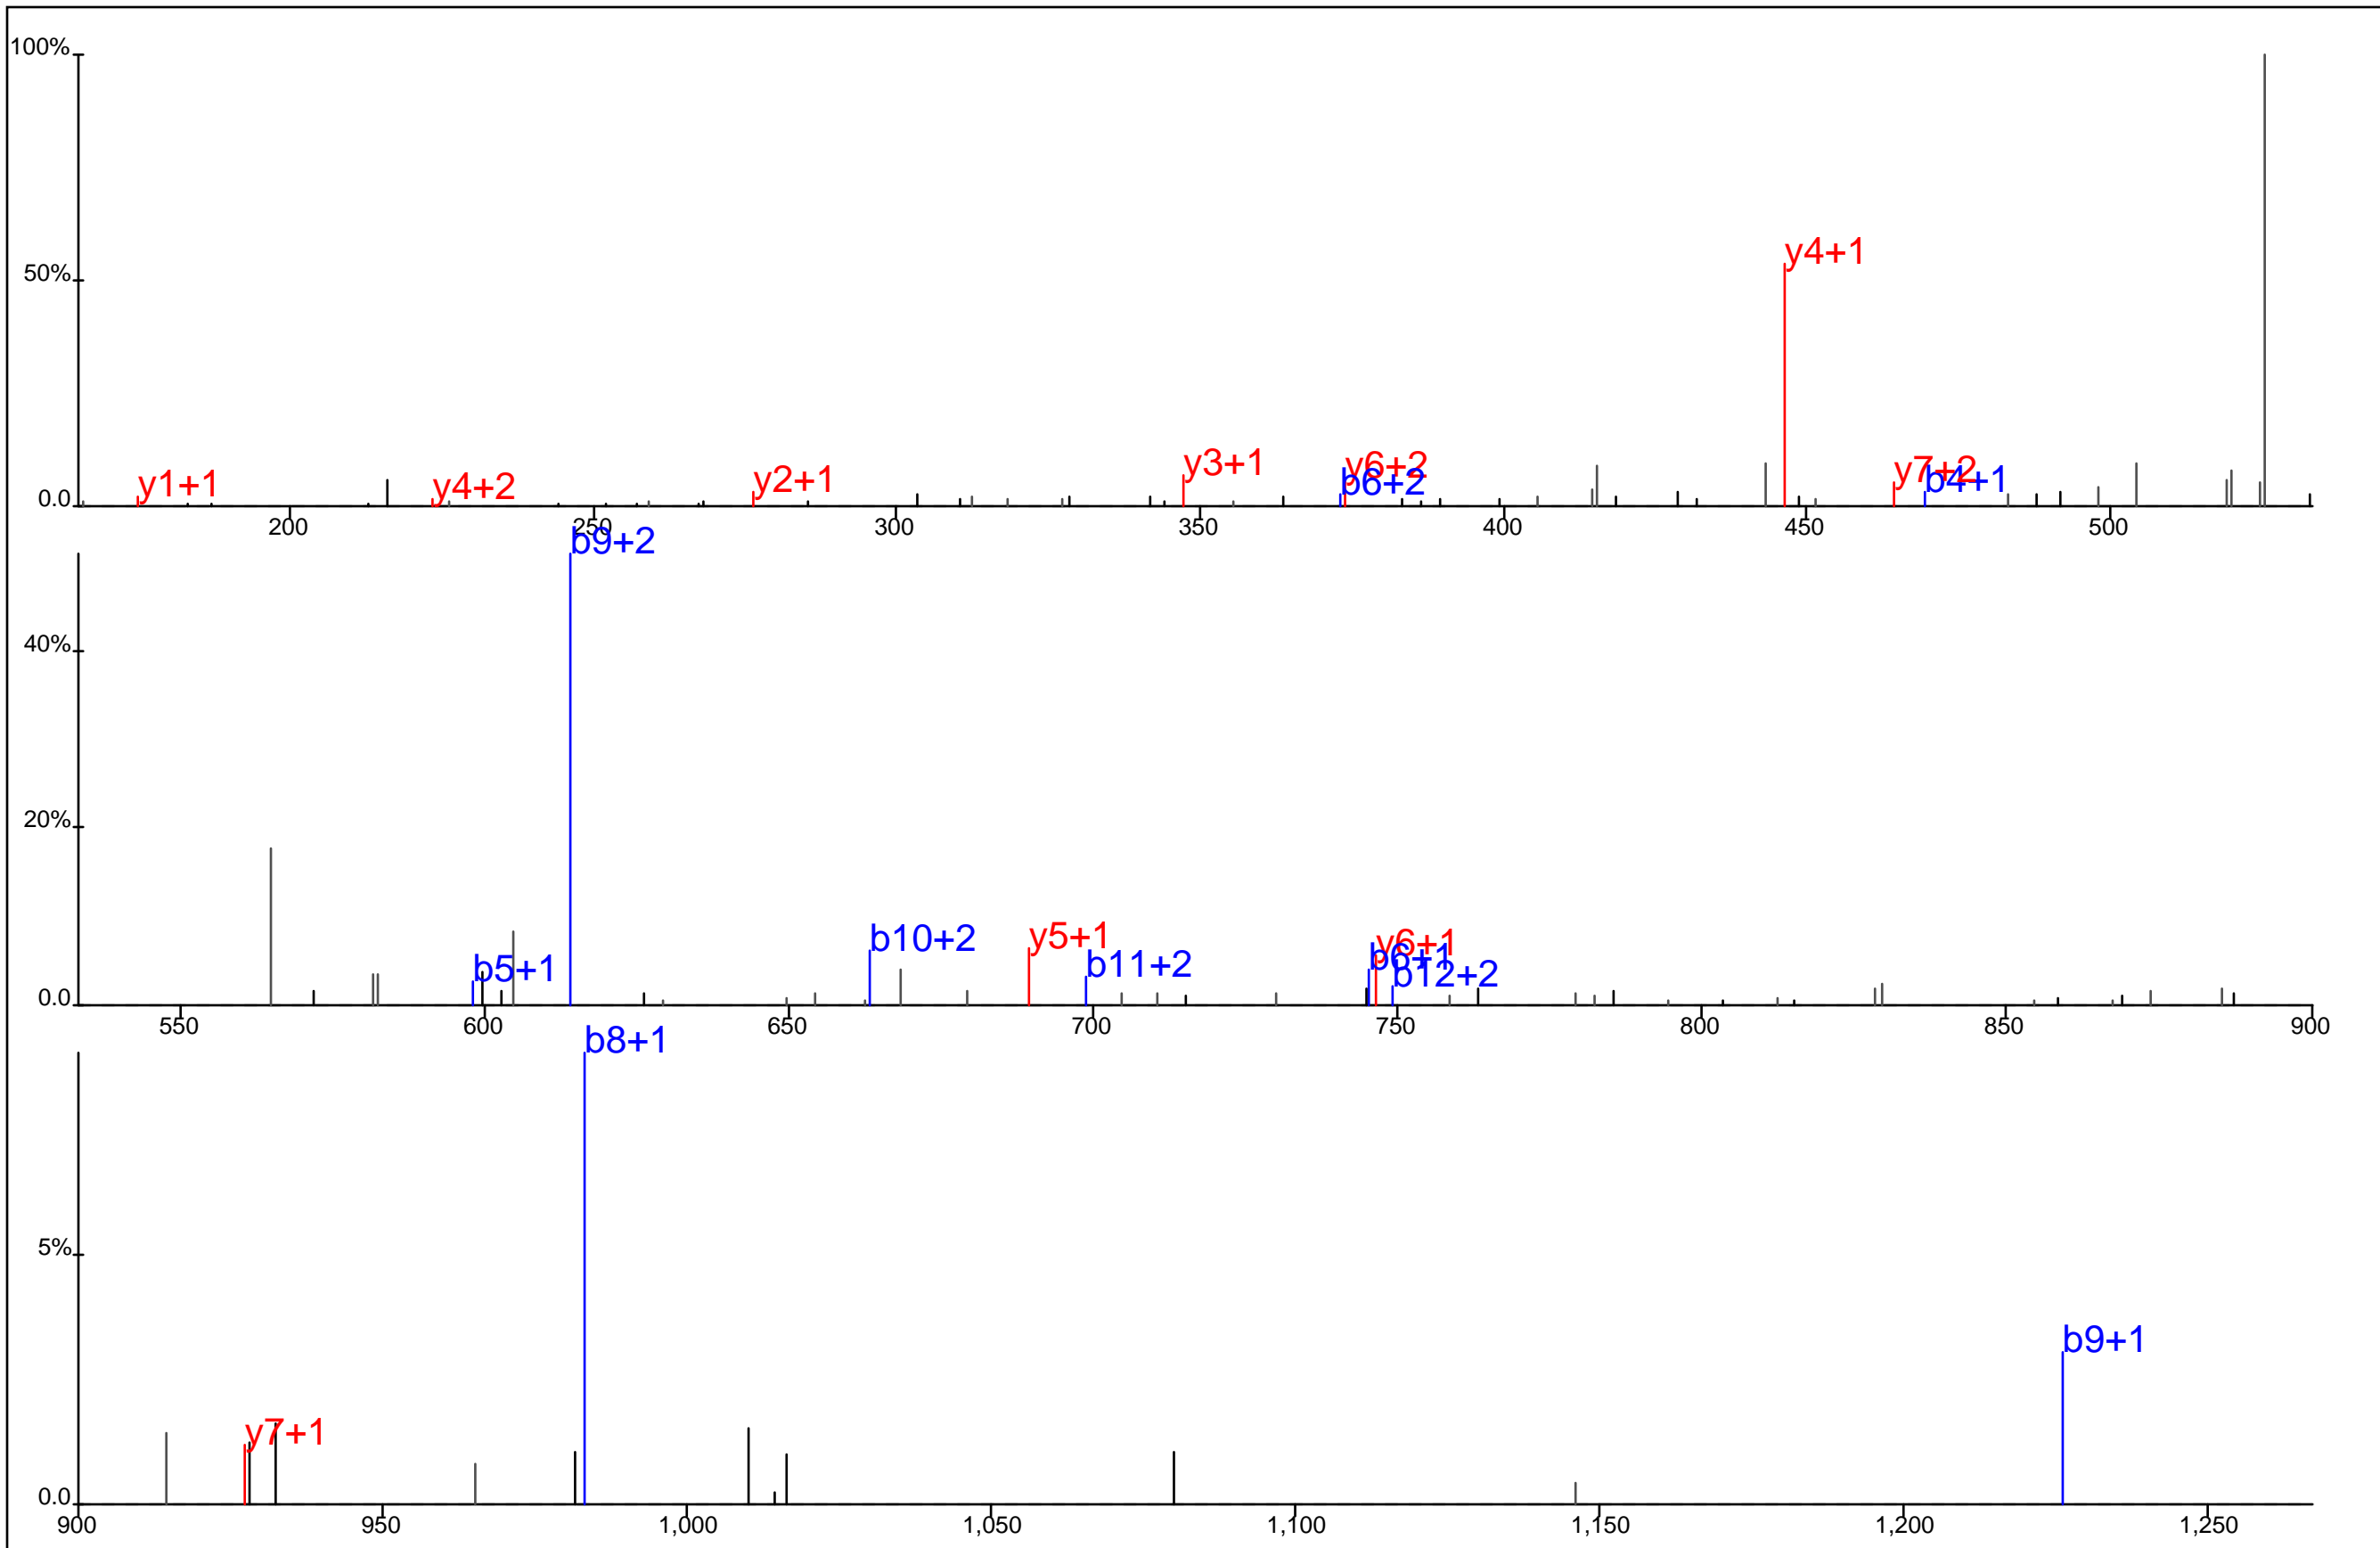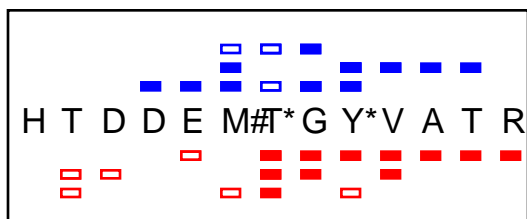

Protein Name: MAPK14  
 gi Accession: 0  
 Precursor Mass: 557.8635+3  
 Delta Mass: 0.047 ppm  
 XCorr: 40.6

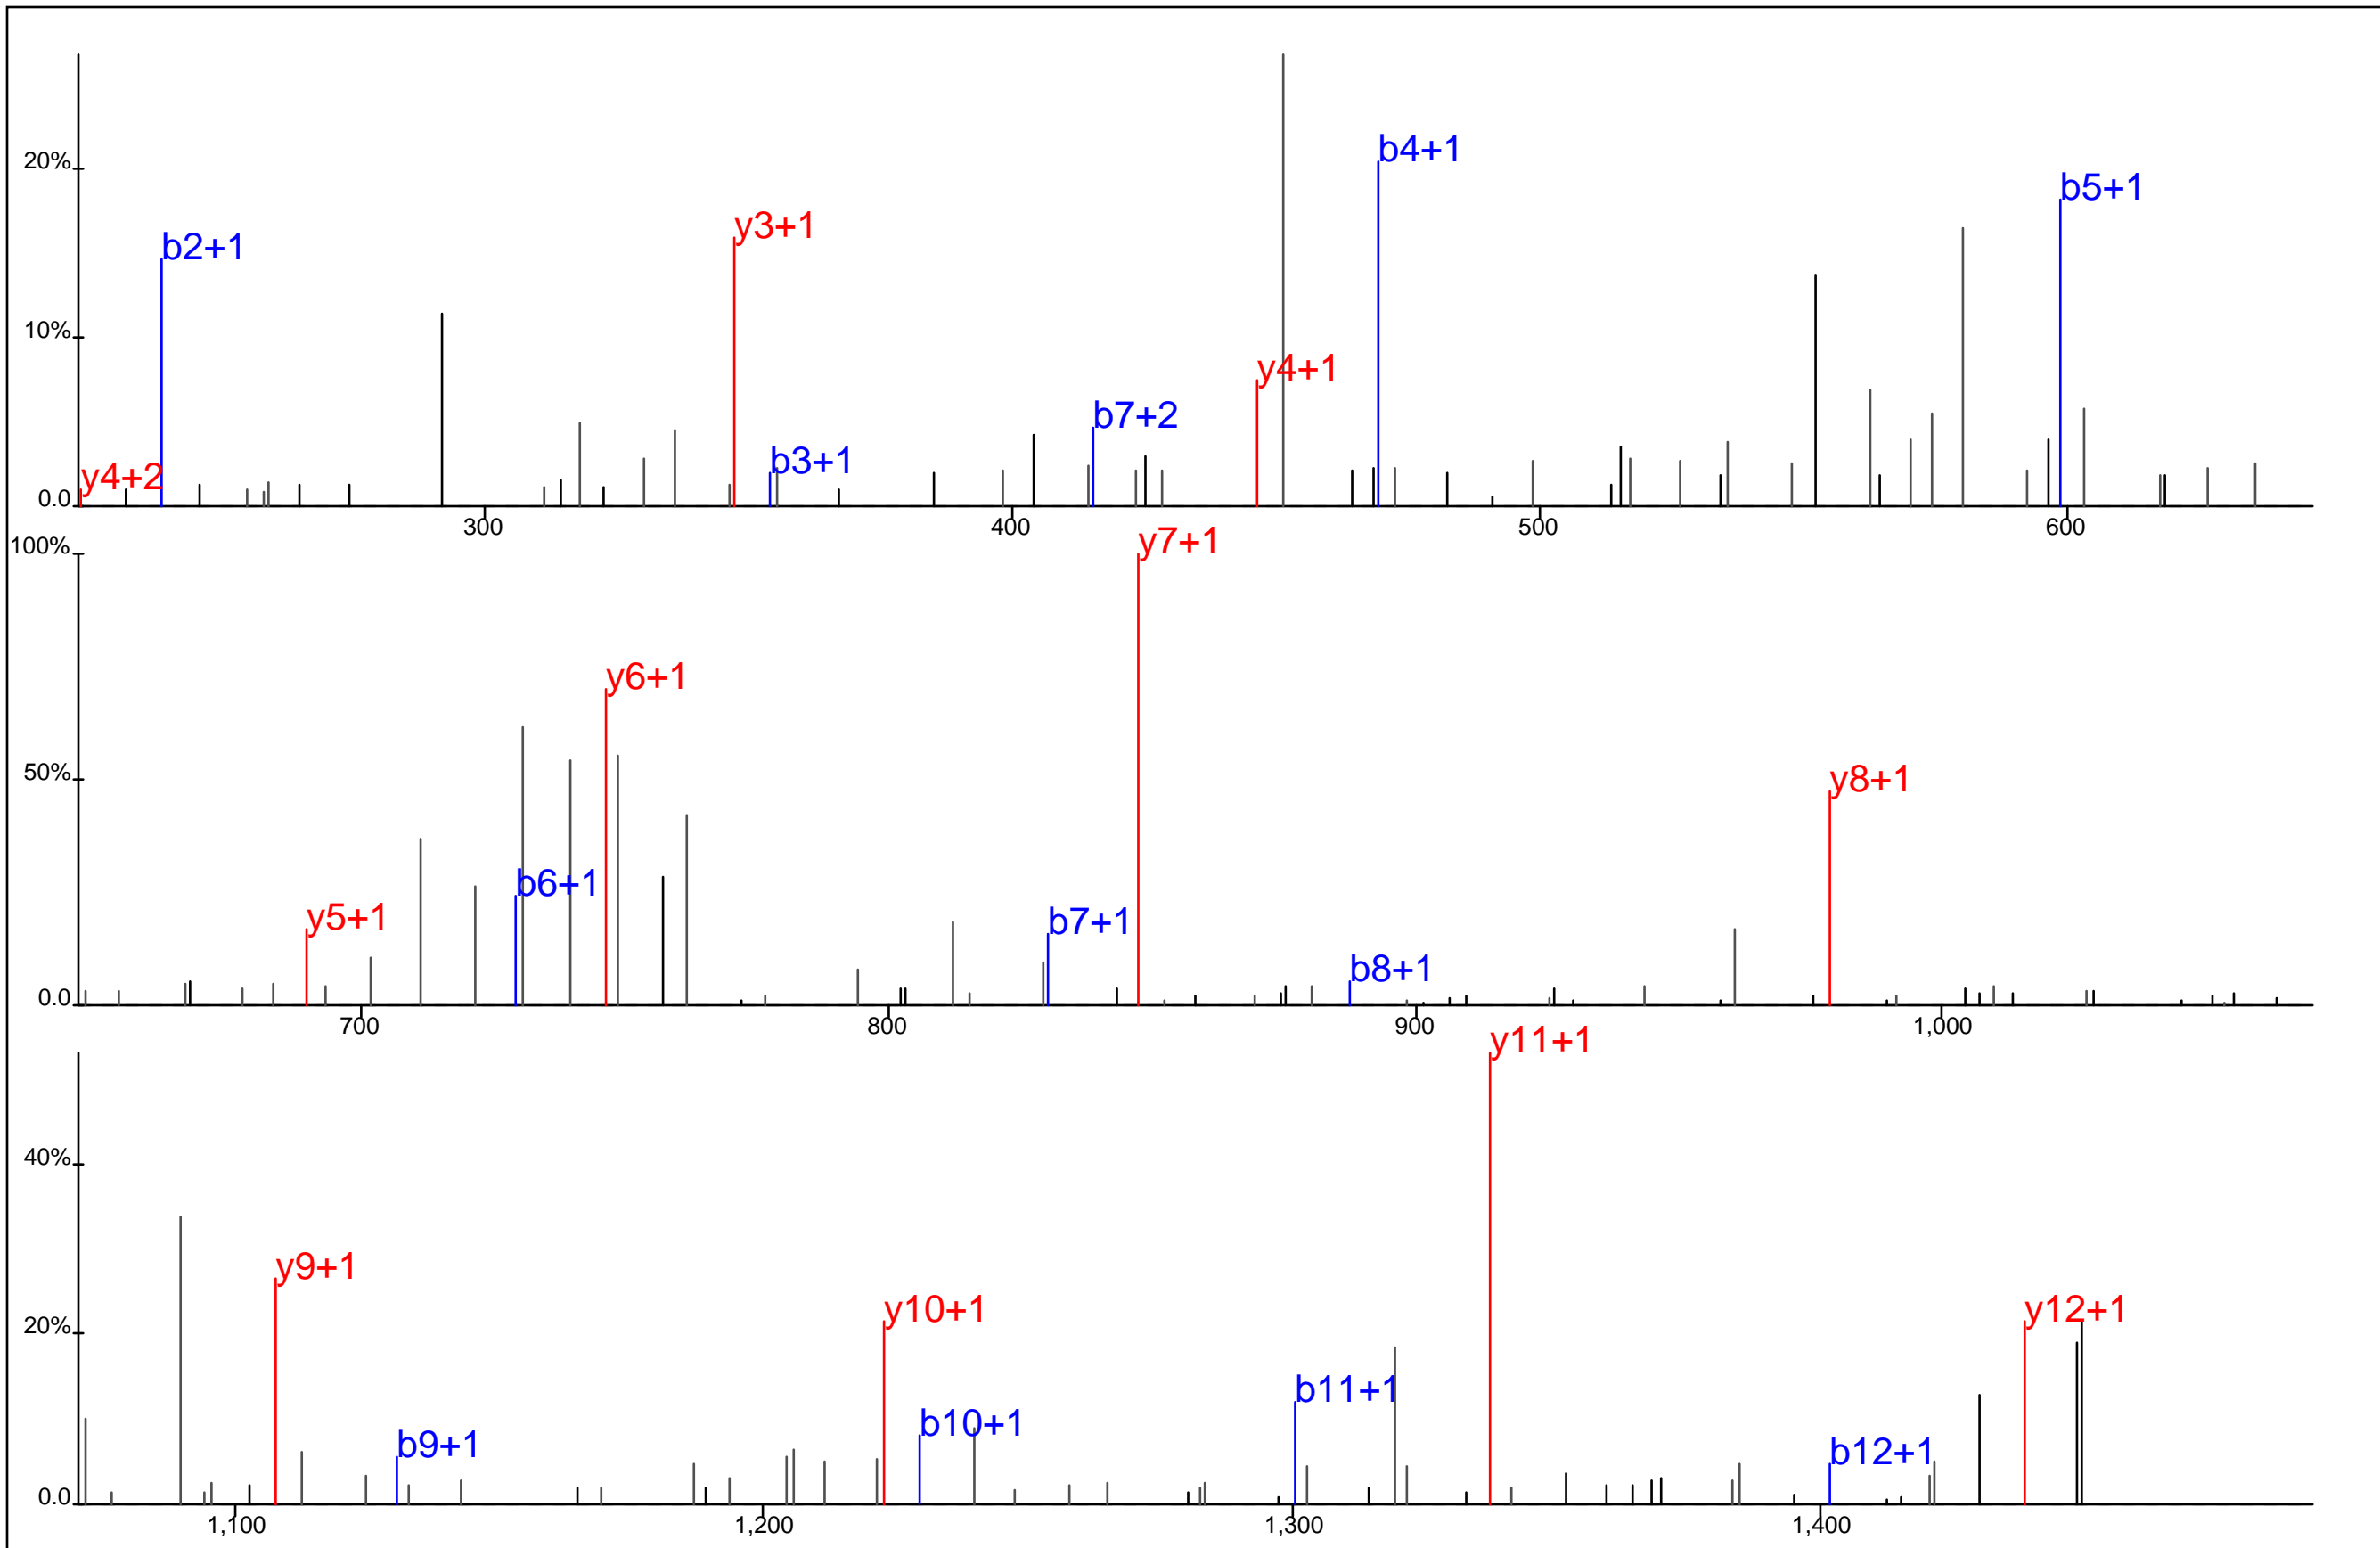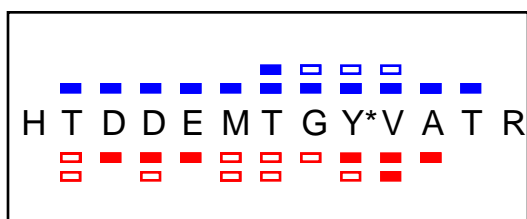

Protein Name: MAPK14  
 gi Accession: 0  
 Precursor Mass: 788.3113+2  
 Delta Mass: 0.489 ppm  
 XCorr: 76.04







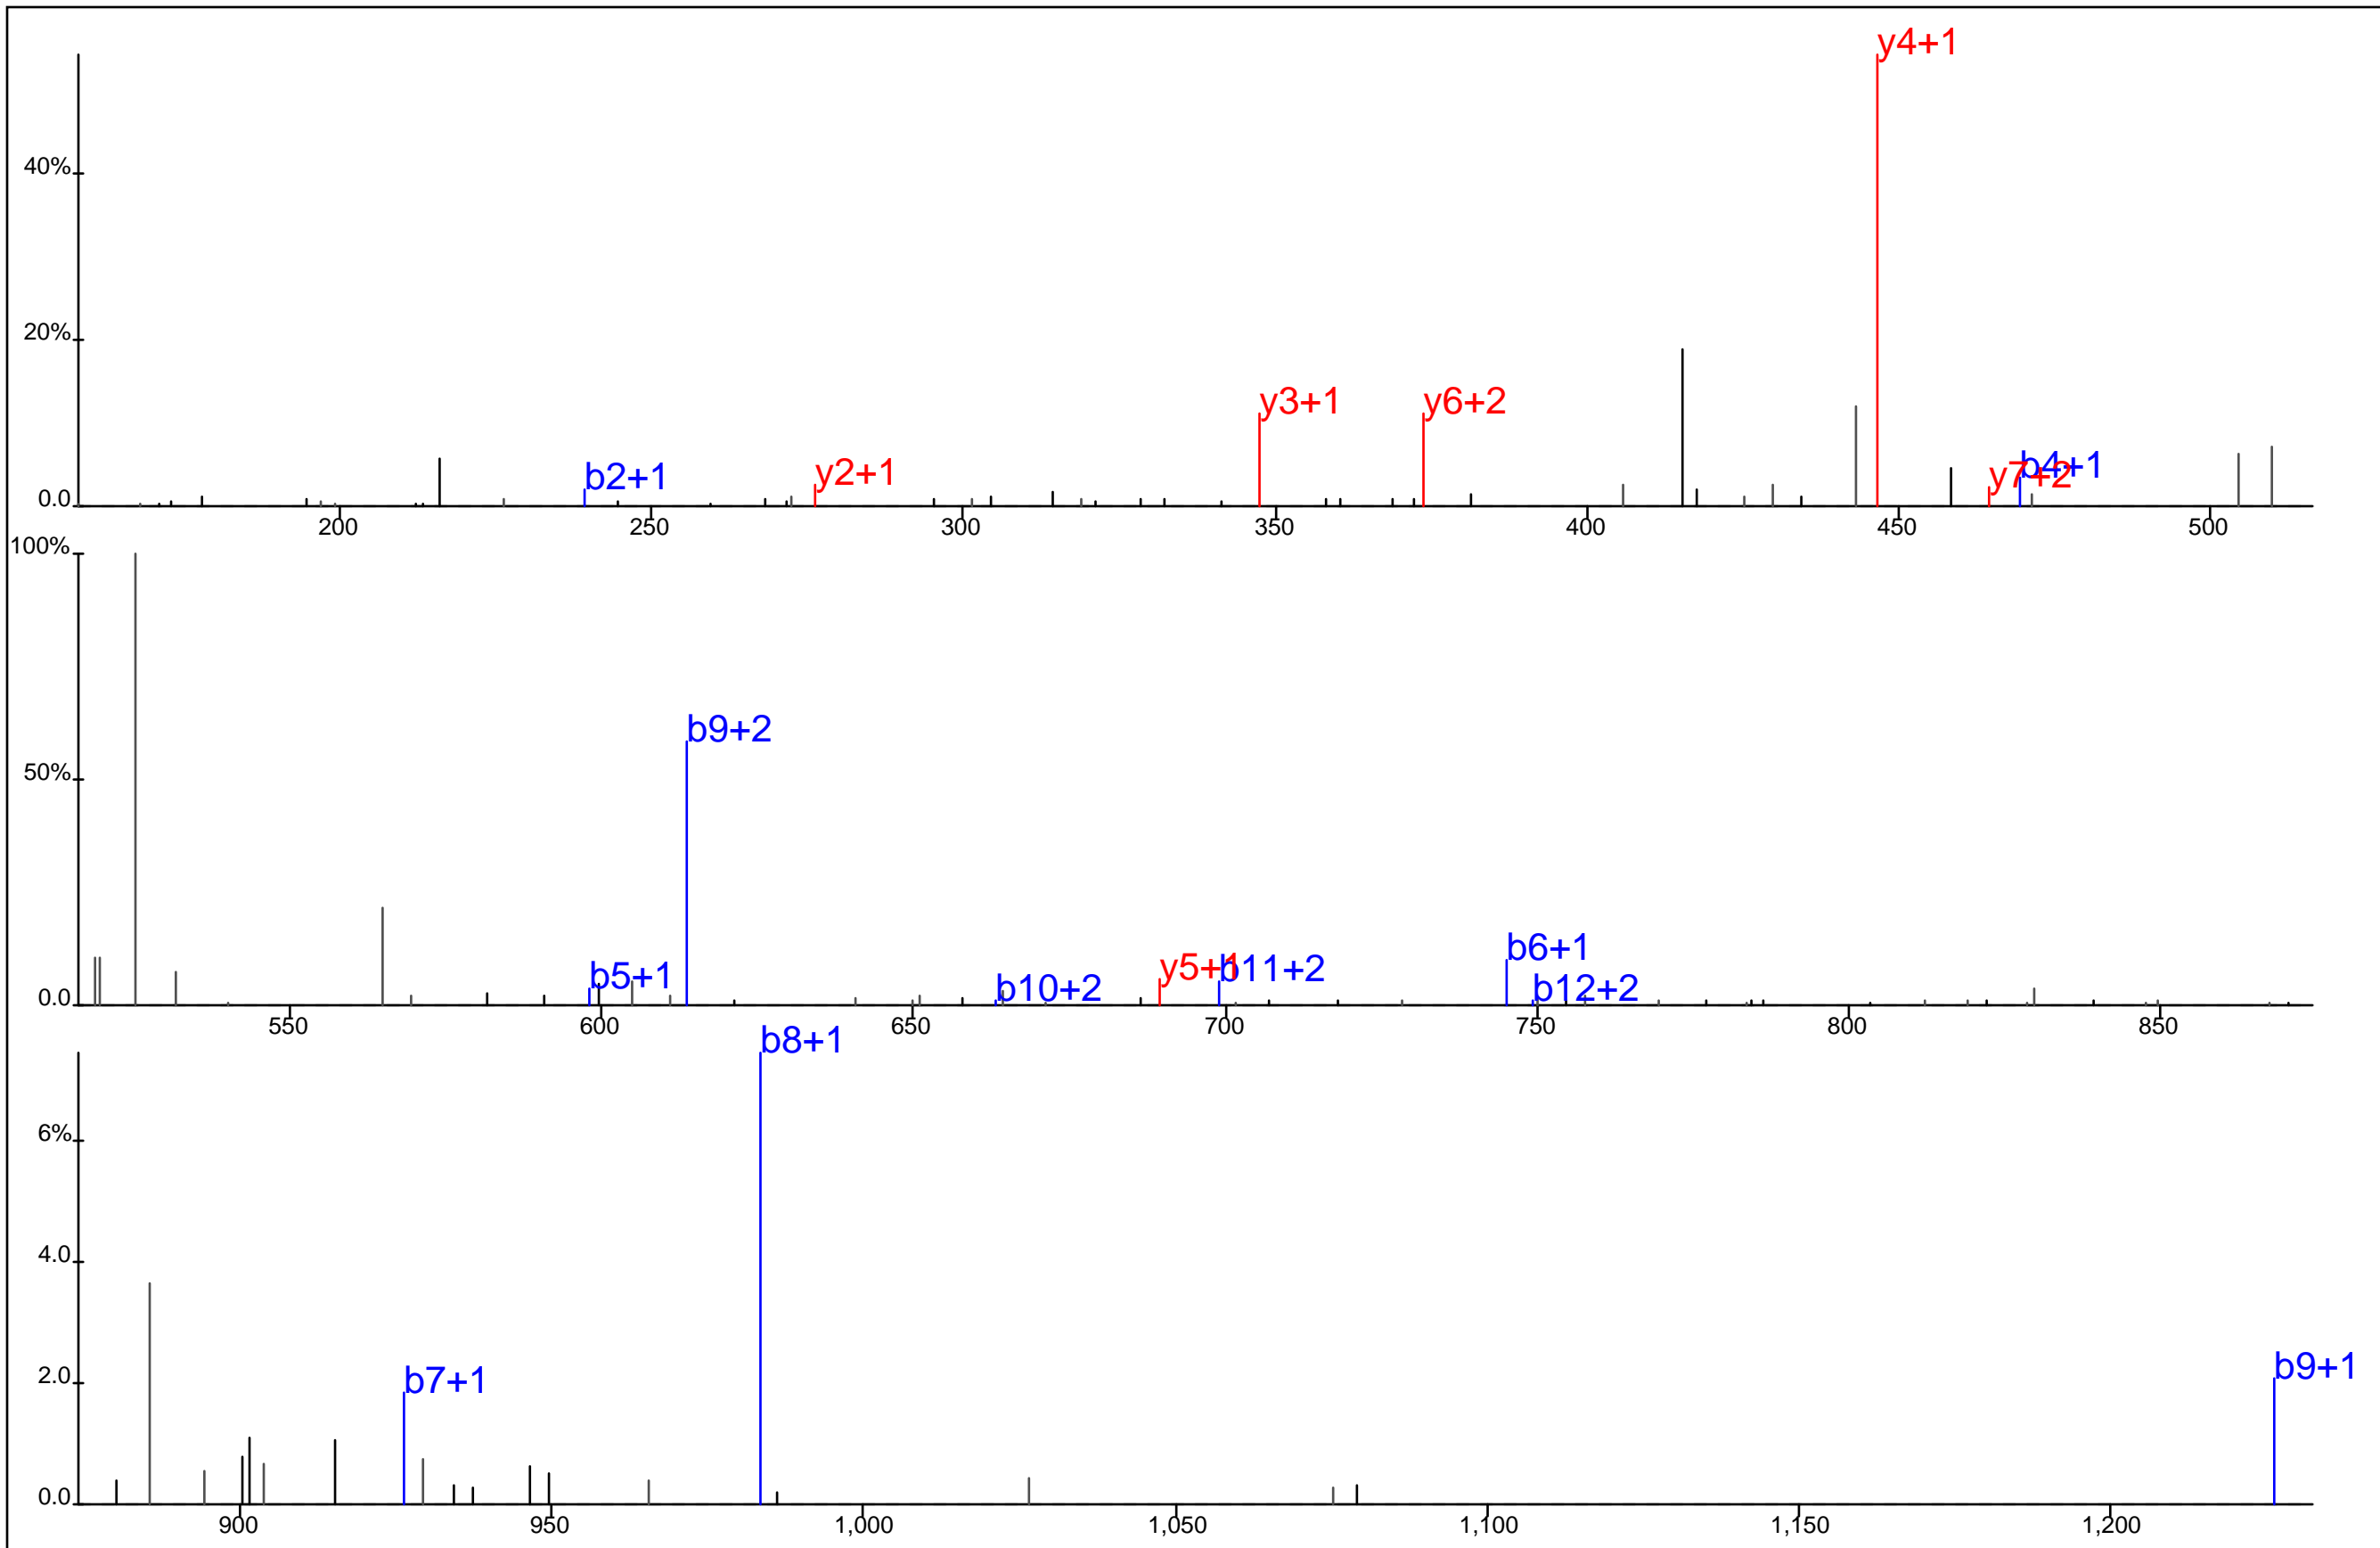

HTDDEMT\*GYVATR

Protein Name: MAPK14  
 gi Accession: 0  
 Precursor Mass: 557.8636+3  
 Delta Mass: 0.375 ppm  
 XCorr: 24.83



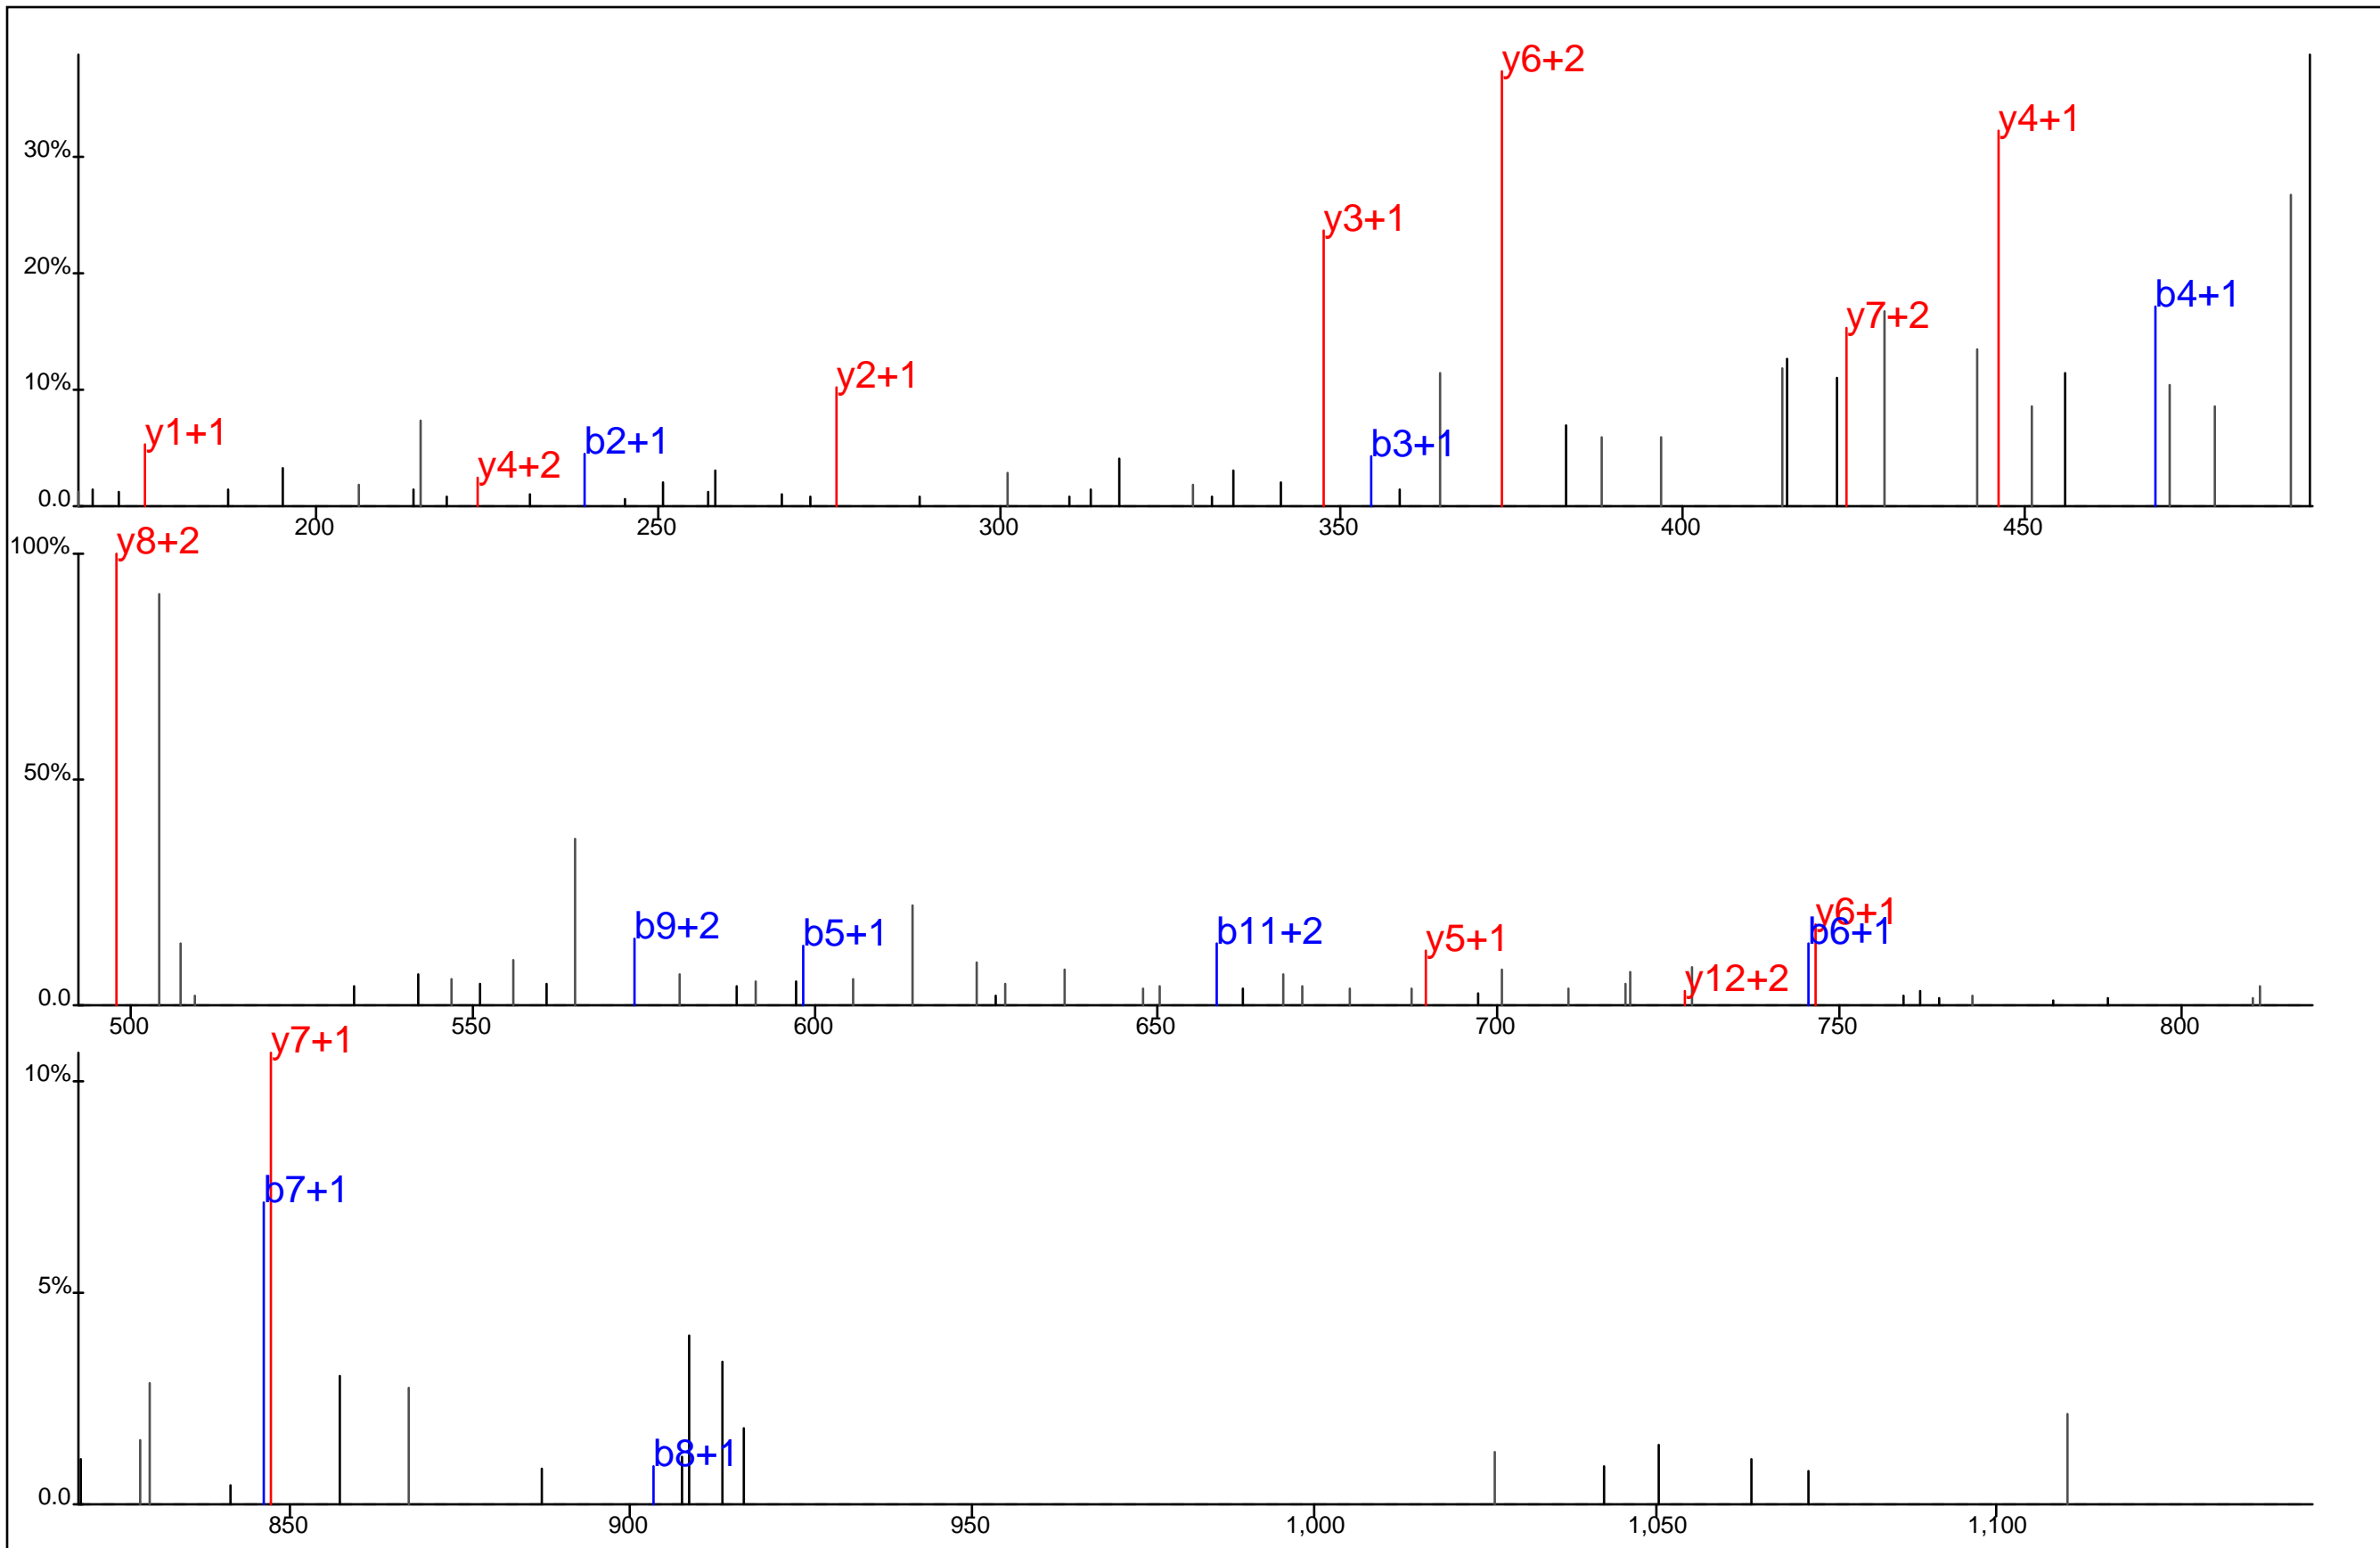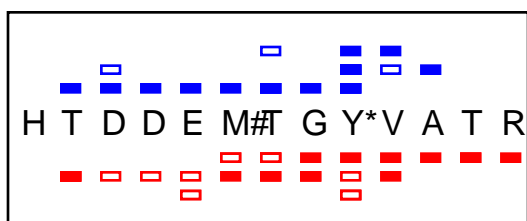

Protein Name: MAPK14  
 gi Accession: 0  
 Precursor Mass: 531.2086+3  
 Delta Mass: 1.175 ppm  
 XCorr: 53.26

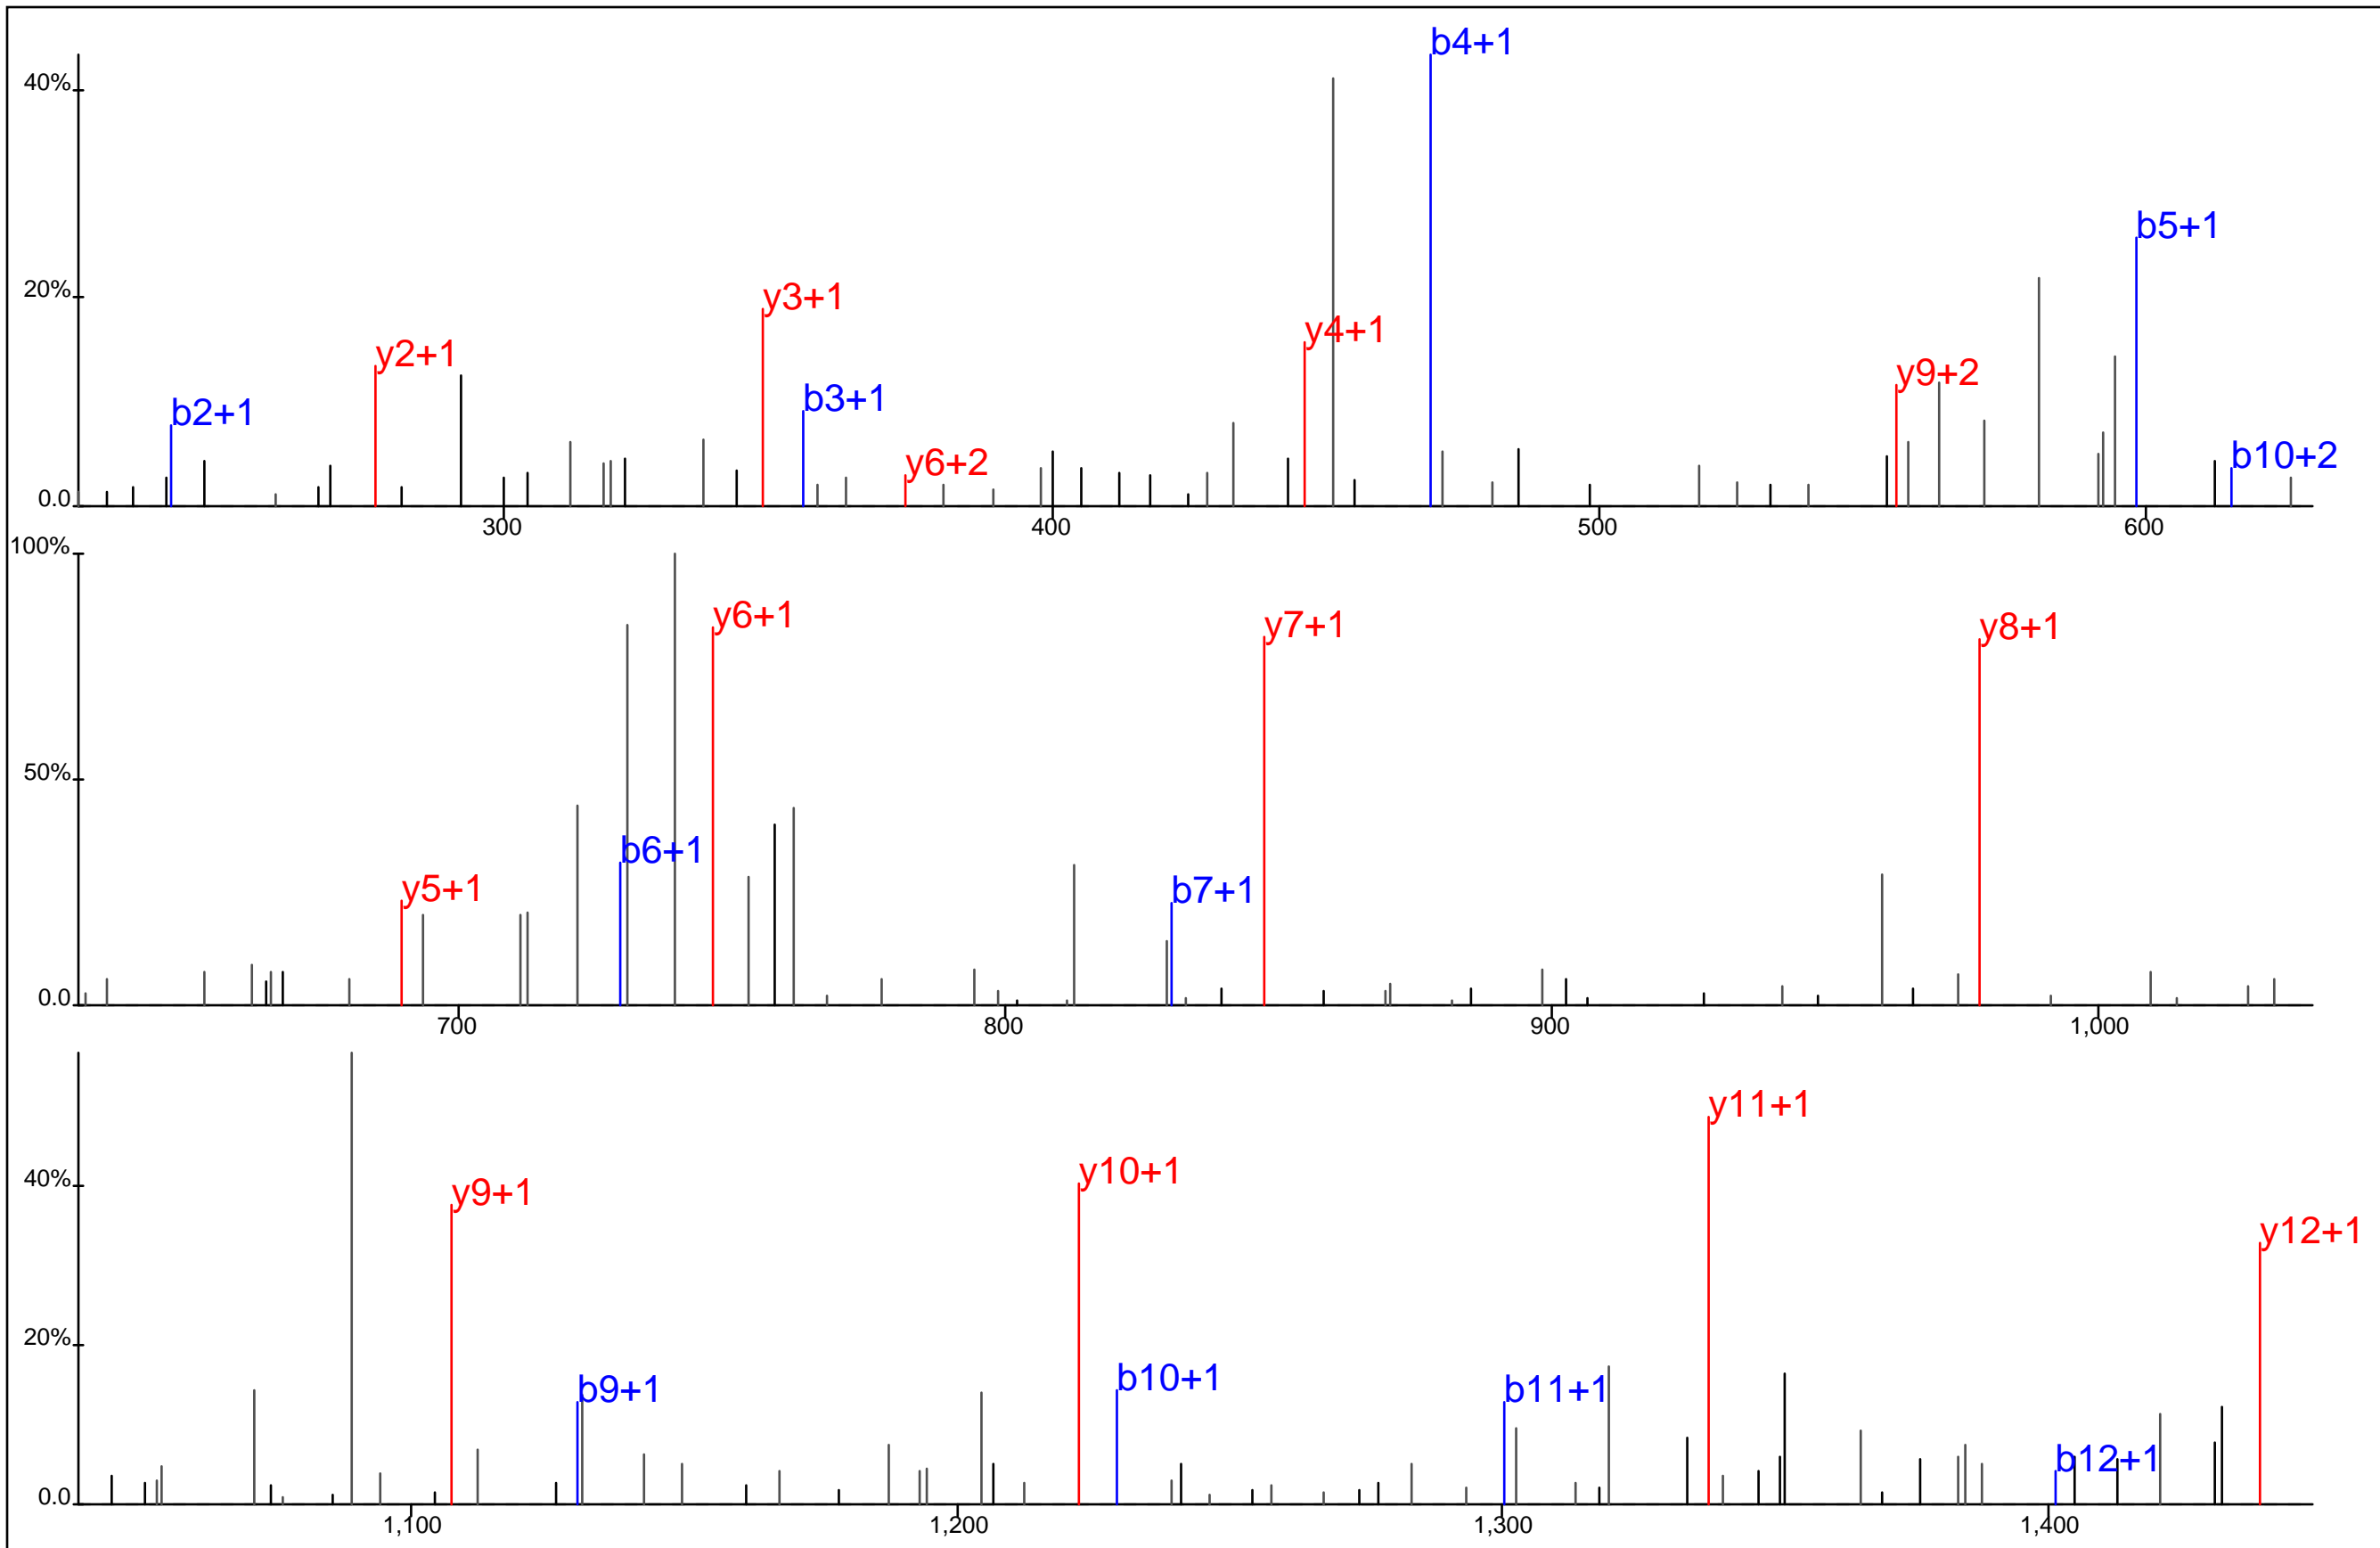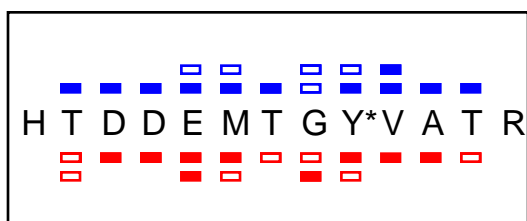

Protein Name: MAPK14  
 gi Accession: 0  
 Precursor Mass: 788.3104+2  
 Delta Mass: 0.595 ppm  
 XCorr: 85.8

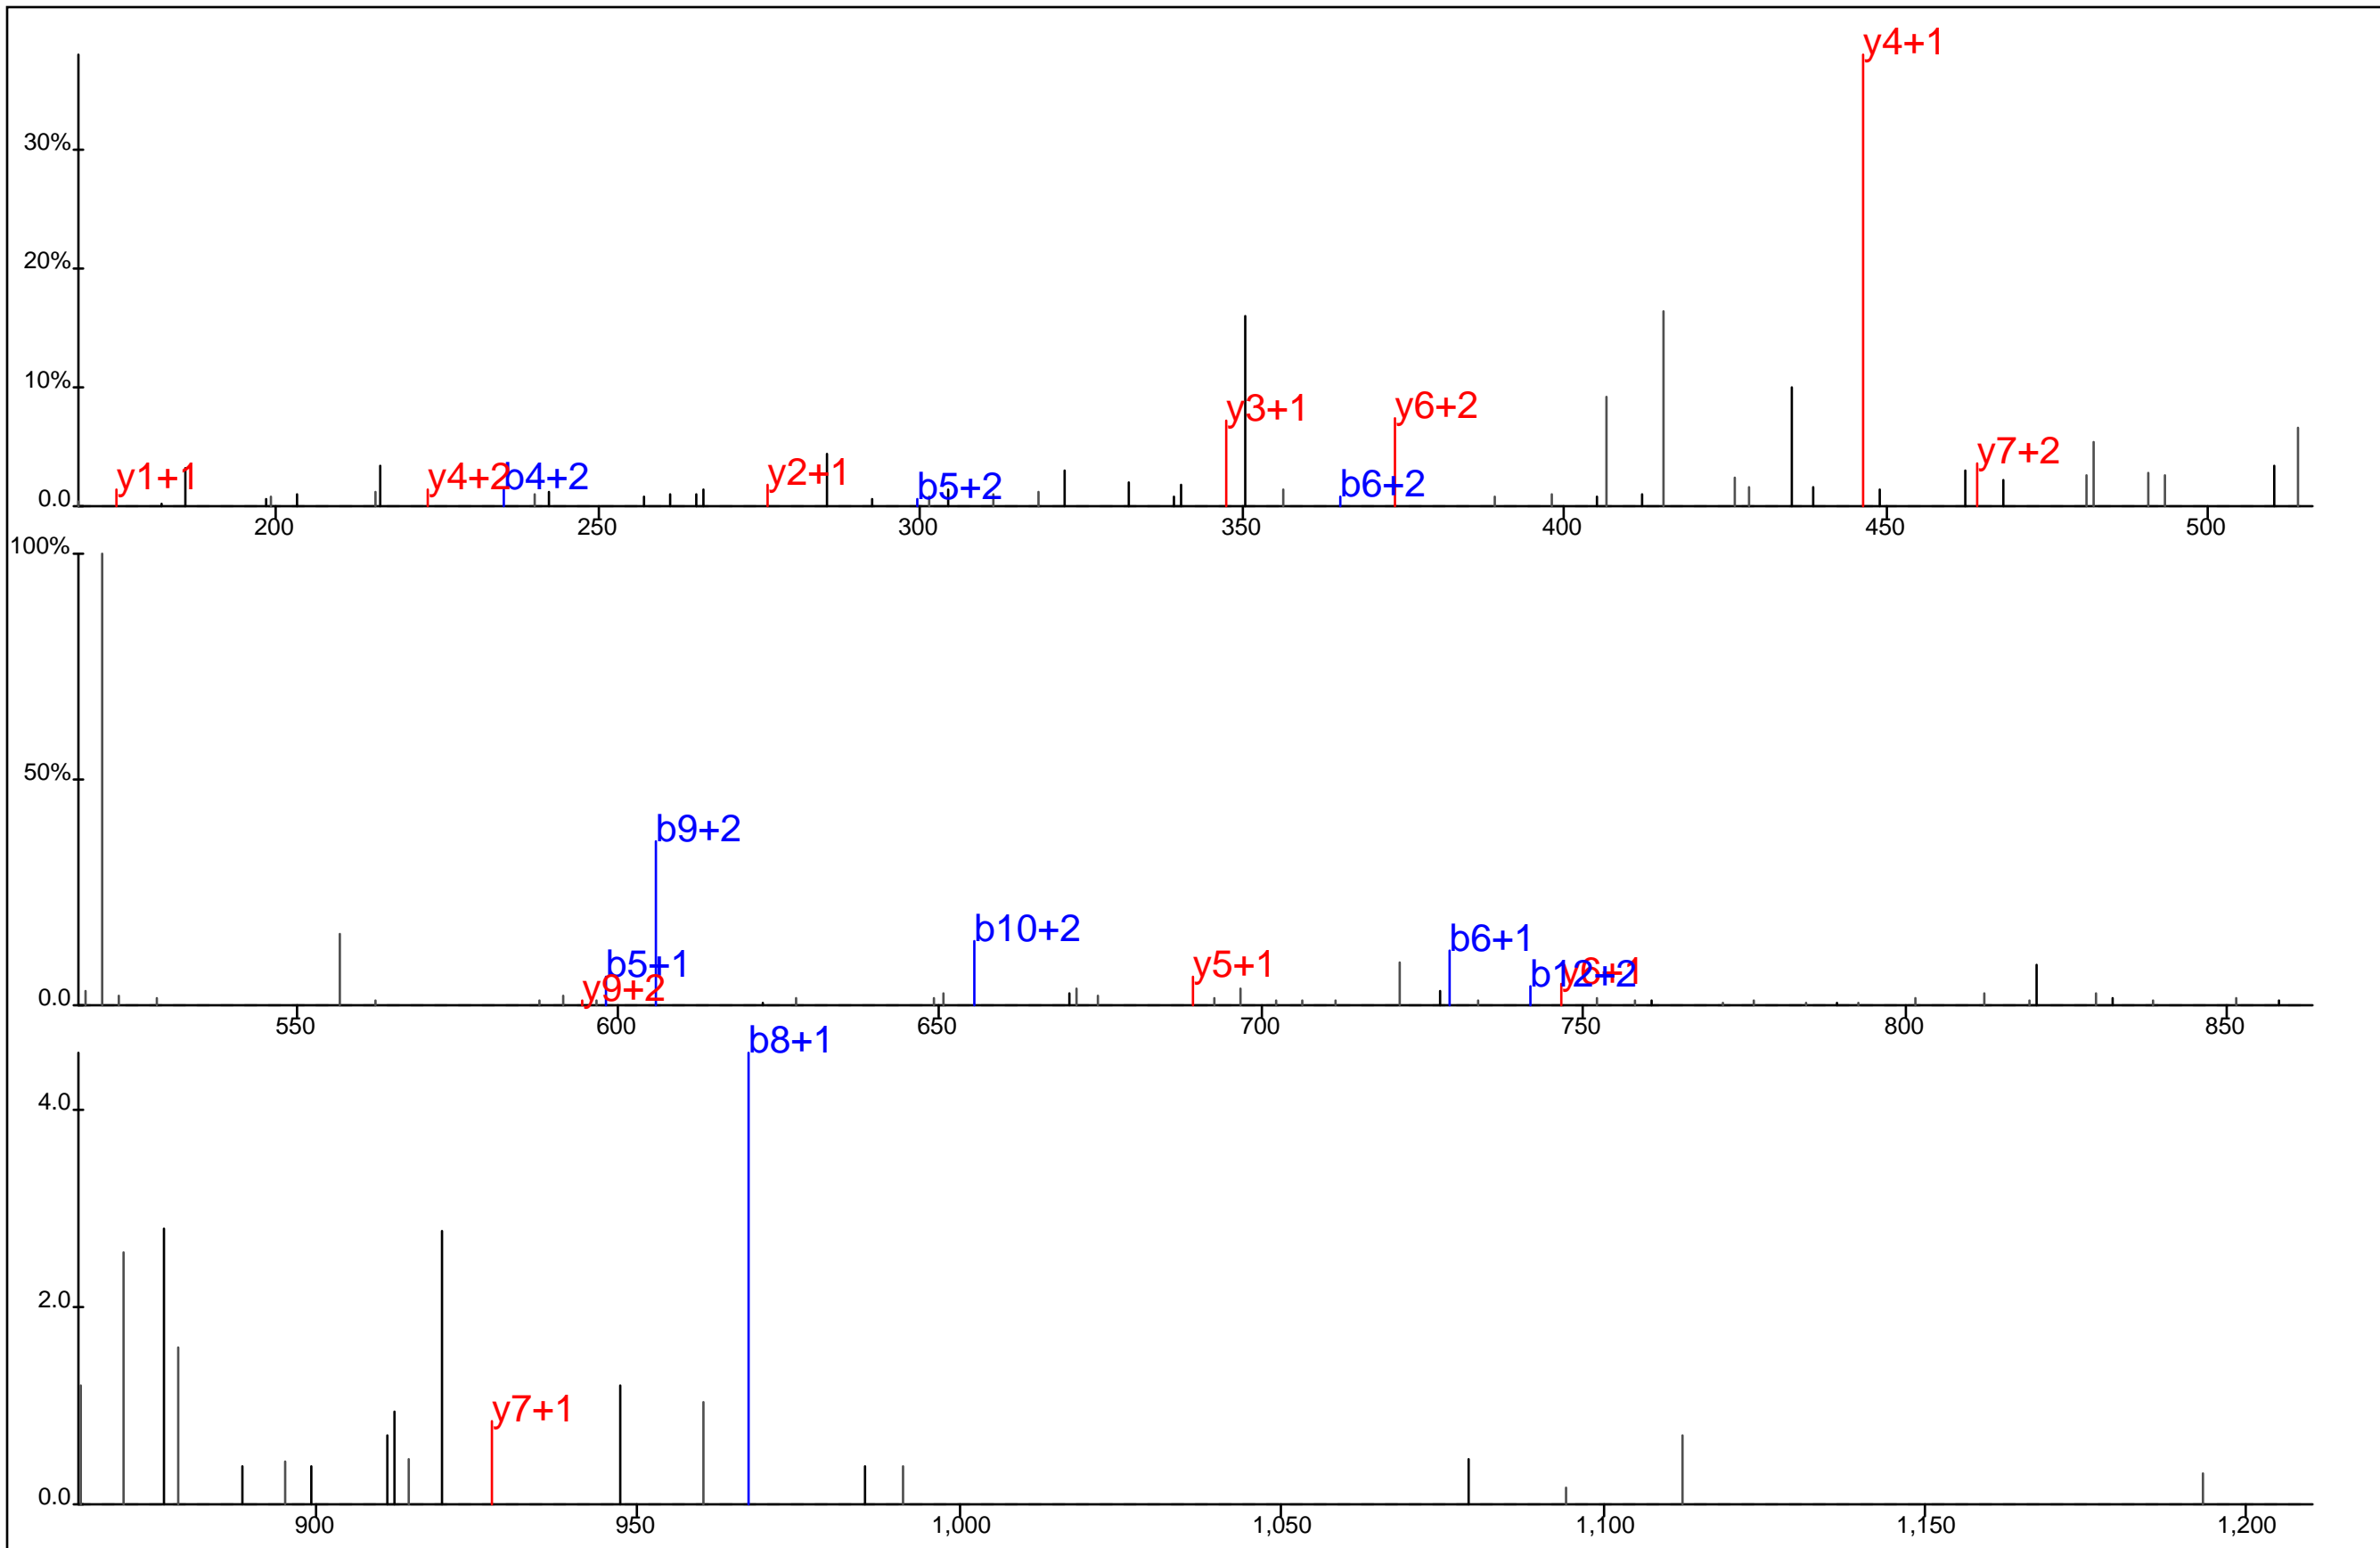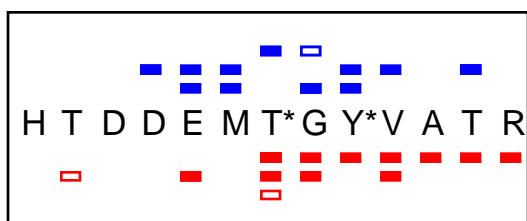

Protein Name: MAPK14  
 gi Accession: 0  
 Precursor Mass: 552.5312+3  
 Delta Mass: 0.993 ppm  
 XCorr: 27.95

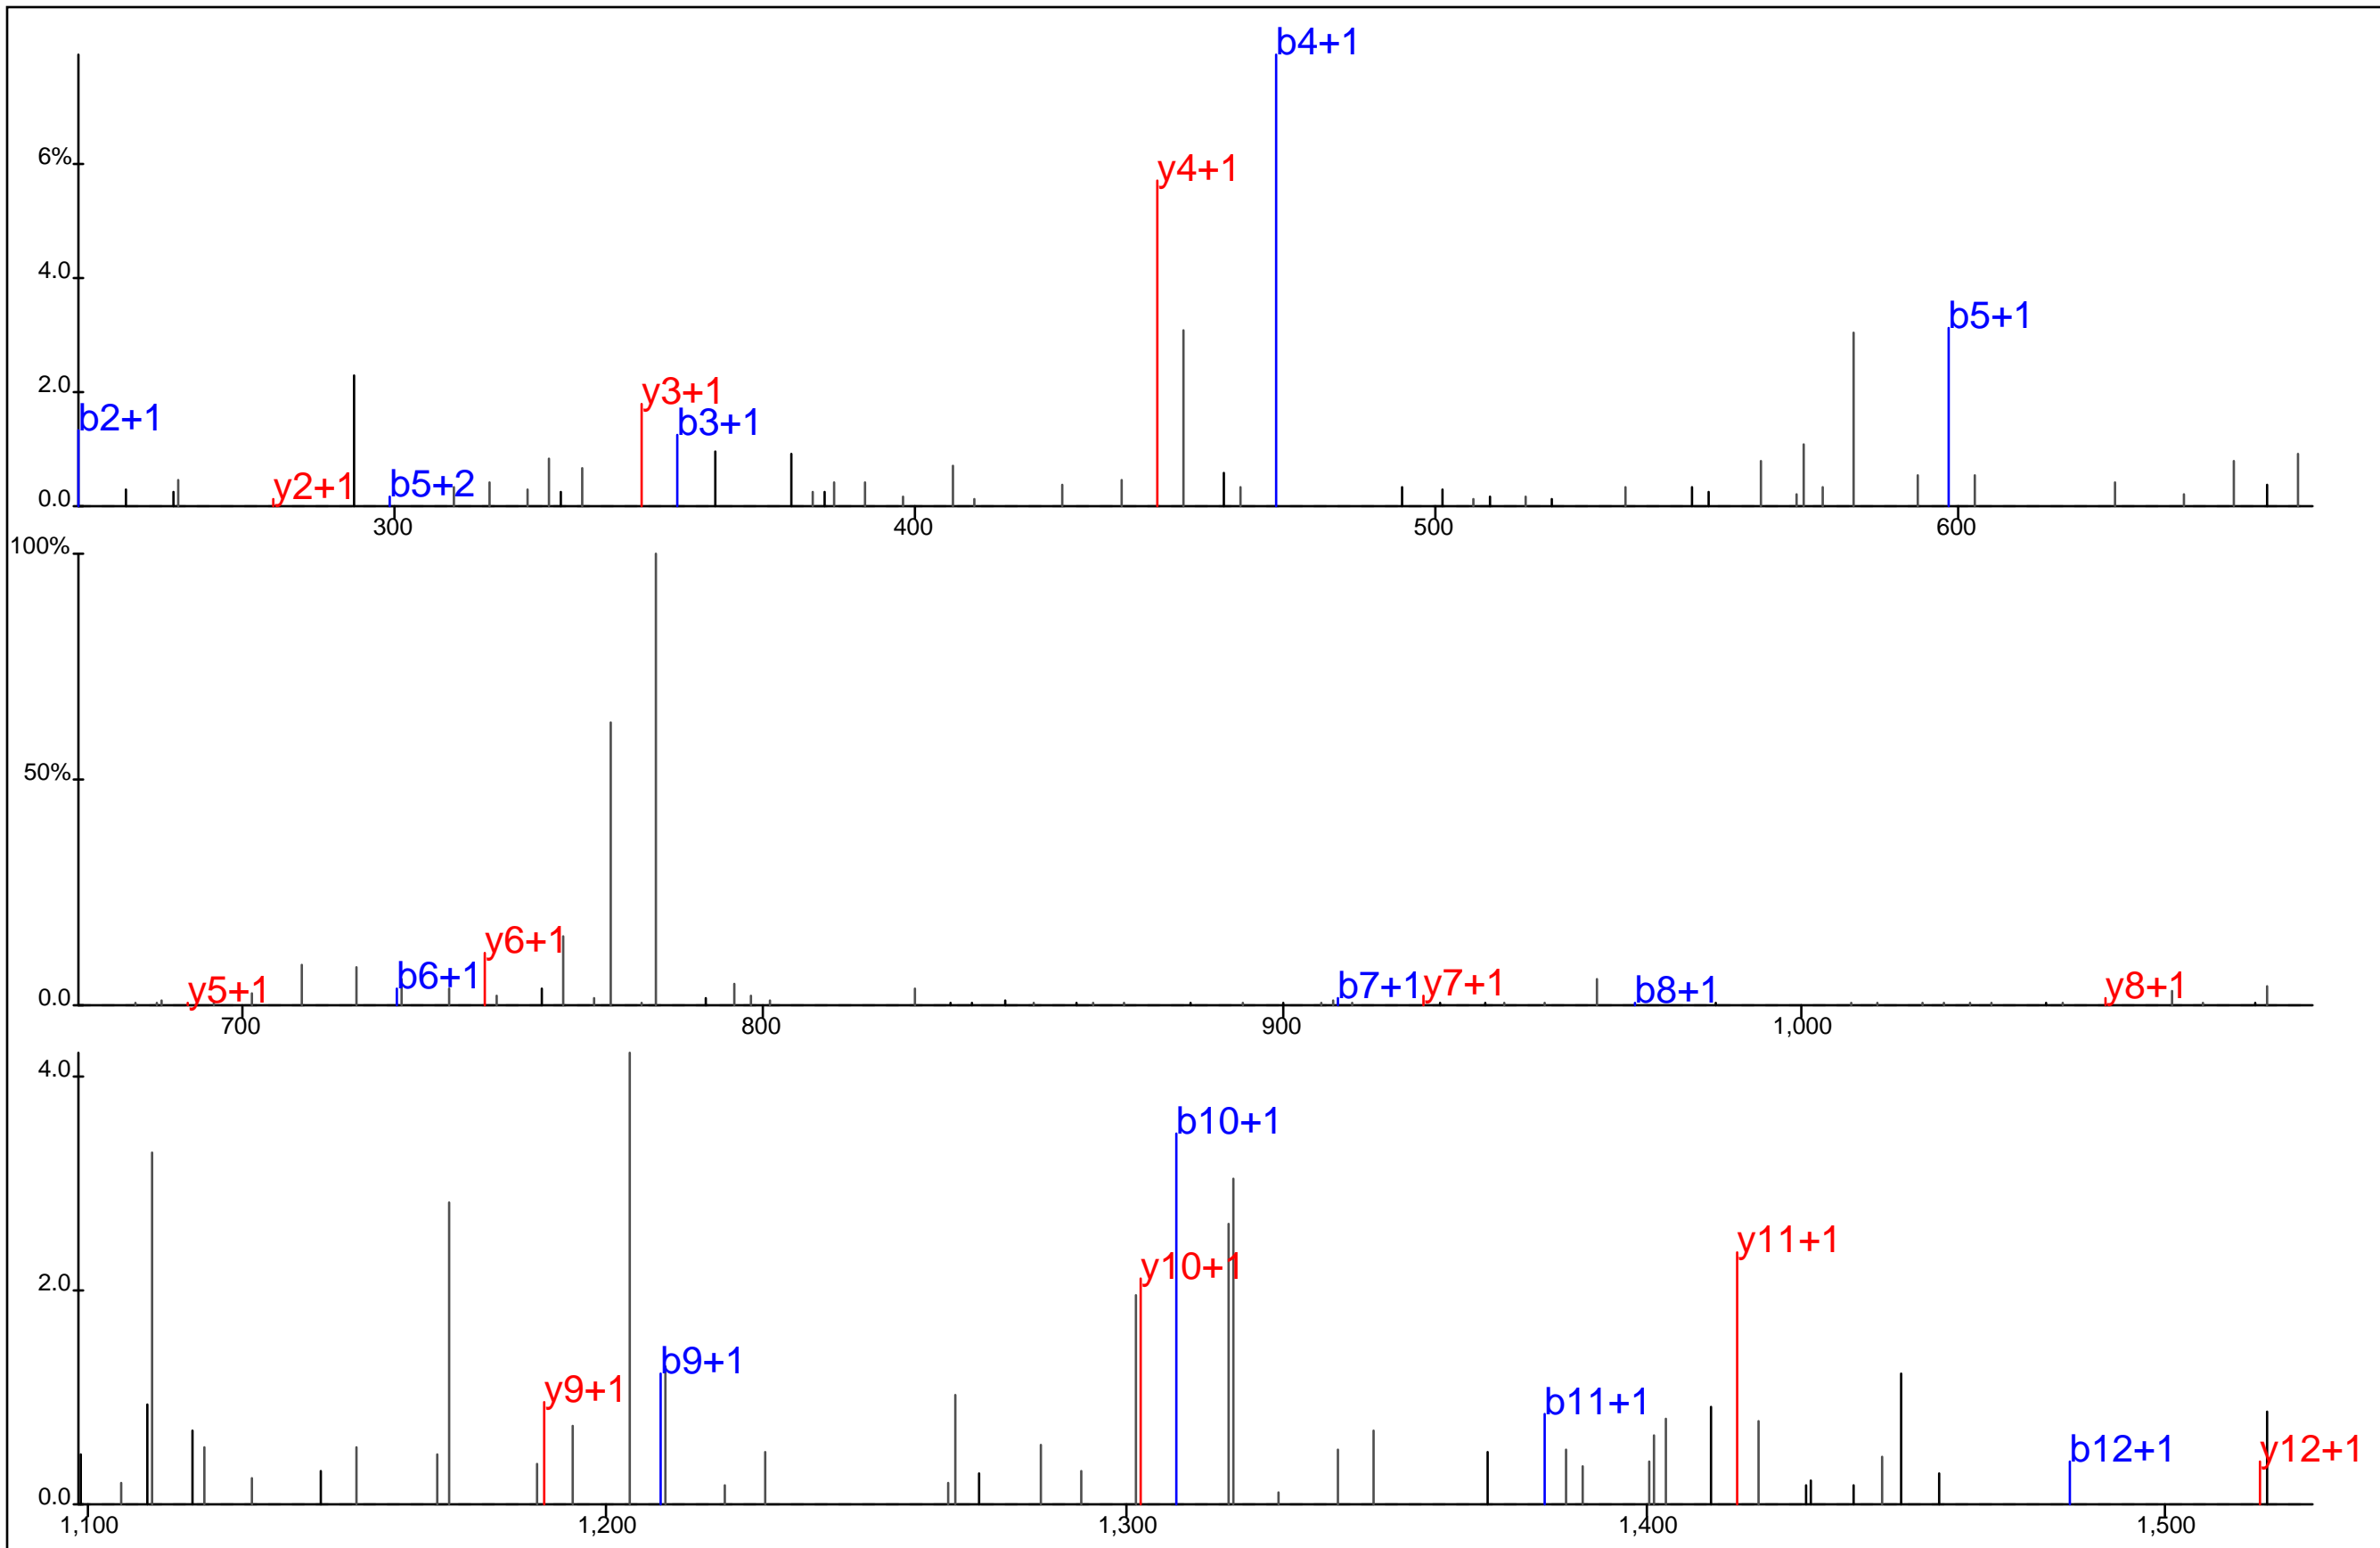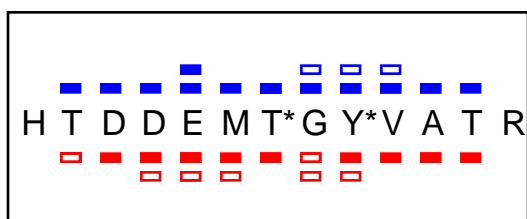

Protein Name: MAPK14  
 gi Accession: 0  
 Precursor Mass: 828.2941+2  
 Delta Mass: 0.083 ppm  
 XCorr: 55.94

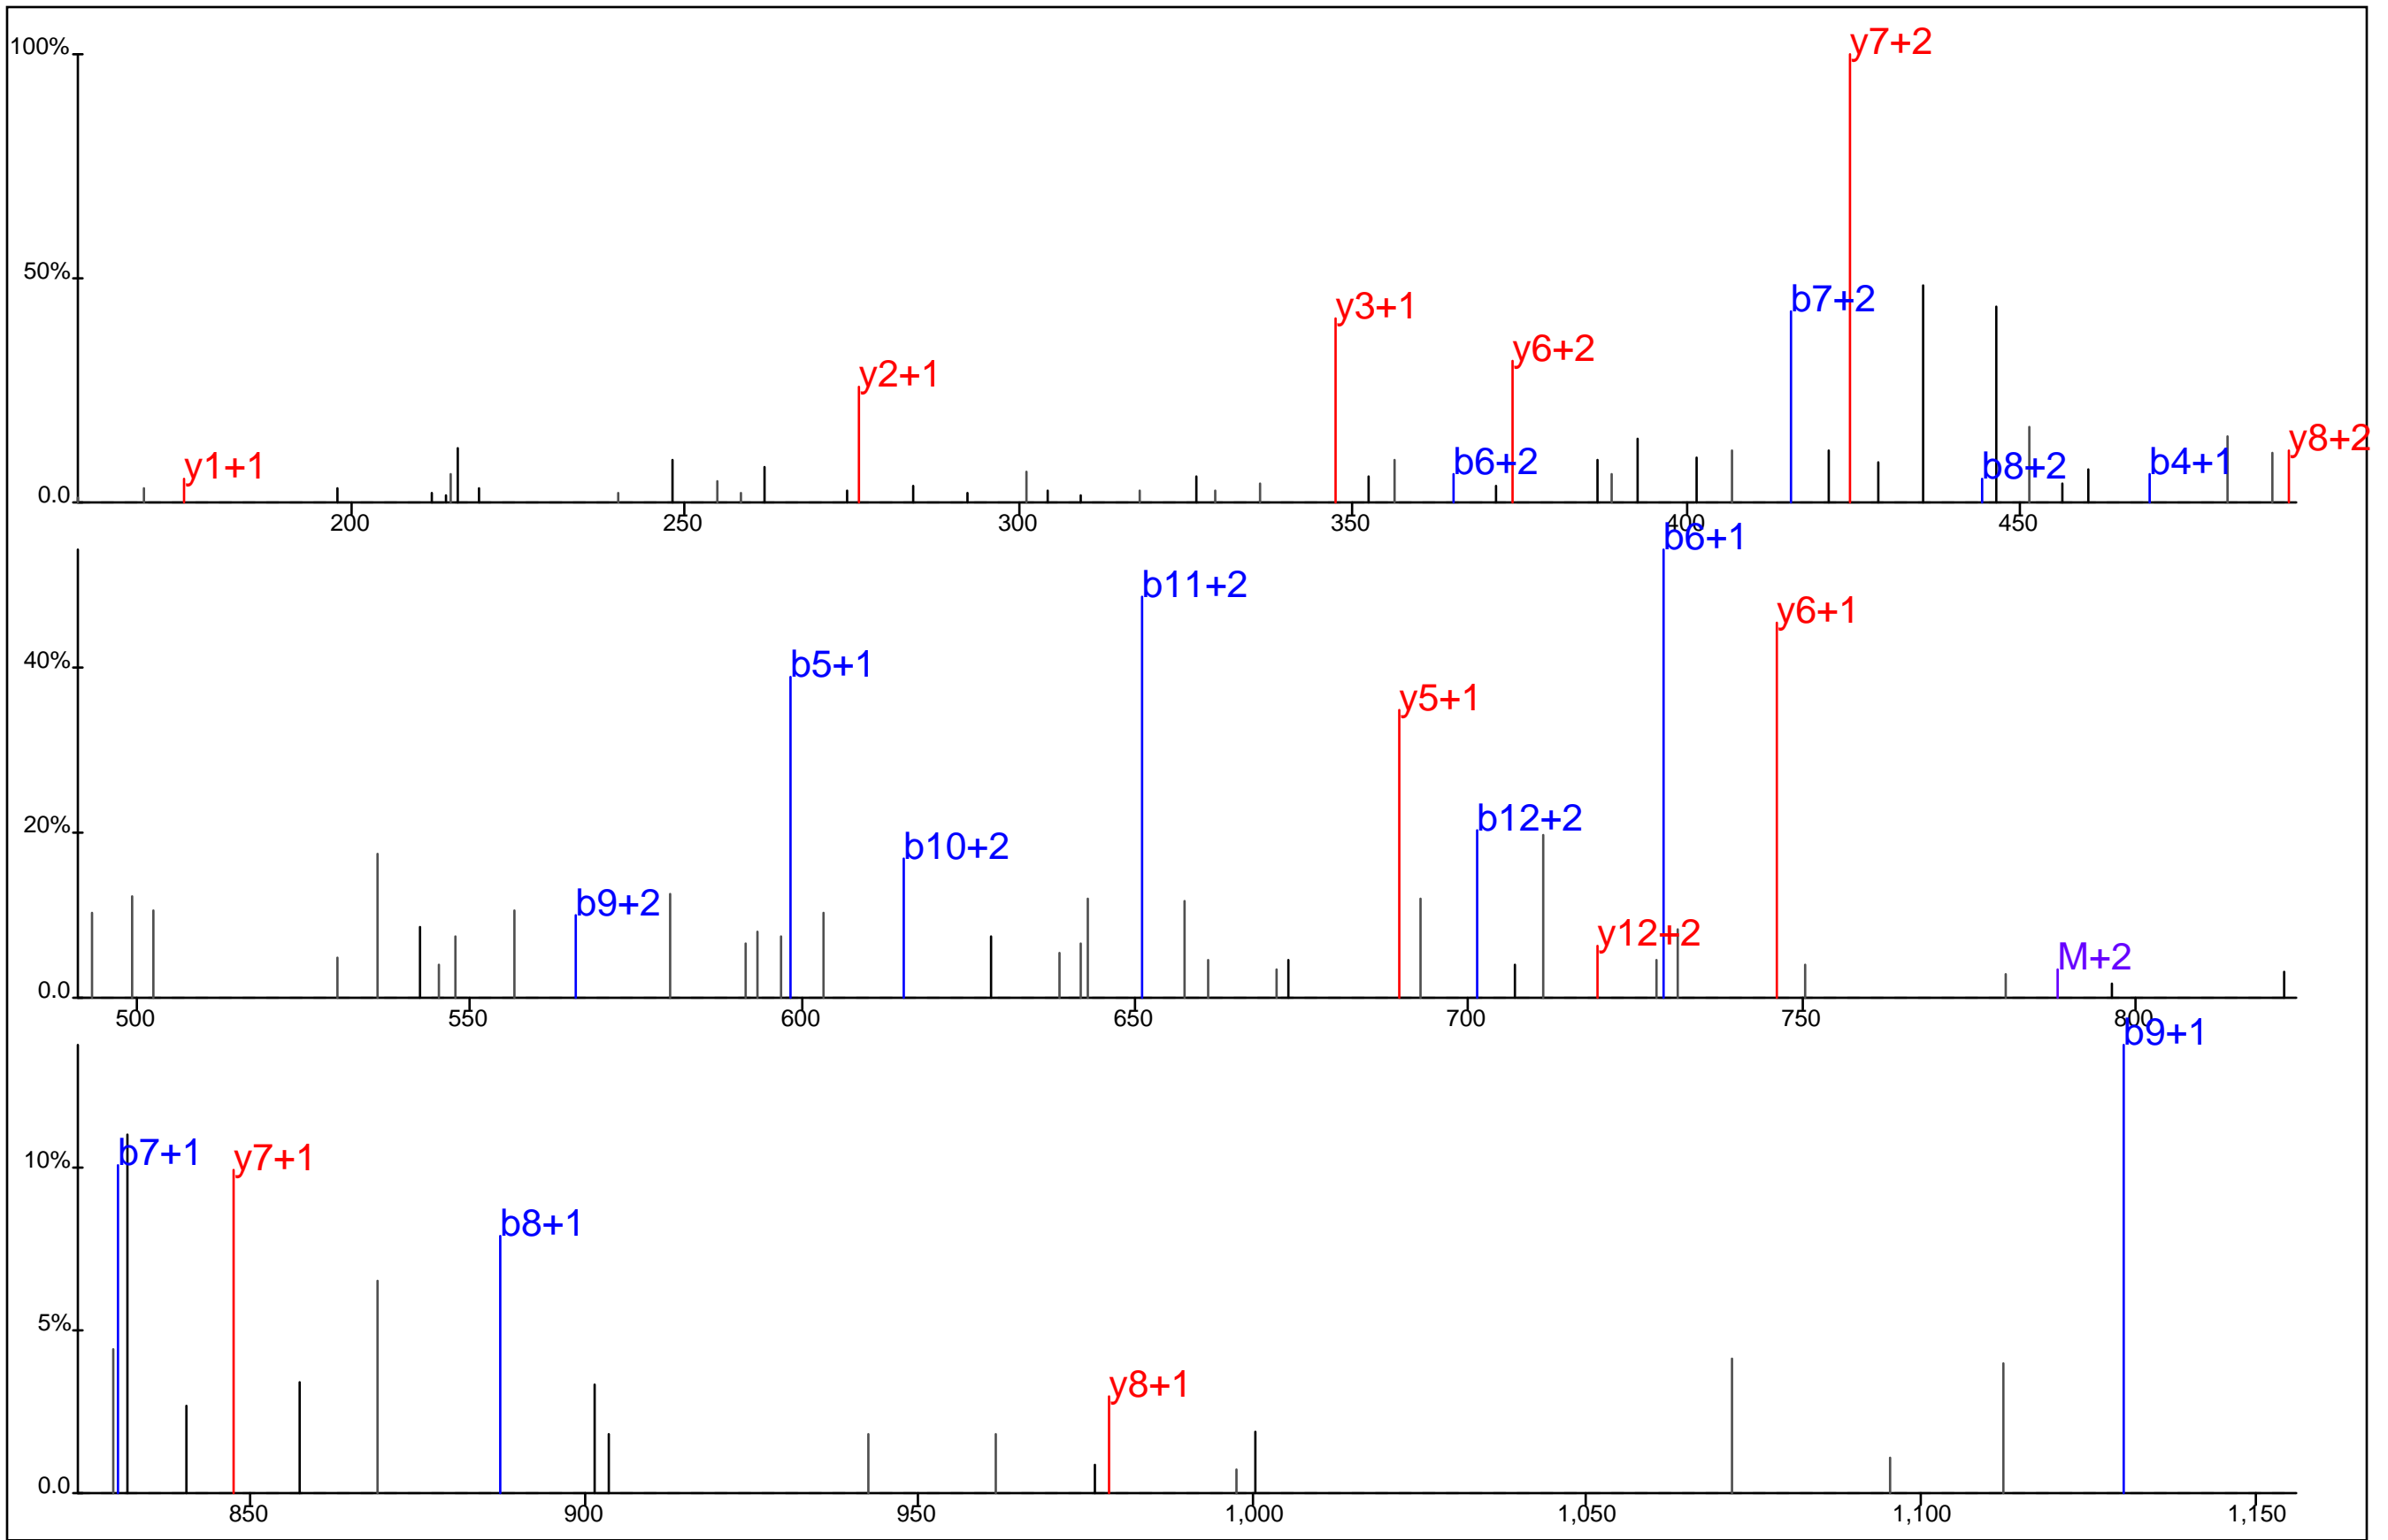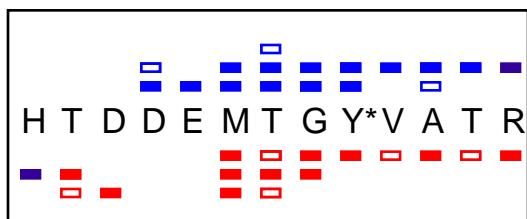

Protein Name: MAPK14  
 gi Accession: 0  
 Precursor Mass: 525.8759+3  
 Delta Mass: 0.835 ppm  
 XCorr: 53.23

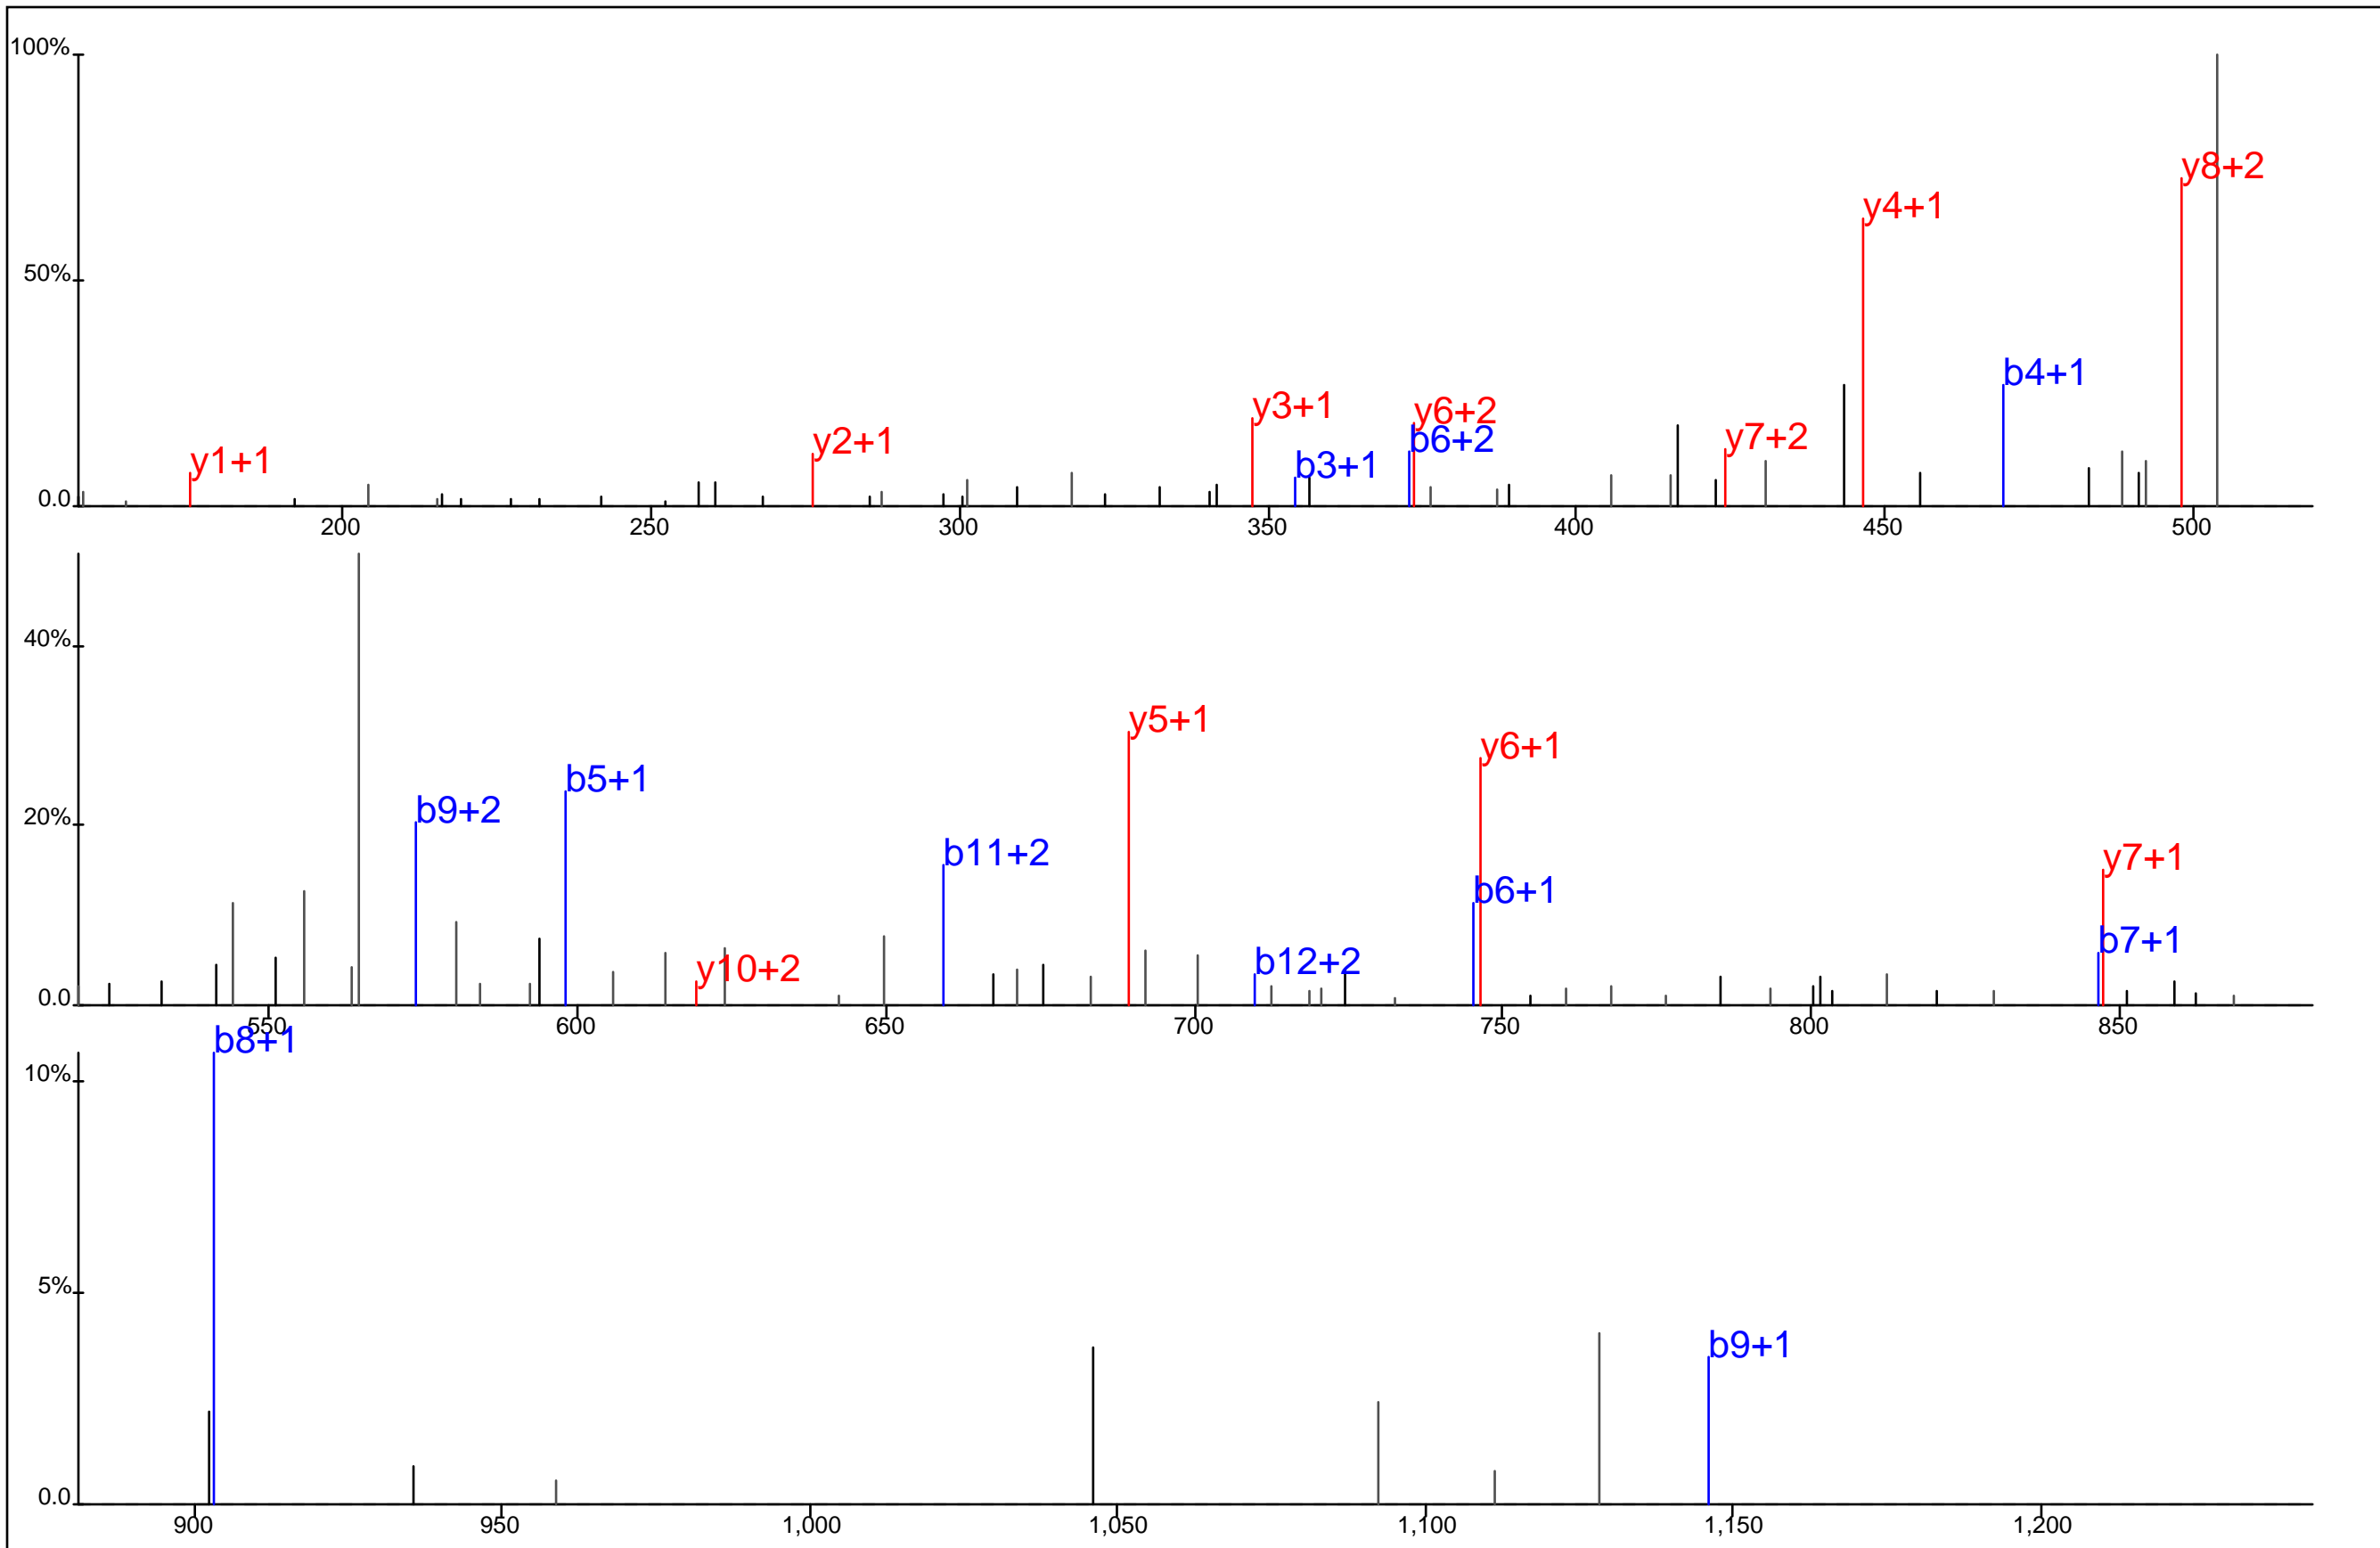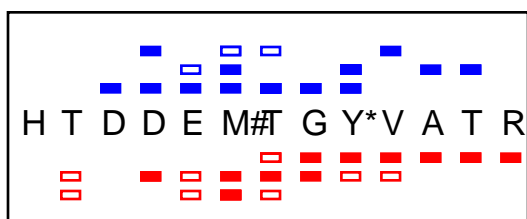

Protein Name: MAPK14  
 gi Accession: 0  
 Precursor Mass: 531.2084+3  
 Delta Mass: 0.715 ppm  
 XCorr: 46.49

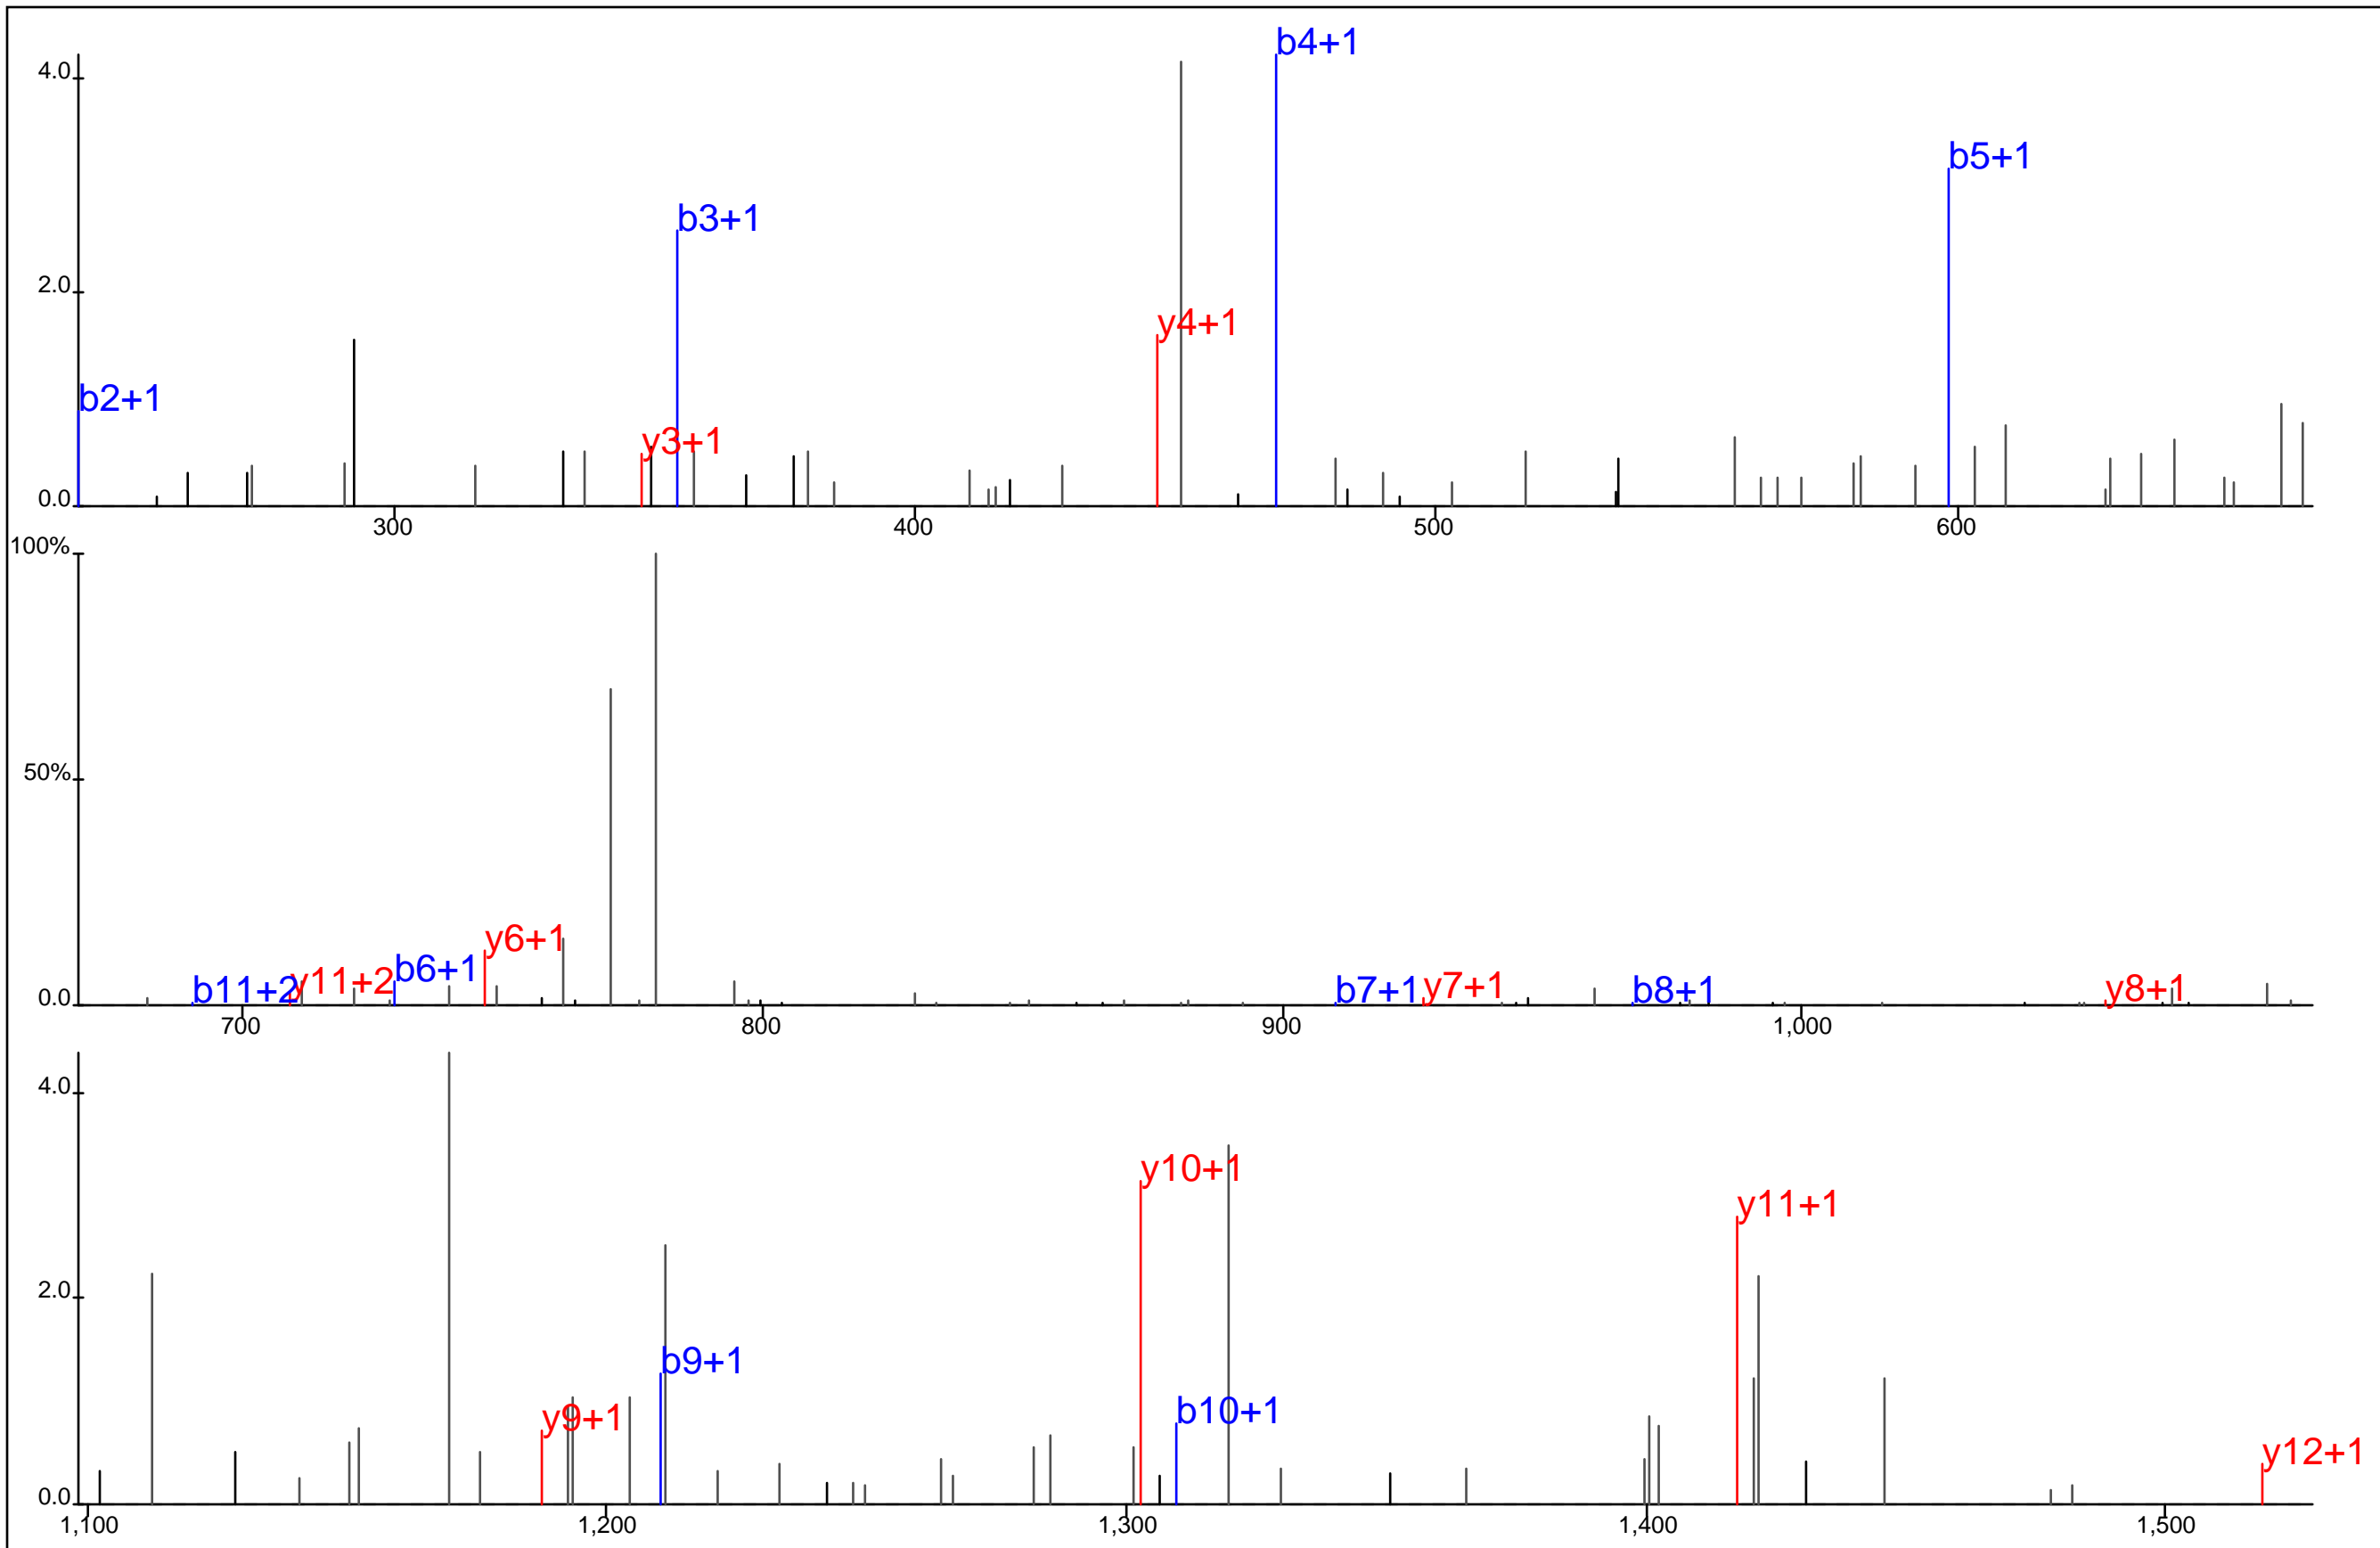

▣ ▣ ▣ ▣ ▣ ▣ ▣ ▣ ▣ ▣ ▣ ▣ ▣ ▣ ▣ ▣
  
 H T D D E M T\* G Y\* V A T R
   
▣ ▣ ▣ ▣ ▣ ▣ ▣ ▣ ▣ ▣ ▣ ▣ ▣ ▣ ▣ ▣

Protein Name: MAPK14  
 gi Accession: 0  
 Precursor Mass: 828.2925+2  
 Delta Mass: 1.907 ppm  
 XCorr: 48.25

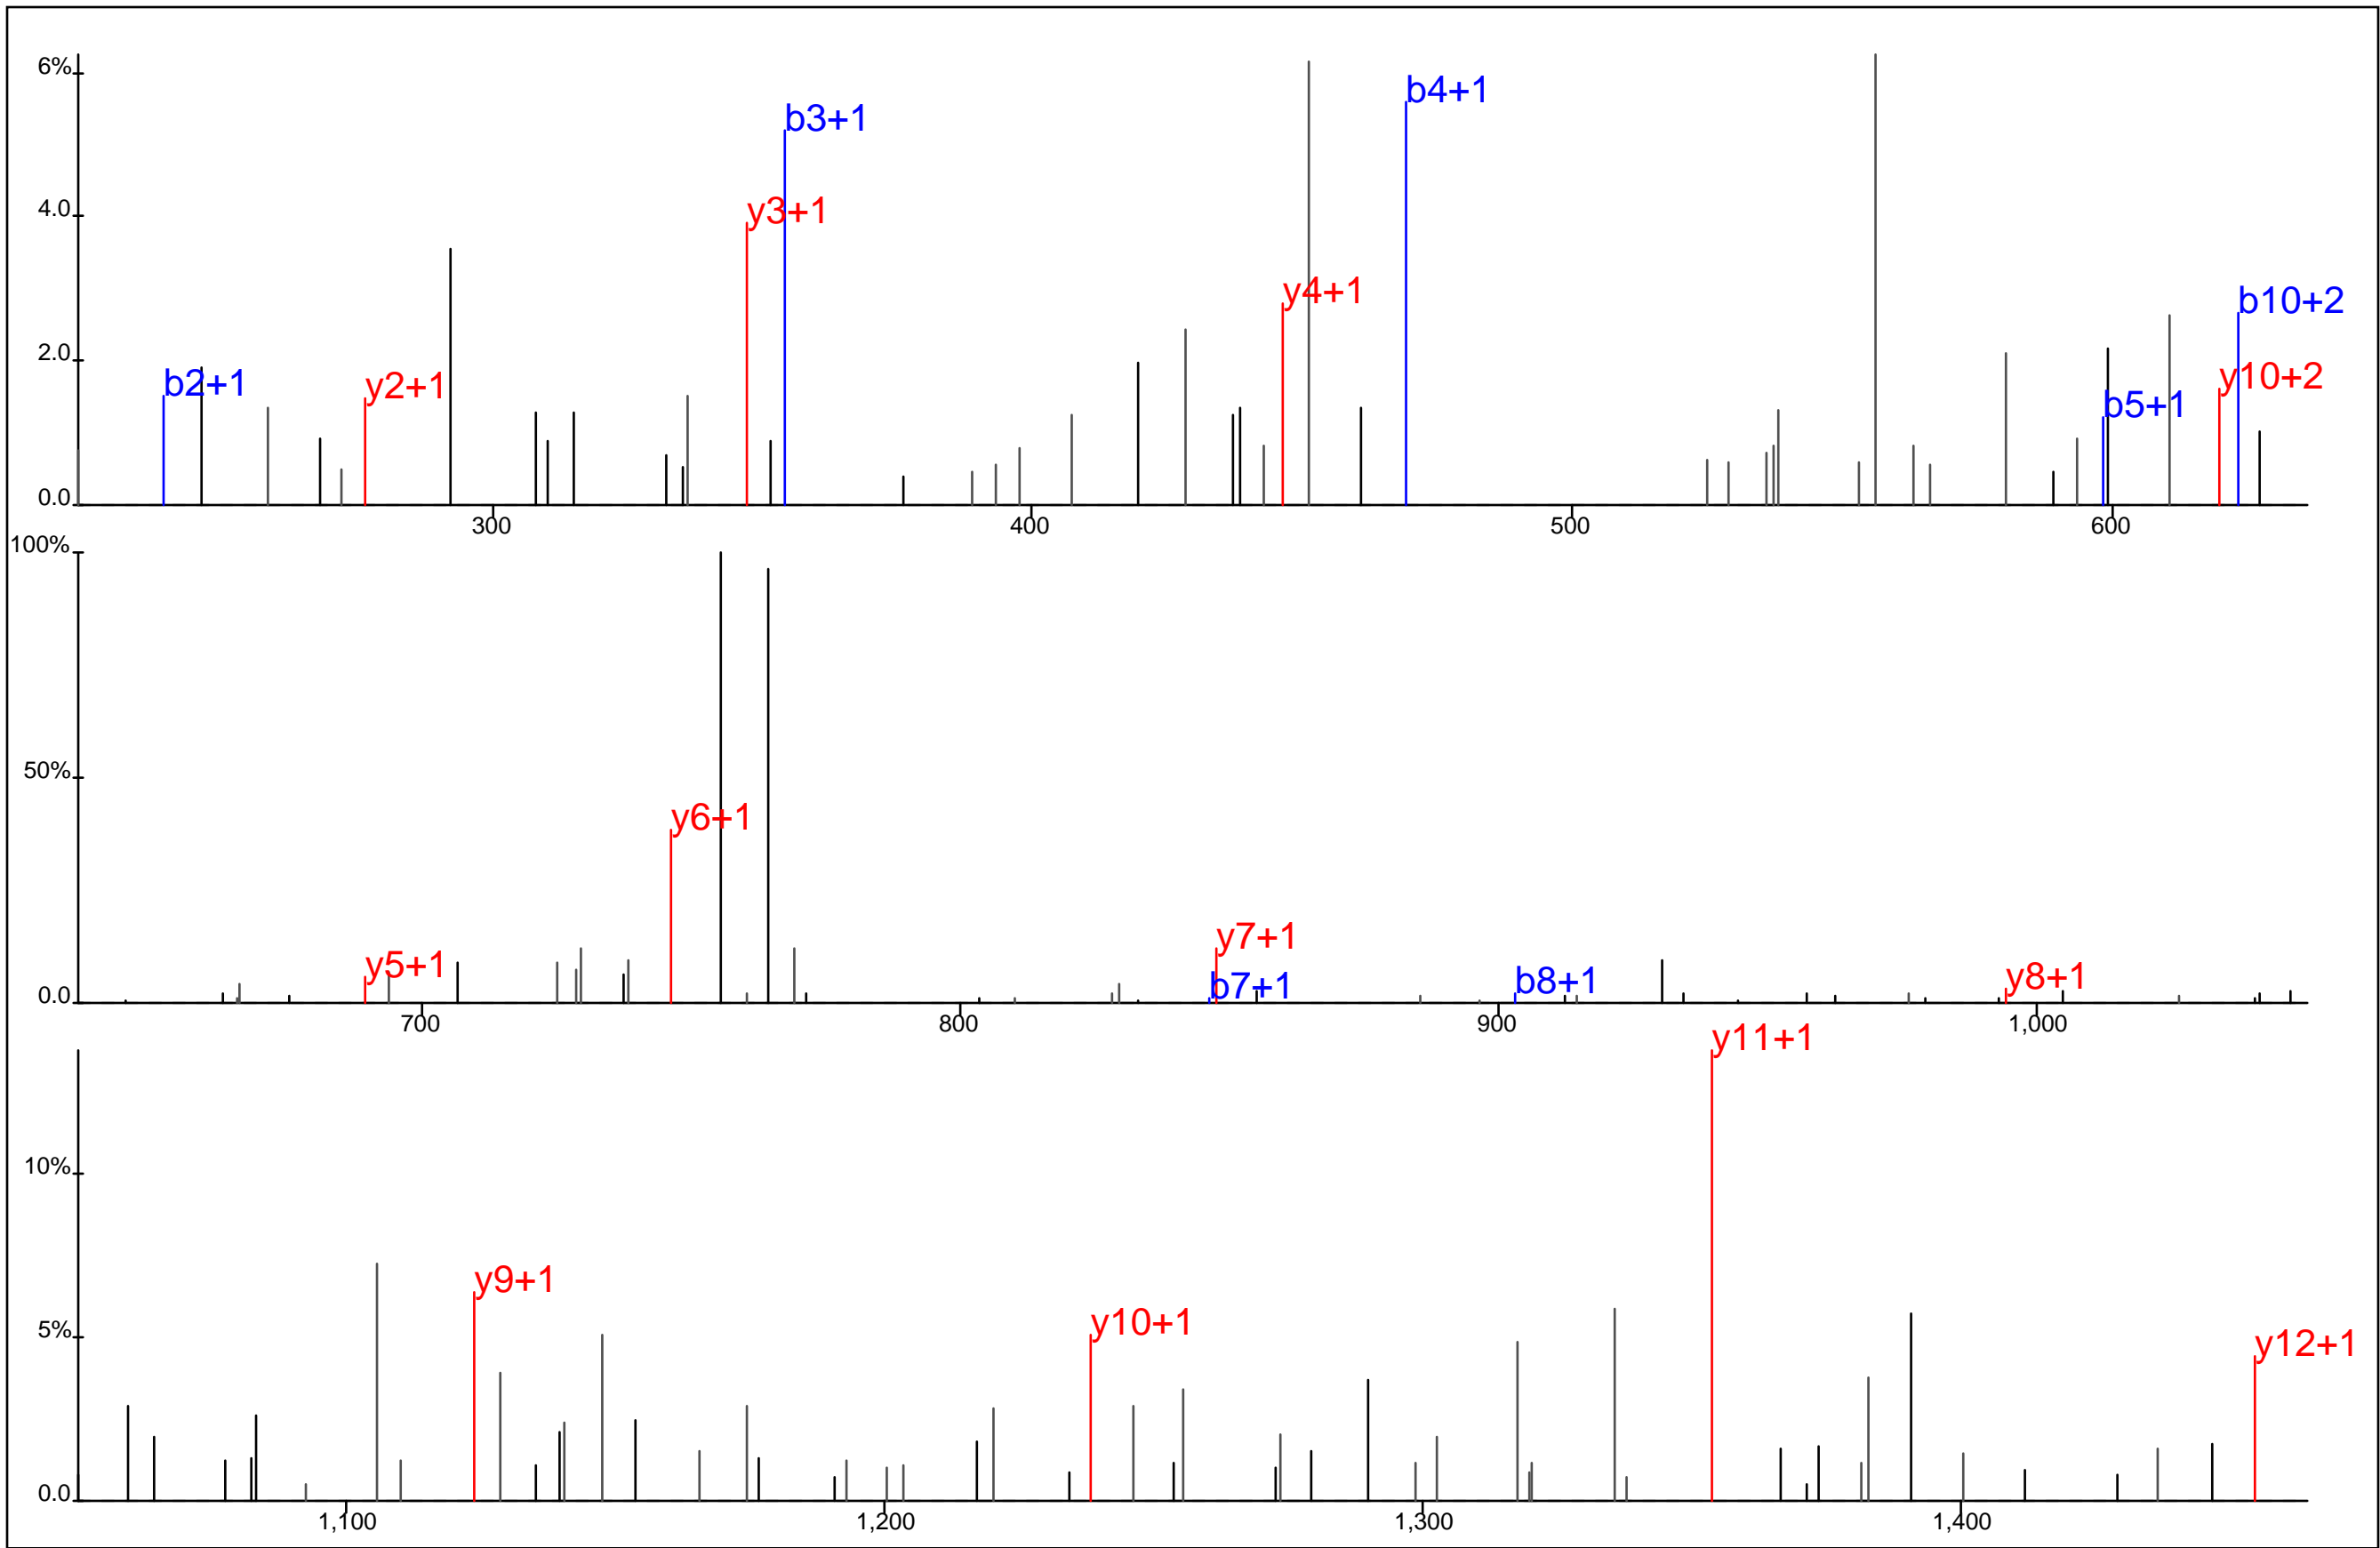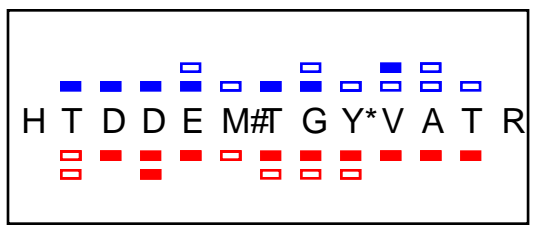

Protein Name: MAPK14  
 gi Accession: 0  
 Precursor Mass: 796.3074+2  
 Delta Mass: 1.156 ppm  
 XCorr: 79.78



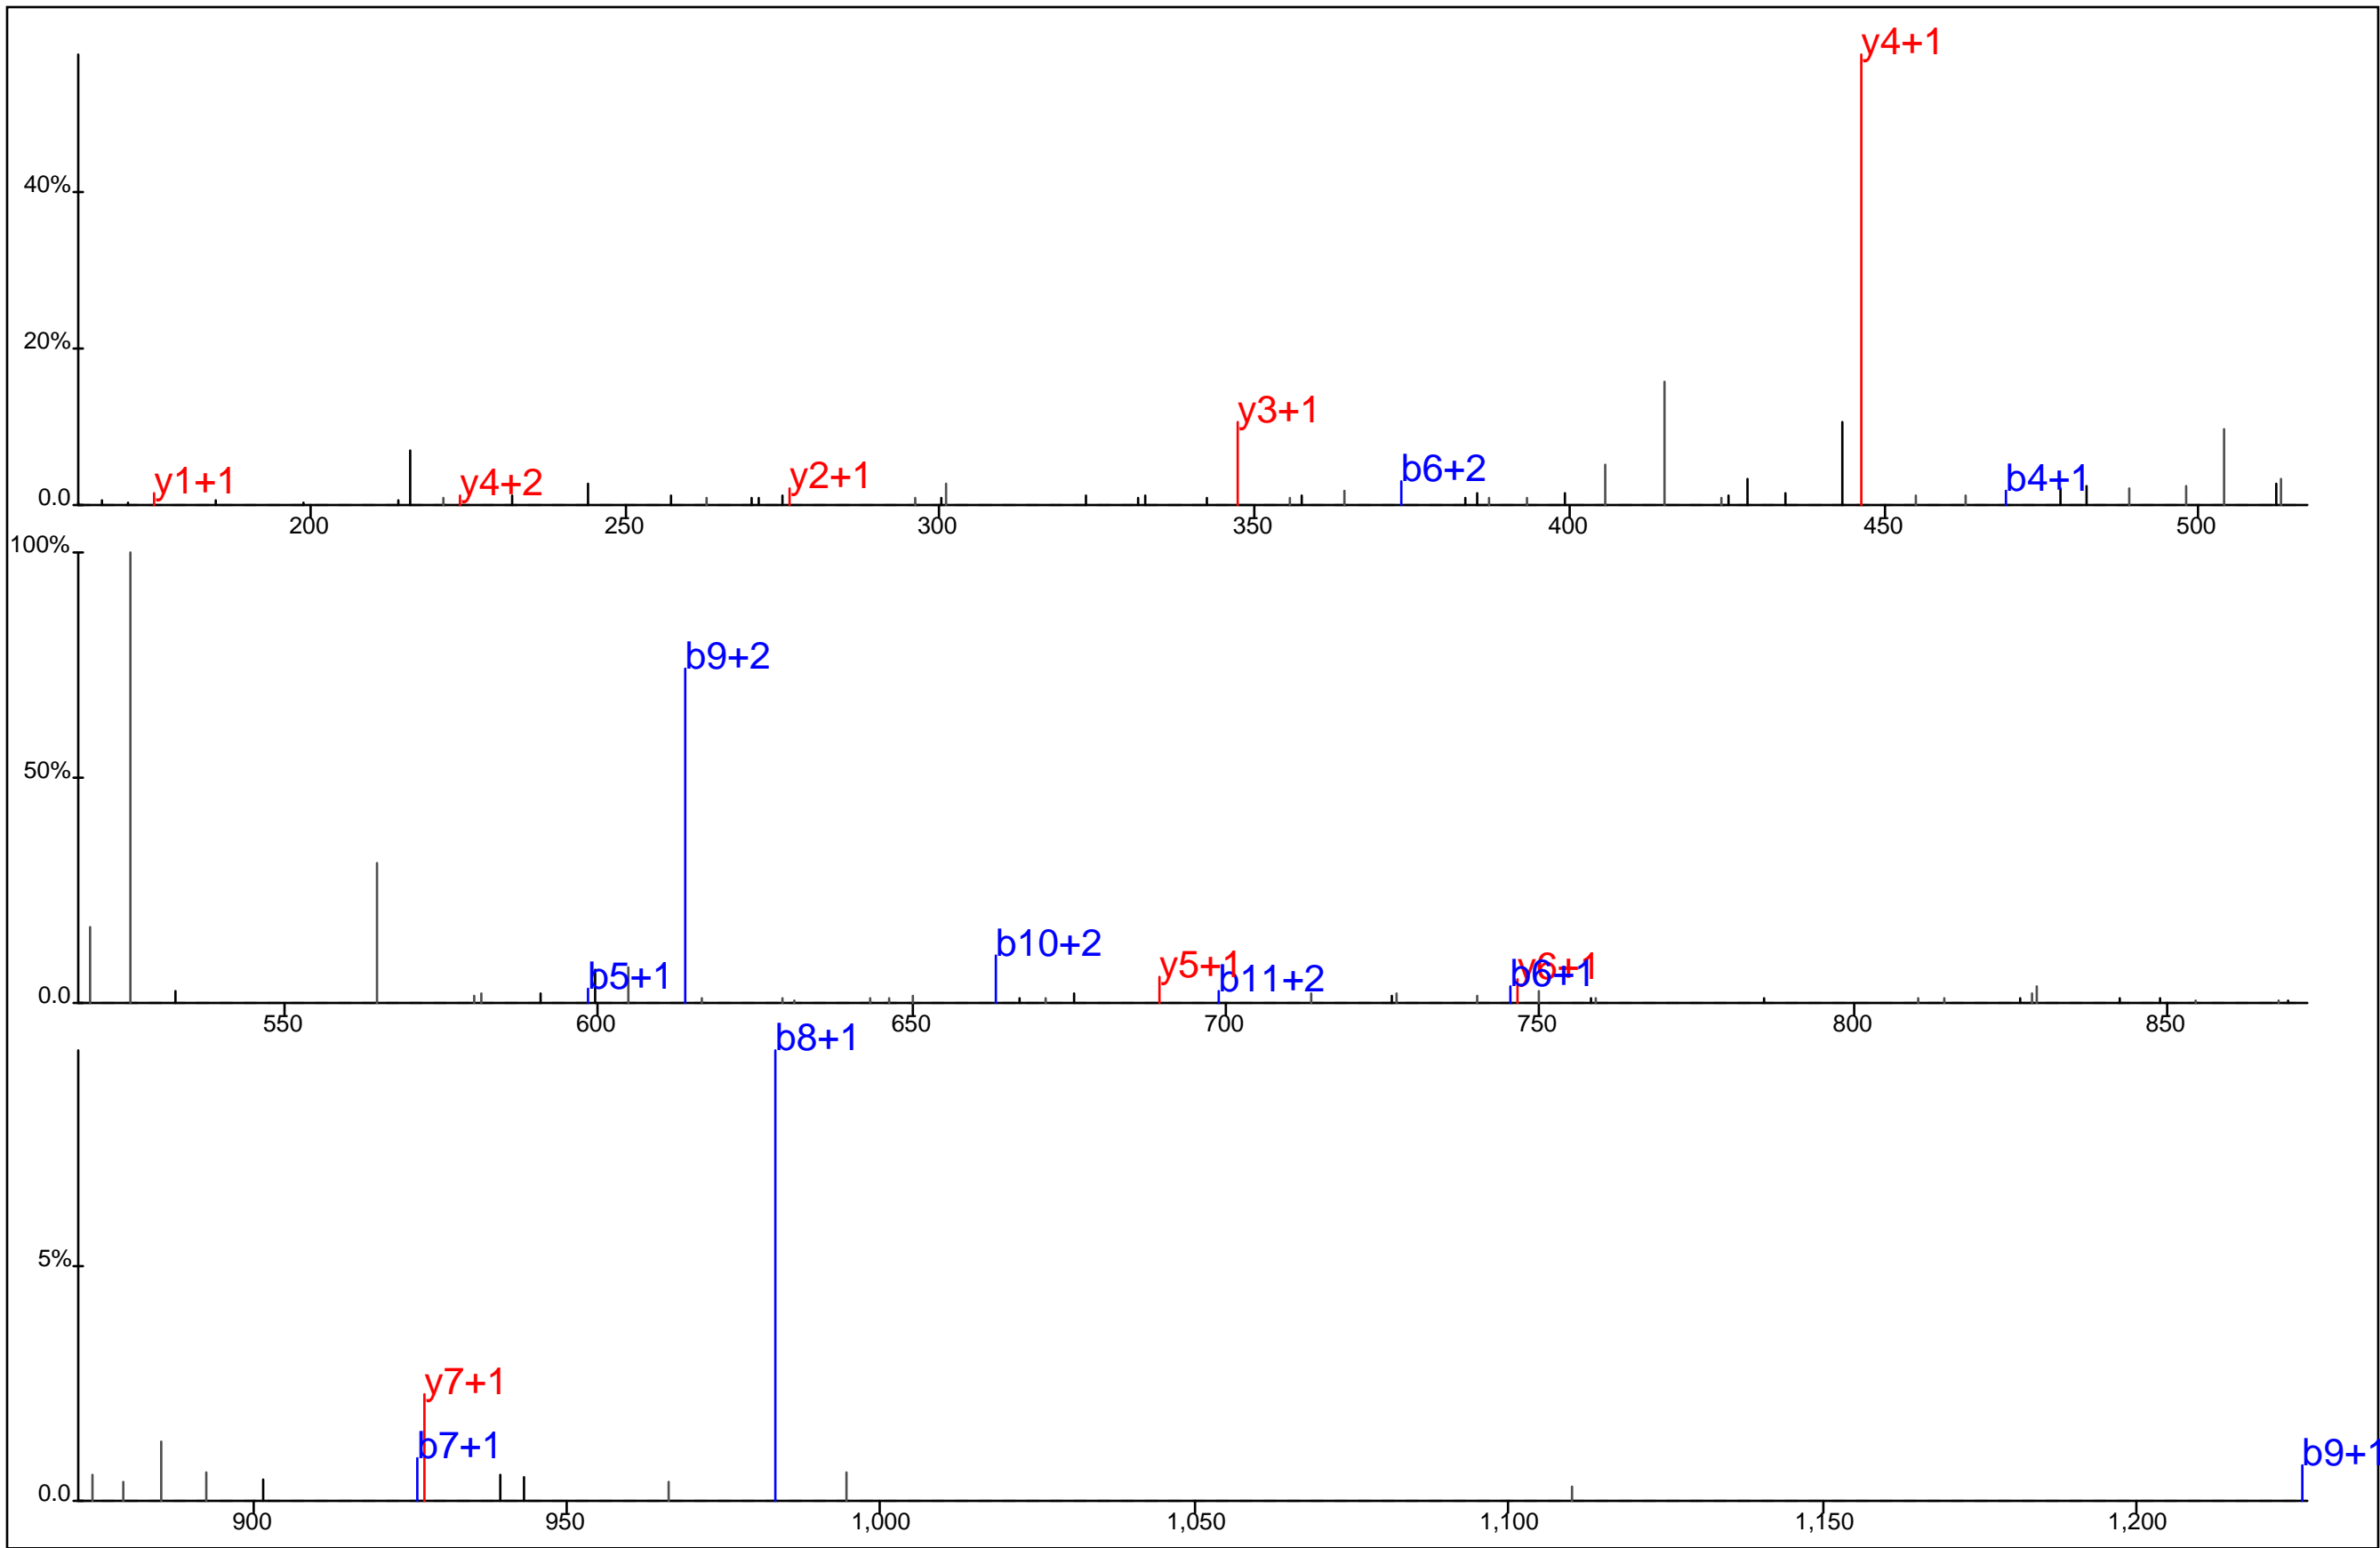

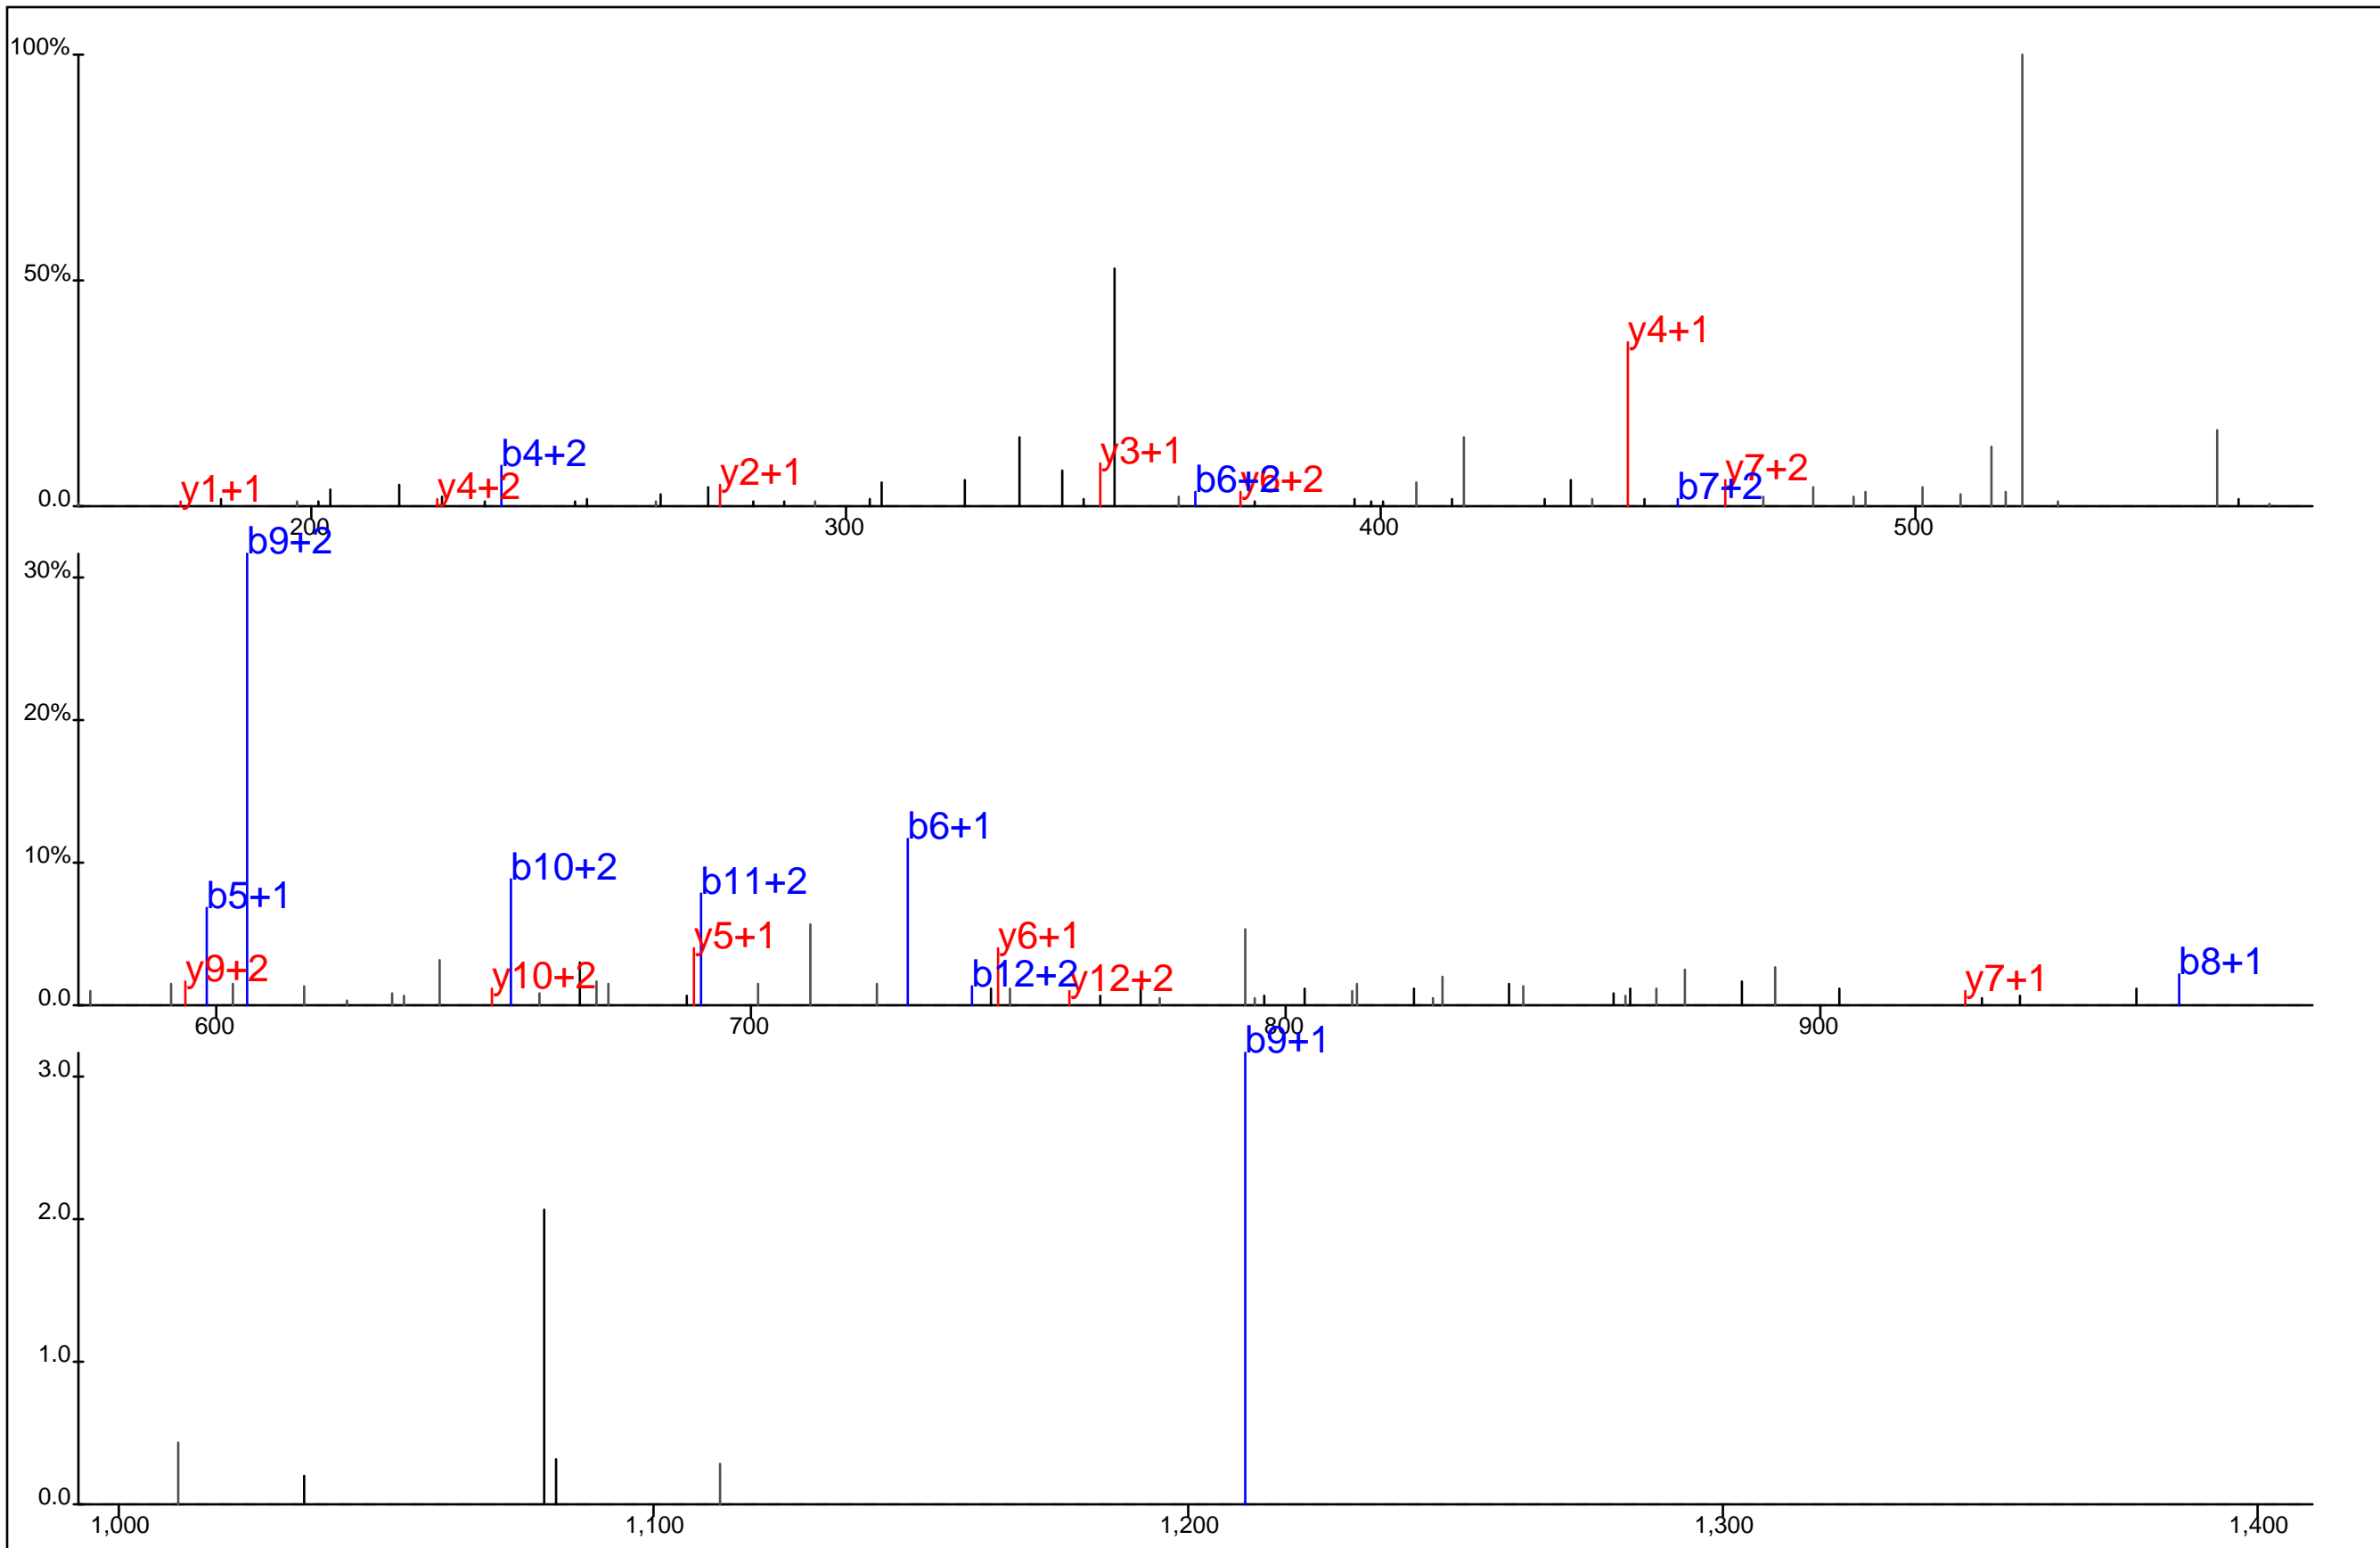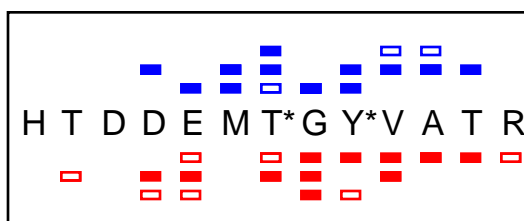

Protein Name: MAPK14  
 gi Accession: 0  
 Precursor Mass: 552.5314+3  
 Delta Mass: 0.661 ppm  
 XCorr: 27.36



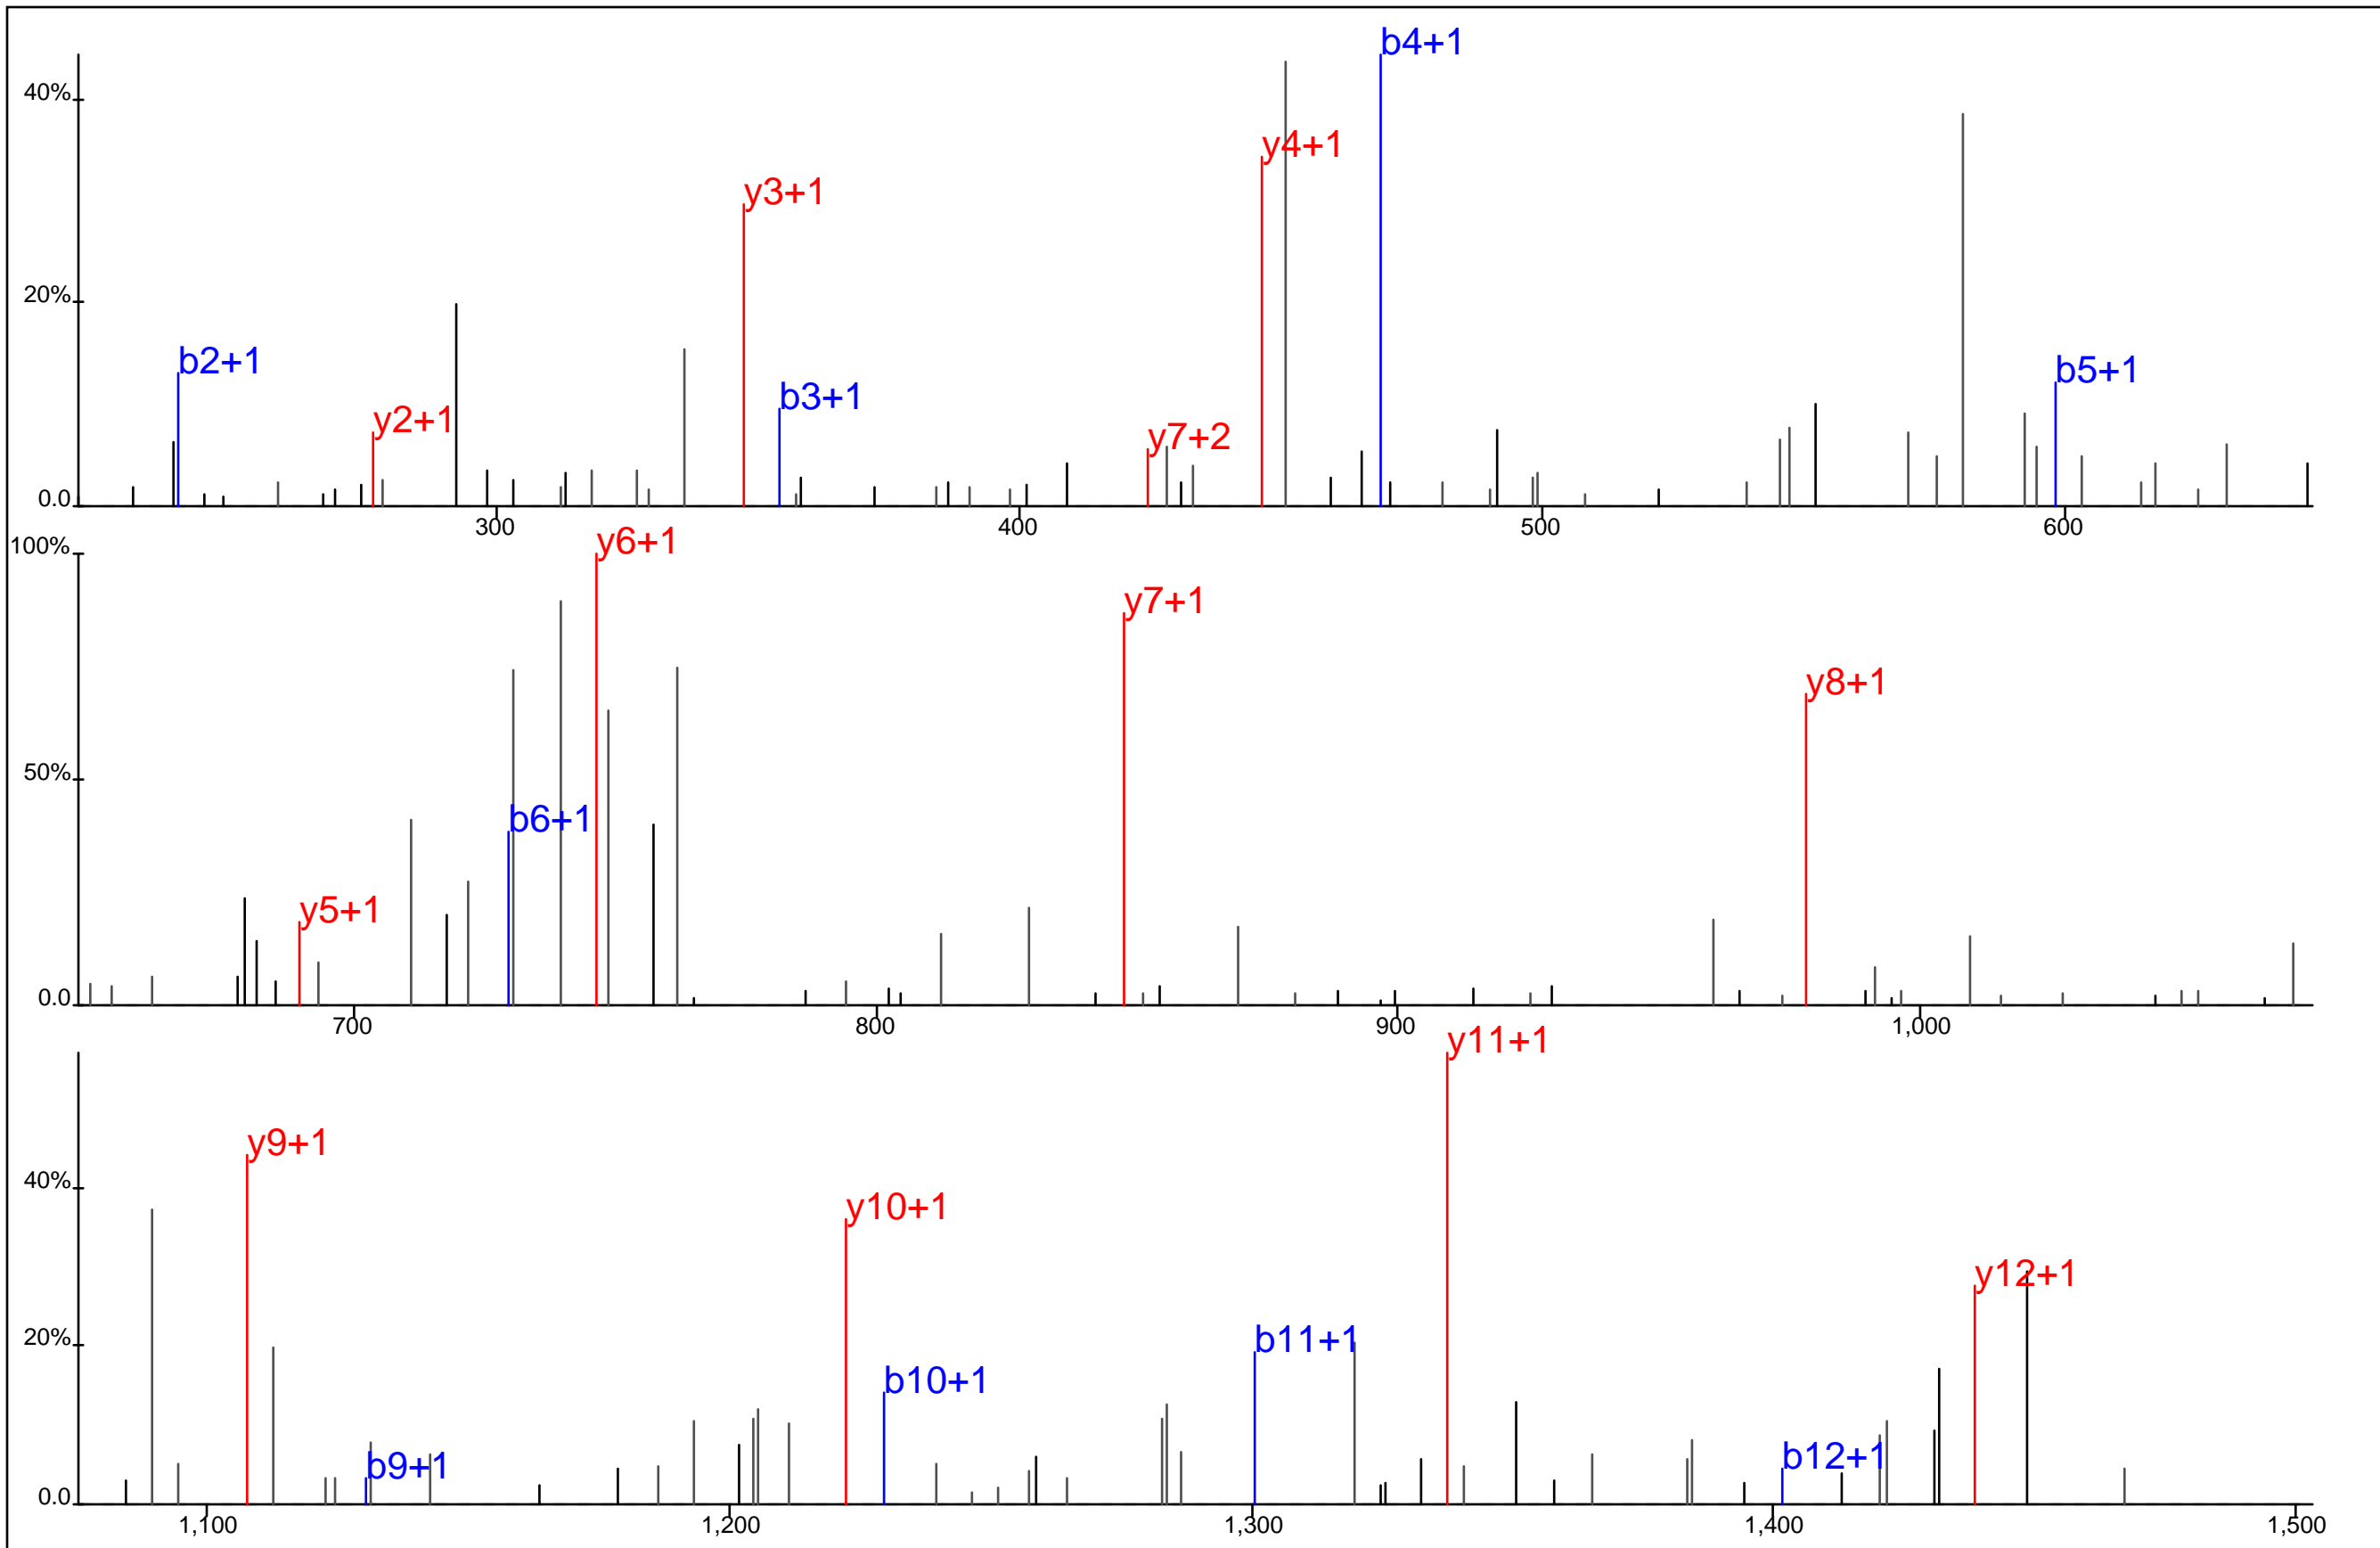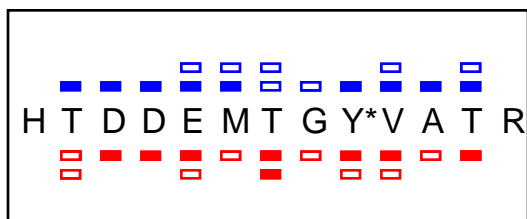

Protein Name: MAPK14  
 gi Accession: 0  
 Precursor Mass: 788.3102+2  
 Delta Mass: 0.828 ppm  
 XCorr: 73.83

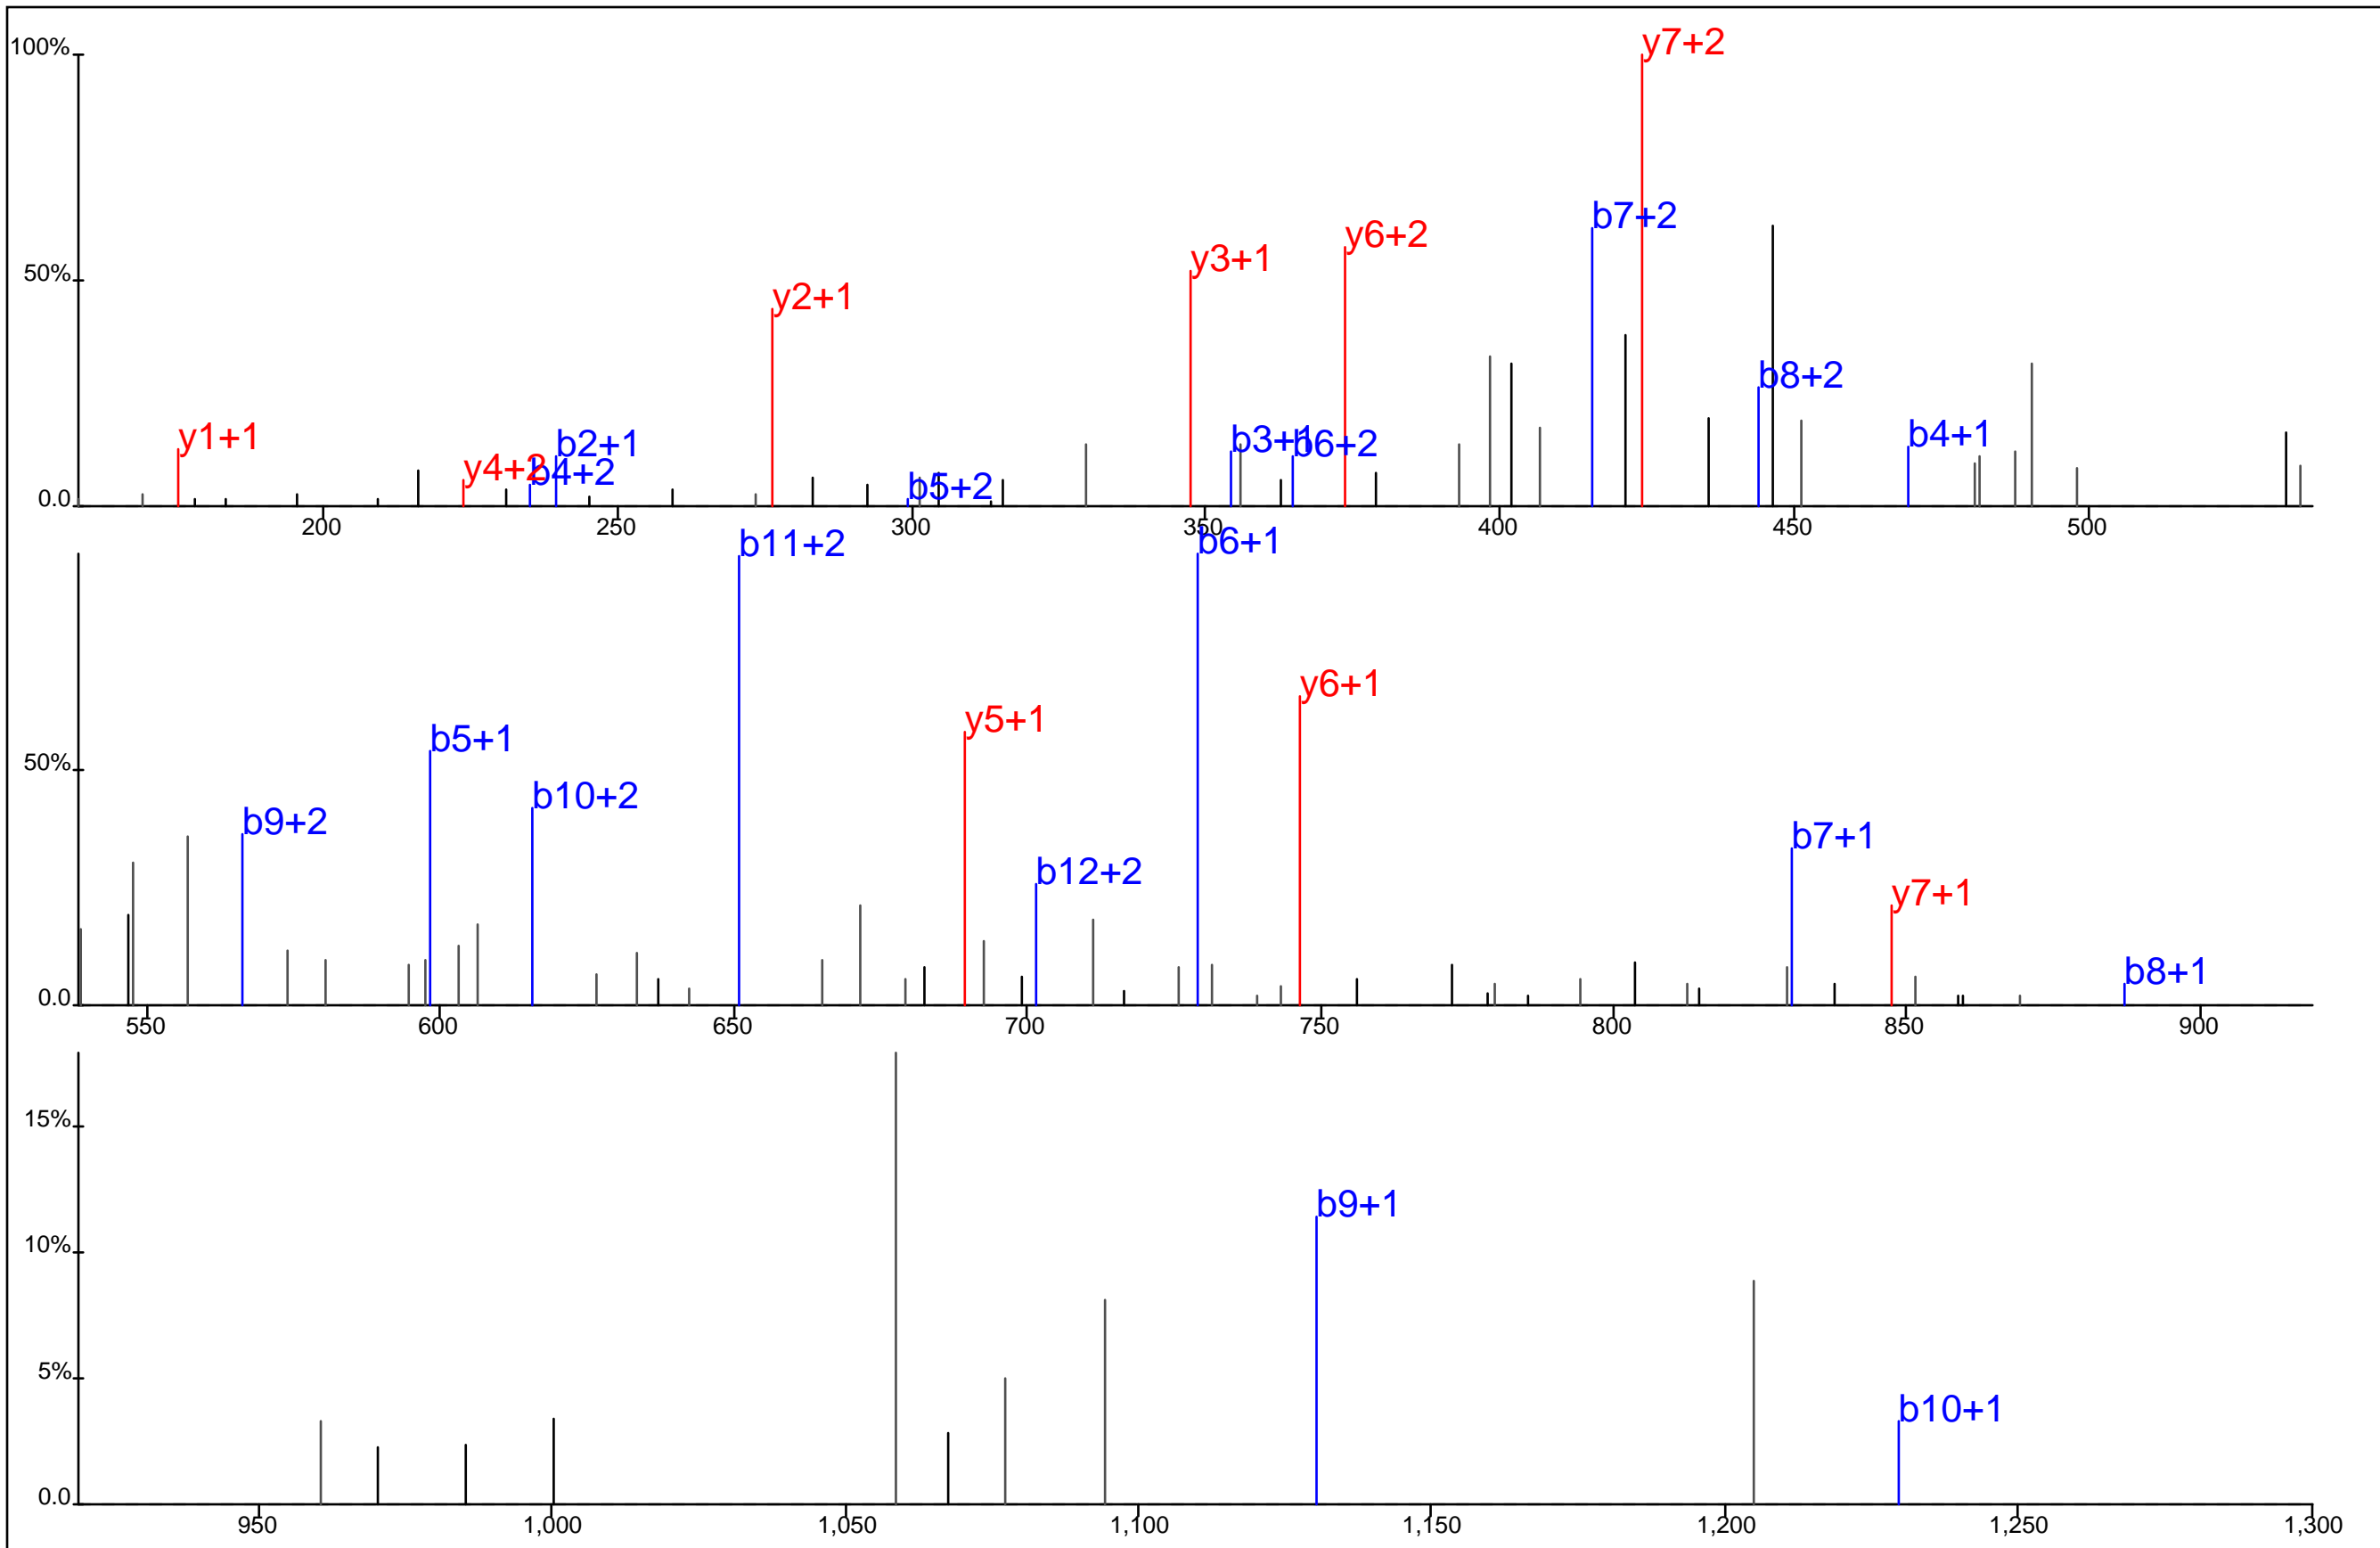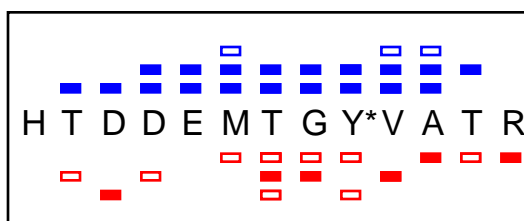

Protein Name: MAPK14  
 gi Accession: 0  
 Precursor Mass: 525.8755+3  
 Delta Mass: 1.650 ppm  
 XCorr: 60.1

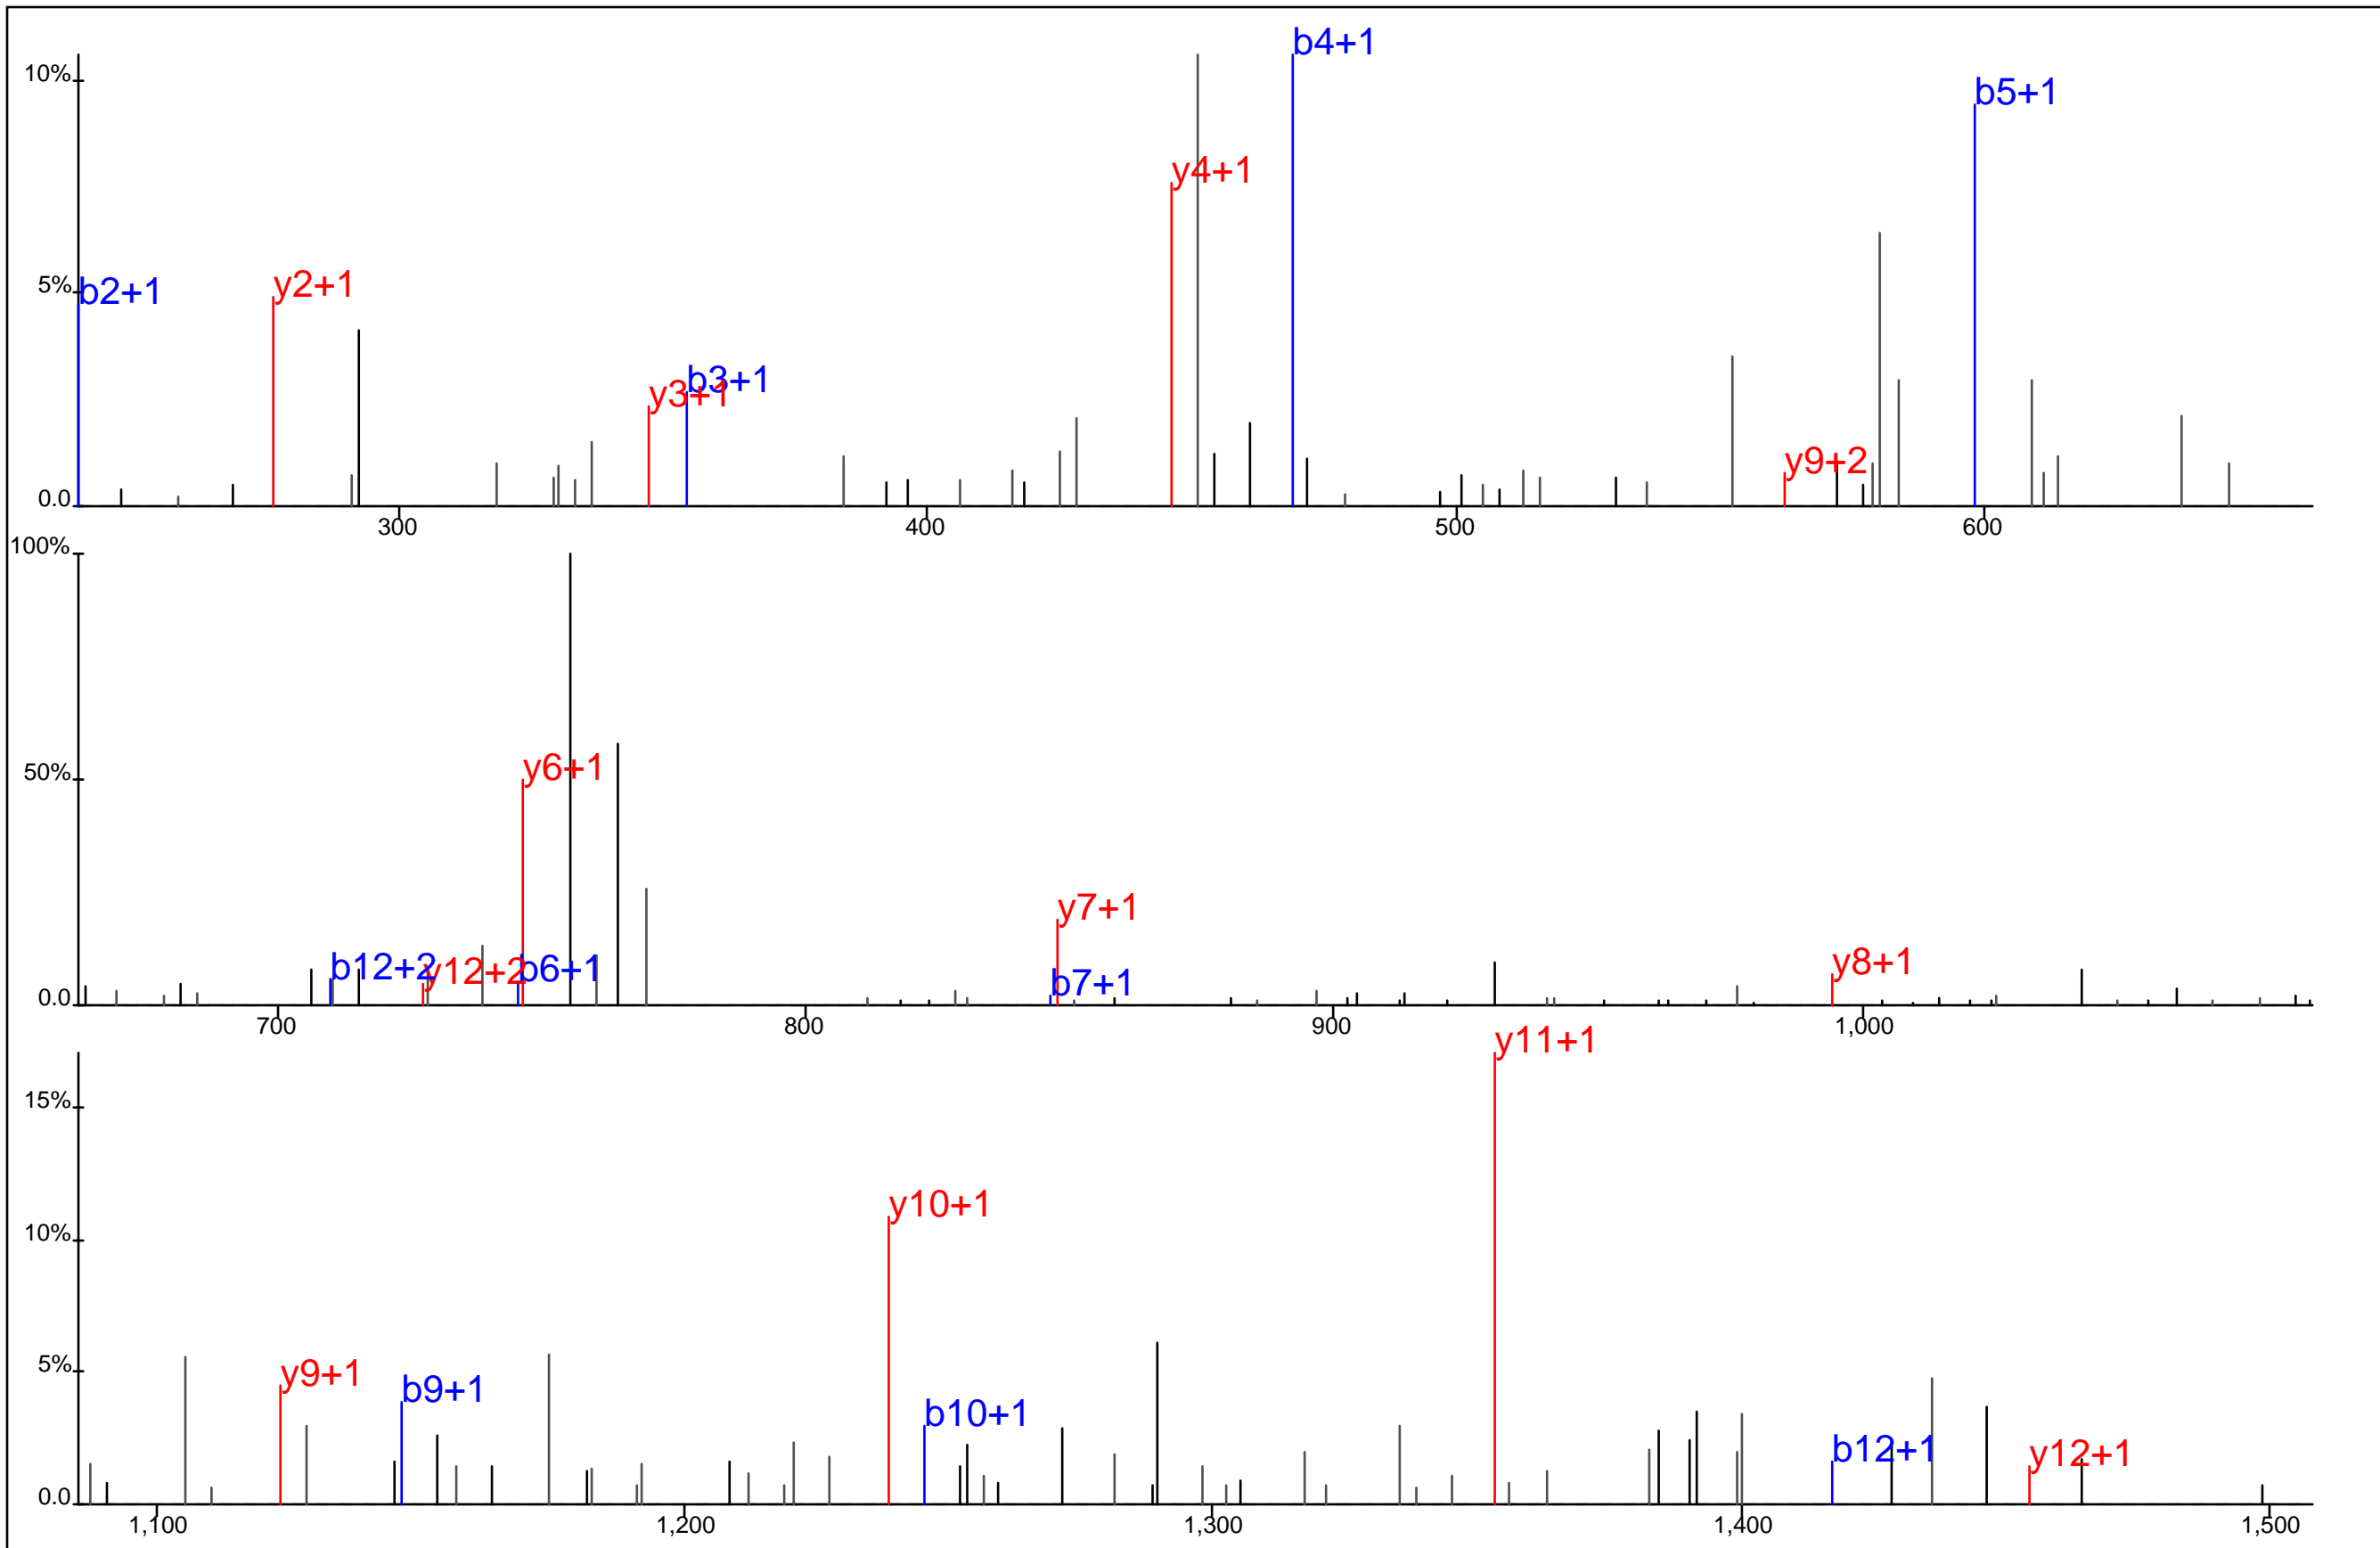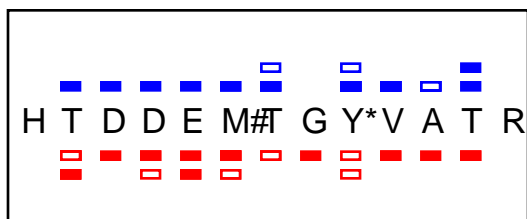

Protein Name: MAPK14  
 gi Accession: 0  
 Precursor Mass: 796.3077+2  
 Delta Mass: 0.849 ppm  
 XCorr: 79.06

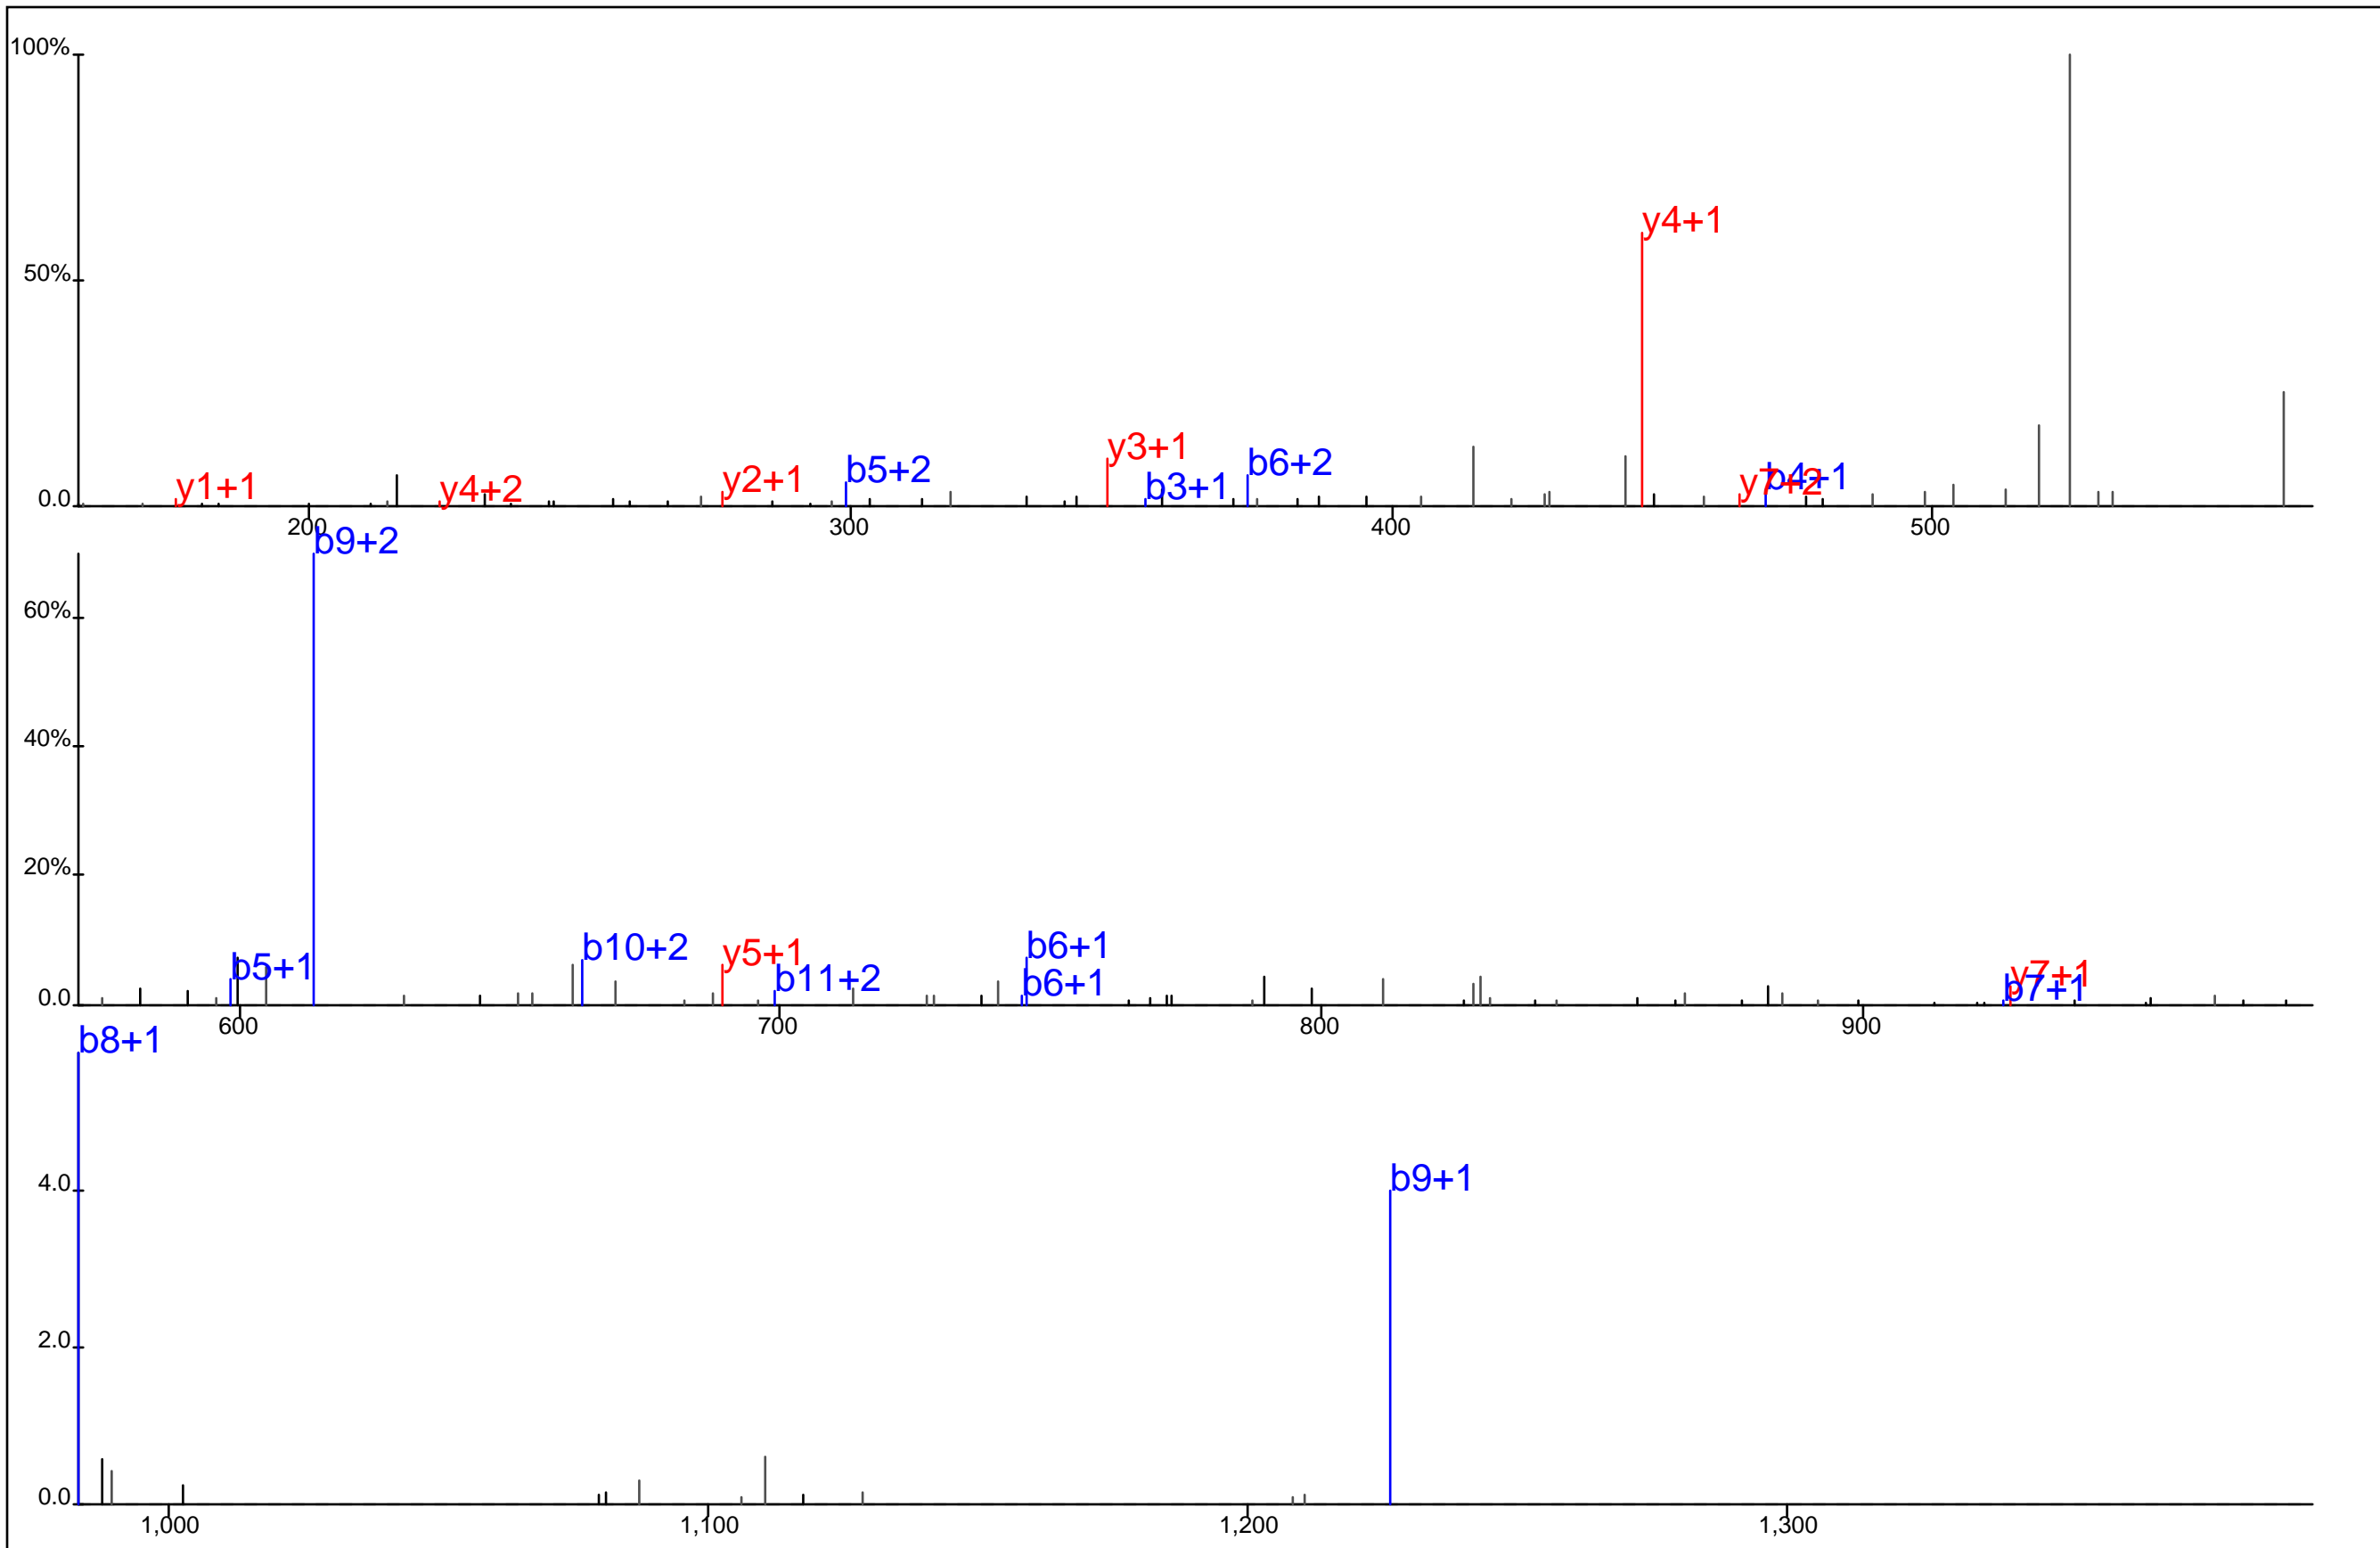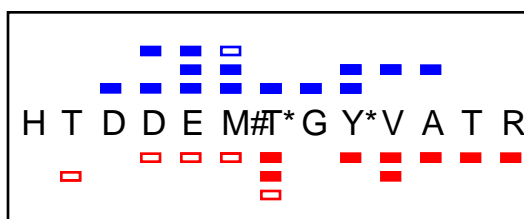

Protein Name: MAPK14  
 gi Accession: 0  
 Precursor Mass: 557.8635+3  
 Delta Mass: 0.047 ppm  
 XCorr: 28.76

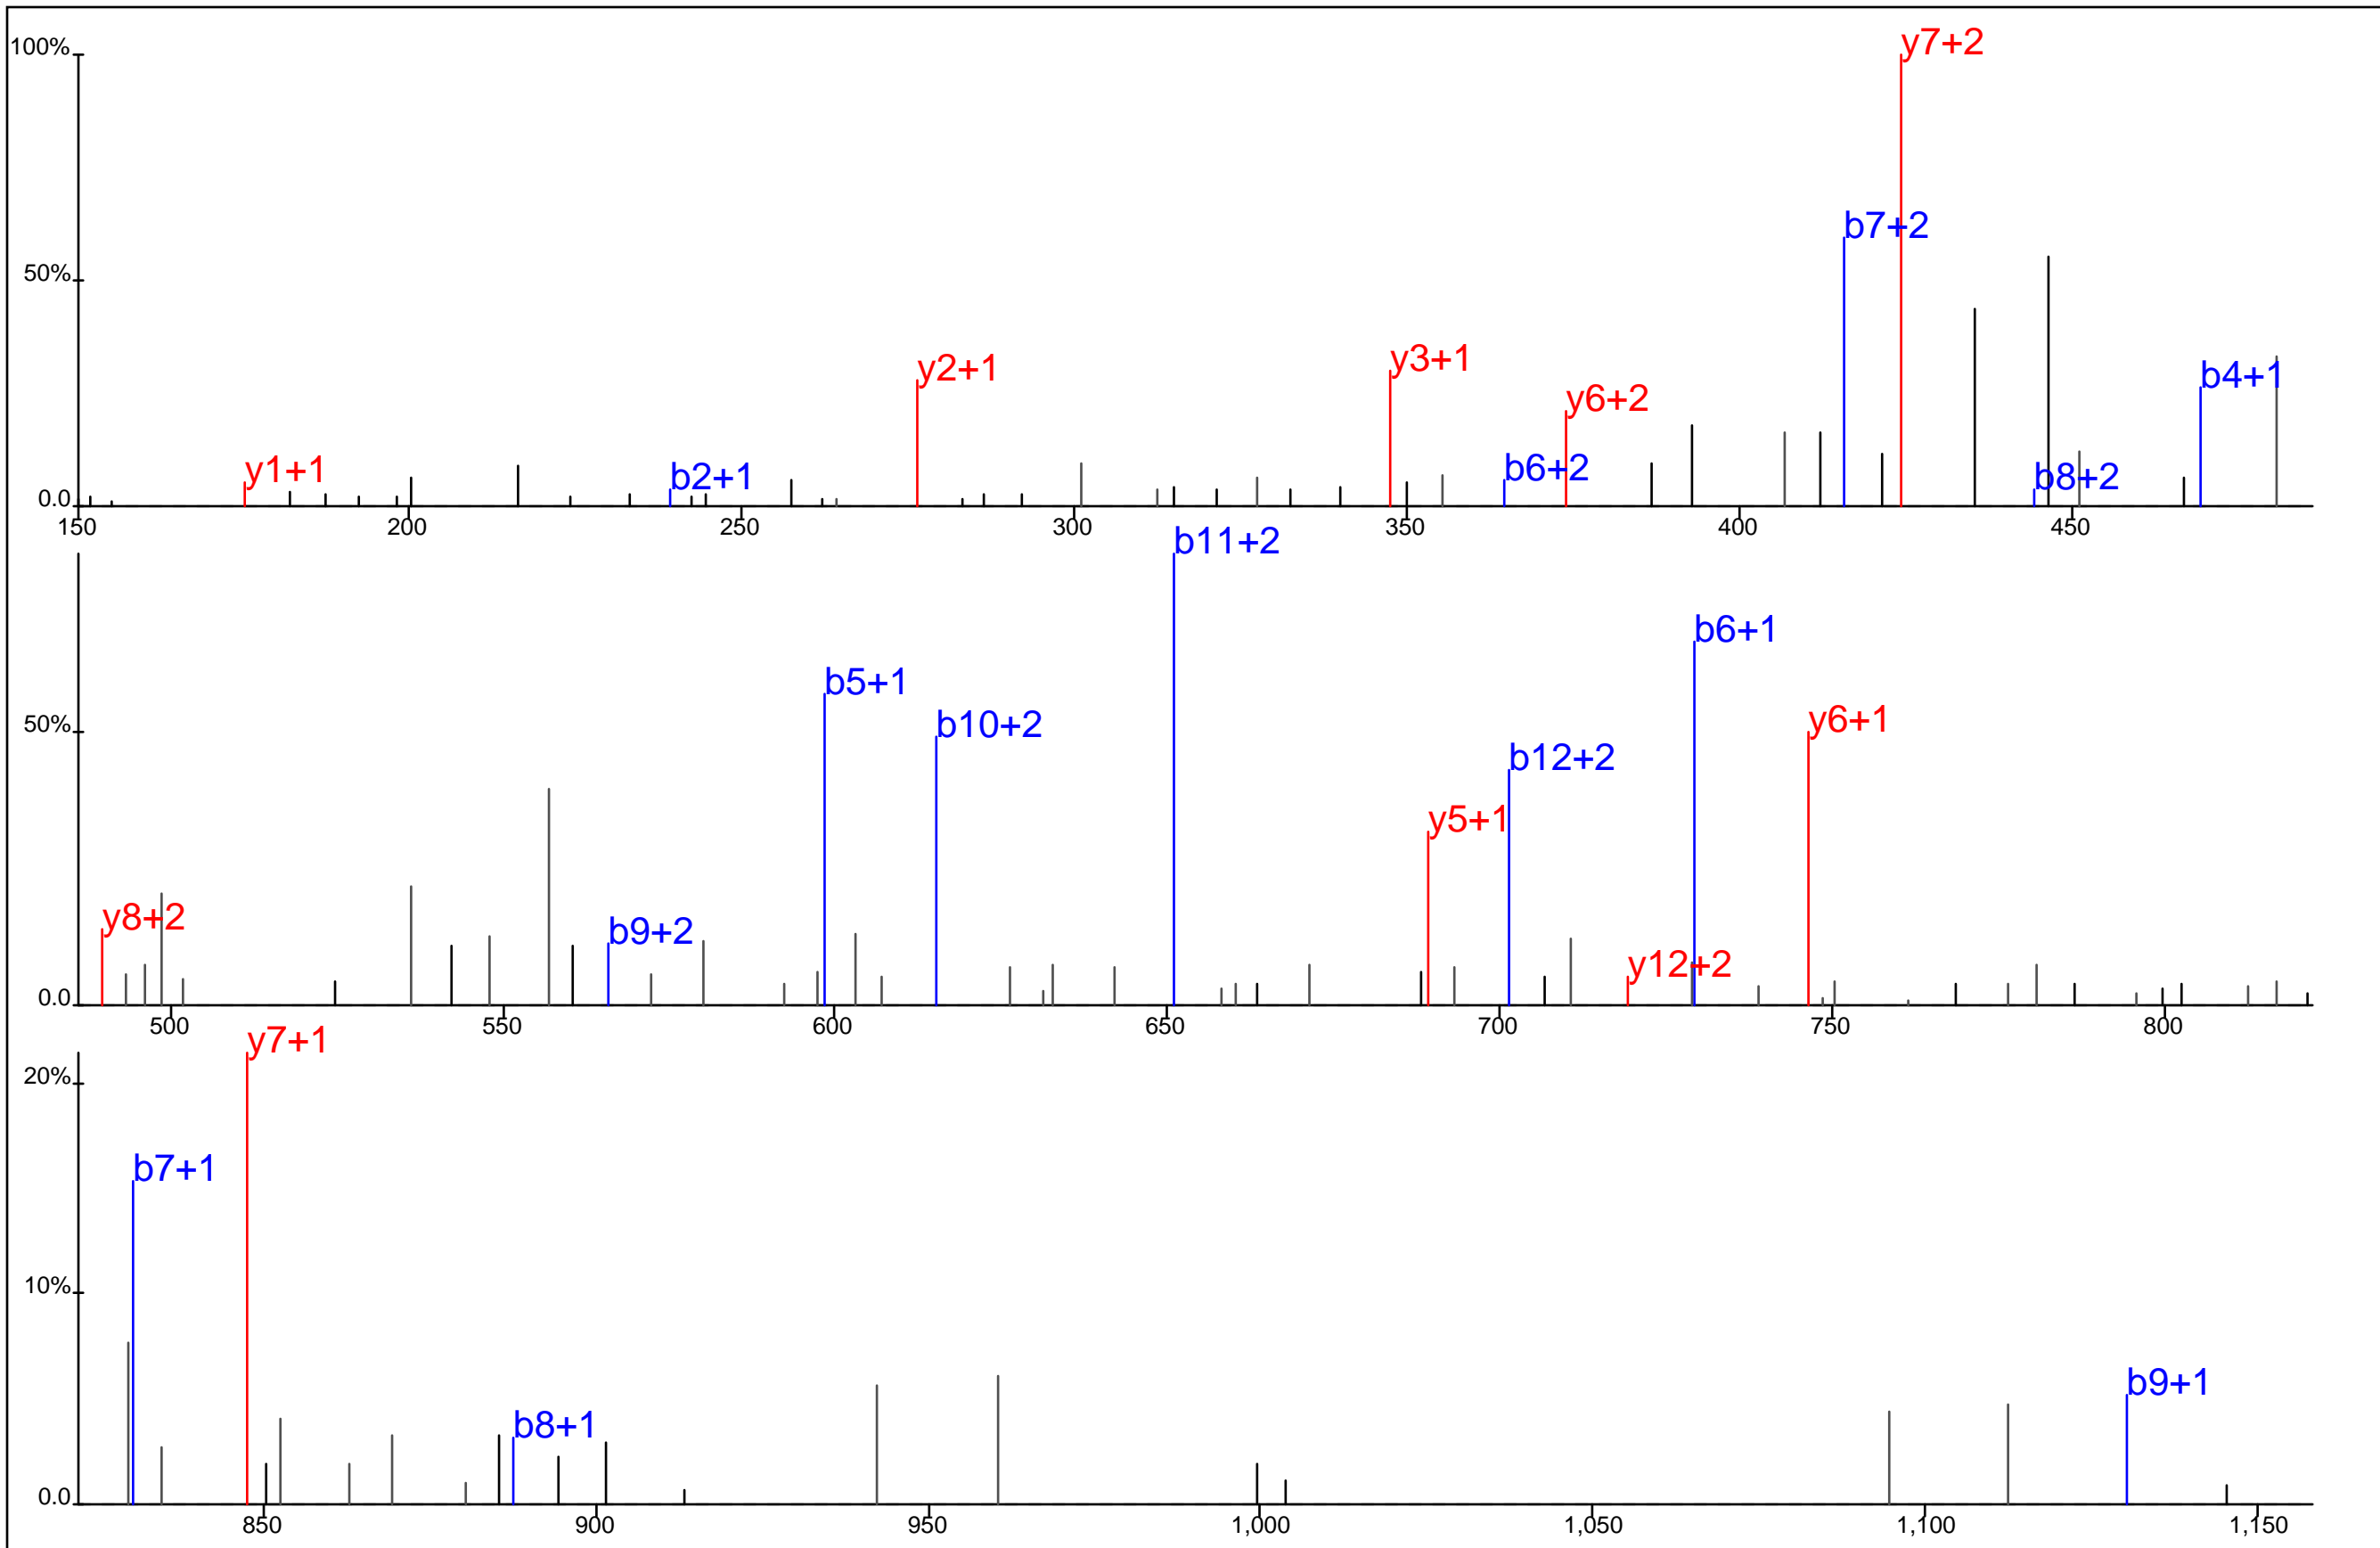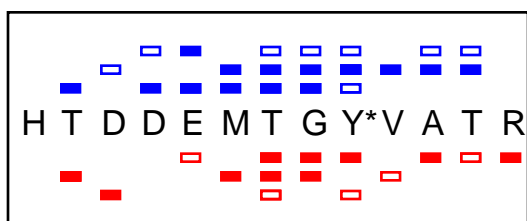

Protein Name: MAPK14  
 gi Accession: 0  
 Precursor Mass: 525.8760+3  
 Delta Mass: 0.719 ppm  
 XCorr: 49.11



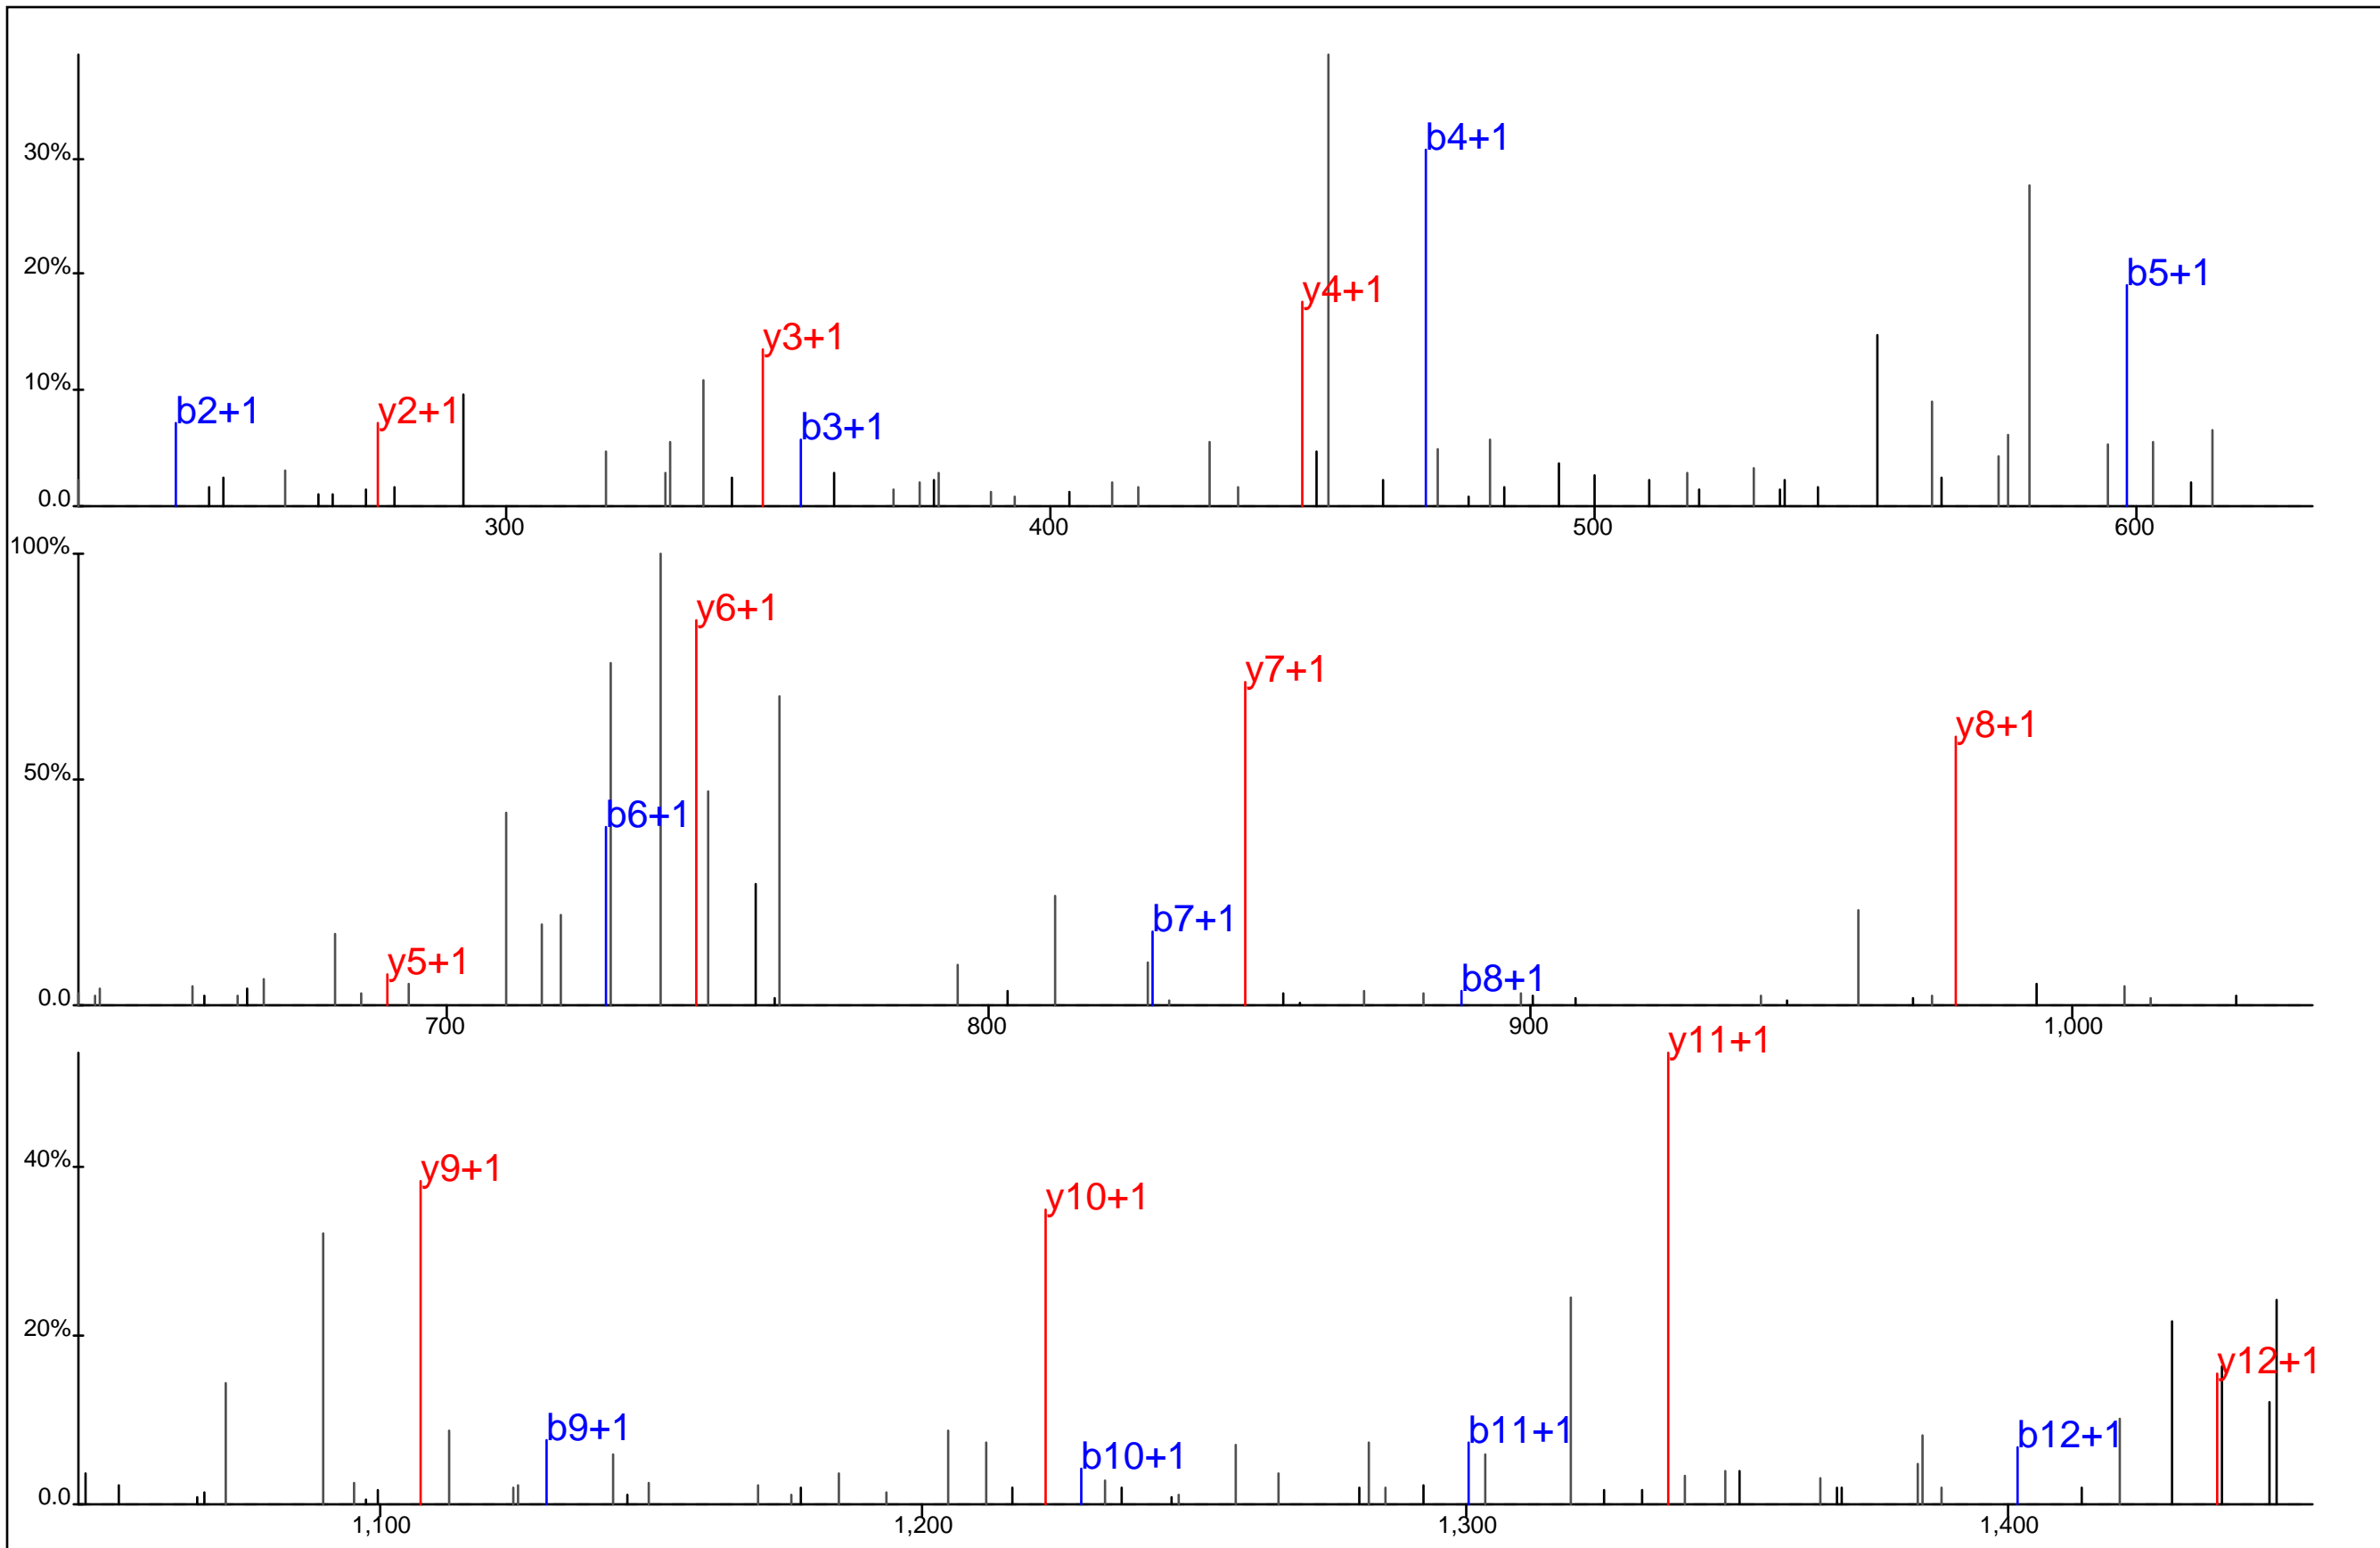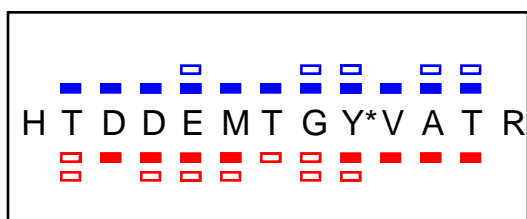

Protein Name: MAPK14  
 gi Accession: 0  
 Precursor Mass: 788.3123+2  
 Delta Mass: 1.729 ppm  
 XCorr: 80.09



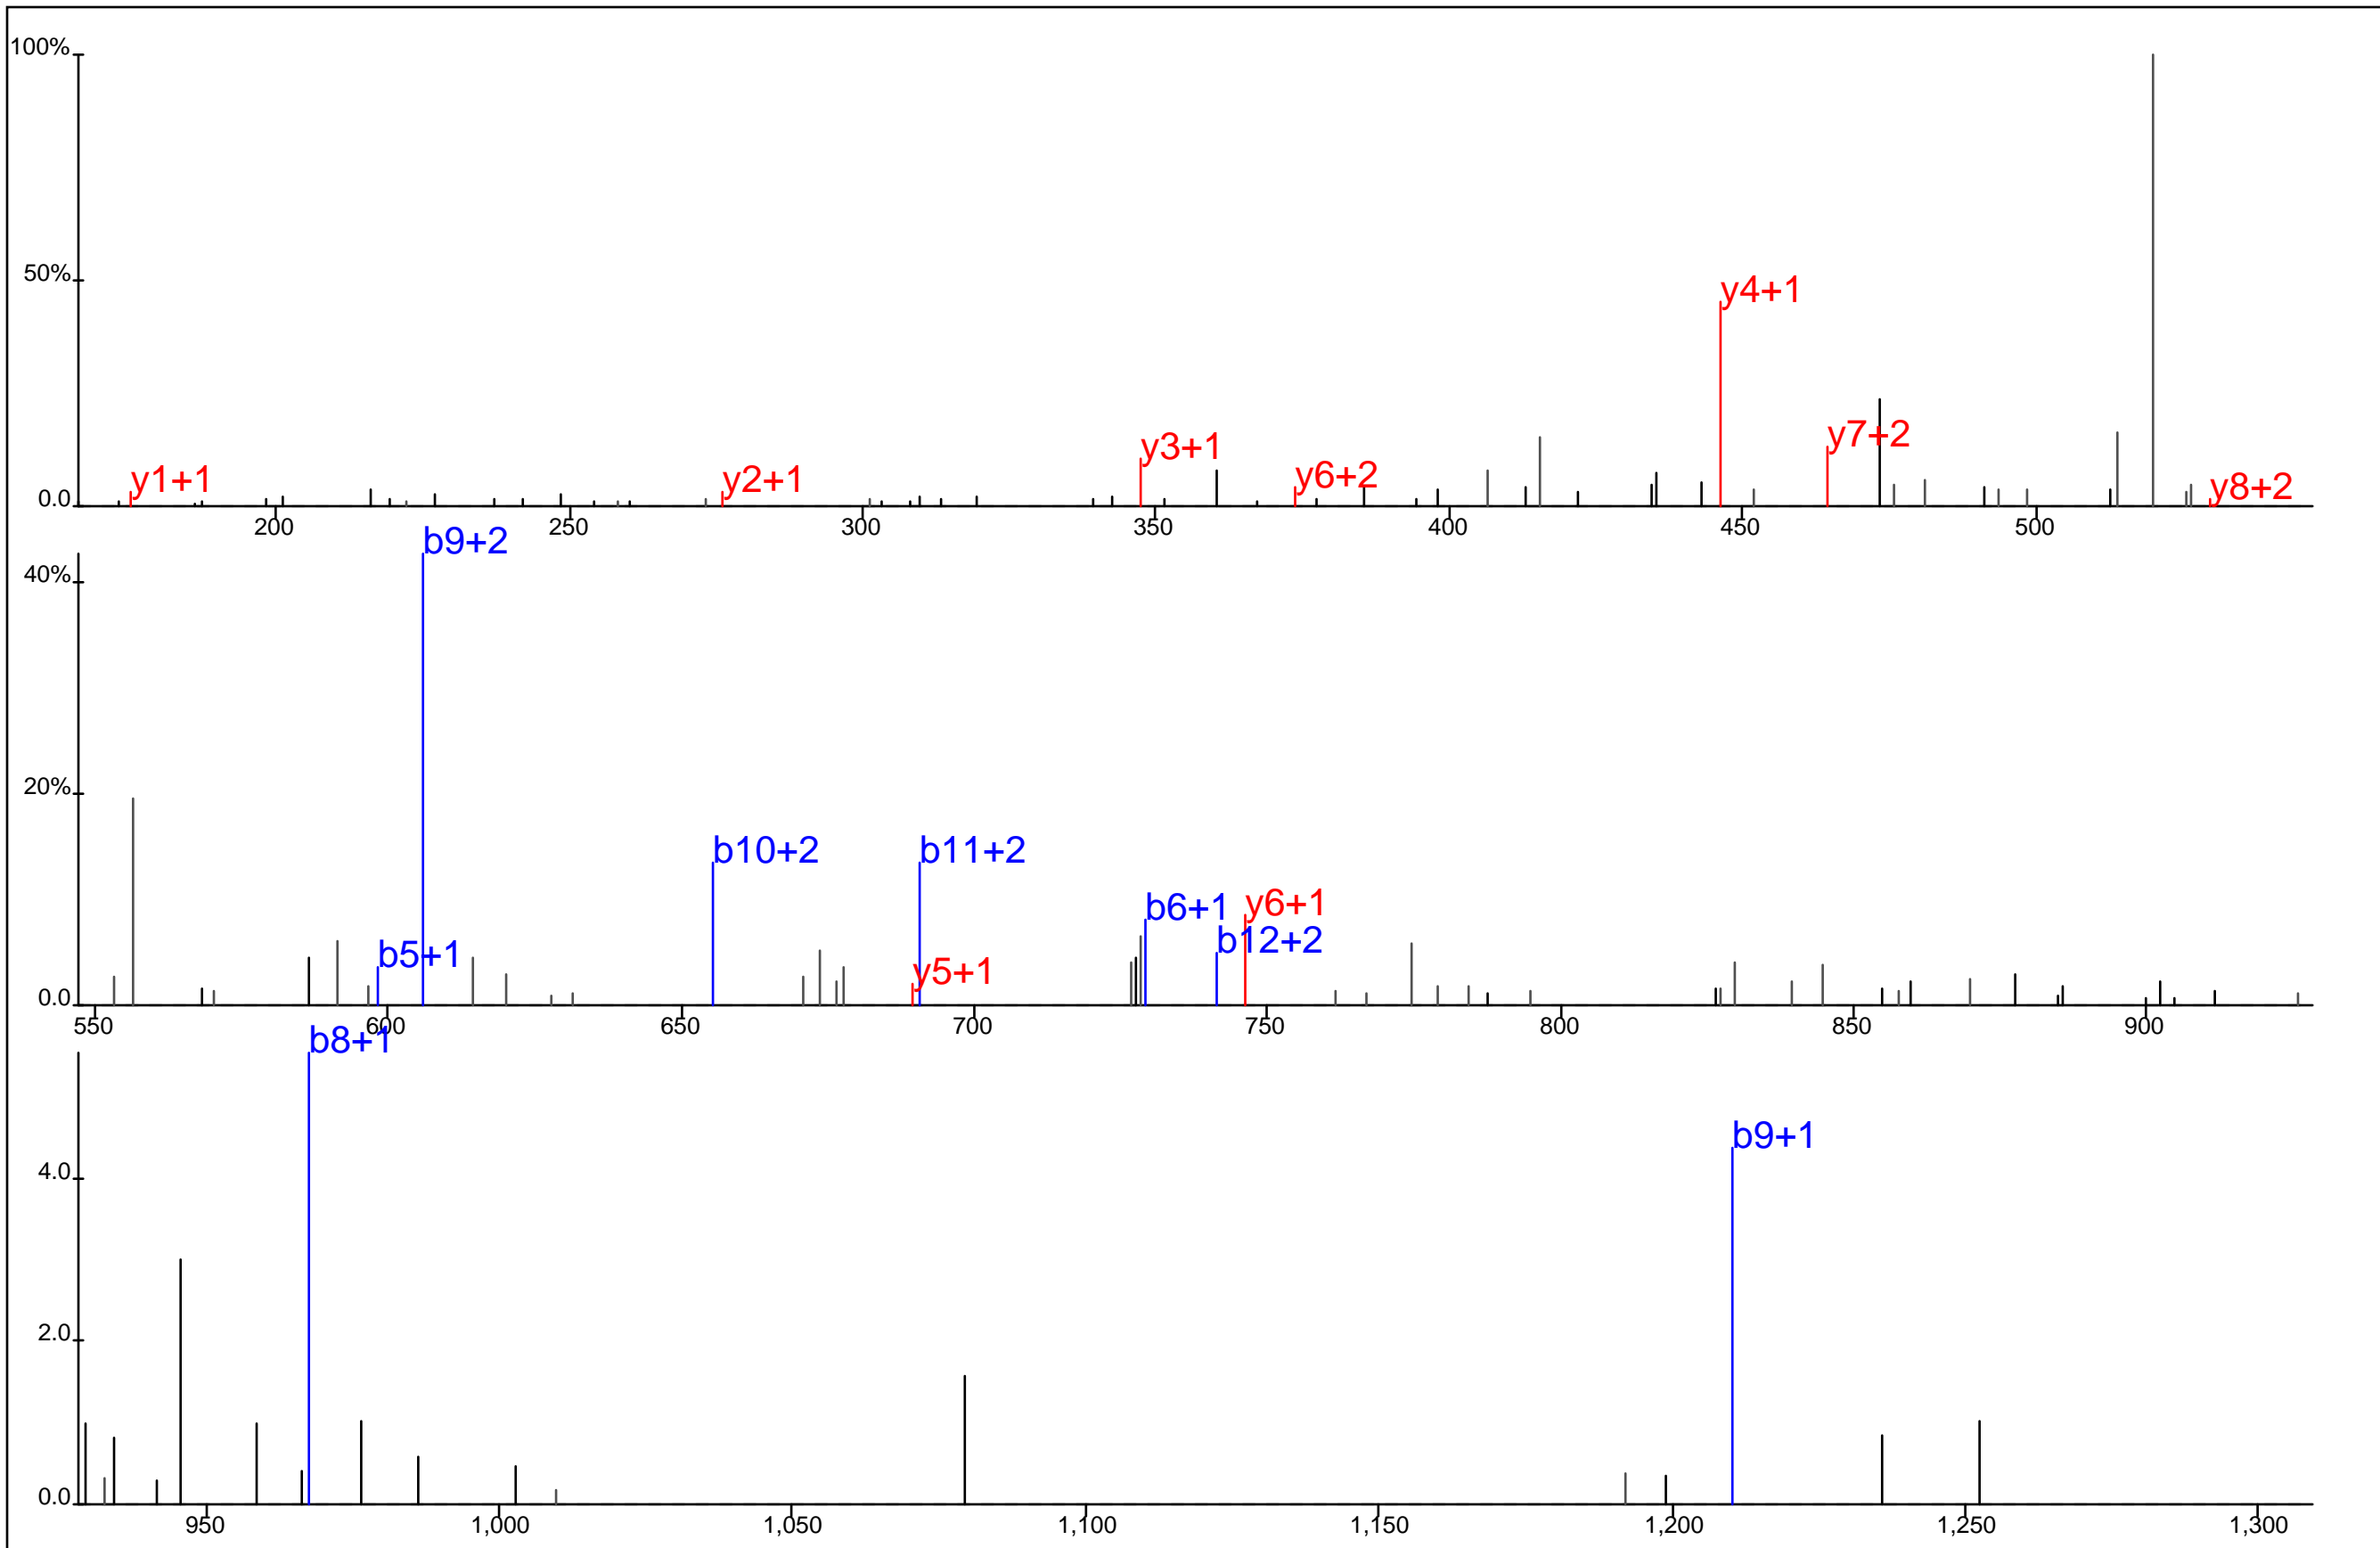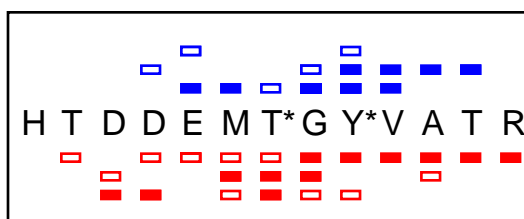

Protein Name: MAPK14  
 gi Accession: 0  
 Precursor Mass: 552.5317+3  
 Delta Mass: 0.109 ppm  
 XCorr: 22.19

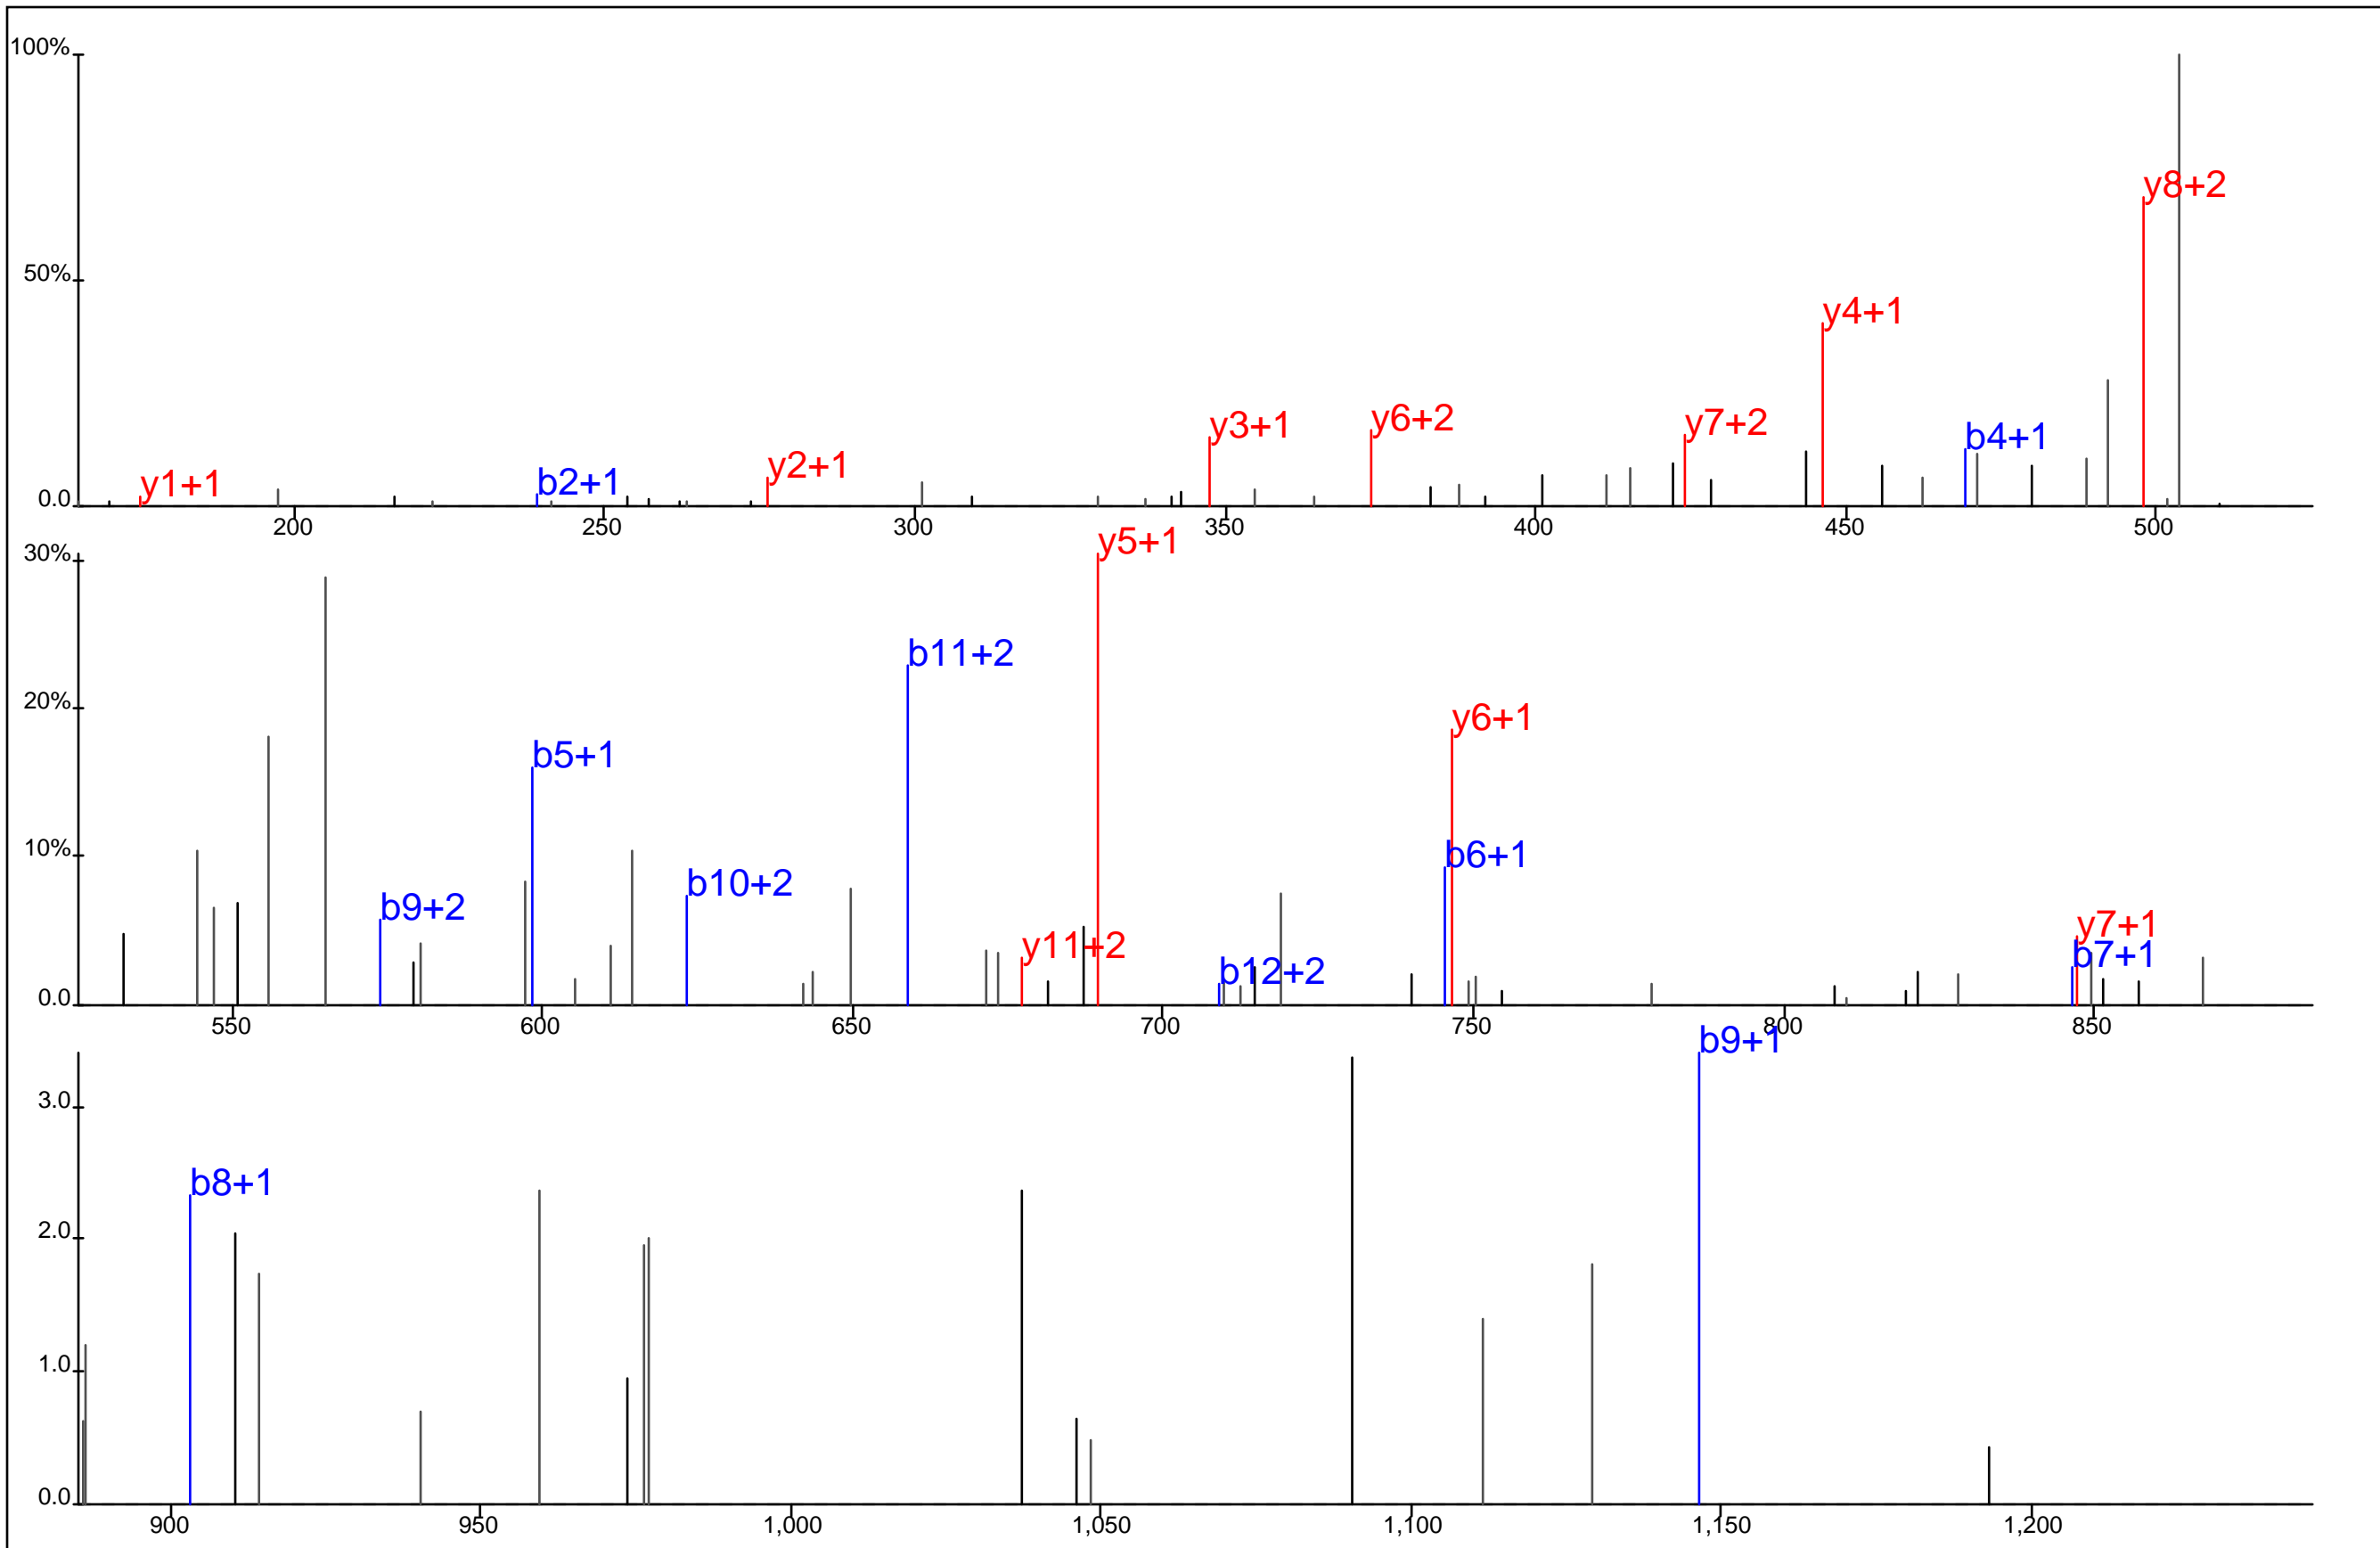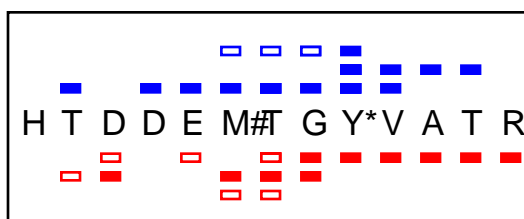

Protein Name: MAPK14  
 gi Accession: 0  
 Precursor Mass: 531.2084+3  
 Delta Mass: 0.715 ppm  
 XCorr: 52.12



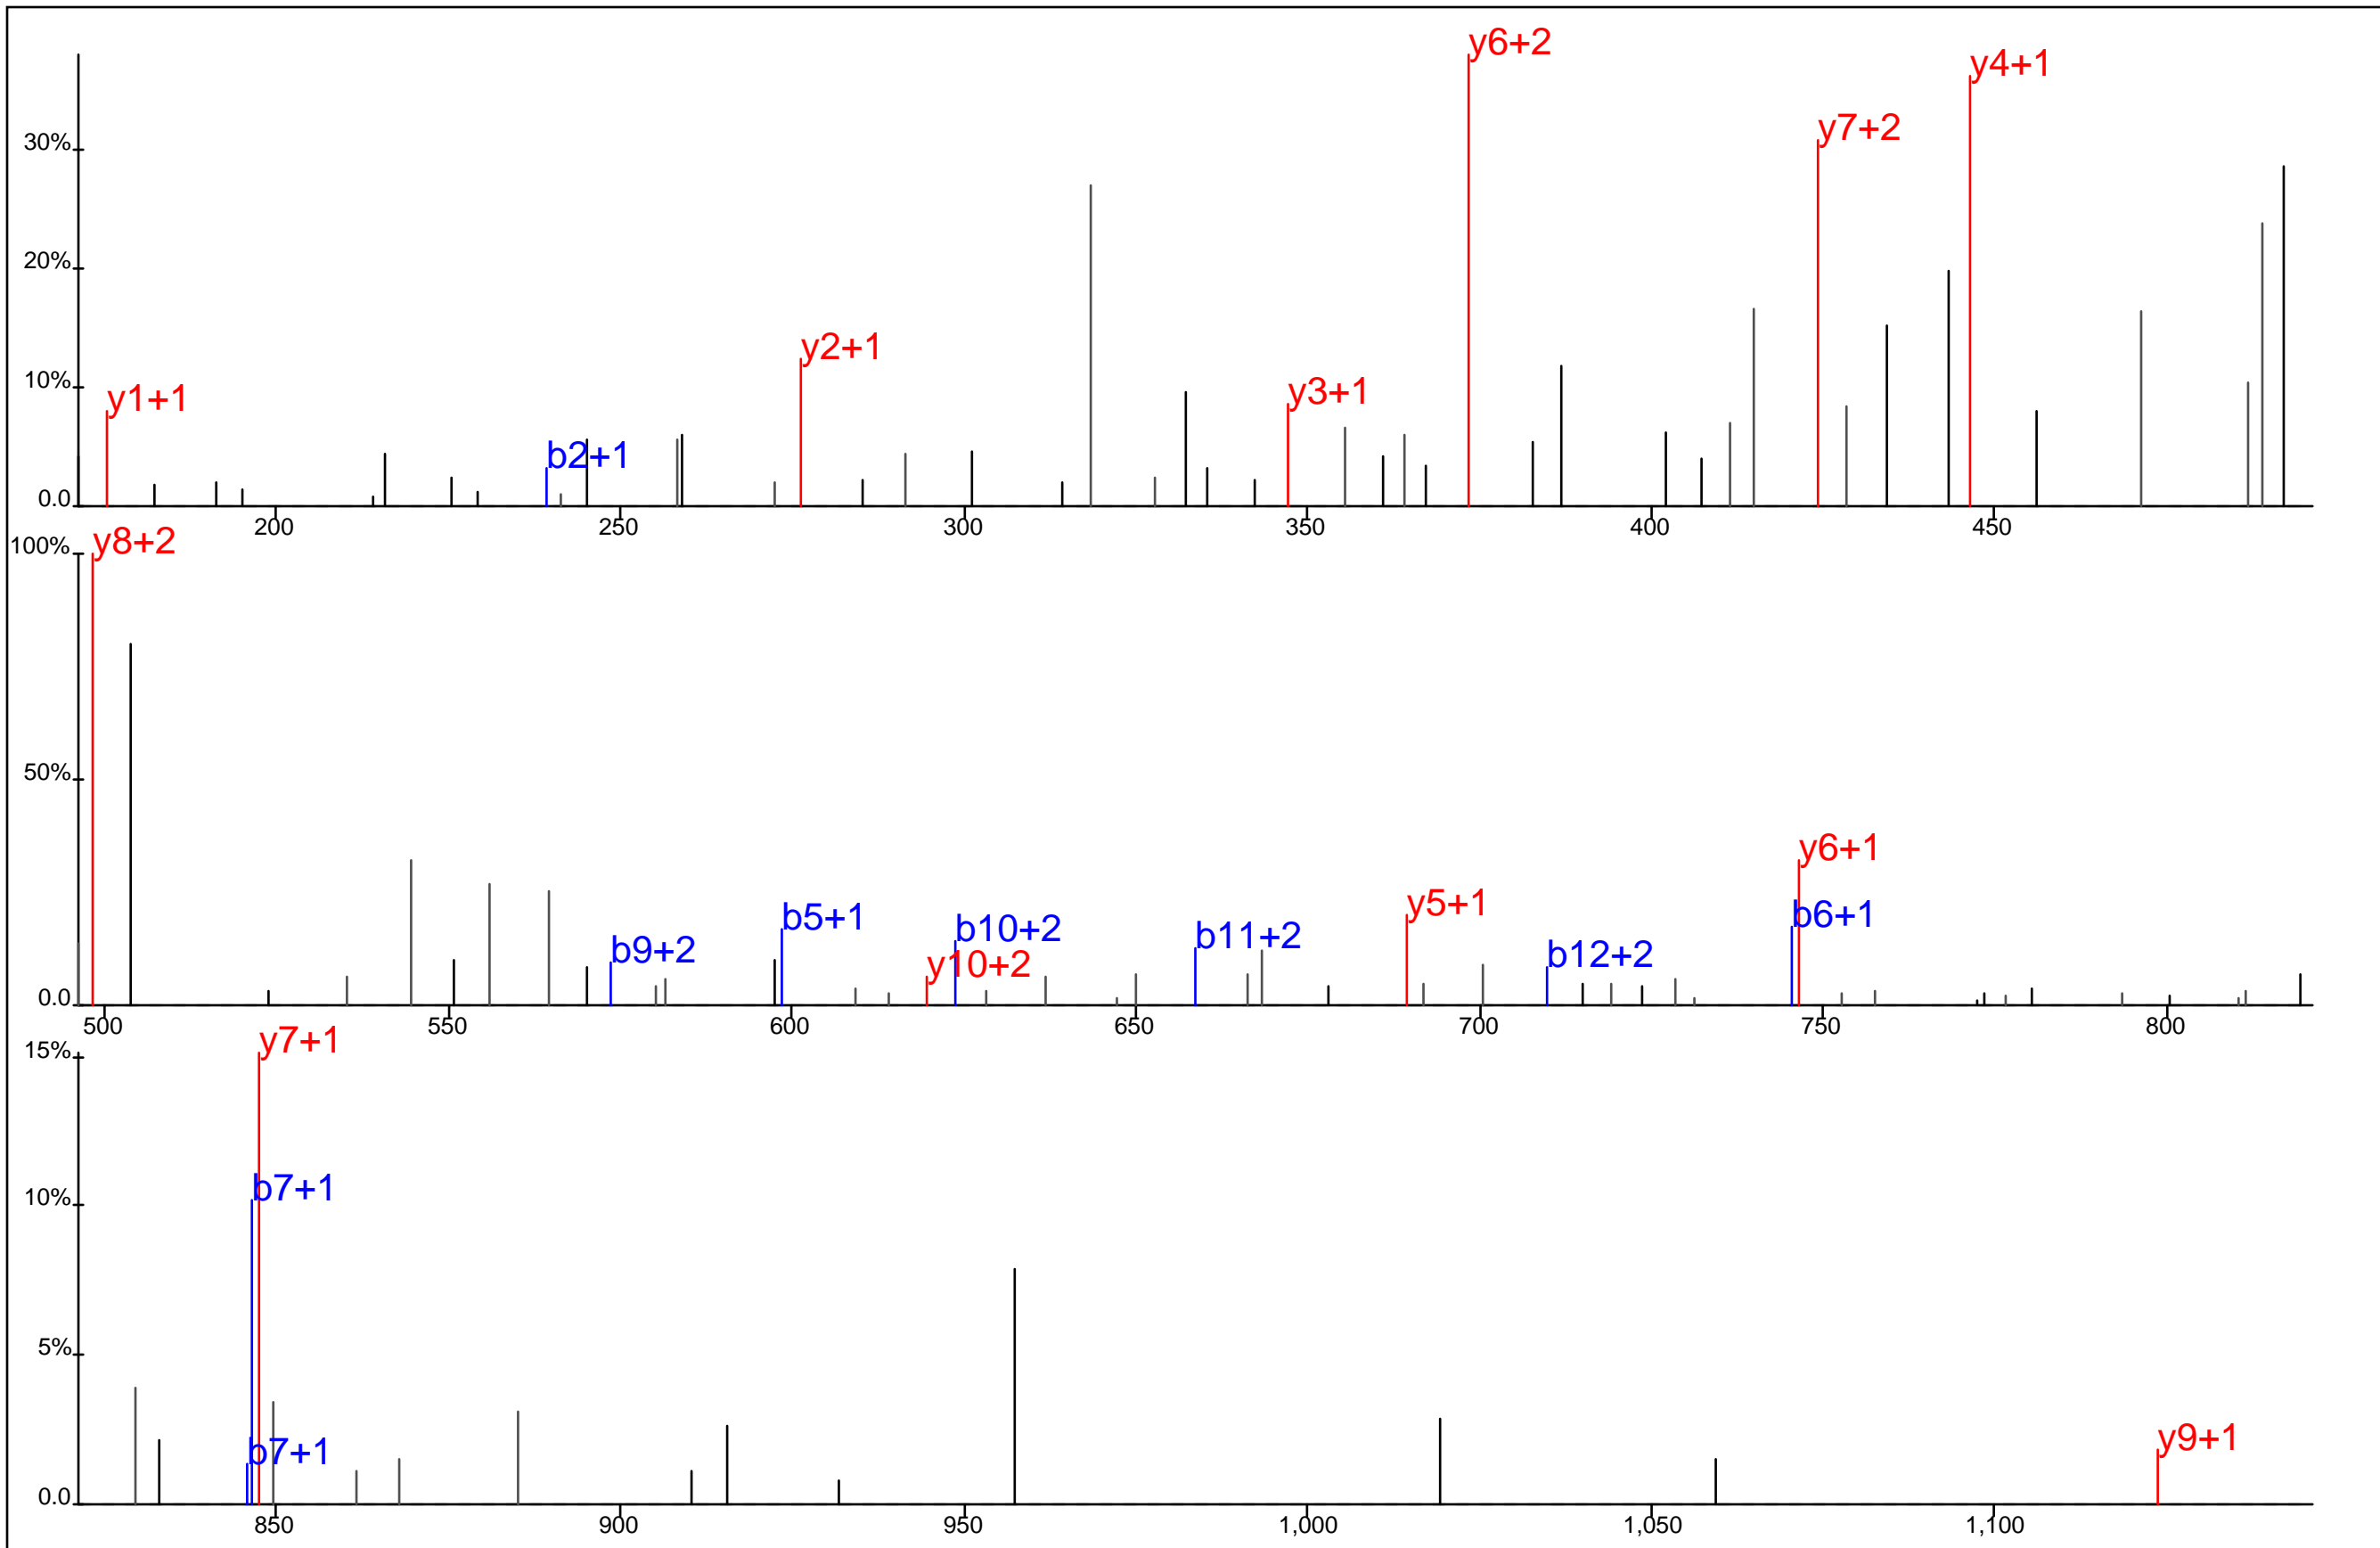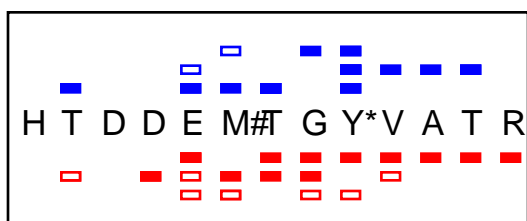

Protein Name: MAPK14  
 gi Accession: 0  
 Precursor Mass: 531.2082+3  
 Delta Mass: 0.370 ppm  
 XCorr: 52.73

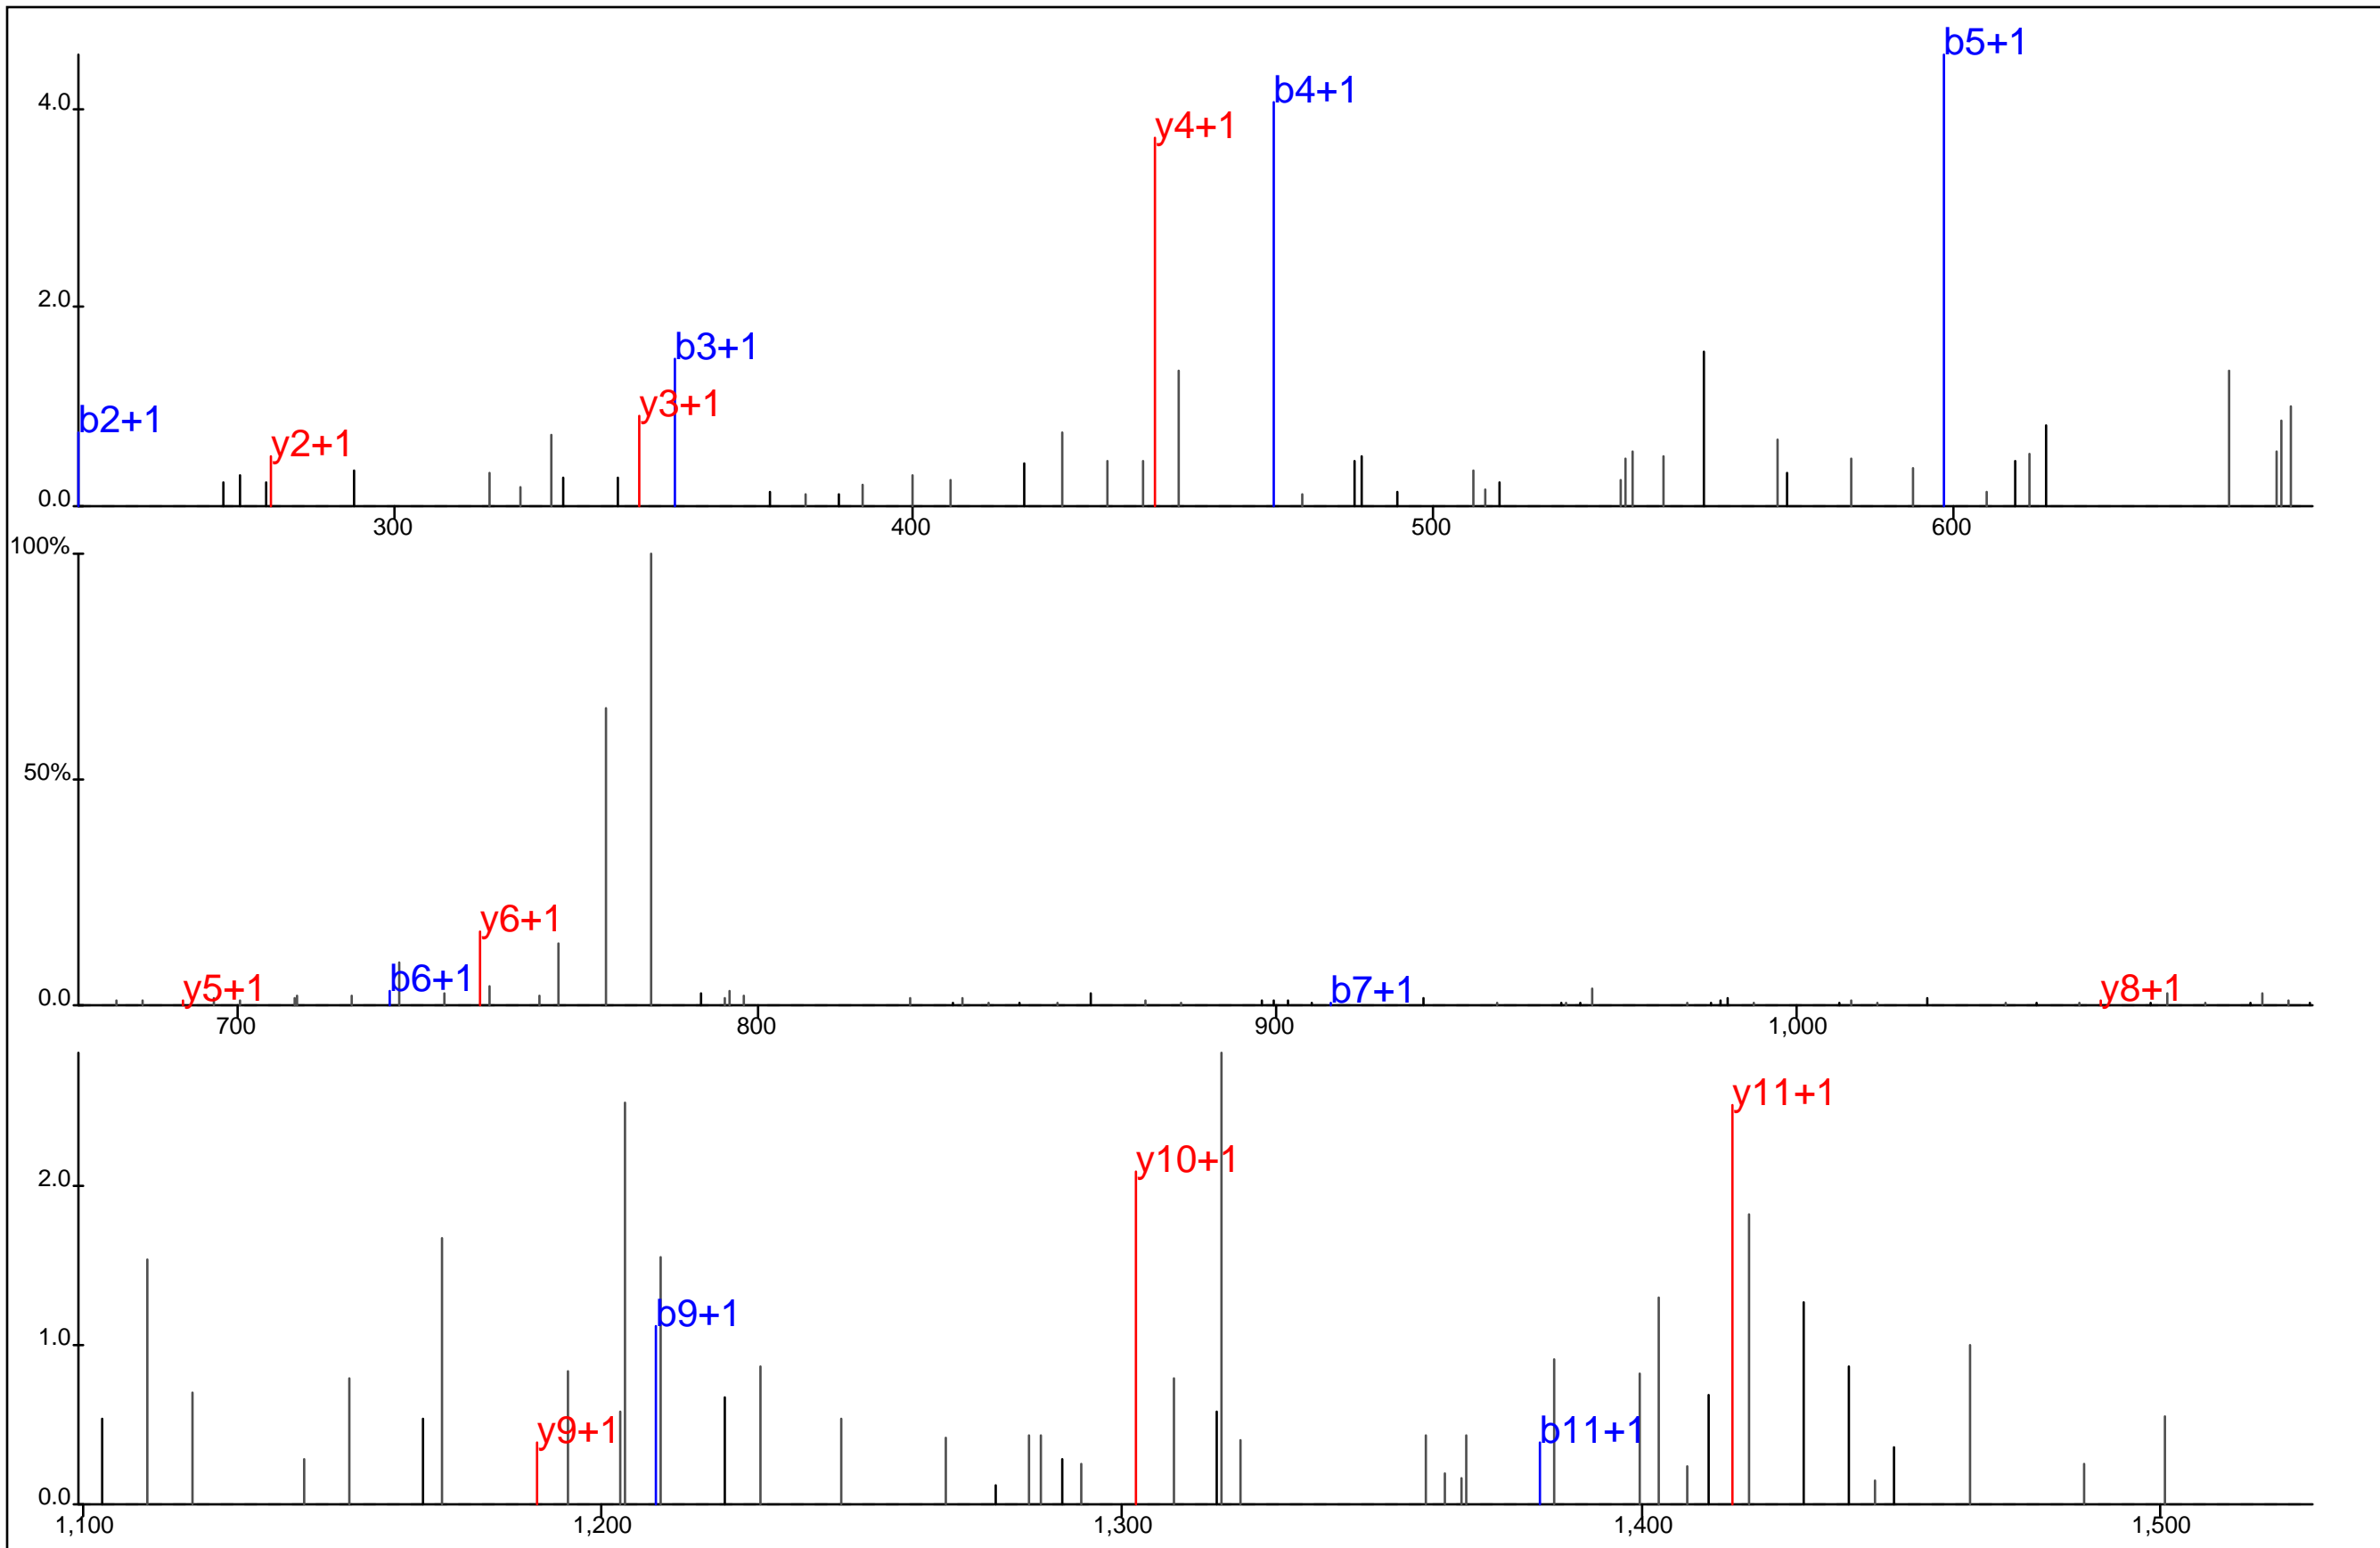

■ ■ ■ ■ ■ ■ ■ ■ ■ ■ ■ ■ ■ ■ ■ ■ ■ ■ ■ ■
  
 H T D D E M T\* G Y\* V A T R
   
□ □ □ □ □ □ □ □ □ □ □ □ □ □ □ □ □ □ □ □

Protein Name: MAPK14  
 gi Accession: 0  
 Precursor Mass: 828.2939+2  
 Delta Mass: 0.138 ppm  
 XCorr: 60.79

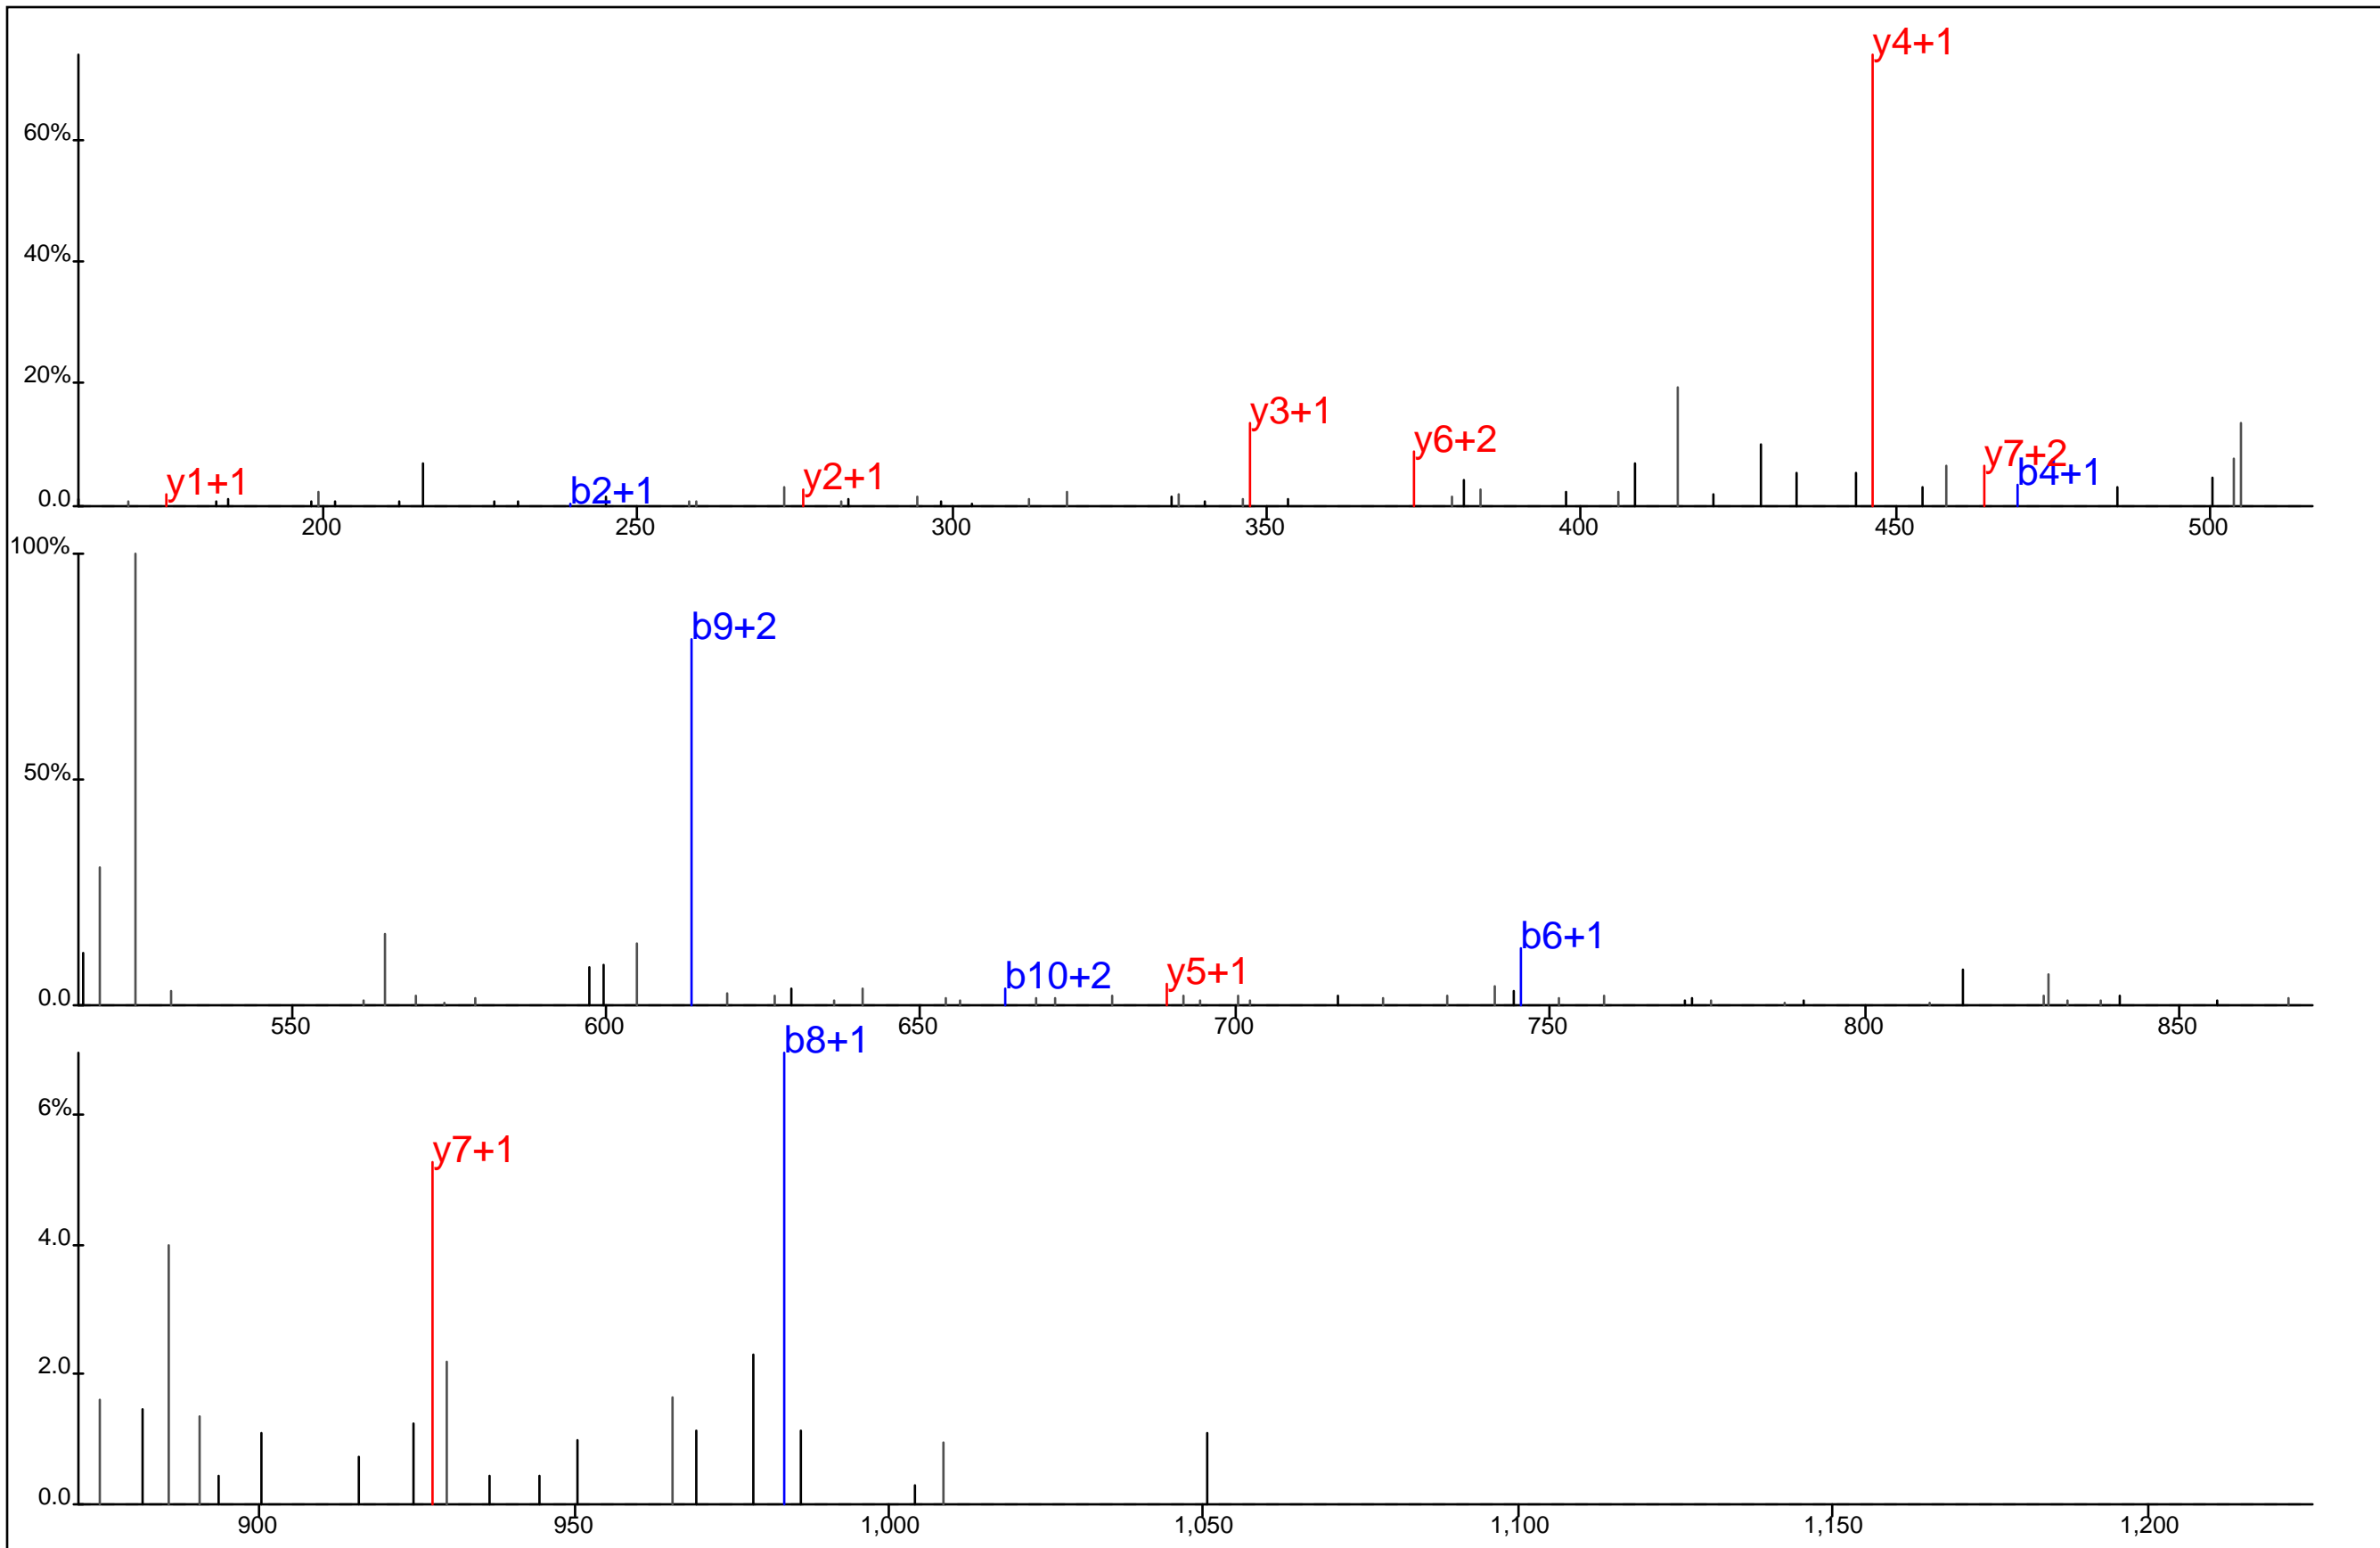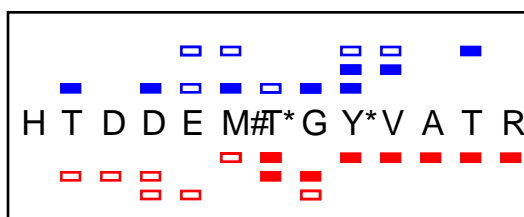

Protein Name: MAPK14  
 gi Accession: 0  
 Precursor Mass: 557.8629+3  
 Delta Mass: 0.939 ppm  
 XCorr: 26.32



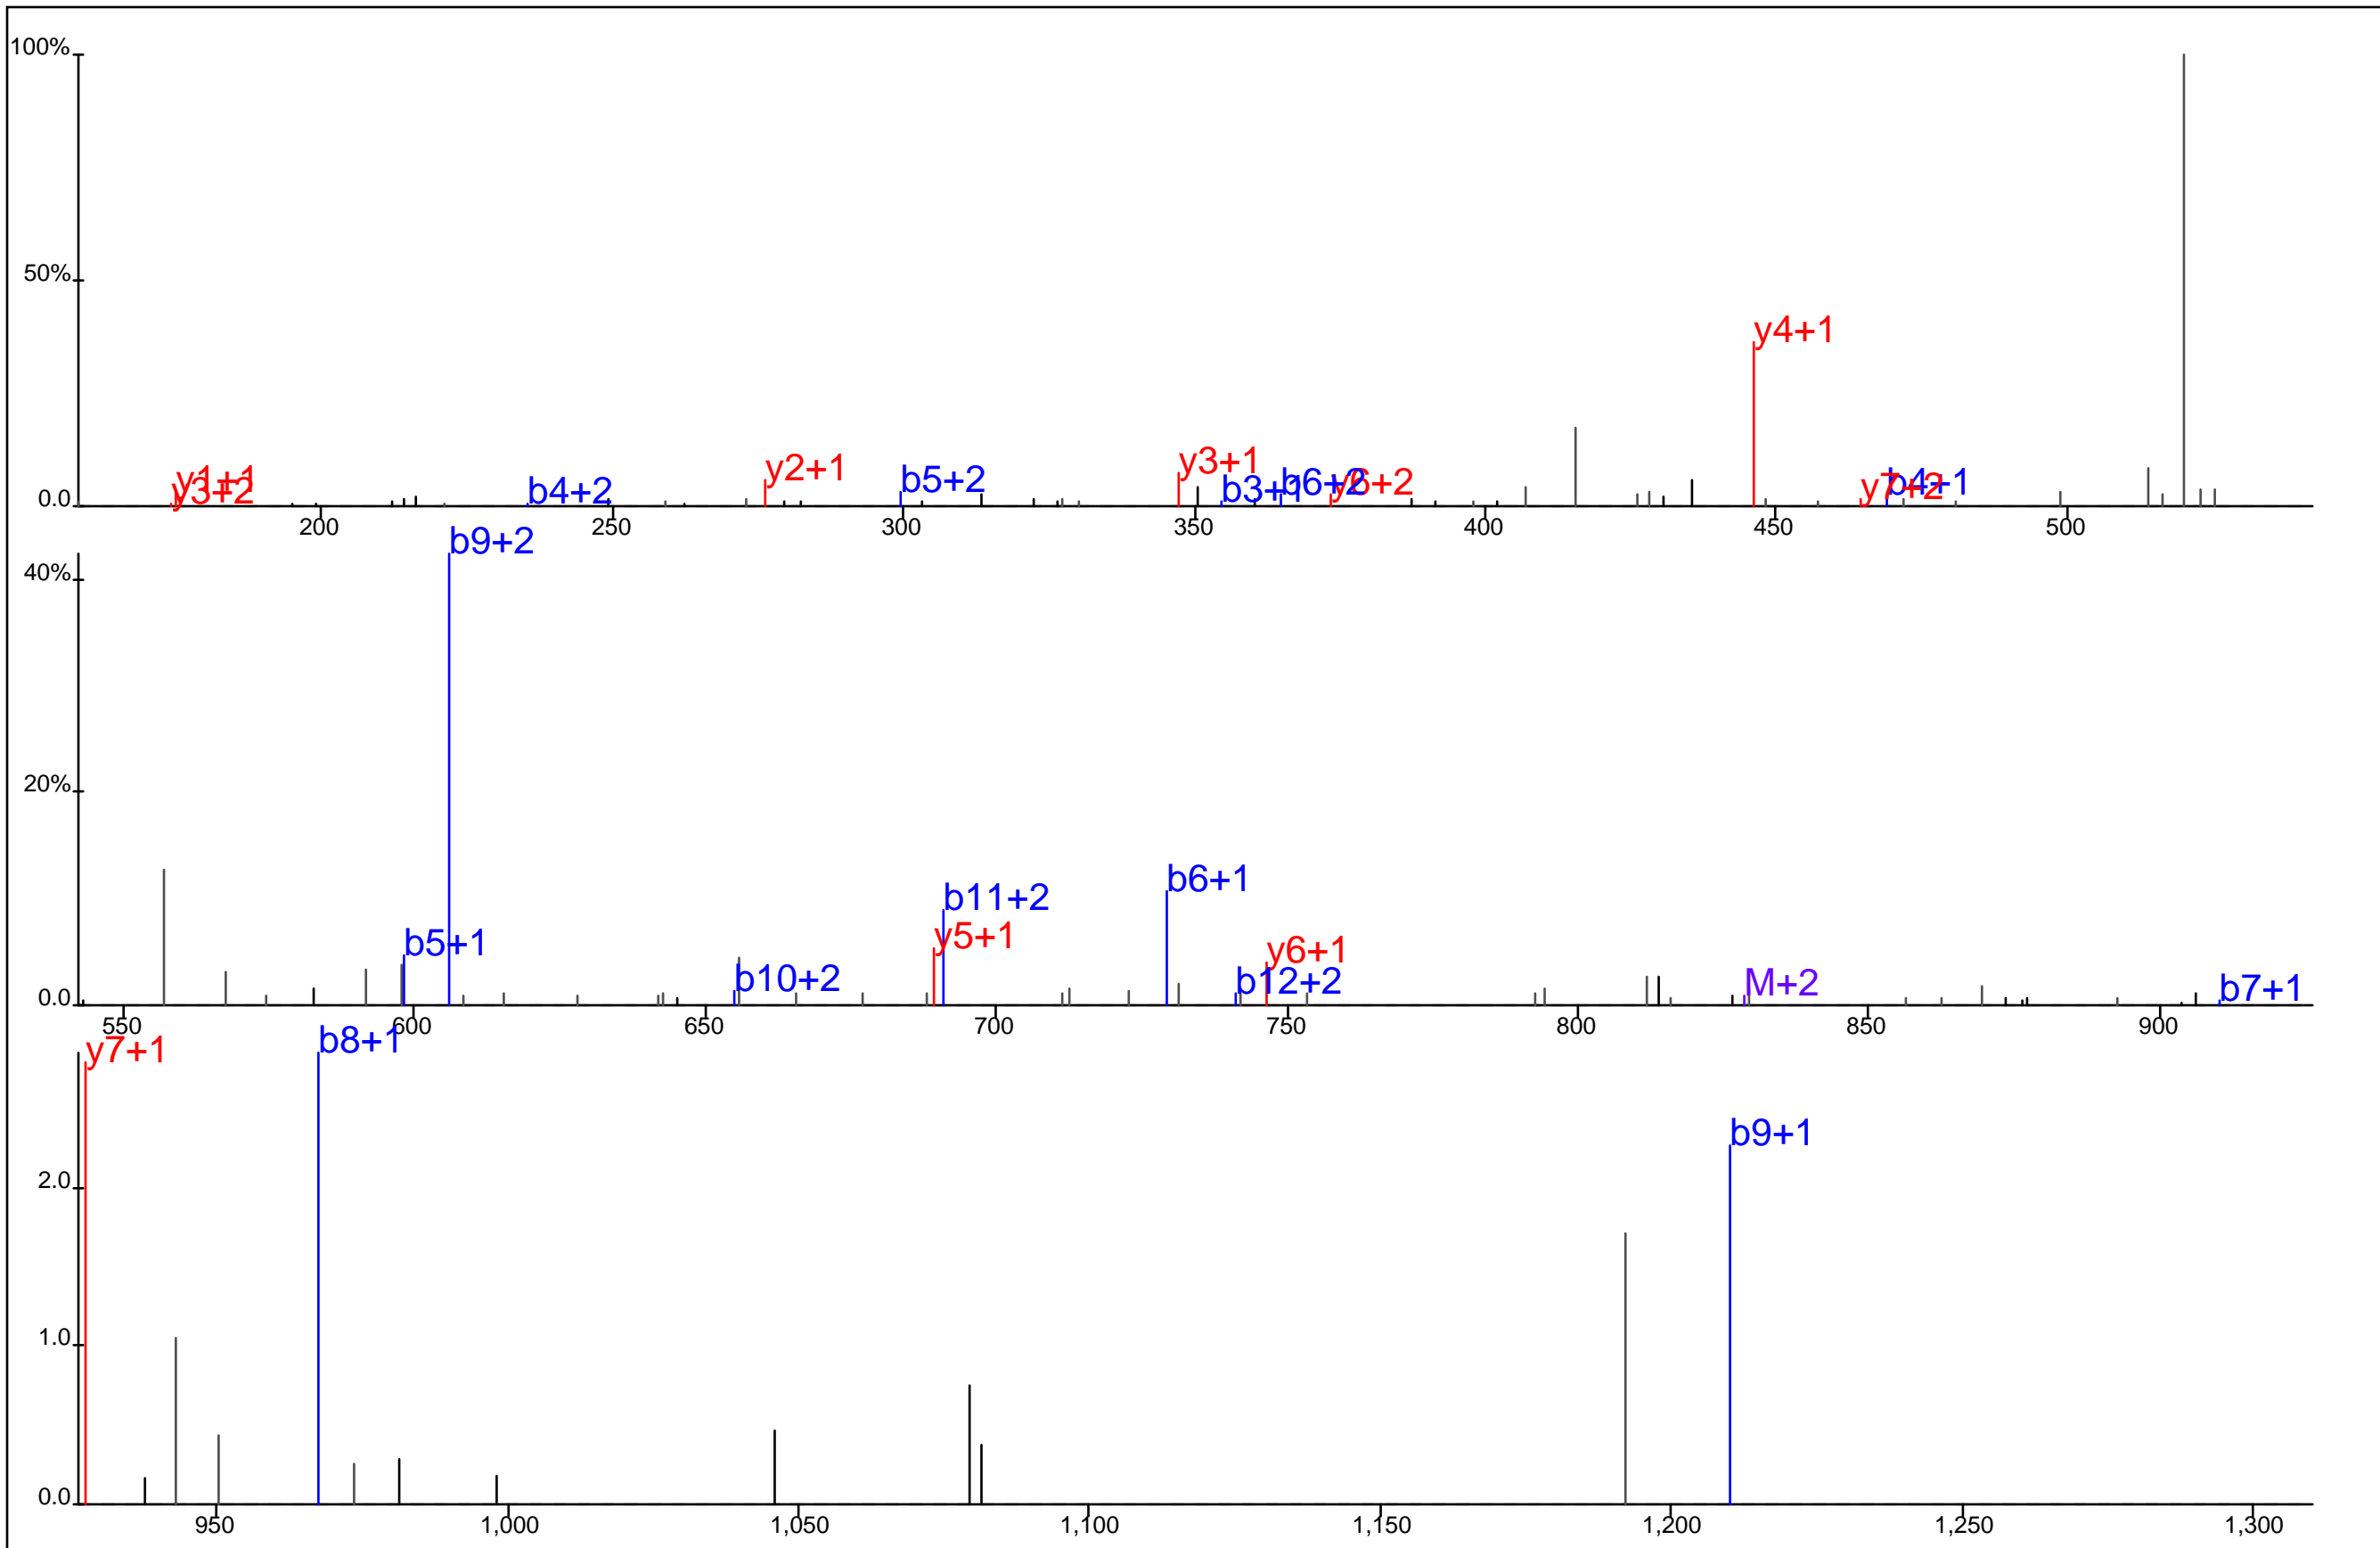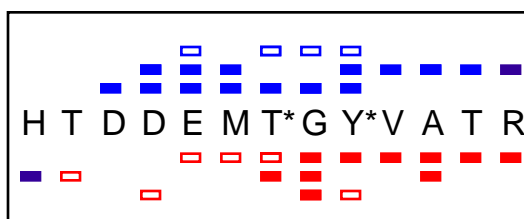

Protein Name: MAPK14  
 gi Accession: 0  
 Precursor Mass: 552.5314+3  
 Delta Mass: 0.772 ppm  
 XCorr: 33.63

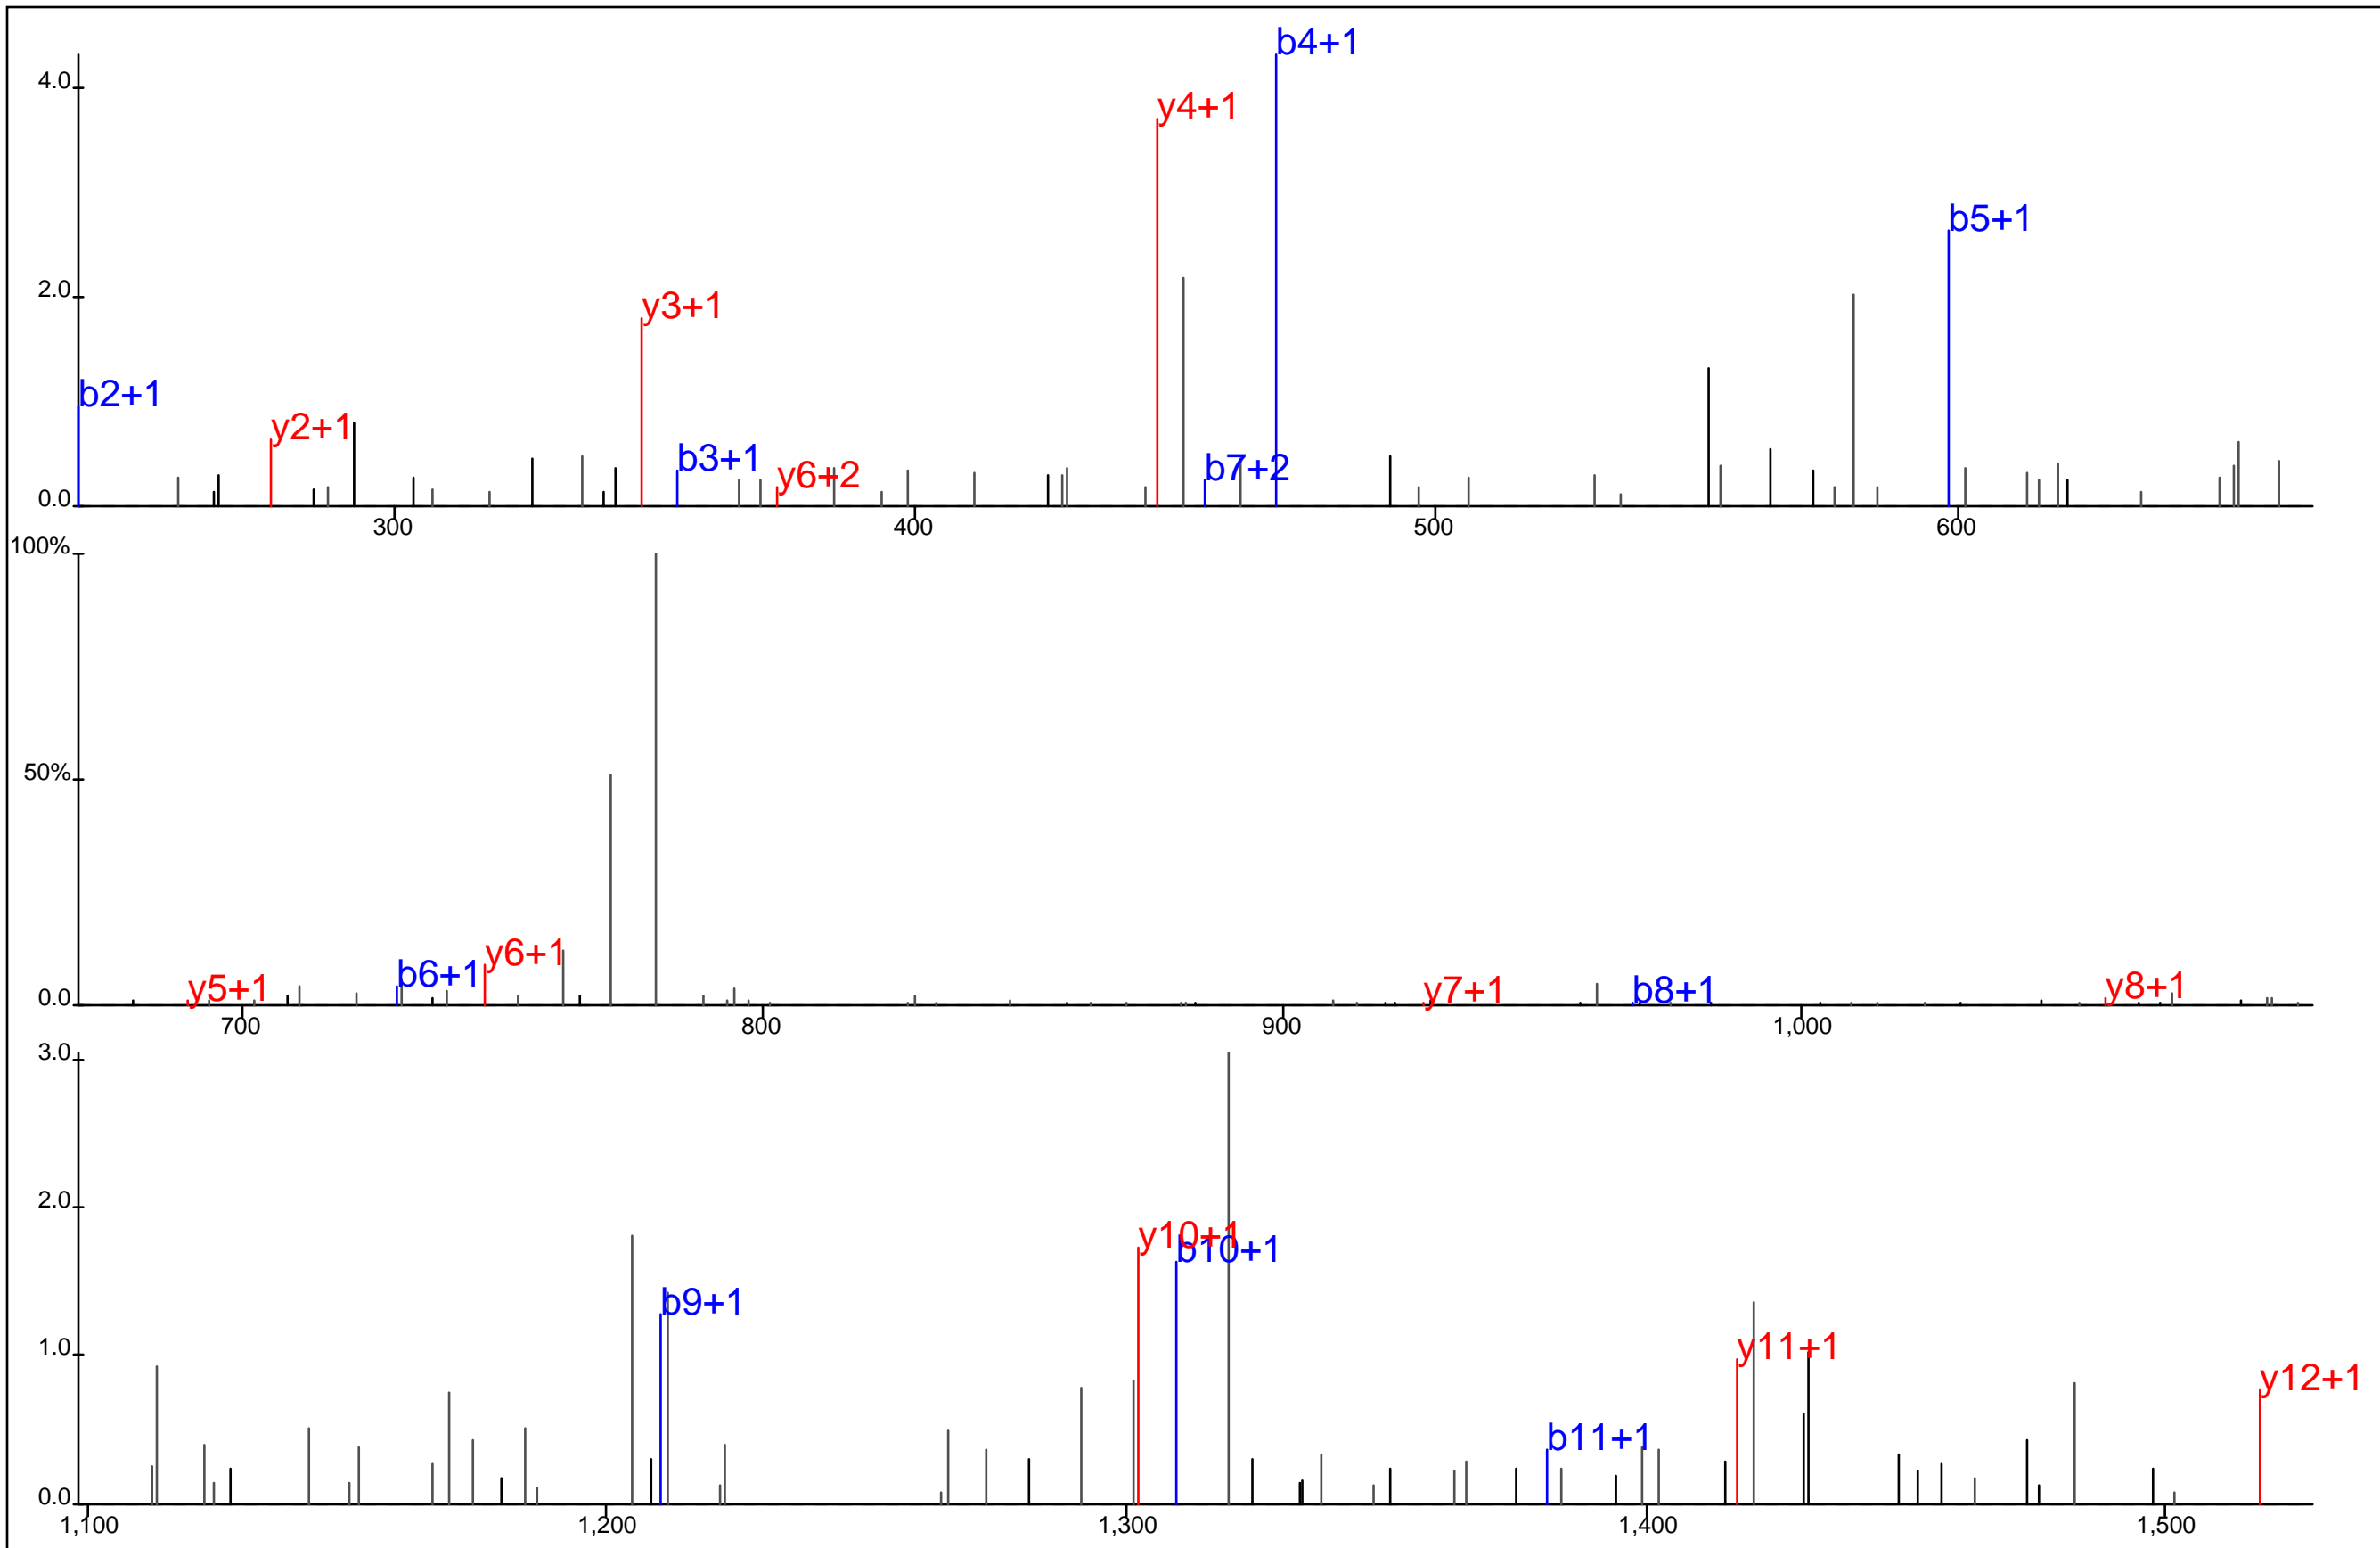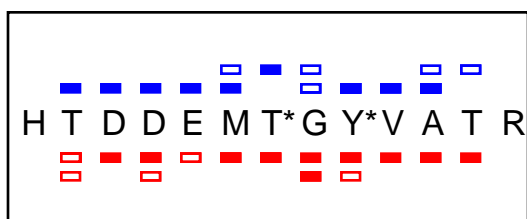

Protein Name: MAPK14  
 gi Accession: 0  
 Precursor Mass: 828.2924+2  
 Delta Mass: 2.055 ppm  
 XCorr: 53.1

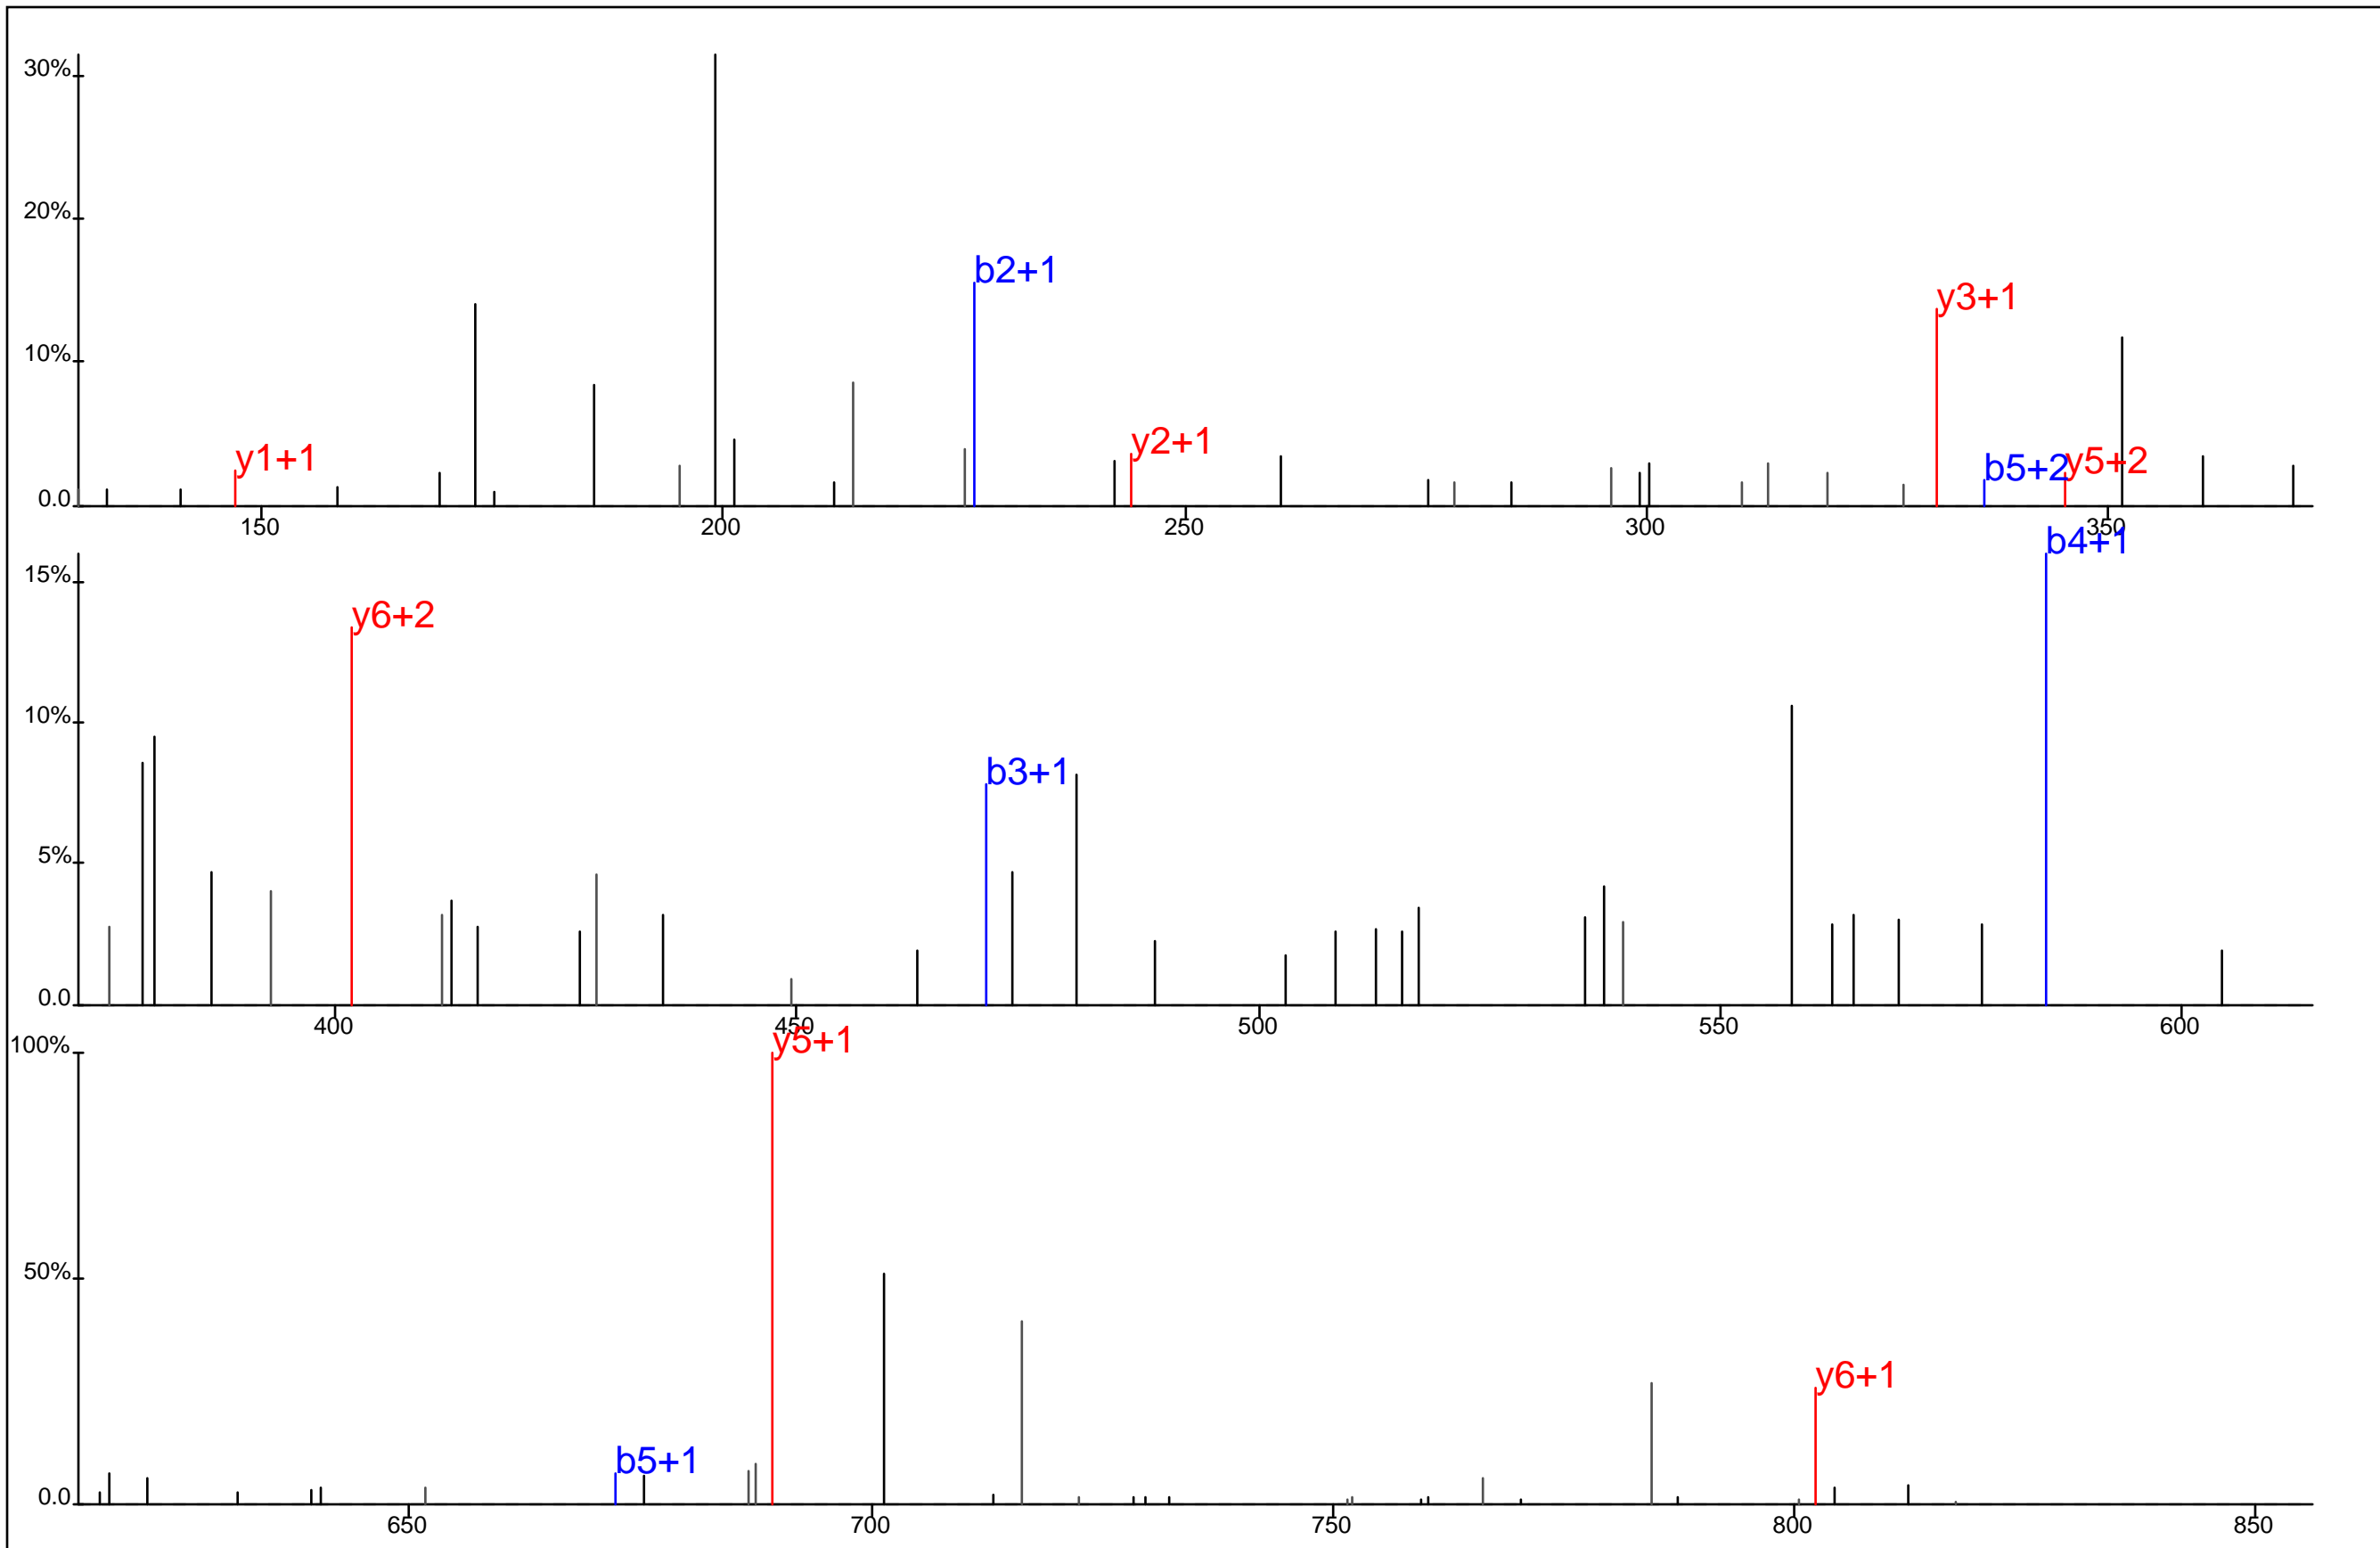

▢ ▢ ▢ ▢  
 L L Y\* D S P K  
▢ ▢ ▢ ▢ ▢

Protein Name: MAPKAPK3  
 gi Accession: 0  
 Precursor Mass: 458.2151+2  
 Delta Mass: 0.586 ppm  
 XCorr: 22.24

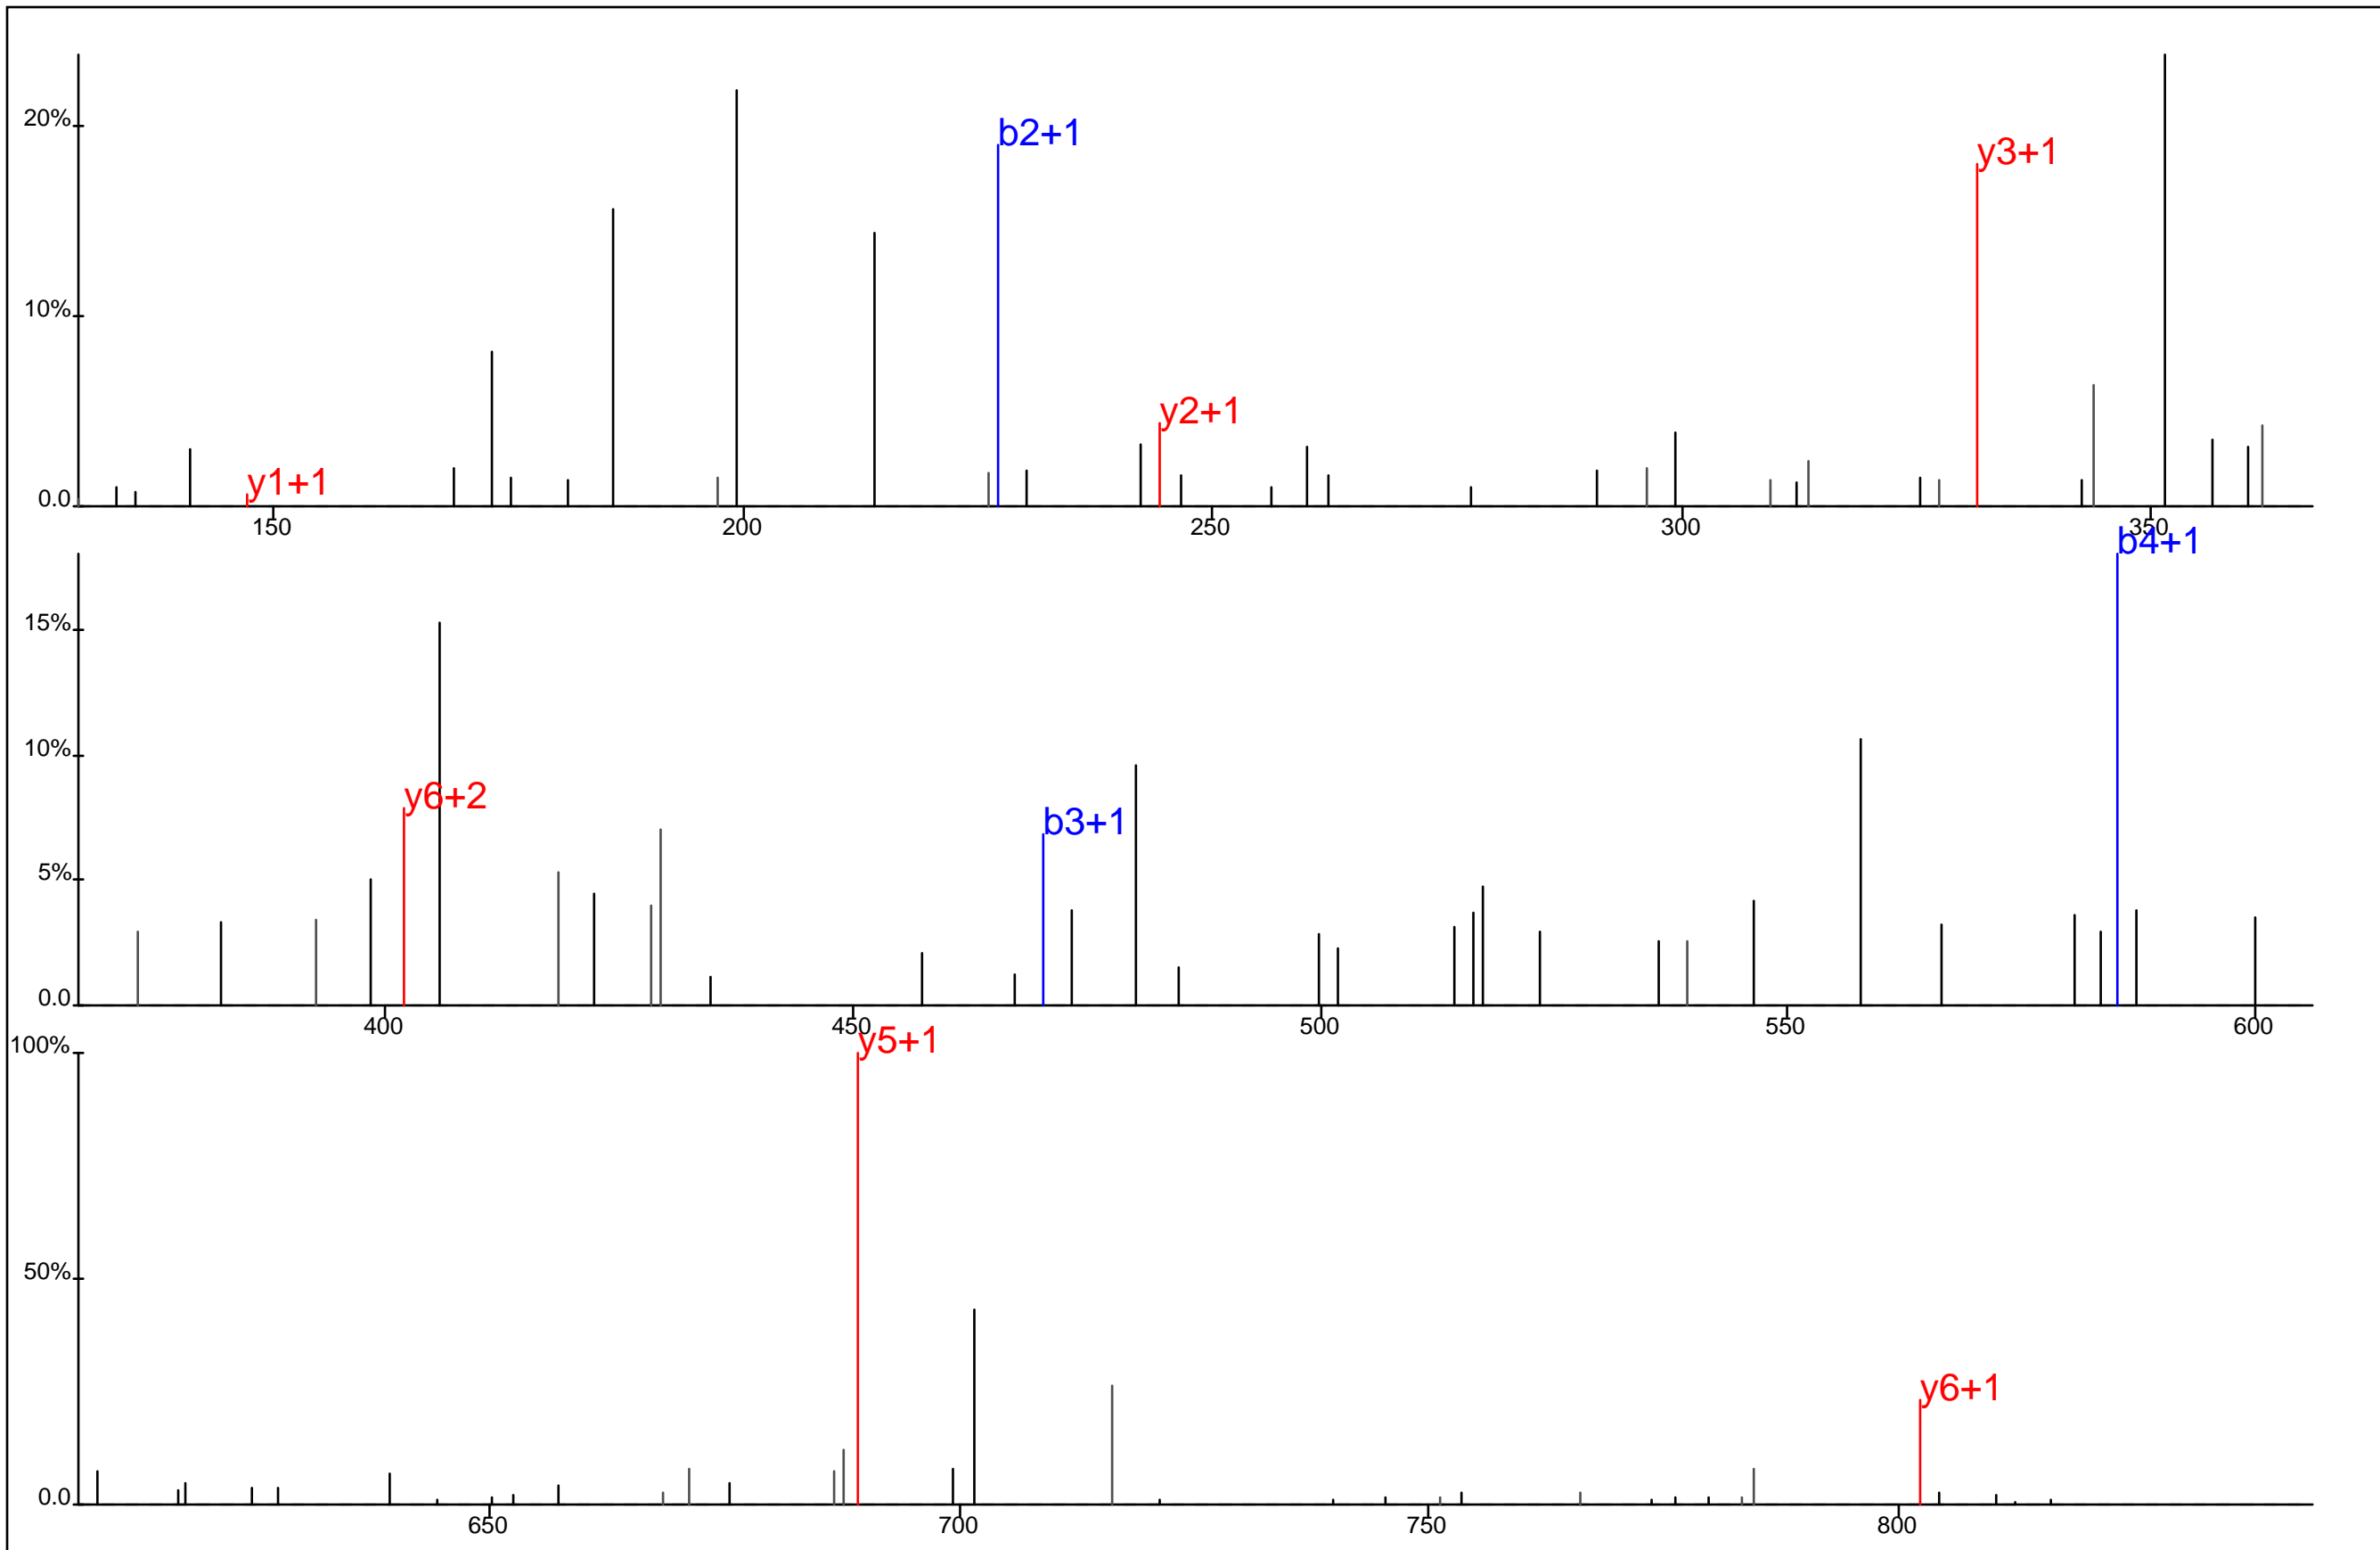

□ □ □ □ □  
 L L Y\* D S P K  
■ ■ ■ ■ ■ ■

Protein Name: MAPKAPK3  
 gi Accession: 0  
 Precursor Mass: 458.2148+2  
 Delta Mass: 0.120 ppm  
 XCorr: 20.39

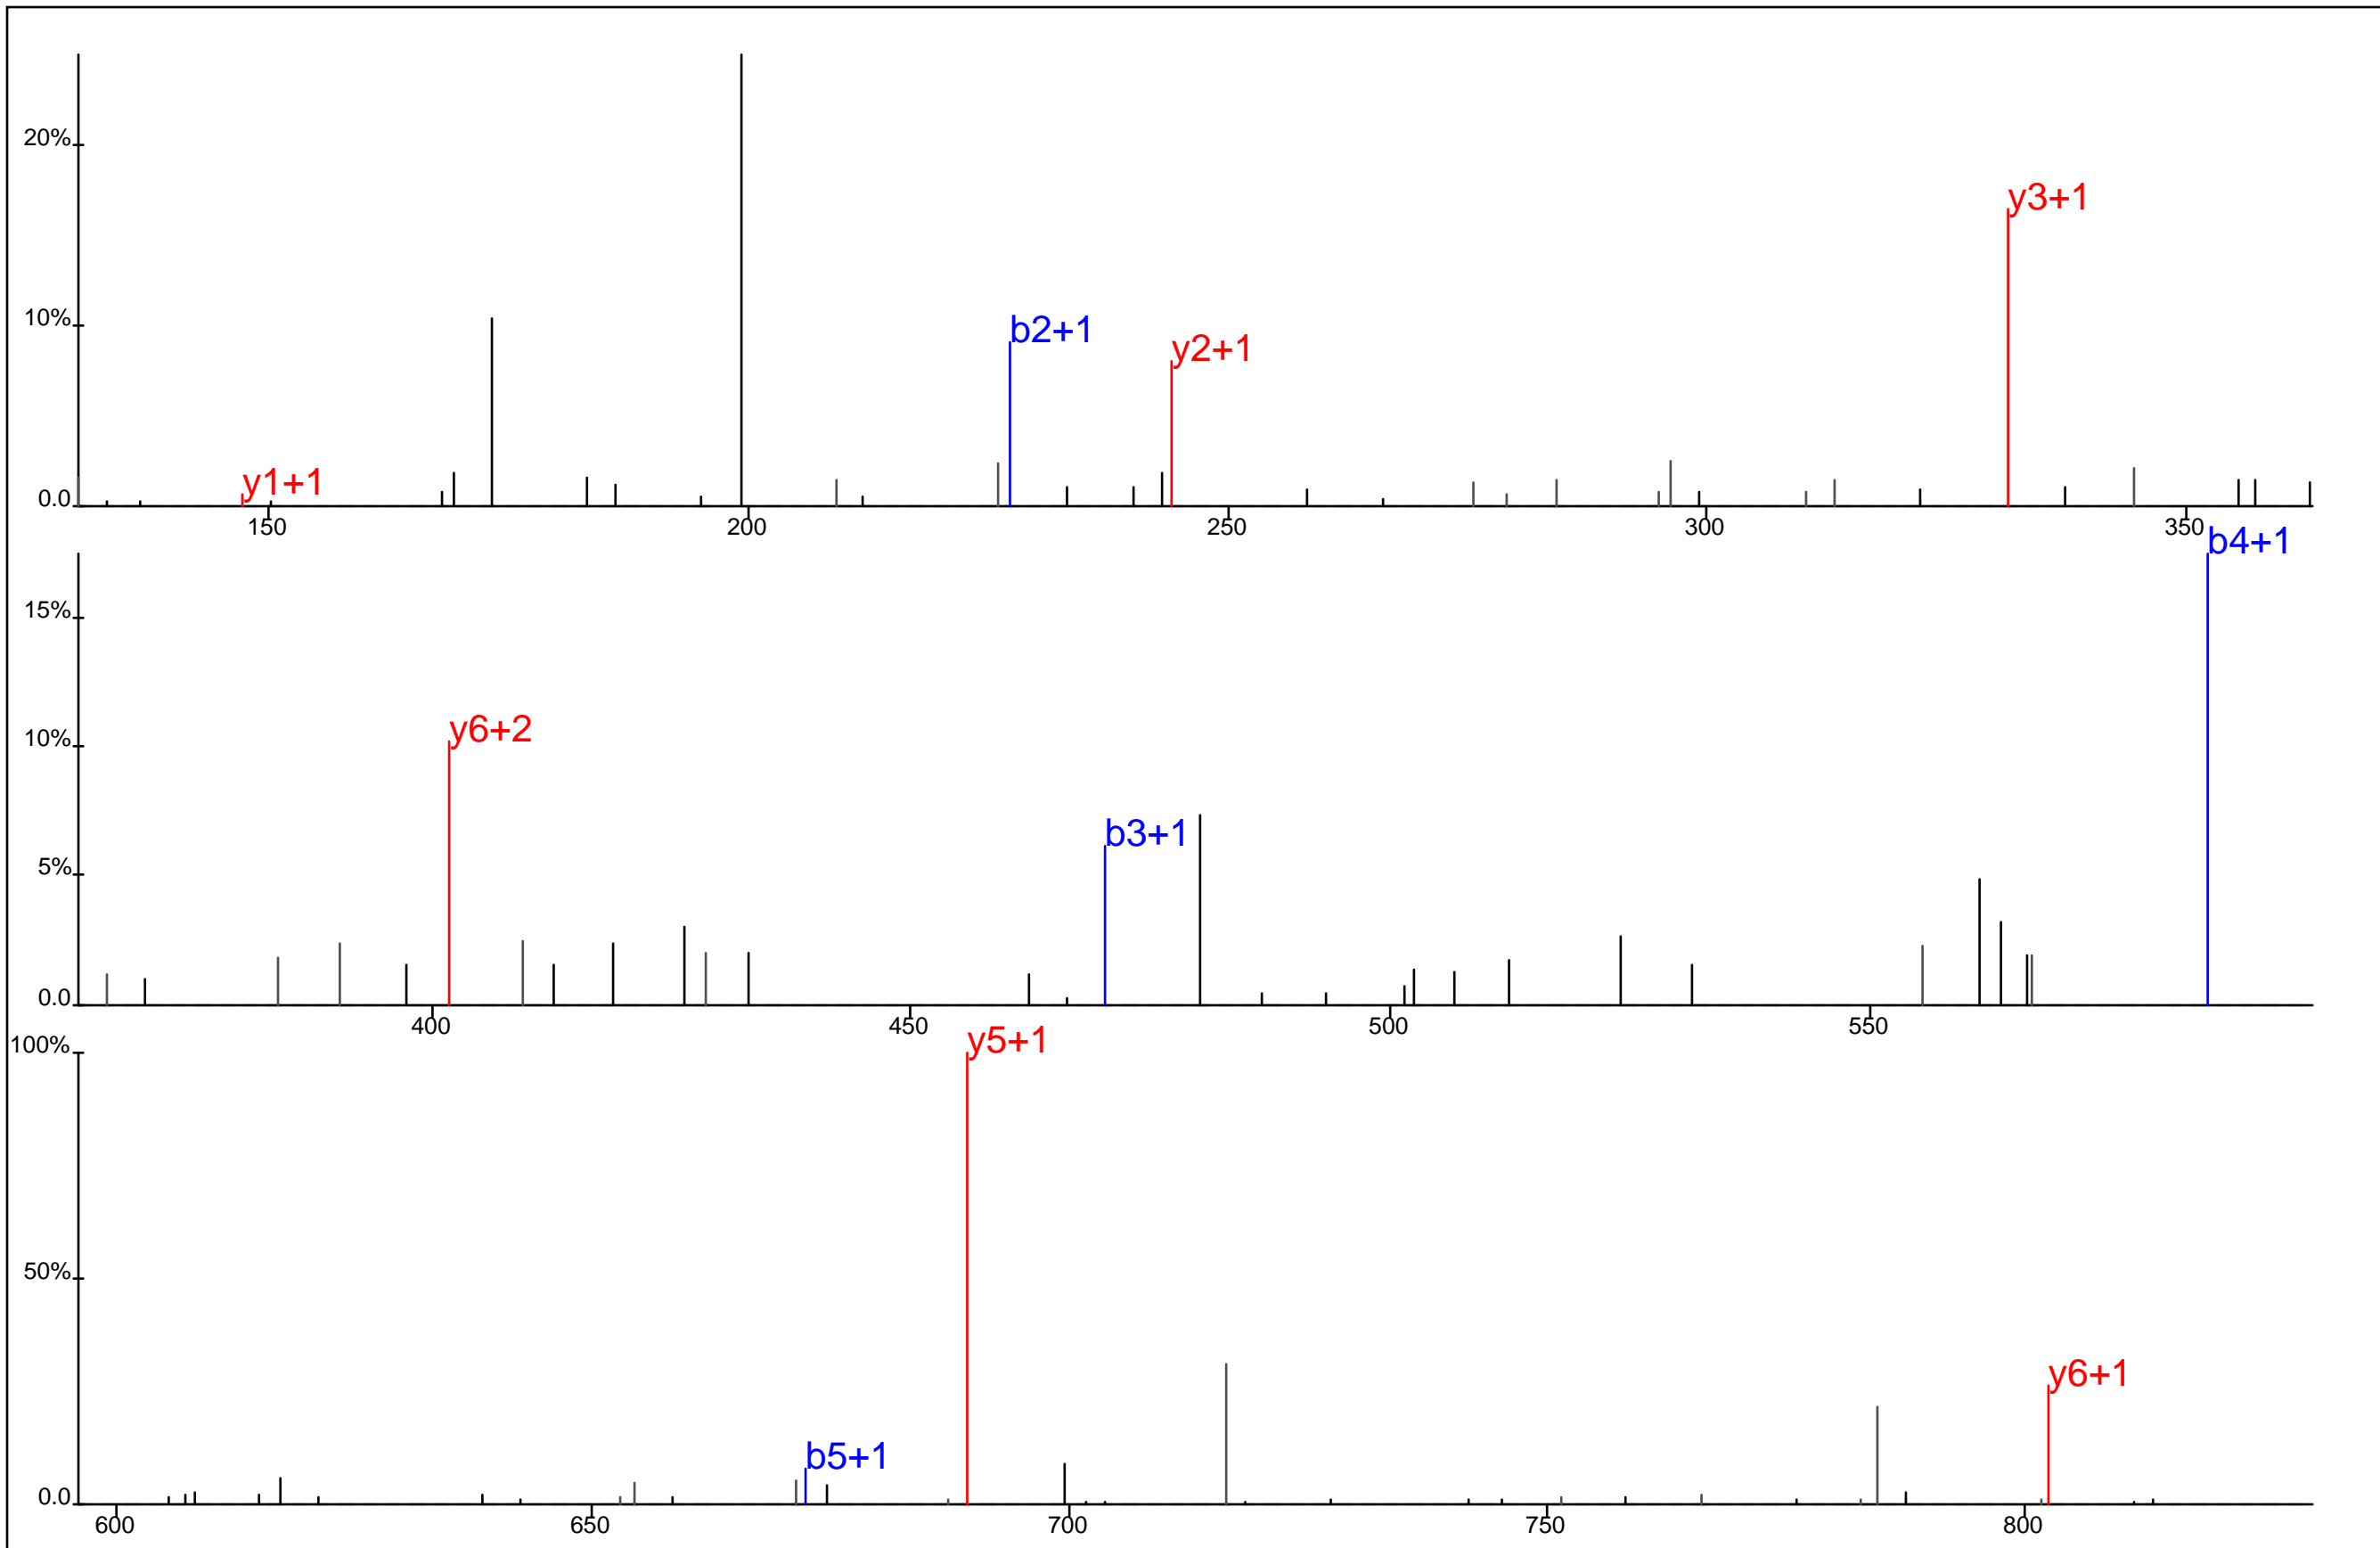

L L Y\* D S P K

Protein Name: MAPKAPK3  
 gi Accession: 0  
 Precursor Mass: 458.2148+2  
 Delta Mass: 0.081 ppm  
 XCorr: 23.75

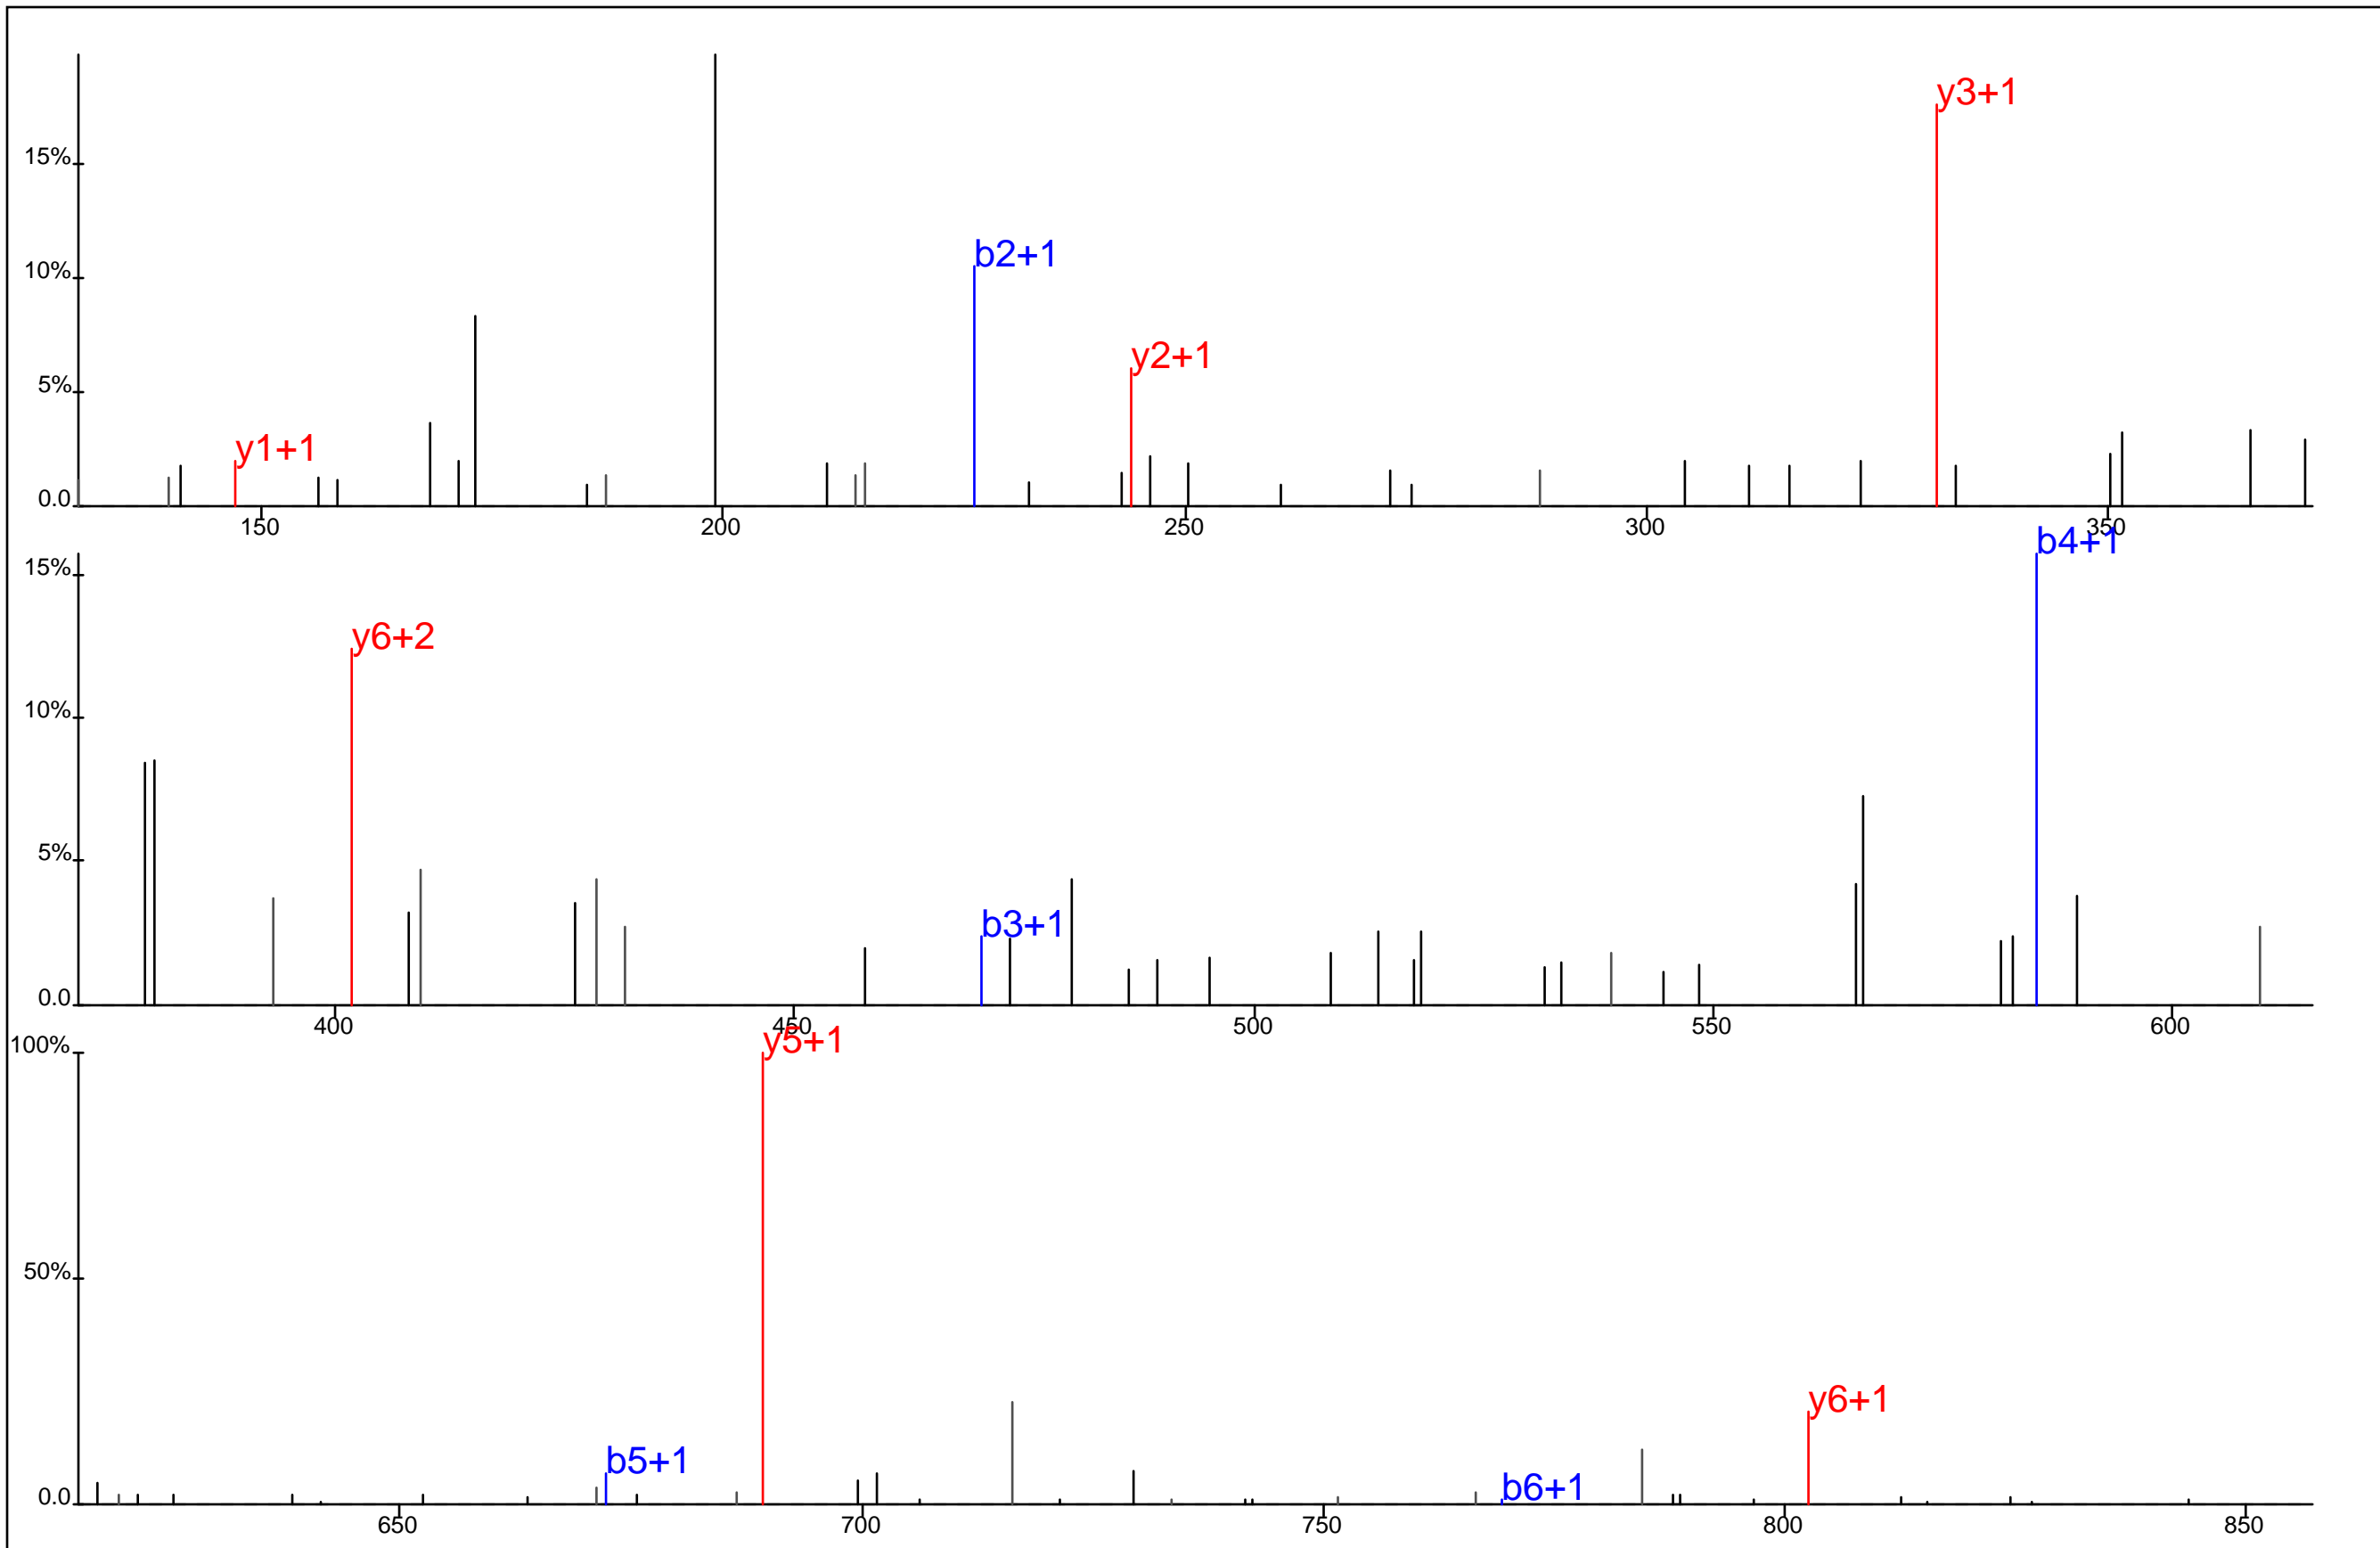

■ ■ ■ ■ ■  
 L L Y\* D S P K  
■ ■ ■ ■ ■

Protein Name: MAPKAPK3  
 gi Accession: 0  
 Precursor Mass: 458.2144+2  
 Delta Mass: 0.813 ppm  
 XCorr: 23.47

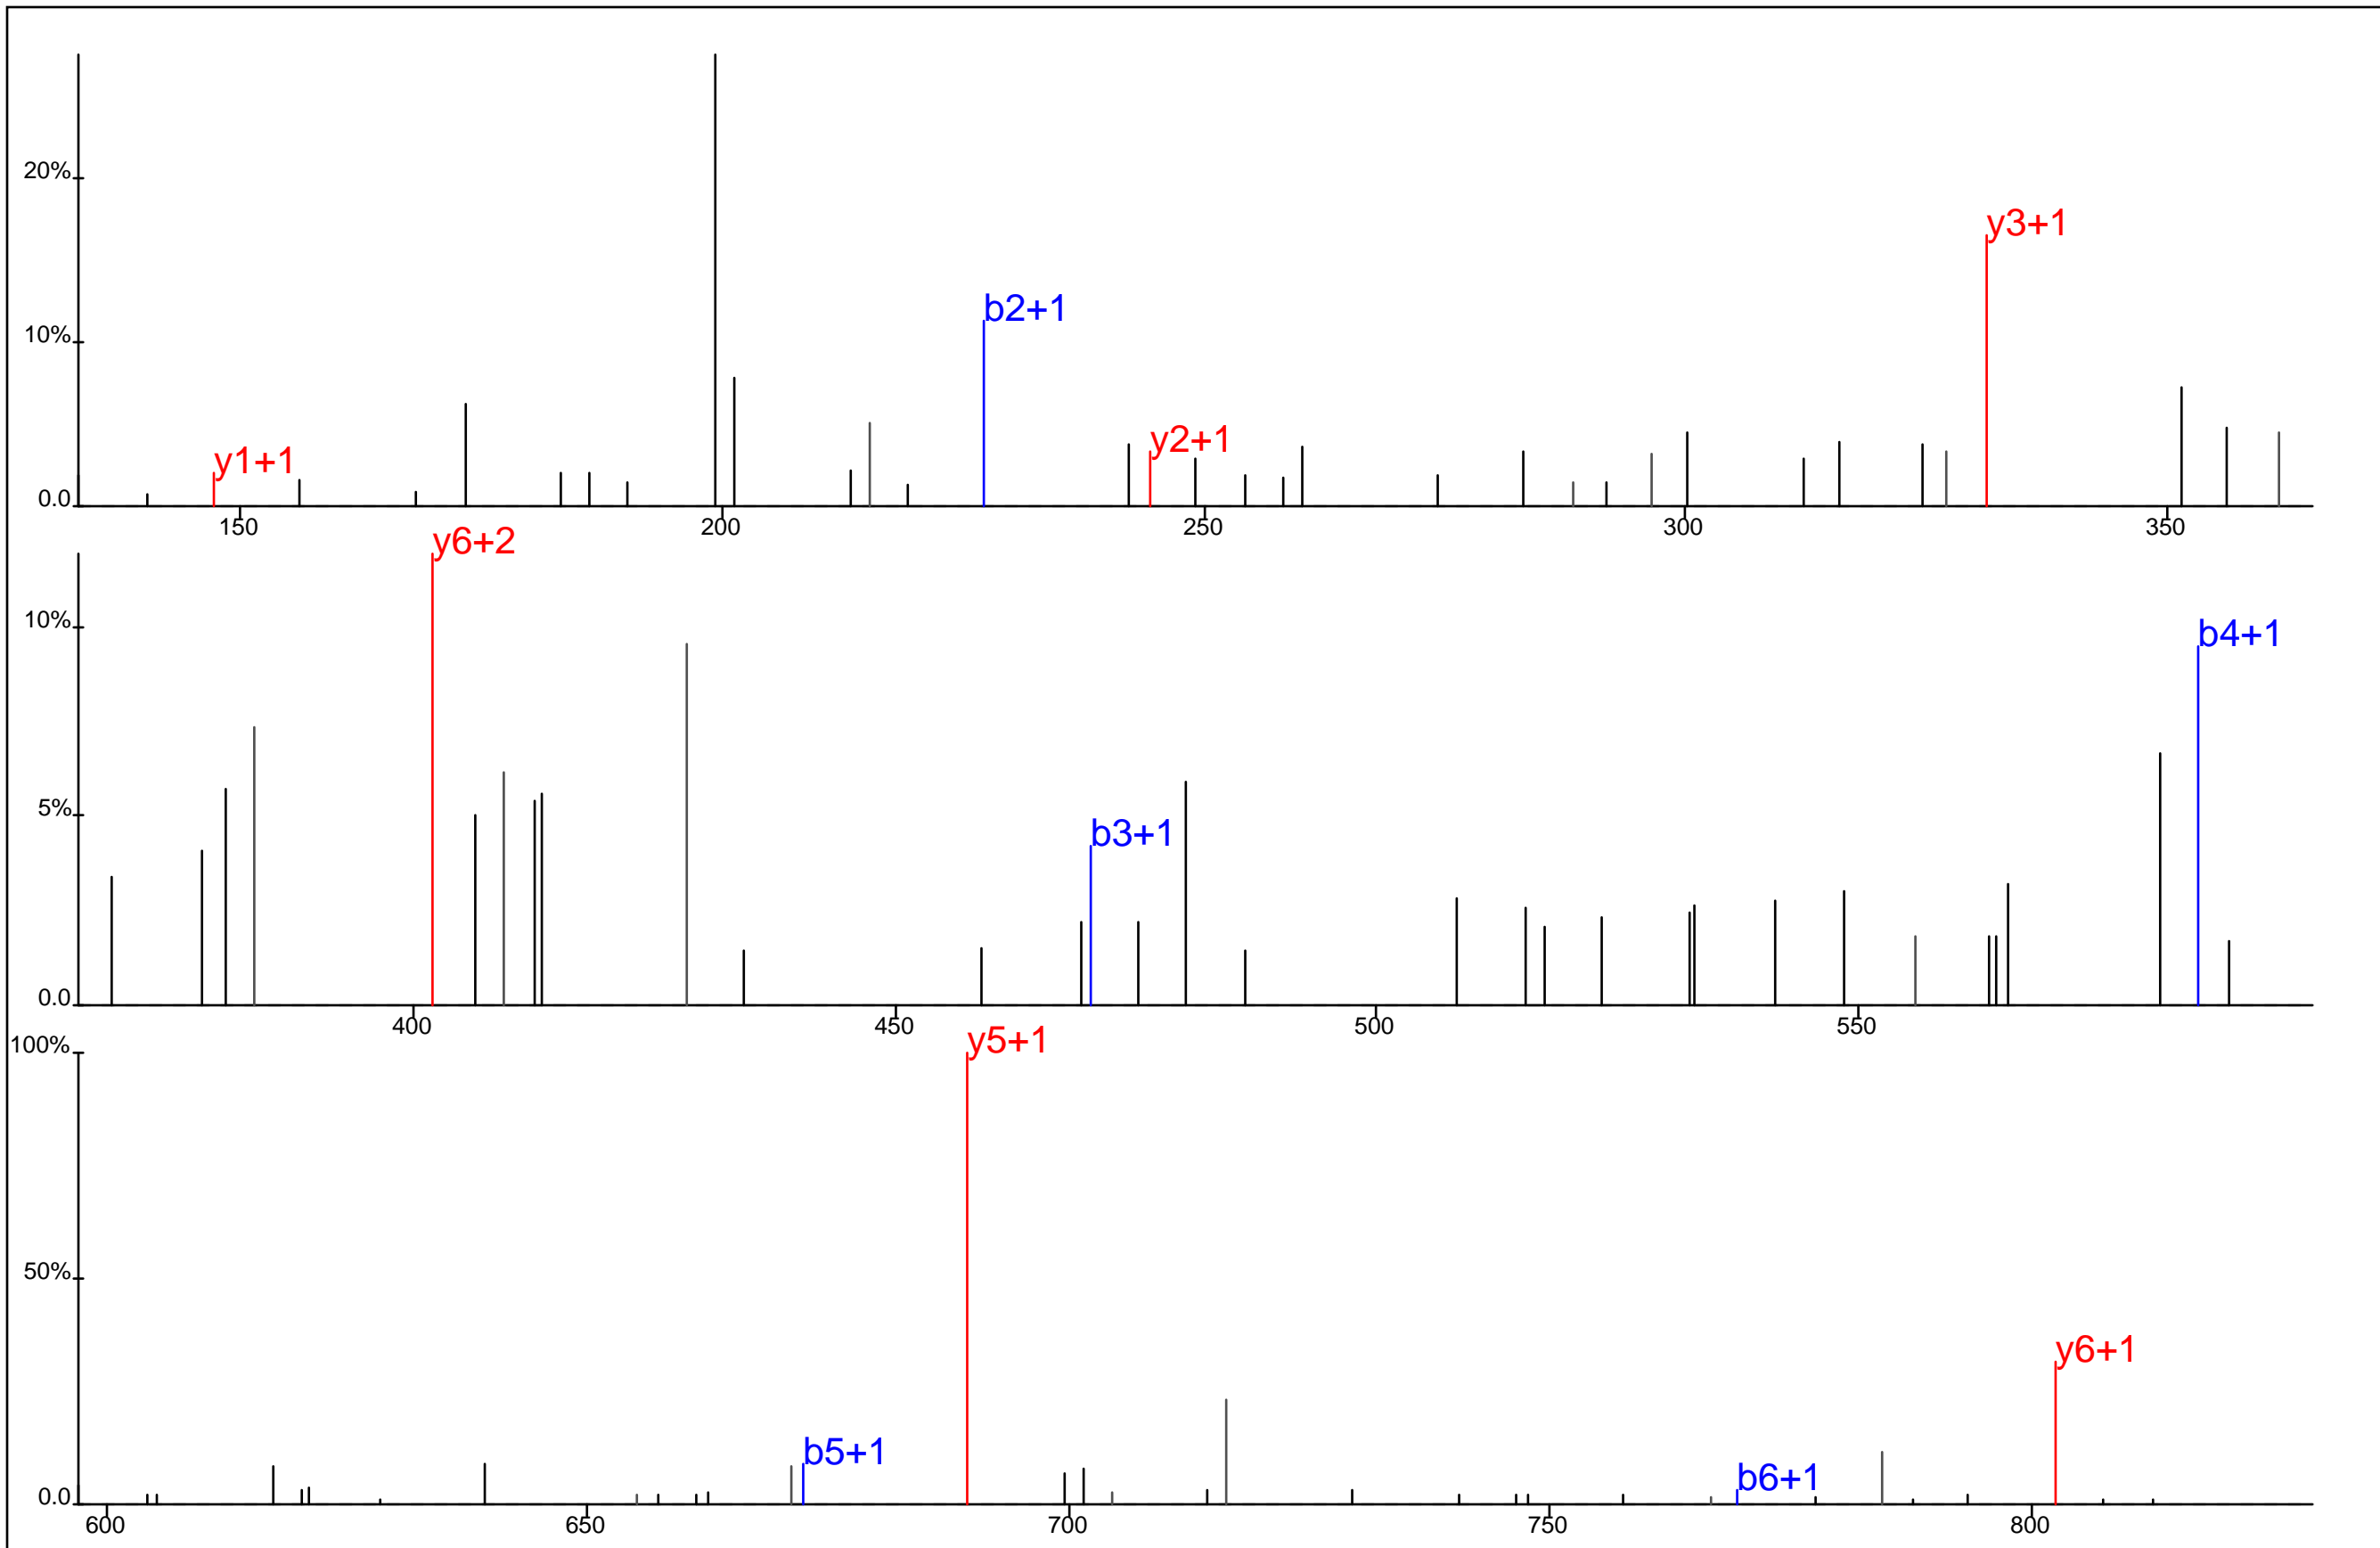

▢ ▢ ▢ ▢ ▢  
 L L Y\* D S P K  
▢ ▢ ▢ ▢ ▢

Protein Name: MAPKAPK3  
 gi Accession: 0  
 Precursor Mass: 458.2154+2  
 Delta Mass: 1.387 ppm  
 XCorr: 26.66

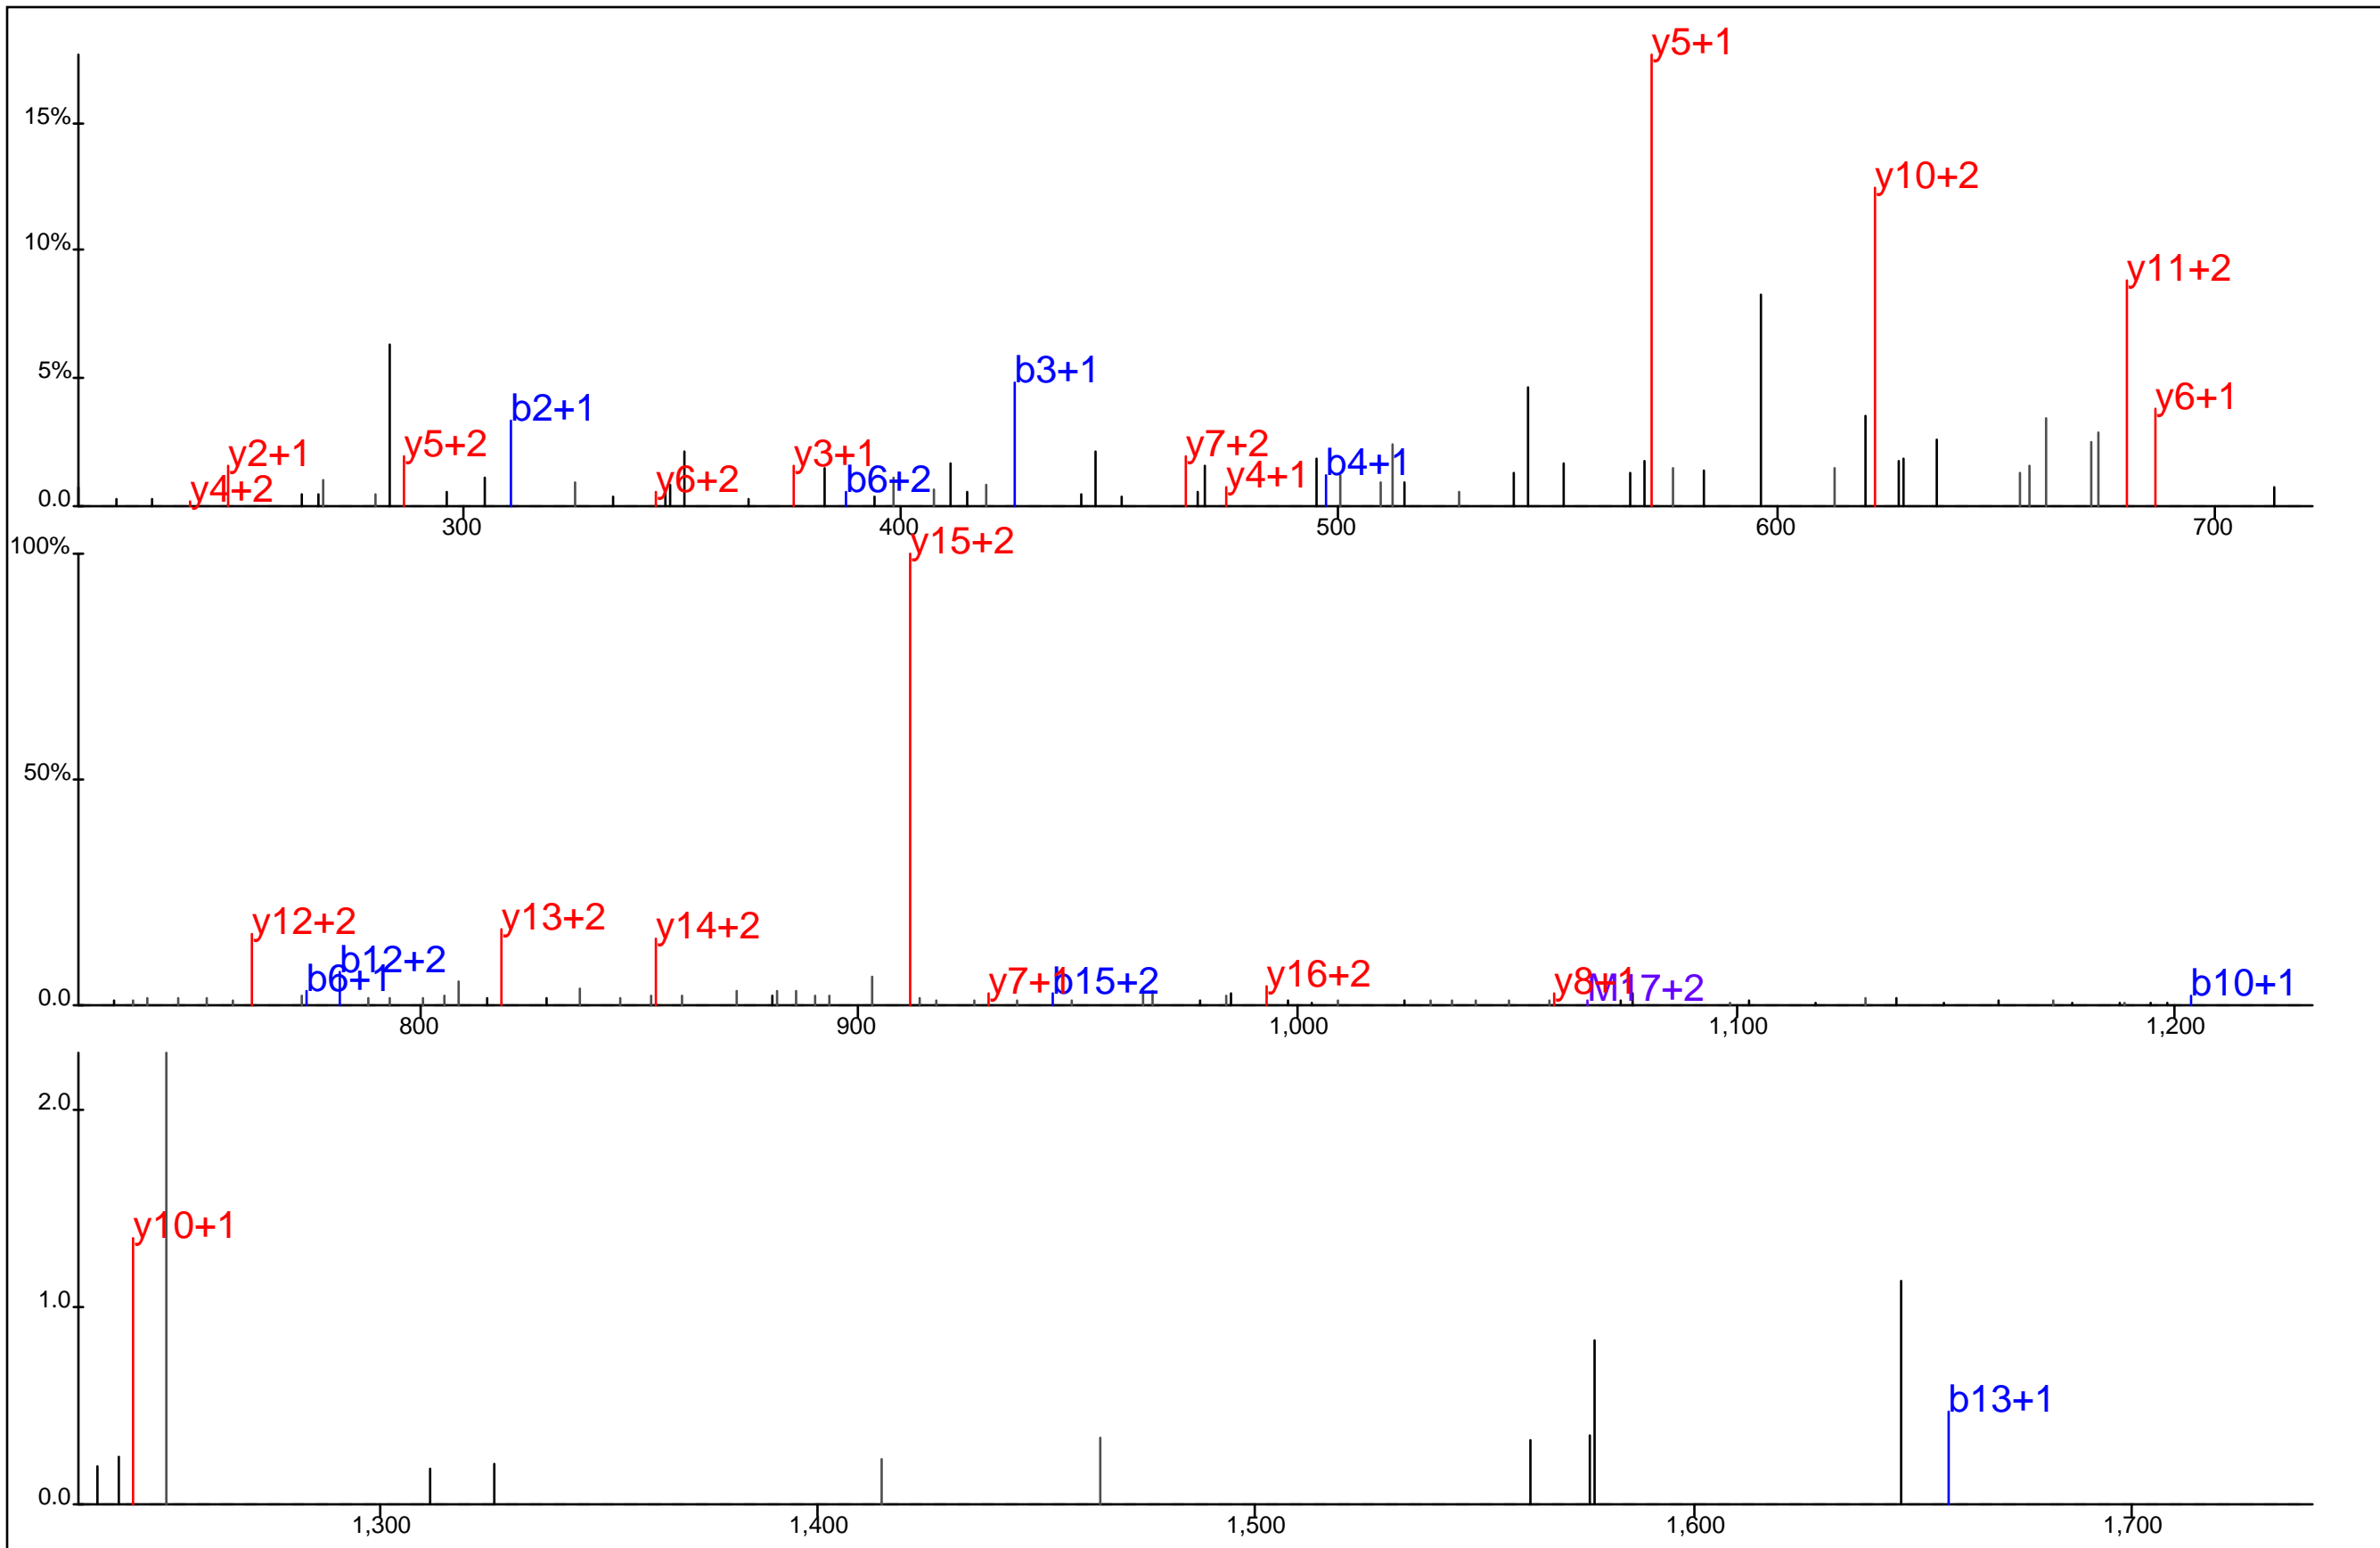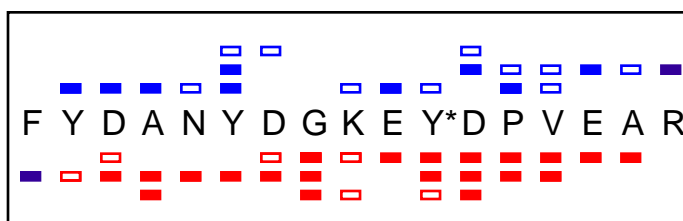

Protein Name: MAPRE2  
 gi Accession: 0  
 Precursor Mass: 711.2913+3  
 Delta Mass: 2.351 ppm  
 XCorr: 45.49



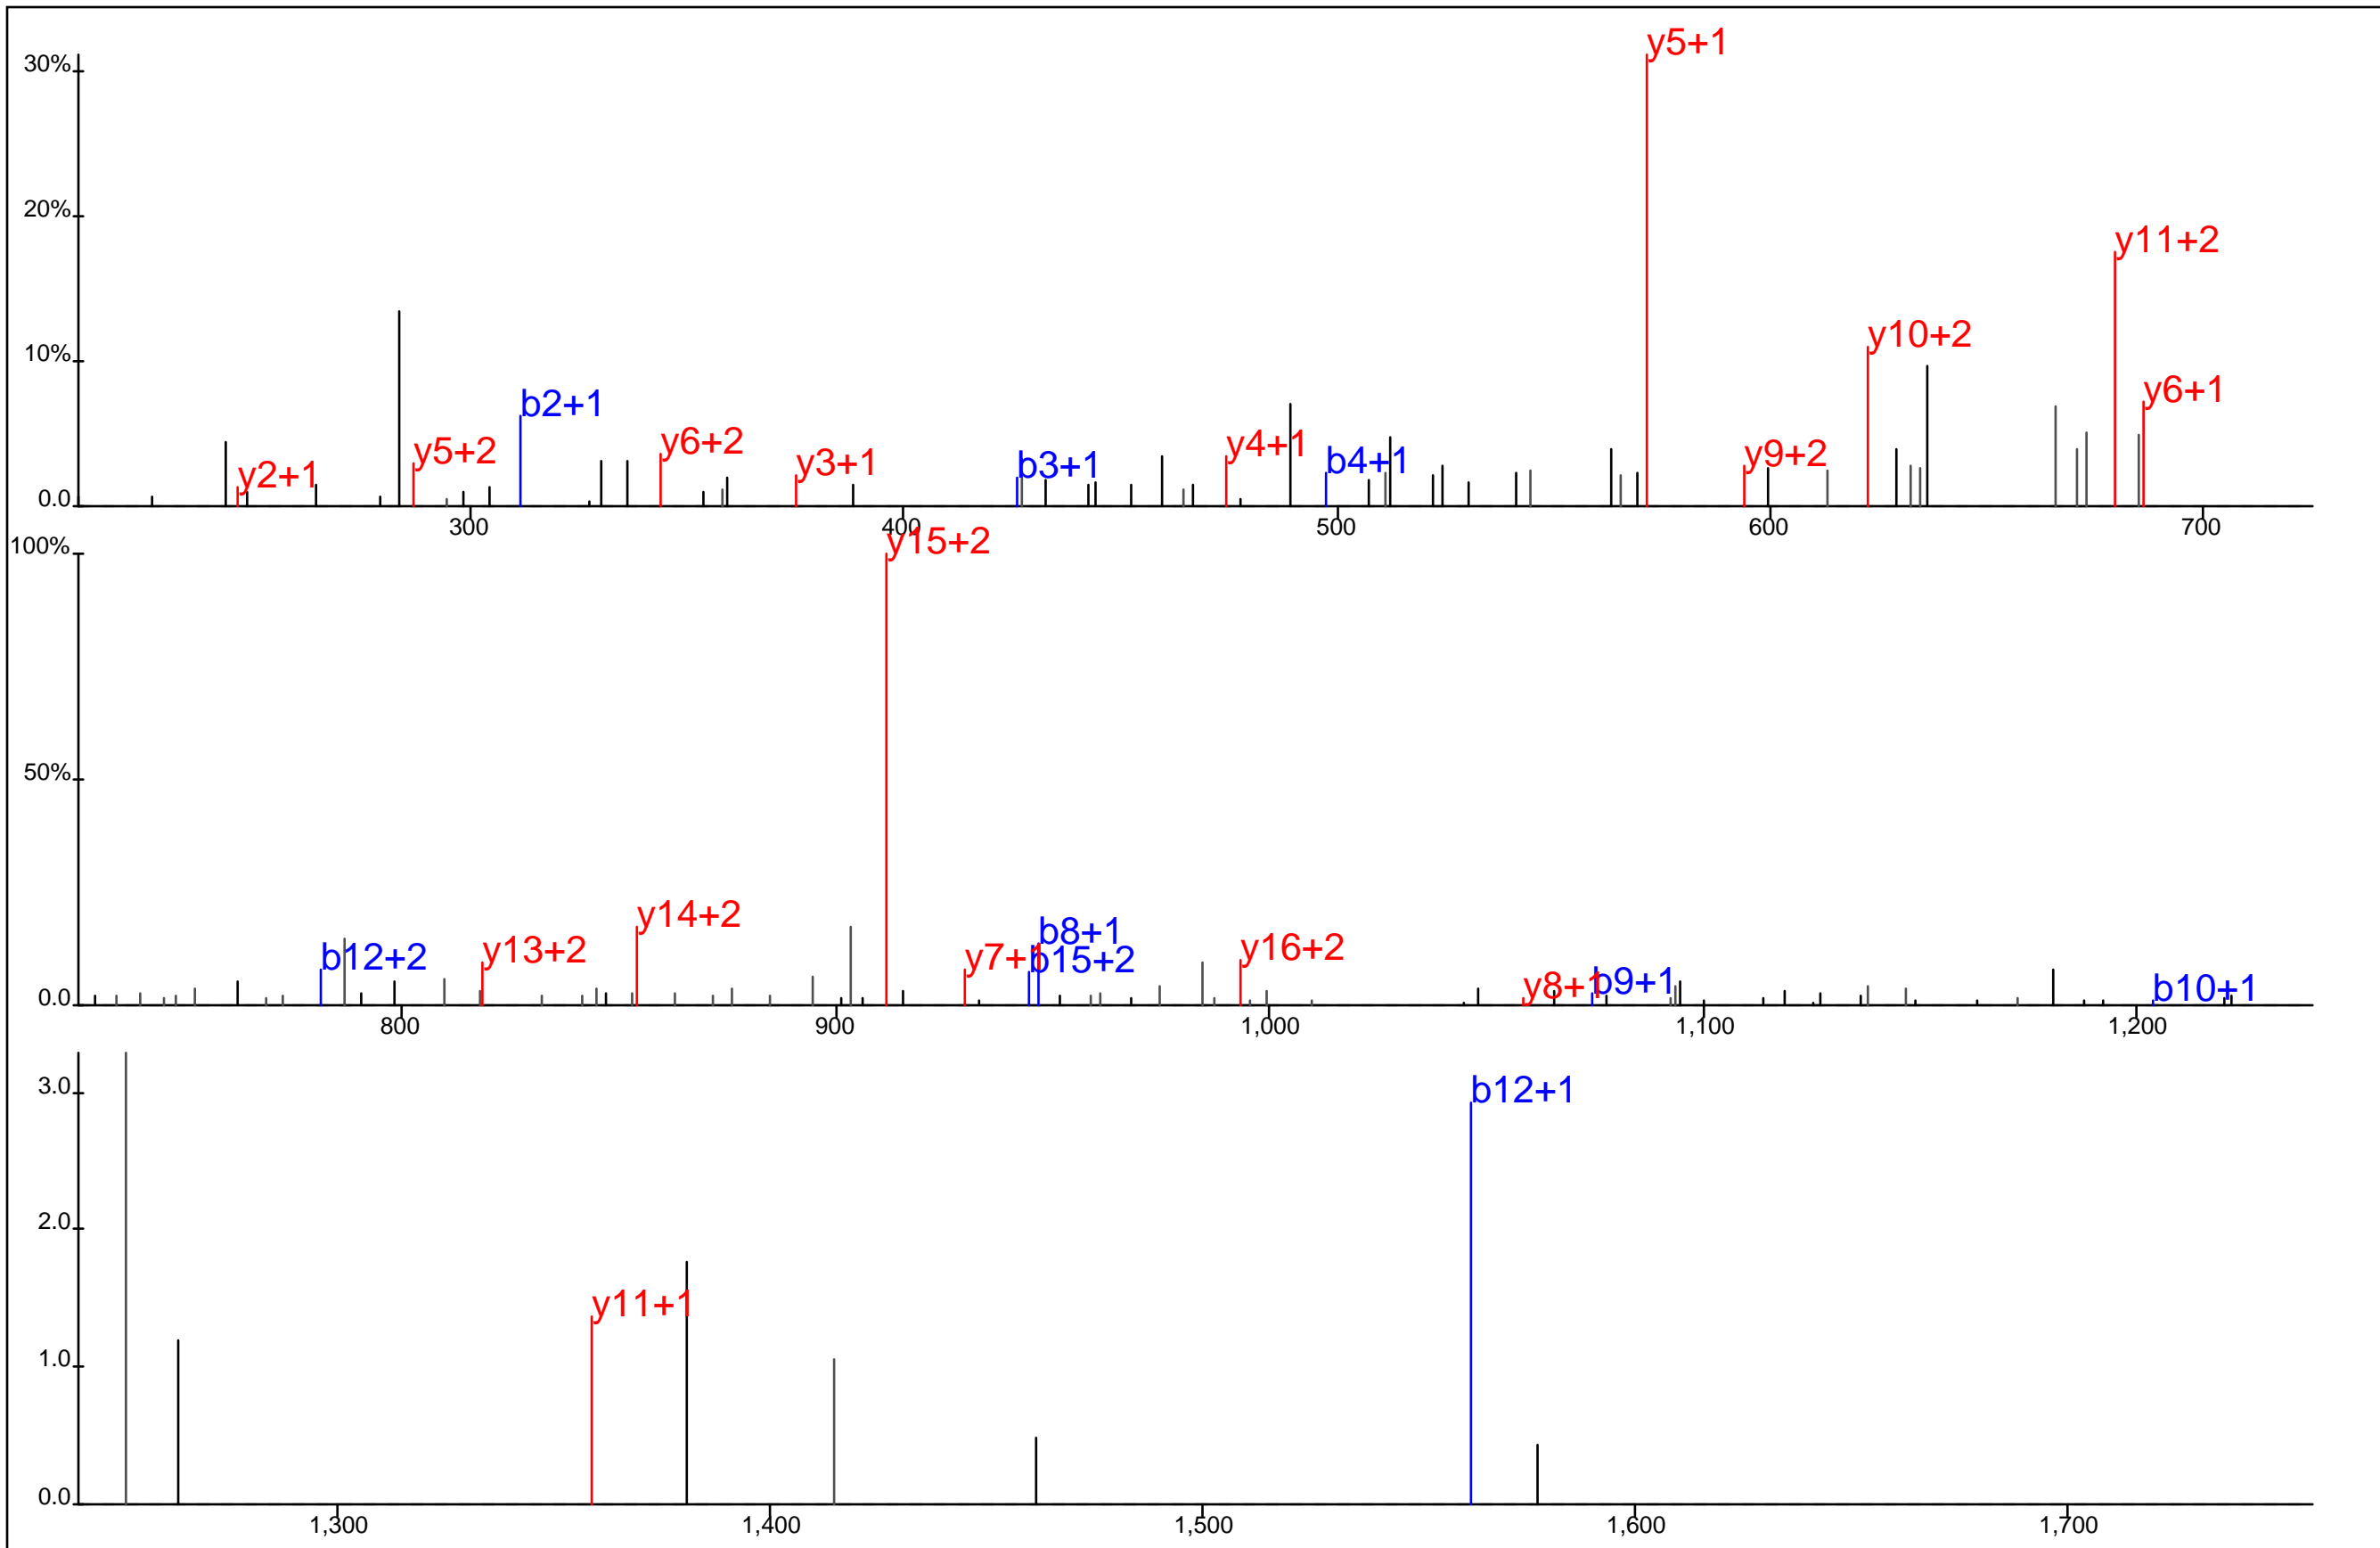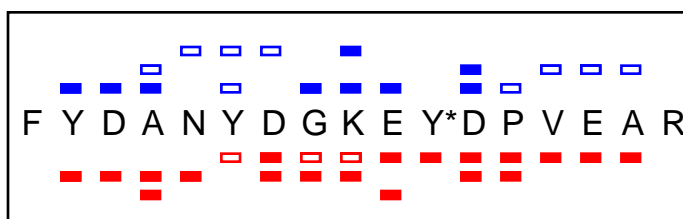

Protein Name: MAPRE2  
 gi Accession: 0  
 Precursor Mass: 711.2924+3  
 Delta Mass: 0.805 ppm  
 XCorr: 41.25

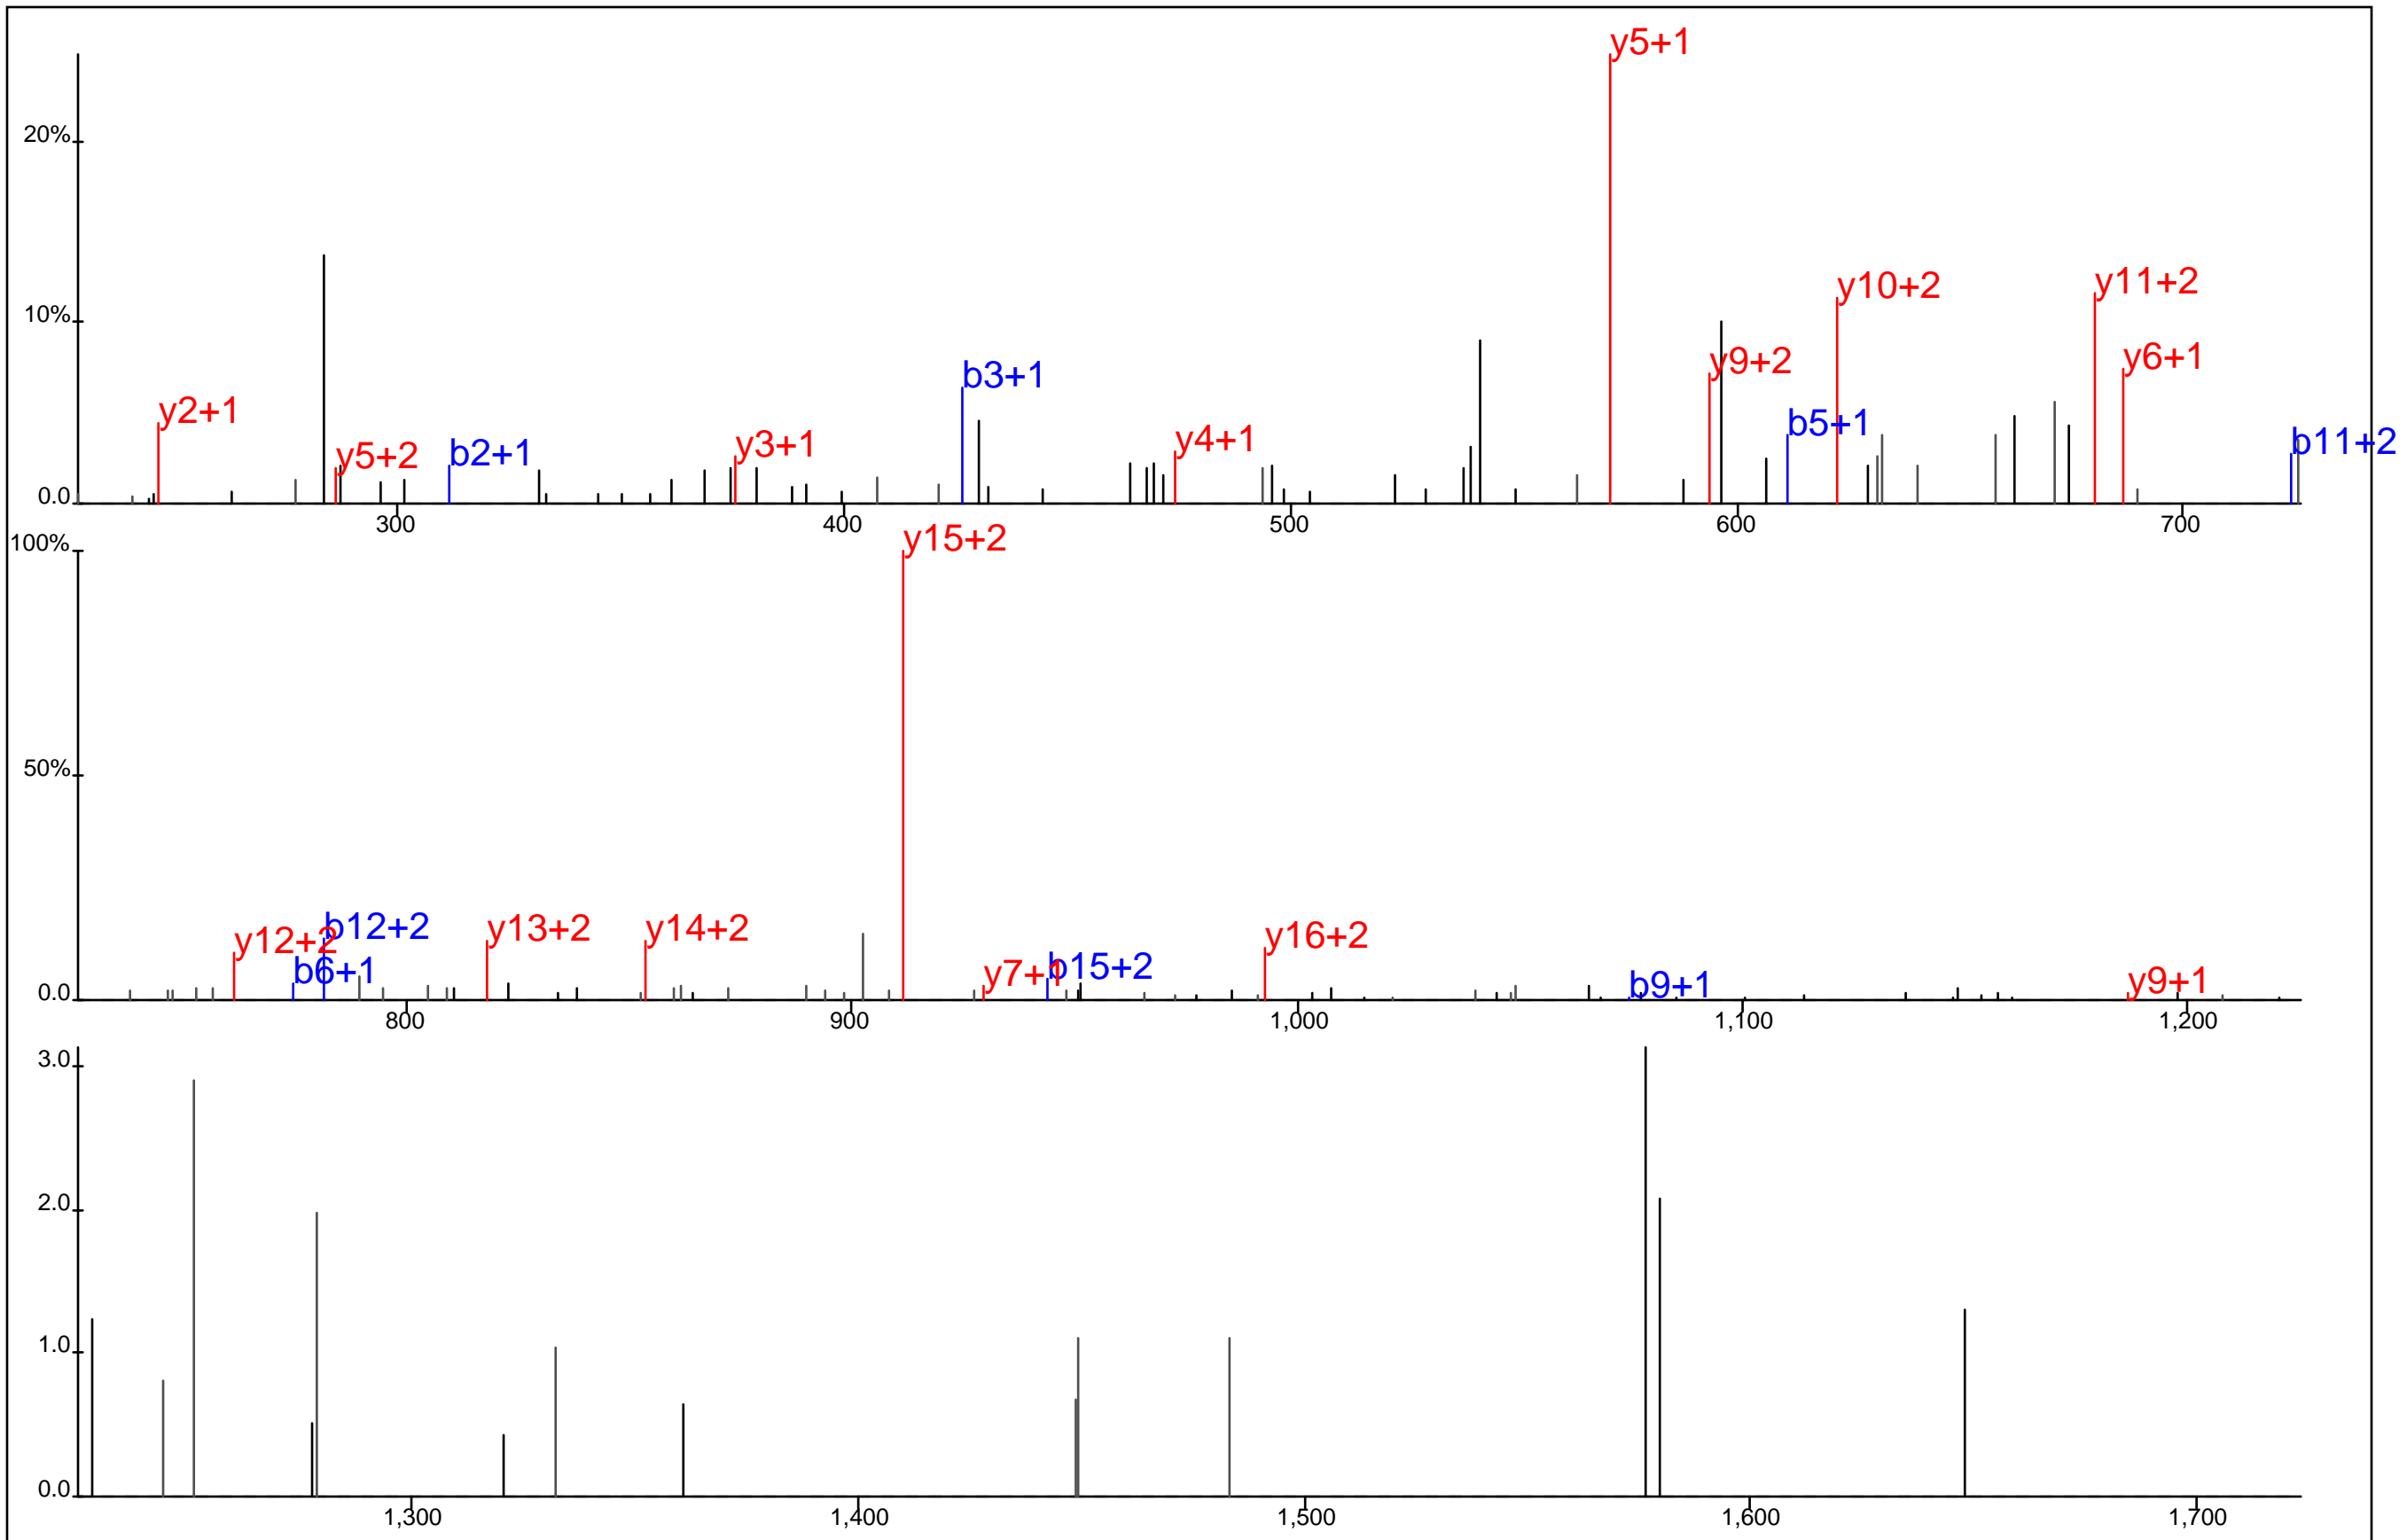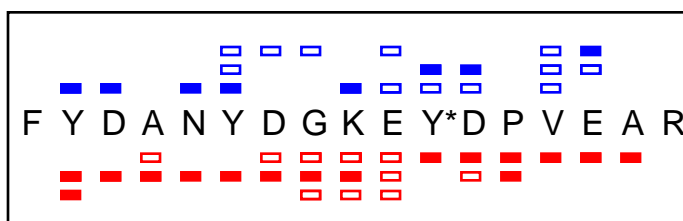

Protein Name: MAPRE2  
 gi Accession: 0  
 Precursor Mass: 711.2889+3  
 Delta Mass: 5.787 ppm  
 XCorr: 47.54



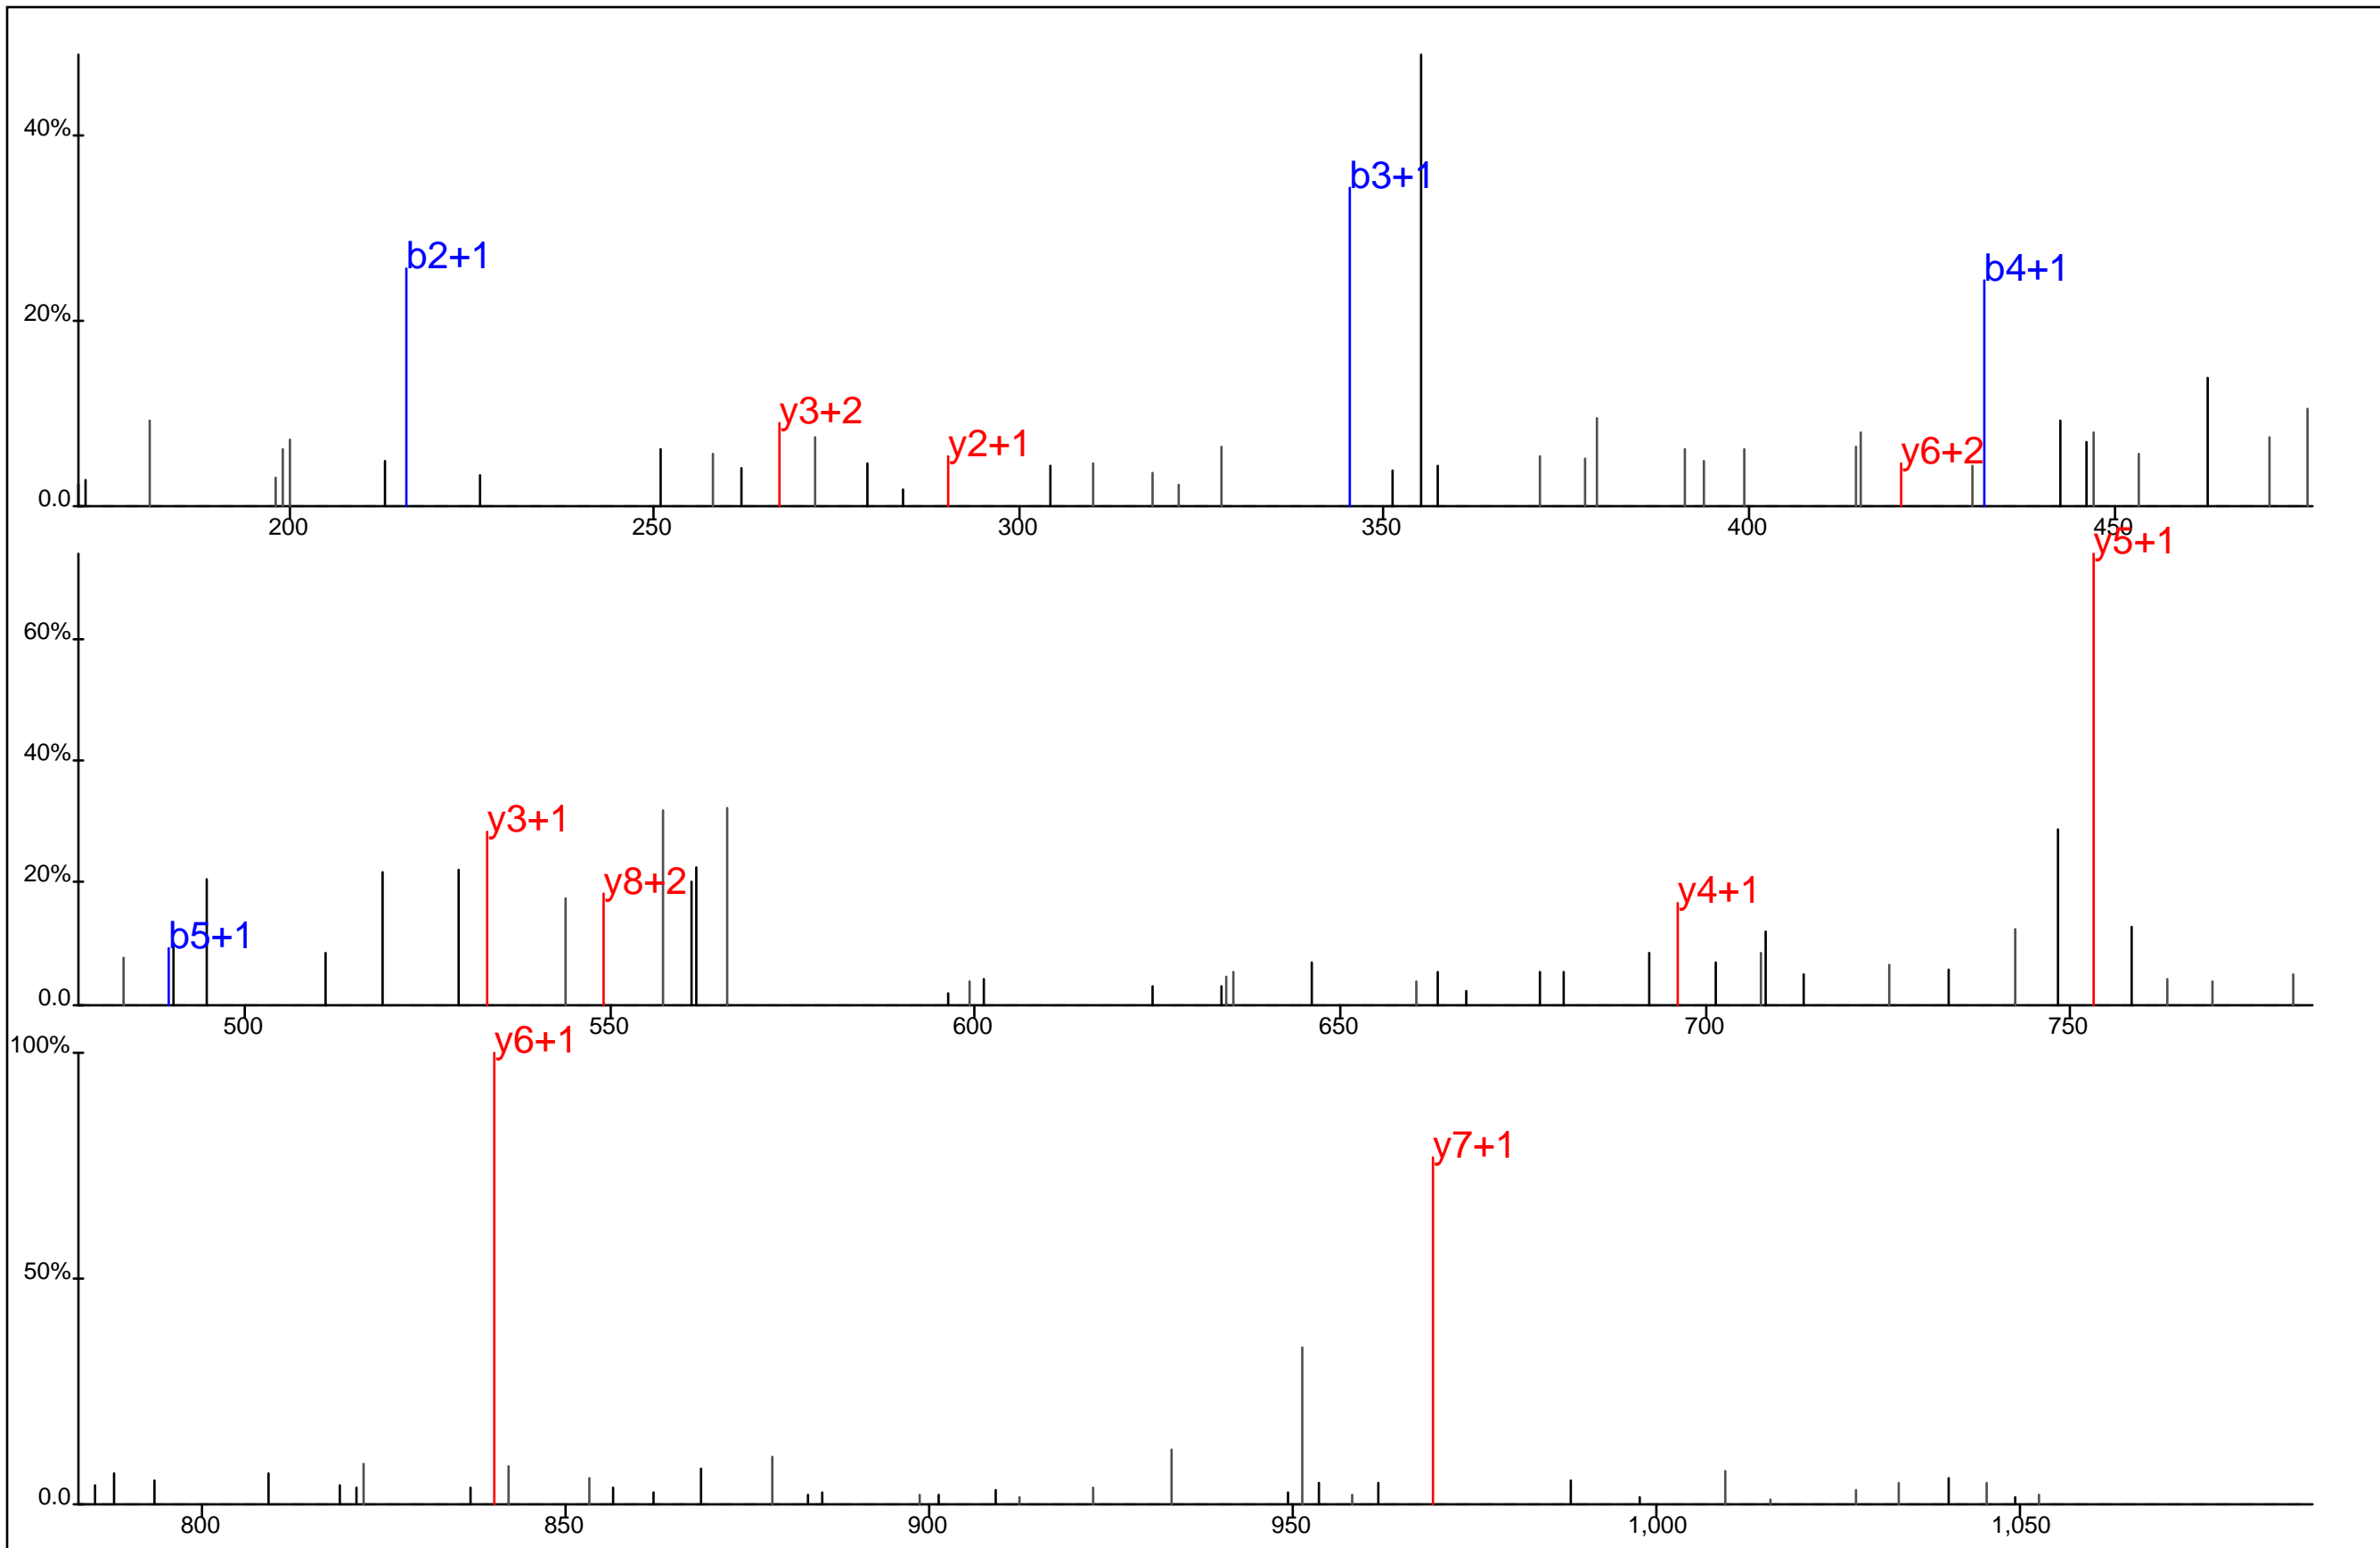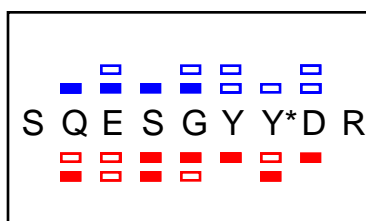

Protein Name: Matrin 3  
 gi Accession: 0  
 Precursor Mass: 592.7172+2  
 Delta Mass: 1.368 ppm  
 XCorr: 20.48

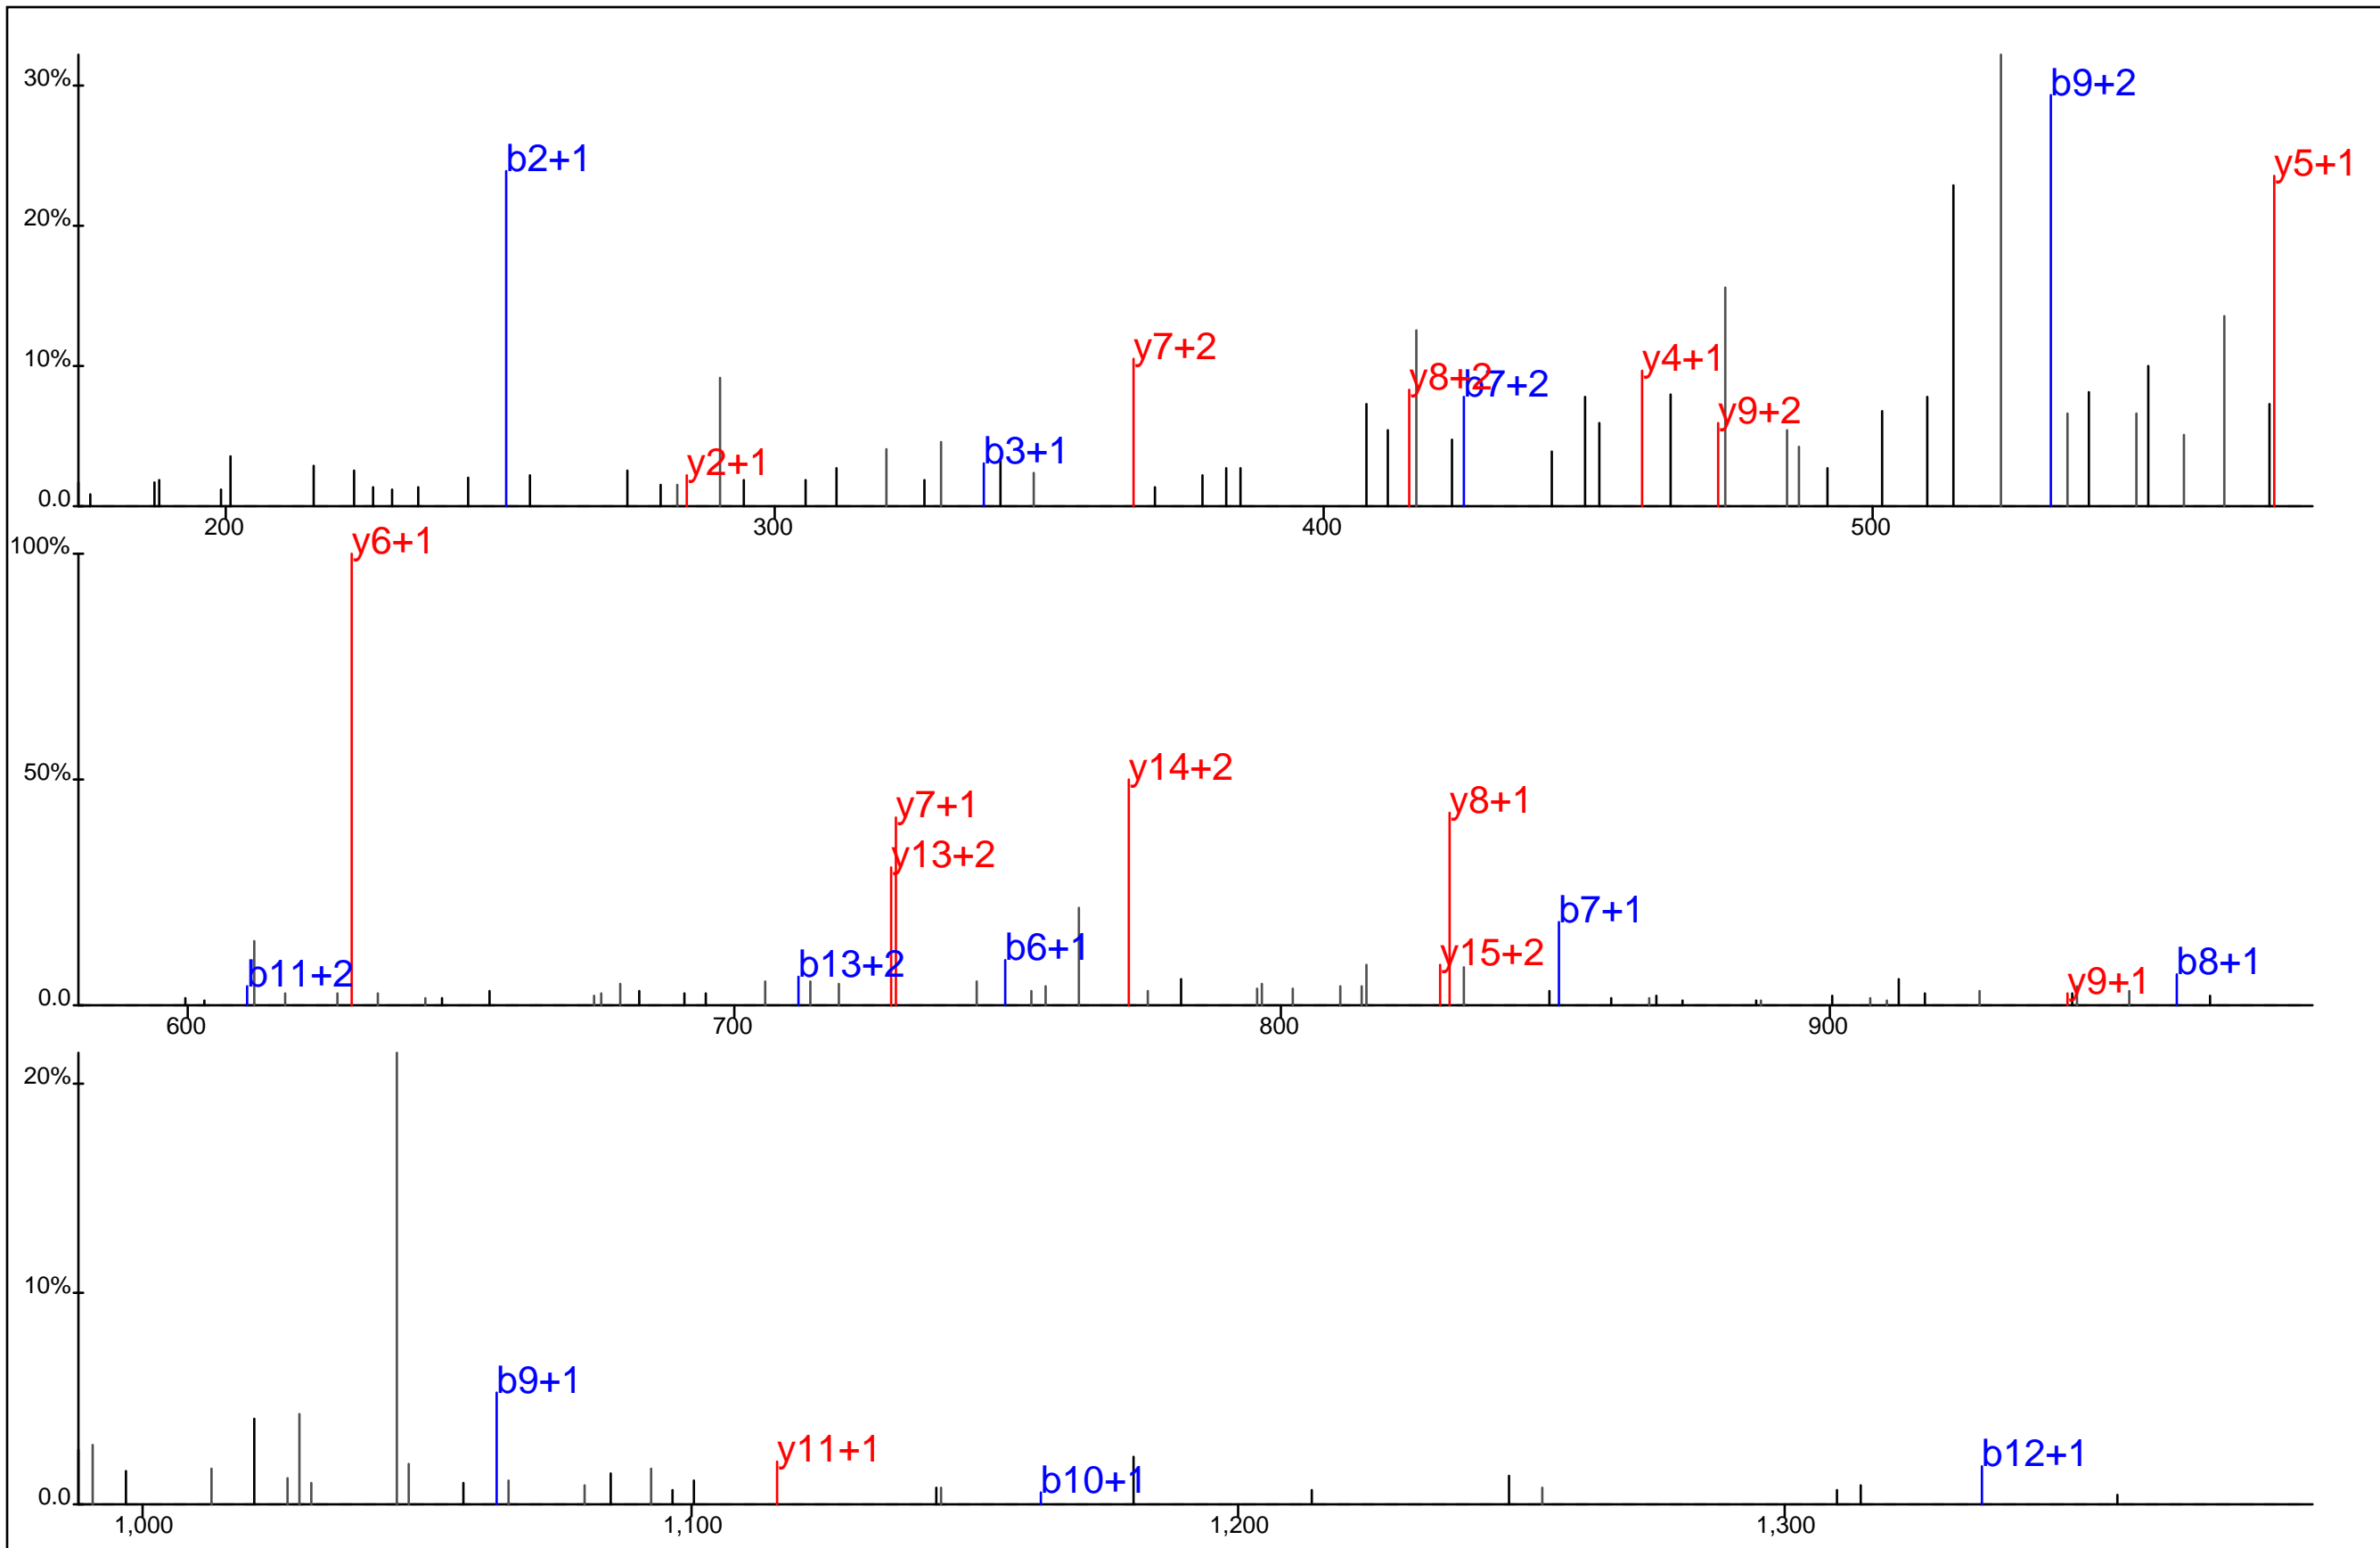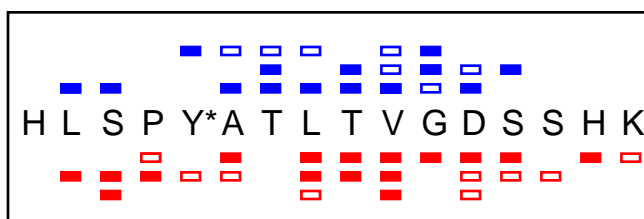

Protein Name: MBC2  
 gi Accession: 0  
 Precursor Mass: 598.2794+3  
 Delta Mass: 1.690 ppm  
 XCorr: 40.25

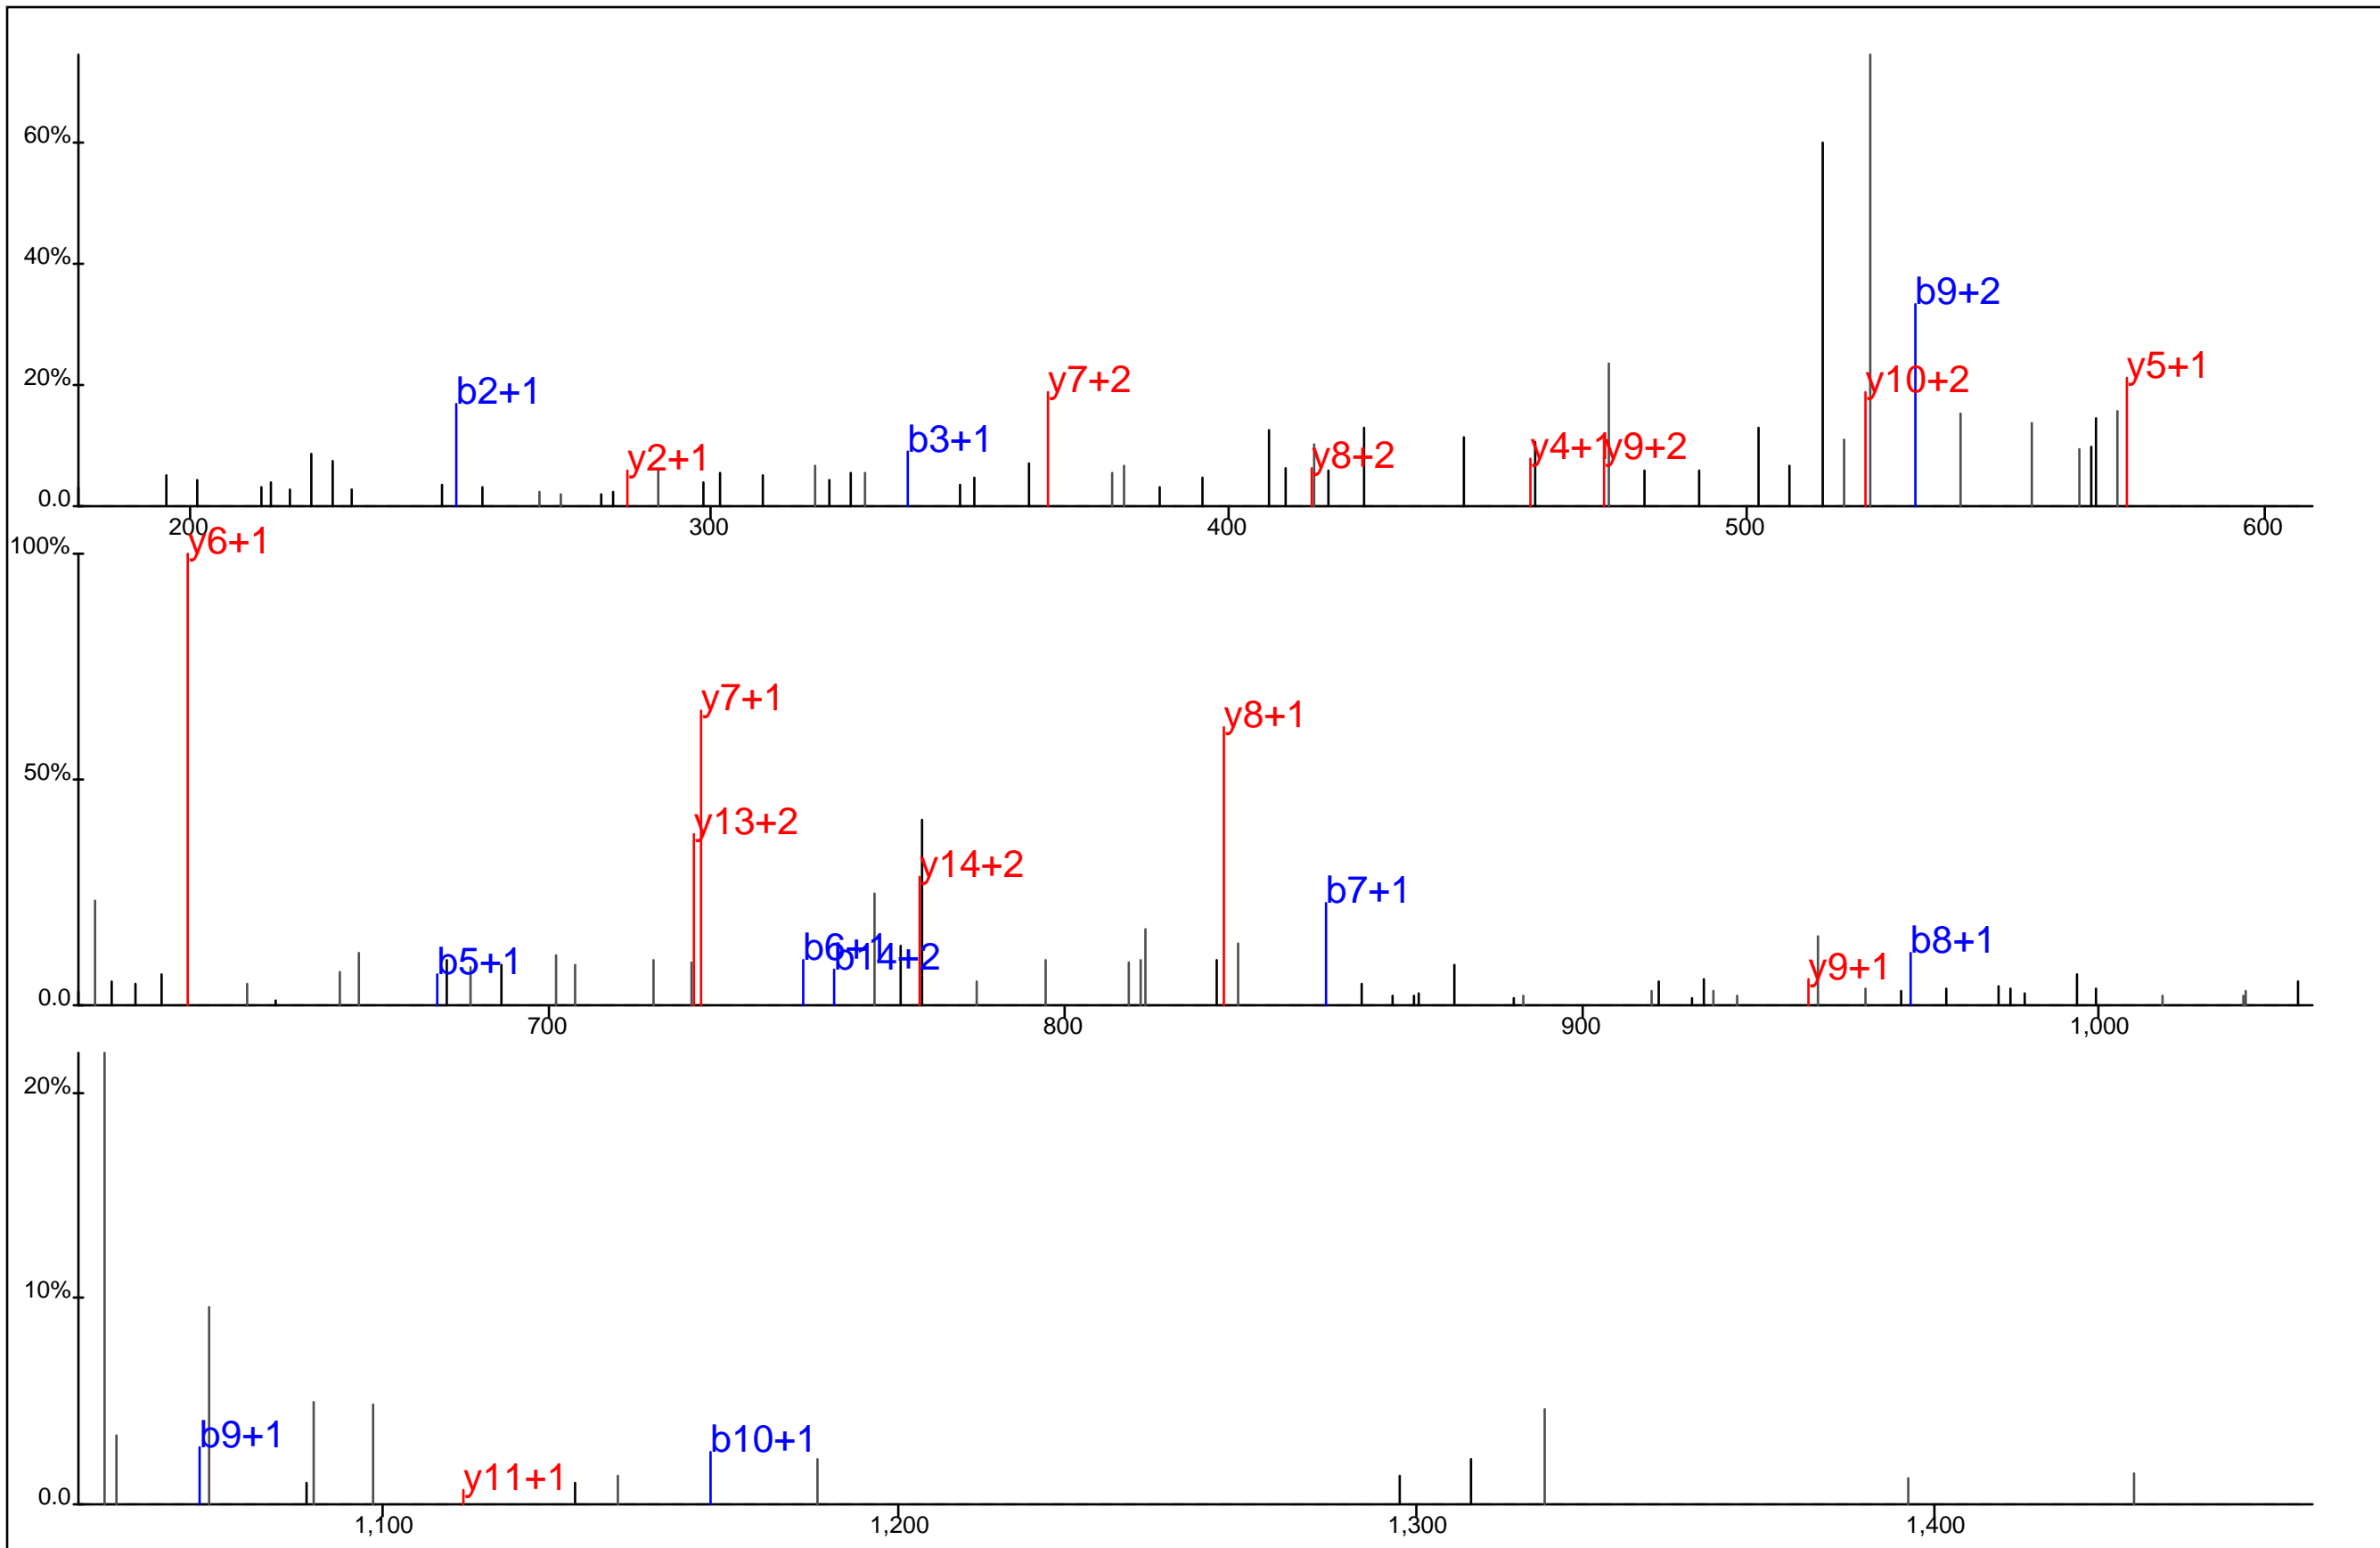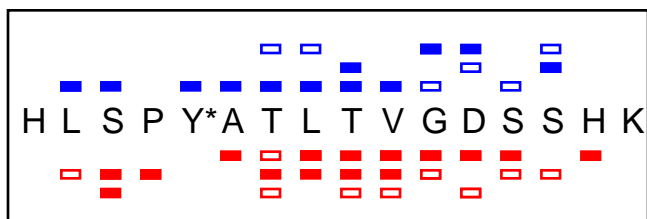

Protein Name: MBC2  
 gi Accession: 0  
 Precursor Mass: 598.2808+3  
 Delta Mass: 0.761 ppm  
 XCorr: 30.34

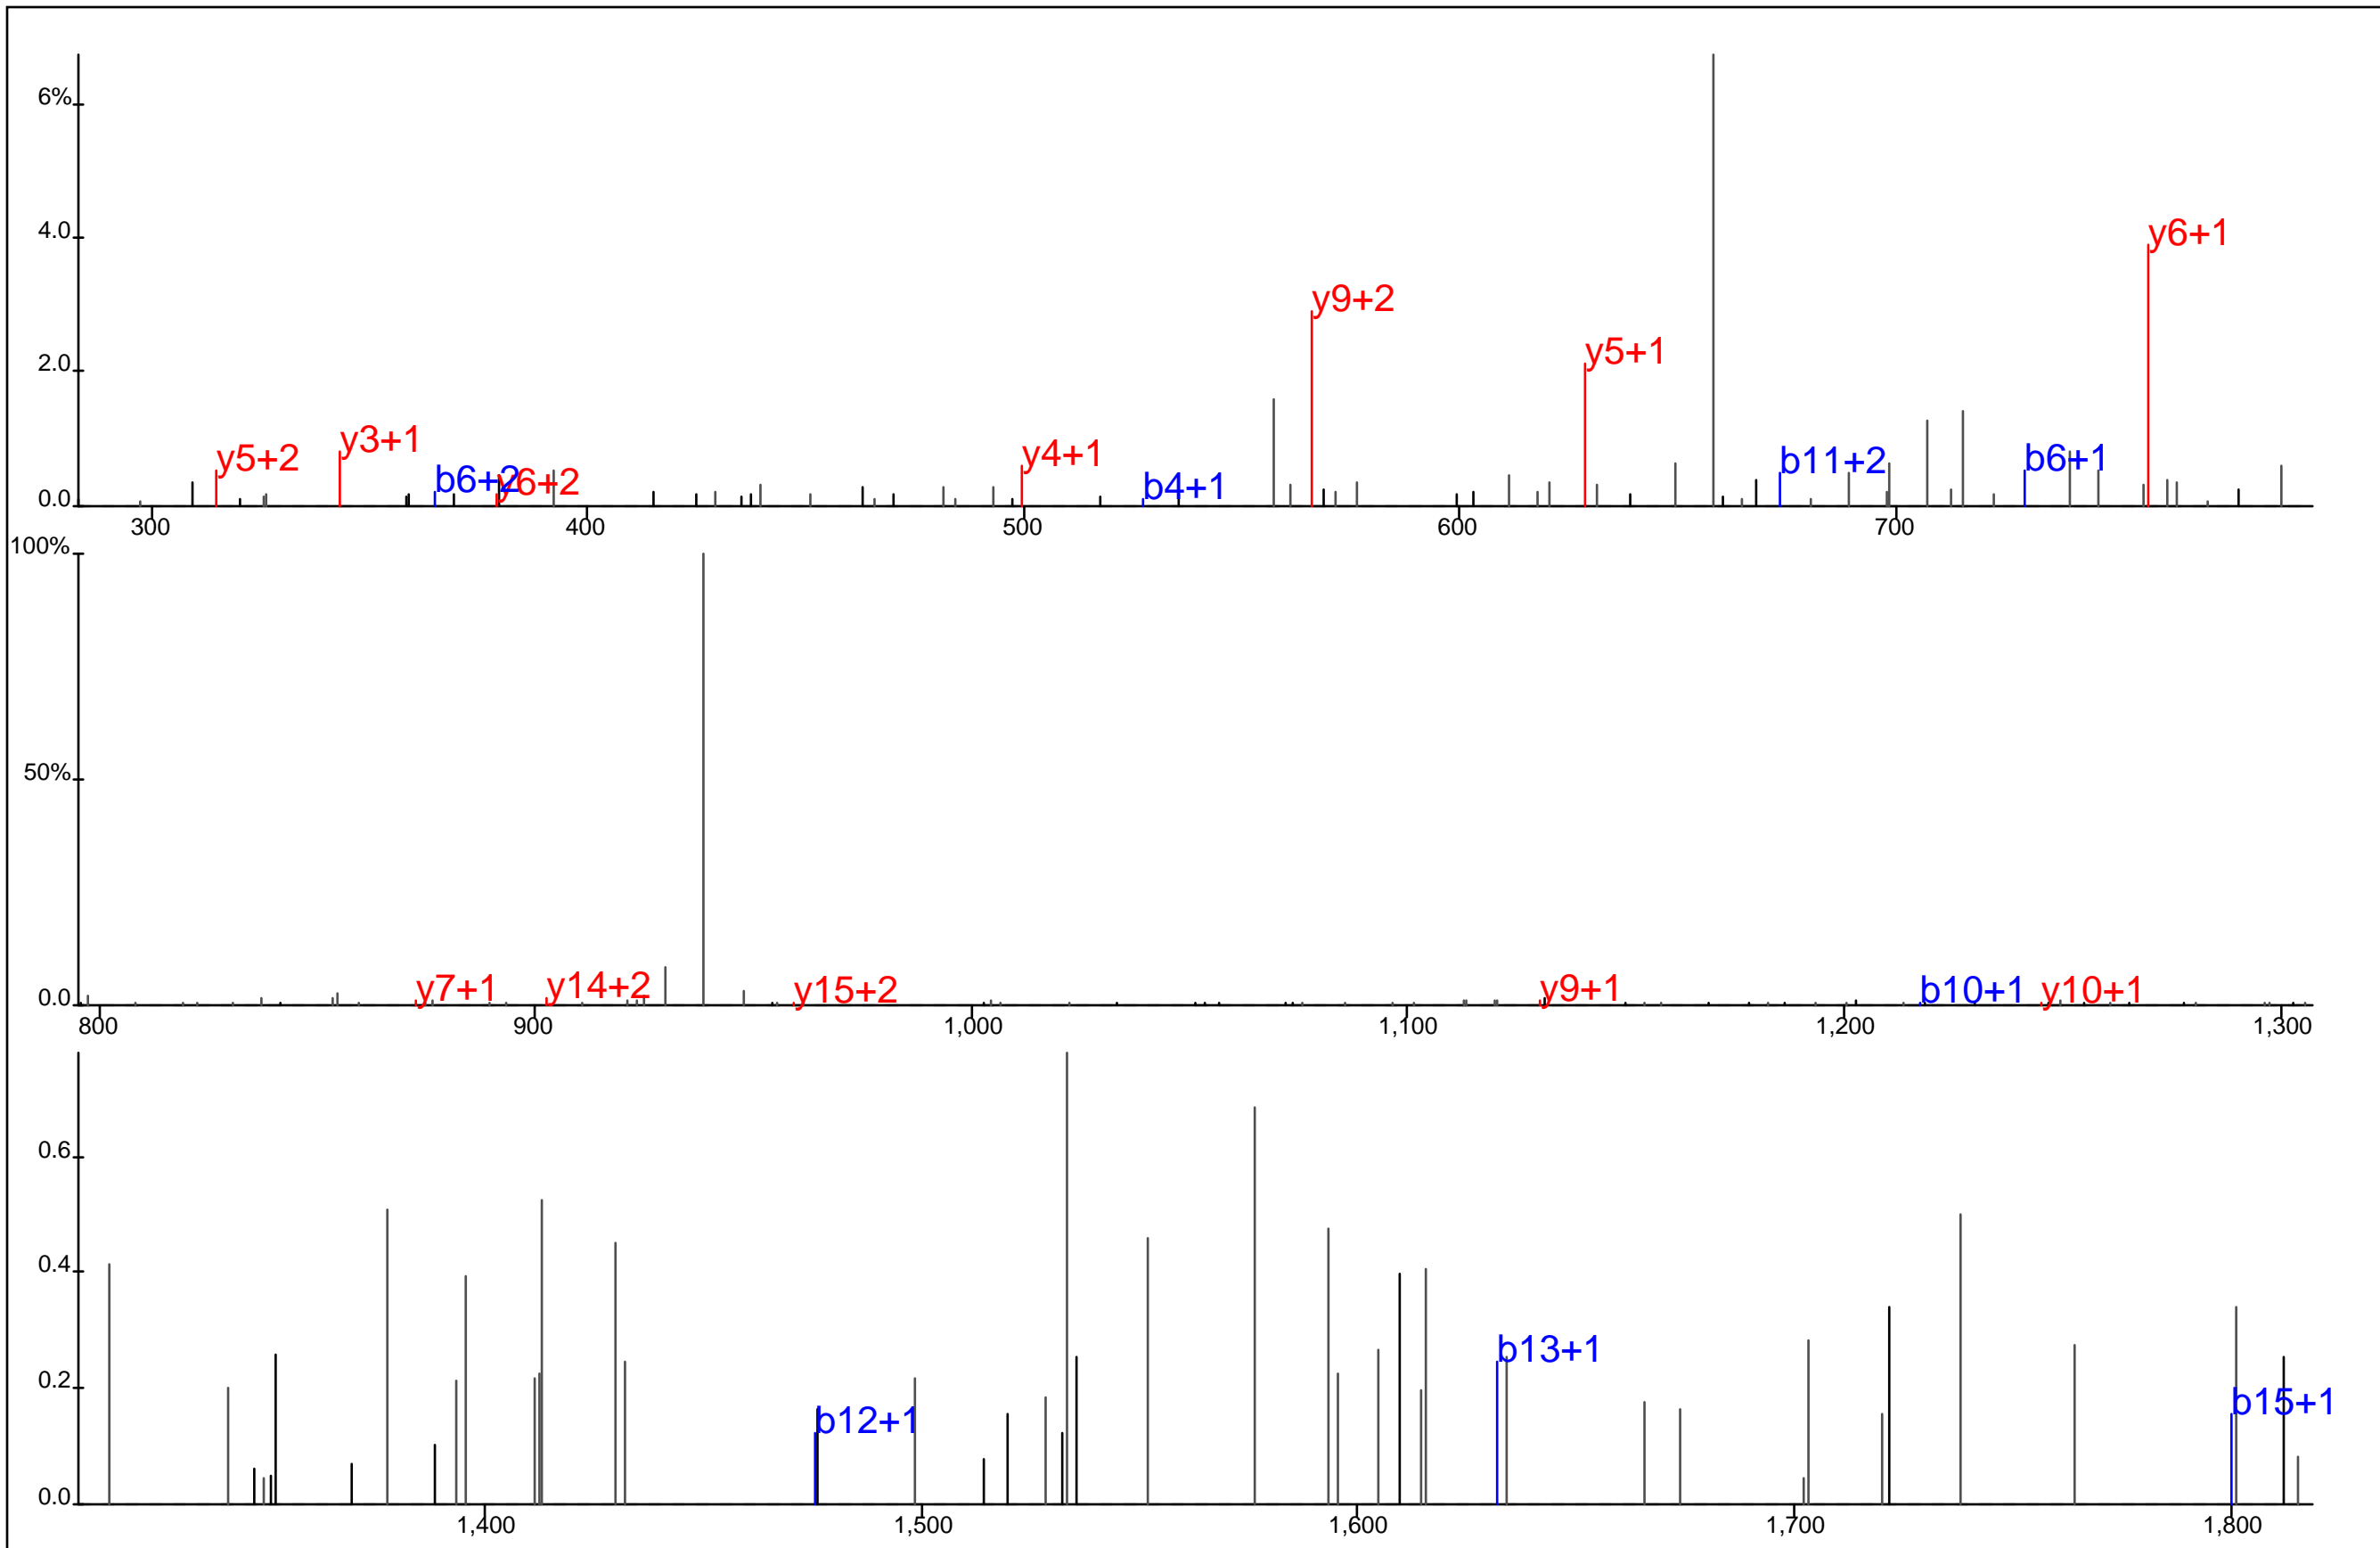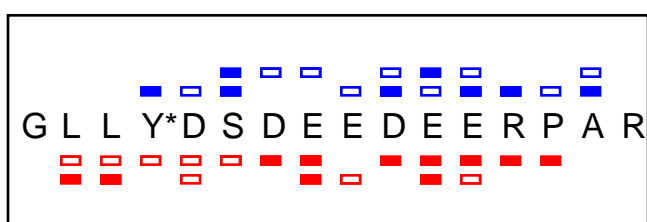

Protein Name: MCM2 minichromosome maintenance deficient 2, mitotin  
 gi Accession: 0  
 Precursor Mass: 987.4092+2  
 Delta Mass: 0.591 ppm  
 XCorr: 40.15

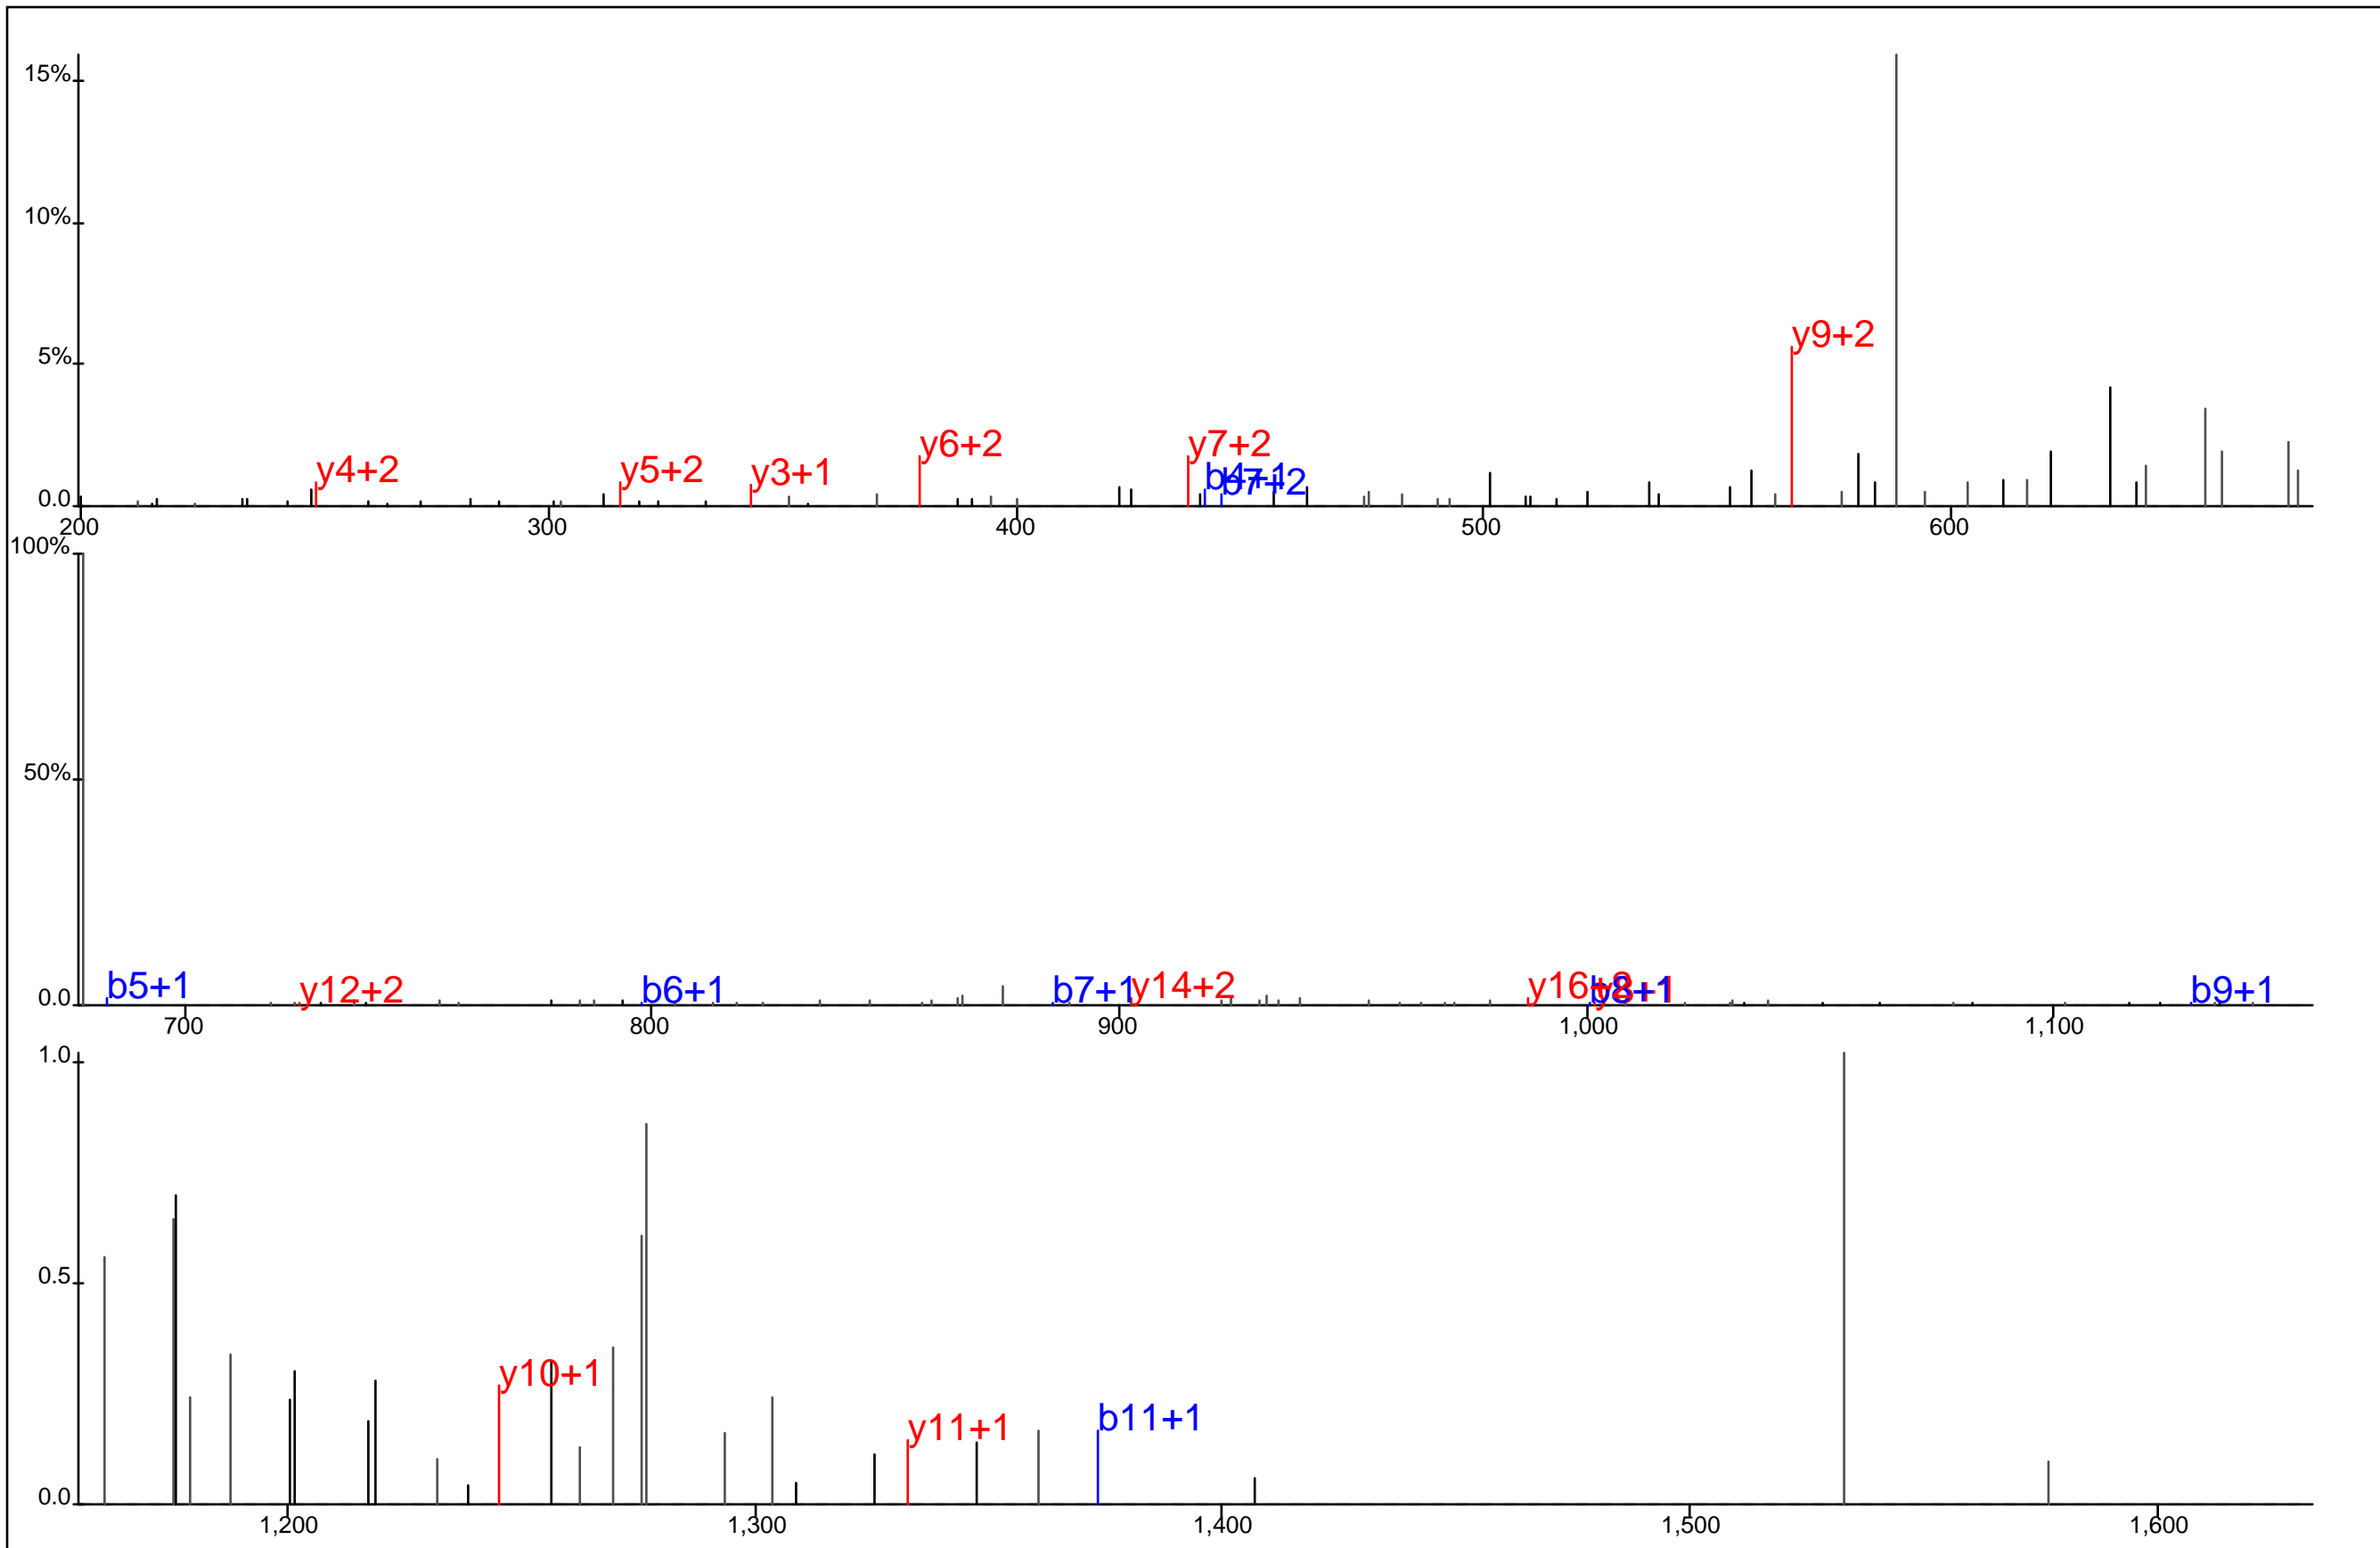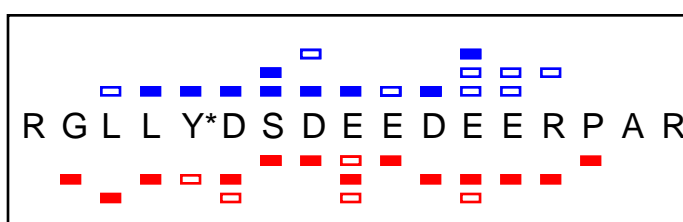

Protein Name: MCM2 minichromosome maintenance deficient 2, mitotin  
 gi Accession: 0  
 Precursor Mass: 710.6411+3  
 Delta Mass: 2.290 ppm  
 XCorr: 20.5





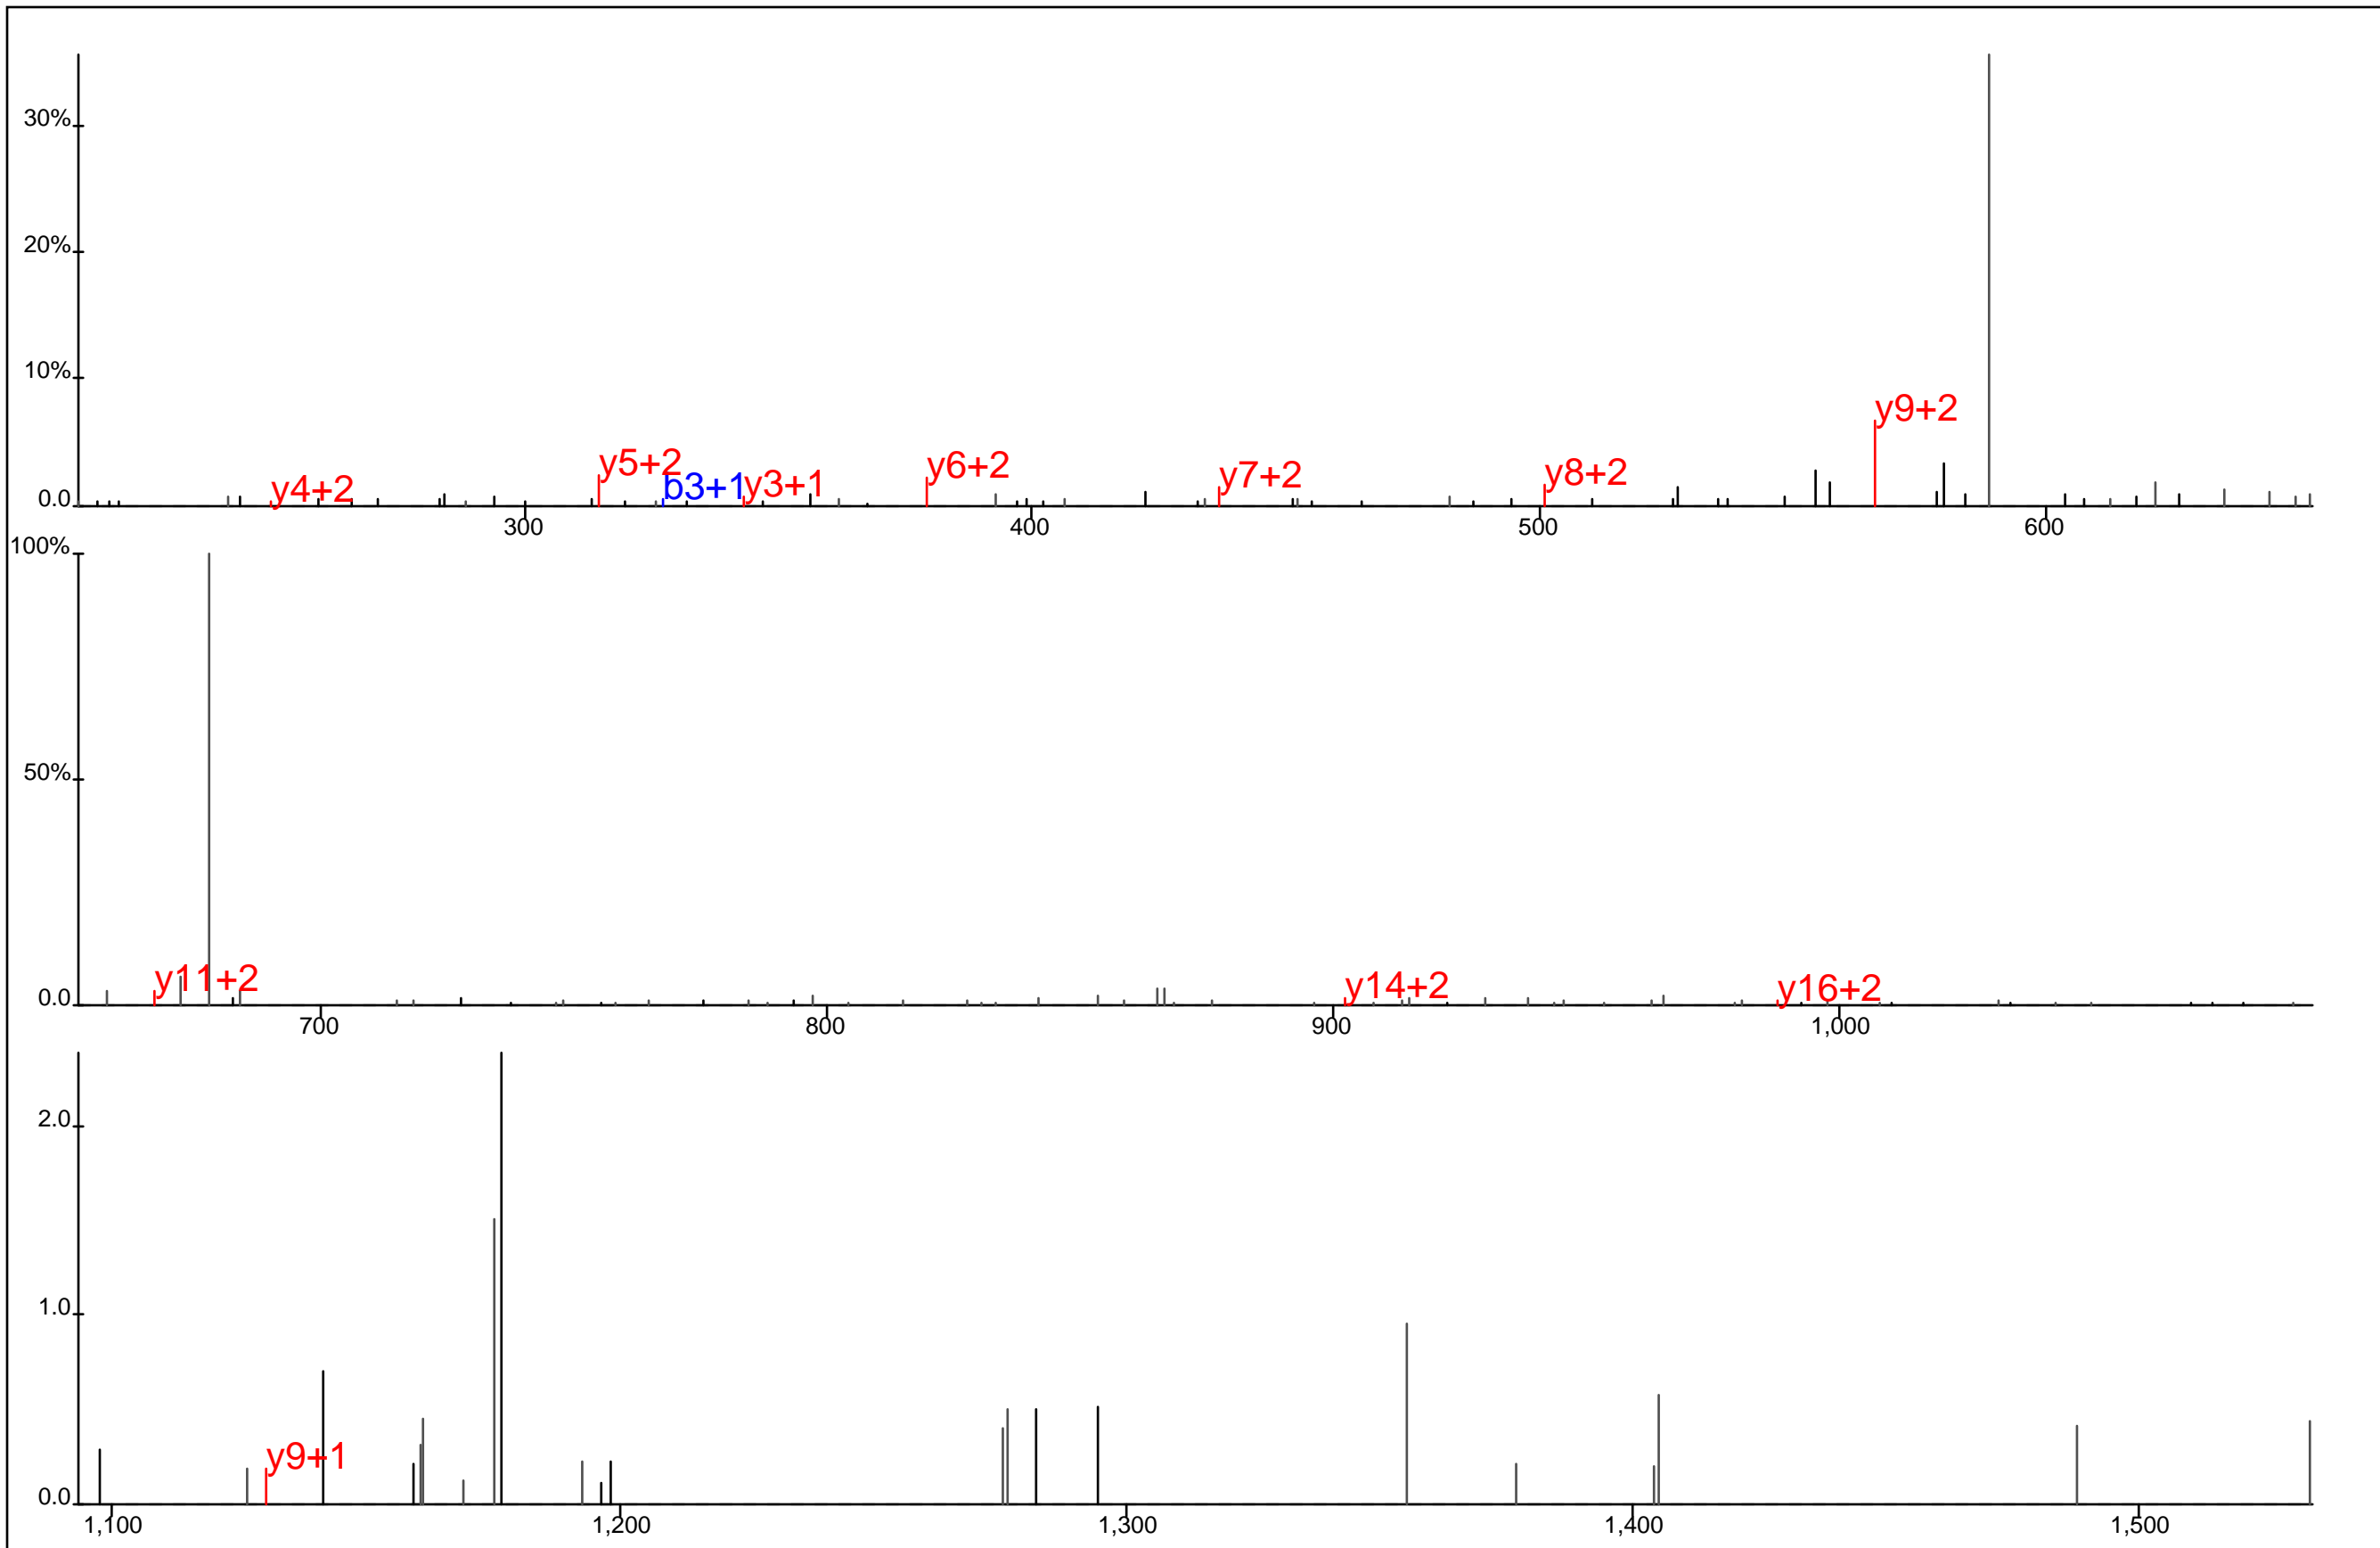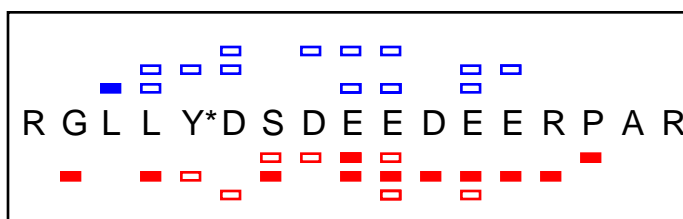

Protein Name: MCM2 minichromosome maintenance deficient 2, mitotin  
 gi Accession: 0  
 Precursor Mass: 710.6394+3  
 Delta Mass: 4.611 ppm  
 XCorr: 22.81

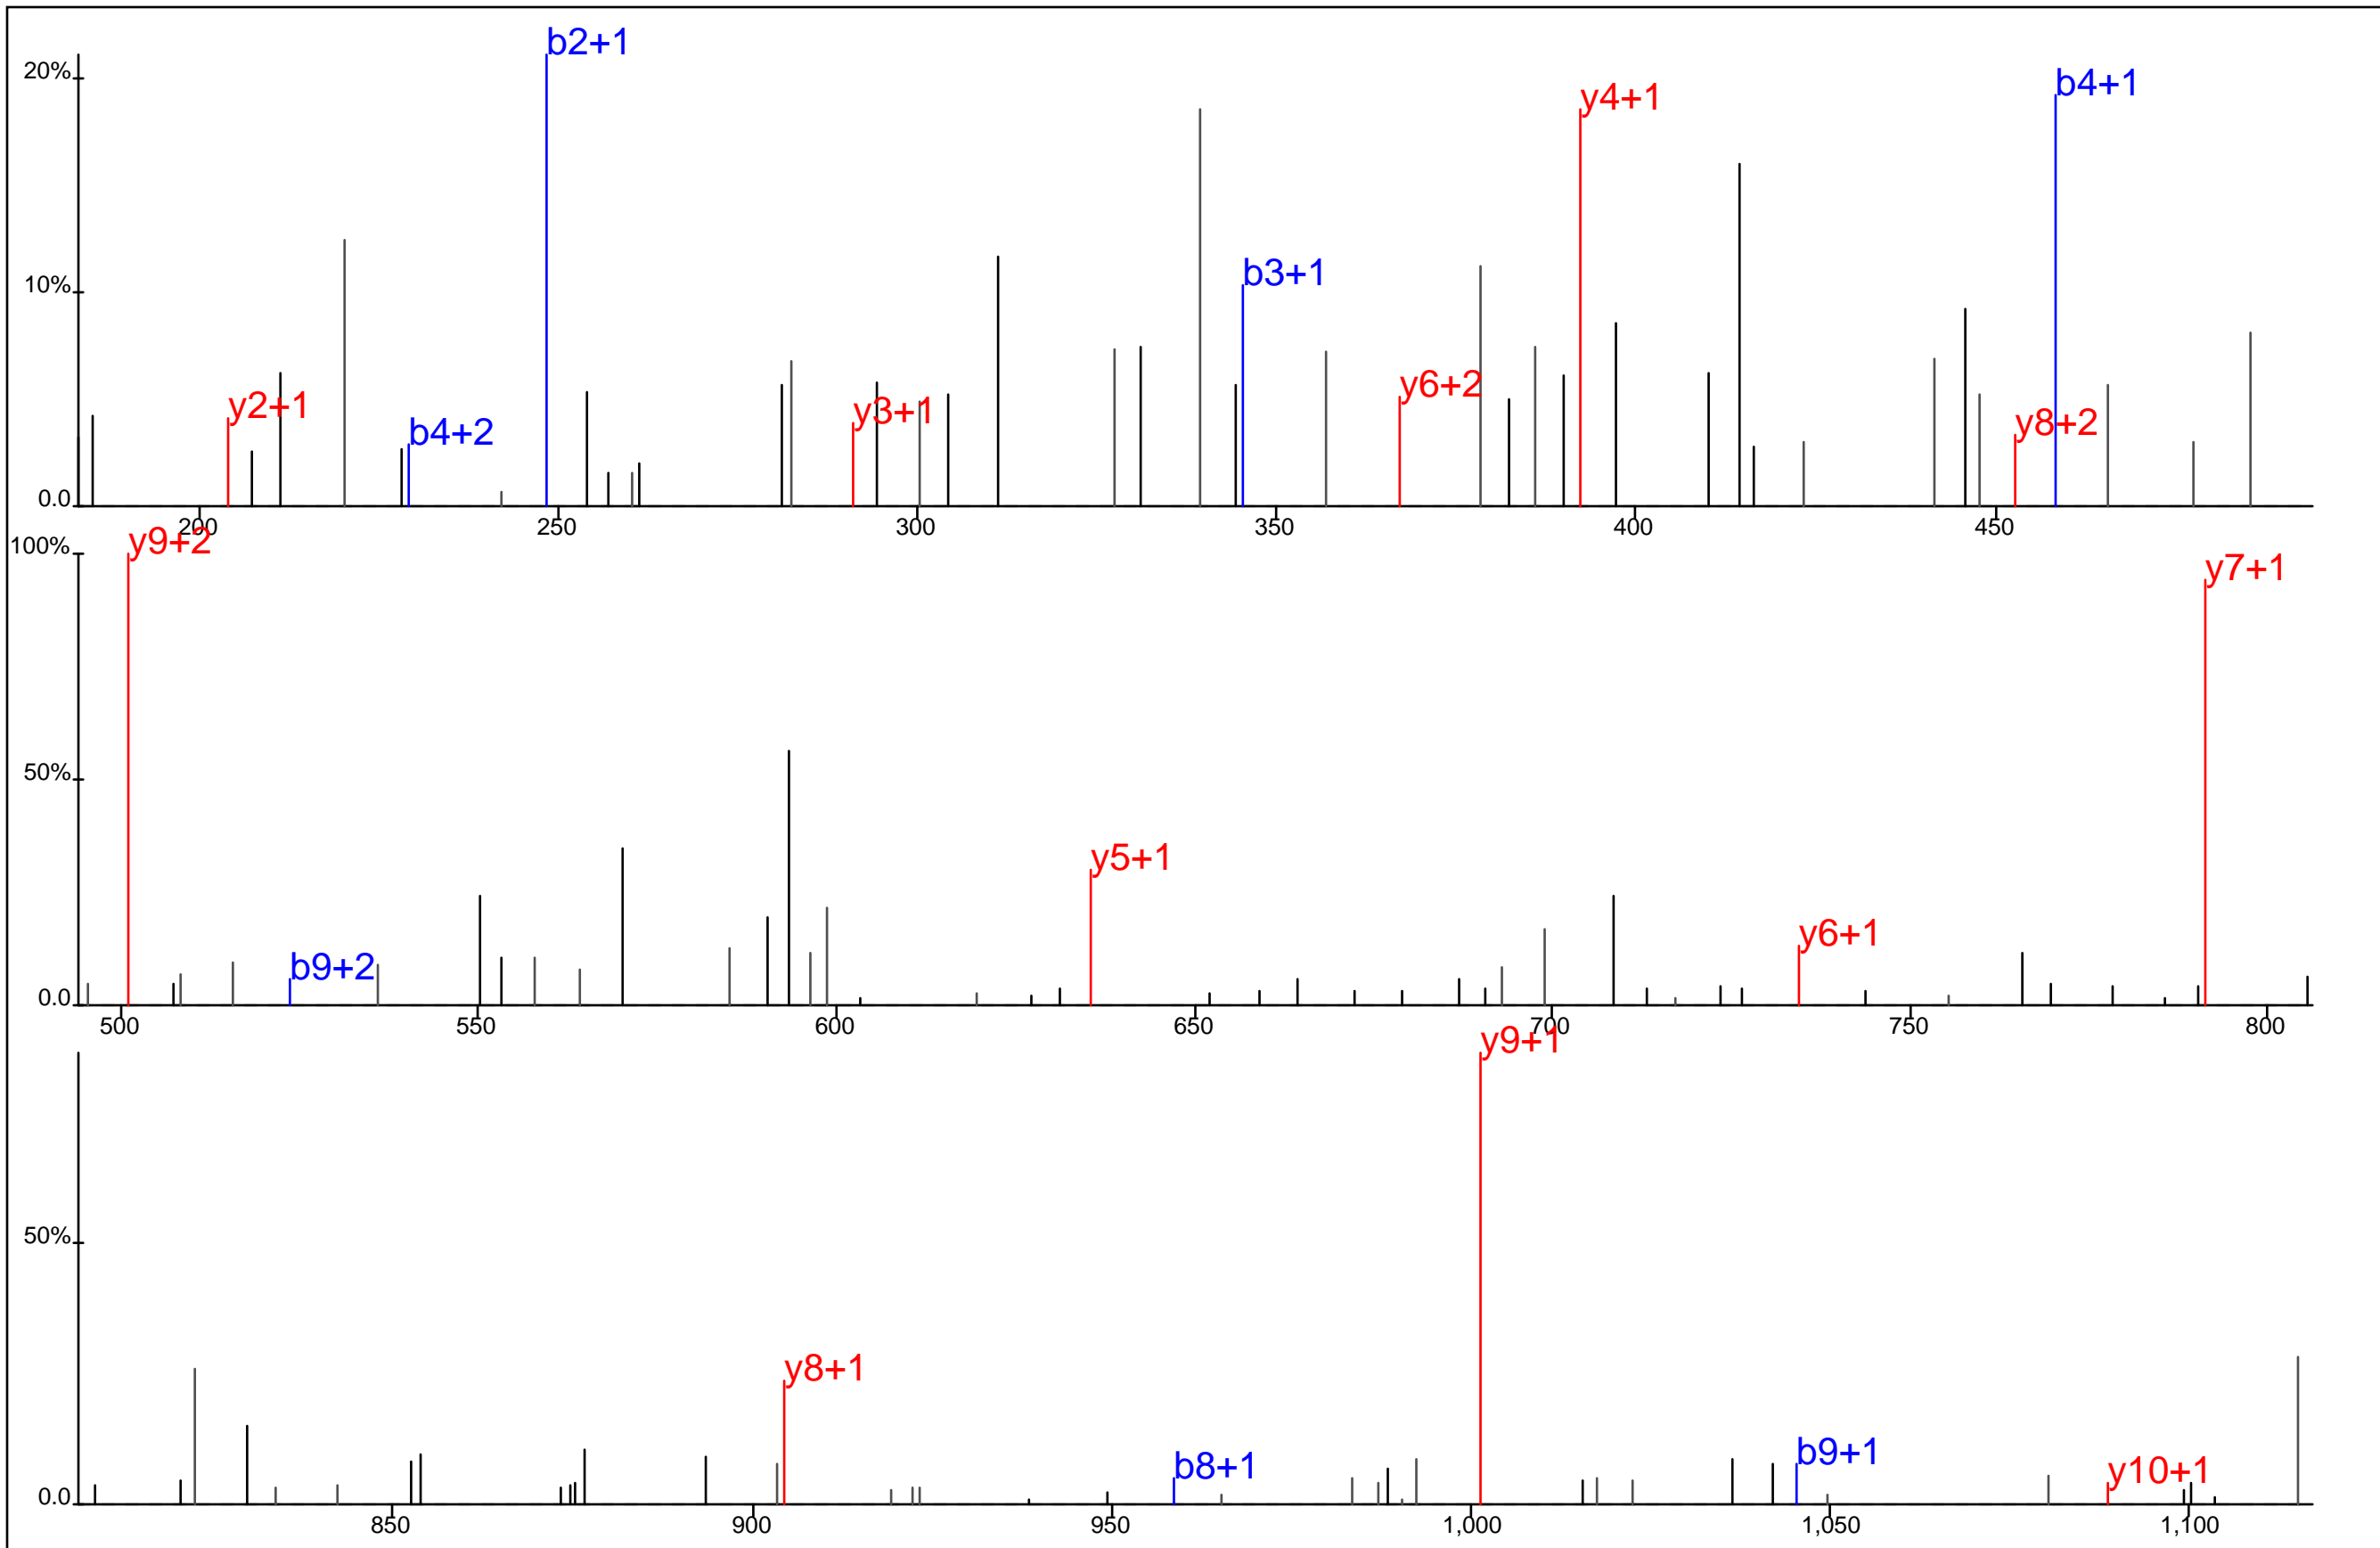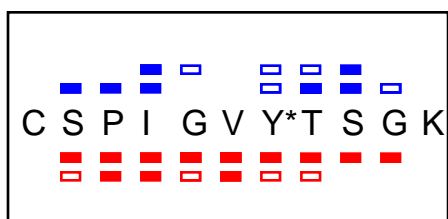

Protein Name: MCM5  
 gi Accession: 0  
 Precursor Mass: 624.7706+2  
 Delta Mass: 0.771 ppm  
 XCorr: 29.3

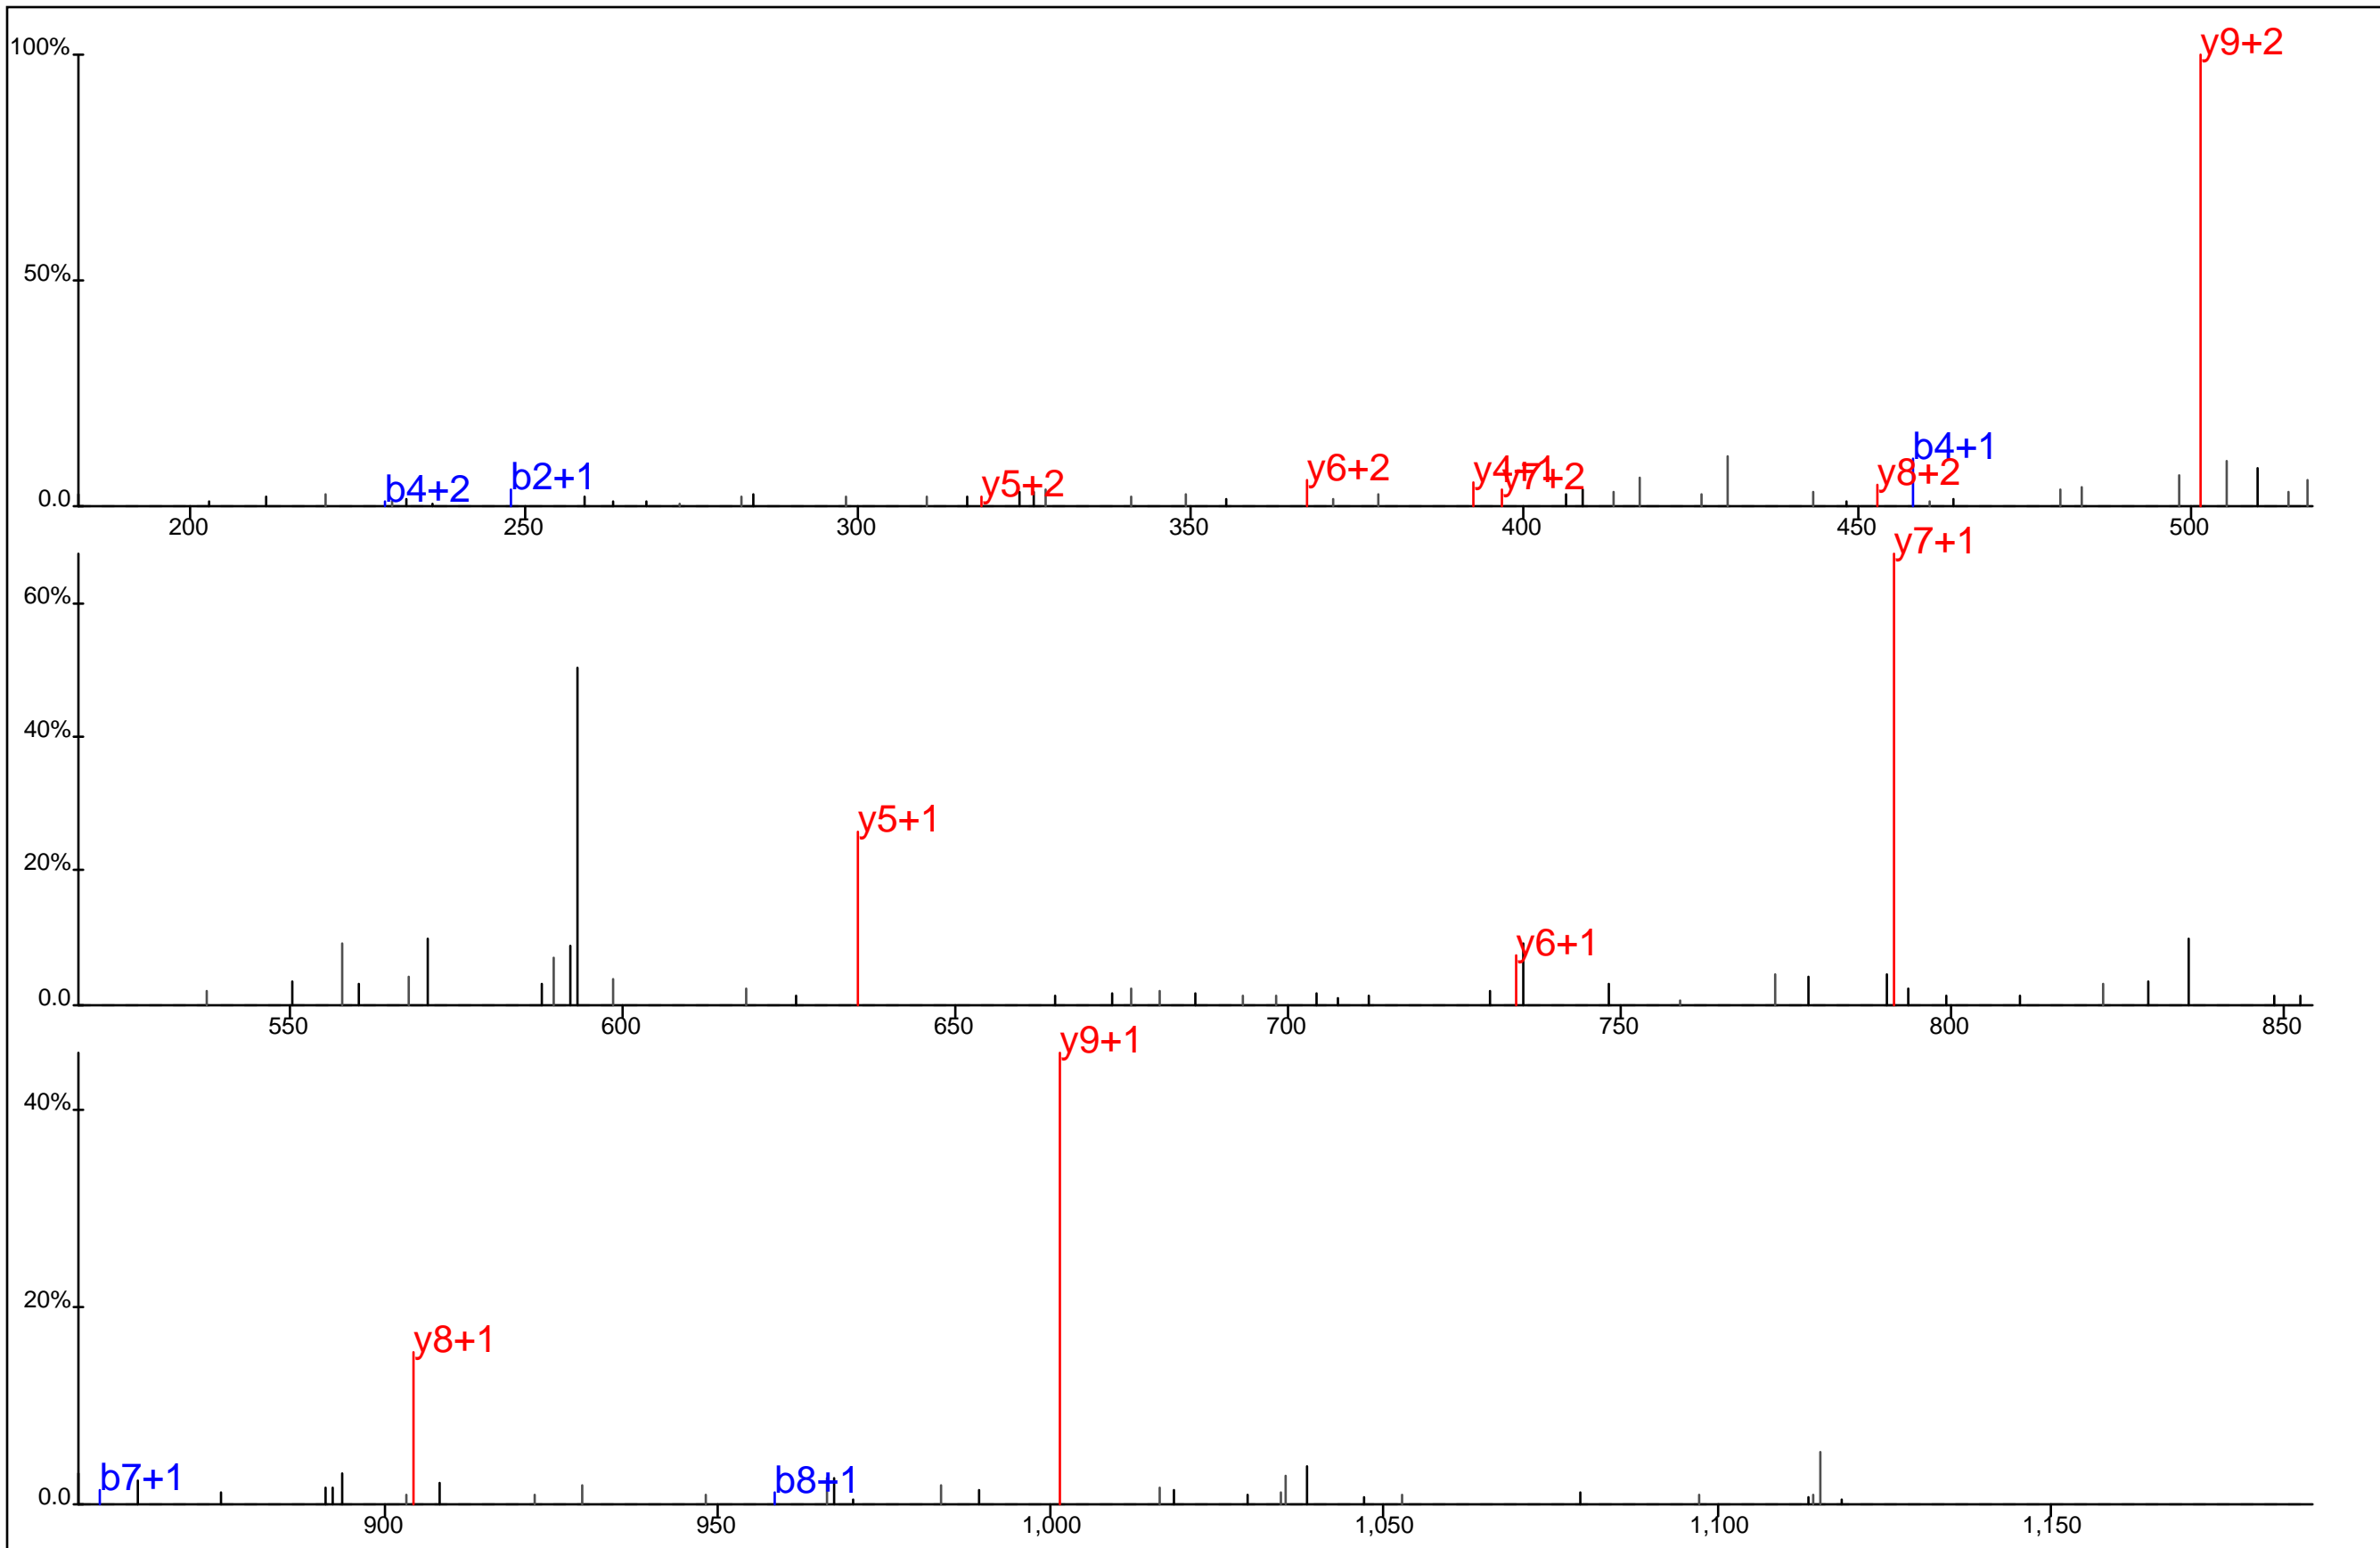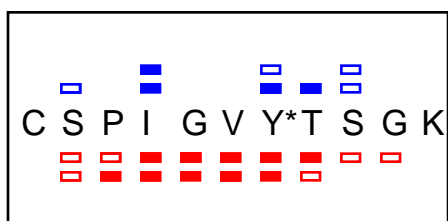

Protein Name: MCM5  
 gi Accession: 0  
 Precursor Mass: 624.7708+2  
 Delta Mass: 0.966 ppm  
 XCorr: 23.79

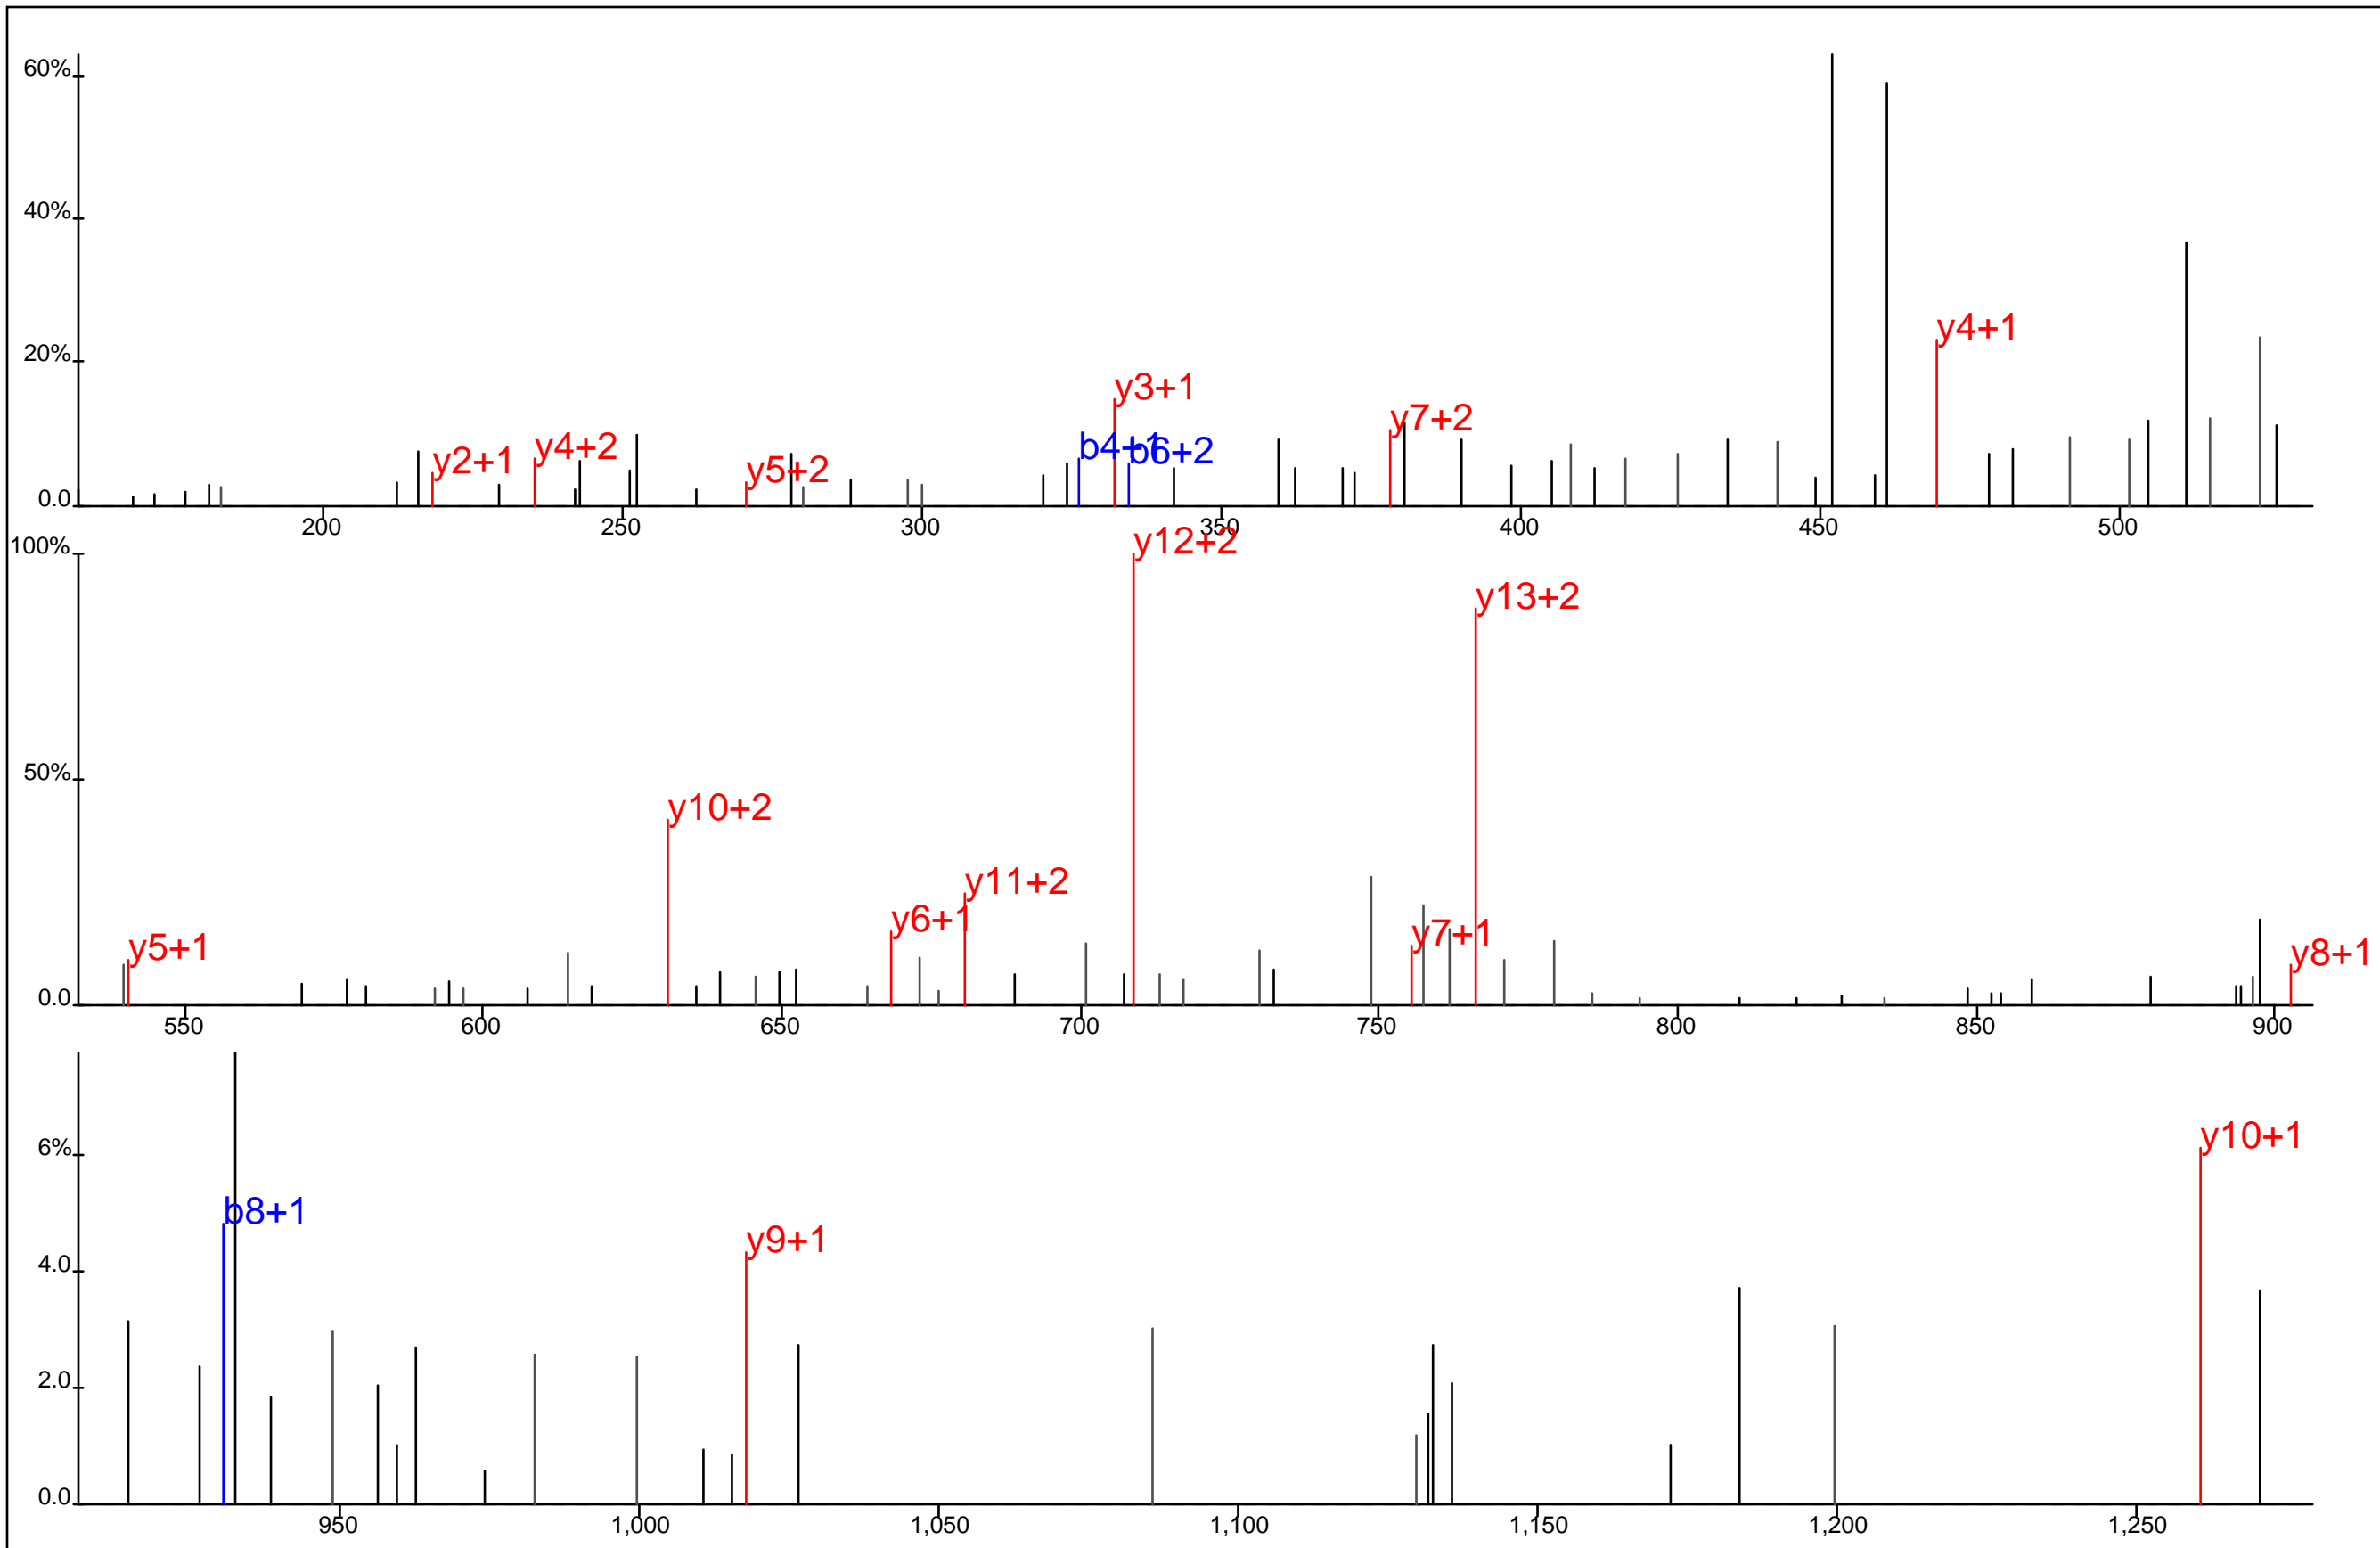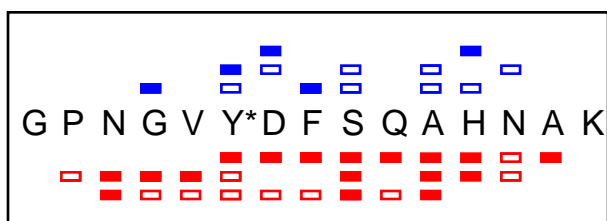

Protein Name: Melanoma antigen family D, 1  
 gi Accession: 0  
 Precursor Mass: 562.2411+3  
 Delta Mass: 1.552 ppm  
 XCorr: 28.9

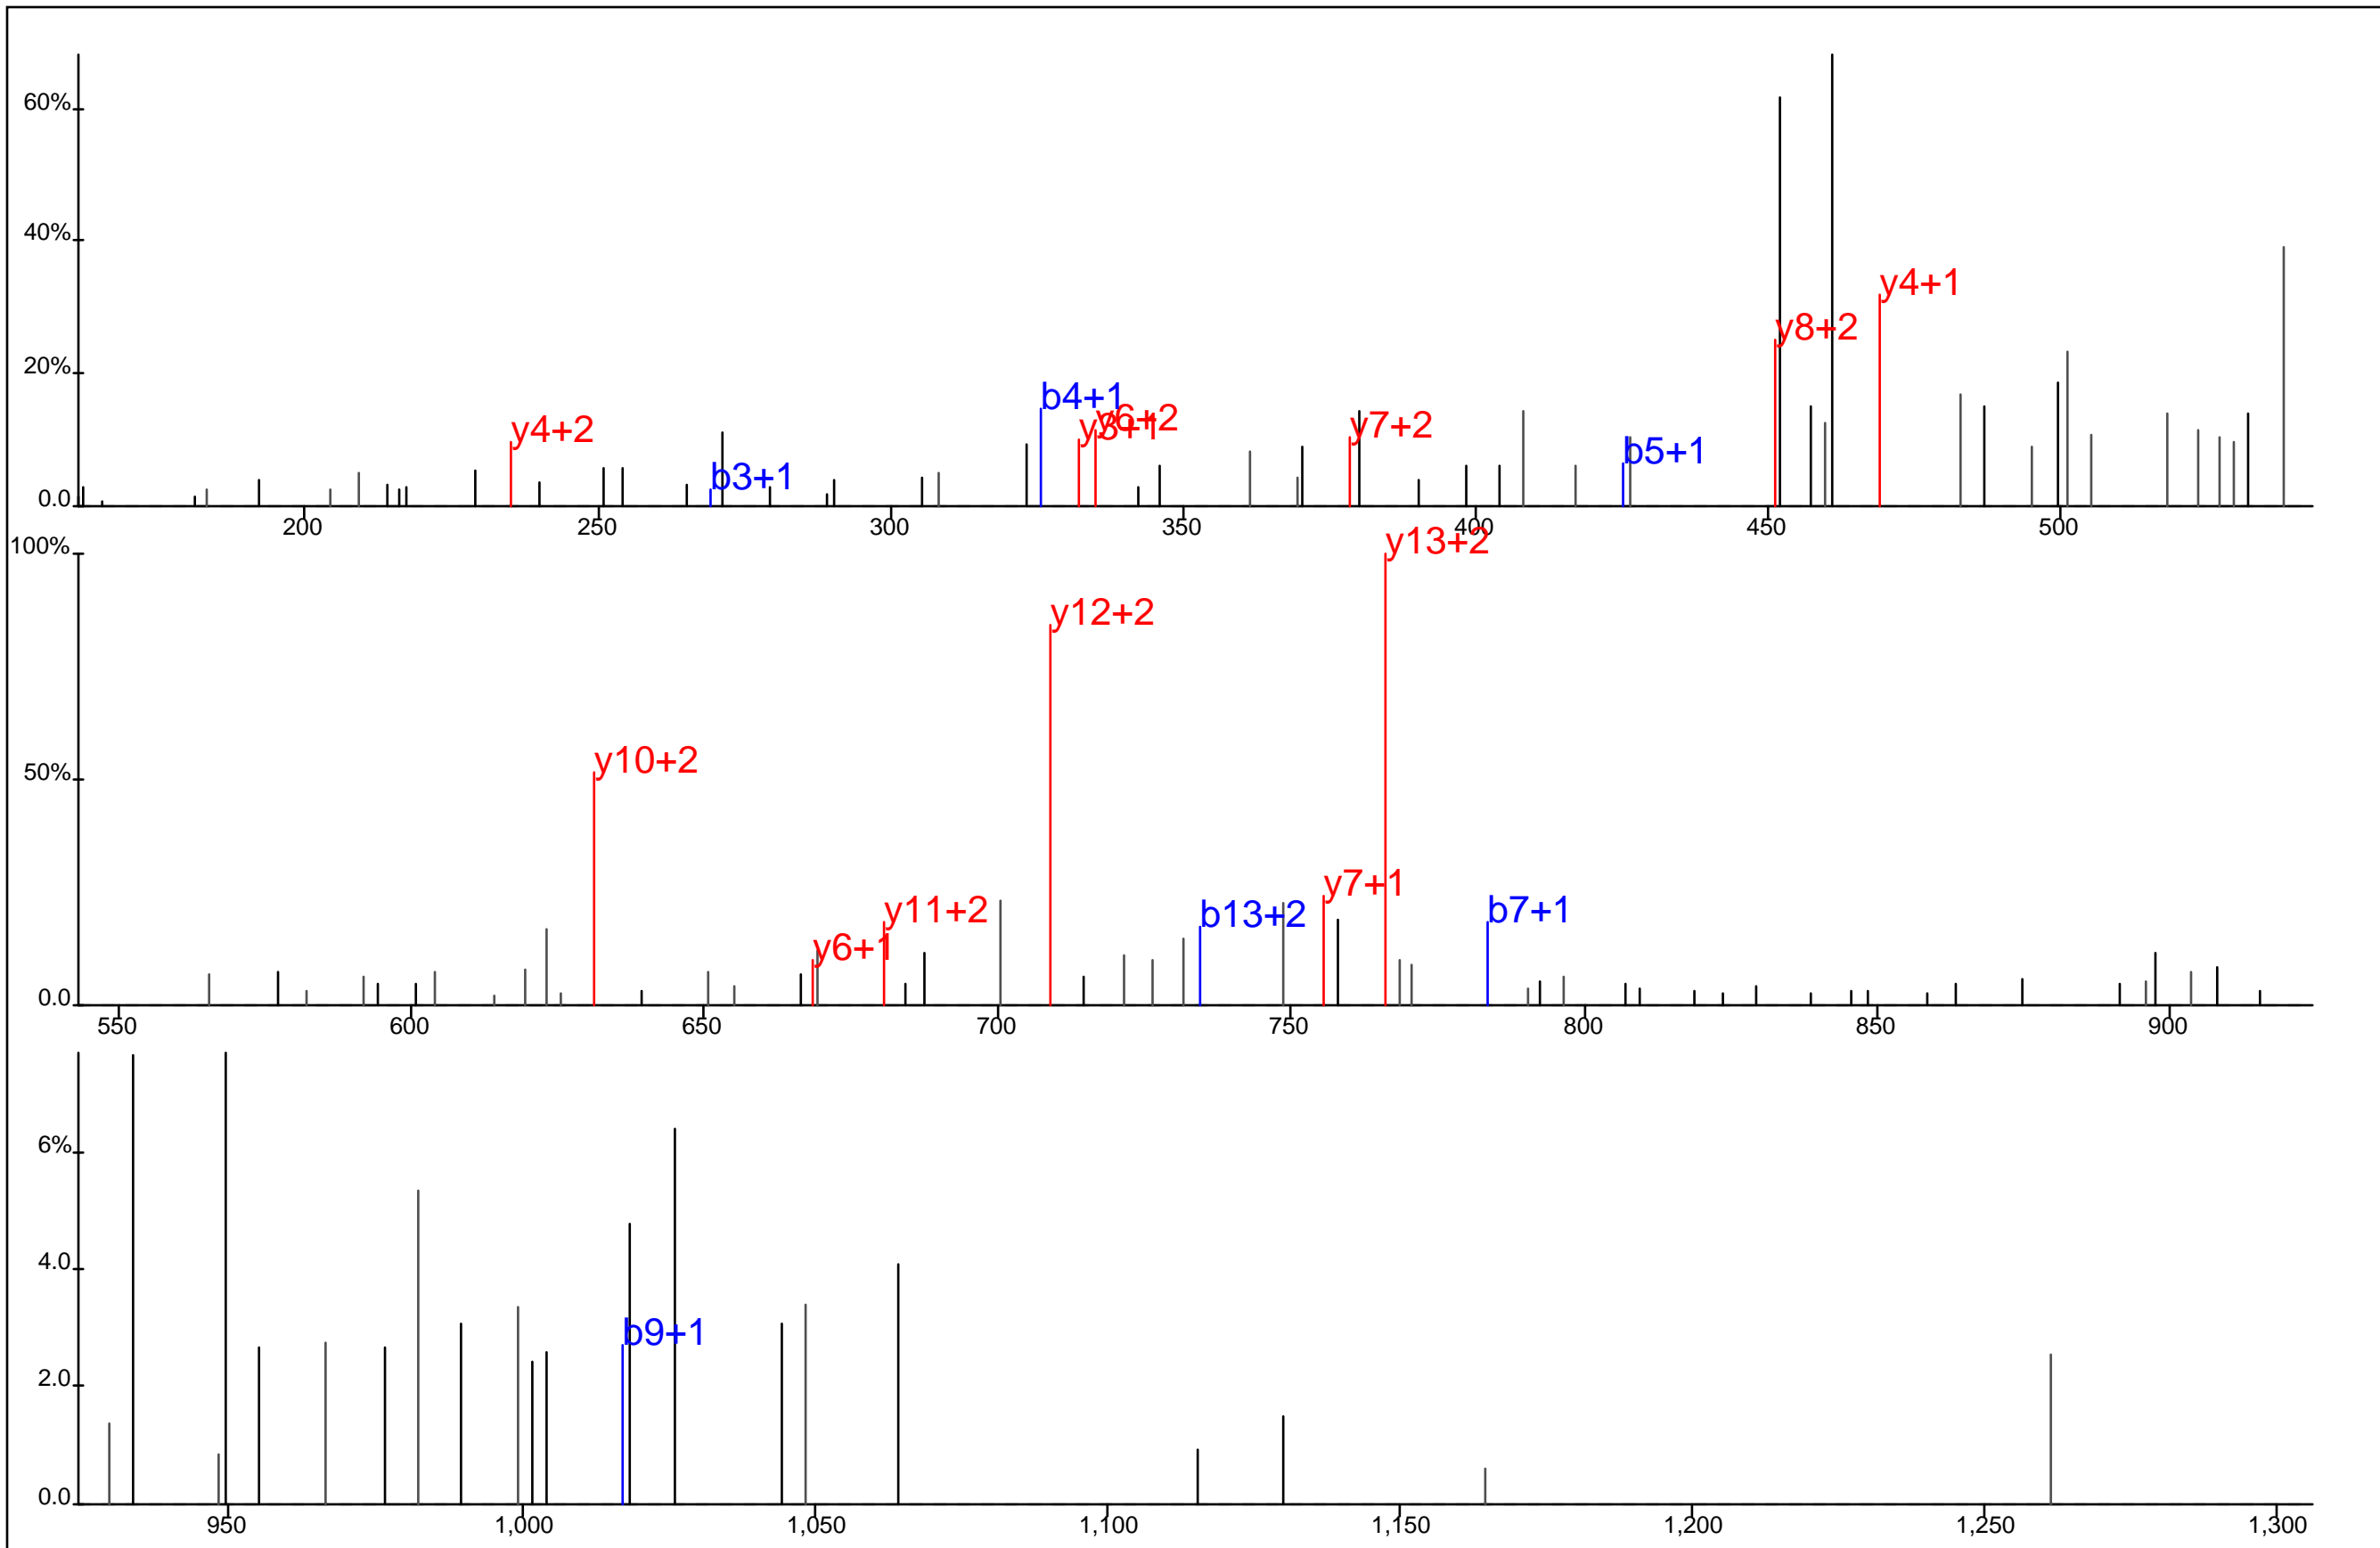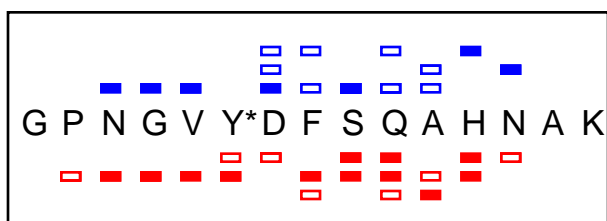

Protein Name: Melanoma antigen family D, 1  
 gi Accession: 0  
 Precursor Mass: 562.2397+3  
 Delta Mass: 4.052 ppm  
 XCorr: 22.81

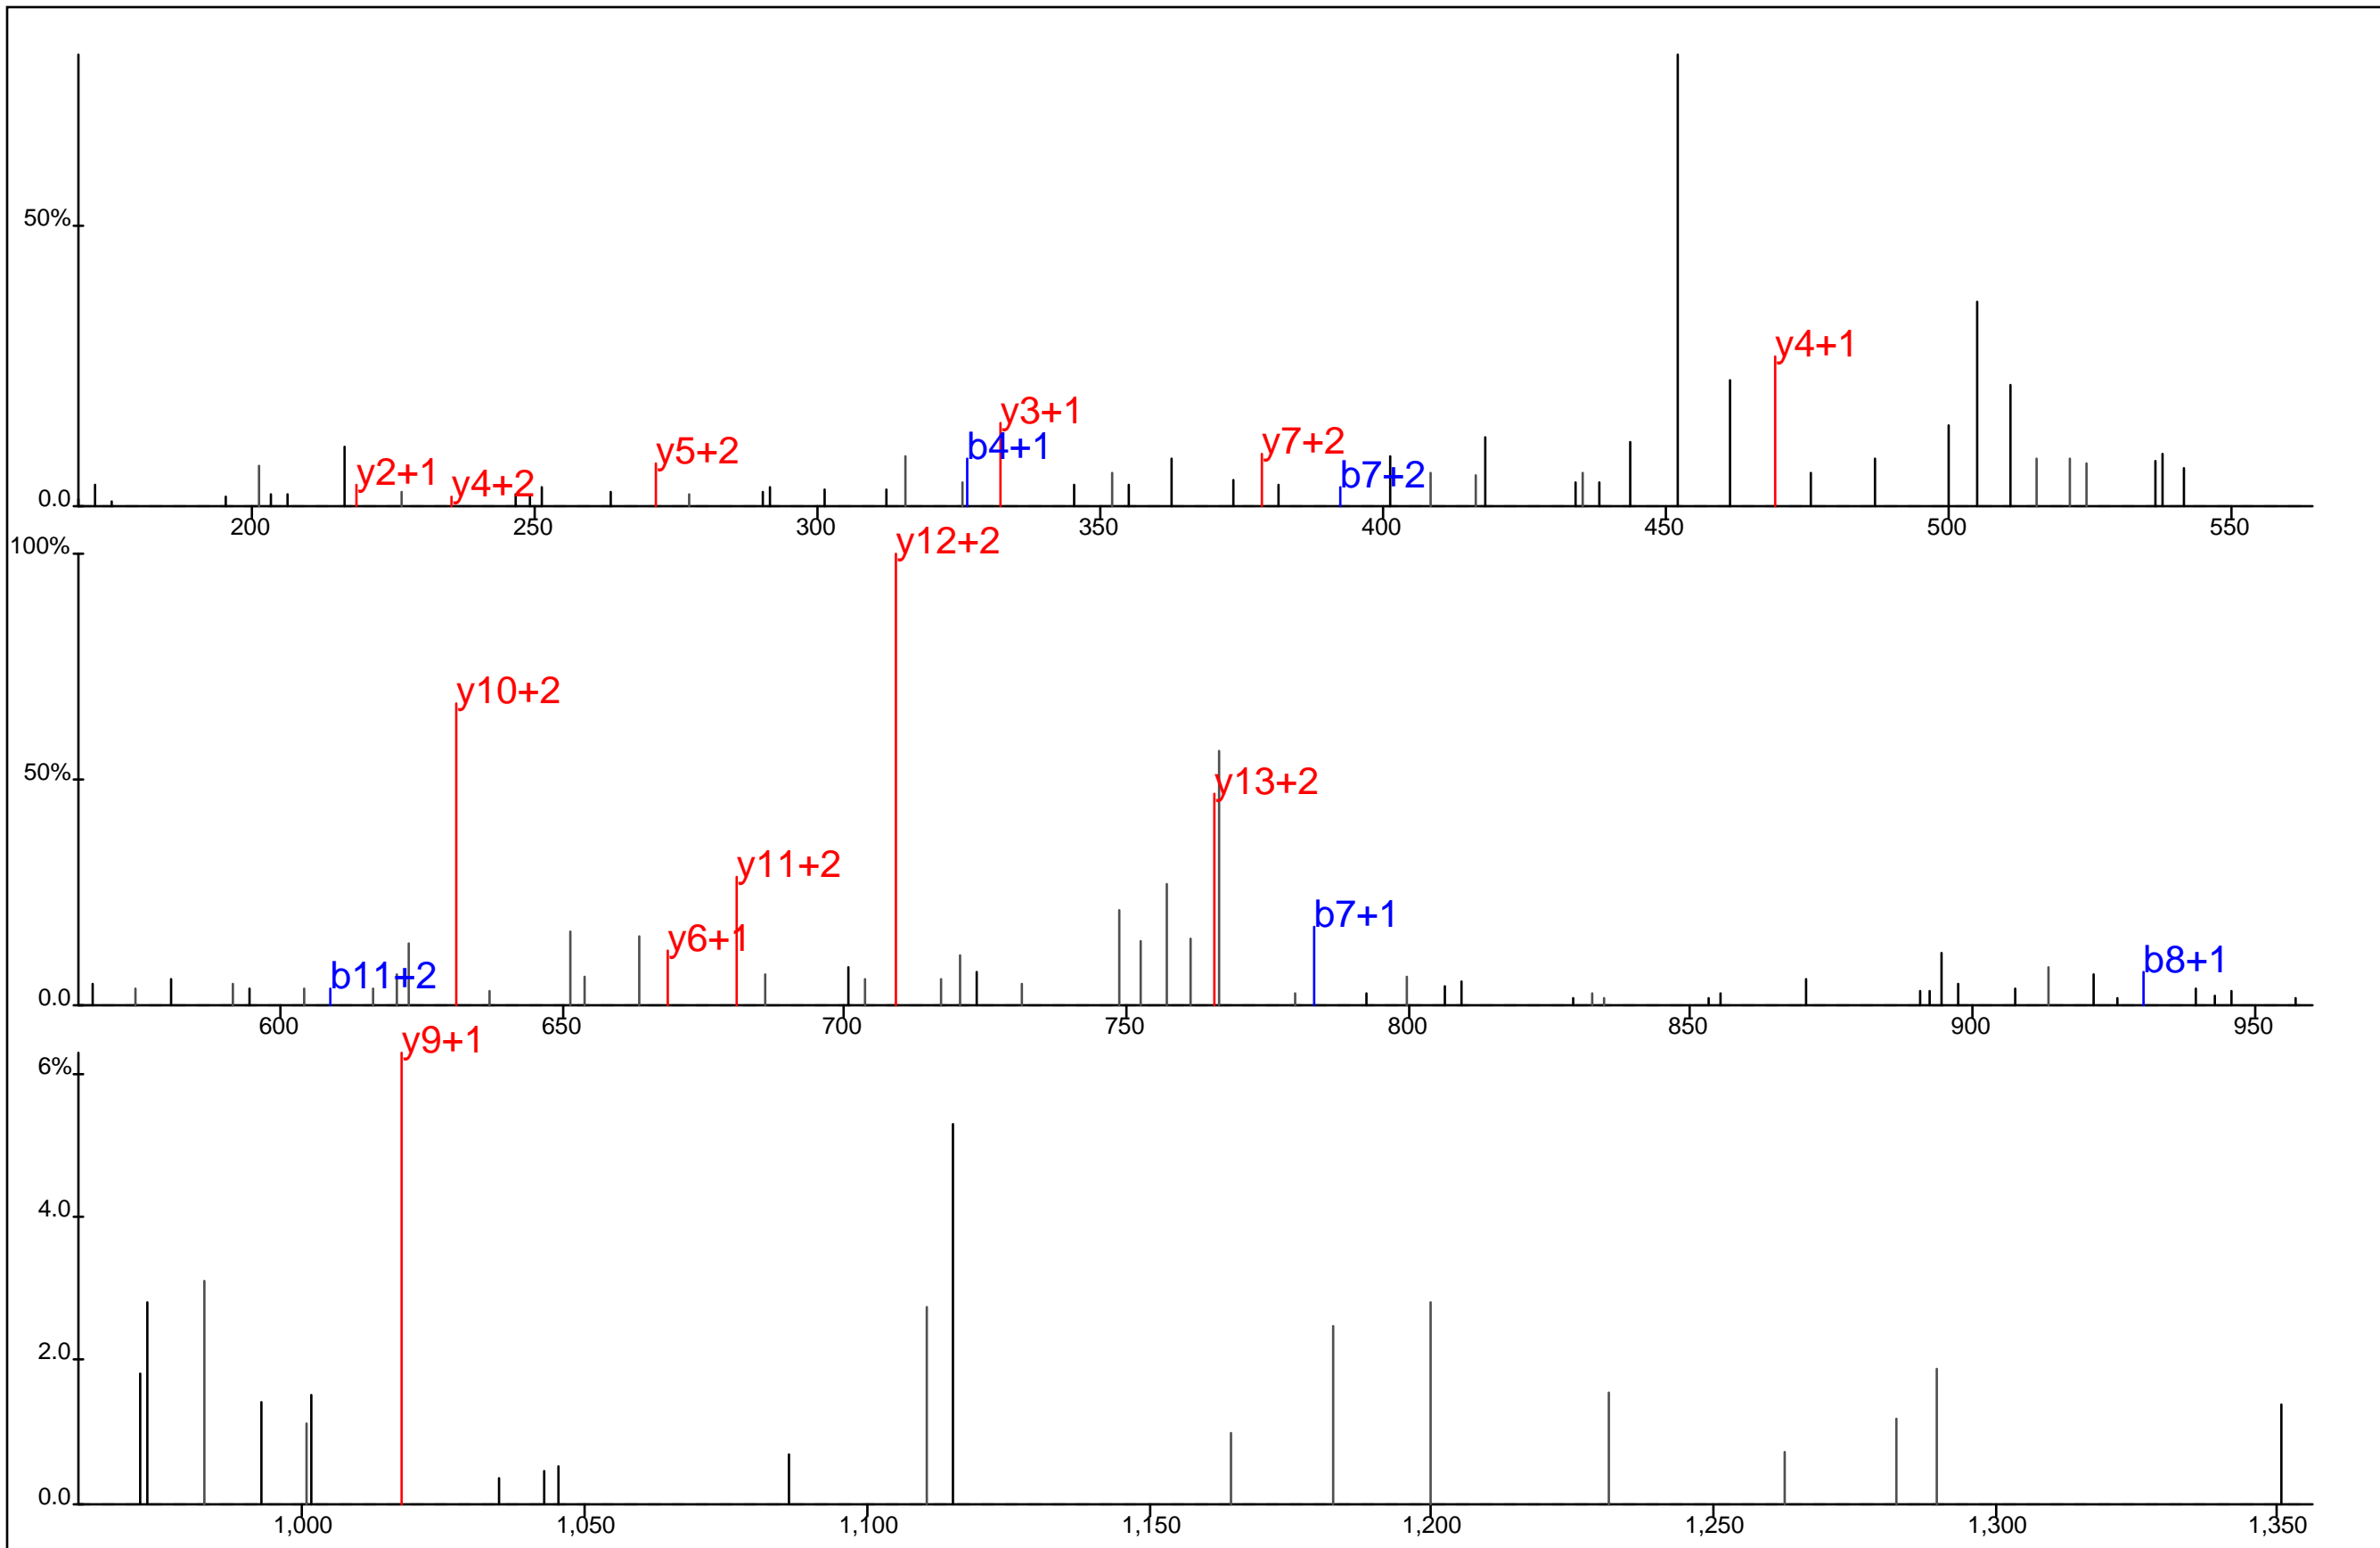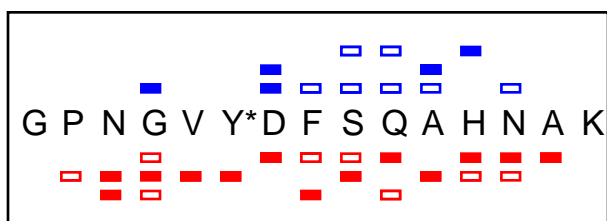

Protein Name: Melanoma antigen family D, 1  
 gi Accession: 0  
 Precursor Mass: 562.2406+3  
 Delta Mass: 2.529 ppm  
 XCorr: 32.35

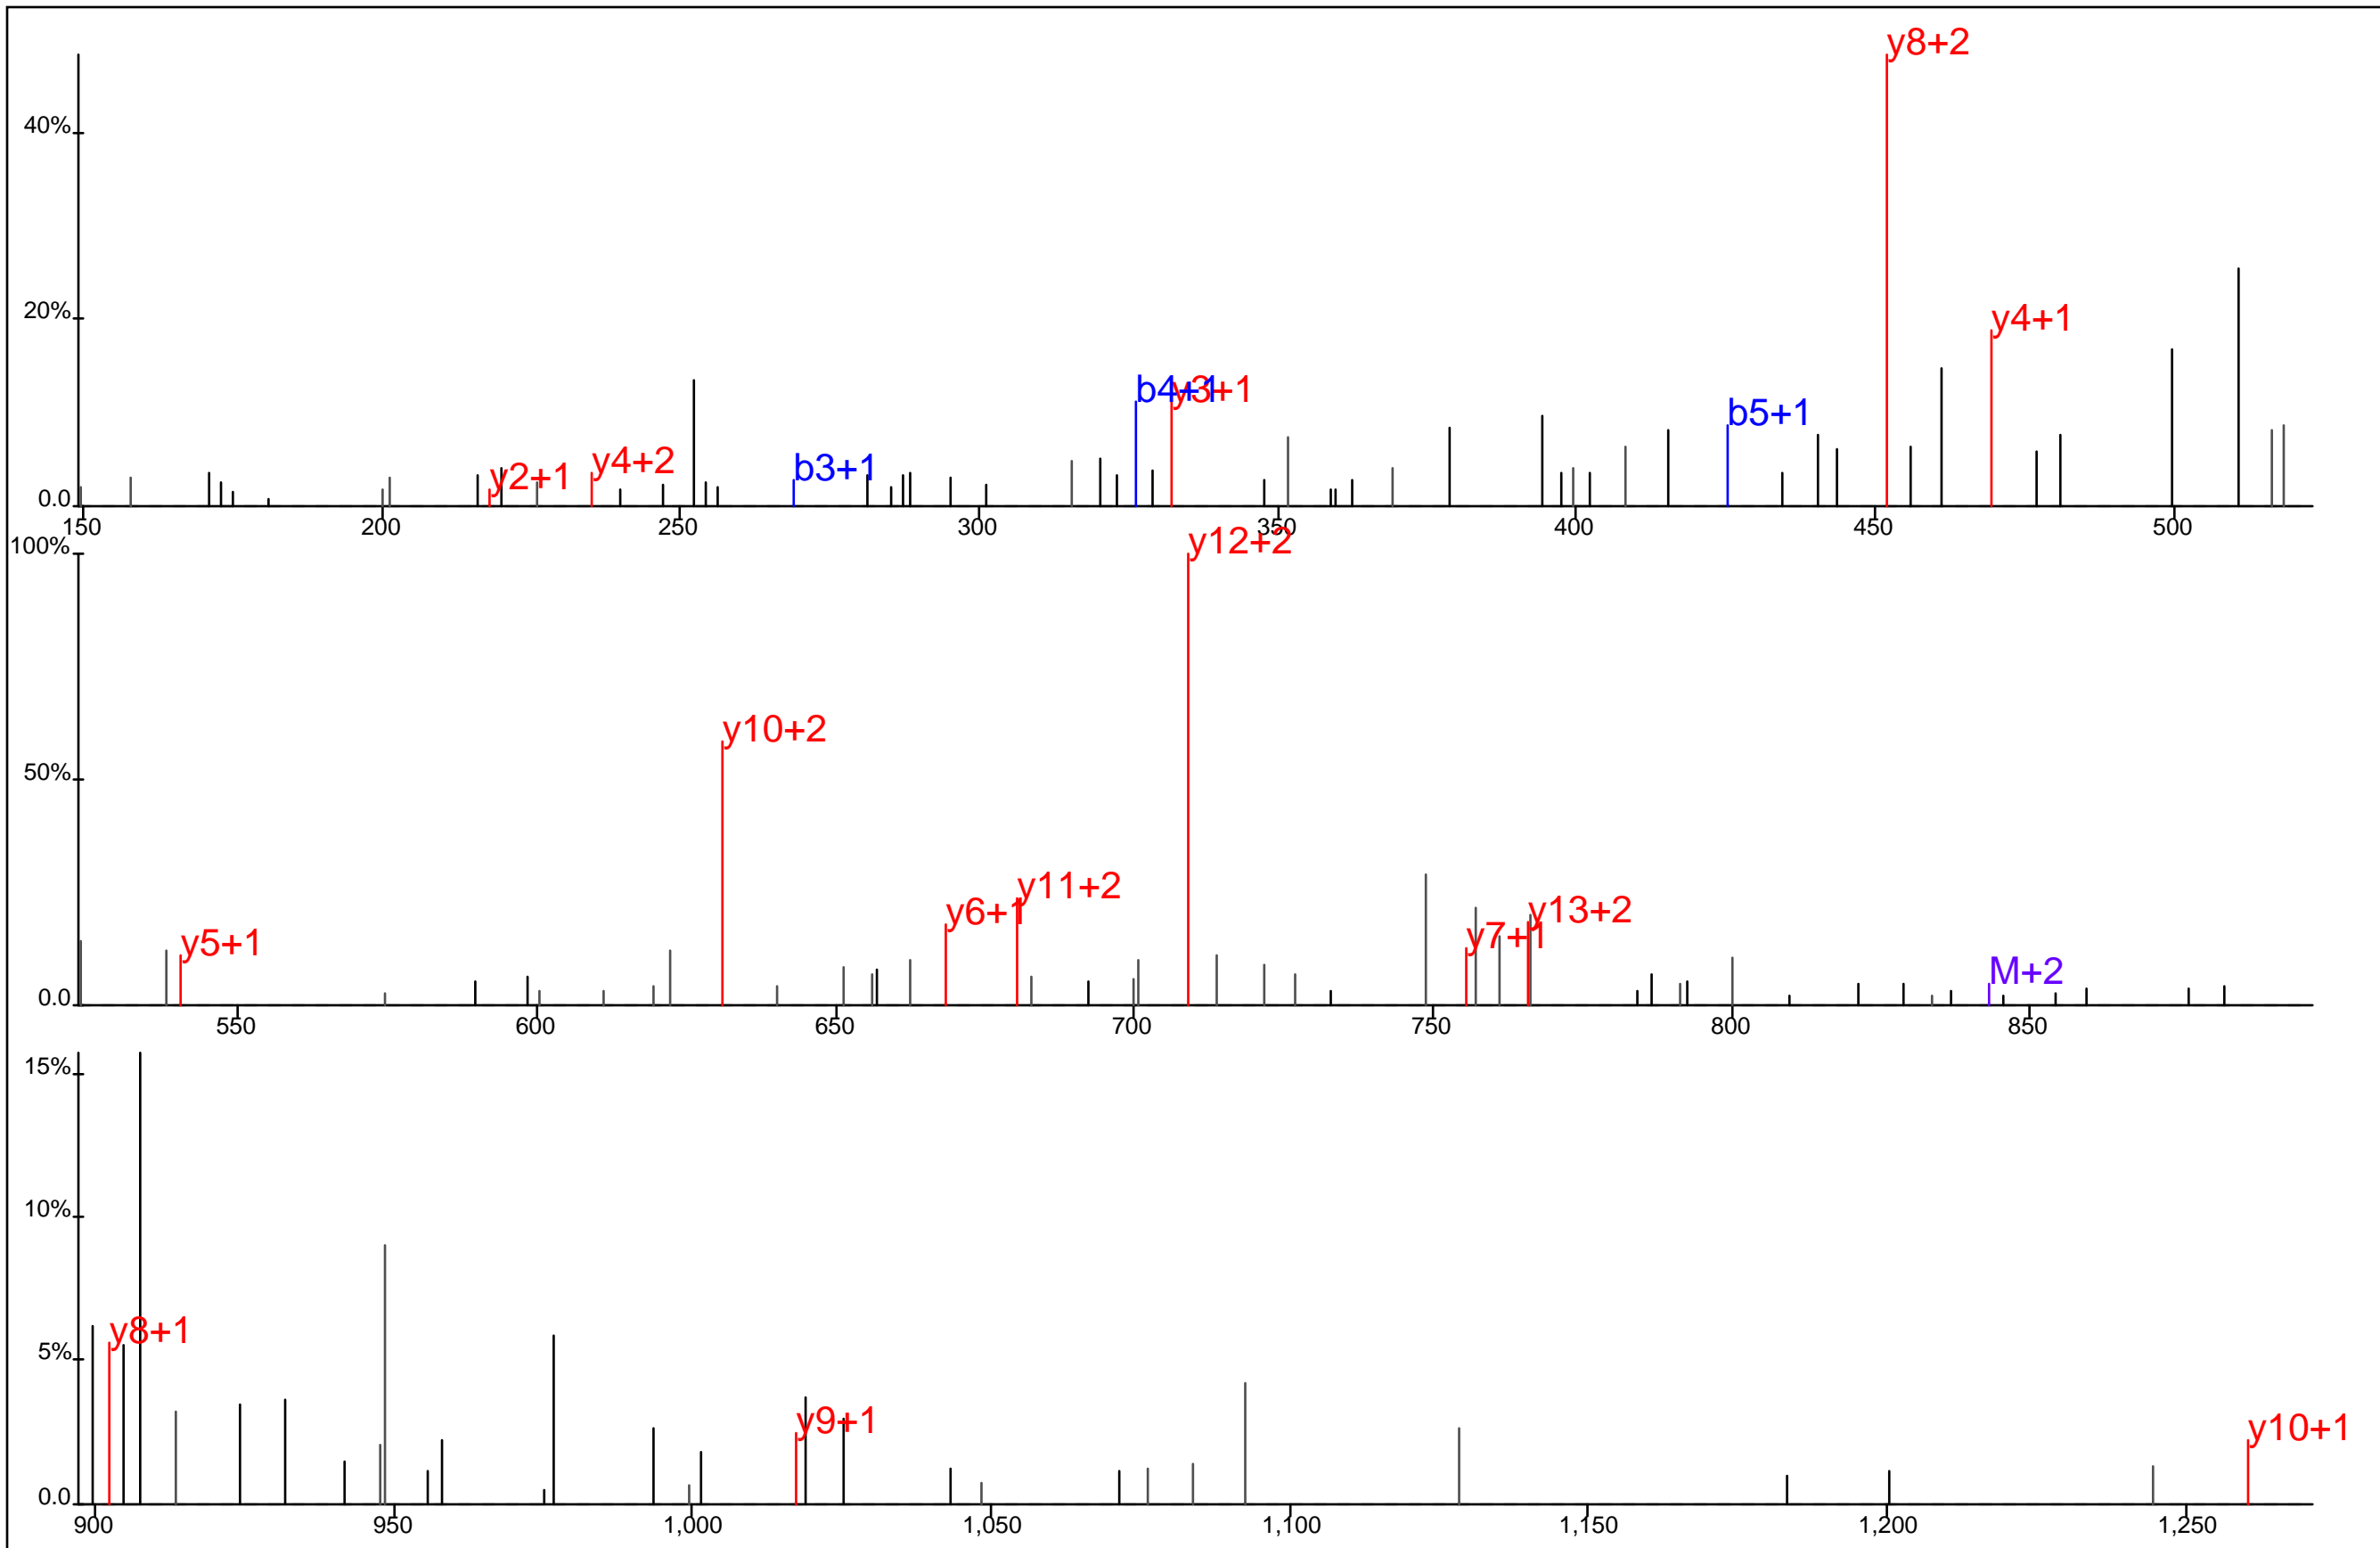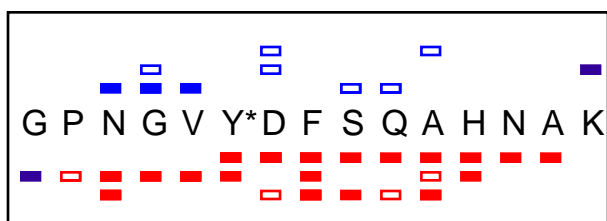

Protein Name: Melanoma antigen family D, 1  
 gi Accession: 0  
 Precursor Mass: 562.2407+3  
 Delta Mass: 2.312 ppm  
 XCorr: 25.34



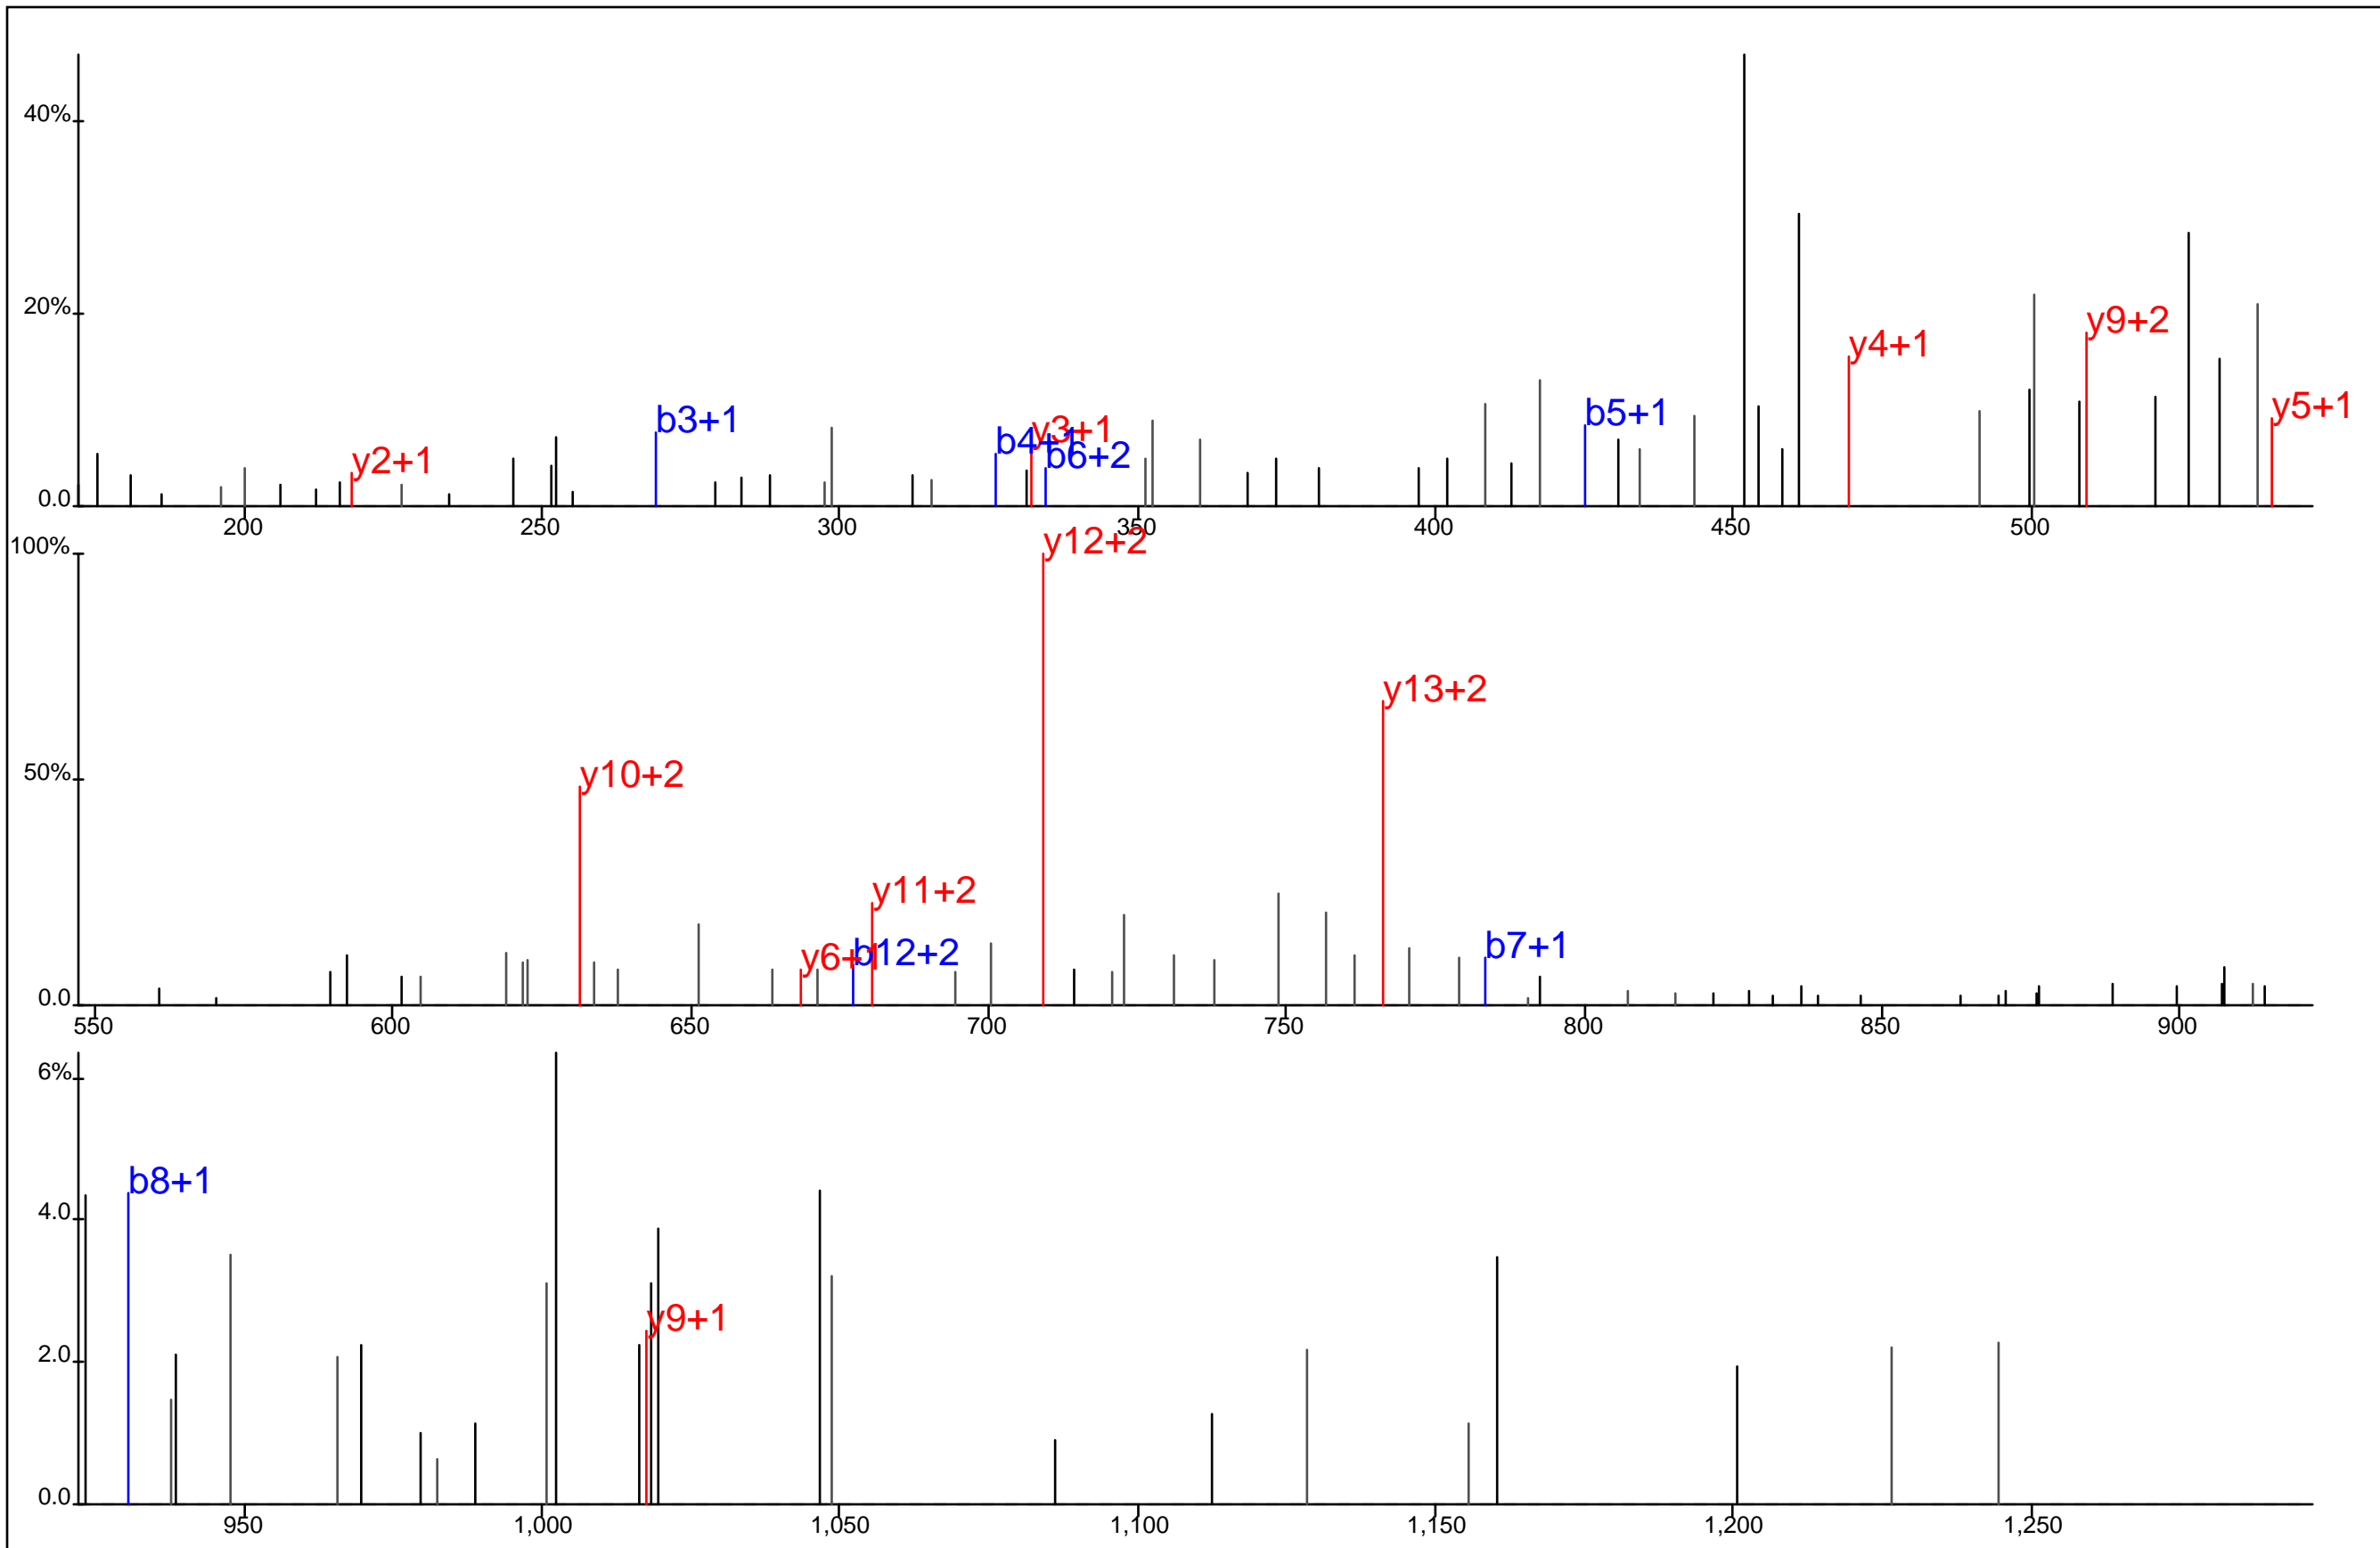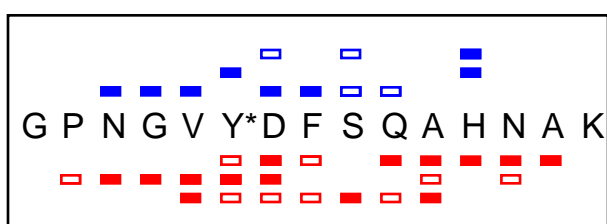

Protein Name: Melanoma antigen family D, 1  
 gi Accession: 0  
 Precursor Mass: 562.2413+3  
 Delta Mass: 1.226 ppm  
 XCorr: 23.15



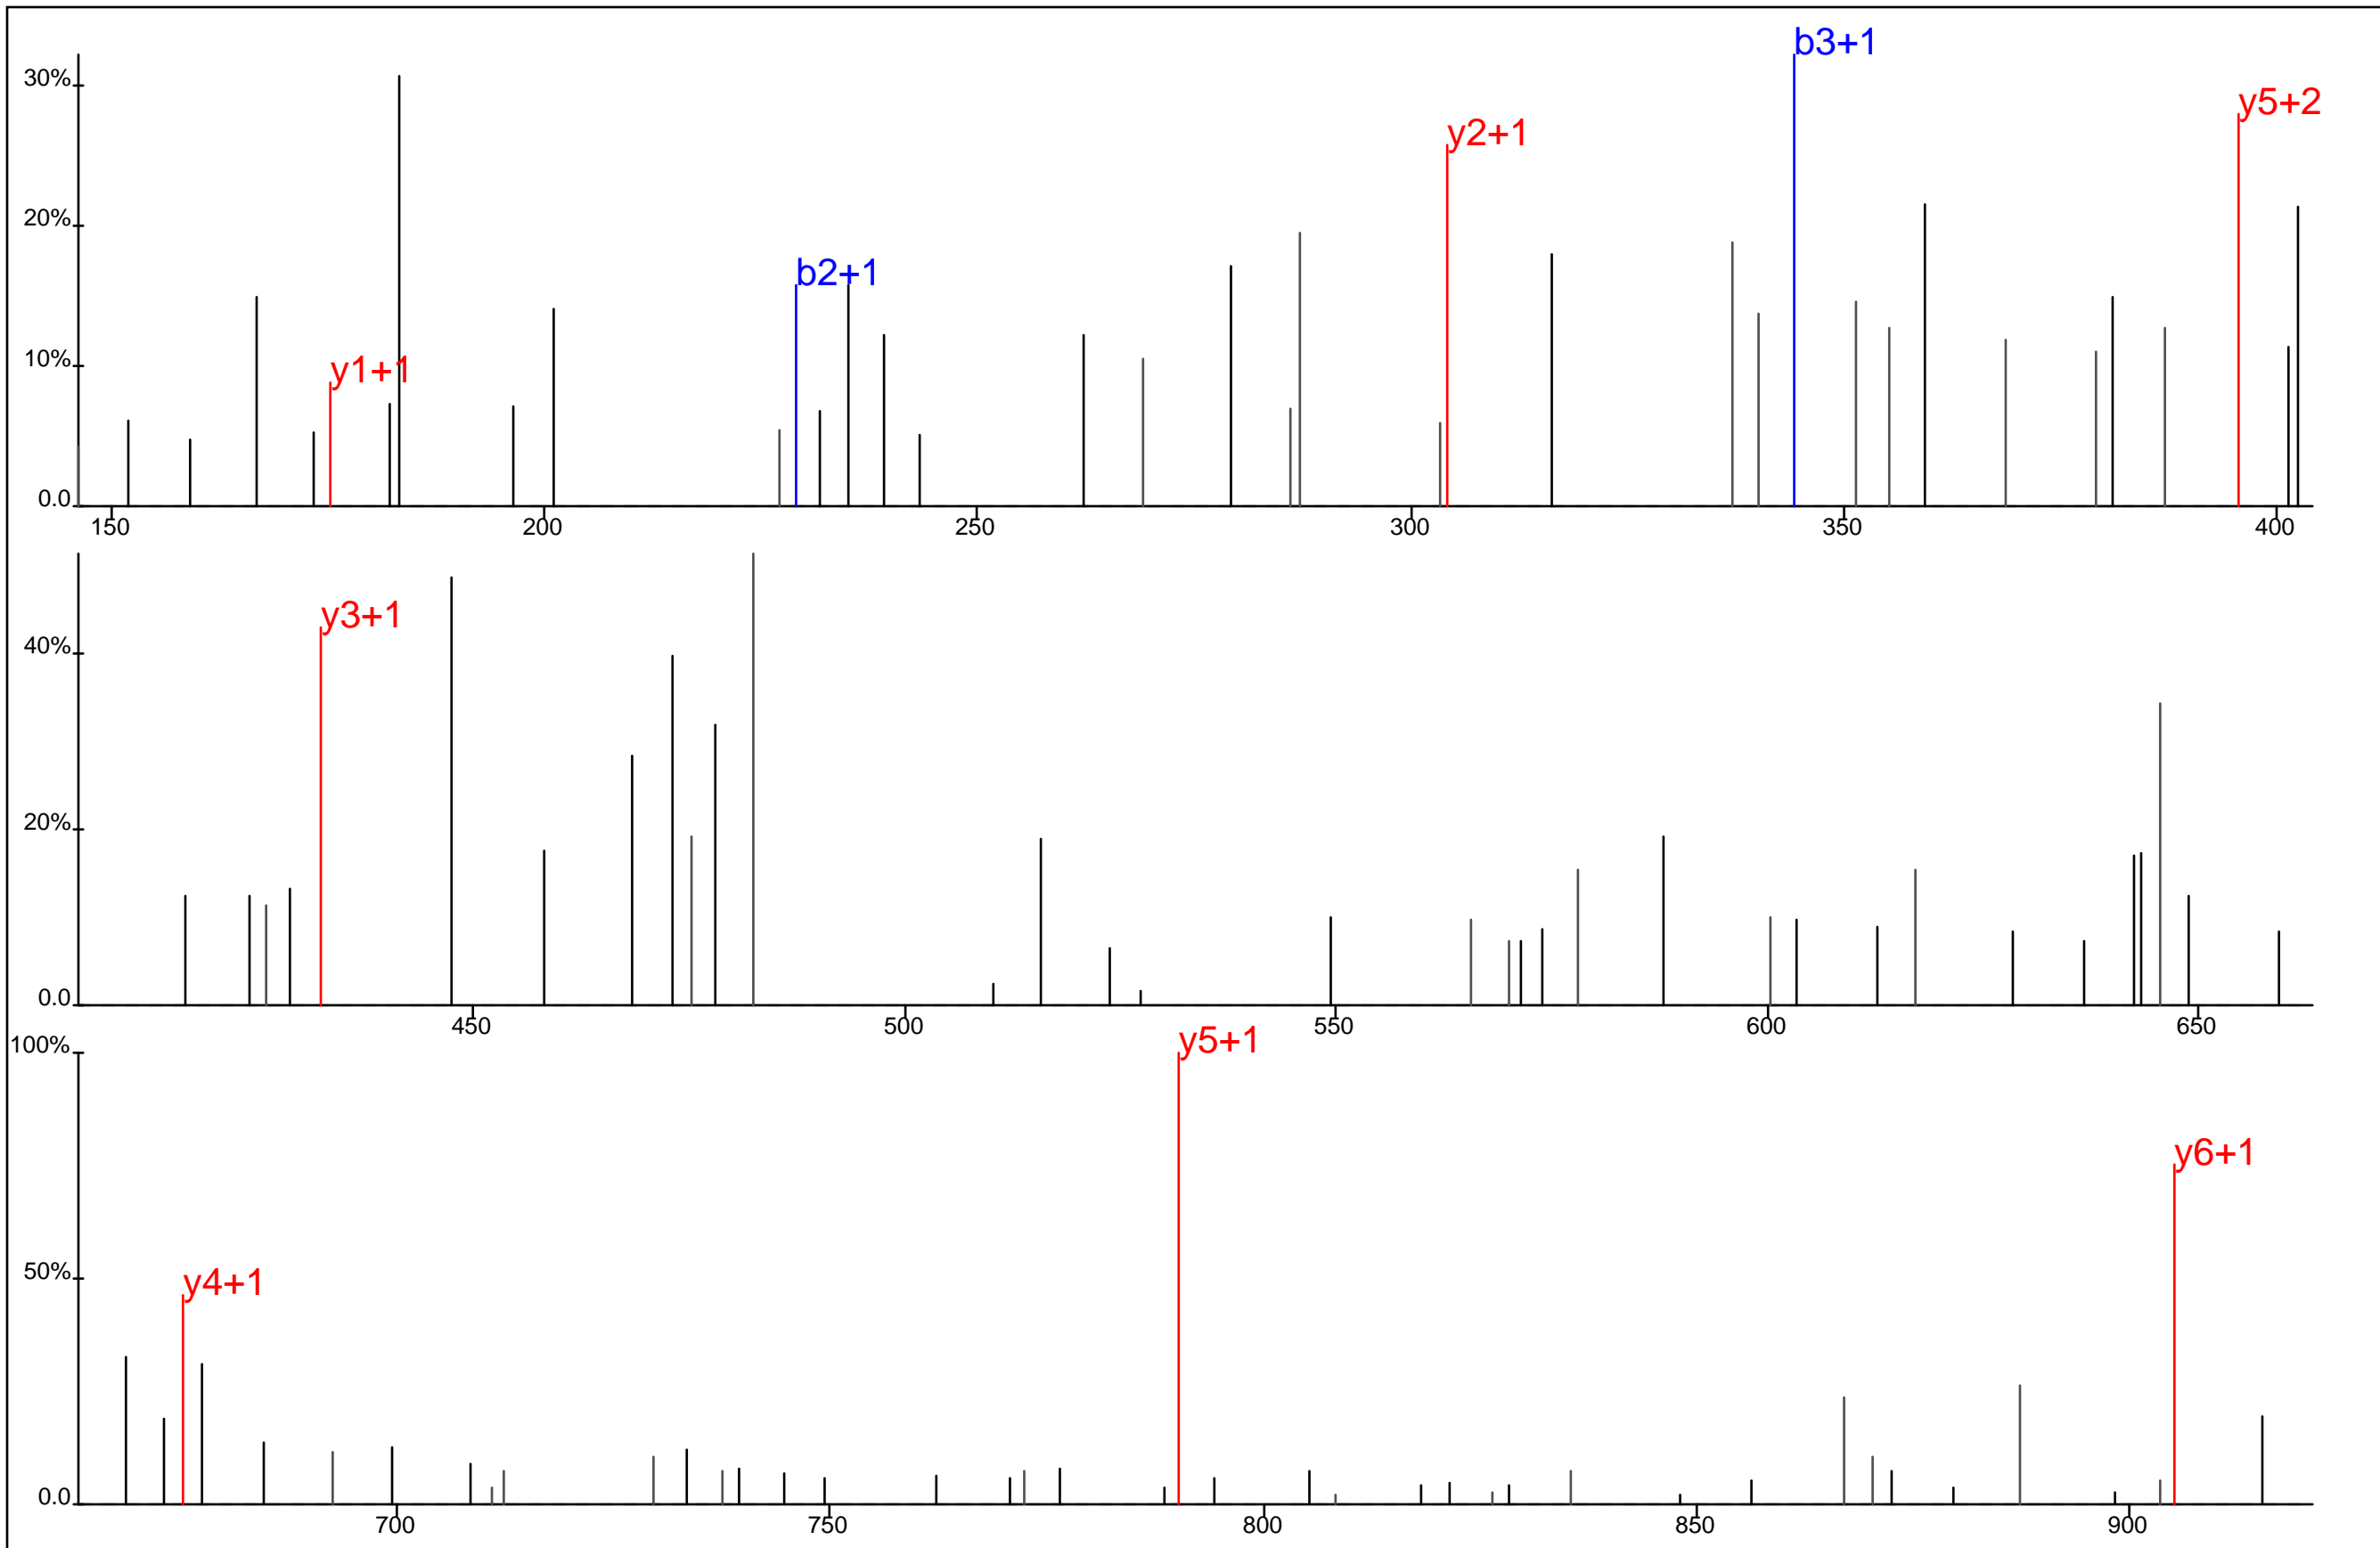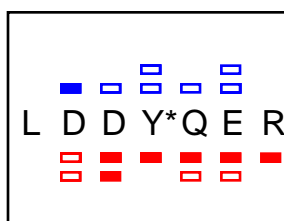

Protein Name: Membrane component, chromosome 11, surface marker 1  
 gi Accession: 0  
 Precursor Mass: 509.6973+2  
 Delta Mass: 0.328 ppm  
 XCorr: 21.49

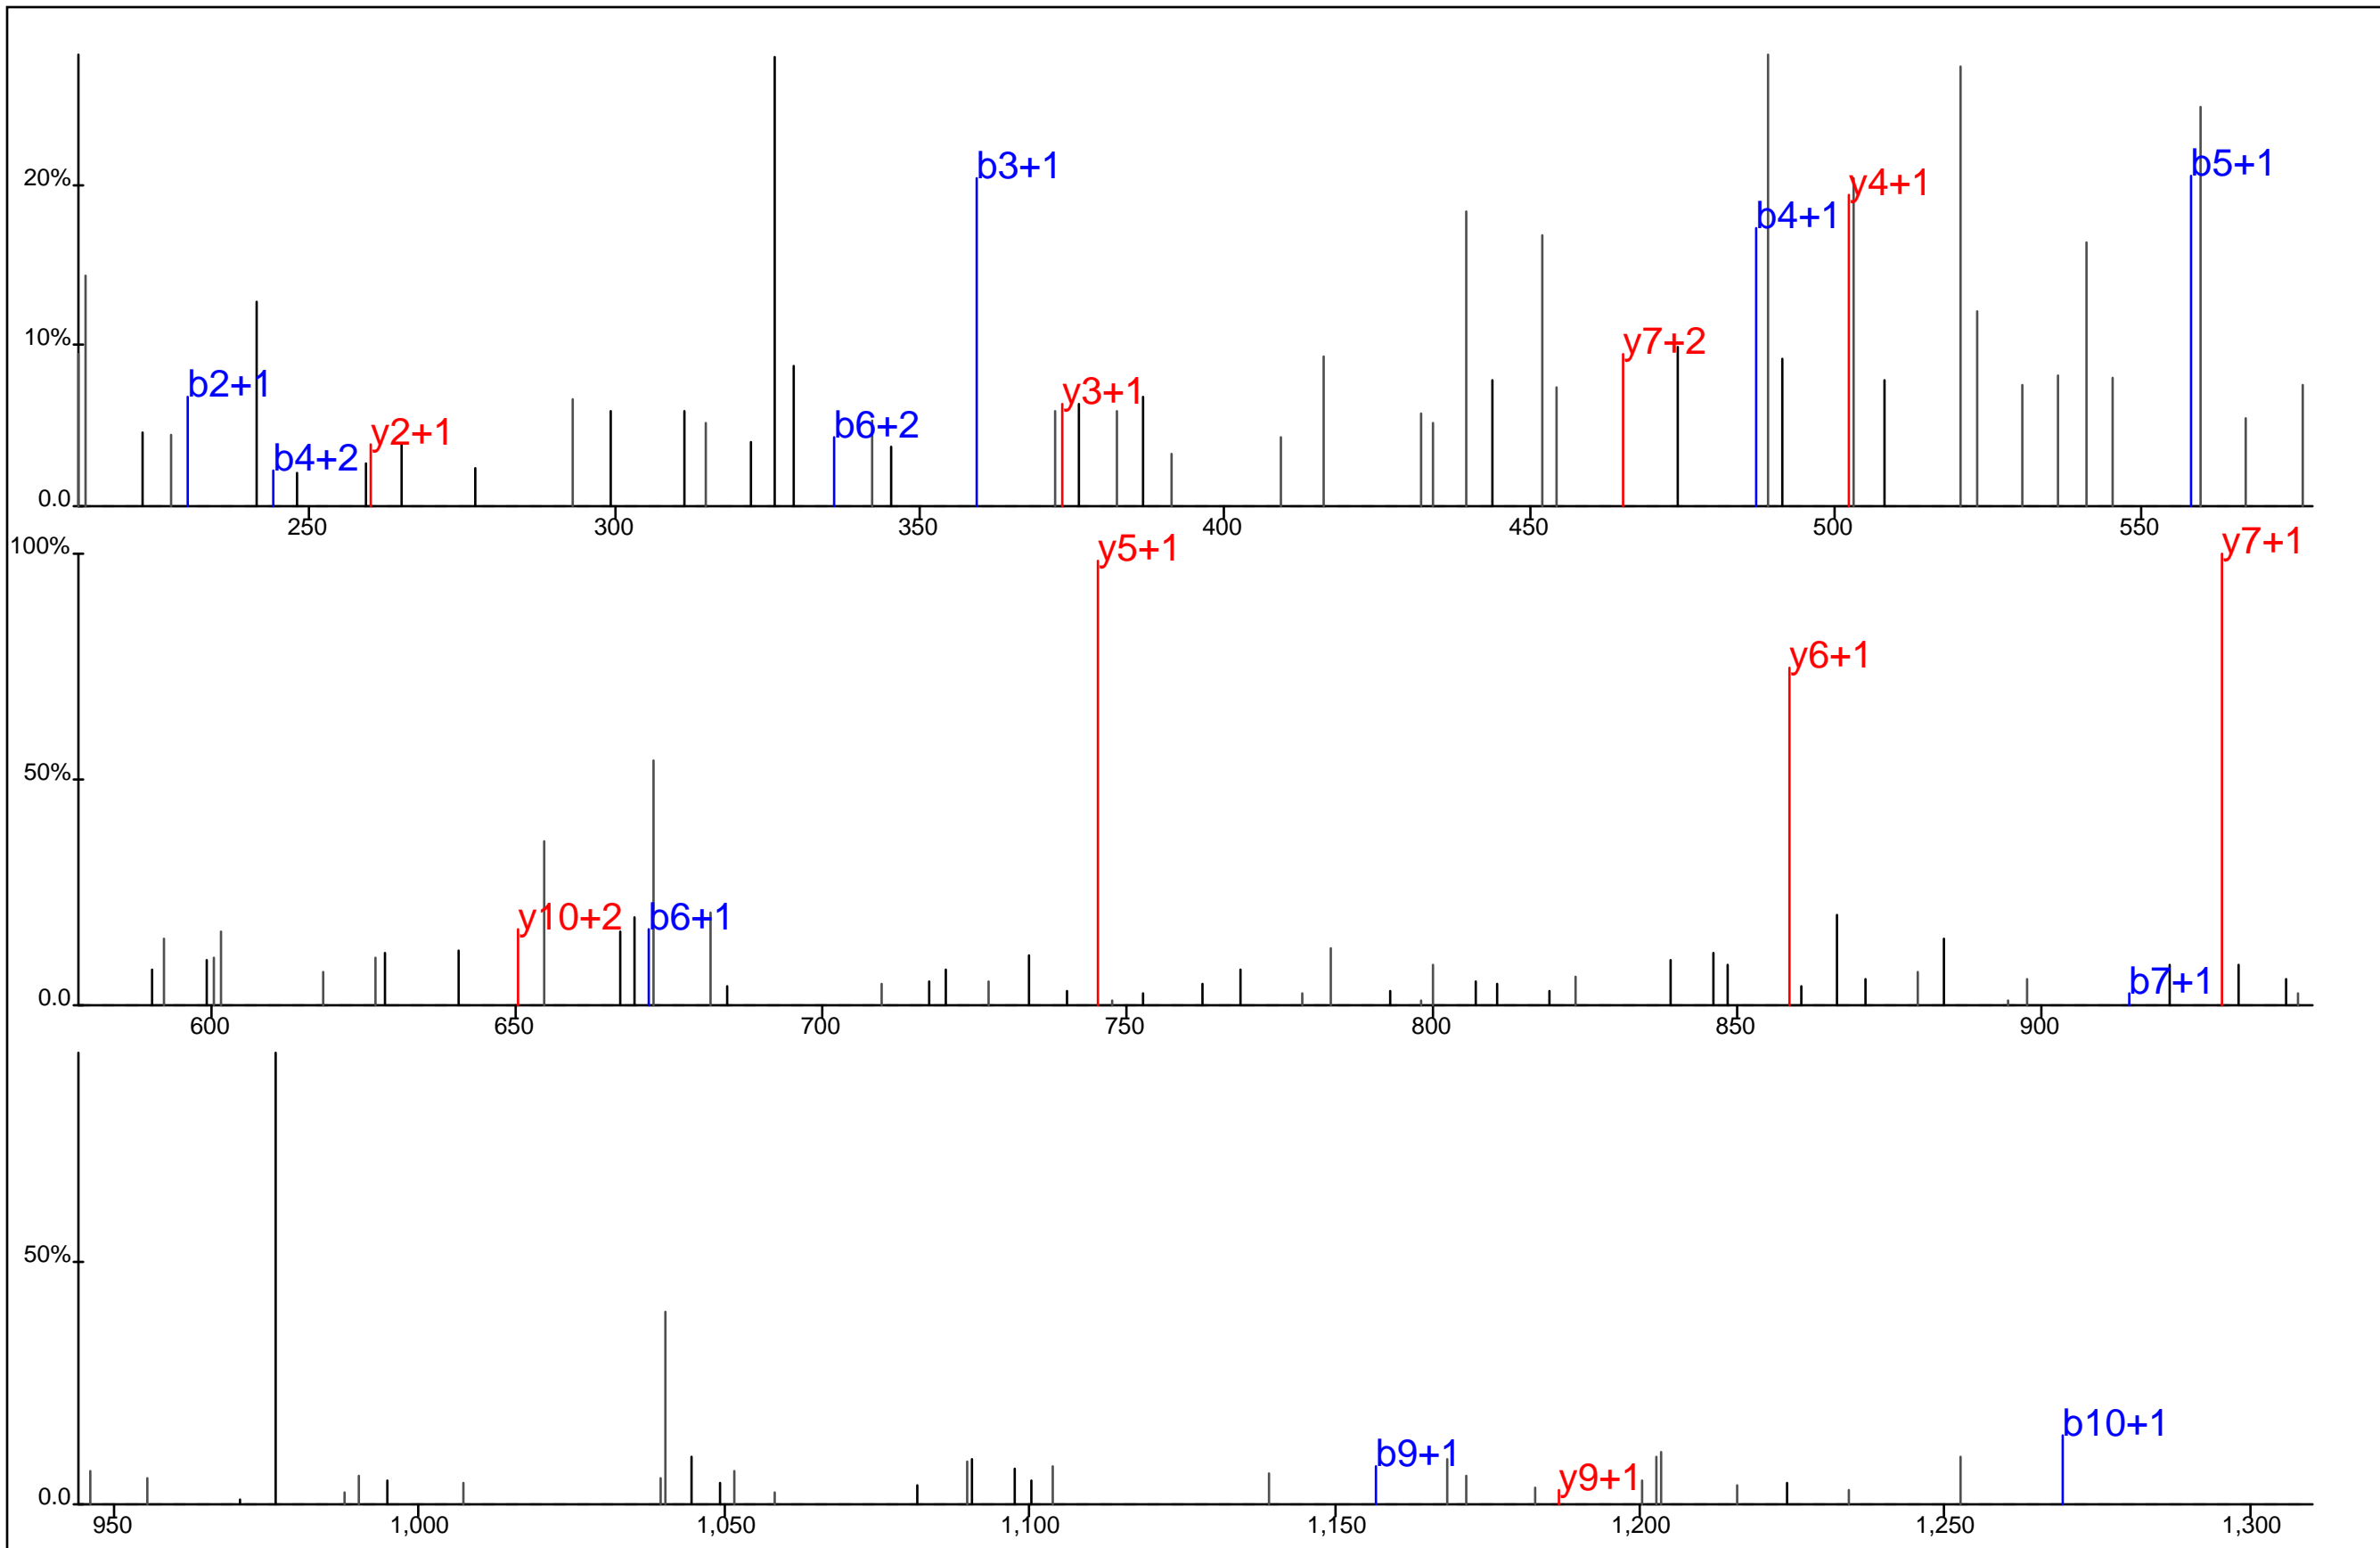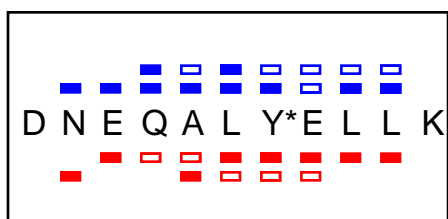

Protein Name: Mesoderm induction early response 1, family member 3  
 gi Accession: 0  
 Precursor Mass: 708.3262+2  
 Delta Mass: 0.114 ppm  
 XCorr: 20.55

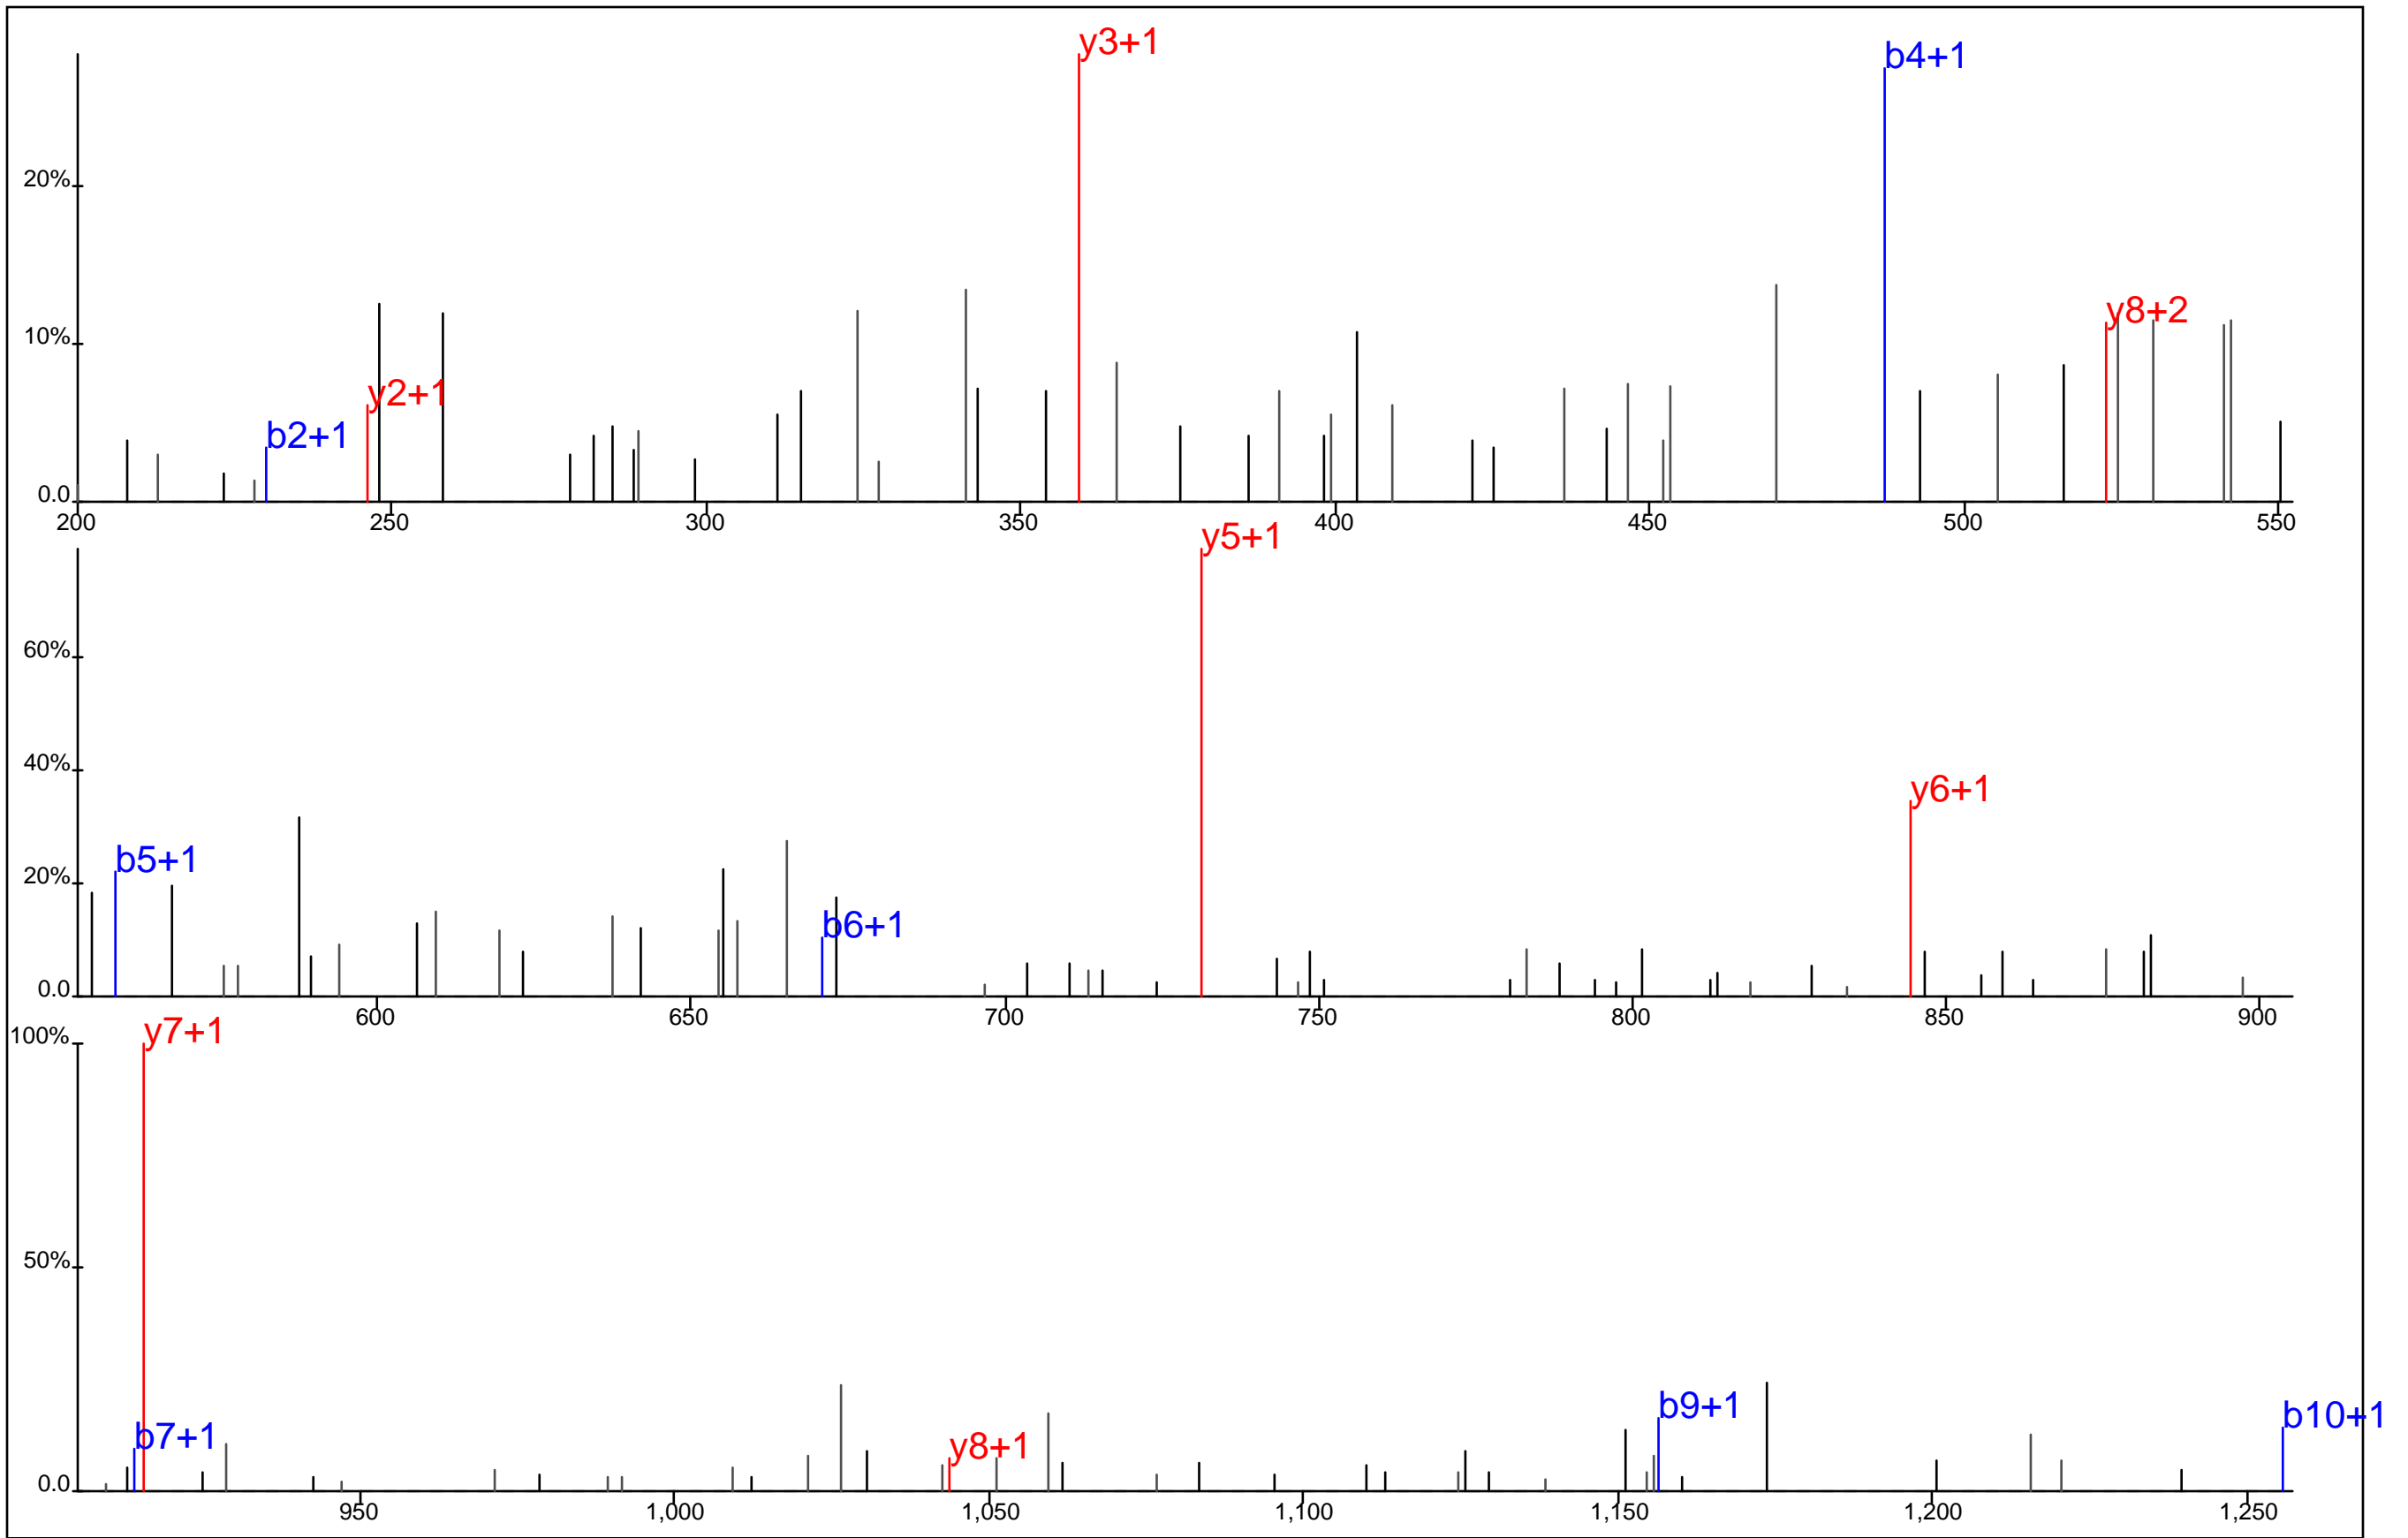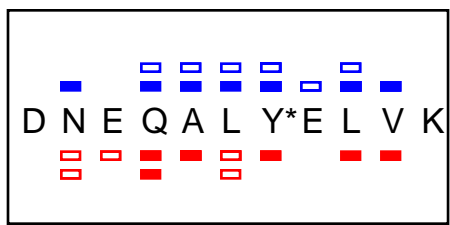

Protein Name: Mesoderm induction early response 1  
 gi Accession: 0  
 Precursor Mass: 701.3160+2  
 Delta Mass: 3.502 ppm  
 XCorr: 23.21





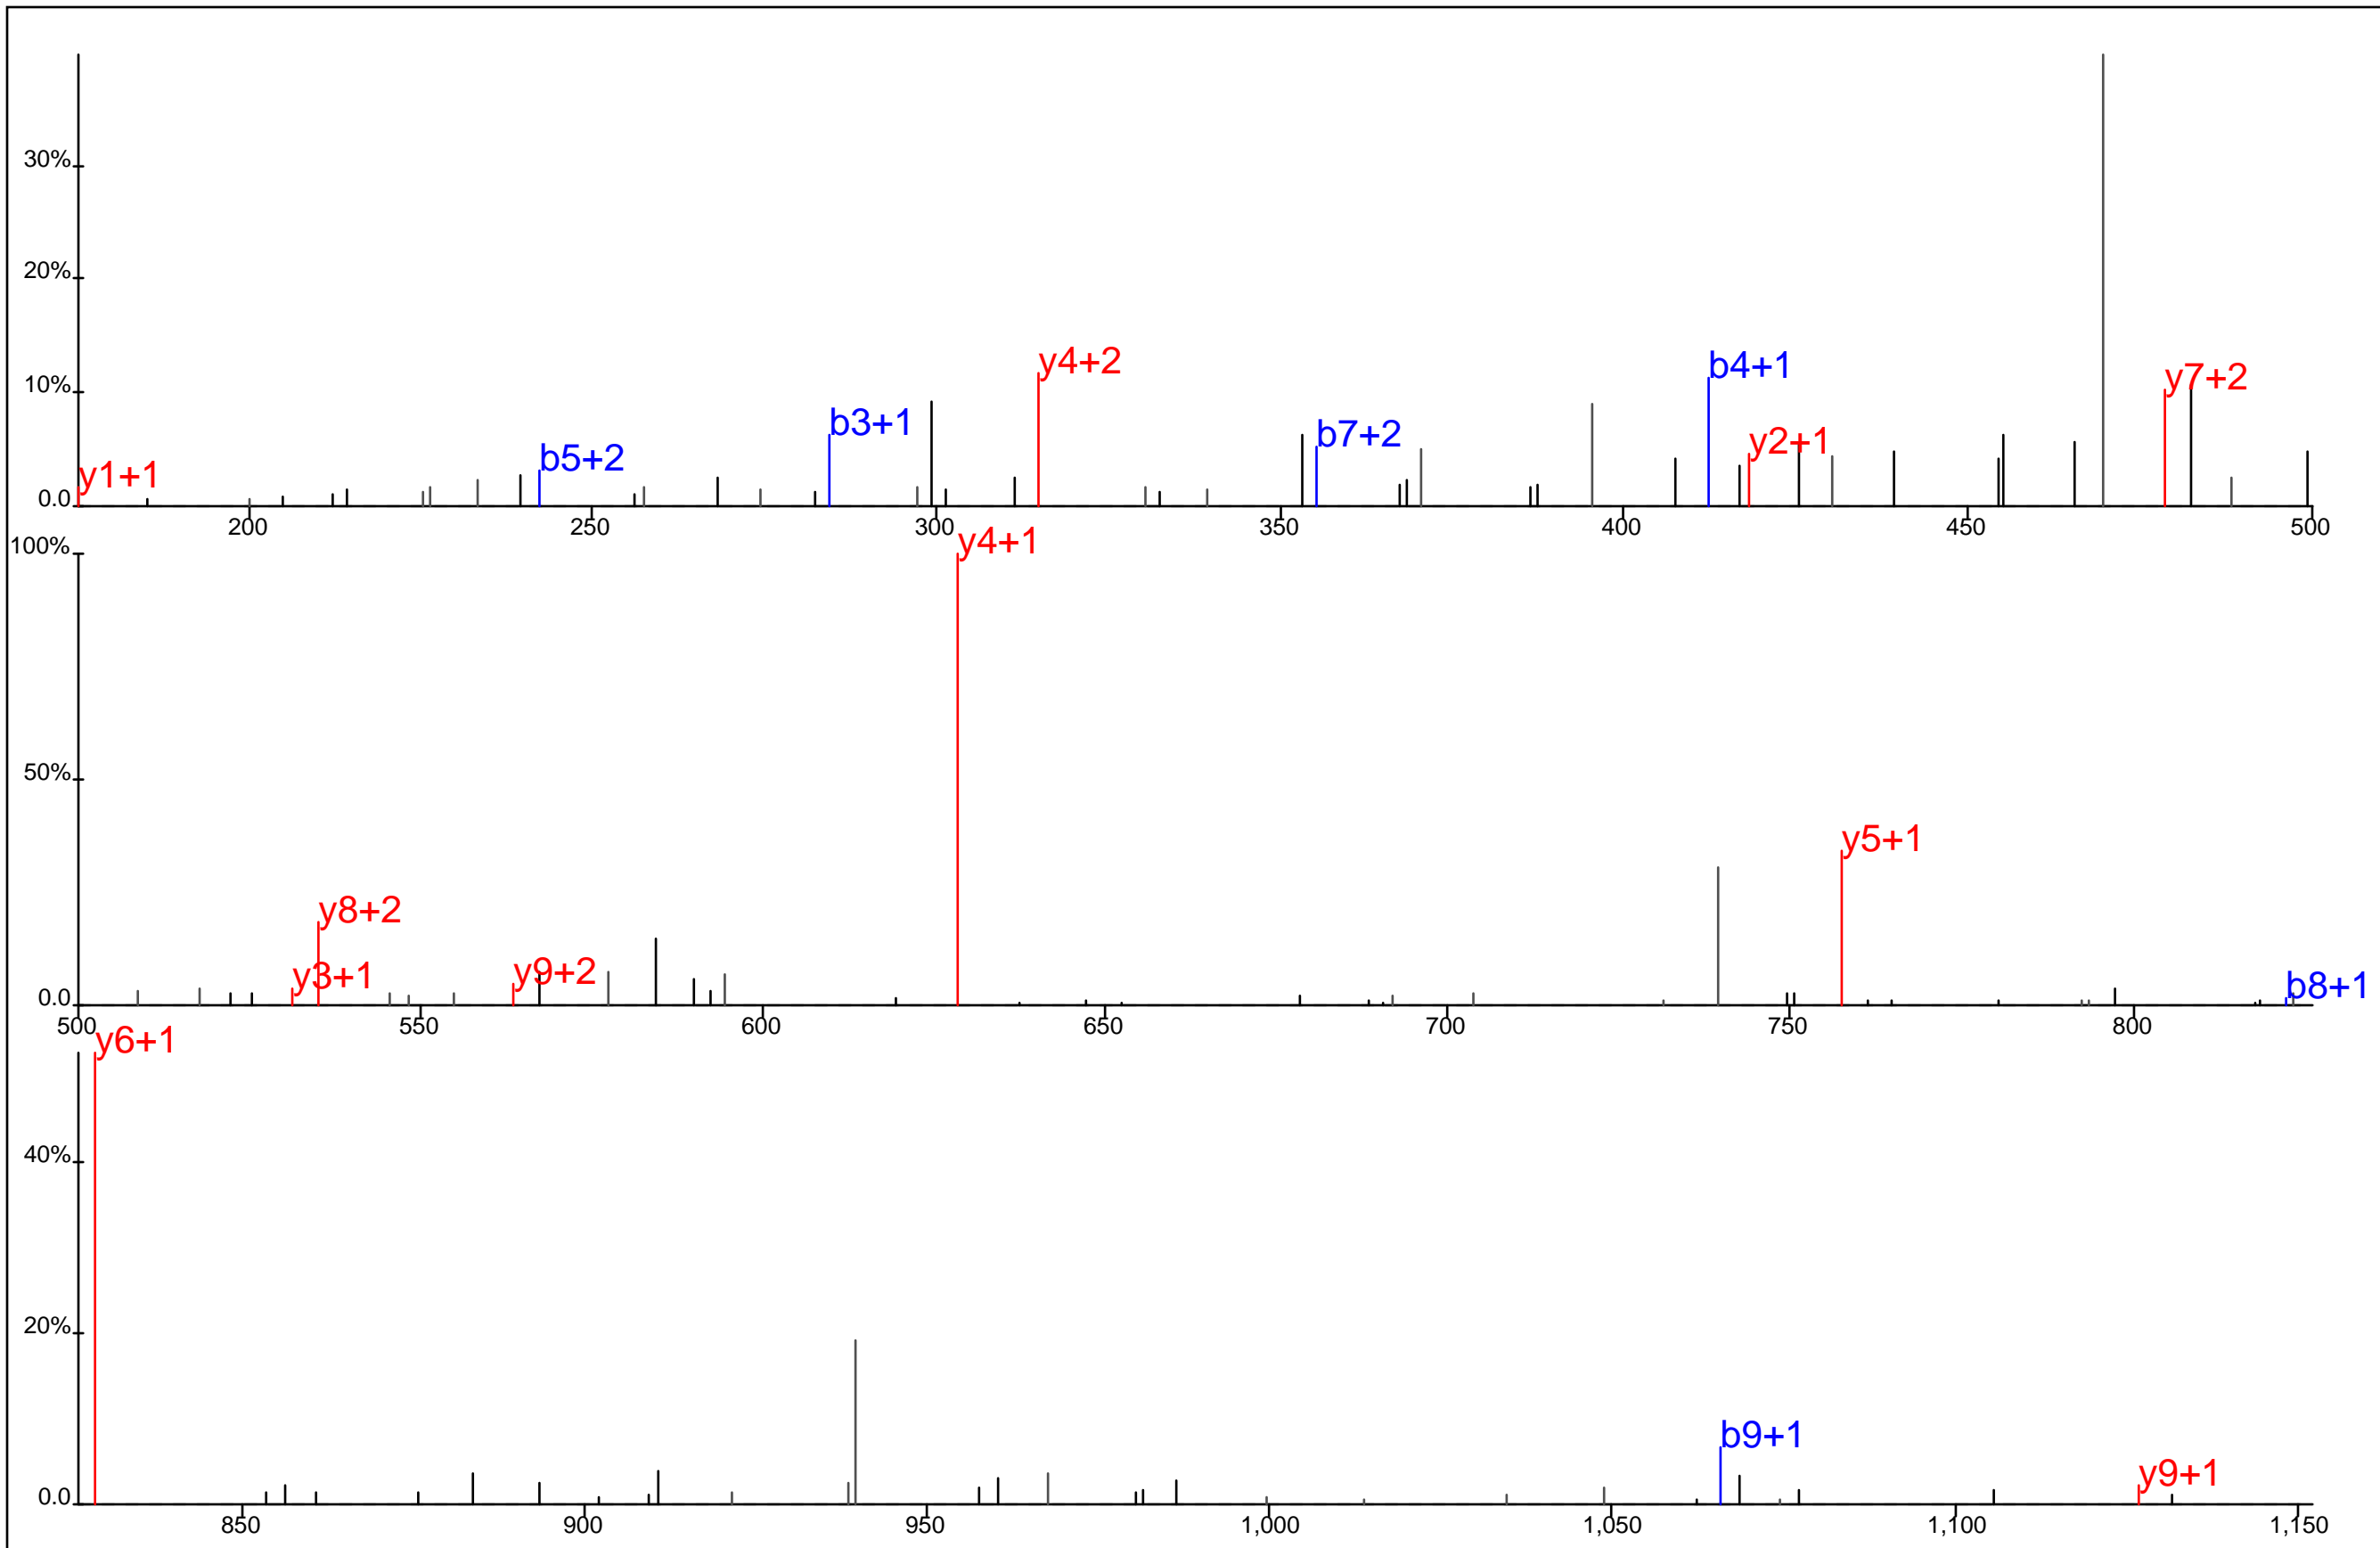

L G I Q A E P L Y\* R

Protein Name: Microtubule associated protein 1A  
 gi Accession: 0  
 Precursor Mass: 620.3099+2  
 Delta Mass: 0.652 ppm  
 XCorr: 28.75



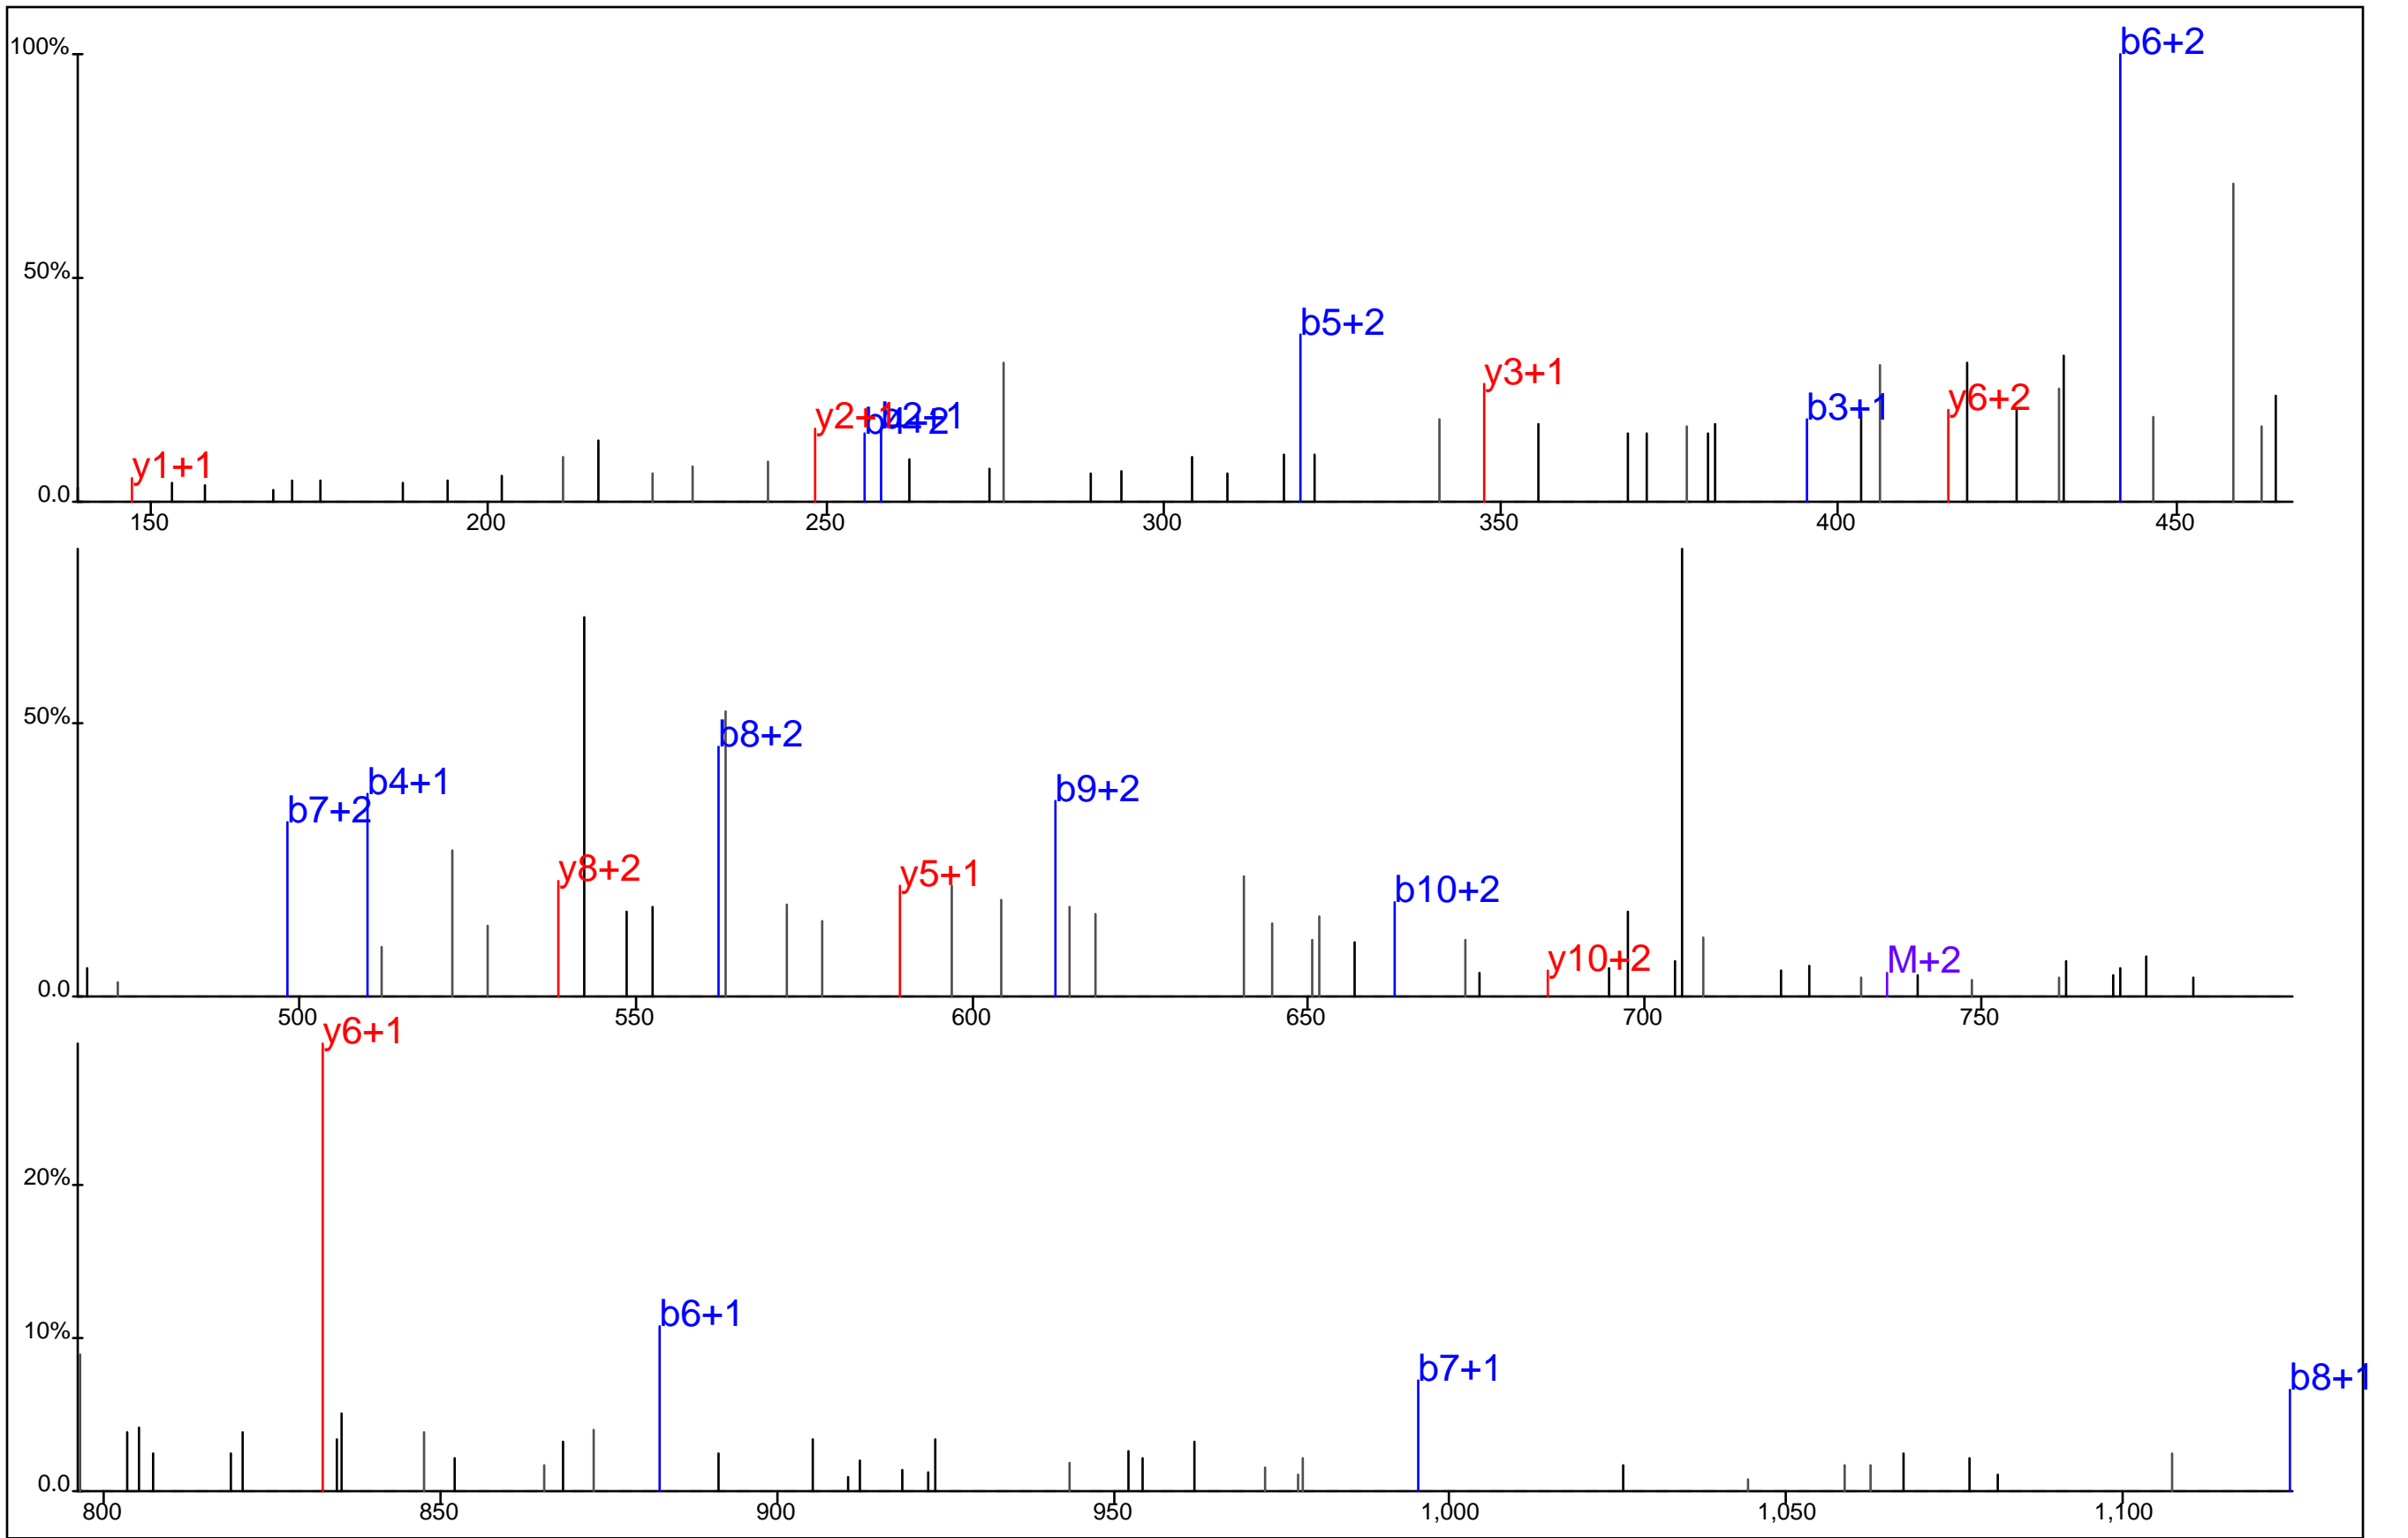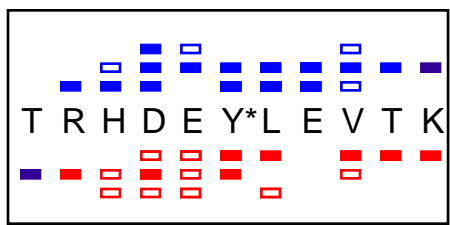

Protein Name: Microtubule associated protein 1A  
 gi Accession: 0  
 Precursor Mass: 490.8924+3  
 Delta Mass: 0.143 ppm  
 XCorr: 27.27

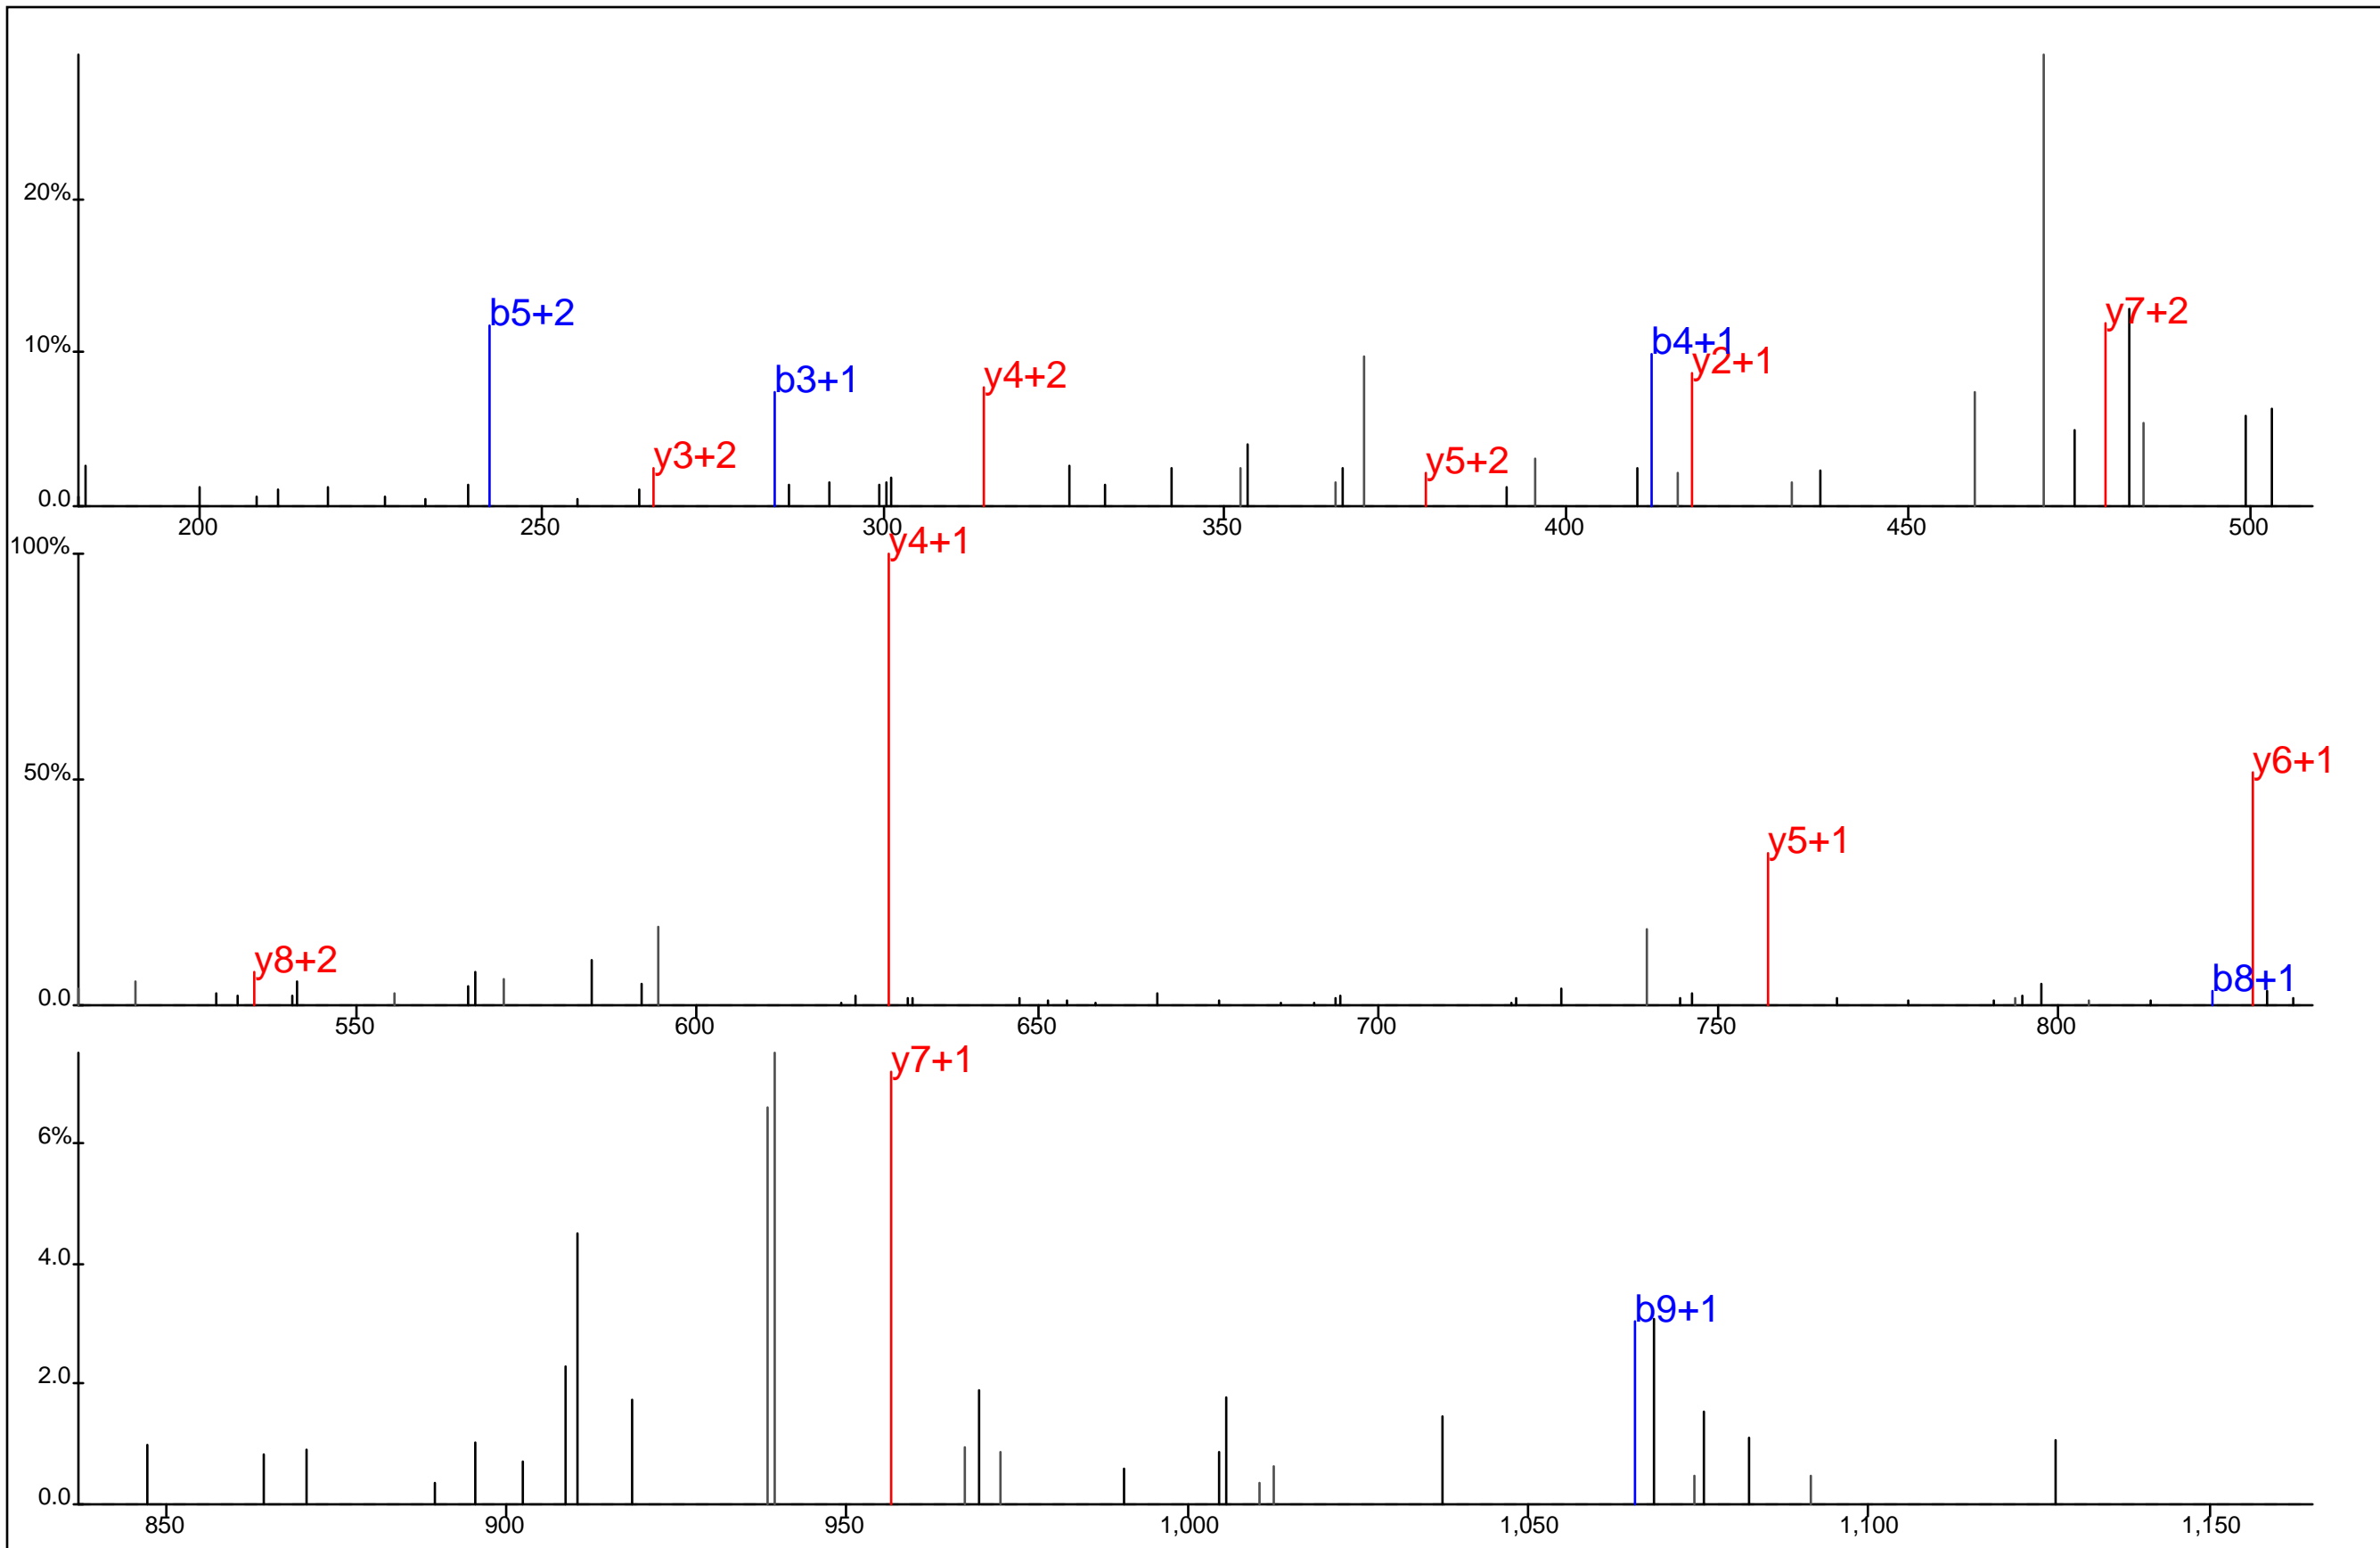

L G I Q A E P L Y\* R

Protein Name: Microtubule associated protein 1A  
 gi Accession: 0  
 Precursor Mass: 620.3098+2  
 Delta Mass: 0.750 ppm  
 XCorr: 24.4

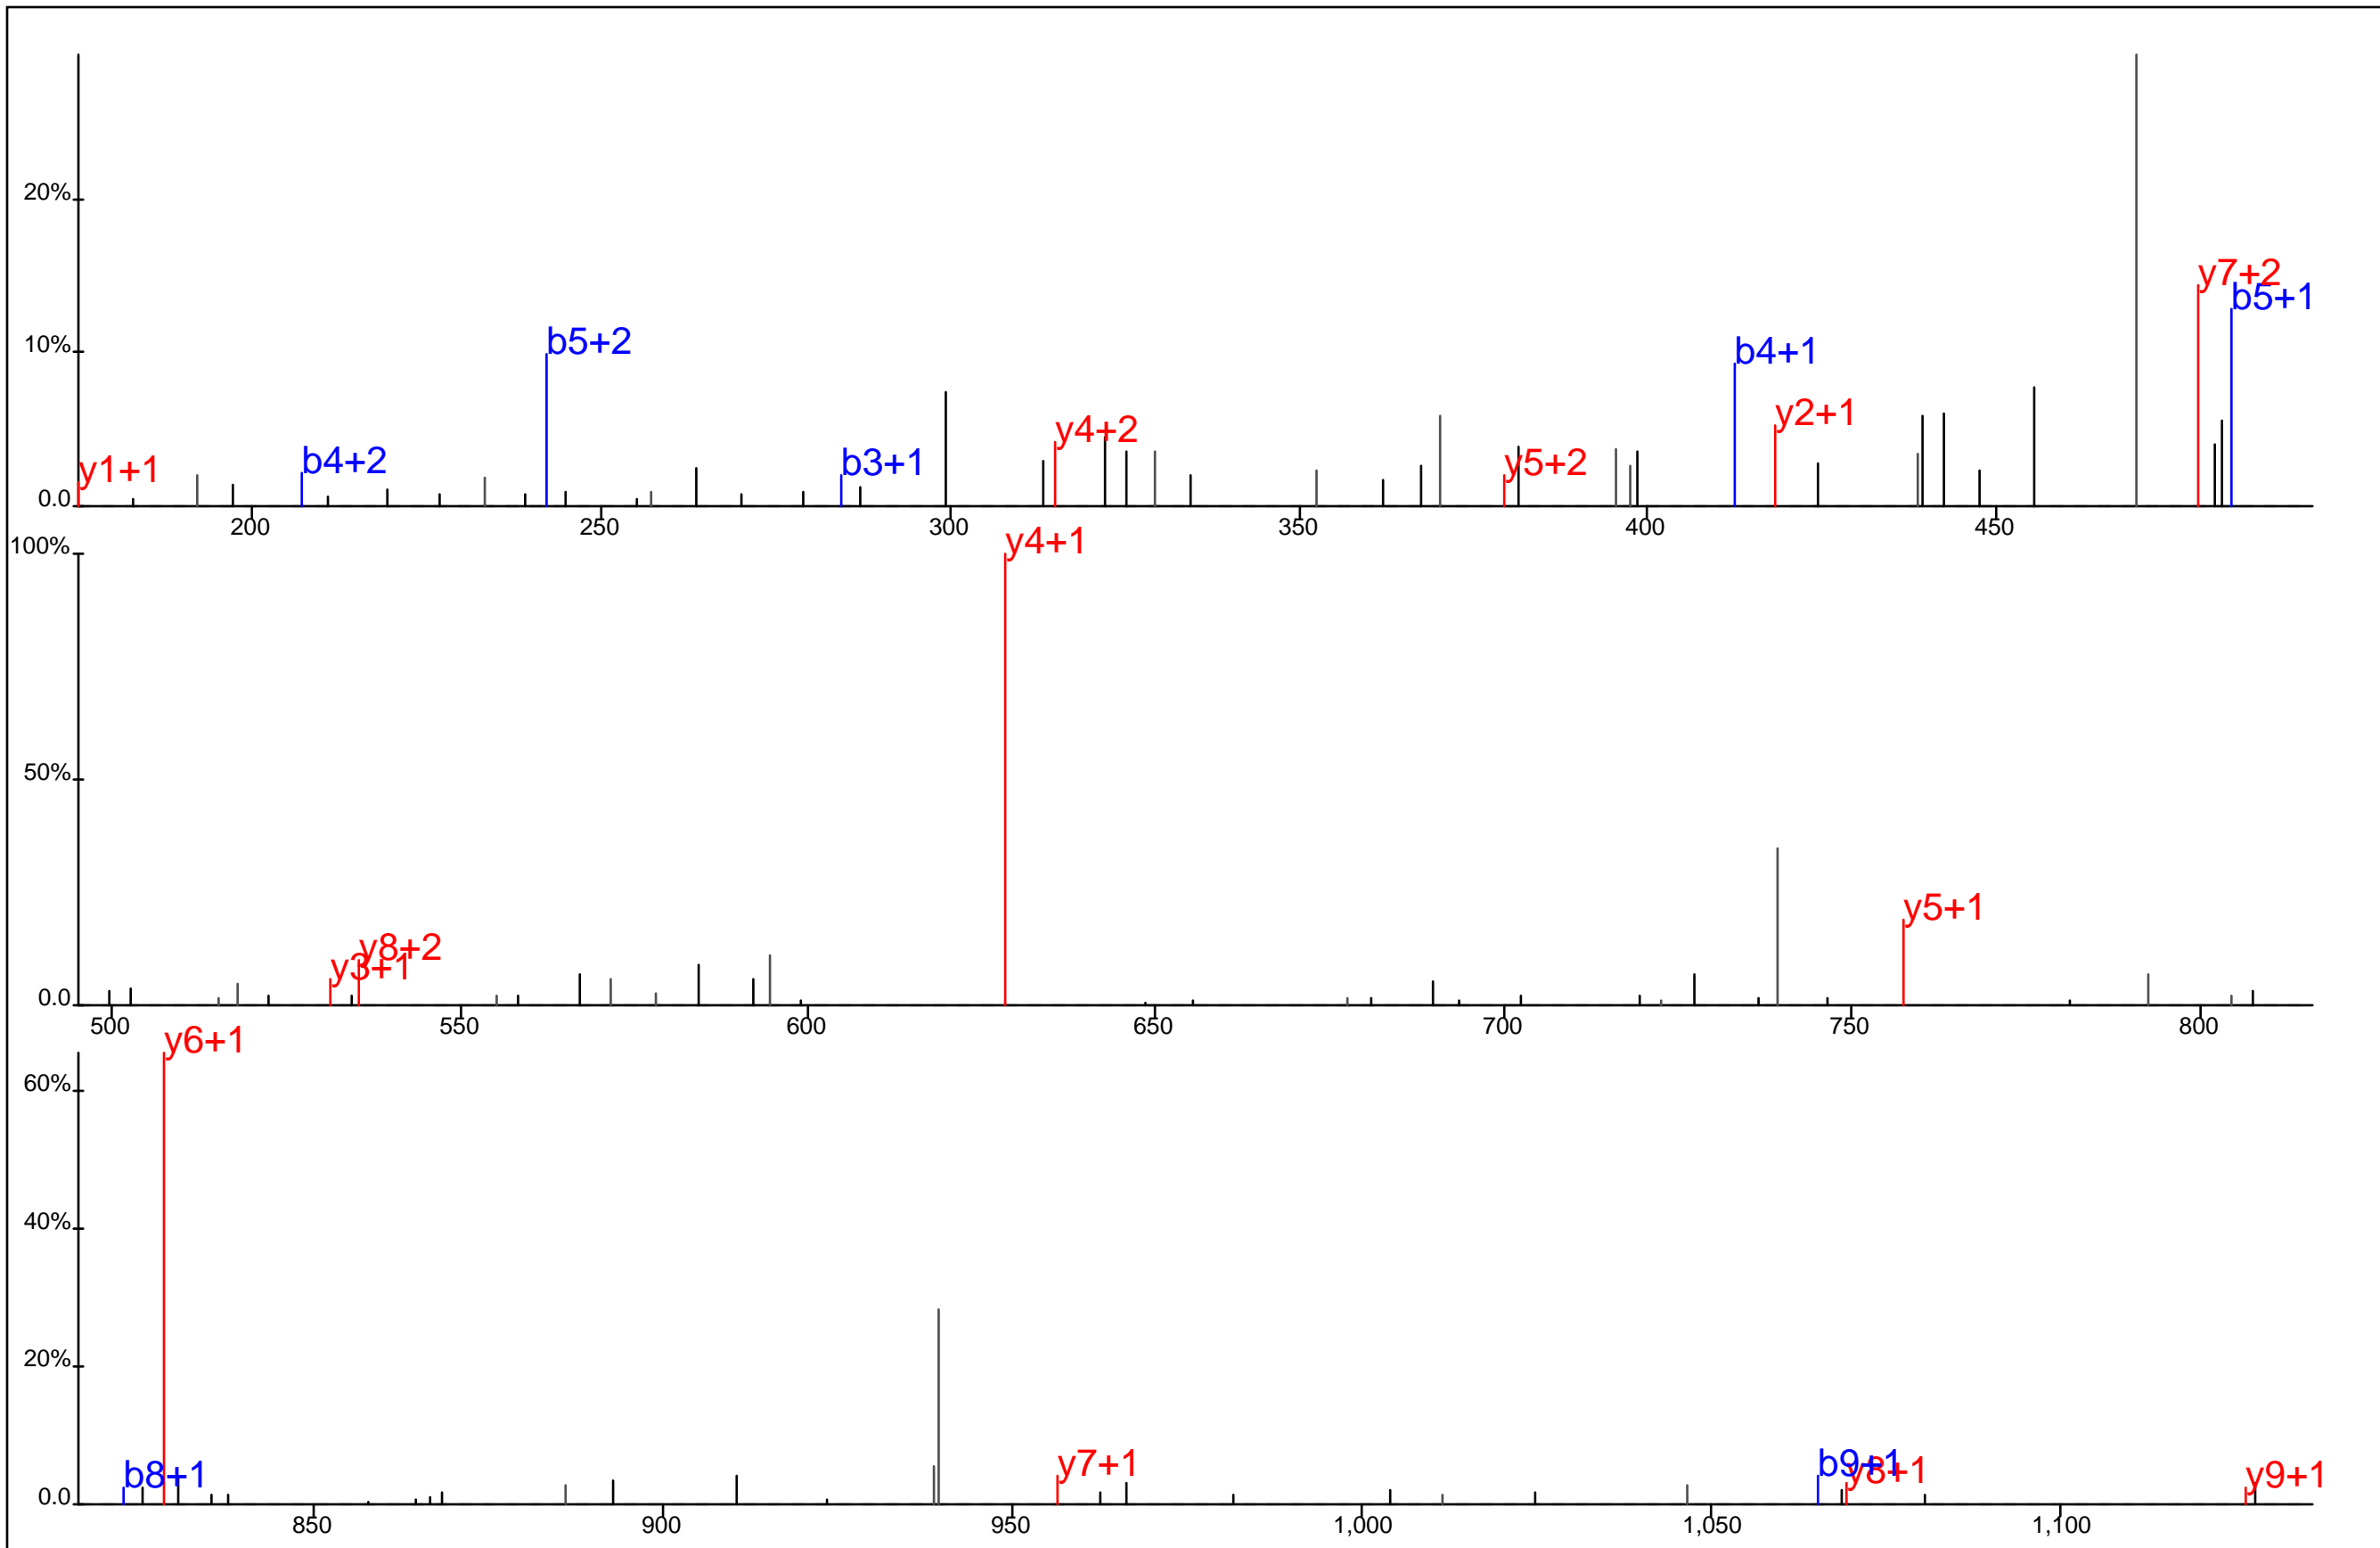

■ ■ ■ □ □ □ □  
**L G I Q A E P L Y\* R**  
□ □ □ □ □ □ □ □

Protein Name: Microtubule associated protein 1A  
 gi Accession: 0  
 Precursor Mass: 620.3111+2  
 Delta Mass: 1.318 ppm  
 XCorr: 45.57

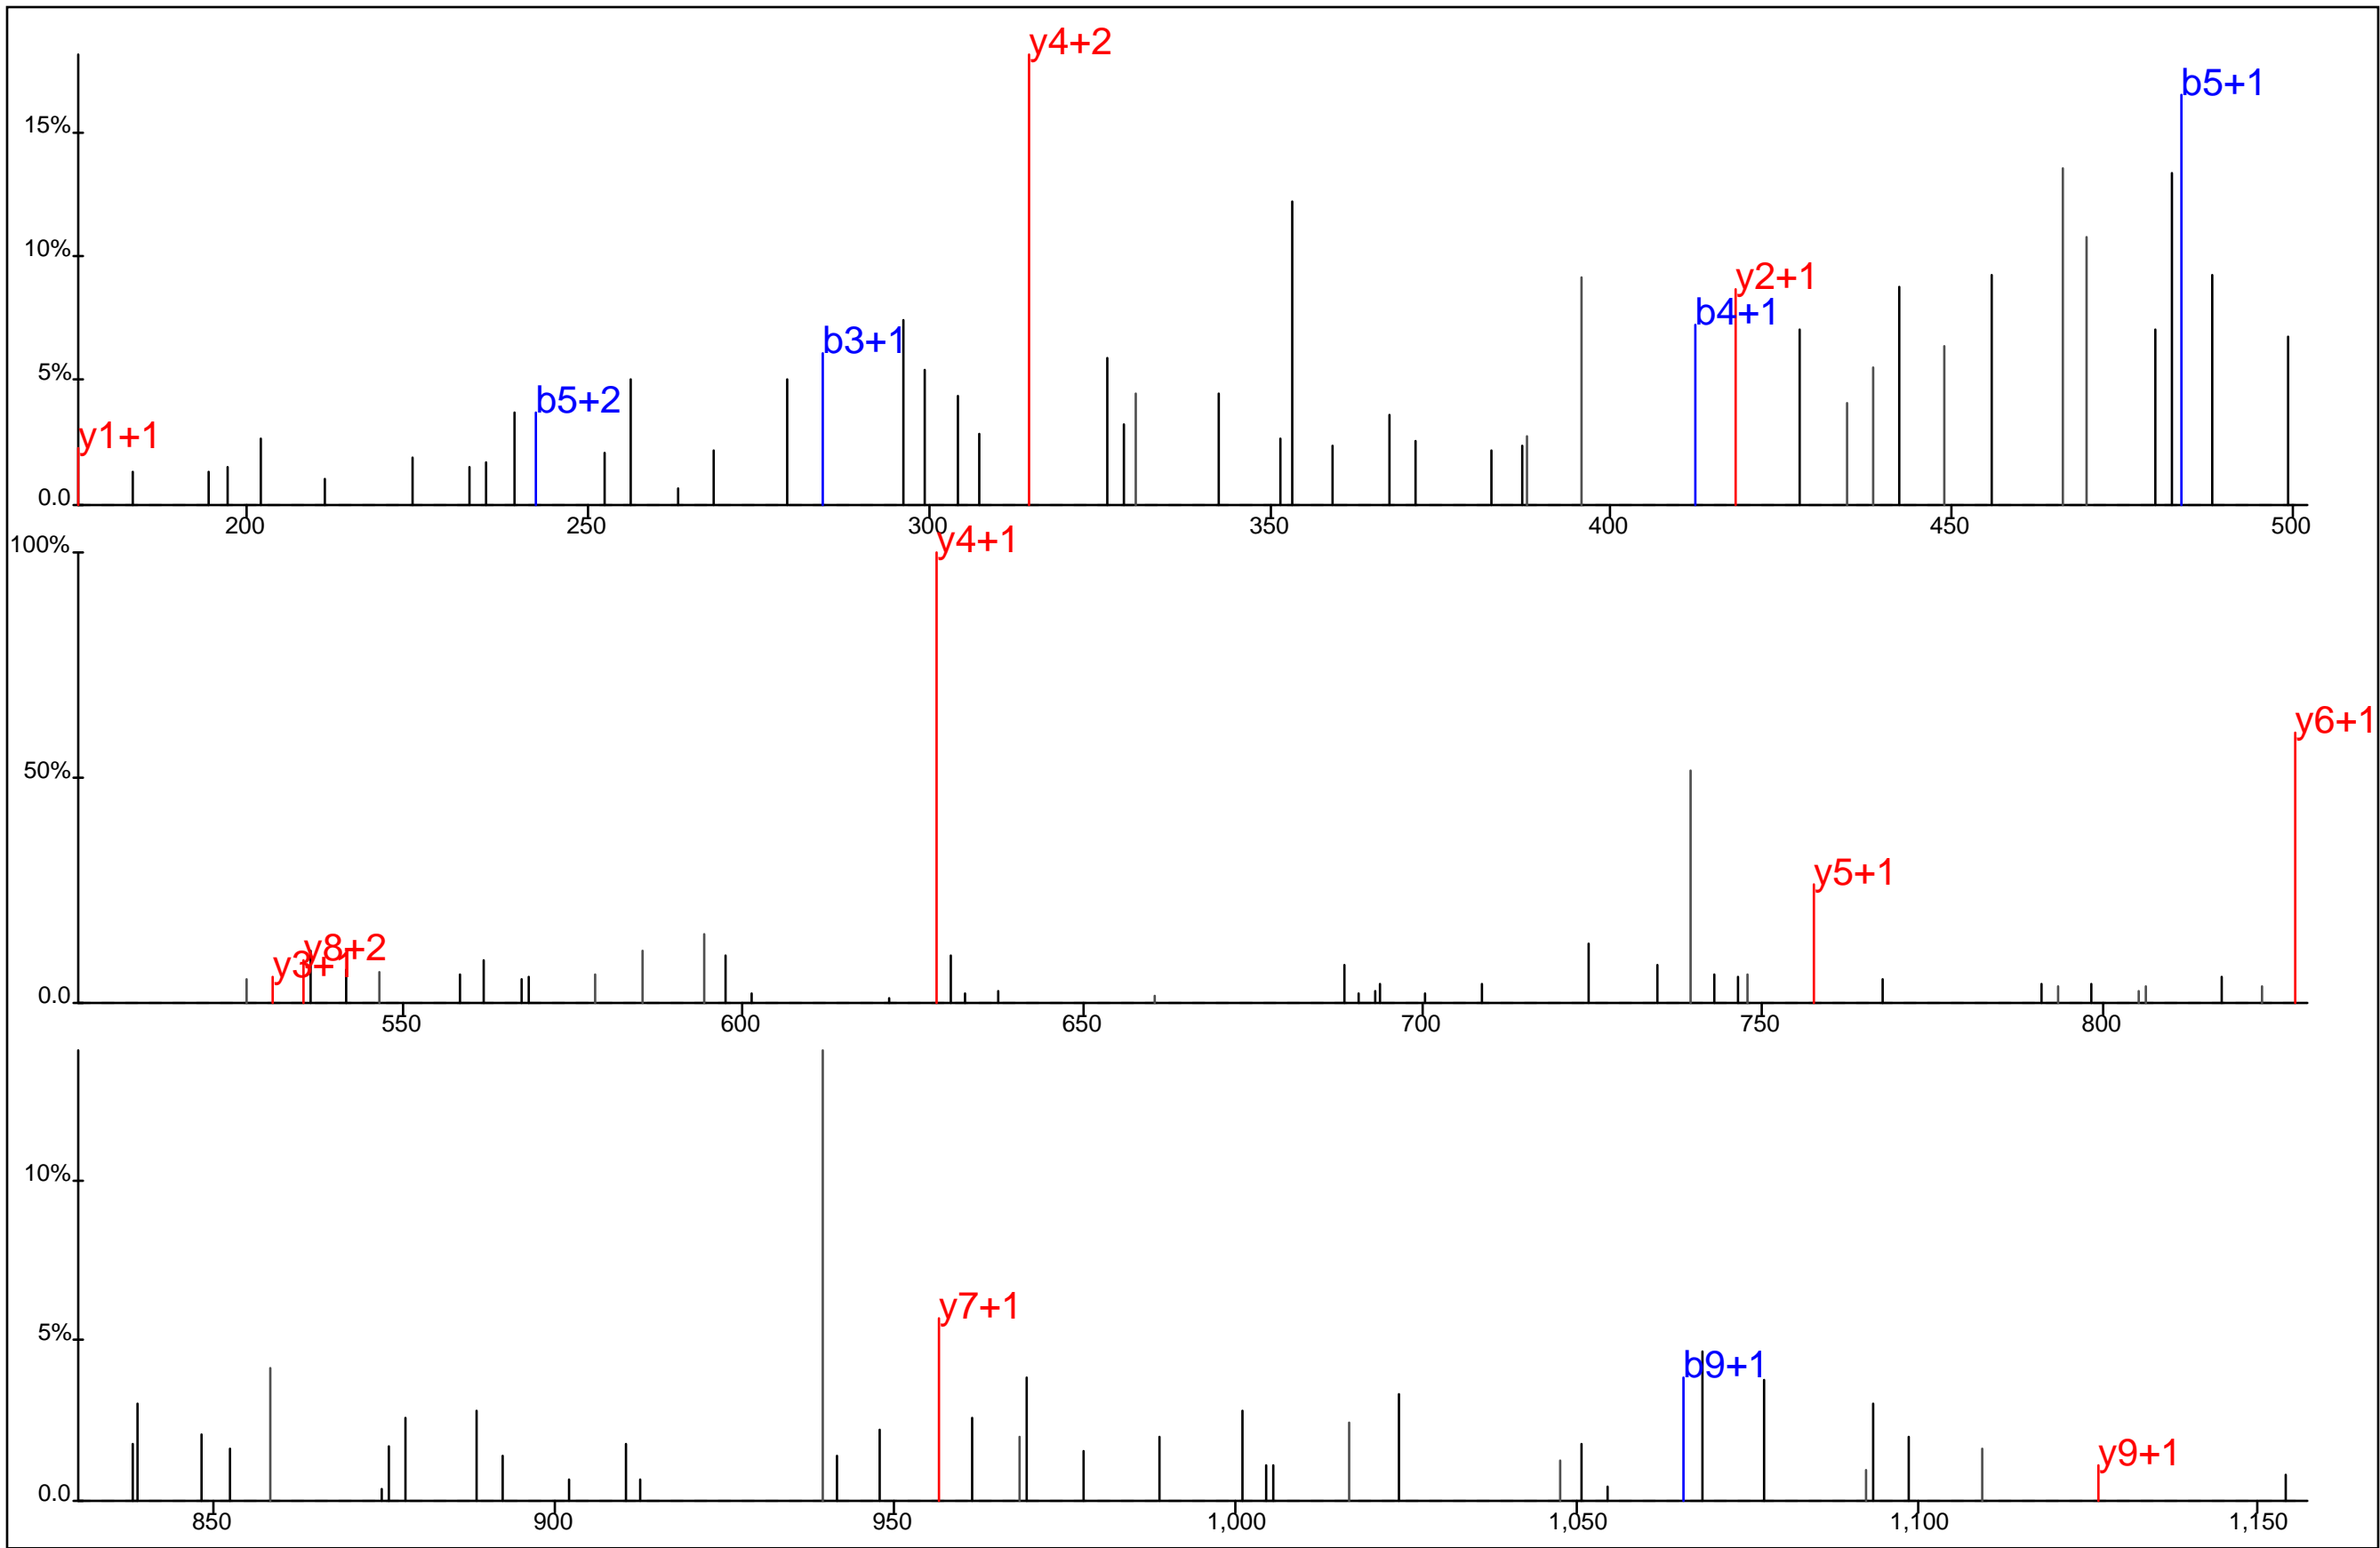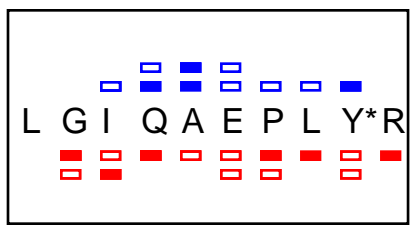

Protein Name: Microtubule associated protein 1A  
 gi Accession: 0  
 Precursor Mass: 620.3085+2  
 Delta Mass: 2.915 ppm  
 XCorr: 20.97

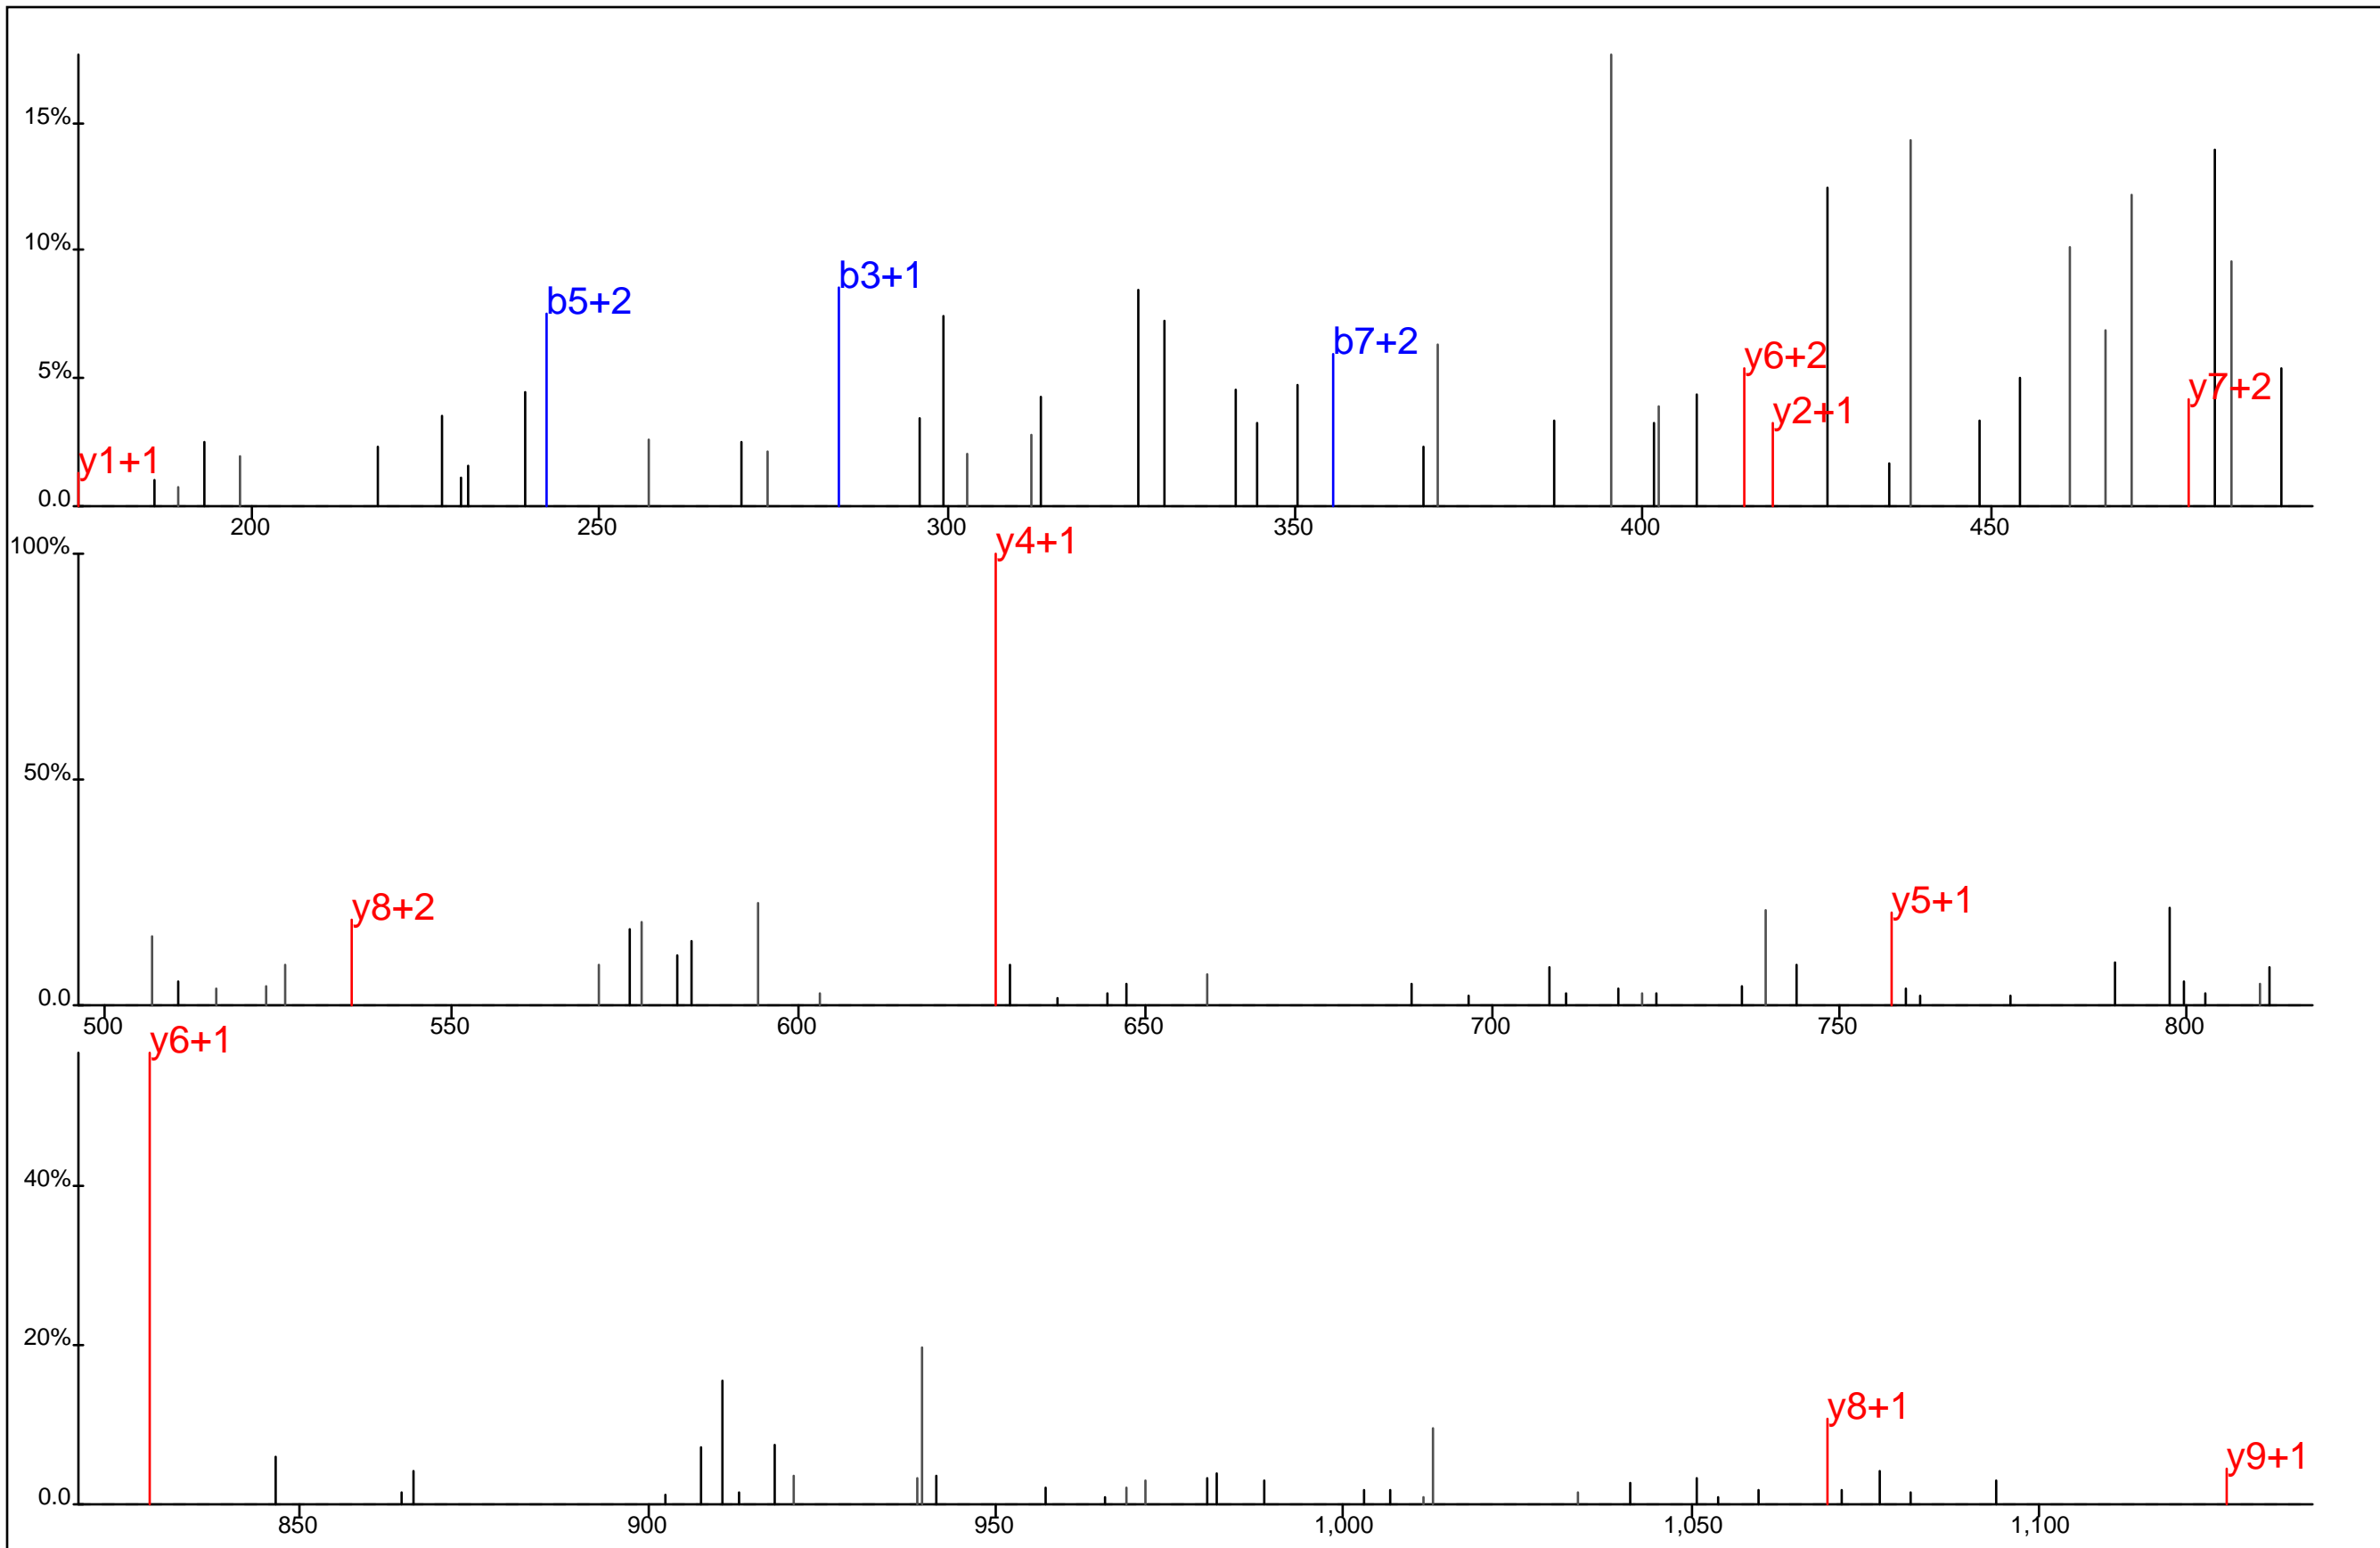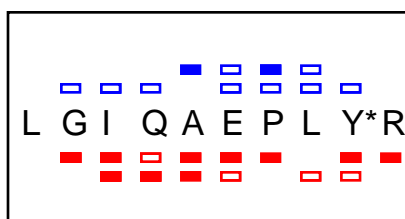

Protein Name: Microtubule associated protein 1A  
 gi Accession: 0  
 Precursor Mass: 620.3112+2  
 Delta Mass: 1.515 ppm  
 XCorr: 21.51

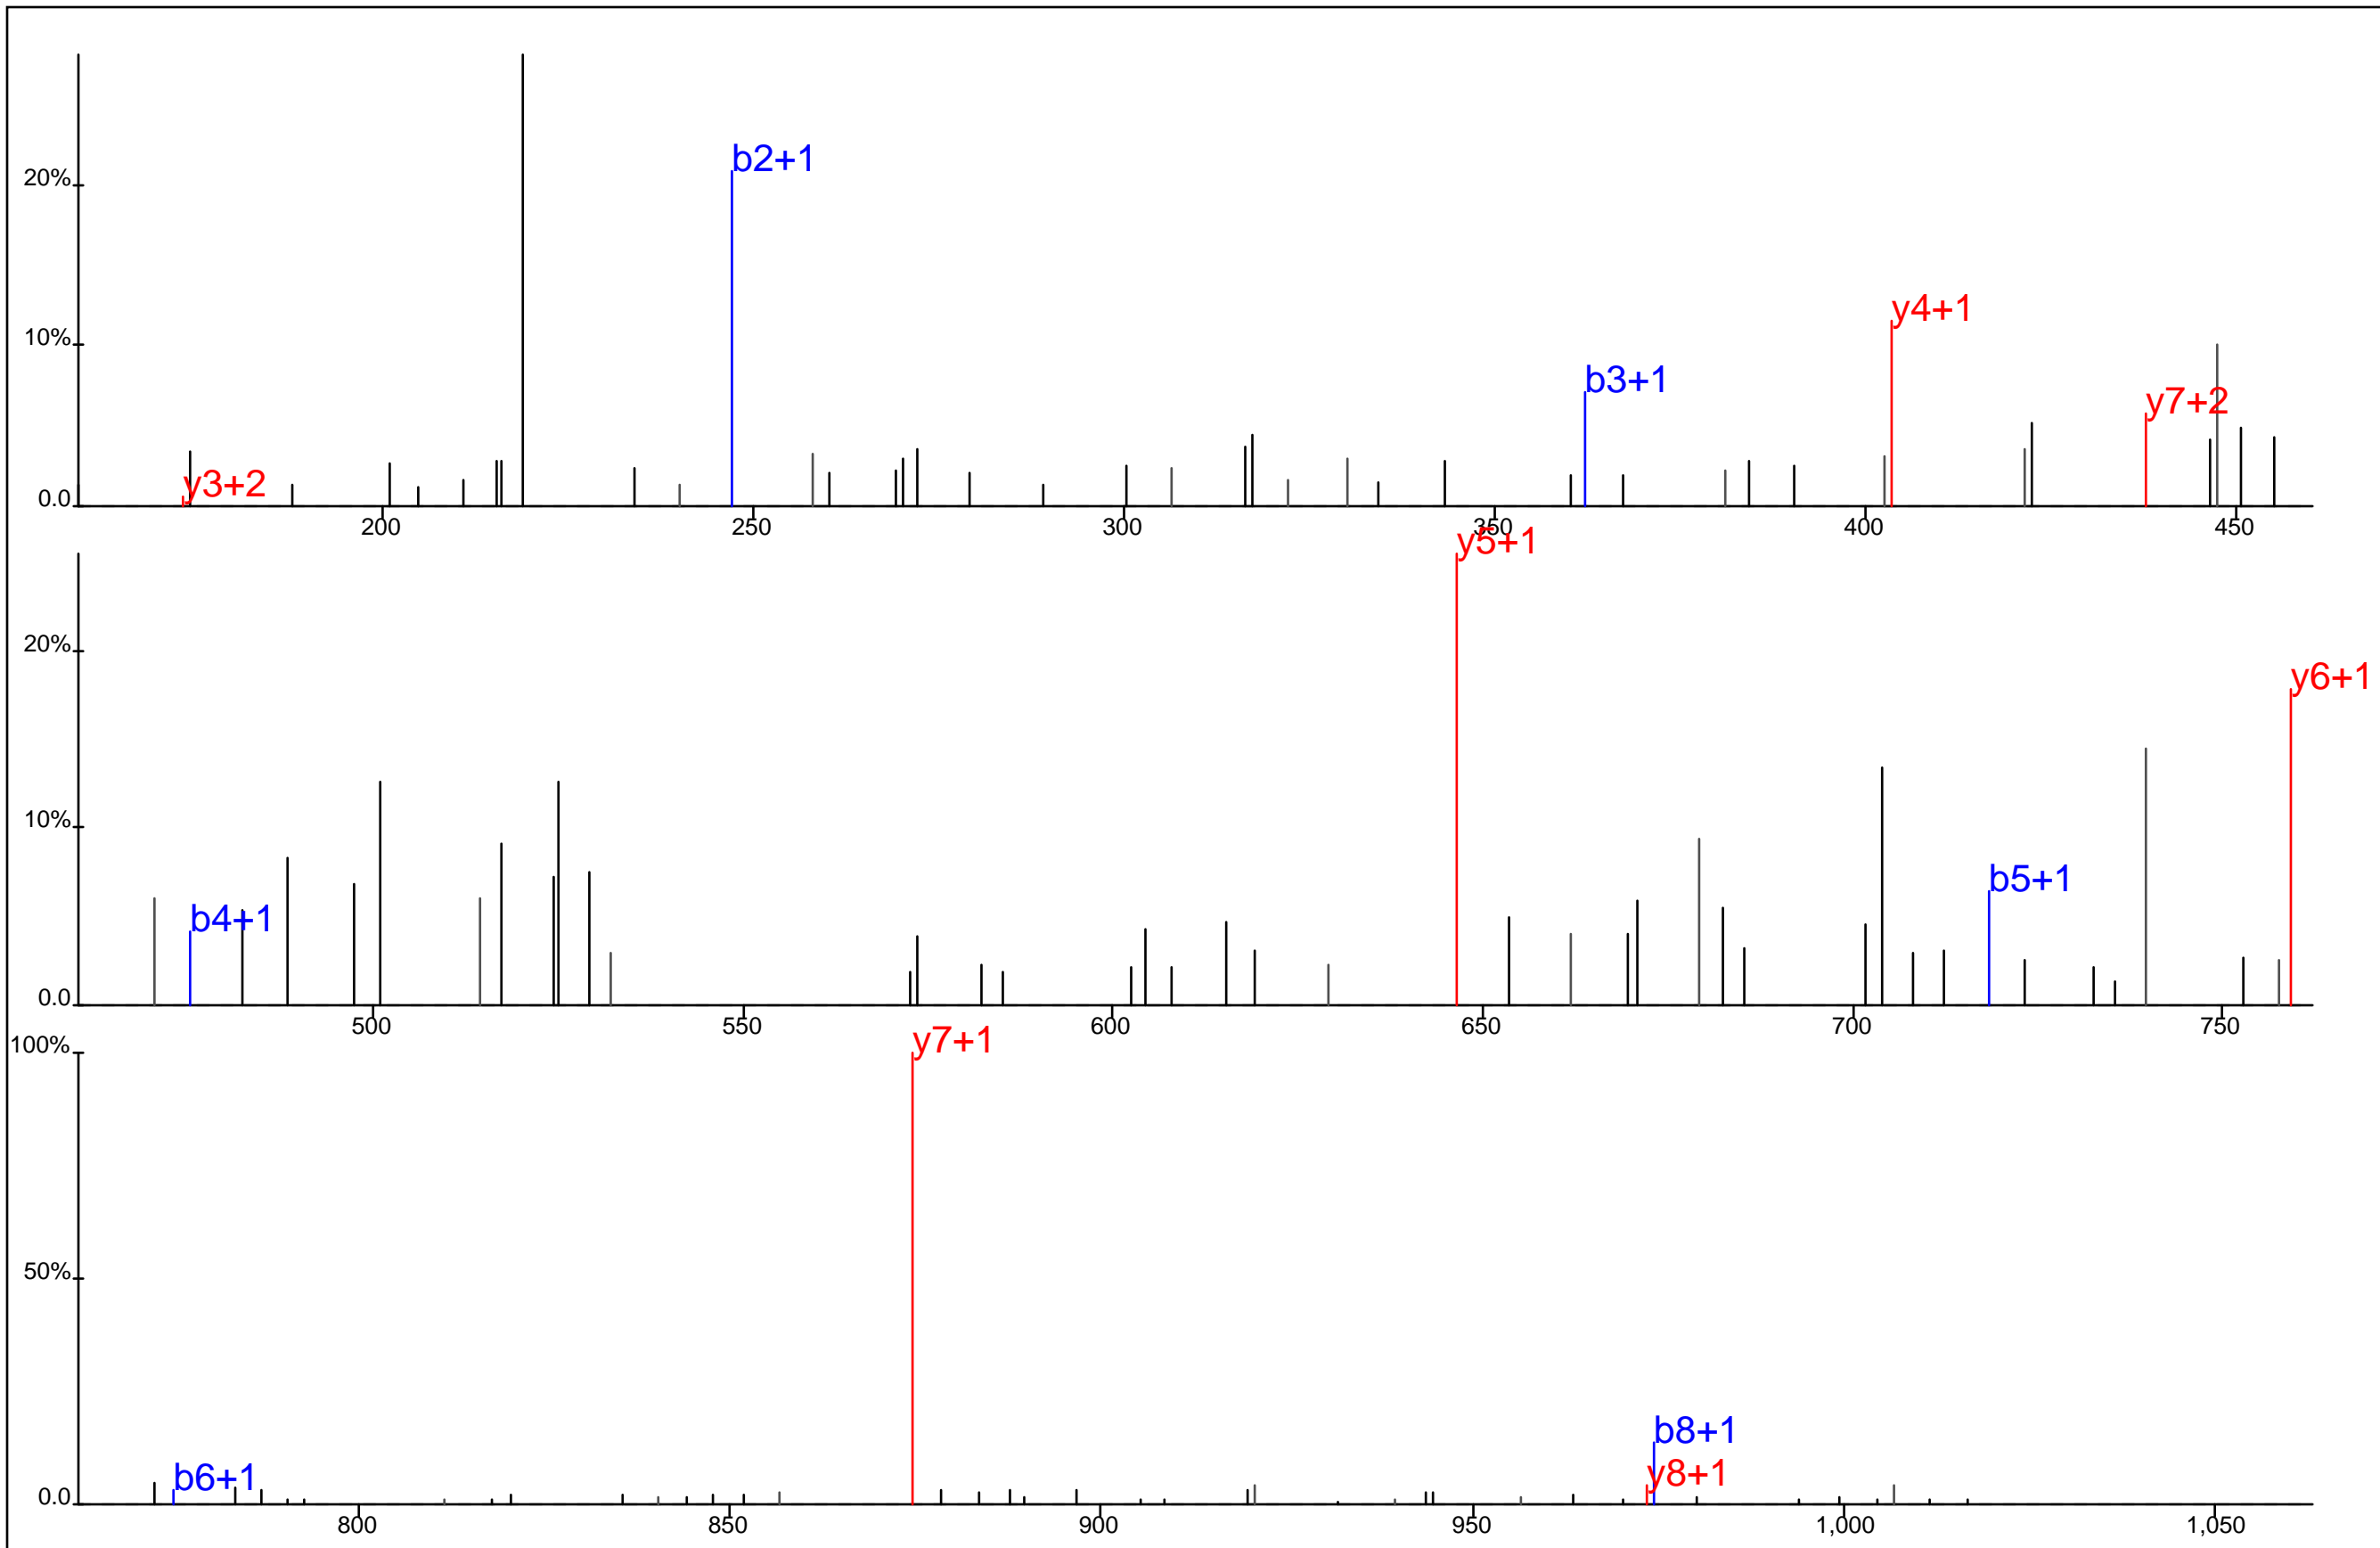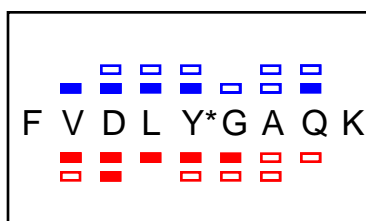

Protein Name: Mitochondrial trifunctional protein, alpha subunit  
 gi Accession: 0  
 Precursor Mass: 560.7581+2  
 Delta Mass: 1.246 ppm  
 XCorr: 20.27



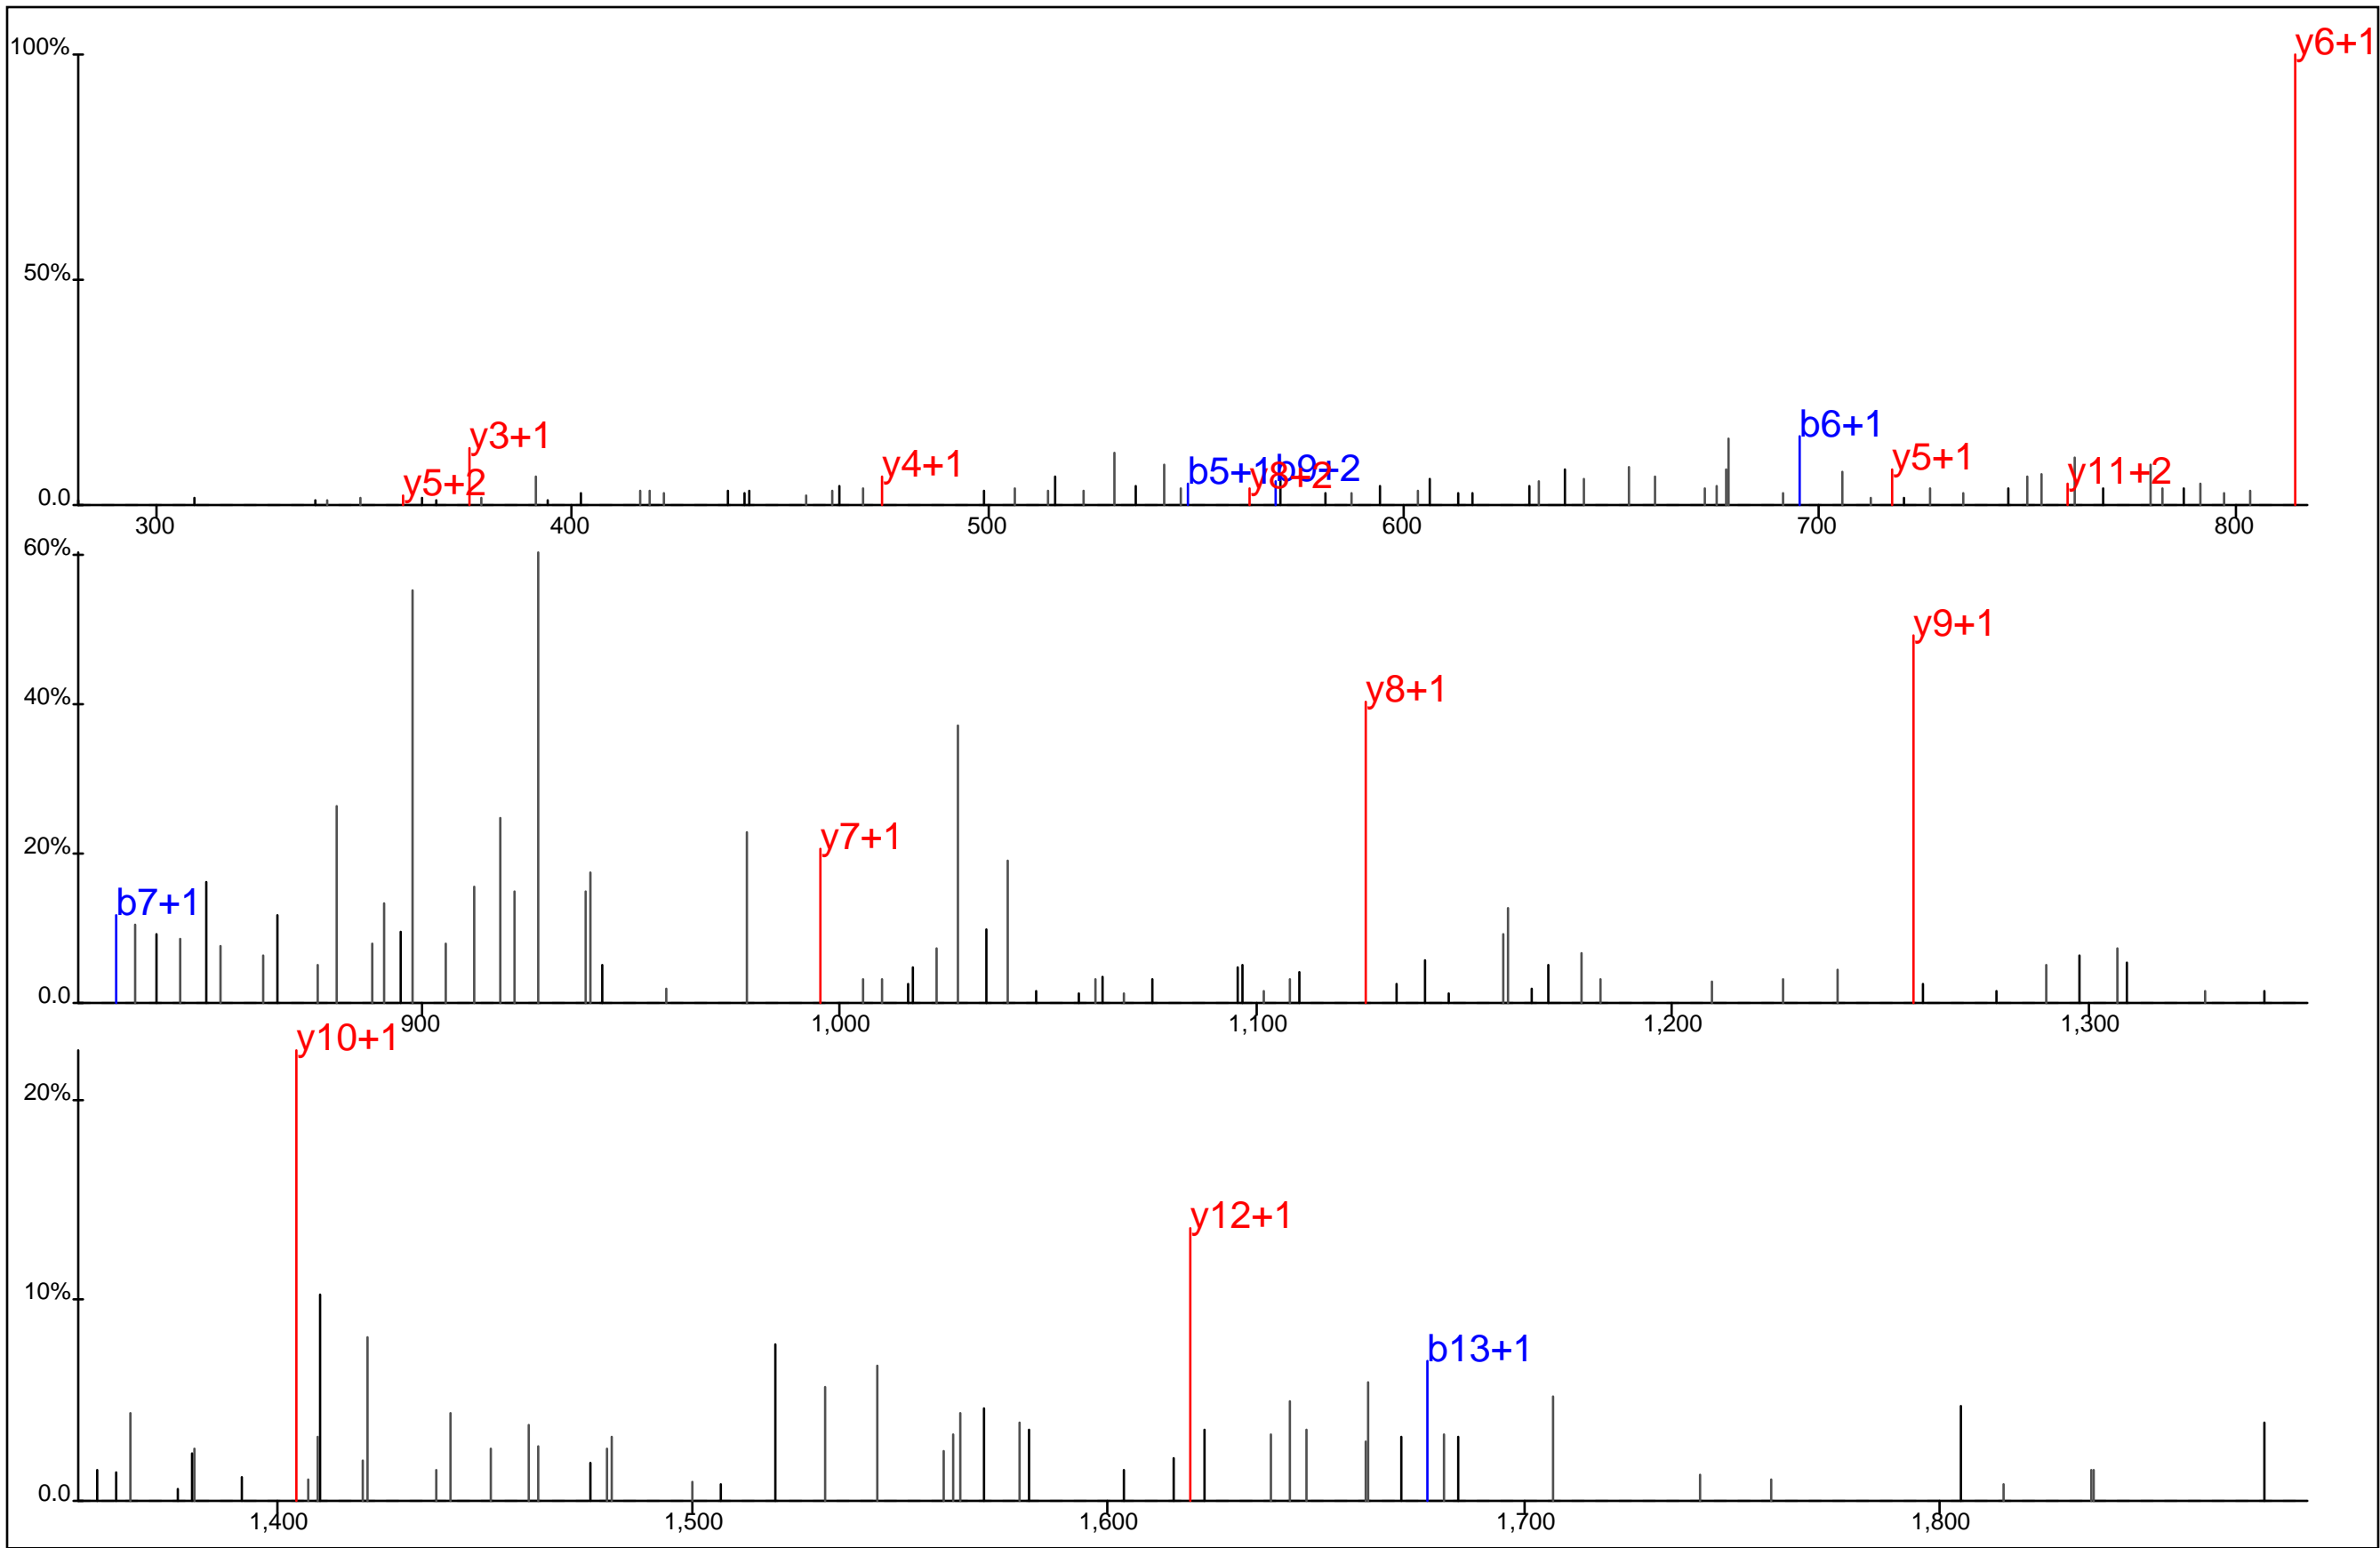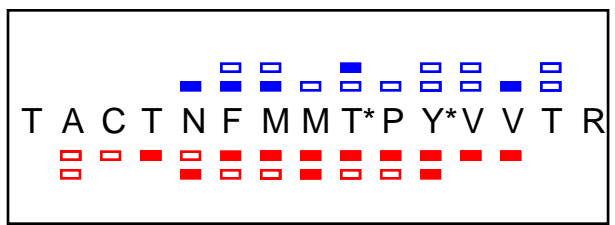

Protein Name: Mitogen-activated protein kinase 9  
 gi Accession: 0  
 Precursor Mass: 976.3821+2  
 Delta Mass: 0.800 ppm  
 XCorr: 43.02



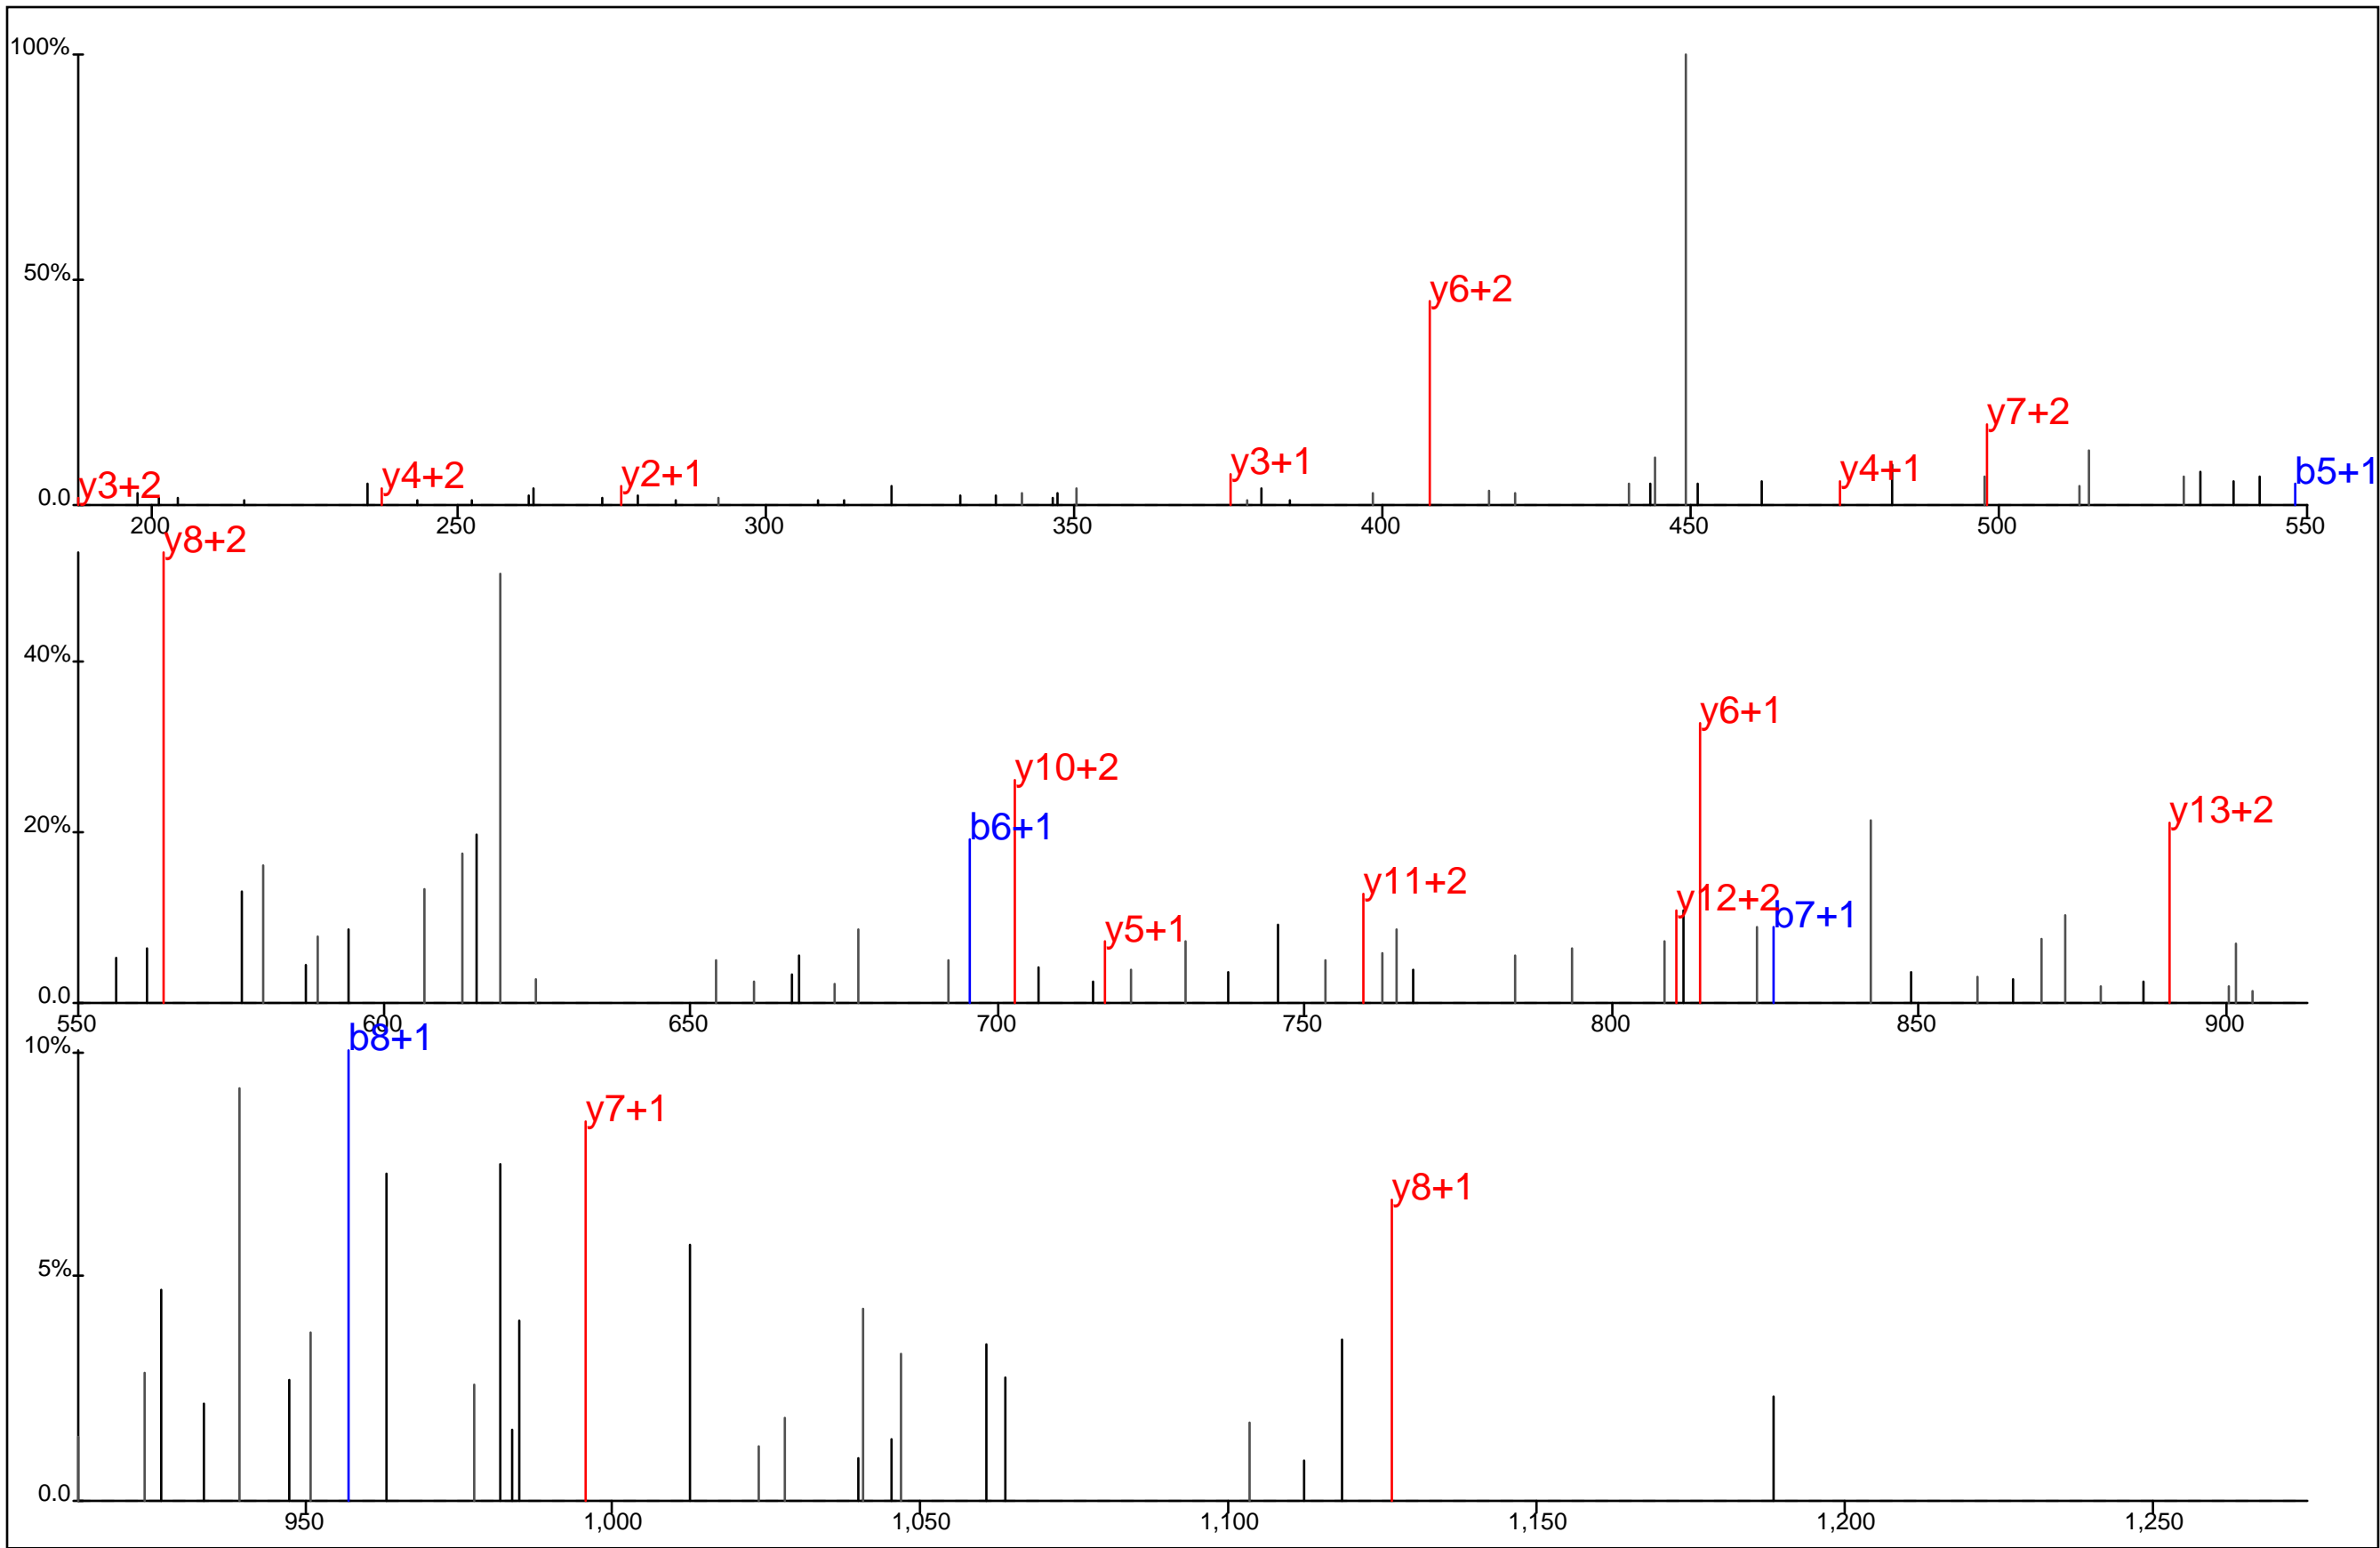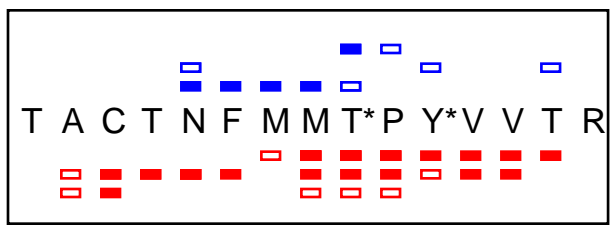

Protein Name: Mitogen-activated protein kinase 9  
 gi Accession: 0  
 Precursor Mass: 651.2563+3  
 Delta Mass: 0.519 ppm  
 XCorr: 35.39

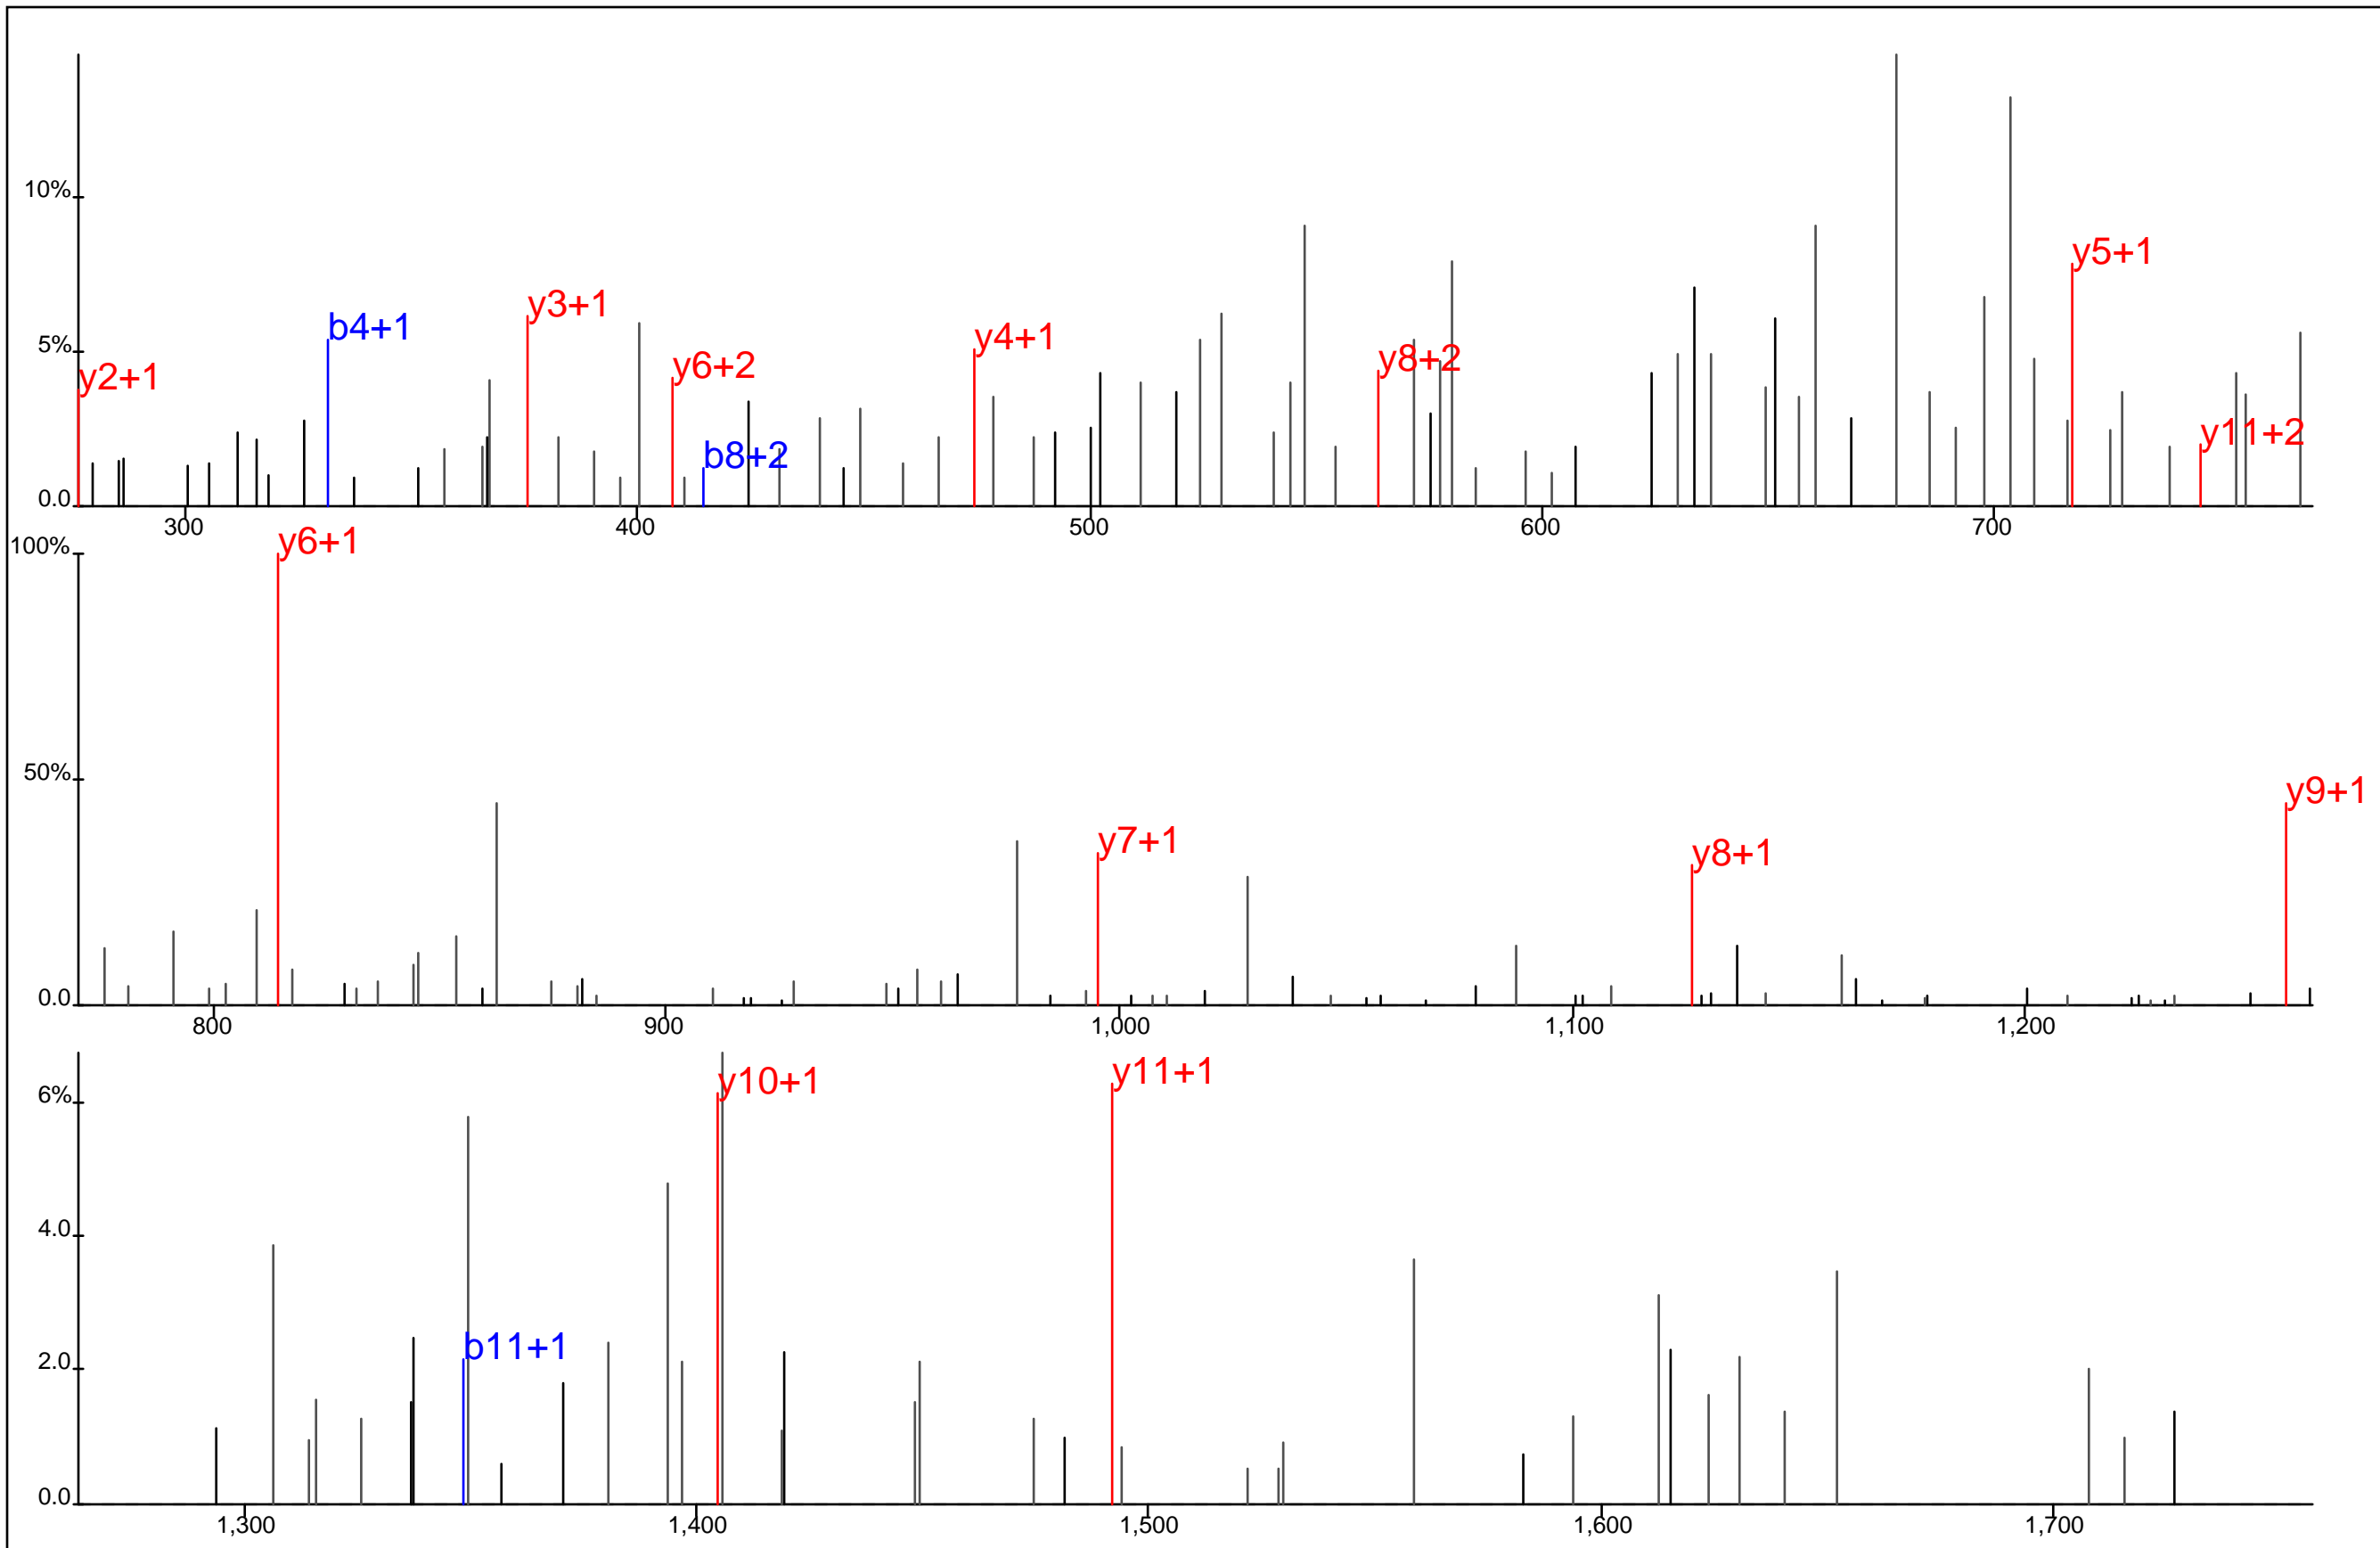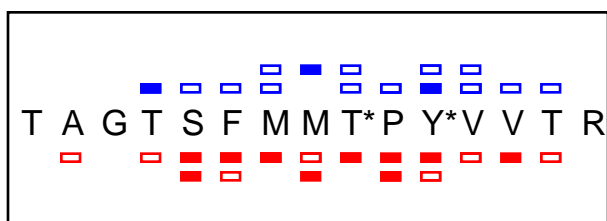

Protein Name: Mitogen-activated protein kinase 8  
 gi Accession: 0  
 Precursor Mass: 911.3713+2  
 Delta Mass: 0.087 ppm  
 XCorr: 35.12







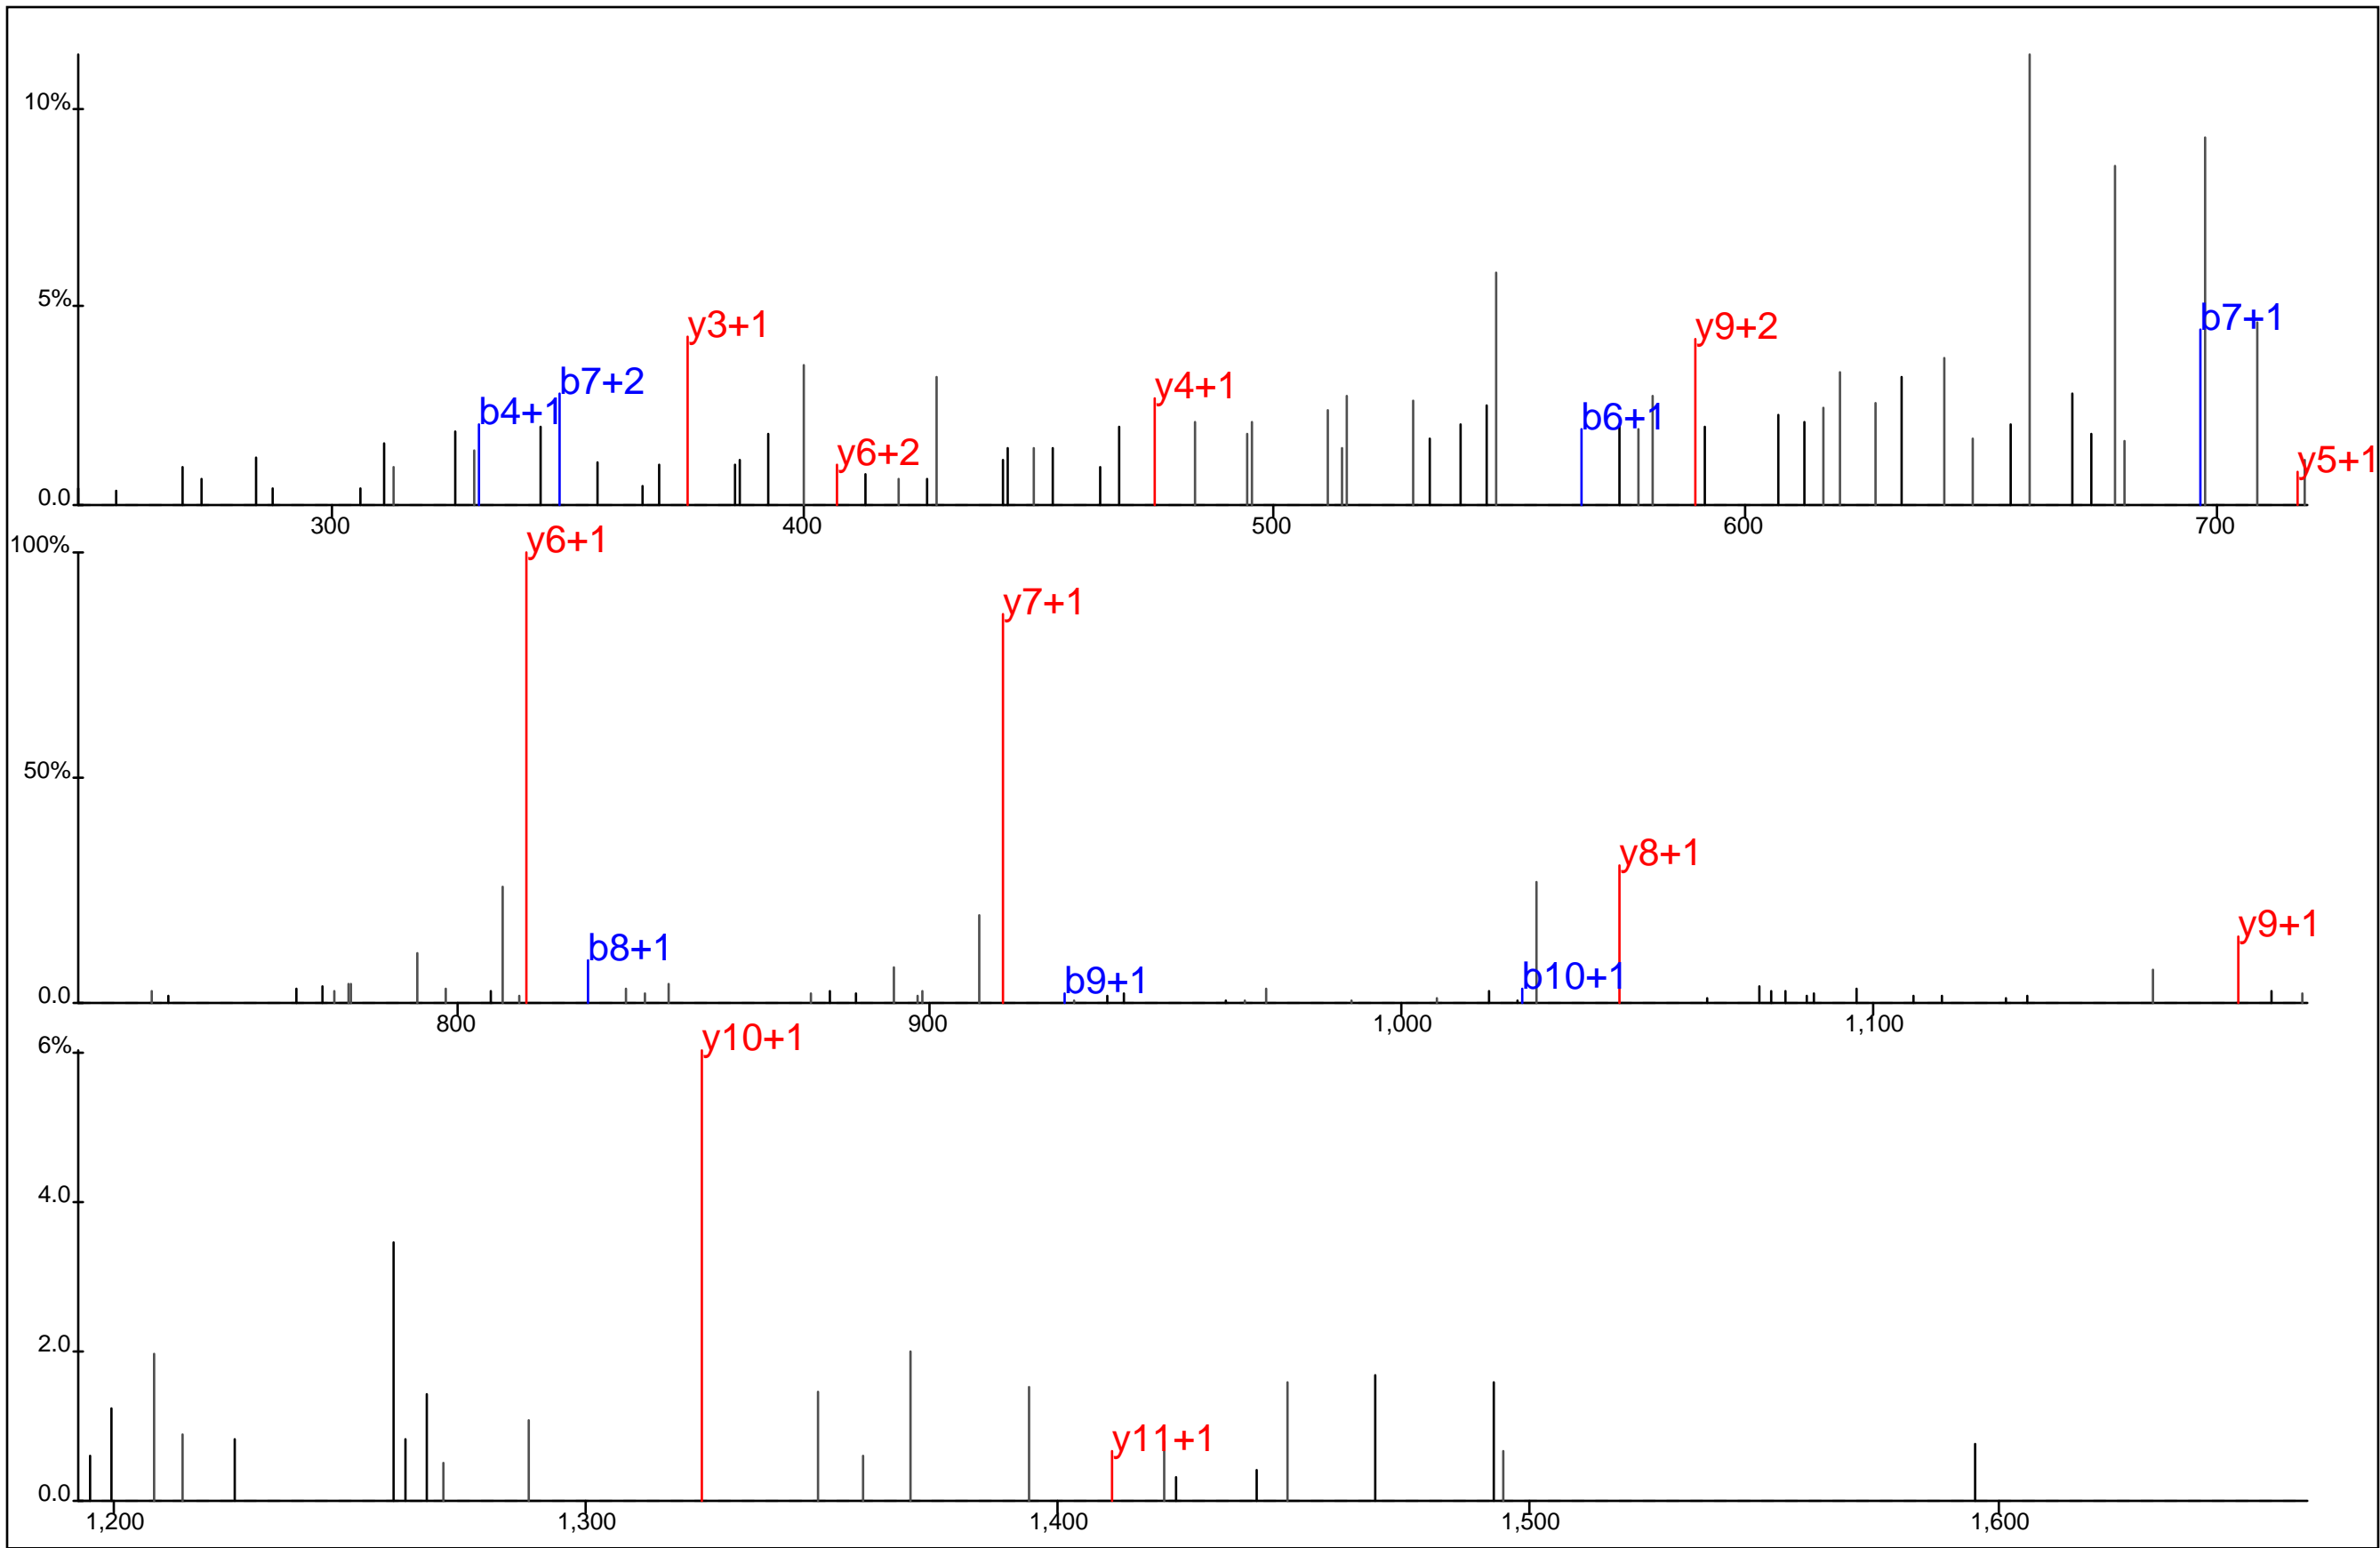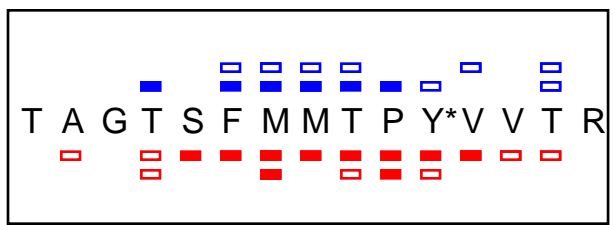

Protein Name: Mitogen-activated protein kinase 8  
 gi Accession: 0  
 Precursor Mass: 871.3875+2  
 Delta Mass: 0.674 ppm  
 XCorr: 42.76

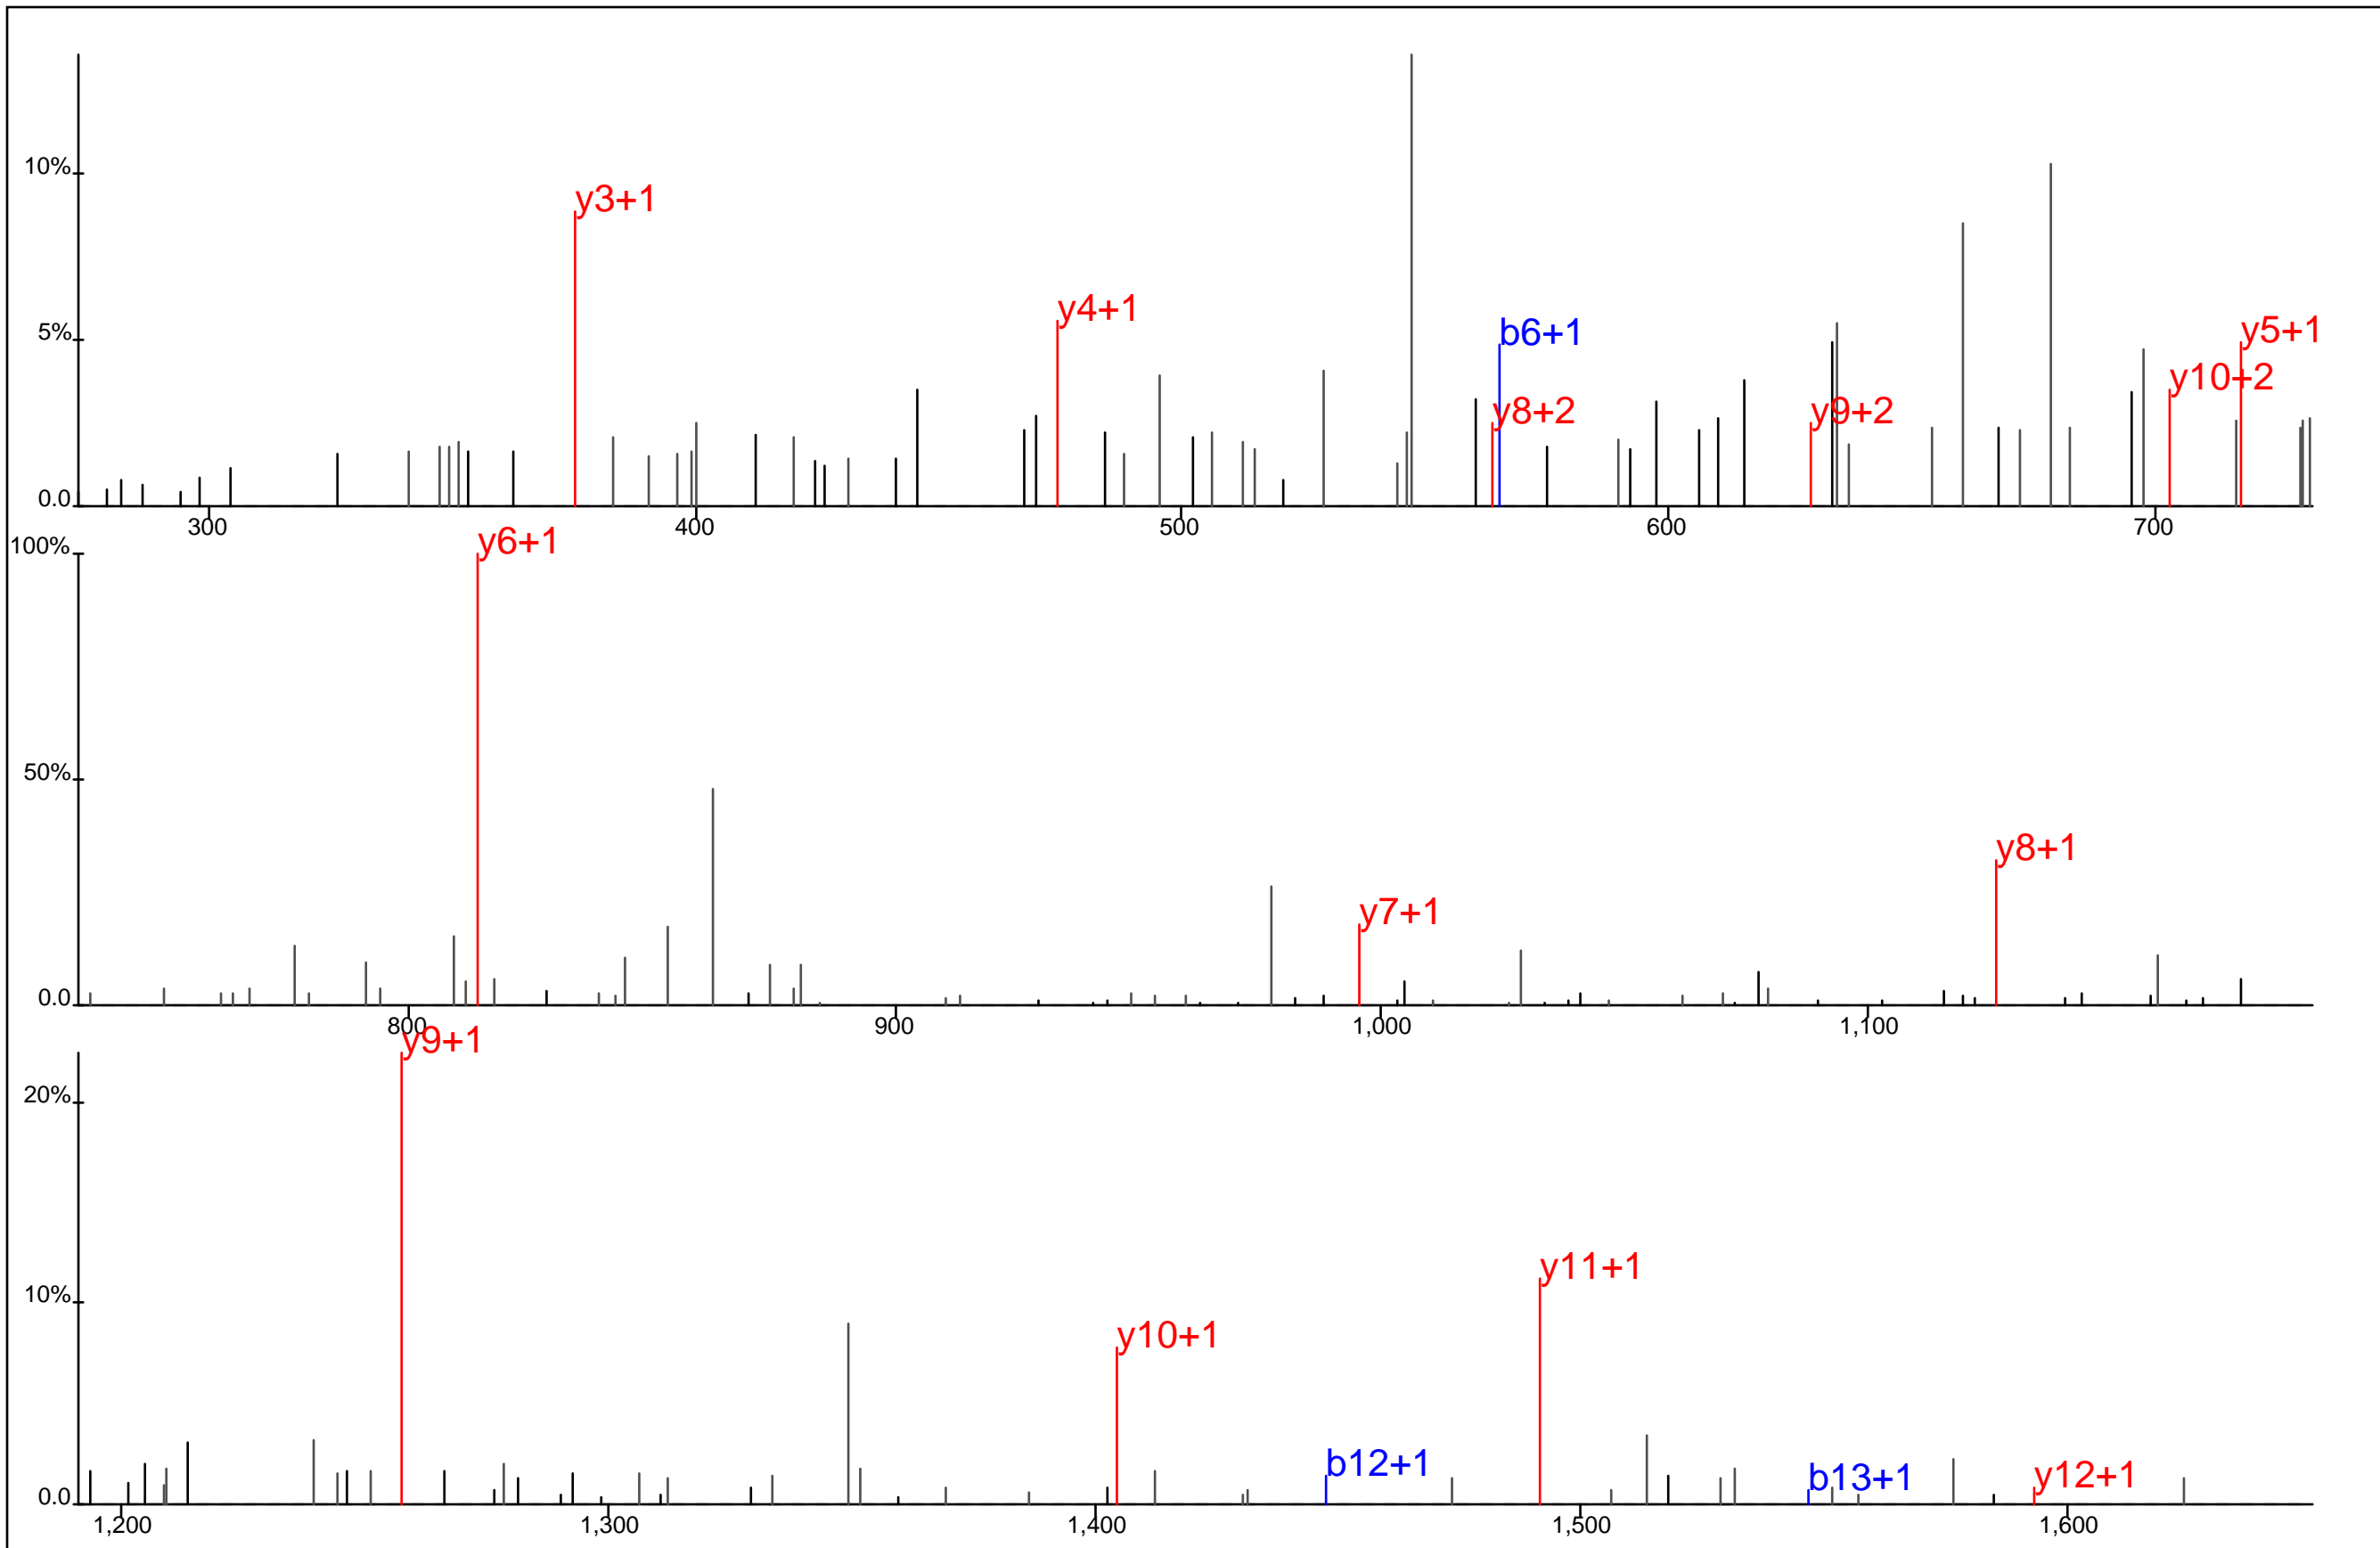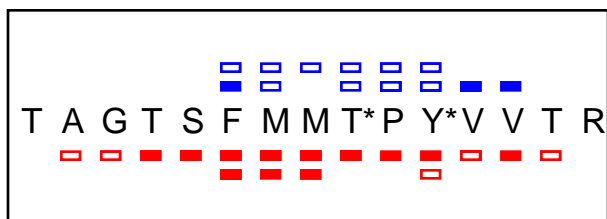

Protein Name: Mitogen-activated protein kinase 8  
 gi Accession: 0  
 Precursor Mass: 911.3730+2  
 Delta Mass: 1.896 ppm  
 XCorr: 49.59

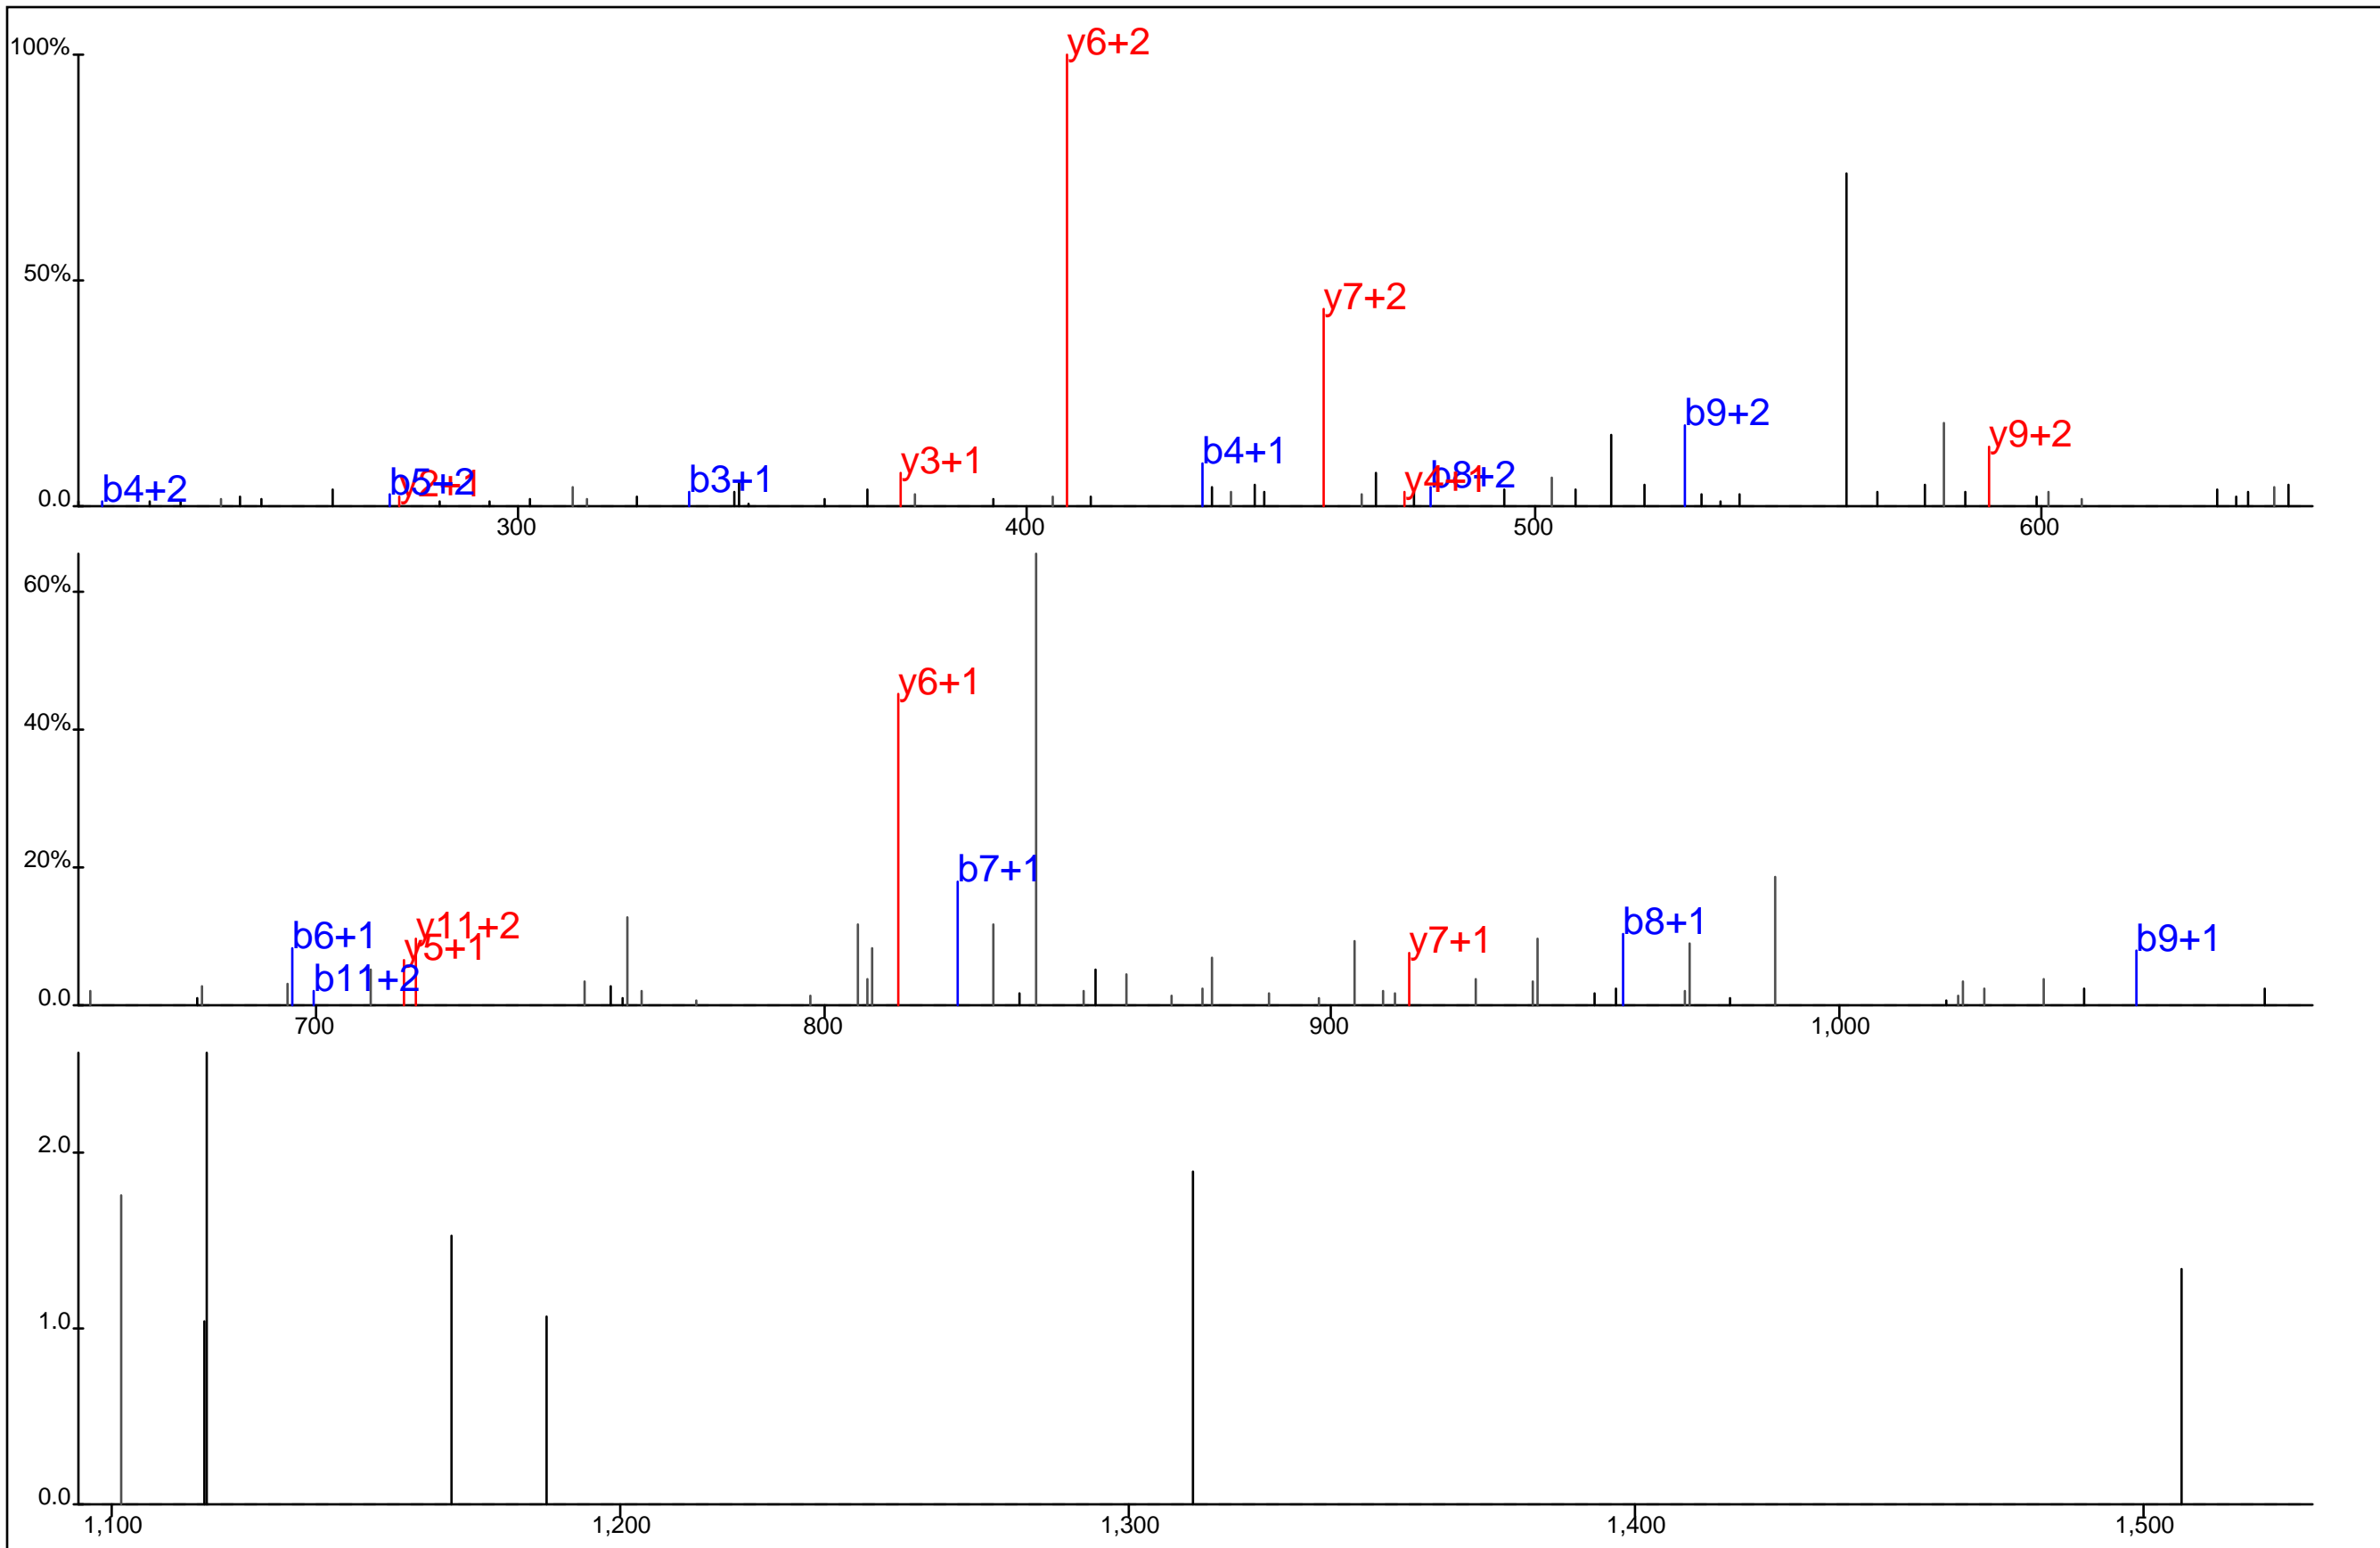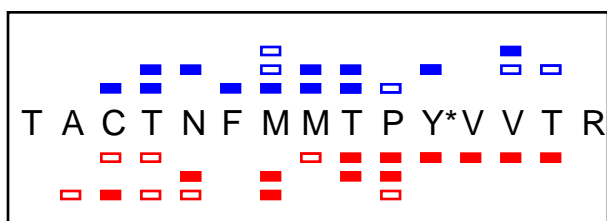

Protein Name: Mitogen-activated protein kinase 9  
 gi Accession: 0  
 Precursor Mass: 624.6004+3  
 Delta Mass: 1.253 ppm  
 XCorr: 24.97



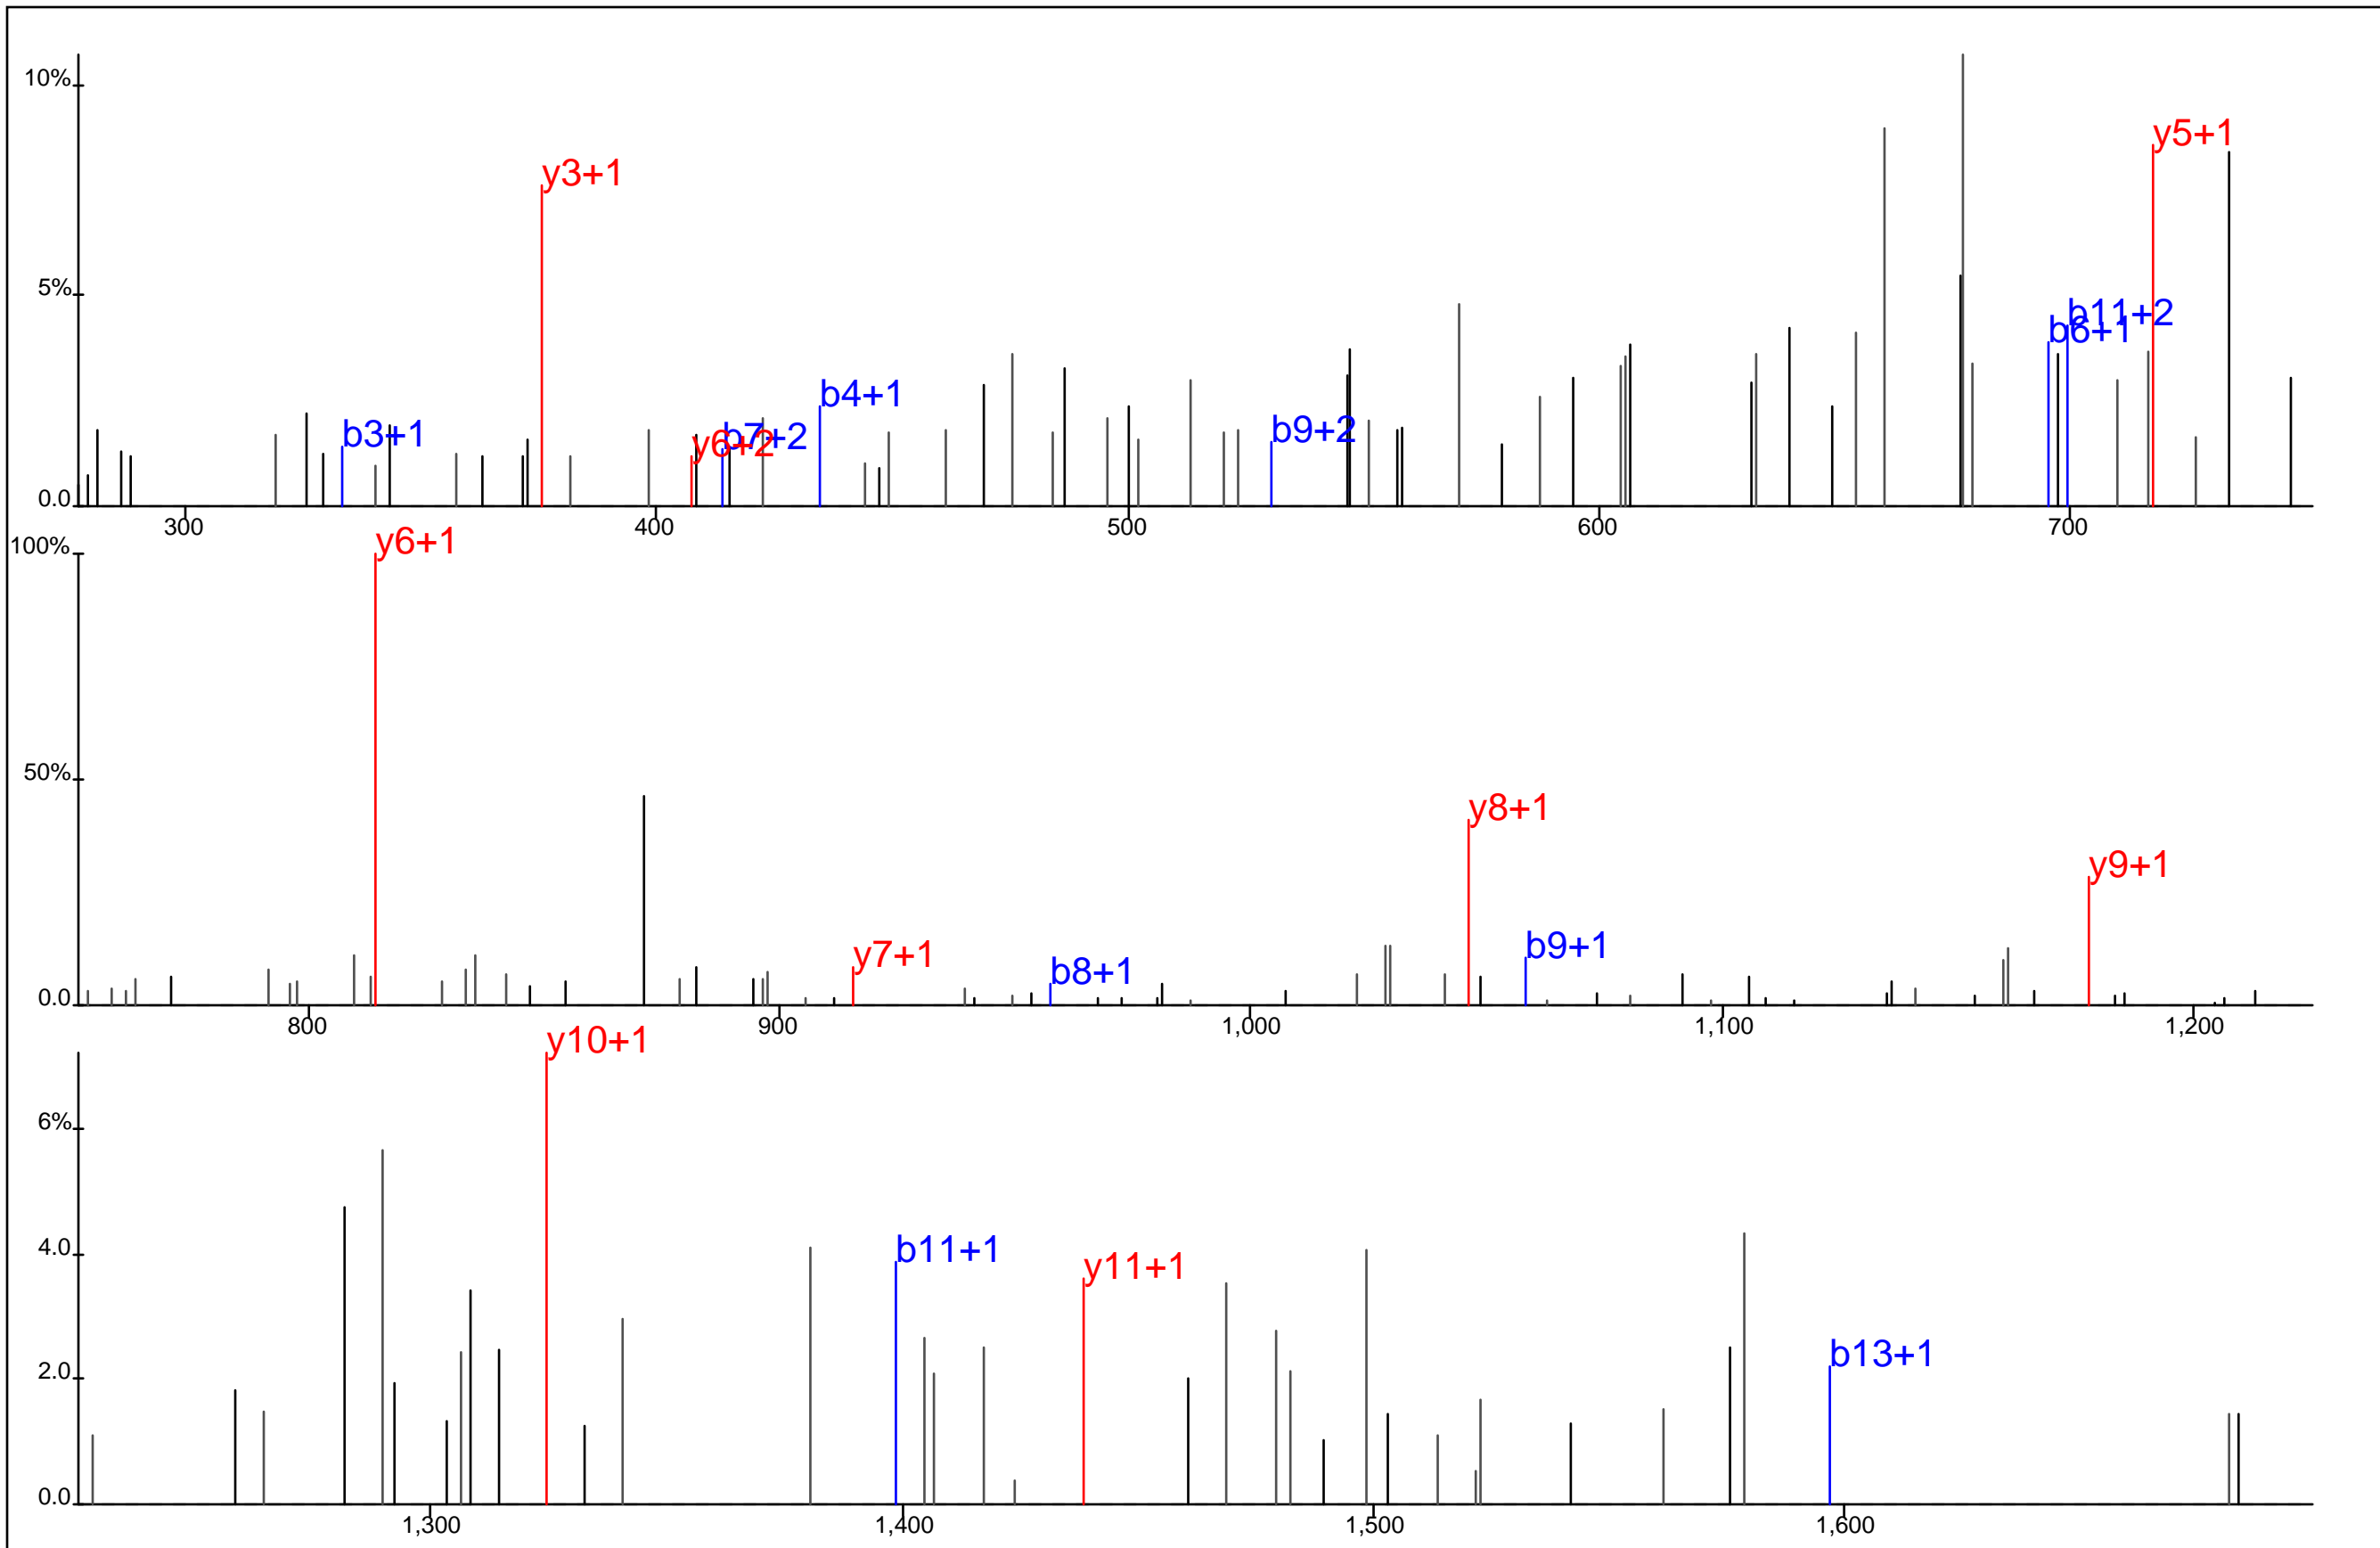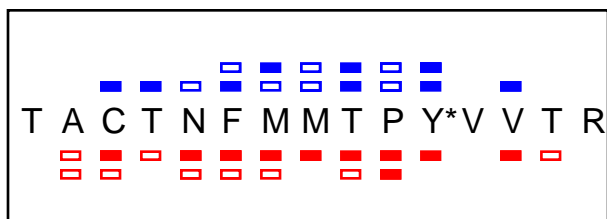

Protein Name: Mitogen-activated protein kinase 9  
 gi Accession: 0  
 Precursor Mass: 936.3988+2  
 Delta Mass: 0.711 ppm  
 XCorr: 47.93

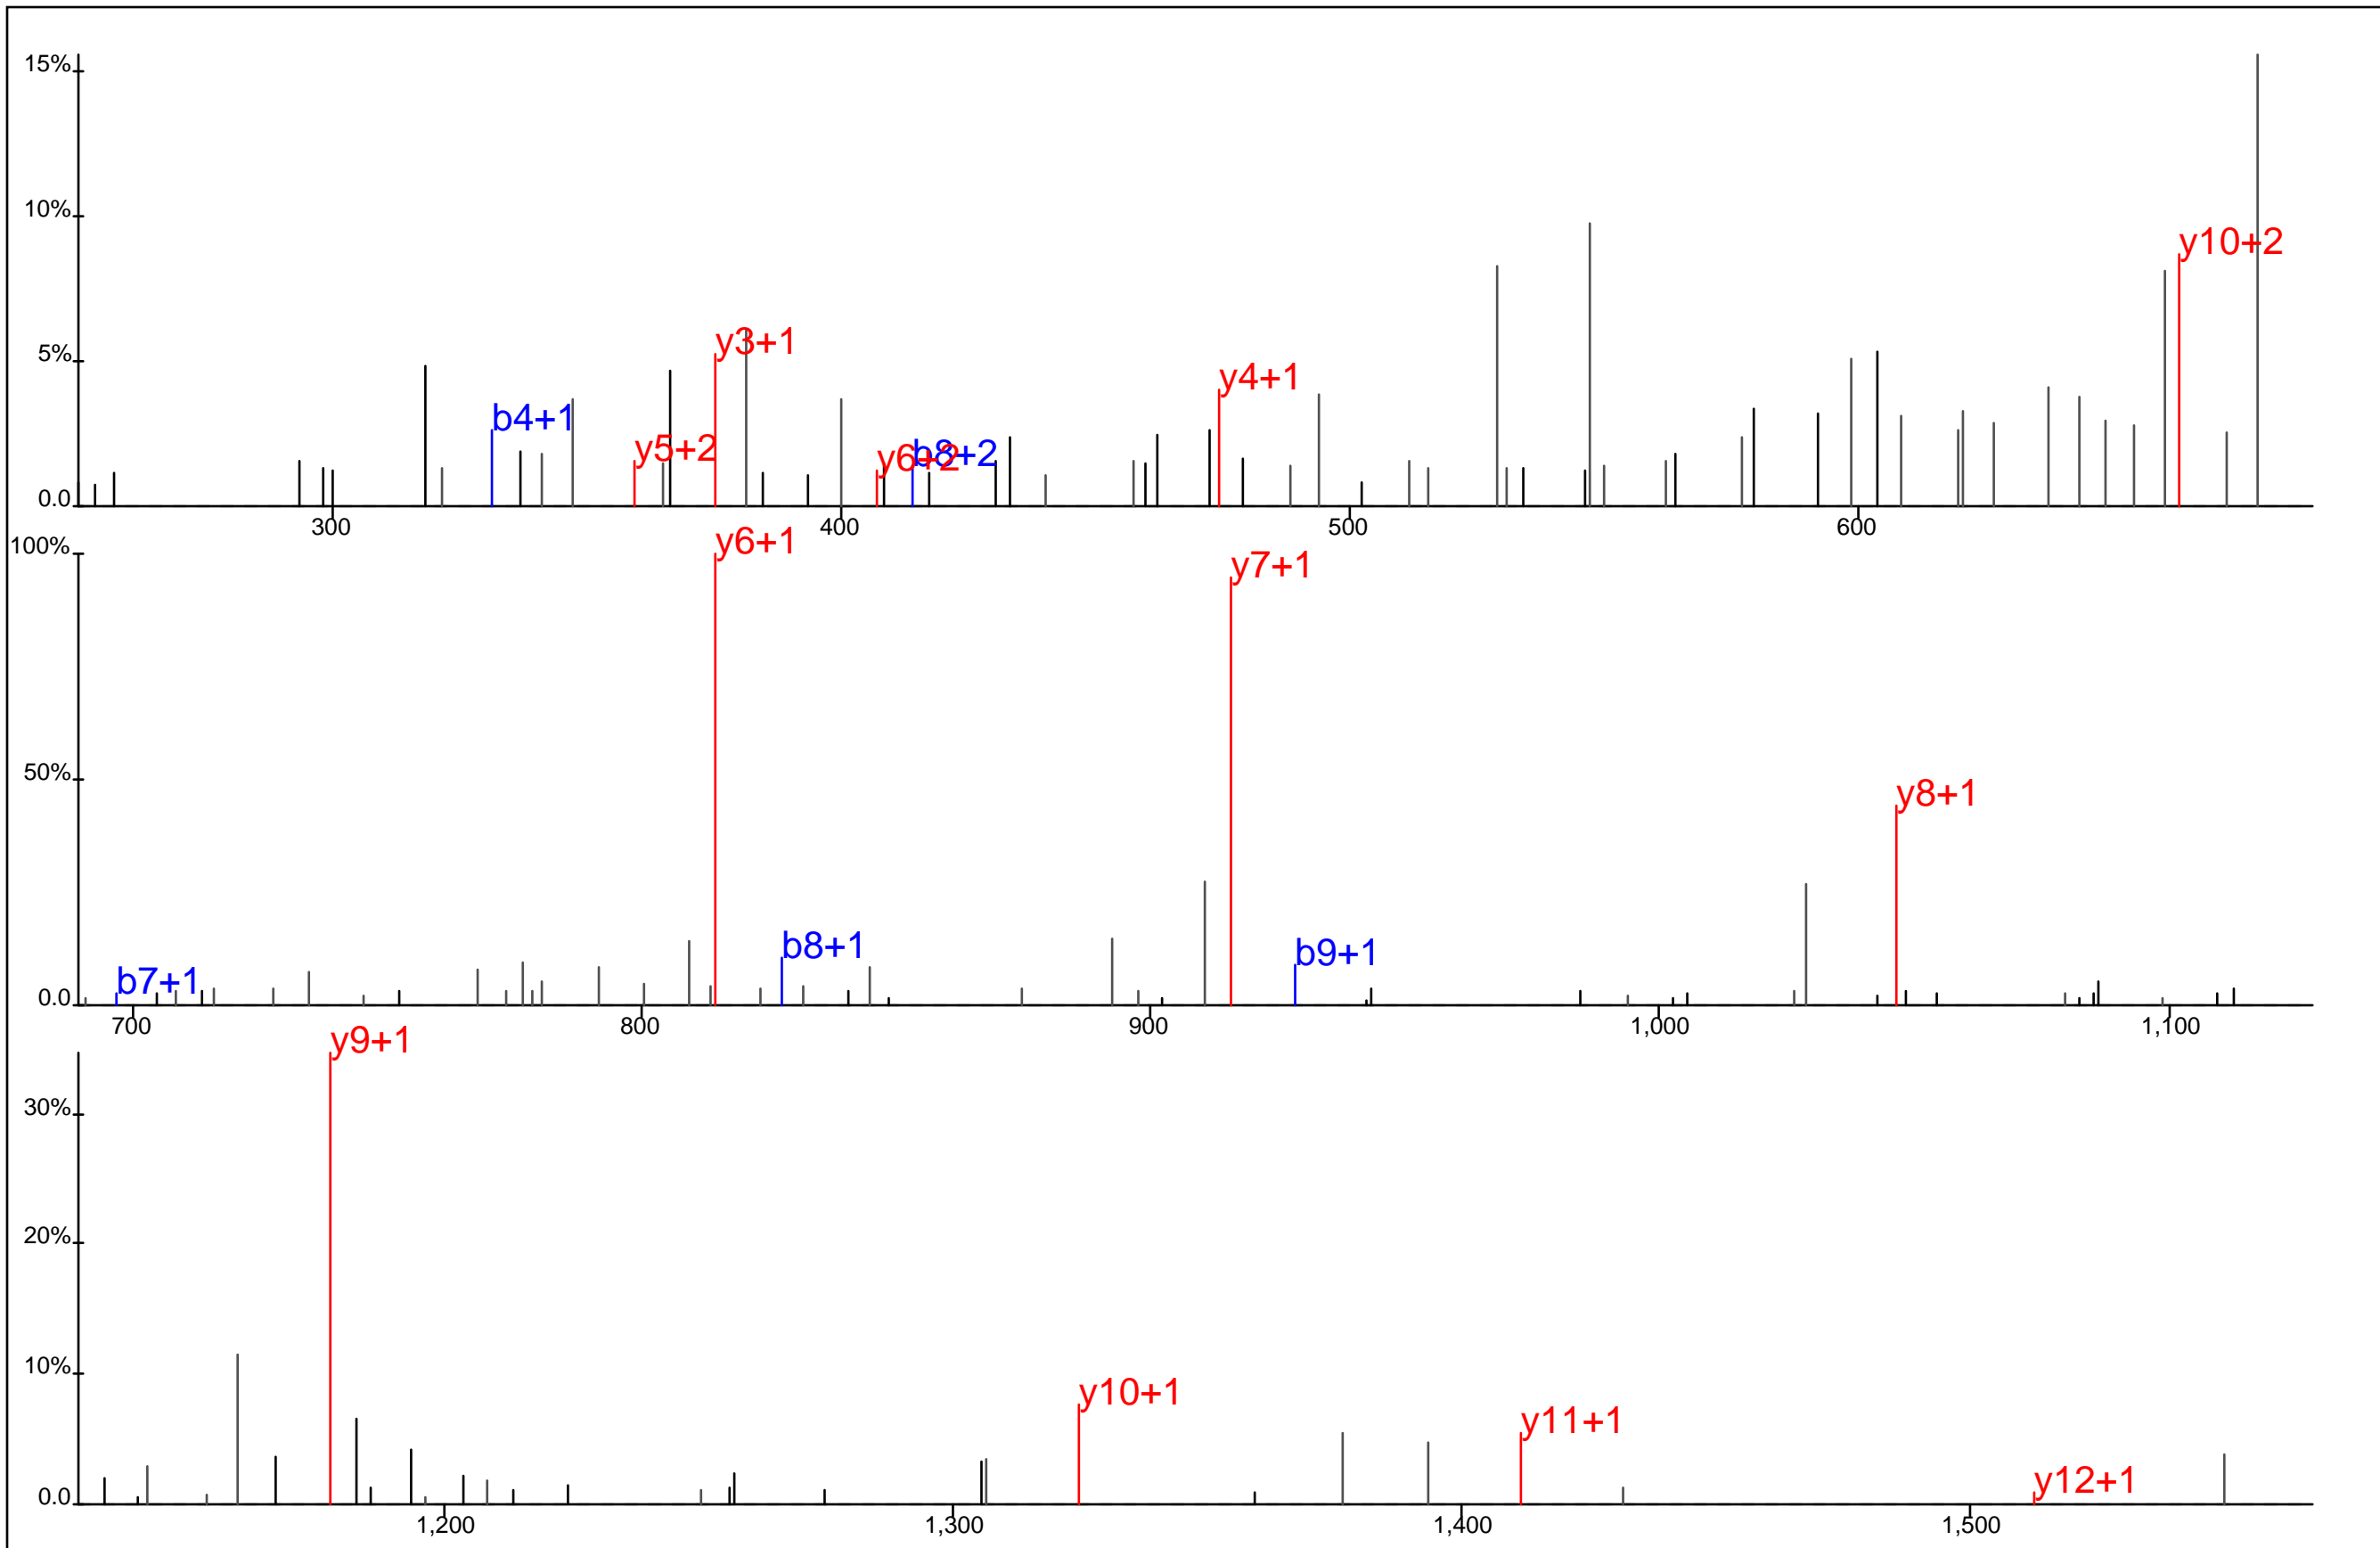

T A G T S F M M T P Y\*V V T R

Protein Name: Mitogen-activated protein kinase 8  
 gi Accession: 0  
 Precursor Mass: 871.3842+2  
 Delta Mass: 4.459 ppm  
 XCorr: 52.26









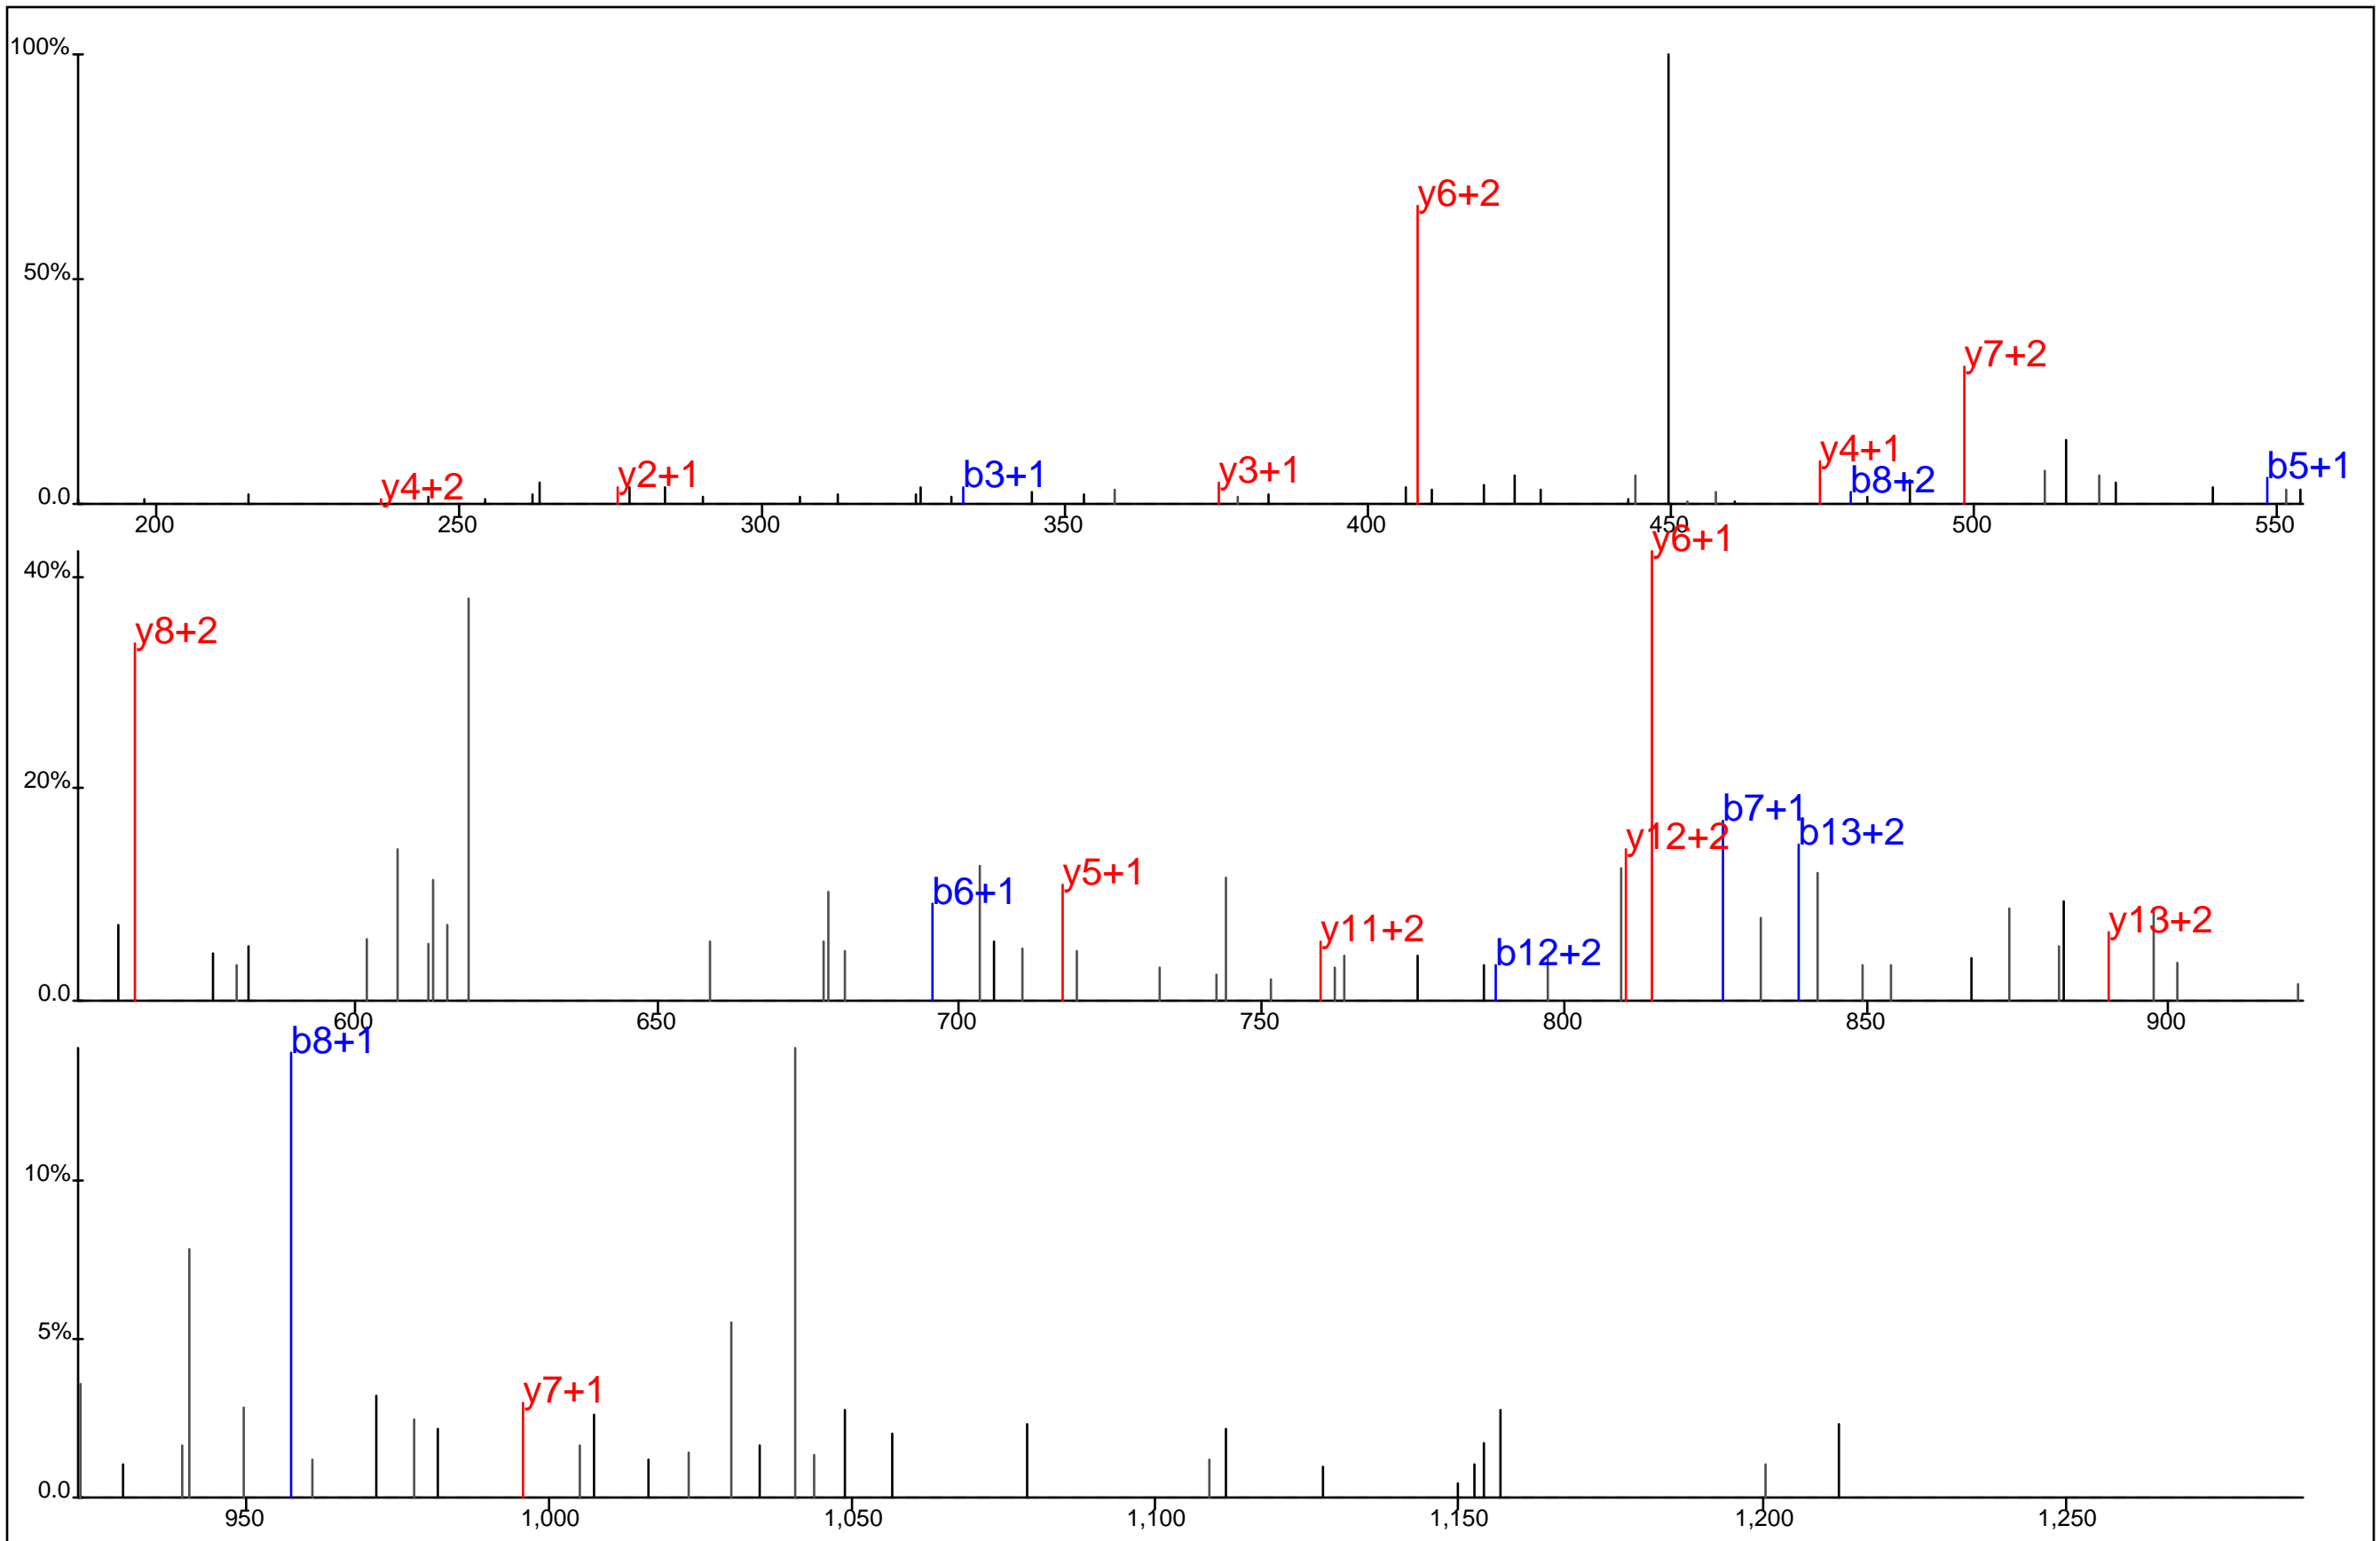

T A C T N F M M T\* P Y\* V V T R

Protein Name: Mitogen-activated protein kinase 9  
 gi Accession: 0  
 Precursor Mass: 651.2587+3  
 Delta Mass: 3.233 ppm  
 XCorr: 31.74

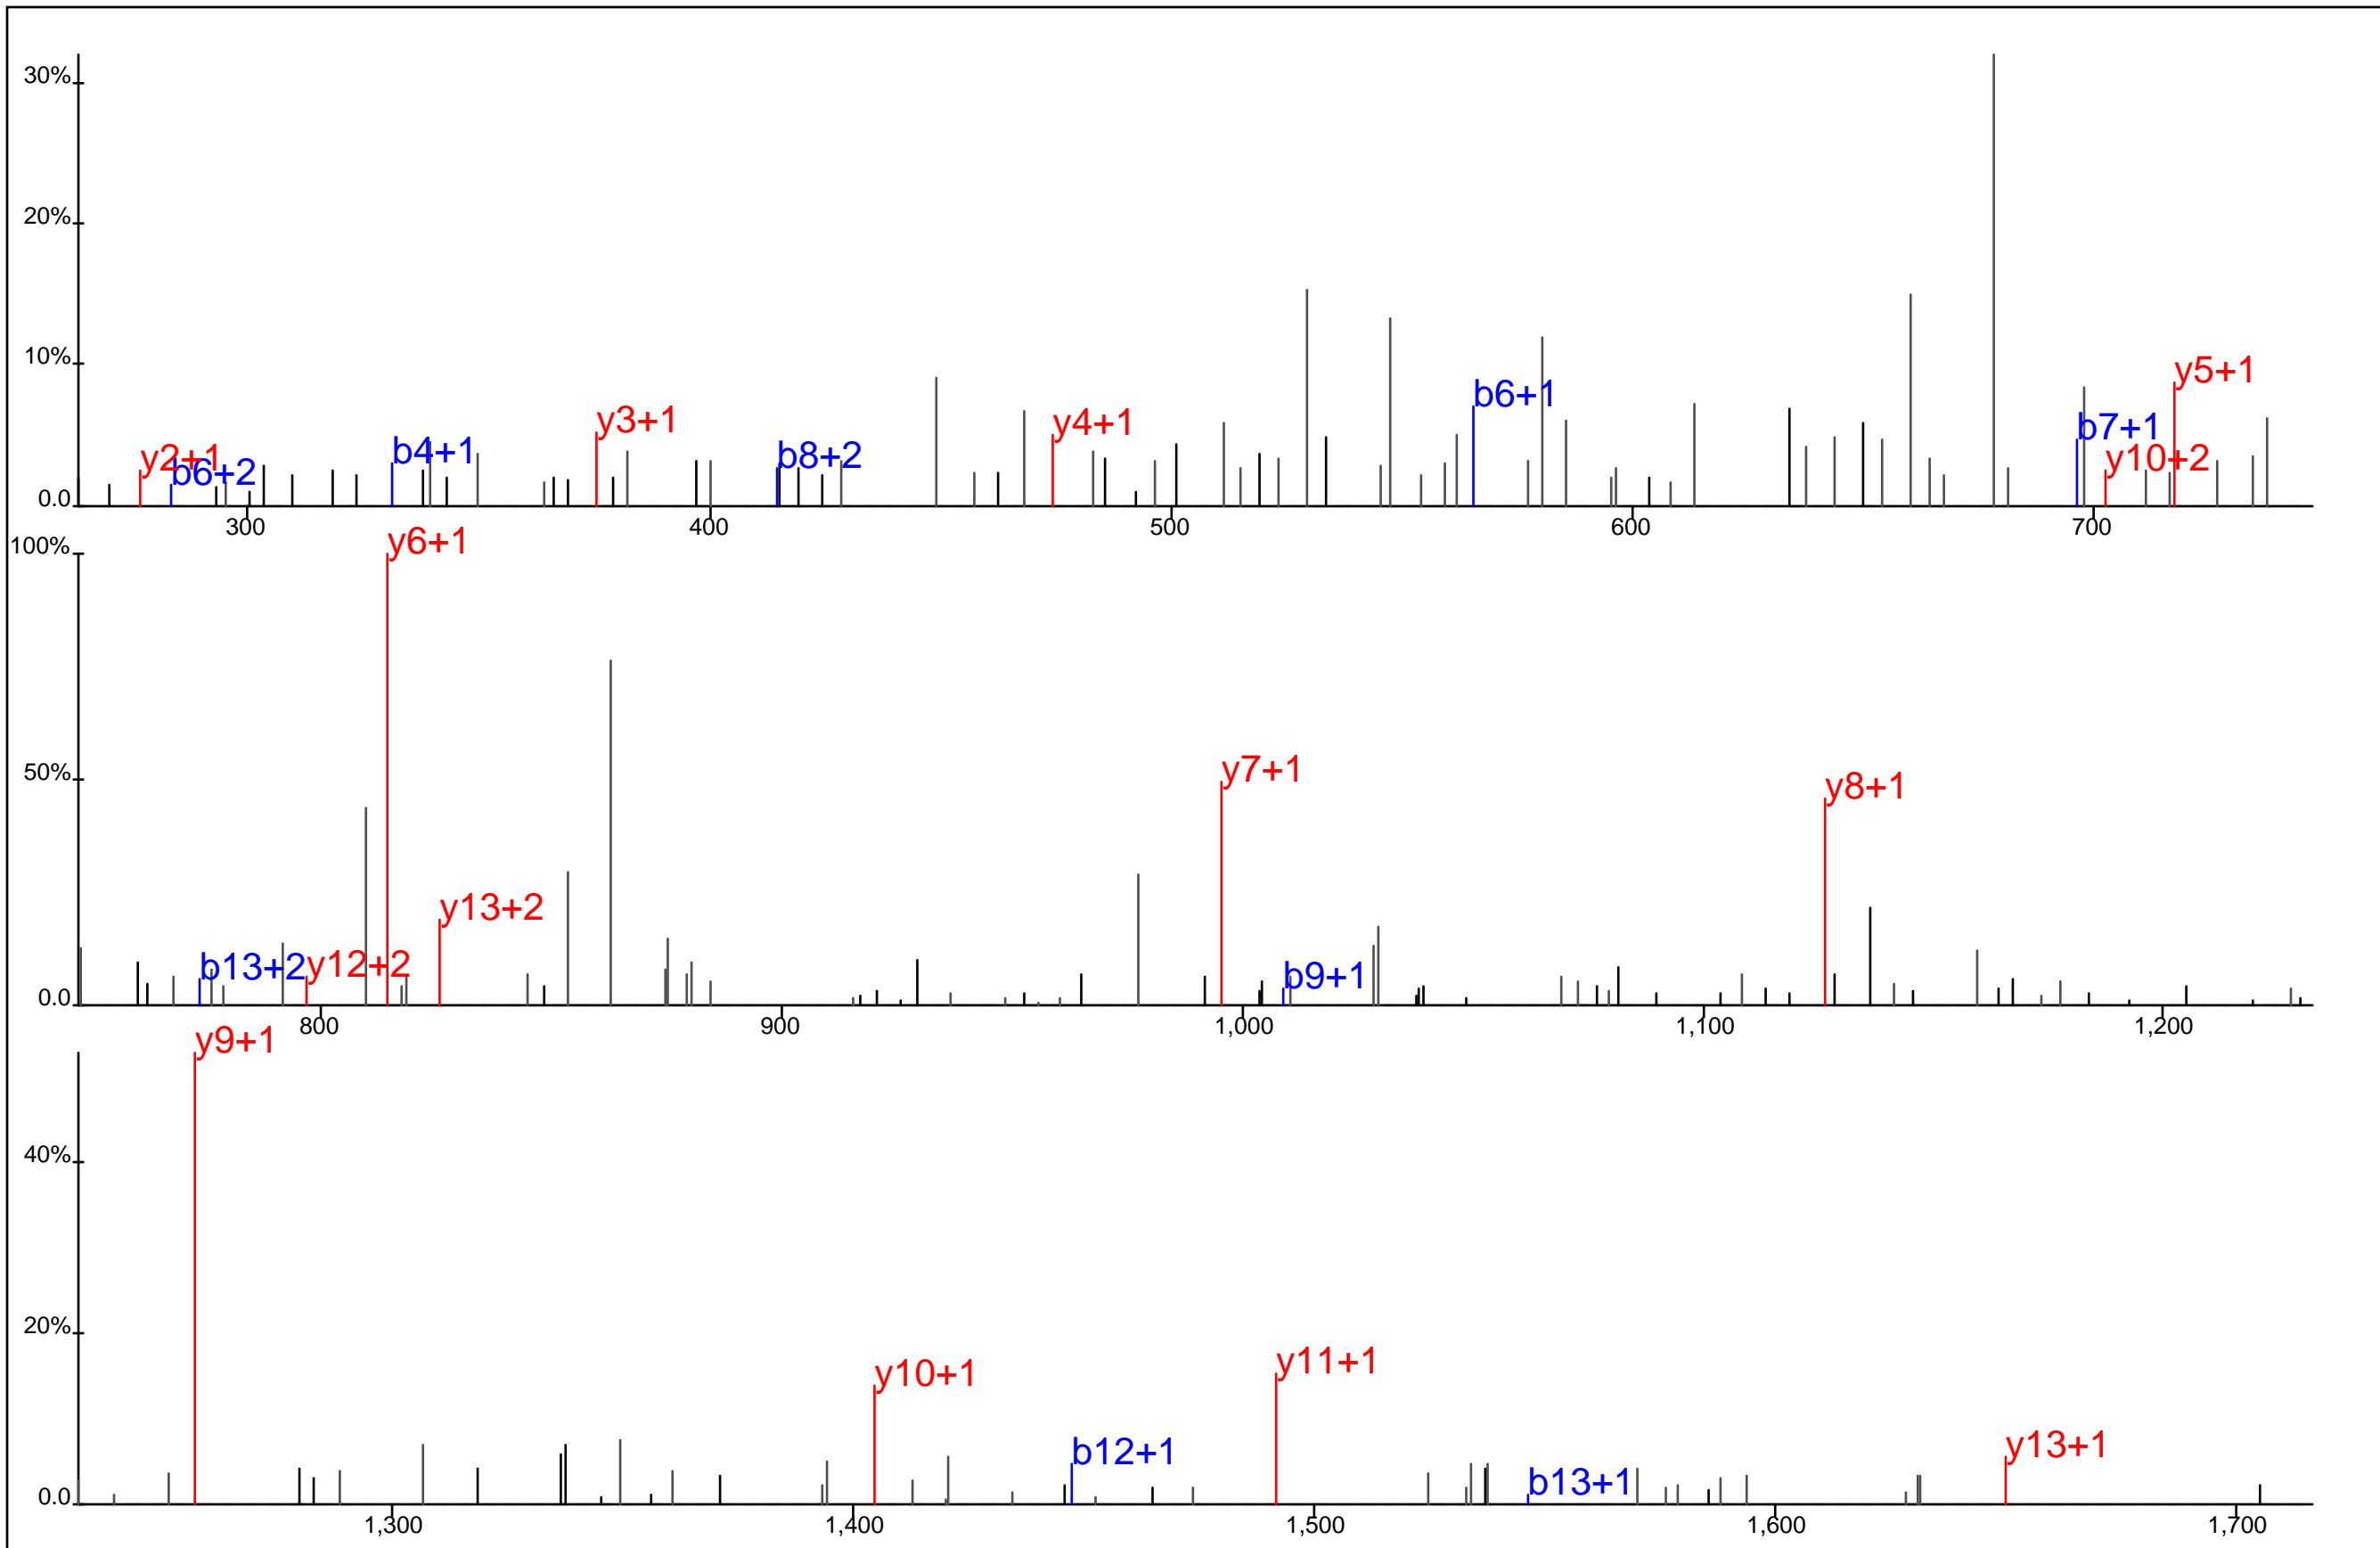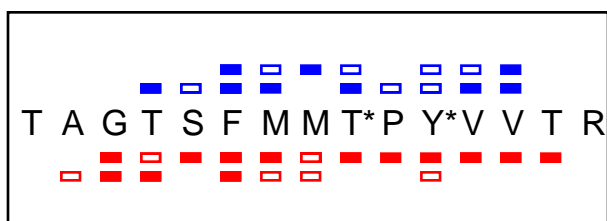

Protein Name: Mitogen-activated protein kinase 8  
 gi Accession: 0  
 Precursor Mass: 911.3686+2  
 Delta Mass: 2.929 ppm  
 XCorr: 45.01



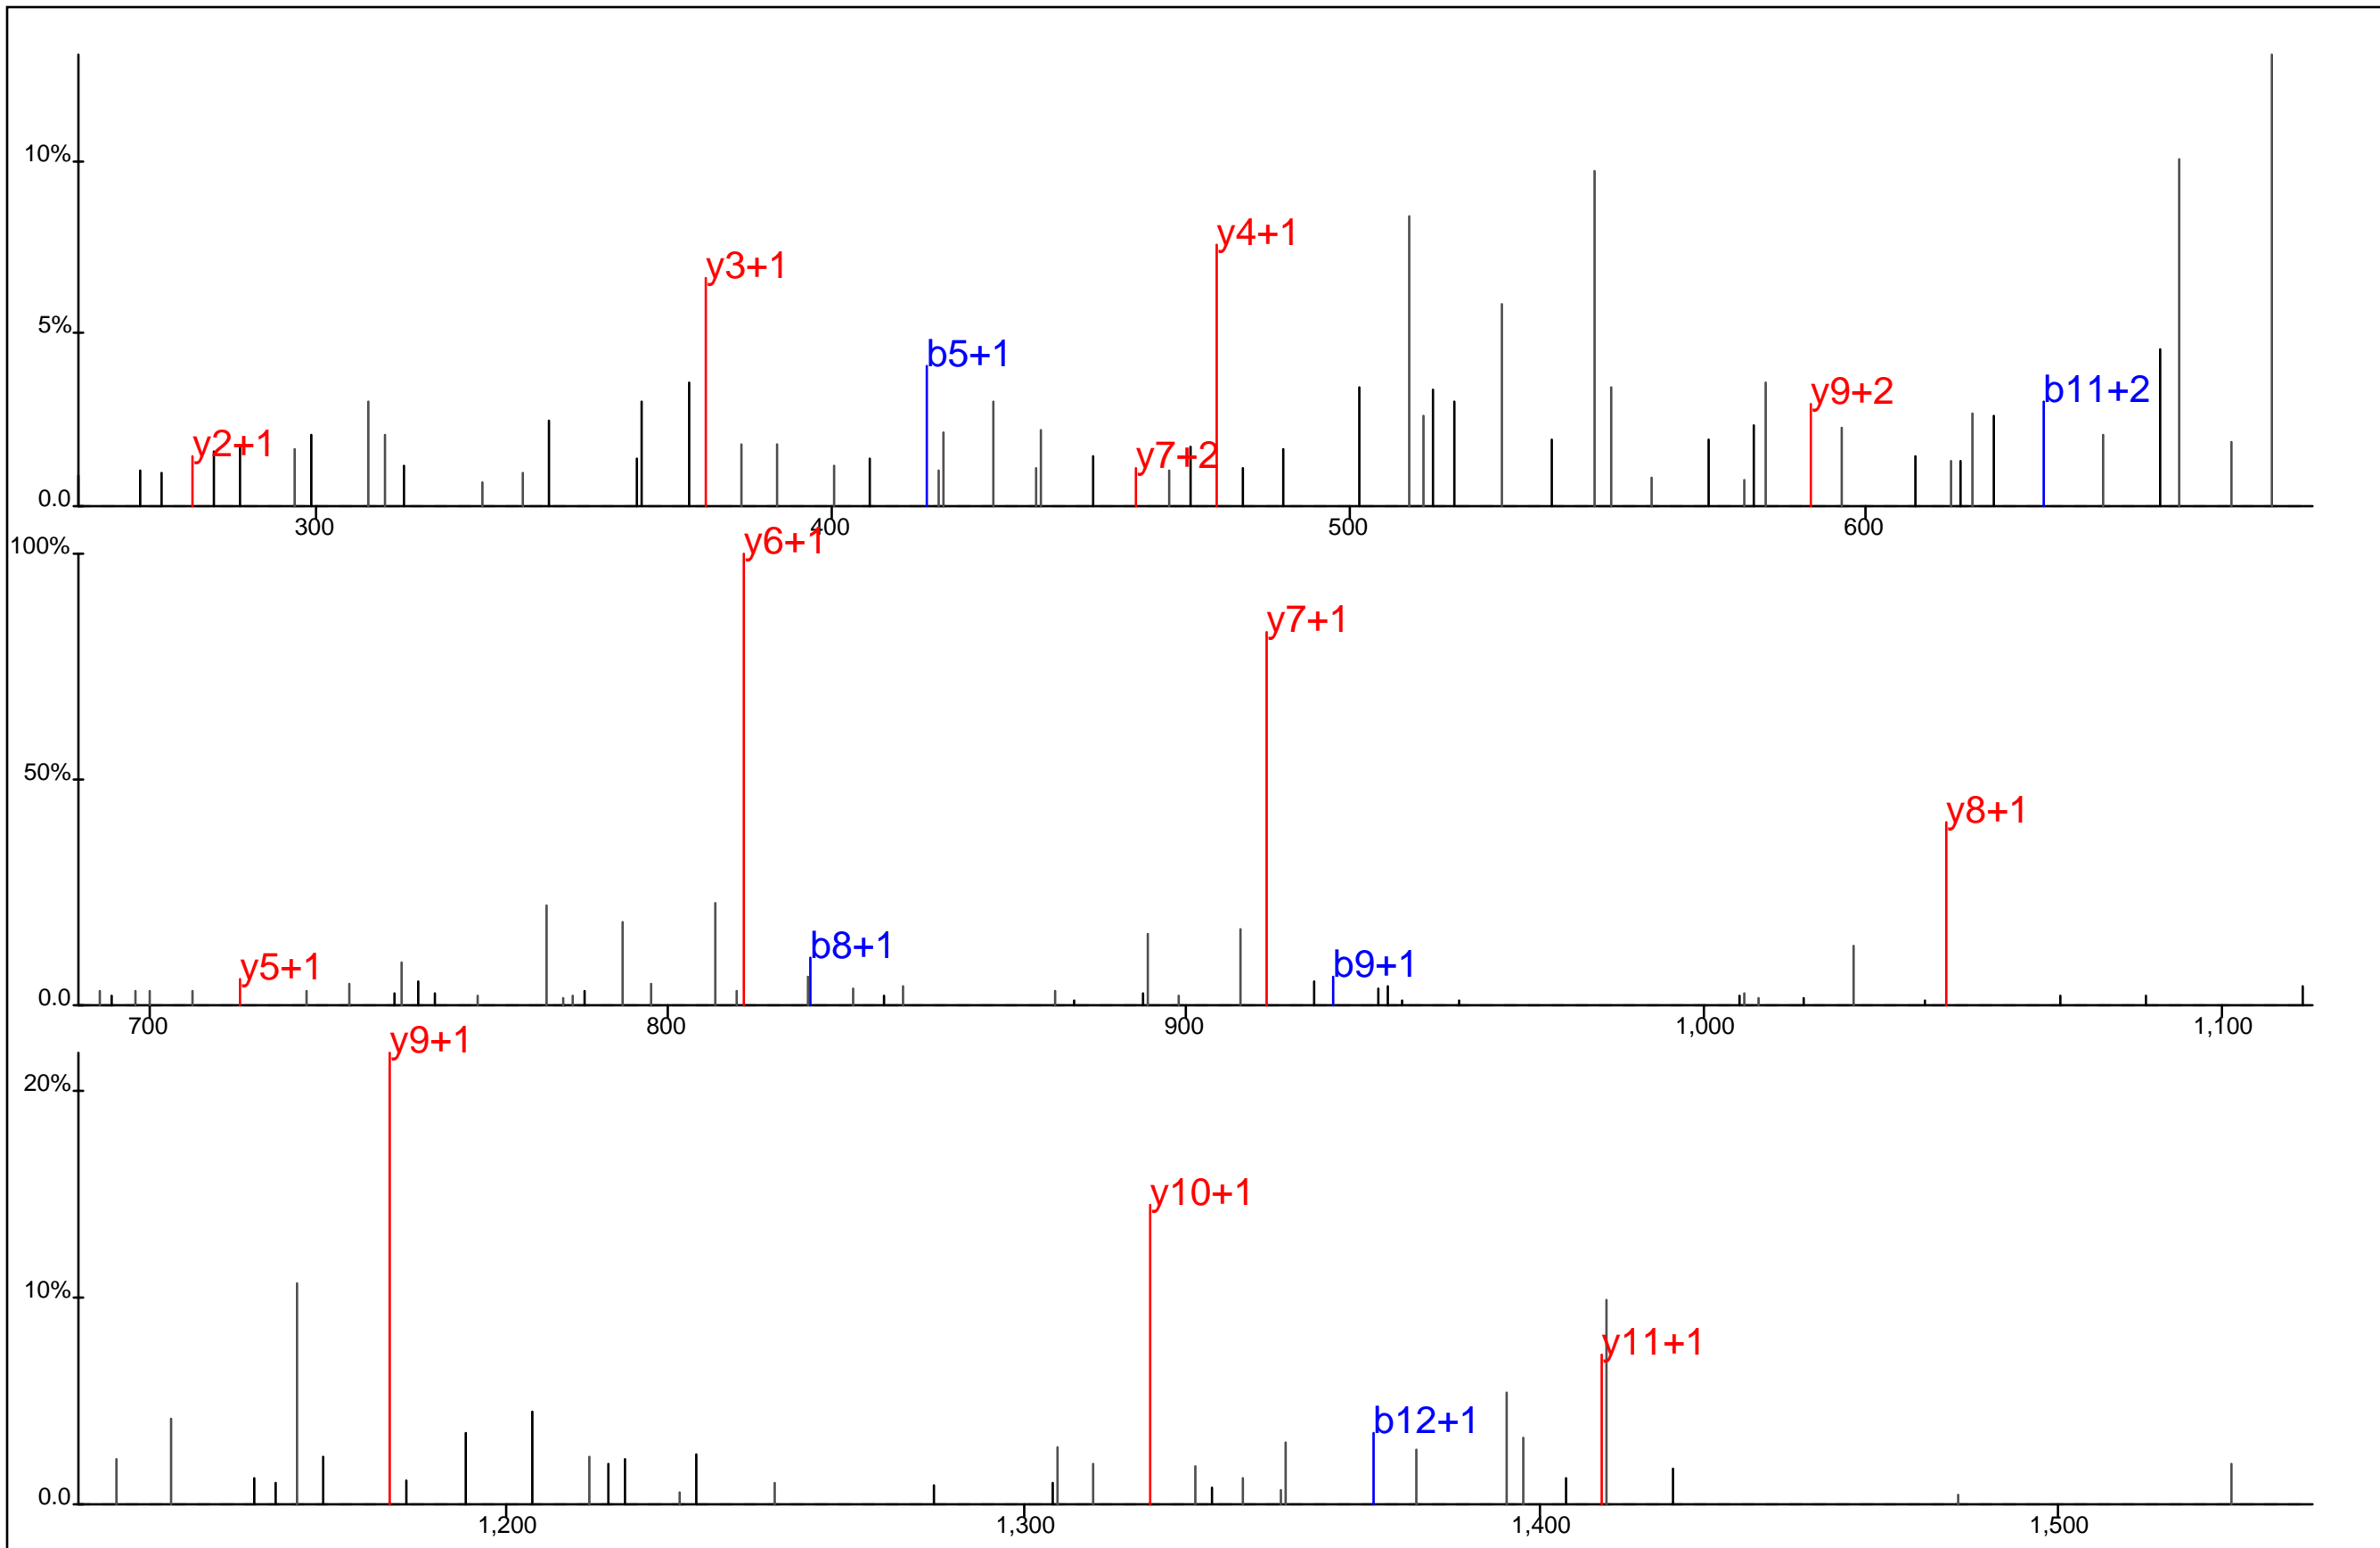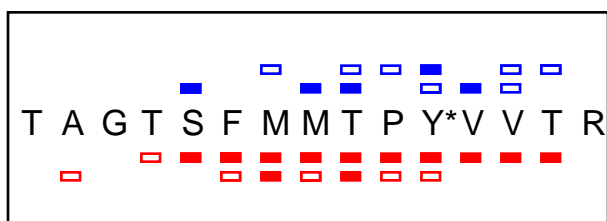

Protein Name: Mitogen-activated protein kinase 8  
 gi Accession: 0  
 Precursor Mass: 871.3907+2  
 Delta Mass: 2.971 ppm  
 XCorr: 46.75

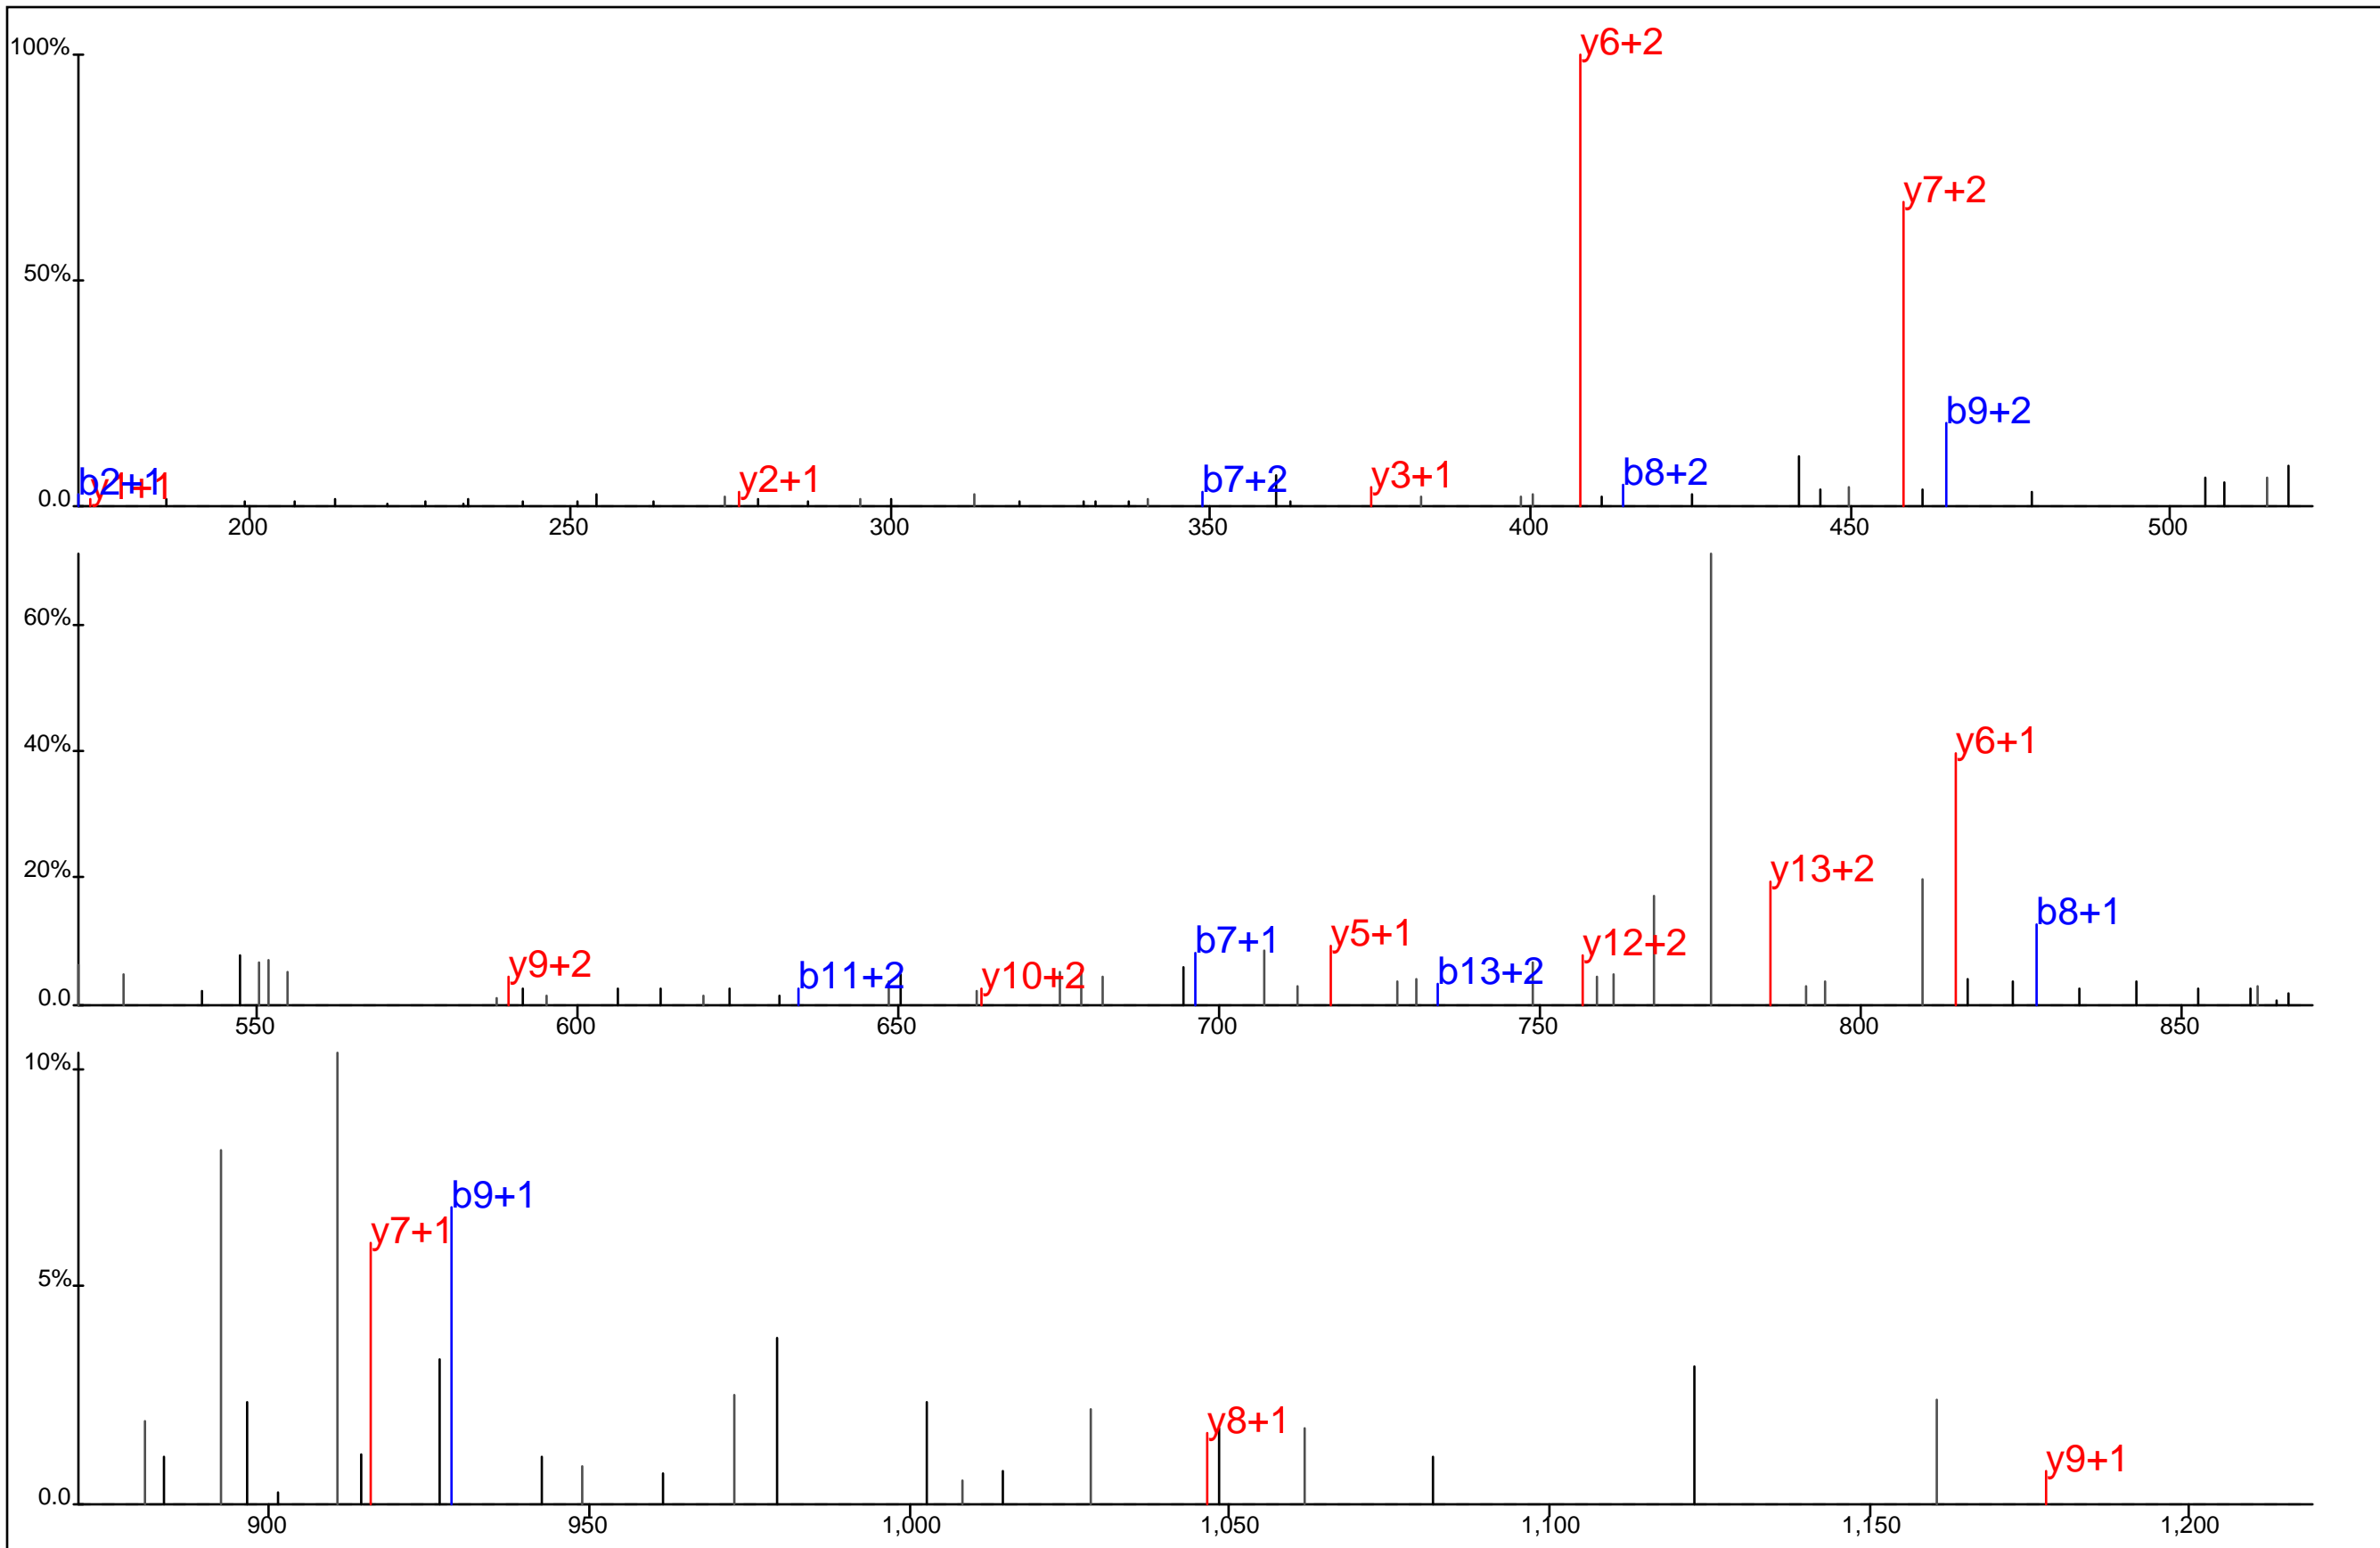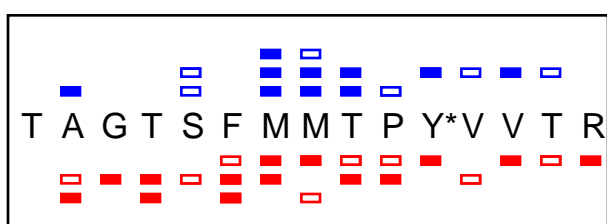

Protein Name: Mitogen-activated protein kinase 8  
 gi Accession: 0  
 Precursor Mass: 581.2629+3  
 Delta Mass: 2.963 ppm  
 XCorr: 38.4

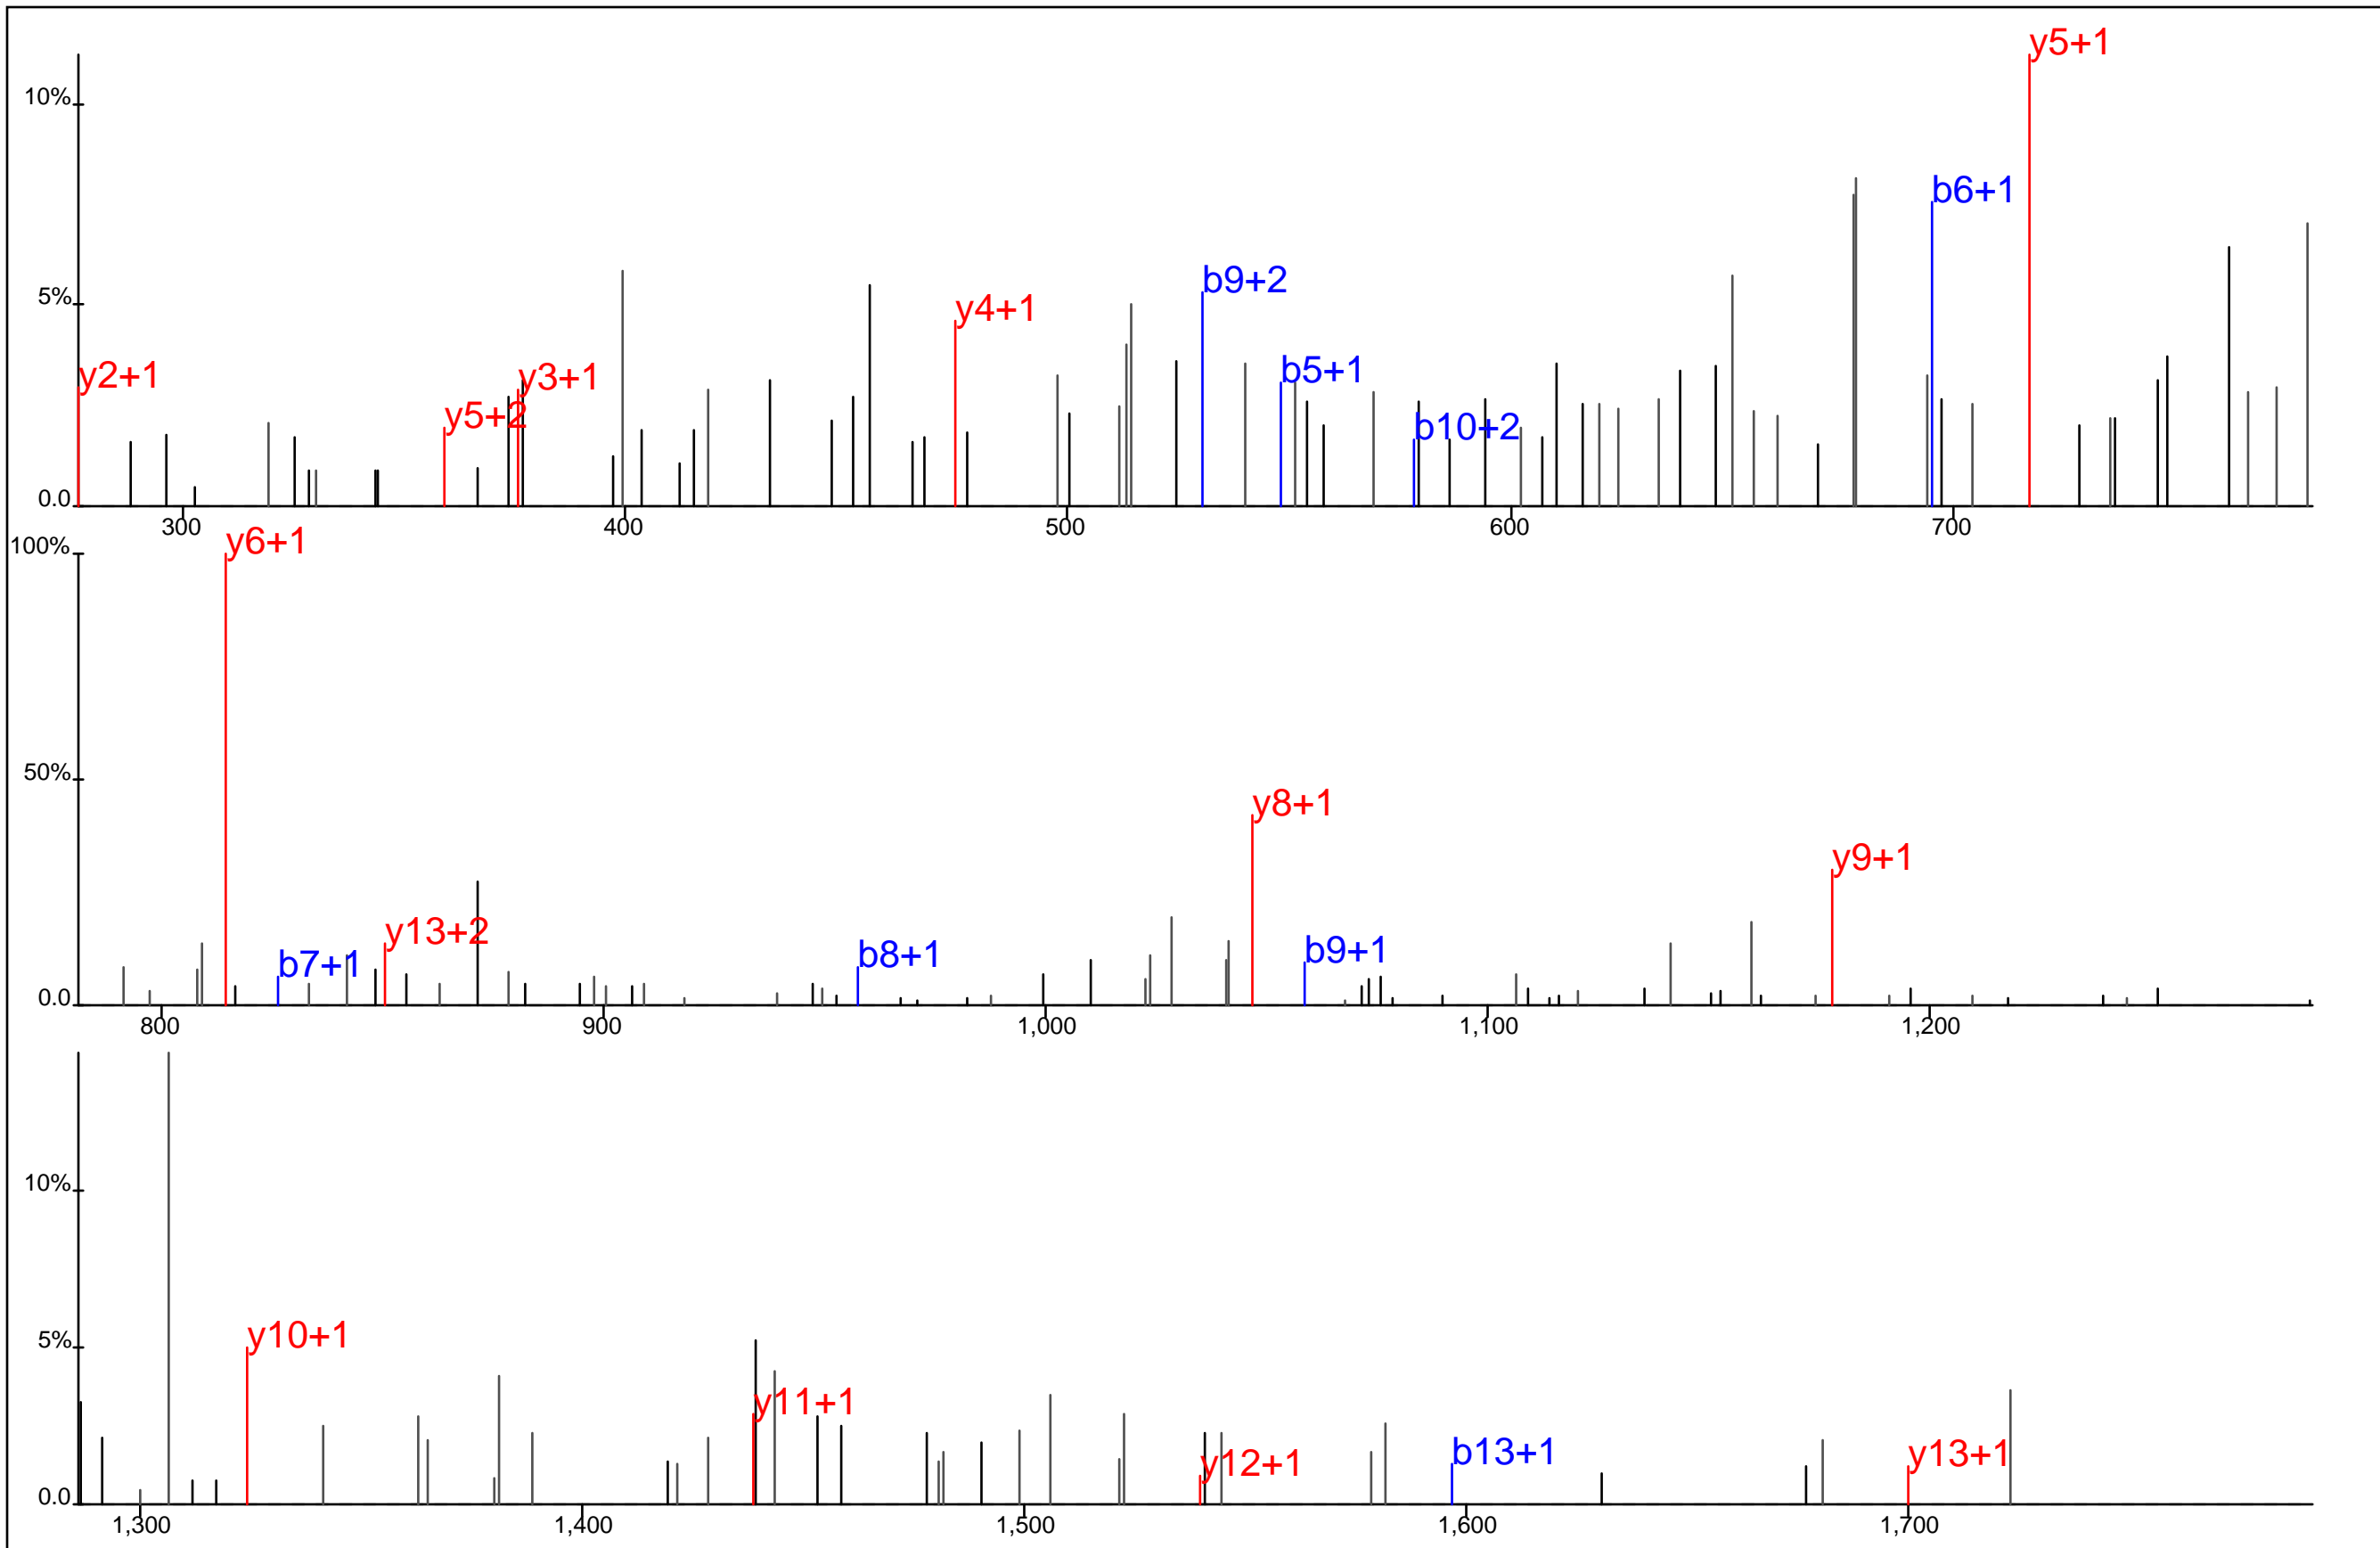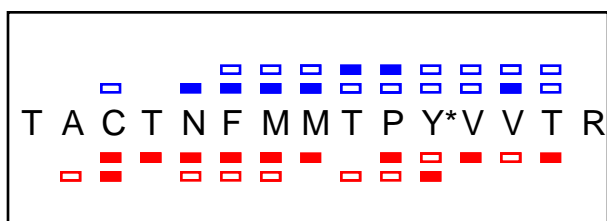

Protein Name: Mitogen-activated protein kinase 9  
 gi Accession: 0  
 Precursor Mass: 936.3981+2  
 Delta Mass: 0.007 ppm  
 XCorr: 45.66

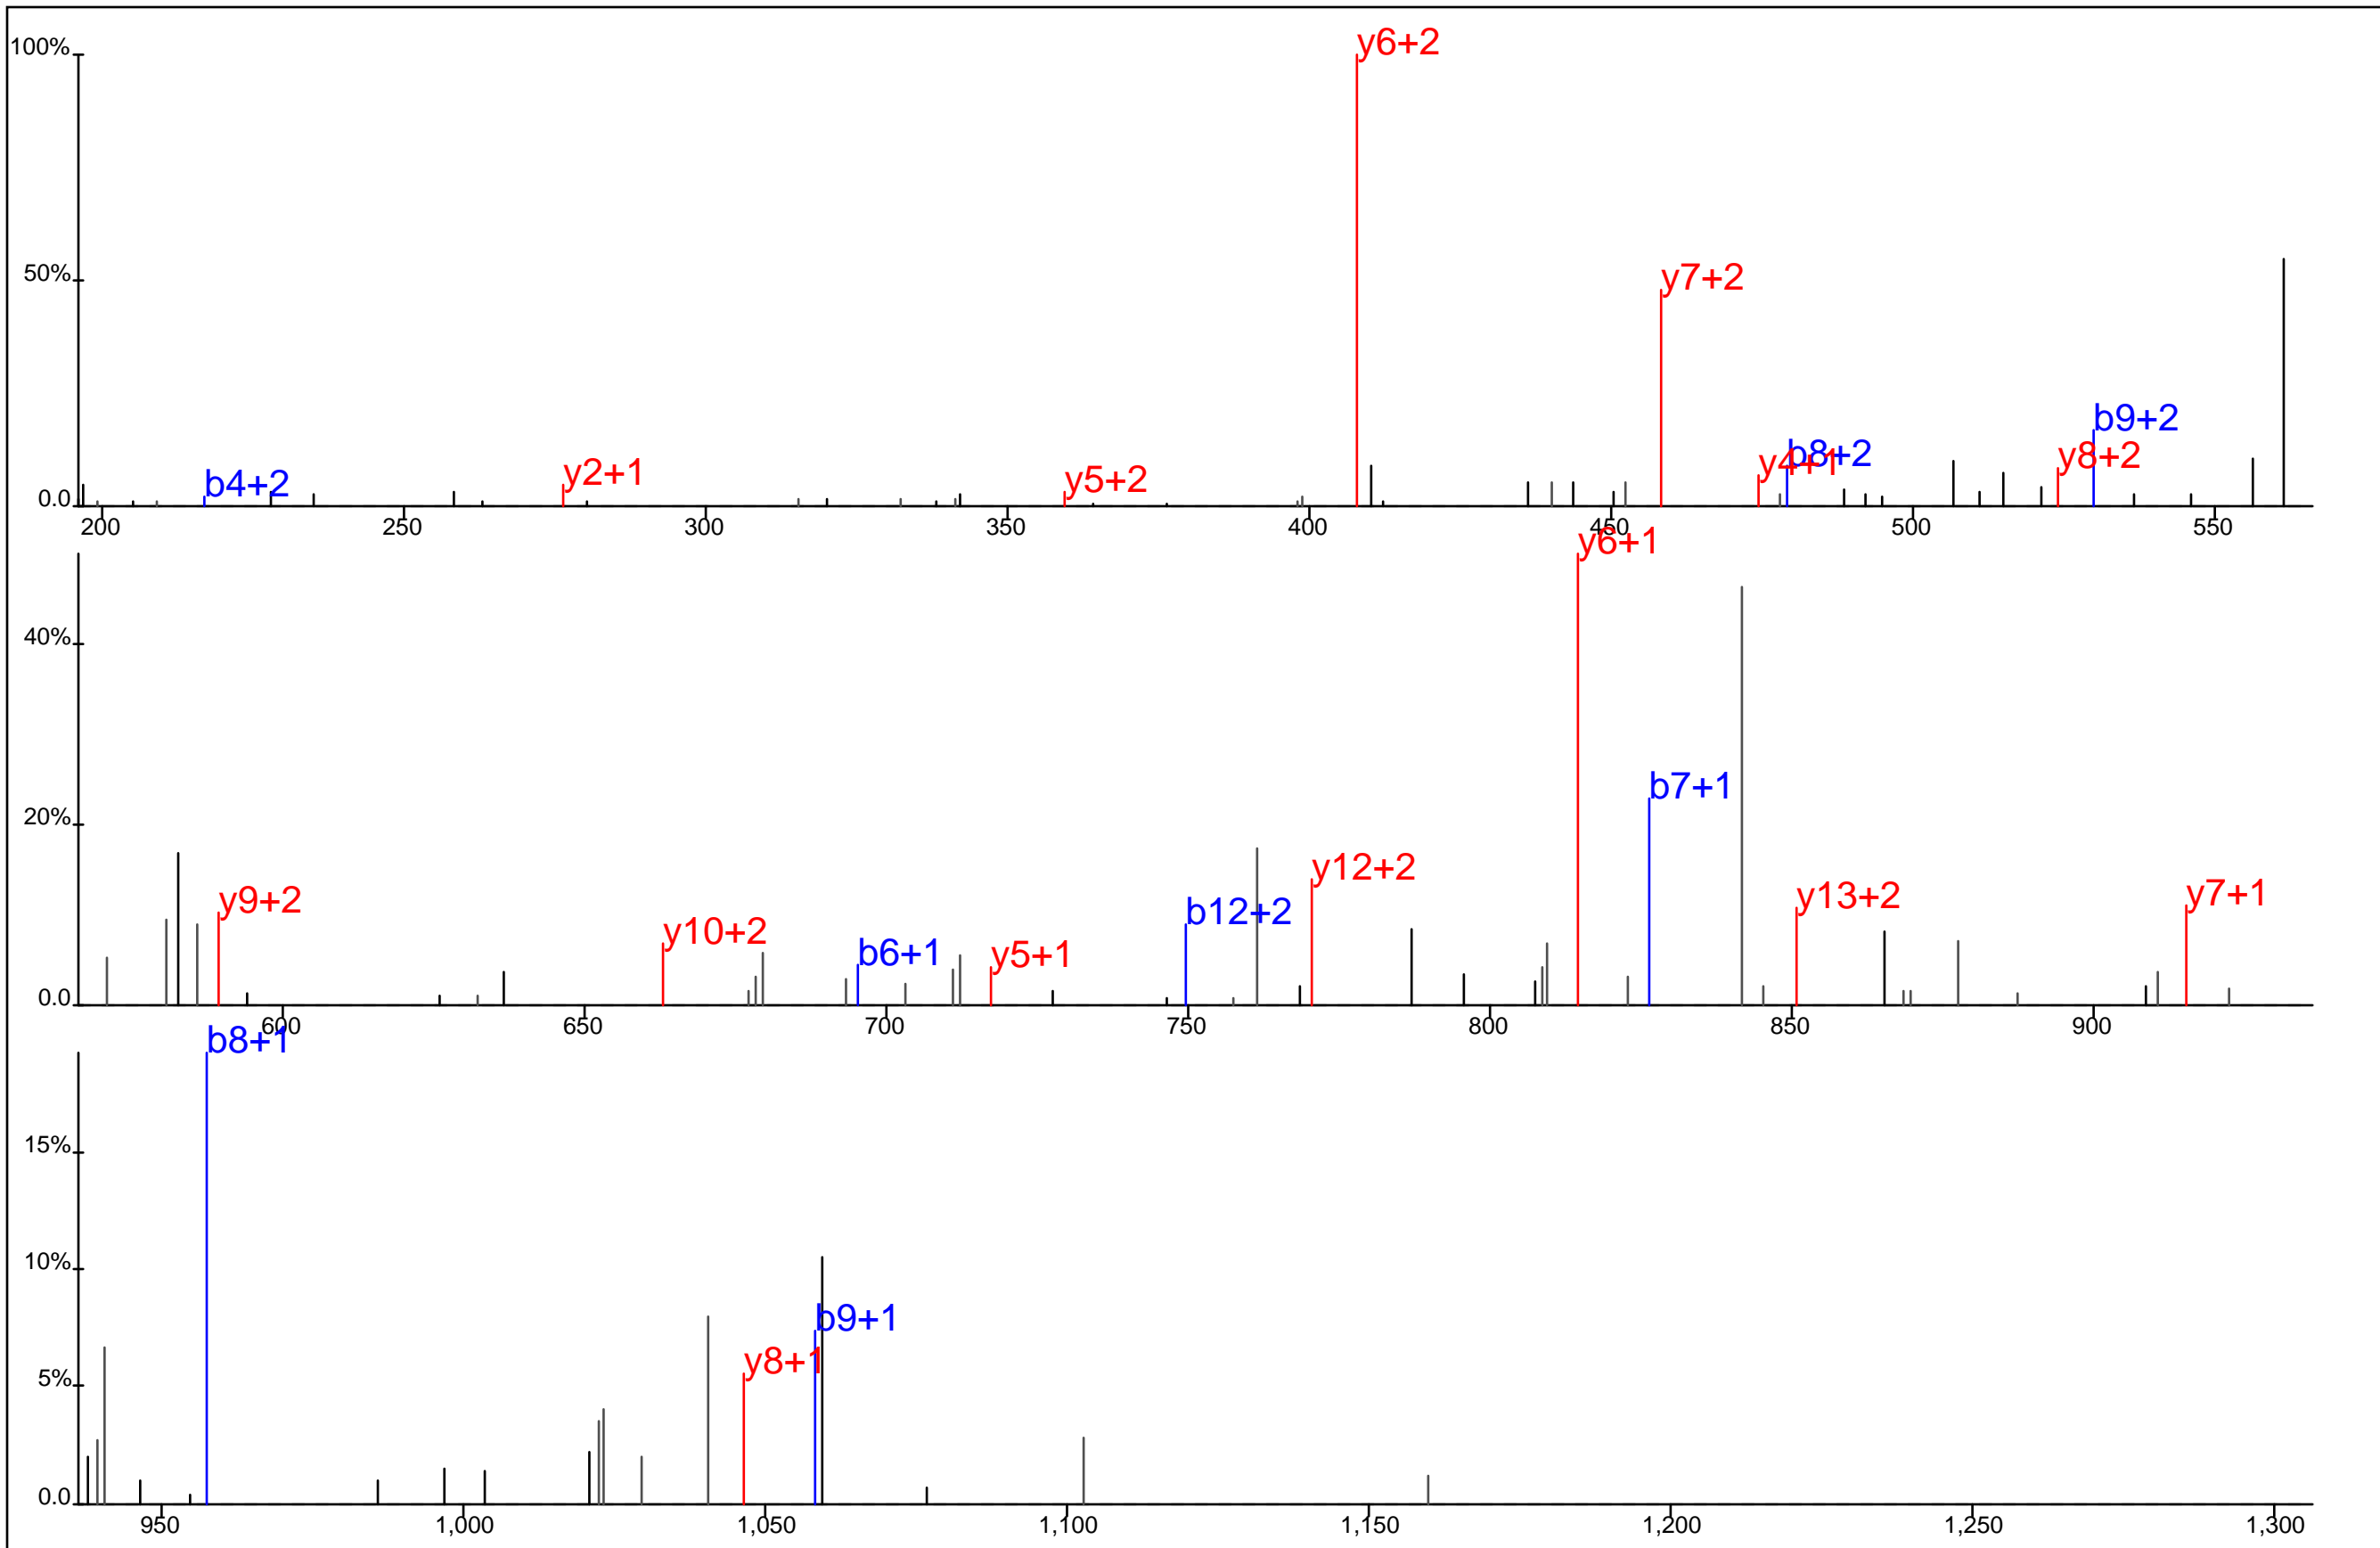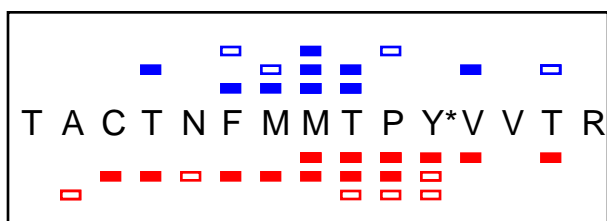

Protein Name: Mitogen-activated protein kinase 9  
 gi Accession: 0  
 Precursor Mass: 624.6019+3  
 Delta Mass: 1.193 ppm  
 XCorr: 47.2

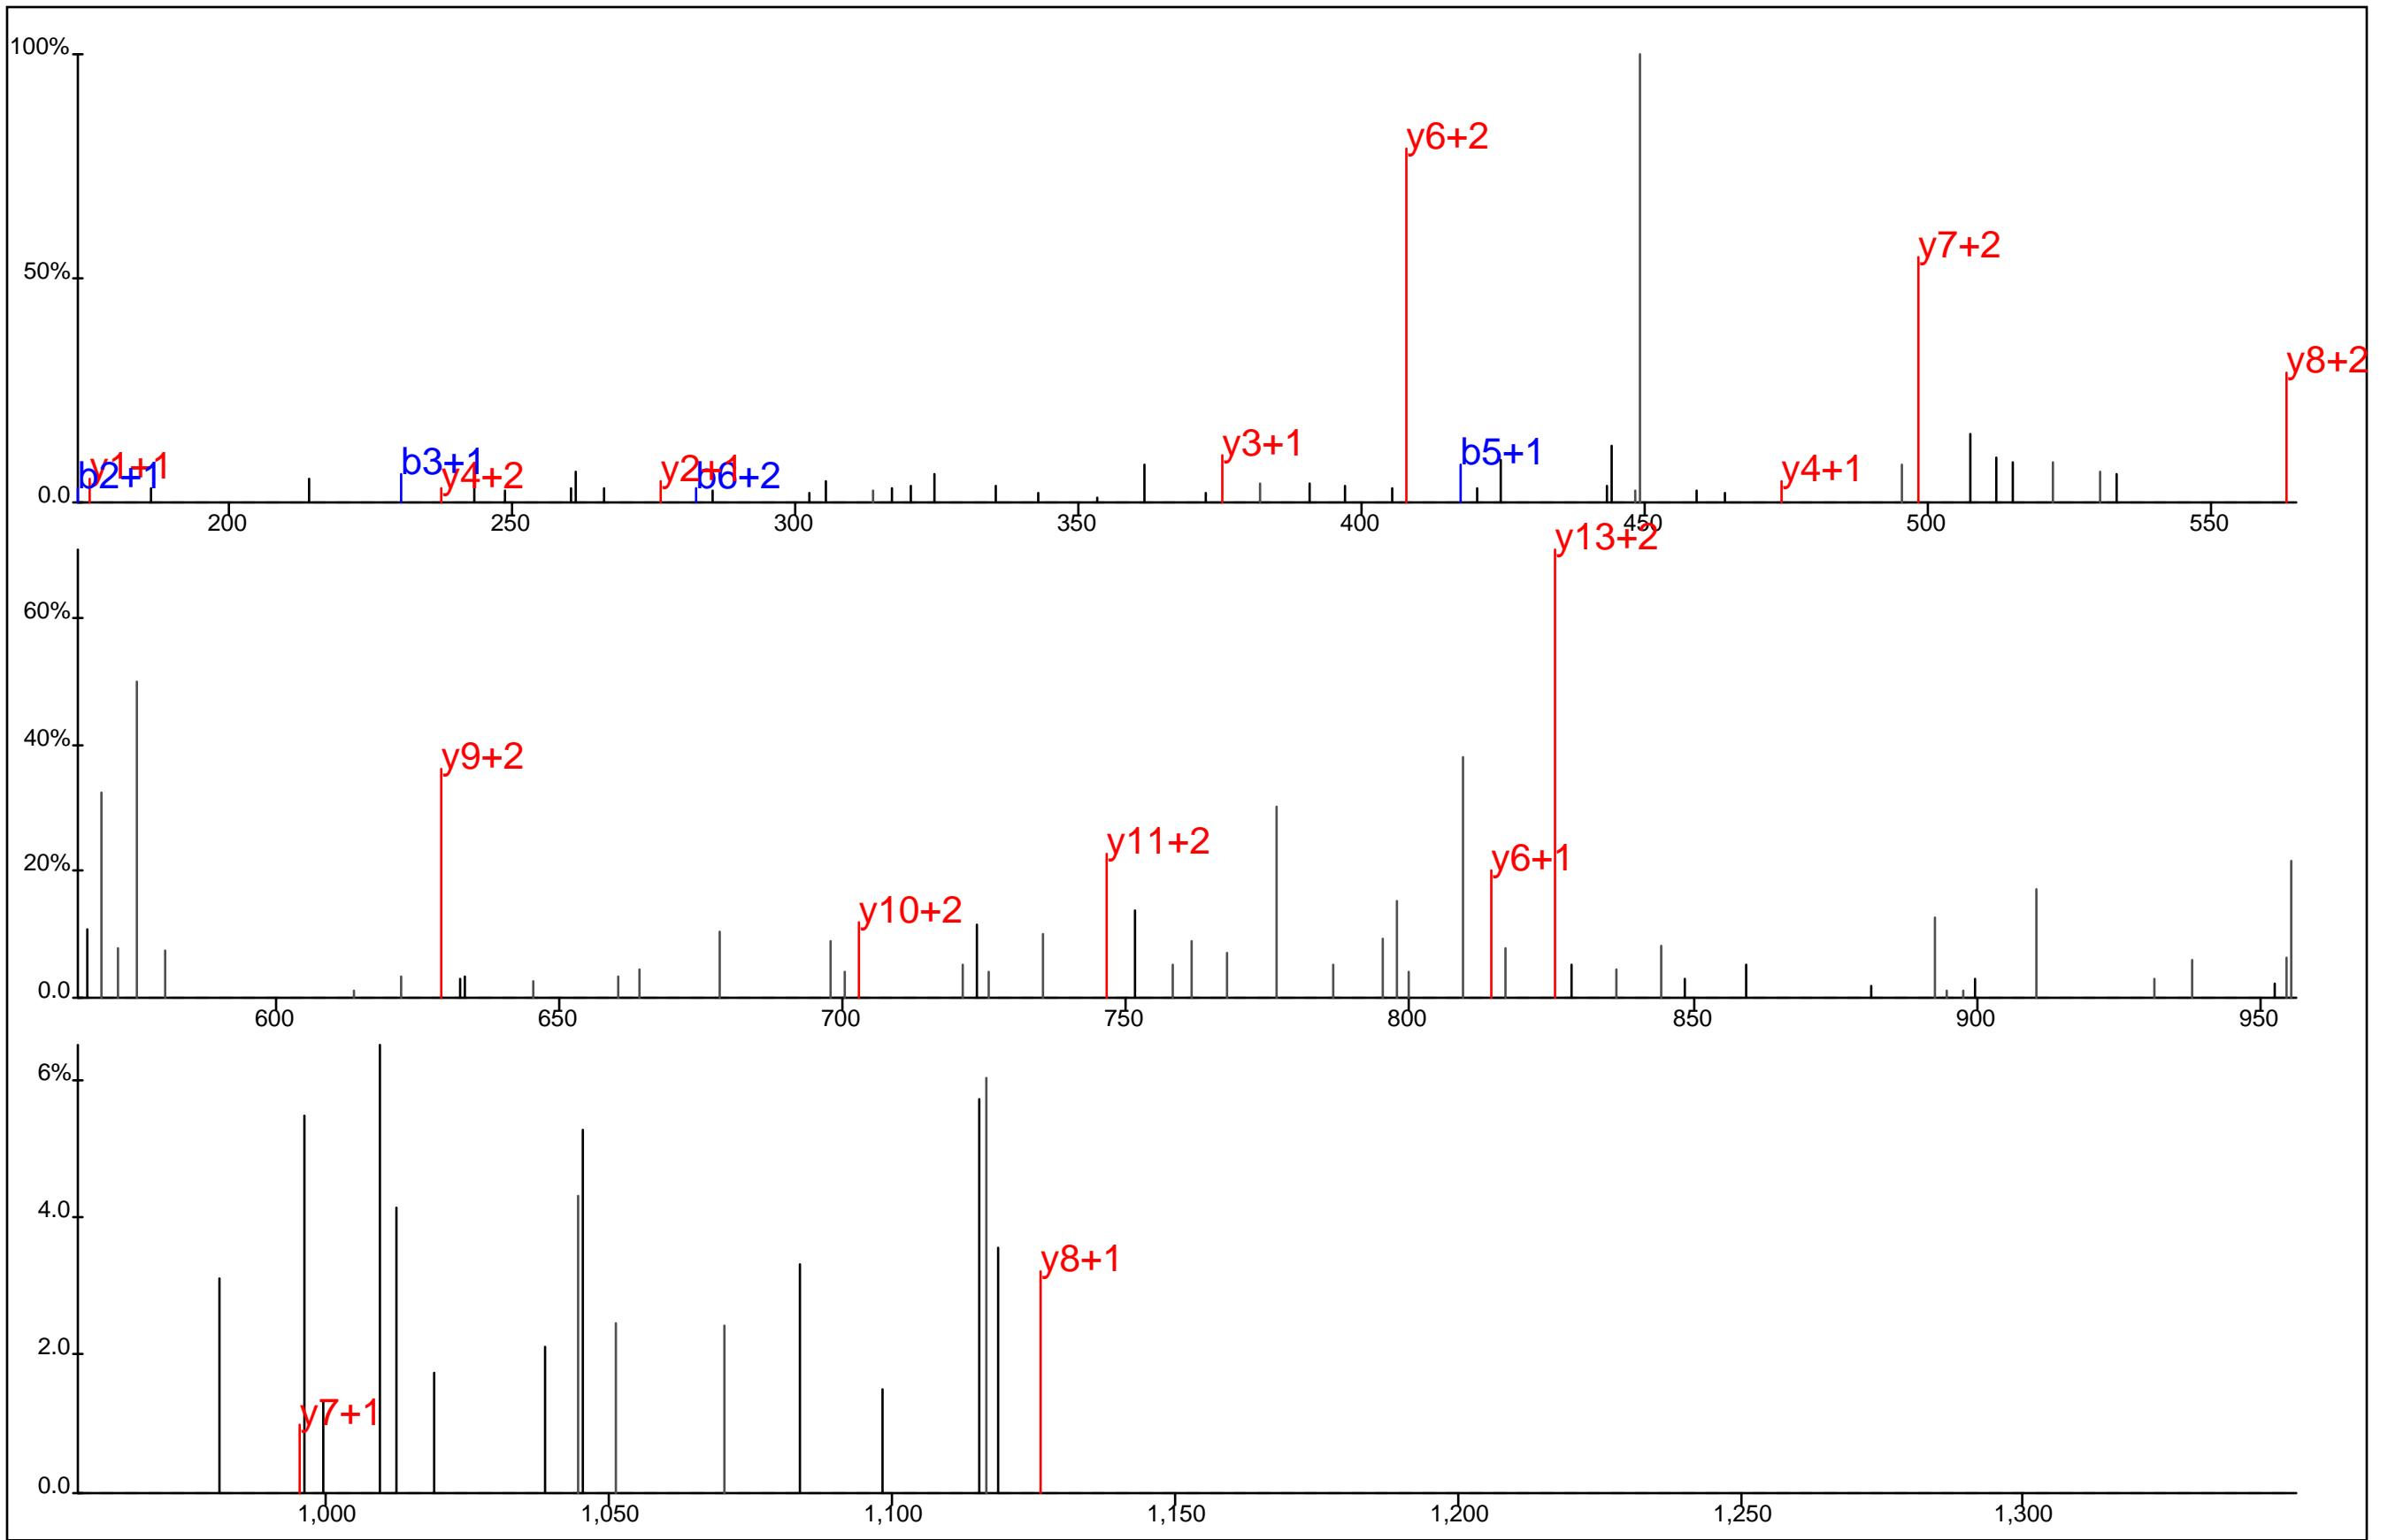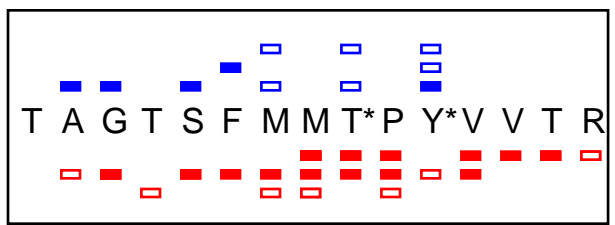

Protein Name: Mitogen-activated protein kinase 8  
 gi Accession: 0  
 Precursor Mass: 607.9170+3  
 Delta Mass: 0.649 ppm  
 XCorr: 30.97

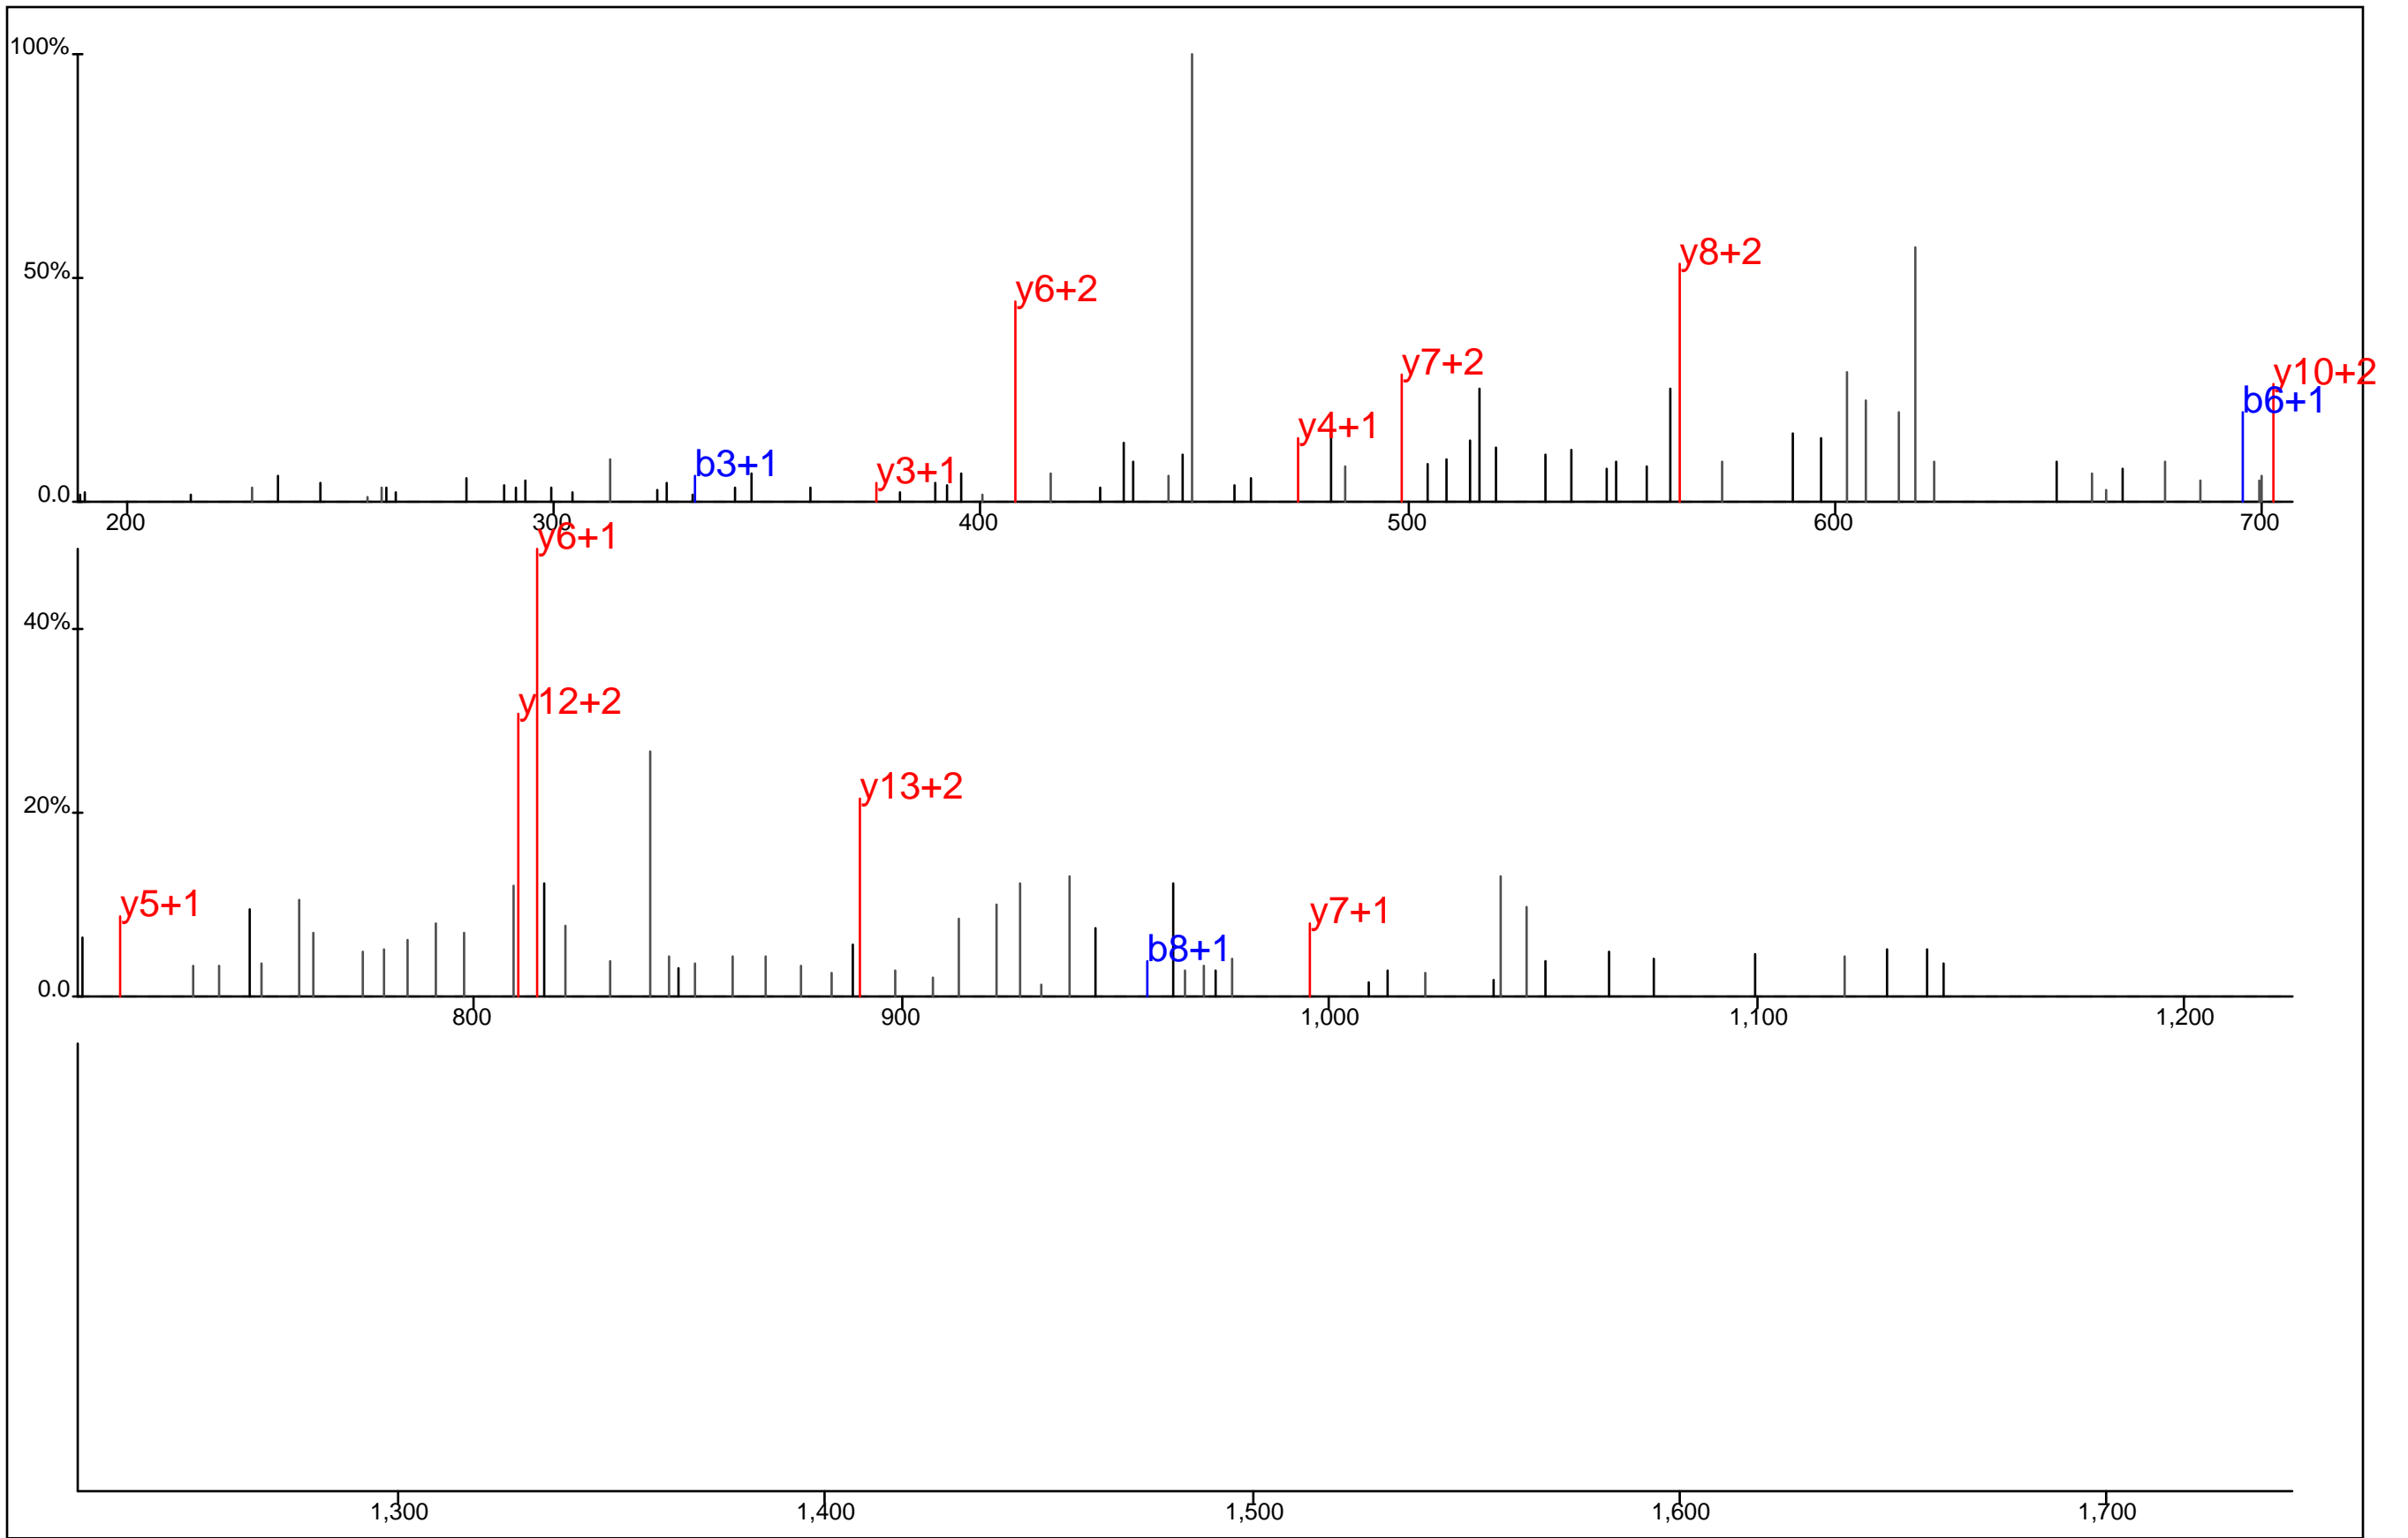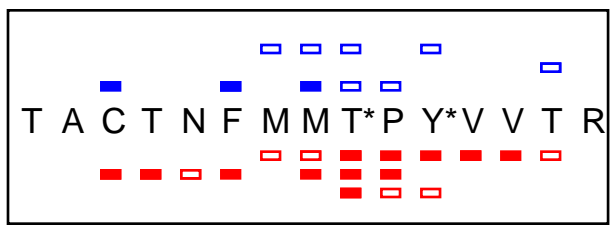

Protein Name: Mitogen-activated protein kinase 9  
 gi Accession: 0  
 Precursor Mass: 651.2566+3  
 Delta Mass: 0.050 ppm  
 XCorr: 23.34

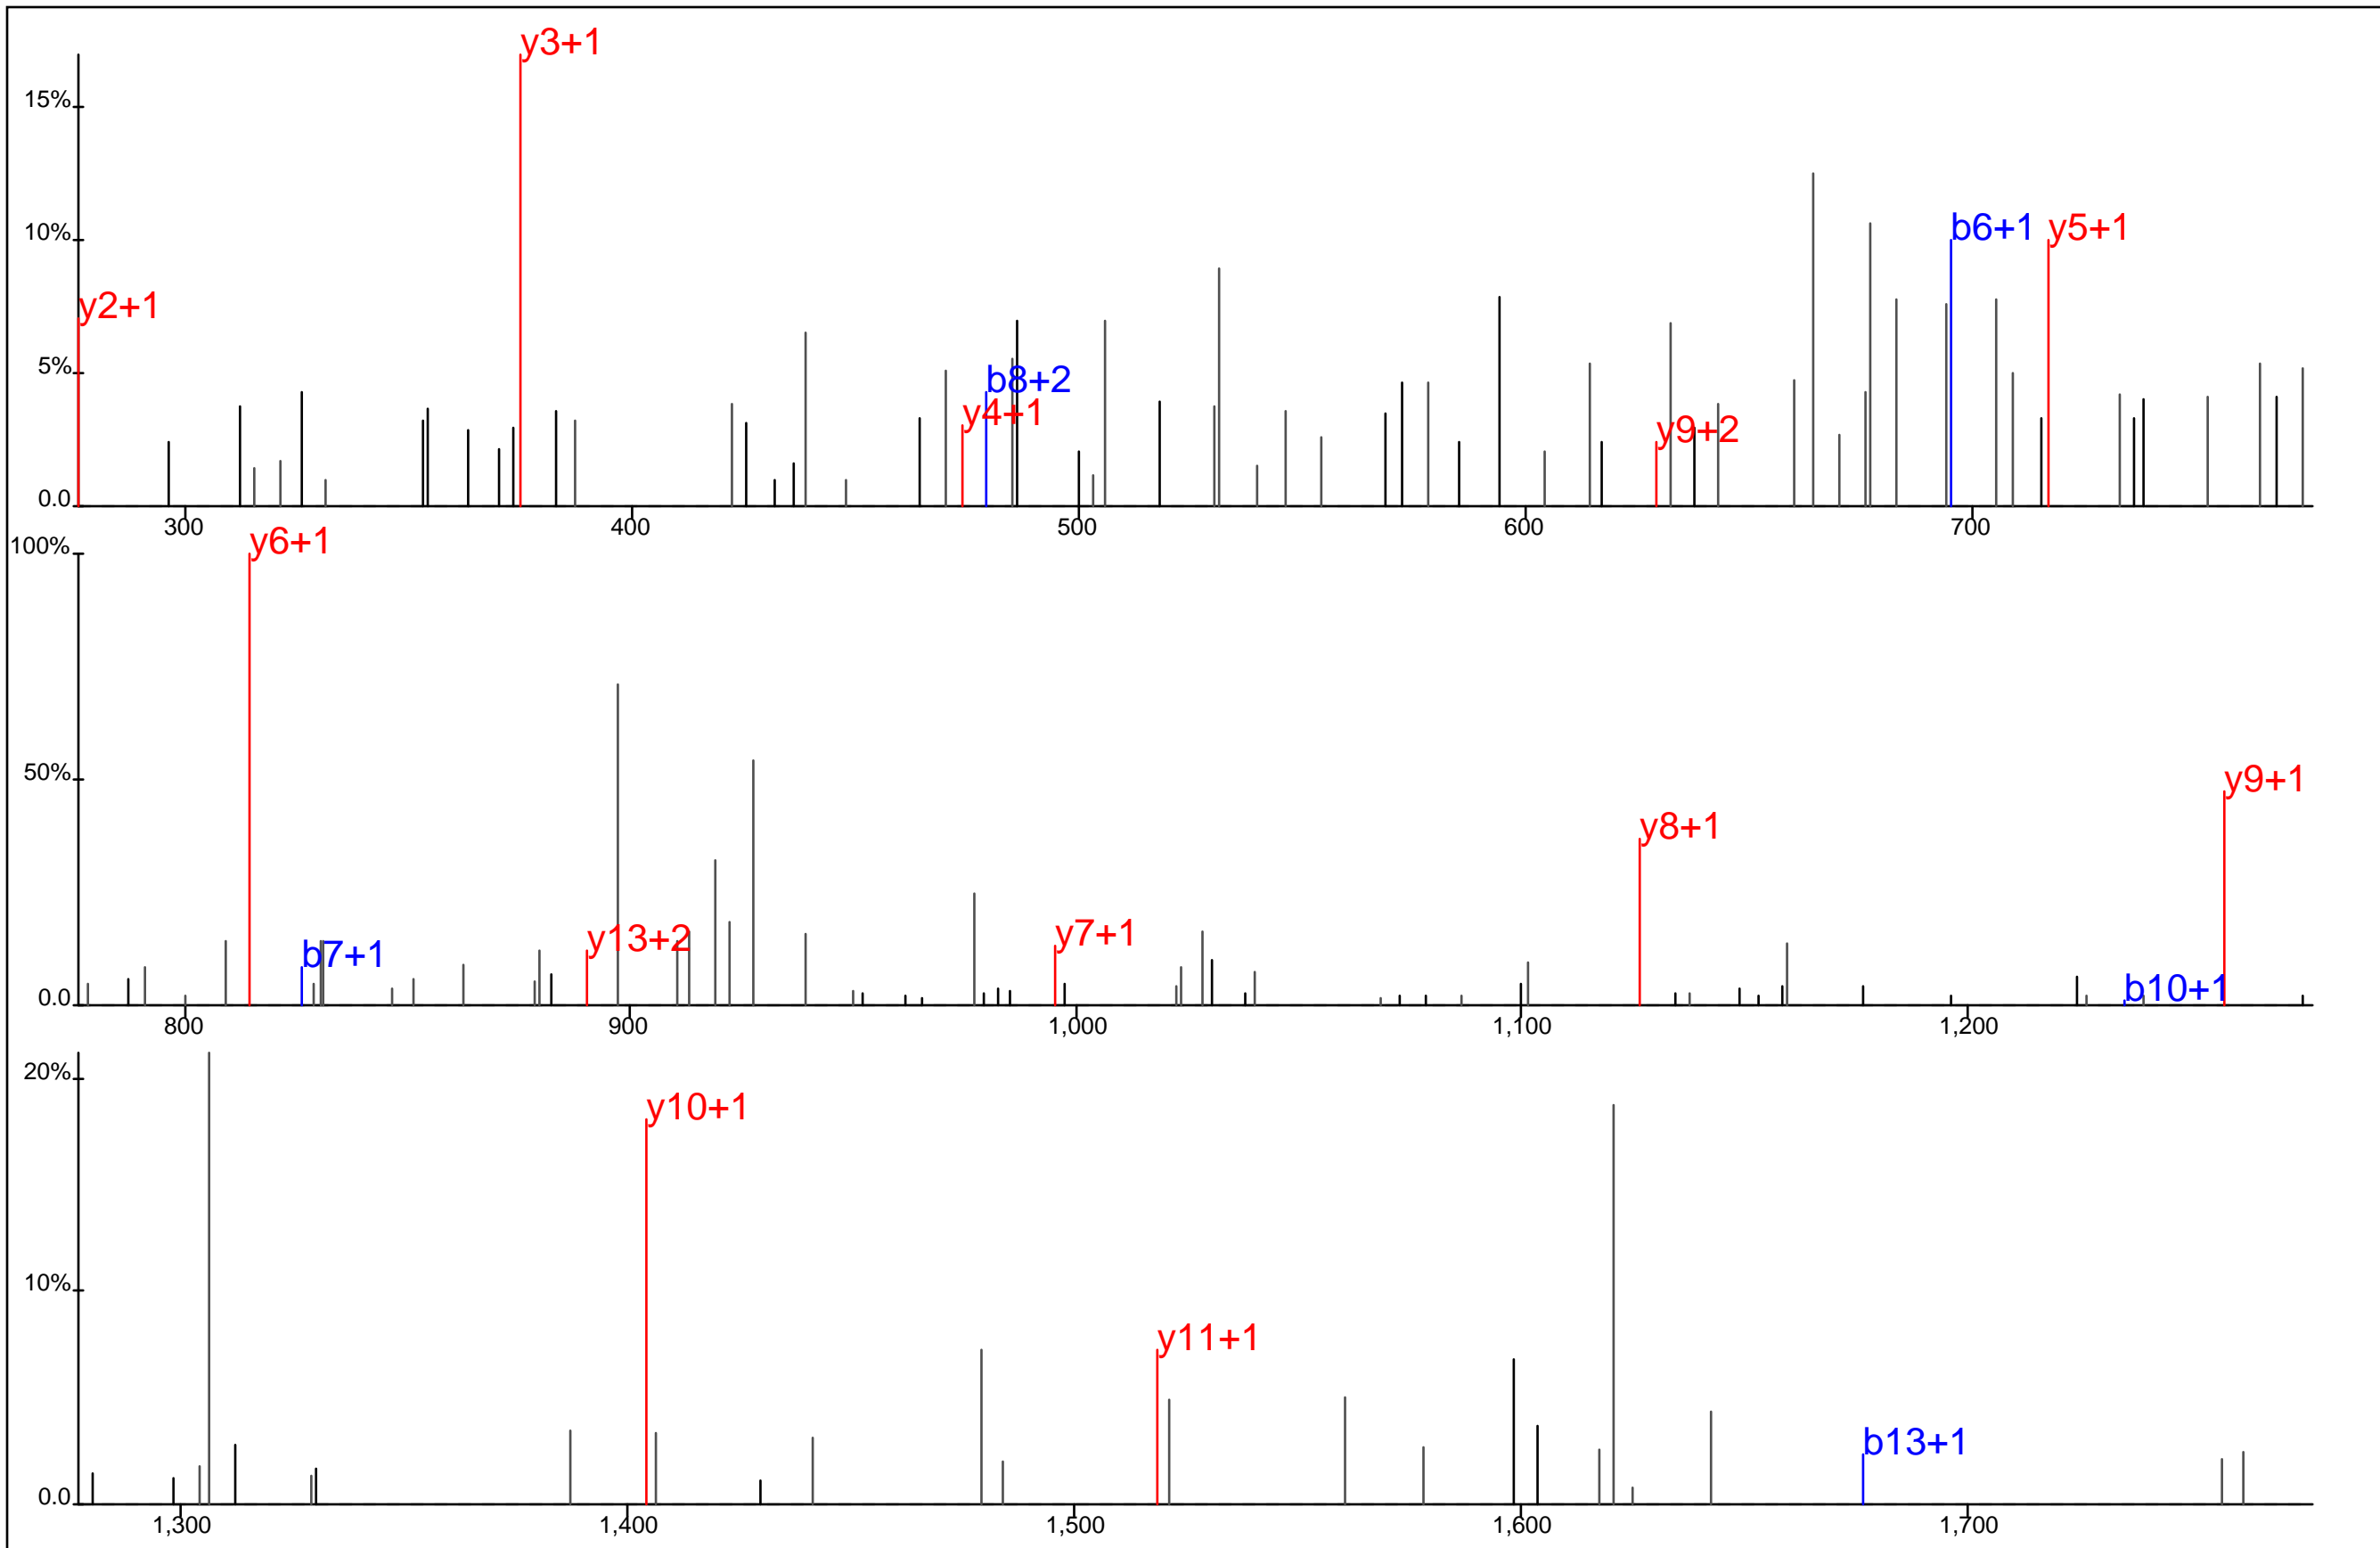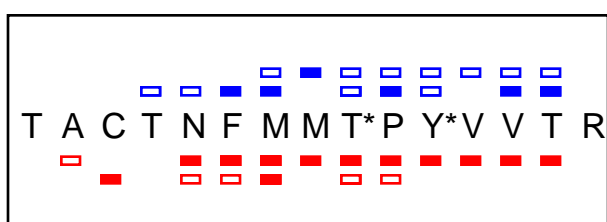

Protein Name: Mitogen-activated protein kinase 9  
 gi Accession: 0  
 Precursor Mass: 976.3819+2  
 Delta Mass: 0.613 ppm  
 XCorr: 51.63

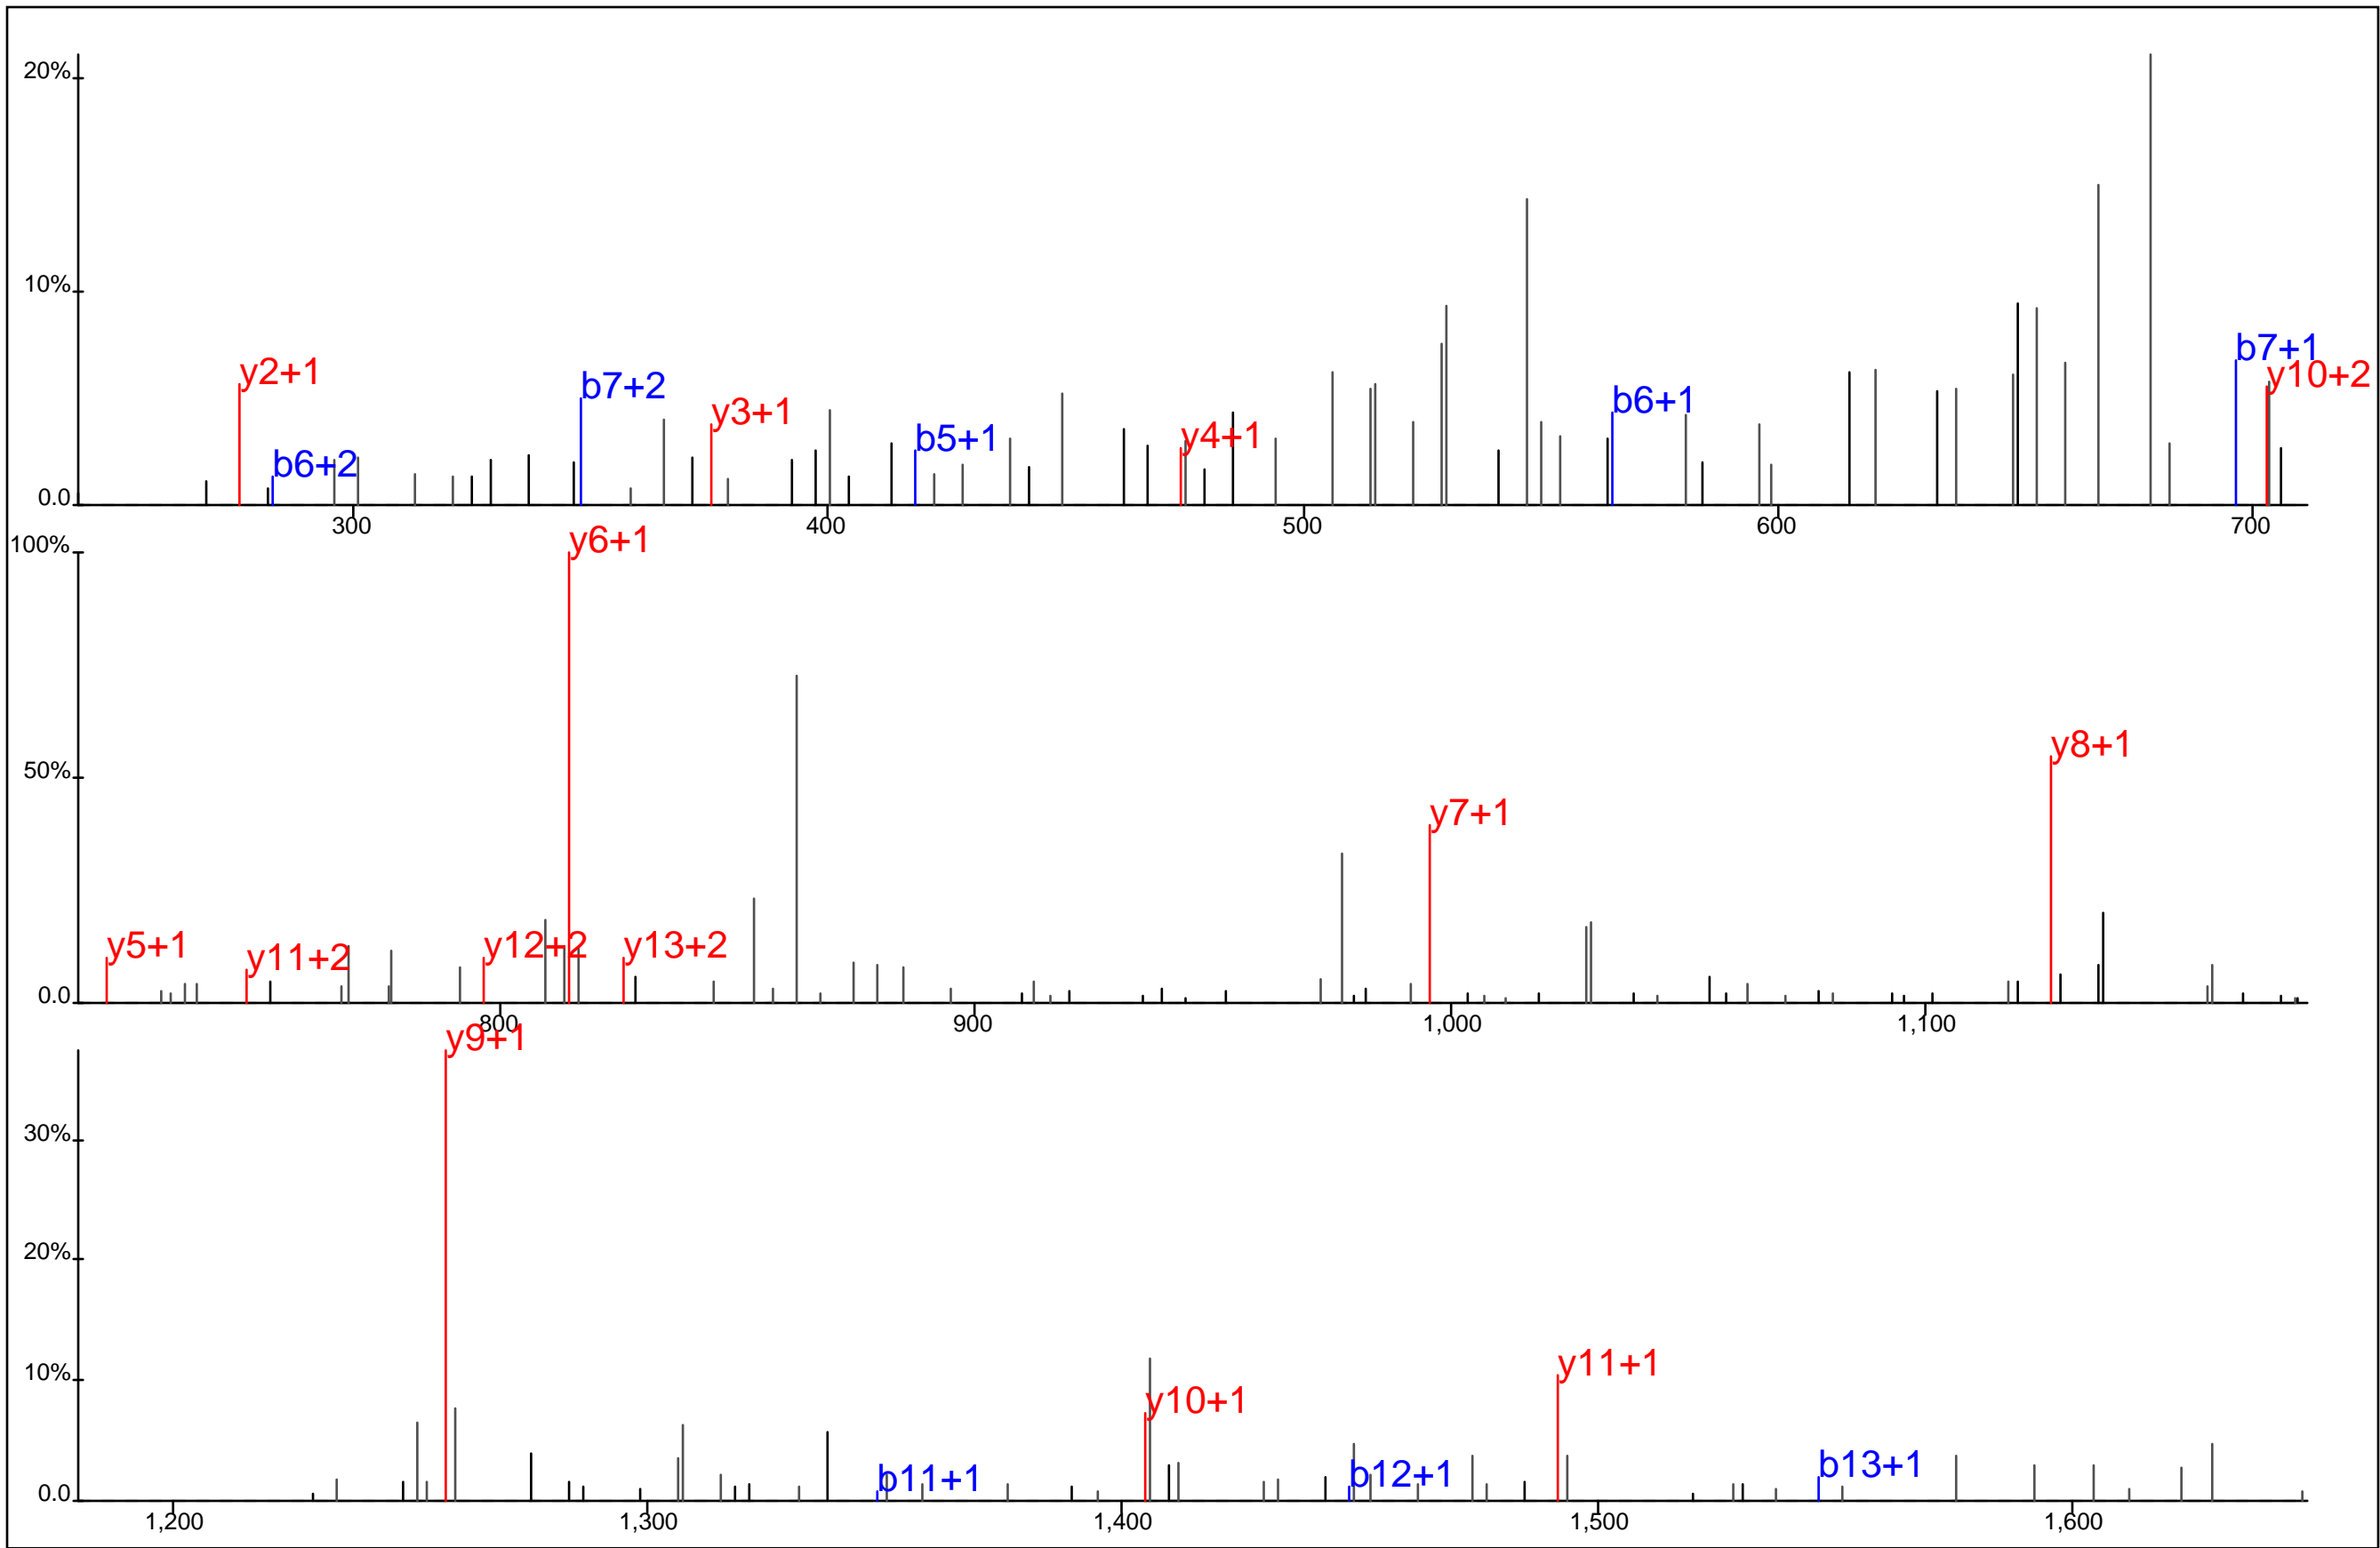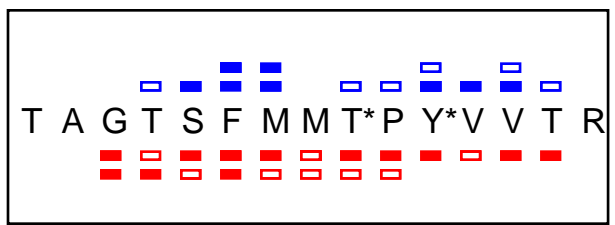

Protein Name: Mitogen-activated protein kinase 8  
 gi Accession: 0  
 Precursor Mass: 911.3735+2  
 Delta Mass: 2.432 ppm  
 XCorr: 40.48



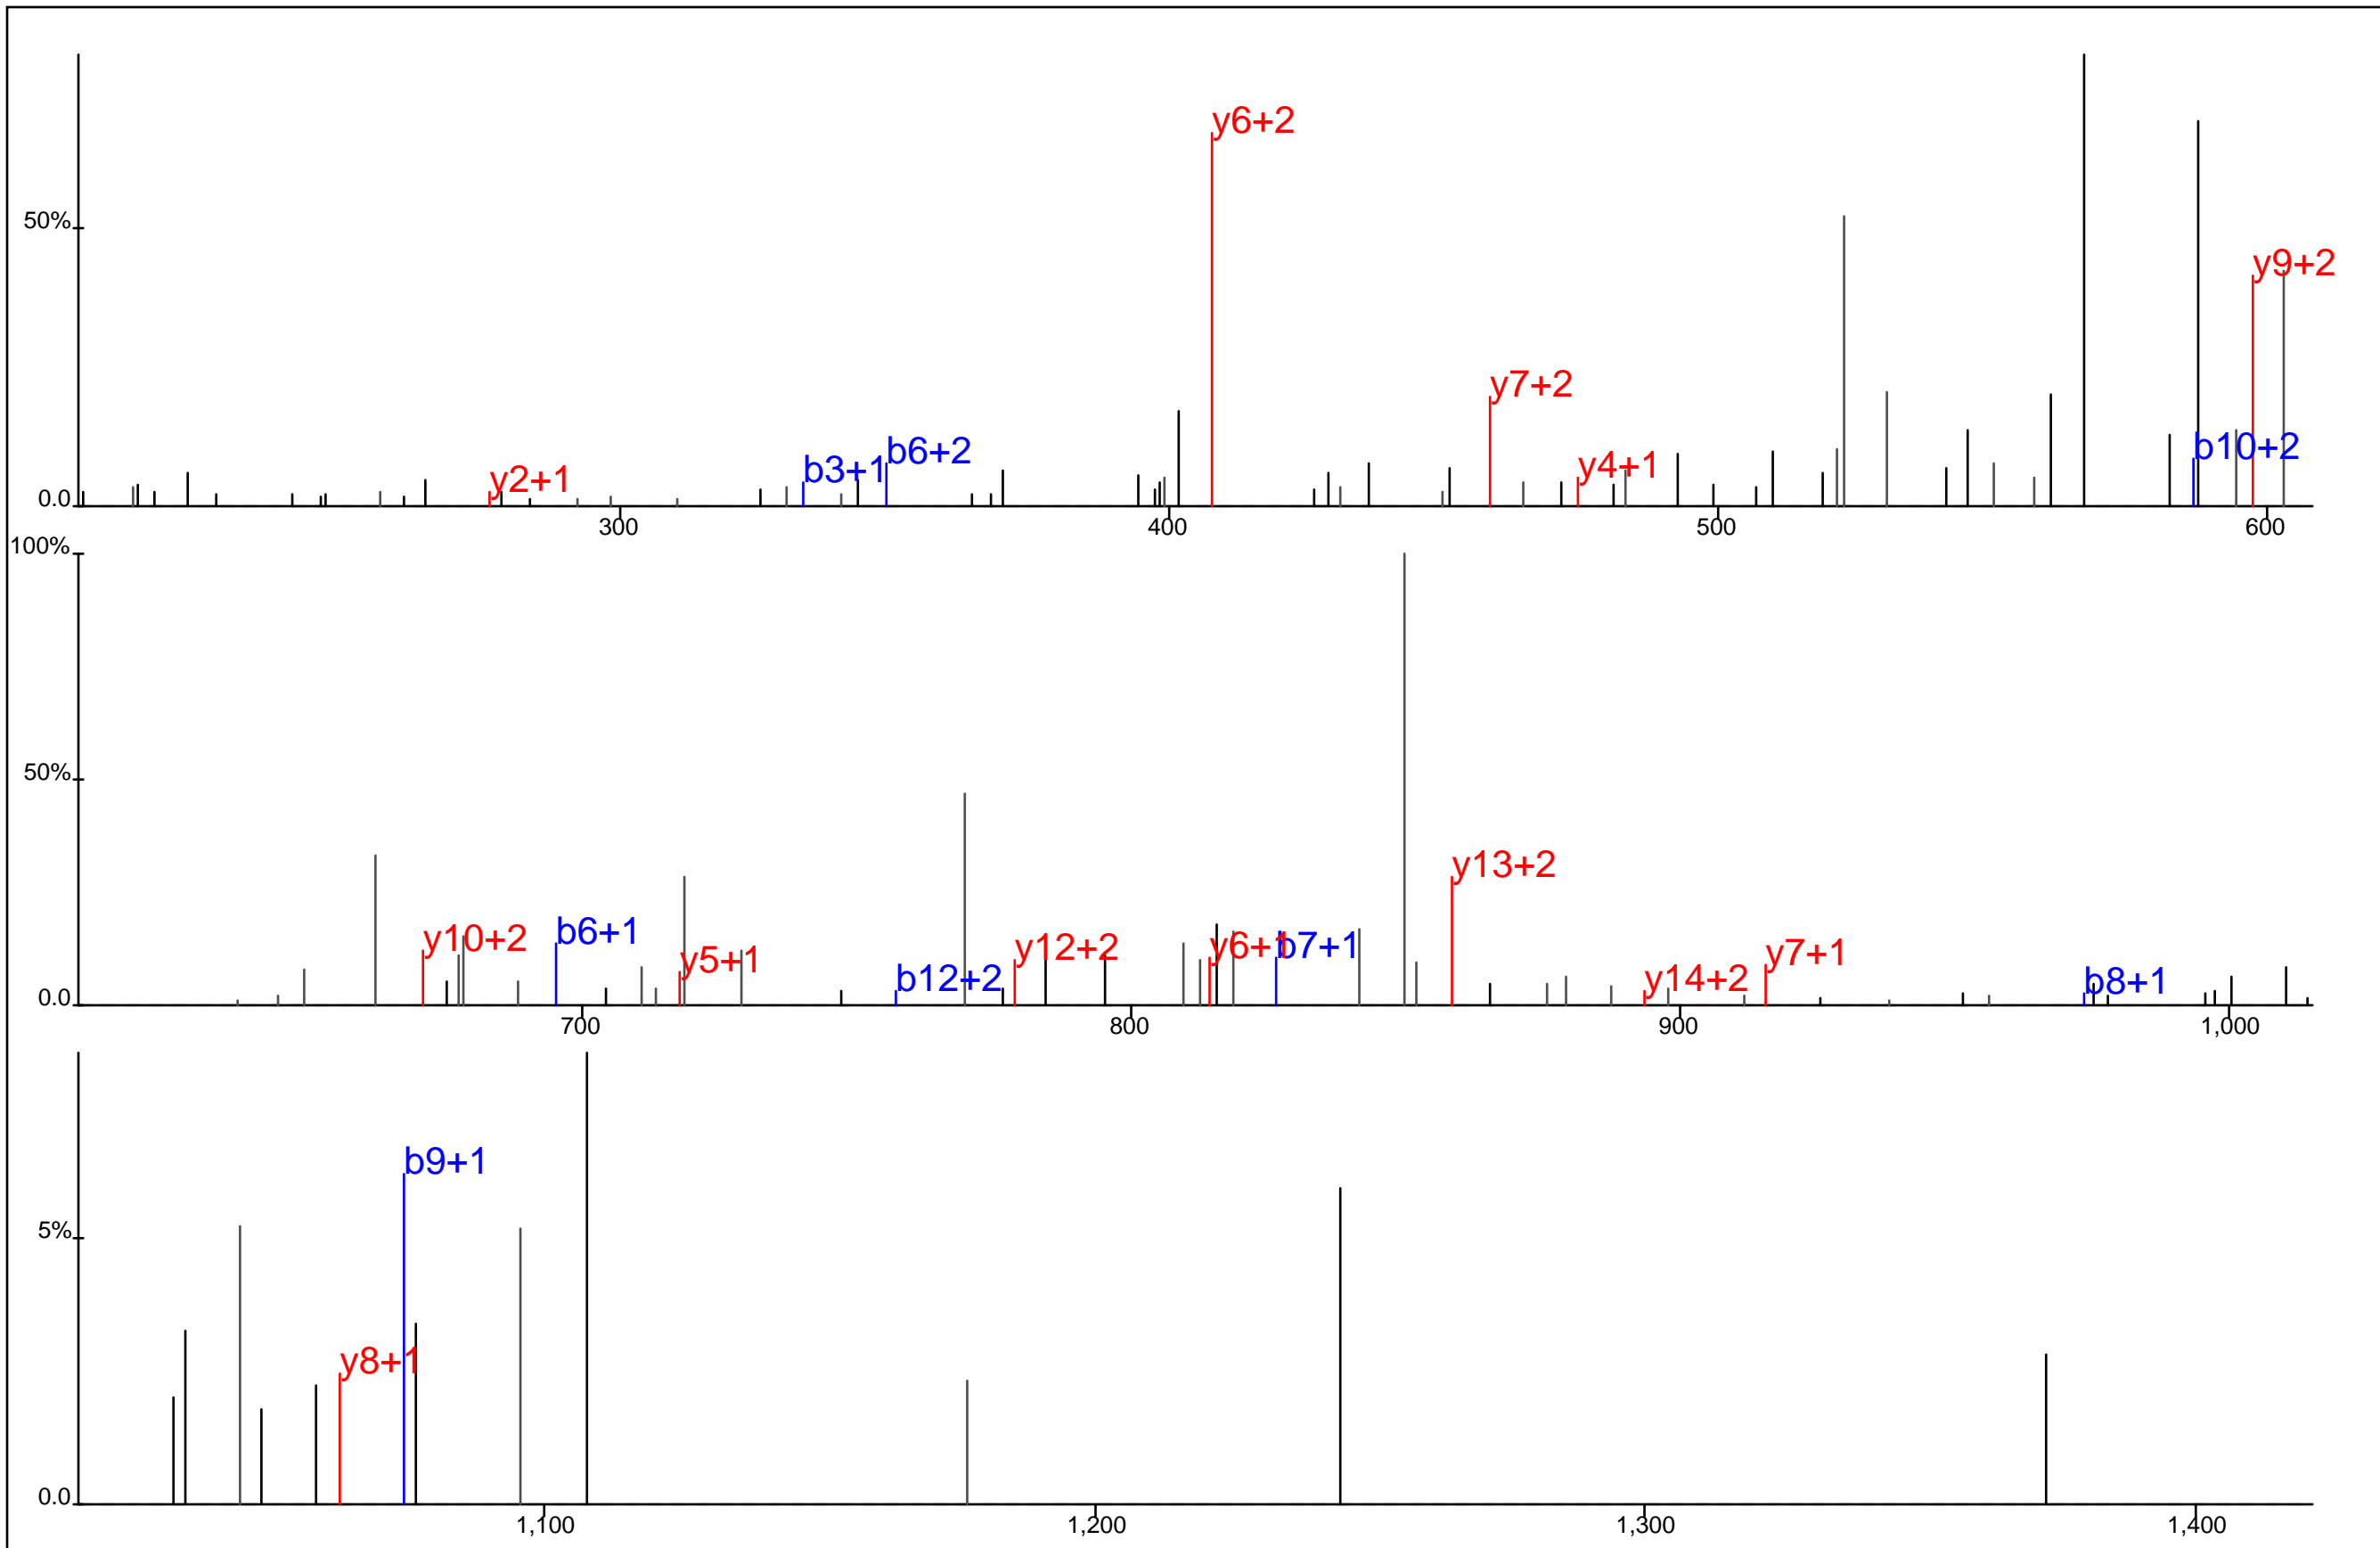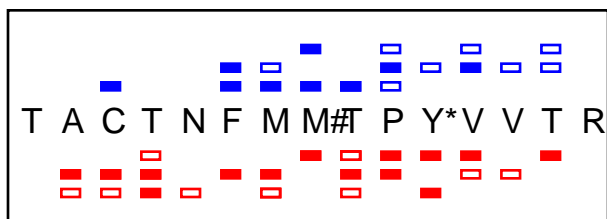

Protein Name: Mitogen-activated protein kinase 9  
 gi Accession: 0  
 Precursor Mass: 629.9335+3  
 Delta Mass: 1.126 ppm  
 XCorr: 22.9

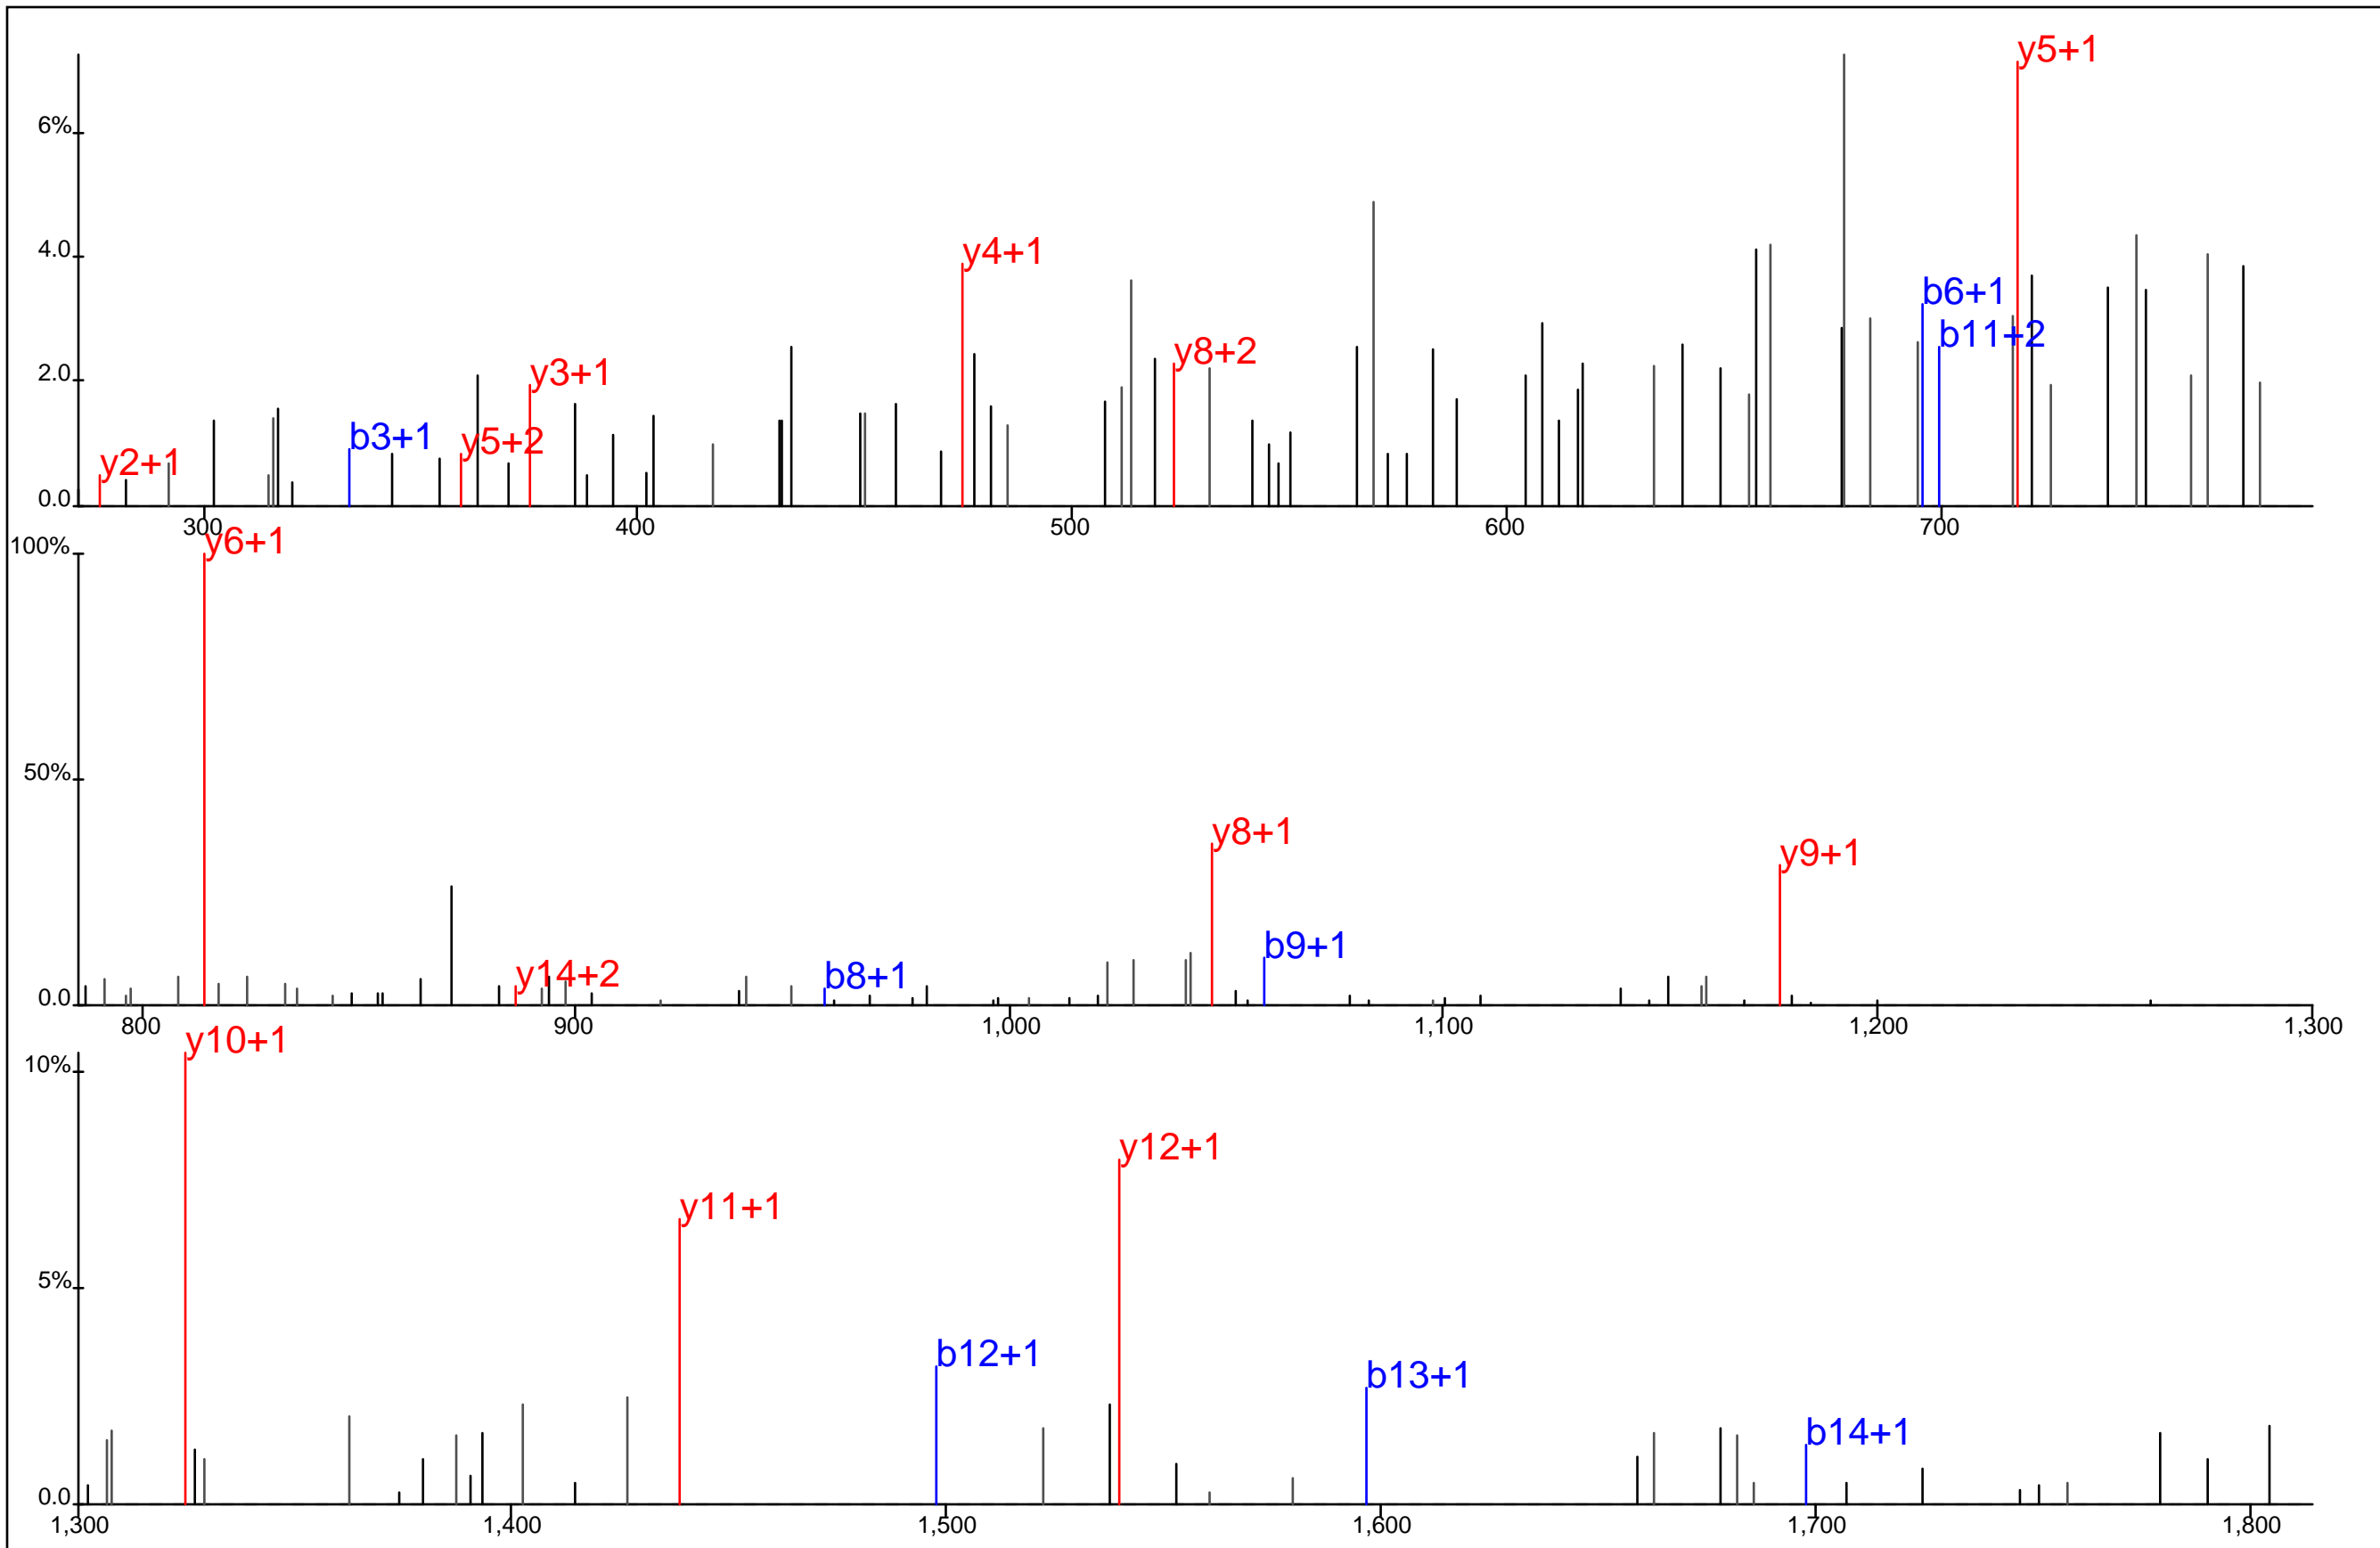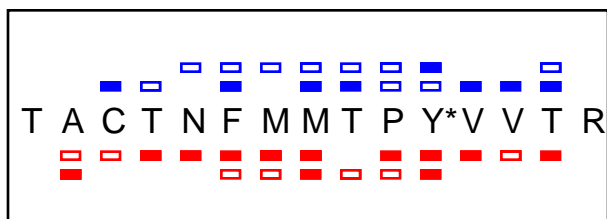

Protein Name: Mitogen-activated protein kinase 9  
 gi Accession: 0  
 Precursor Mass: 936.4000+2  
 Delta Mass: 1.949 ppm  
 XCorr: 51.48







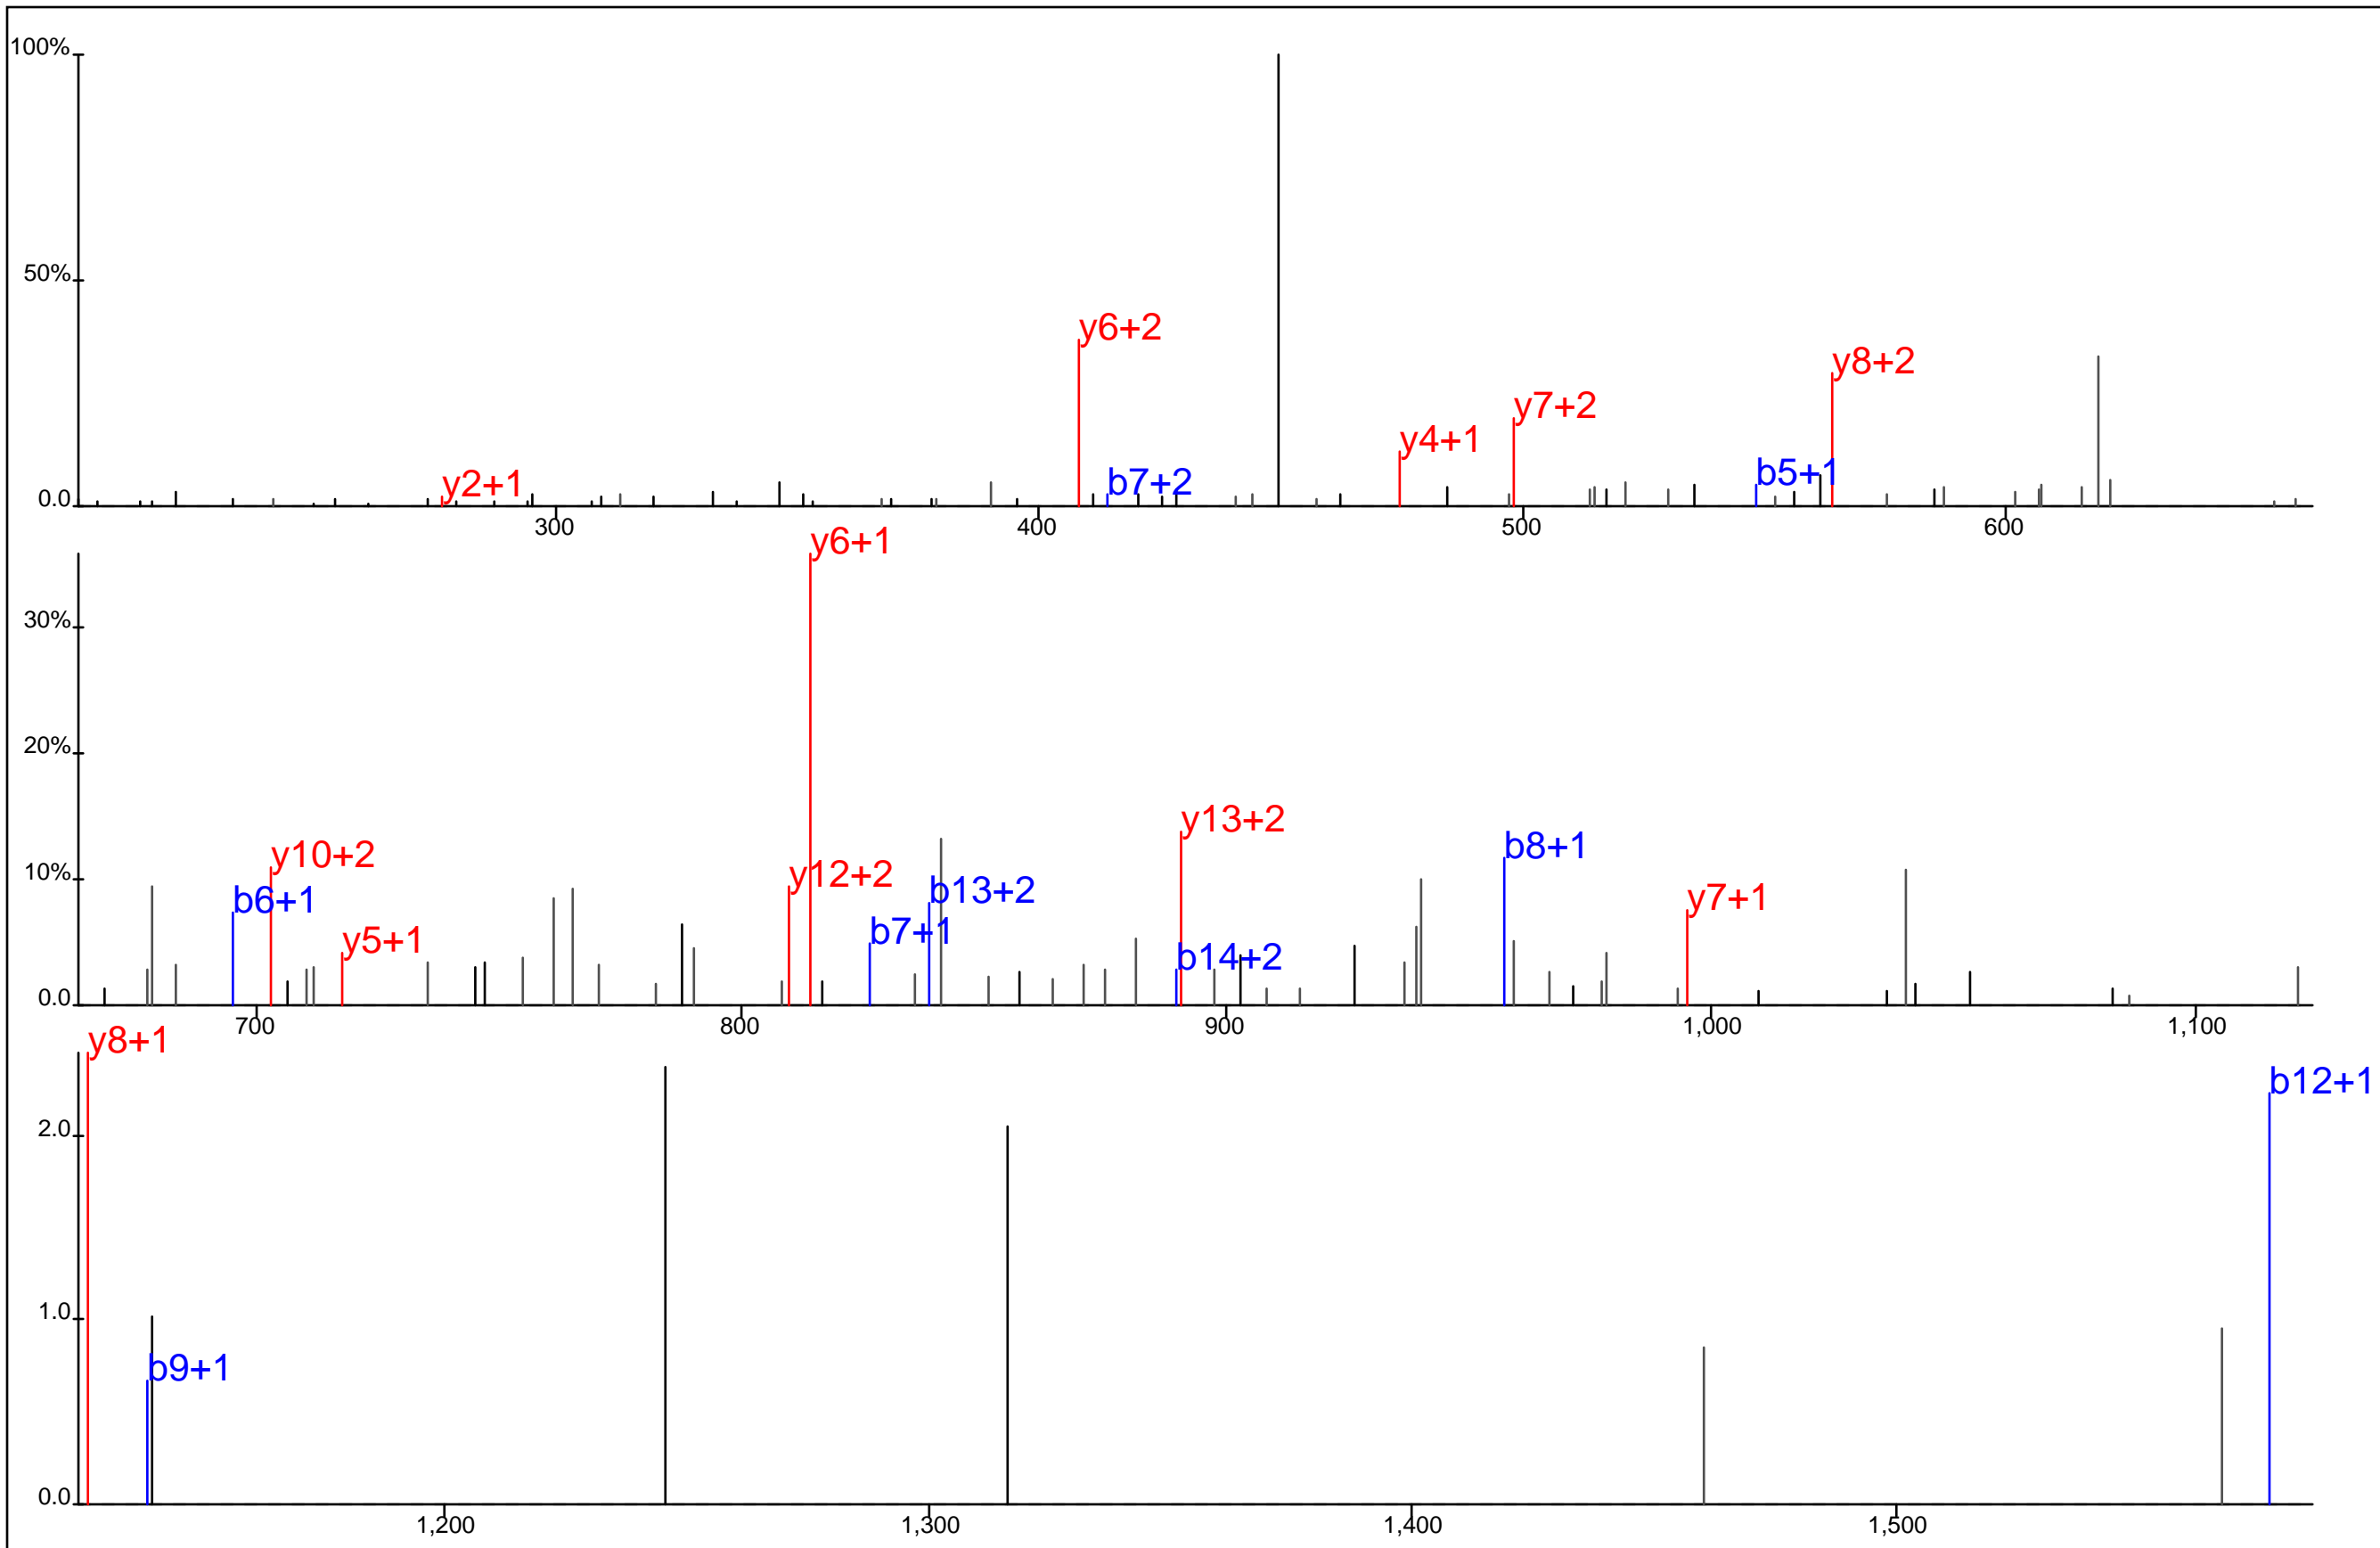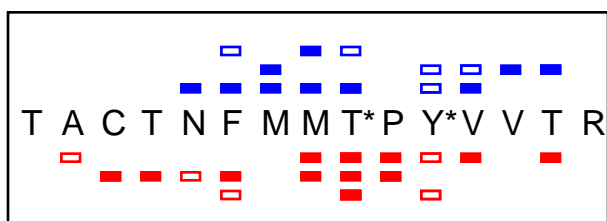

Protein Name: Mitogen-activated protein kinase 9  
 gi Accession: 0  
 Precursor Mass: 651.2558+3  
 Delta Mass: 1.271 ppm  
 XCorr: 32.32



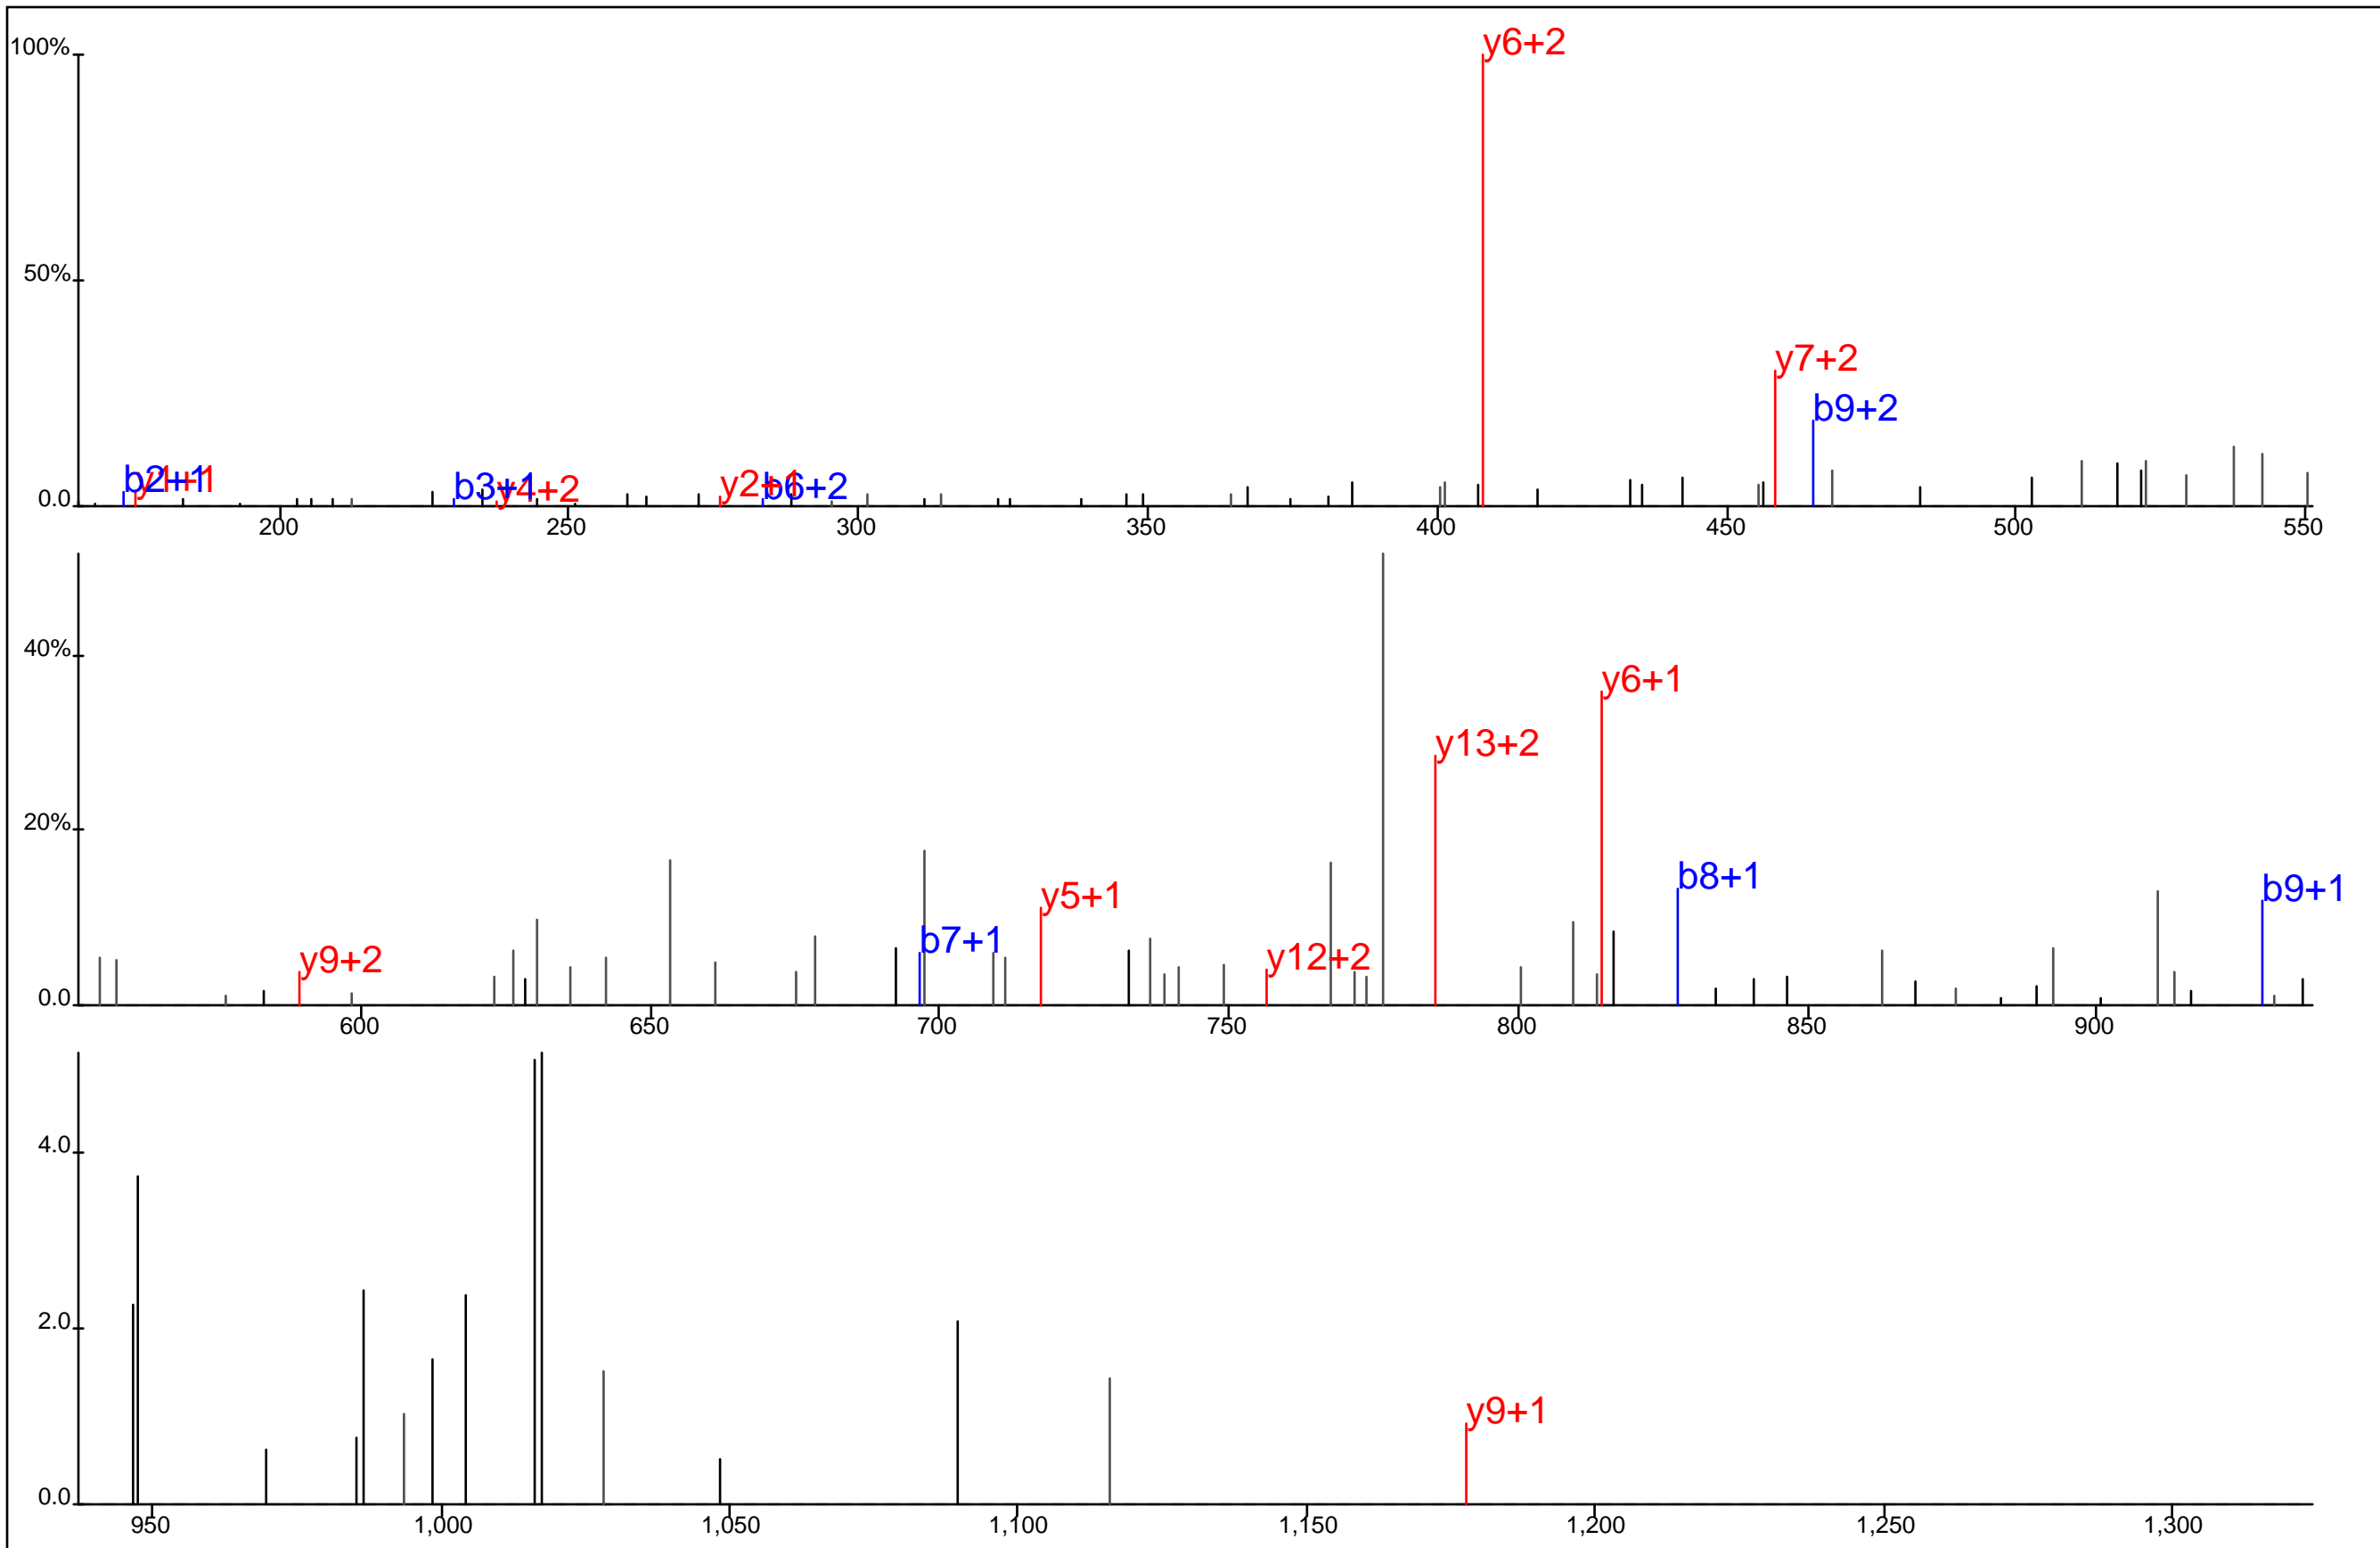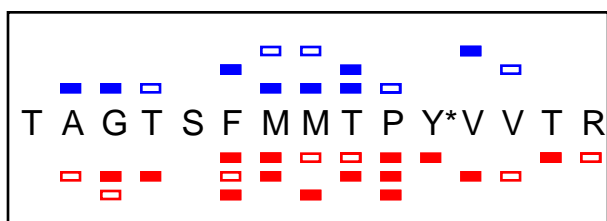

Protein Name: Mitogen-activated protein kinase 8  
 gi Accession: 0  
 Precursor Mass: 581.2623+3  
 Delta Mass: 2.017 ppm  
 XCorr: 21.53









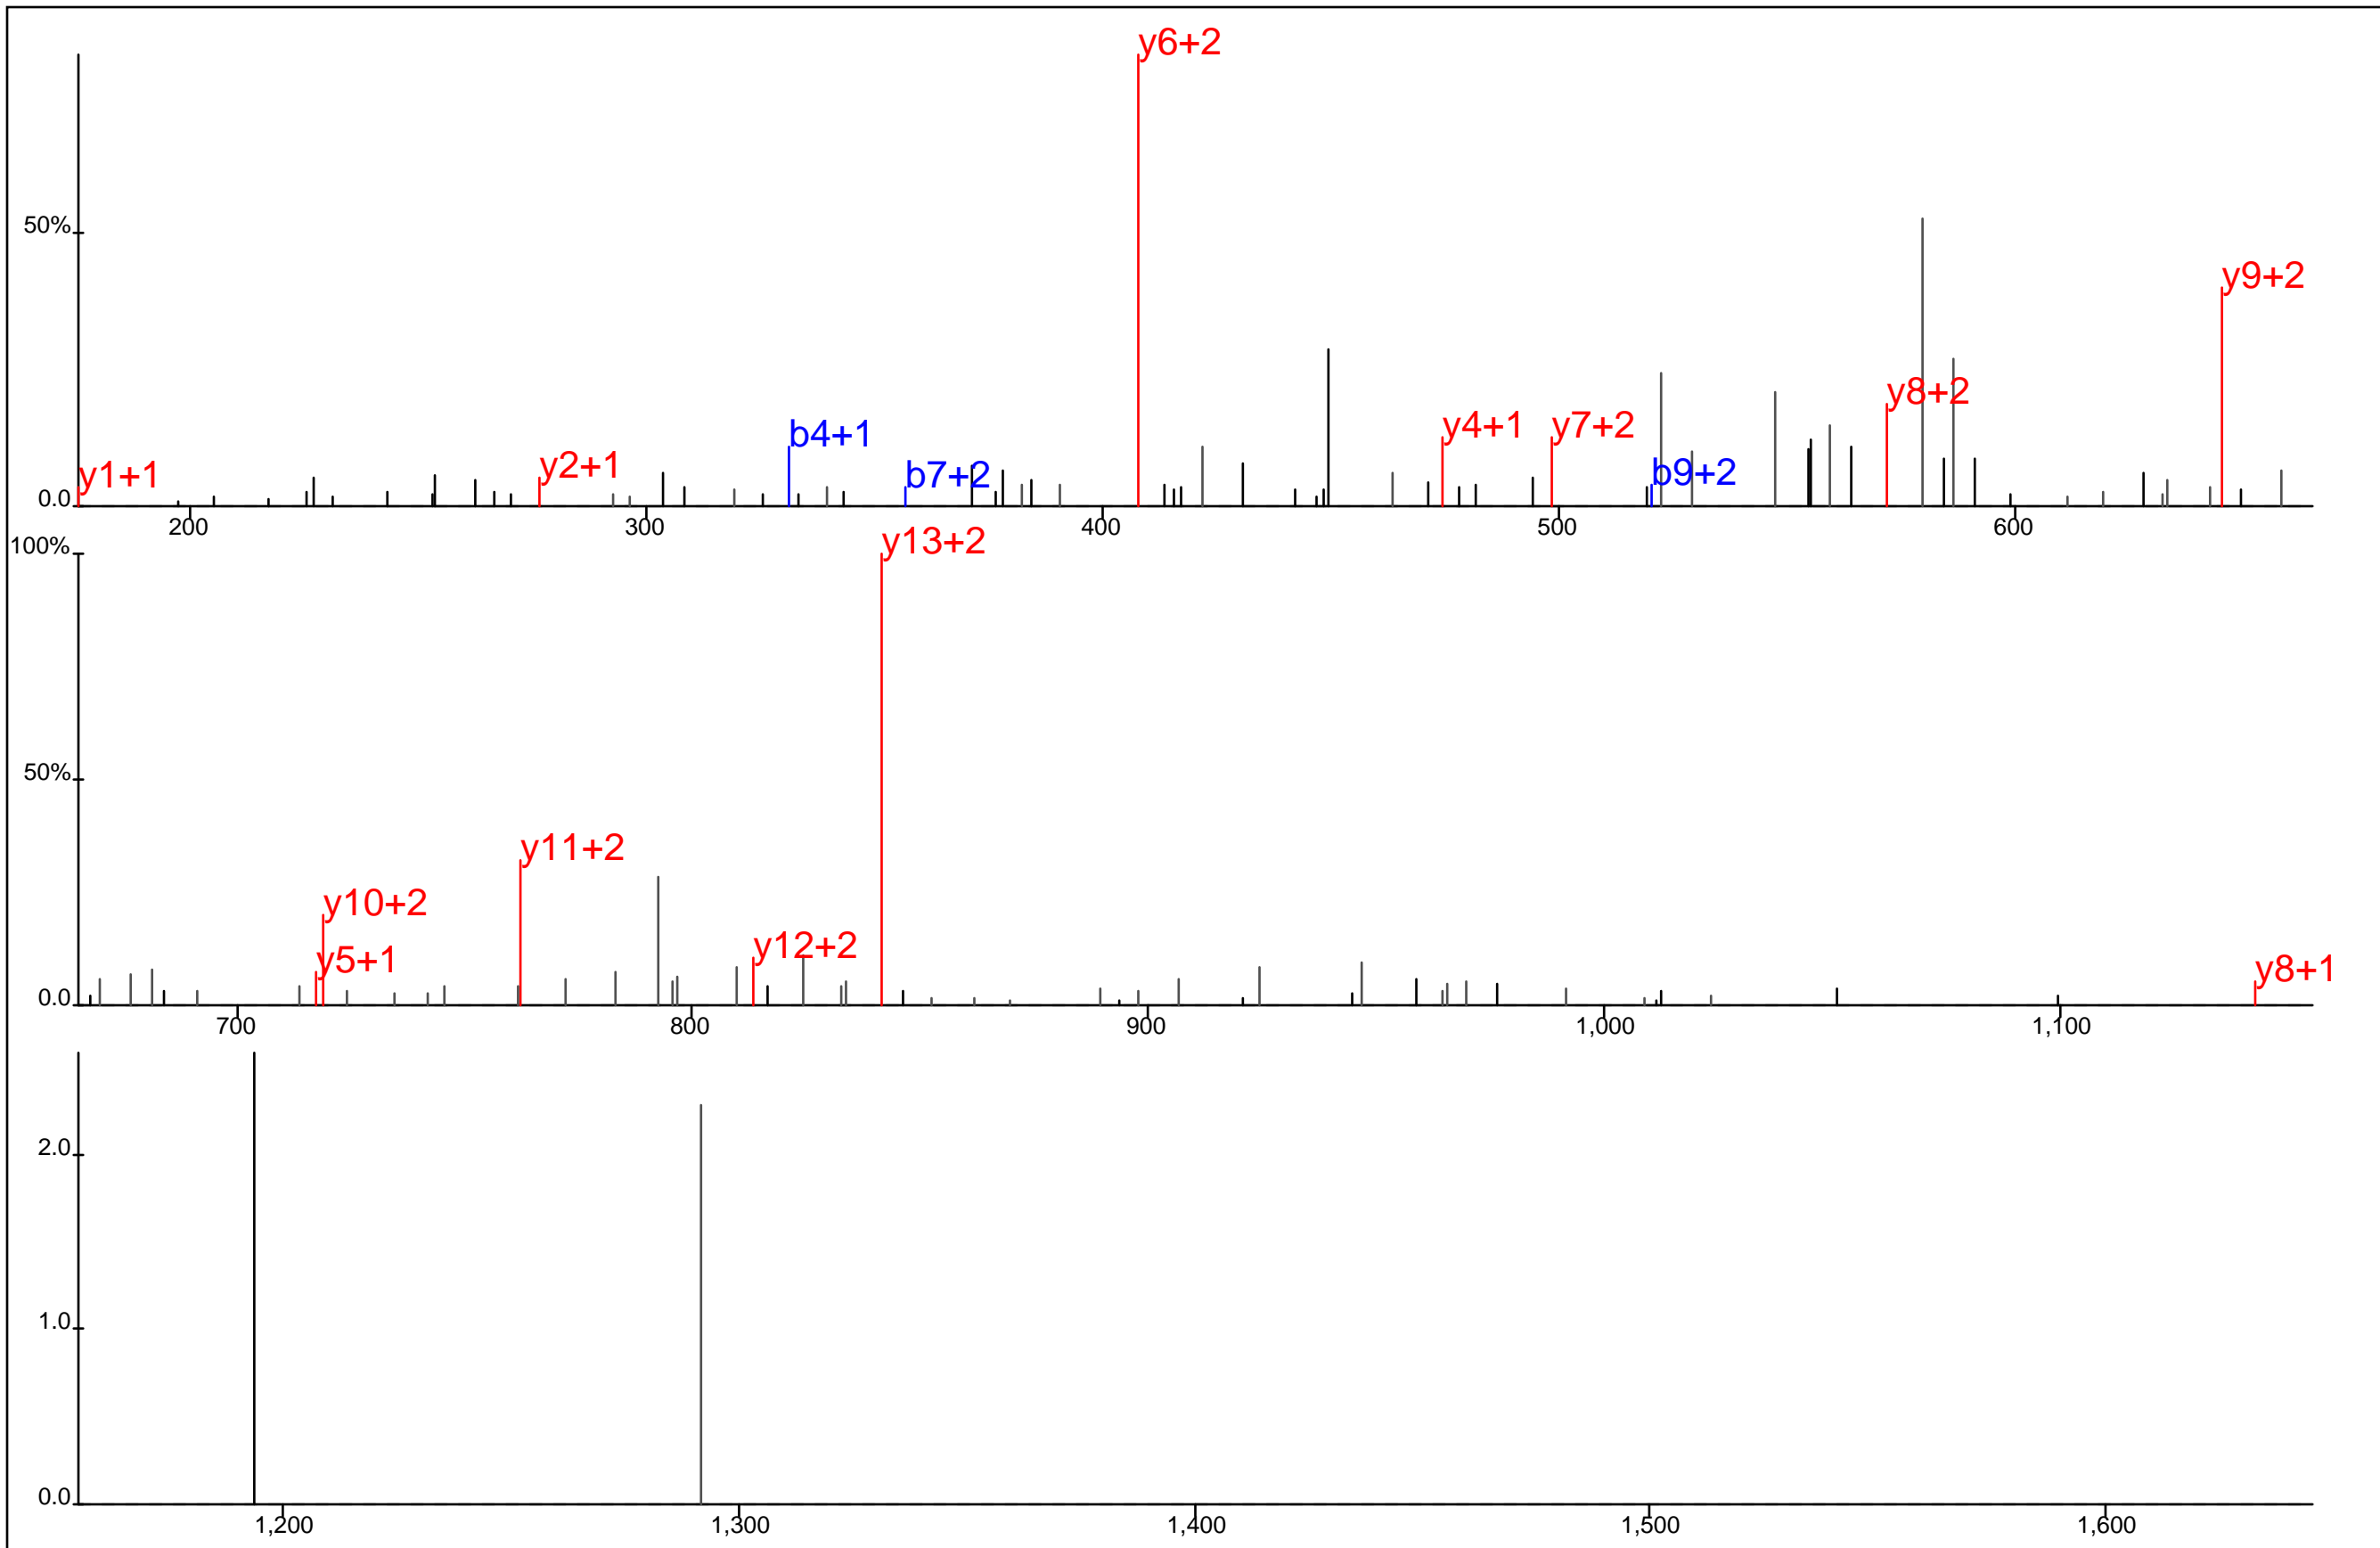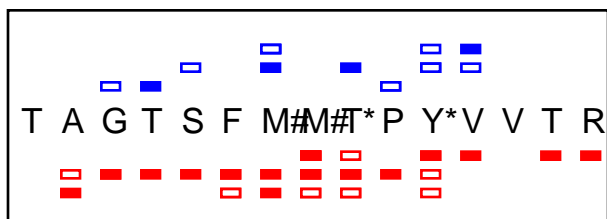

Protein Name: Mitogen-activated protein kinase 8  
 gi Accession: 0  
 Precursor Mass: 618.5794+3  
 Delta Mass: 0.762 ppm  
 XCorr: 29.36



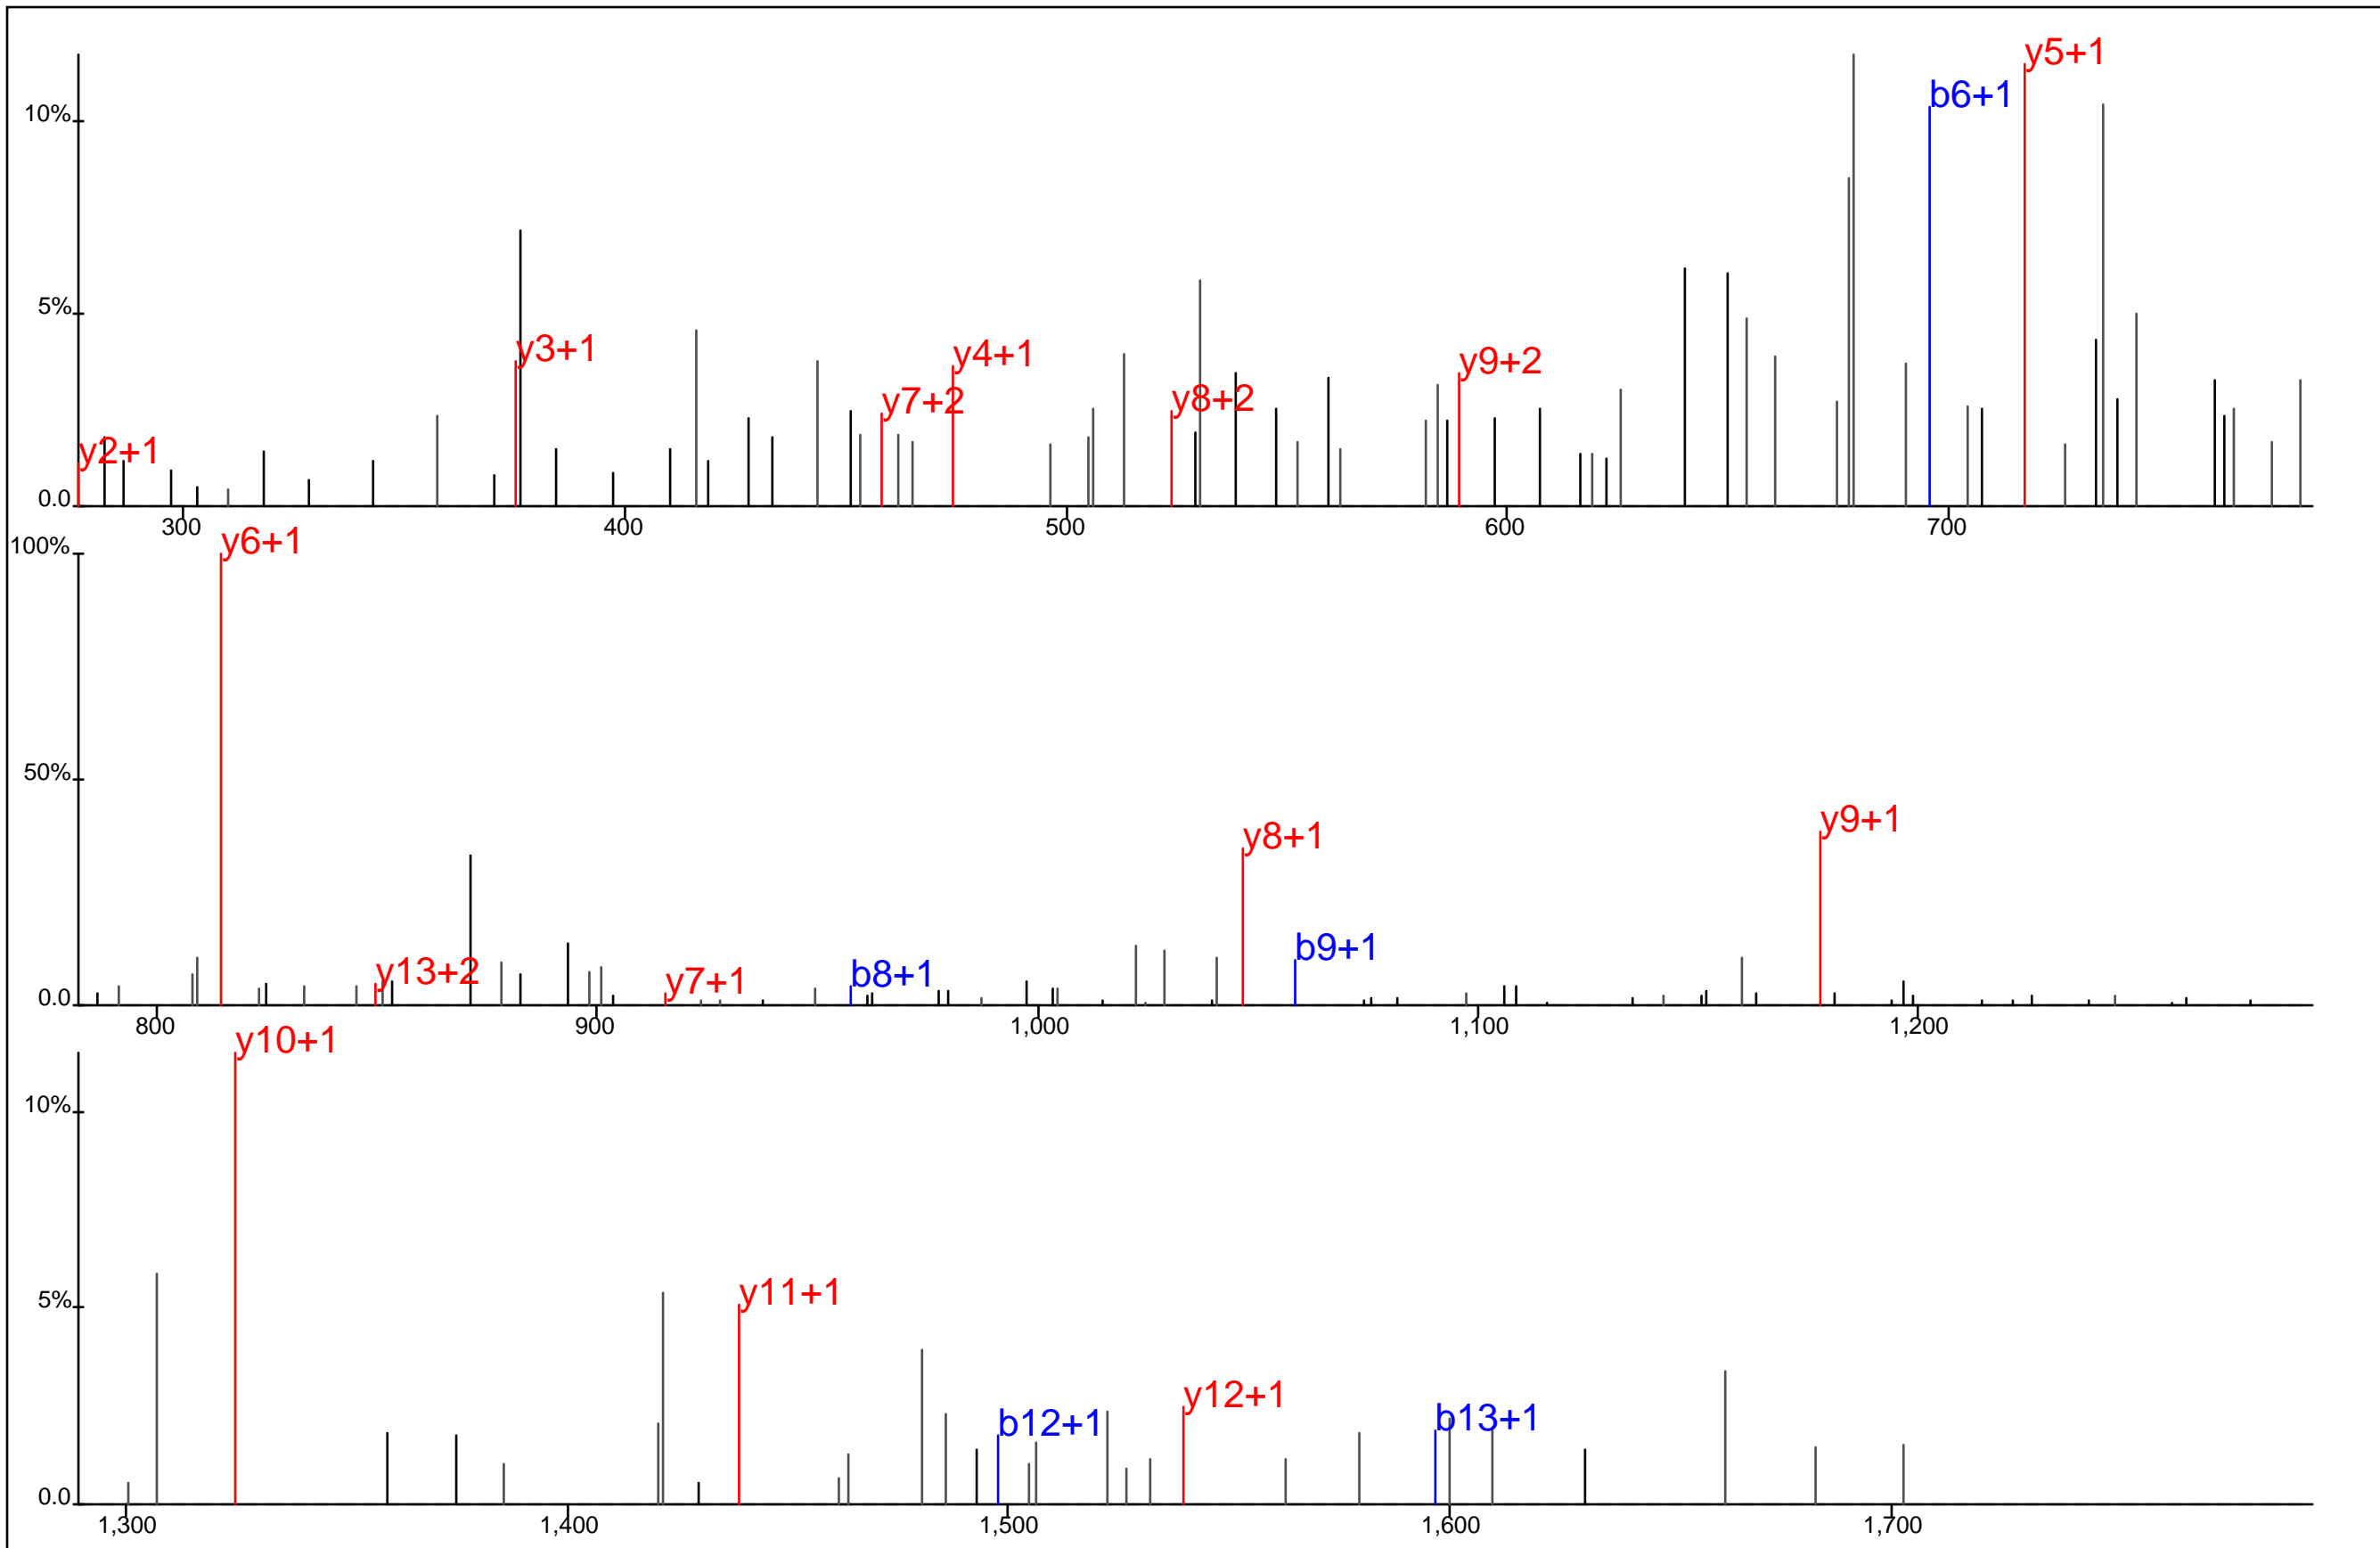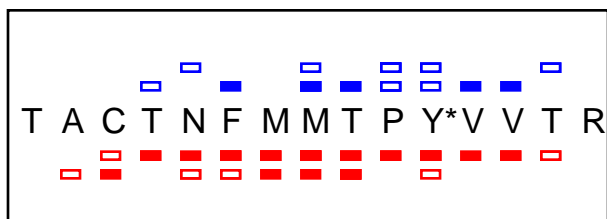

Protein Name: Mitogen-activated protein kinase 9  
 gi Accession: 0  
 Precursor Mass: 936.3994+2  
 Delta Mass: 1.362 ppm  
 XCorr: 40.02

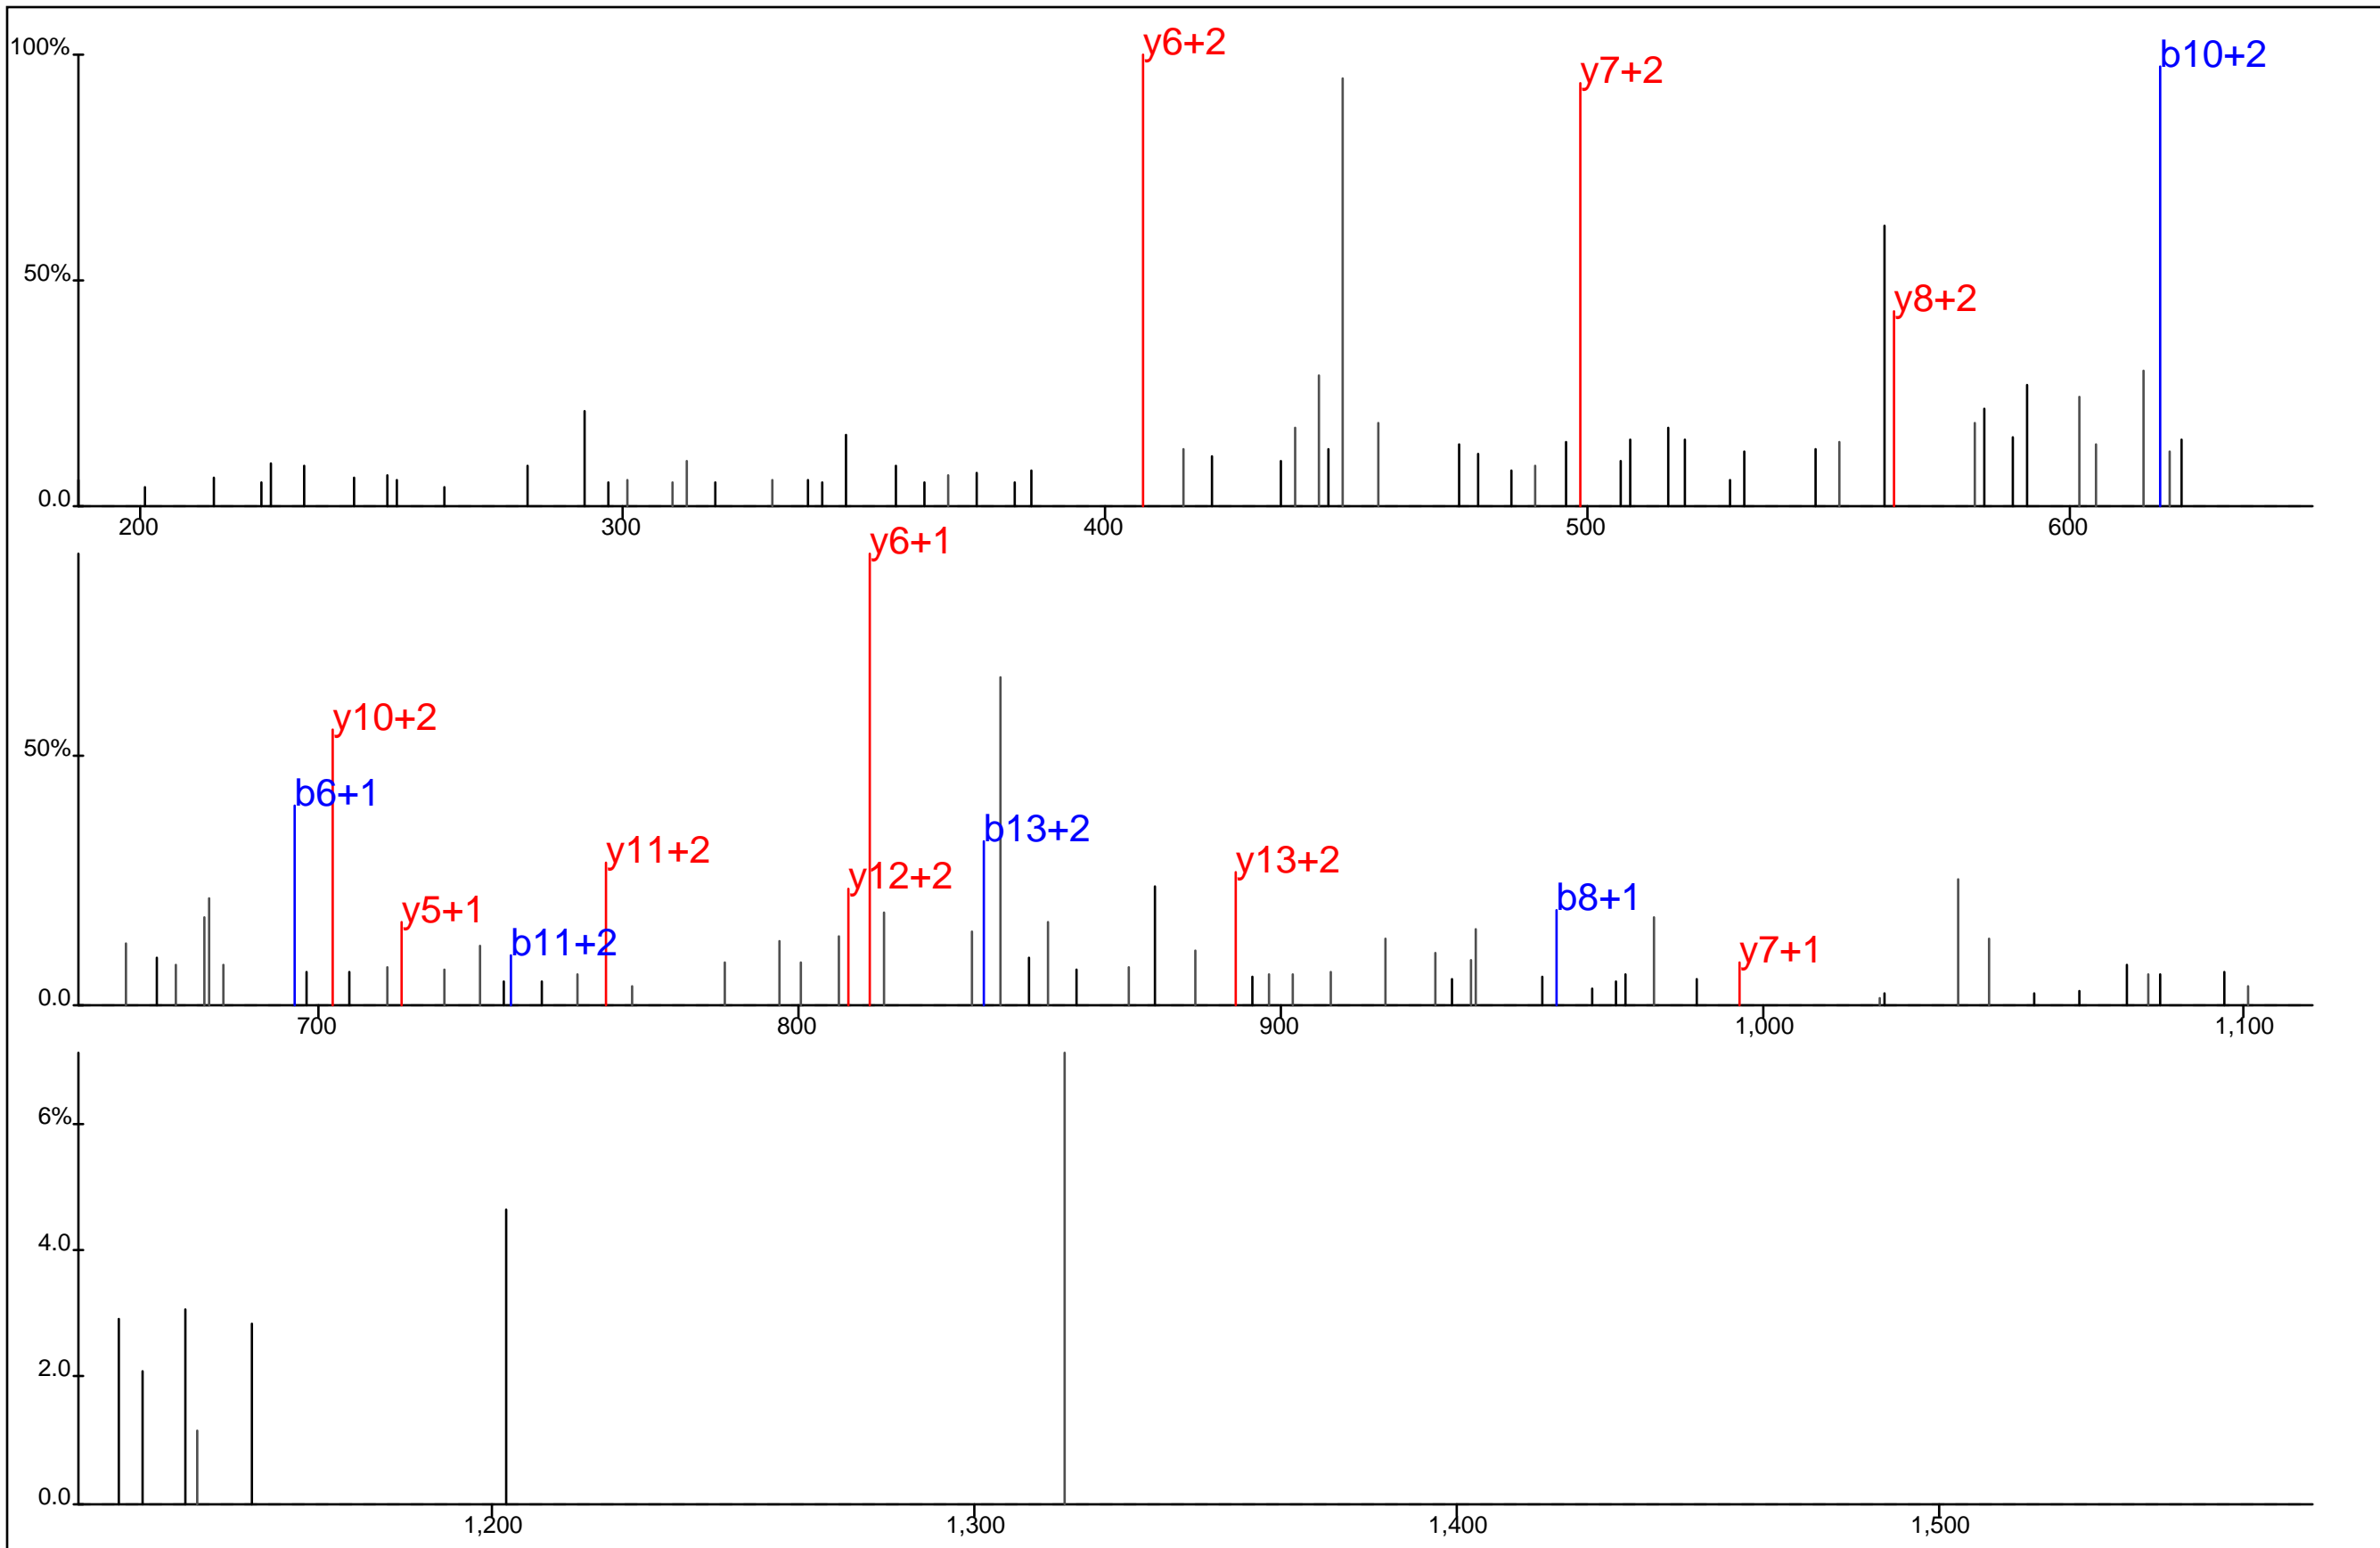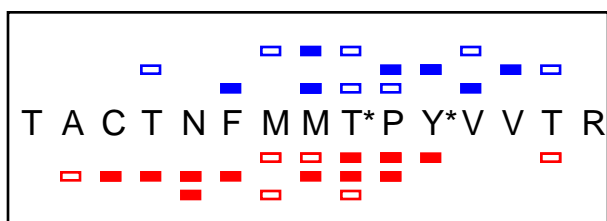

Protein Name: Mitogen-activated protein kinase 9  
 gi Accession: 0  
 Precursor Mass: 651.2599+3  
 Delta Mass: 5.016 ppm  
 XCorr: 26.03







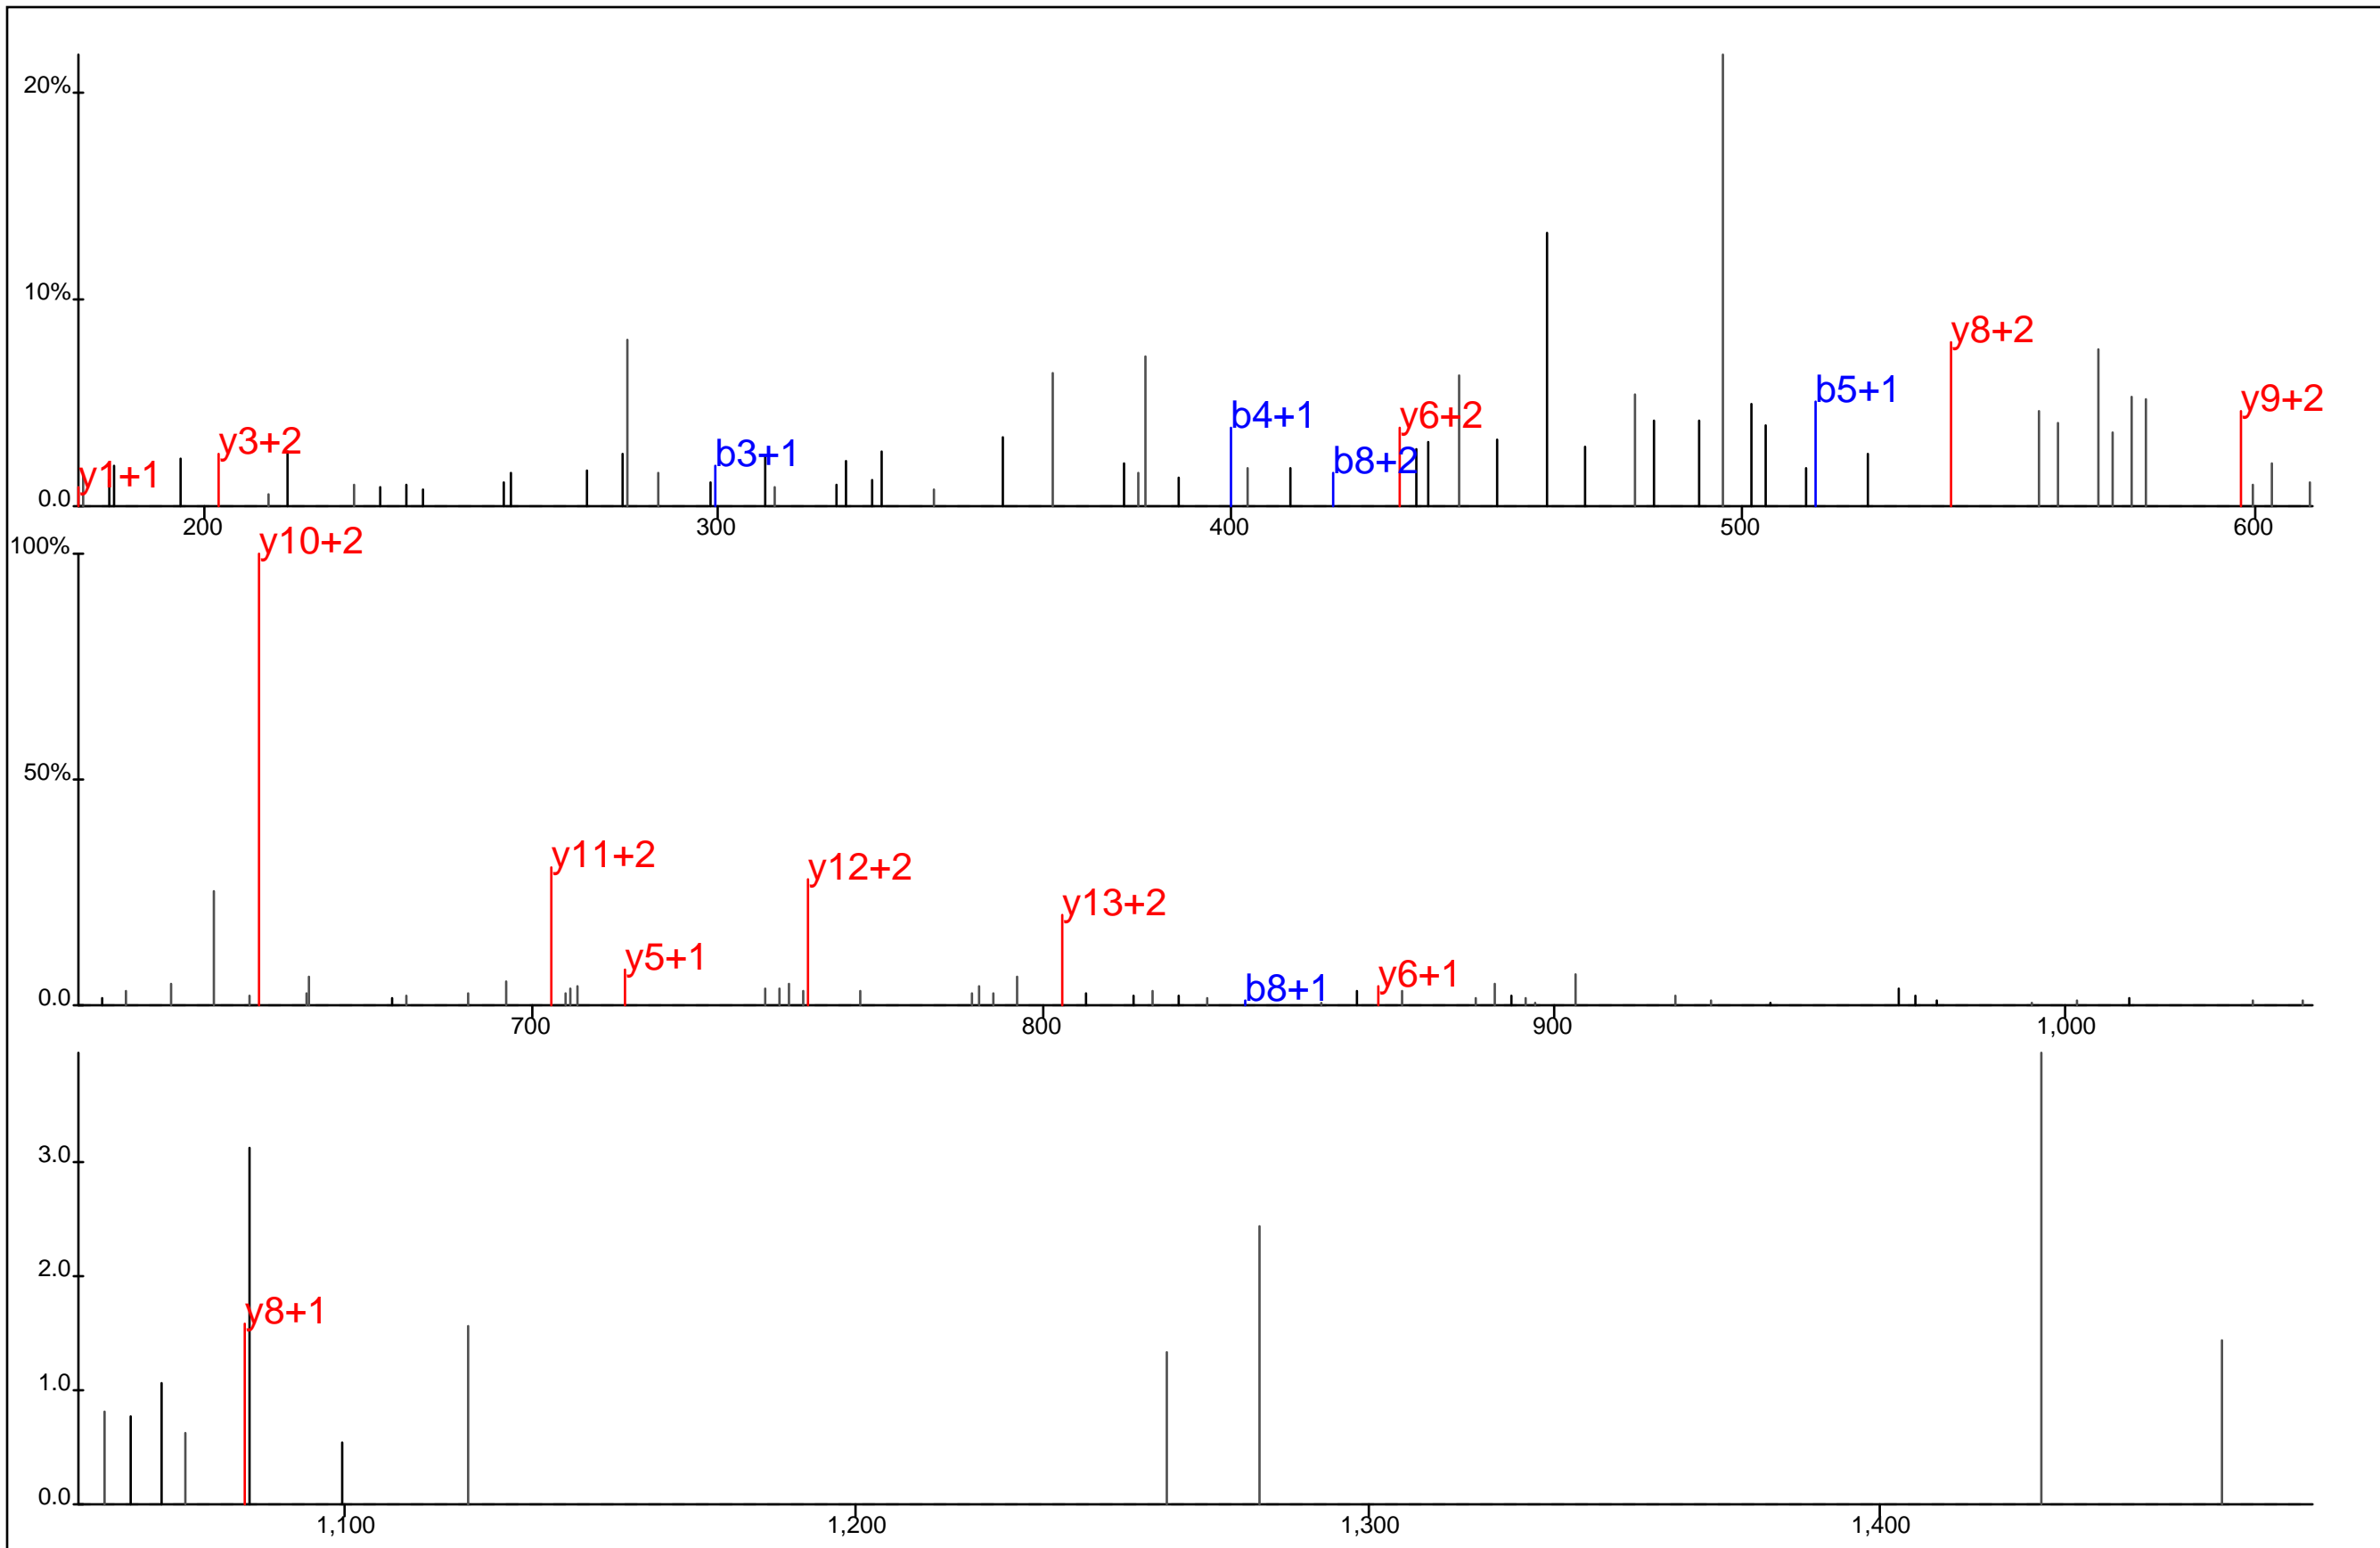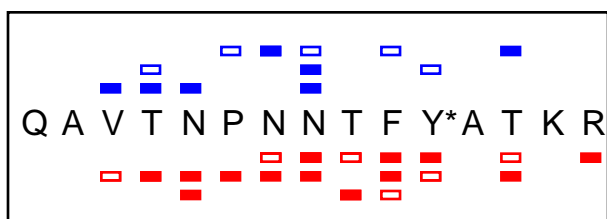

Protein Name: Mortalin 2  
 gi Accession: 0  
 Precursor Mass: 602.2848+3  
 Delta Mass: 1.139 ppm  
 XCorr: 25.05

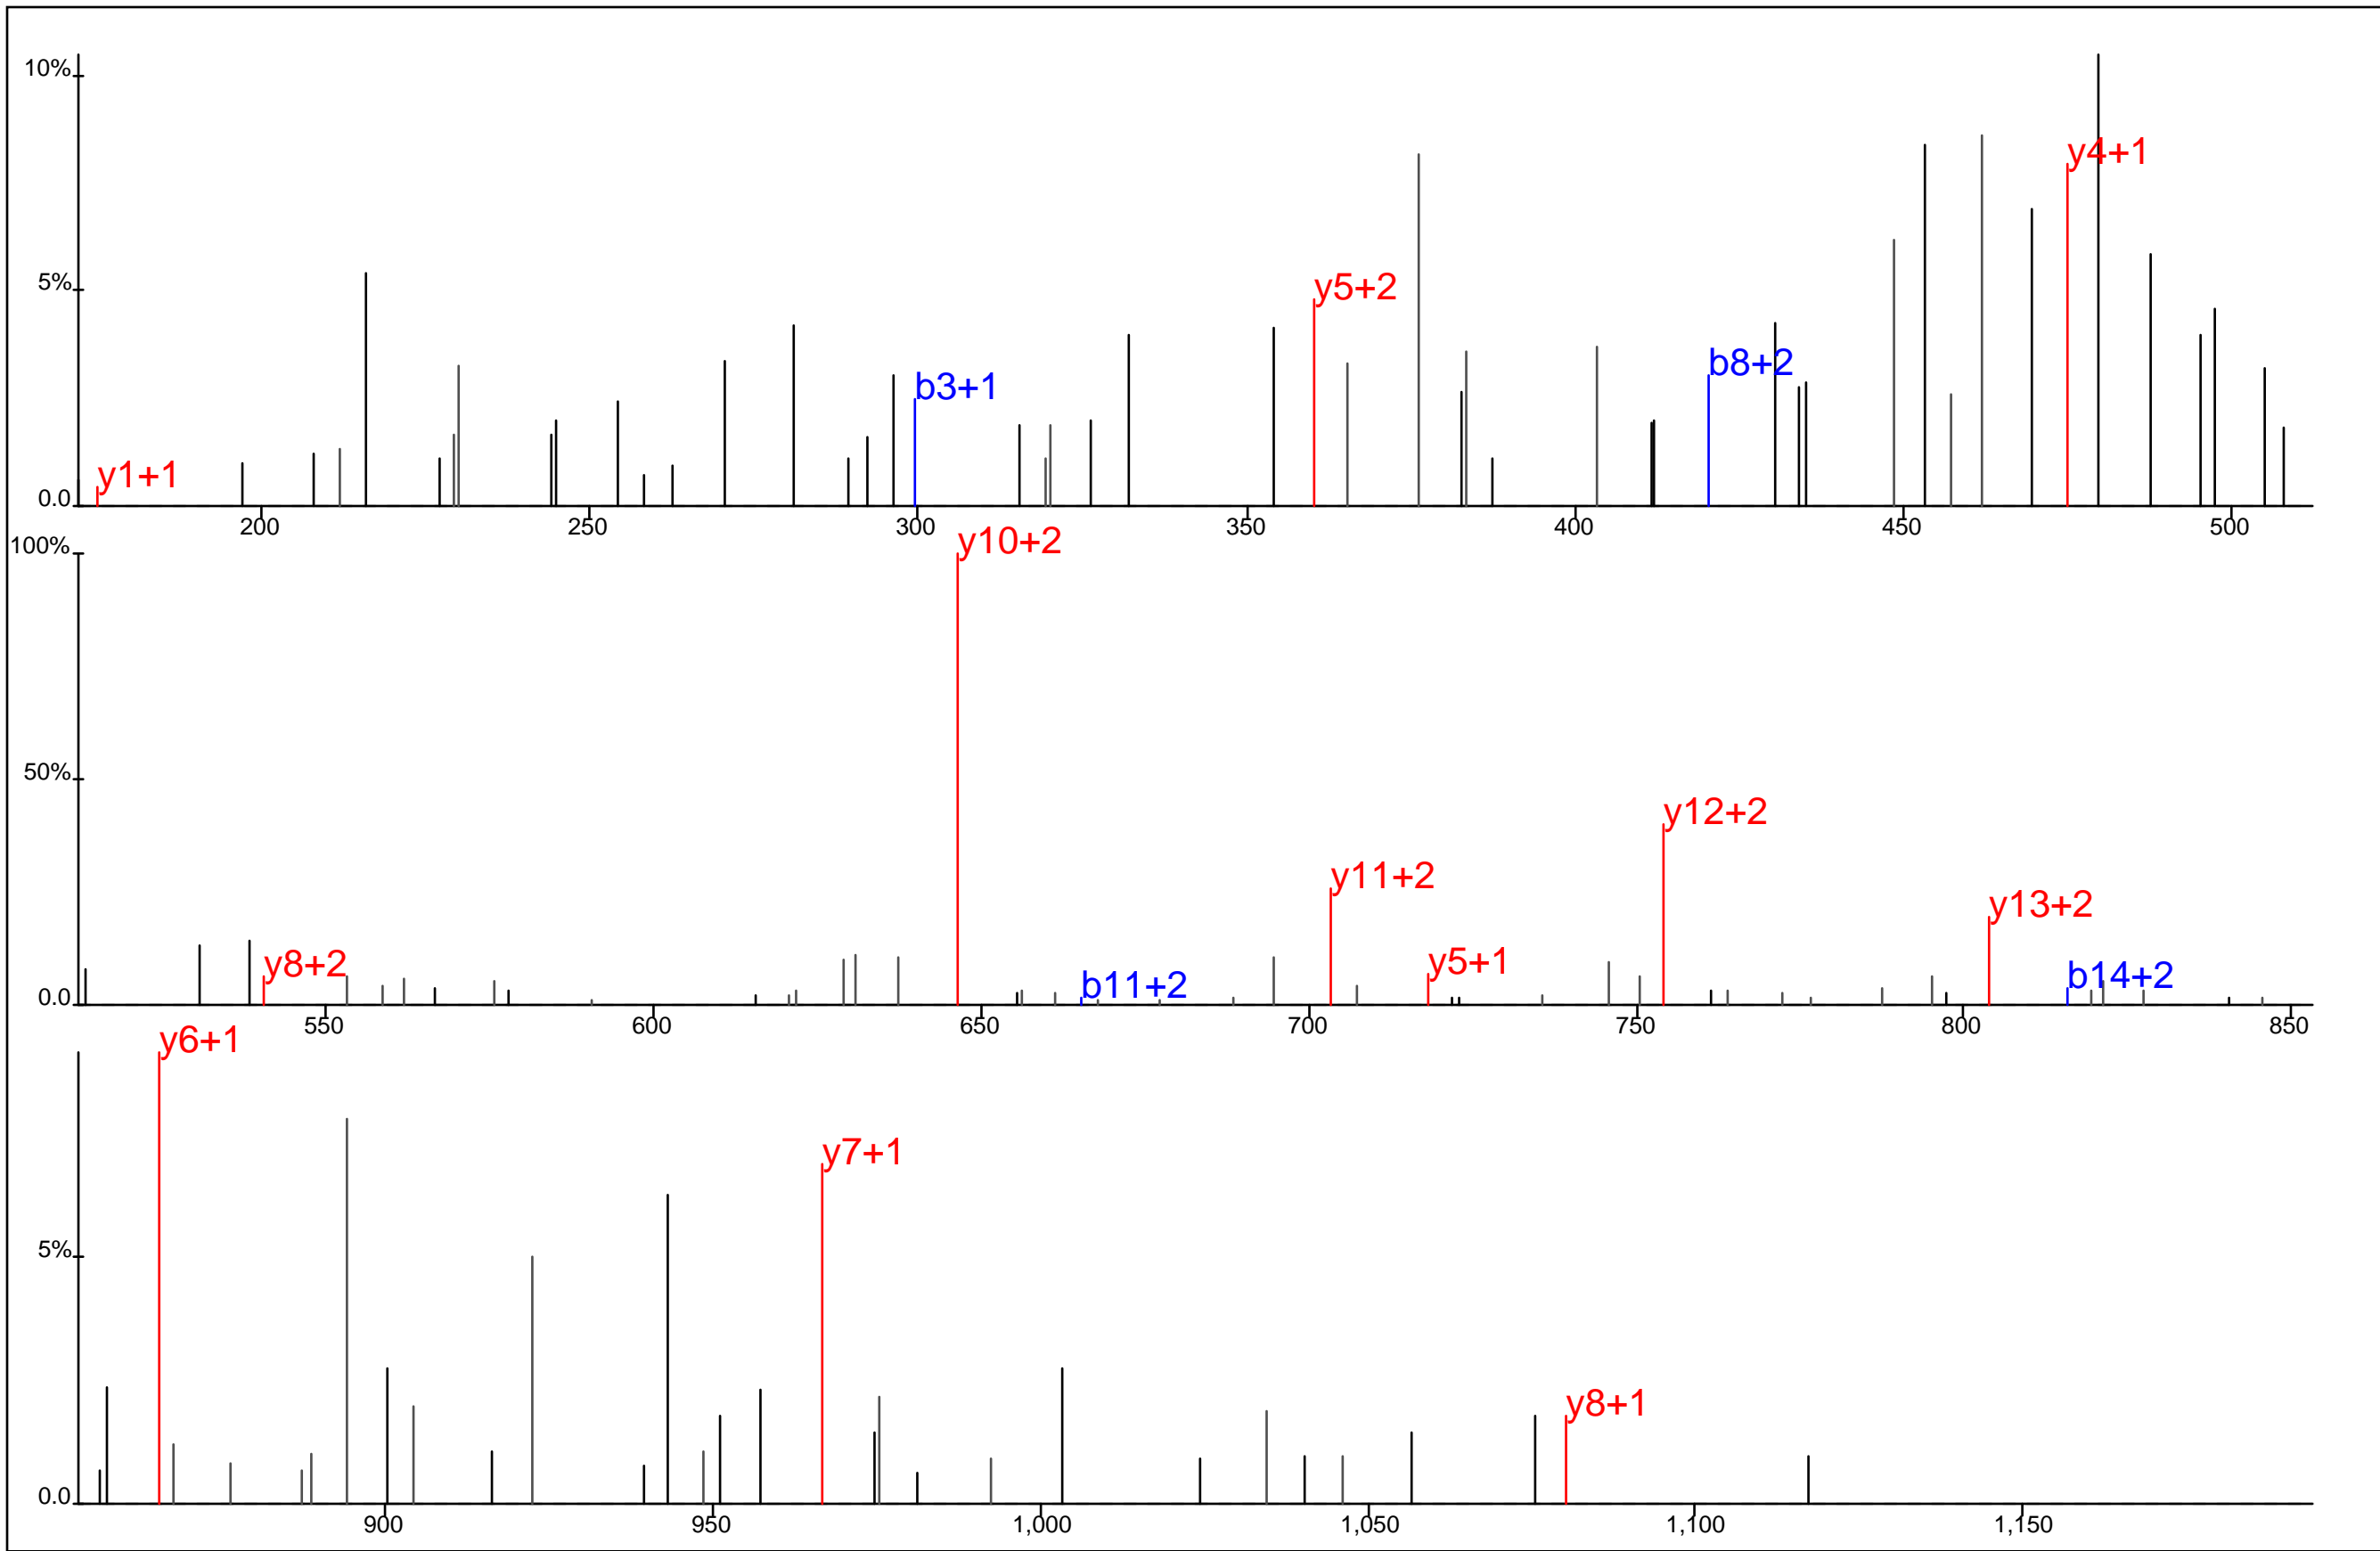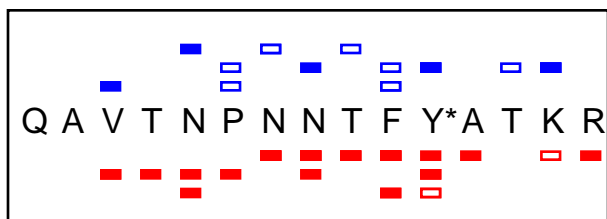

Protein Name: Mortalin 2  
 gi Accession: 0  
 Precursor Mass: 602.2867+3  
 Delta Mass: 4.385 ppm  
 XCorr: 31.82

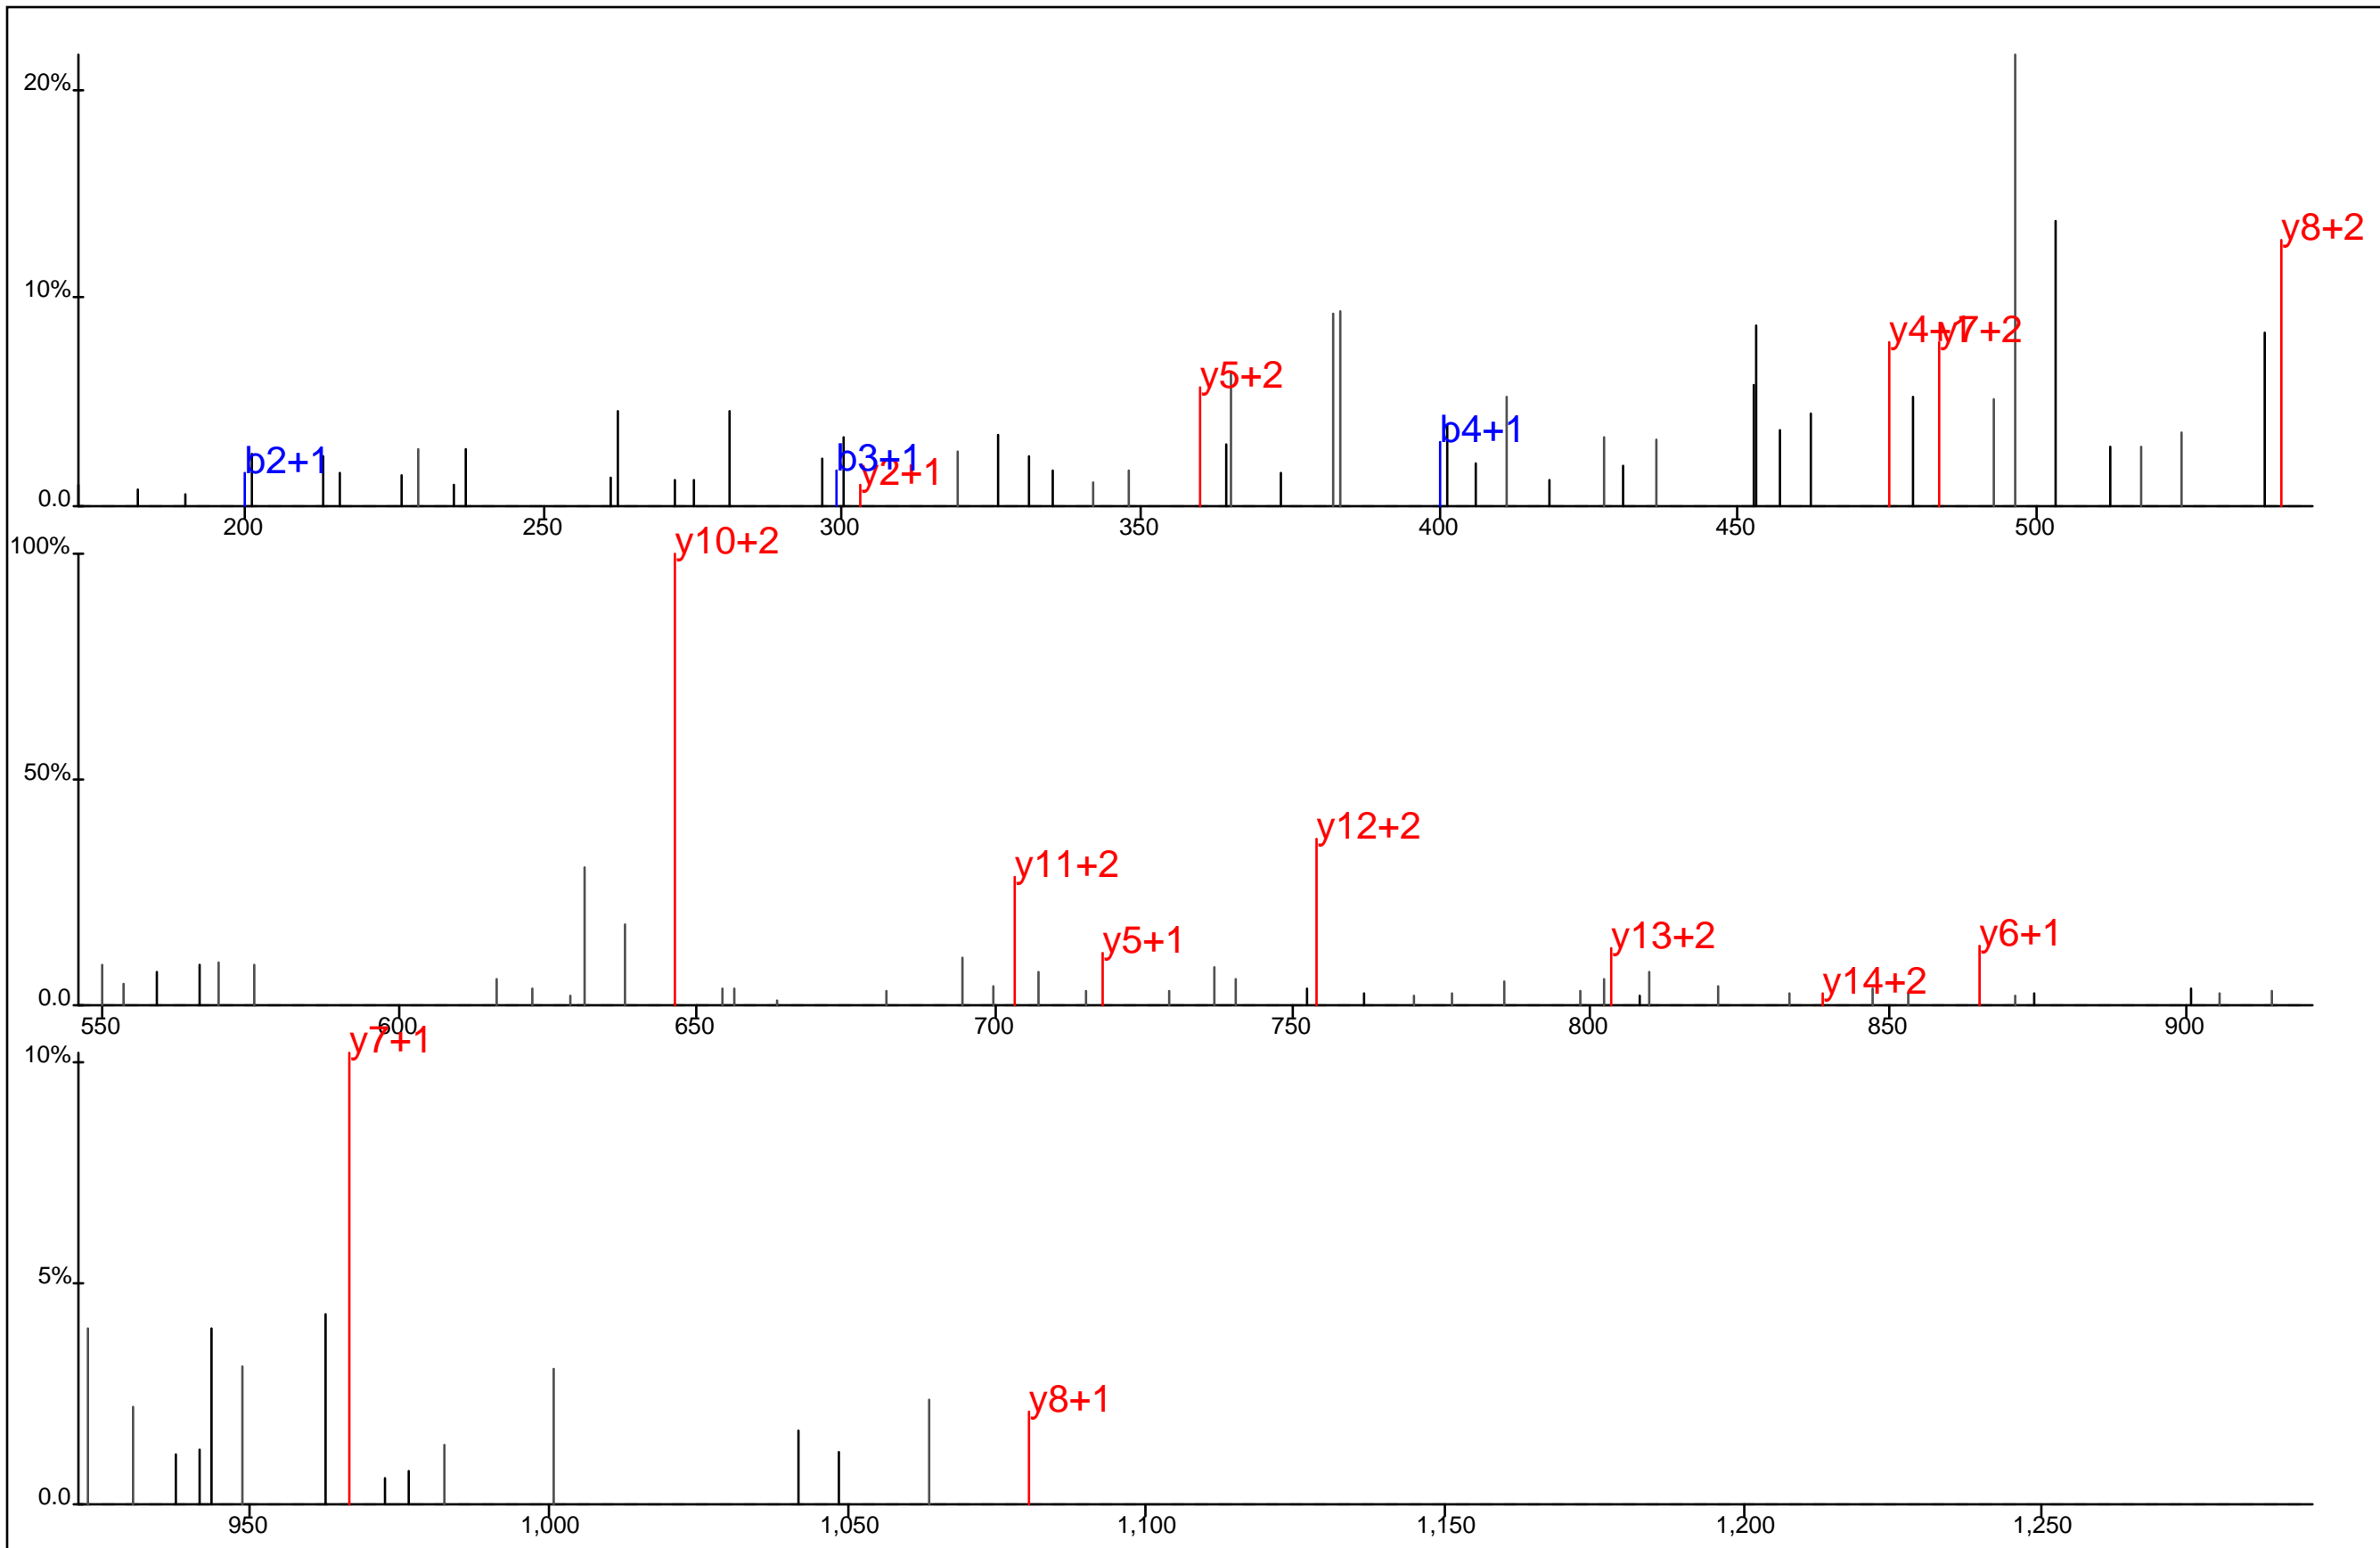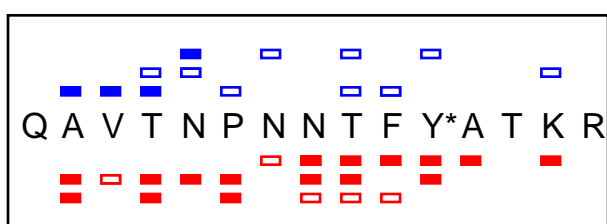

Protein Name: Mortalin 2  
 gi Accession: 0  
 Precursor Mass: 602.2845+3  
 Delta Mass: 0.734 ppm  
 XCorr: 25.3

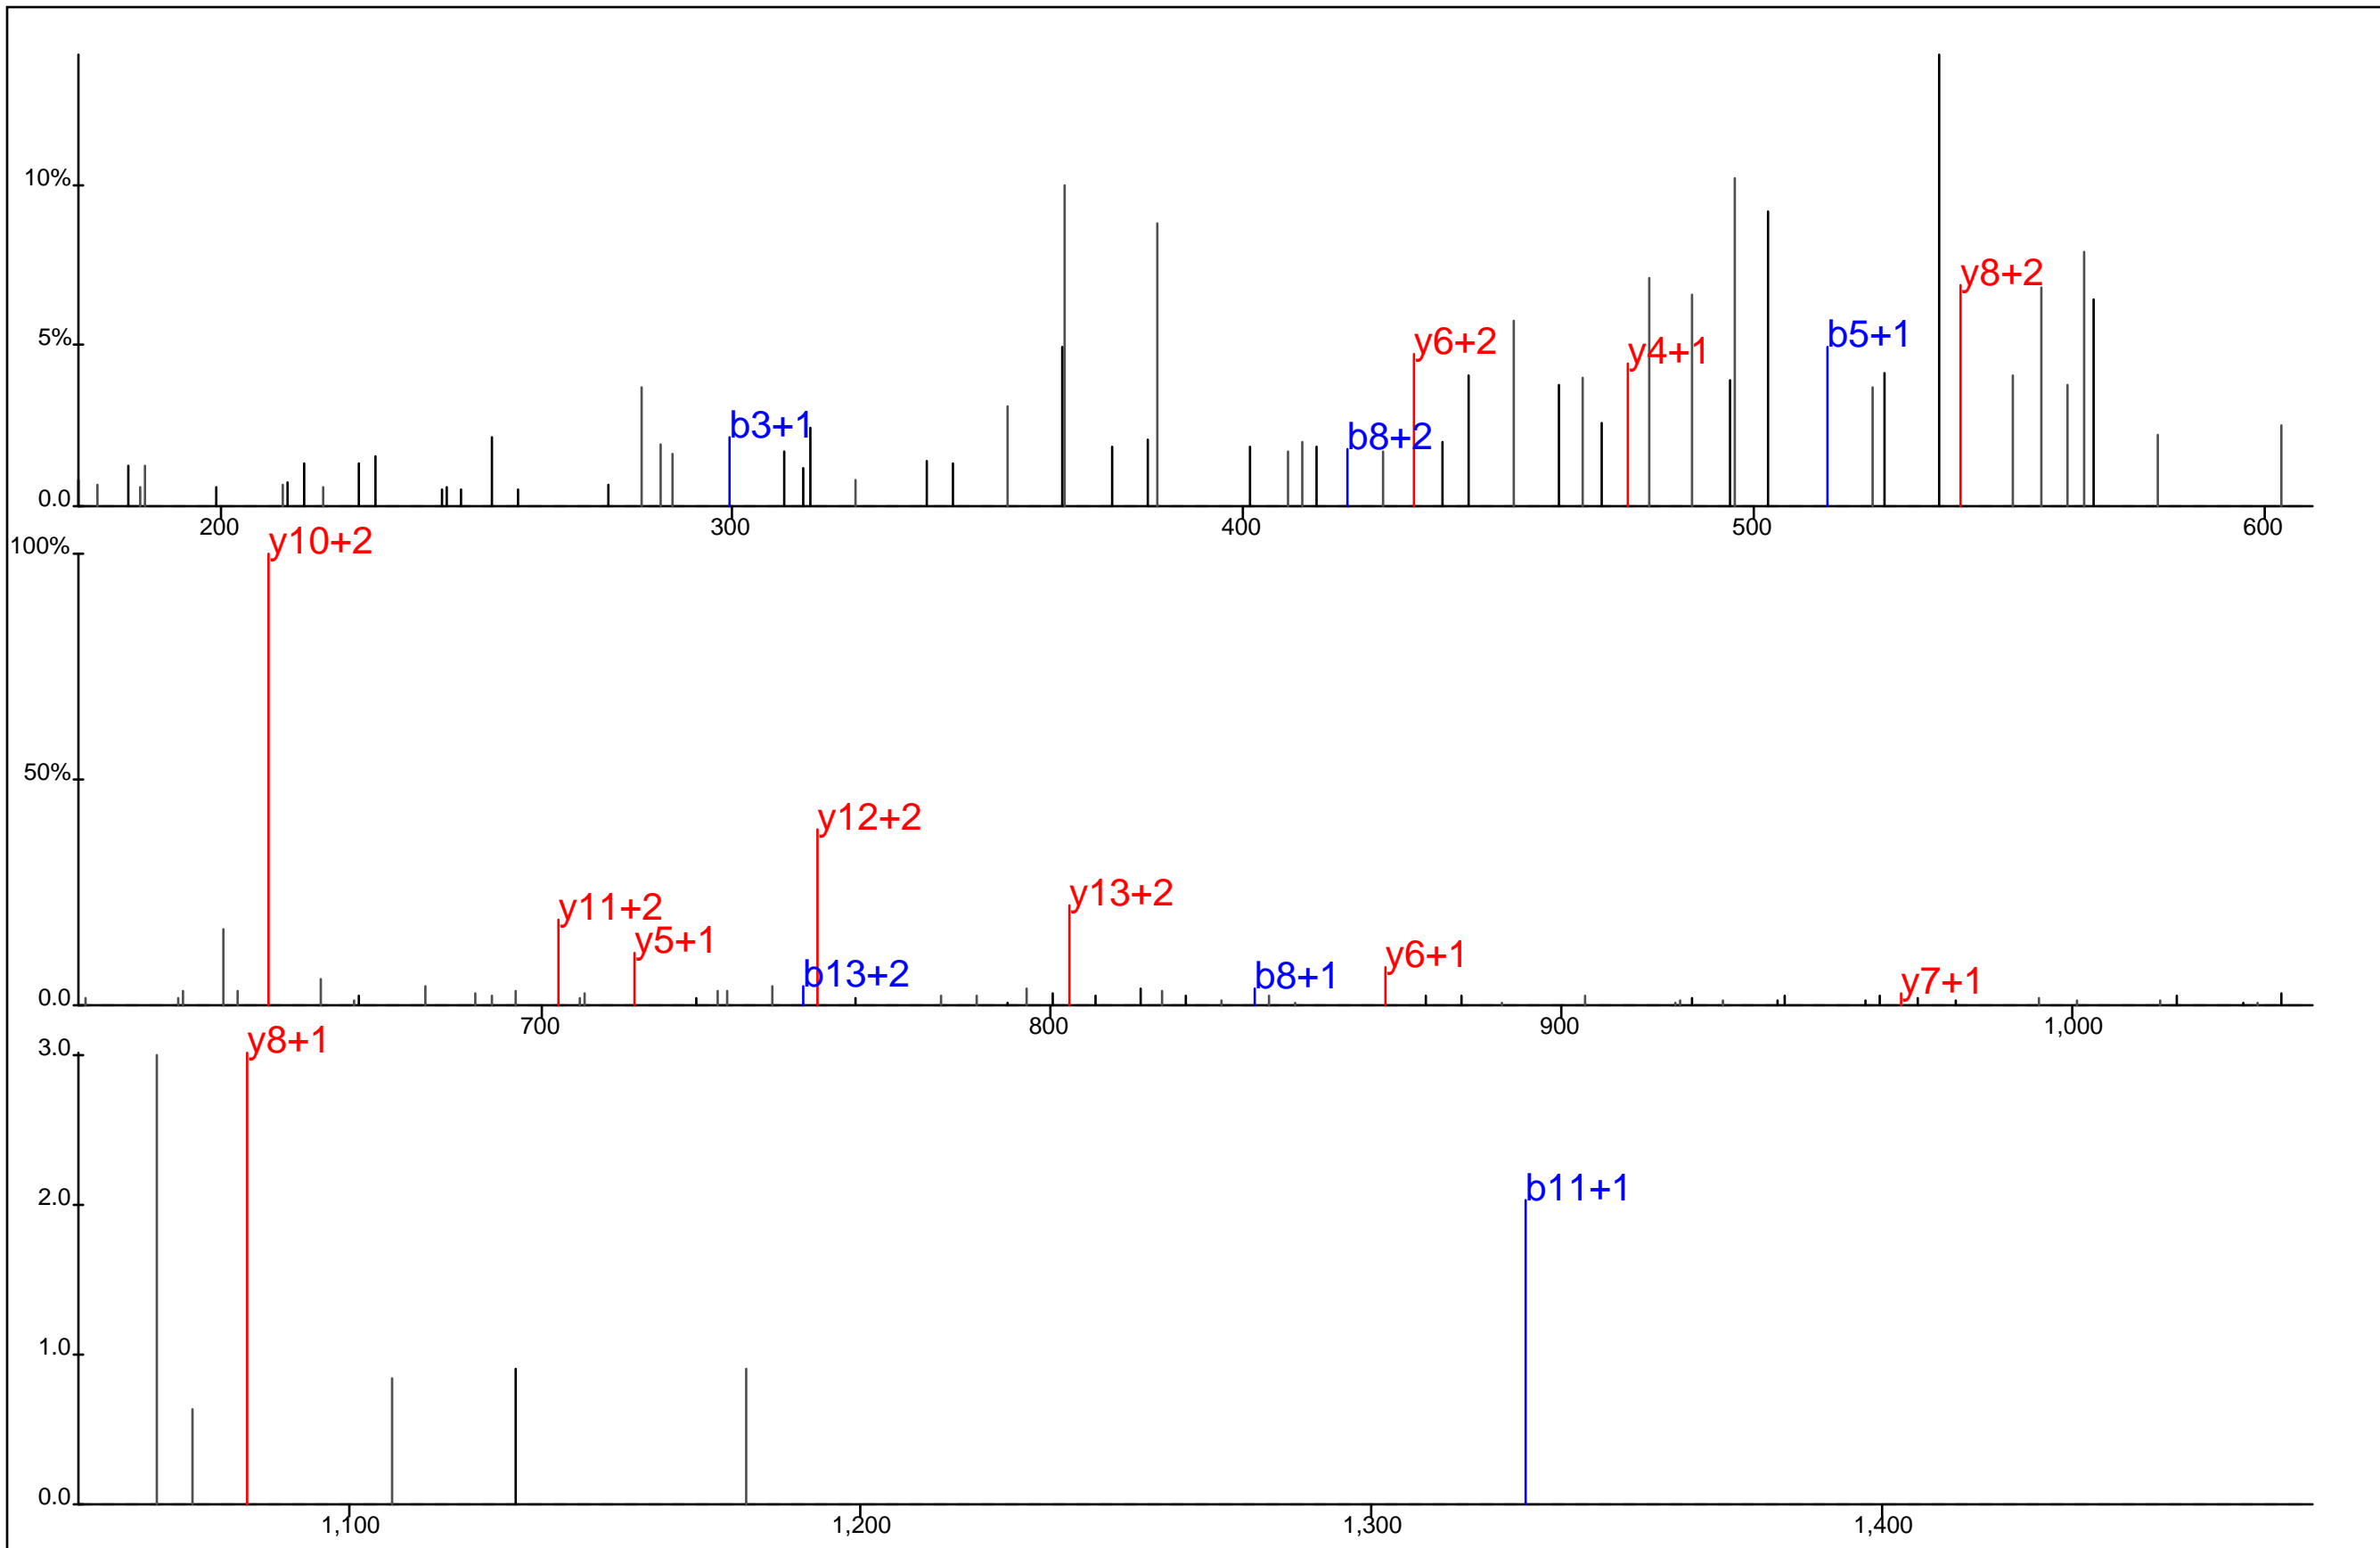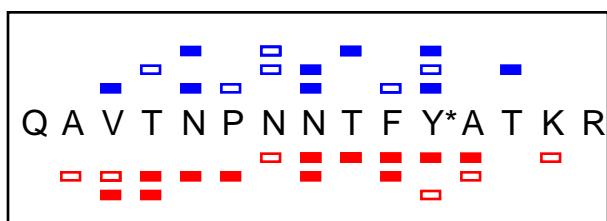

Protein Name: Mortalin 2  
 gi Accession: 0  
 Precursor Mass: 602.2843+3  
 Delta Mass: 0.328 ppm  
 XCorr: 25.09

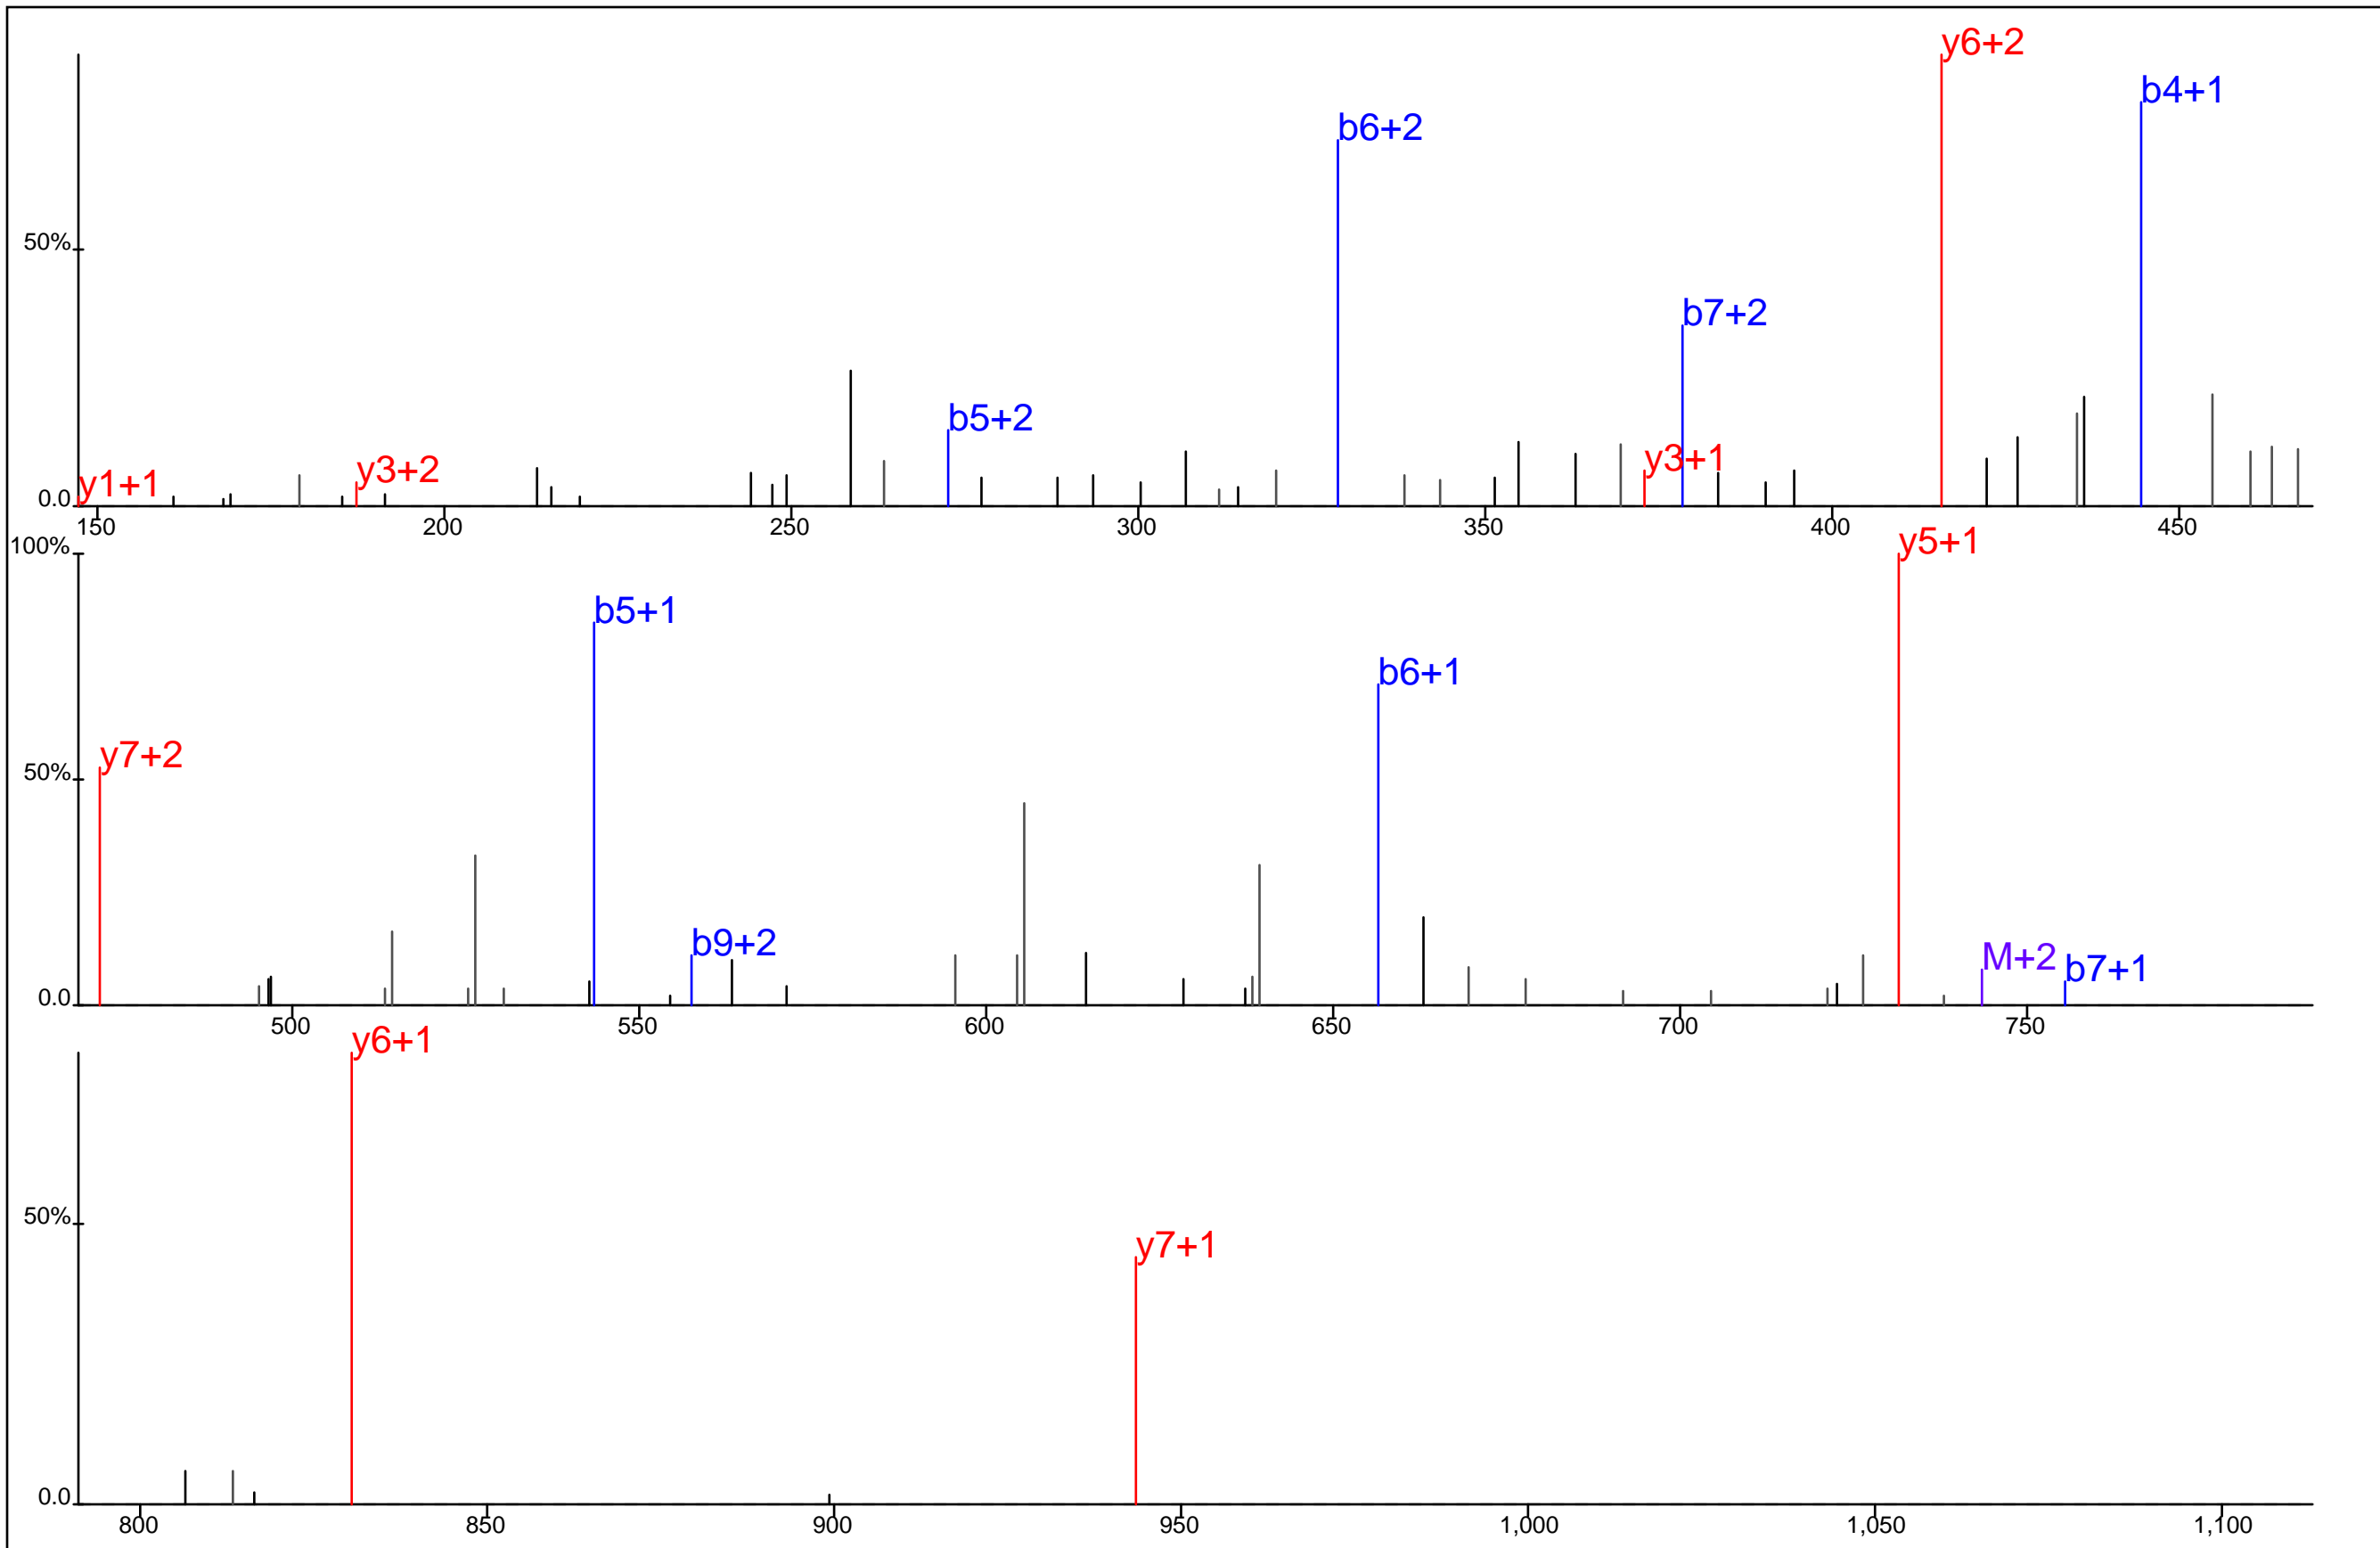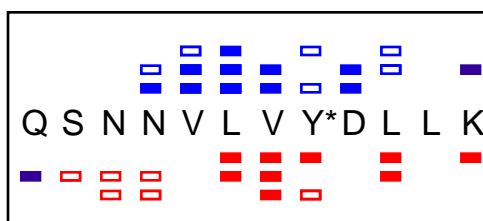

Protein Name: M phase phosphoprotein, mpp8  
 gi Accession: 0  
 Precursor Mass: 495.9165+3  
 Delta Mass: 0.003 ppm  
 XCorr: 30.32

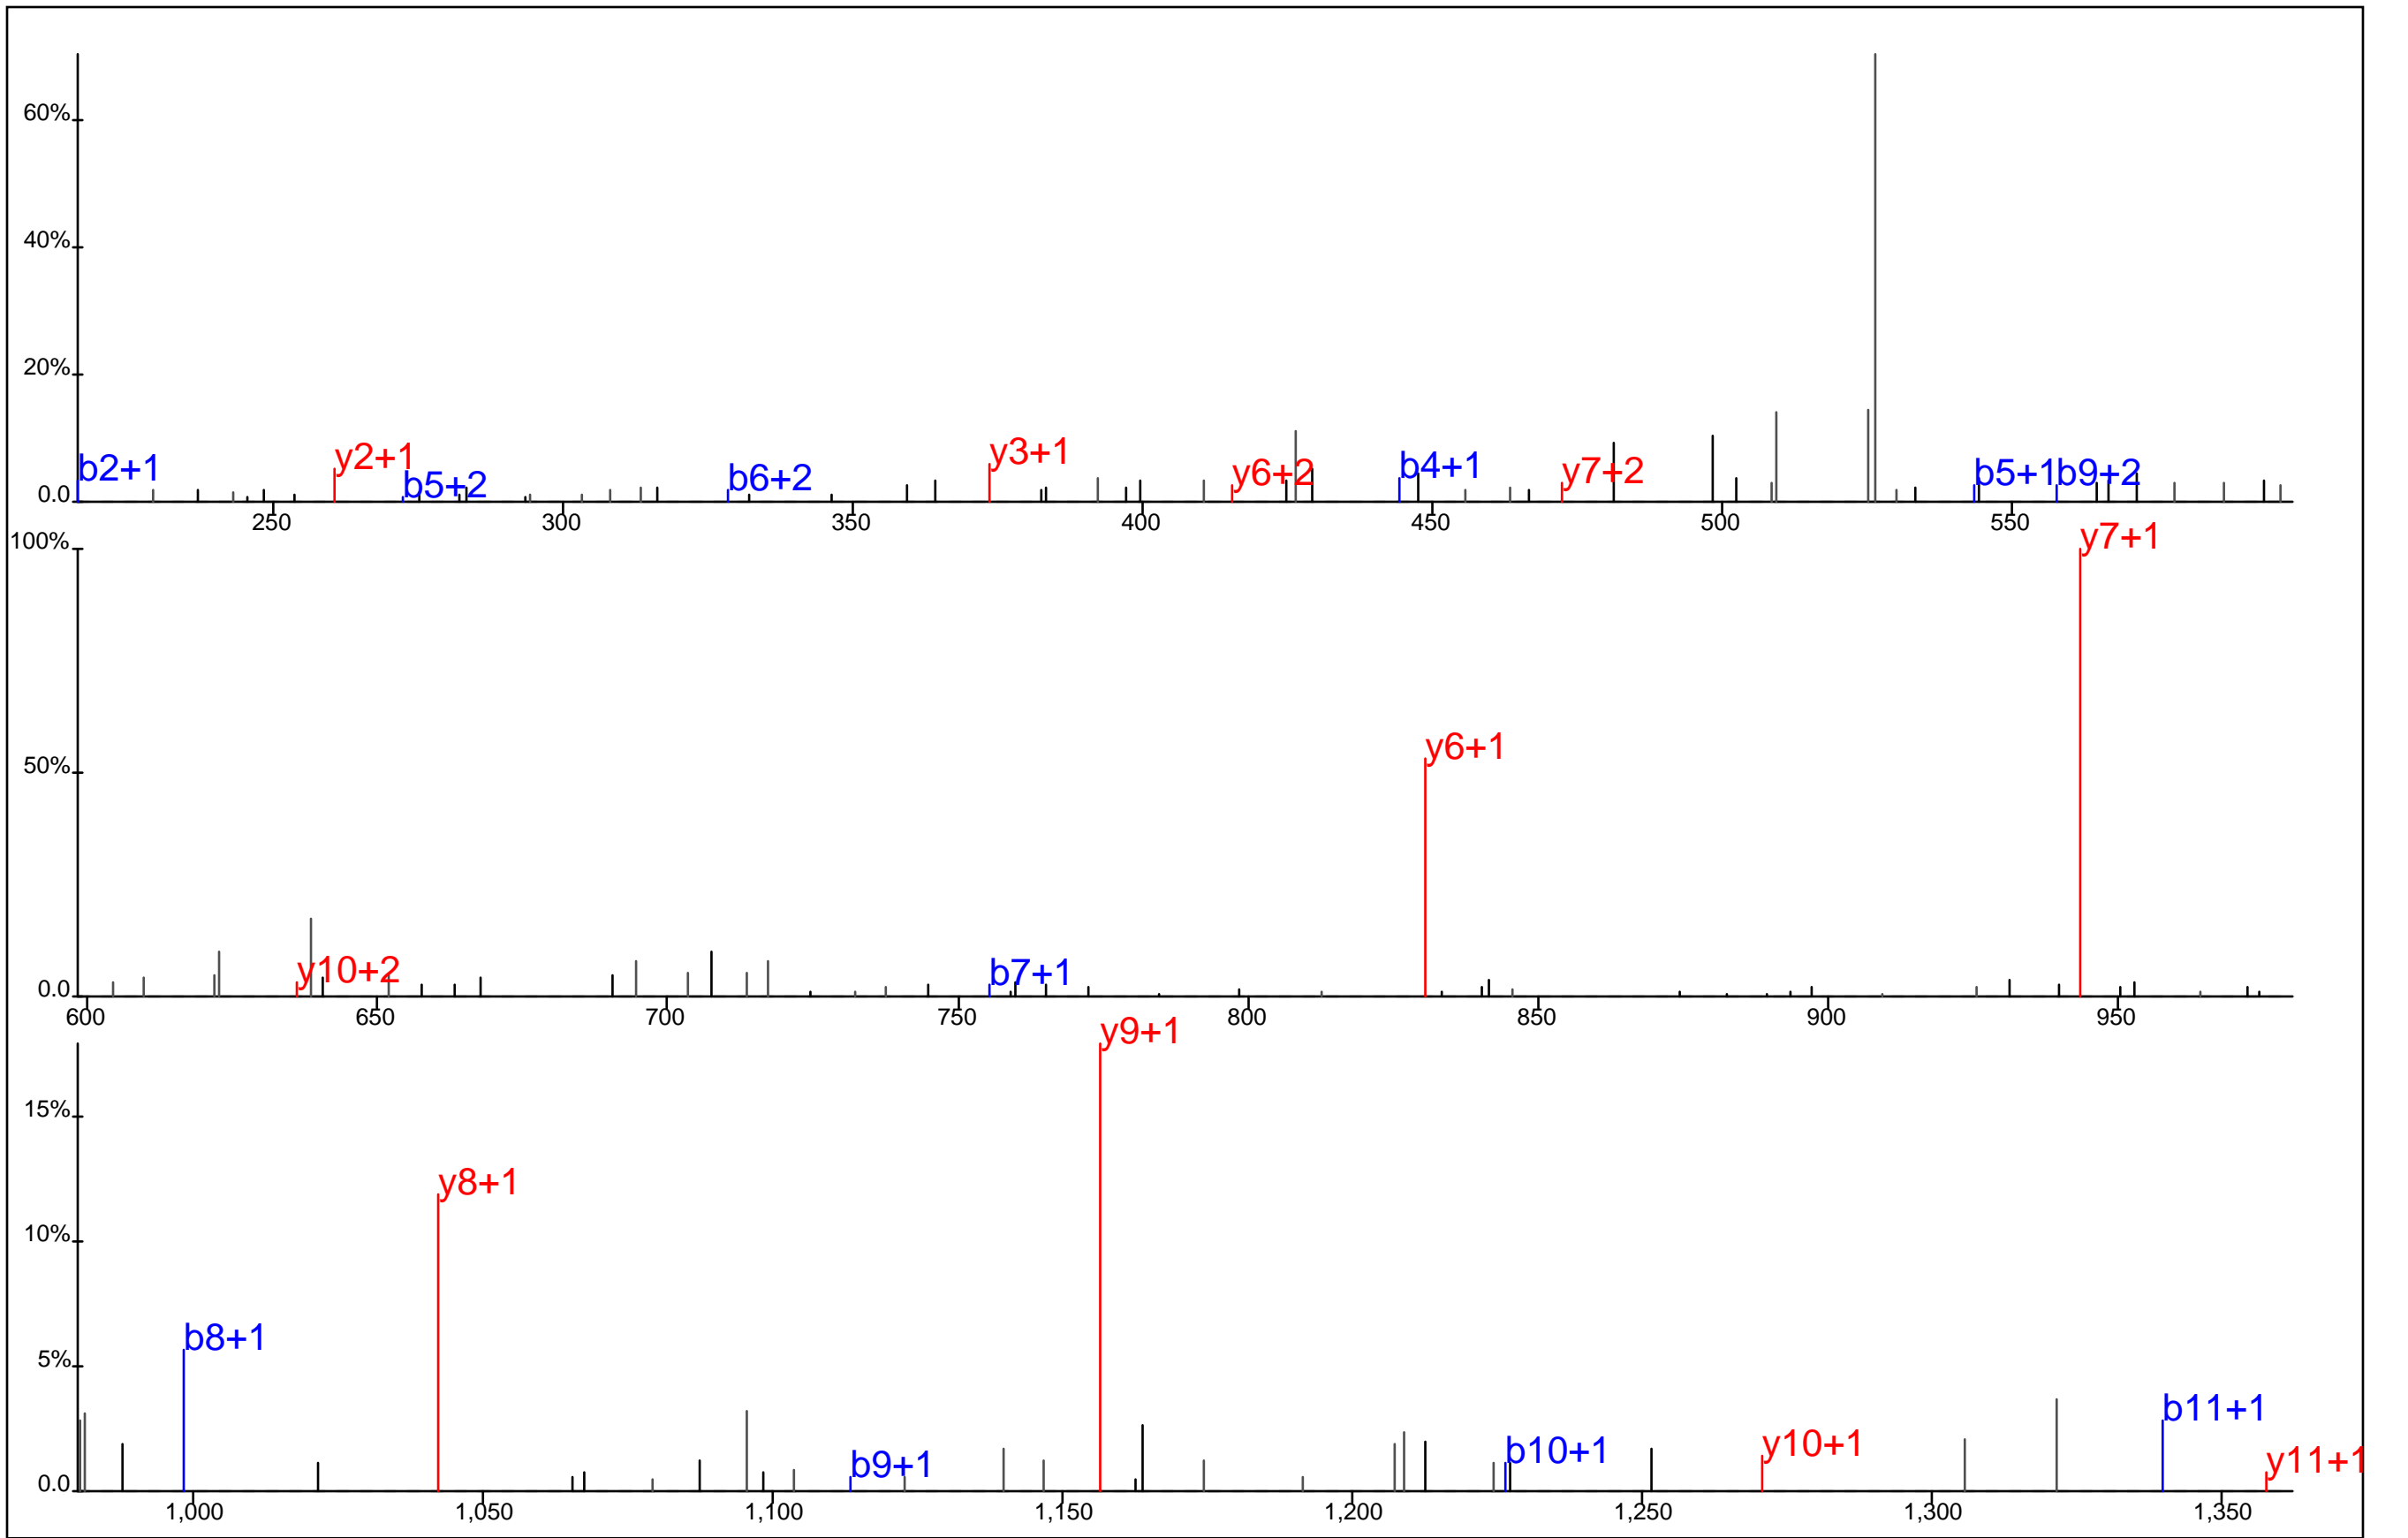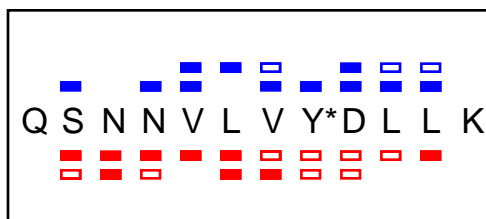

Protein Name: M phase phosphoprotein, mpp8  
 gi Accession: 0  
 Precursor Mass: 743.3702+2  
 Delta Mass: 1.117 ppm  
 XCorr: 44.09







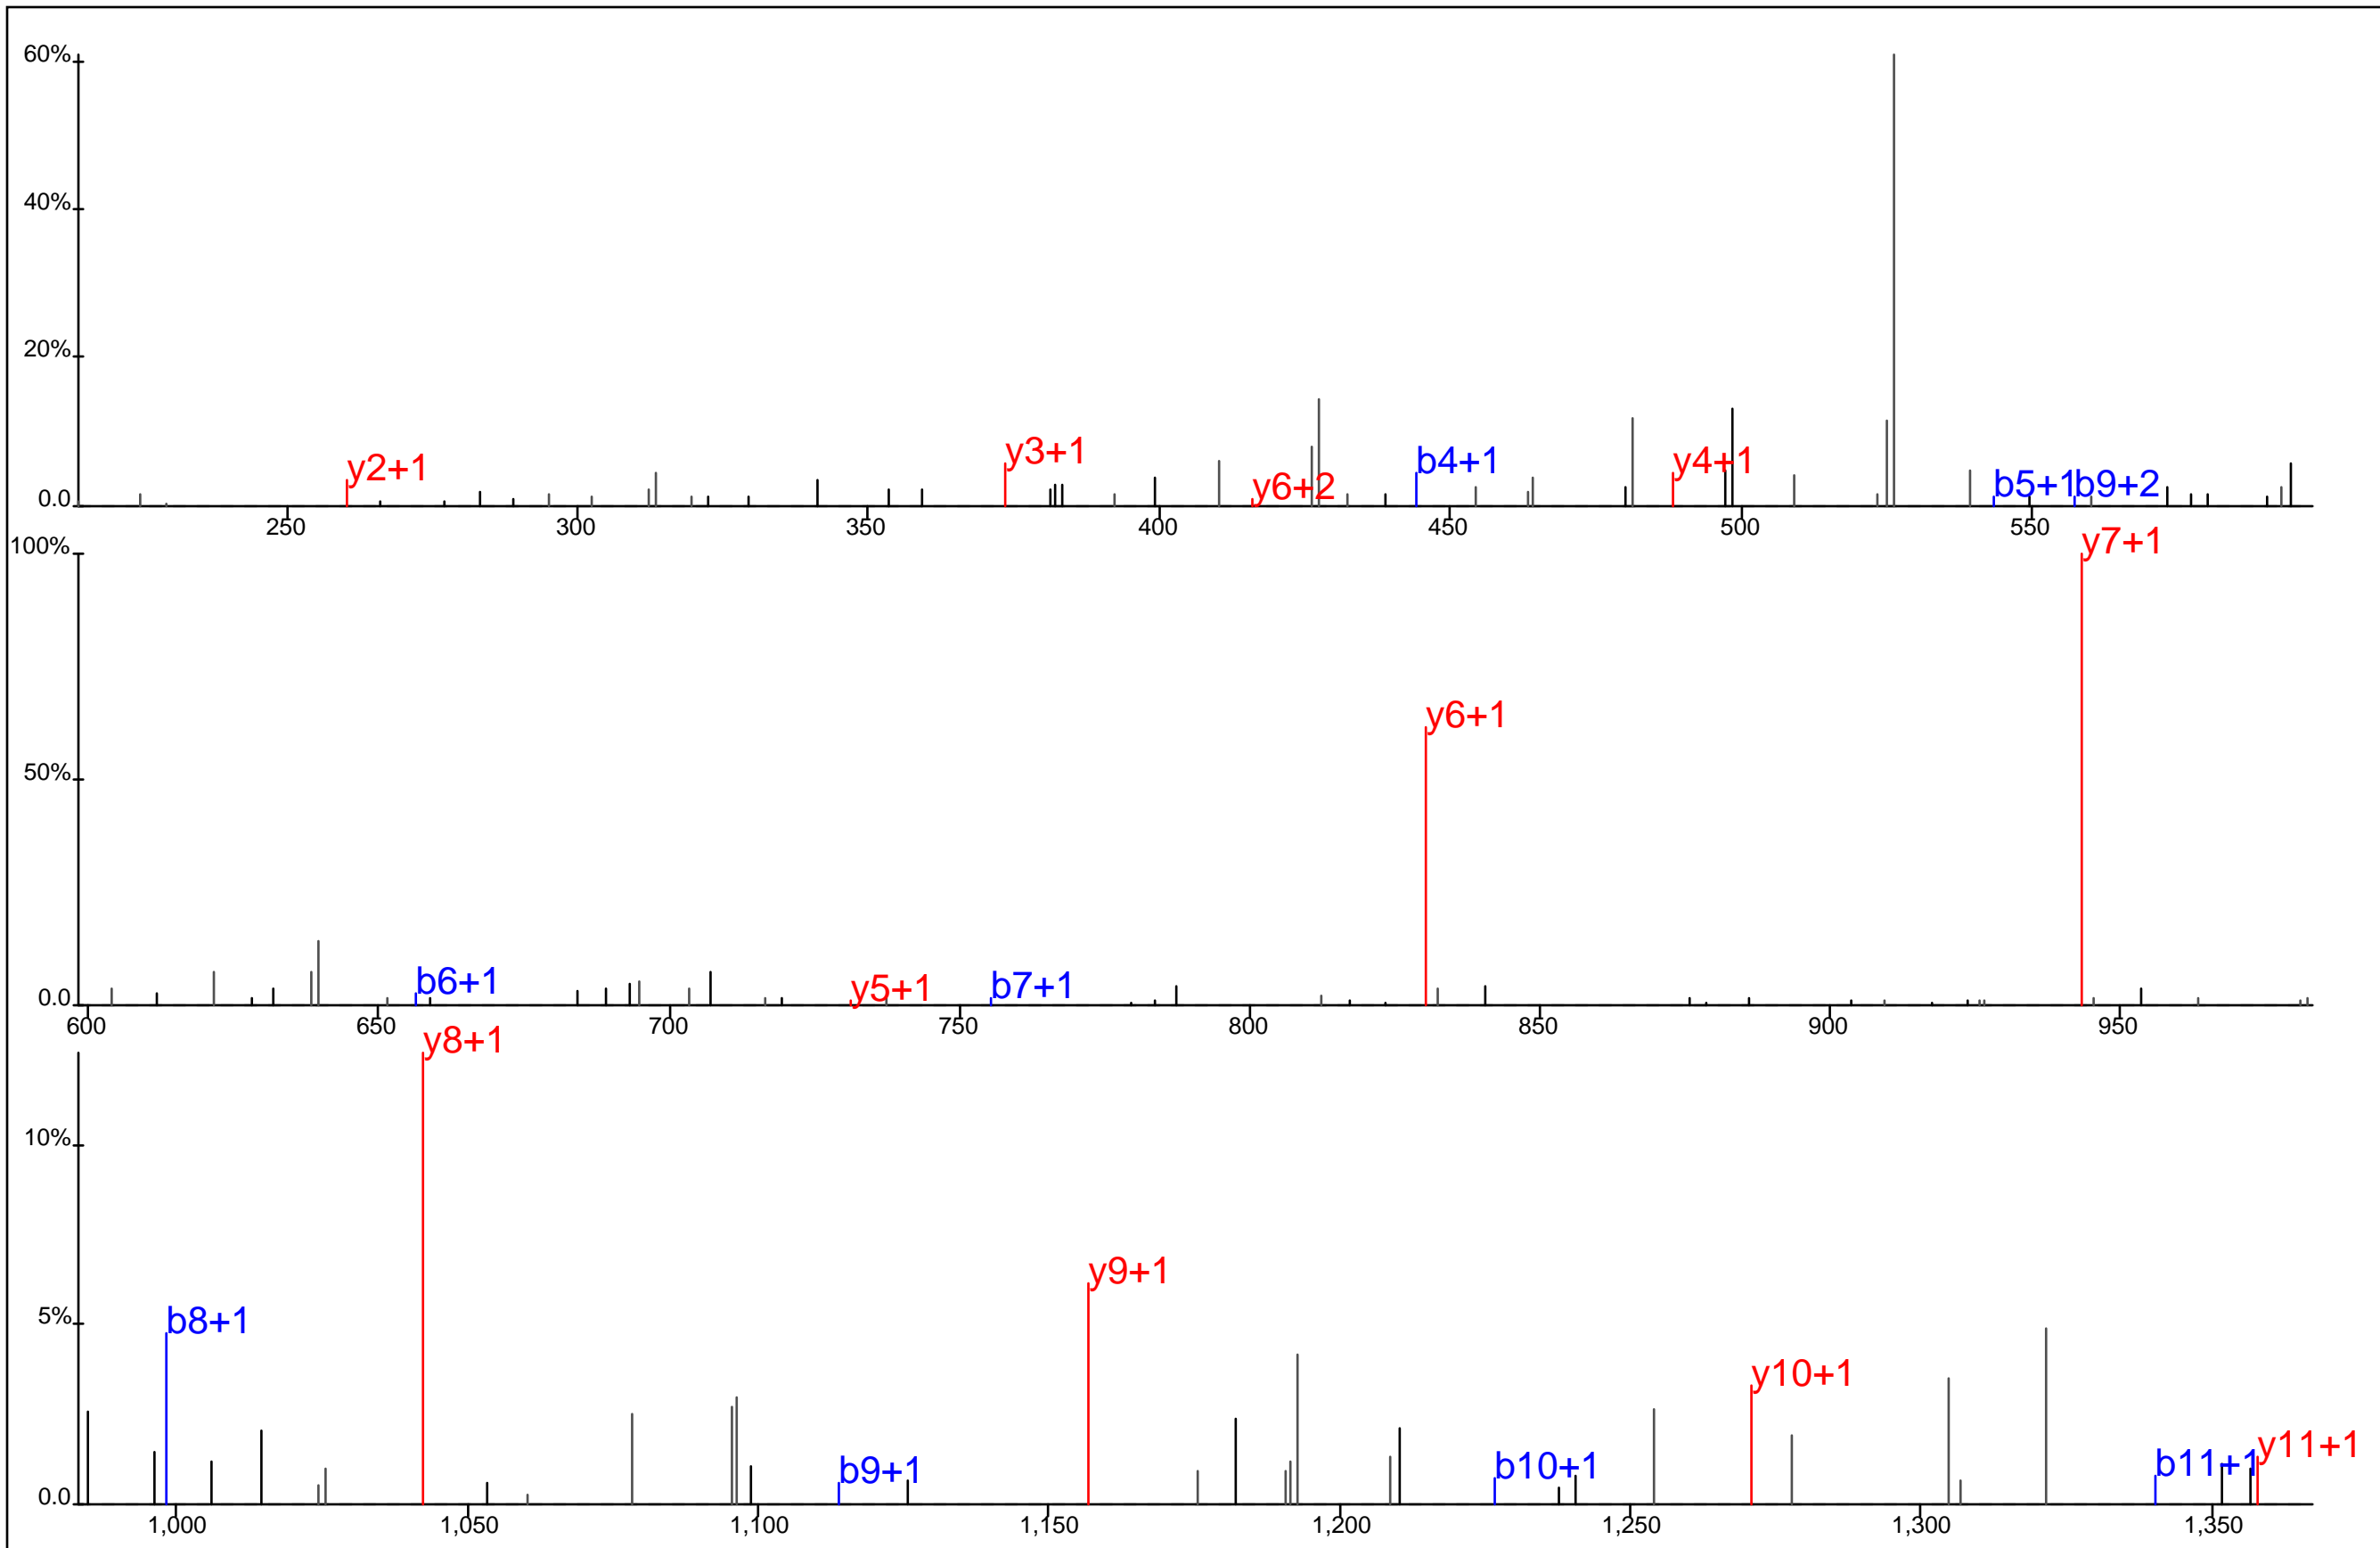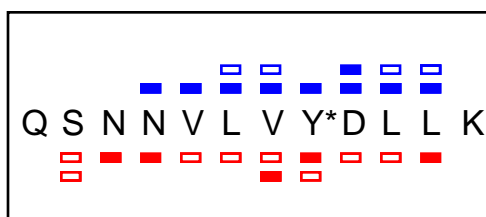

Protein Name: M phase phosphoprotein, mpp8  
 gi Accession: 0  
 Precursor Mass: 743.3723+2  
 Delta Mass: 1.594 ppm  
 XCorr: 43.08

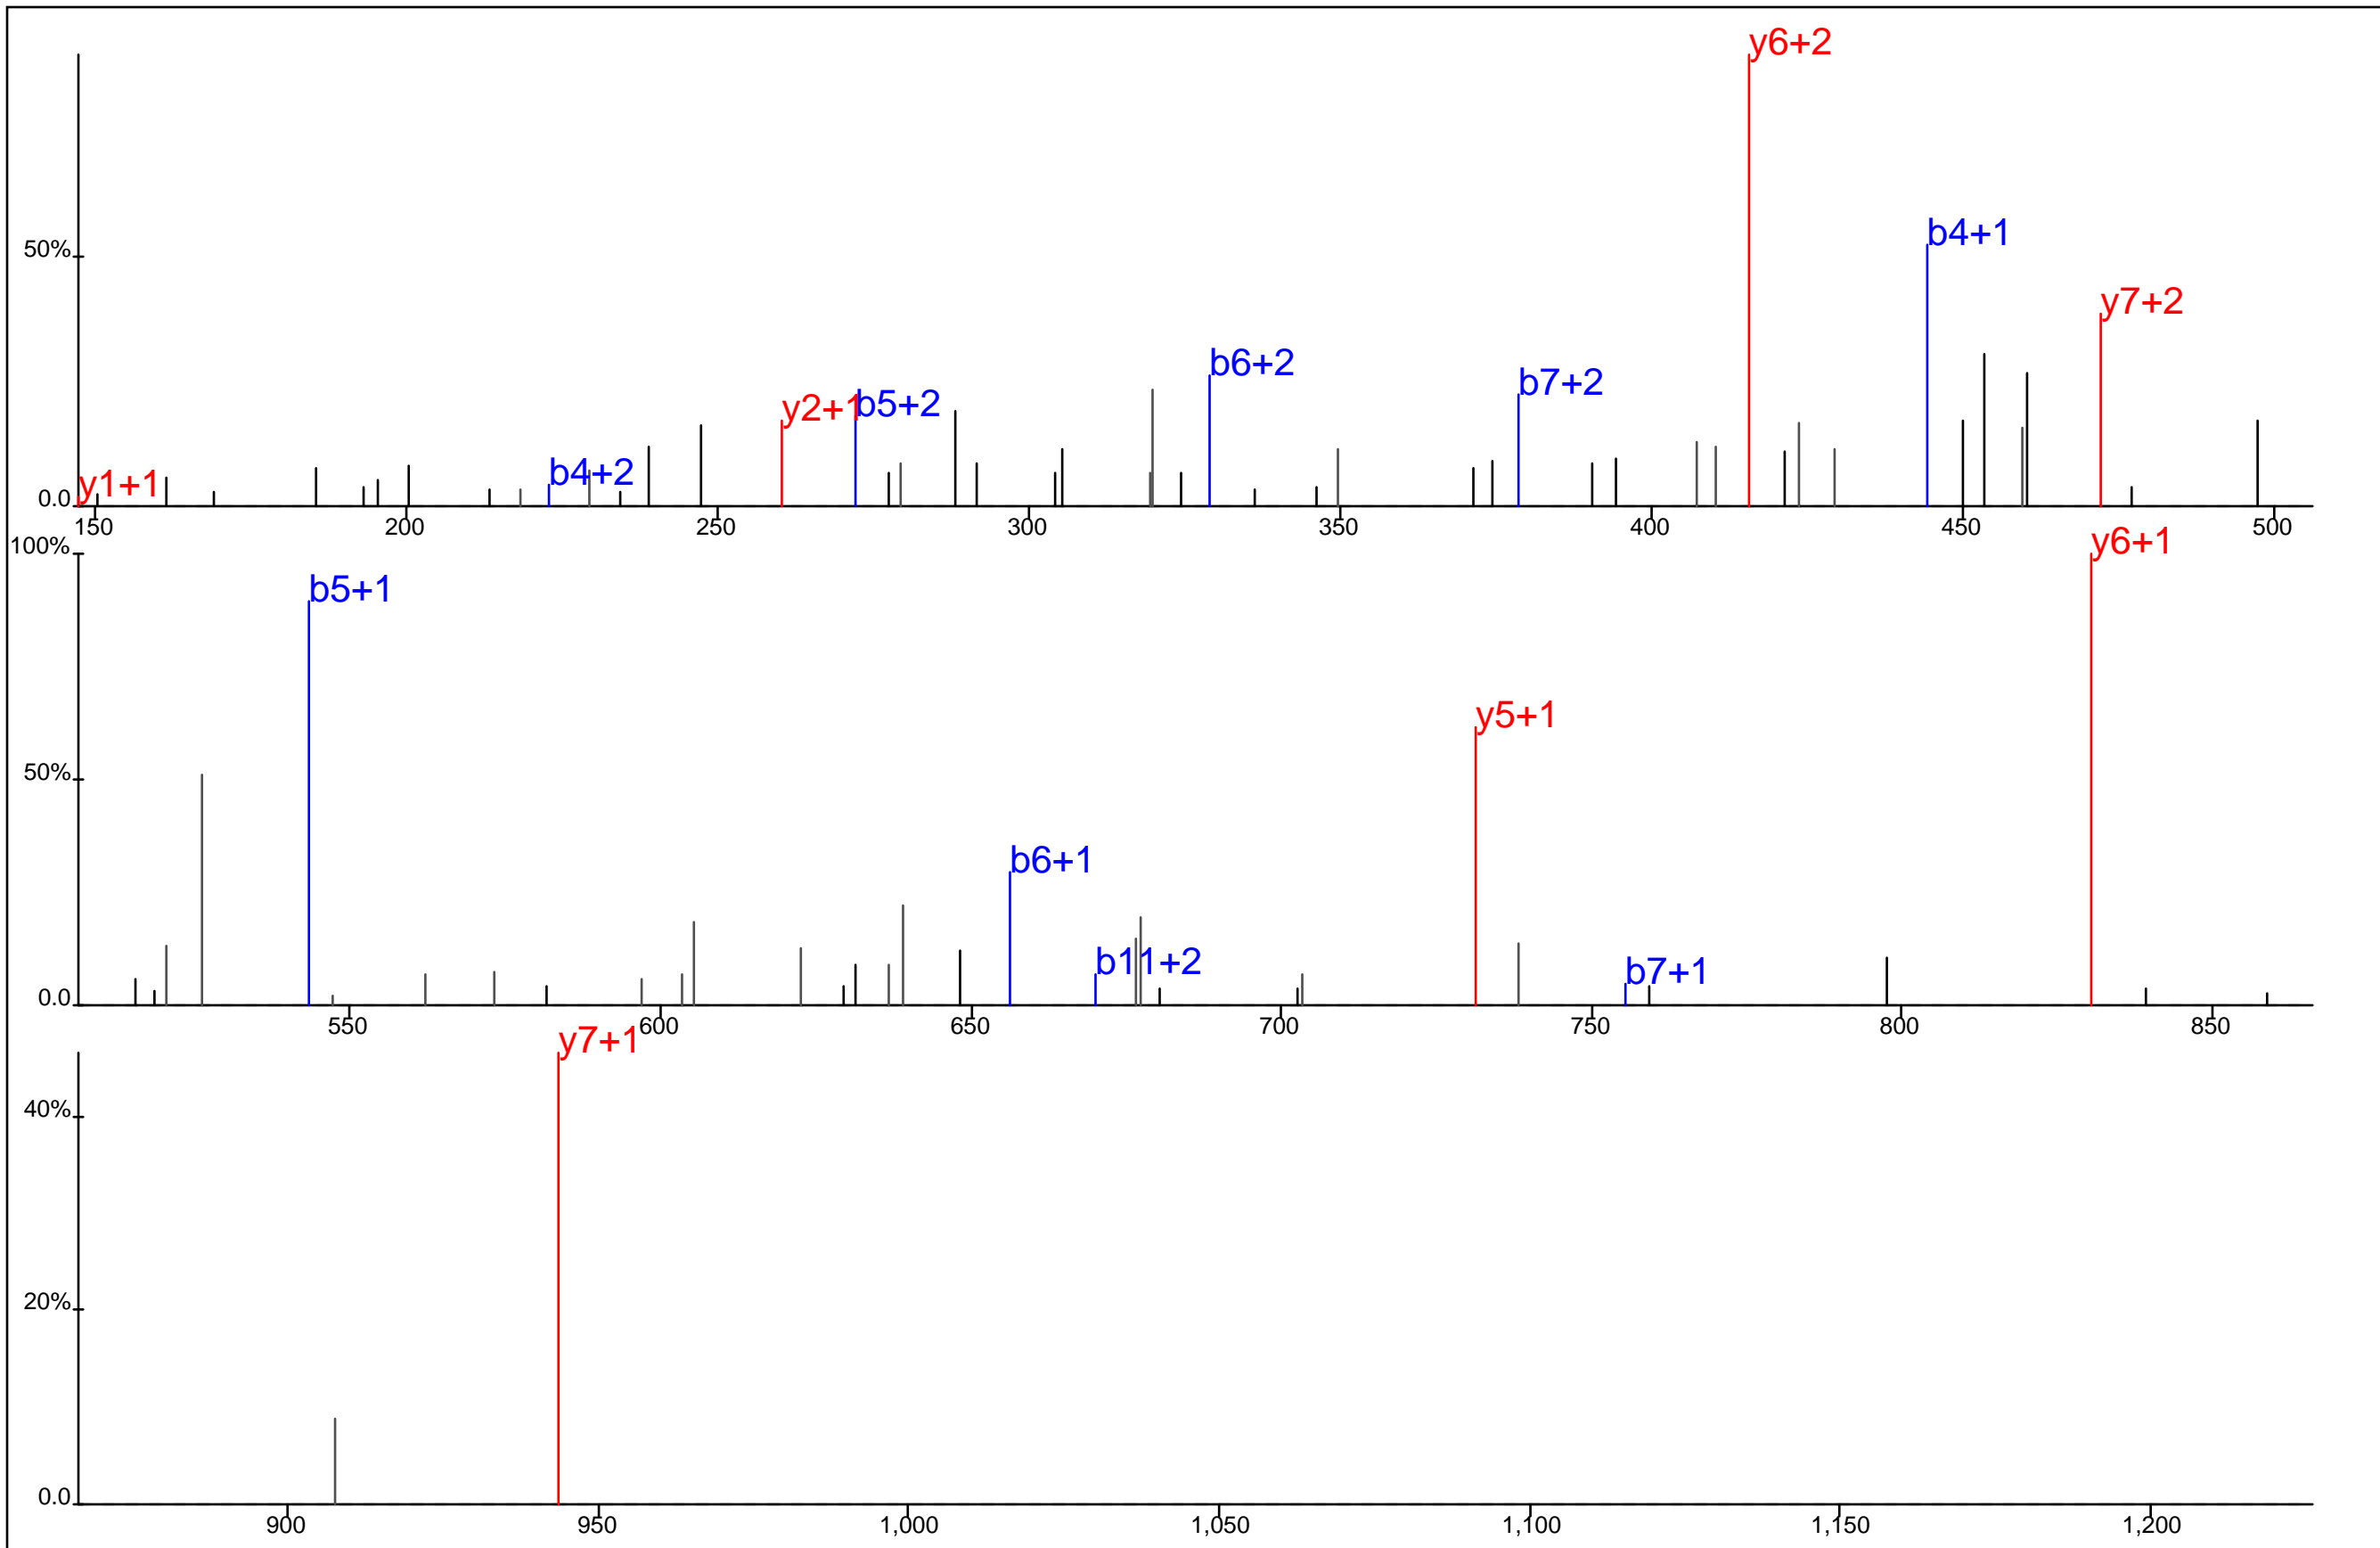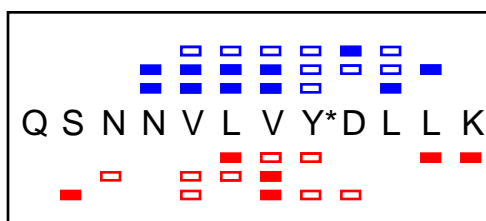

Protein Name: M phase phosphoprotein, mpp8  
 gi Accession: 0  
 Precursor Mass: 495.9165+3  
 Delta Mass: 0.066 ppm  
 XCorr: 27.01





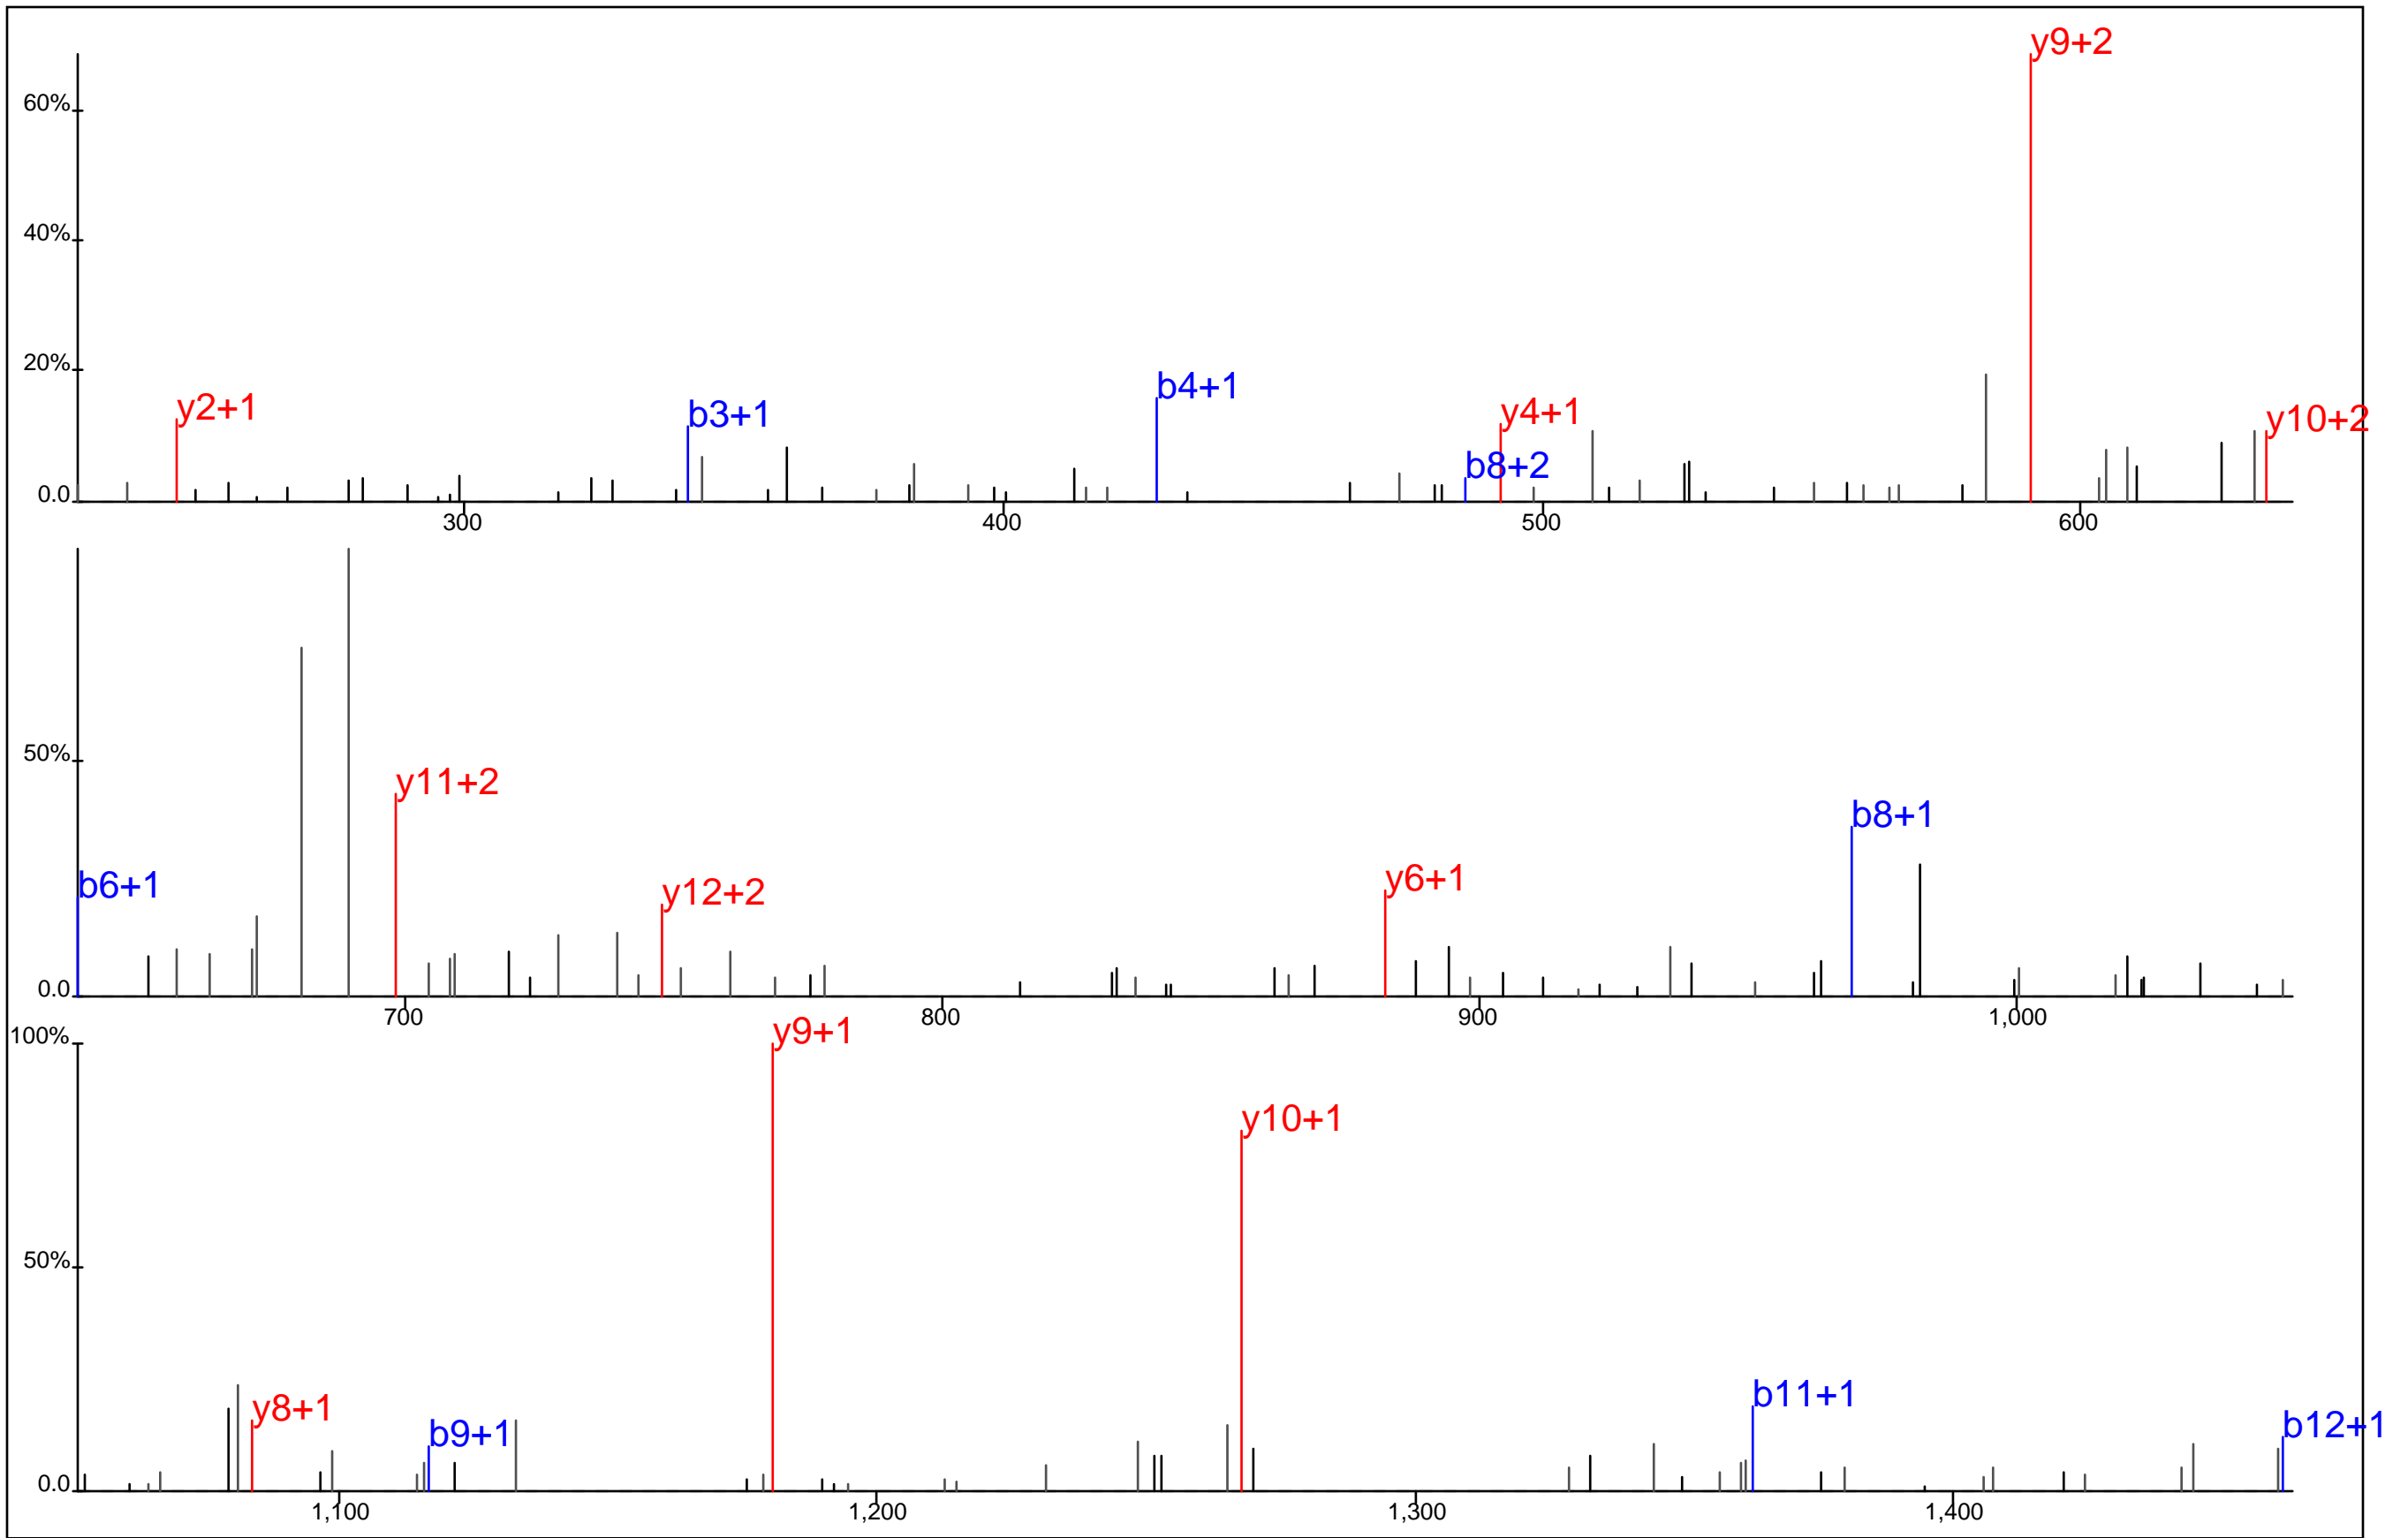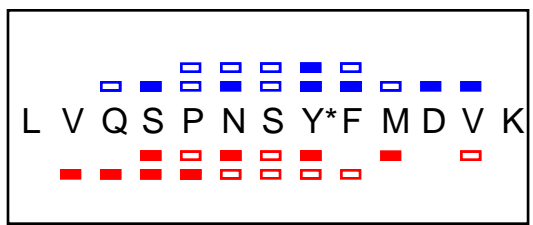

Protein Name: MPS1  
 gi Accession: 0  
 Precursor Mass: 804.3594+2  
 Delta Mass: 3.680 ppm  
 XCorr: 47.36

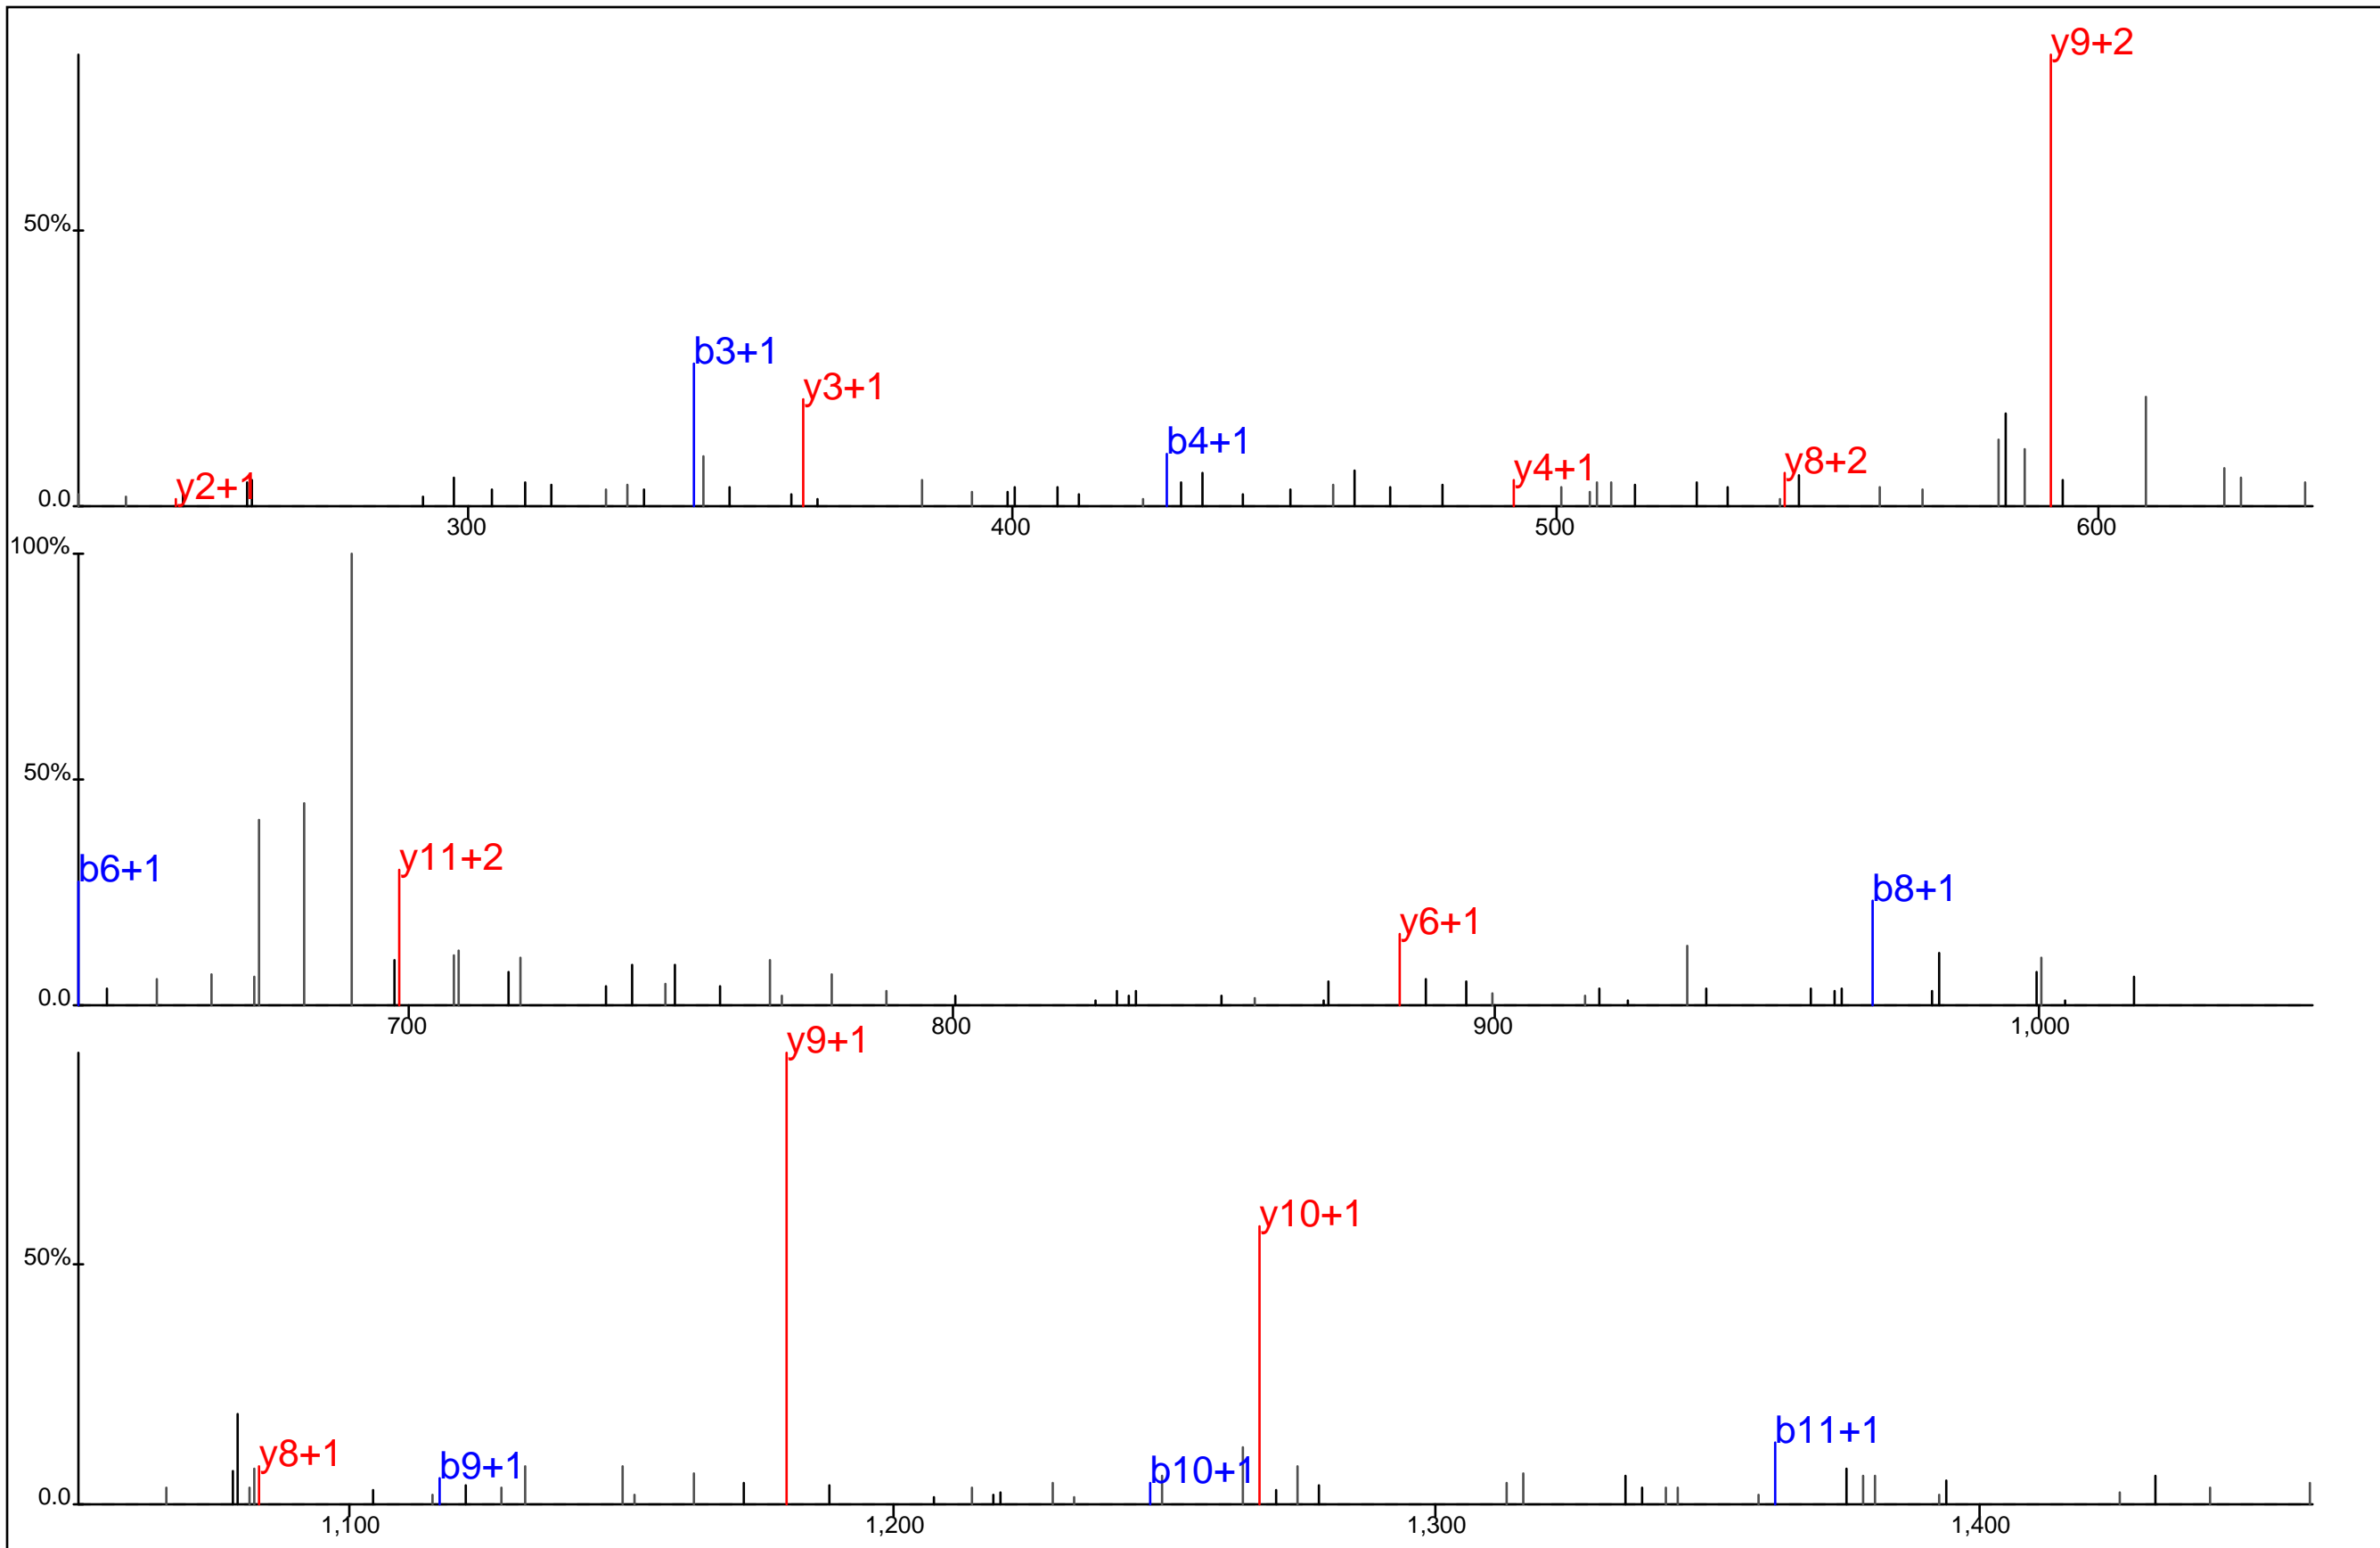

■ ■ ■ ■ ■ ■ ■ ■ ■ ■  
 L V Q S P N S Y\*F M D V K  
■ ■ ■ ■ ■ ■ ■ ■ ■ ■

Protein Name: MPS1  
 gi Accession: 0  
 Precursor Mass: 804.3616+2  
 Delta Mass: 1.023 ppm  
 XCorr: 28.91







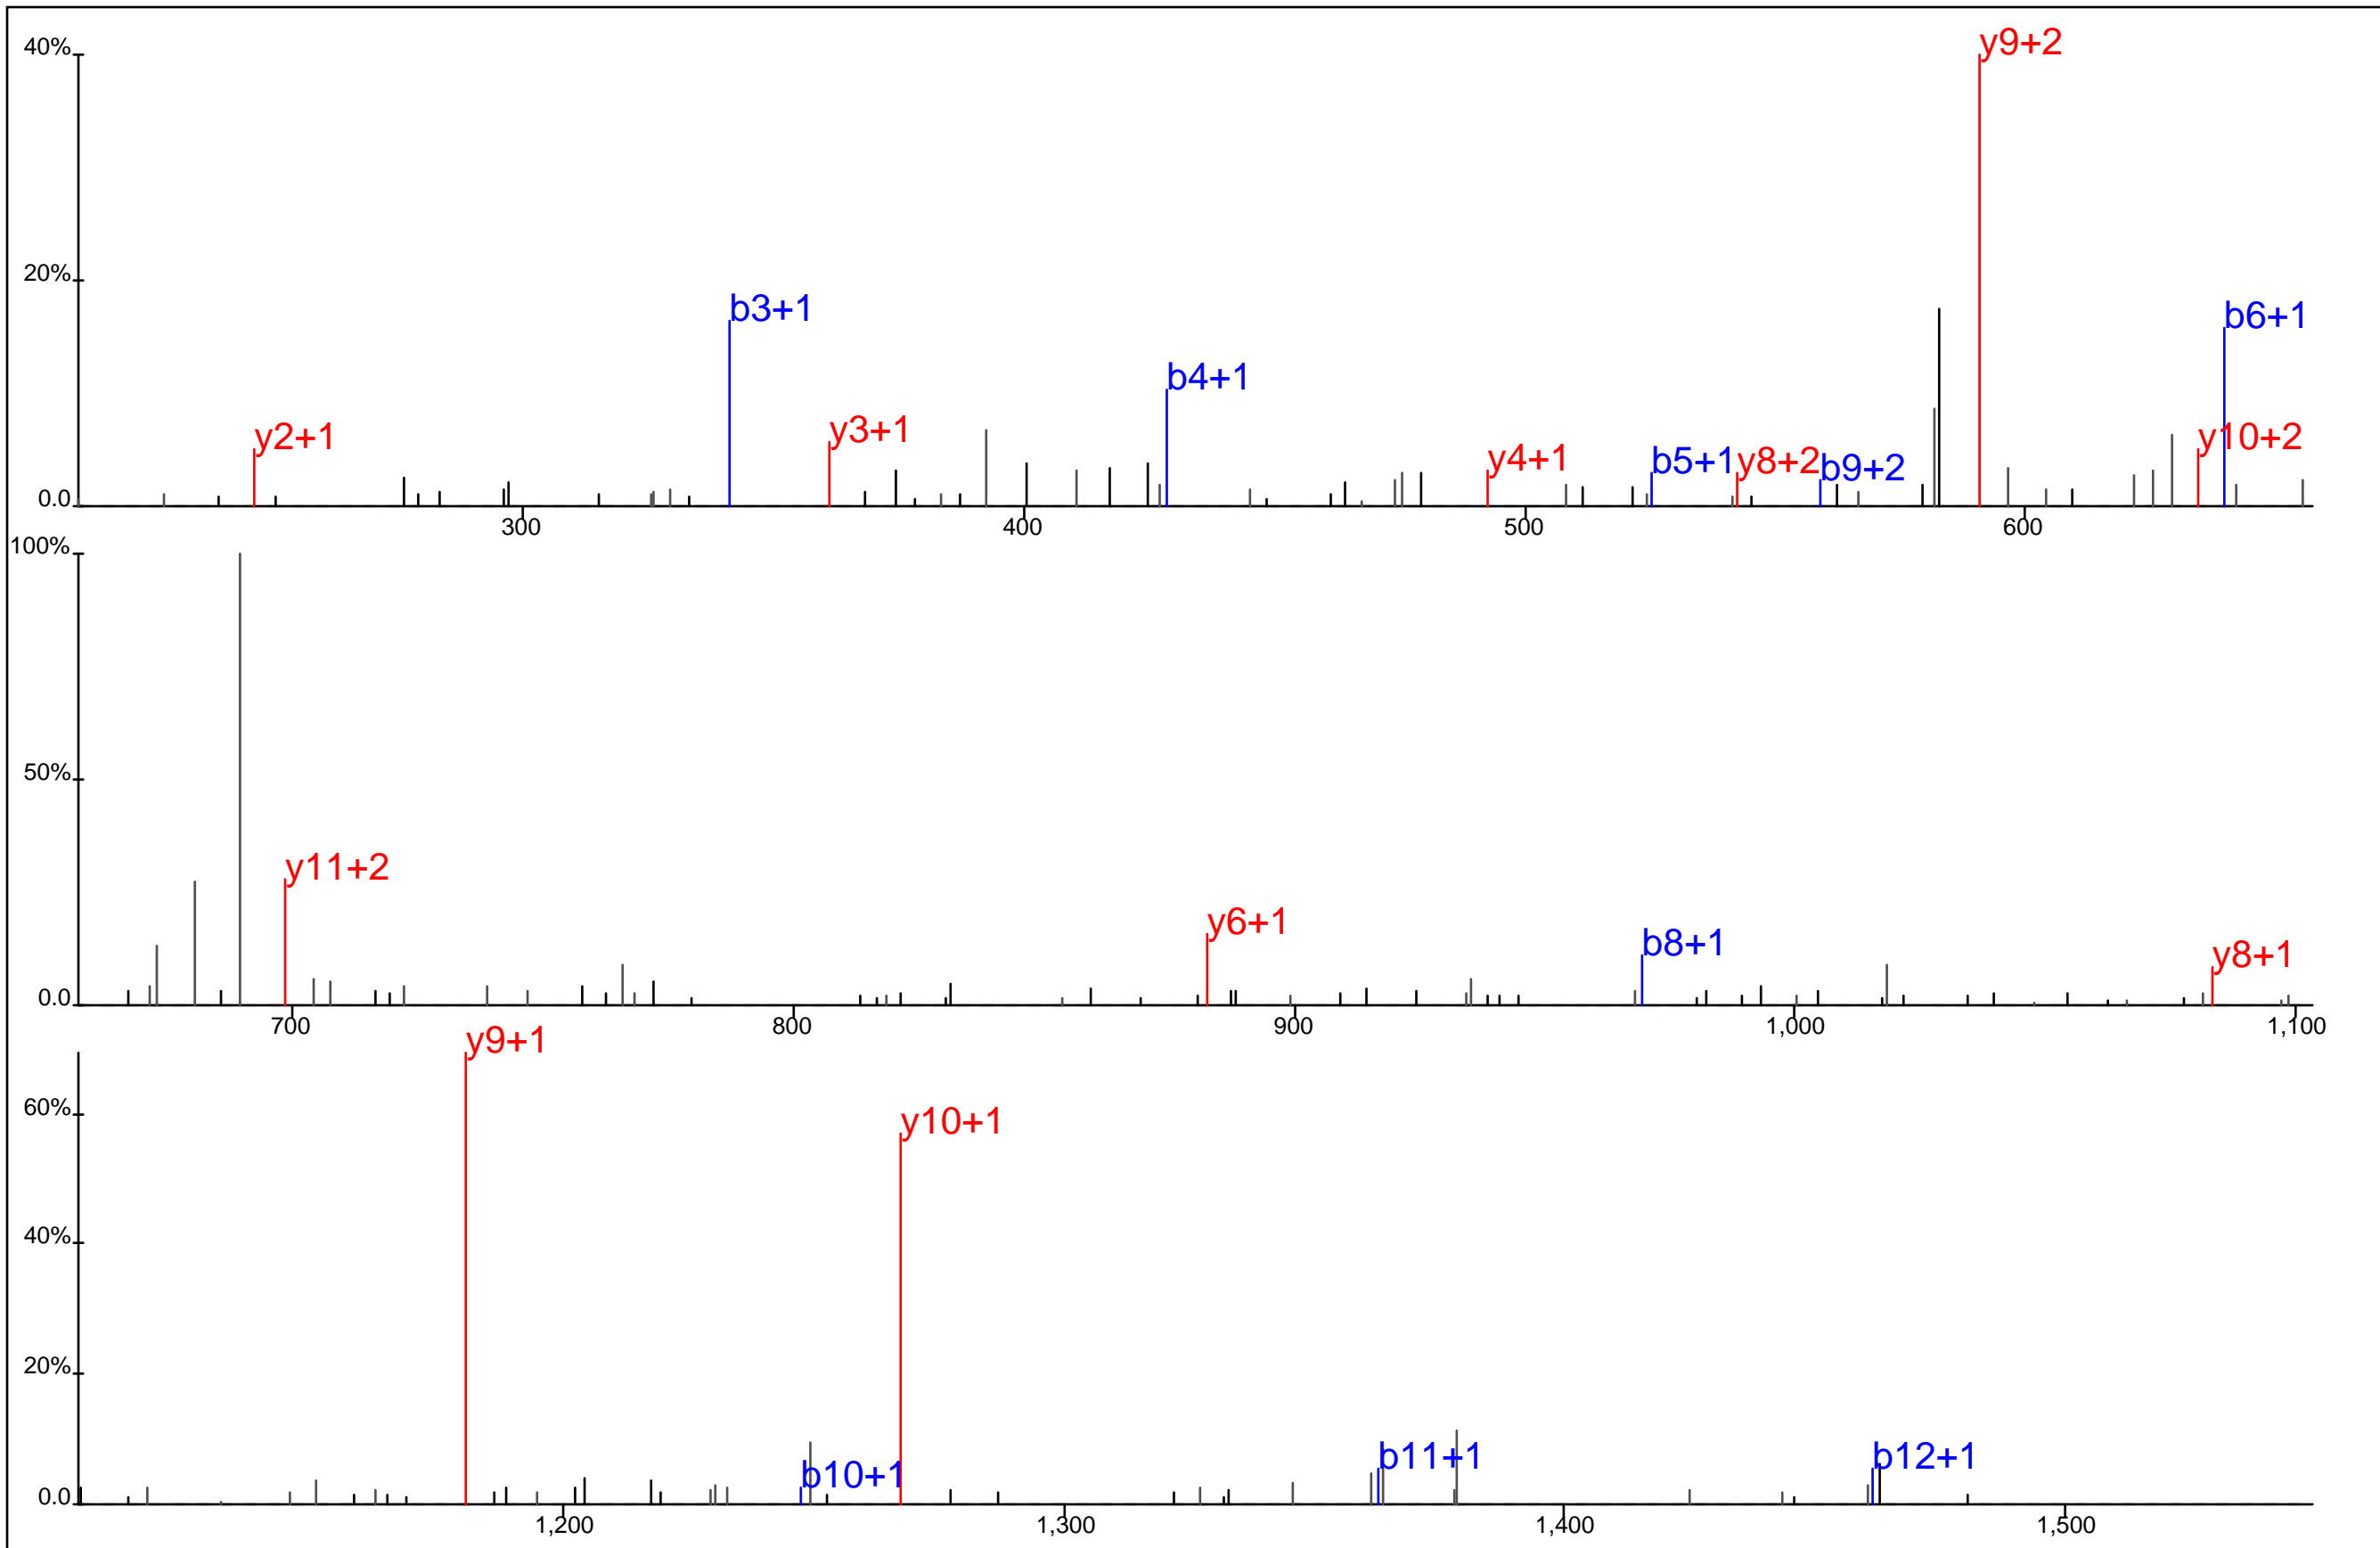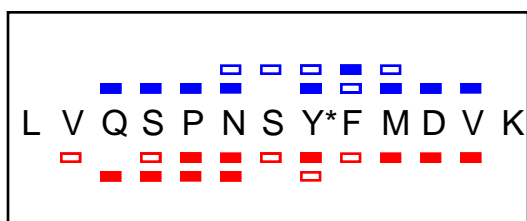

Protein Name: MPS1  
 gi Accession: 0  
 Precursor Mass: 804.3606+2  
 Delta Mass: 2.237 ppm  
 XCorr: 40.04

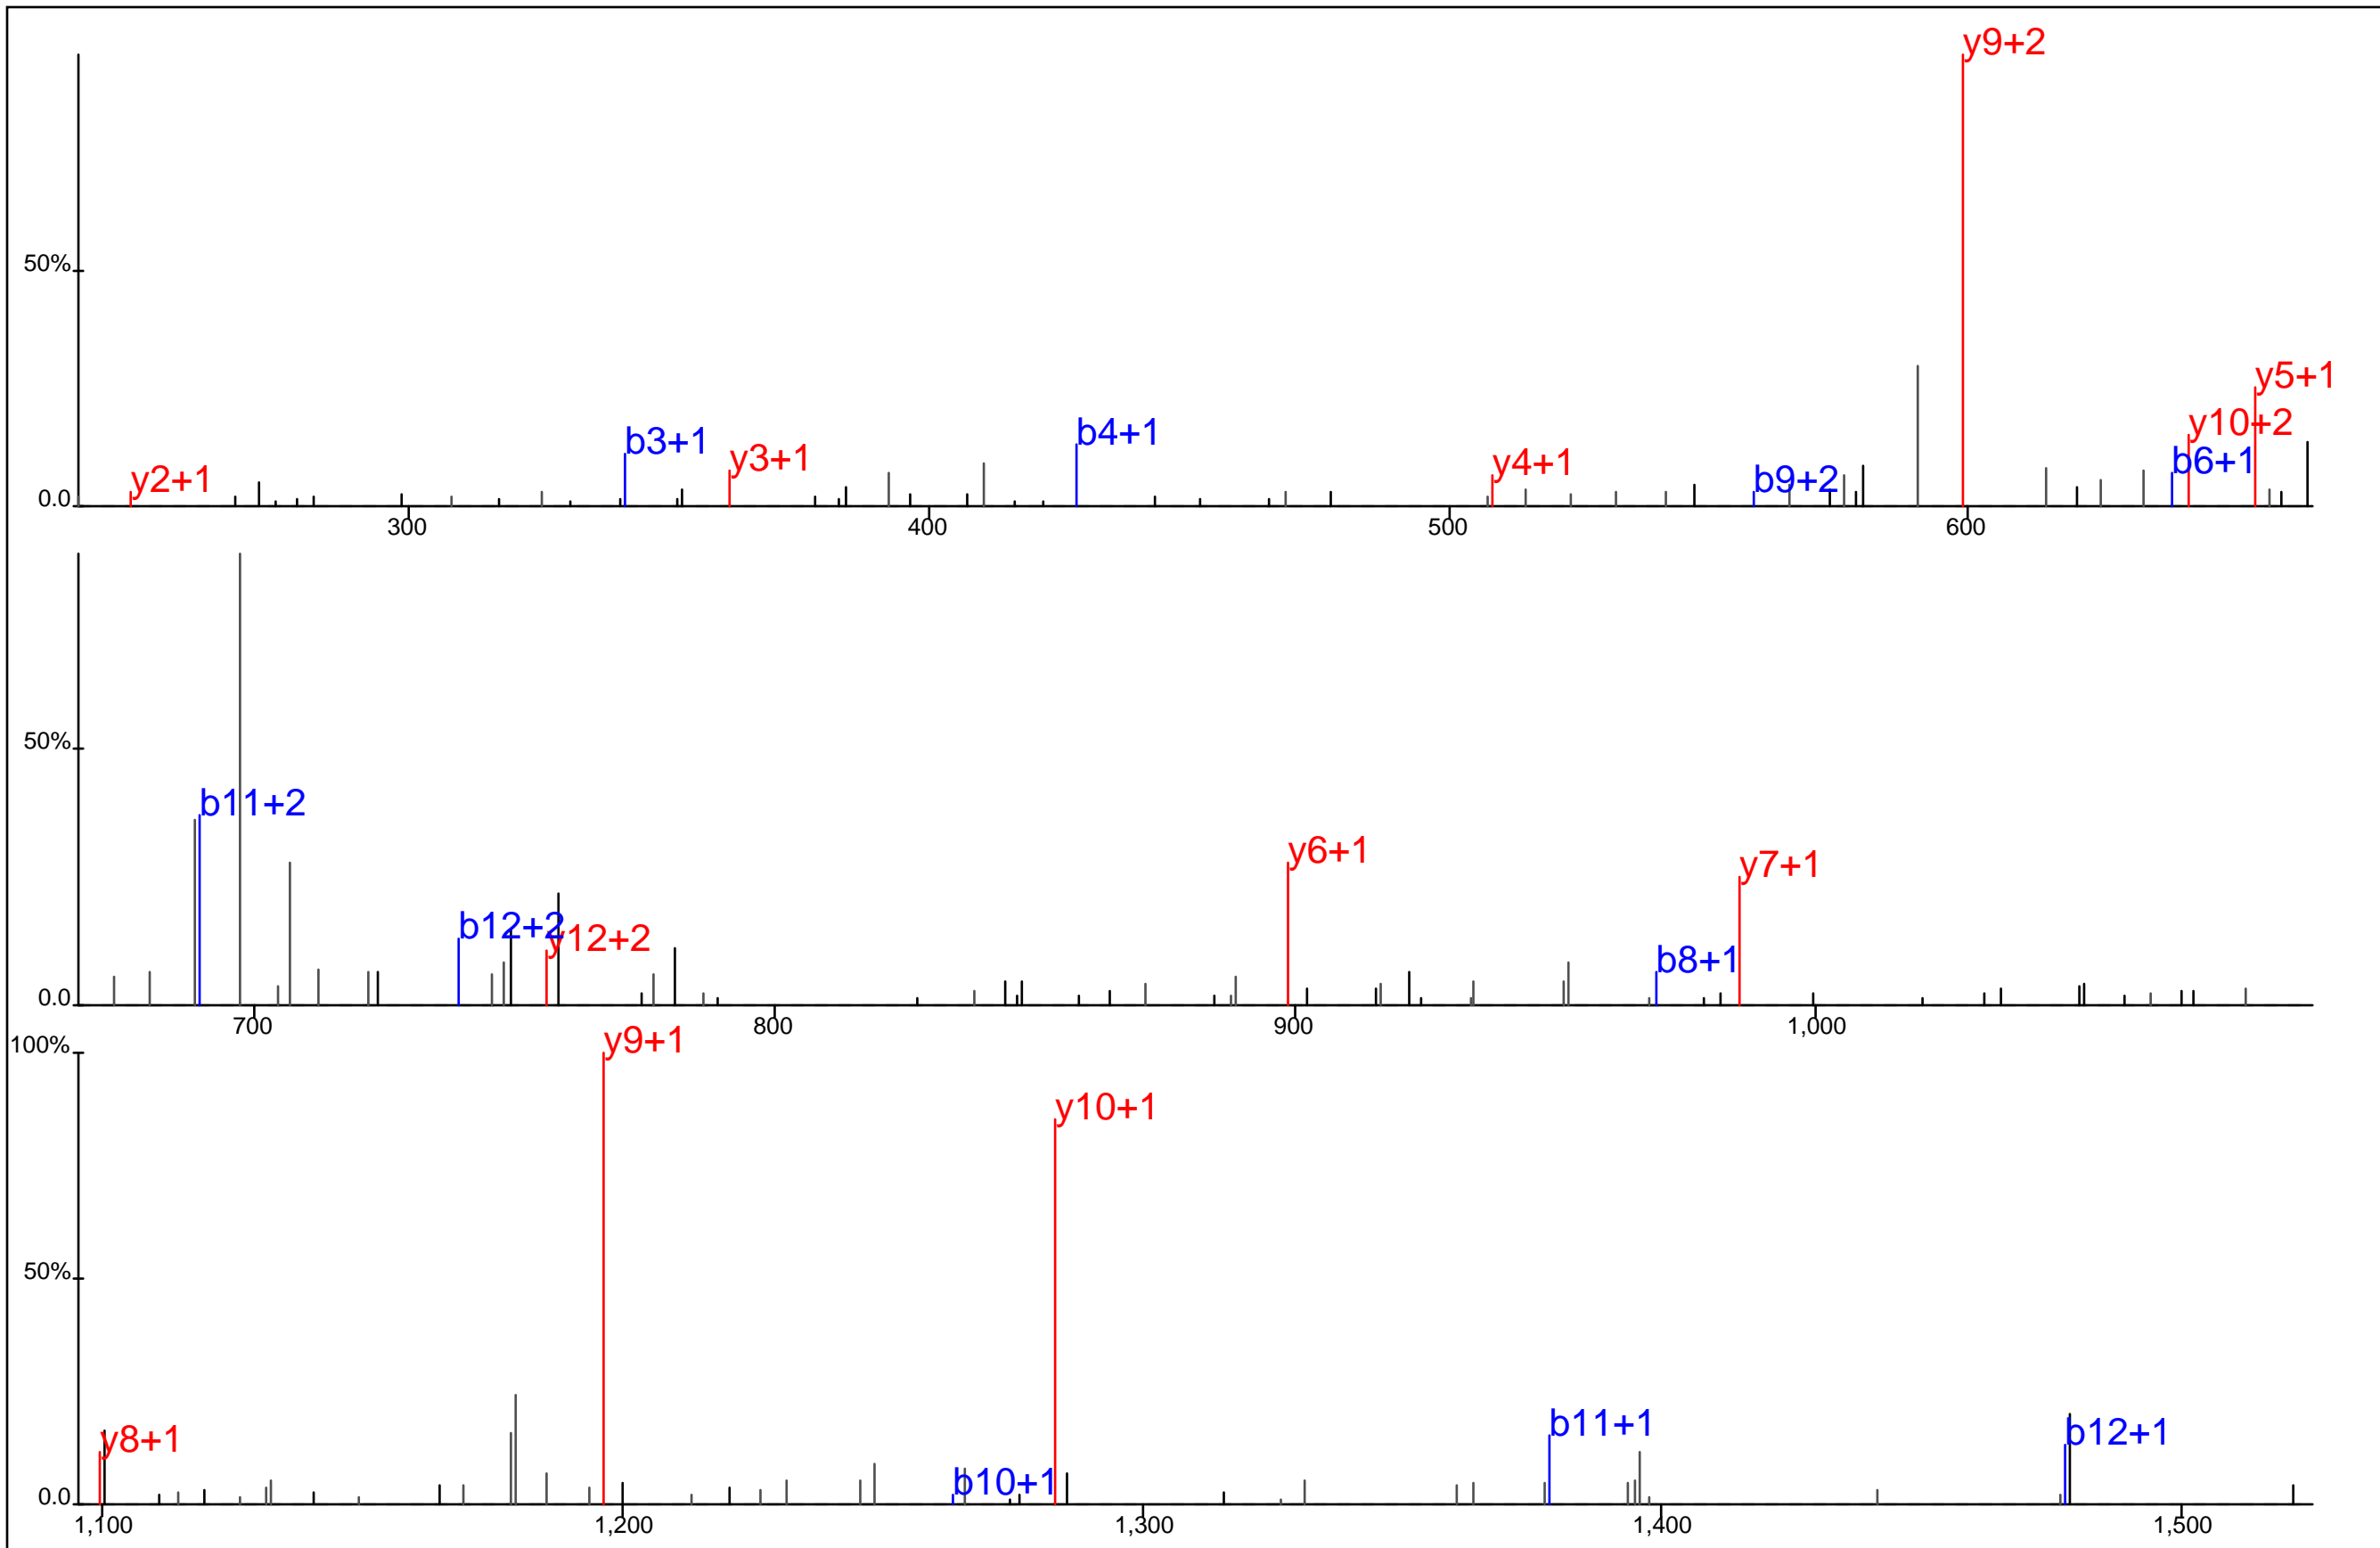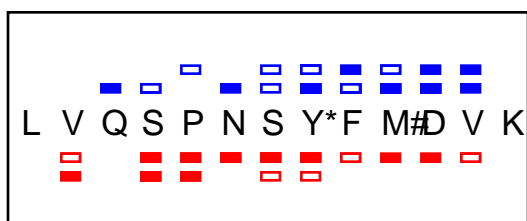

Protein Name: MPS1  
 gi Accession: 0  
 Precursor Mass: 812.3607+2  
 Delta Mass: 0.989 ppm  
 XCorr: 42.32

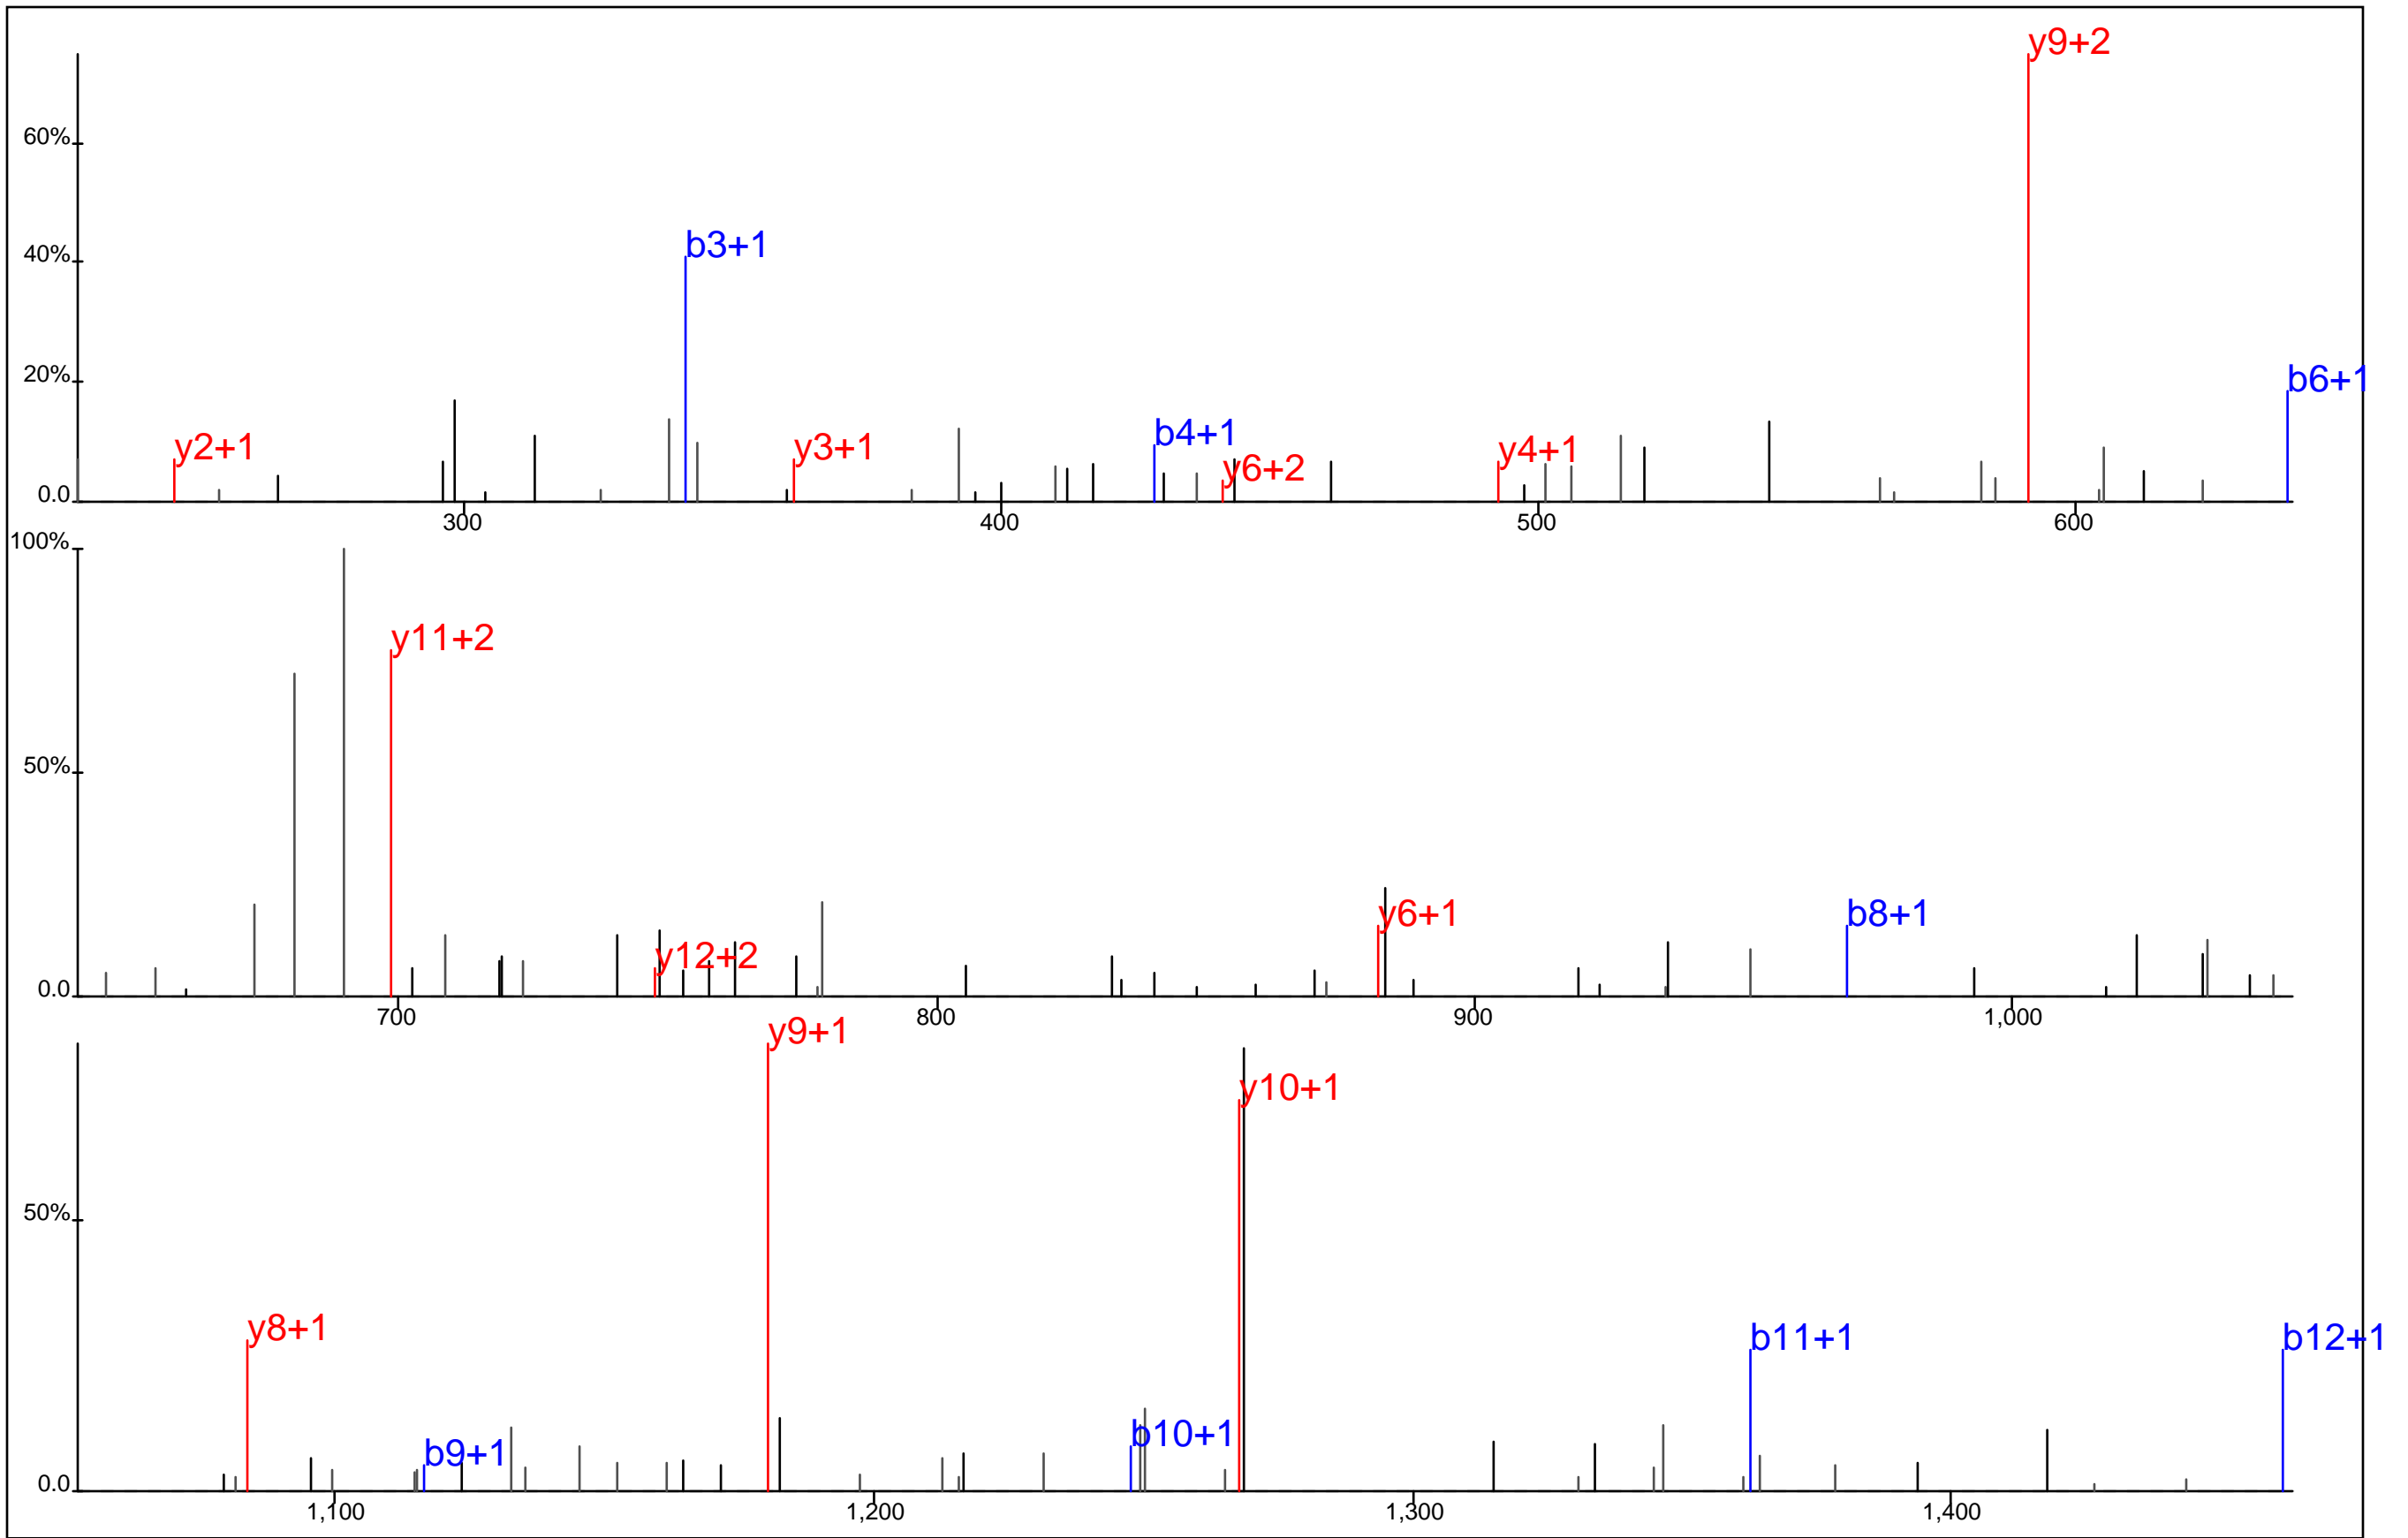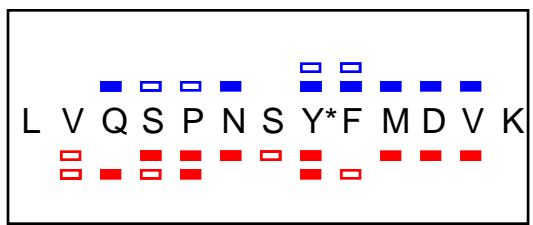

Protein Name: MPS1  
 gi Accession: 0  
 Precursor Mass: 804.3614+2  
 Delta Mass: 1.250 ppm  
 XCorr: 31.57

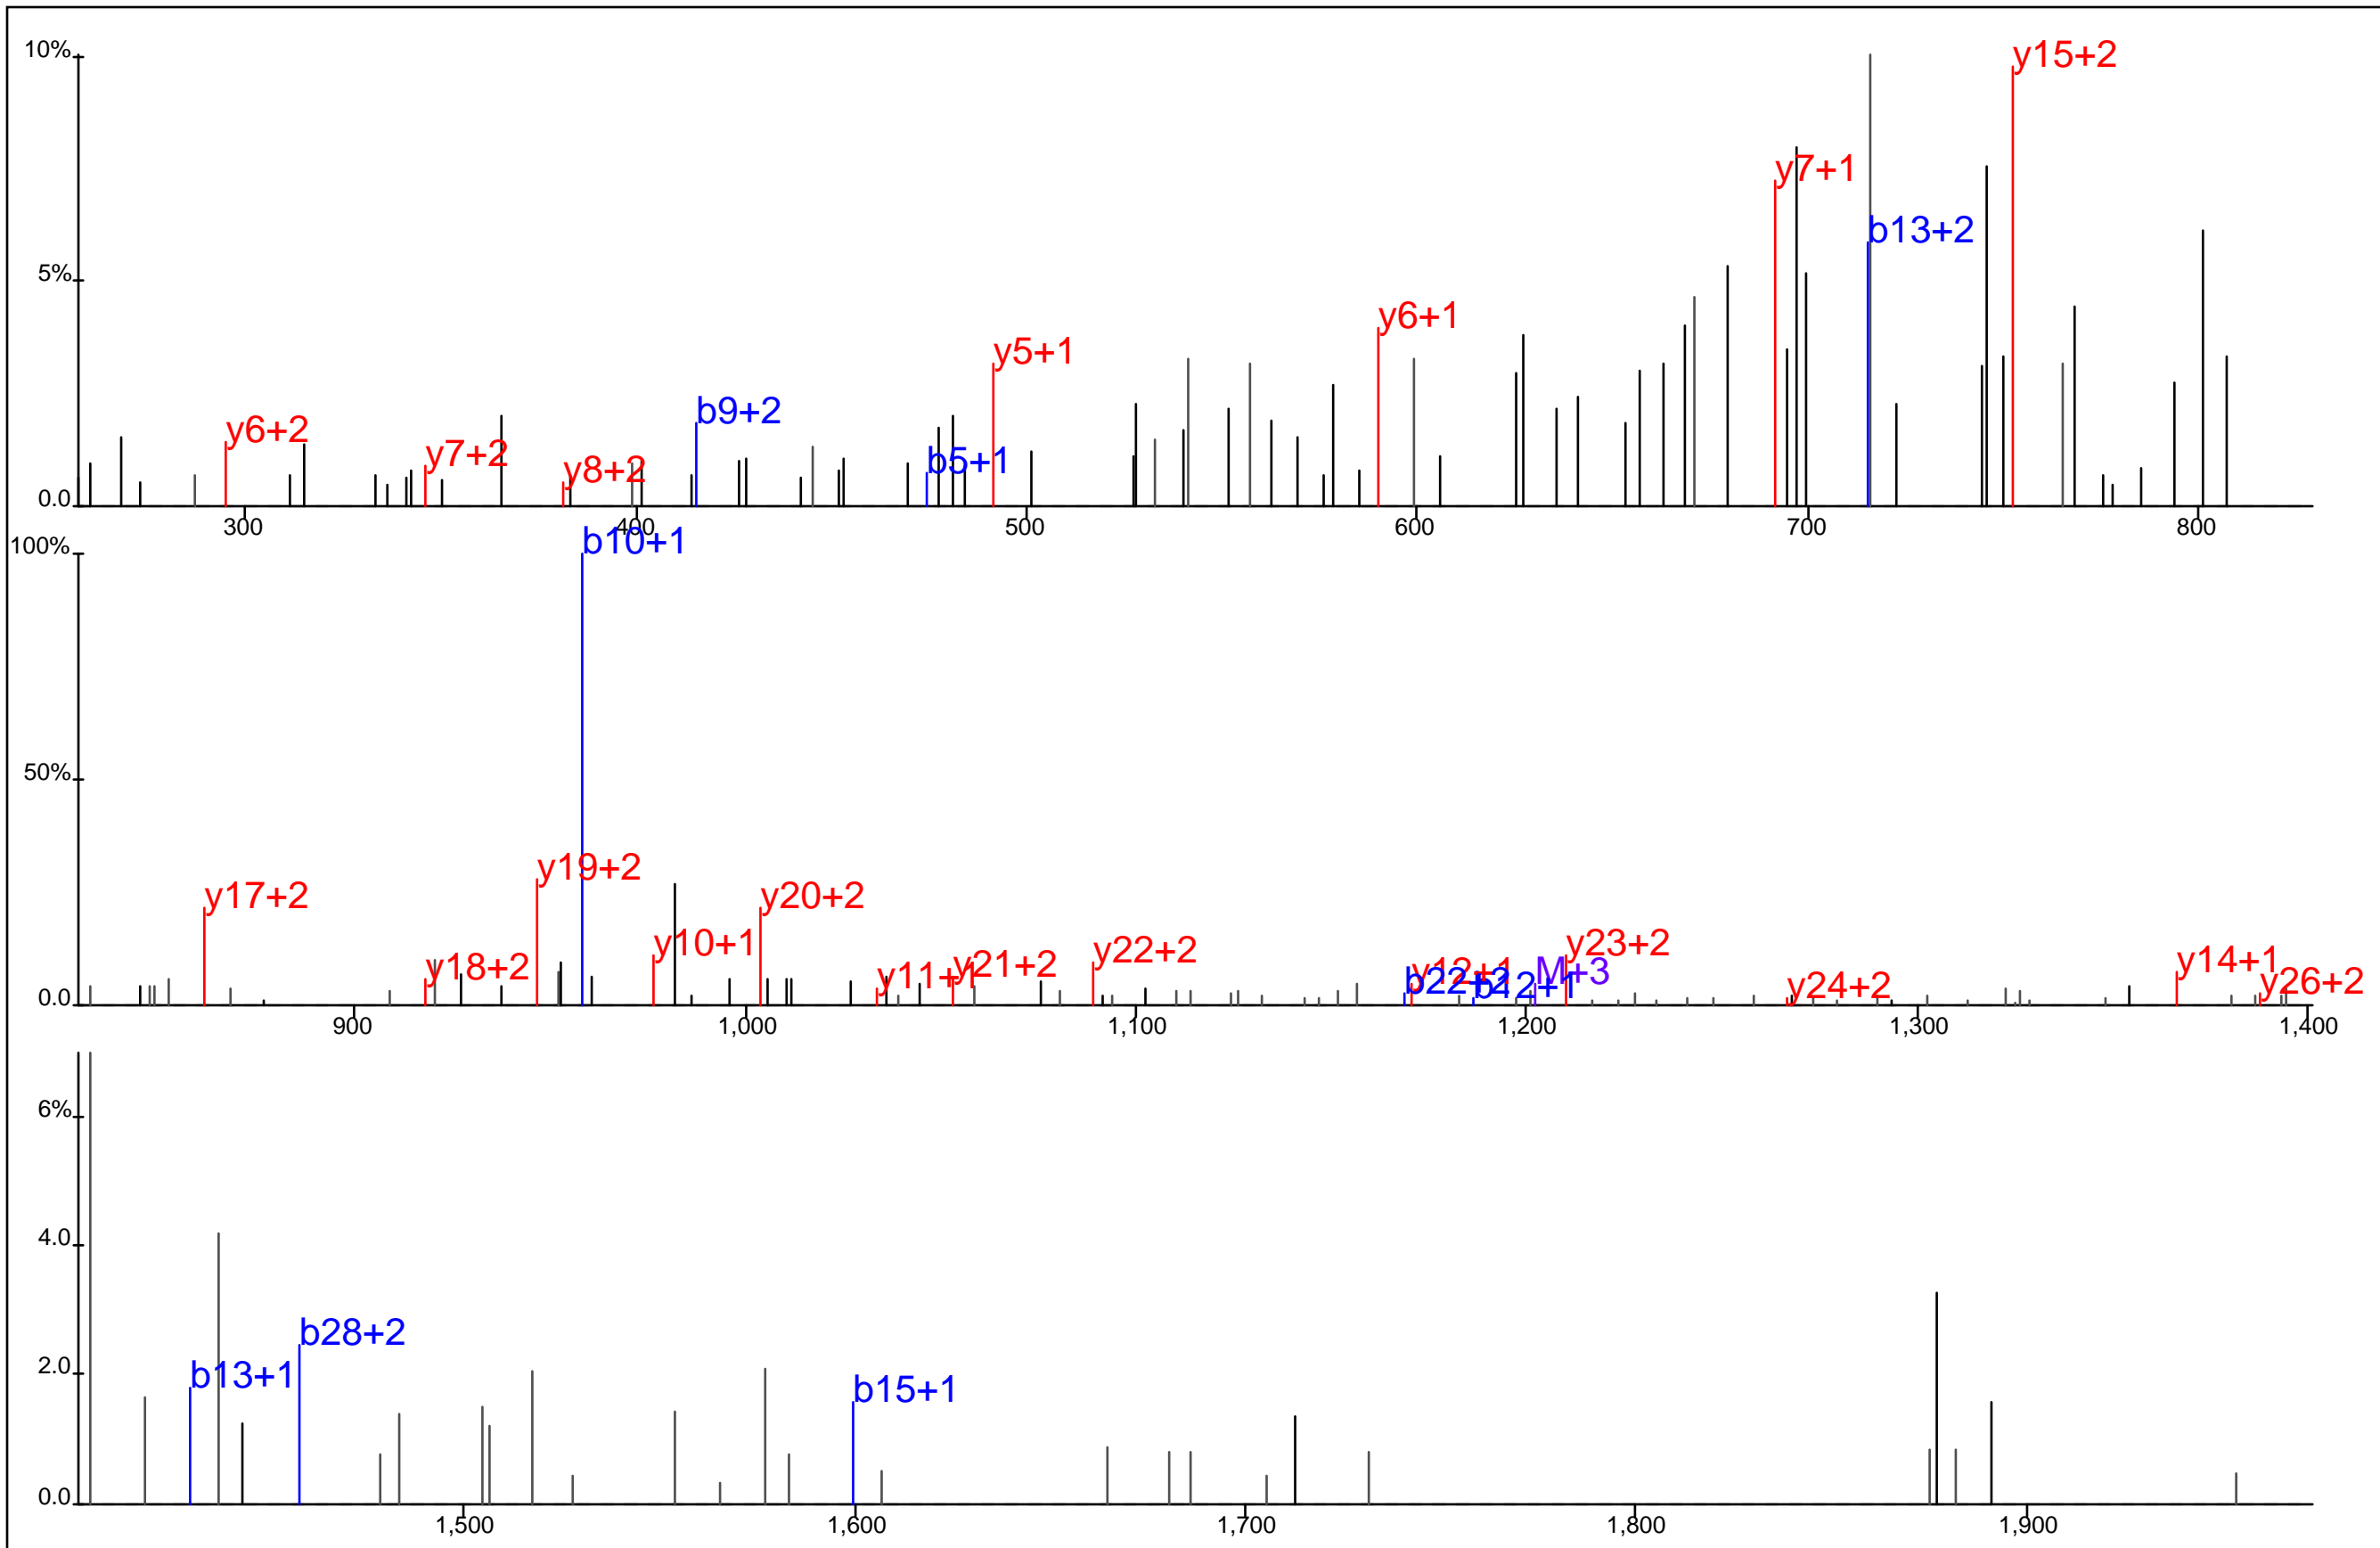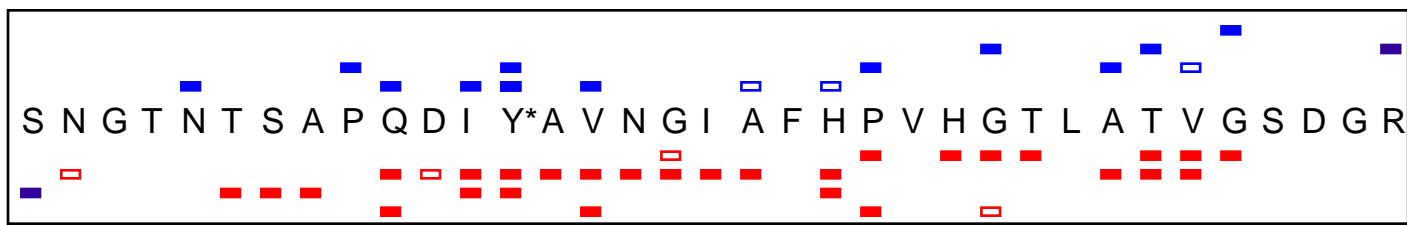

Protein Name: MRNP41  
 gi Accession: 0  
 Precursor Mass: 901.9245+4  
 Delta Mass: 1.520 ppm  
 XCorr: 21.62

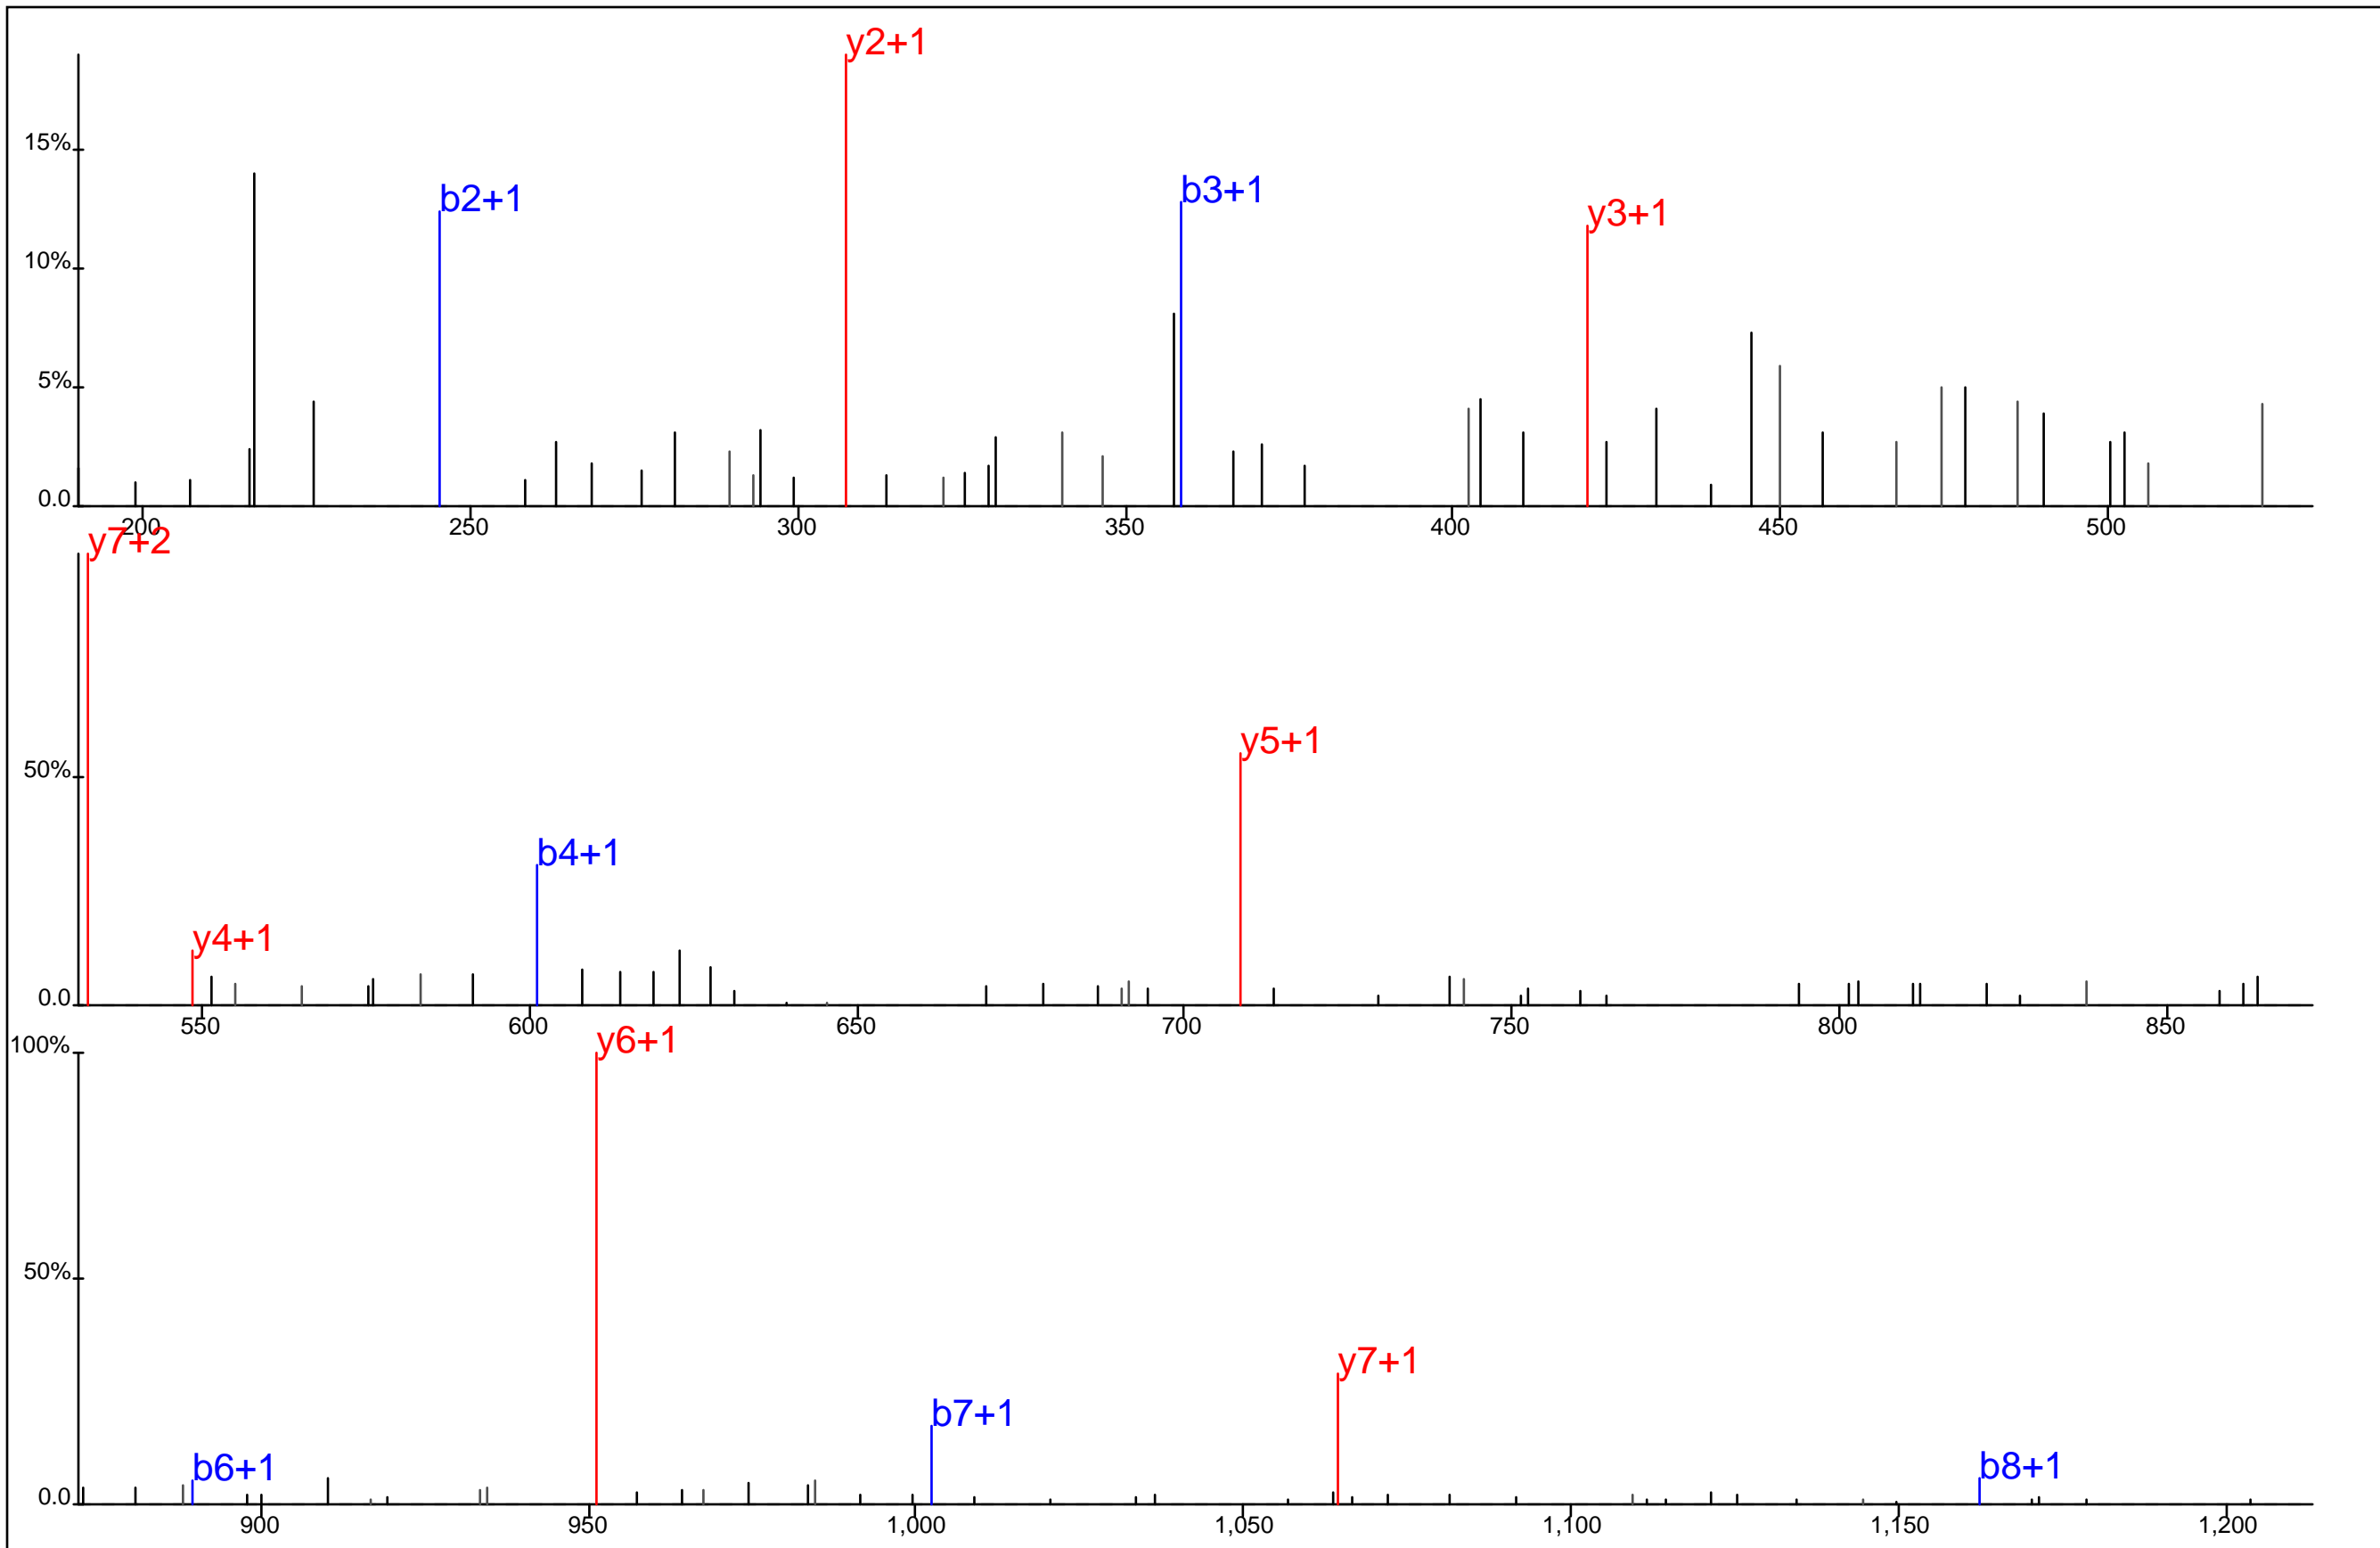

■ ■ ■ ■ ■ ■ ■  
 D E I Y\* C Q I C K  
■ ■ ■ ■ ■ ■ ■

Protein Name: Myosin 7B  
 gi Accession: 0  
 Precursor Mass: 654.7546+2  
 Delta Mass: 1.451 ppm  
 XCorr: 39.74

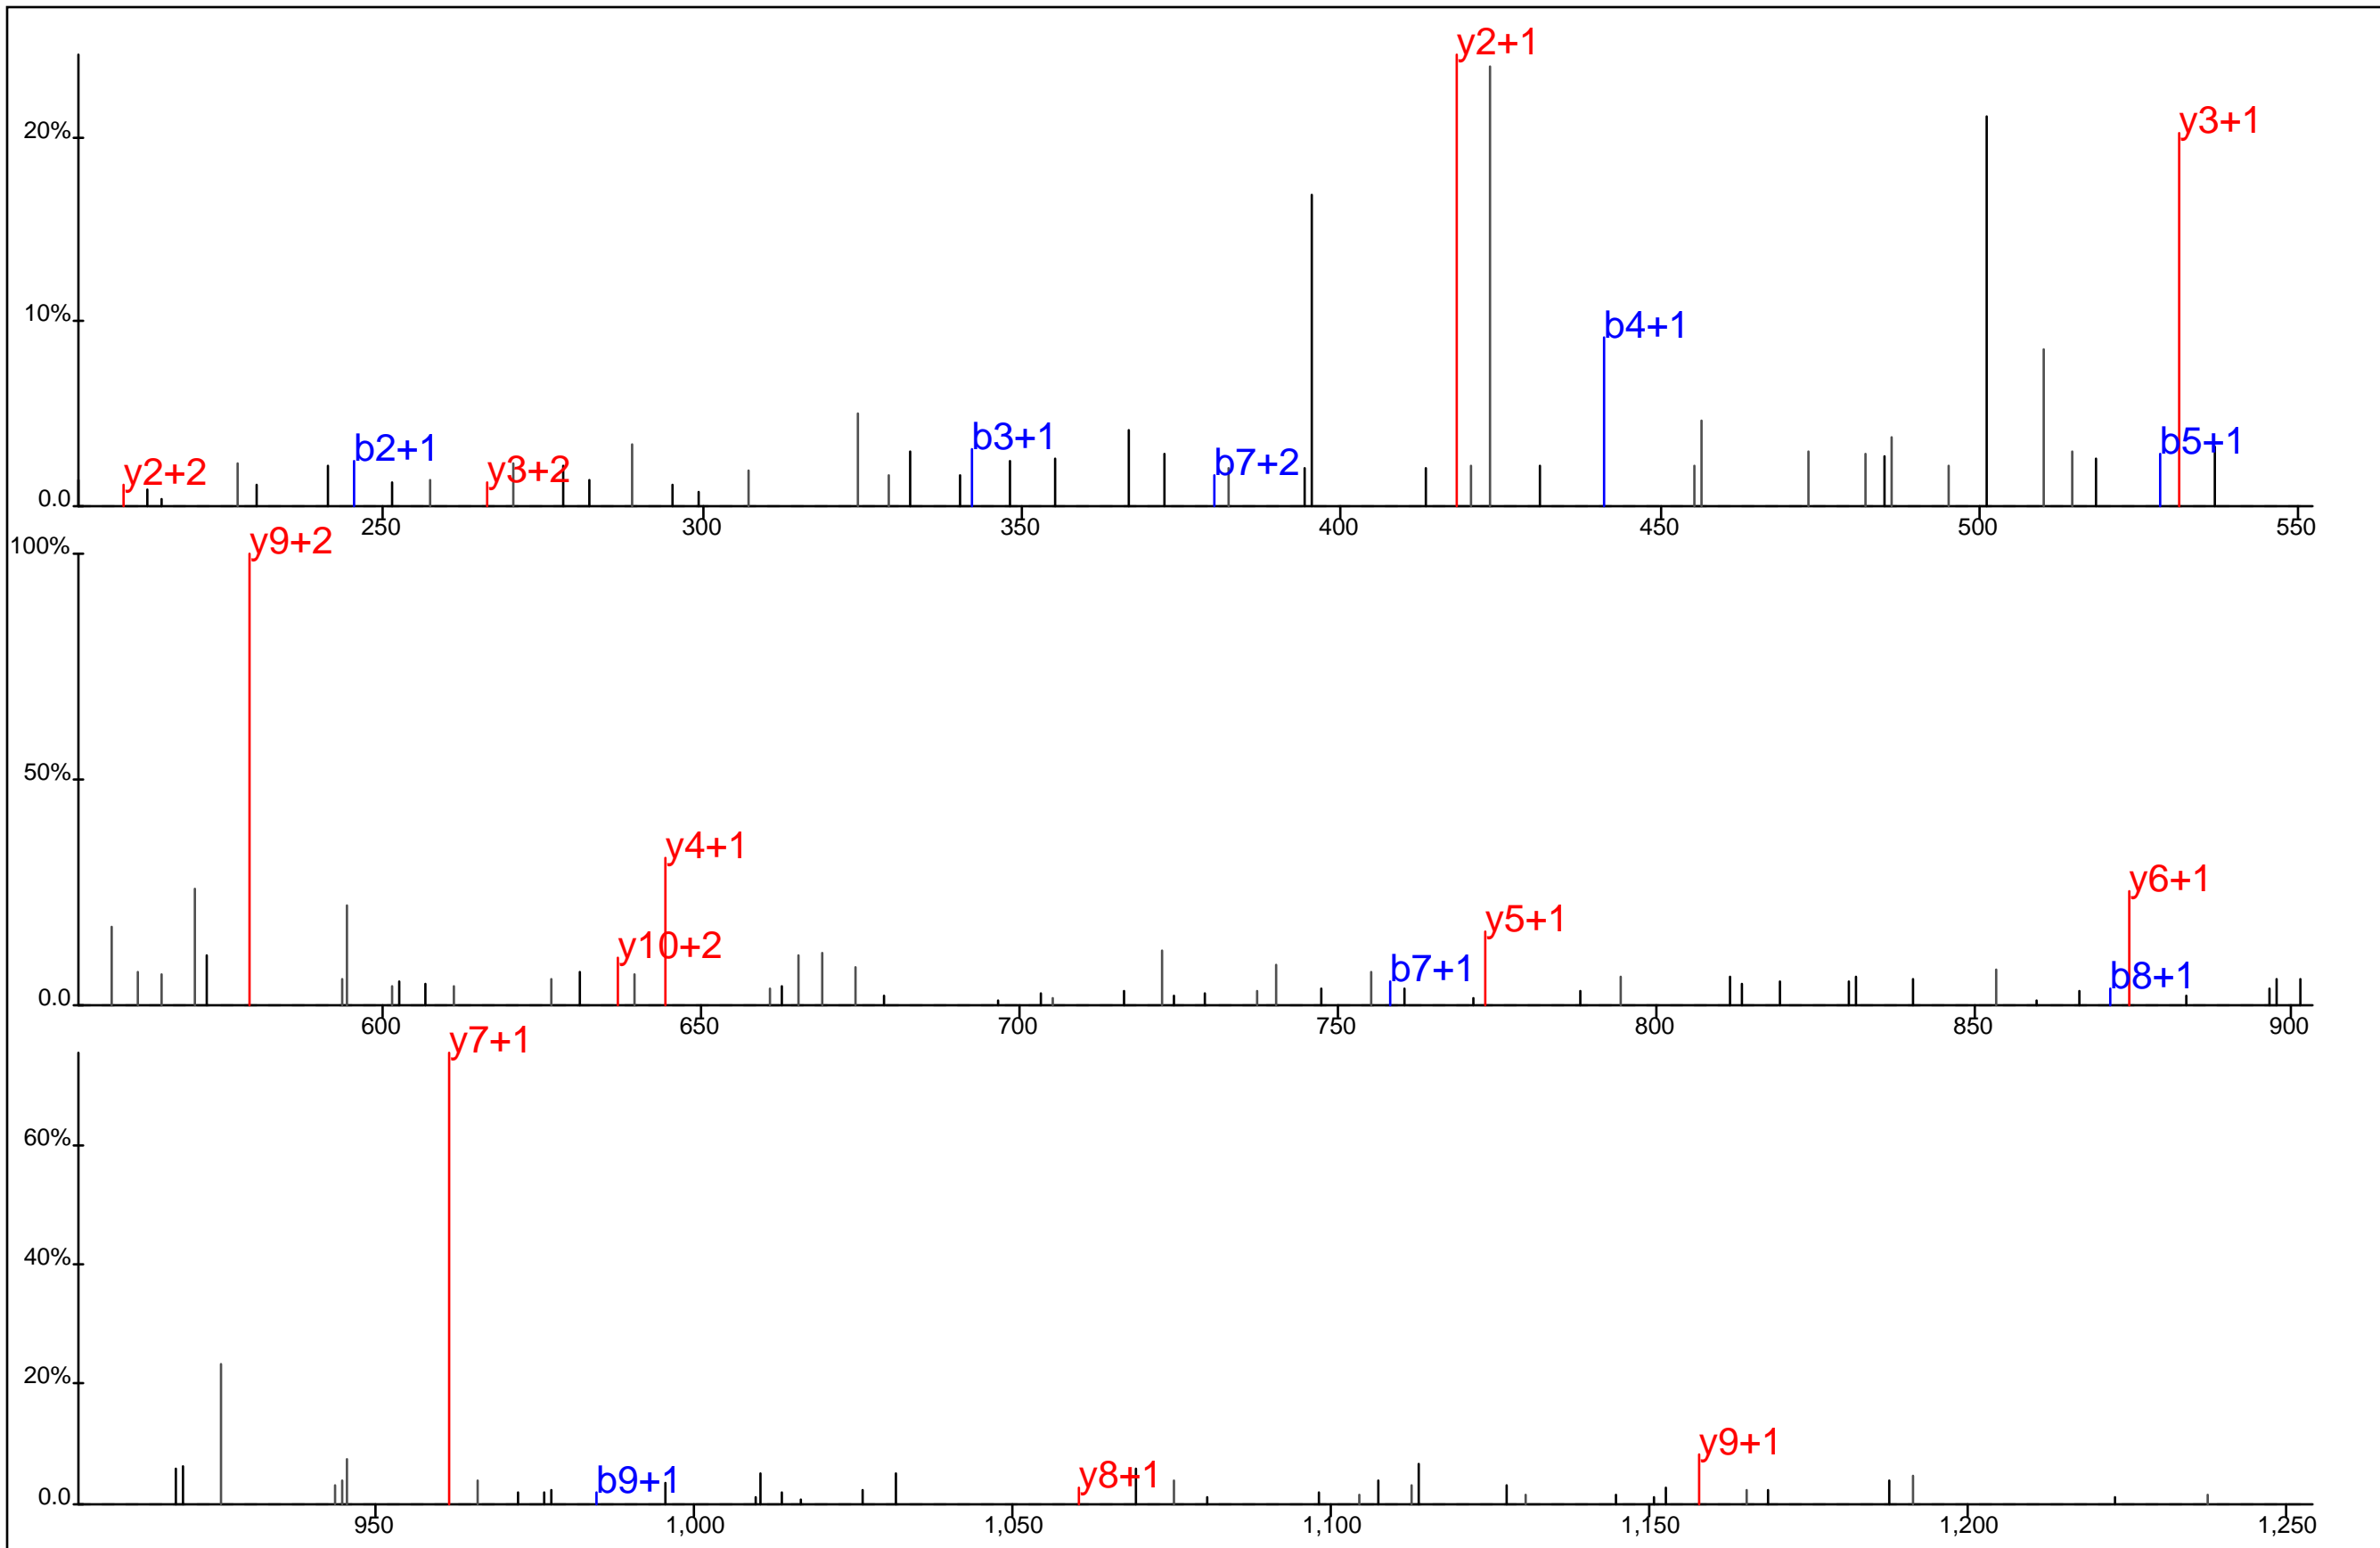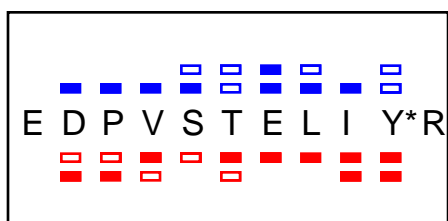

Protein Name: Myosin 7B  
 gi Accession: 0  
 Precursor Mass: 701.3163+2  
 Delta Mass: 3.168 ppm  
 XCorr: 40.99

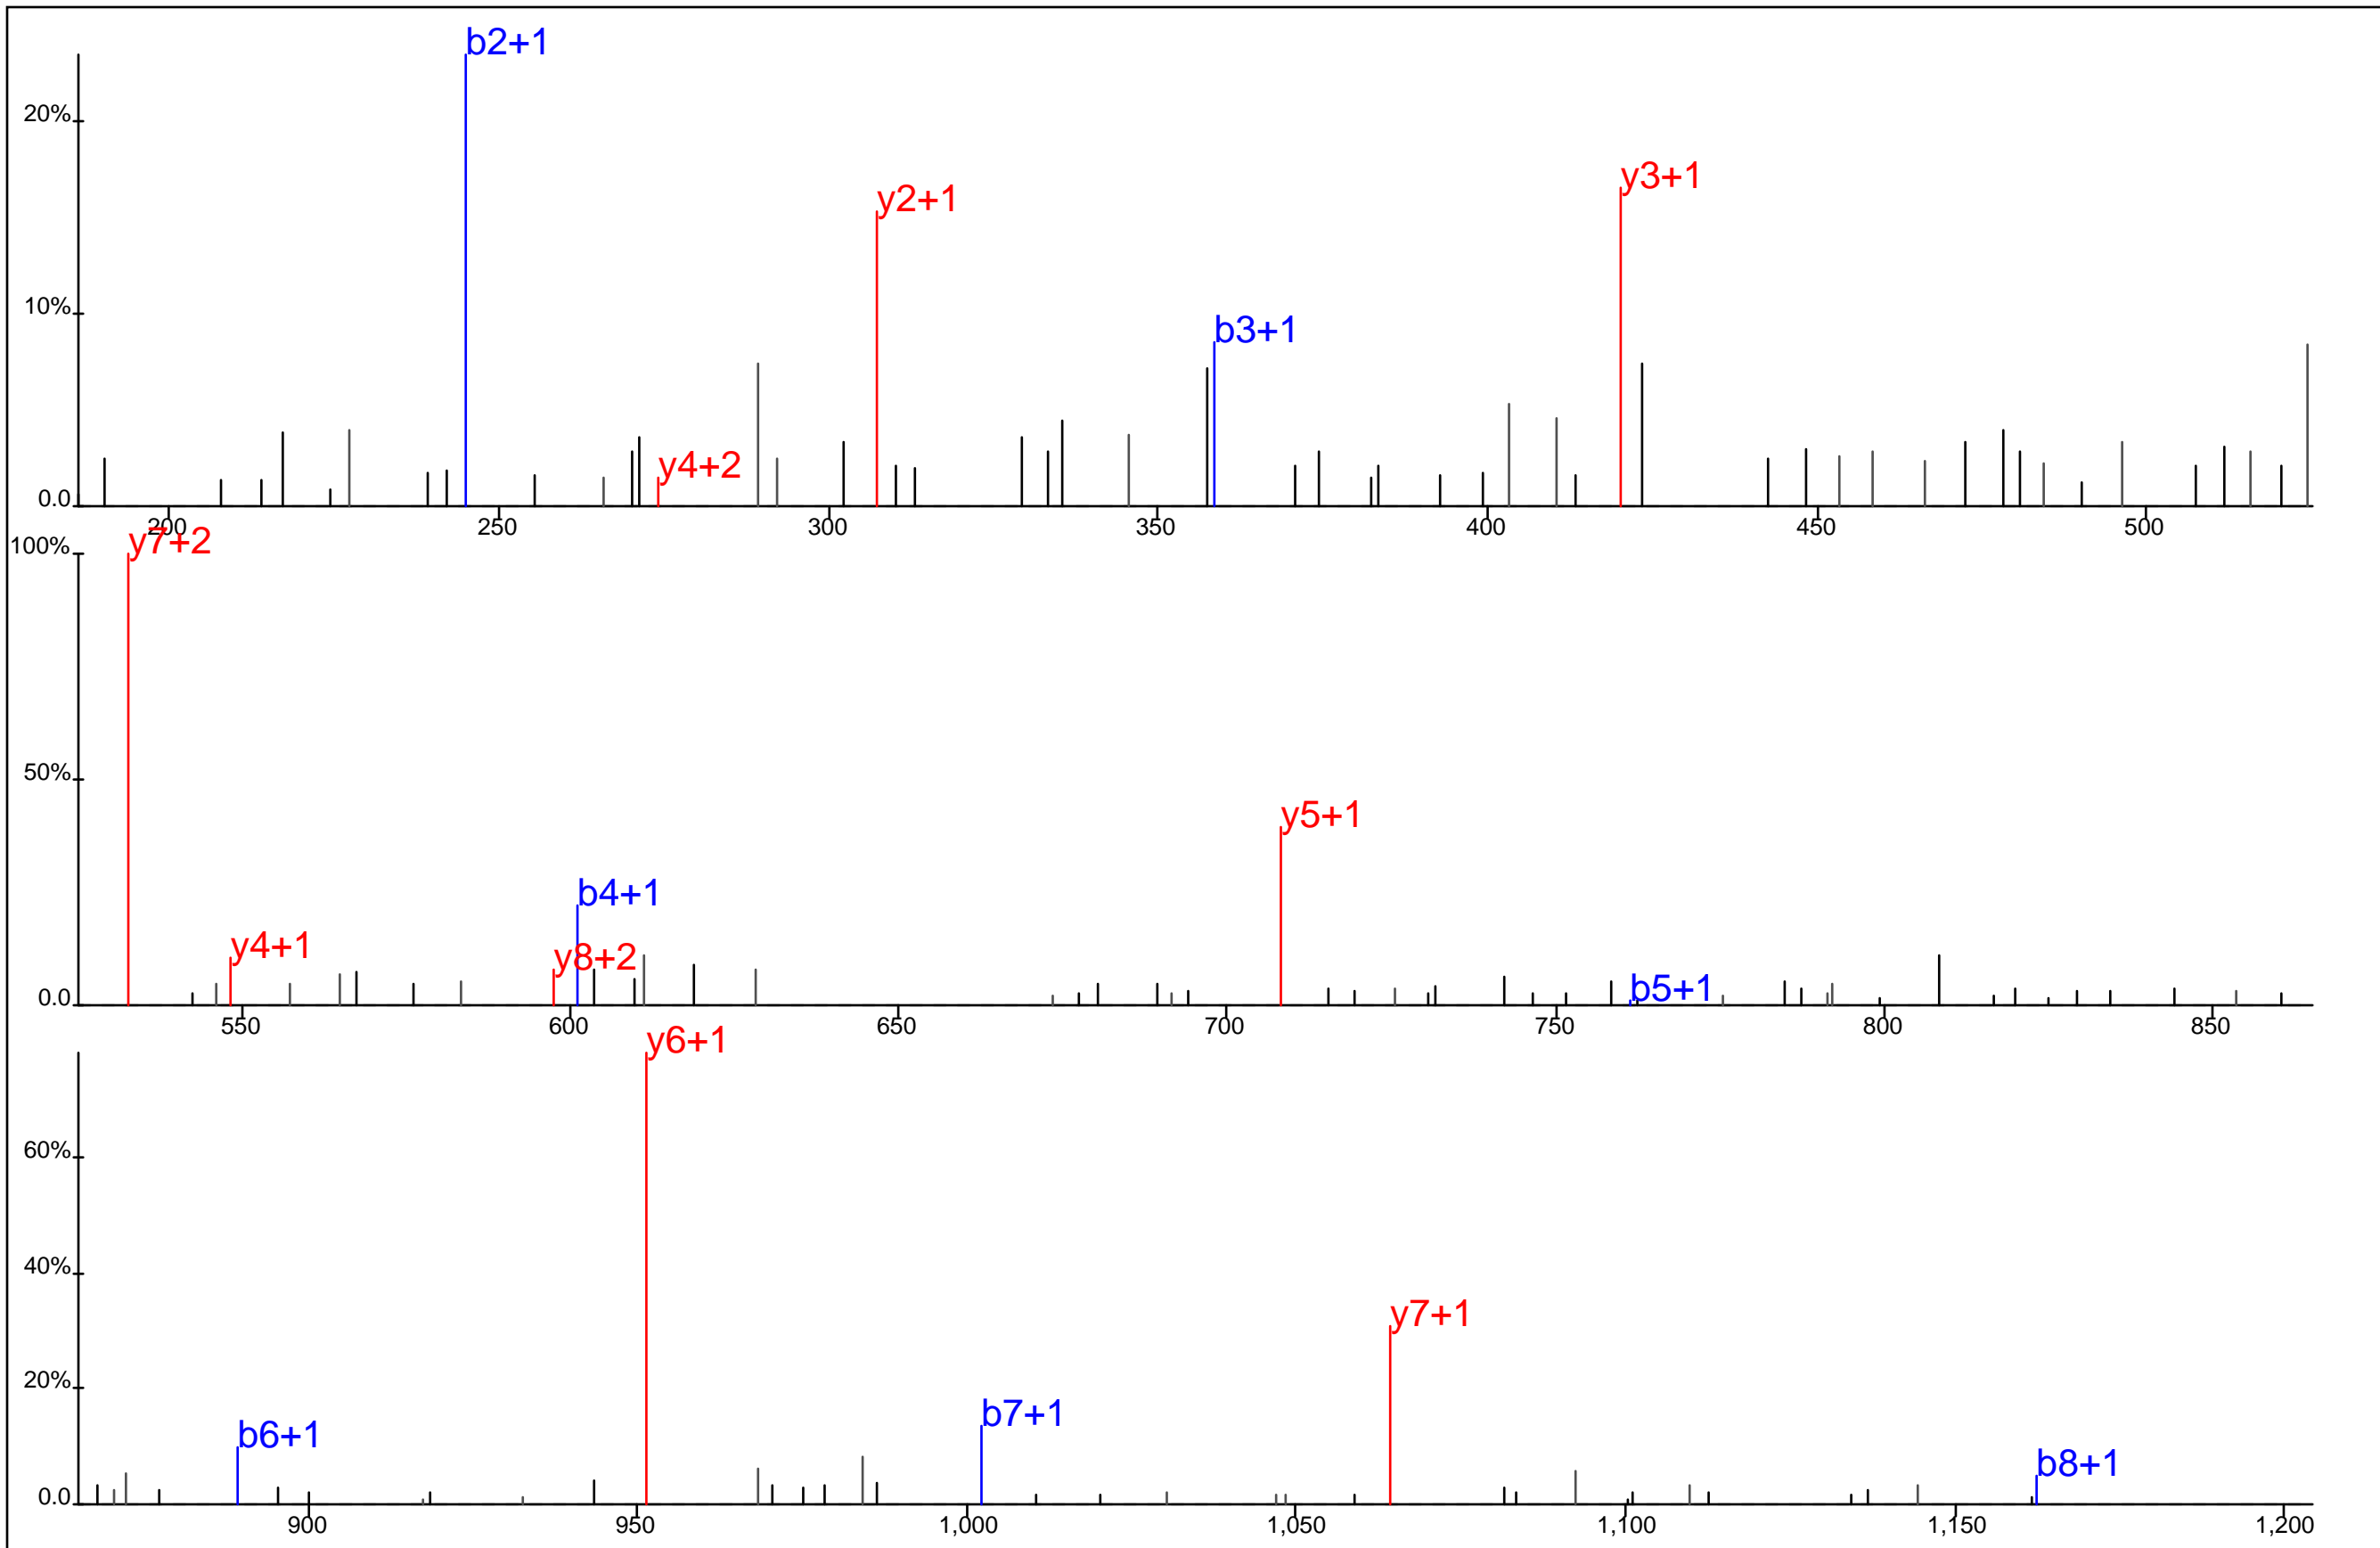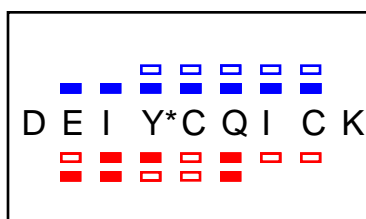

Protein Name: Myosin 7B  
 gi Accession: 0  
 Precursor Mass: 654.7545+2  
 Delta Mass: 1.357 ppm  
 XCorr: 45.53



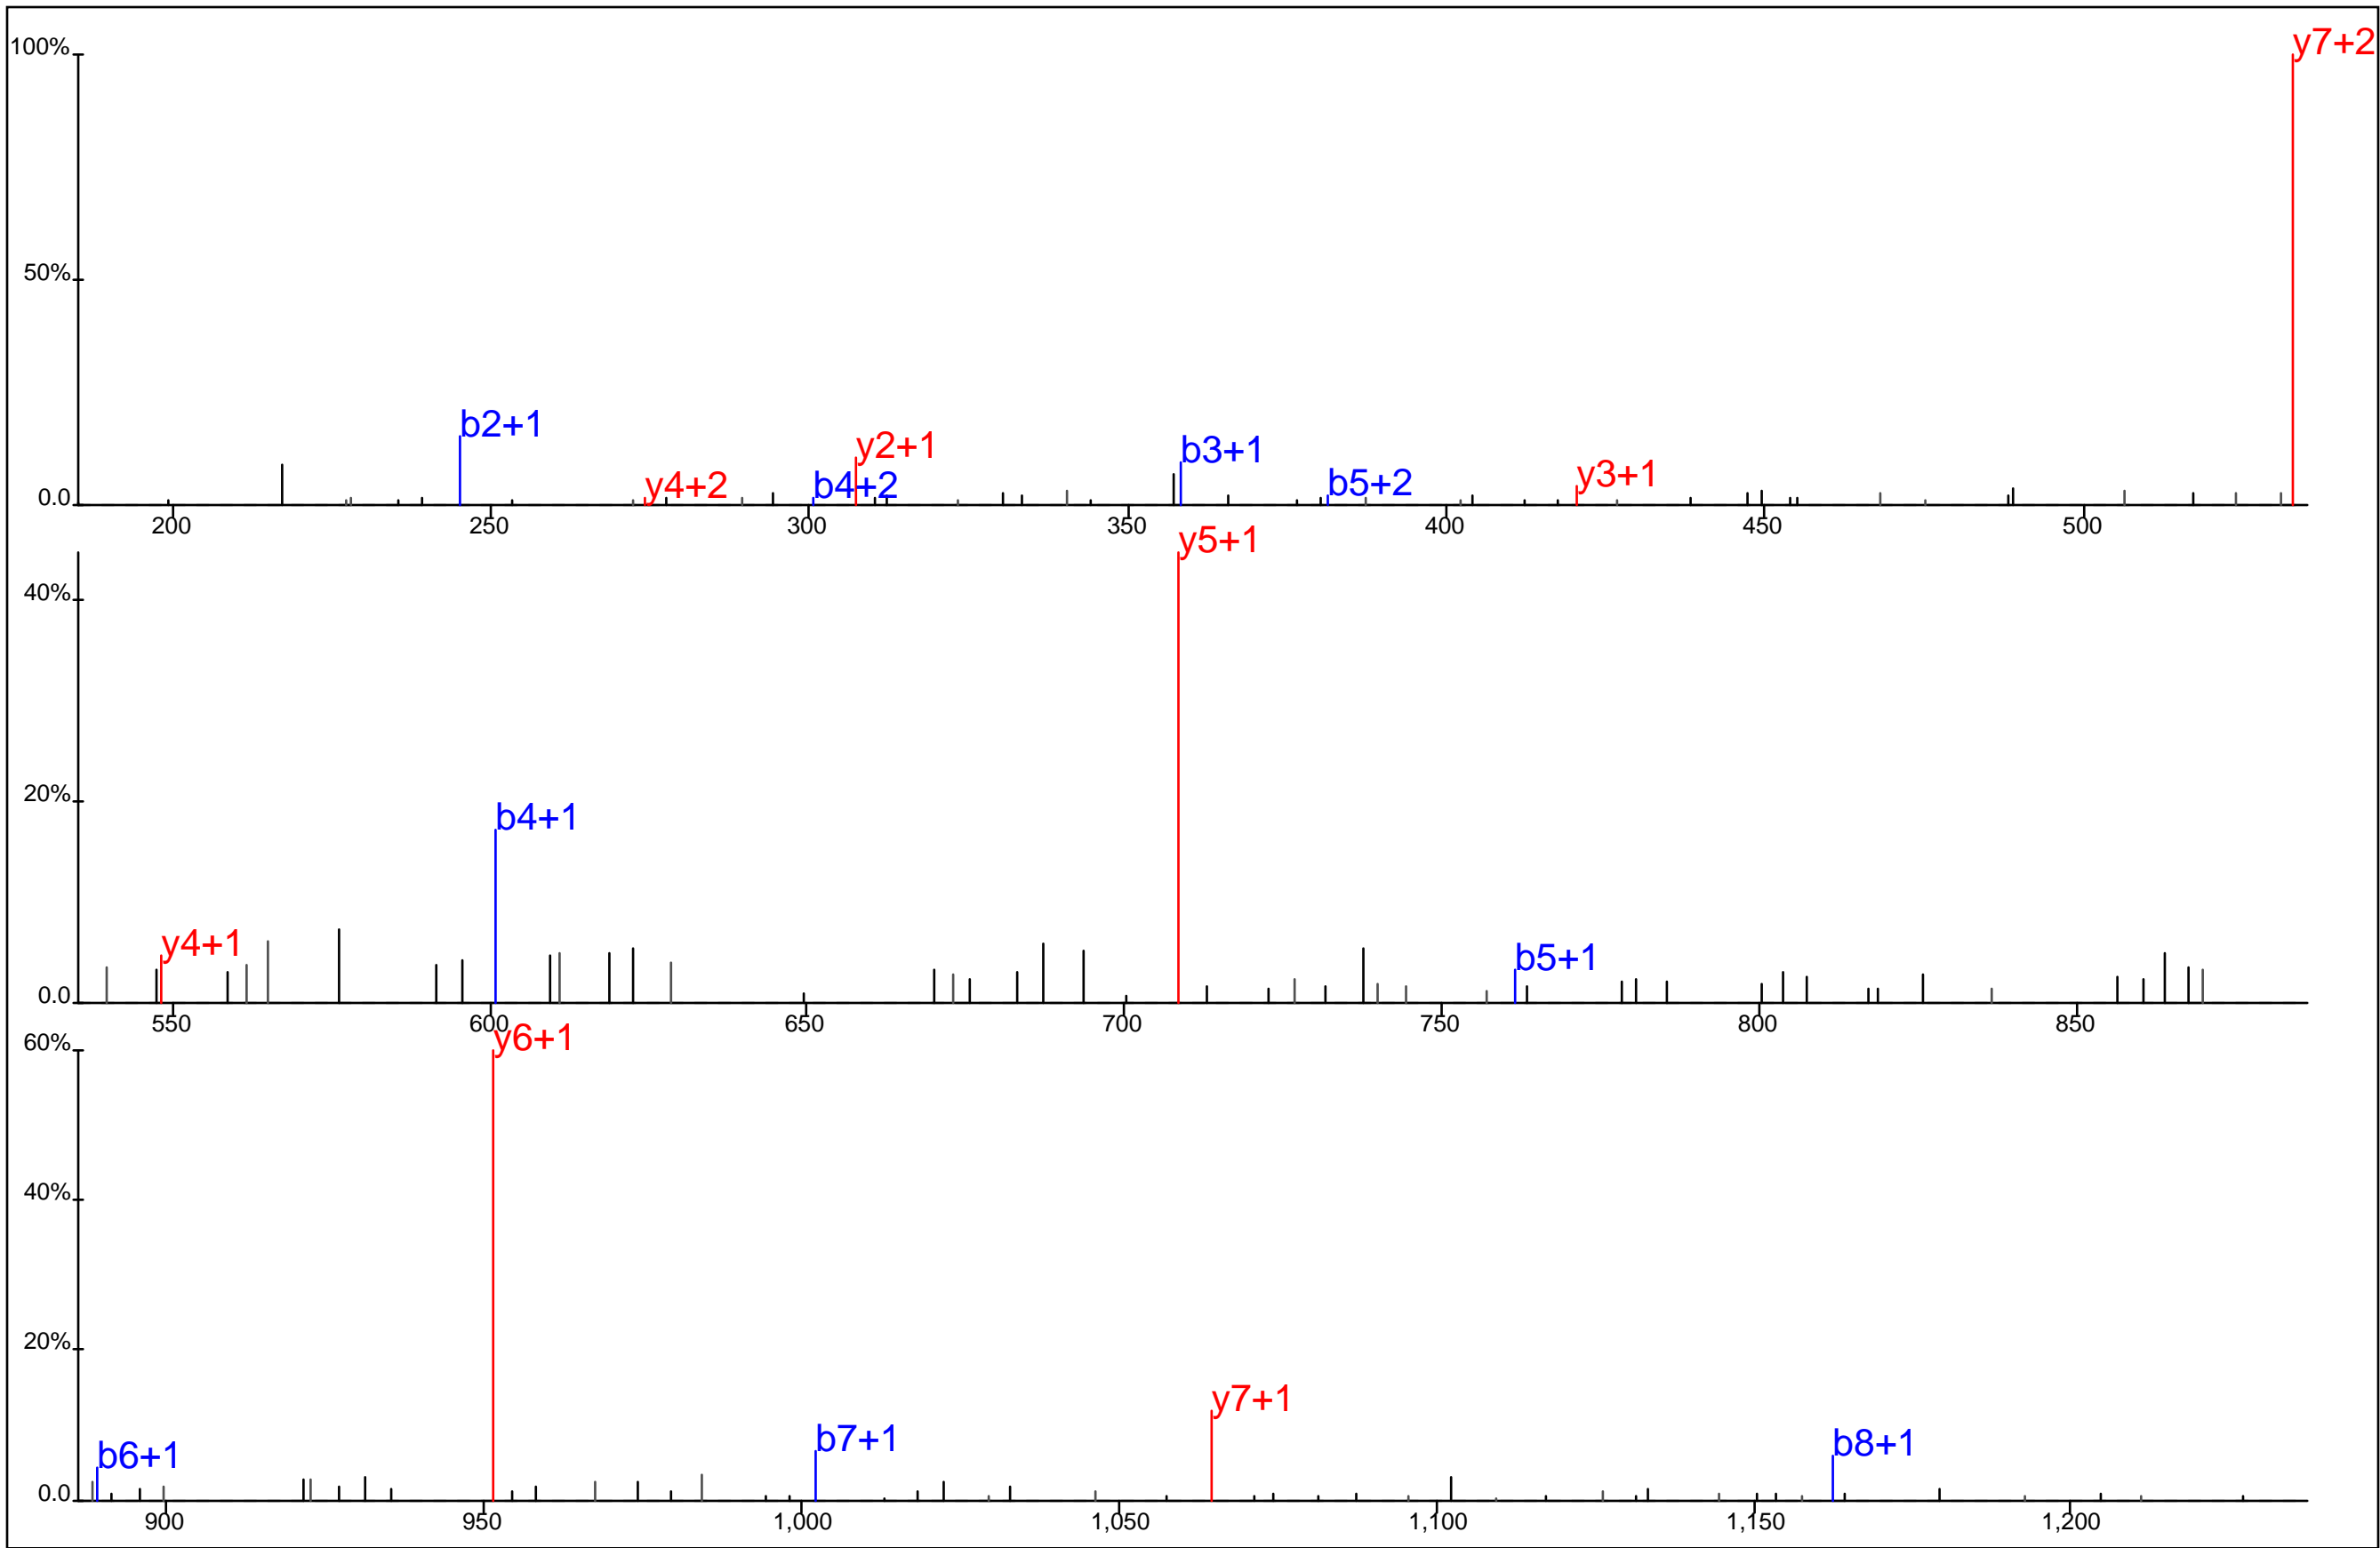

|                |                                                                                                                                  |
|----------------|----------------------------------------------------------------------------------------------------------------------------------|
| <p>DEICYCK</p> | <p>Protein Name: Myosin 7B<br/> gi Accession: 0<br/> Precursor Mass: 654.7541+2<br/> Delta Mass: 0.703 ppm<br/> XCorr: 36.61</p> |
|----------------|----------------------------------------------------------------------------------------------------------------------------------|

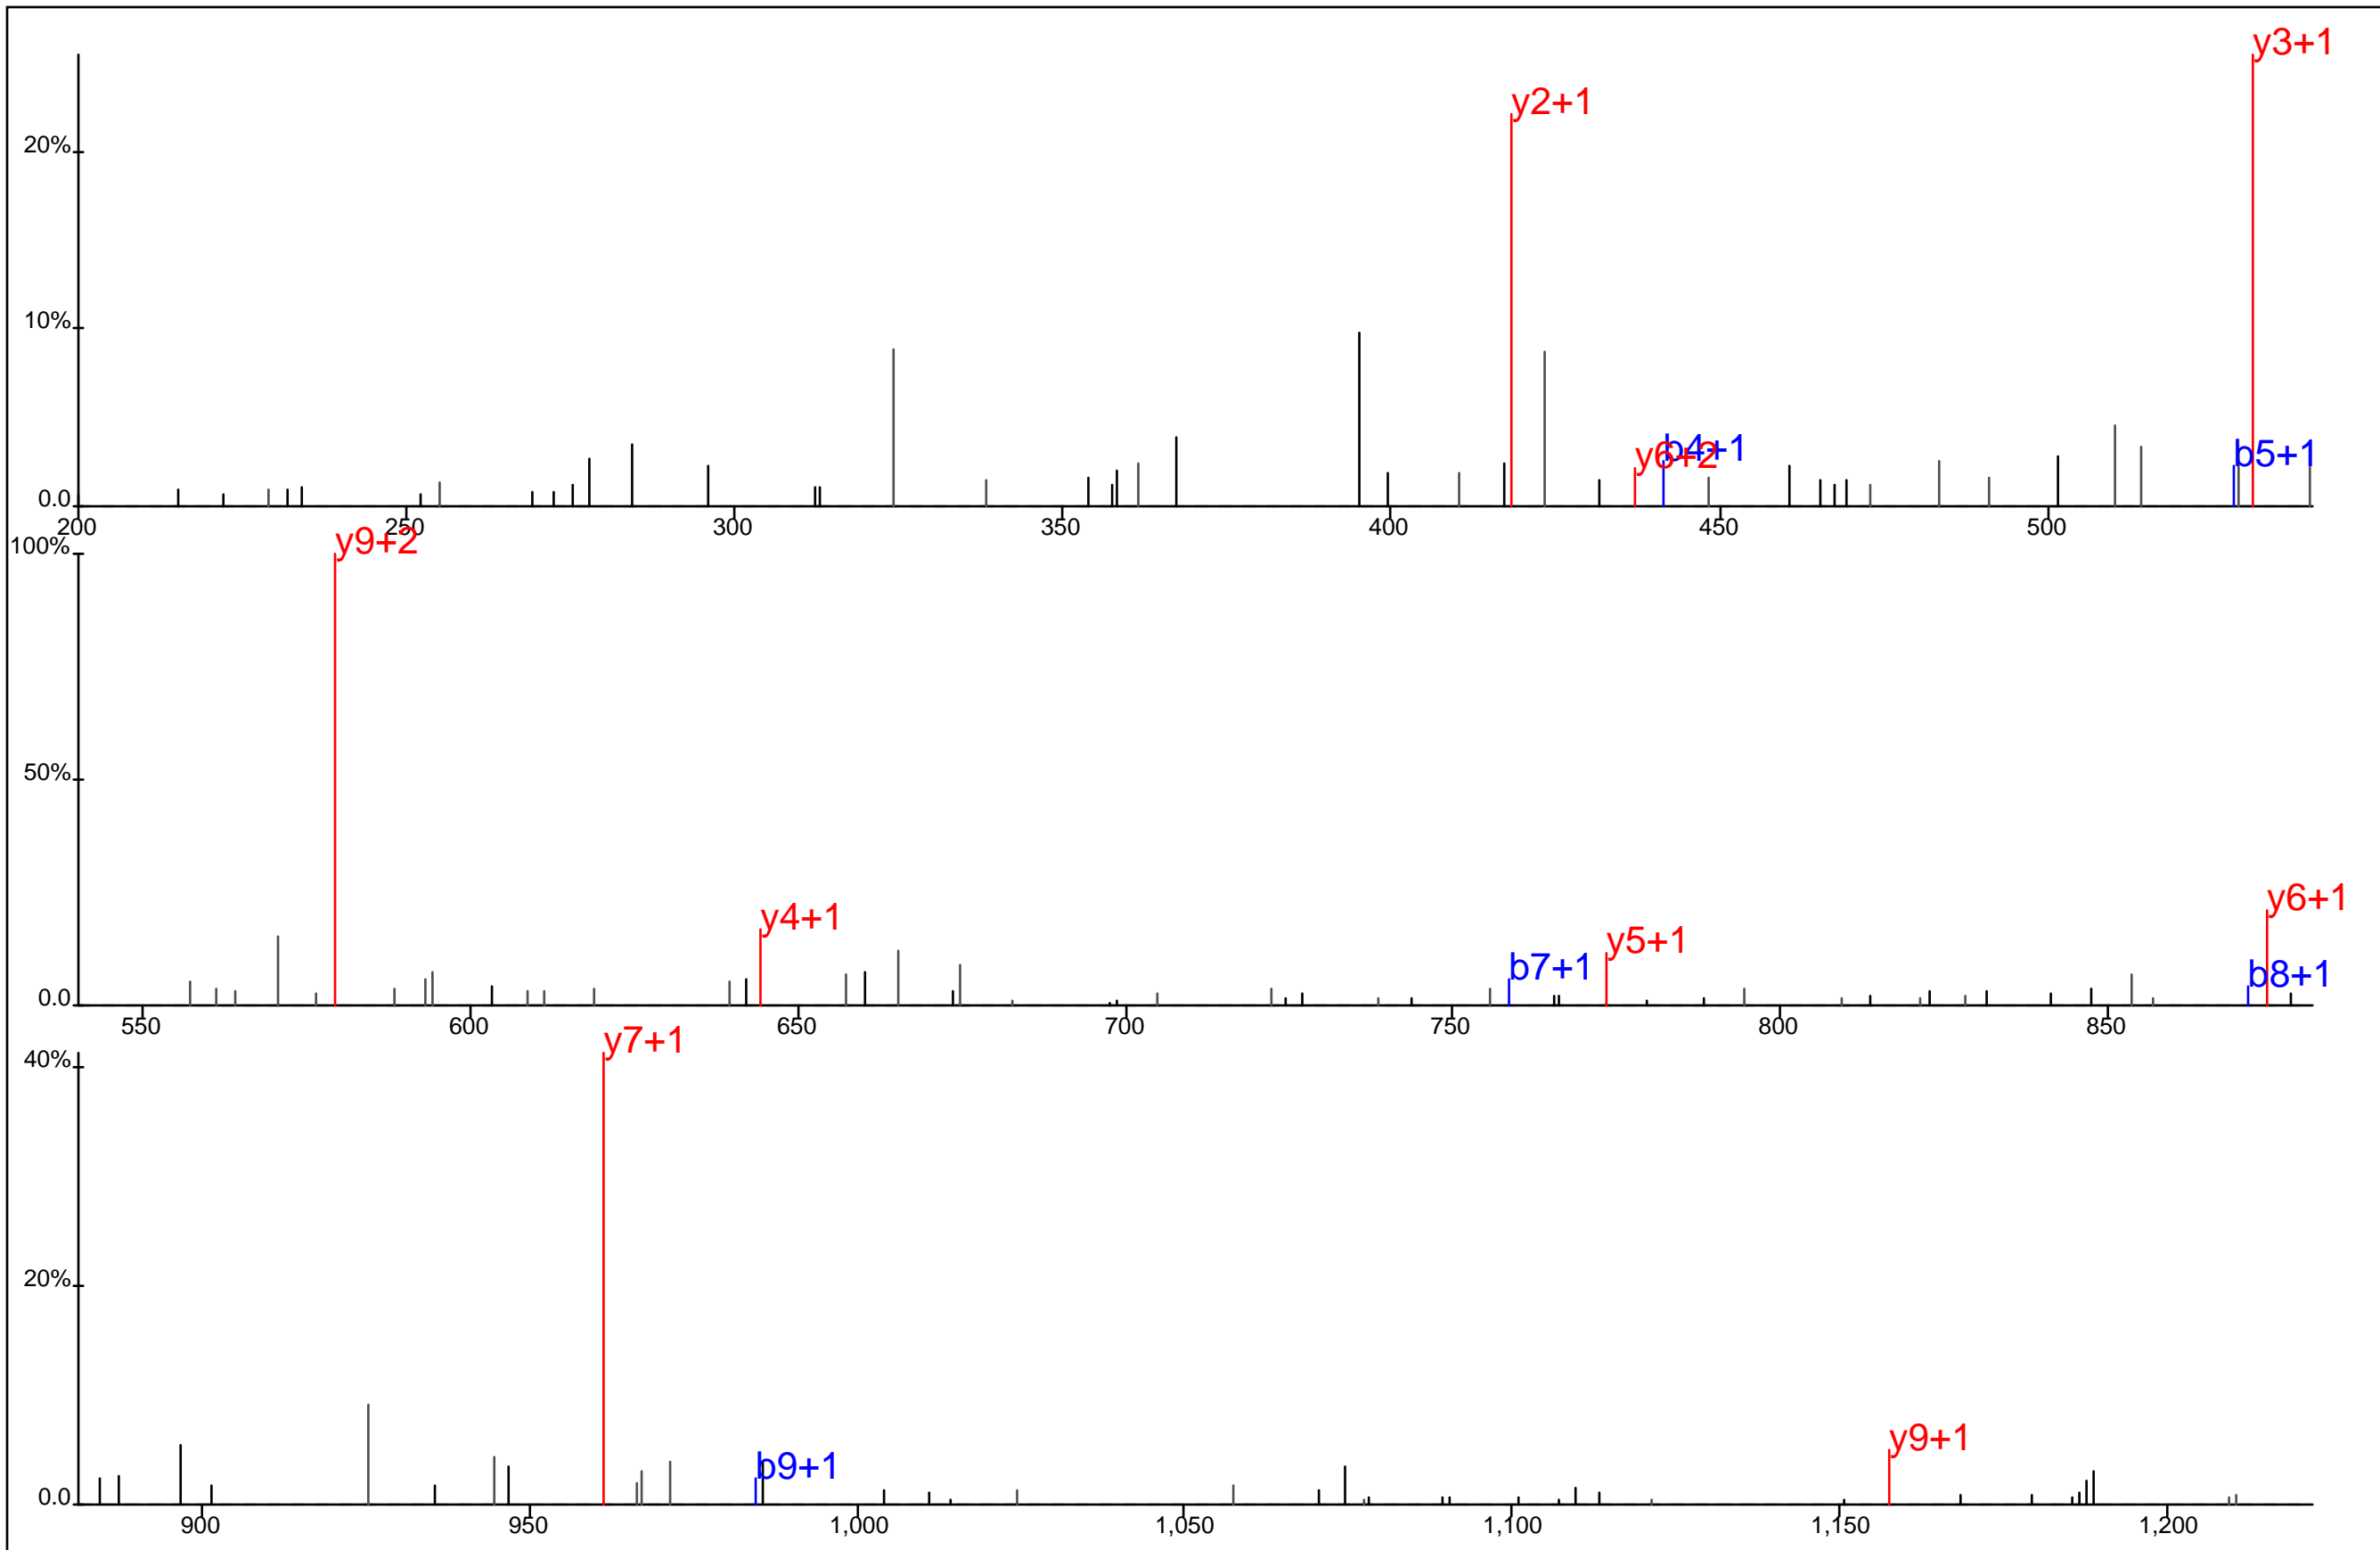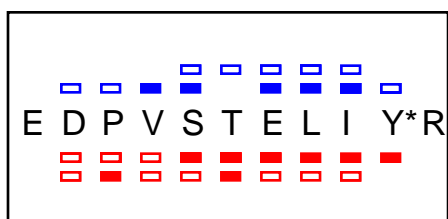

Protein Name: Myosin 7B  
 gi Accession: 0  
 Precursor Mass: 701.3166+2  
 Delta Mass: 2.733 ppm  
 XCorr: 38.38

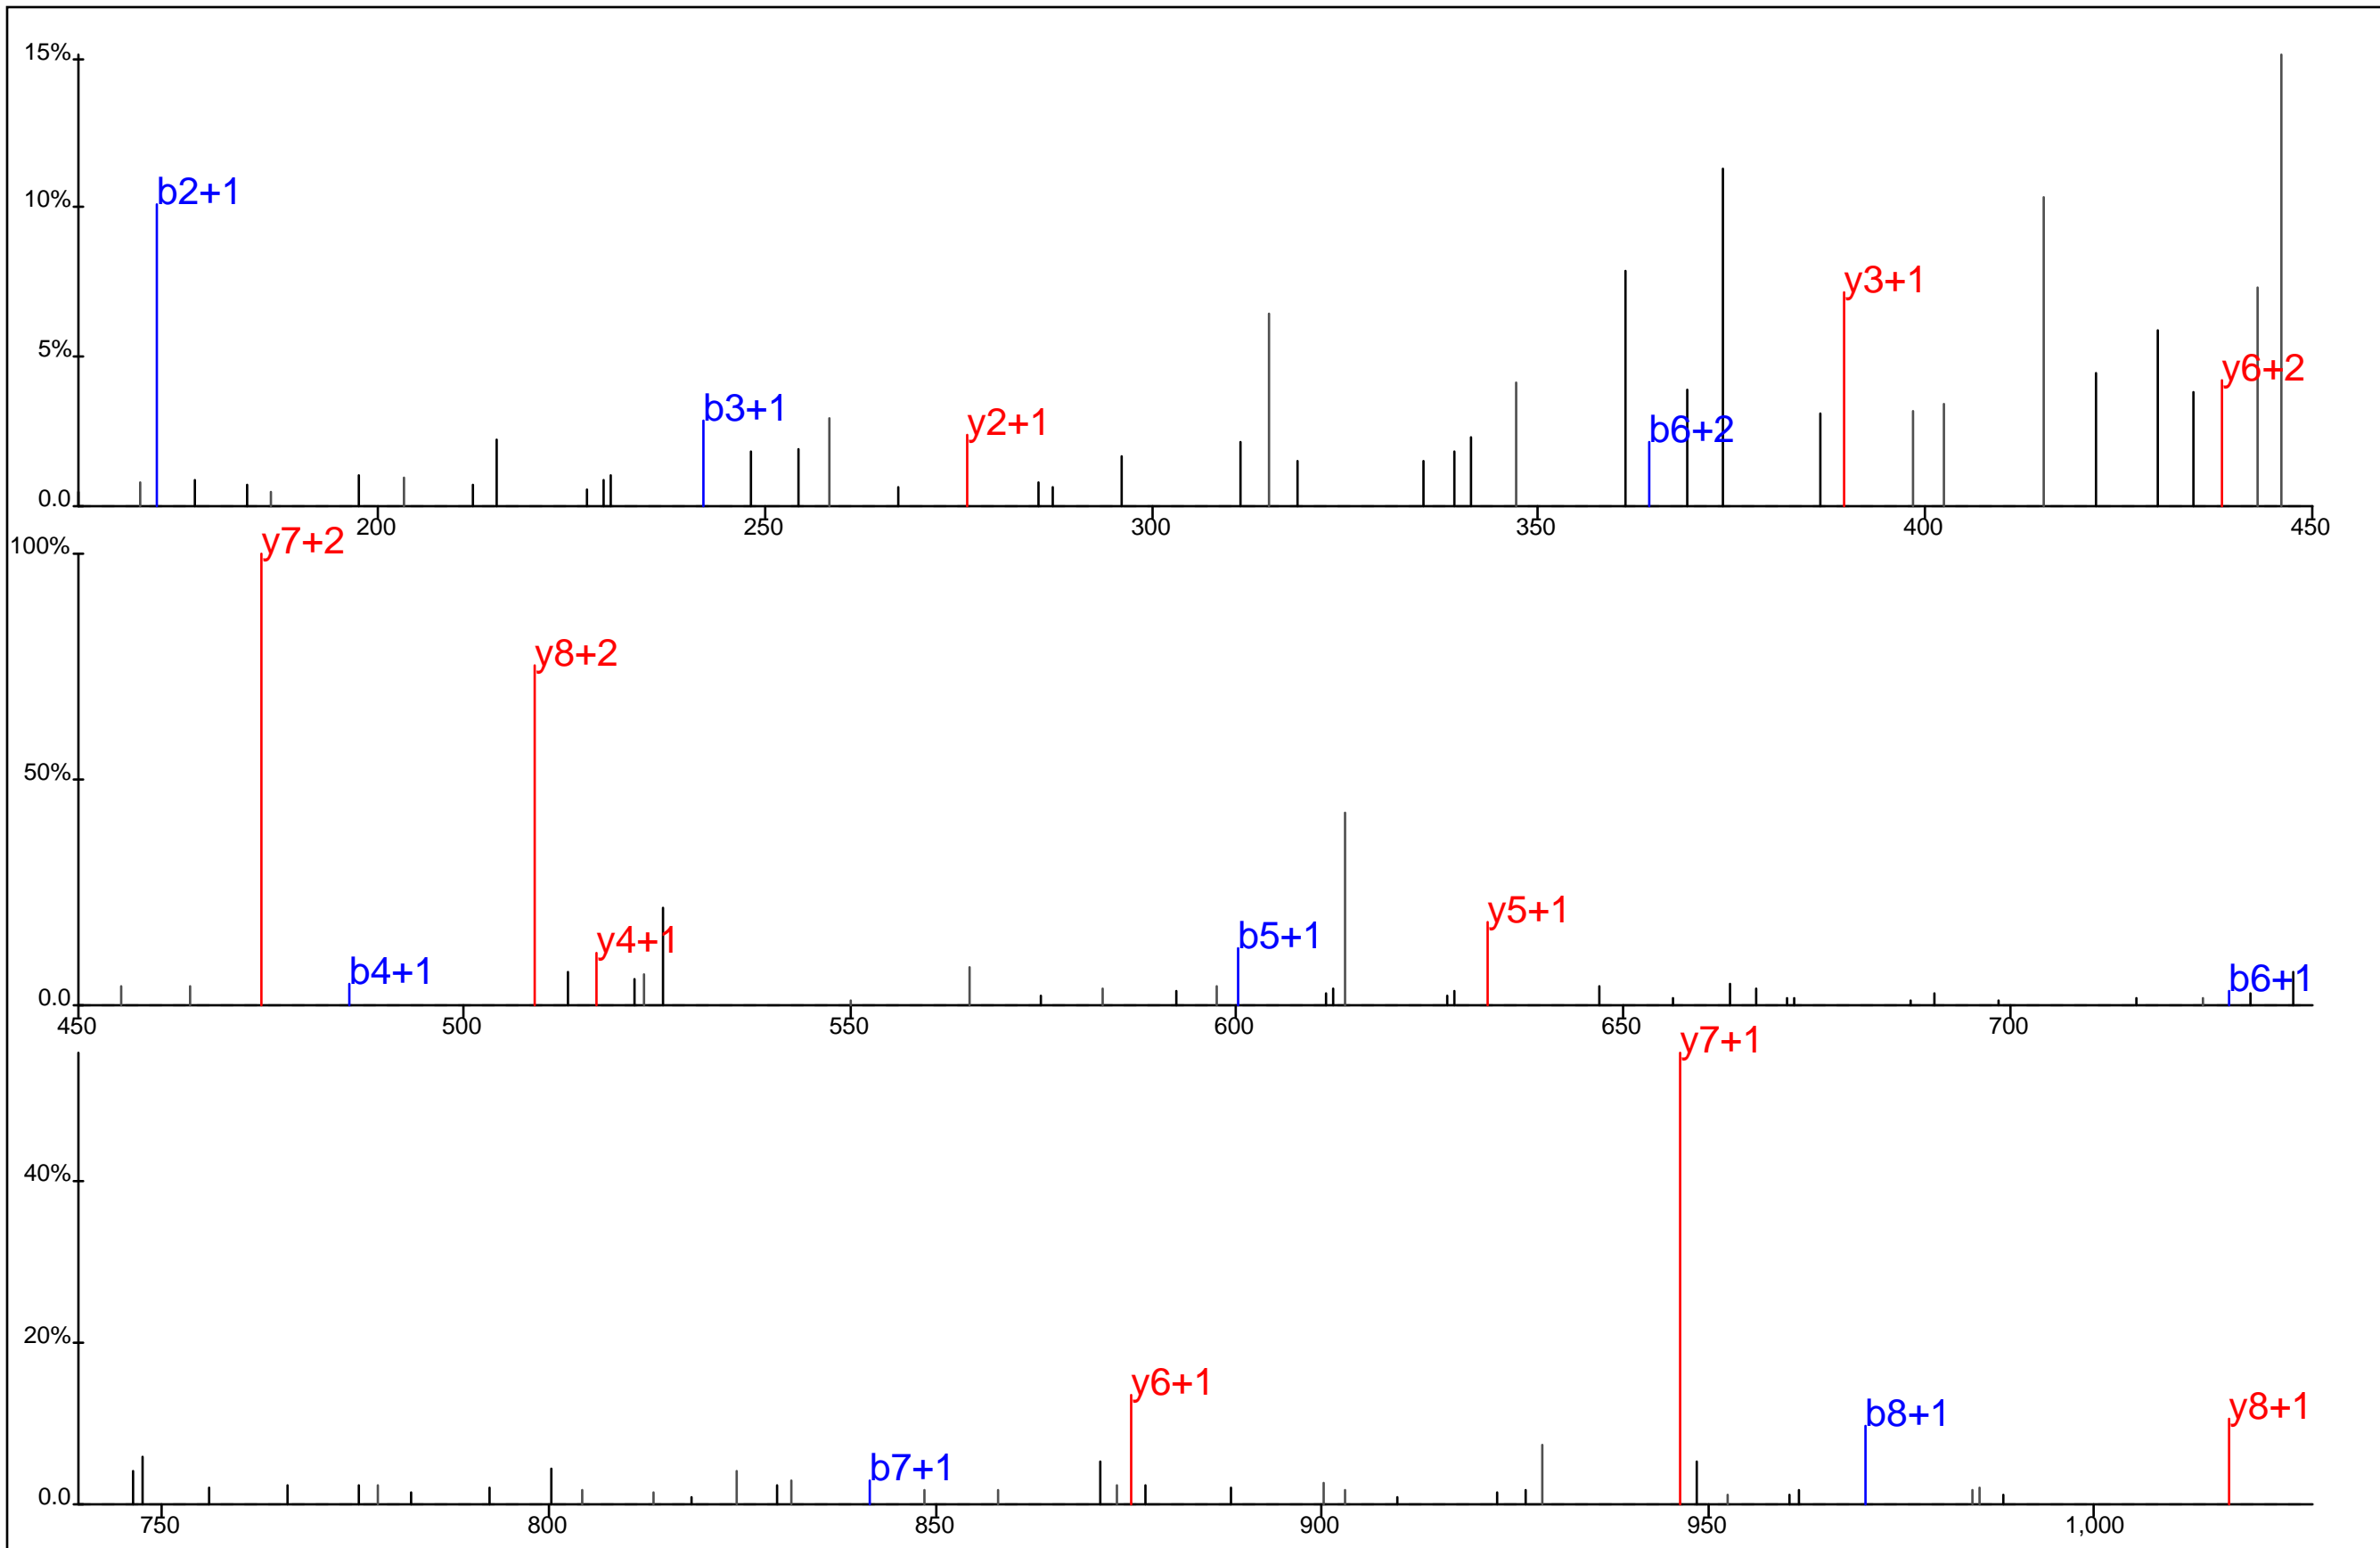

V A A Y\* D K L E K

Protein Name: Myosin heavy chain 9, nonmuscle  
 gi Accession: 0  
 Precursor Mass: 558.7710+2  
 Delta Mass: 0.971 ppm  
 XCorr: 31.03

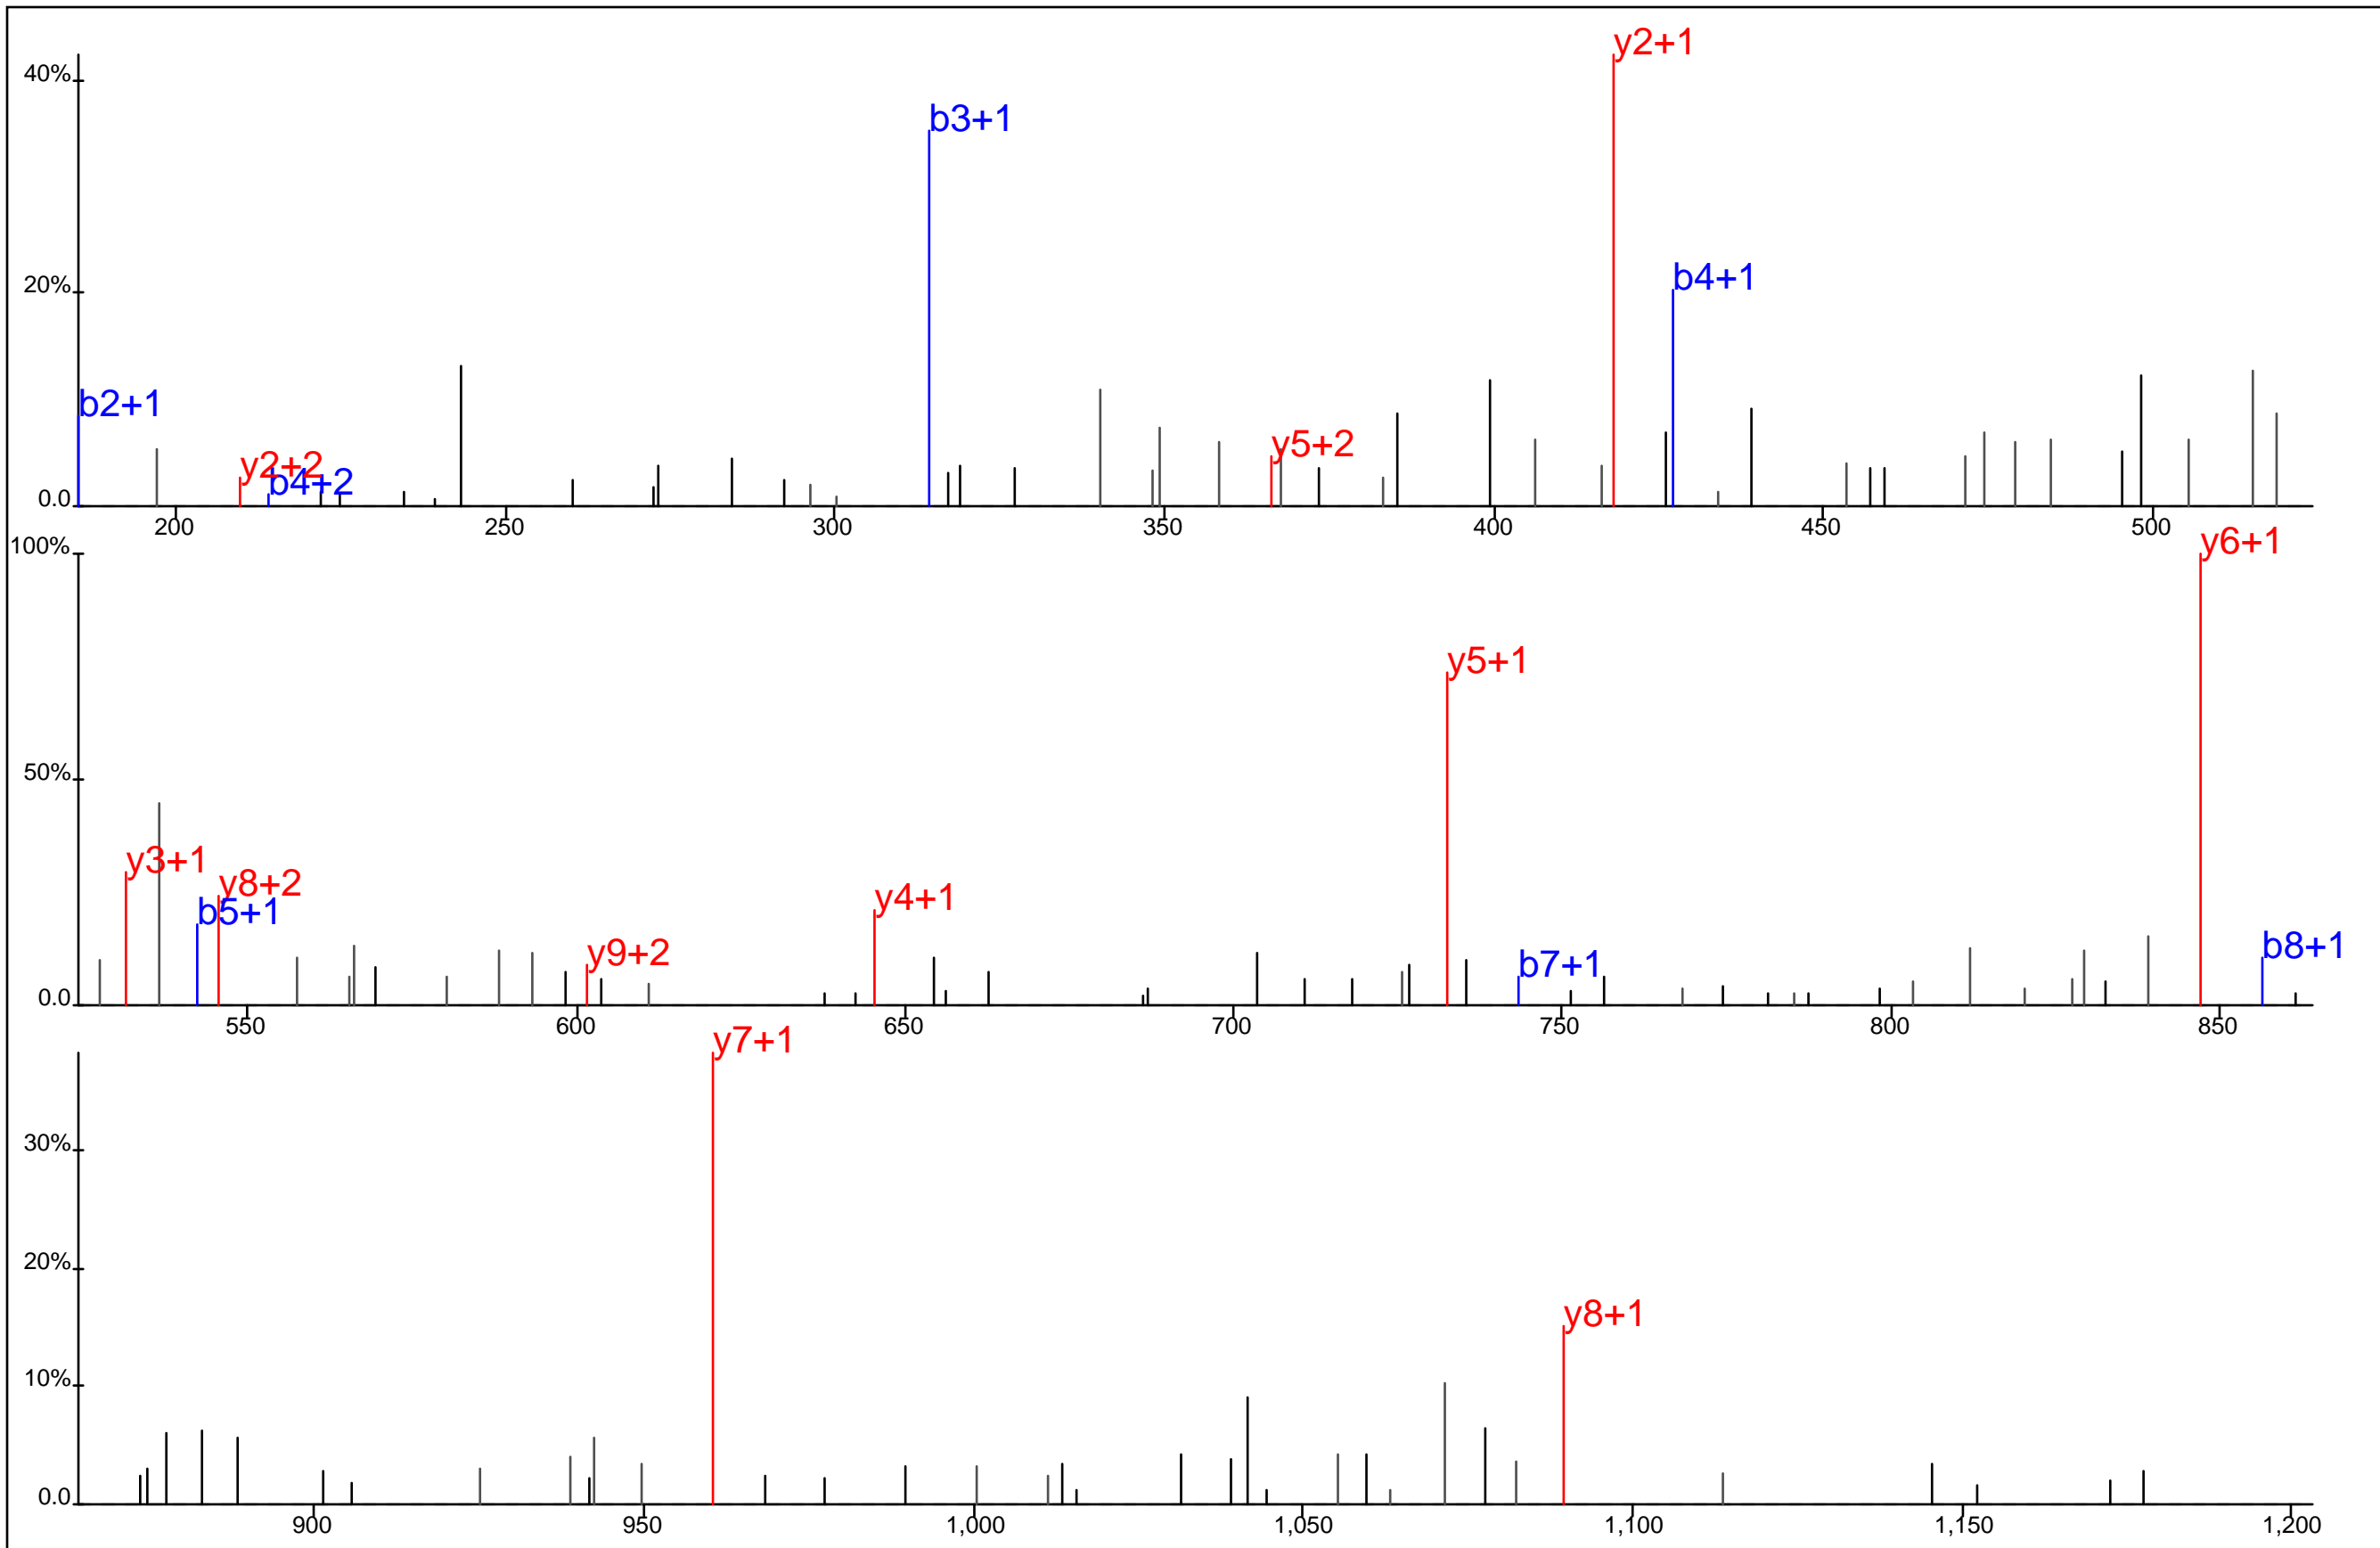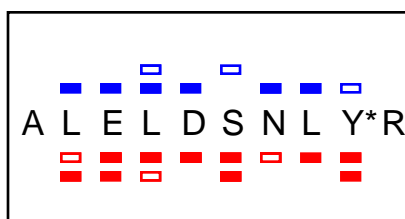

Protein Name: Myosin heavy chain 9, nonmuscle  
 gi Accession: 0  
 Precursor Mass: 637.2960+2  
 Delta Mass: 1.790 ppm  
 XCorr: 49.88

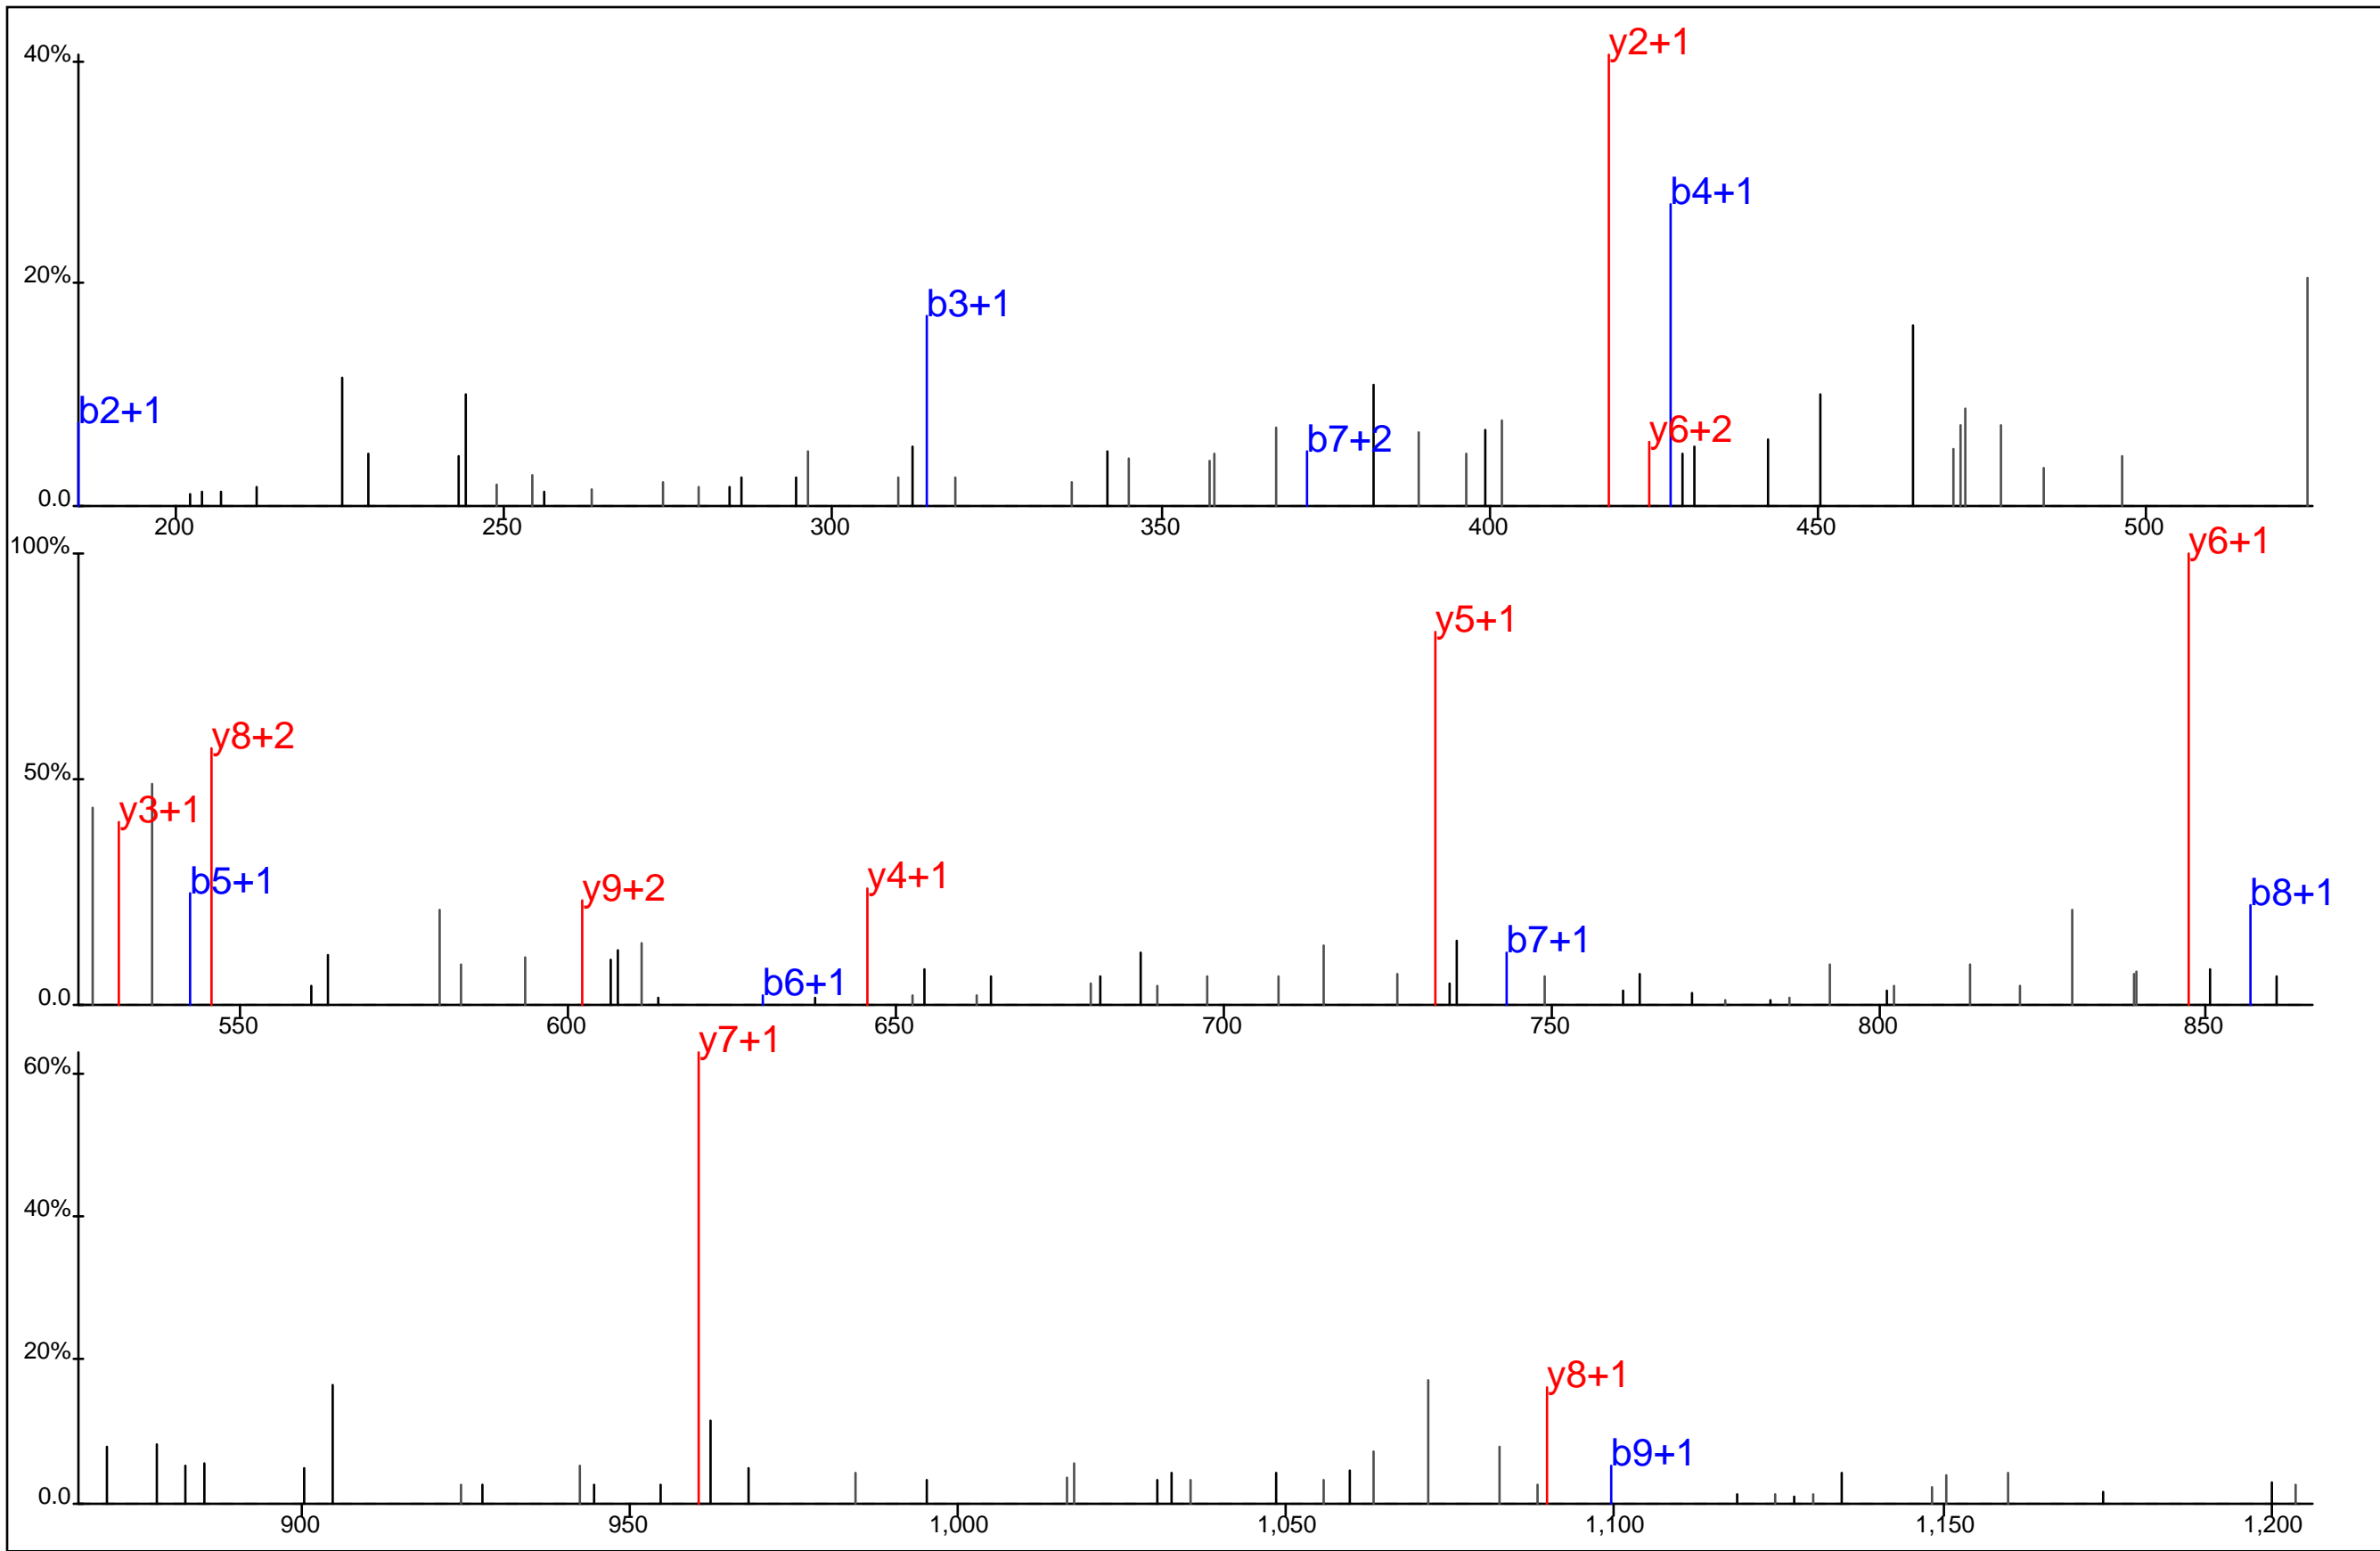

■ ■ ■ ■ ■ ■ ■ ■  
 A L E L D S N L Y\*R  
□ □ □ □ □ □ □ □

Protein Name: Myosin heavy chain 9, nonmuscle  
 gi Accession: 0  
 Precursor Mass: 637.2949+2  
 Delta Mass: 0.066 ppm  
 XCorr: 45.62

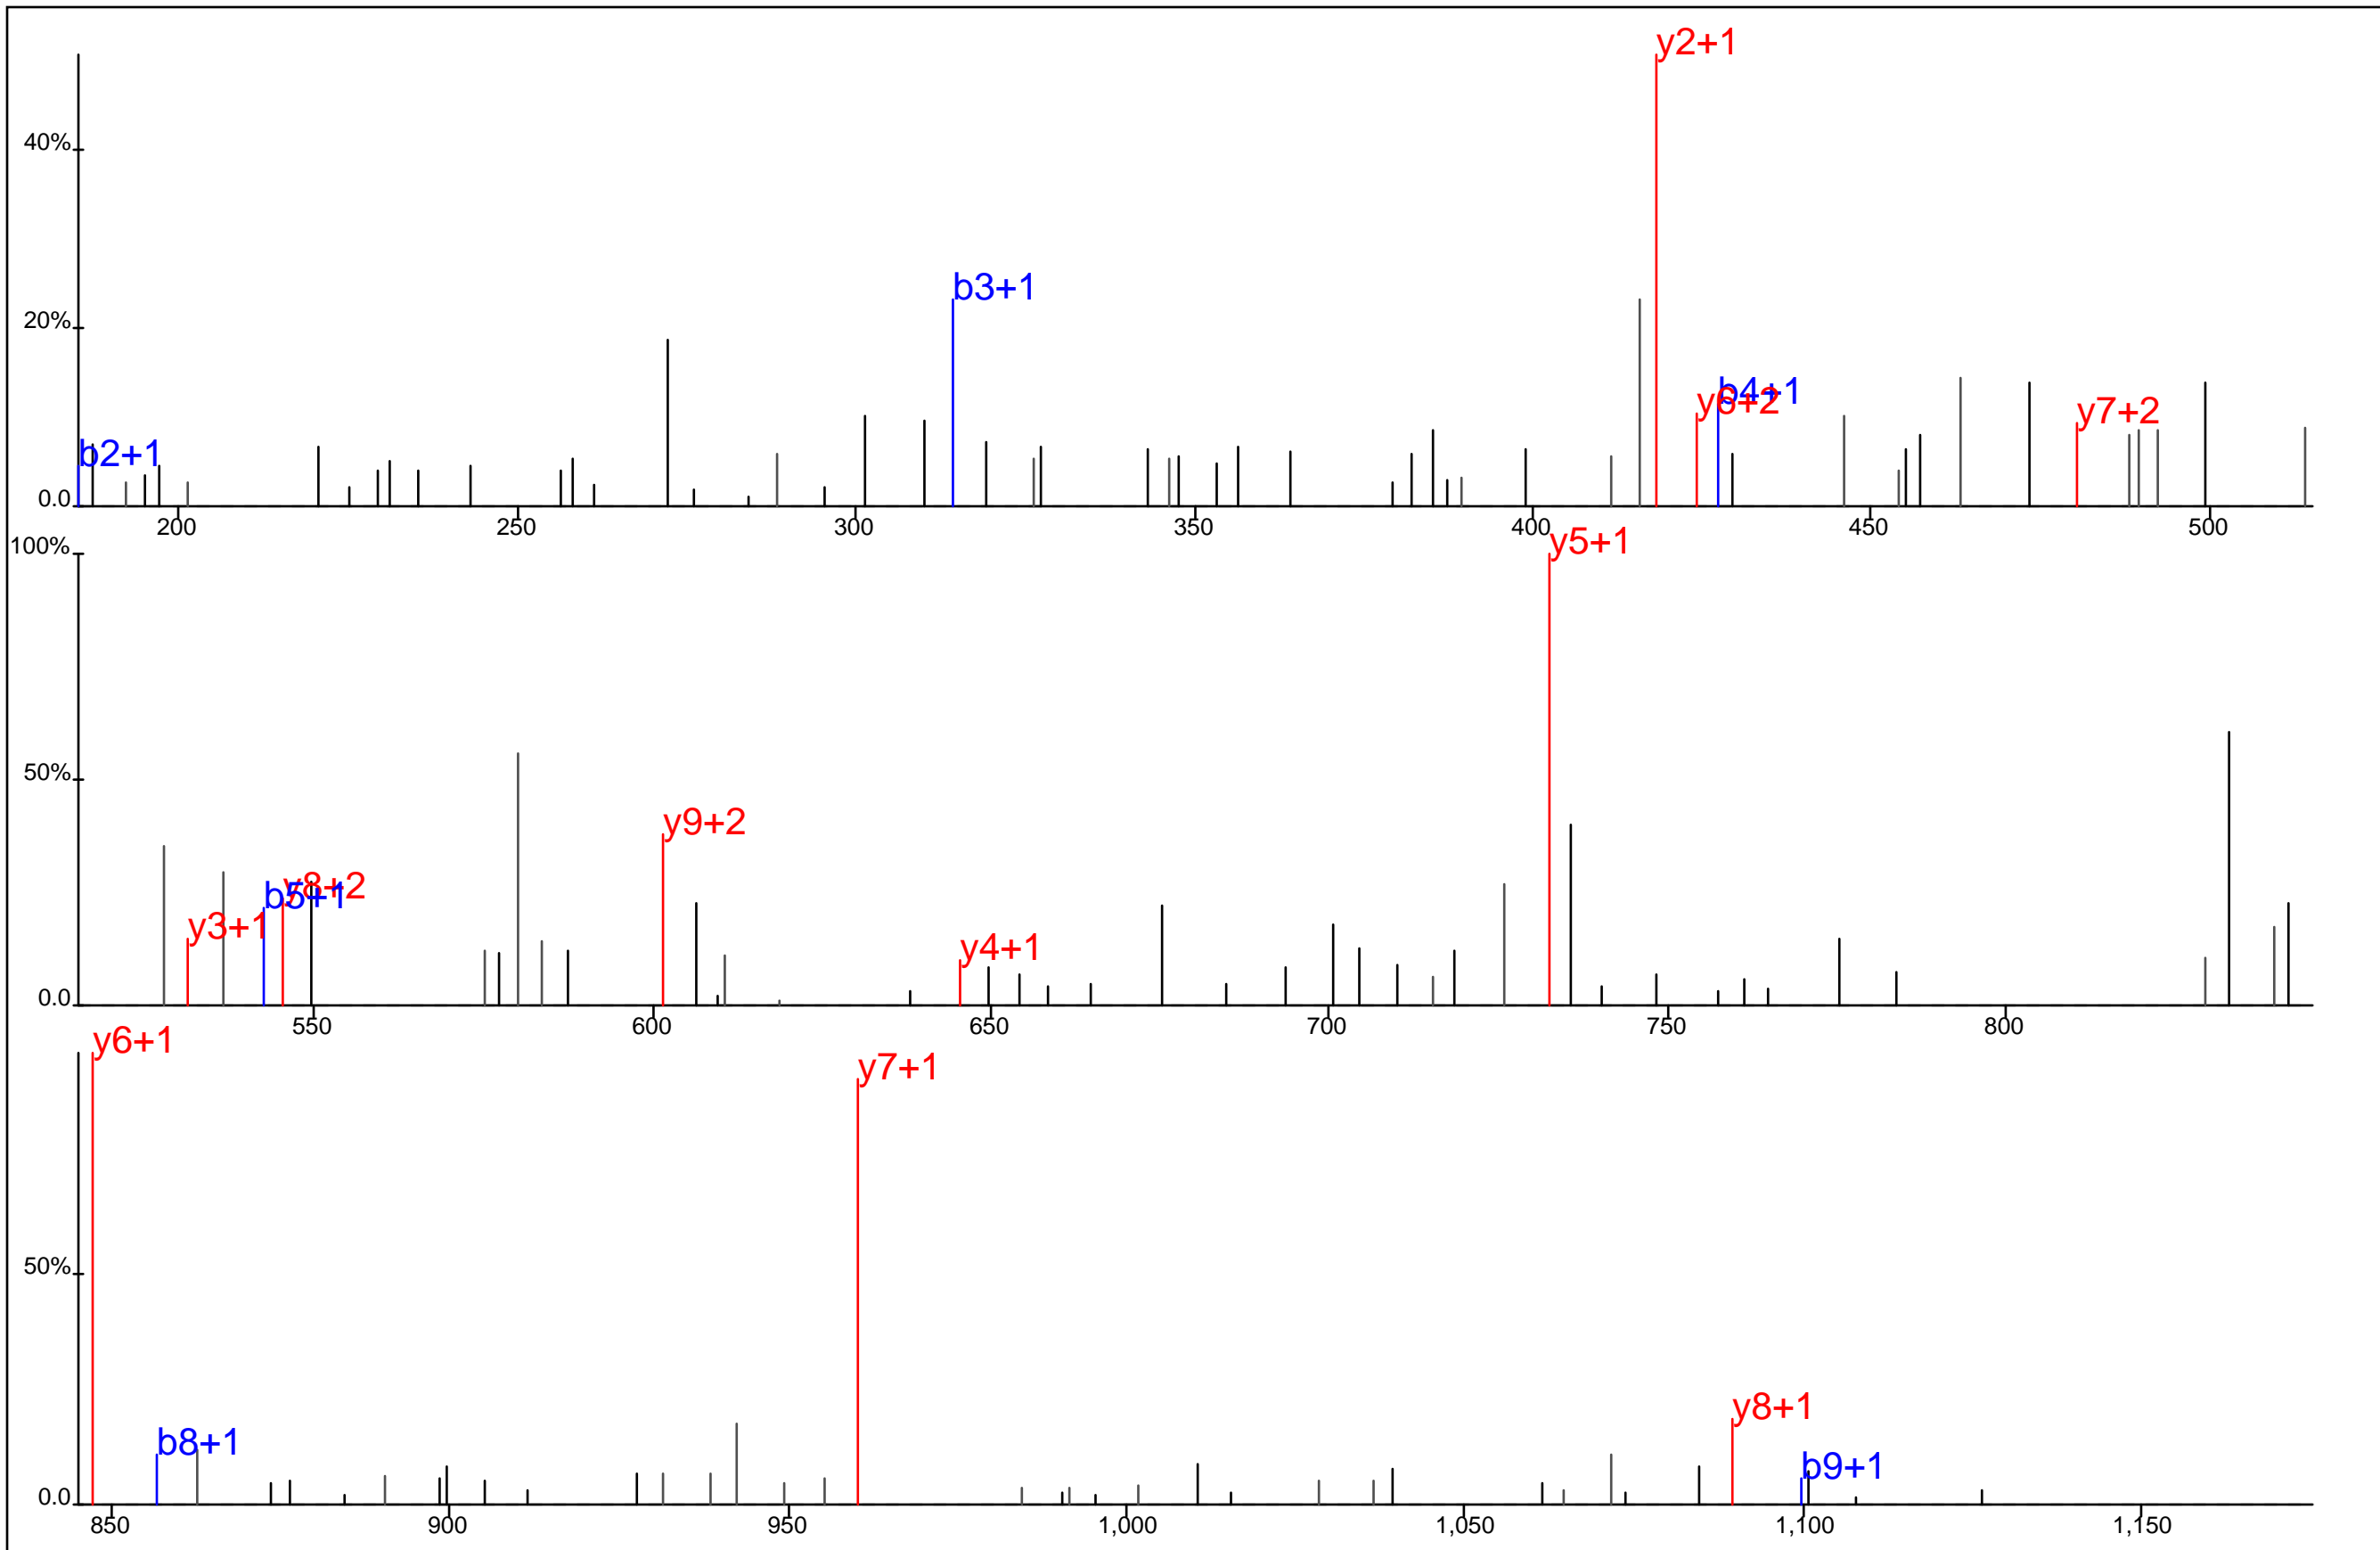

■ ■ ■ ■ ■ ■ ■ ■  
 A L E L D S N L Y\*R  
■ ■ ■ ■ ■ ■ ■ ■

Protein Name: Myosin heavy chain 9, nonmuscle  
 gi Accession: 0  
 Precursor Mass: 637.2961+2  
 Delta Mass: 1.983 ppm  
 XCorr: 33.86

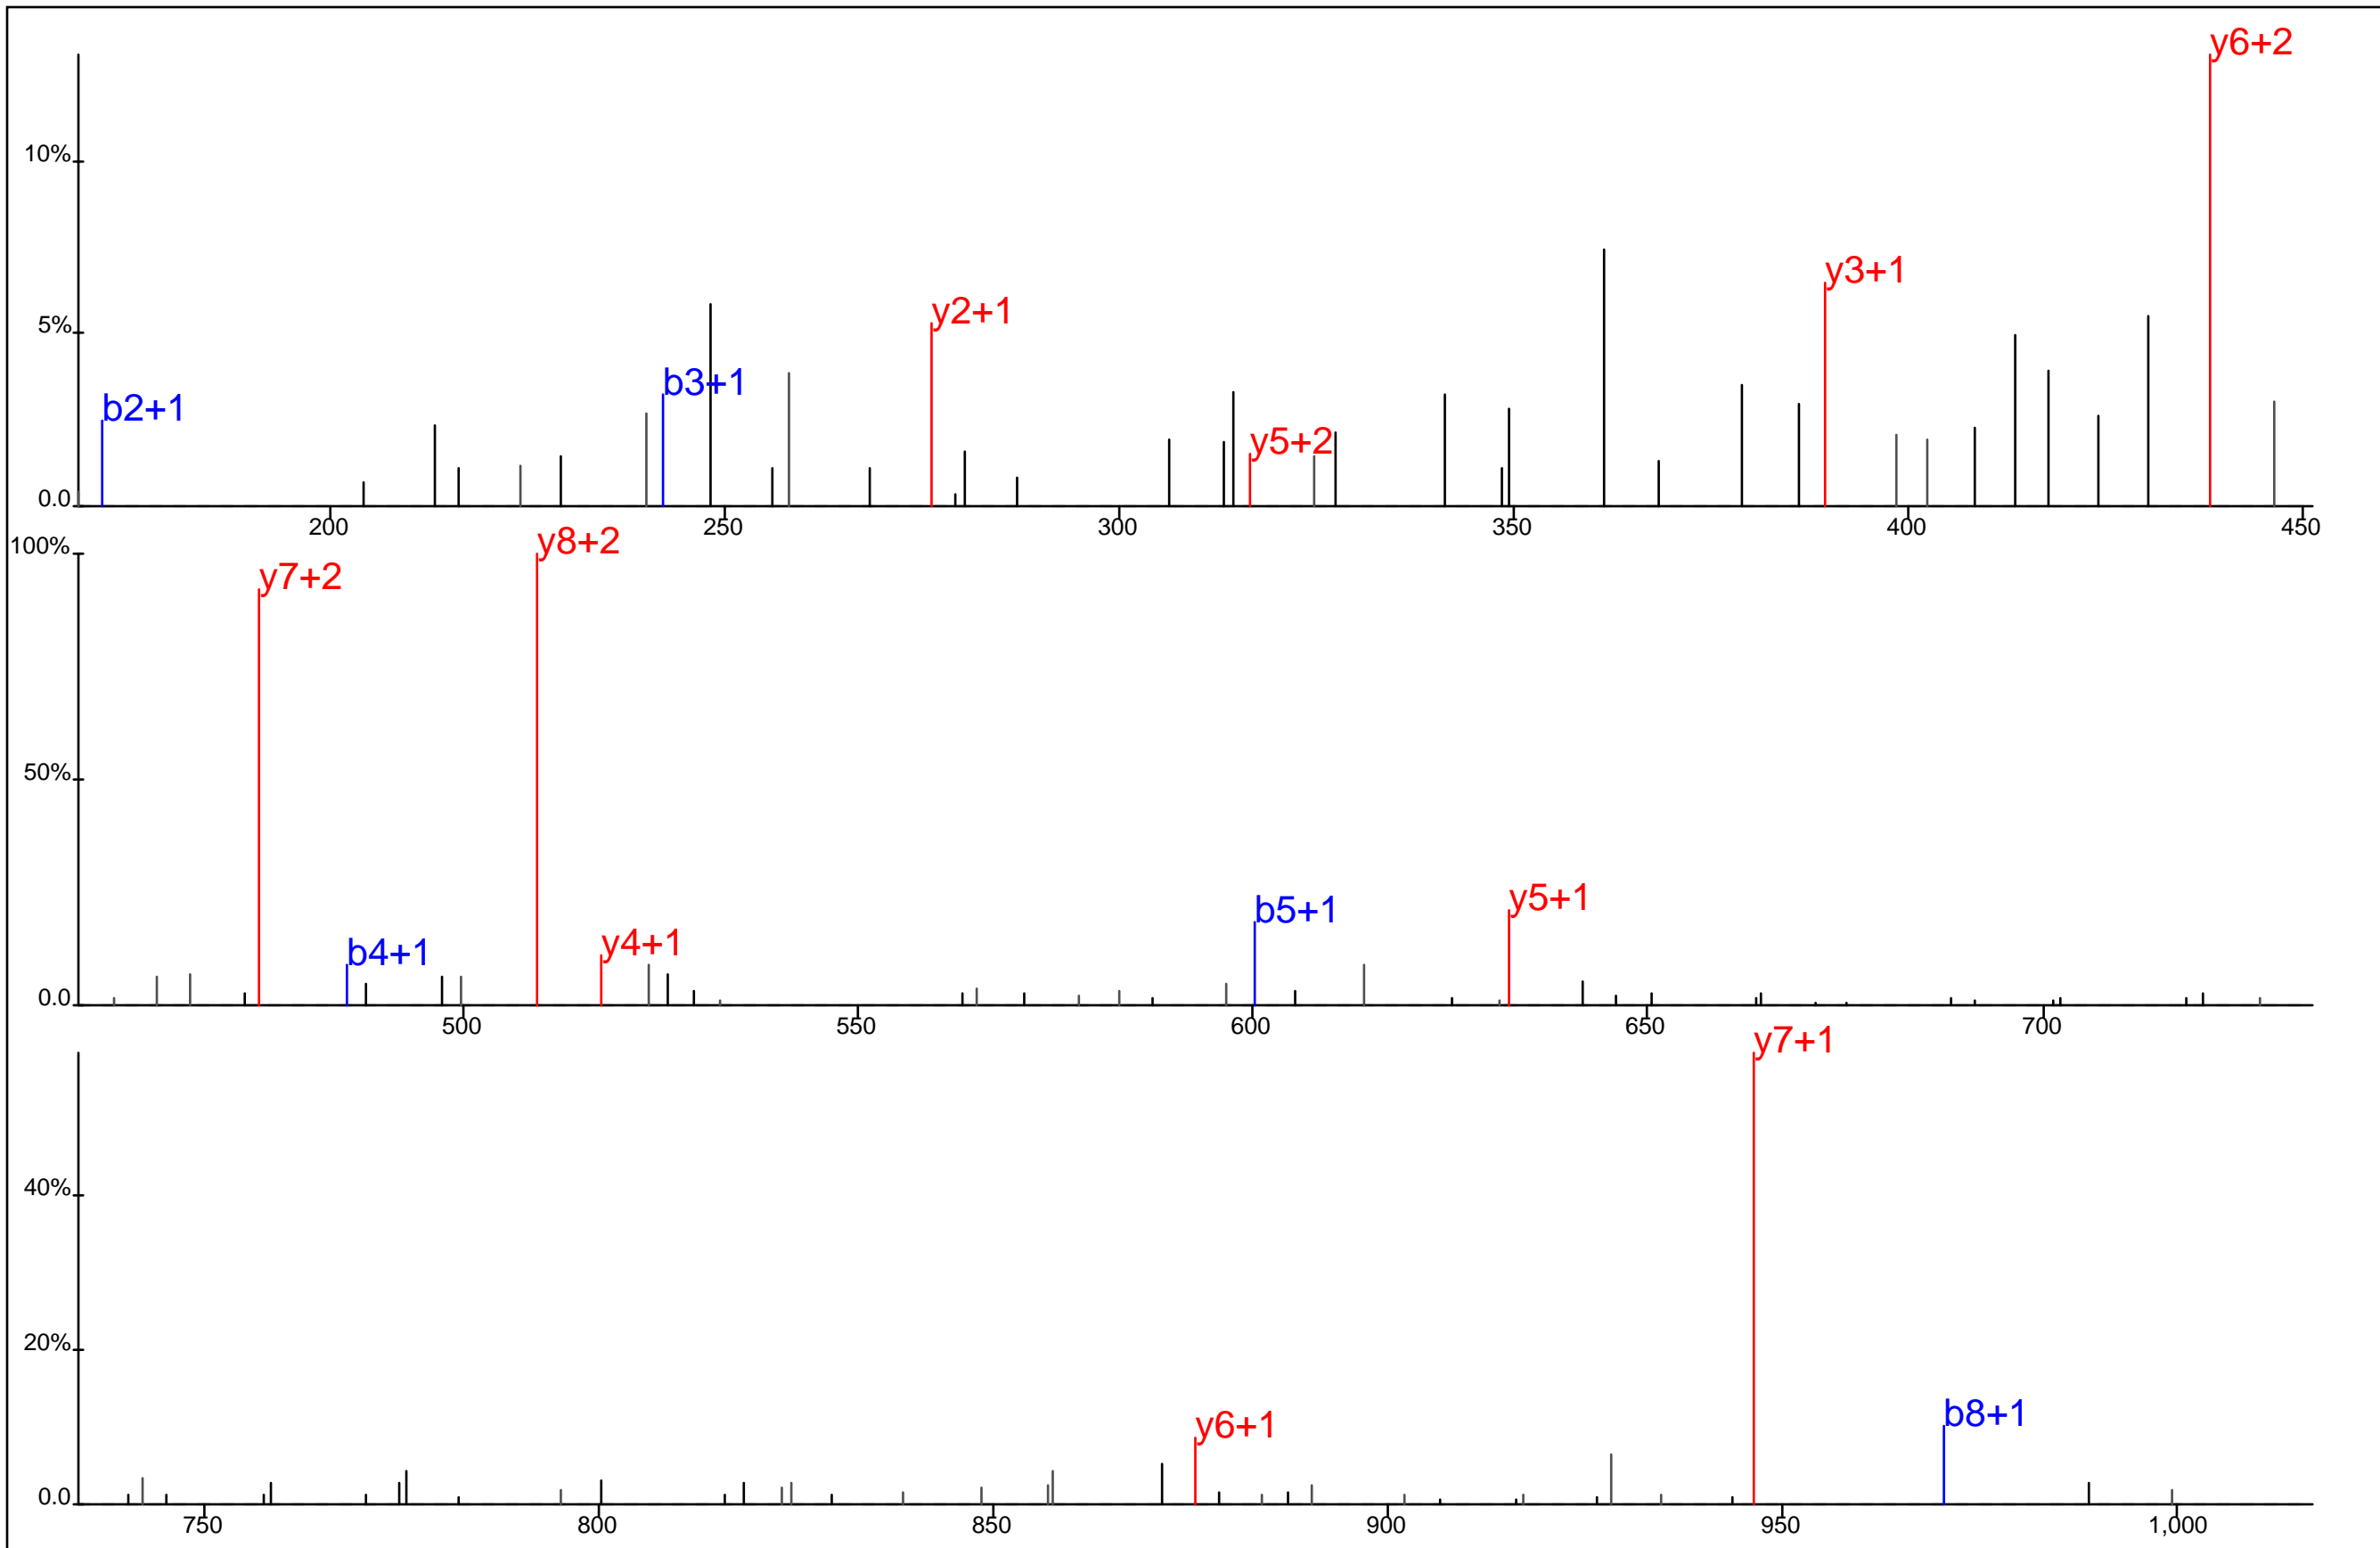

■ ■ ■ ■ ■ ■ ■ ■  
 V A A Y\* D K L E K  
■ ■ ■ ■ ■ ■ ■ ■

Protein Name: Myosin heavy chain 9, nonmuscle  
 gi Accession: 0  
 Precursor Mass: 558.7704+2  
 Delta Mass: 0.122 ppm  
 XCorr: 51.47

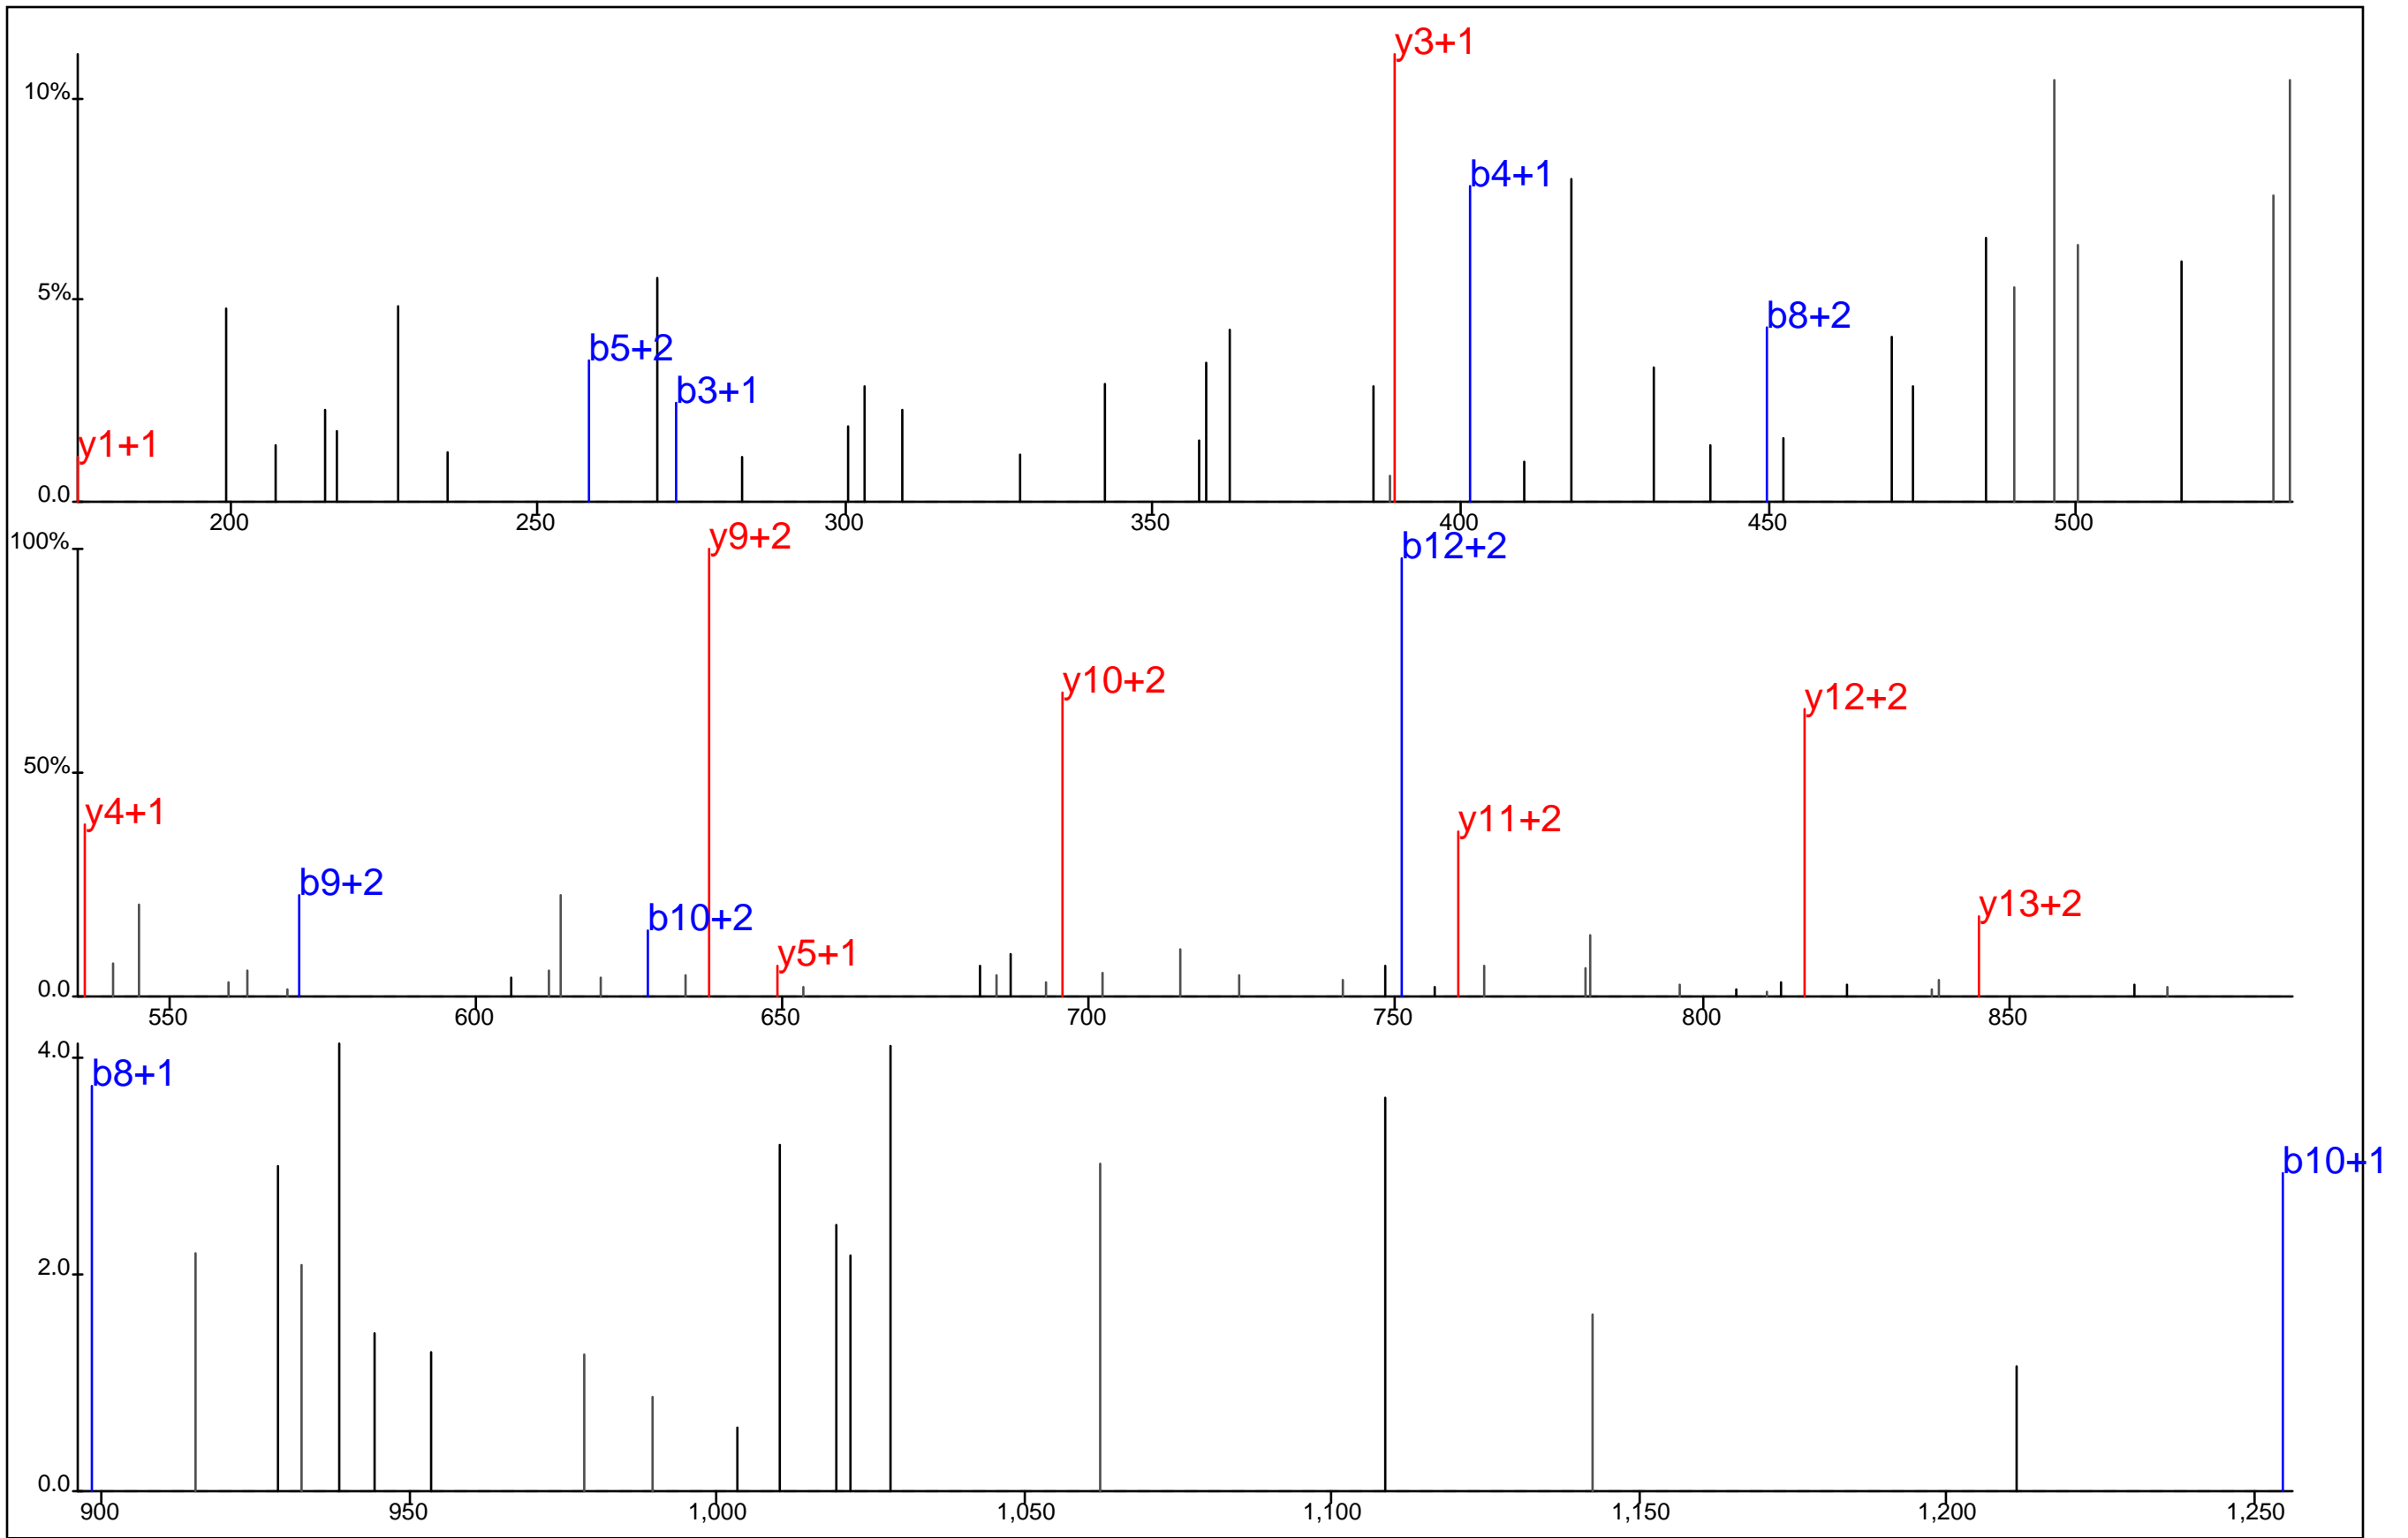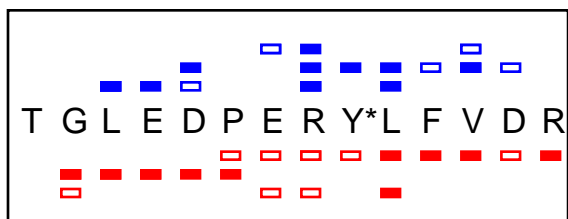

Protein Name: Myosin heavy chain, nonmuscle type B  
 gi Accession: 0  
 Precursor Mass: 597.2766+3  
 Delta Mass: 0.304 ppm  
 XCorr: 26.17



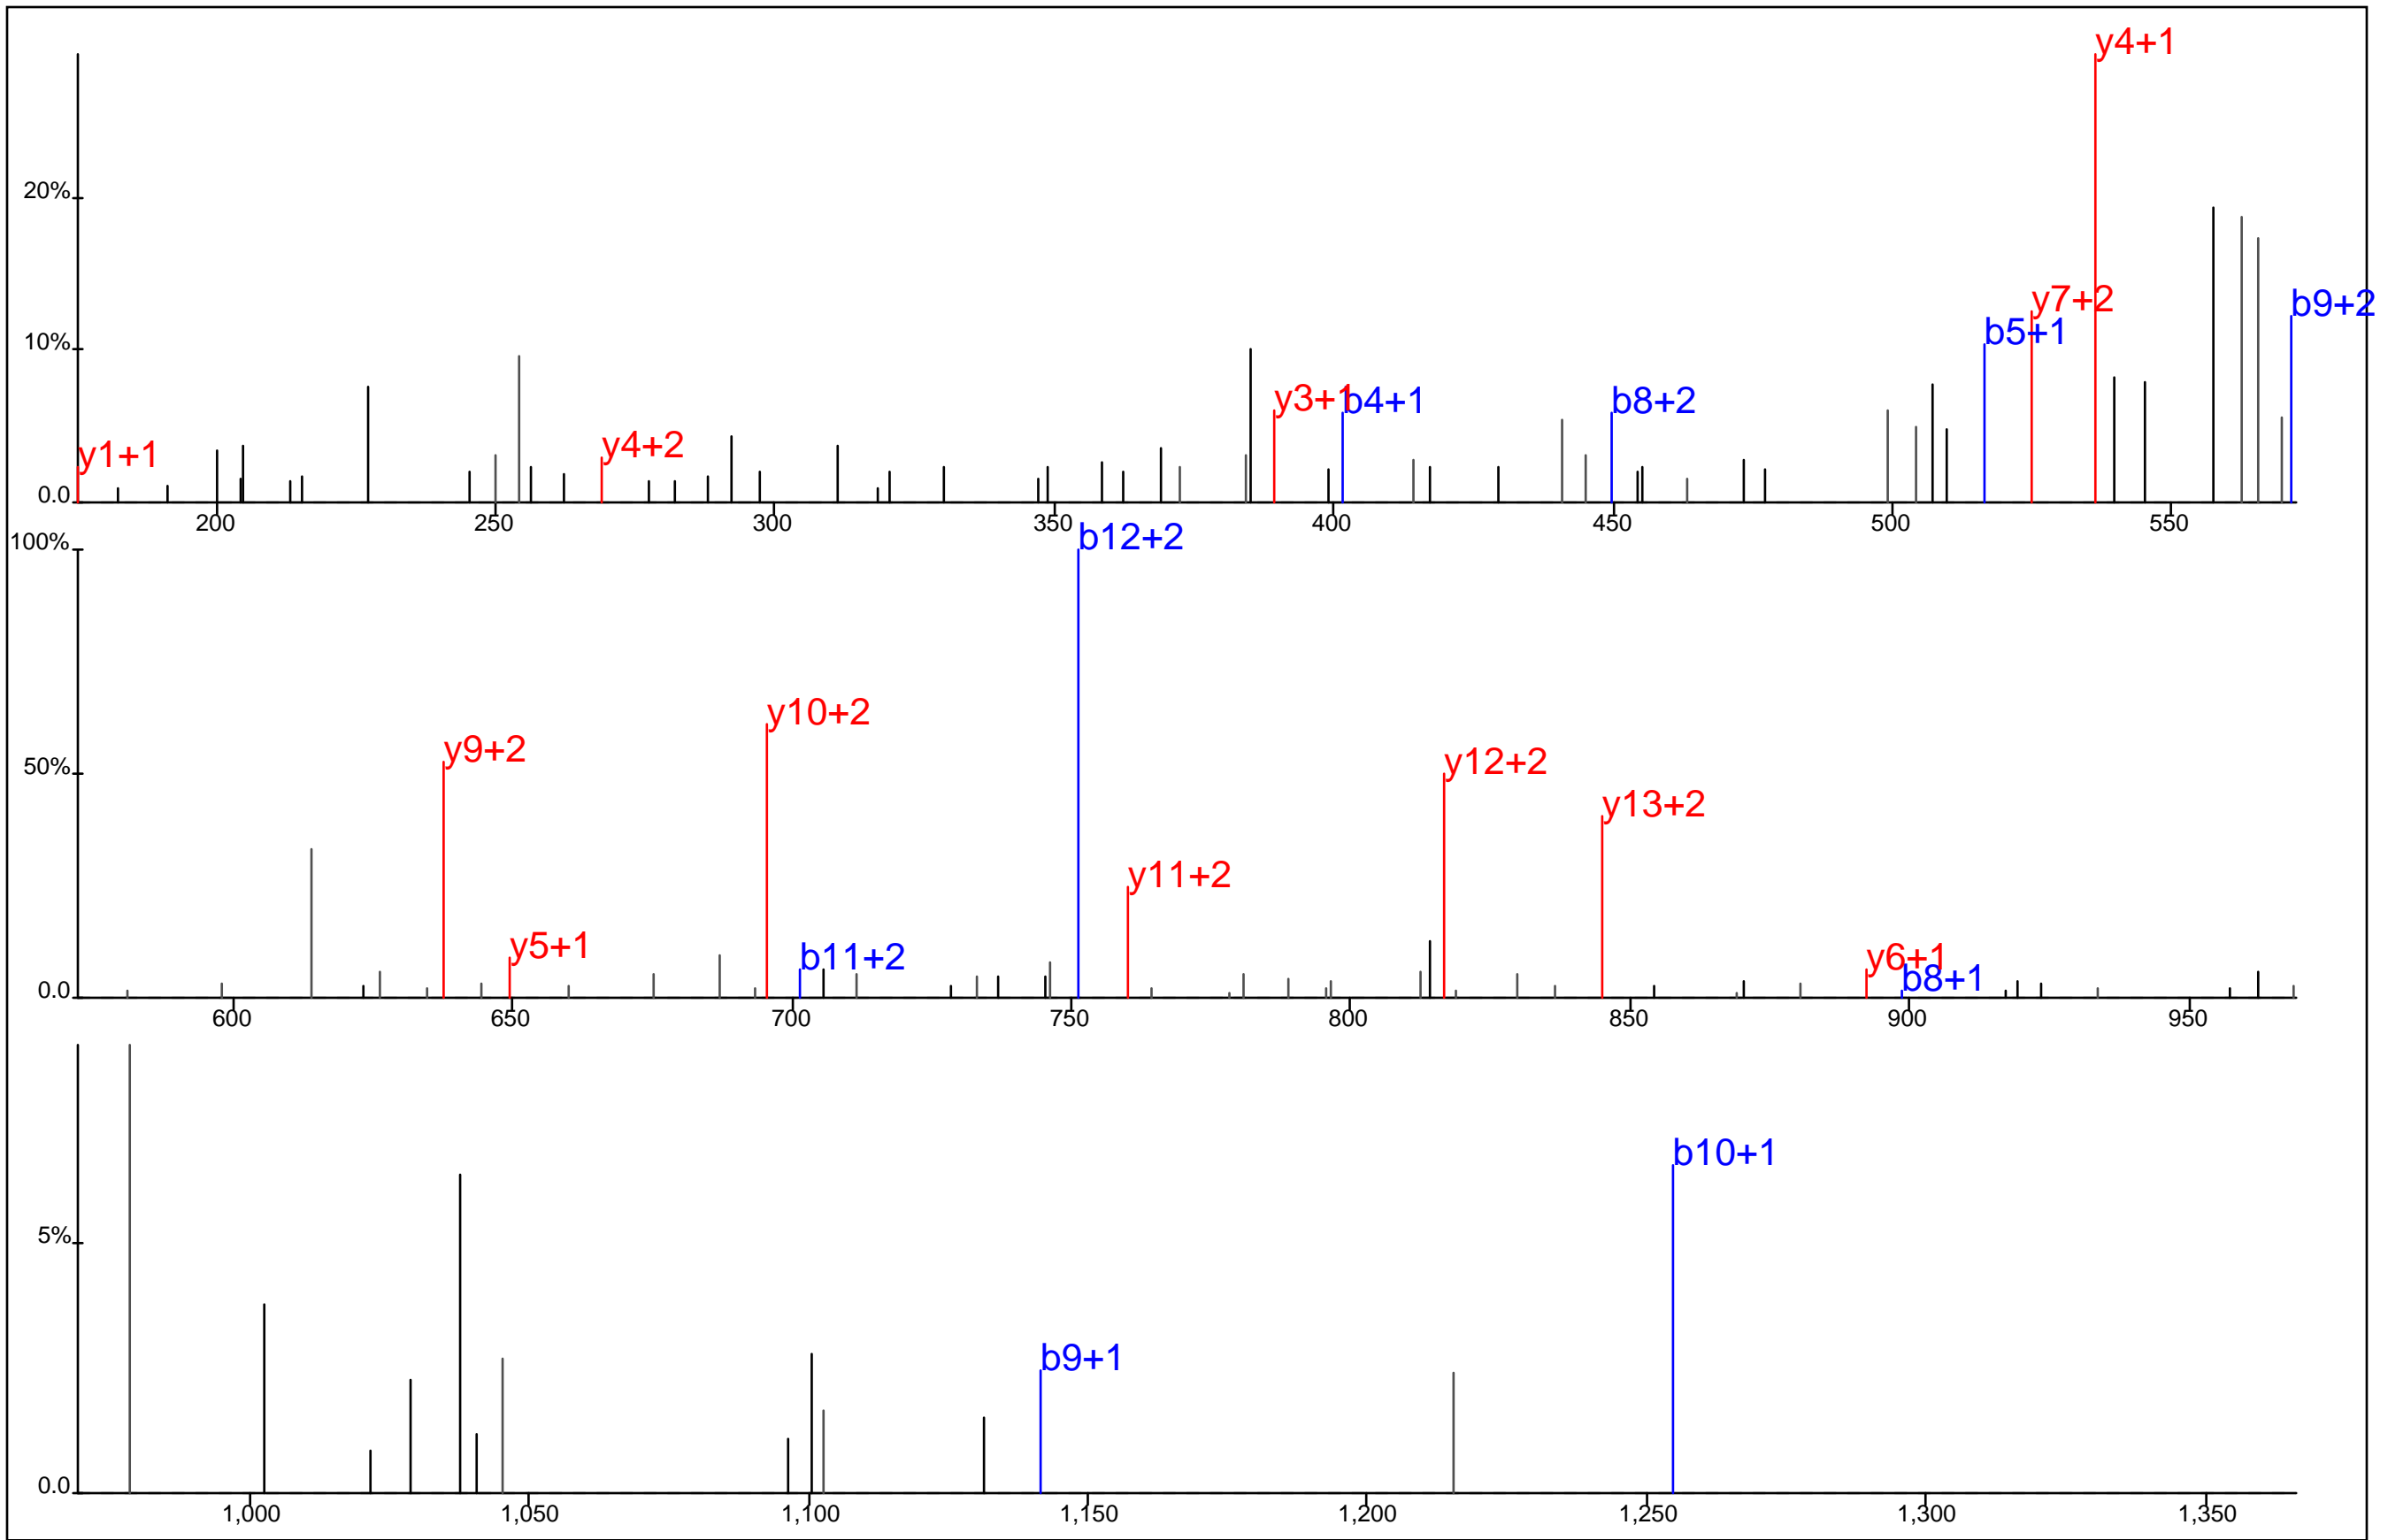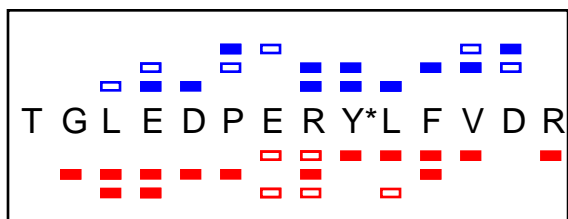

Protein Name: Myosin heavy chain, nonmuscle type B  
 gi Accession: 0  
 Precursor Mass: 597.2761+3  
 Delta Mass: 1.122 ppm  
 XCorr: 29.38



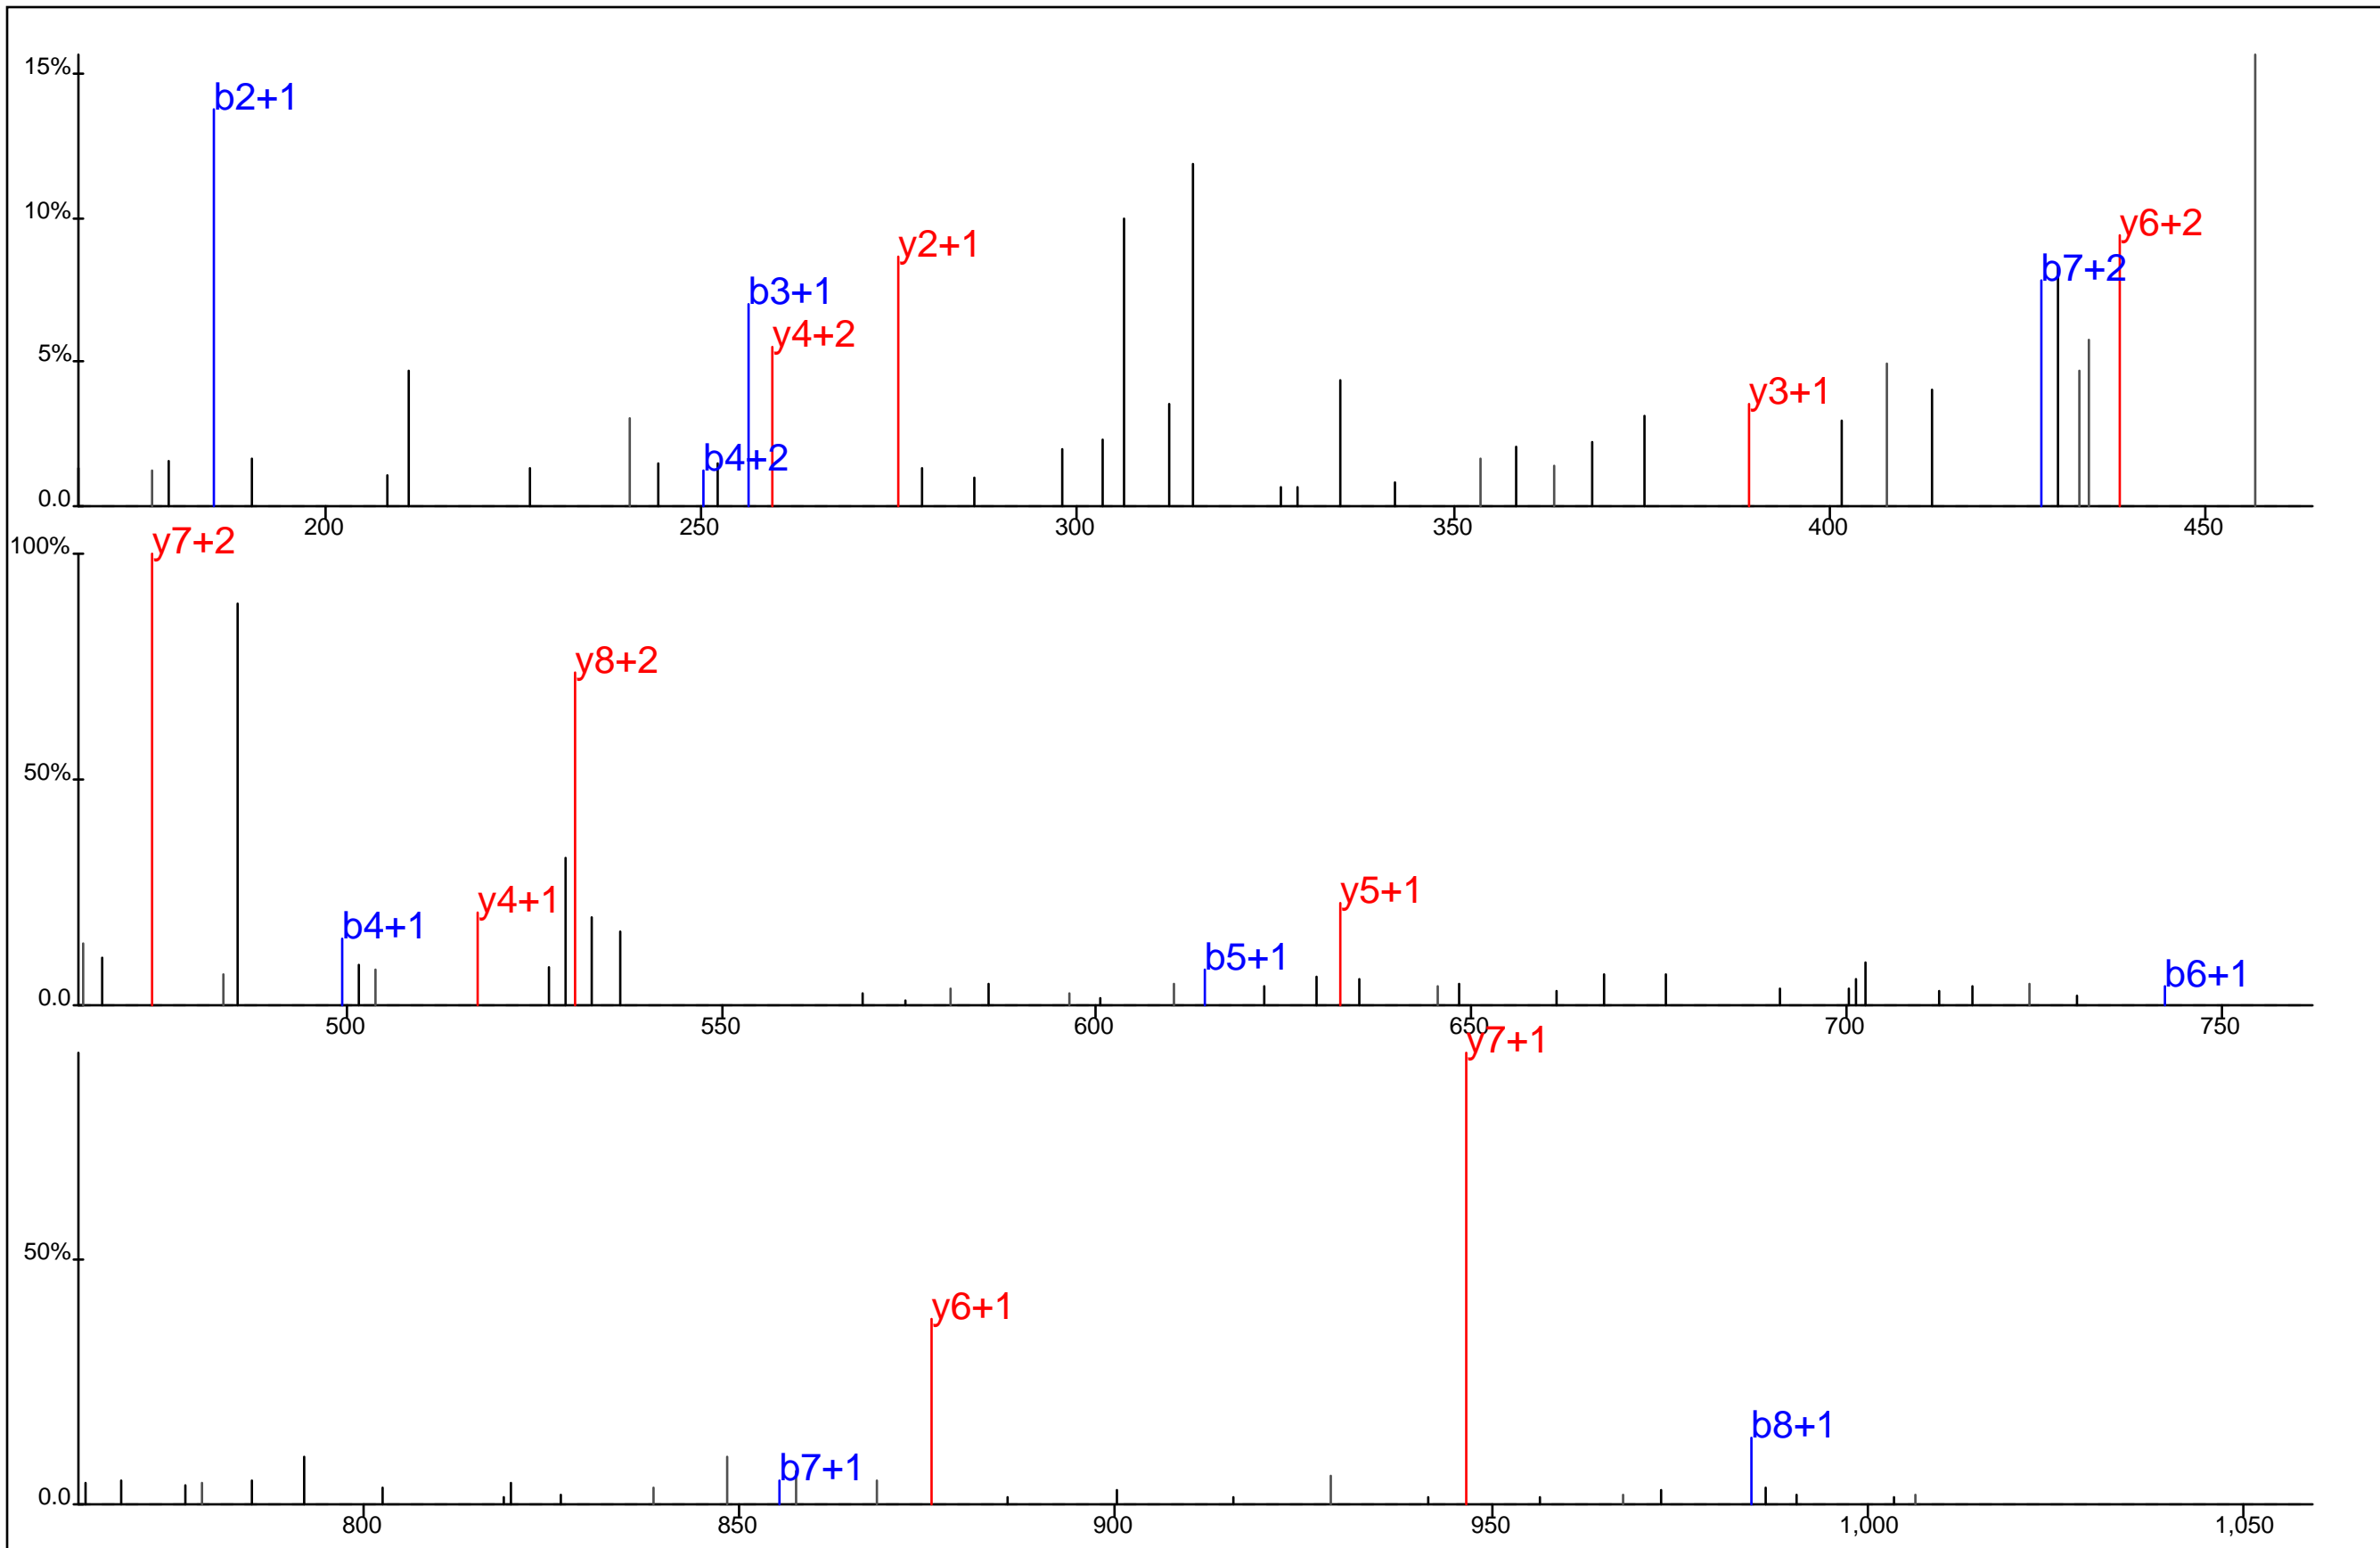

■ ■ ■ ■ ■ ■ ■ ■  
 A L A Y\* D K L E K  
■ ■ ■ ■ ■ ■ ■ ■

Protein Name: Myosin heavy chain, nonmuscle type B  
 gi Accession: 0  
 Precursor Mass: 565.7789+2  
 Delta Mass: 1.054 ppm  
 XCorr: 25.38

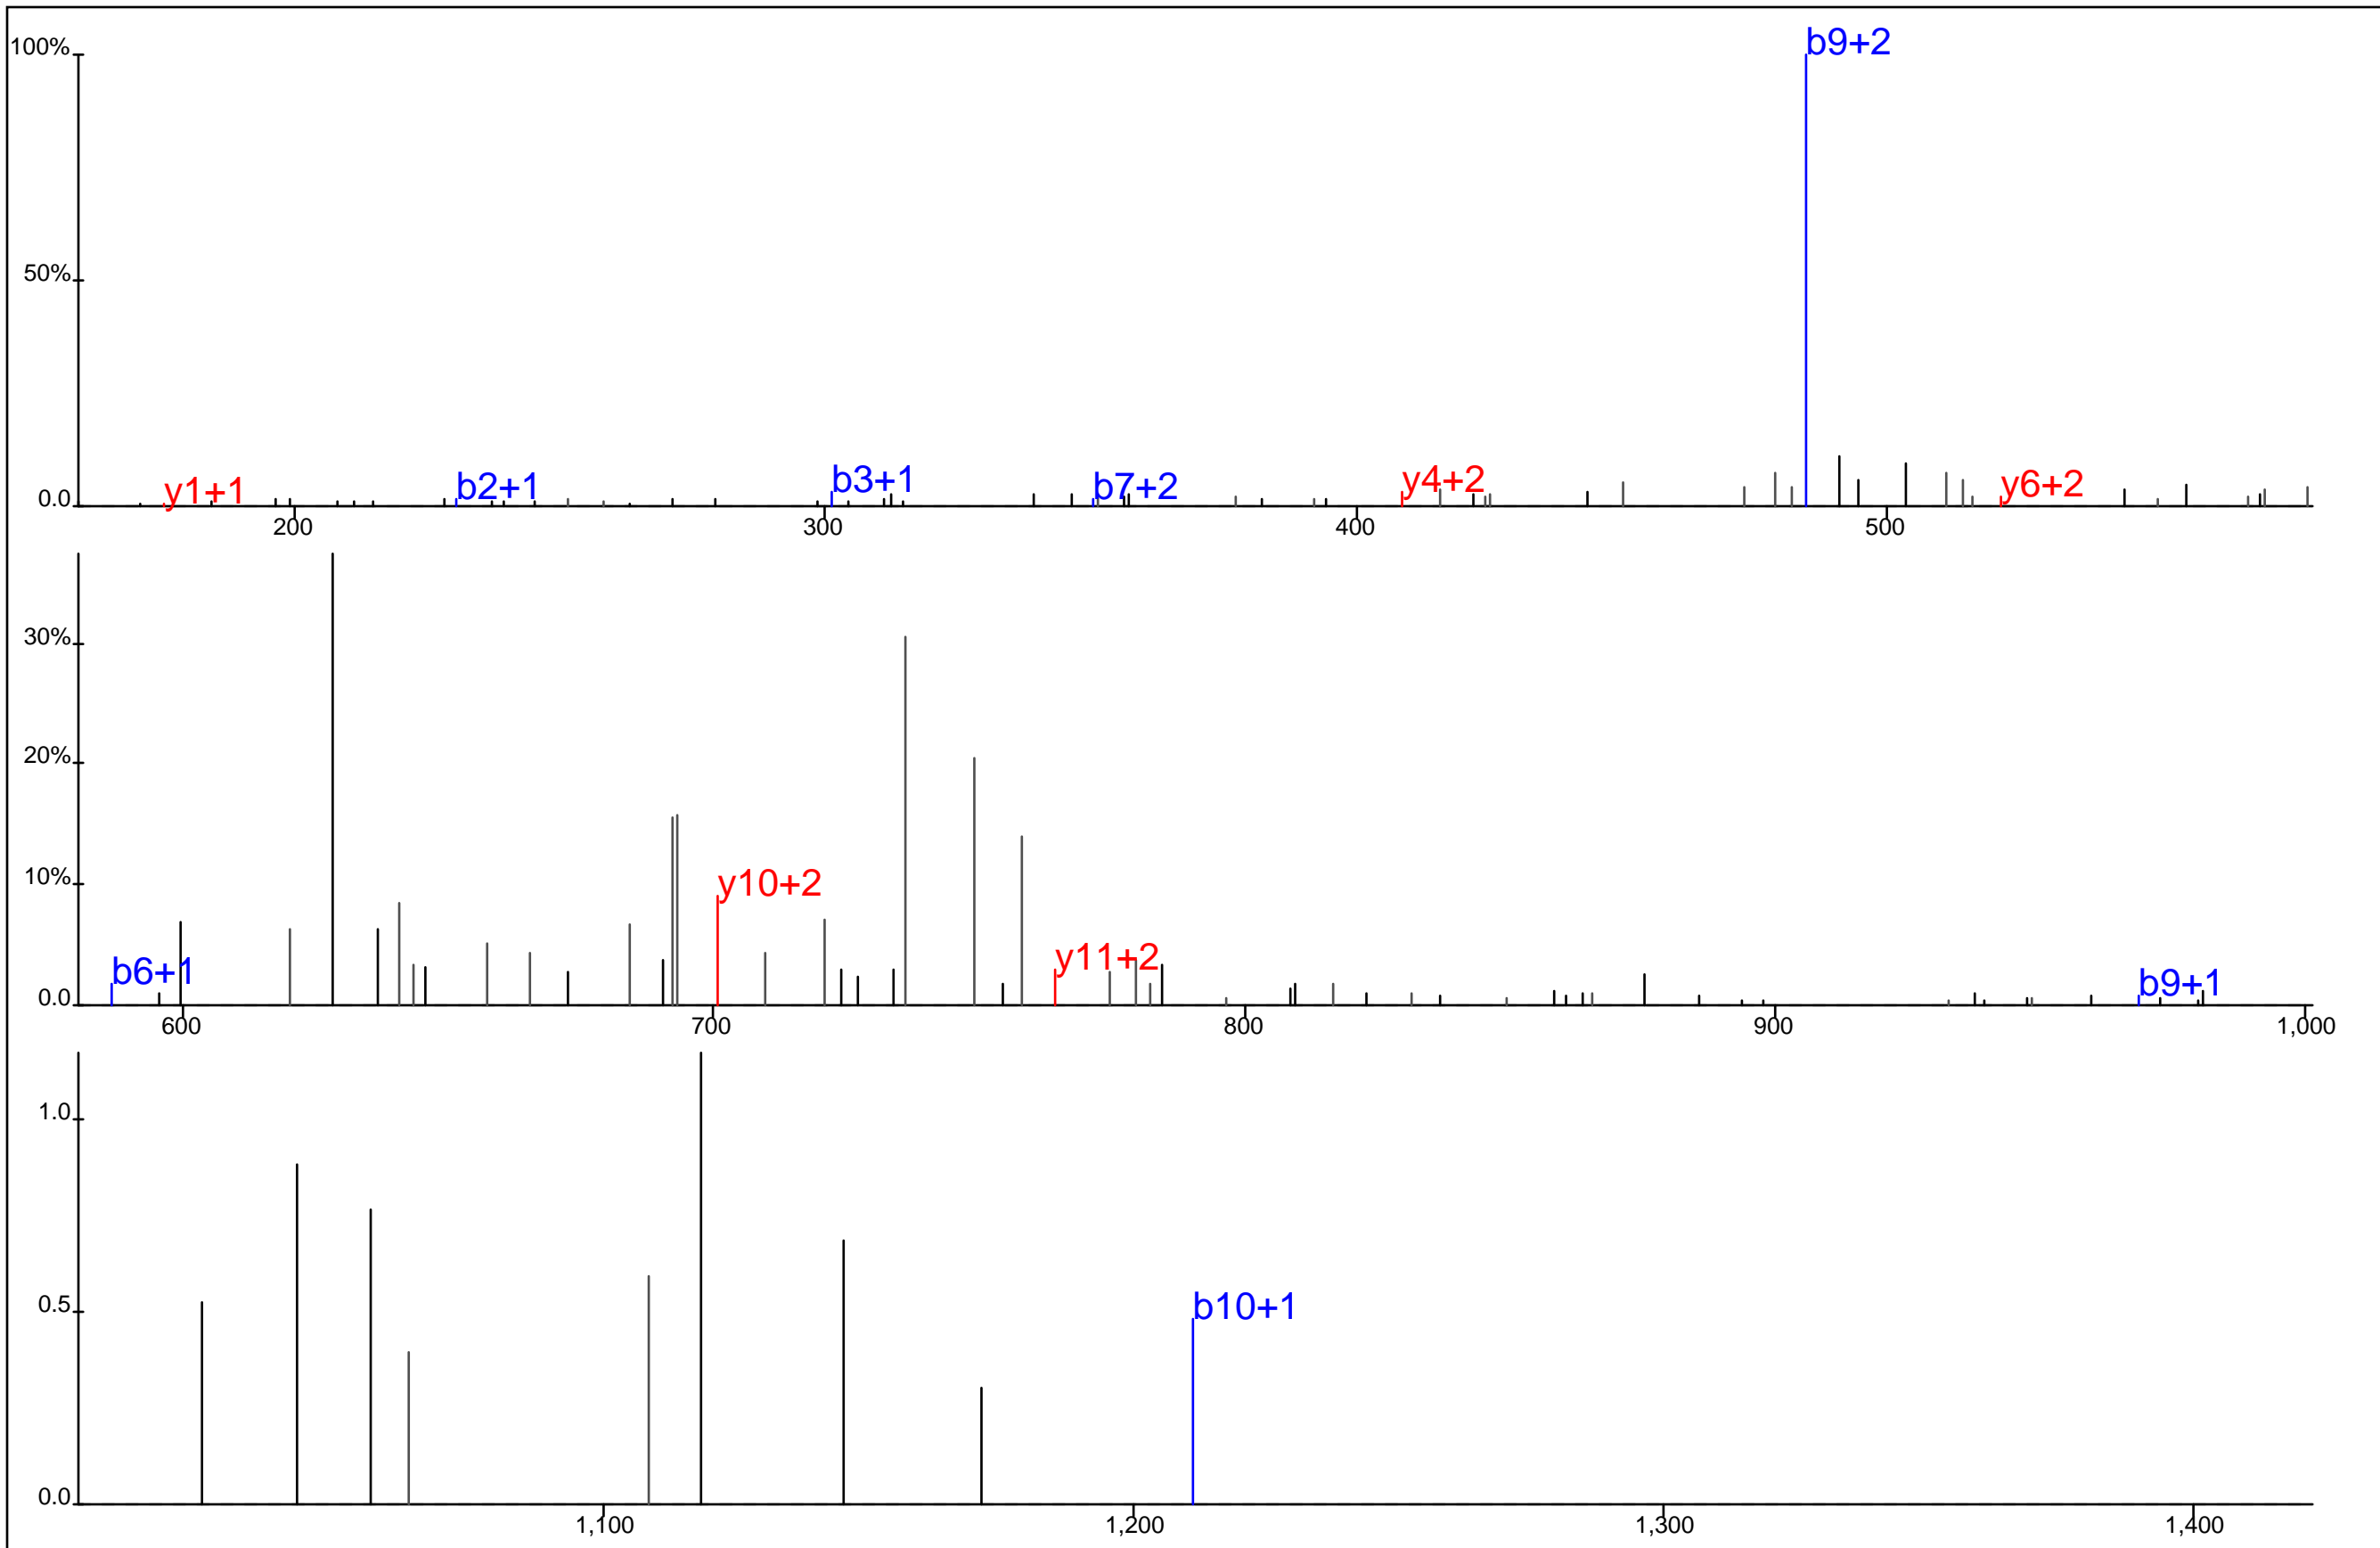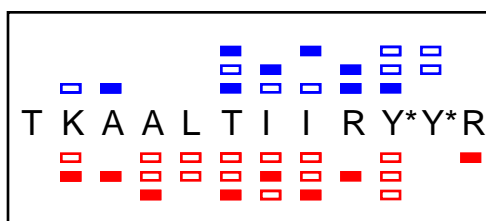

Protein Name: Myosin ID  
 gi Accession: 0  
 Precursor Mass: 543.6016+3  
 Delta Mass: 3.638 ppm  
 XCorr: 23.26

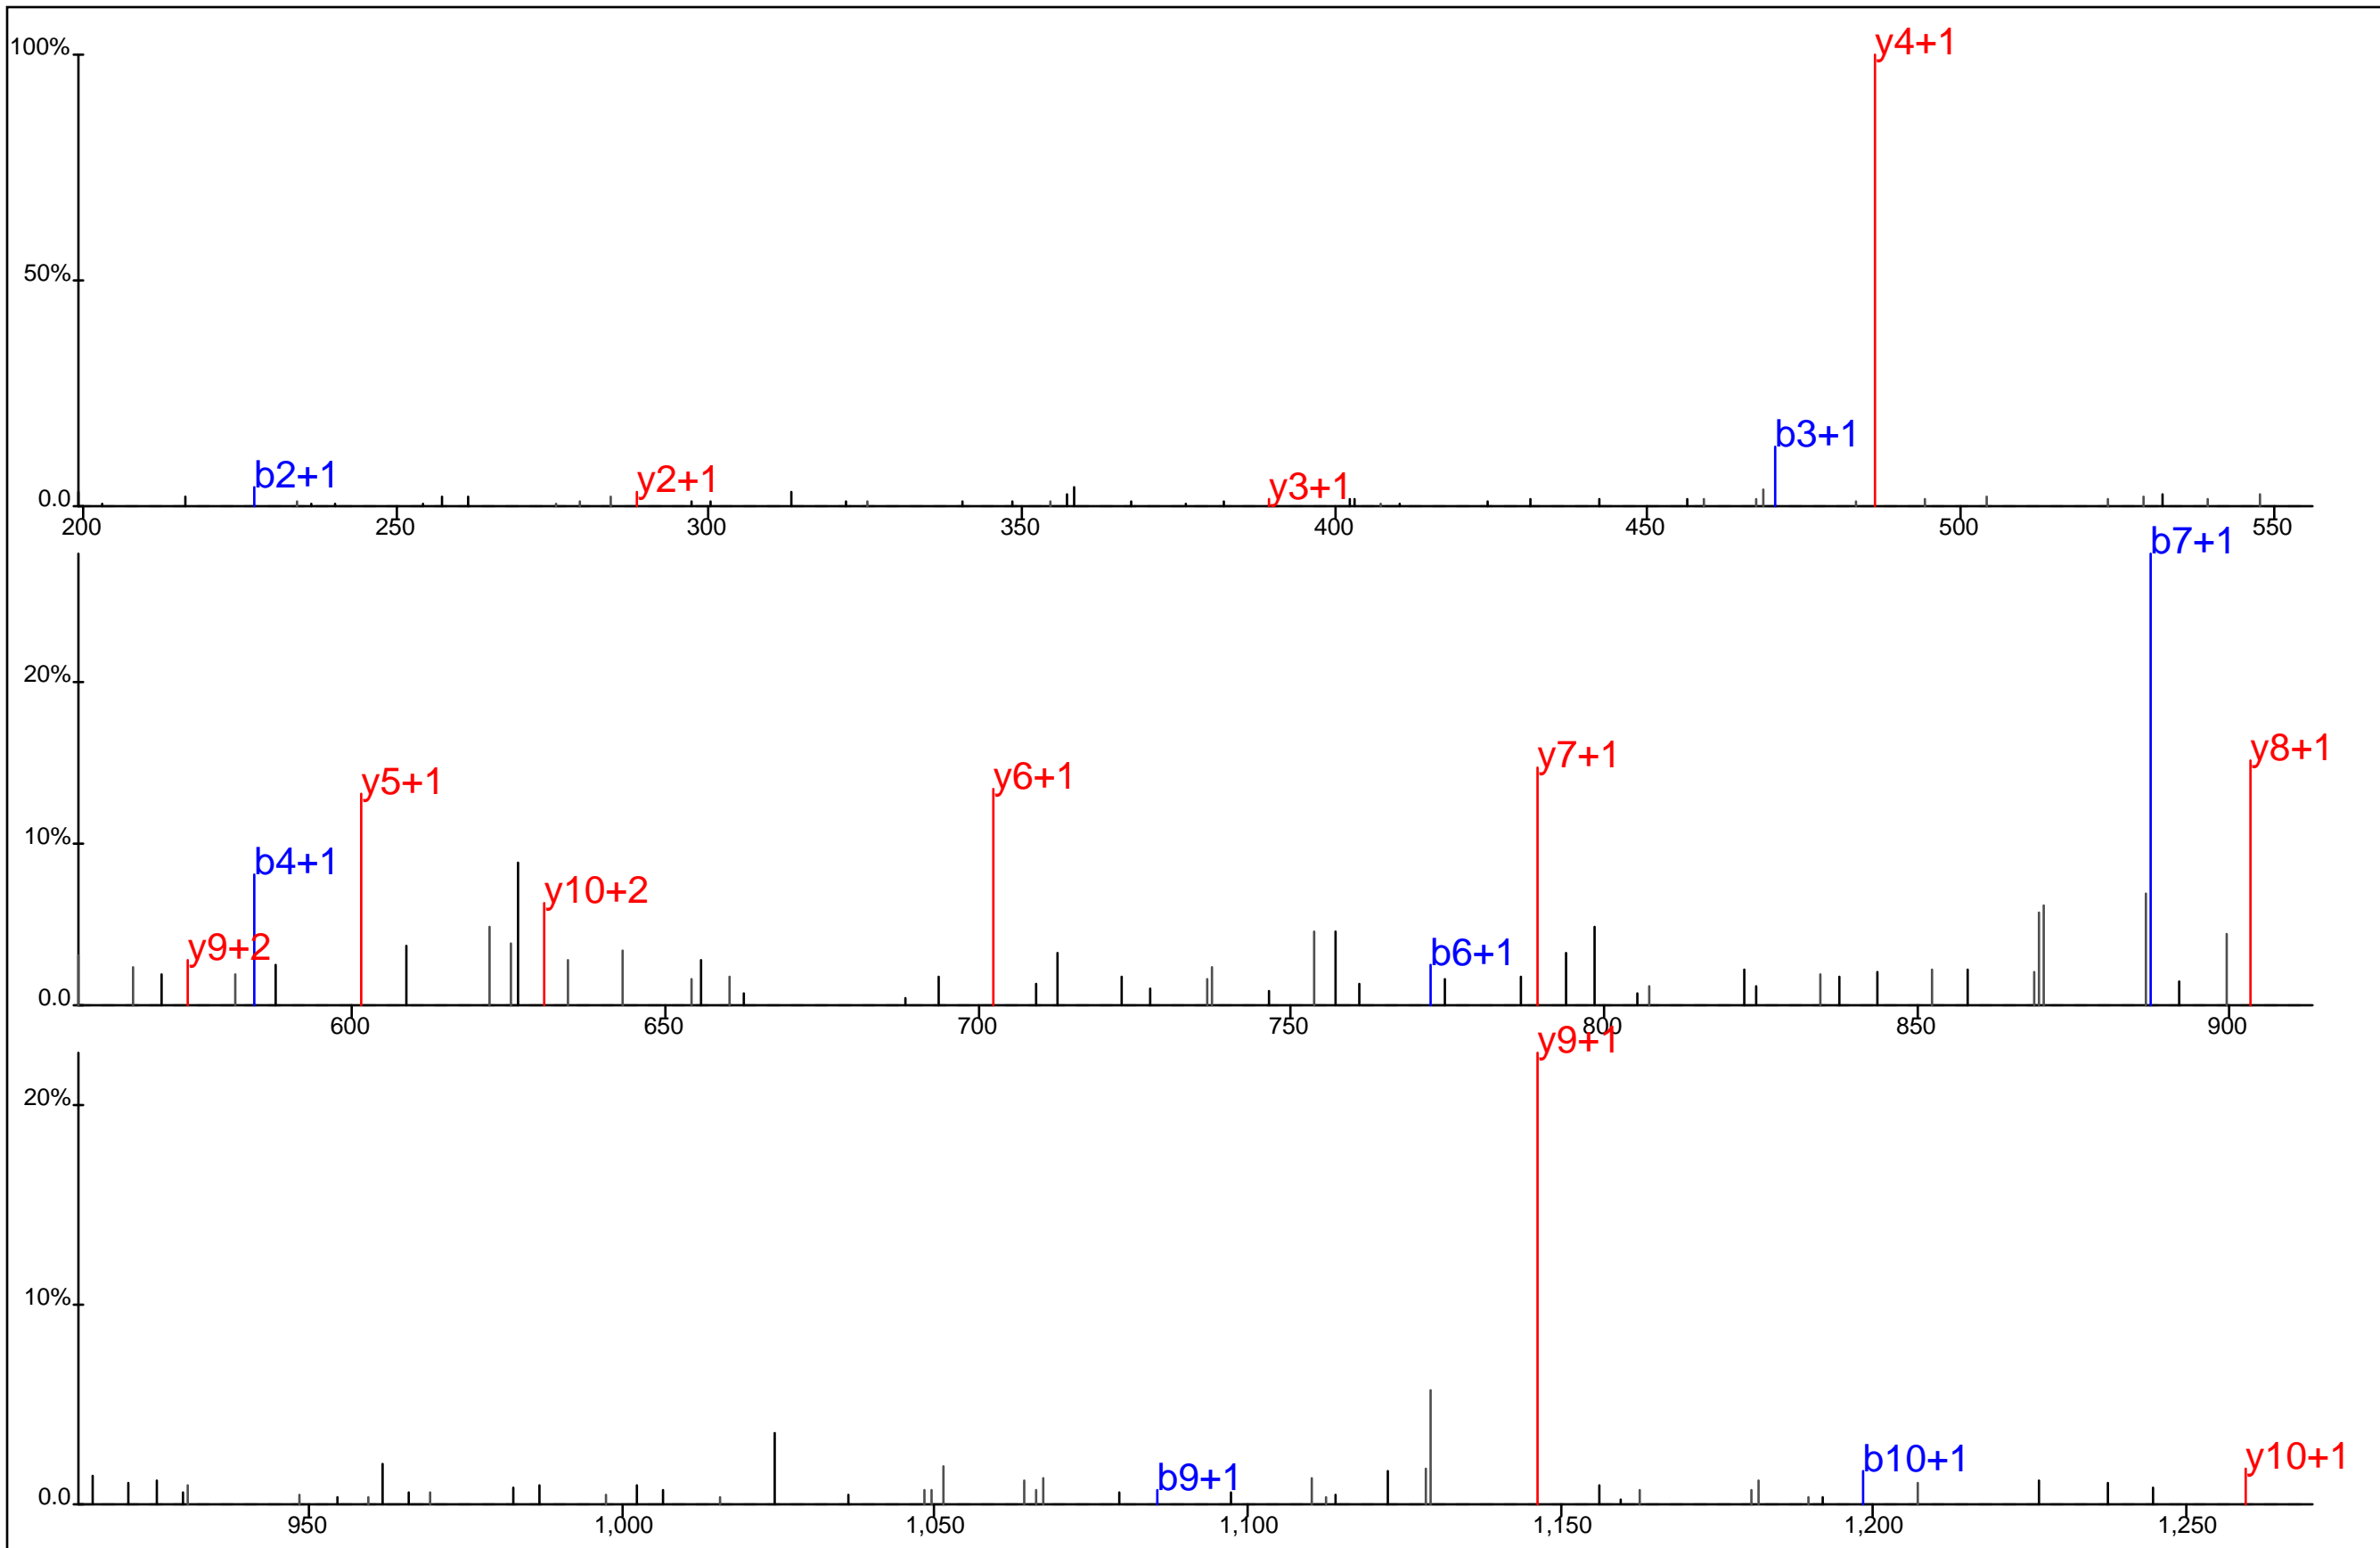

L L Y\* N S T D P T L R

Protein Name: Myosin IG  
 gi Accession: 0  
 Precursor Mass: 686.8286+2  
 Delta Mass: 0.710 ppm  
 XCorr: 53.67

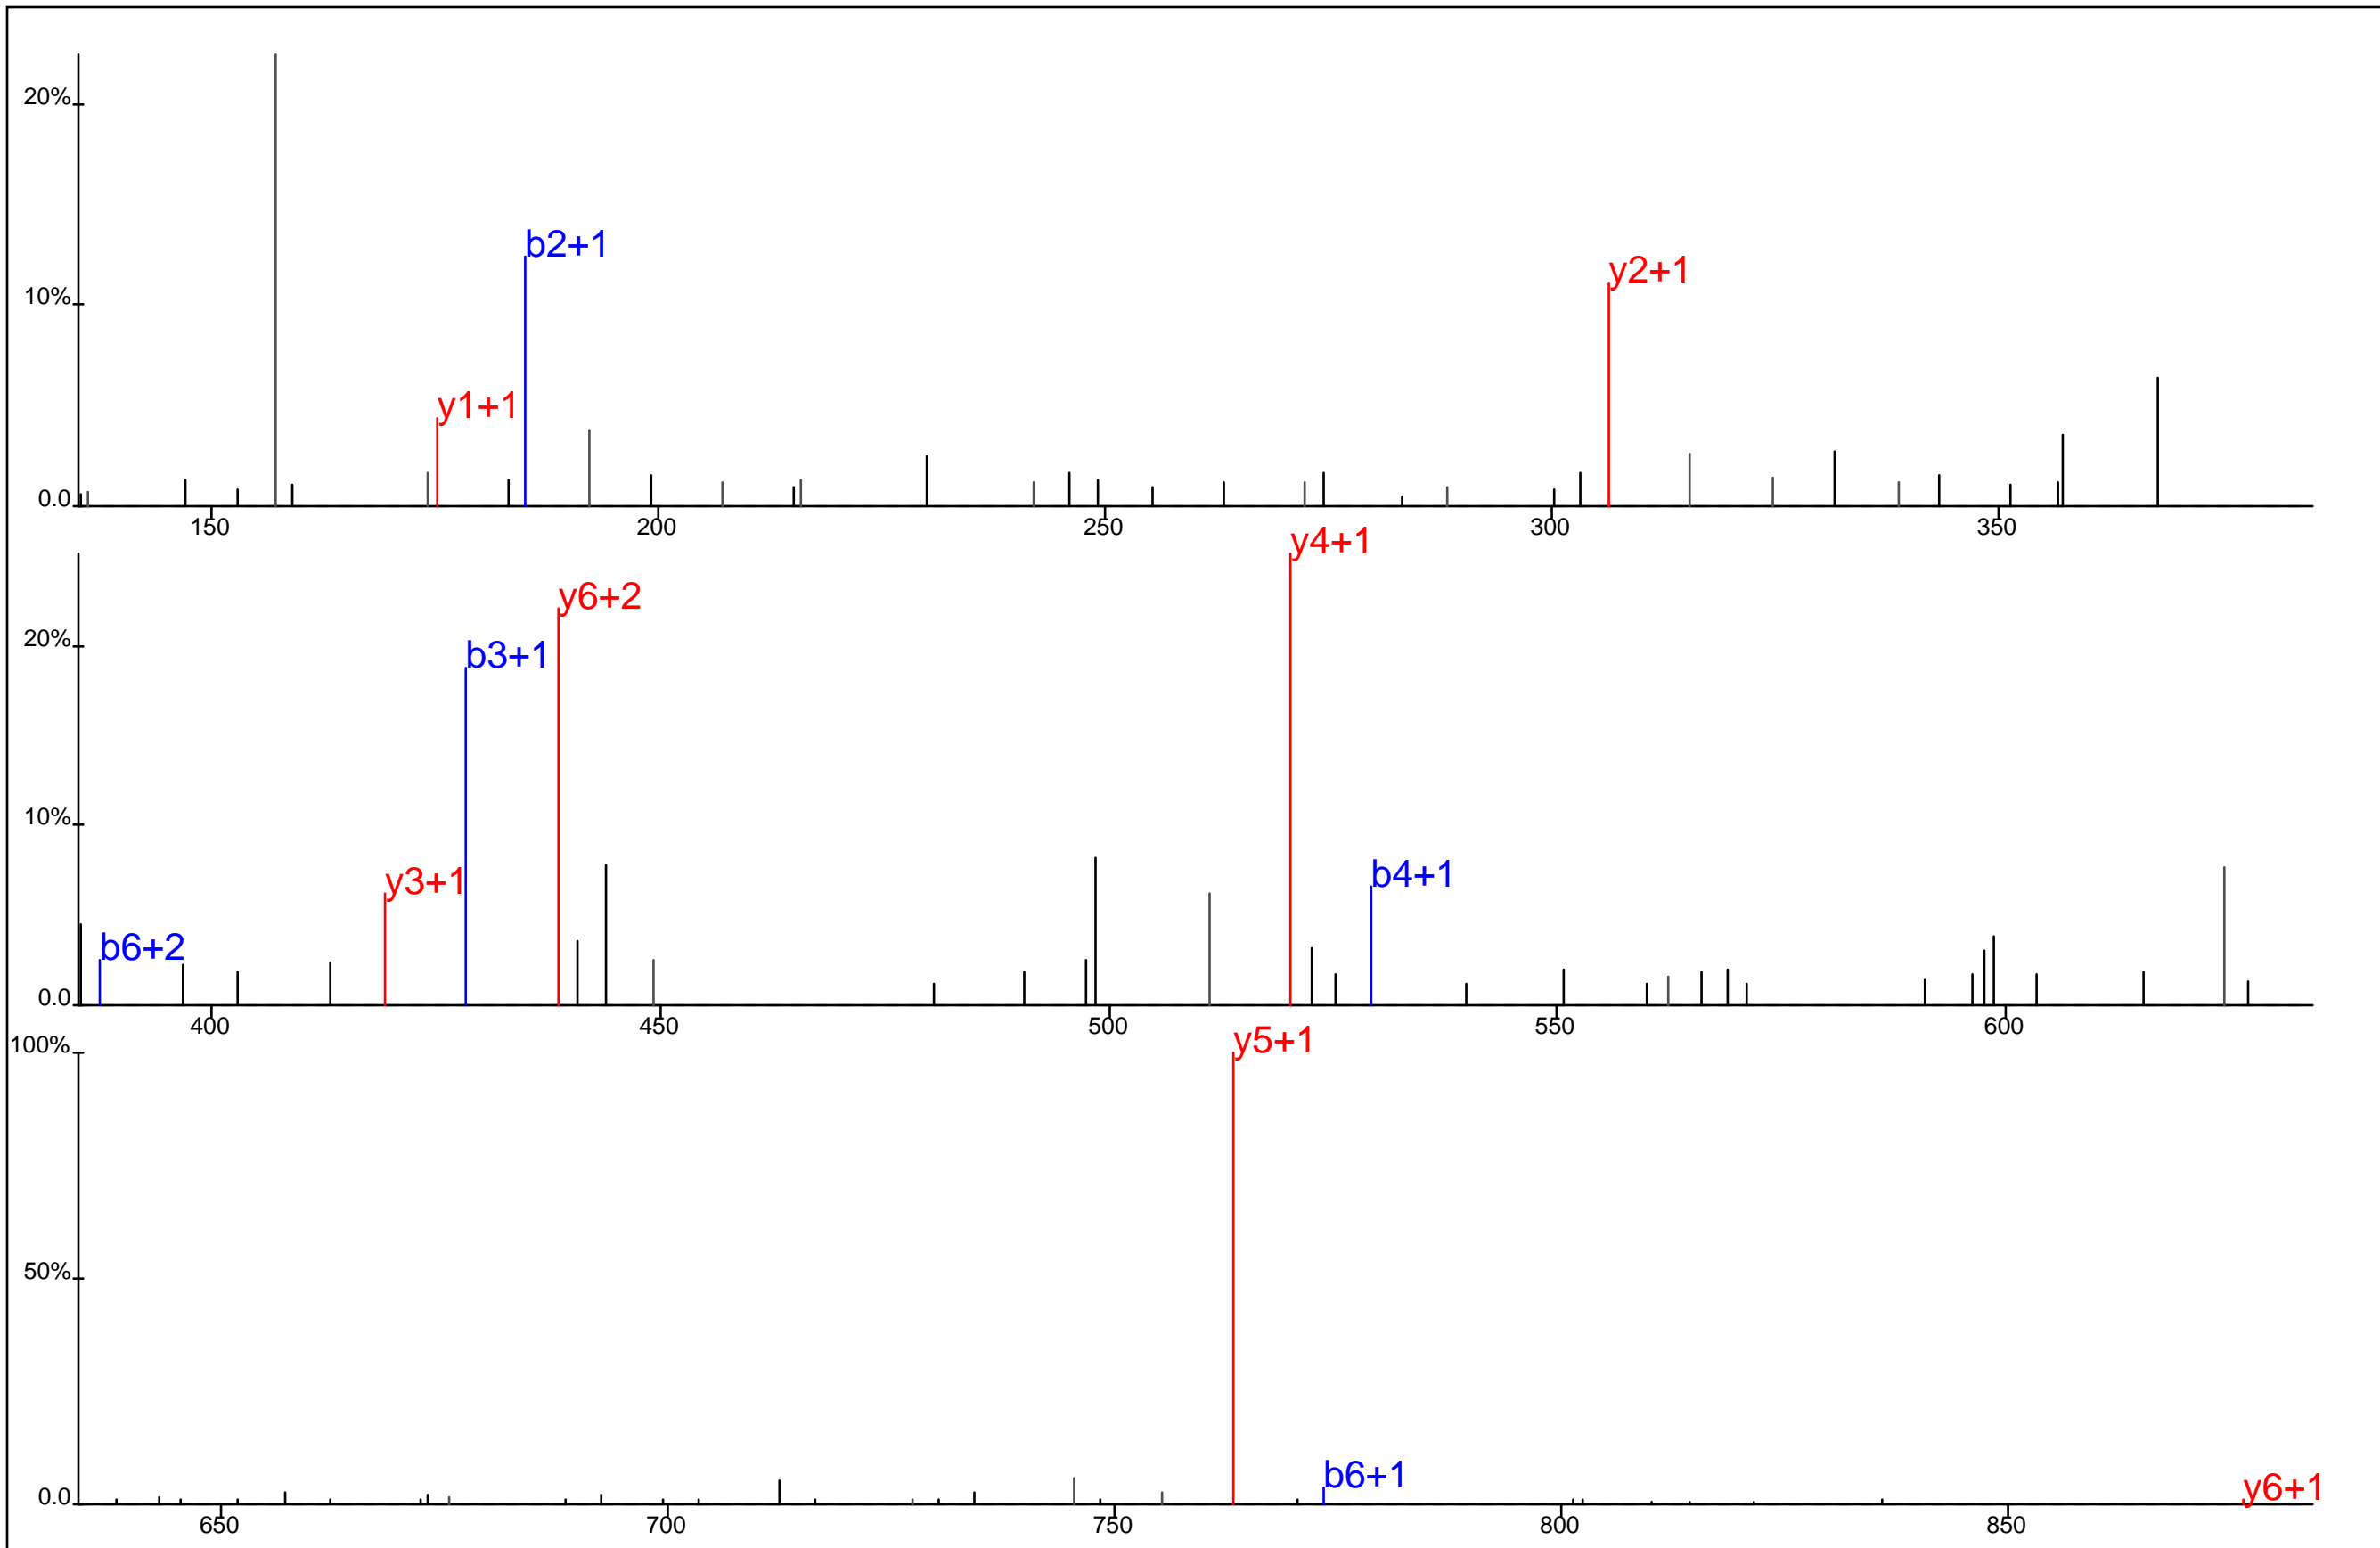


  
 A I Y\* T I M R

Protein Name: Myosin IG  
 gi Accession: 0  
 Precursor Mass: 474.2244+2  
 Delta Mass: 0.492 ppm  
 XCorr: 35.51

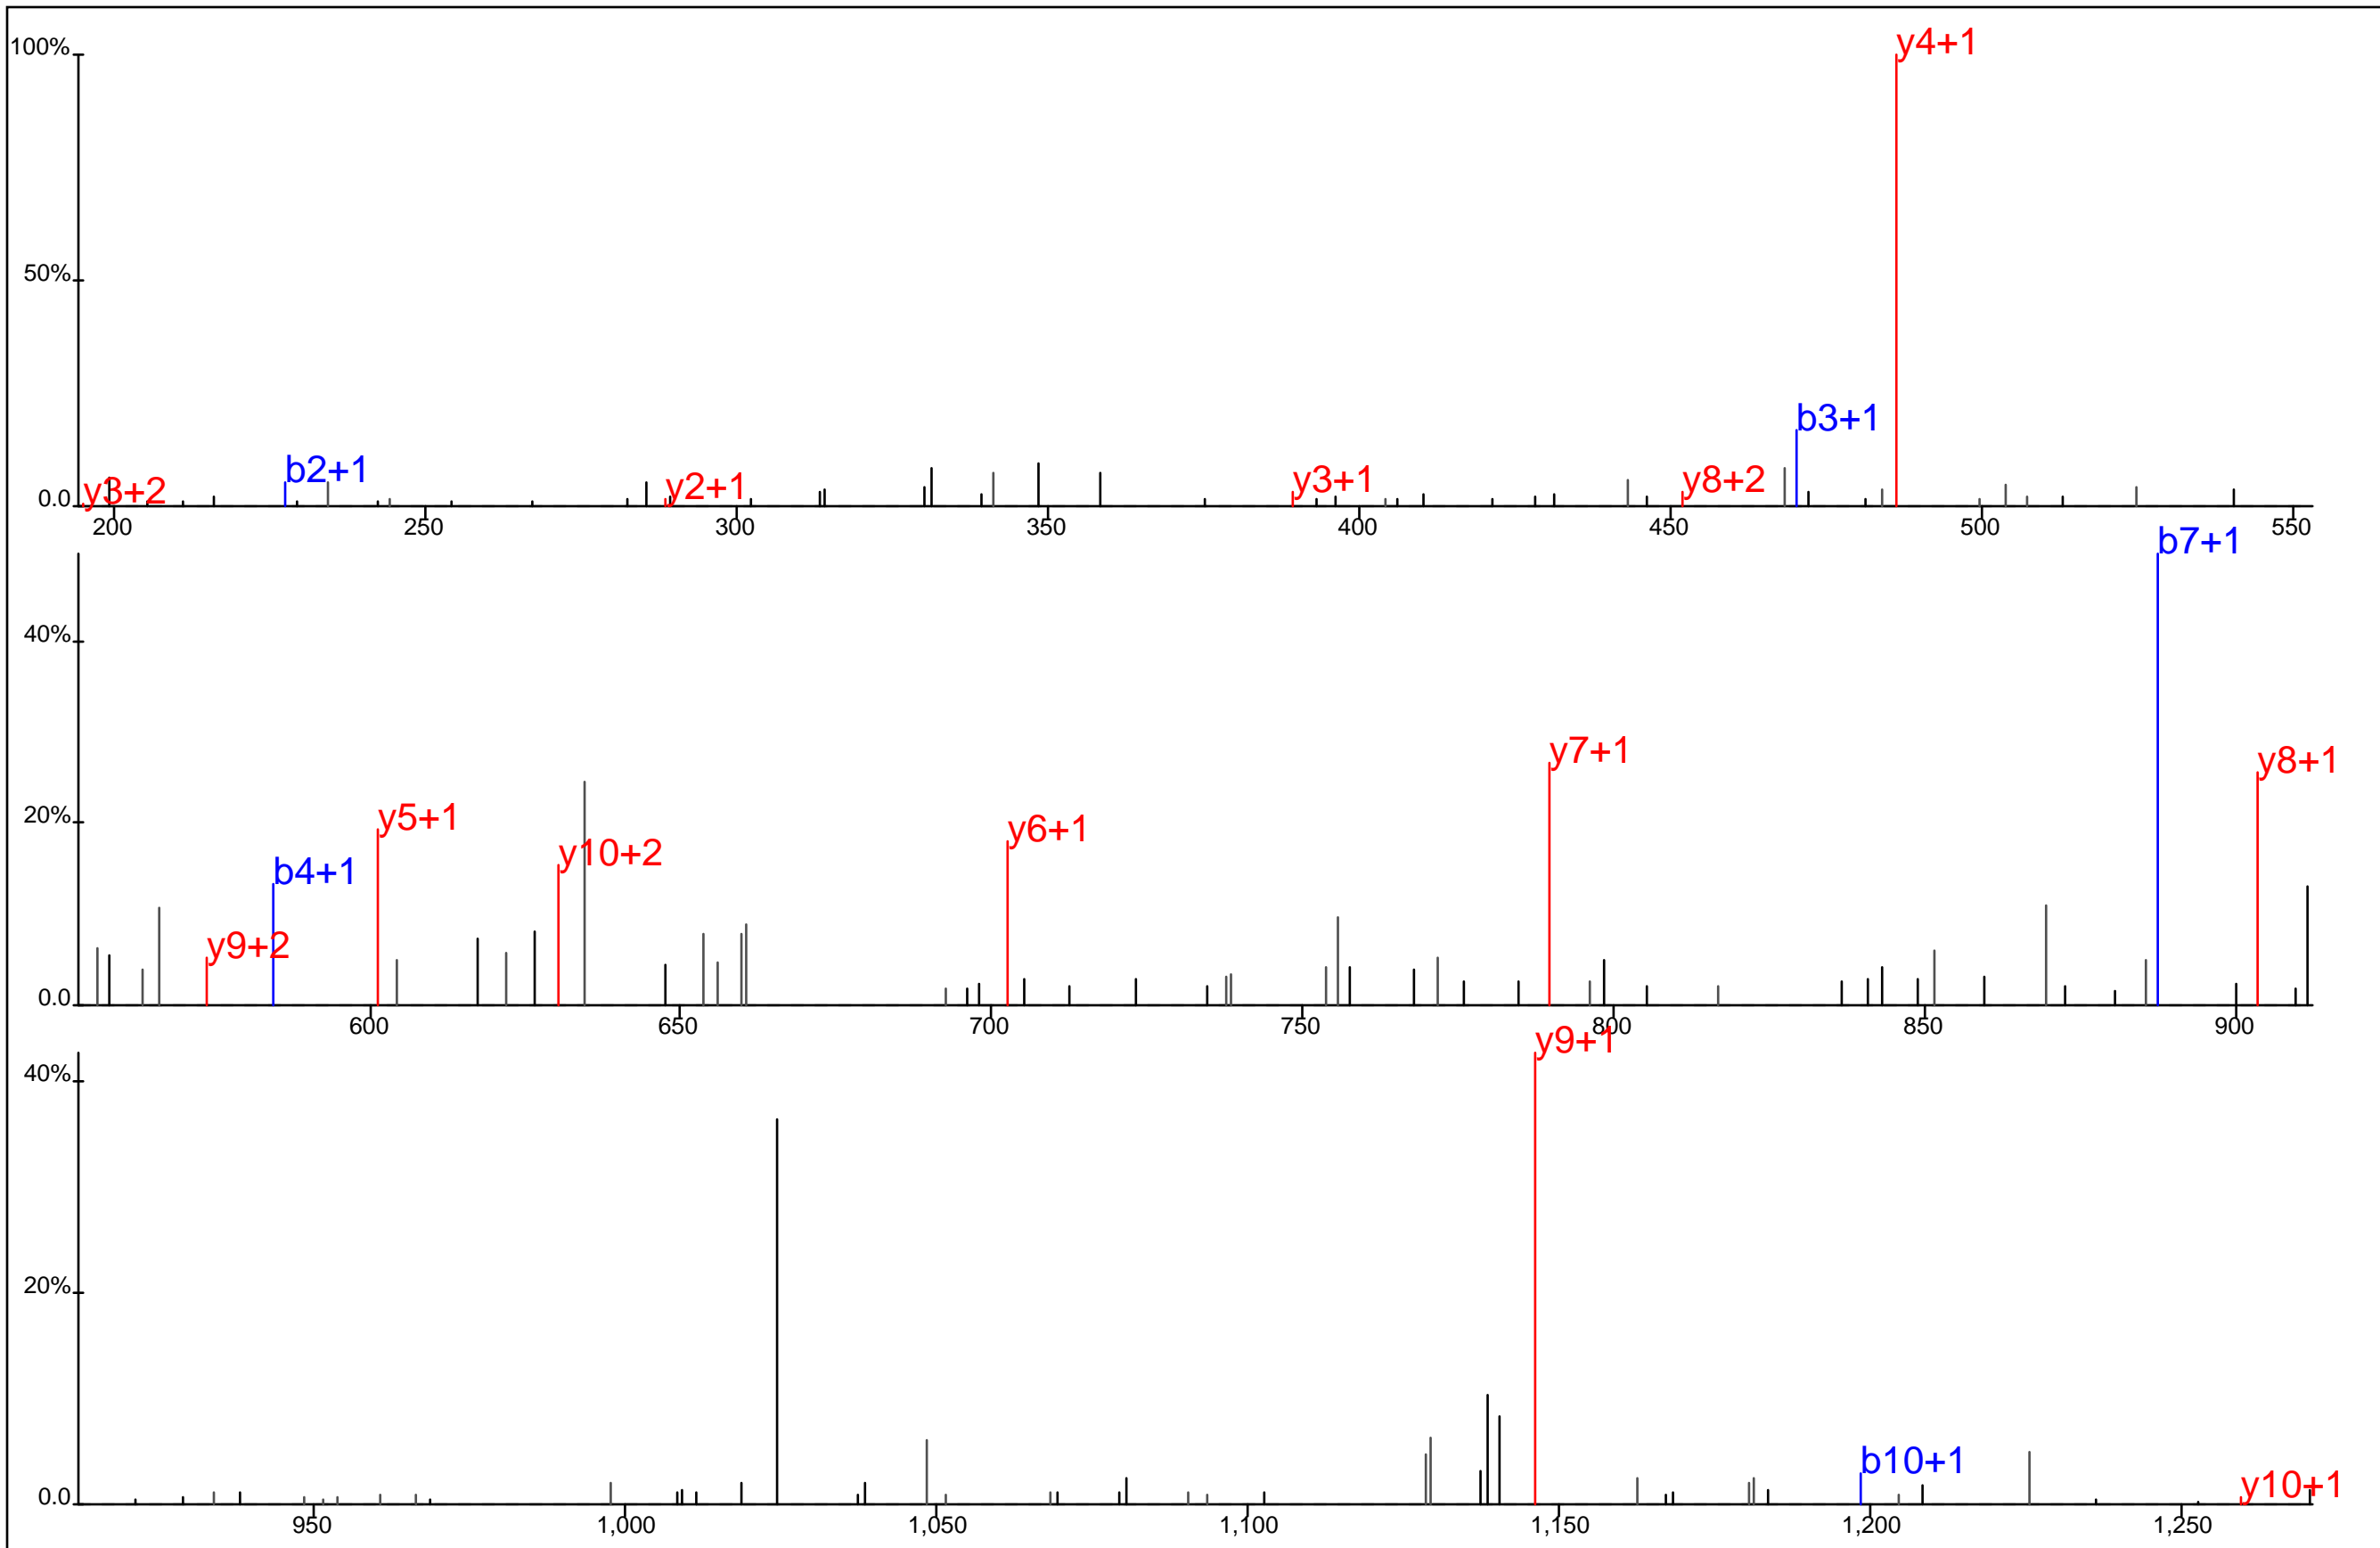

L L Y\* N S T D P T L R

Protein Name: Myosin IG  
 gi Accession: 0  
 Precursor Mass: 686.8254+2  
 Delta Mass: 5.334 ppm  
 XCorr: 37.46

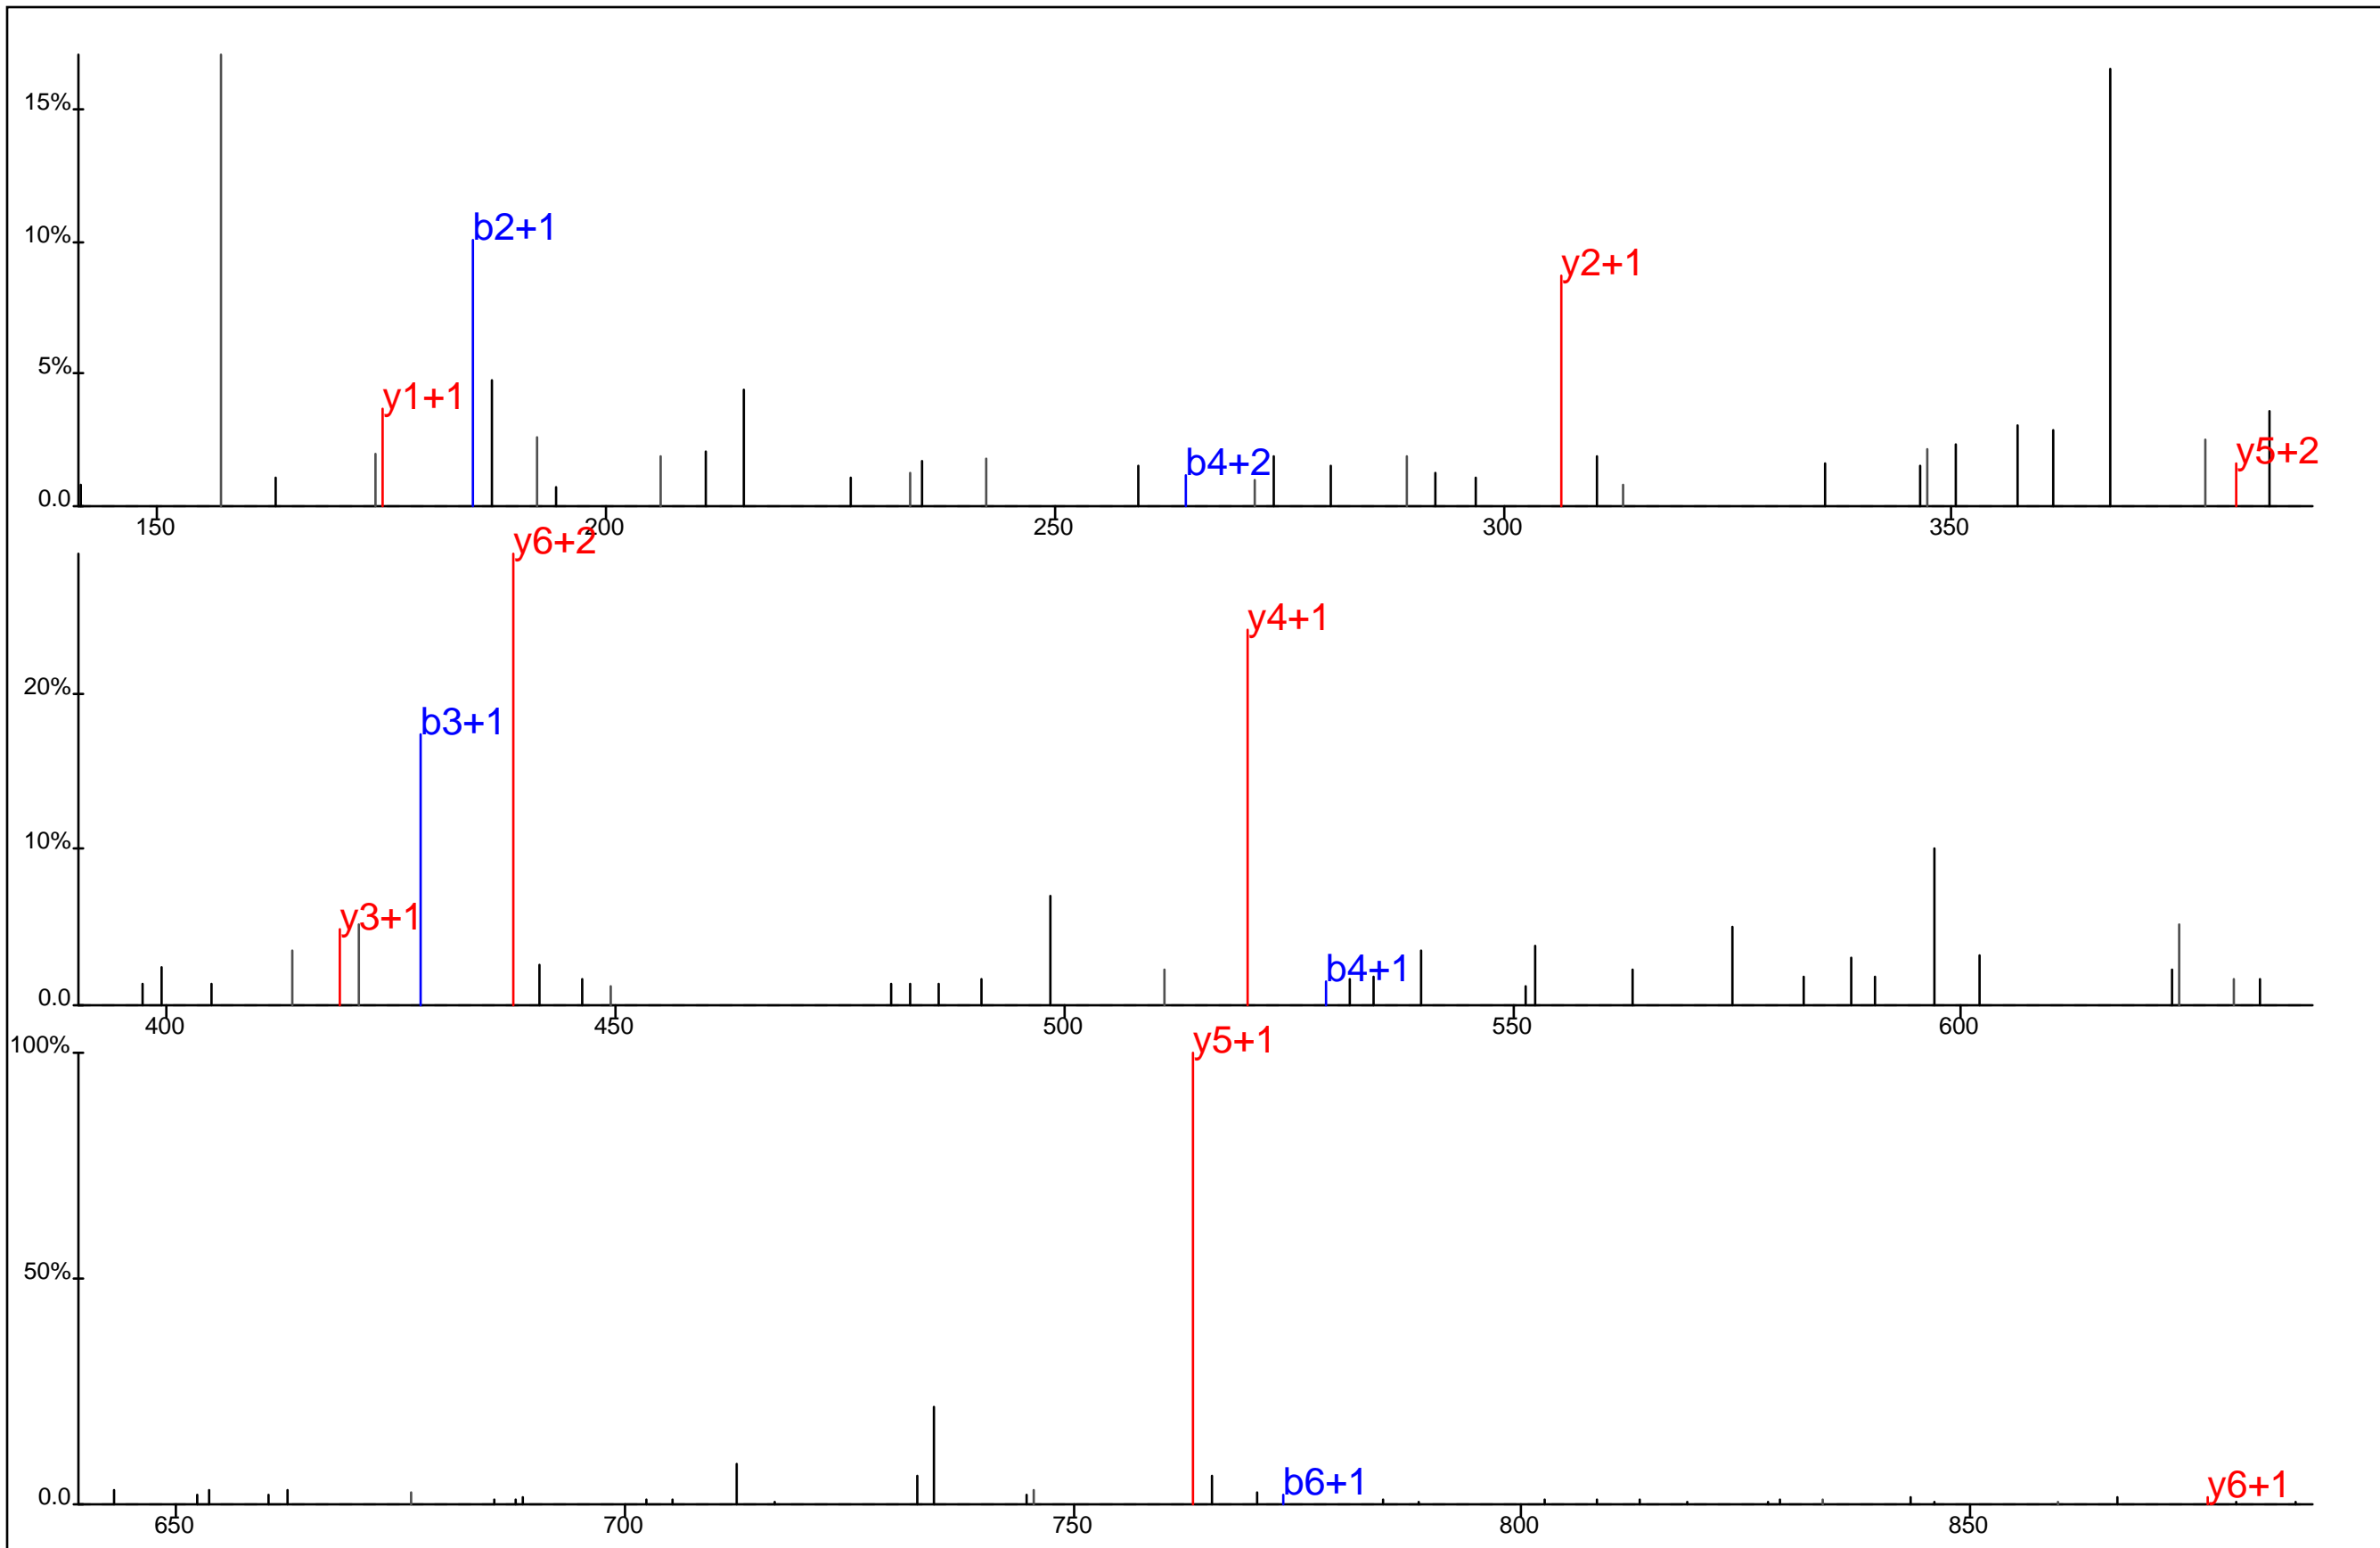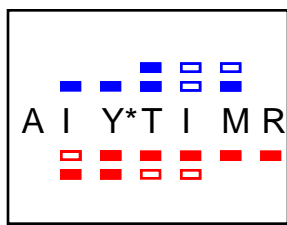

Protein Name: Myosin IG  
 gi Accession: 0  
 Precursor Mass: 474.2245+2  
 Delta Mass: 0.300 ppm  
 XCorr: 24.36



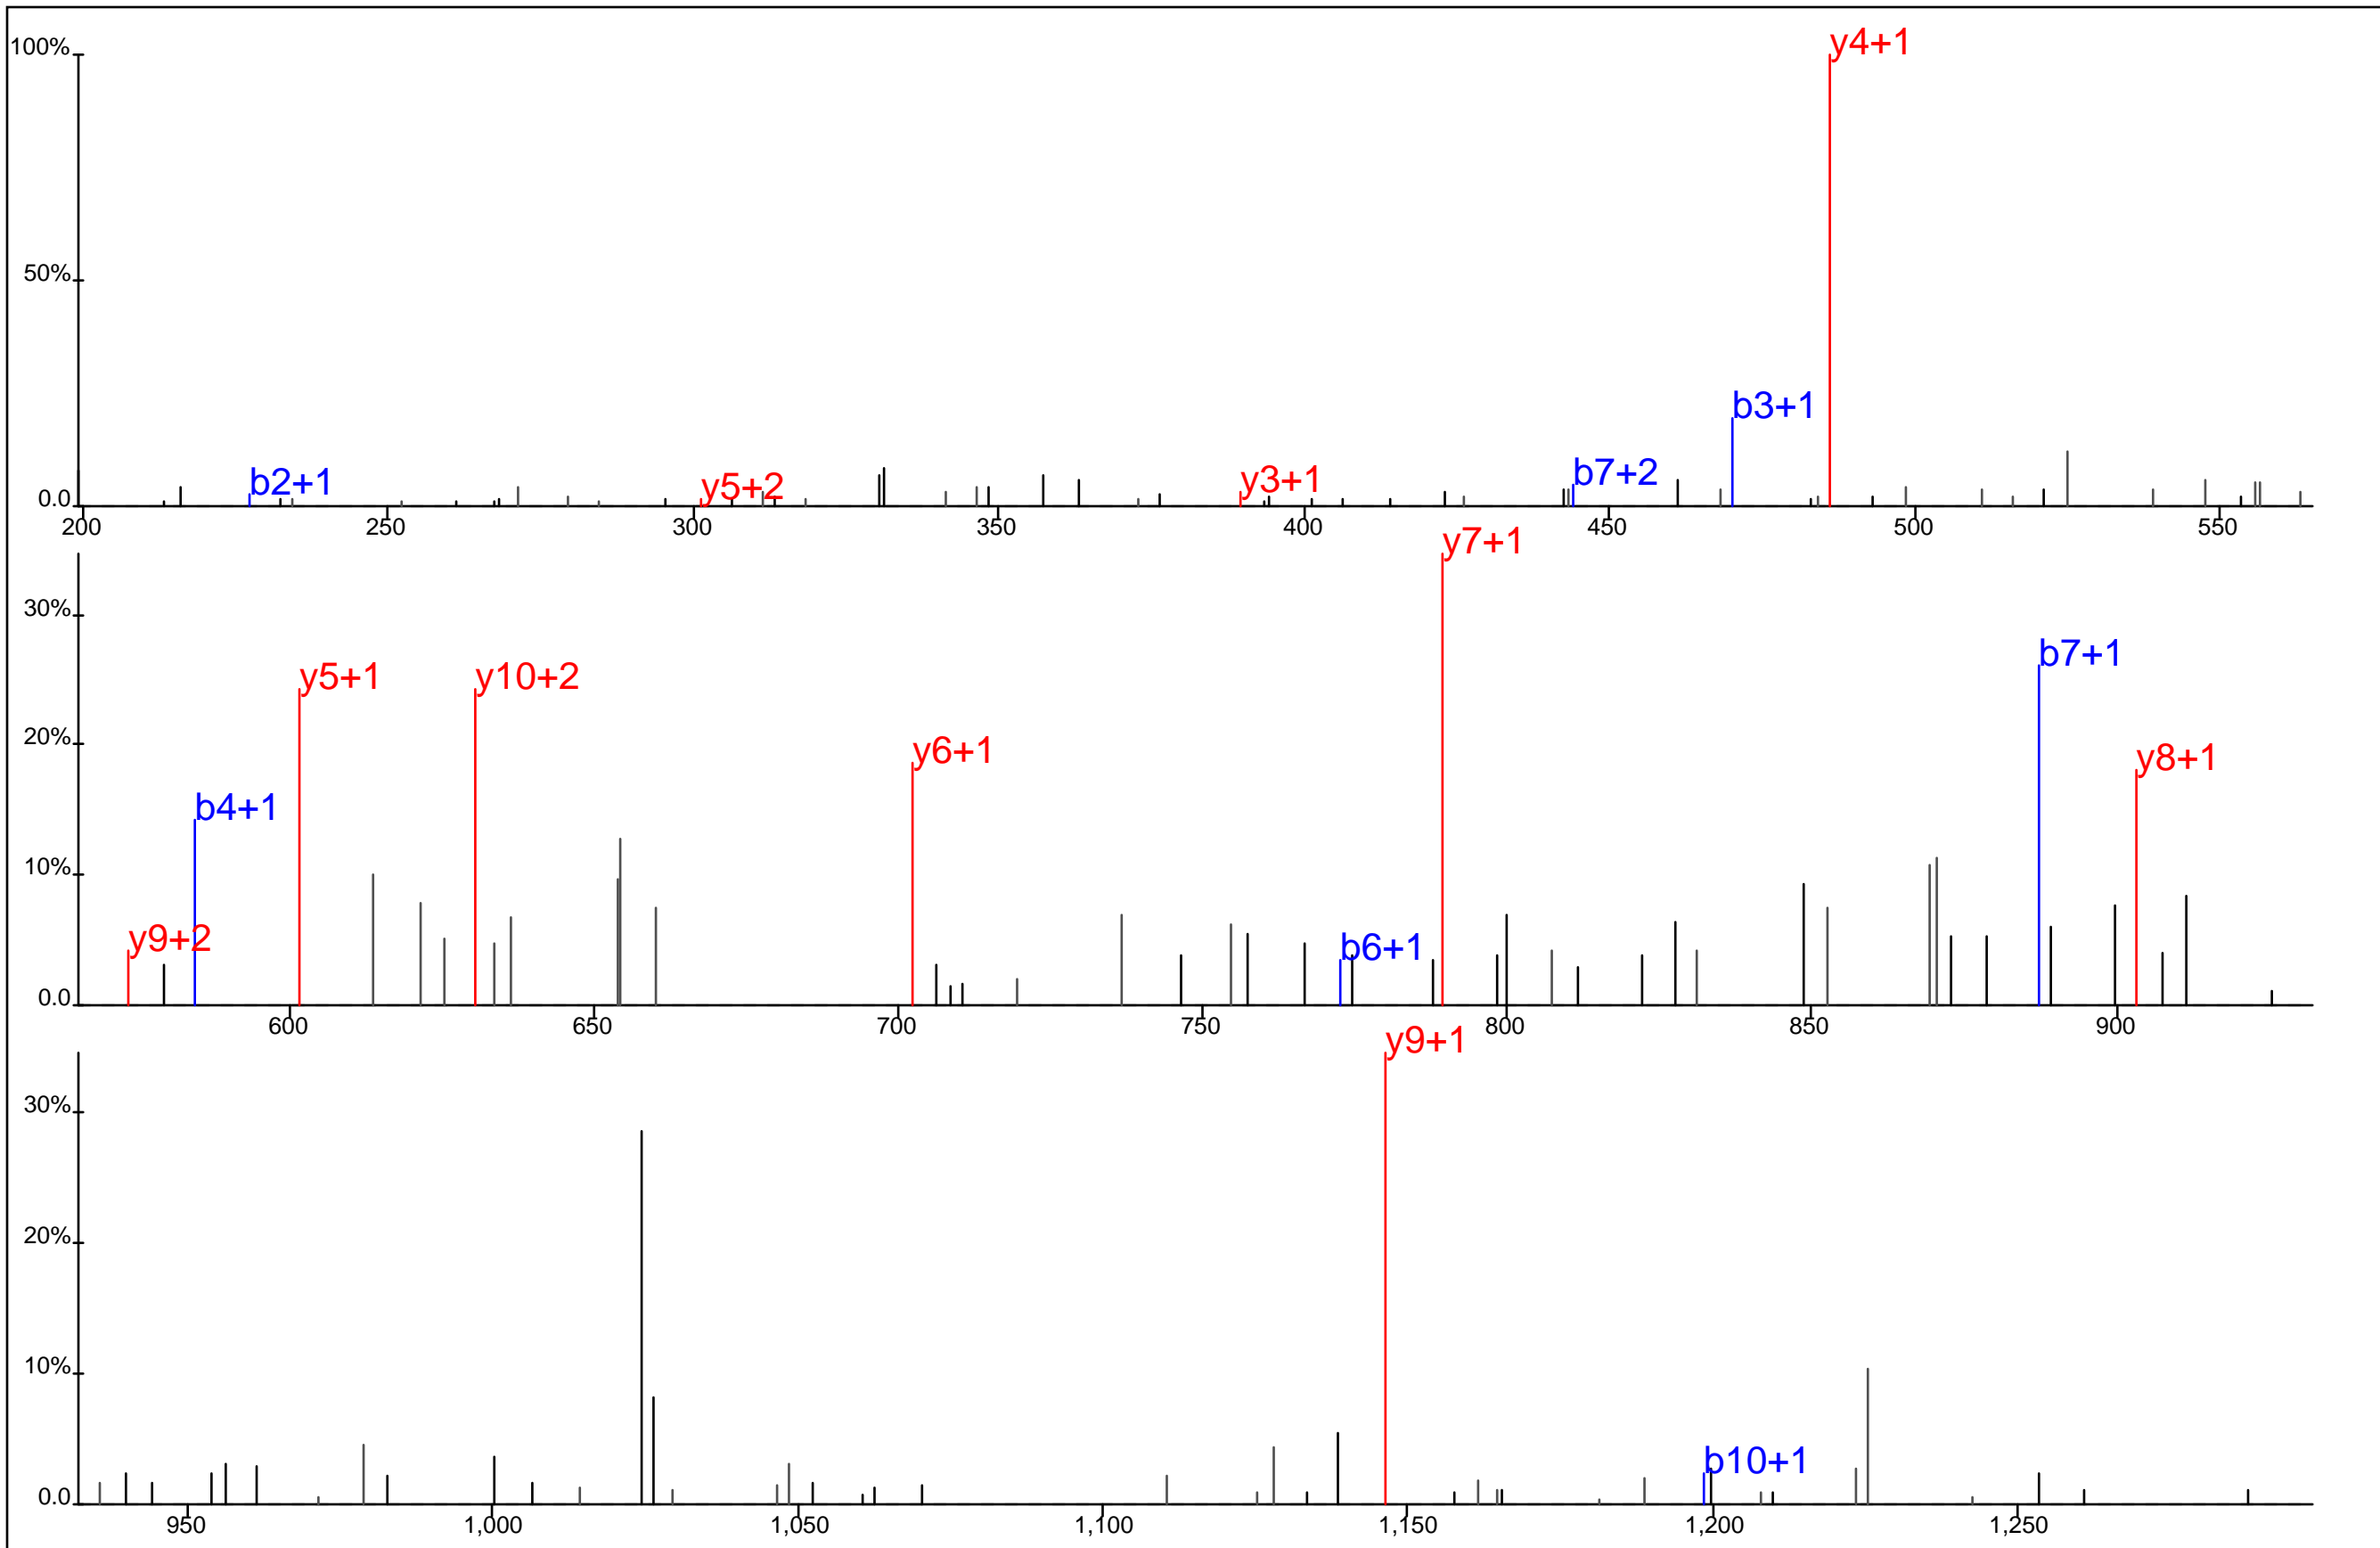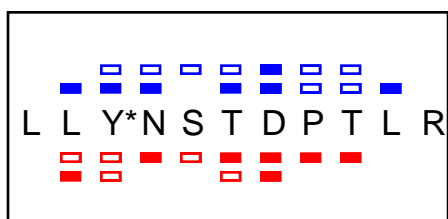

Protein Name: Myosin IG  
 gi Accession: 0  
 Precursor Mass: 686.8290+2  
 Delta Mass: 0.087 ppm  
 XCorr: 31.22

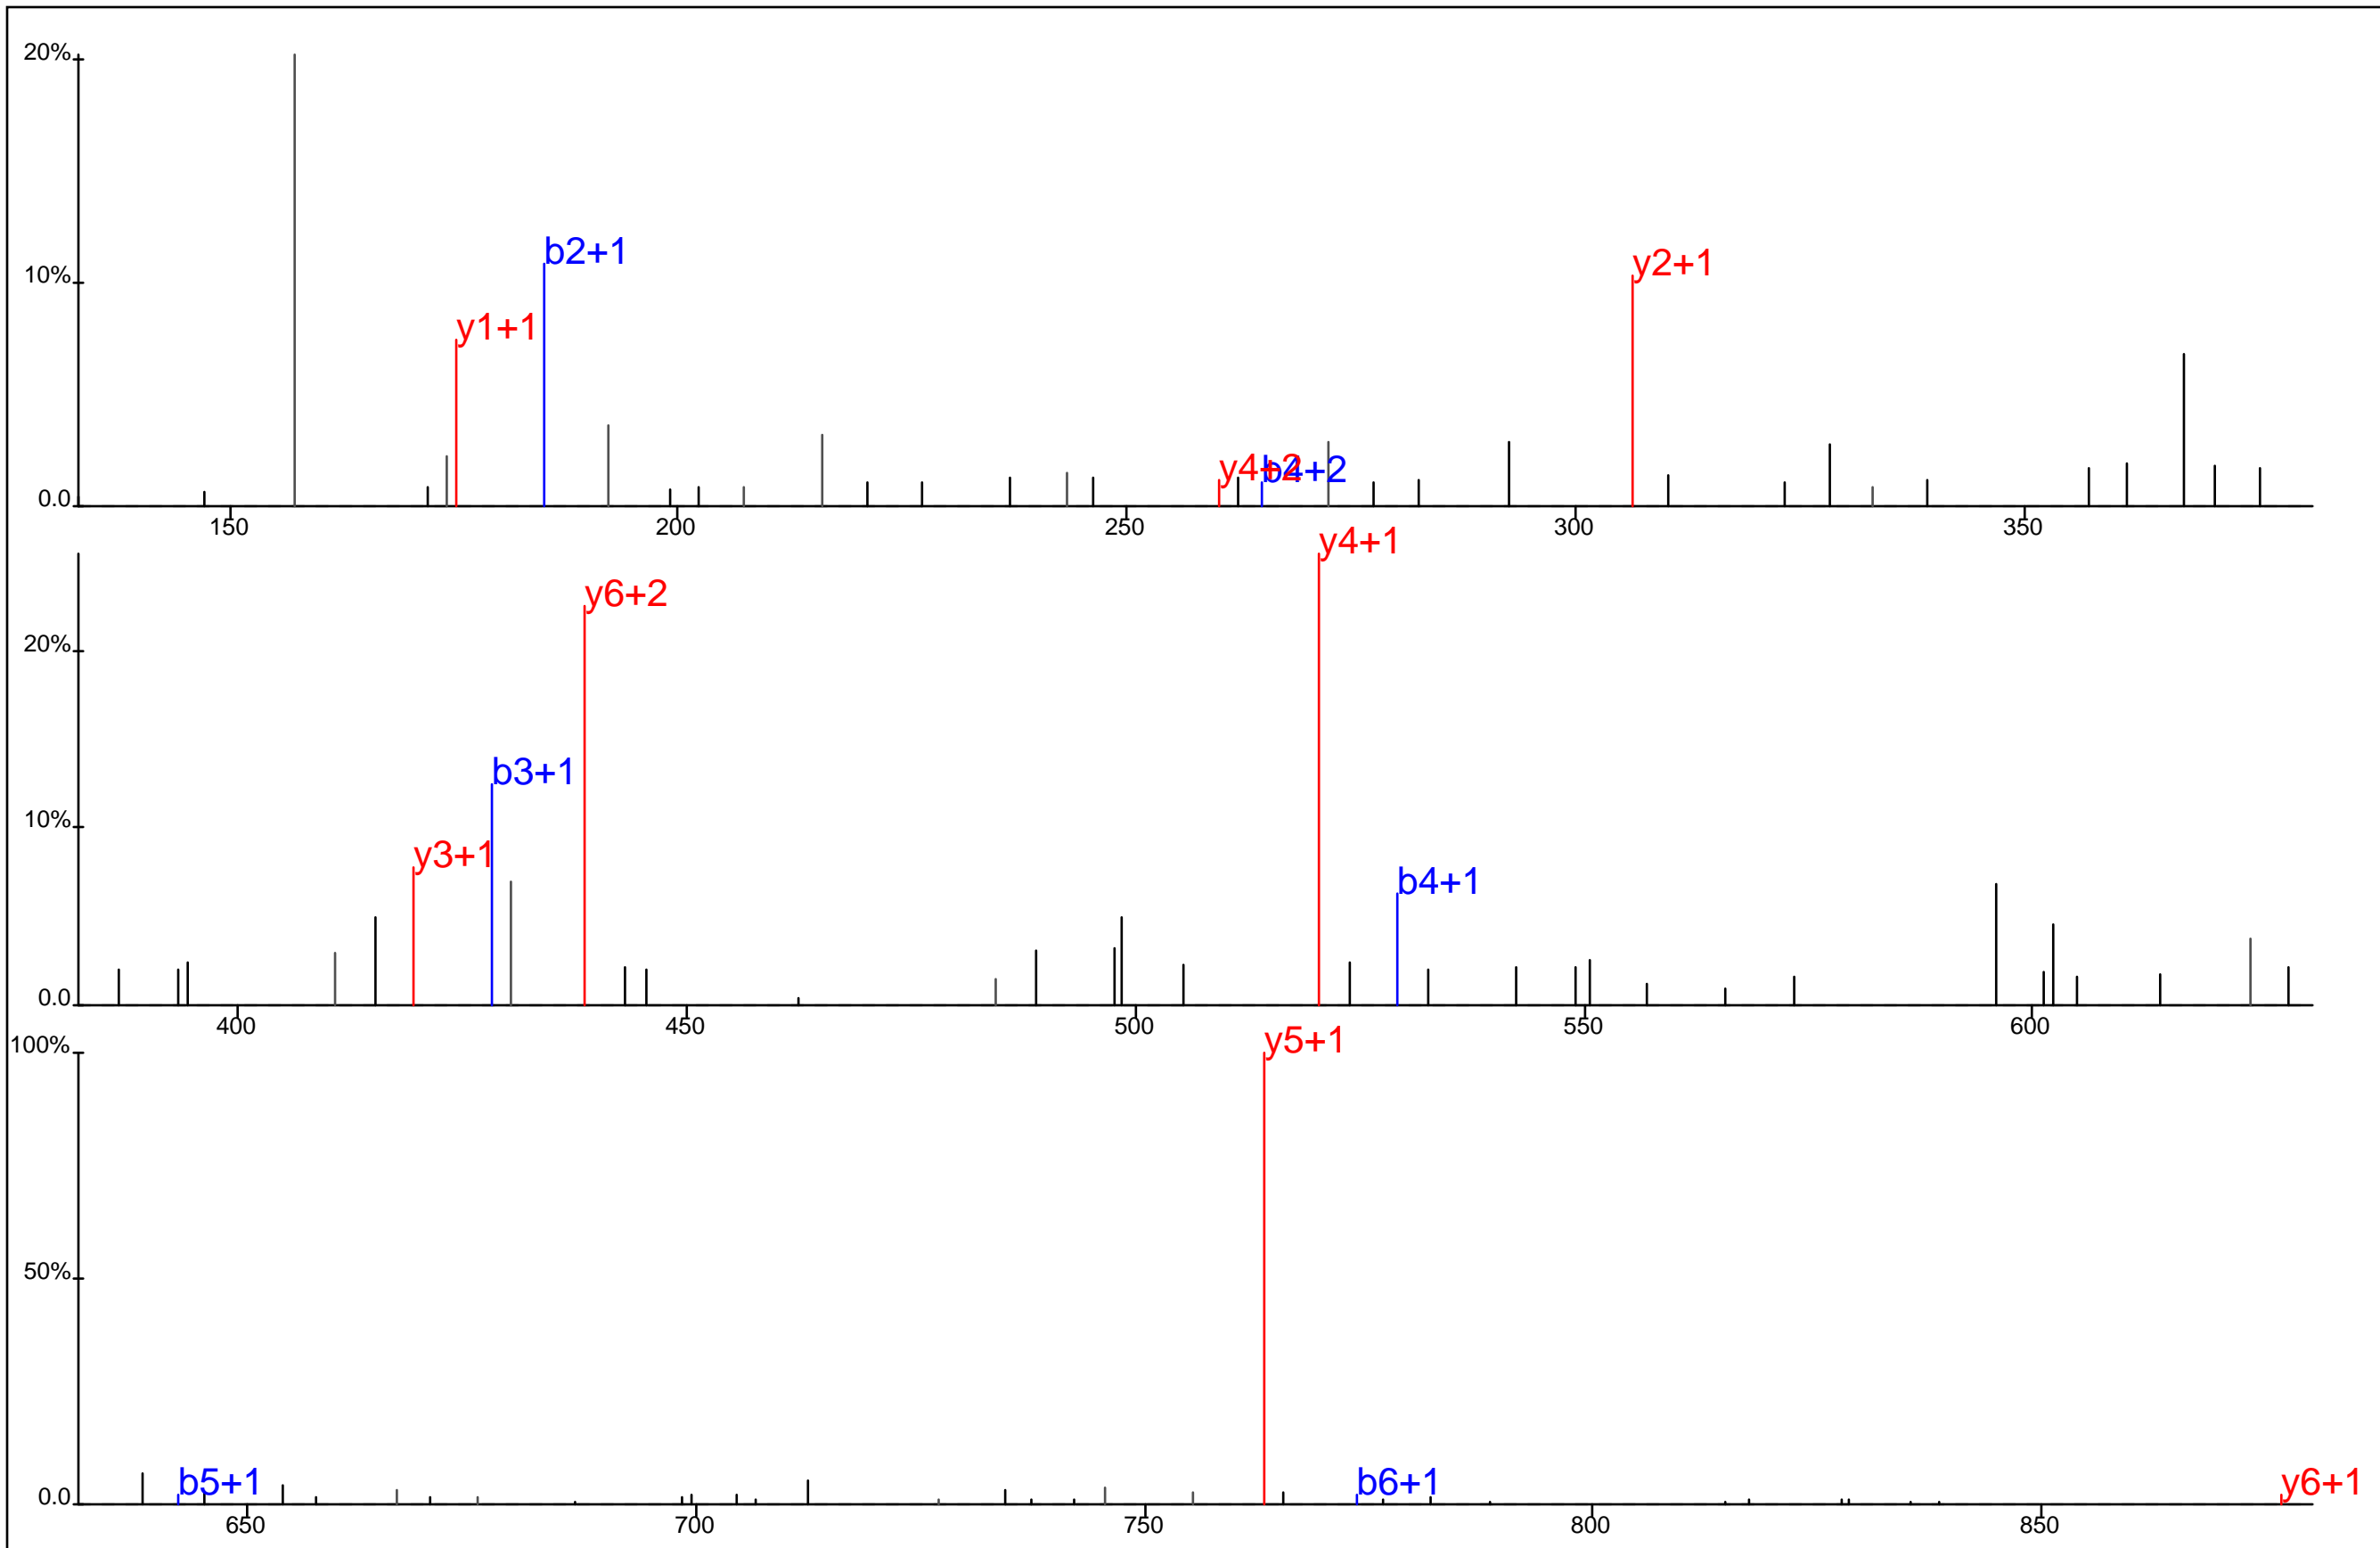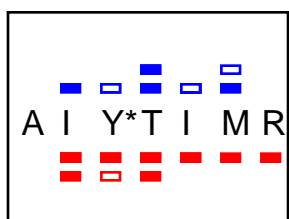

Protein Name: Myosin IG  
 gi Accession: 0  
 Precursor Mass: 474.2230+2  
 Delta Mass: 3.456 ppm  
 XCorr: 37.34

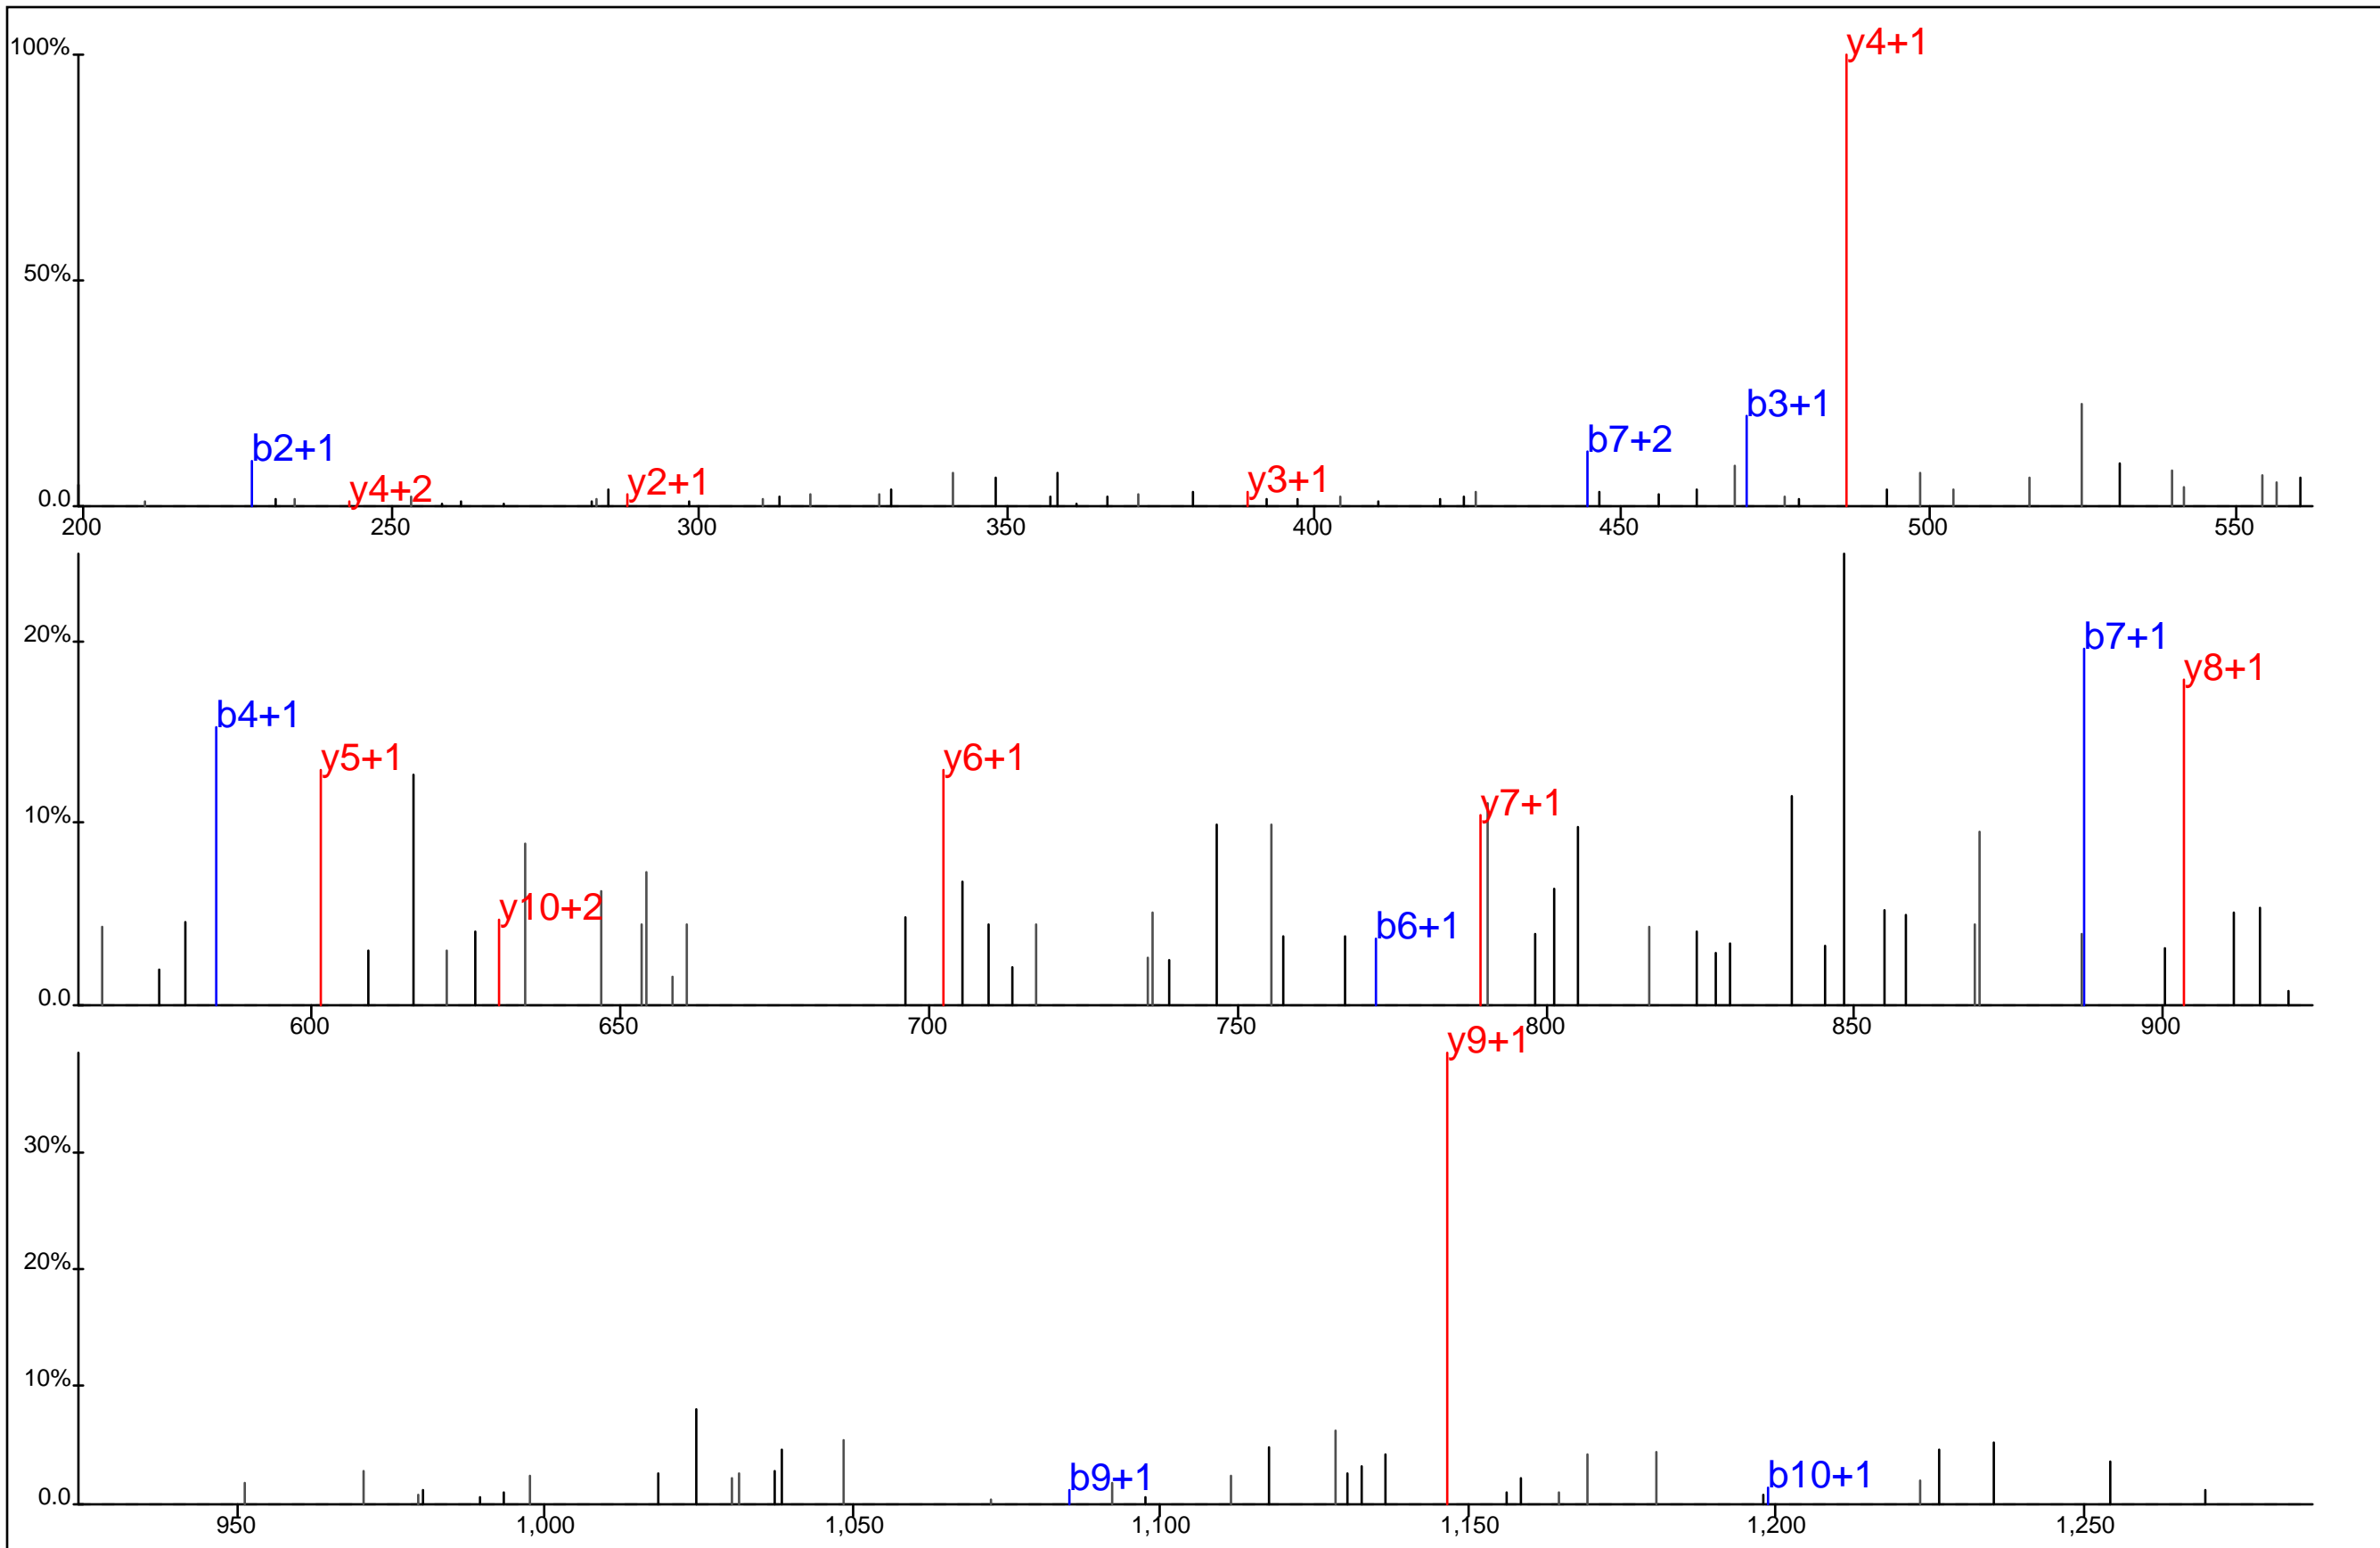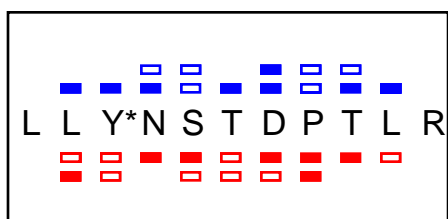

Protein Name: Myosin IG  
 gi Accession: 0  
 Precursor Mass: 686.8300+2  
 Delta Mass: 1.336 ppm  
 XCorr: 26.3

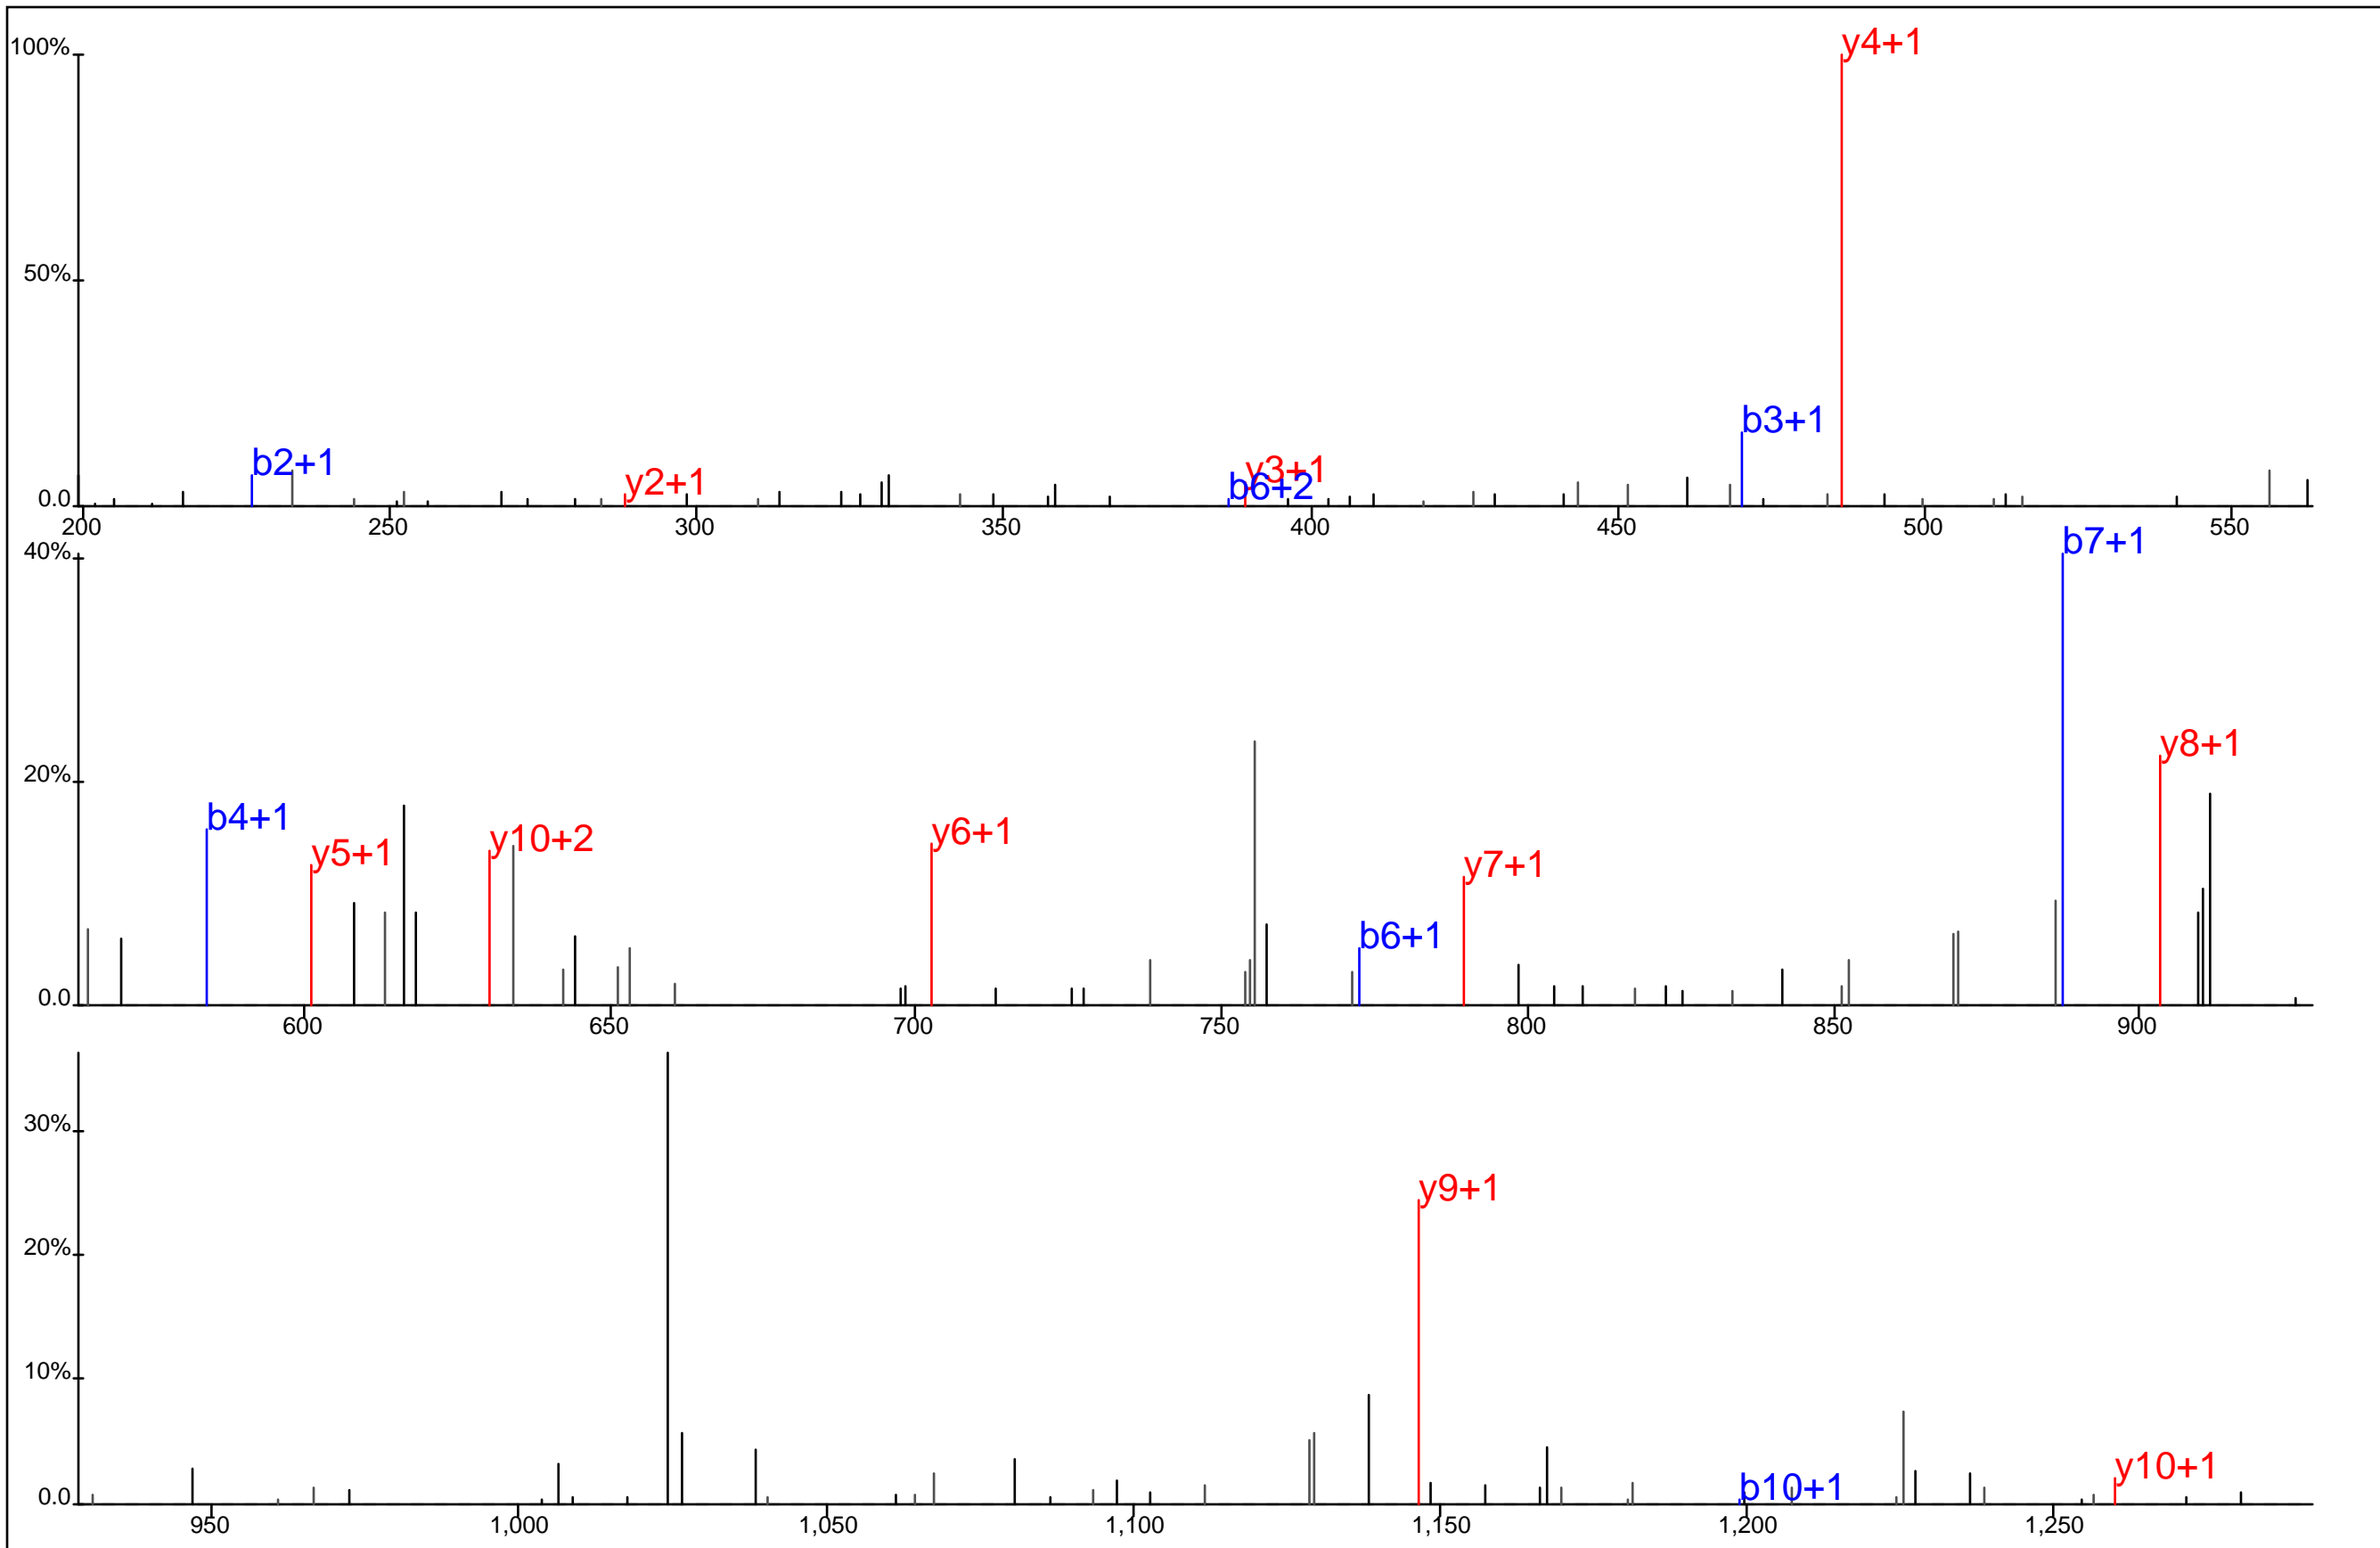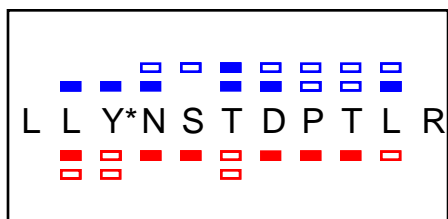

Protein Name: Myosin IG  
 gi Accession: 0  
 Precursor Mass: 686.8253+2  
 Delta Mass: 5.512 ppm  
 XCorr: 41.45

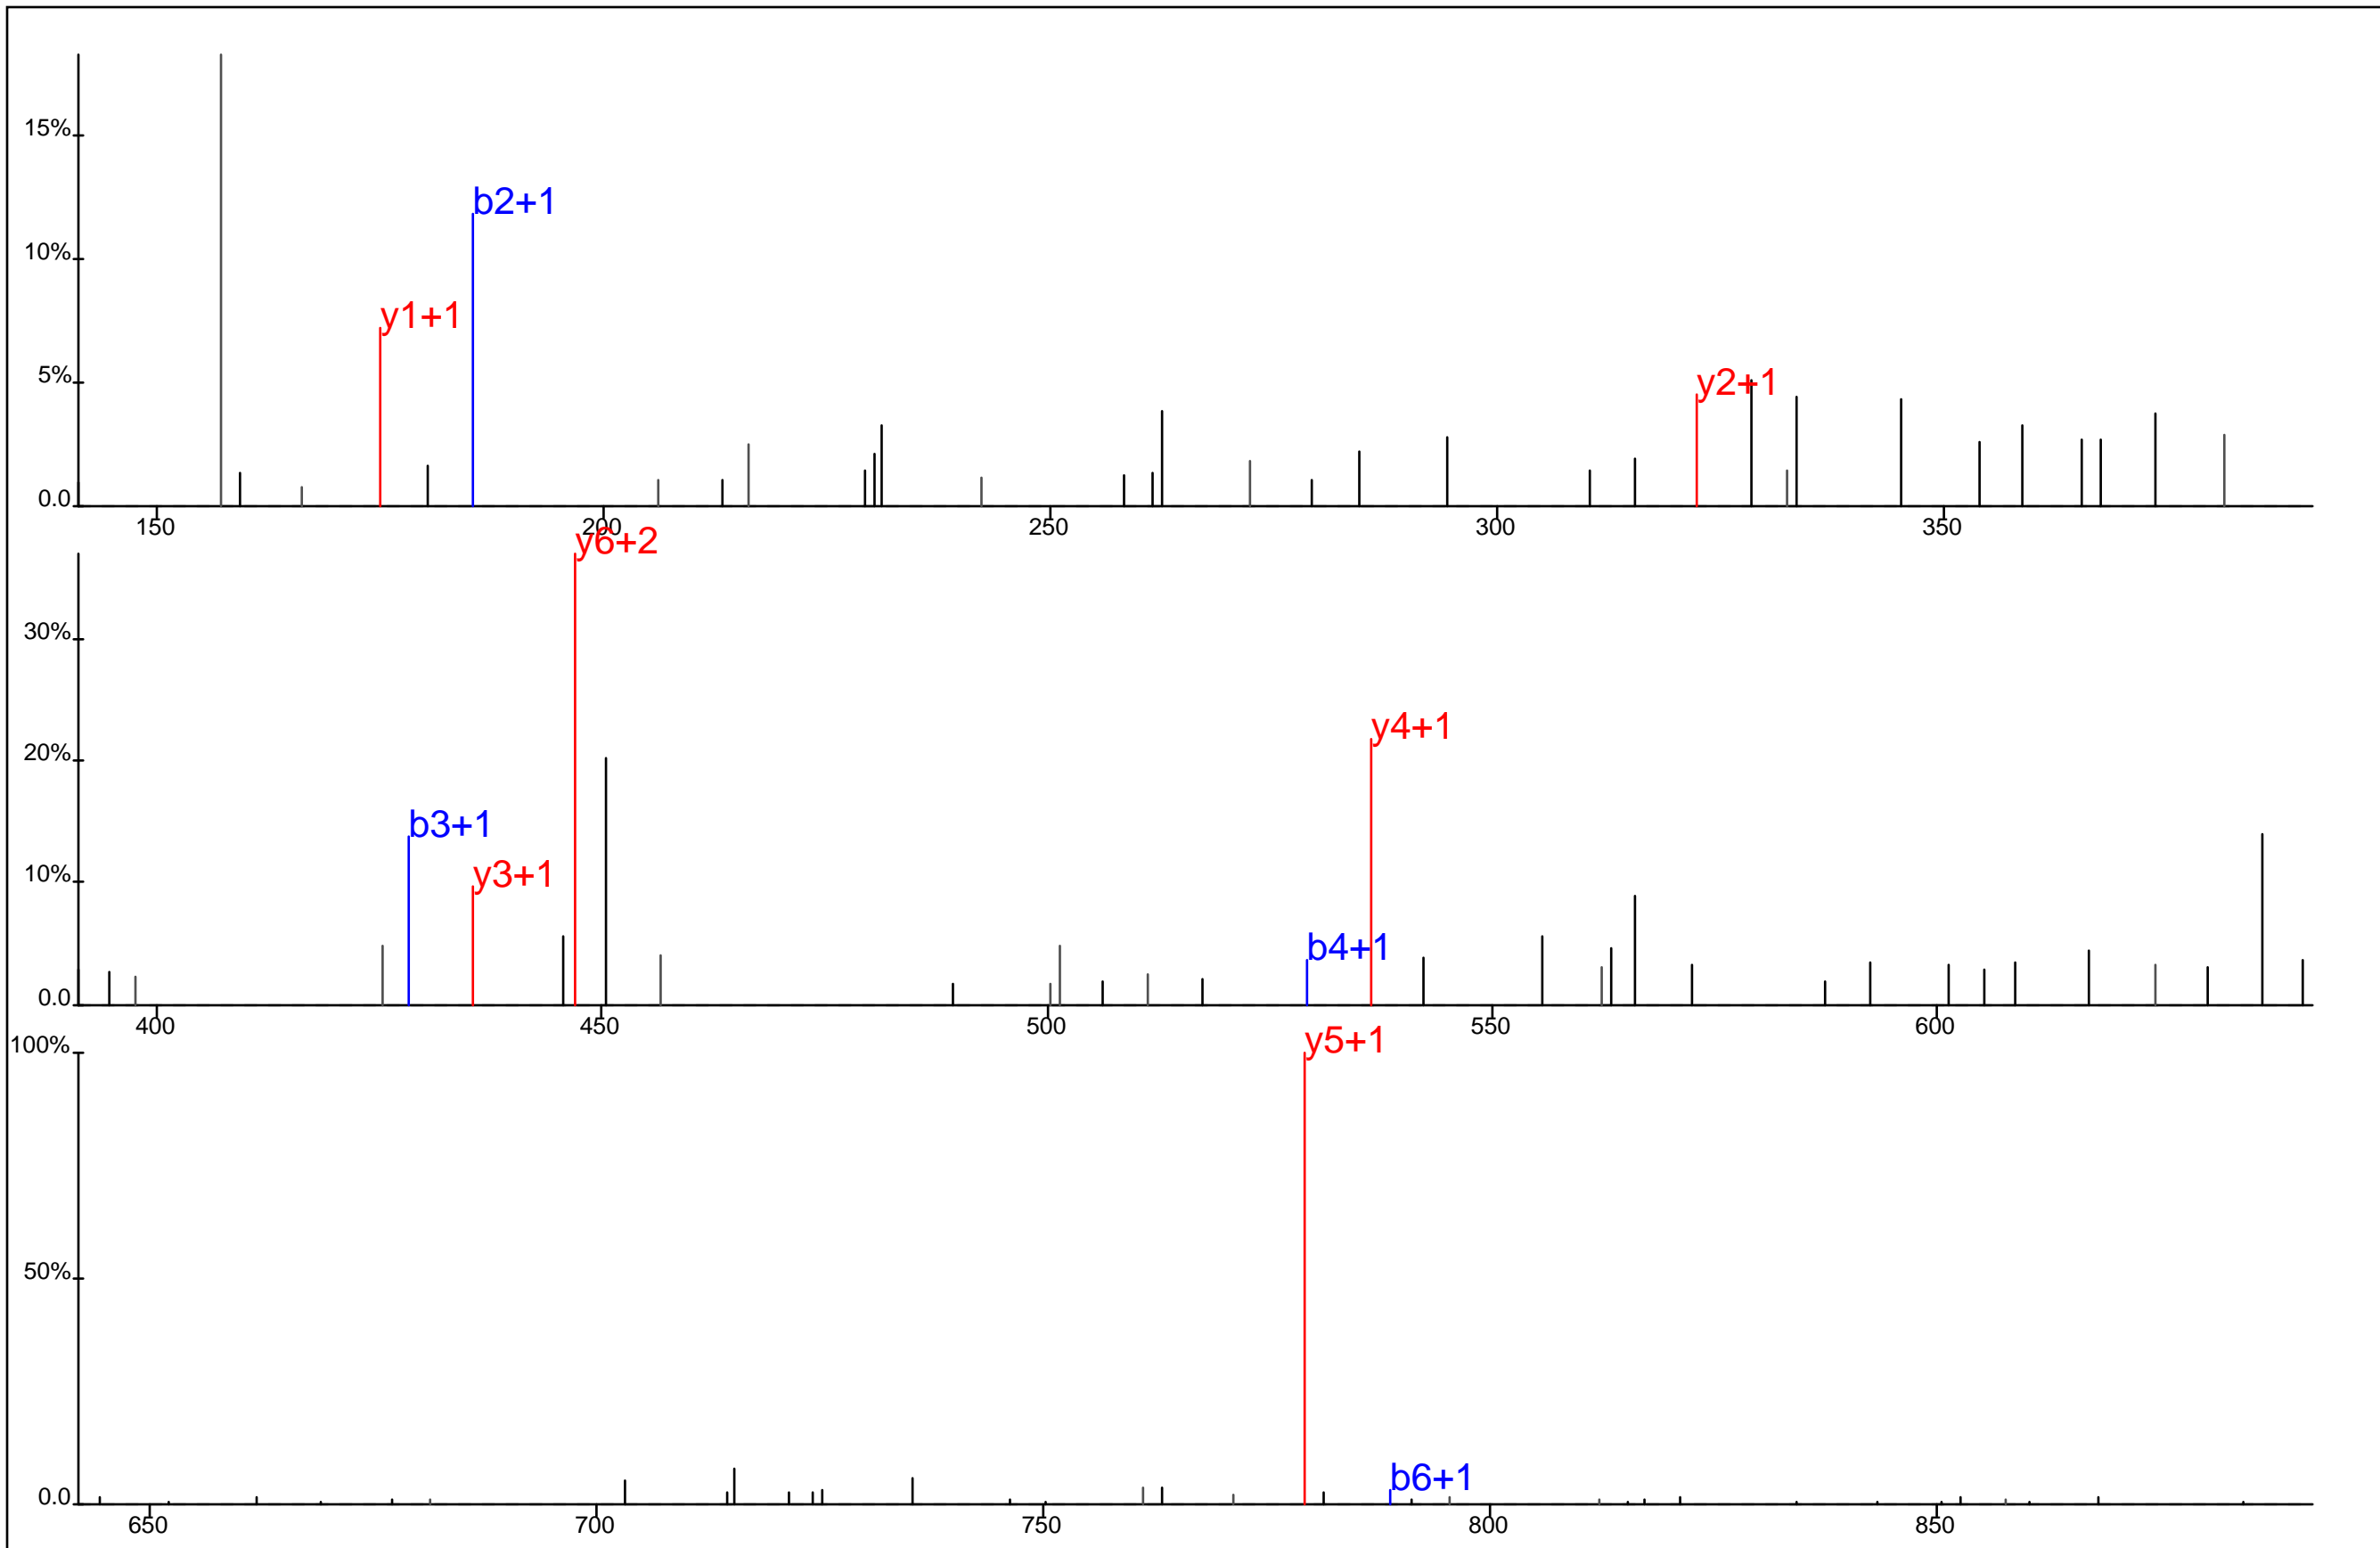

**A** | **Y\*** | **T** | **M** | **R**

Protein Name: Myosin IG  
 gi Accession: 0  
 Precursor Mass: 482.2227+2  
 Delta Mass: 1.241 ppm  
 XCorr: 35.22

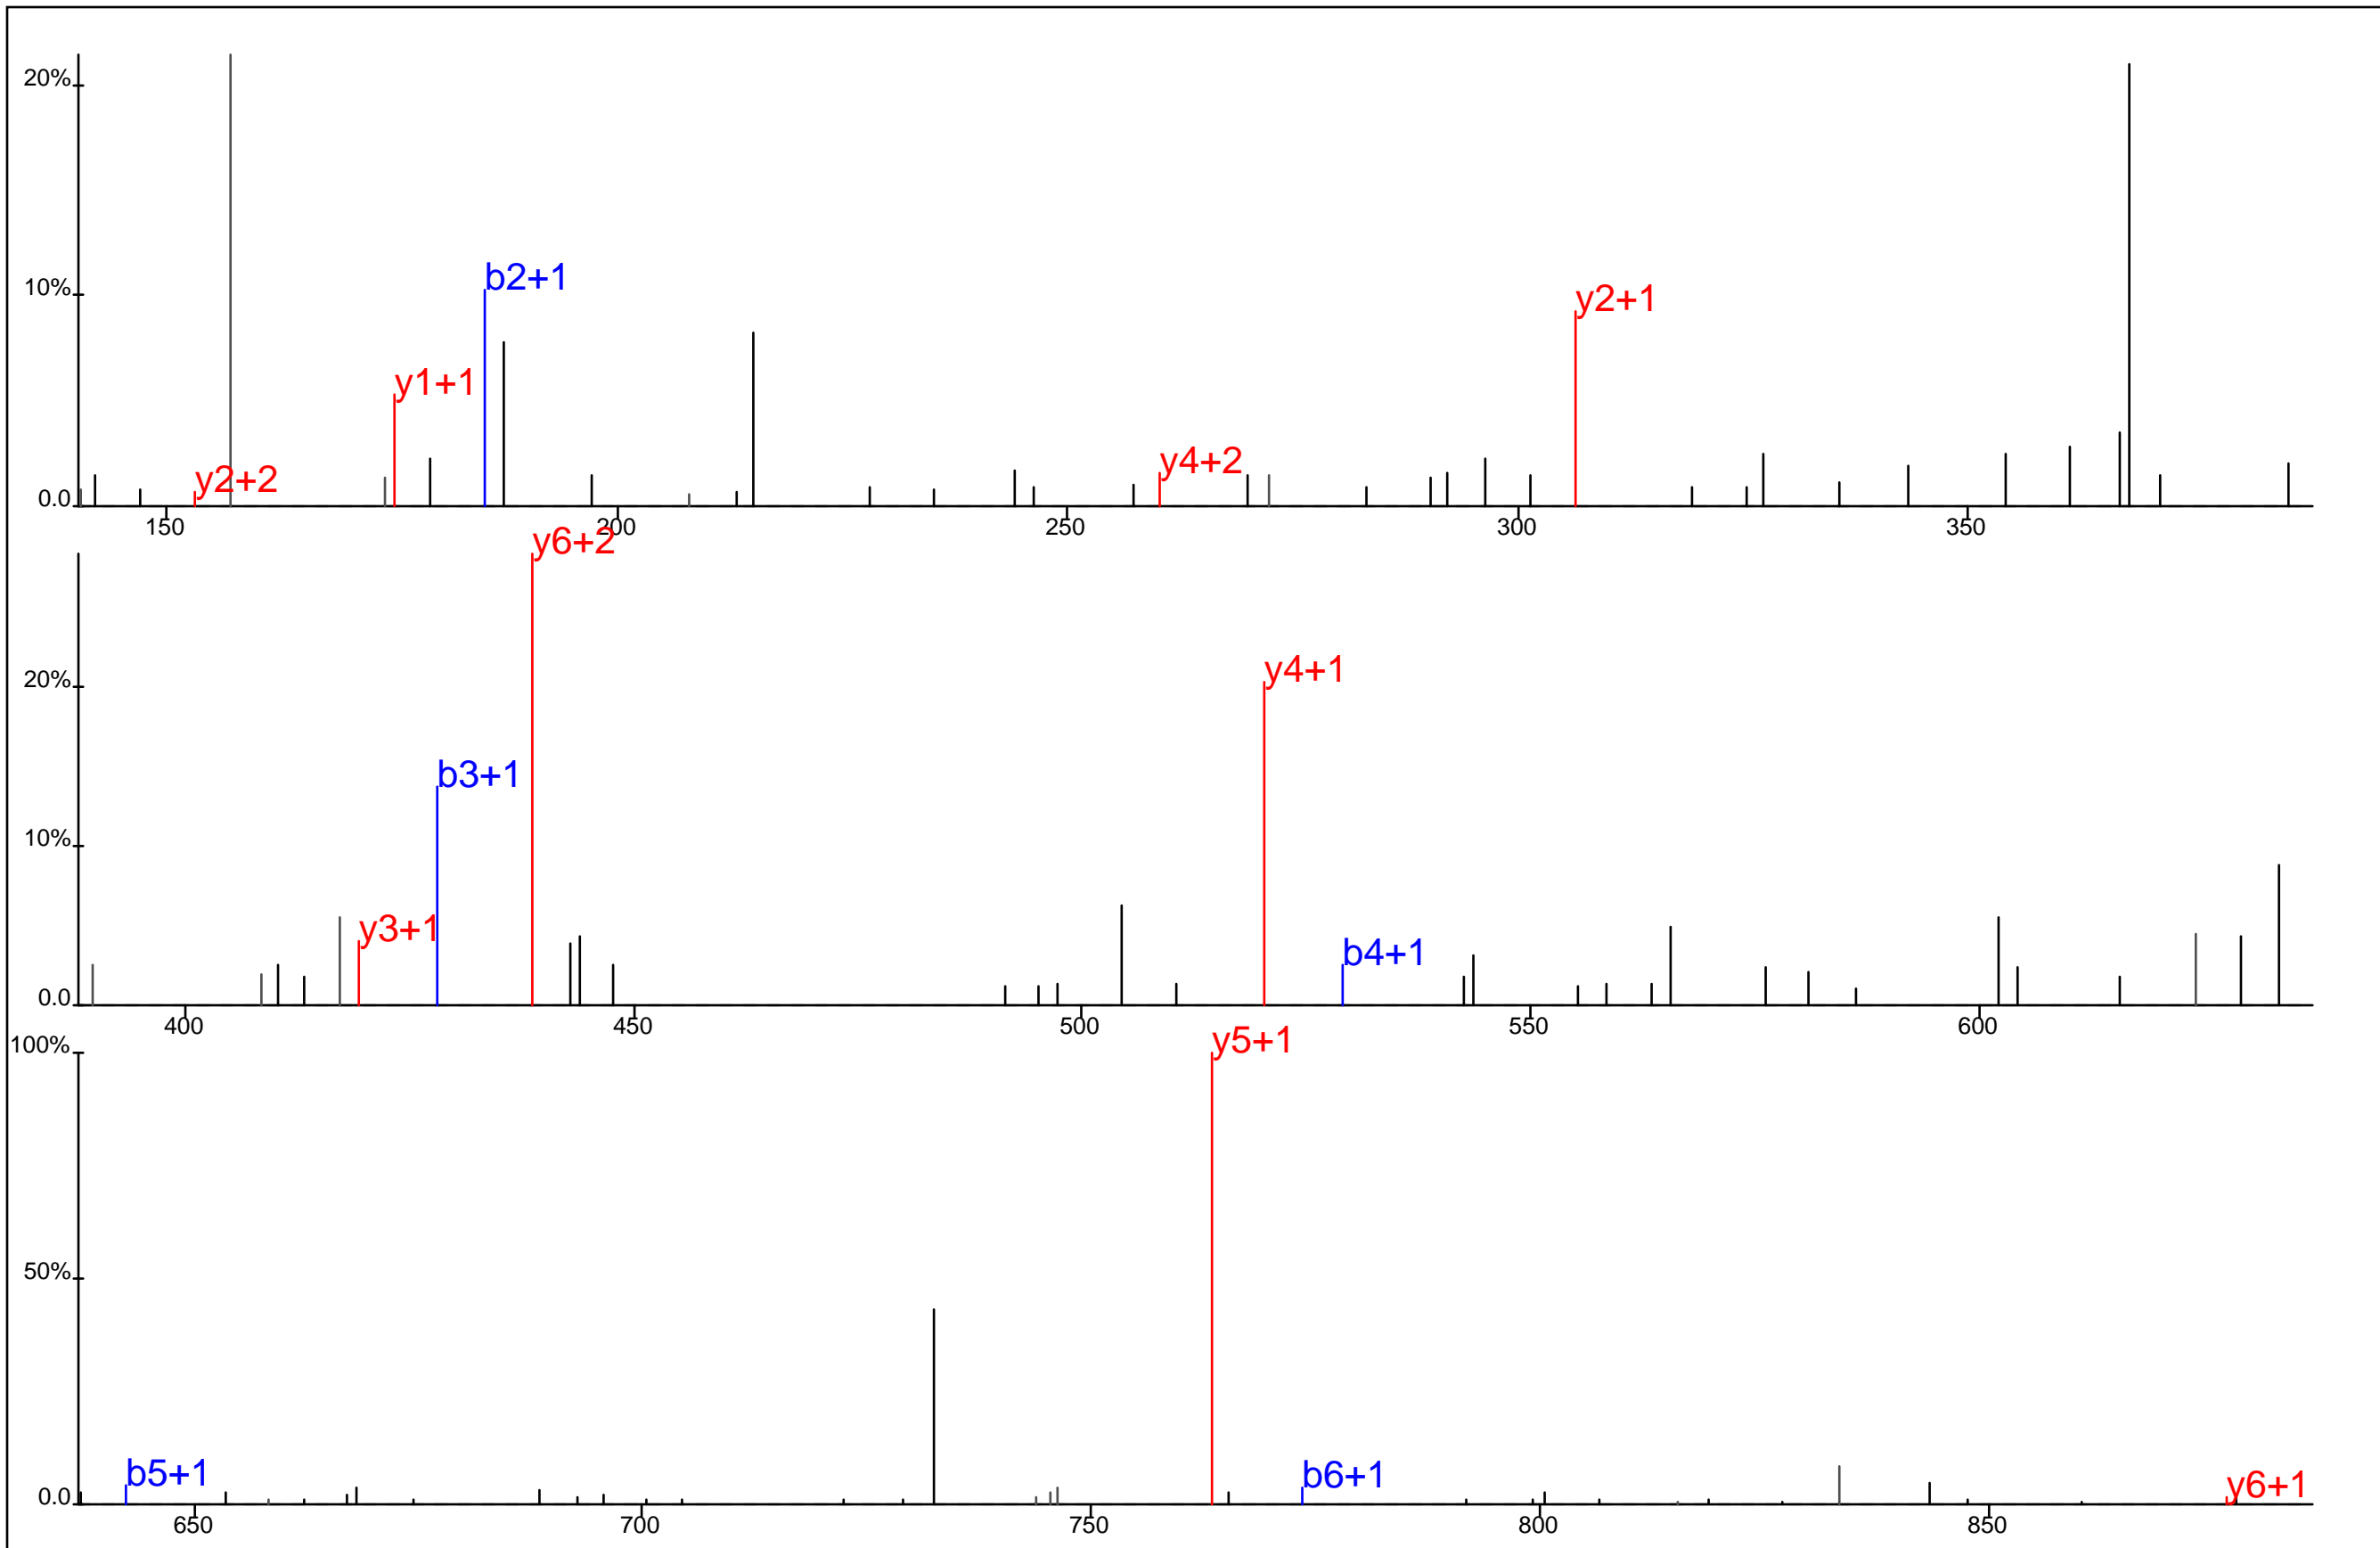

**b**  $\square$   $\square$   $\square$   $\square$   $\square$ 
  
**y**  $\square$   $\square$   $\square$   $\square$   $\square$ 
  
**A I Y\* T I M R**

Protein Name: Myosin IG  
 gi Accession: 0  
 Precursor Mass: 474.2250+2  
 Delta Mass: 0.732 ppm  
 XCorr: 25.19

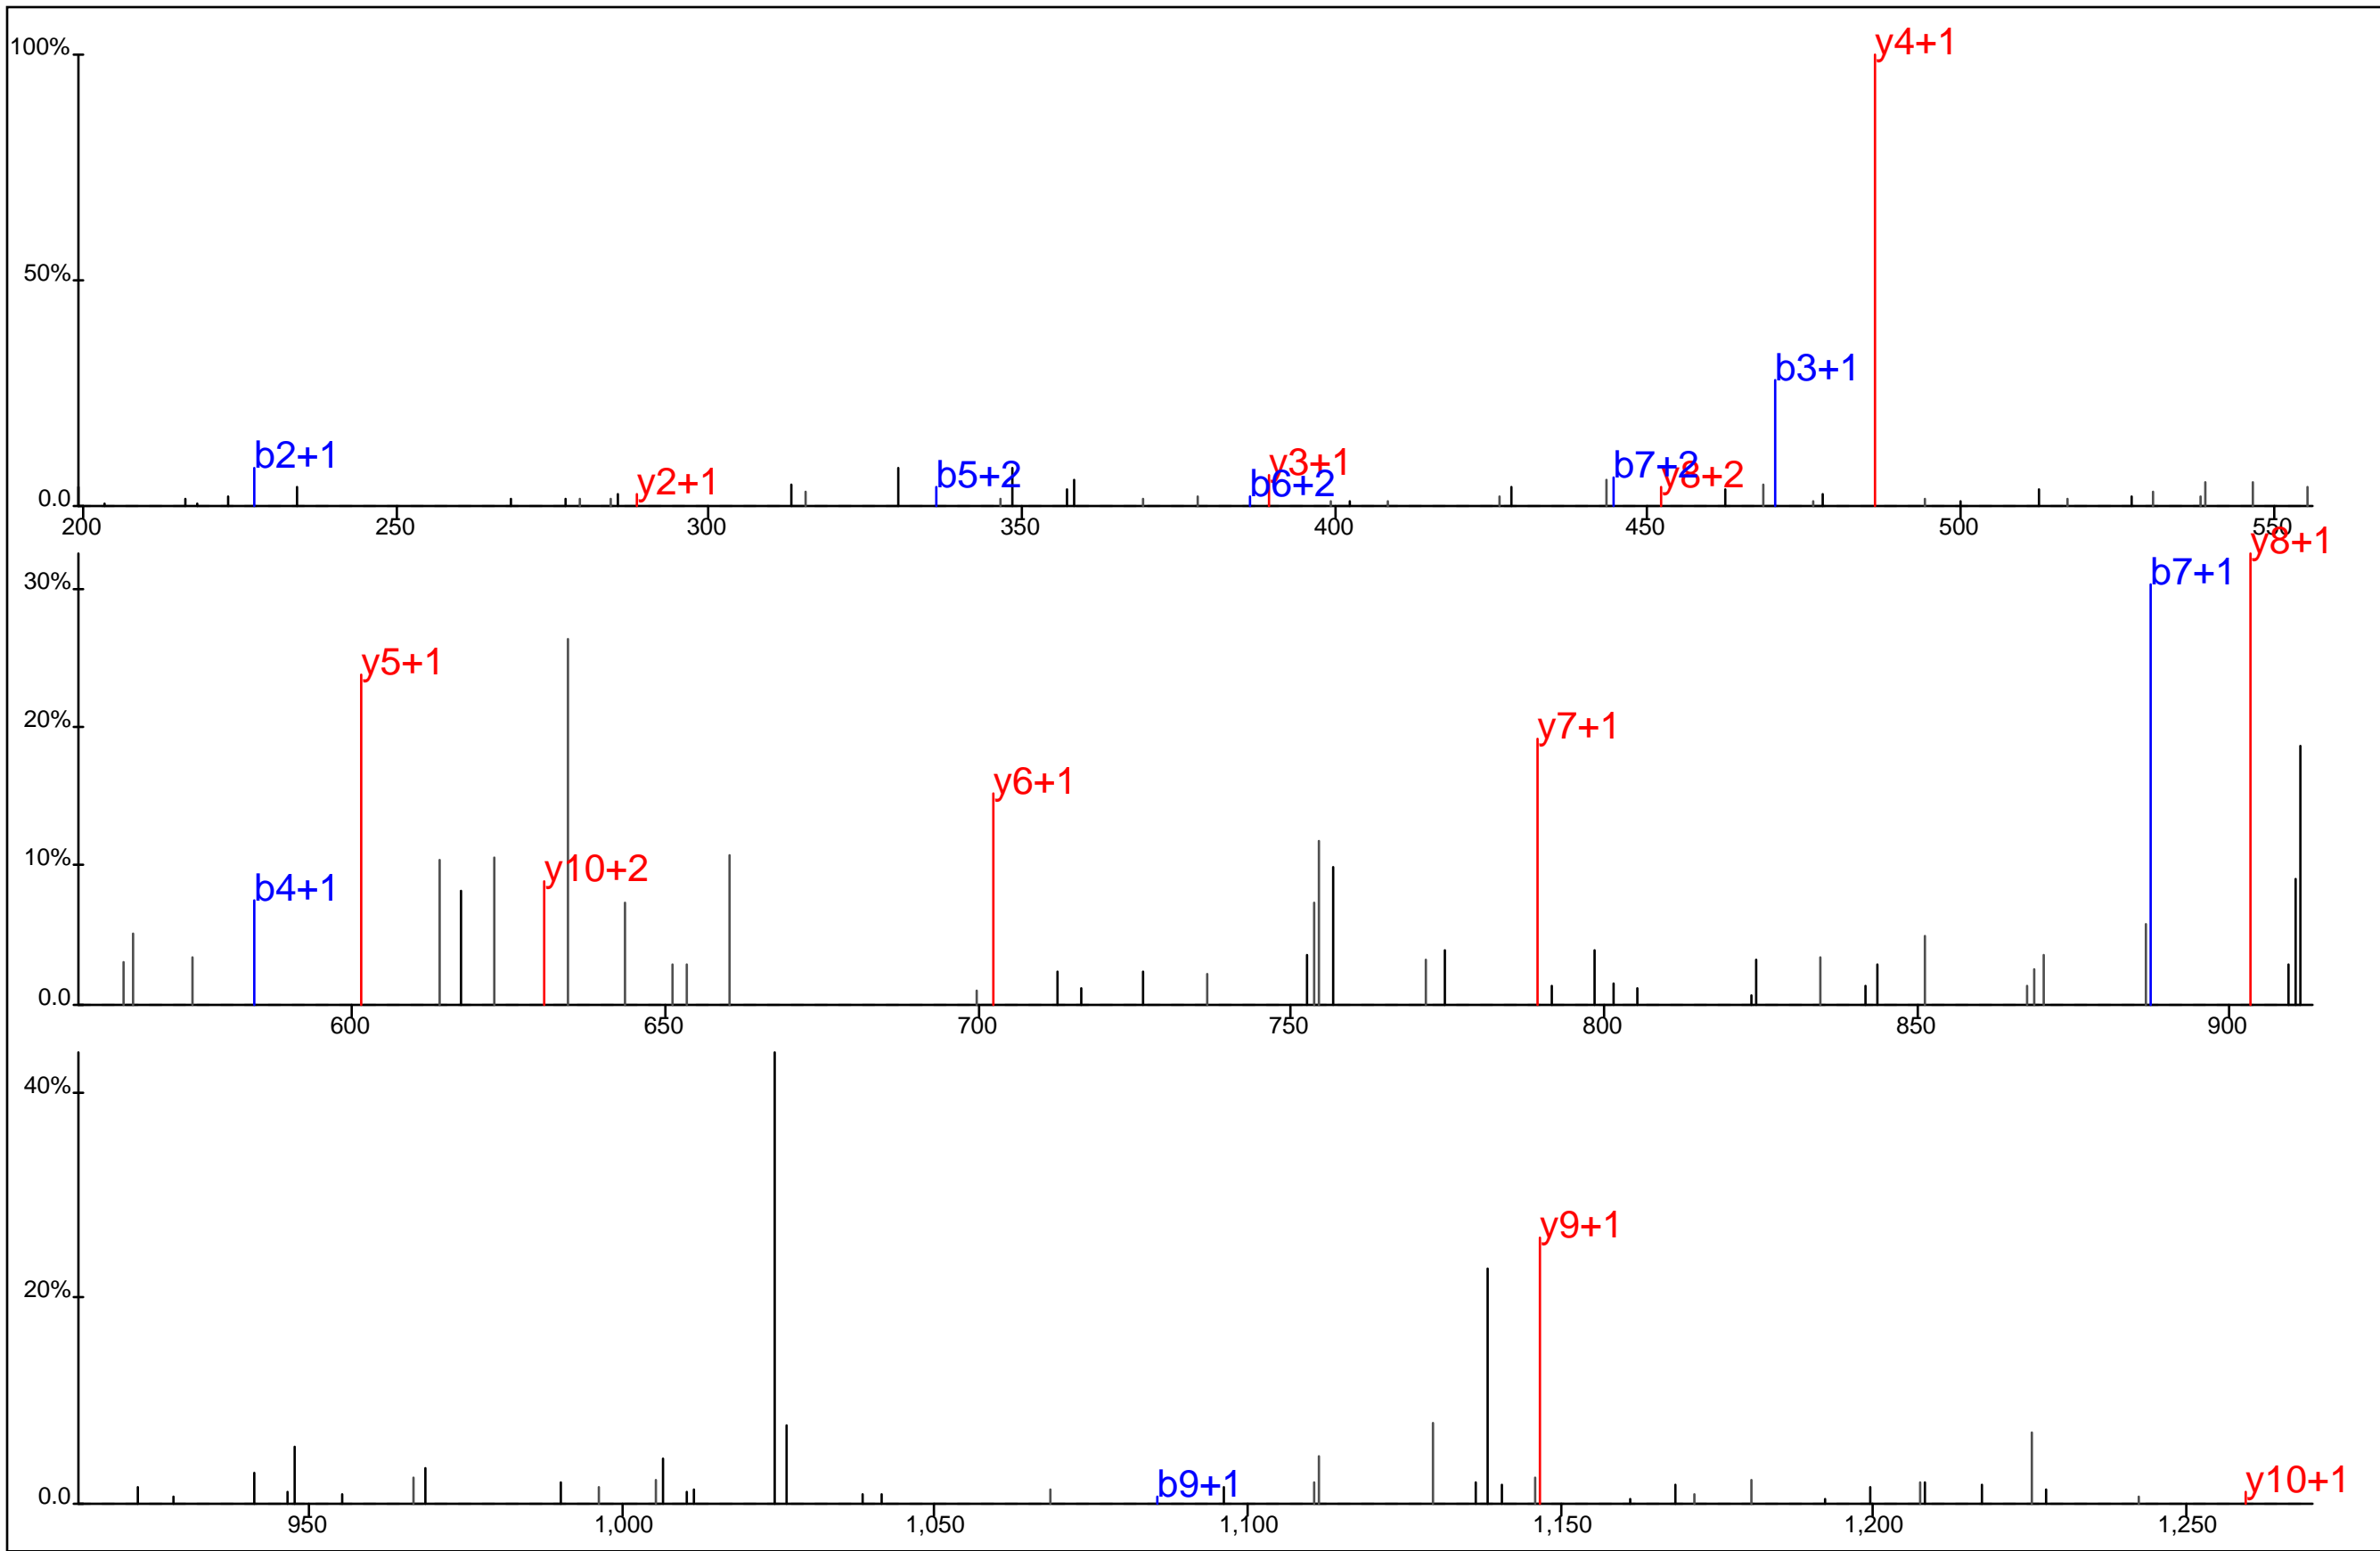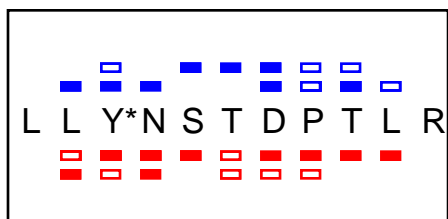

Protein Name: Myosin IG  
 gi Accession: 0  
 Precursor Mass: 686.8270+2  
 Delta Mass: 3.022 ppm  
 XCorr: 34.01

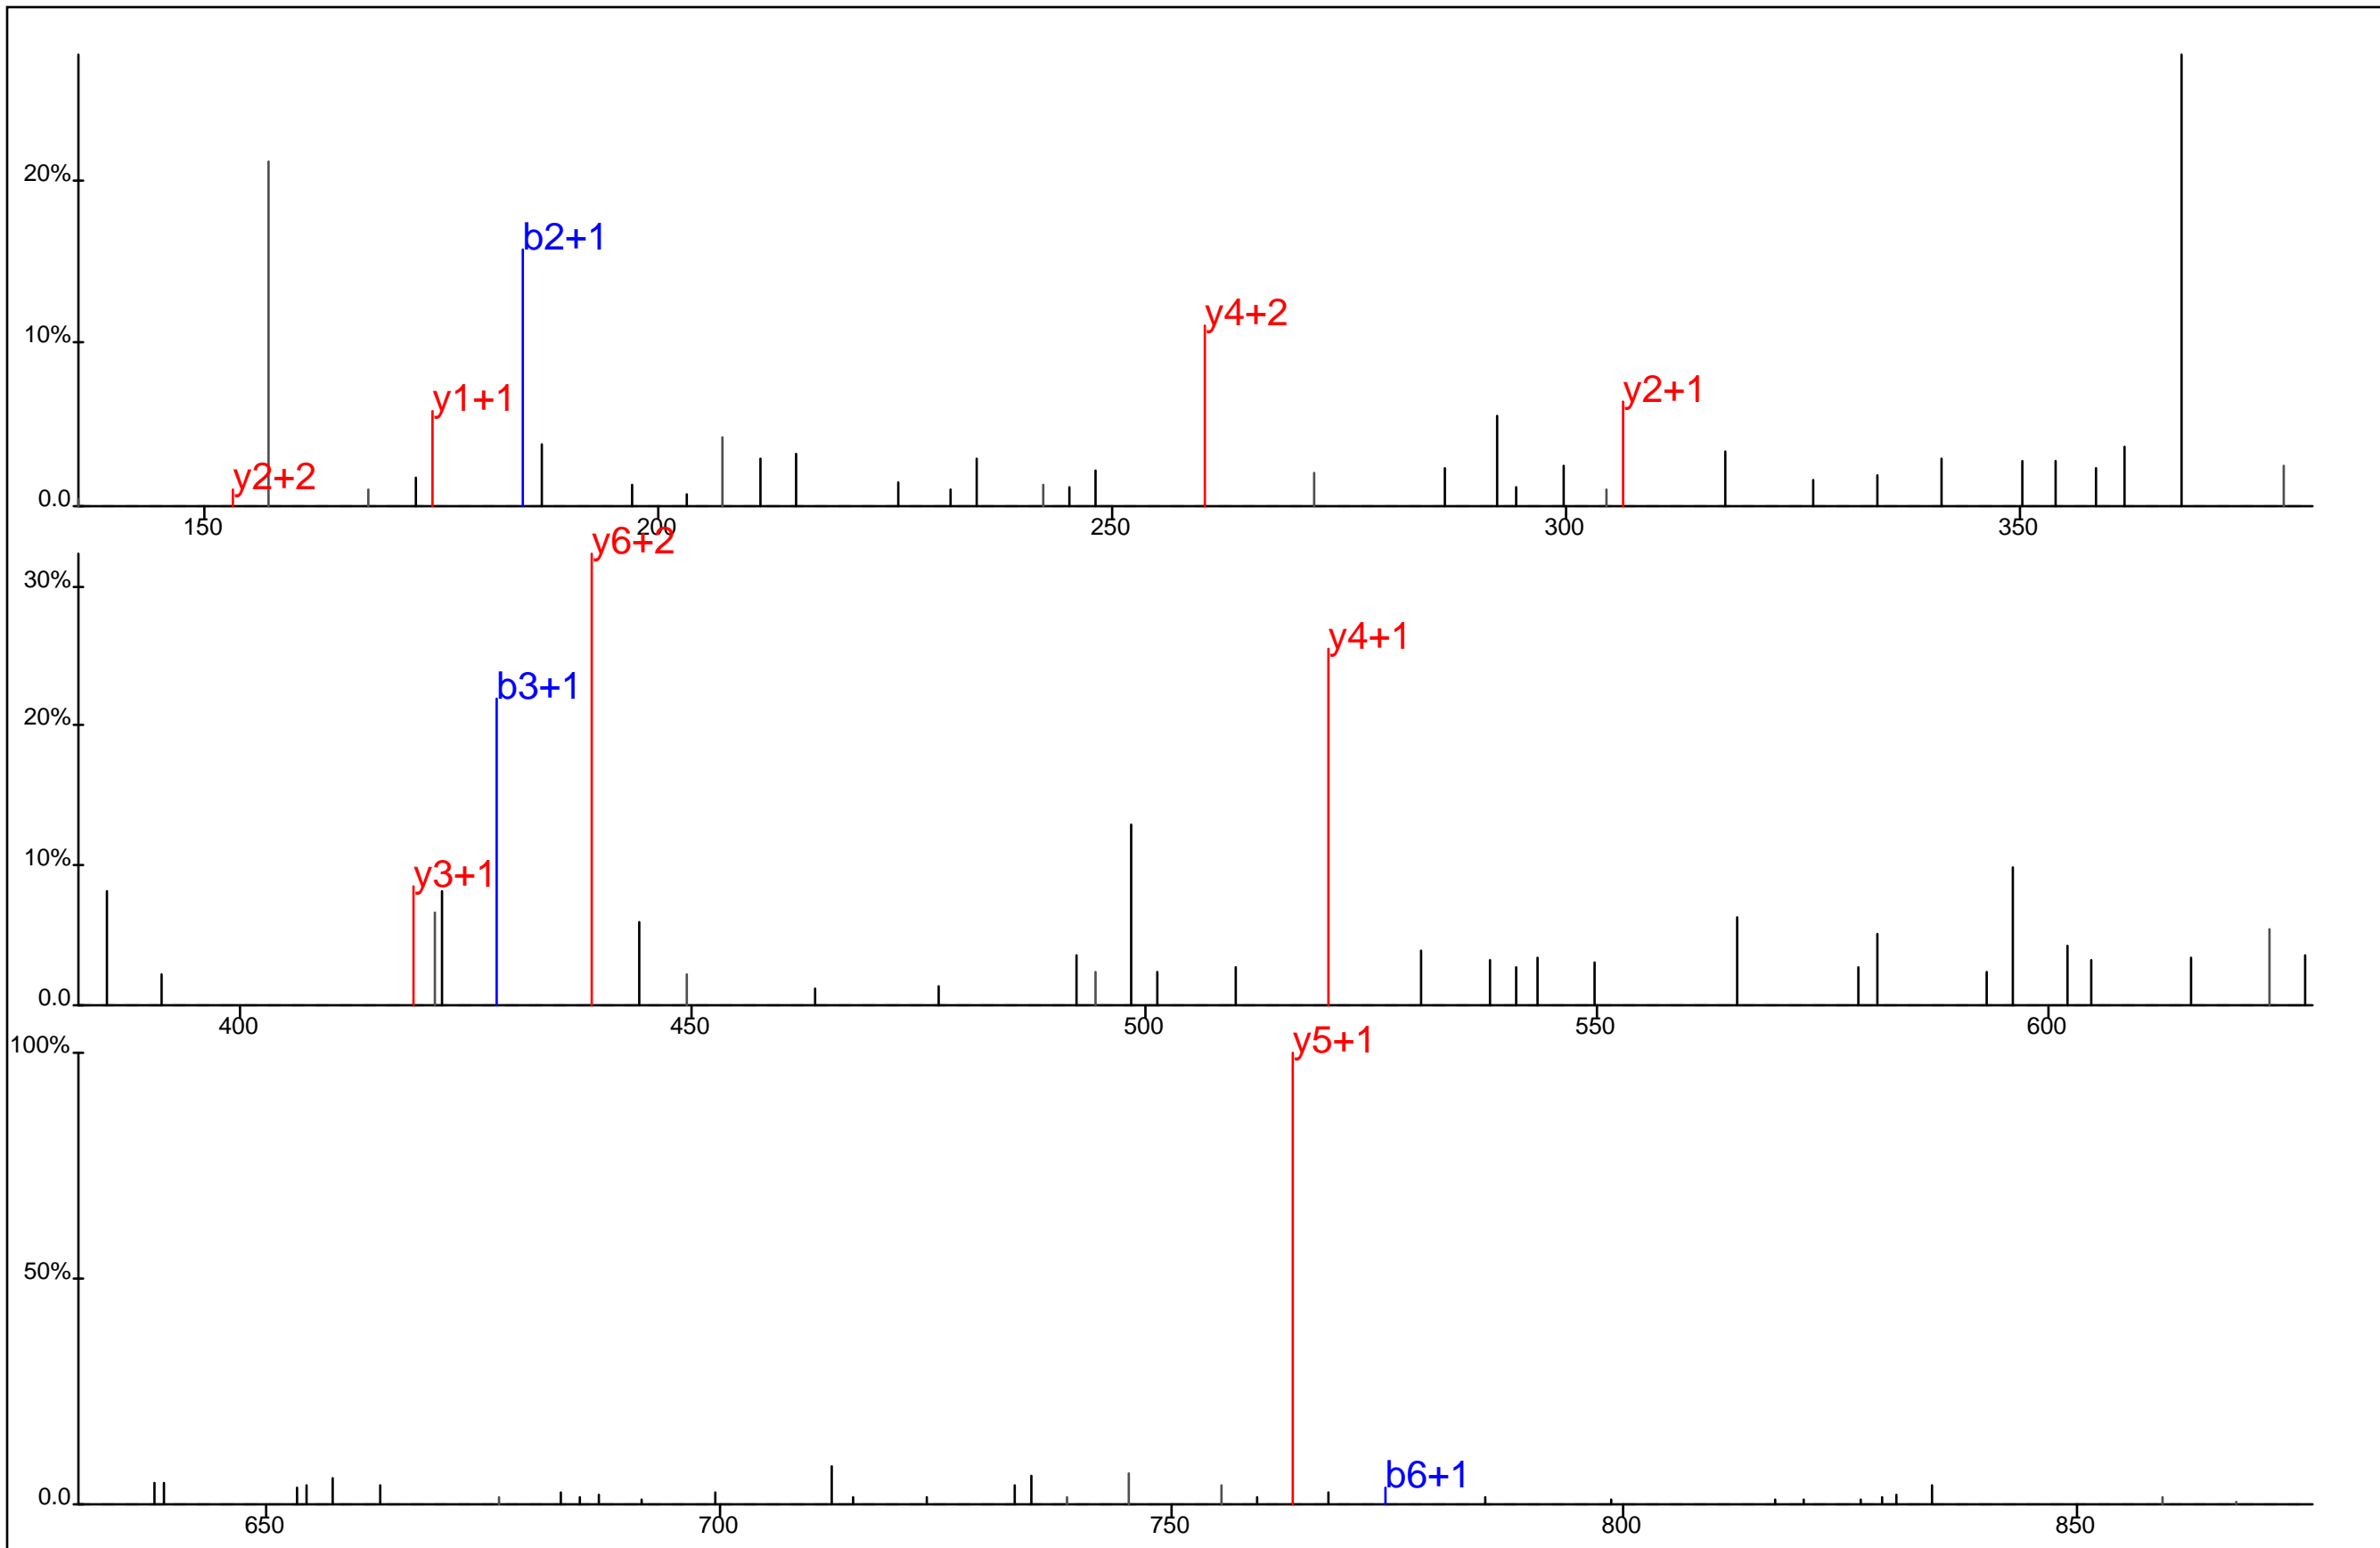

■ ▢ ▣ ▤ ▥  
 A I Y\* T I M R  
▢ ▣ ▤ ▥ ▦

Protein Name: Myosin IG  
 gi Accession: 0  
 Precursor Mass: 474.2245+2  
 Delta Mass: 0.234 ppm  
 XCorr: 38.24



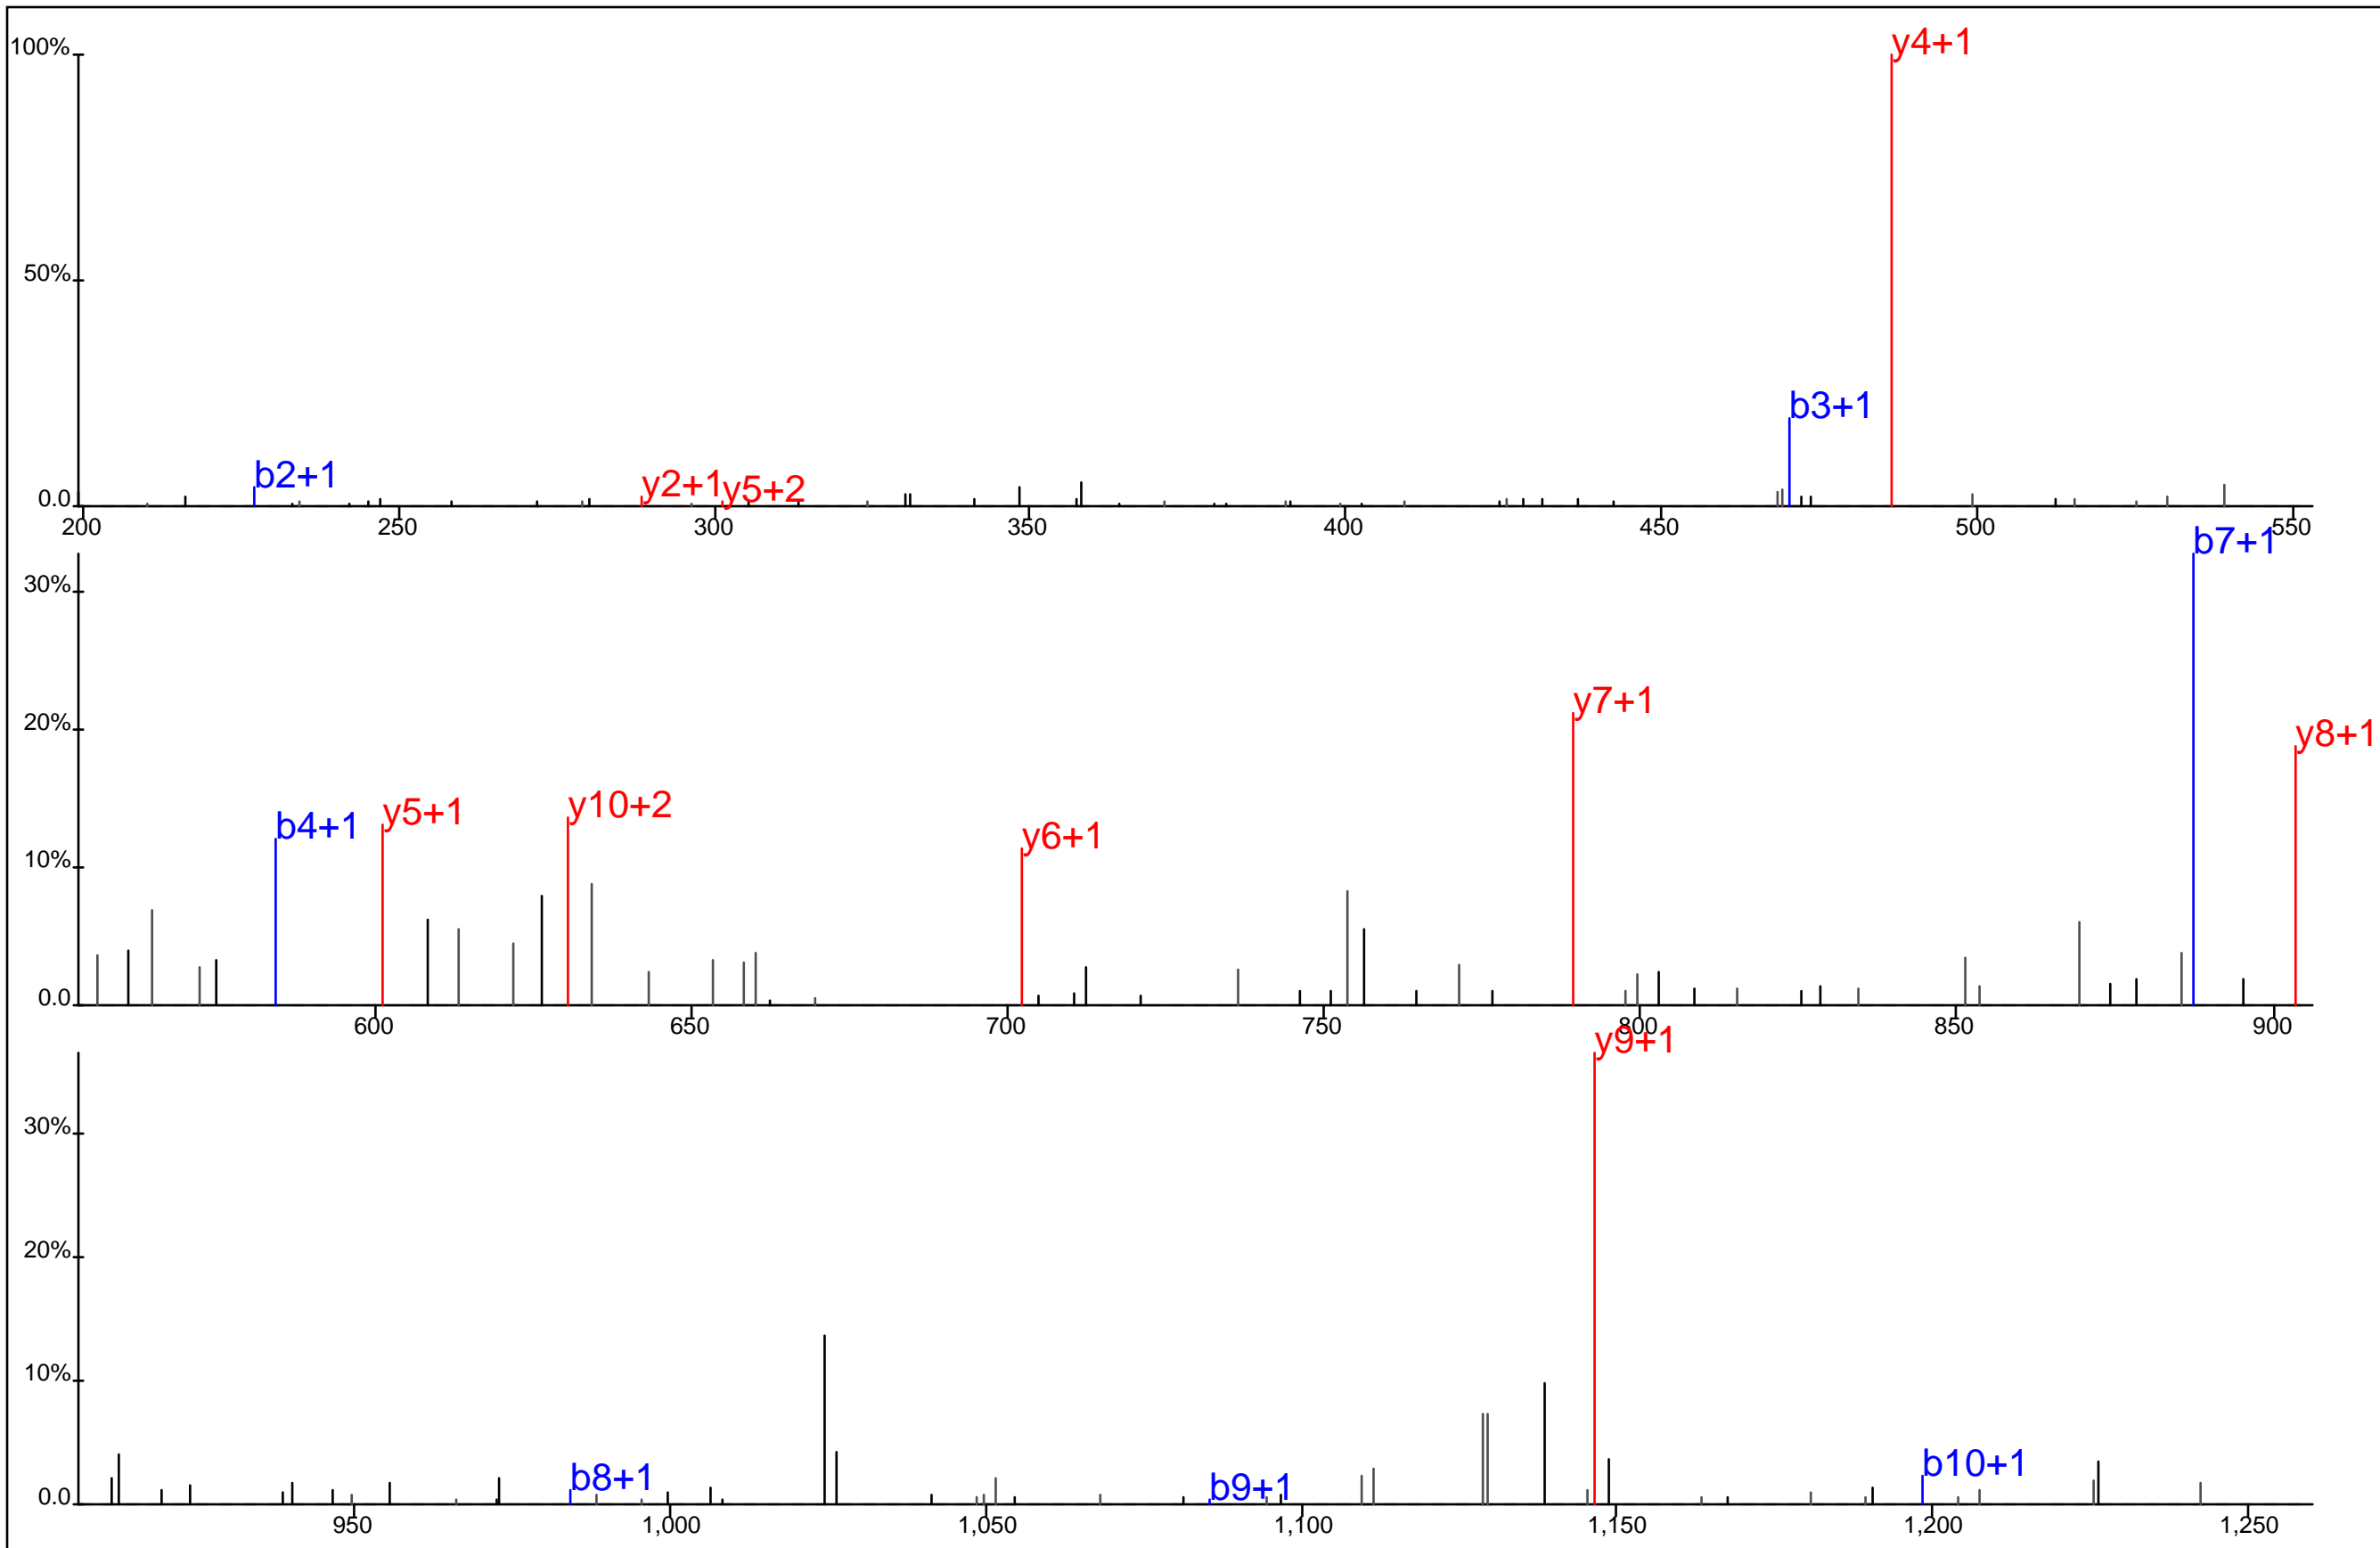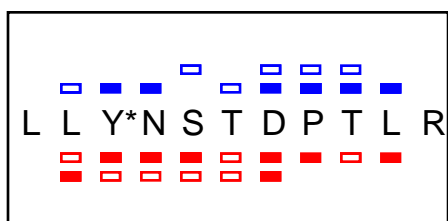

Protein Name: Myosin IG  
 gi Accession: 0  
 Precursor Mass: 686.8292+2  
 Delta Mass: 0.181 ppm  
 XCorr: 38.2

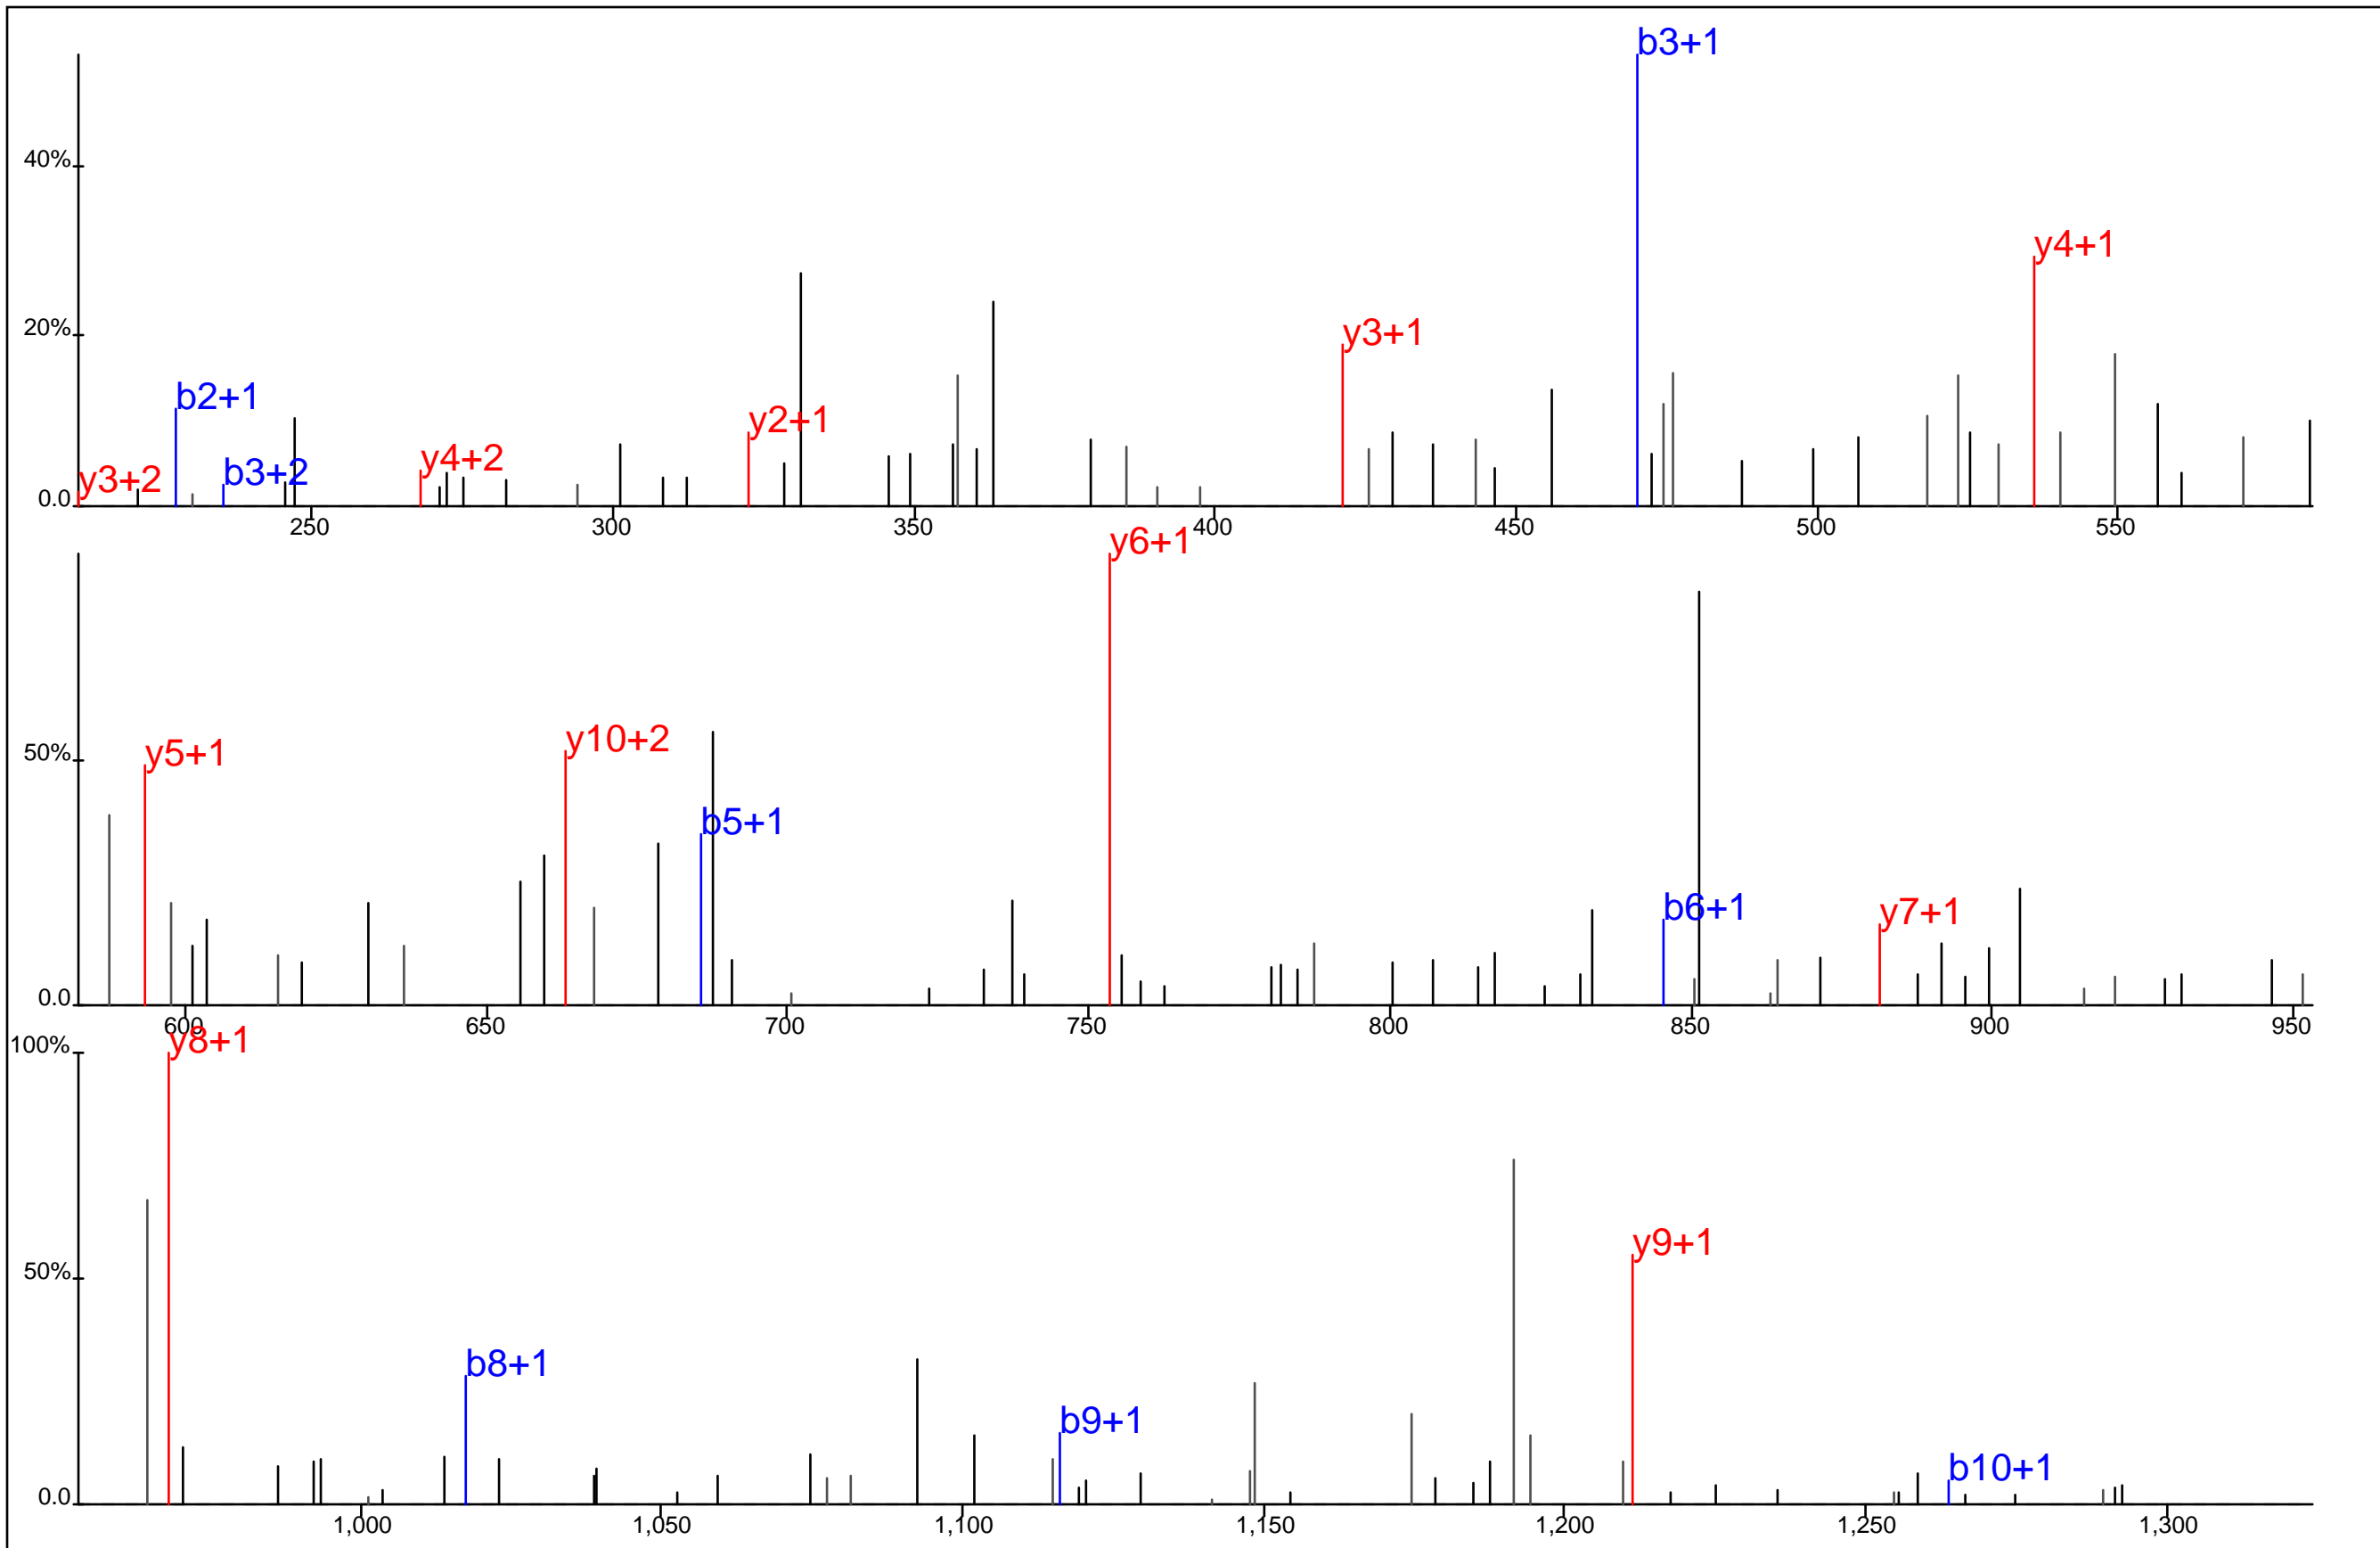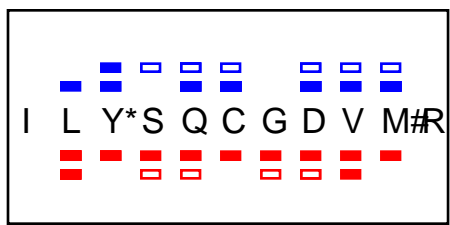

Protein Name: Myosin light chain 1 slow a  
 gi Accession: 0  
 Precursor Mass: 719.3032+2  
 Delta Mass: 6.231 ppm  
 XCorr: 43.88

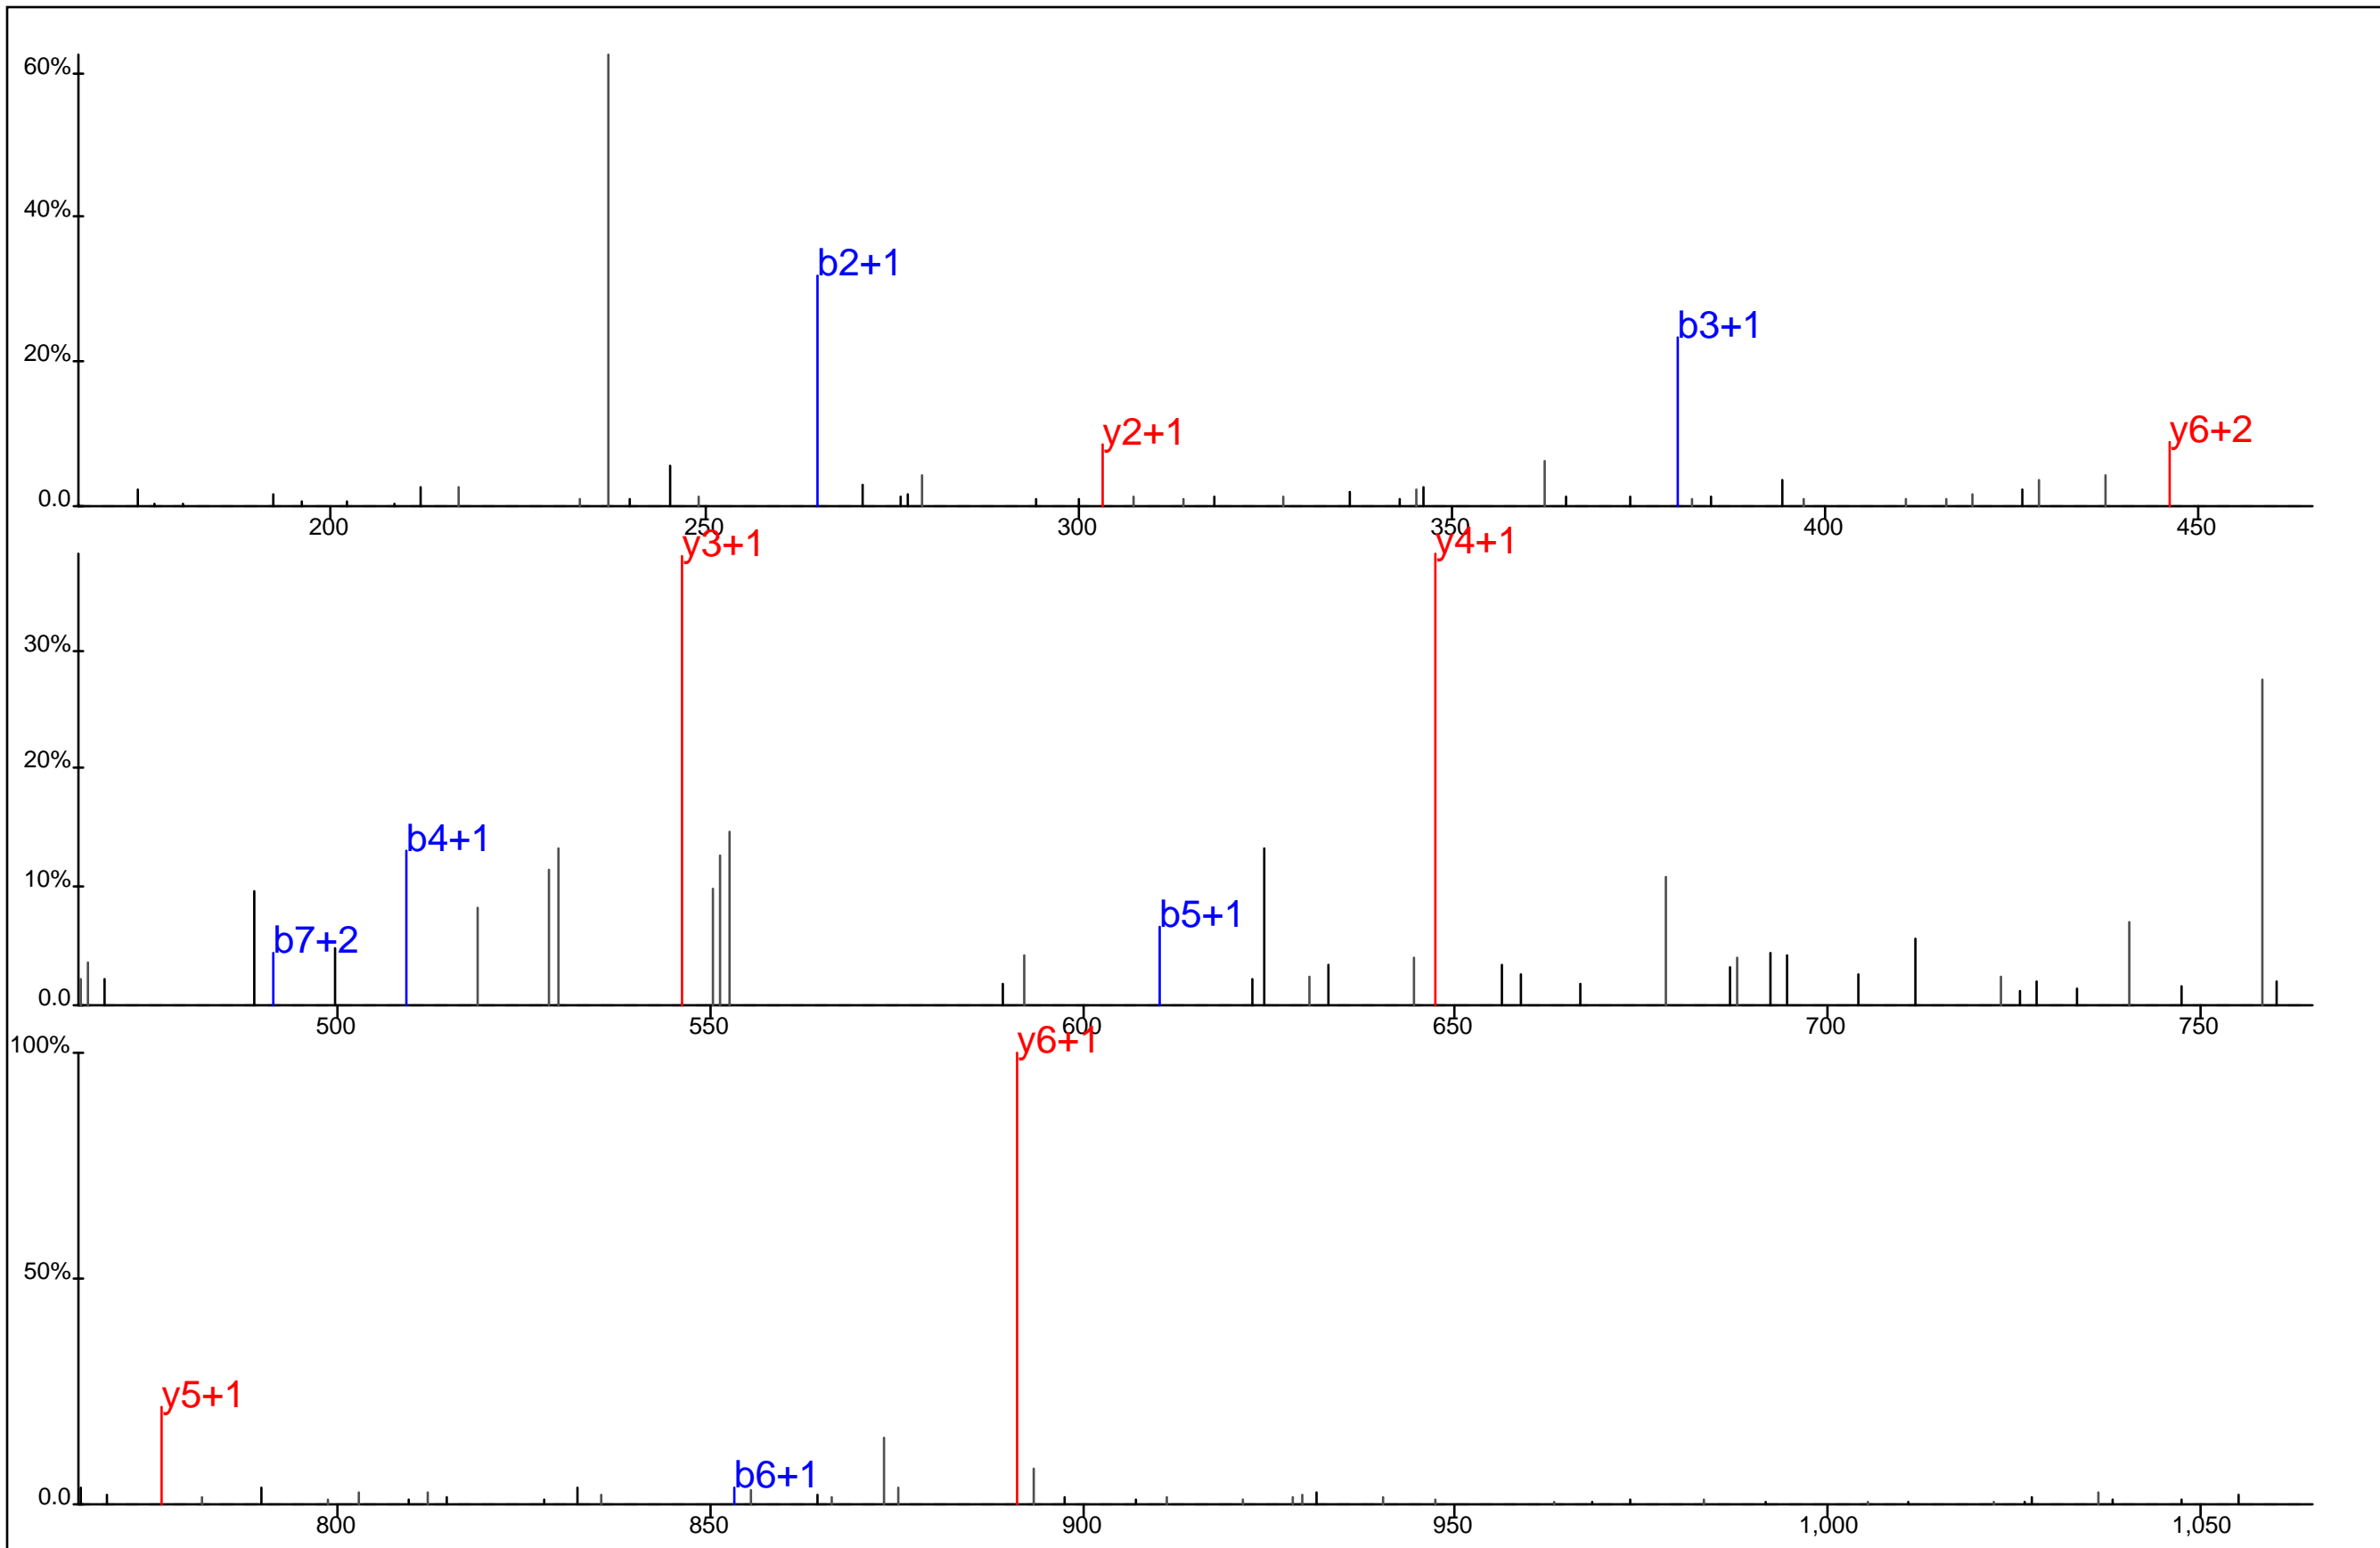


  
 T Y D E T Y\* Q R

Protein Name: Myosin phosphatase target subunit 1  
 gi Accession: 0  
 Precursor Mass: 578.2218+2  
 Delta Mass: 0.810 ppm  
 XCorr: 42.96

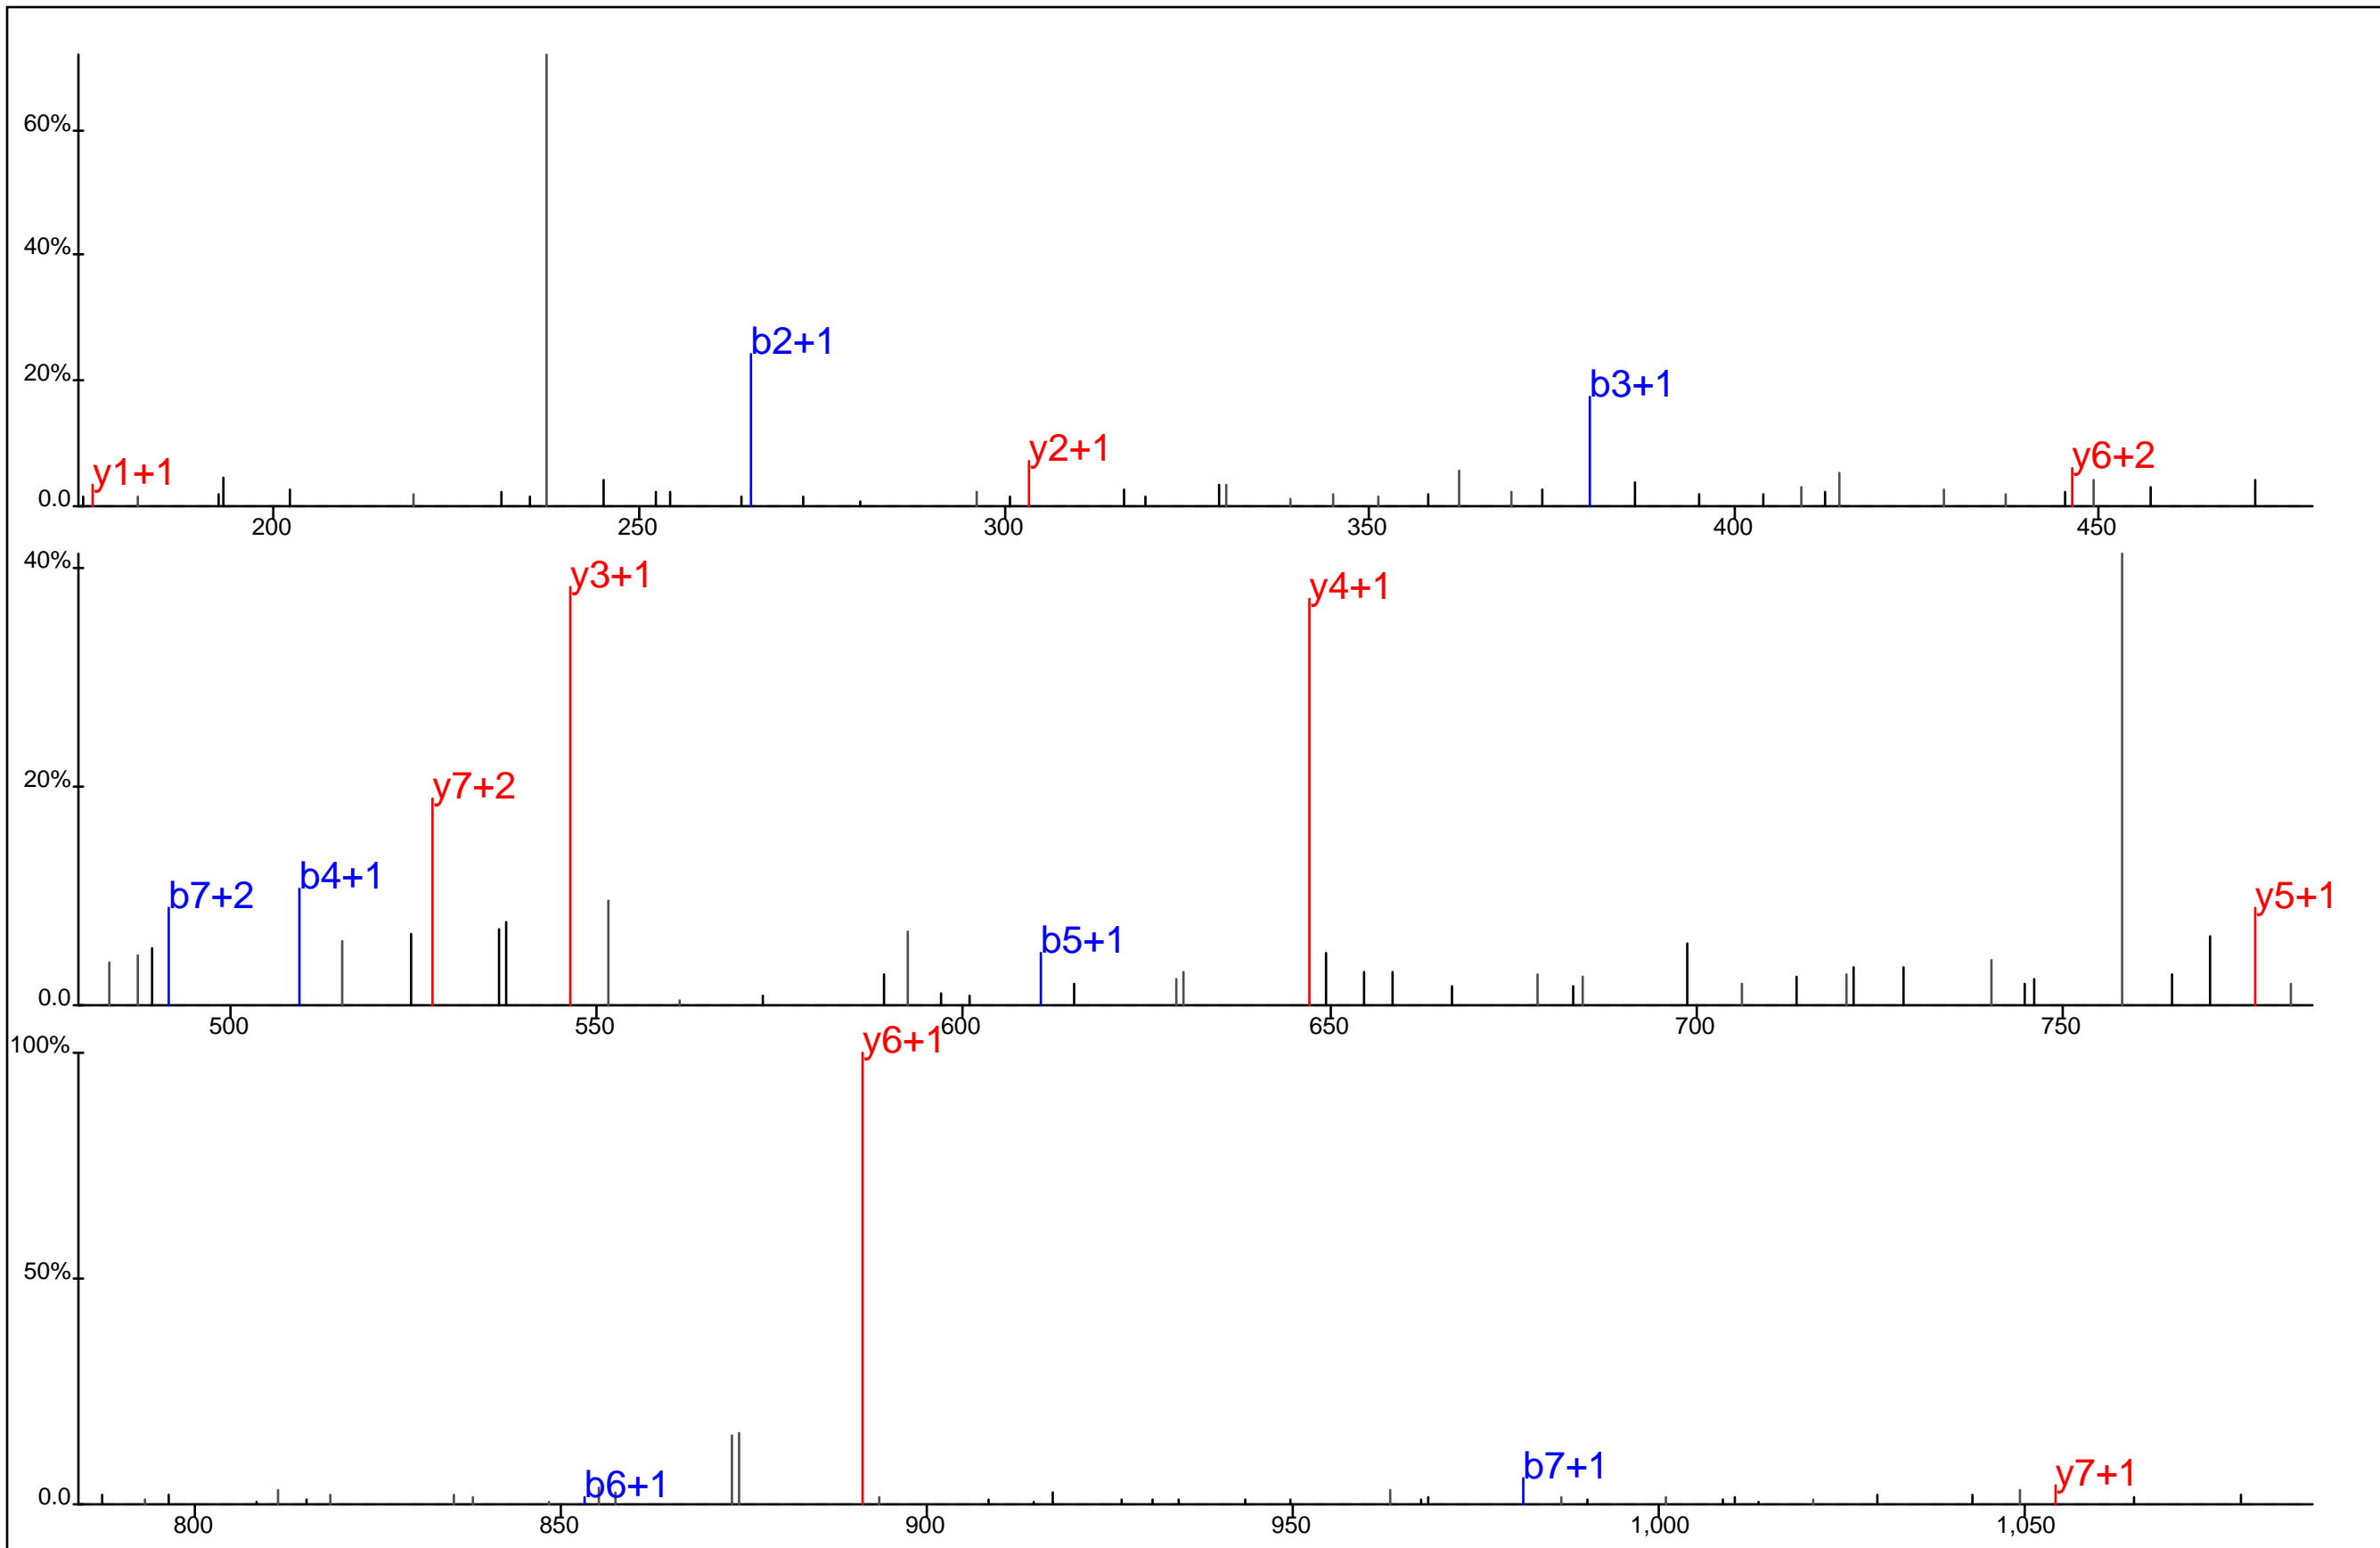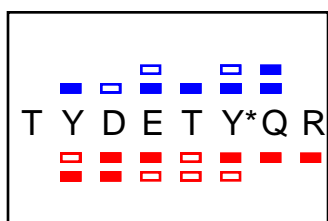

Protein Name: Myosin phosphatase target subunit 1  
 gi Accession: 0  
 Precursor Mass: 578.2219+2  
 Delta Mass: 1.021 ppm  
 XCorr: 48.27

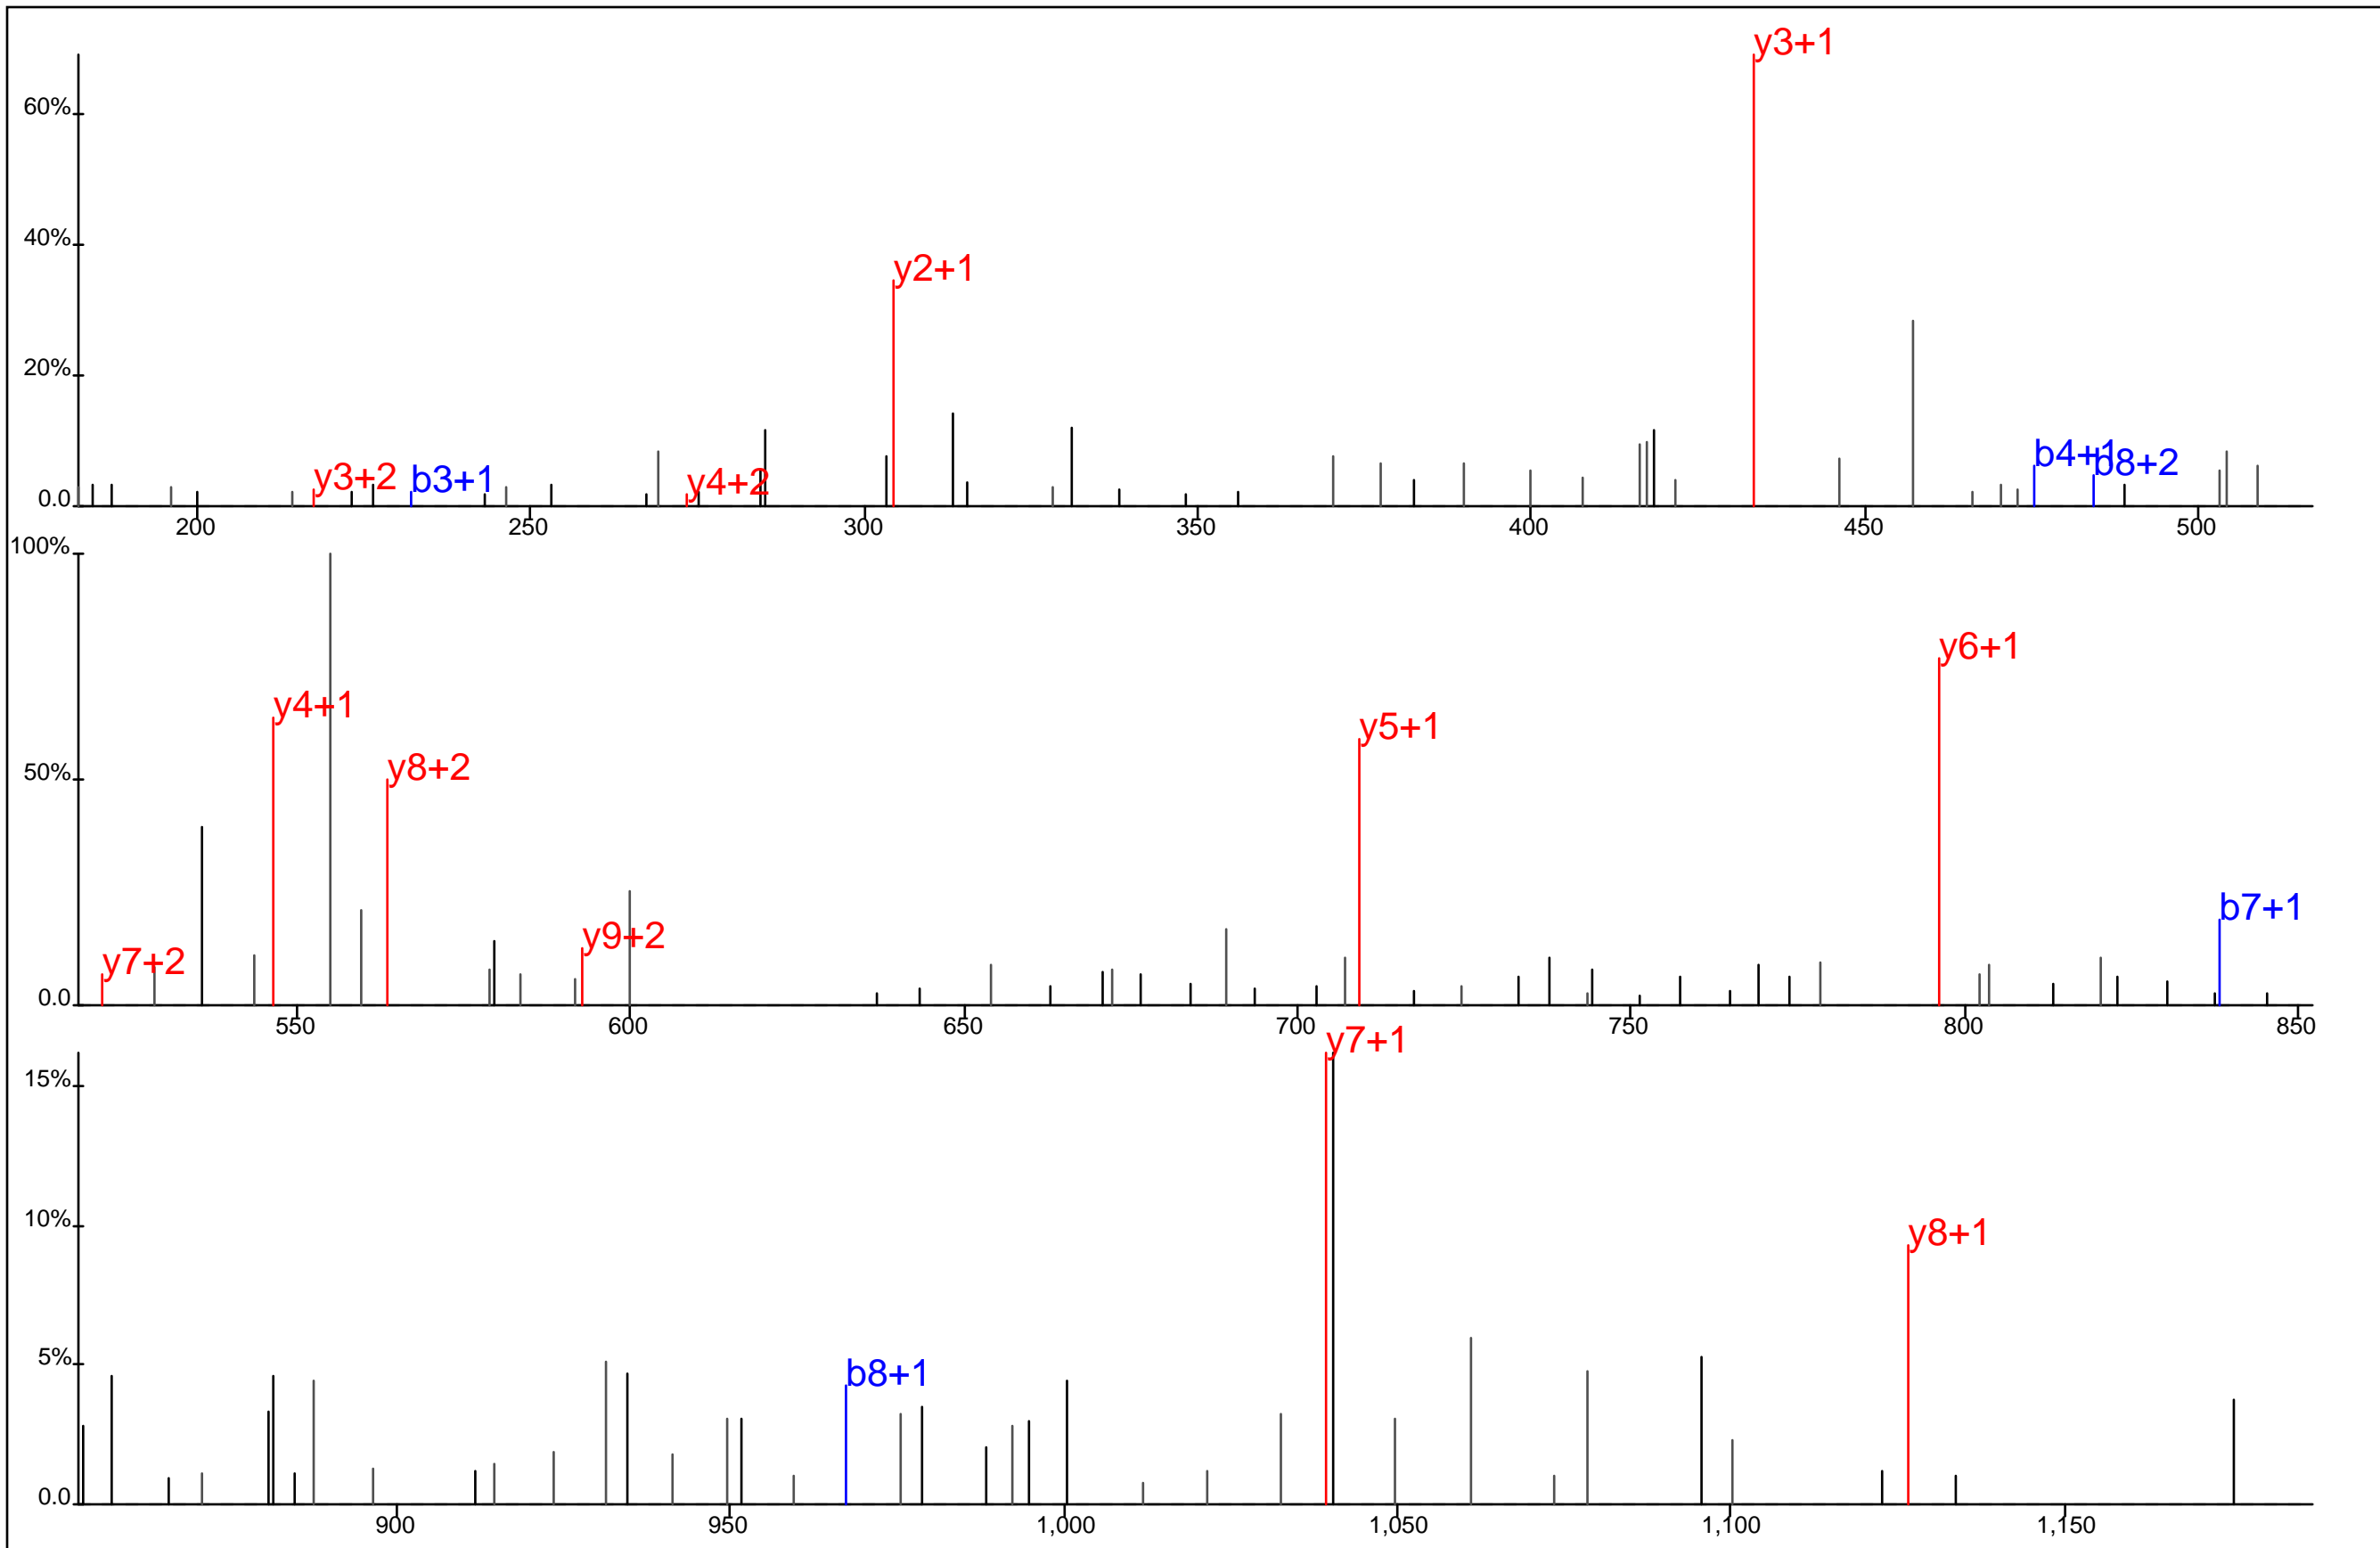

S G S Y\* S Y L E E R

Protein Name: Myosin phosphatase target subunit 1  
 gi Accession: 0  
 Precursor Mass: 635.7535+2  
 Delta Mass: 0.771 ppm  
 XCorr: 36.43

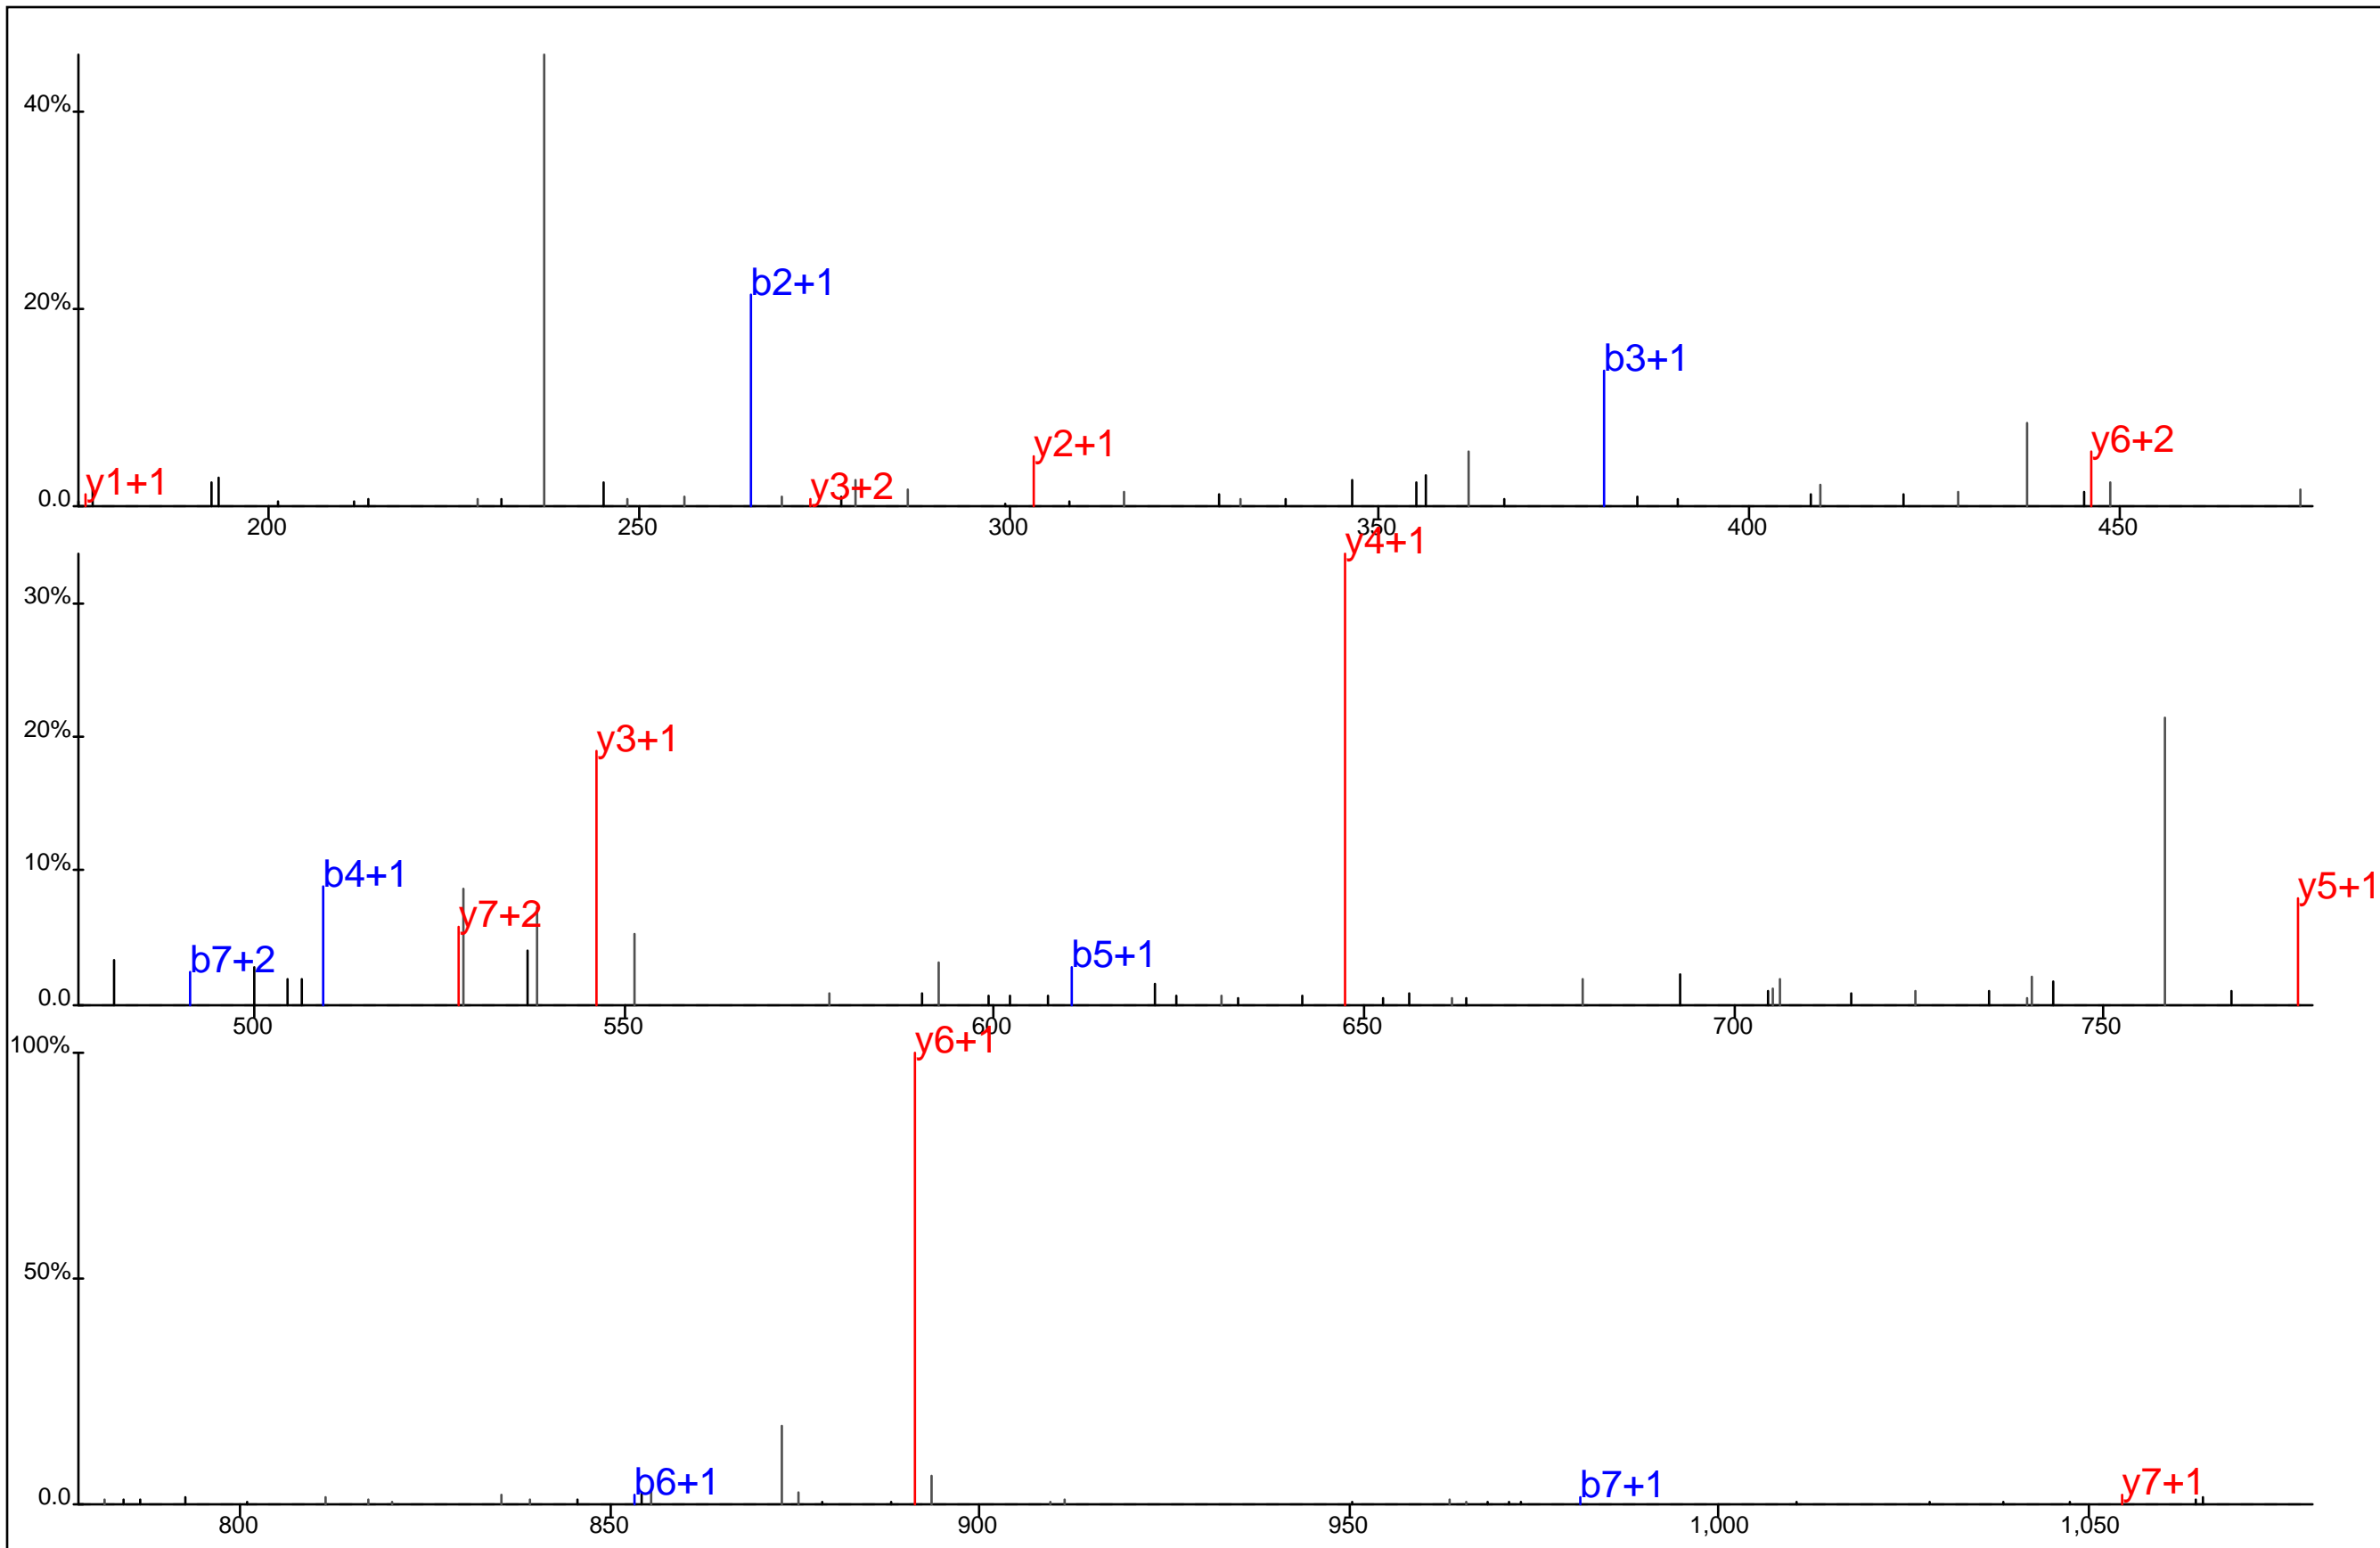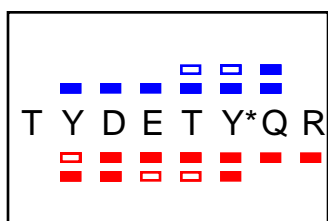

Protein Name: Myosin phosphatase target subunit 1  
 gi Accession: 0  
 Precursor Mass: 578.2222+2  
 Delta Mass: 1.444 ppm  
 XCorr: 46.11

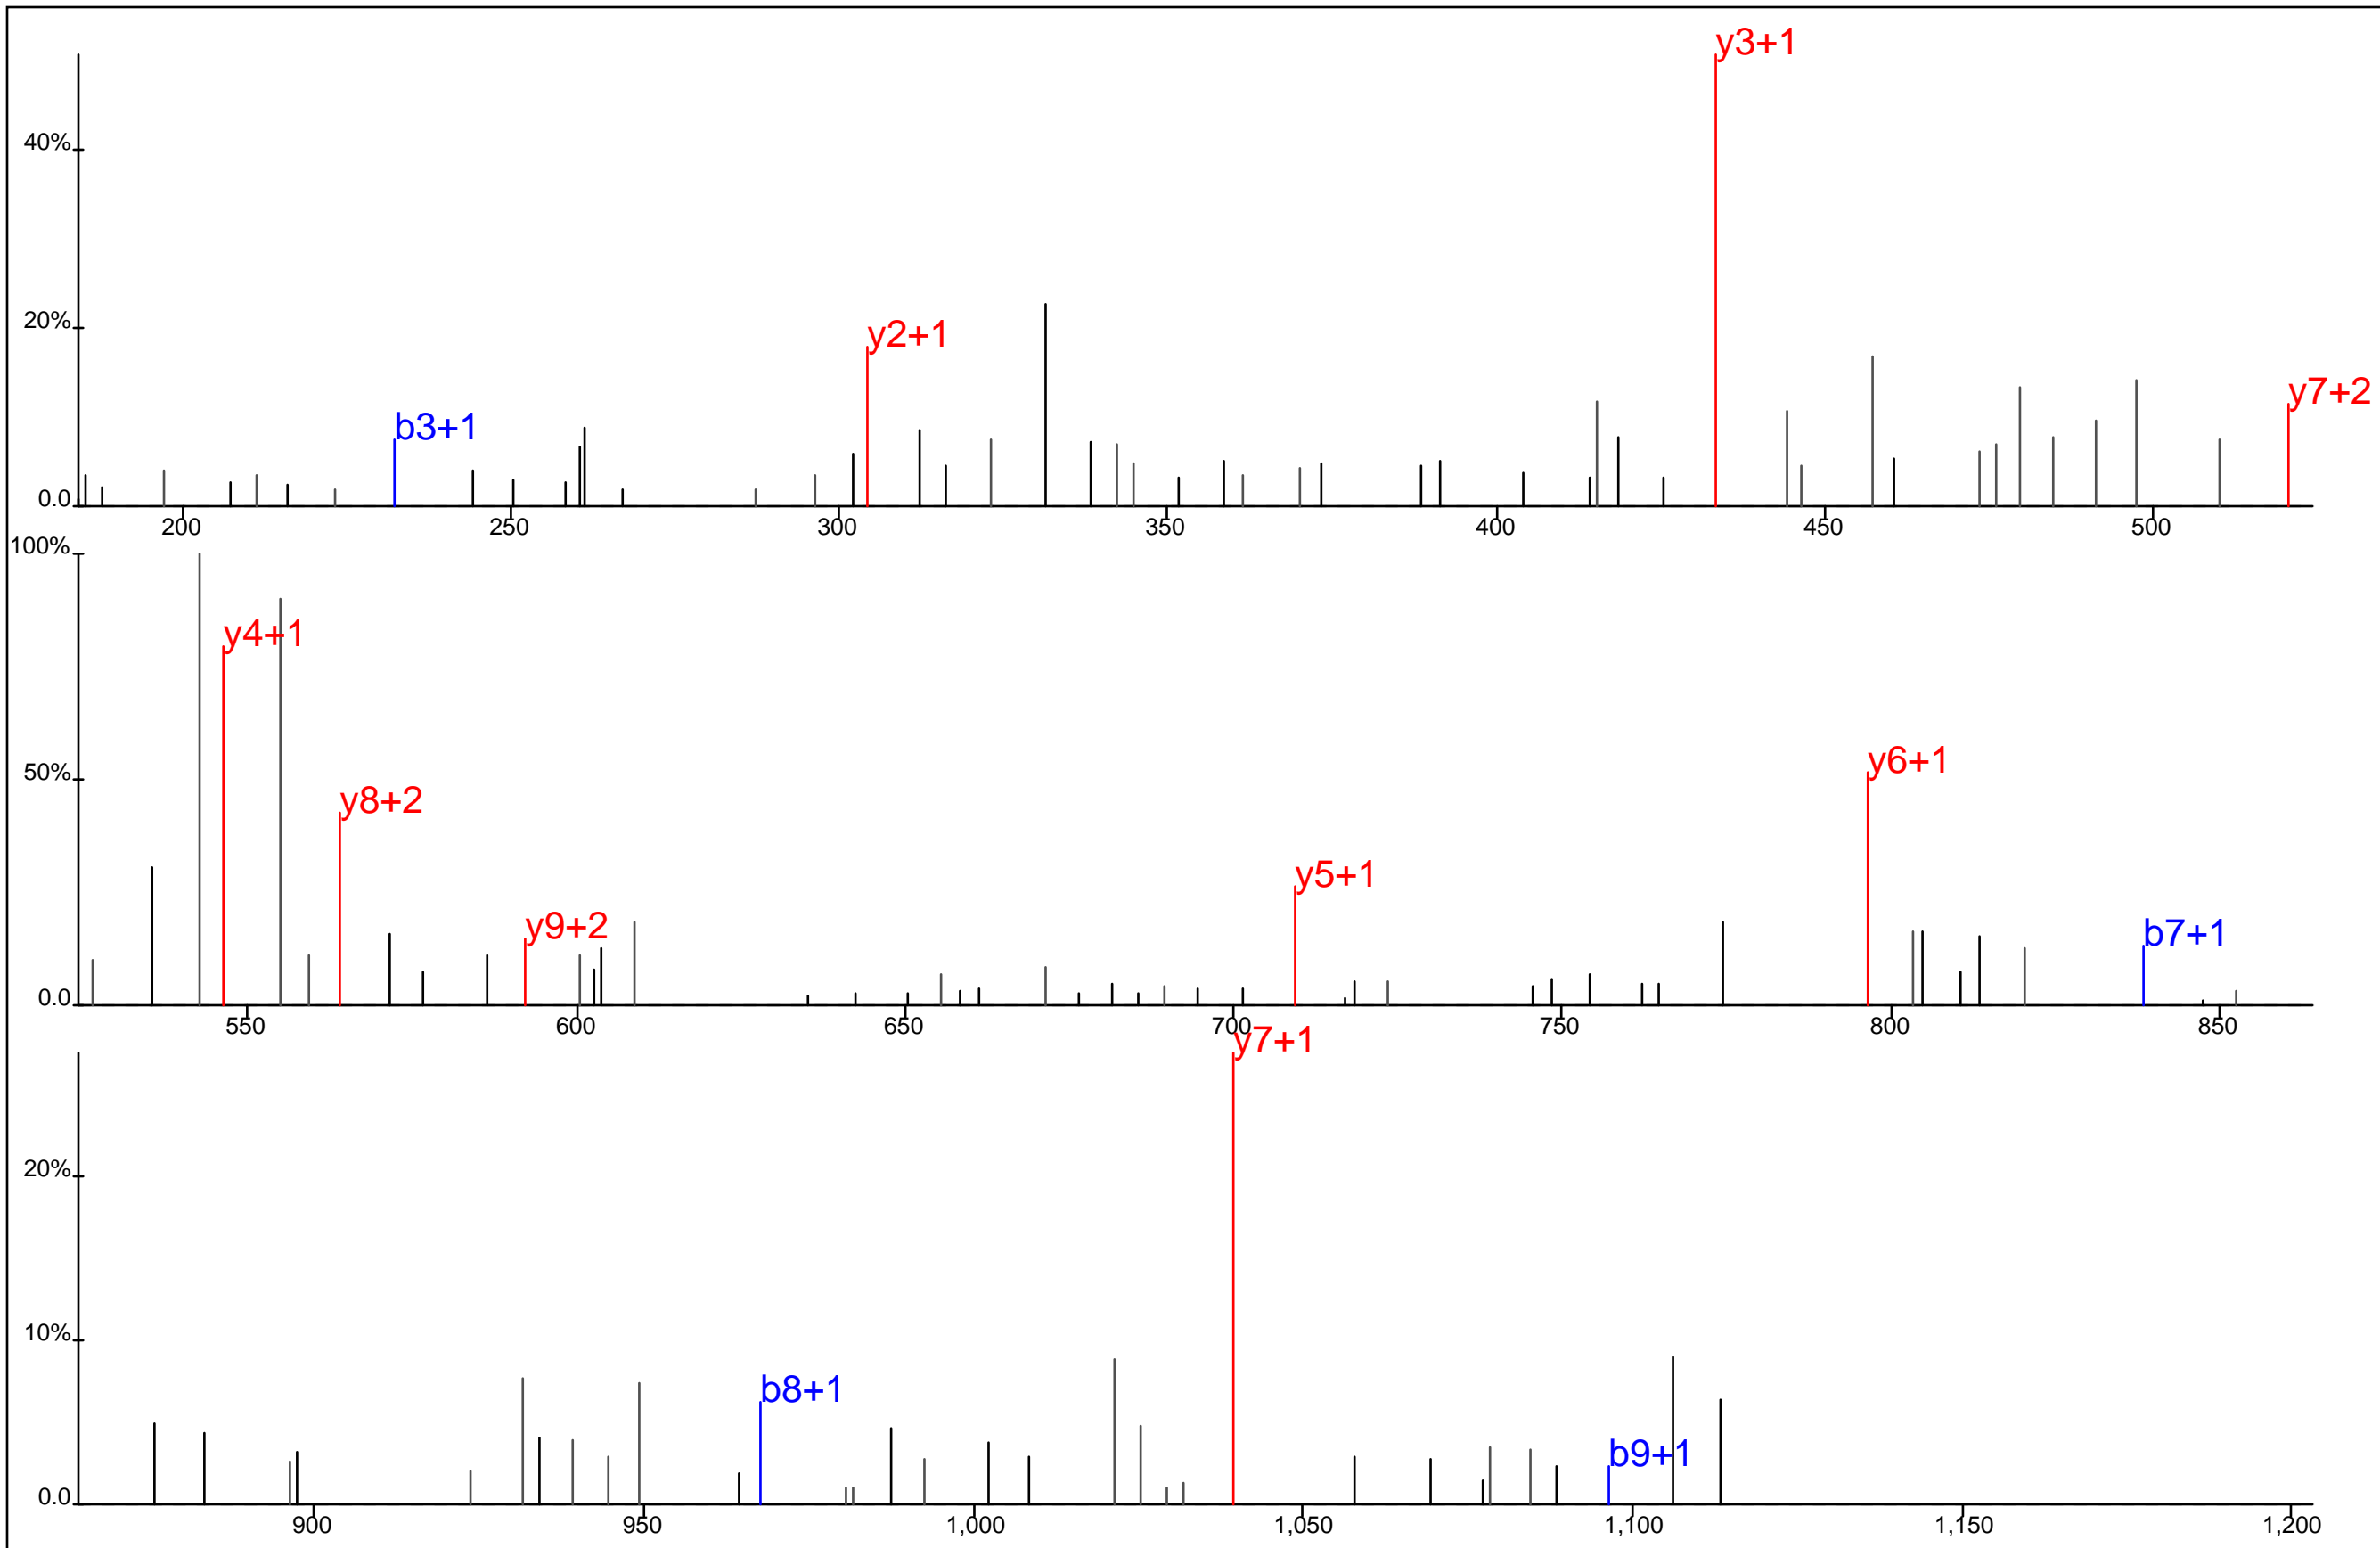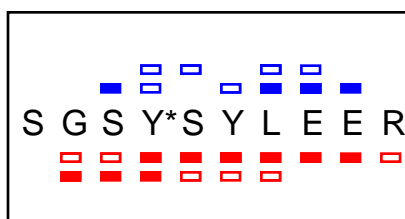

Protein Name: Myosin phosphatase target subunit 1  
 gi Accession: 0  
 Precursor Mass: 635.7501+2  
 Delta Mass: 4.513 ppm  
 XCorr: 23.74

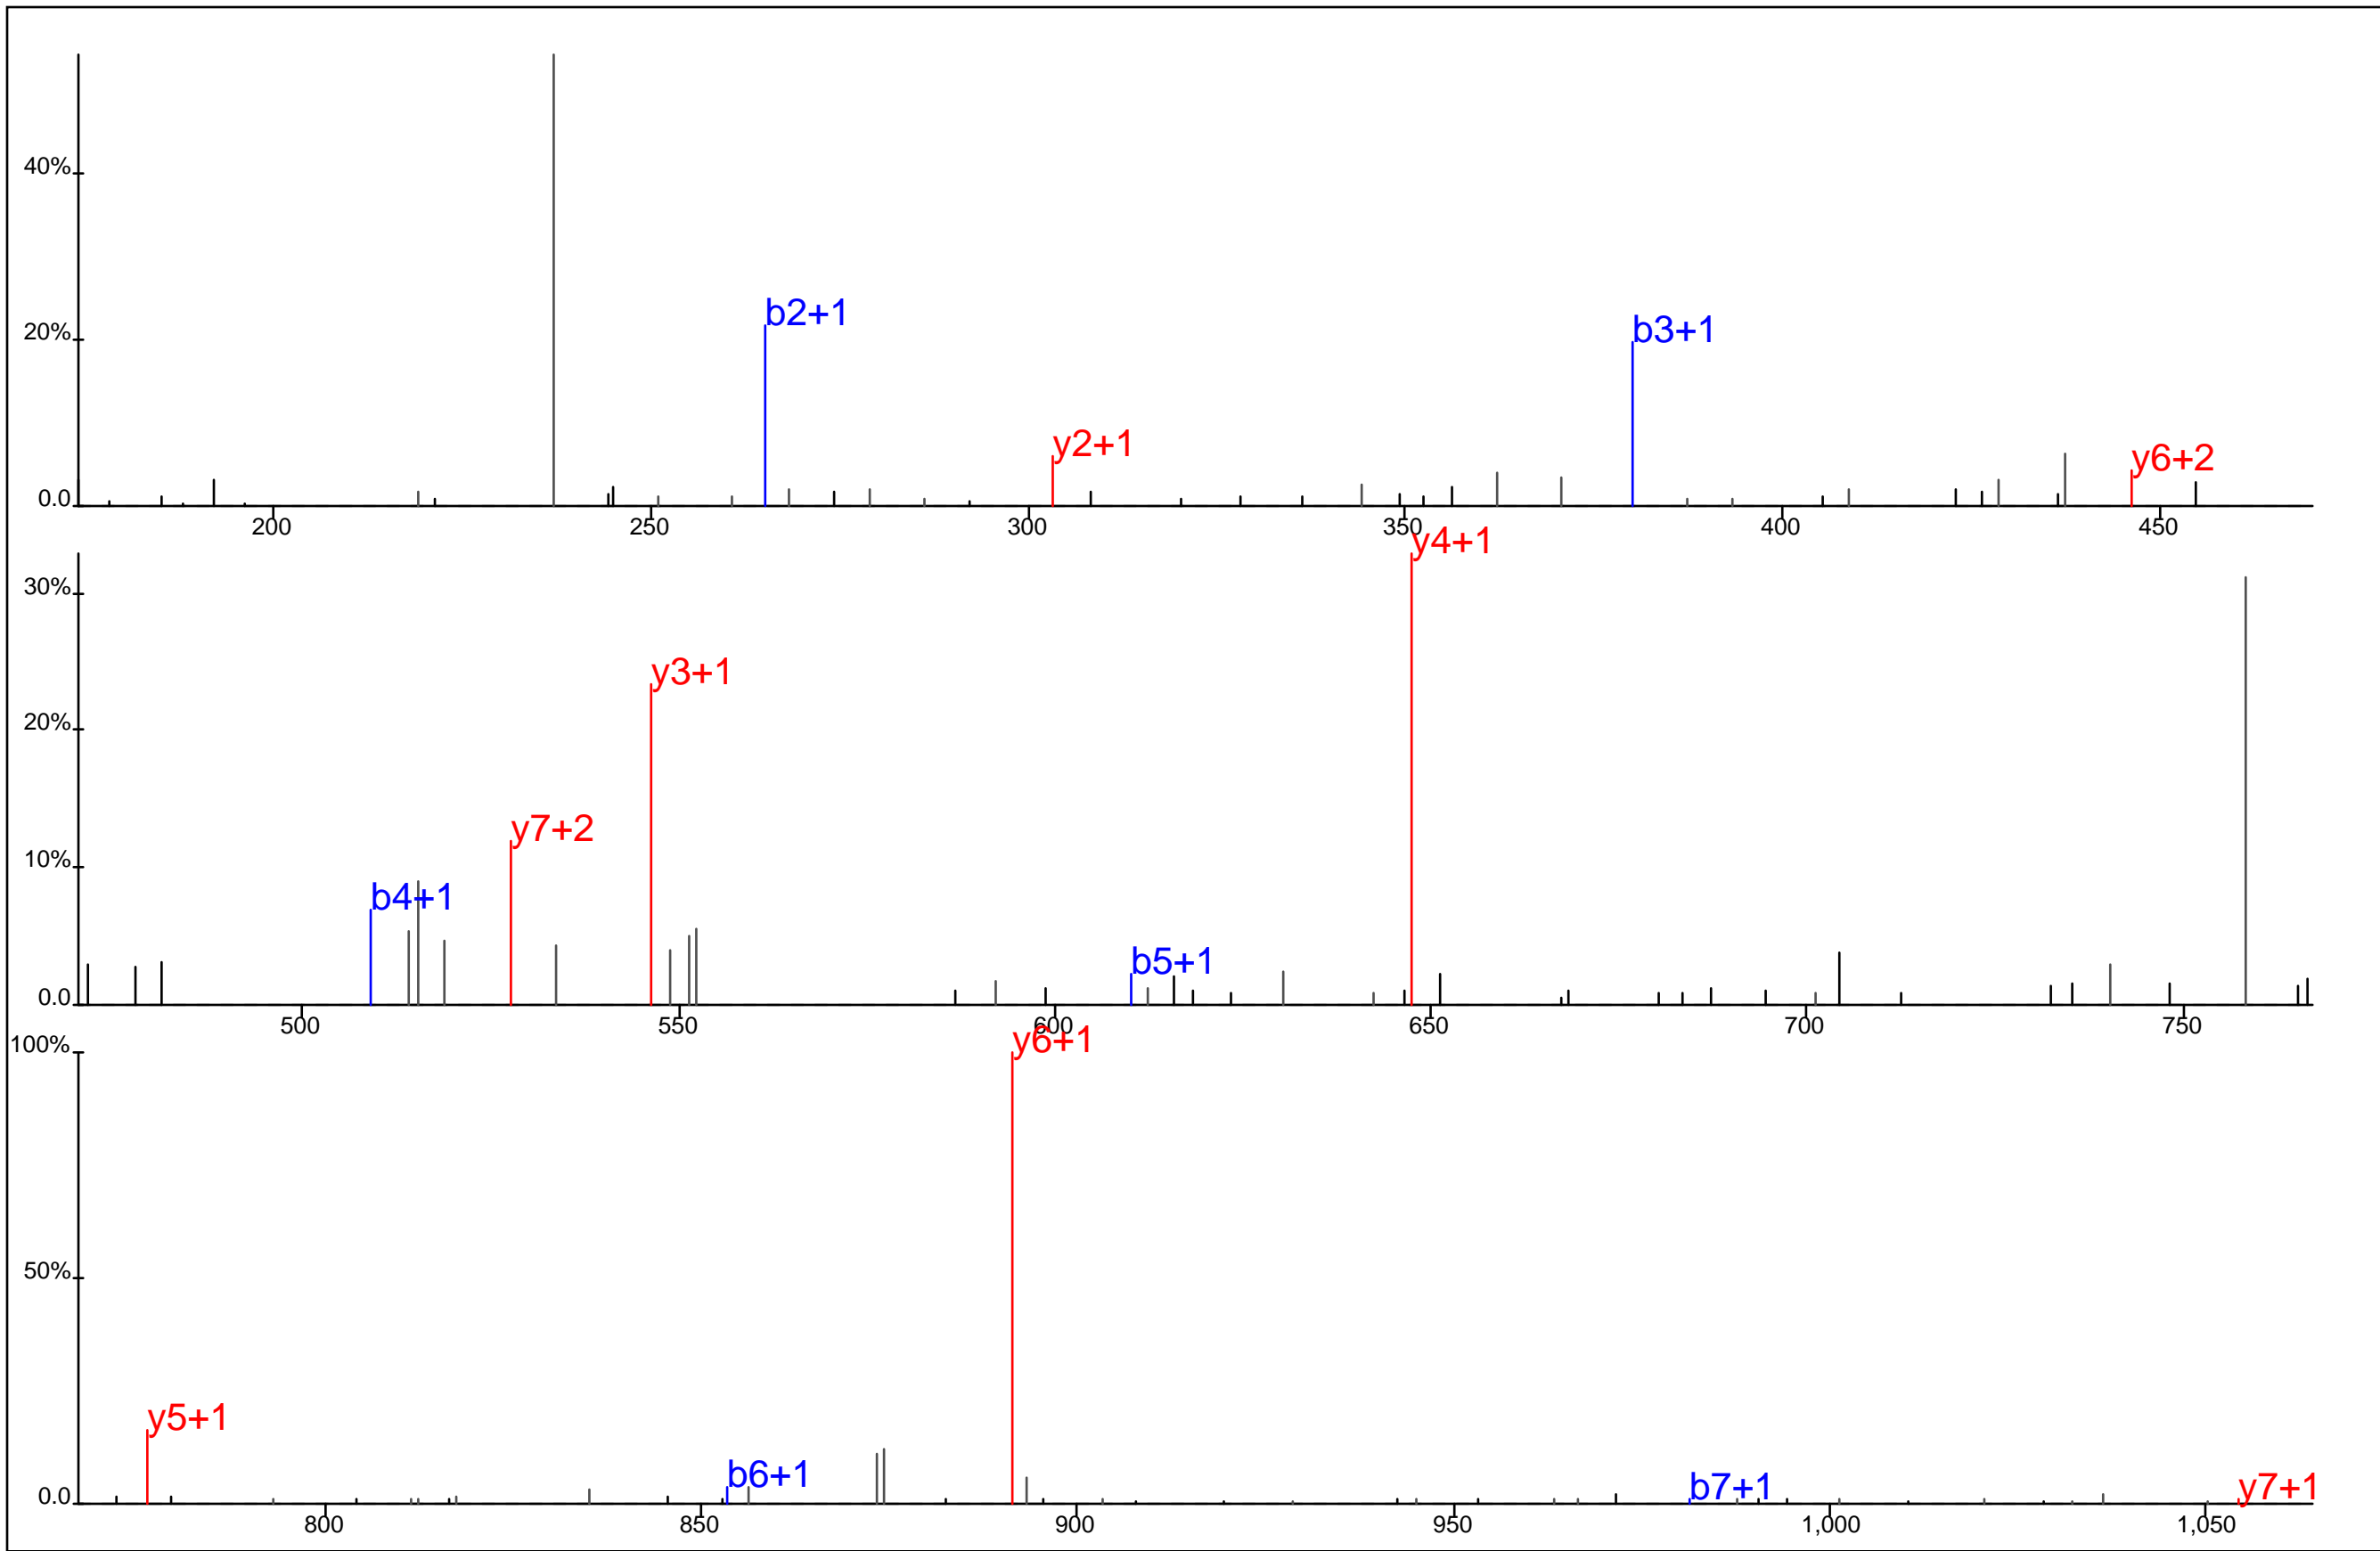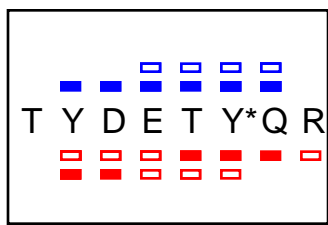

Protein Name: Myosin phosphatase target subunit 1  
 gi Accession: 0  
 Precursor Mass: 578.2225+2  
 Delta Mass: 1.972 ppm  
 XCorr: 43.64



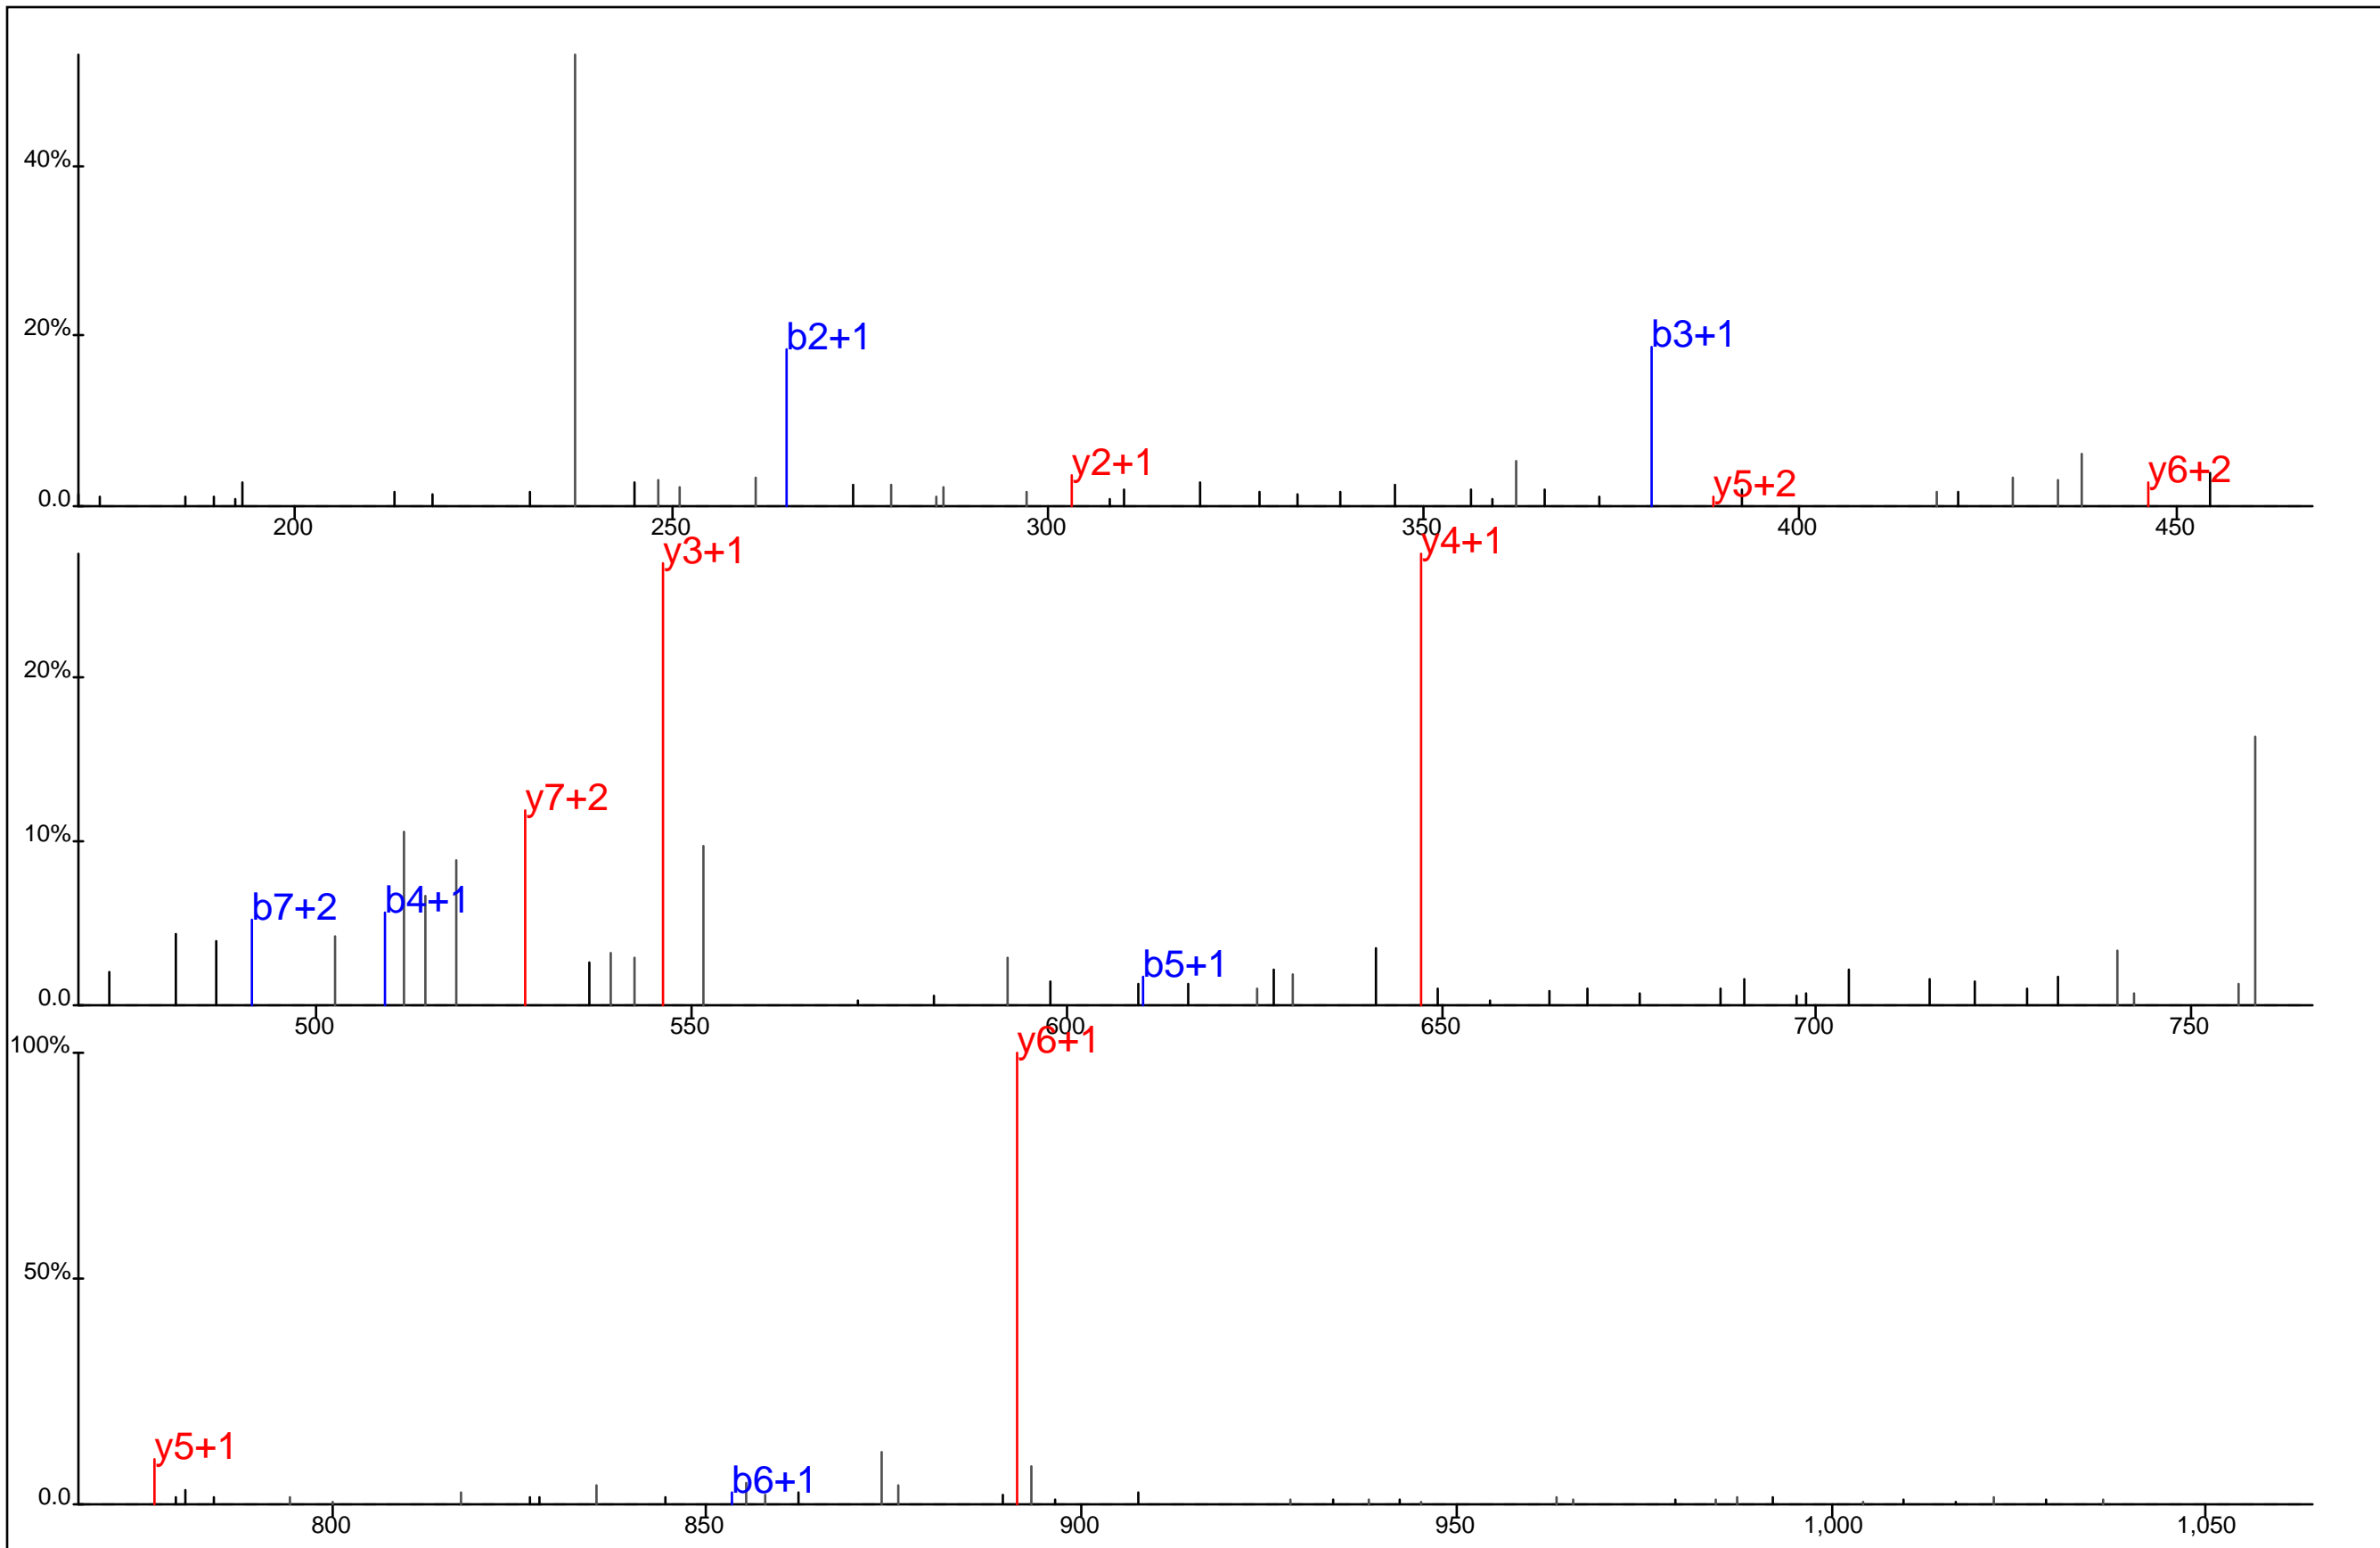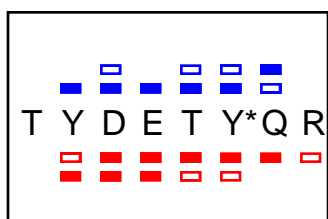

Protein Name: Myosin phosphatase target subunit 1  
 gi Accession: 0  
 Precursor Mass: 578.2213+2  
 Delta Mass: 0.142 ppm  
 XCorr: 30.53

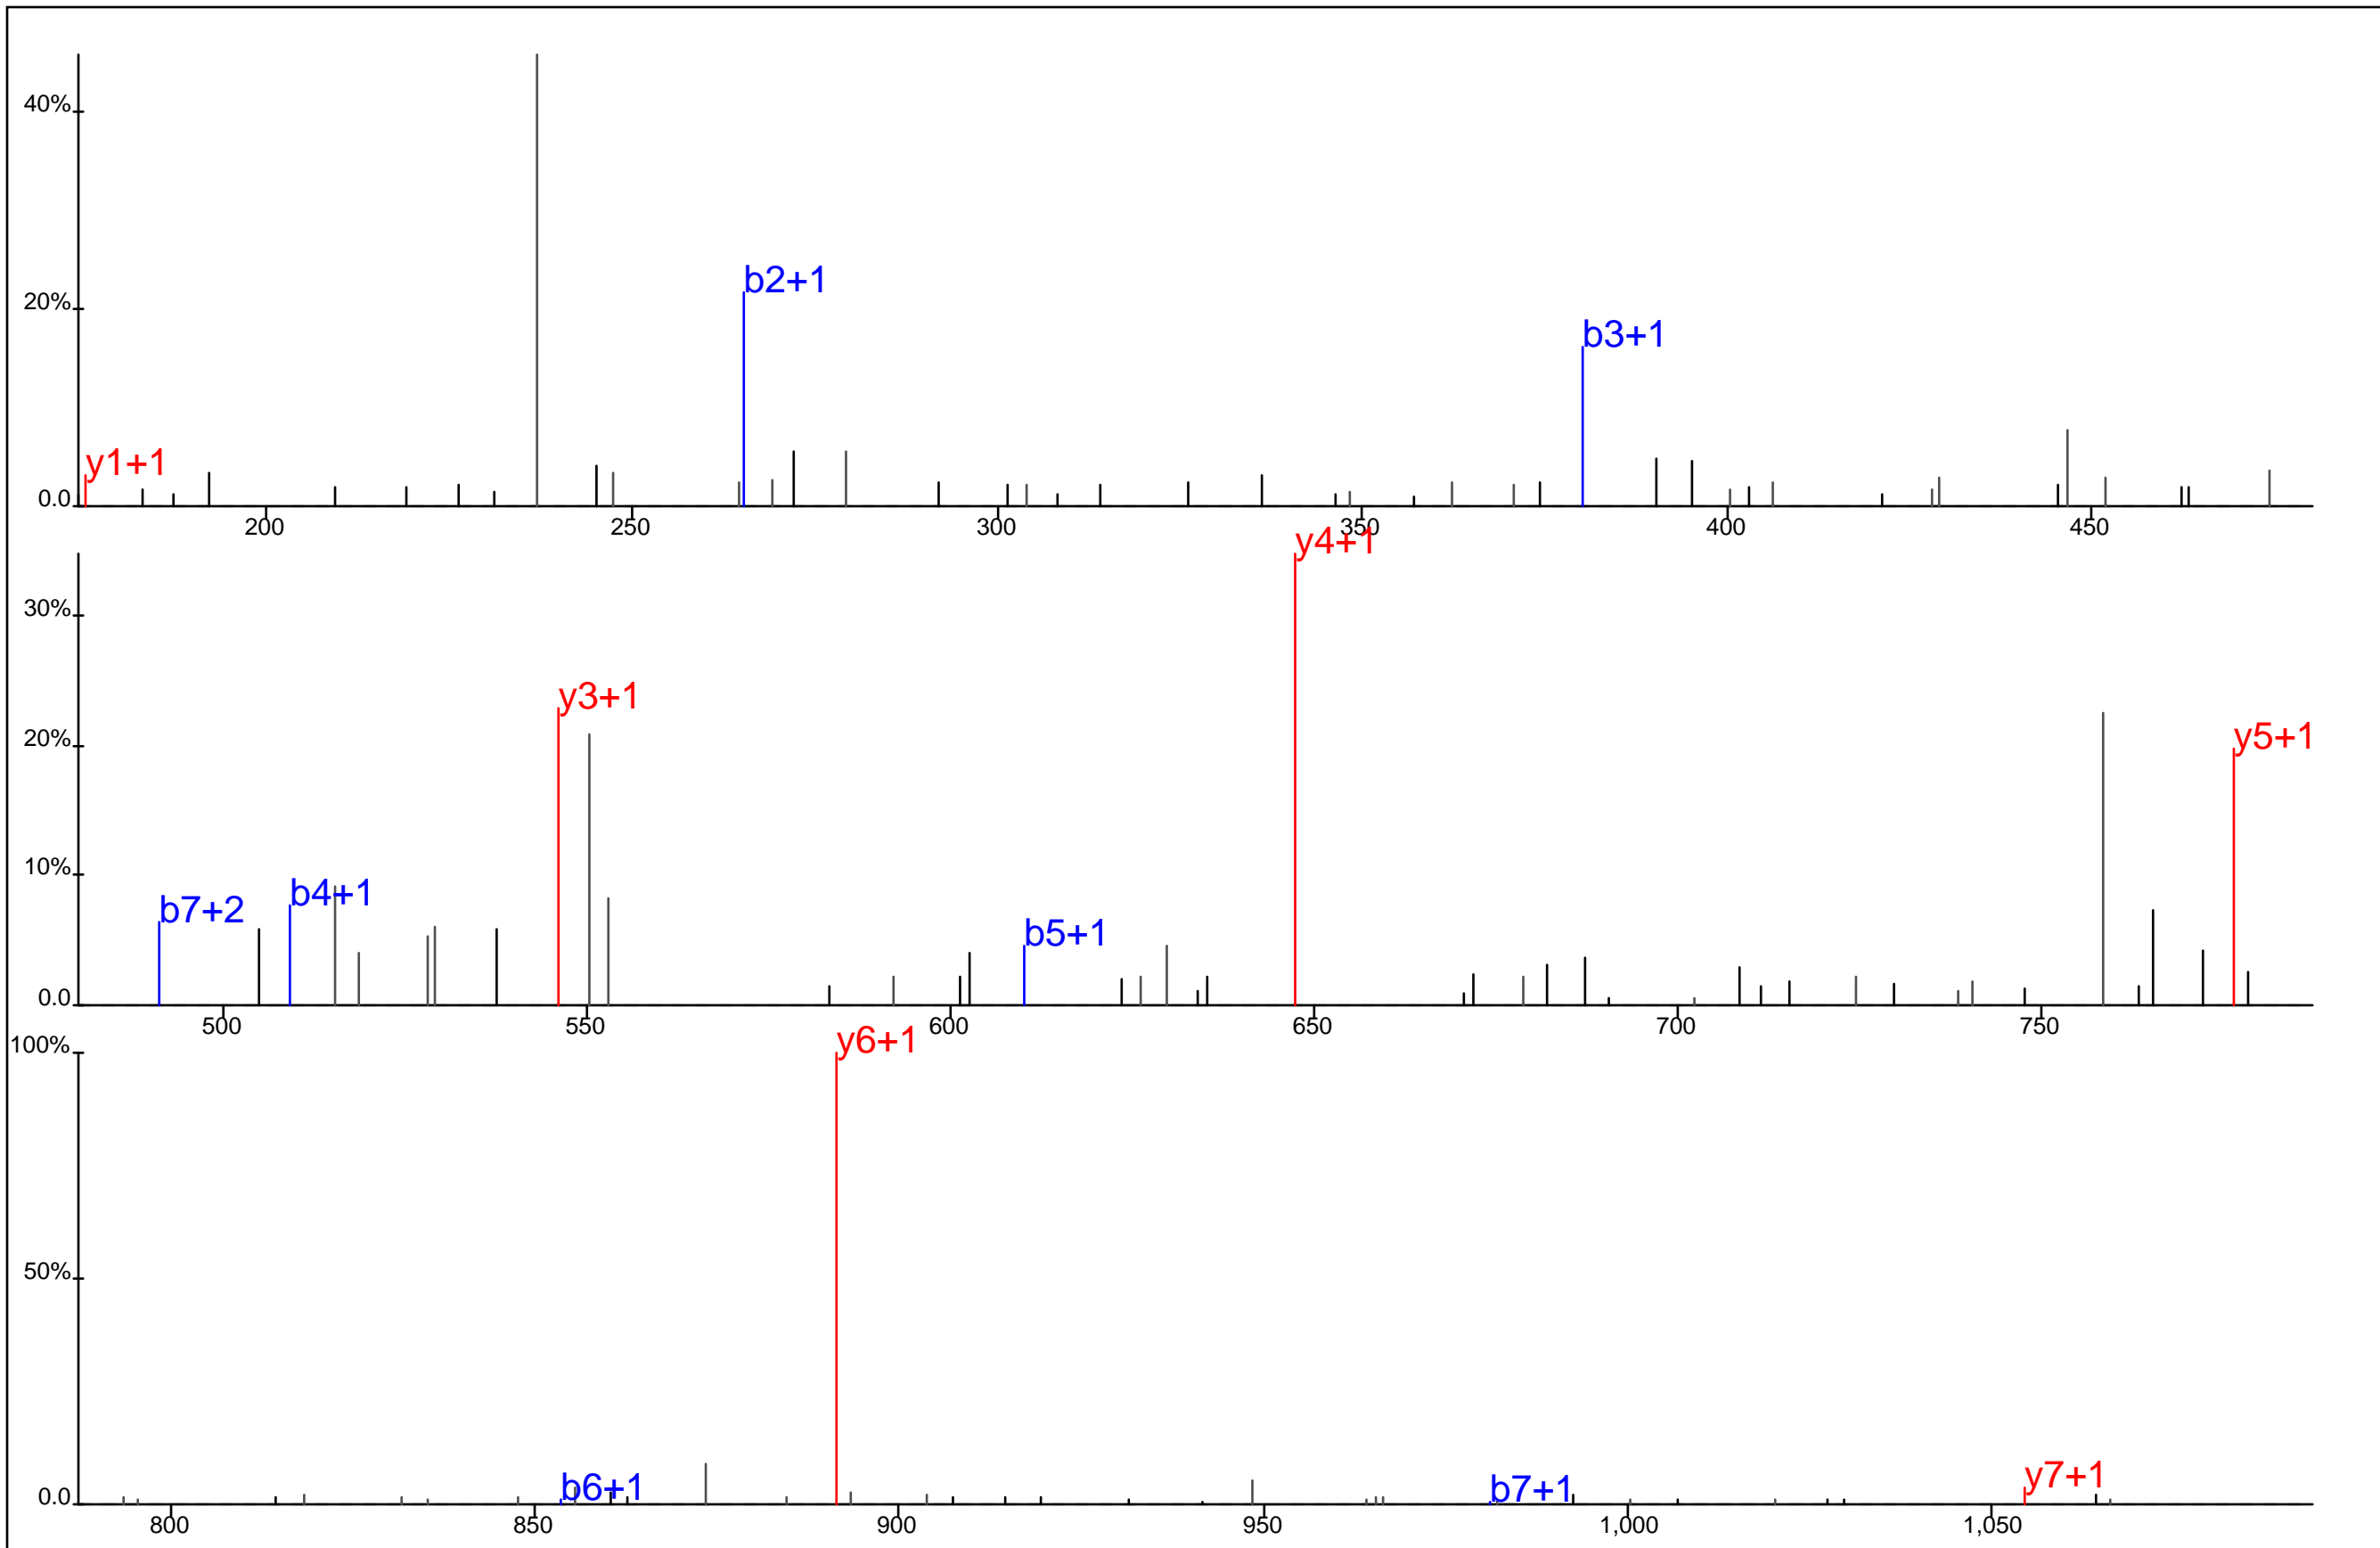

**T Y D E T Y\* Q R**

Protein Name: Myosin phosphatase target subunit 1  
 gi Accession: 0  
 Precursor Mass: 578.2212+2  
 Delta Mass: 0.248 ppm  
 XCorr: 36.12

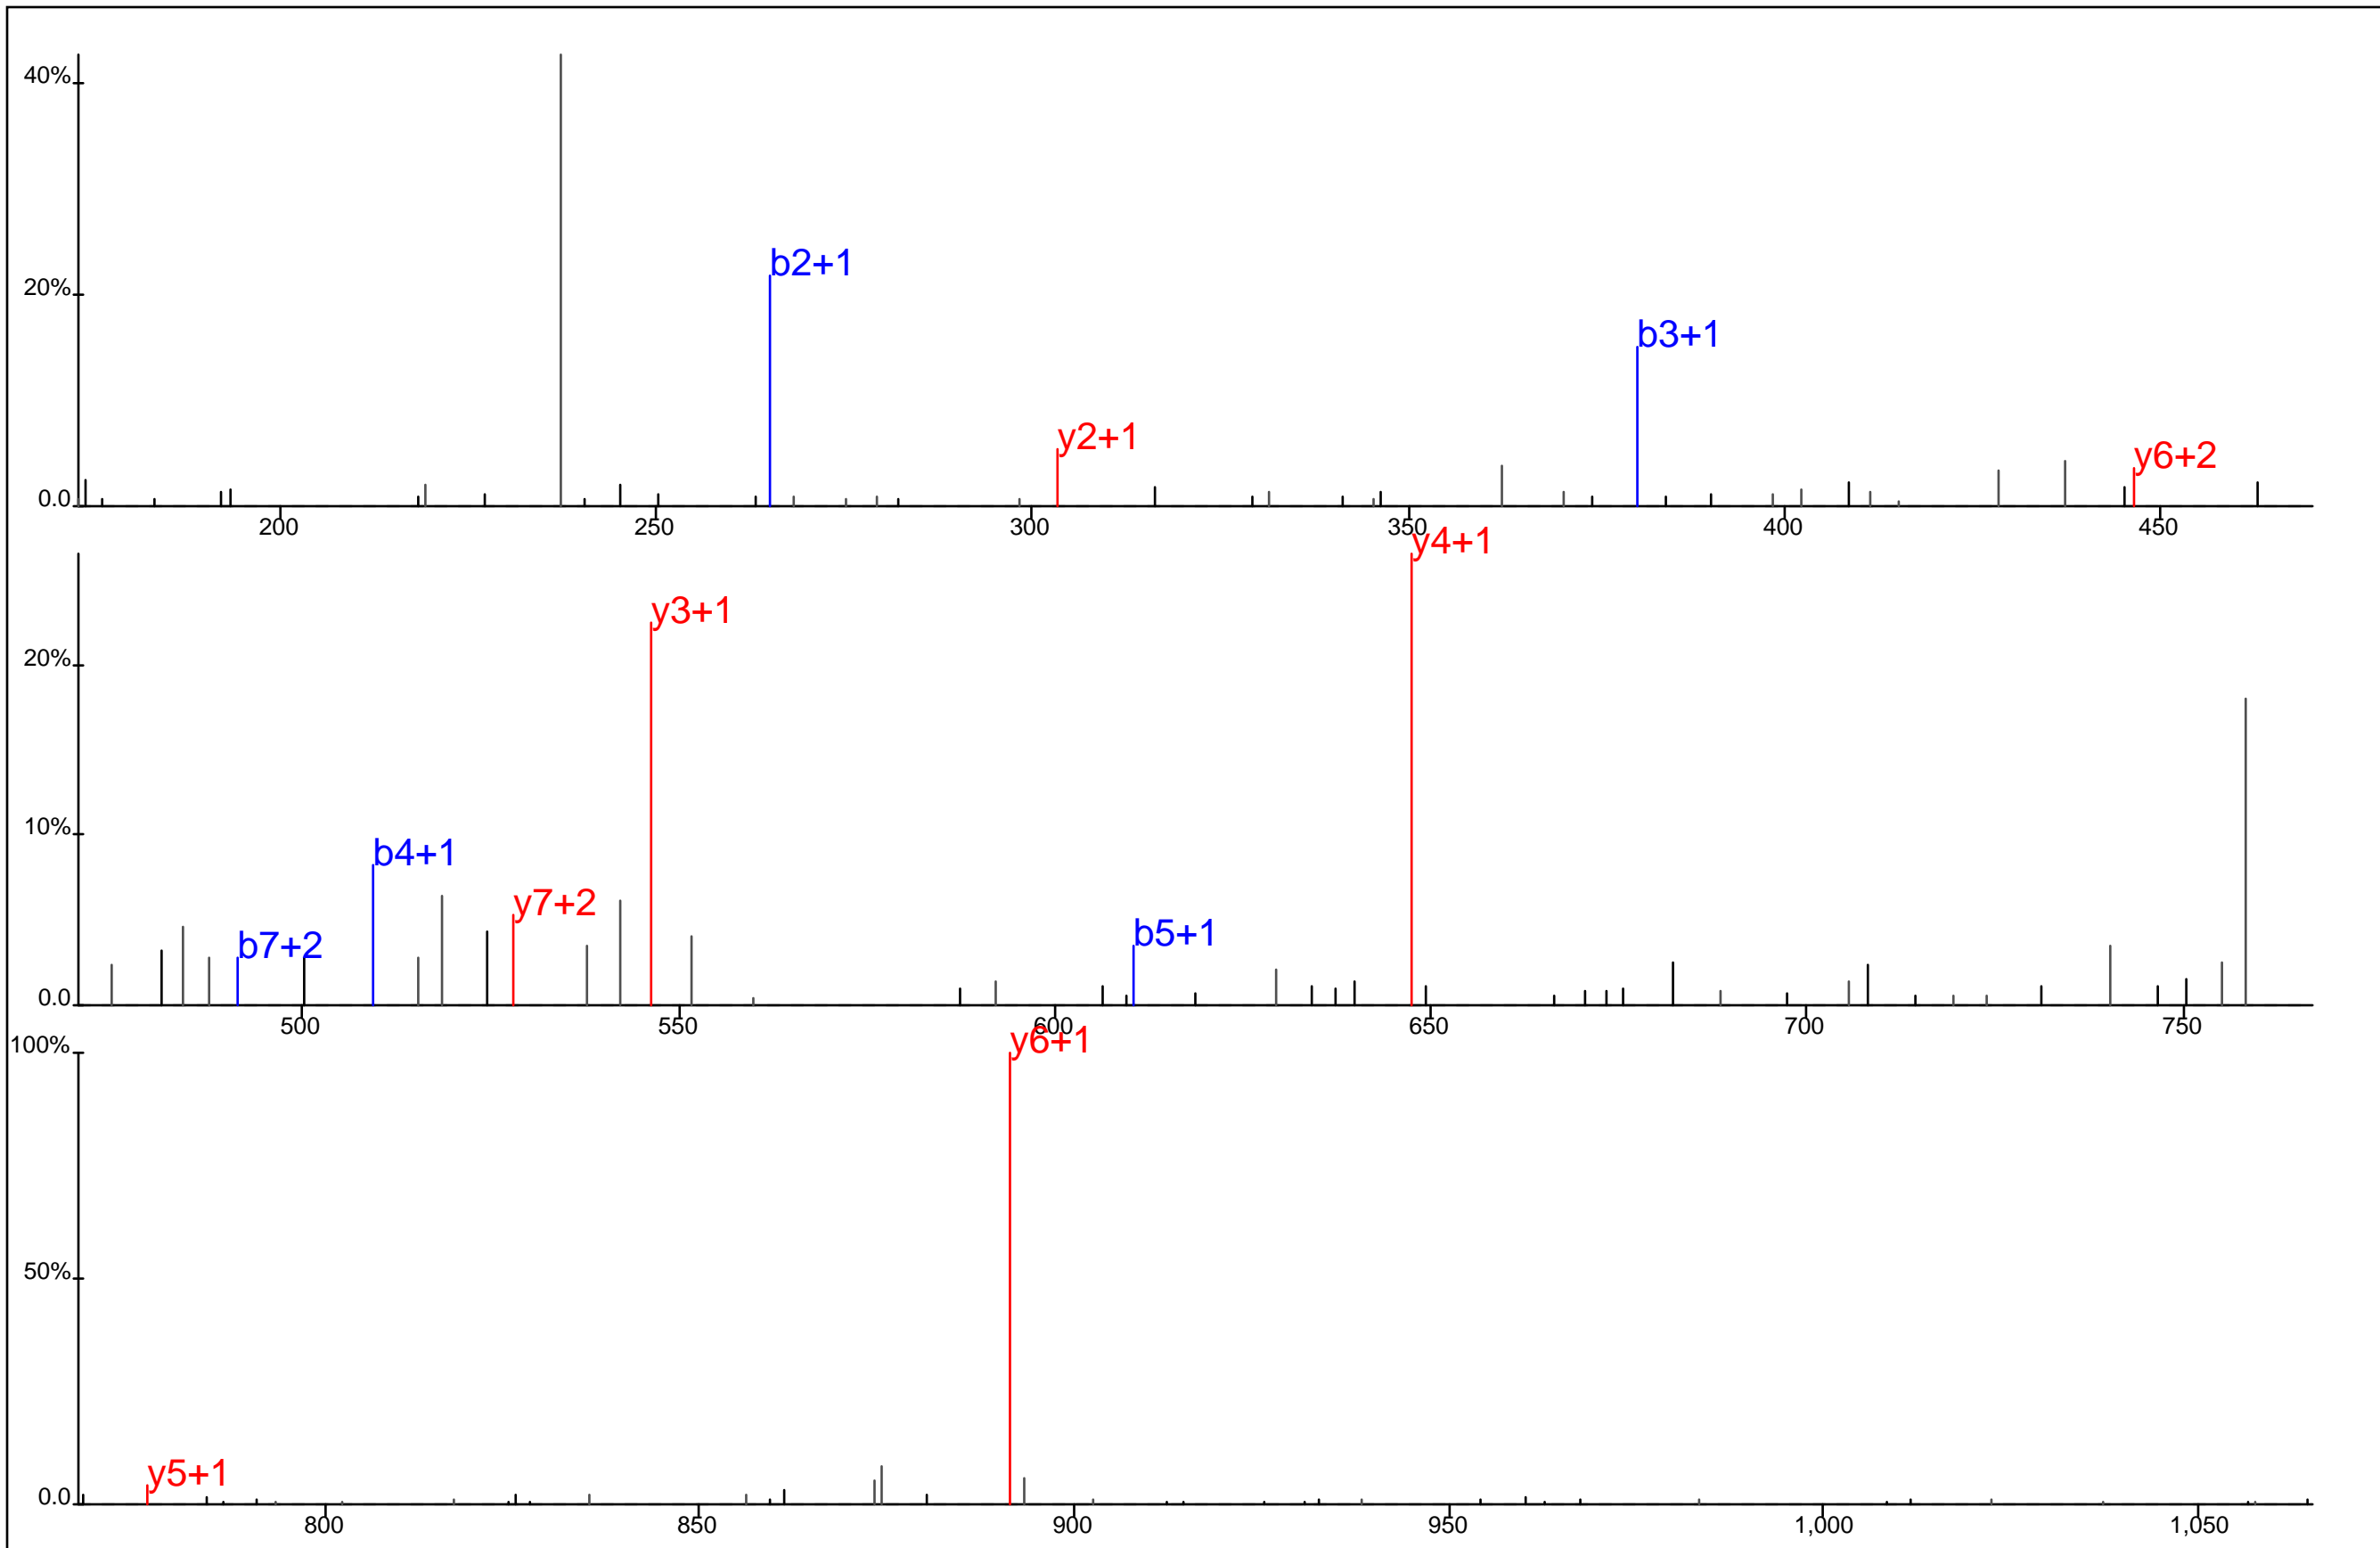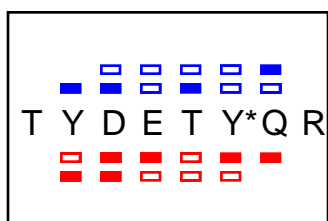

Protein Name: Myosin phosphatase target subunit 1  
 gi Accession: 0  
 Precursor Mass: 578.2224+2  
 Delta Mass: 1.760 ppm  
 XCorr: 39.74

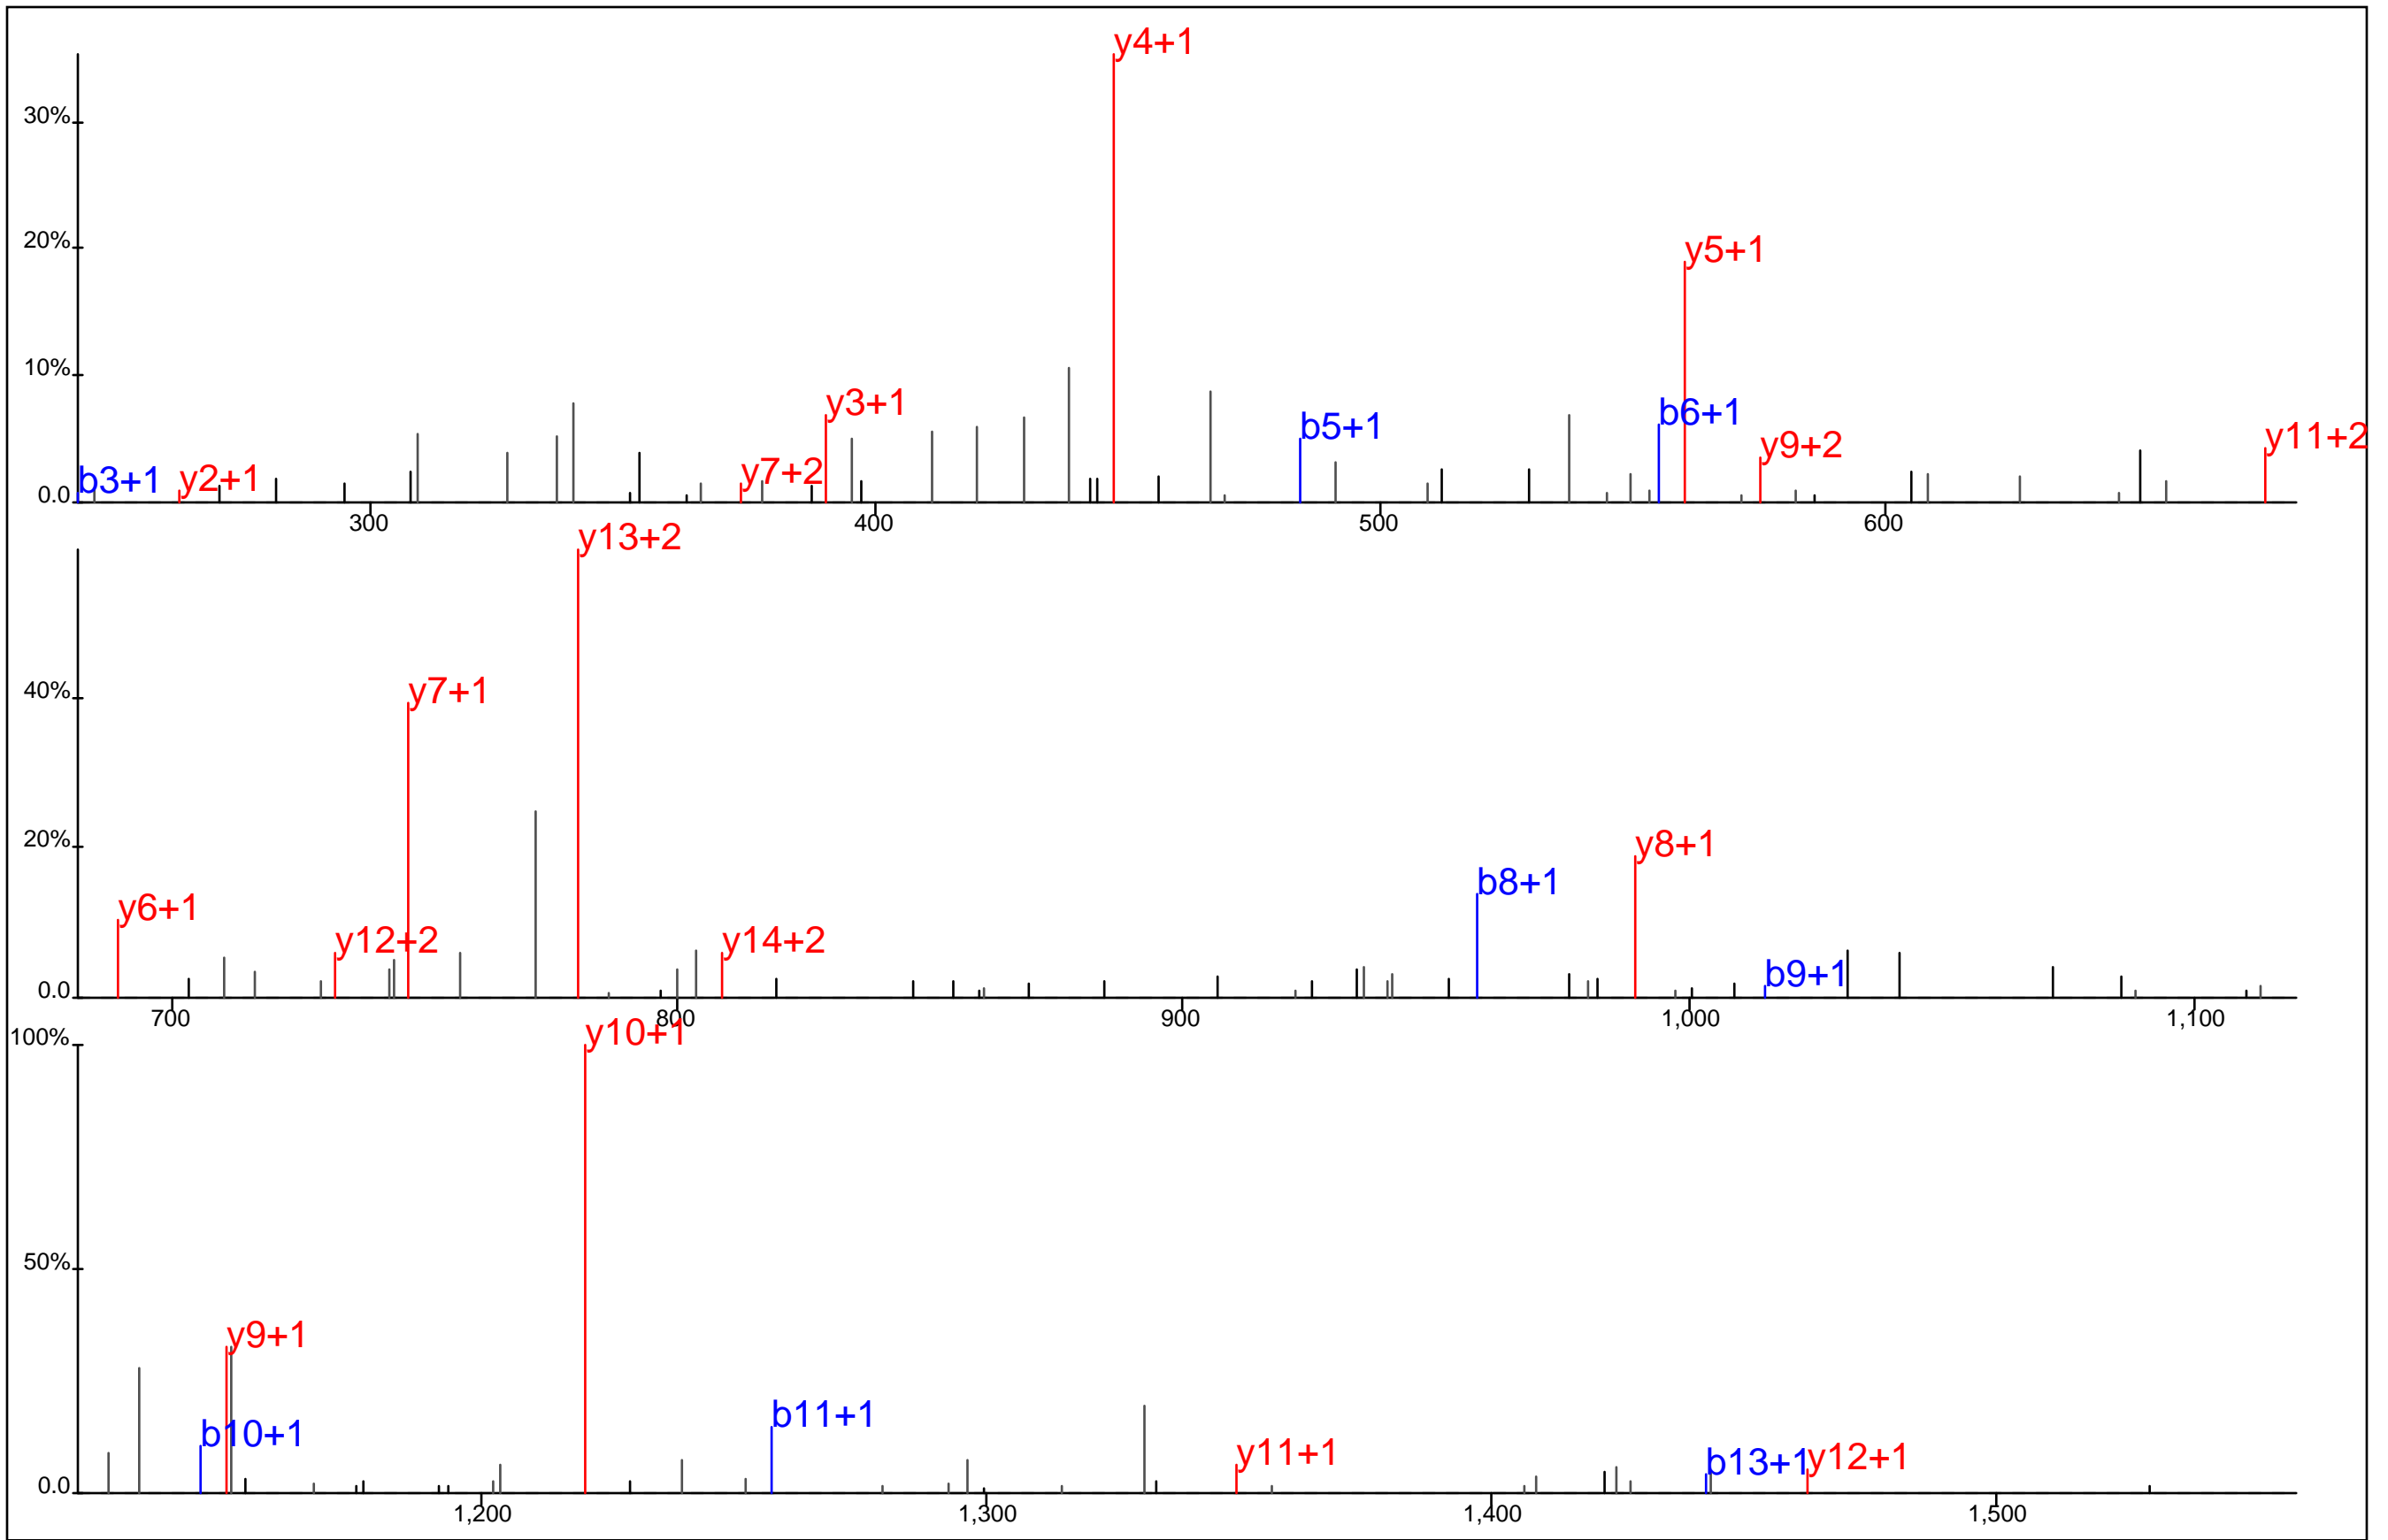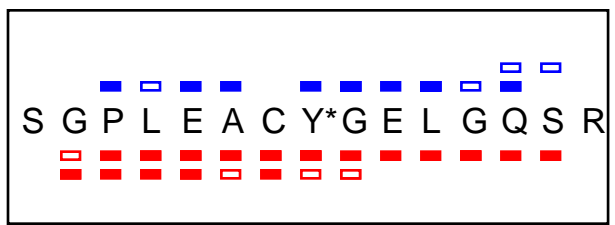

Protein Name: Myotubularin related protein 10  
 gi Accession: 0  
 Precursor Mass: 852.3585+2  
 Delta Mass: 0.184 ppm  
 XCorr: 85.12

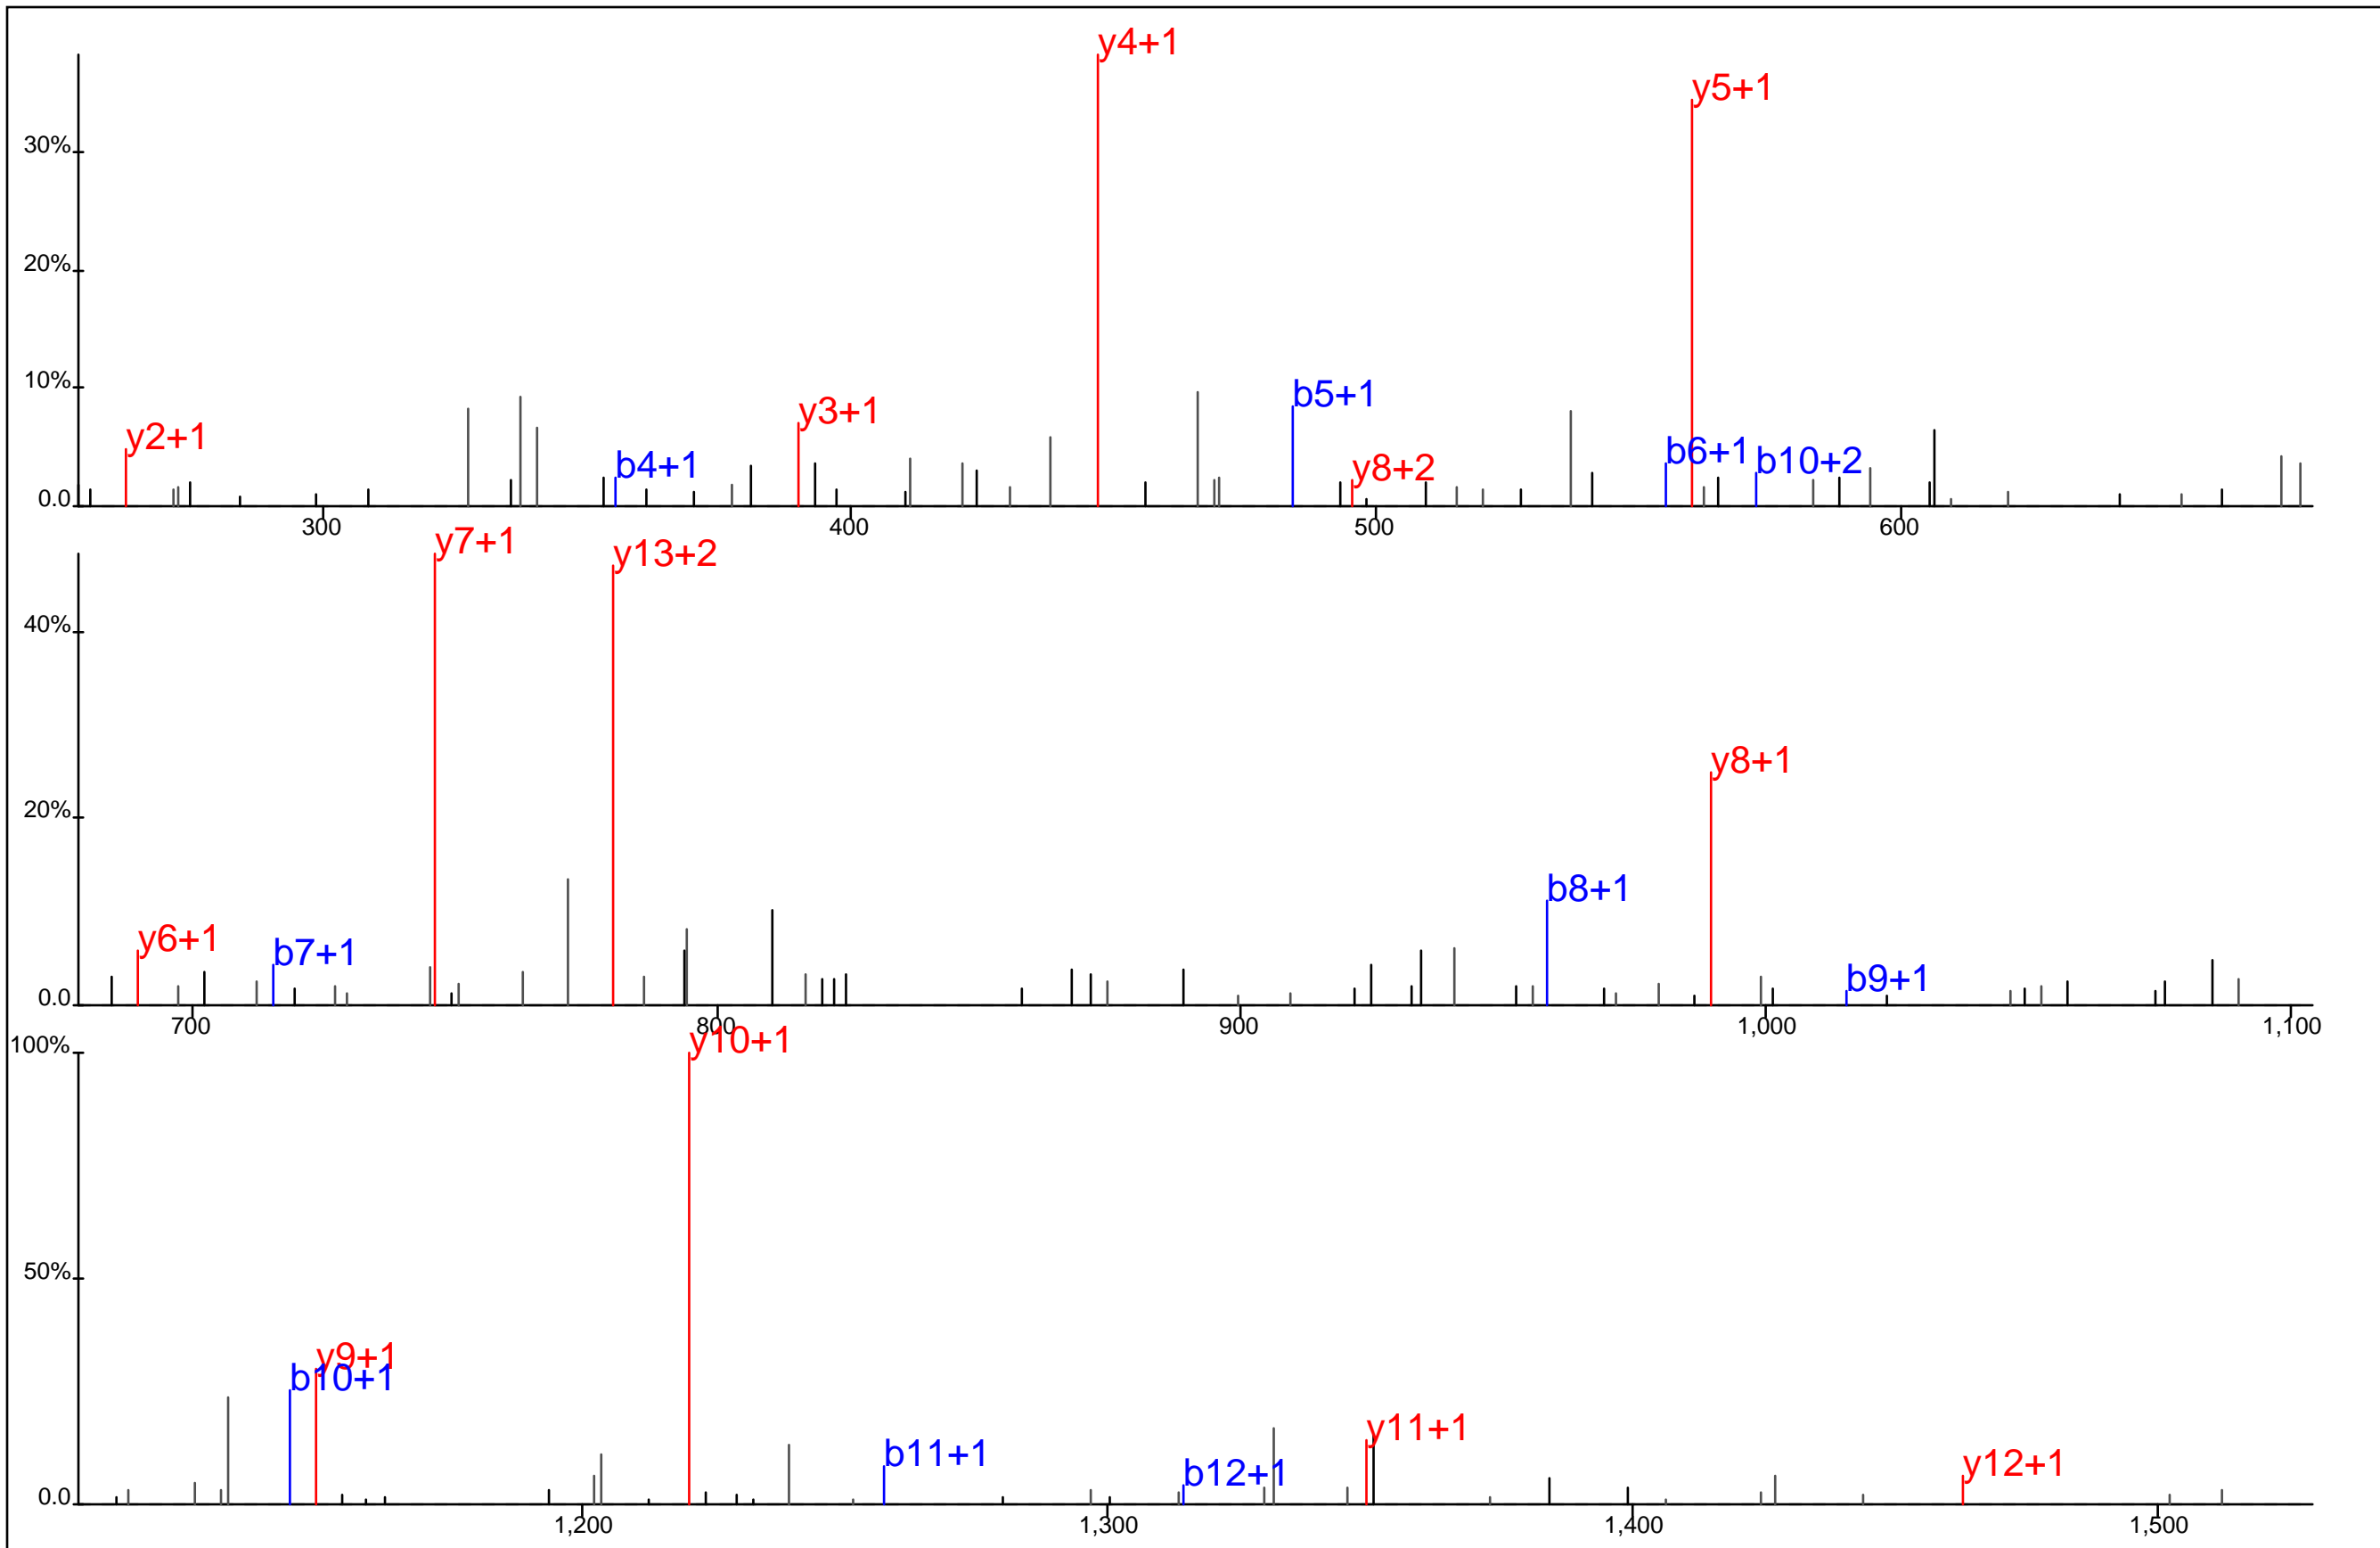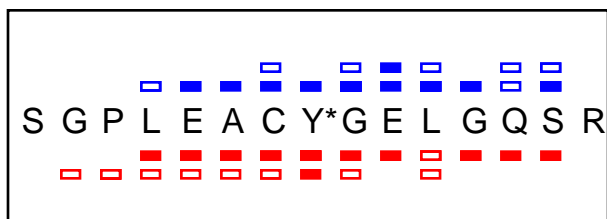

Protein Name: Myotubularin related protein 10  
 gi Accession: 0  
 Precursor Mass: 852.3579+2  
 Delta Mass: 0.533 ppm  
 XCorr: 72.81

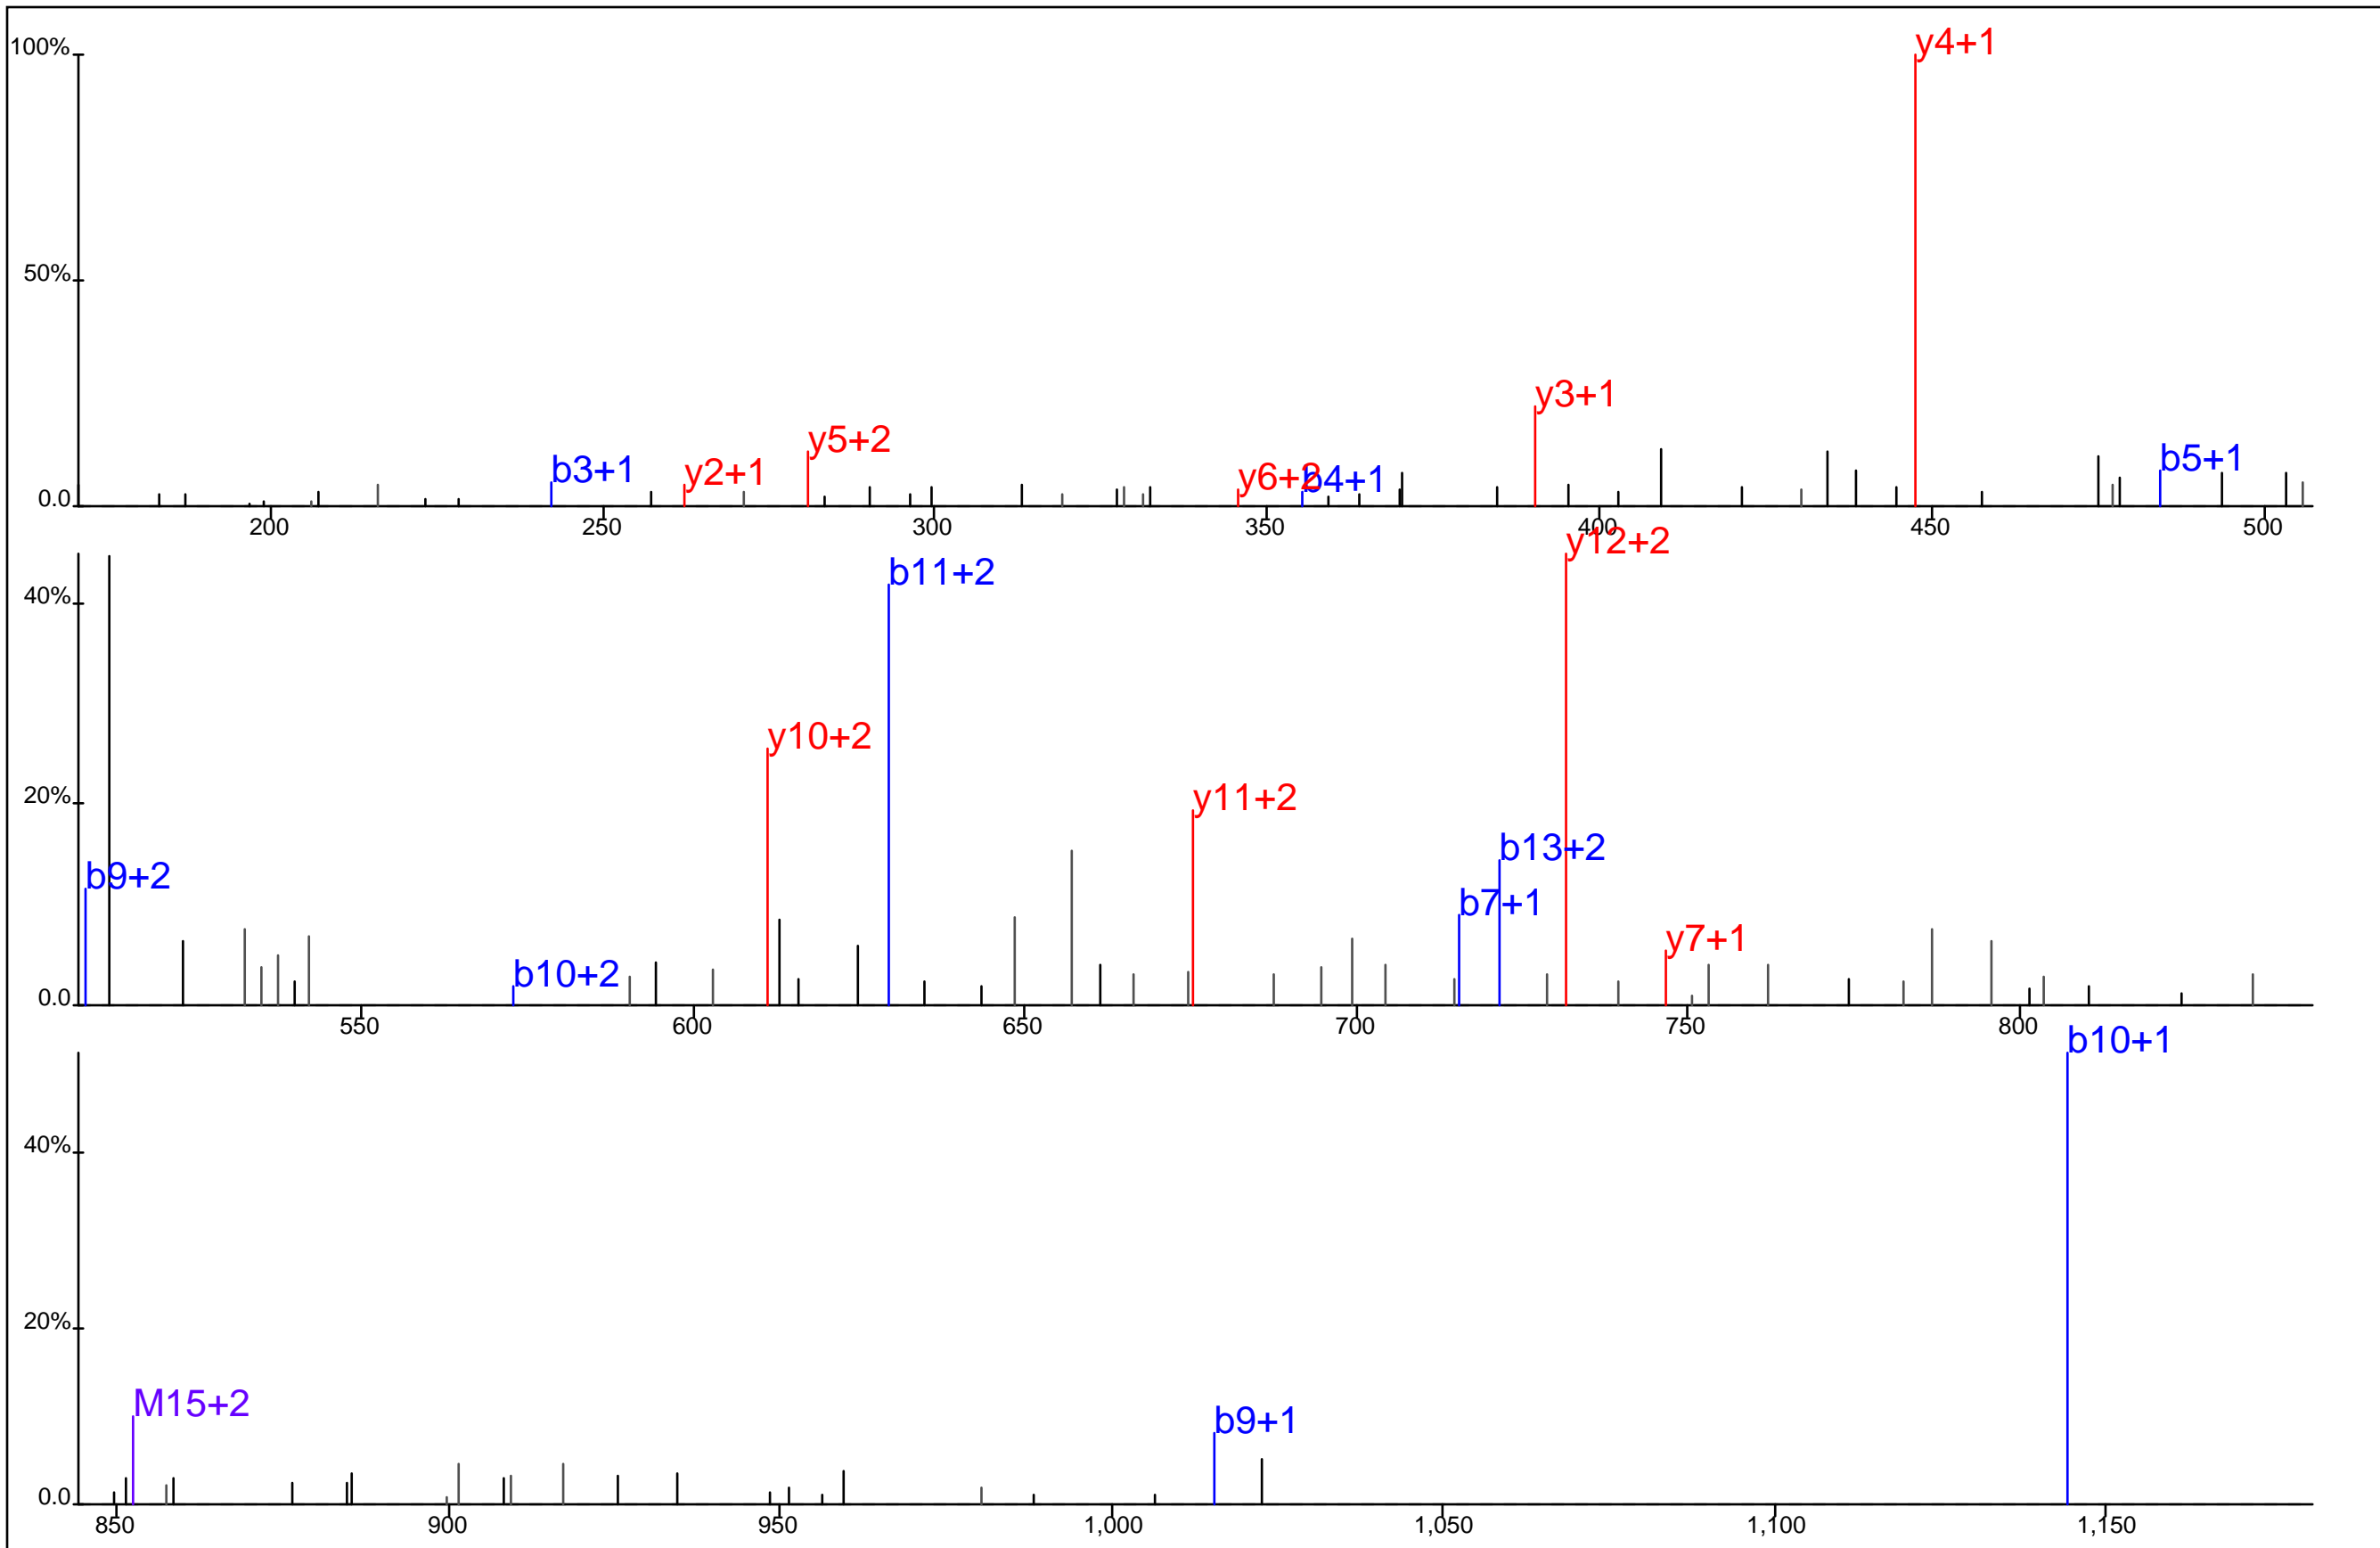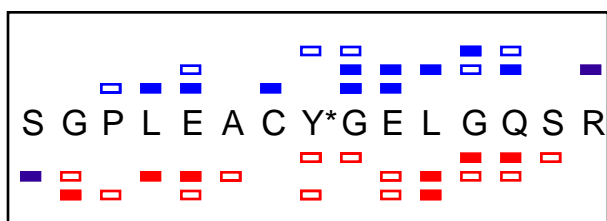

Protein Name: Myotubularin related protein 10  
 gi Accession: 0  
 Precursor Mass: 568.5741+3  
 Delta Mass: 1.005 ppm  
 XCorr: 22.01

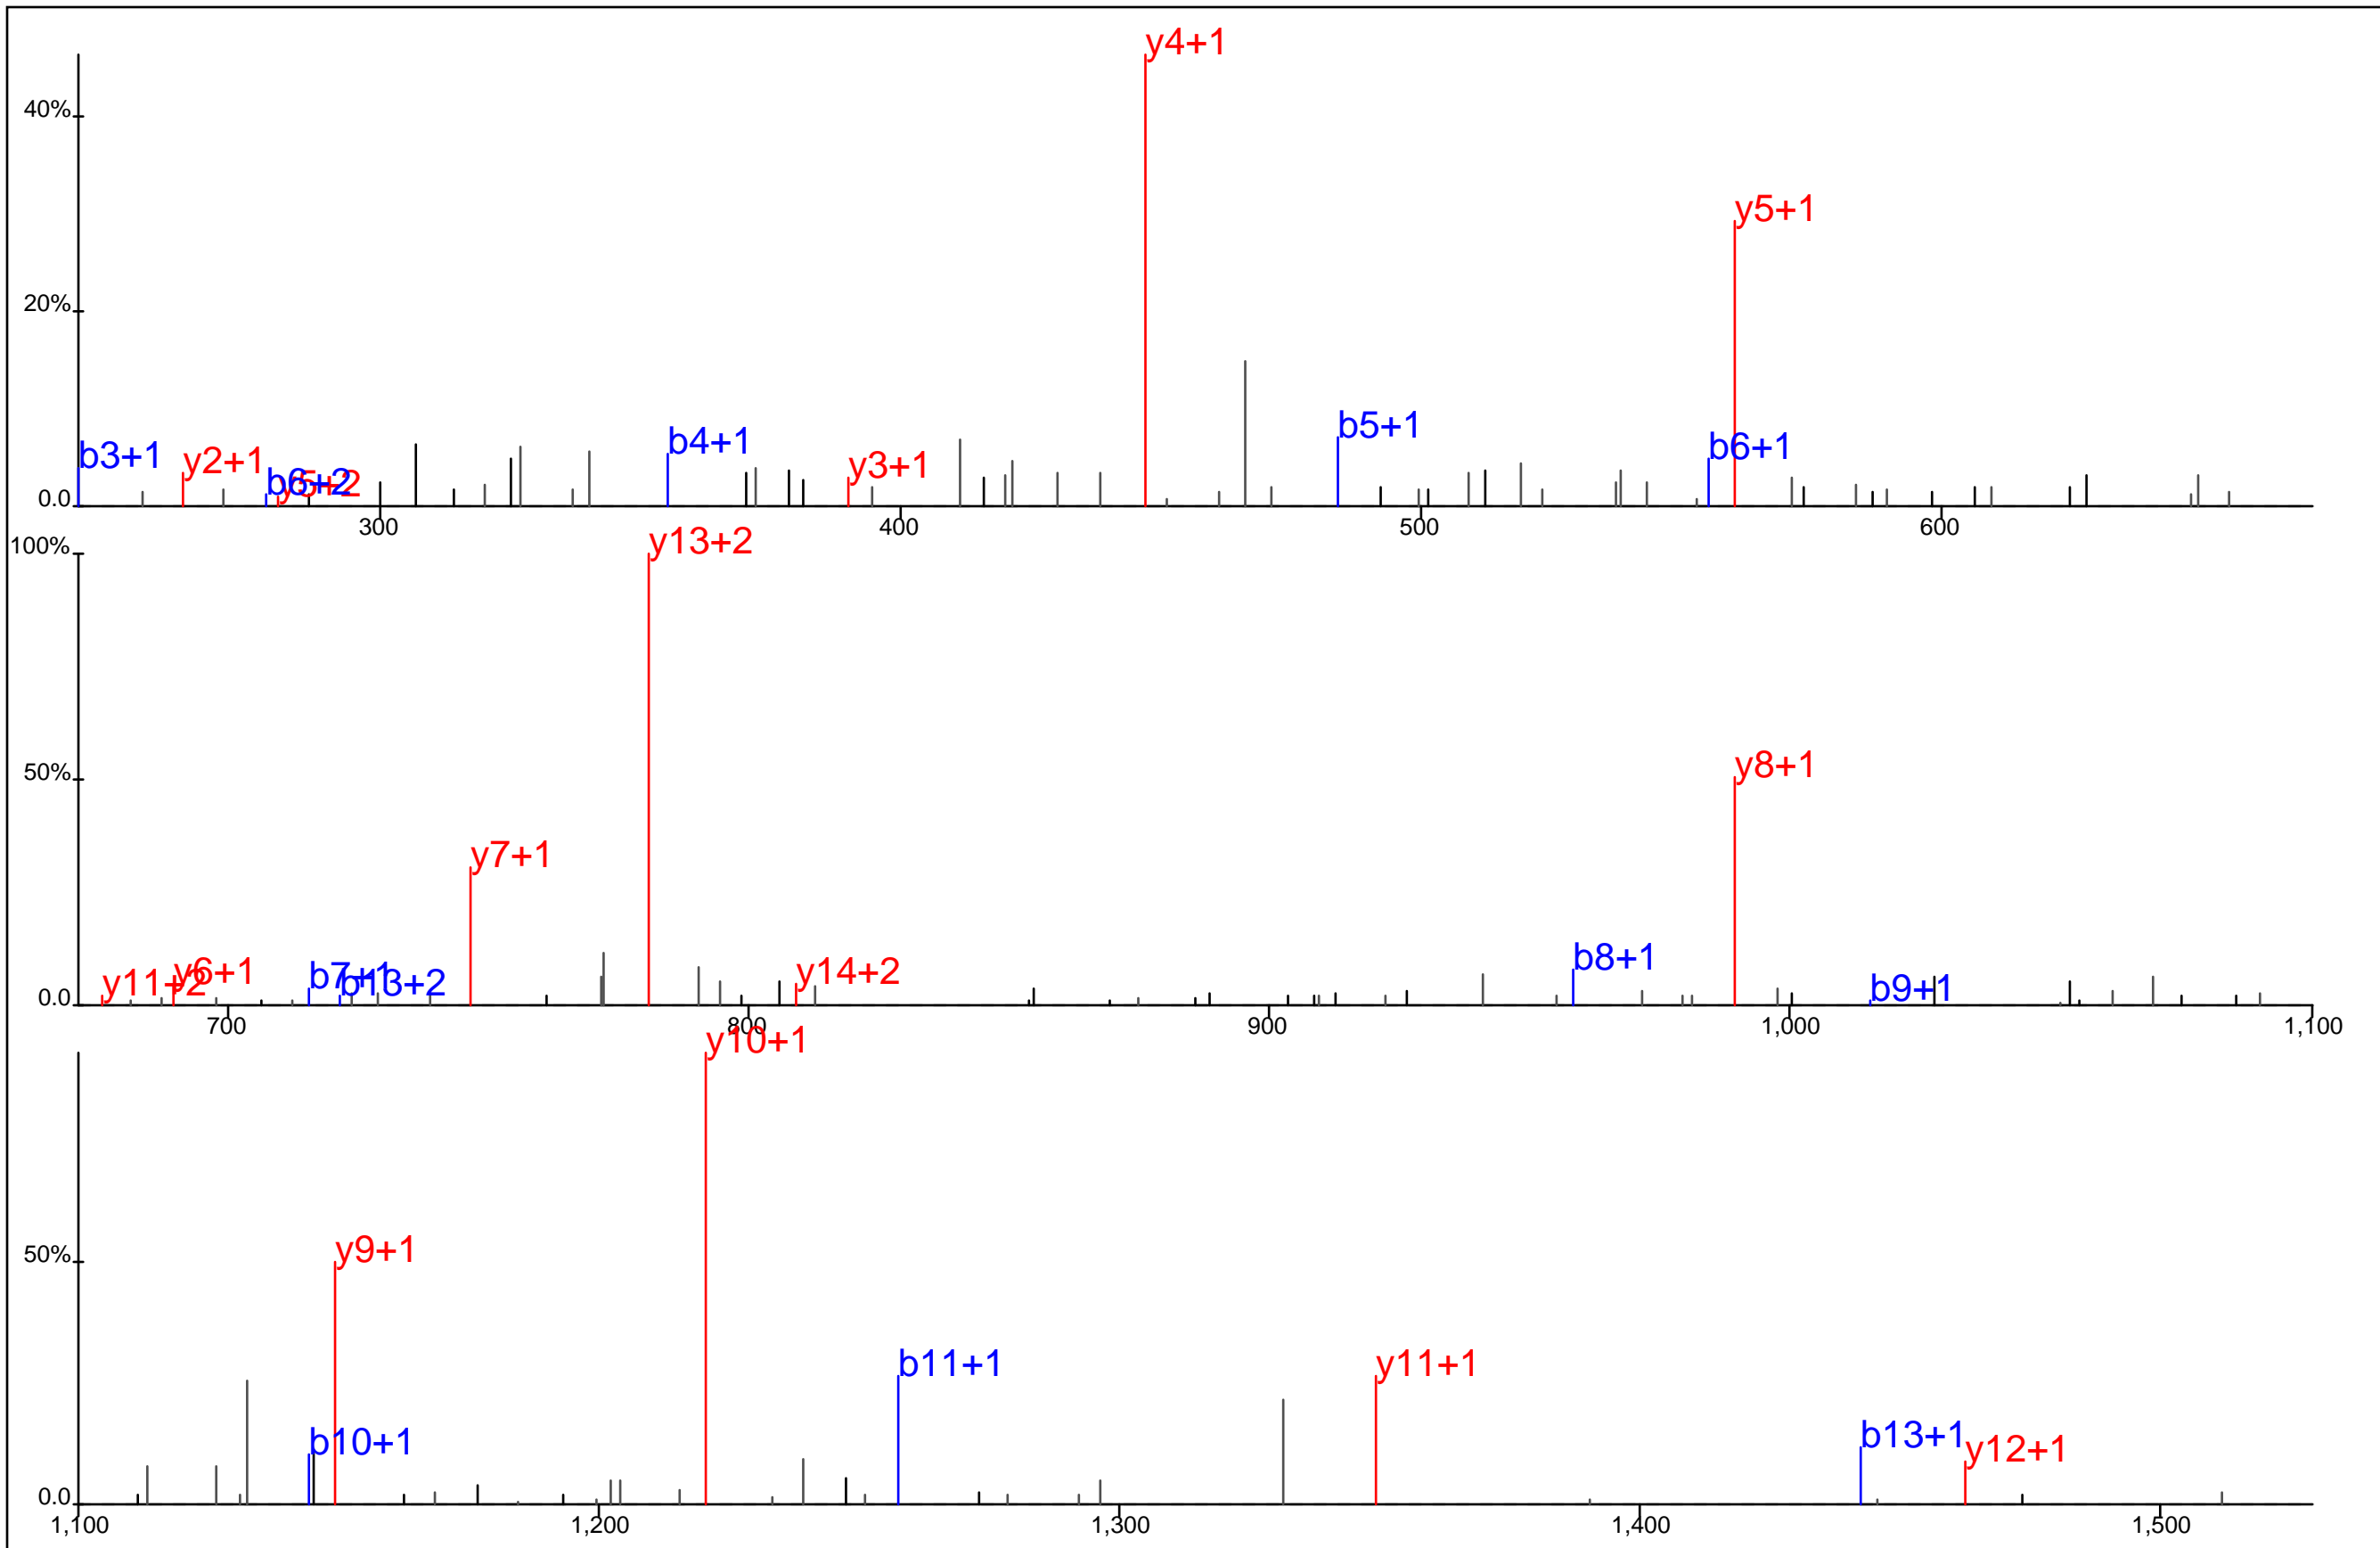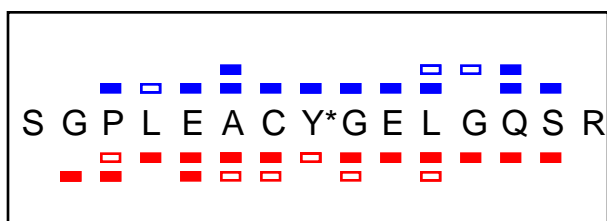

Protein Name: Myotubularin related protein 10  
 gi Accession: 0  
 Precursor Mass: 852.3581+2  
 Delta Mass: 0.318 ppm  
 XCorr: 72.35

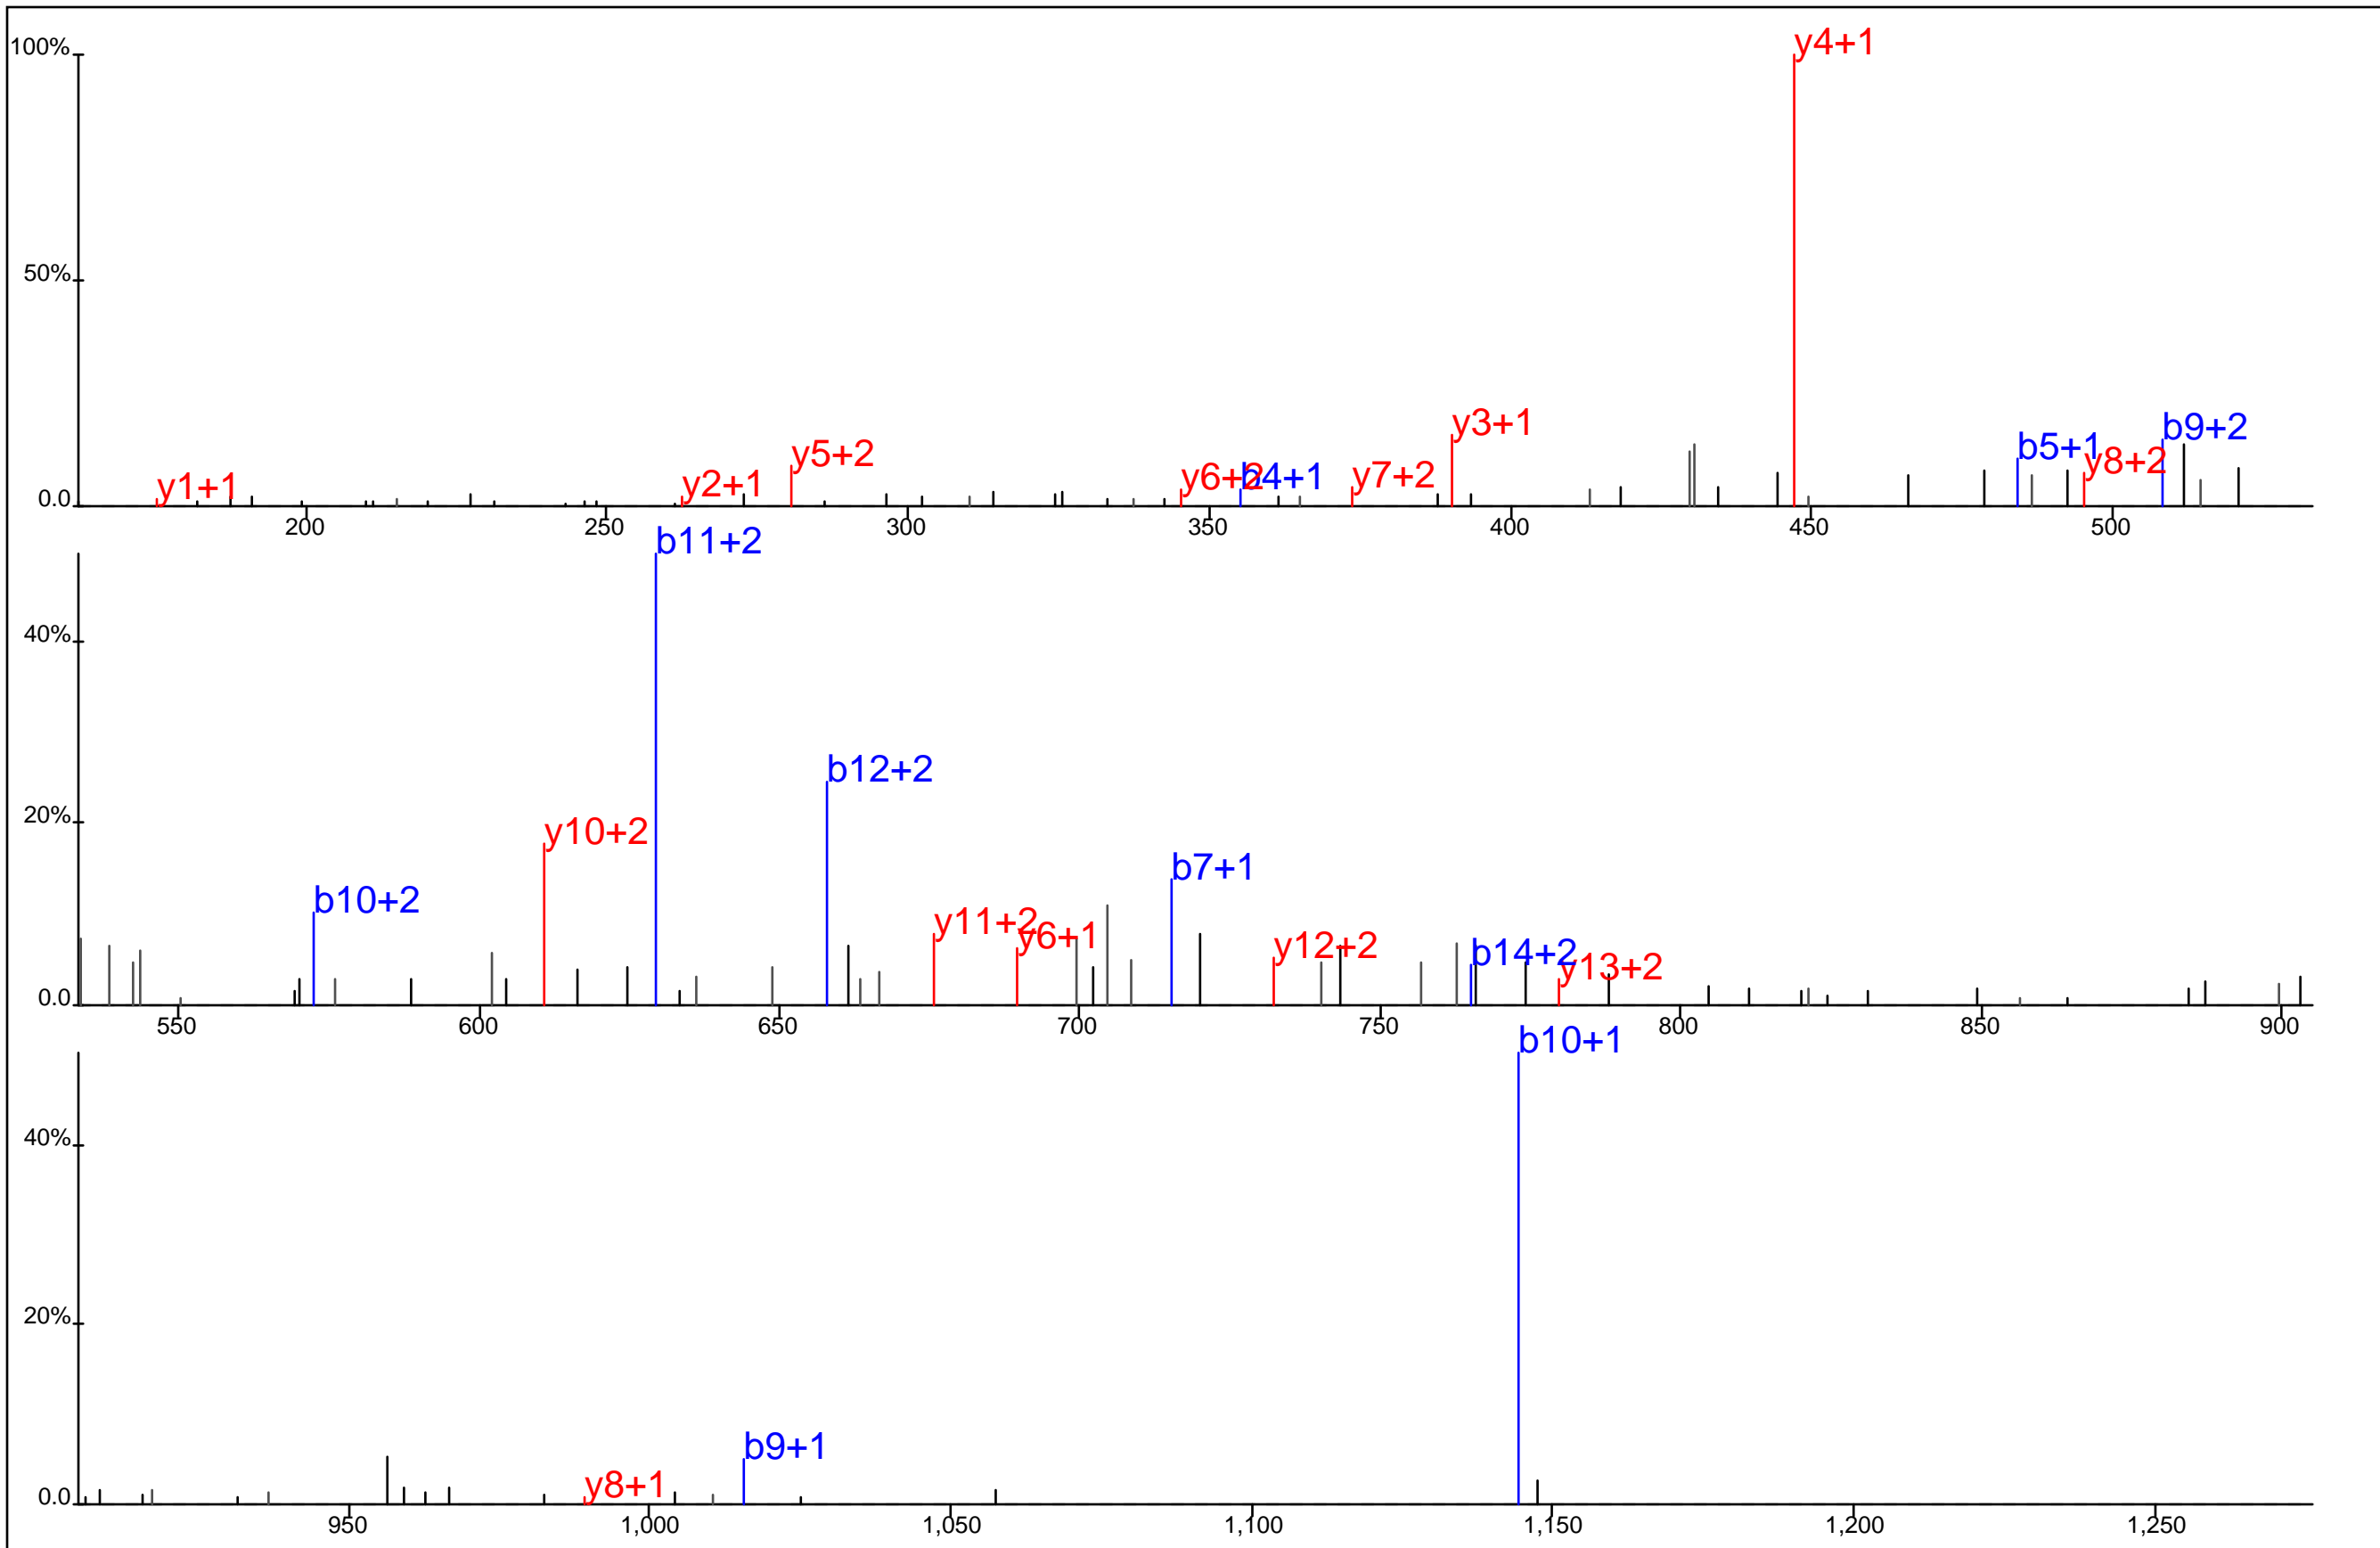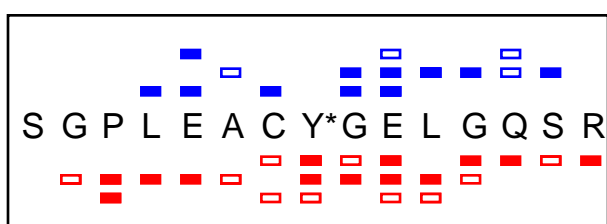

Protein Name: Myotubularin related protein 10  
 gi Accession: 0  
 Precursor Mass: 568.5748+3  
 Delta Mass: 0.176 ppm  
 XCorr: 33.95



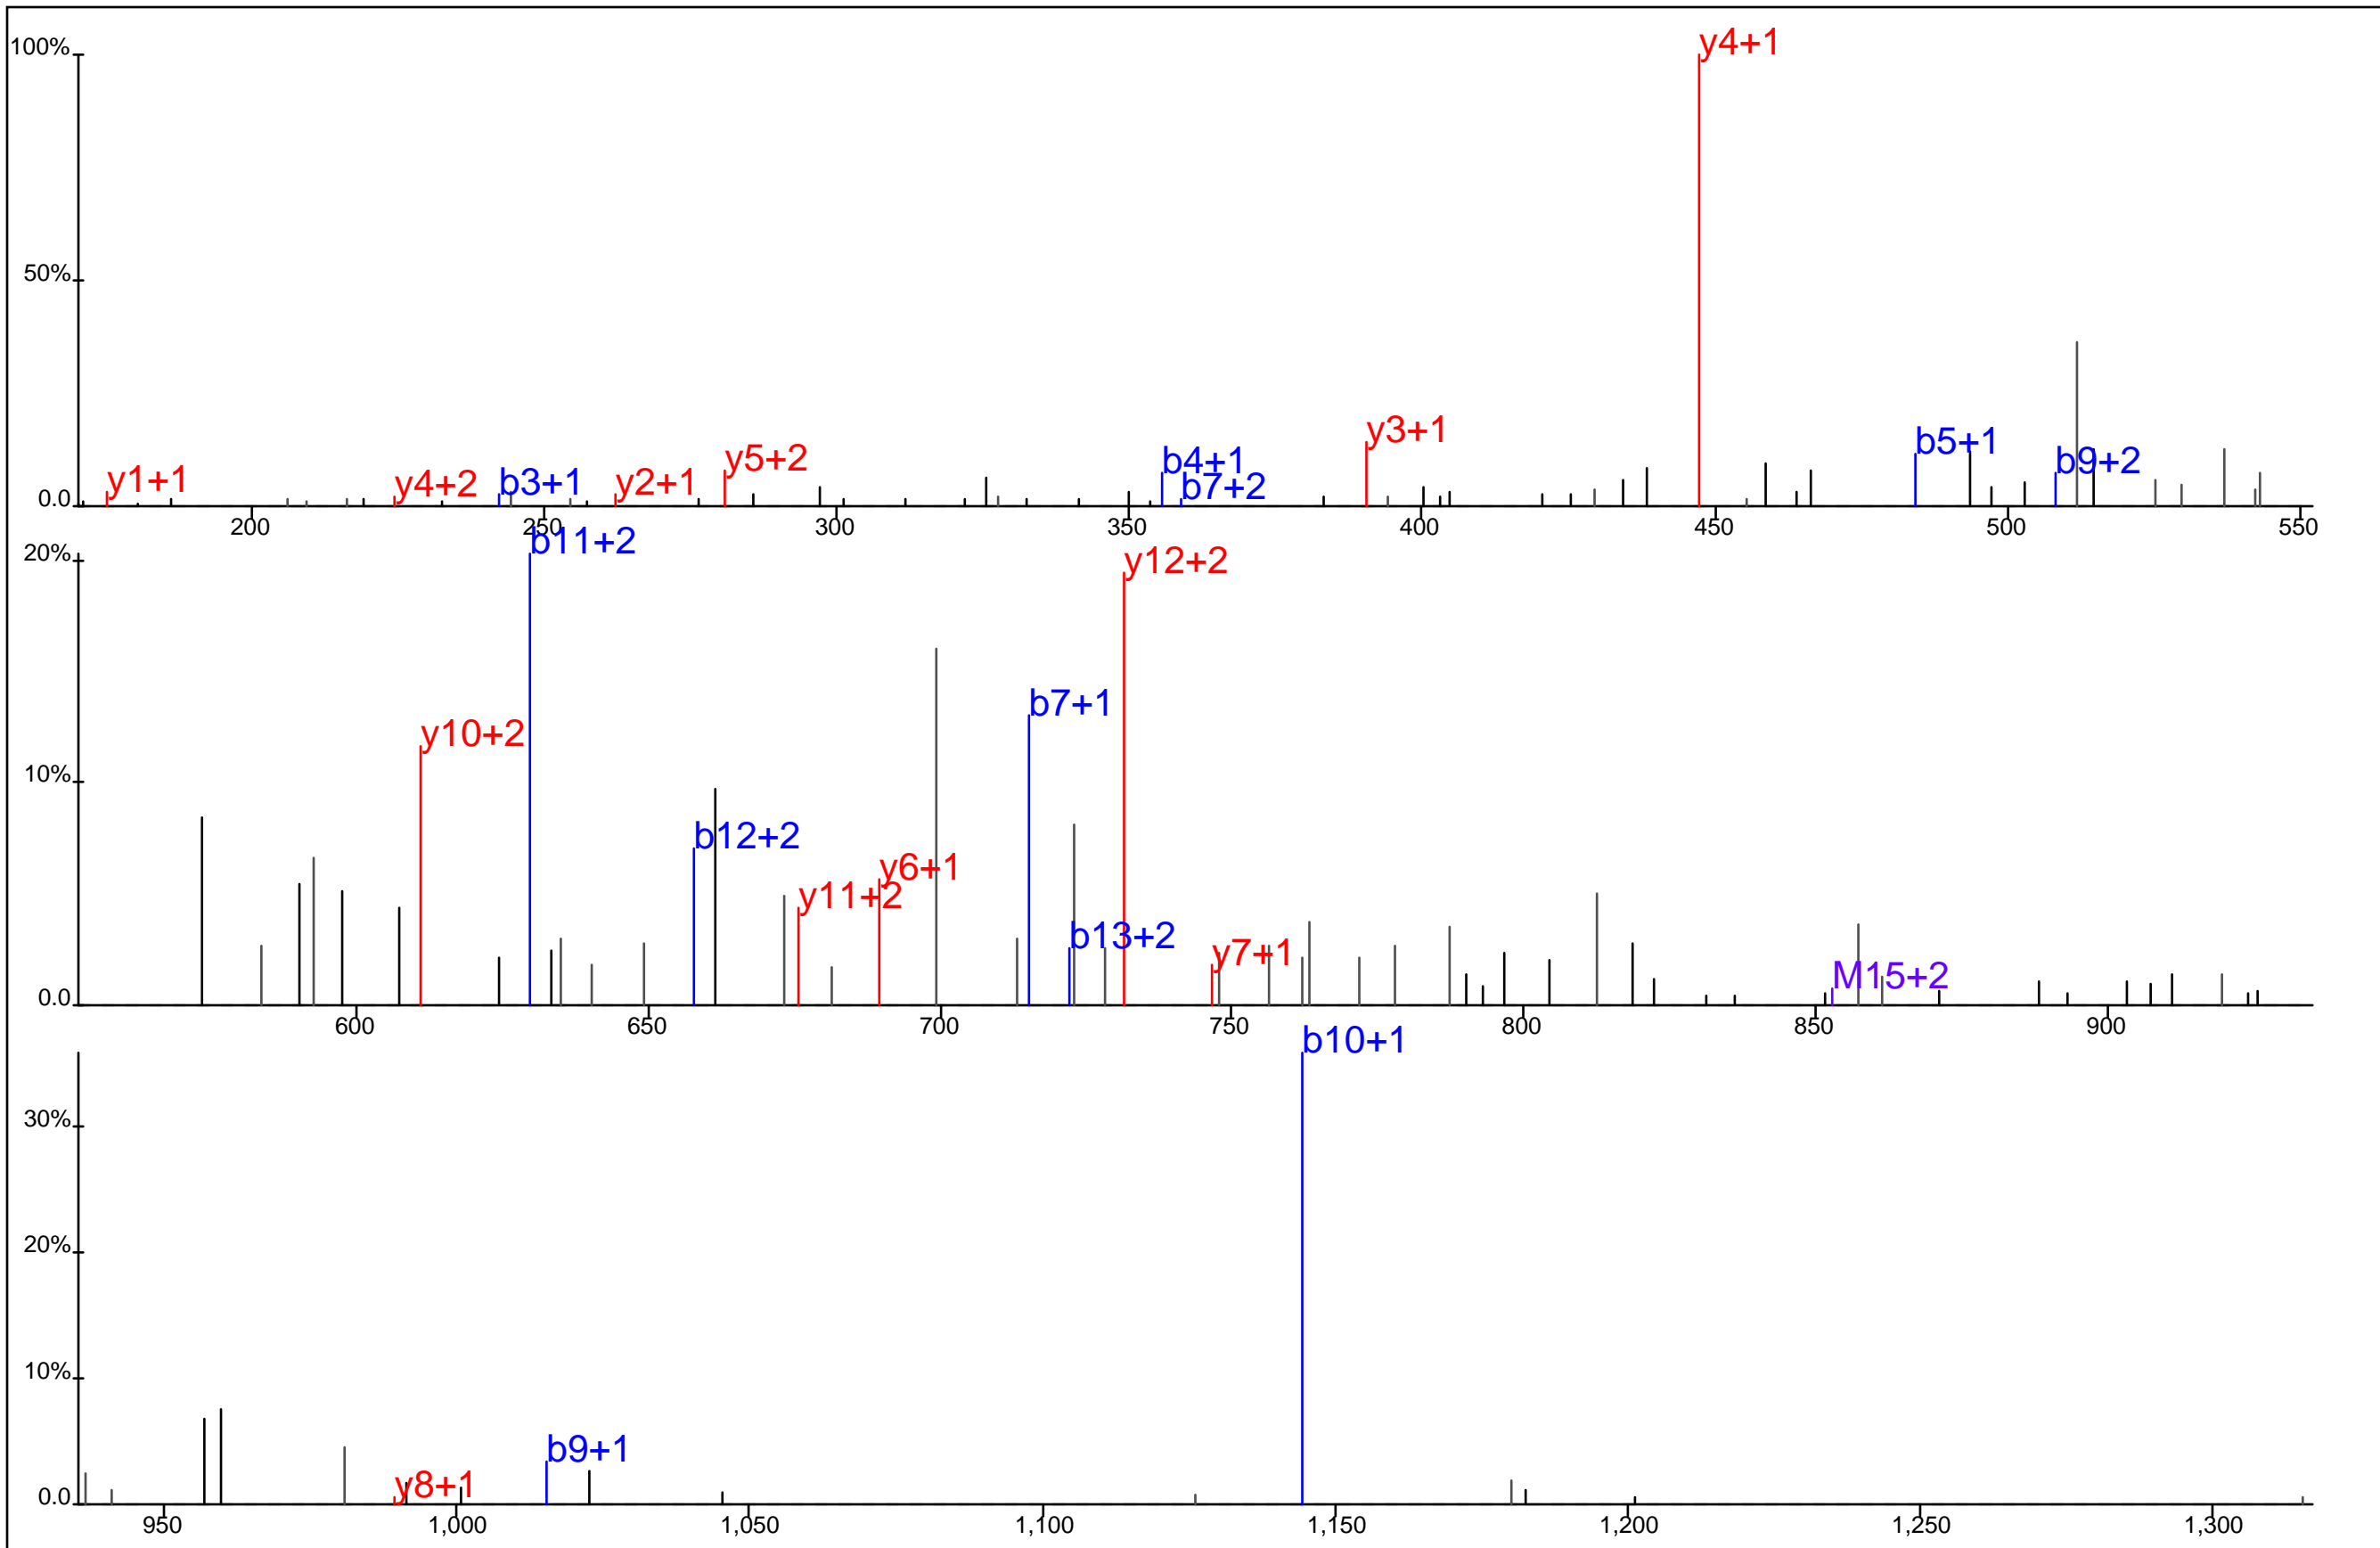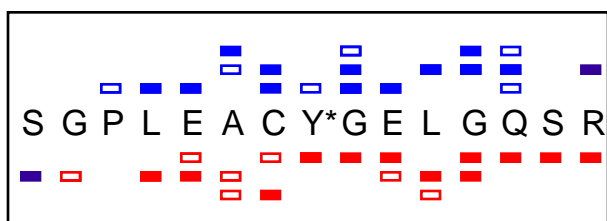

Protein Name: Myotubularin related protein 10  
 gi Accession: 0  
 Precursor Mass: 568.5754+3  
 Delta Mass: 1.250 ppm  
 XCorr: 28.43

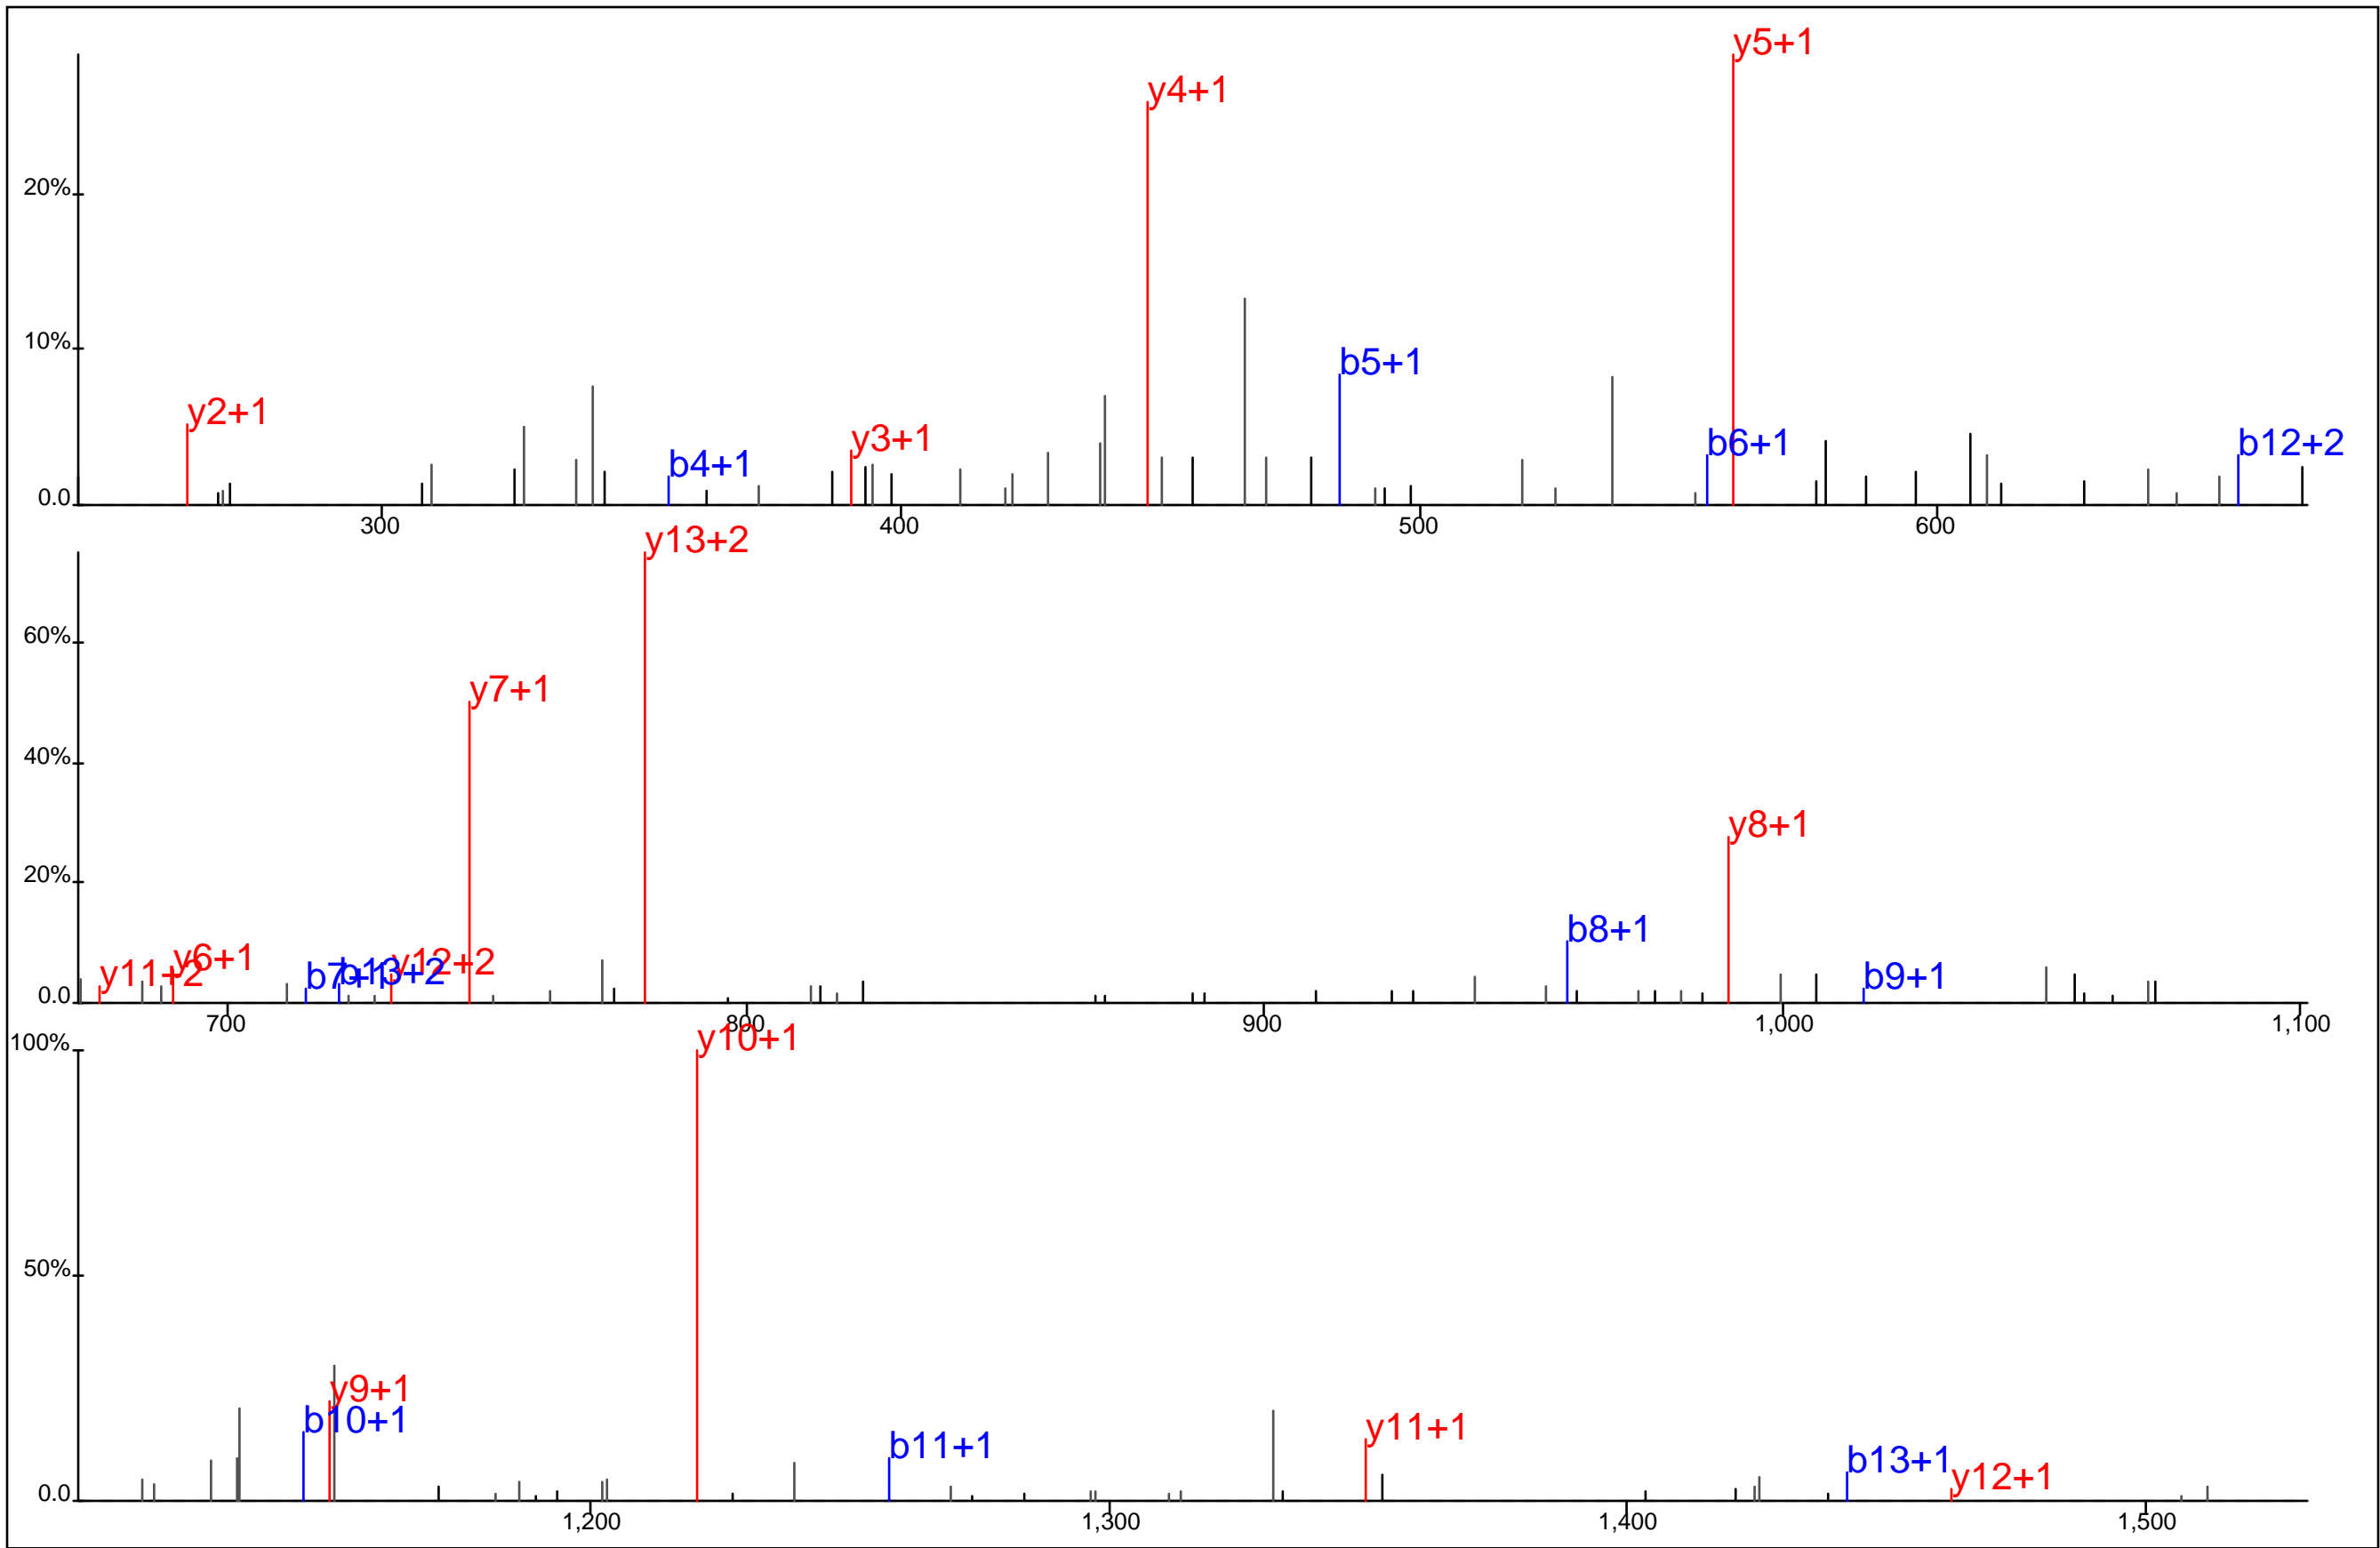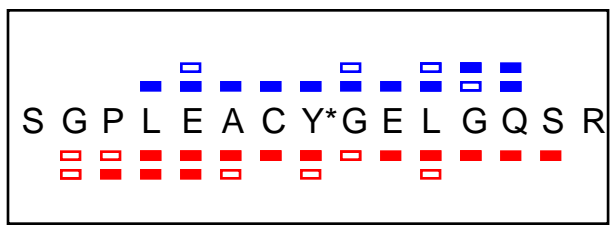

Protein Name: Myotubularin related protein 10  
 gi Accession: 0  
 Precursor Mass: 852.3562+2  
 Delta Mass: 2.539 ppm  
 XCorr: 84.87

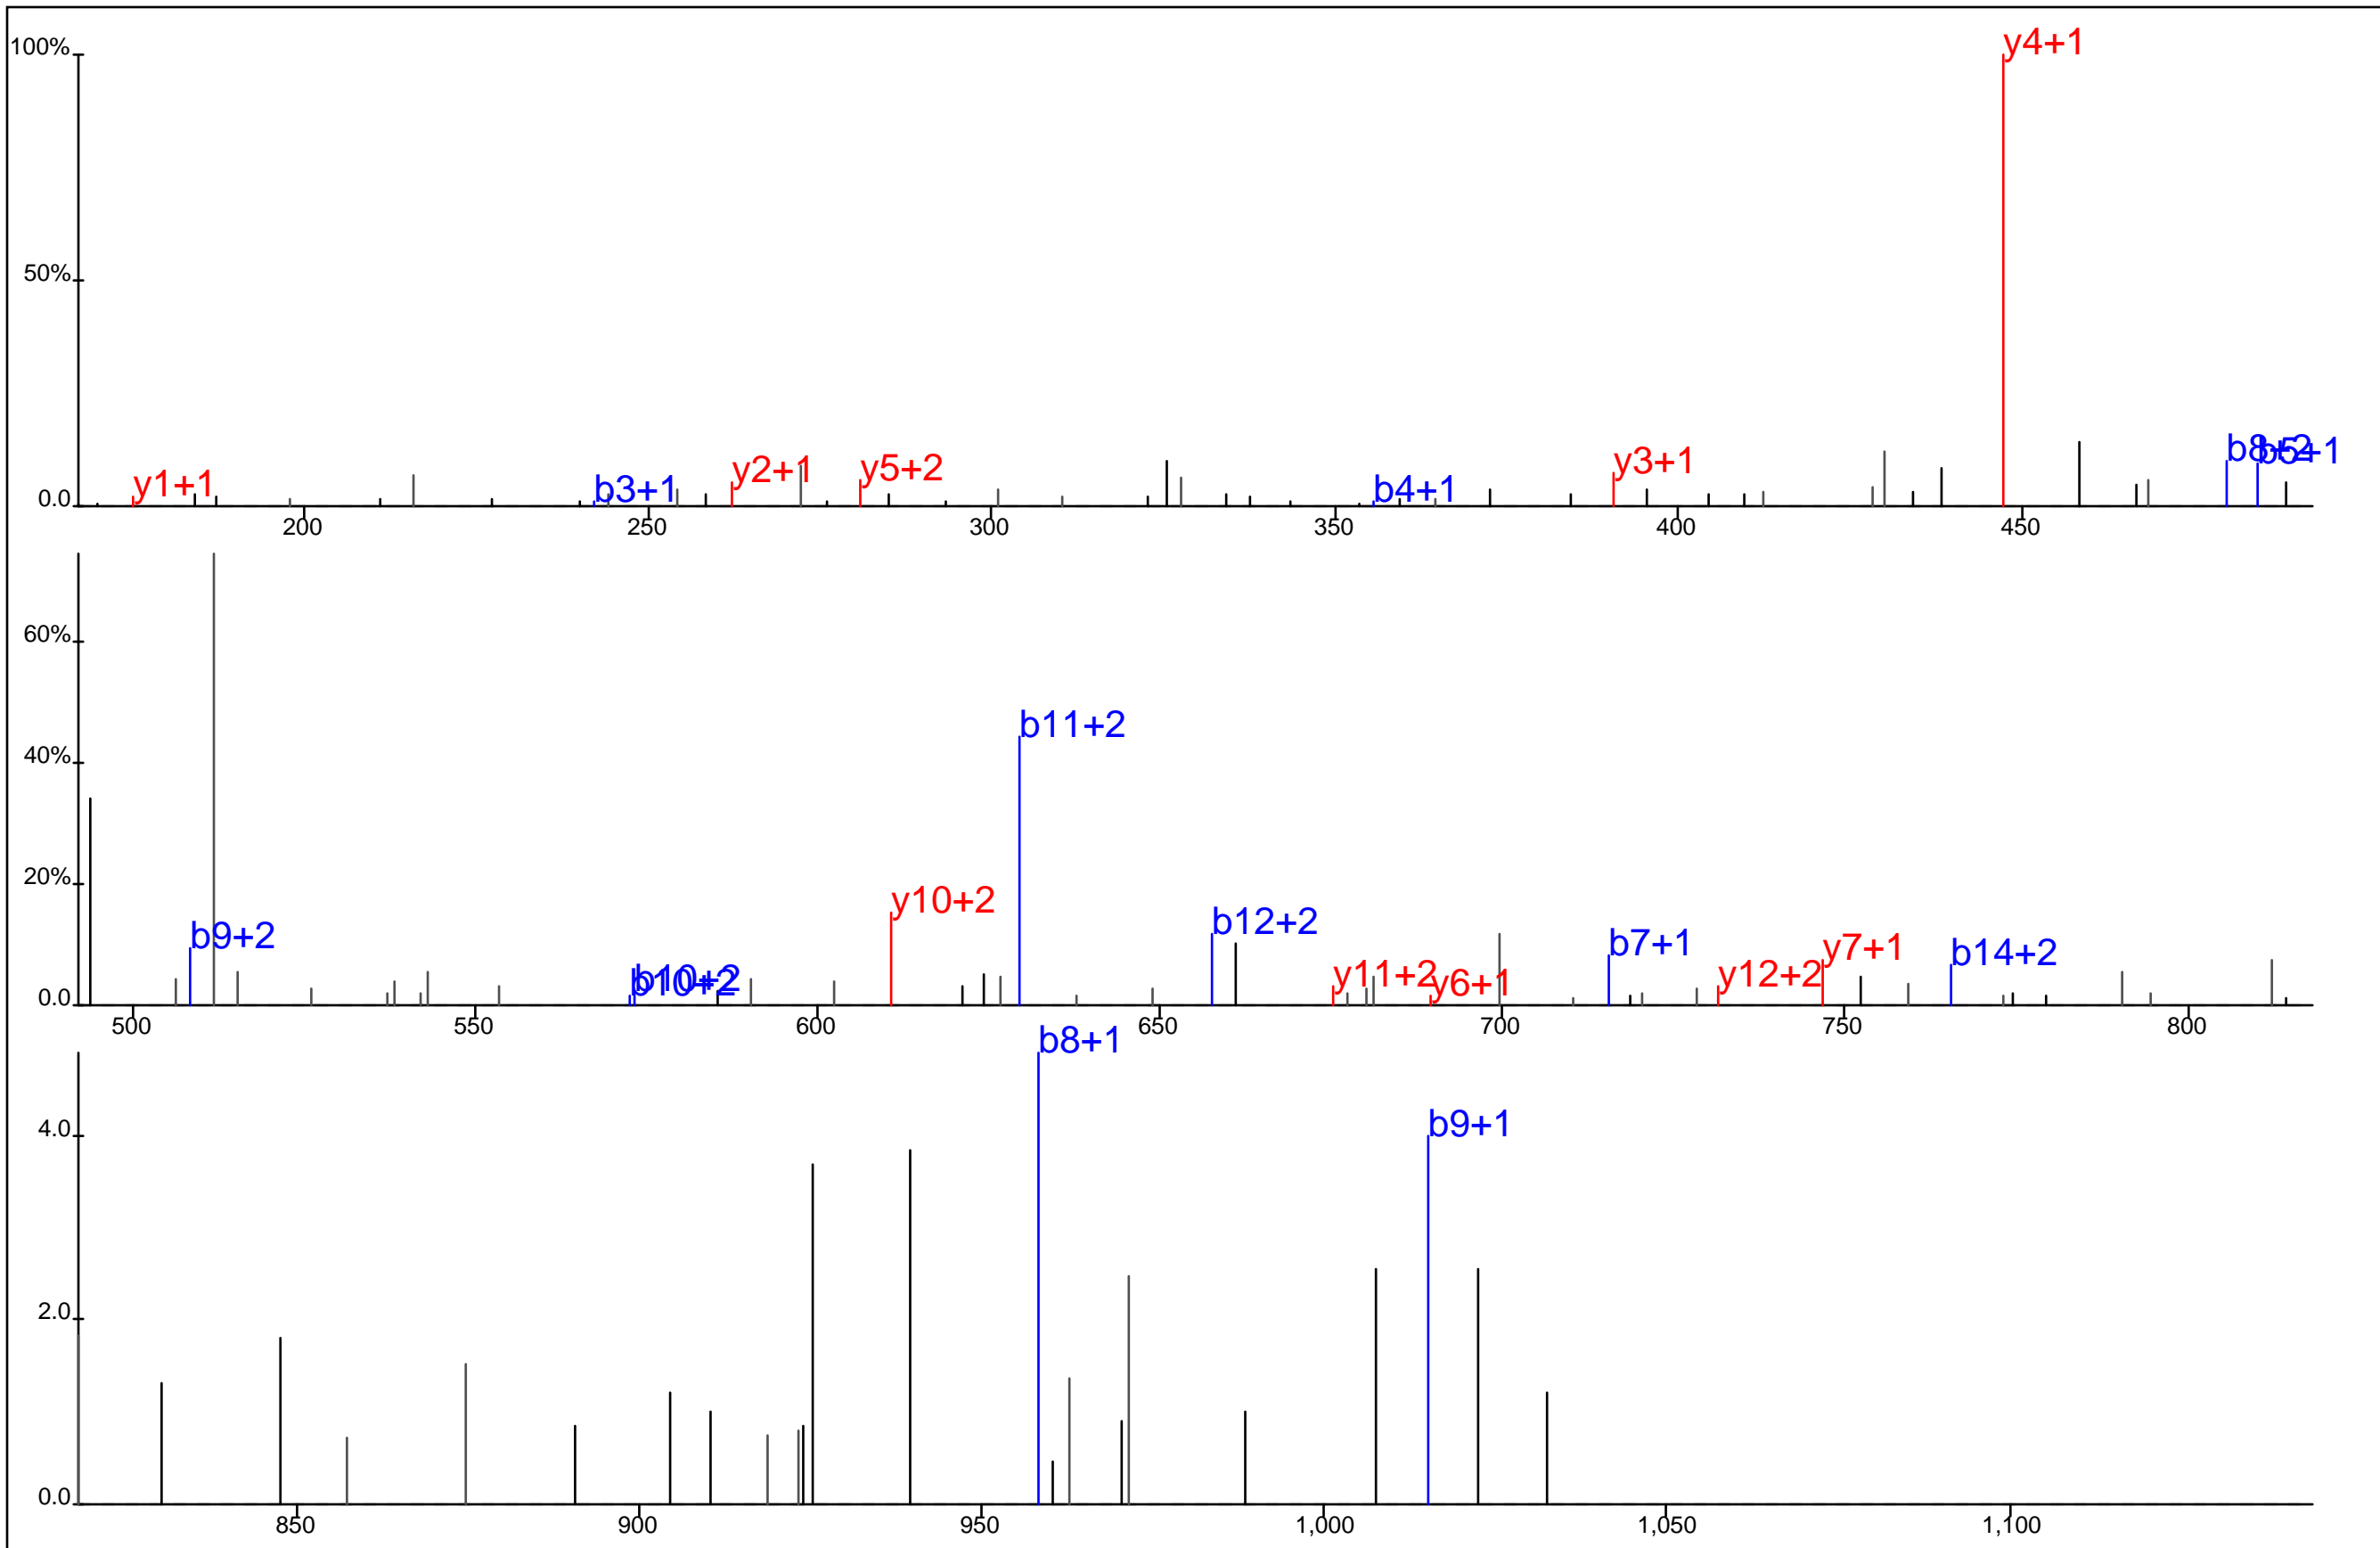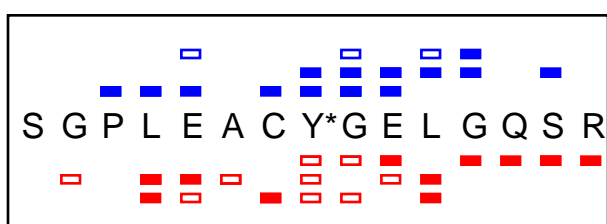

Protein Name: Myotubularin related protein 10  
 gi Accession: 0  
 Precursor Mass: 568.5748+3  
 Delta Mass: 0.176 ppm  
 XCorr: 21.51

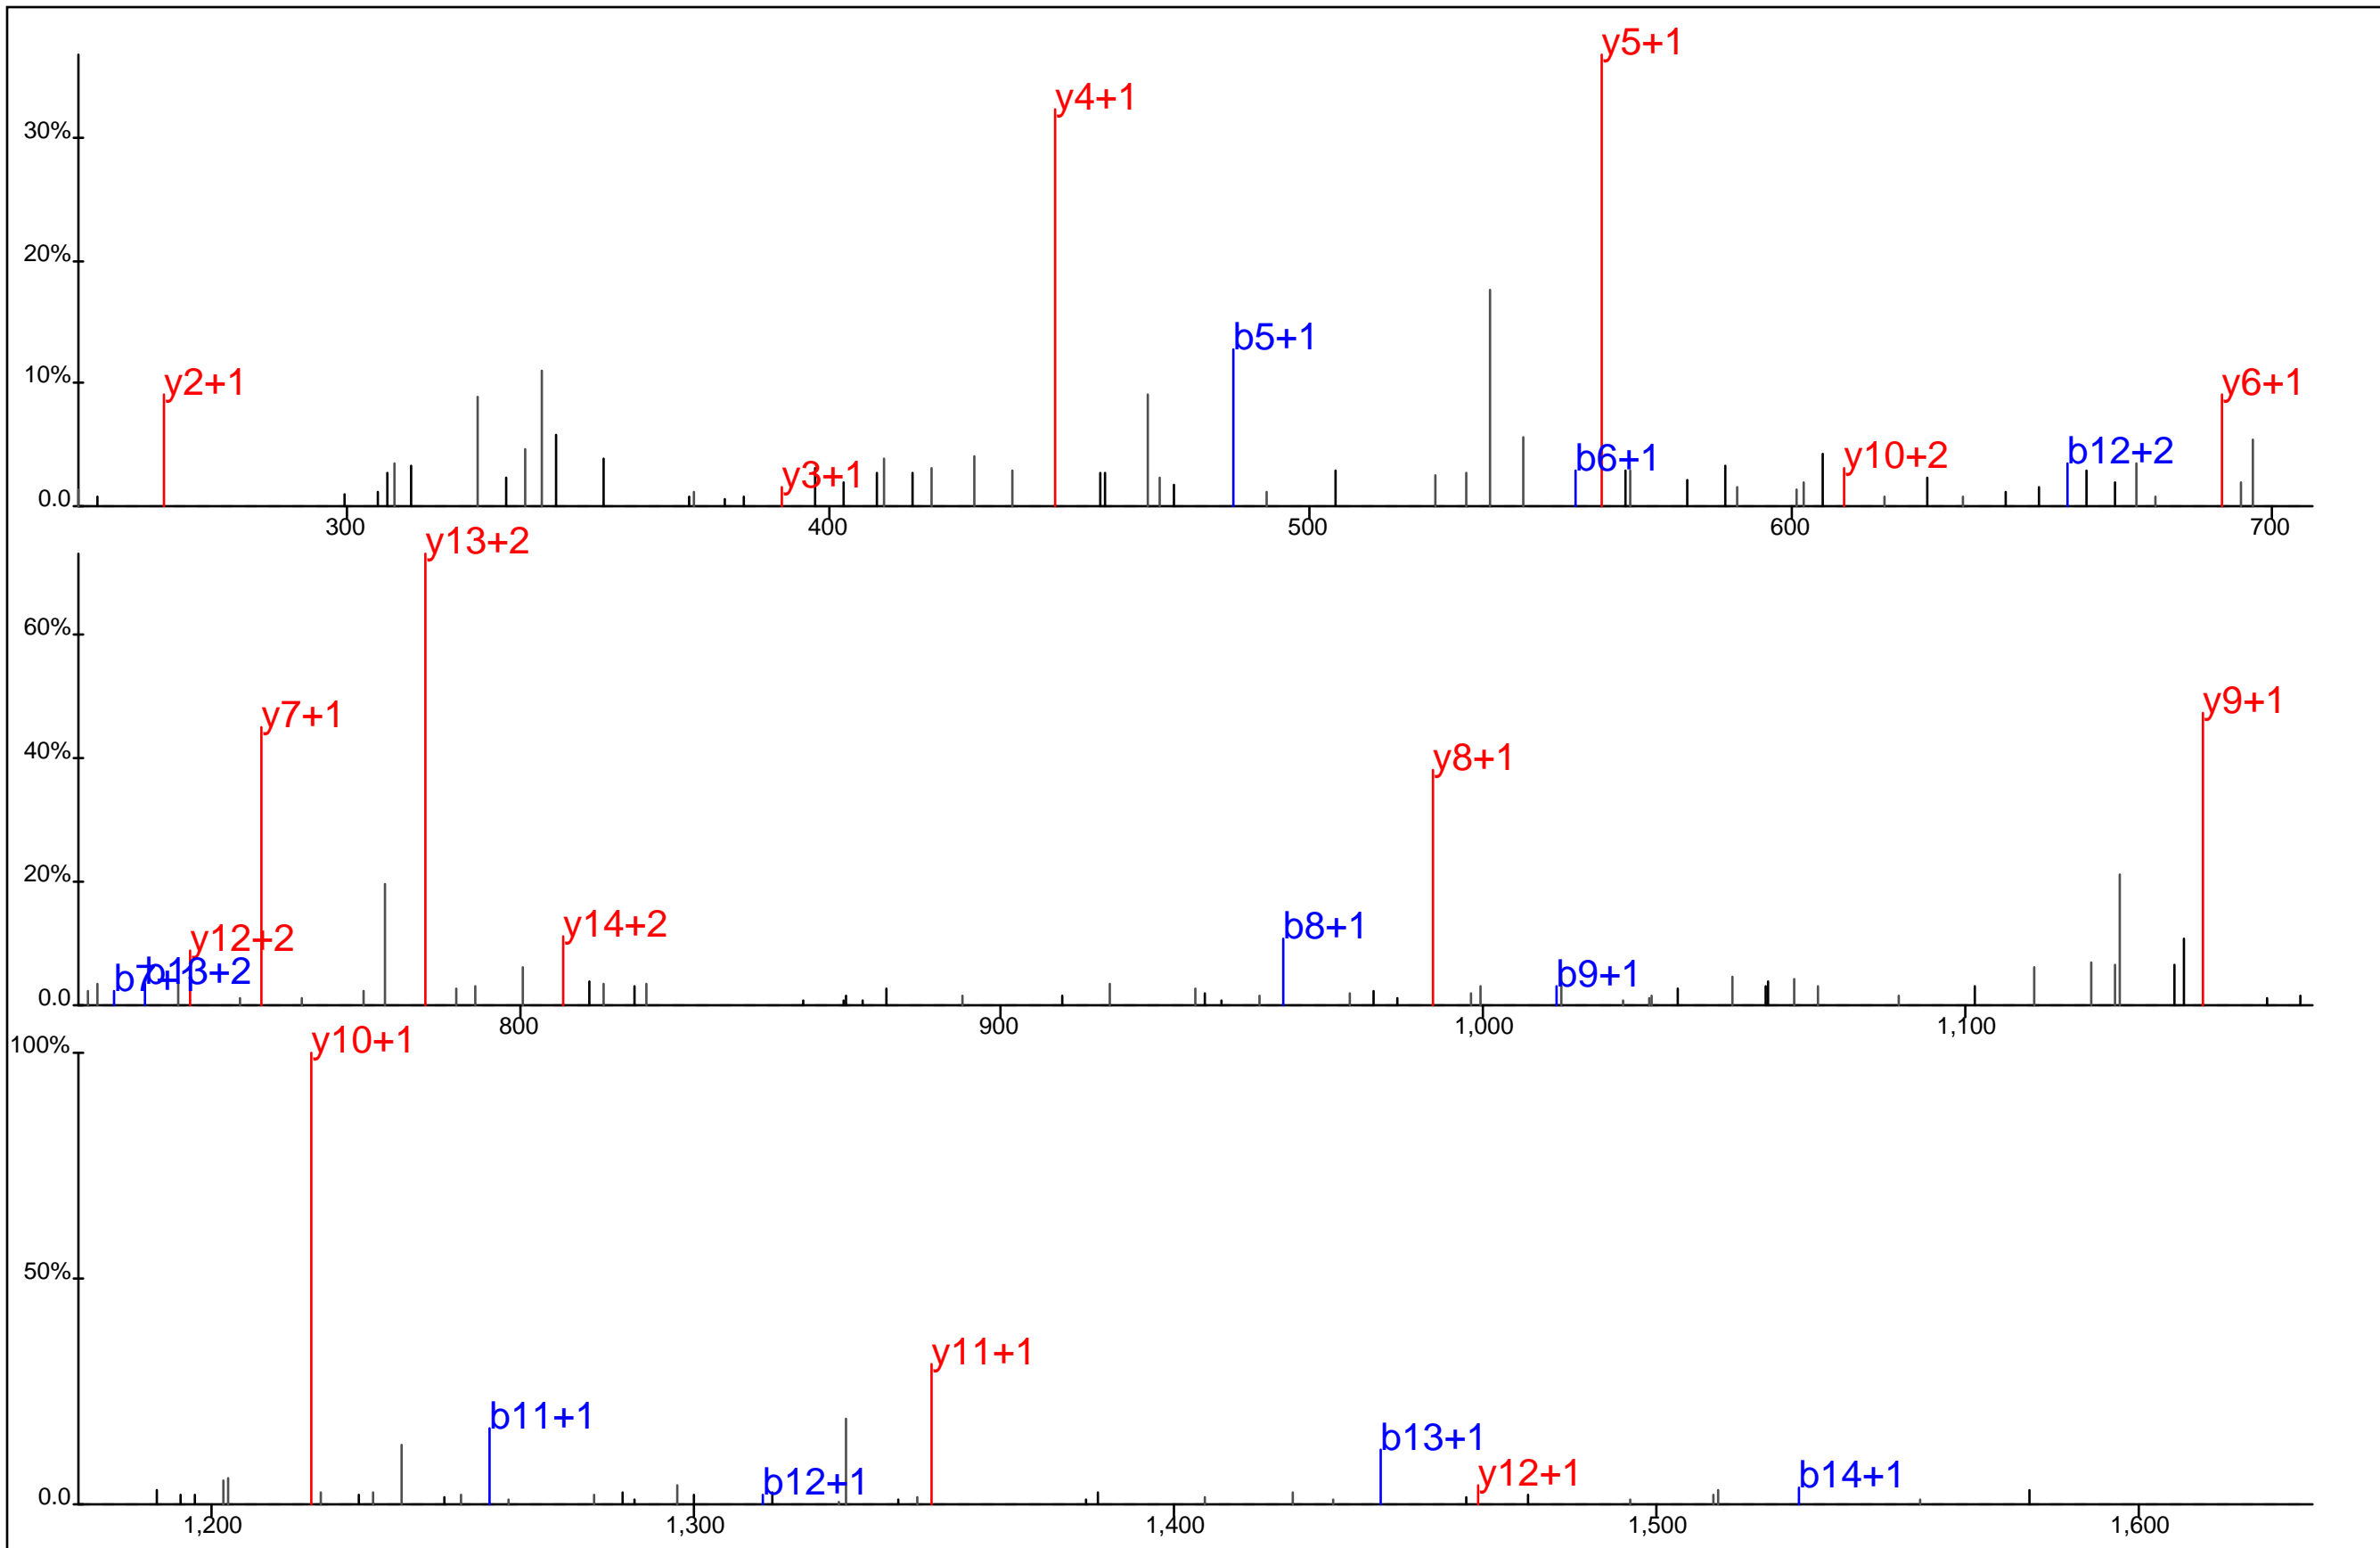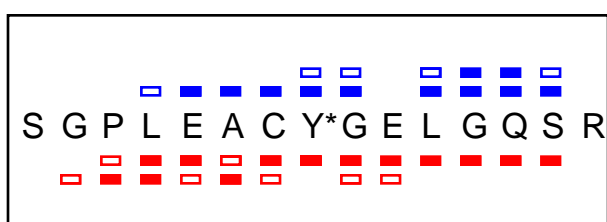

Protein Name: Myotubularin related protein 10  
 gi Accession: 0  
 Precursor Mass: 852.3578+2  
 Delta Mass: 0.605 ppm  
 XCorr: 84.45

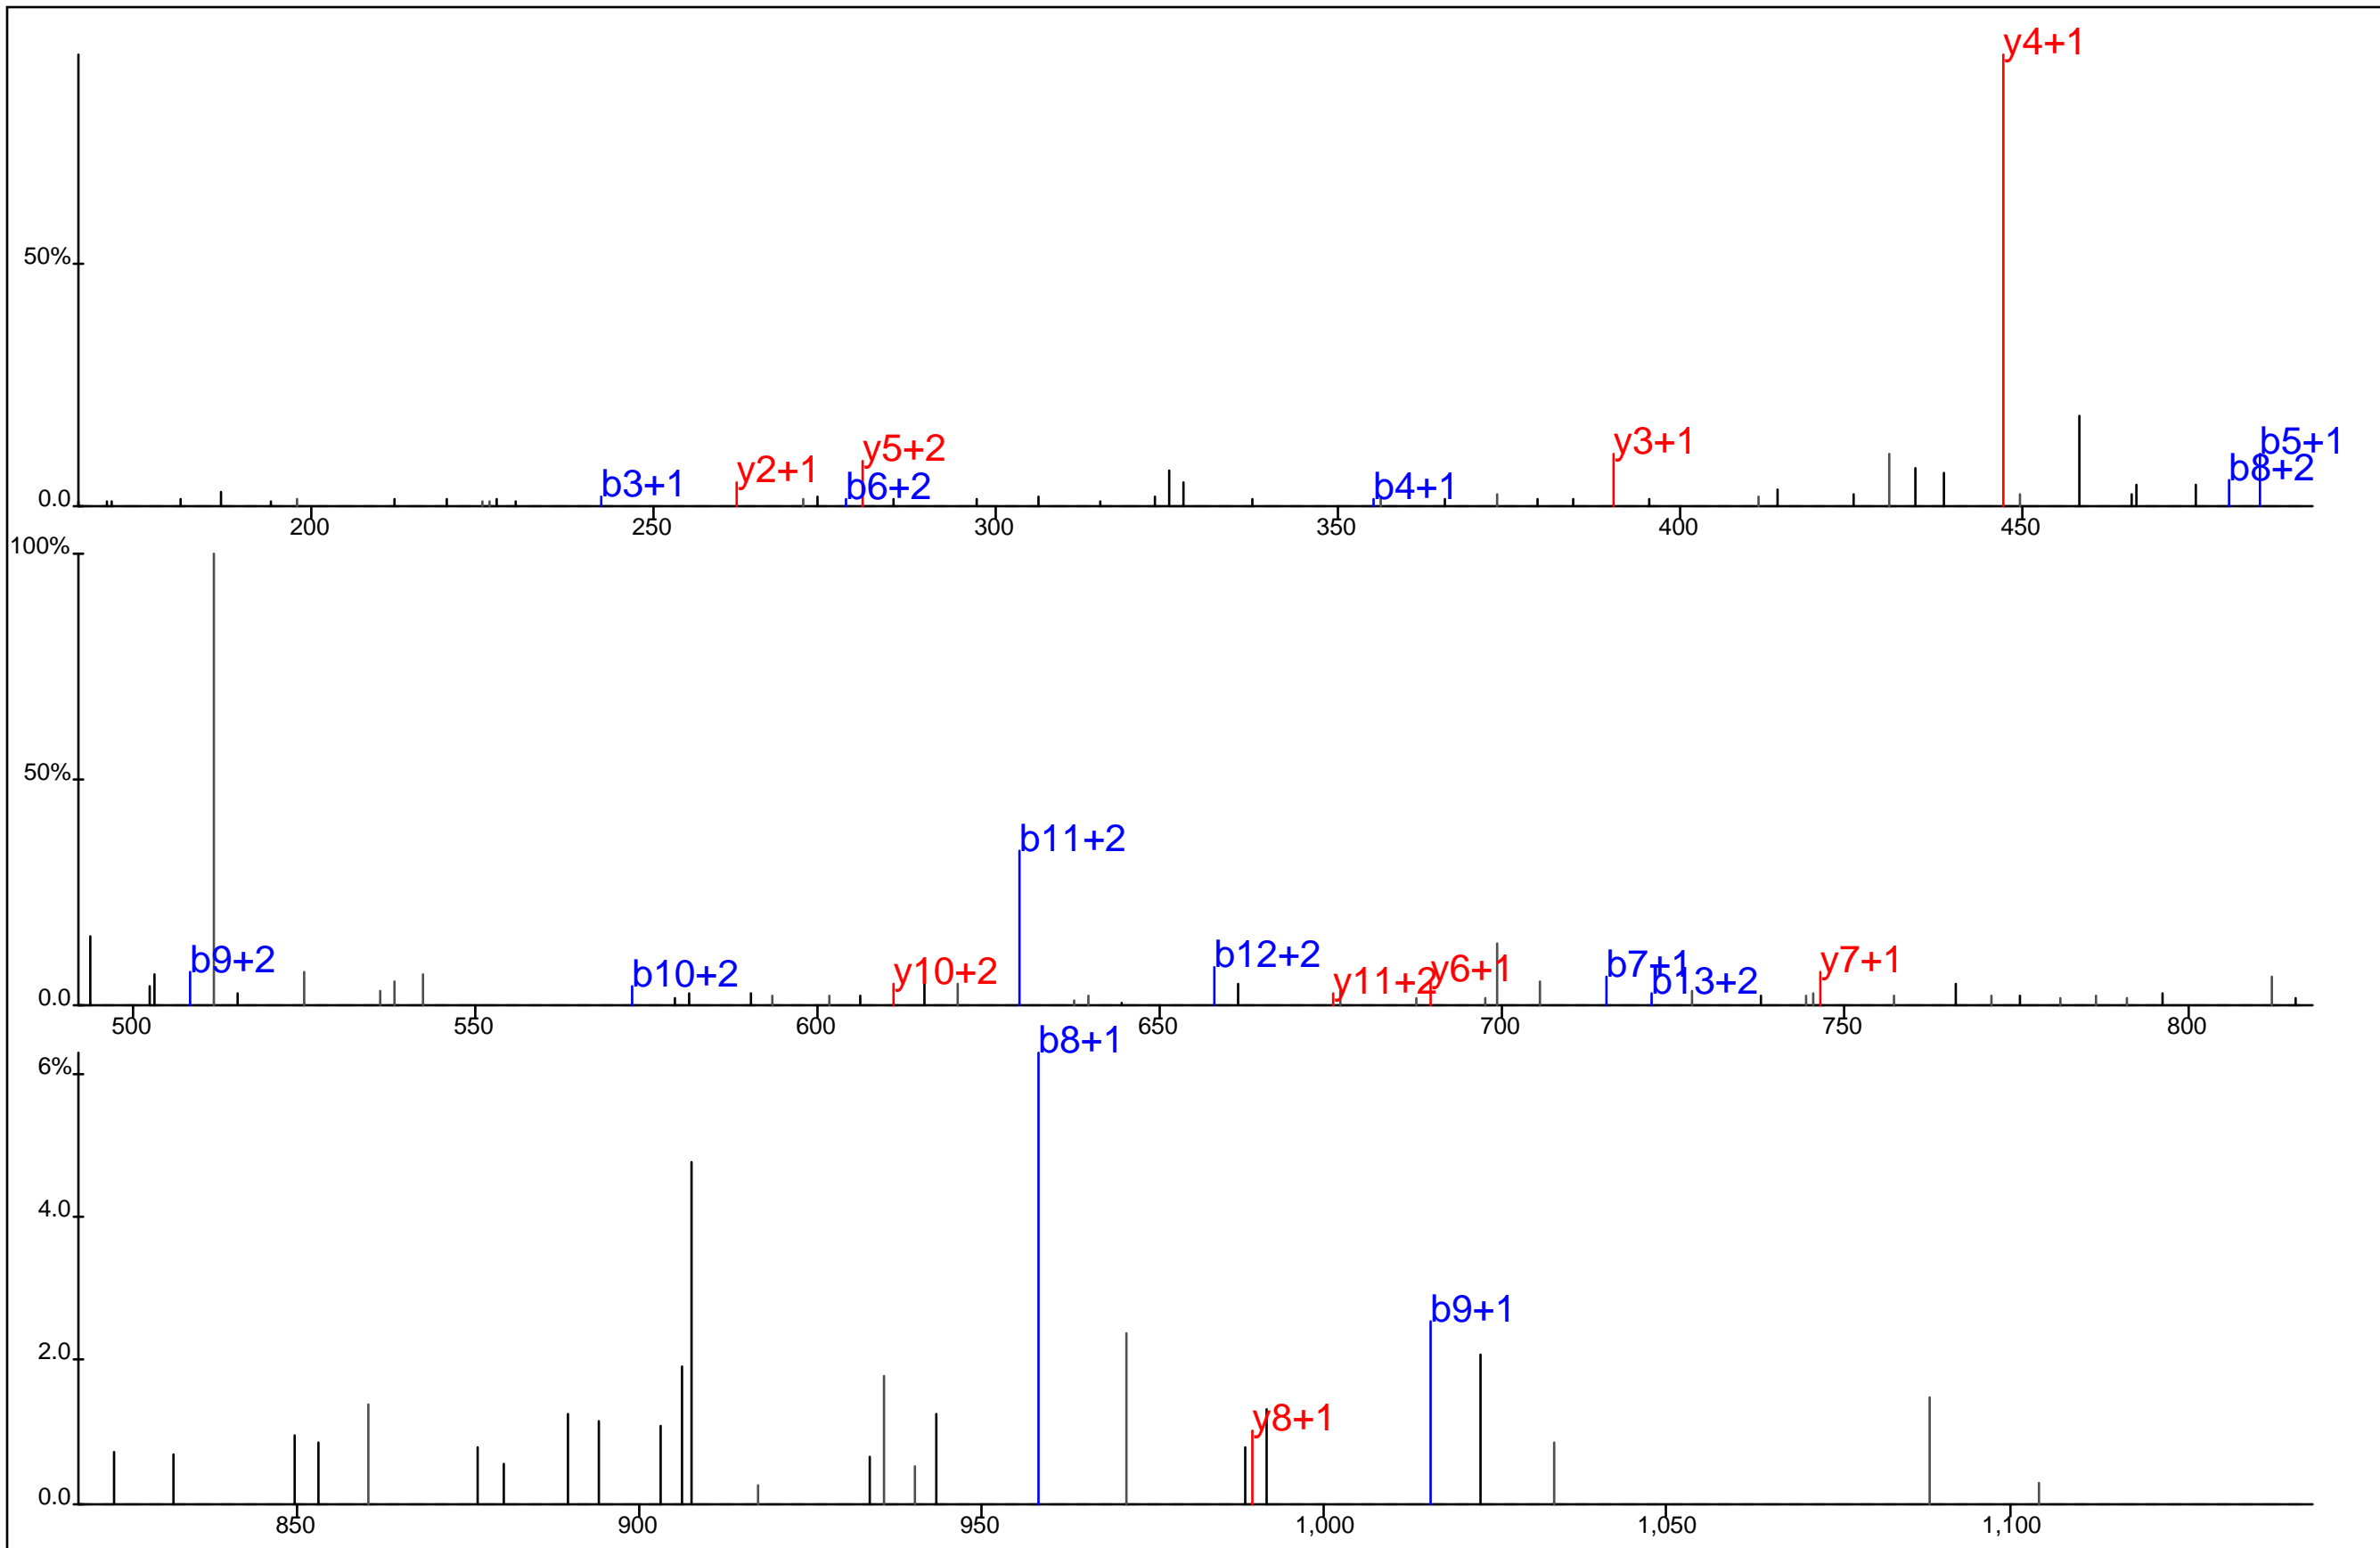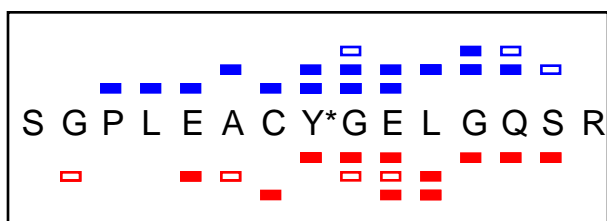

Protein Name: Myotubularin related protein 10  
 gi Accession: 0  
 Precursor Mass: 568.5750+3  
 Delta Mass: 0.498 ppm  
 XCorr: 28.32

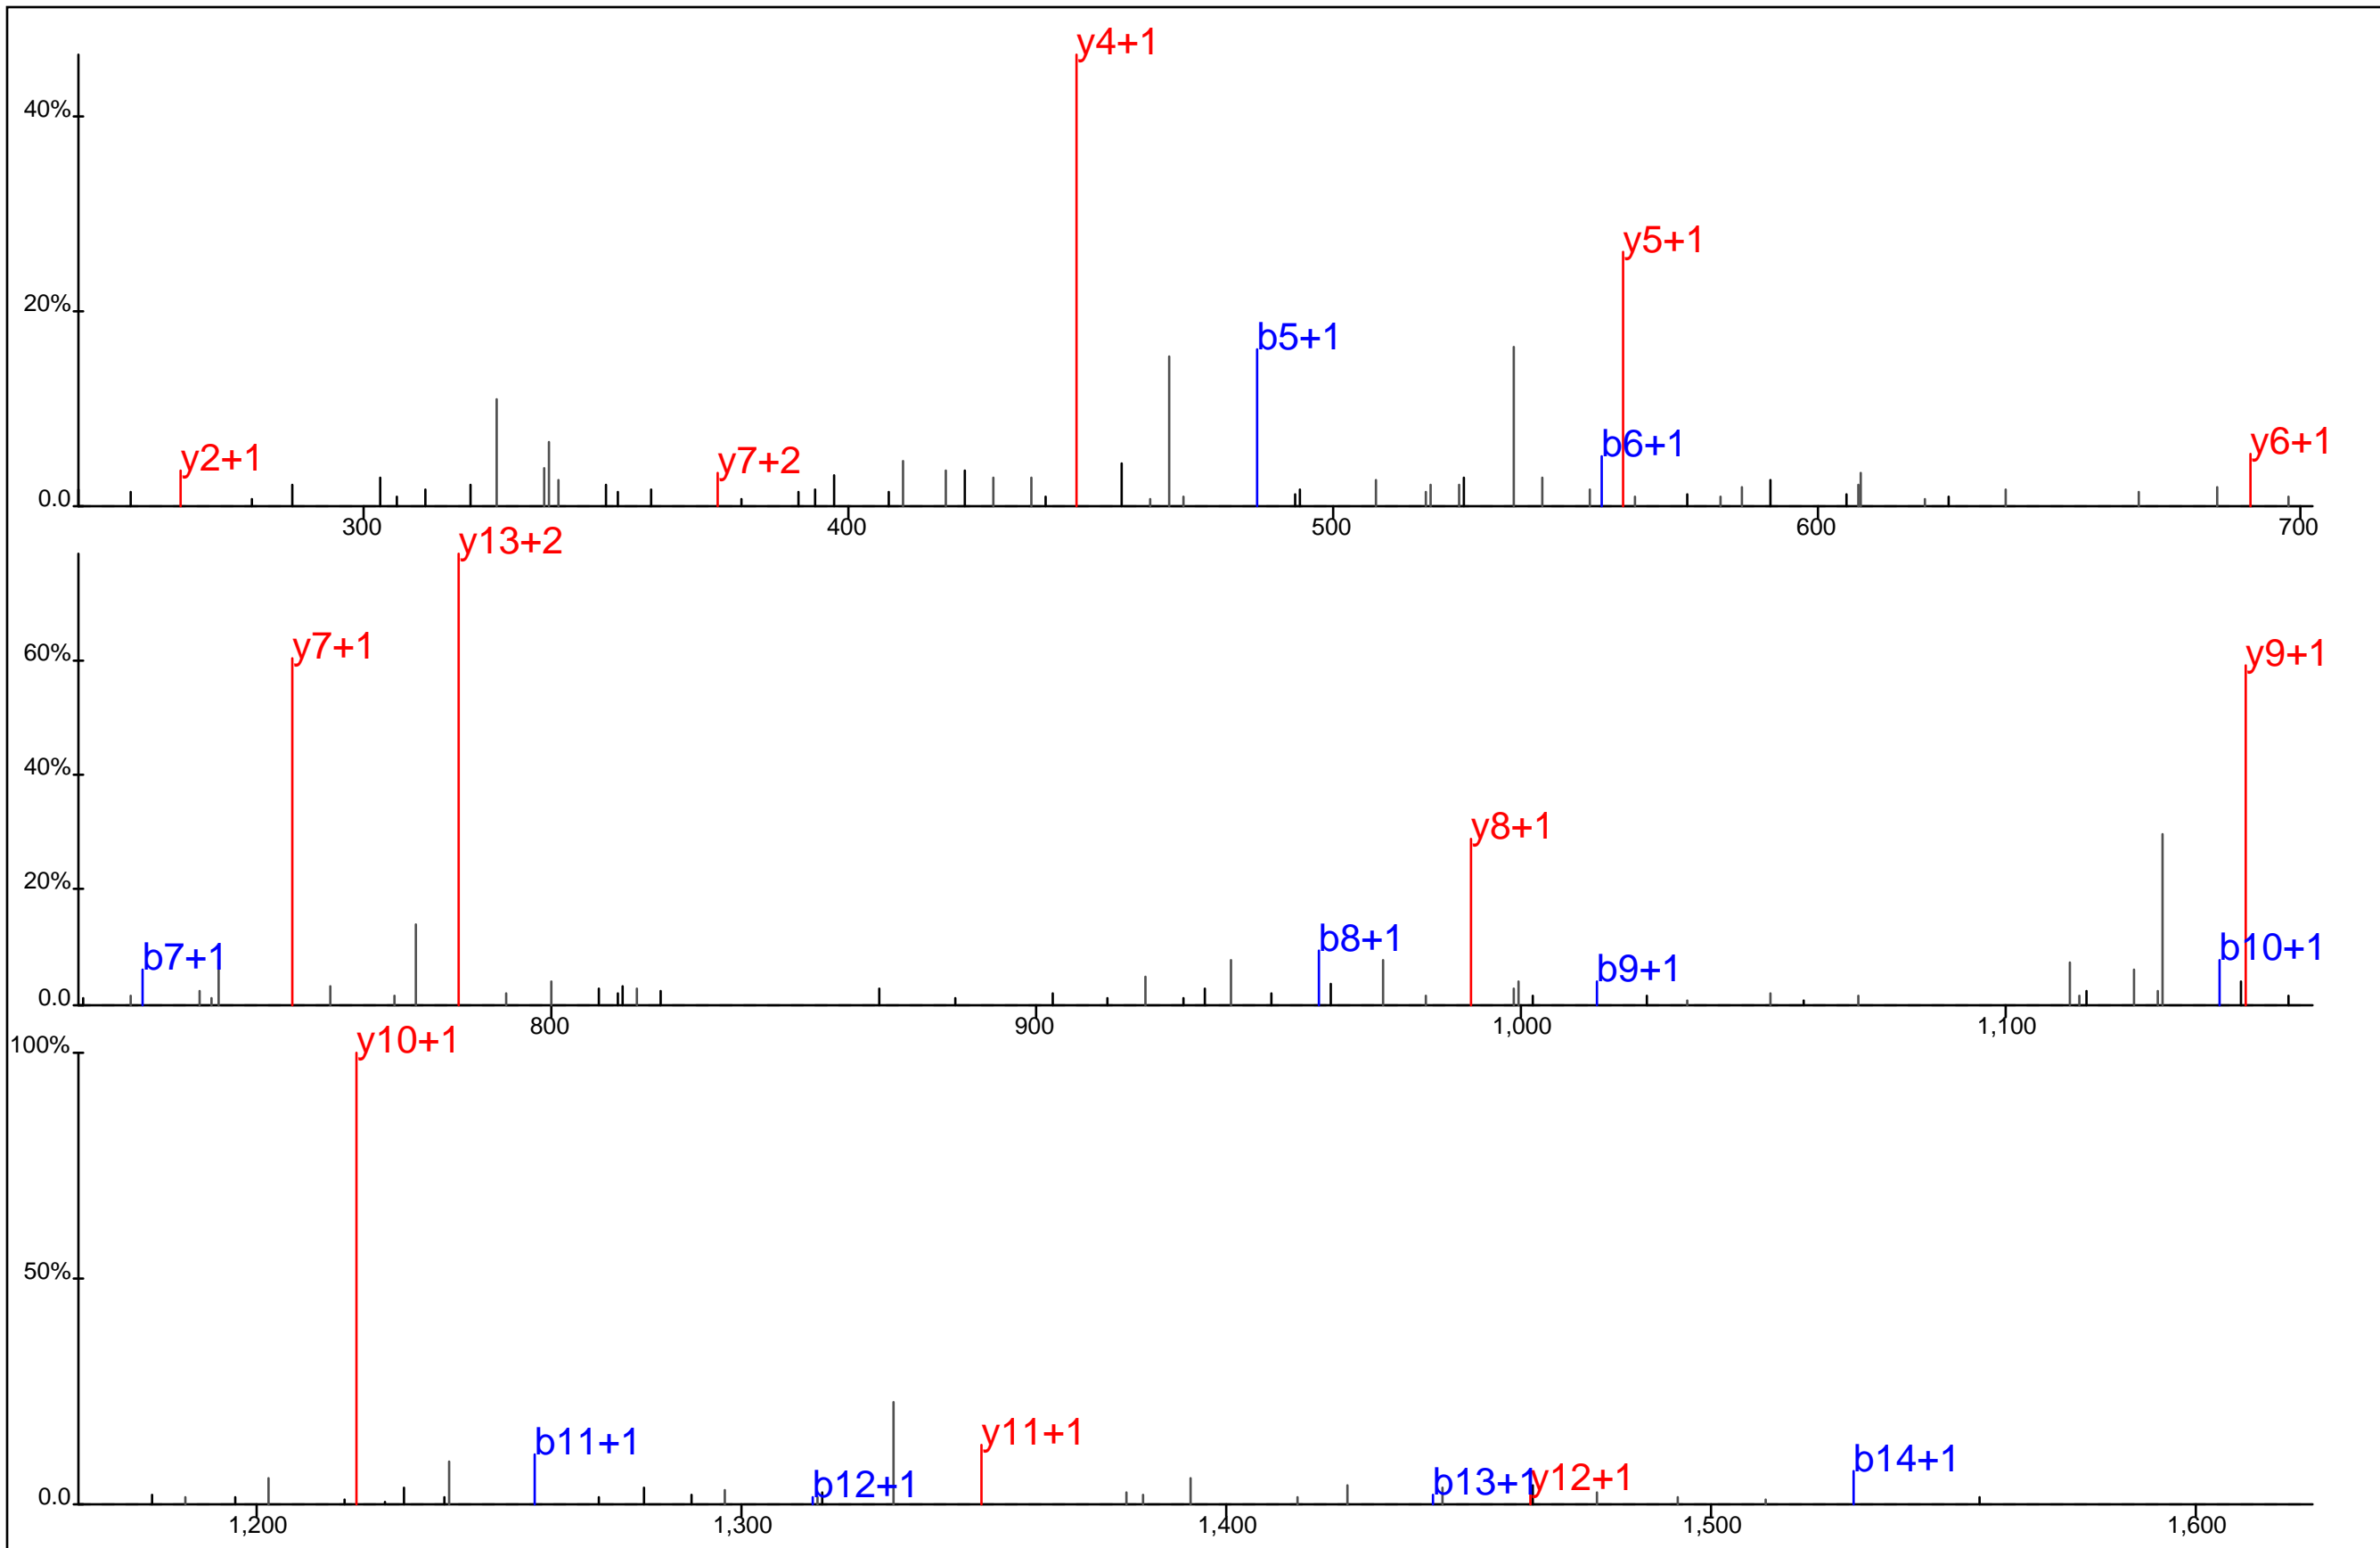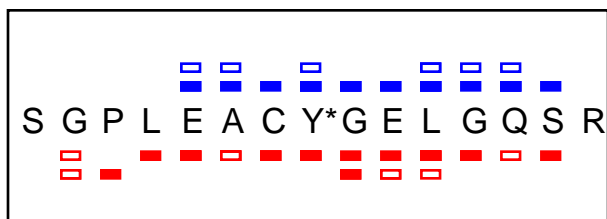

Protein Name: Myotubularin related protein 10  
 gi Accession: 0  
 Precursor Mass: 852.3588+2  
 Delta Mass: 0.471 ppm  
 XCorr: 63.17



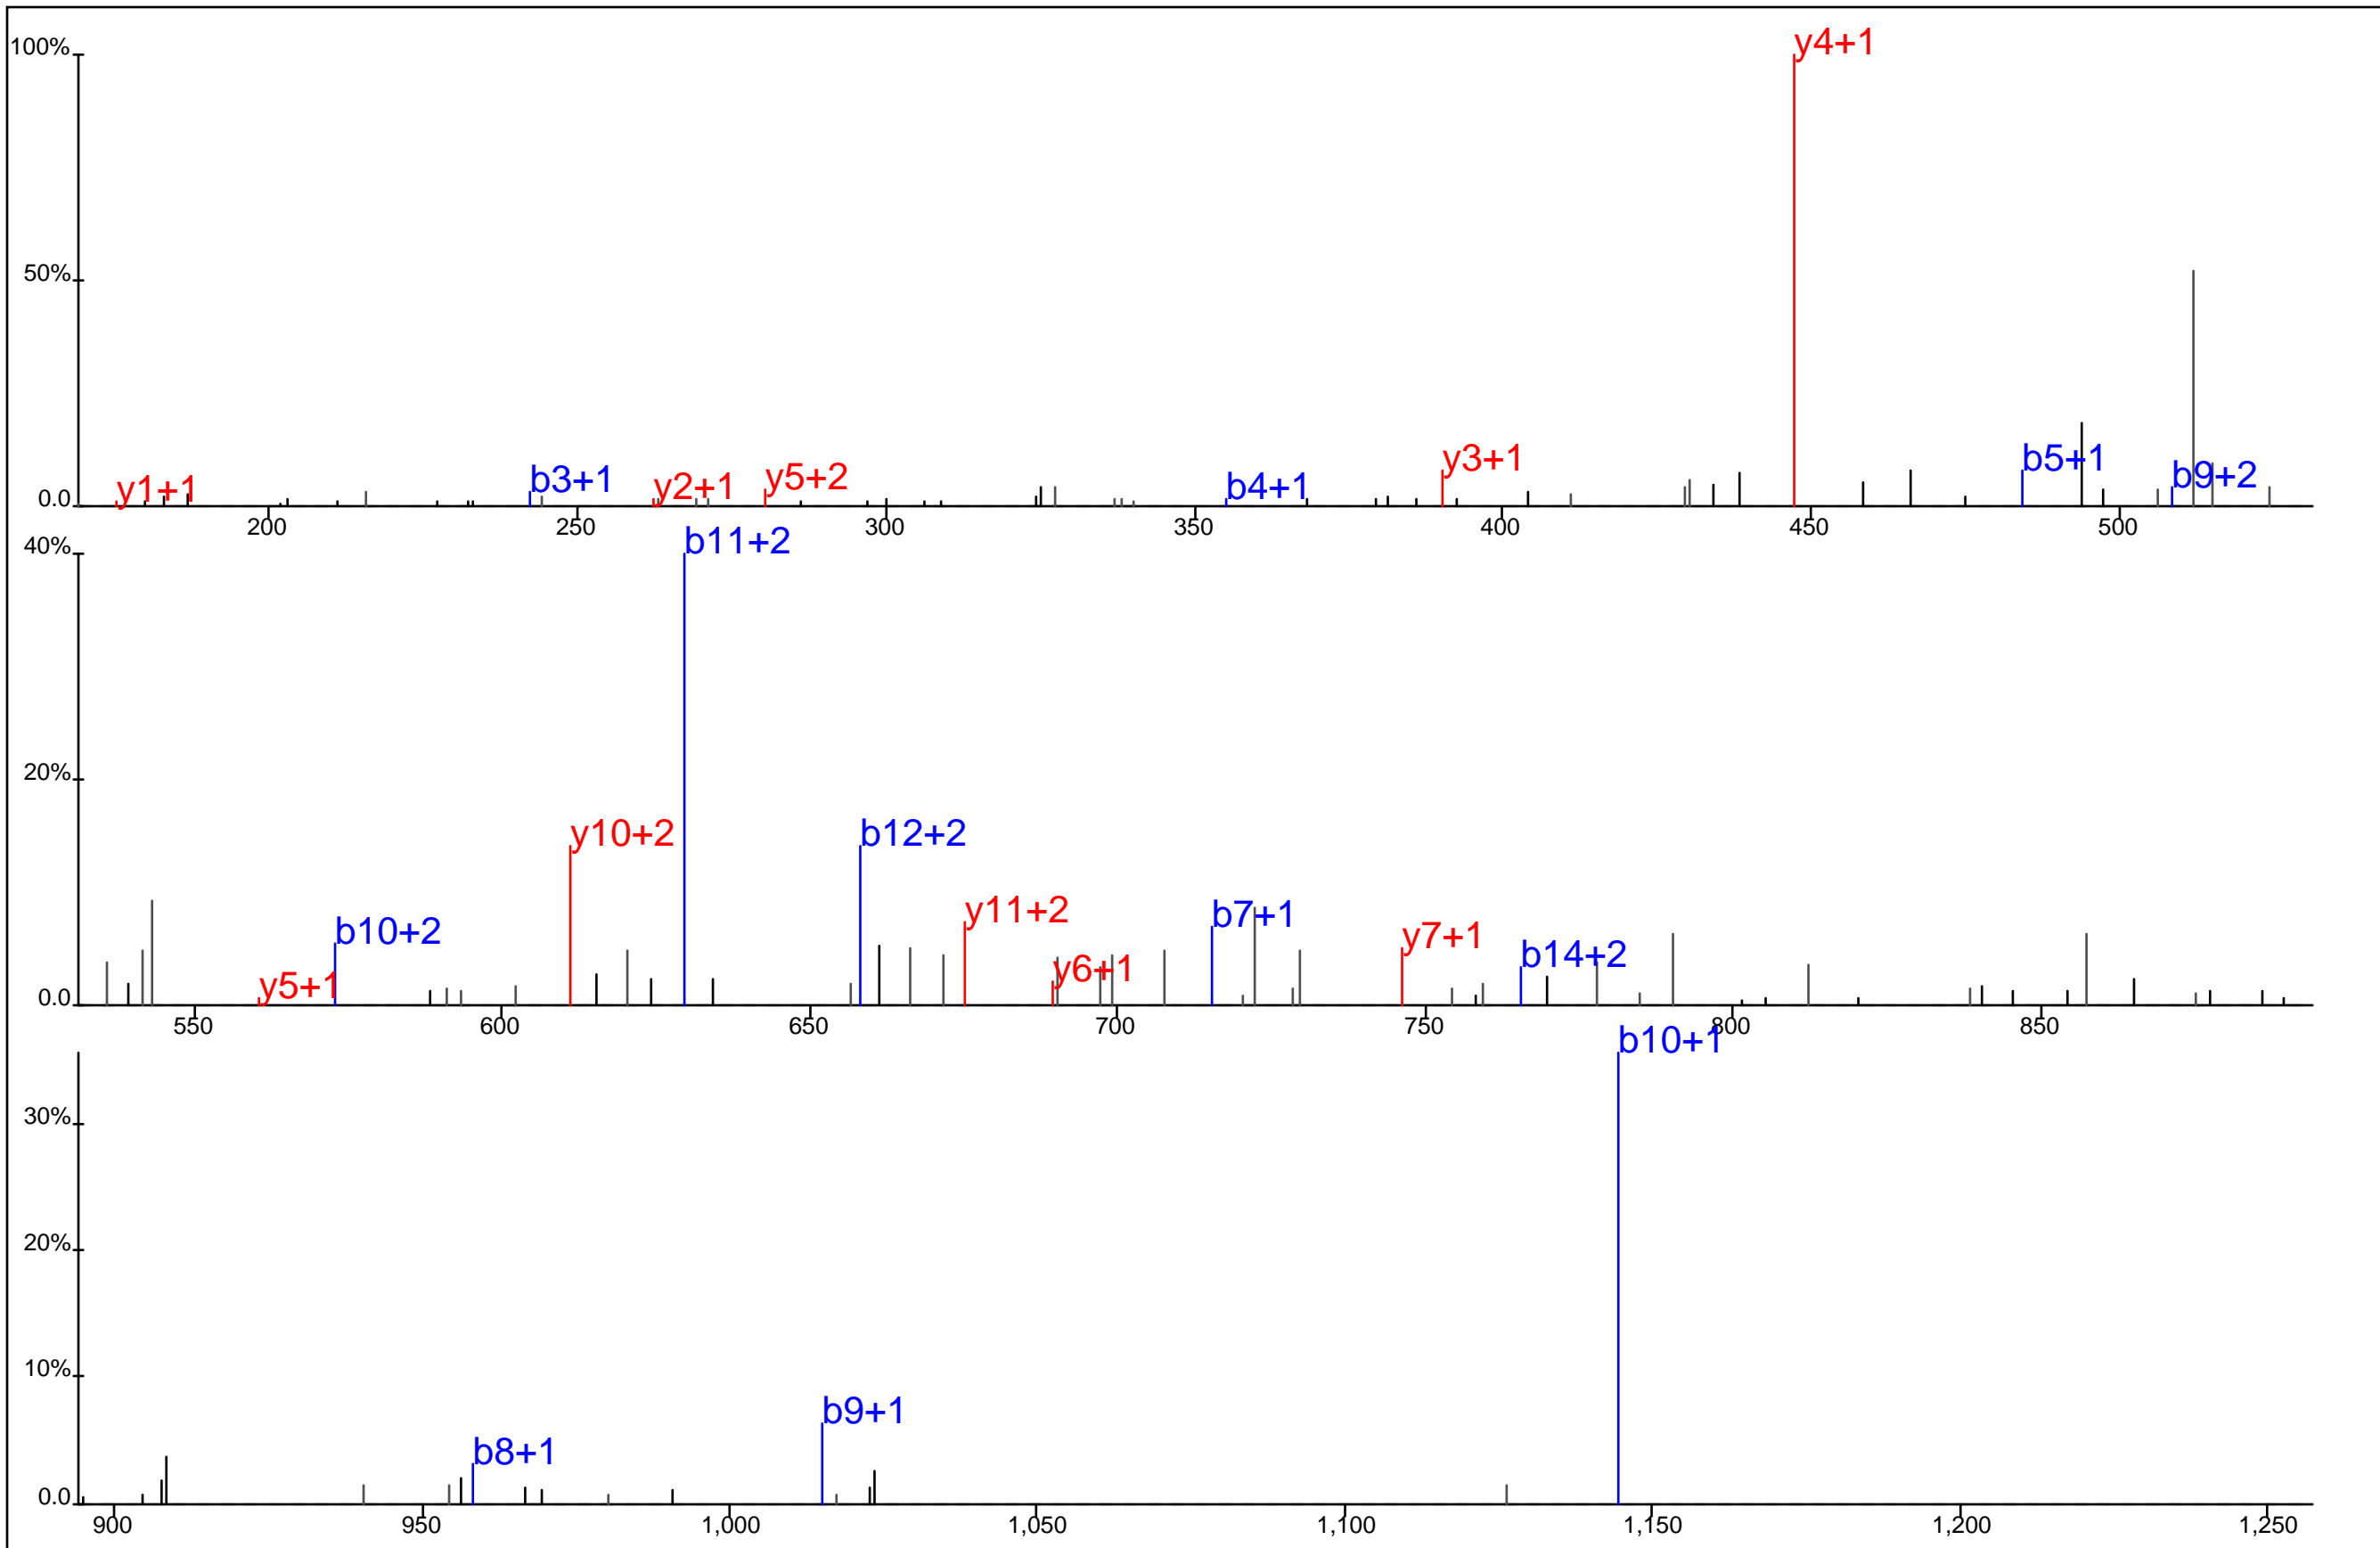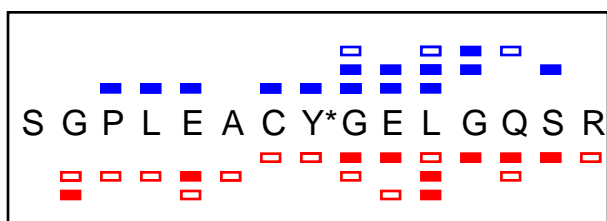

Protein Name: Myotubularin related protein 10  
 gi Accession: 0  
 Precursor Mass: 568.5746+3  
 Delta Mass: 0.039 ppm  
 XCorr: 33.56



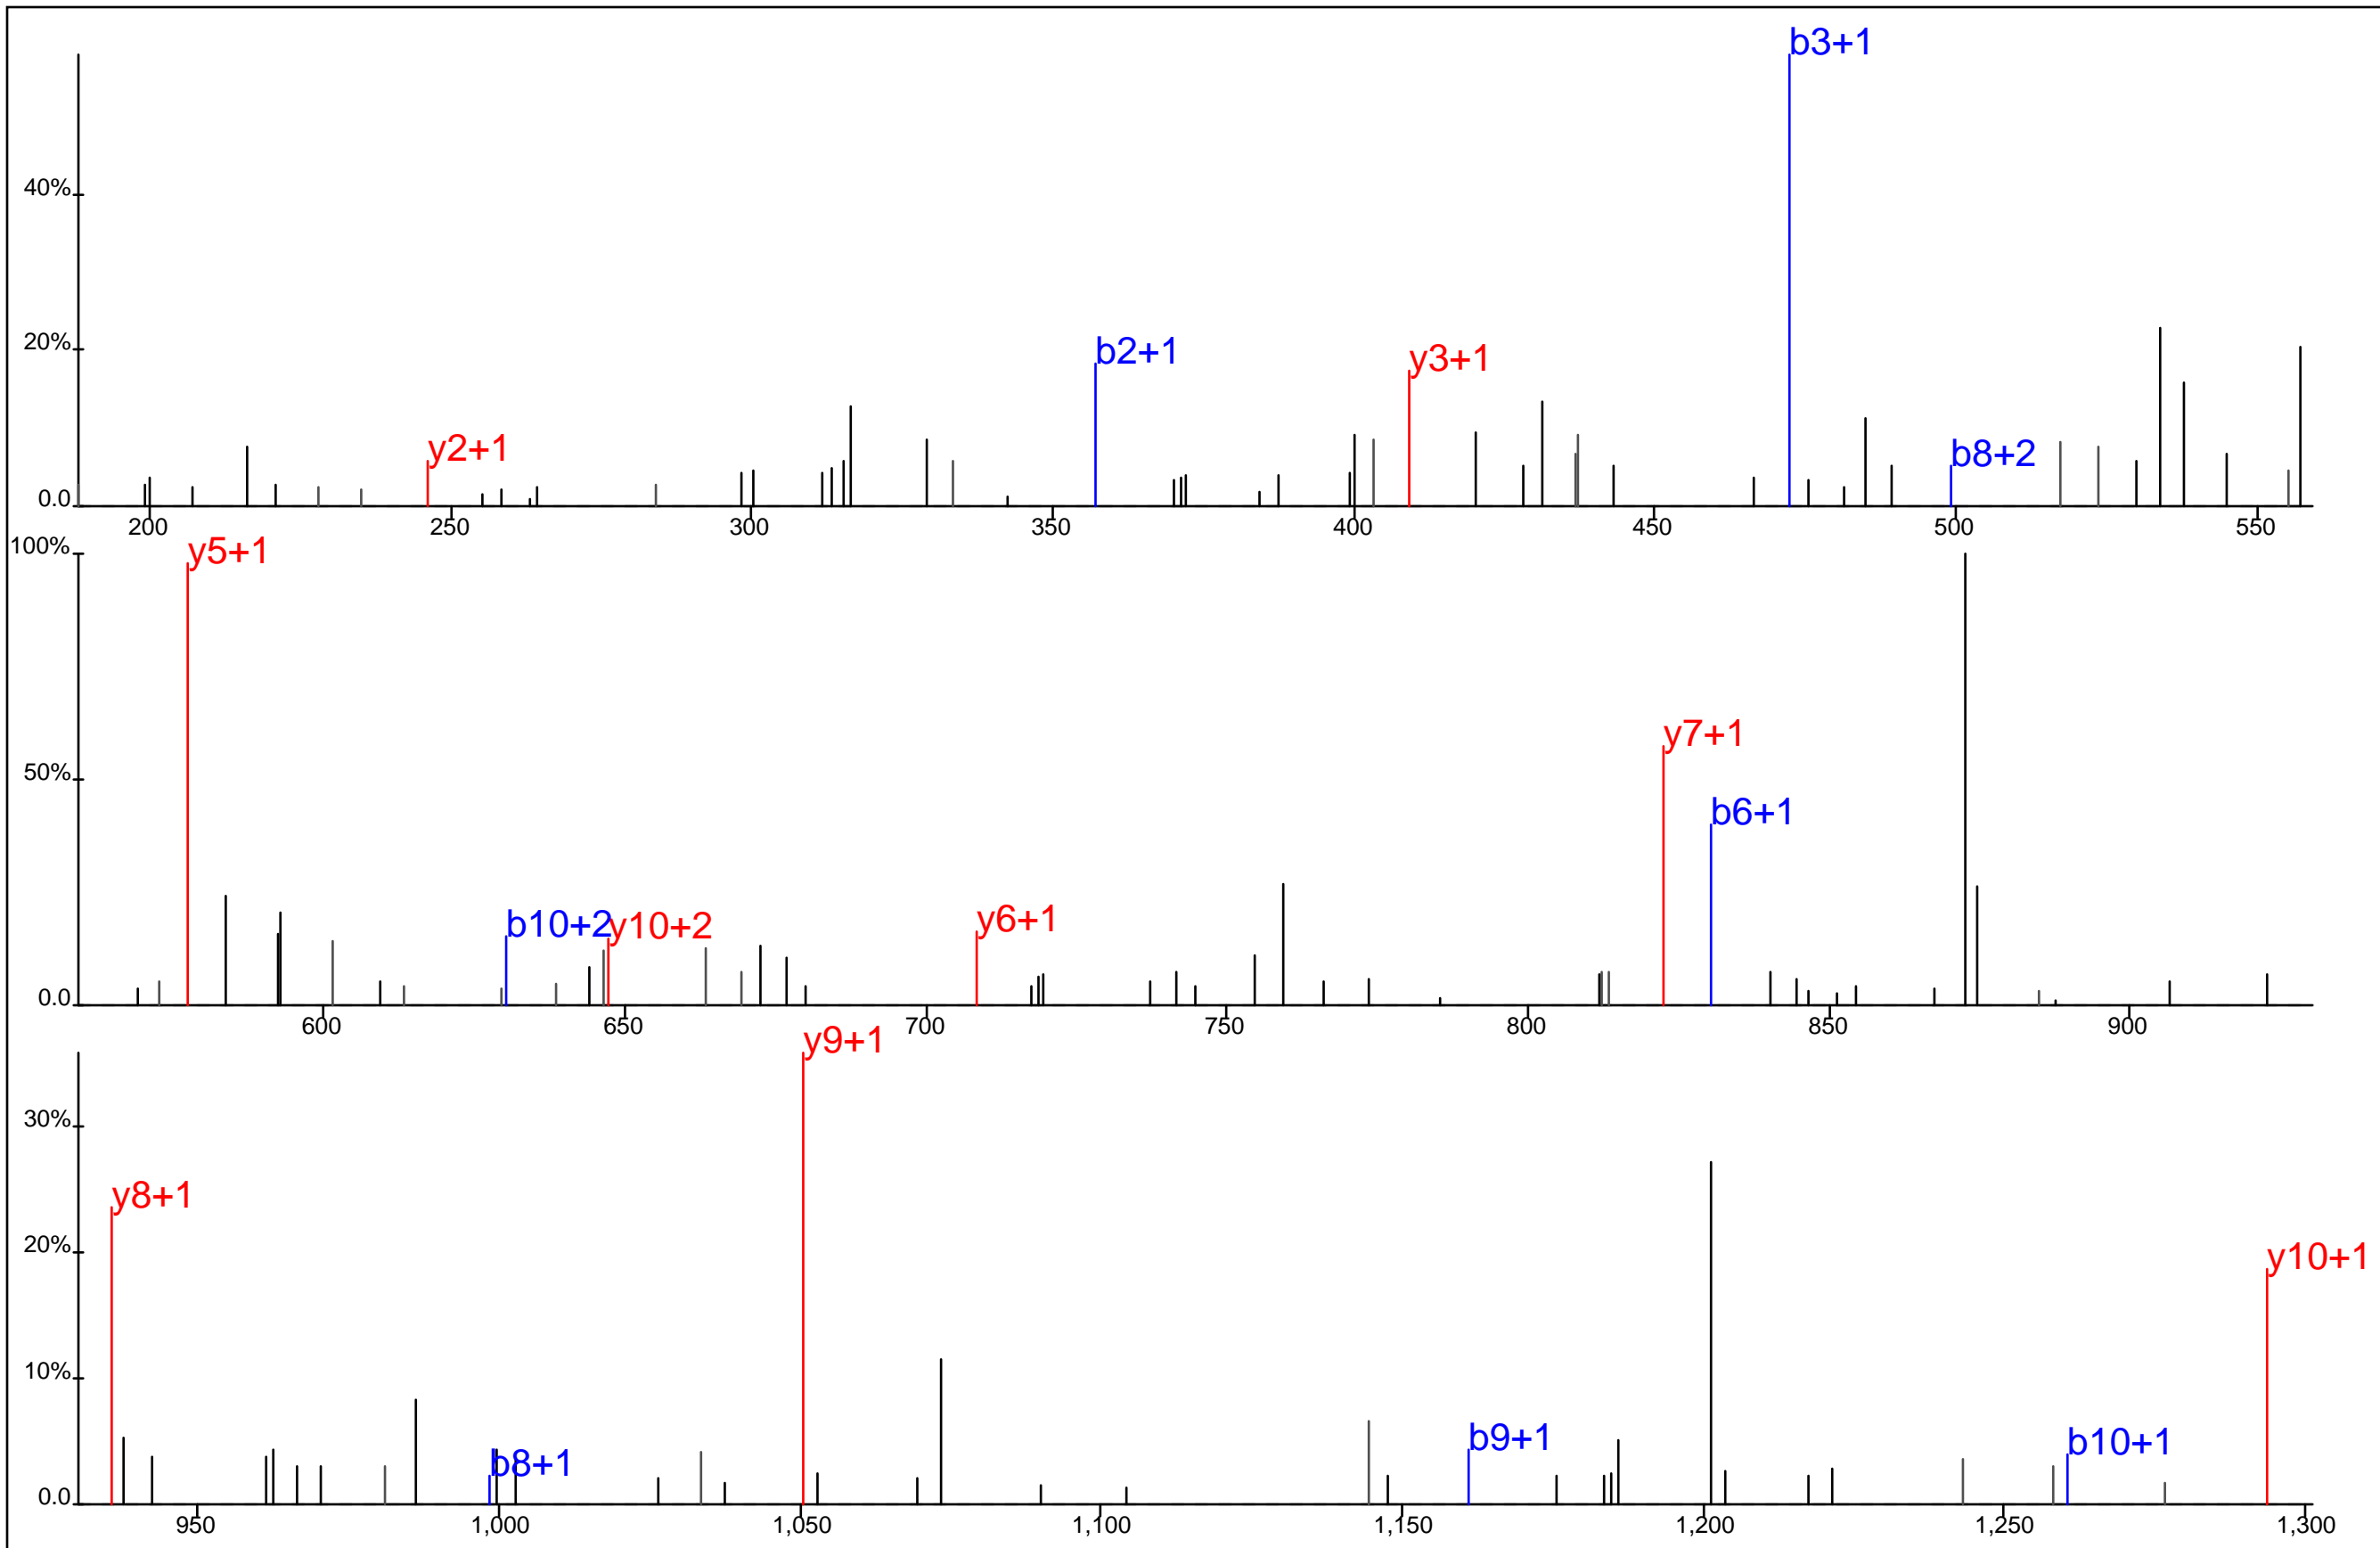

■ ■ ■ ■ ■ ■ ■ ■ ■ ■  
■ ■ ■ ■ ■ ■ ■ ■ ■ ■  
 L Y\* D L N M P A Y V K

Protein Name: NCK1  
 gi Accession: 0  
 Precursor Mass: 703.8244+2  
 Delta Mass: 0.714 ppm  
 XCorr: 47.77

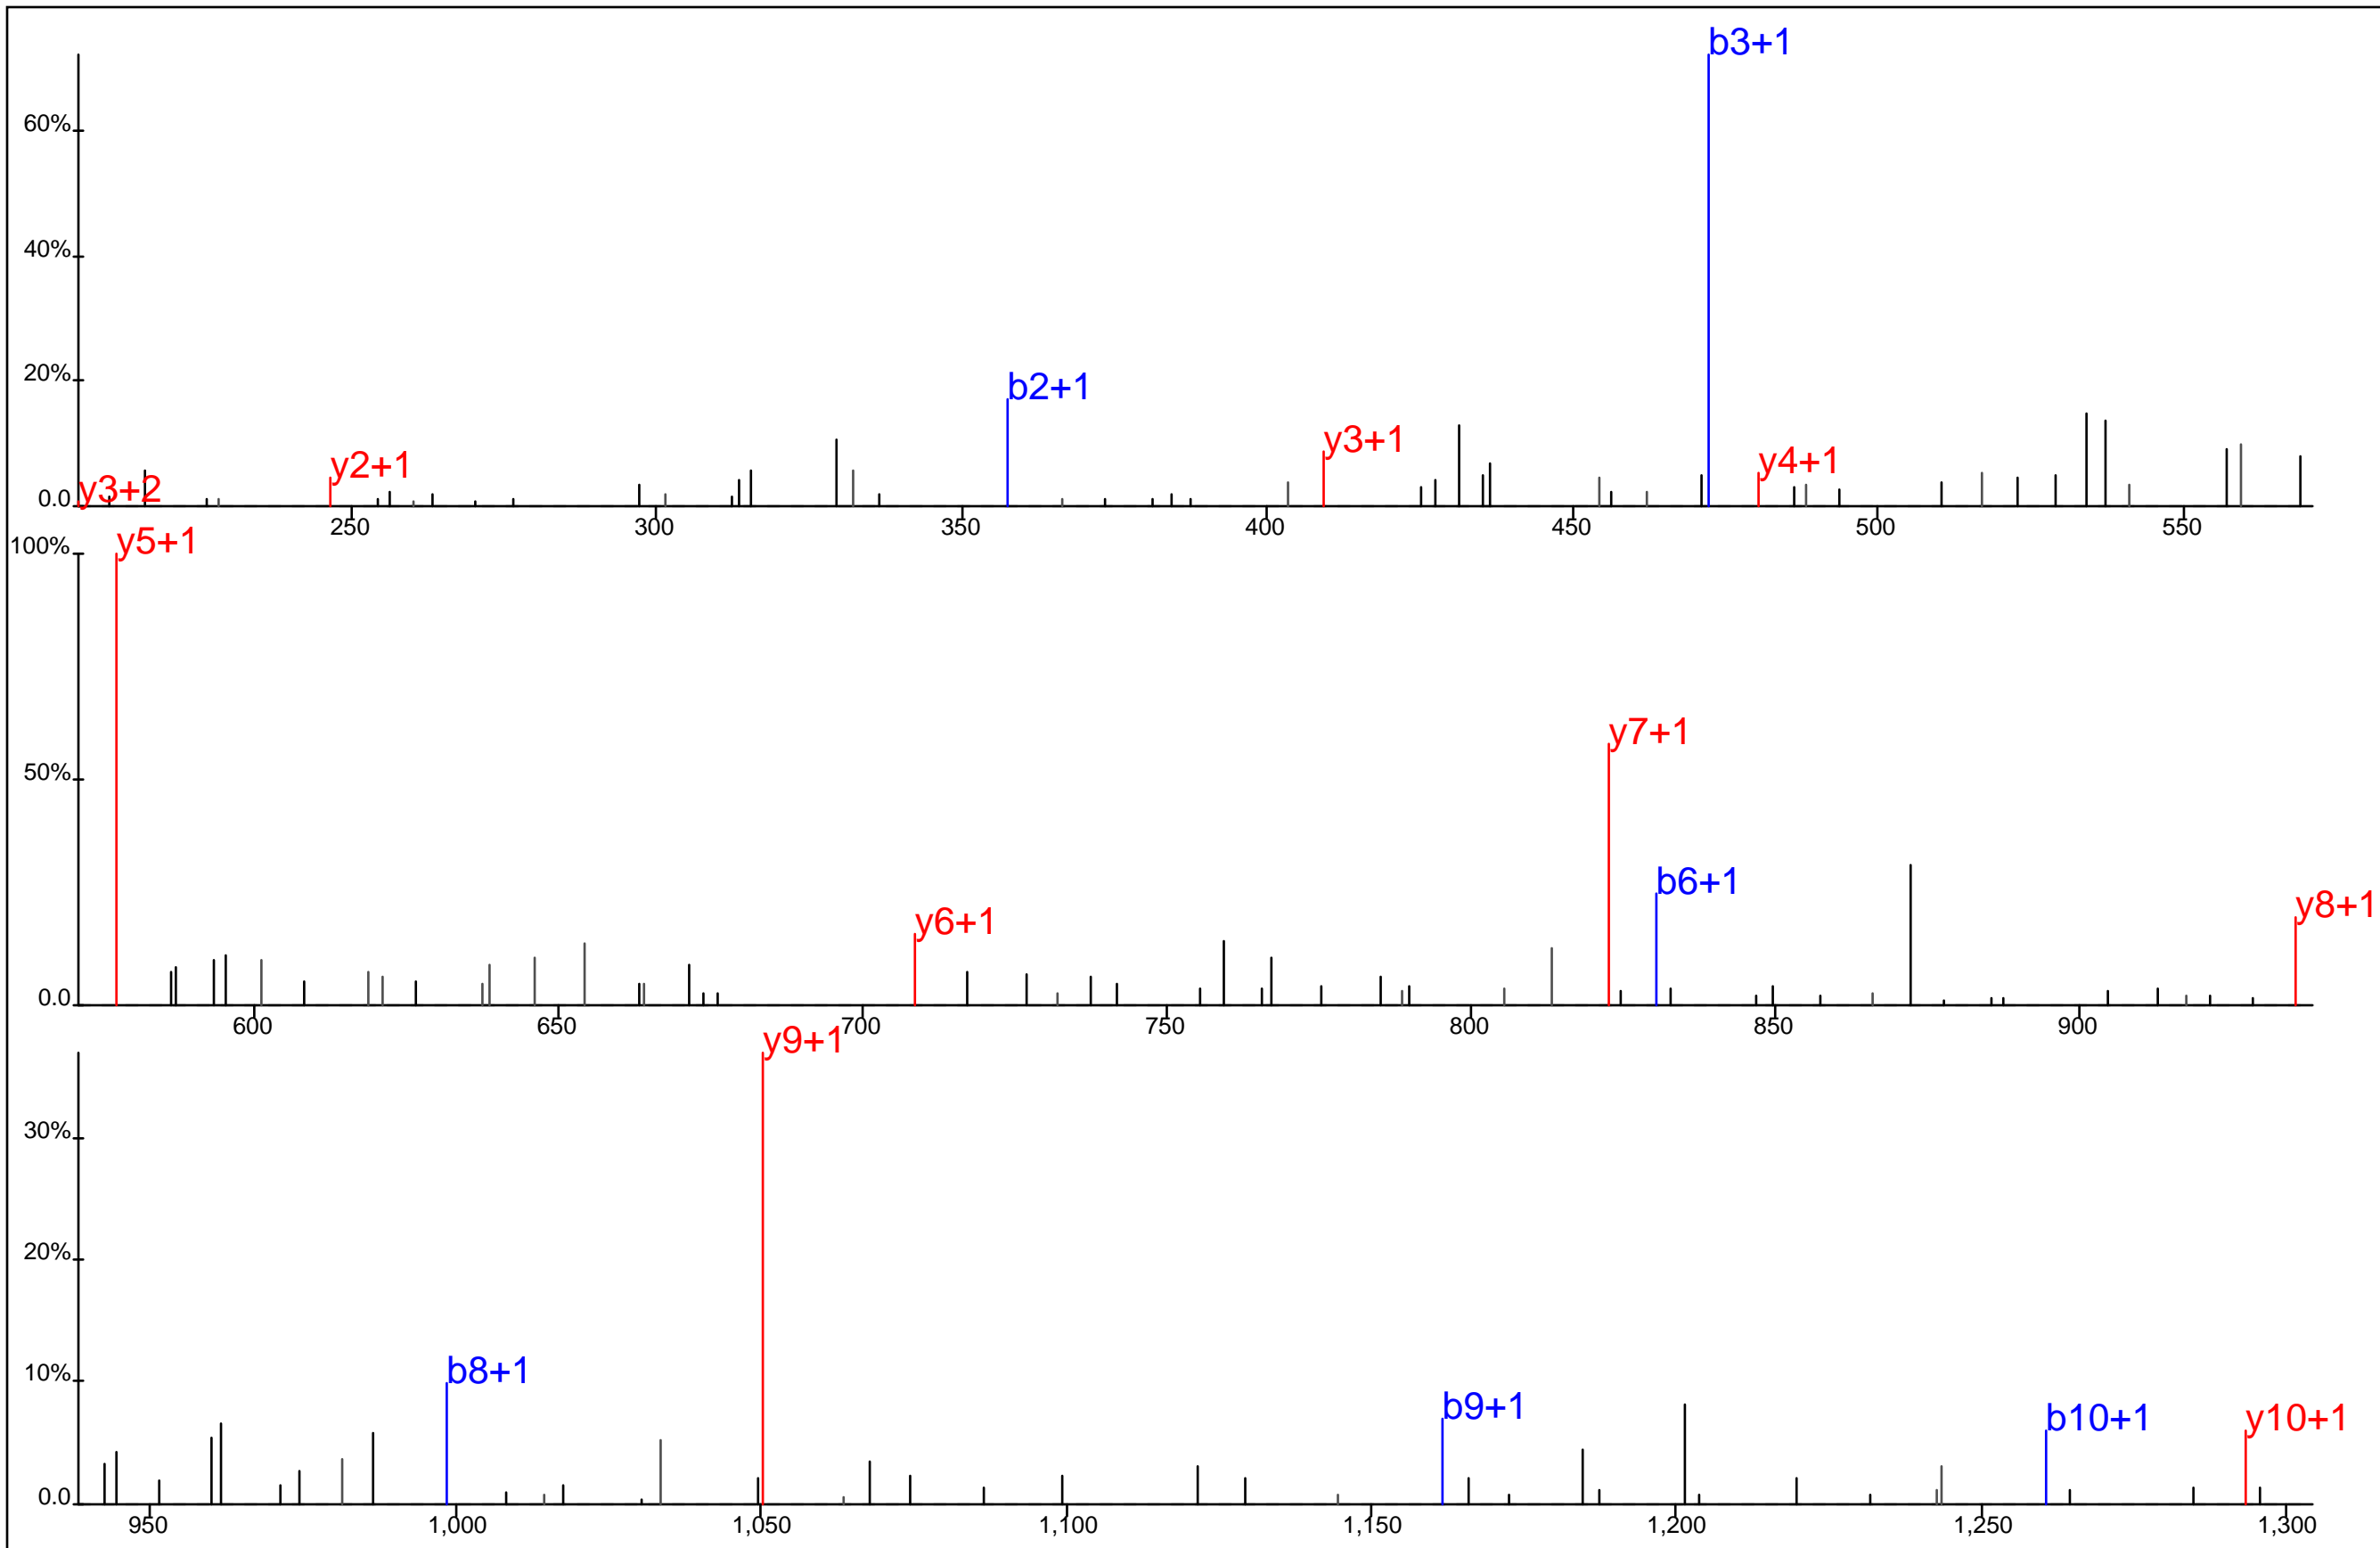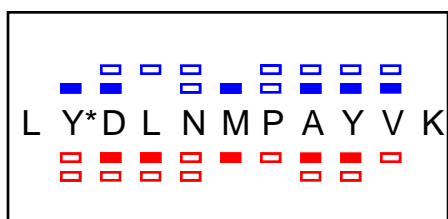

Protein Name: NCK1  
 gi Accession: 0  
 Precursor Mass: 703.8238+2  
 Delta Mass: 1.581 ppm  
 XCorr: 47.71

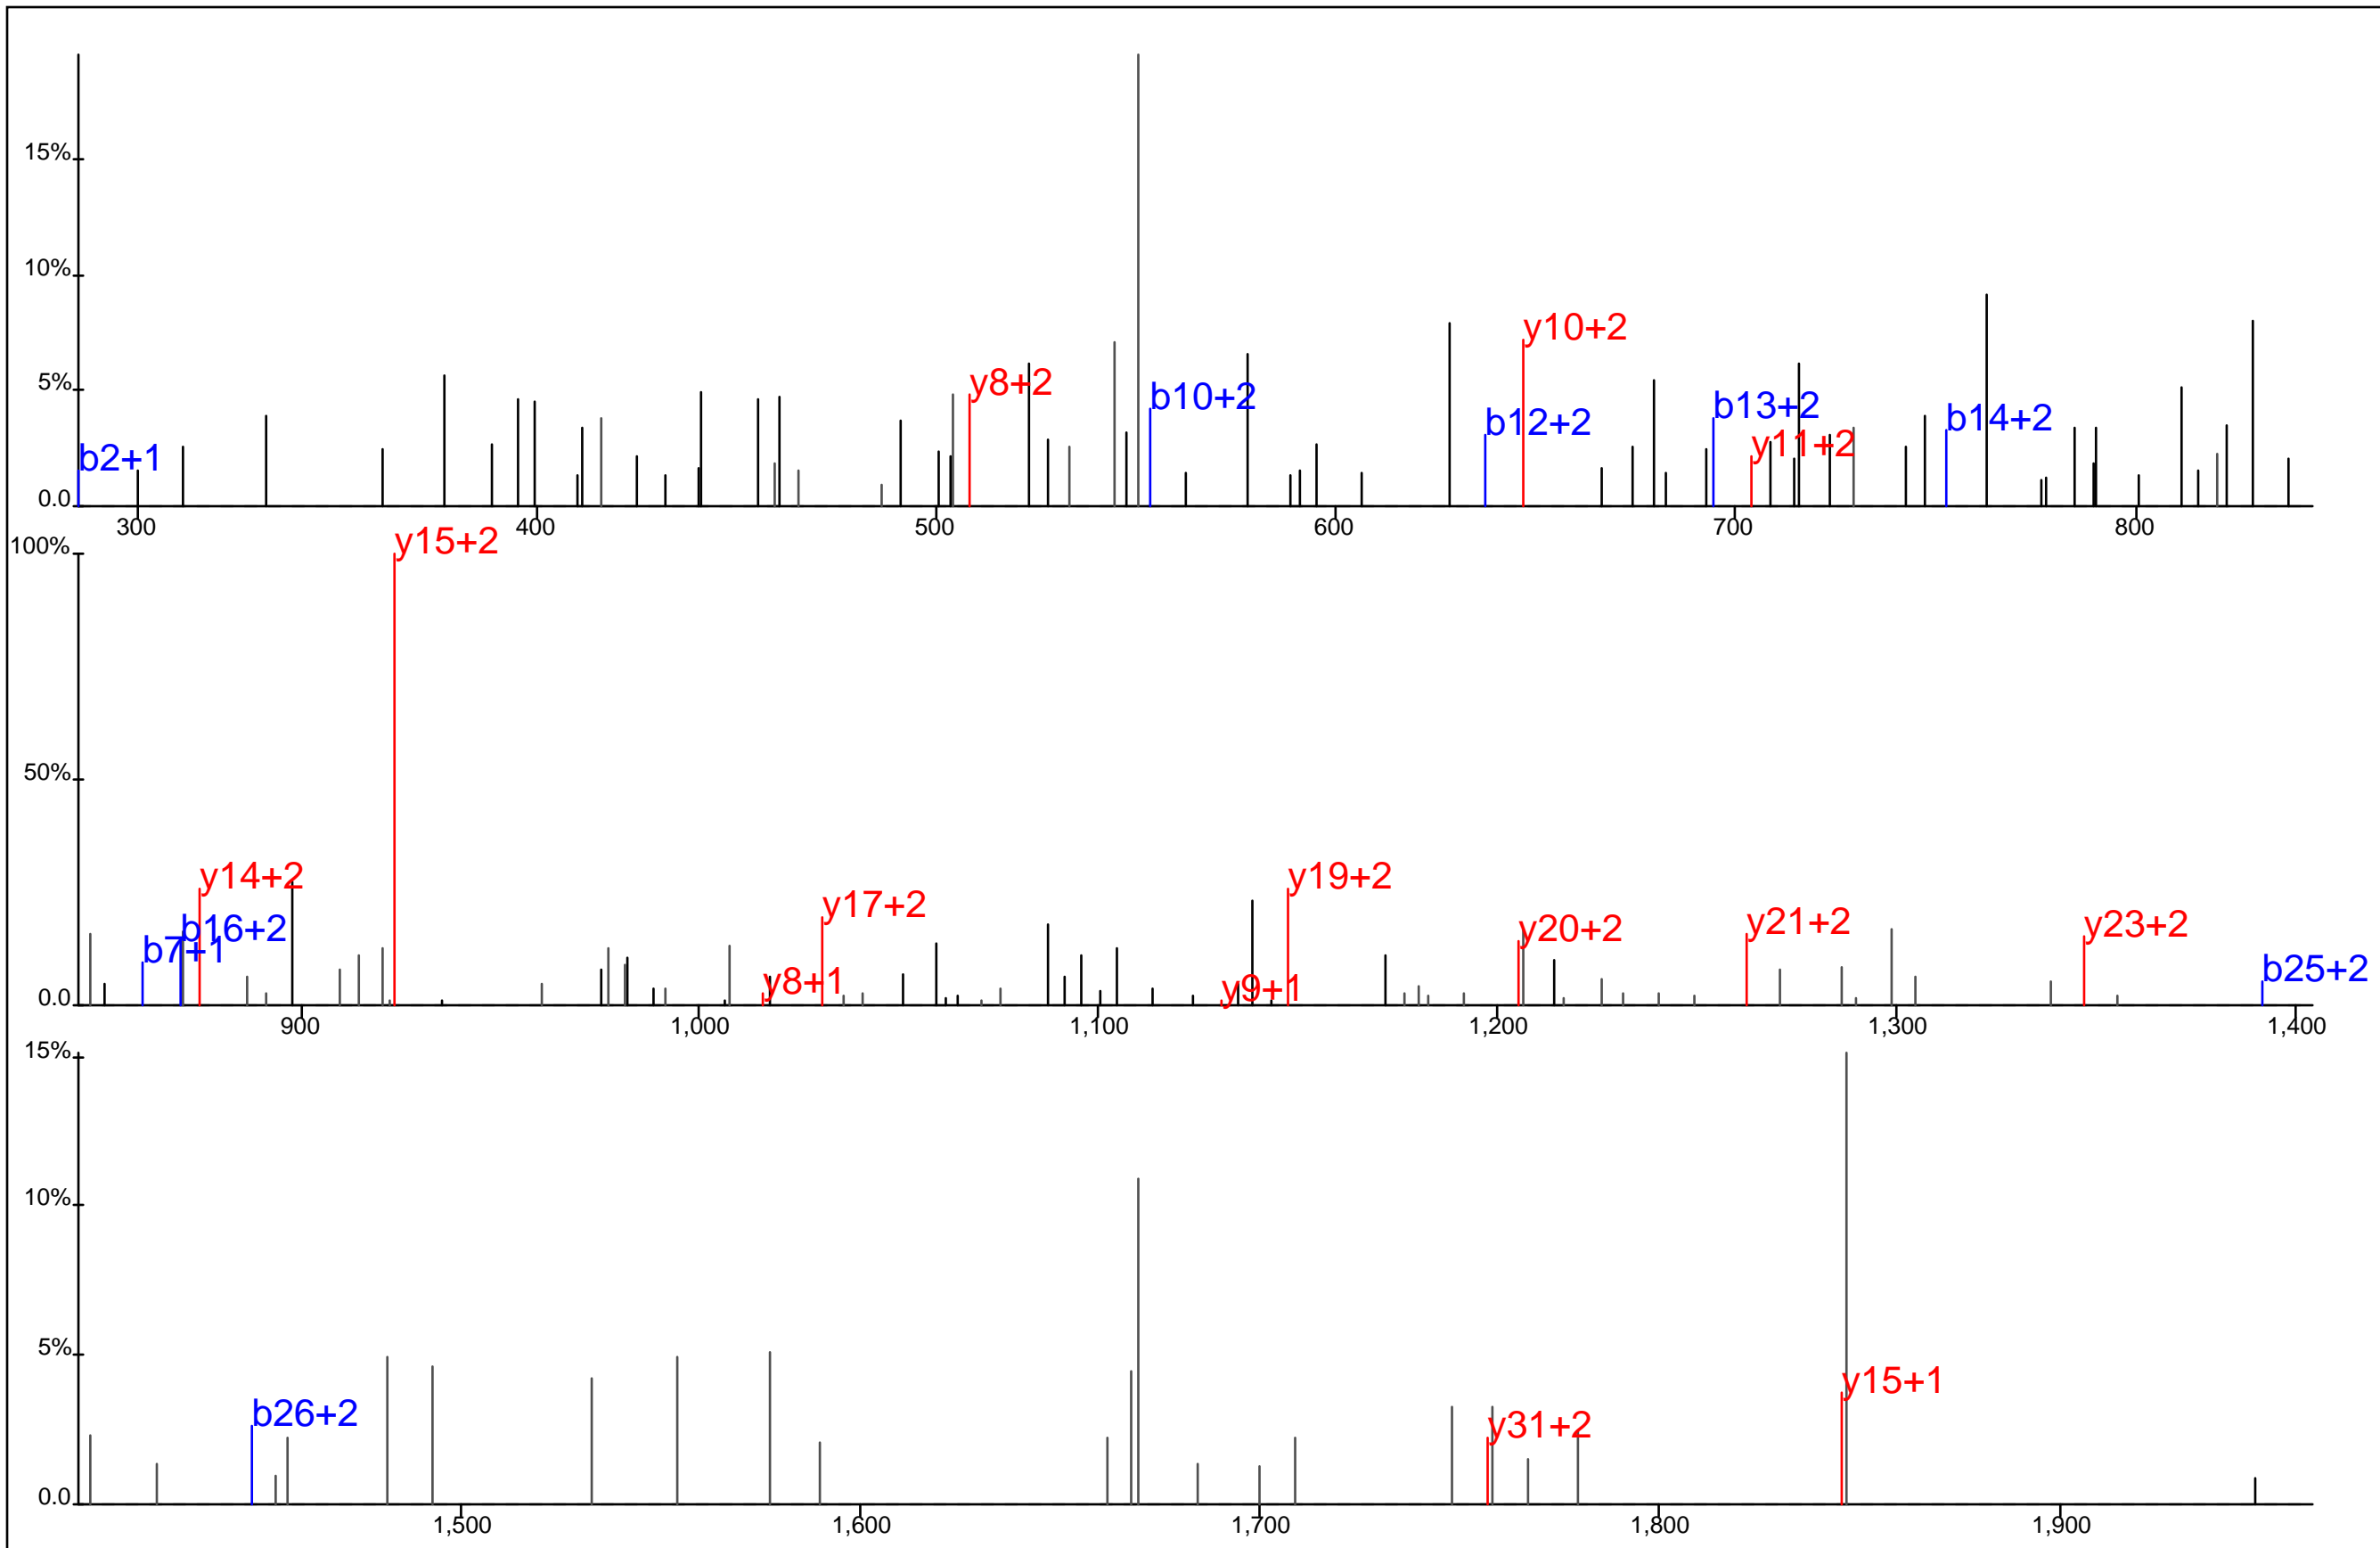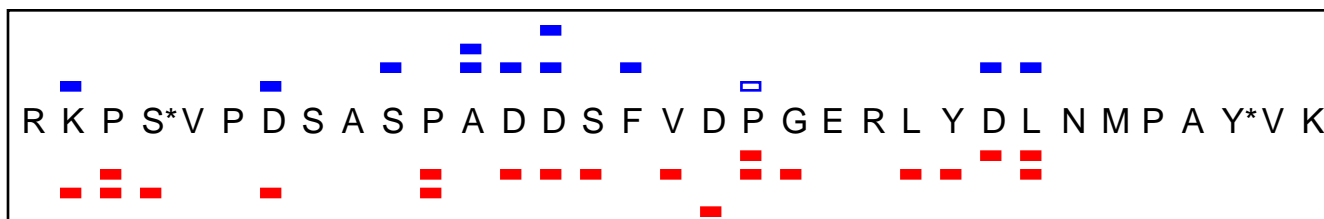

Protein Name: NCK1  
 gi Accession: 0  
 Precursor Mass: 949.9286+4  
 Delta Mass: 1.049 ppm  
 XCorr: 22.56



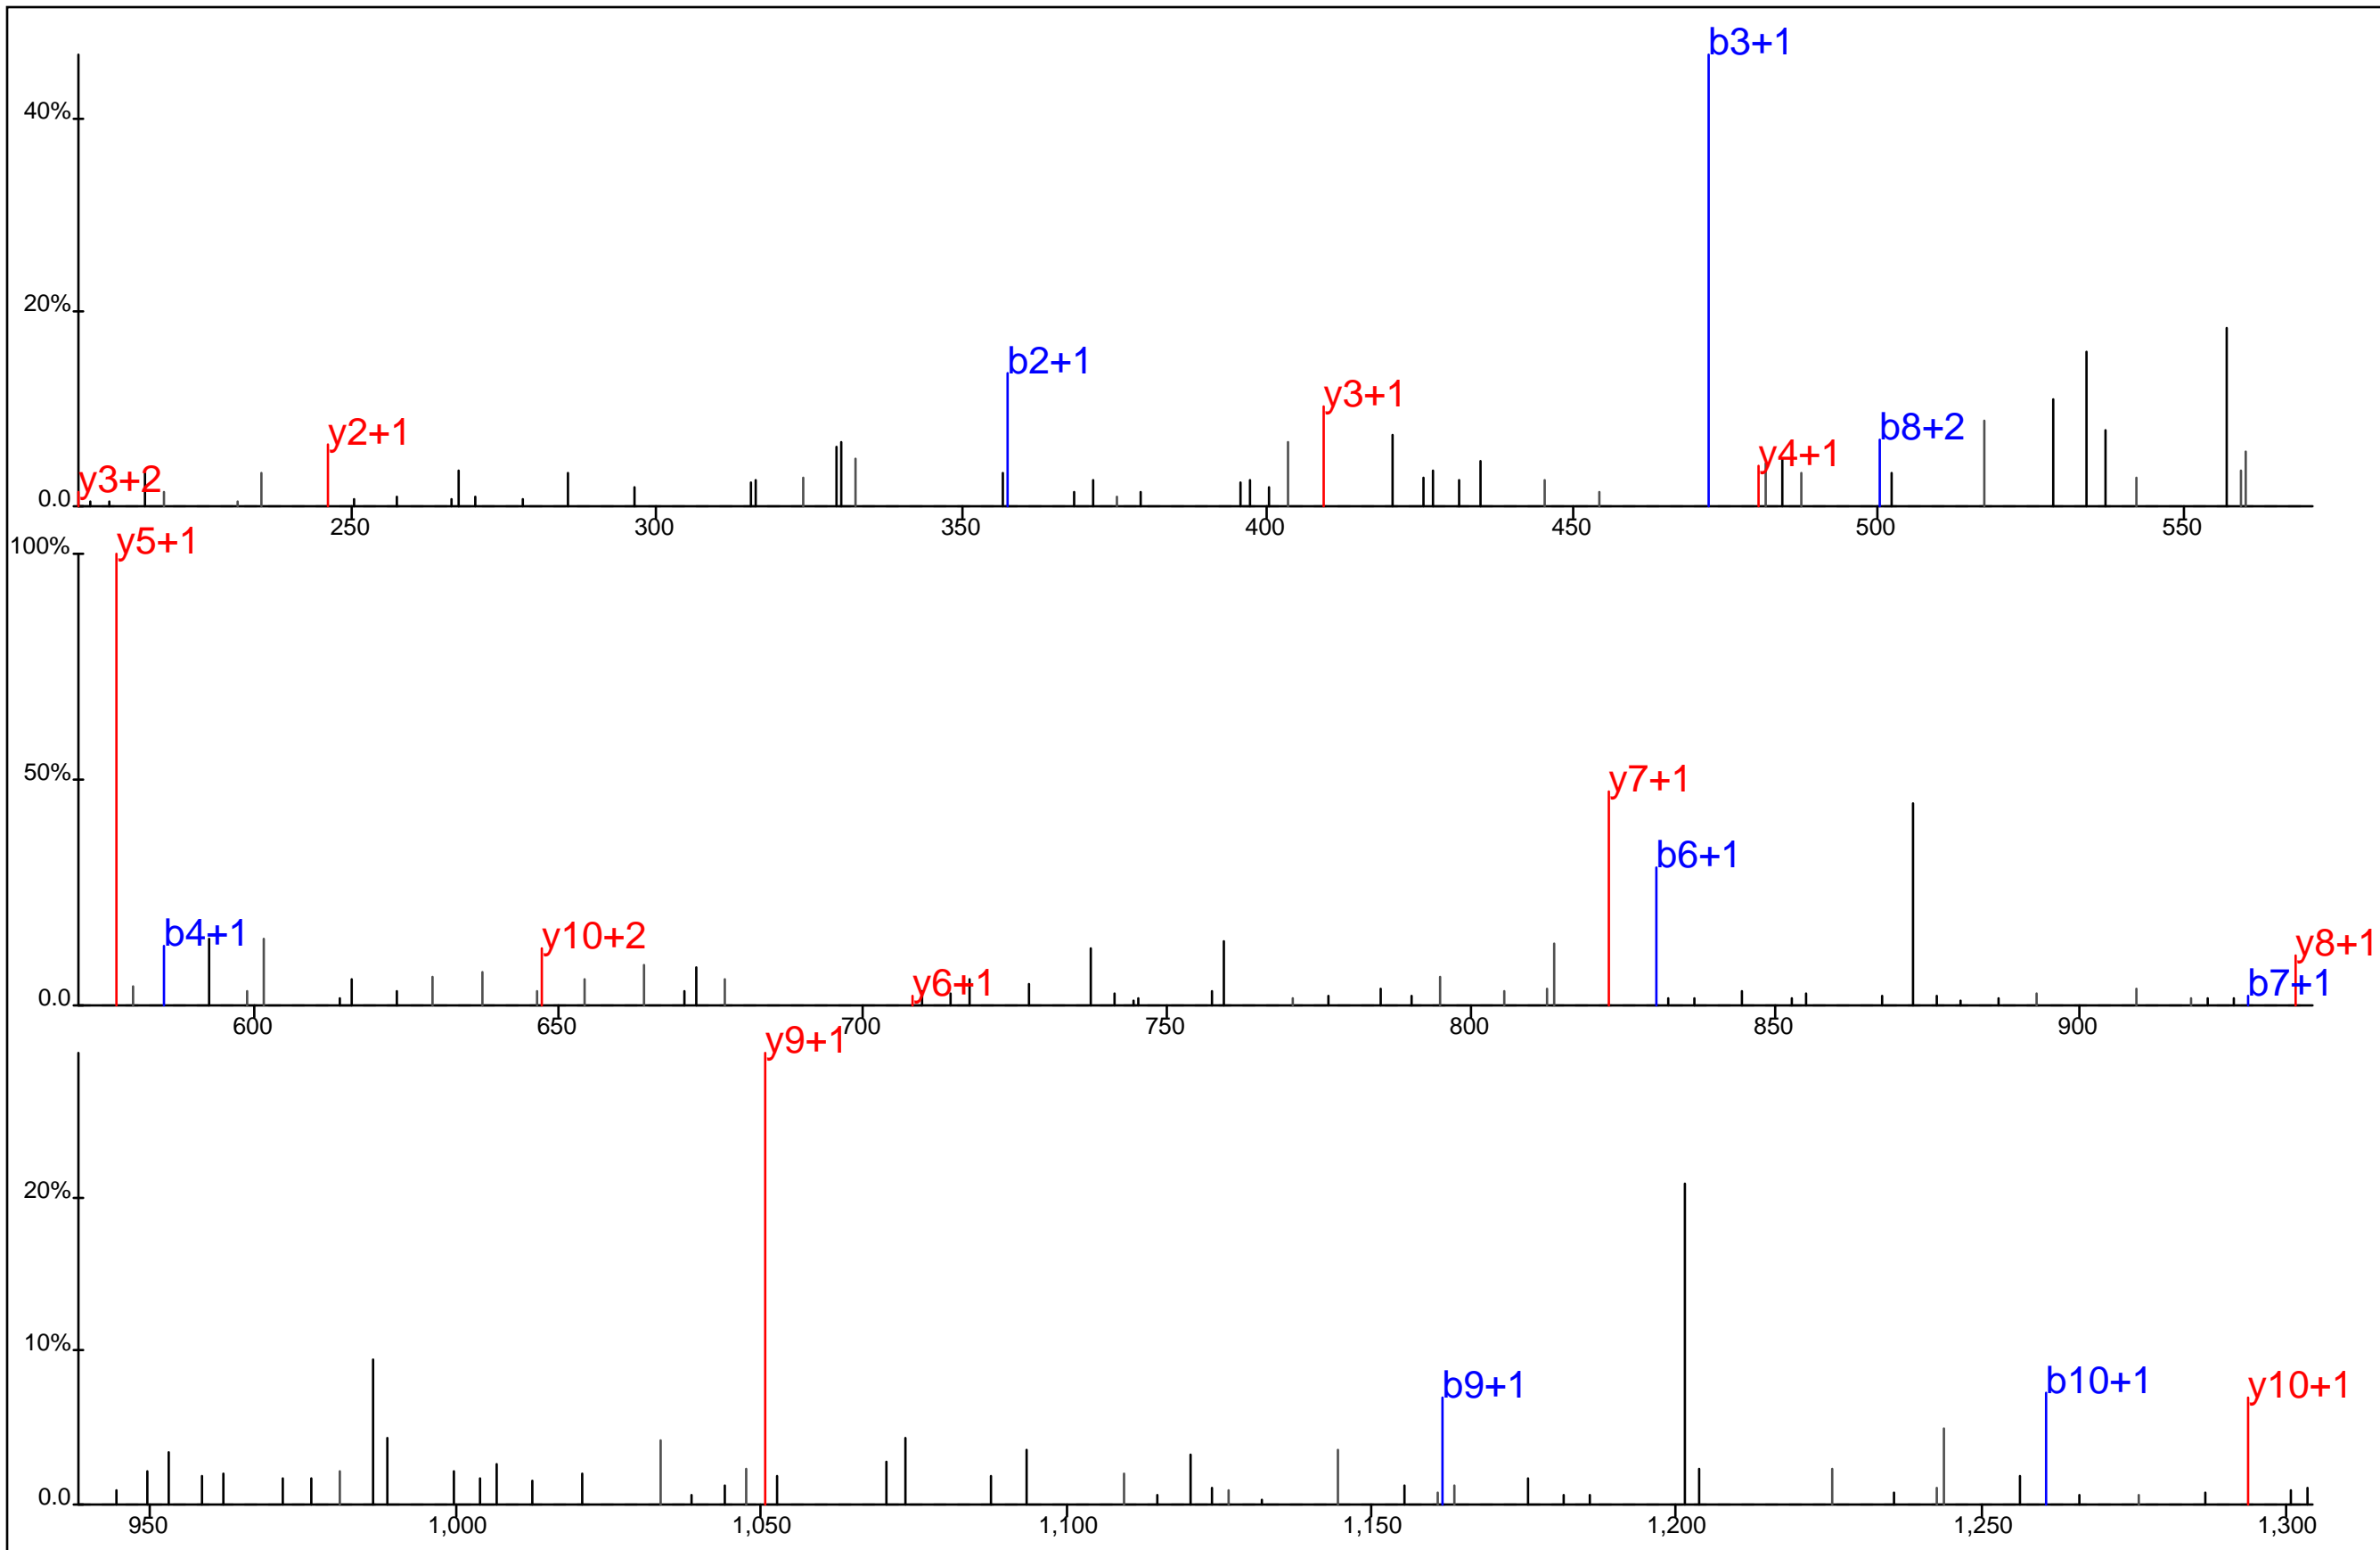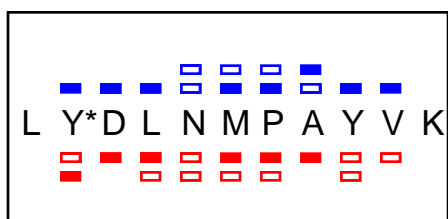

Protein Name: NCK1  
 gi Accession: 0  
 Precursor Mass: 703.8239+2  
 Delta Mass: 1.494 ppm  
 XCorr: 39.59

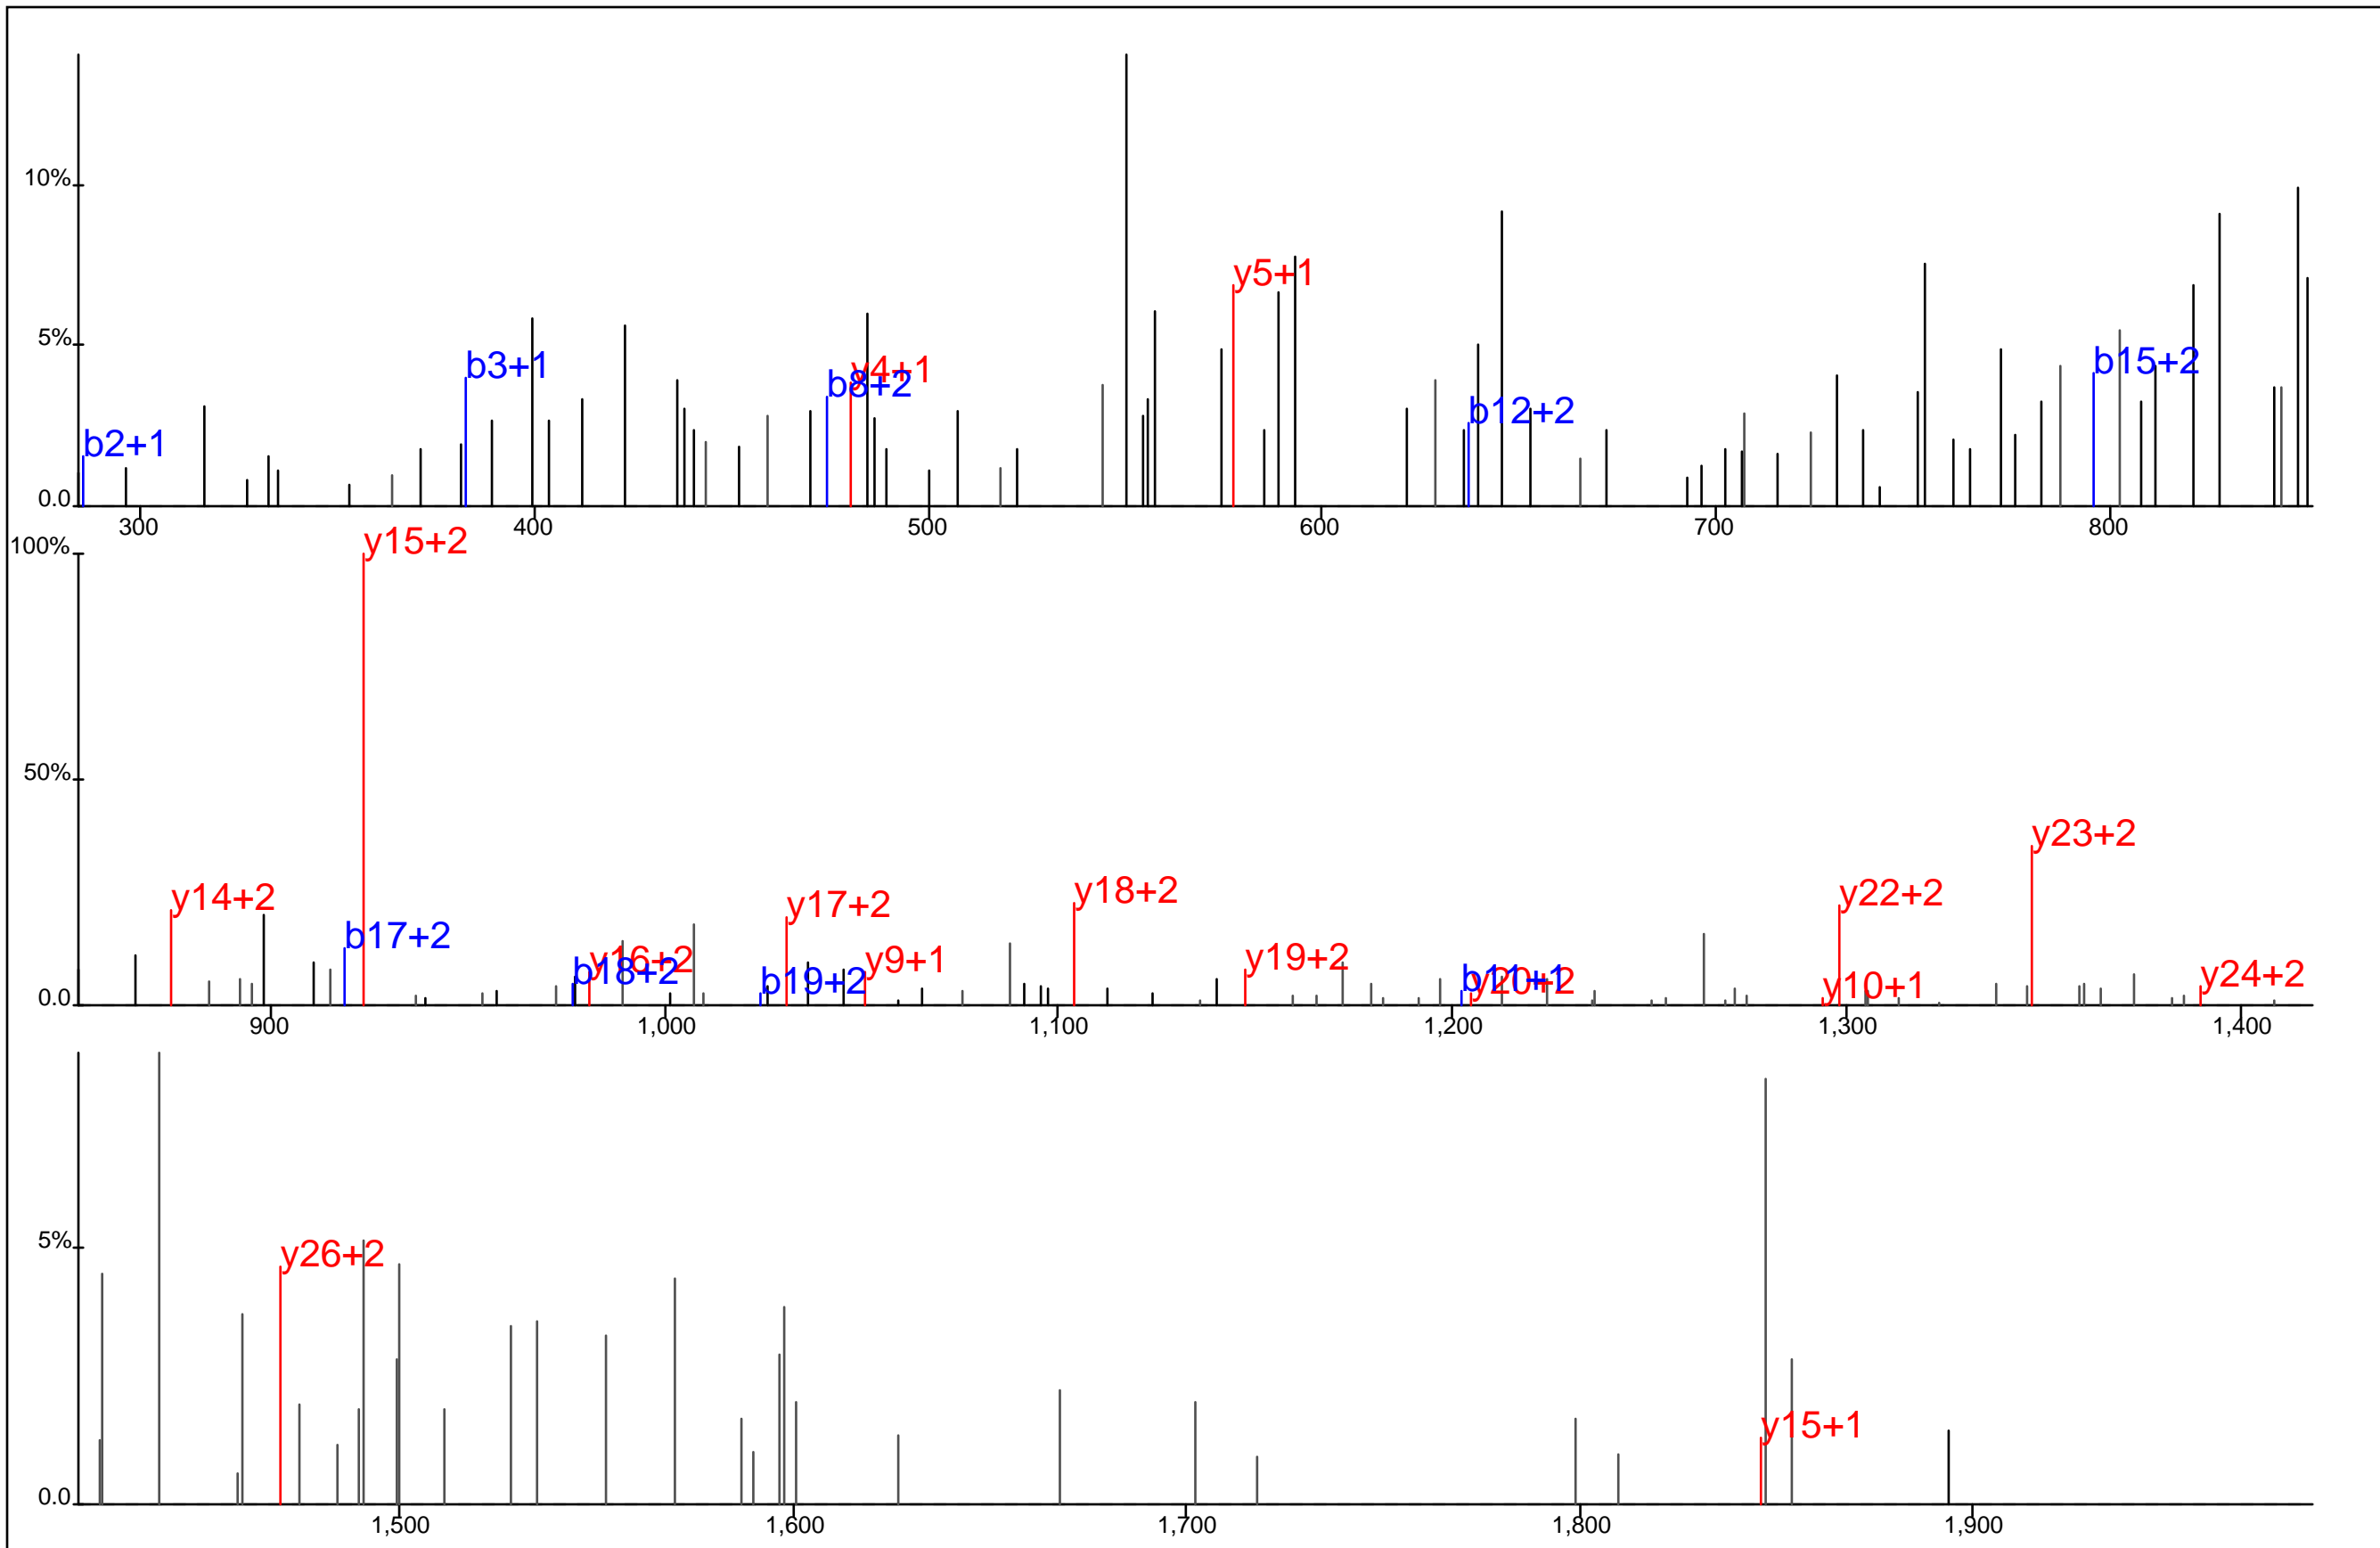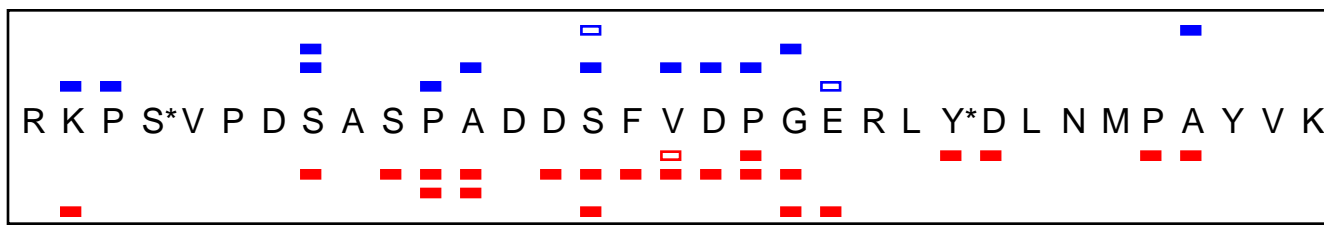

Protein Name: NCK1  
 gi Accession: 0  
 Precursor Mass: 949.9316+4  
 Delta Mass: 2.166 ppm  
 XCorr: 22.15

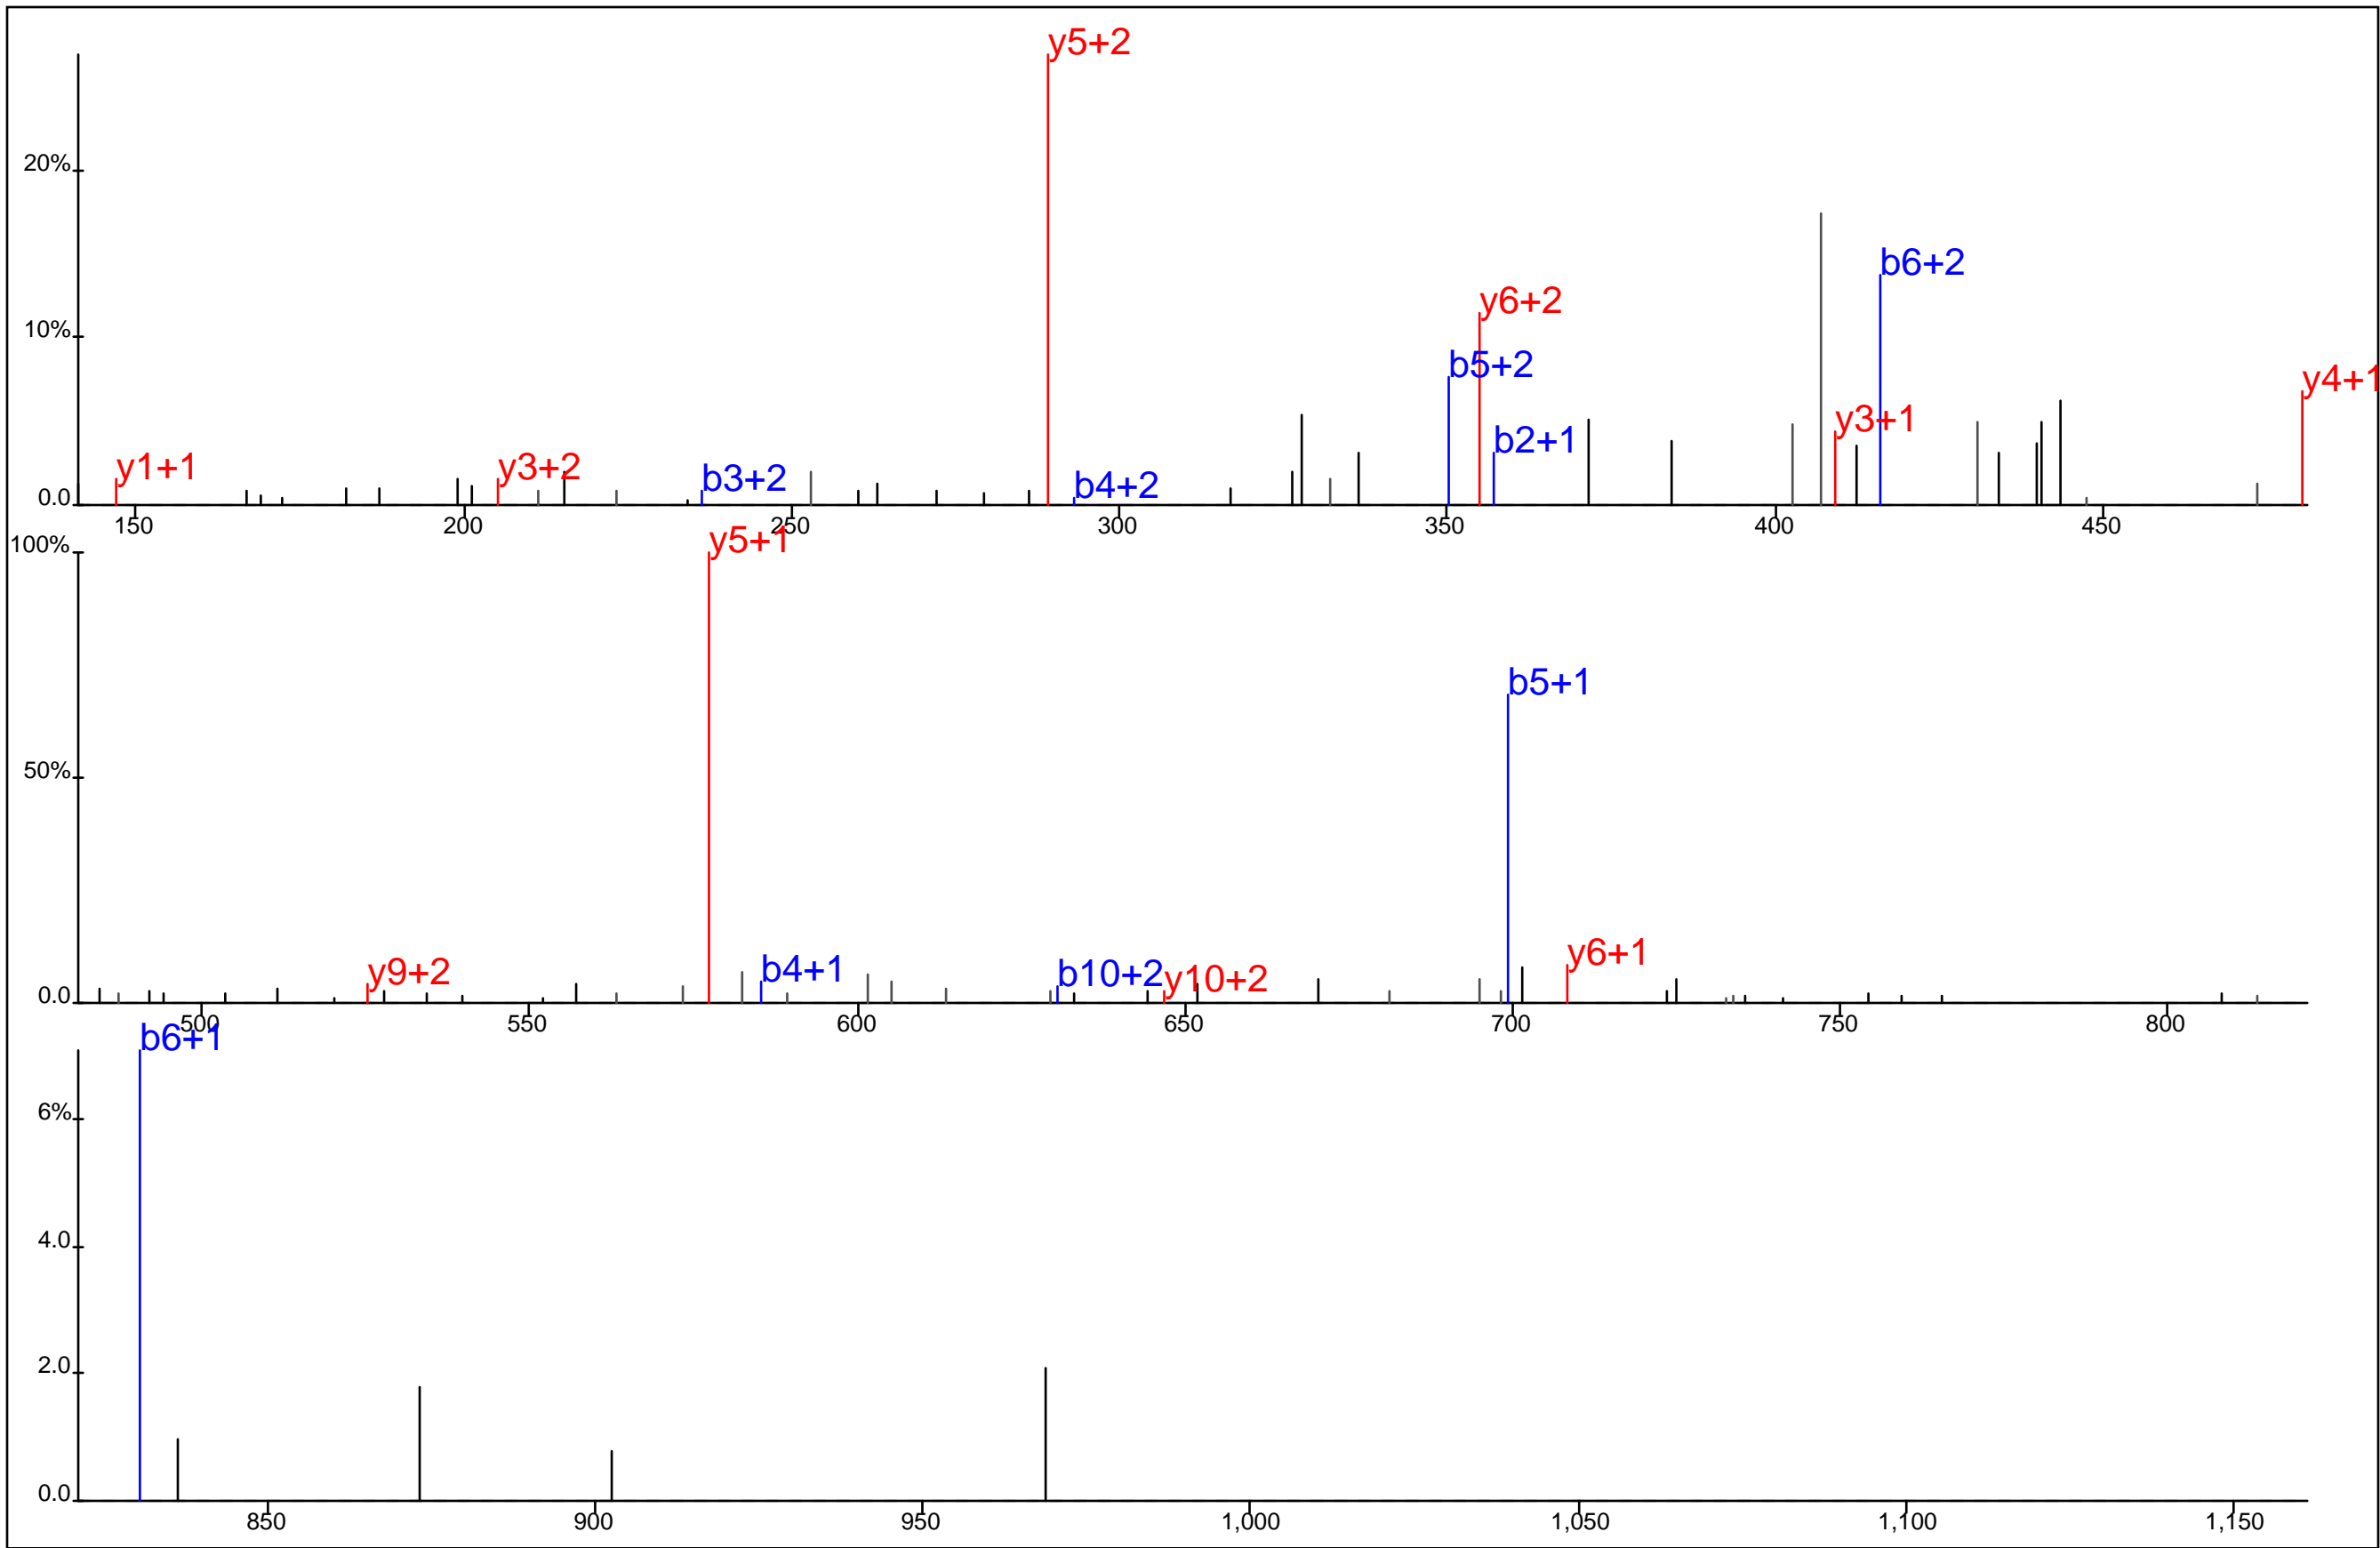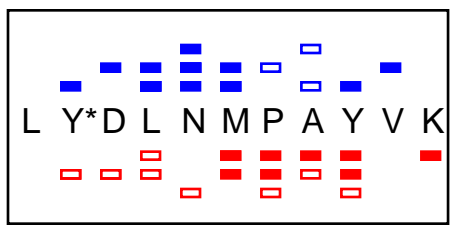

Protein Name: NCK1  
 gi Accession: 0  
 Precursor Mass: 469.5524+3  
 Delta Mass: 0.014 ppm  
 XCorr: 23.6

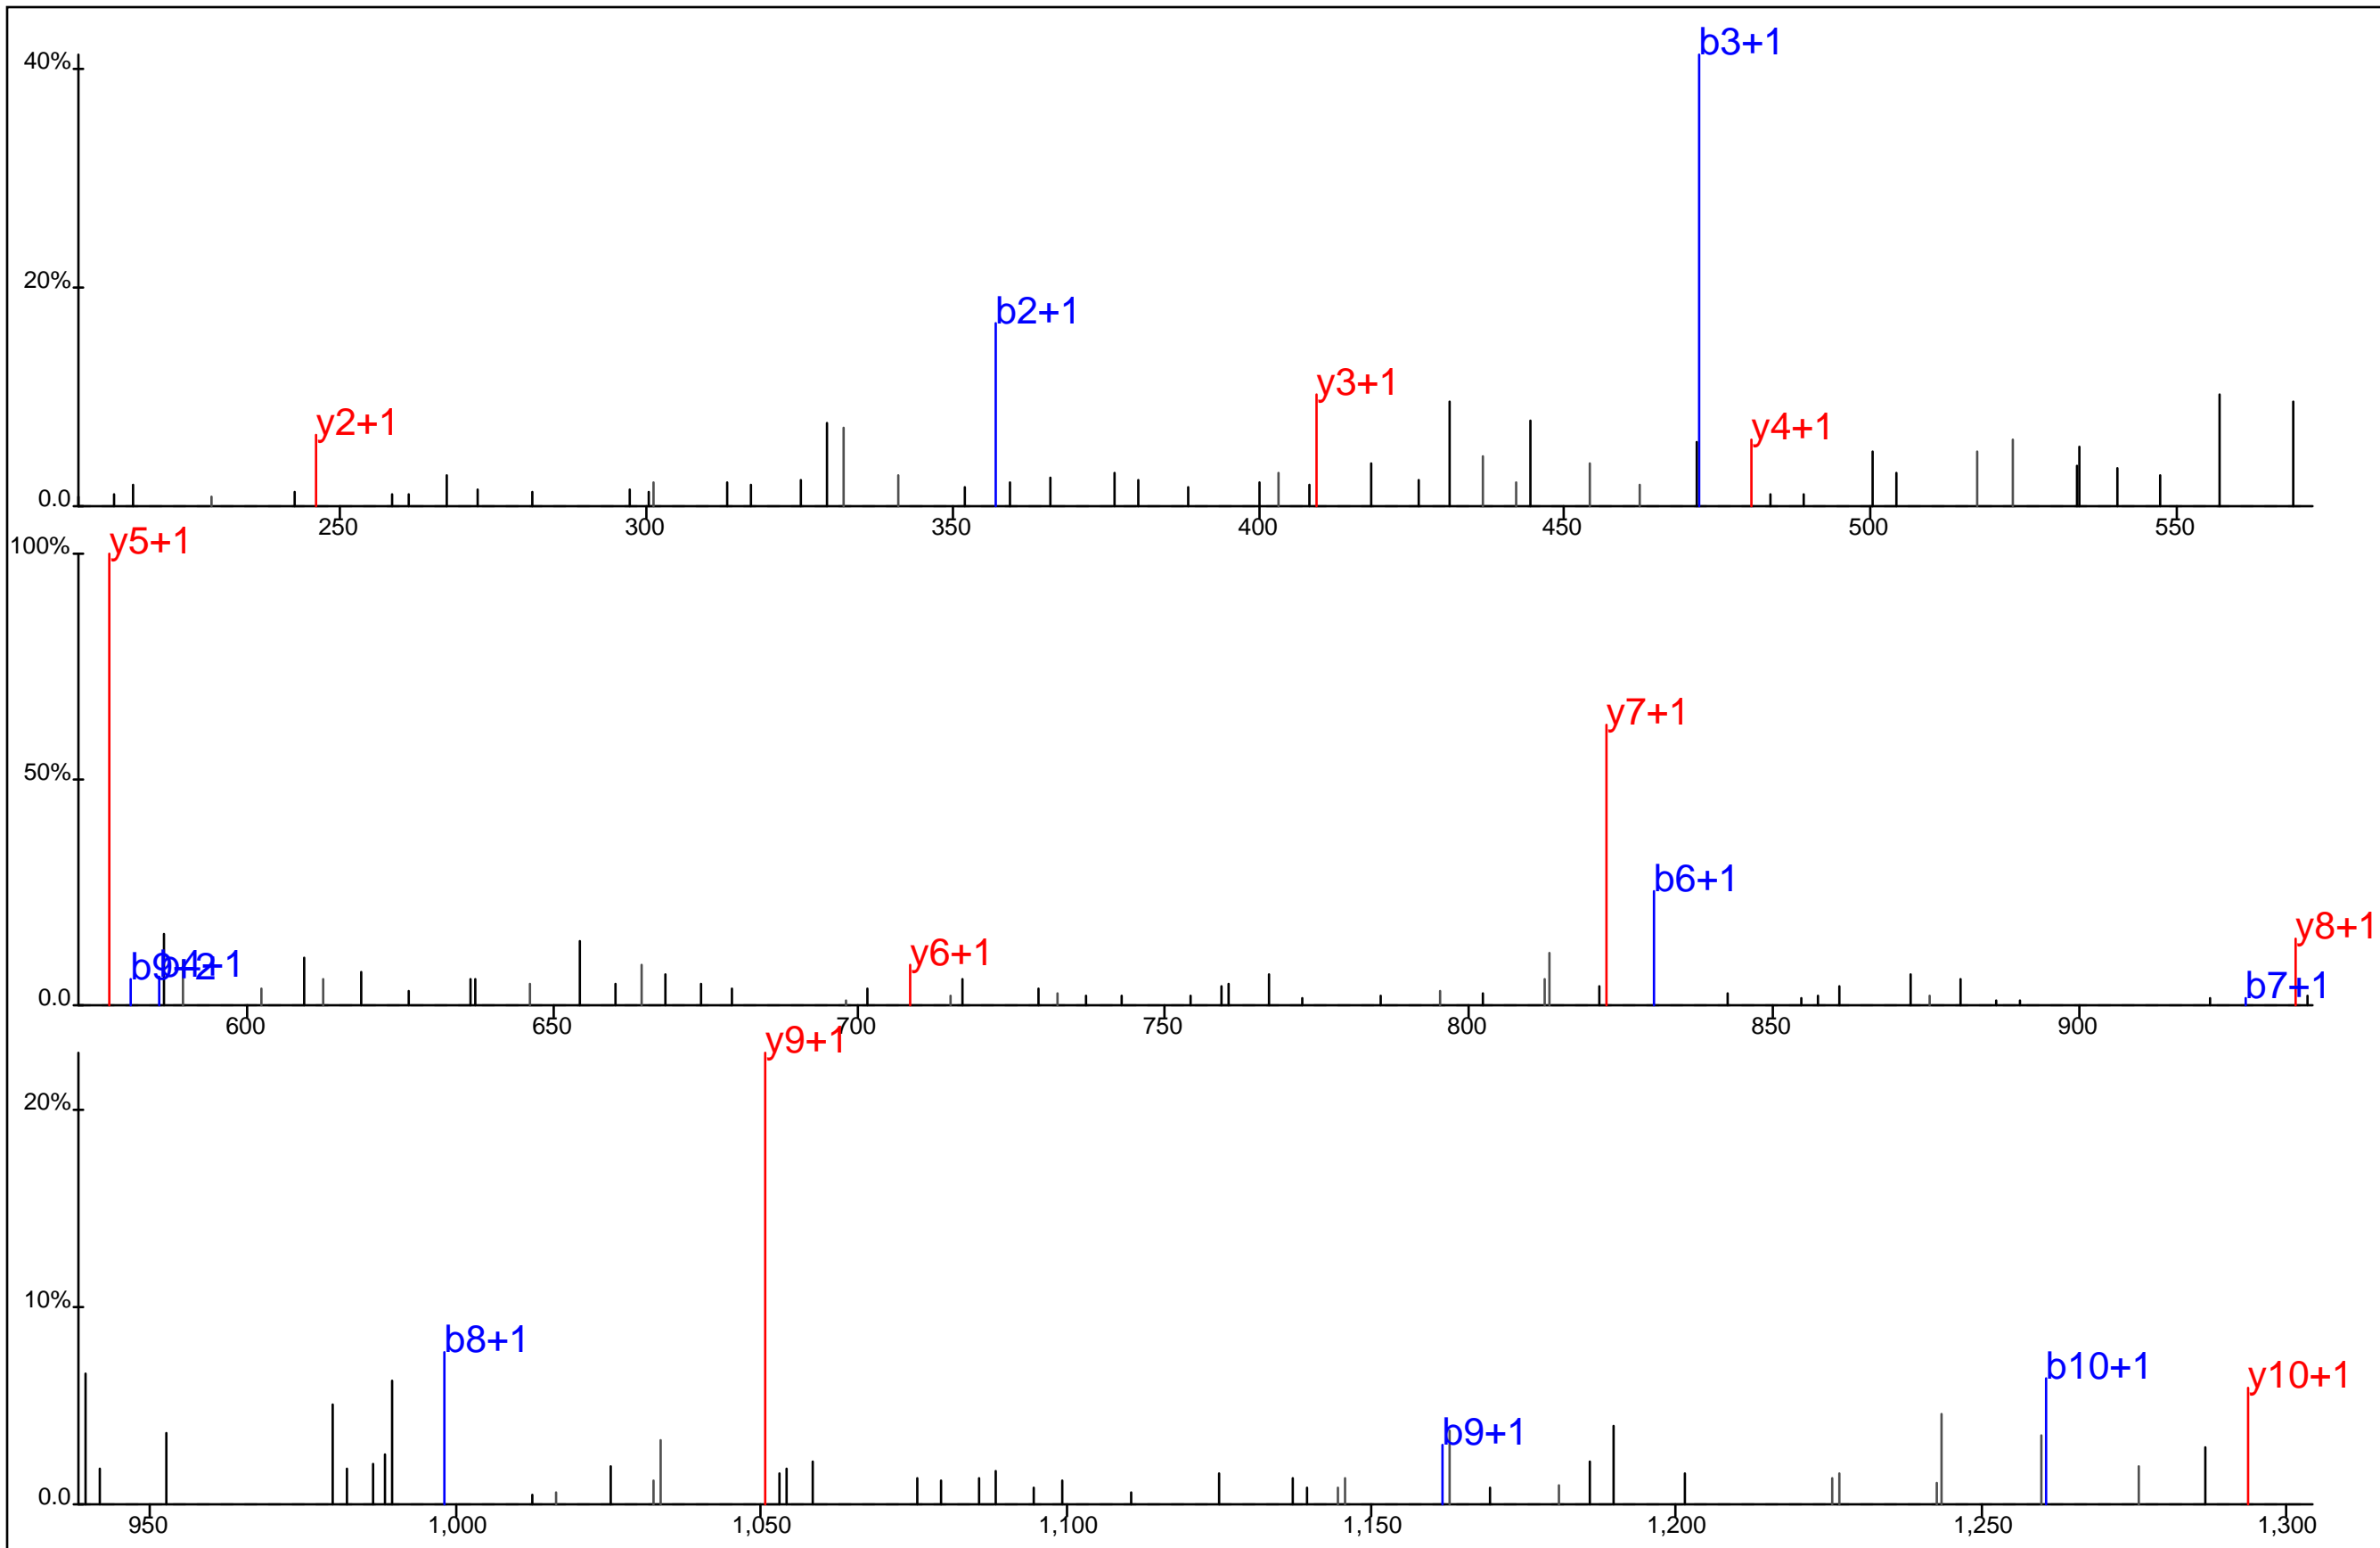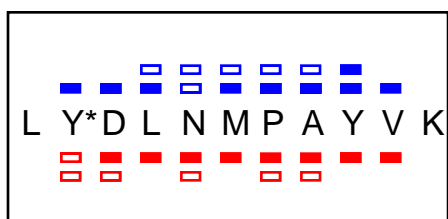

Protein Name: NCK1  
 gi Accession: 0  
 Precursor Mass: 703.8235+2  
 Delta Mass: 2.016 ppm  
 XCorr: 57.99





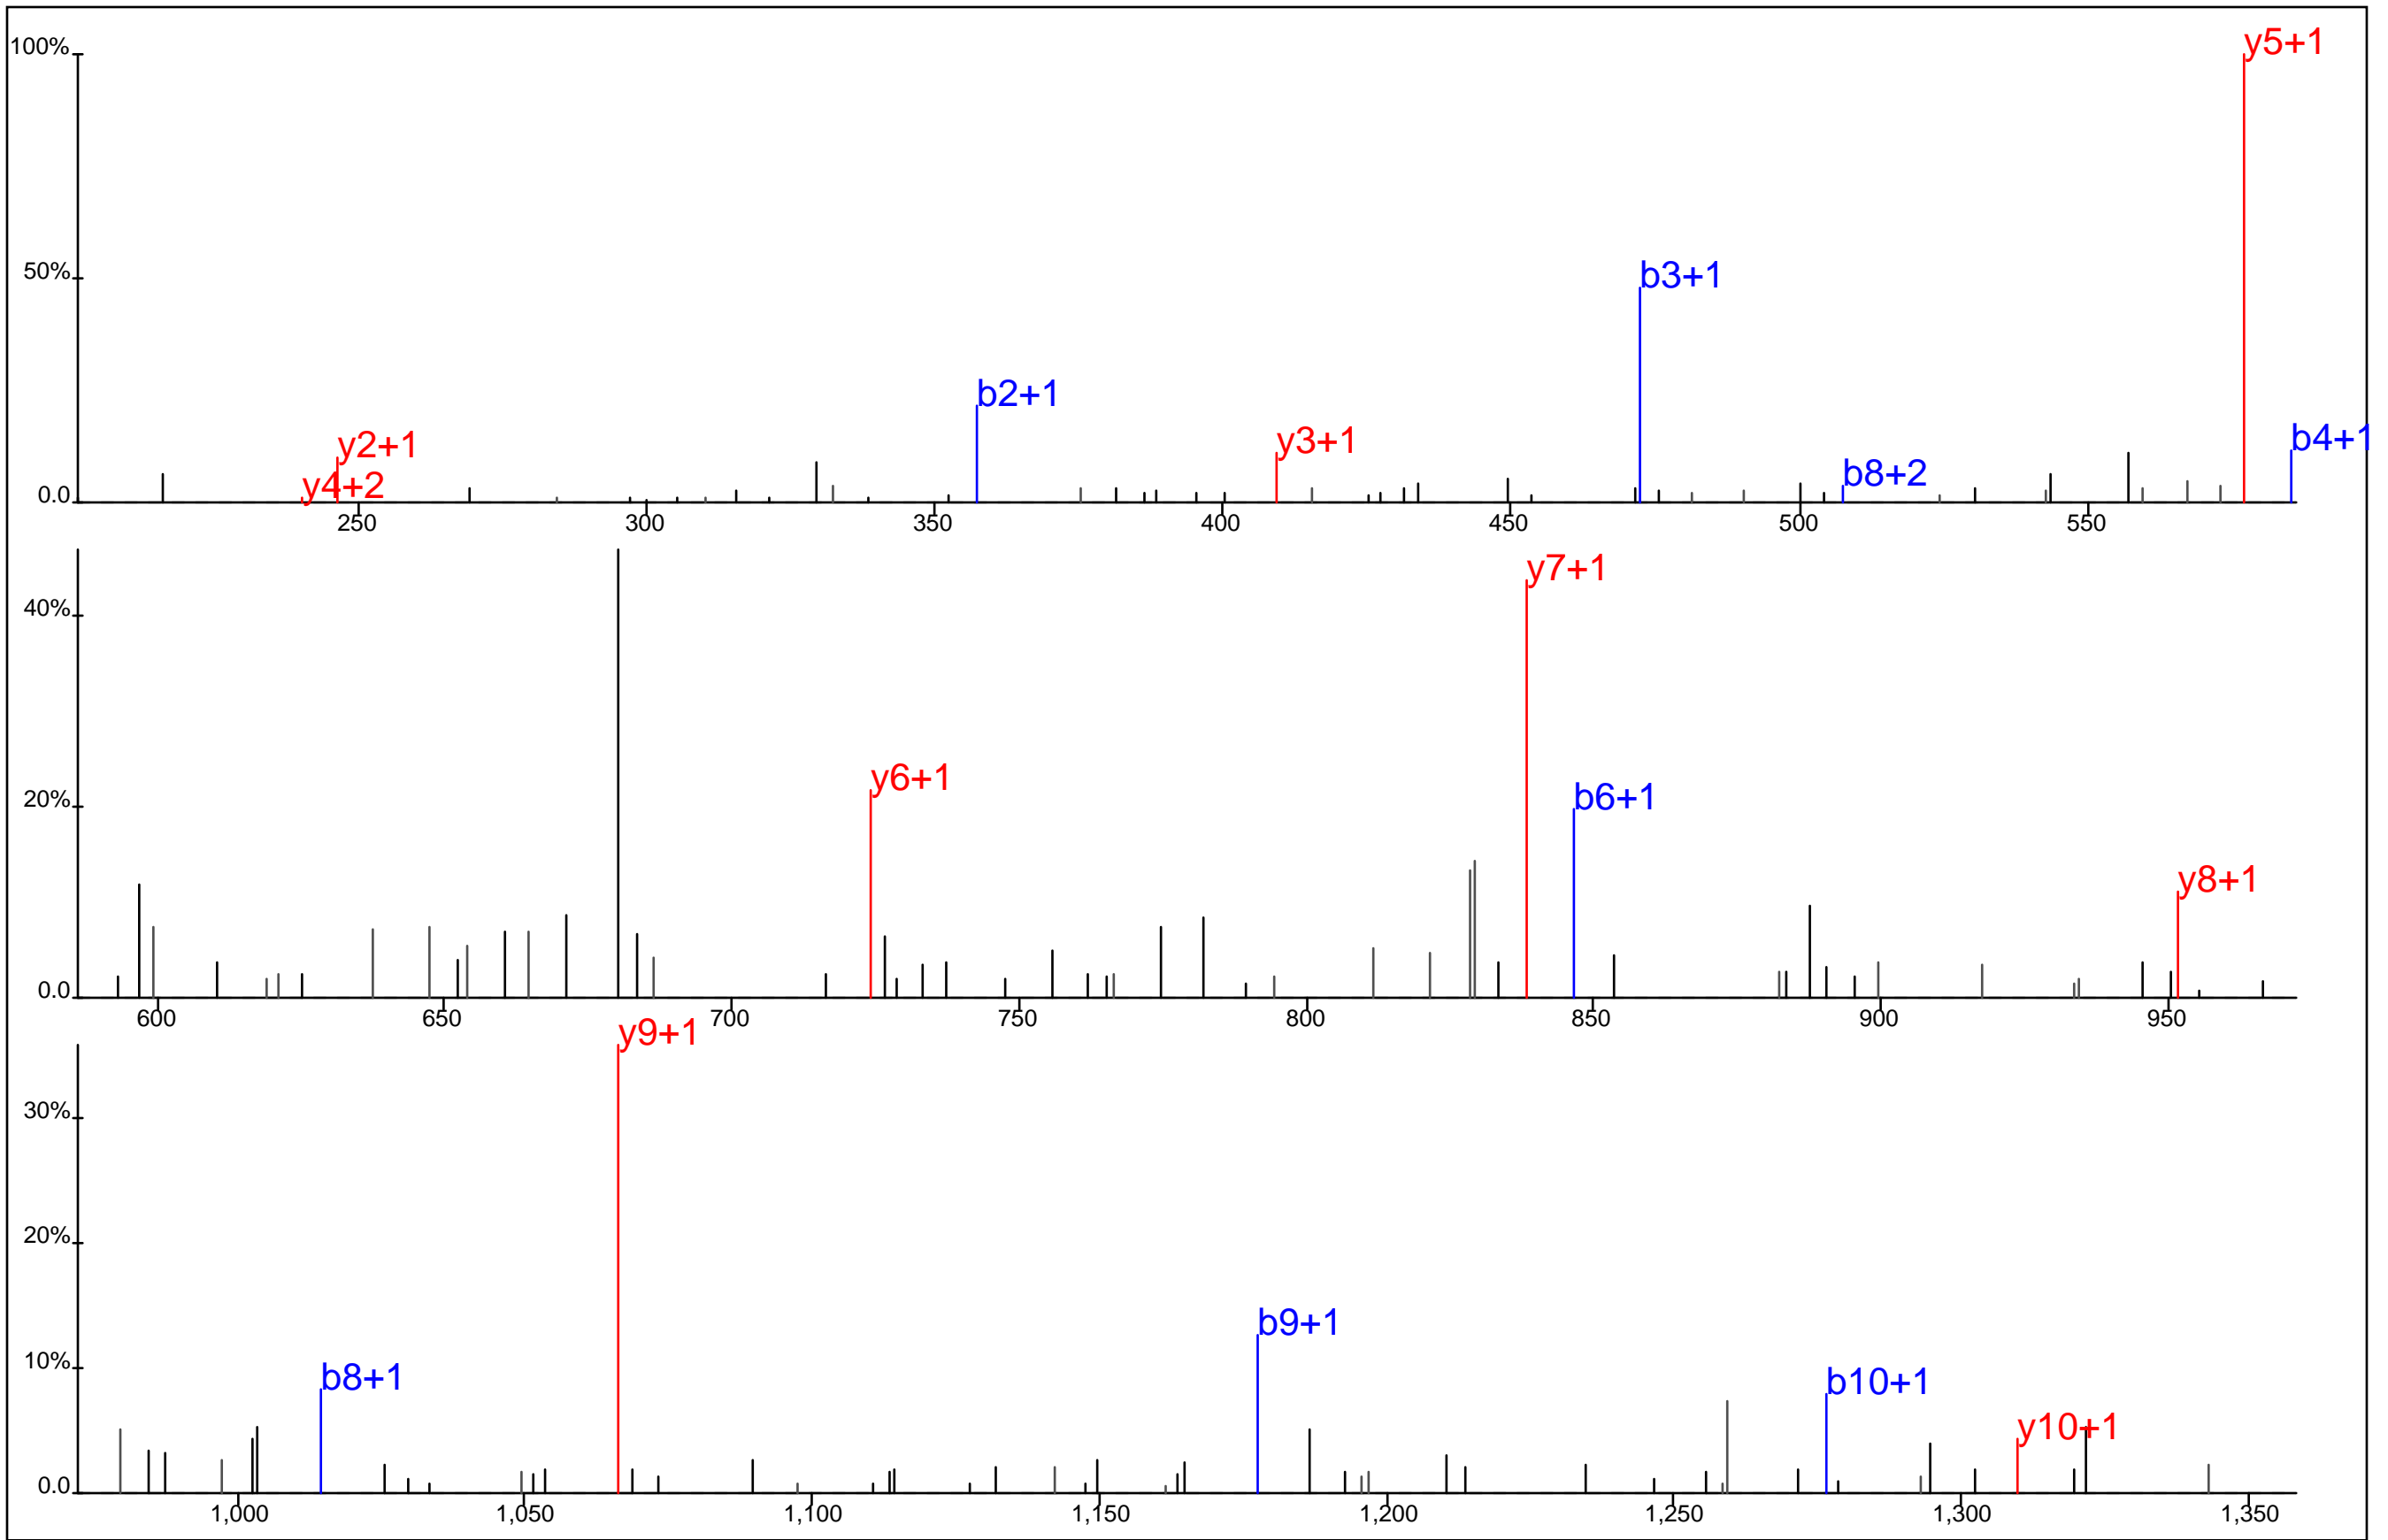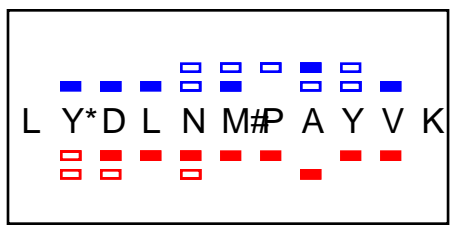

Protein Name: NCK1  
 gi Accession: 0  
 Precursor Mass: 711.8229+2  
 Delta Mass: 0.806 ppm  
 XCorr: 64.35

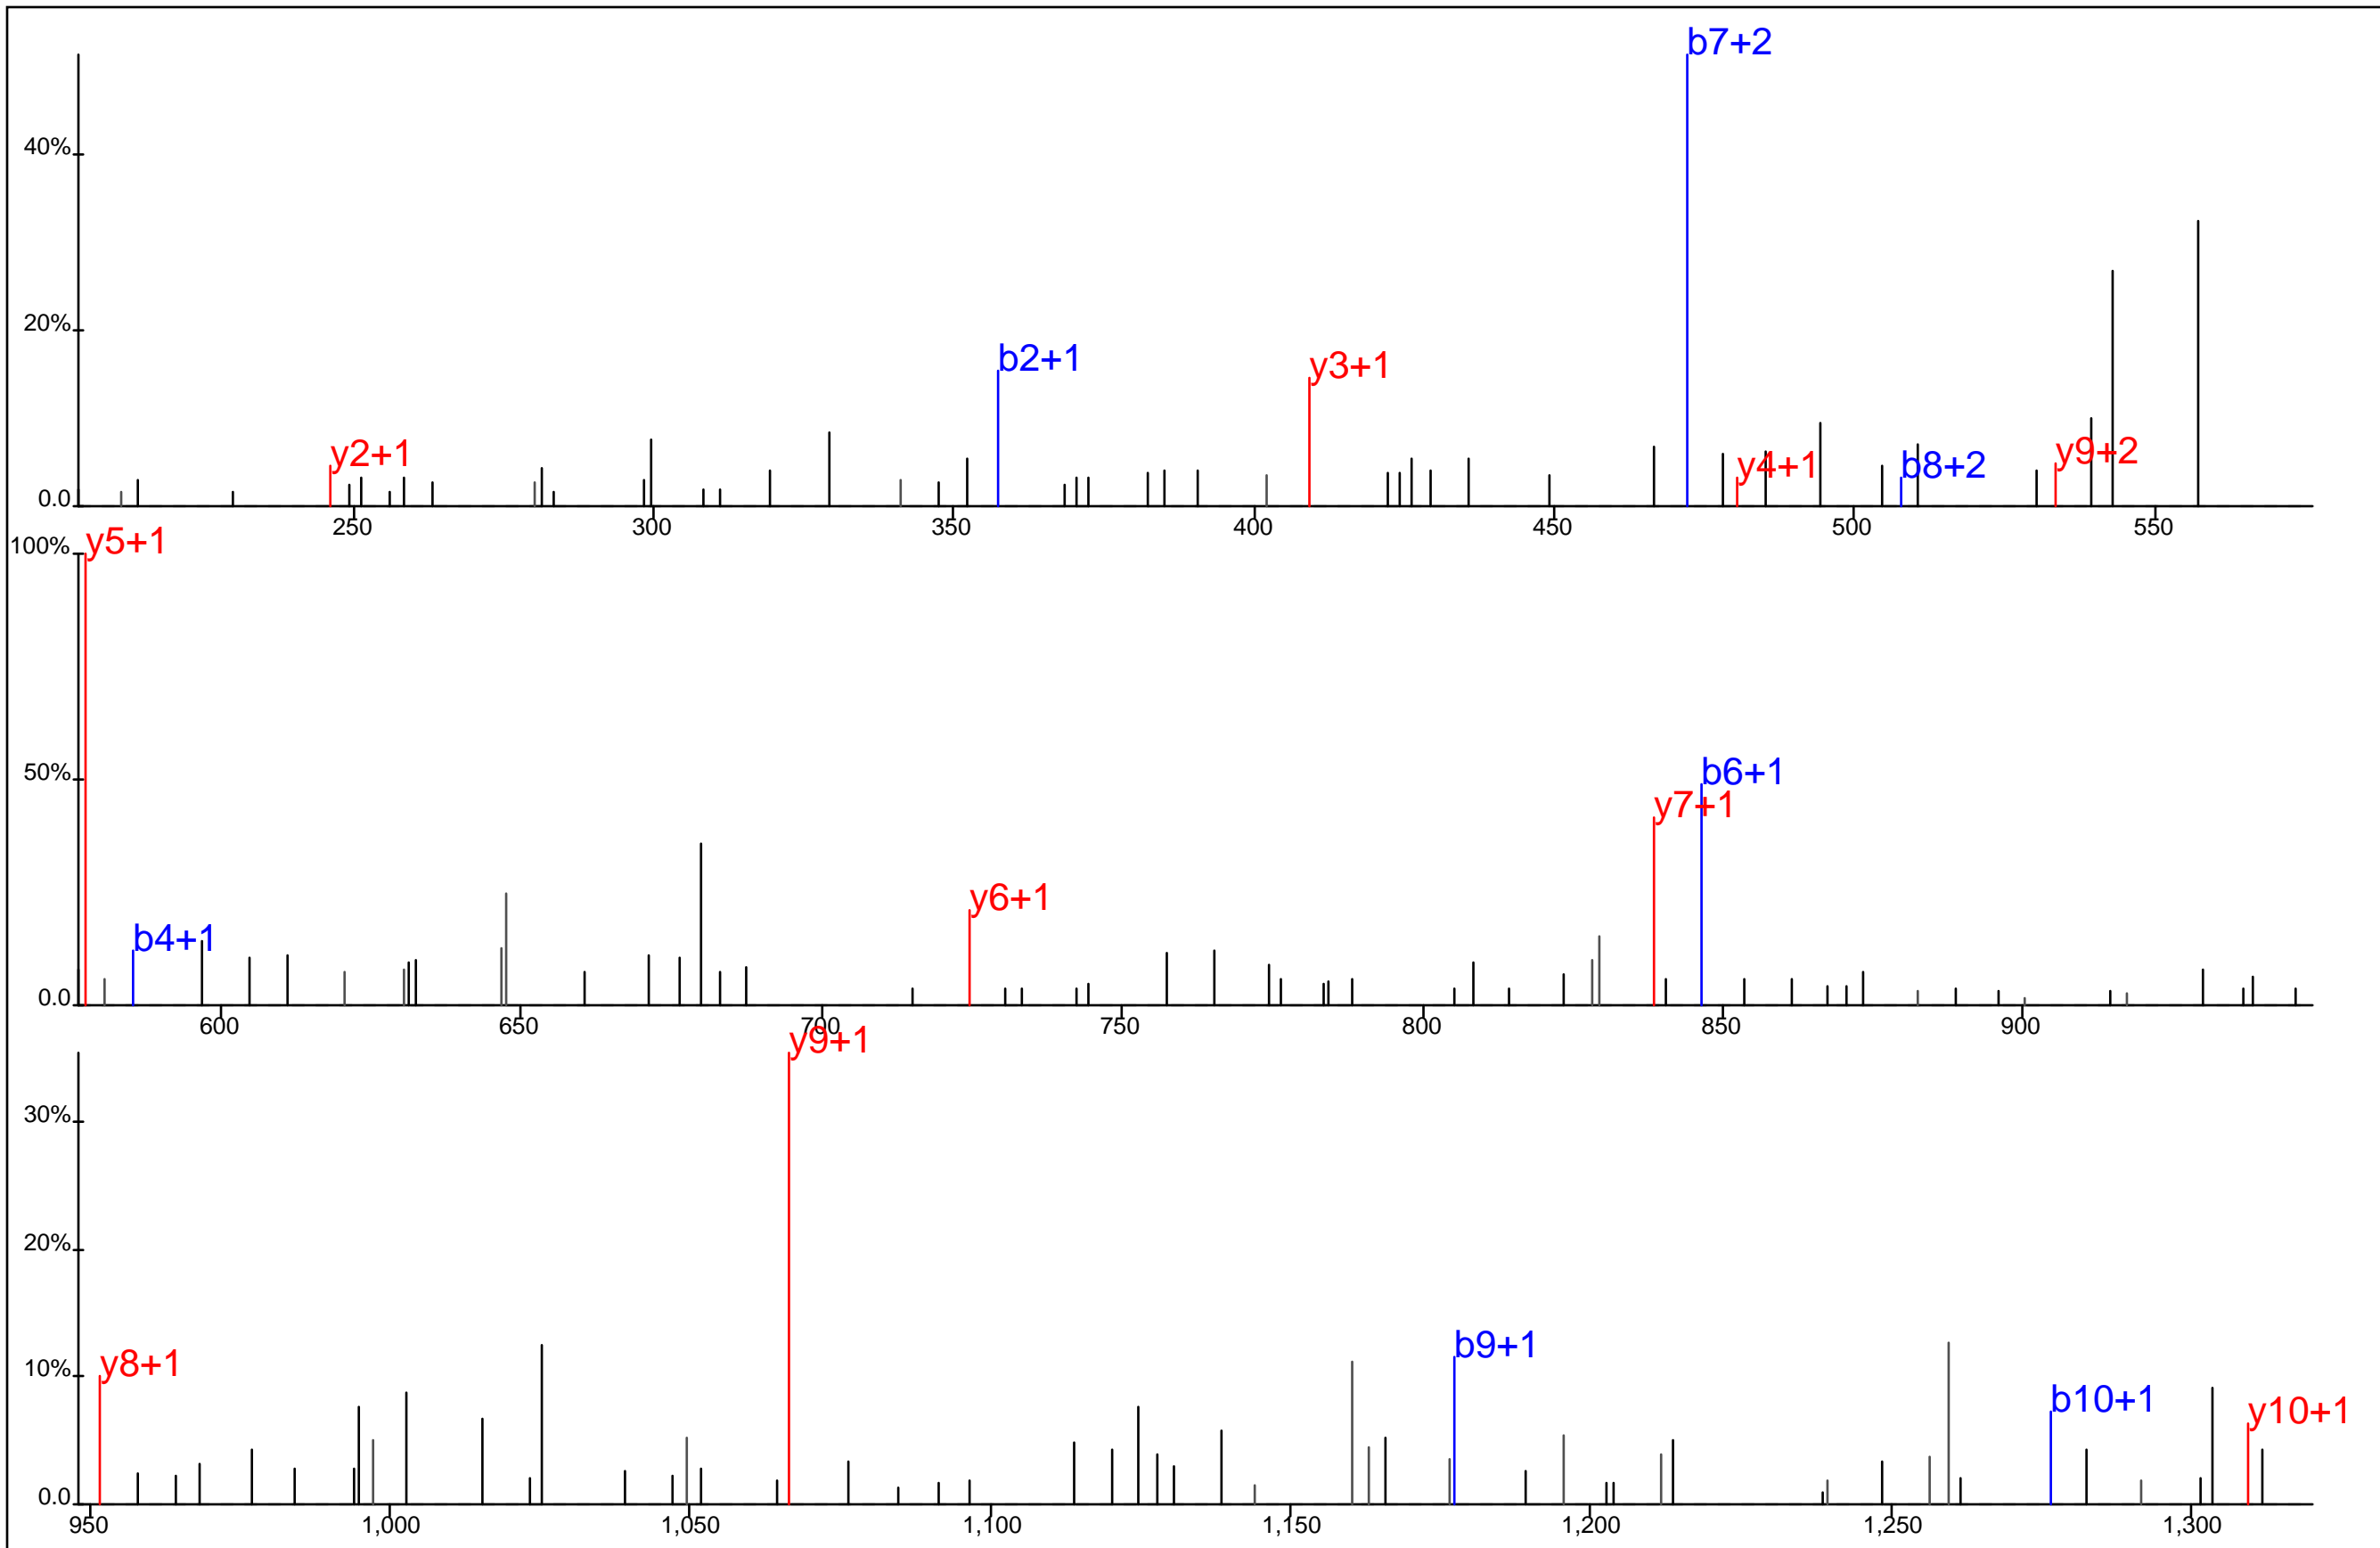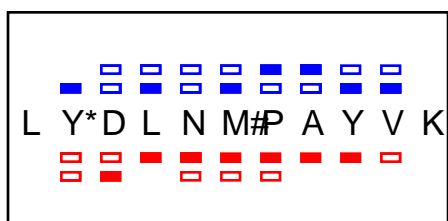

Protein Name: NCK1  
 gi Accession: 0  
 Precursor Mass: 711.8230+2  
 Delta Mass: 0.891 ppm  
 XCorr: 60.92

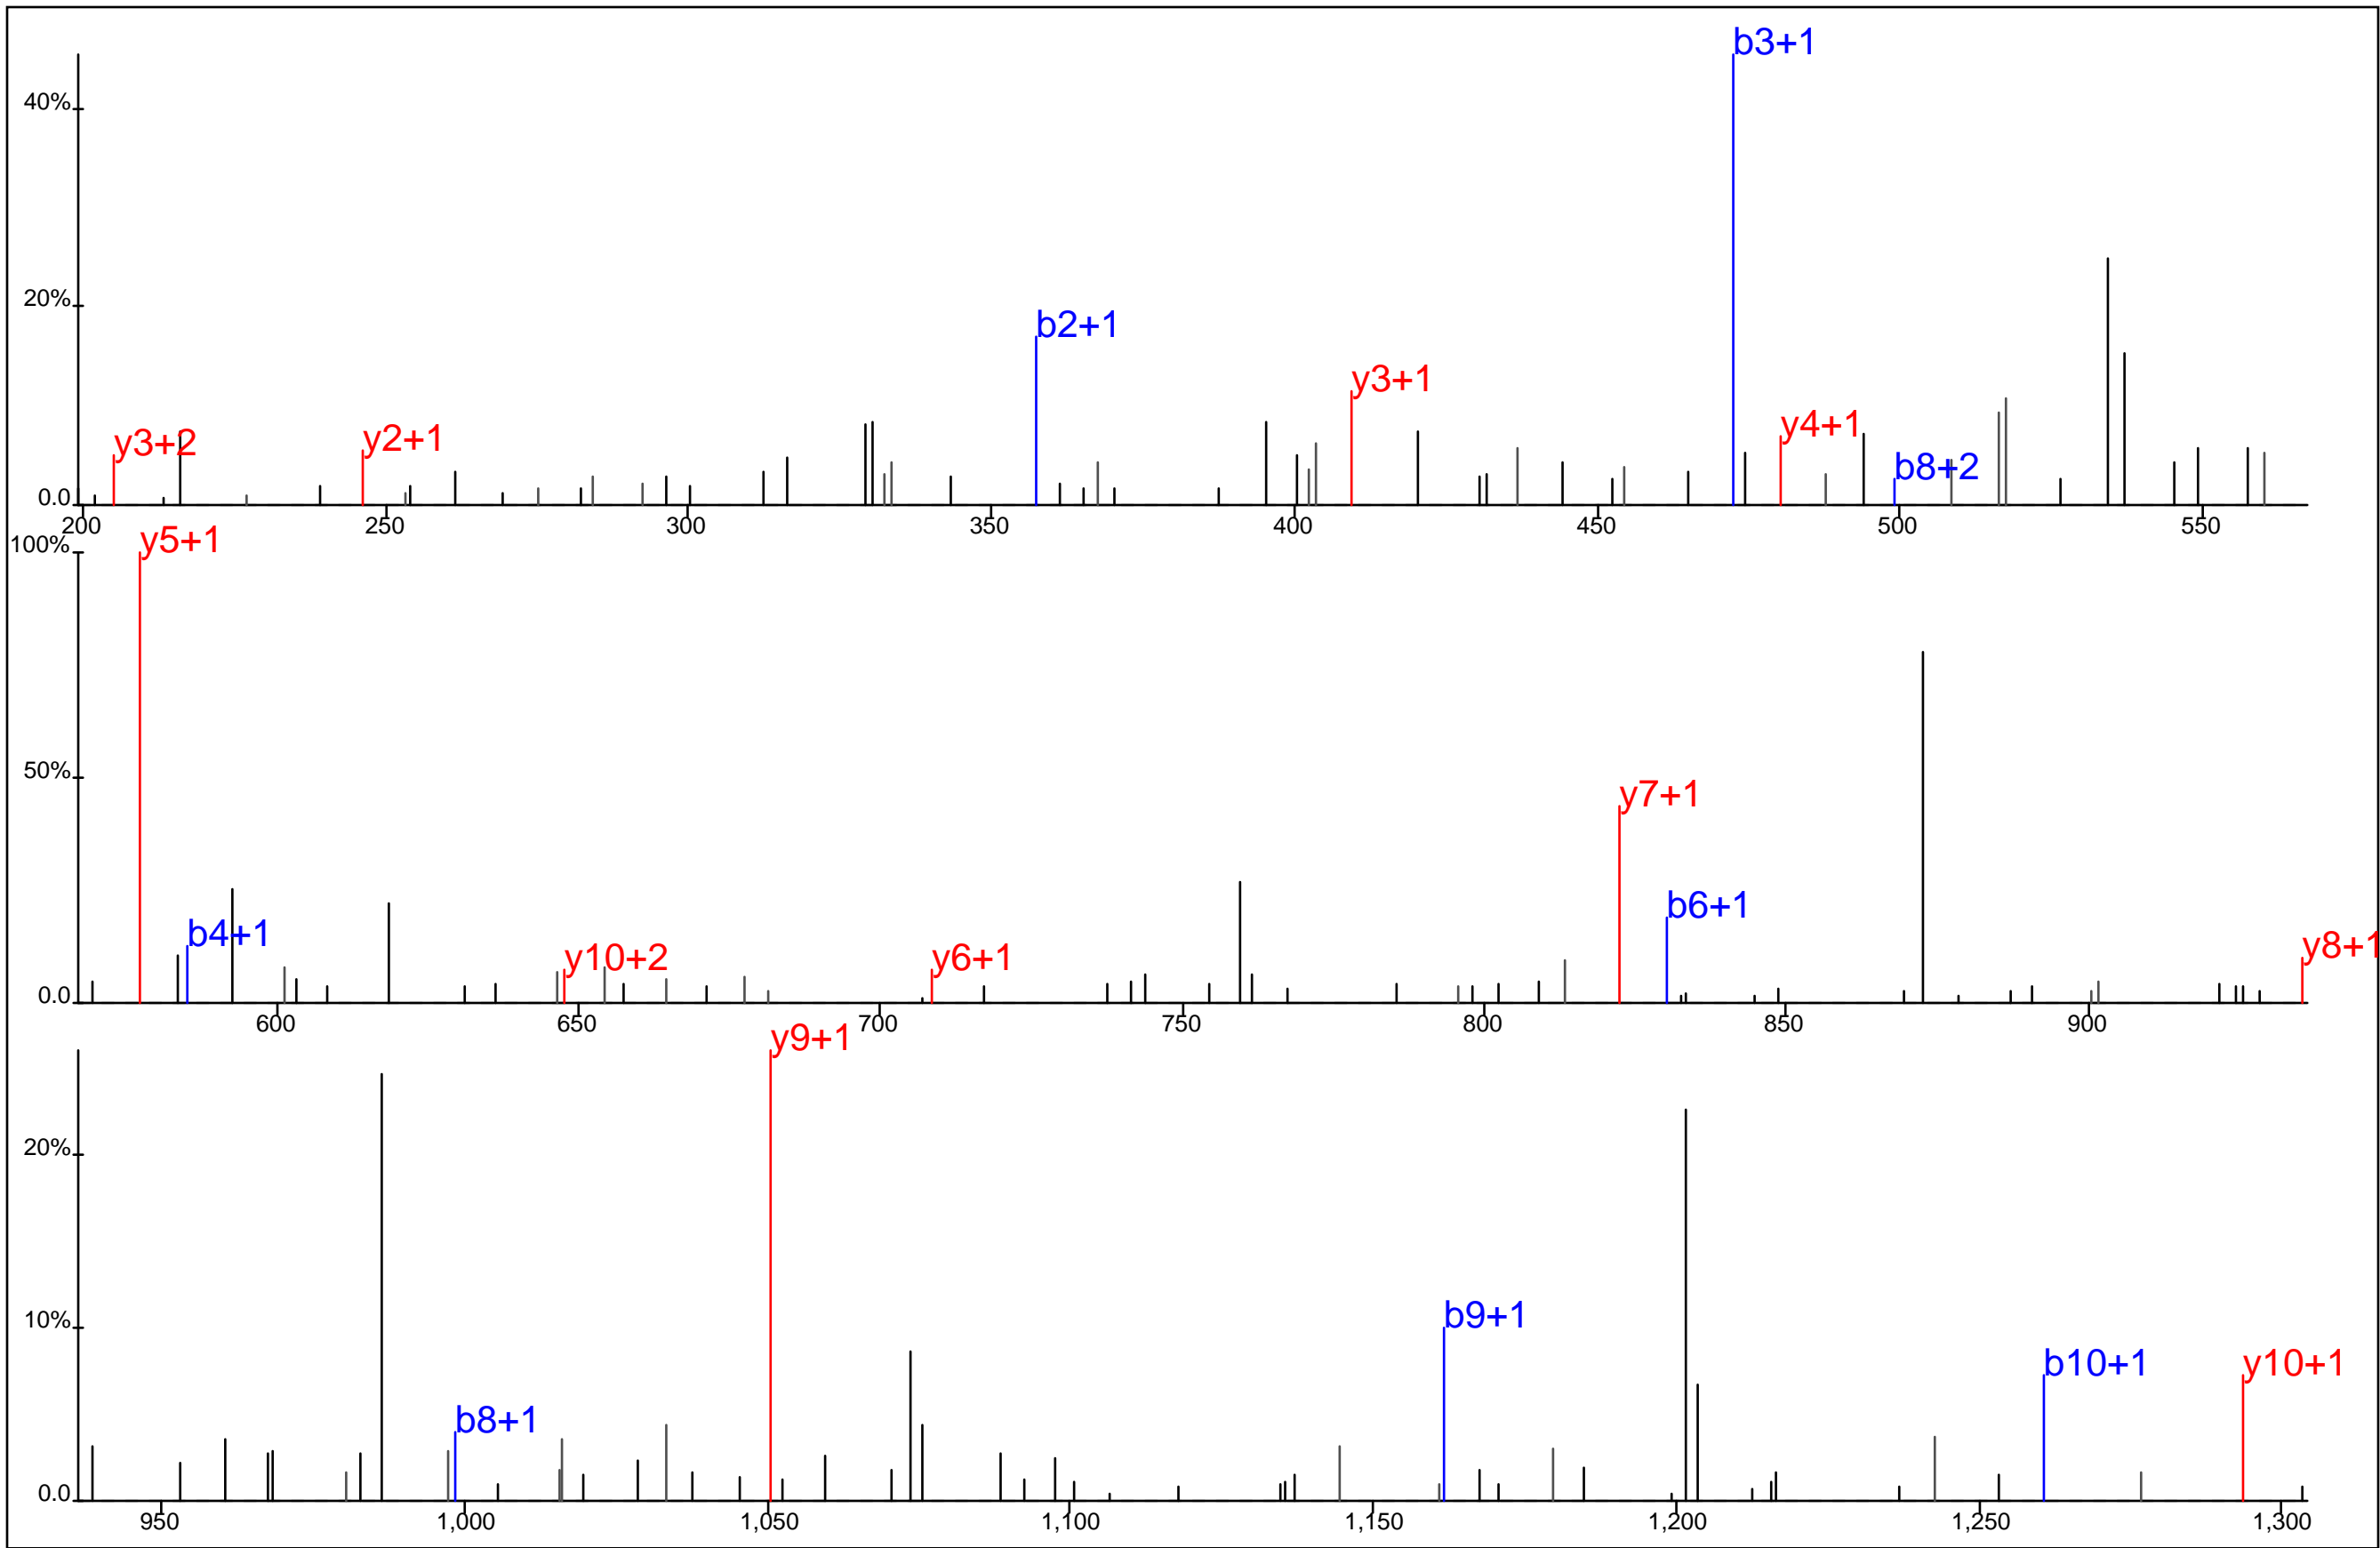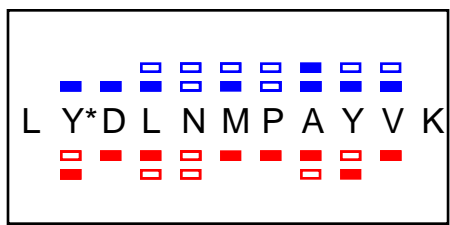

Protein Name: NCK1  
 gi Accession: 0  
 Precursor Mass: 703.8232+2  
 Delta Mass: 2.450 ppm  
 XCorr: 38.06

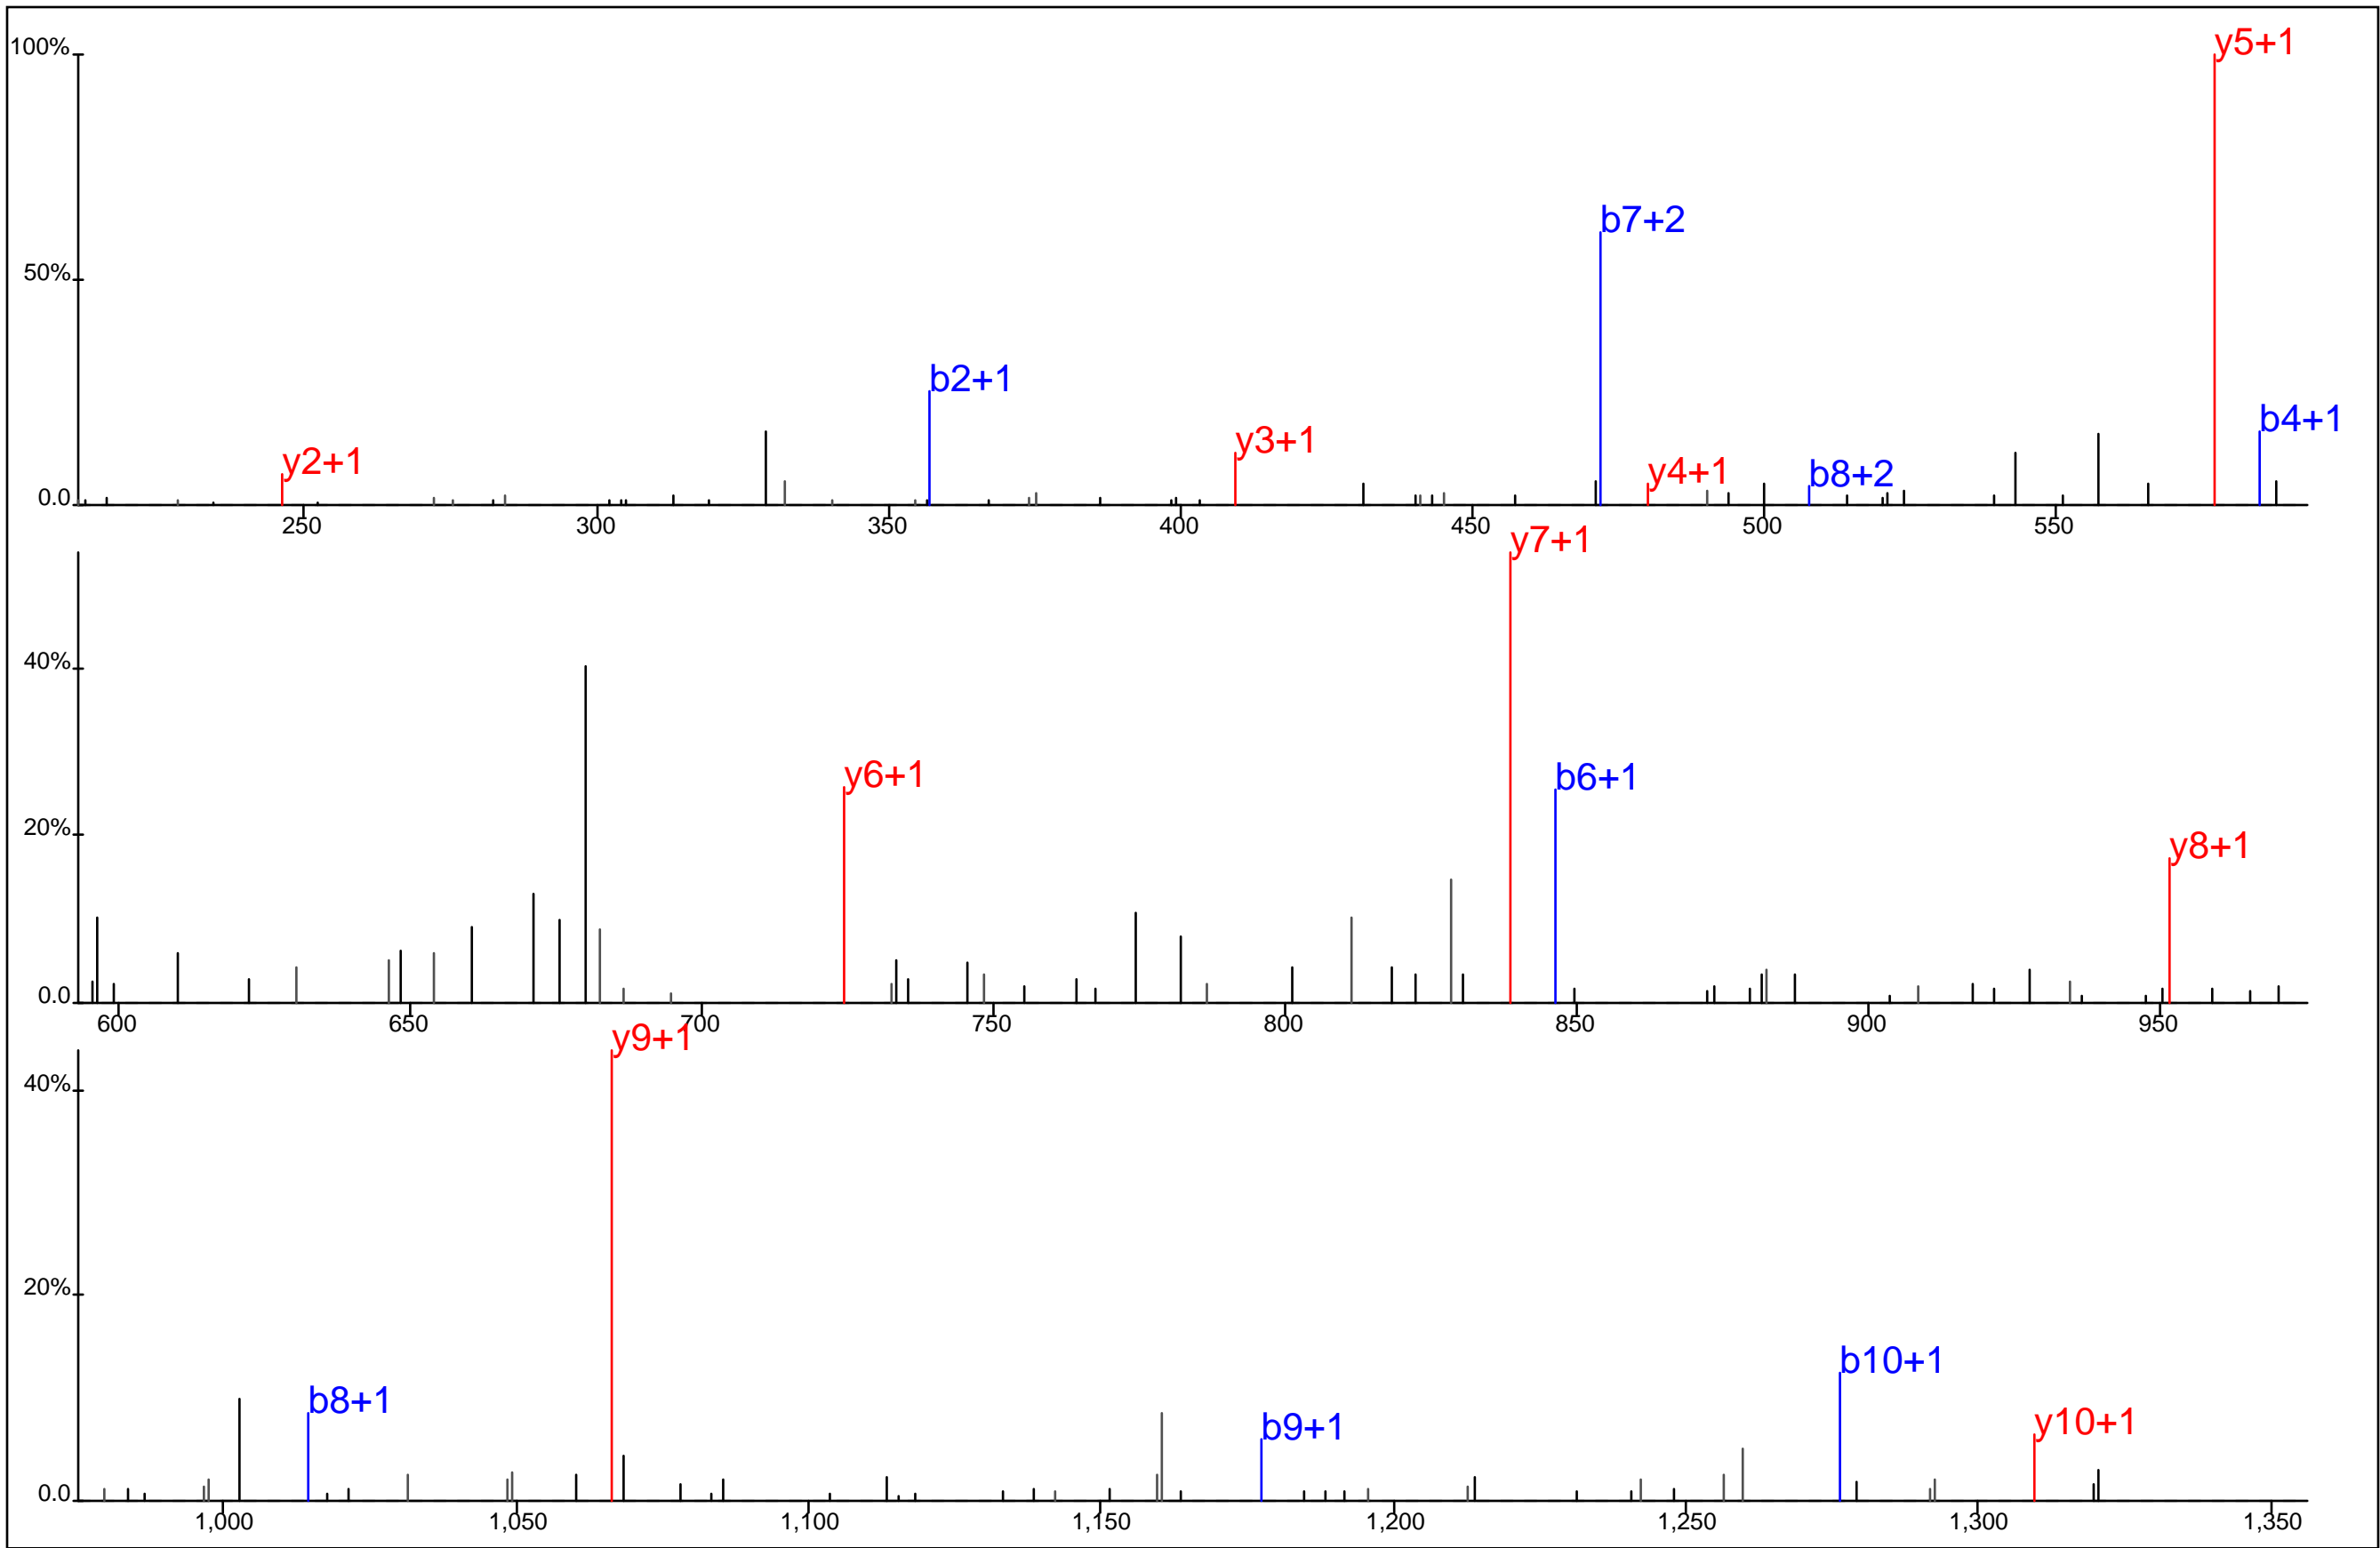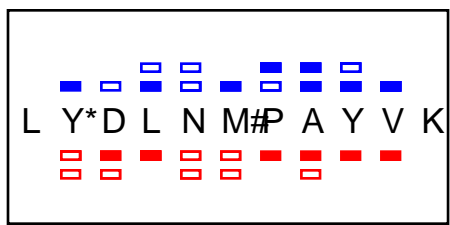

Protein Name: NCK1  
 gi Accession: 0  
 Precursor Mass: 711.8239+2  
 Delta Mass: 2.179 ppm  
 XCorr: 73.02



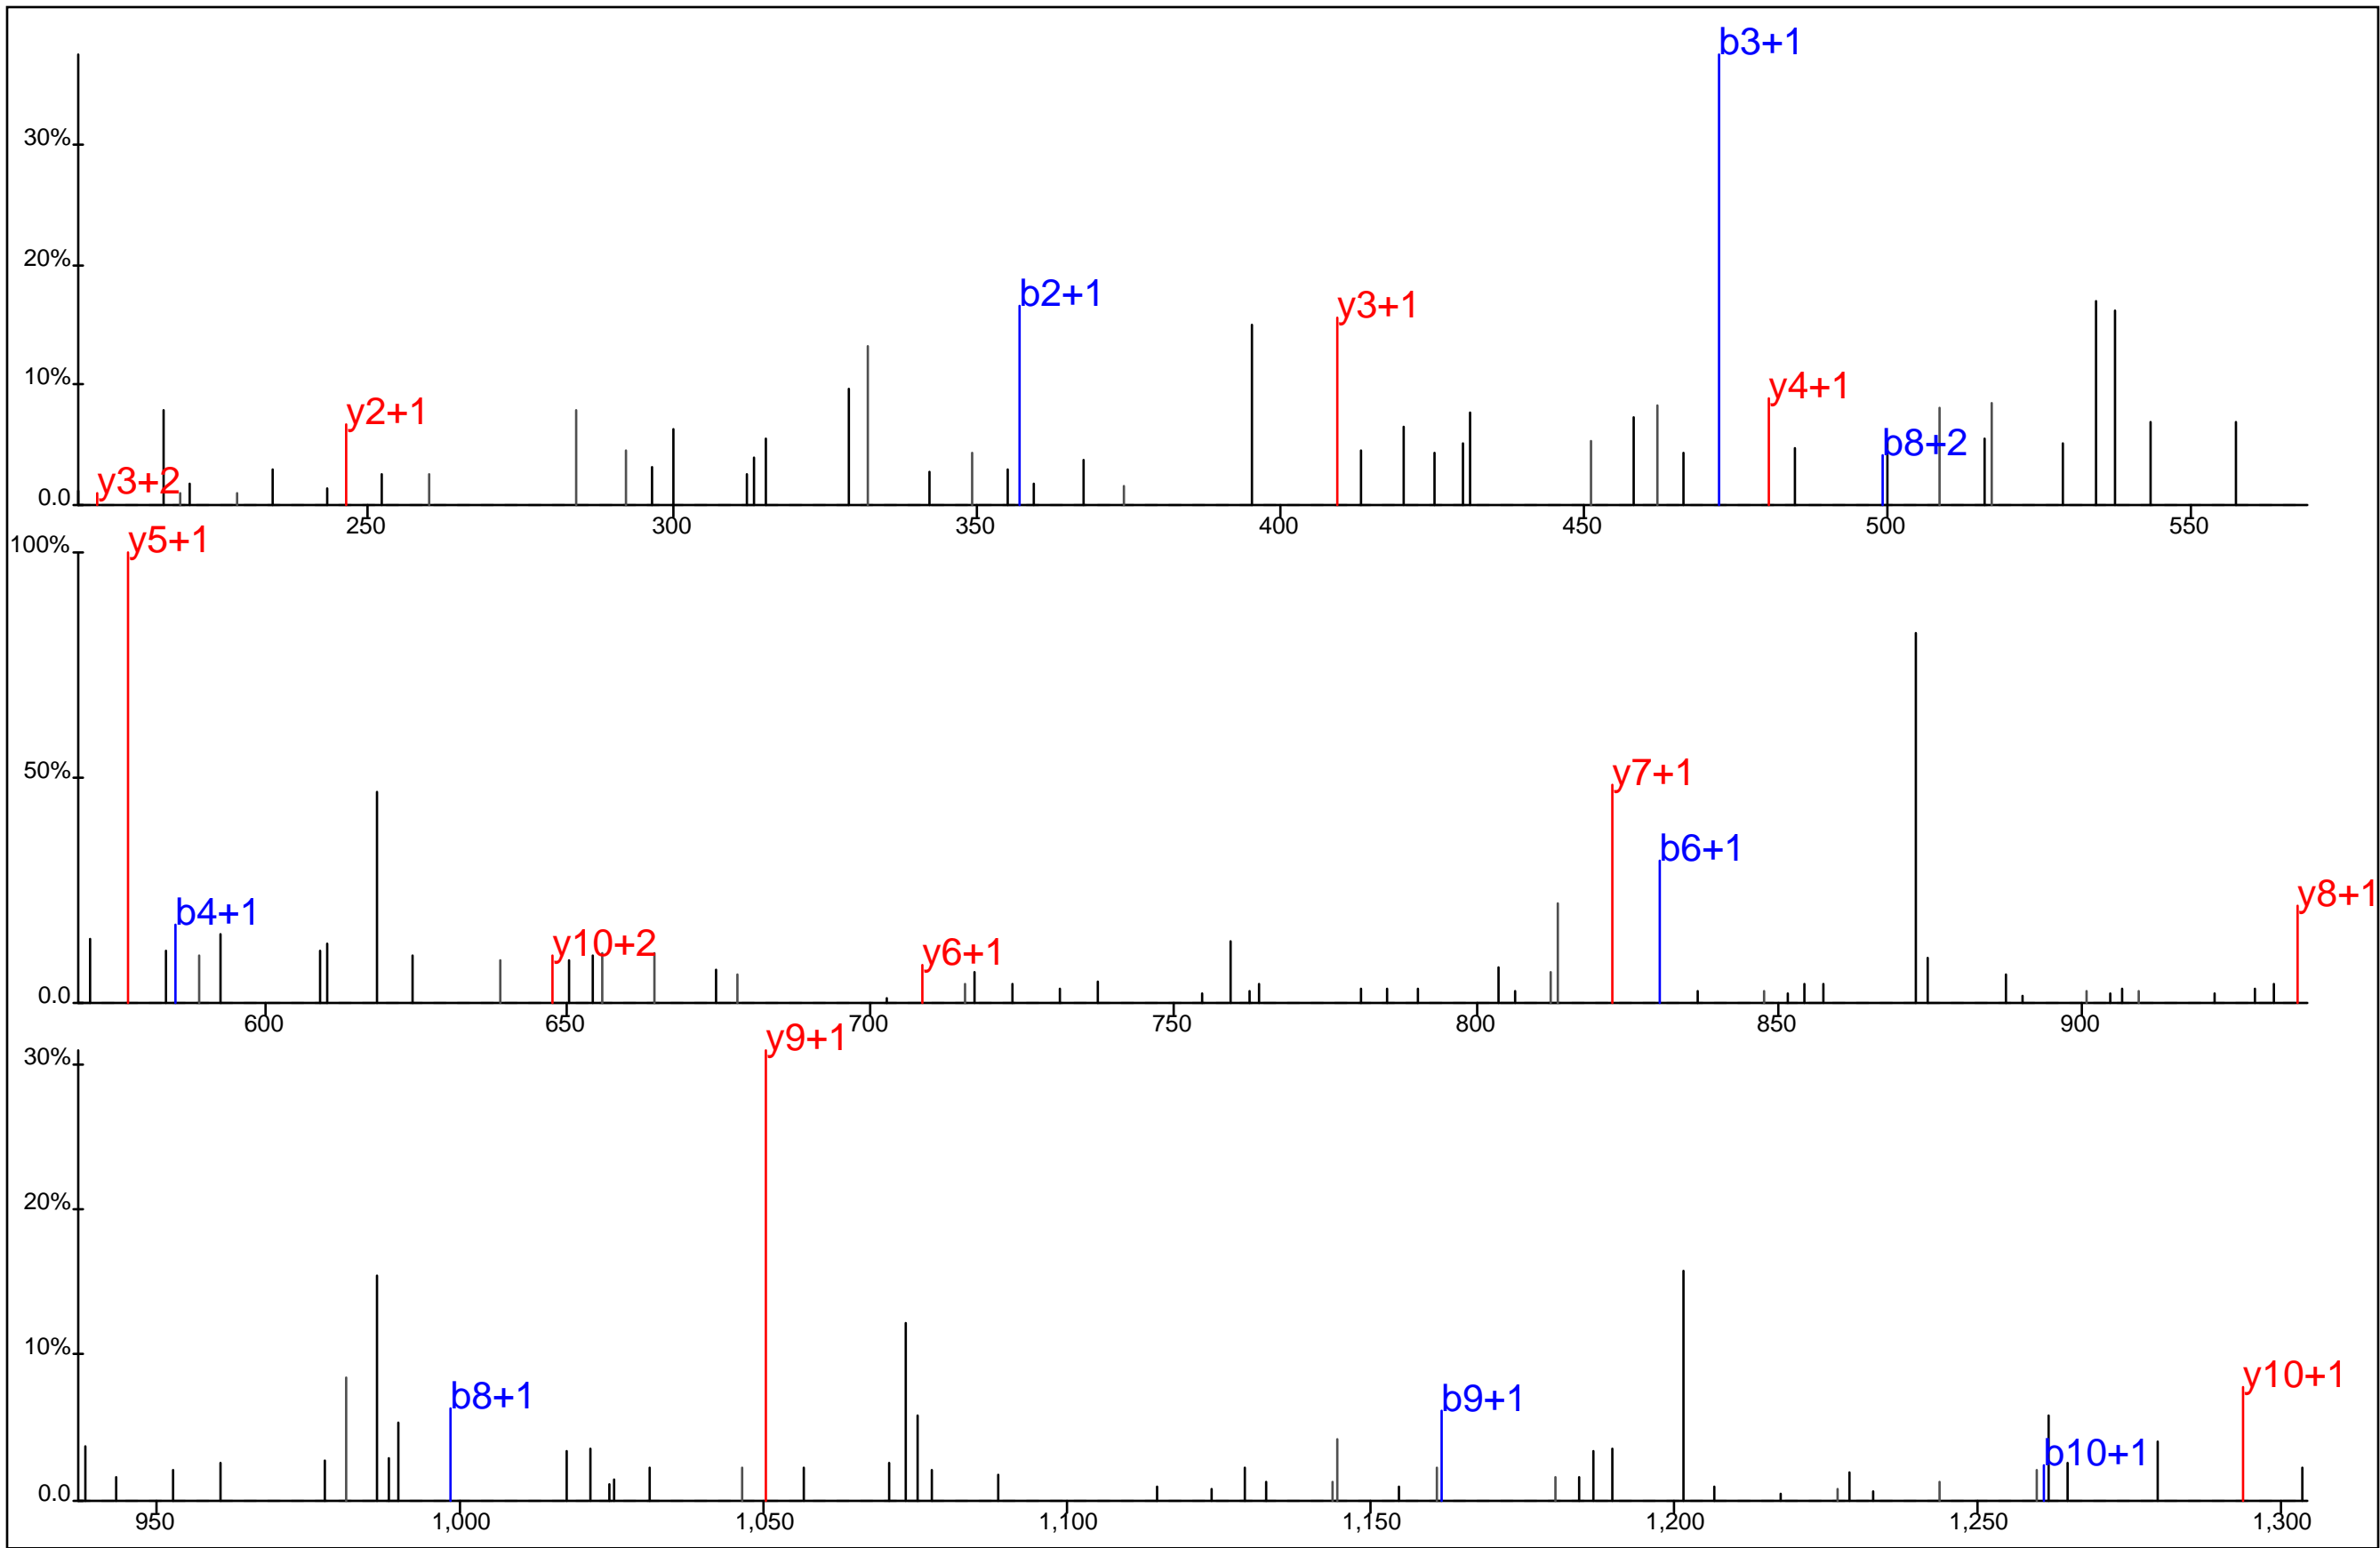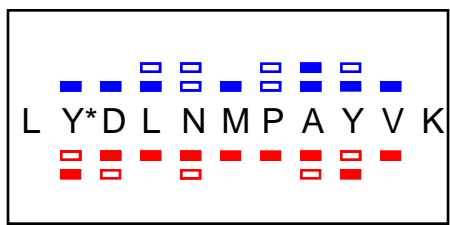

Protein Name: NCK1  
 gi Accession: 0  
 Precursor Mass: 703.8226+2  
 Delta Mass: 3.230 ppm  
 XCorr: 53.15





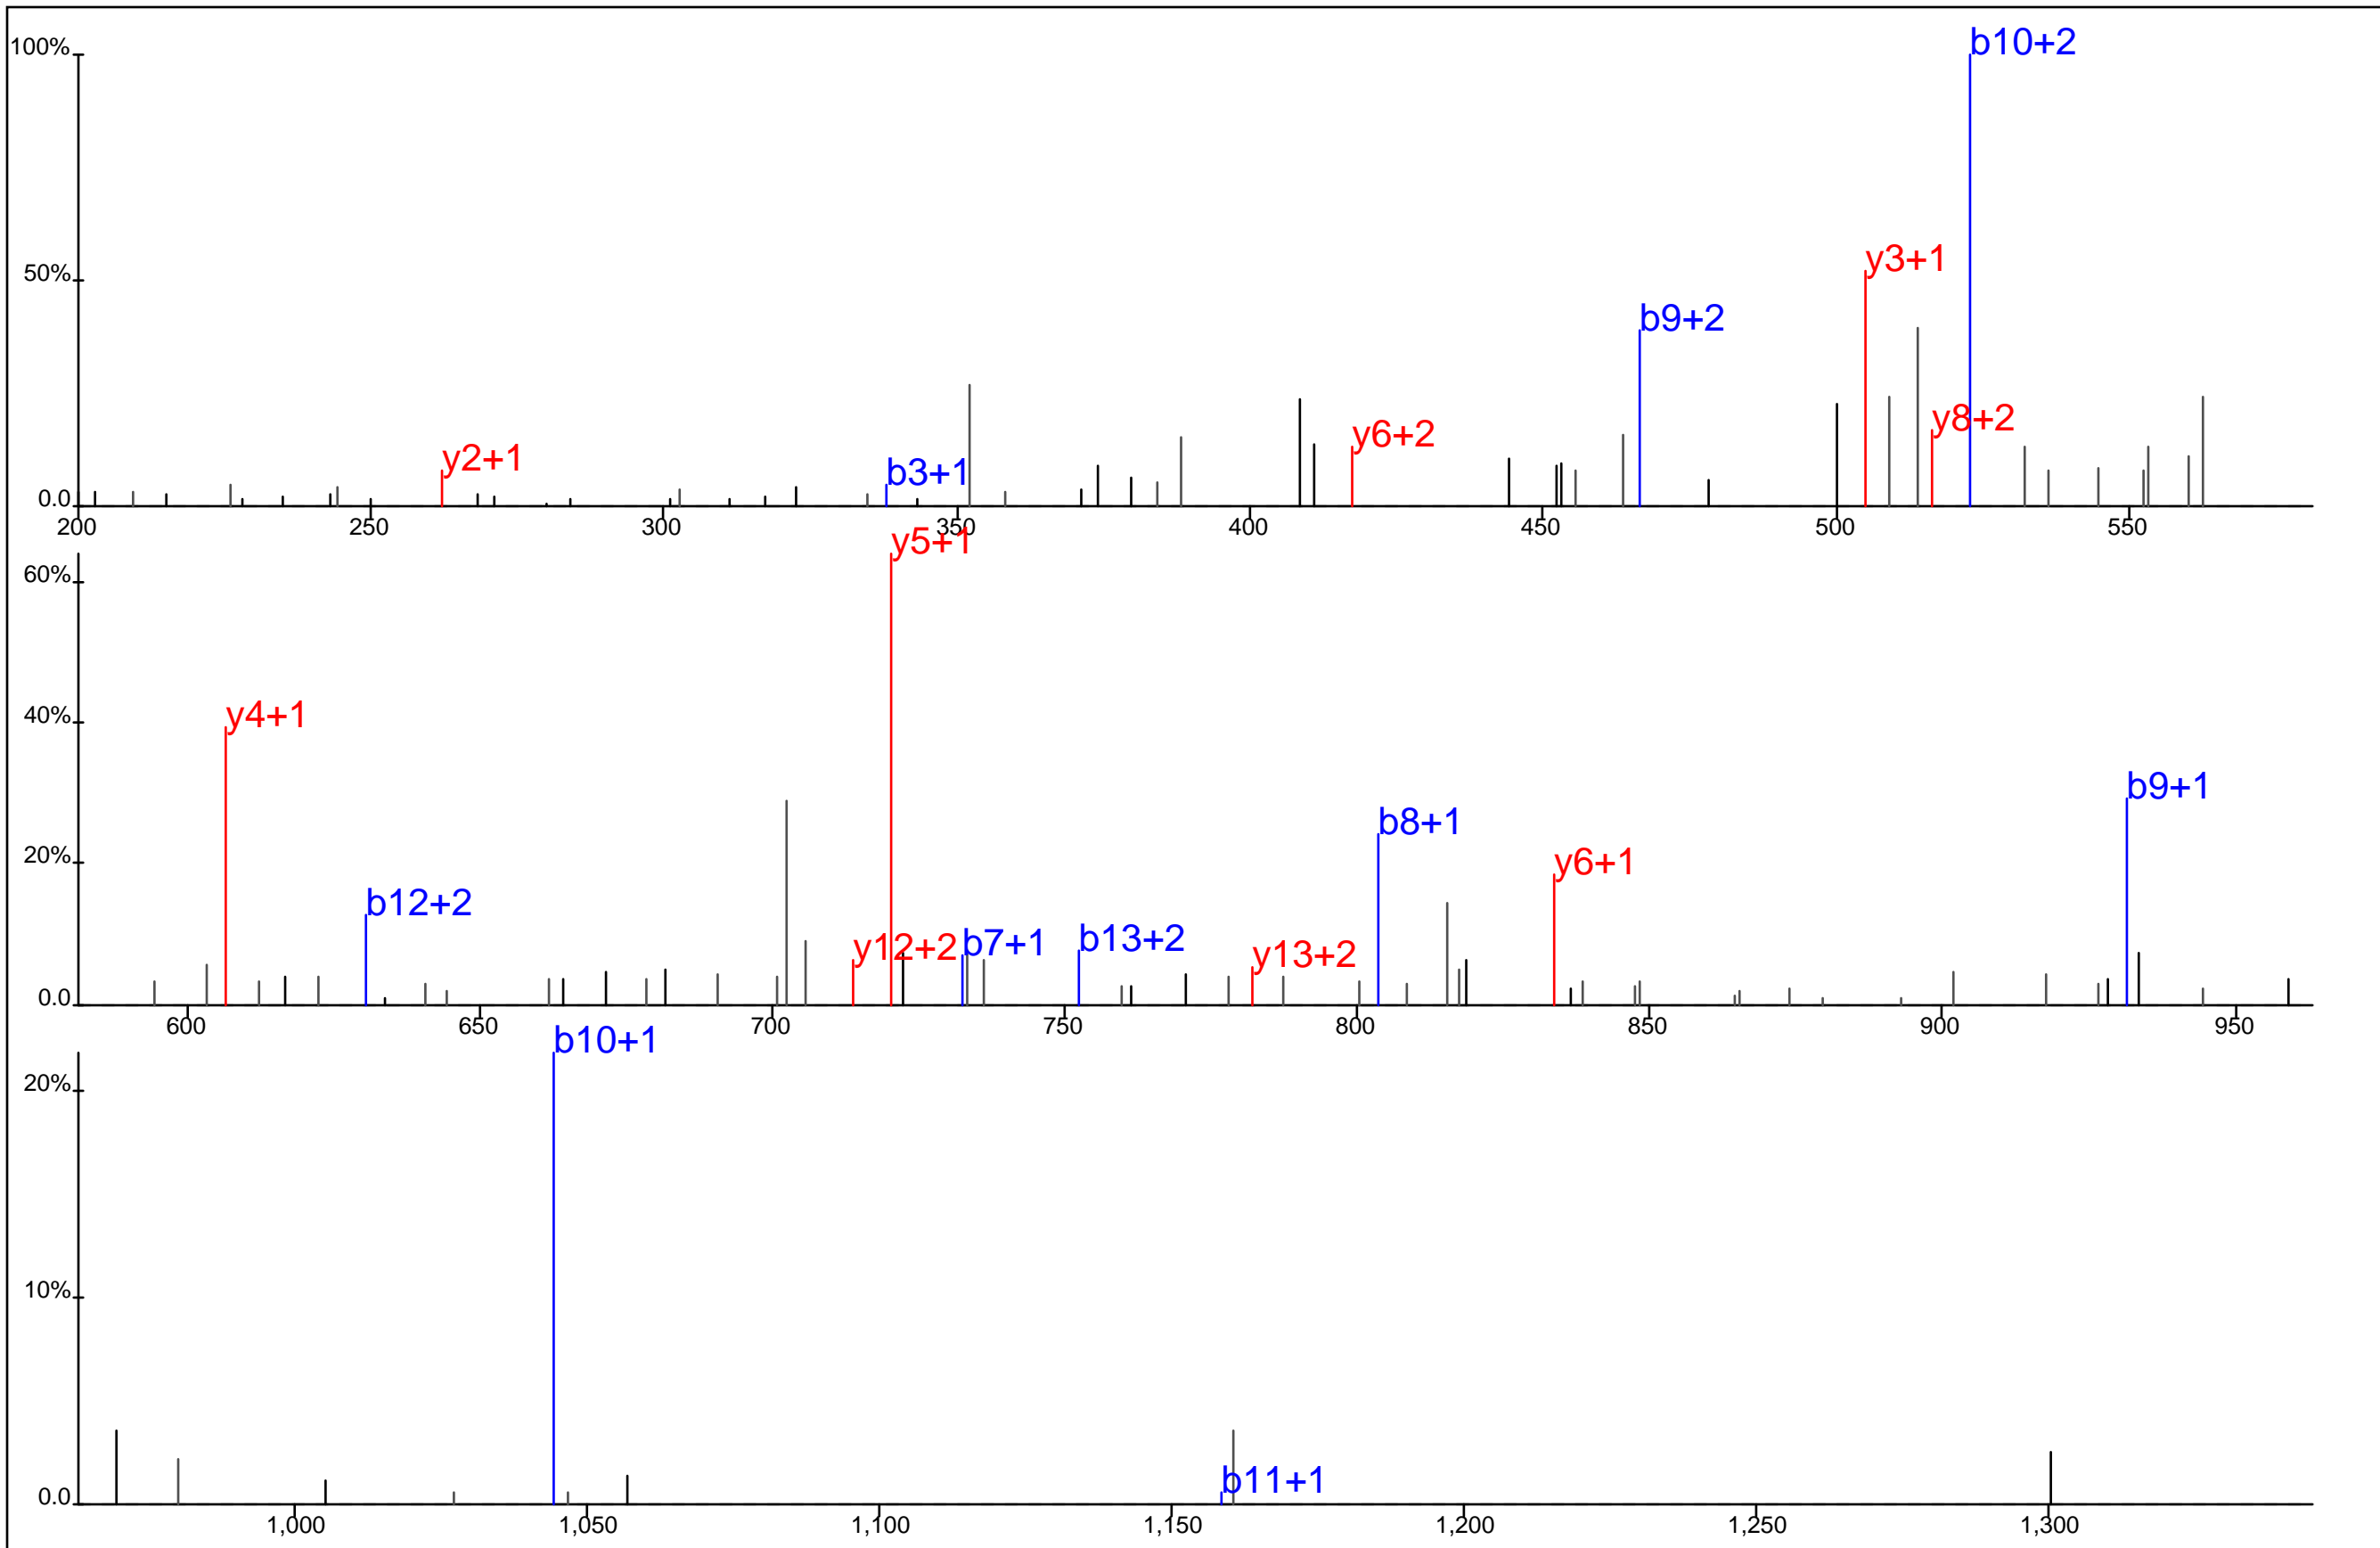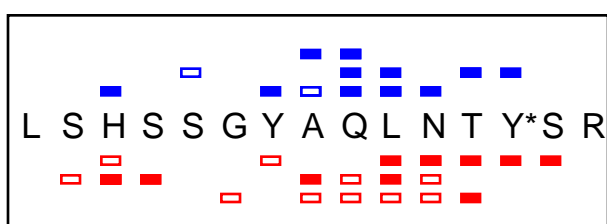

Protein Name: Nephrin like 1  
 gi Accession: 0  
 Precursor Mass: 588.5969+3  
 Delta Mass: 0.689 ppm  
 XCorr: 29.41



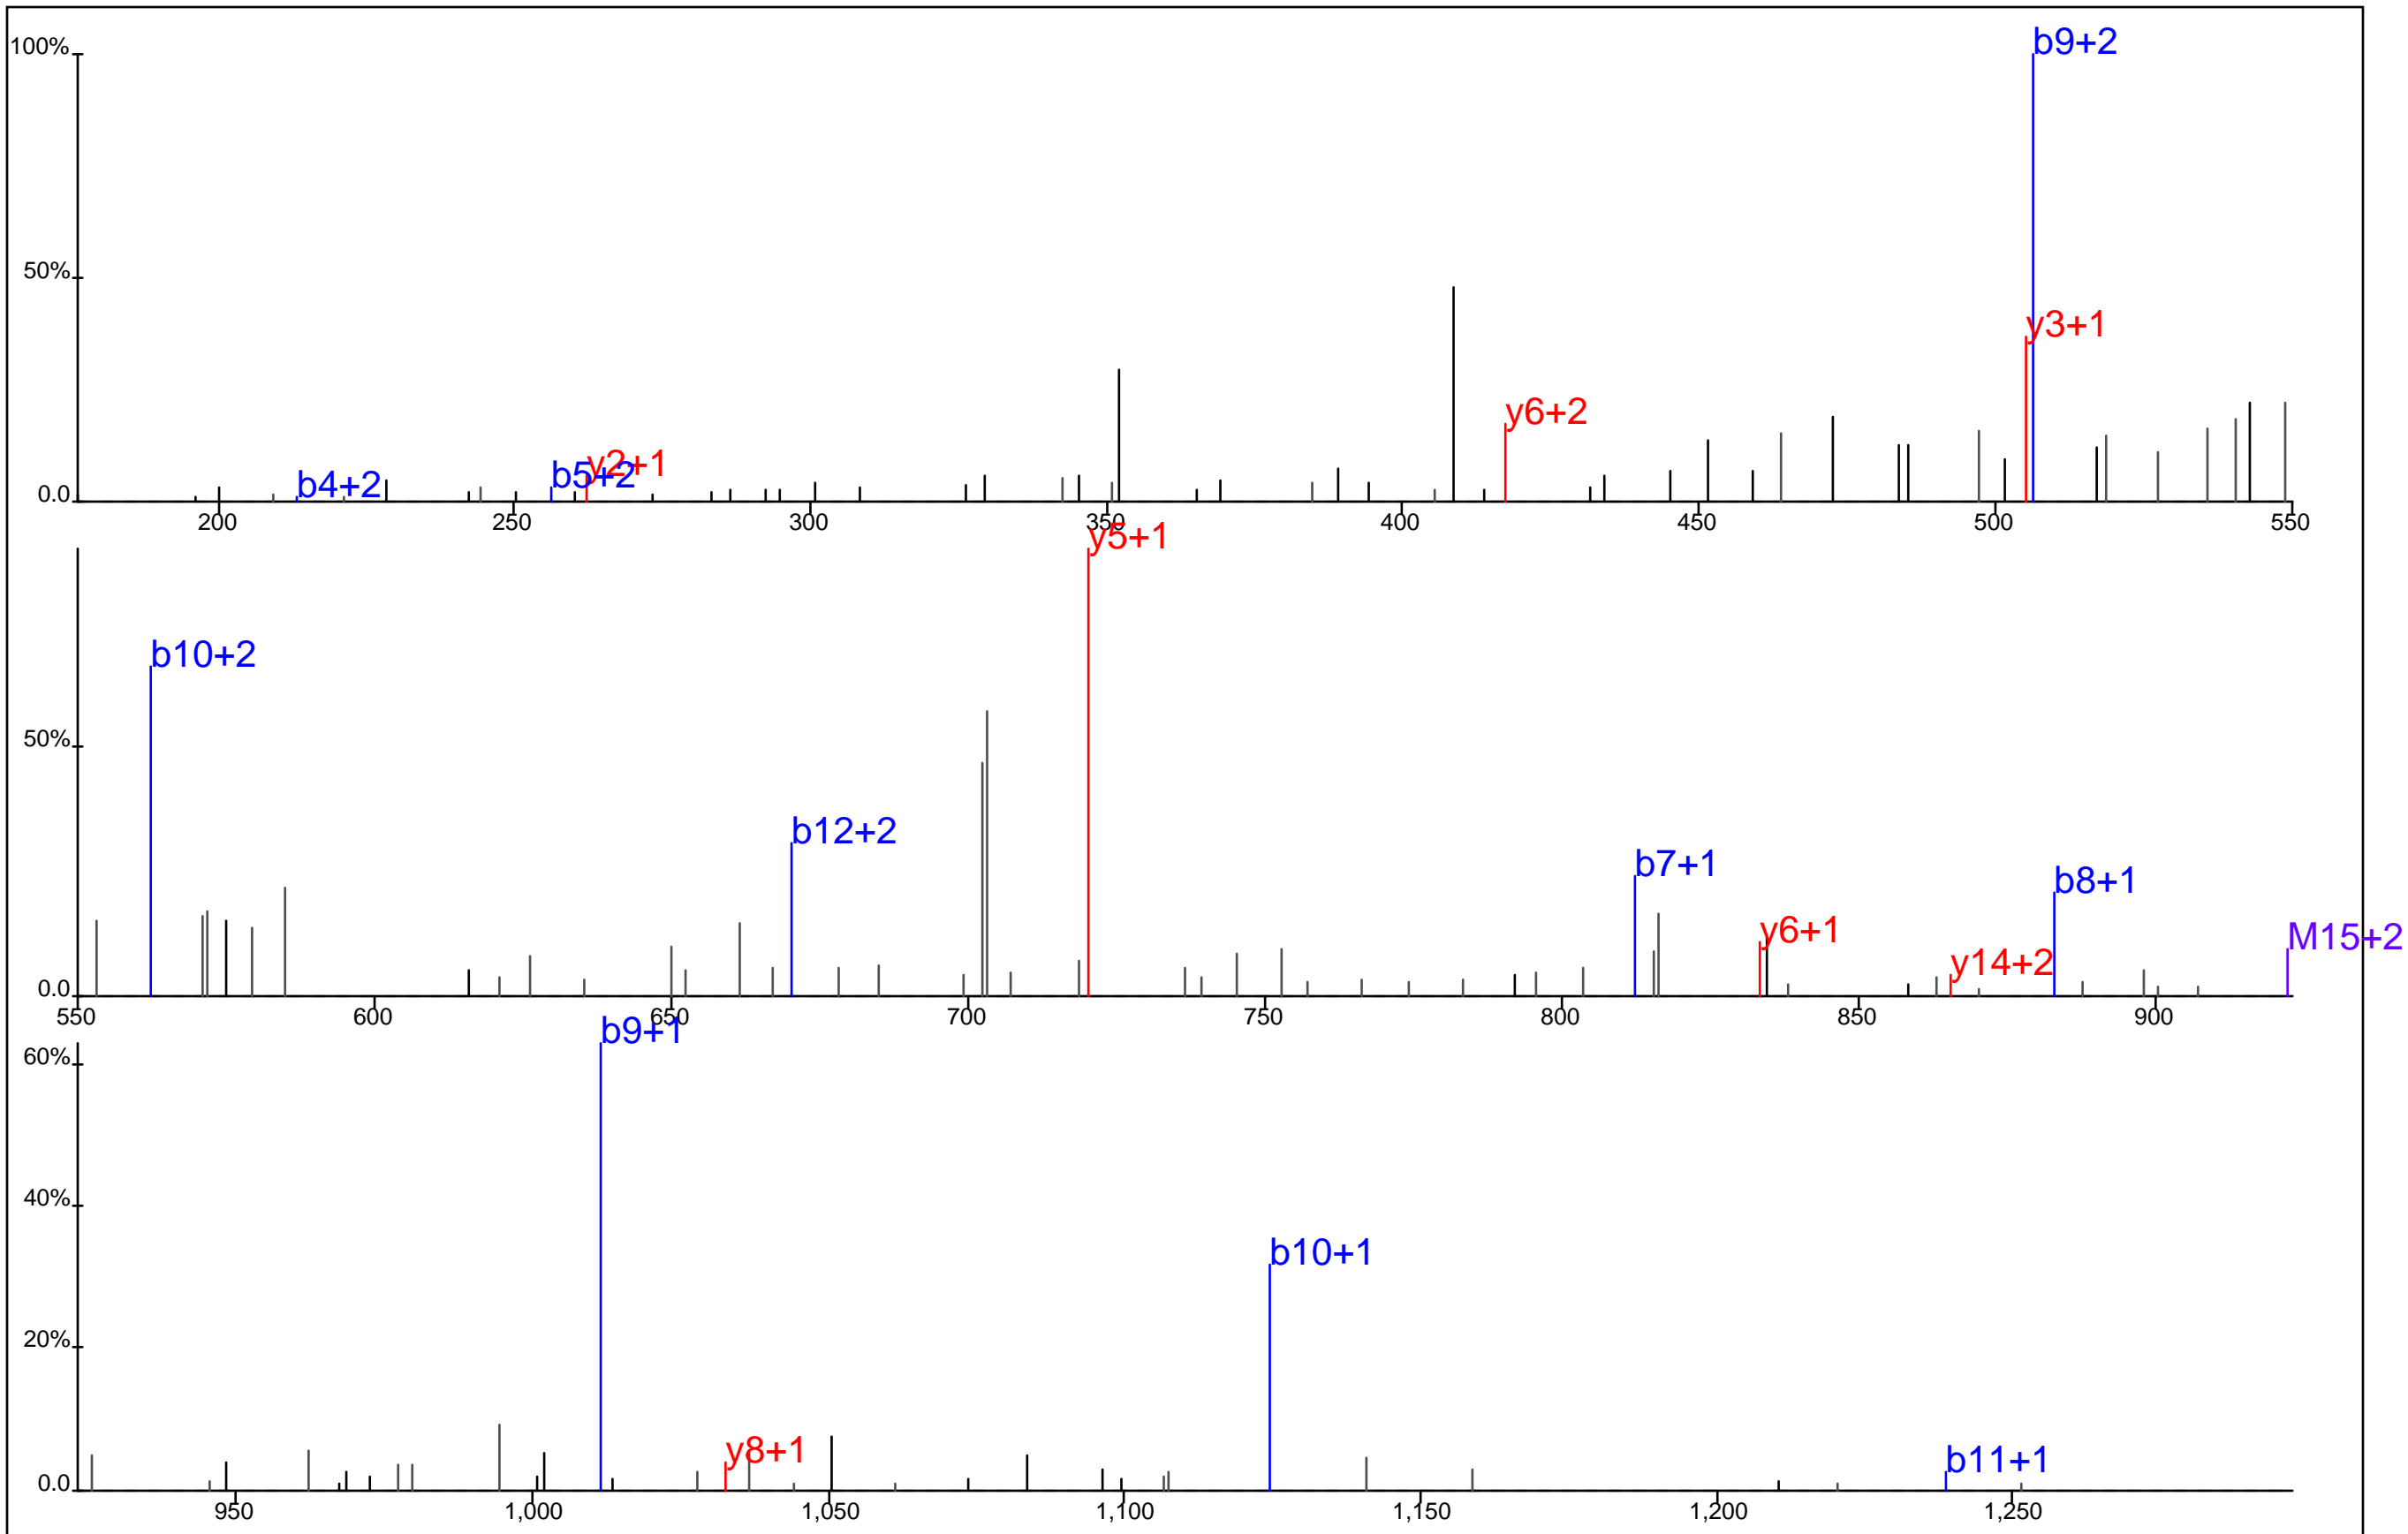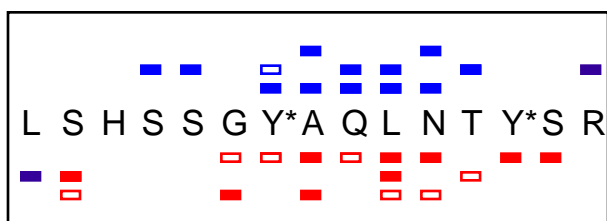

Protein Name: Nephrin like 1  
 gi Accession: 0  
 Precursor Mass: 615.2518+3  
 Delta Mass: 0.208 ppm  
 XCorr: 38.09

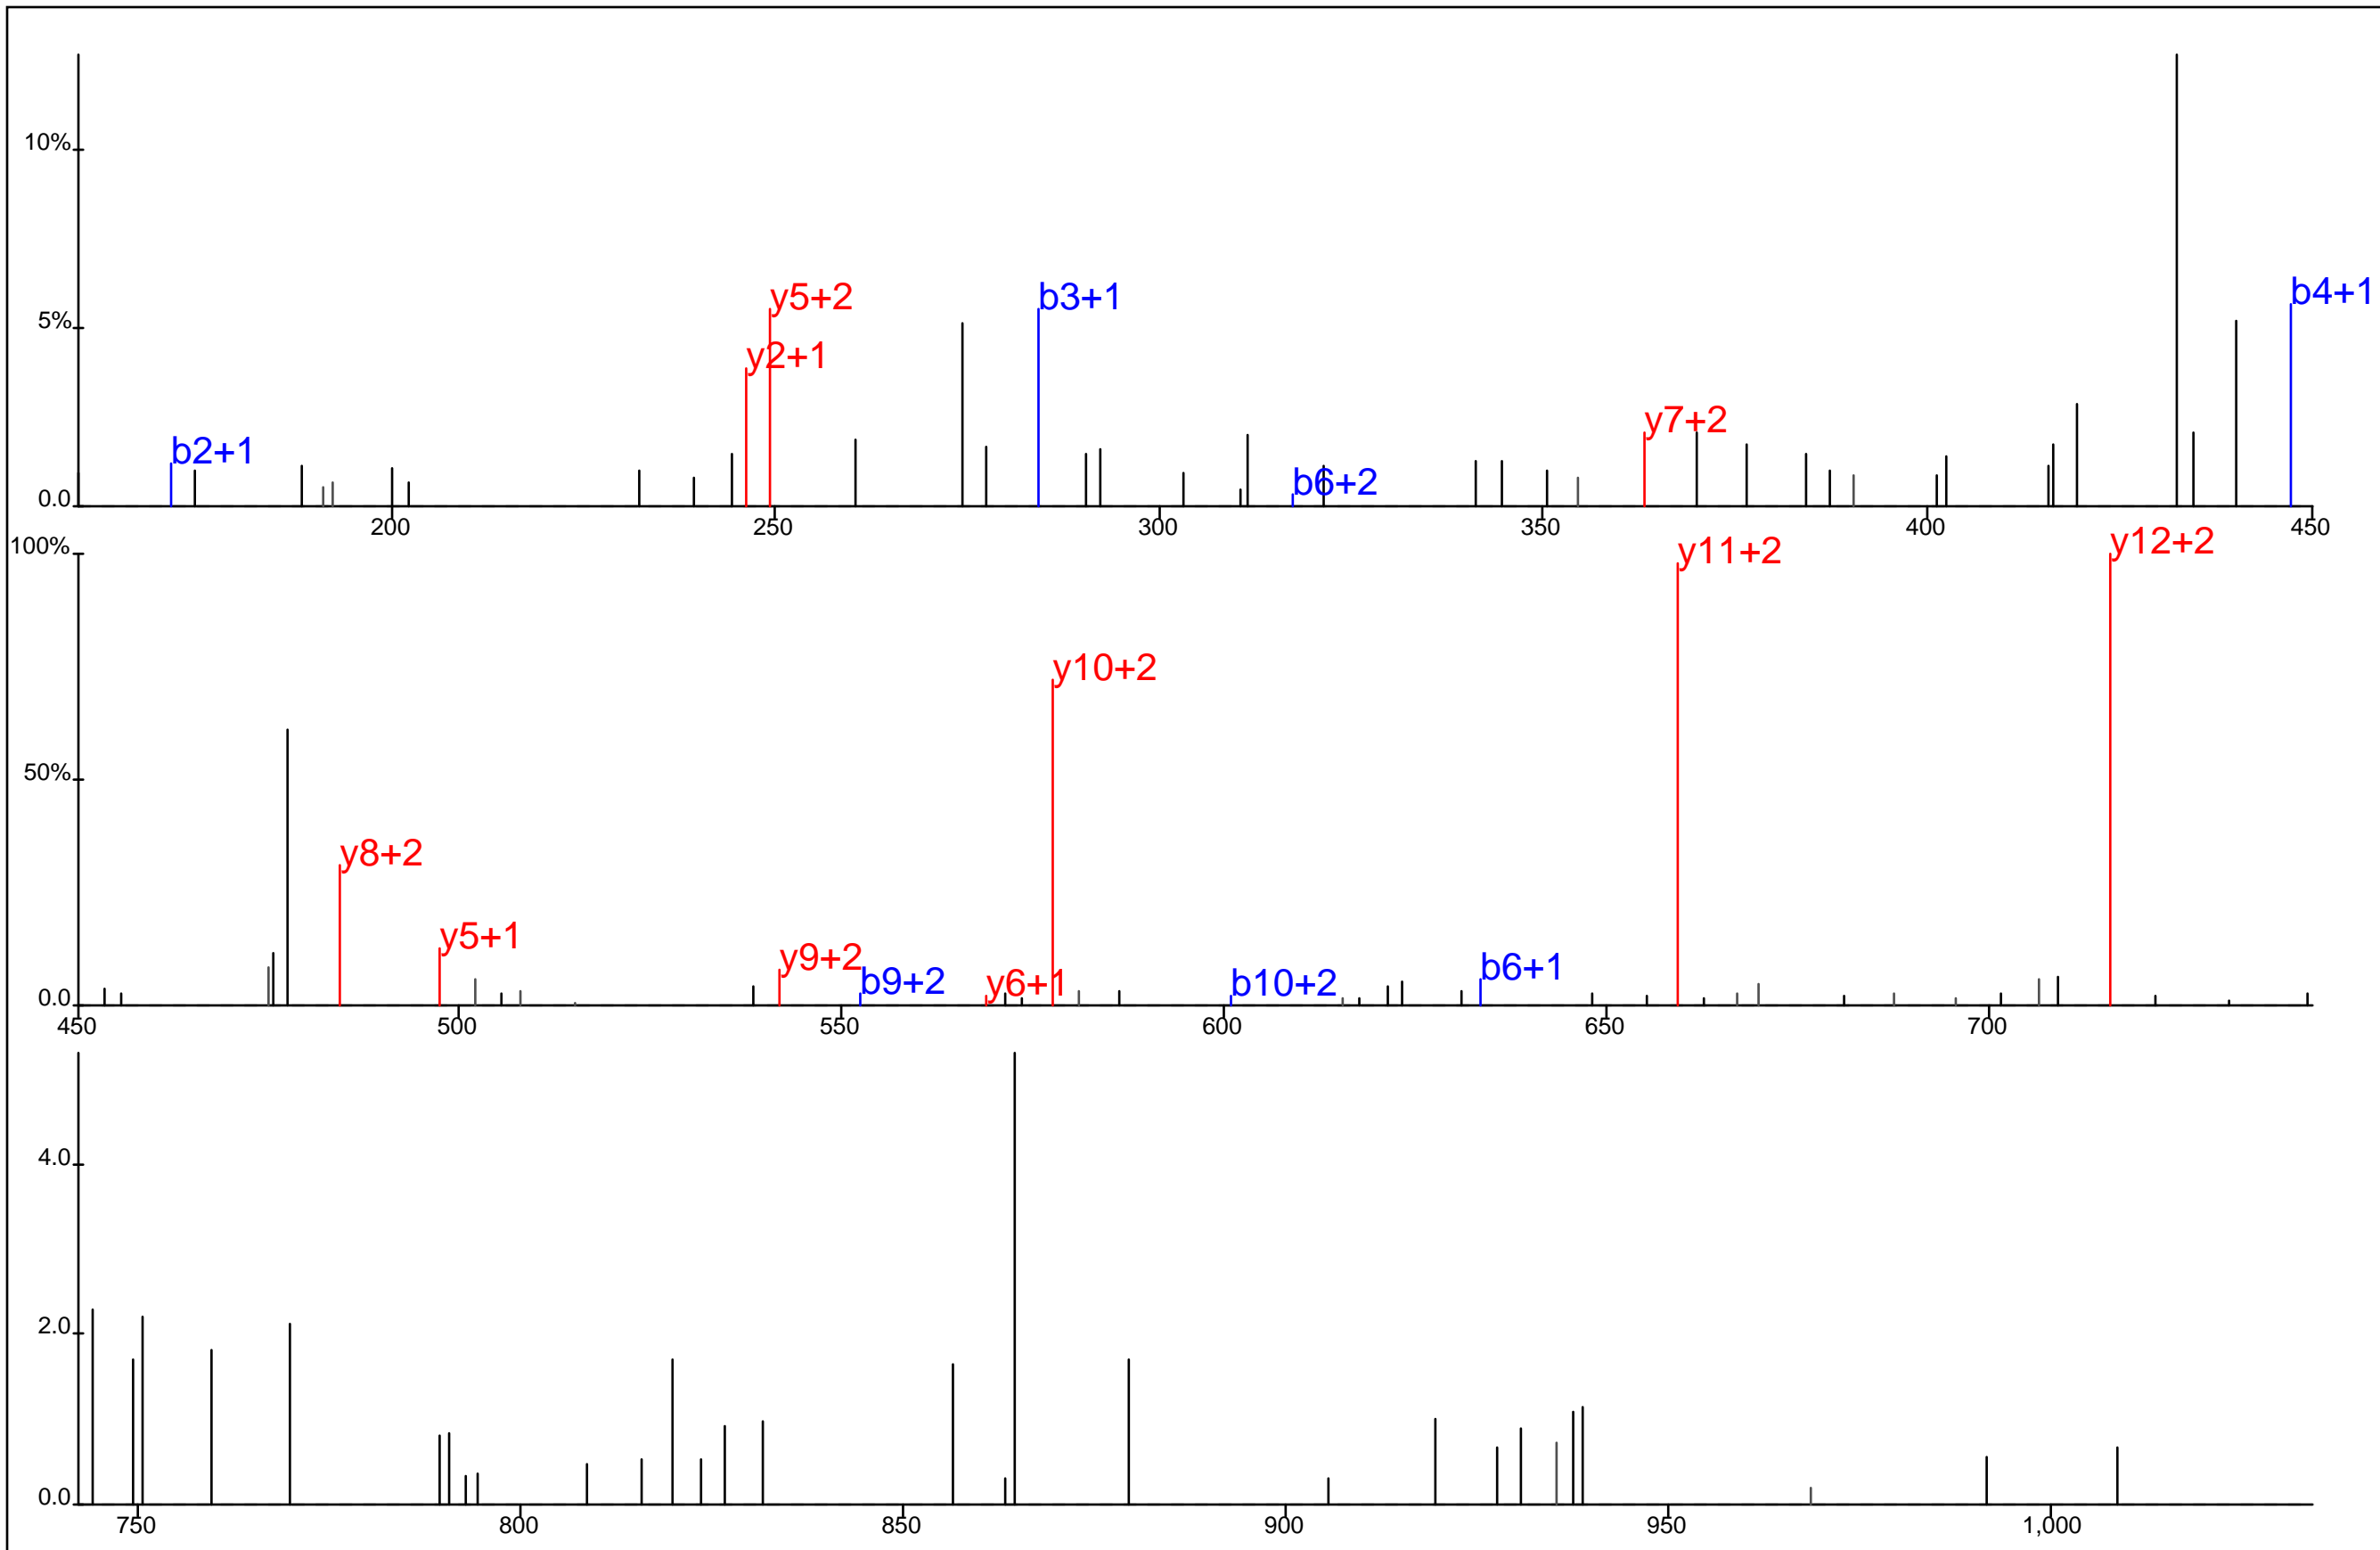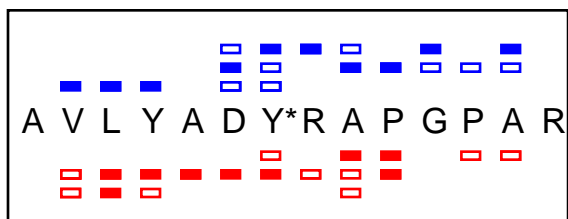

Protein Name: Nephrin like 1  
 gi Accession: 0  
 Precursor Mass: 533.9279+3  
 Delta Mass: 0.709 ppm  
 XCorr: 27.79

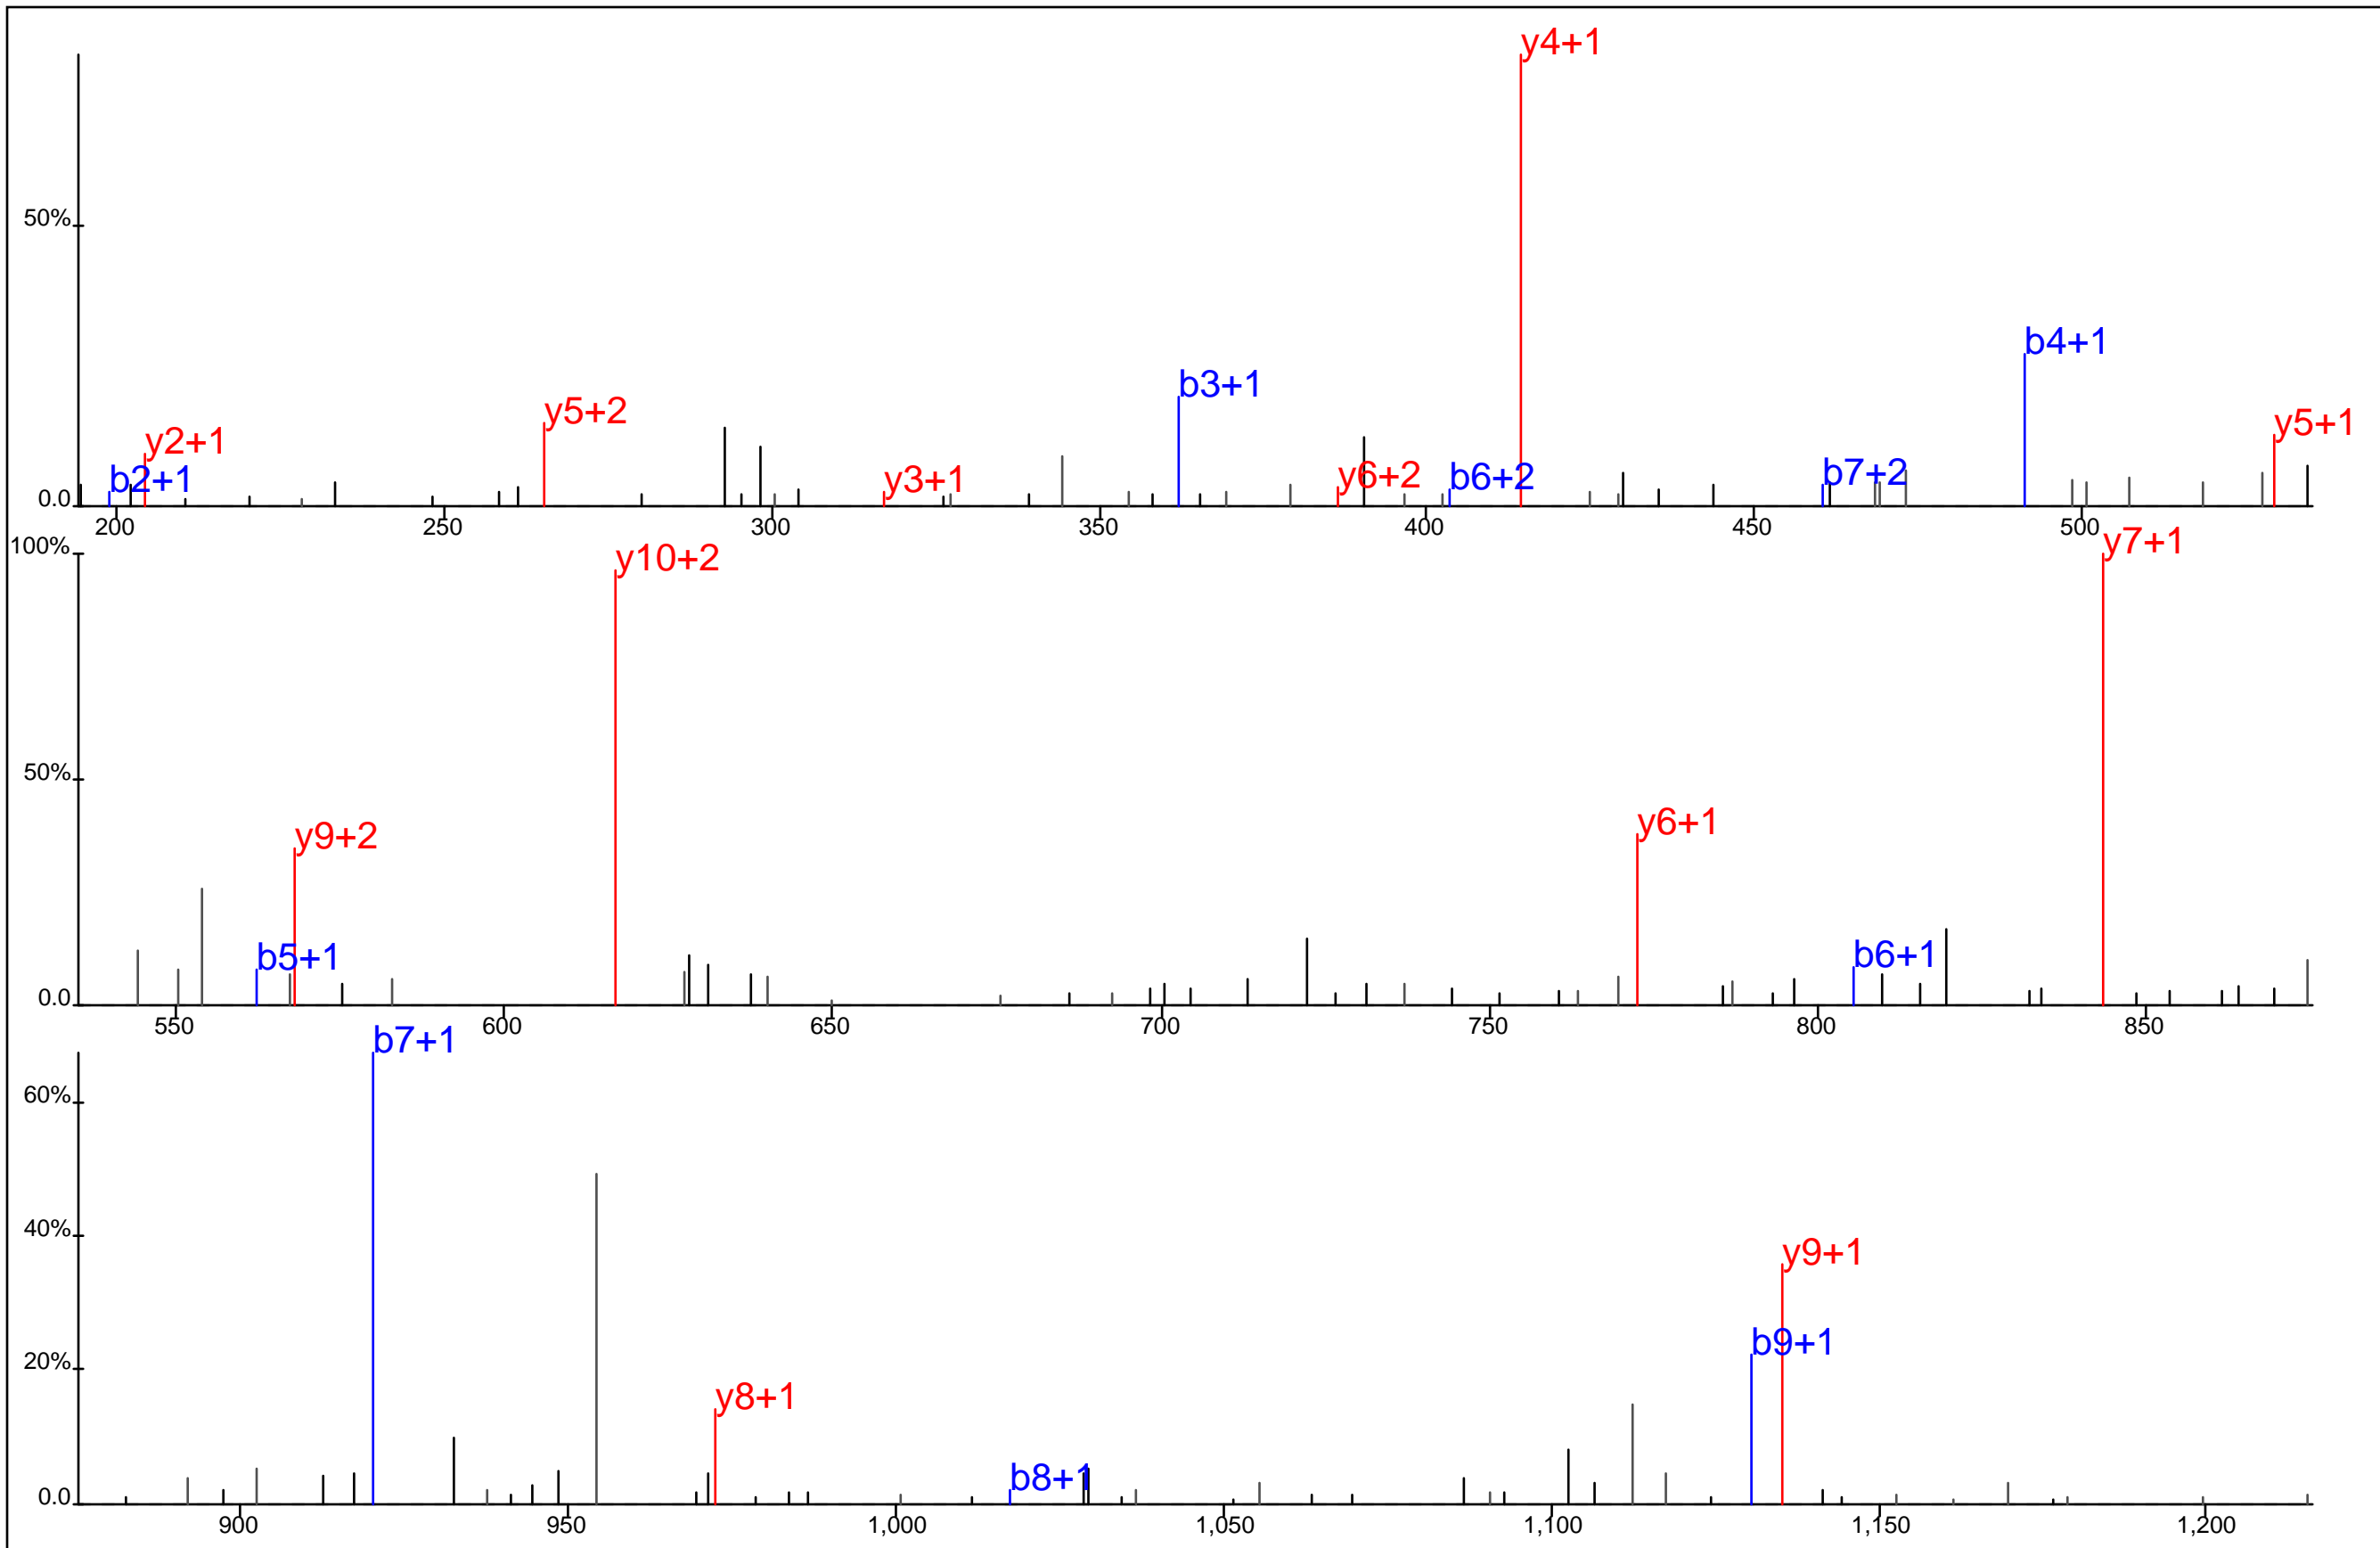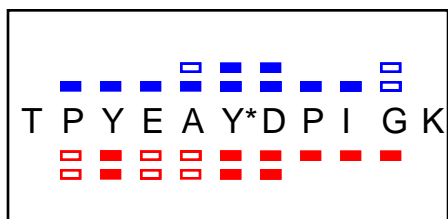

Protein Name: Nephtrin like 1  
 gi Accession: 0  
 Precursor Mass: 667.2880+2  
 Delta Mass: 1.783 ppm  
 XCorr: 39.76

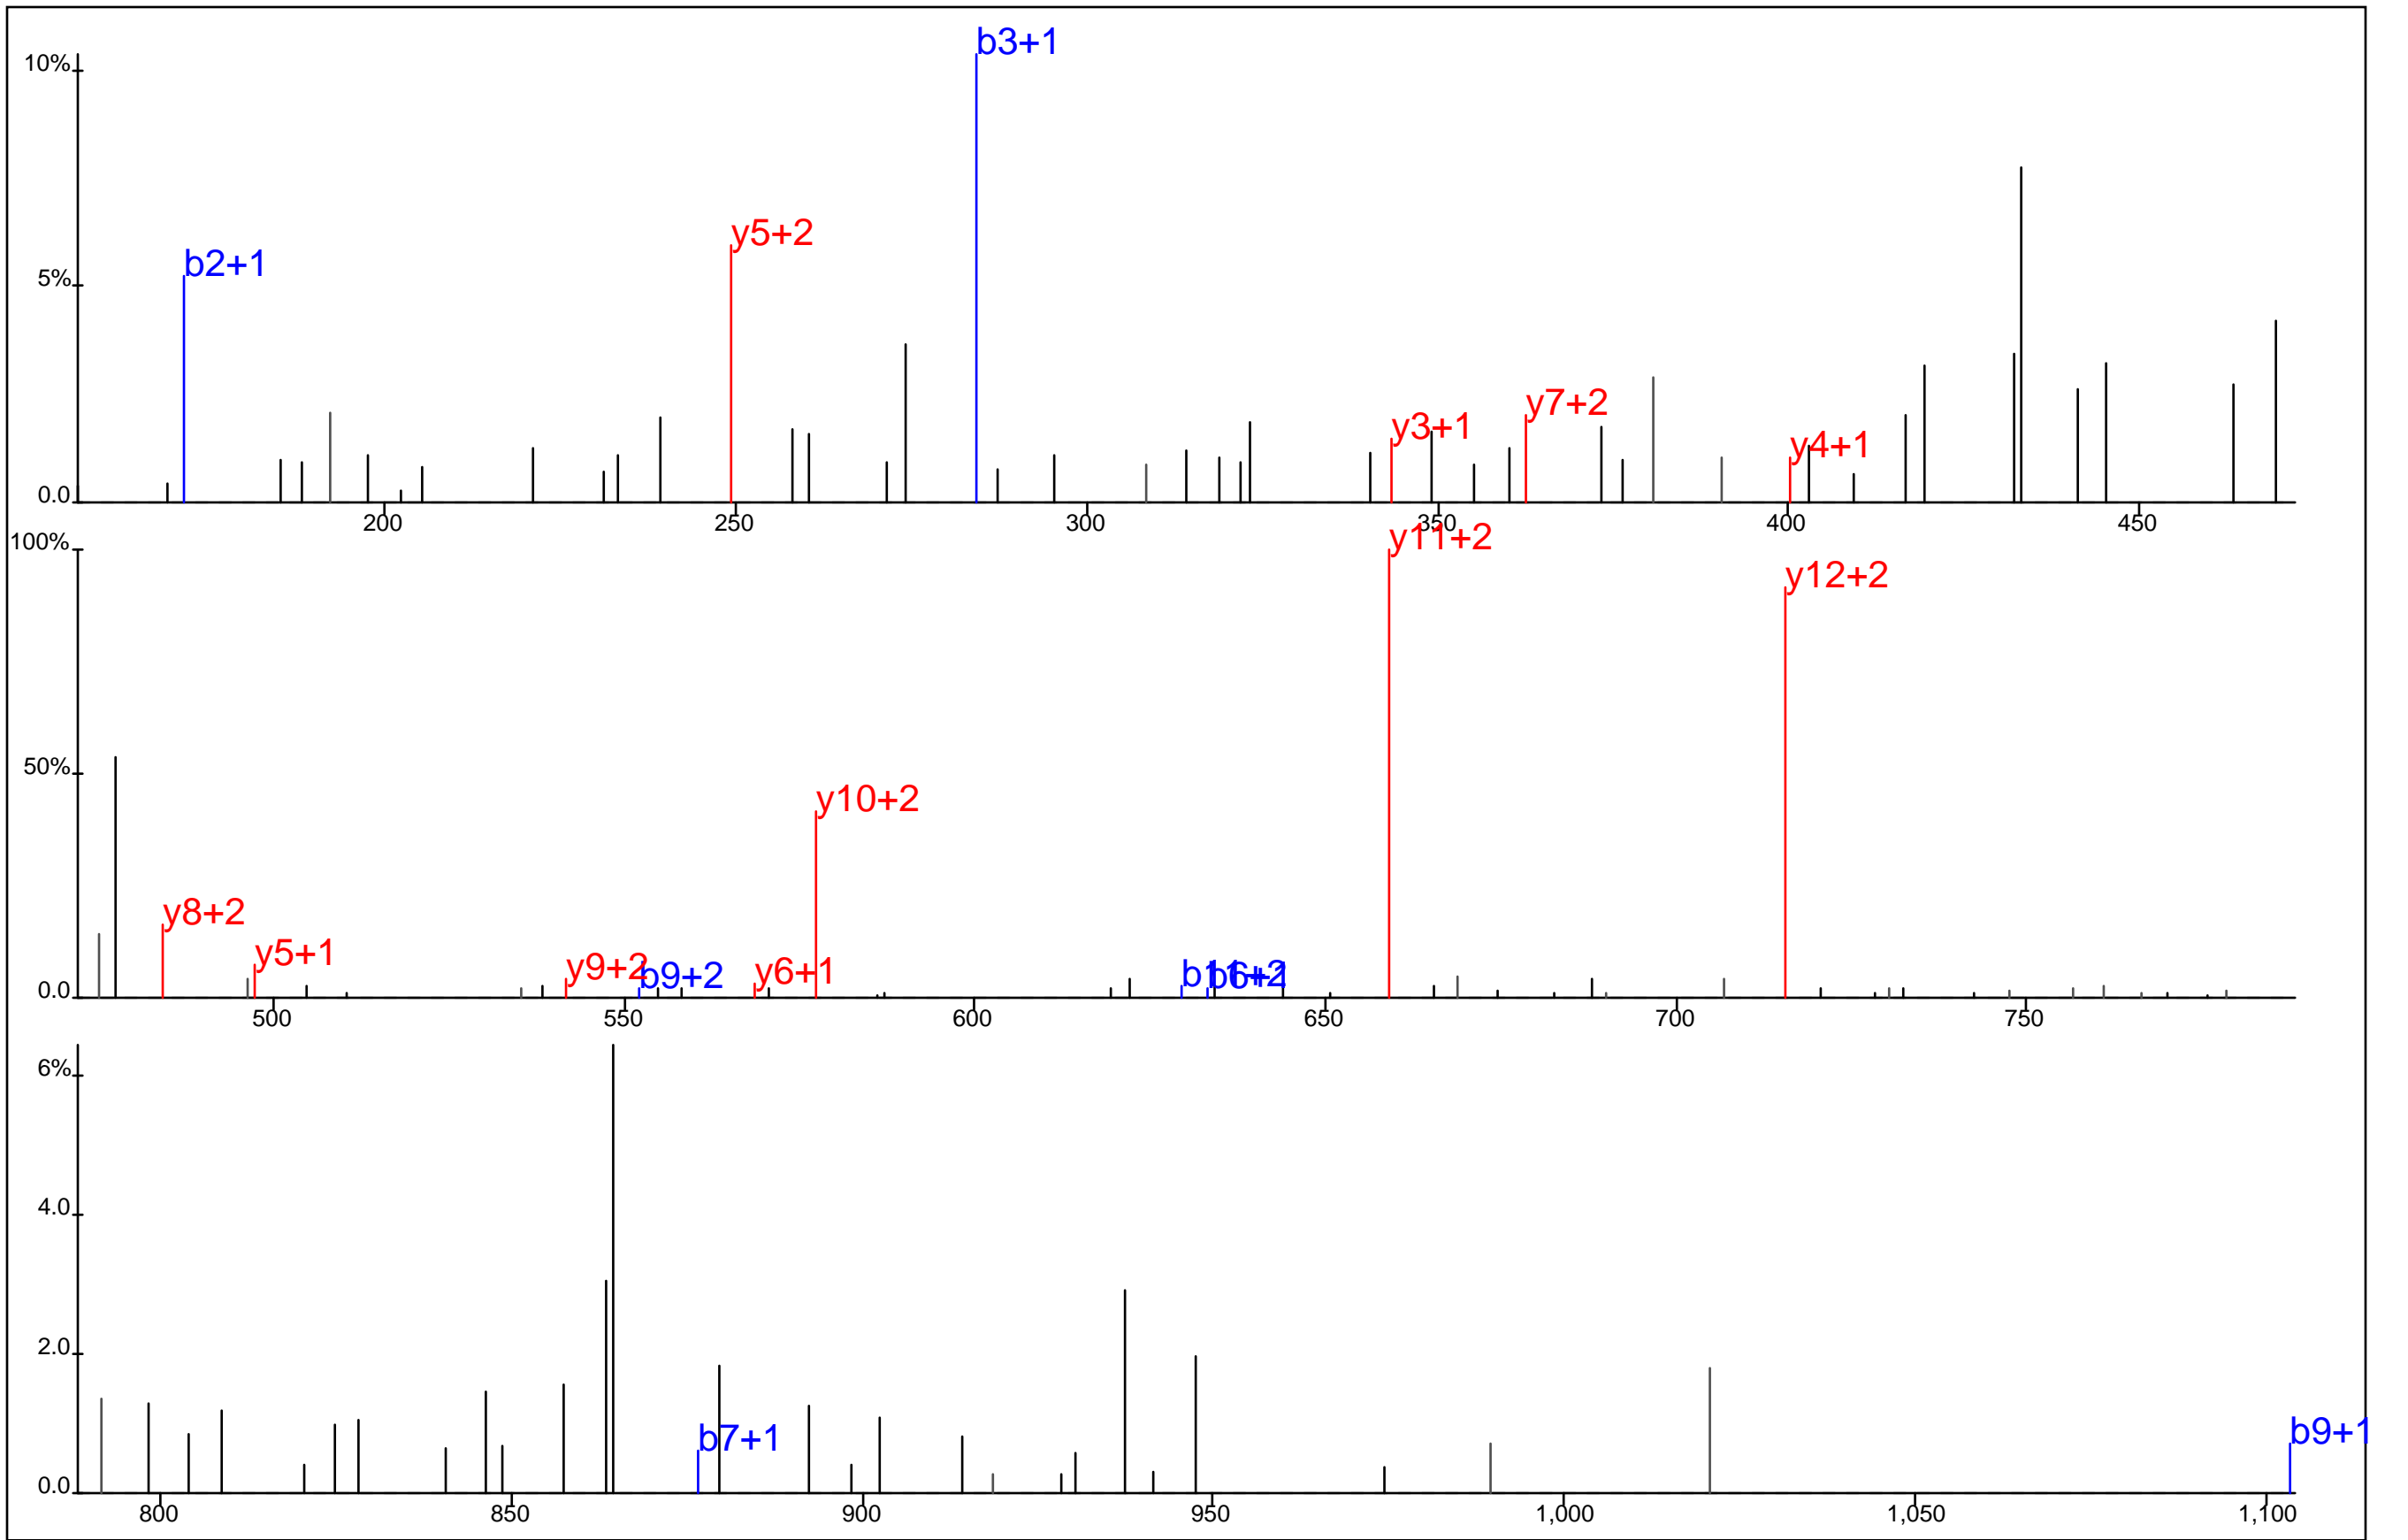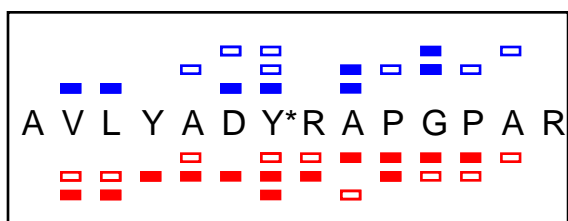

Protein Name: Nephrin like 1  
 gi Accession: 0  
 Precursor Mass: 533.9280+3  
 Delta Mass: 1.054 ppm  
 XCorr: 27.23

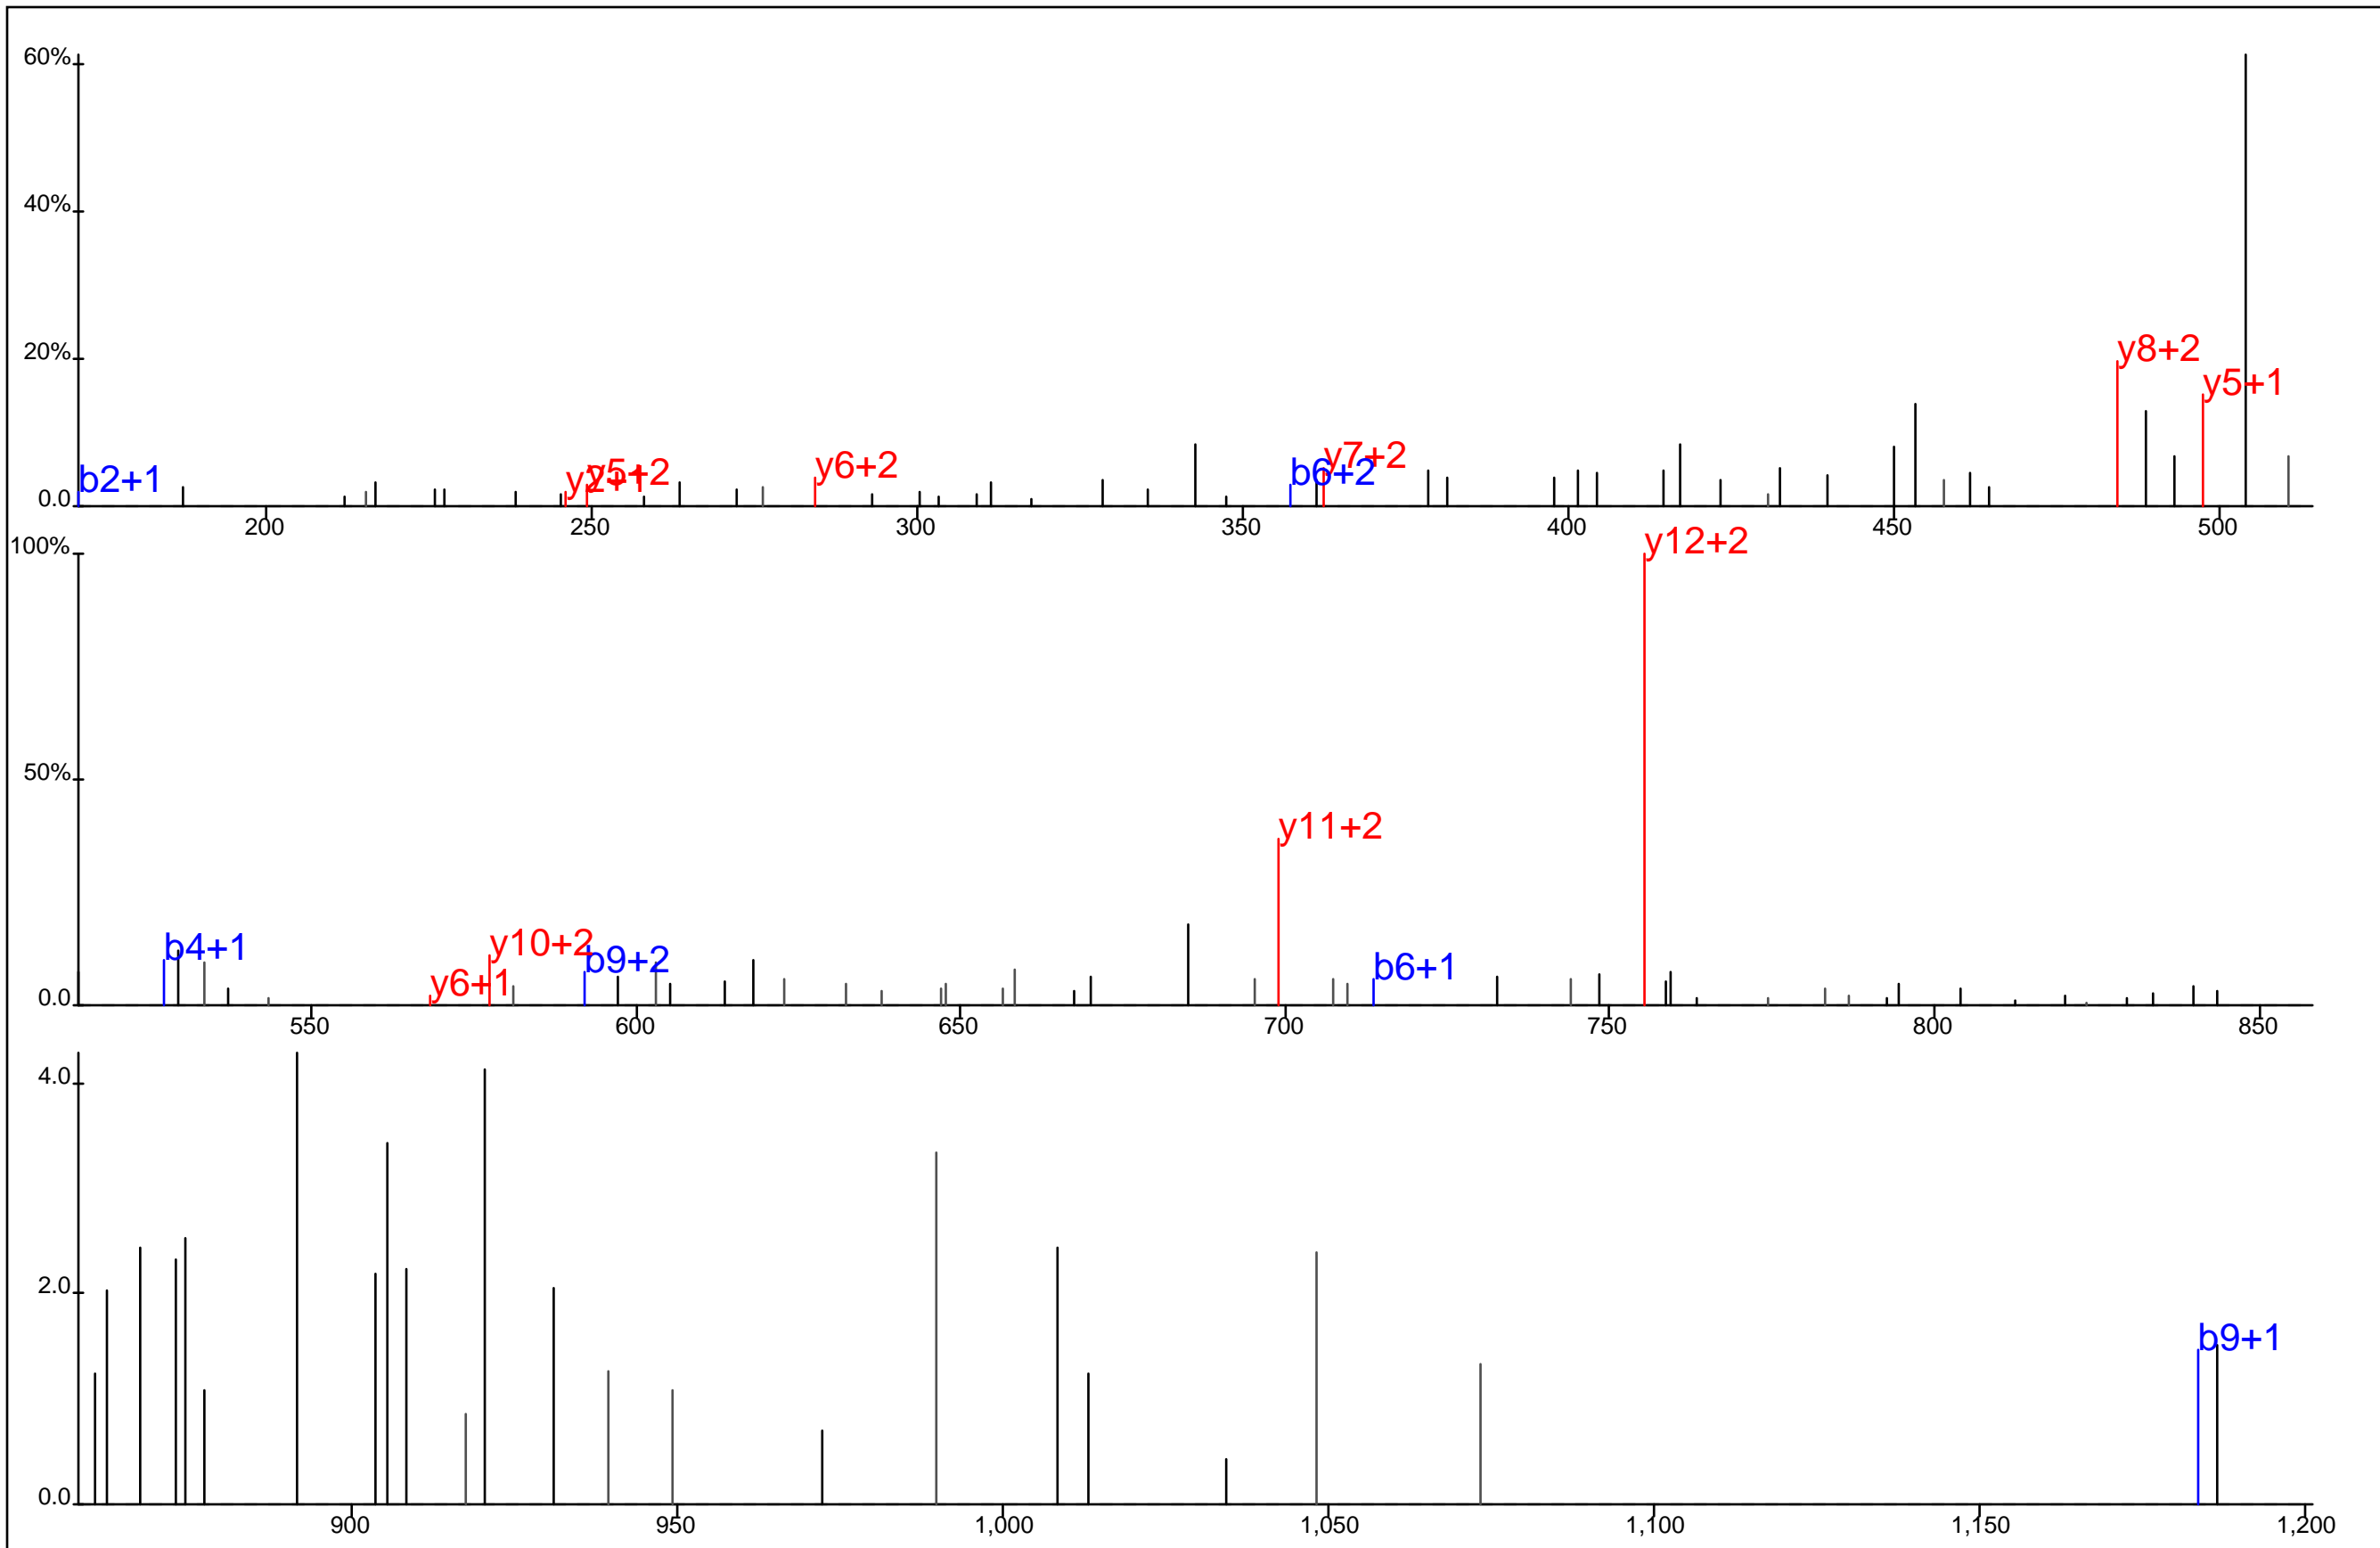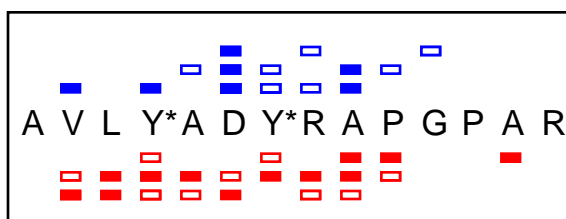

Protein Name: Nephrin like 1  
 gi Accession: 0  
 Precursor Mass: 560.5835+3  
 Delta Mass: 1.032 ppm  
 XCorr: 20.04

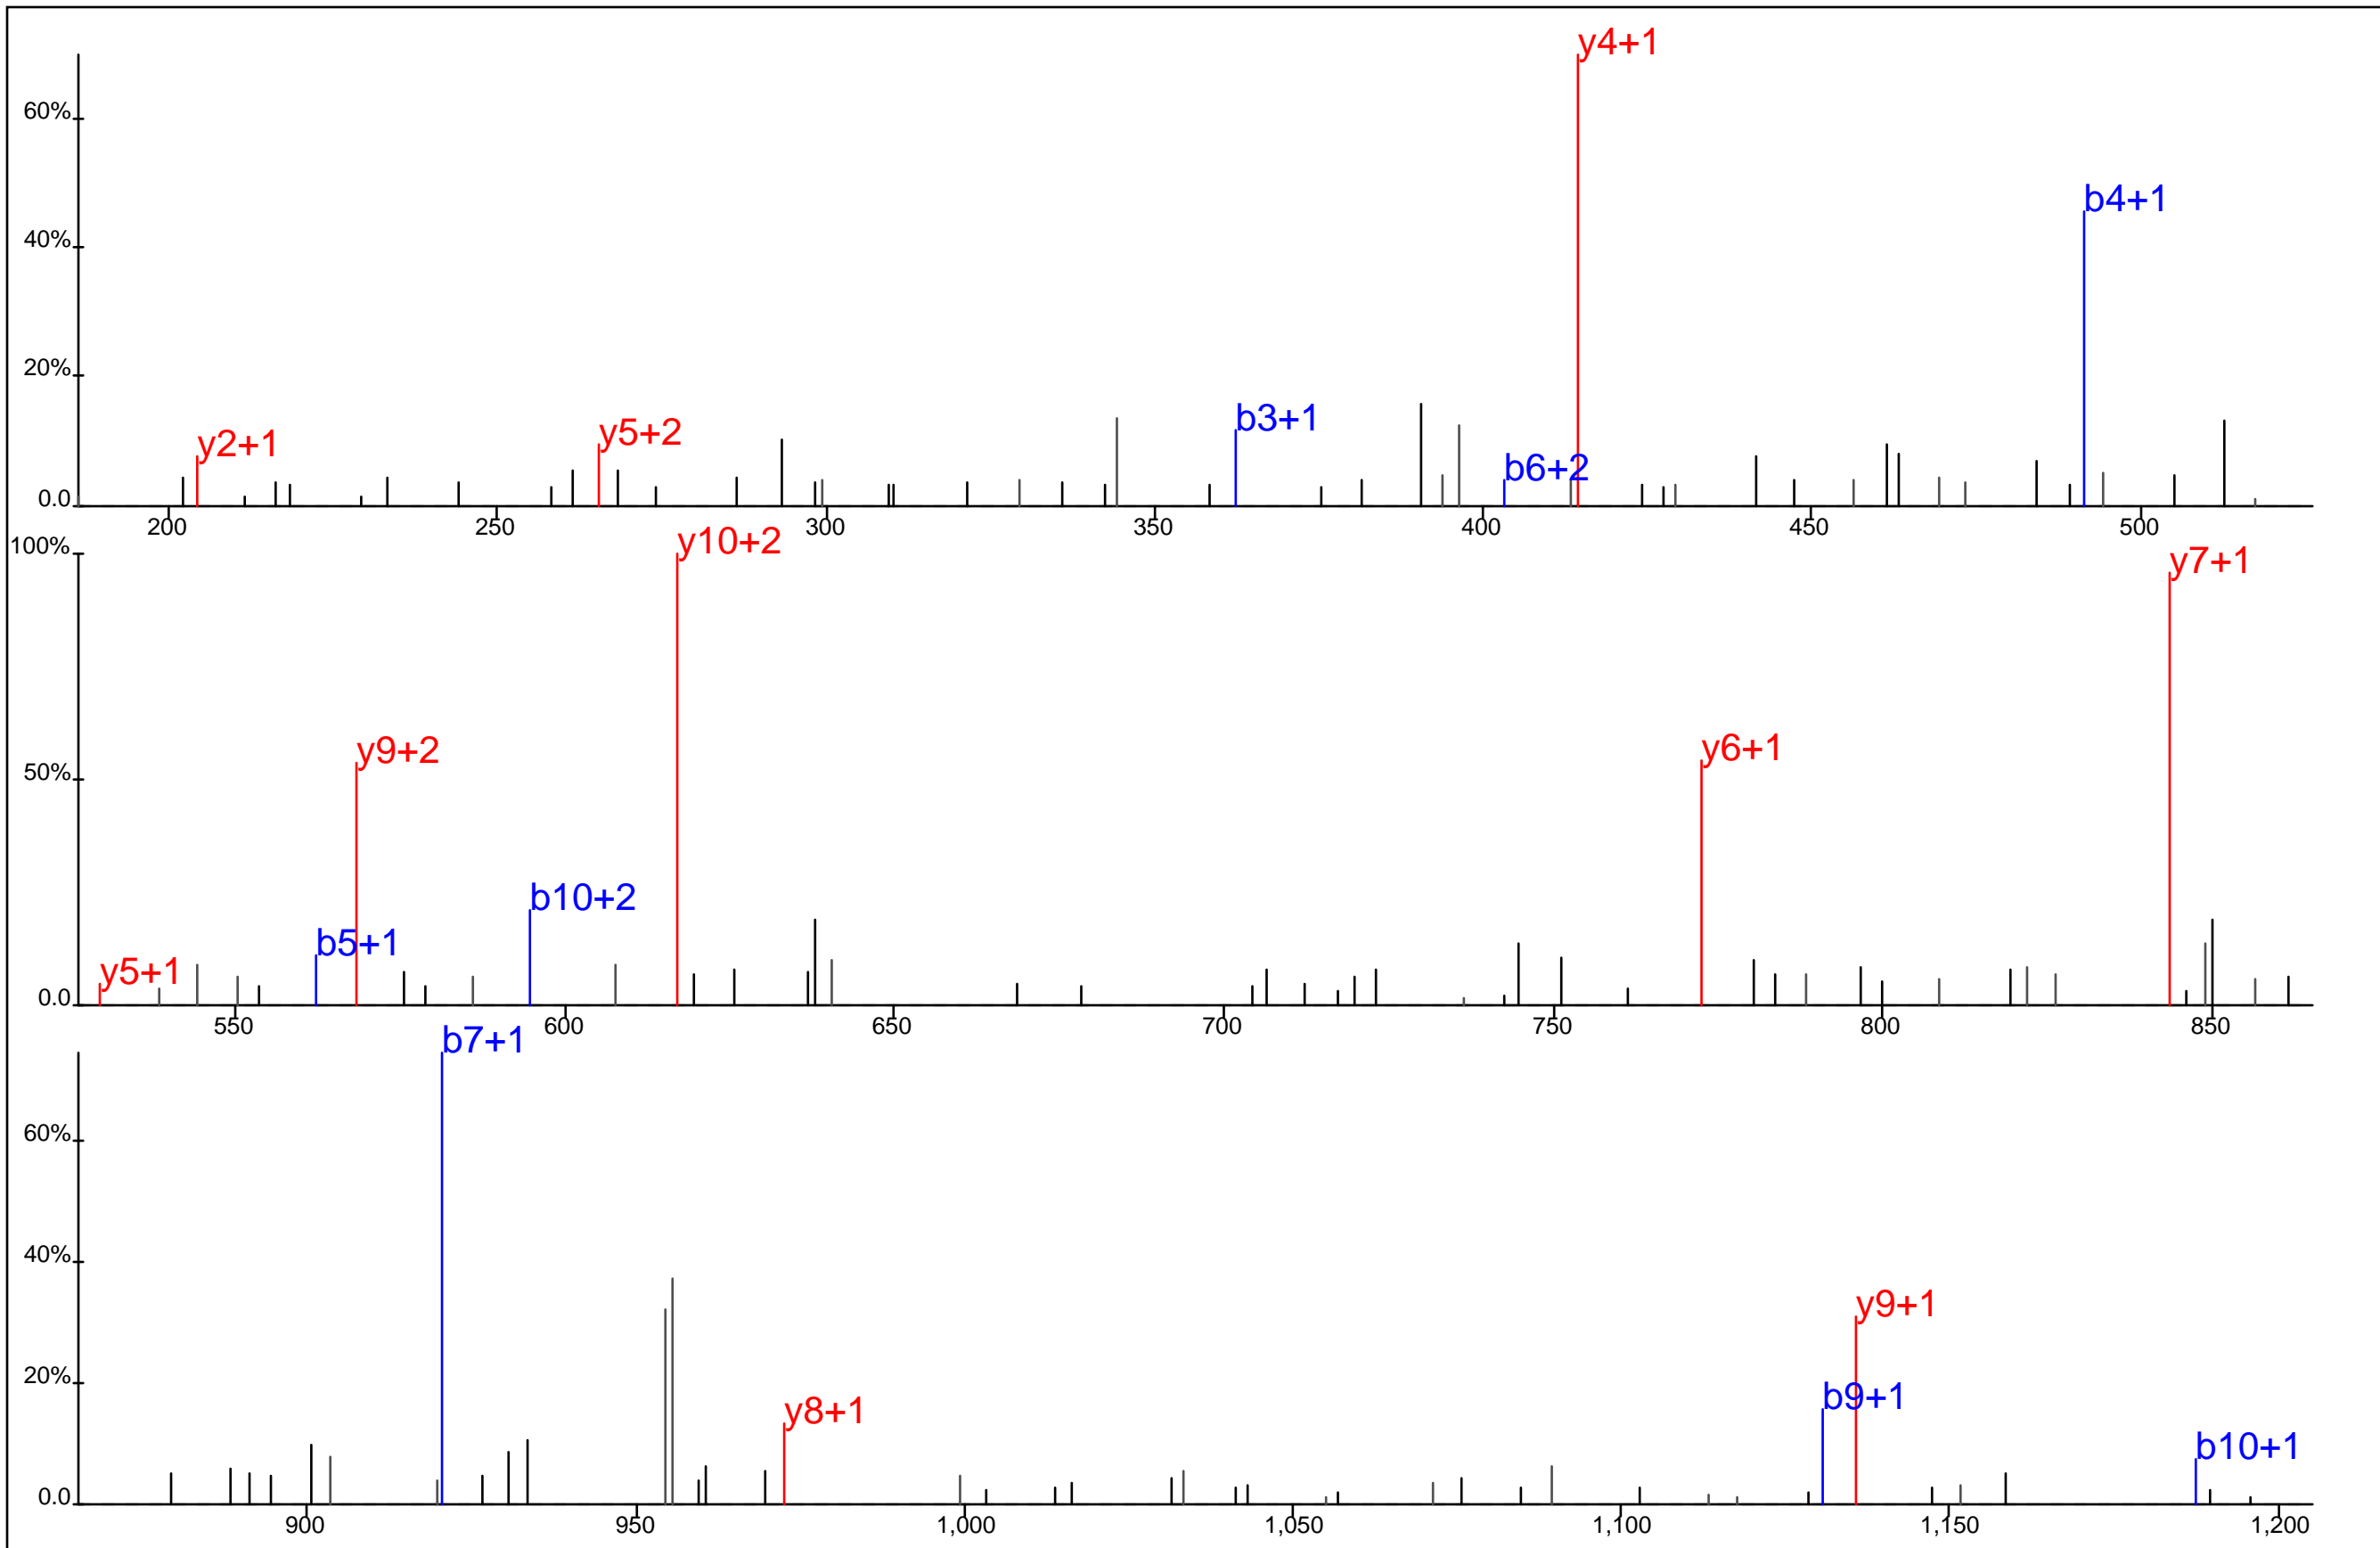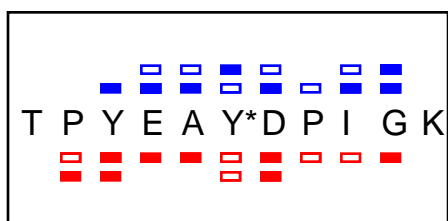

Protein Name: Nephrin like 1  
 gi Accession: 0  
 Precursor Mass: 667.2896+2  
 Delta Mass: 0.597 ppm  
 XCorr: 41.41



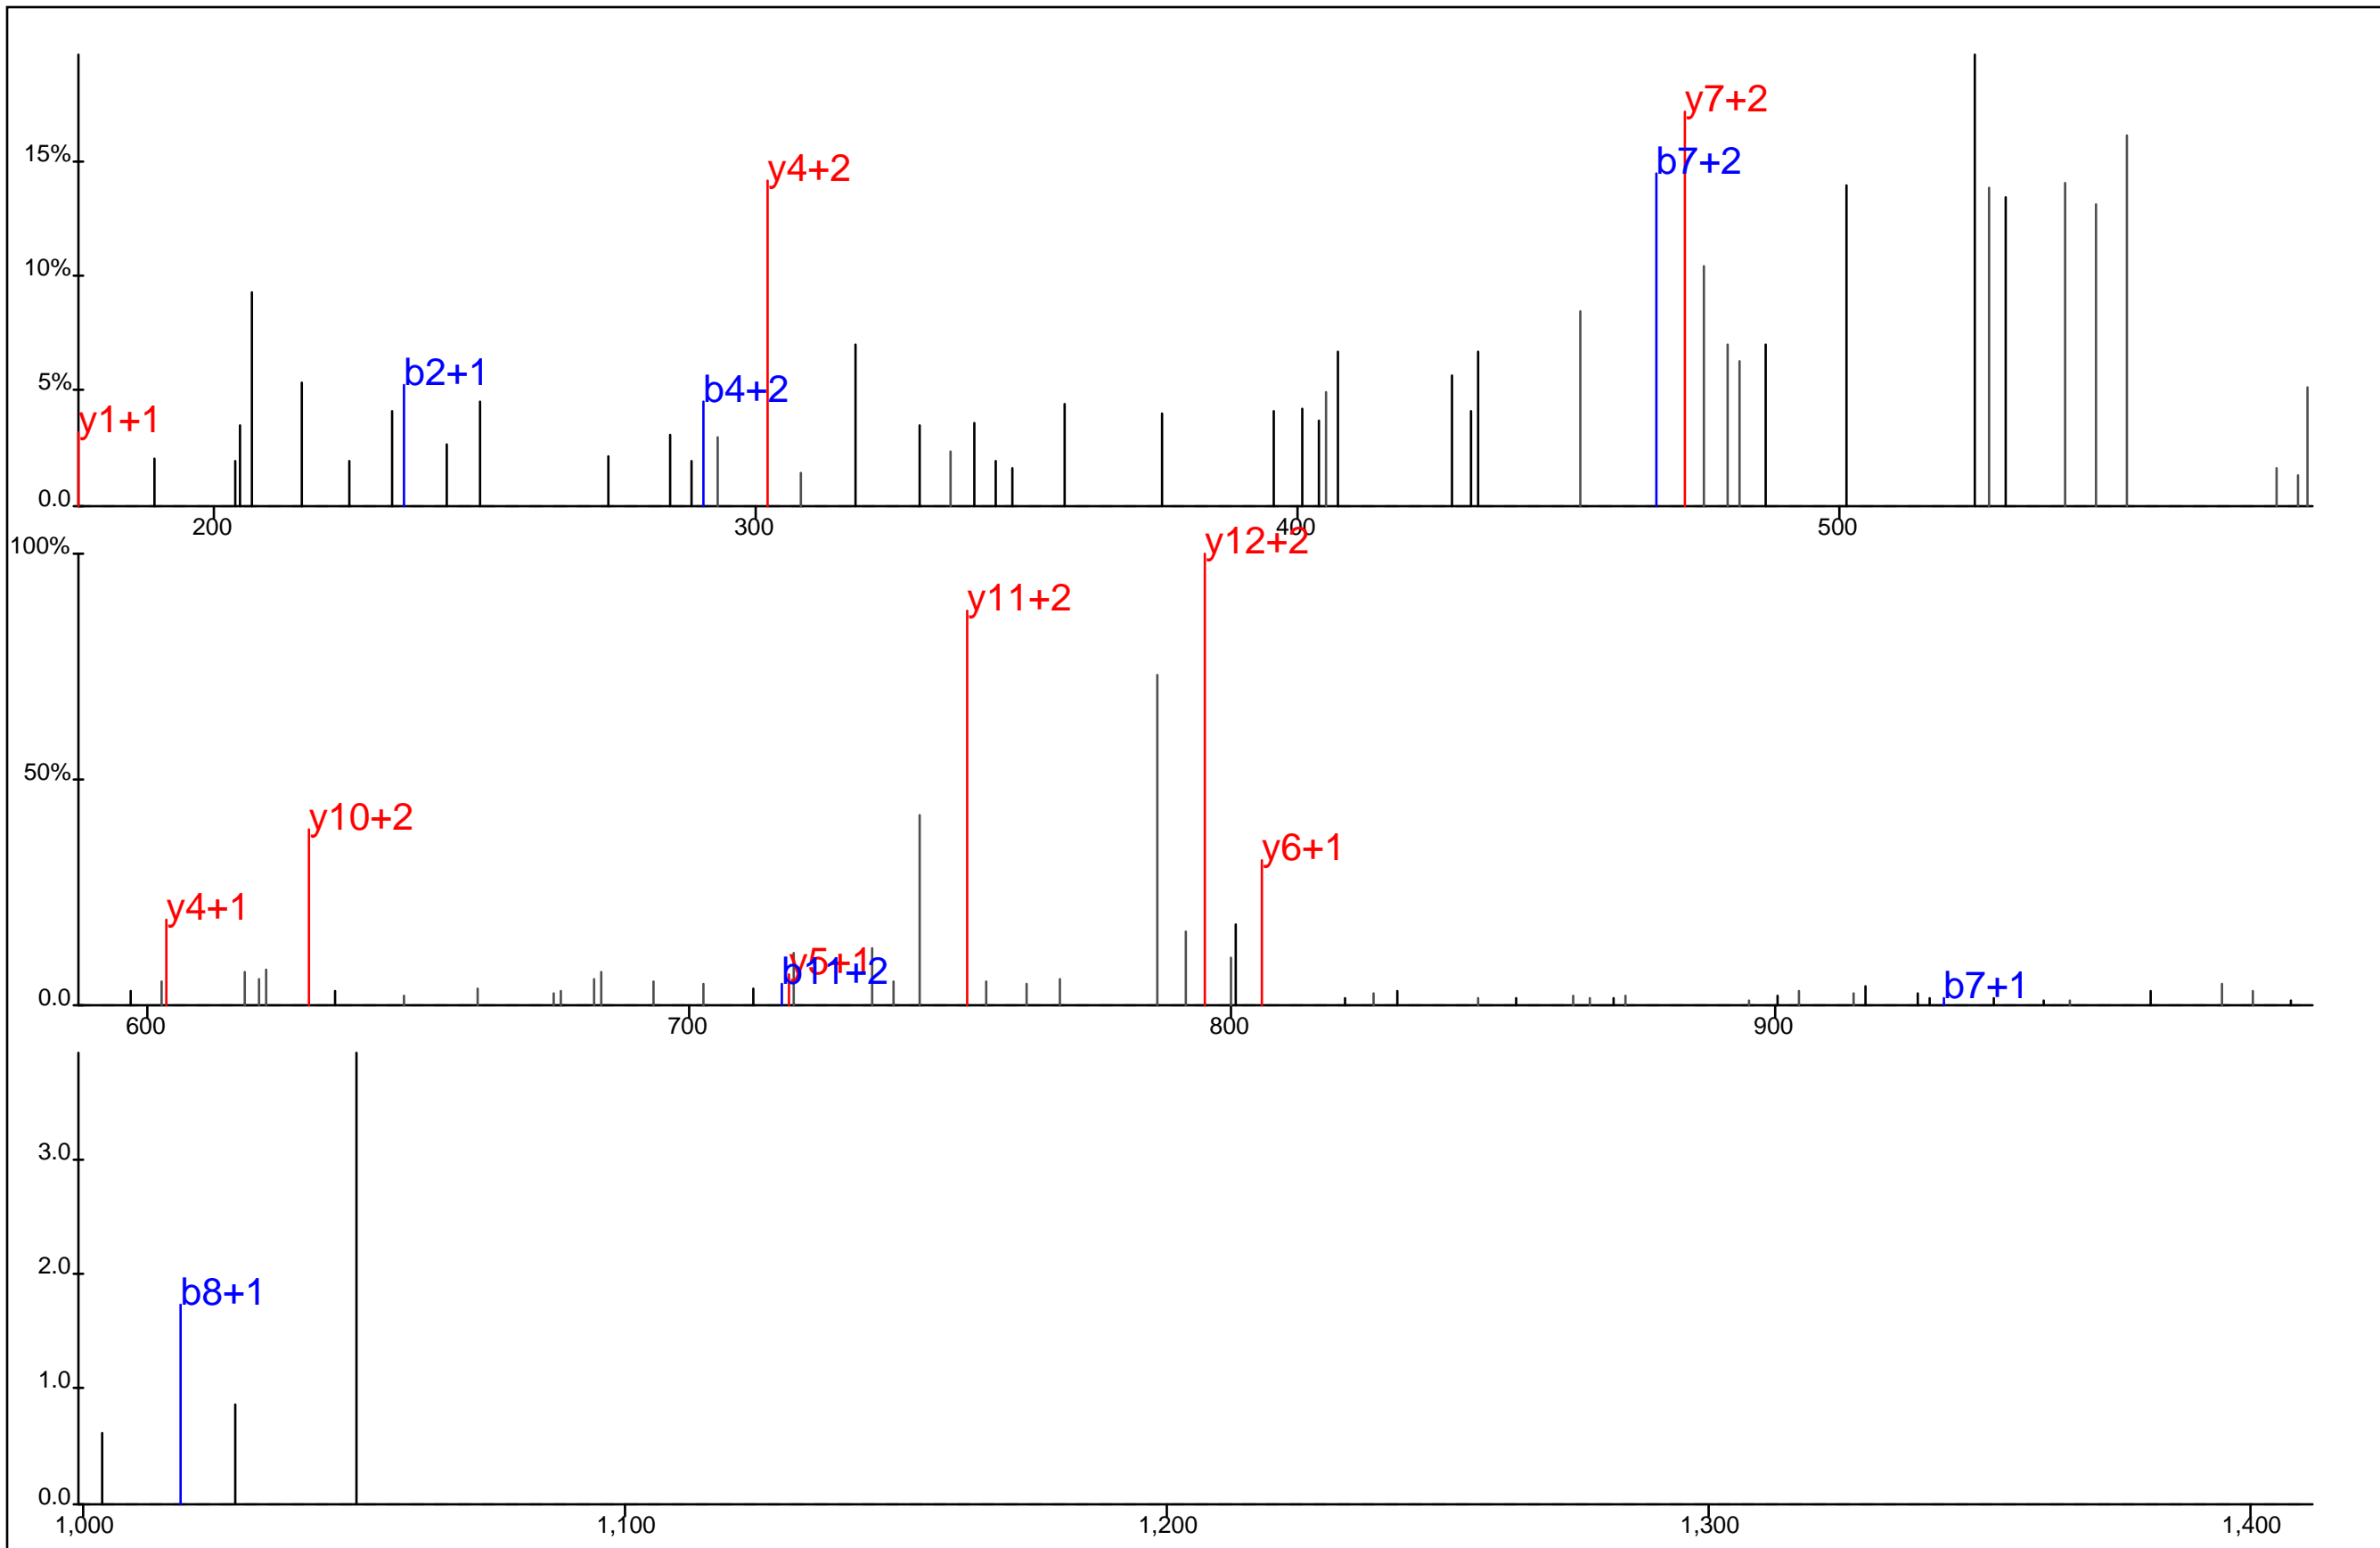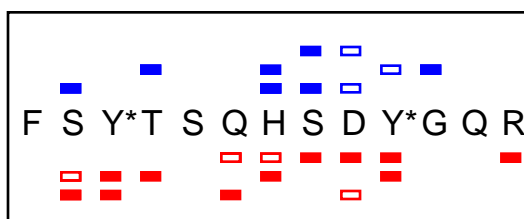

Protein Name: Nephrin like 1  
 gi Accession: 0  
 Precursor Mass: 579.2106+3  
 Delta Mass: 1.401 ppm  
 XCorr: 24.75

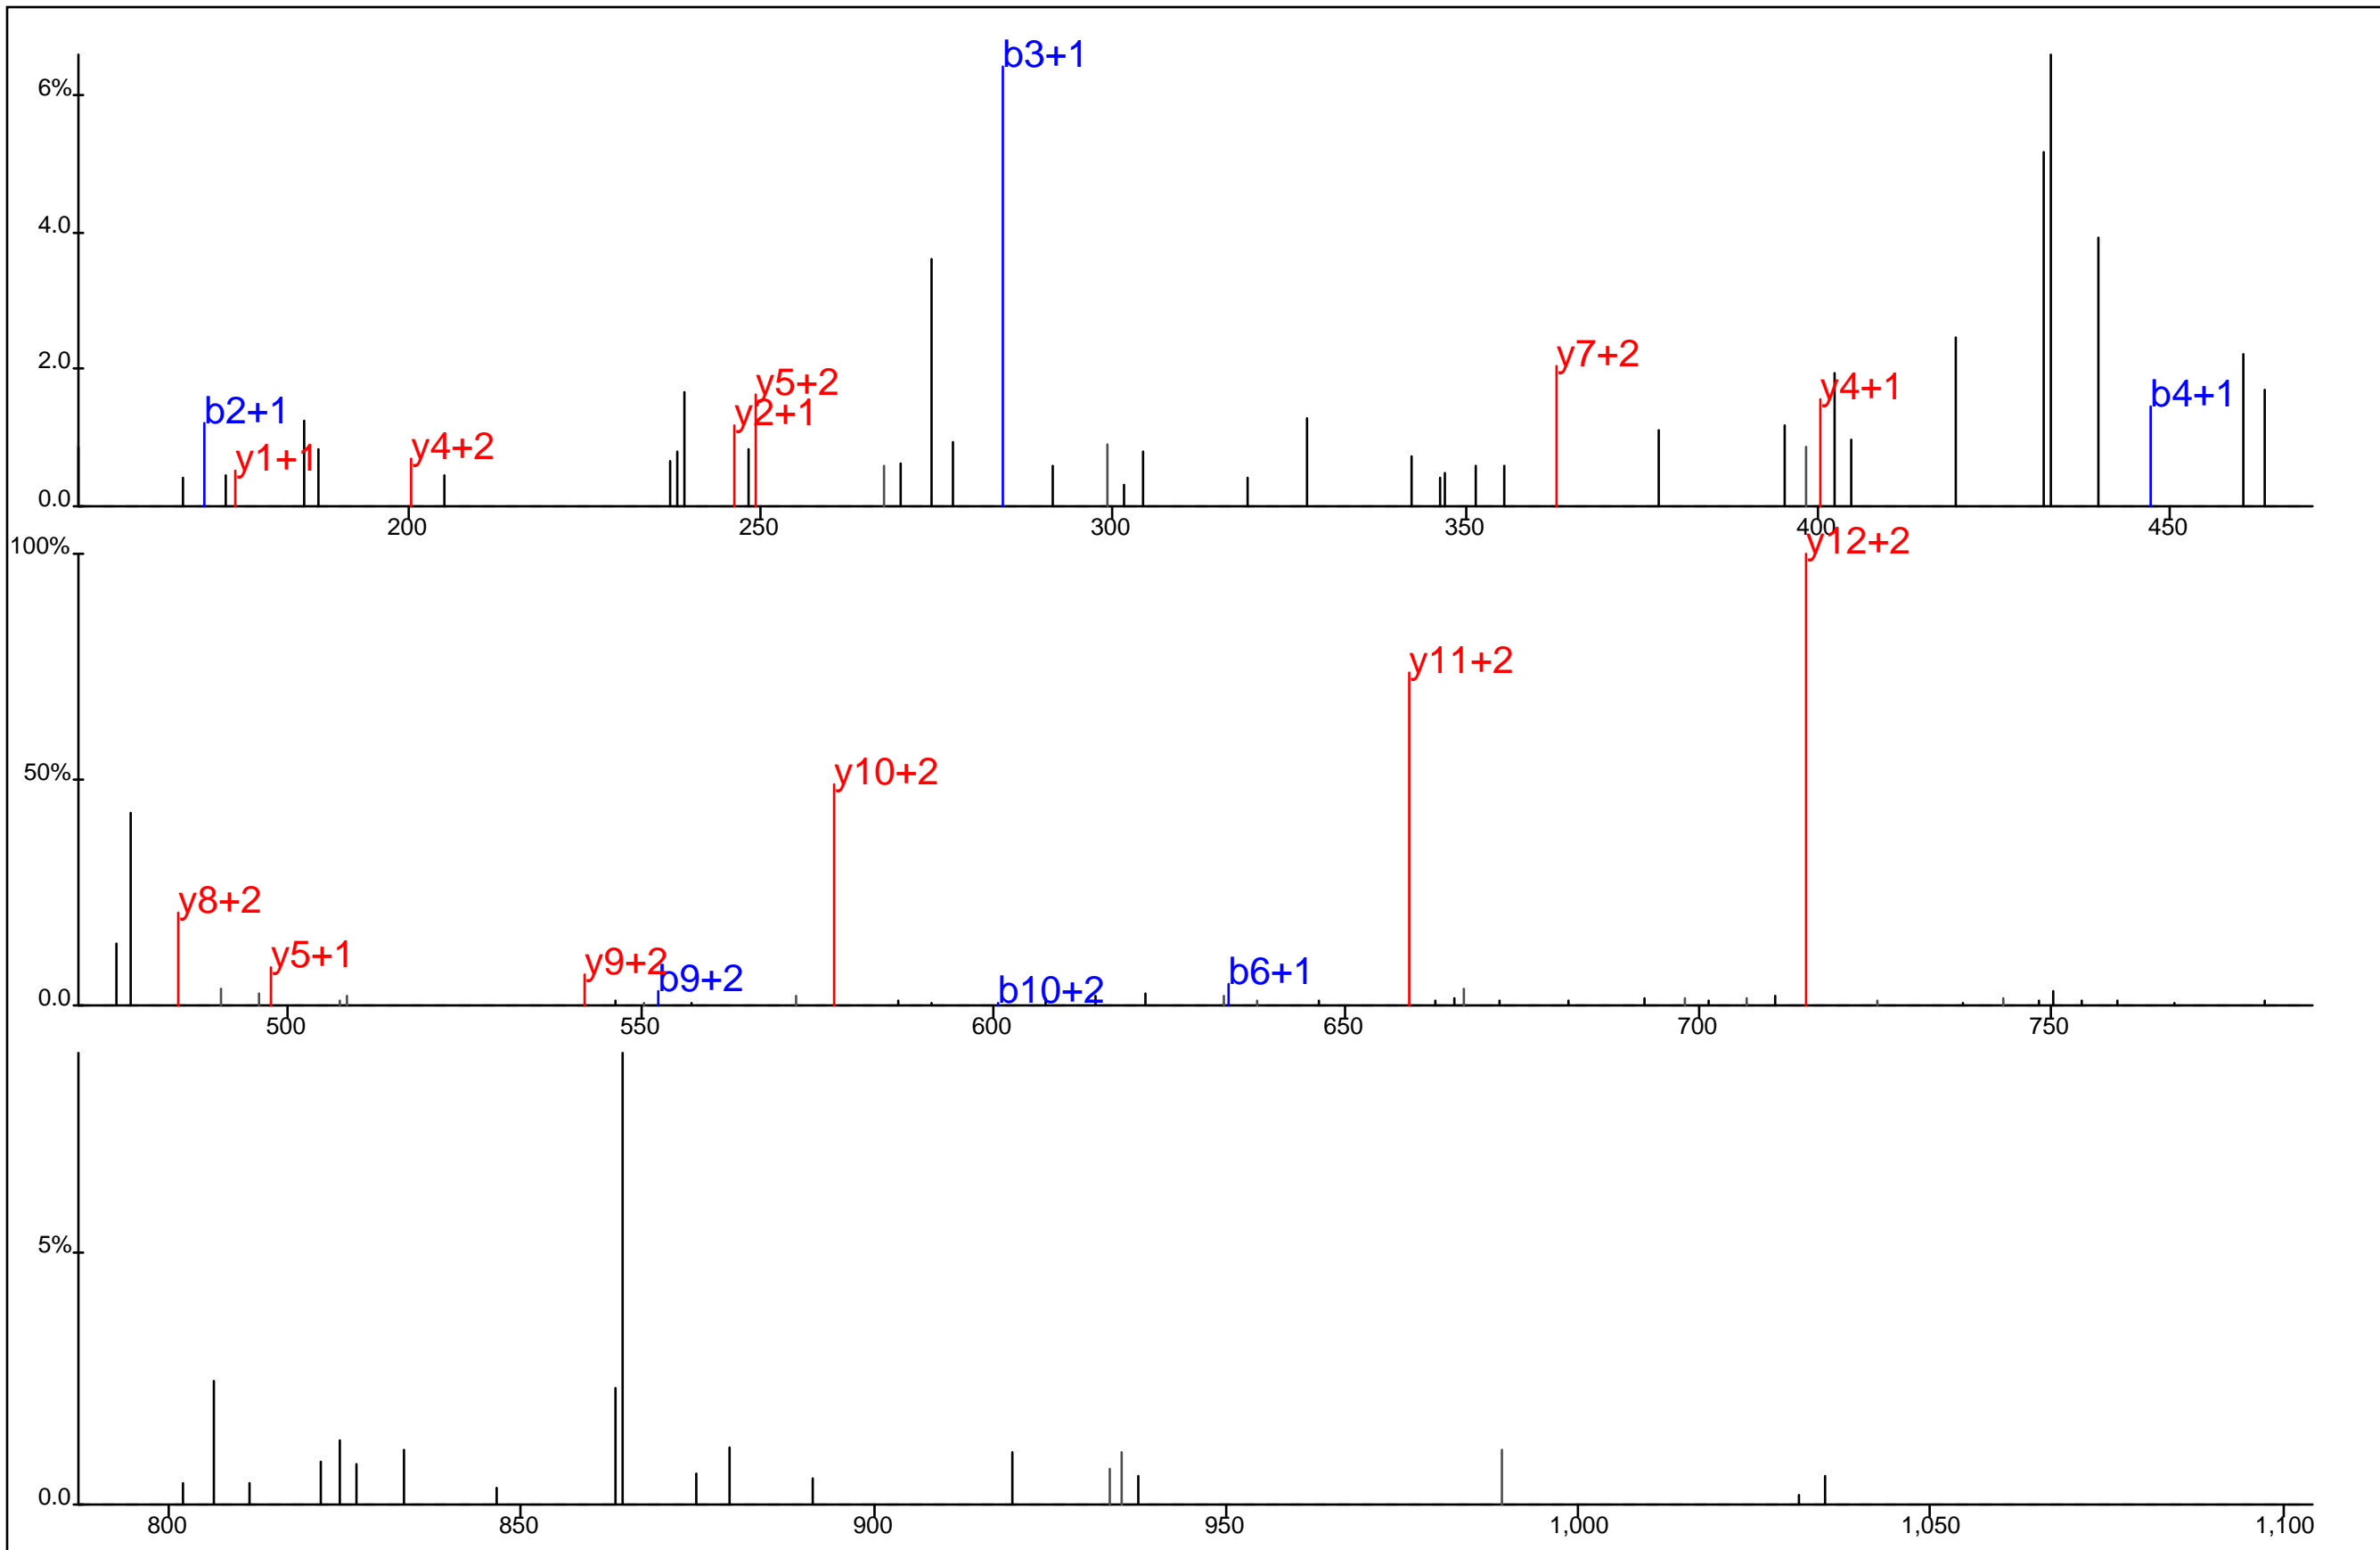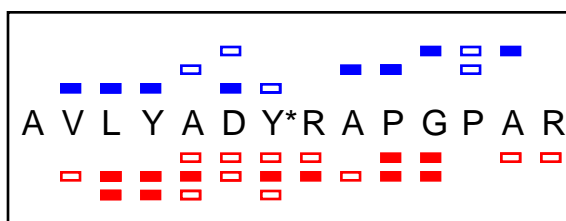

Protein Name: Nephrin like 1  
 gi Accession: 0  
 Precursor Mass: 533.9278+3  
 Delta Mass: 0.594 ppm  
 XCorr: 26.69

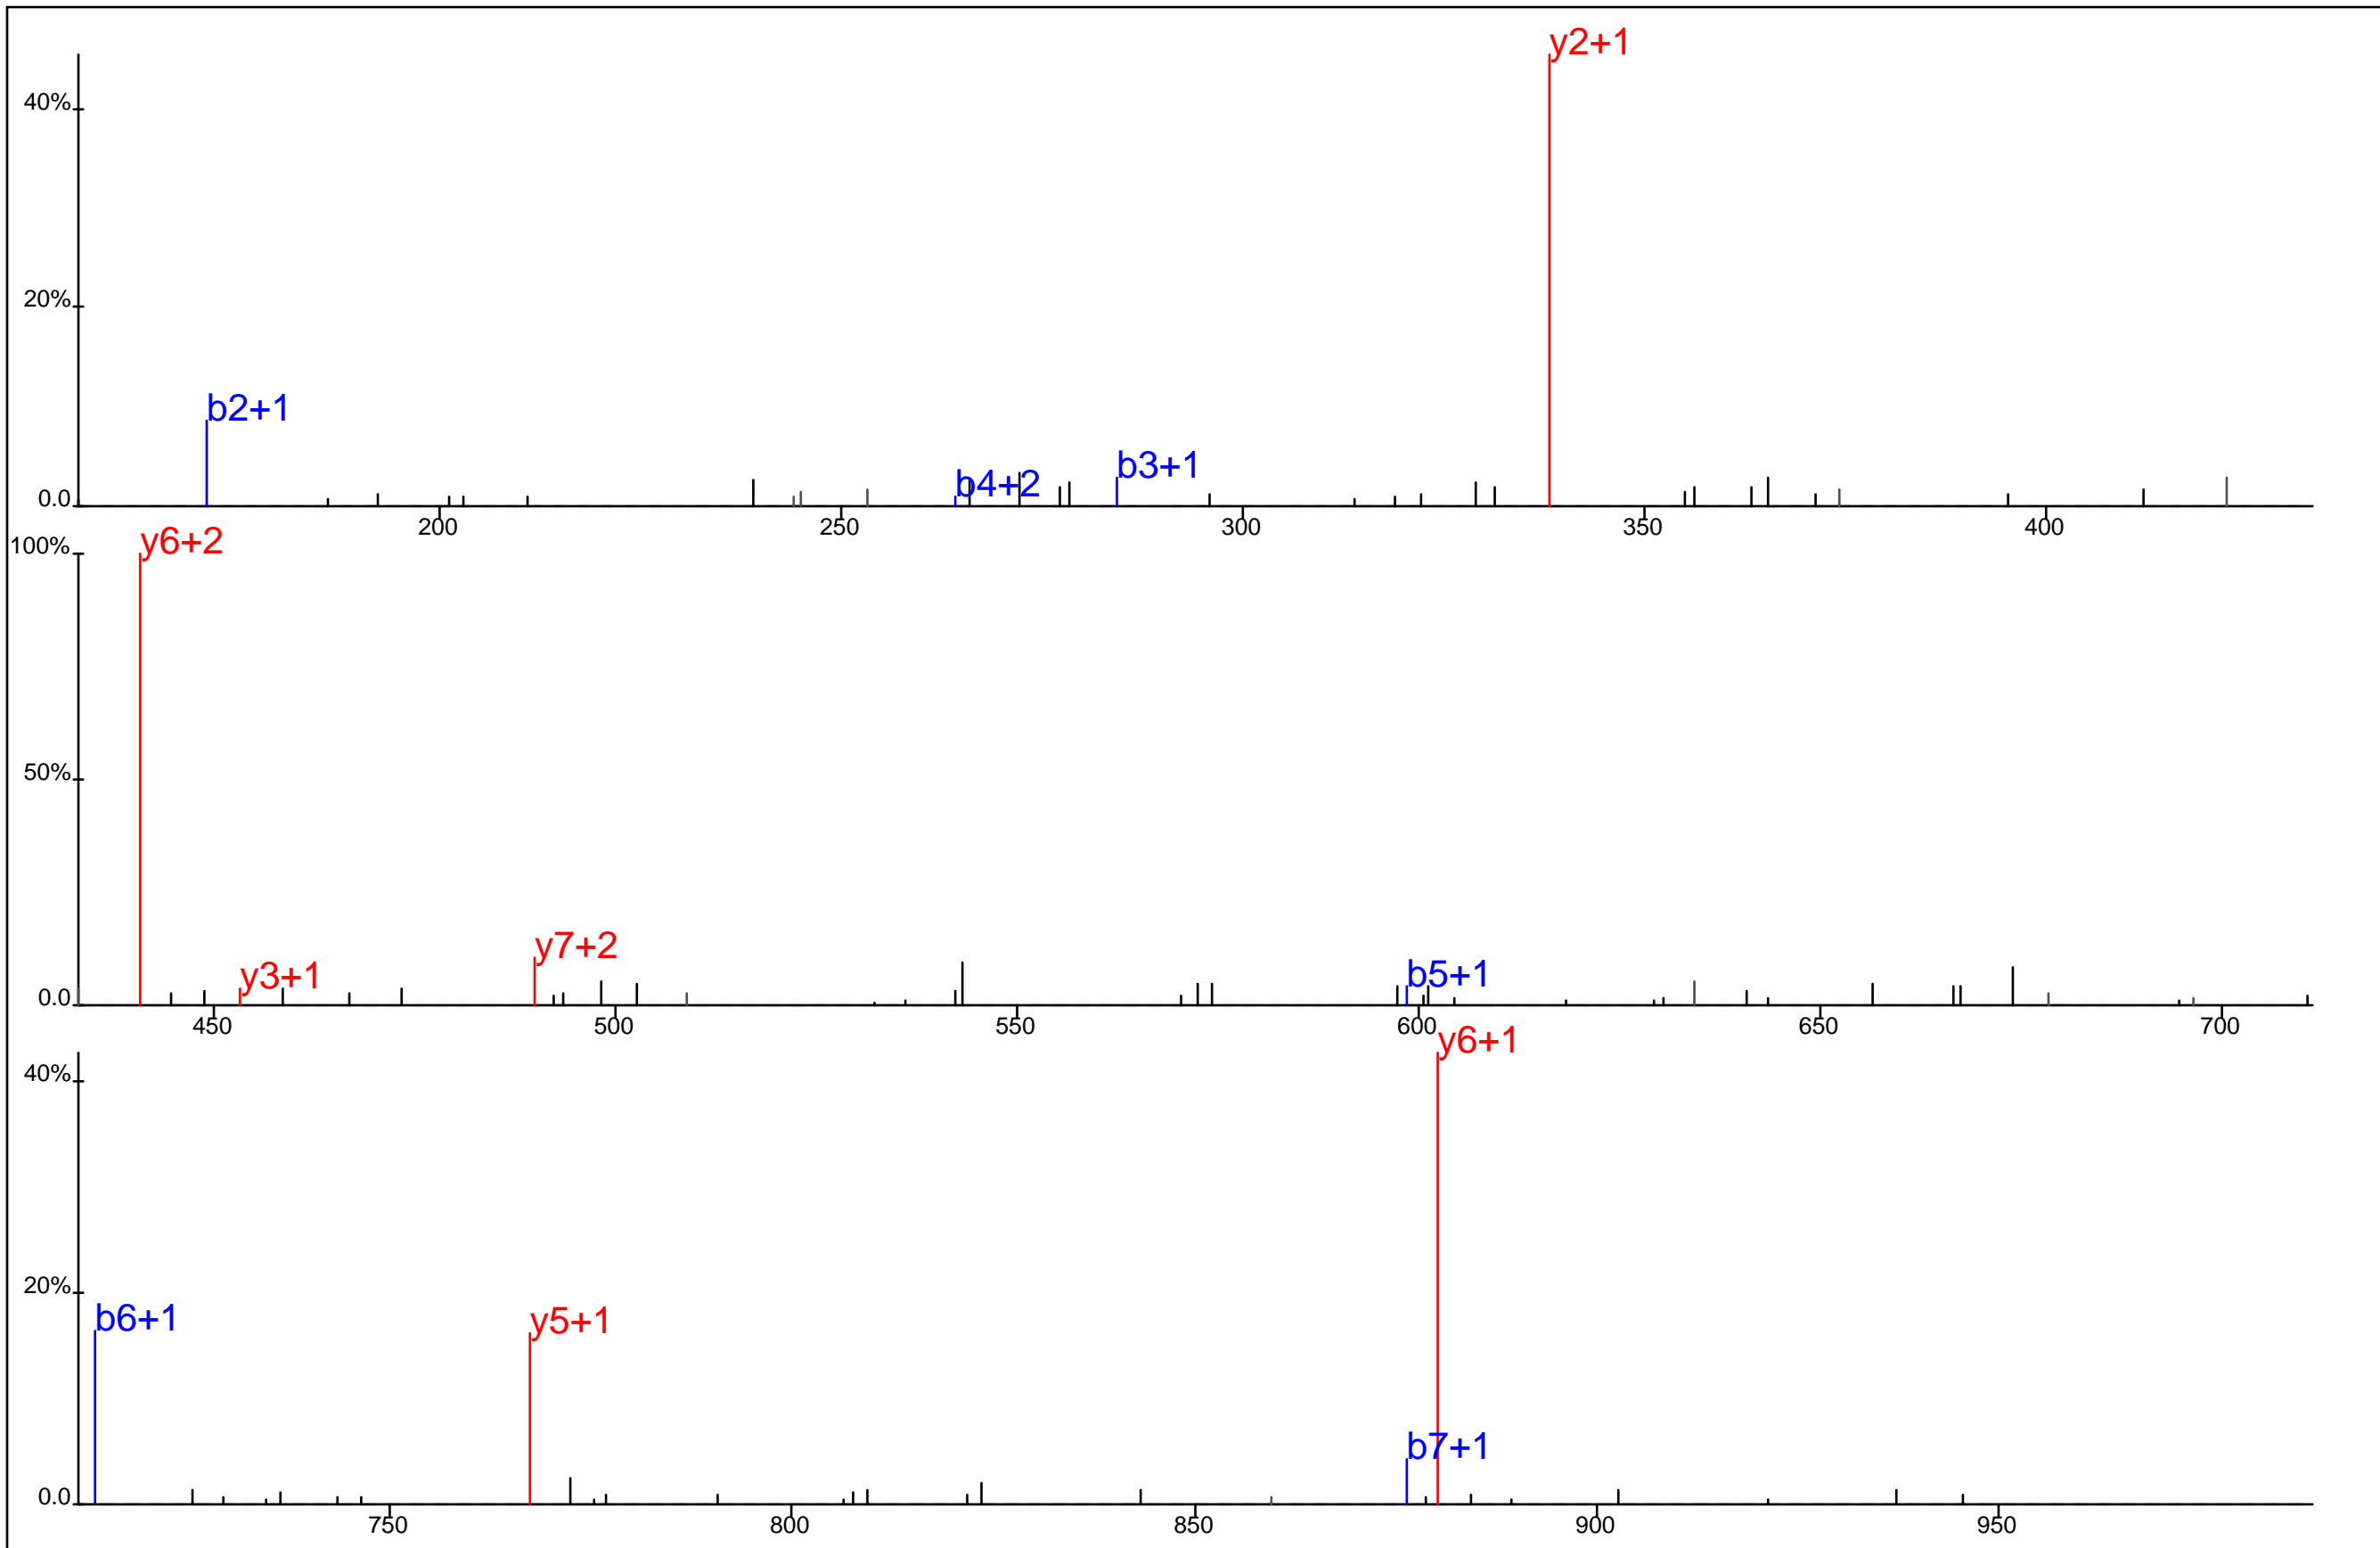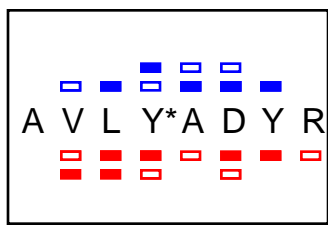

Protein Name: Nephrin like 1  
 gi Accession: 0  
 Precursor Mass: 525.7379+2  
 Delta Mass: 2.732 ppm  
 XCorr: 22.52

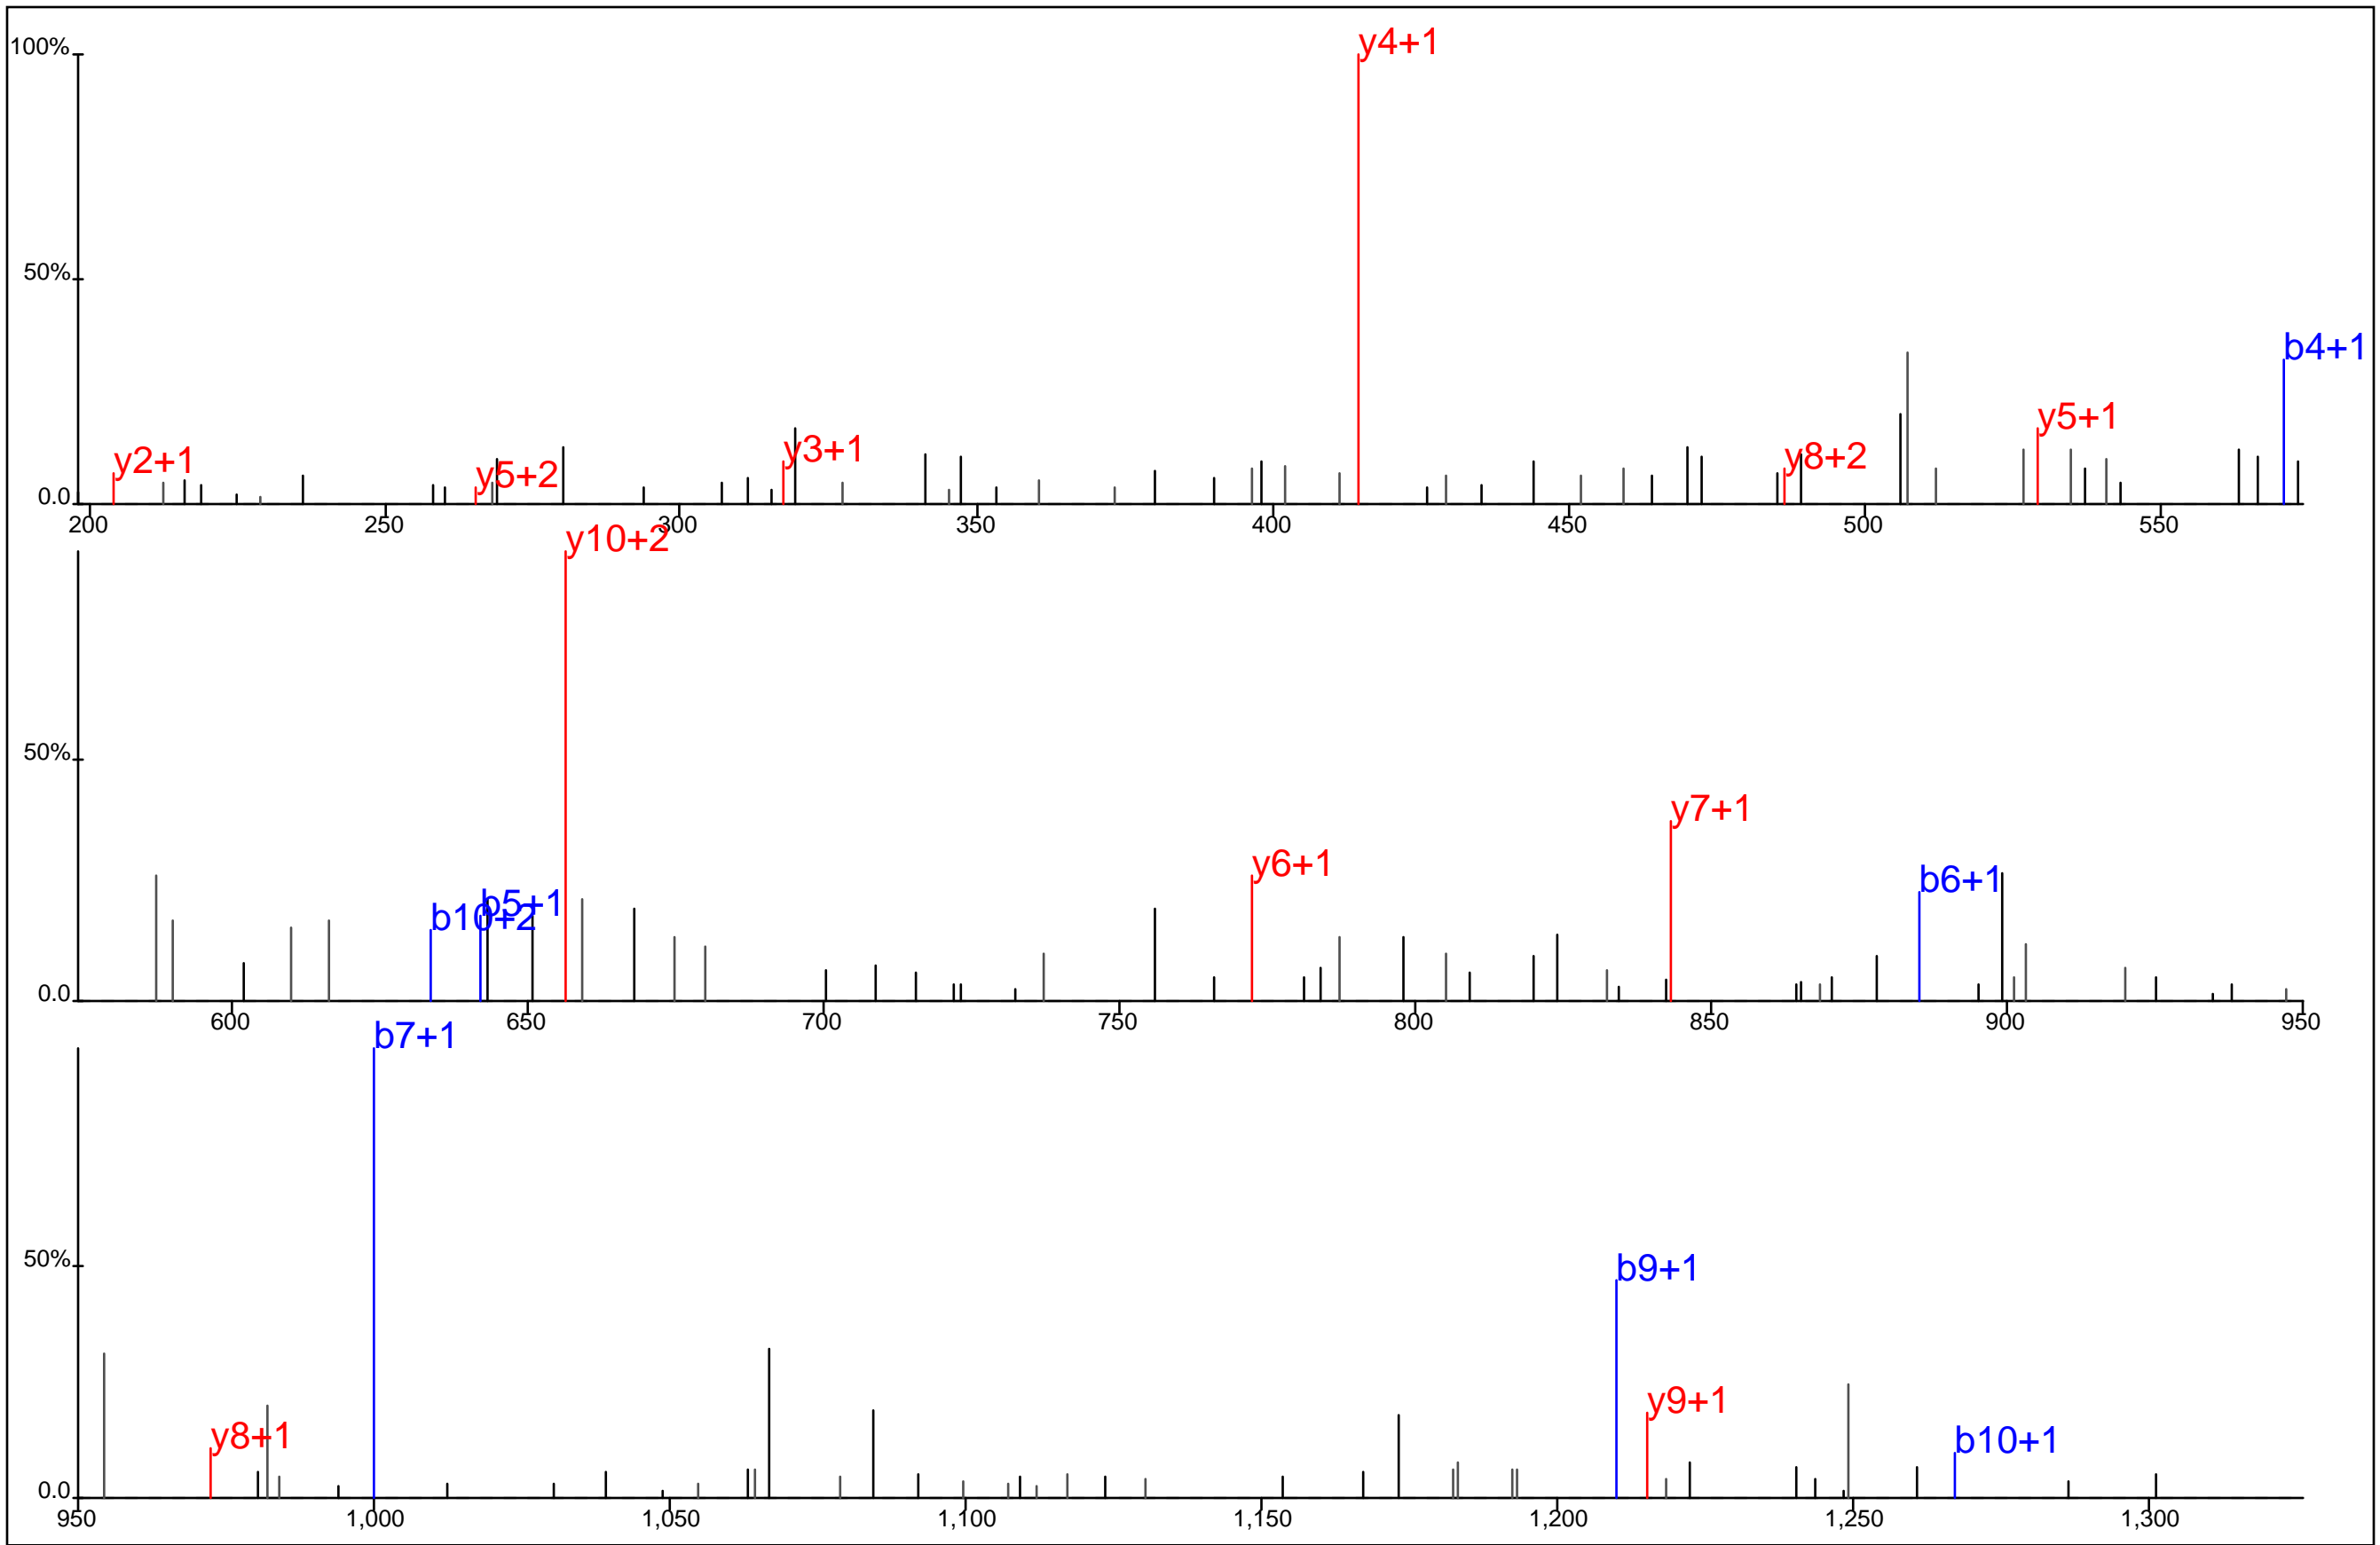

▢ ▢ ▢ ▢ ▢ ▢ ▢  
 T P Y\* E A Y\* D P I G K  
▢ ▢ ▢ ▢ ▢ ▢ ▢

Protein Name: Nephrin like 1  
 gi Accession: 0  
 Precursor Mass: 707.2726+2  
 Delta Mass: 0.296 ppm  
 XCorr: 27.98



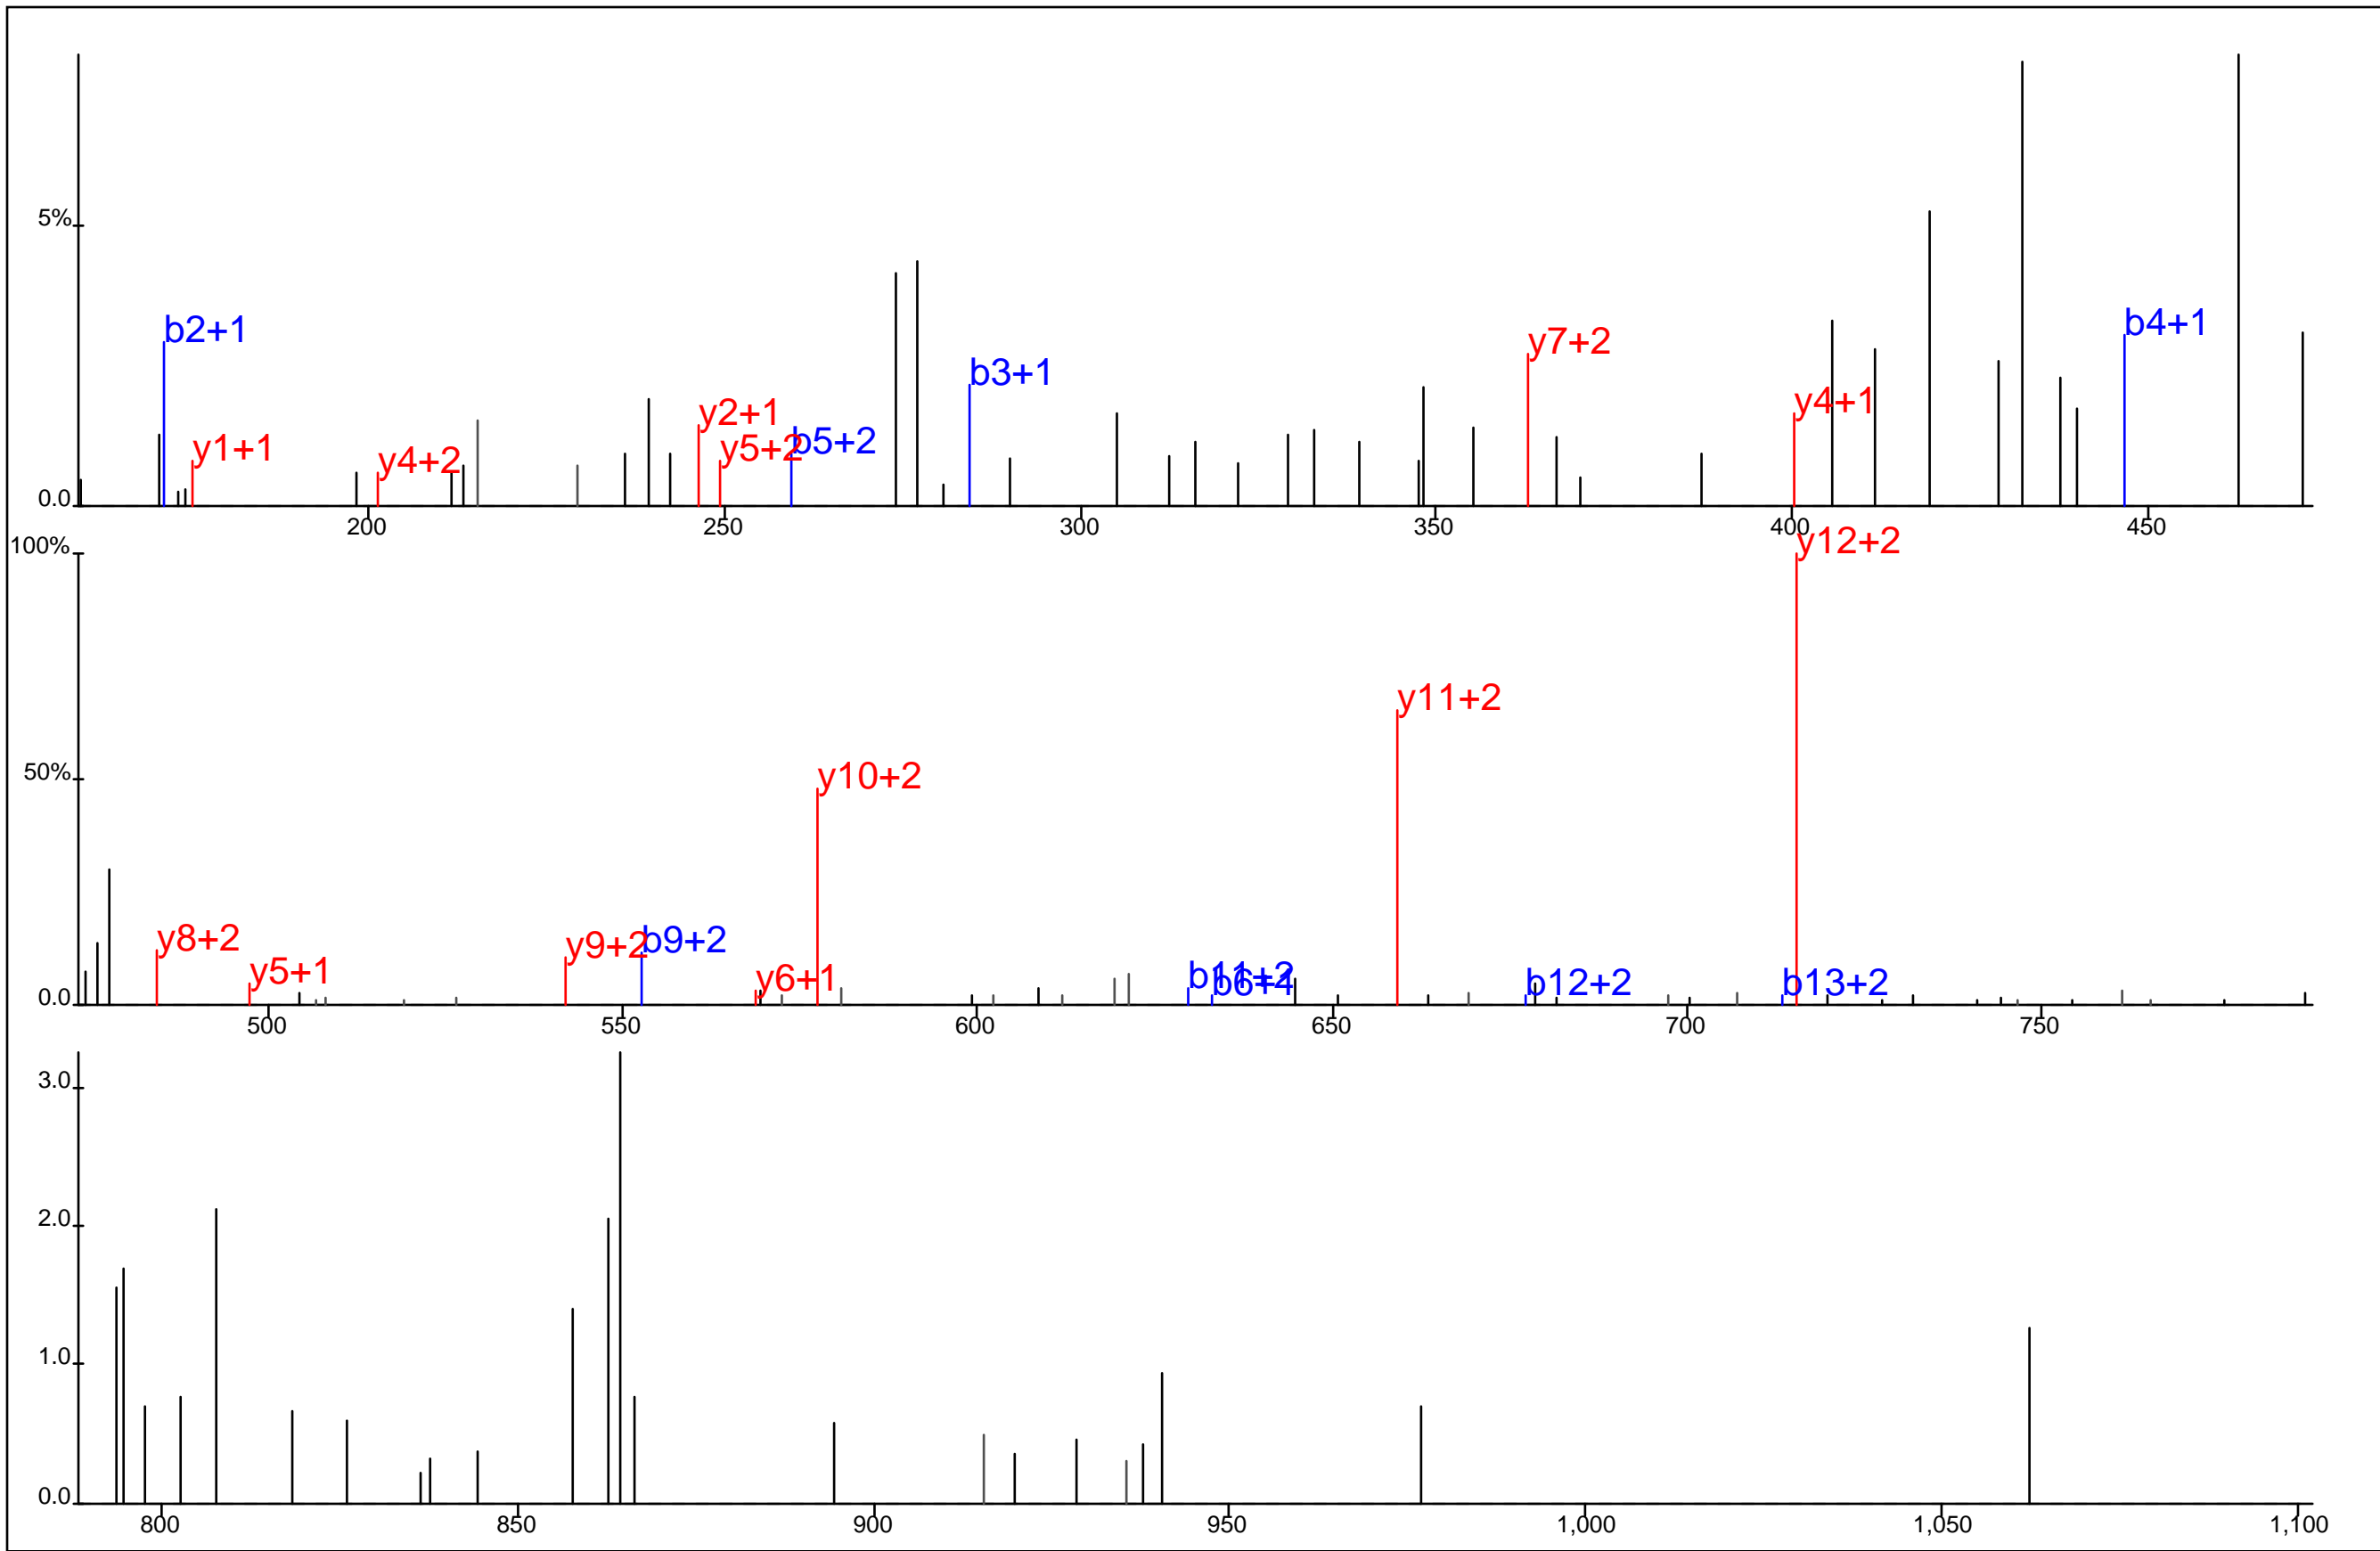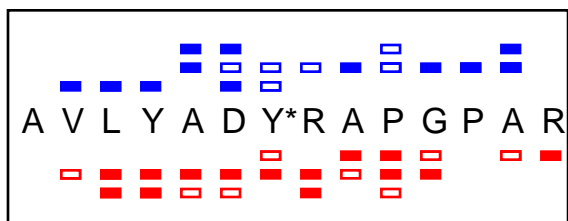

Protein Name: Nephrin like 1  
 gi Accession: 0  
 Precursor Mass: 533.9269+3  
 Delta Mass: 1.007 ppm  
 XCorr: 24.96







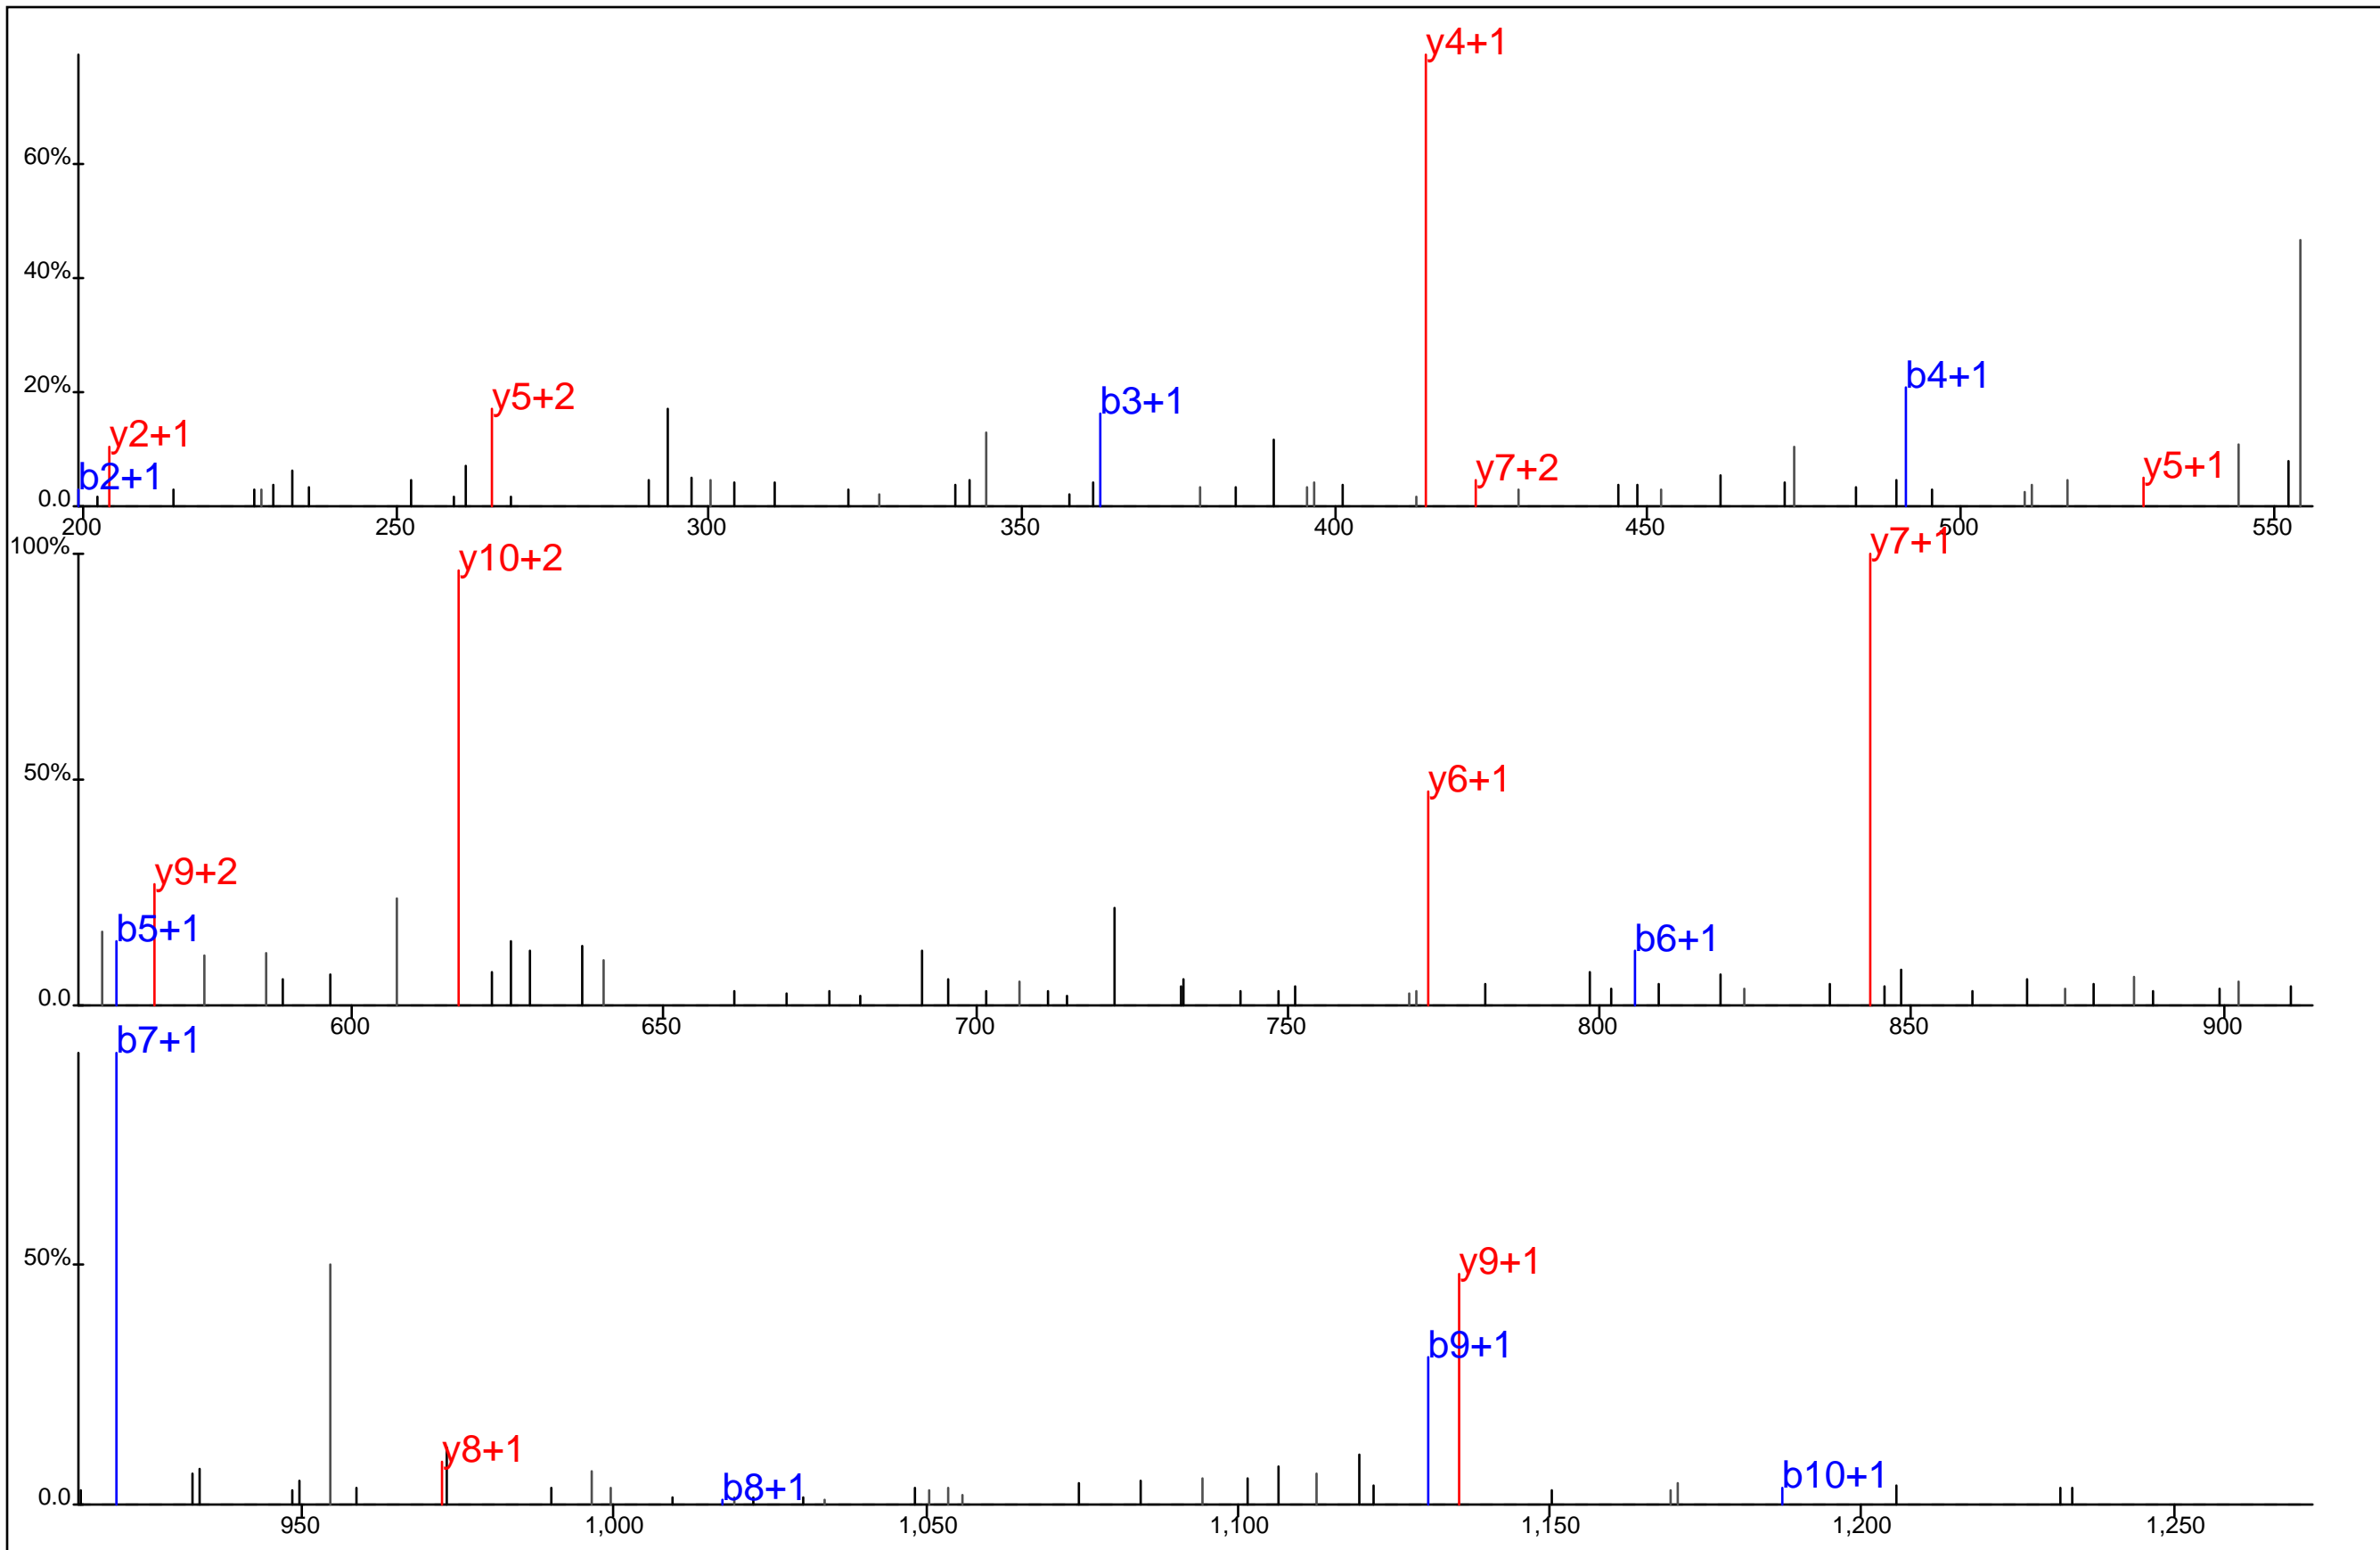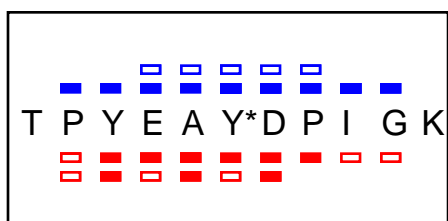

Protein Name: Nephrin like 1  
 gi Accession: 0  
 Precursor Mass: 667.2877+2  
 Delta Mass: 2.241 ppm  
 XCorr: 35.31

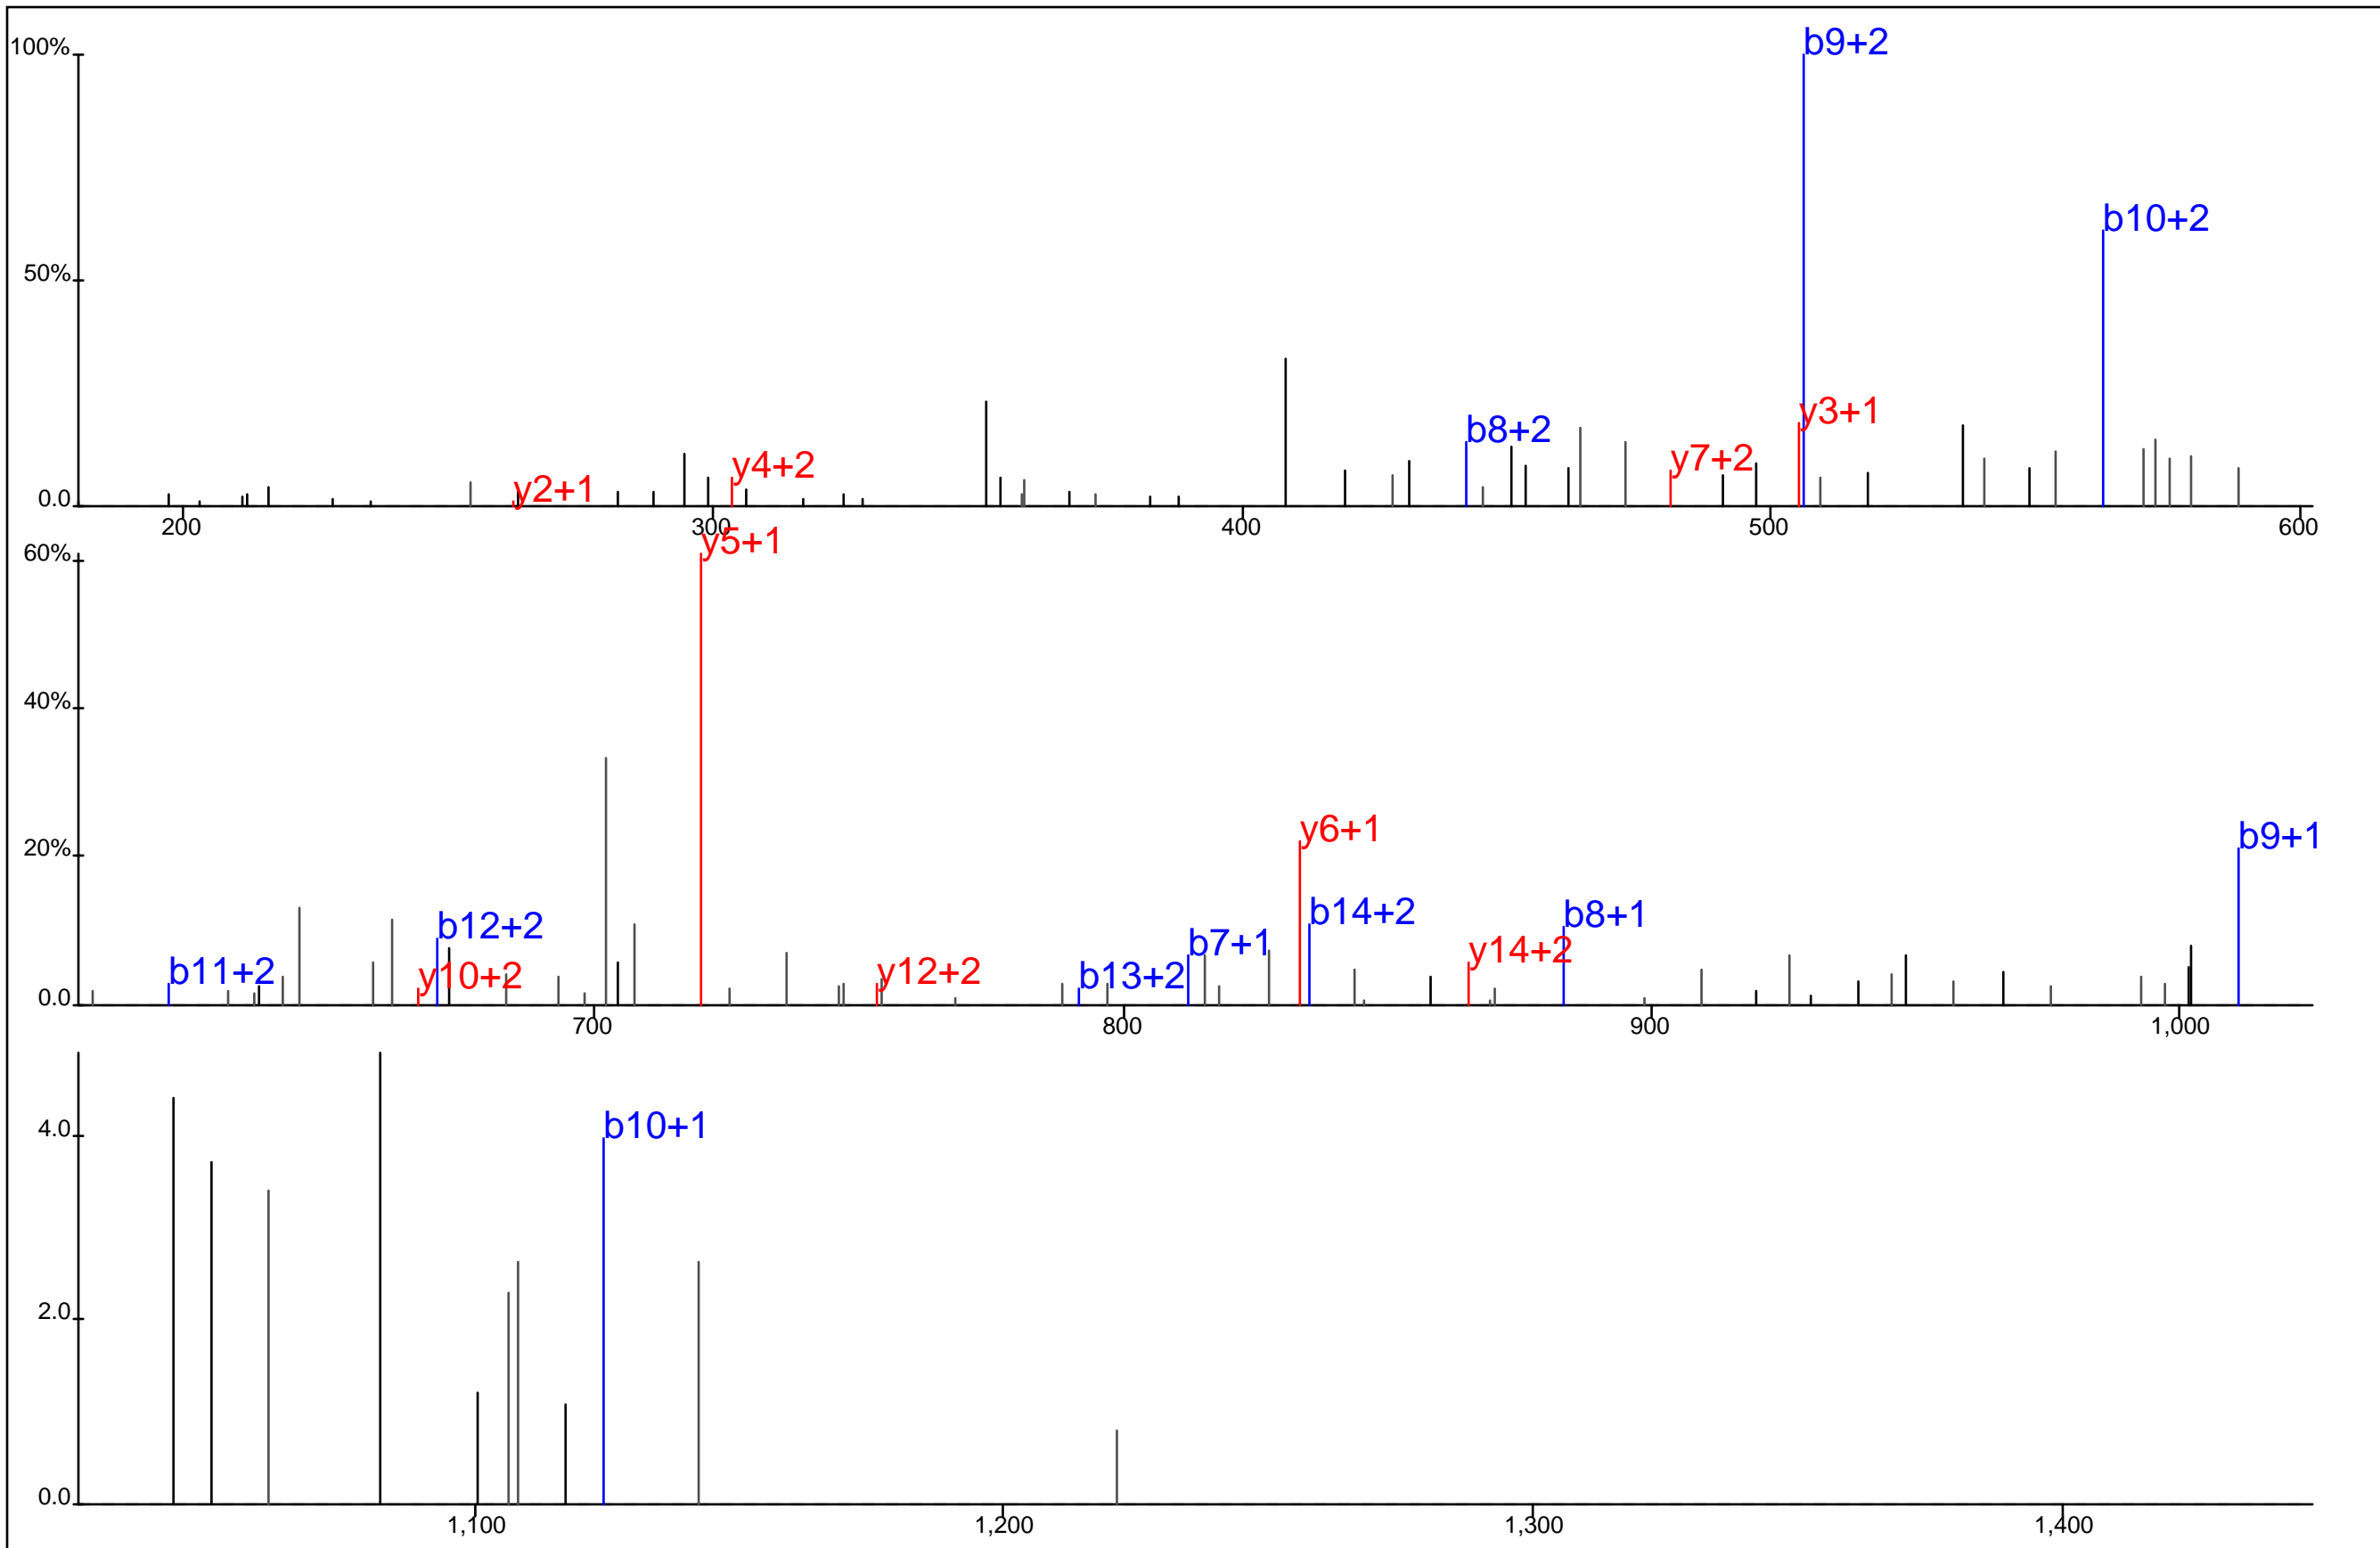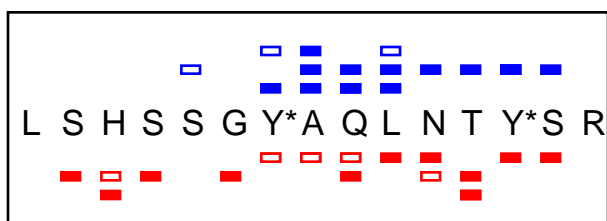

Protein Name: Nephrin like 1  
 gi Accession: 0  
 Precursor Mass: 615.2506+3  
 Delta Mass: 2.096 ppm  
 XCorr: 22.82

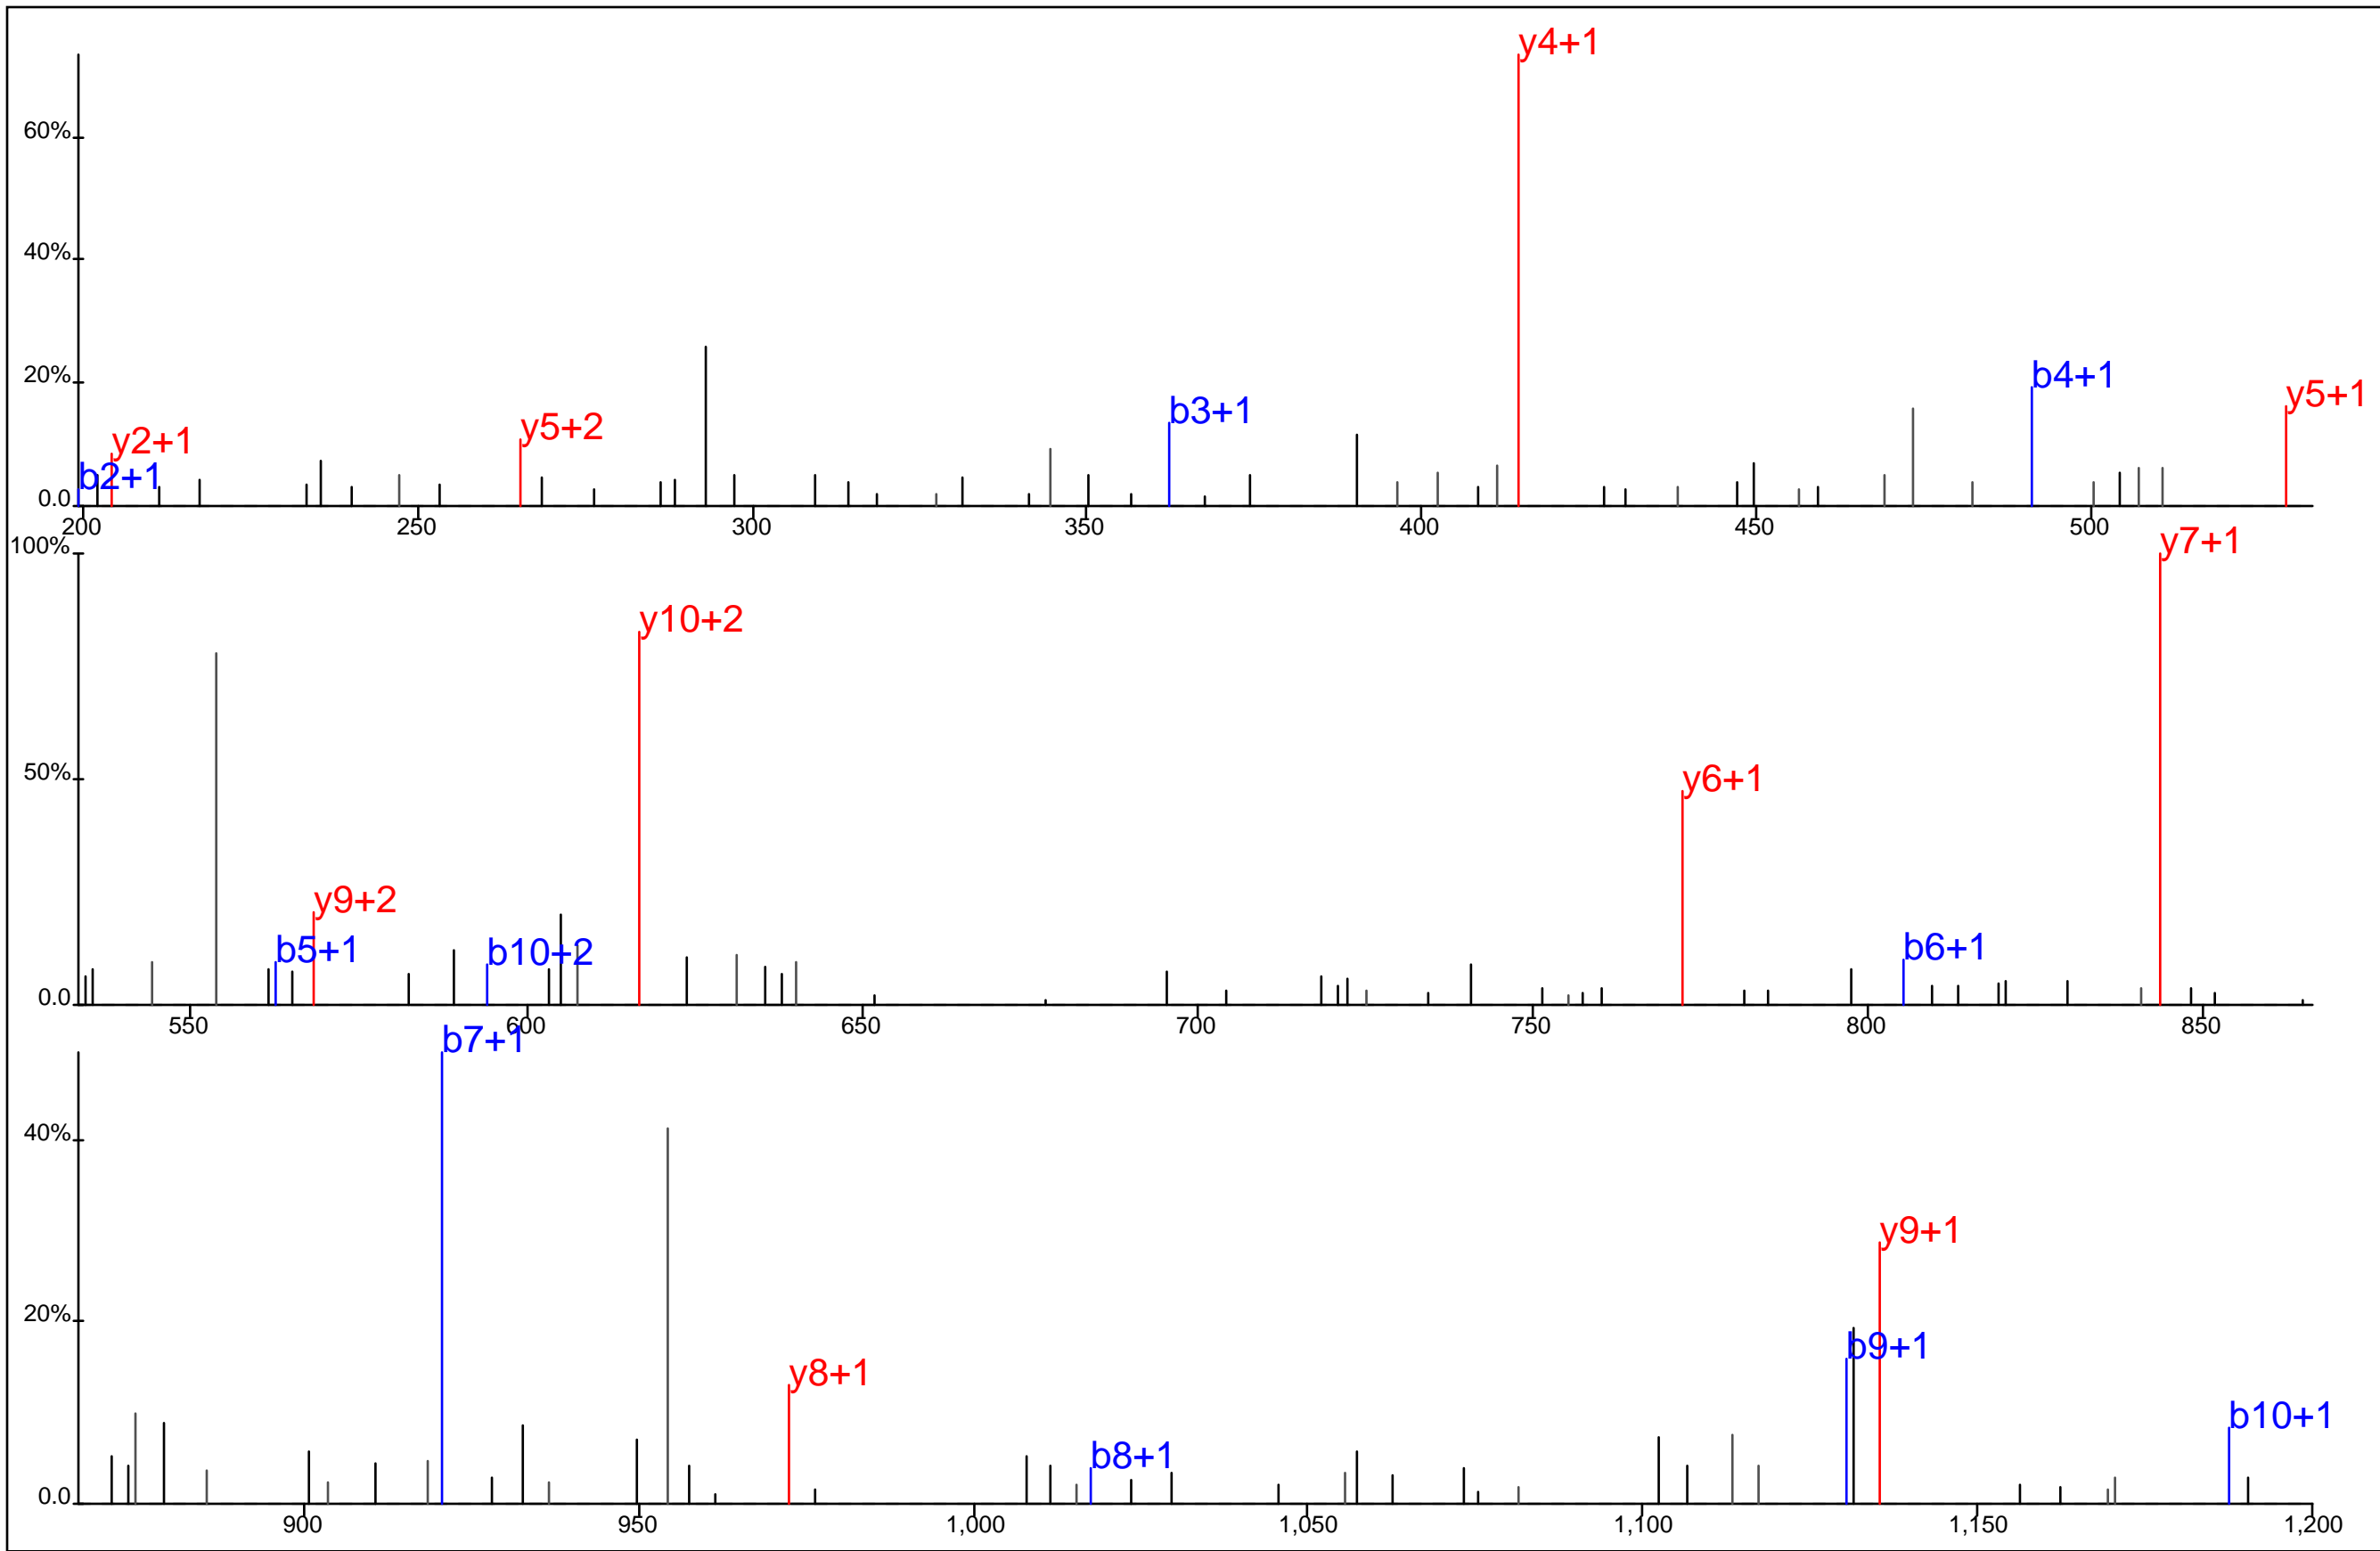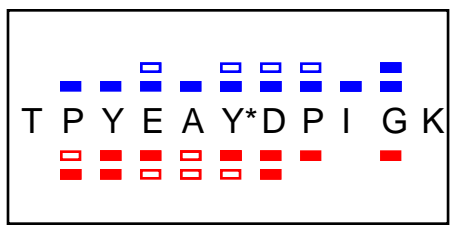

Protein Name: Nephrin like 1  
 gi Accession: 0  
 Precursor Mass: 667.2889+2  
 Delta Mass: 0.502 ppm  
 XCorr: 42.98

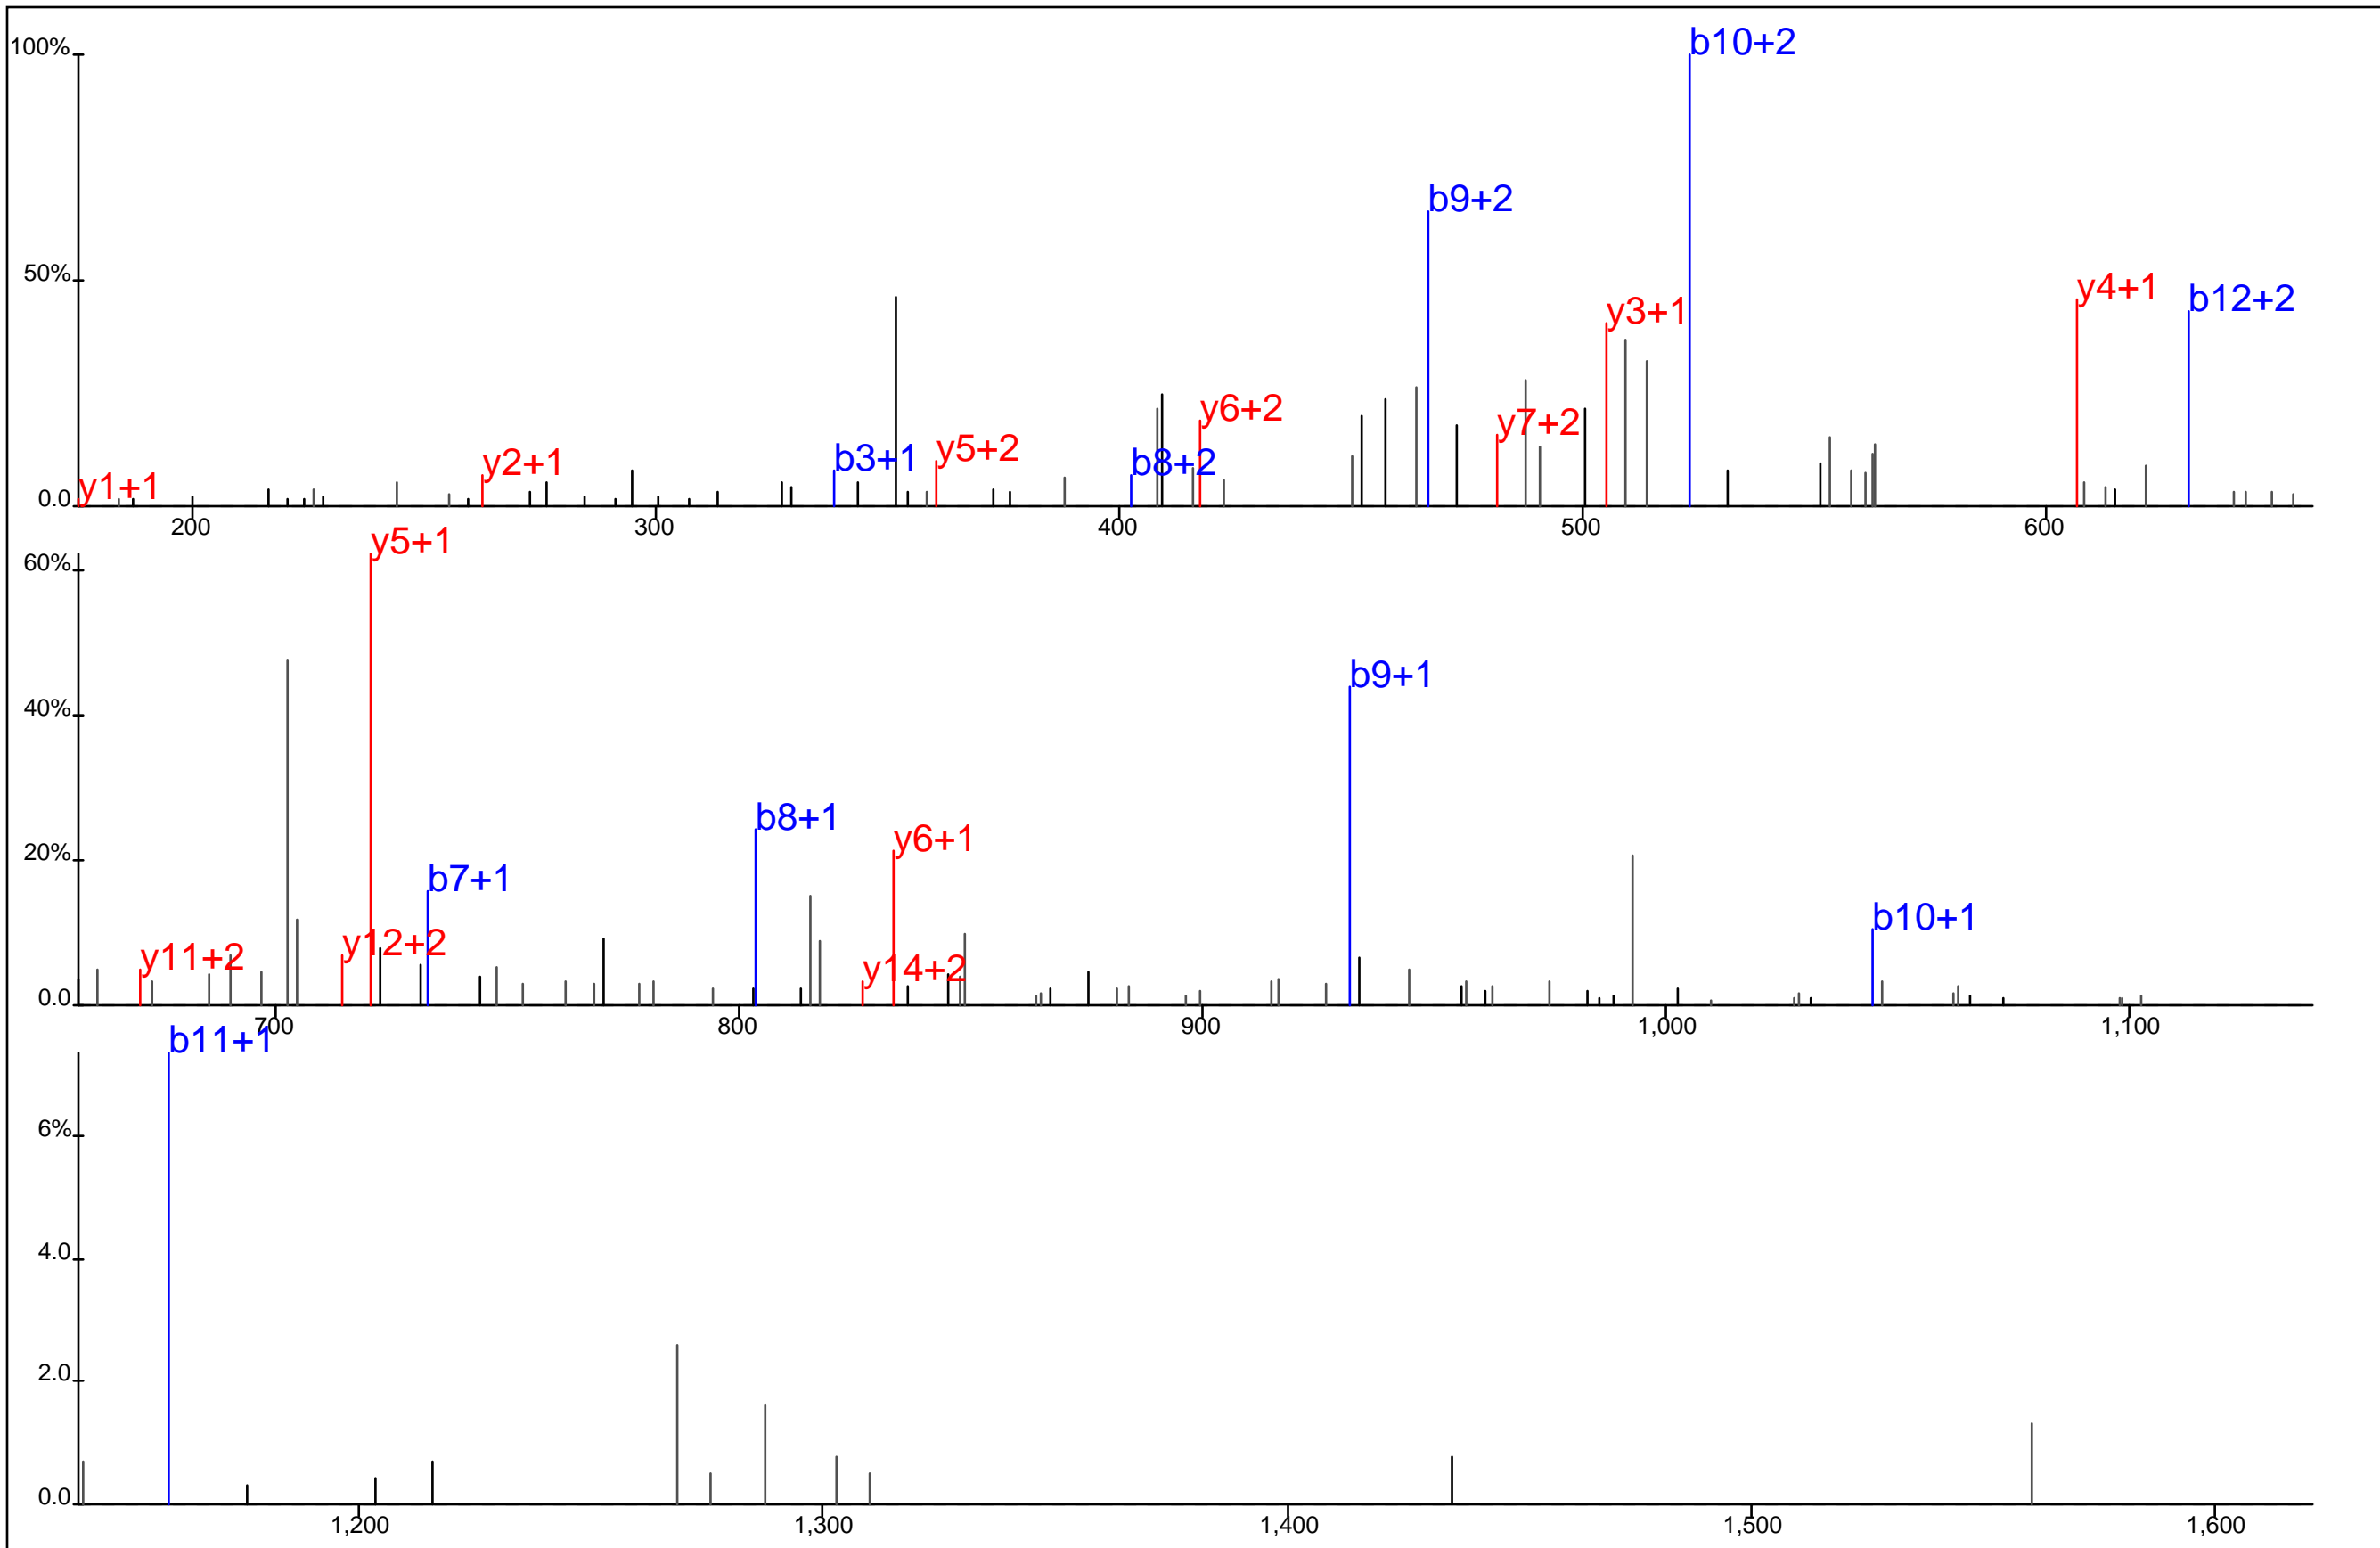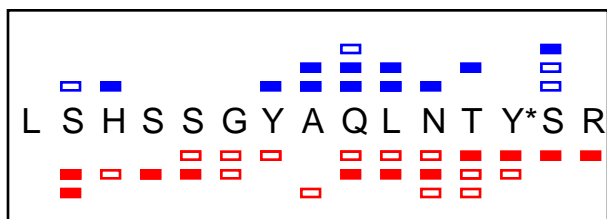

Protein Name: Nephrin like 1  
 gi Accession: 0  
 Precursor Mass: 588.5959+3  
 Delta Mass: 0.869 ppm  
 XCorr: 25.68





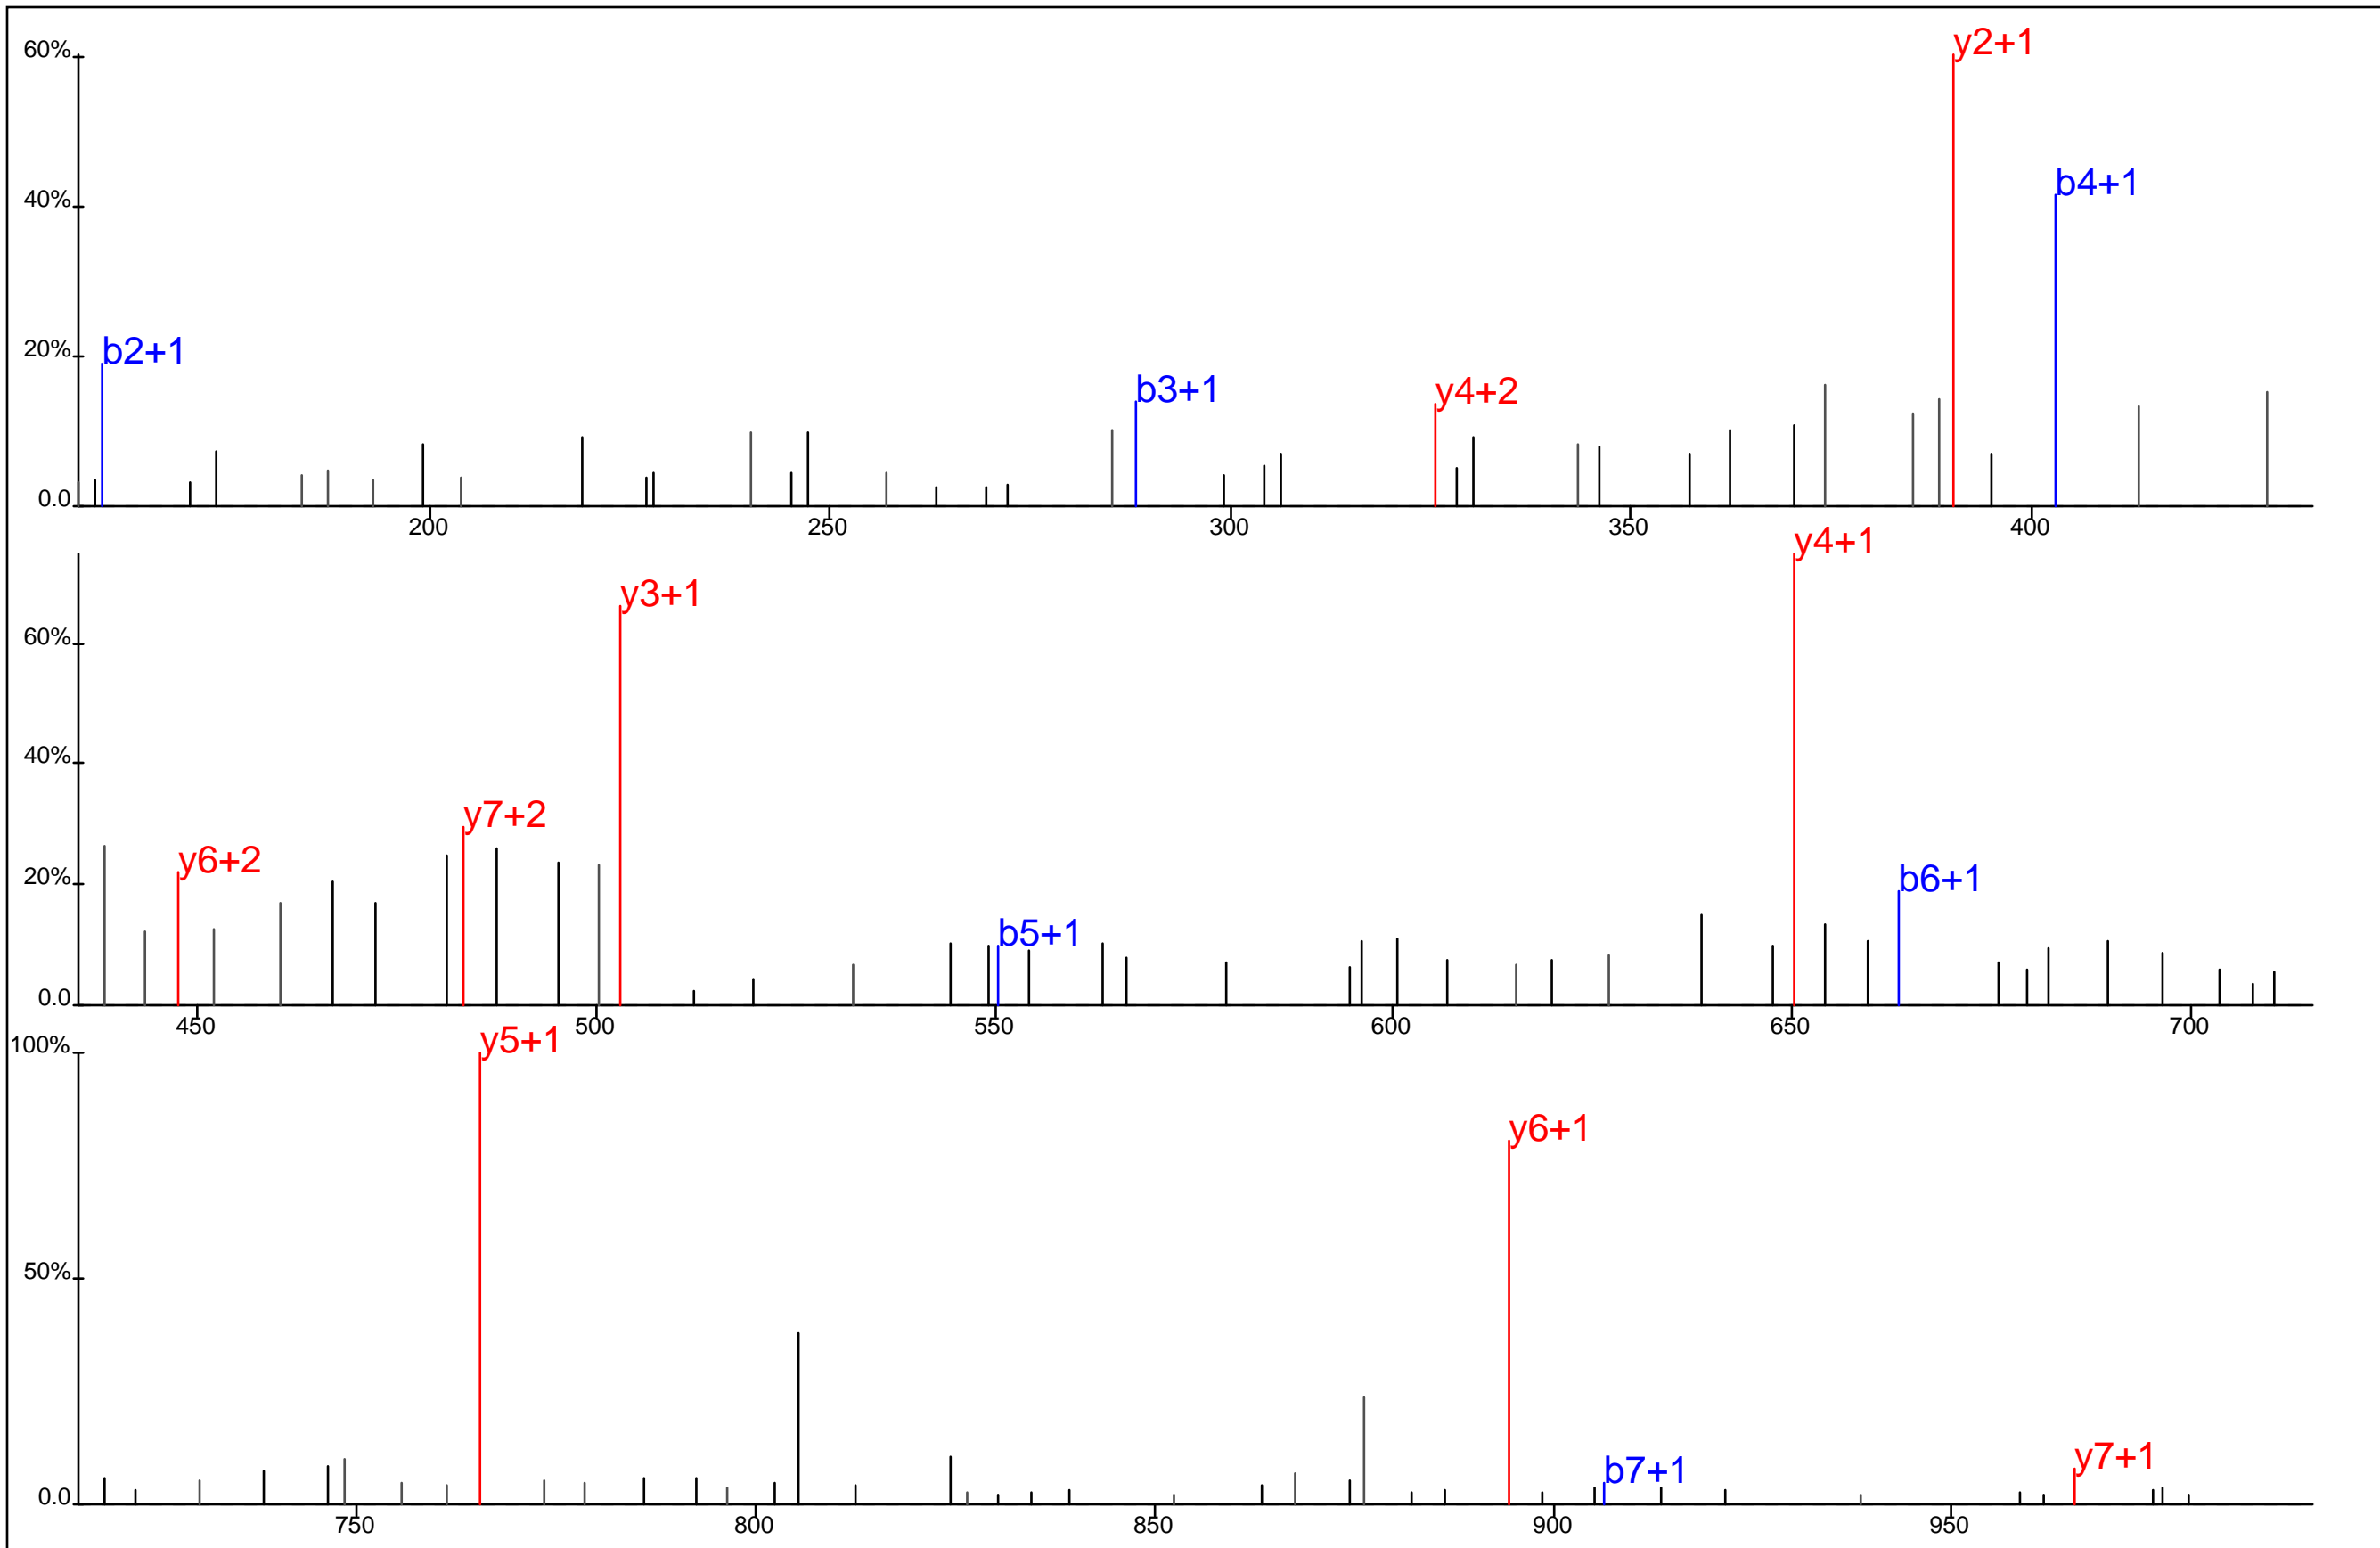

**S A E D F I Y\* K**

Protein Name: Neurobeachin like 1  
 gi Accession: 0  
 Precursor Mass: 526.7213+2  
 Delta Mass: 1.554 ppm  
 XCorr: 61.95

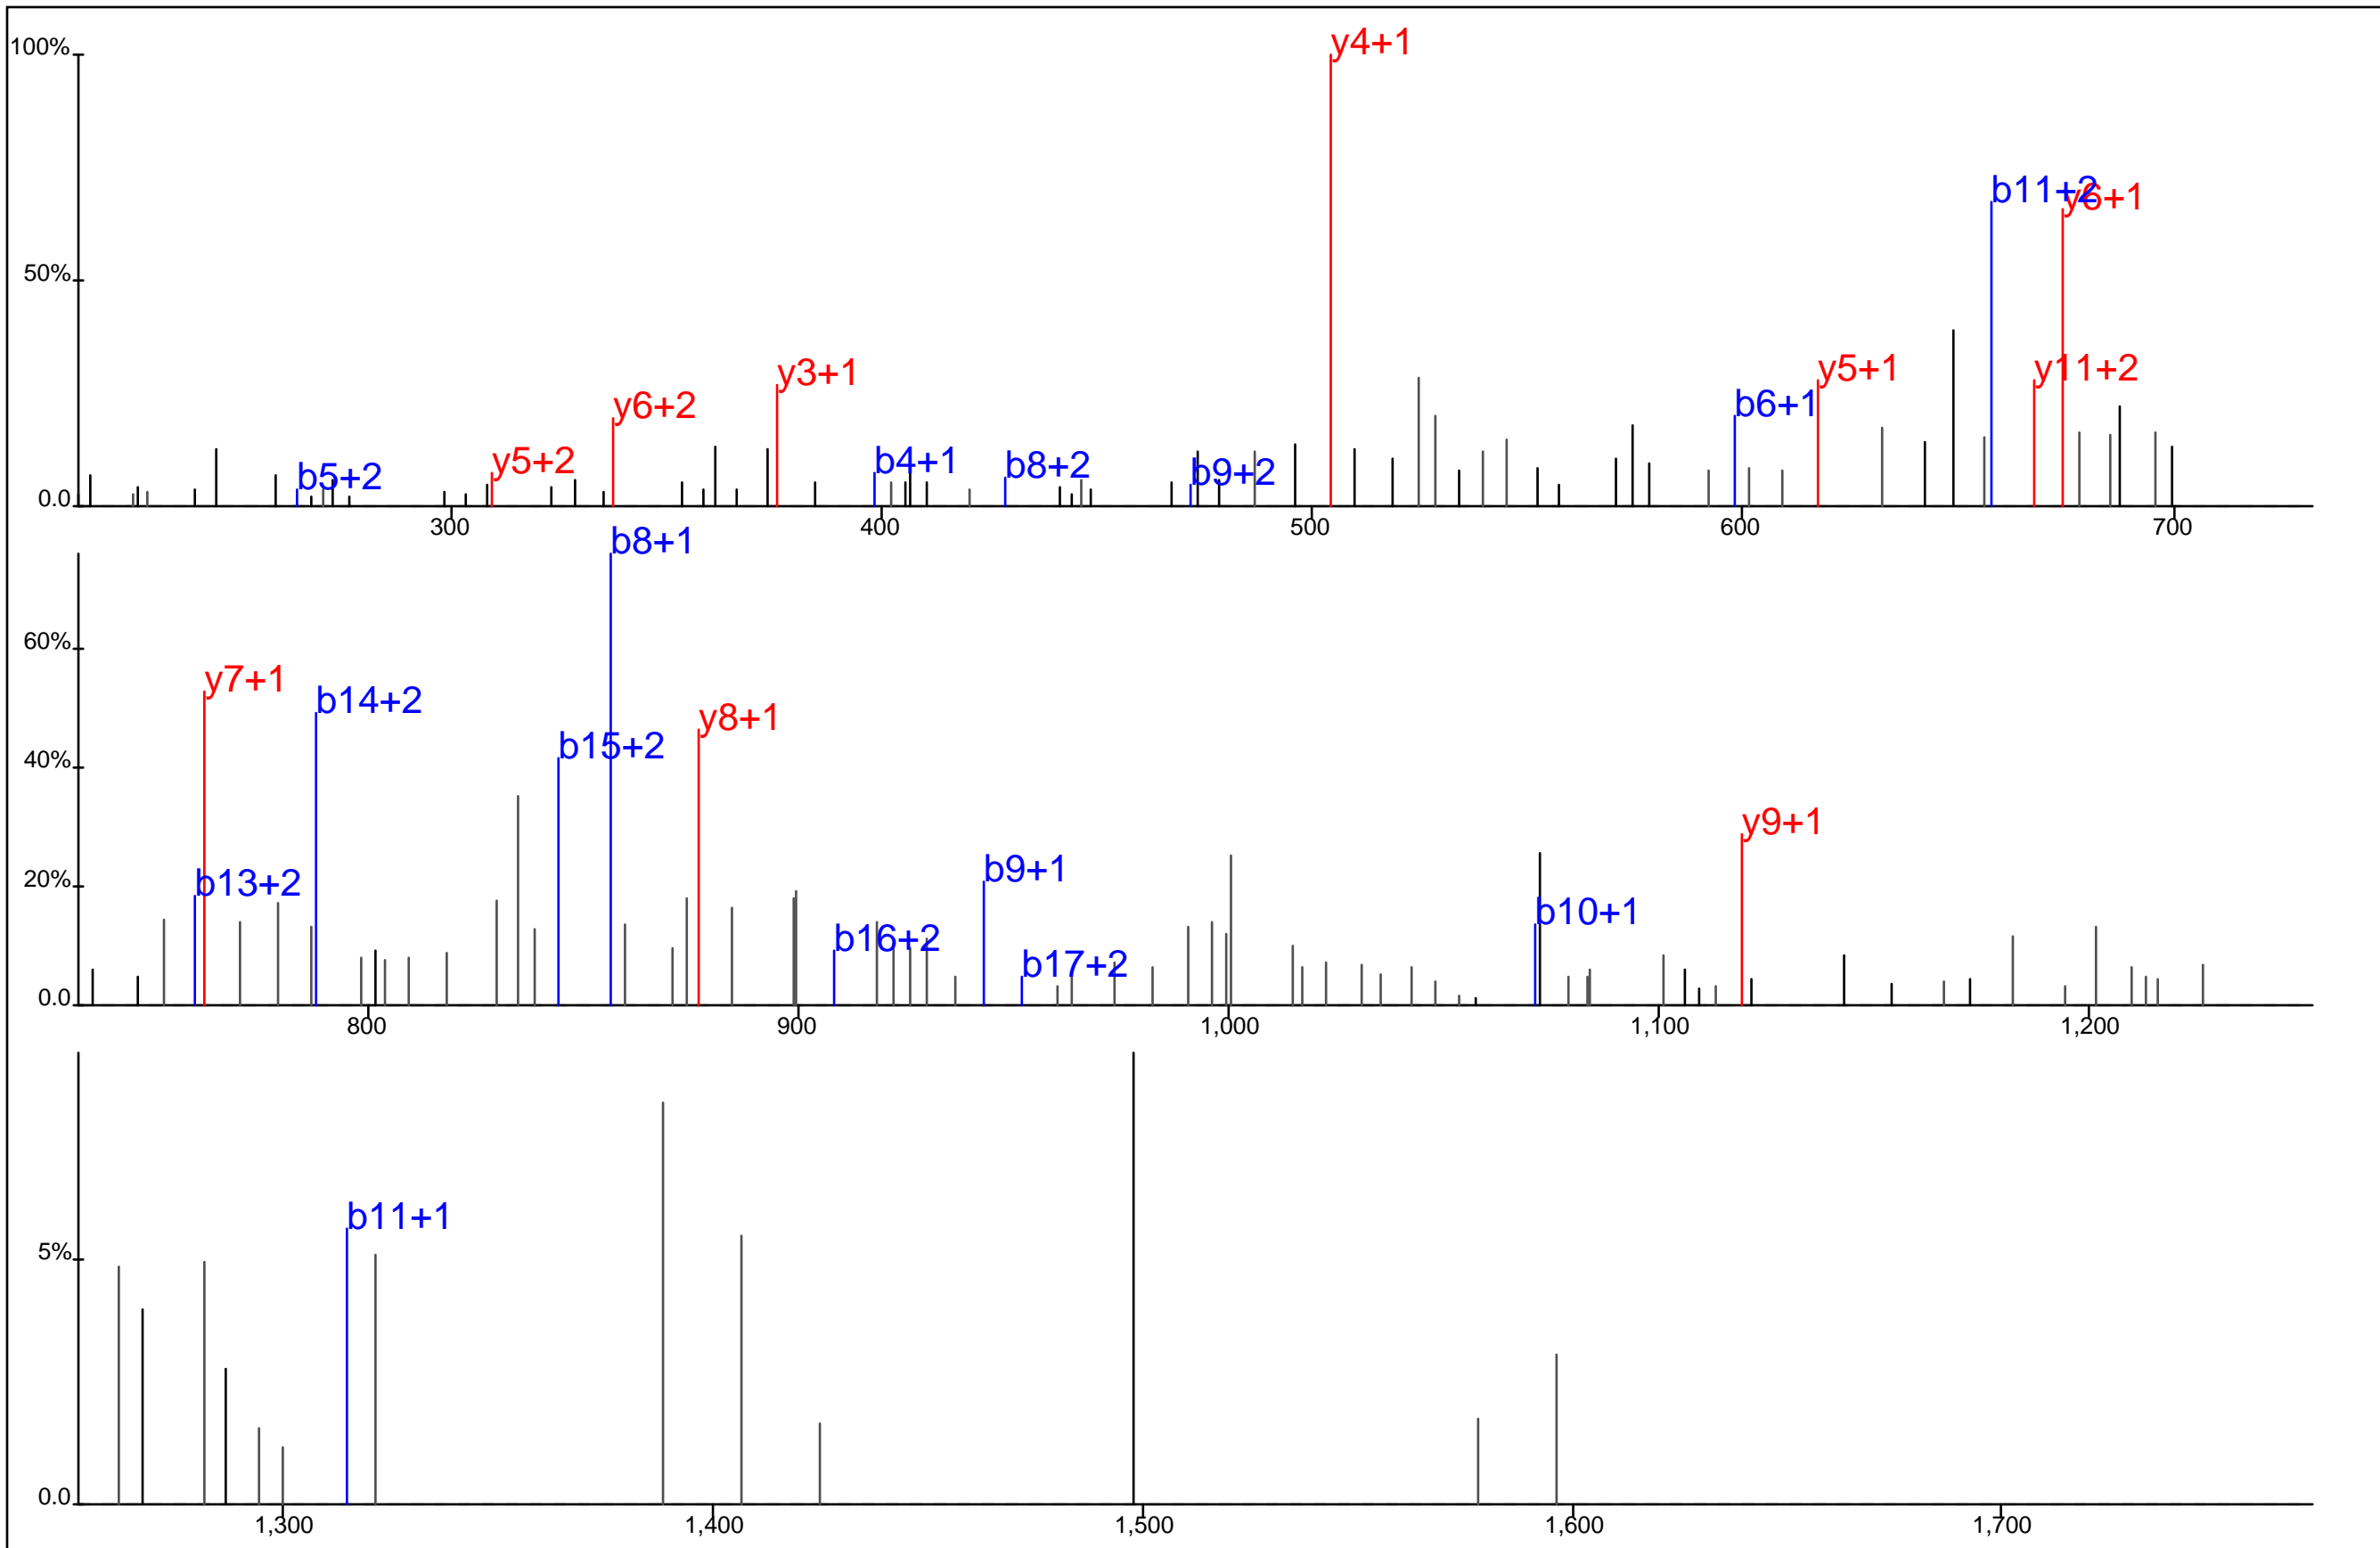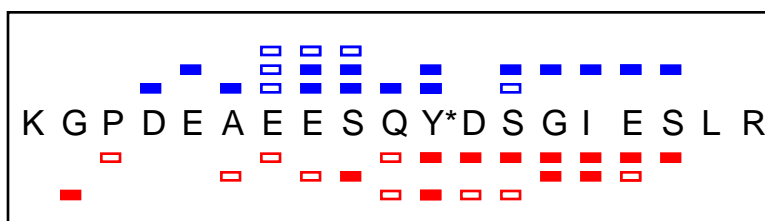

Protein Name: NF kappa B inhibitor epsilon  
 gi Accession: 0  
 Precursor Mass: 730.6458+3  
 Delta Mass: 0.310 ppm  
 XCorr: 30.6



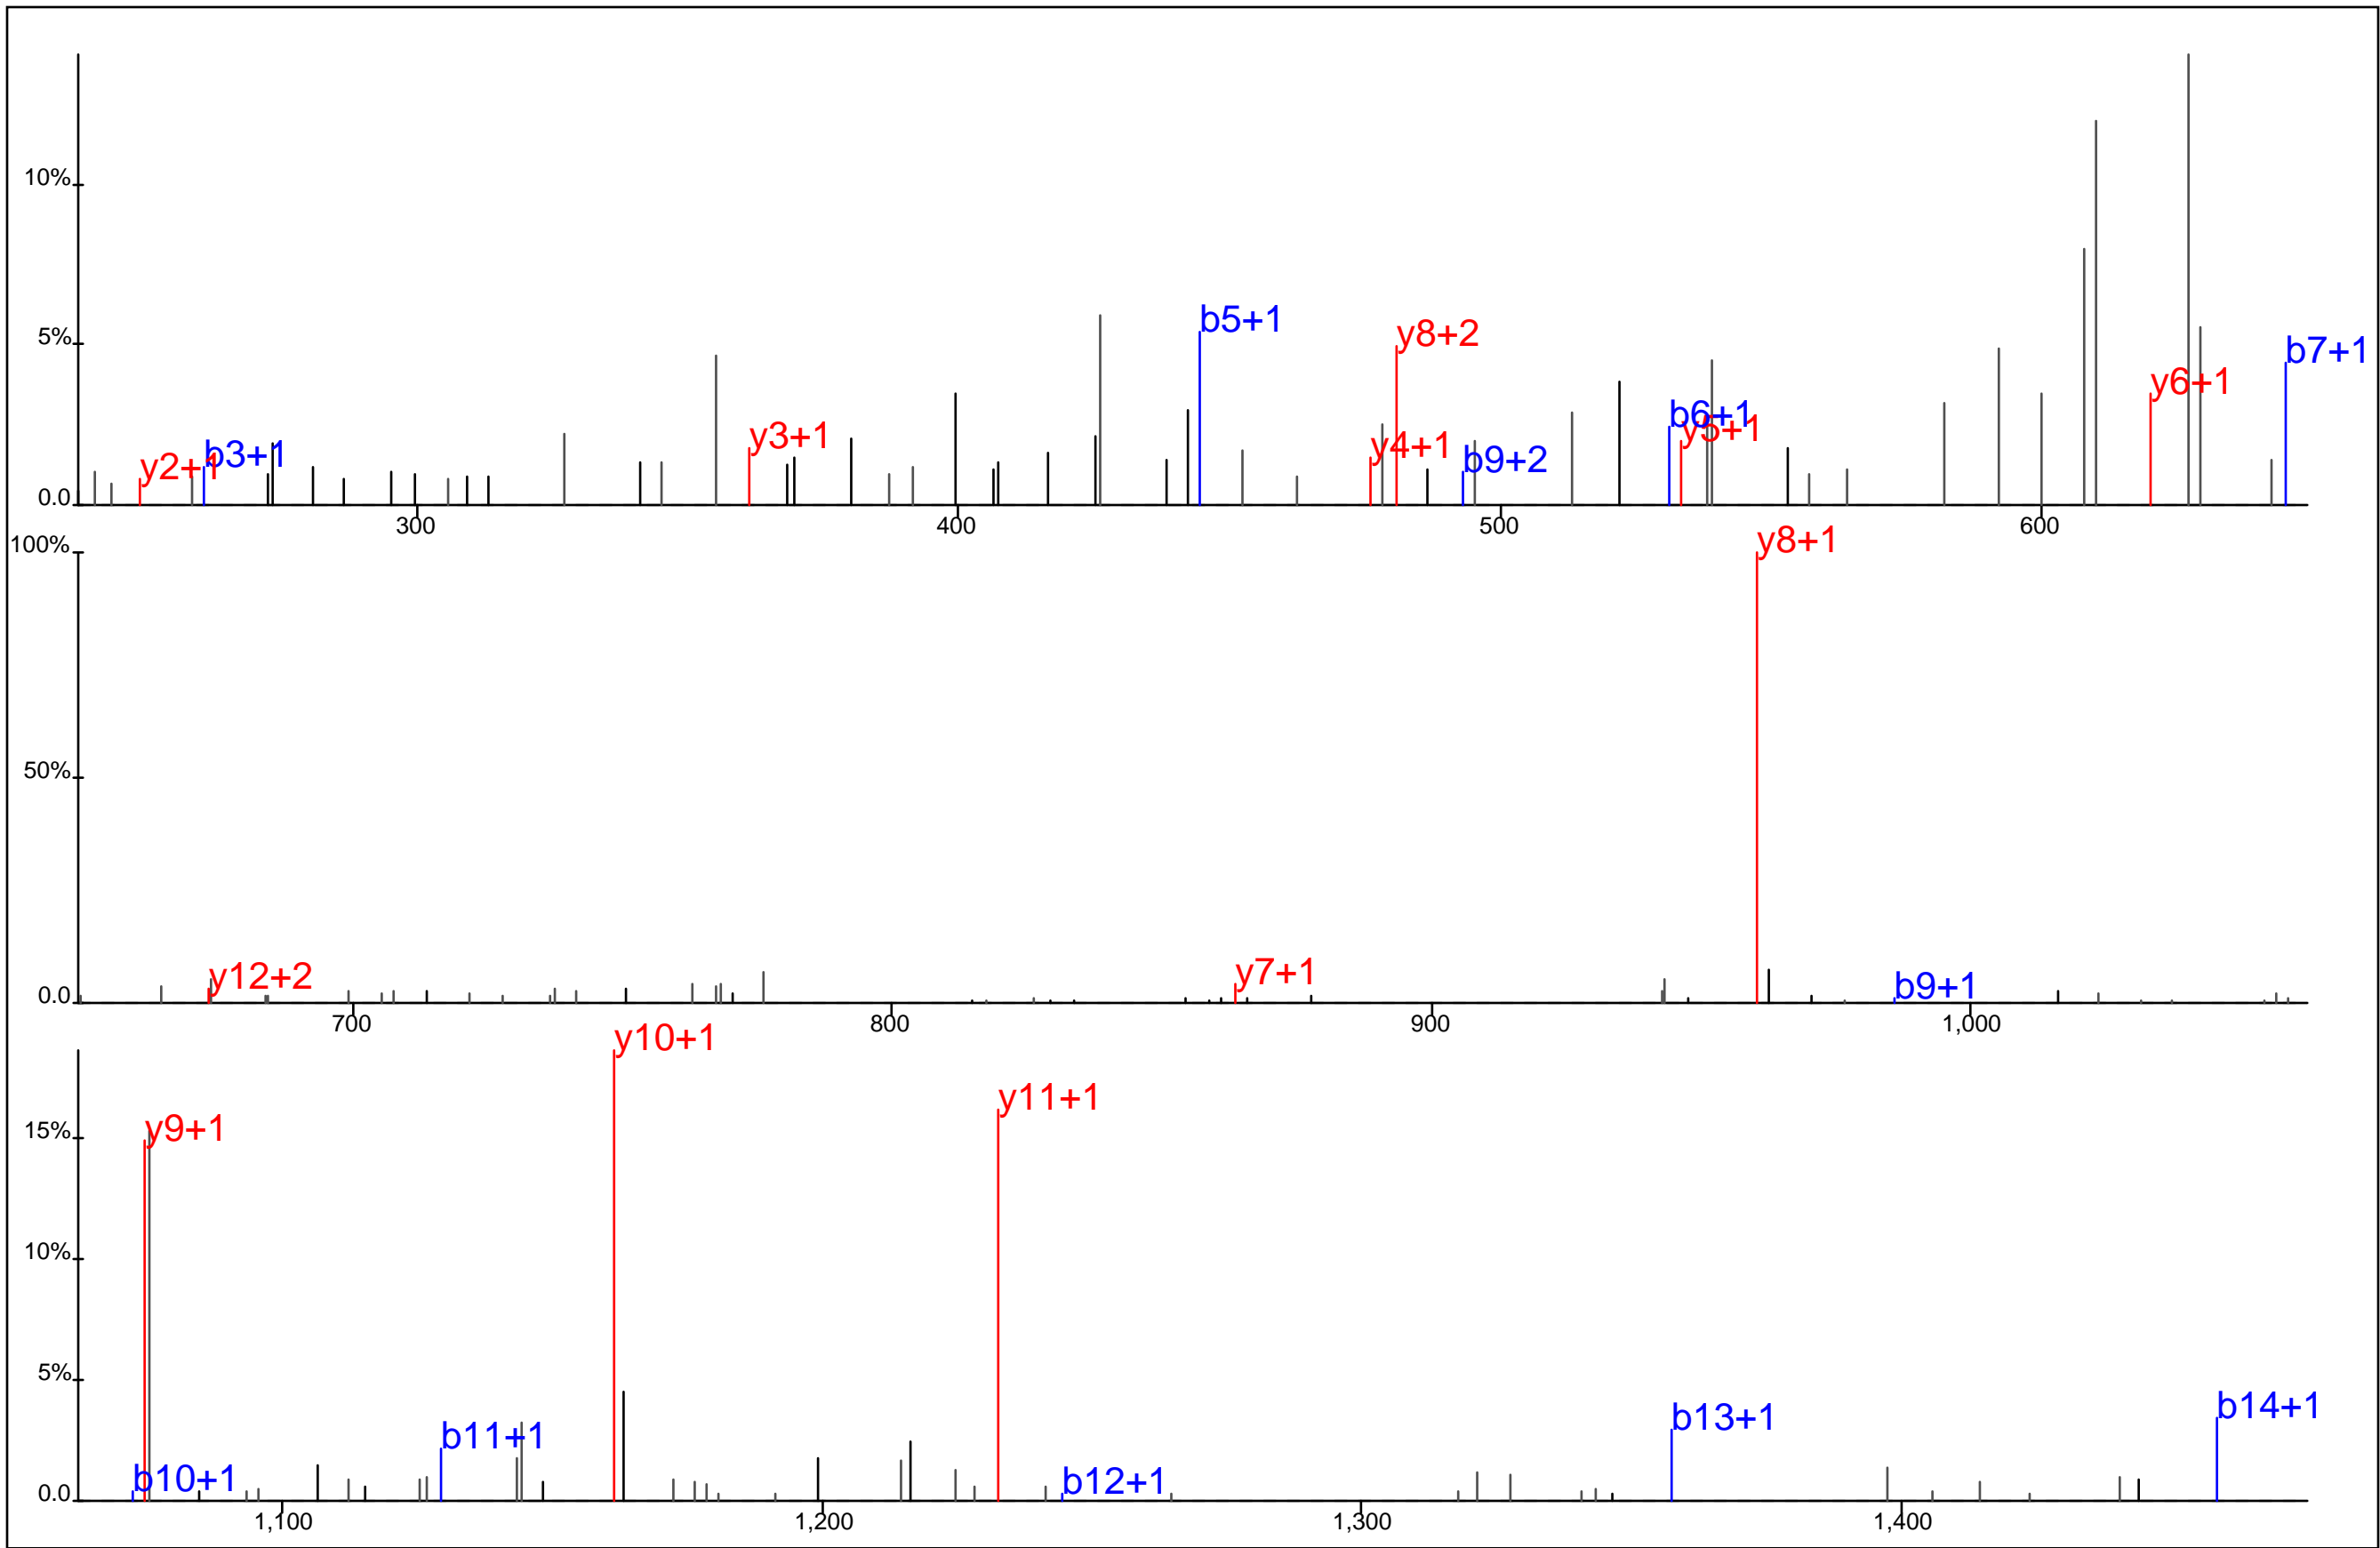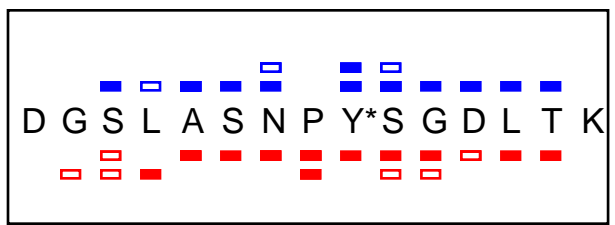

Protein Name: NICE 4 protein  
 gi Accession: 0  
 Precursor Mass: 802.8480+2  
 Delta Mass: 2.919 ppm  
 XCorr: 37.21

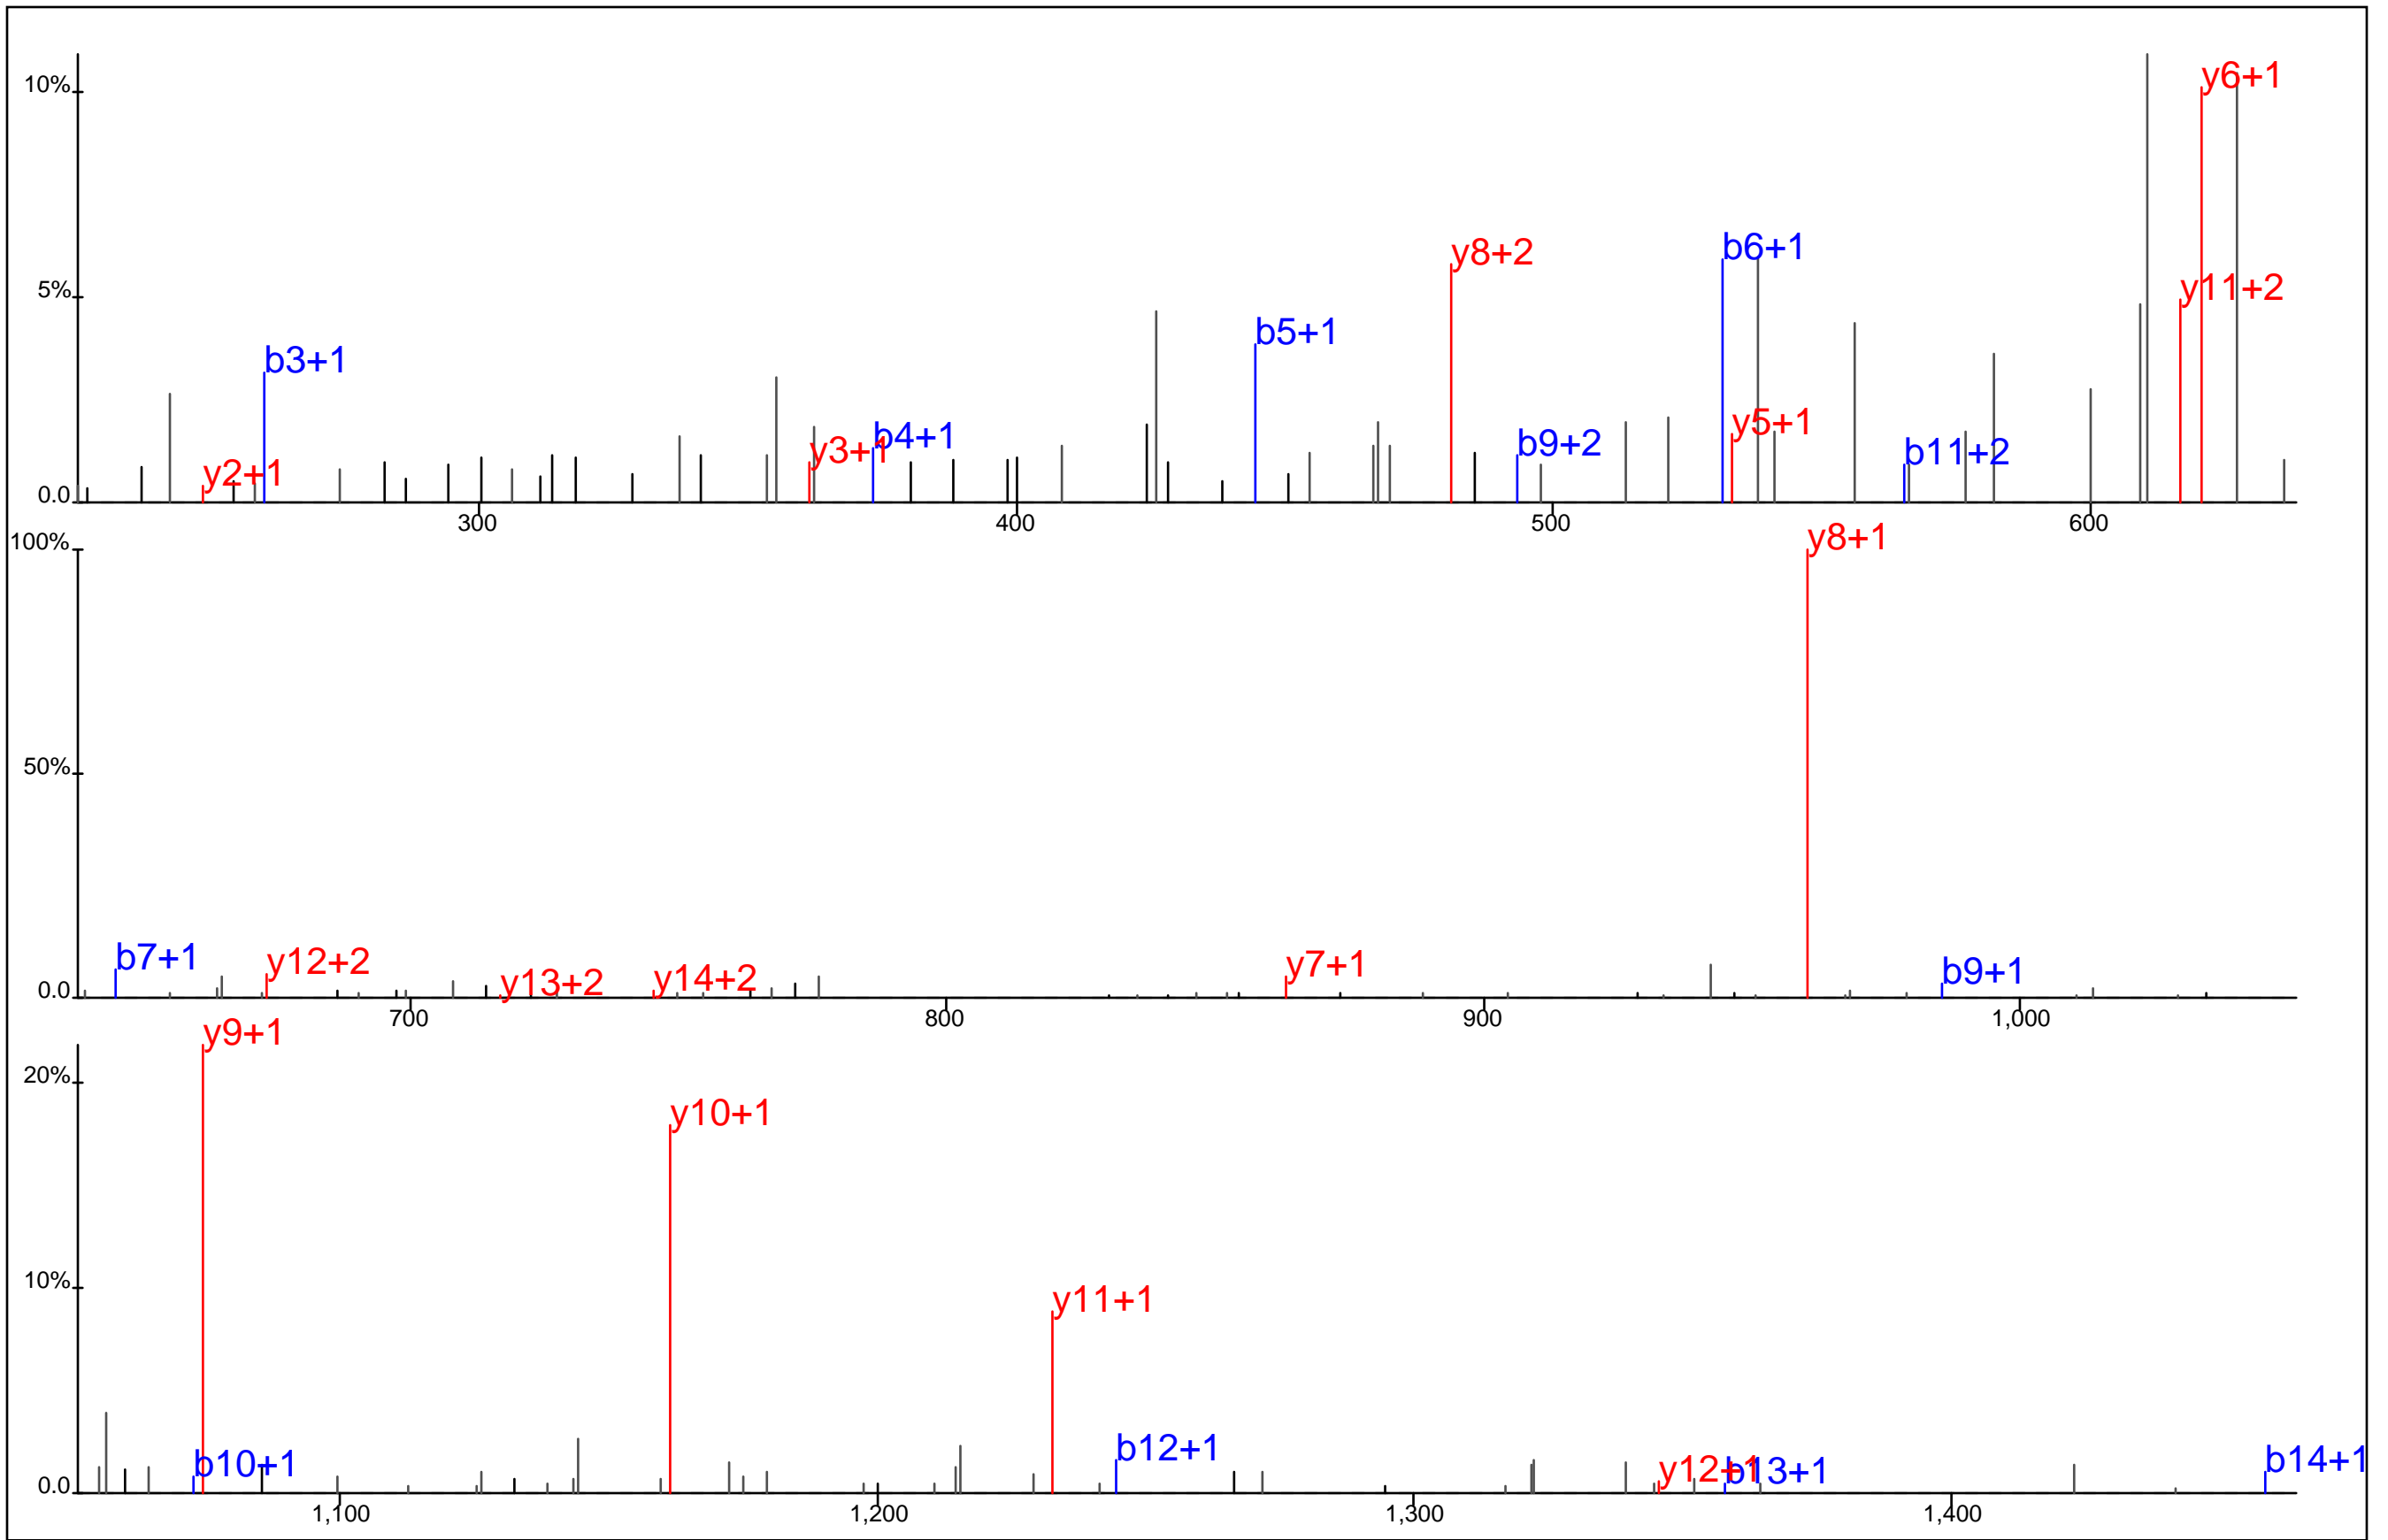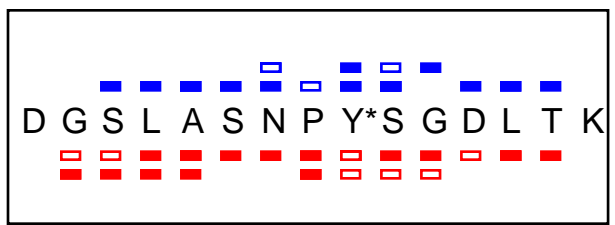

Protein Name: NICE 4 protein  
 gi Accession: 0  
 Precursor Mass: 802.8475+2  
 Delta Mass: 2.311 ppm  
 XCorr: 45.25

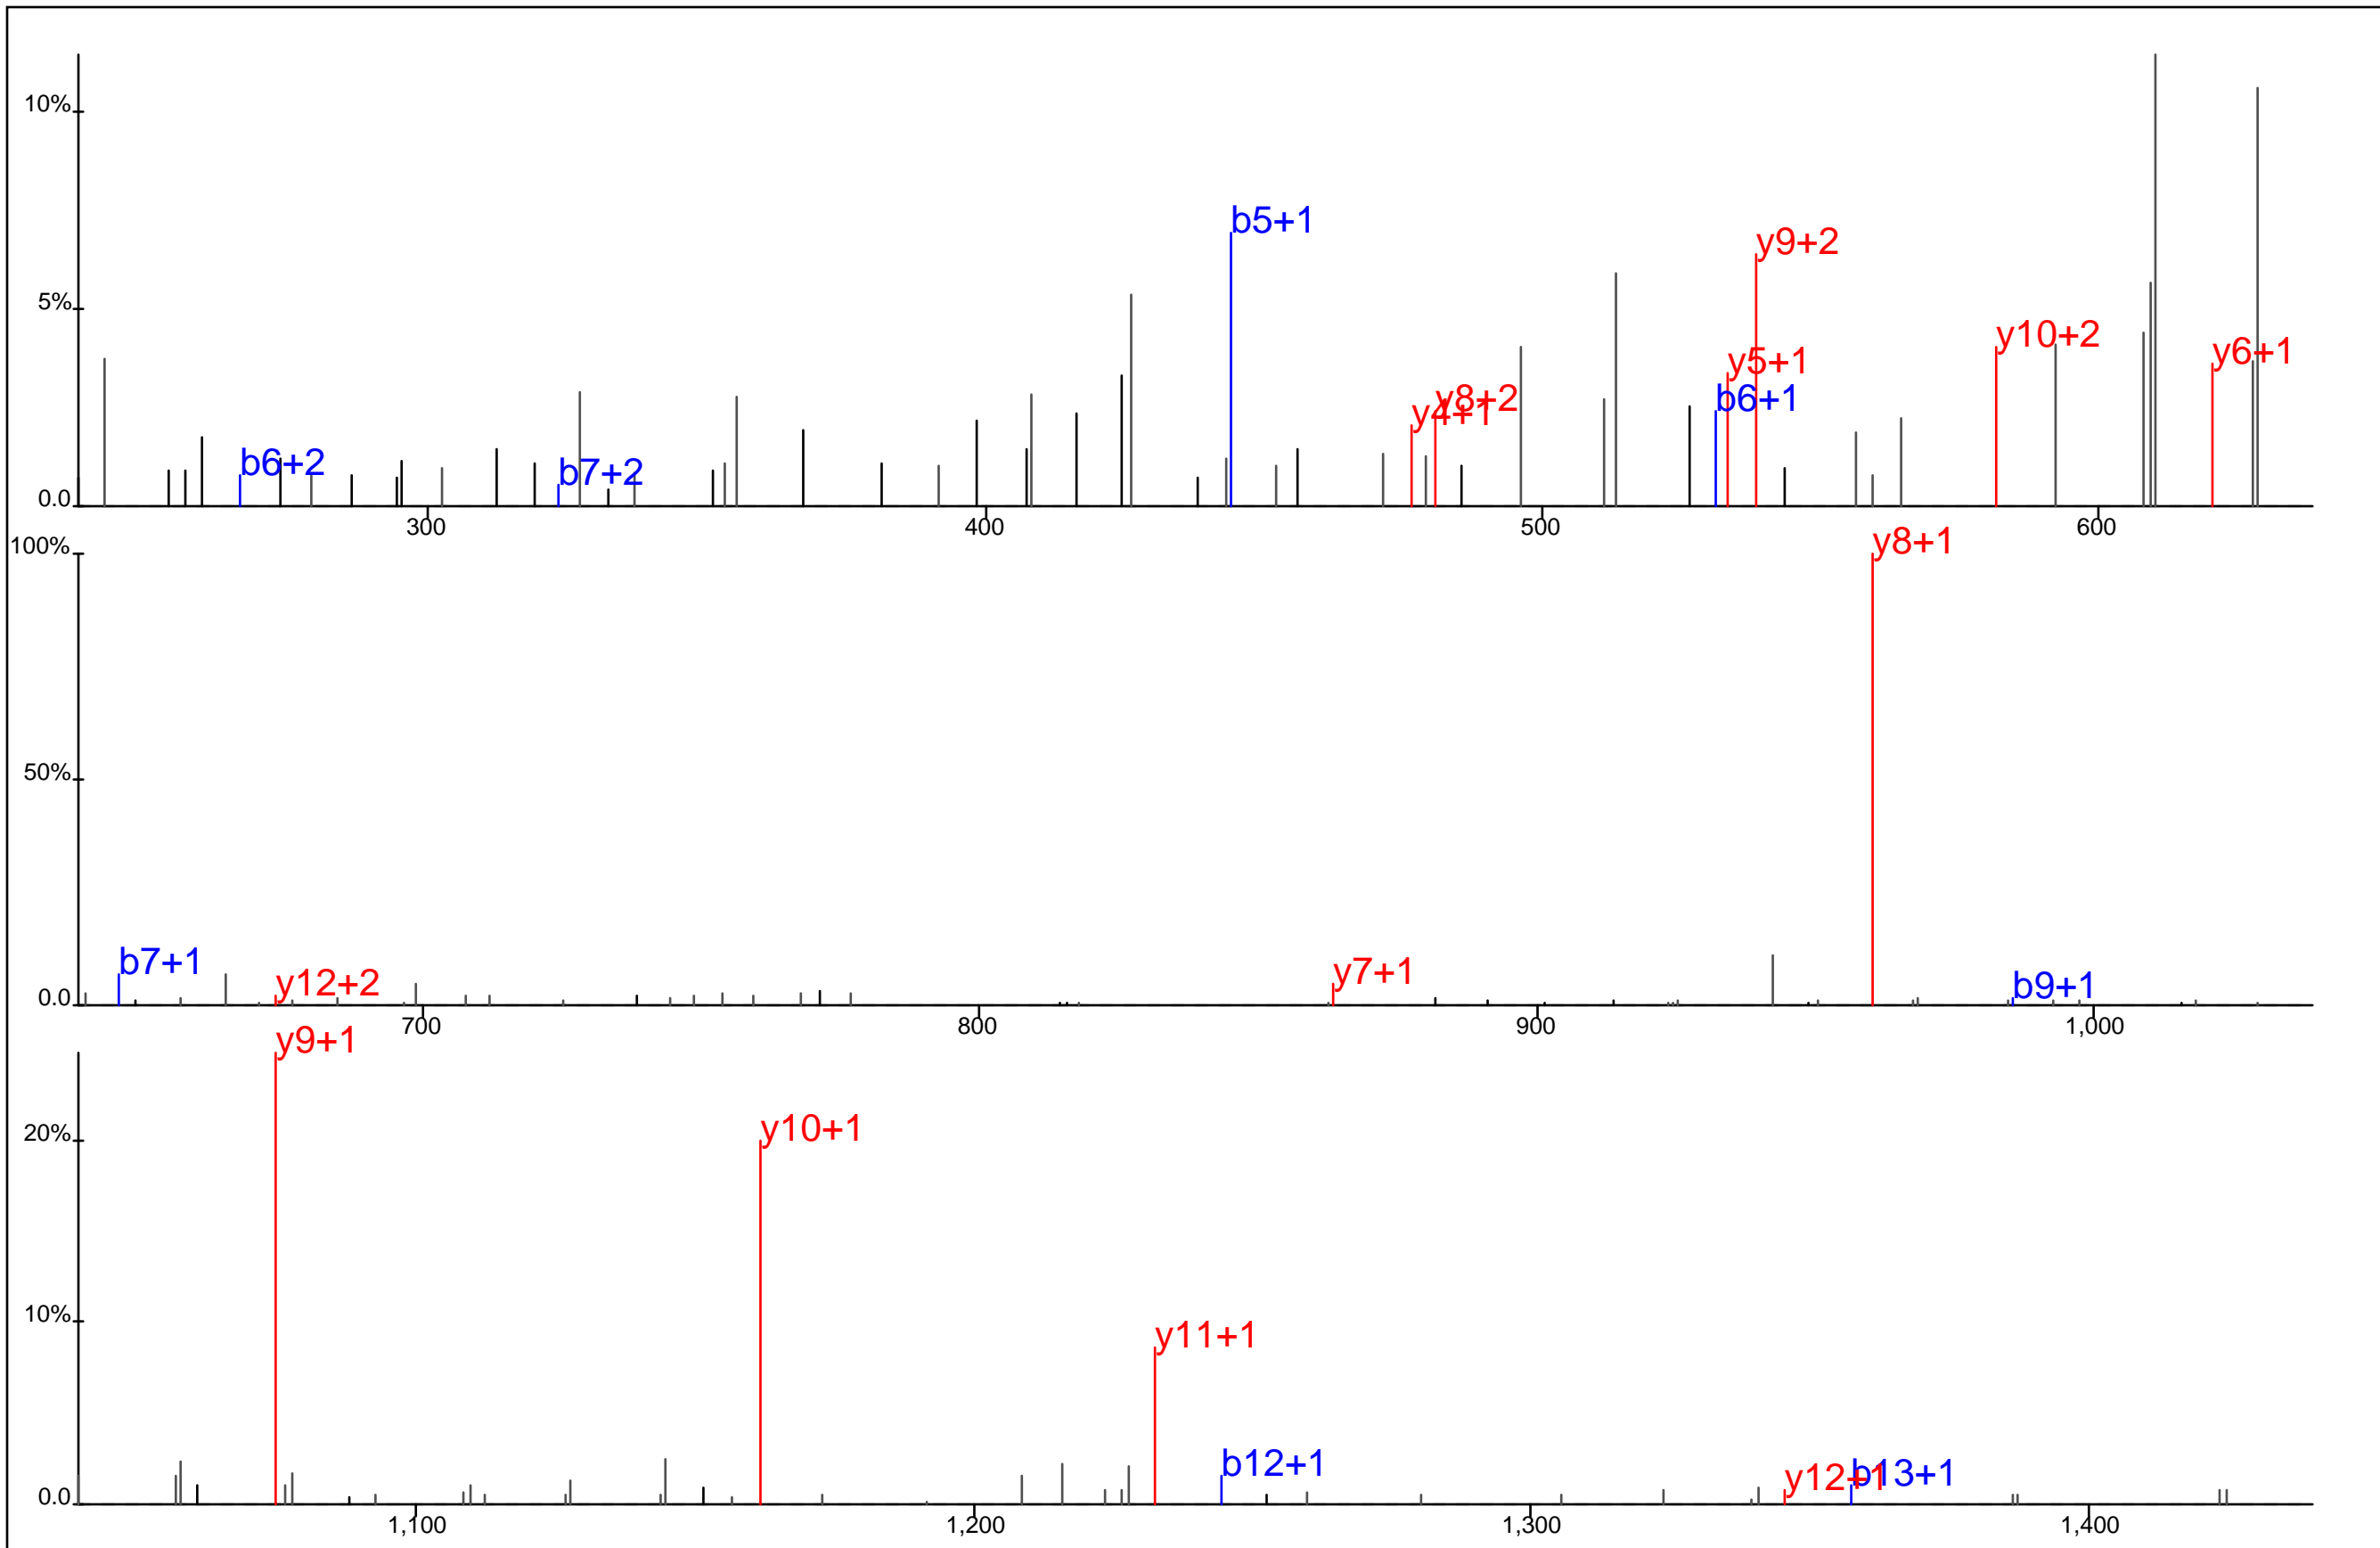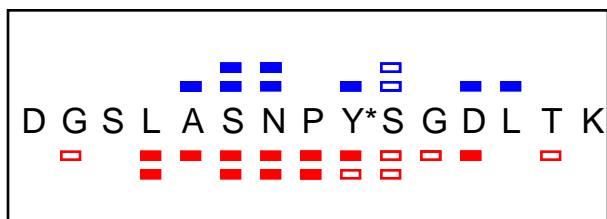

Protein Name: NICE 4 protein  
 gi Accession: 0  
 Precursor Mass: 802.8467+2  
 Delta Mass: 1.398 ppm  
 XCorr: 38.64





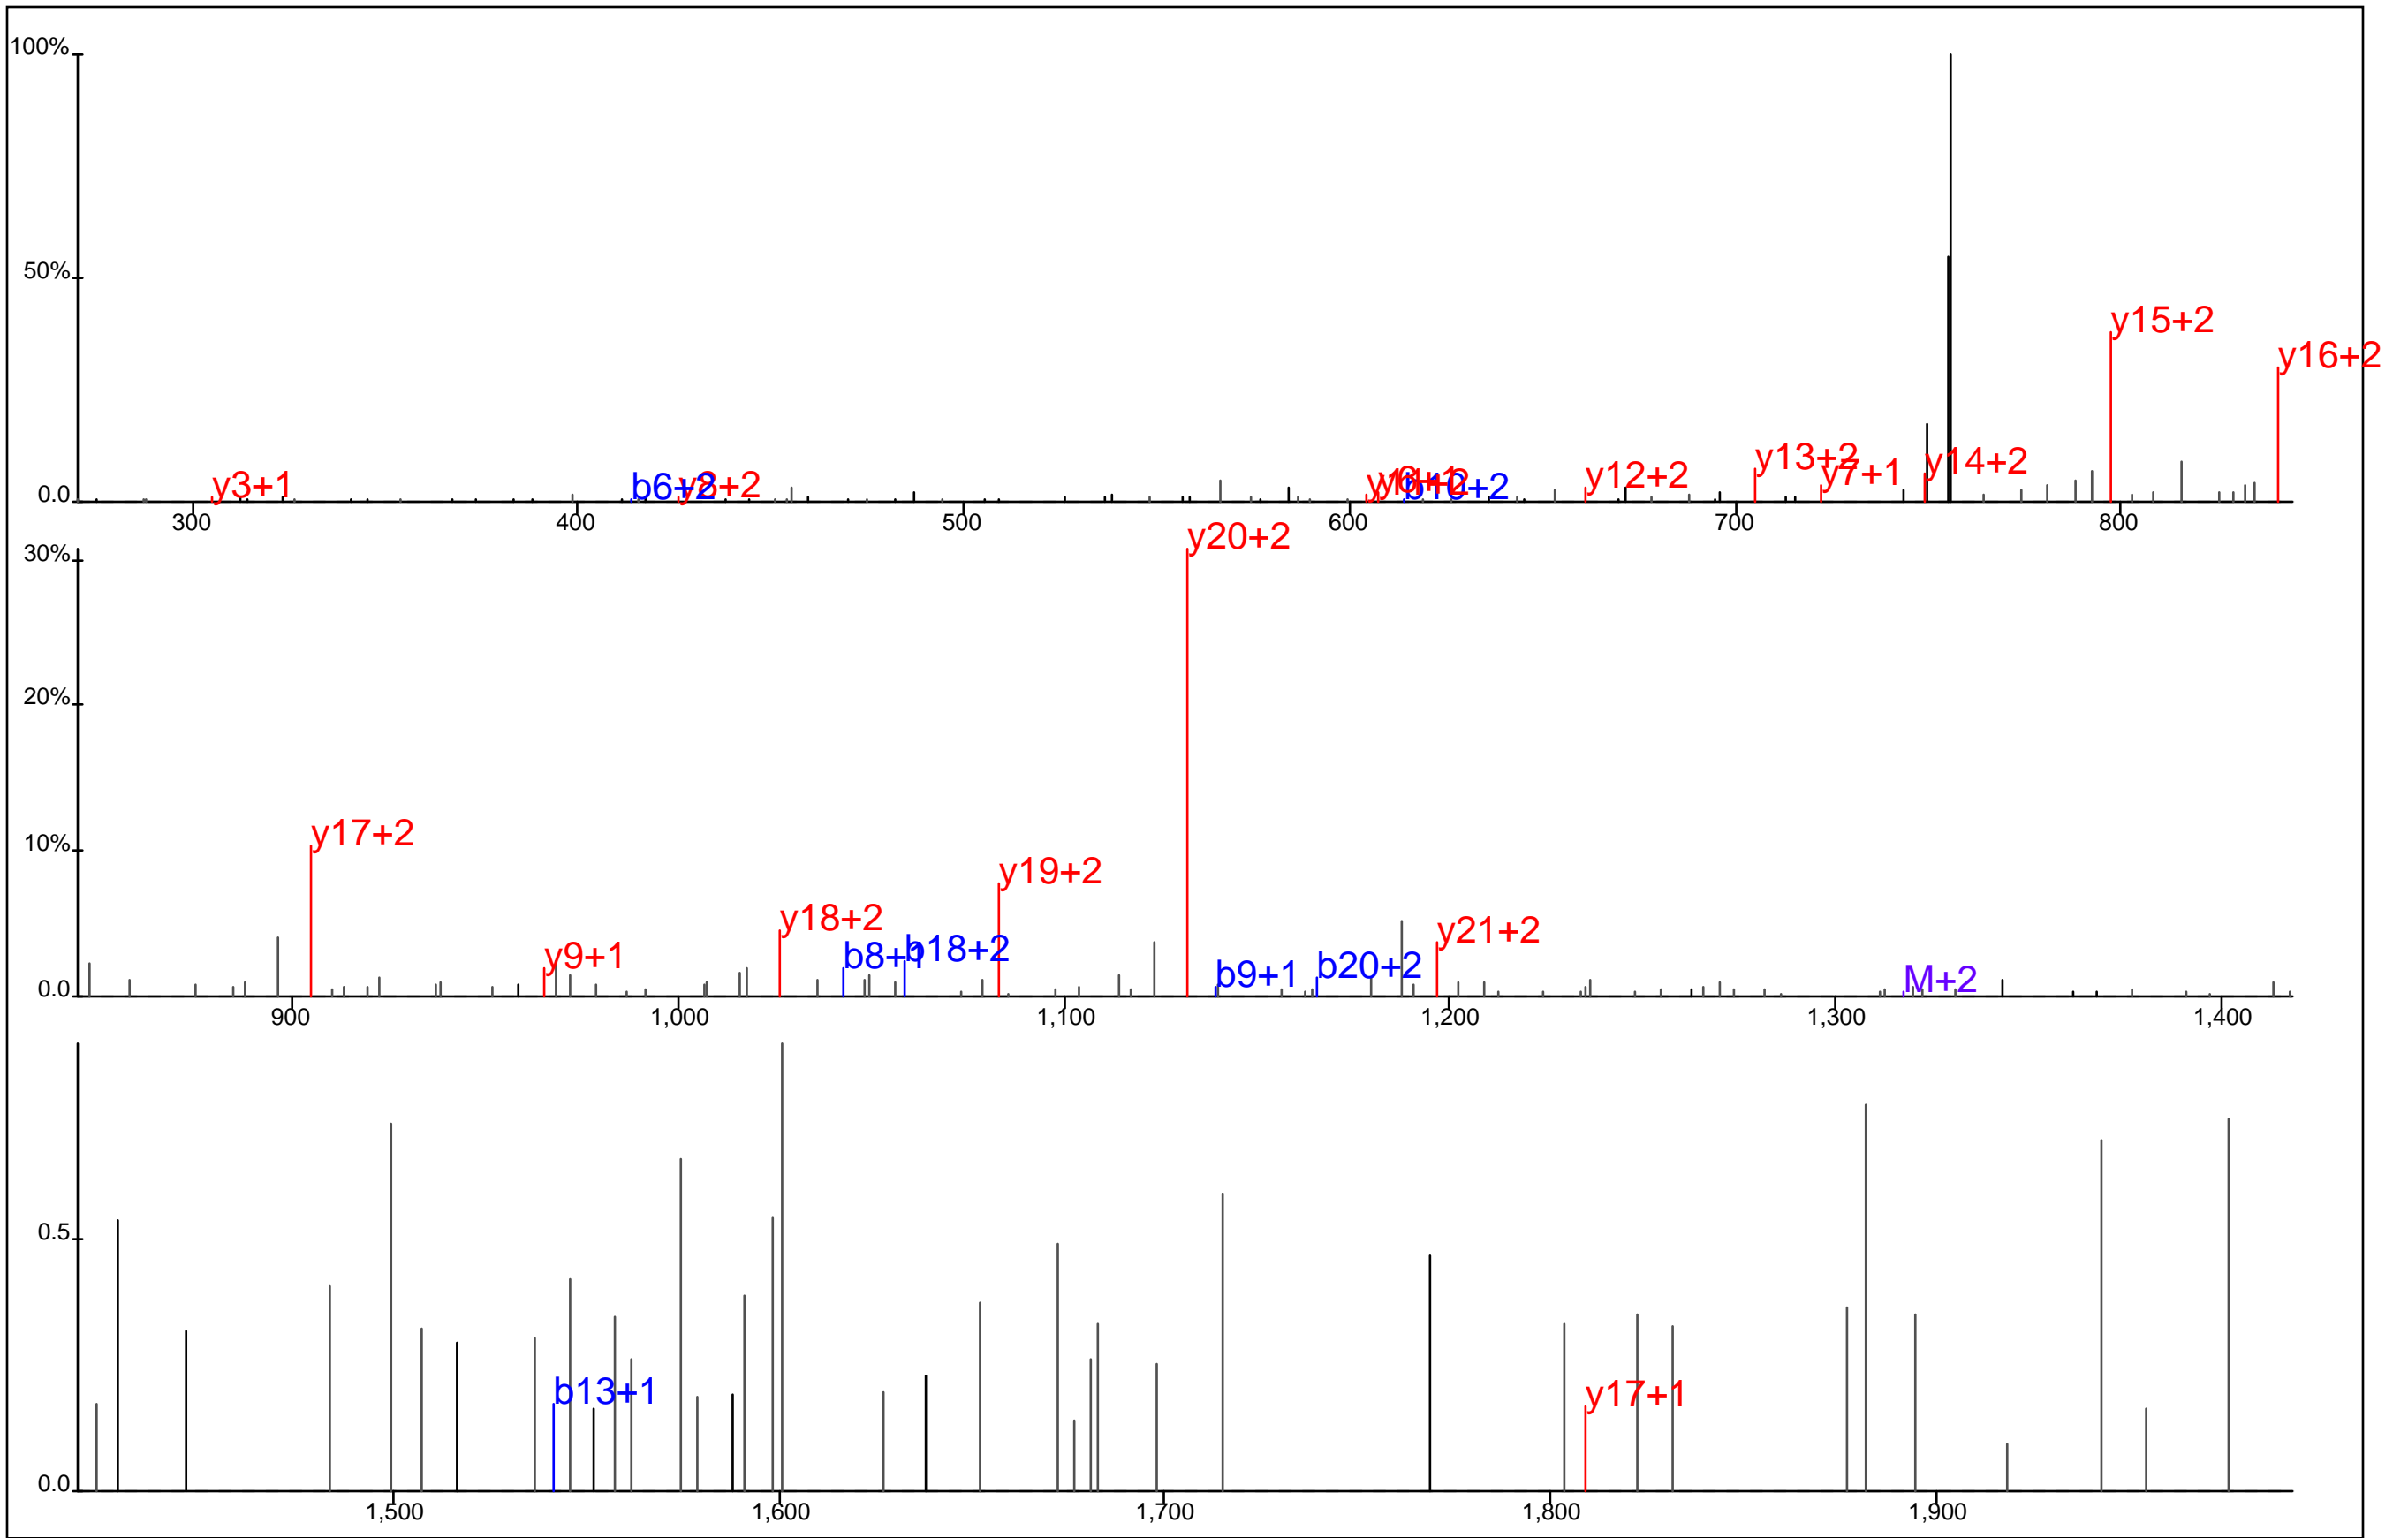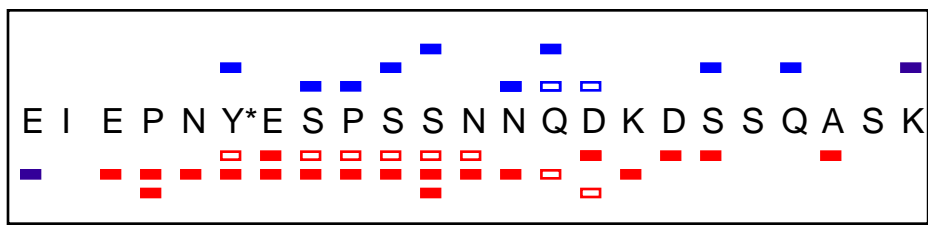

Protein Name: NKf3 kinase family member  
 gi Accession: 0  
 Precursor Mass: 878.6997+3  
 Delta Mass: 0.276 ppm  
 XCorr: 32.31

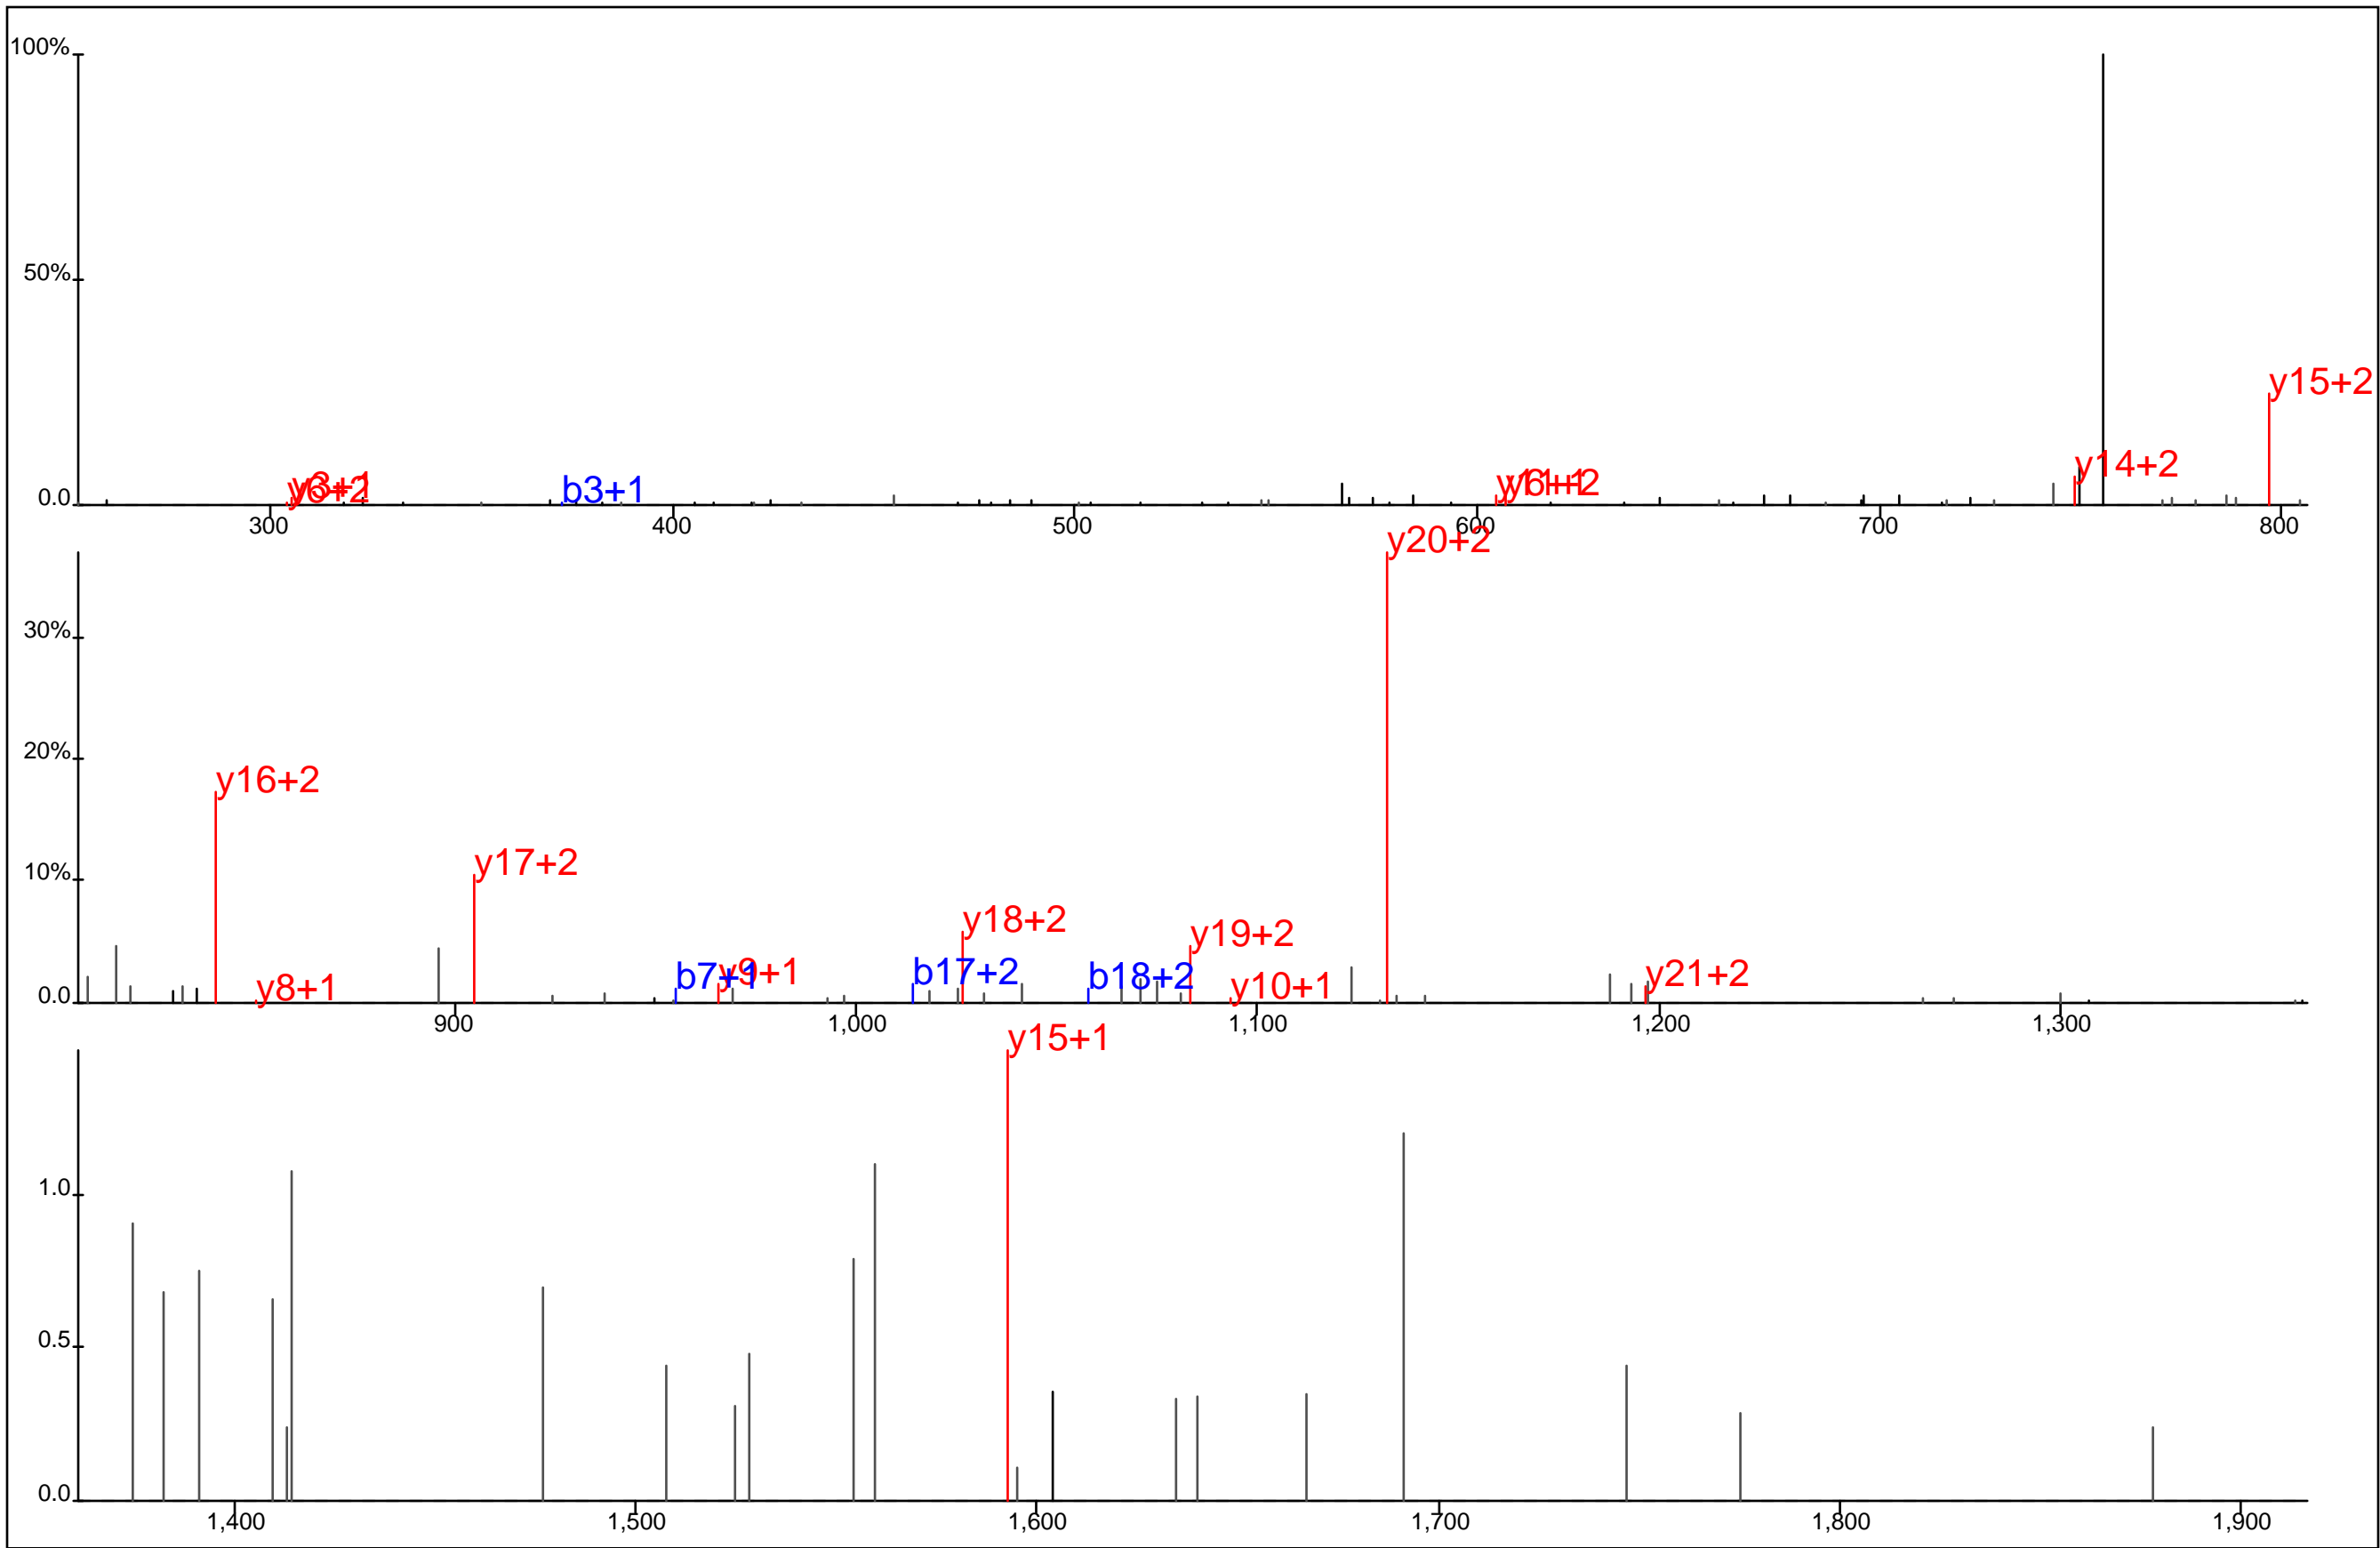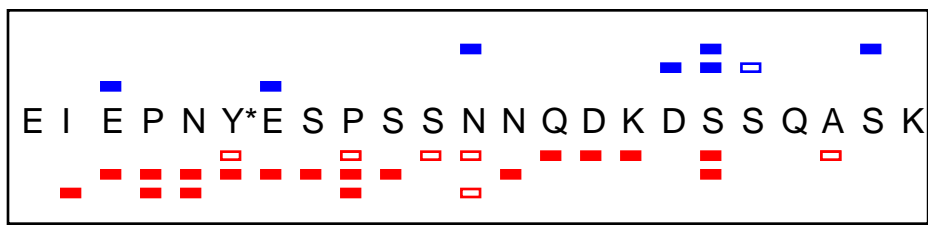

Protein Name: NKf3 kinase family member  
 gi Accession: 0  
 Precursor Mass: 878.6995+3  
 Delta Mass: 0.002 ppm  
 XCorr: 23.18

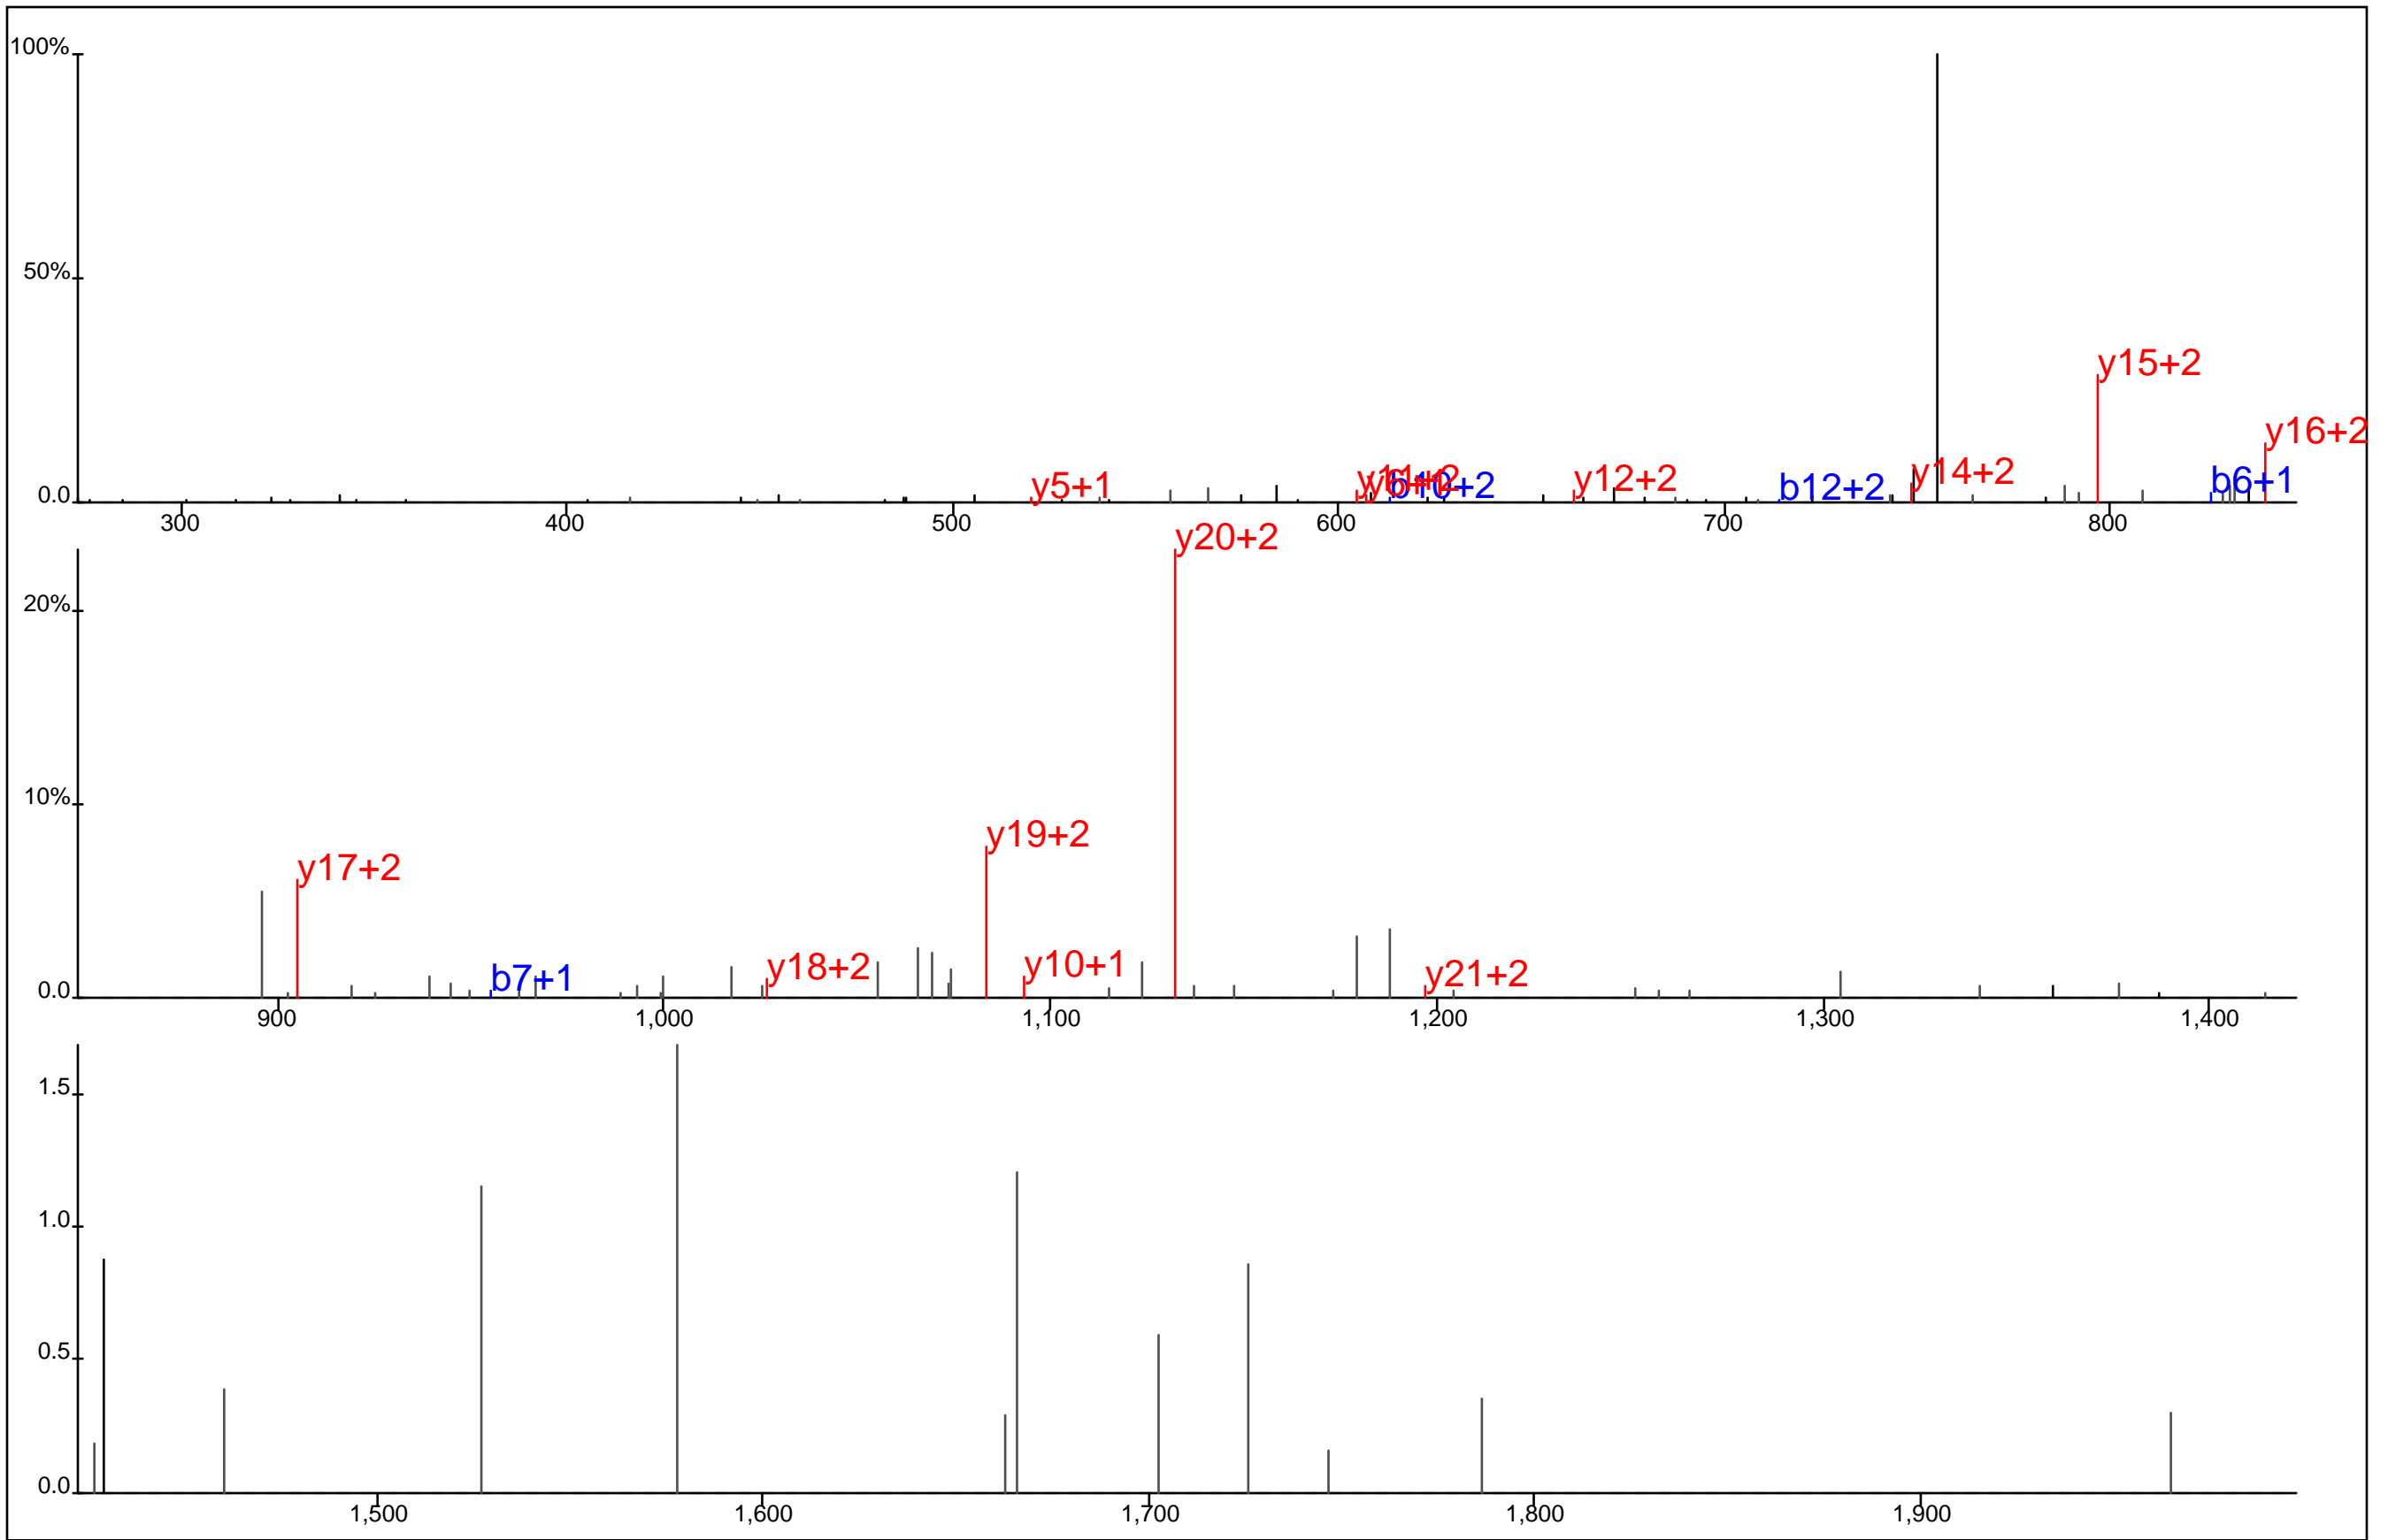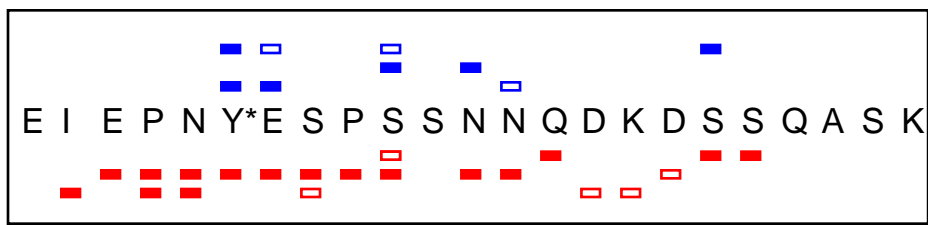

Protein Name: NKf3 kinase family member  
 gi Accession: 0  
 Precursor Mass: 878.7018+3  
 Delta Mass: 2.639 ppm  
 XCorr: 21.61



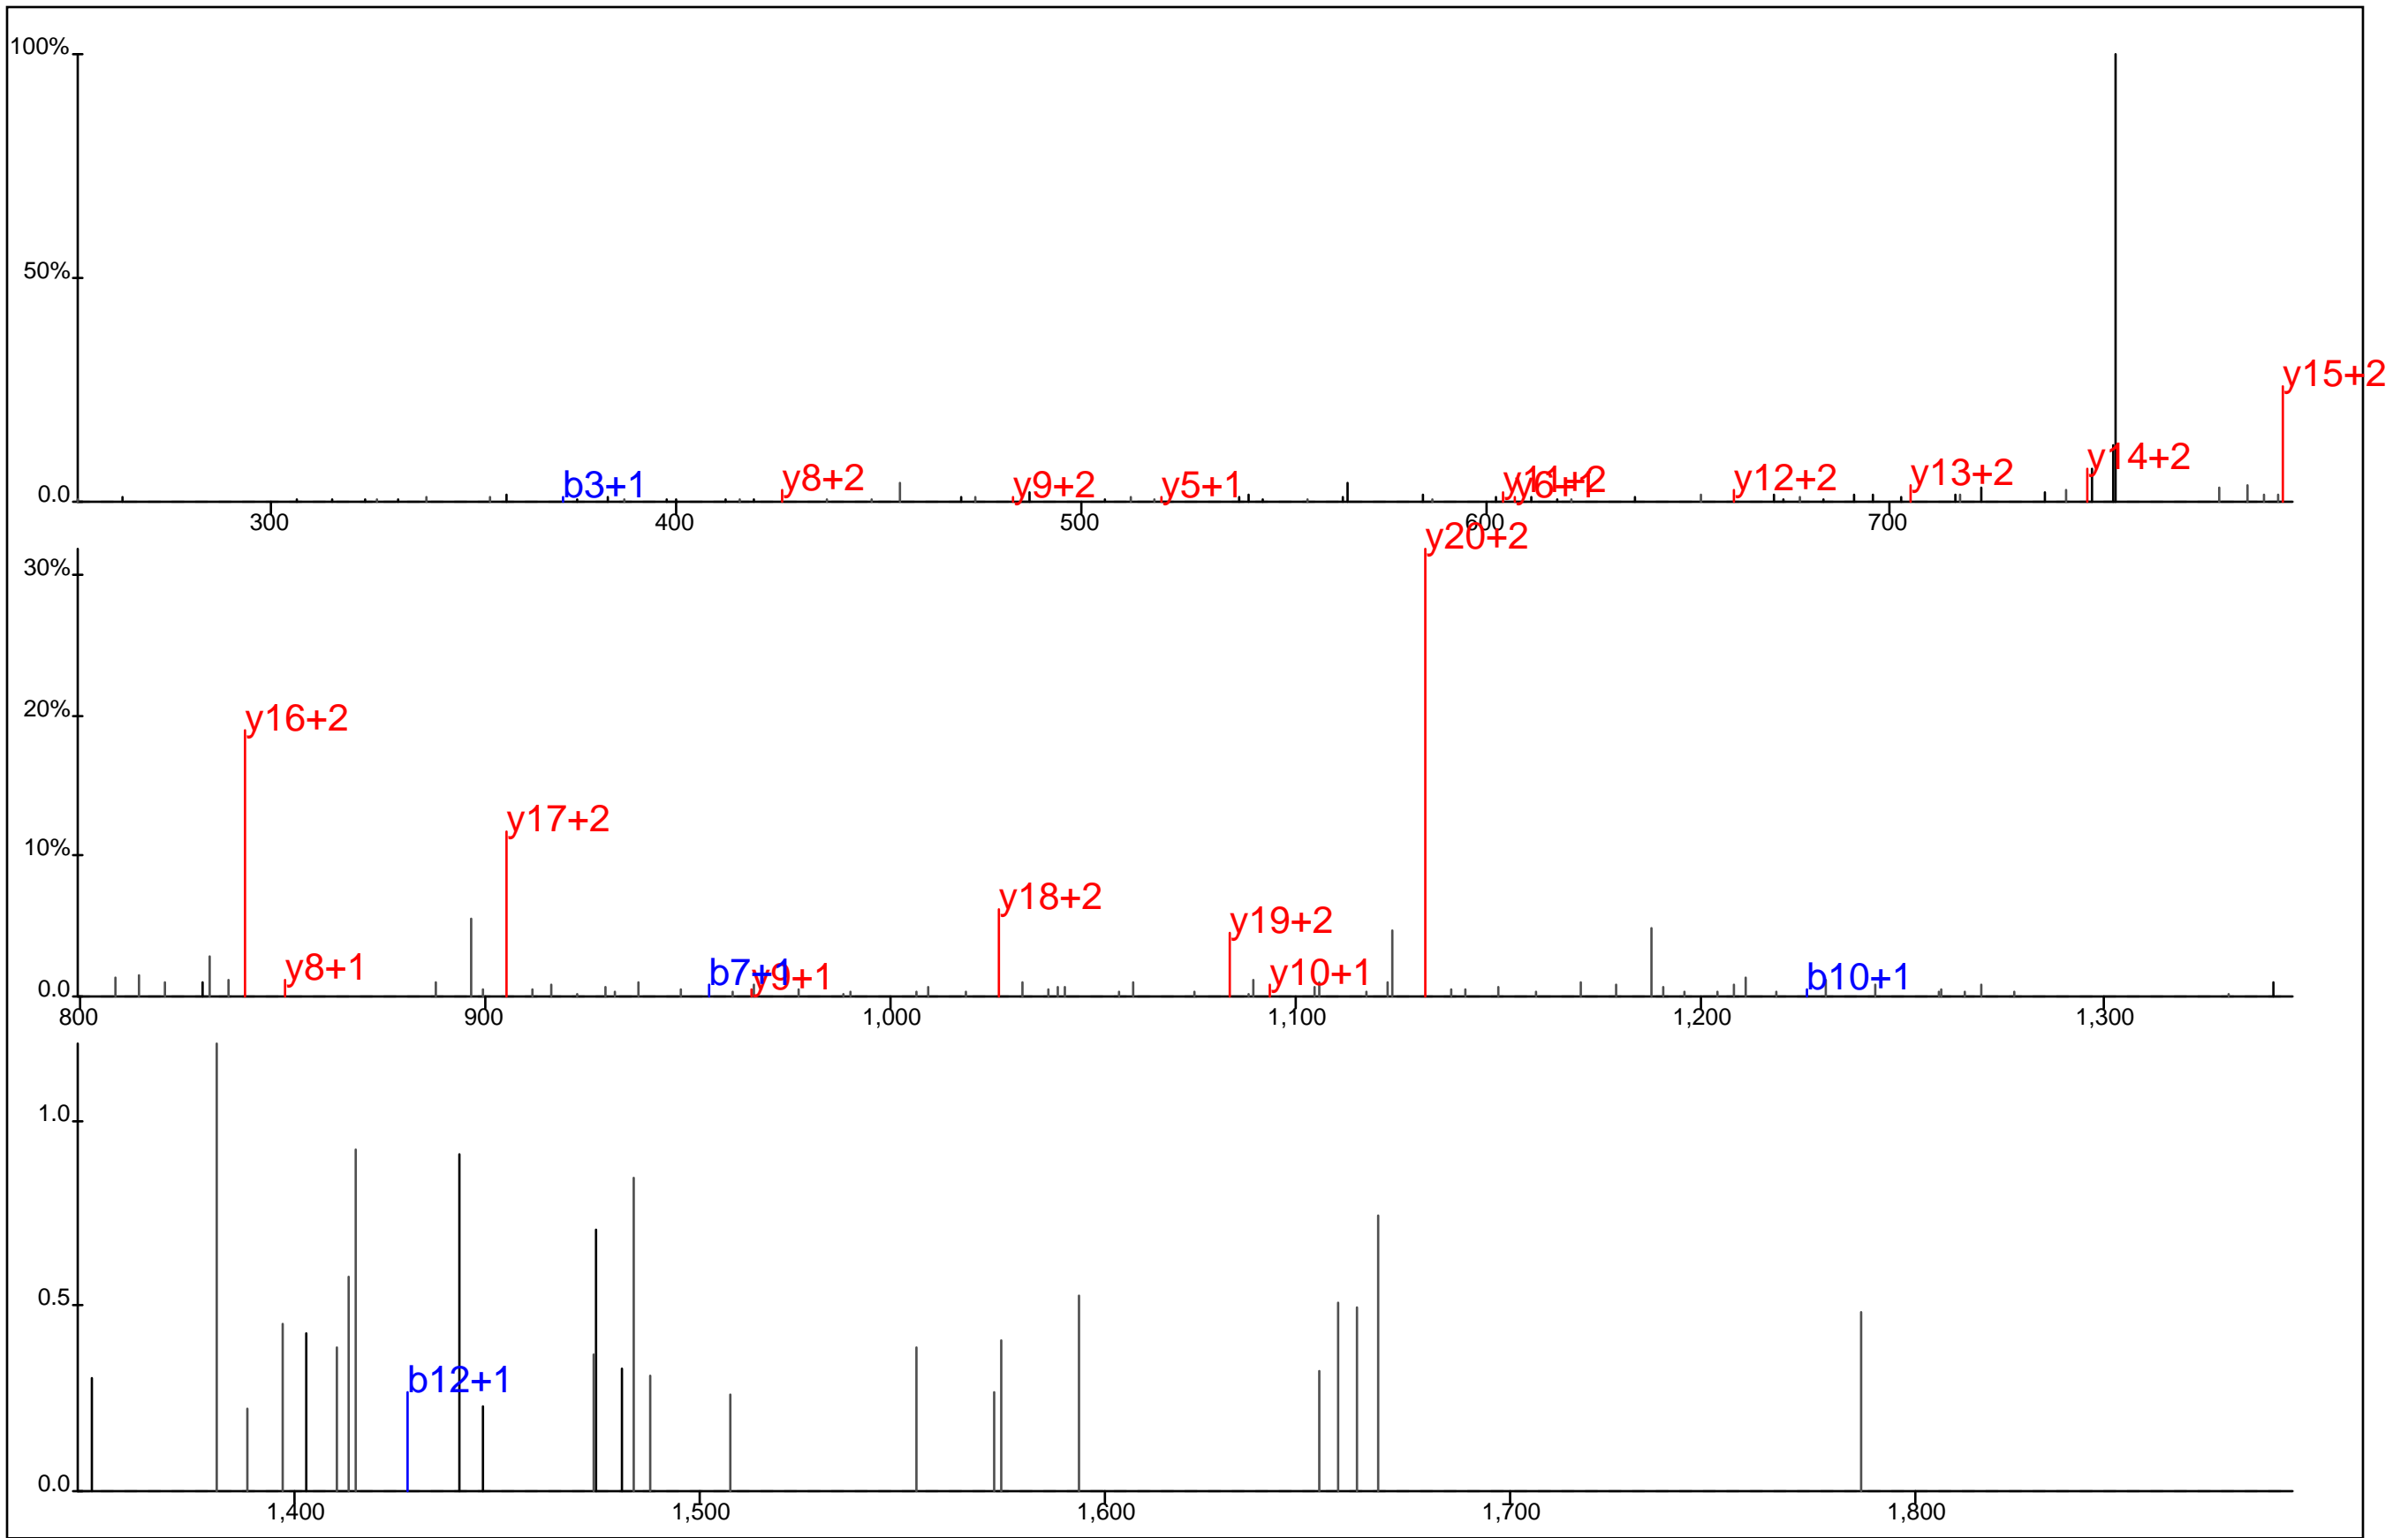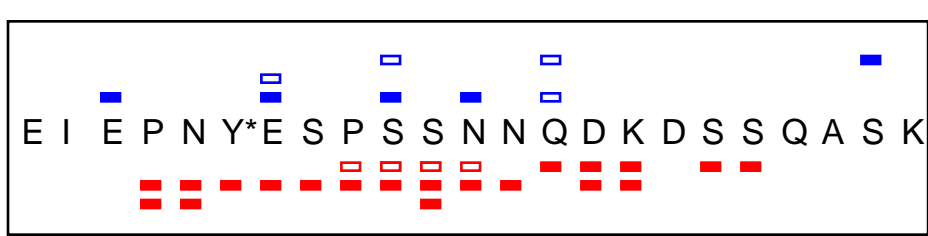

Protein Name: NKF3 kinase family member  
 gi Accession: 0  
 Precursor Mass: 878.6960+3  
 Delta Mass: 3.964 ppm  
 XCorr: 31.66



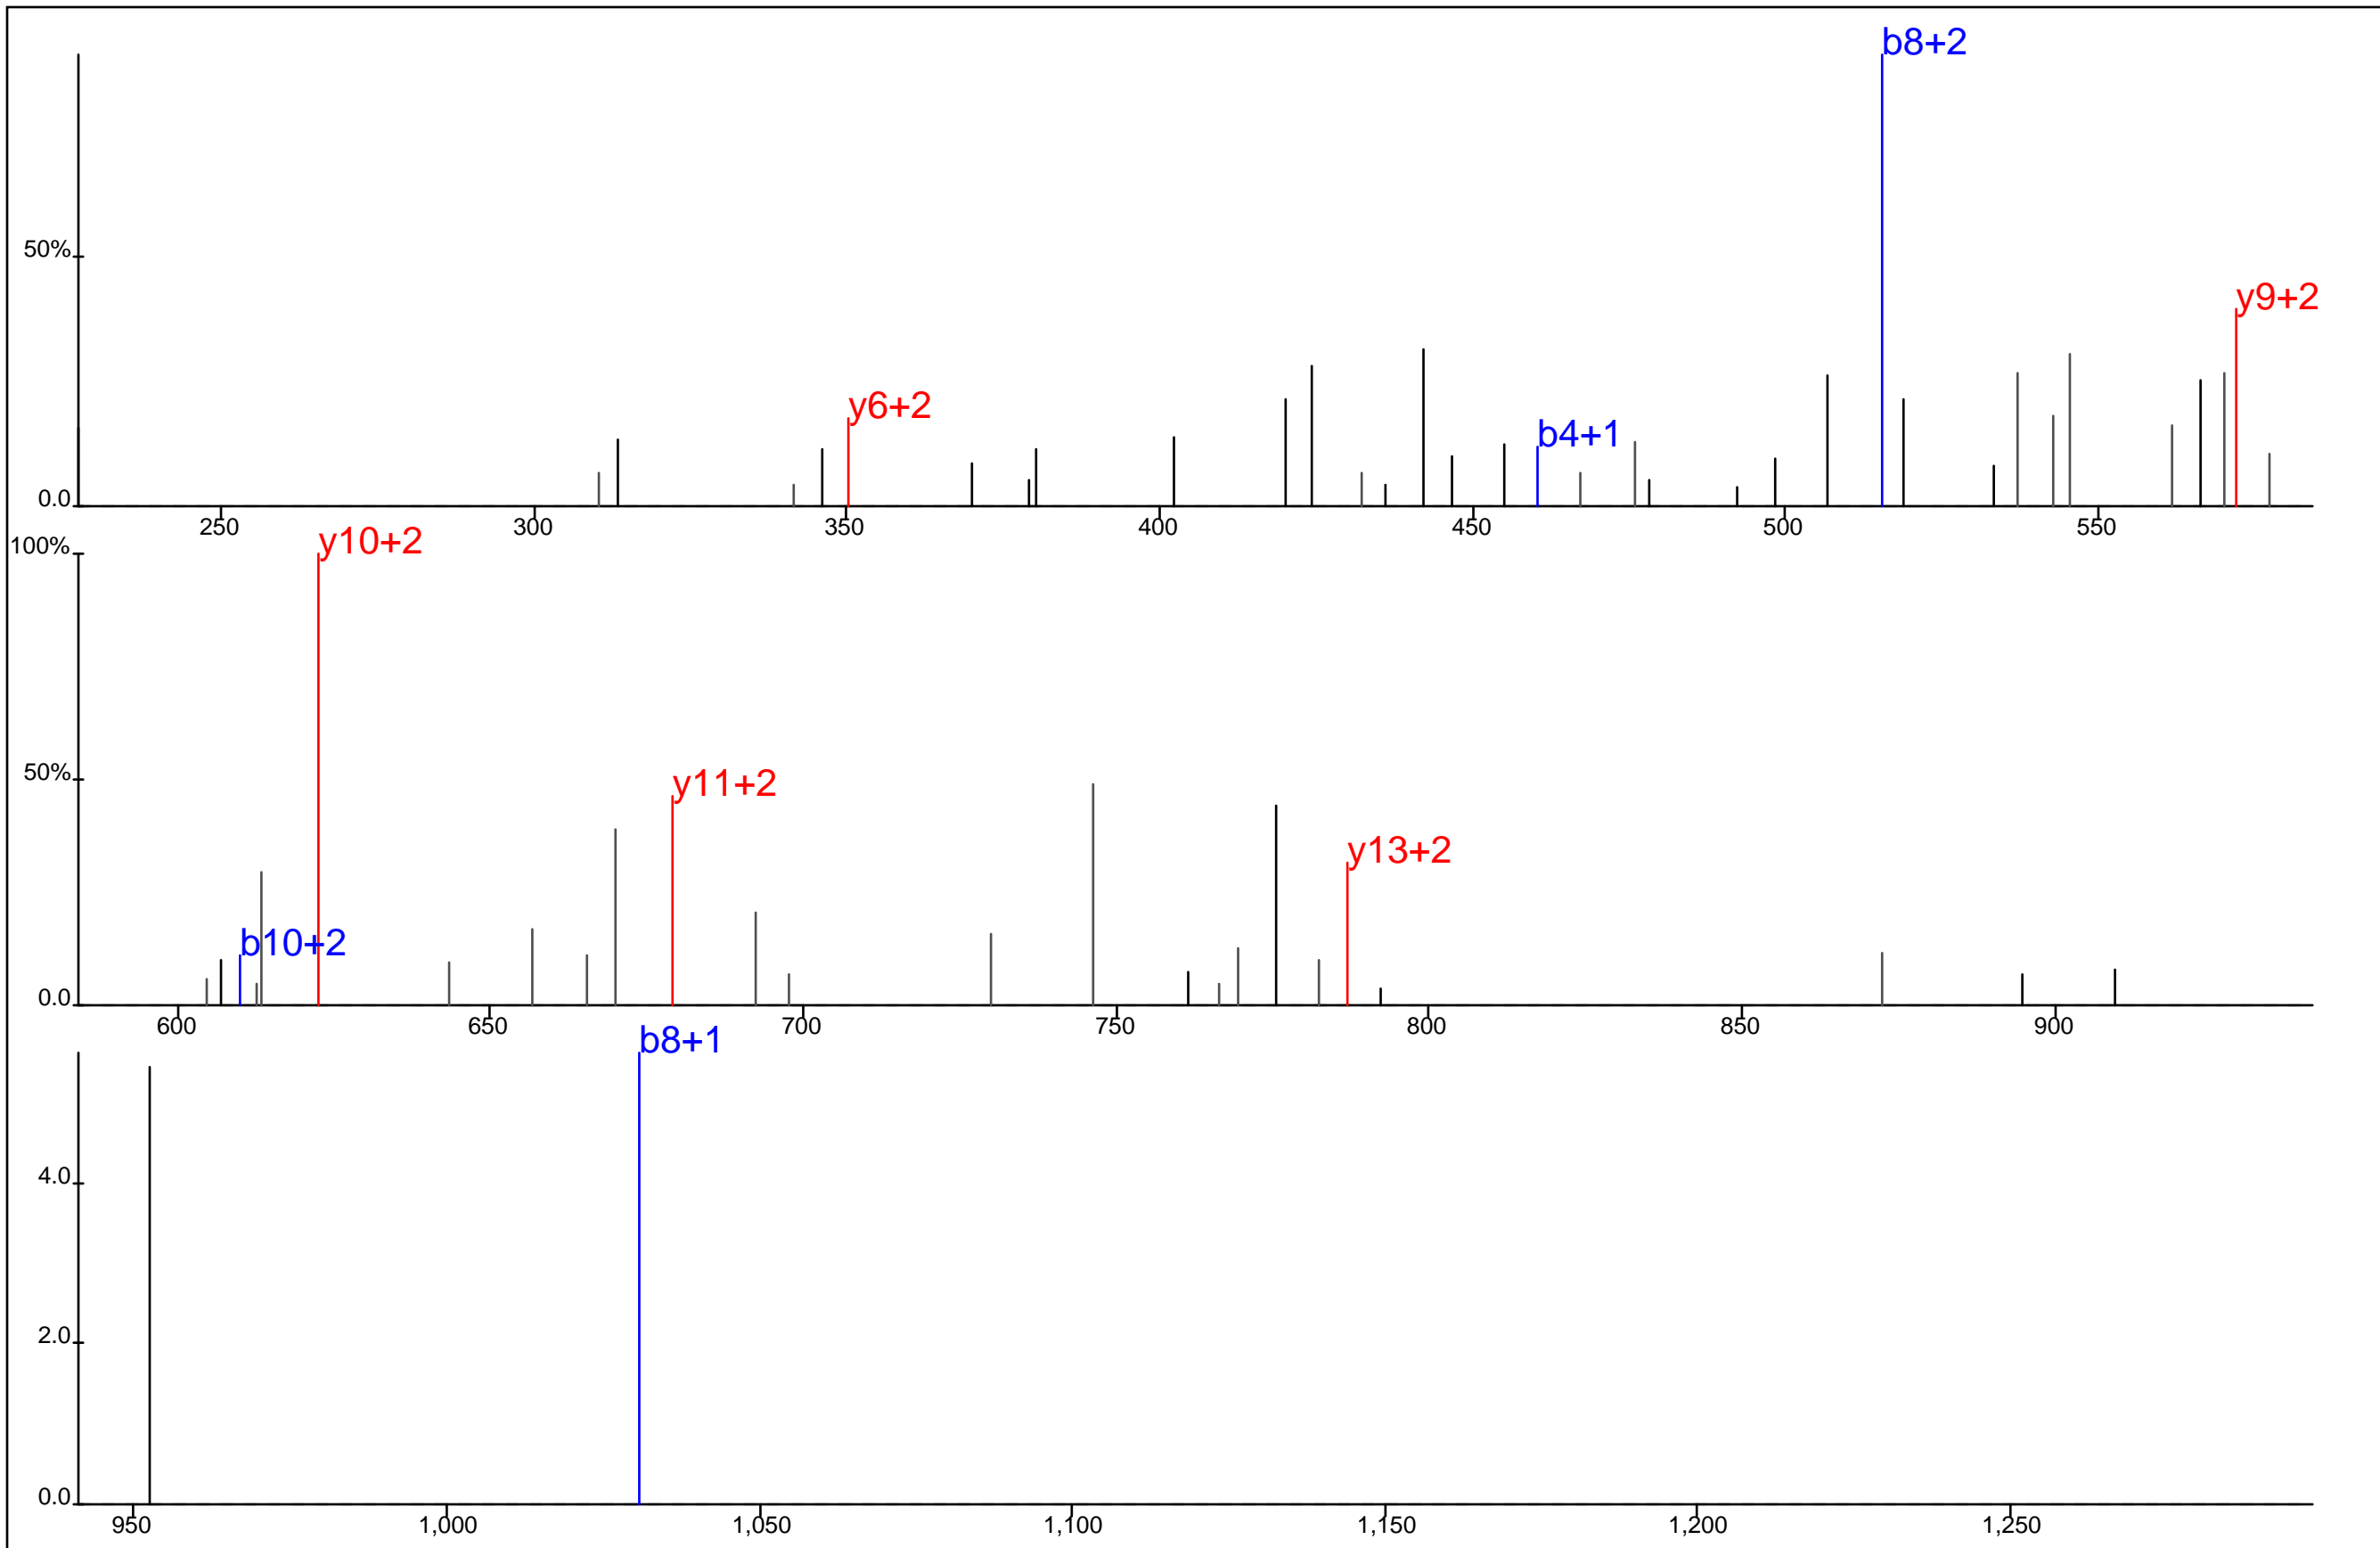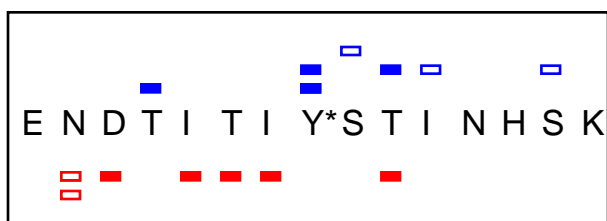

Protein Name: NTBA  
 gi Accession: 0  
 Precursor Mass: 605.9440+3  
 Delta Mass: 0.736 ppm  
 XCorr: 23.25



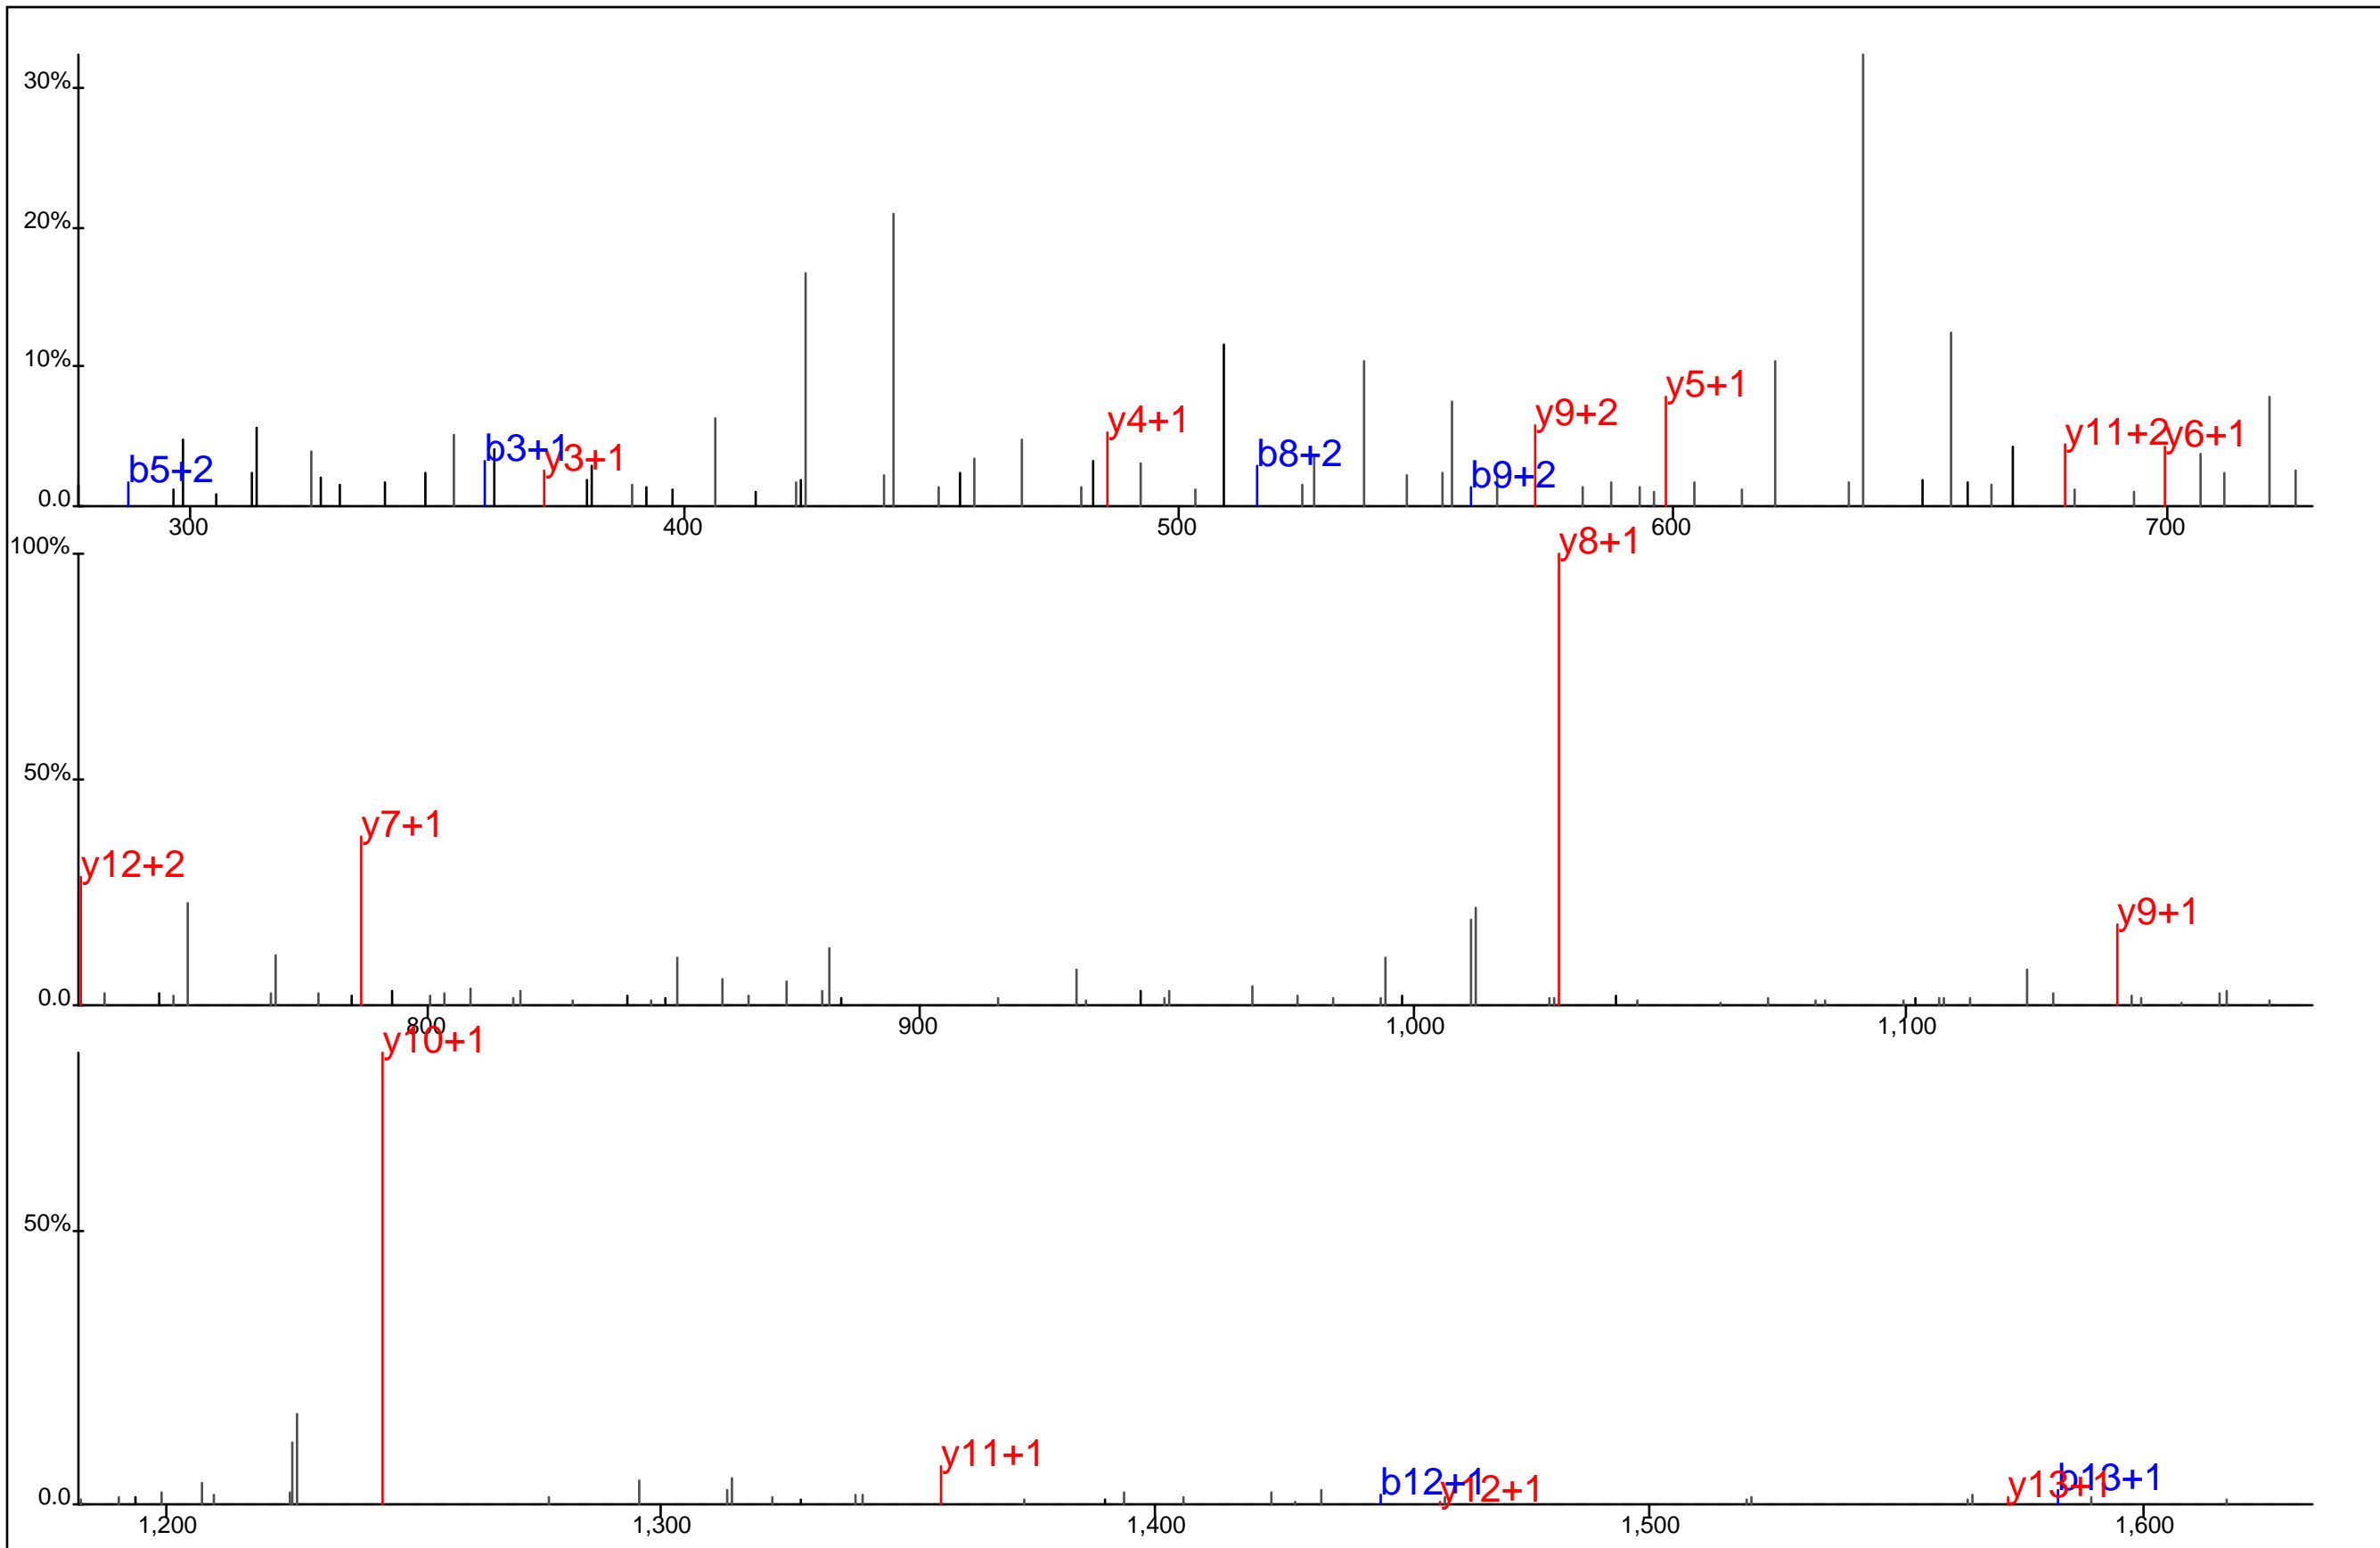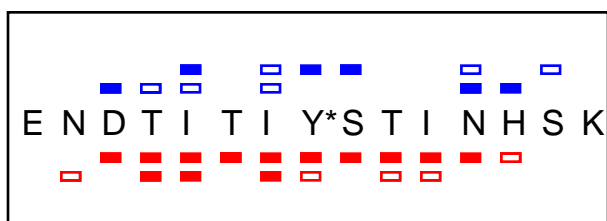

Protein Name: NTBA  
 gi Accession: 0  
 Precursor Mass: 908.4115+2  
 Delta Mass: 0.165 ppm  
 XCorr: 35.5

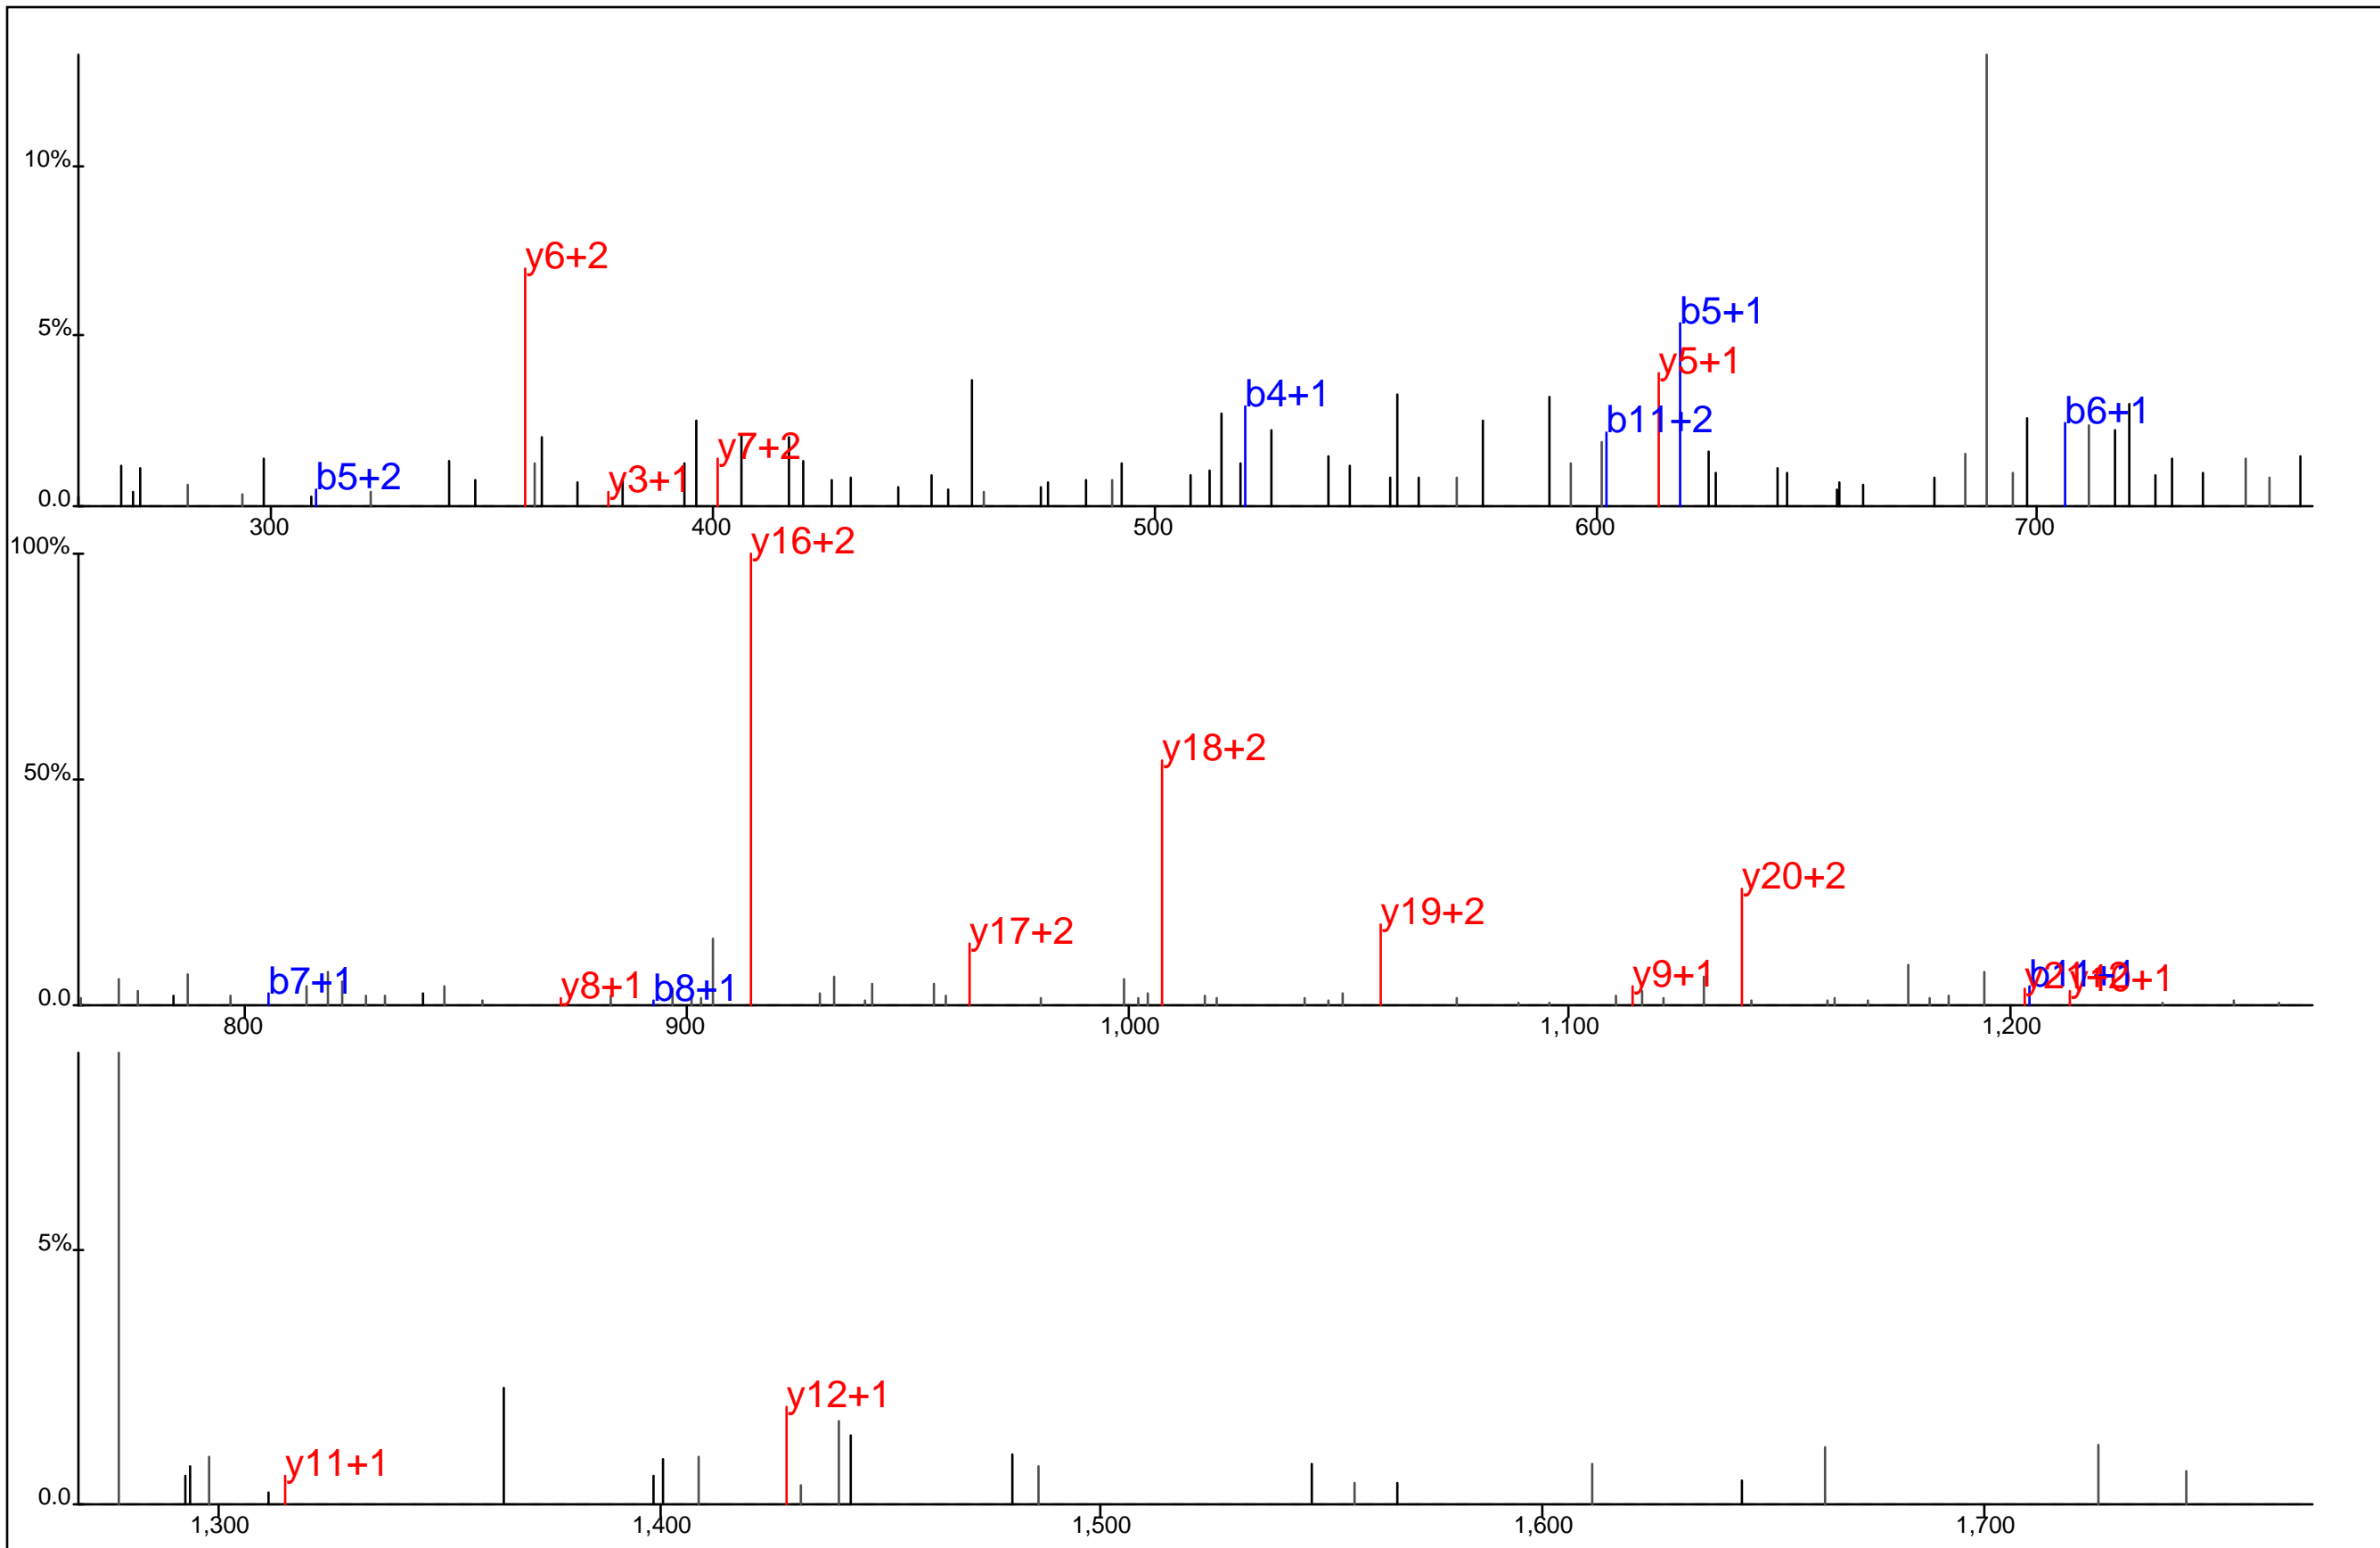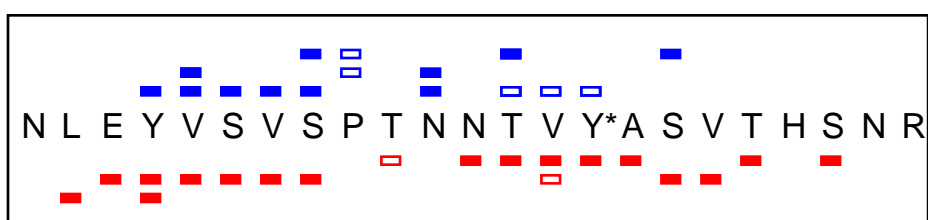

Protein Name: NTBA  
 gi Accession: 0  
 Precursor Mass: 878.0702+3  
 Delta Mass: 2.988 ppm  
 XCorr: 24.96



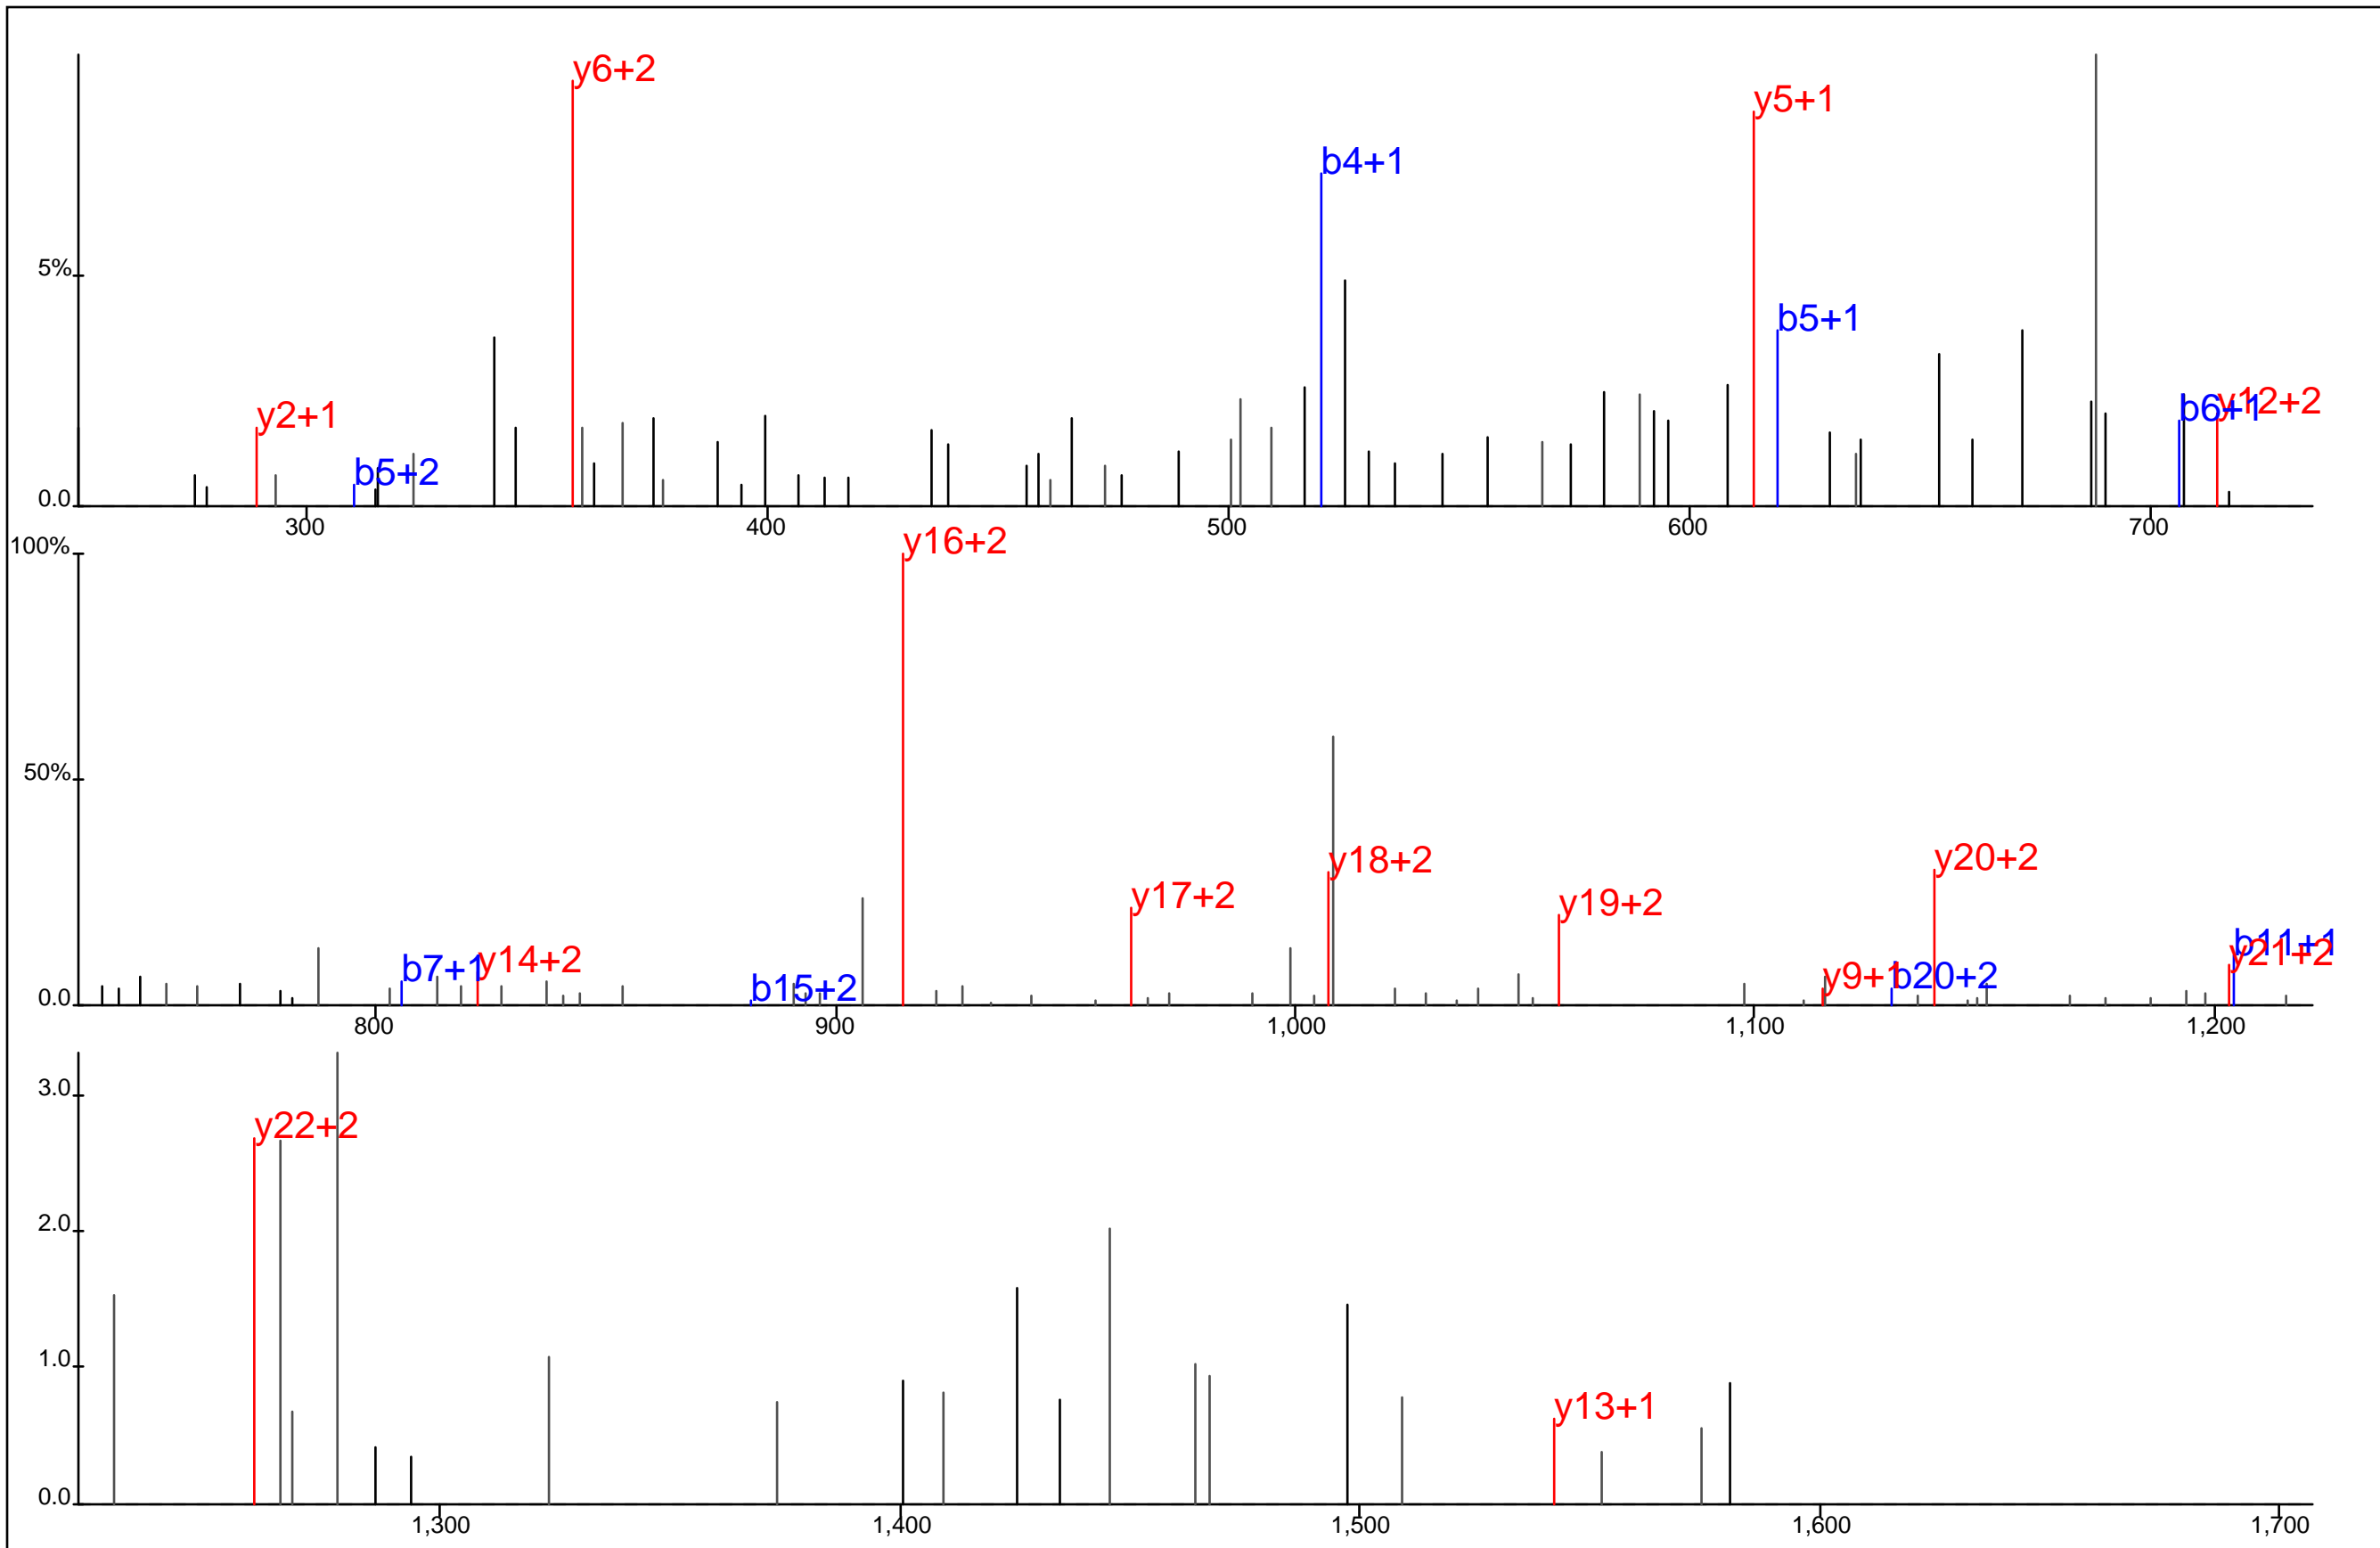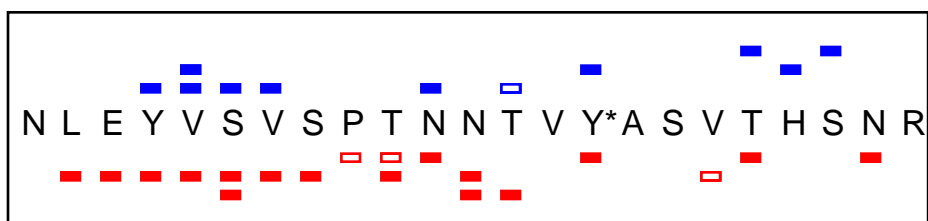

Protein Name: NTBA  
 gi Accession: 0  
 Precursor Mass: 878.0758+3  
 Delta Mass: 3.413 ppm  
 XCorr: 45.15



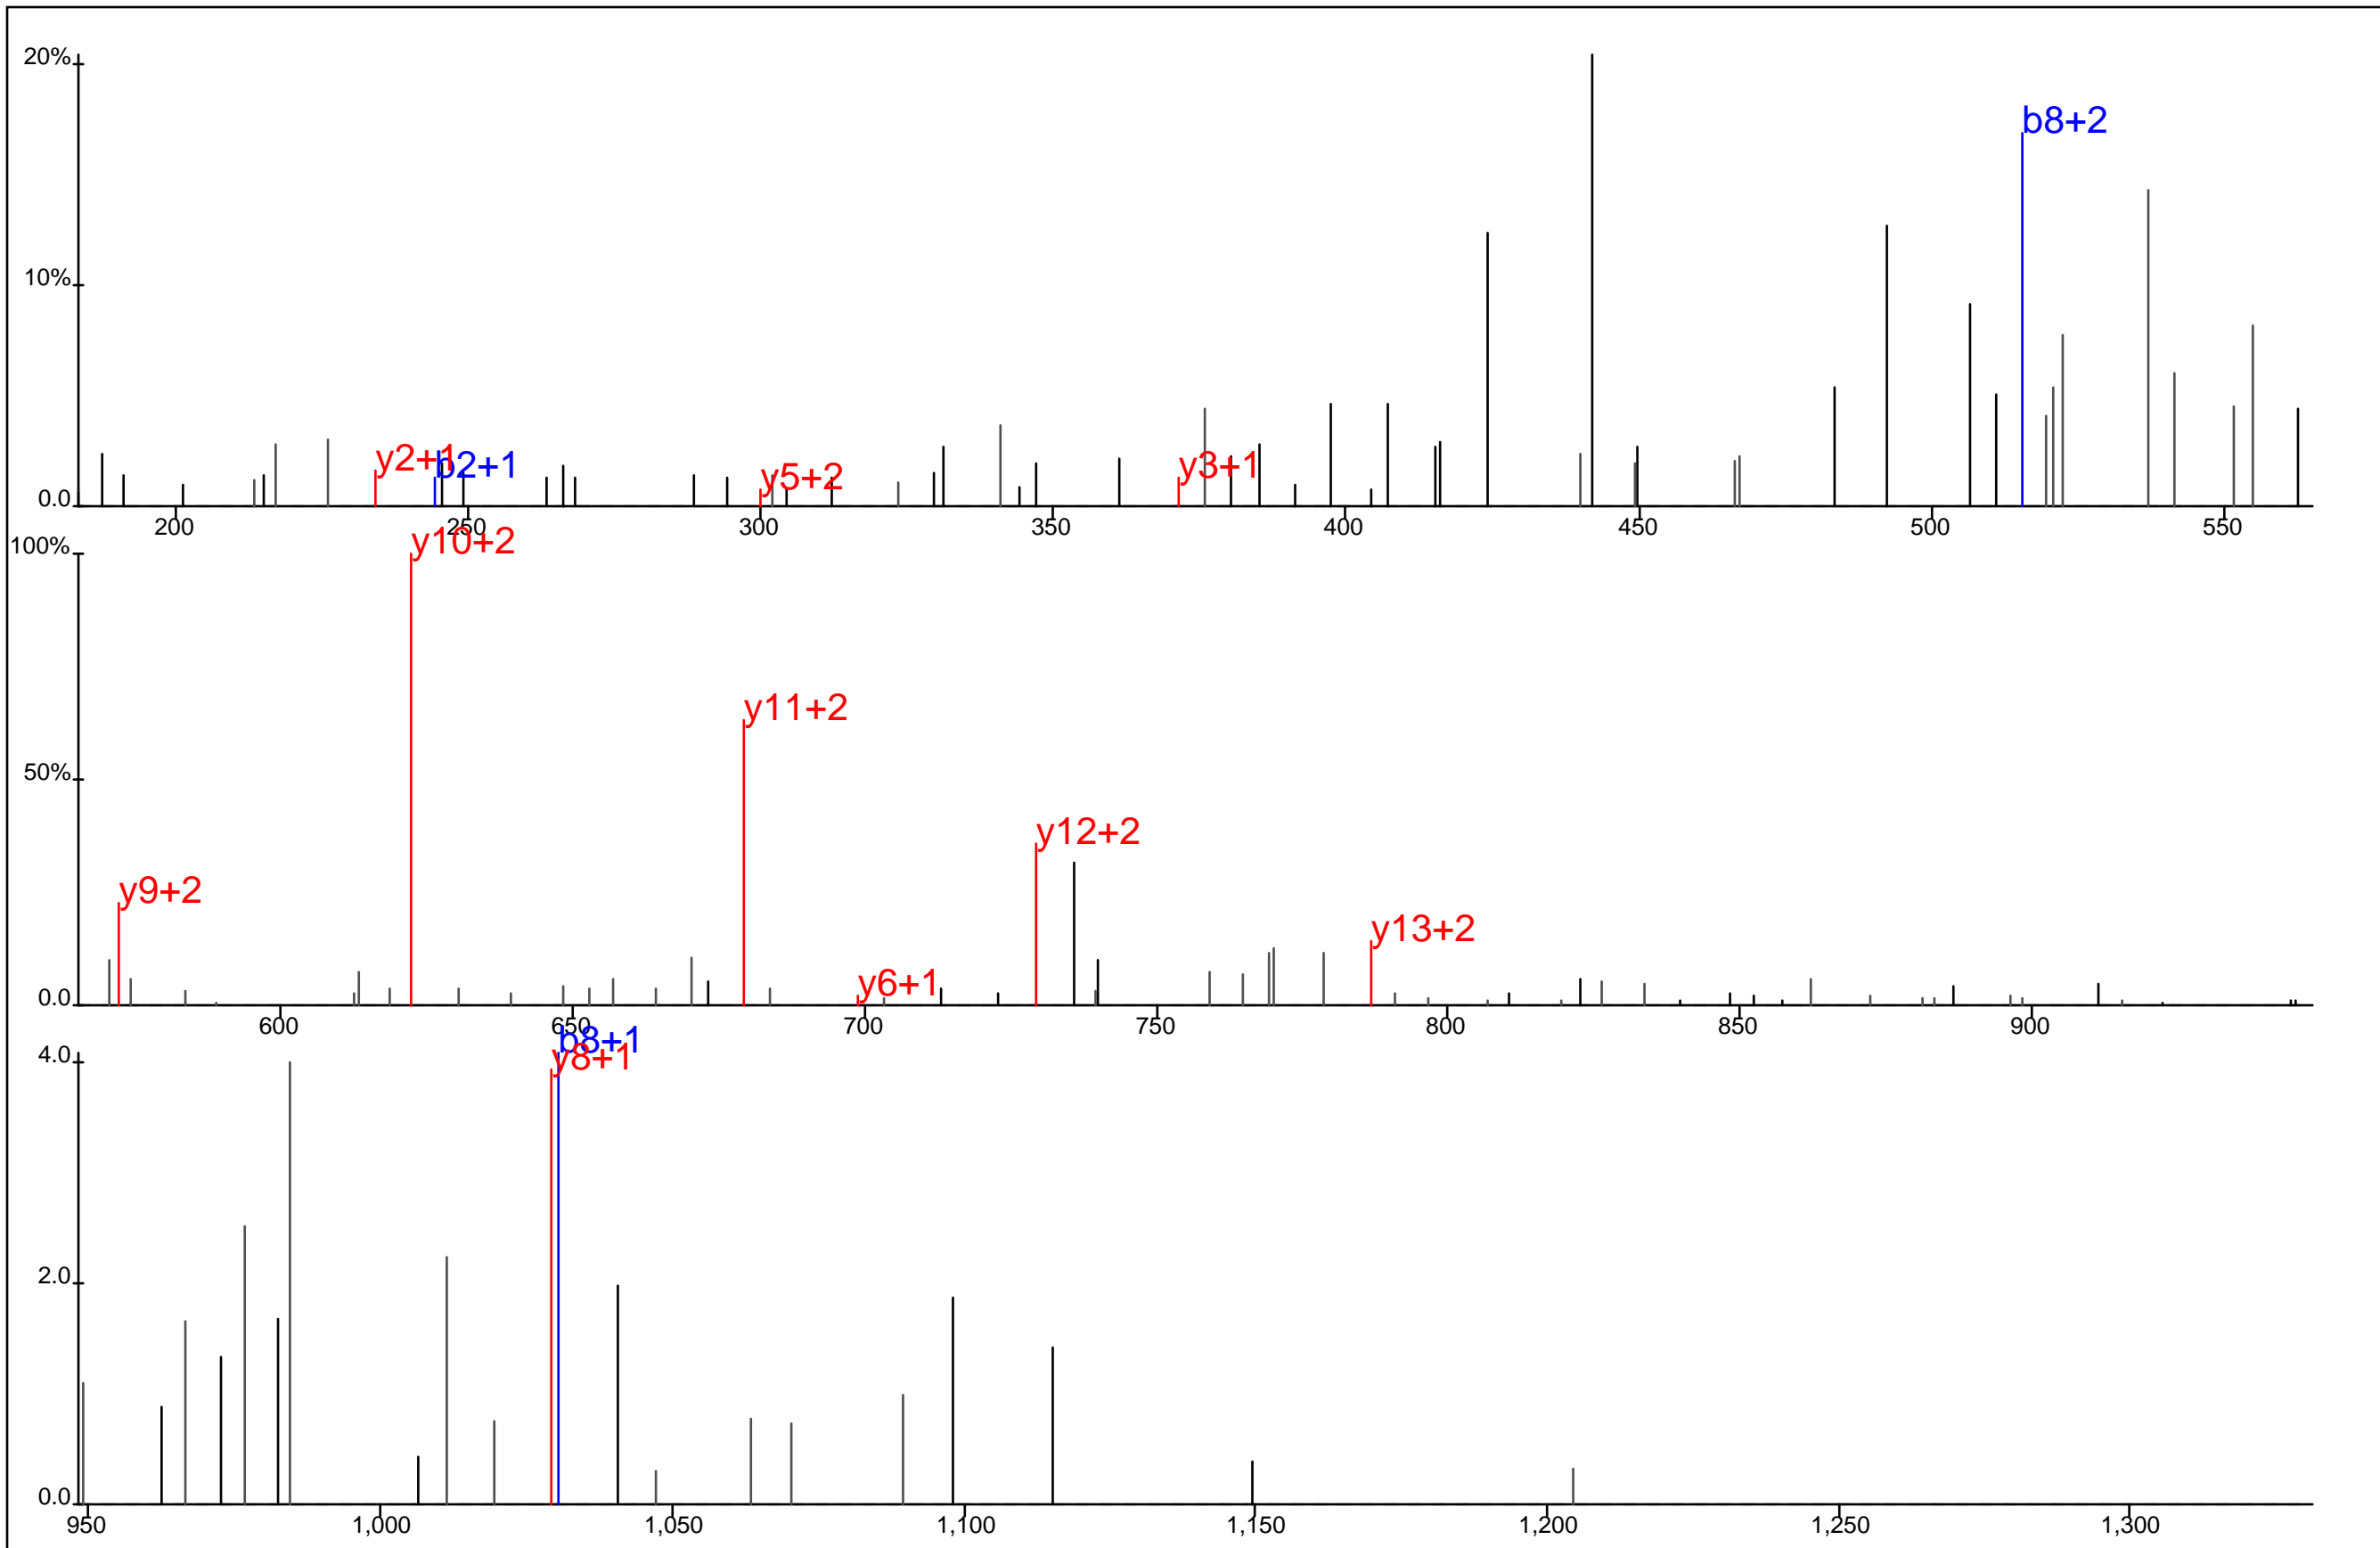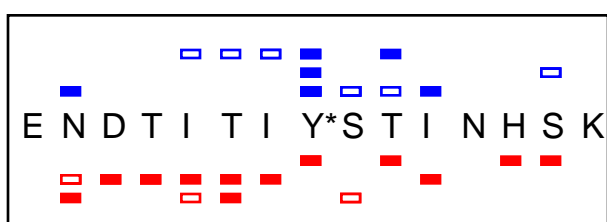

Protein Name: NTBA  
 gi Accession: 0  
 Precursor Mass: 605.9434+3  
 Delta Mass: 0.274 ppm  
 XCorr: 28.01

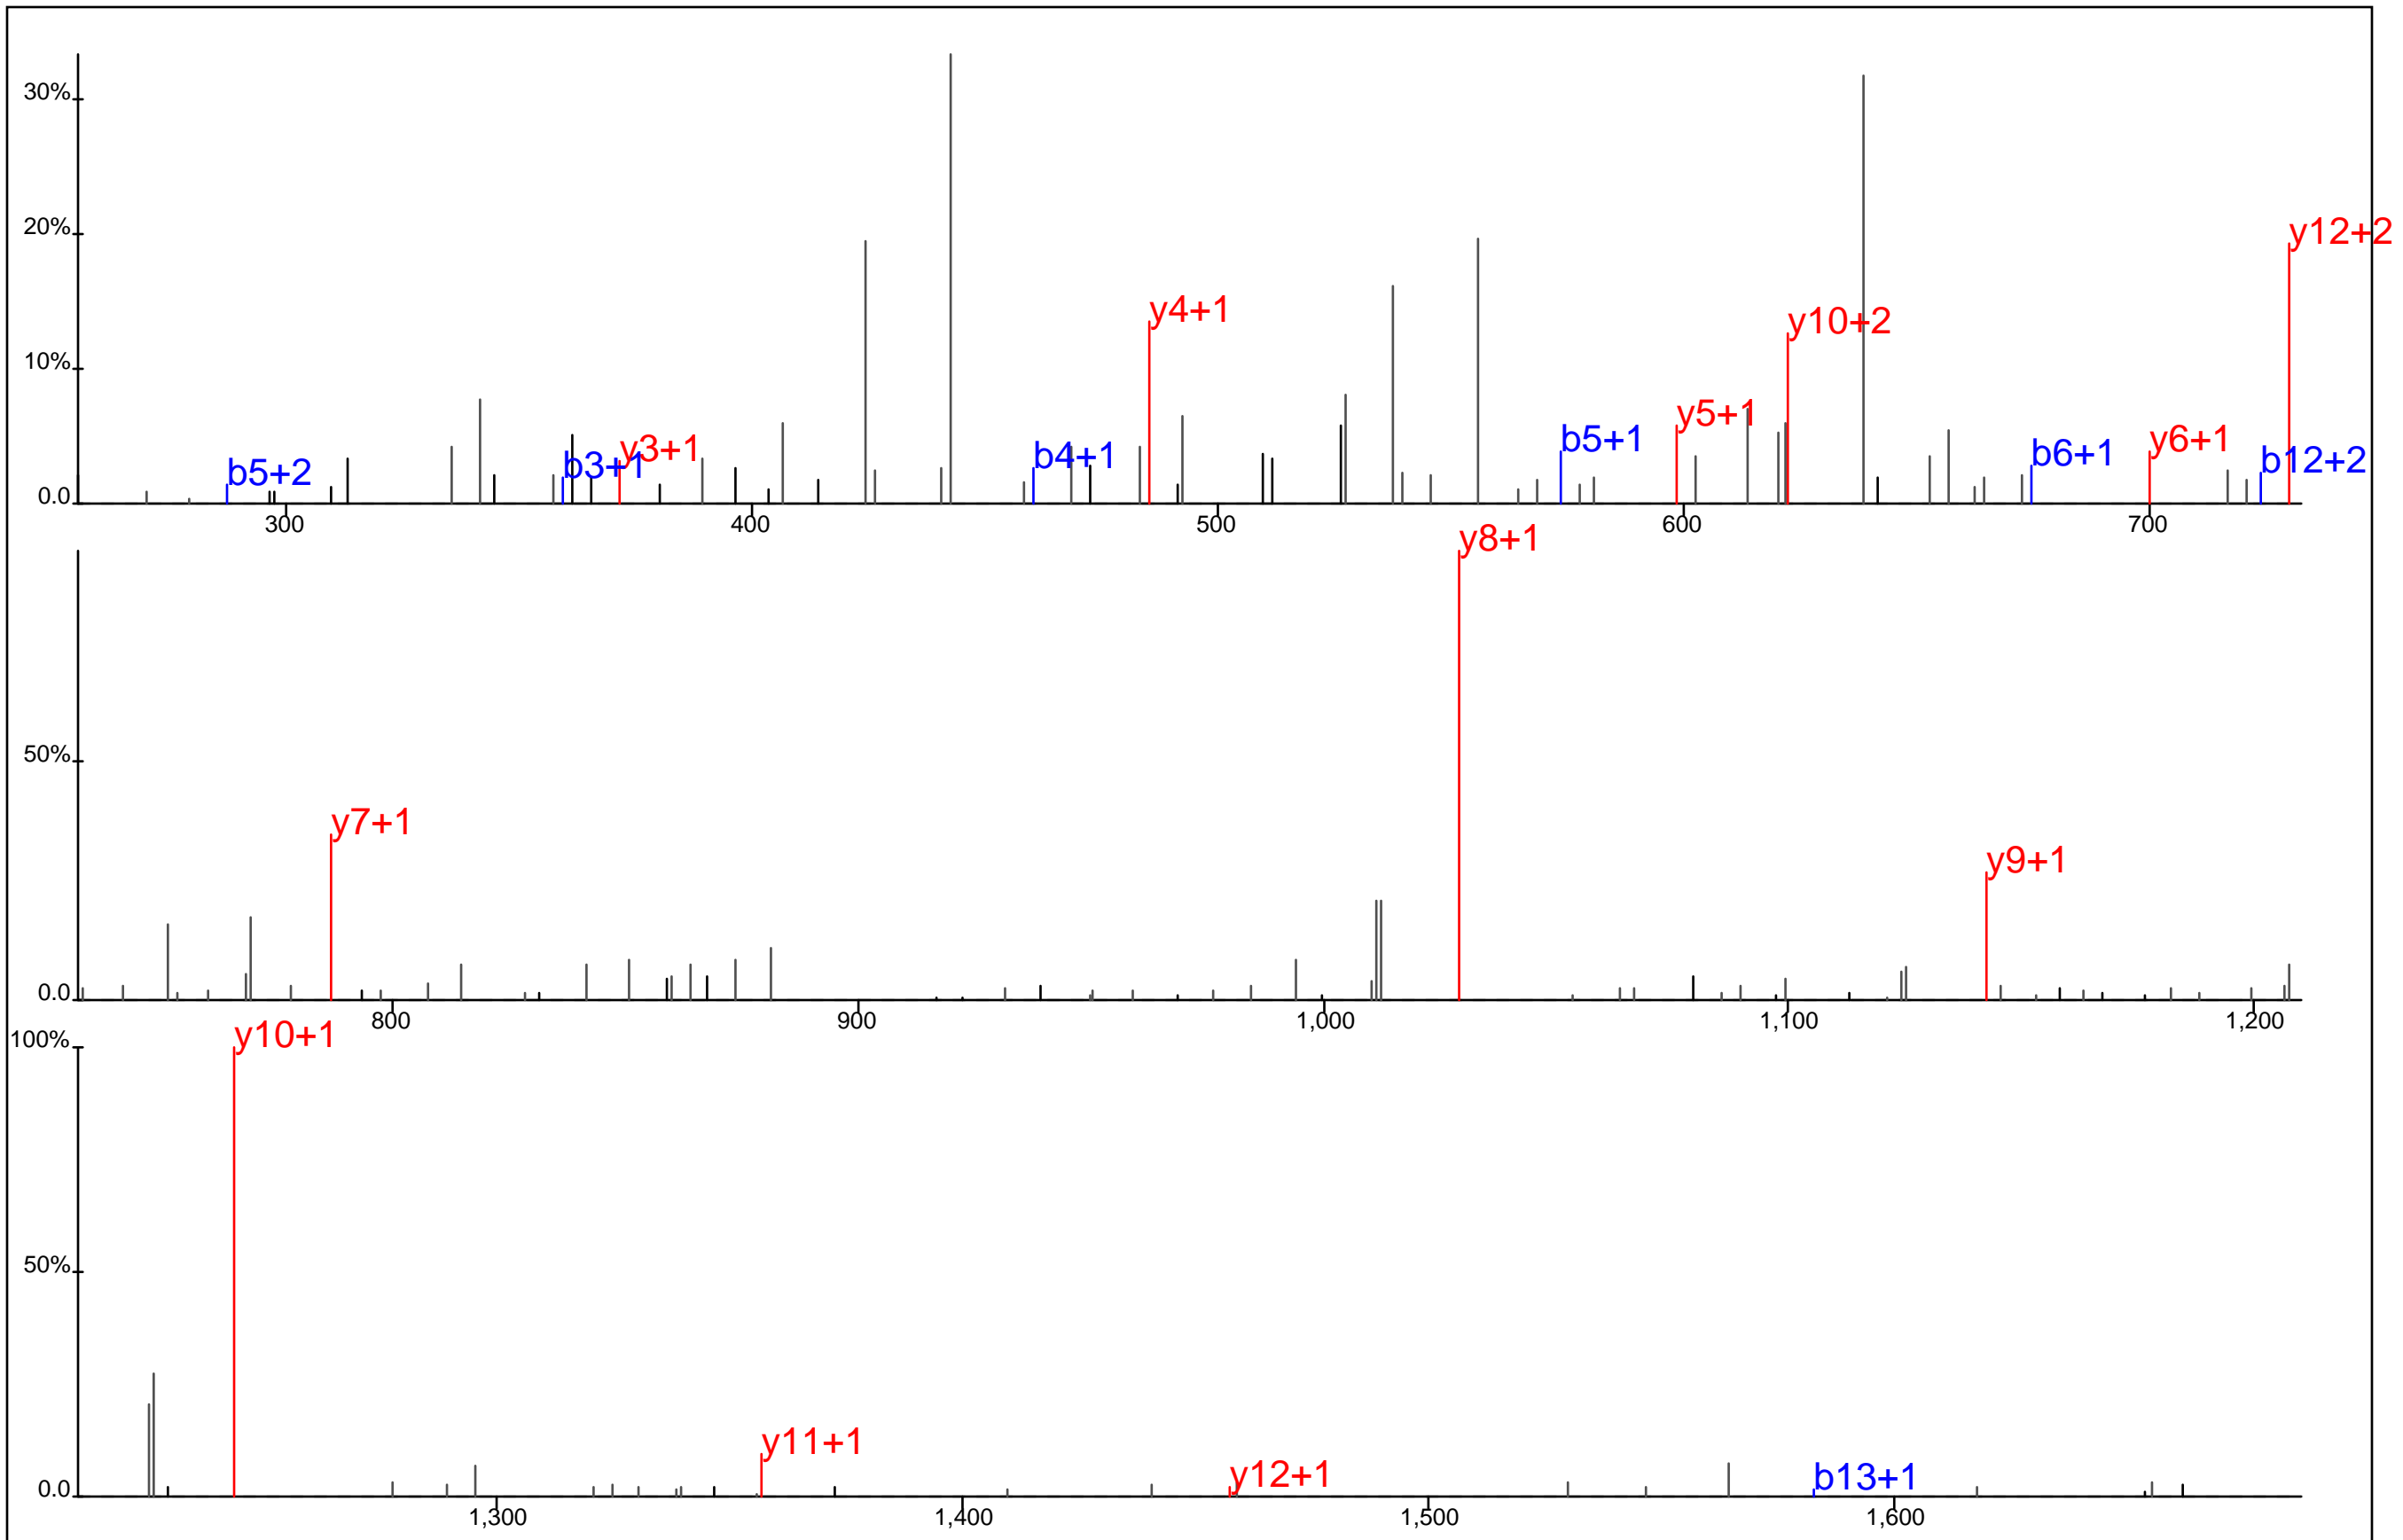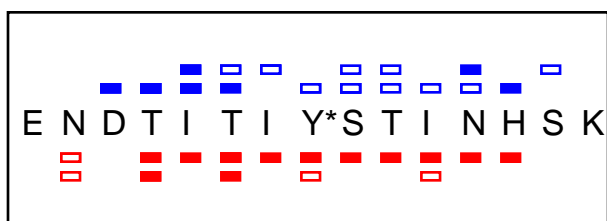

Protein Name: NTBA  
 gi Accession: 0  
 Precursor Mass: 908.4110+2  
 Delta Mass: 0.703 ppm  
 XCorr: 30.57

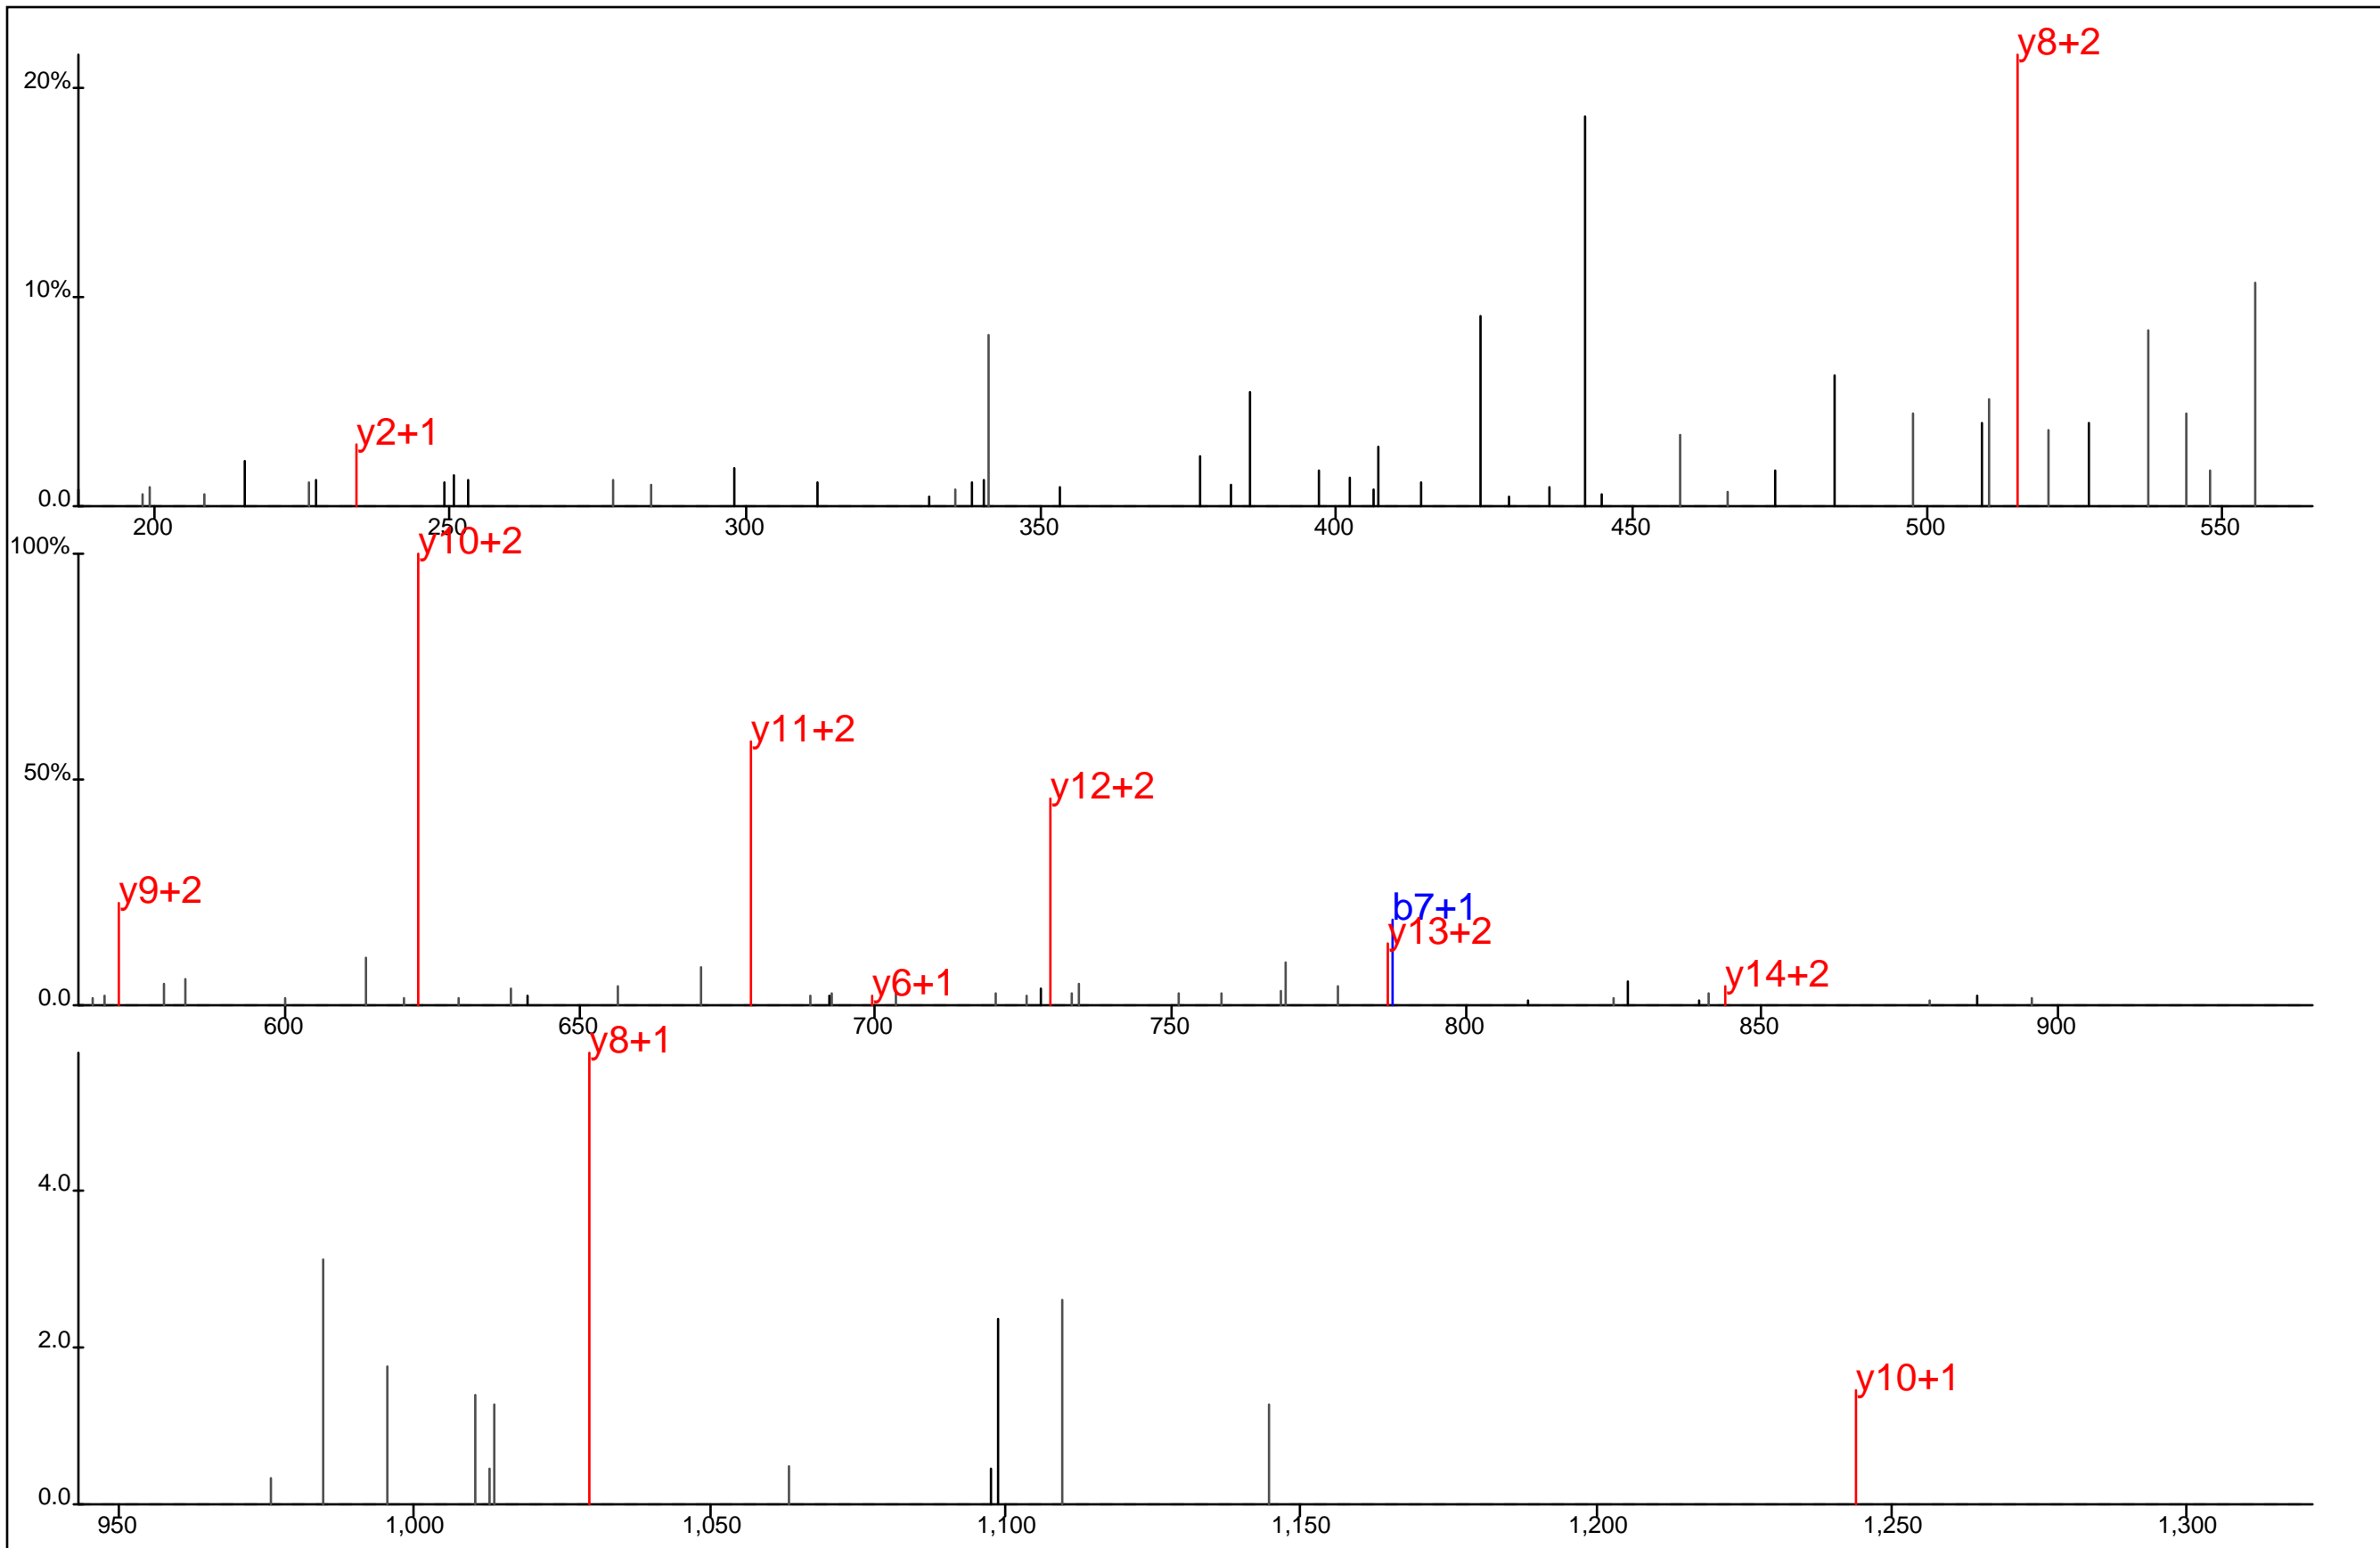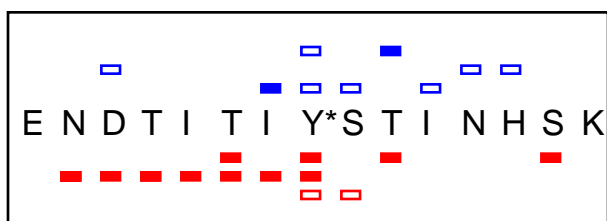

Protein Name: NTBA  
 gi Accession: 0  
 Precursor Mass: 605.9445+3  
 Delta Mass: 1.643 ppm  
 XCorr: 30.92



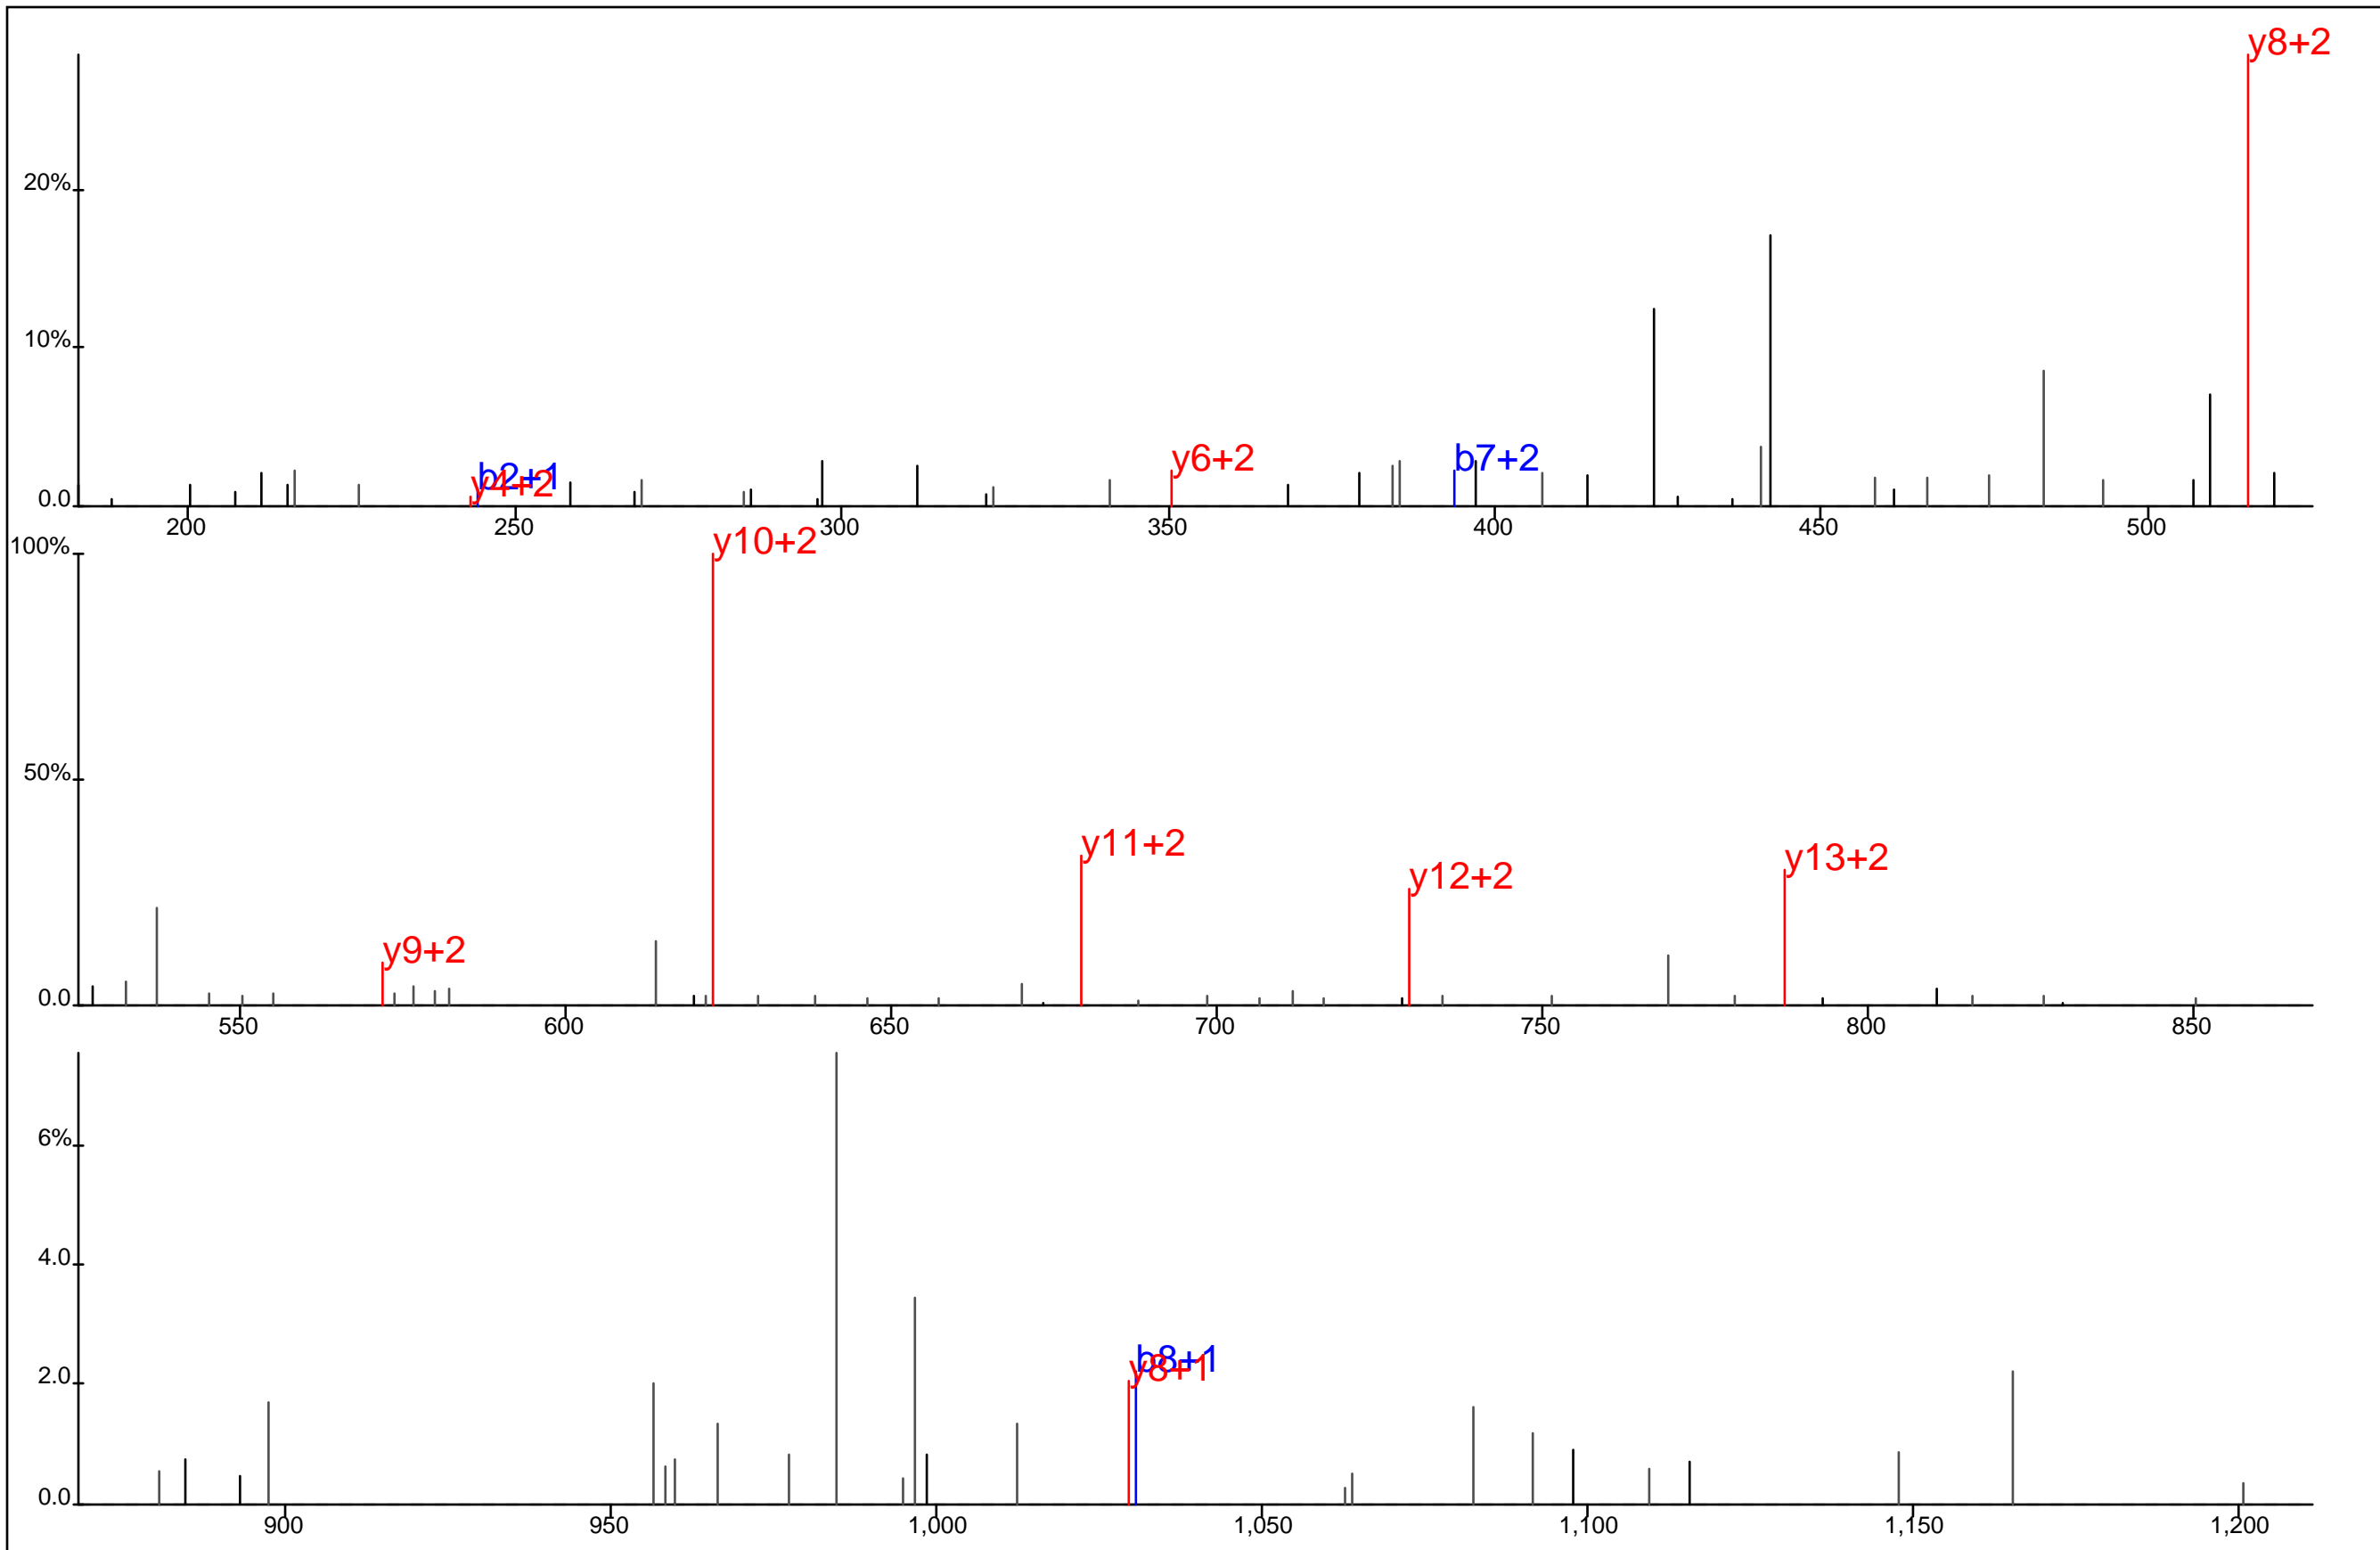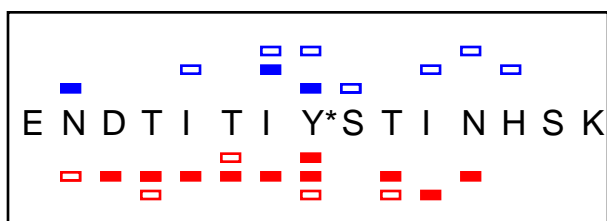

Protein Name: NTBA  
 gi Accession: 0  
 Precursor Mass: 605.9435+3  
 Delta Mass: 0.029 ppm  
 XCorr: 25.87

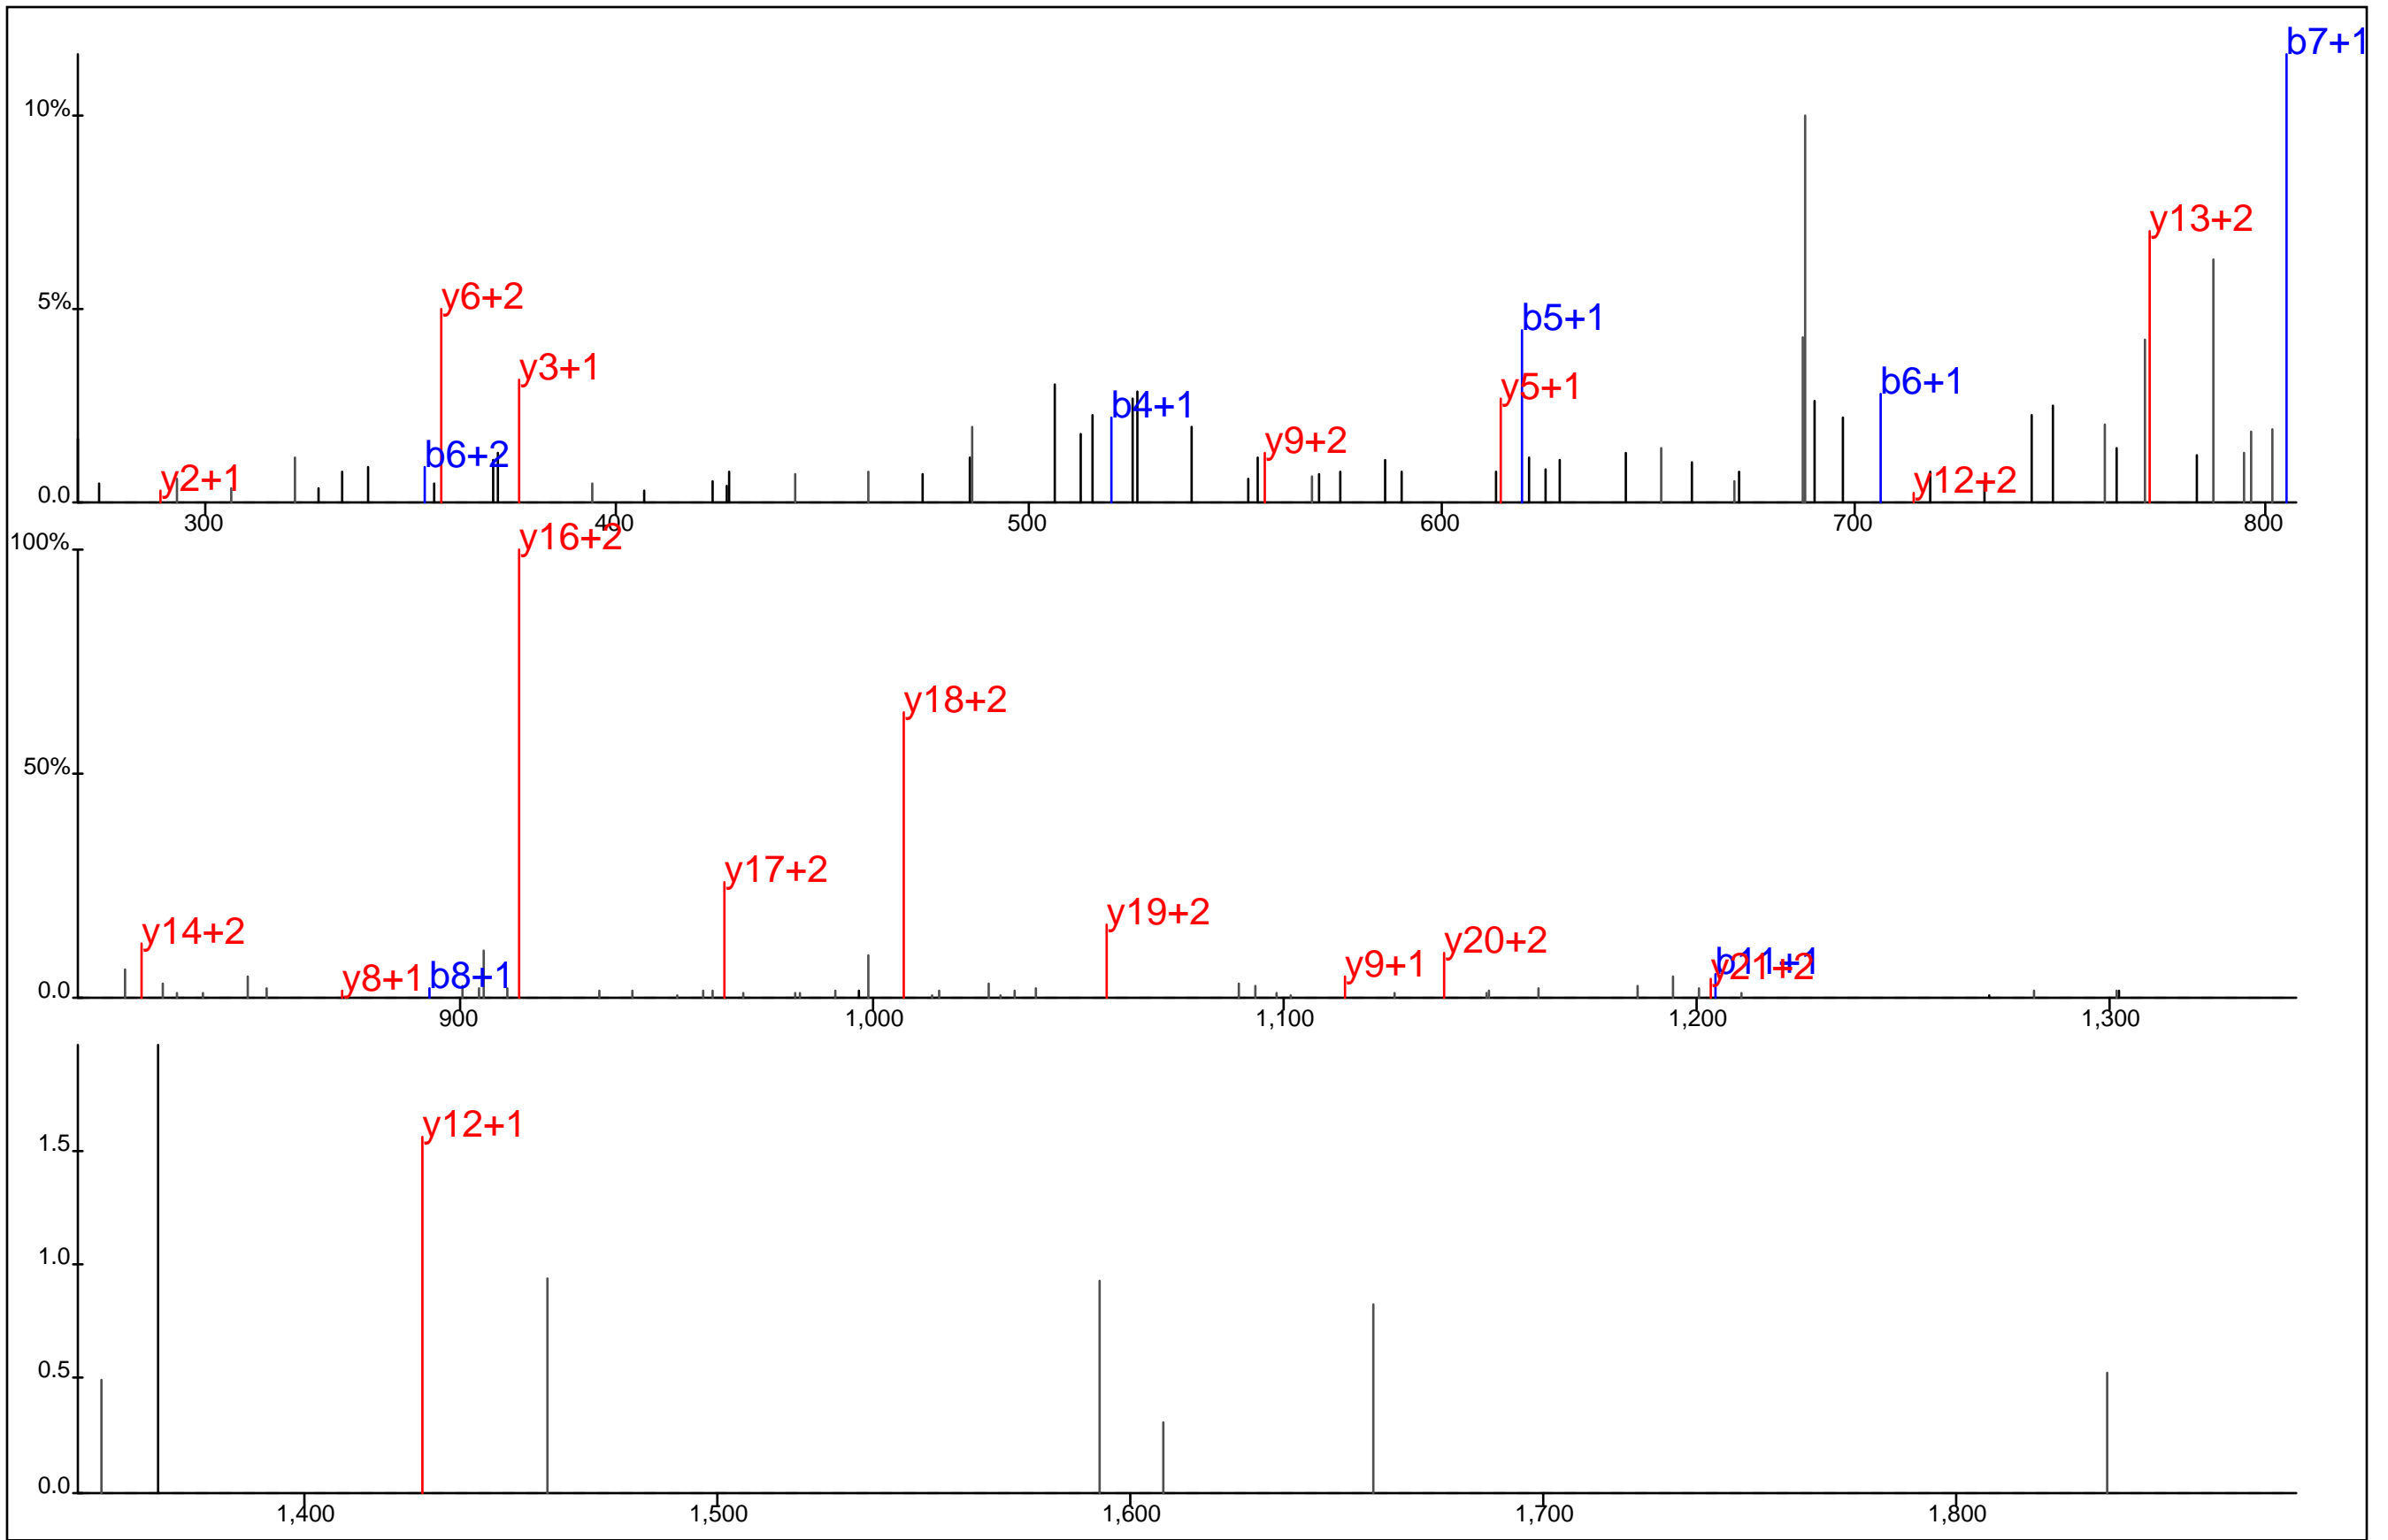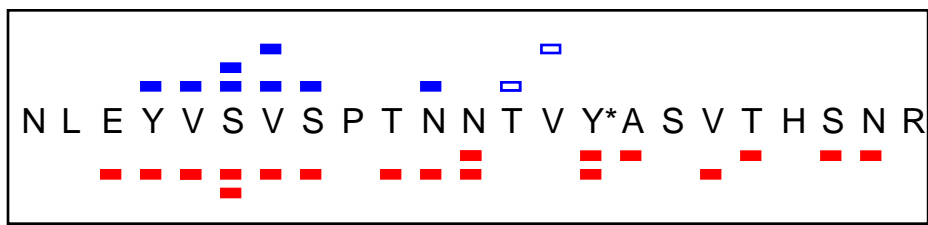

Protein Name: NTBA  
 gi Accession: 0  
 Precursor Mass: 878.0732+3  
 Delta Mass: 0.491 ppm  
 XCorr: 42.96

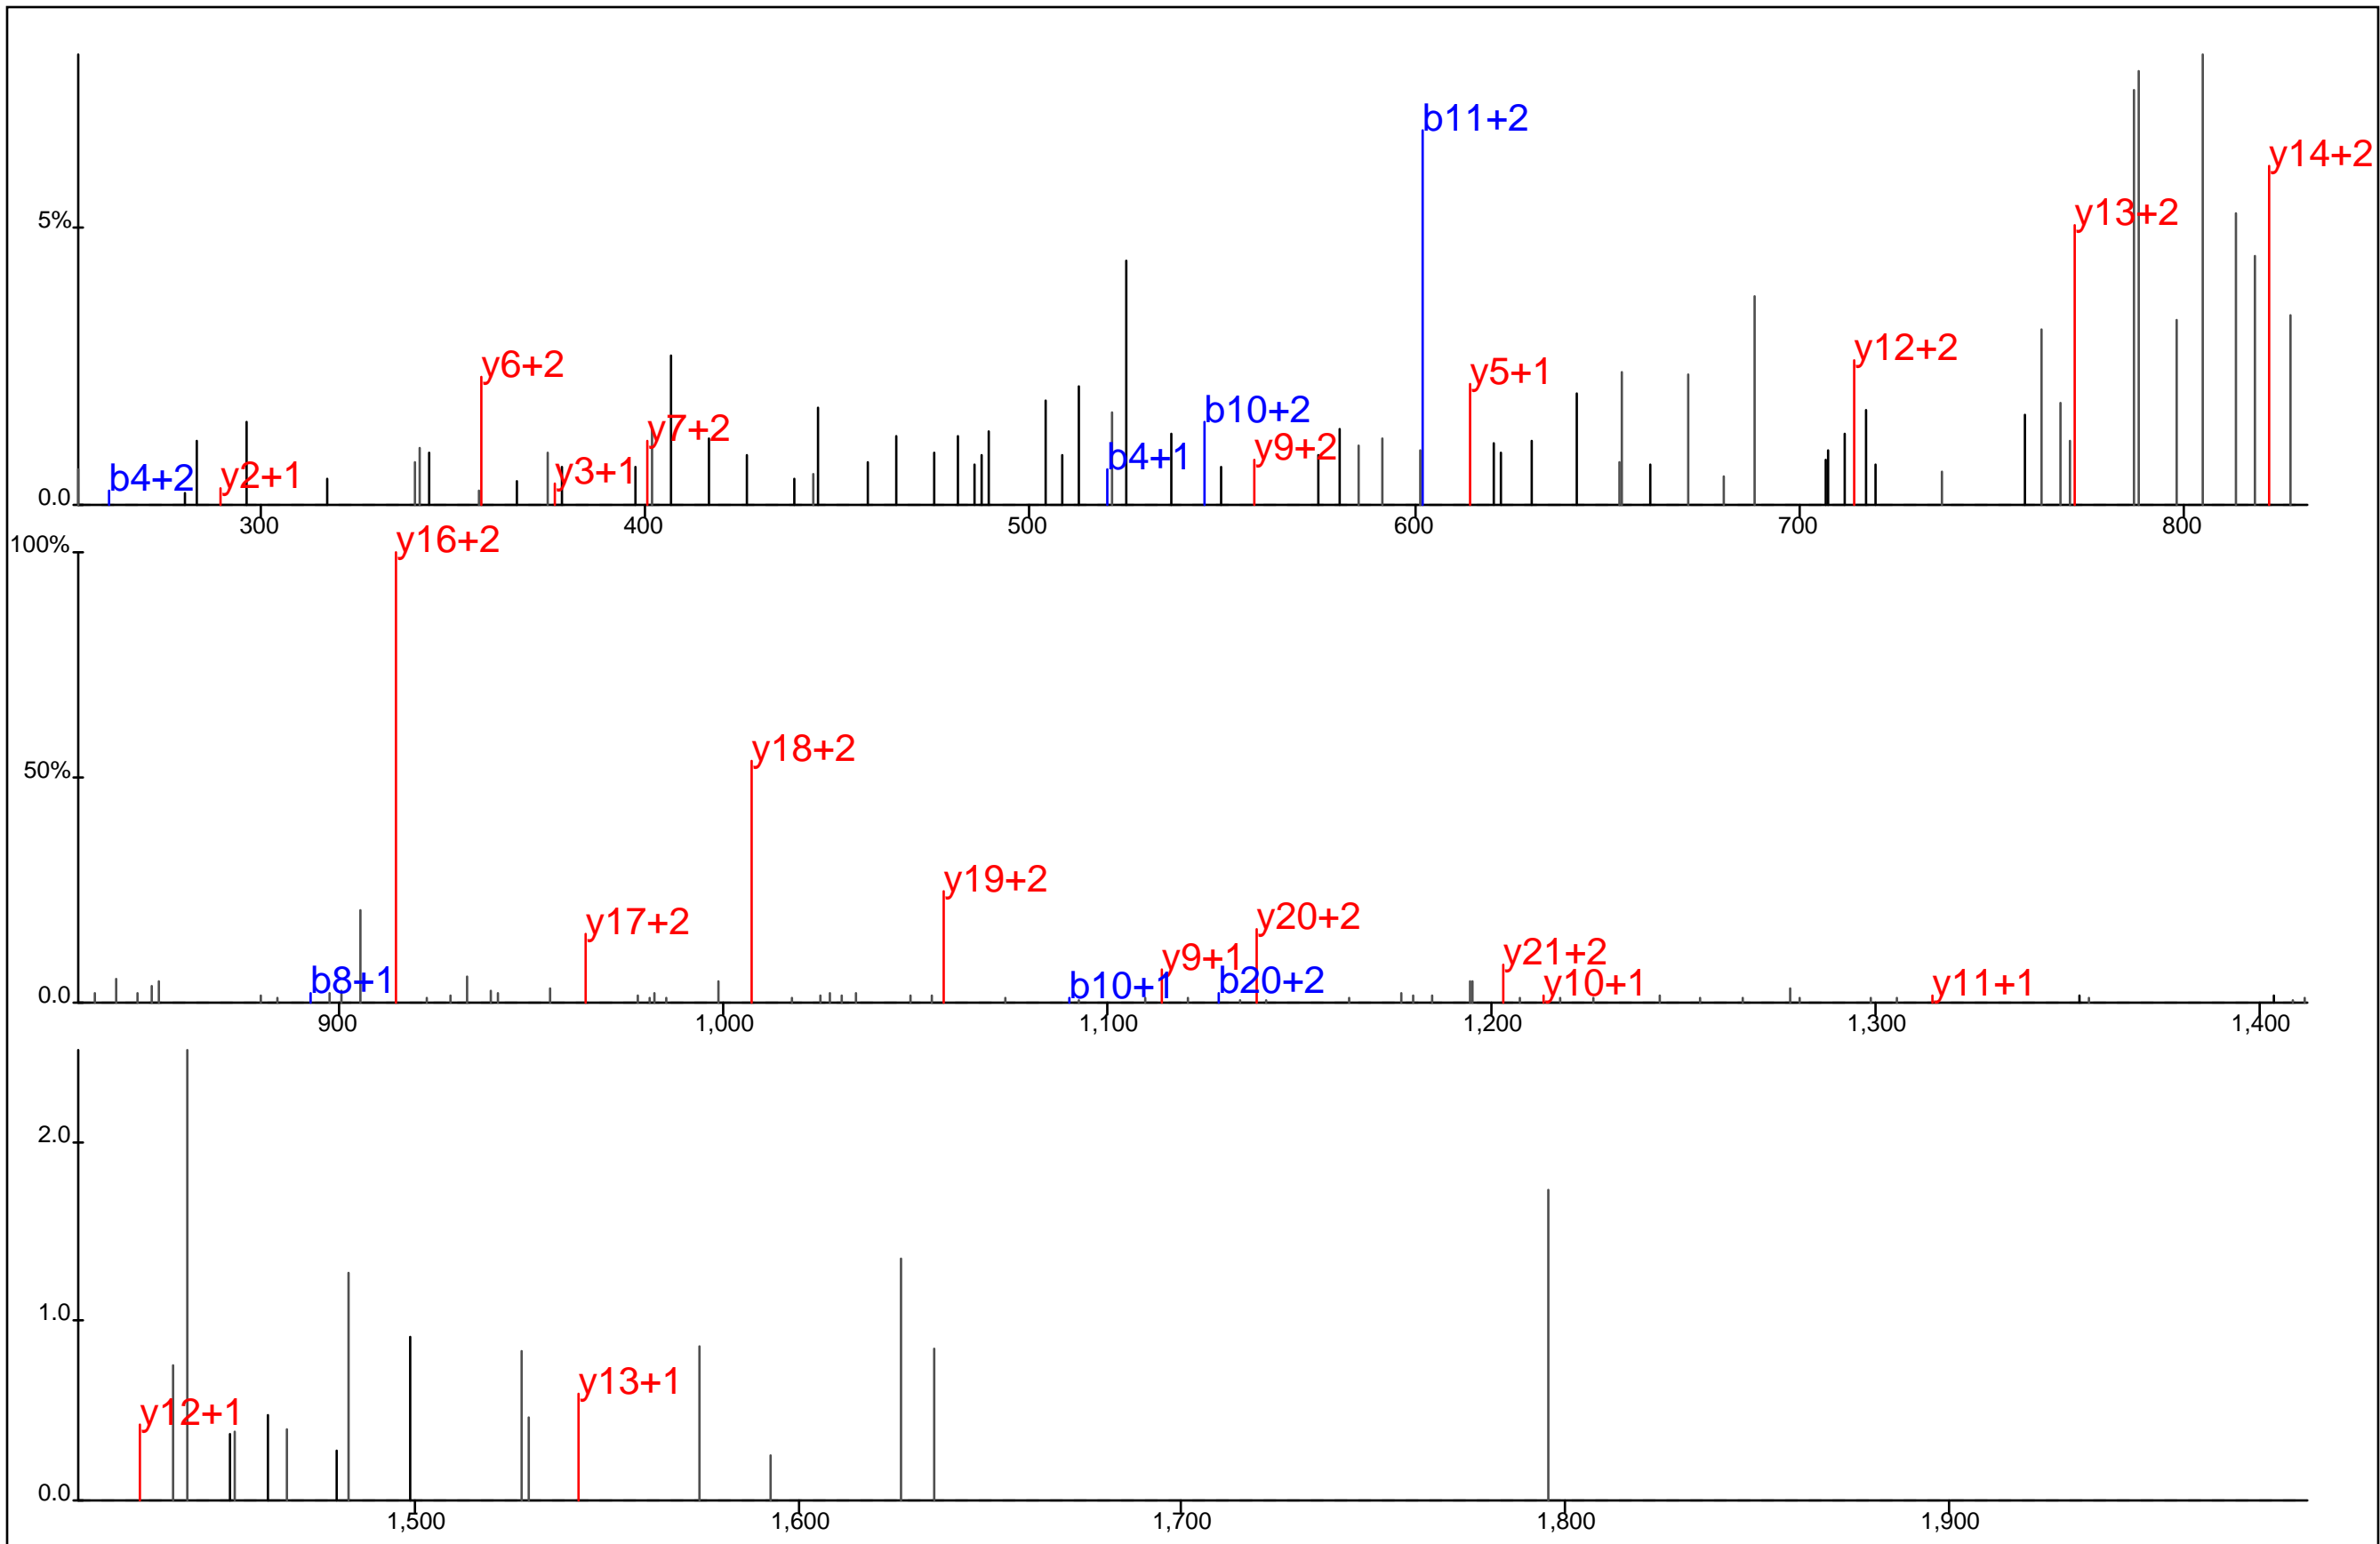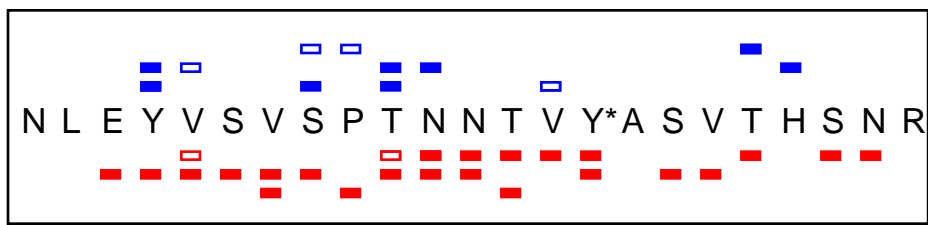

Protein Name: NTBA  
 gi Accession: 0  
 Precursor Mass: 878.0709+3  
 Delta Mass: 2.222 ppm  
 XCorr: 33.21

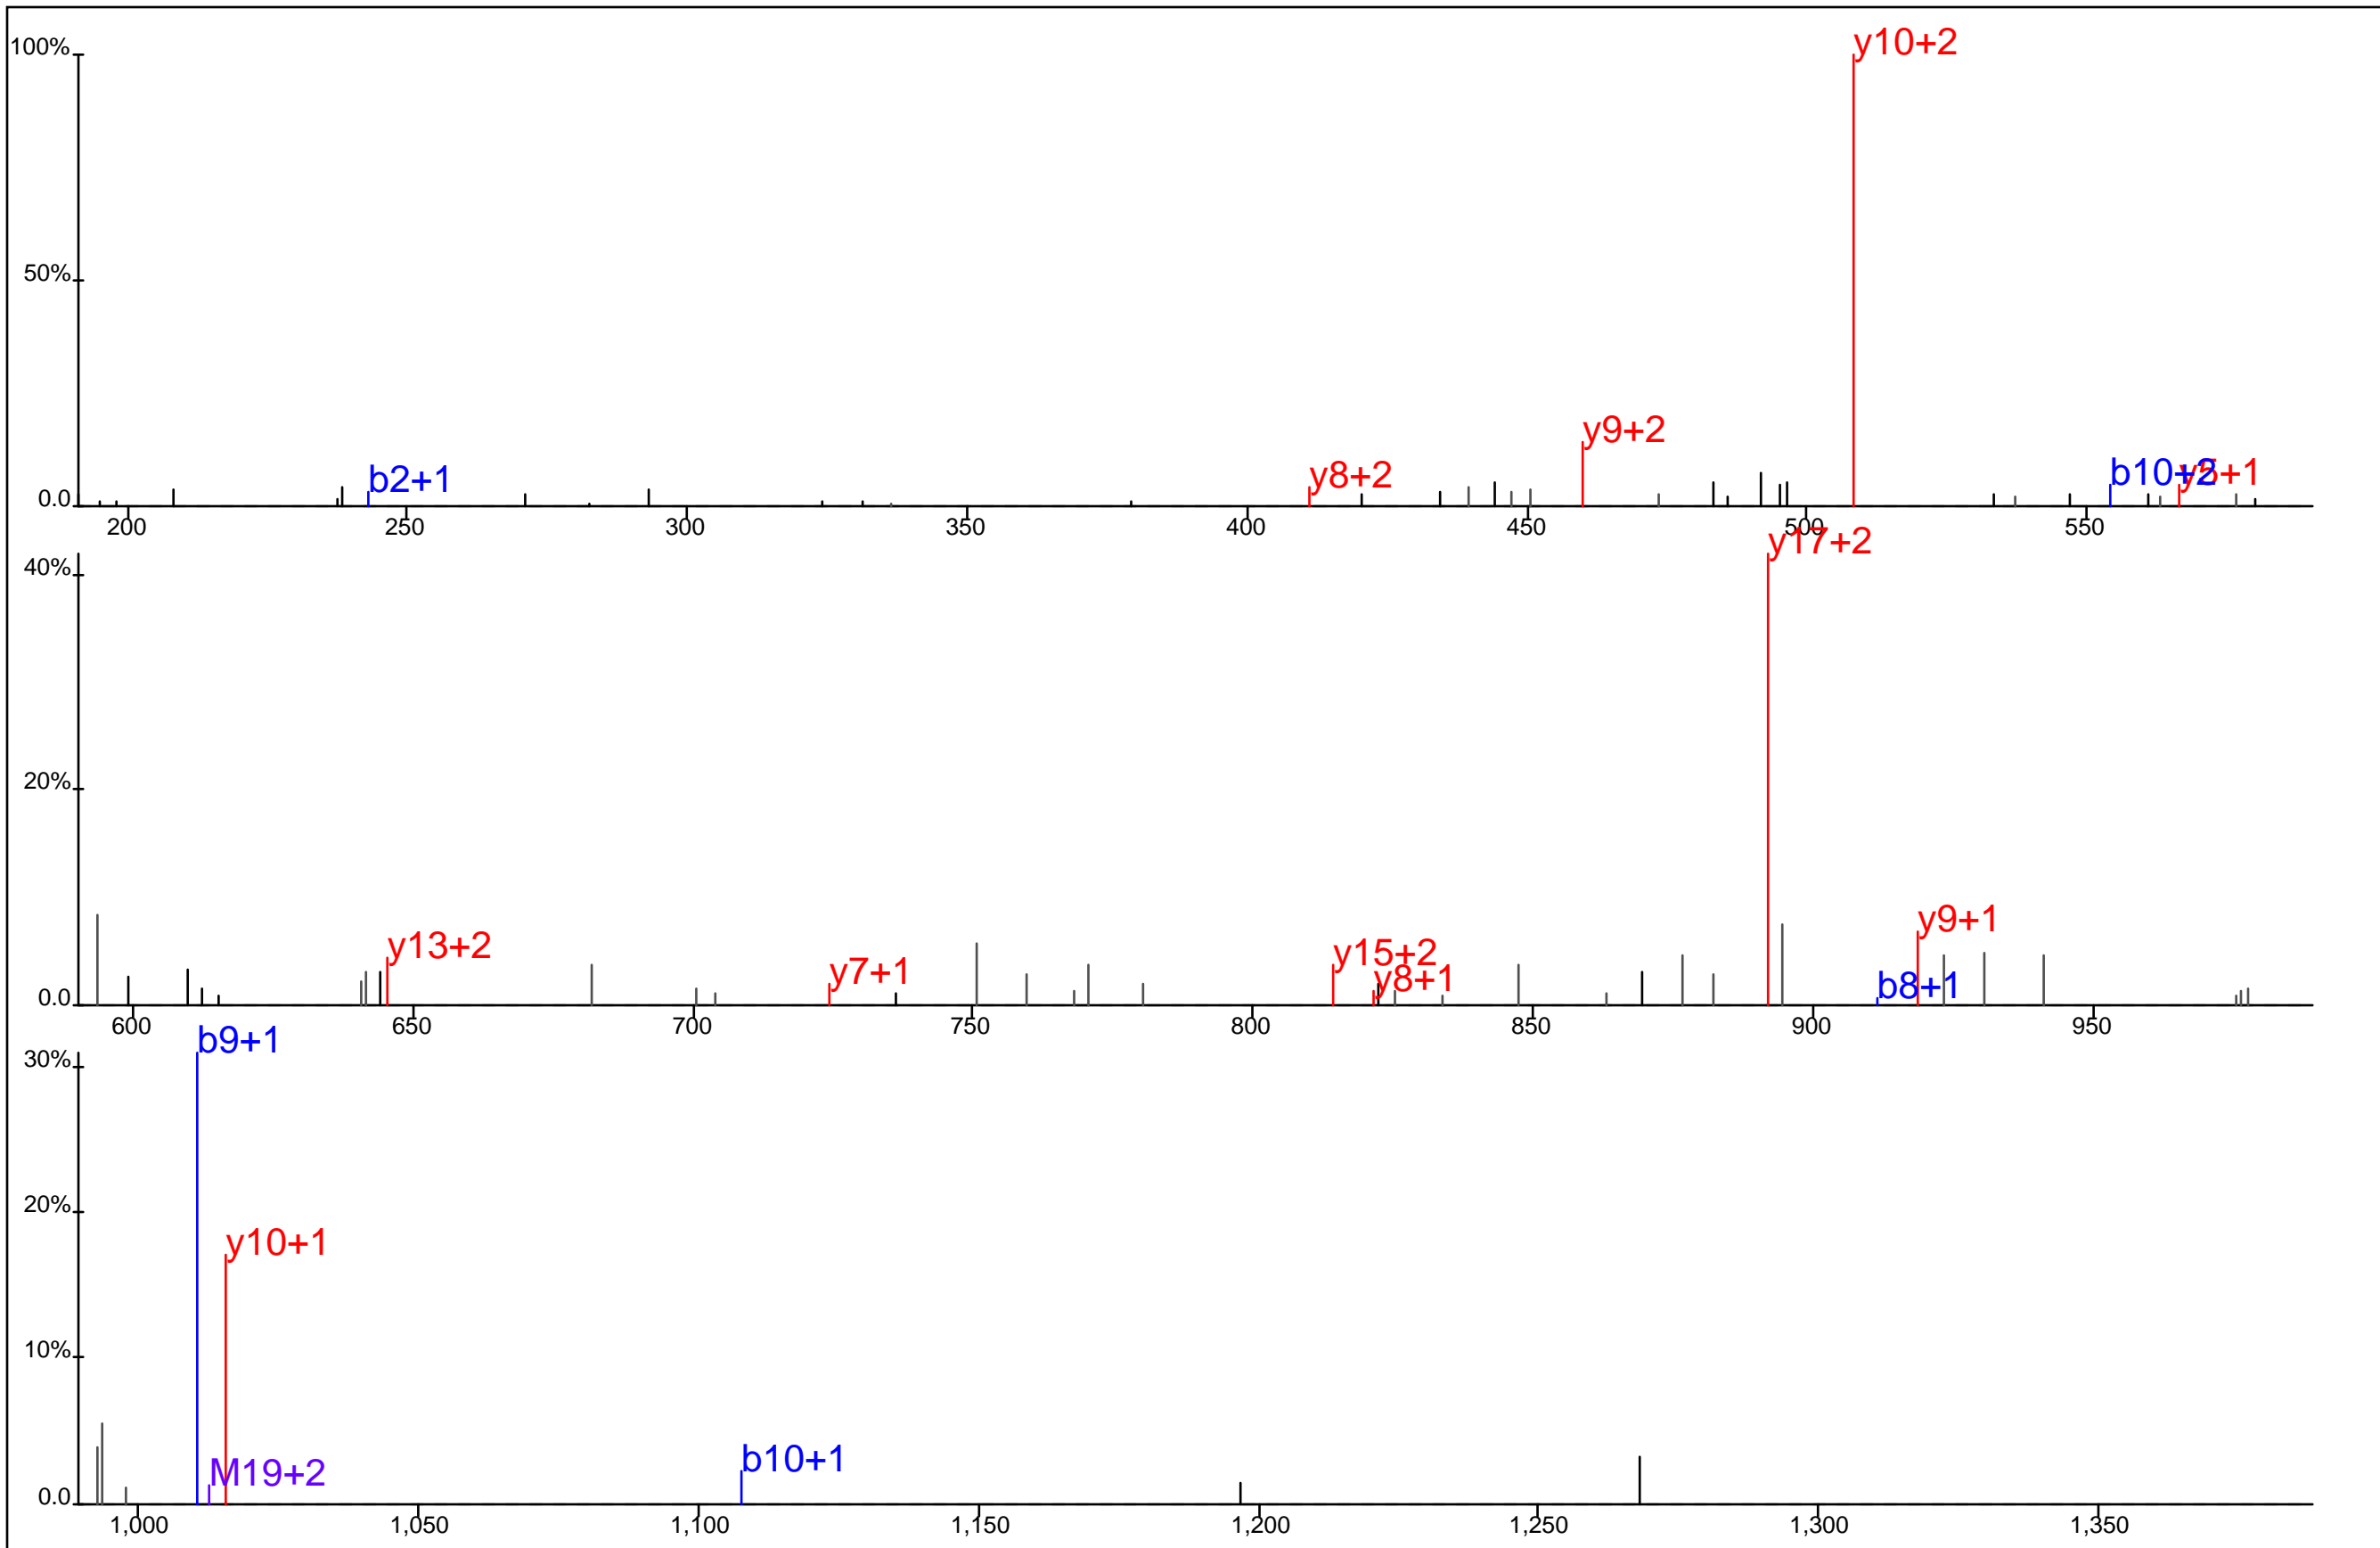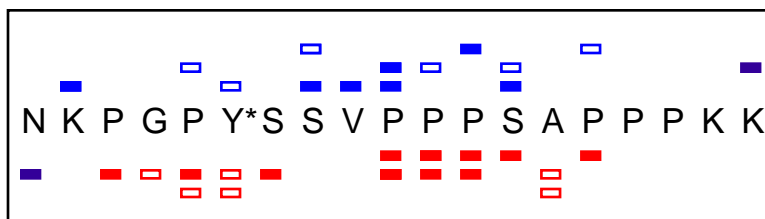

Protein Name: Nucleolar phosphoprotein p130  
 gi Accession: 0  
 Precursor Mass: 675.6775+3  
 Delta Mass: 1.261 ppm  
 XCorr: 20.97



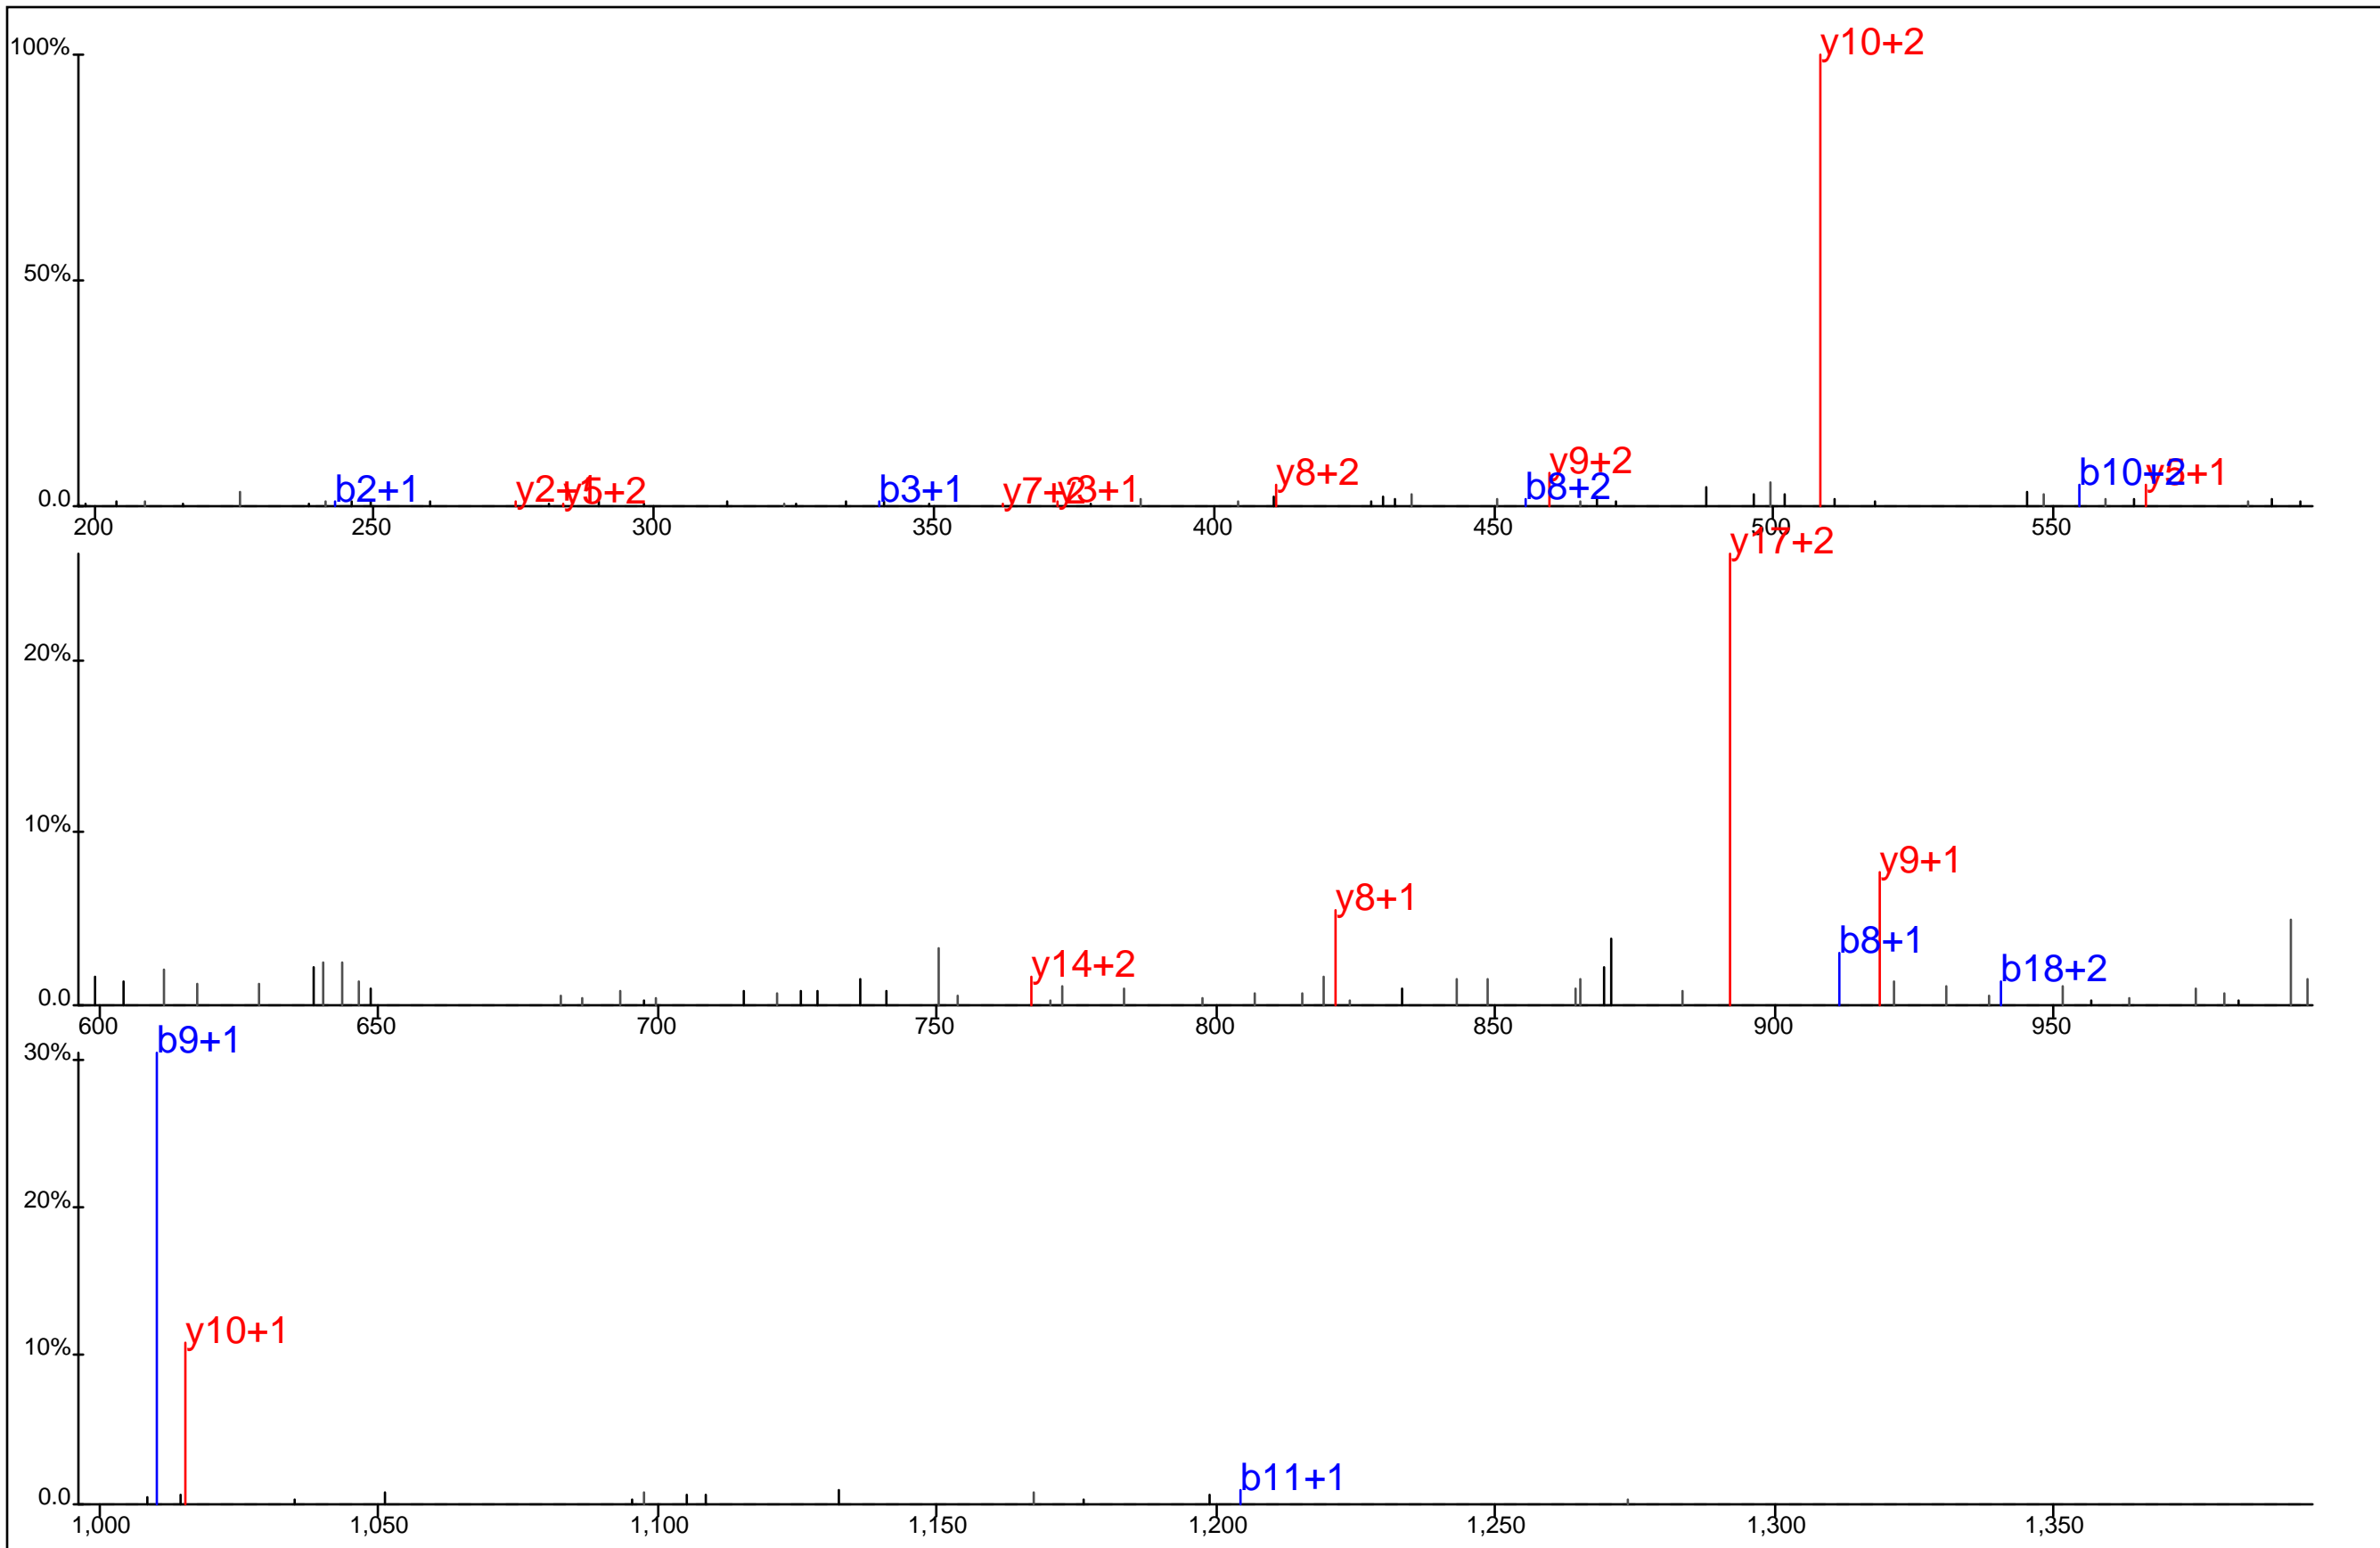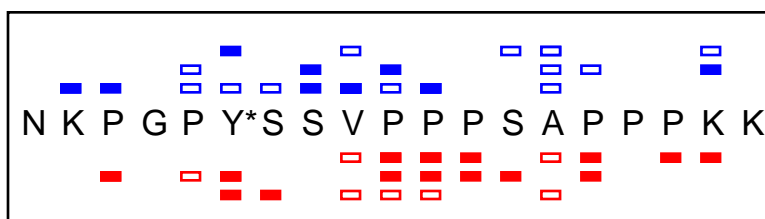

Protein Name: Nucleolar phosphoprotein p130  
 gi Accession: 0  
 Precursor Mass: 675.6768+3  
 Delta Mass: 2.255 ppm  
 XCorr: 25.14

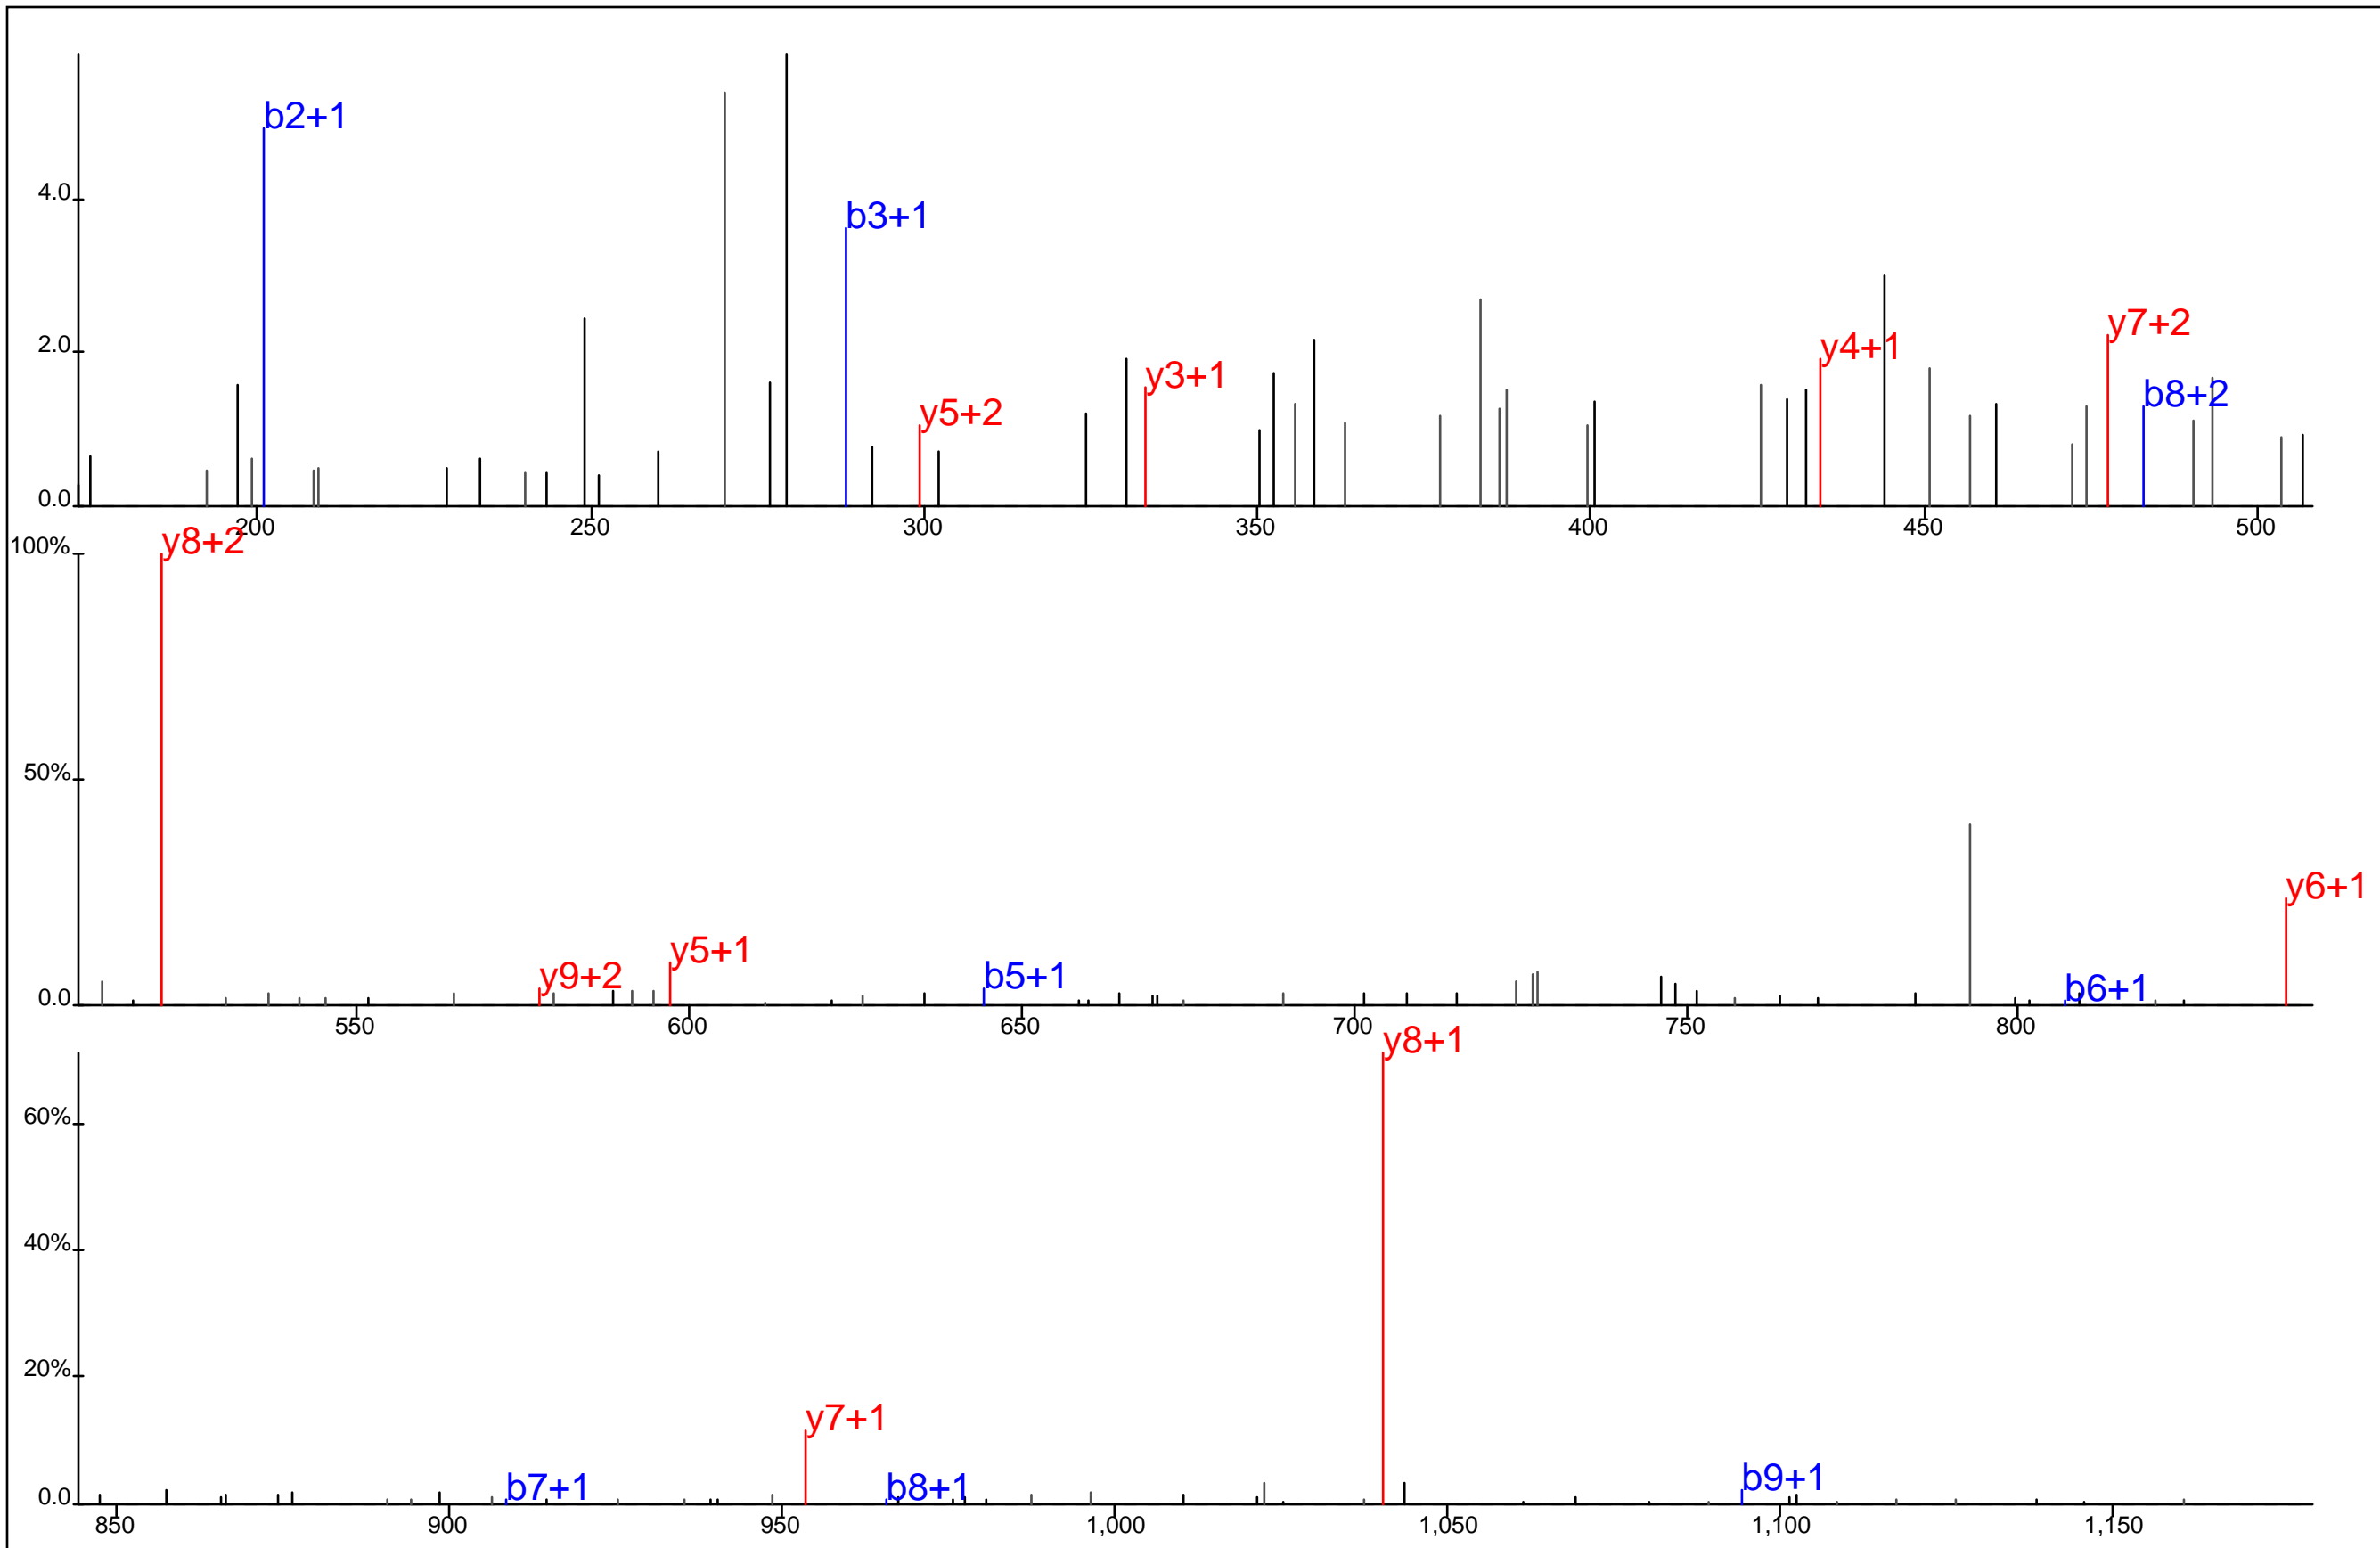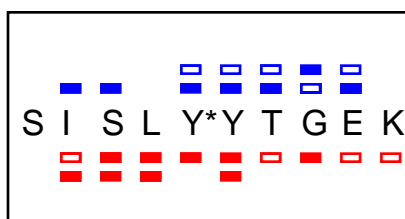

Protein Name: Nucleolin  
 gi Accession: 0  
 Precursor Mass: 620.7787+2  
 Delta Mass: 0.335 ppm  
 XCorr: 22.79

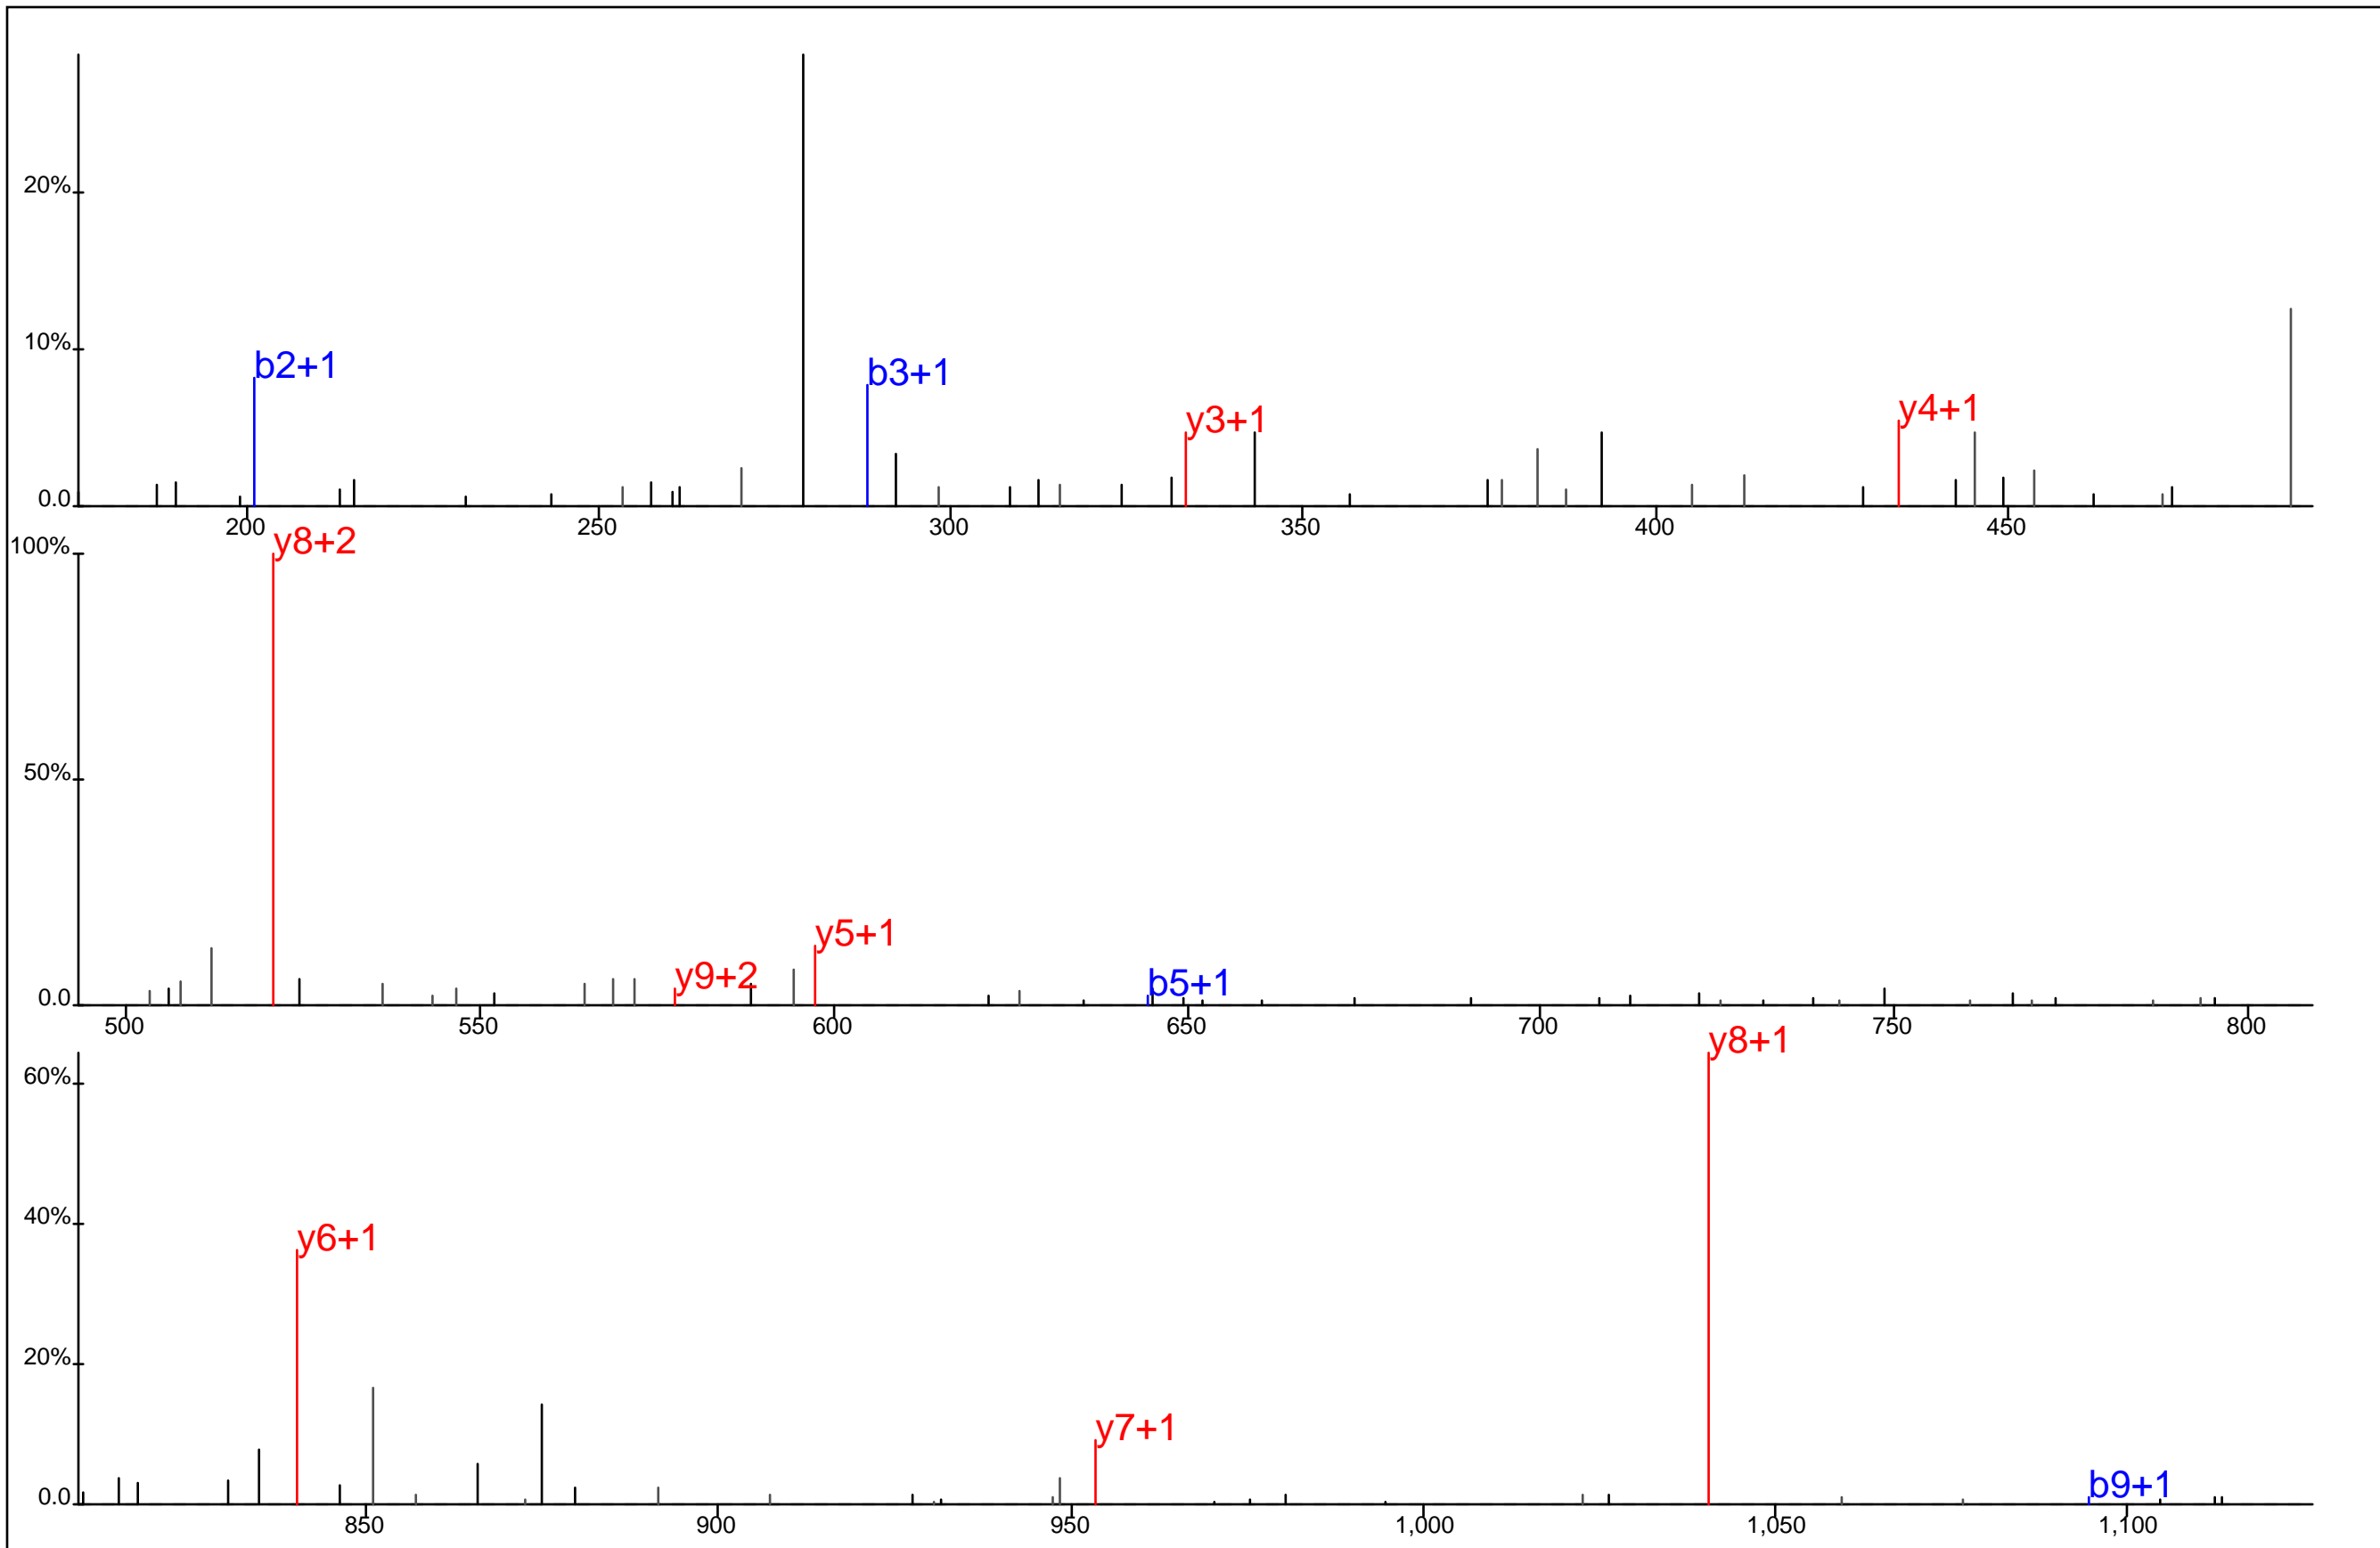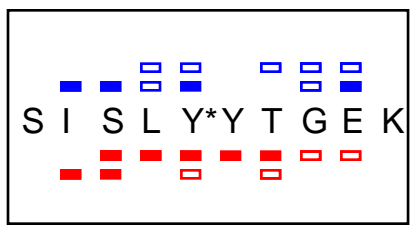

Protein Name: Nucleolin  
 gi Accession: 0  
 Precursor Mass: 620.7790+2  
 Delta Mass: 0.827 ppm  
 XCorr: 29.54

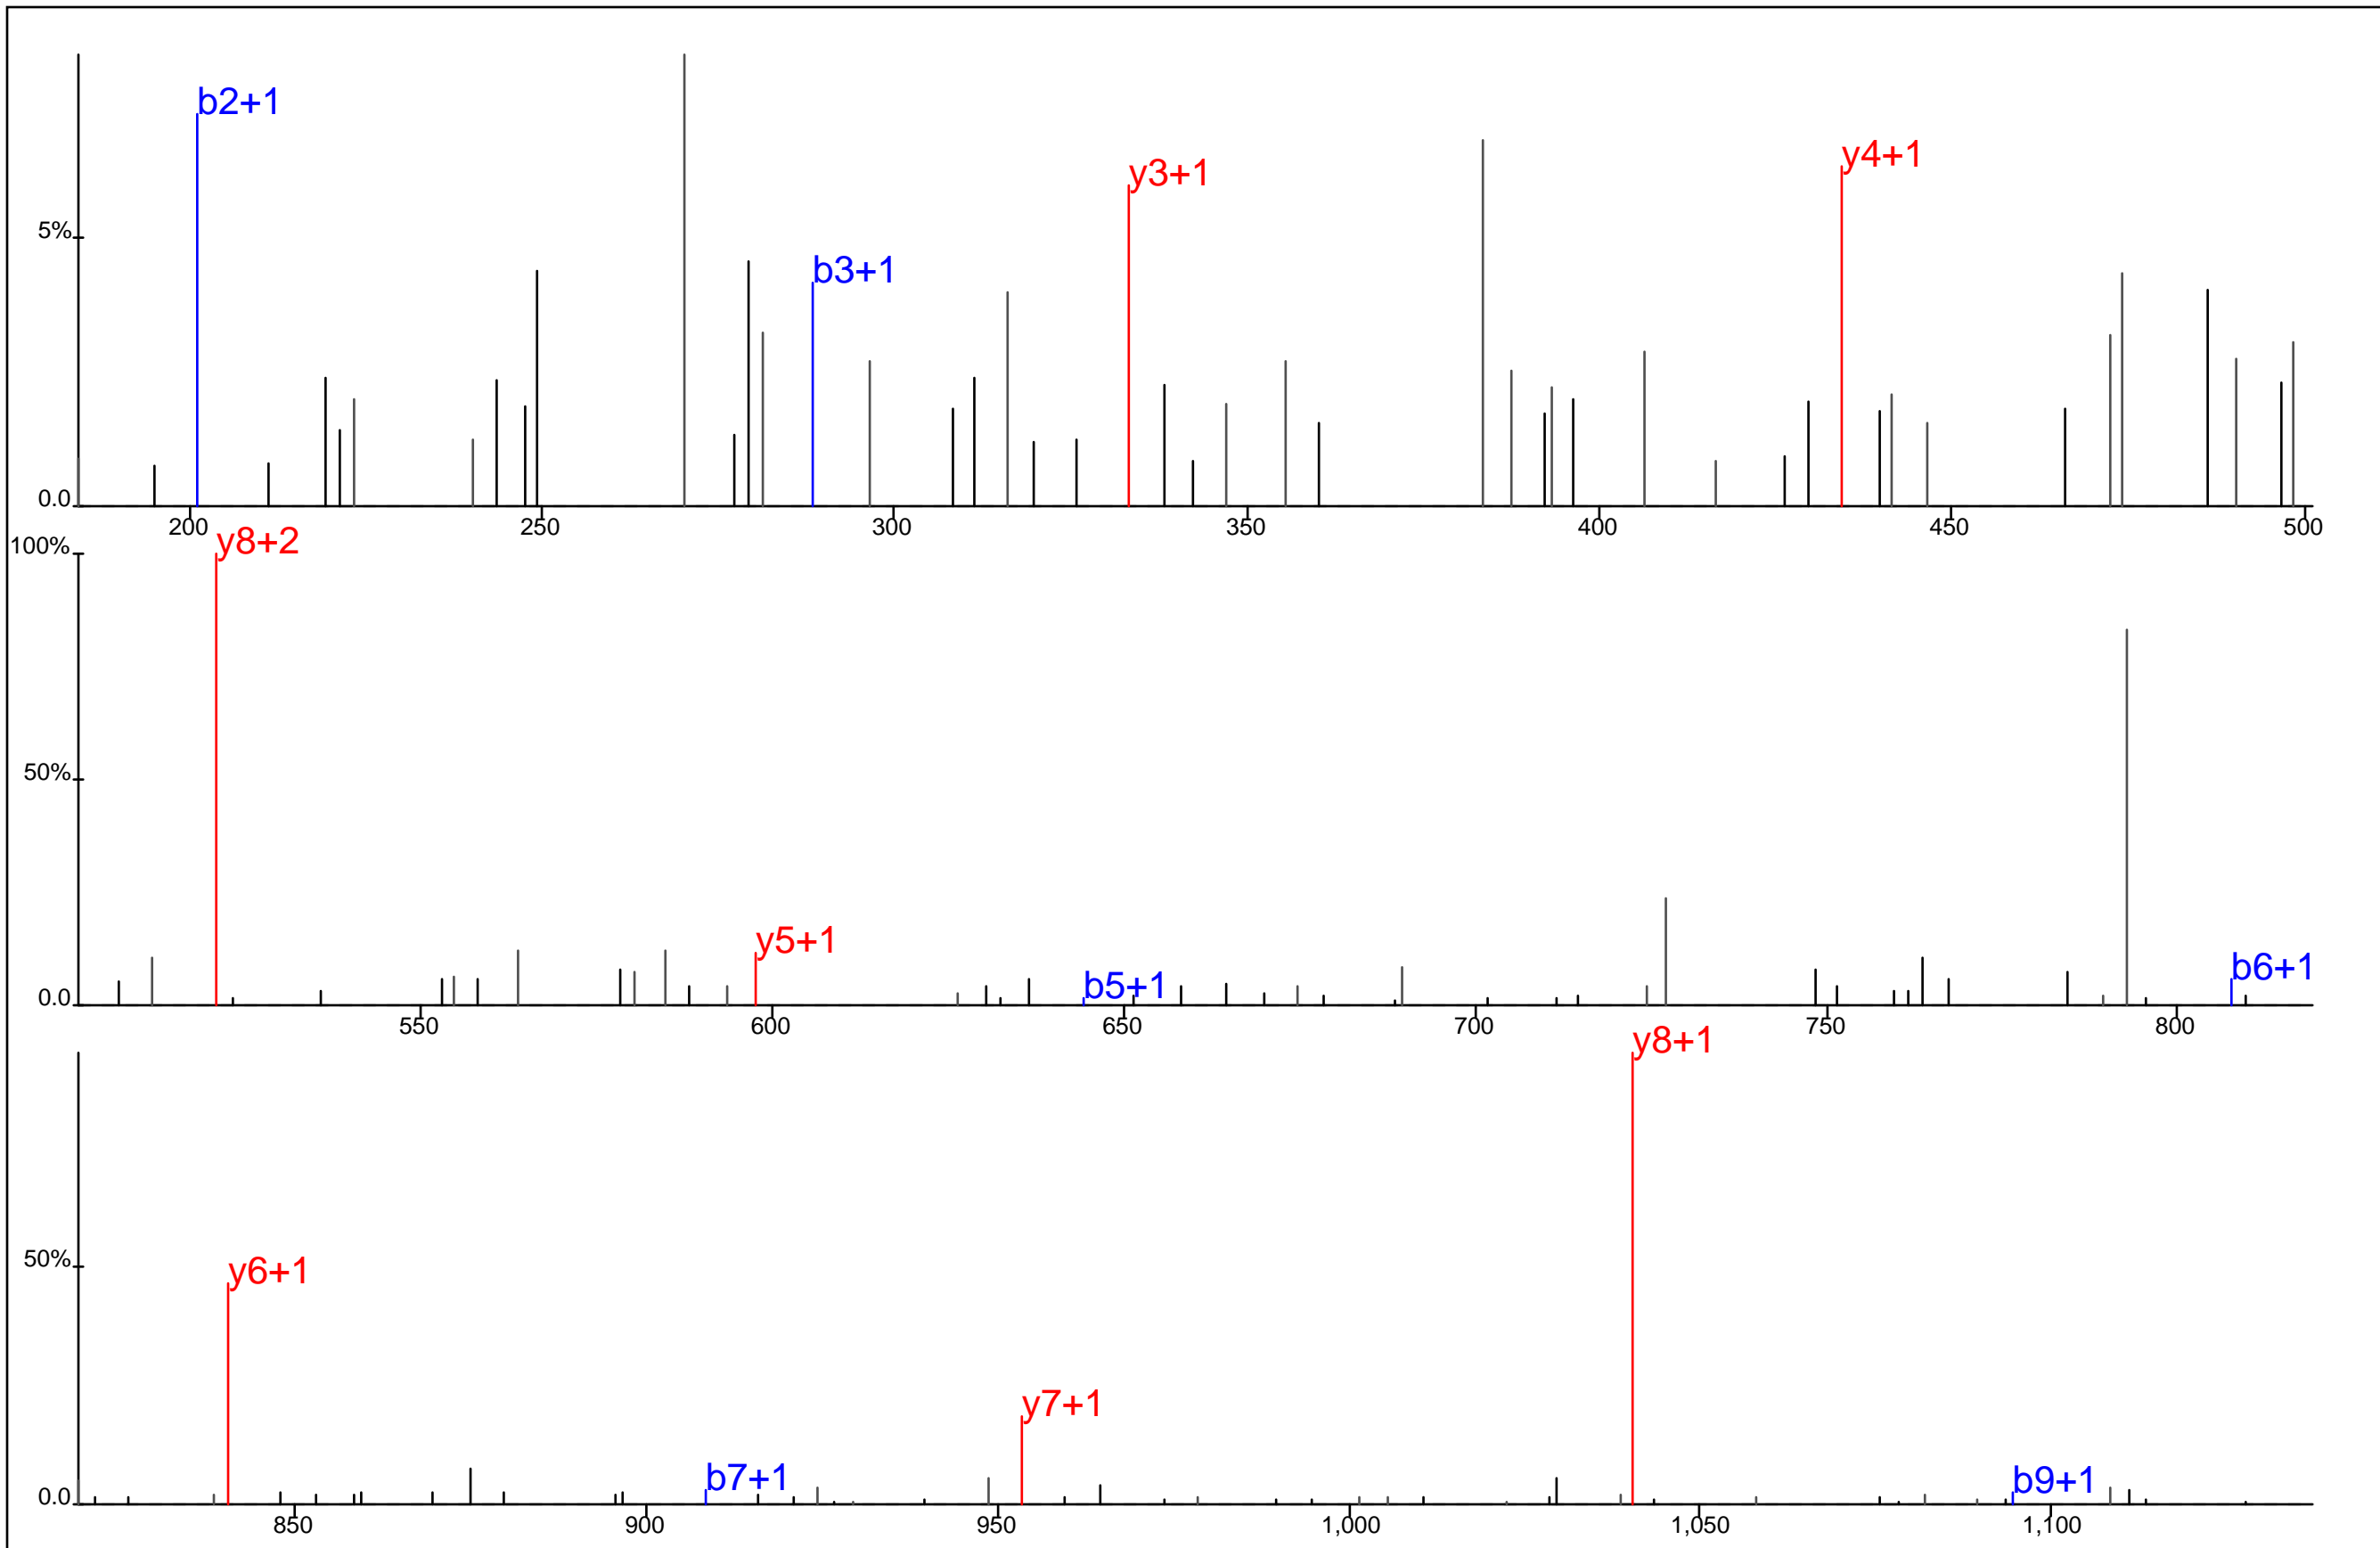

■ ■ ■ ■ ■ ■ ■ ■ ■ ■  
 S I S L Y\*Y T G E K  
□ □ □ □ □ □ □ □

Protein Name: Nucleolin  
 gi Accession: 0  
 Precursor Mass: 620.7780+2  
 Delta Mass: 0.846 ppm  
 XCorr: 27.04

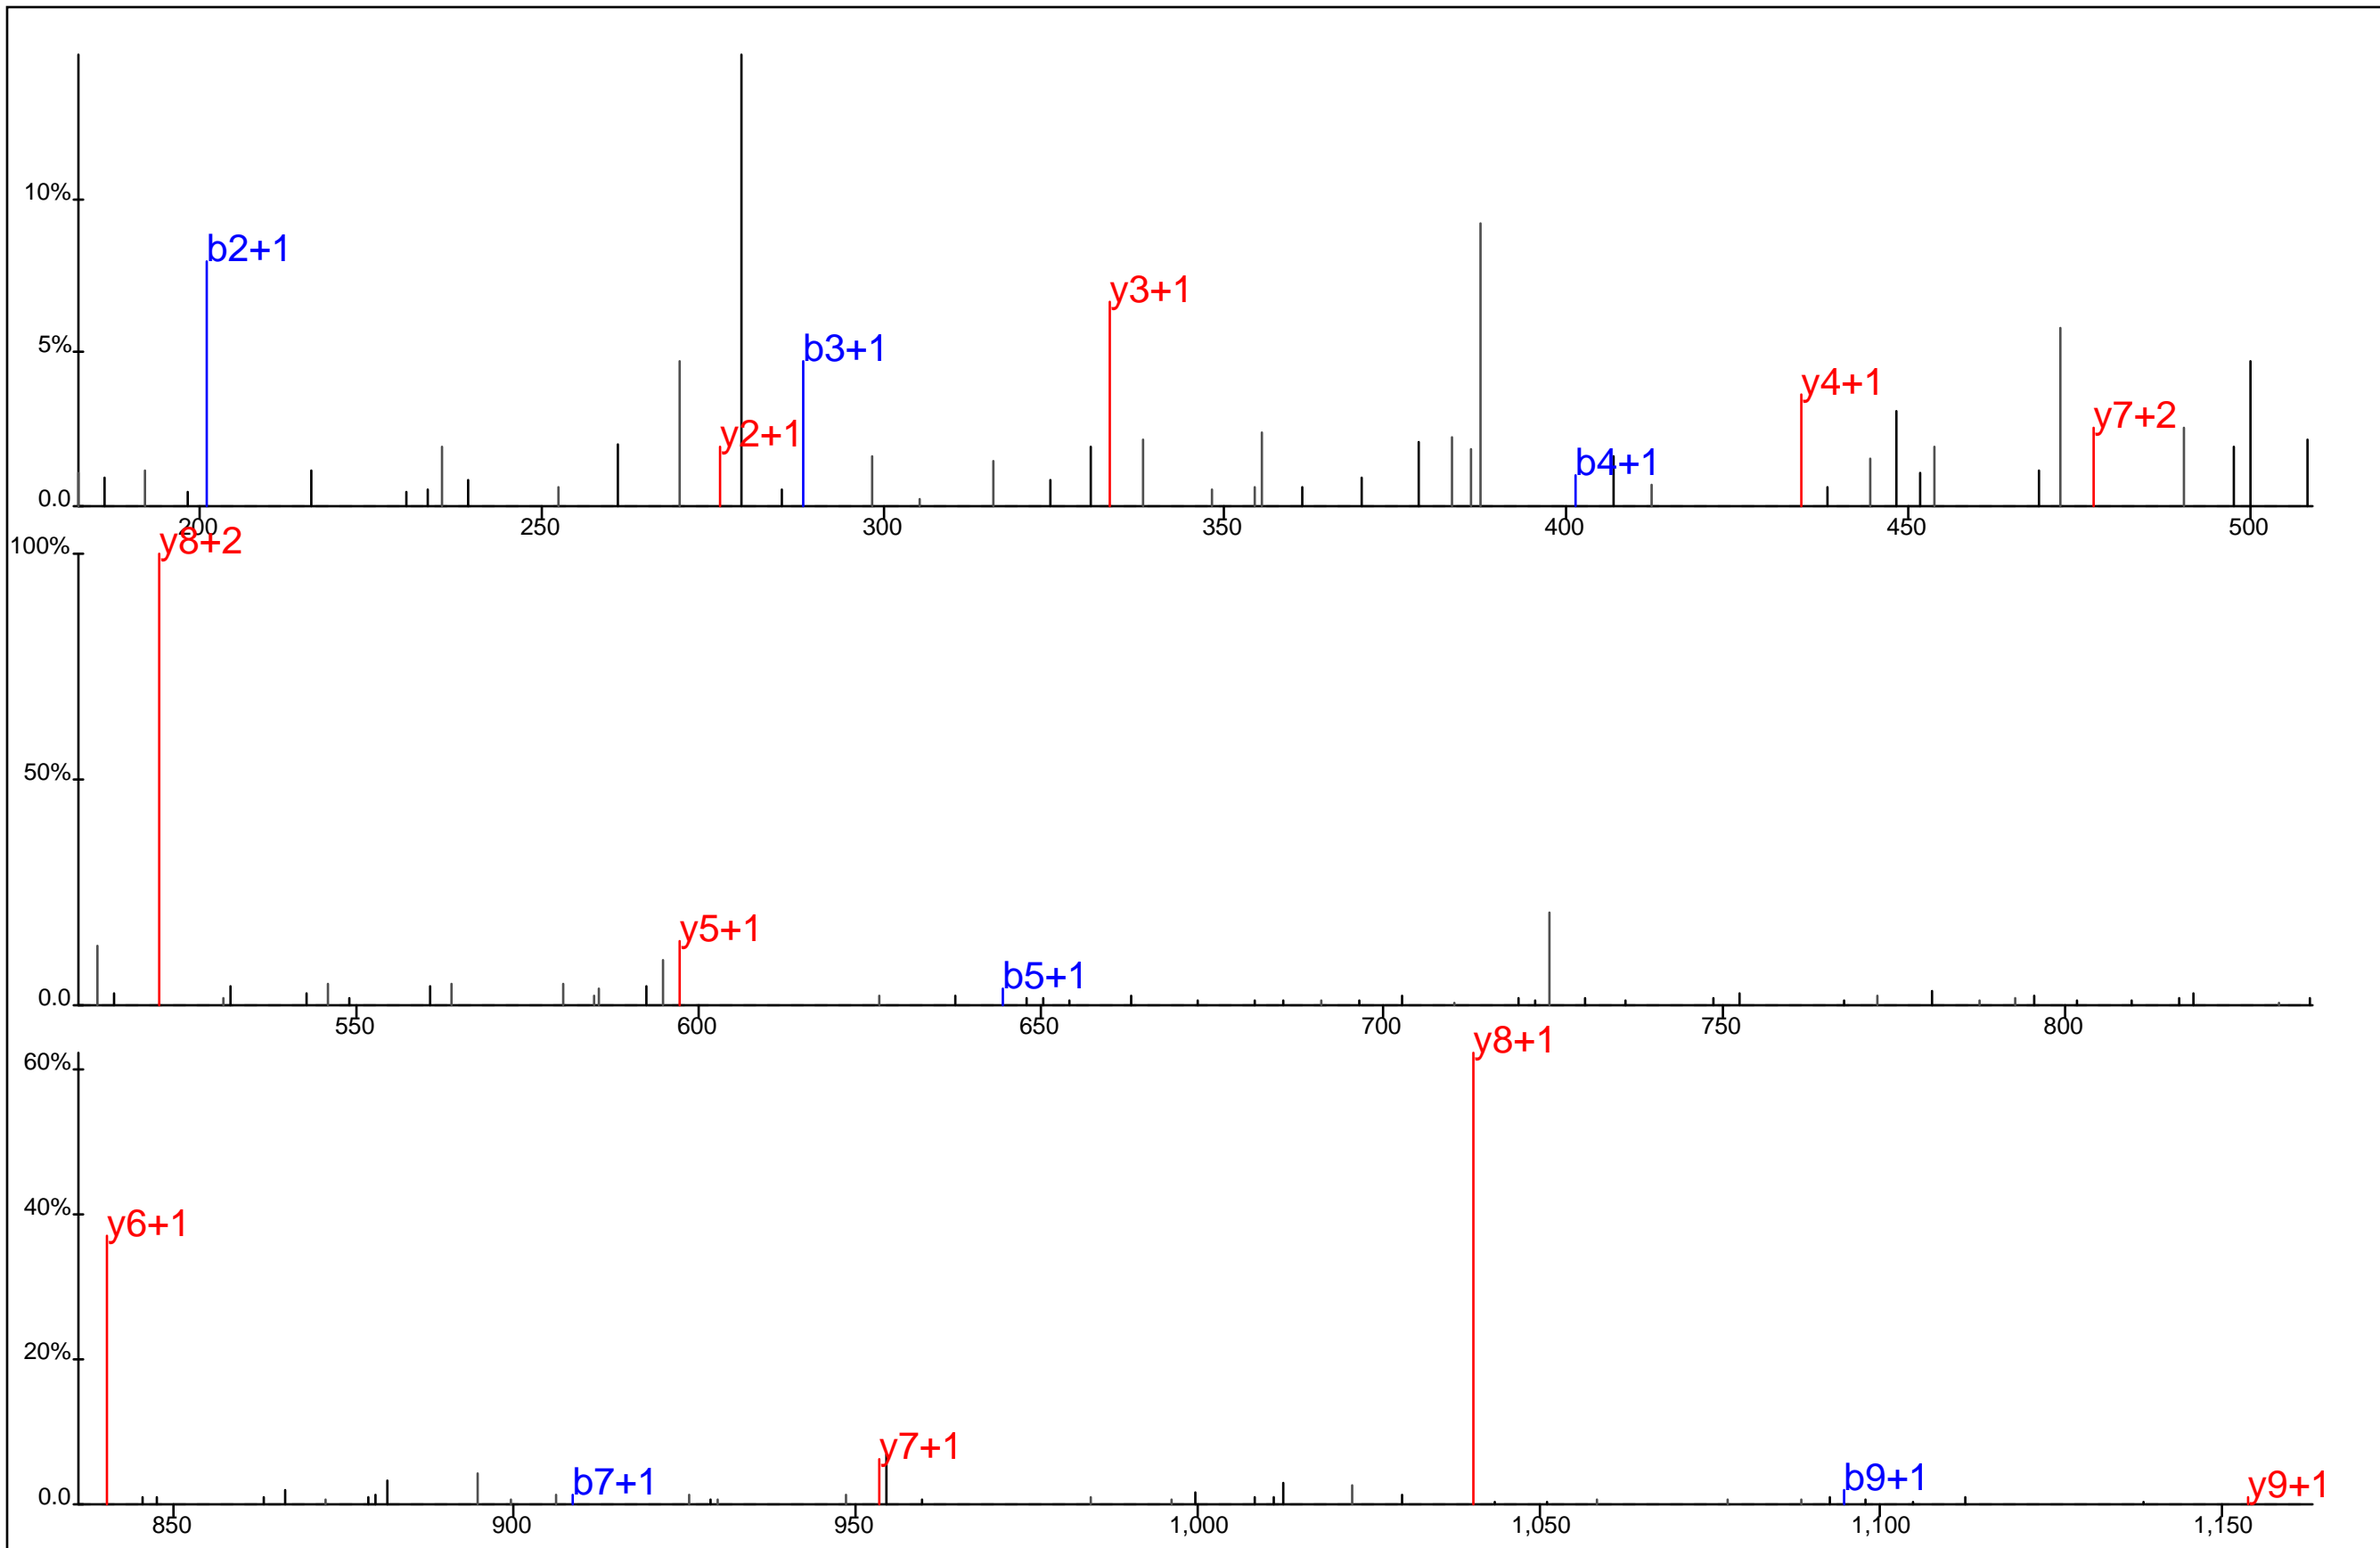

▢ ▢ ▢ ▢ ▢ ▢ ▢ ▢  
**S I S L Y\*Y T G E K**  
▢ ▢ ▢ ▢ ▢ ▢ ▢ ▢

Protein Name: Nucleolin  
 gi Accession: 0  
 Precursor Mass: 620.7786+2  
 Delta Mass: 0.137 ppm  
 XCorr: 36.47

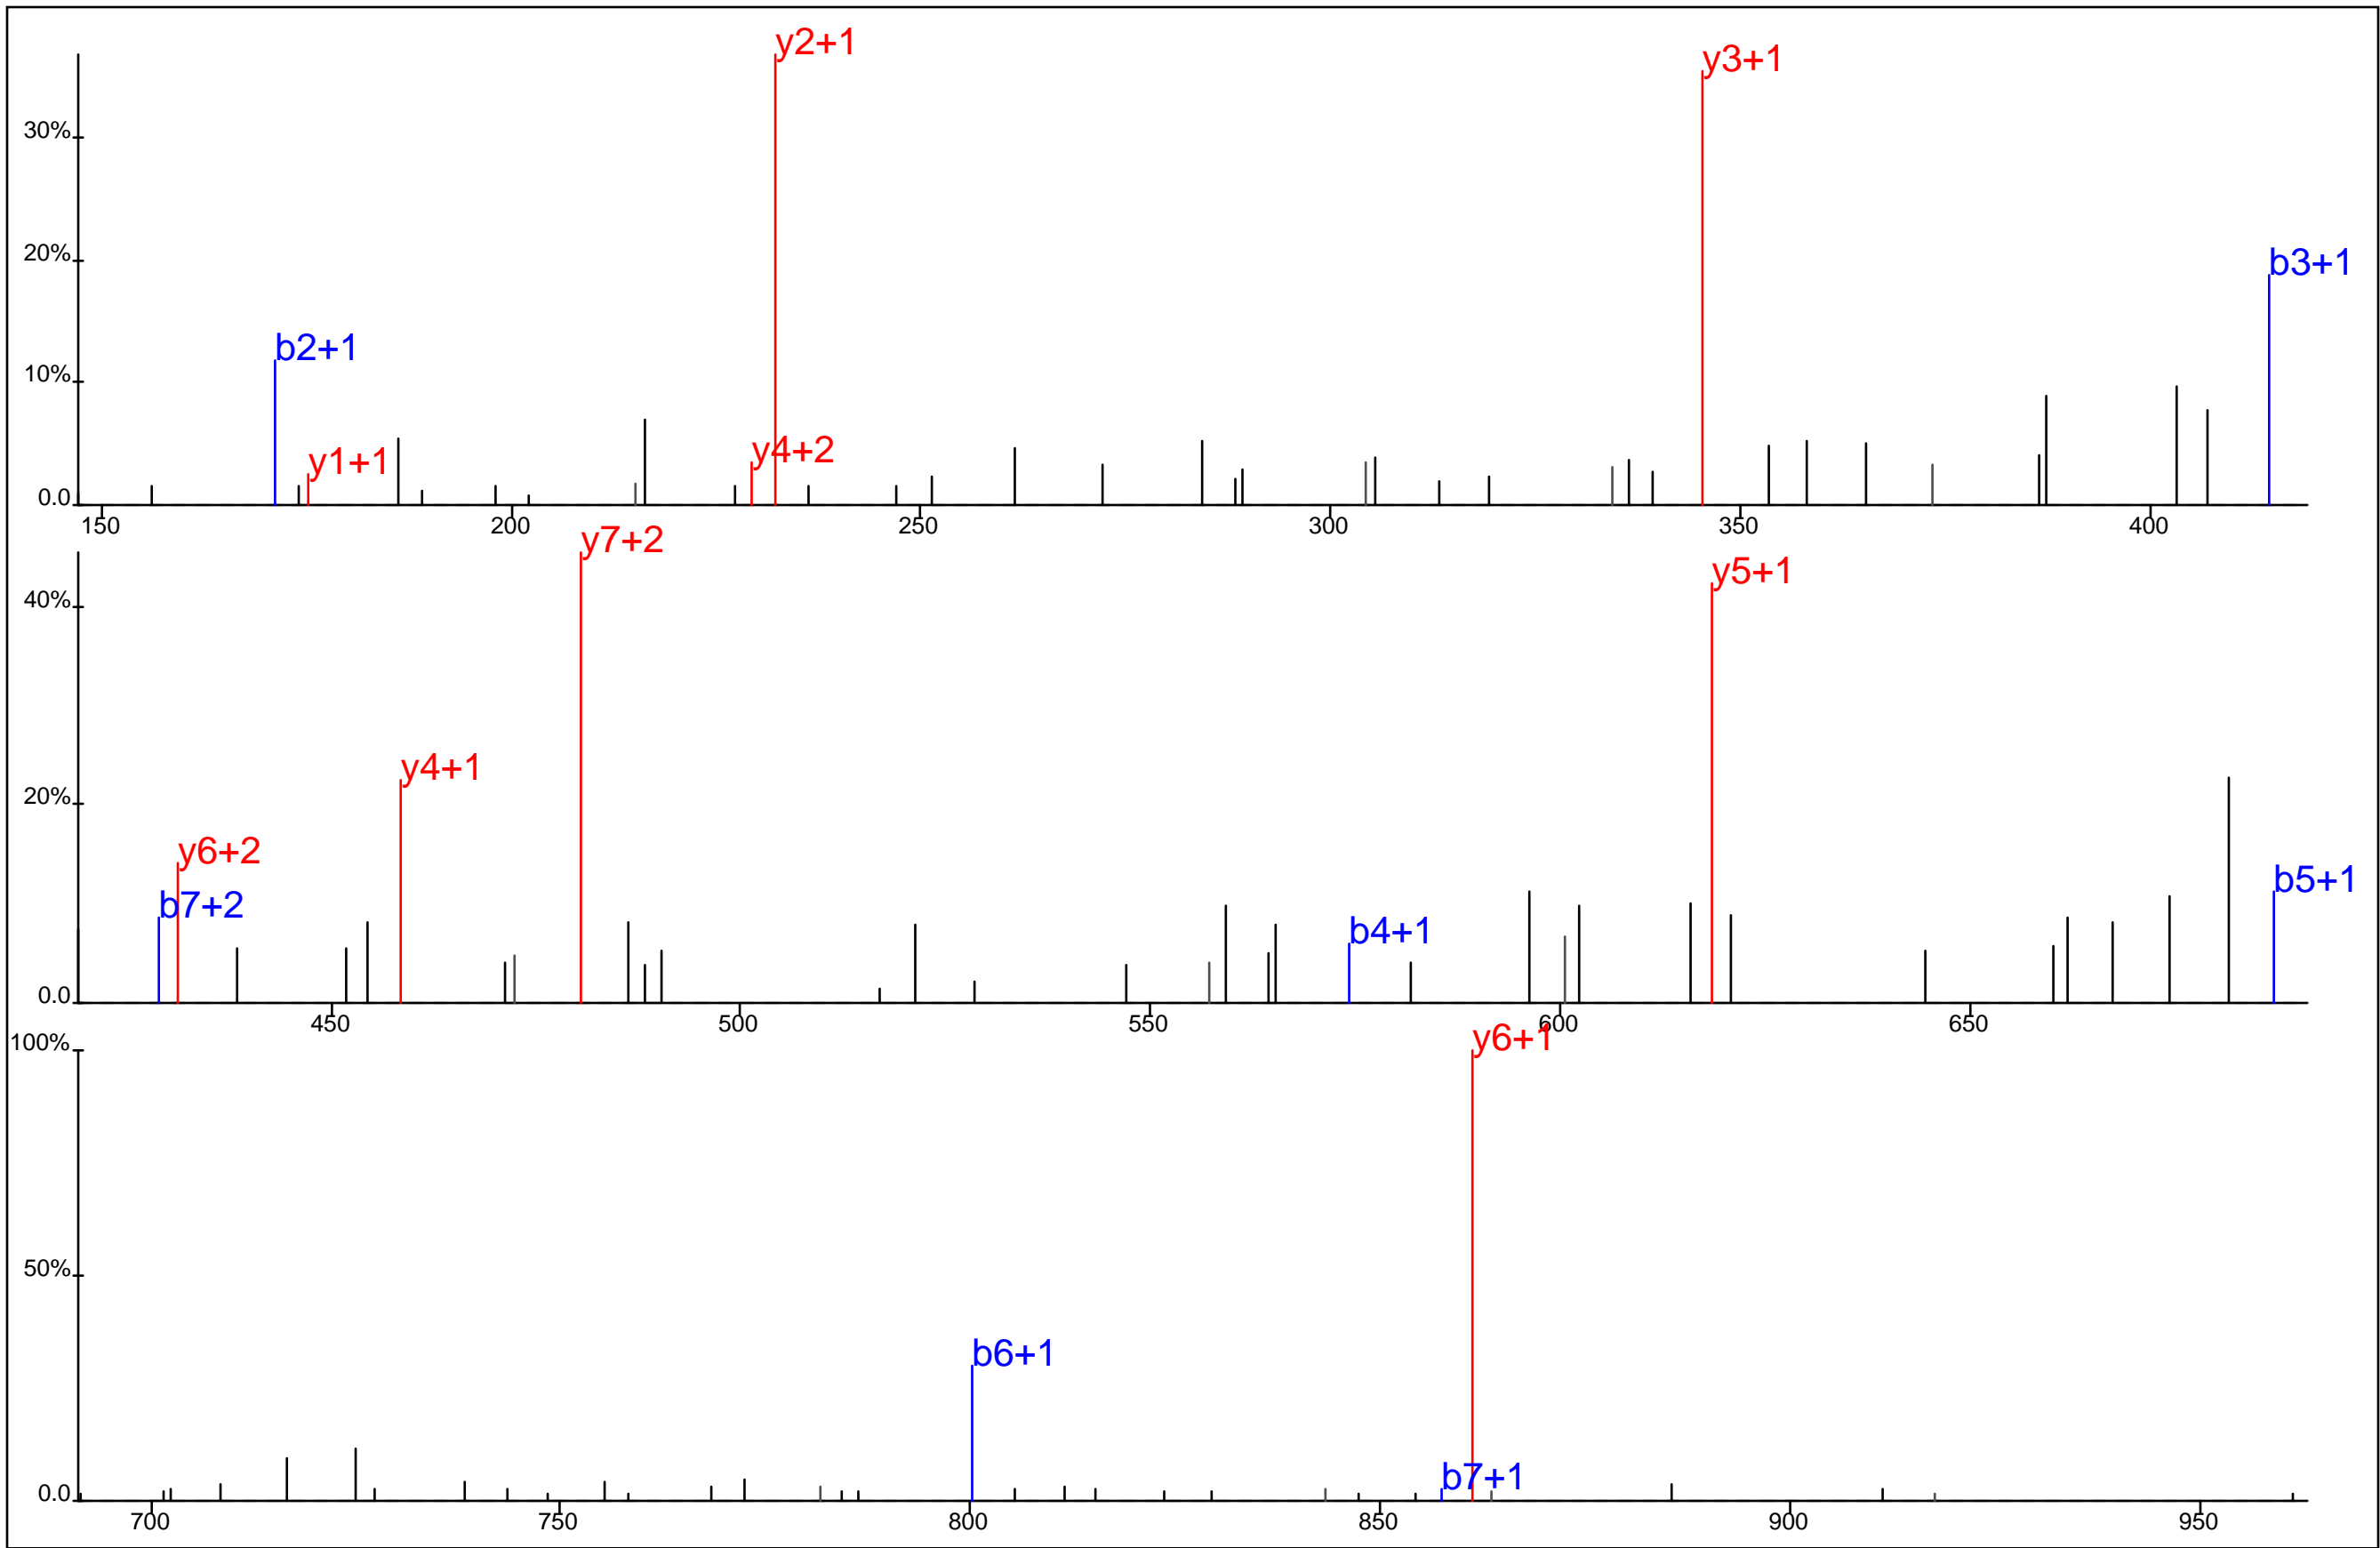

■ □  
■ □ ■ □ ■ □  
■ □ ■ □ ■ □ ■ □  
■ □ ■ □ ■ □ ■ □

Protein Name: Nucleoporin 93kDa  
 gi Accession: 0  
 Precursor Mass: 516.2396+2  
 Delta Mass: 2.317 ppm  
 XCorr: 29.62

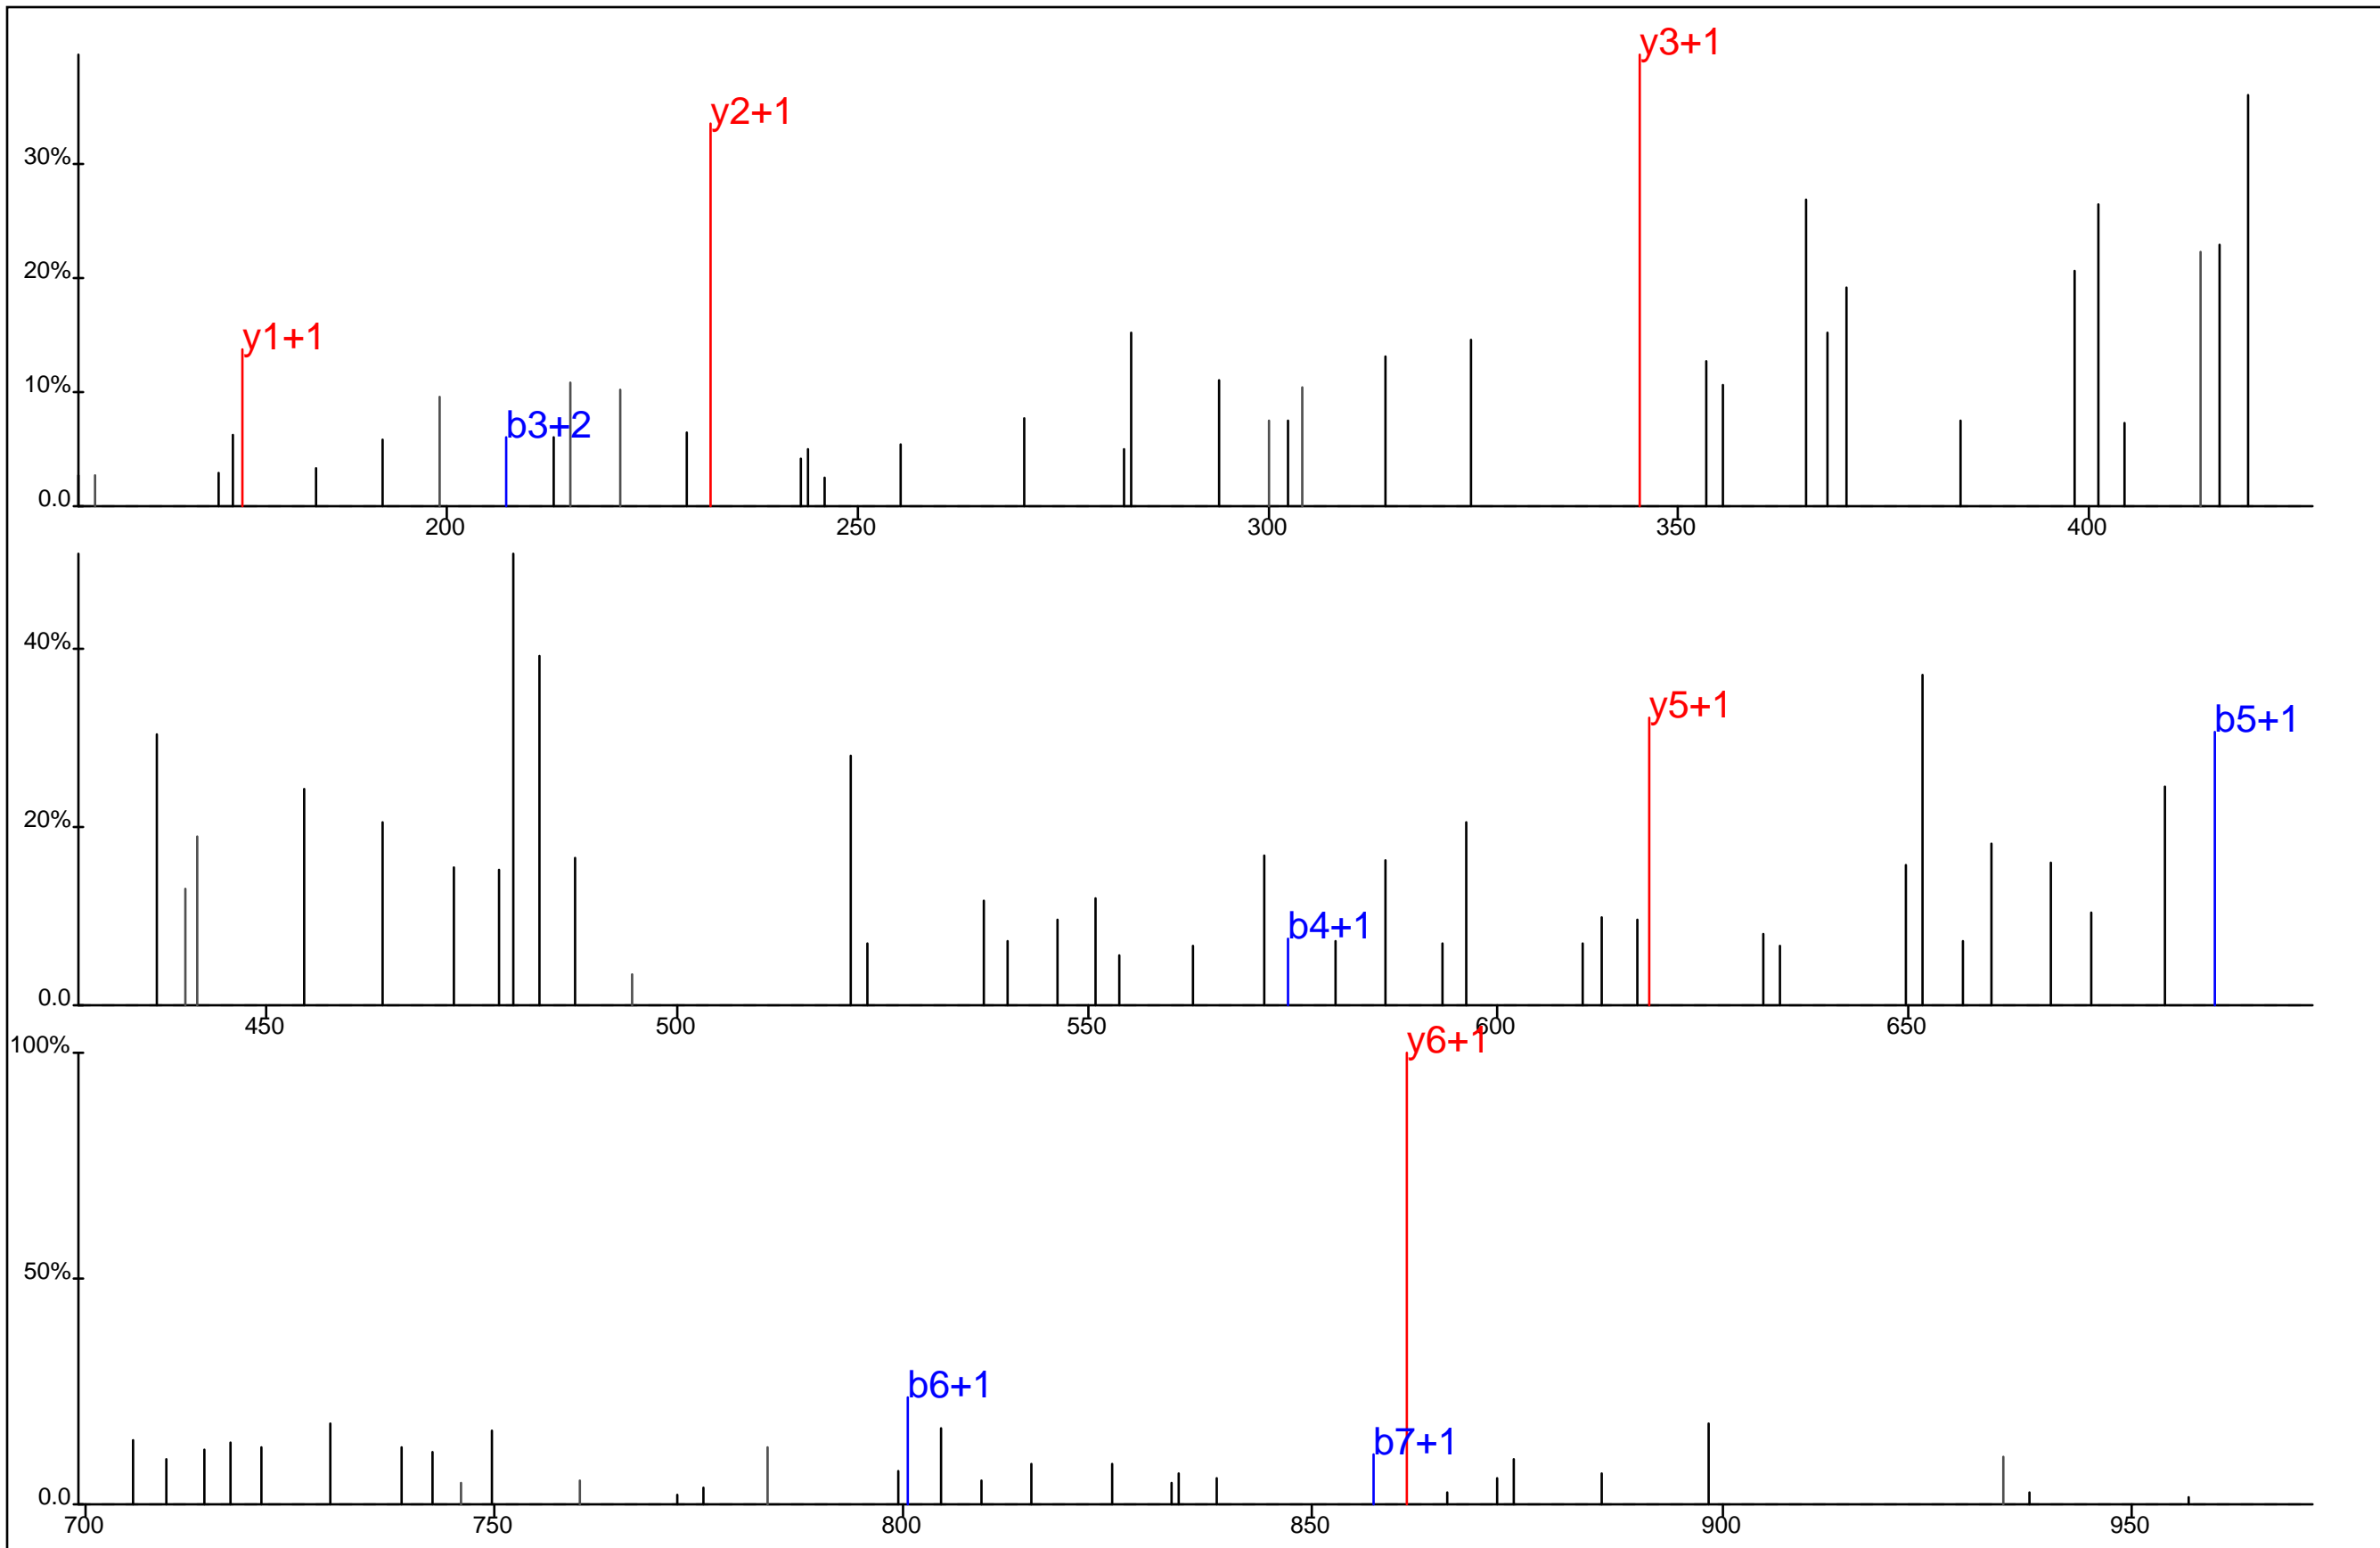

■    
■

A V Y\* C I I G R

Protein Name: Nucleoporin 93kDa  
 gi Accession: 0  
 Precursor Mass: 516.2374+2  
 Delta Mass: 6.577 ppm  
 XCorr: 20.12

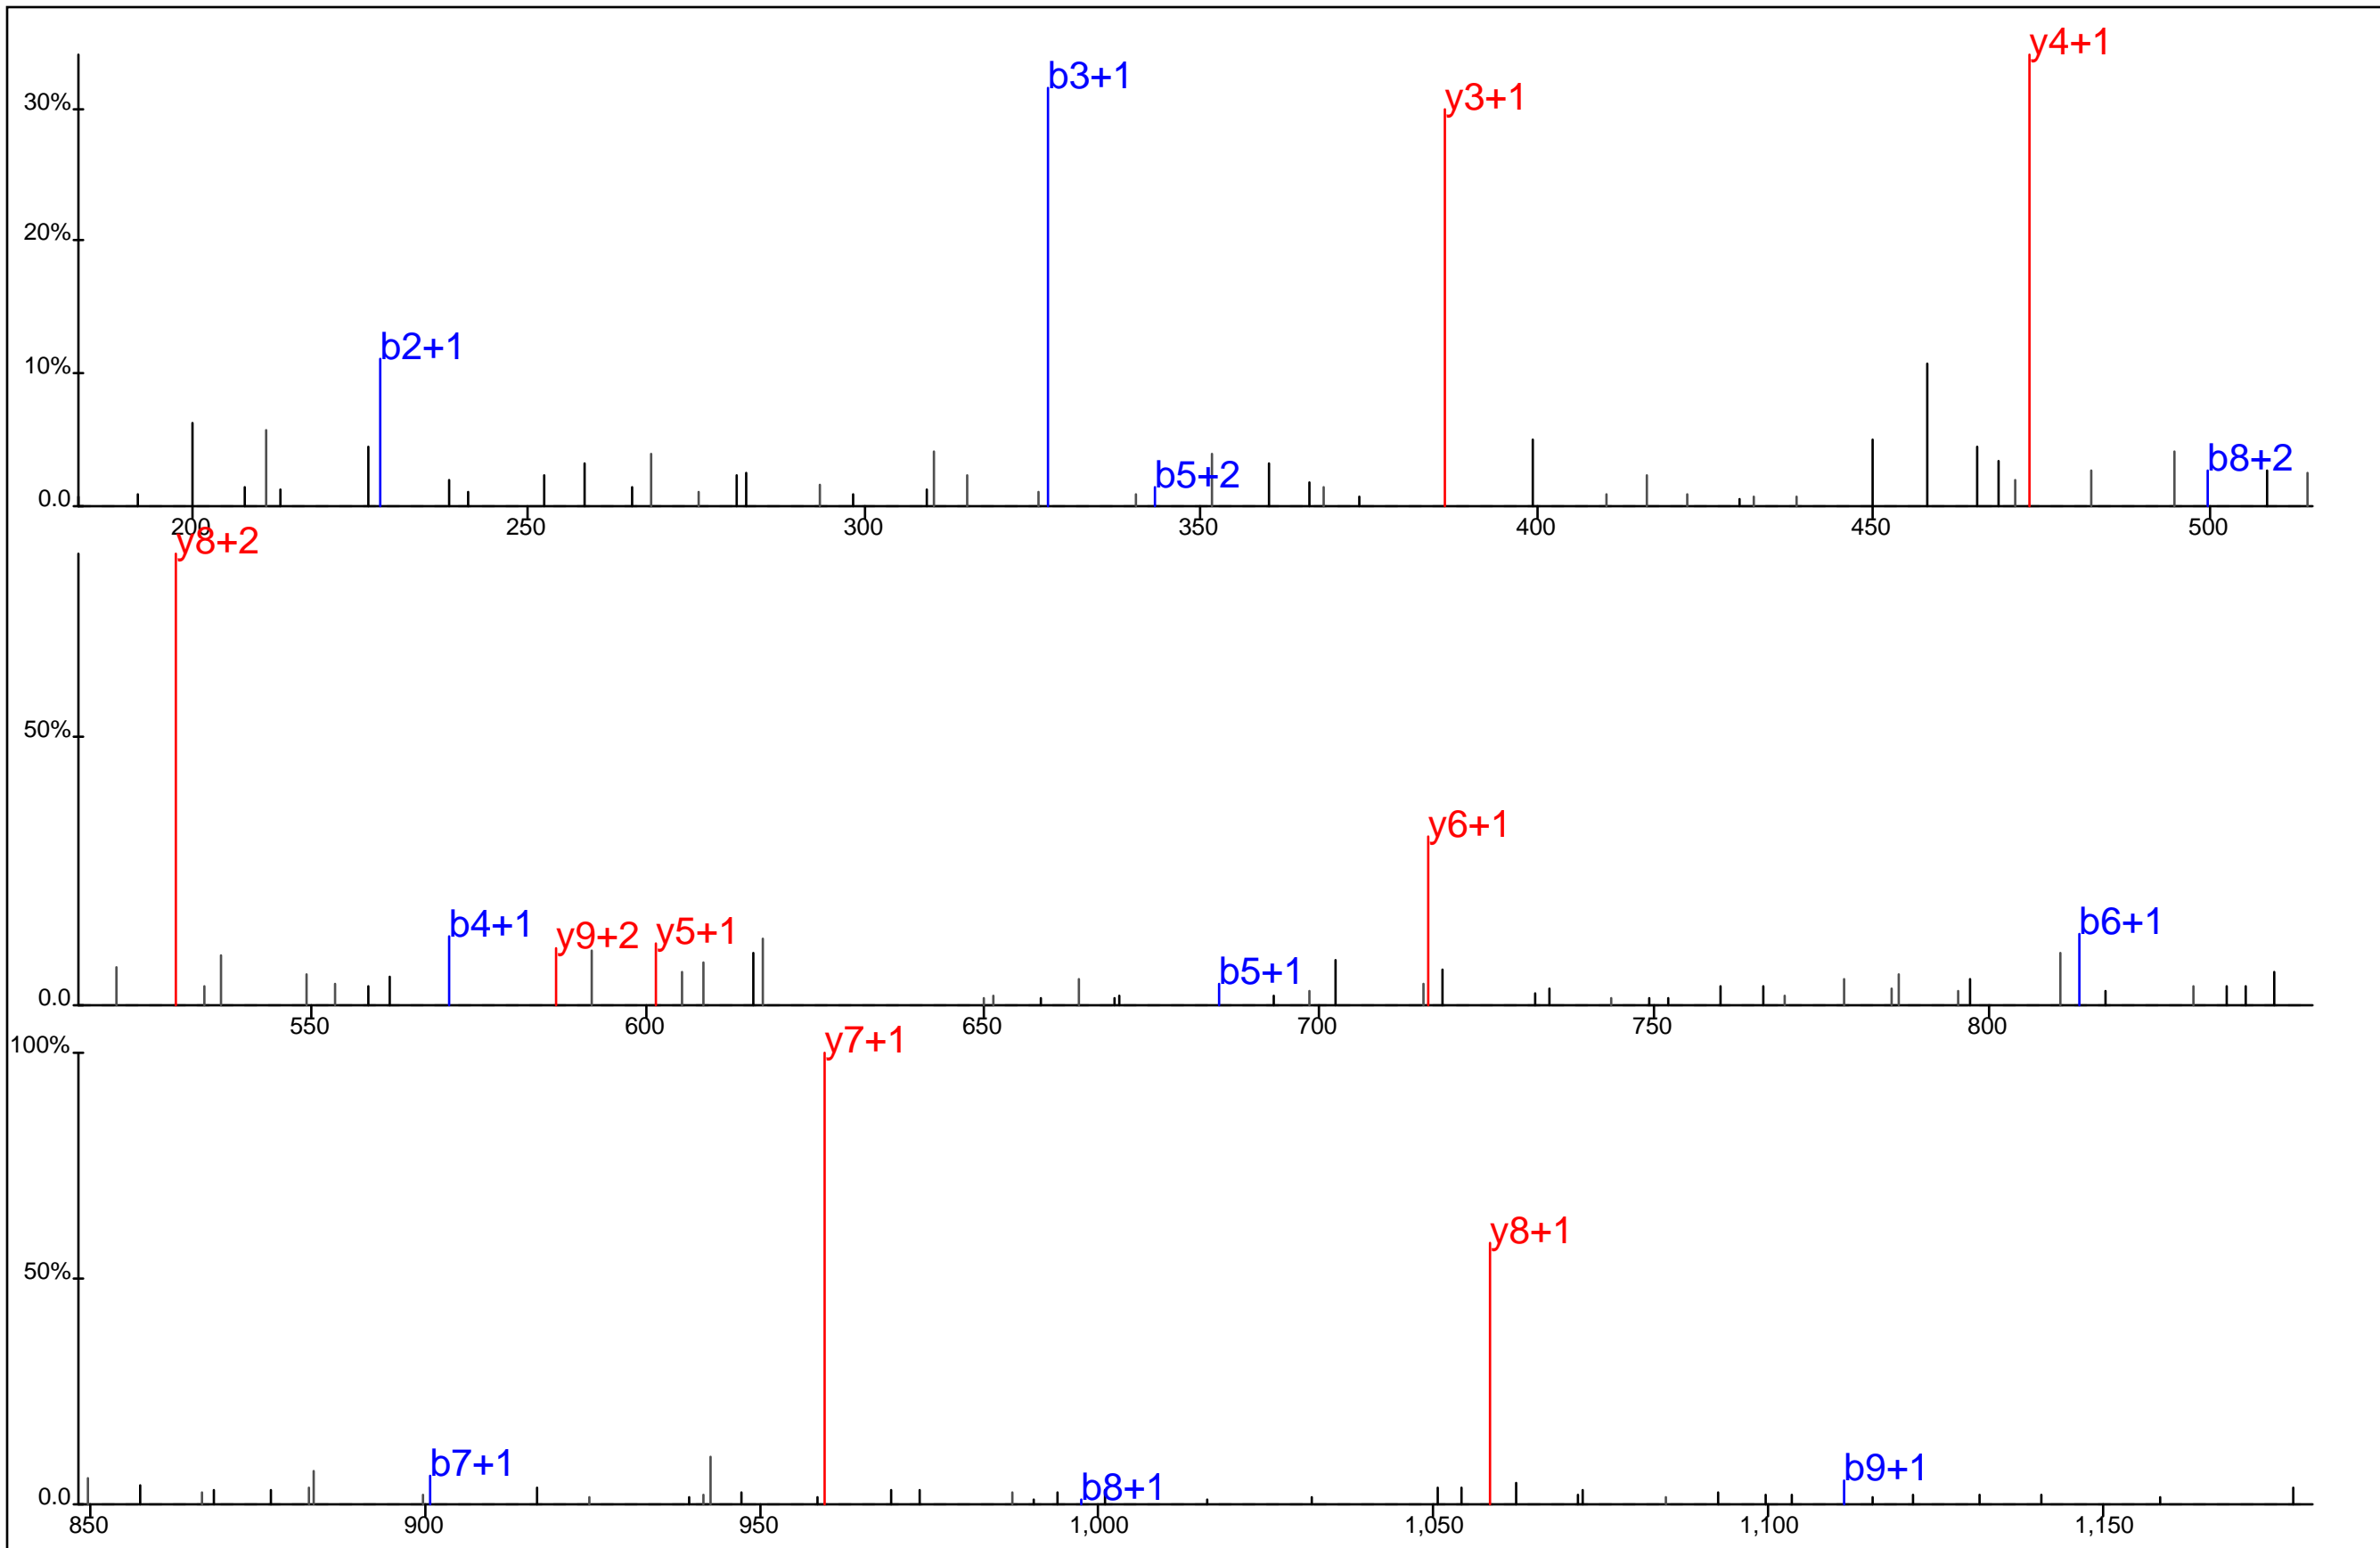

N L V Y\* D Q S P N R

Protein Name: NUDE1  
 gi Accession: 0  
 Precursor Mass: 643.2826+2  
 Delta Mass: 0.527 ppm  
 XCorr: 42.29





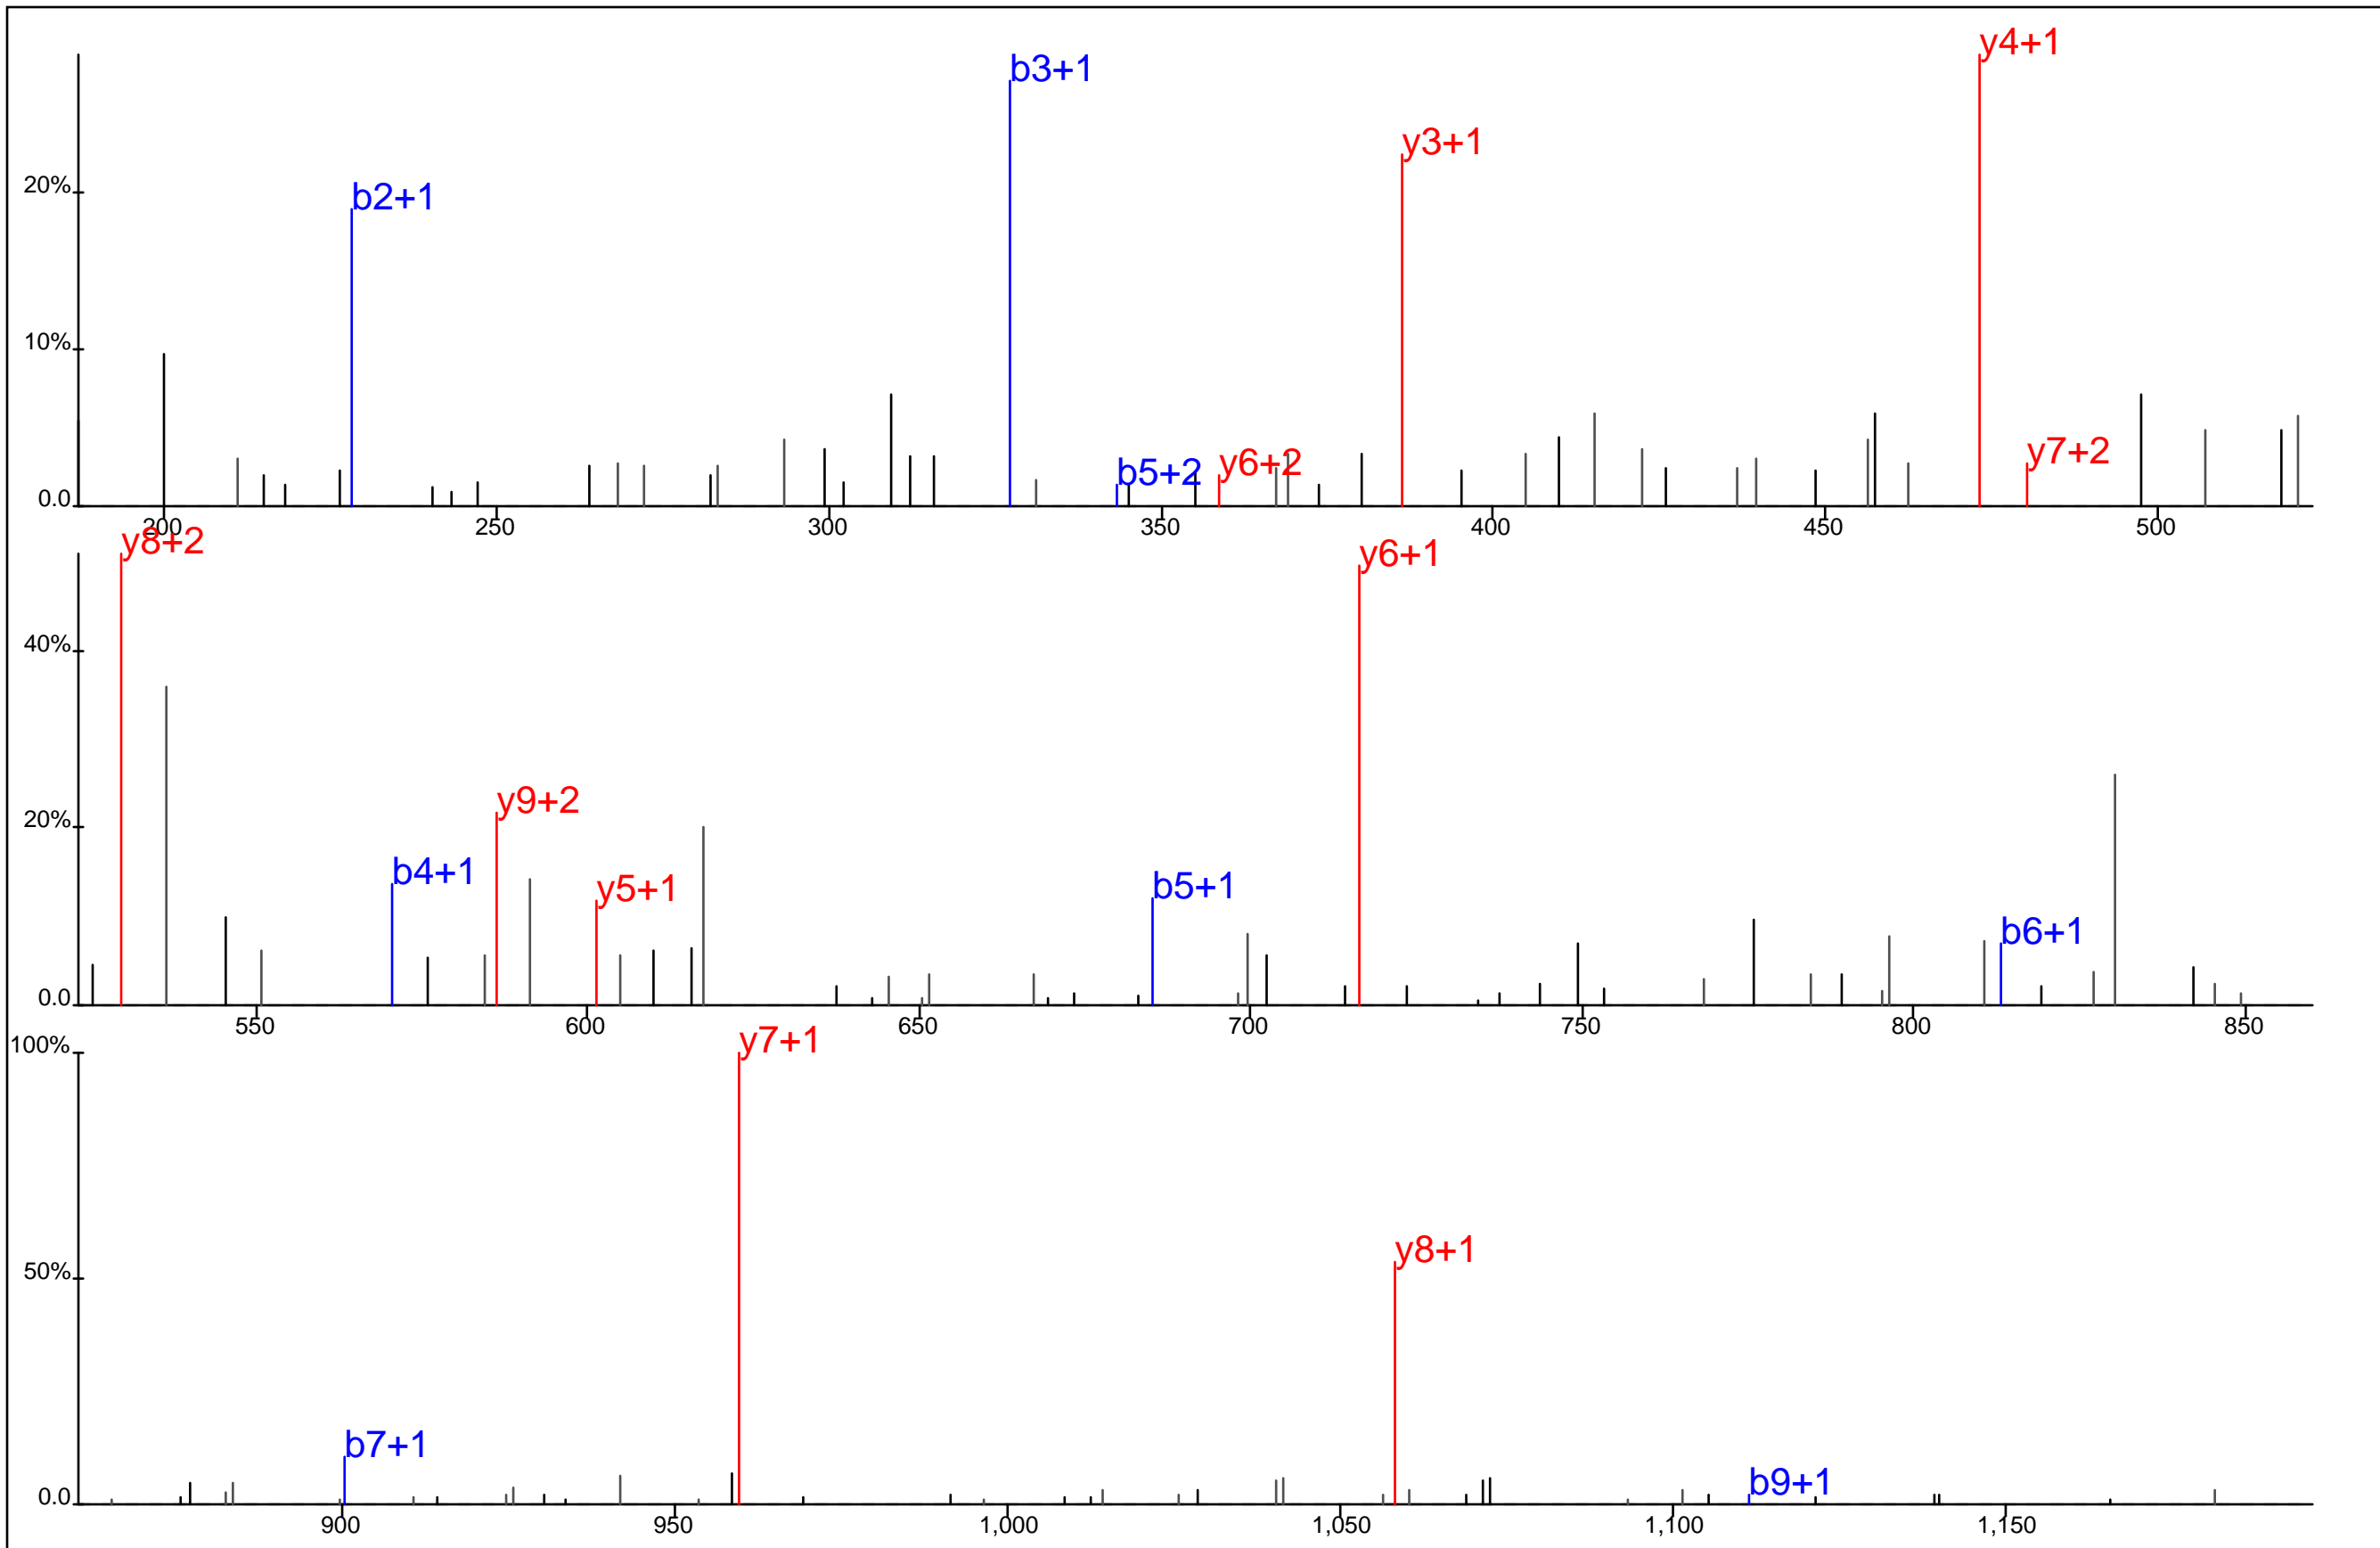

▣ ▣ ▣ ▣ ▣ ▣ ▣ ▣  
 N L V Y\* D Q S P N R  
▣ ▣ ▣ ▣ ▣ ▣ ▣ ▣

Protein Name: NUDE1  
 gi Accession: 0  
 Precursor Mass: 643.2819+2  
 Delta Mass: 0.613 ppm  
 XCorr: 37.01

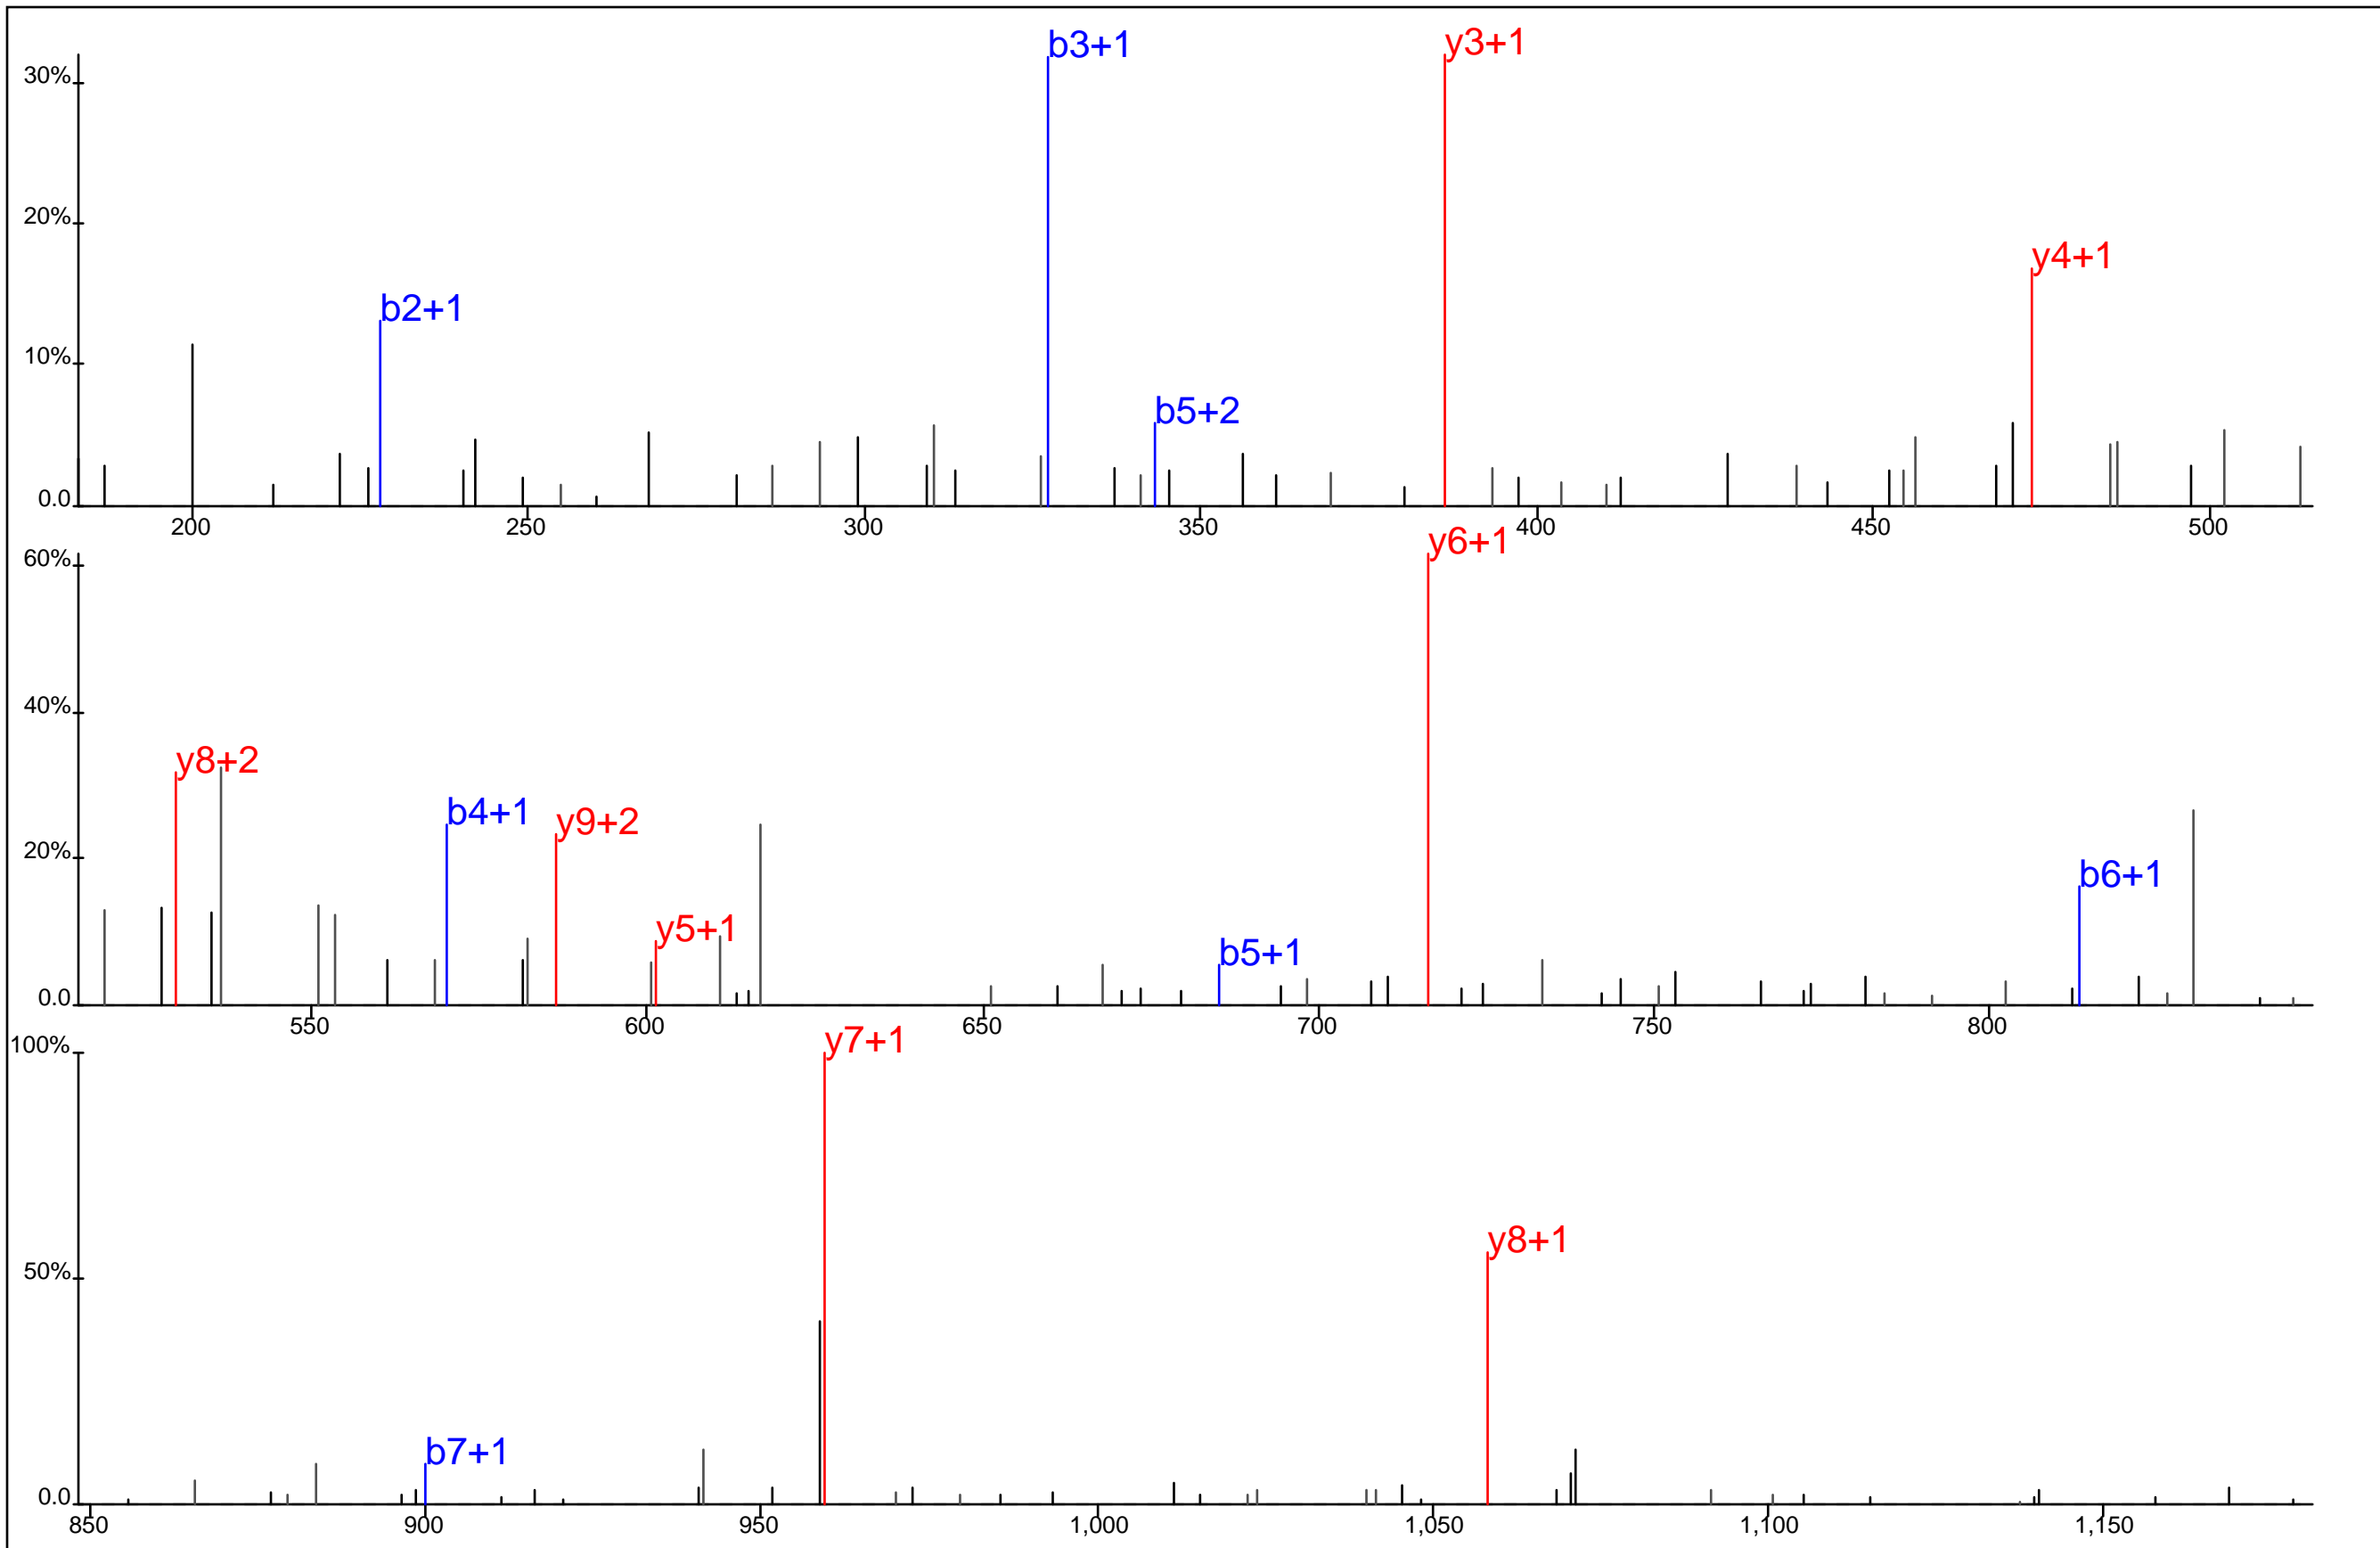

■ ■ ■ ■ ■ ■ ■ ■  
 N L V Y\* D Q S P N R  
□ □ □ □ □ □ □ □

Protein Name: NUDE1  
 gi Accession: 0  
 Precursor Mass: 643.2816+2  
 Delta Mass: 1.087 ppm  
 XCorr: 24.54

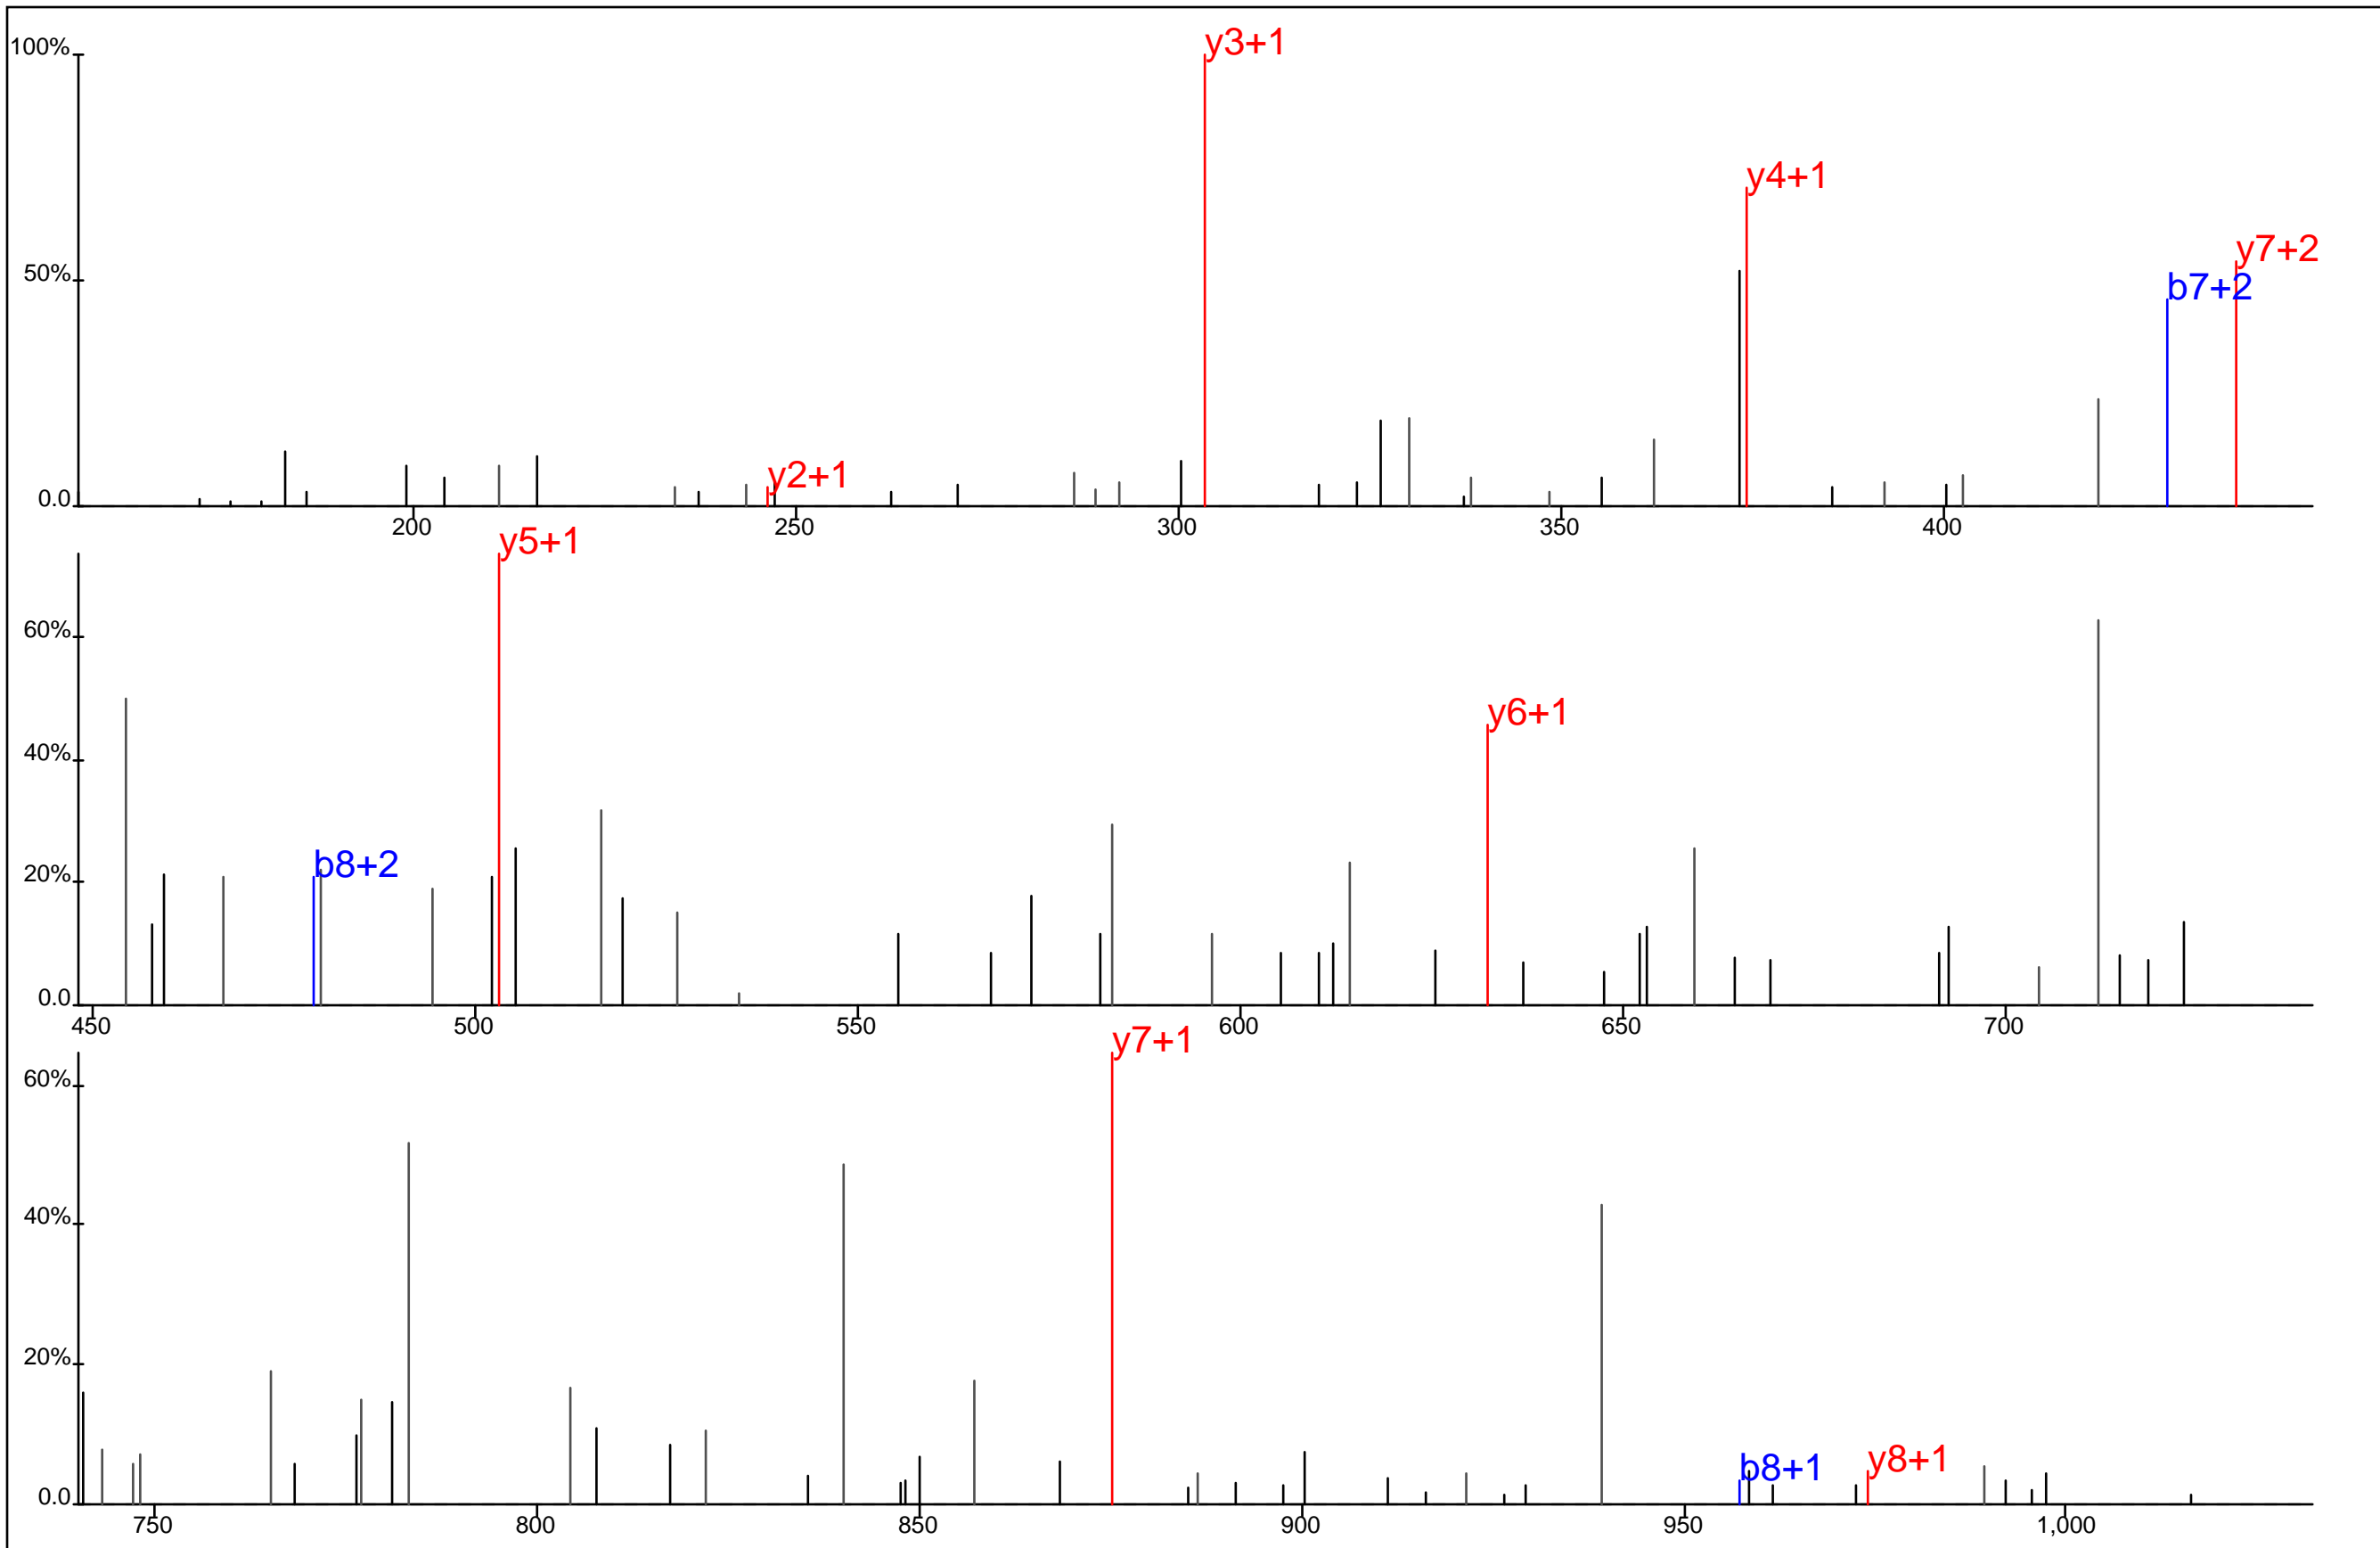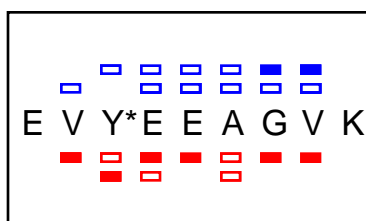

Protein Name: Nudix type motif 11  
 gi Accession: 0  
 Precursor Mass: 552.2379+2  
 Delta Mass: 2.547 ppm  
 XCorr: 30.79

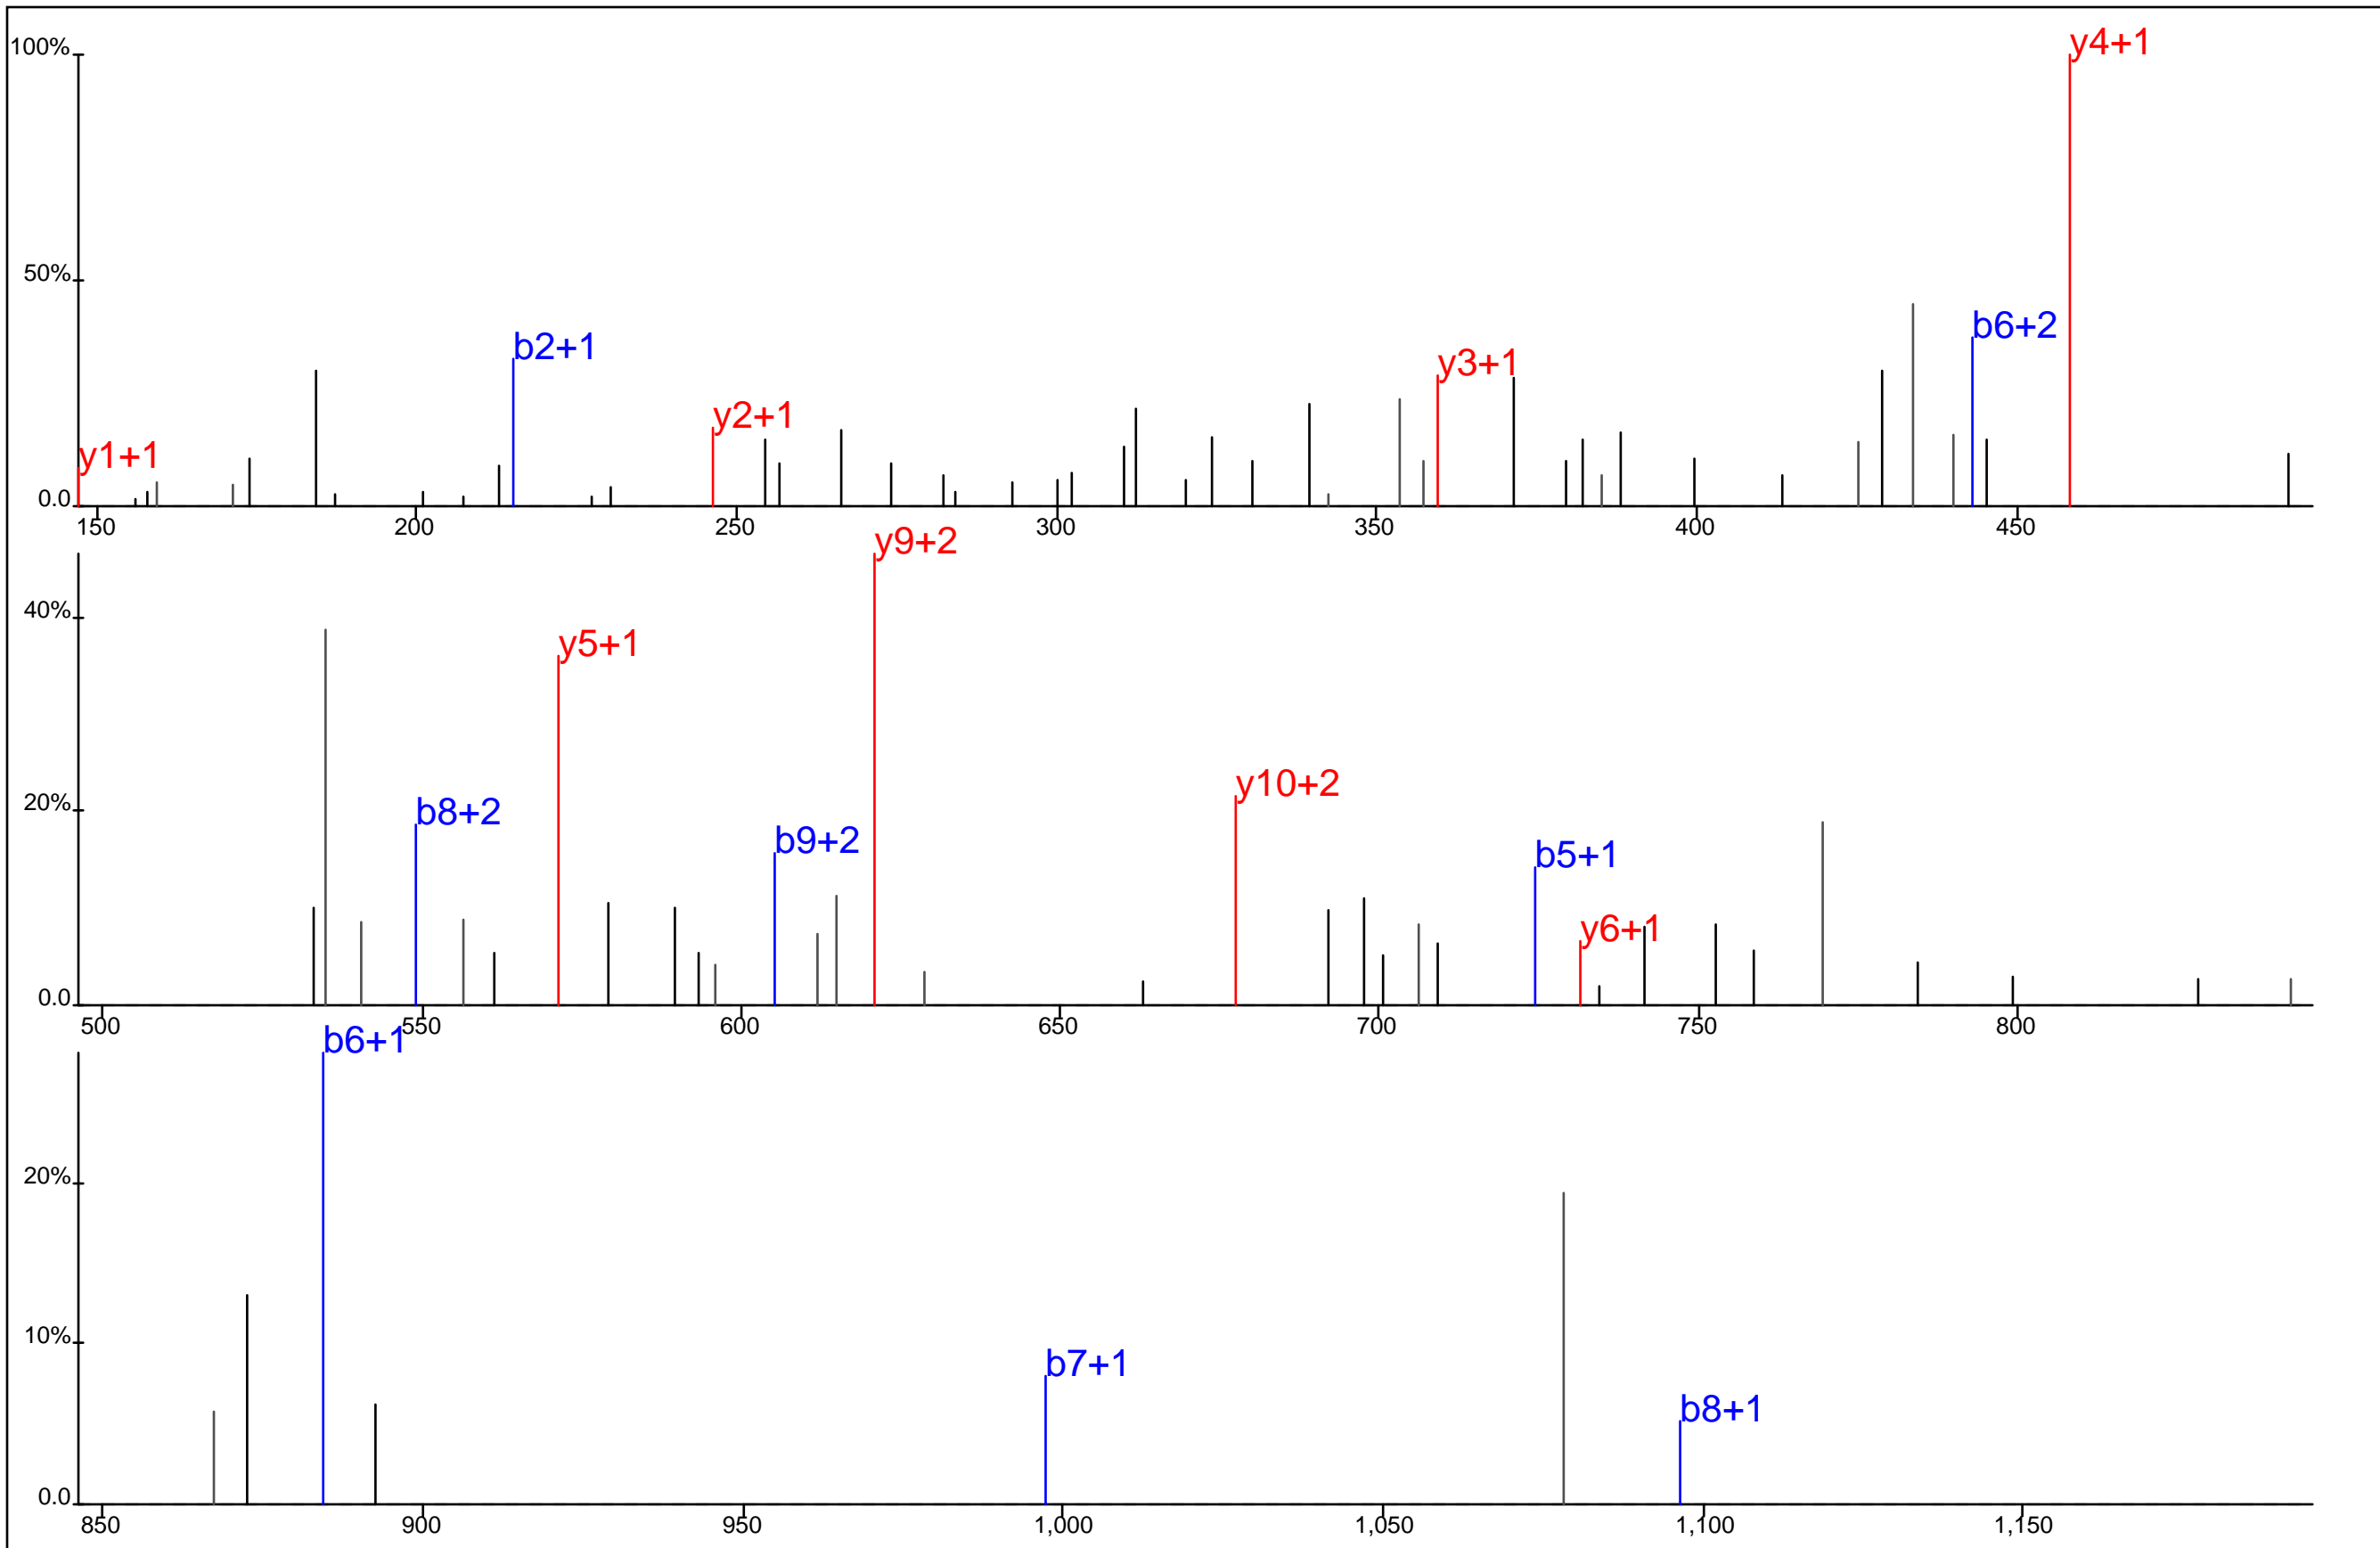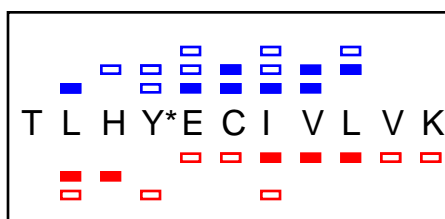

Protein Name: Nudix type motif 5  
 gi Accession: 0  
 Precursor Mass: 485.5772+3  
 Delta Mass: 3.968 ppm  
 XCorr: 23.74

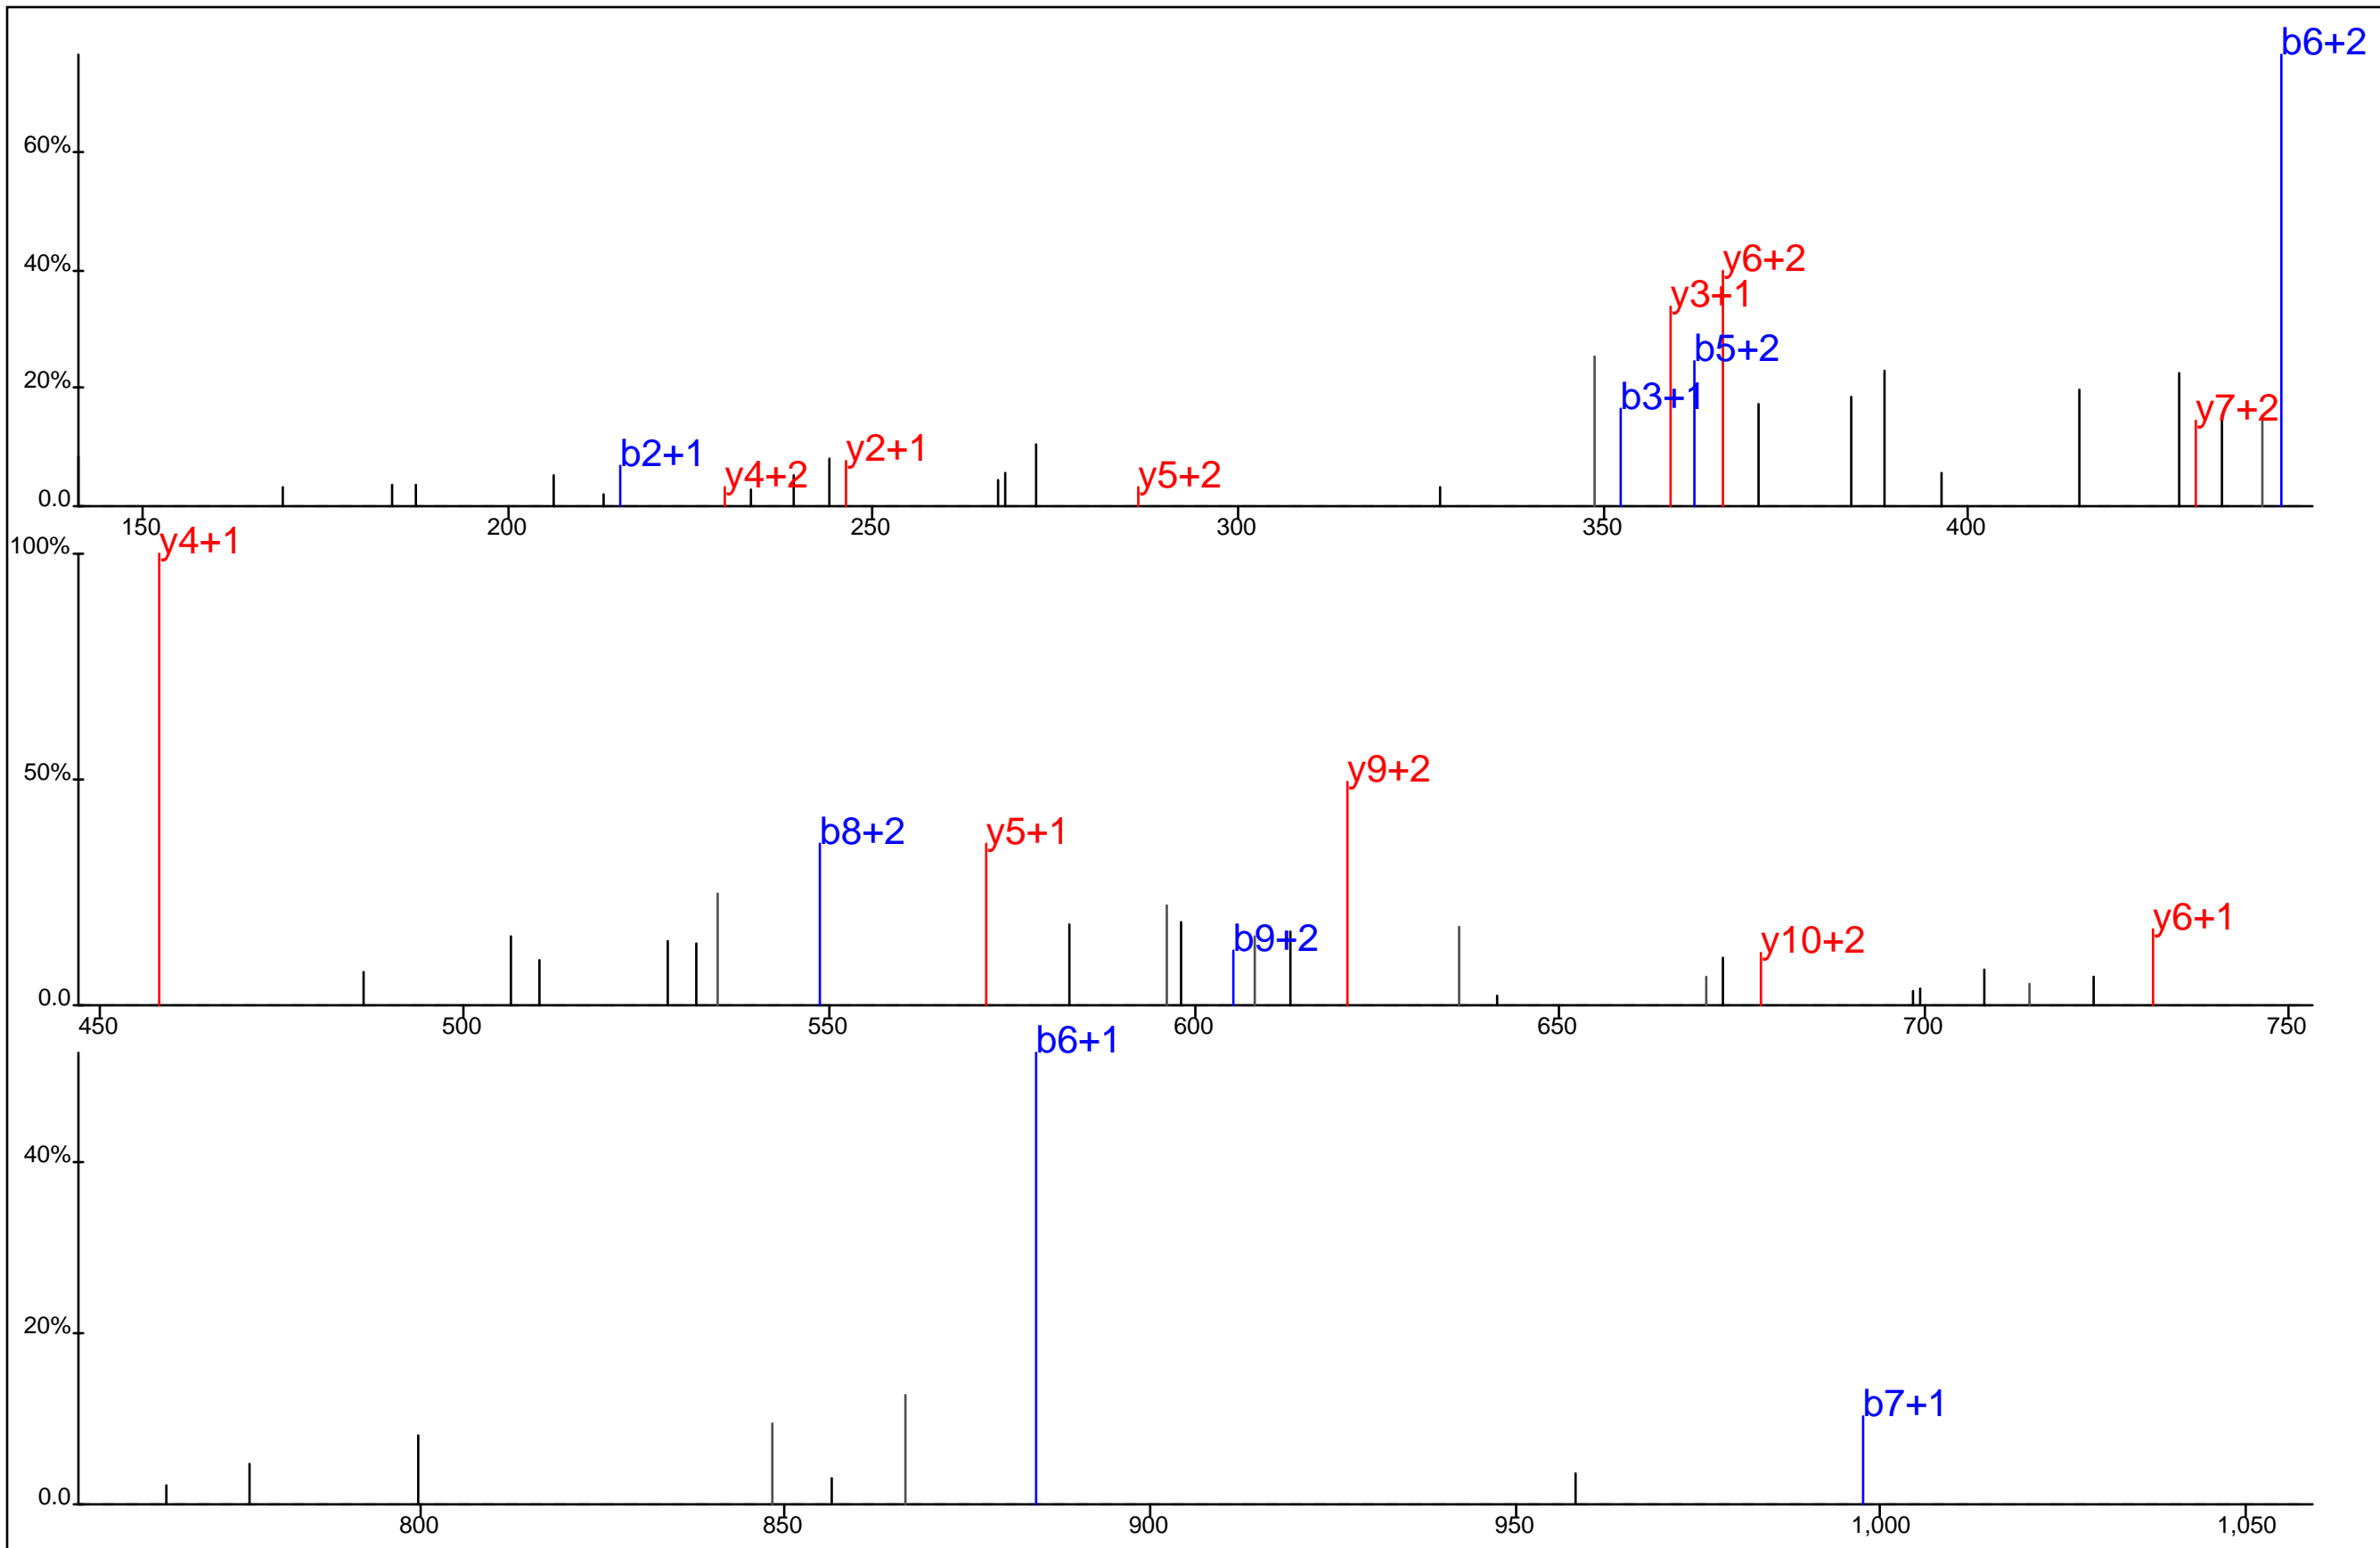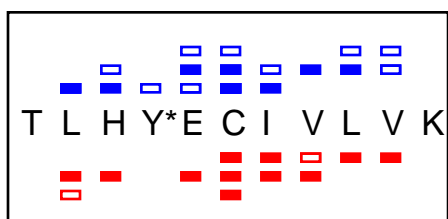

Protein Name: Nudix type motif 5  
 gi Accession: 0  
 Precursor Mass: 485.5771+3  
 Delta Mass: 3.843 ppm  
 XCorr: 23.88

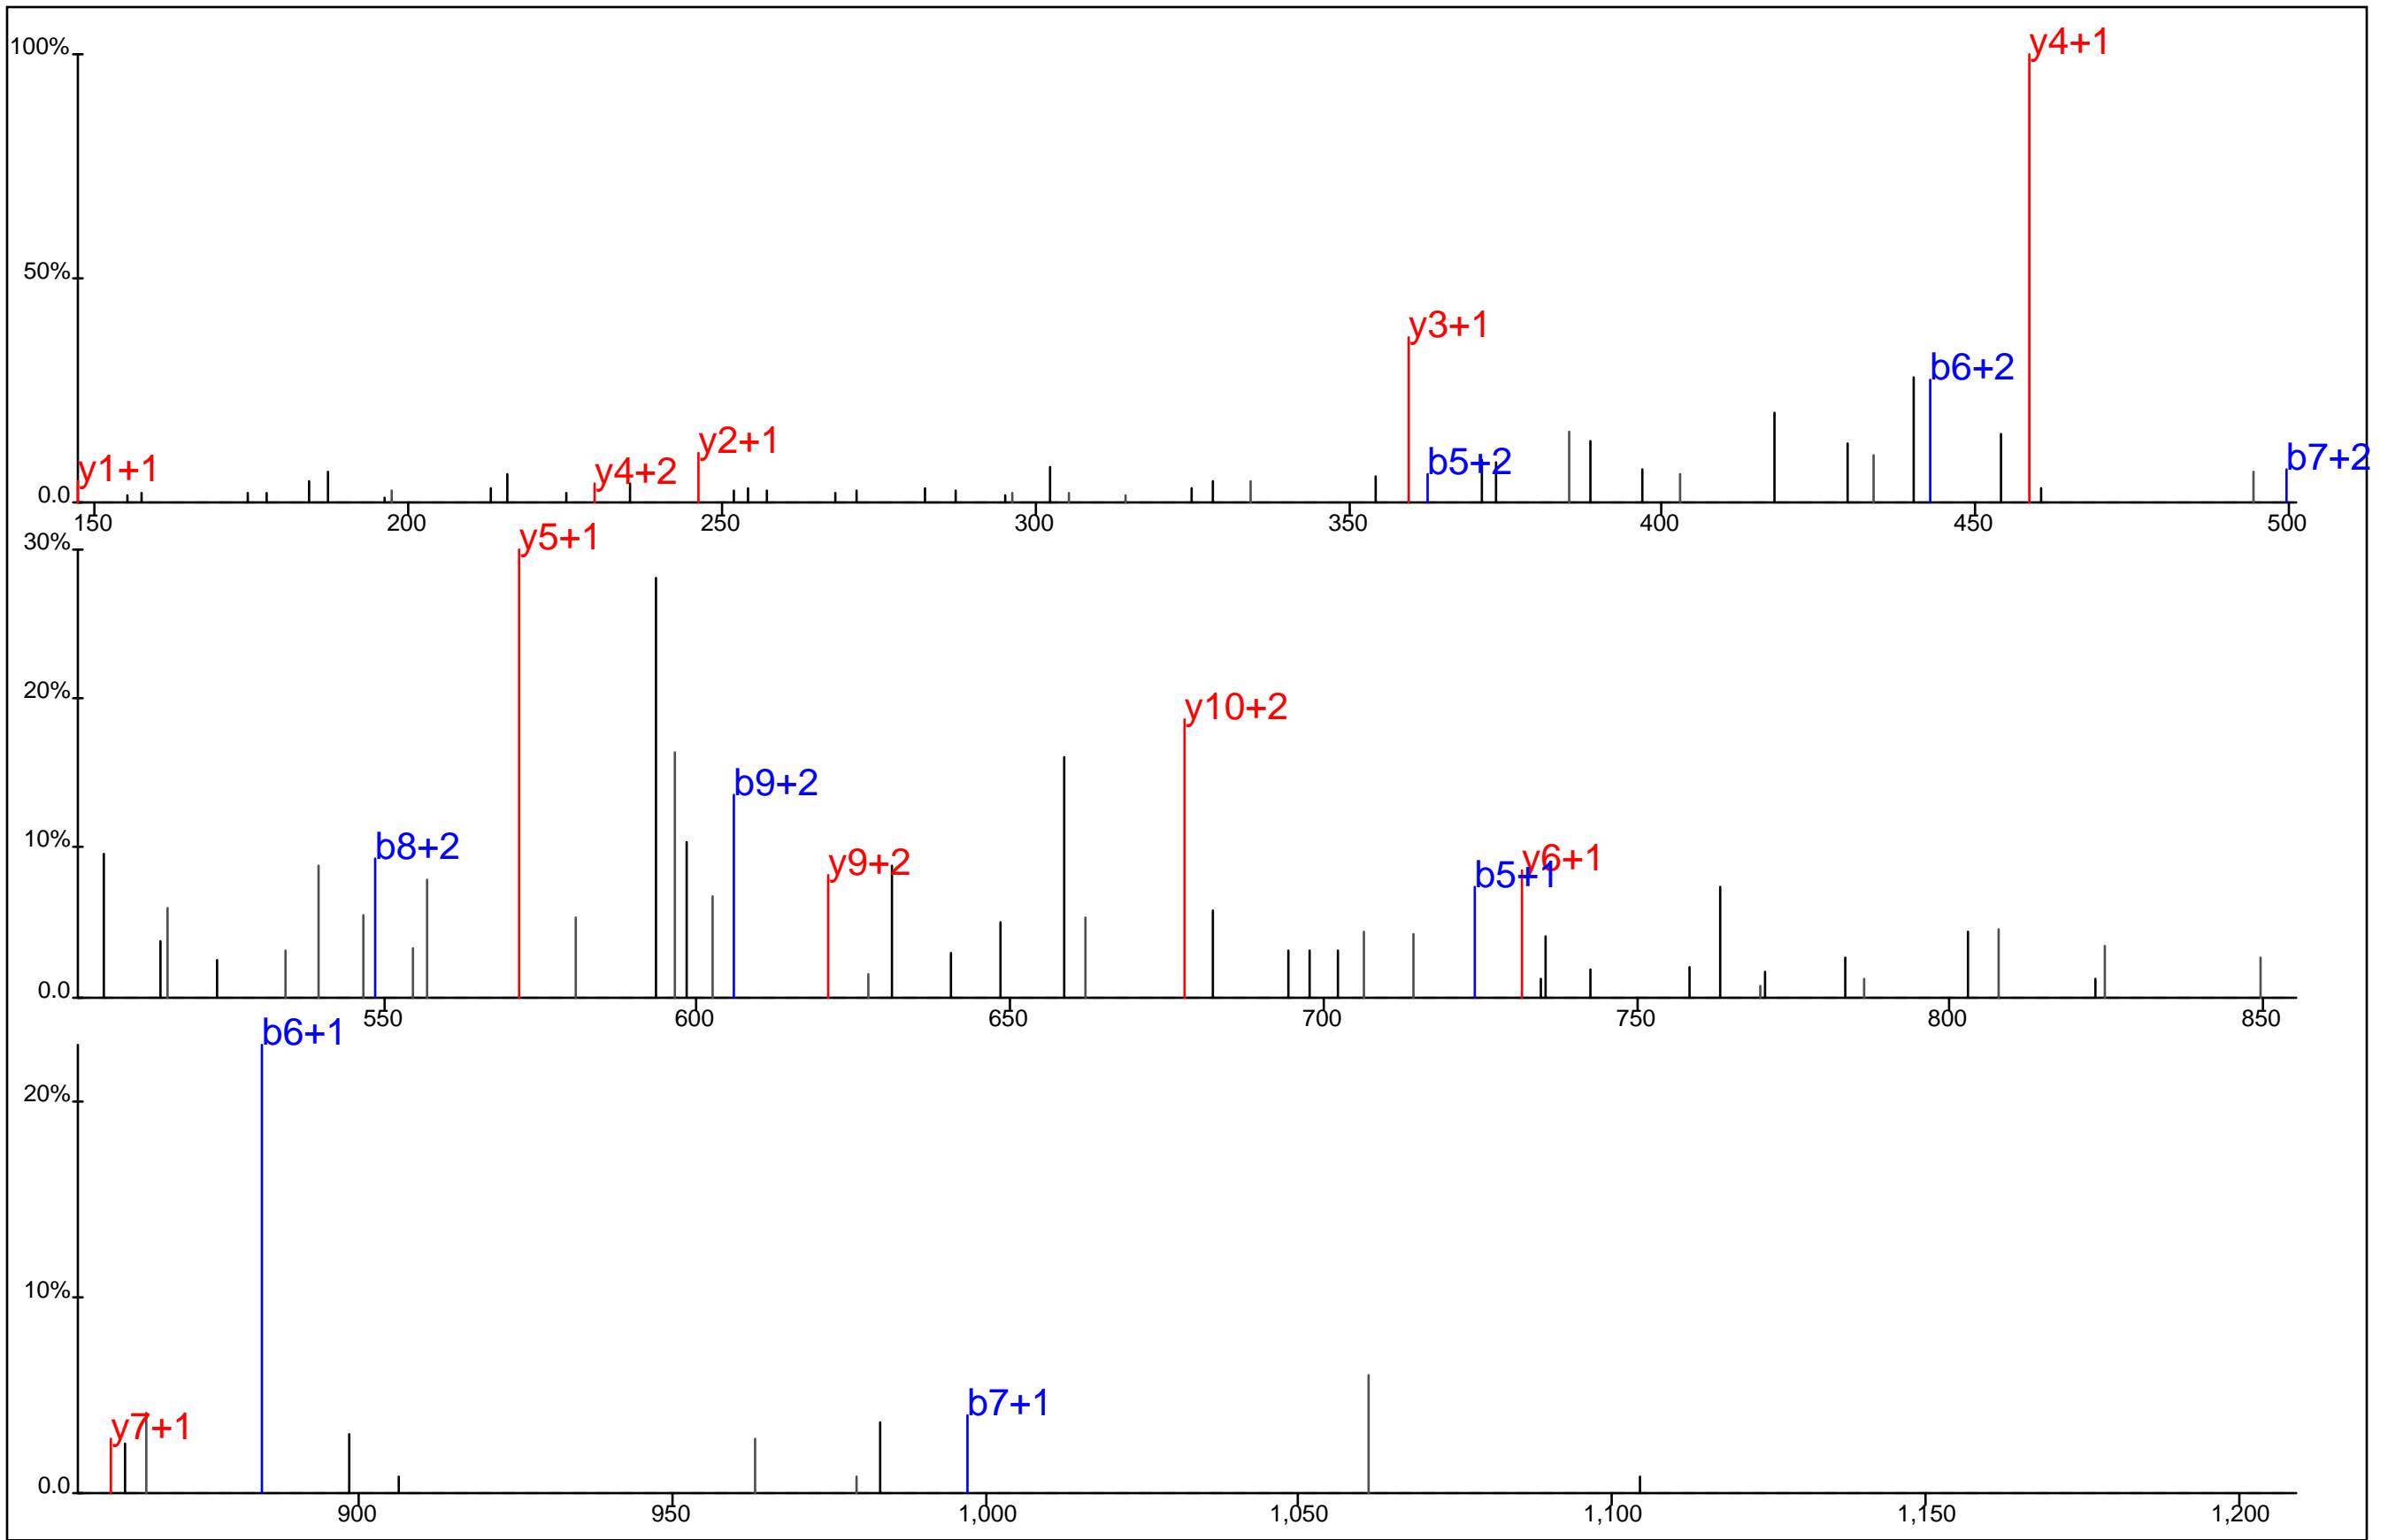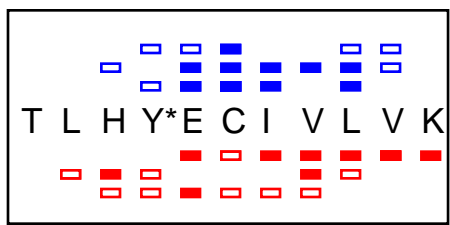

Protein Name: Nudix type motif 5  
 gi Accession: 0  
 Precursor Mass: 485.5765+3  
 Delta Mass: 2.459 ppm  
 XCorr: 26.76

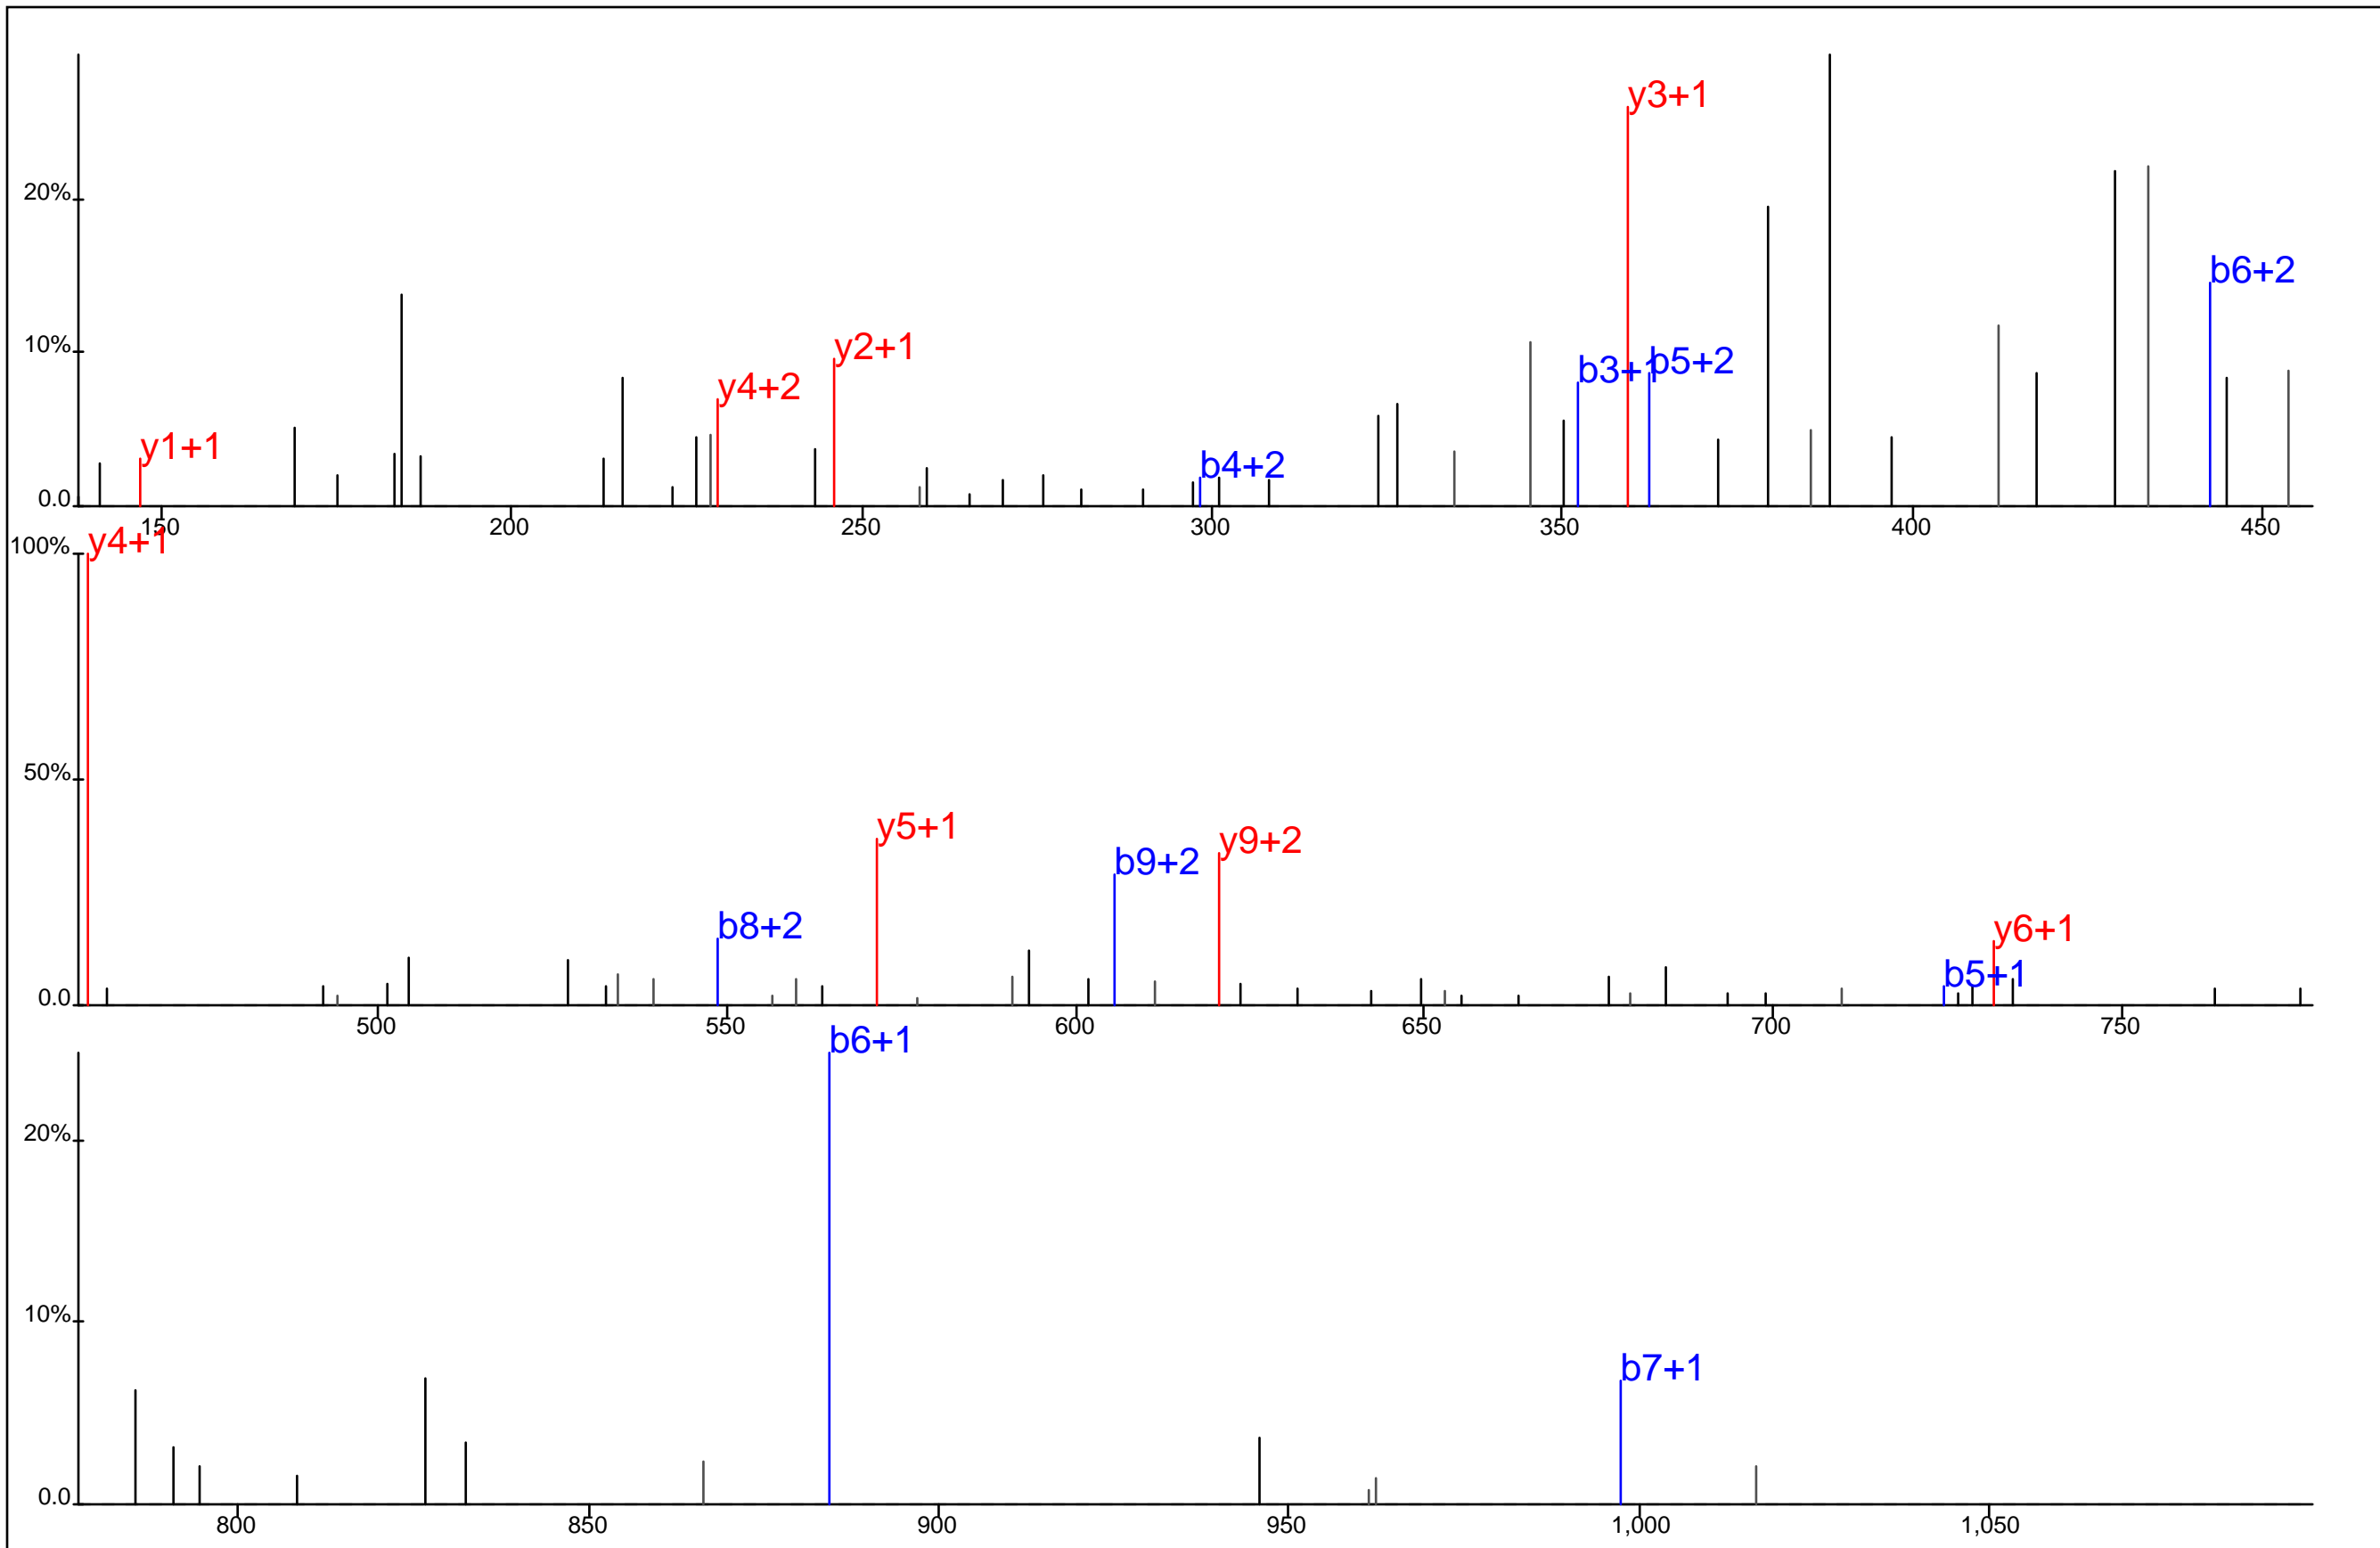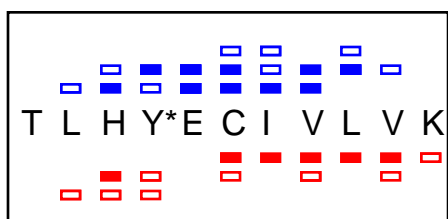

Protein Name: Nudix type motif 5  
 gi Accession: 0  
 Precursor Mass: 485.5753+3  
 Delta Mass: 0.067 ppm  
 XCorr: 24.44



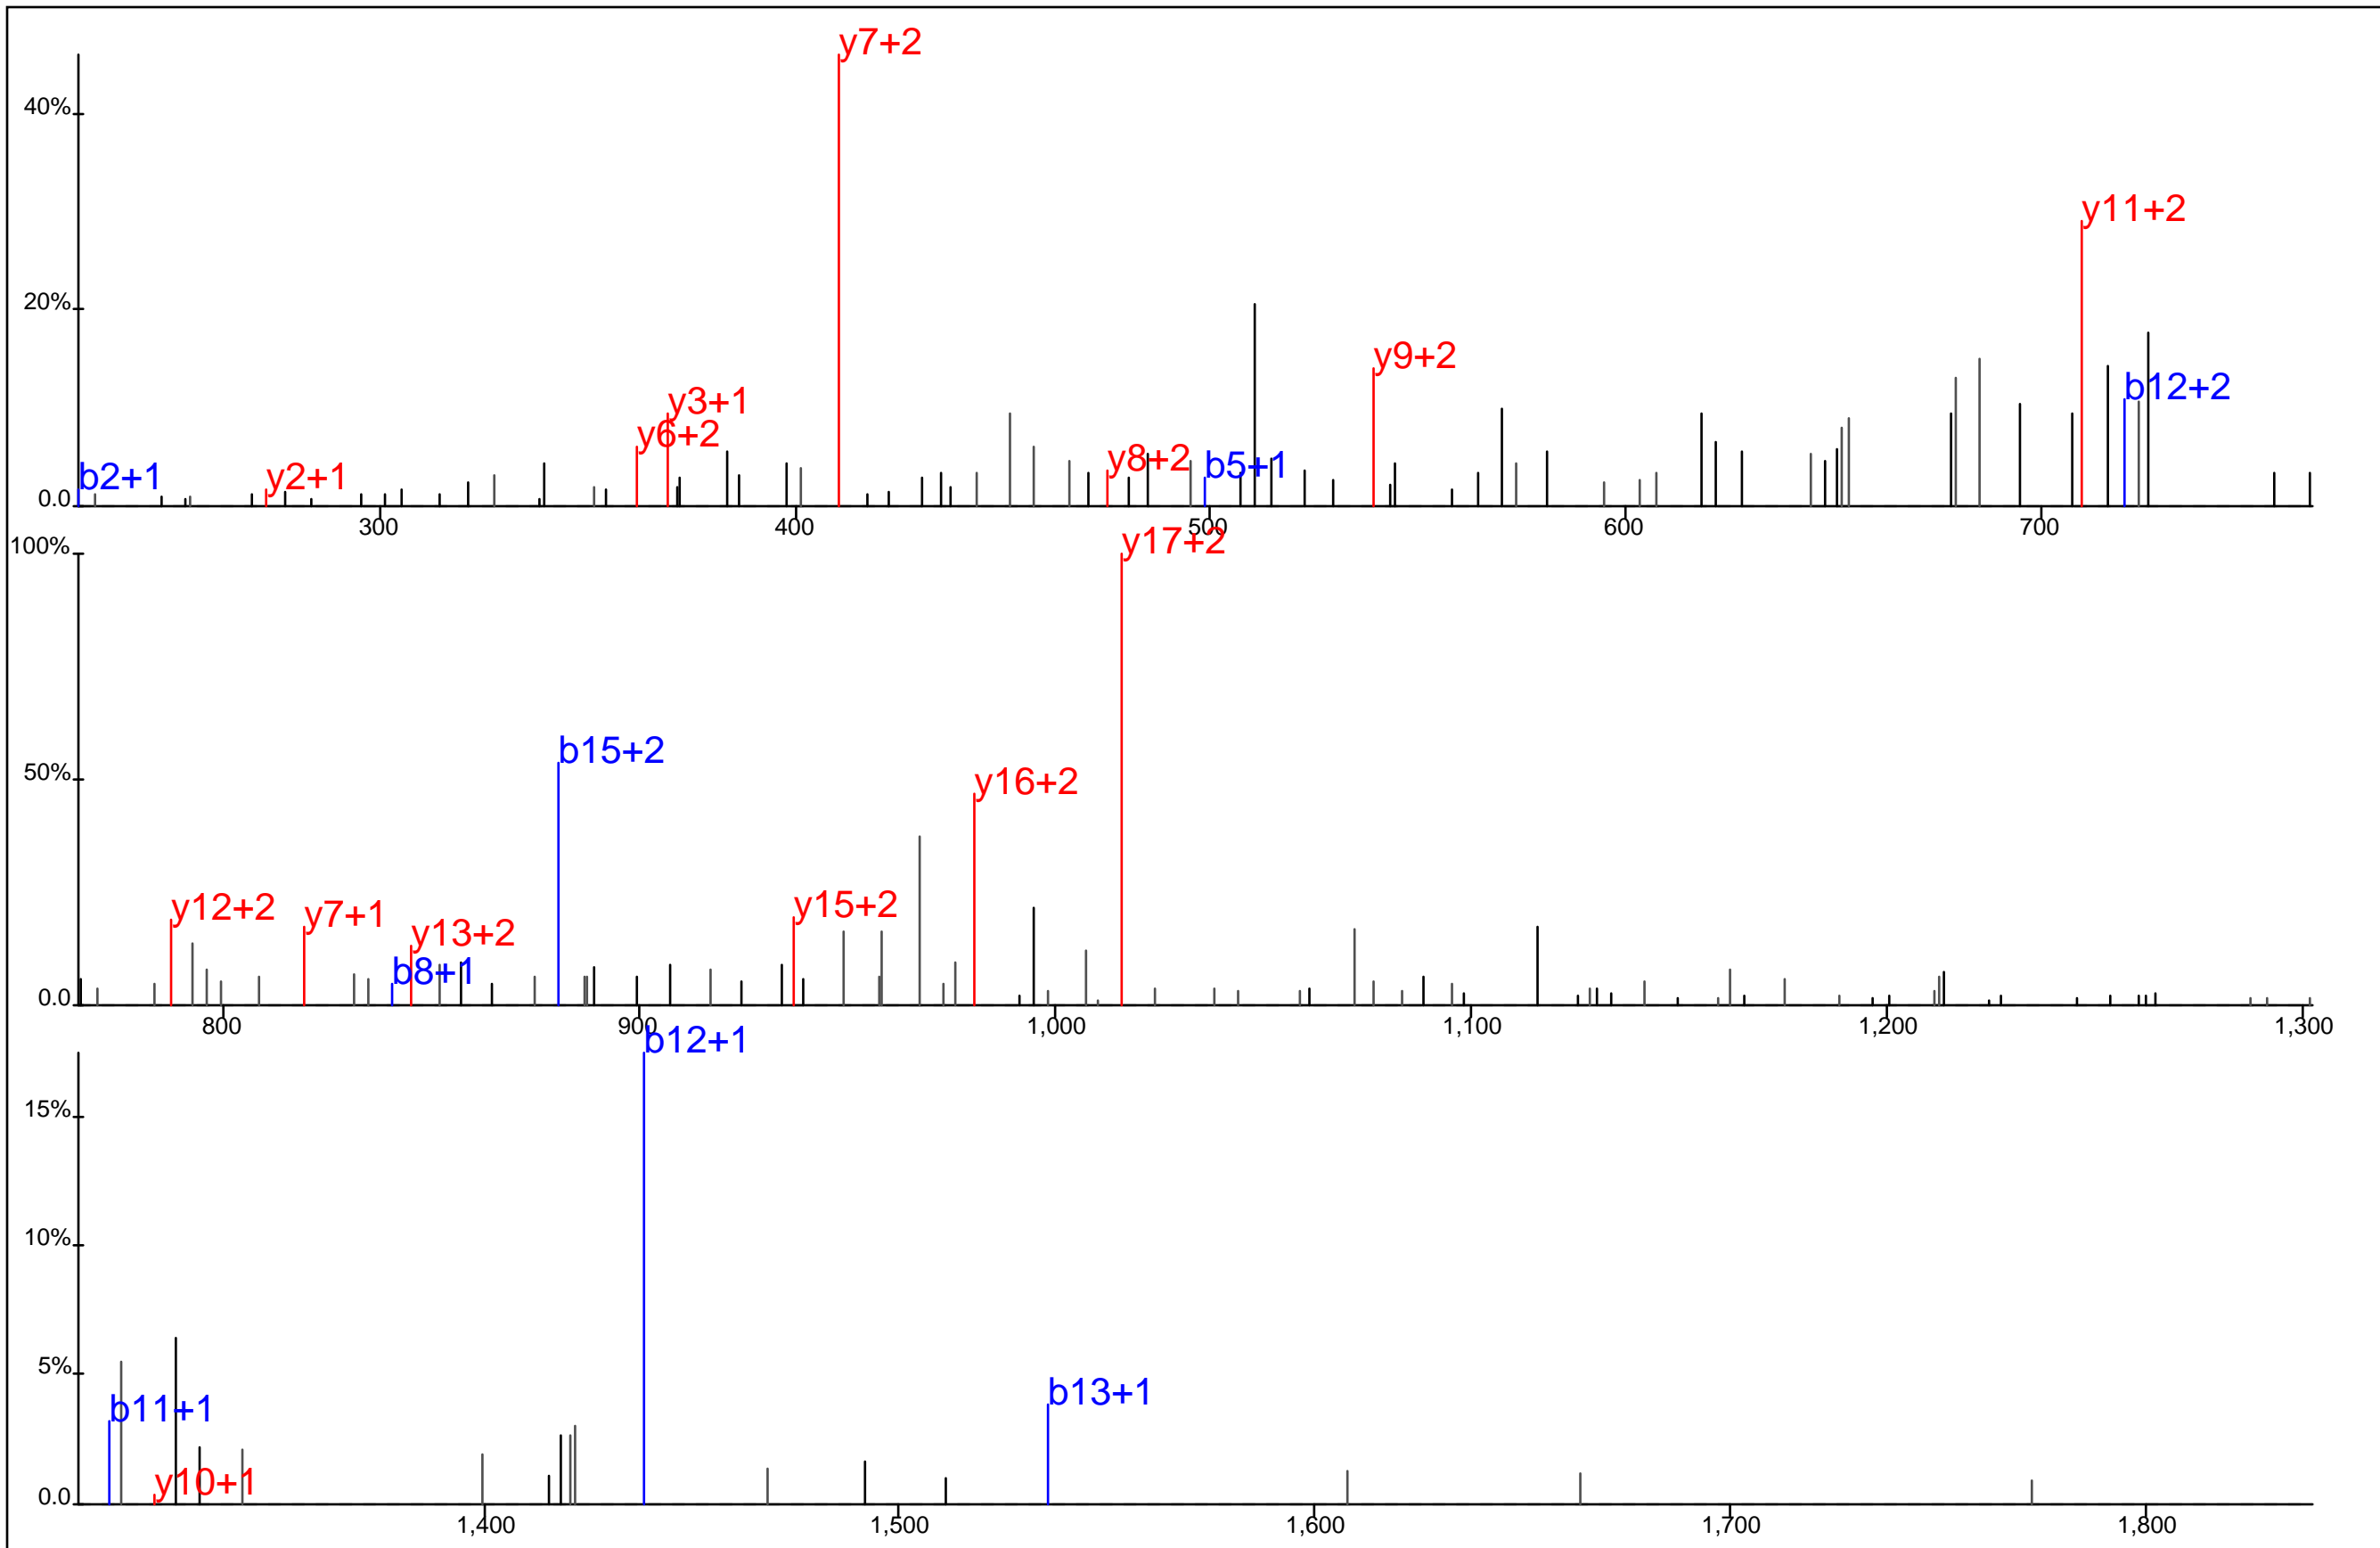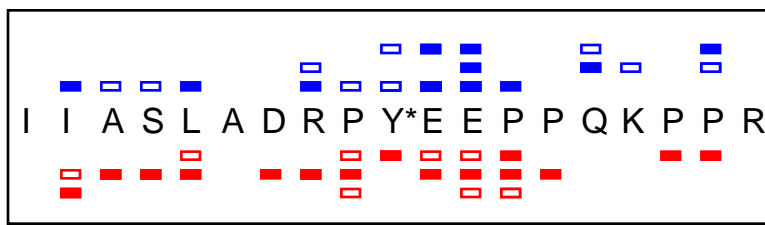

Protein Name: Odin  
 gi Accession: 0  
 Precursor Mass: 753.0511+3  
 Delta Mass: 0.489 ppm  
 XCorr: 35.96

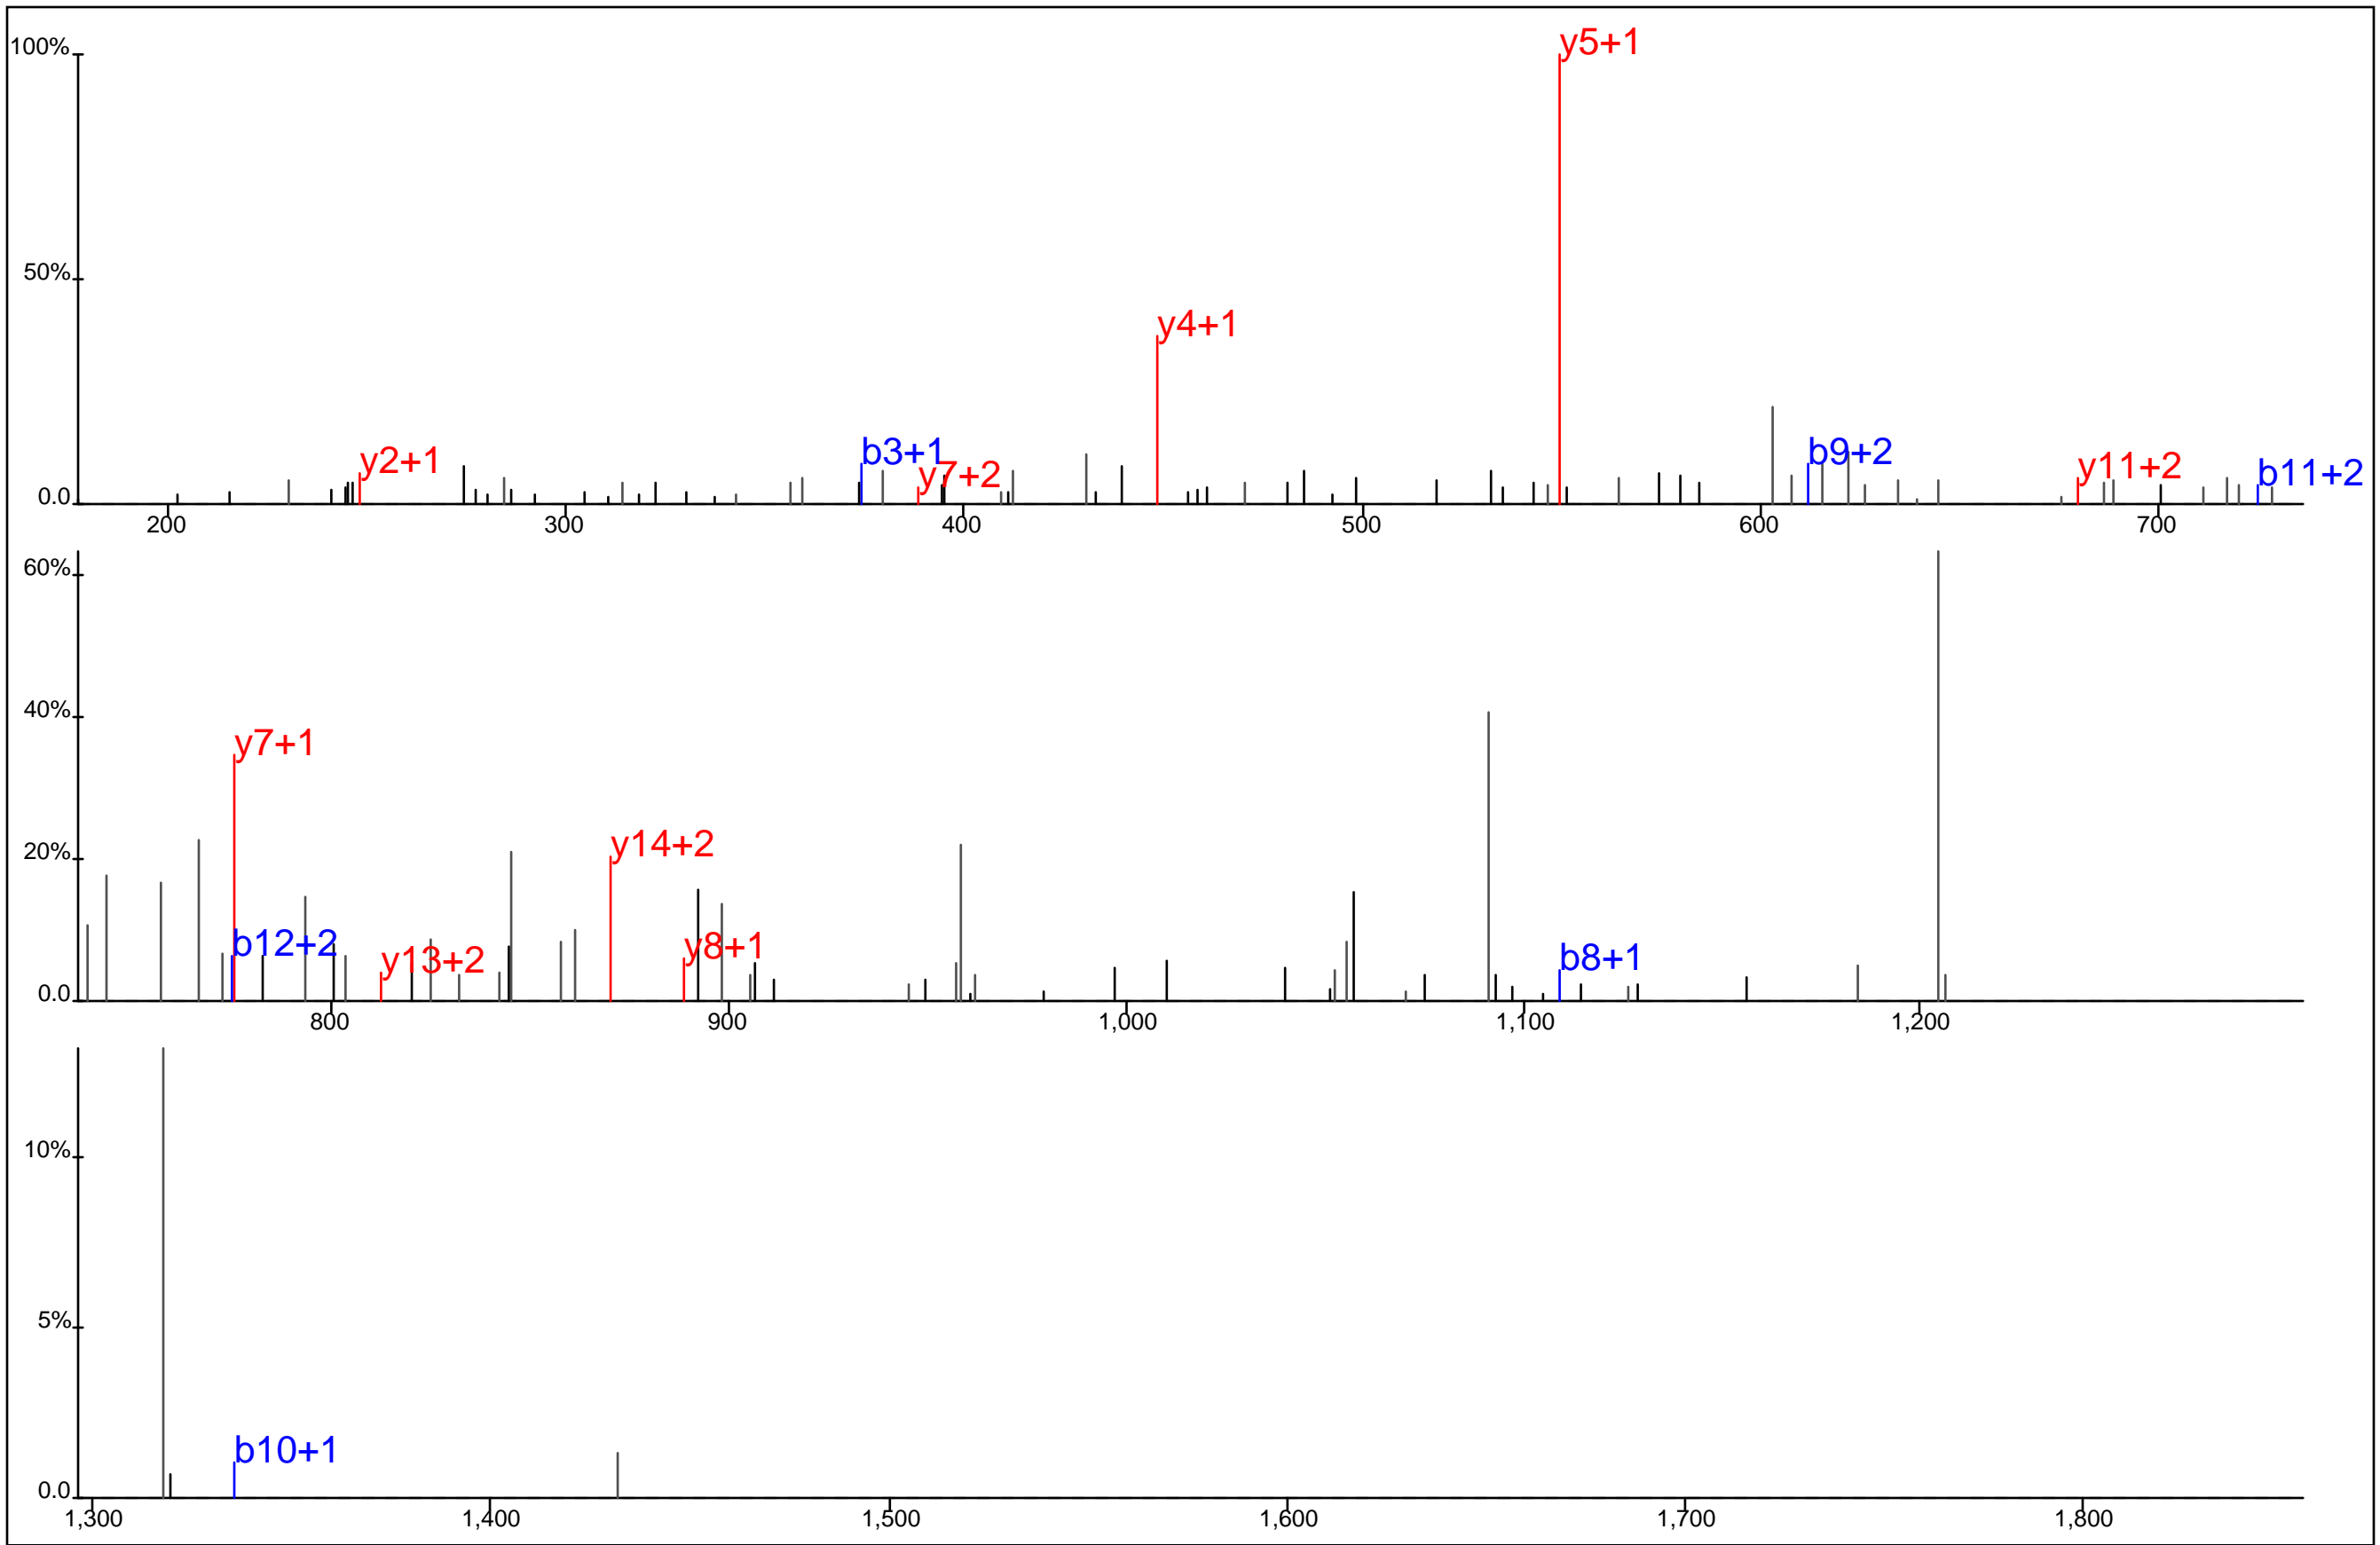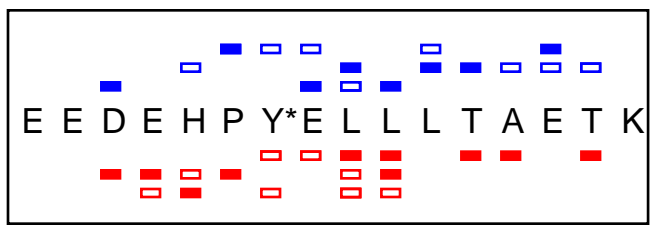

Protein Name: Odin  
 gi Accession: 0  
 Precursor Mass: 666.2944+3  
 Delta Mass: 5.055 ppm  
 XCorr: 22.84

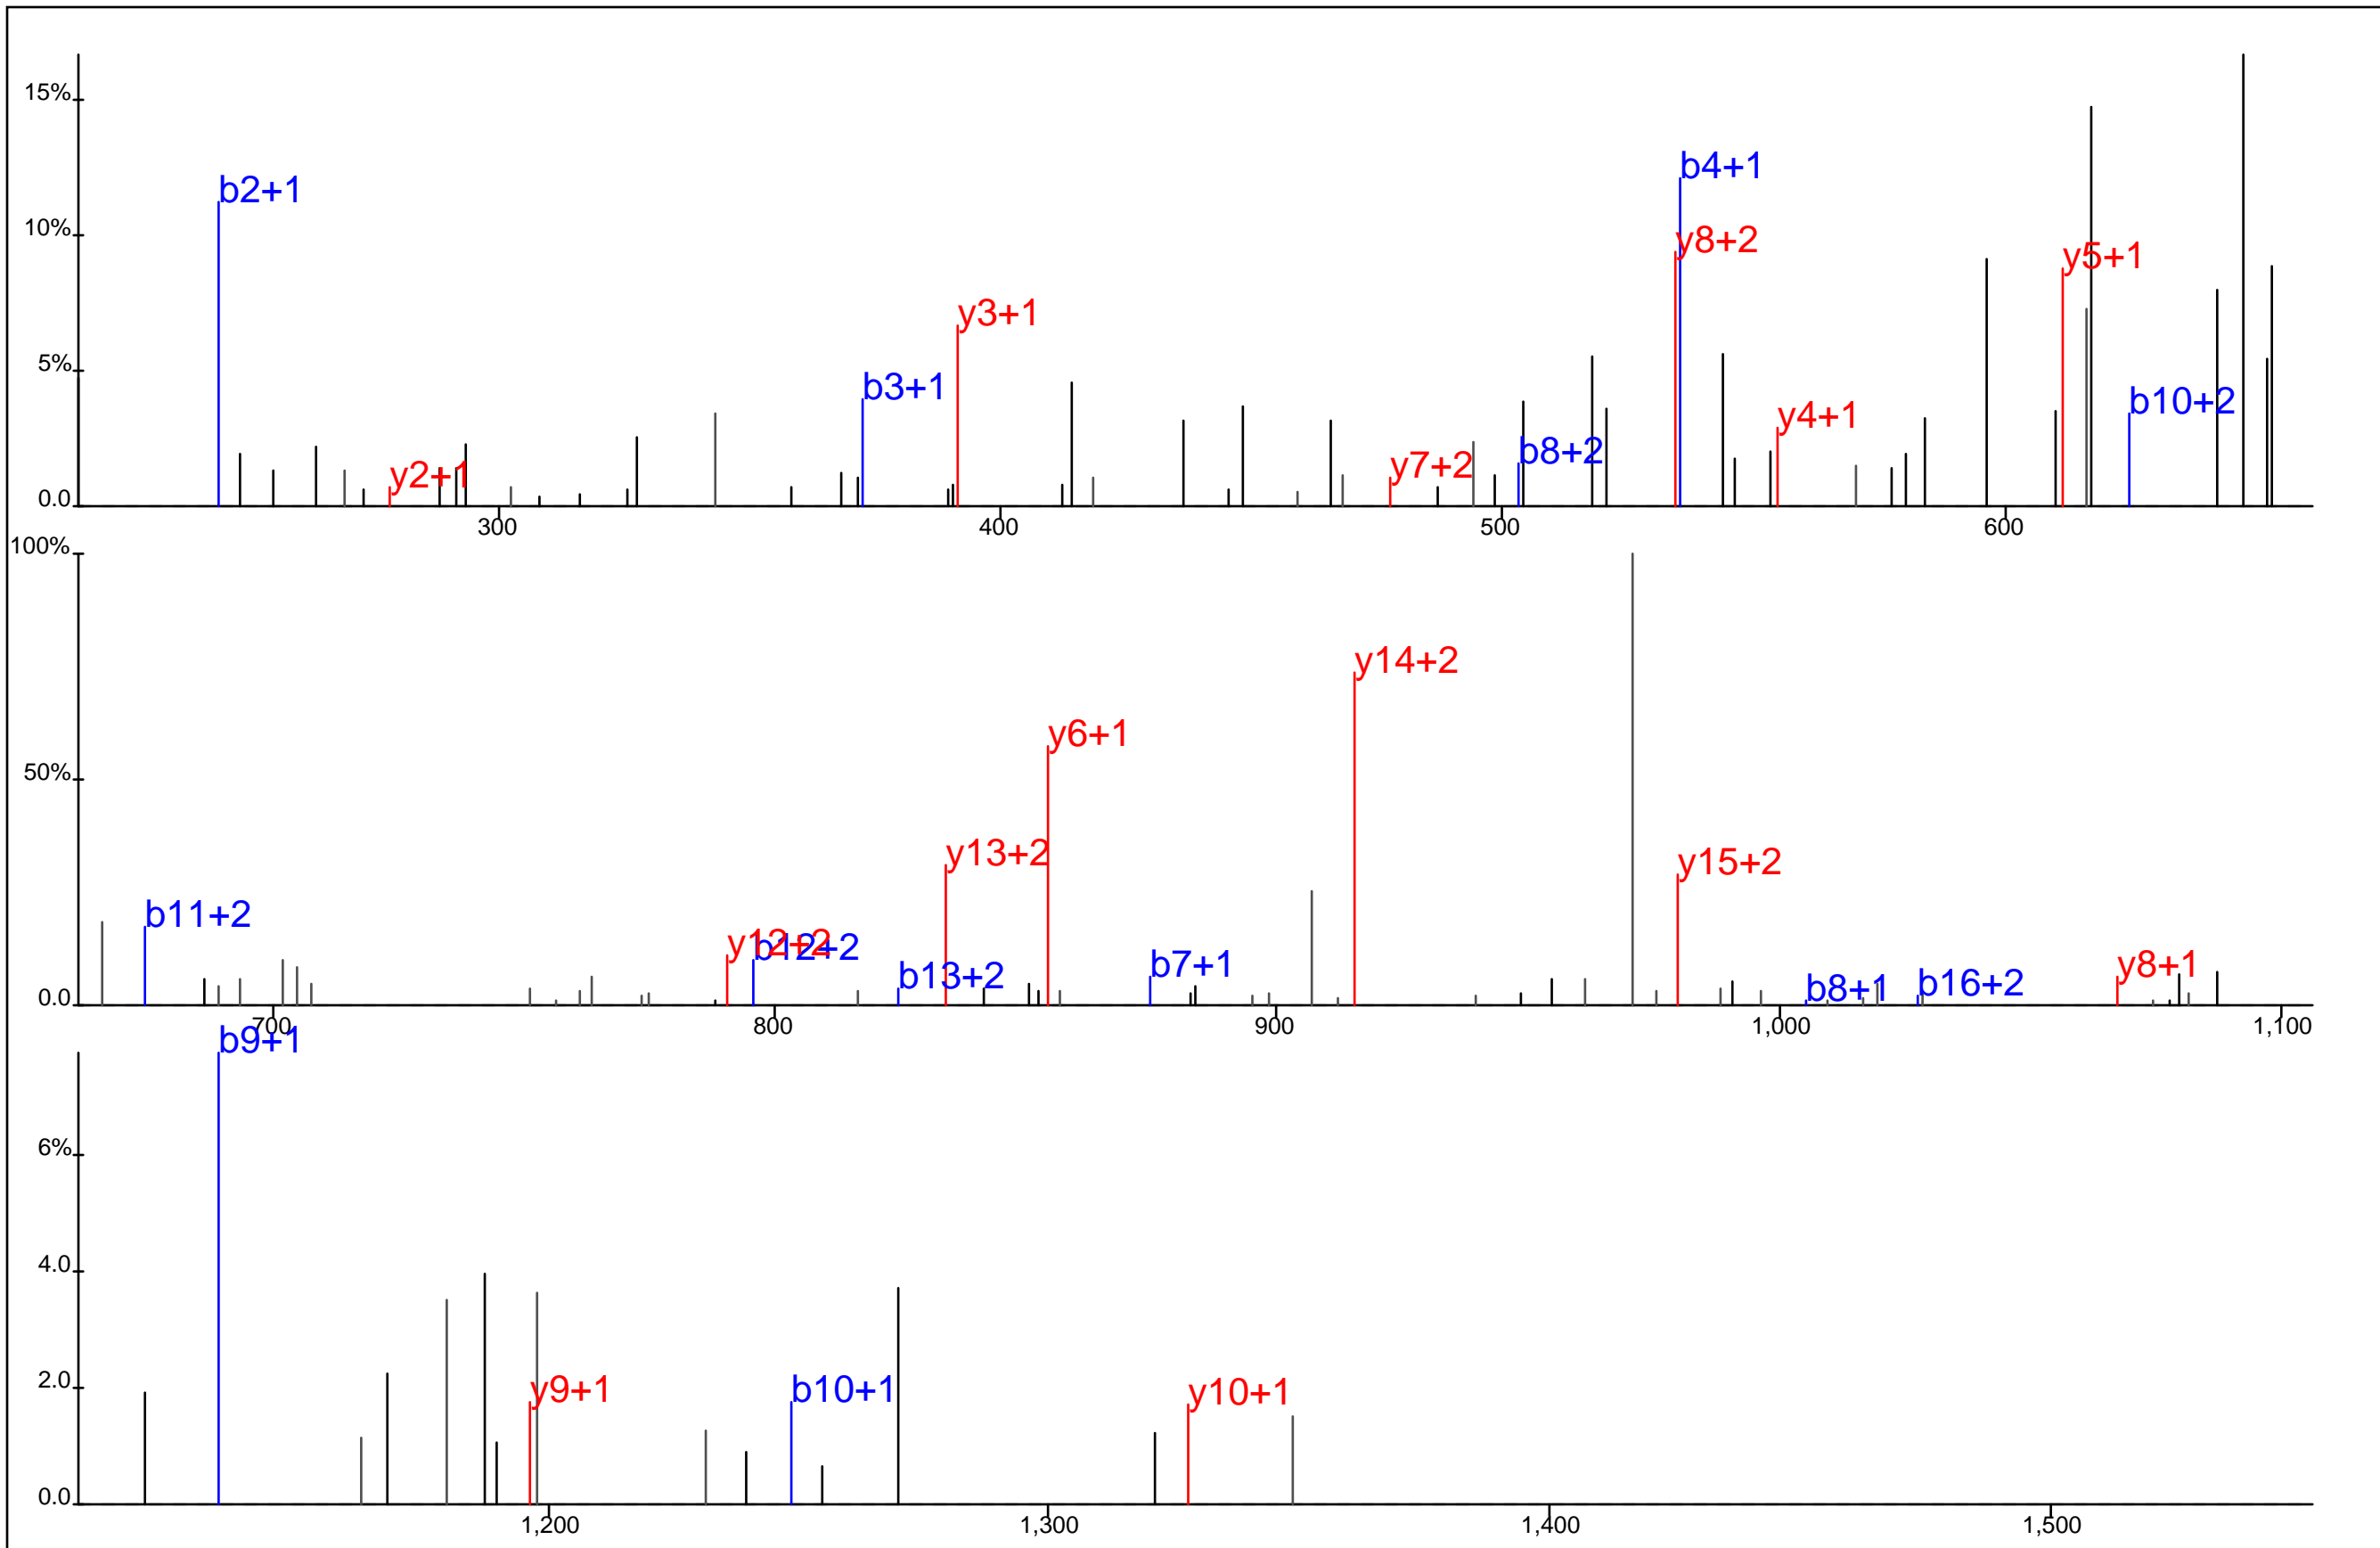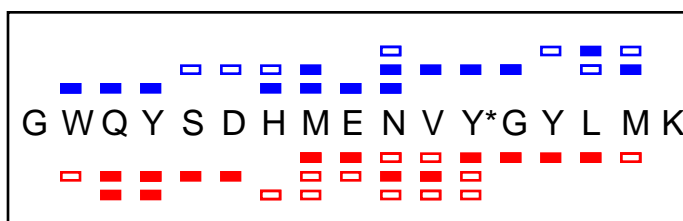

Protein Name: OSBP related protein 11  
 gi Accession: 0  
 Precursor Mass: 734.3007+3  
 Delta Mass: 0.384 ppm  
 XCorr: 25.21



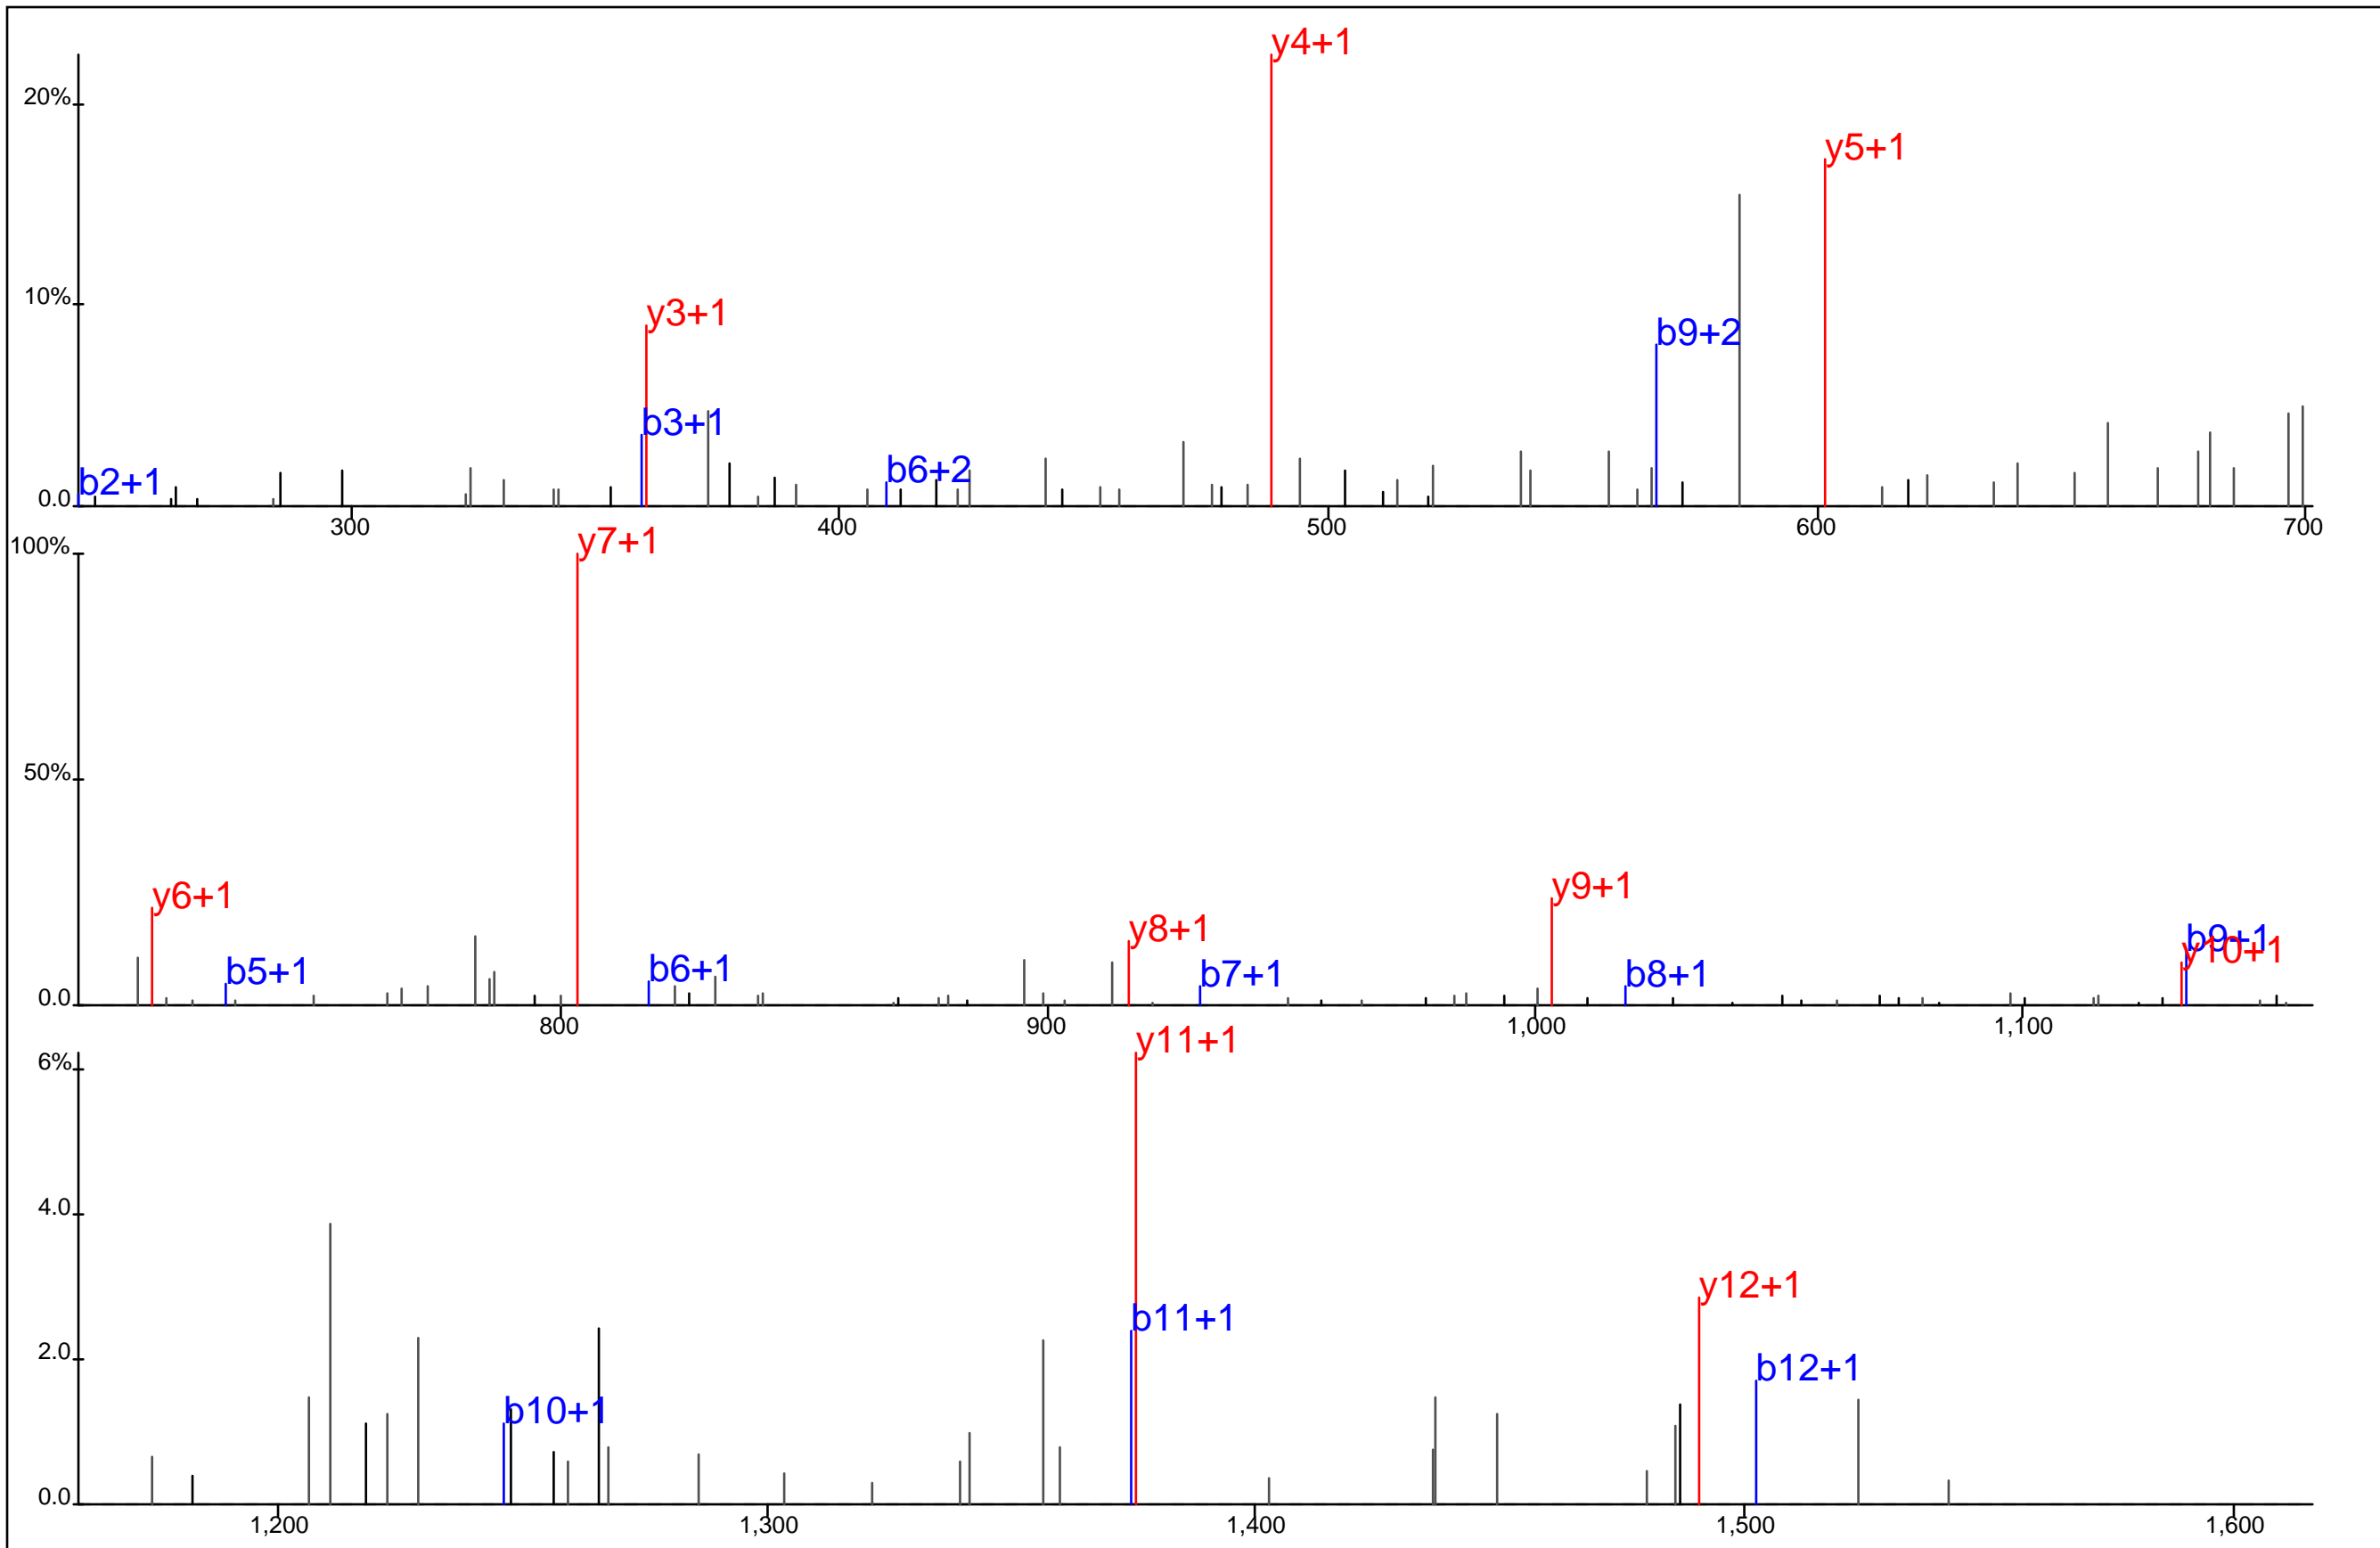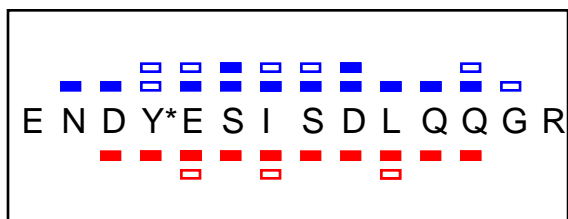

Protein Name: PAG  
 gi Accession: 0  
 Precursor Mass: 867.3544+2  
 Delta Mass: 0.047 ppm  
 XCorr: 73.01





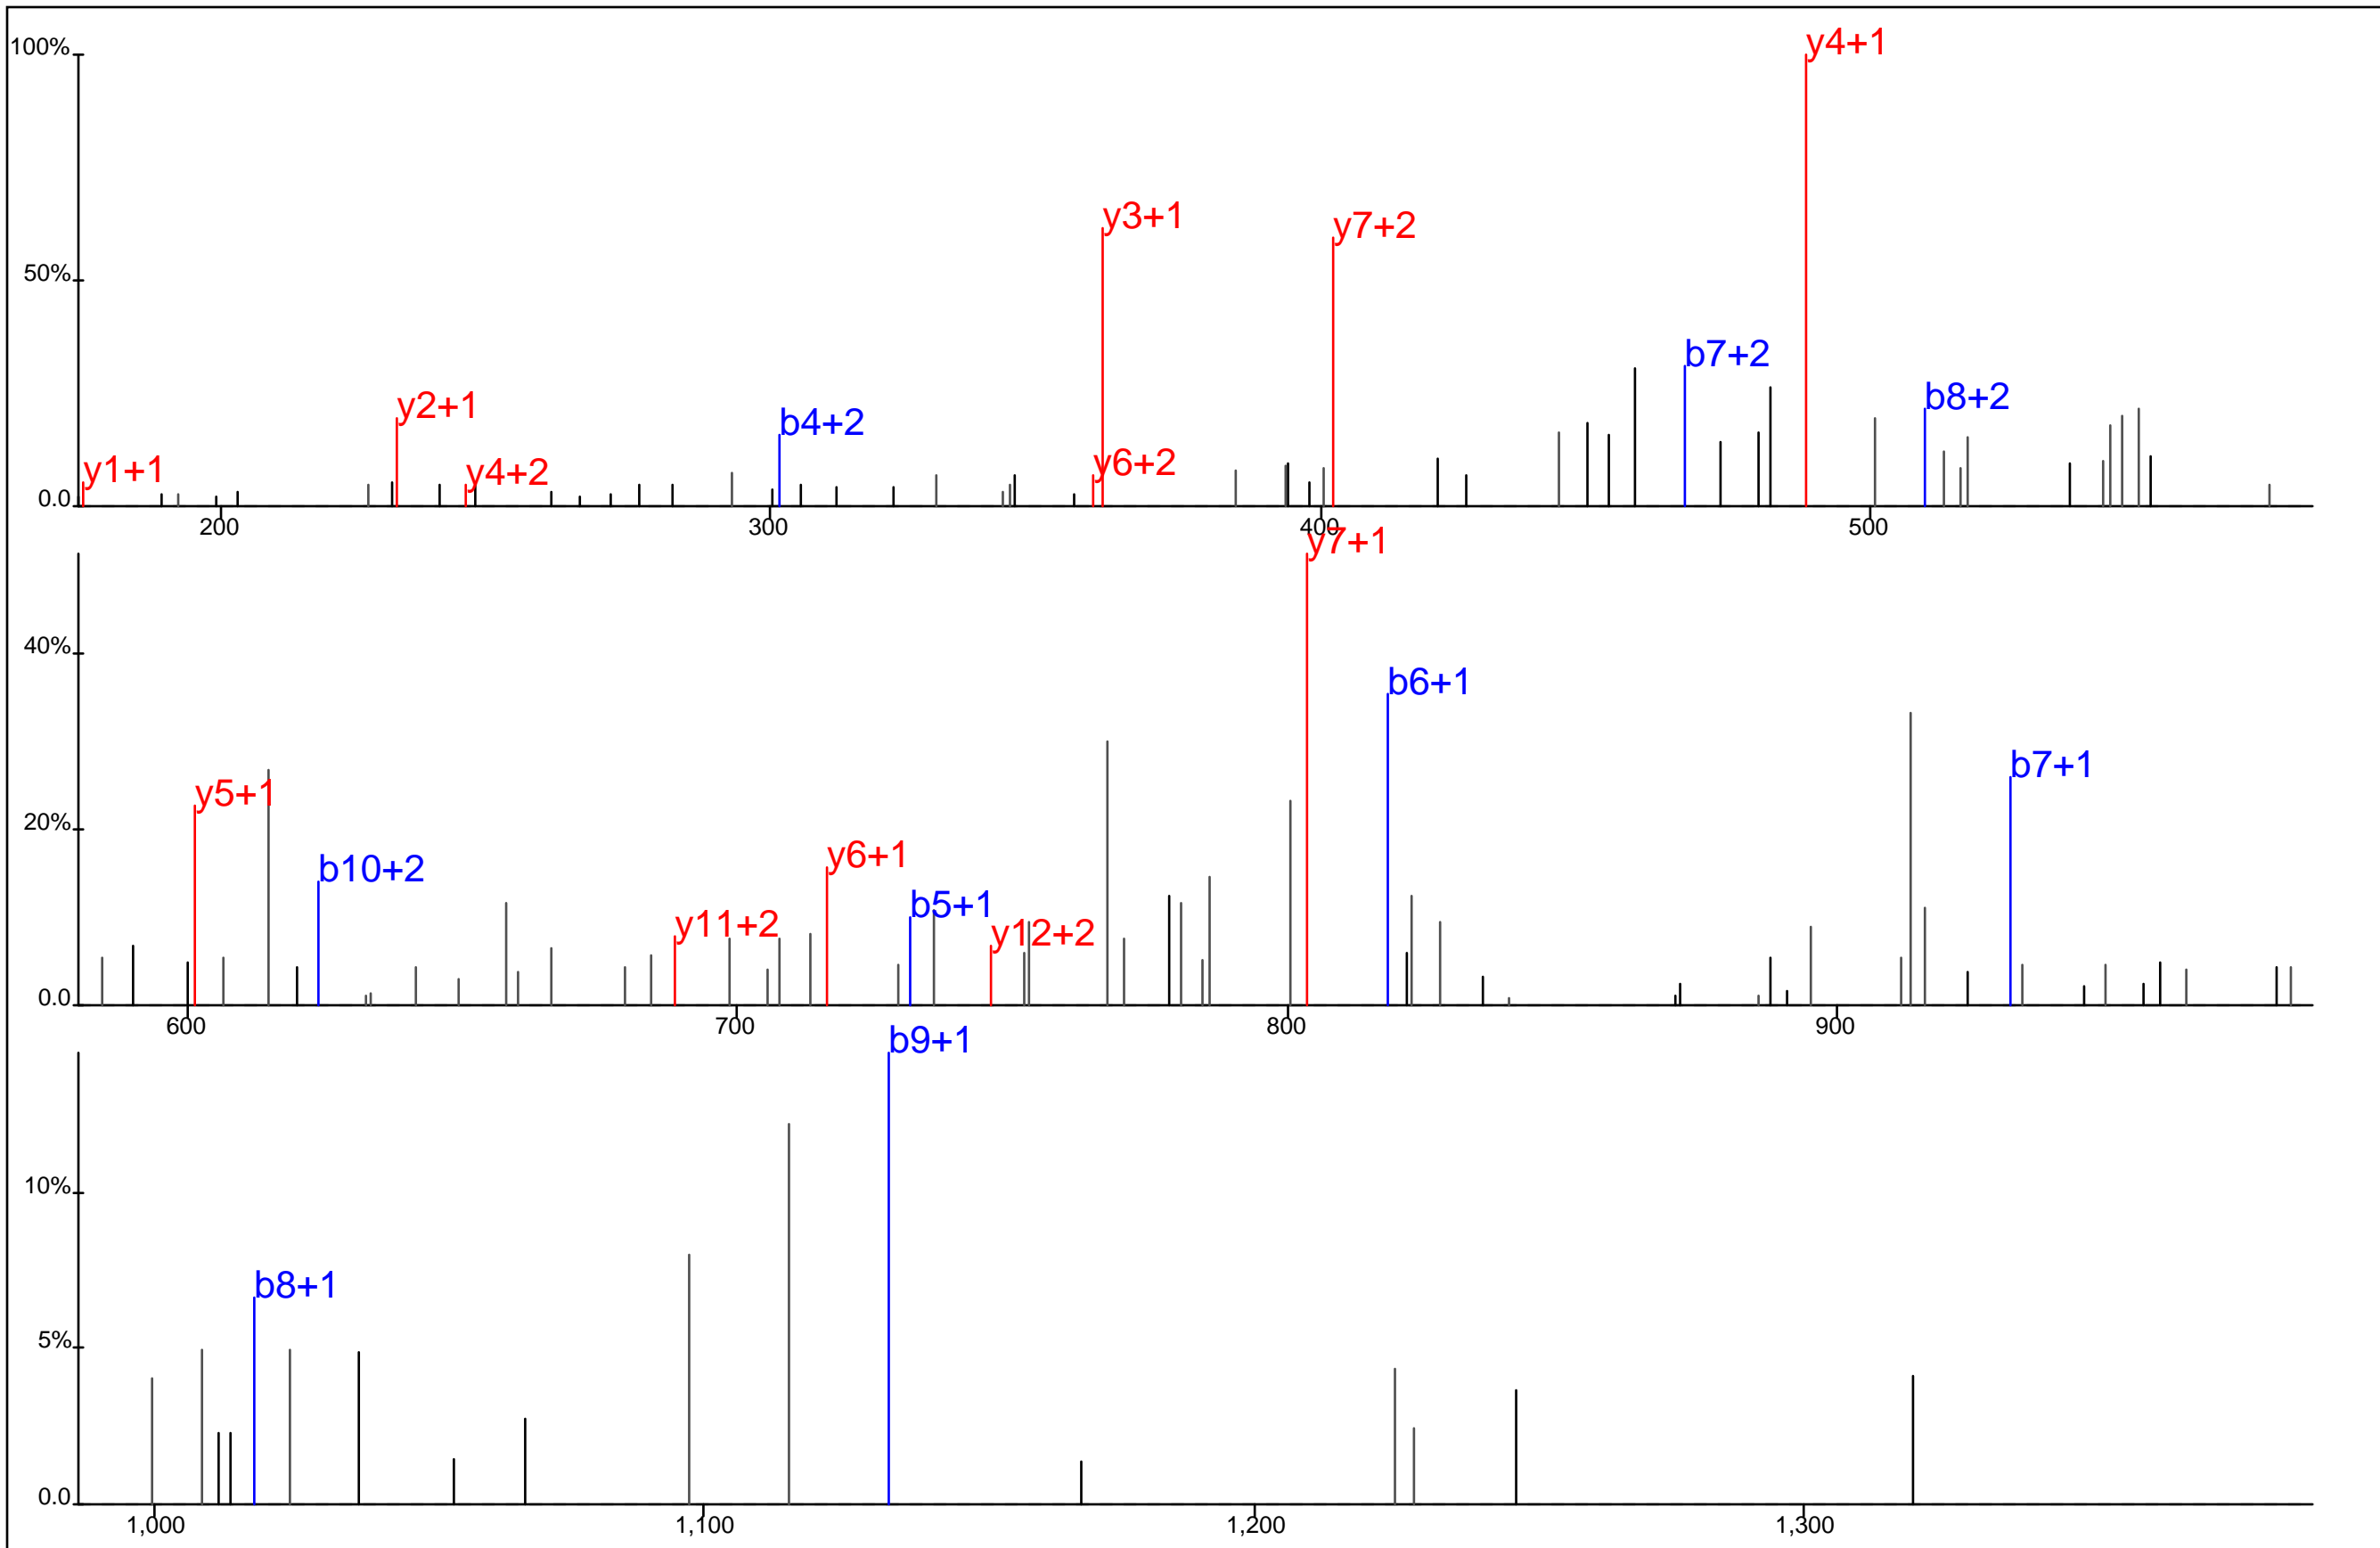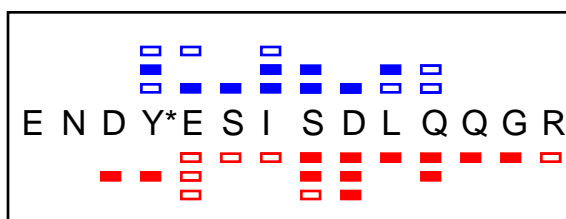

Protein Name: PAG  
 gi Accession: 0  
 Precursor Mass: 578.5718+3  
 Delta Mass: 0.242 ppm  
 XCorr: 37.38



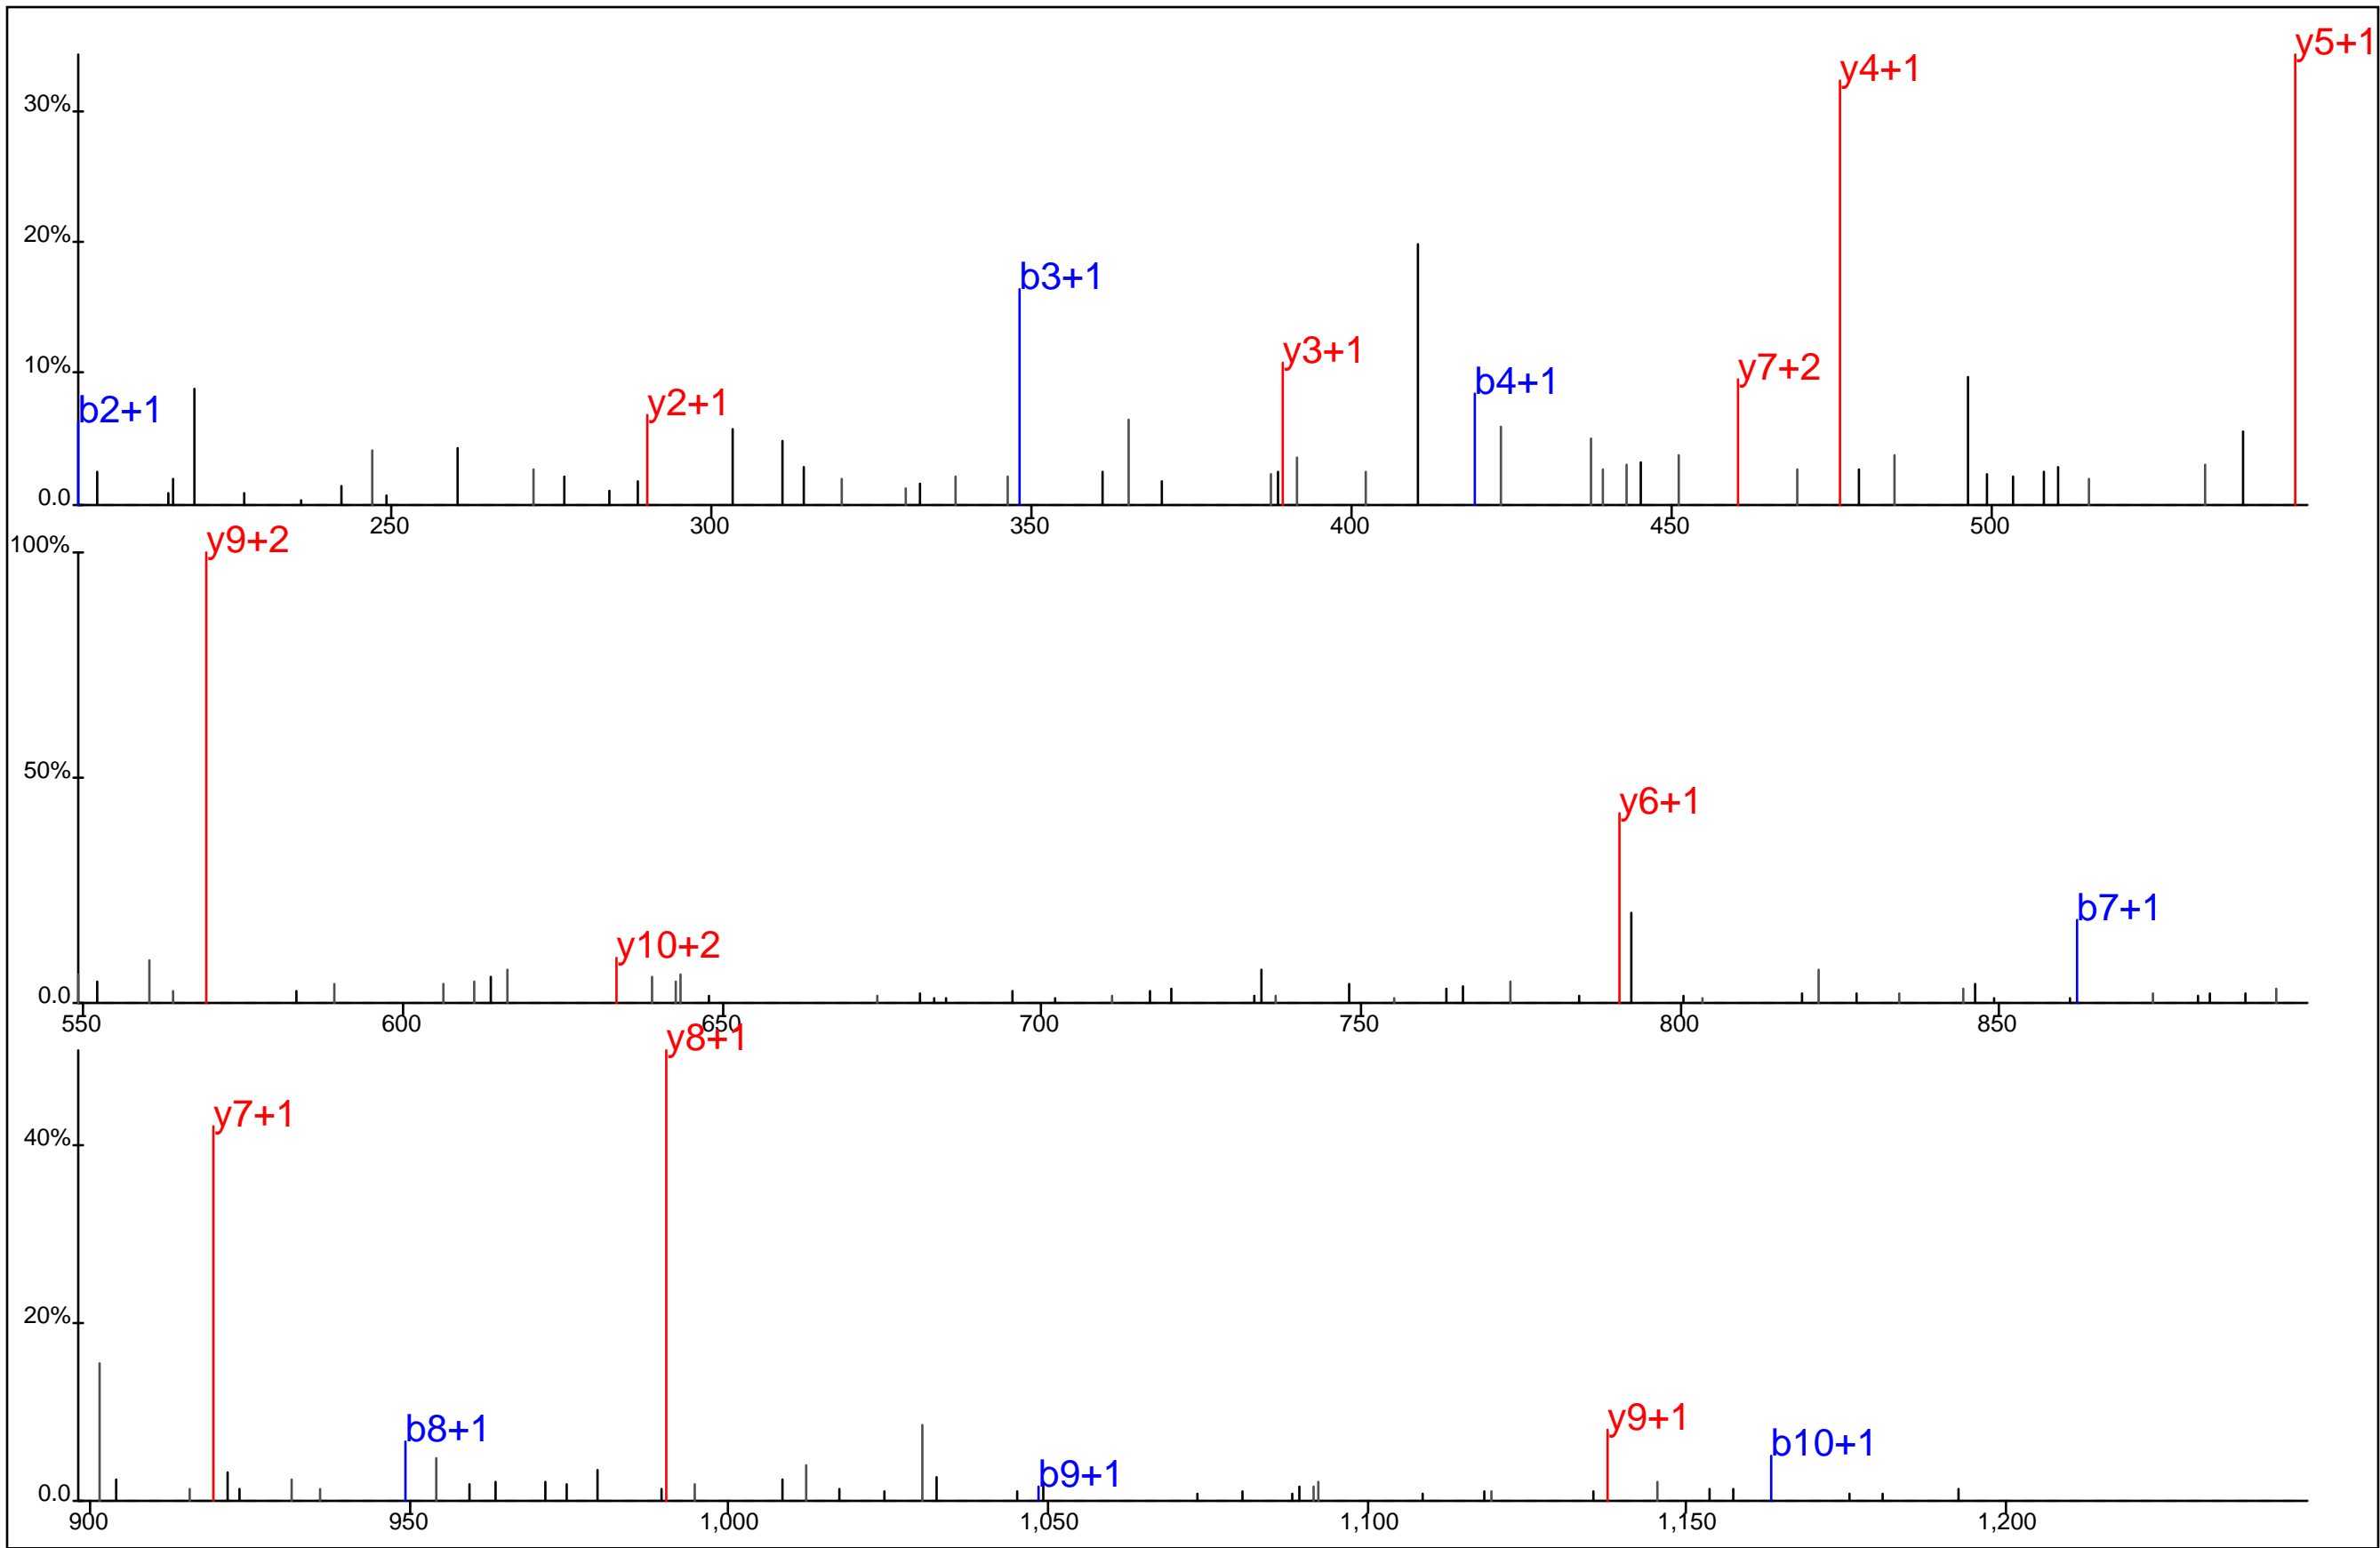

▢ ▢ ▢ ▢ ▢ ▢ ▢ ▢ ▢ ▢  
 A E F A E Y\* A S V D R  
▢ ▢ ▢ ▢ ▢ ▢ ▢ ▢ ▢ ▢

Protein Name: PAG  
 gi Accession: 0  
 Precursor Mass: 669.2739+2  
 Delta Mass: 0.335 ppm  
 XCorr: 60.7

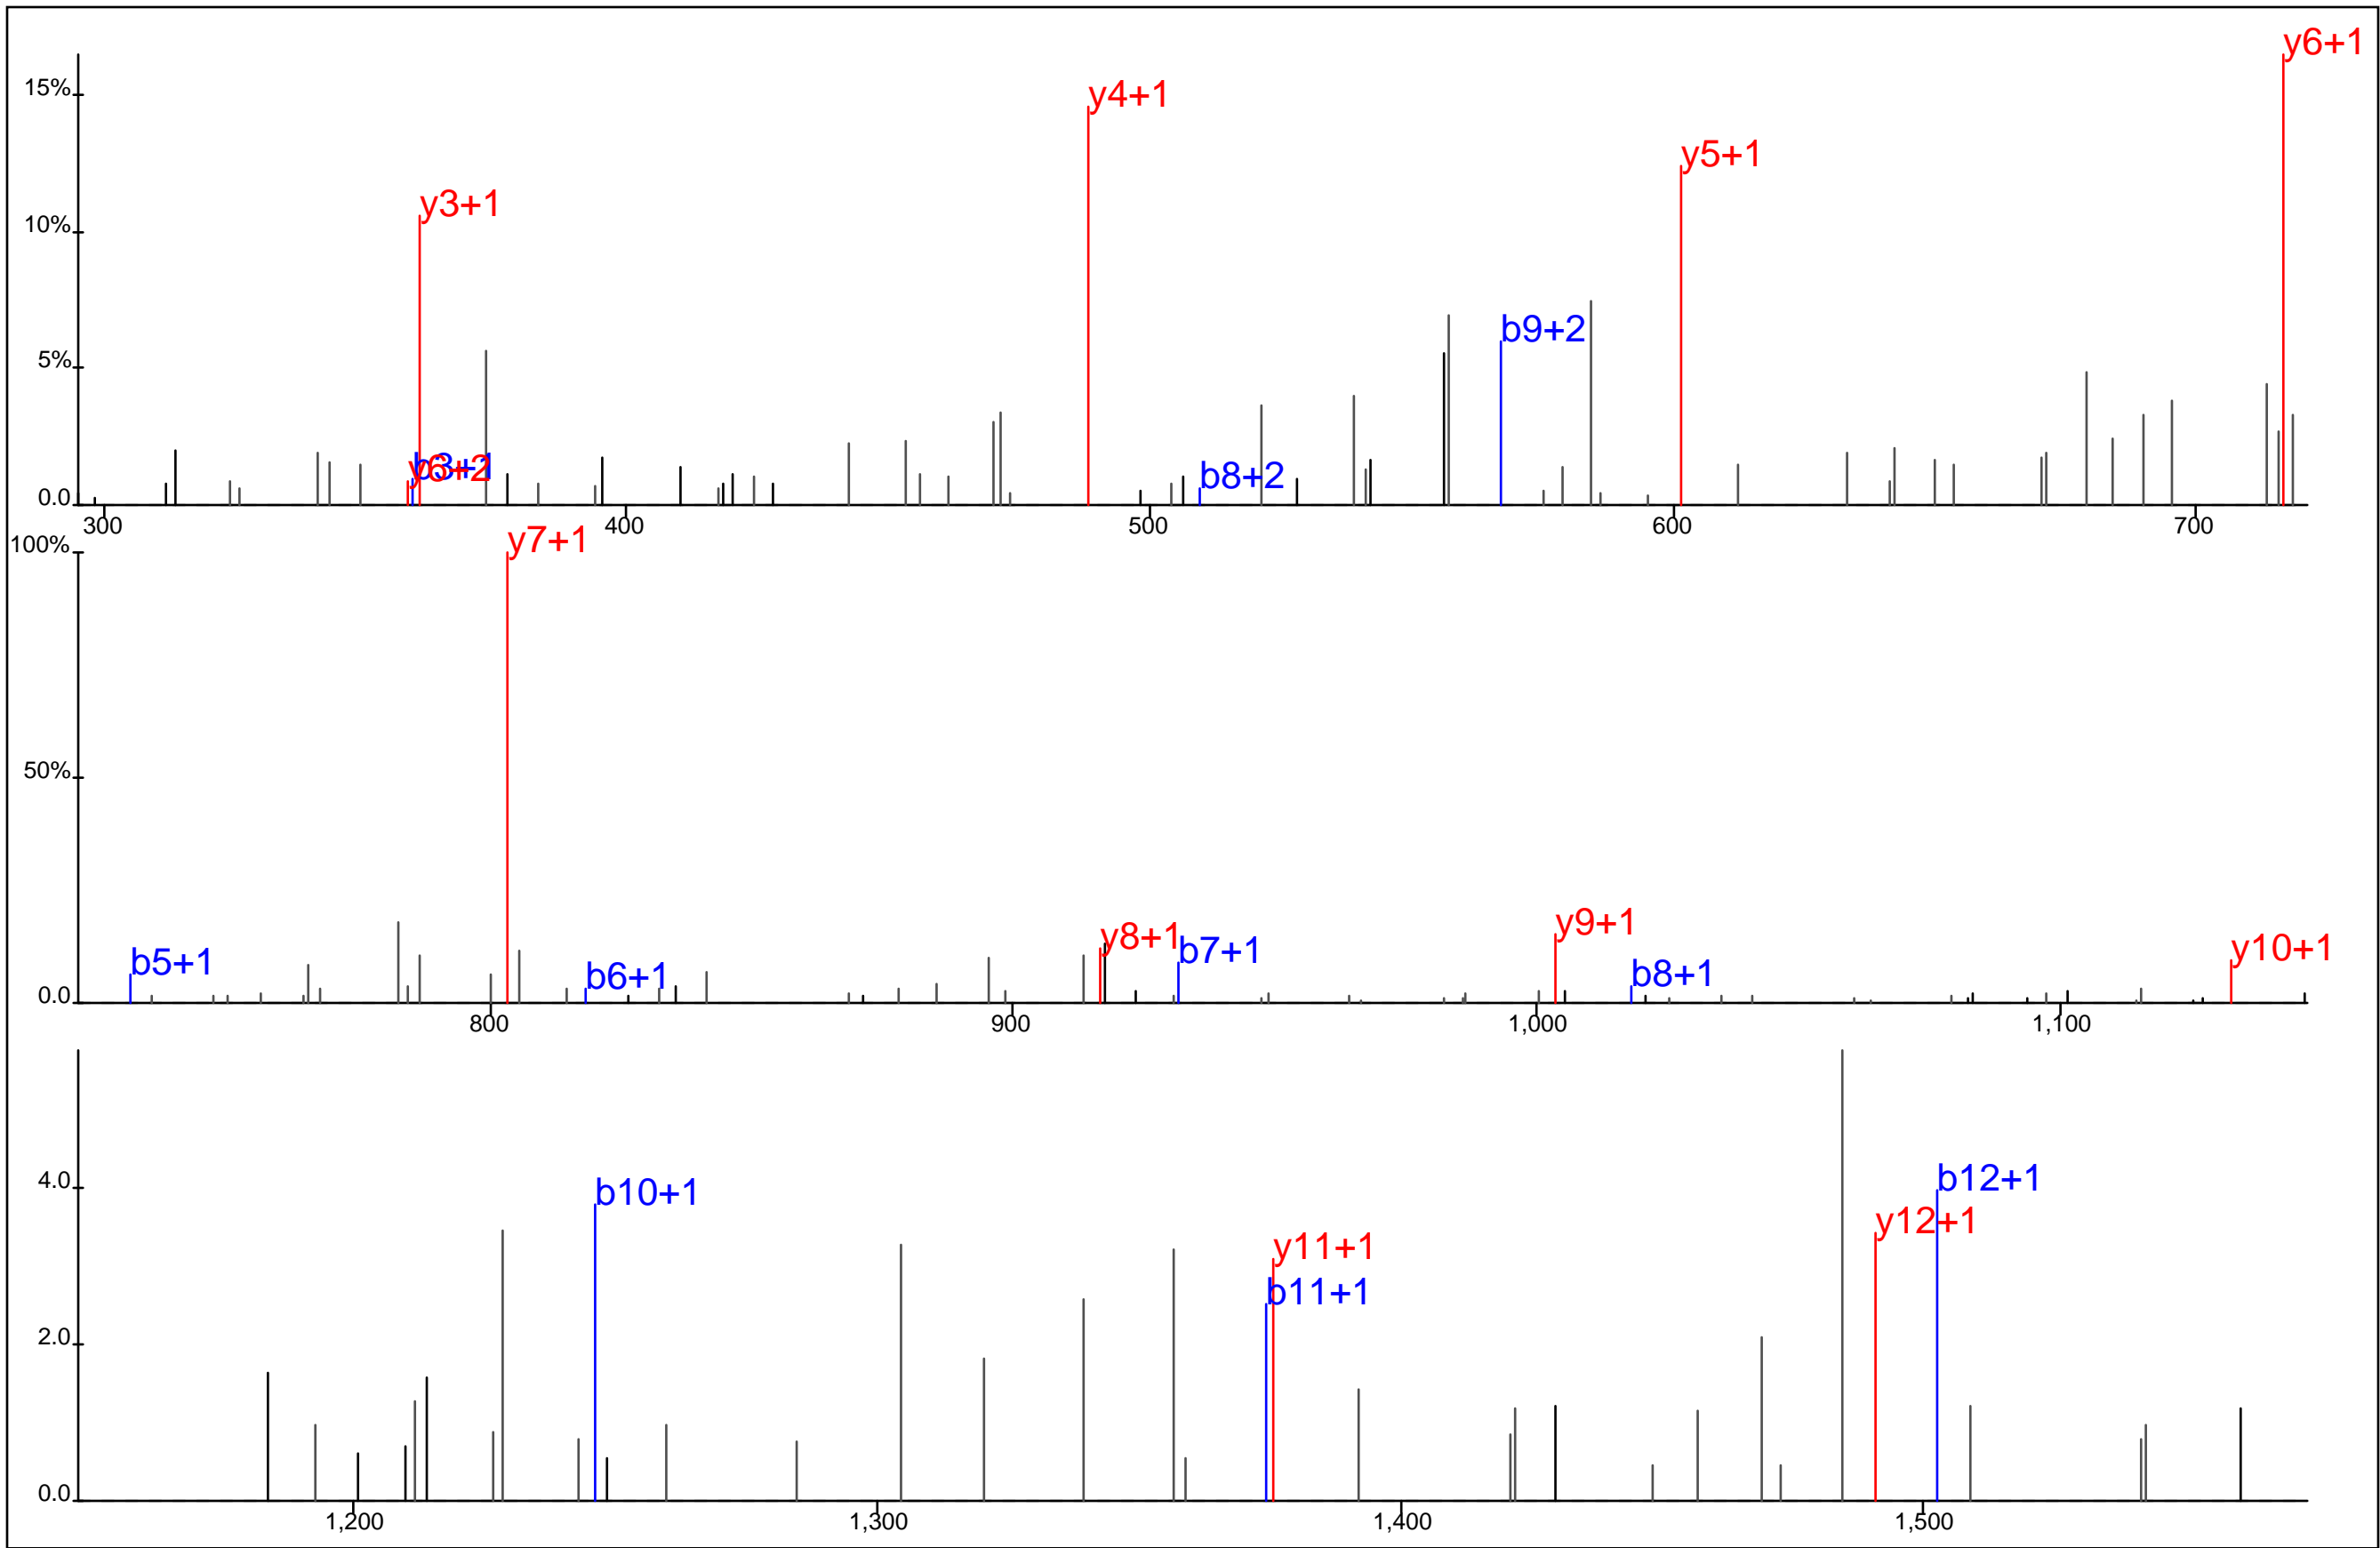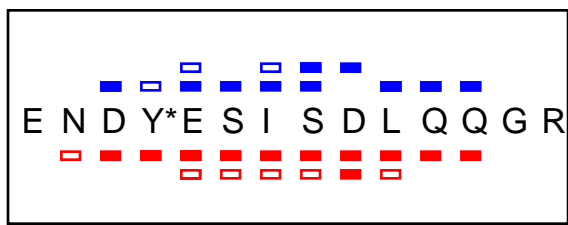

Protein Name: PAG  
 gi Accession: 0  
 Precursor Mass: 867.3554+2  
 Delta Mass: 1.245 ppm  
 XCorr: 68.16

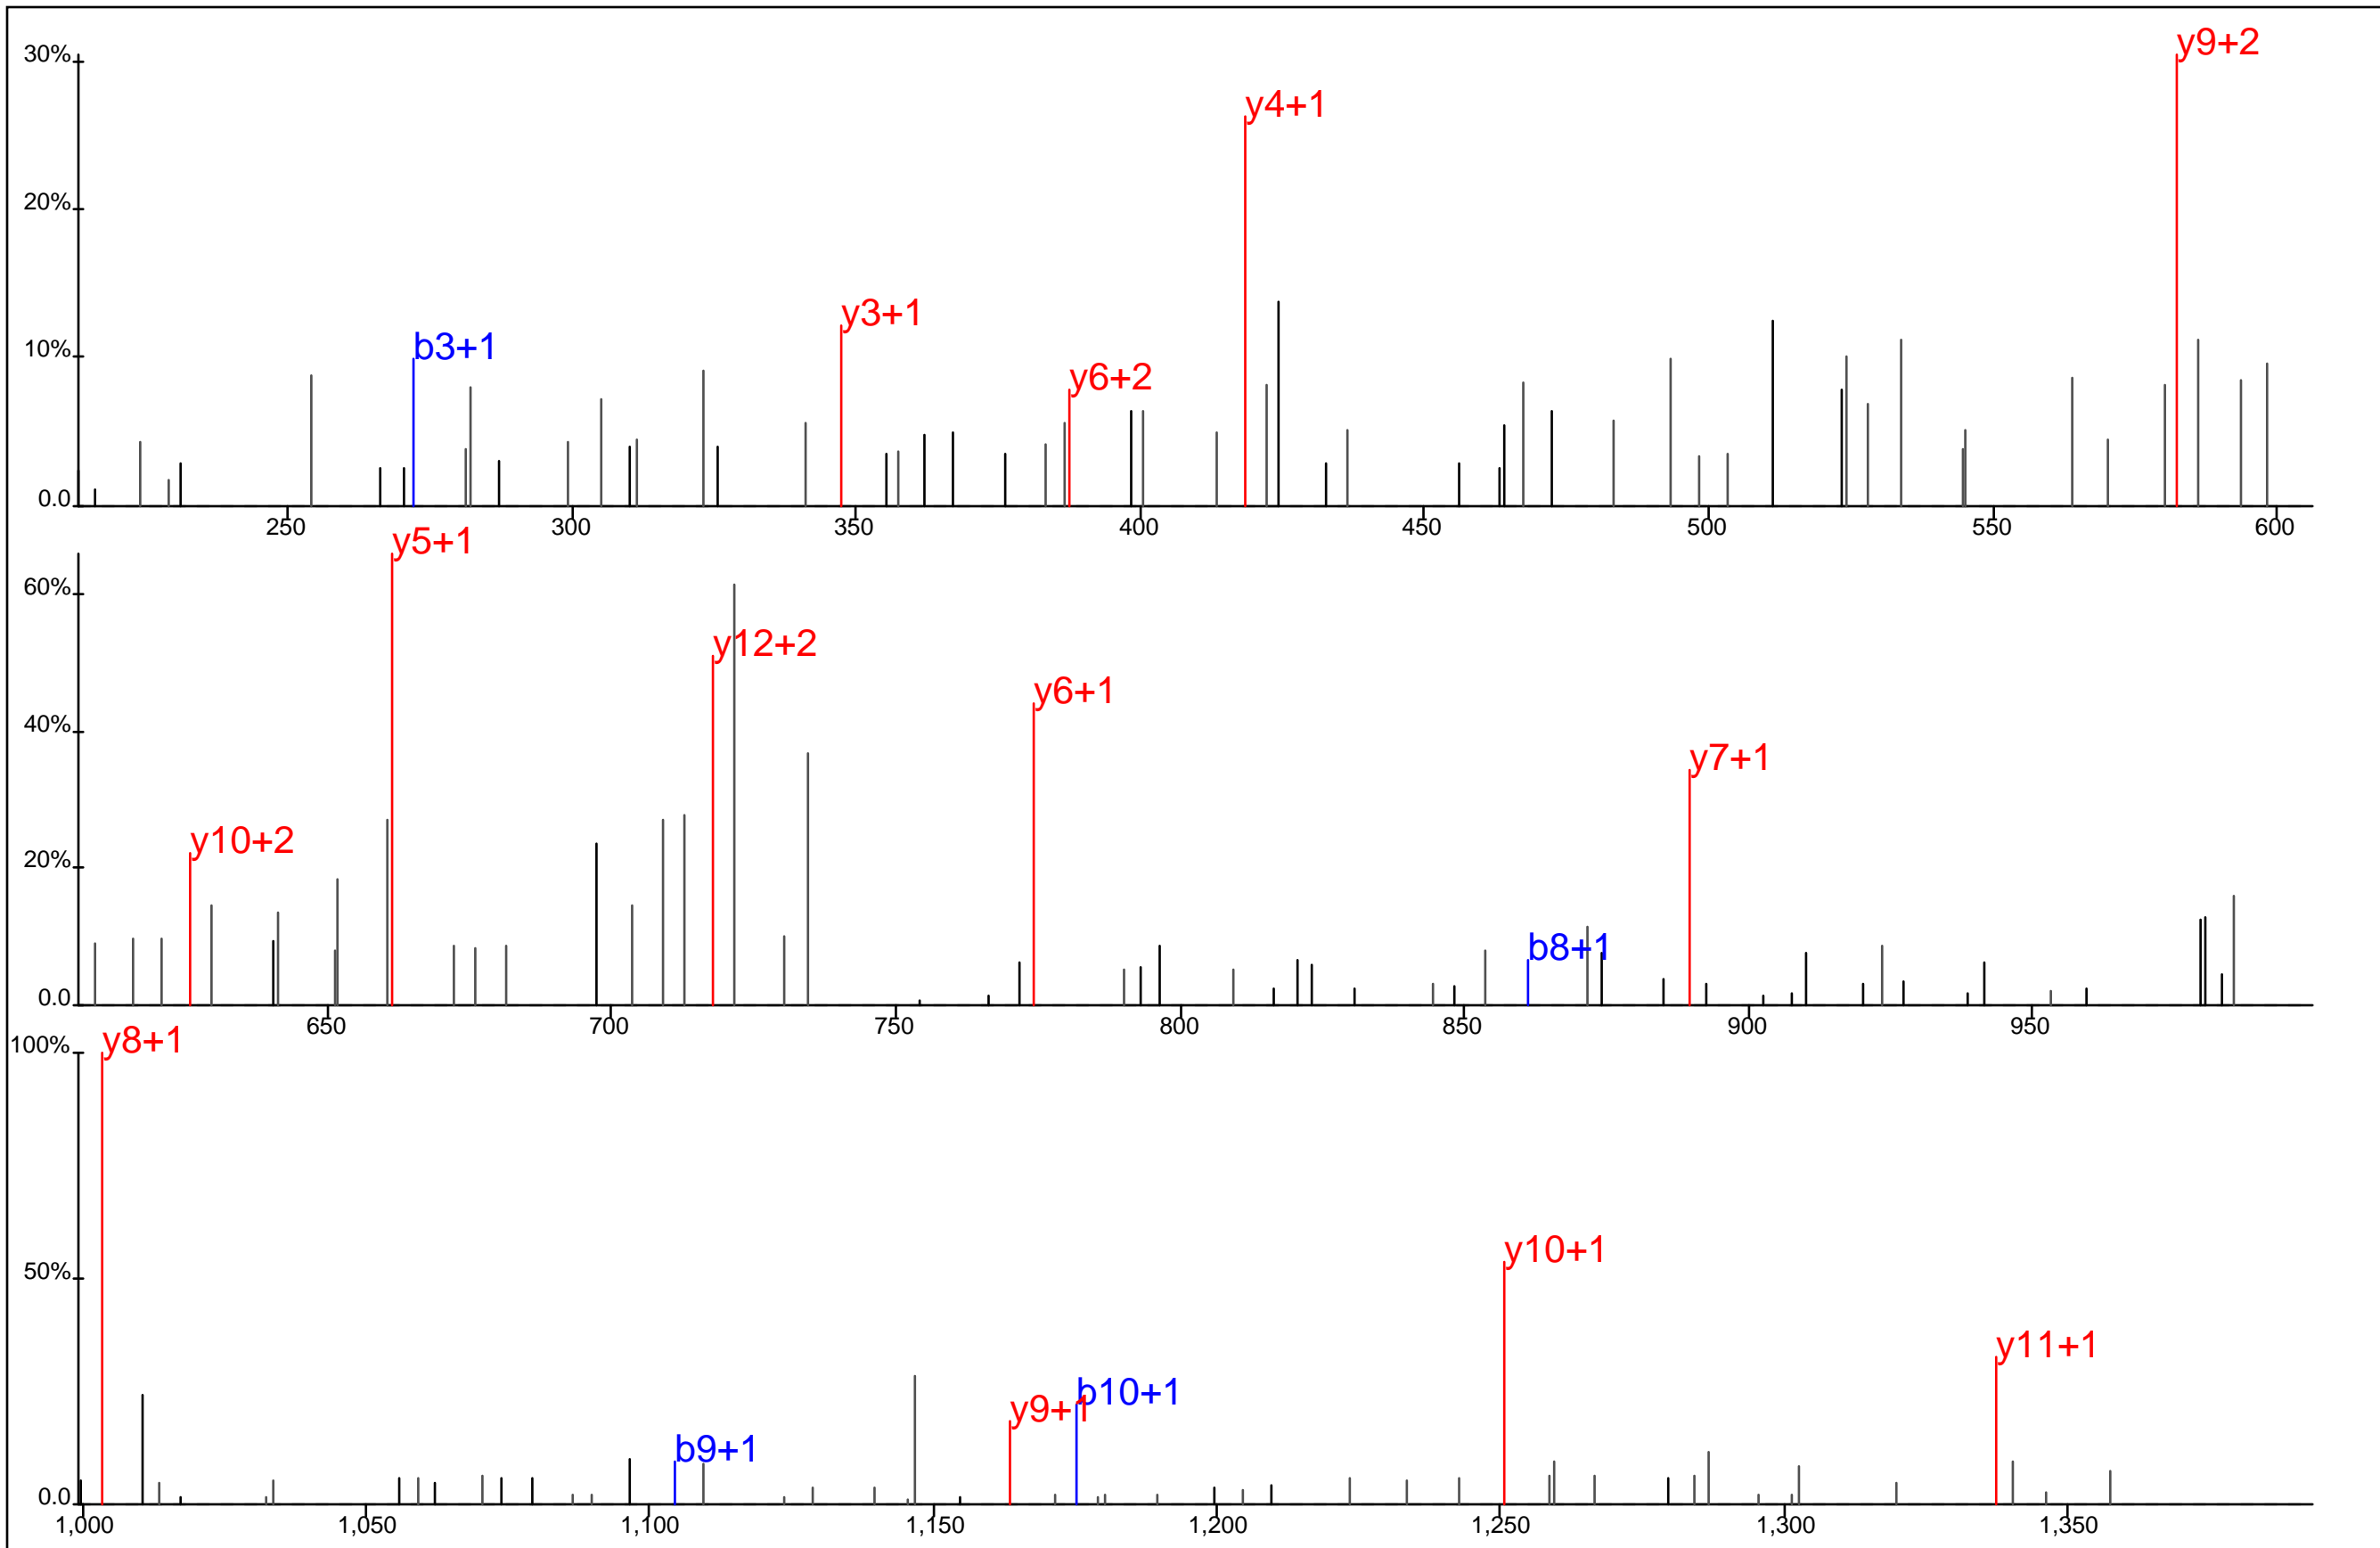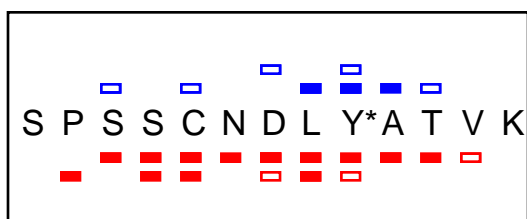

Protein Name: PAG  
 gi Accession: 0  
 Precursor Mass: 761.3185+2  
 Delta Mass: 0.397 ppm  
 XCorr: 59.67

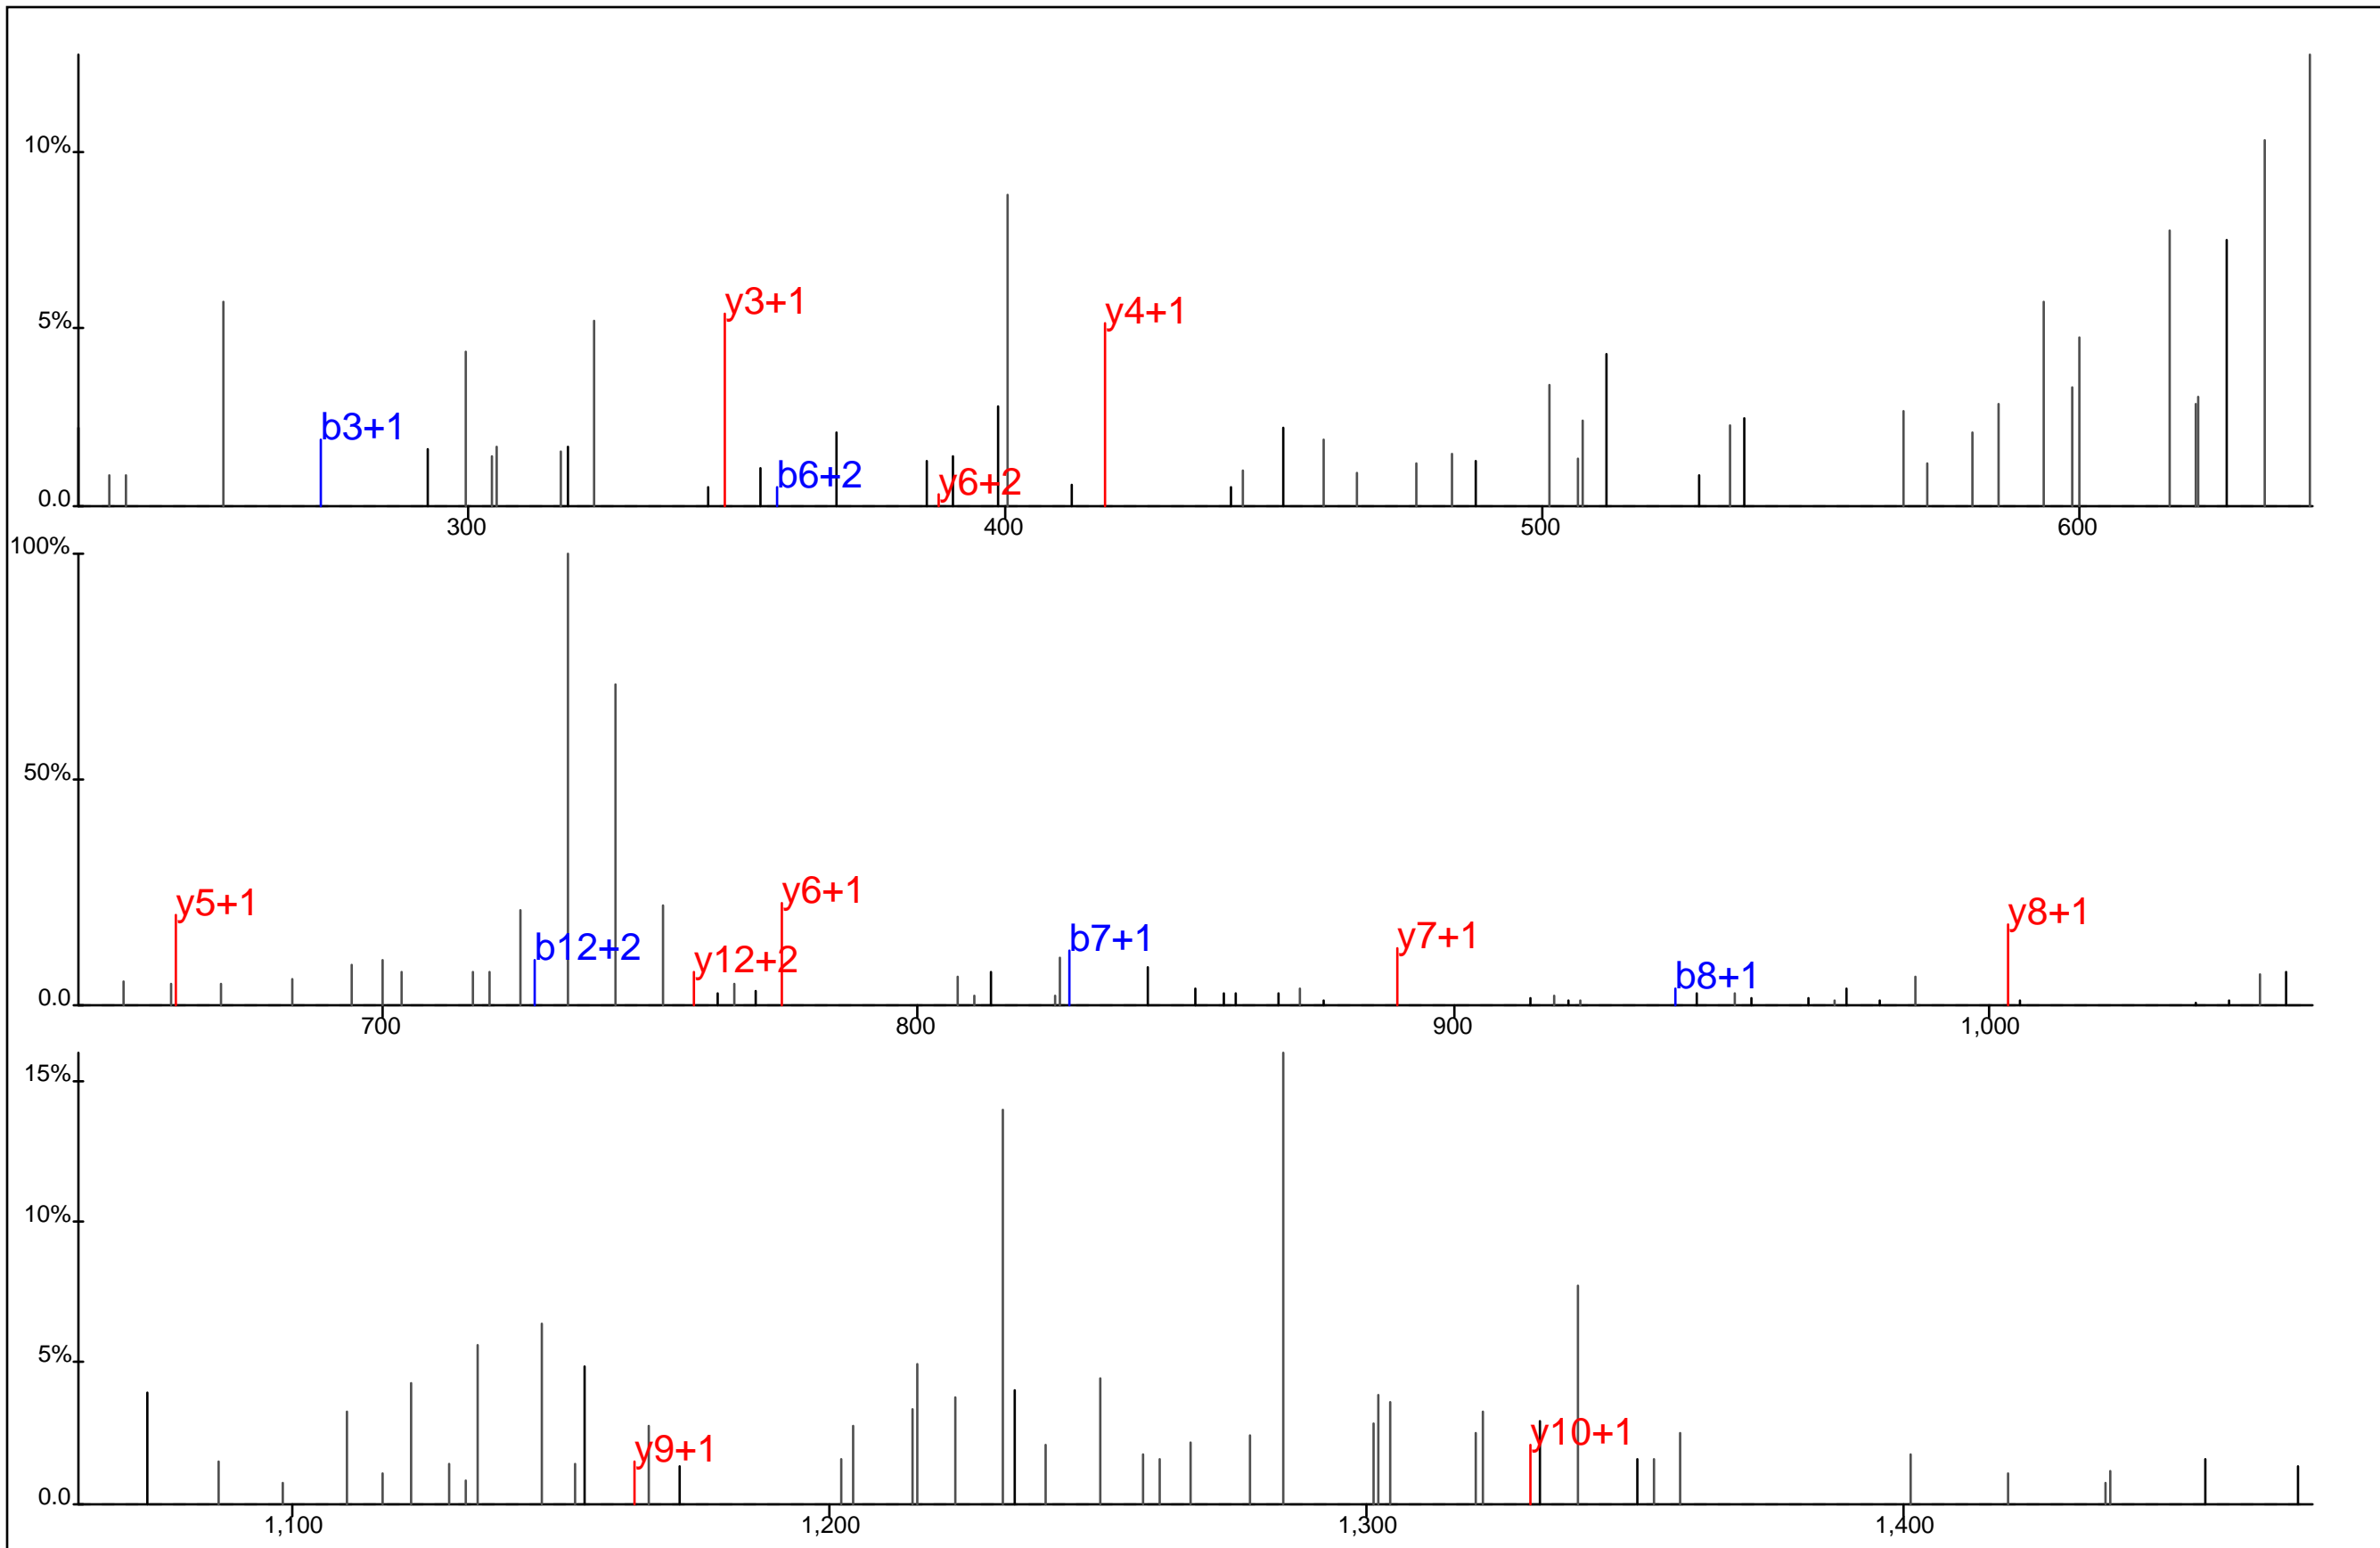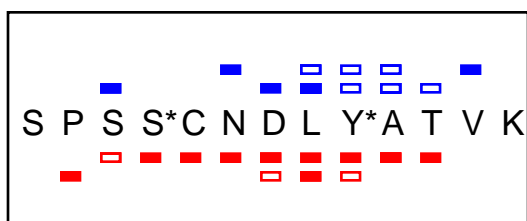

Protein Name: PAG  
 gi Accession: 0  
 Precursor Mass: 801.3019+2  
 Delta Mass: 0.669 ppm  
 XCorr: 31.56

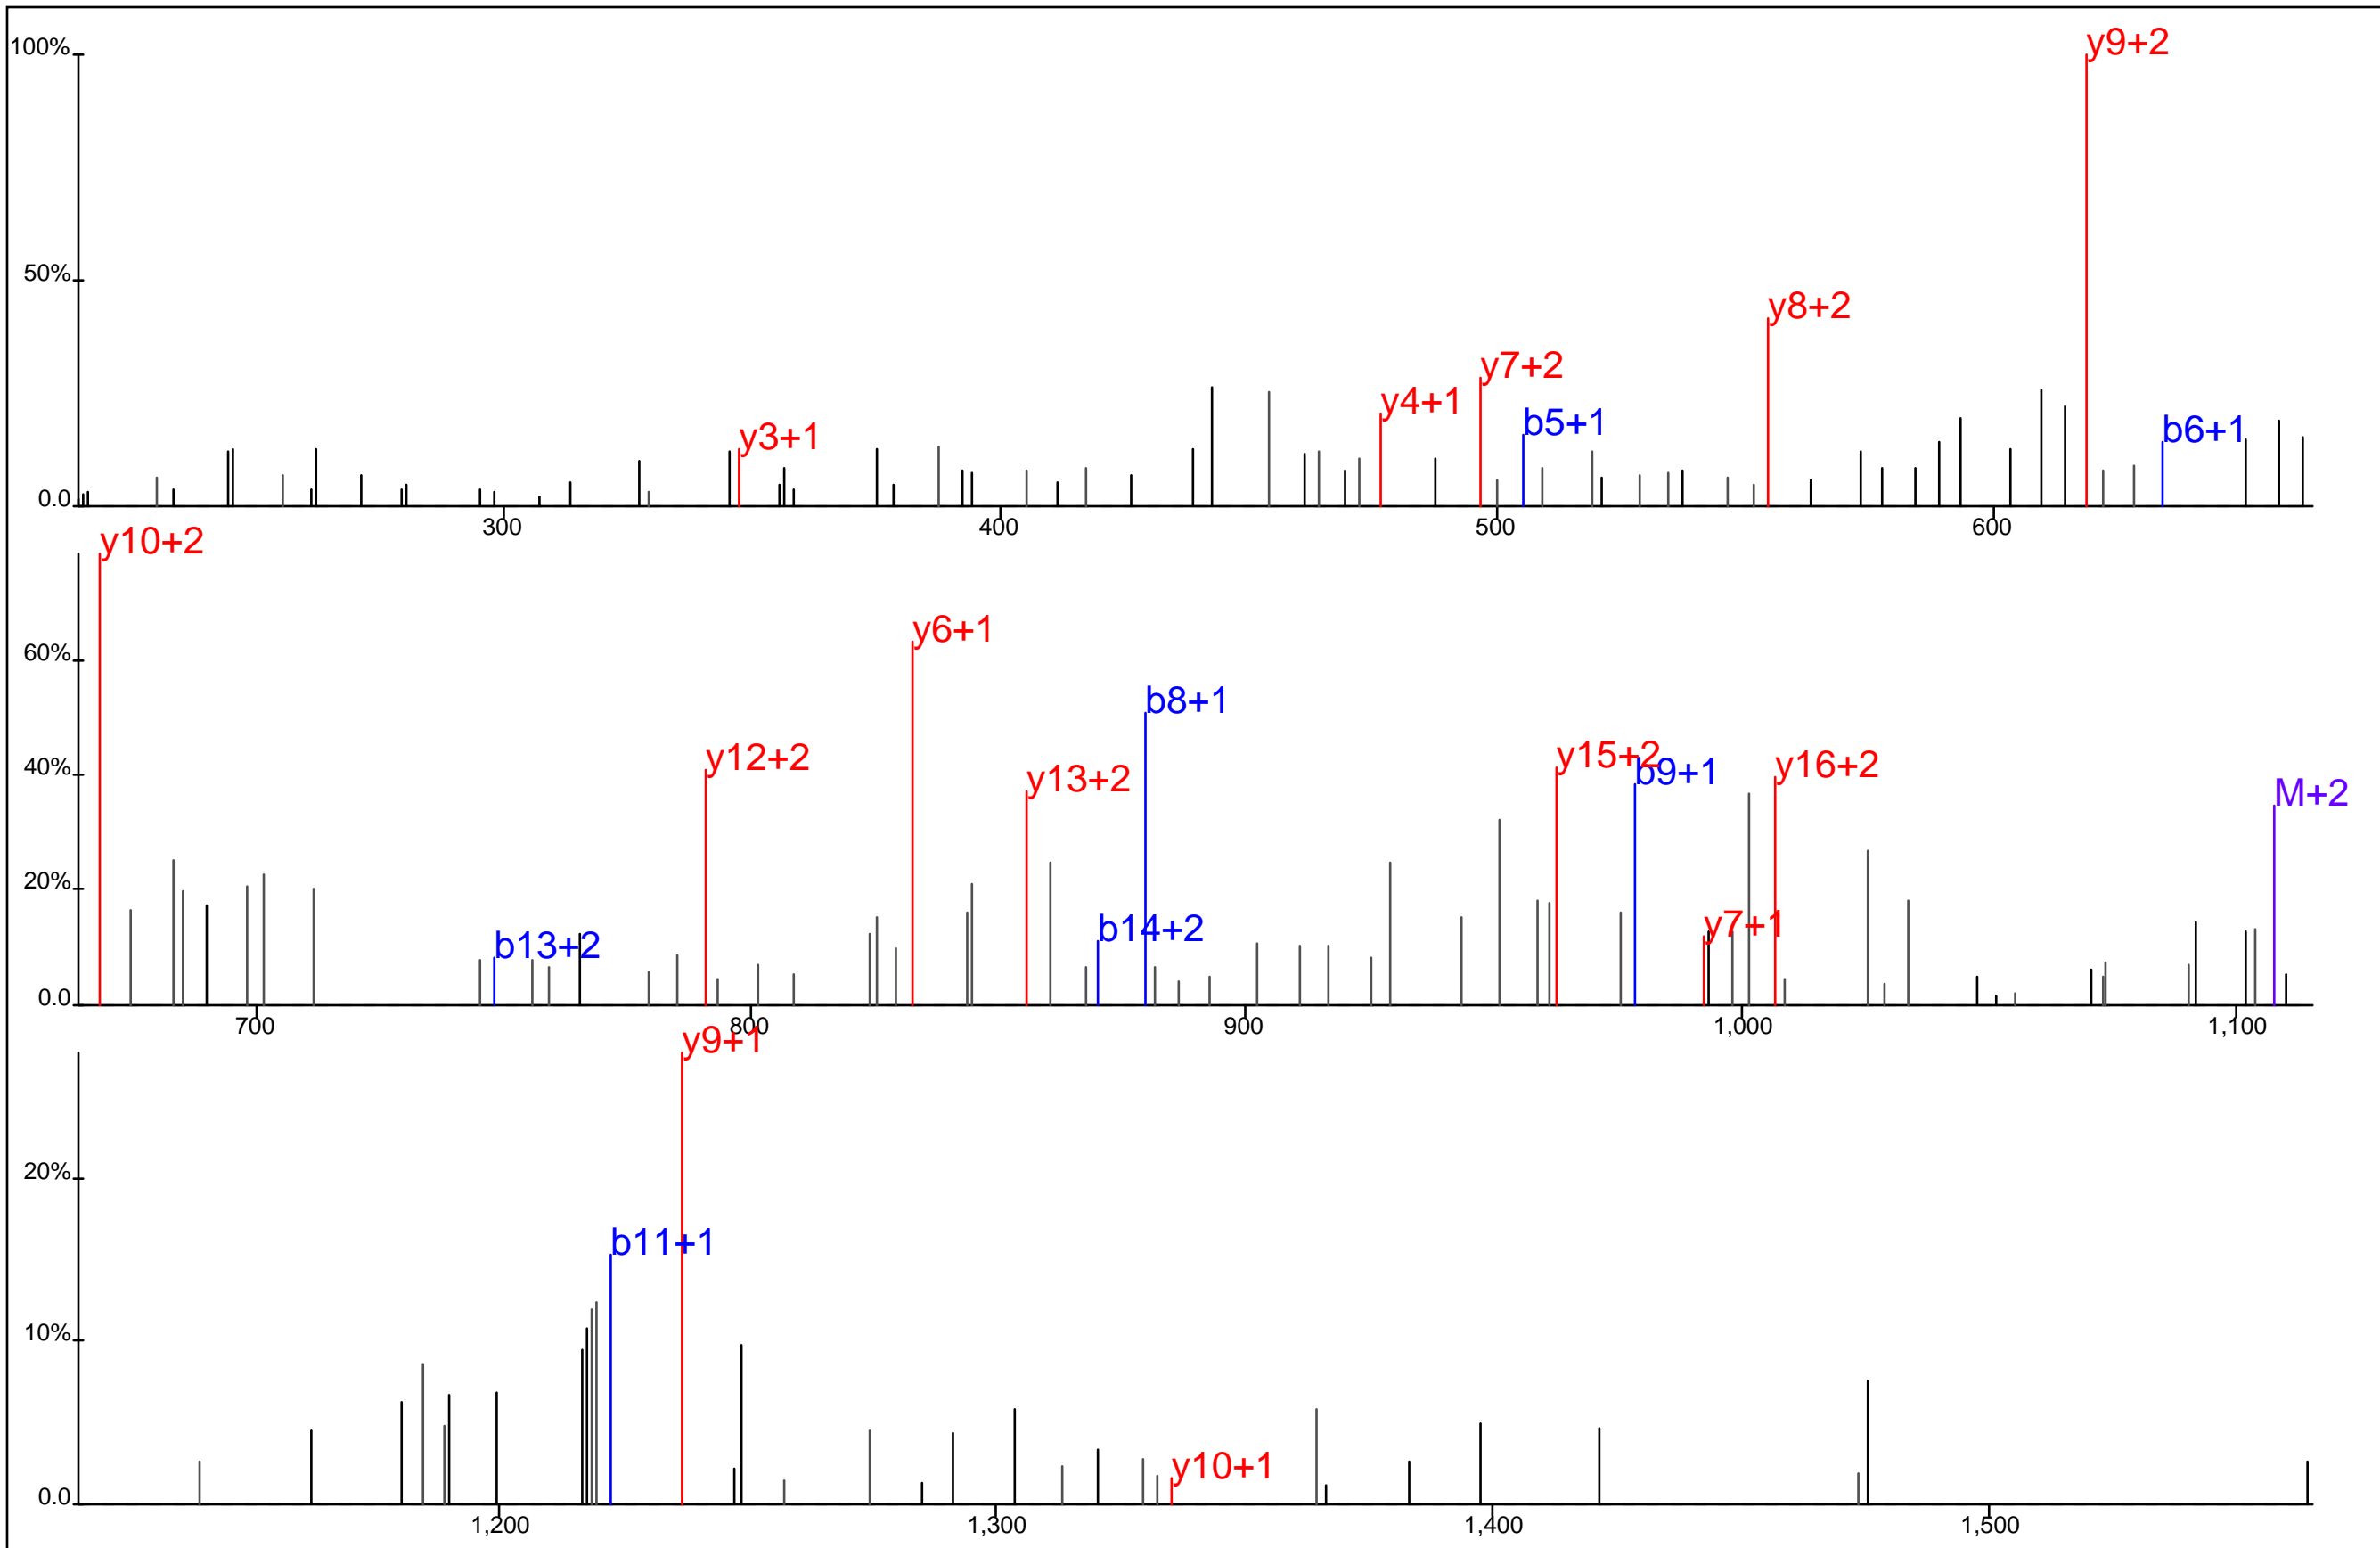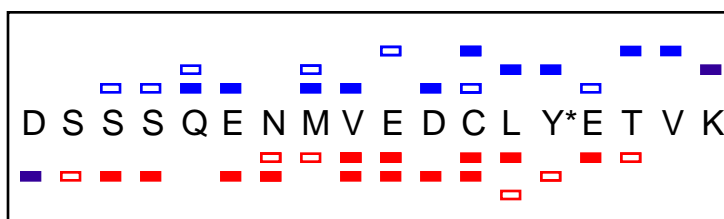

Protein Name: PAG  
 gi Accession: 0  
 Precursor Mass: 738.6290+3  
 Delta Mass: 4.945 ppm  
 XCorr: 35.06

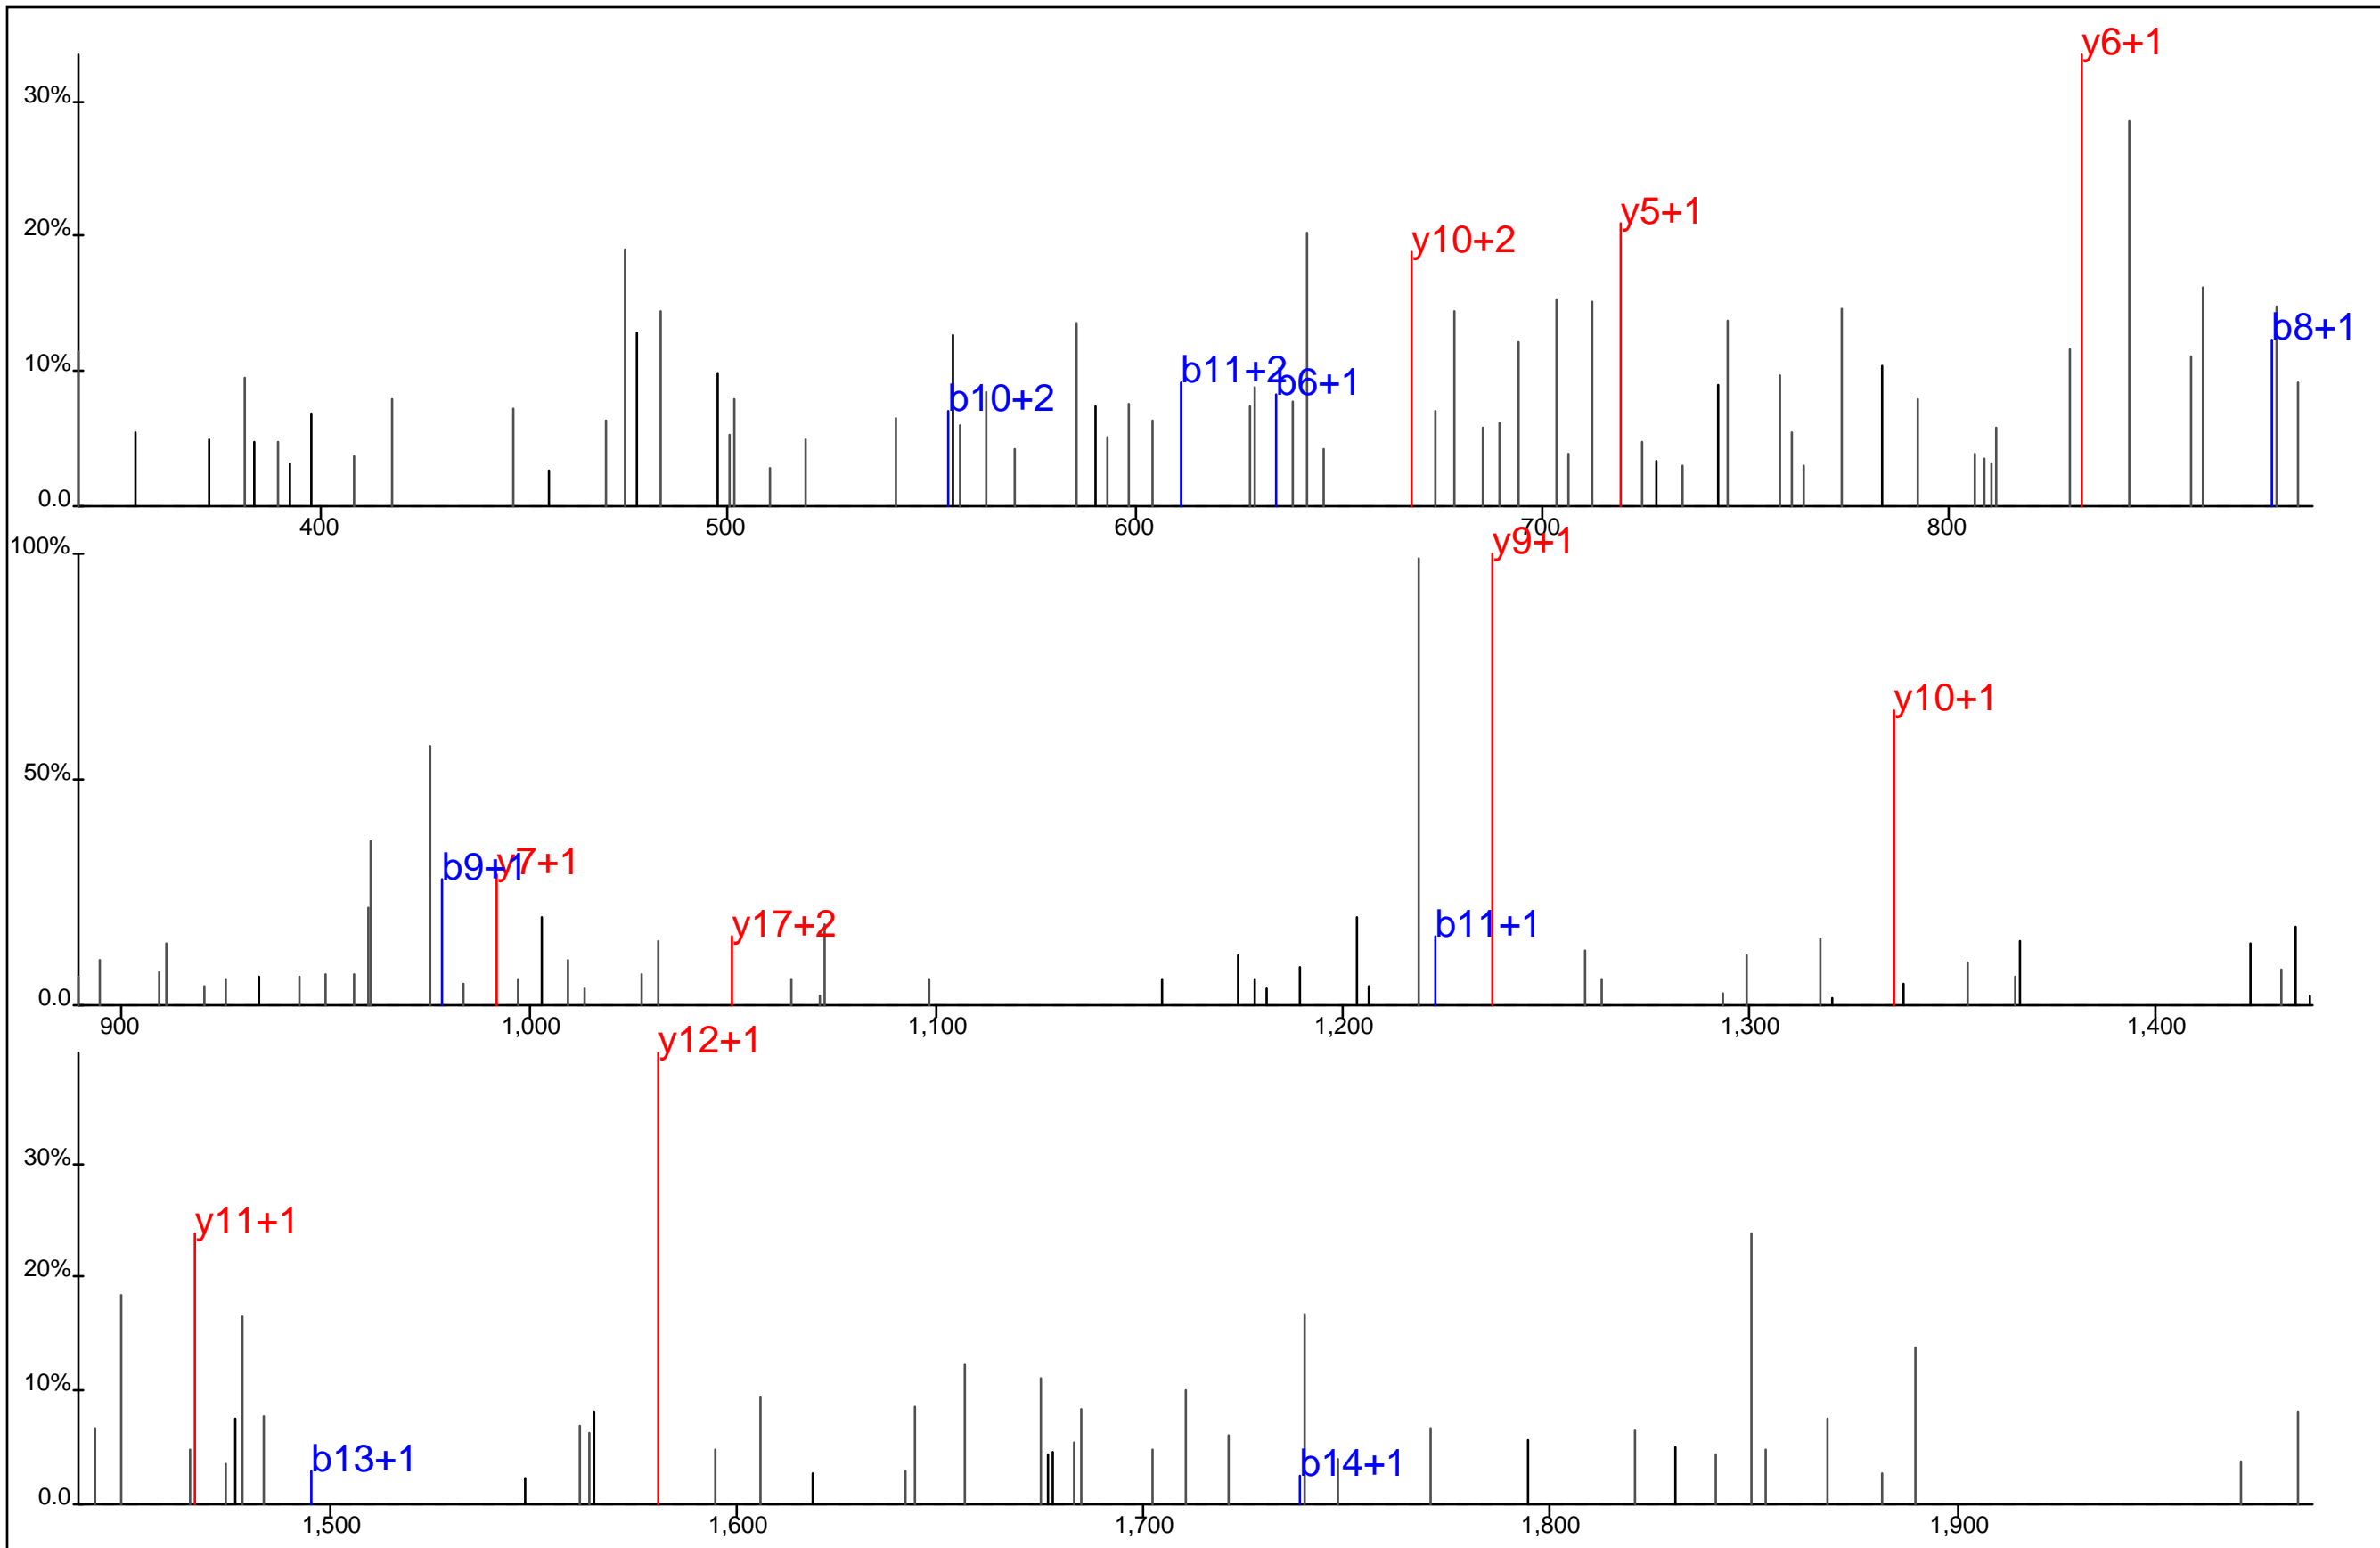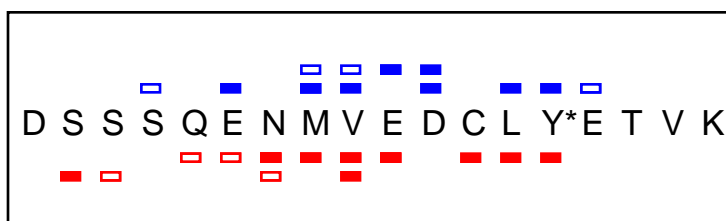

Protein Name: PAG  
 gi Accession: 0  
 Precursor Mass: 1,107.4332+2  
 Delta Mass: 1.004 ppm  
 XCorr: 24.13

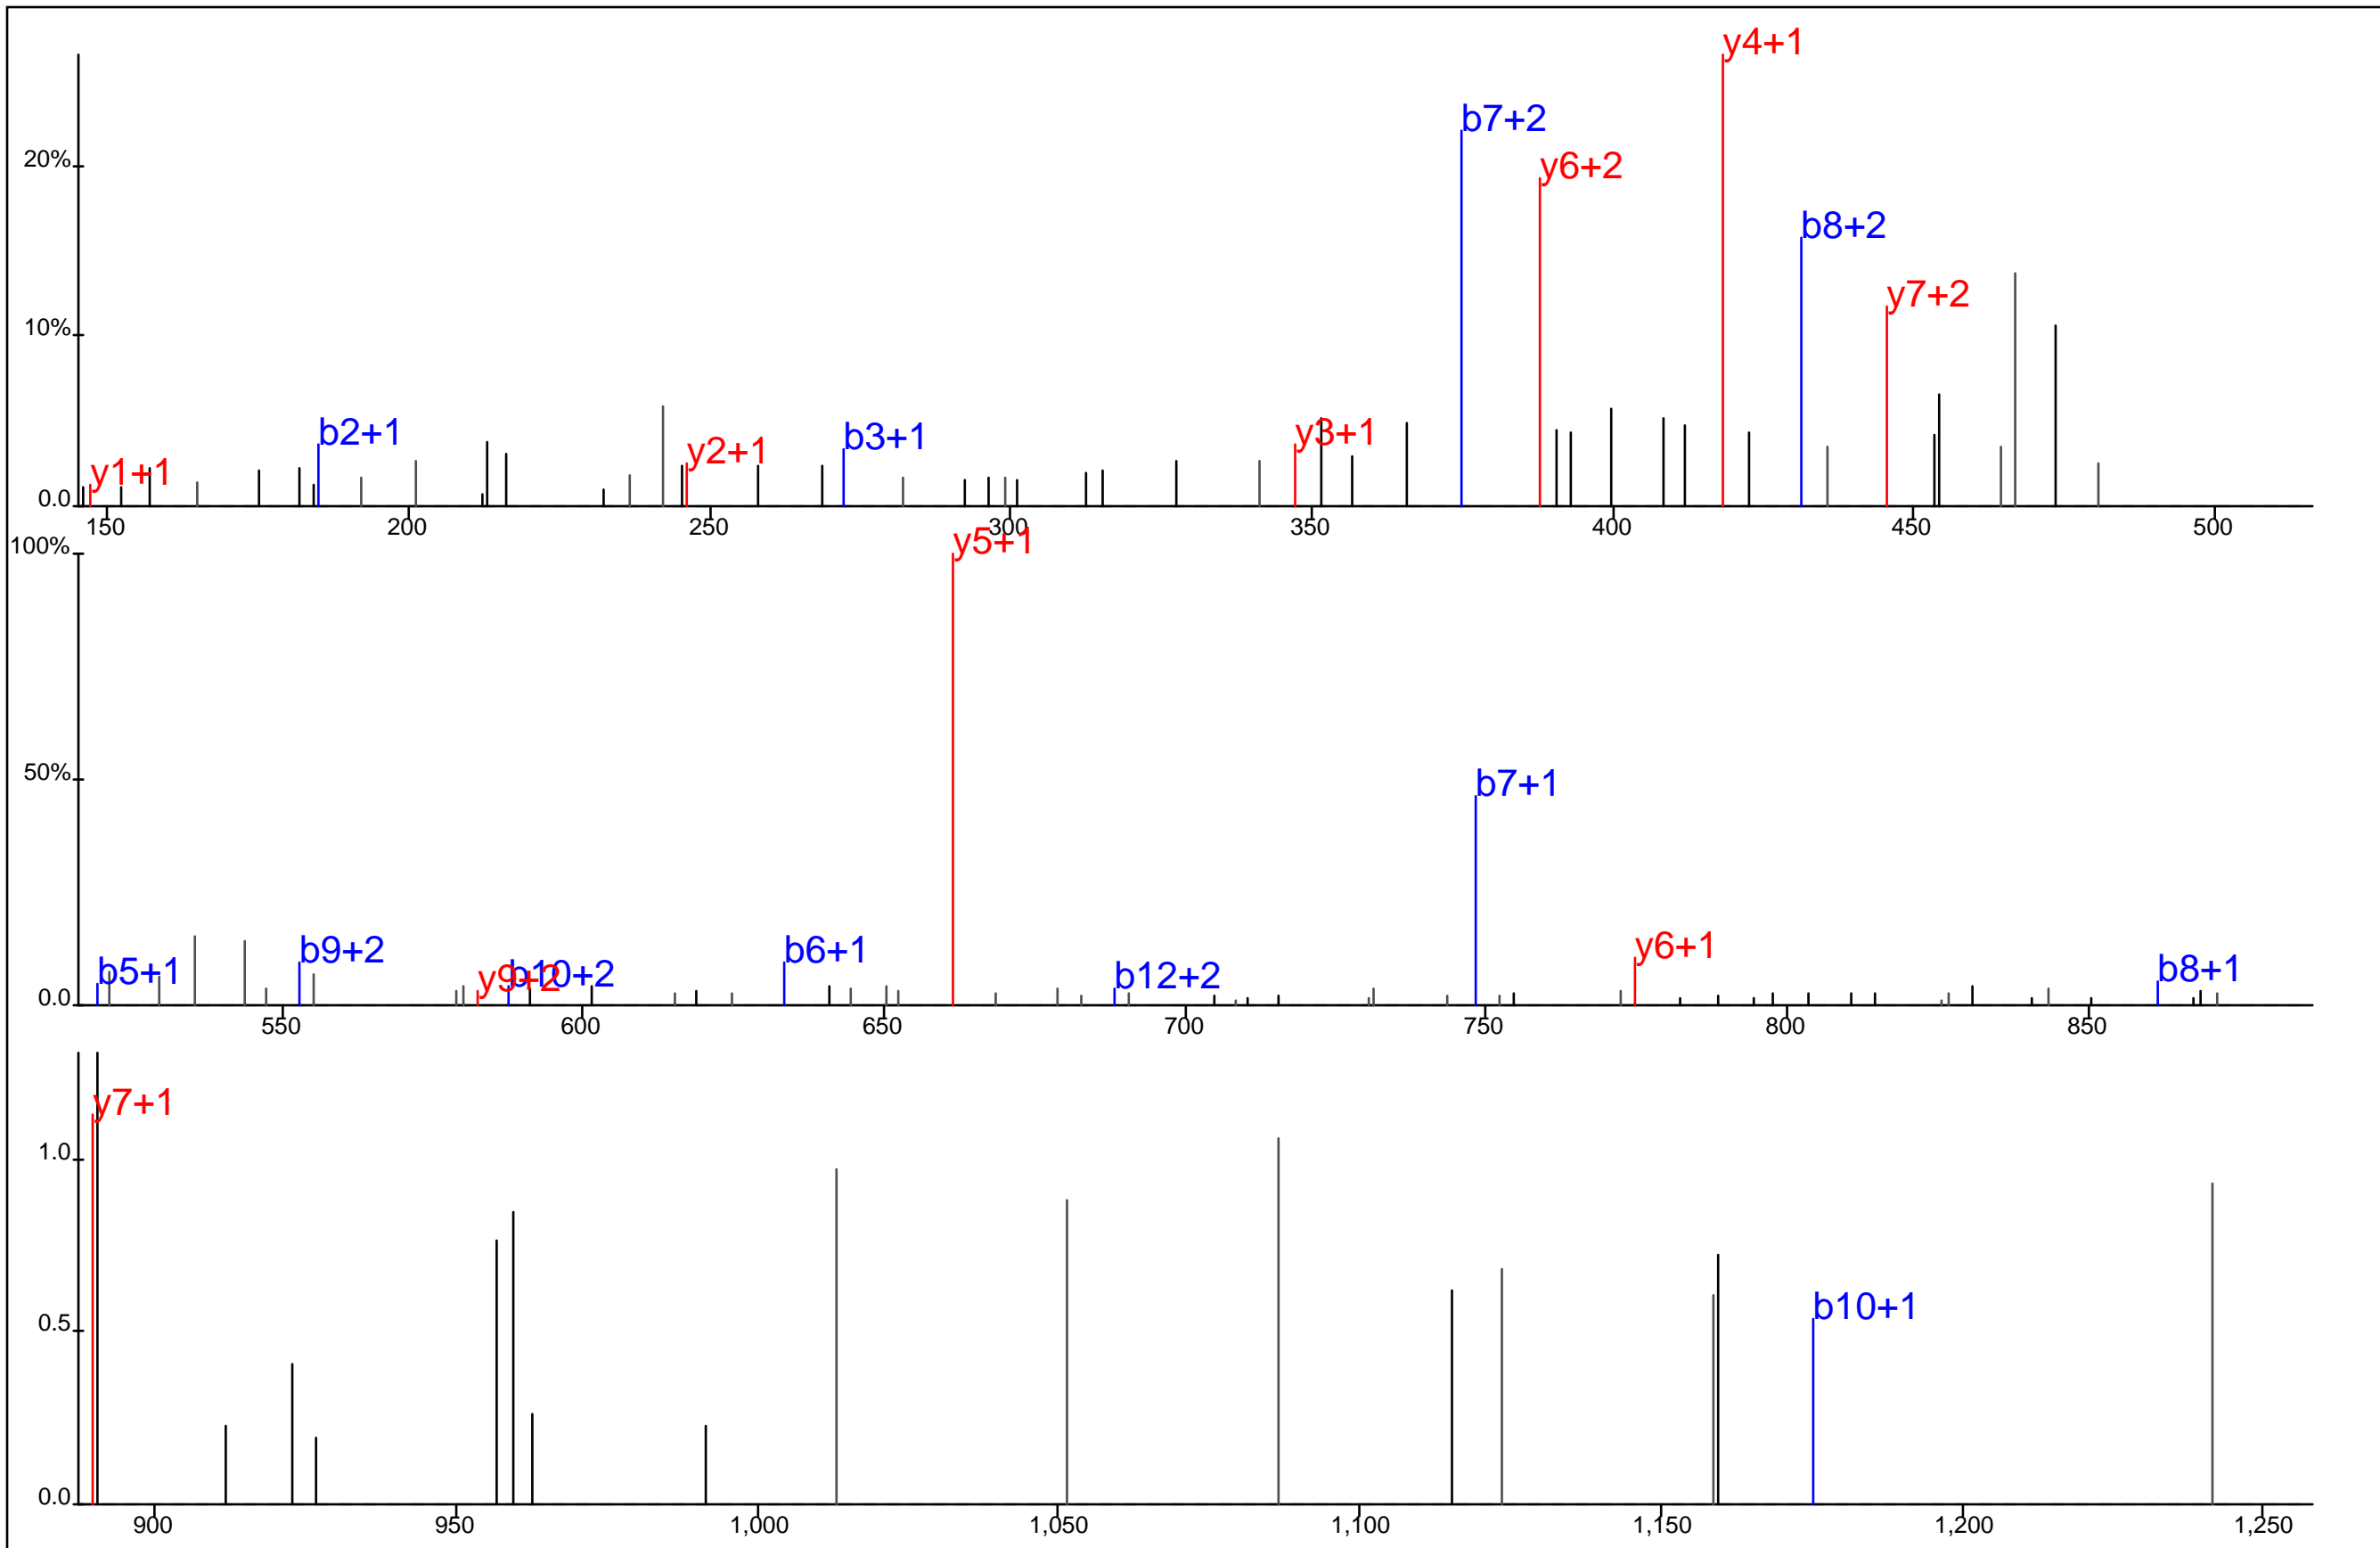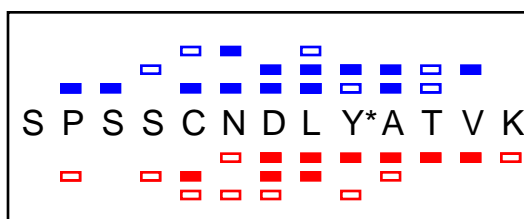

Protein Name: PAG  
 gi Accession: 0  
 Precursor Mass: 507.8812+3  
 Delta Mass: 0.032 ppm  
 XCorr: 26.65

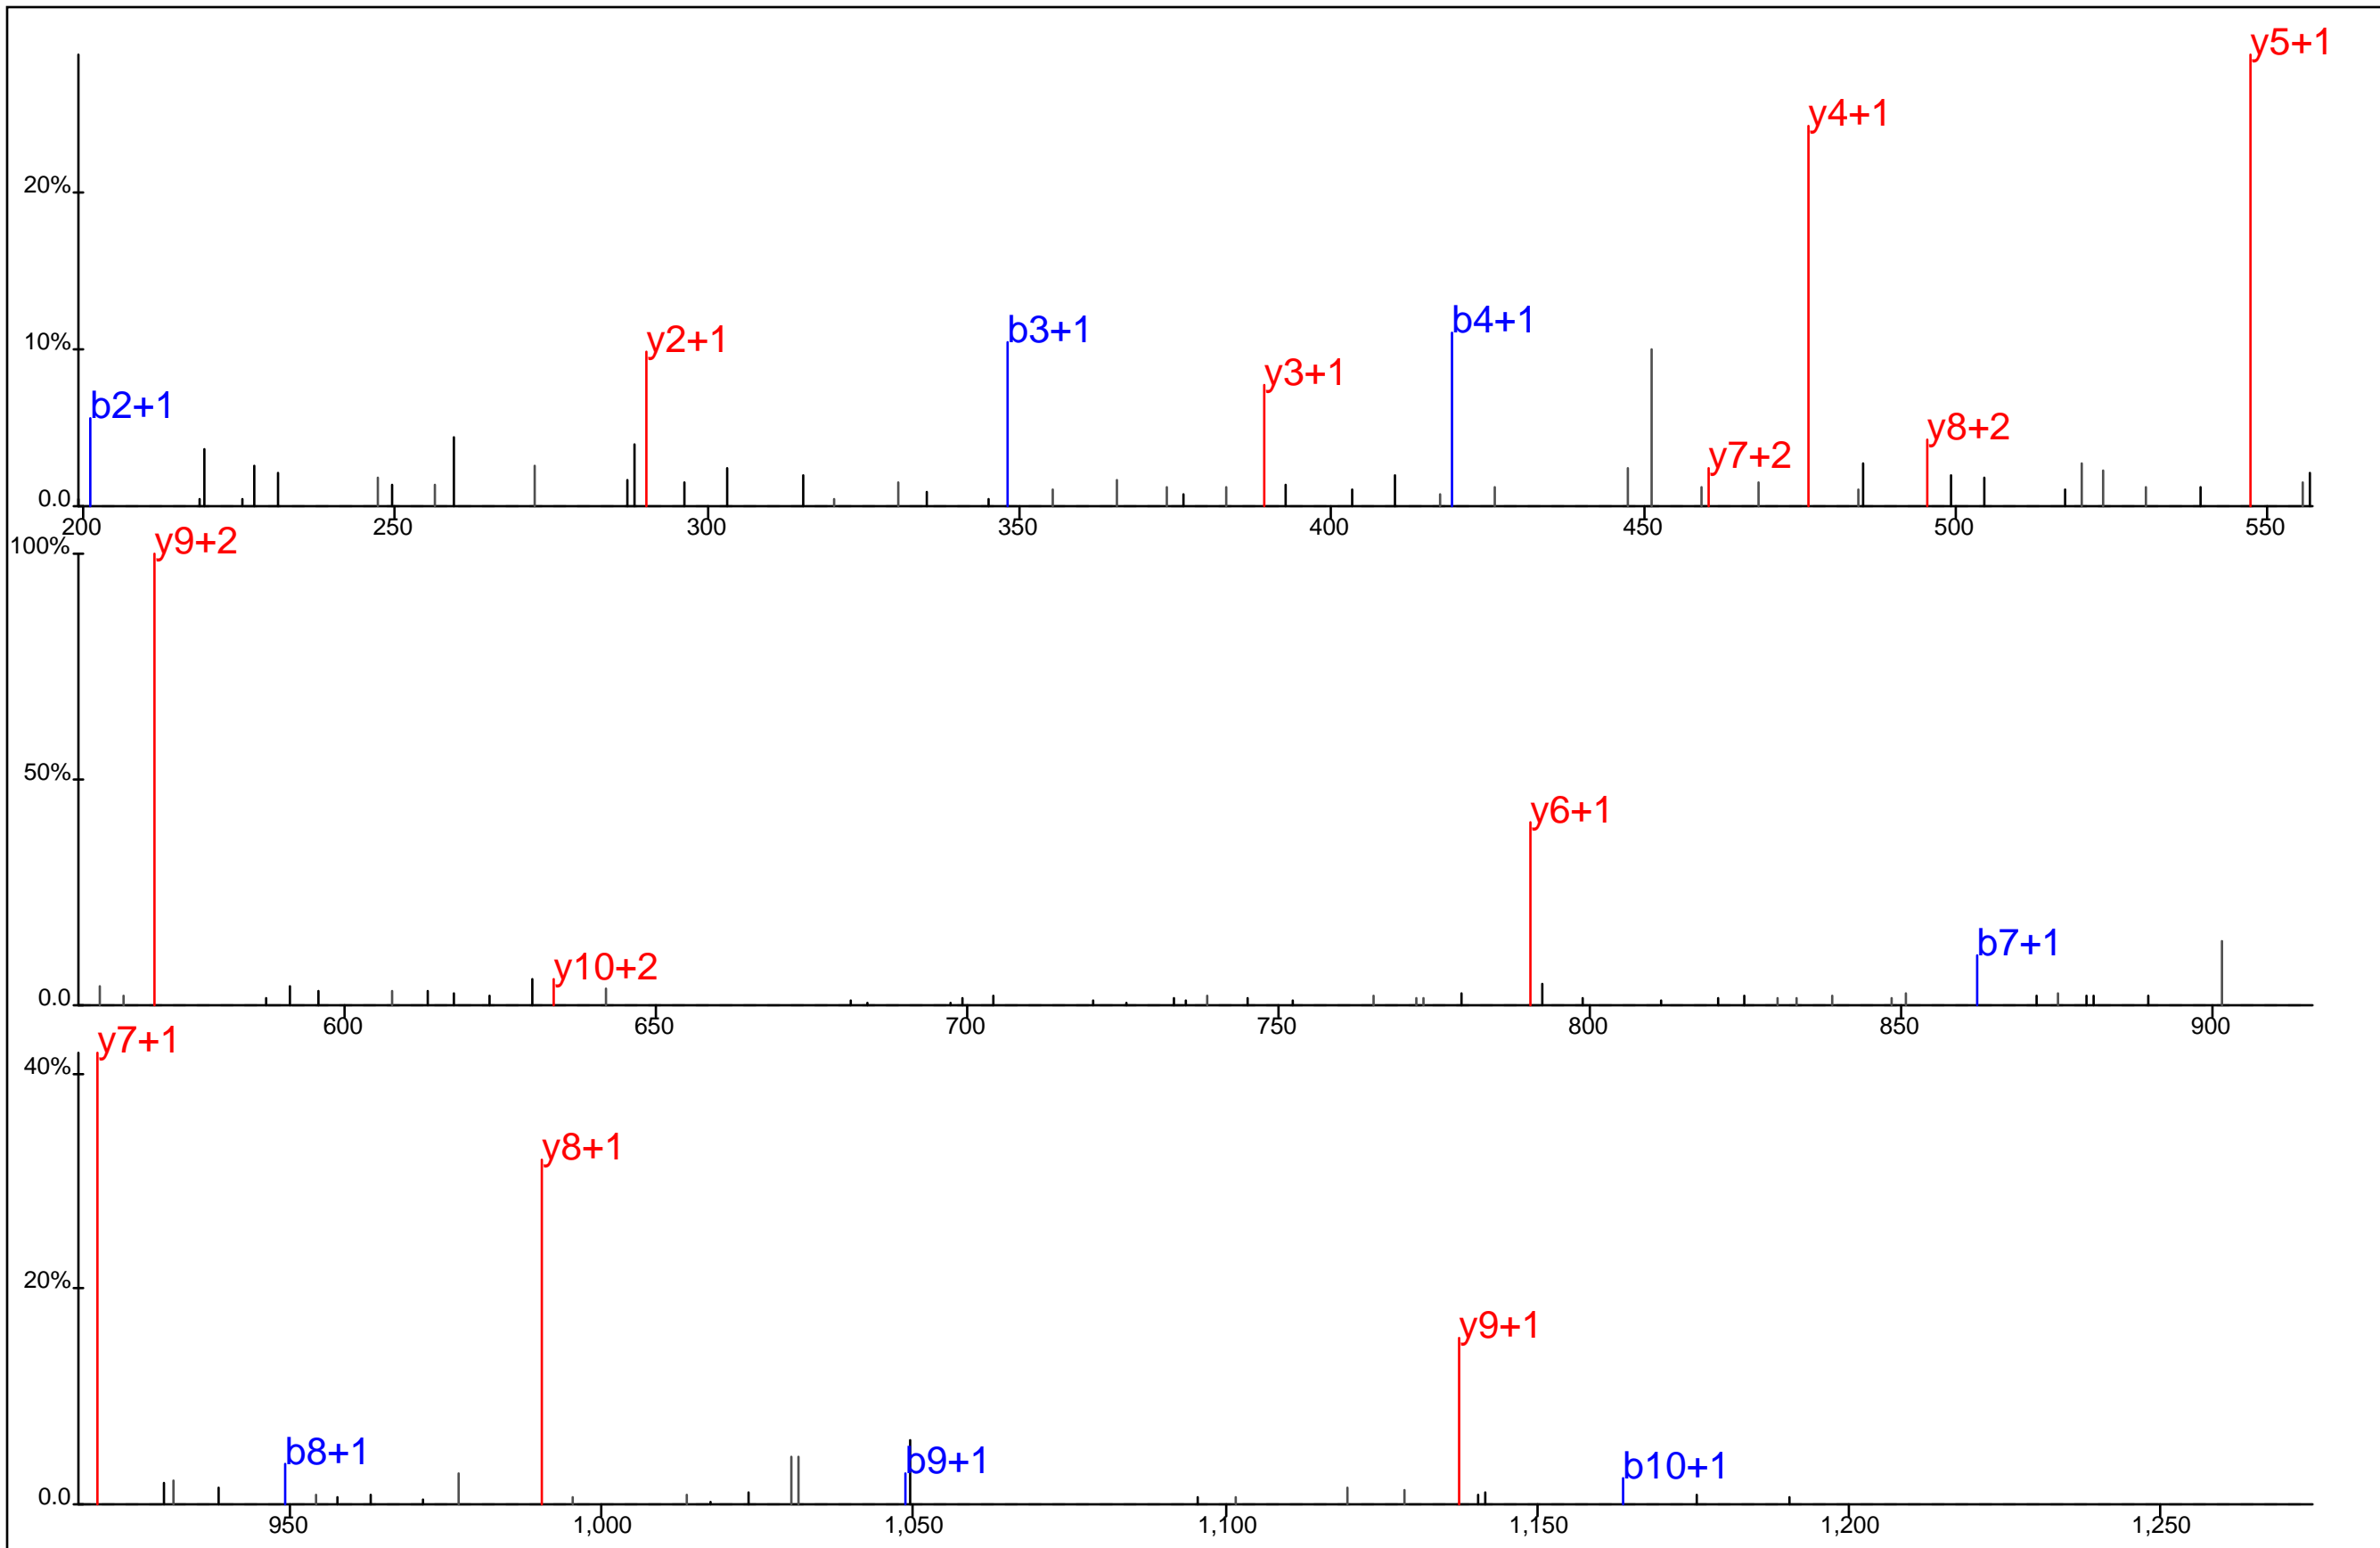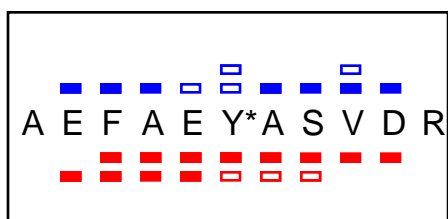

Protein Name: PAG  
 gi Accession: 0  
 Precursor Mass: 669.2747+2  
 Delta Mass: 0.942 ppm  
 XCorr: 64.32



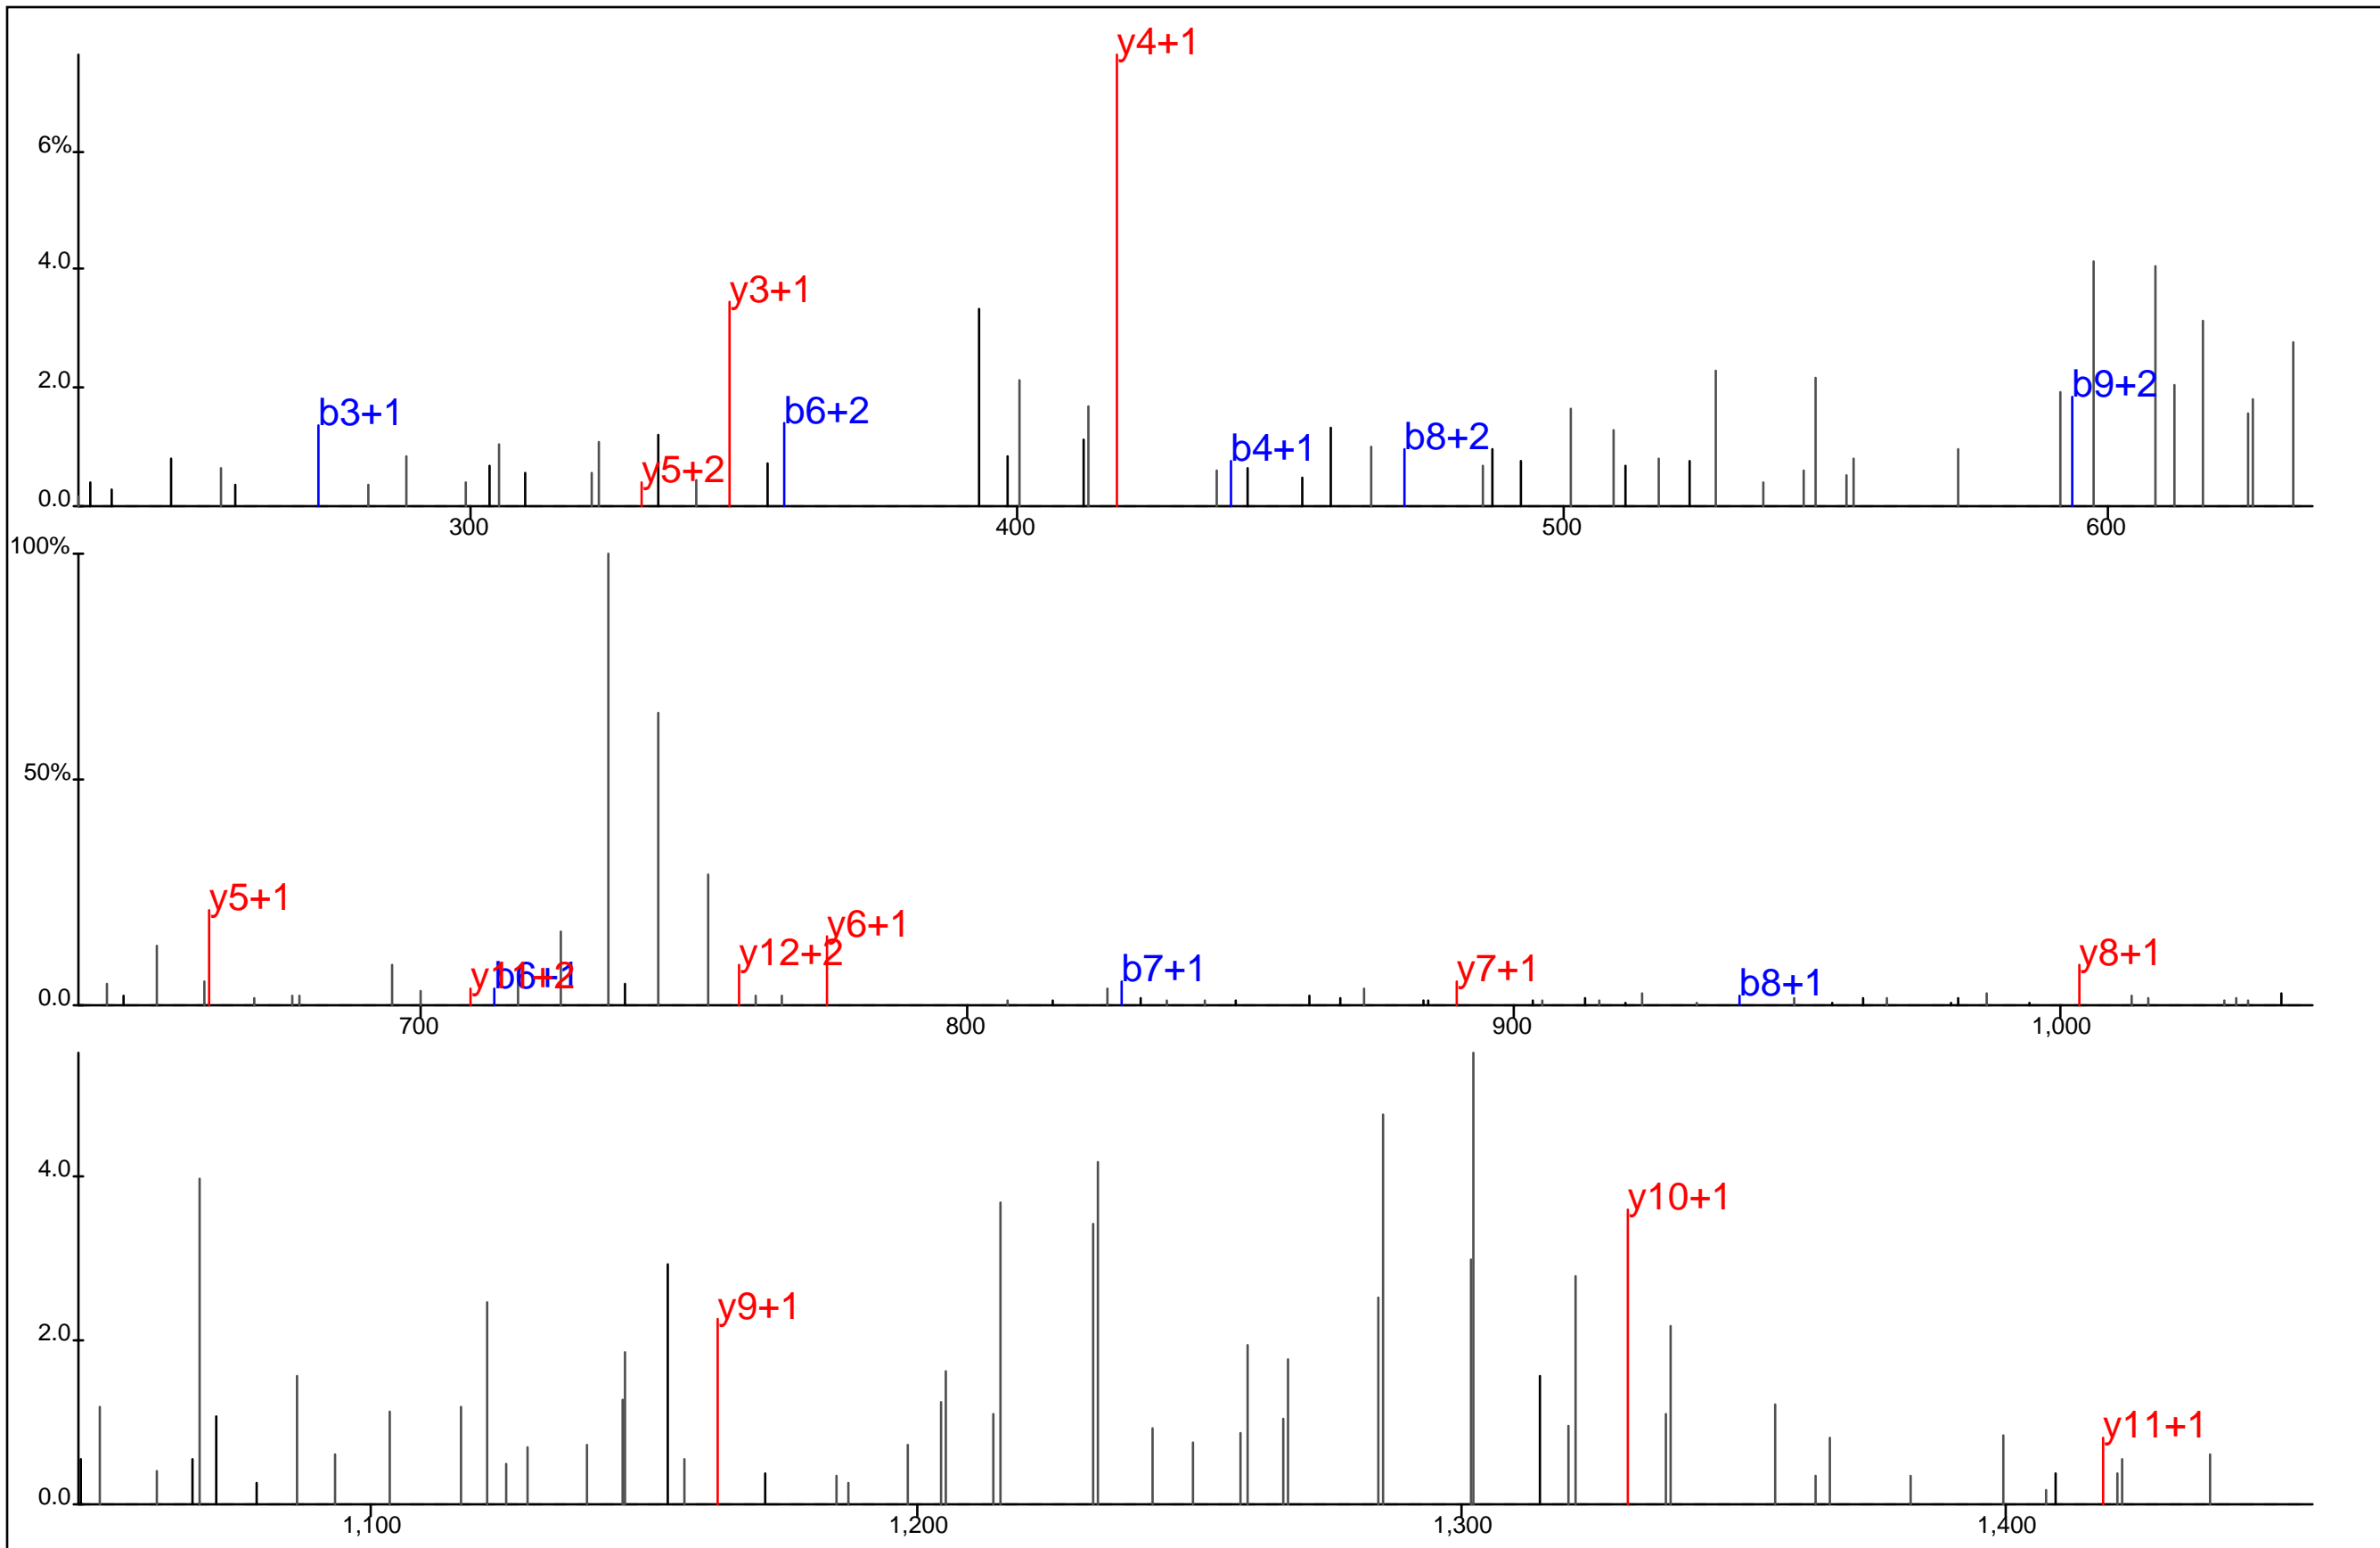

■ ■ ■ ■ ■ ■ ■ ■ ■ ■  
 S P S S\* C N D L Y\* A T V K  
■ ■ ■ ■ ■ ■ ■ ■ ■ ■

Protein Name: PAG  
 gi Accession: 0  
 Precursor Mass: 801.3010+2  
 Delta Mass: 0.398 ppm  
 XCorr: 41.34

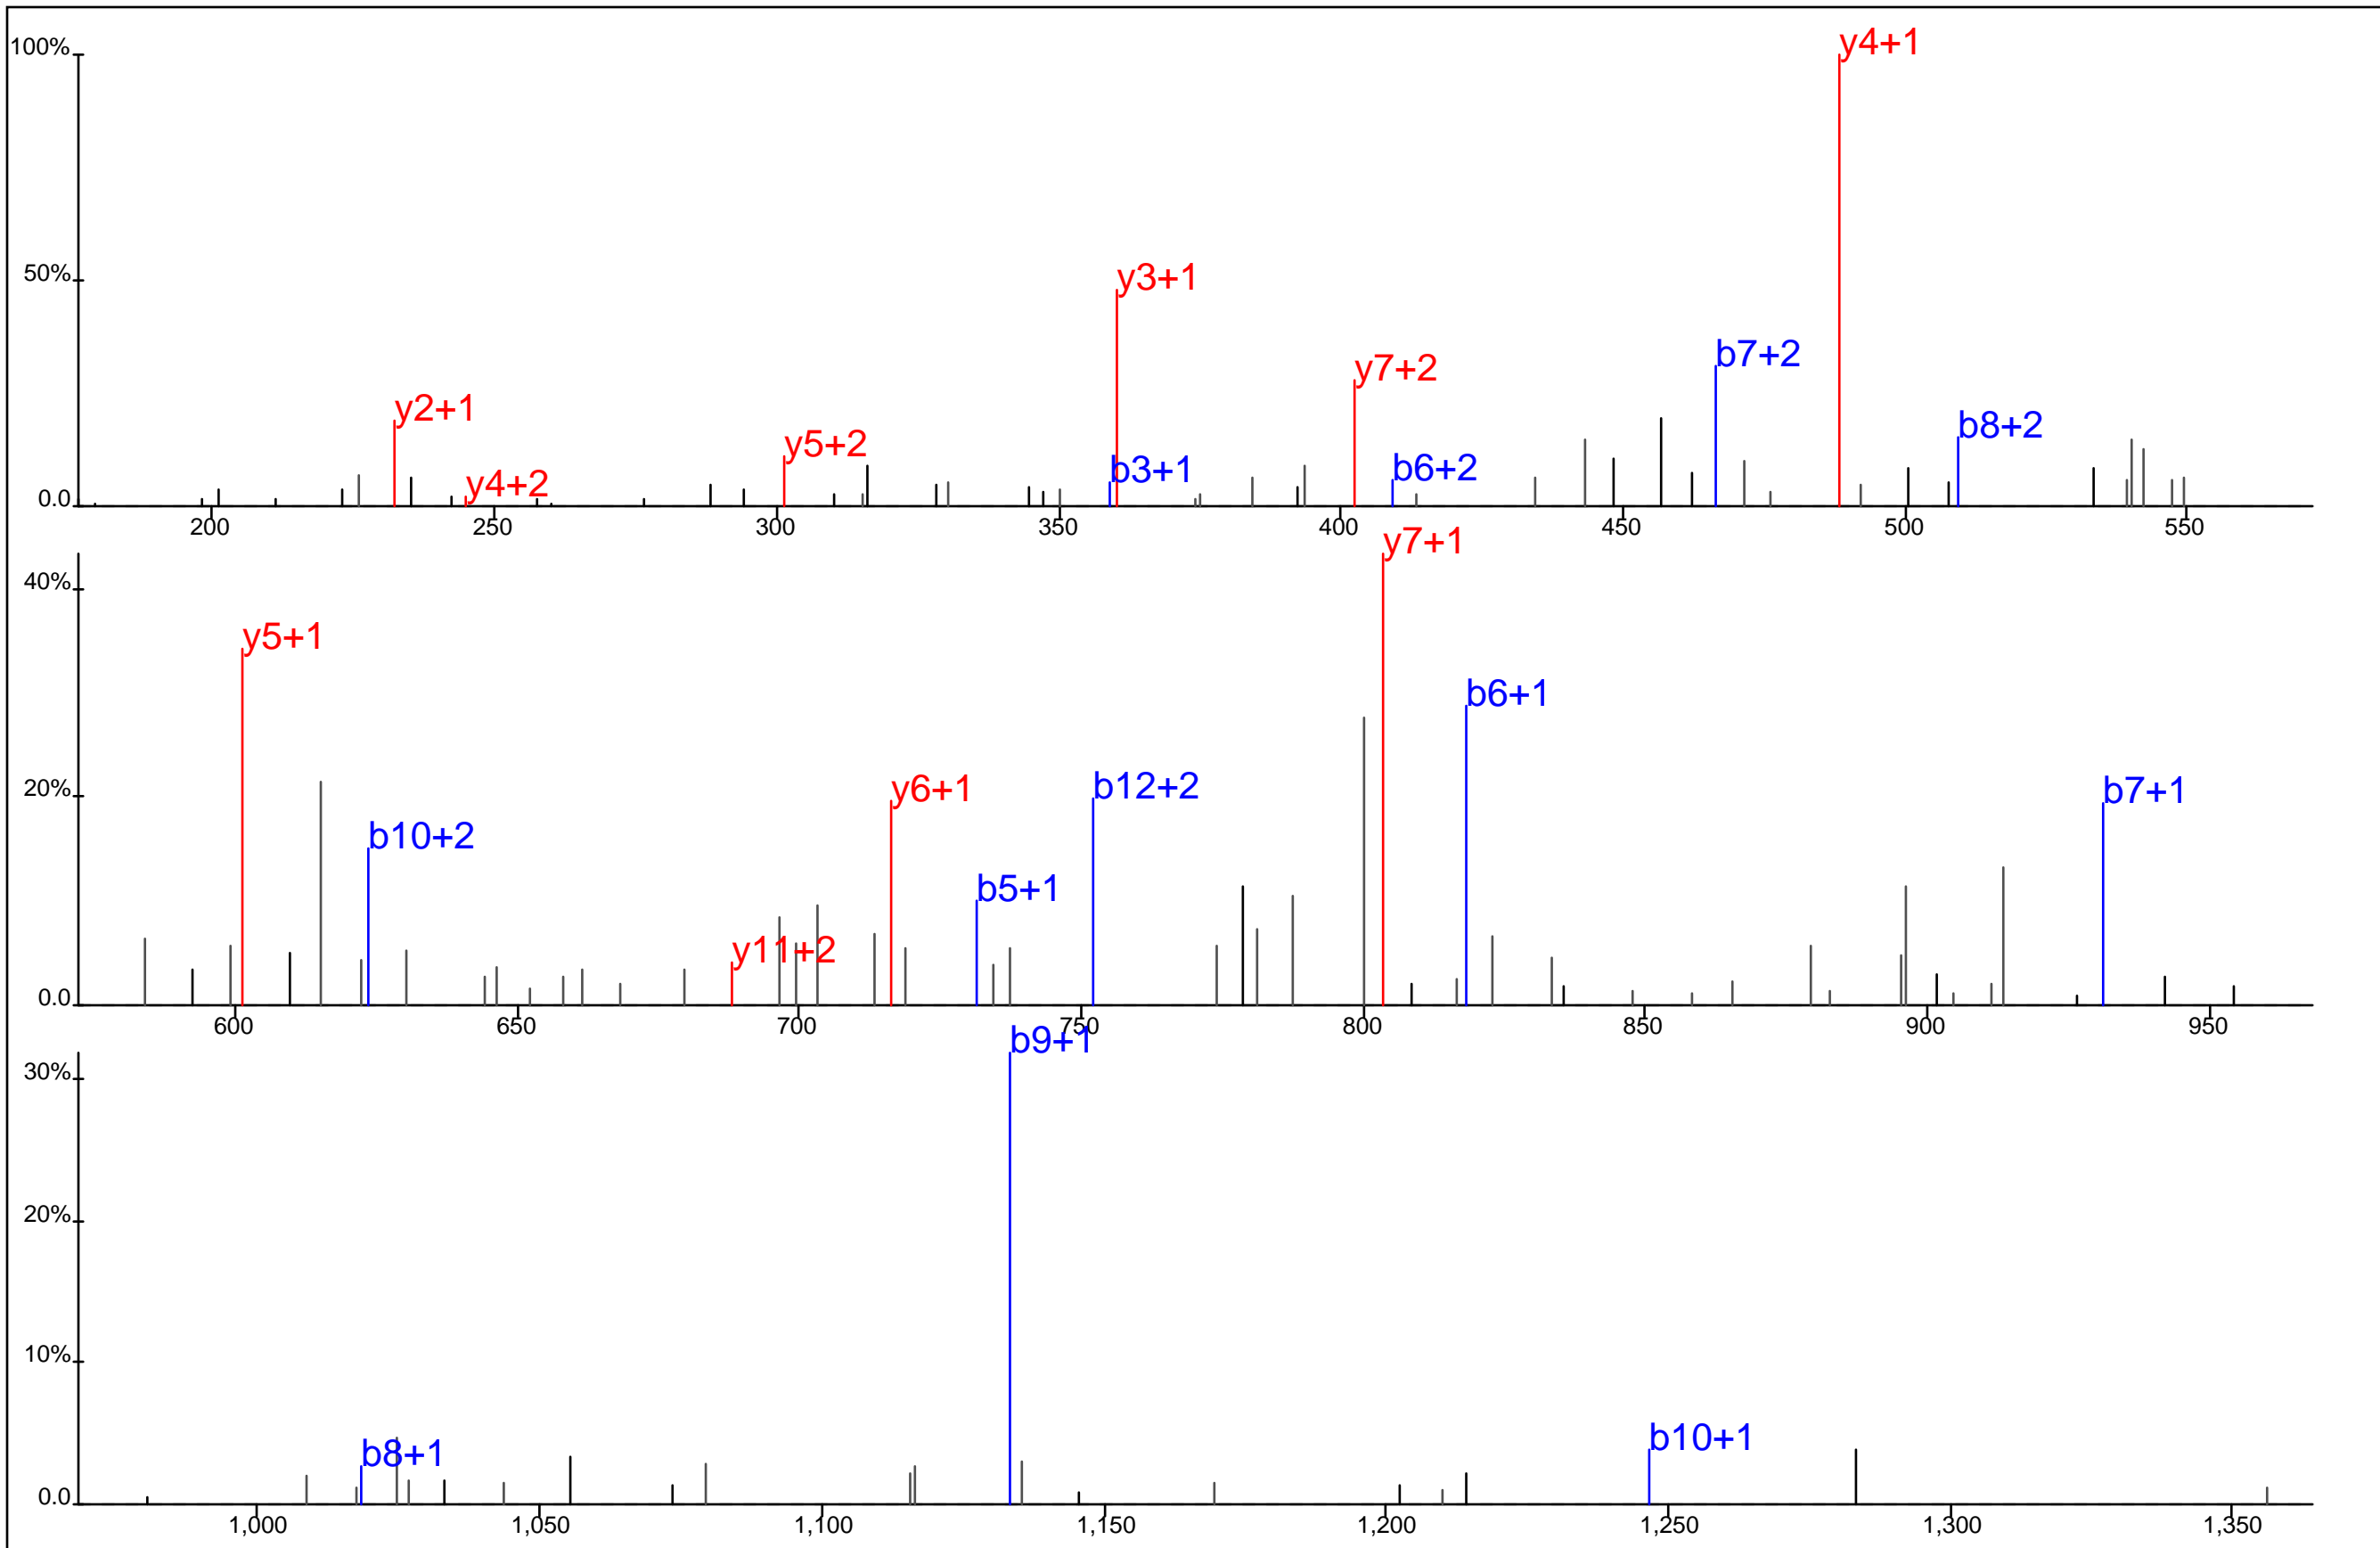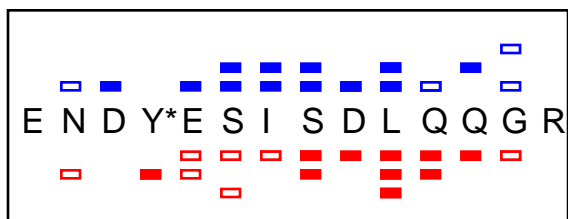

Protein Name: PAG  
 gi Accession: 0  
 Precursor Mass: 578.5718+3  
 Delta Mass: 0.348 ppm  
 XCorr: 39.9

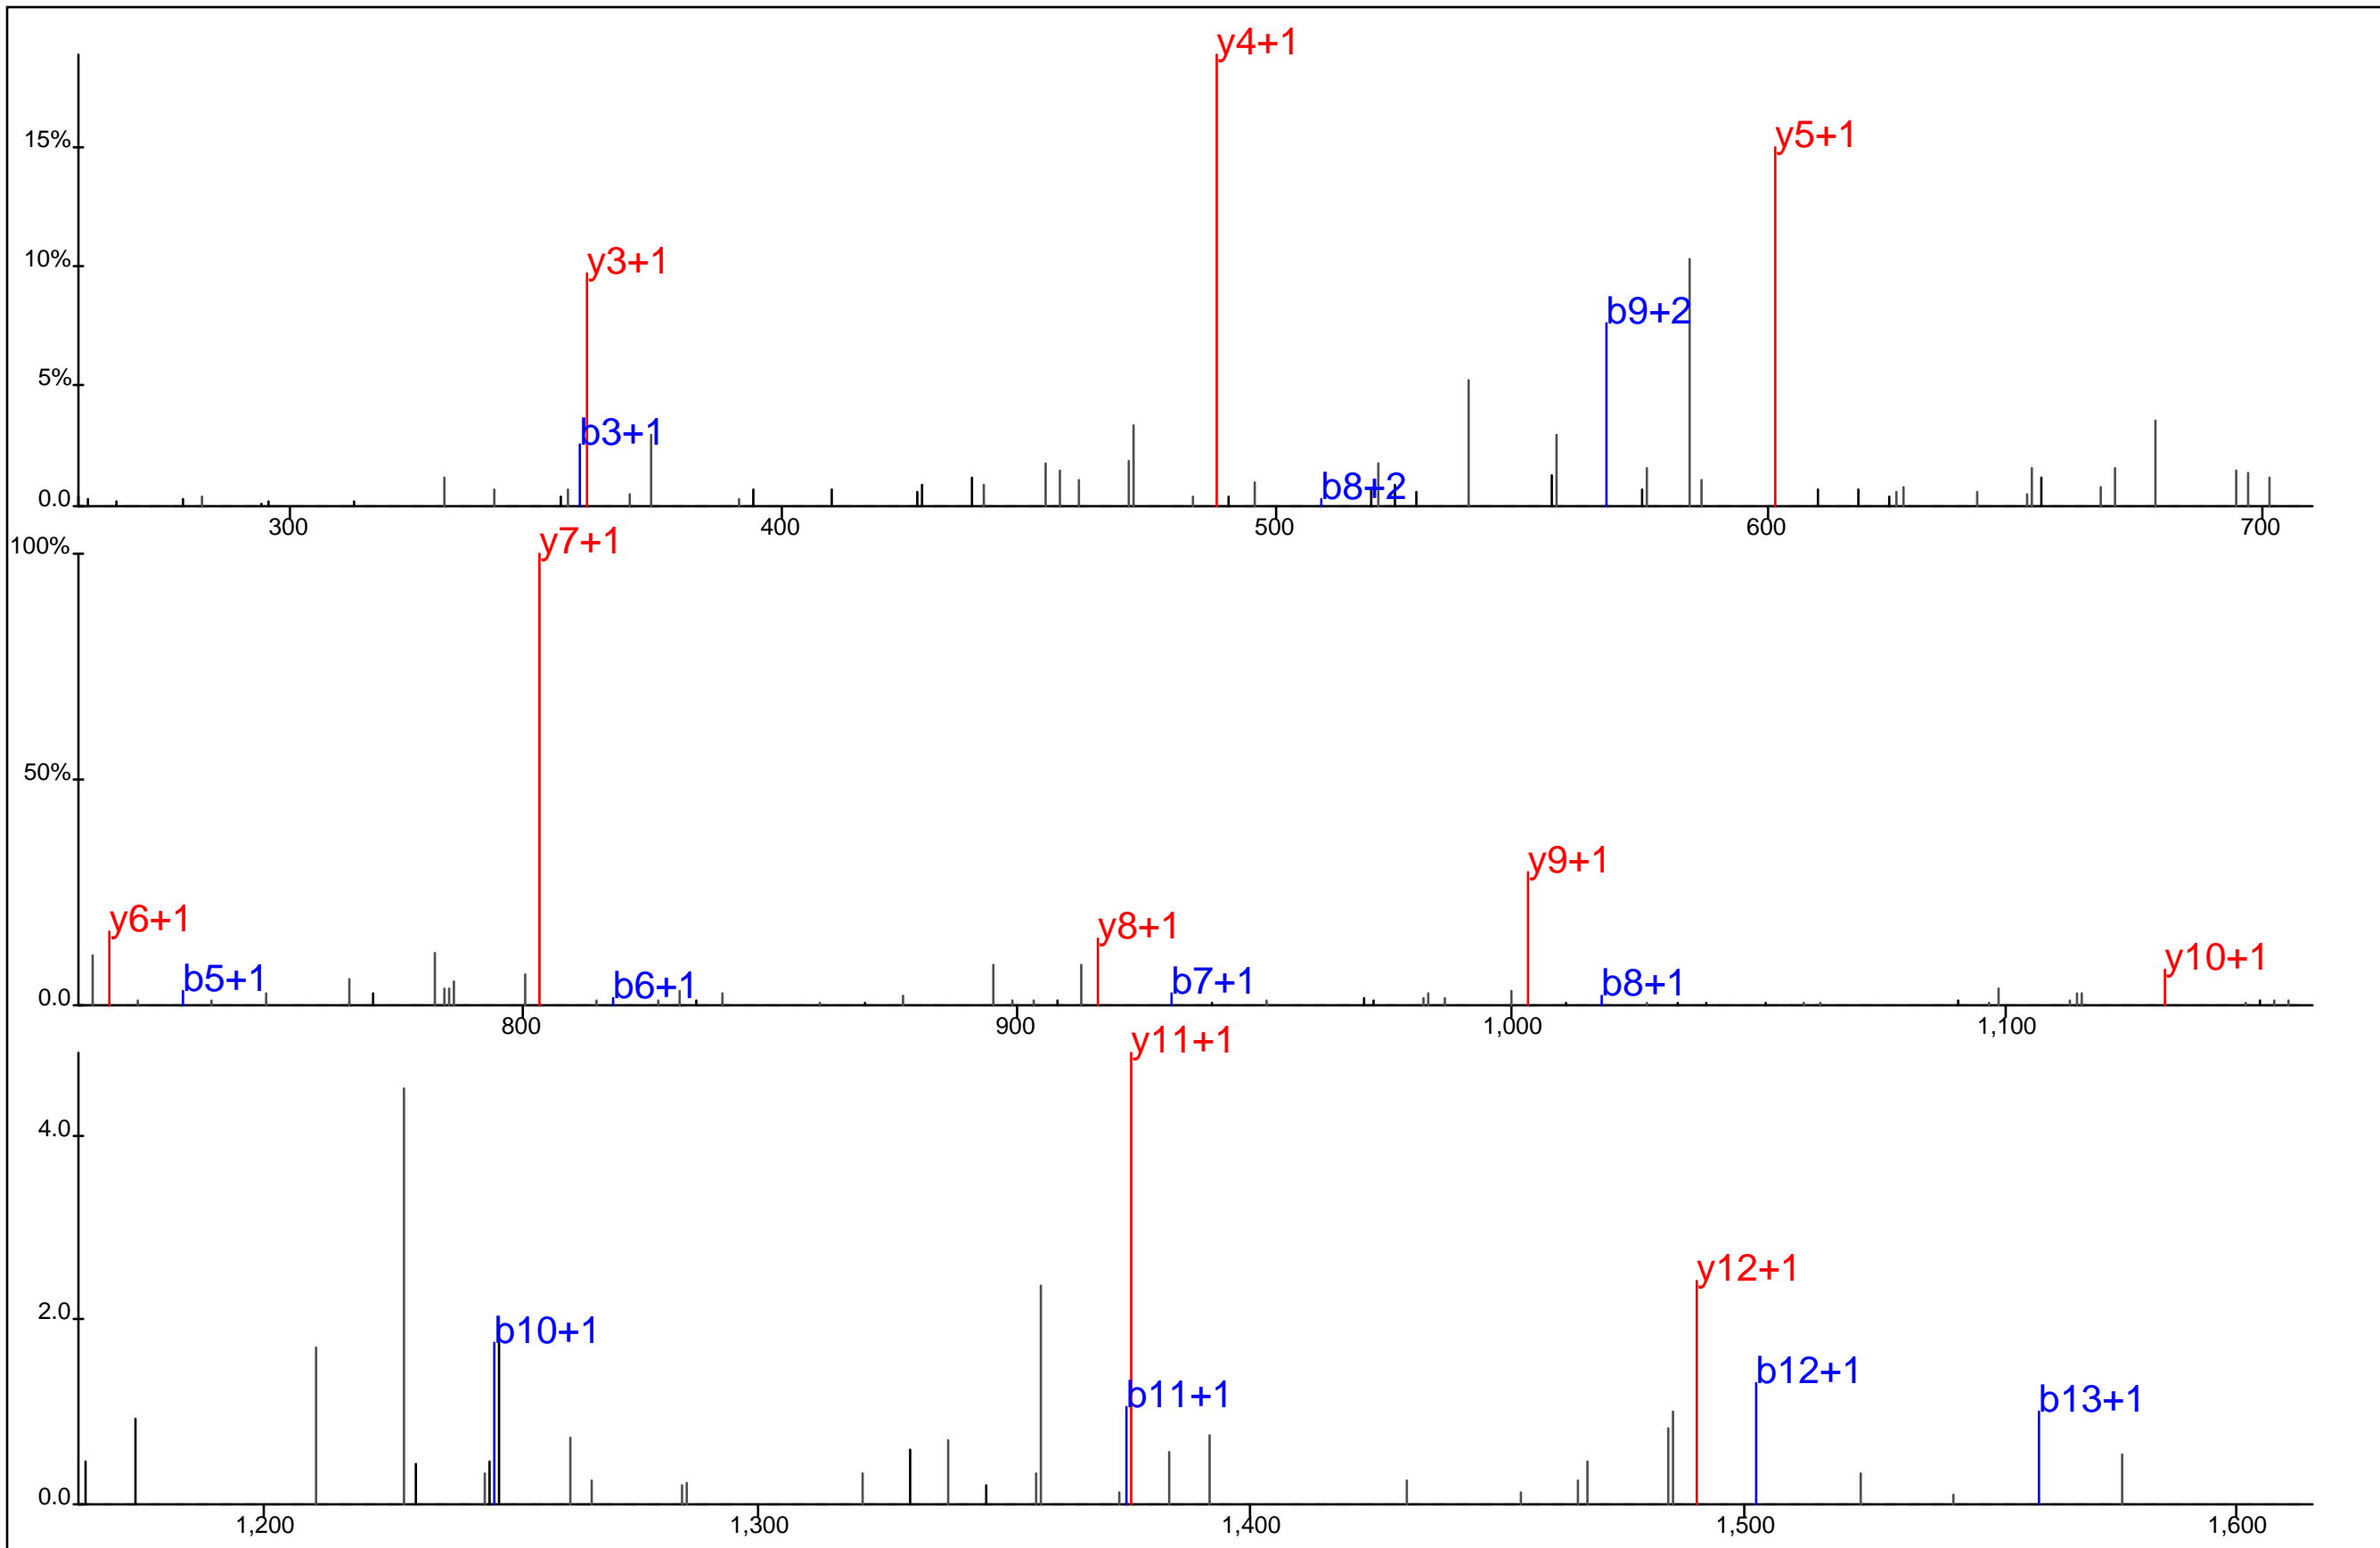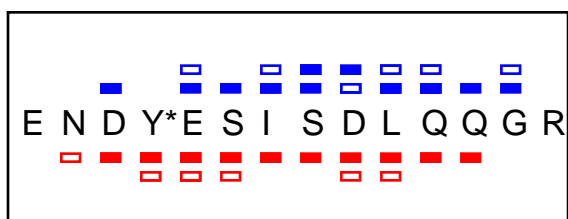

Protein Name: PAG  
 gi Accession: 0  
 Precursor Mass: 867.3525+2  
 Delta Mass: 2.135 ppm  
 XCorr: 86.2

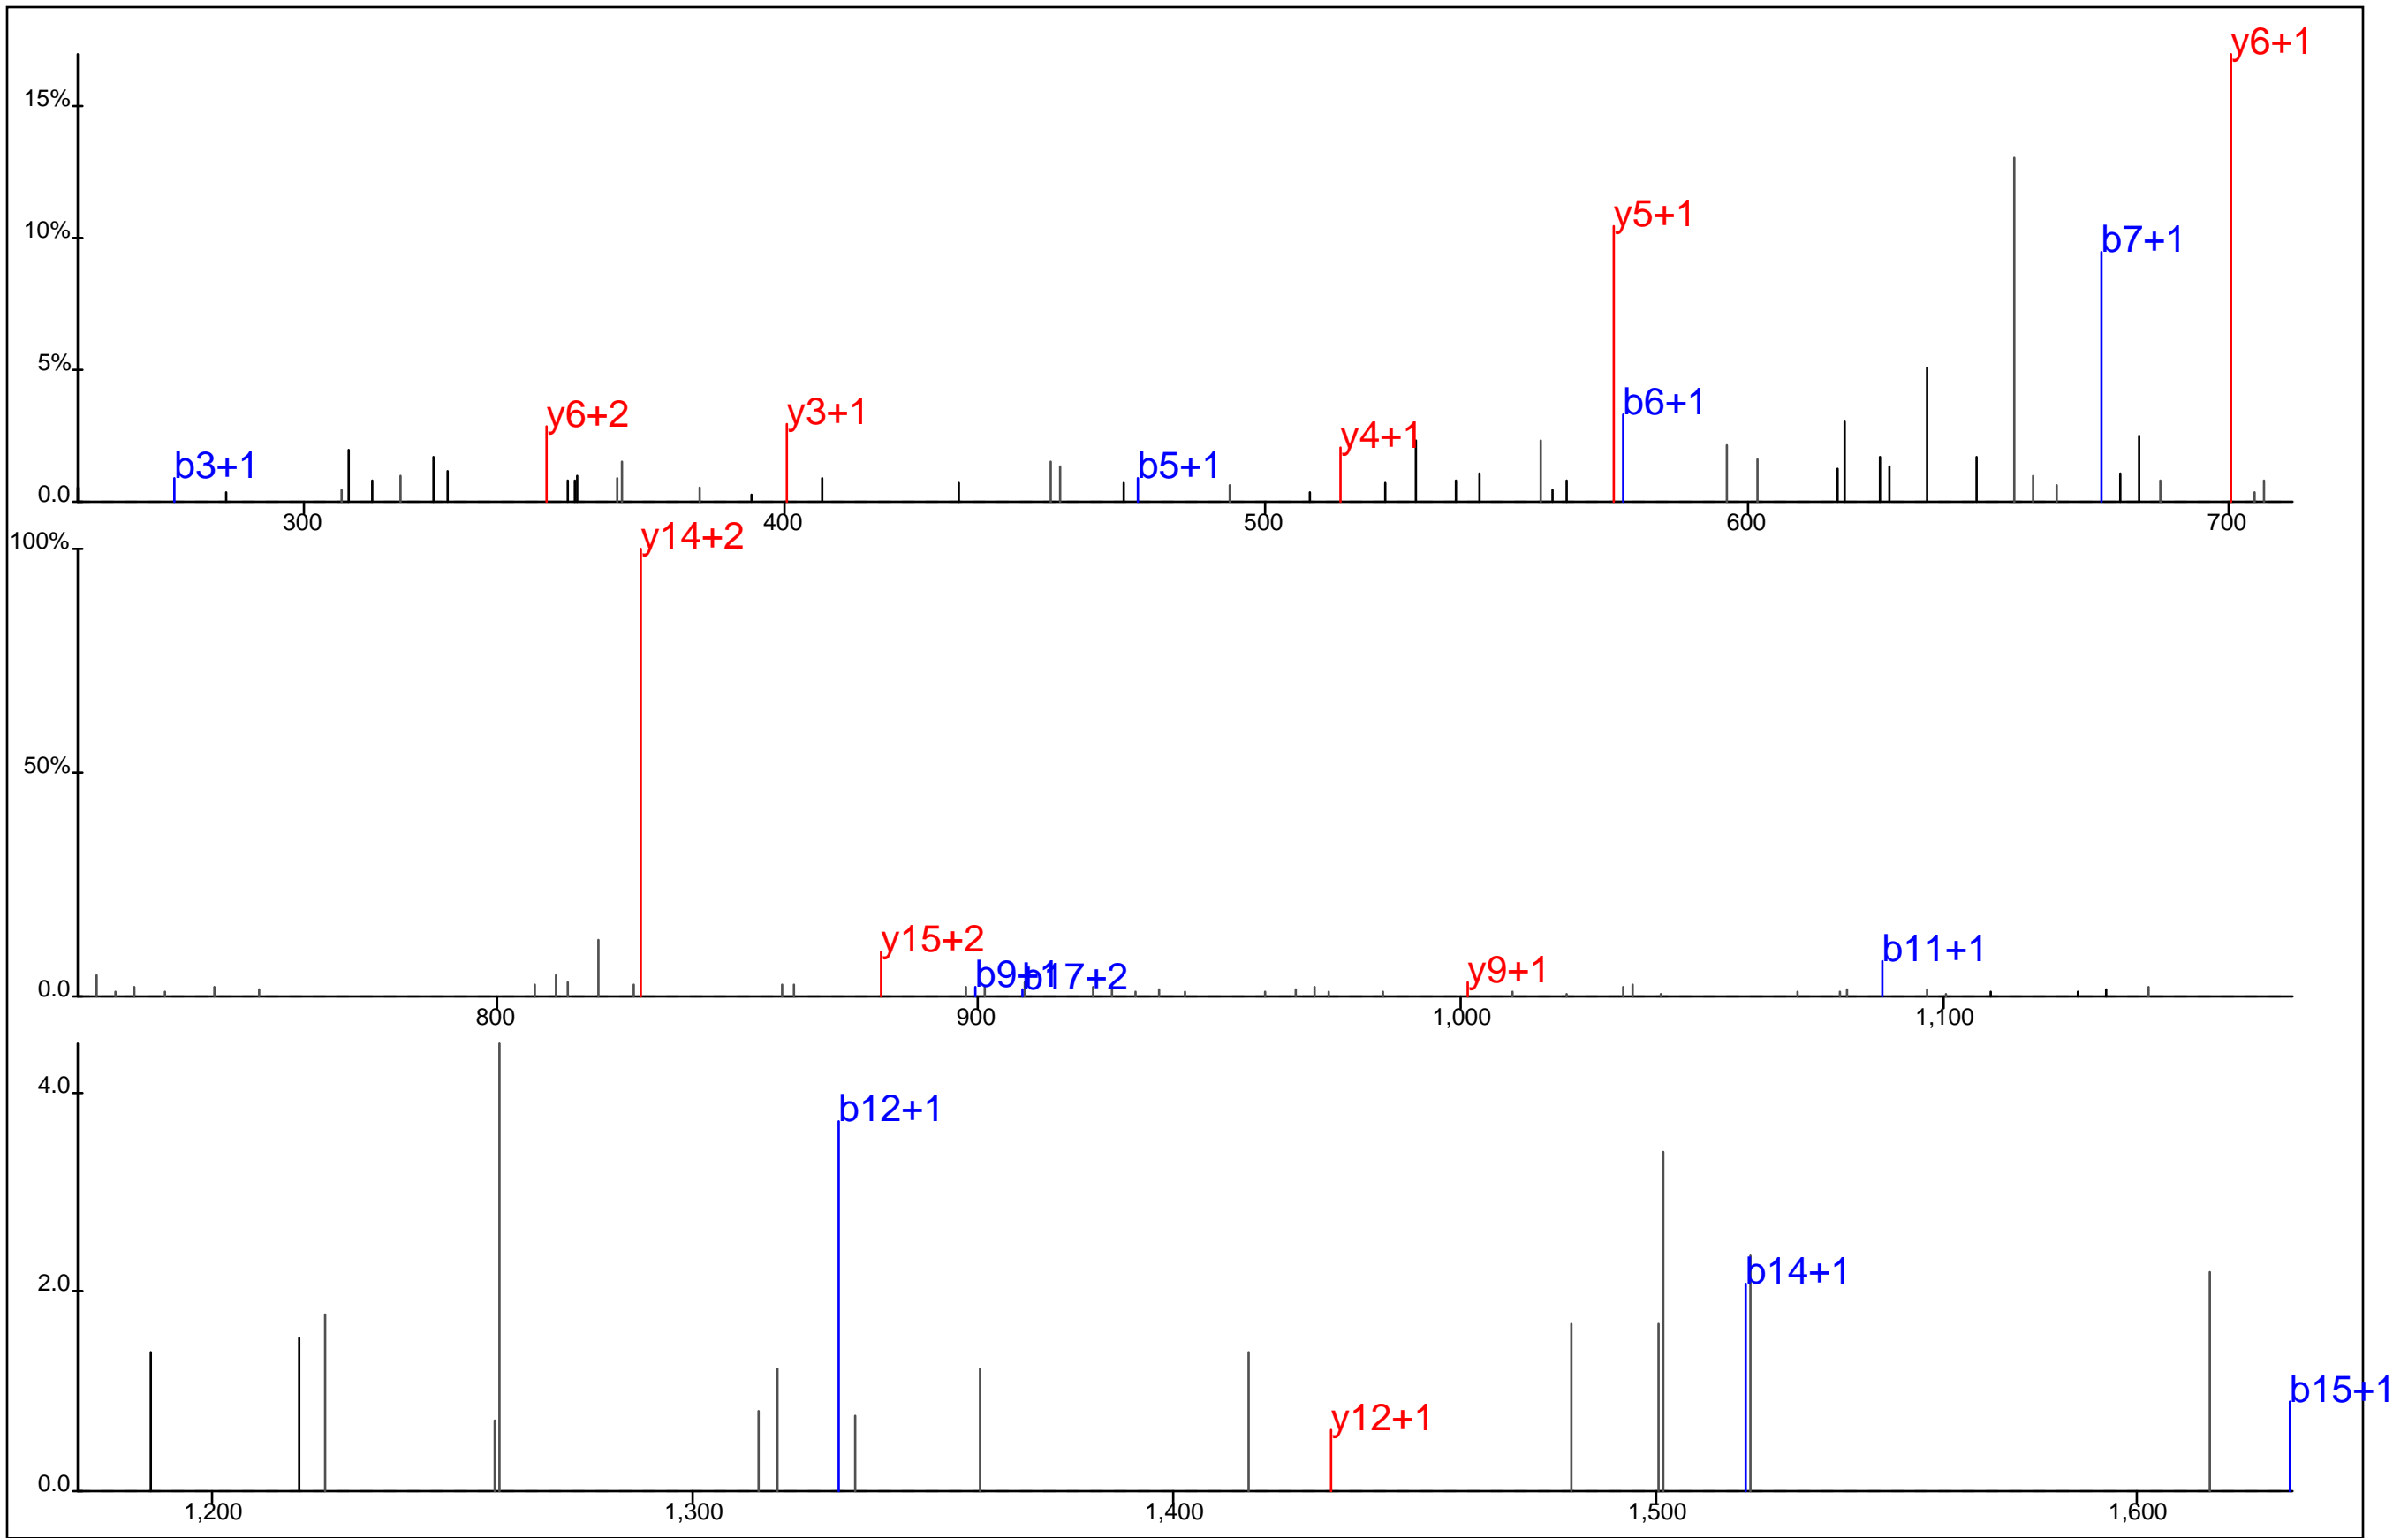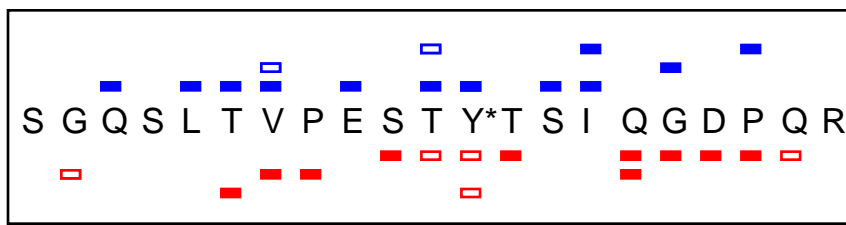

Protein Name: PAG  
 gi Accession: 0  
 Precursor Mass: 777.6876+3  
 Delta Mass: 0.816 ppm  
 XCorr: 30.24

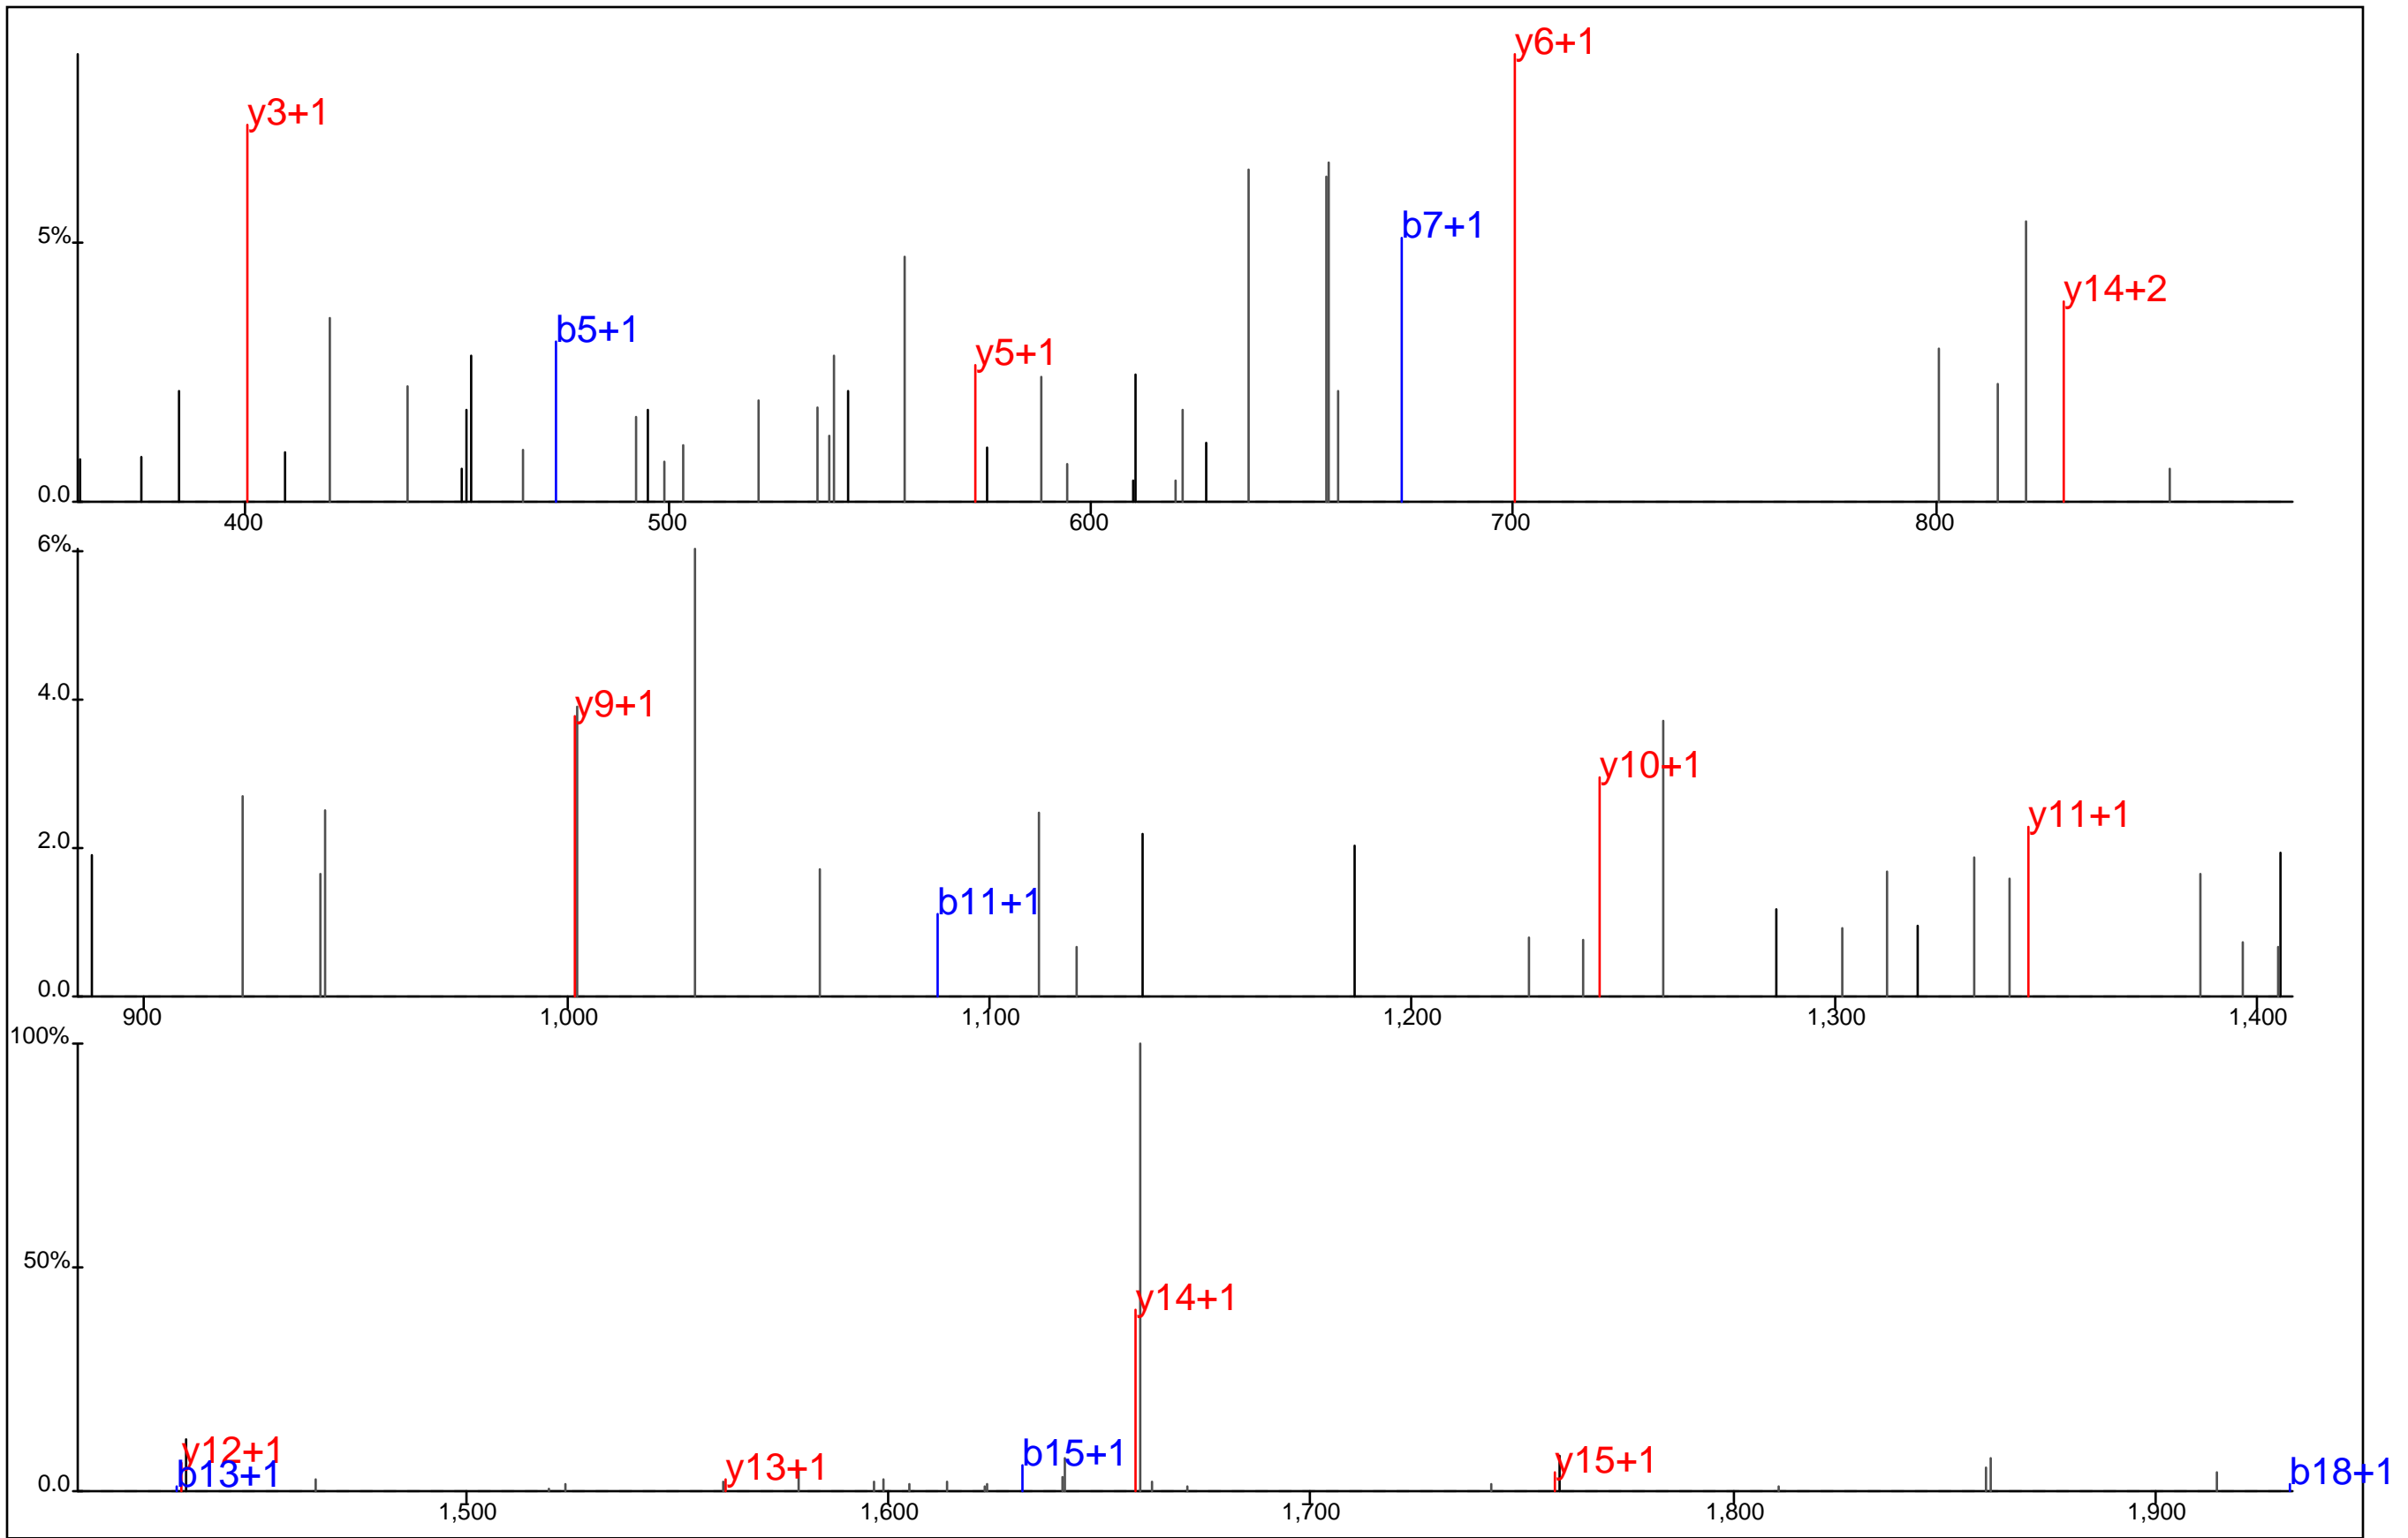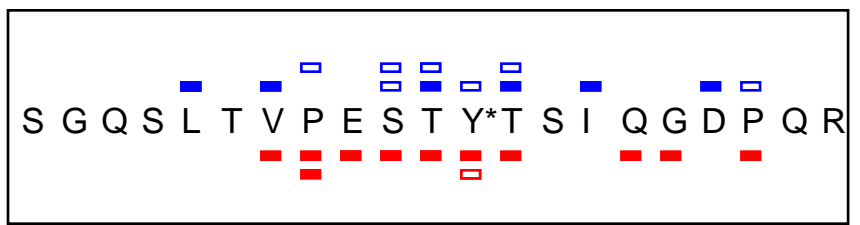

Protein Name: PAG  
 gi Accession: 0  
 Precursor Mass: 1,166.0310+2  
 Delta Mass: 2.018 ppm  
 XCorr: 30.05

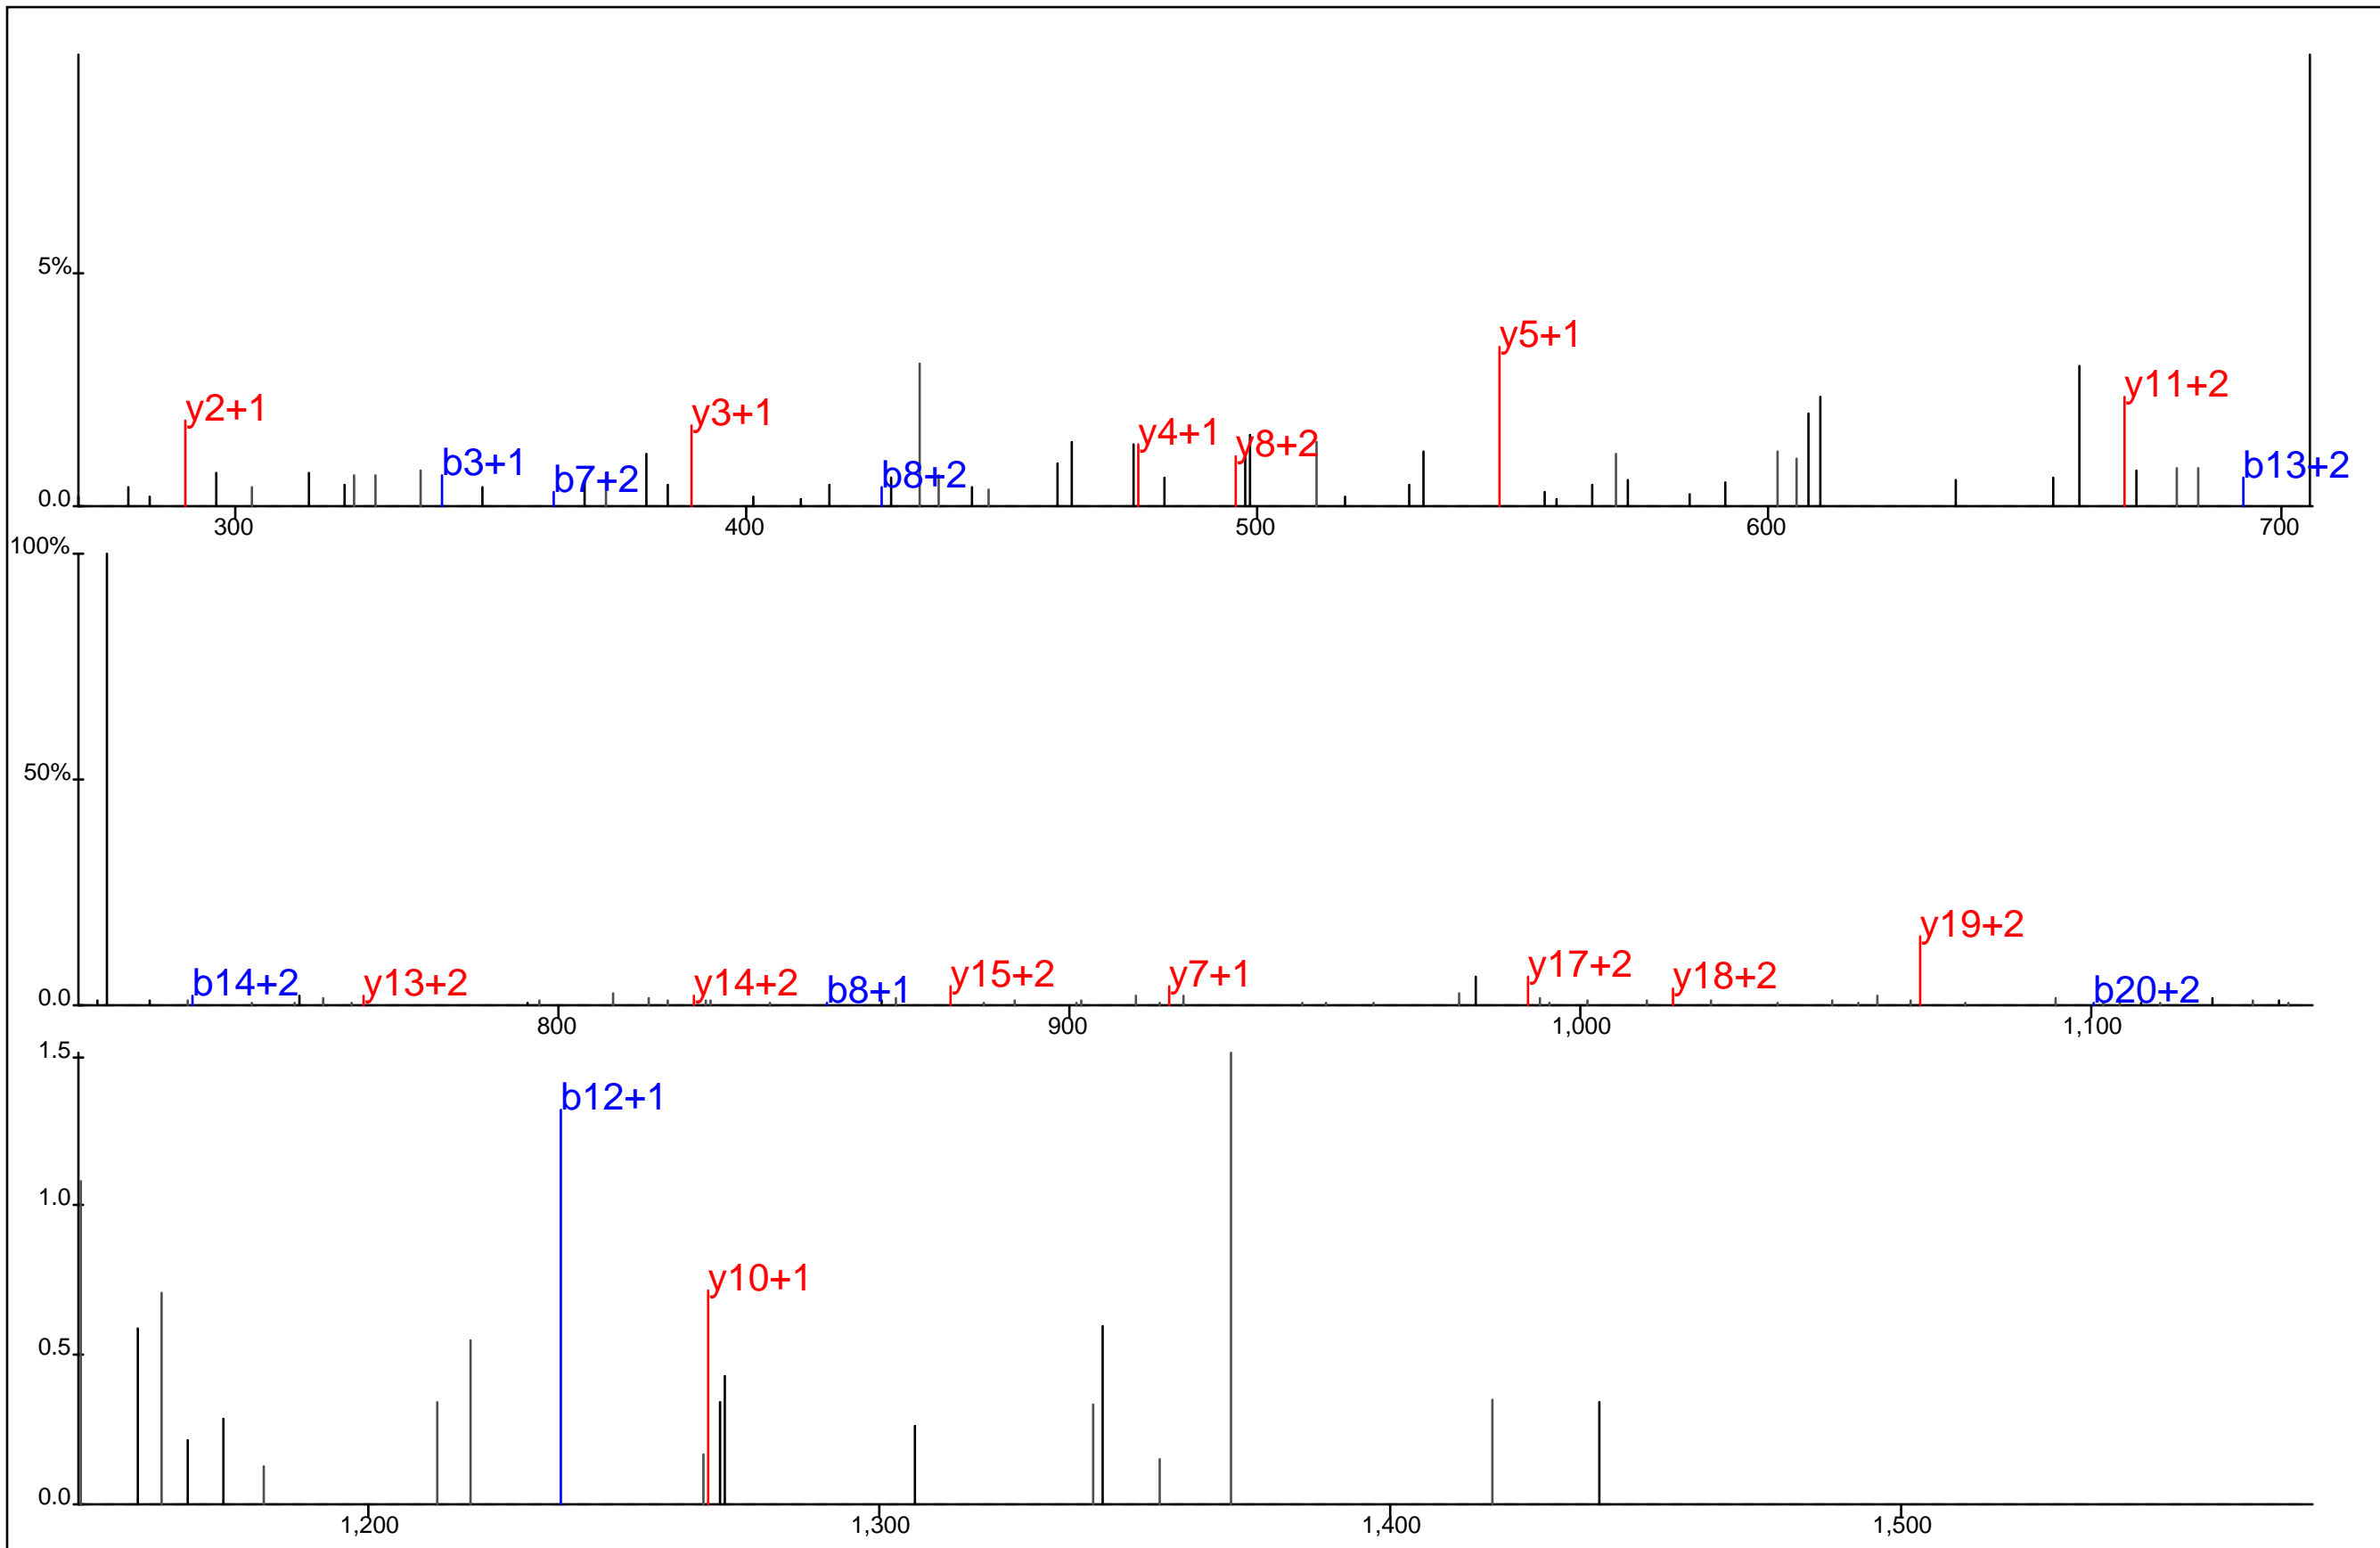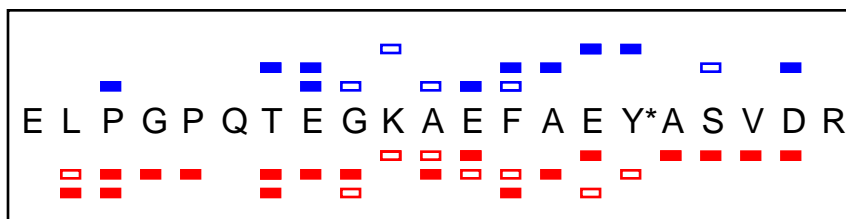

Protein Name: PAG  
 gi Accession: 0  
 Precursor Mass: 792.0244+3  
 Delta Mass: 0.558 ppm  
 XCorr: 20.71

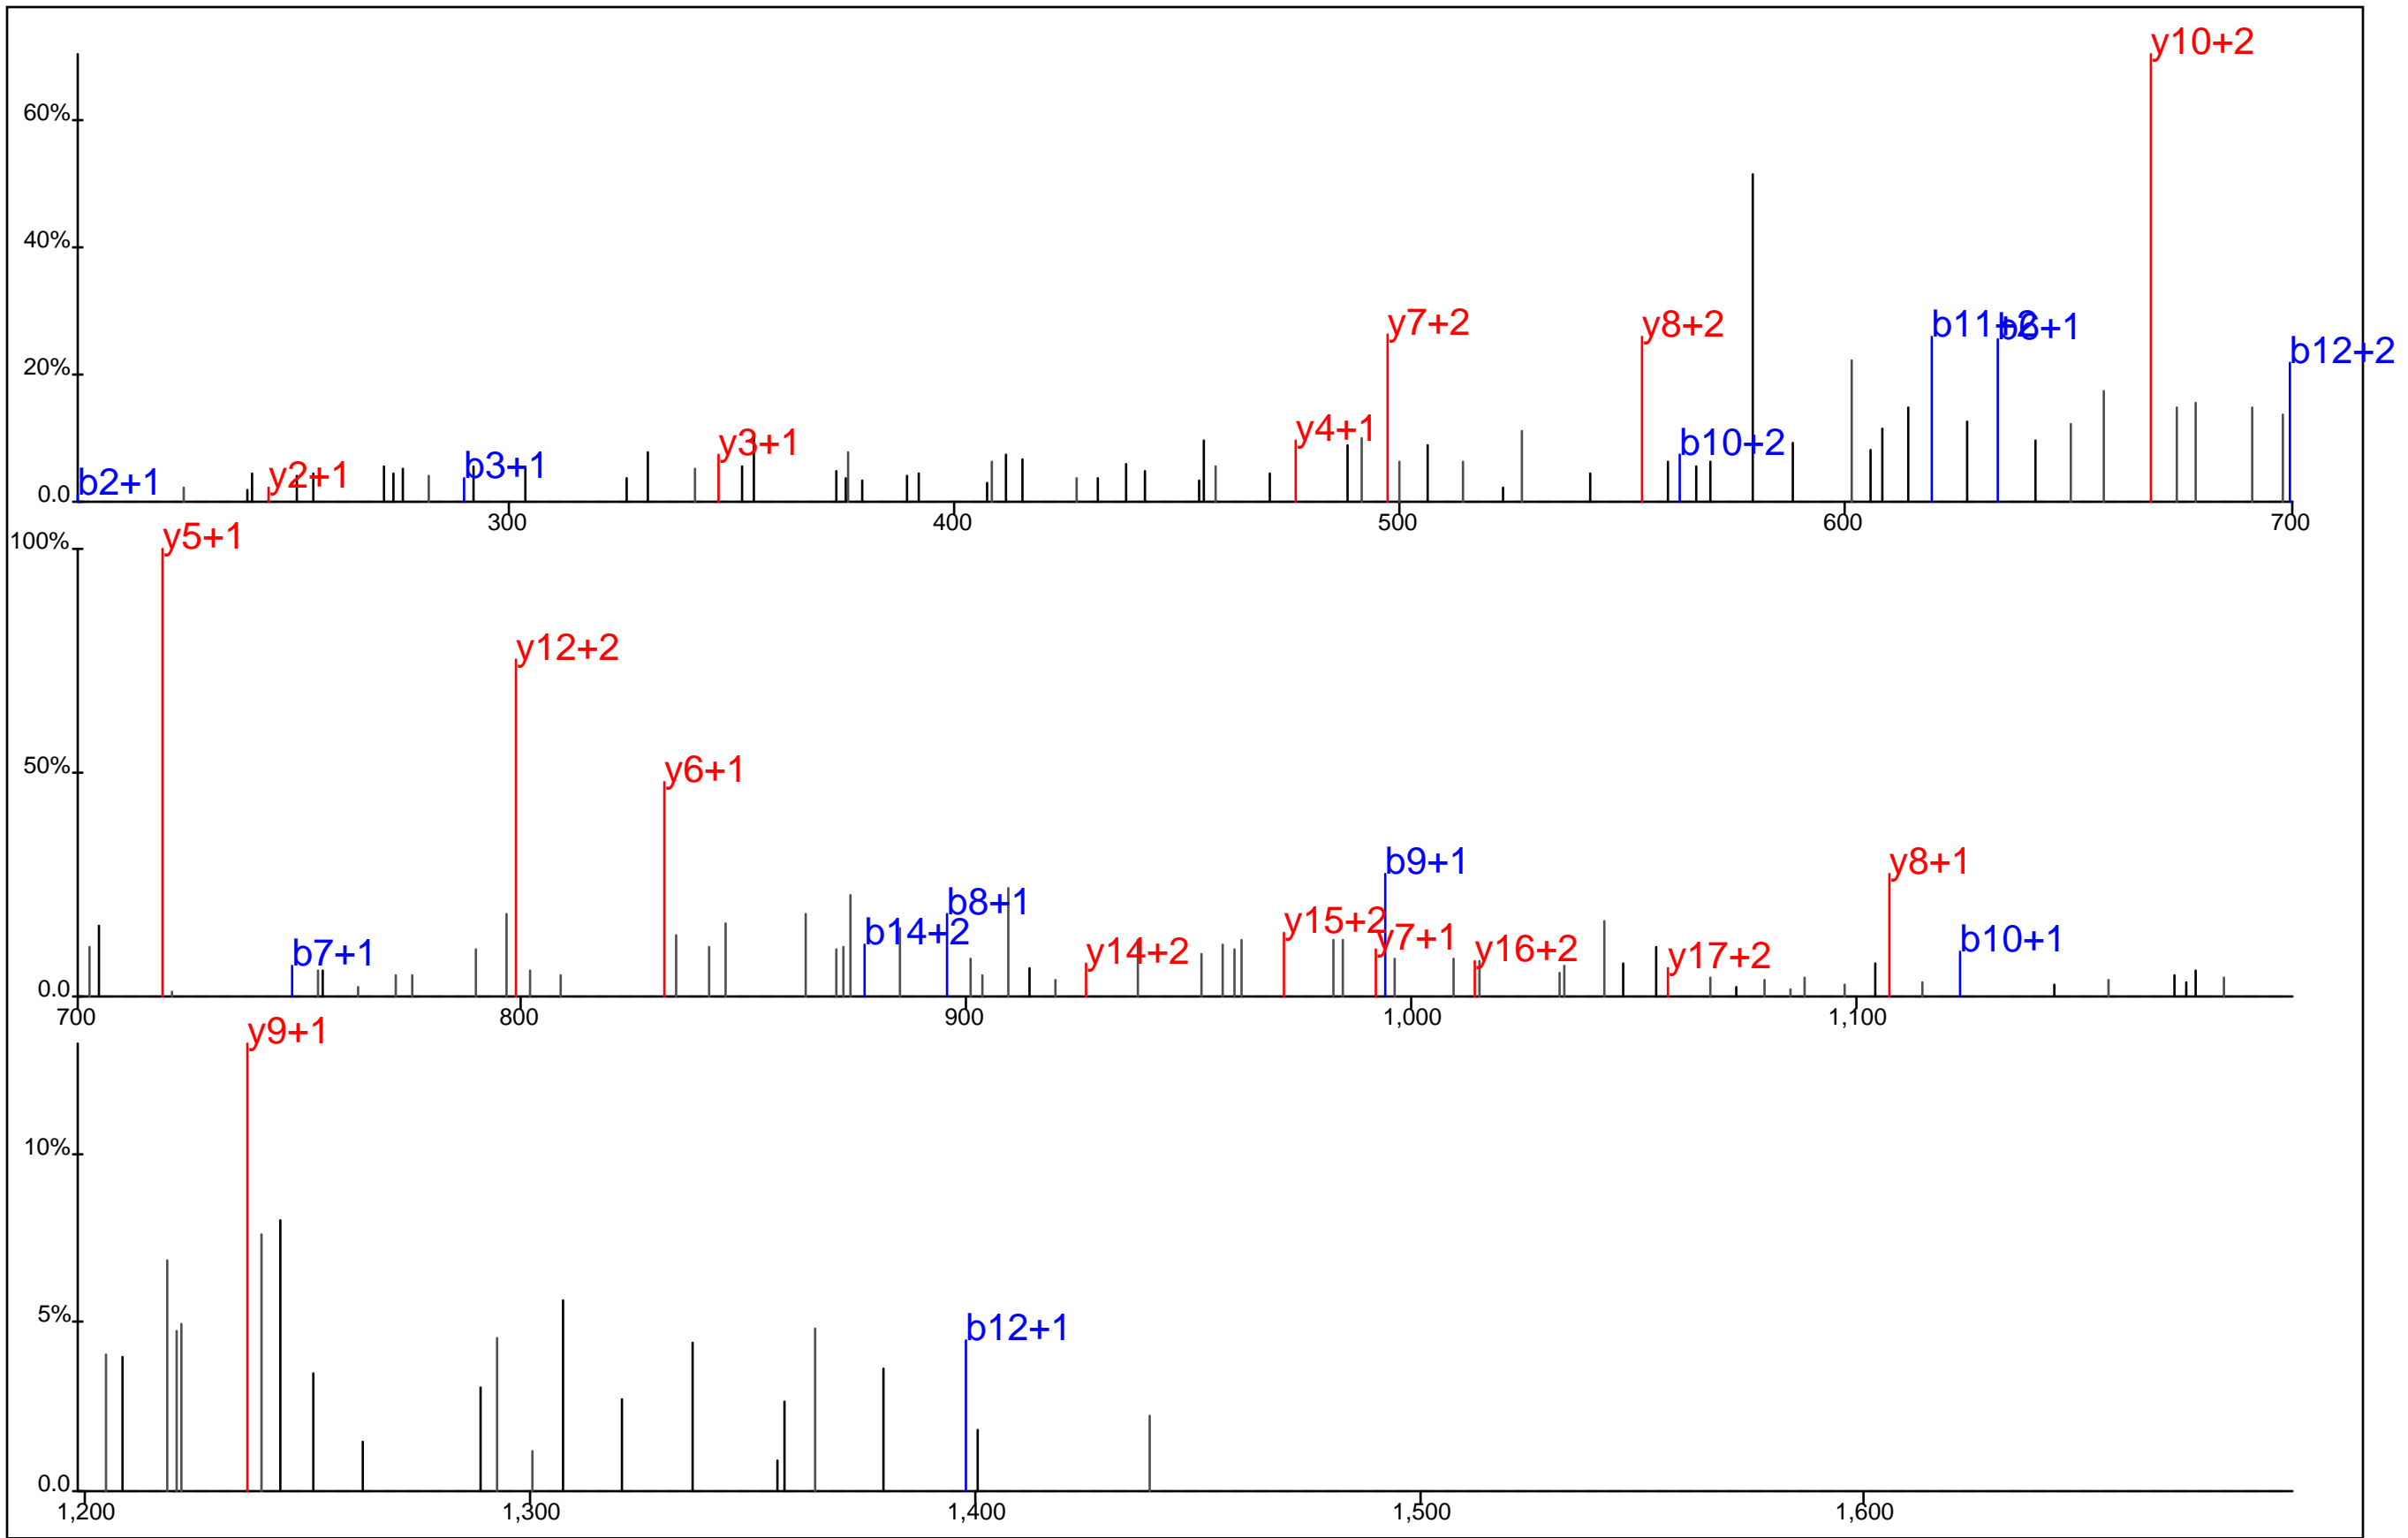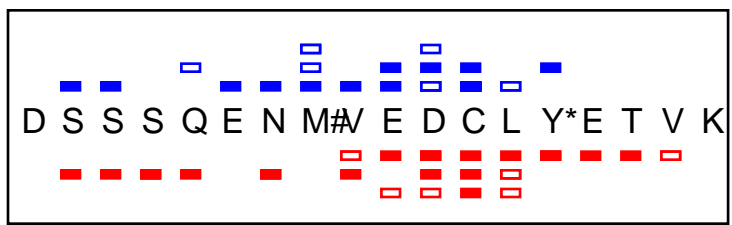

Protein Name: PAG  
 gi Accession: 0  
 Precursor Mass: 743.9570+3  
 Delta Mass: 0.016 ppm  
 XCorr: 25.87

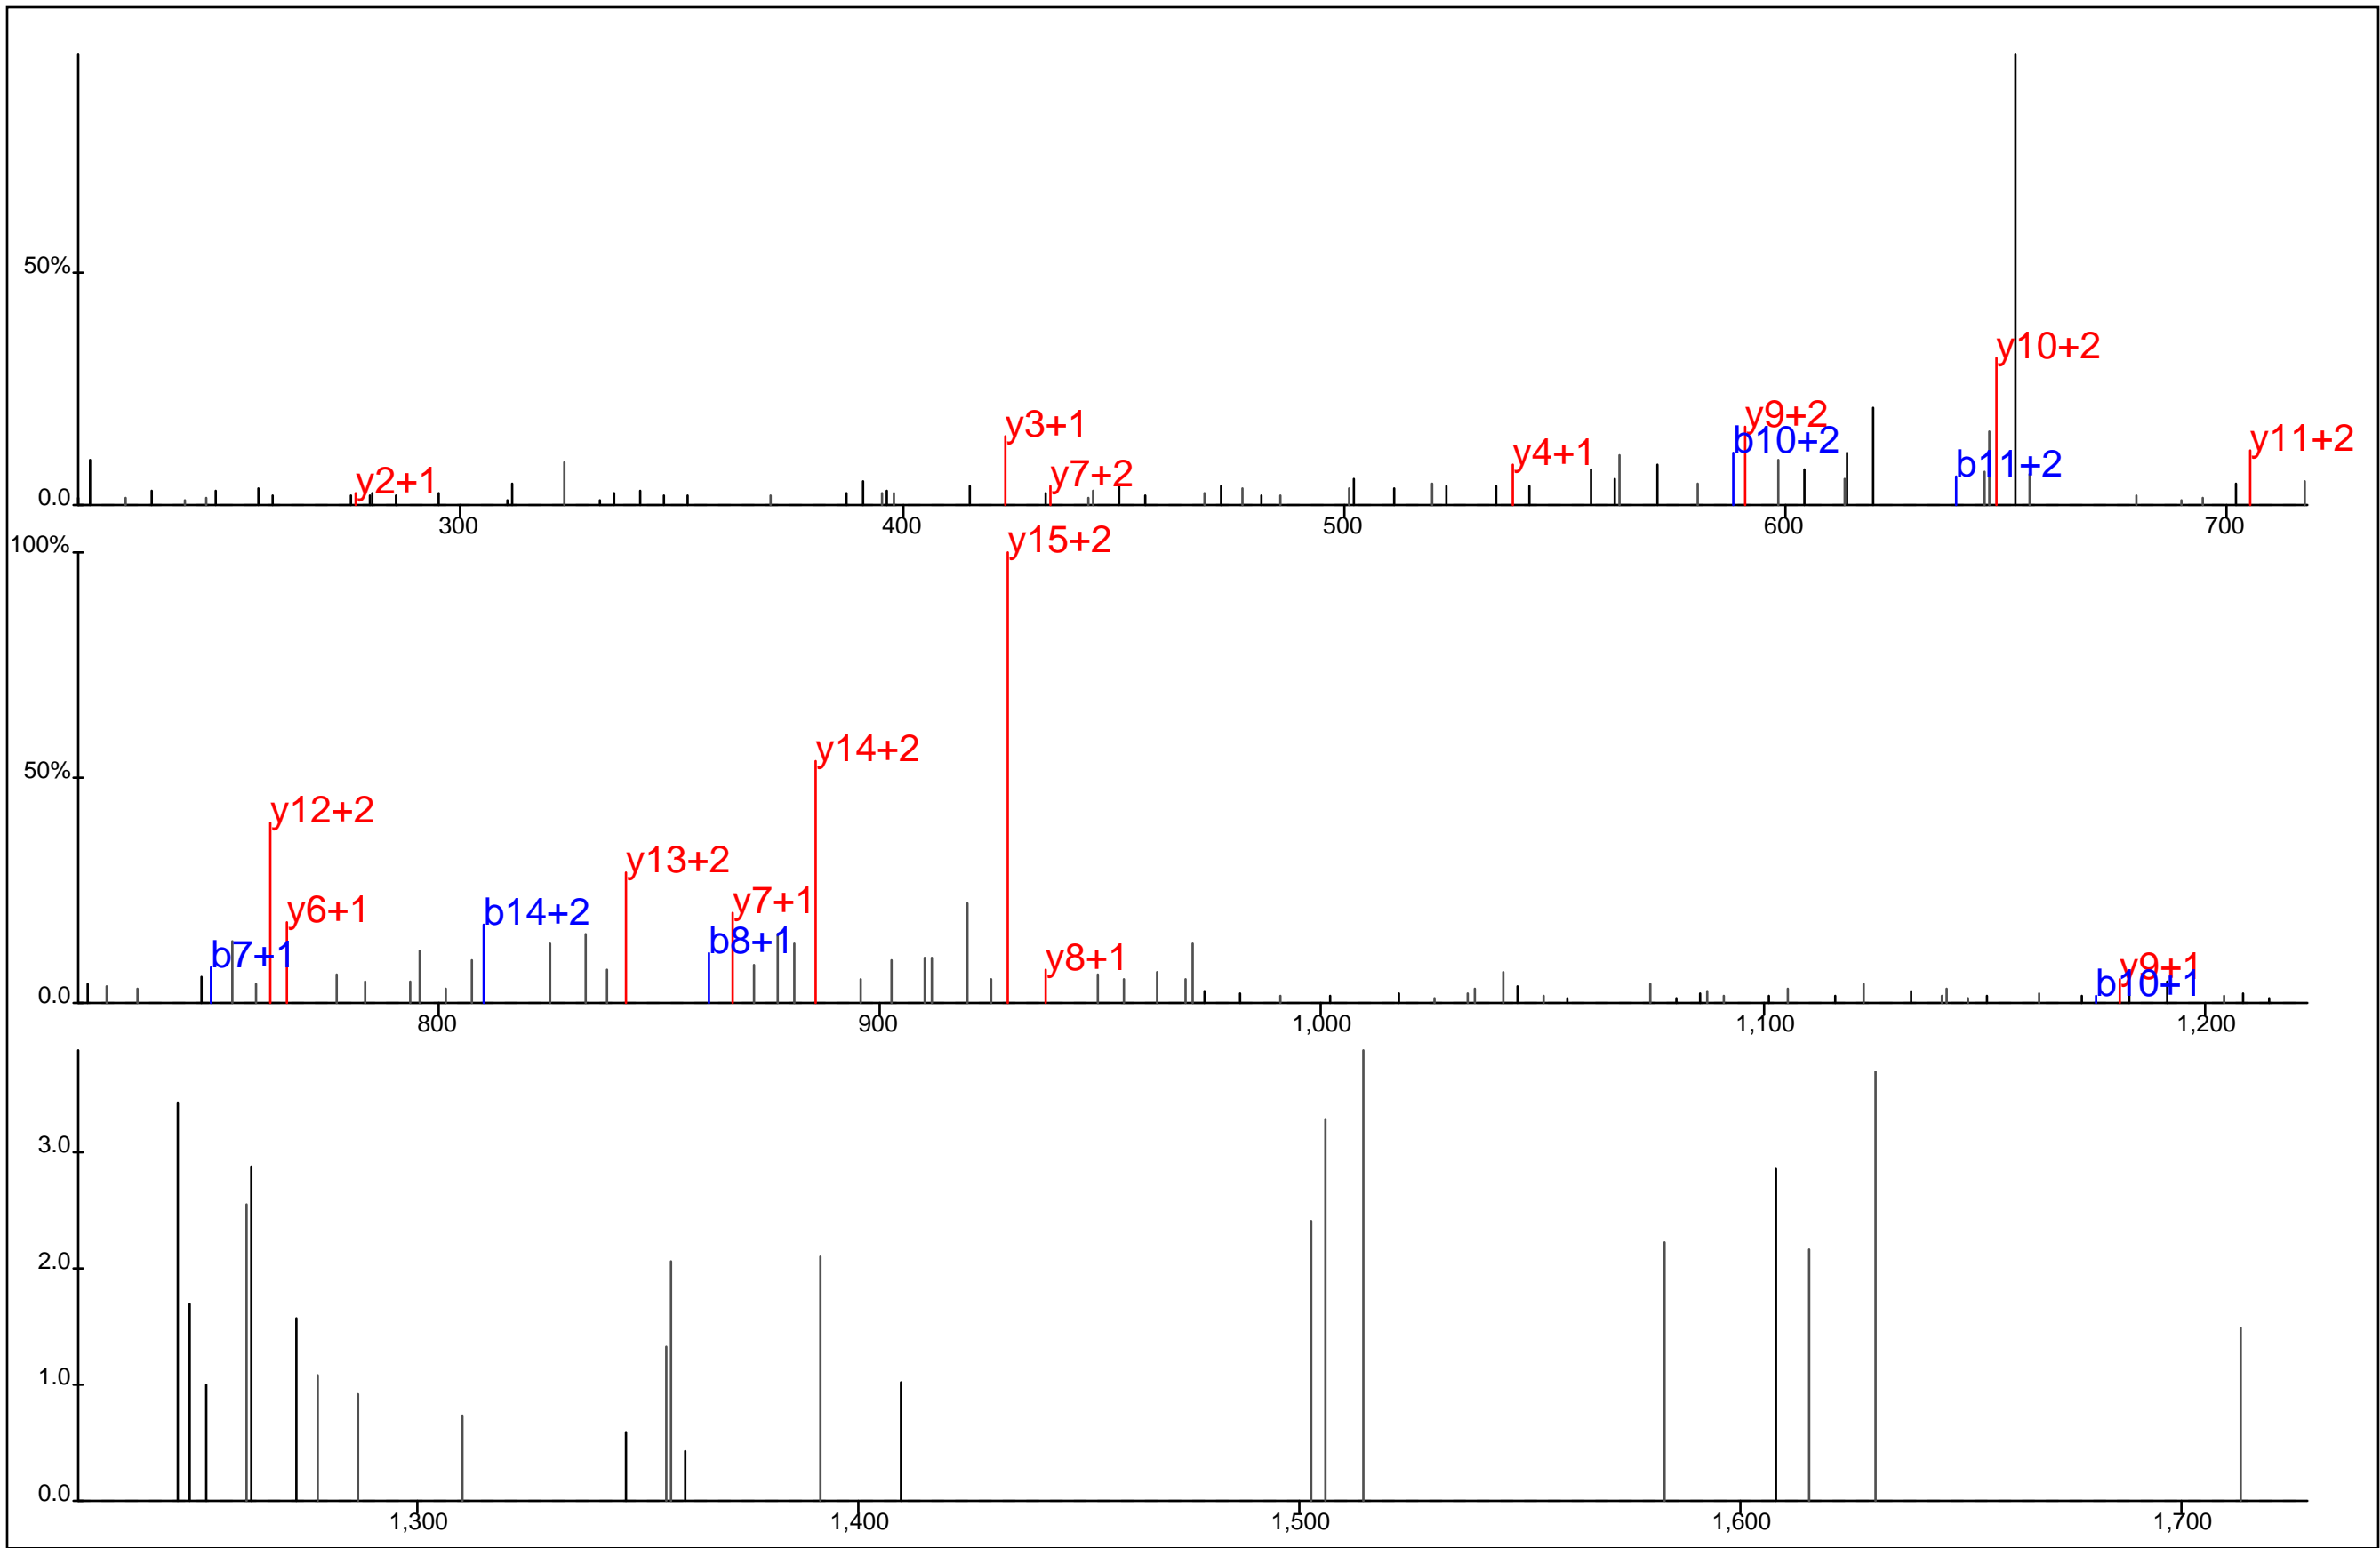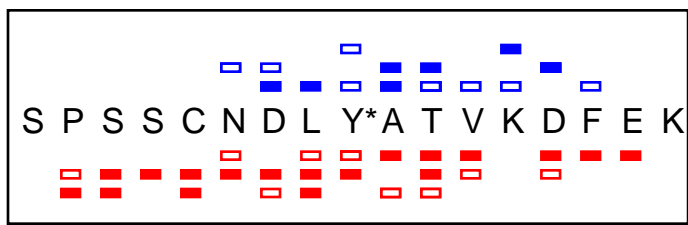

Protein Name: PAG  
 gi Accession: 0  
 Precursor Mass: 680.9589+3  
 Delta Mass: 0.105 ppm  
 XCorr: 25.26



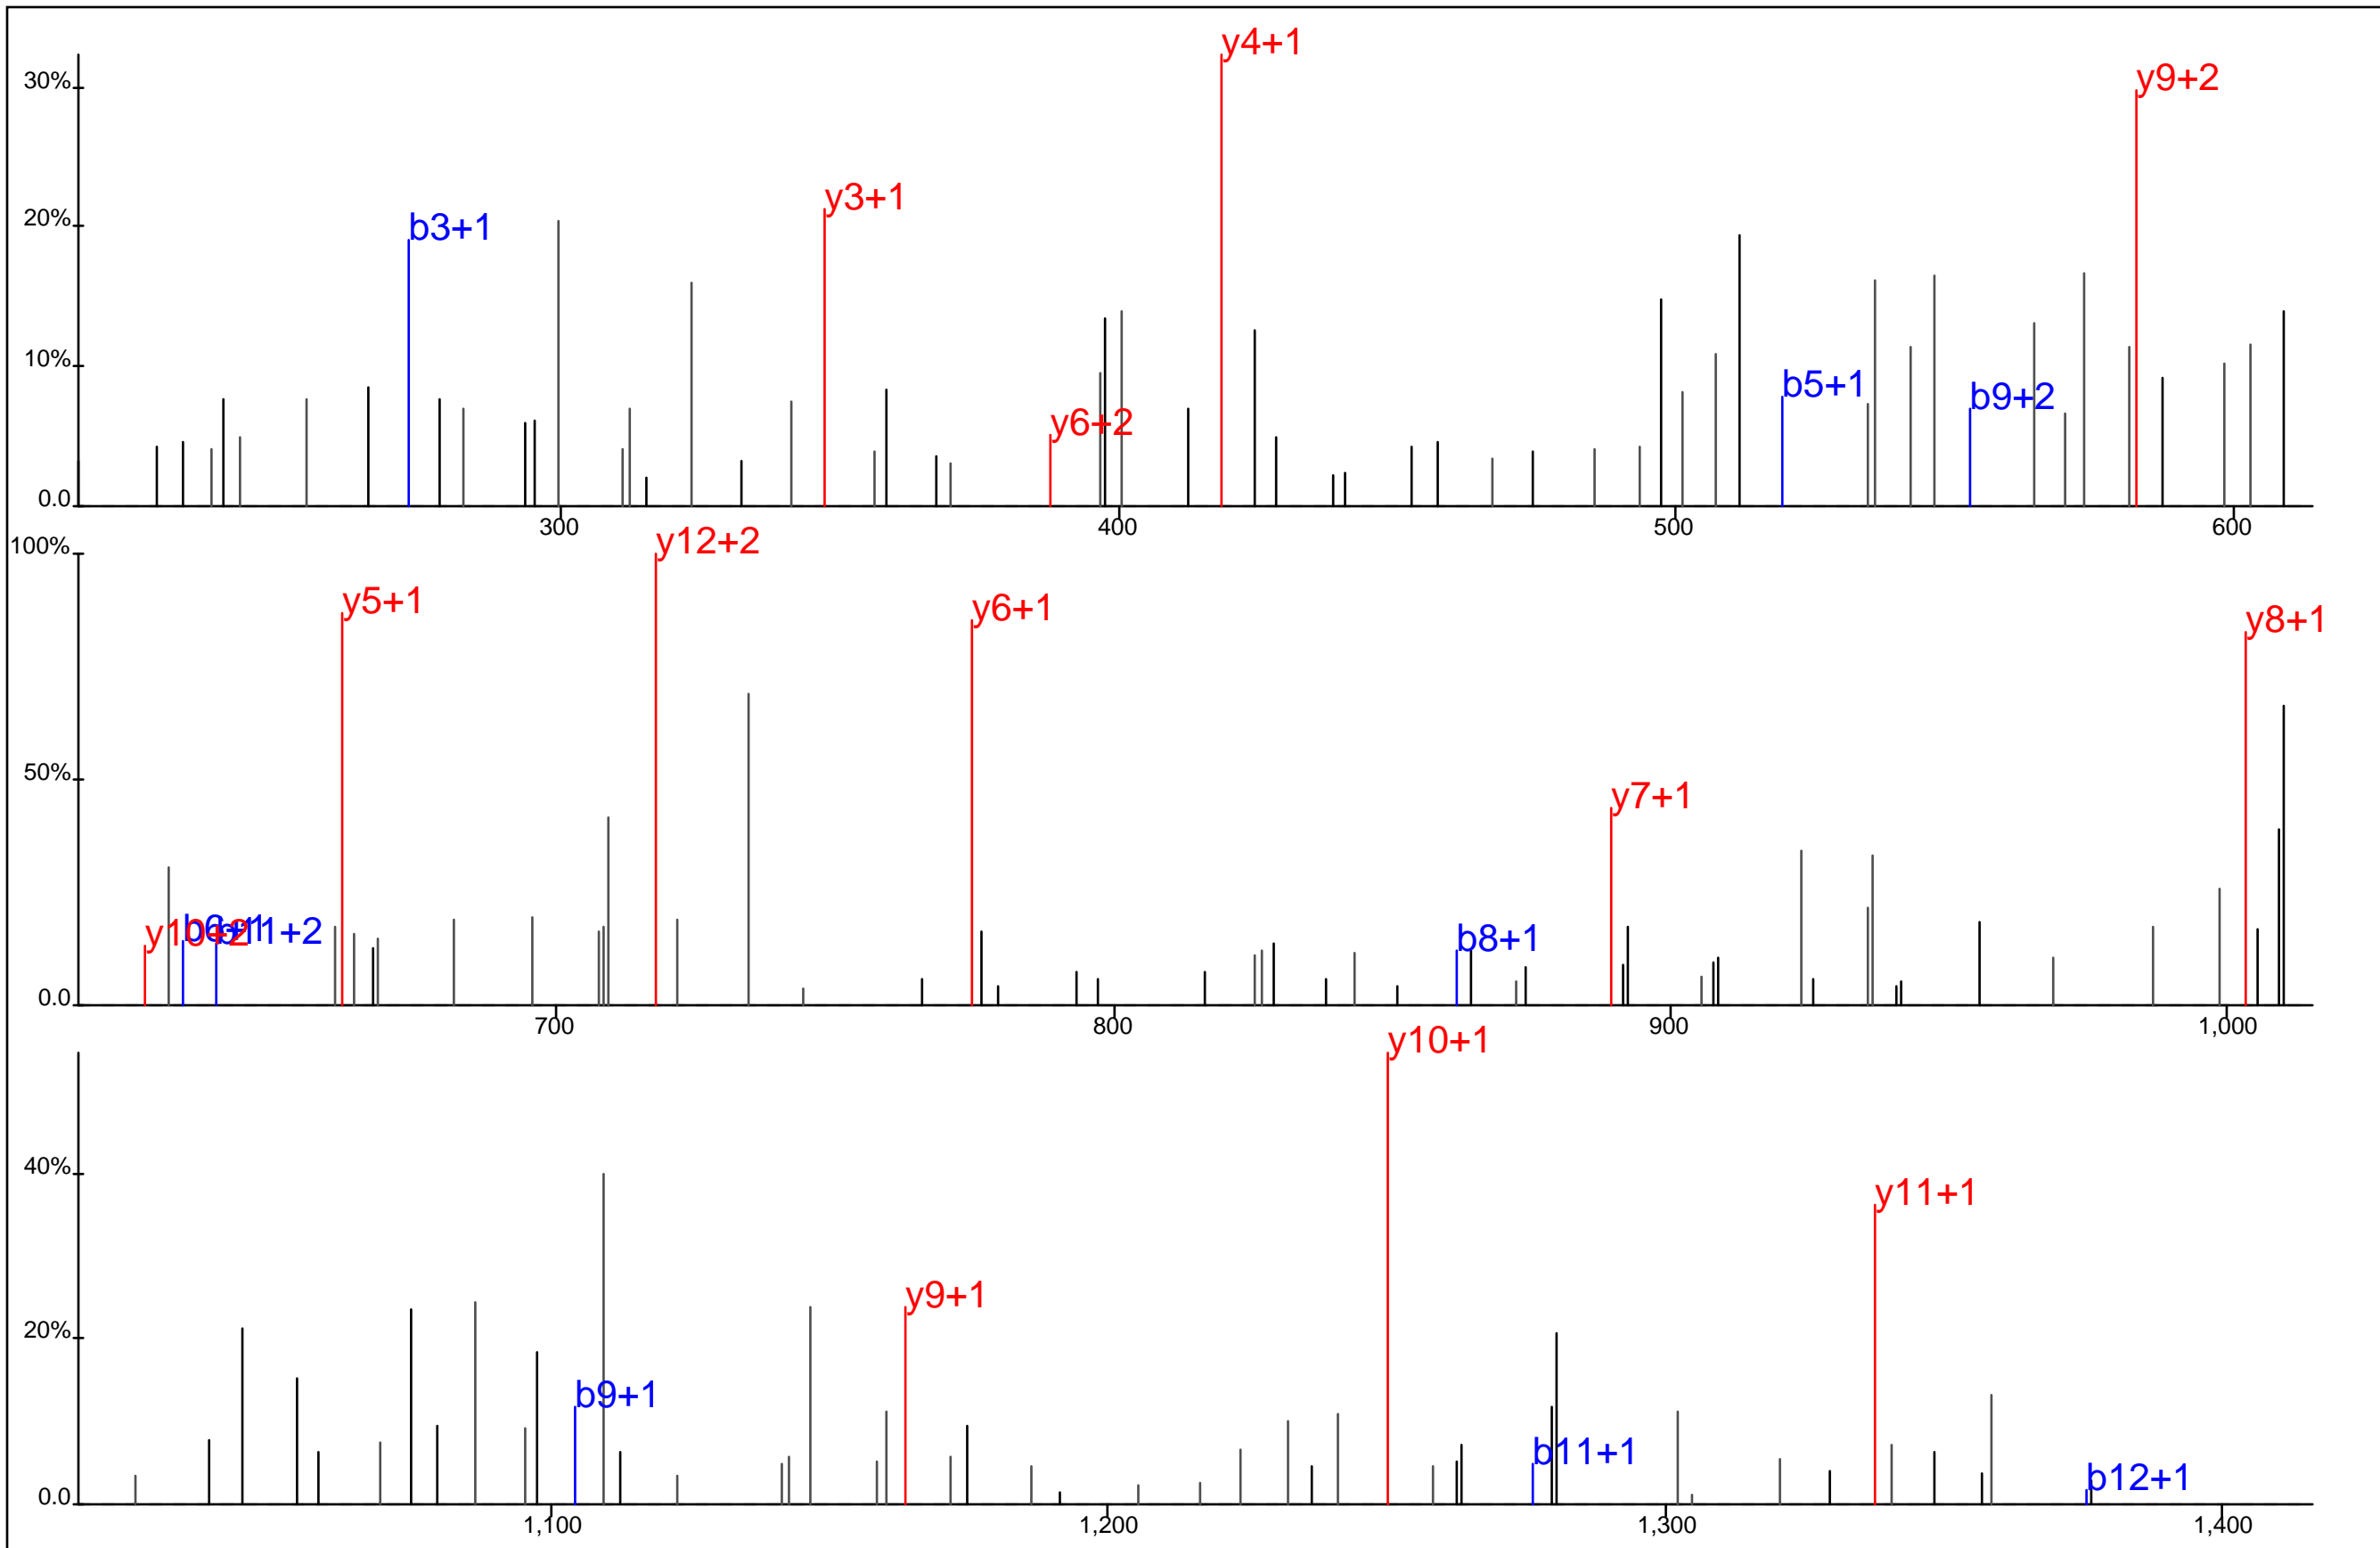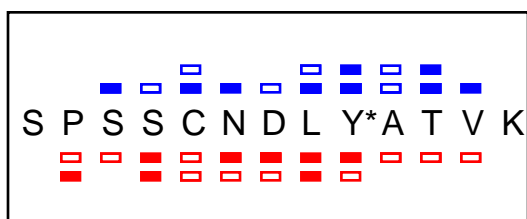

Protein Name: PAG  
 gi Accession: 0  
 Precursor Mass: 761.3187+2  
 Delta Mass: 0.719 ppm  
 XCorr: 70.02

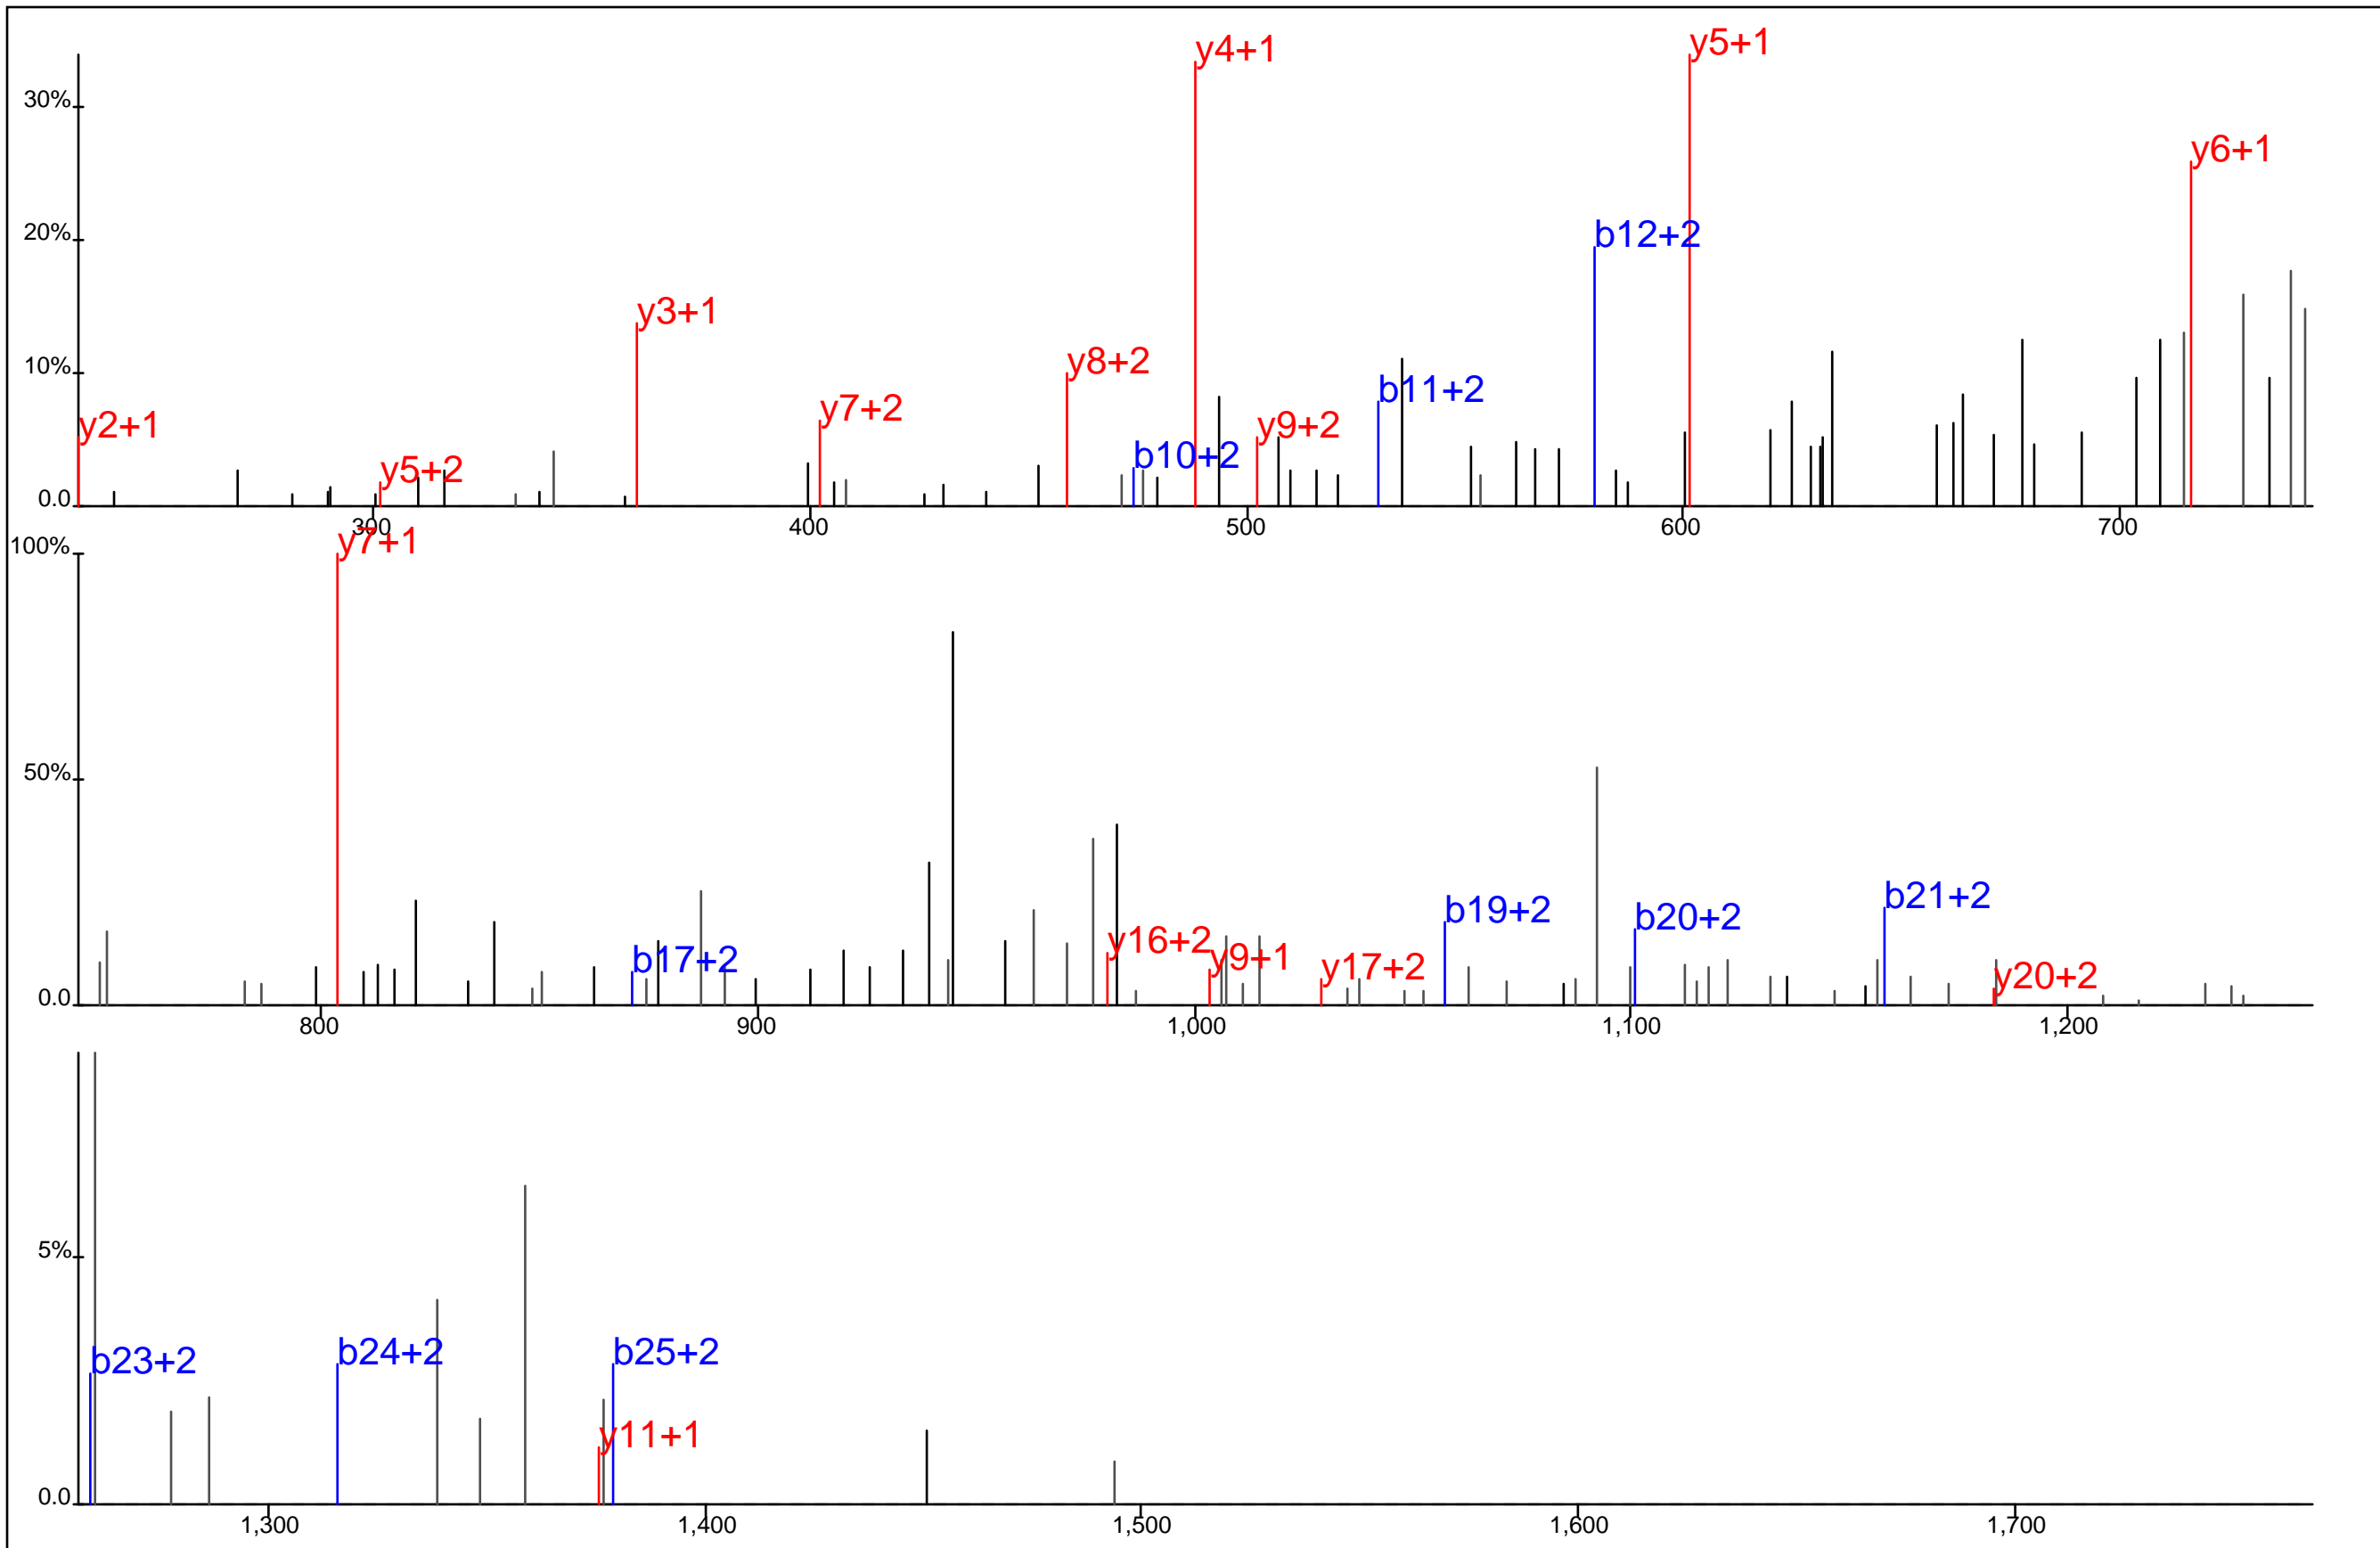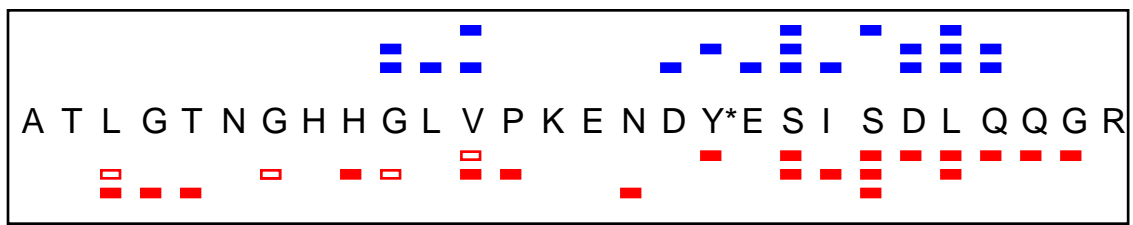

Protein Name: PAG  
 gi Accession: 0  
 Precursor Mass: 779.8699+4  
 Delta Mass: 4.615 ppm  
 XCorr: 25.14

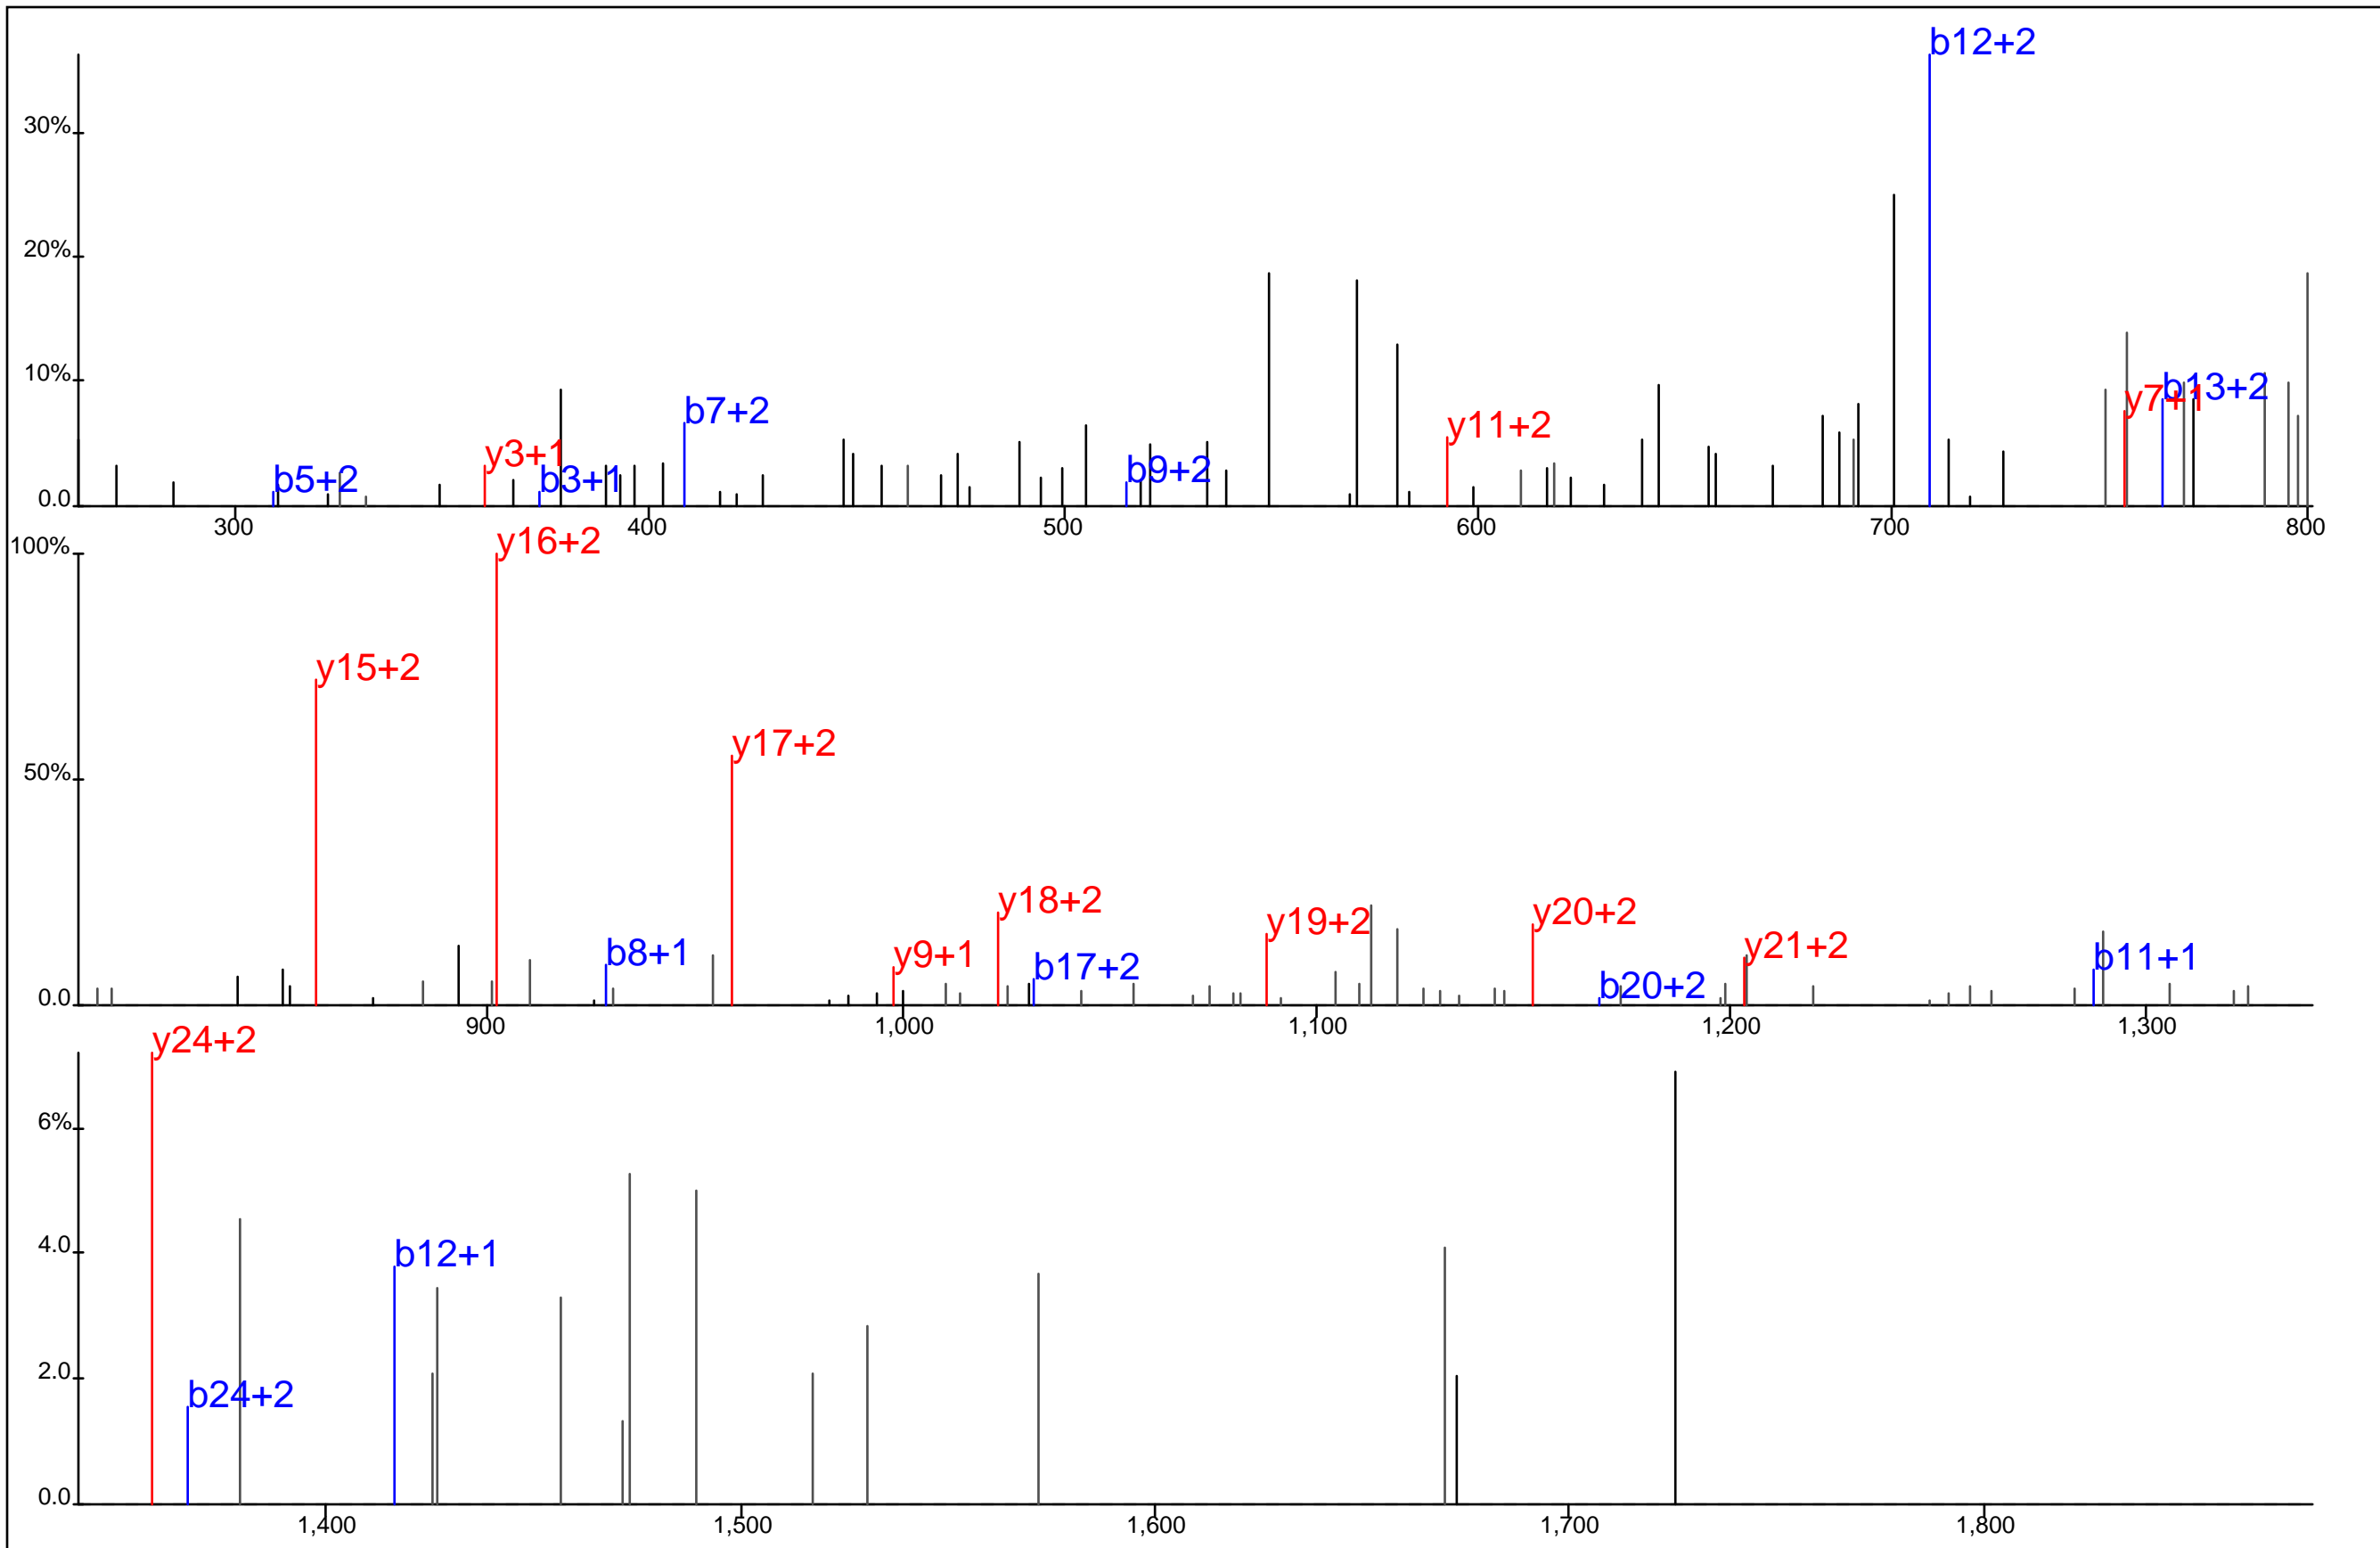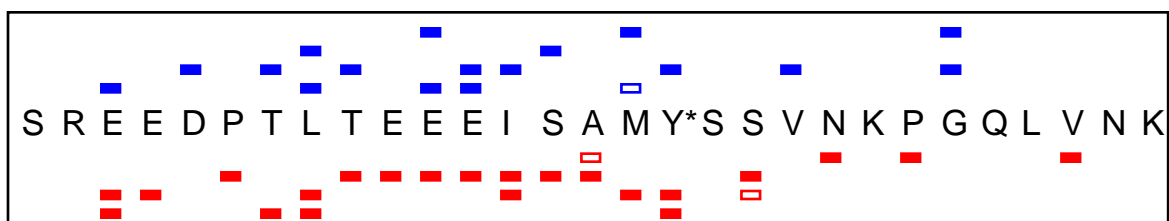

Protein Name: PAG  
 gi Accession: 0  
 Precursor Mass: 833.6407+4  
 Delta Mass: 0.378 ppm  
 XCorr: 28.11



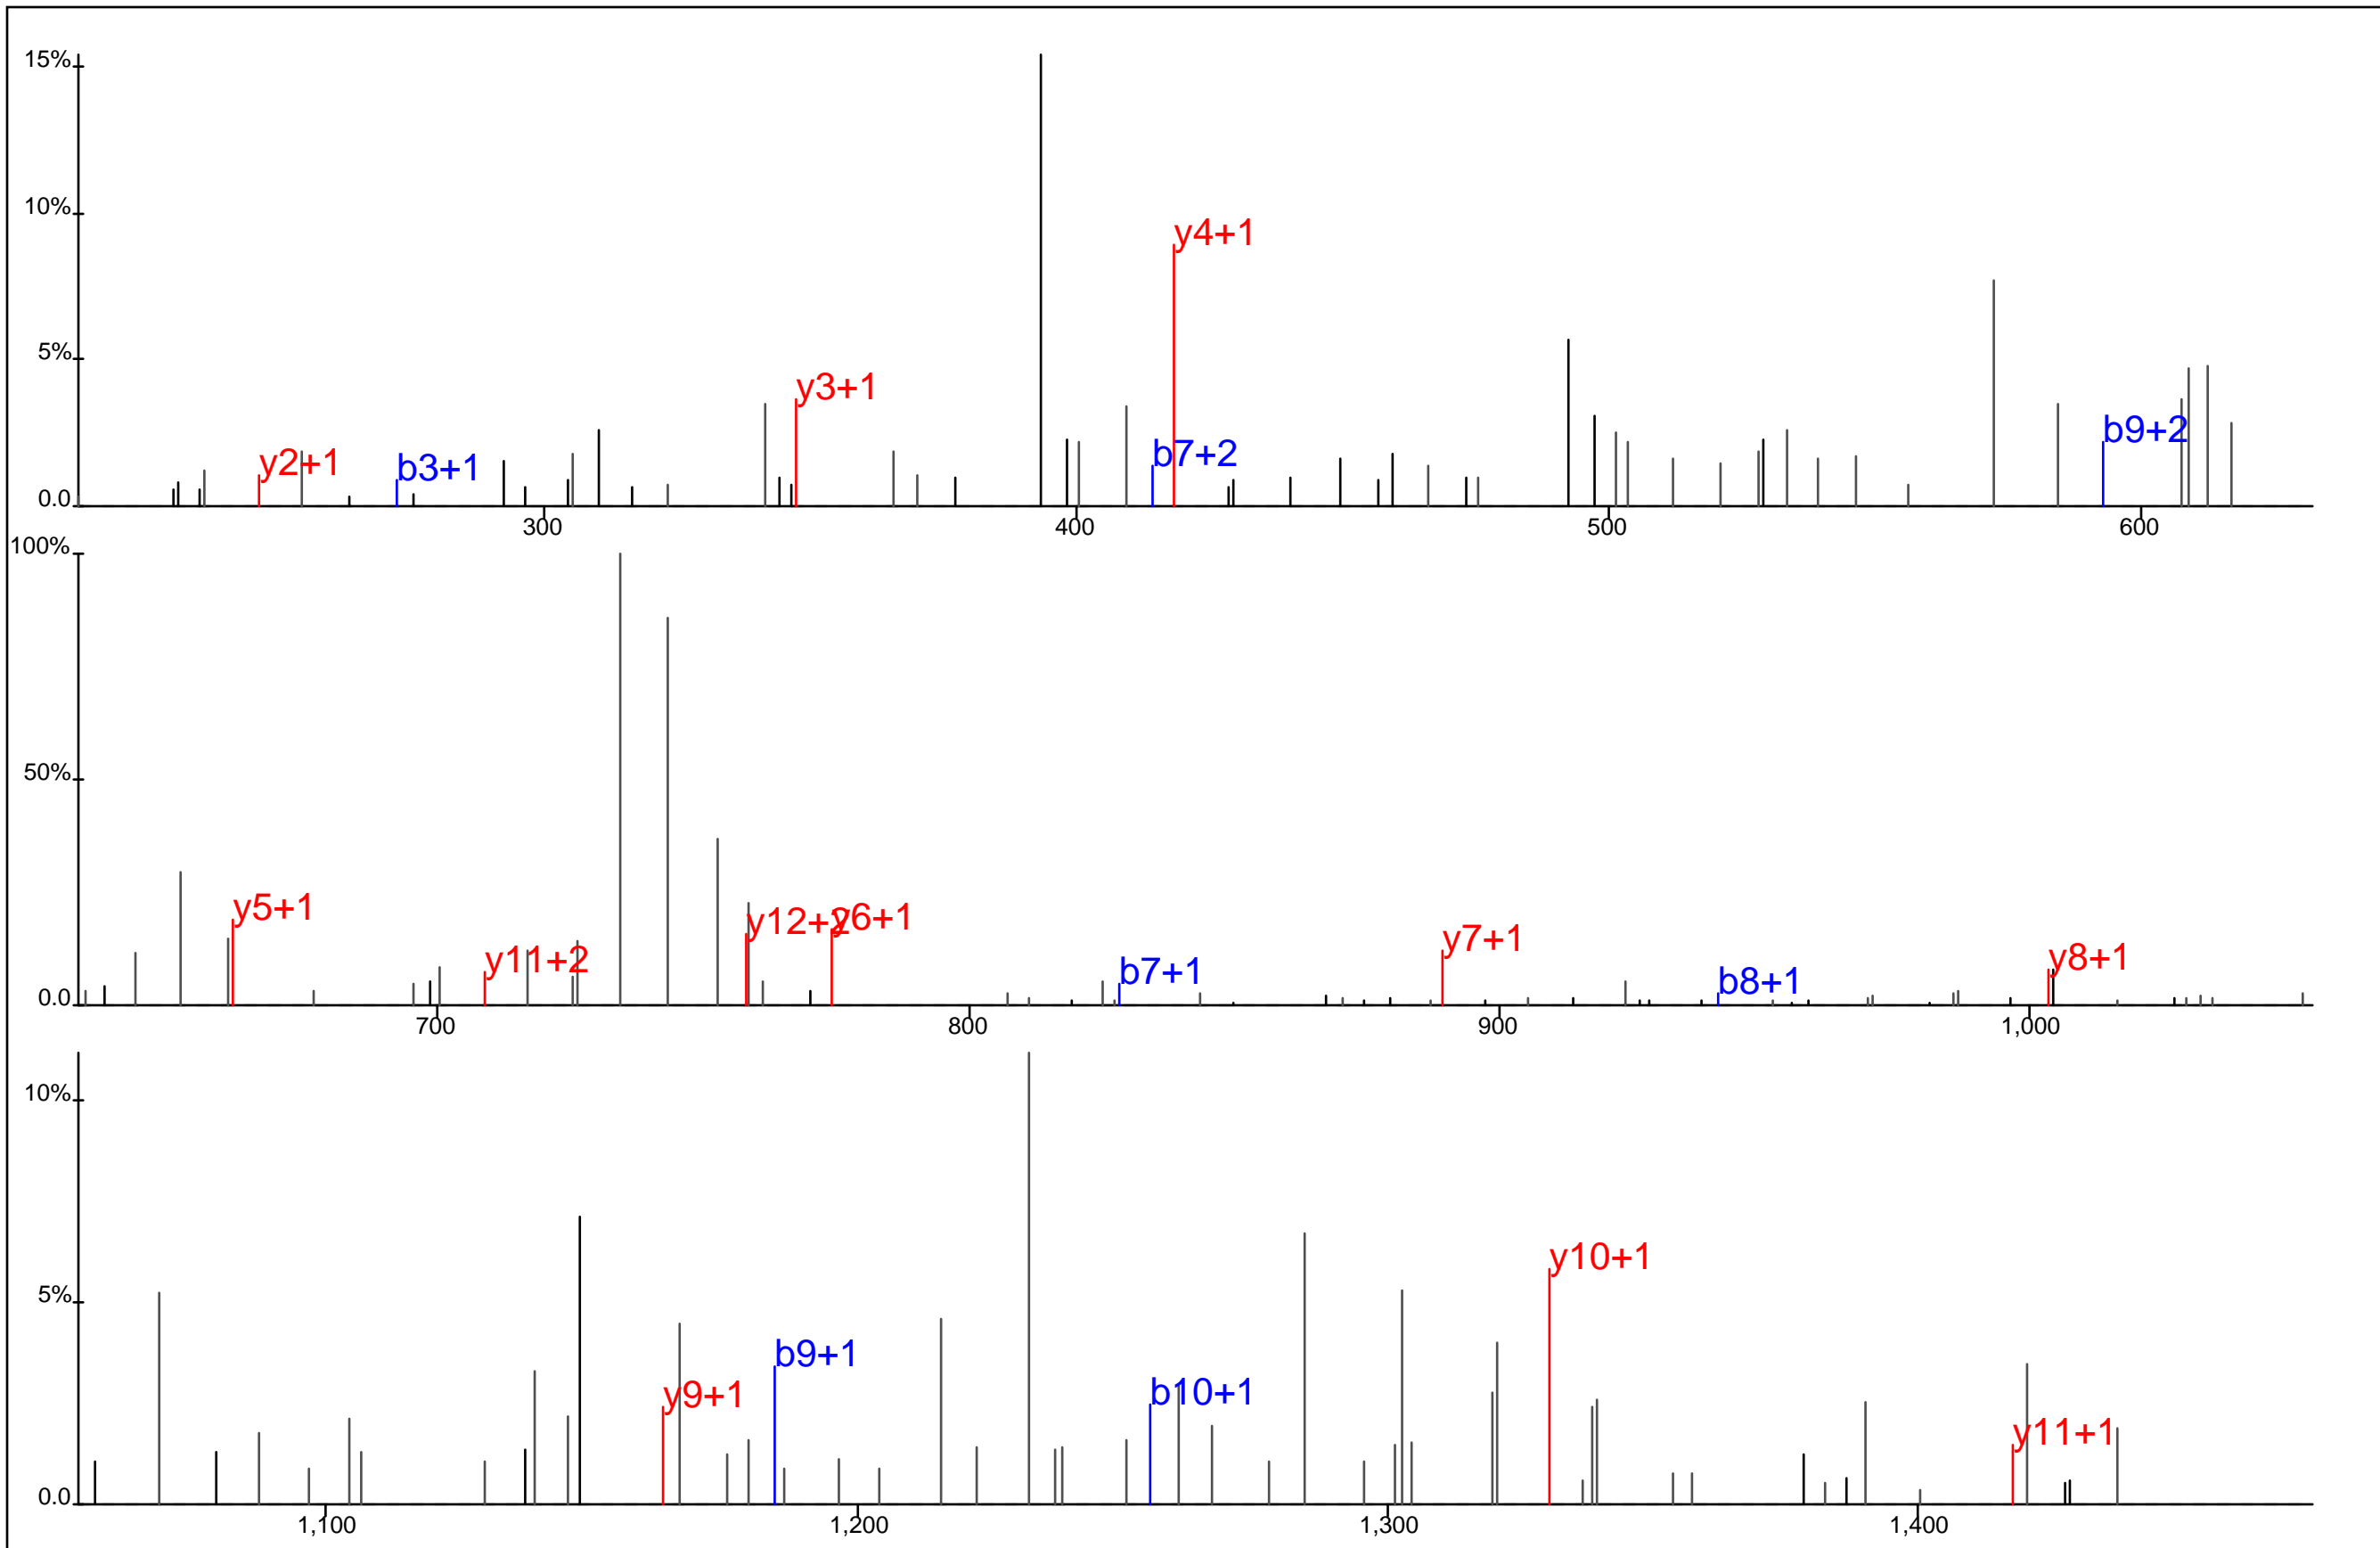

■ □ ■ □ ■ □ ■ □ ■ □  
 S P S S\* C N D L Y\* A T V K  
■ □ ■ □ ■ □ ■ □ ■ □ ■ □

Protein Name: PAG  
 gi Accession: 0  
 Precursor Mass: 801.2996+2  
 Delta Mass: 2.227 ppm  
 XCorr: 46.81

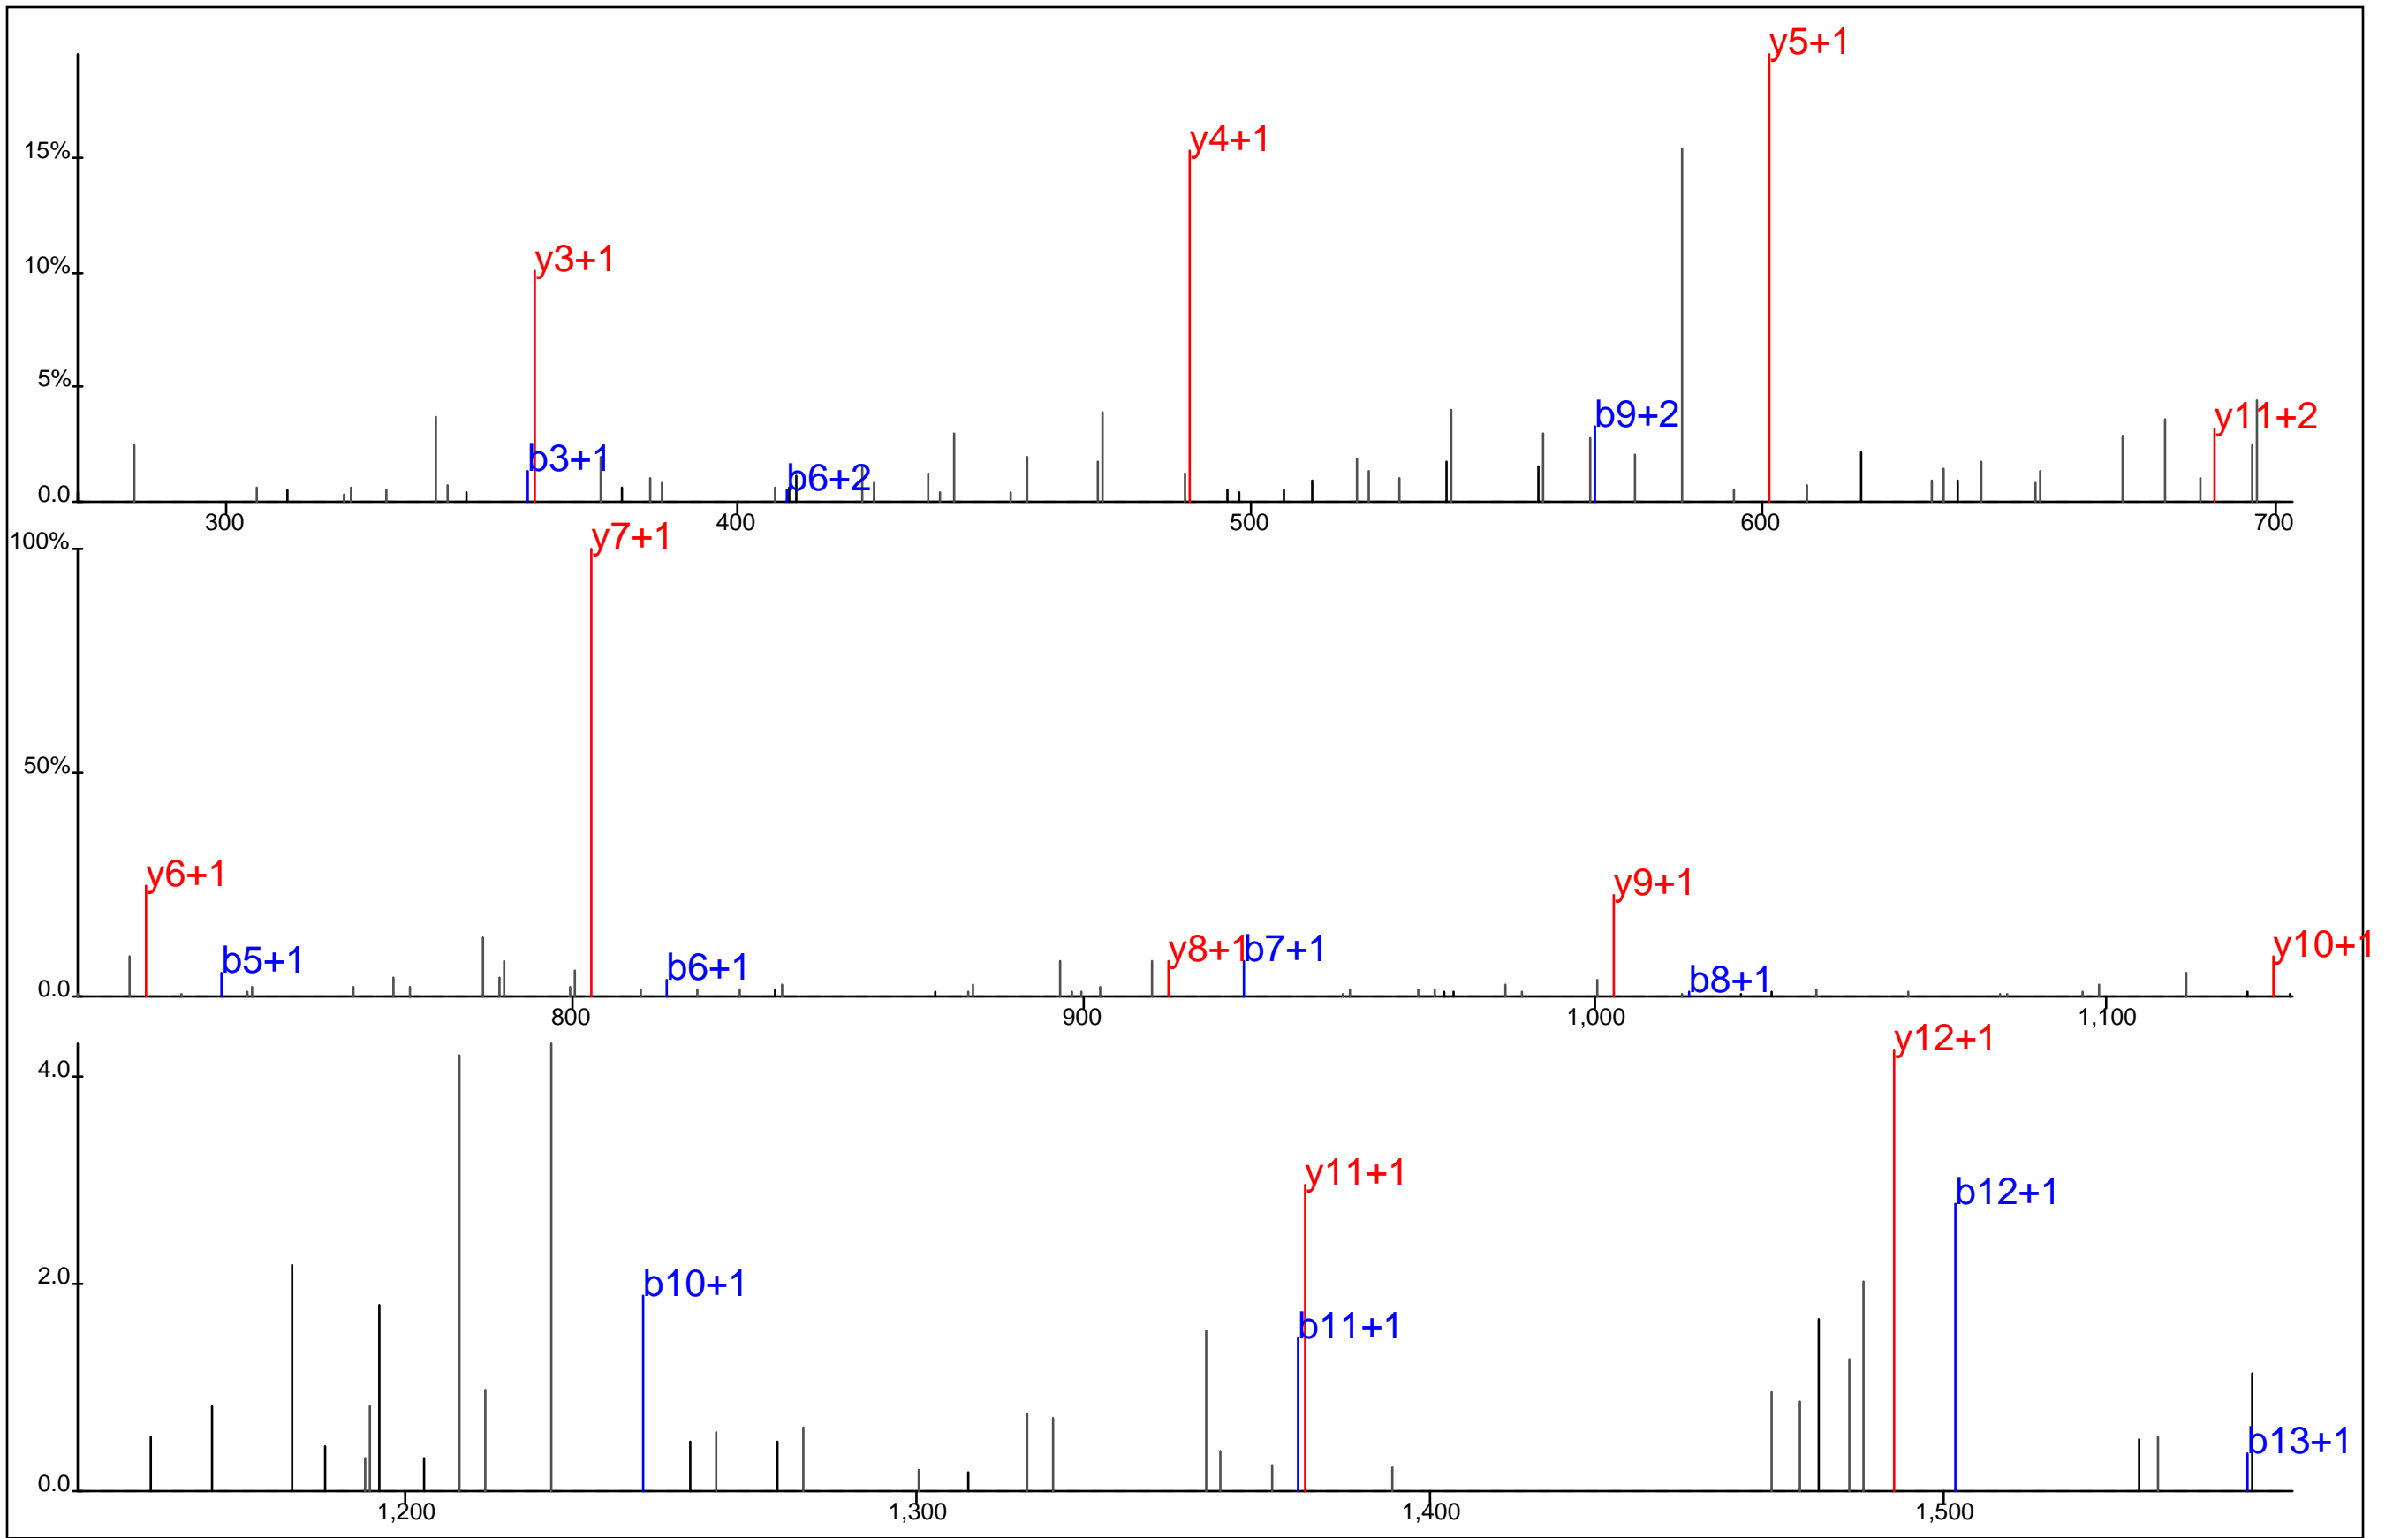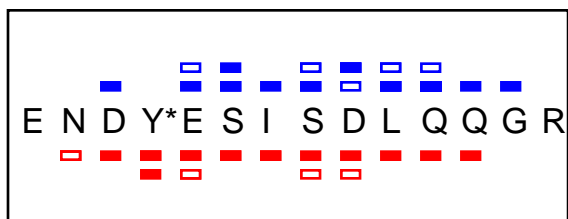

Protein Name: PAG  
 gi Accession: 0  
 Precursor Mass: 867.3542+2  
 Delta Mass: 0.093 ppm  
 XCorr: 89.99

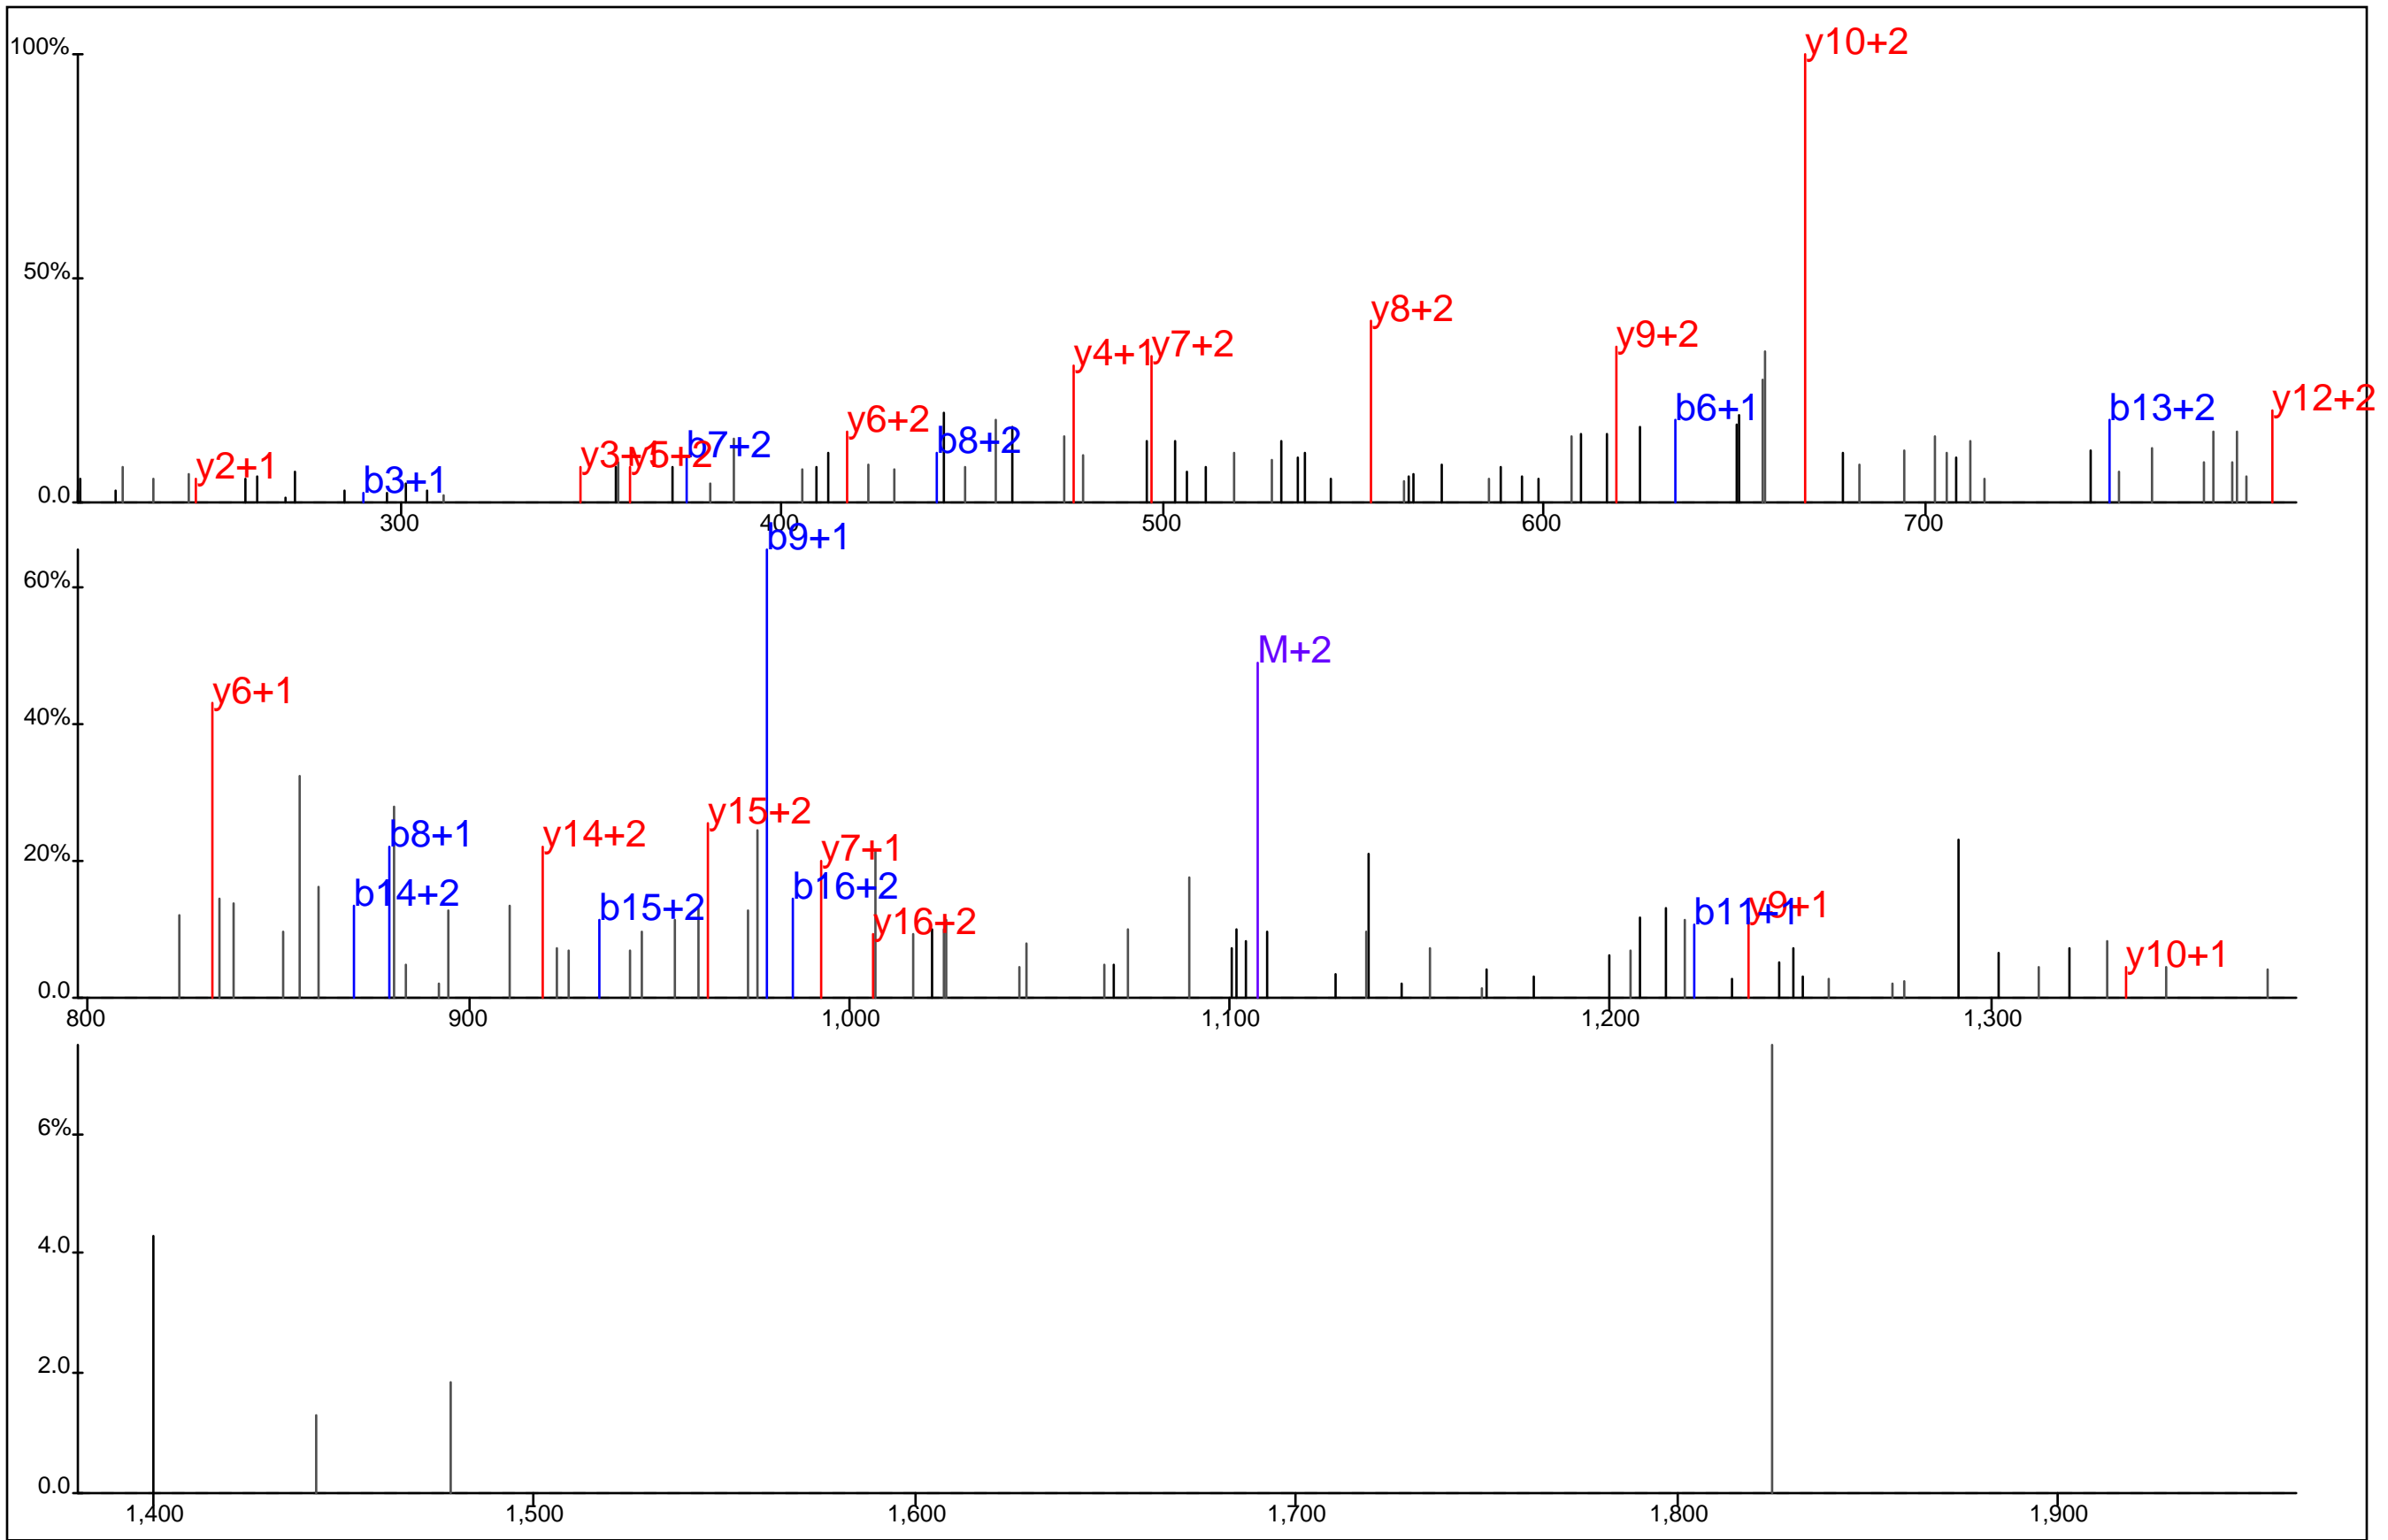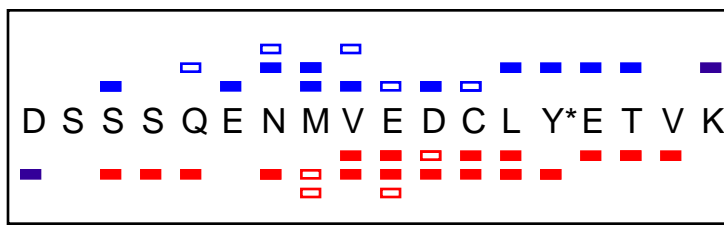

Protein Name: PAG  
 gi Accession: 0  
 Precursor Mass: 738.6263+3  
 Delta Mass: 1.306 ppm  
 XCorr: 31.3

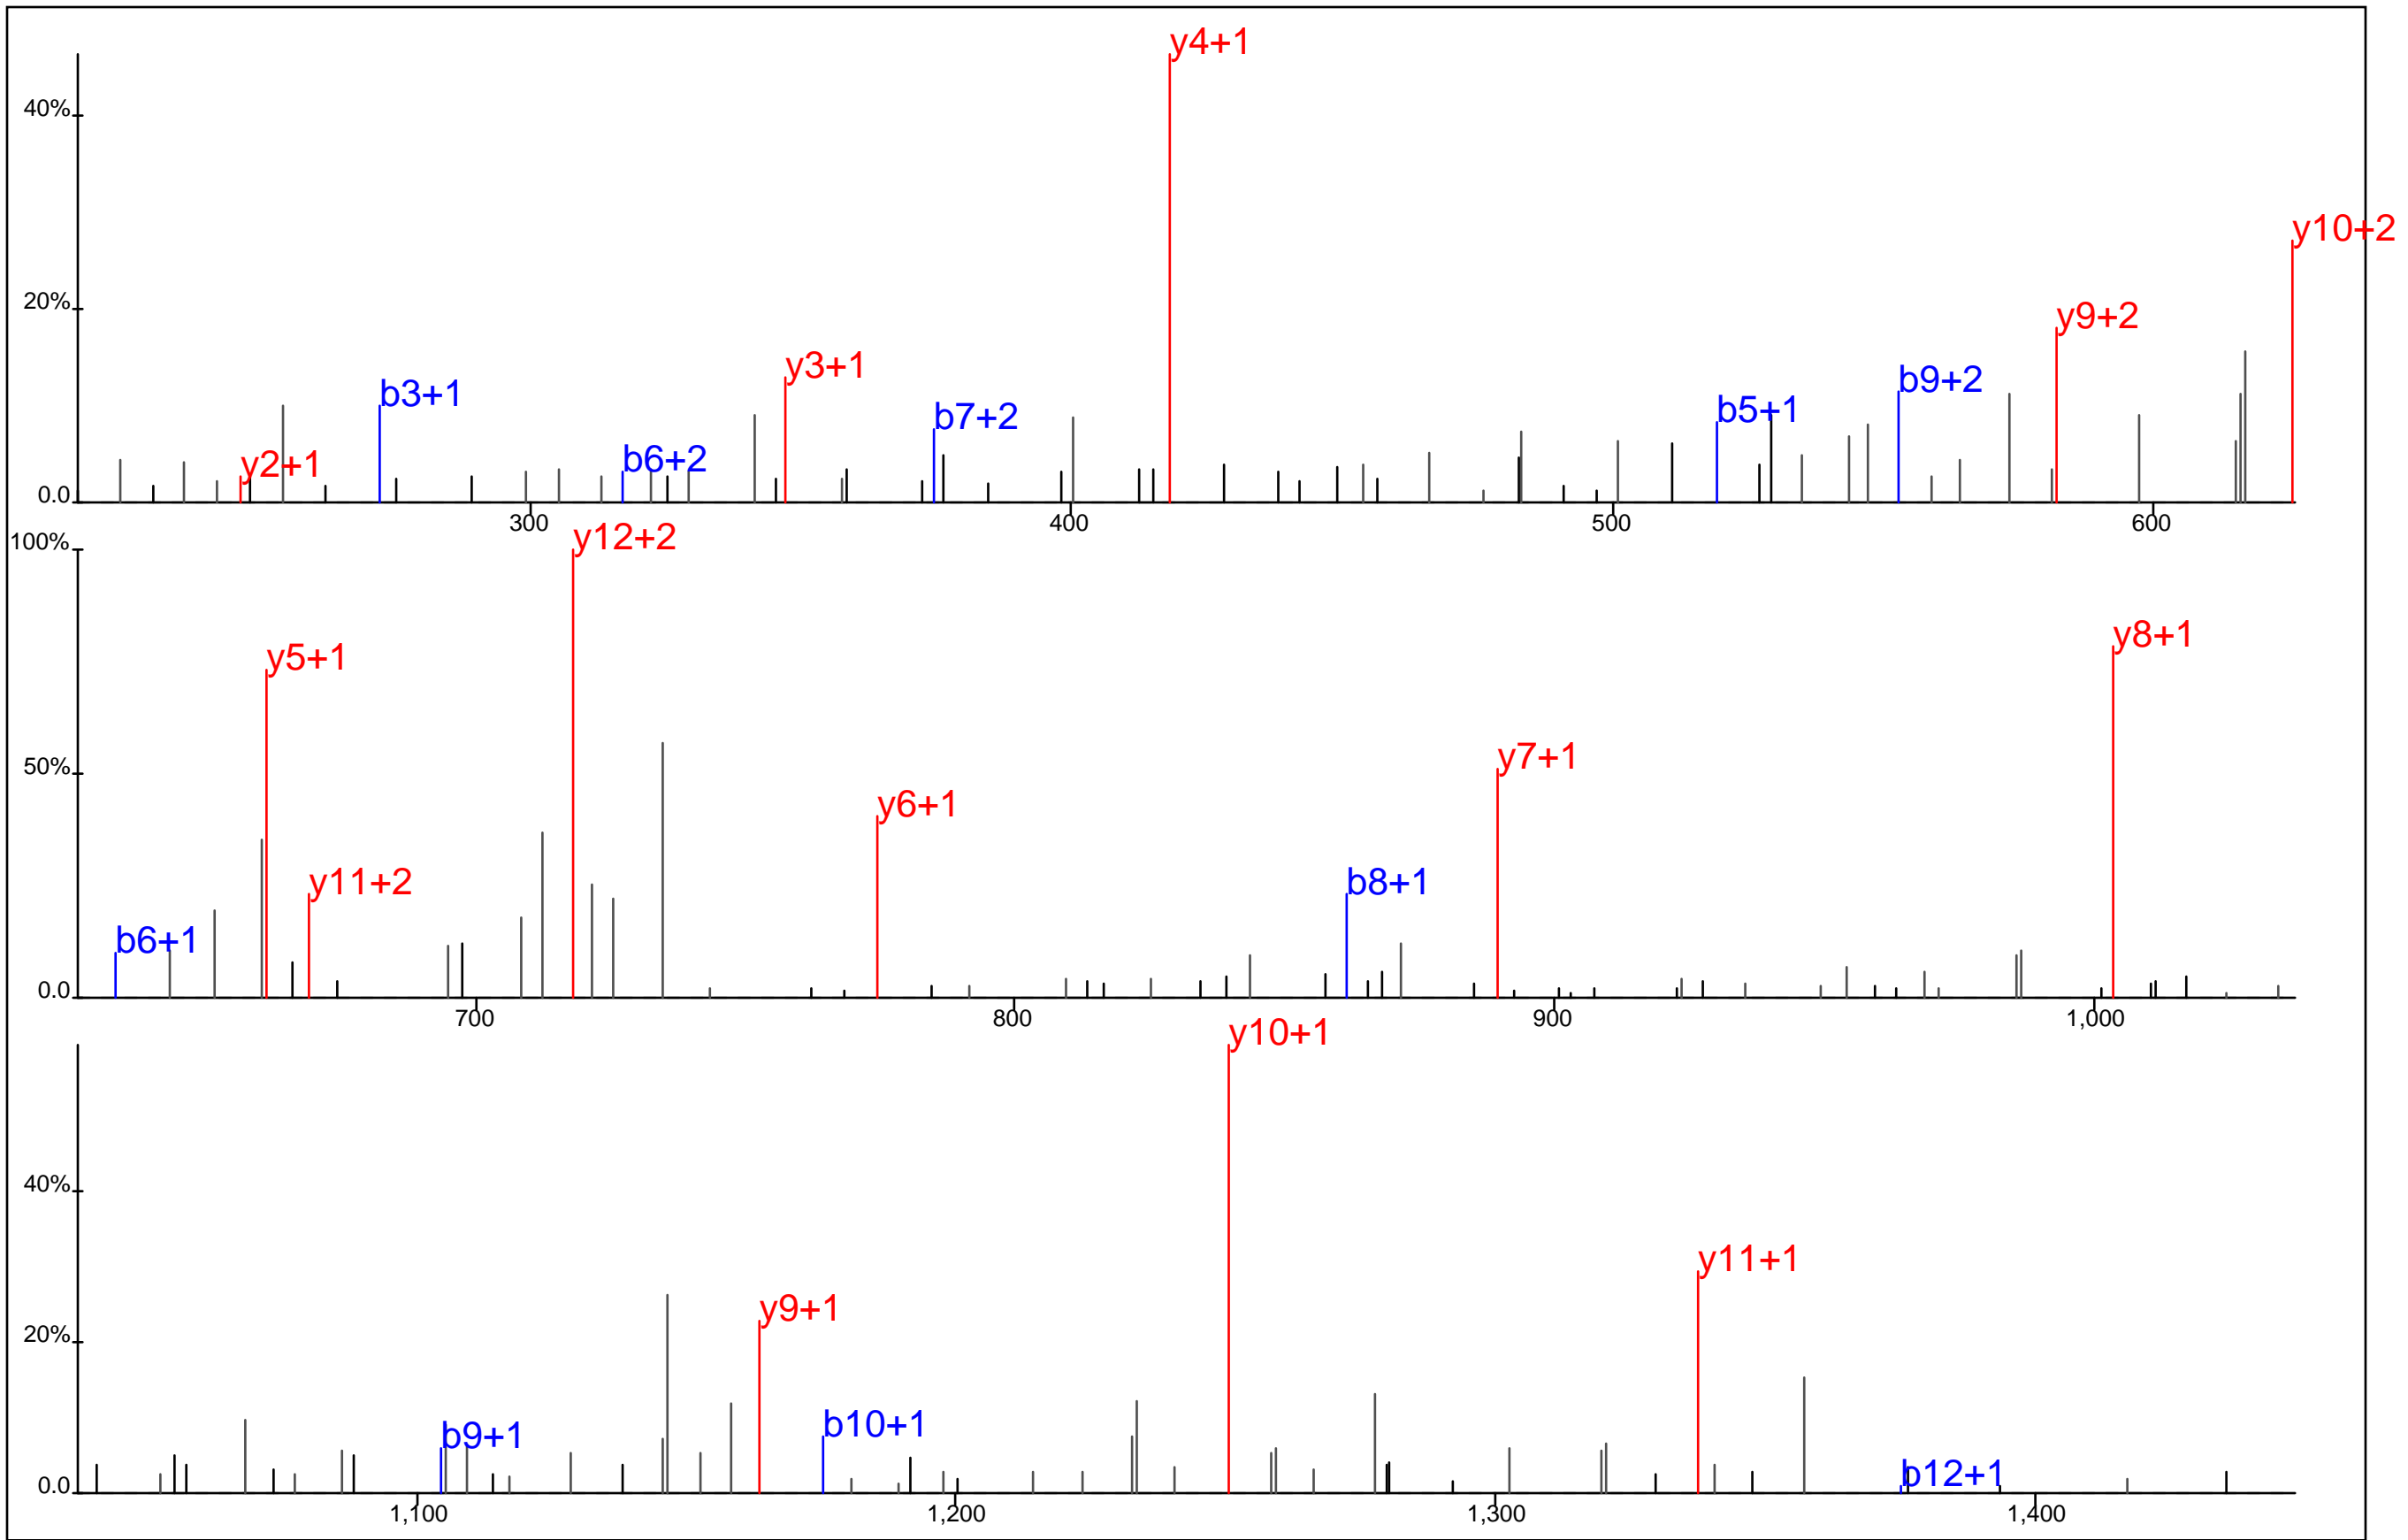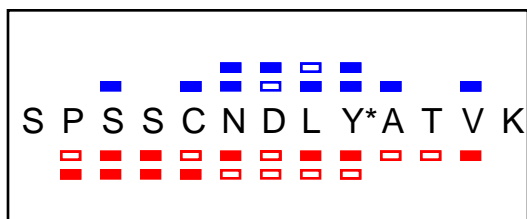

Protein Name: PAG  
 gi Accession: 0  
 Precursor Mass: 761.3182+2  
 Delta Mass: 0.076 ppm  
 XCorr: 66.72



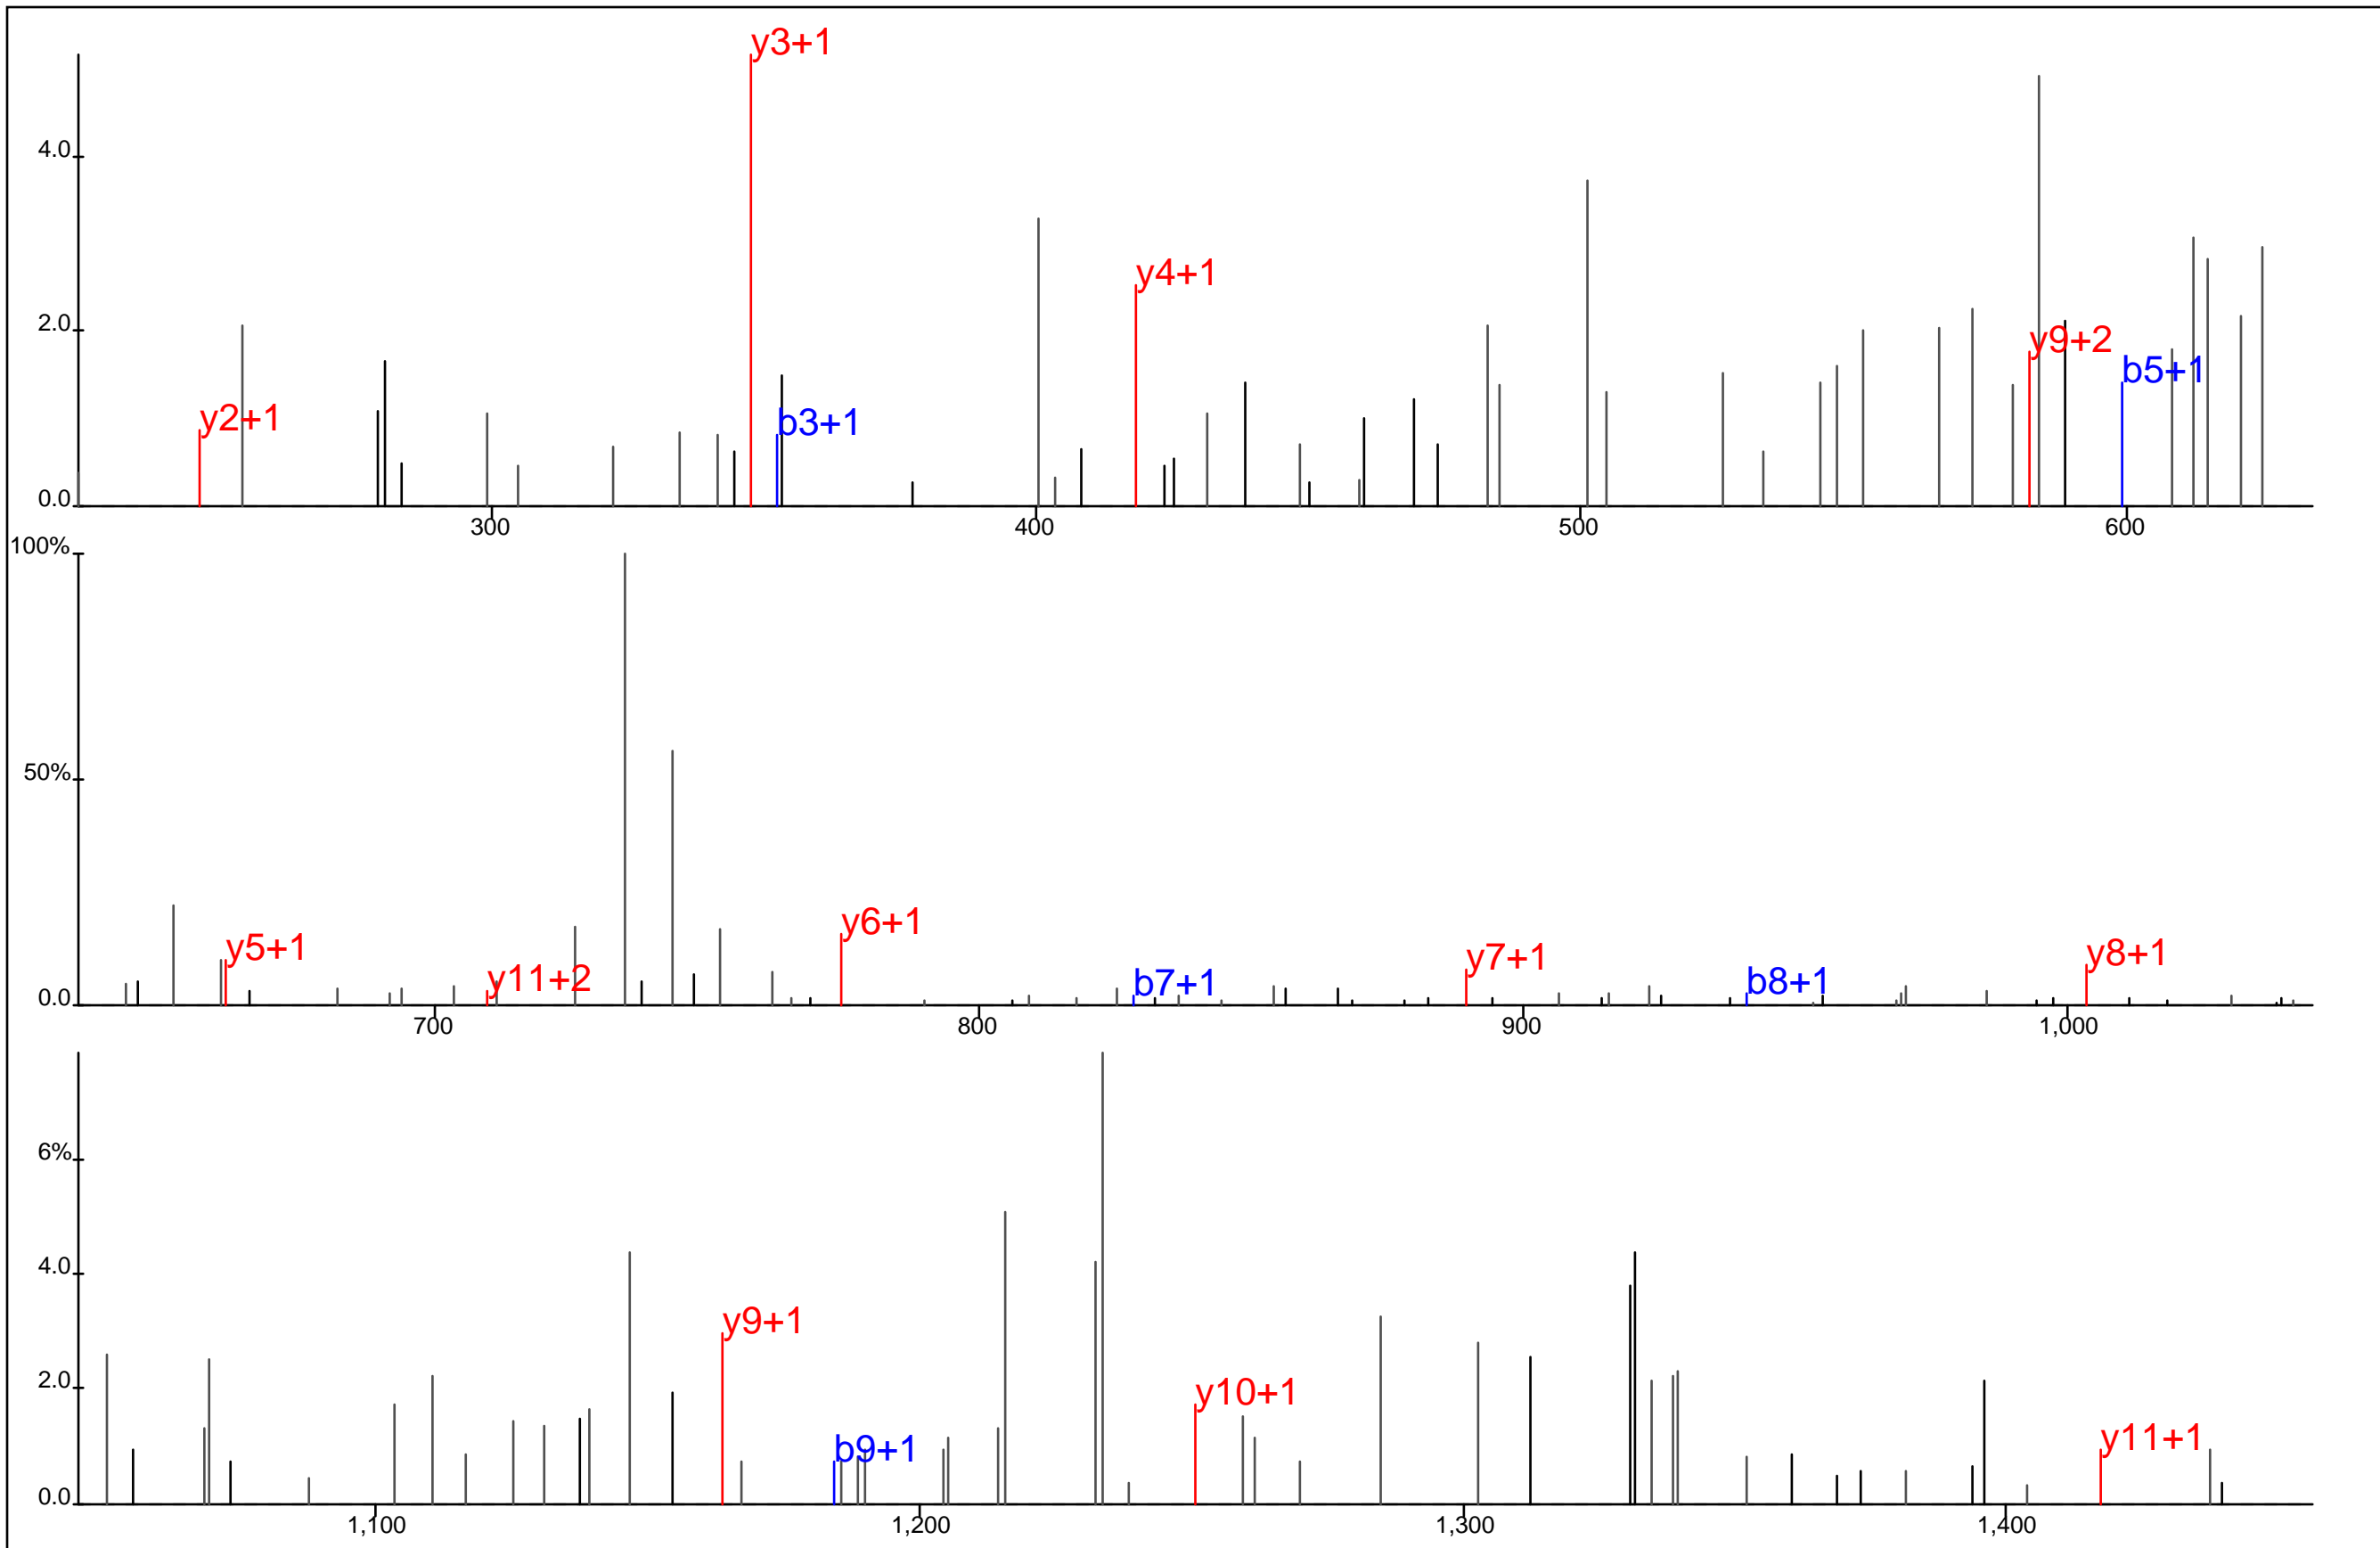

■ ■ ■ ■ ■ ■ ■ ■ ■ ■  
 S P S\* S C N D L Y\* A T V K  
□ □ □ □ □ □ □ □ □ □ □

Protein Name: PAG  
 gi Accession: 0  
 Precursor Mass: 801.3028+2  
 Delta Mass: 1.812 ppm  
 XCorr: 38.71

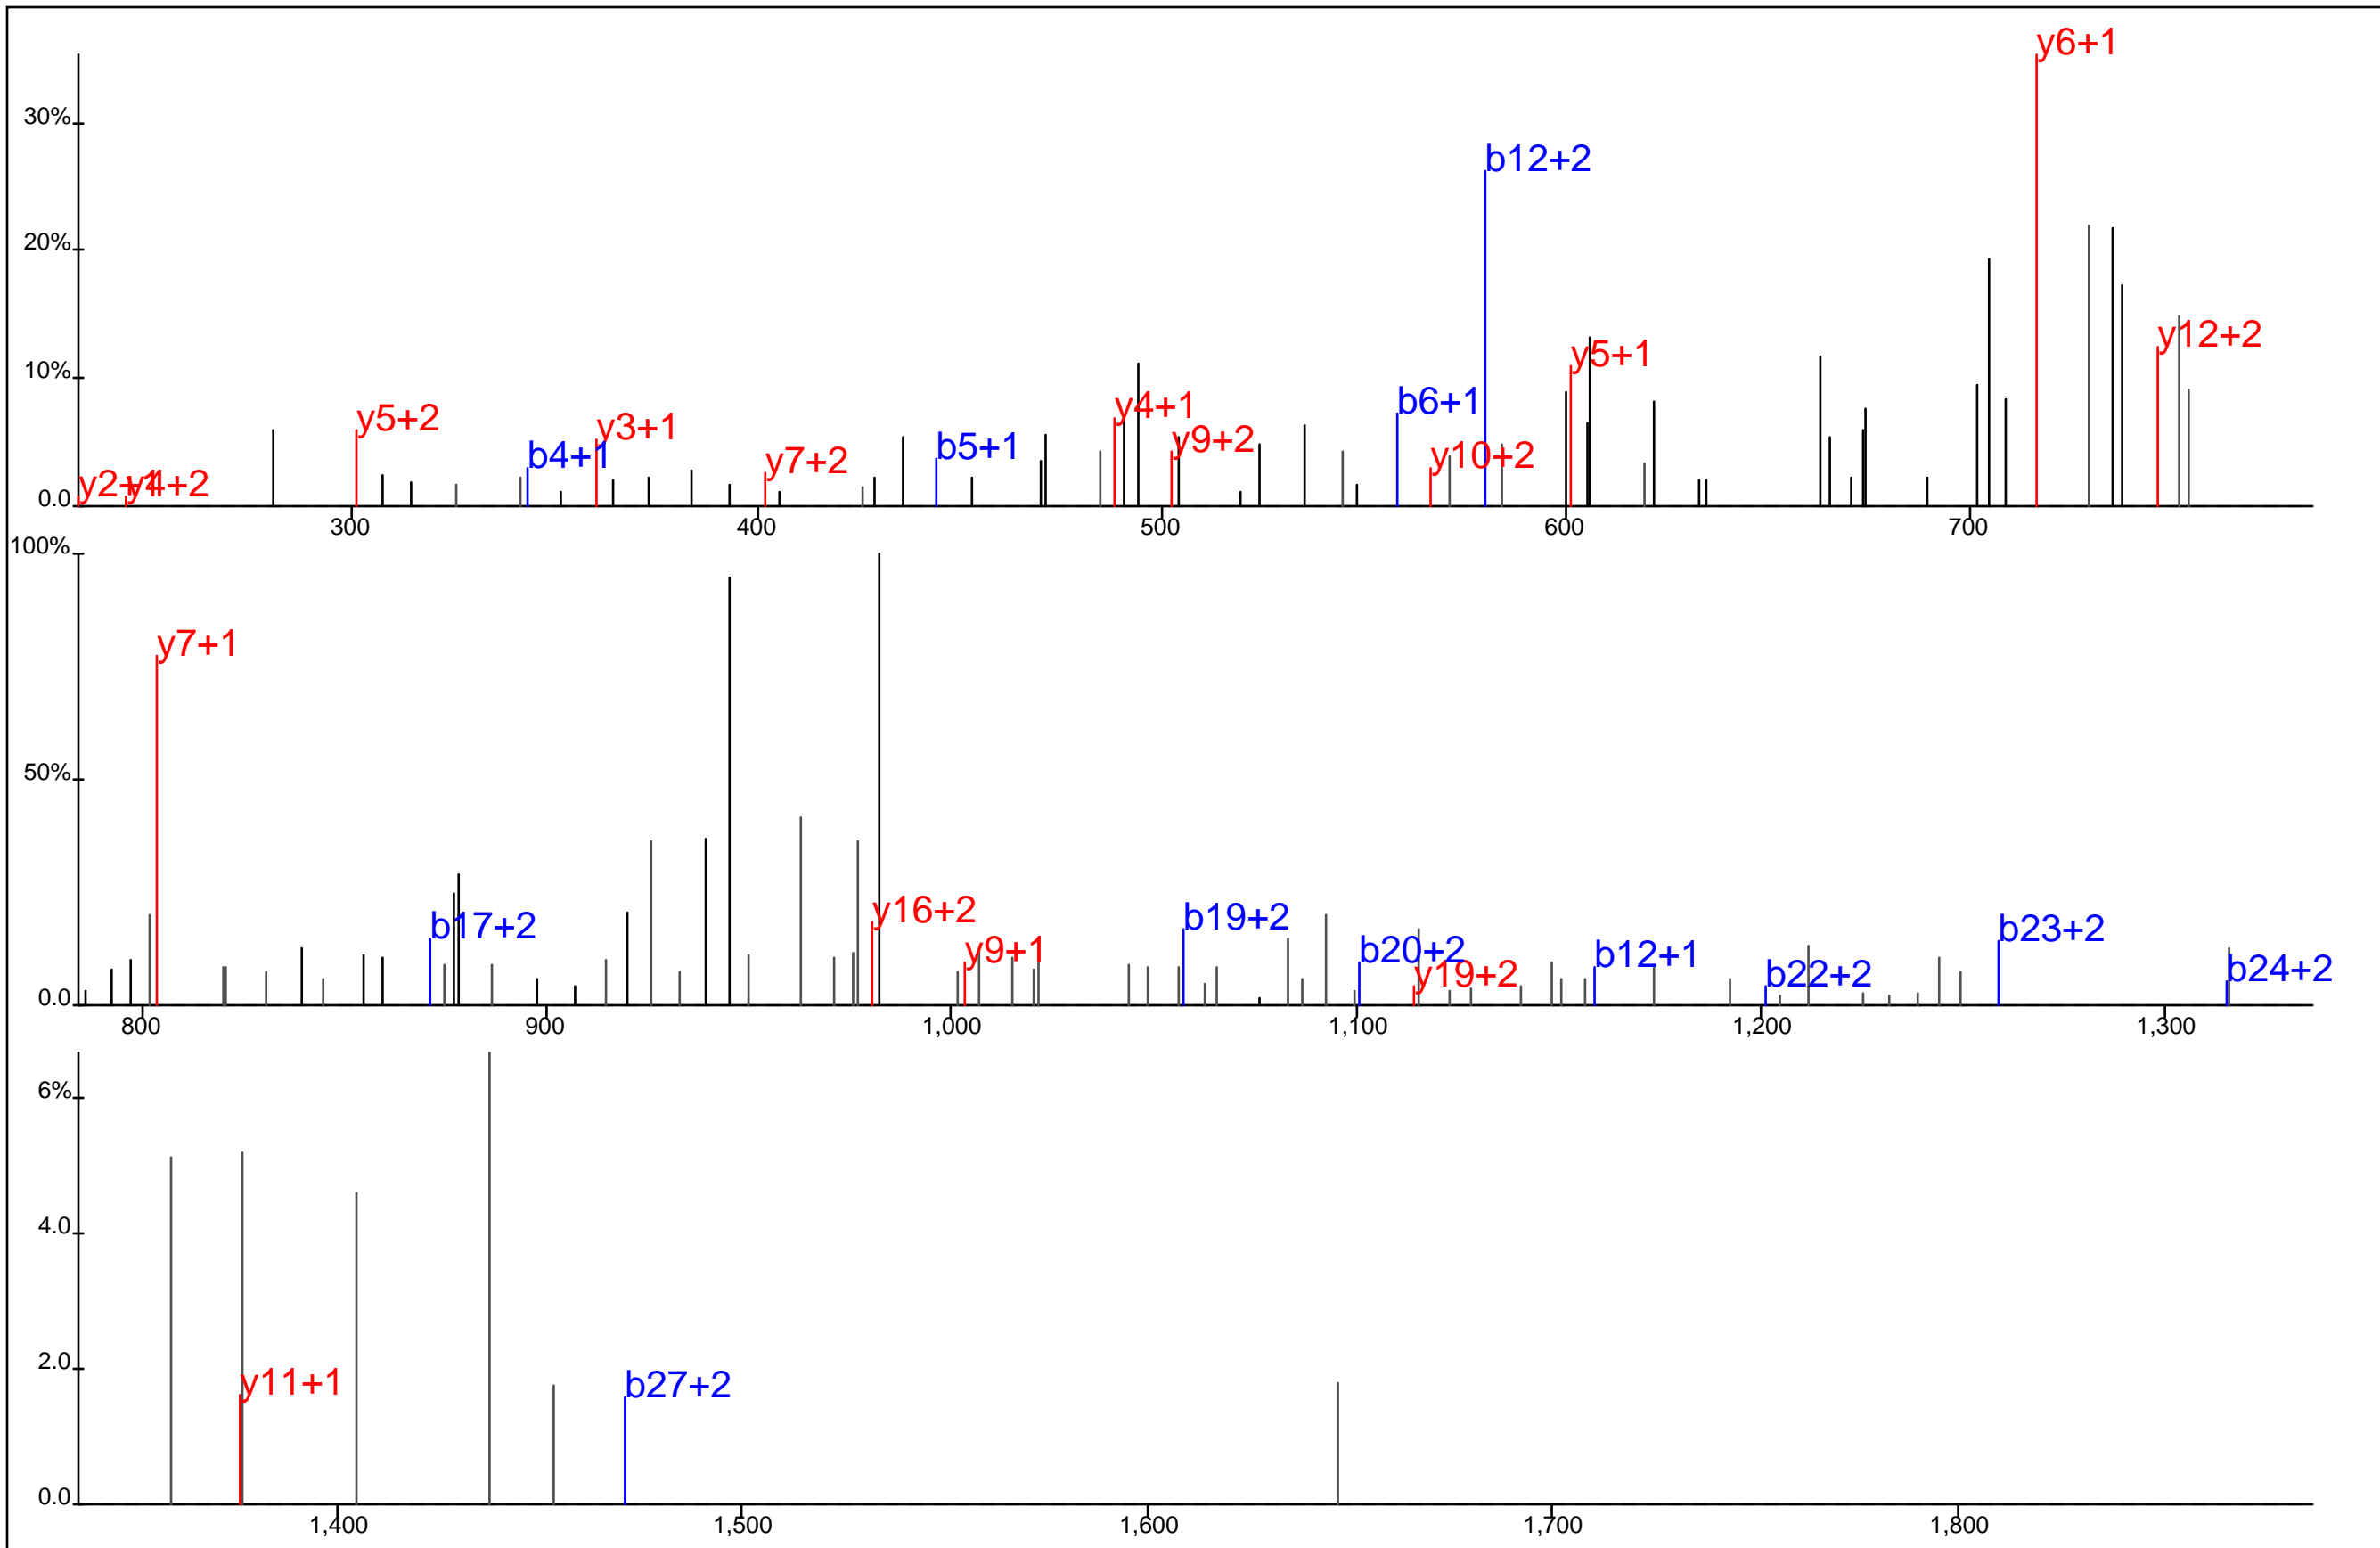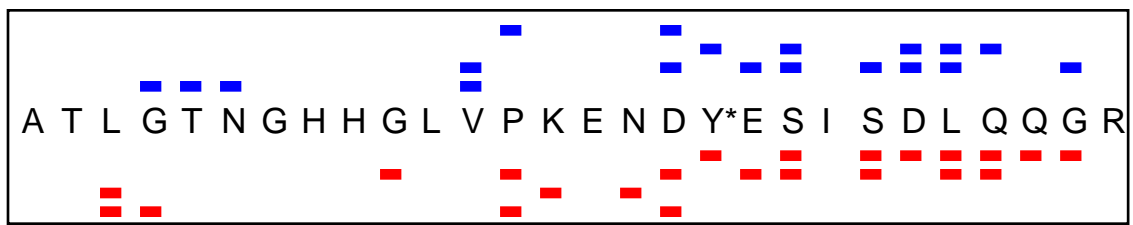

Protein Name: PAG  
 gi Accession: 0  
 Precursor Mass: 779.8653+4  
 Delta Mass: 1.261 ppm  
 XCorr: 21.1

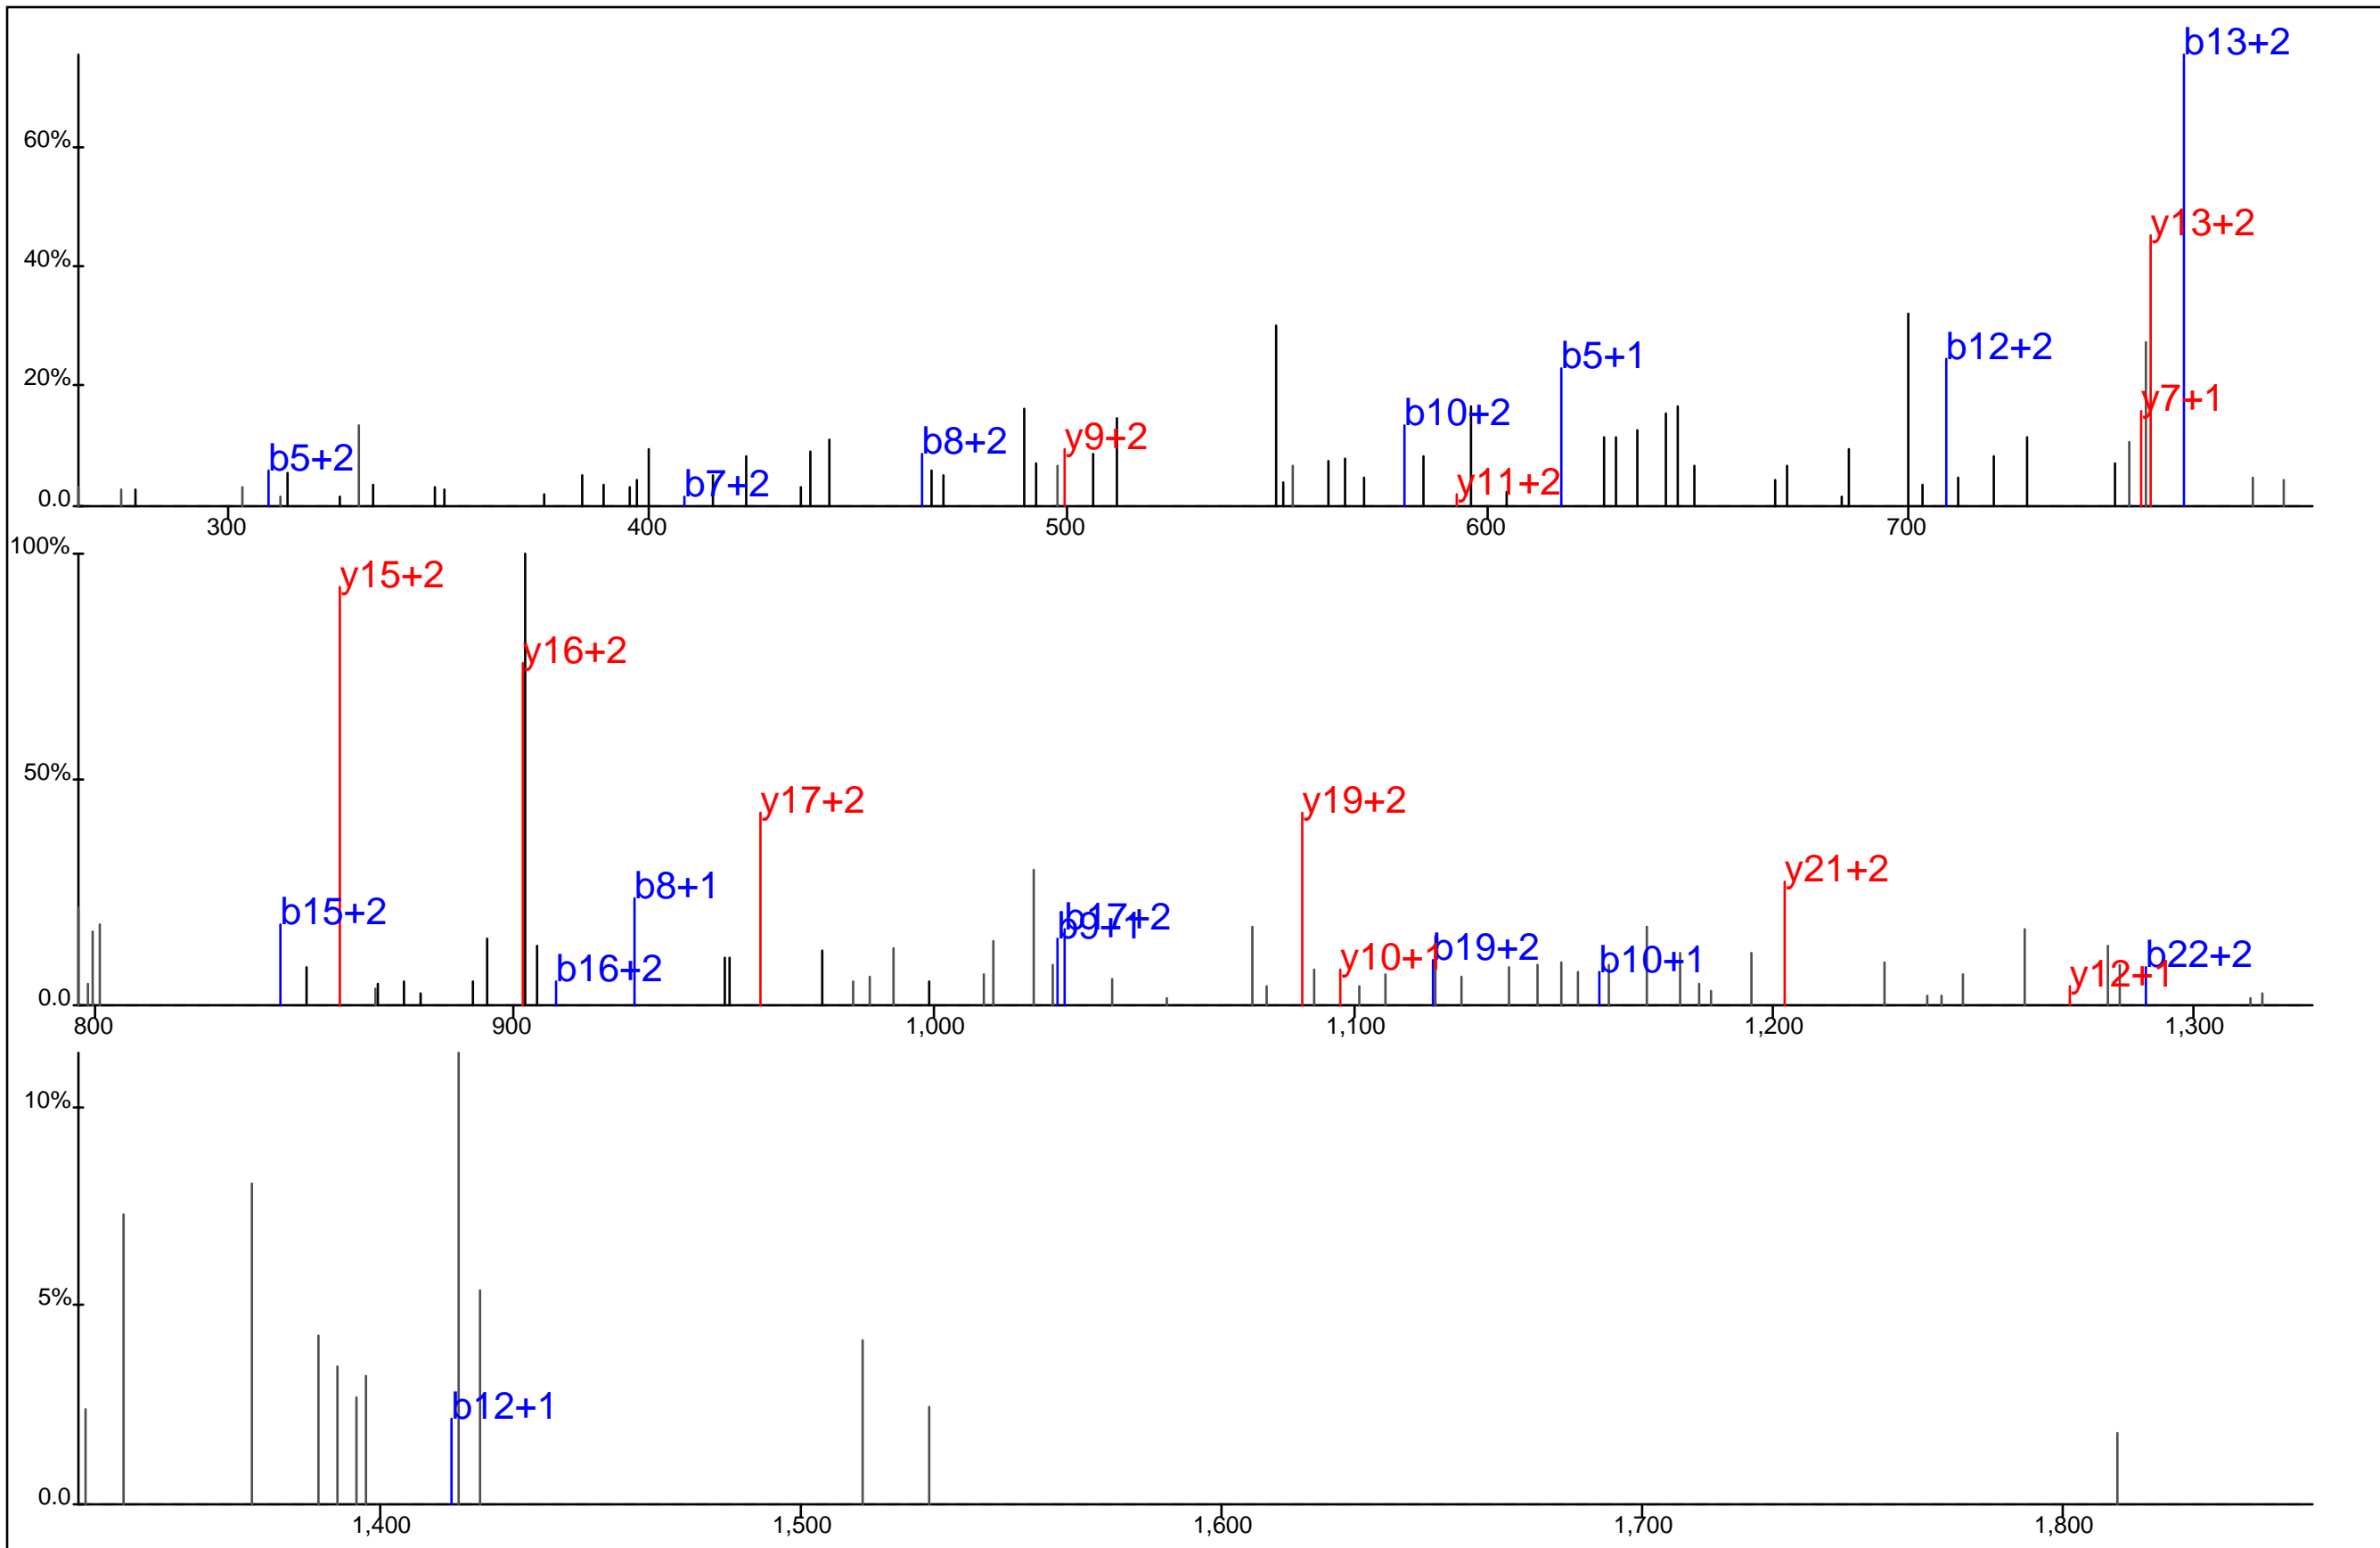

S R E E D P T L T E E E I S A M Y \* S S V N K P G Q L V N K  
■ ■

Protein Name: PAG  
 gi Accession: 0  
 Precursor Mass: 833.6410+4  
 Delta Mass: 0.671 ppm  
 XCorr: 26.87

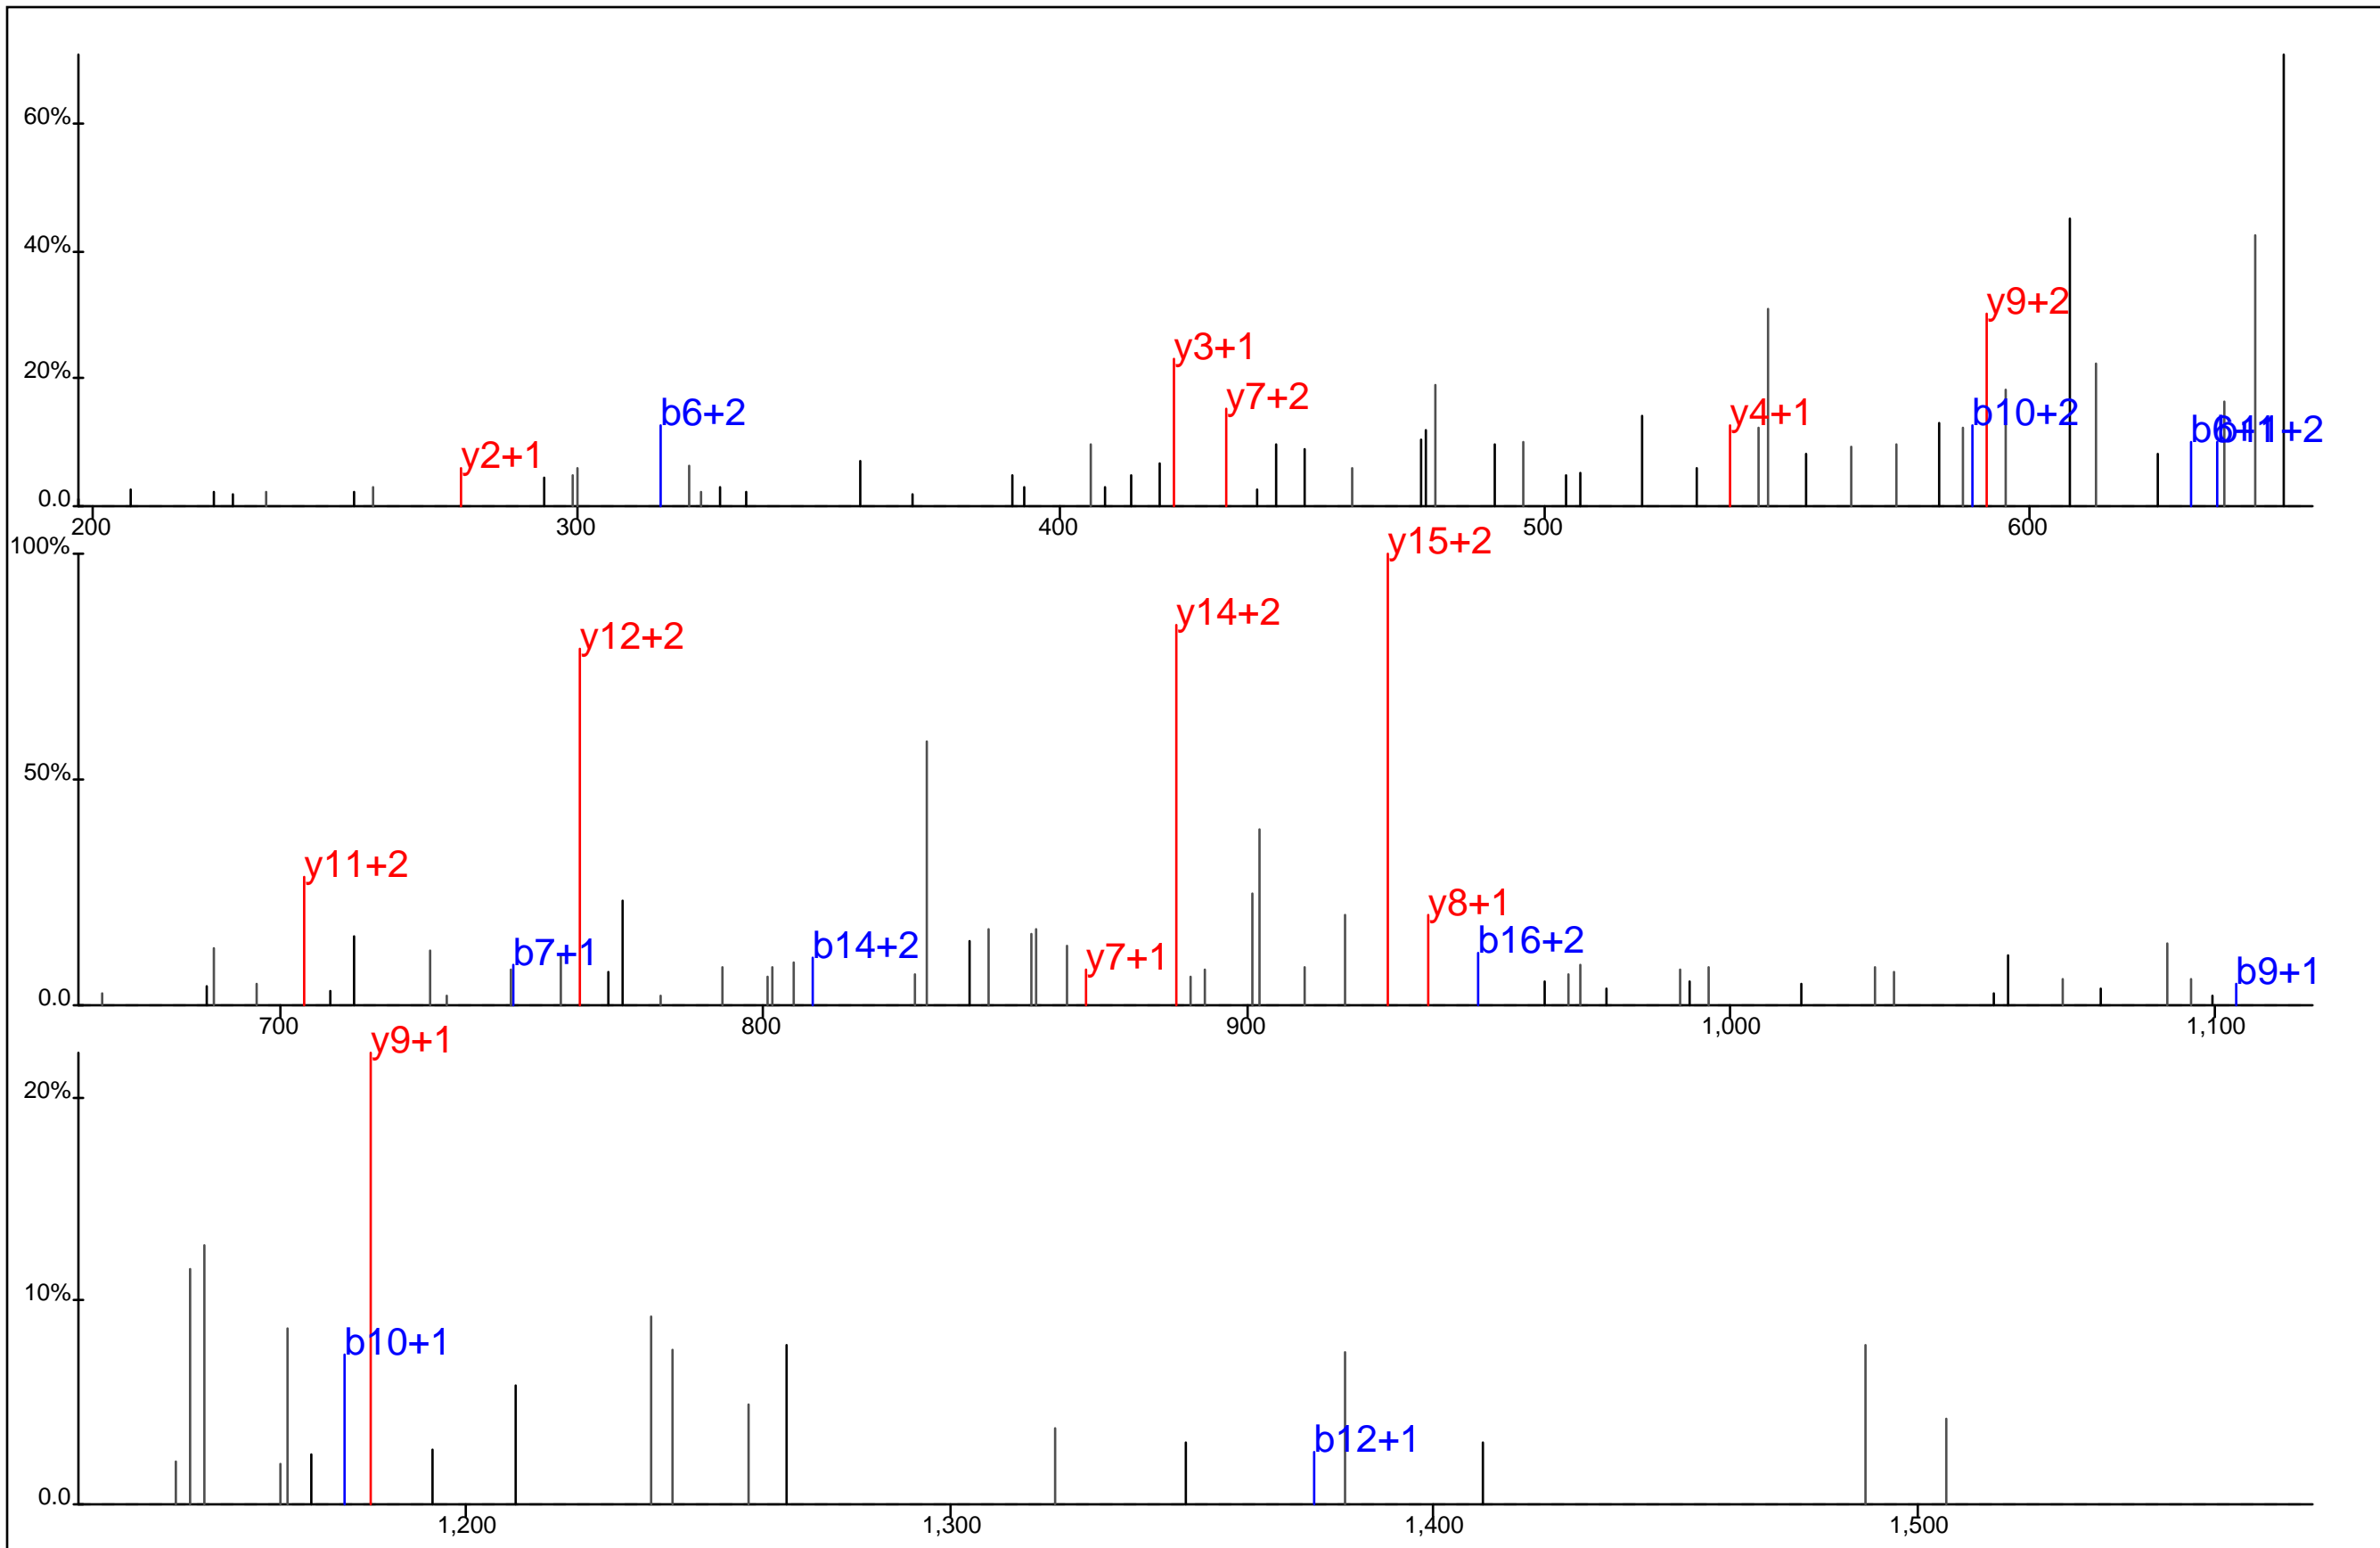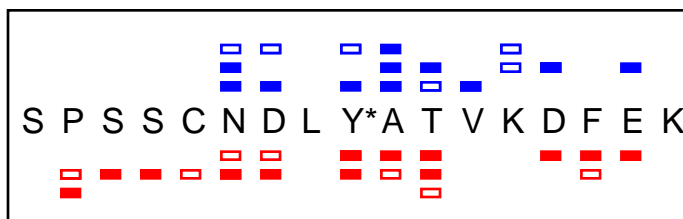

Protein Name: PAG  
 gi Accession: 0  
 Precursor Mass: 680.9561+3  
 Delta Mass: 4.021 ppm  
 XCorr: 20.44

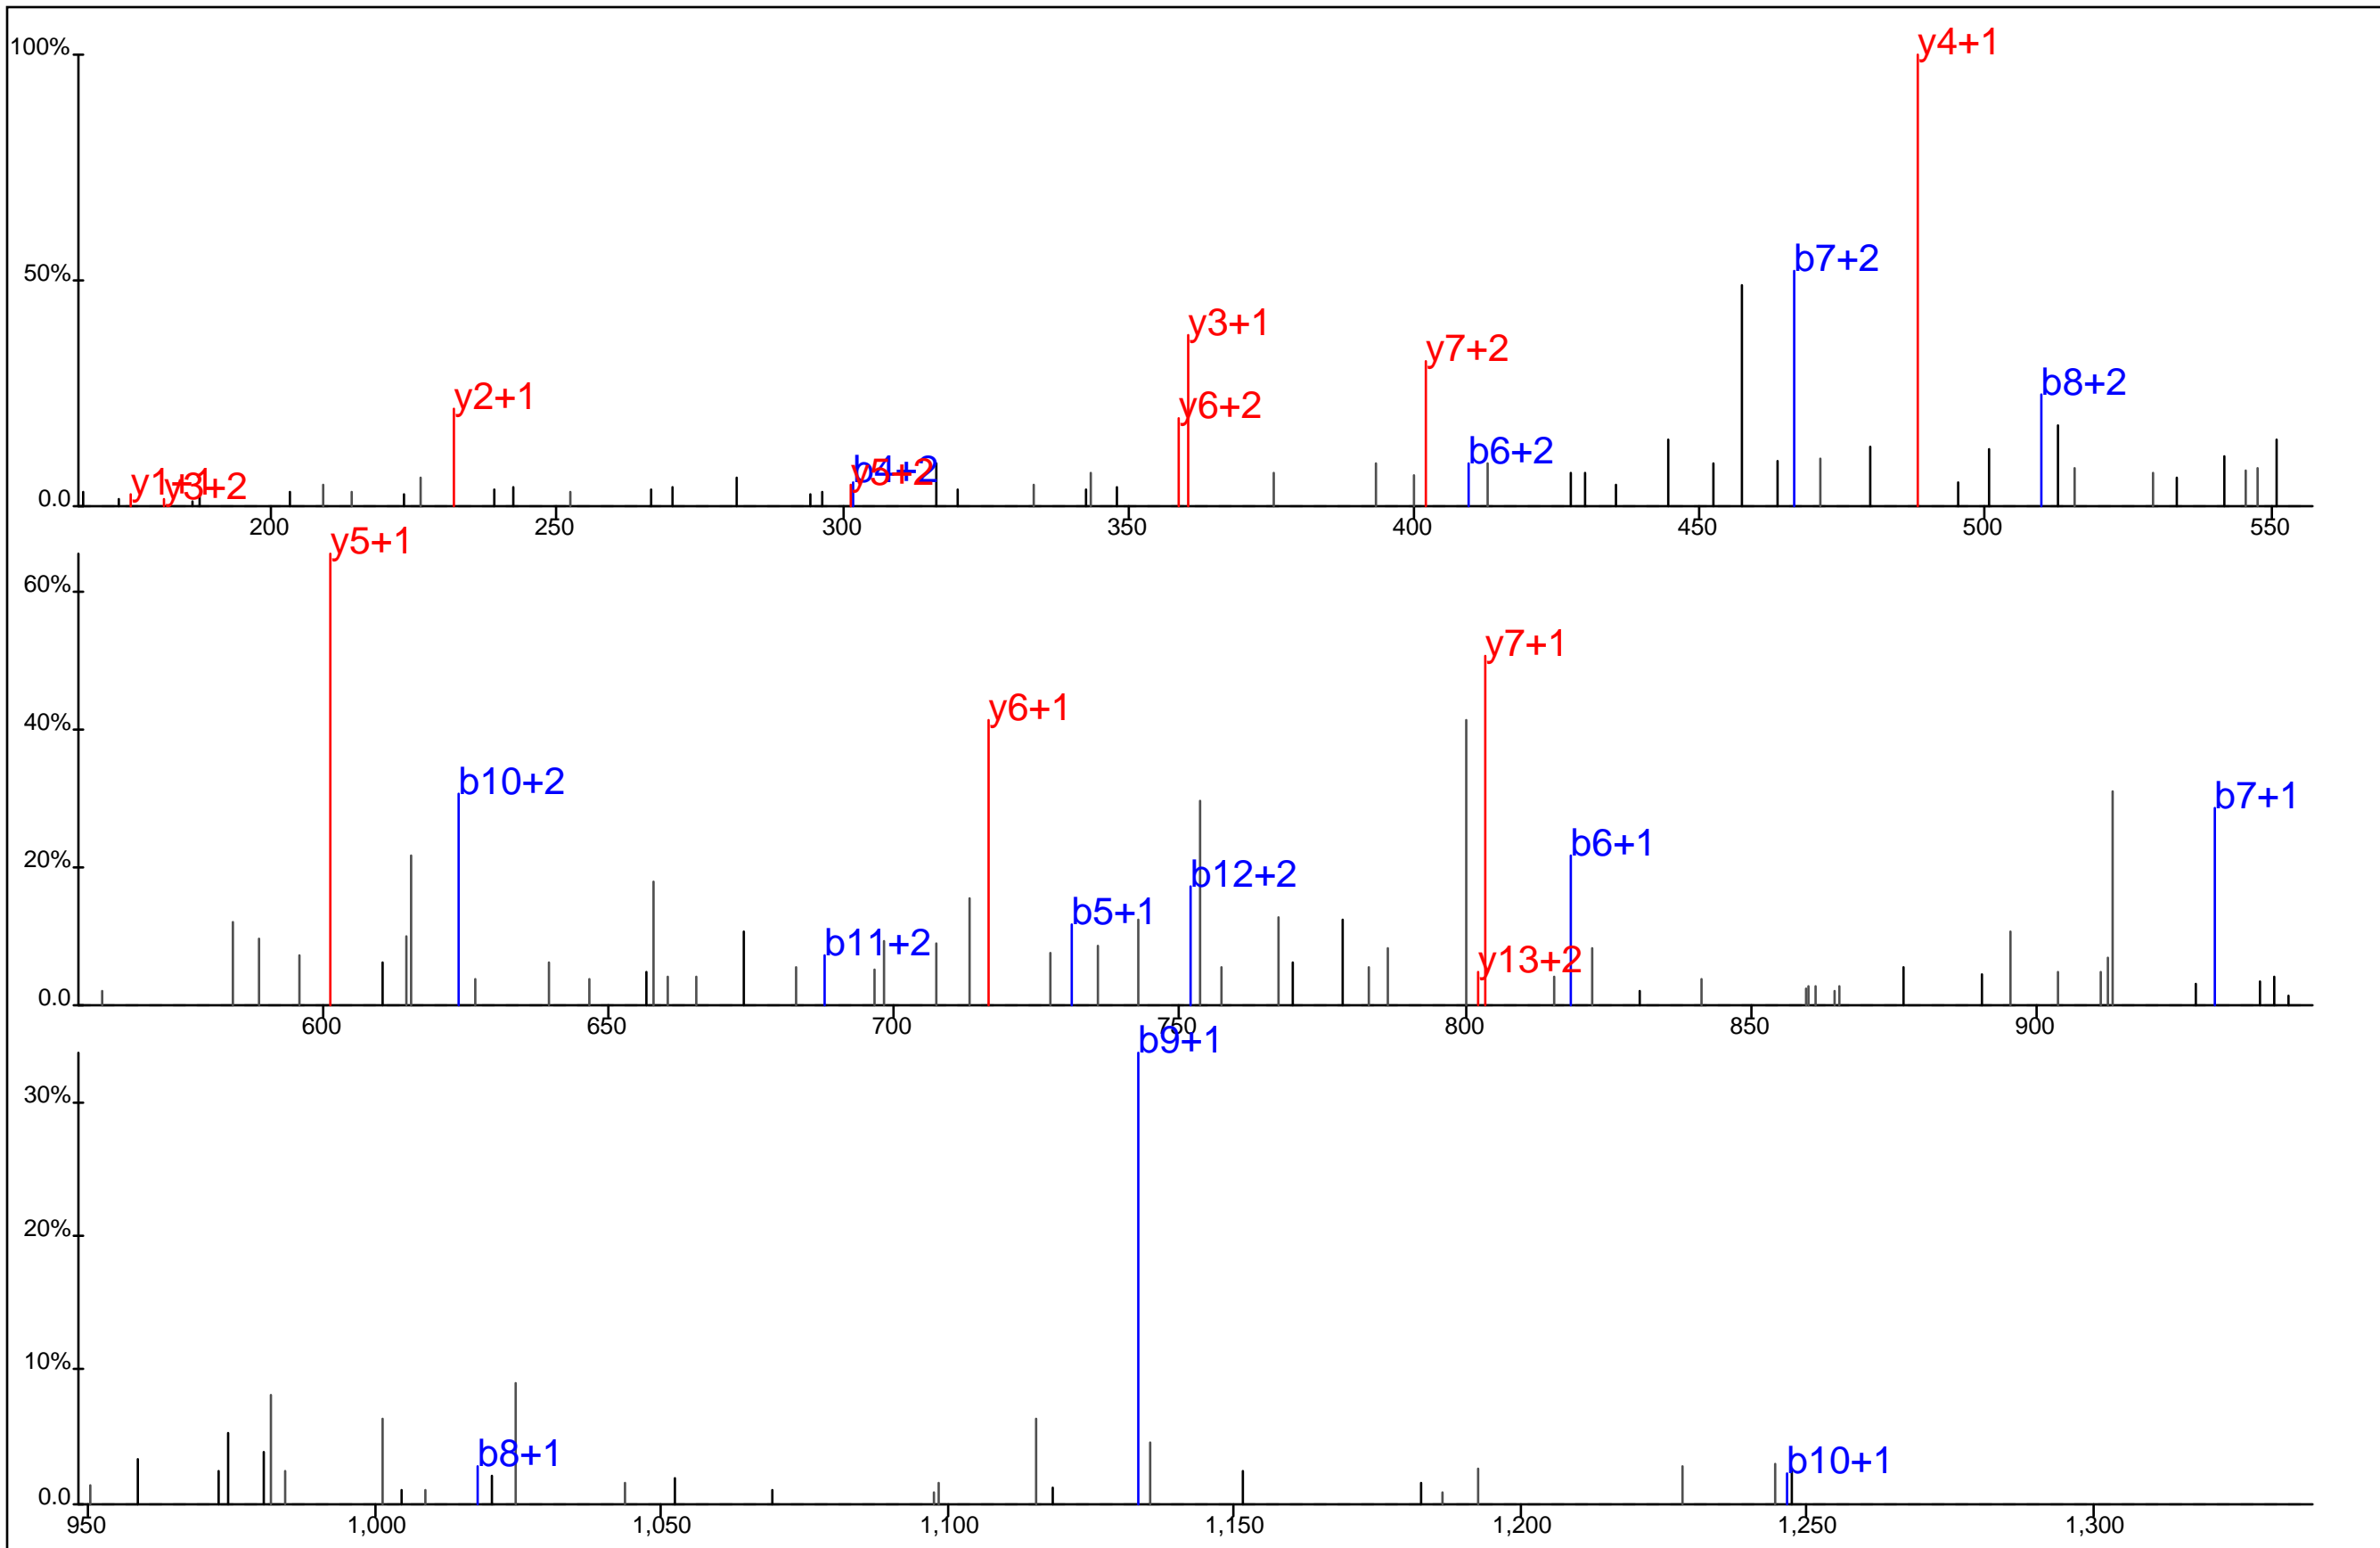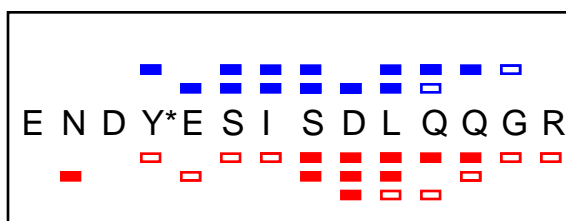

Protein Name: PAG  
 gi Accession: 0  
 Precursor Mass: 578.5722+3  
 Delta Mass: 0.393 ppm  
 XCorr: 42.94

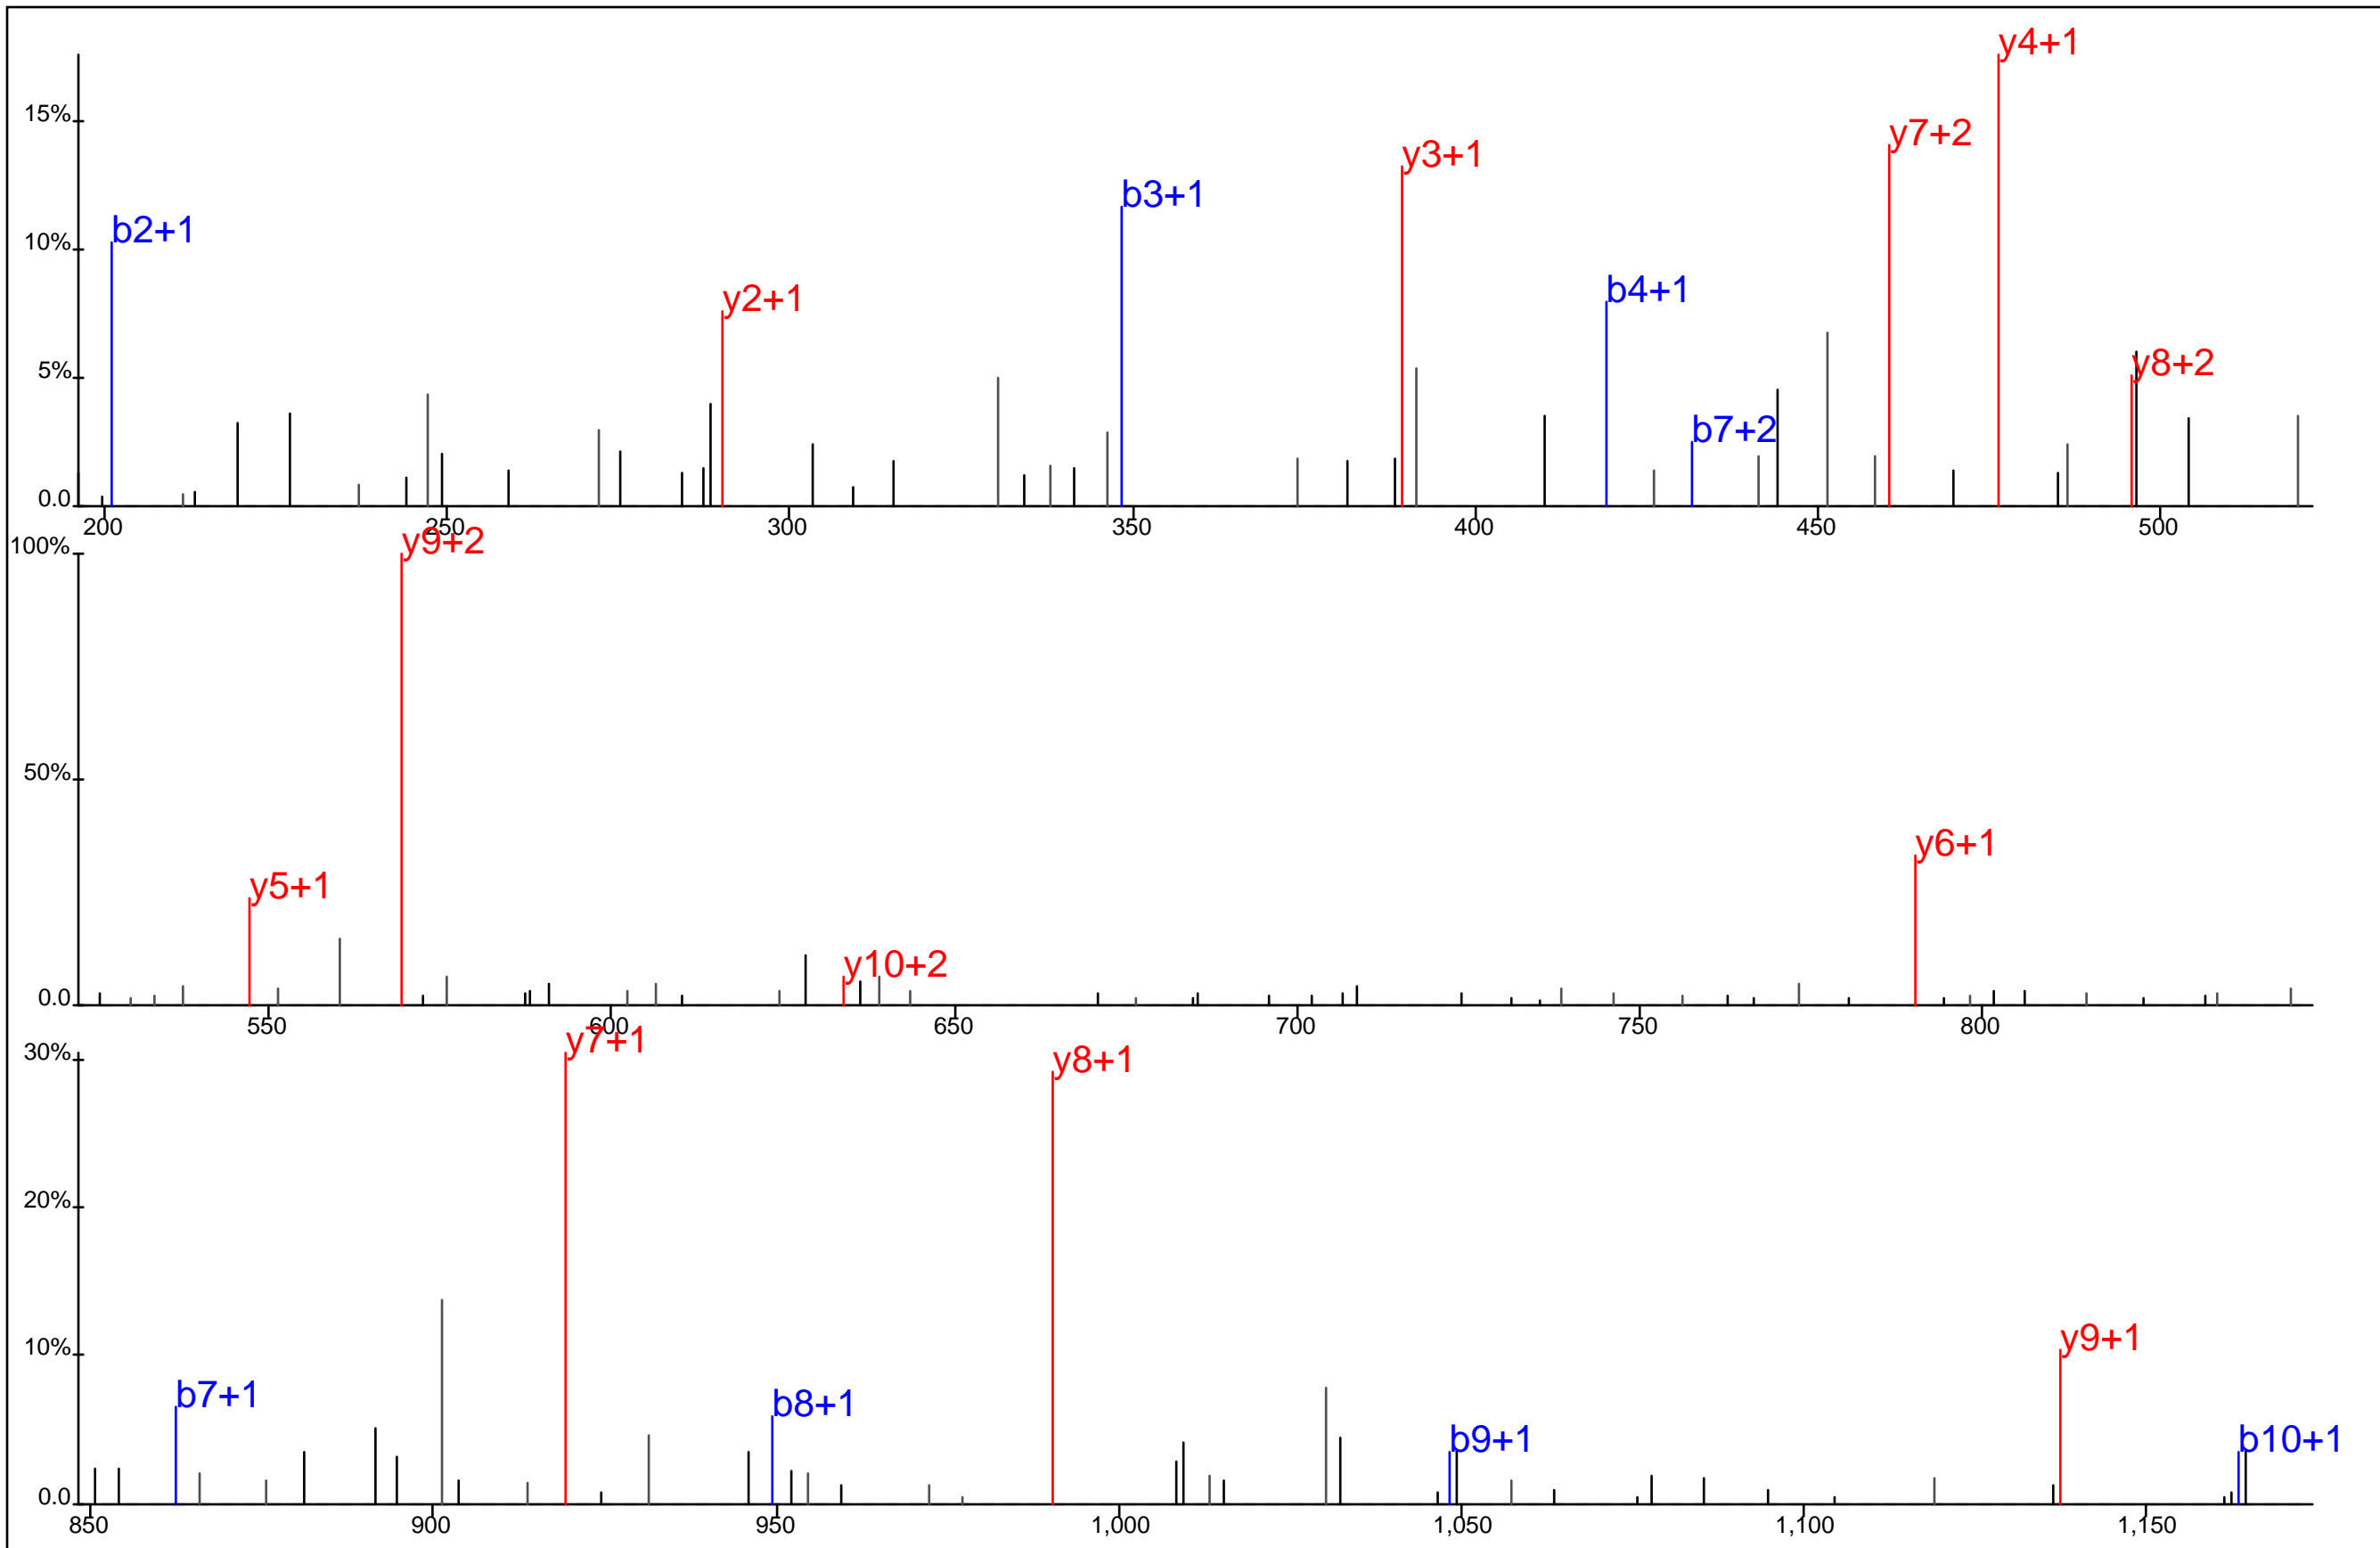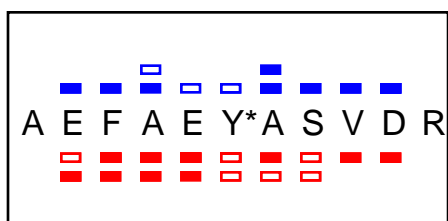

Protein Name: PAG  
 gi Accession: 0  
 Precursor Mass: 669.2755+2  
 Delta Mass: 2.129 ppm  
 XCorr: 69.07



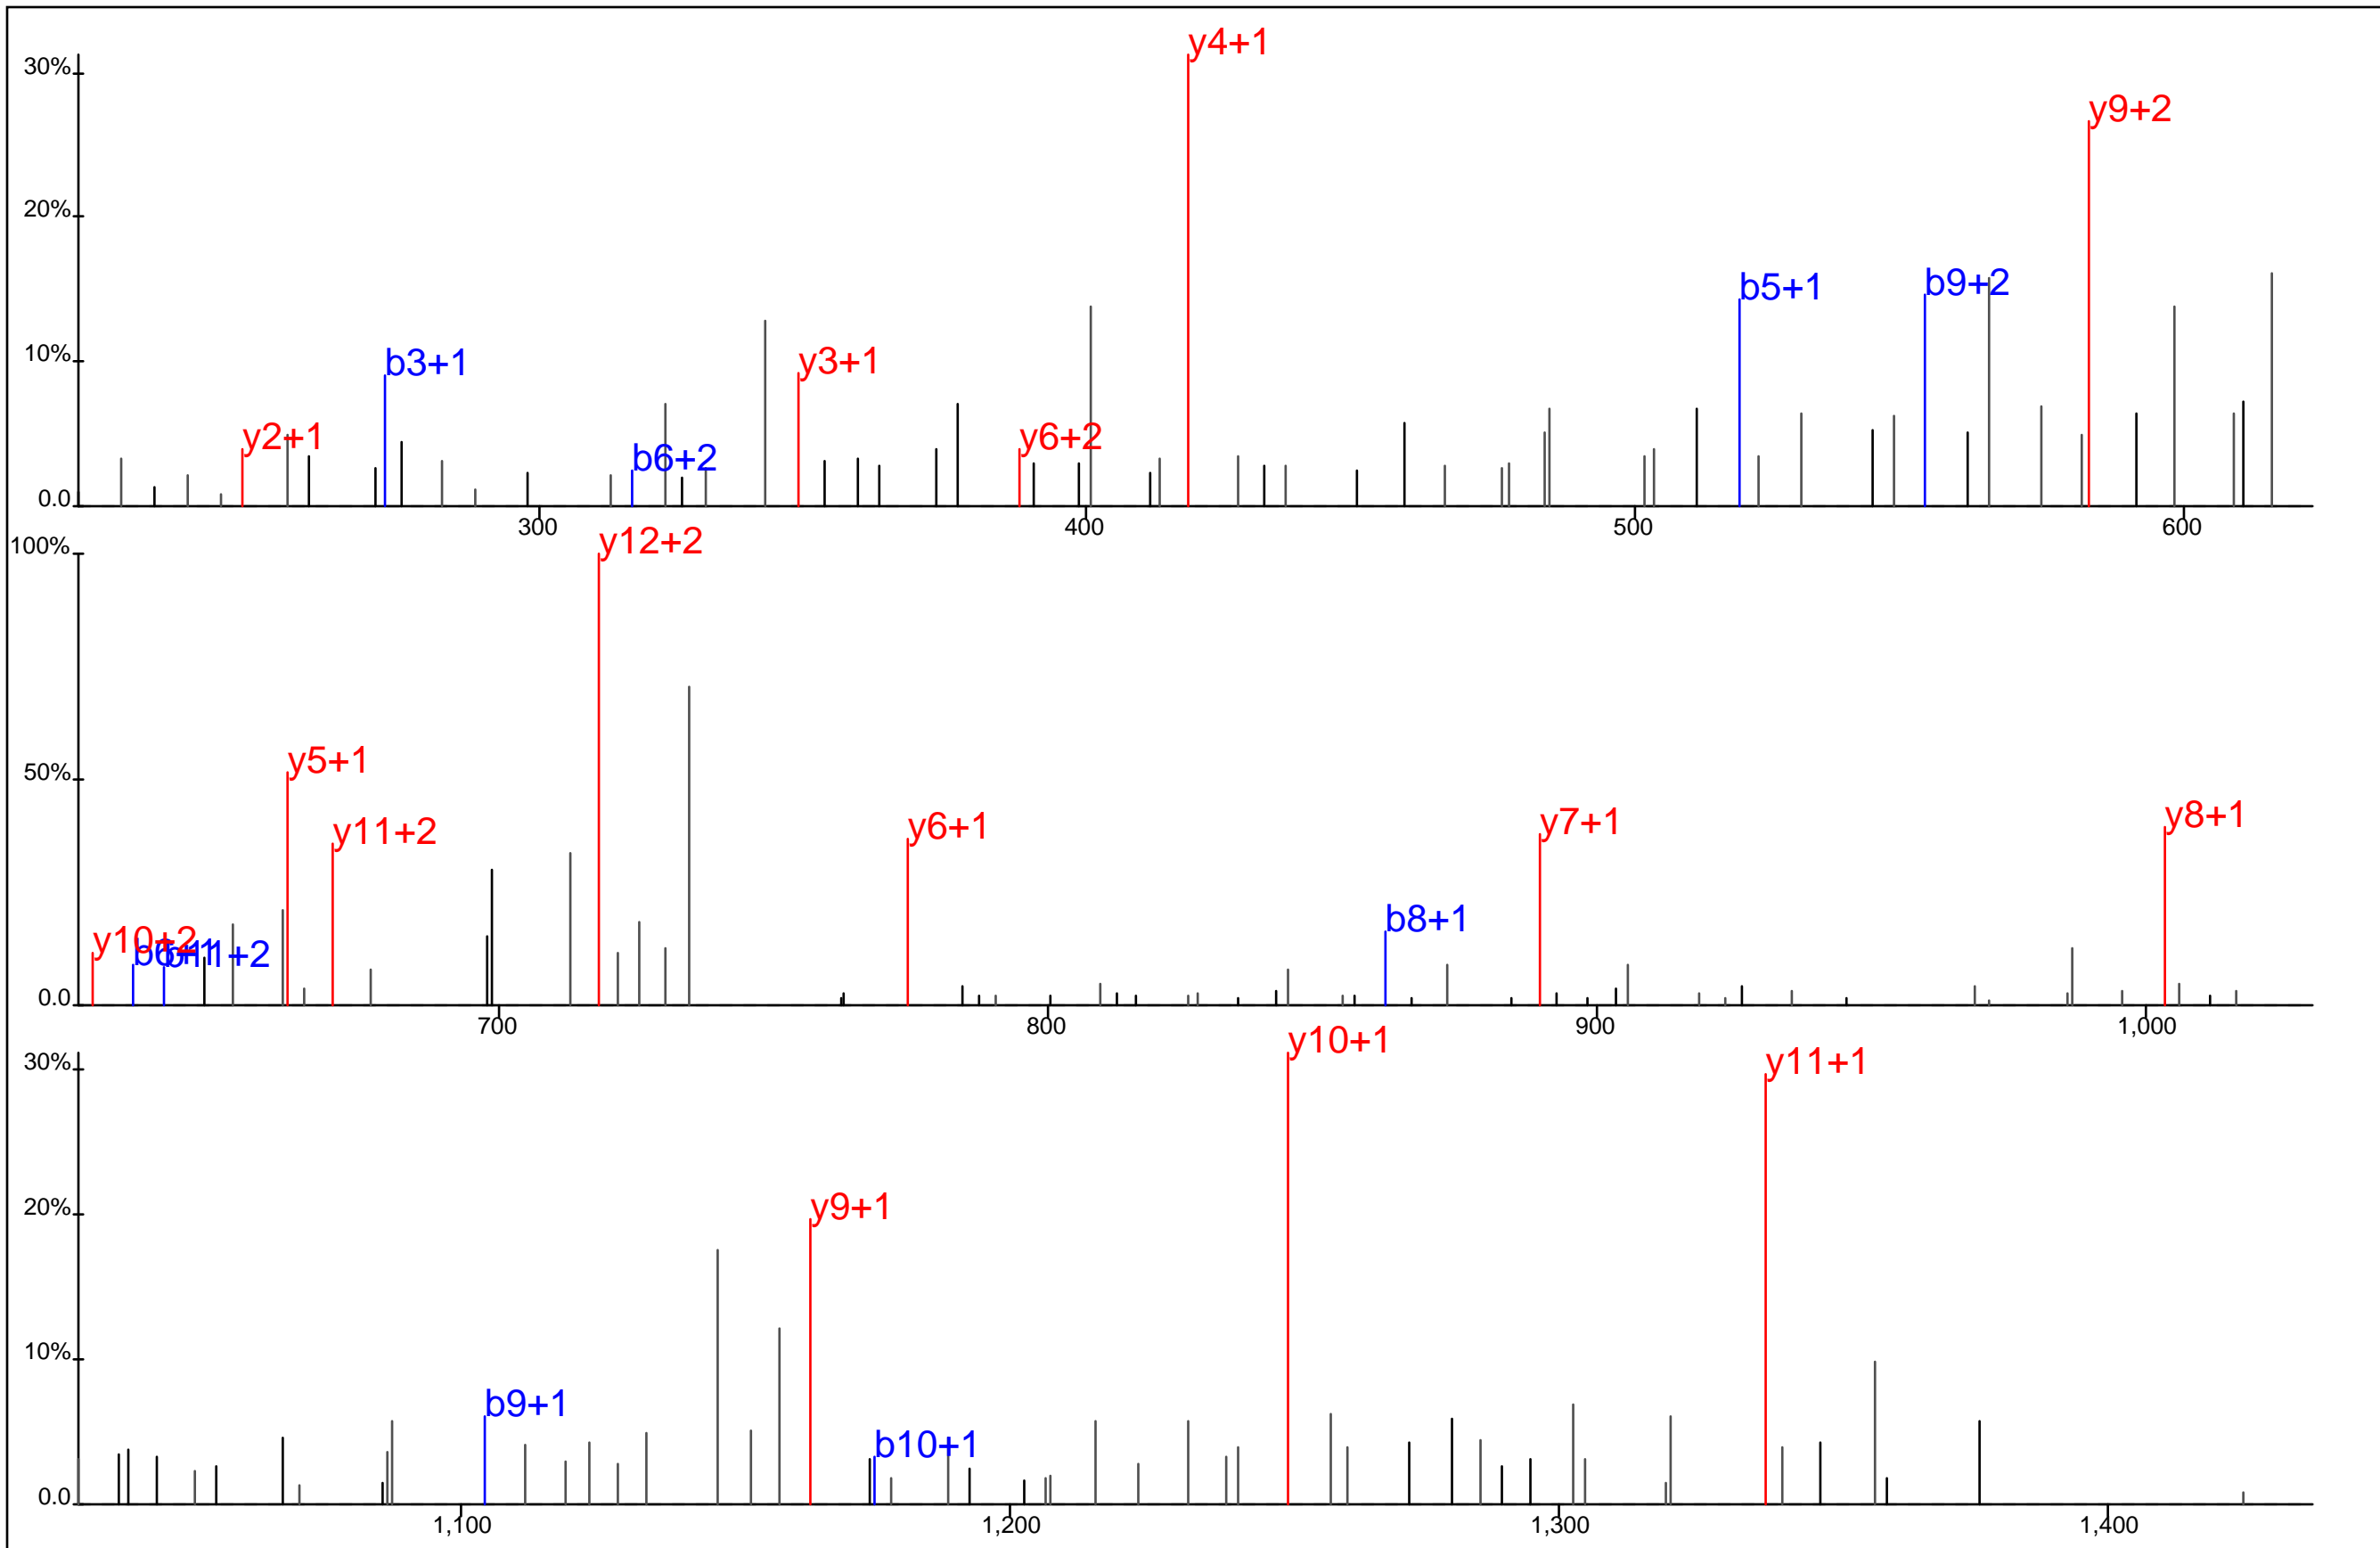

■ □ ■ ■ □ □ ■ ■ ■ ■  
 S P S S C N D L Y\* A T V K  
■ ■ ■ ■ ■ ■ ■ ■ ■ ■

Protein Name: PAG  
 gi Accession: 0  
 Precursor Mass: 761.3188+2  
 Delta Mass: 0.799 ppm  
 XCorr: 64.26





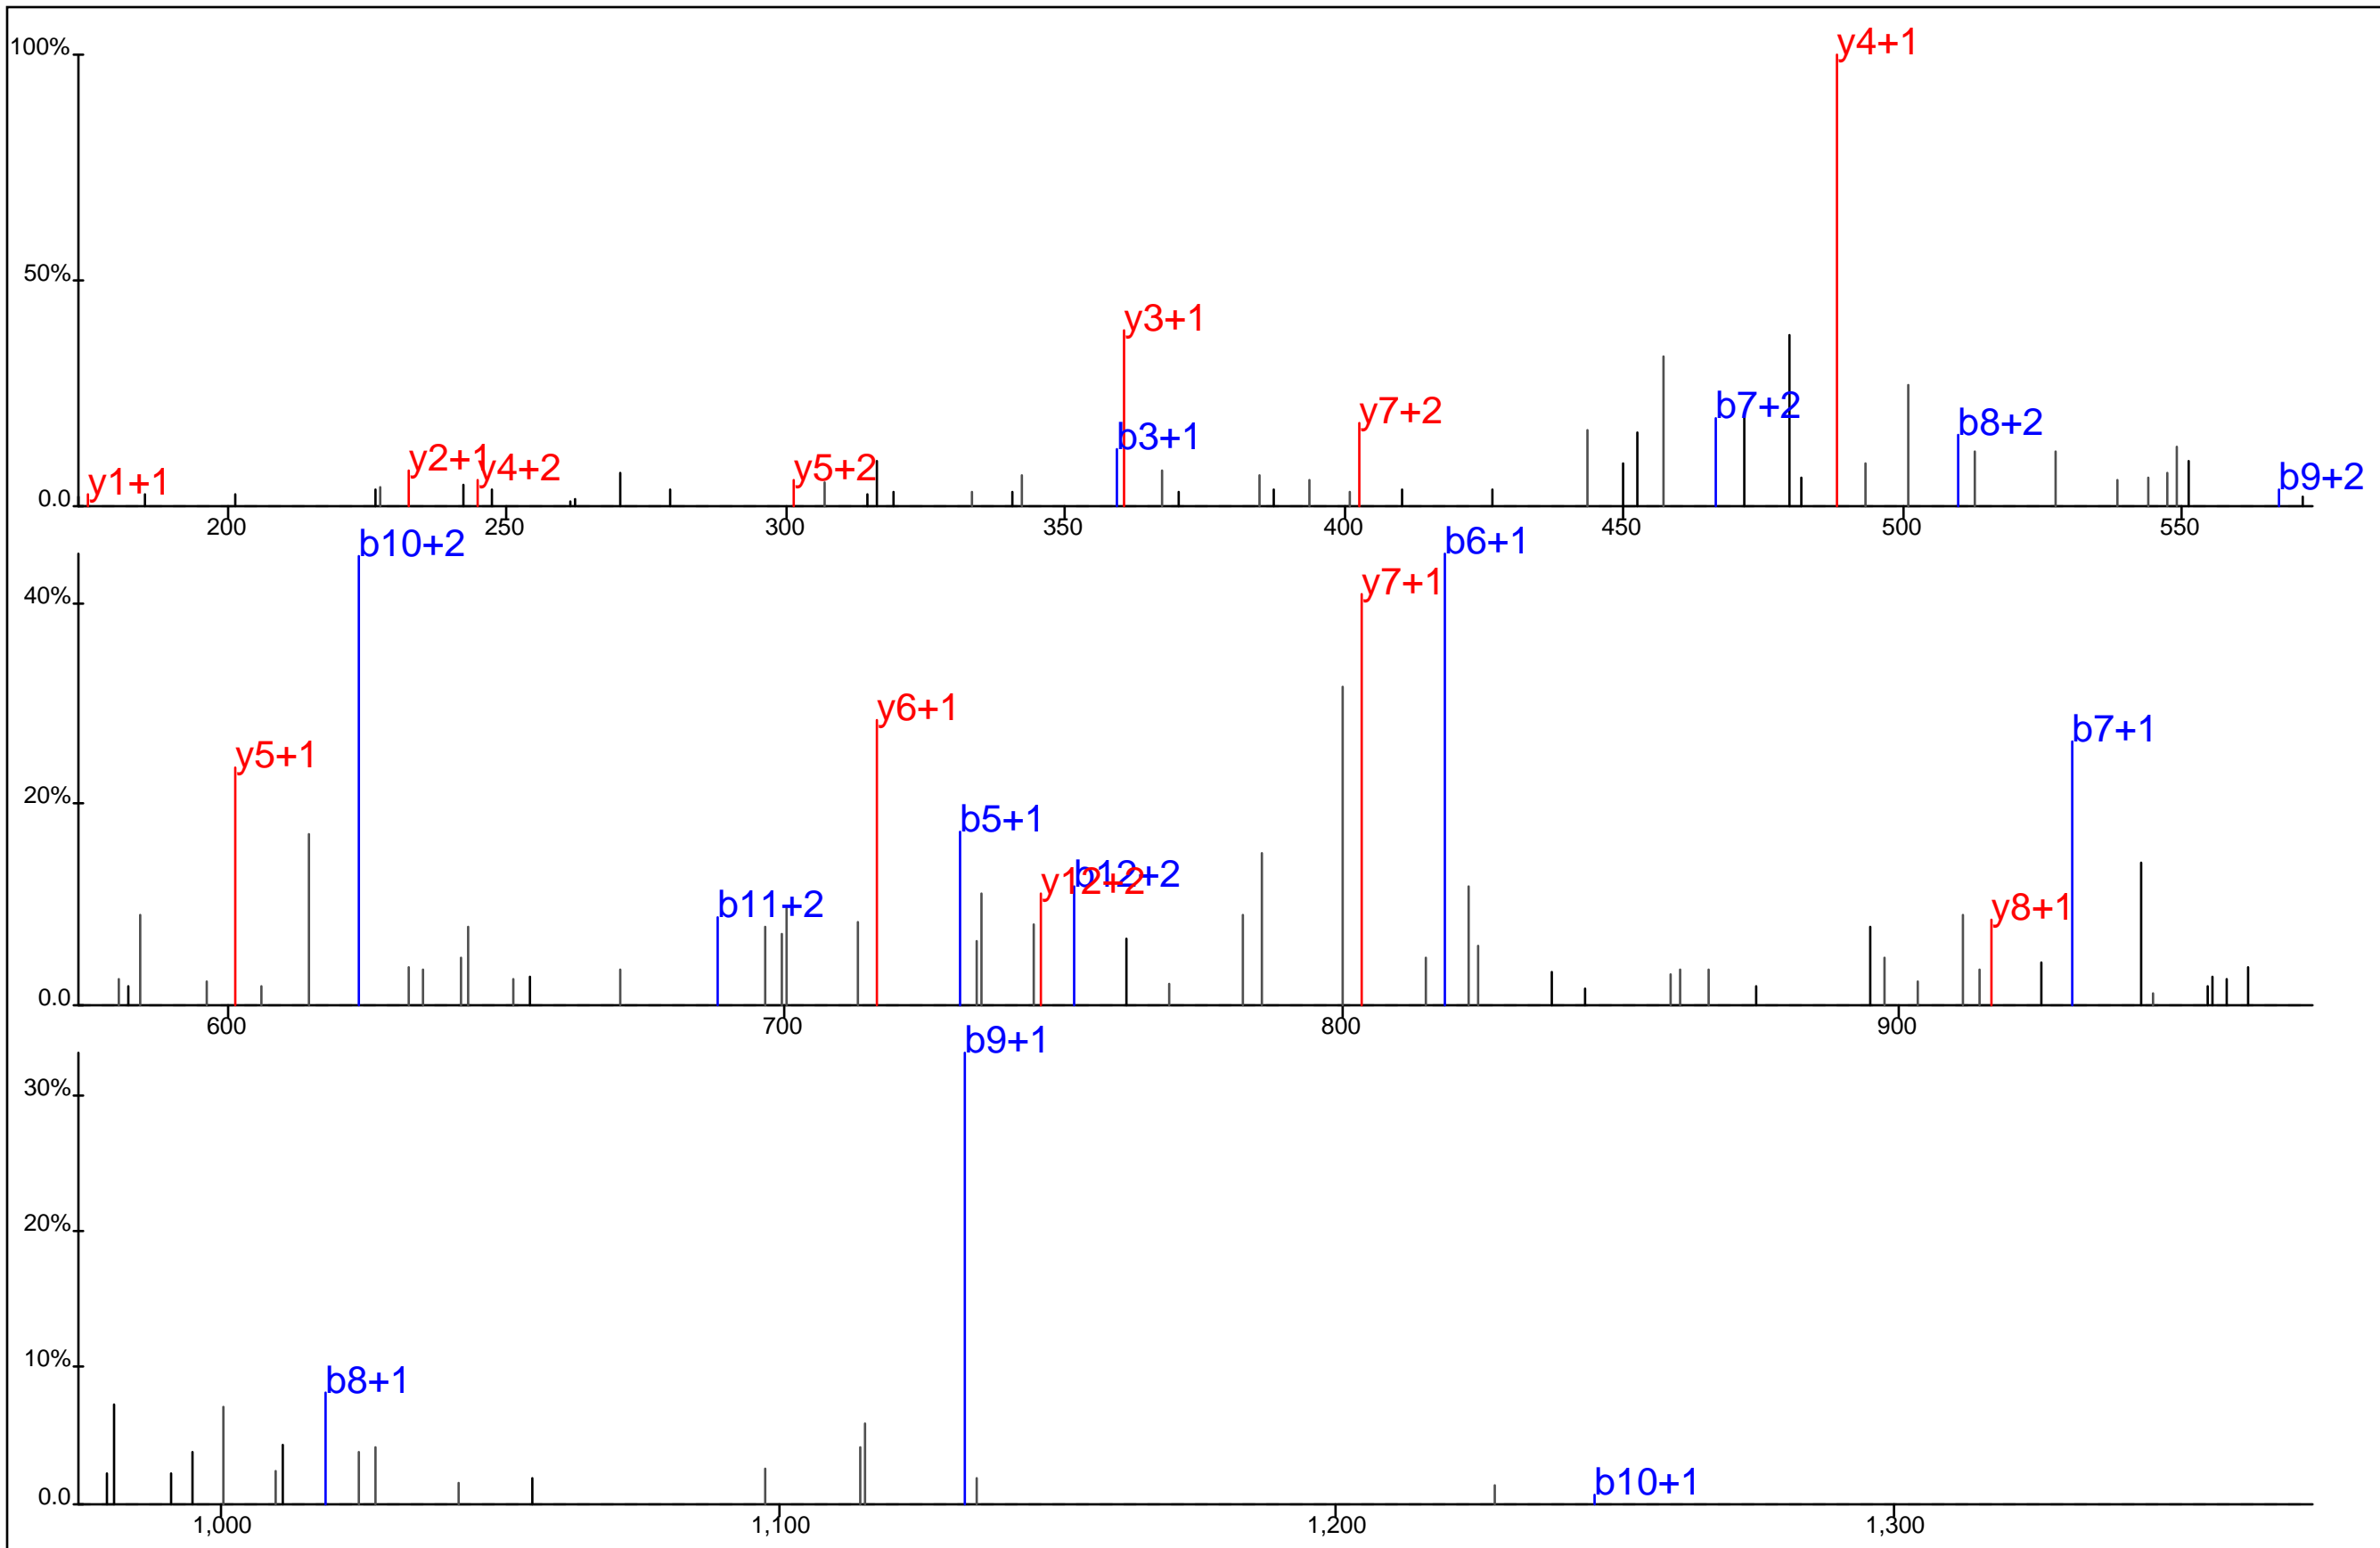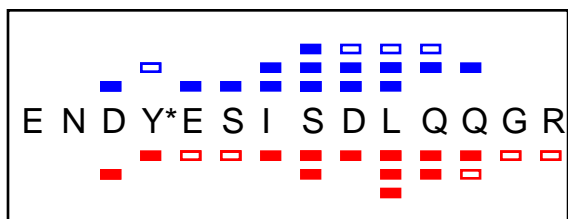

Protein Name: PAG  
 gi Accession: 0  
 Precursor Mass: 578.5719+3  
 Delta Mass: 0.137 ppm  
 XCorr: 63.95

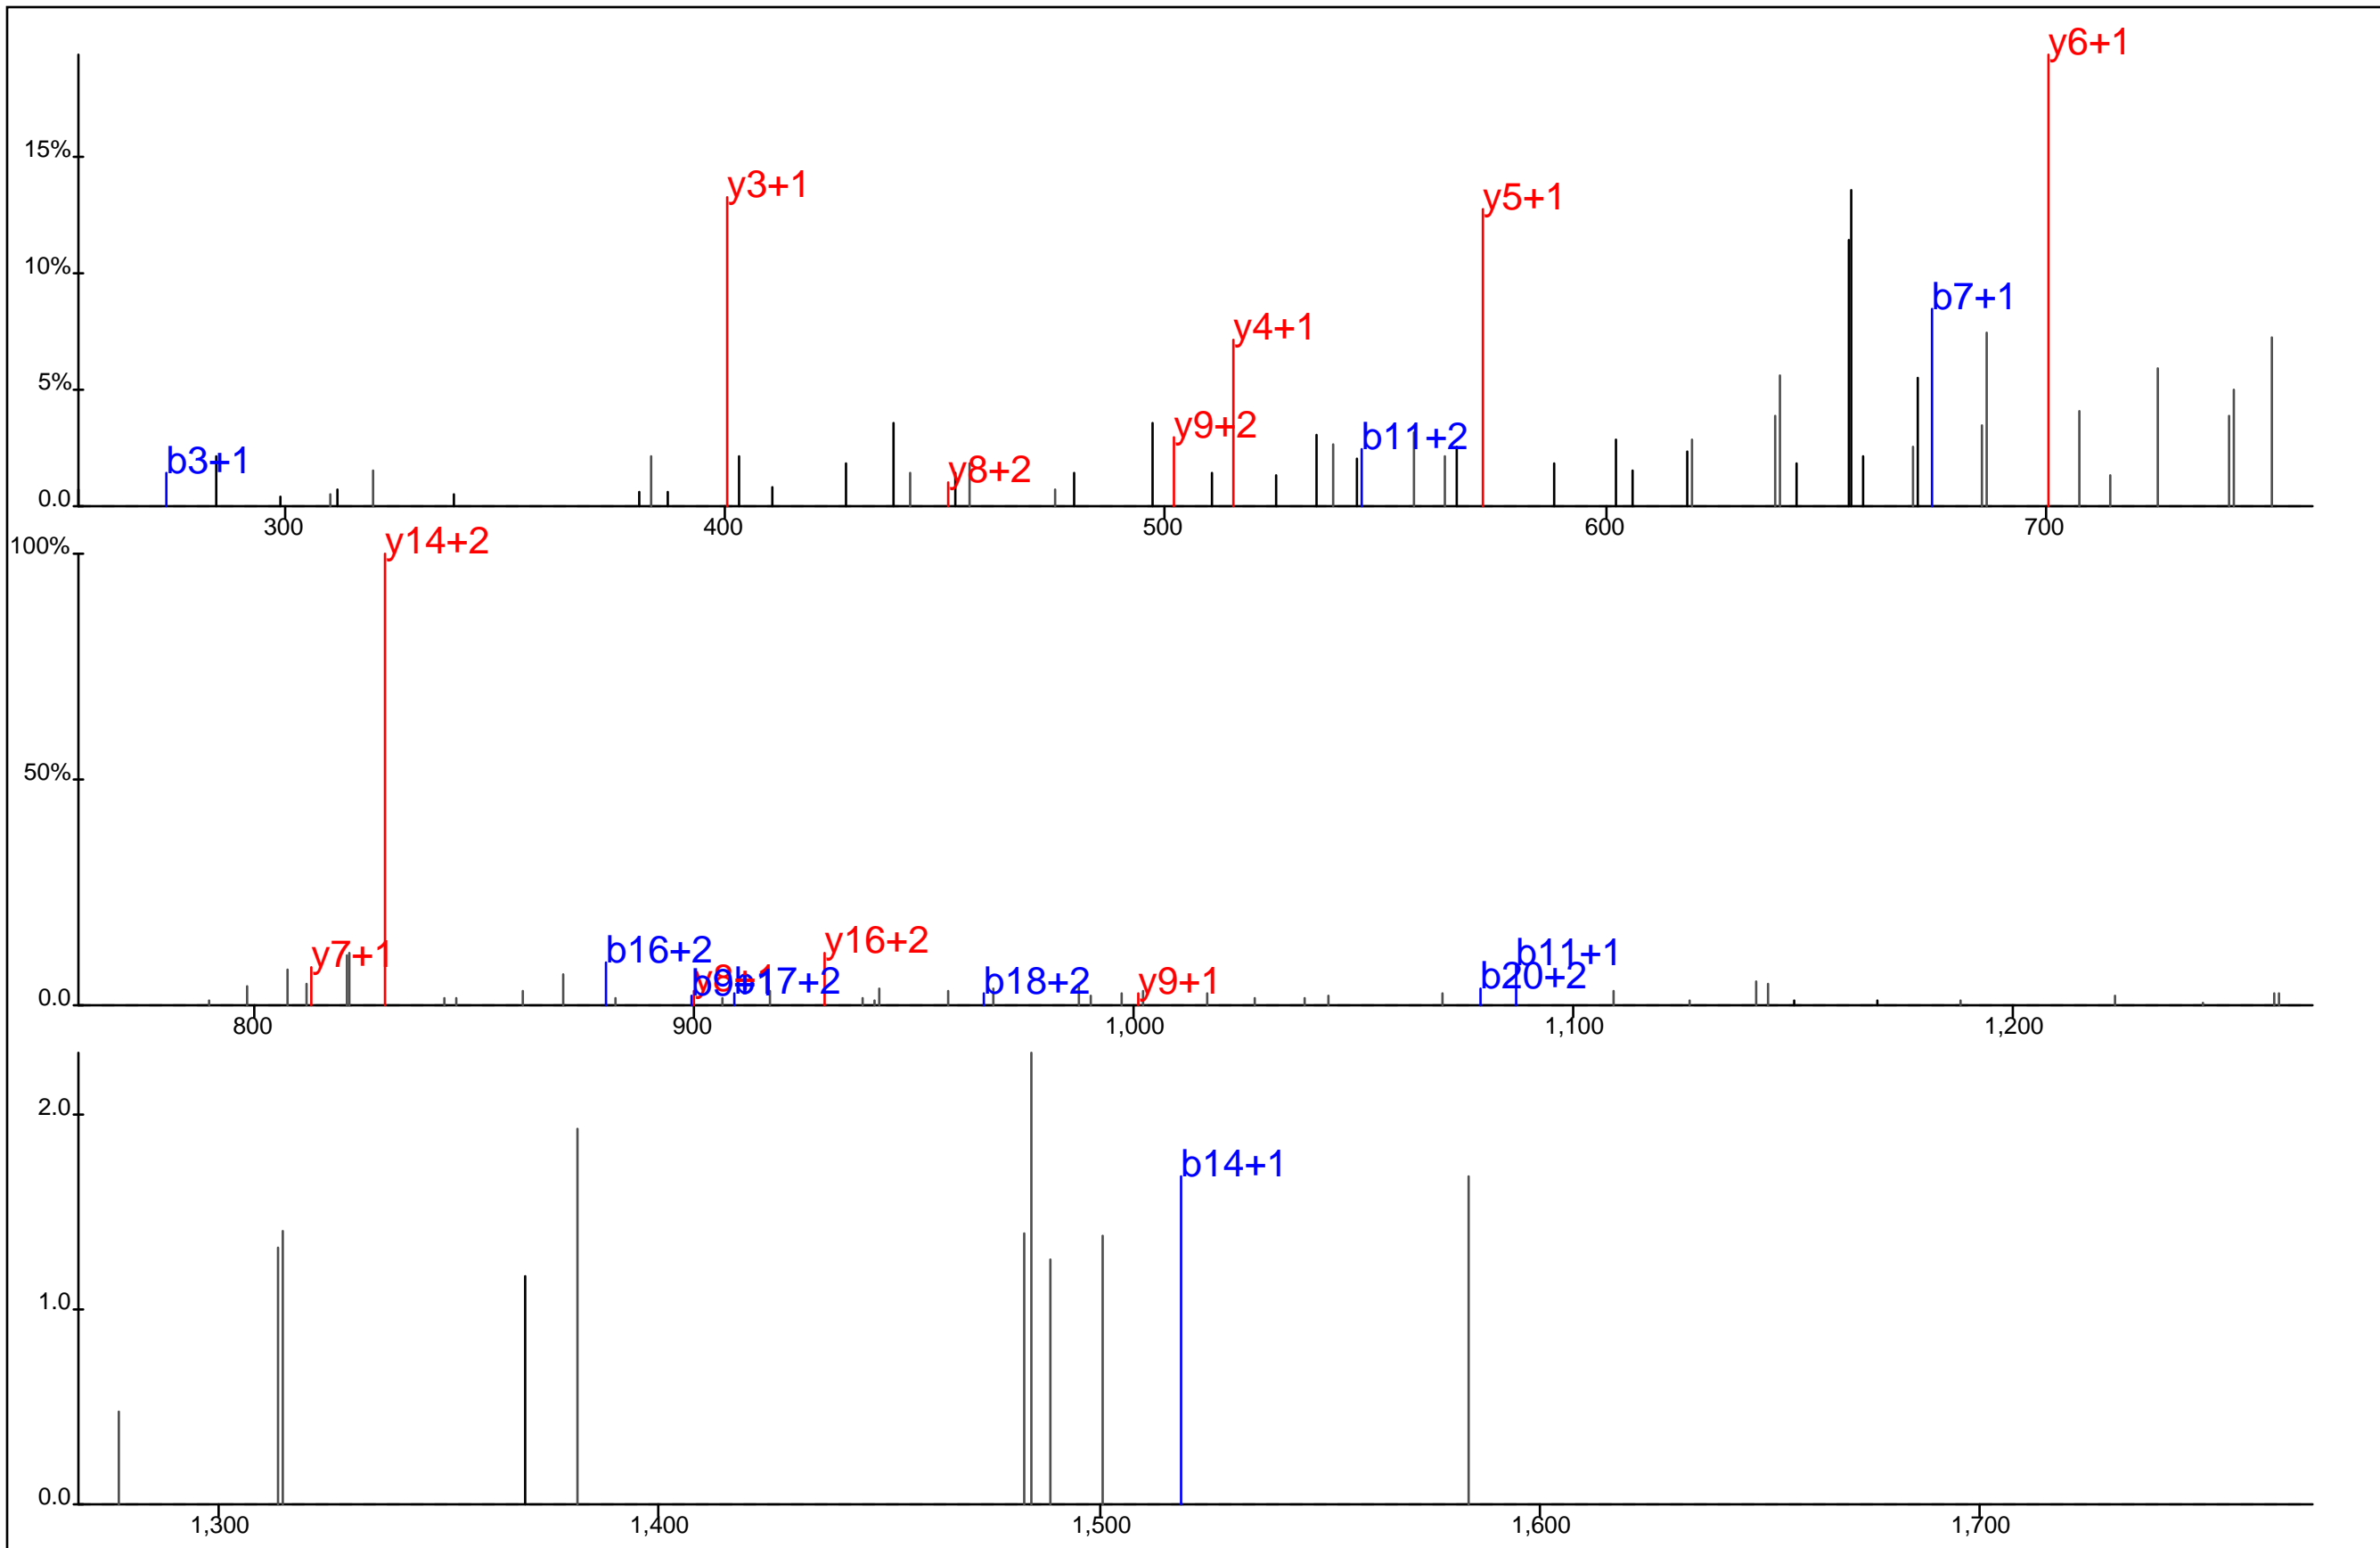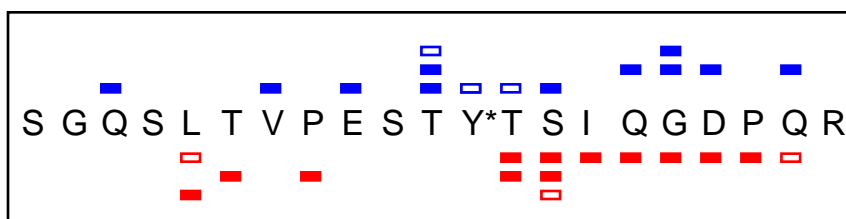

Protein Name: PAG  
 gi Accession: 0  
 Precursor Mass: 777.6872+3  
 Delta Mass: 1.287 ppm  
 XCorr: 23.52

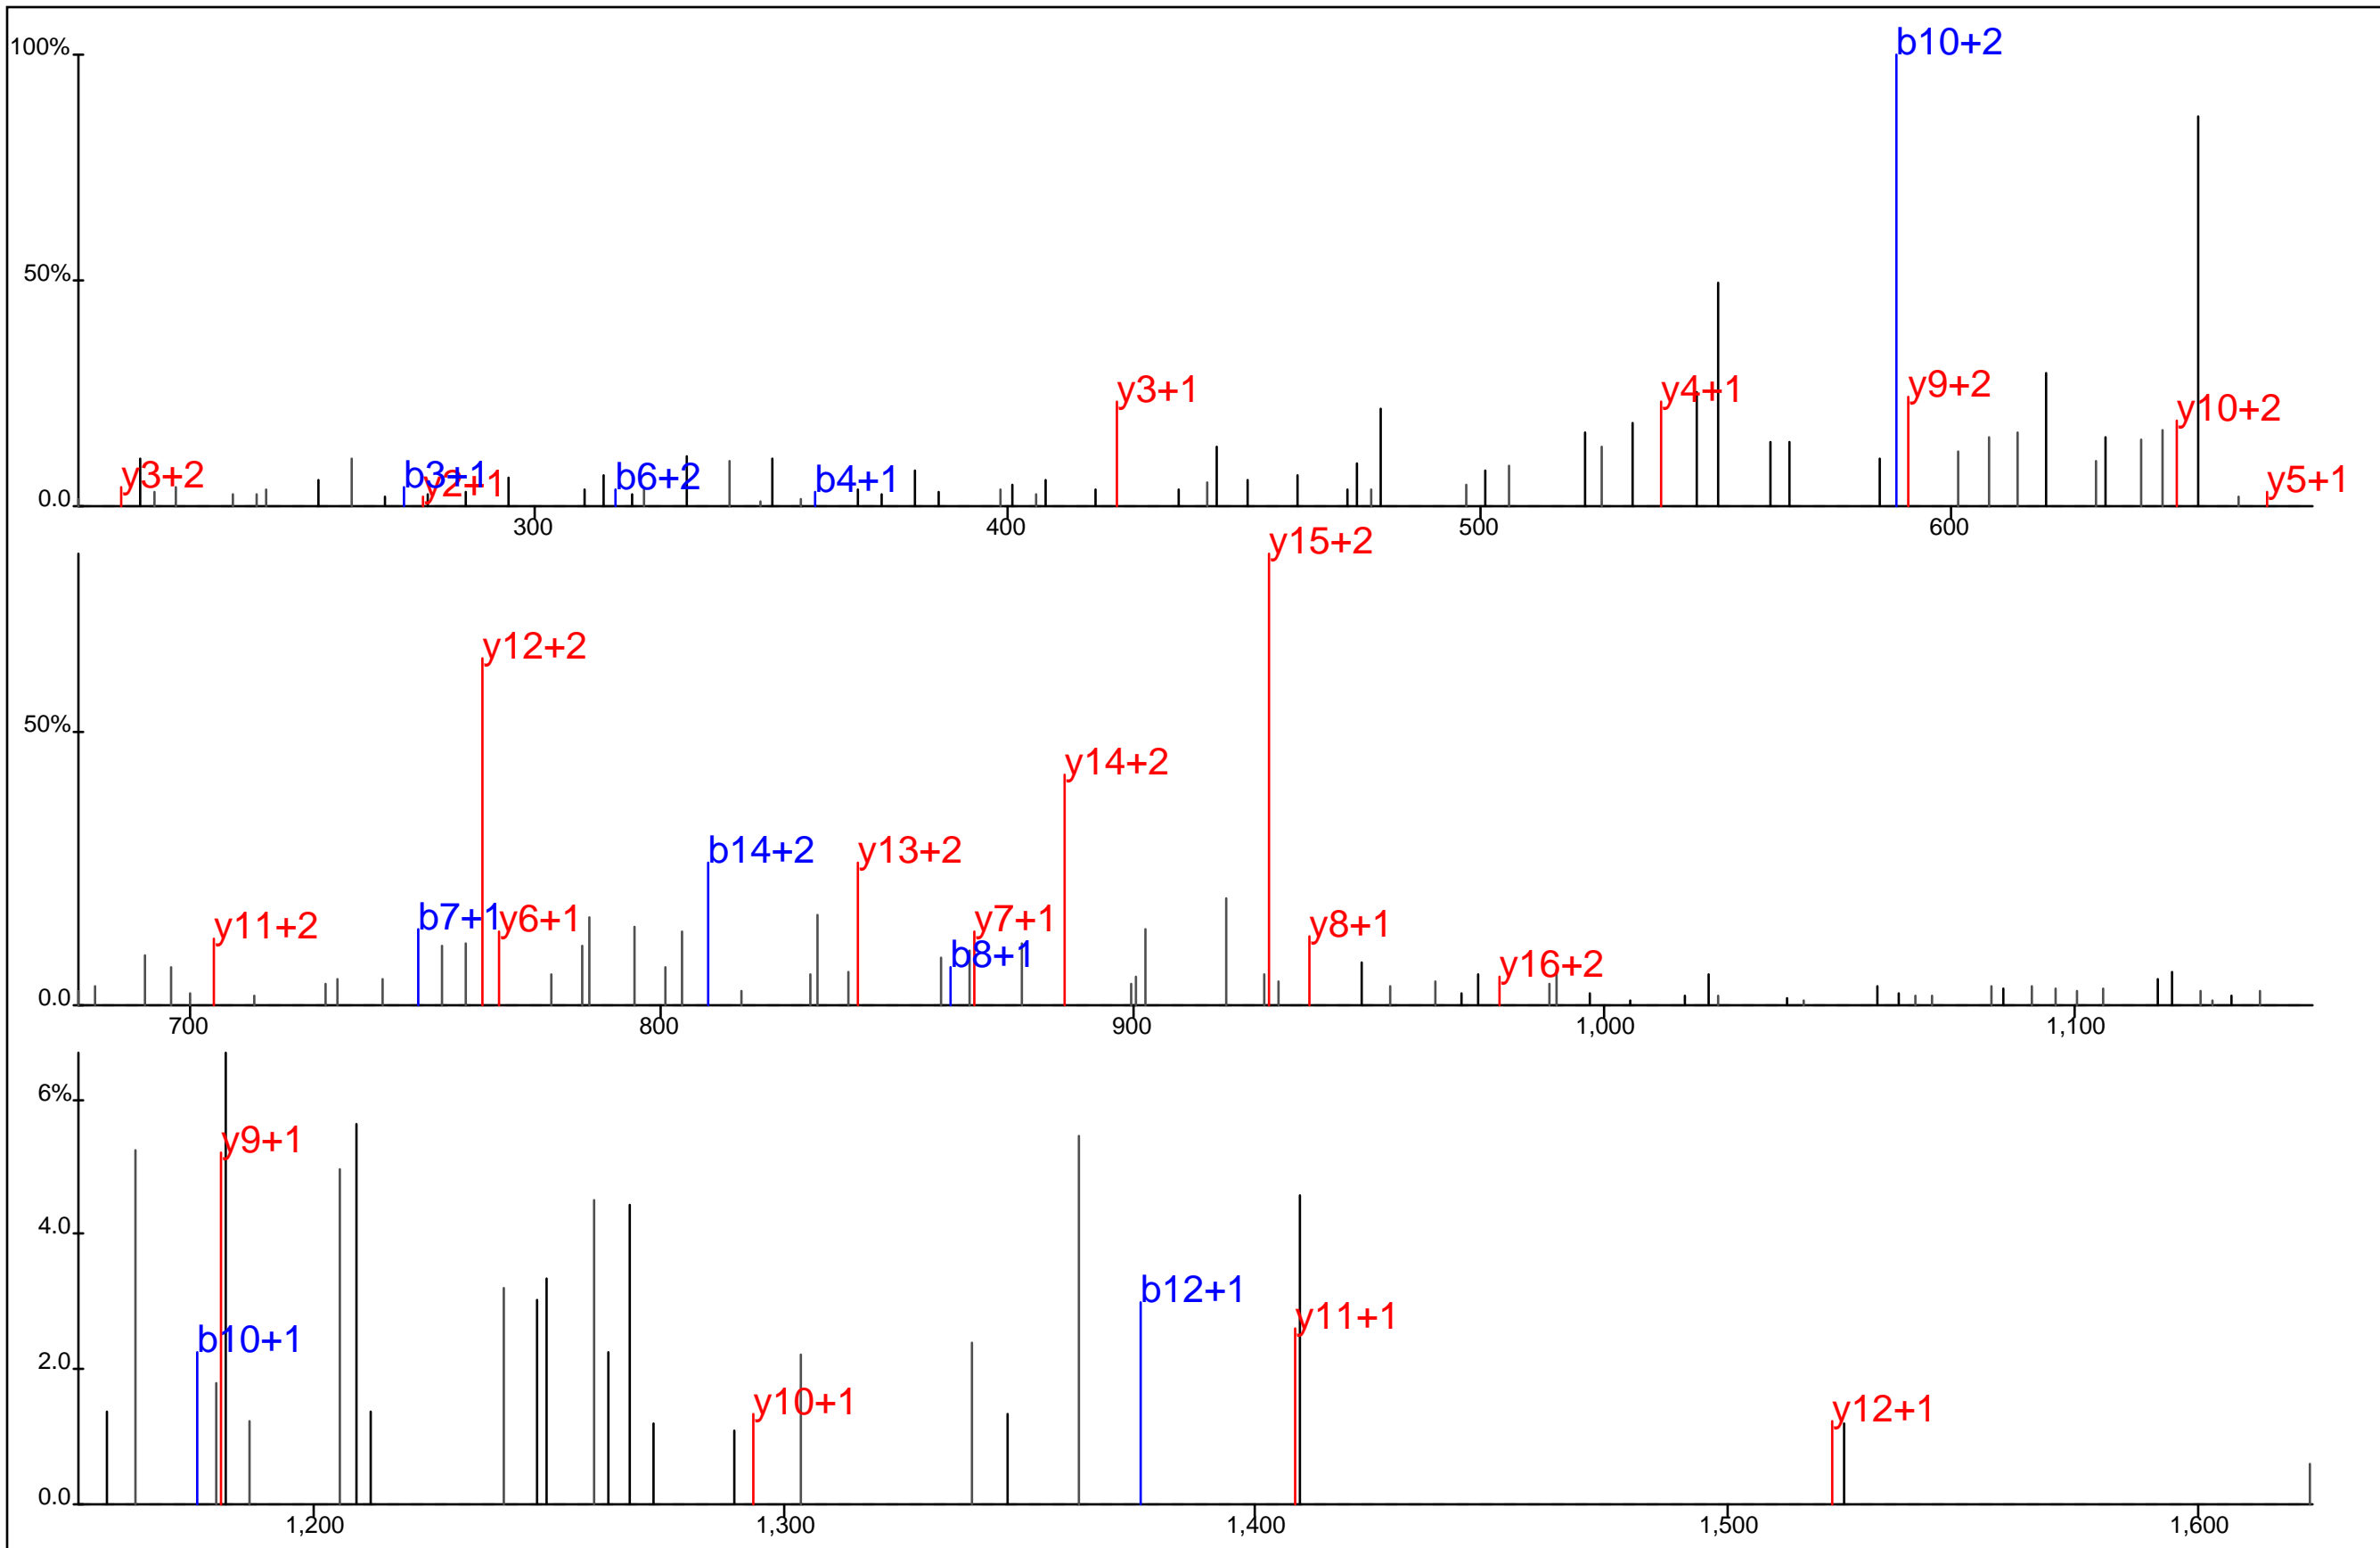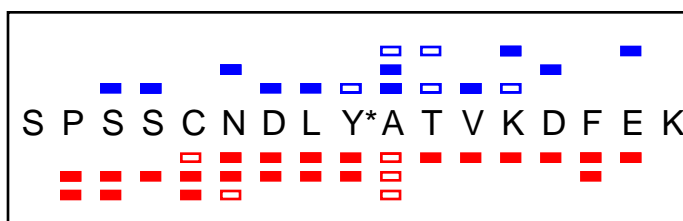

Protein Name: PAG  
 gi Accession: 0  
 Precursor Mass: 680.9616+3  
 Delta Mass: 4.054 ppm  
 XCorr: 29.54

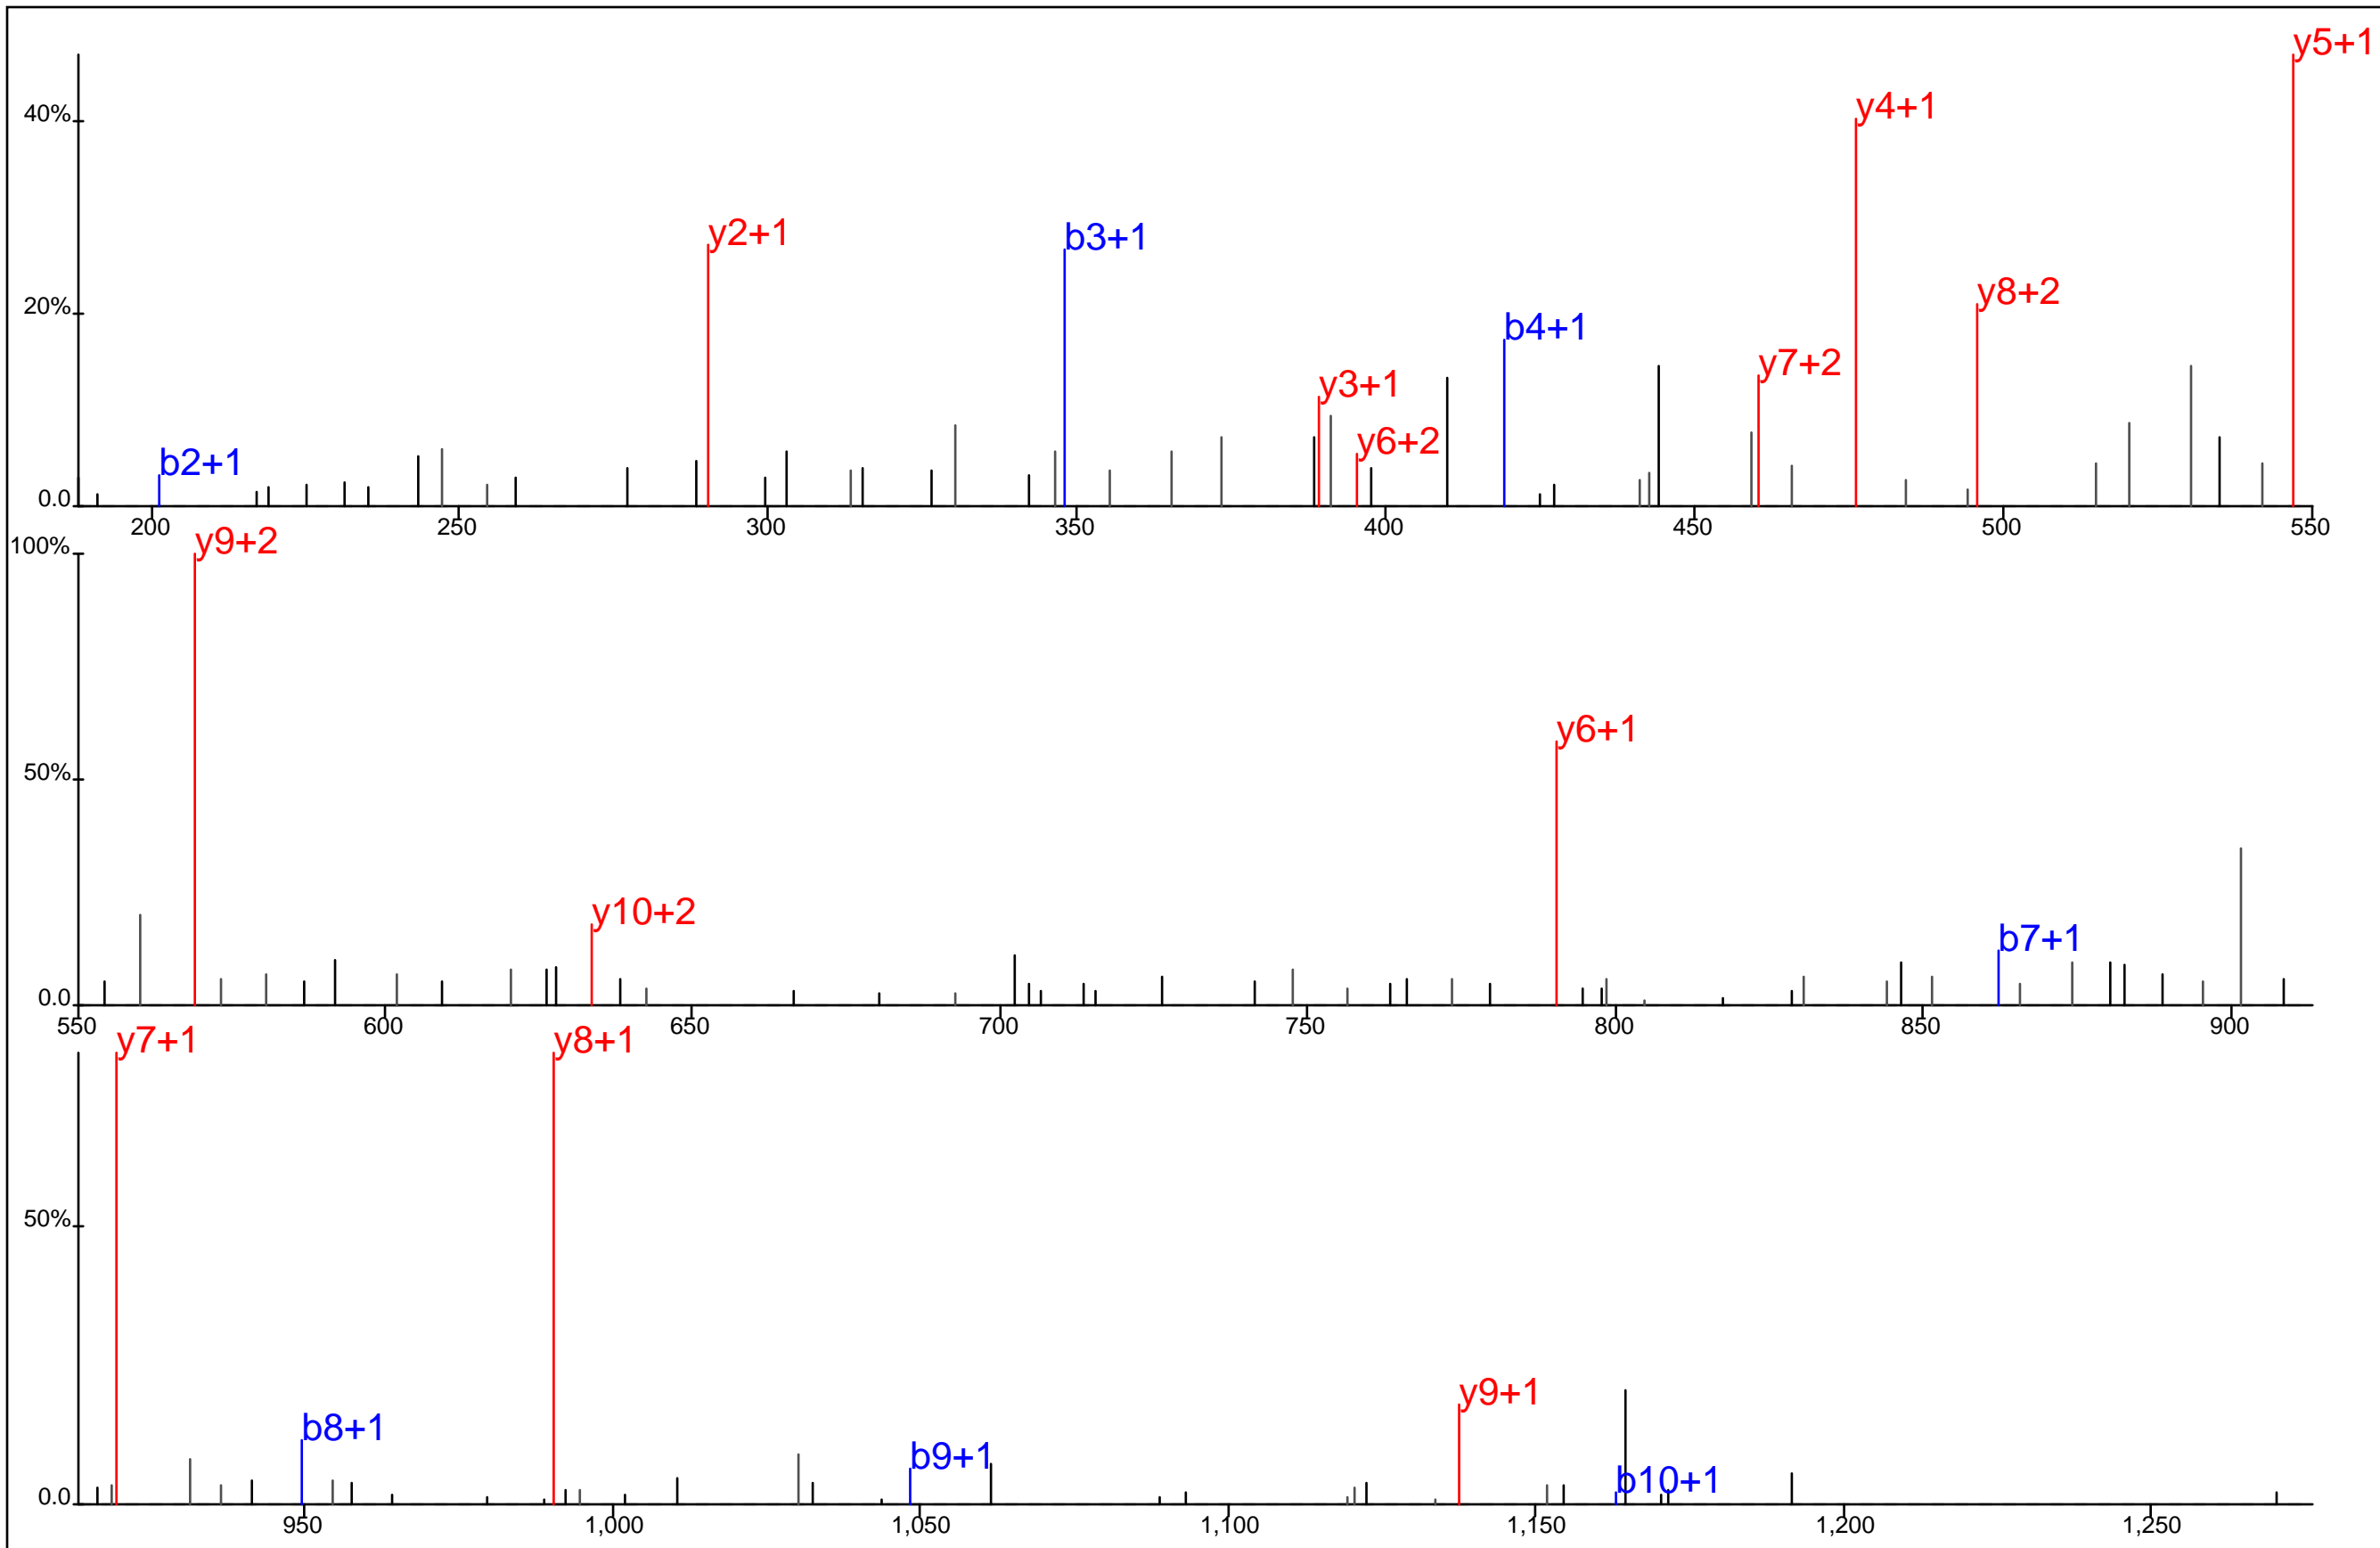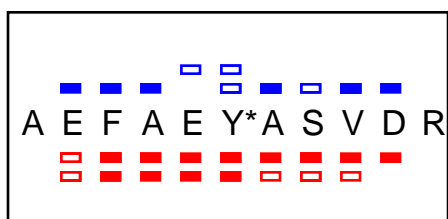

Protein Name: PAG  
 gi Accession: 0  
 Precursor Mass: 669.2723+2  
 Delta Mass: 2.617 ppm  
 XCorr: 47.58

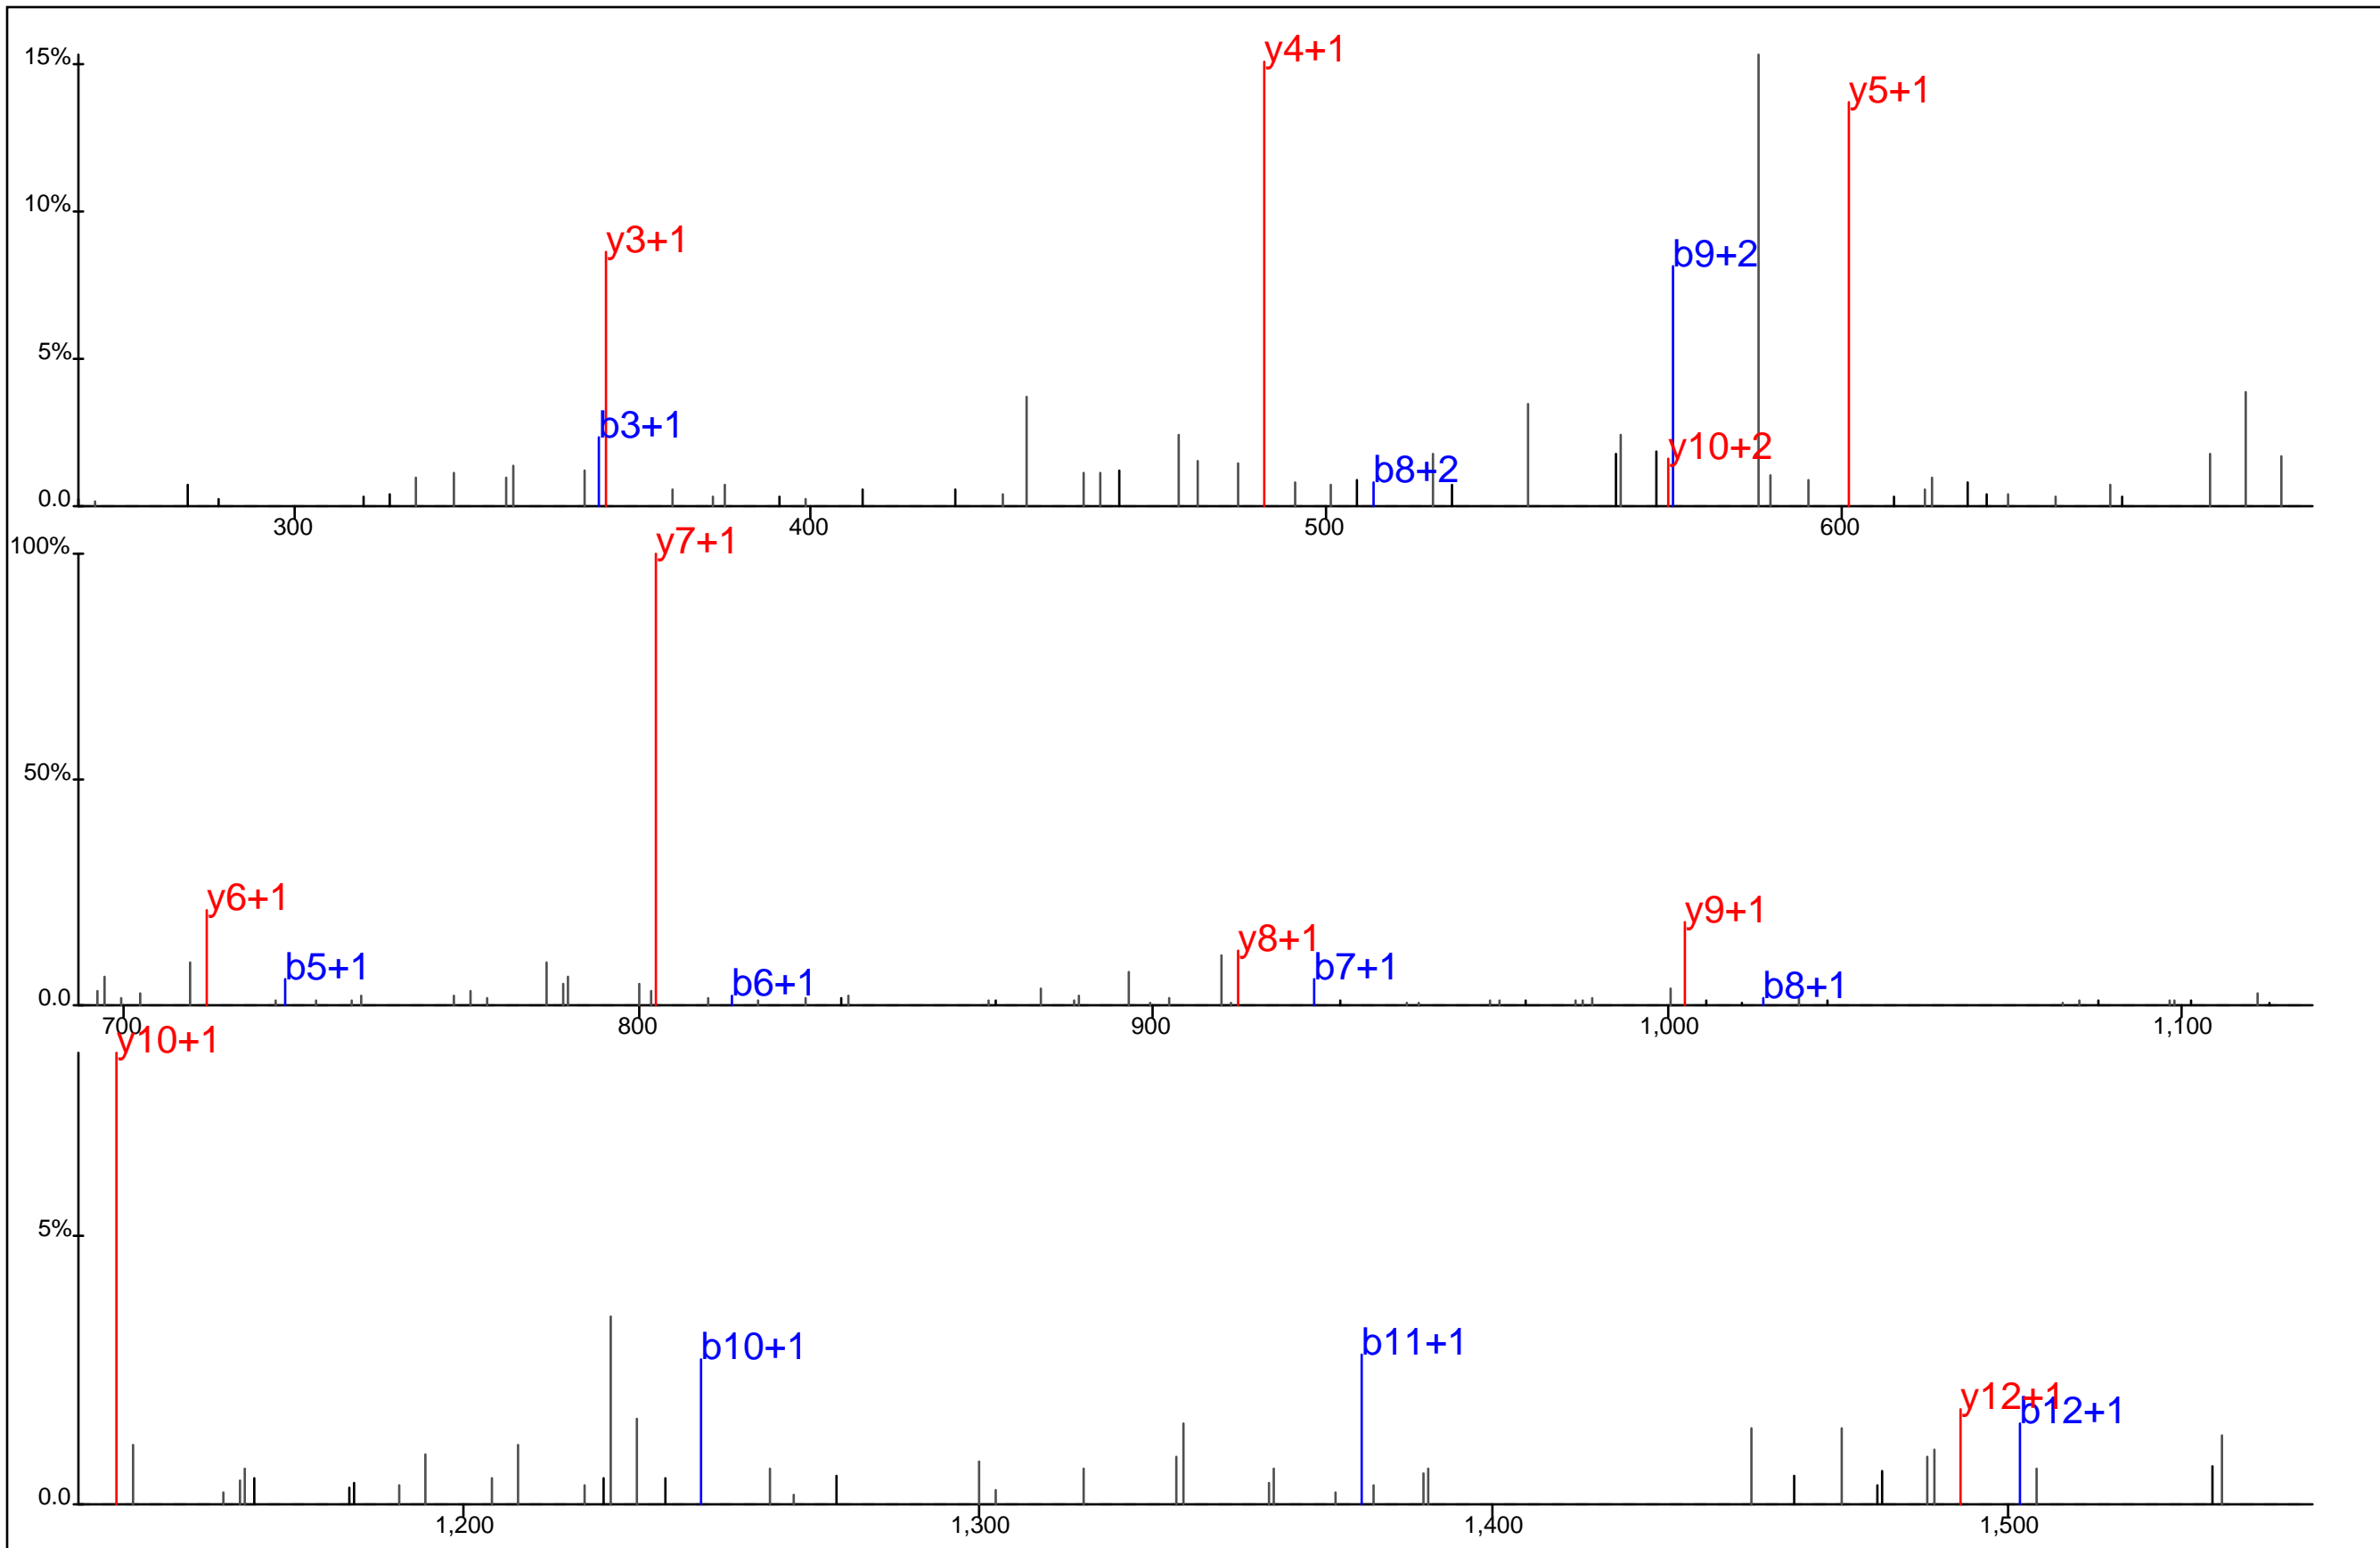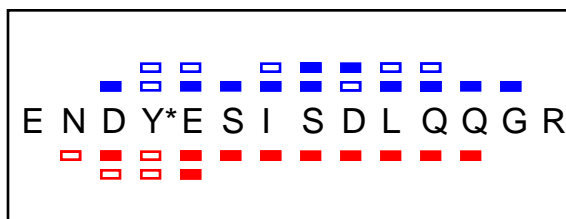

Protein Name: PAG  
 gi Accession: 0  
 Precursor Mass: 867.3551+2  
 Delta Mass: 0.893 ppm  
 XCorr: 74.95



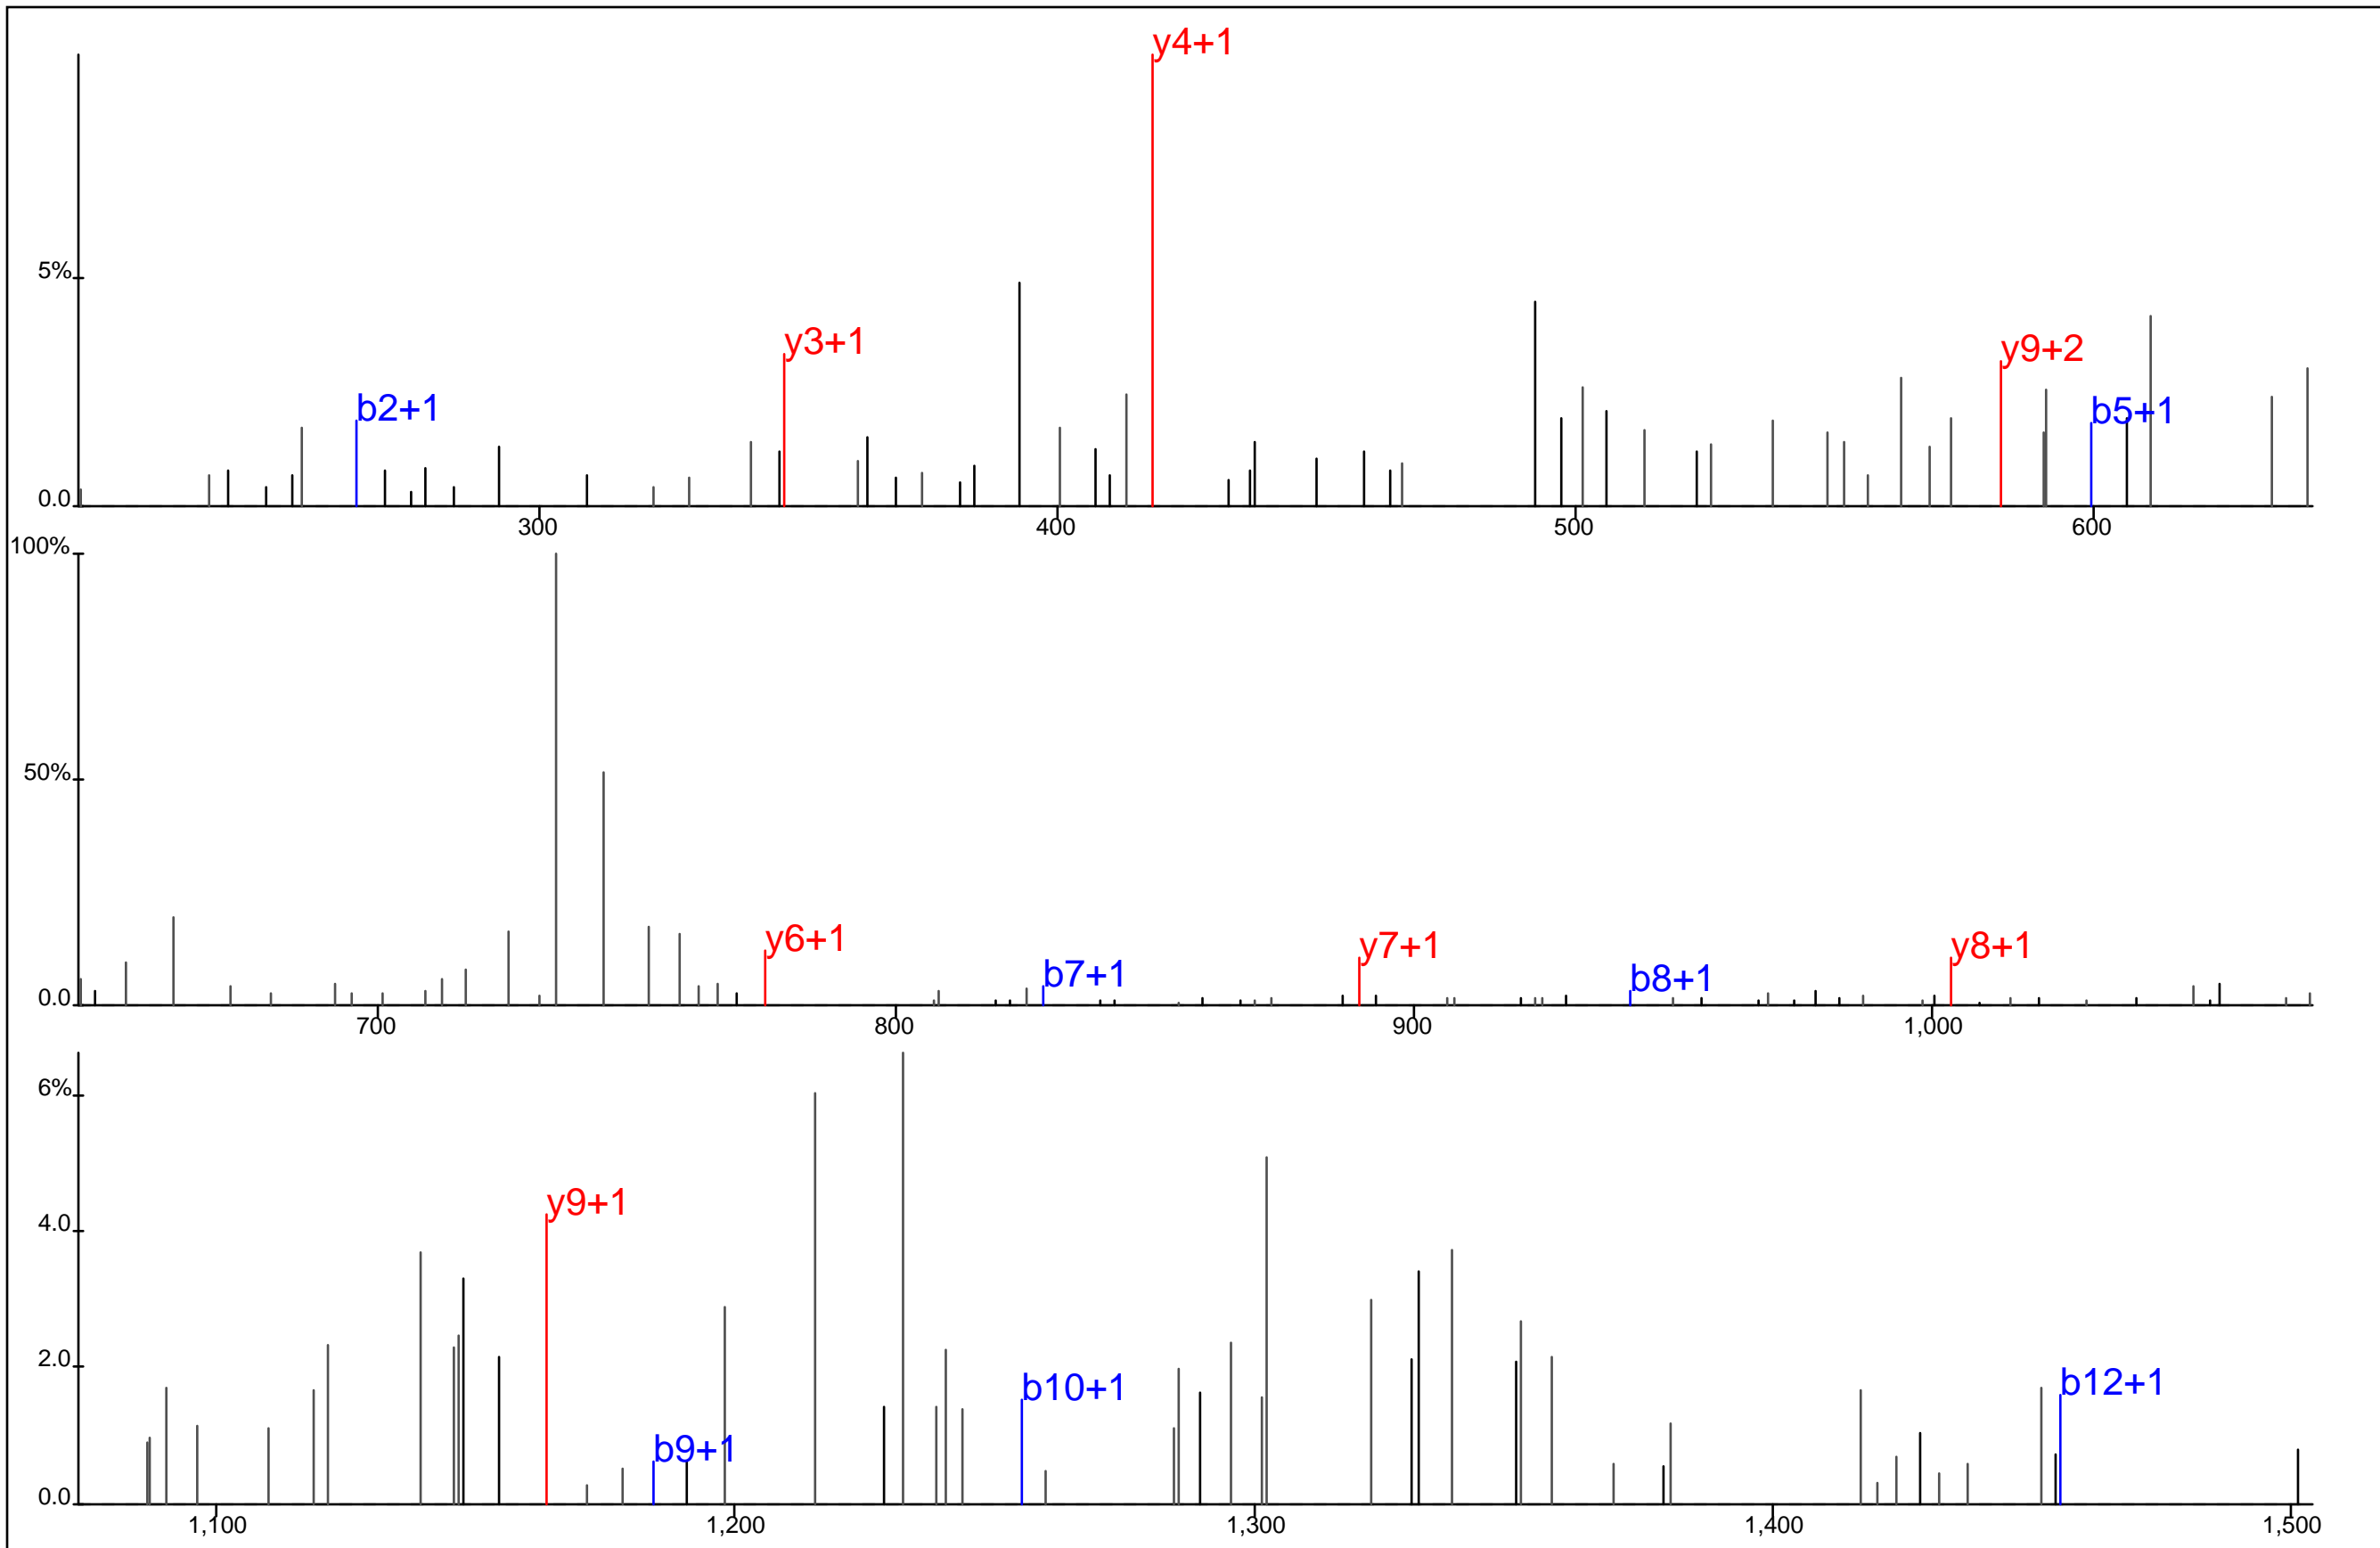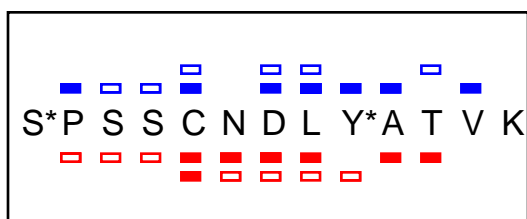

Protein Name: PAG  
 gi Accession: 0  
 Precursor Mass: 801.2989+2  
 Delta Mass: 3.066 ppm  
 XCorr: 25.62





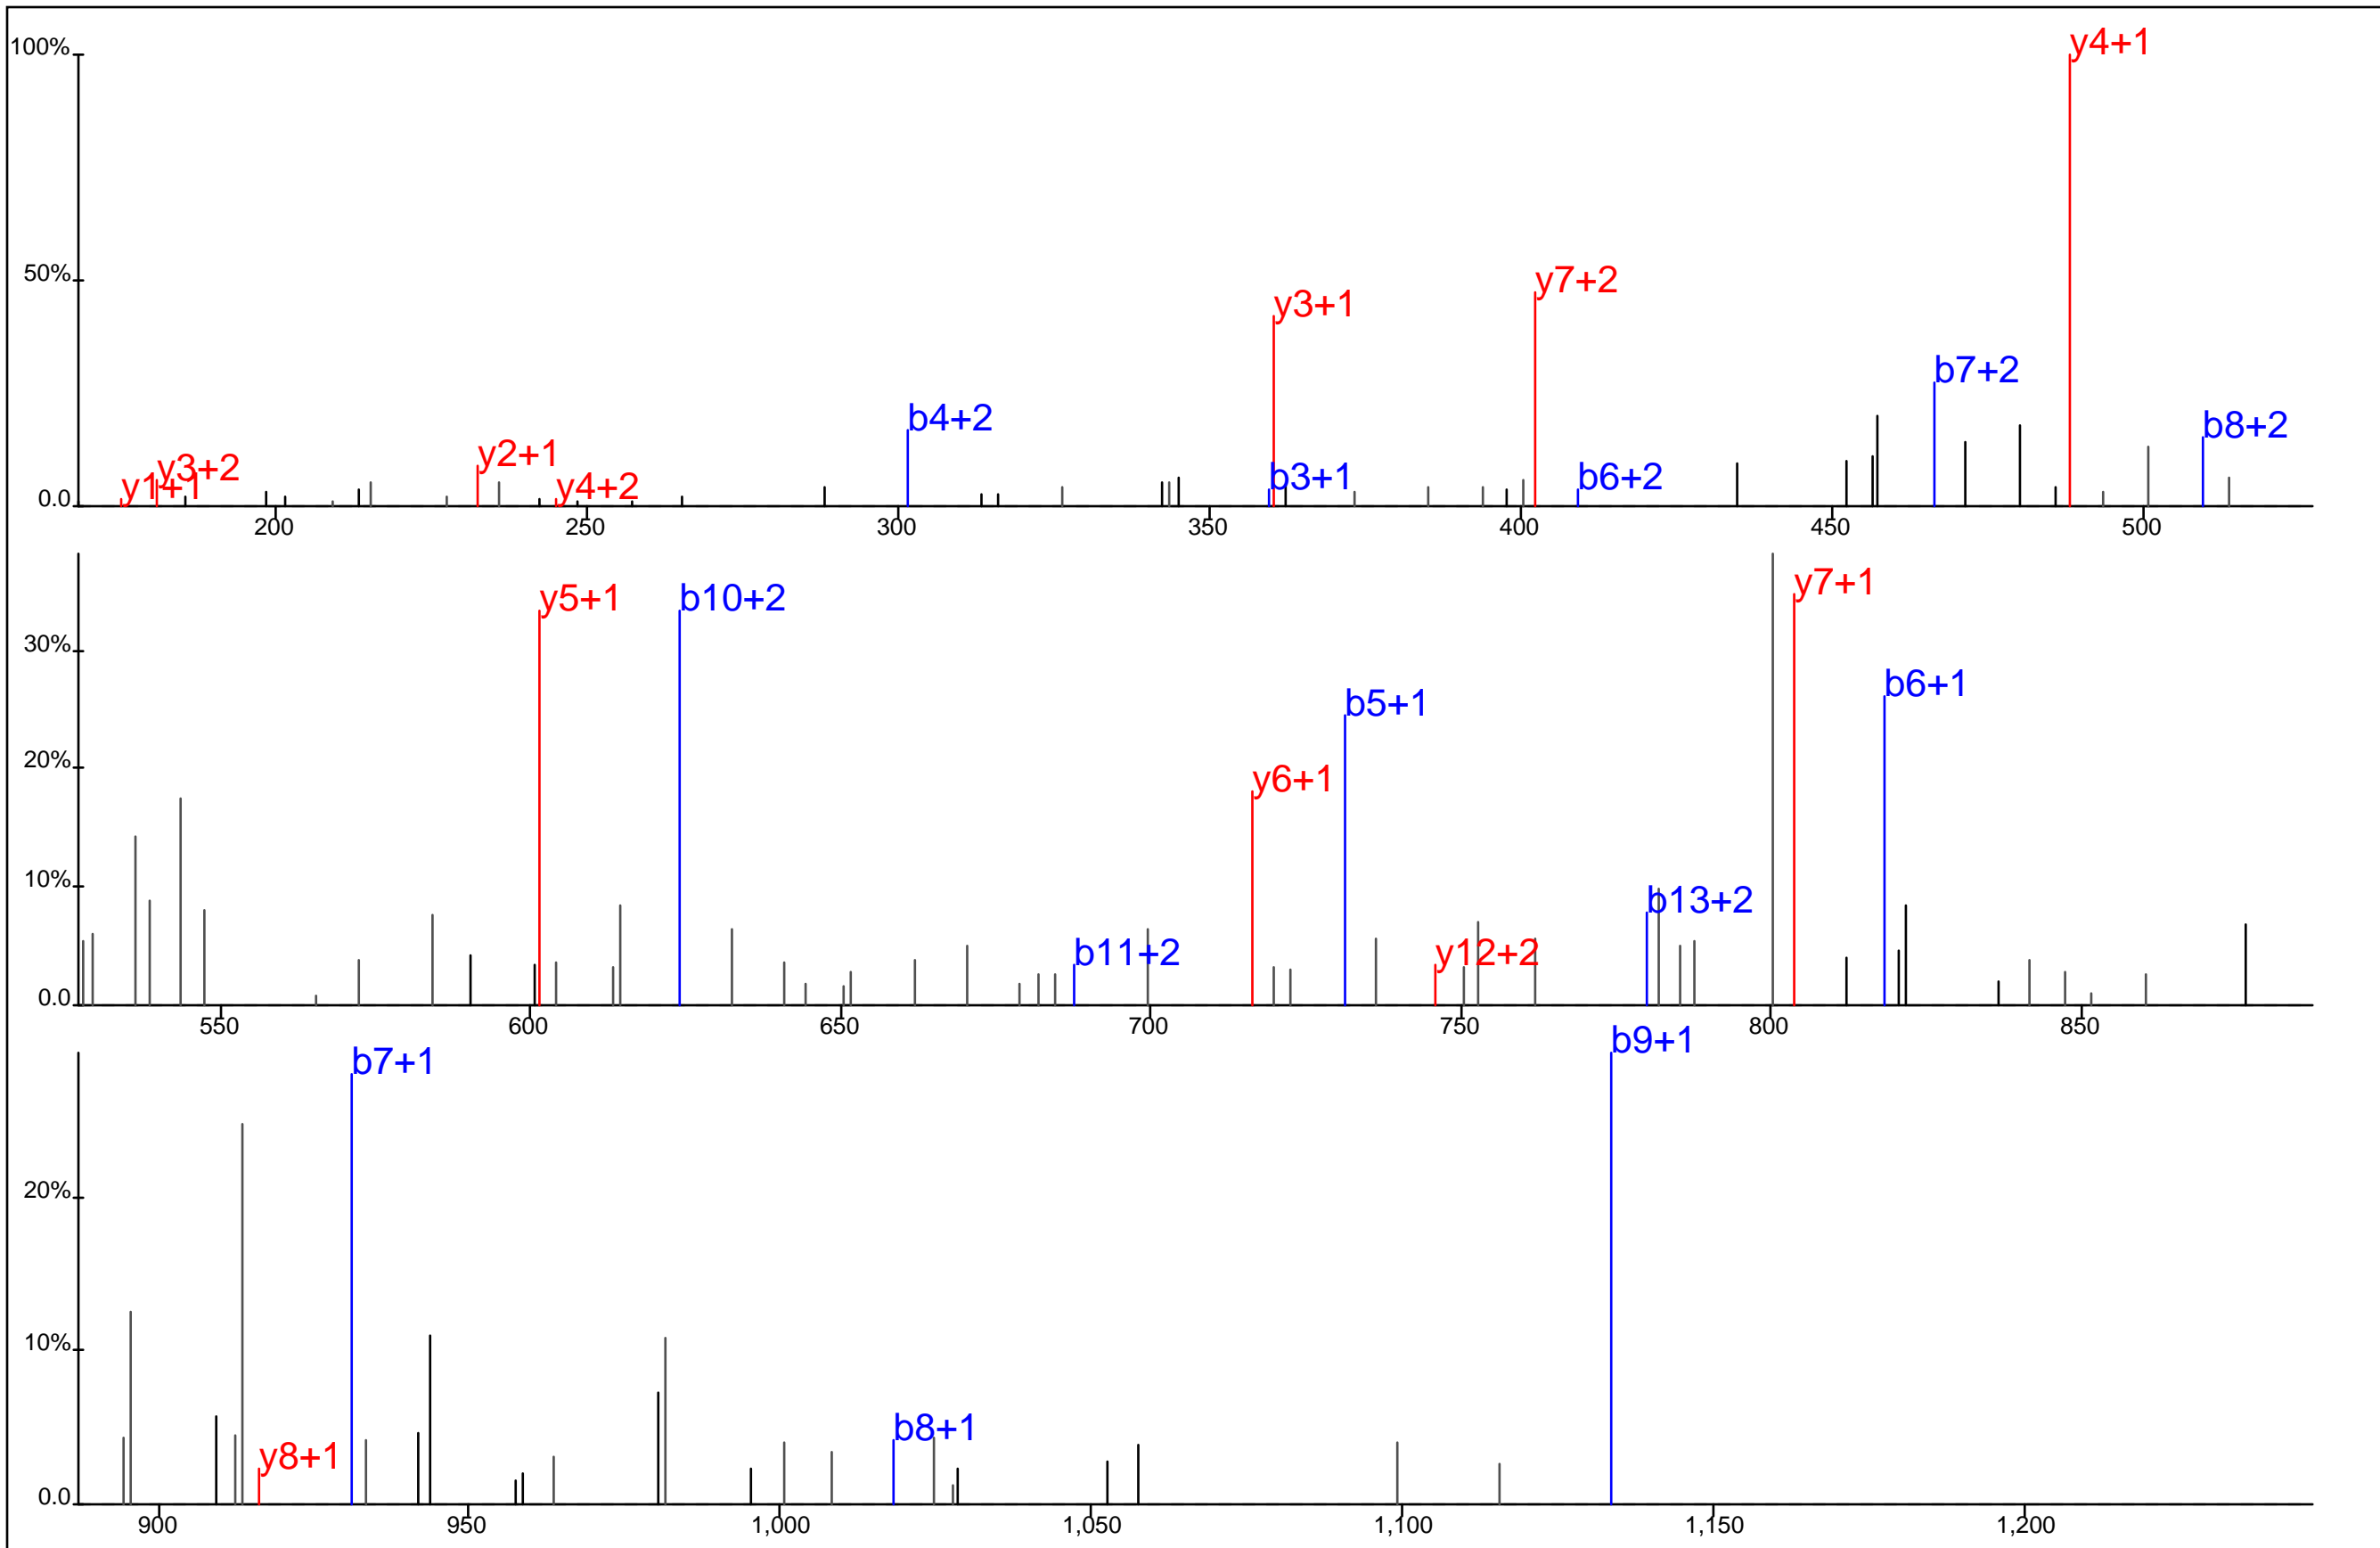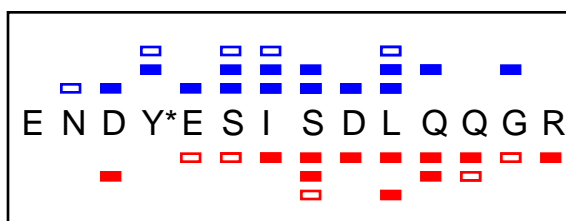

Protein Name: PAG  
 gi Accession: 0  
 Precursor Mass: 578.5721+3  
 Delta Mass: 0.287 ppm  
 XCorr: 42.69

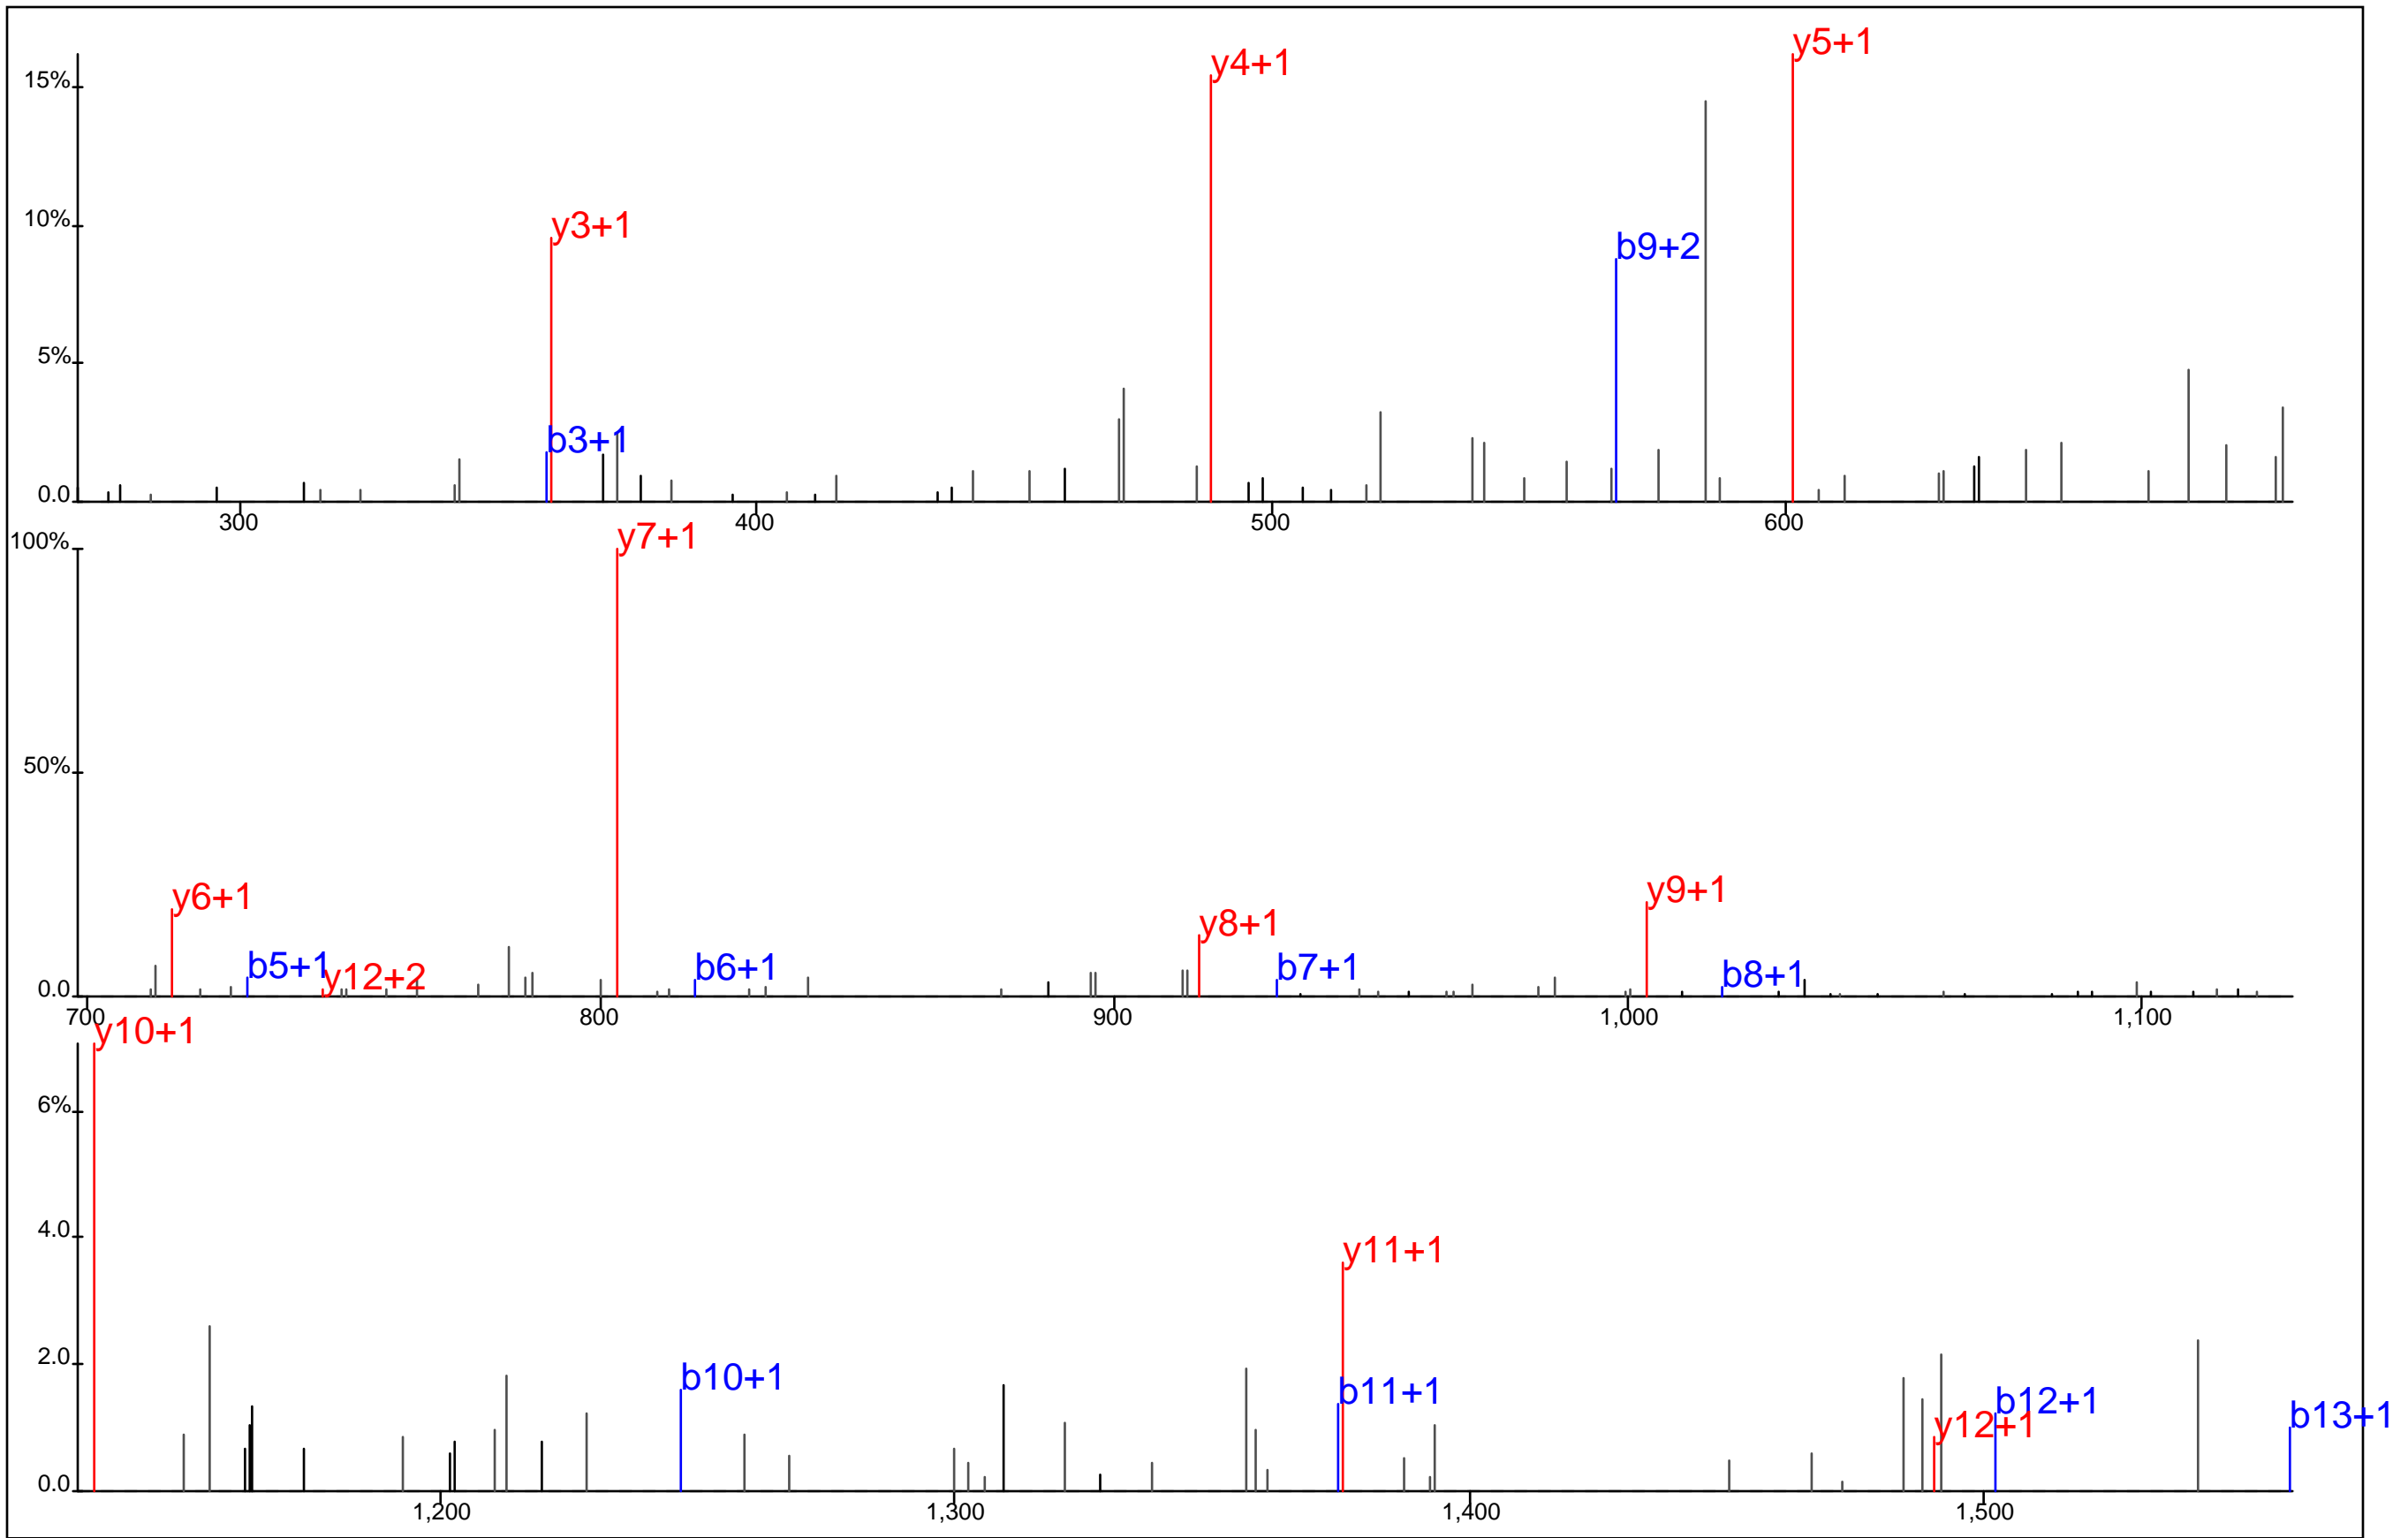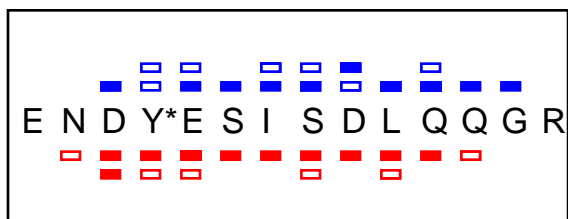

Protein Name: PAG  
 gi Accession: 0  
 Precursor Mass: 867.3561+2  
 Delta Mass: 2.019 ppm  
 XCorr: 73.15

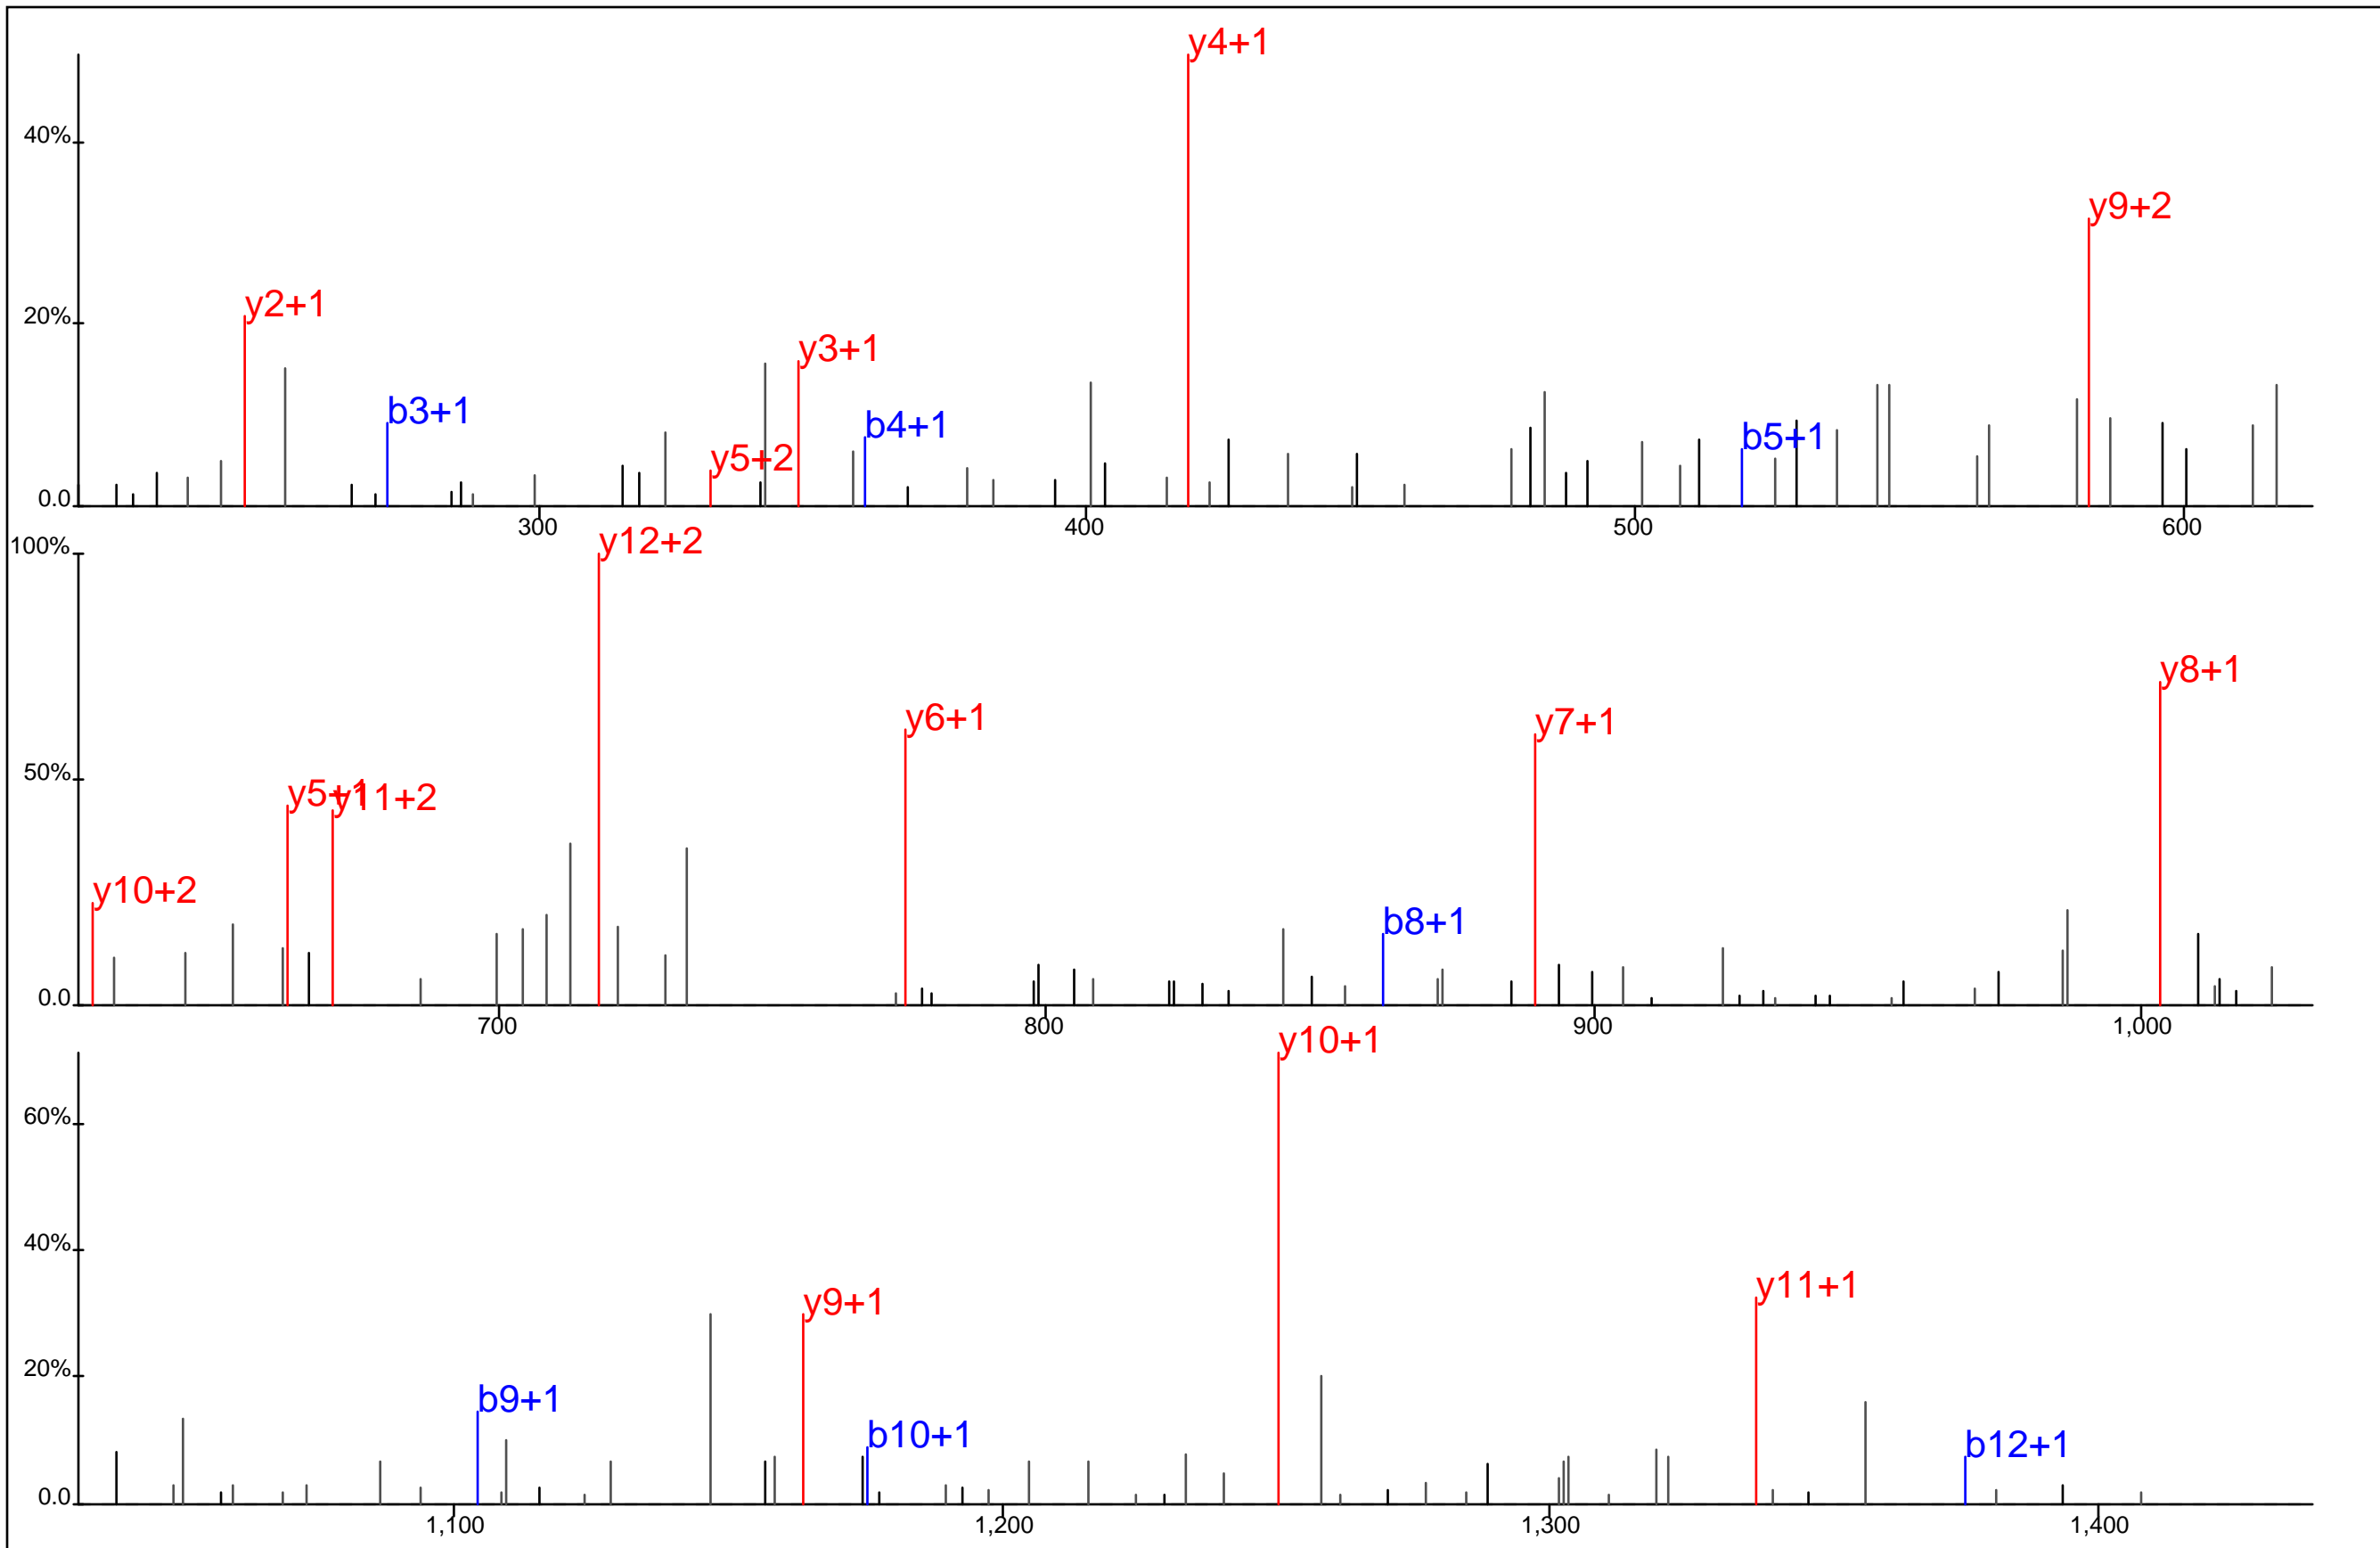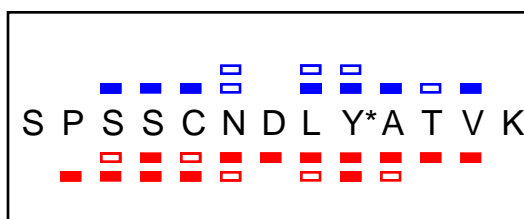

Protein Name: PAG  
 gi Accession: 0  
 Precursor Mass: 761.3181+2  
 Delta Mass: 0.164 ppm  
 XCorr: 82.48

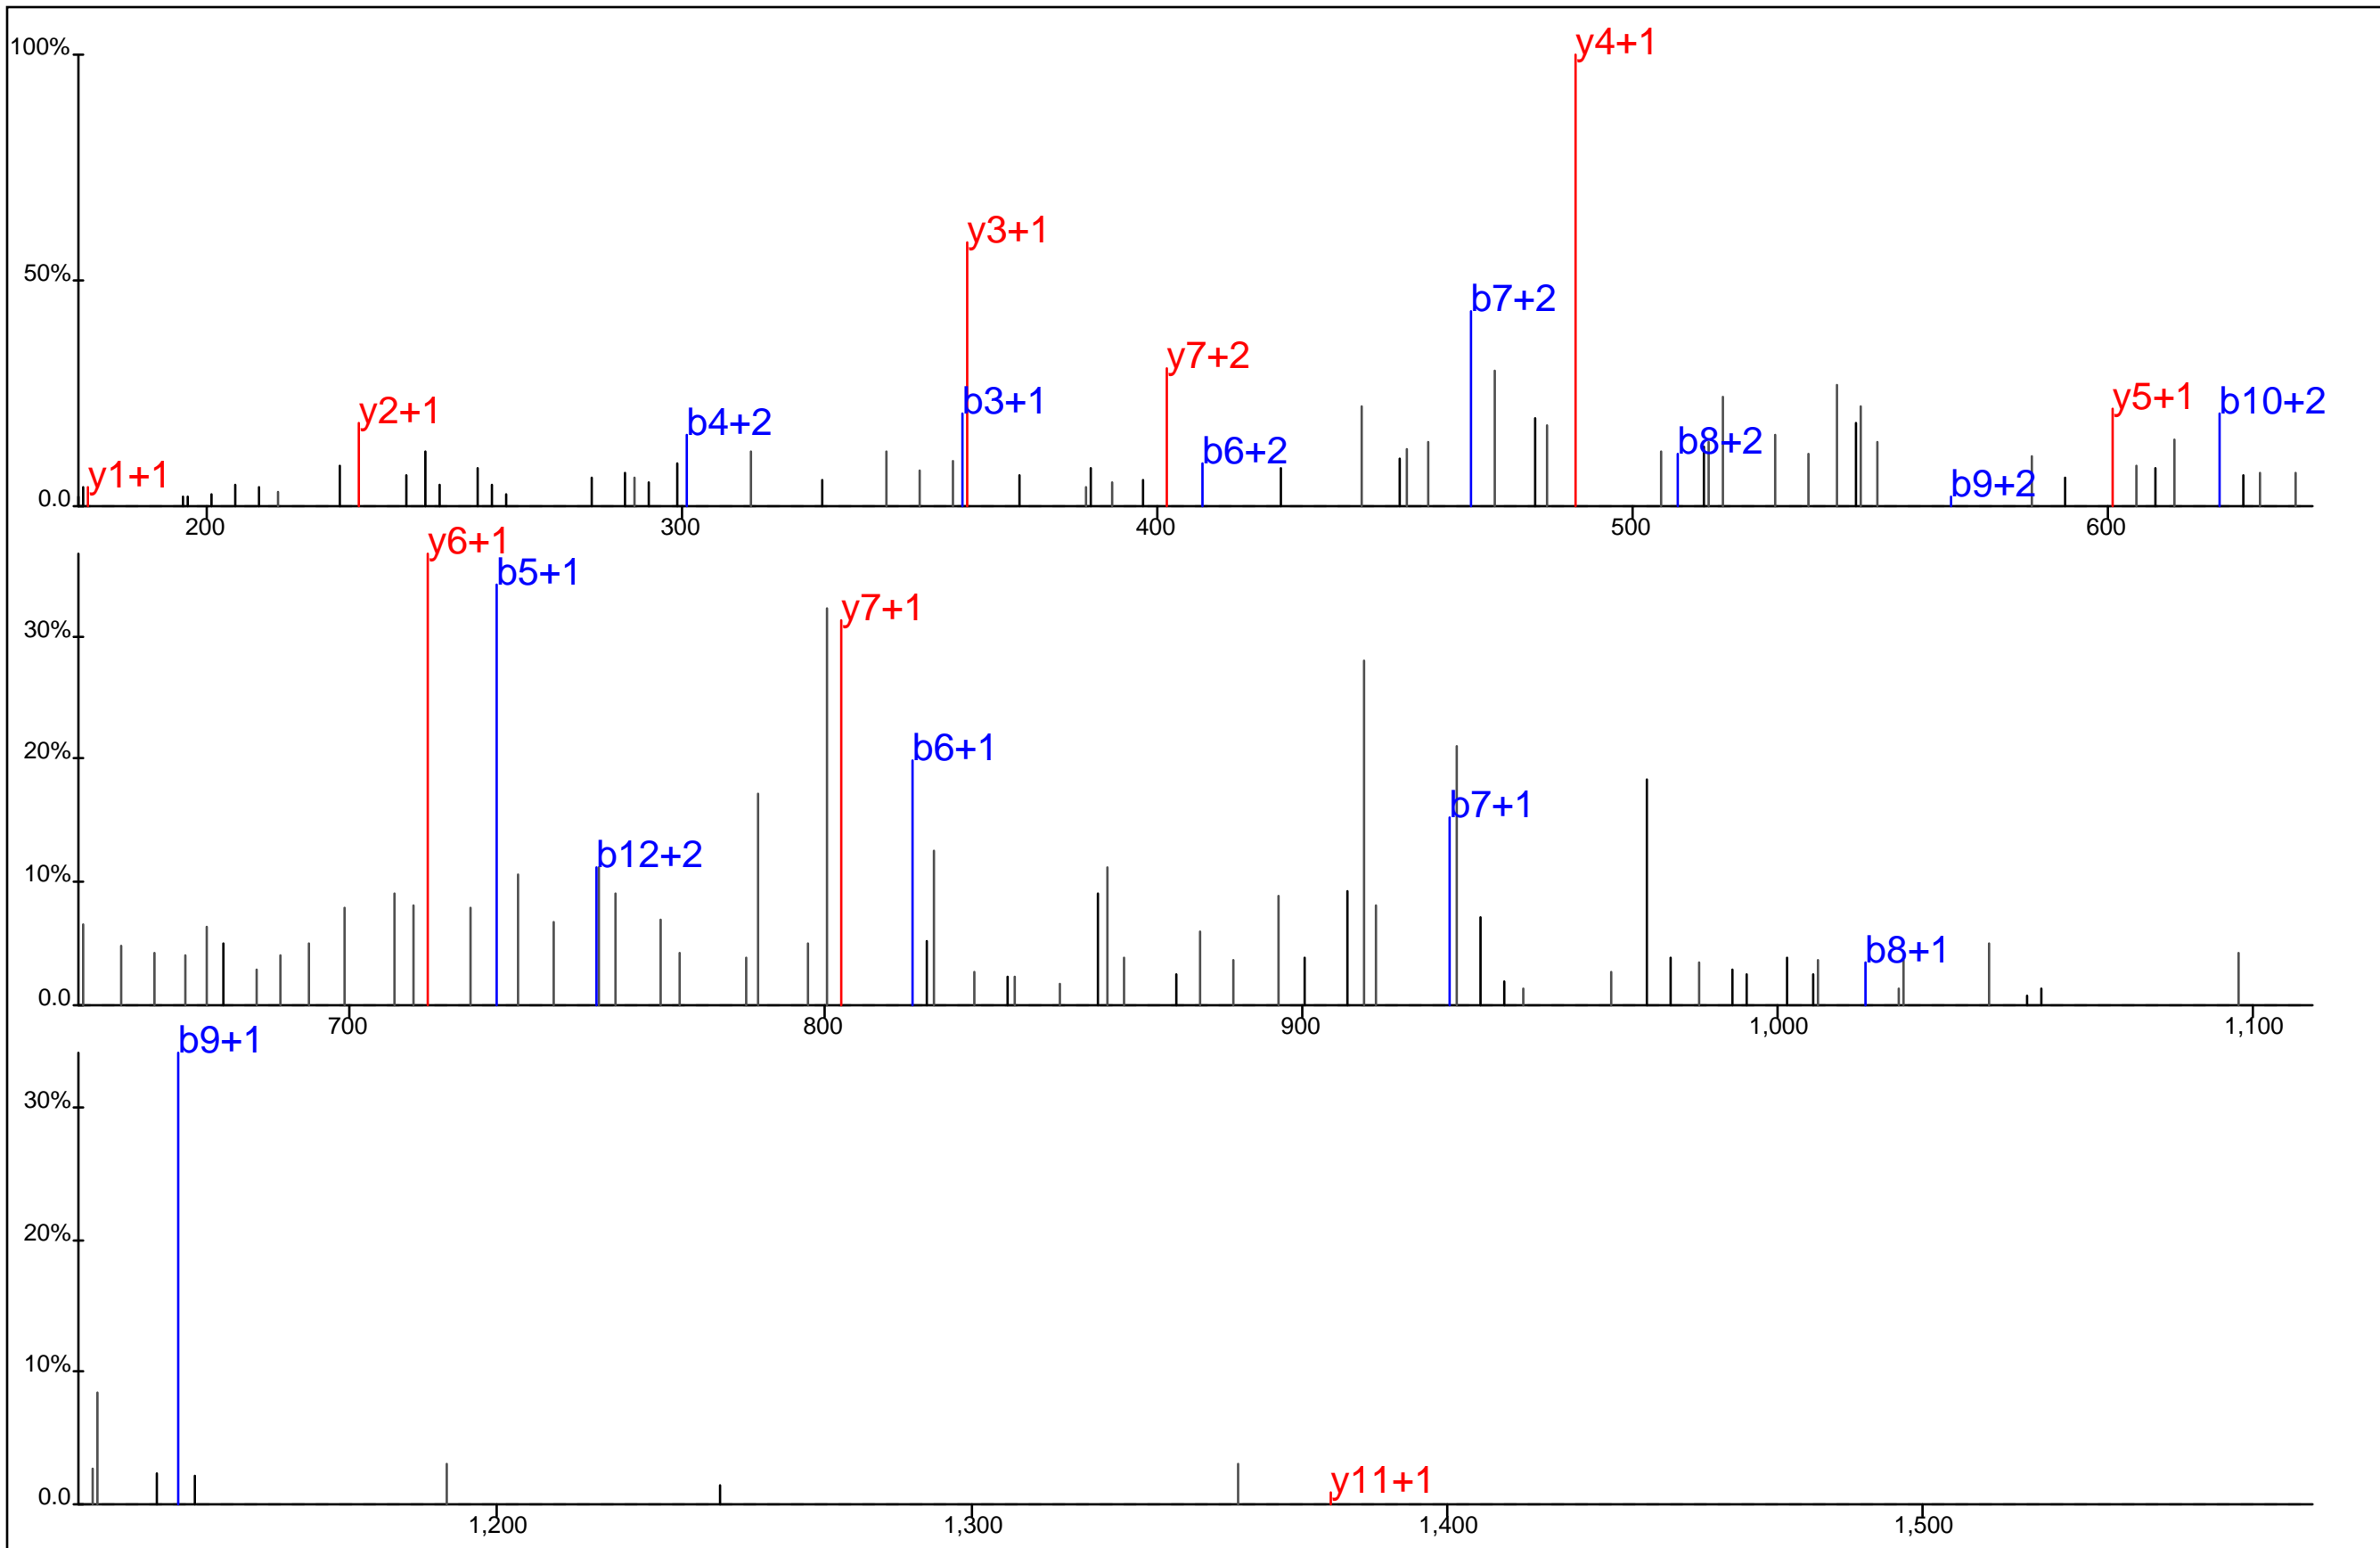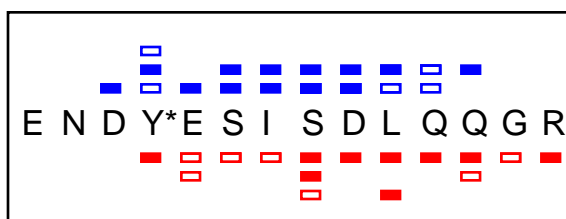

Protein Name: PAG  
 gi Accession: 0  
 Precursor Mass: 578.5721+3  
 Delta Mass: 0.182 ppm  
 XCorr: 41.82

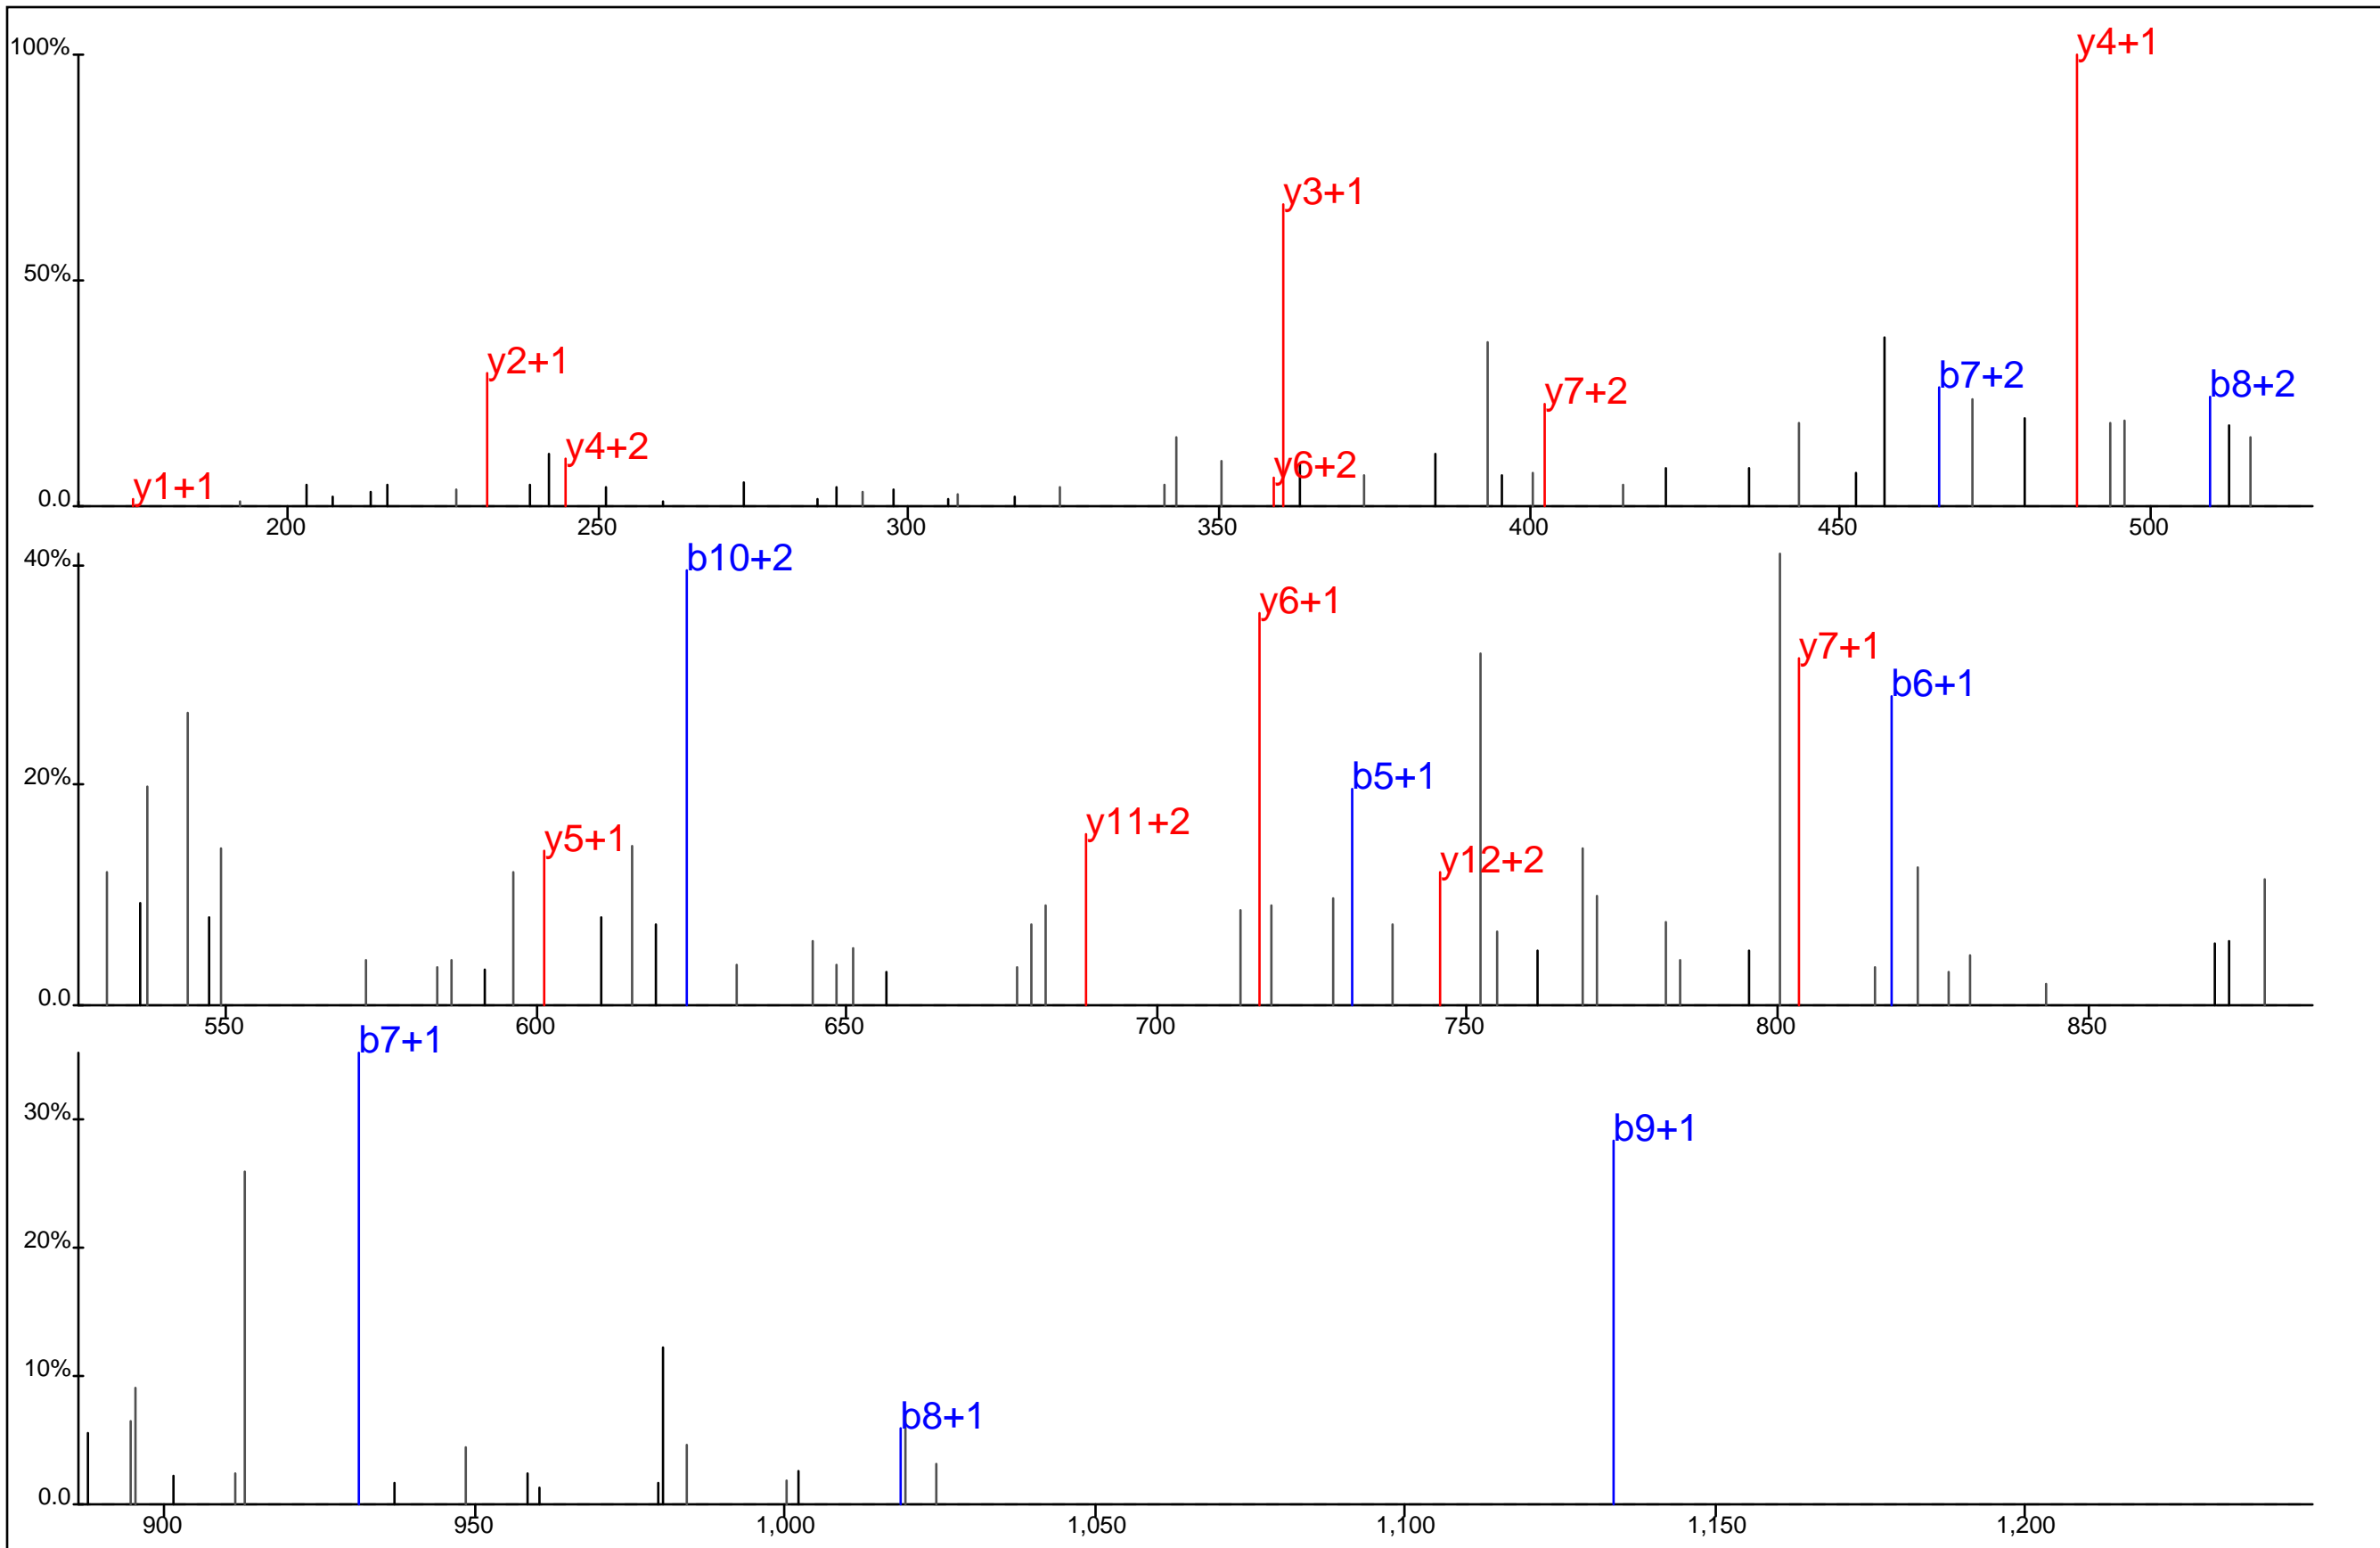

E N D Y\* E S I S D L Q Q G R

Protein Name: PAG  
 gi Accession: 0  
 Precursor Mass: 578.5716+3  
 Delta Mass: 0.664 ppm  
 XCorr: 45.33

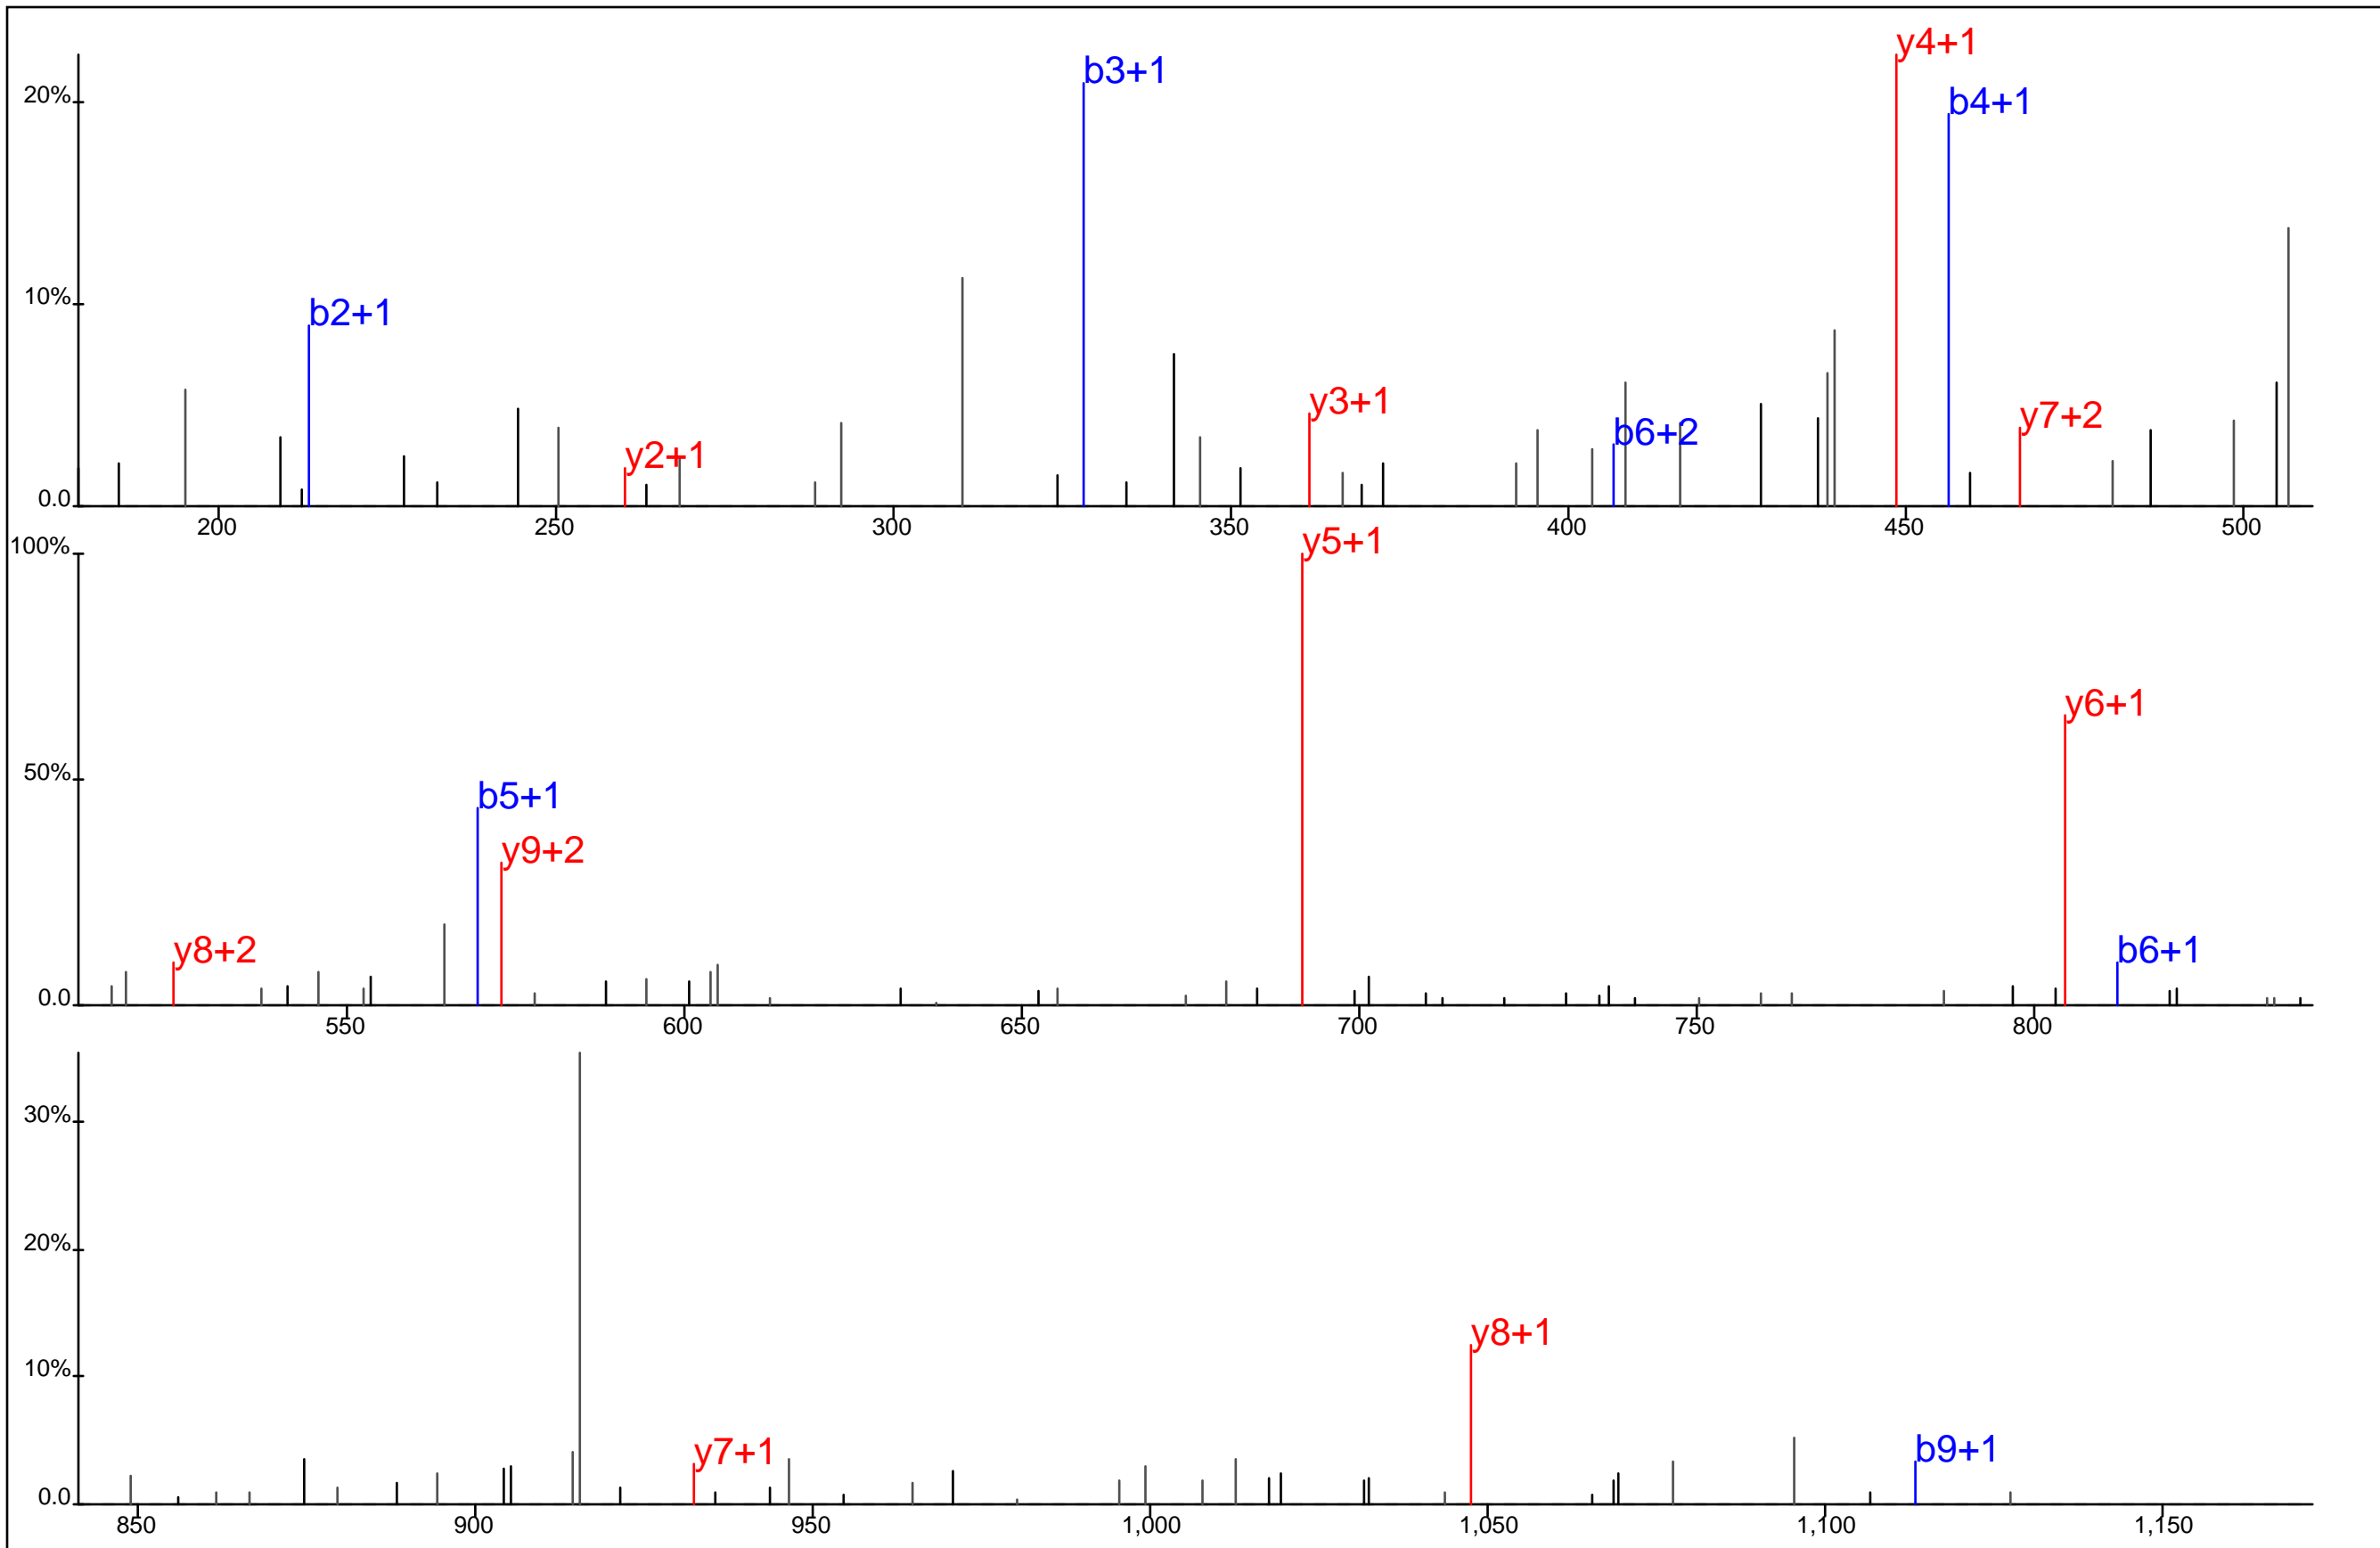

**D P D Q L Y\* S T L K**

Protein Name: PCAF  
 gi Accession: 0  
 Precursor Mass: 630.2814+2  
 Delta Mass: 0.035 ppm  
 XCorr: 44.75

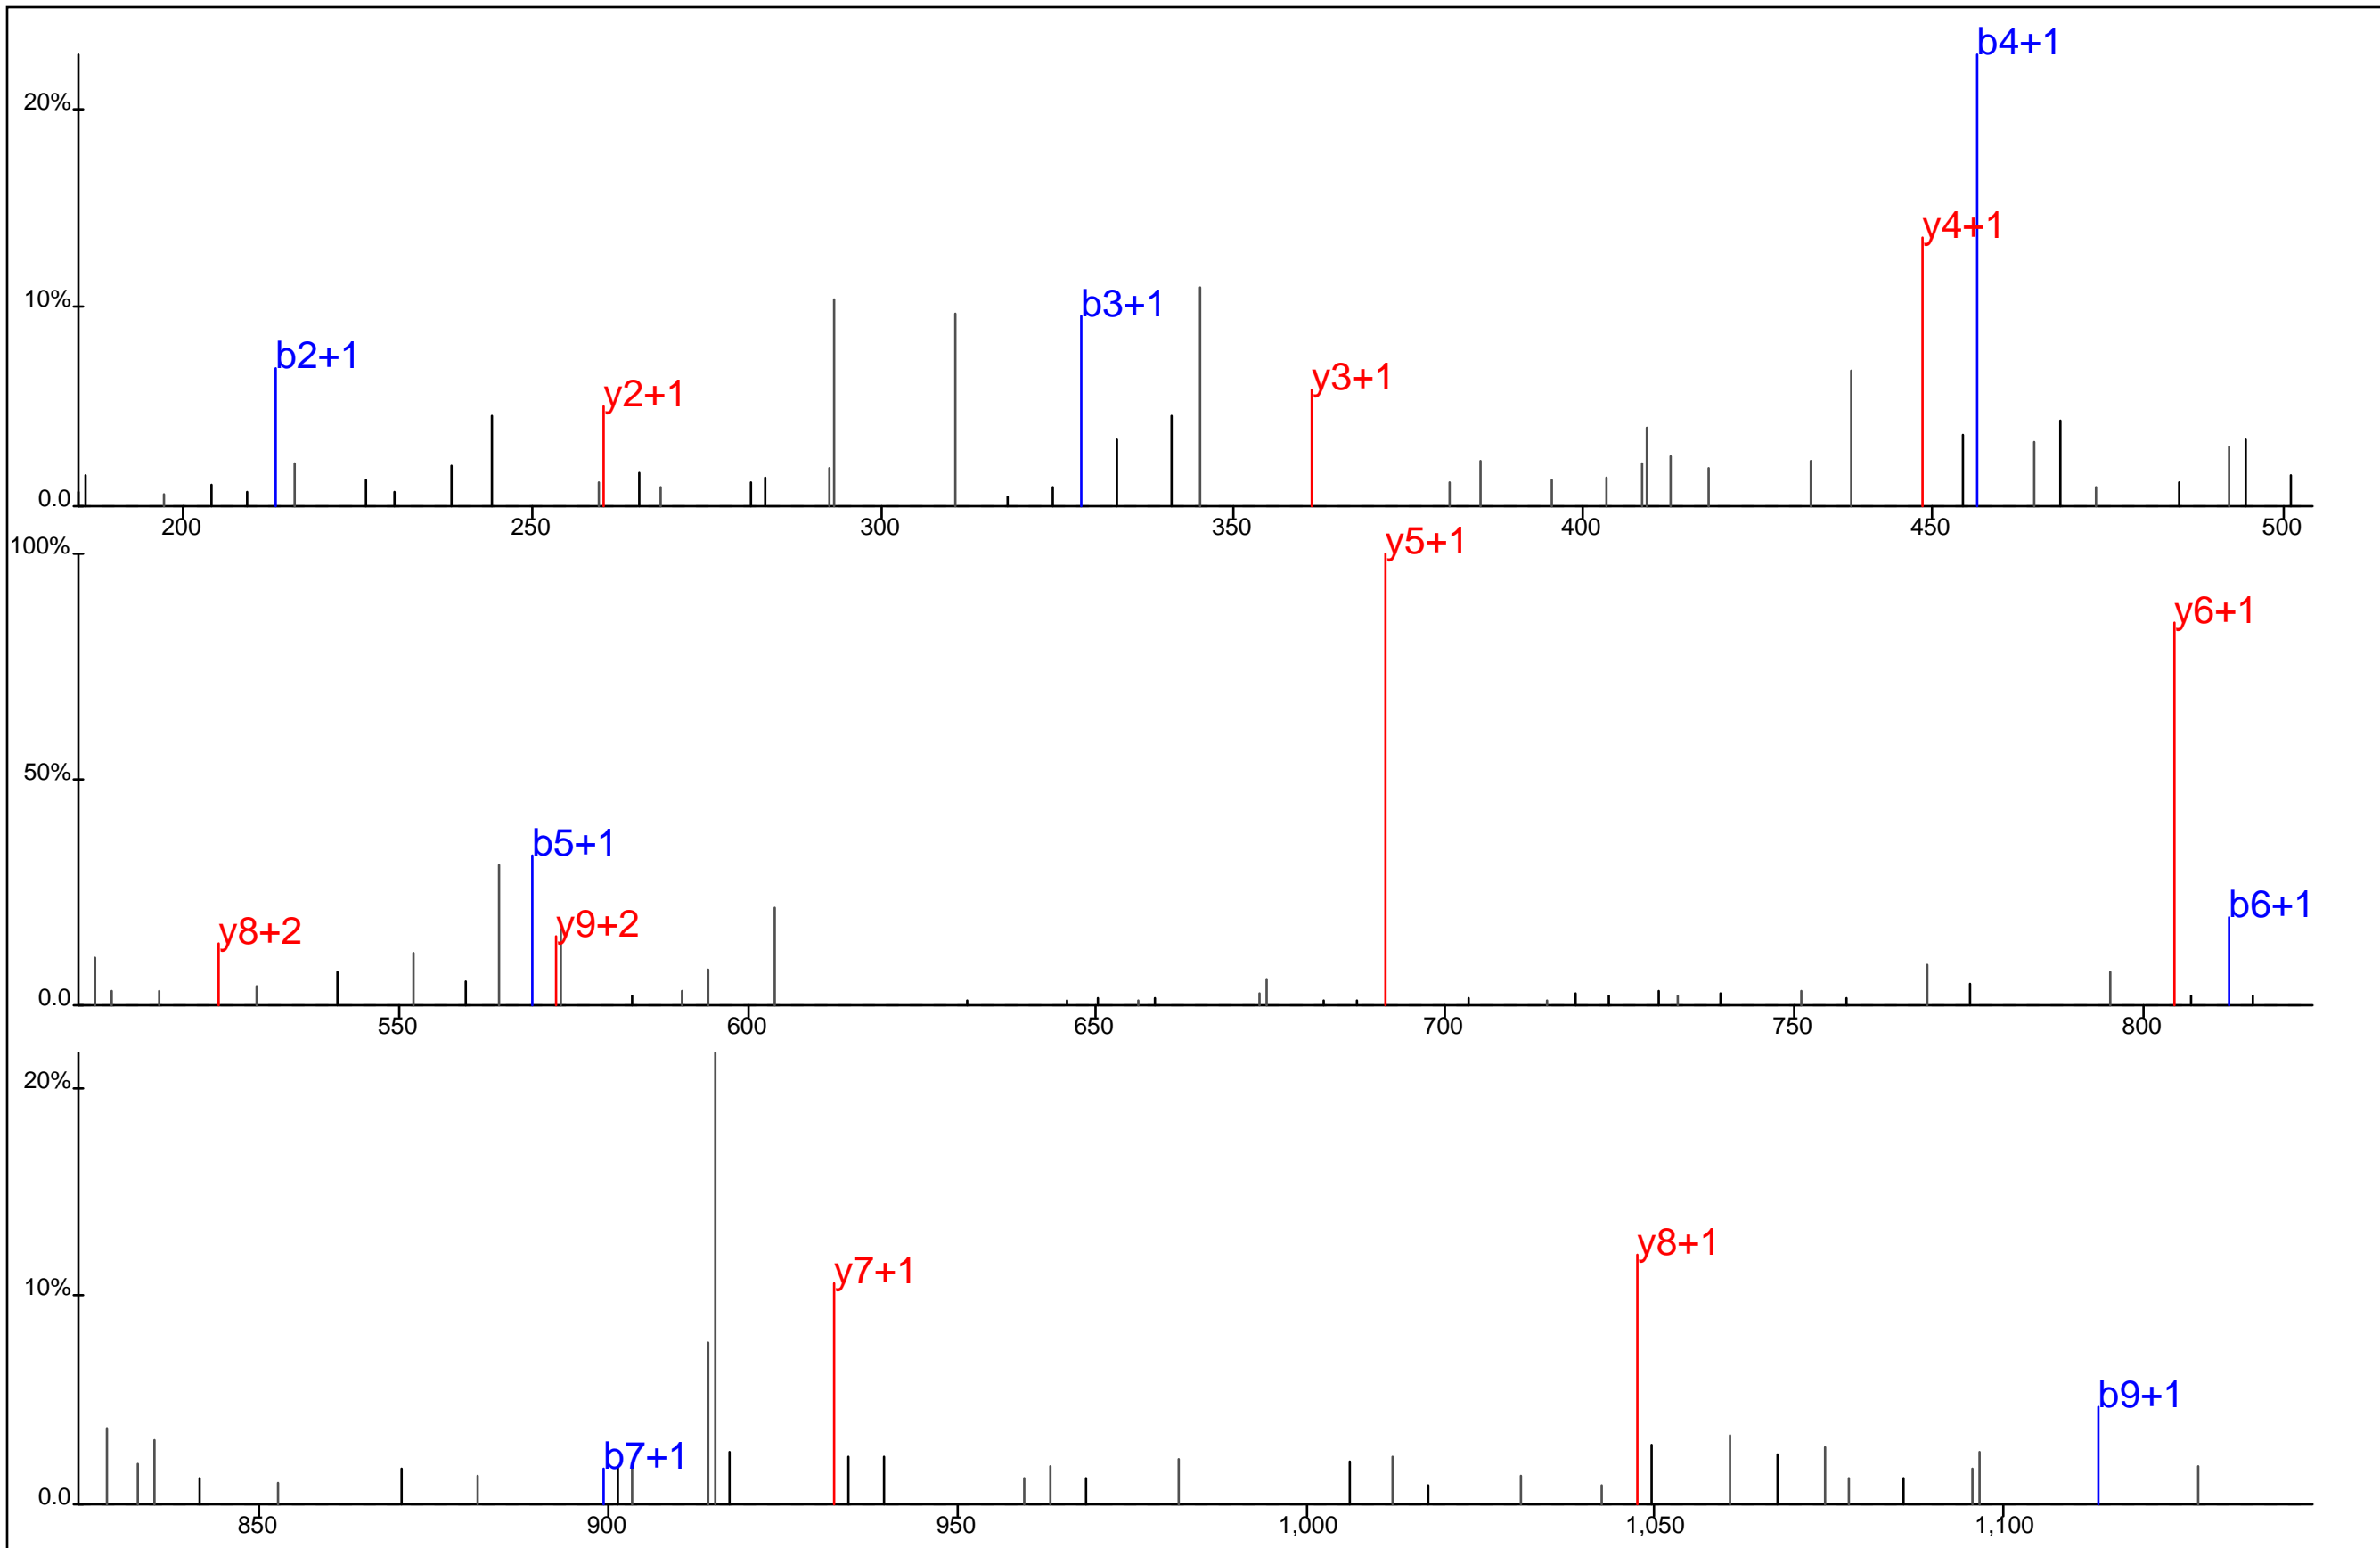

**D P D Q L Y\* S T L K**

Protein Name: PCAF  
 gi Accession: 0  
 Precursor Mass: 630.2813+2  
 Delta Mass: 0.132 ppm  
 XCorr: 45.38



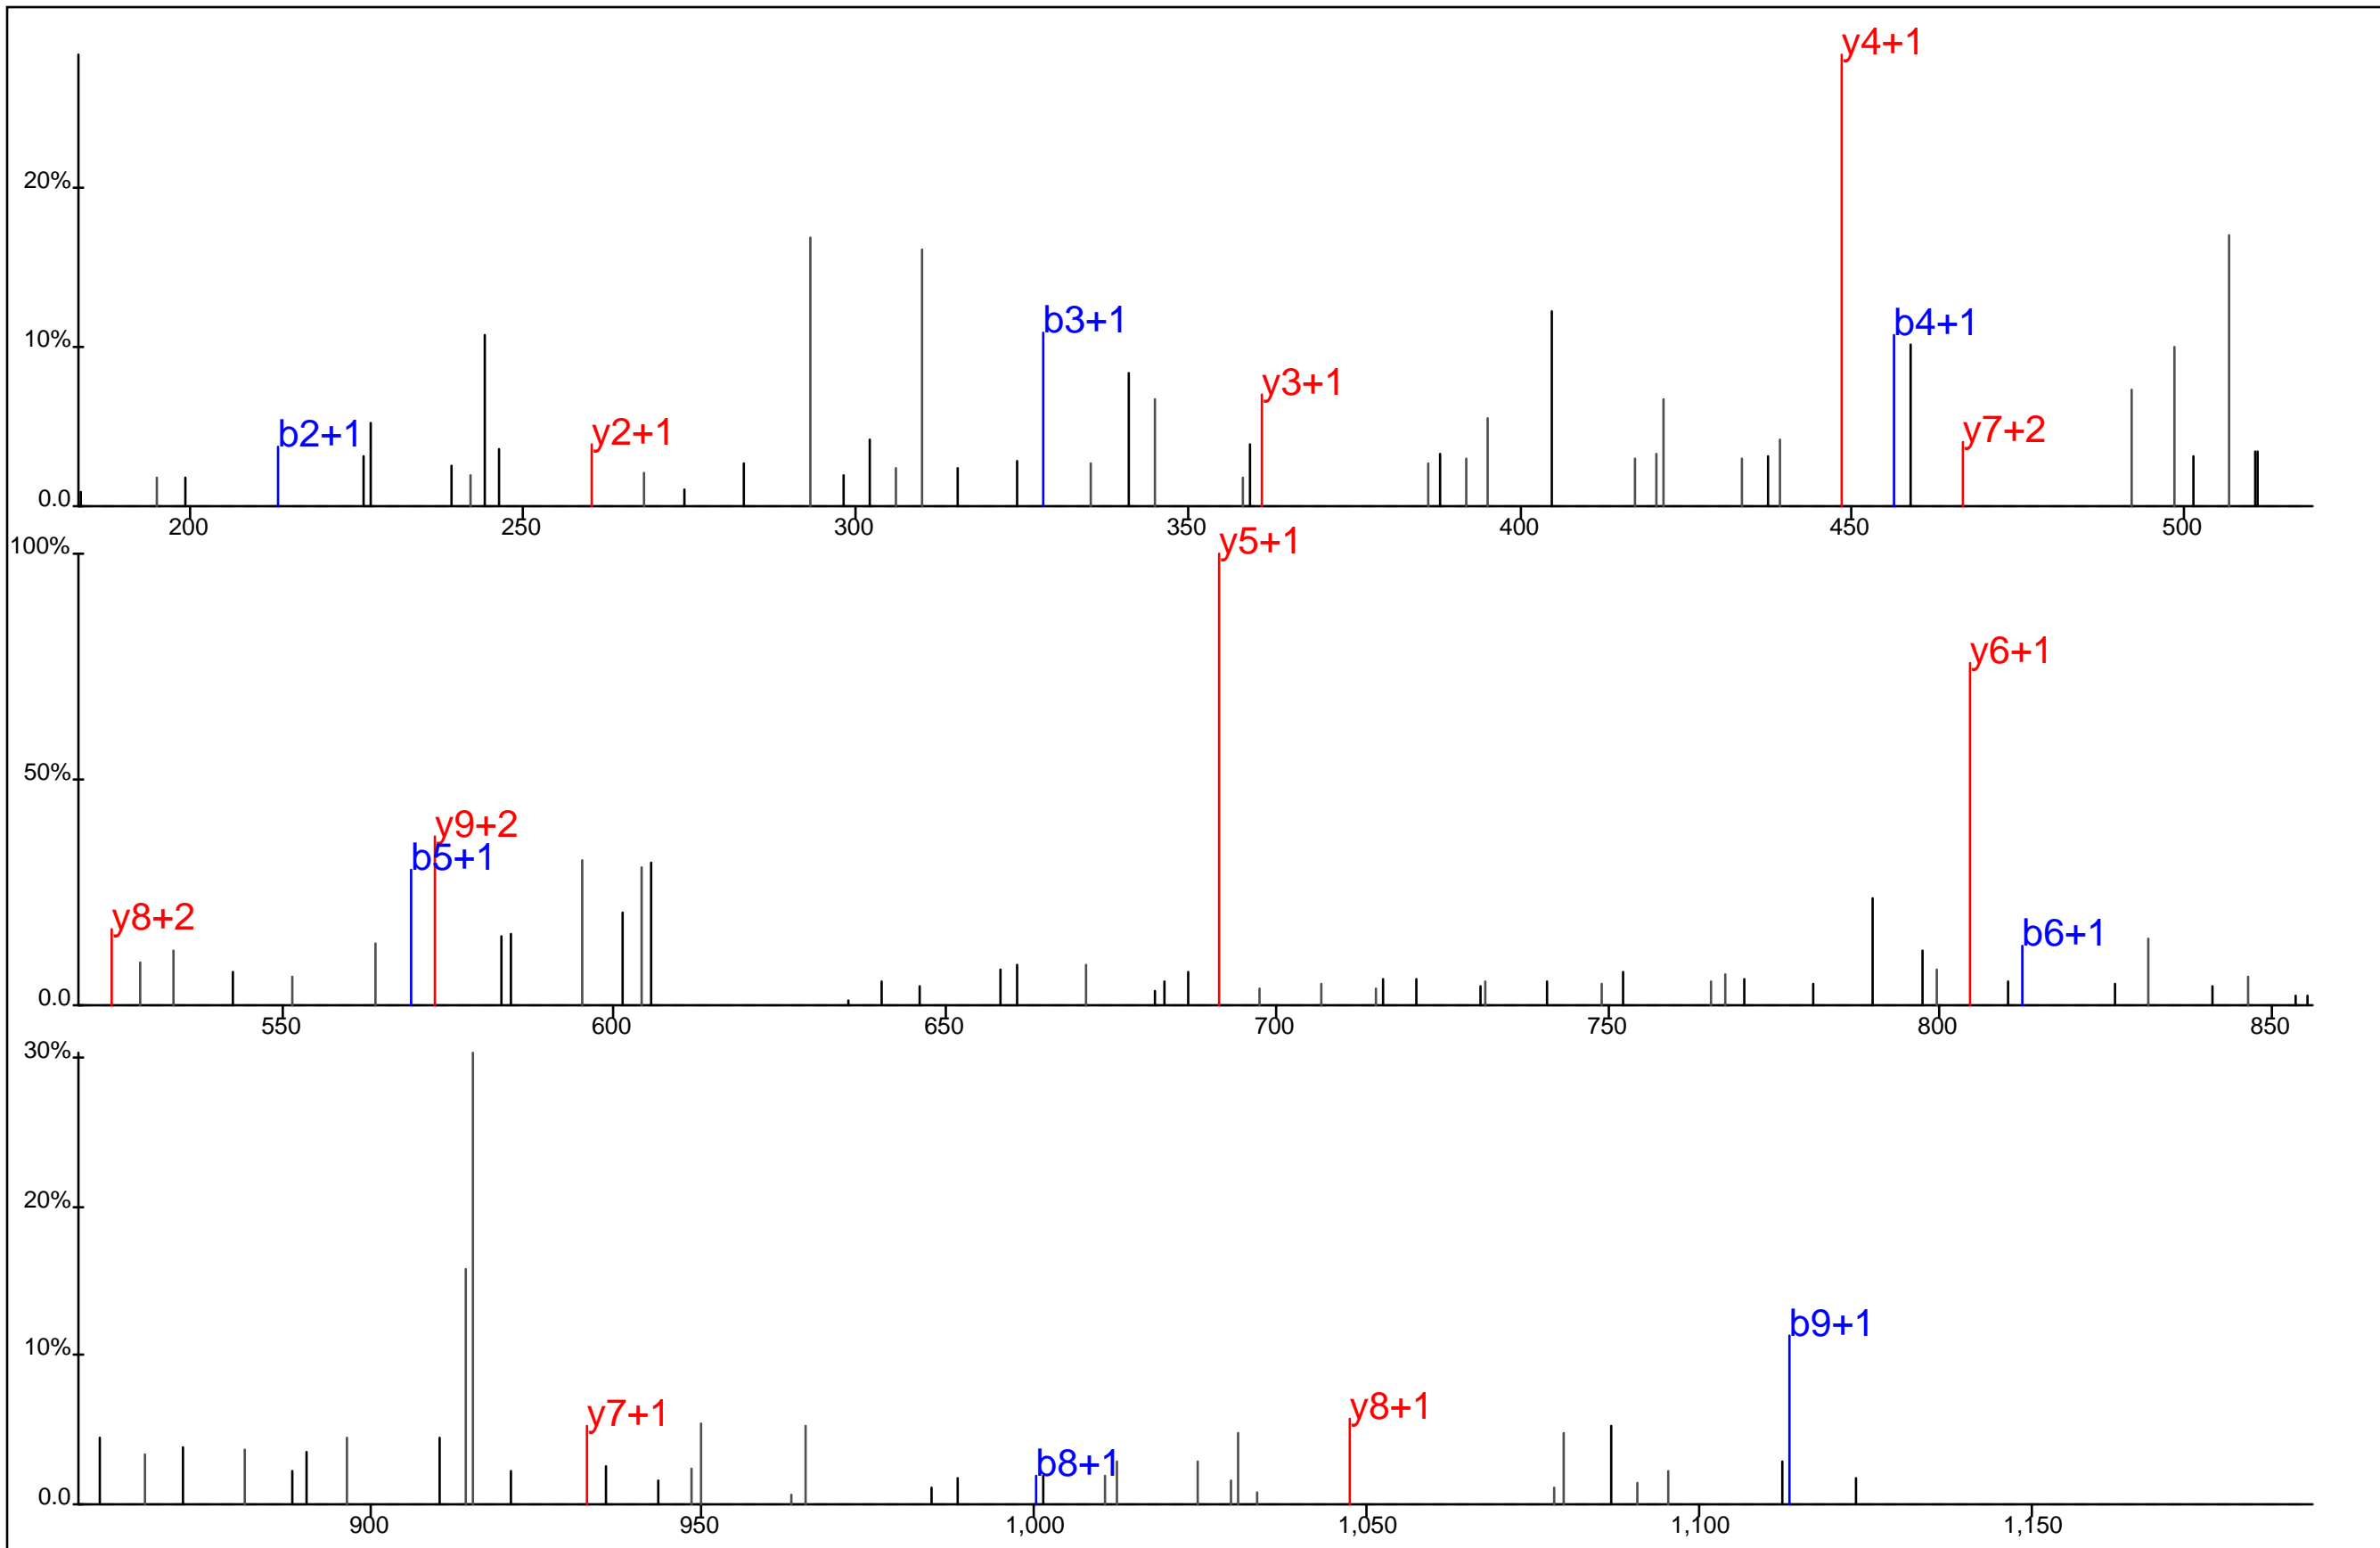

■ ■ ■ ■ ■ ■ ■ ■ ■ ■  
 D P D Q L Y\* S T L K  
■ ■ ■ ■ ■ ■ ■ ■ ■ ■

Protein Name: PCAF  
 gi Accession: 0  
 Precursor Mass: 630.2815+2  
 Delta Mass: 0.159 ppm  
 XCorr: 25.82

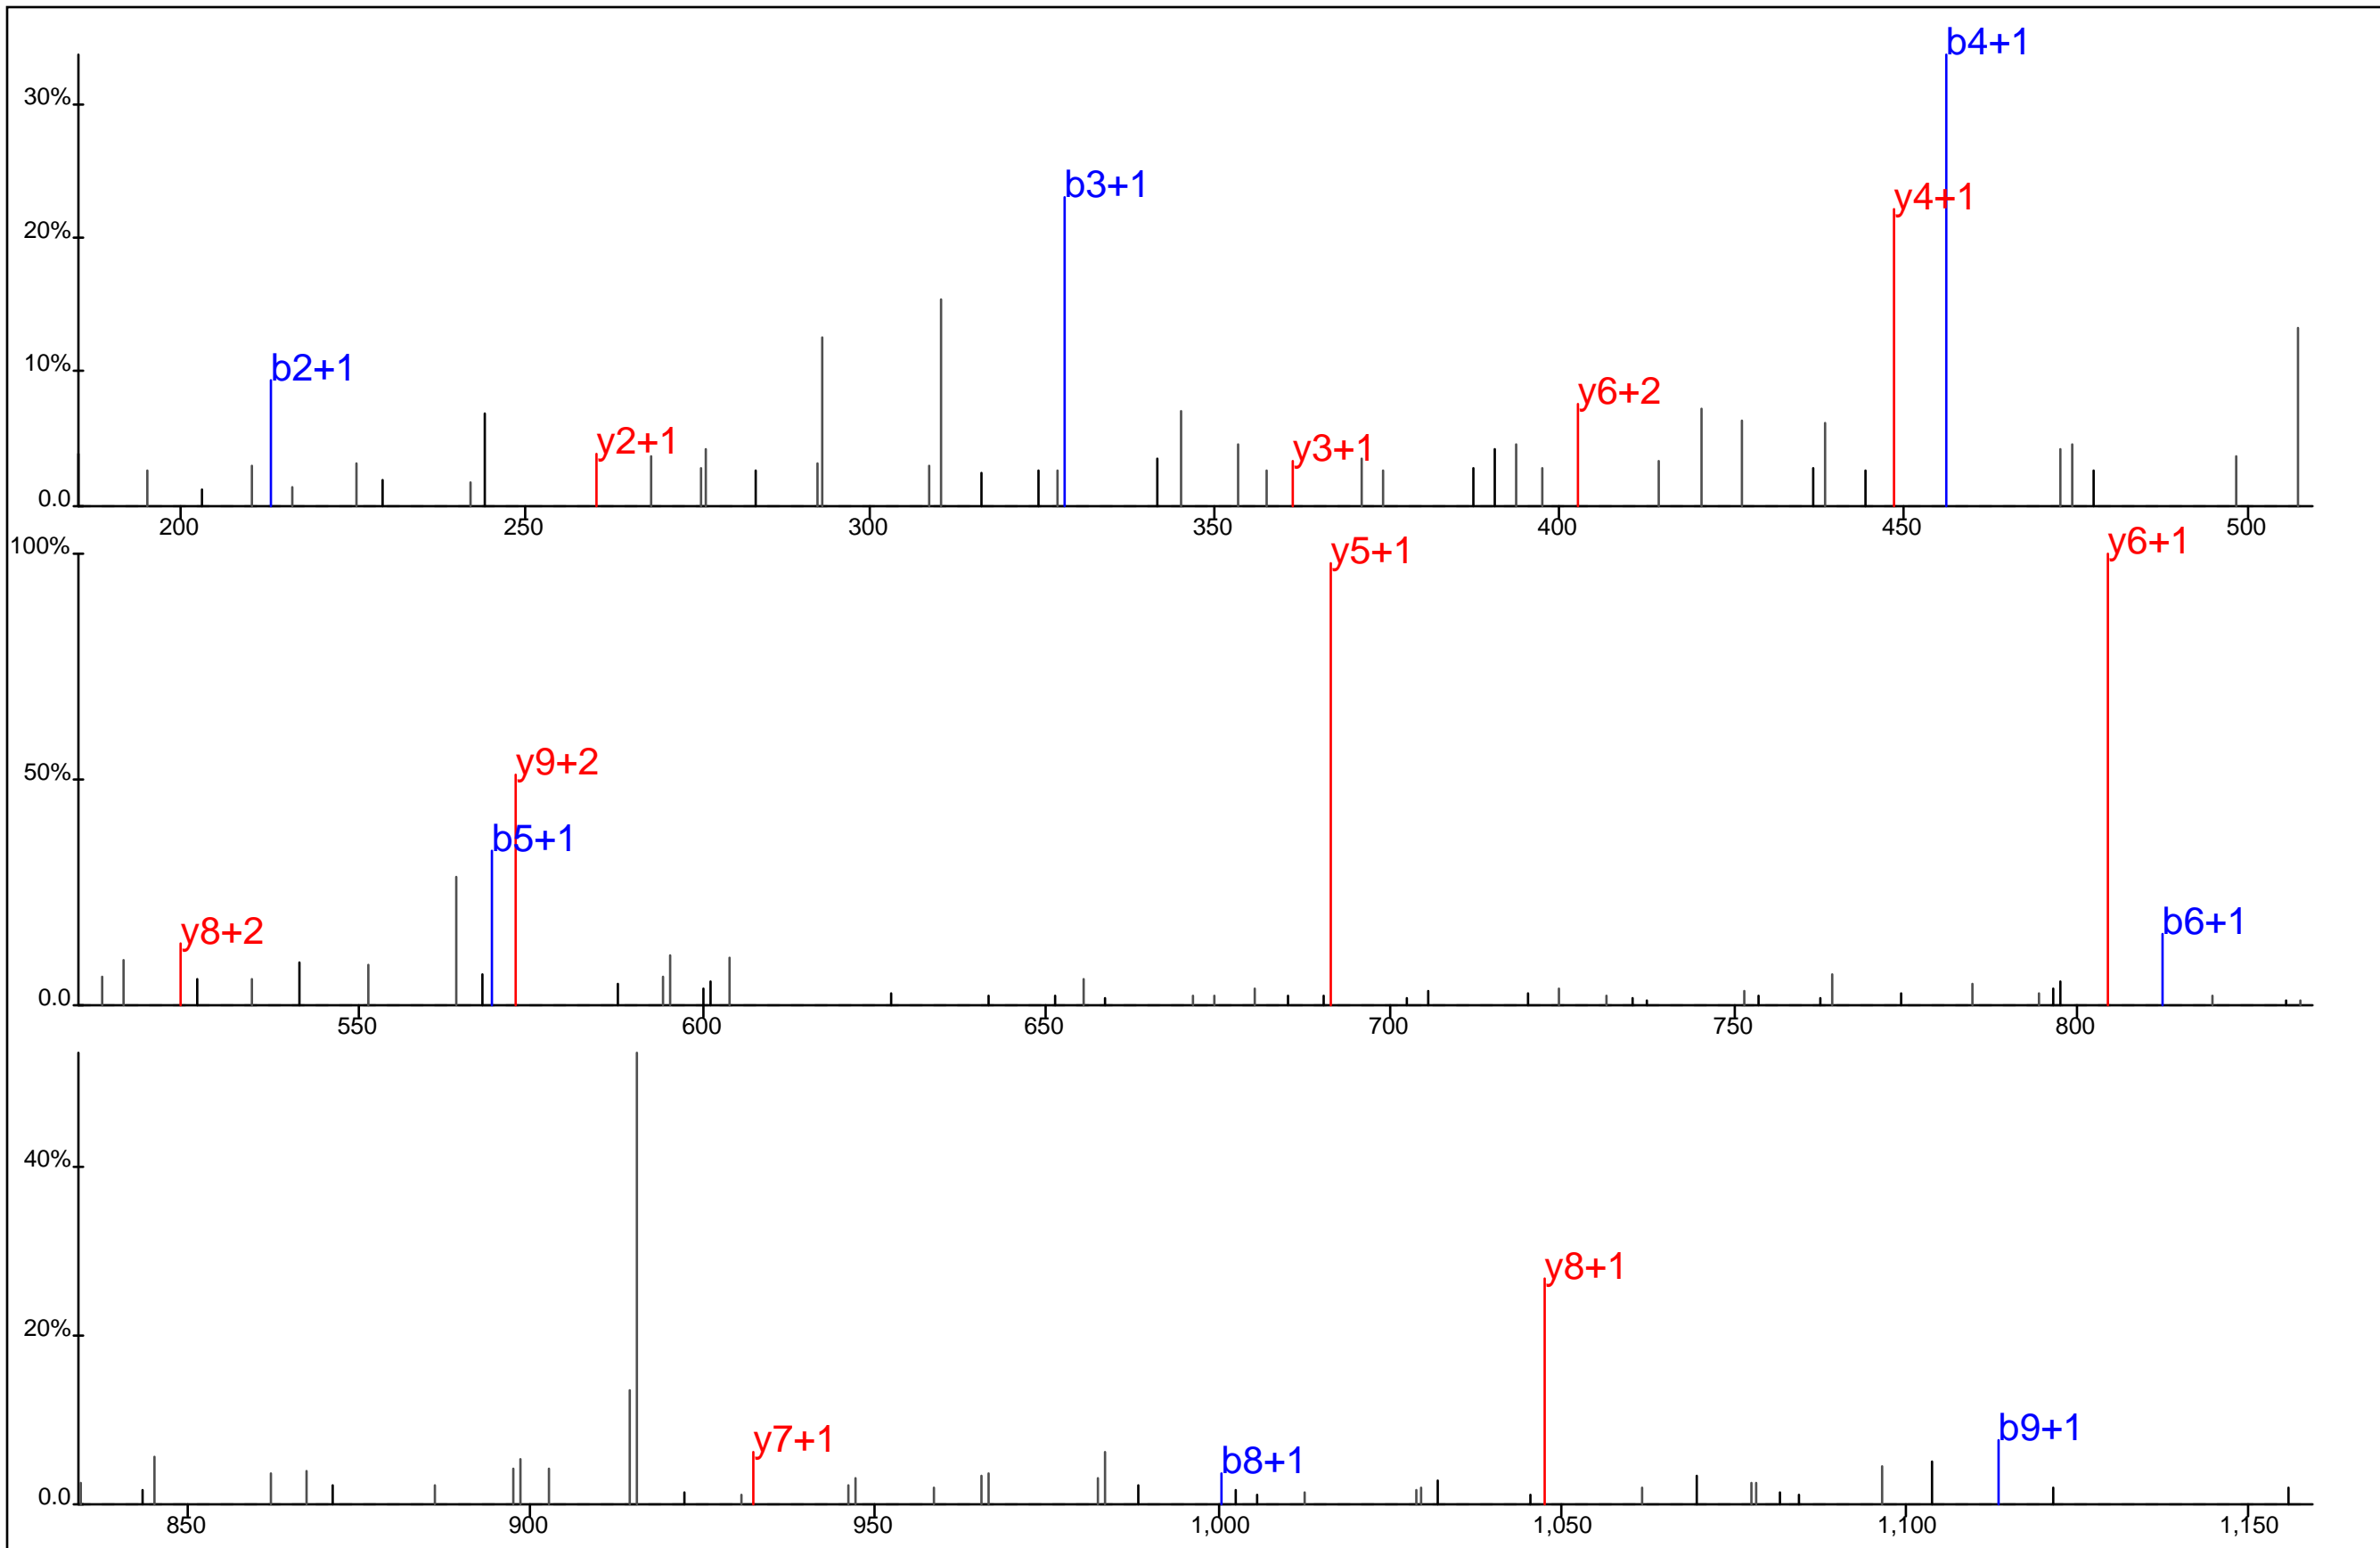

■ ■ ■ ■ ■ ■ ■ ■ ■ ■  
 D P D Q L Y\* S T L K  
■ ■ ■ ■ ■ ■ ■ ■ ■ ■

Protein Name: PCAF  
 gi Accession: 0  
 Precursor Mass: 630.2815+2  
 Delta Mass: 0.159 ppm  
 XCorr: 53.5

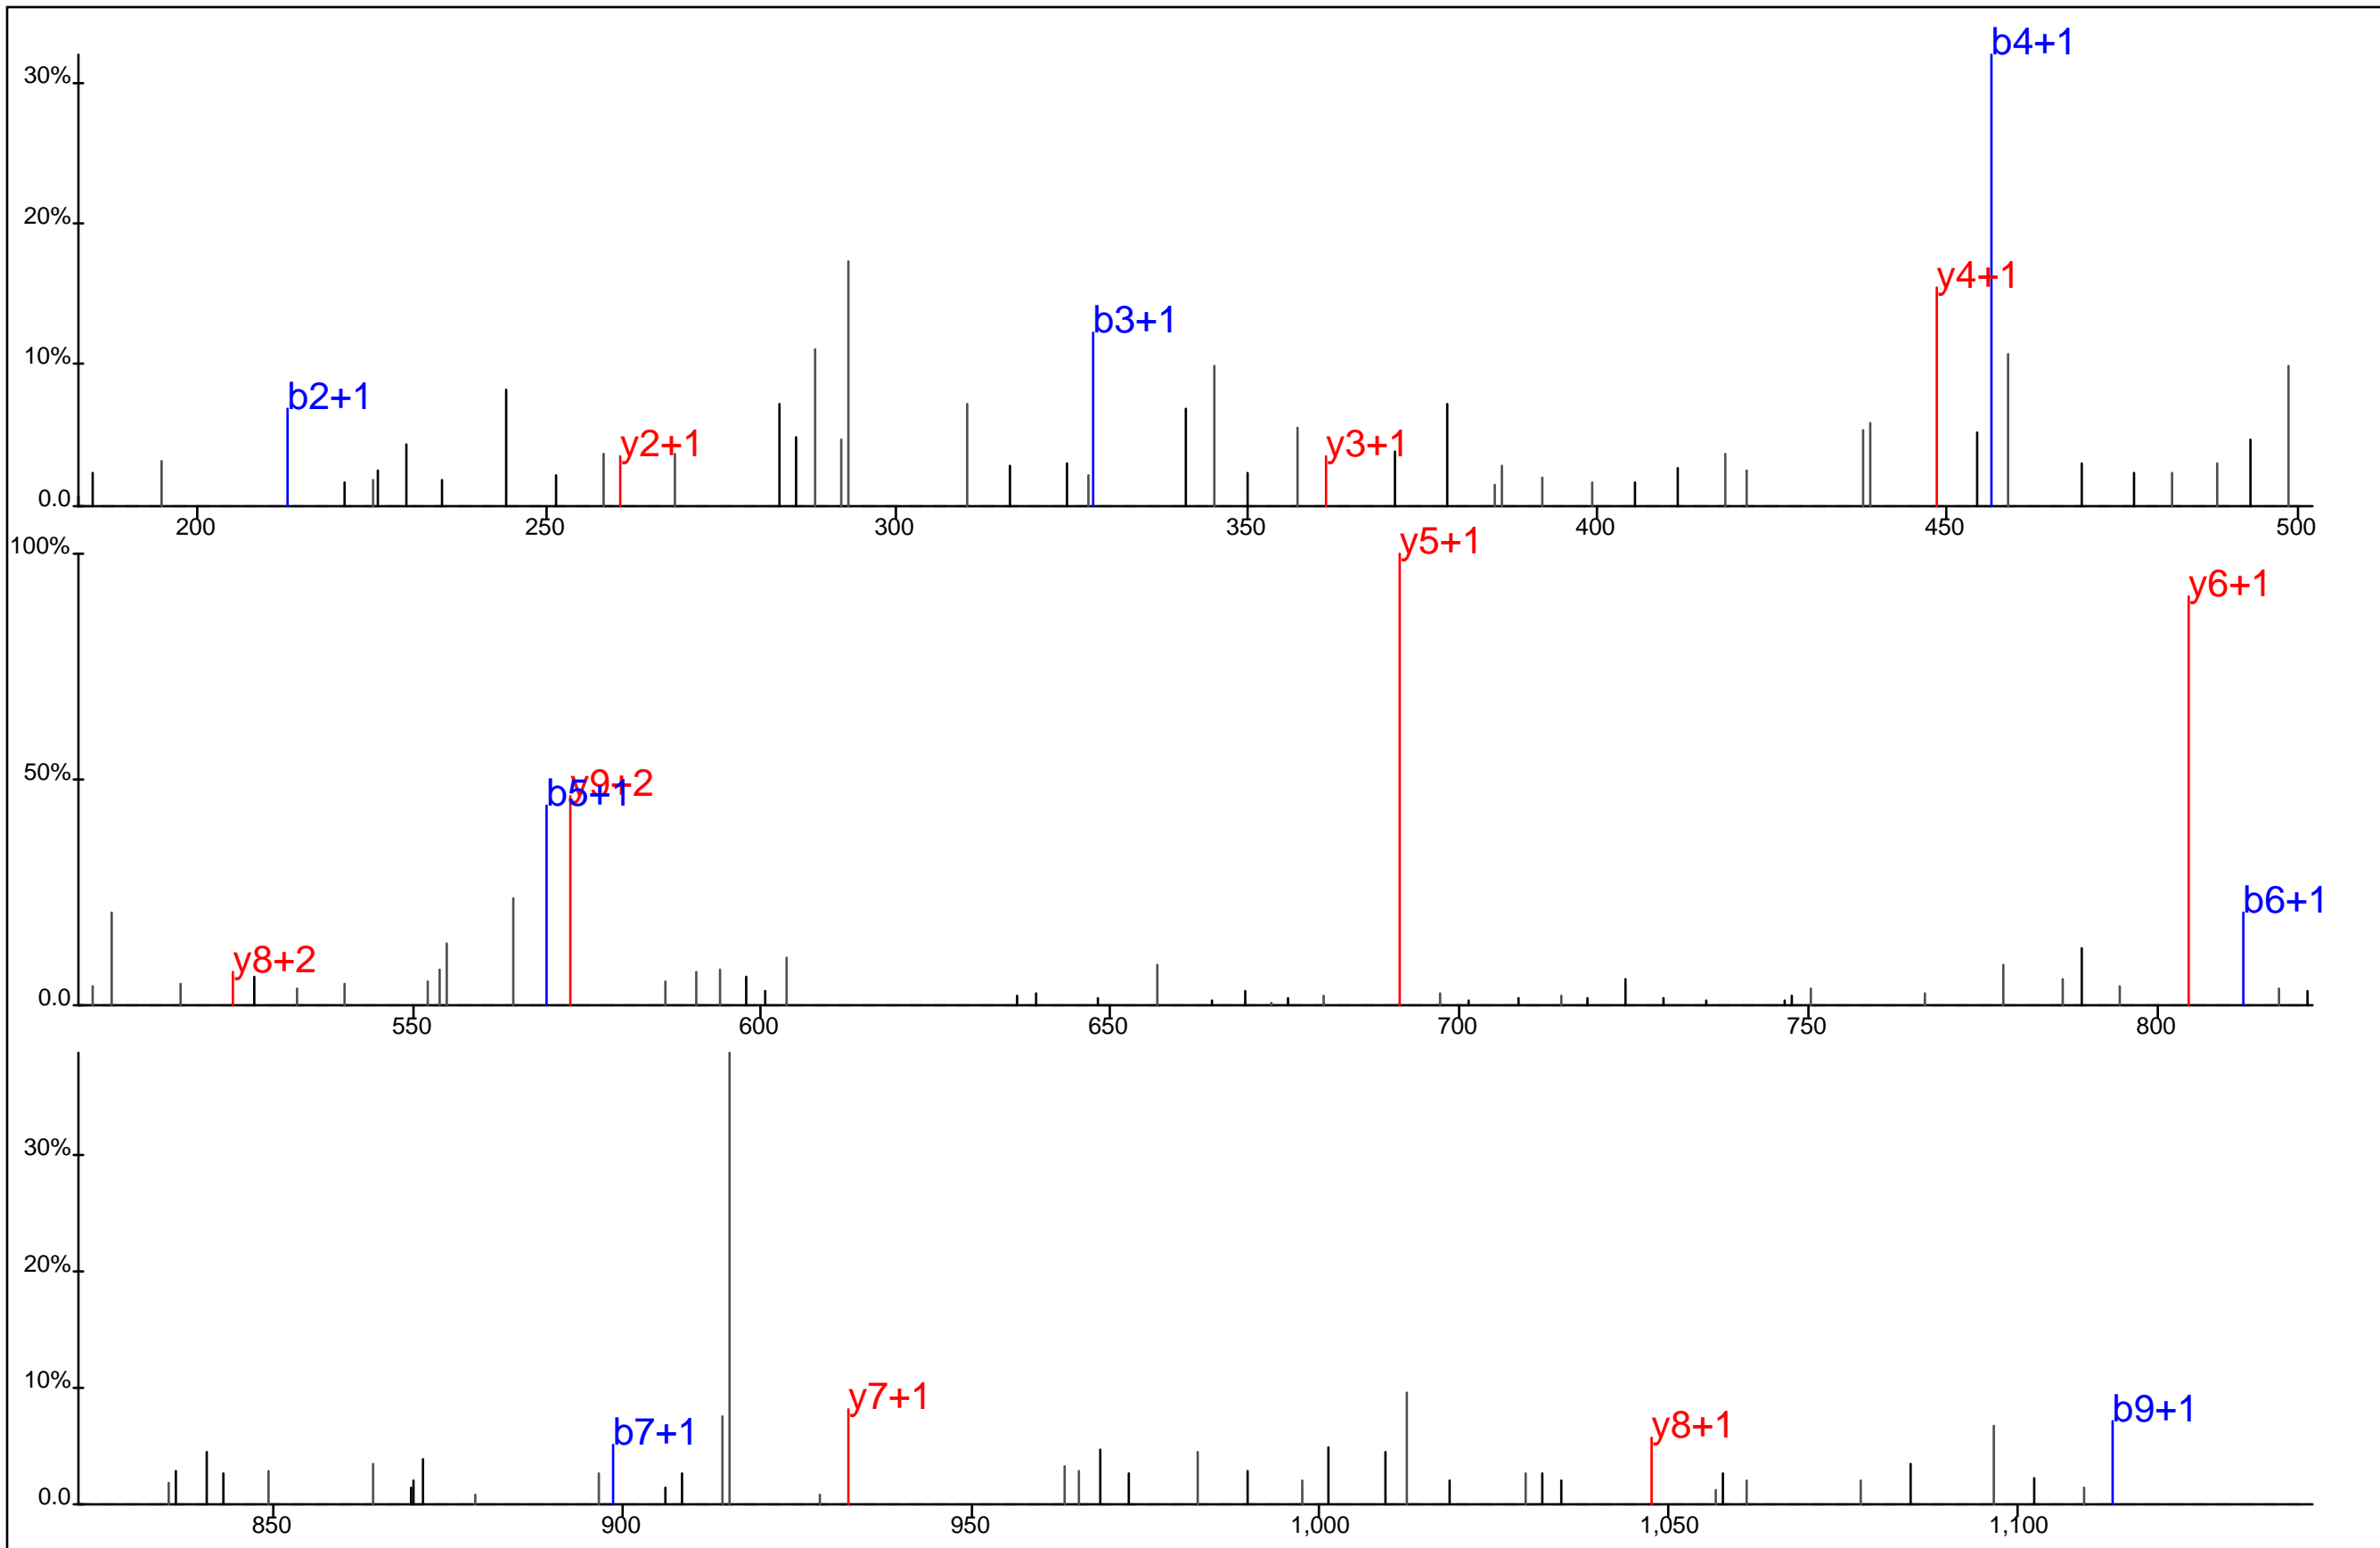

■ ■ ■ ■ ■ ■ ■ ■  
■ ■ ■ ■ ■ ■ ■ ■  
**D P D Q L Y\* S T L K**

Protein Name: PCAF  
 gi Accession: 0  
 Precursor Mass: 630.2822+2  
 Delta Mass: 1.323 ppm  
 XCorr: 39.84

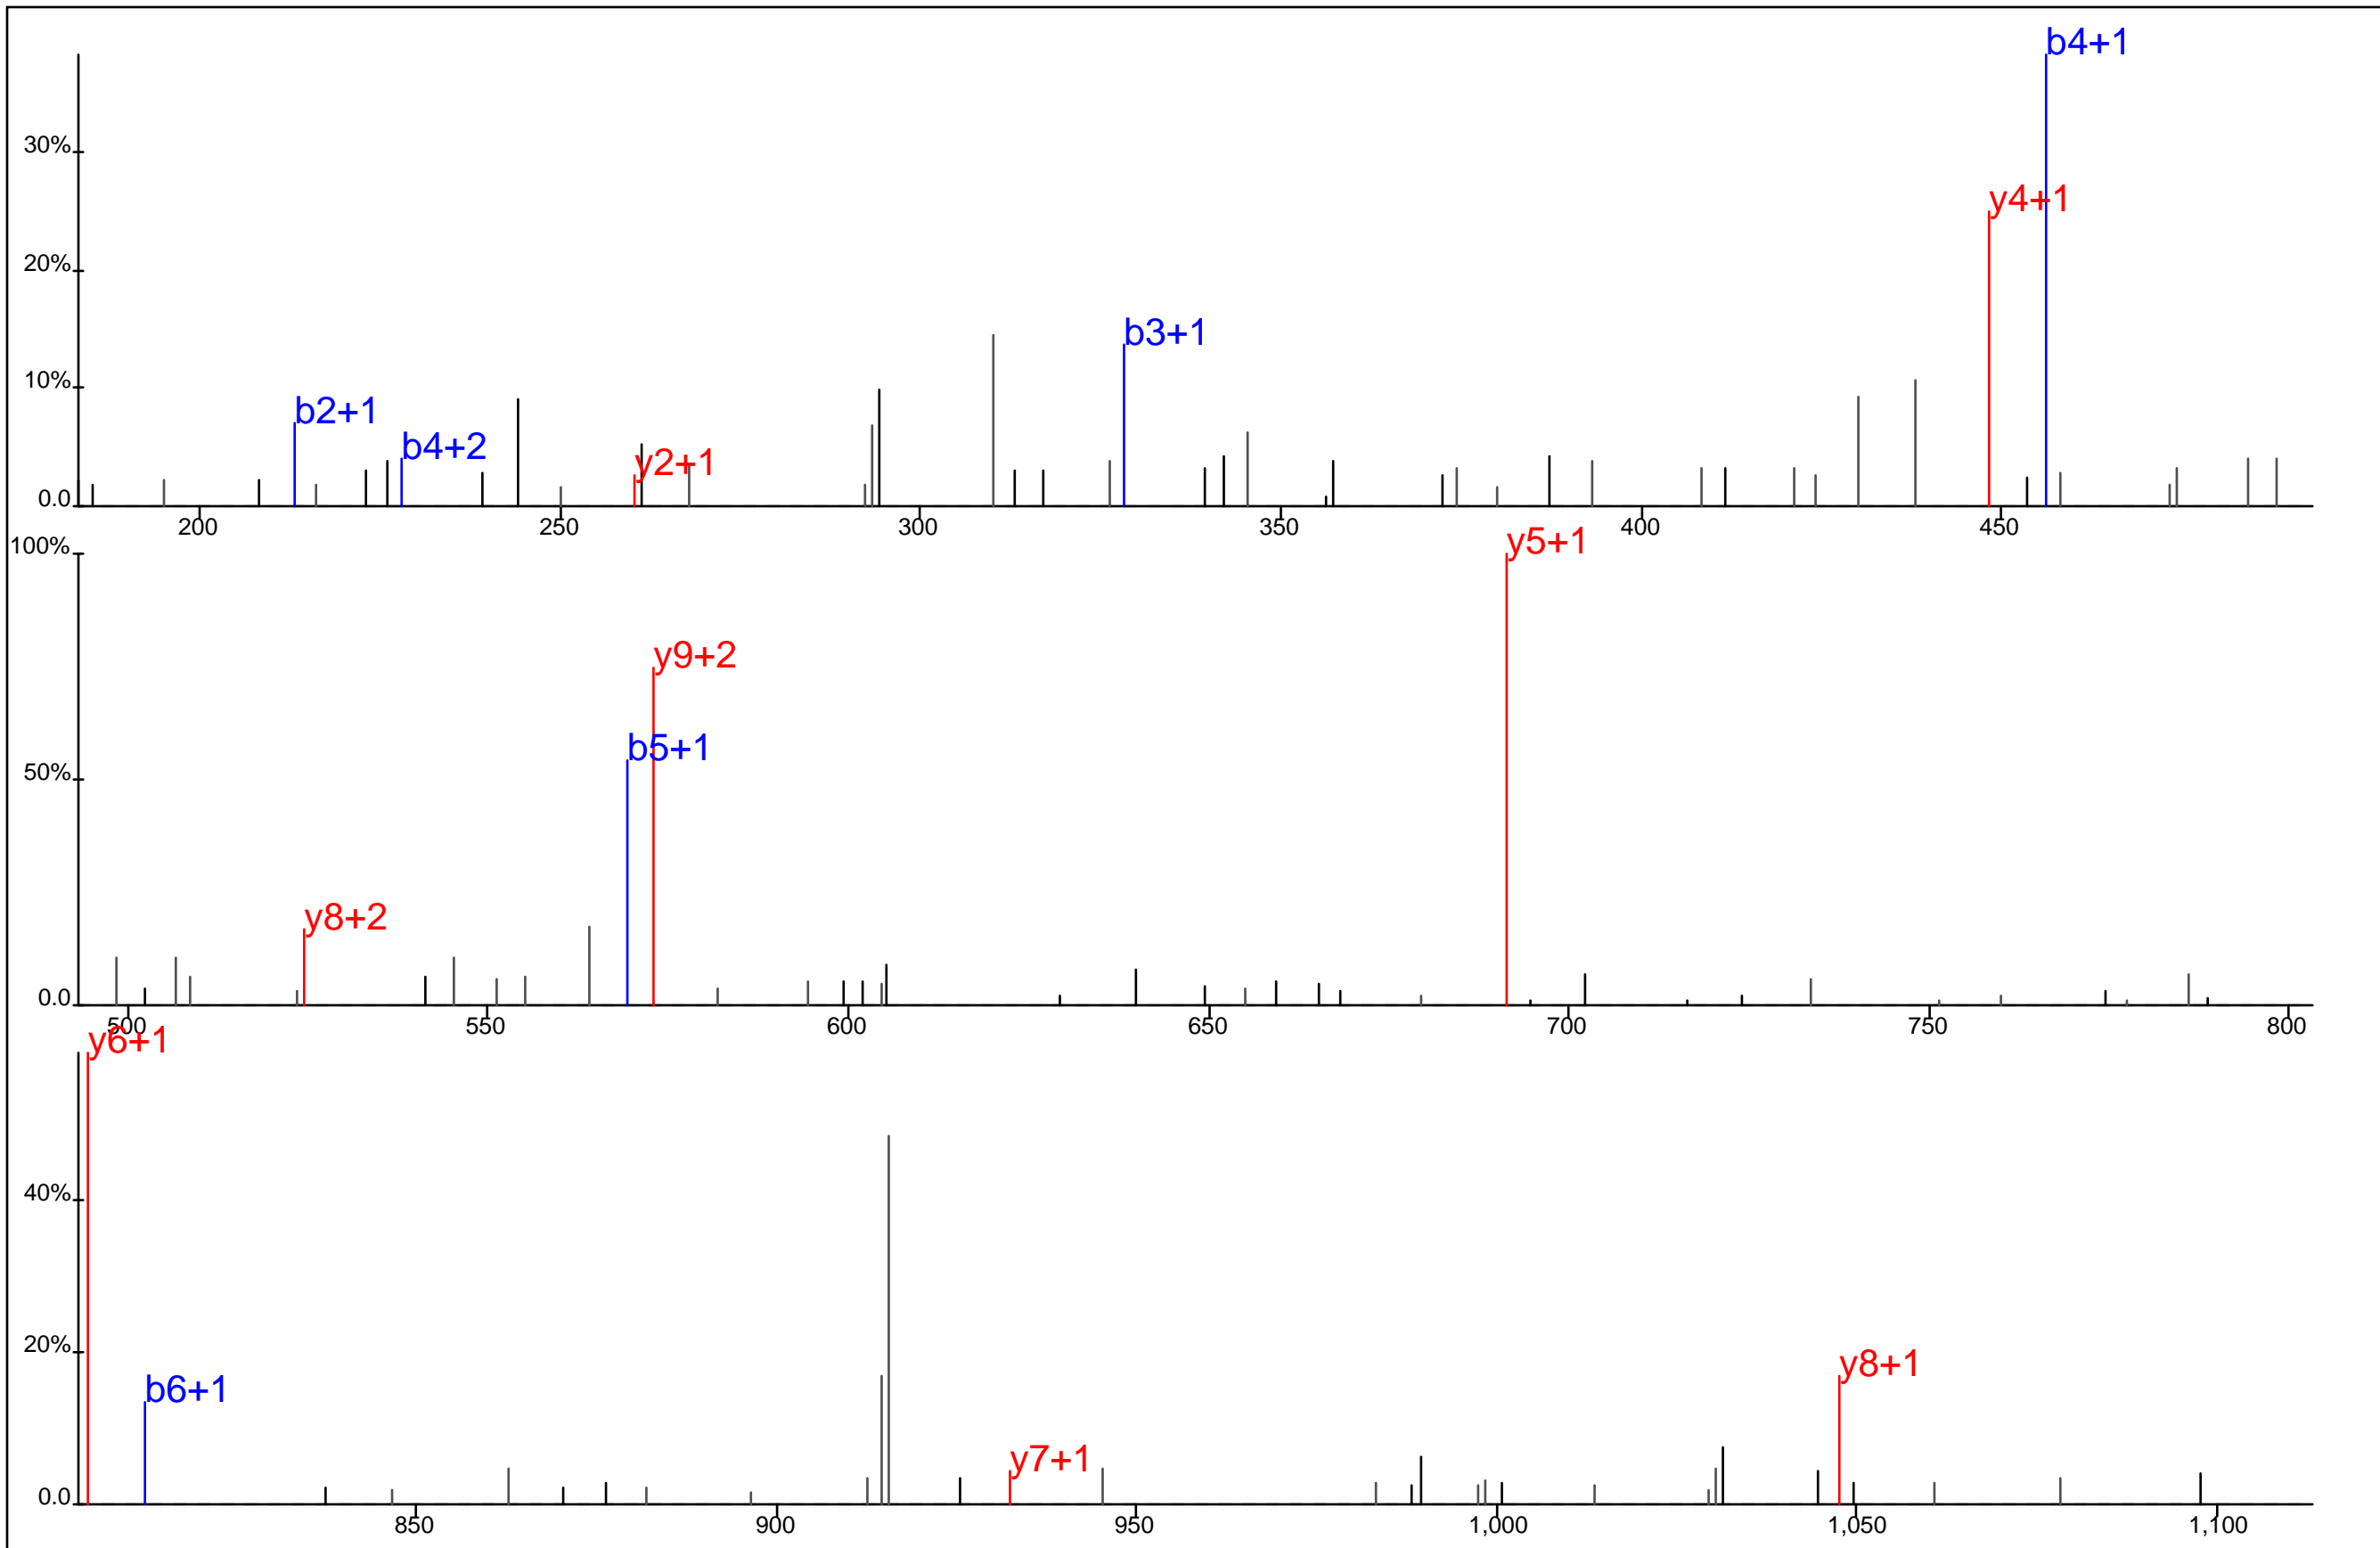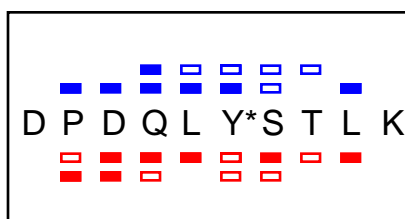

Protein Name: PCAF  
 gi Accession: 0  
 Precursor Mass: 630.2811+2  
 Delta Mass: 0.519 ppm  
 XCorr: 40.5



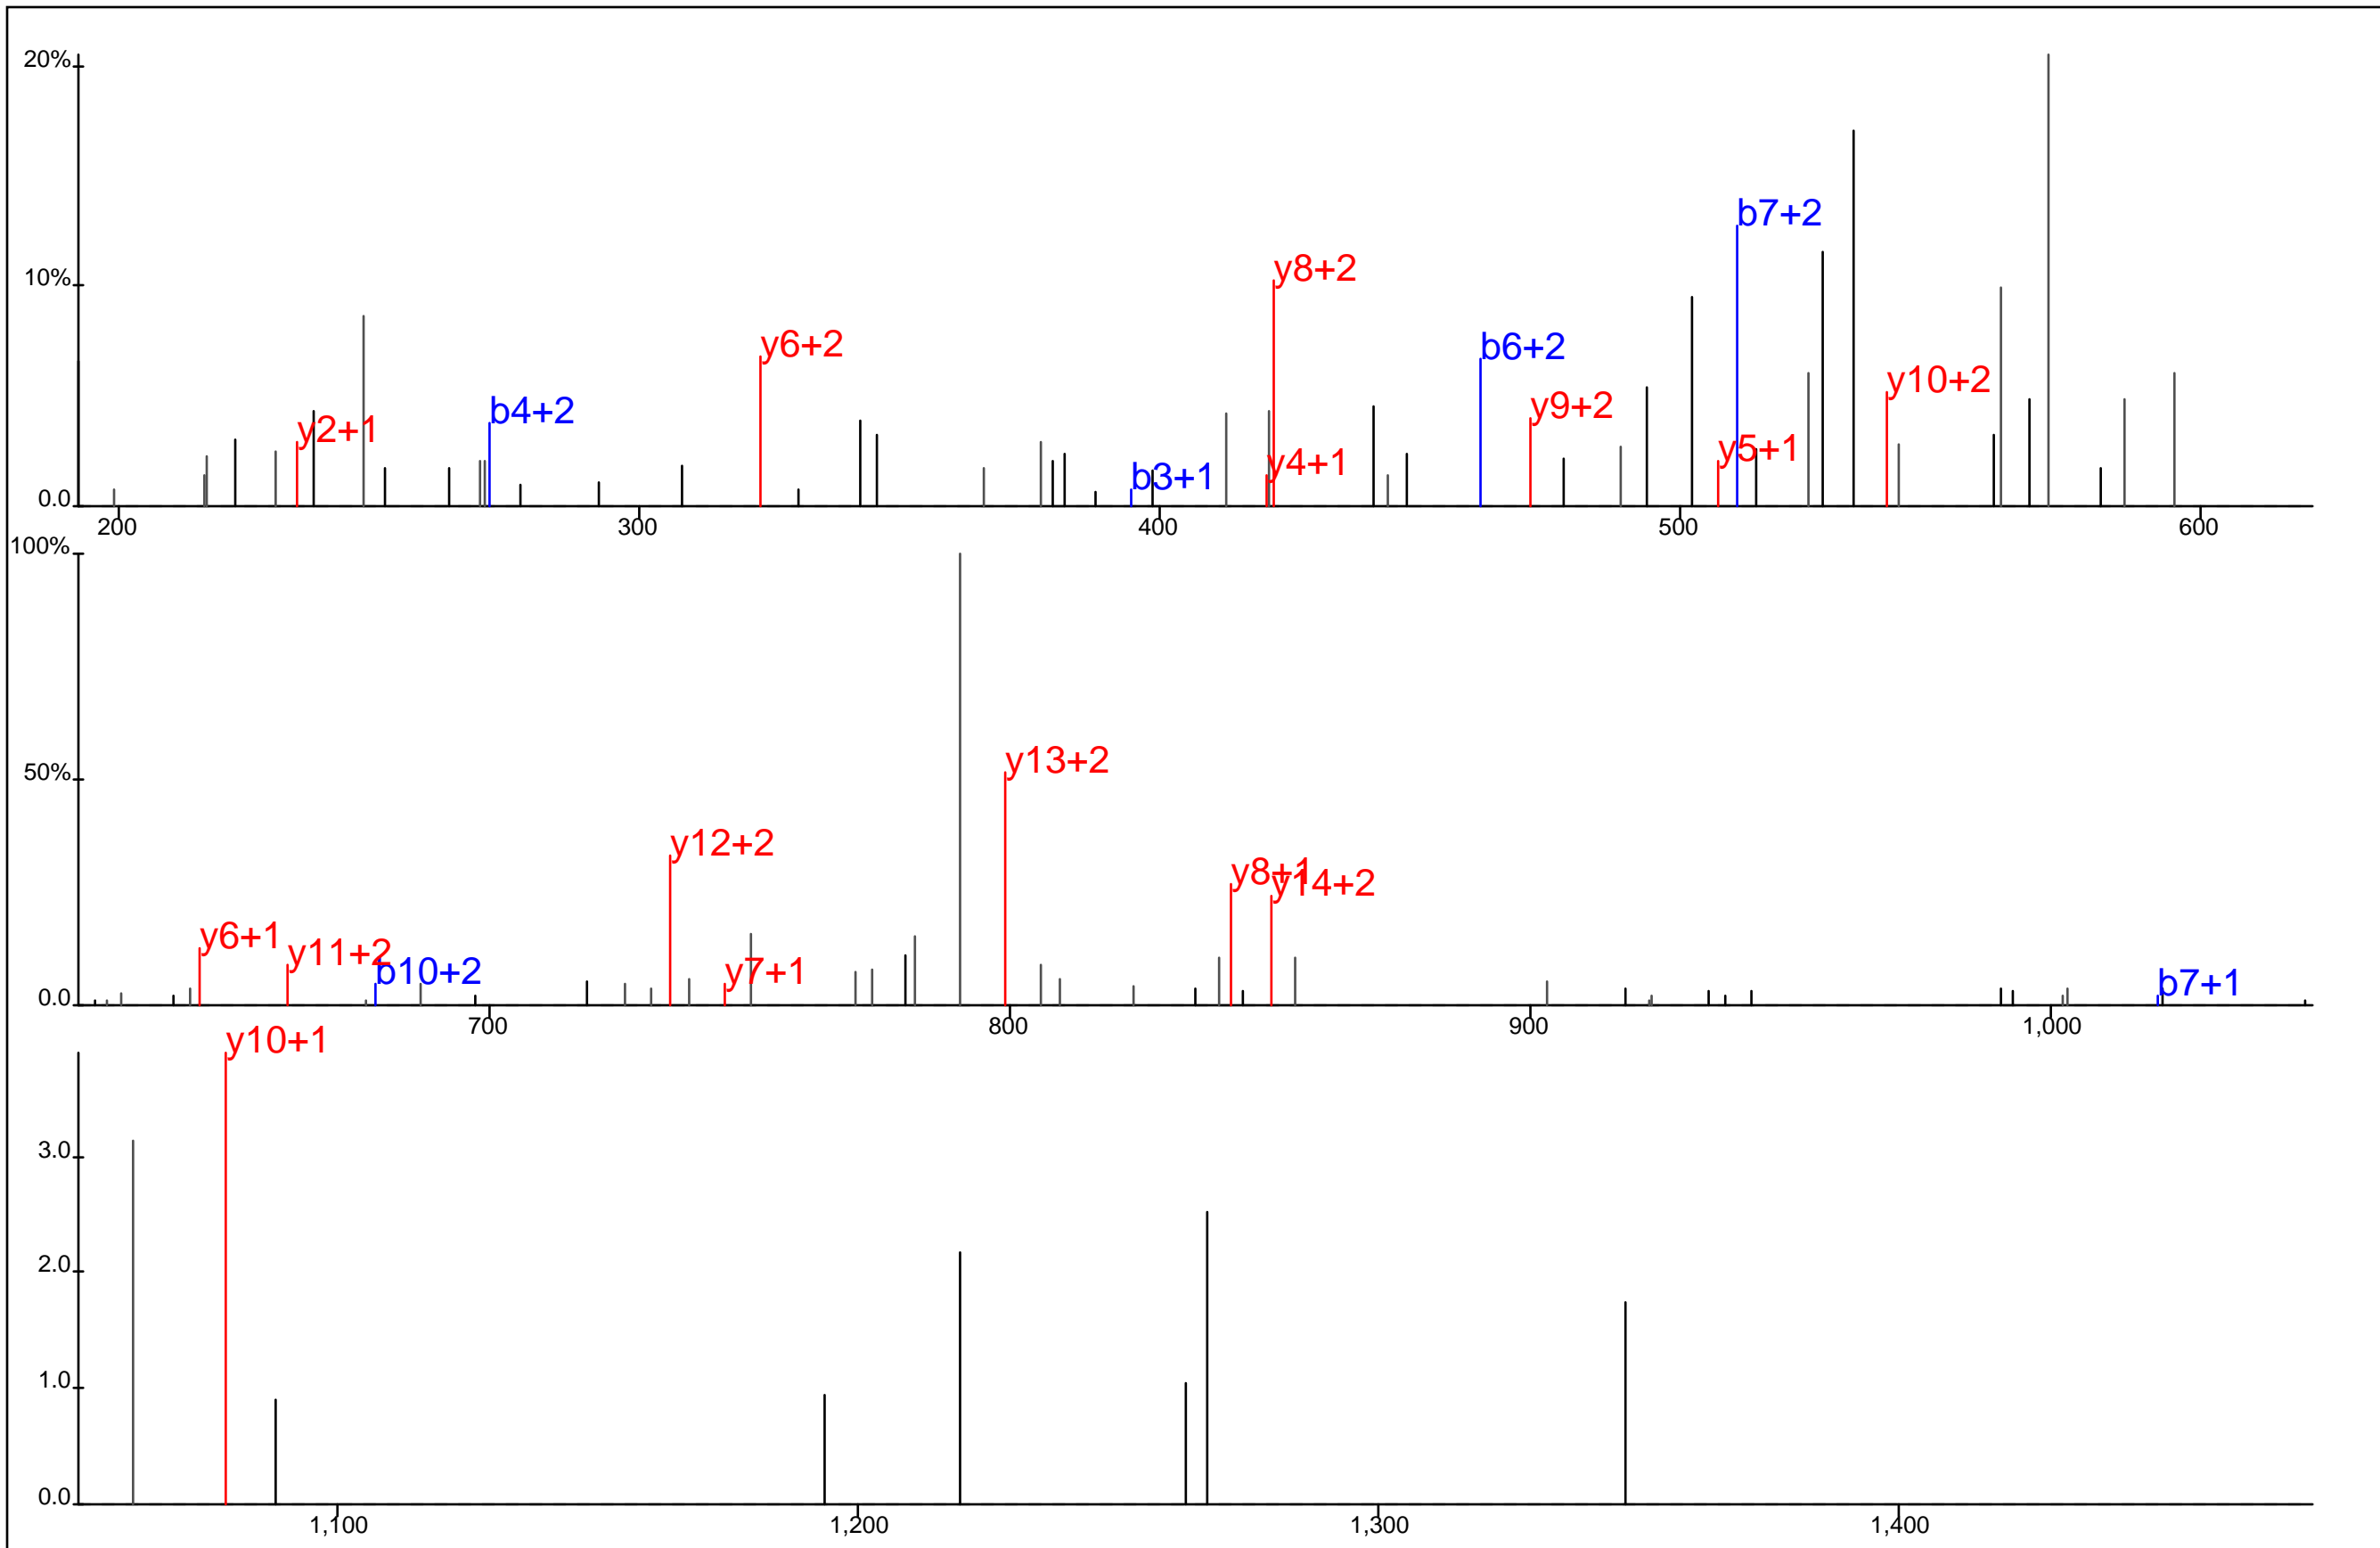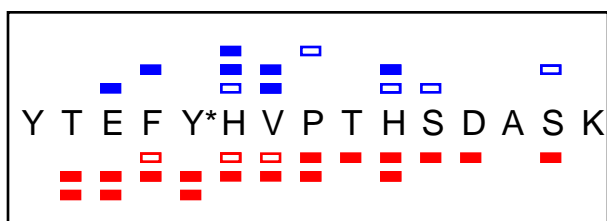

Protein Name: PDZ and LIM domain 5  
 gi Accession: 0  
 Precursor Mass: 621.2639+3  
 Delta Mass: 1.110 ppm  
 XCorr: 27.96

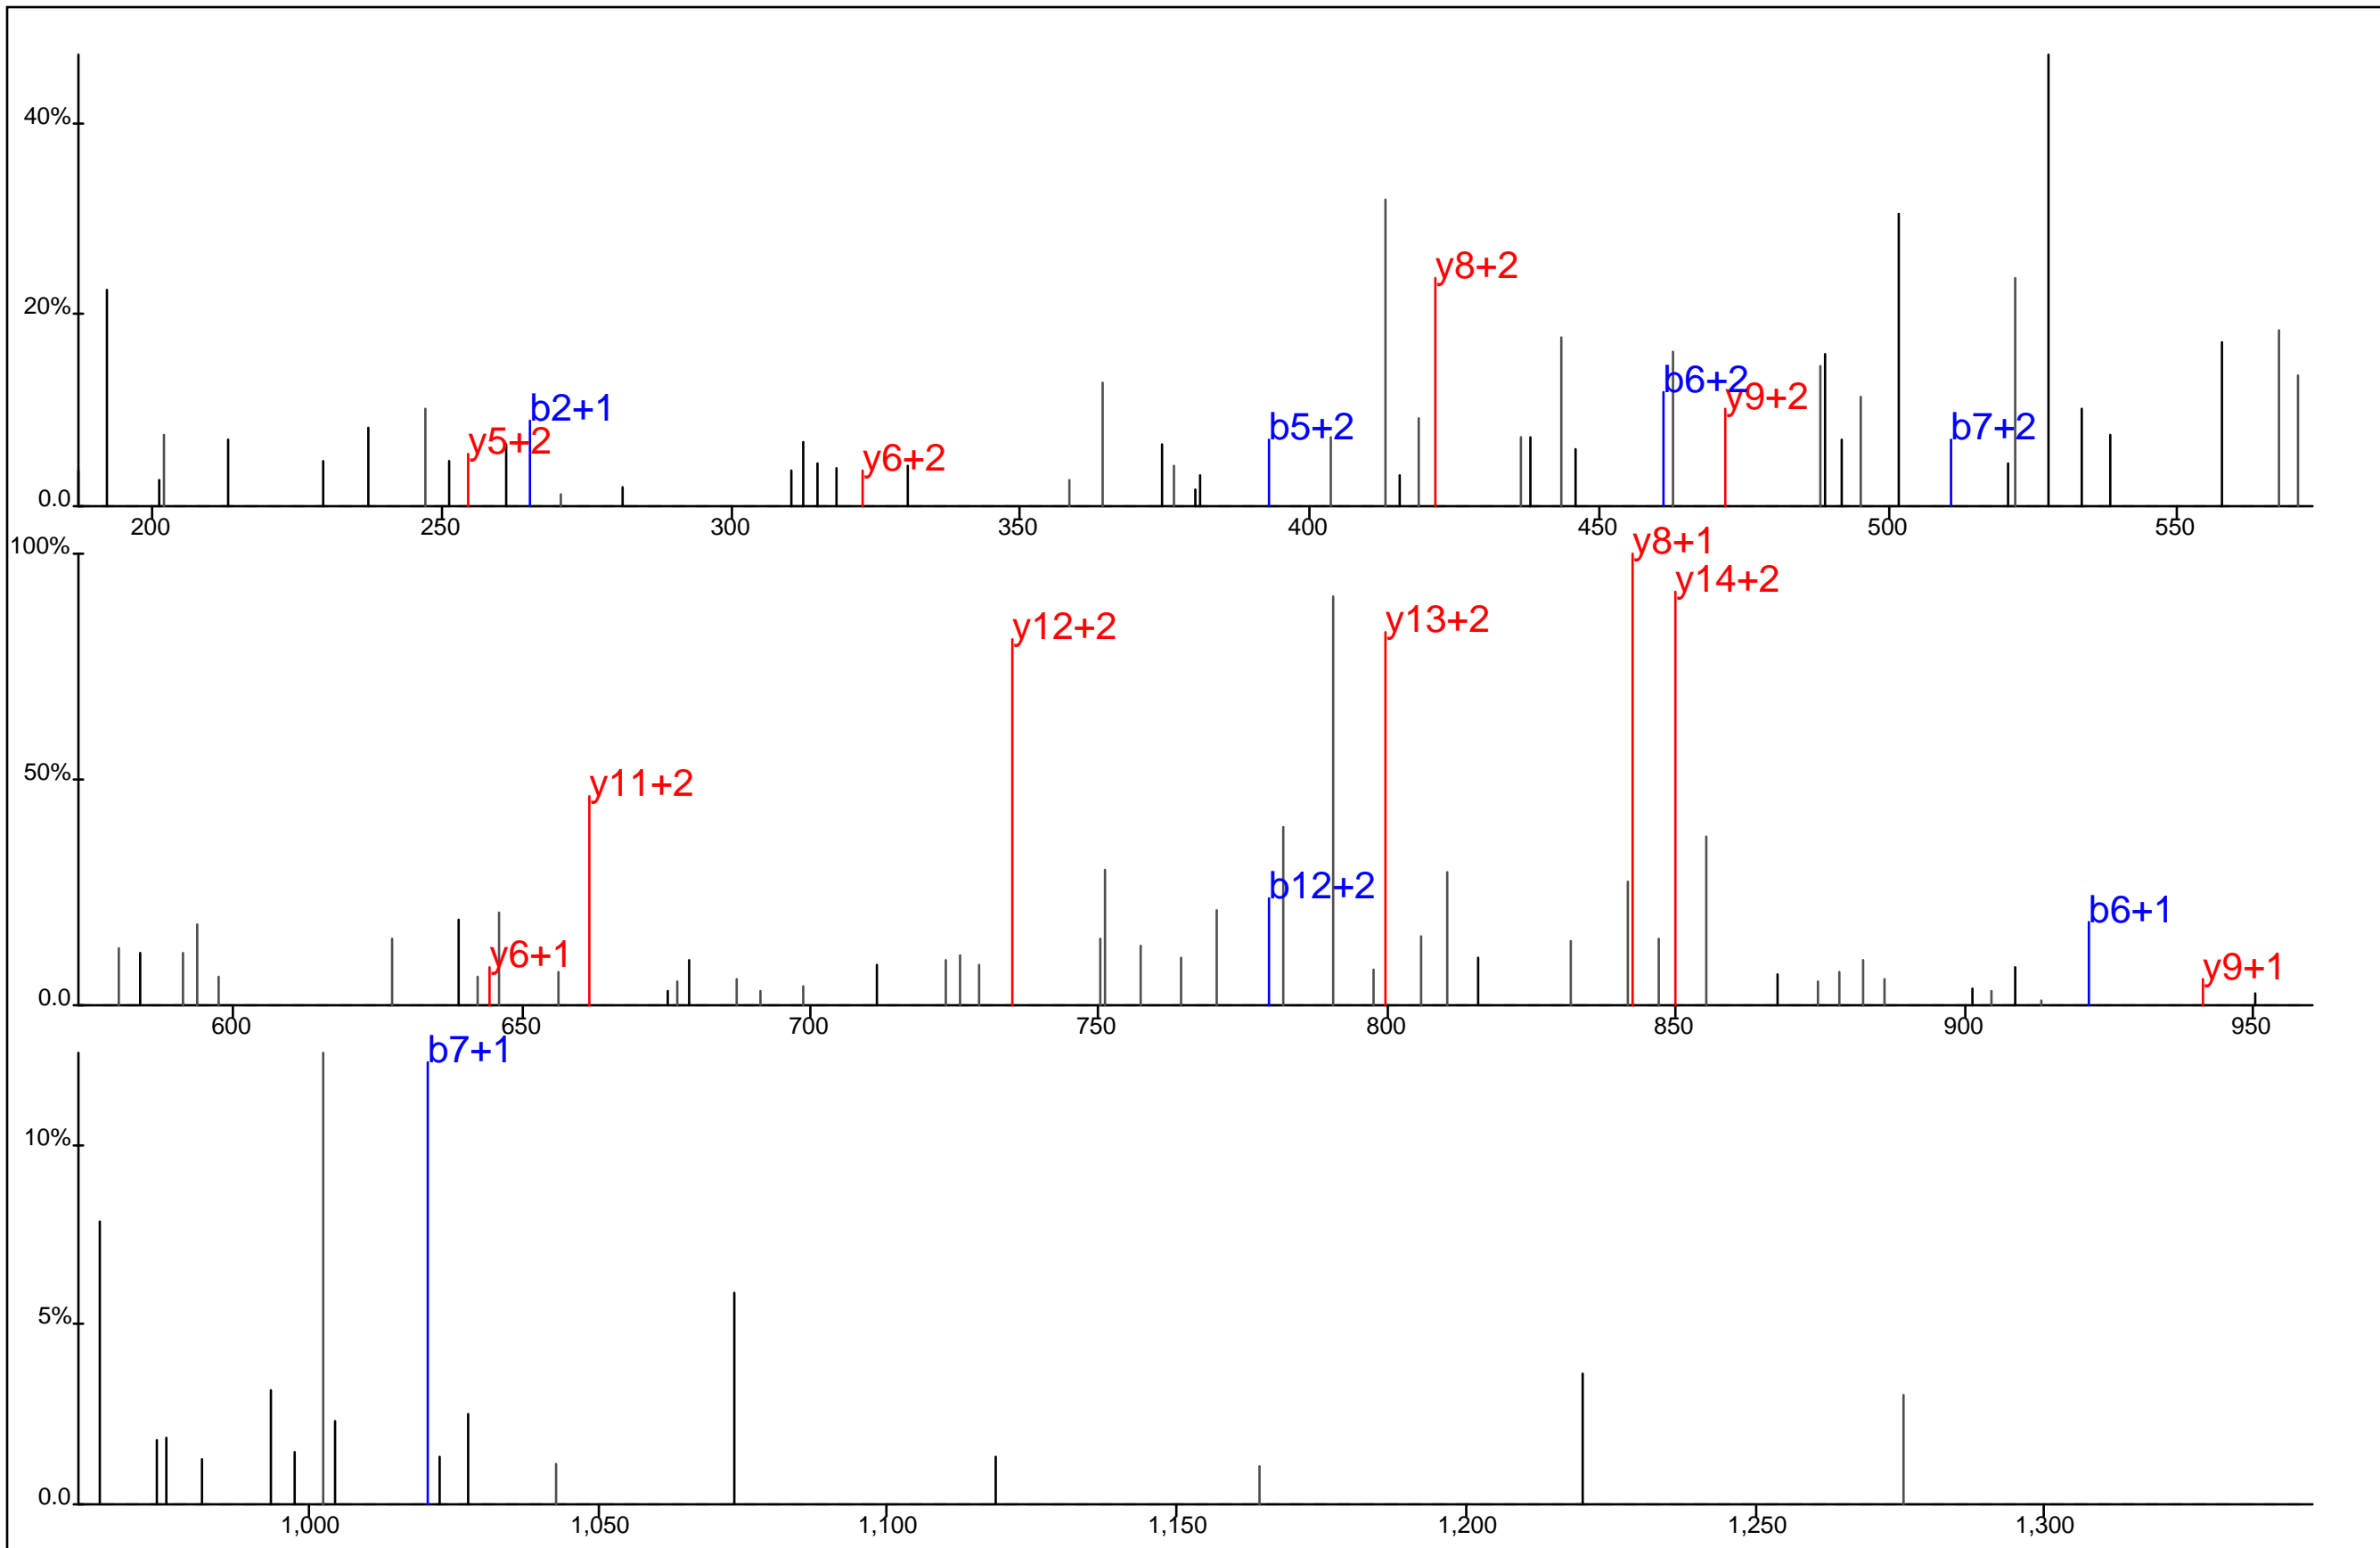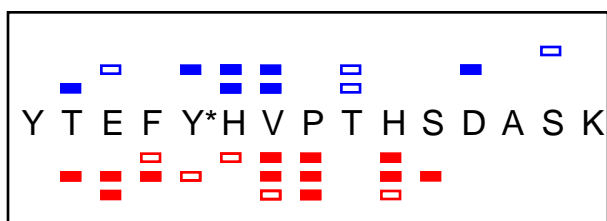

Protein Name: PDZ and LIM domain 5  
 gi Accession: 0  
 Precursor Mass: 621.2626+3  
 Delta Mass: 3.274 ppm  
 XCorr: 24.67

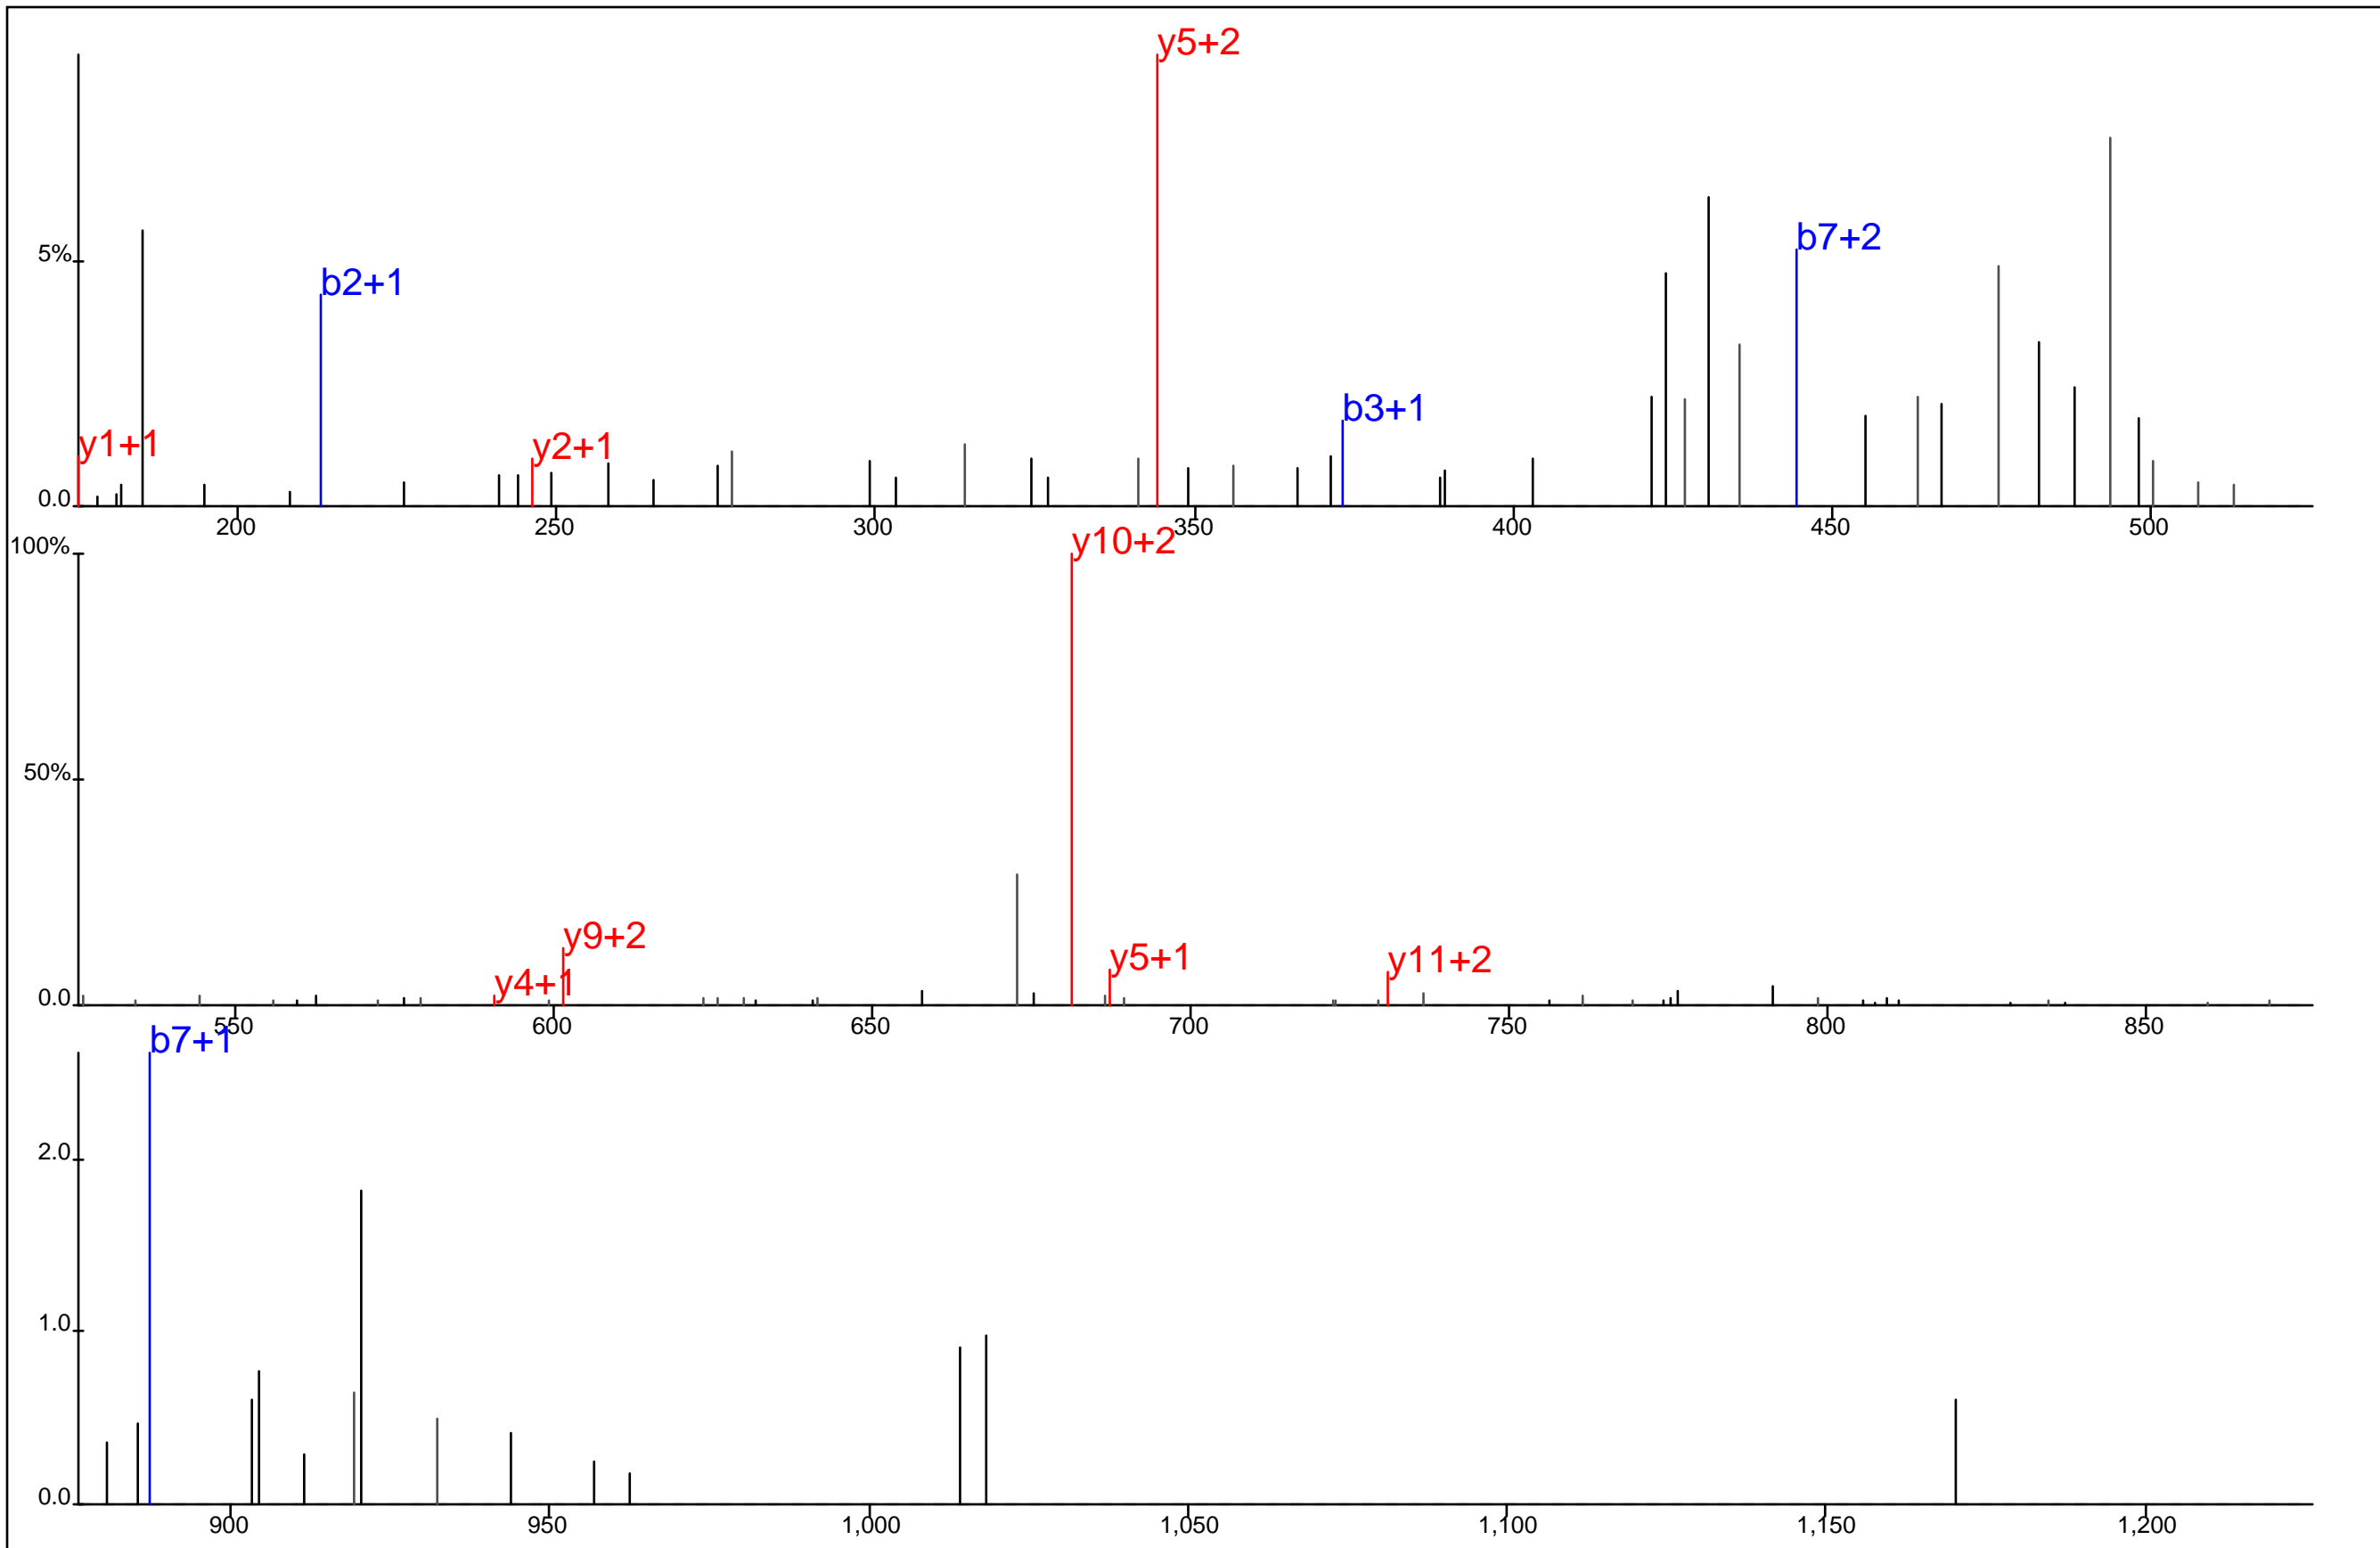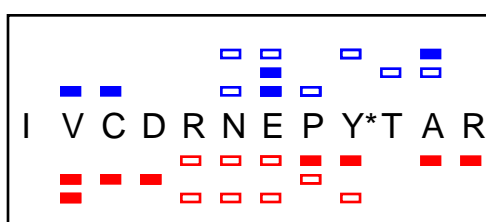

Protein Name: Pellino 2  
 gi Accession: 0  
 Precursor Mass: 525.2310+3  
 Delta Mass: 2.874 ppm  
 XCorr: 20.36



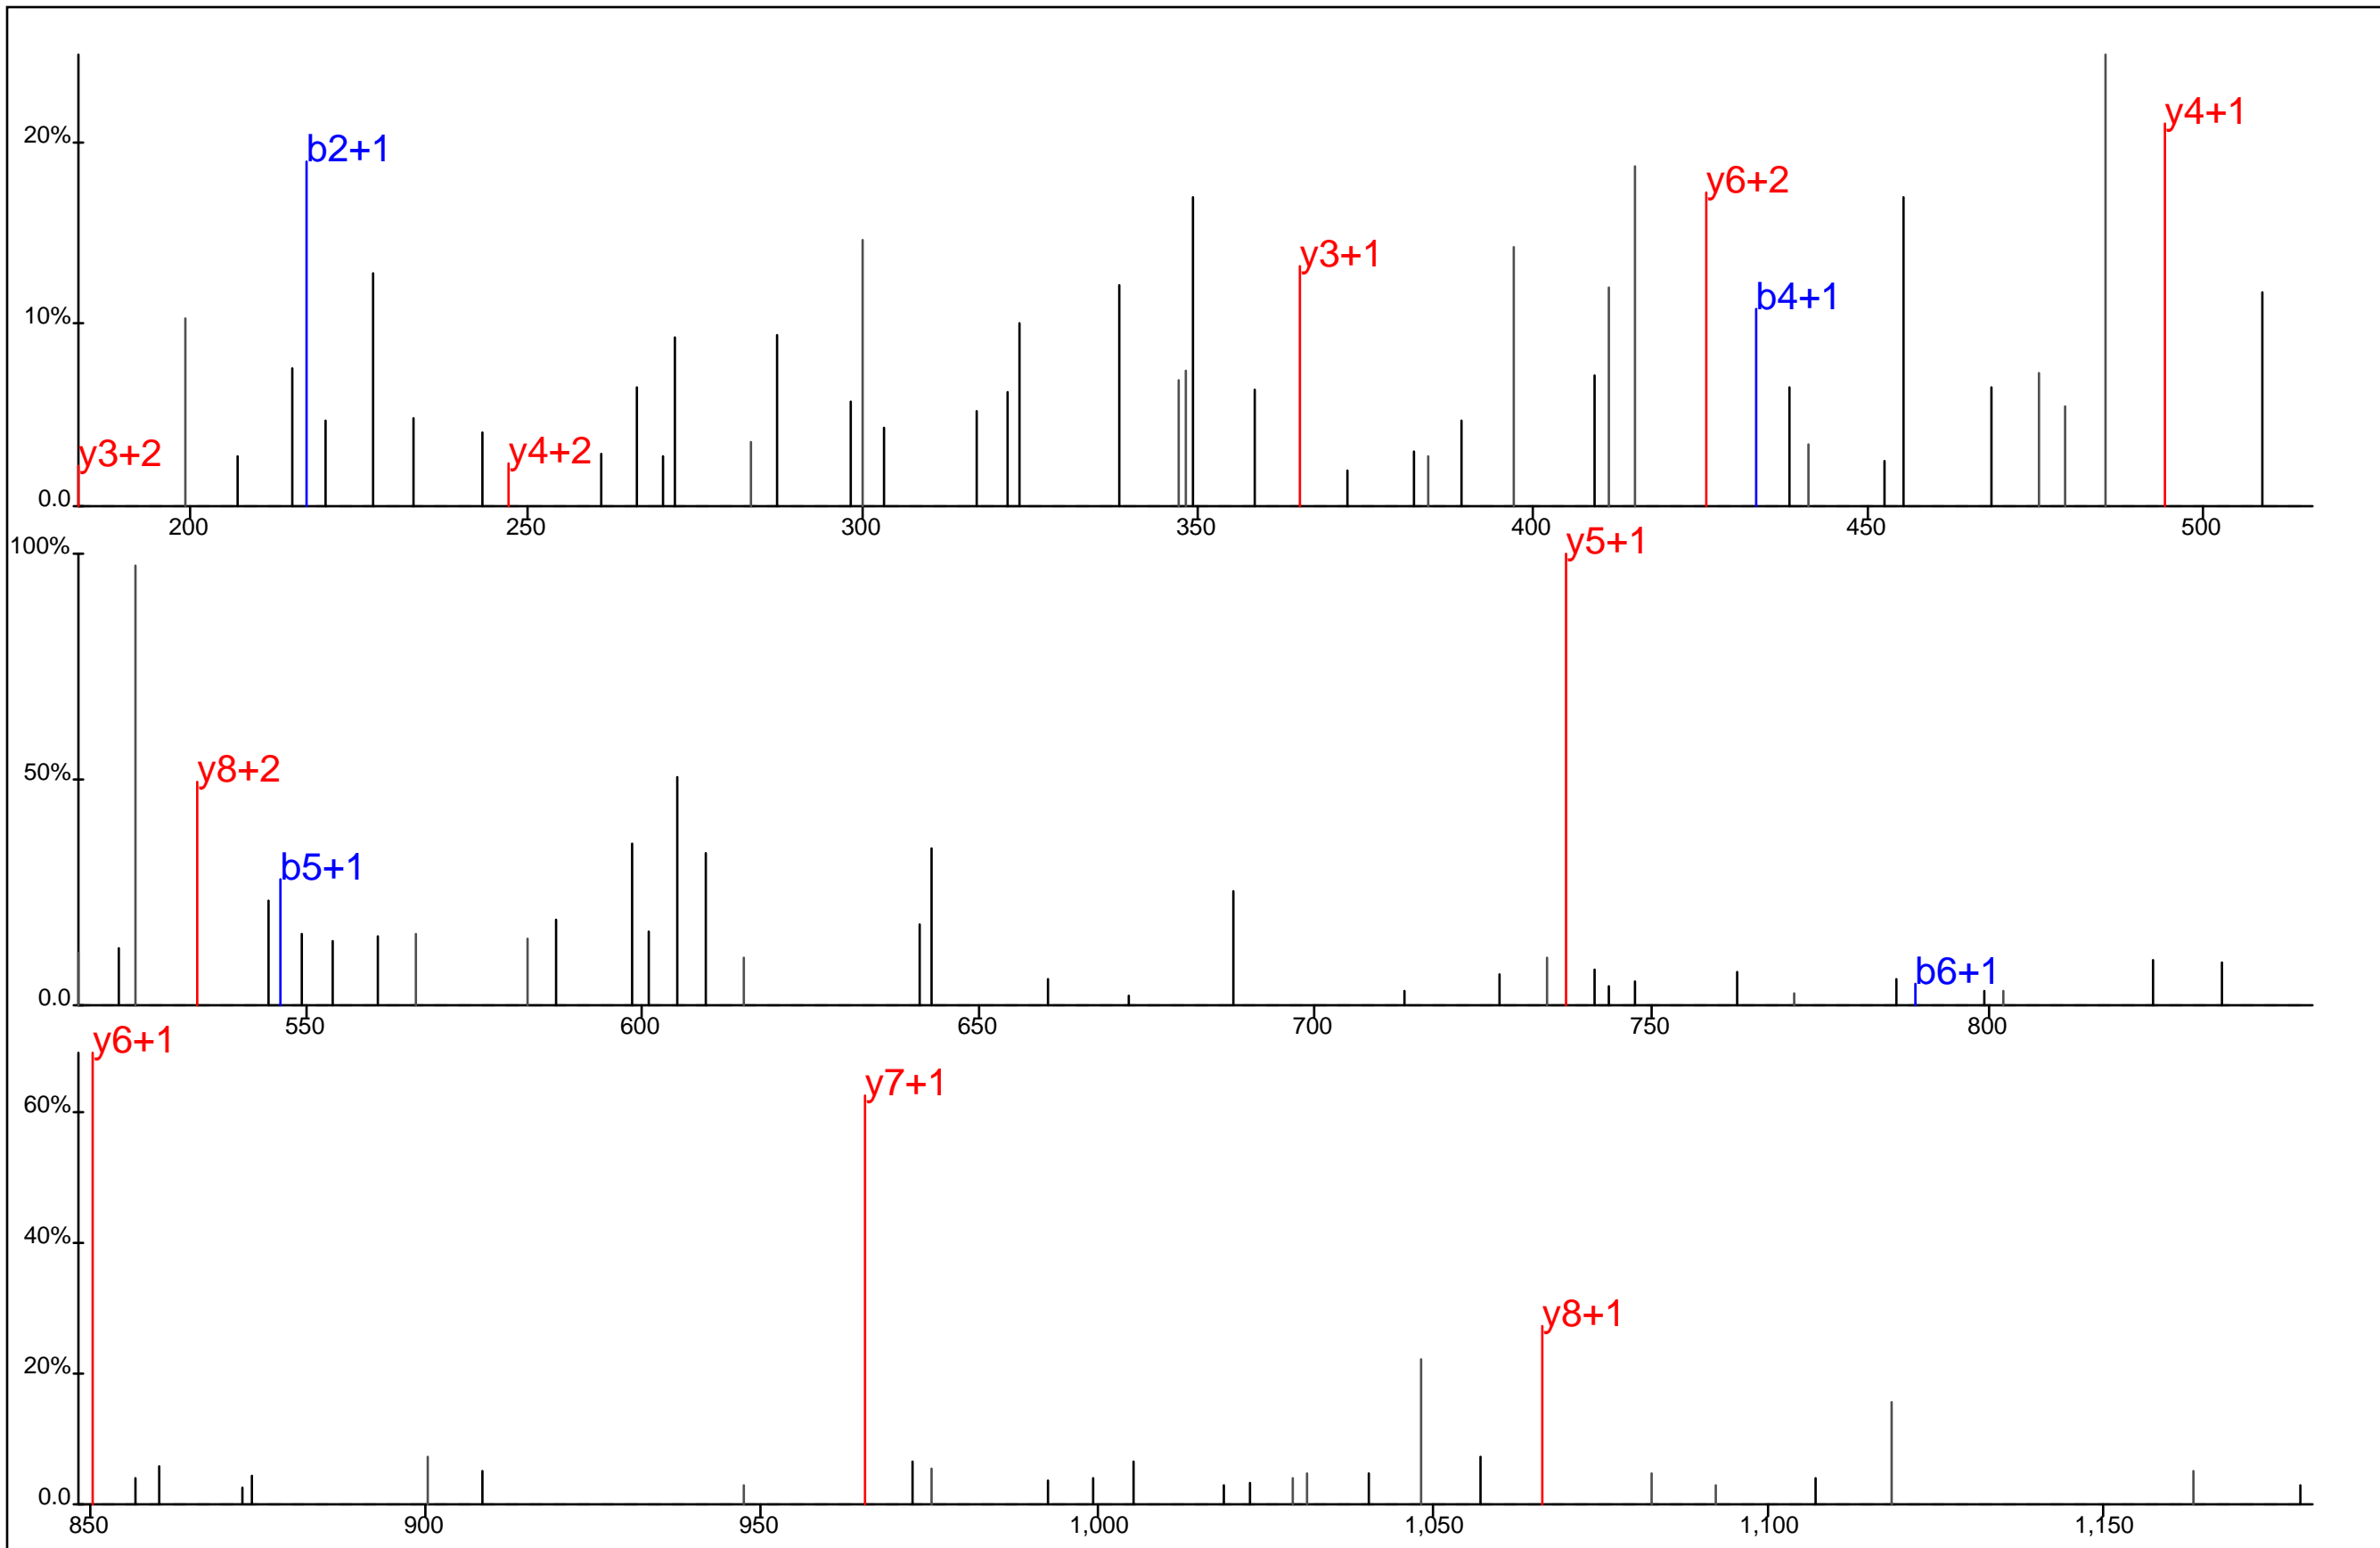

**T D T D L Y\* E F A K**

Protein Name: Peptidylprolyl isomerase domain and WD repeat containing 1  
 gi Accession: 0  
 Precursor Mass: 641.7645+2  
 Delta Mass: 1.642 ppm  
 XCorr: 33.85

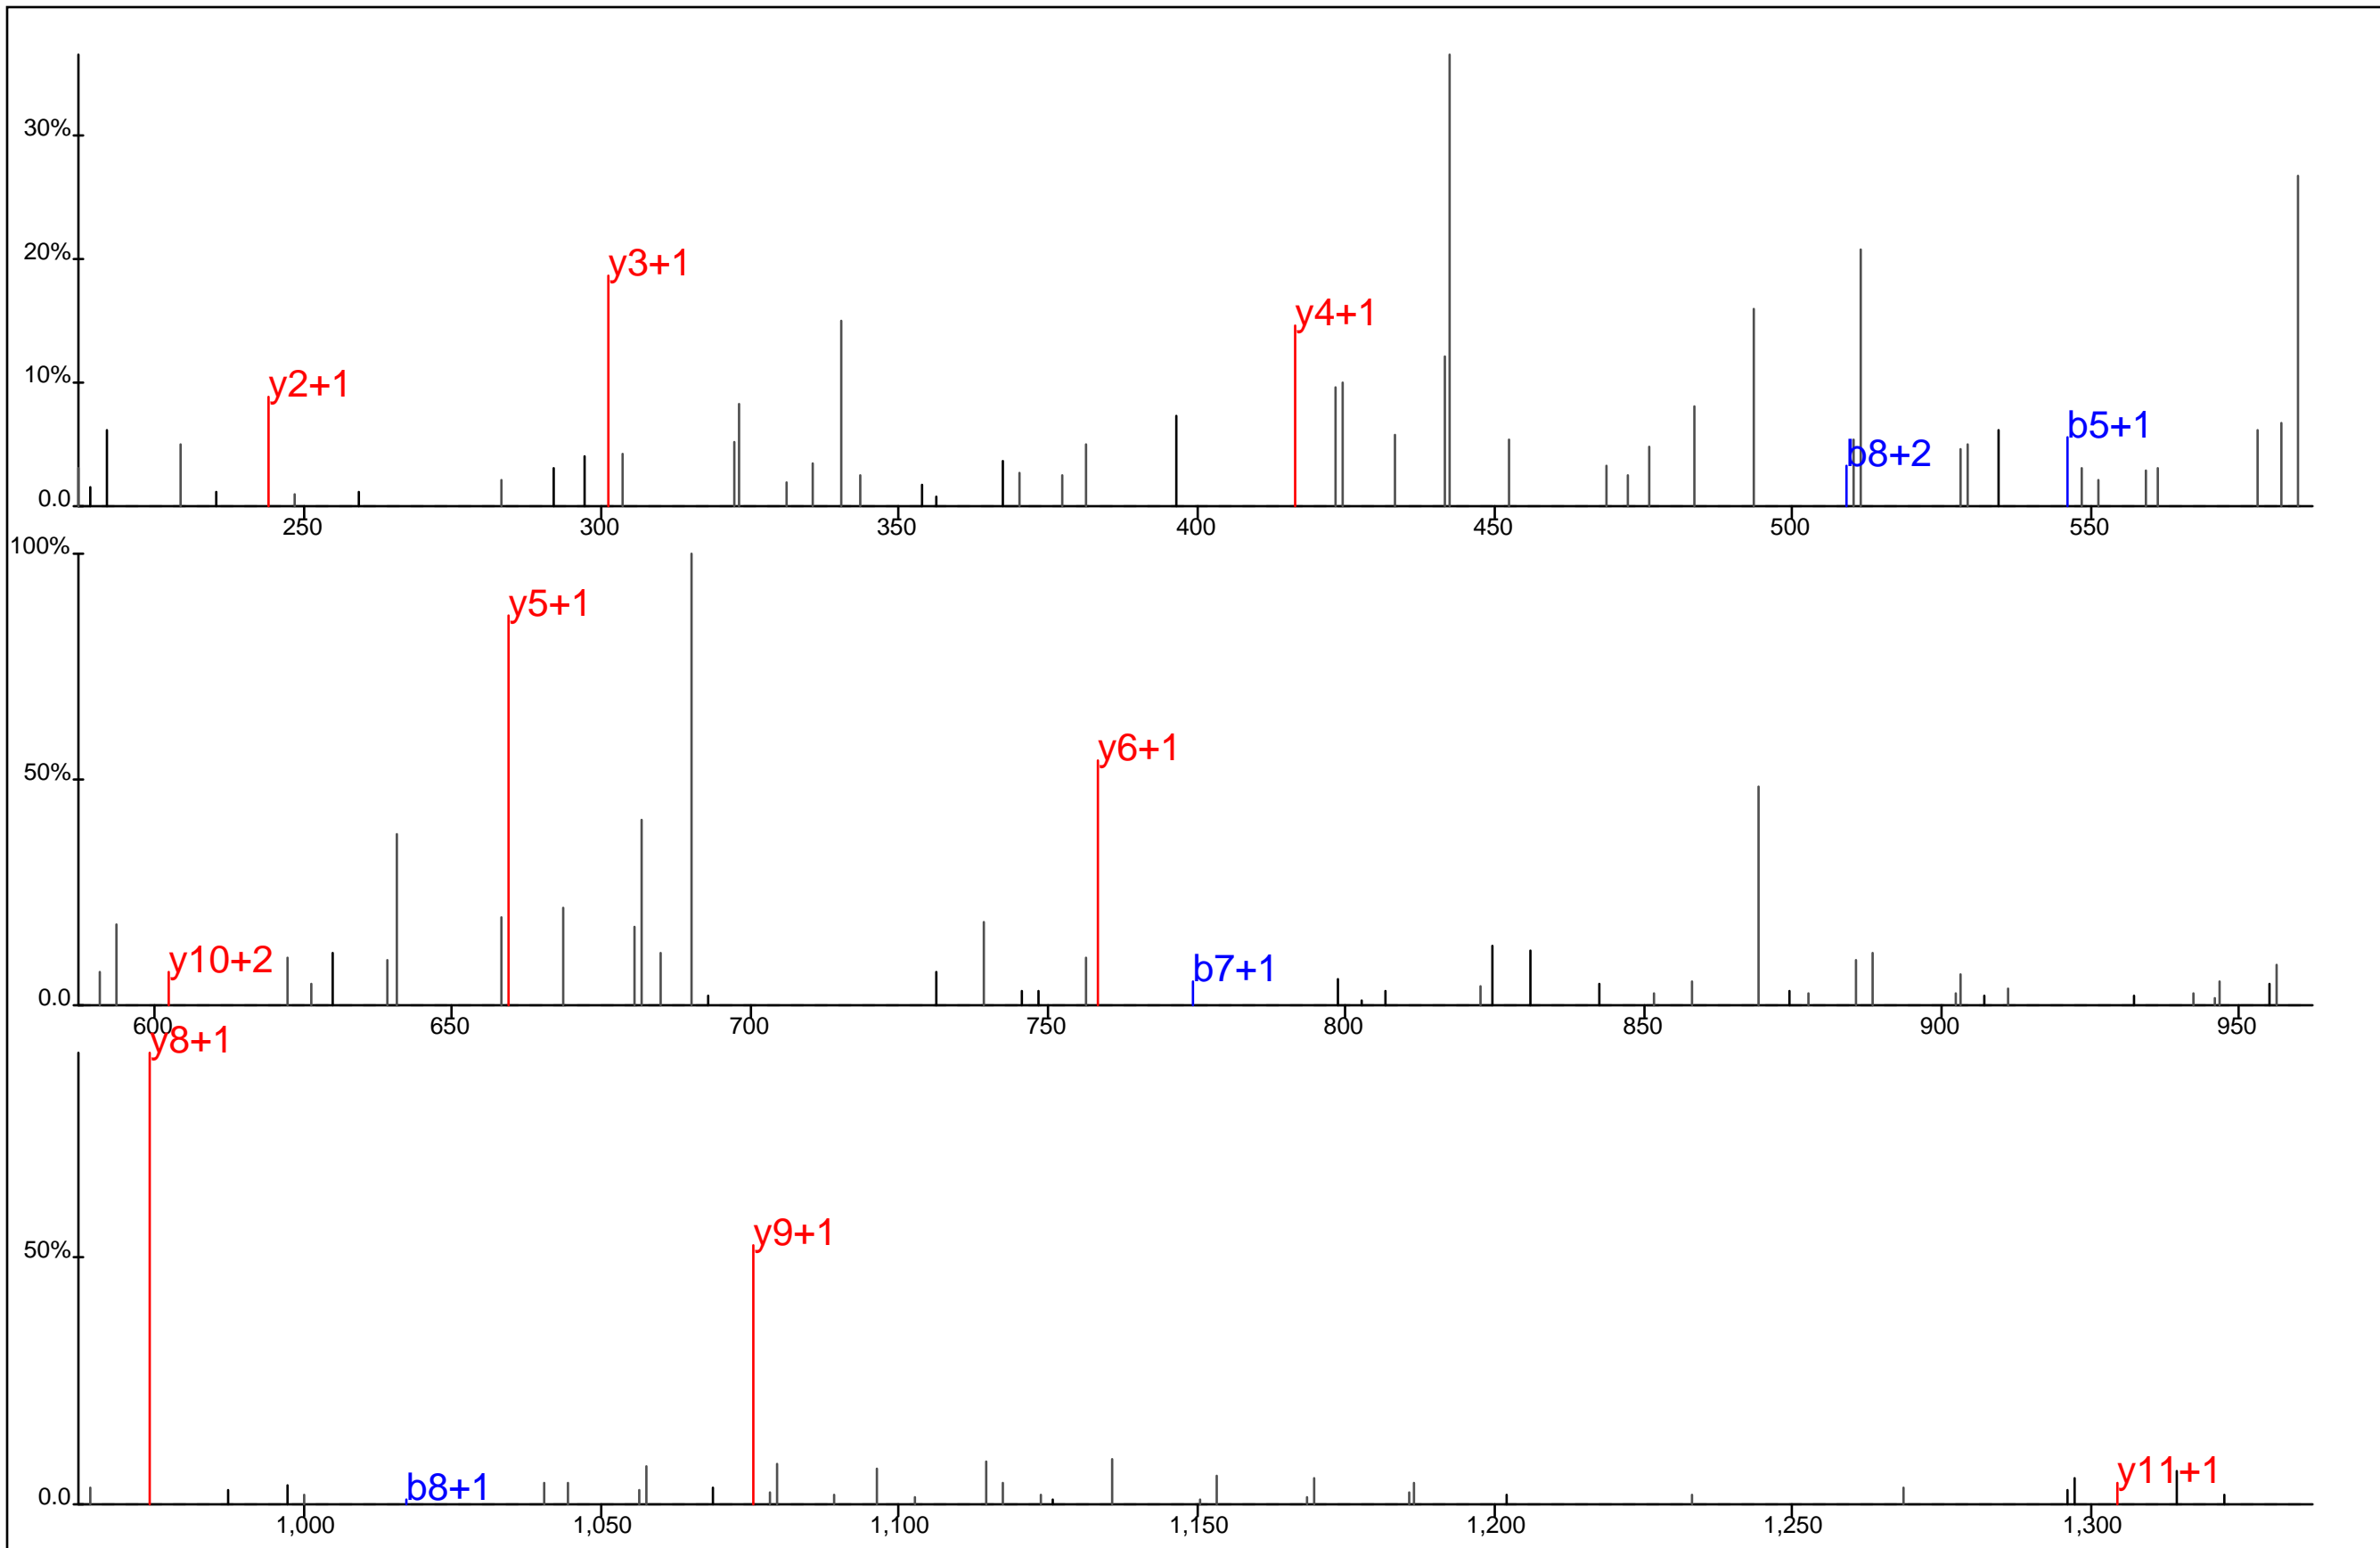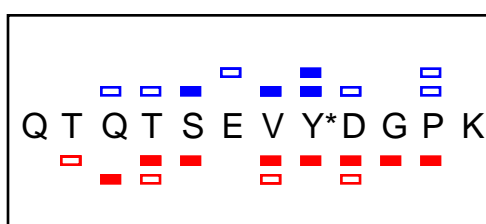

Protein Name: Pericentriolar material 1  
 gi Accession: 0  
 Precursor Mass: 716.8044+2  
 Delta Mass: 1.695 ppm  
 XCorr: 34.14

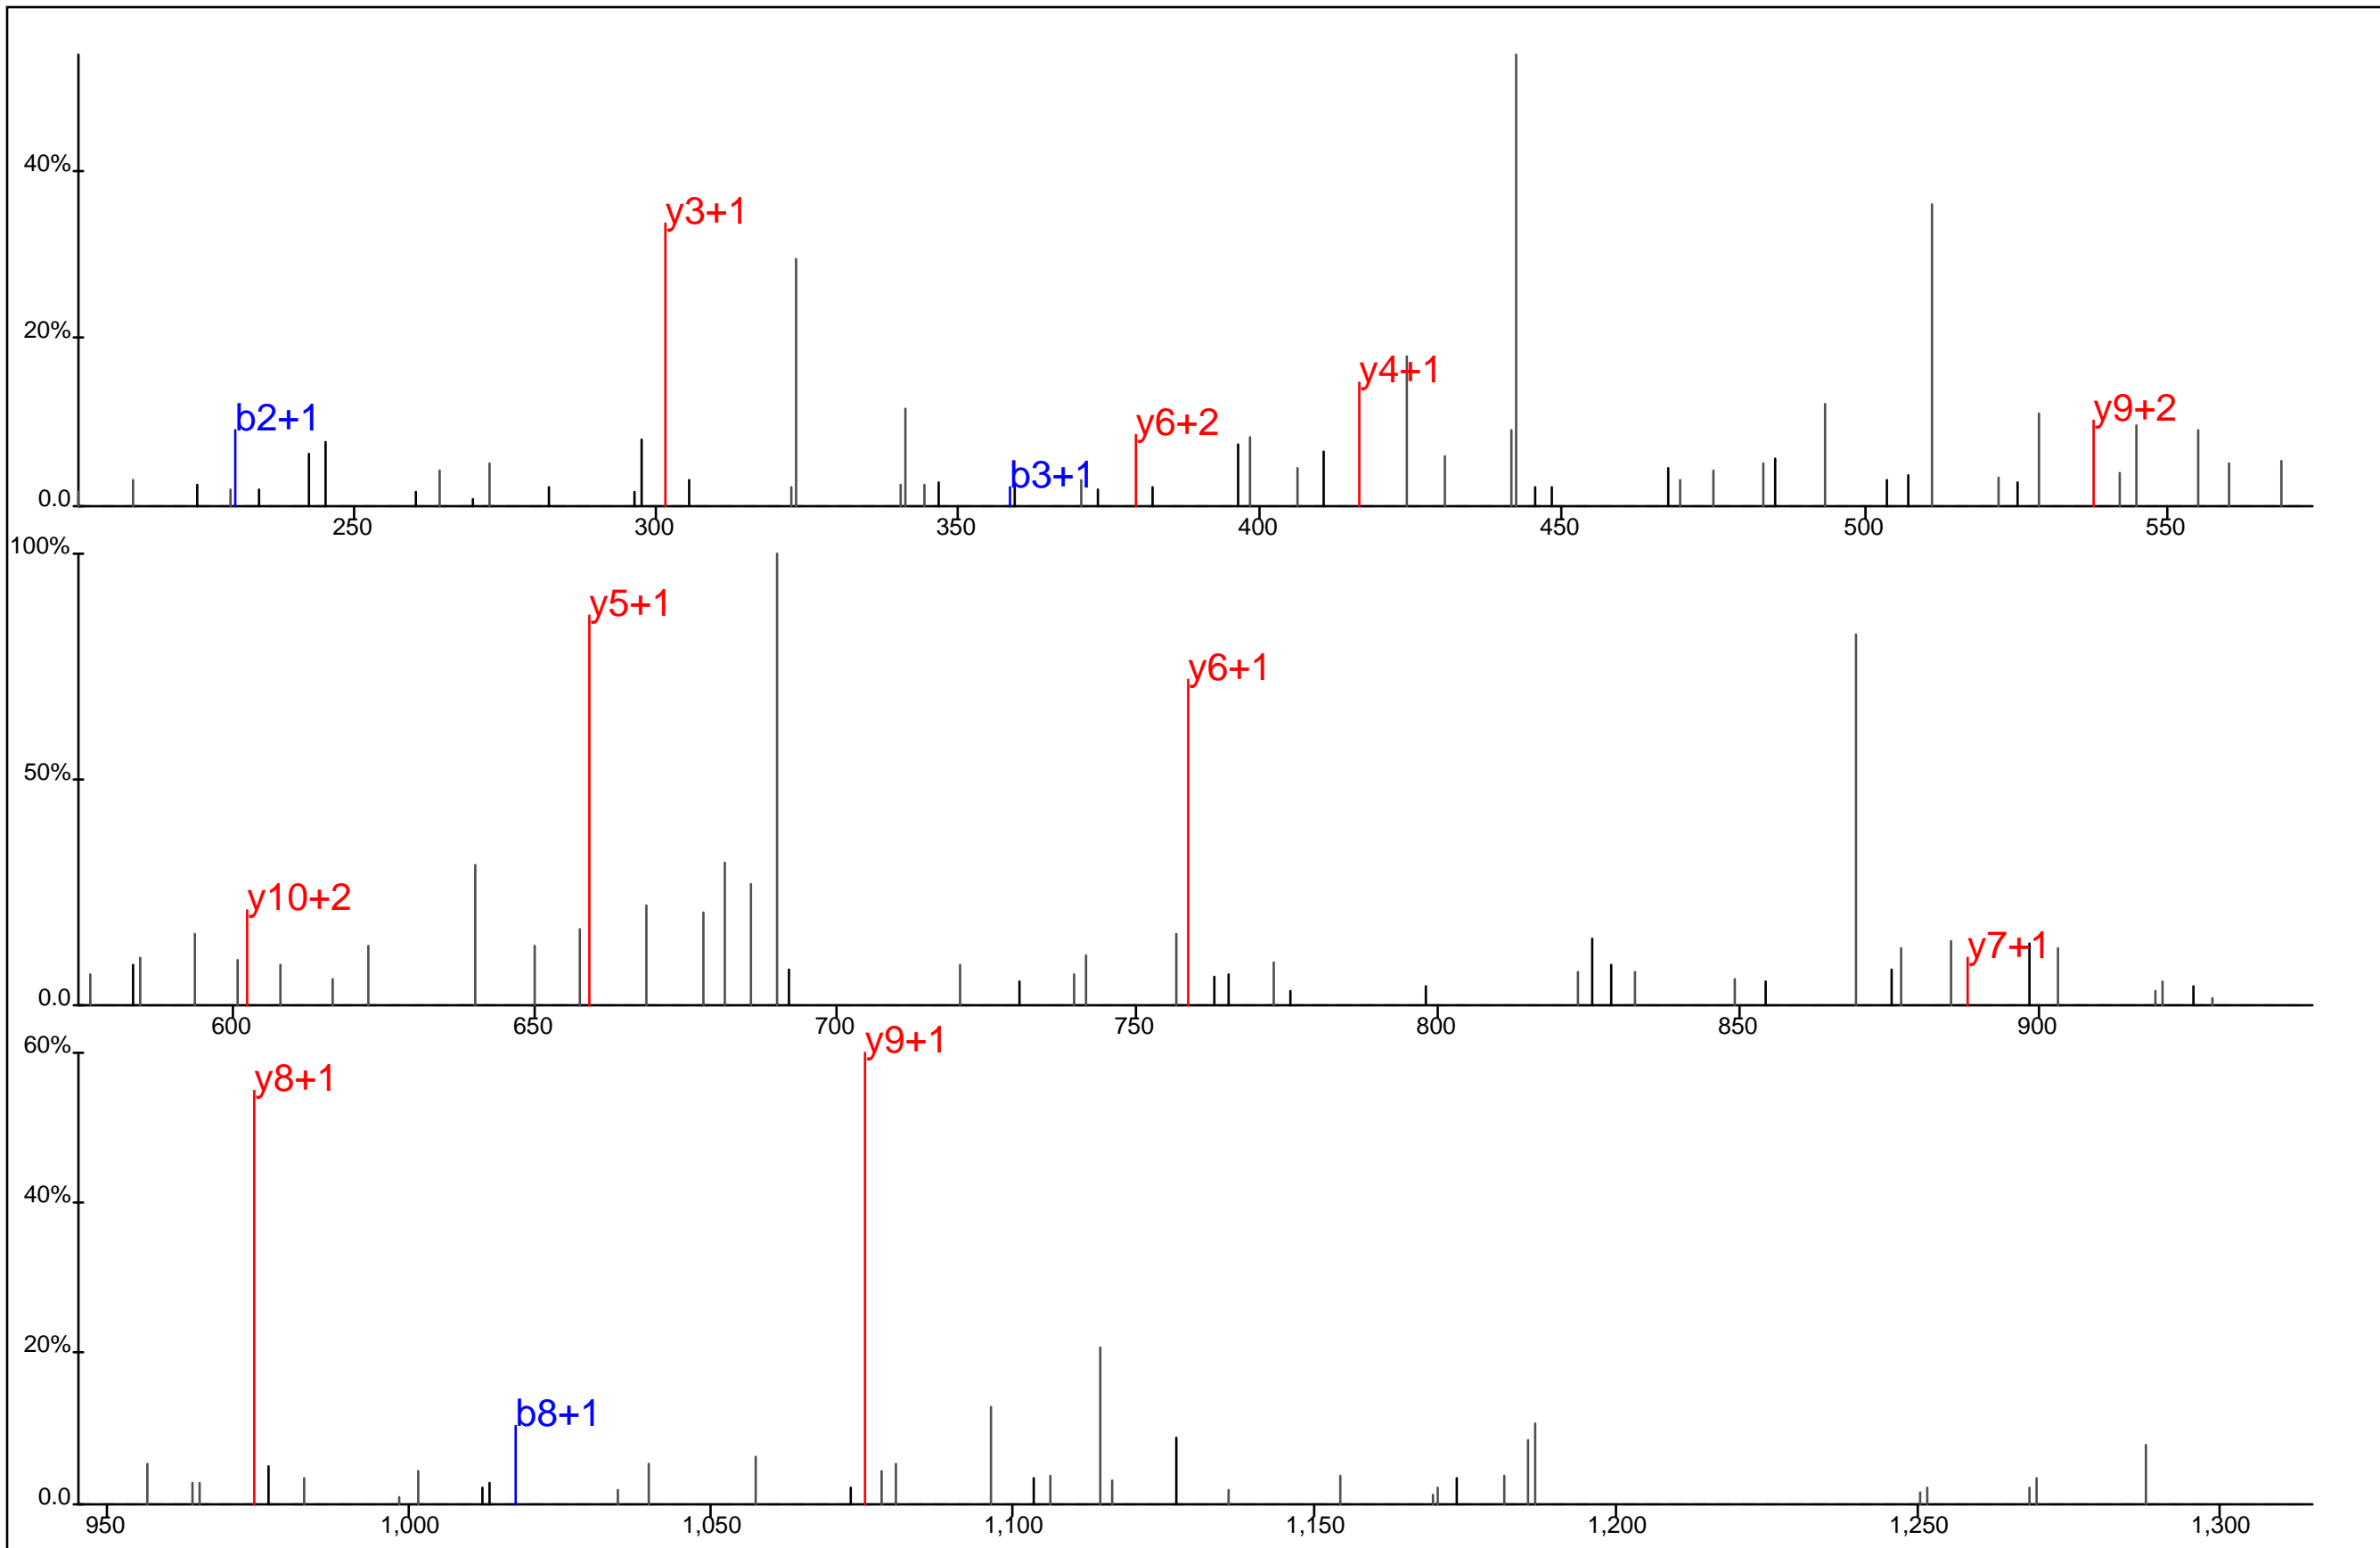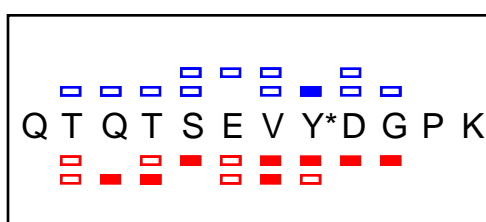

Protein Name: Pericentriolar material 1  
 gi Accession: 0  
 Precursor Mass: 716.8031+2  
 Delta Mass: 0.179 ppm  
 XCorr: 32.14

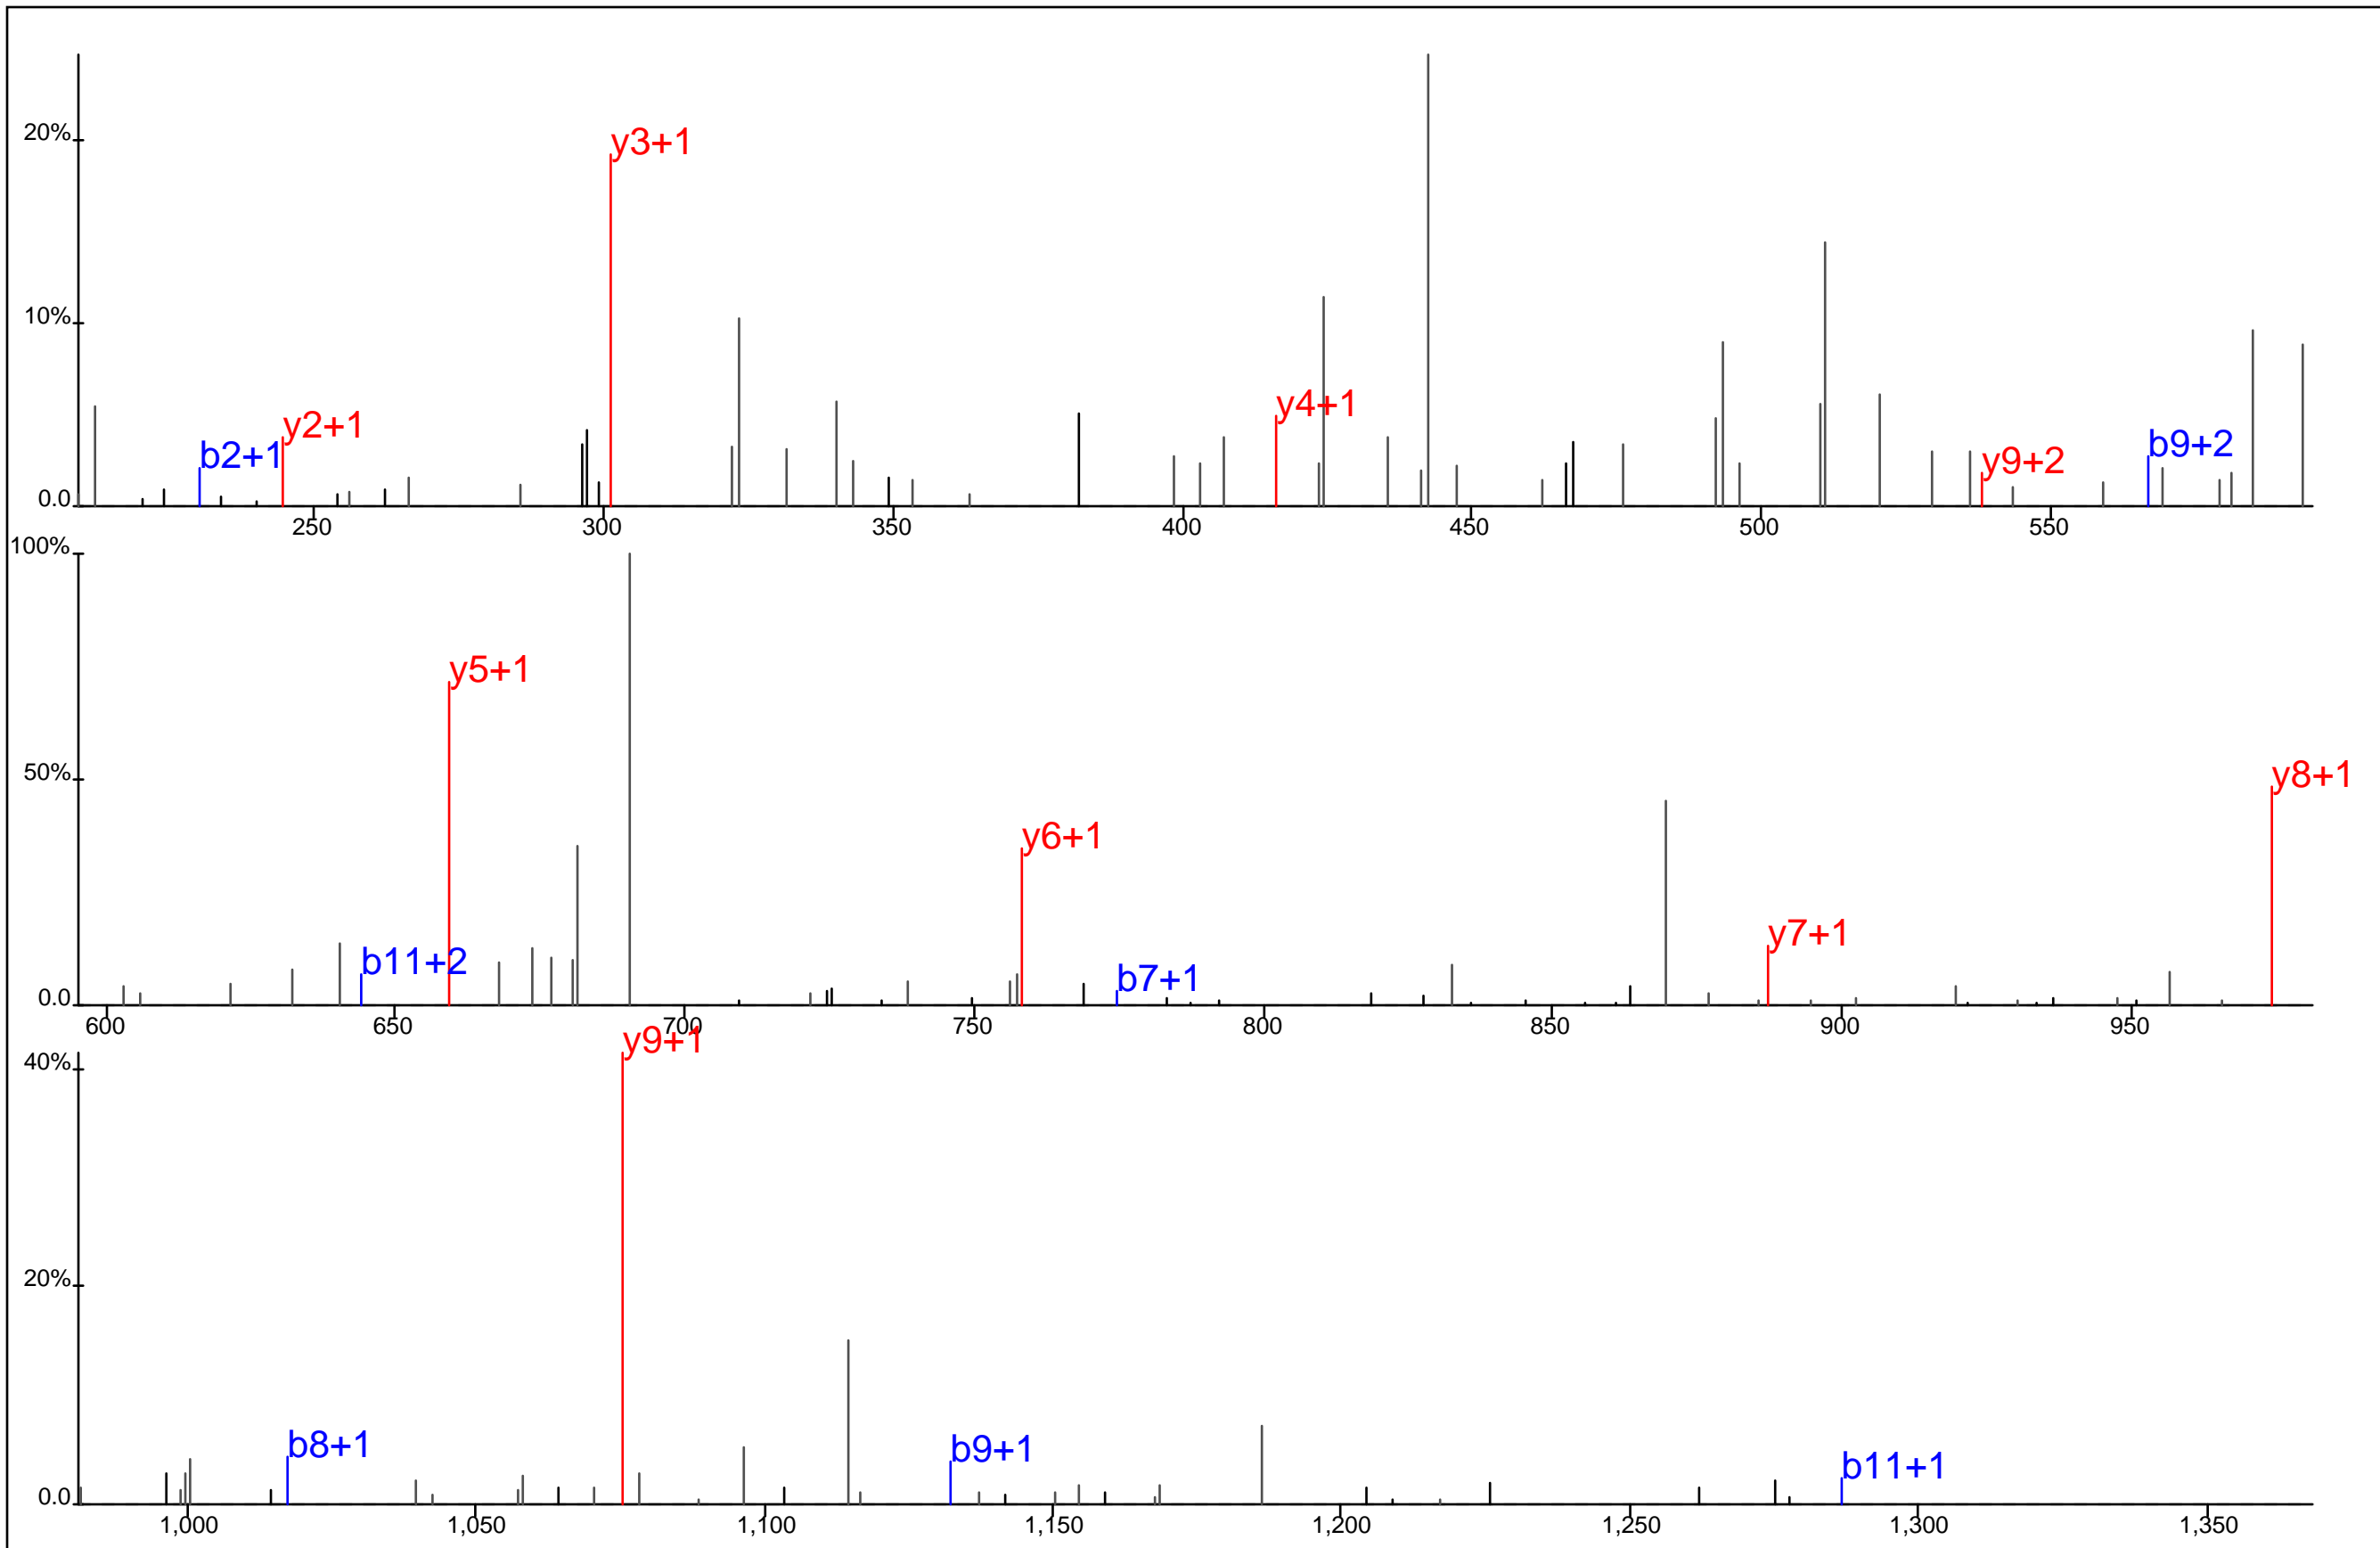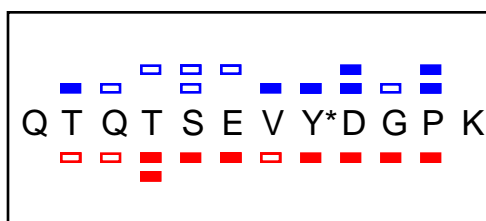

Protein Name: Pericentriolar material 1  
 gi Accession: 0  
 Precursor Mass: 716.8046+2  
 Delta Mass: 1.865 ppm  
 XCorr: 41.55



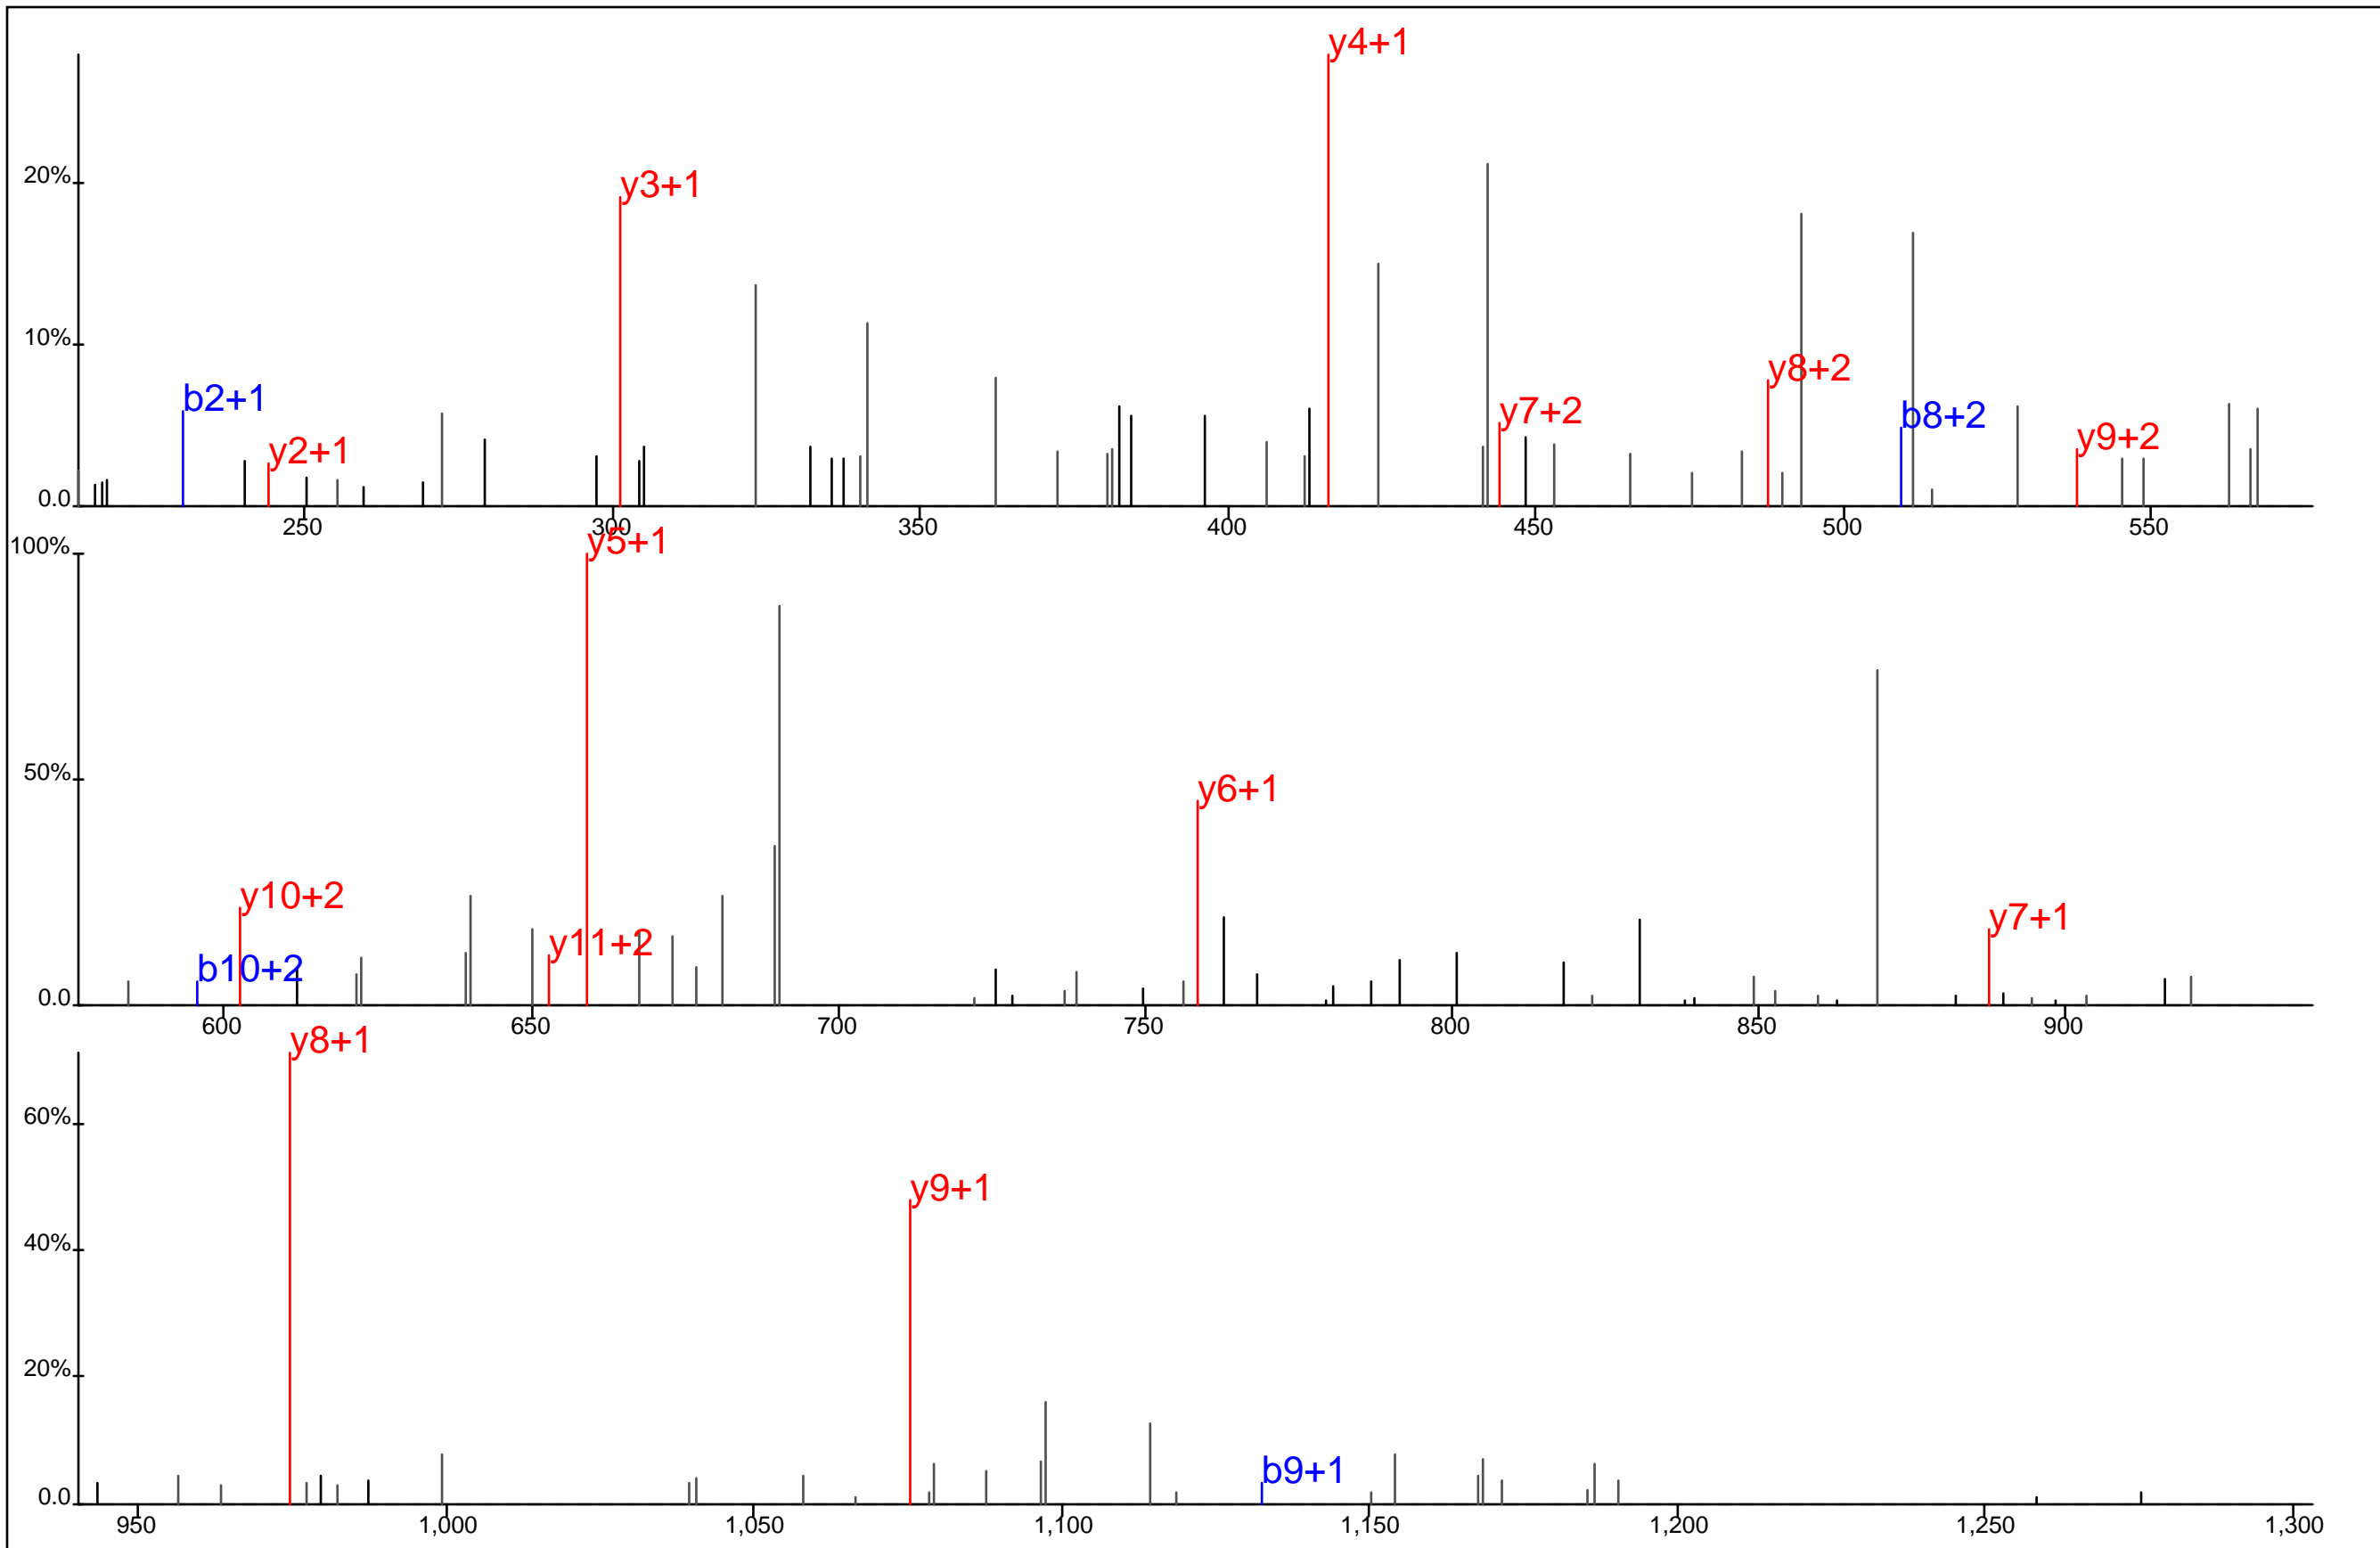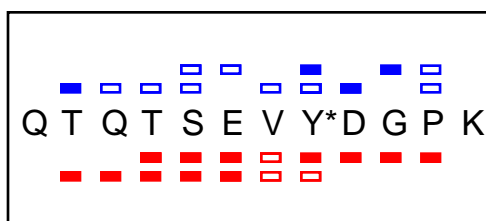

Protein Name: Pericentriolar material 1  
 gi Accession: 0  
 Precursor Mass: 716.8046+2  
 Delta Mass: 1.950 ppm  
 XCorr: 41.1

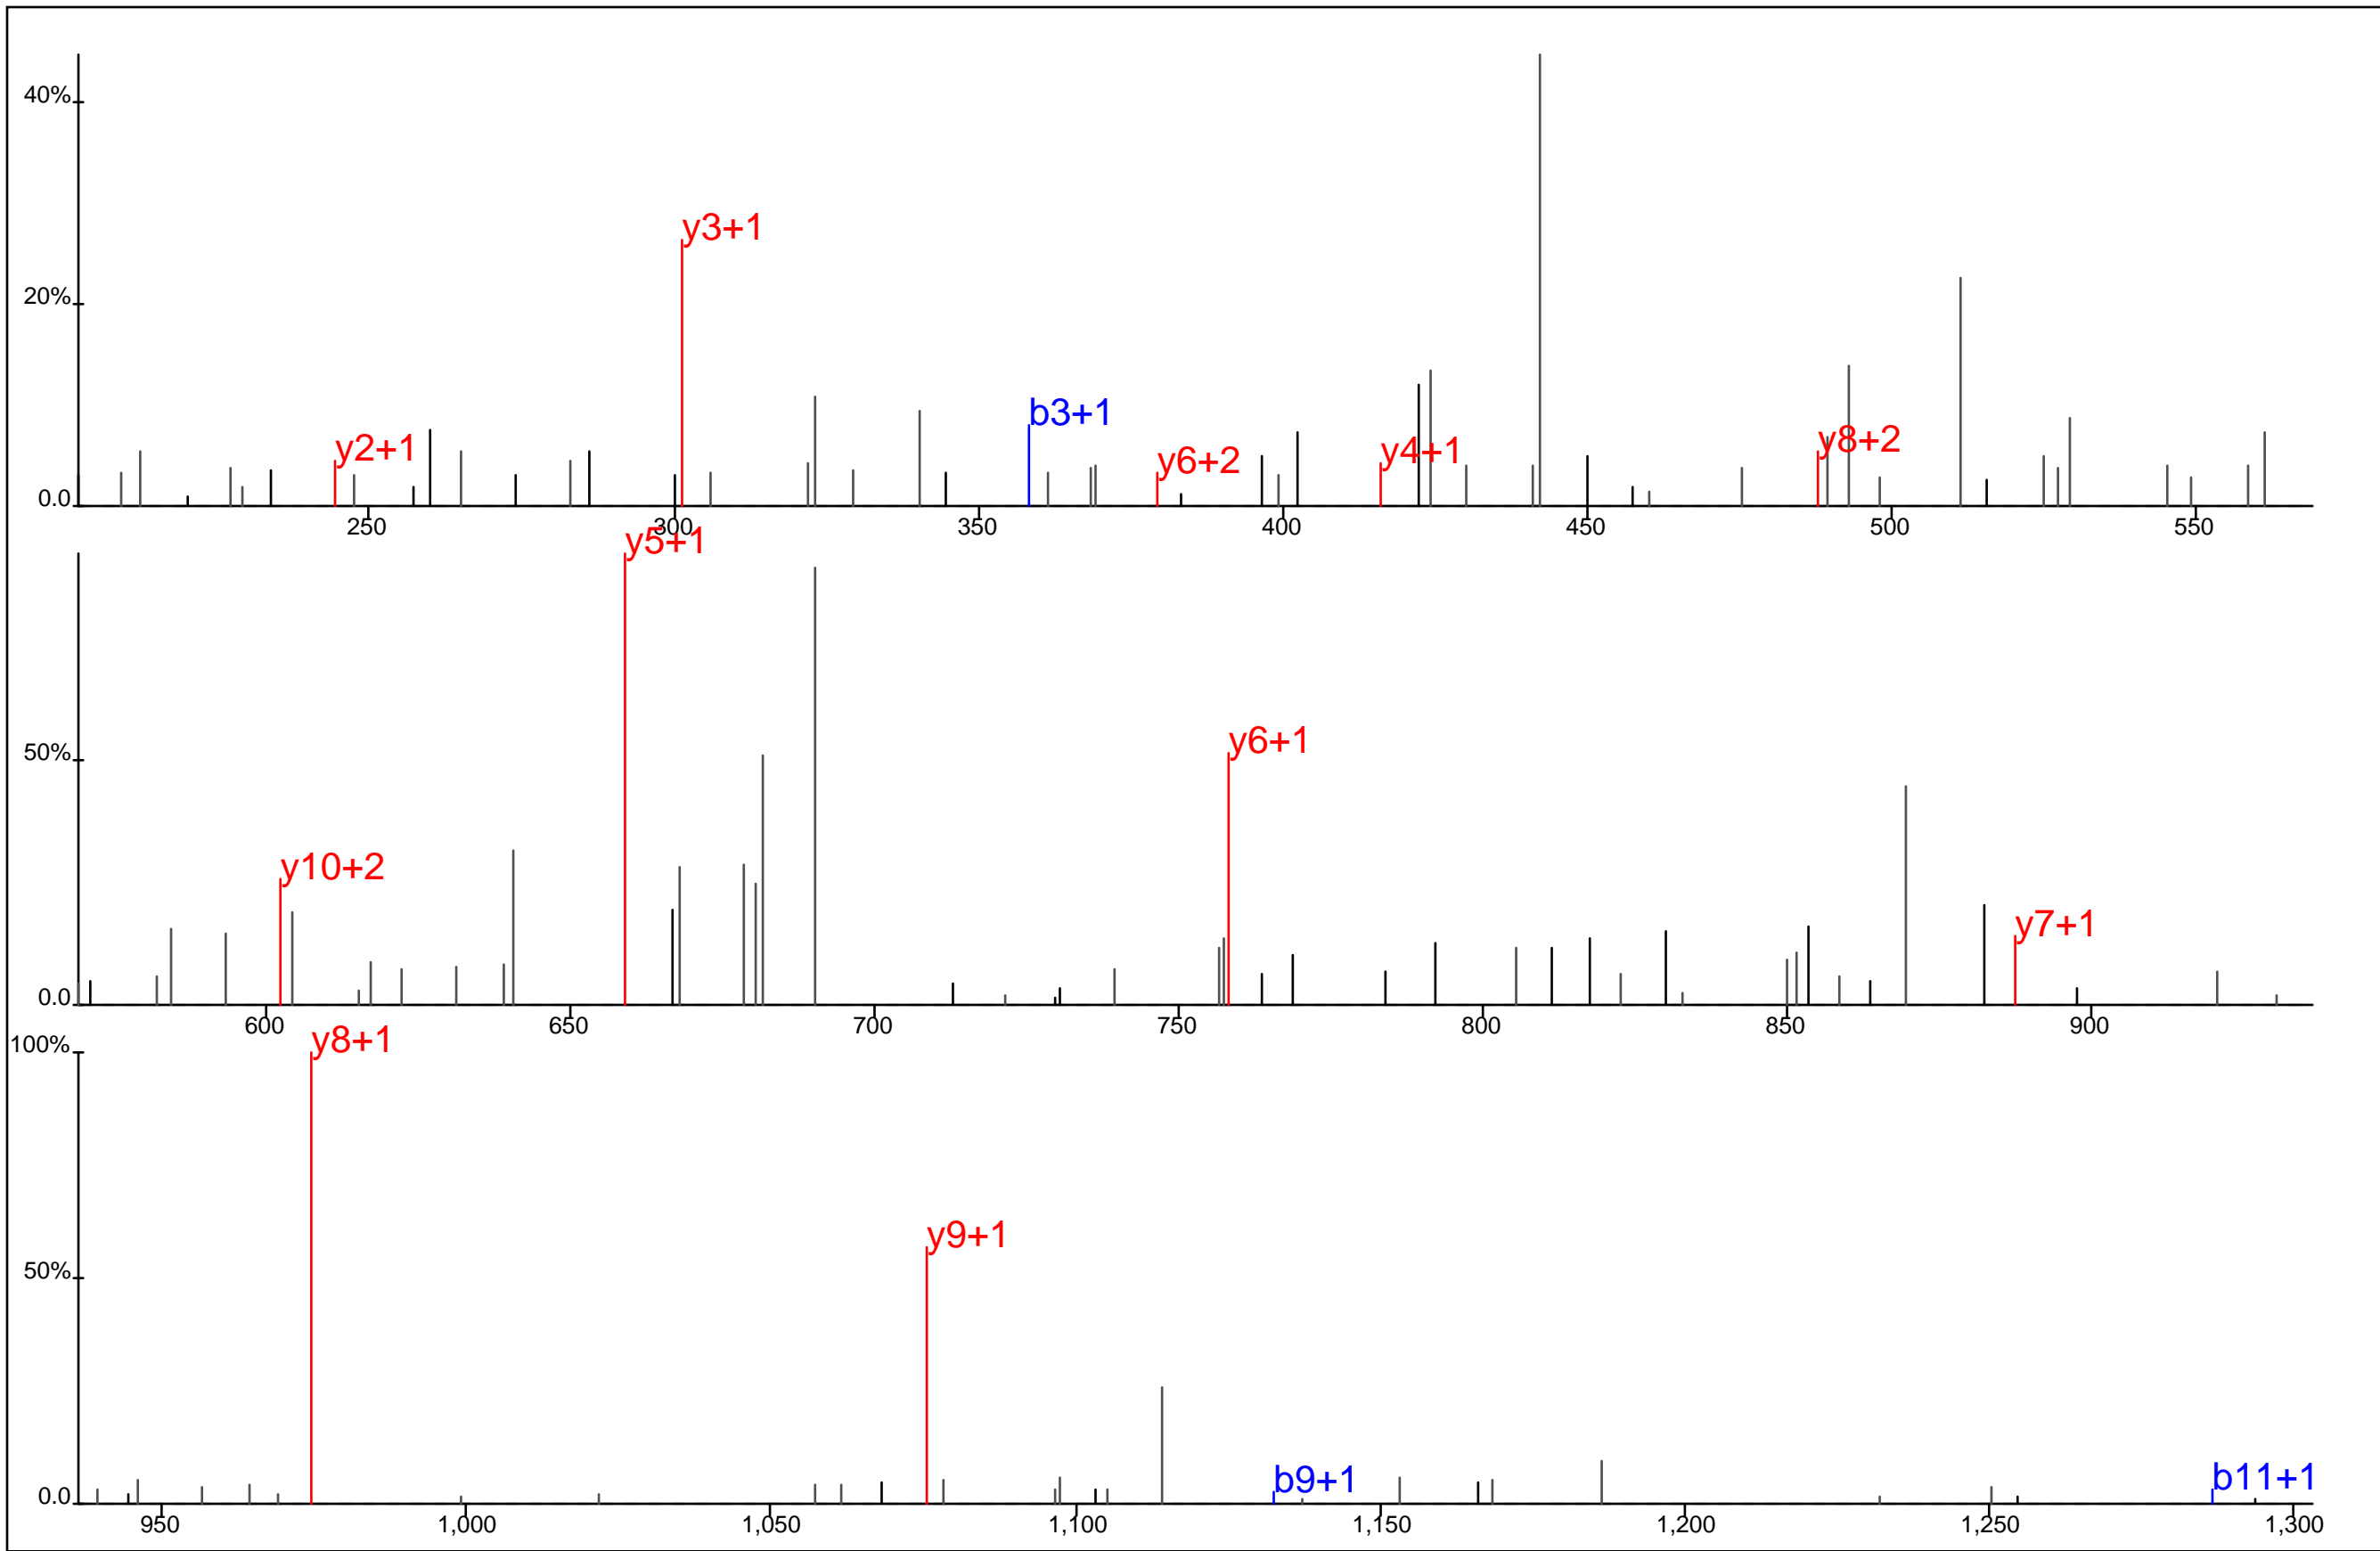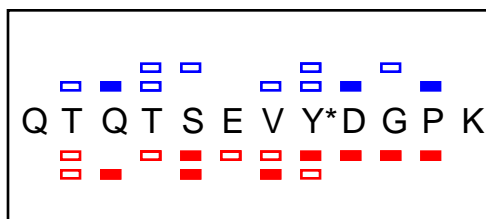

Protein Name: Pericentriolar material 1  
 gi Accession: 0  
 Precursor Mass: 716.8026+2  
 Delta Mass: 0.861 ppm  
 XCorr: 26.12

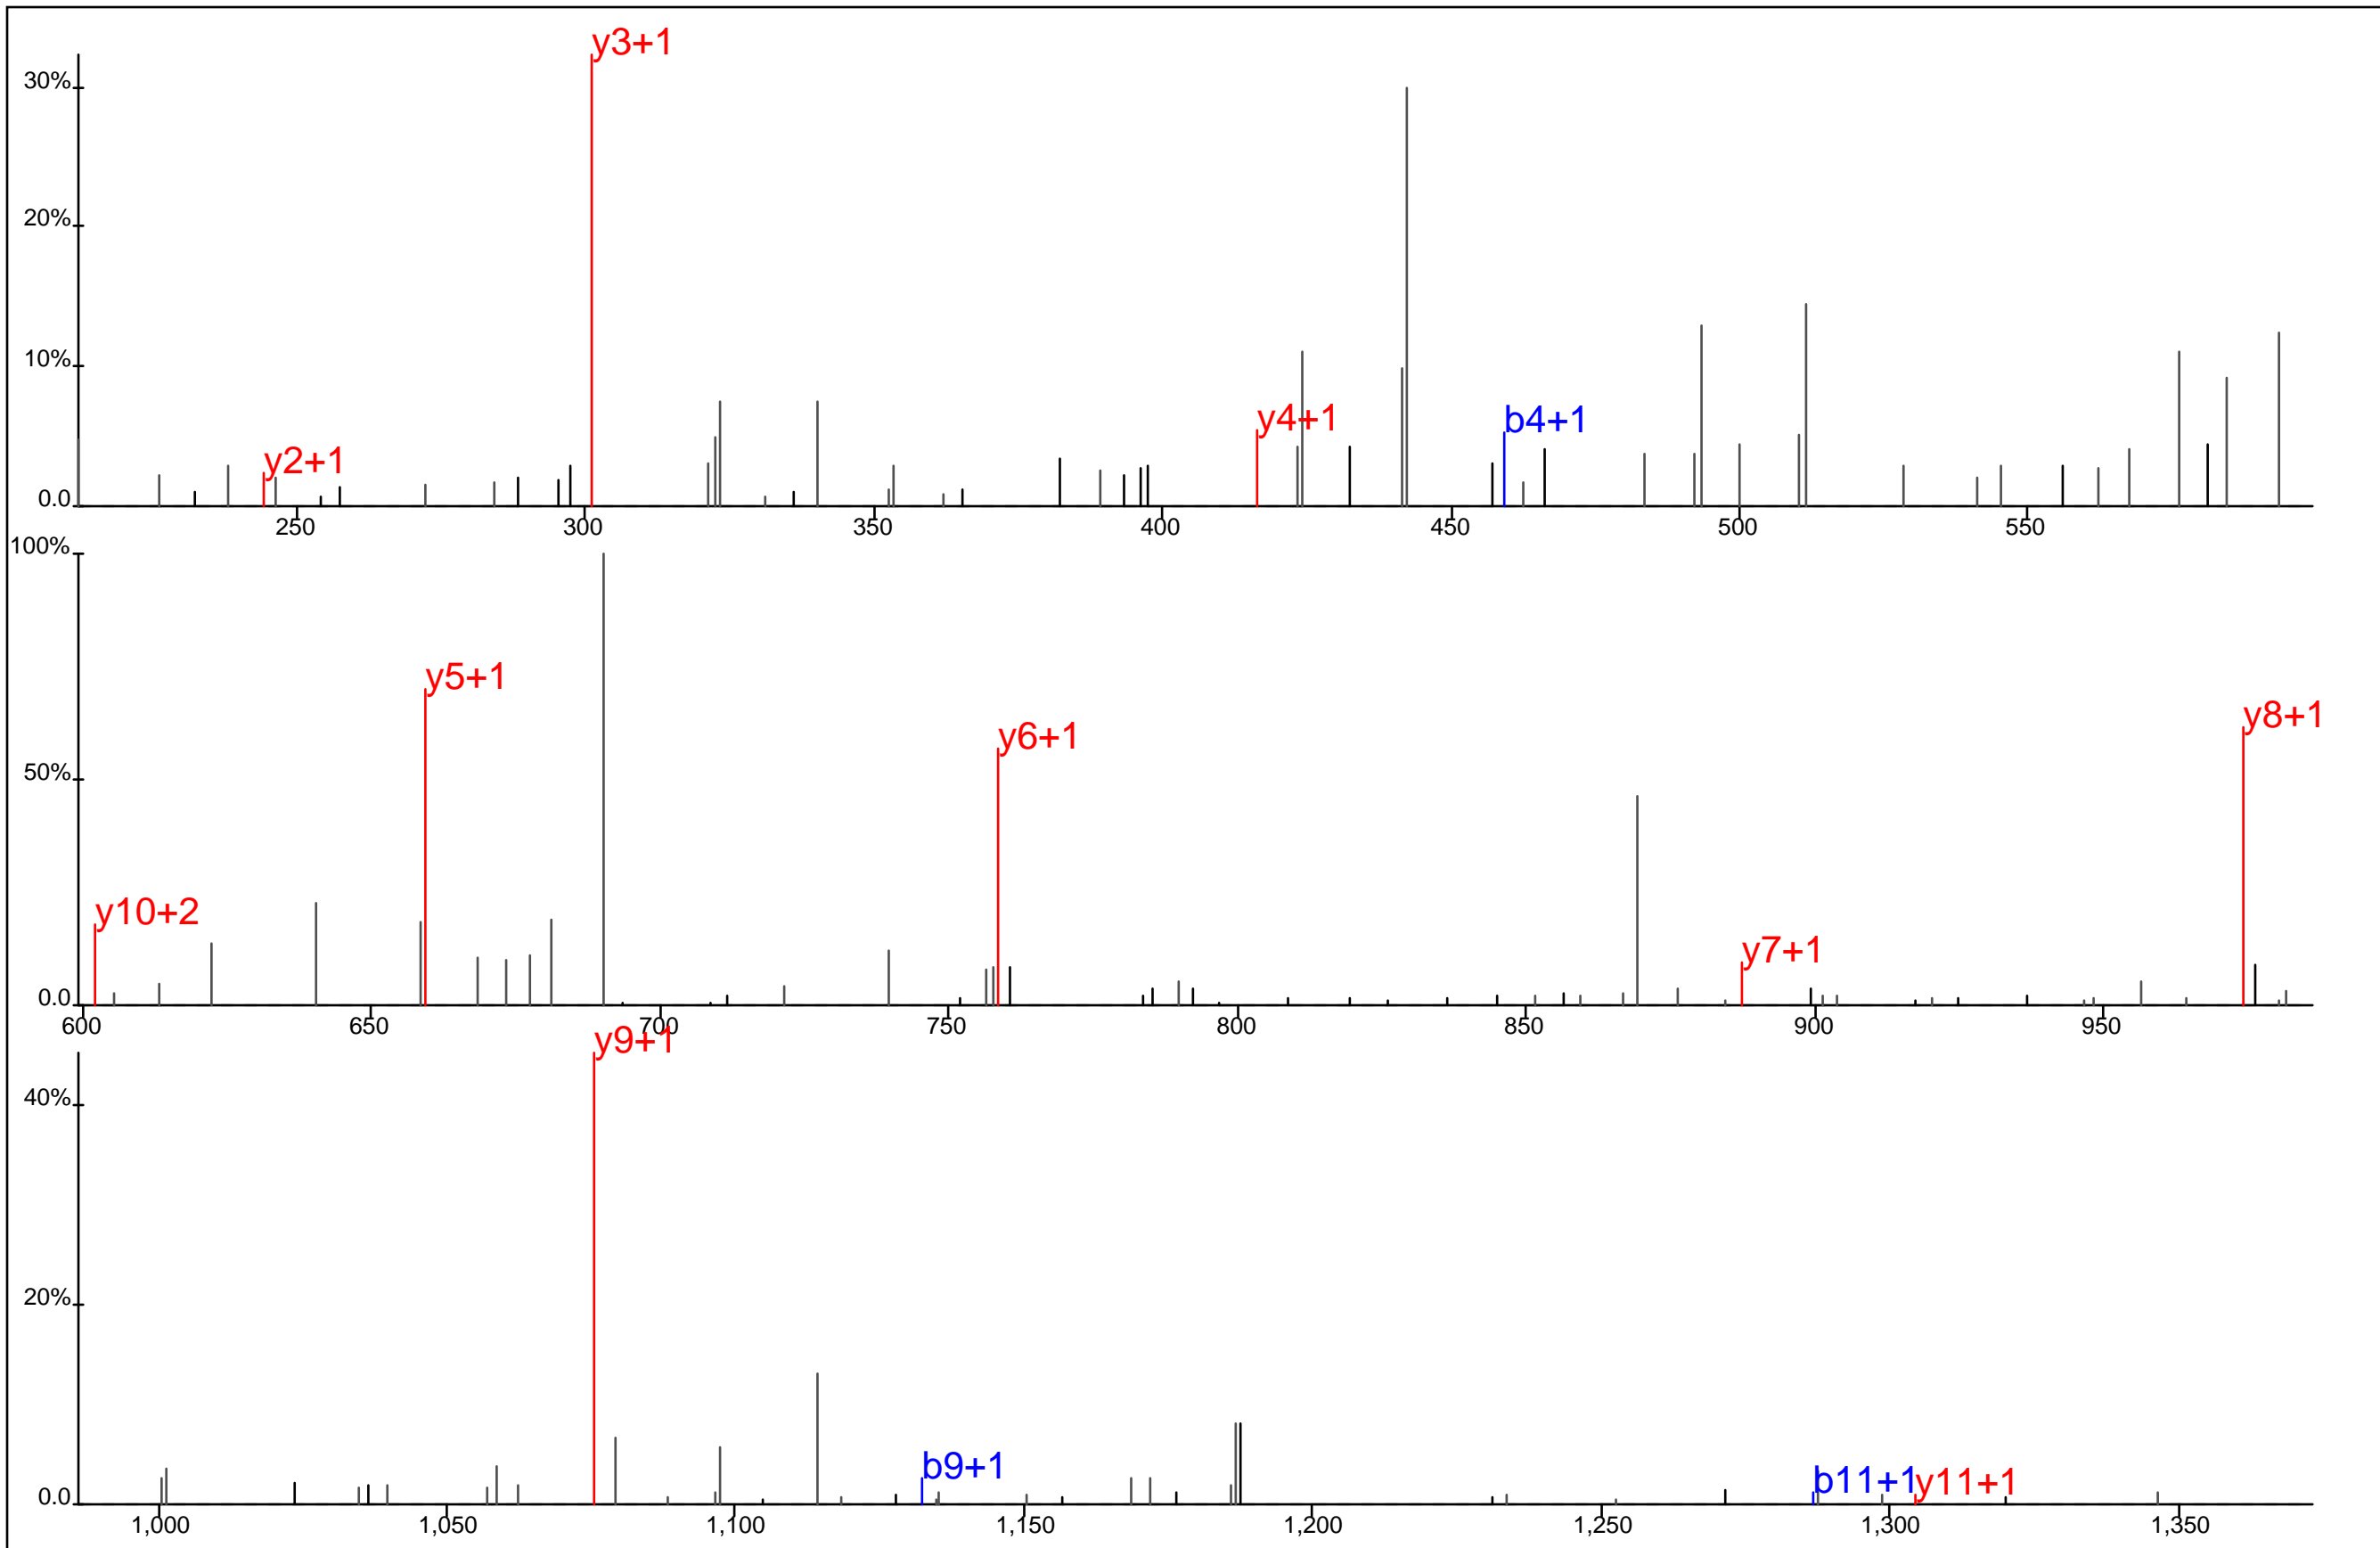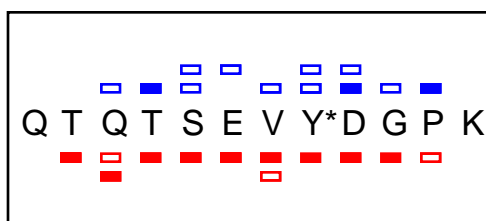

Protein Name: Pericentriolar material 1  
 gi Accession: 0  
 Precursor Mass: 716.8023+2  
 Delta Mass: 1.287 ppm  
 XCorr: 37.55



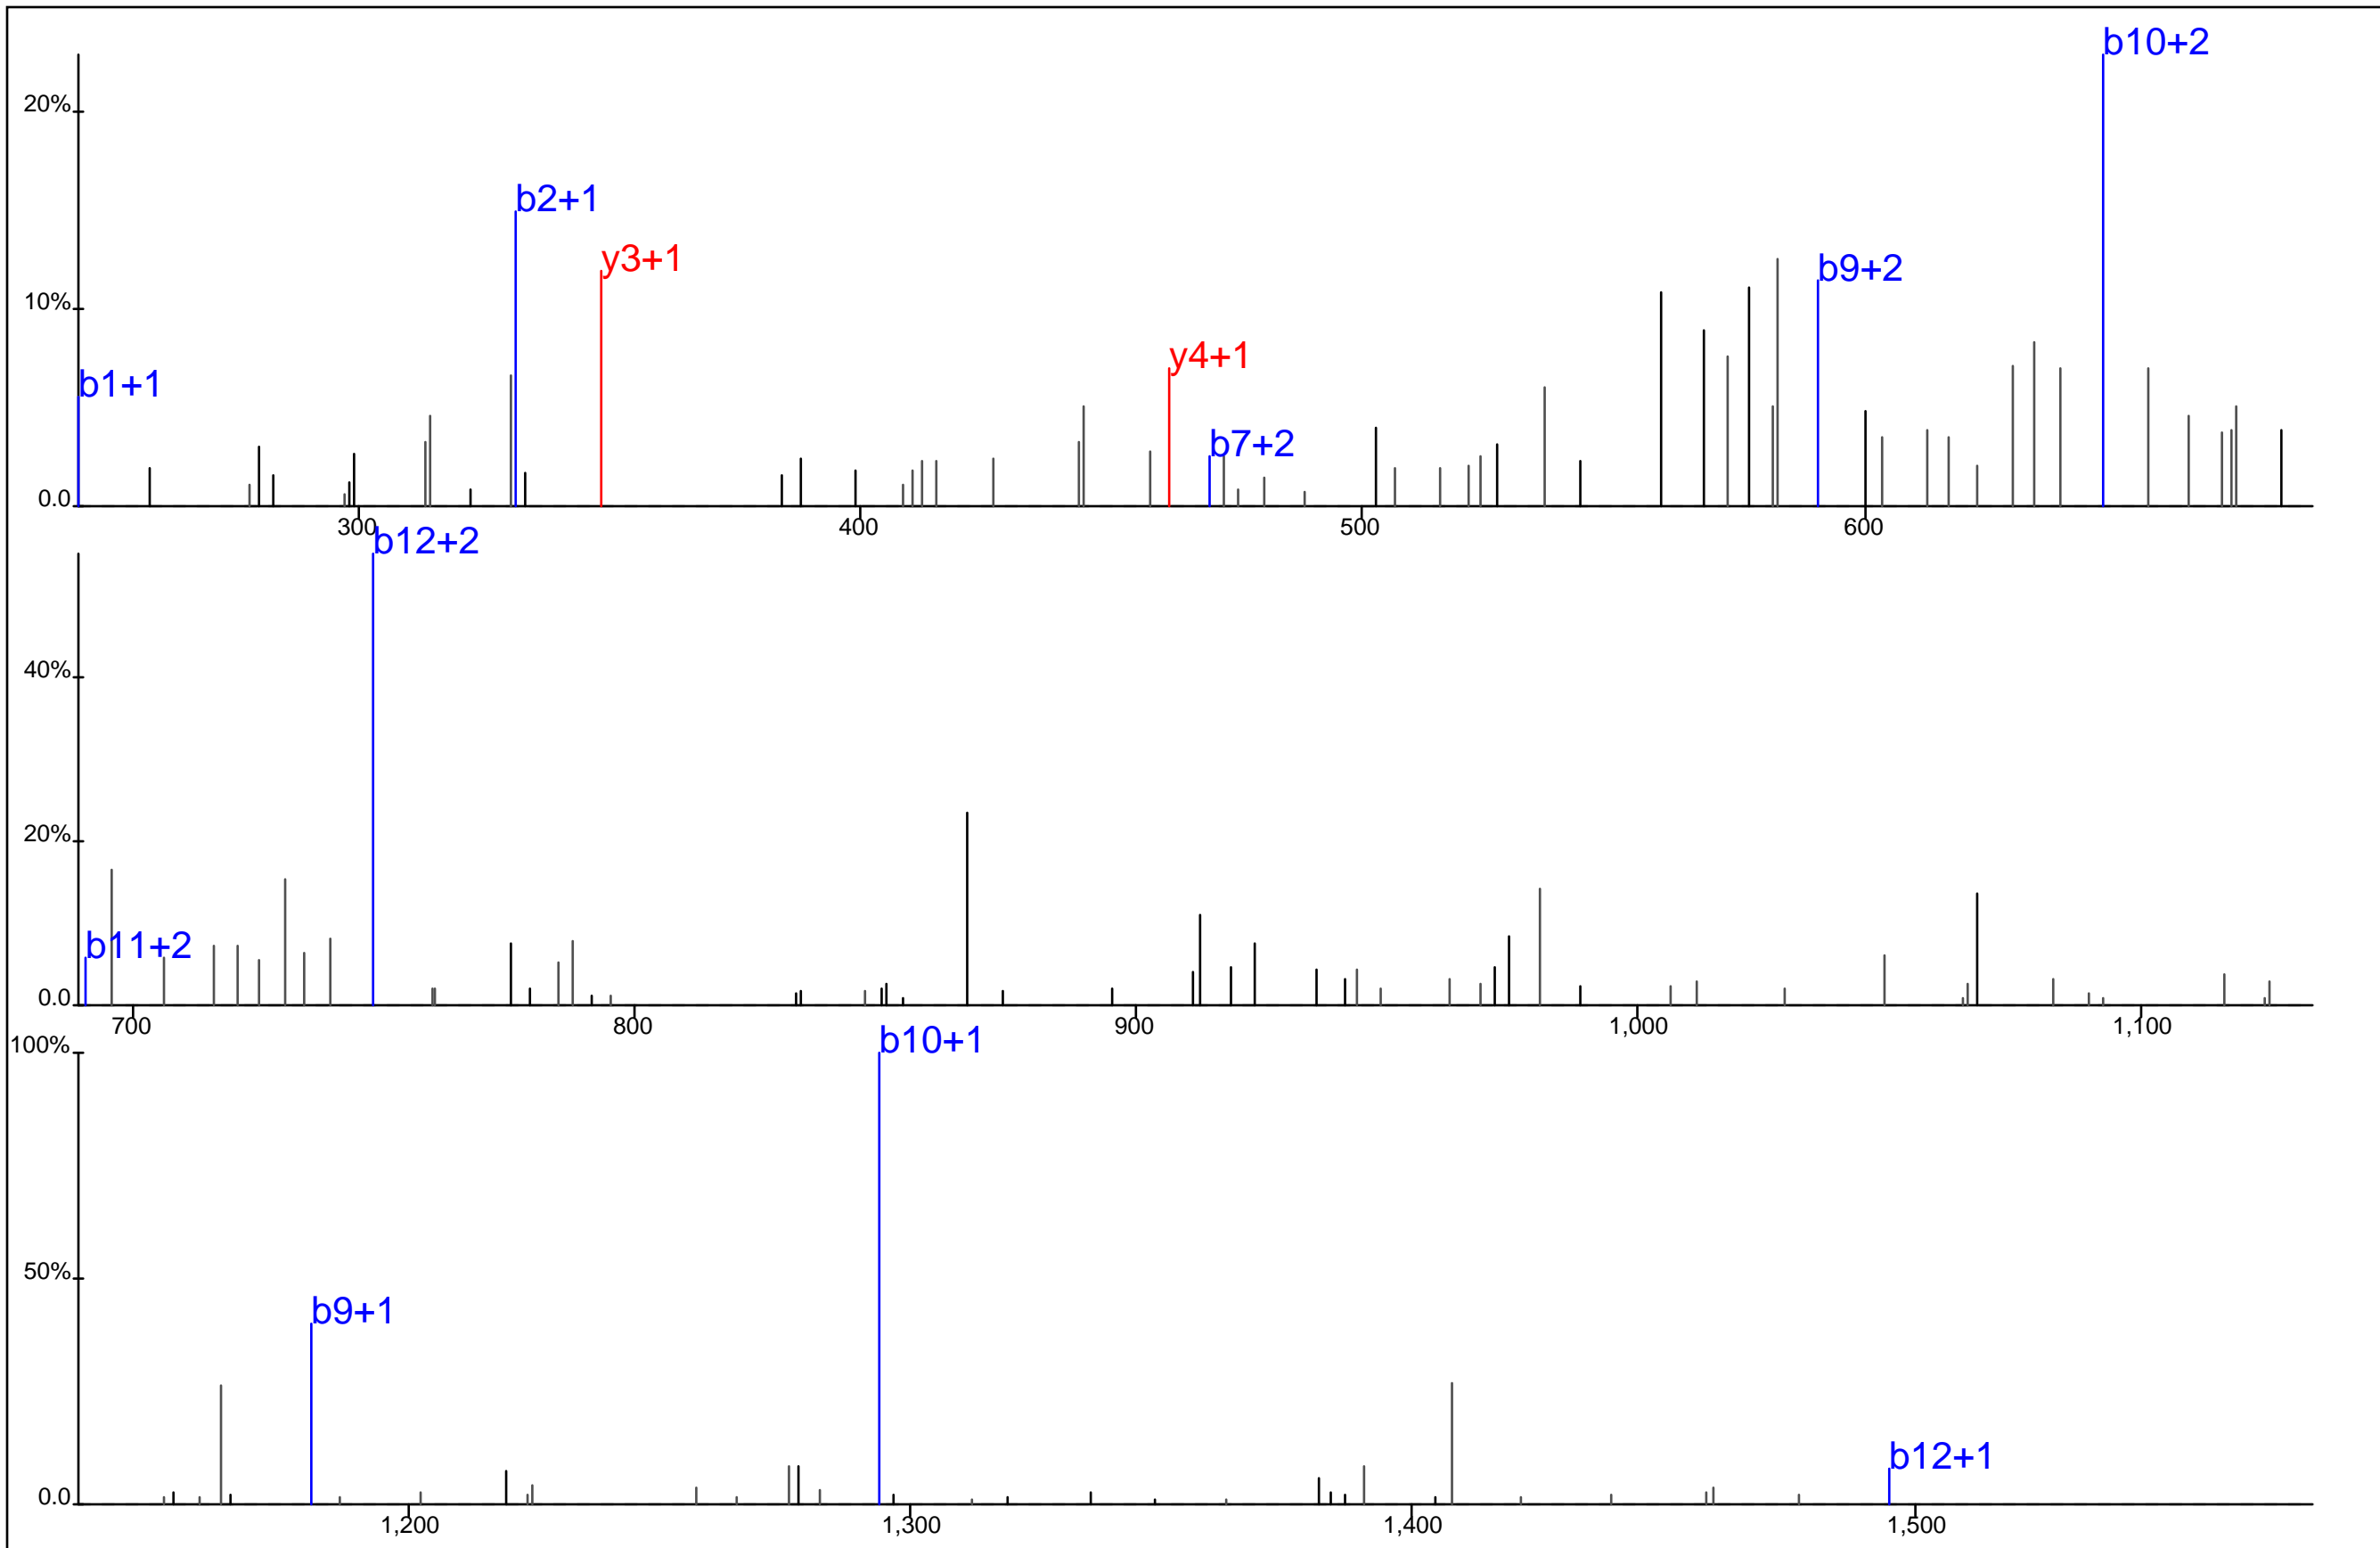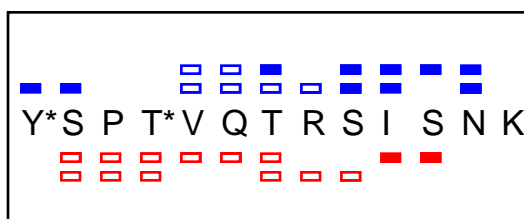

Protein Name: Periplakin  
 gi Accession: 0  
 Precursor Mass: 820.8588+2  
 Delta Mass: 1.410 ppm  
 XCorr: 20.51

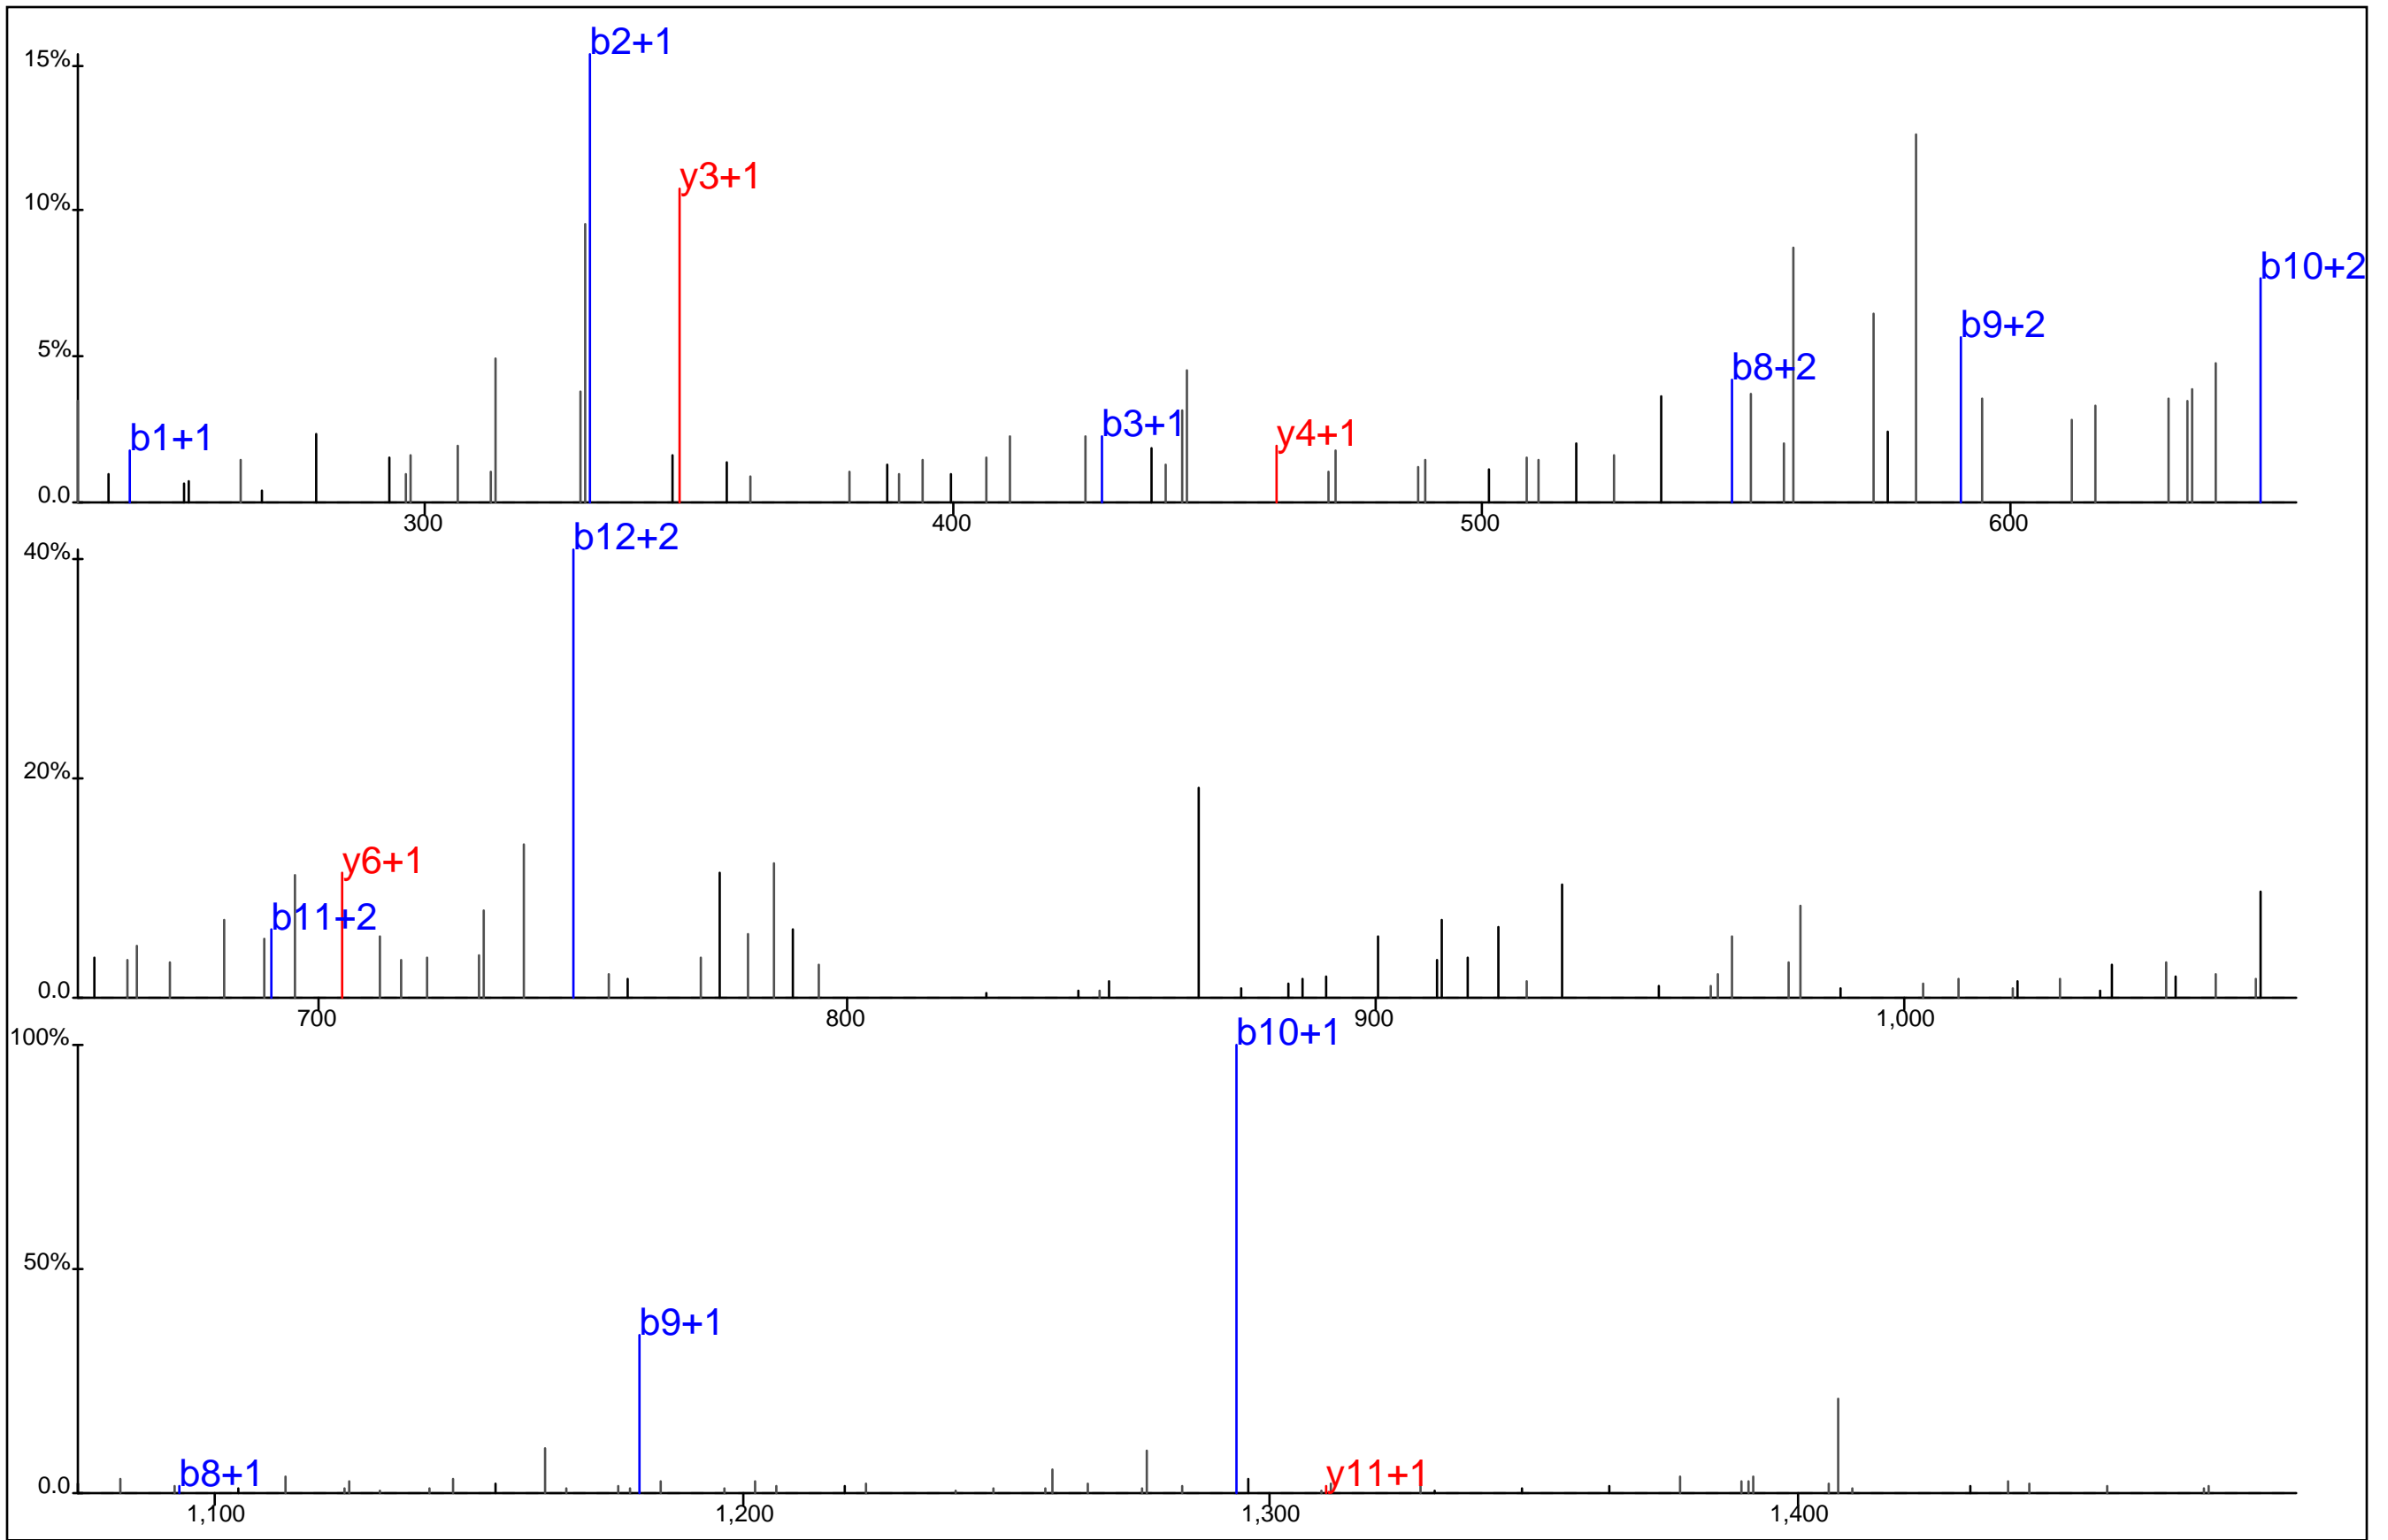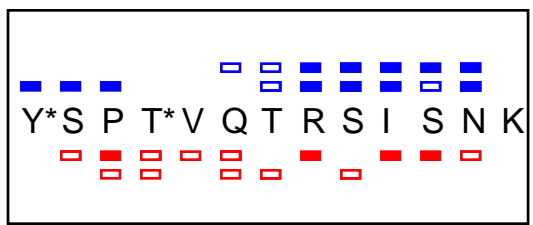

Protein Name: Periplakin  
 gi Accession: 0  
 Precursor Mass: 820.8586+2  
 Delta Mass: 1.113 ppm  
 XCorr: 21.26

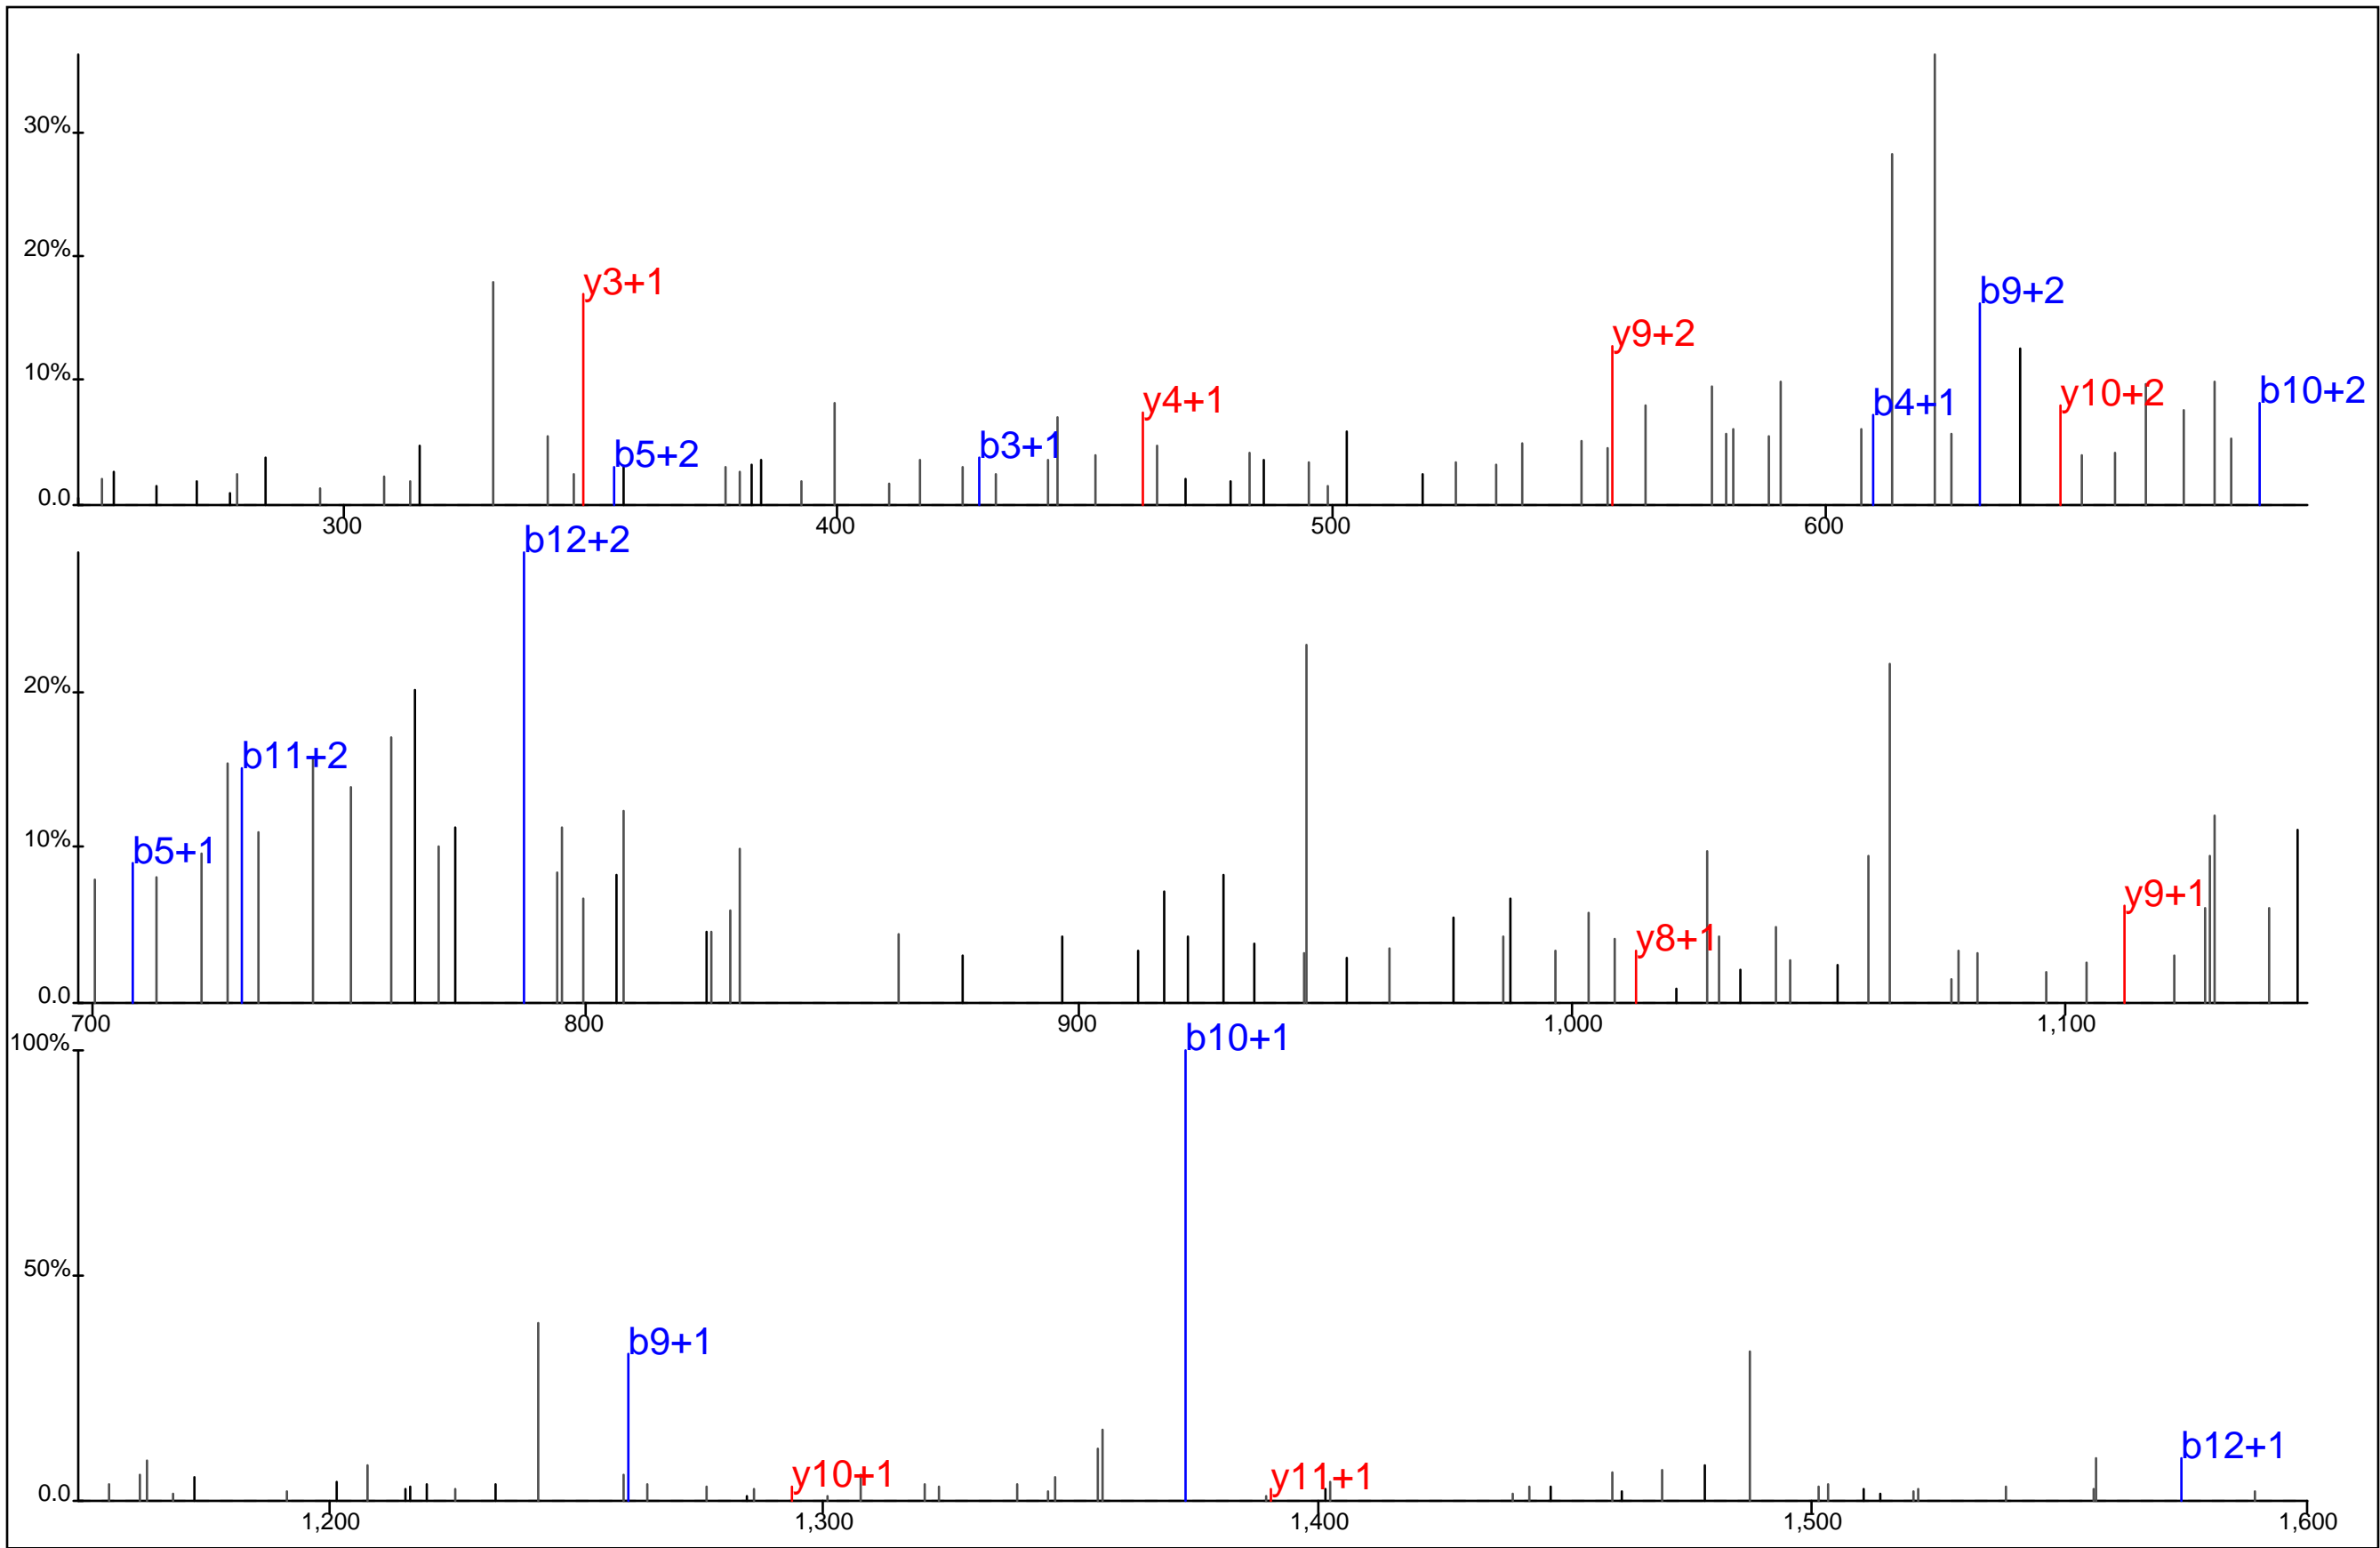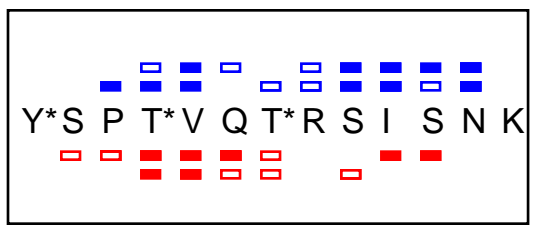

Protein Name: Periplakin  
 gi Accession: 0  
 Precursor Mass: 860.8420+2  
 Delta Mass: 1.403 ppm  
 XCorr: 20.06

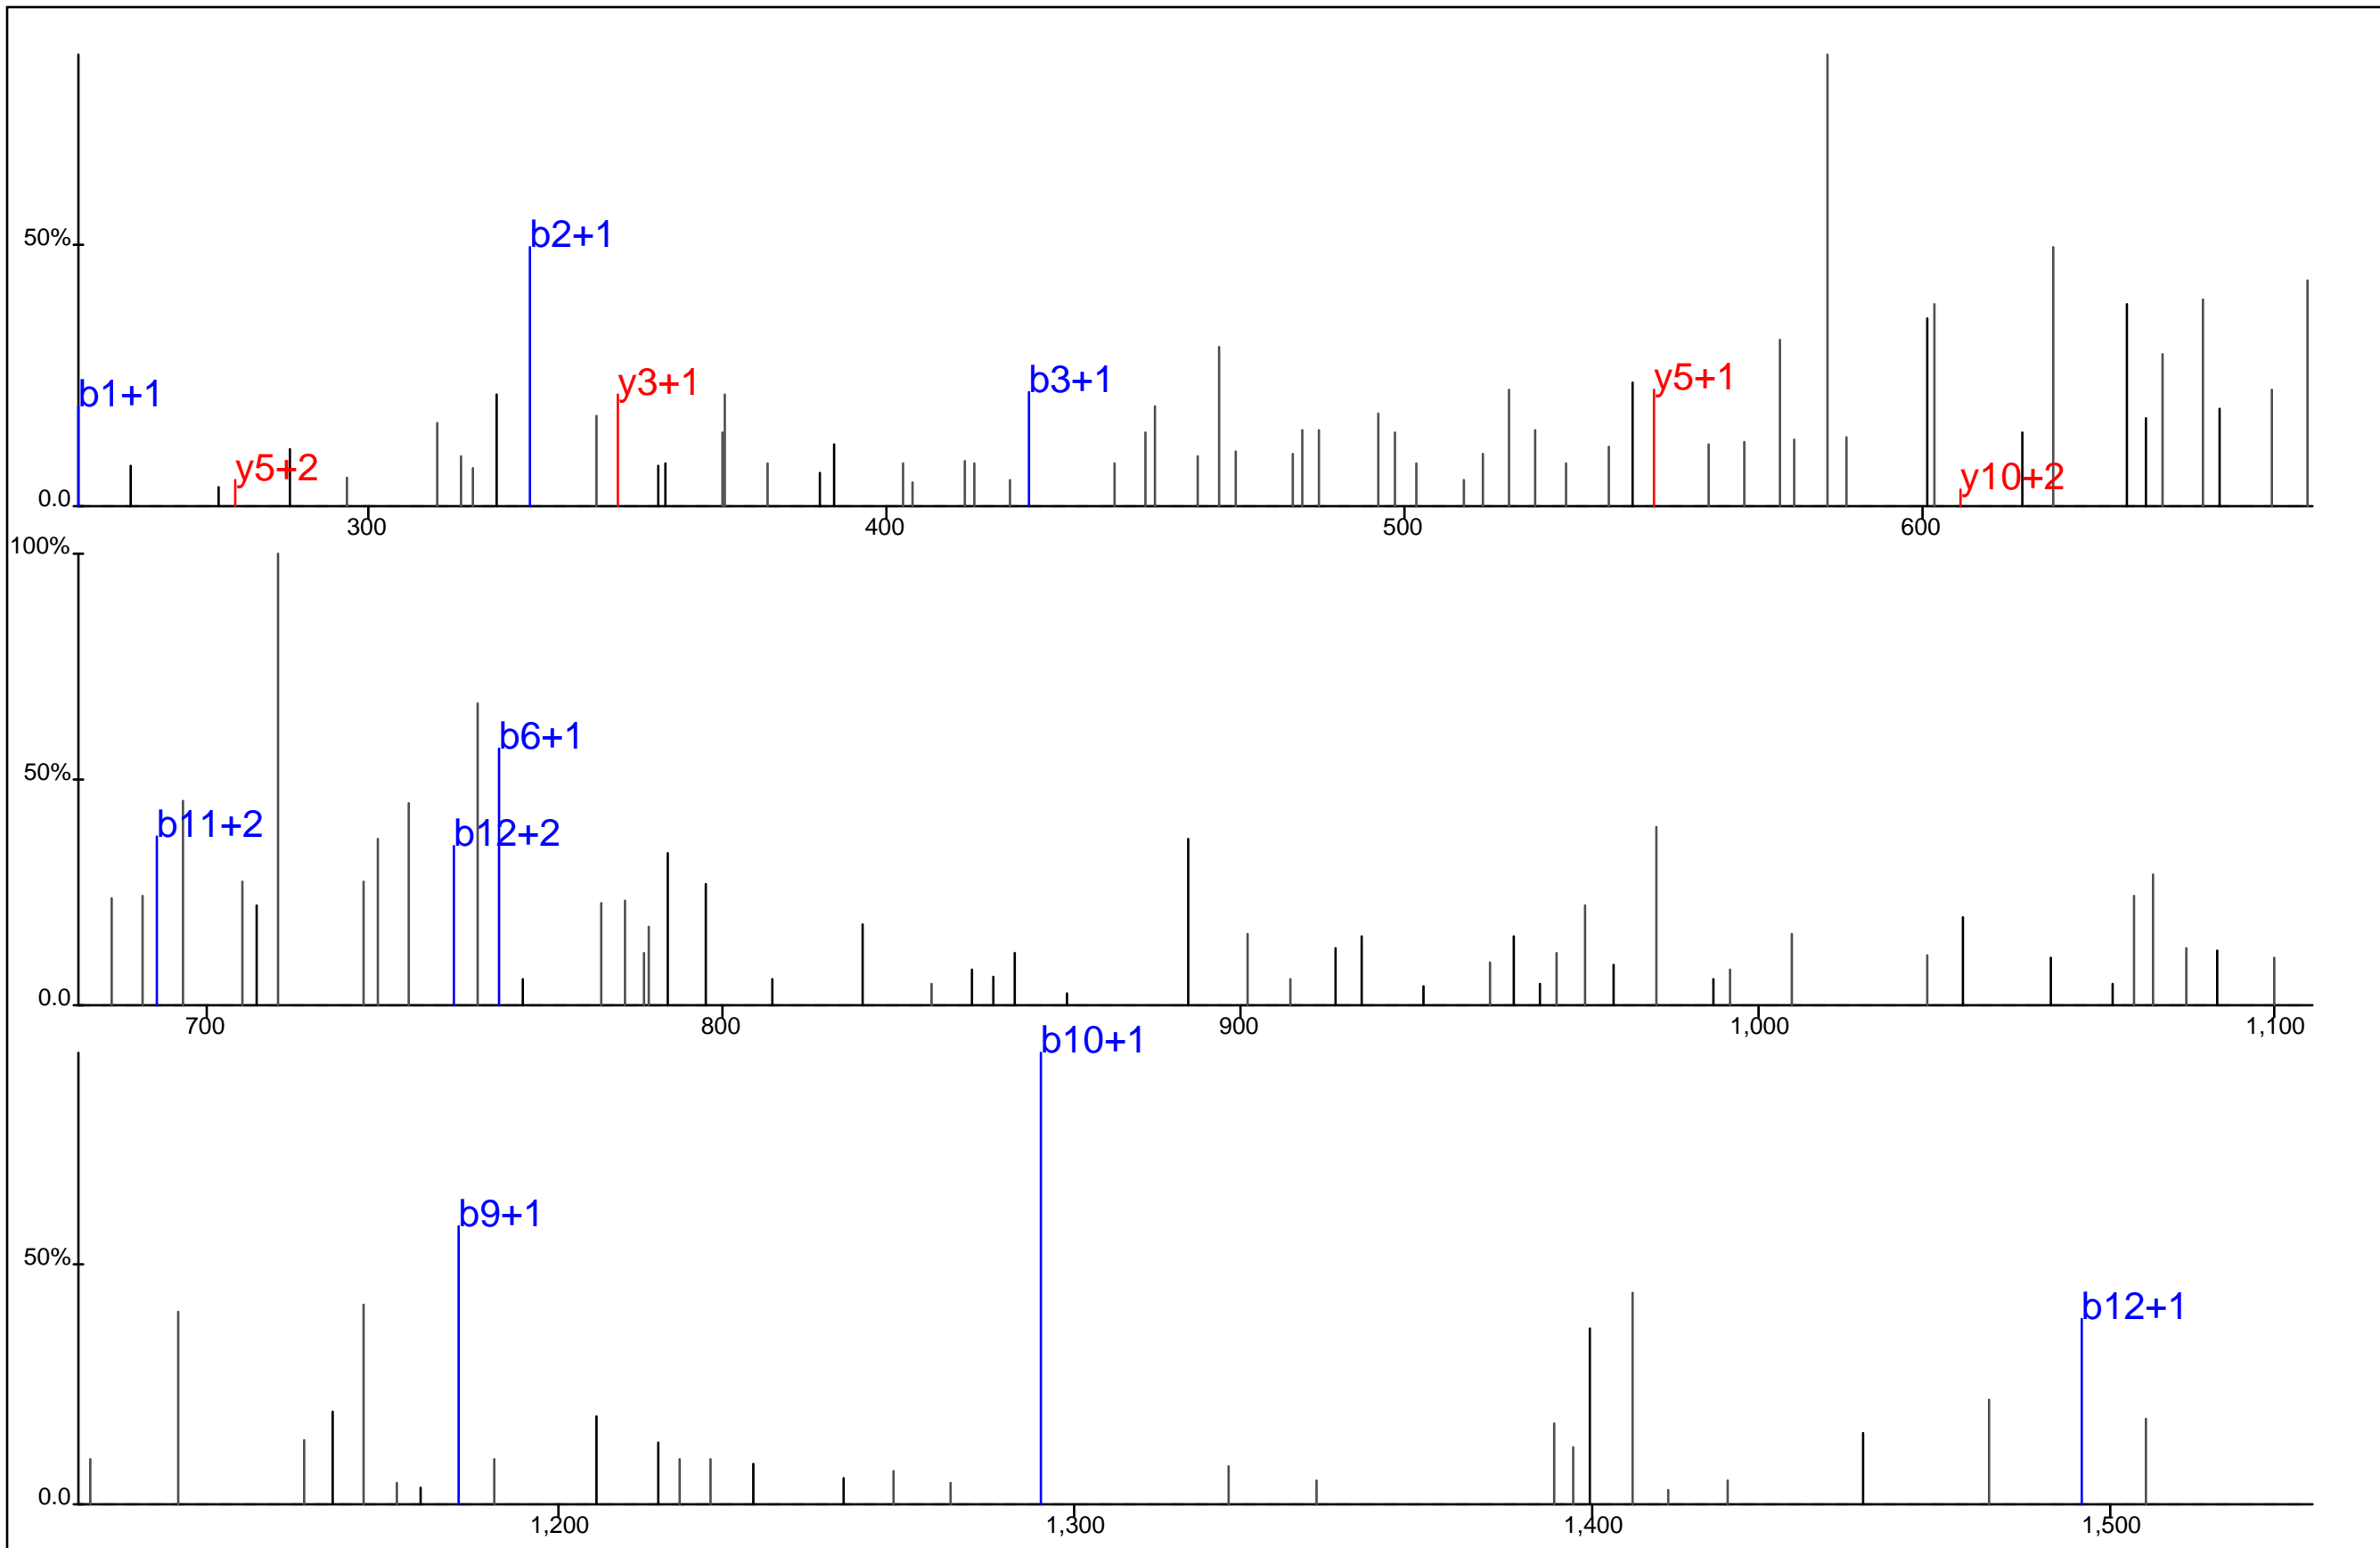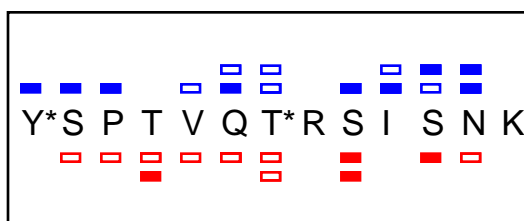

Protein Name: Periplakin  
 gi Accession: 0  
 Precursor Mass: 820.8604+2  
 Delta Mass: 3.271 ppm  
 XCorr: 22.62

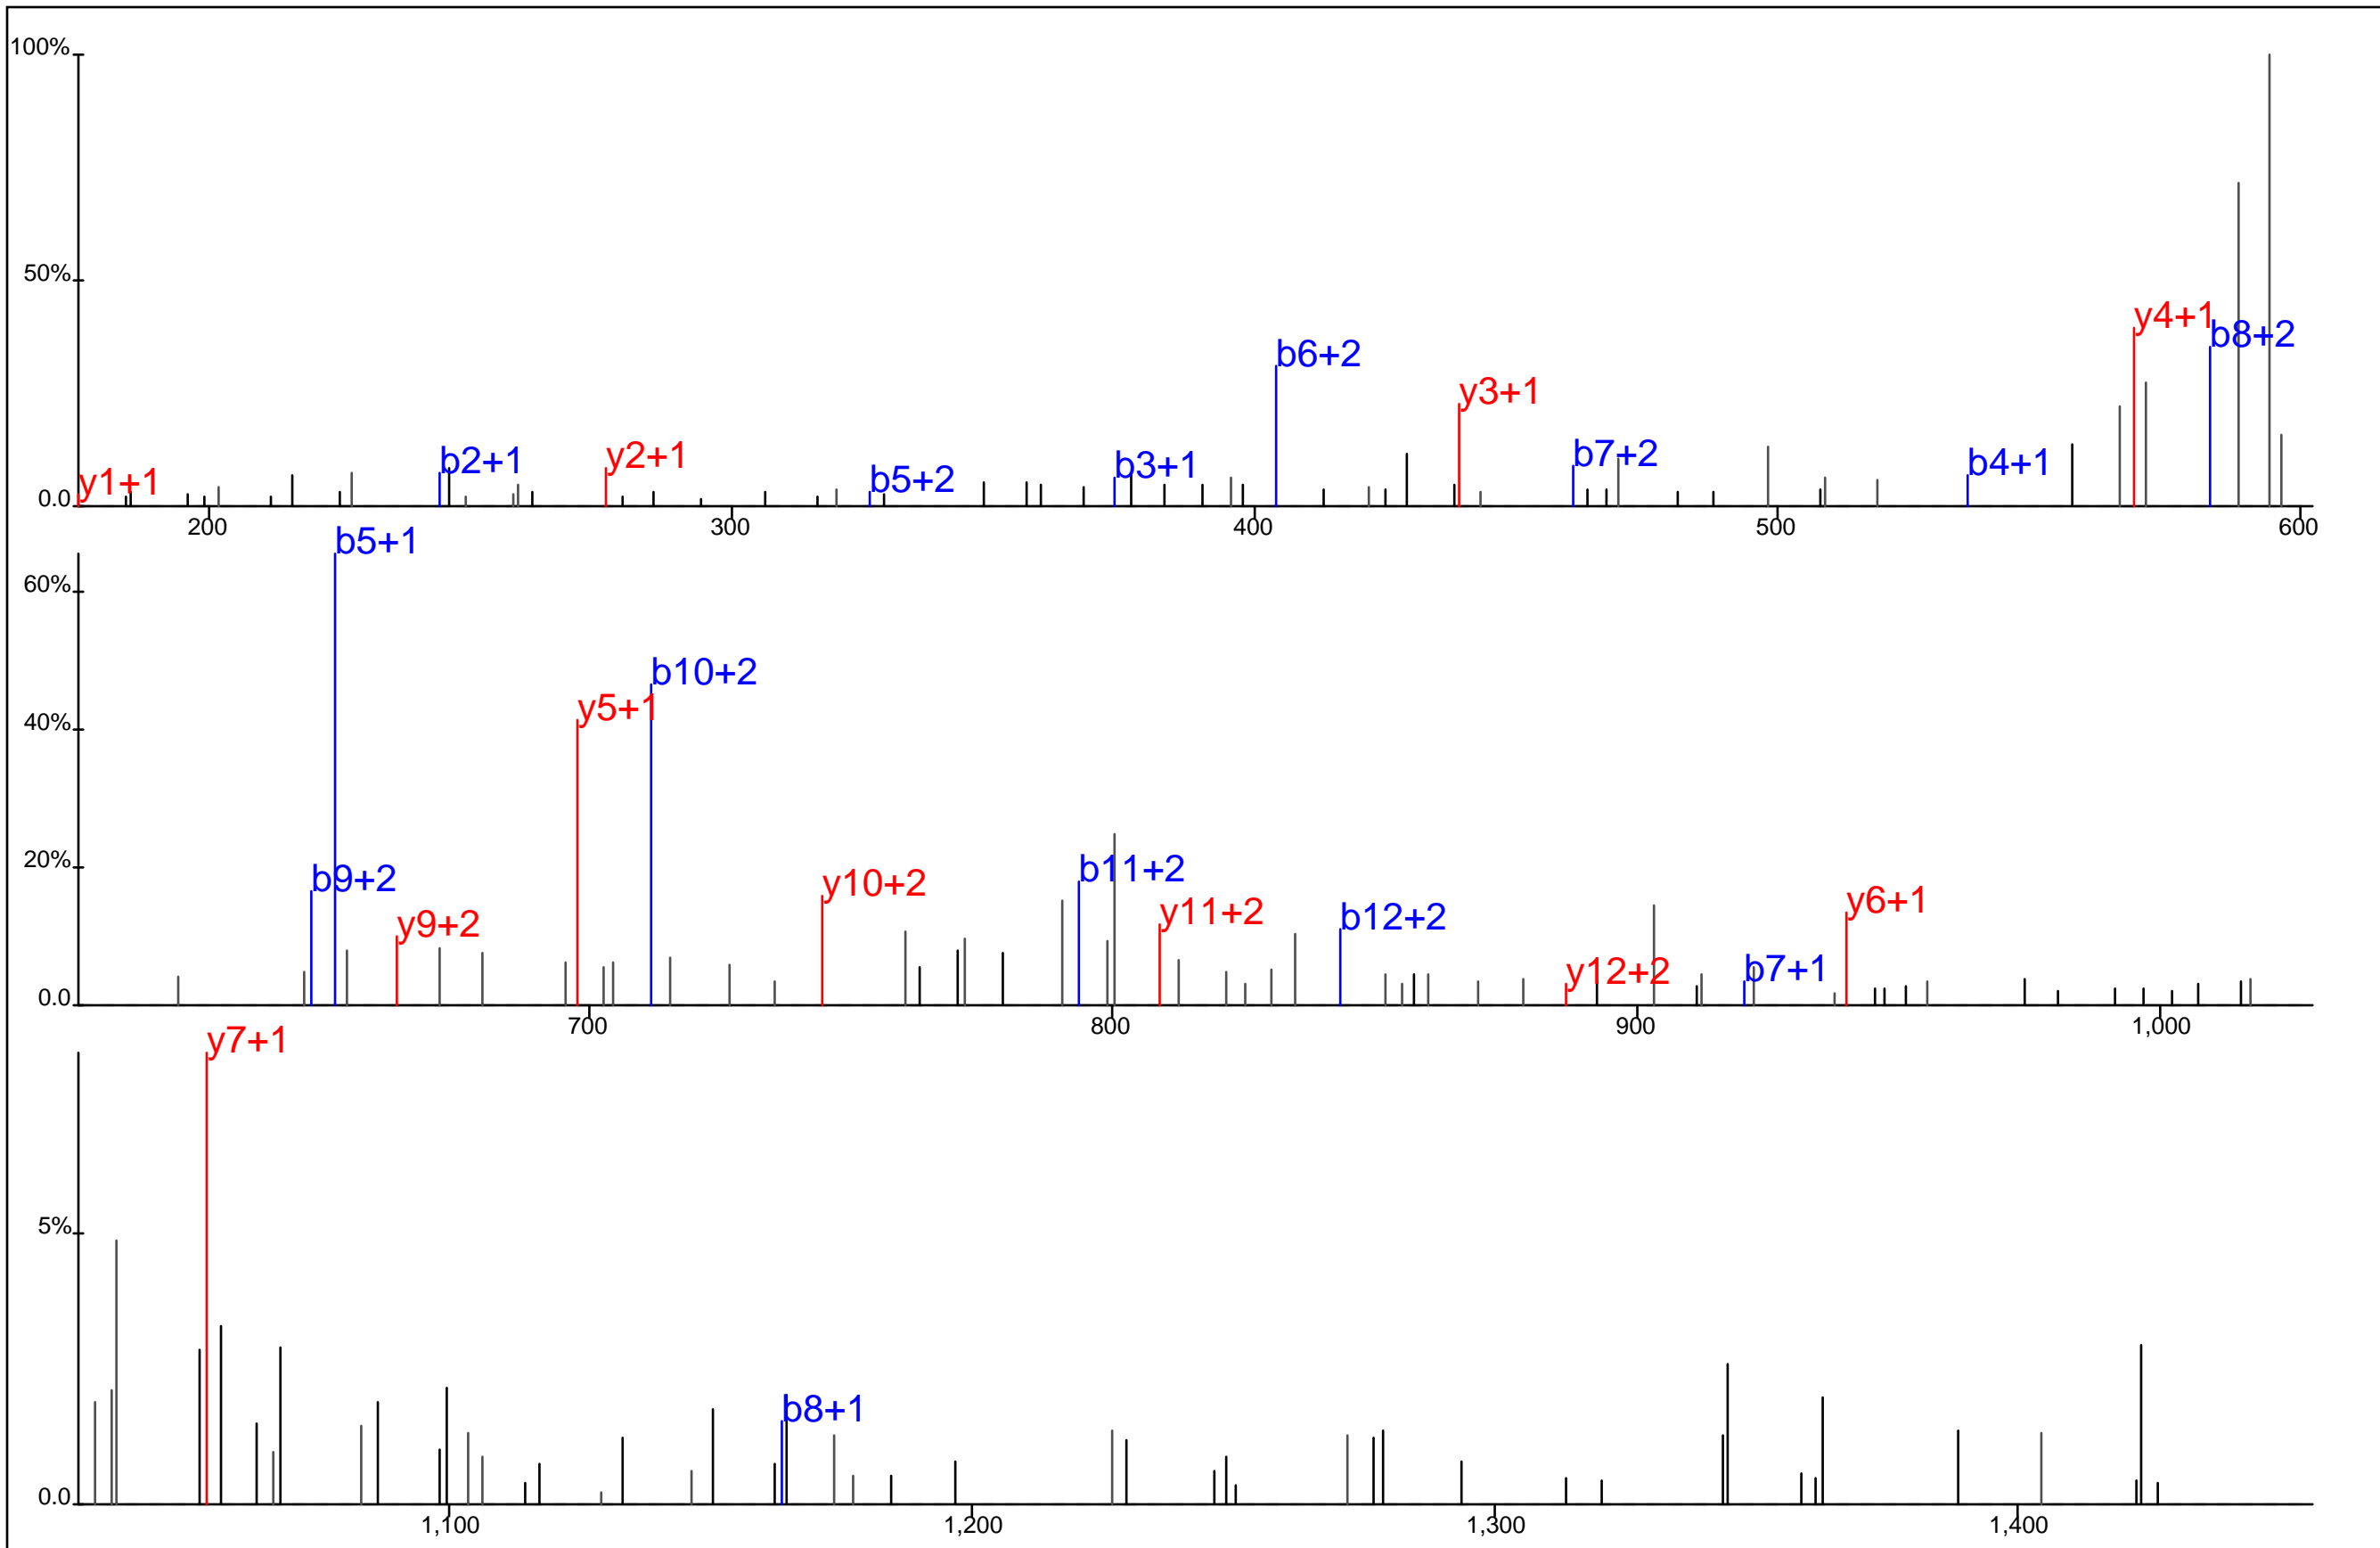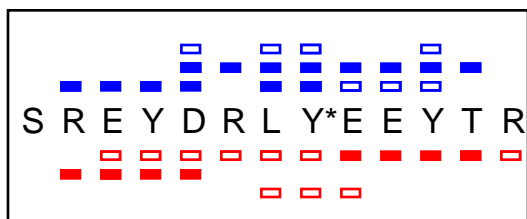

Protein Name: Phosphatidylinositol 3 kinase regulatory subunit, alpha  
 gi Accession: 0  
 Precursor Mass: 620.6042+3  
 Delta Mass: 1.117 ppm  
 XCorr: 27.83

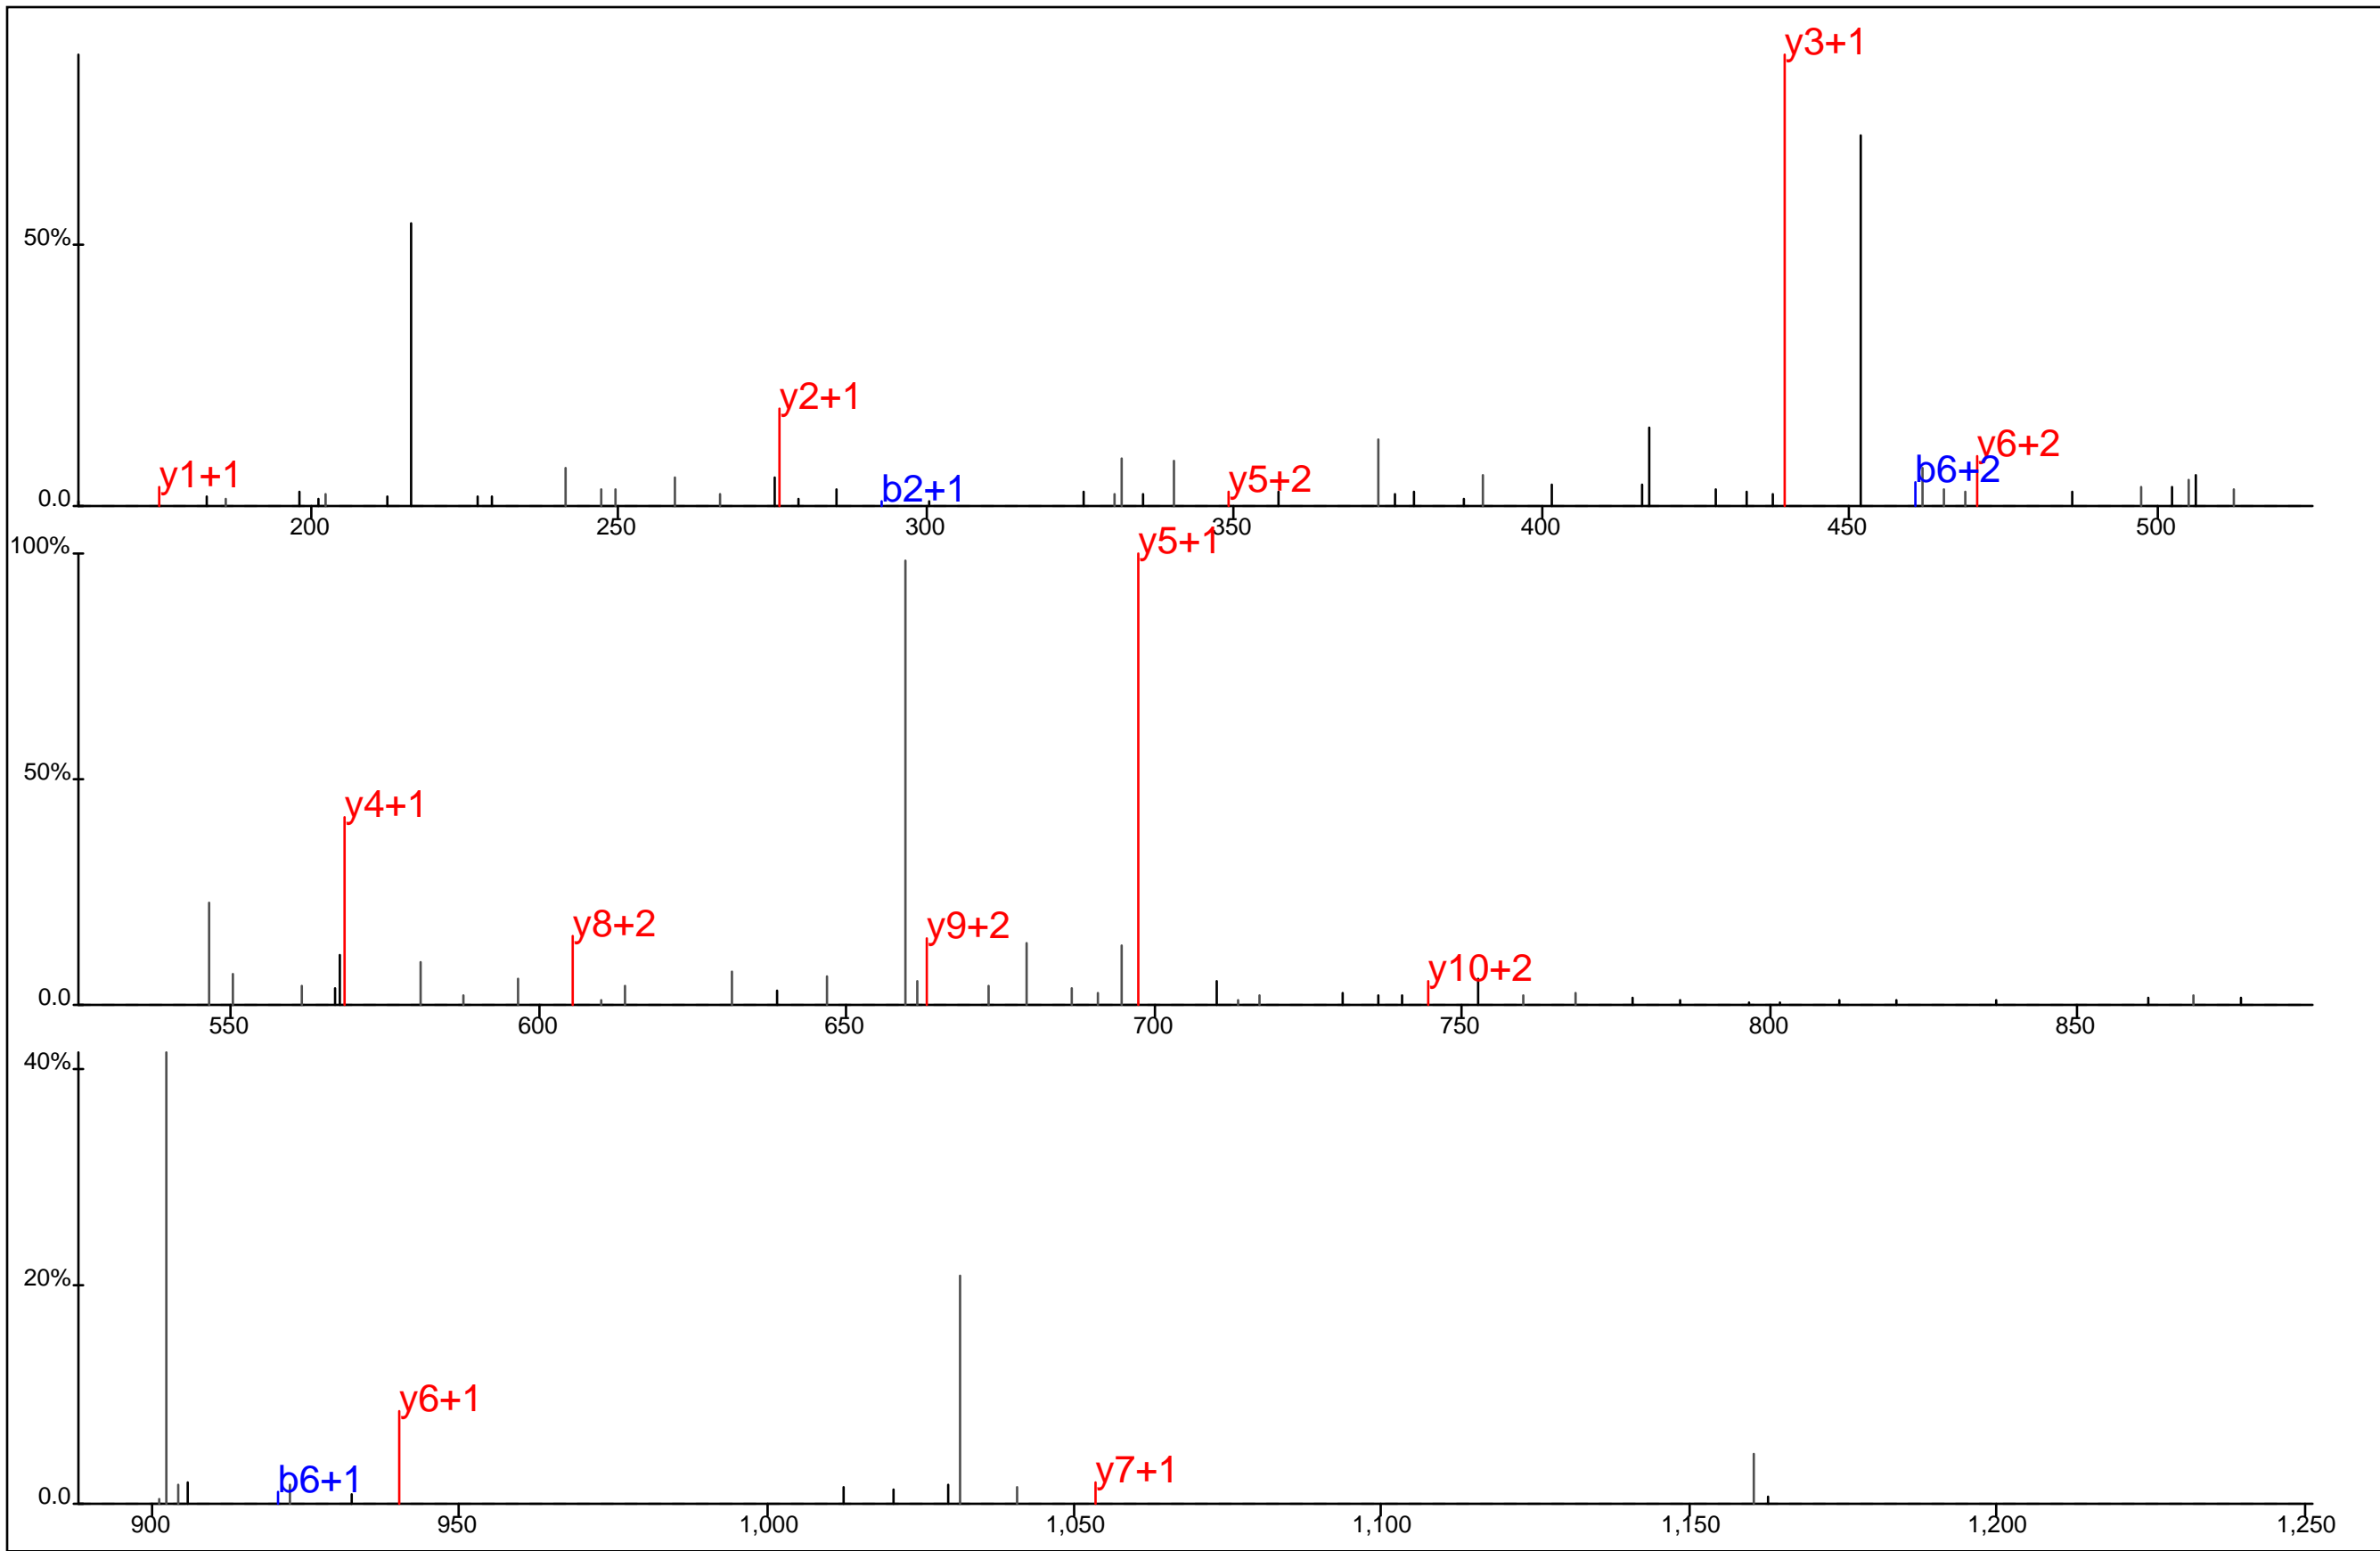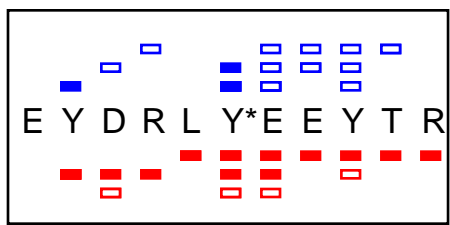

Protein Name: Phosphatidylinositol 3 kinase regulatory subunit, alpha  
 gi Accession: 0  
 Precursor Mass: 539.5594+3  
 Delta Mass: 0.619 ppm  
 XCorr: 25.88

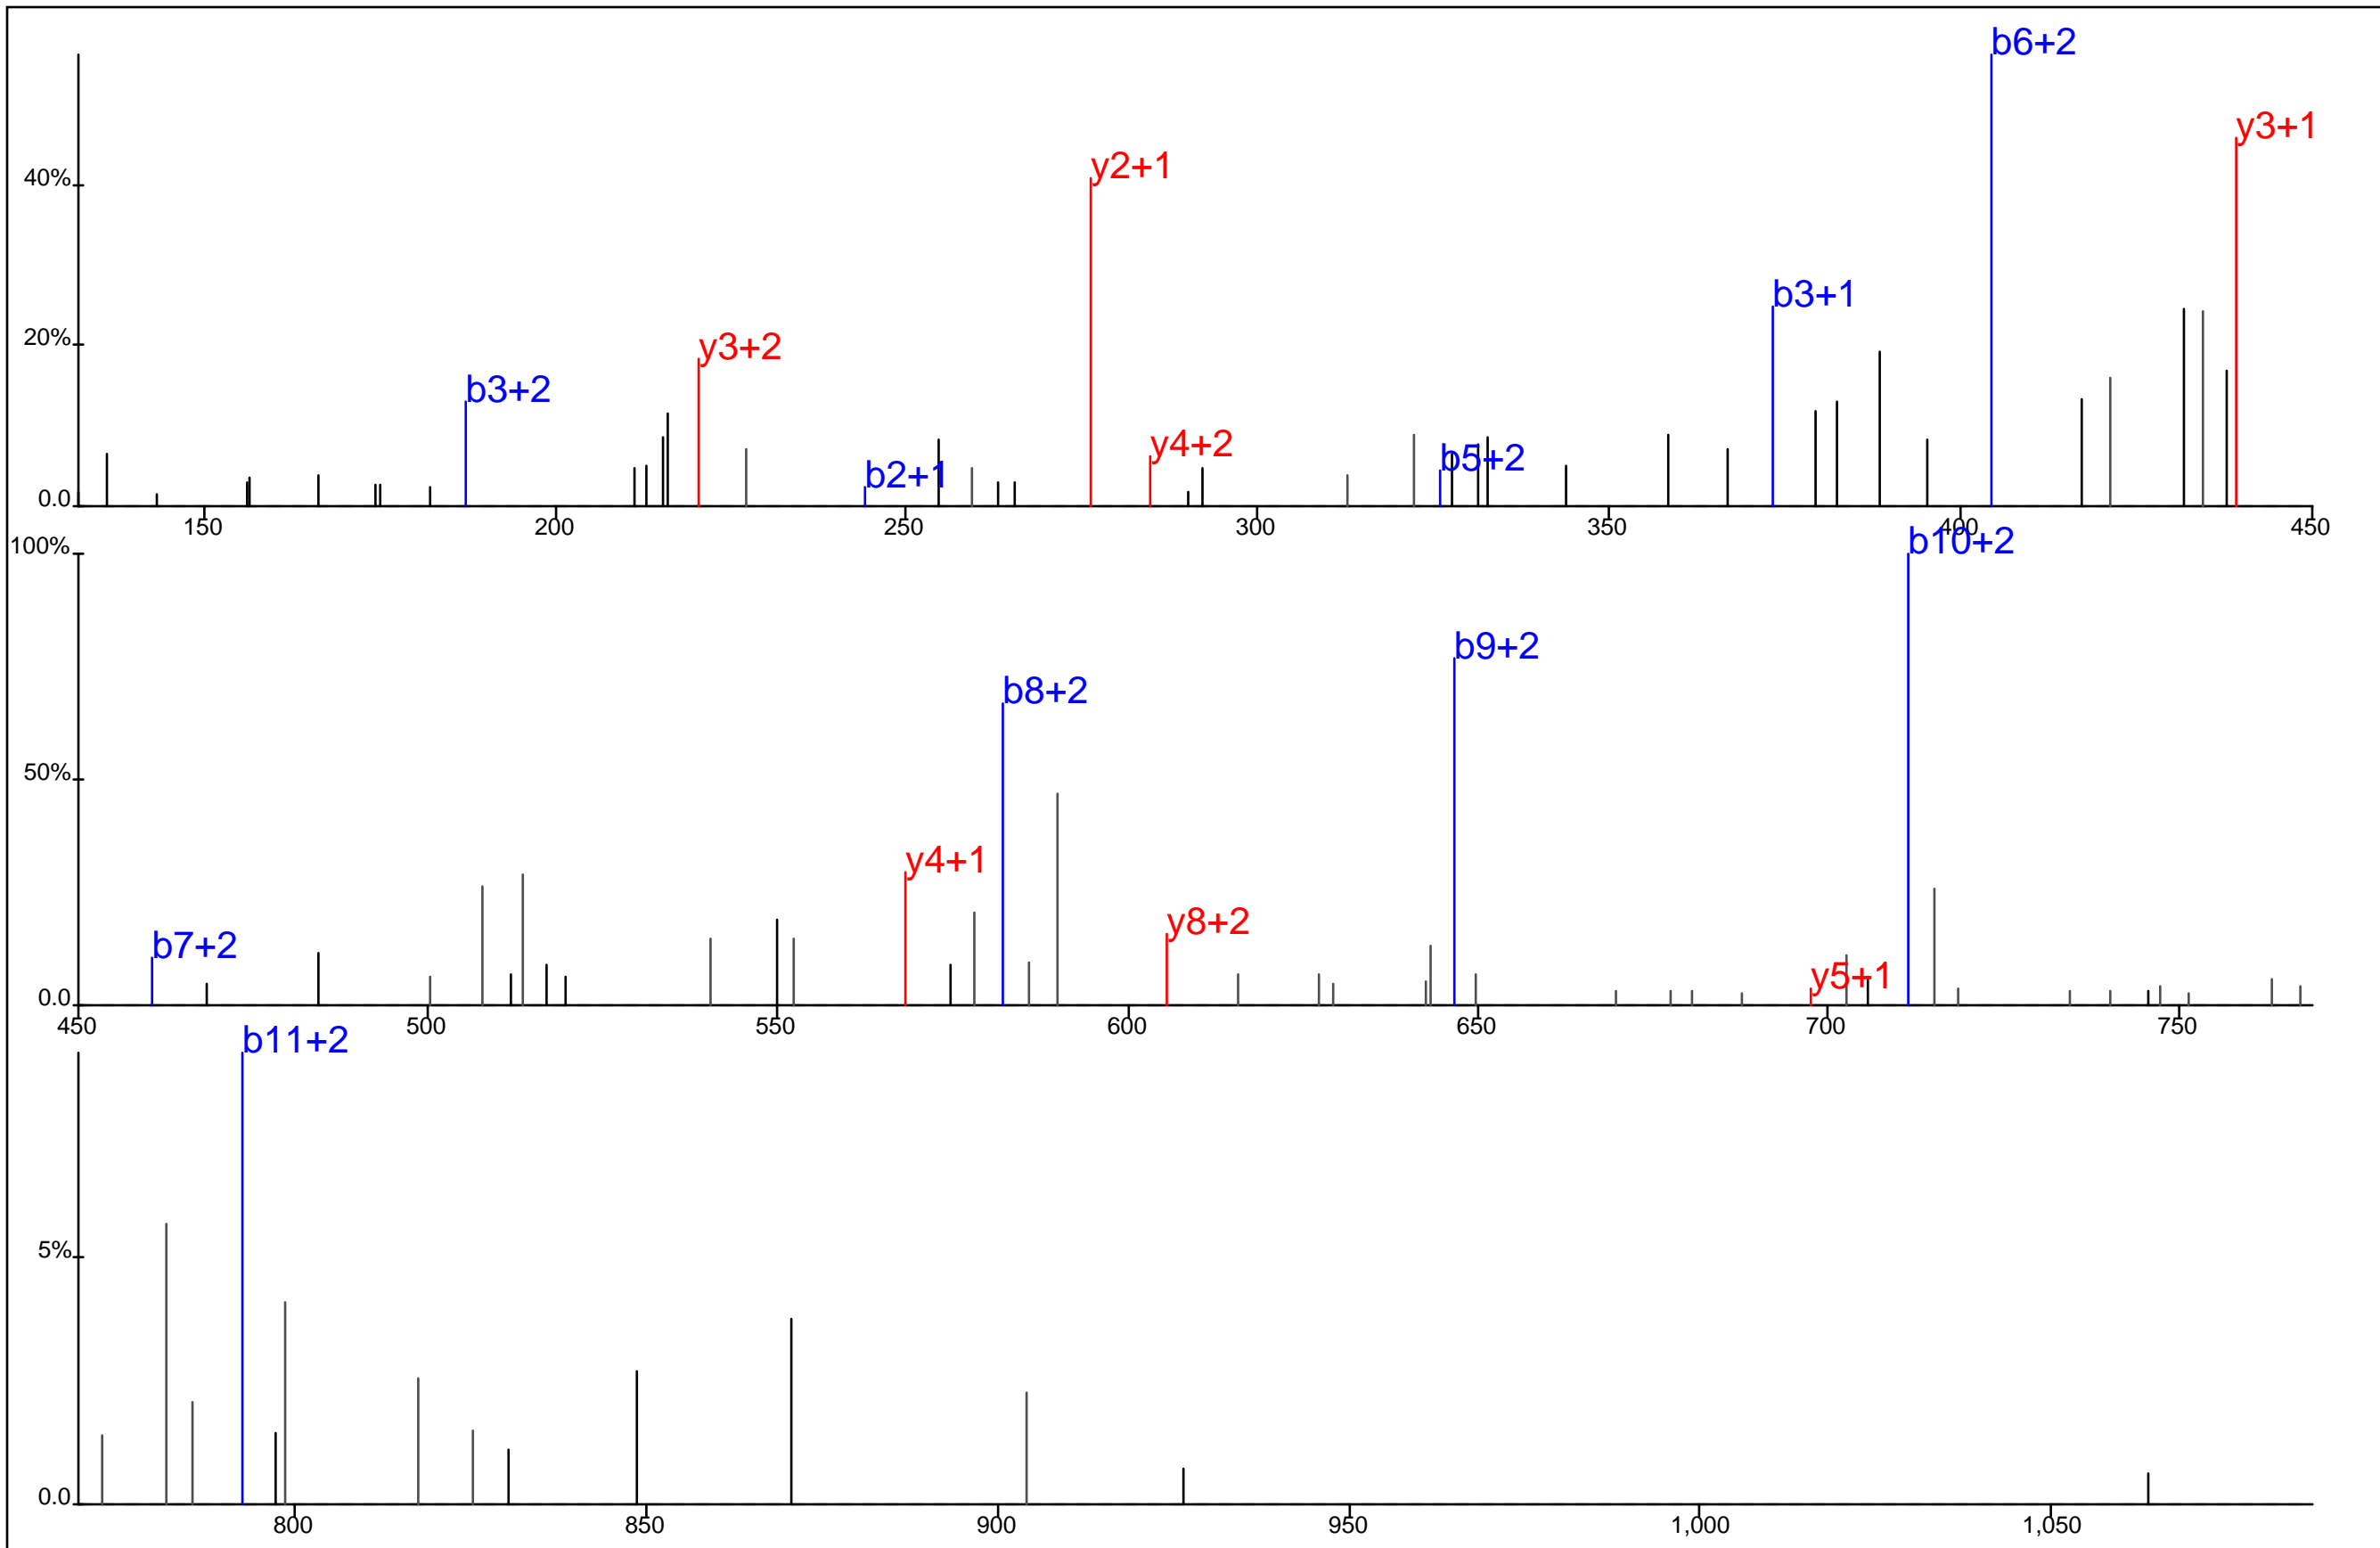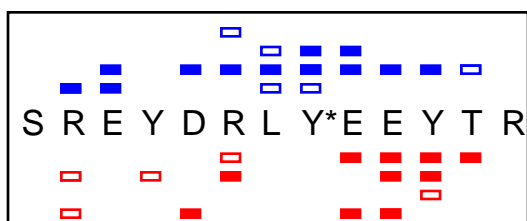

Protein Name: Phosphatidylinositol 3 kinase regulatory subunit, alpha  
 gi Accession: 0  
 Precursor Mass: 465.7047+4  
 Delta Mass: 0.454 ppm  
 XCorr: 27.24

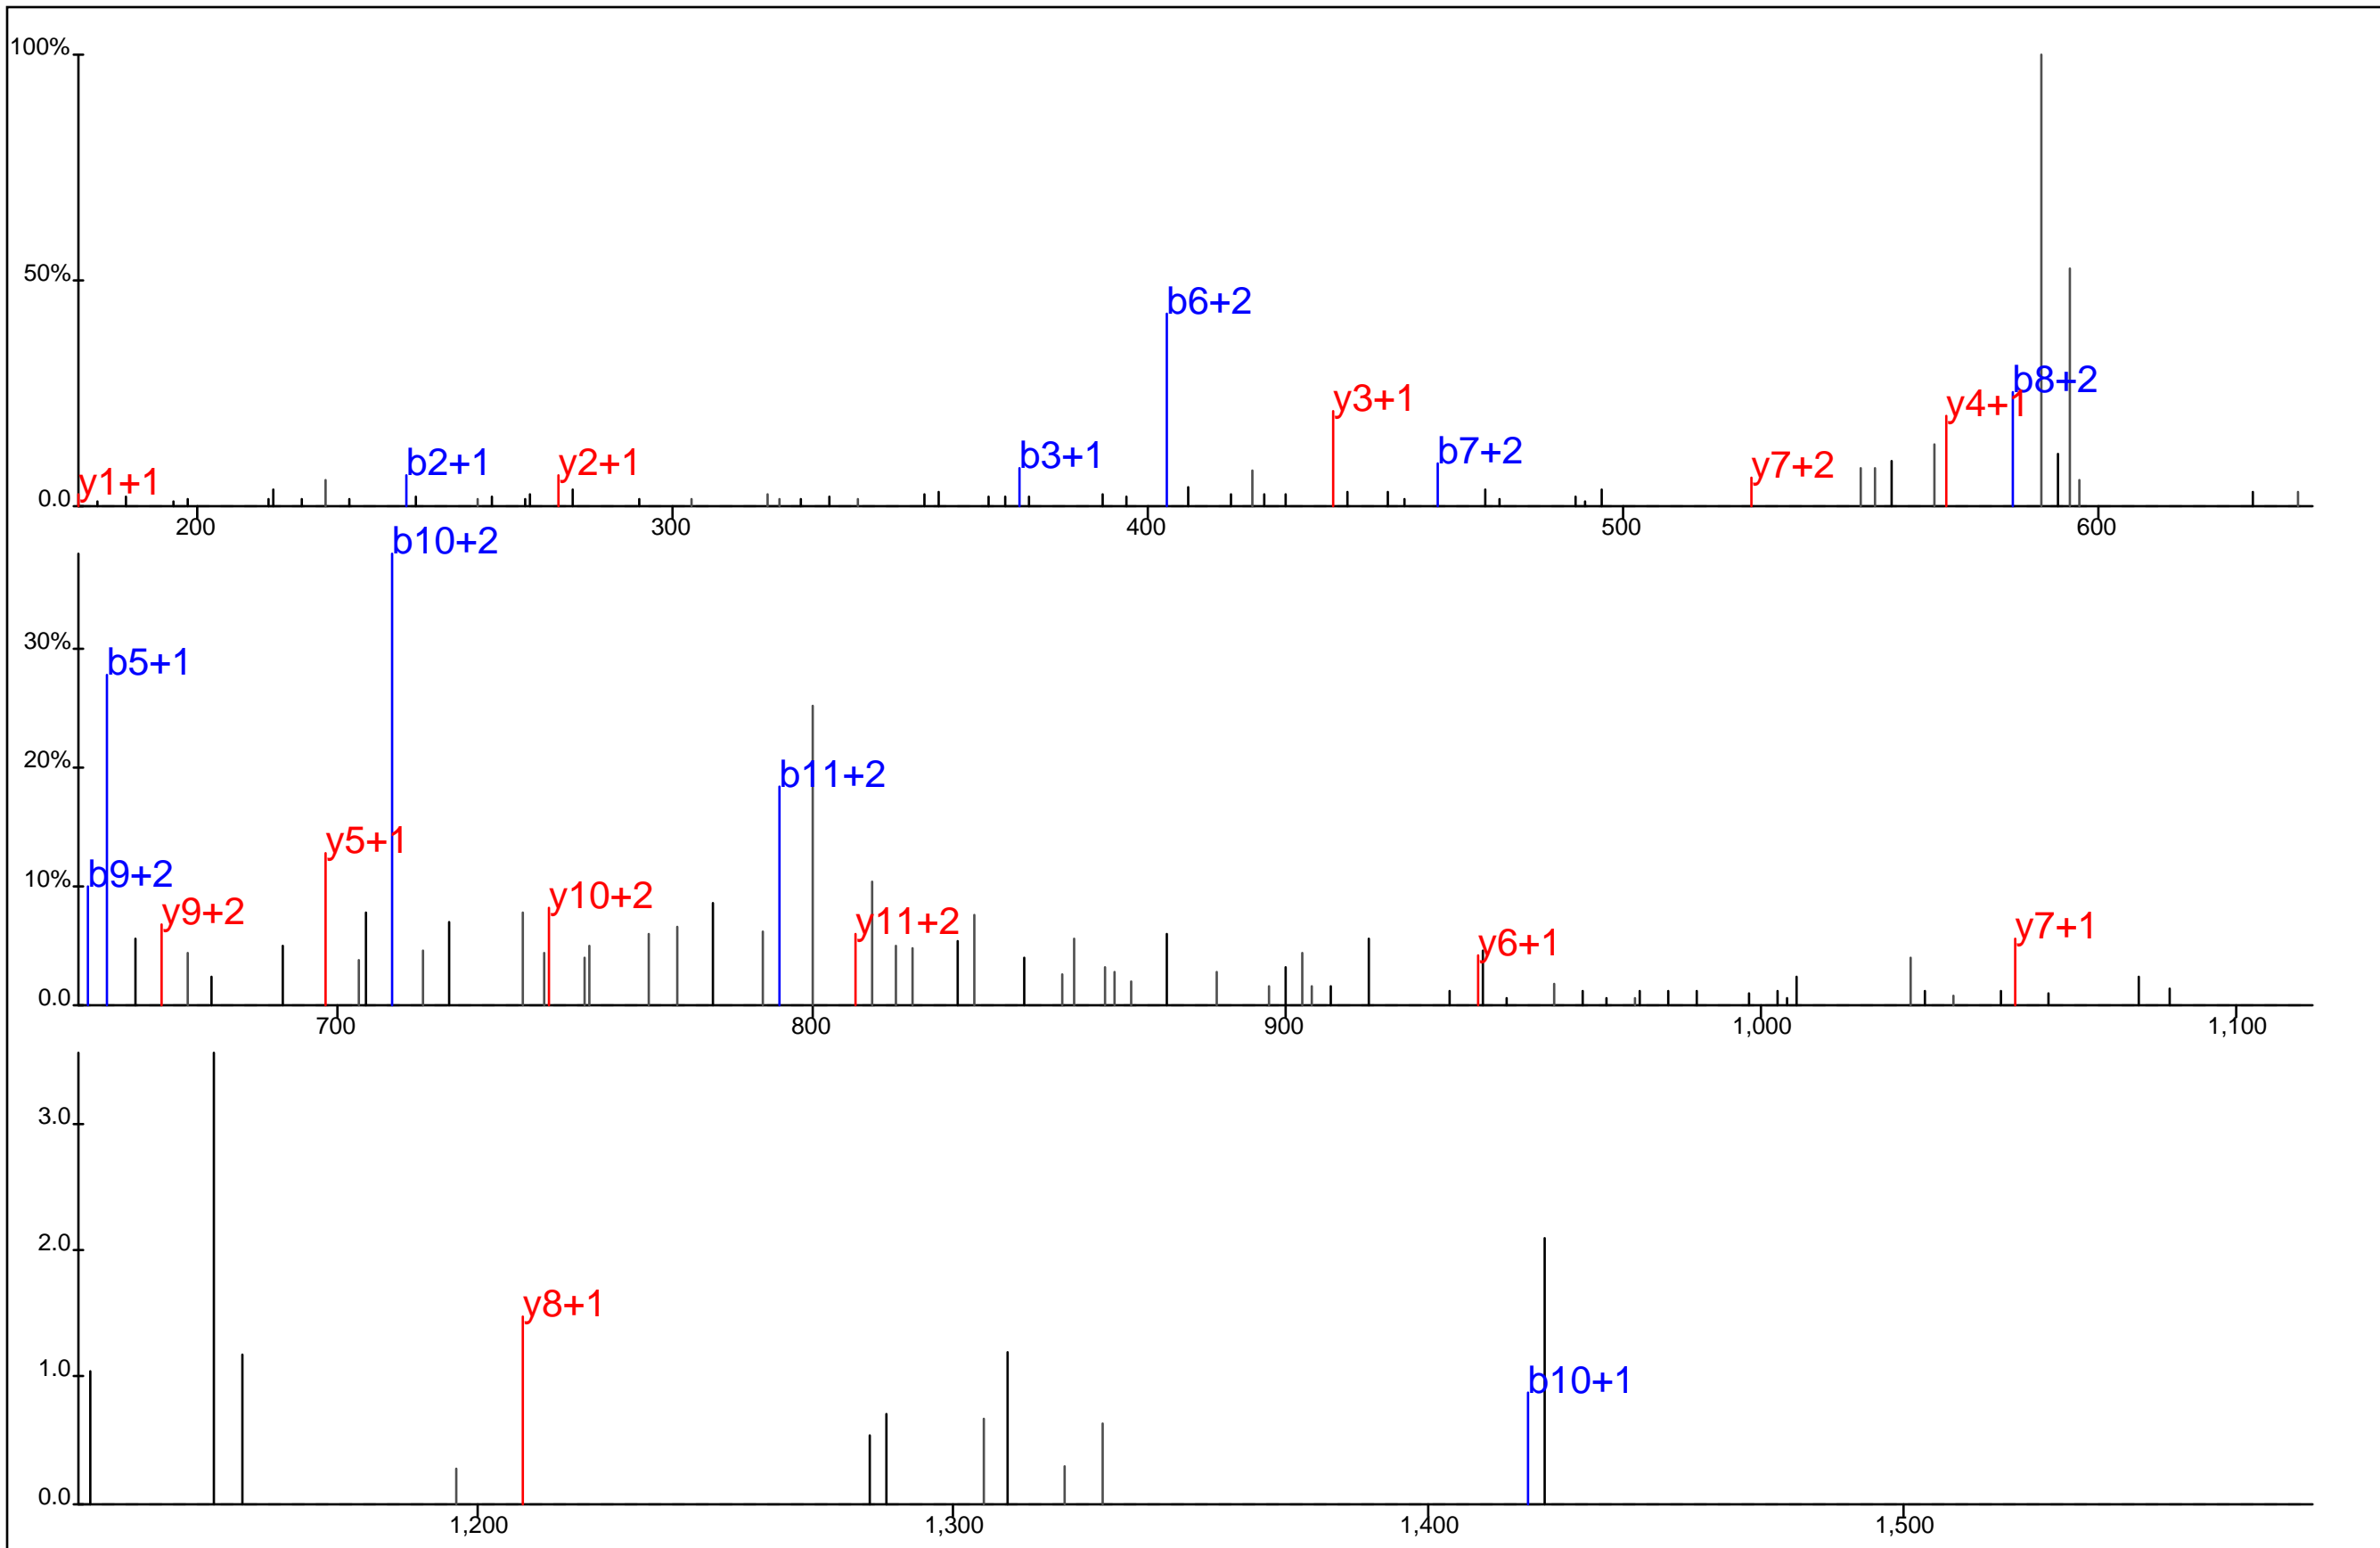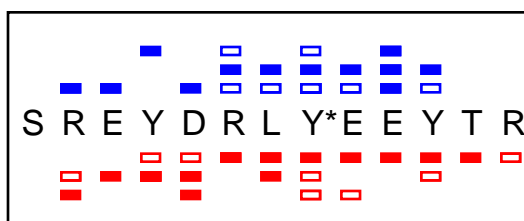

Protein Name: Phosphatidylinositol 3 kinase regulatory subunit, alpha  
 gi Accession: 0  
 Precursor Mass: 620.6045+3  
 Delta Mass: 1.609 ppm  
 XCorr: 28.38





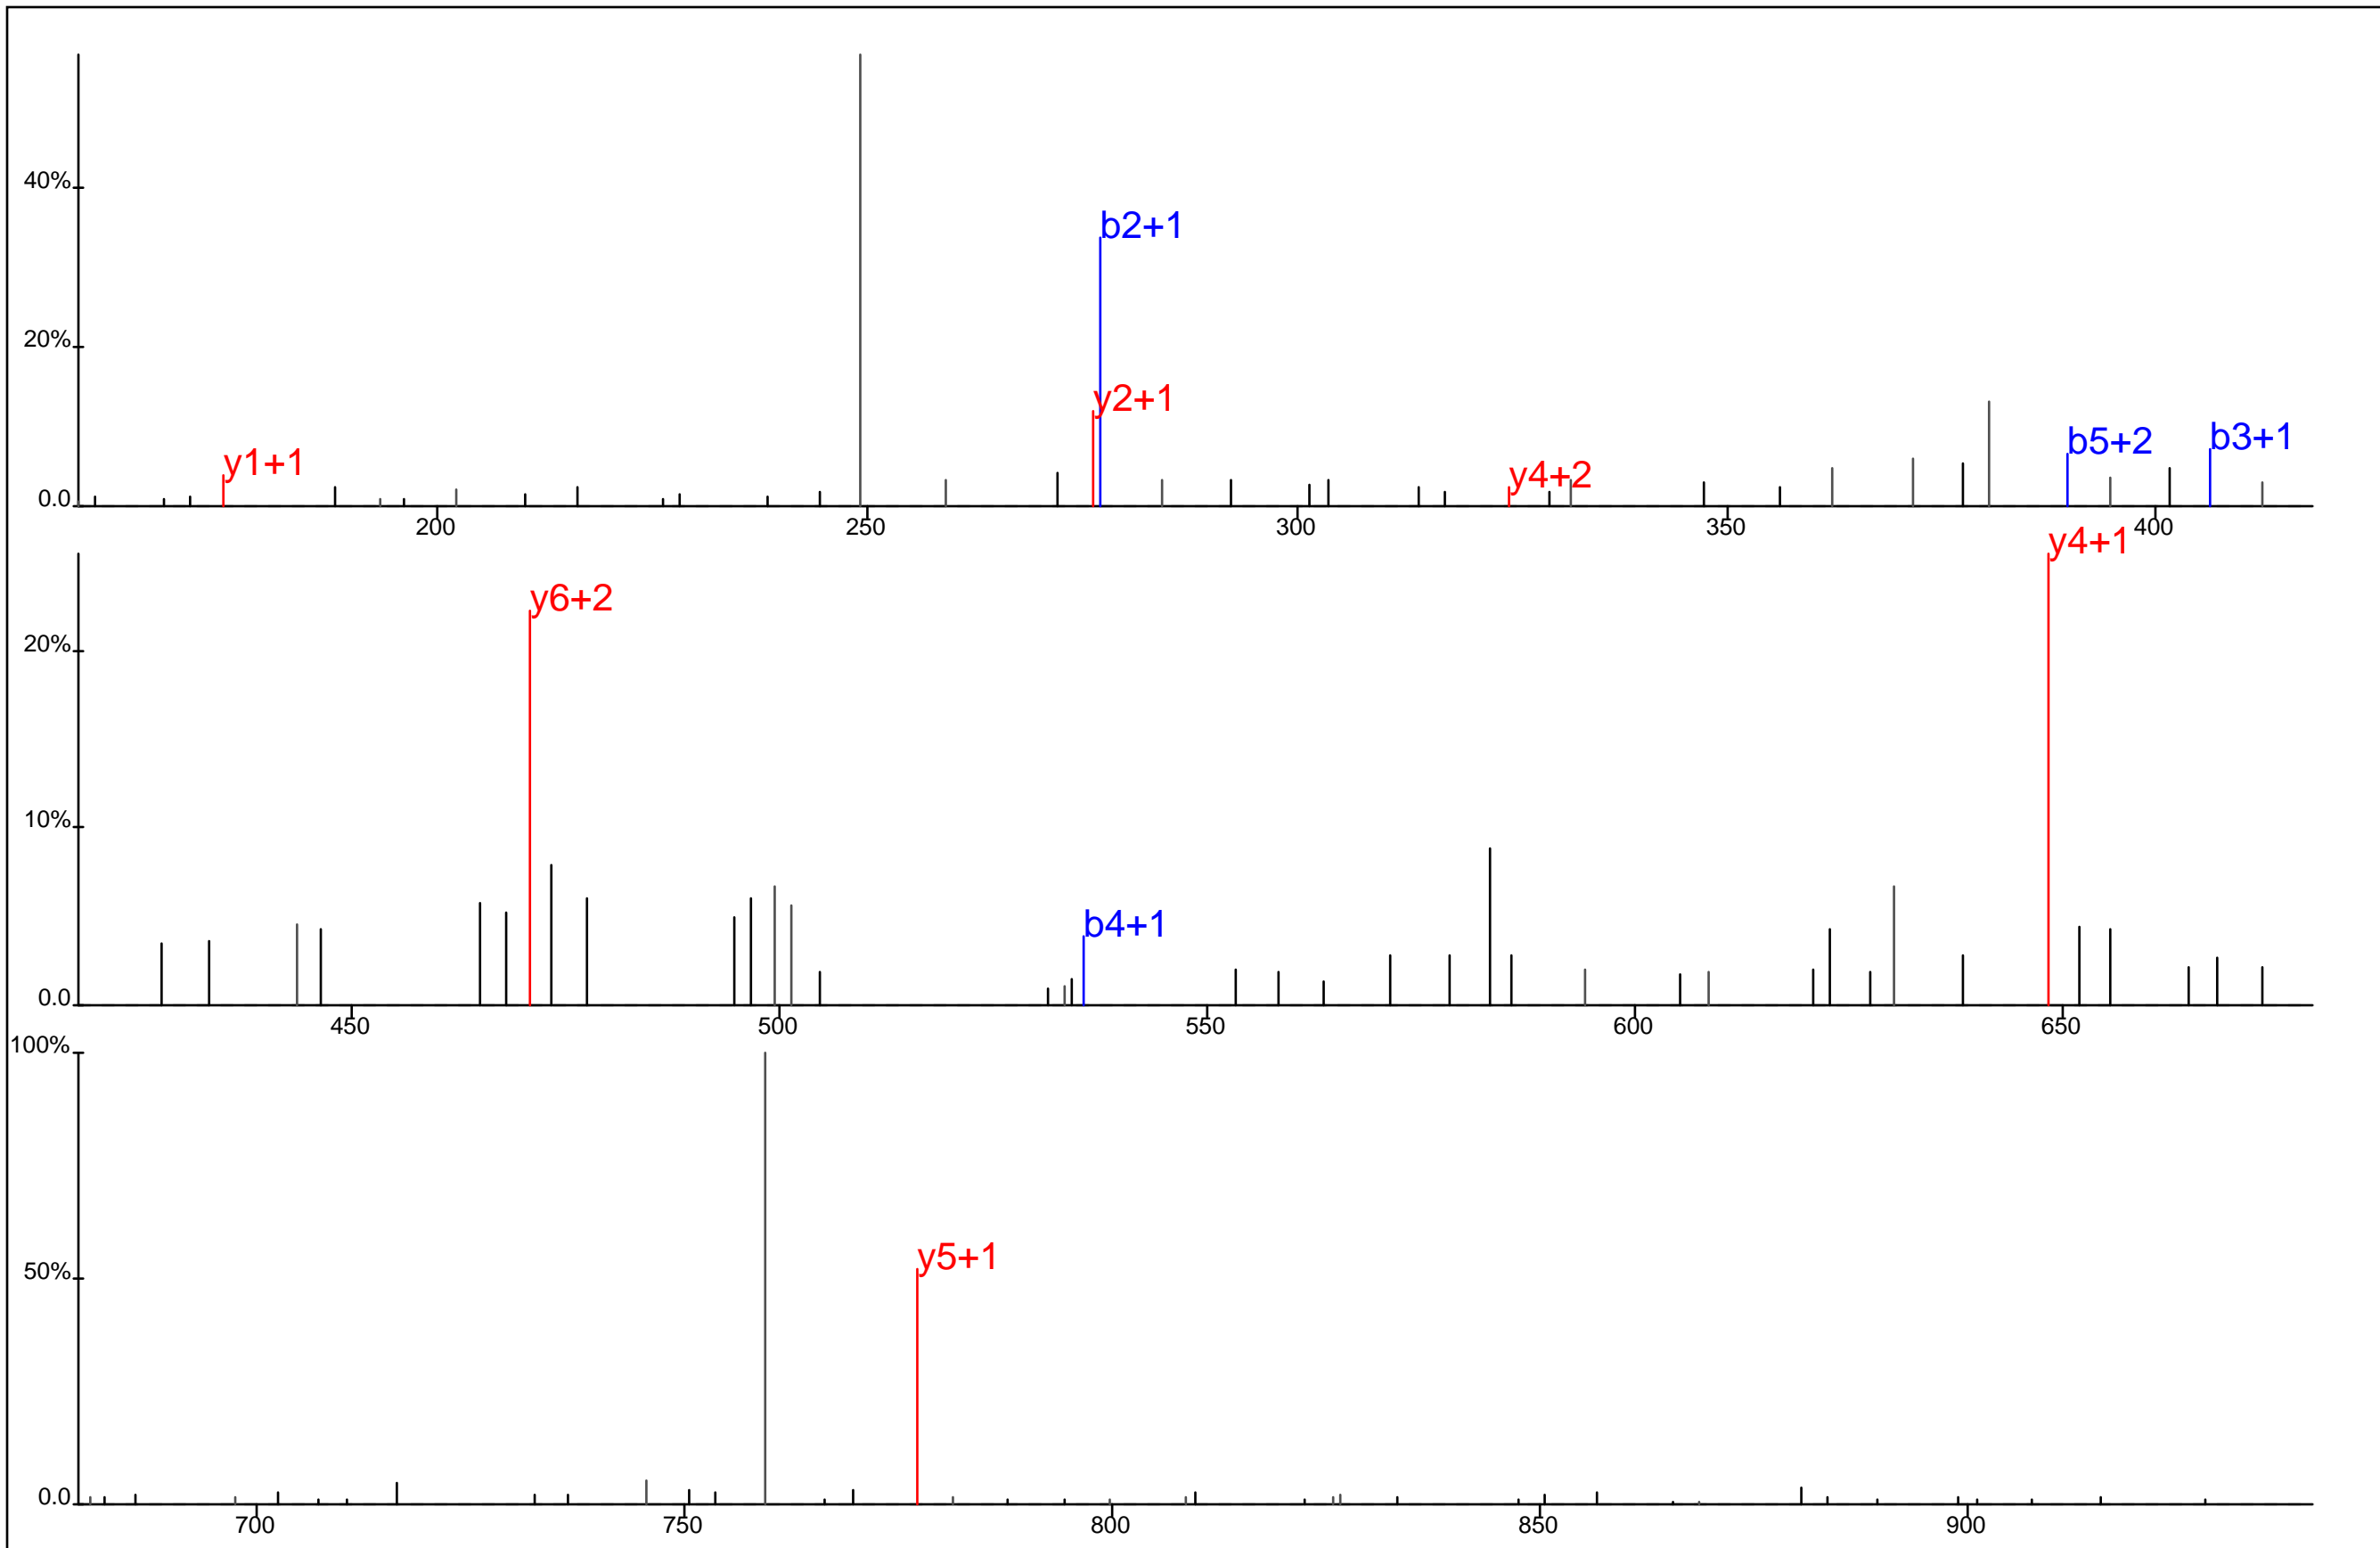

□ □ □ □ □  
 L Y E E Y\* T R  
□ □ □ □ □

Protein Name: Phosphatidylinositol 3 kinase regulatory subunit, alpha  
 gi Accession: 0  
 Precursor Mass: 527.2183+2  
 Delta Mass: 0.511 ppm  
 XCorr: 30.74

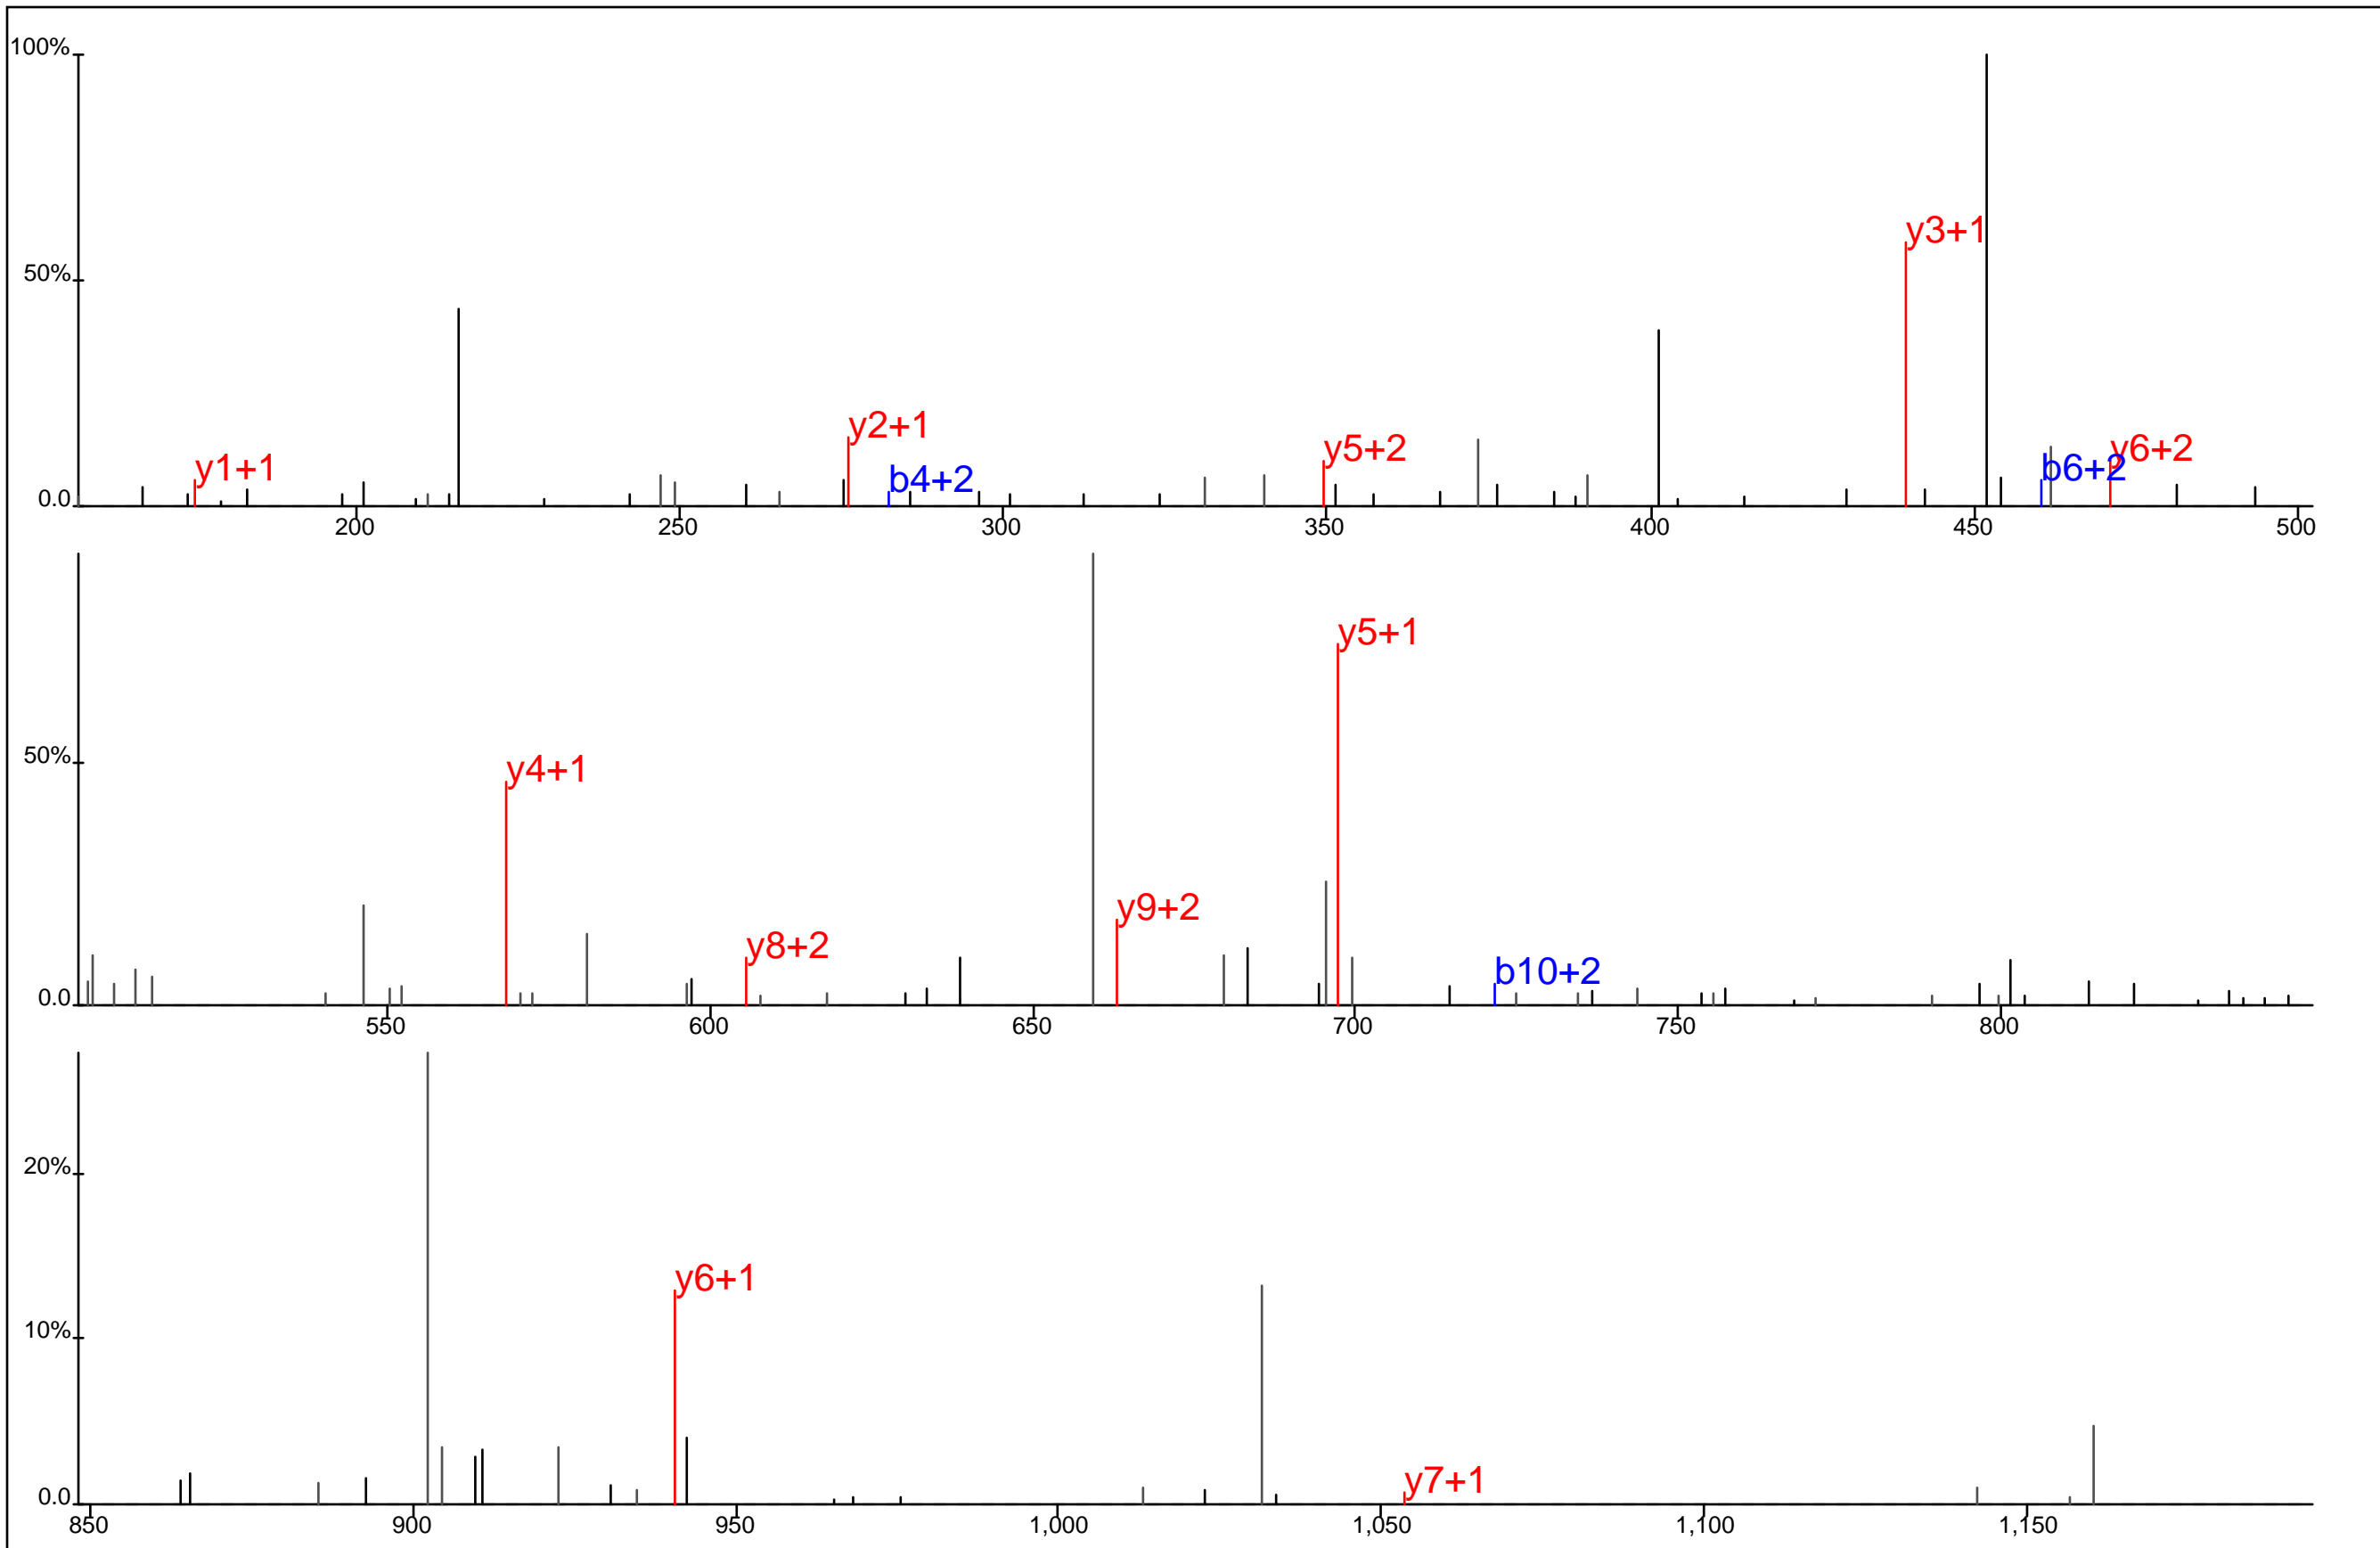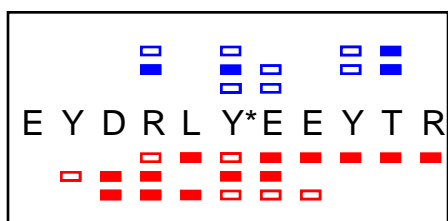

Protein Name: Phosphatidylinositol 3 kinase regulatory subunit, alpha  
 gi Accession: 0  
 Precursor Mass: 539.5596+3  
 Delta Mass: 0.958 ppm  
 XCorr: 22.14

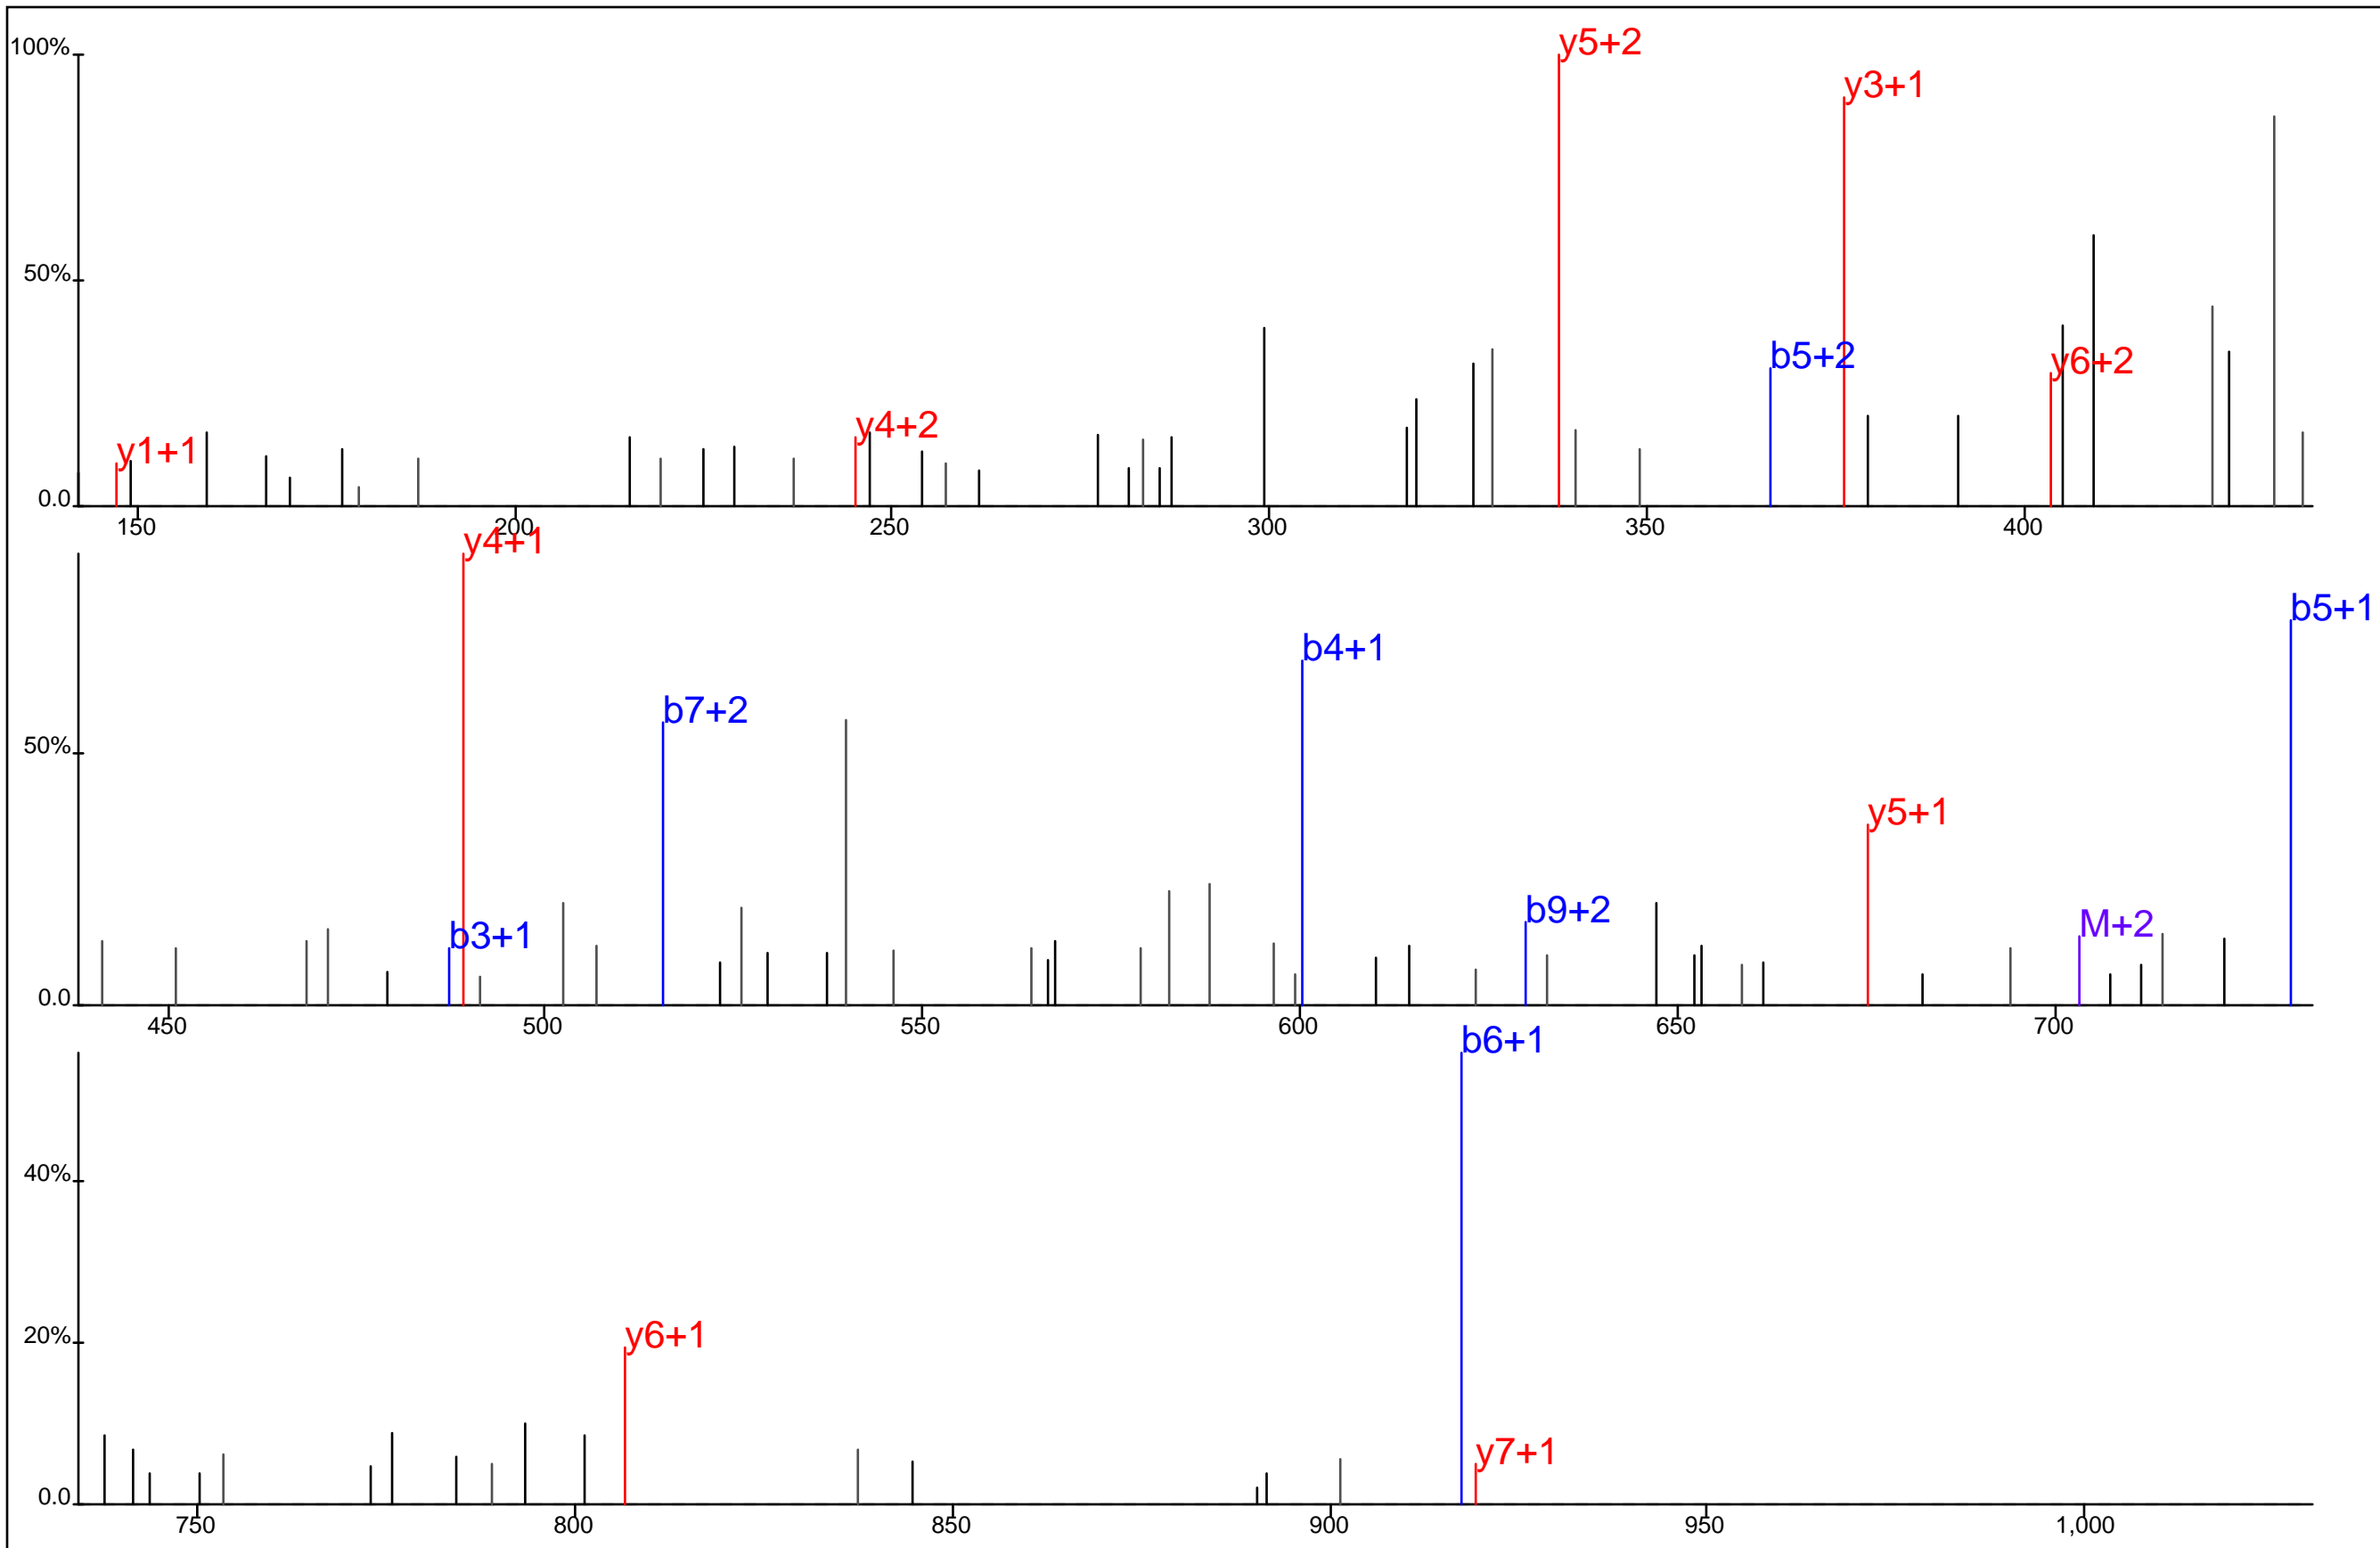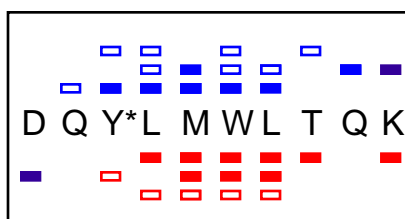

Protein Name: Phosphatidylinositol 3 kinase regulatory subunit, alpha  
 gi Accession: 0  
 Precursor Mass: 469.2115+3  
 Delta Mass: 1.525 ppm  
 XCorr: 25.57

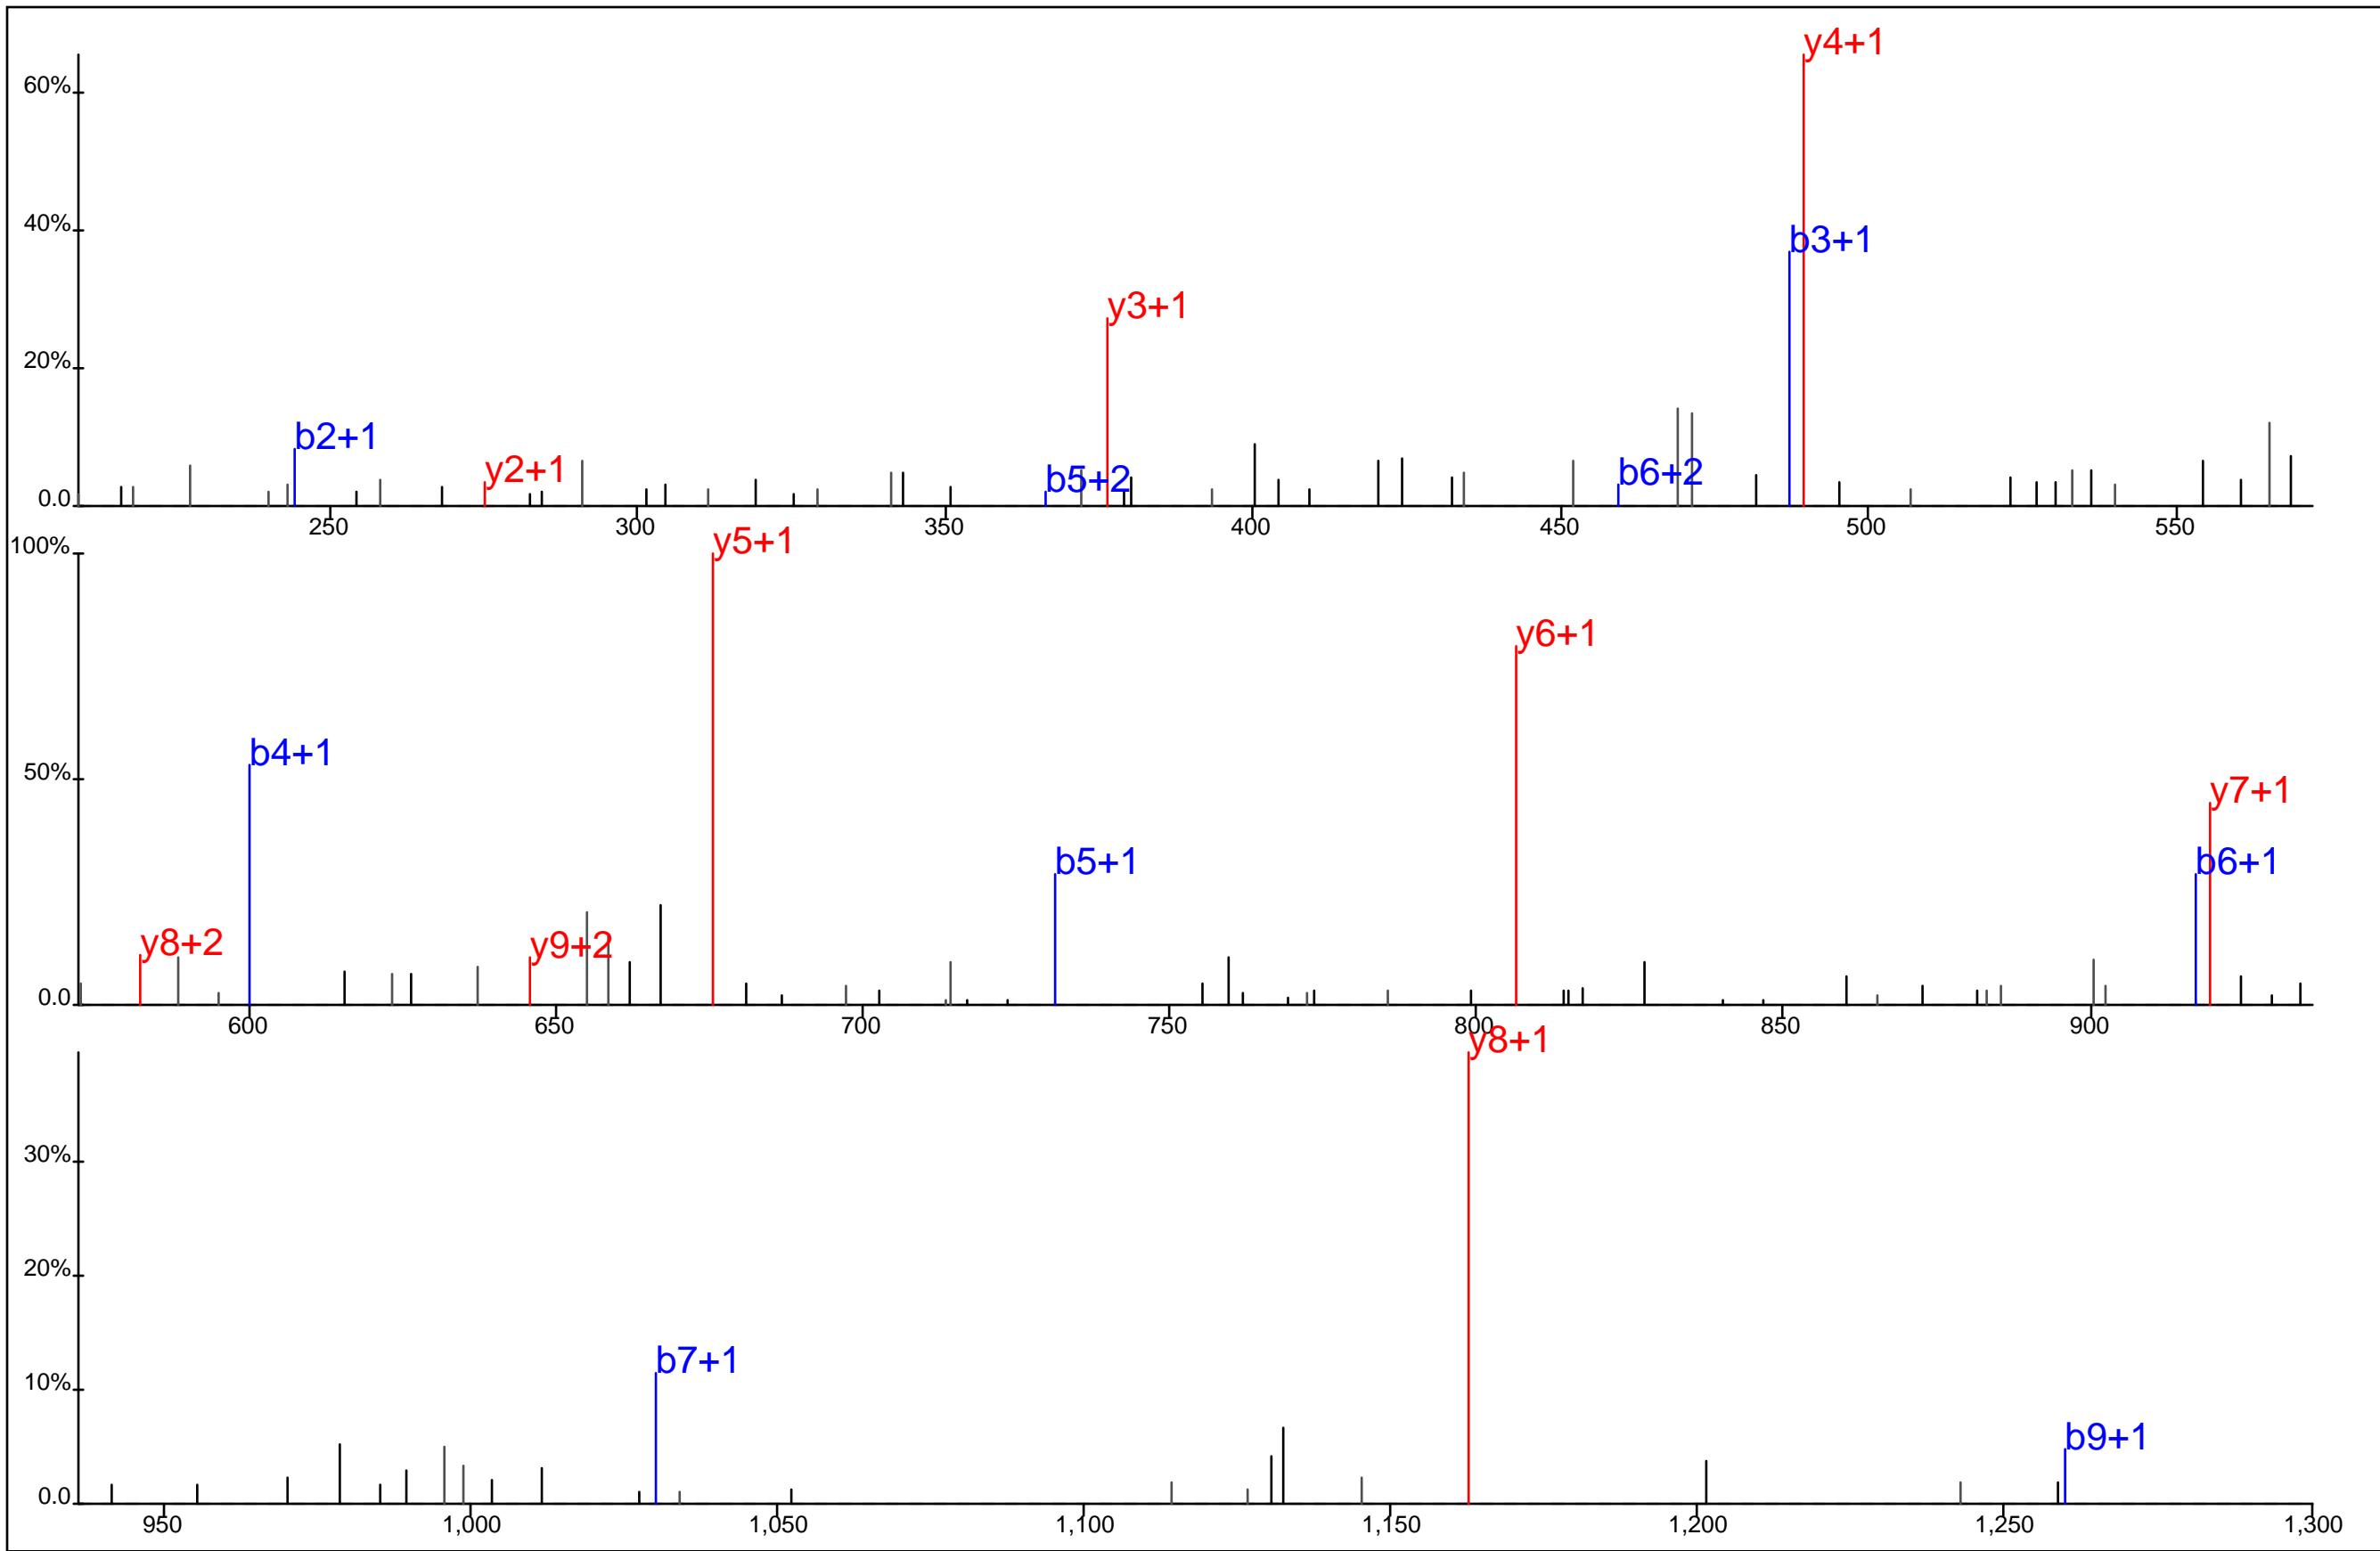

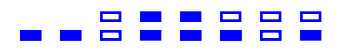
  
 D Q Y\* L M W L T Q K

Protein Name: Phosphatidylinositol 3 kinase regulatory subunit, alpha  
 gi Accession: 0  
 Precursor Mass: 703.3149+2  
 Delta Mass: 0.330 ppm  
 XCorr: 59.55

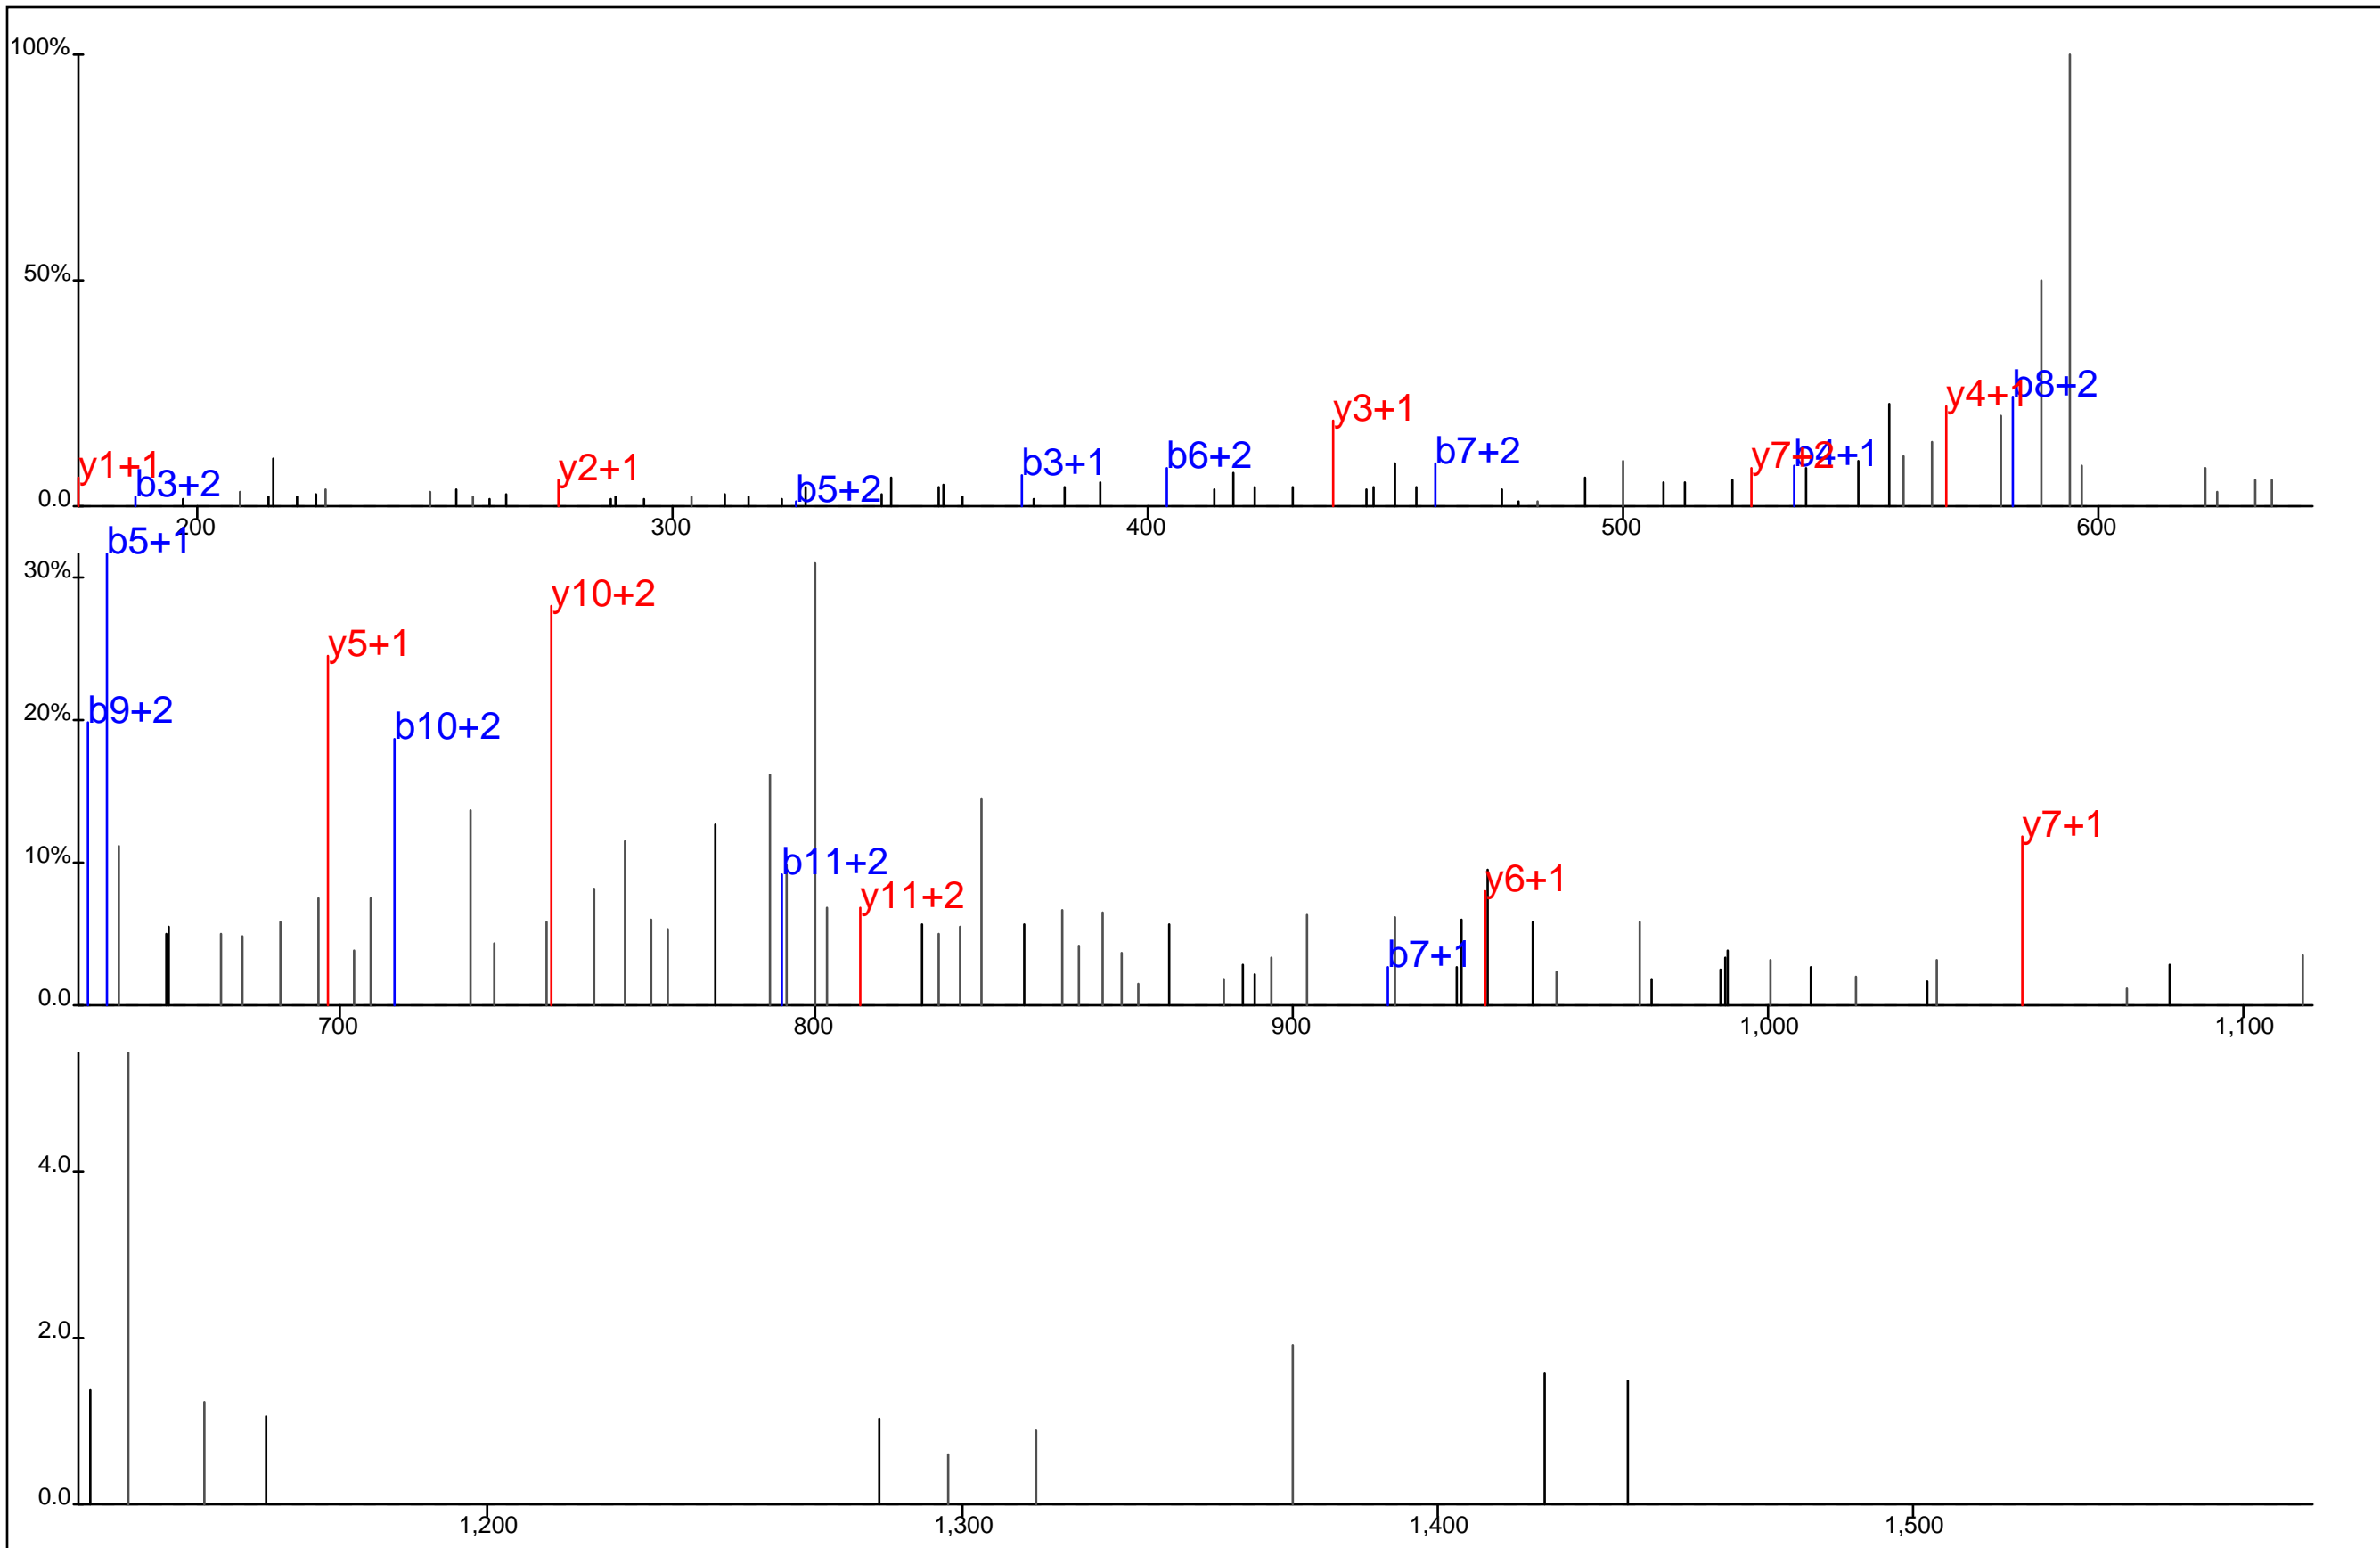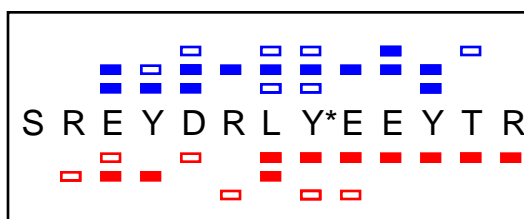

Protein Name: Phosphatidylinositol 3 kinase regulatory subunit, alpha  
 gi Accession: 0  
 Precursor Mass: 620.6020+3  
 Delta Mass: 2.427 ppm  
 XCorr: 27.95

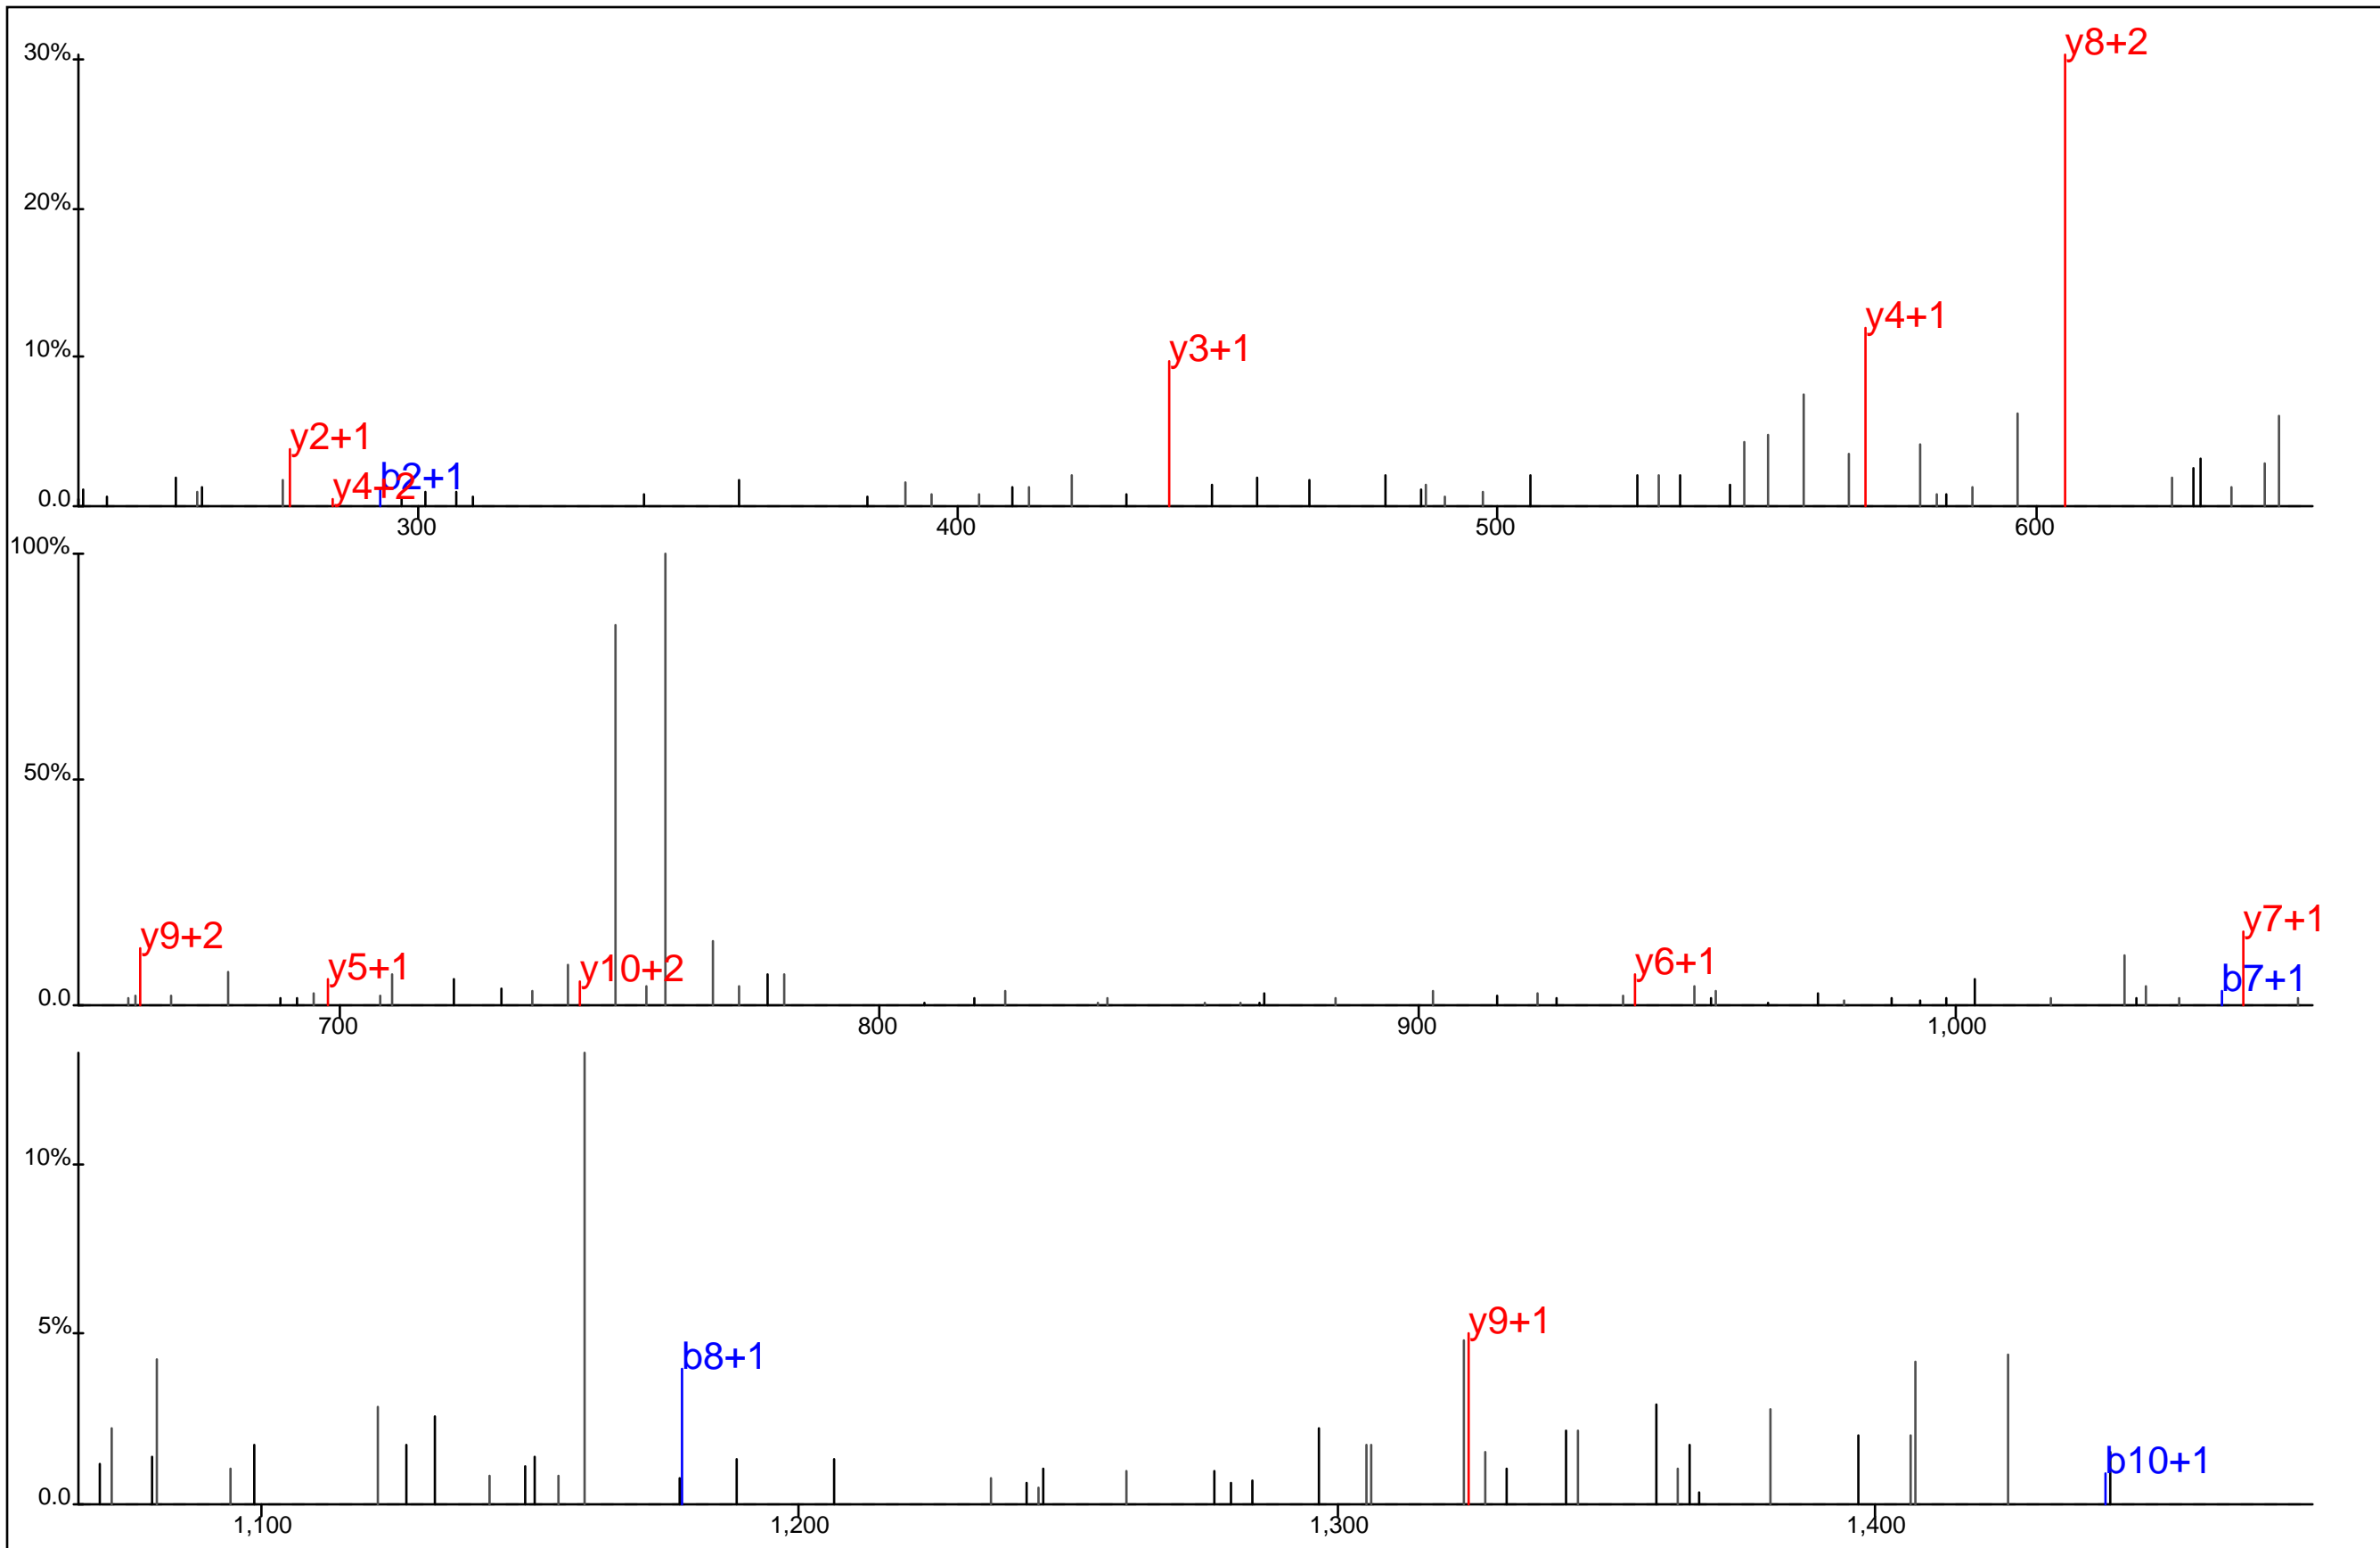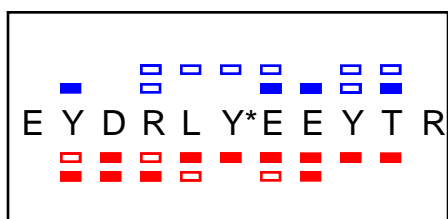

Protein Name: Phosphatidylinositol 3 kinase regulatory subunit, alpha  
 gi Accession: 0  
 Precursor Mass: 808.8335+2  
 Delta Mass: 1.903 ppm  
 XCorr: 31.7

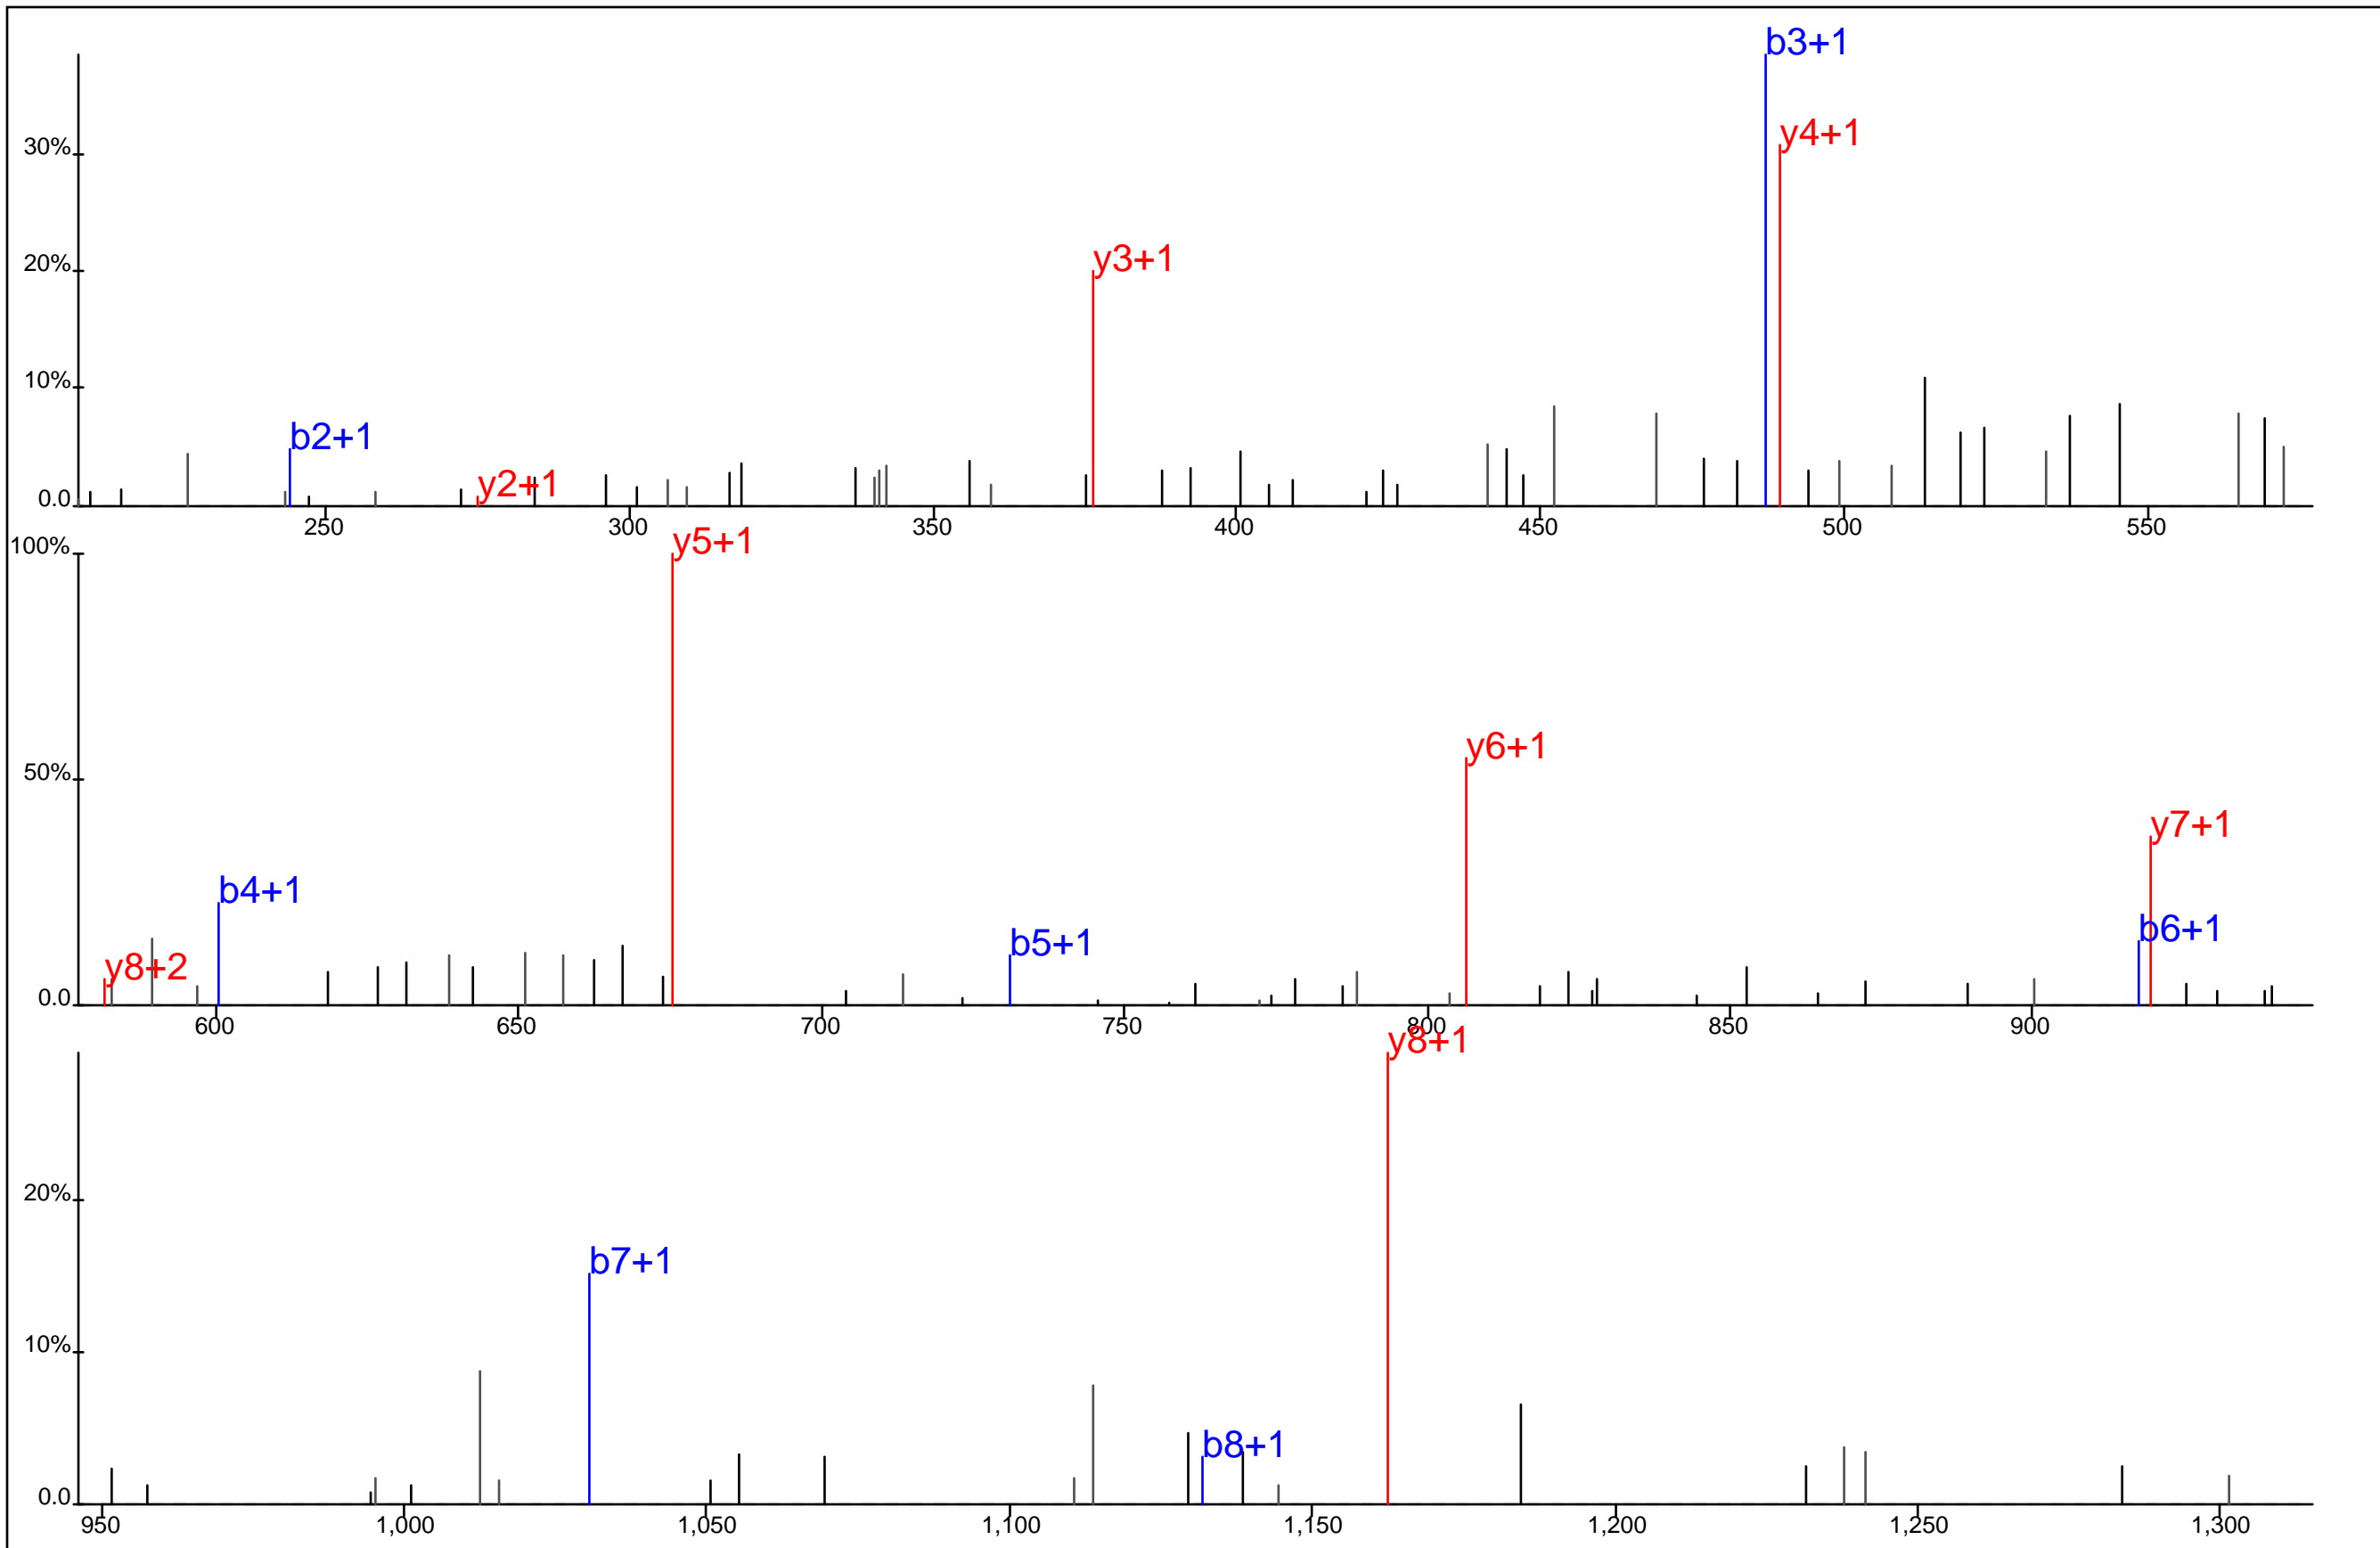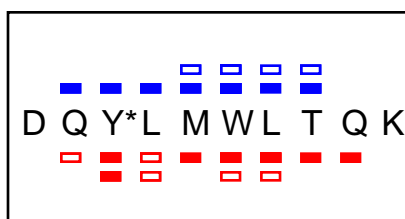

Protein Name: Phosphatidylinositol 3 kinase regulatory subunit, alpha  
 gi Accession: 0  
 Precursor Mass: 703.3132+2  
 Delta Mass: 2.188 ppm  
 XCorr: 41.02



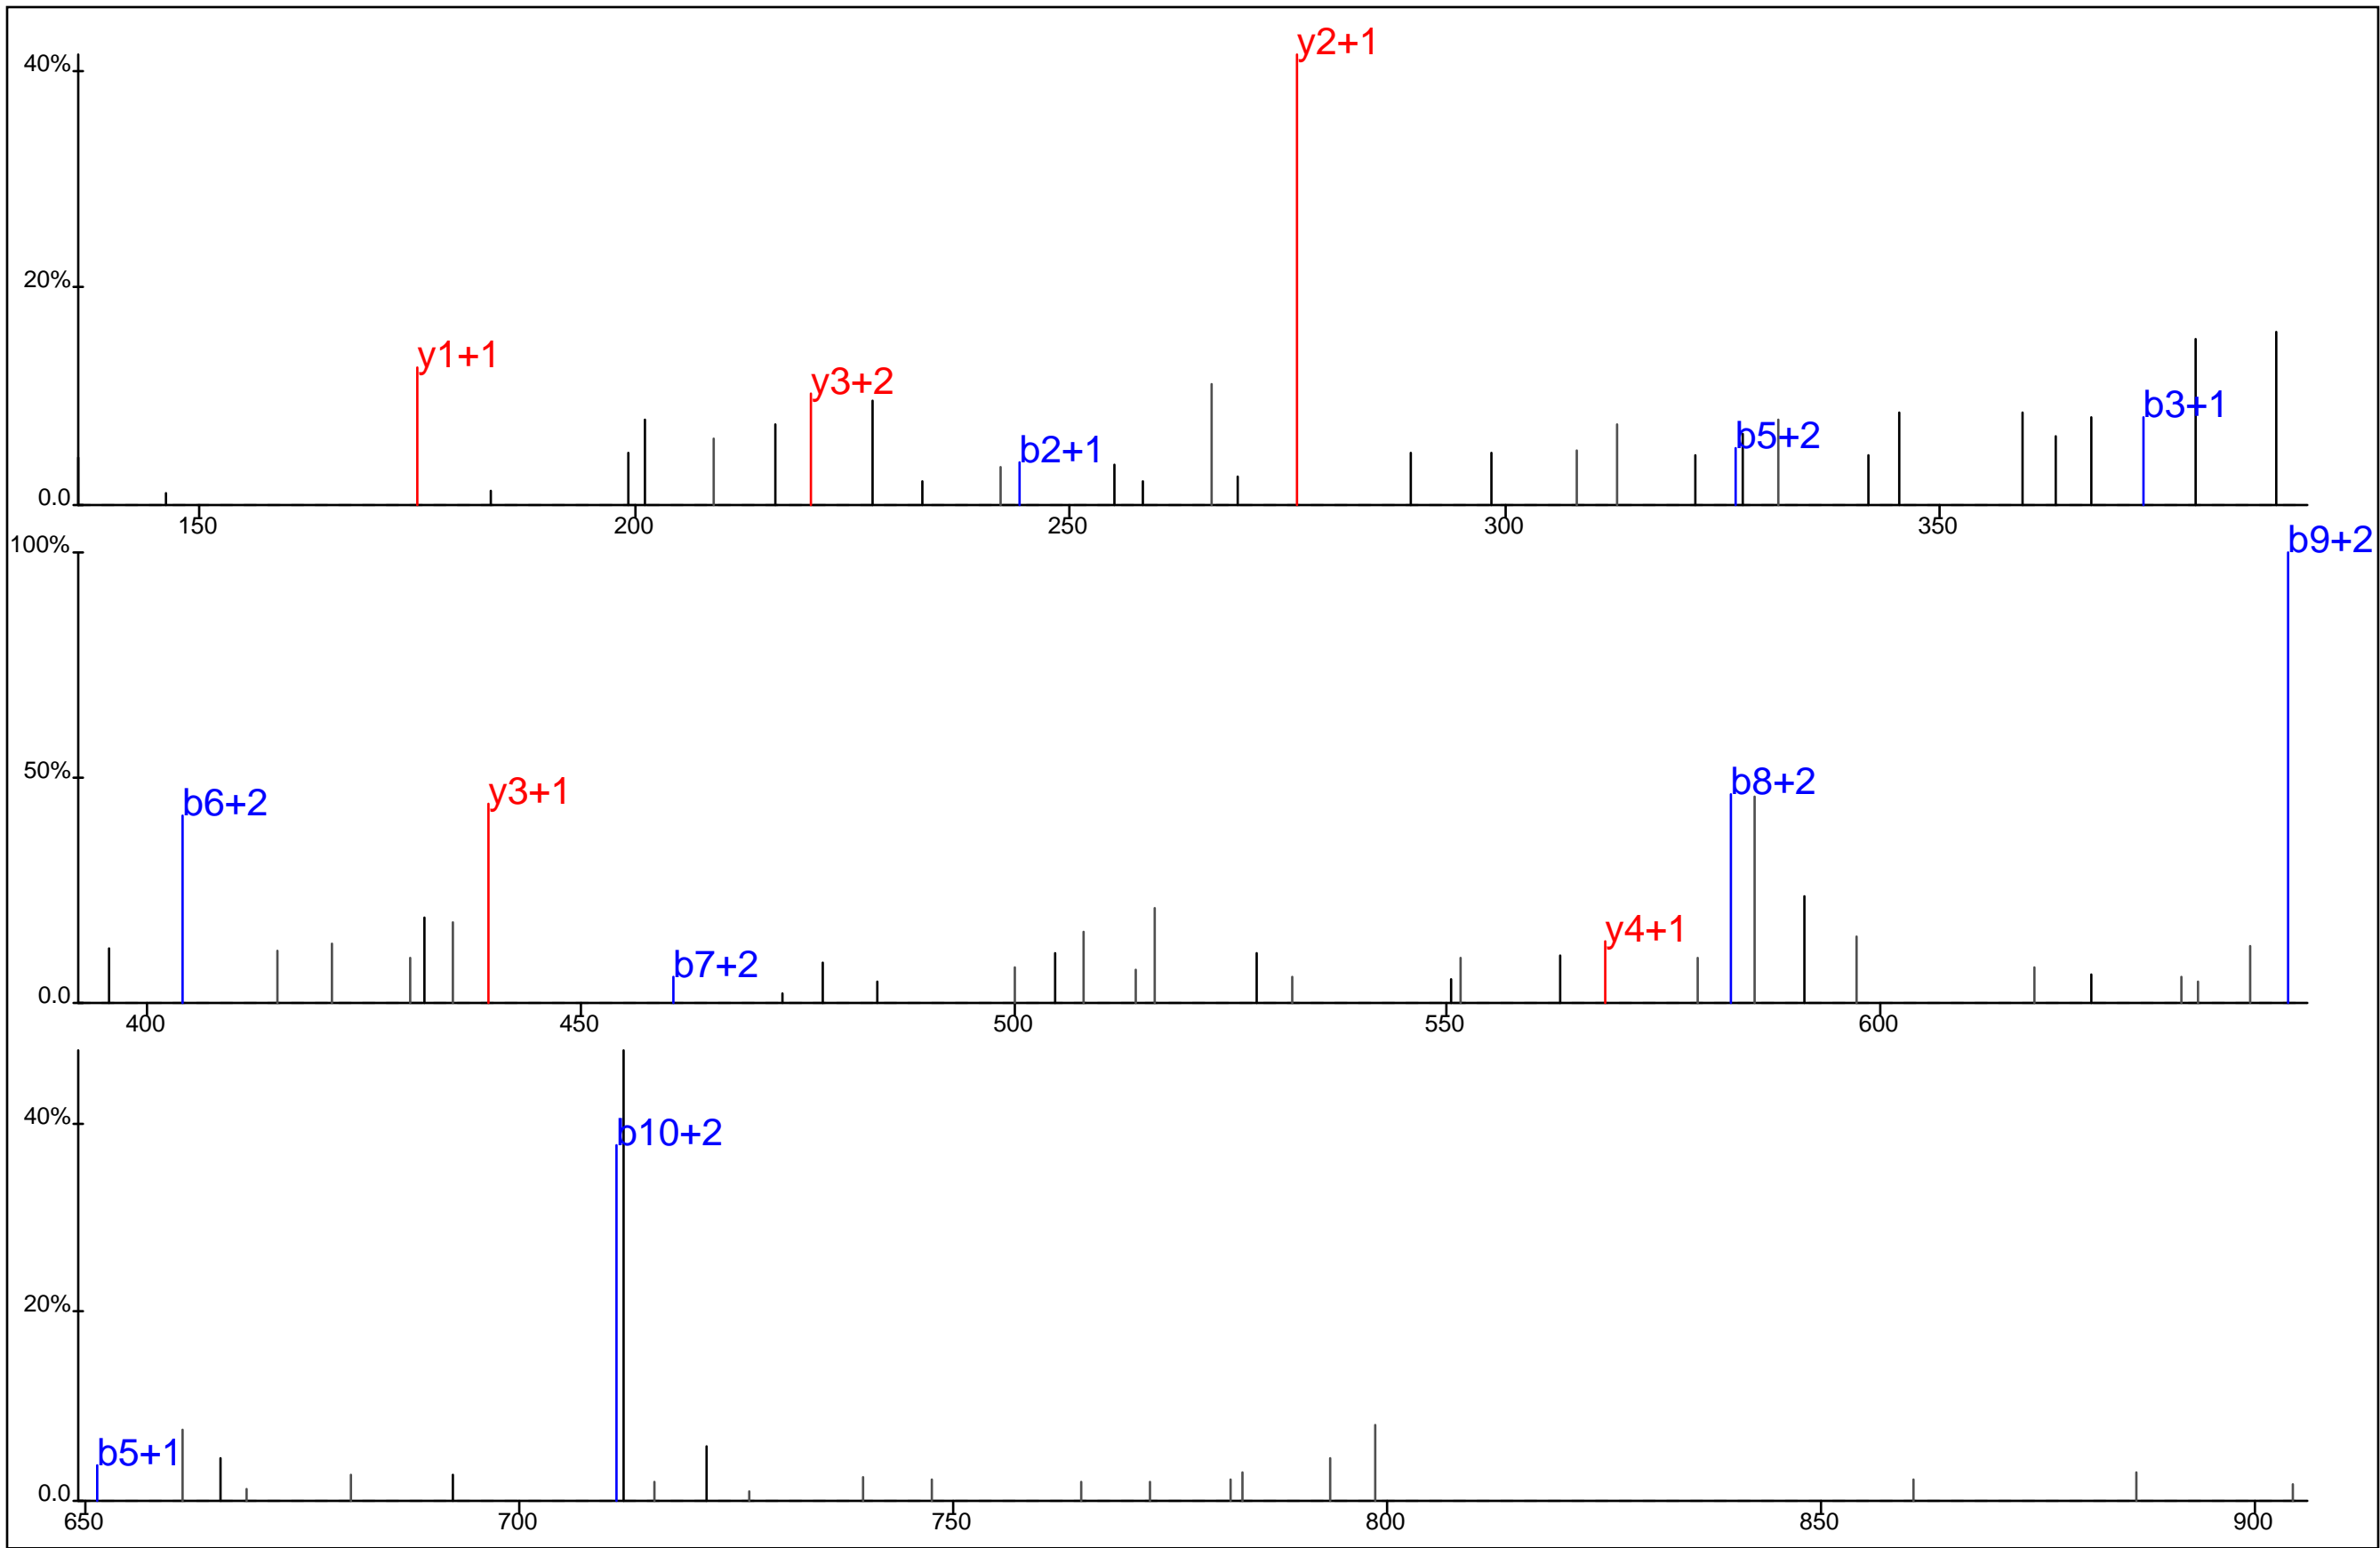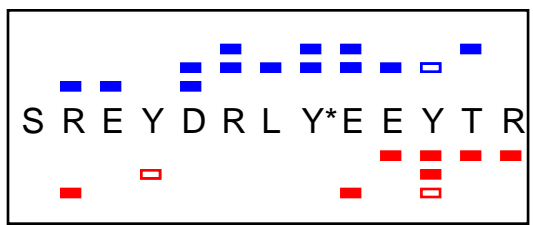

Protein Name: Phosphatidylinositol 3 kinase regulatory subunit, alpha  
 gi Accession: 0  
 Precursor Mass: 465.7047+4  
 Delta Mass: 0.454 ppm  
 XCorr: 25.35

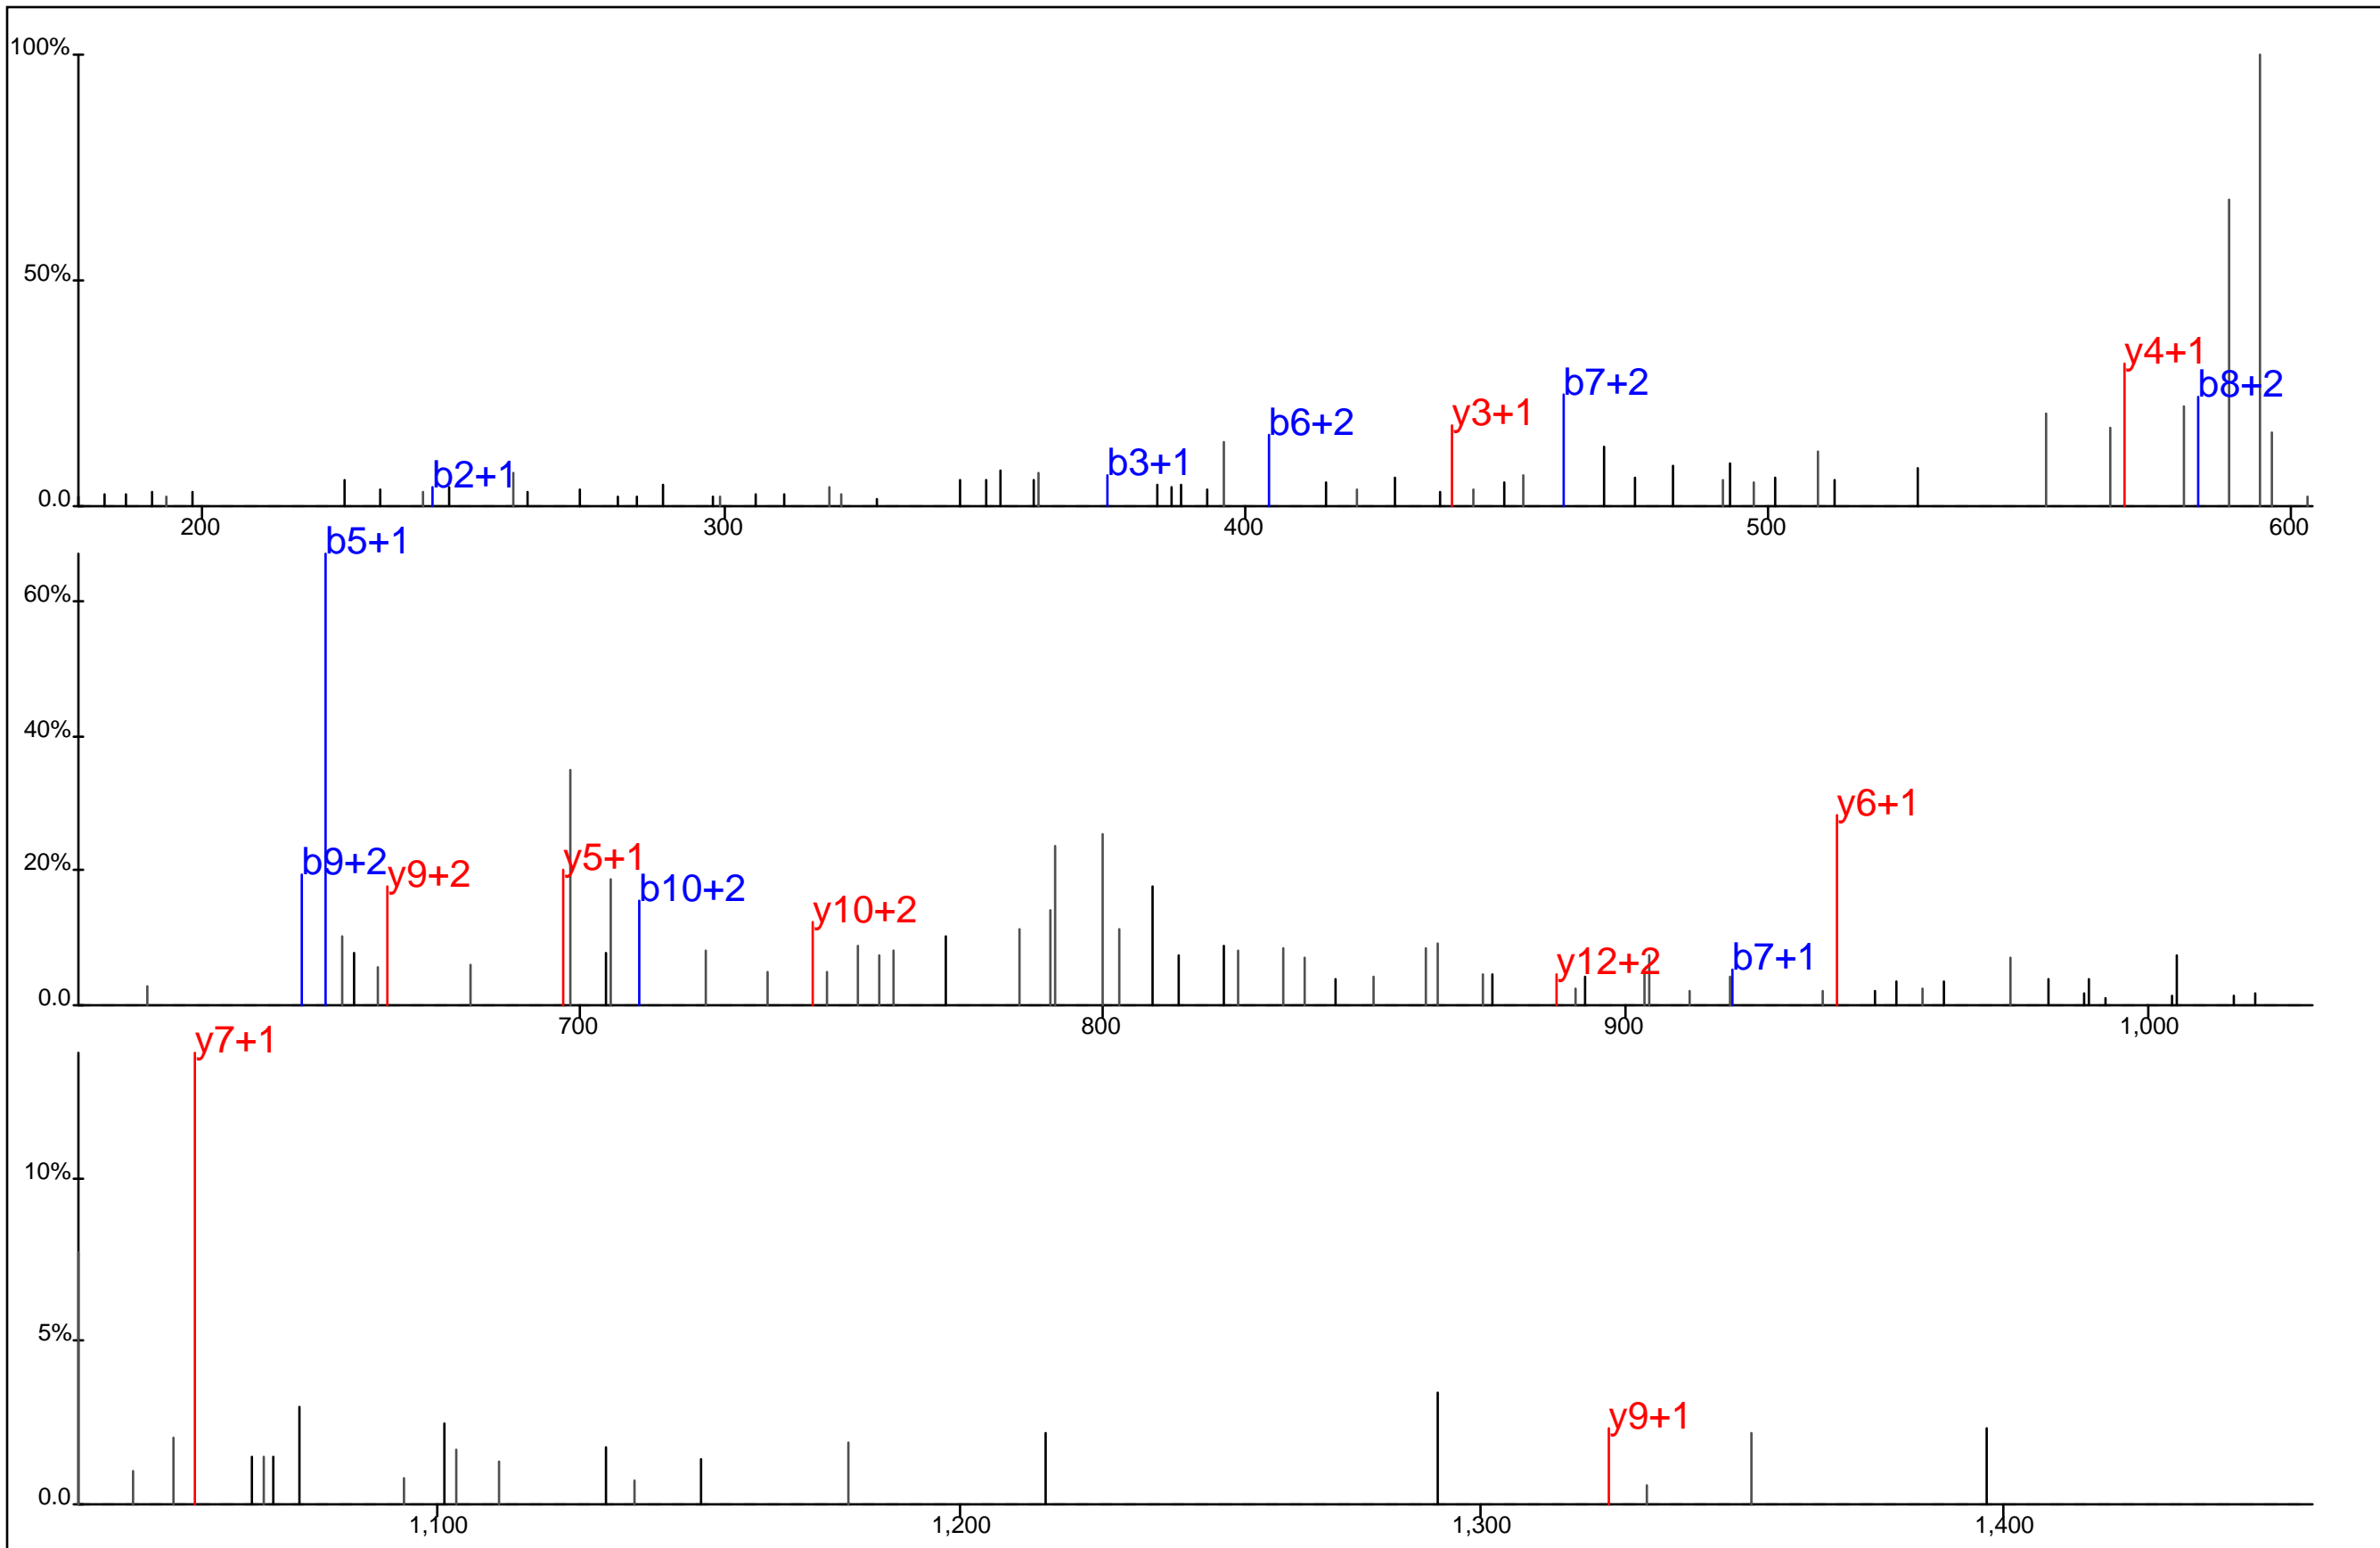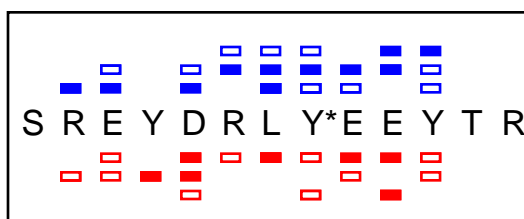

Protein Name: Phosphatidylinositol 3 kinase regulatory subunit, alpha  
 gi Accession: 0  
 Precursor Mass: 620.6028+3  
 Delta Mass: 1.050 ppm  
 XCorr: 21.24

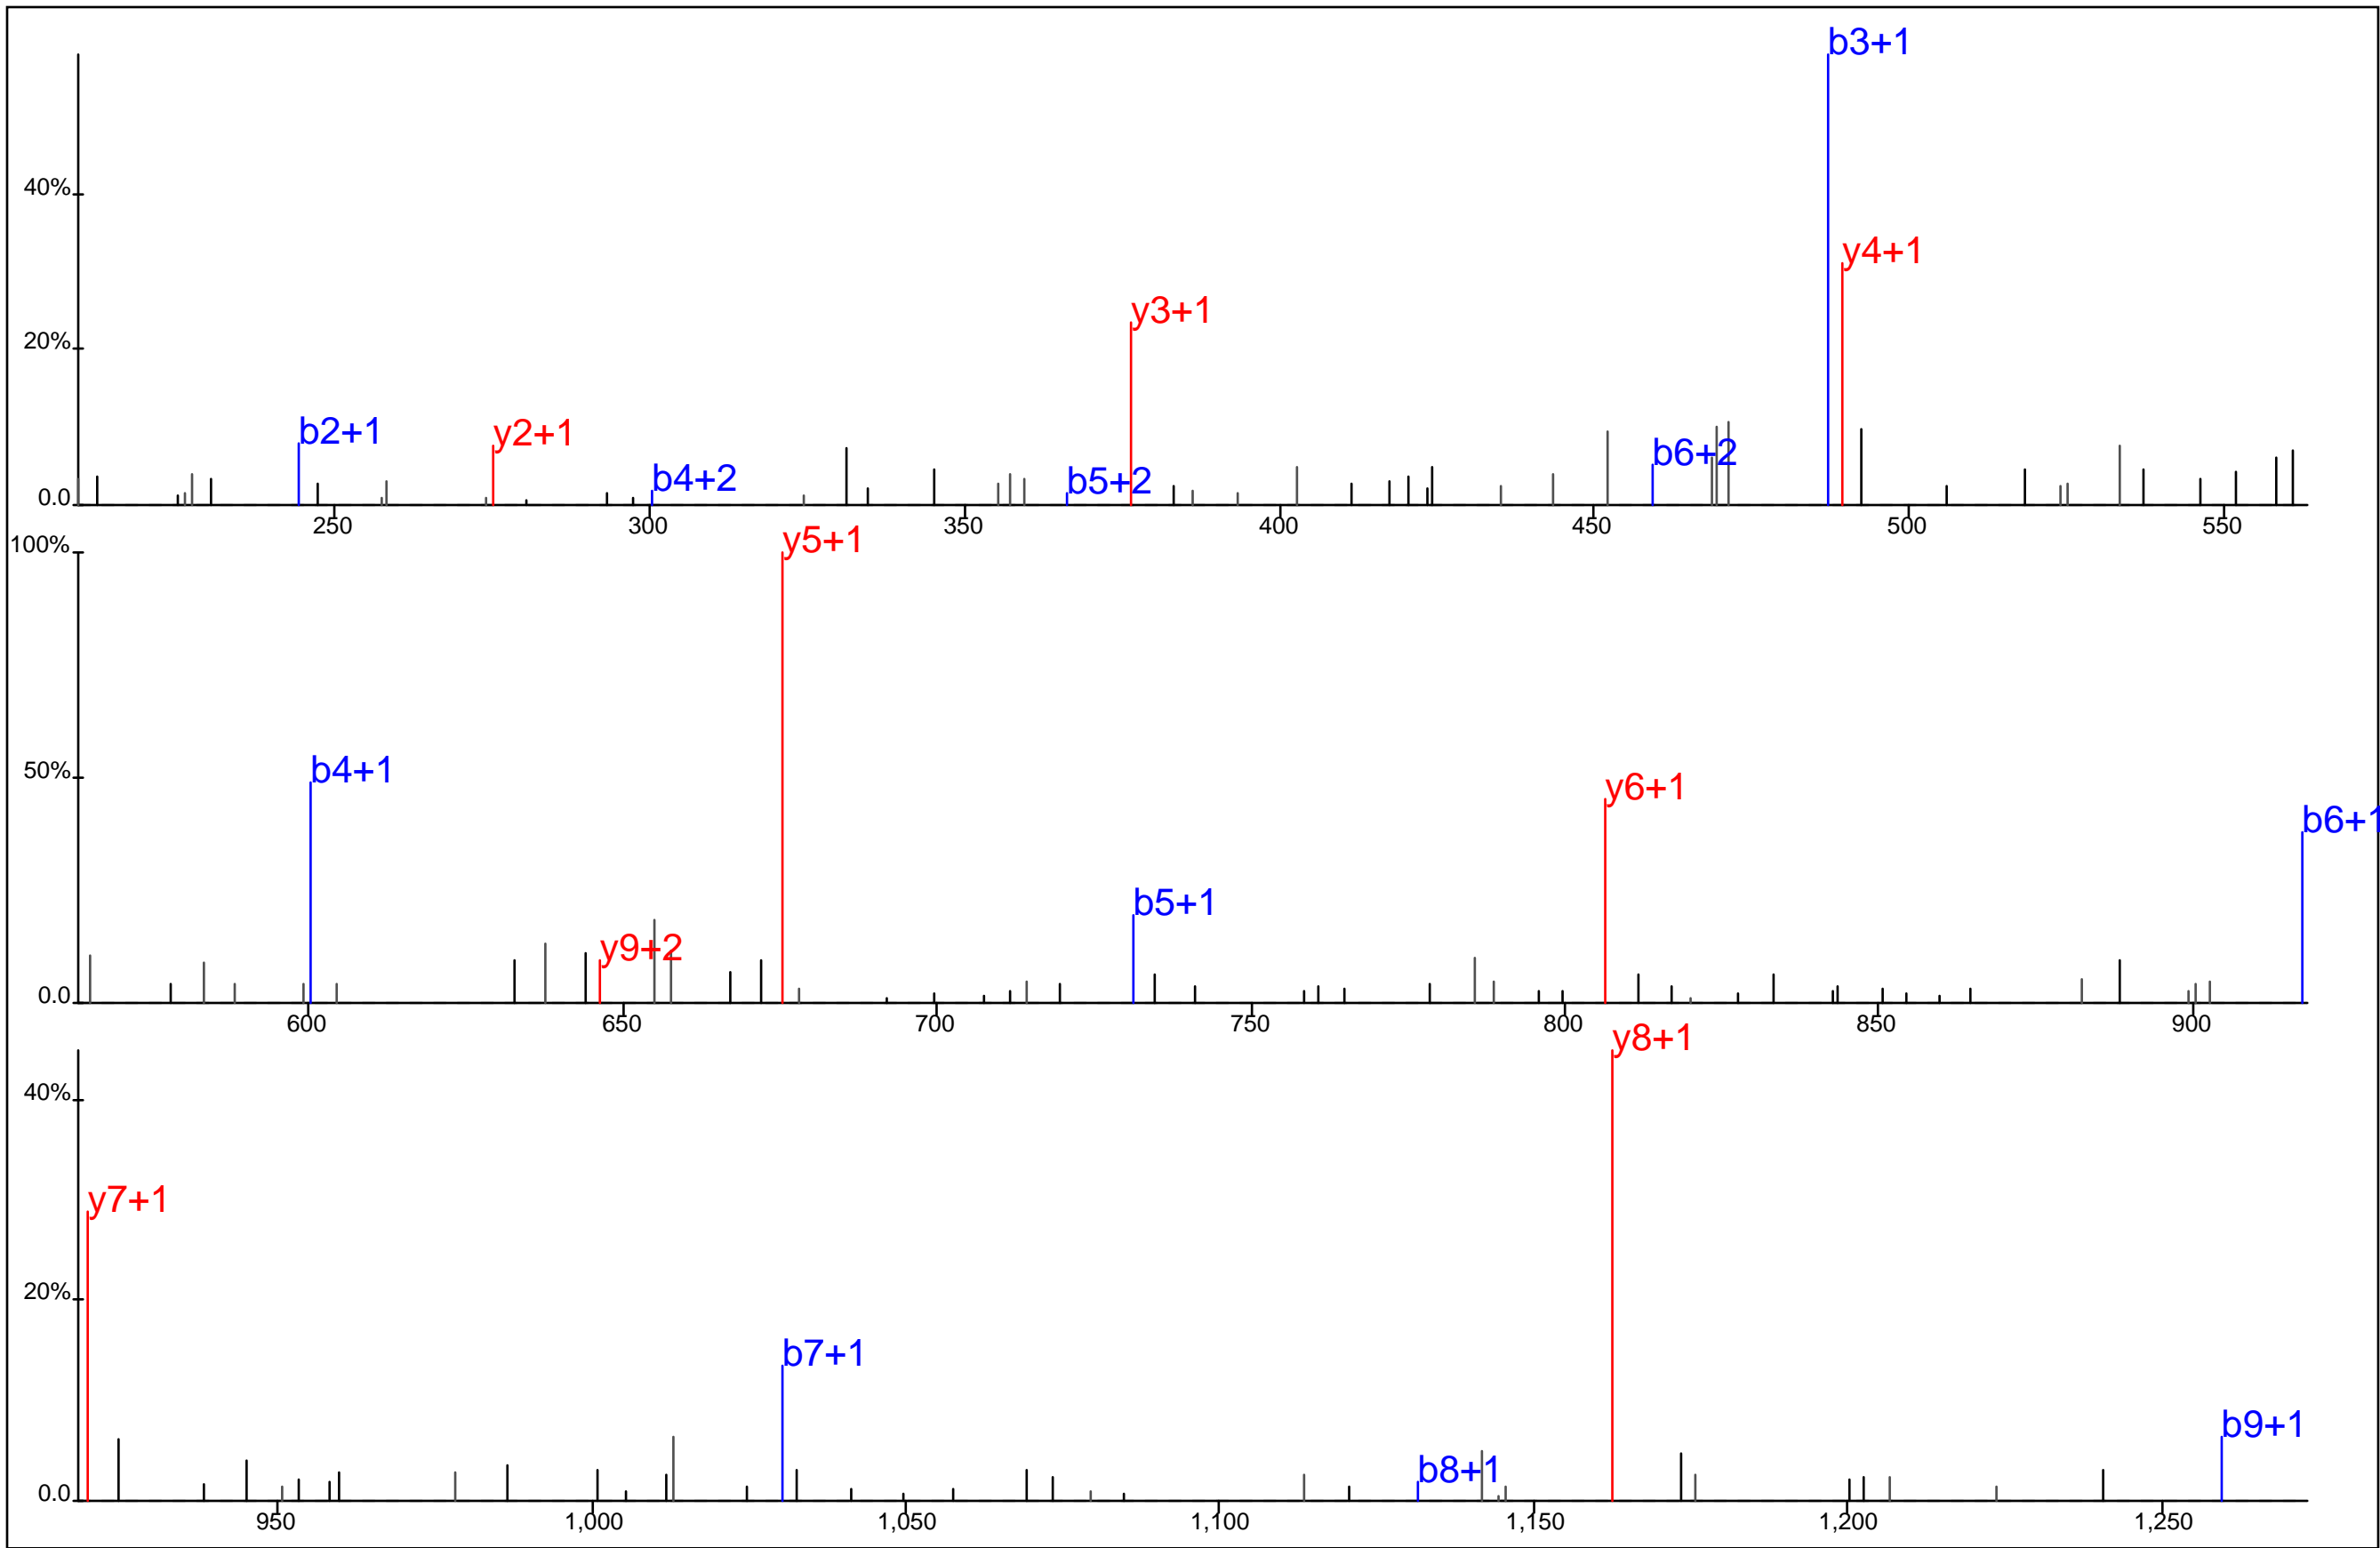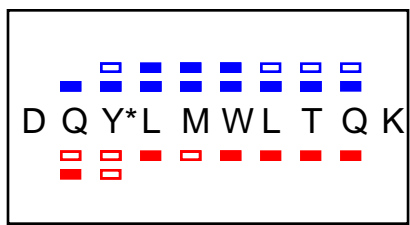

Protein Name: Phosphatidylinositol 3 kinase regulatory subunit, alpha  
 gi Accession: 0  
 Precursor Mass: 703.3132+2  
 Delta Mass: 2.102 ppm  
 XCorr: 55.42

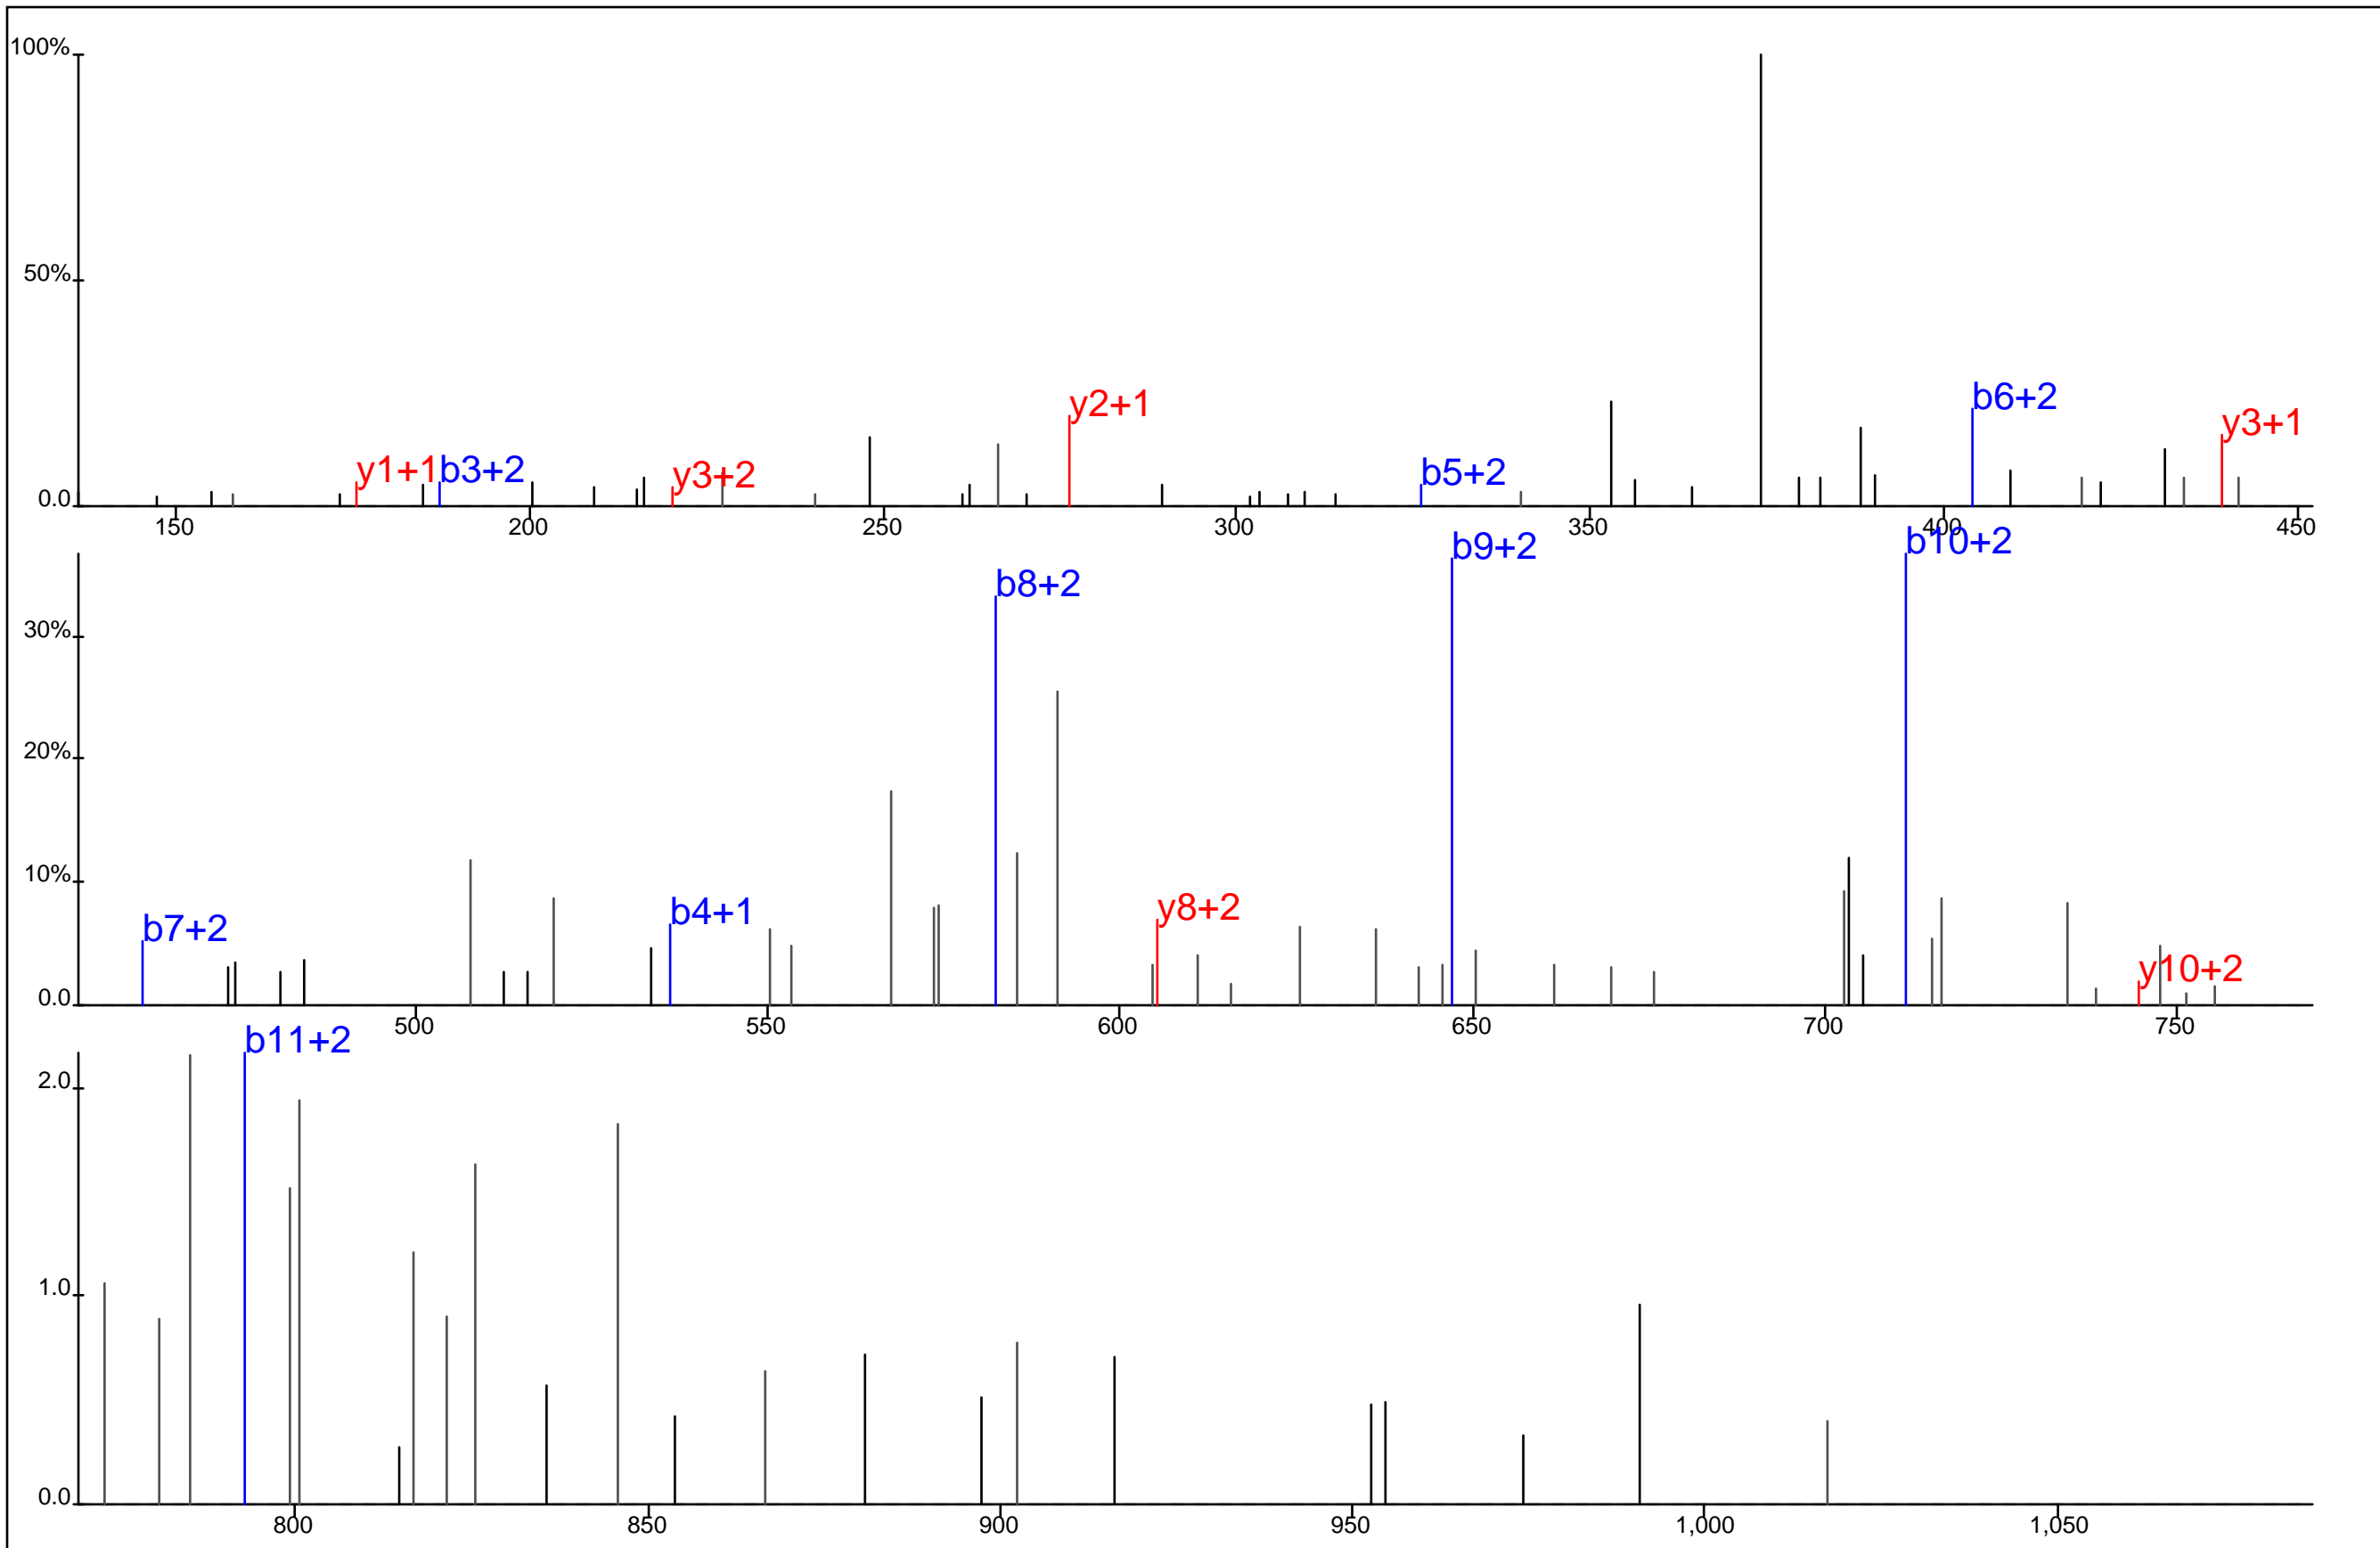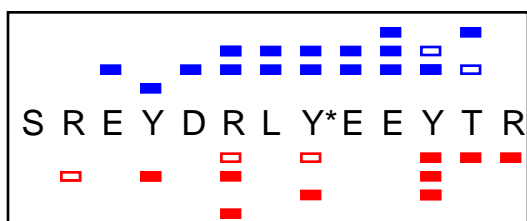

Protein Name: Phosphatidylinositol 3 kinase regulatory subunit, alpha  
 gi Accession: 0  
 Precursor Mass: 465.7063+4  
 Delta Mass: 3.932 ppm  
 XCorr: 20.41

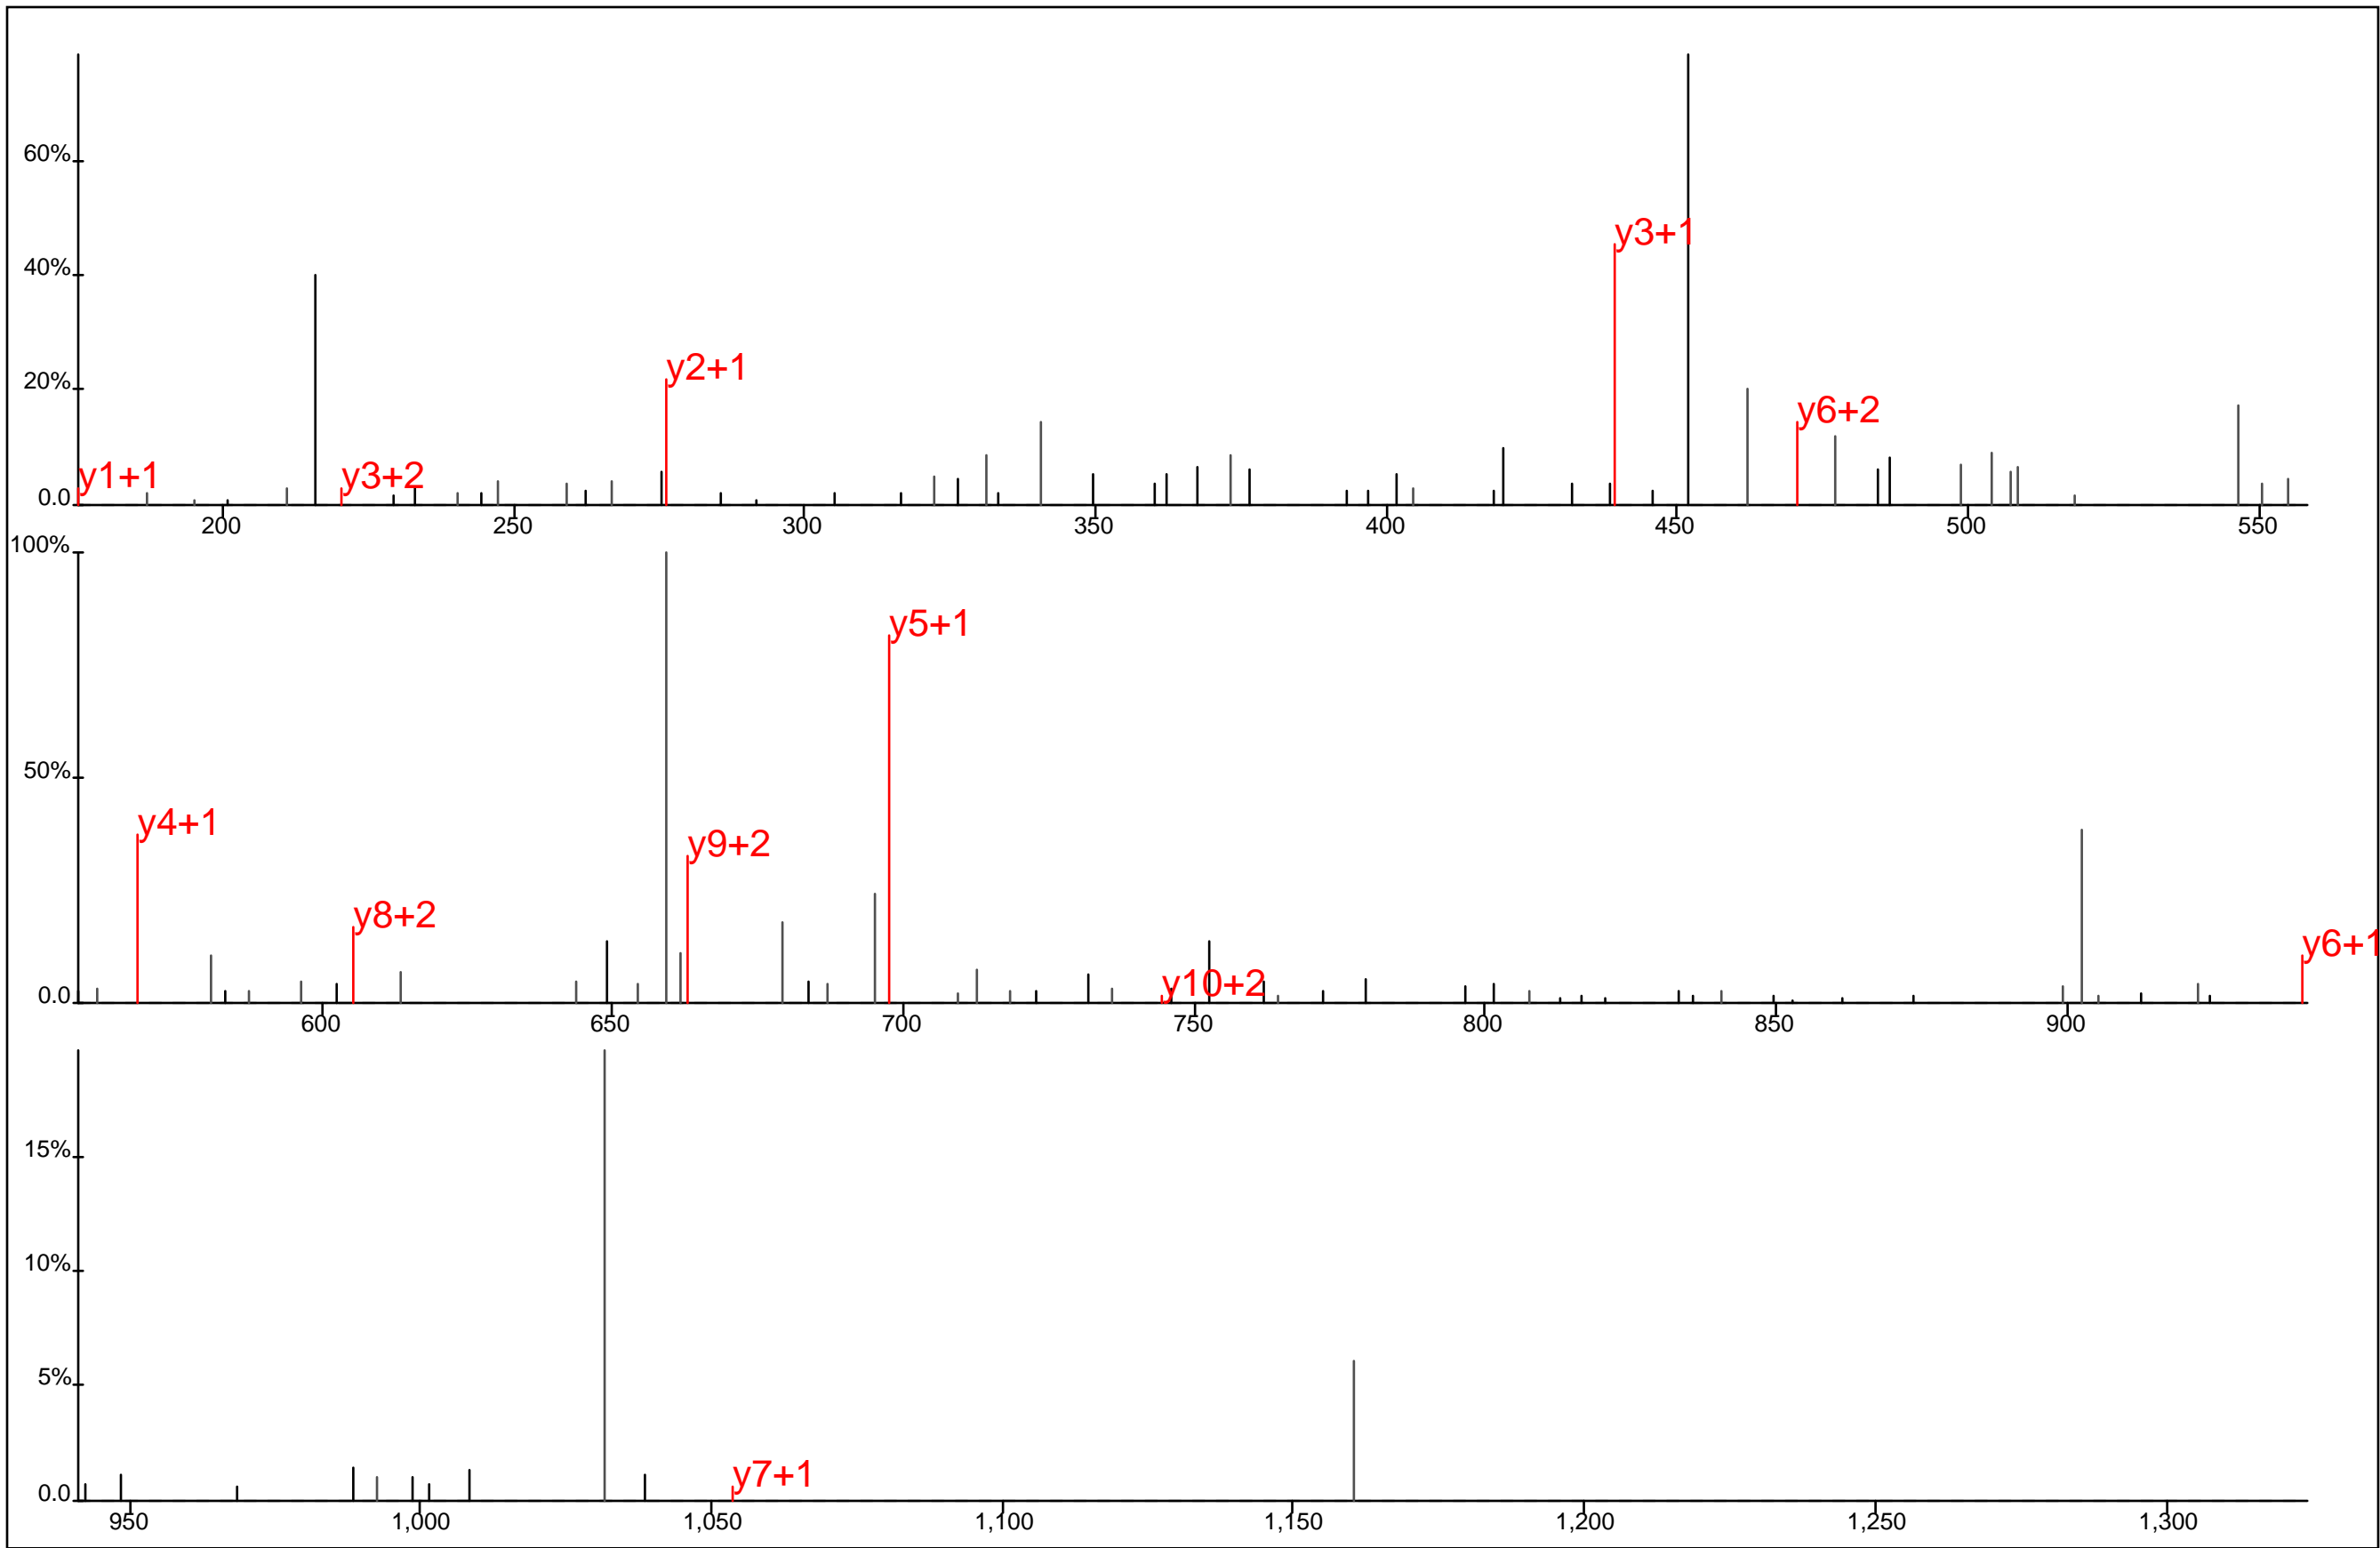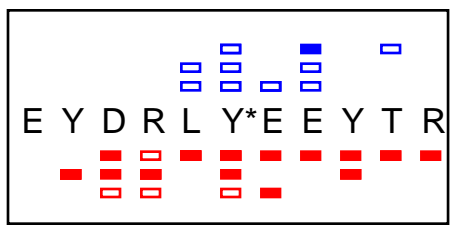

Protein Name: Phosphatidylinositol 3 kinase regulatory subunit, alpha  
 gi Accession: 0  
 Precursor Mass: 539.5595+3  
 Delta Mass: 0.732 ppm  
 XCorr: 22.18

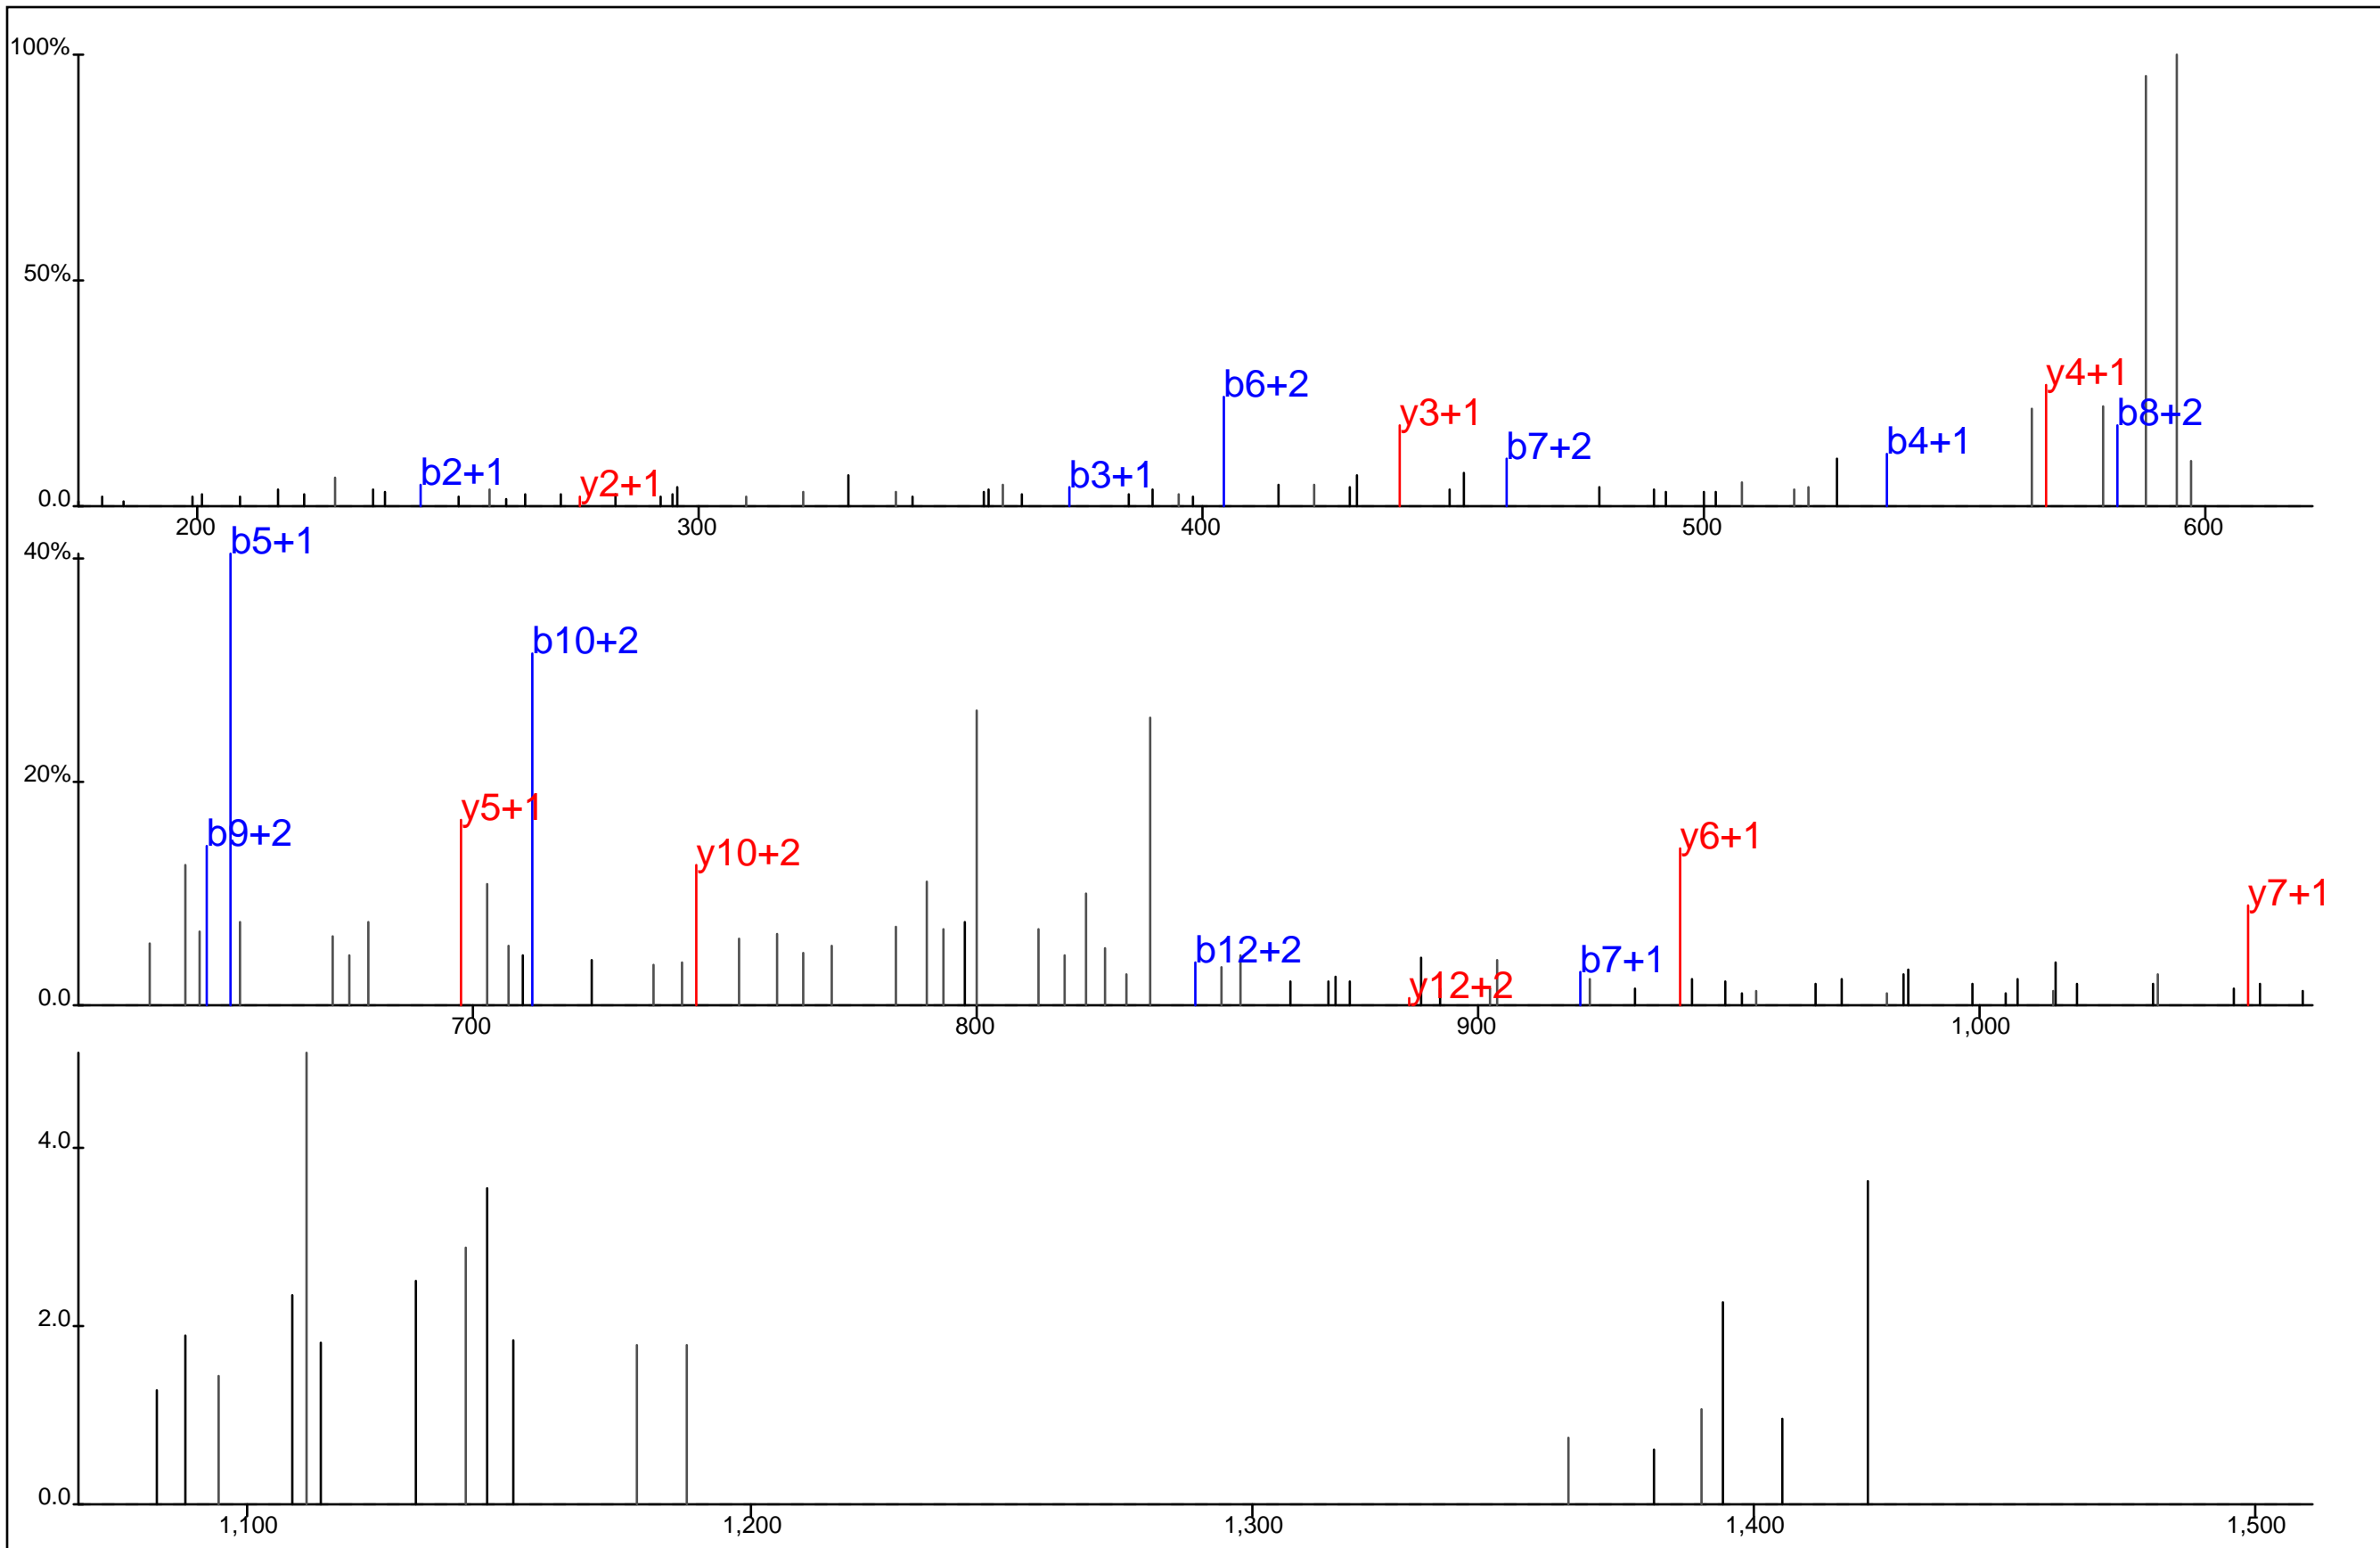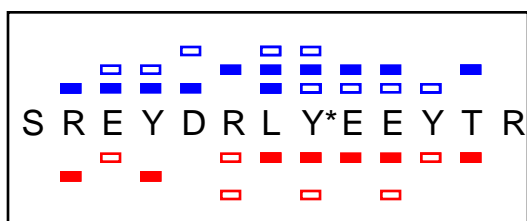

Protein Name: Phosphatidylinositol 3 kinase regulatory subunit, alpha  
 gi Accession: 0  
 Precursor Mass: 620.6034+3  
 Delta Mass: 0.162 ppm  
 XCorr: 22.22

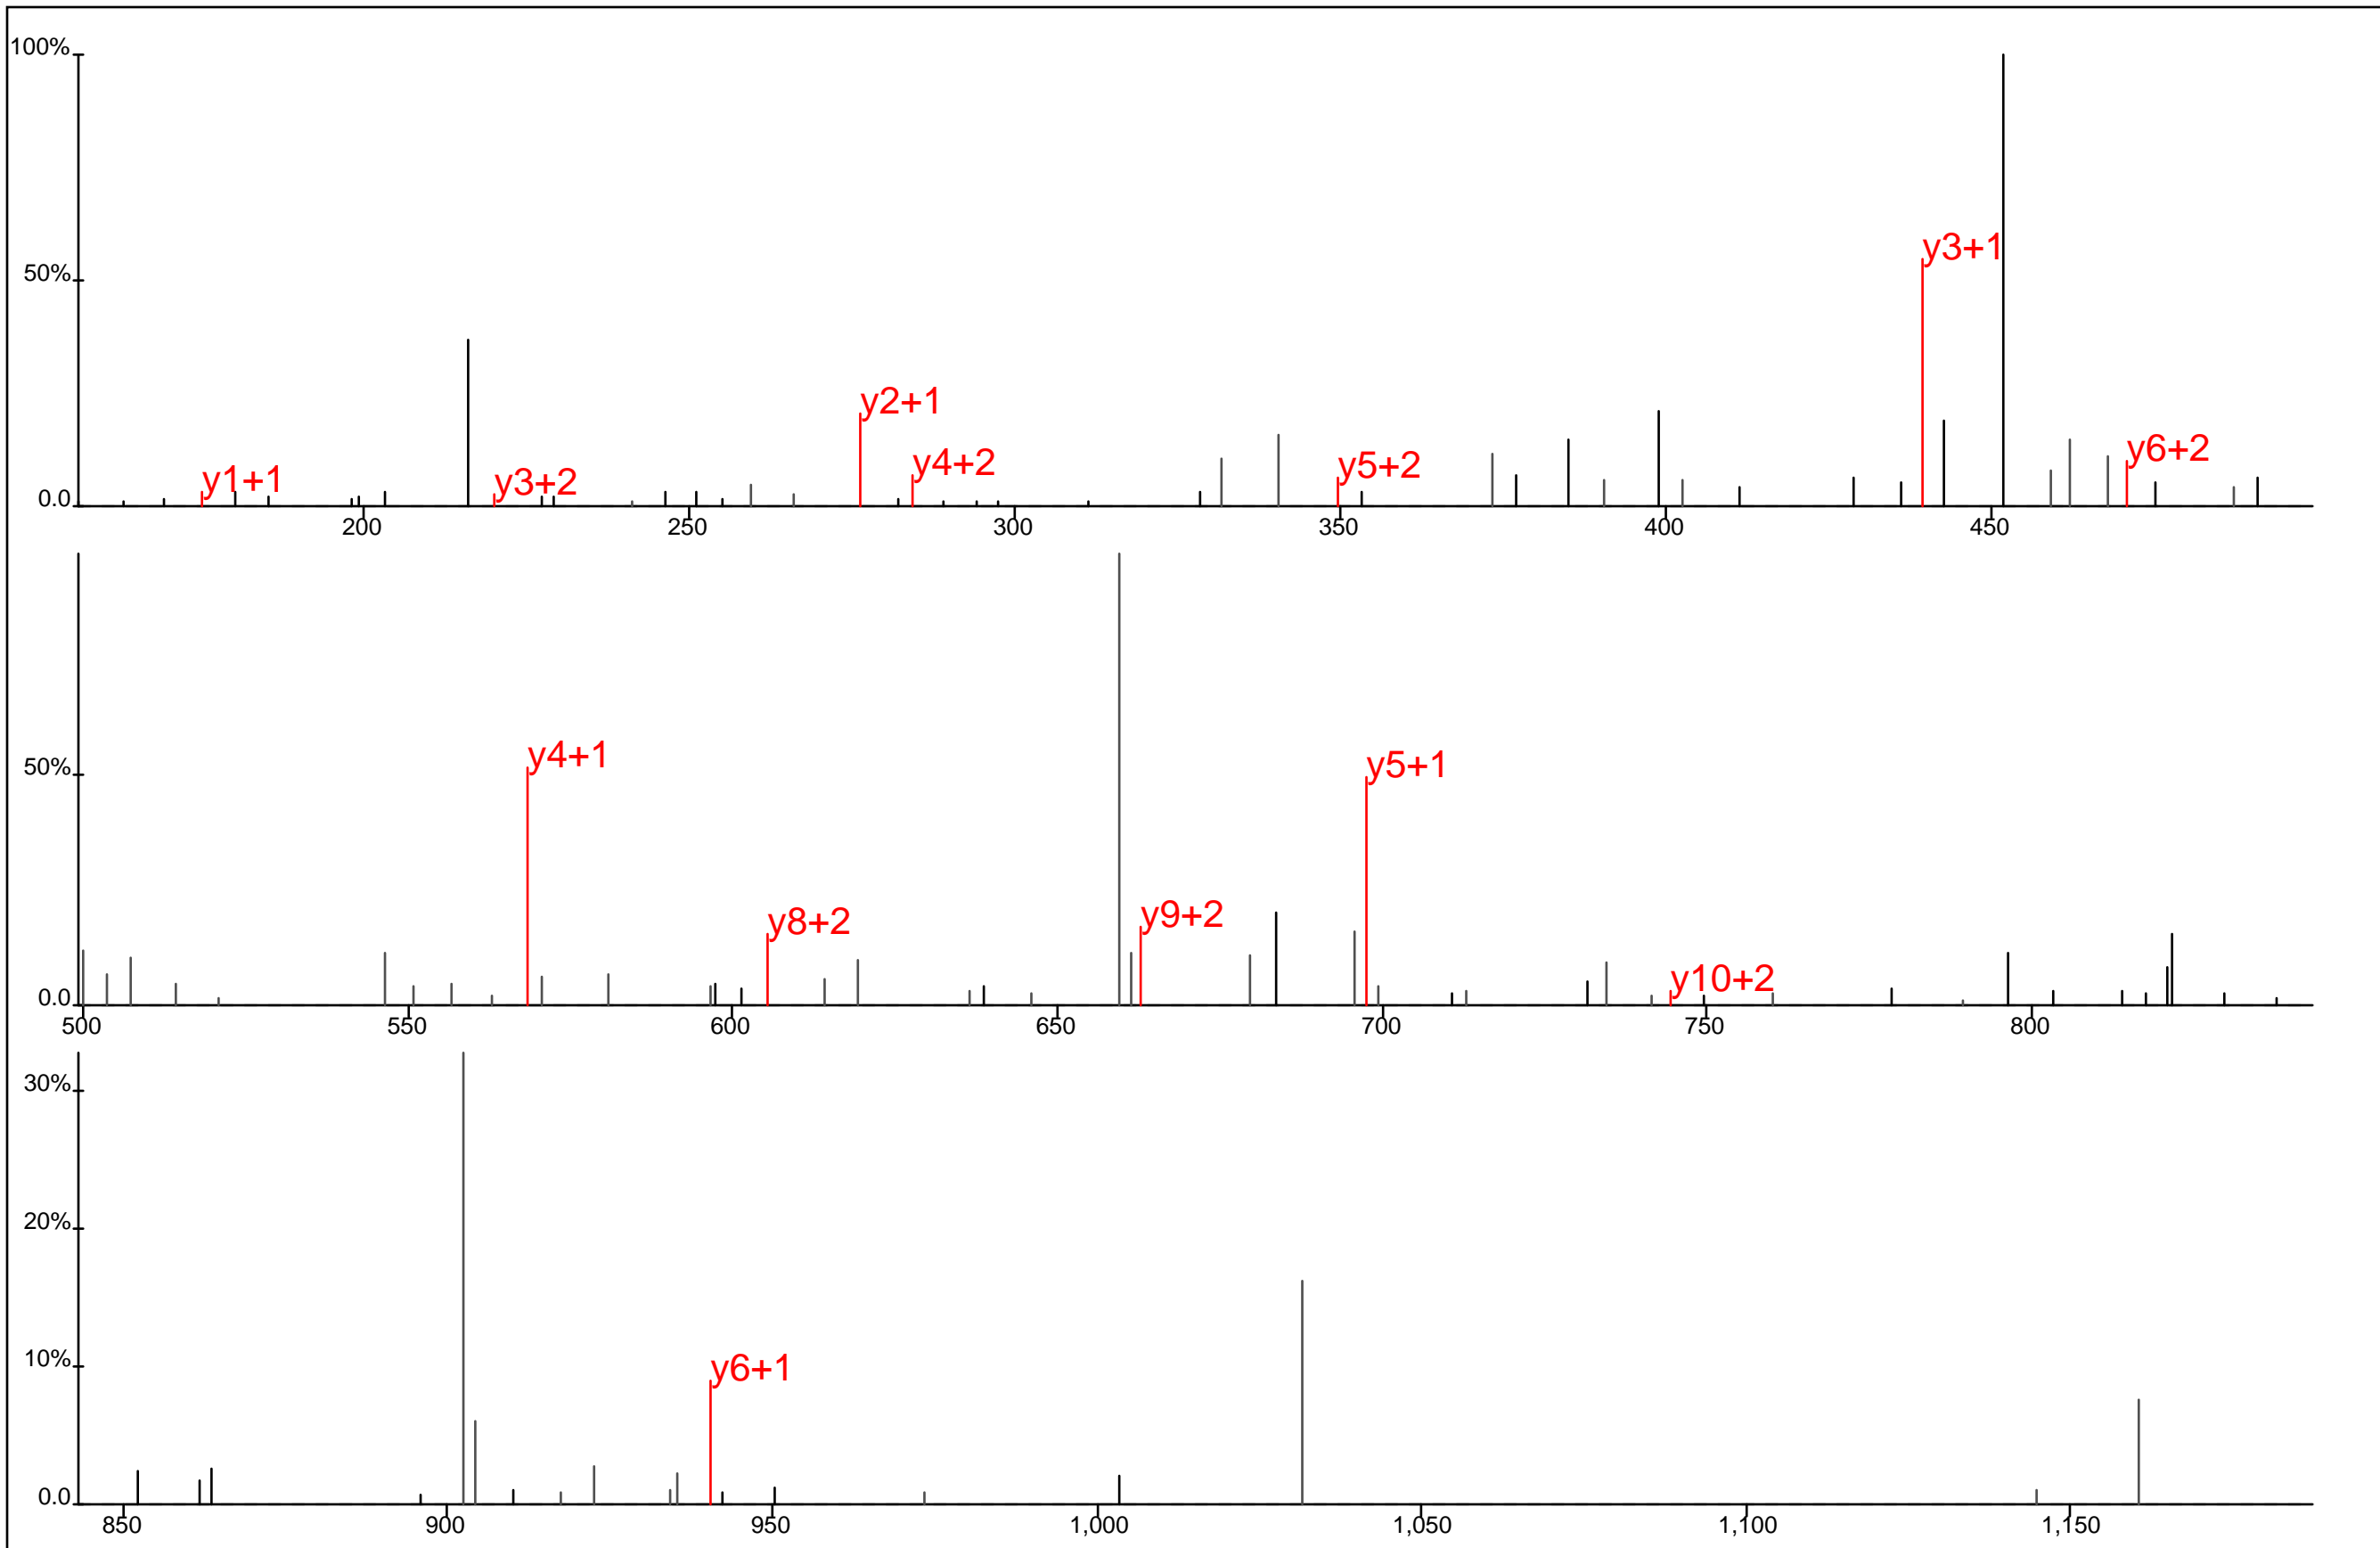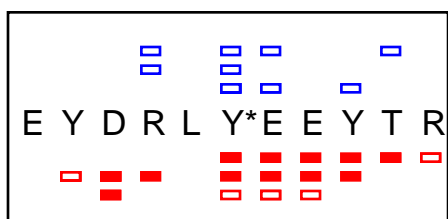

Protein Name: Phosphatidylinositol 3 kinase regulatory subunit, alpha  
 gi Accession: 0  
 Precursor Mass: 539.5557+3  
 Delta Mass: 6.403 ppm  
 XCorr: 22.52

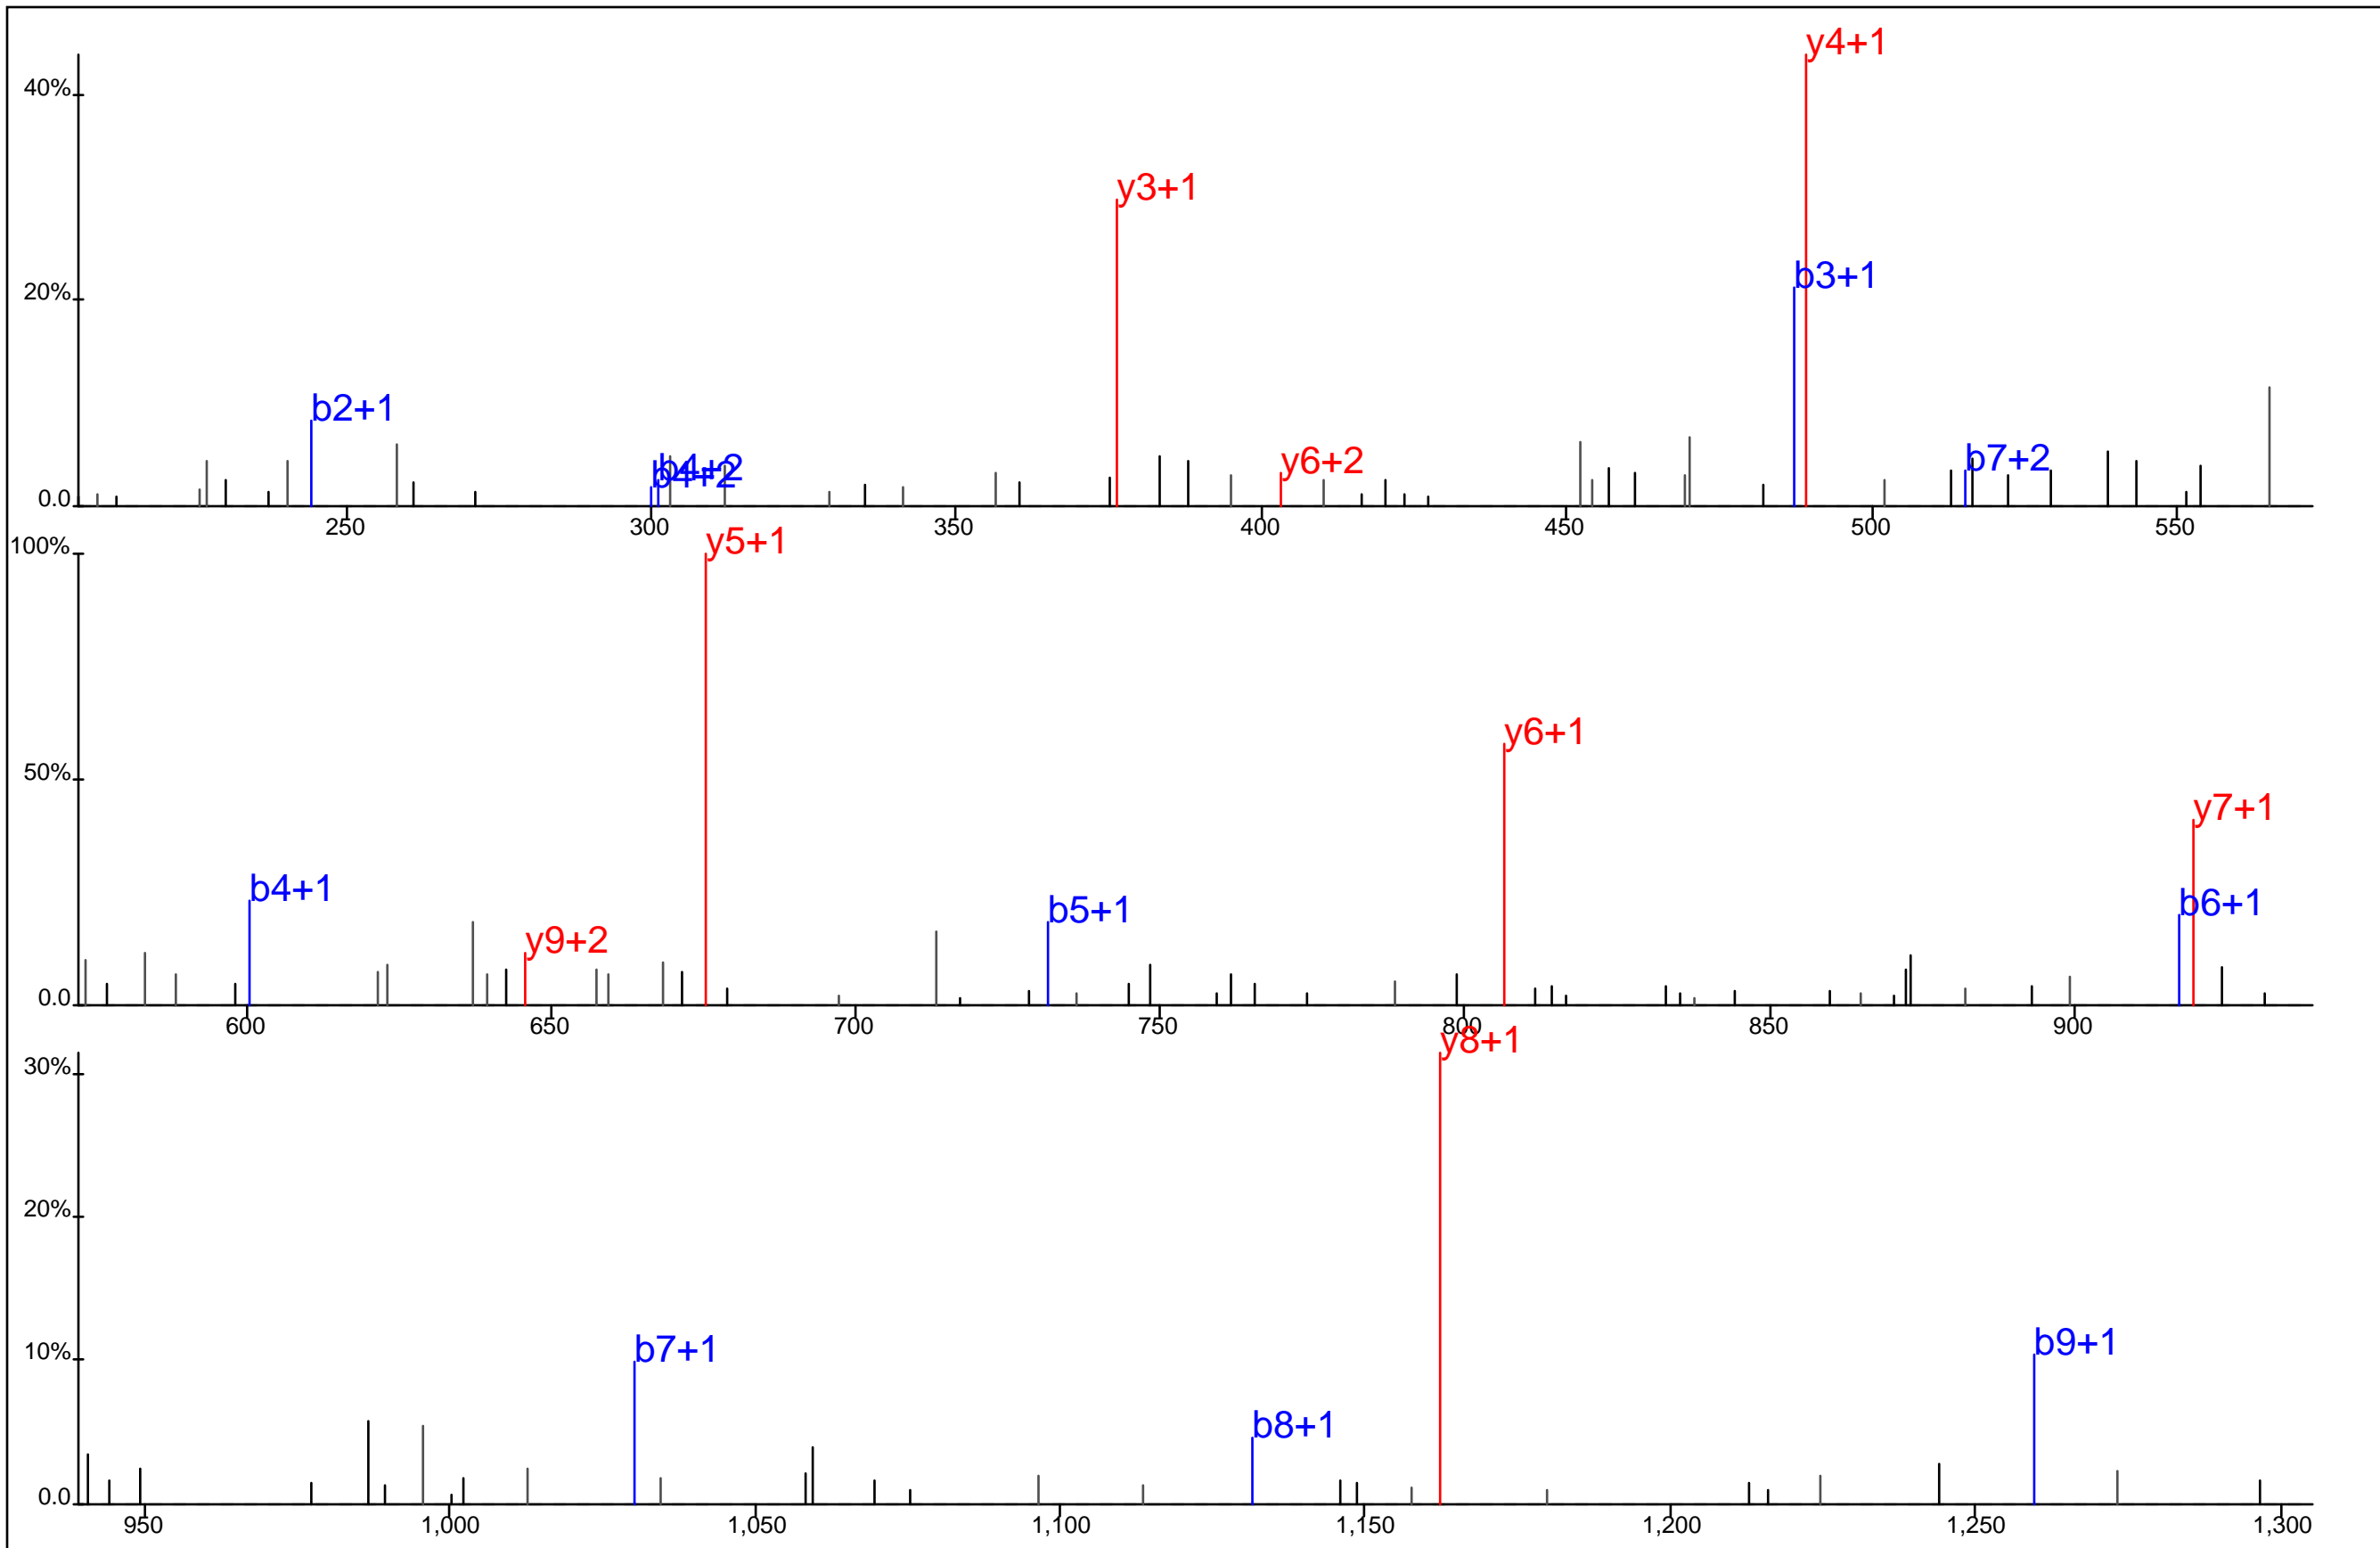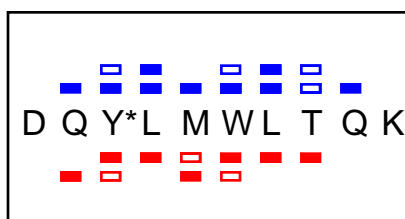

Protein Name: Phosphatidylinositol 3 kinase regulatory subunit, alpha  
 gi Accession: 0  
 Precursor Mass: 703.3114+2  
 Delta Mass: 4.707 ppm  
 XCorr: 66.74



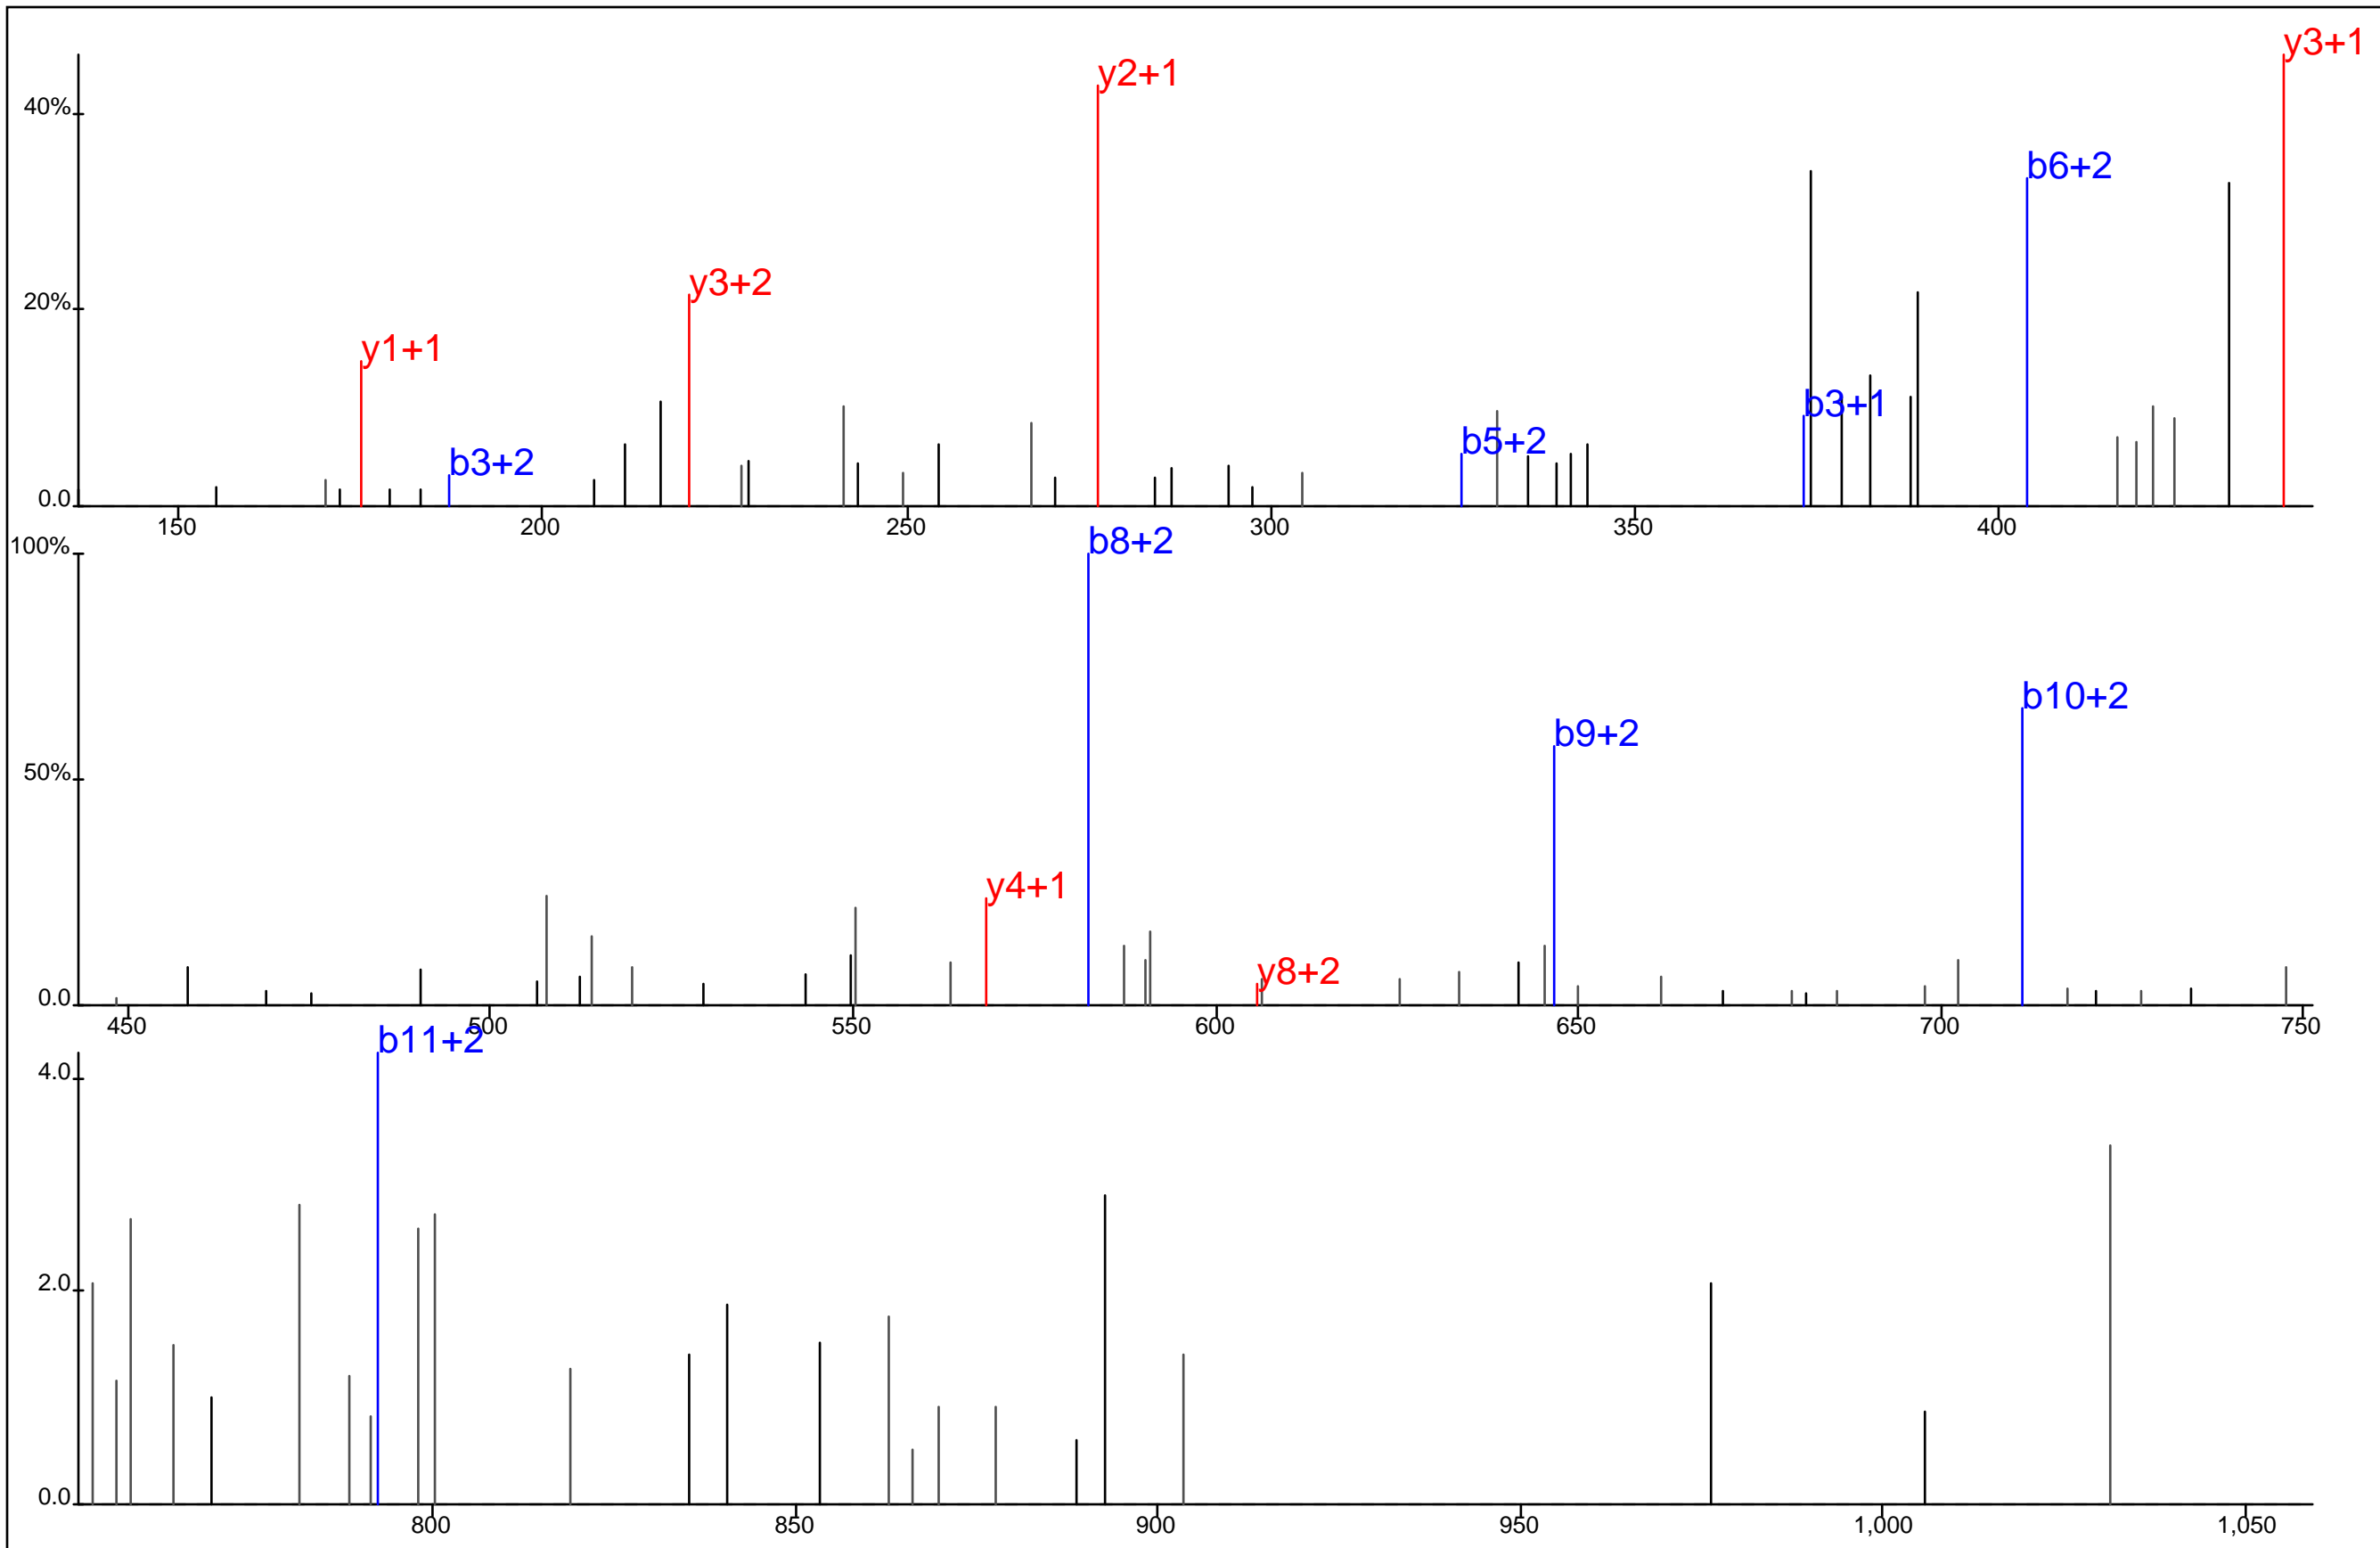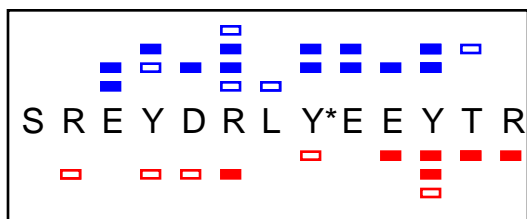

Protein Name: Phosphatidylinositol 3 kinase regulatory subunit, alpha  
 gi Accession: 0  
 Precursor Mass: 465.7055+4  
 Delta Mass: 2.226 ppm  
 XCorr: 22.75

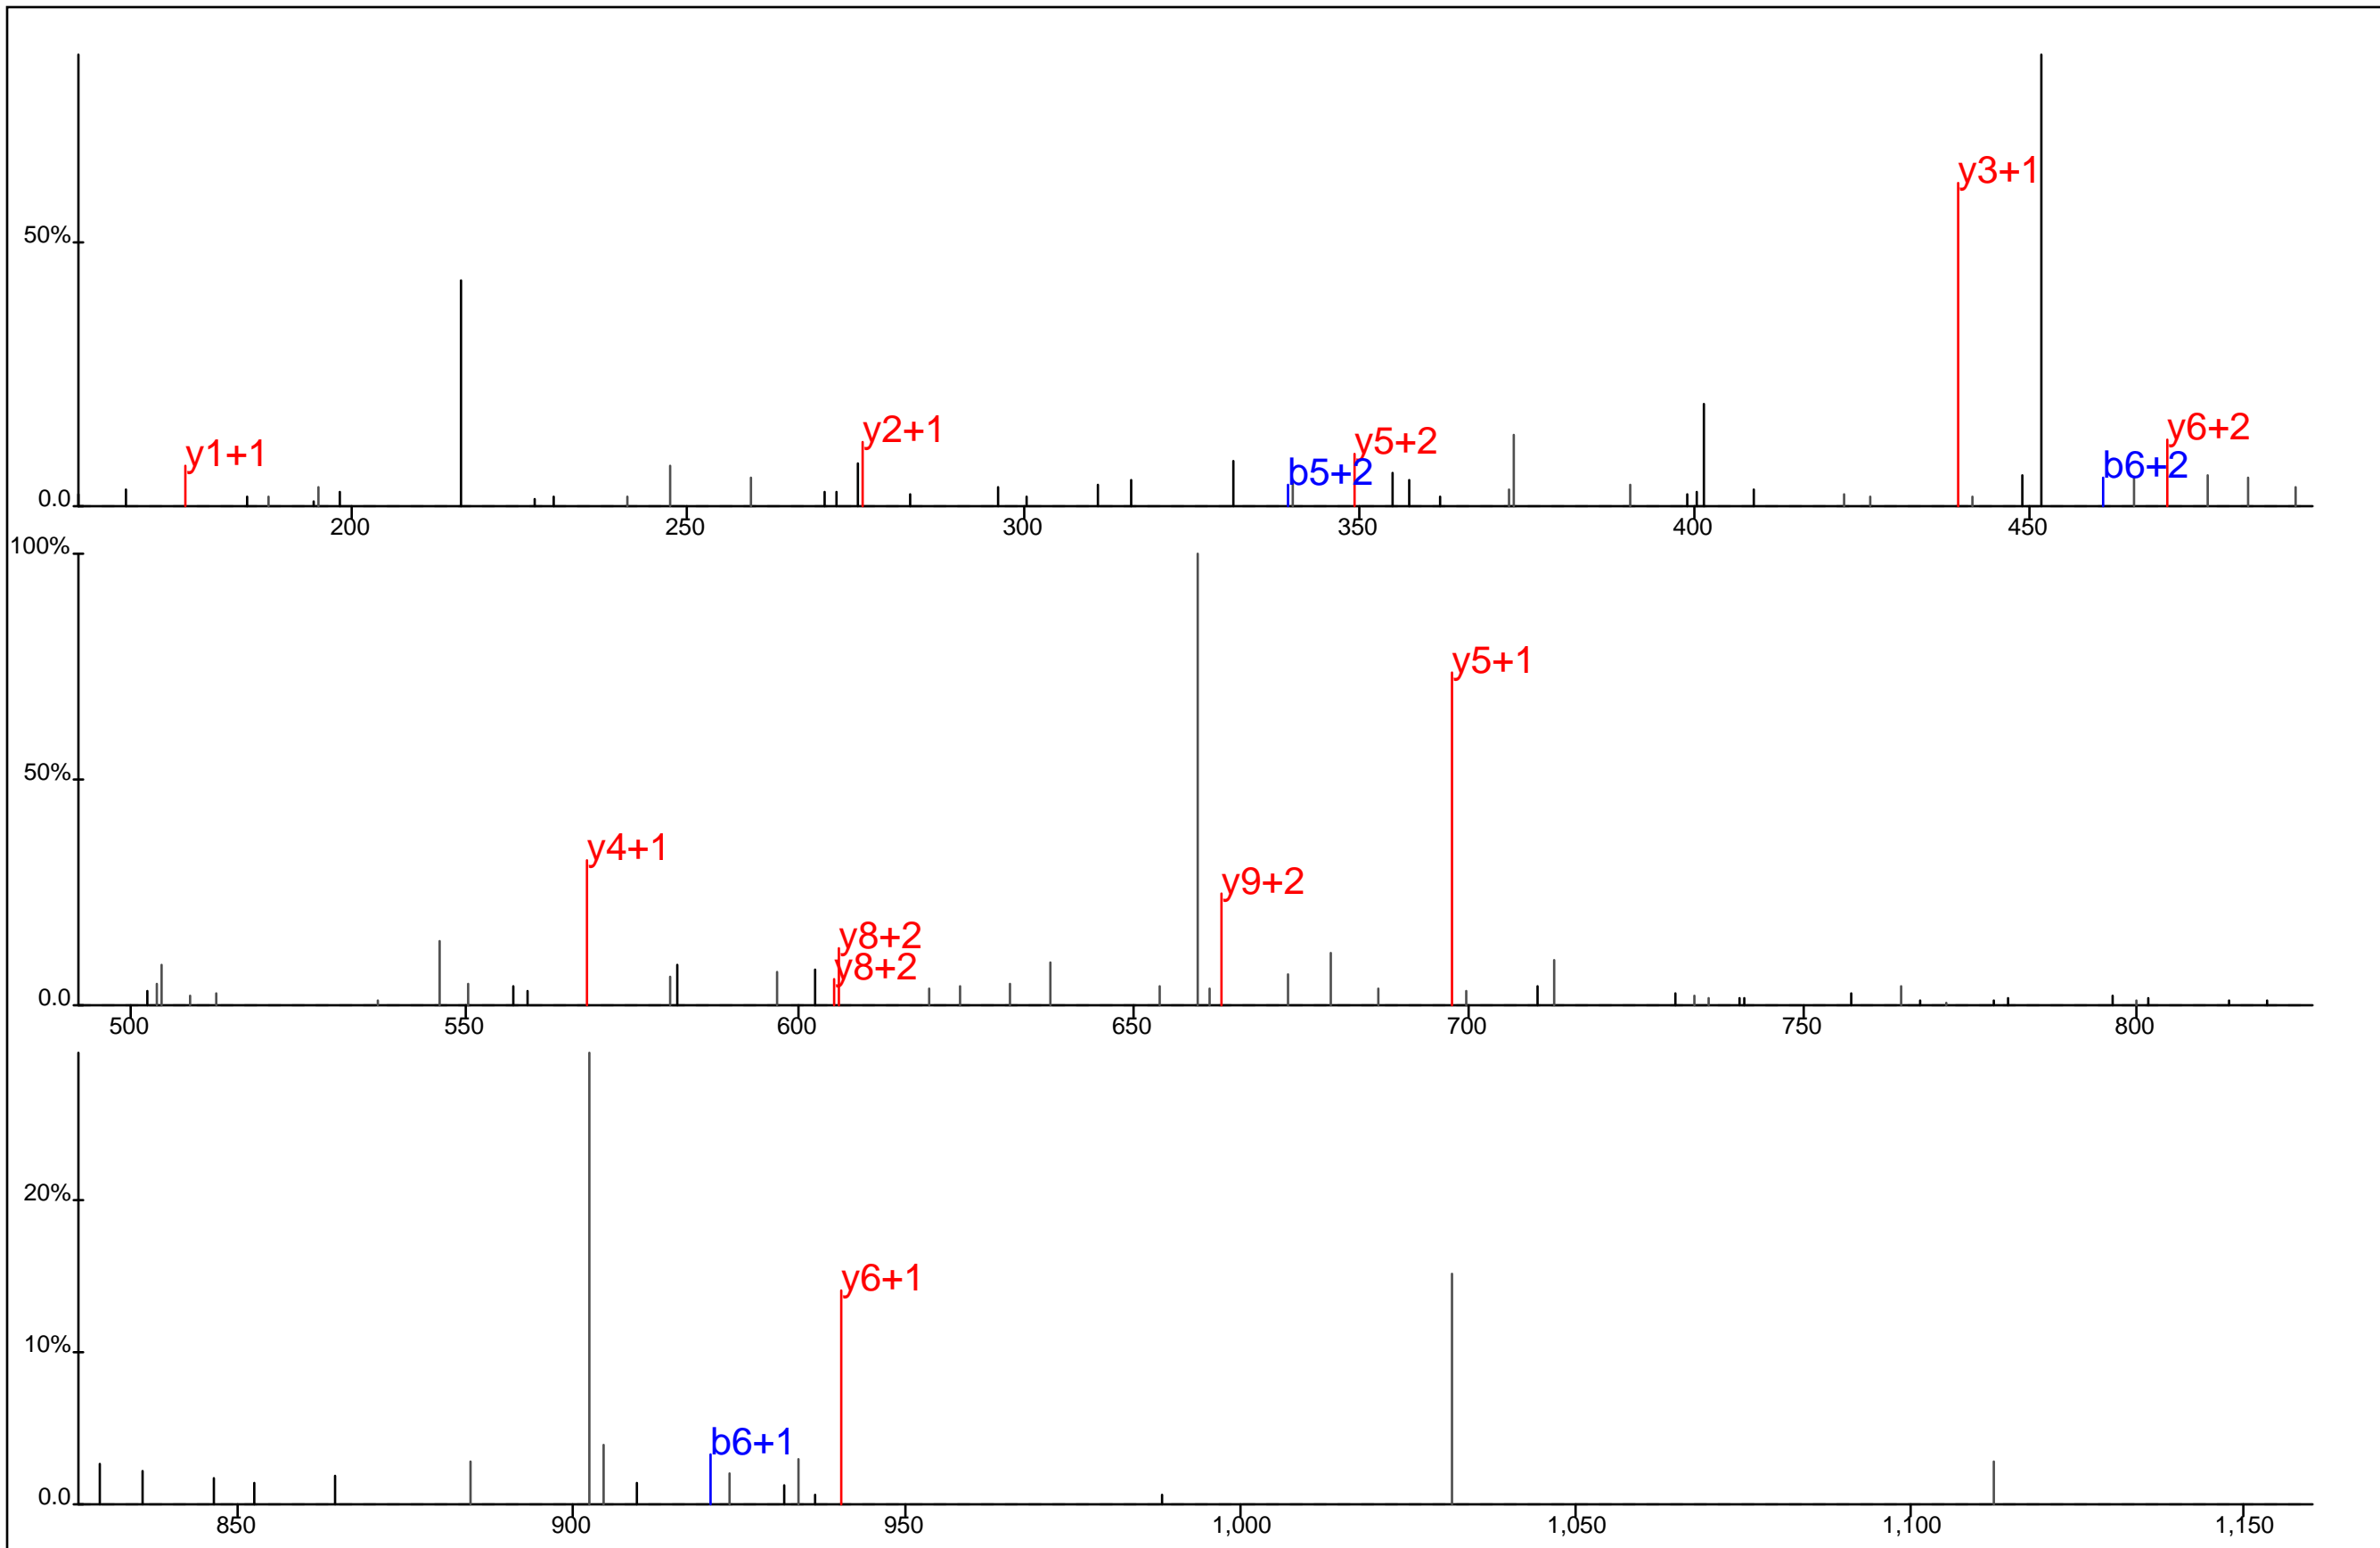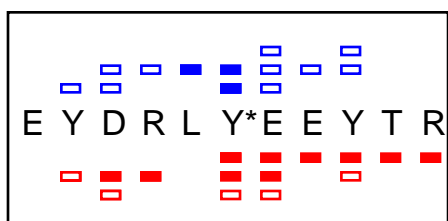

Protein Name: Phosphatidylinositol 3 kinase regulatory subunit, alpha  
 gi Accession: 0  
 Precursor Mass: 539.5599+3  
 Delta Mass: 1.411 ppm  
 XCorr: 26.26

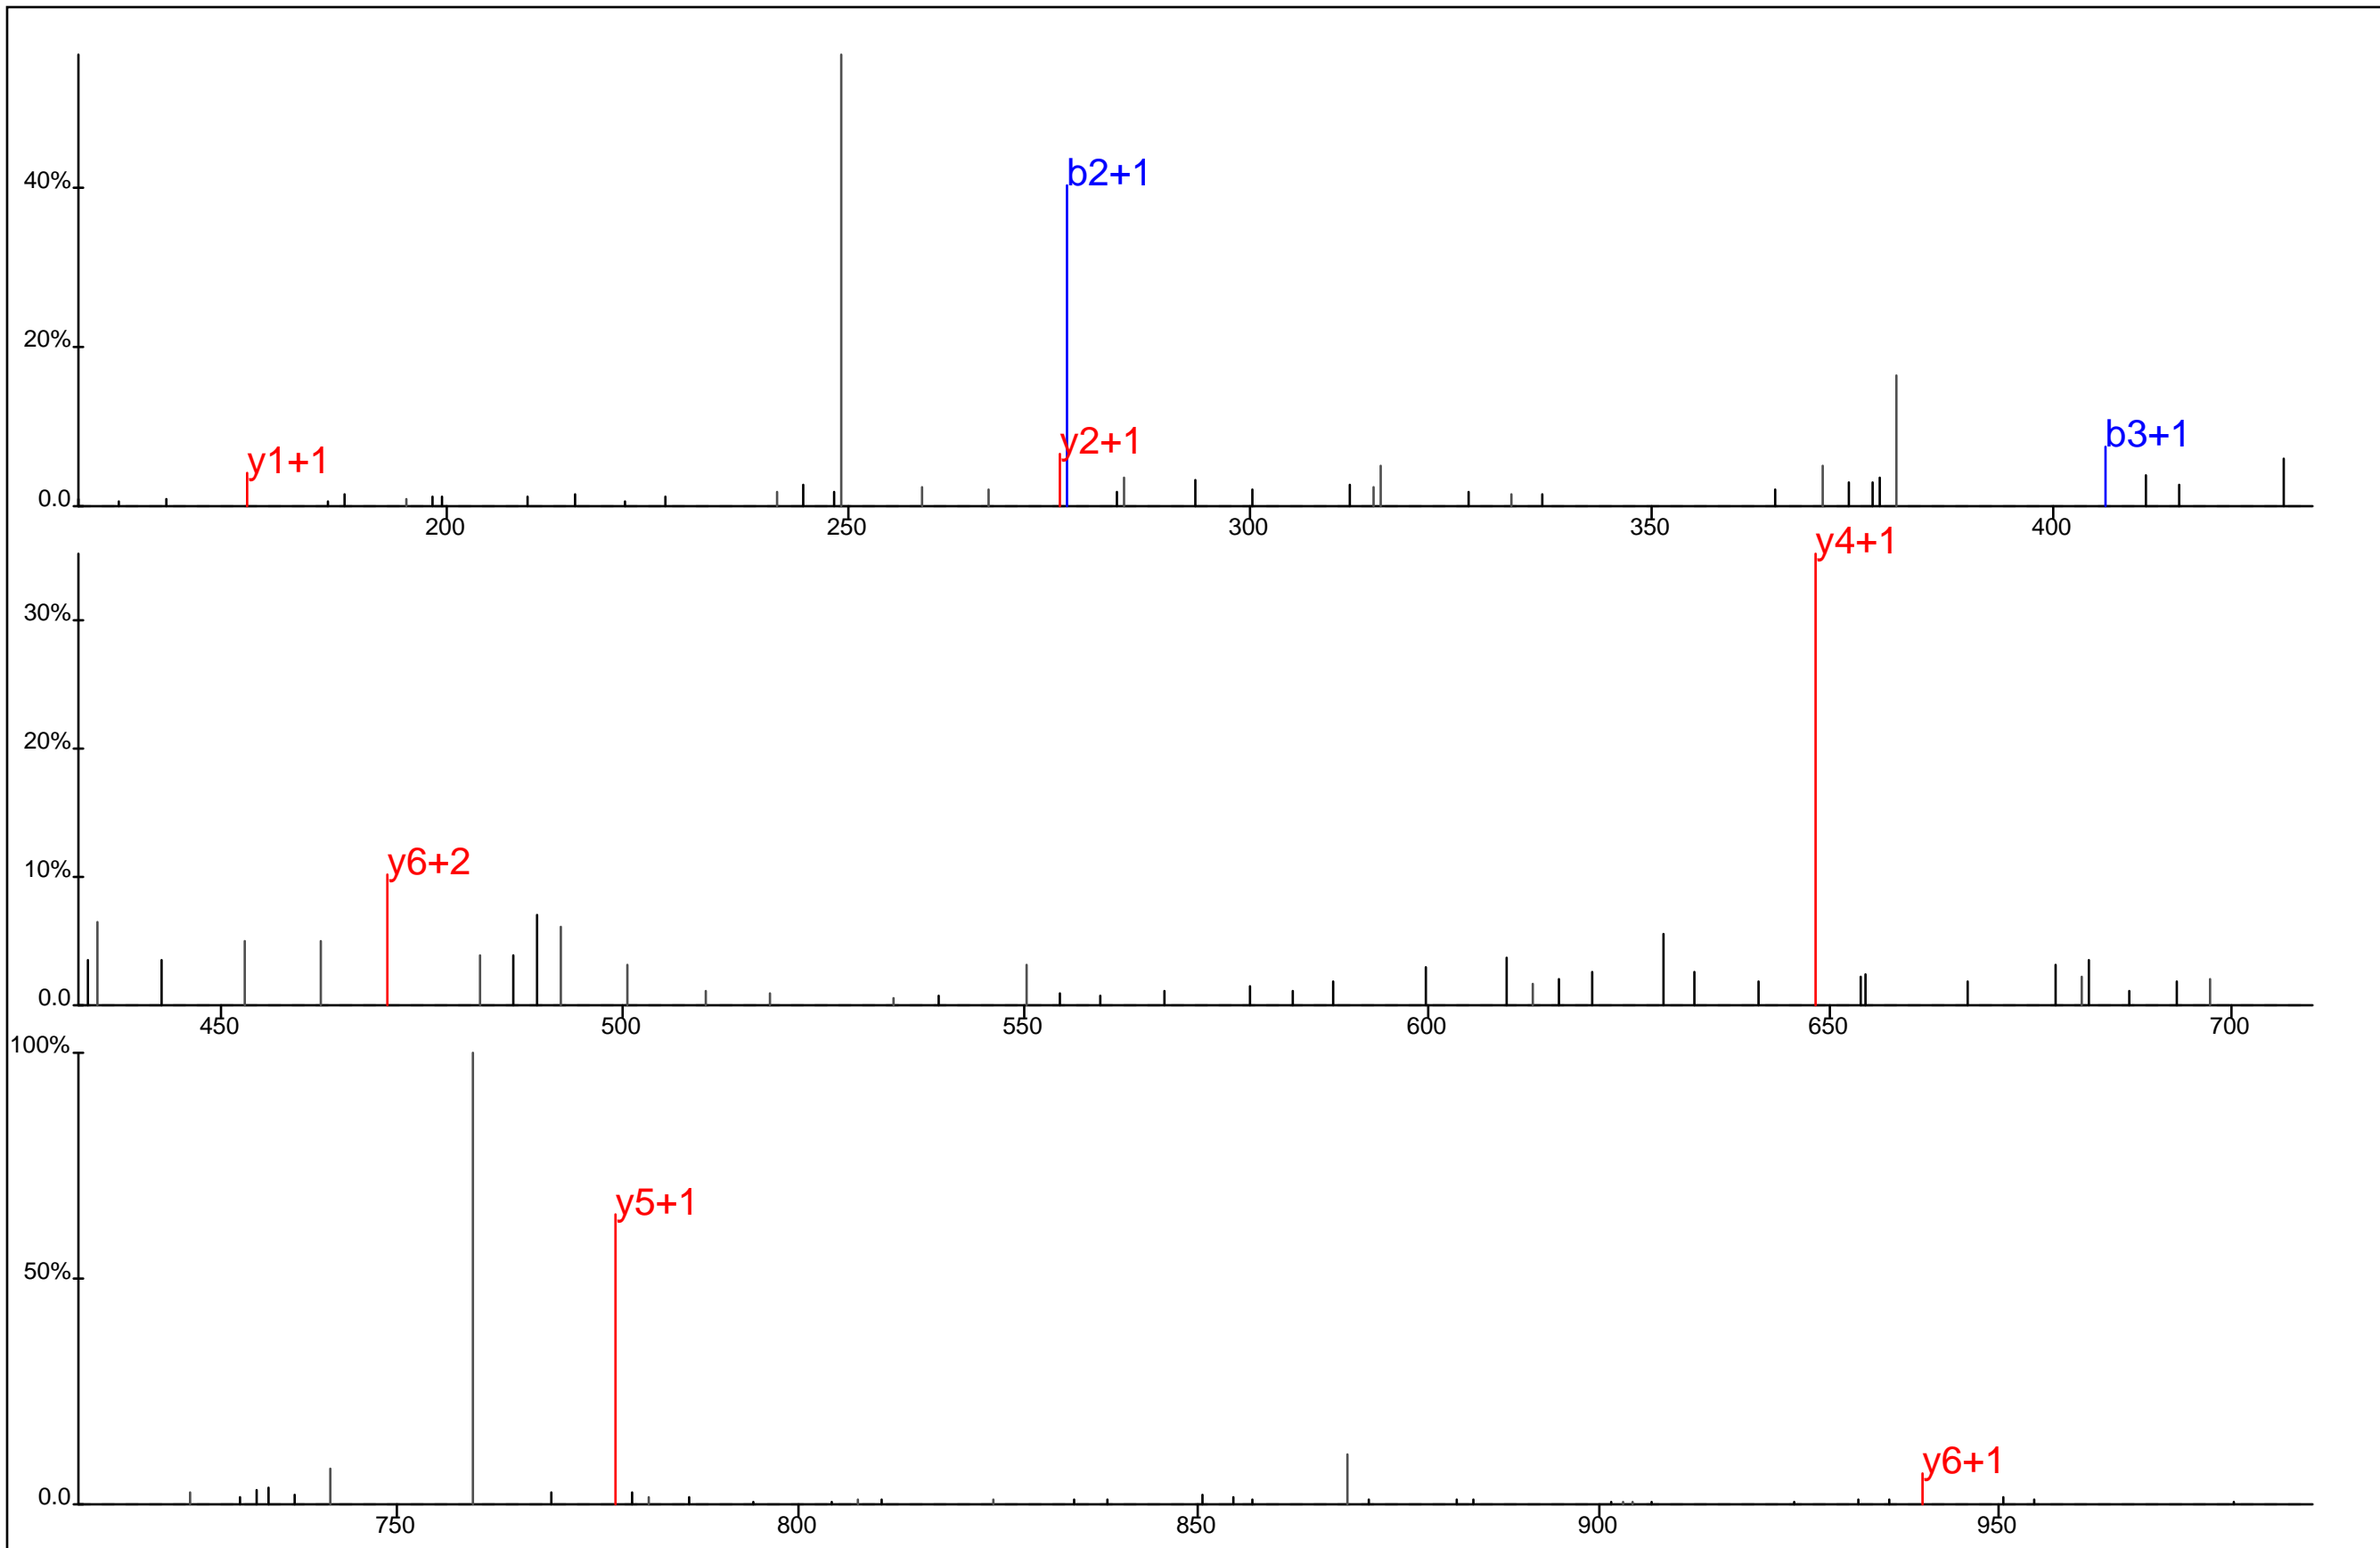

■ ■     
 L Y E E Y\* T R  
■ ■

Protein Name: Phosphatidylinositol 3 kinase regulatory subunit, alpha  
 gi Accession: 0  
 Precursor Mass: 527.2184+2  
 Delta Mass: 0.627 ppm  
 XCorr: 28.17

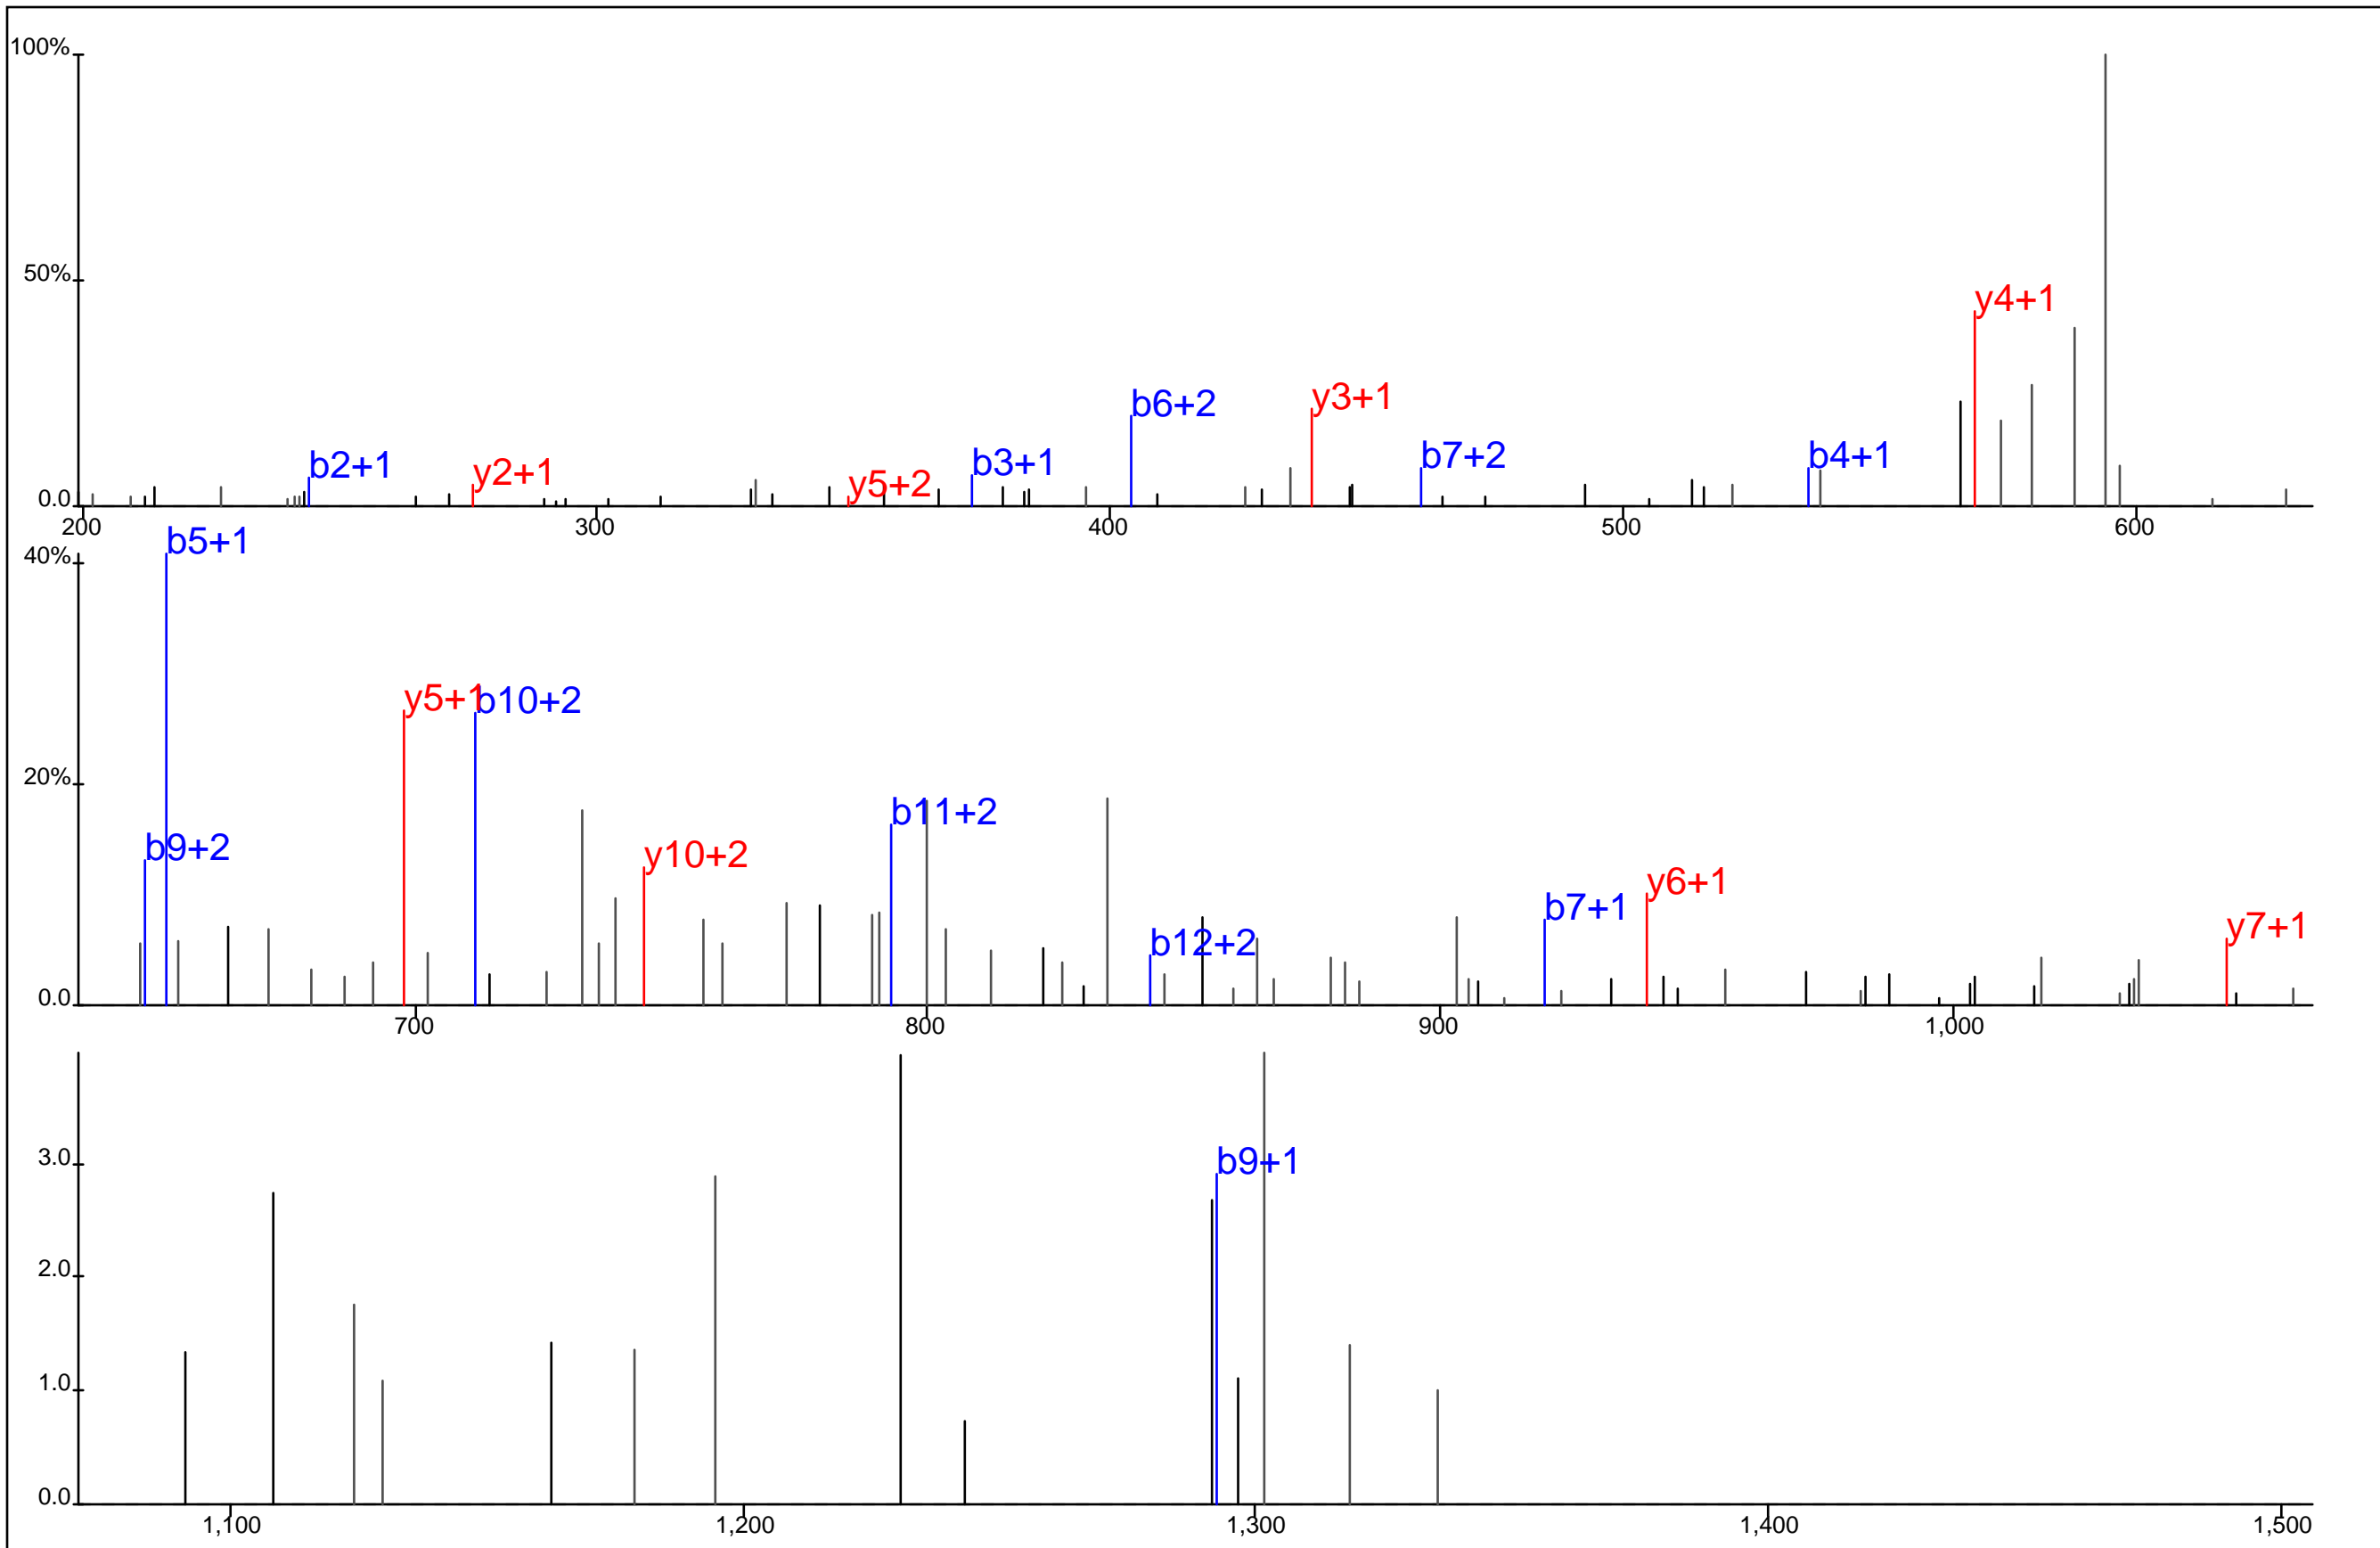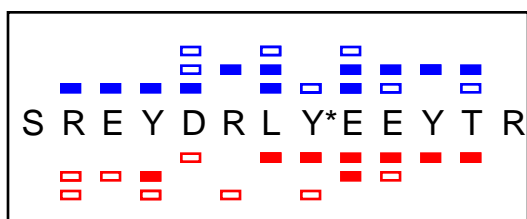

Protein Name: Phosphatidylinositol 3 kinase regulatory subunit, alpha  
 gi Accession: 0  
 Precursor Mass: 620.6044+3  
 Delta Mass: 1.510 ppm  
 XCorr: 35.02



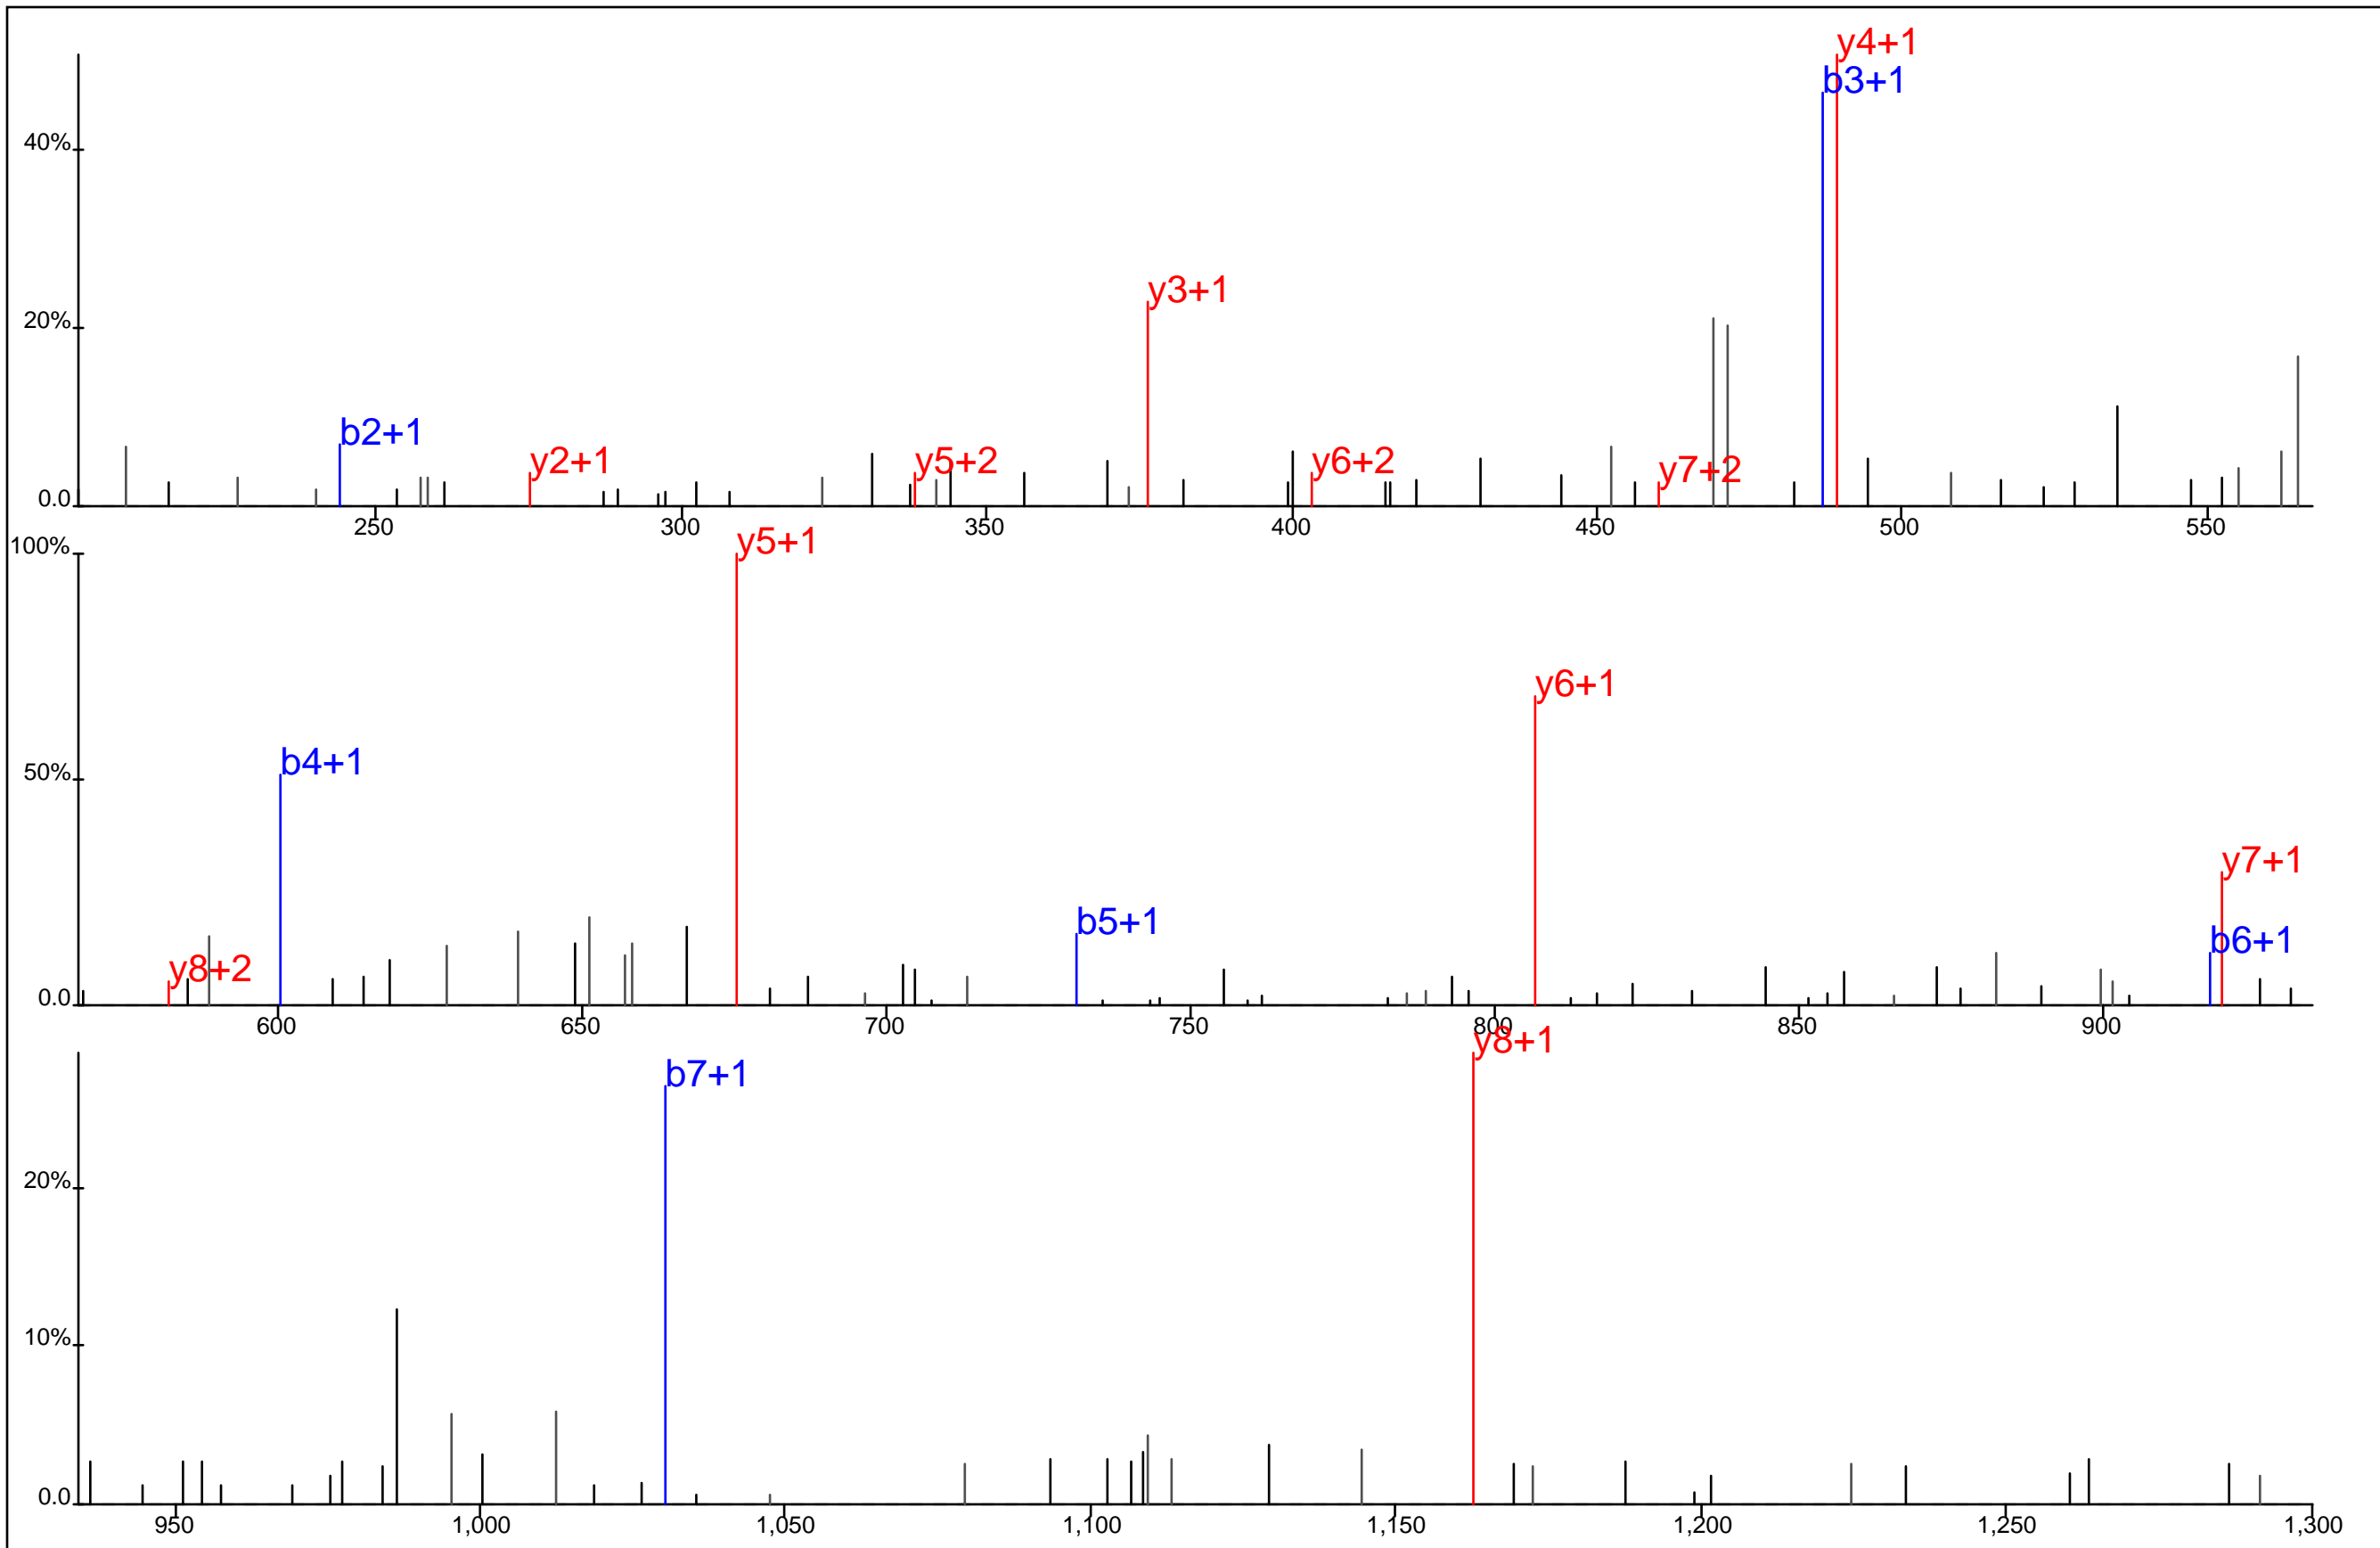

■ ■ □ □ ■ □ □ □  
 D Q Y\* L M W L T Q K  
□ □ □ □ □ □ □ □

Protein Name: Phosphatidylinositol 3 kinase regulatory subunit, alpha  
 gi Accession: 0  
 Precursor Mass: 703.3134+2  
 Delta Mass: 1.840 ppm  
 XCorr: 53.1

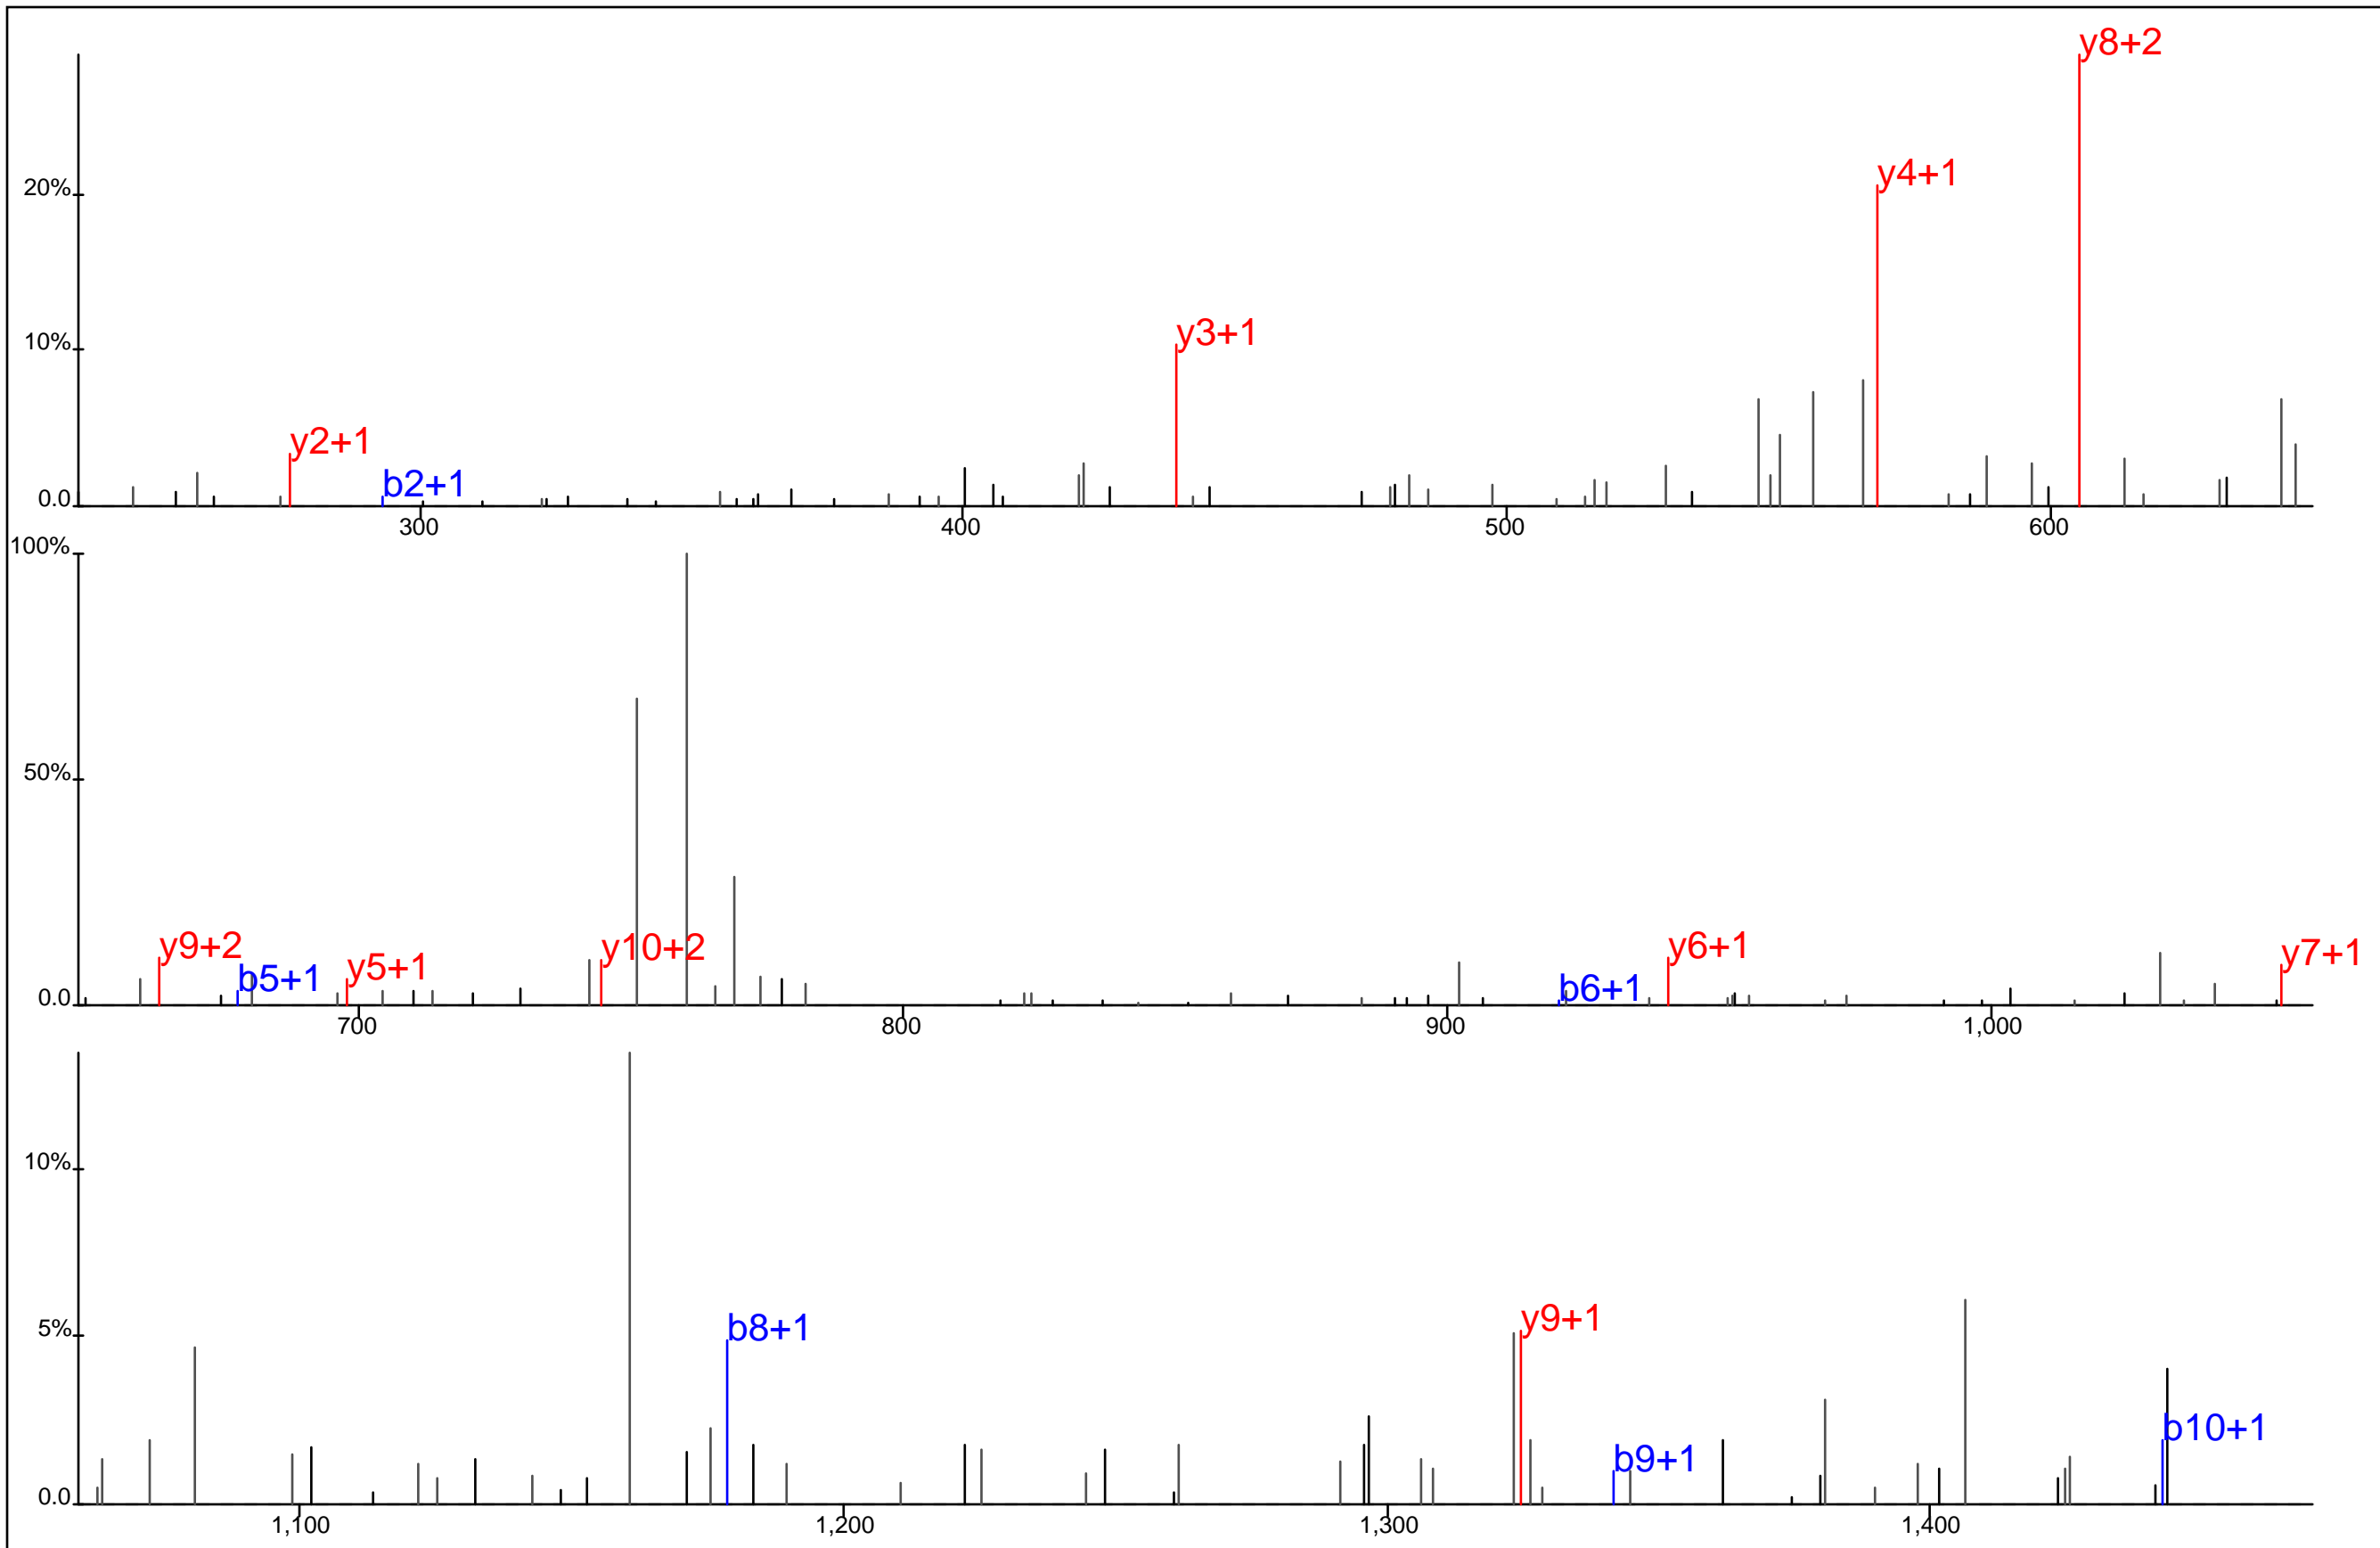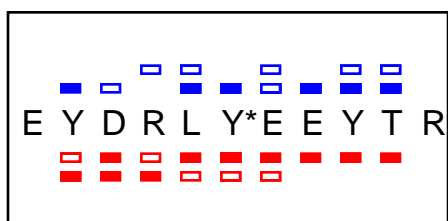

Protein Name: Phosphatidylinositol 3 kinase regulatory subunit, alpha  
 gi Accession: 0  
 Precursor Mass: 808.8336+2  
 Delta Mass: 1.827 ppm  
 XCorr: 25.78

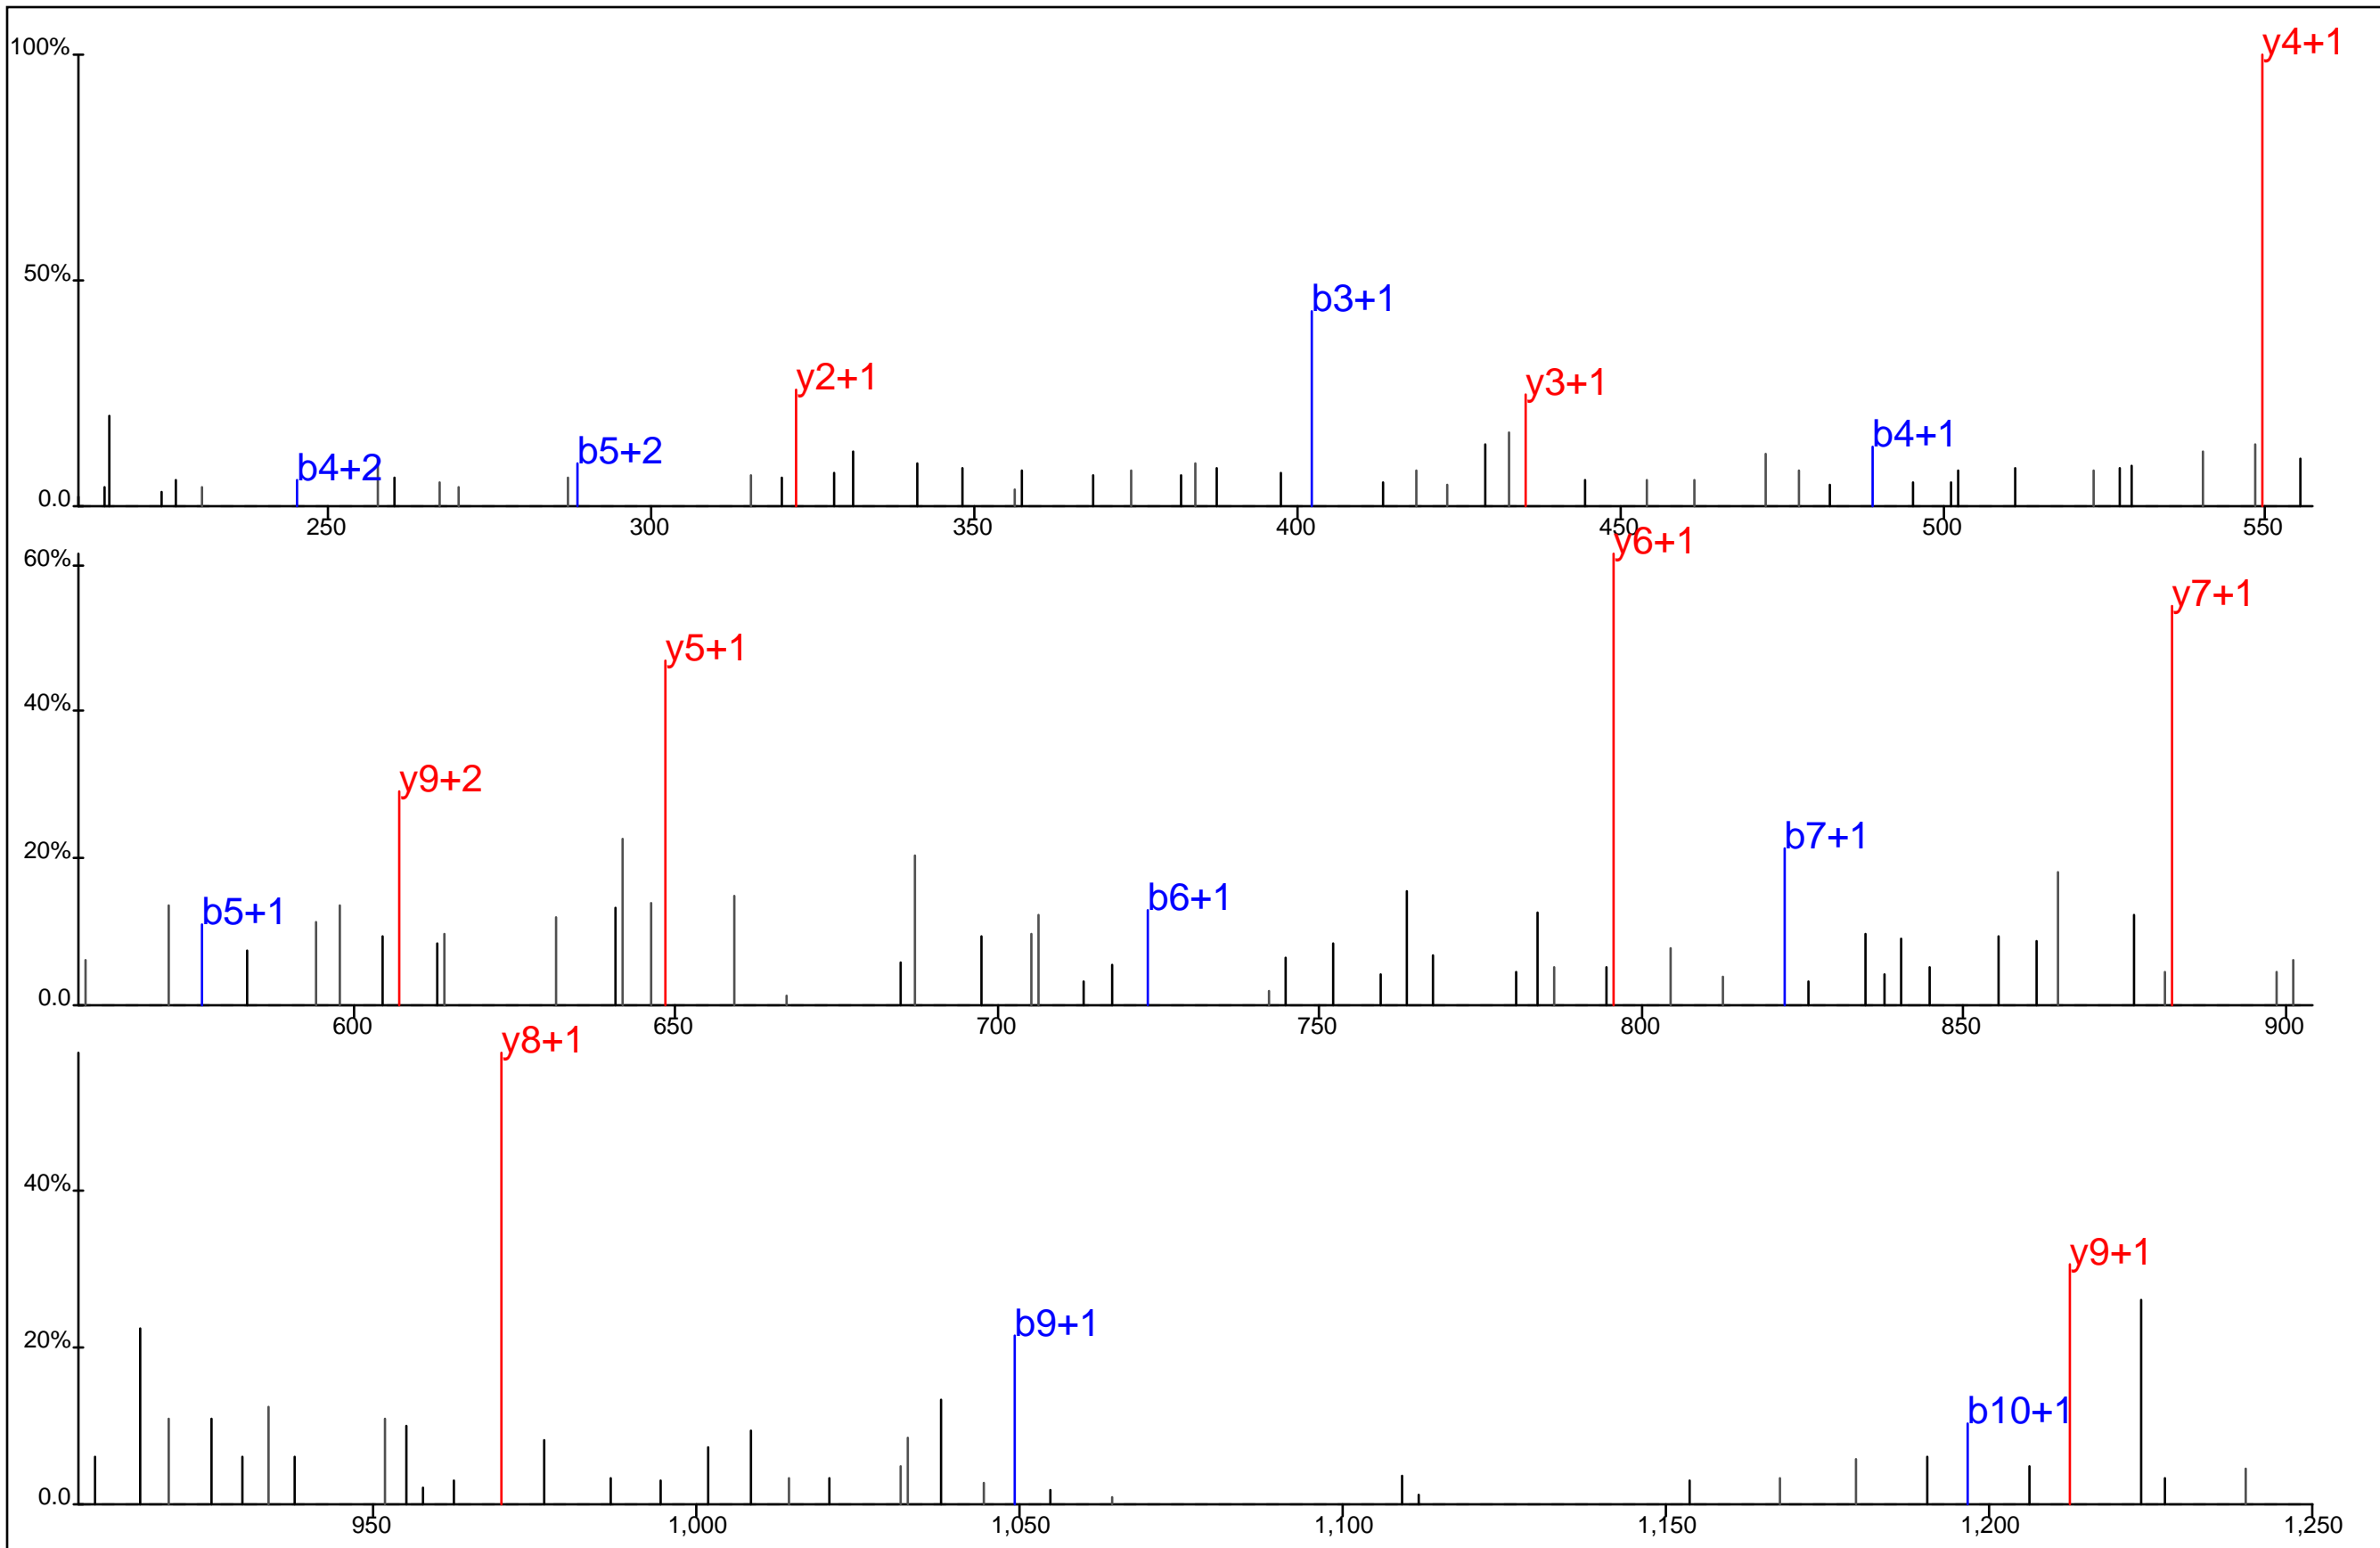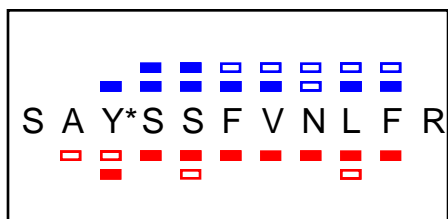

Protein Name: Phosphatidylinositol-3-phosphate/phosphatidylinositol 5-kinase type III  
 gi Accession: 0  
 Precursor Mass: 685.8104+2  
 Delta Mass: 0.416 ppm  
 XCorr: 64.61



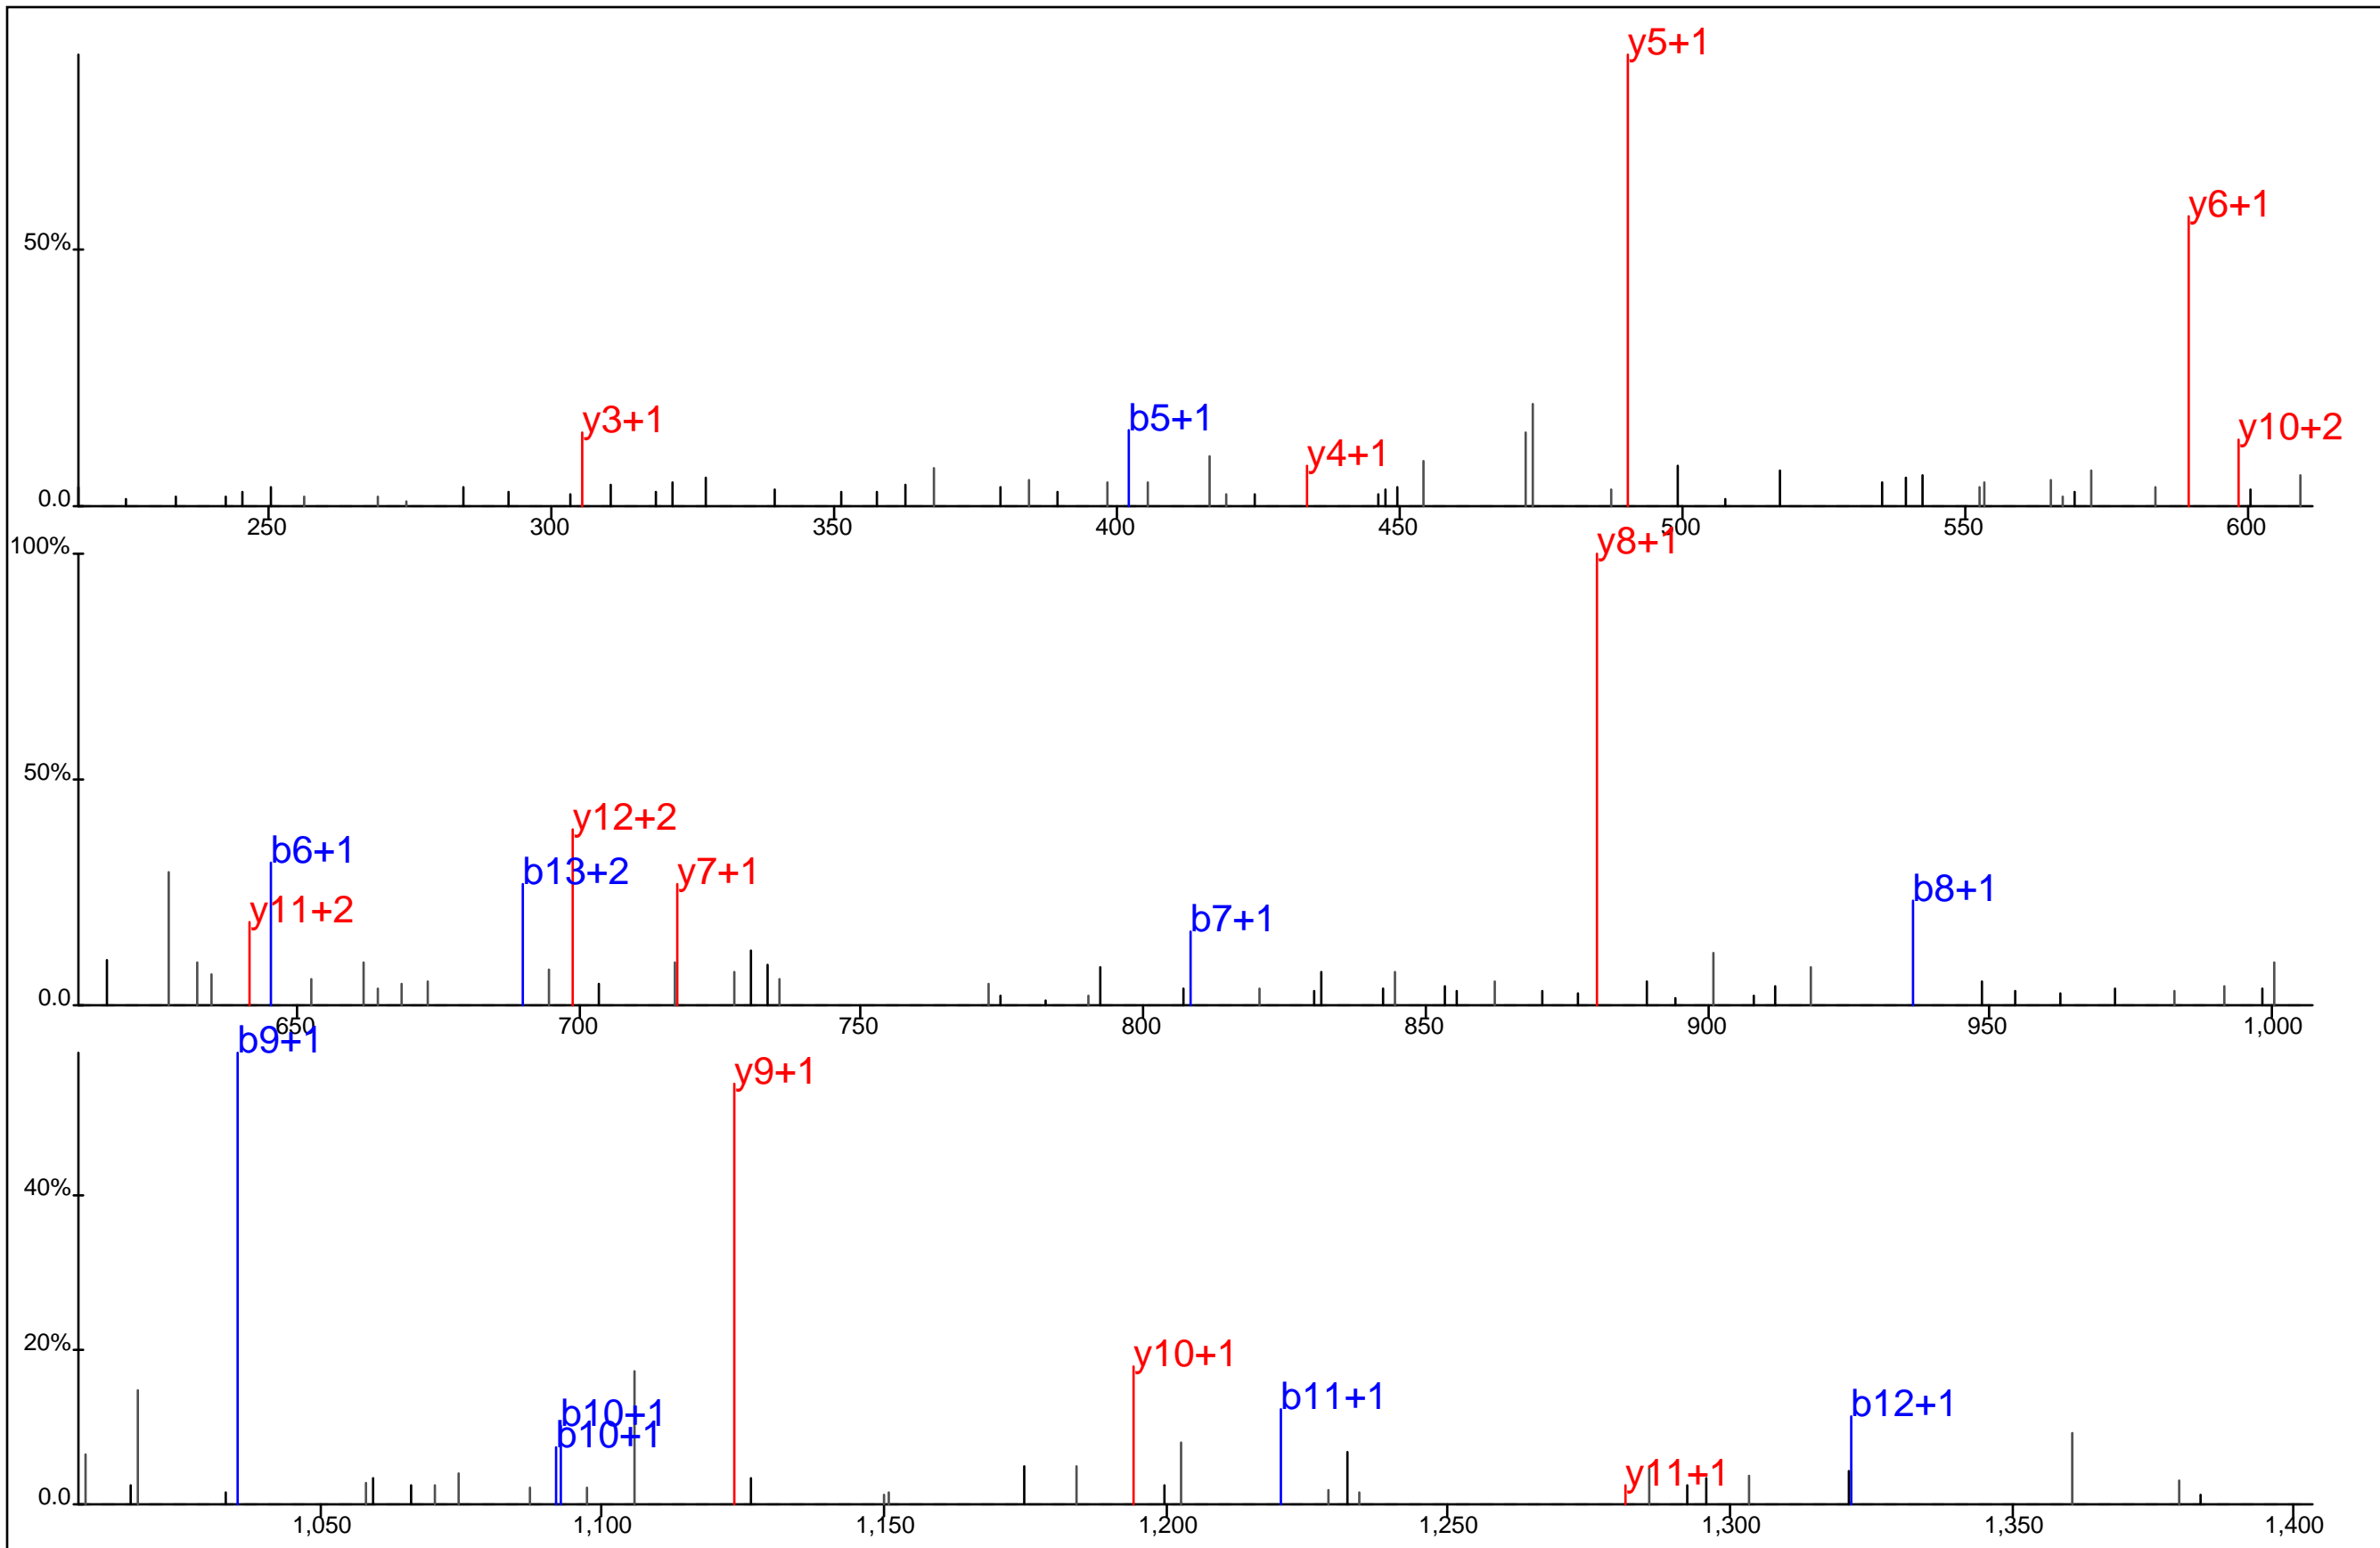

▢ ▢ ▢ ▢ ▢ ▢ ▢ ▢ ▢ ▢ ▢ ▢  
 G A D S A Y\*Y Q V G Q T G K  
▢ ▢ ▢ ▢ ▢ ▢ ▢ ▢ ▢ ▢ ▢ ▢

Protein Name: Phosphatidylinositol-3-phosphate/phosphatidylinositol 5-kinase type III  
 gi Accession: 0  
 Precursor Mass: 762.8222+2  
 Delta Mass: 0.336 ppm  
 XCorr: 59.87

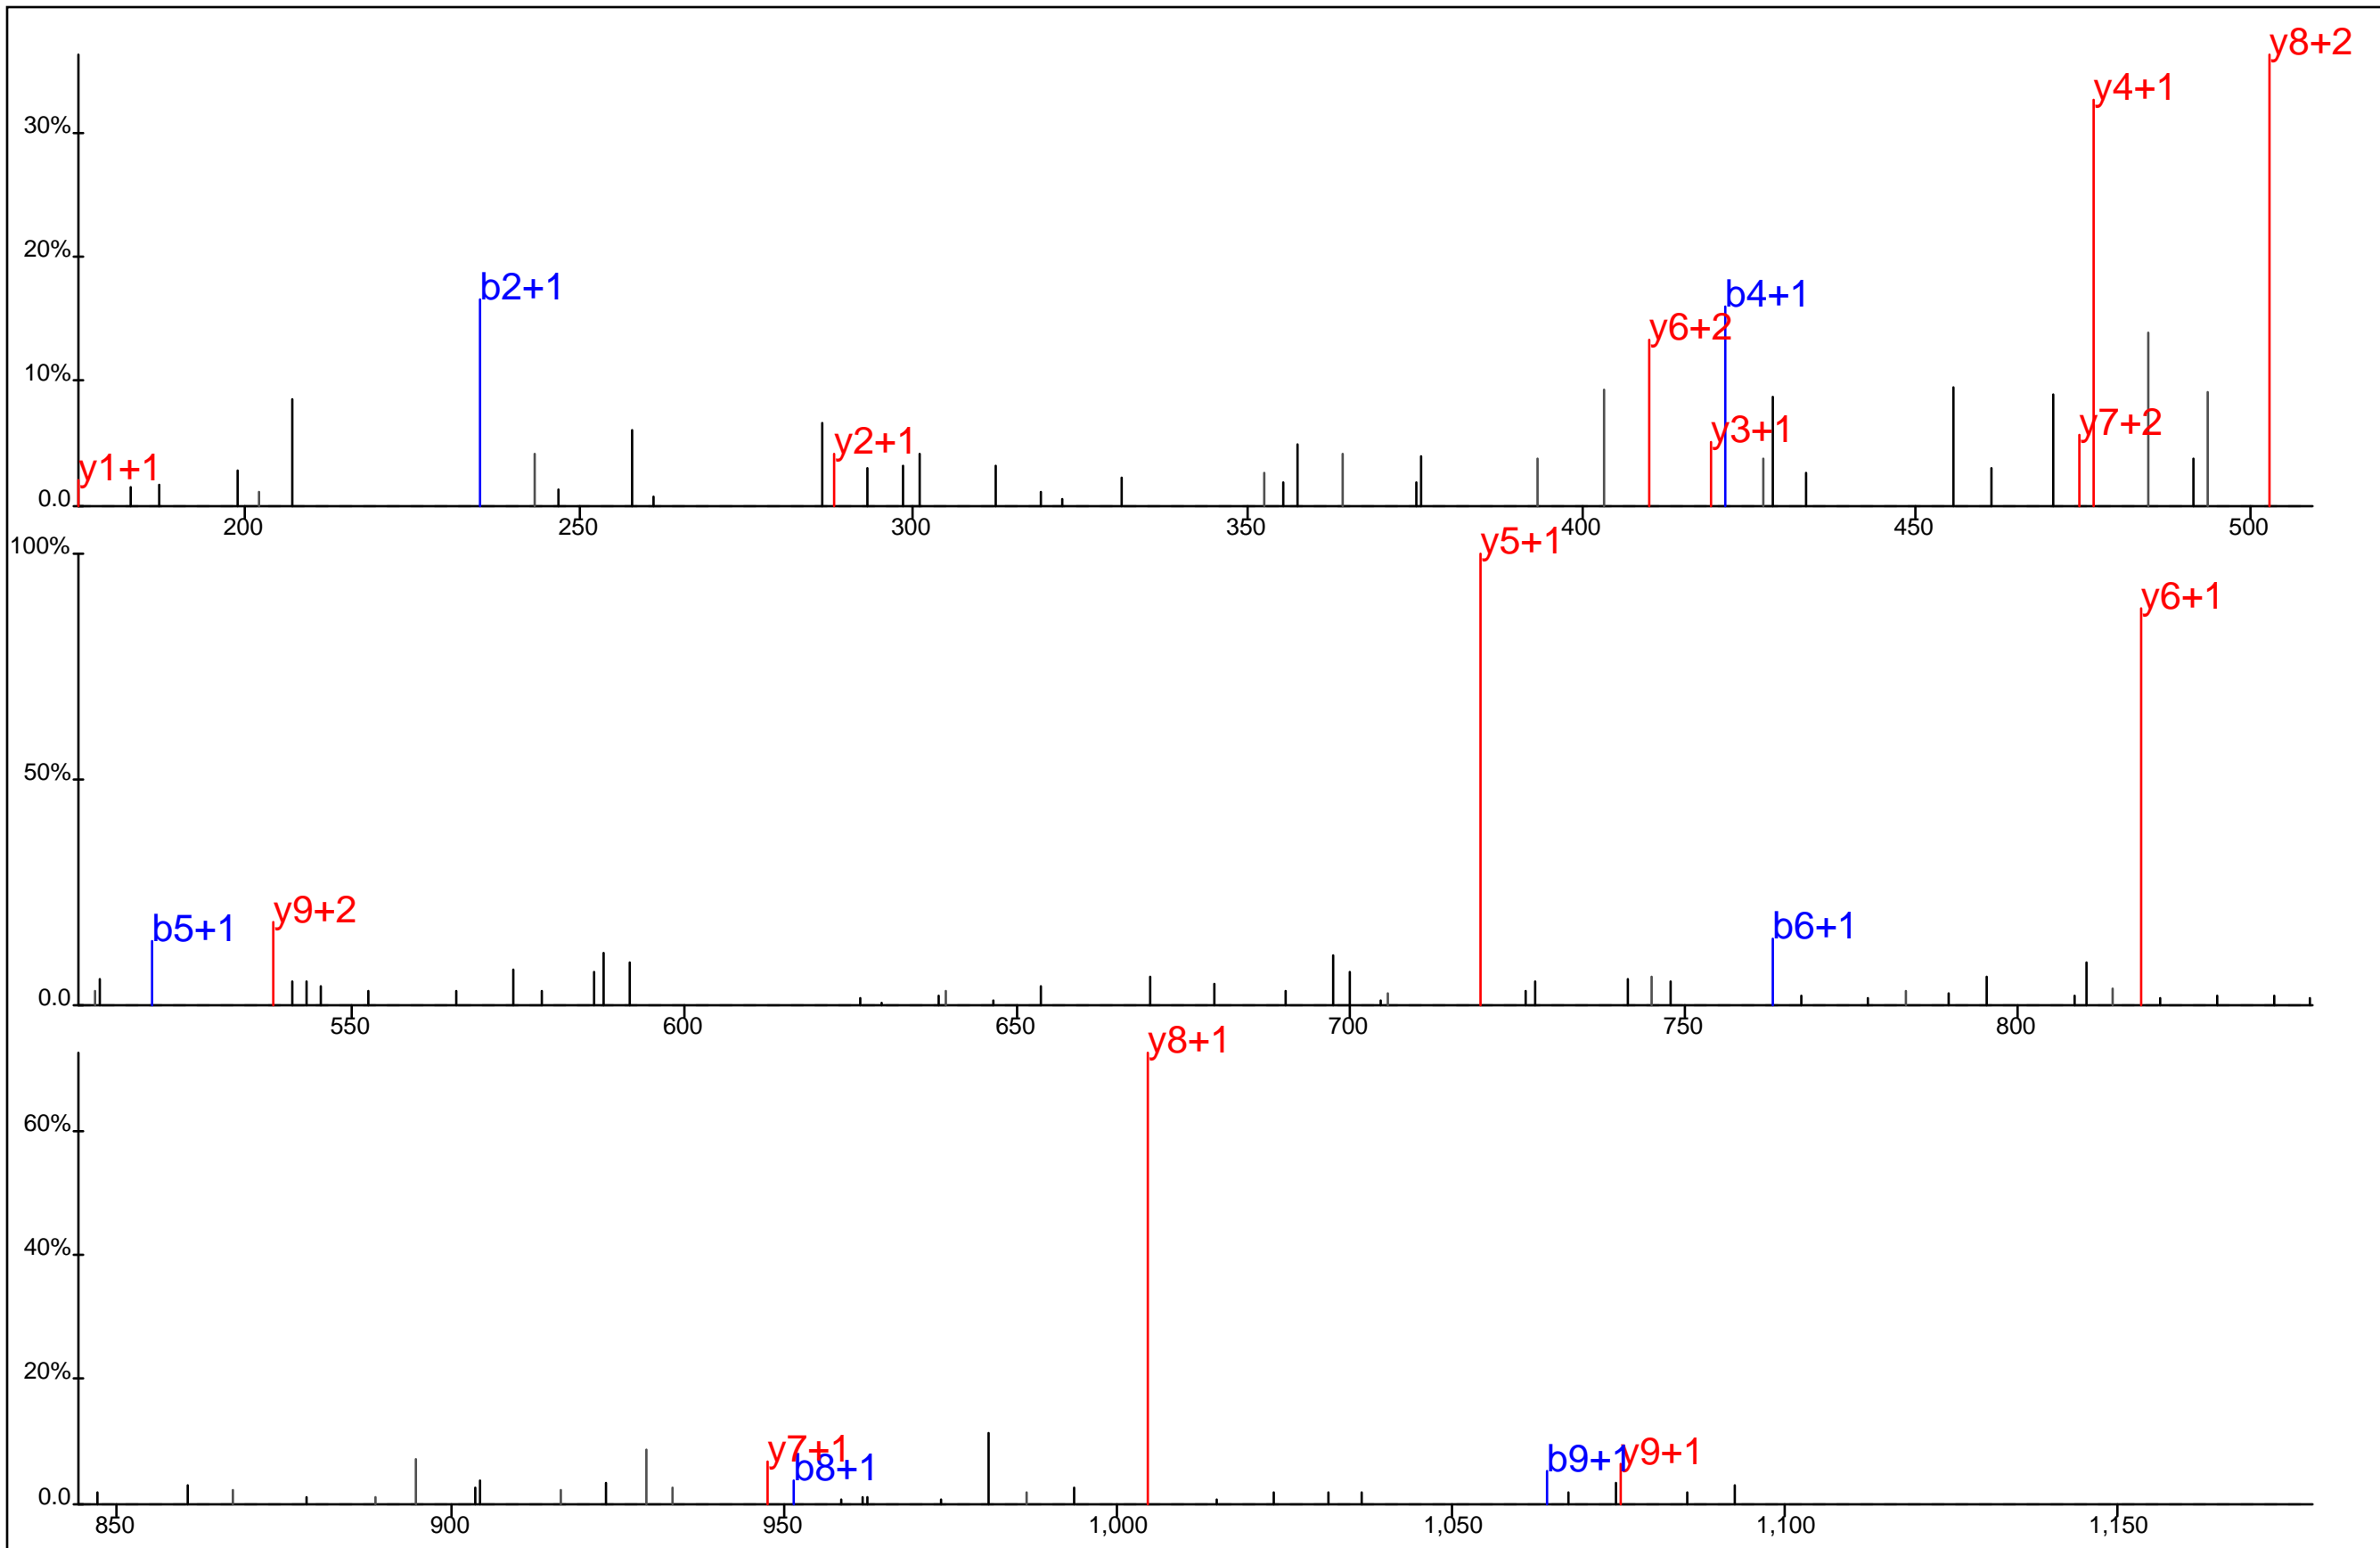

■ □ ■ ■ □ ■ ■ ■  
**Y A G E V Y\* G M I R**  
□ □ □ □ □ □ □ □

Protein Name: Phosphatidylinositol 4-kinase alpha  
 gi Accession: 0  
 Precursor Mass: 619.7670+2  
 Delta Mass: 0.589 ppm  
 XCorr: 36.98

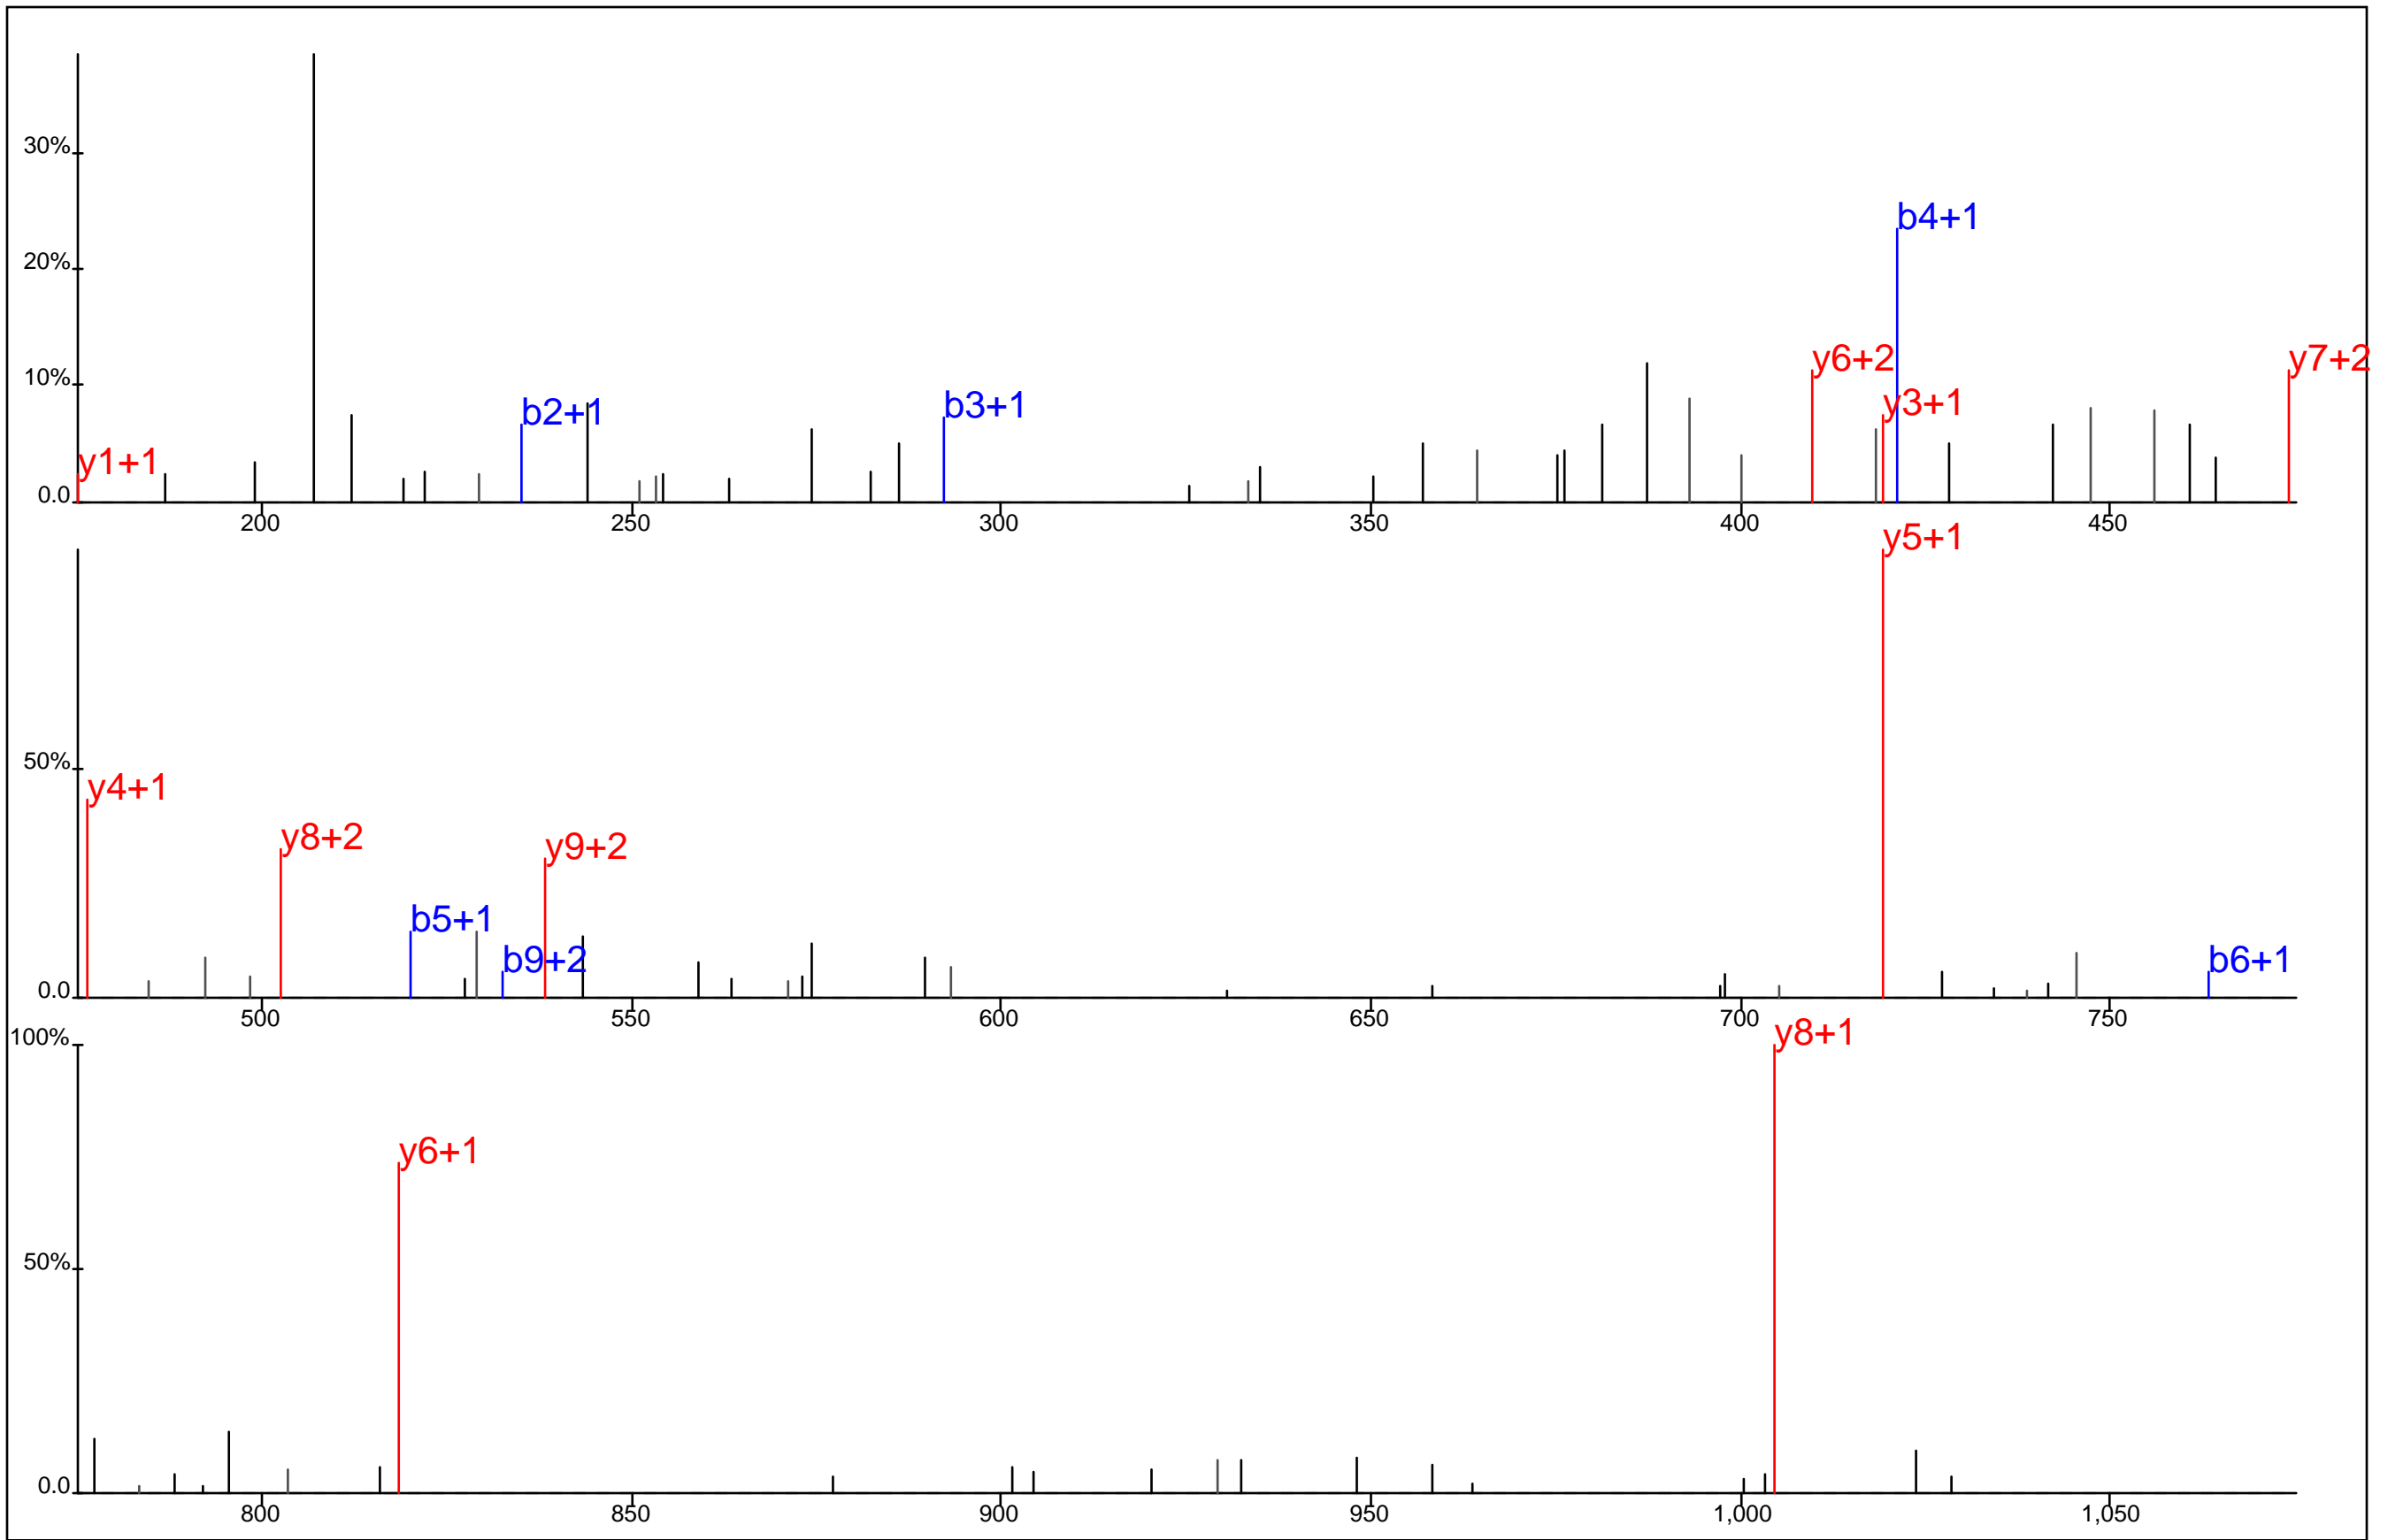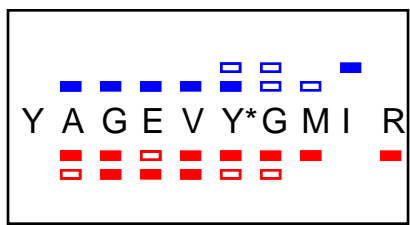

Protein Name: Phosphatidylinositol 4-kinase alpha  
 gi Accession: 0  
 Precursor Mass: 619.7673+2  
 Delta Mass: 0.195 ppm  
 XCorr: 35.39



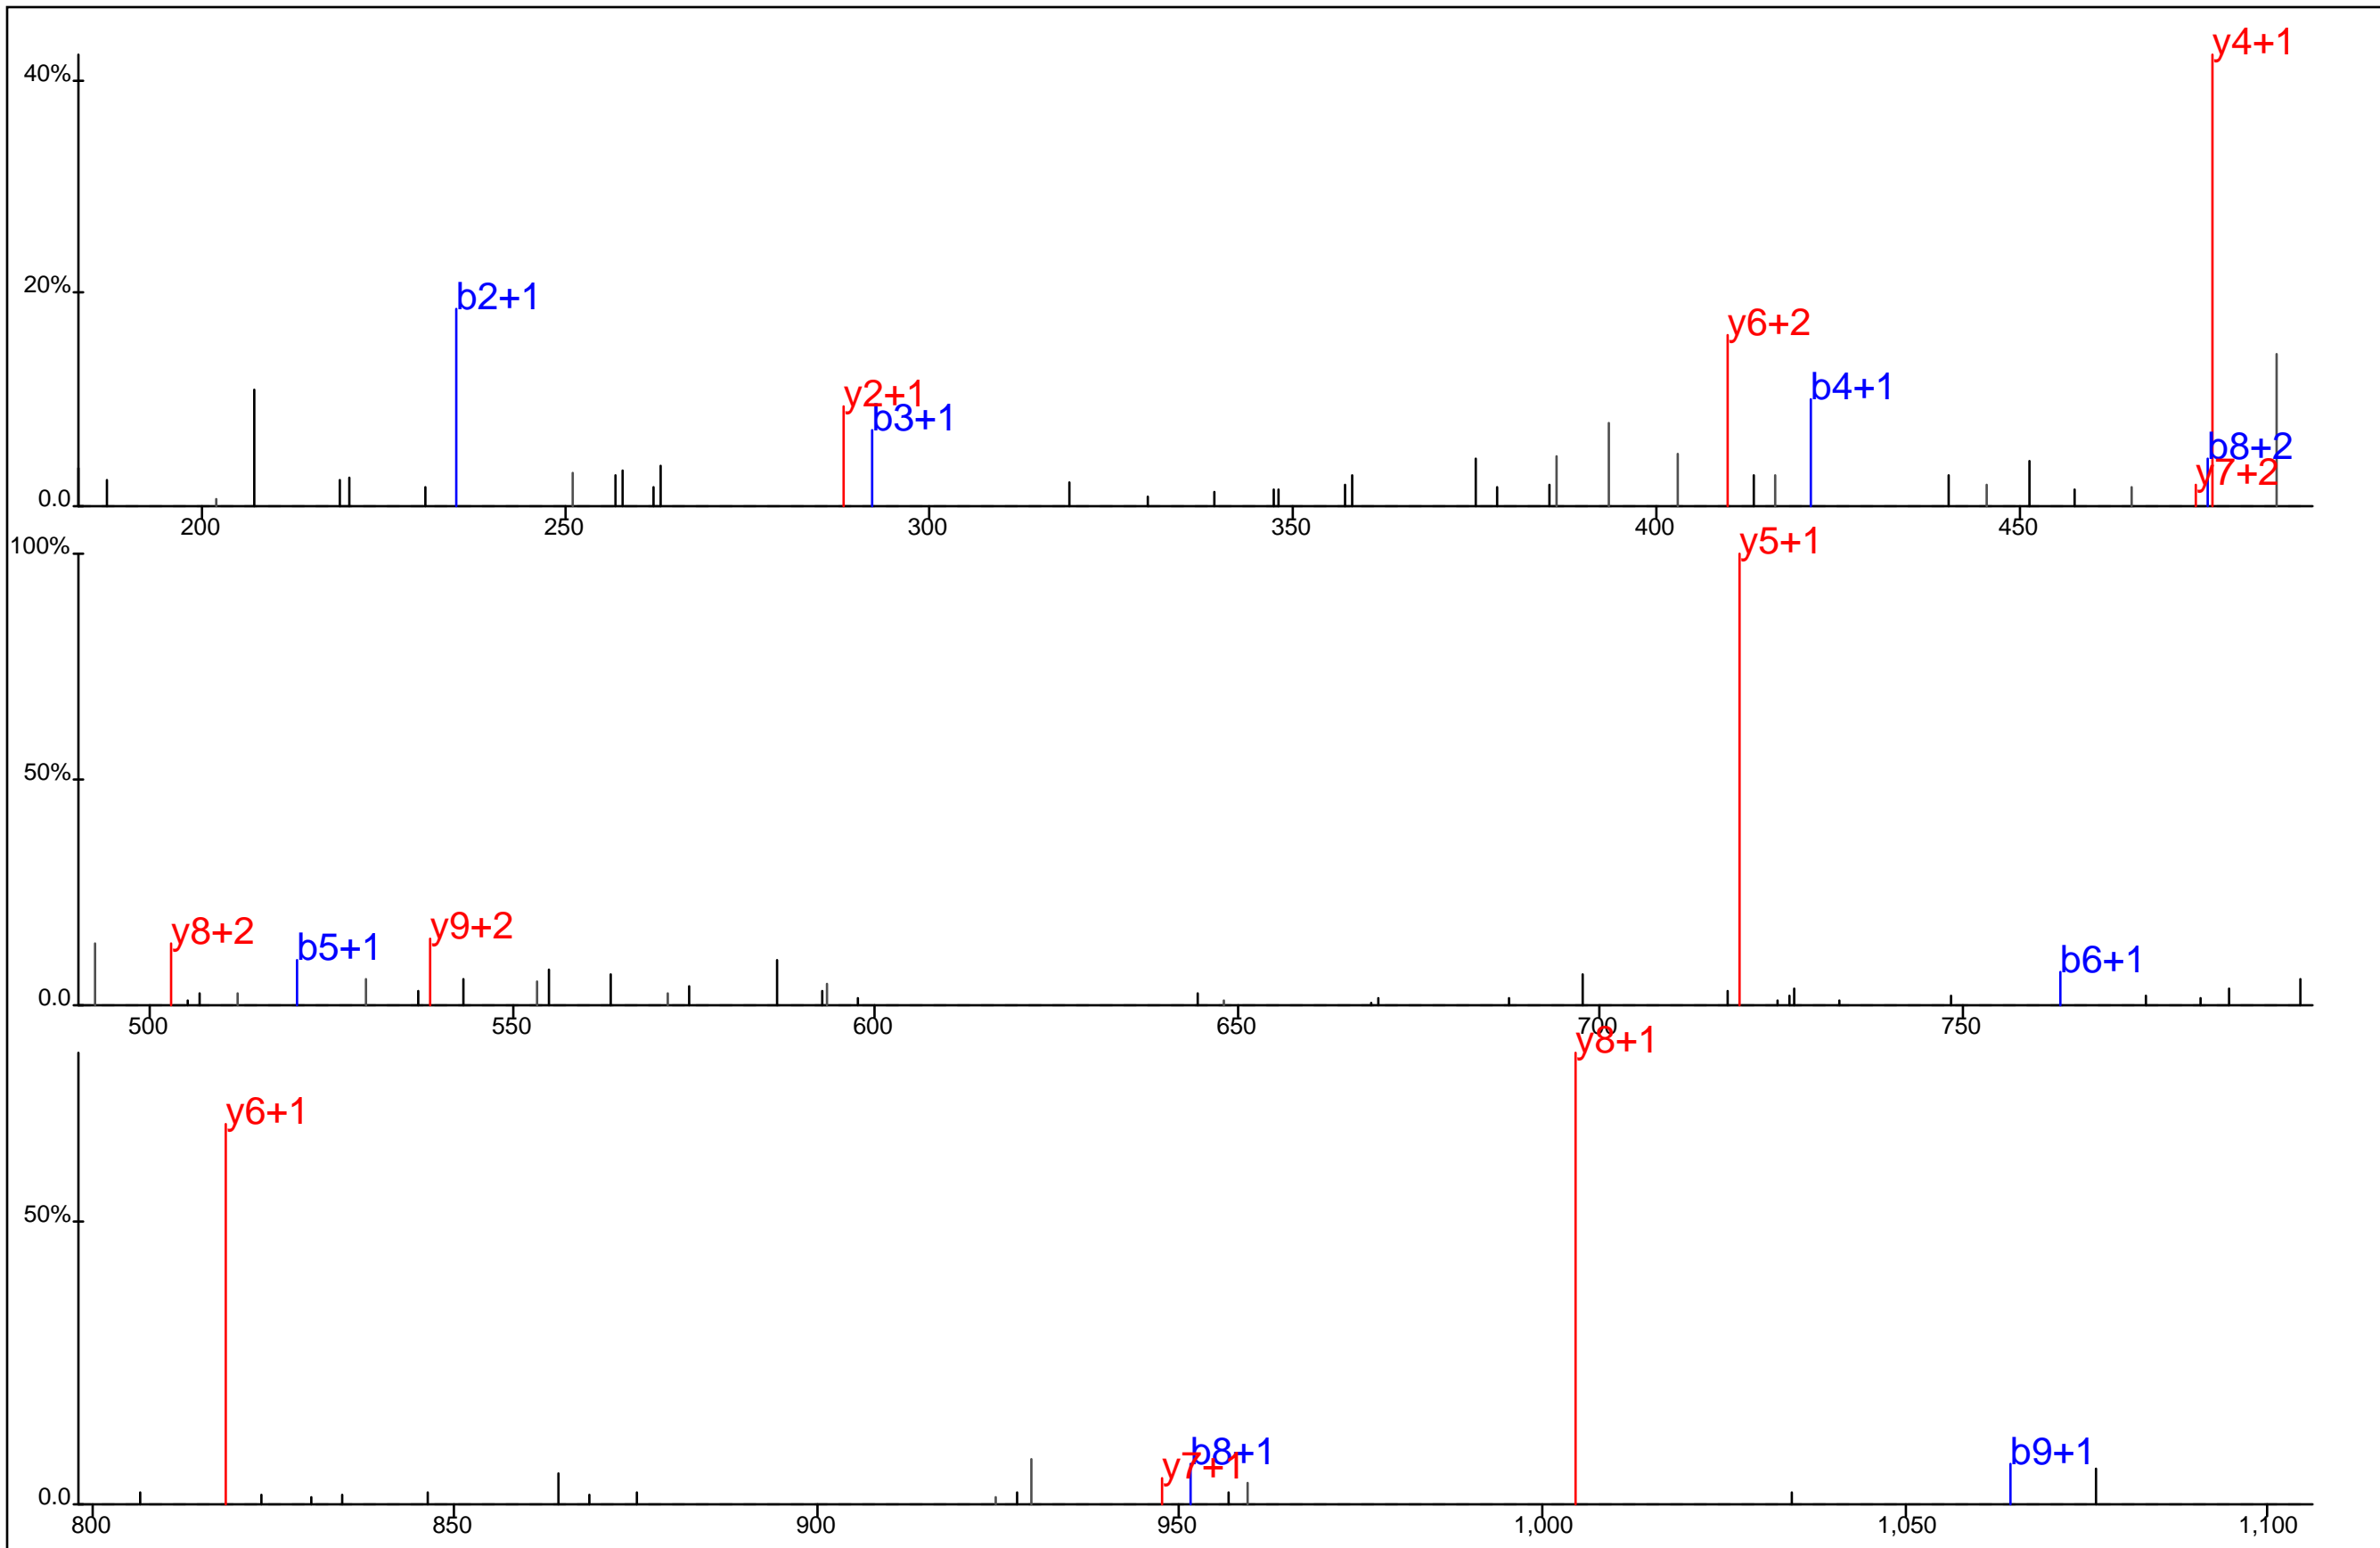

Y A G E V Y\* G M I R

Protein Name: Phosphatidylinositol 4-kinase alpha  
 gi Accession: 0  
 Precursor Mass: 619.7676+2  
 Delta Mass: 0.396 ppm  
 XCorr: 41.26

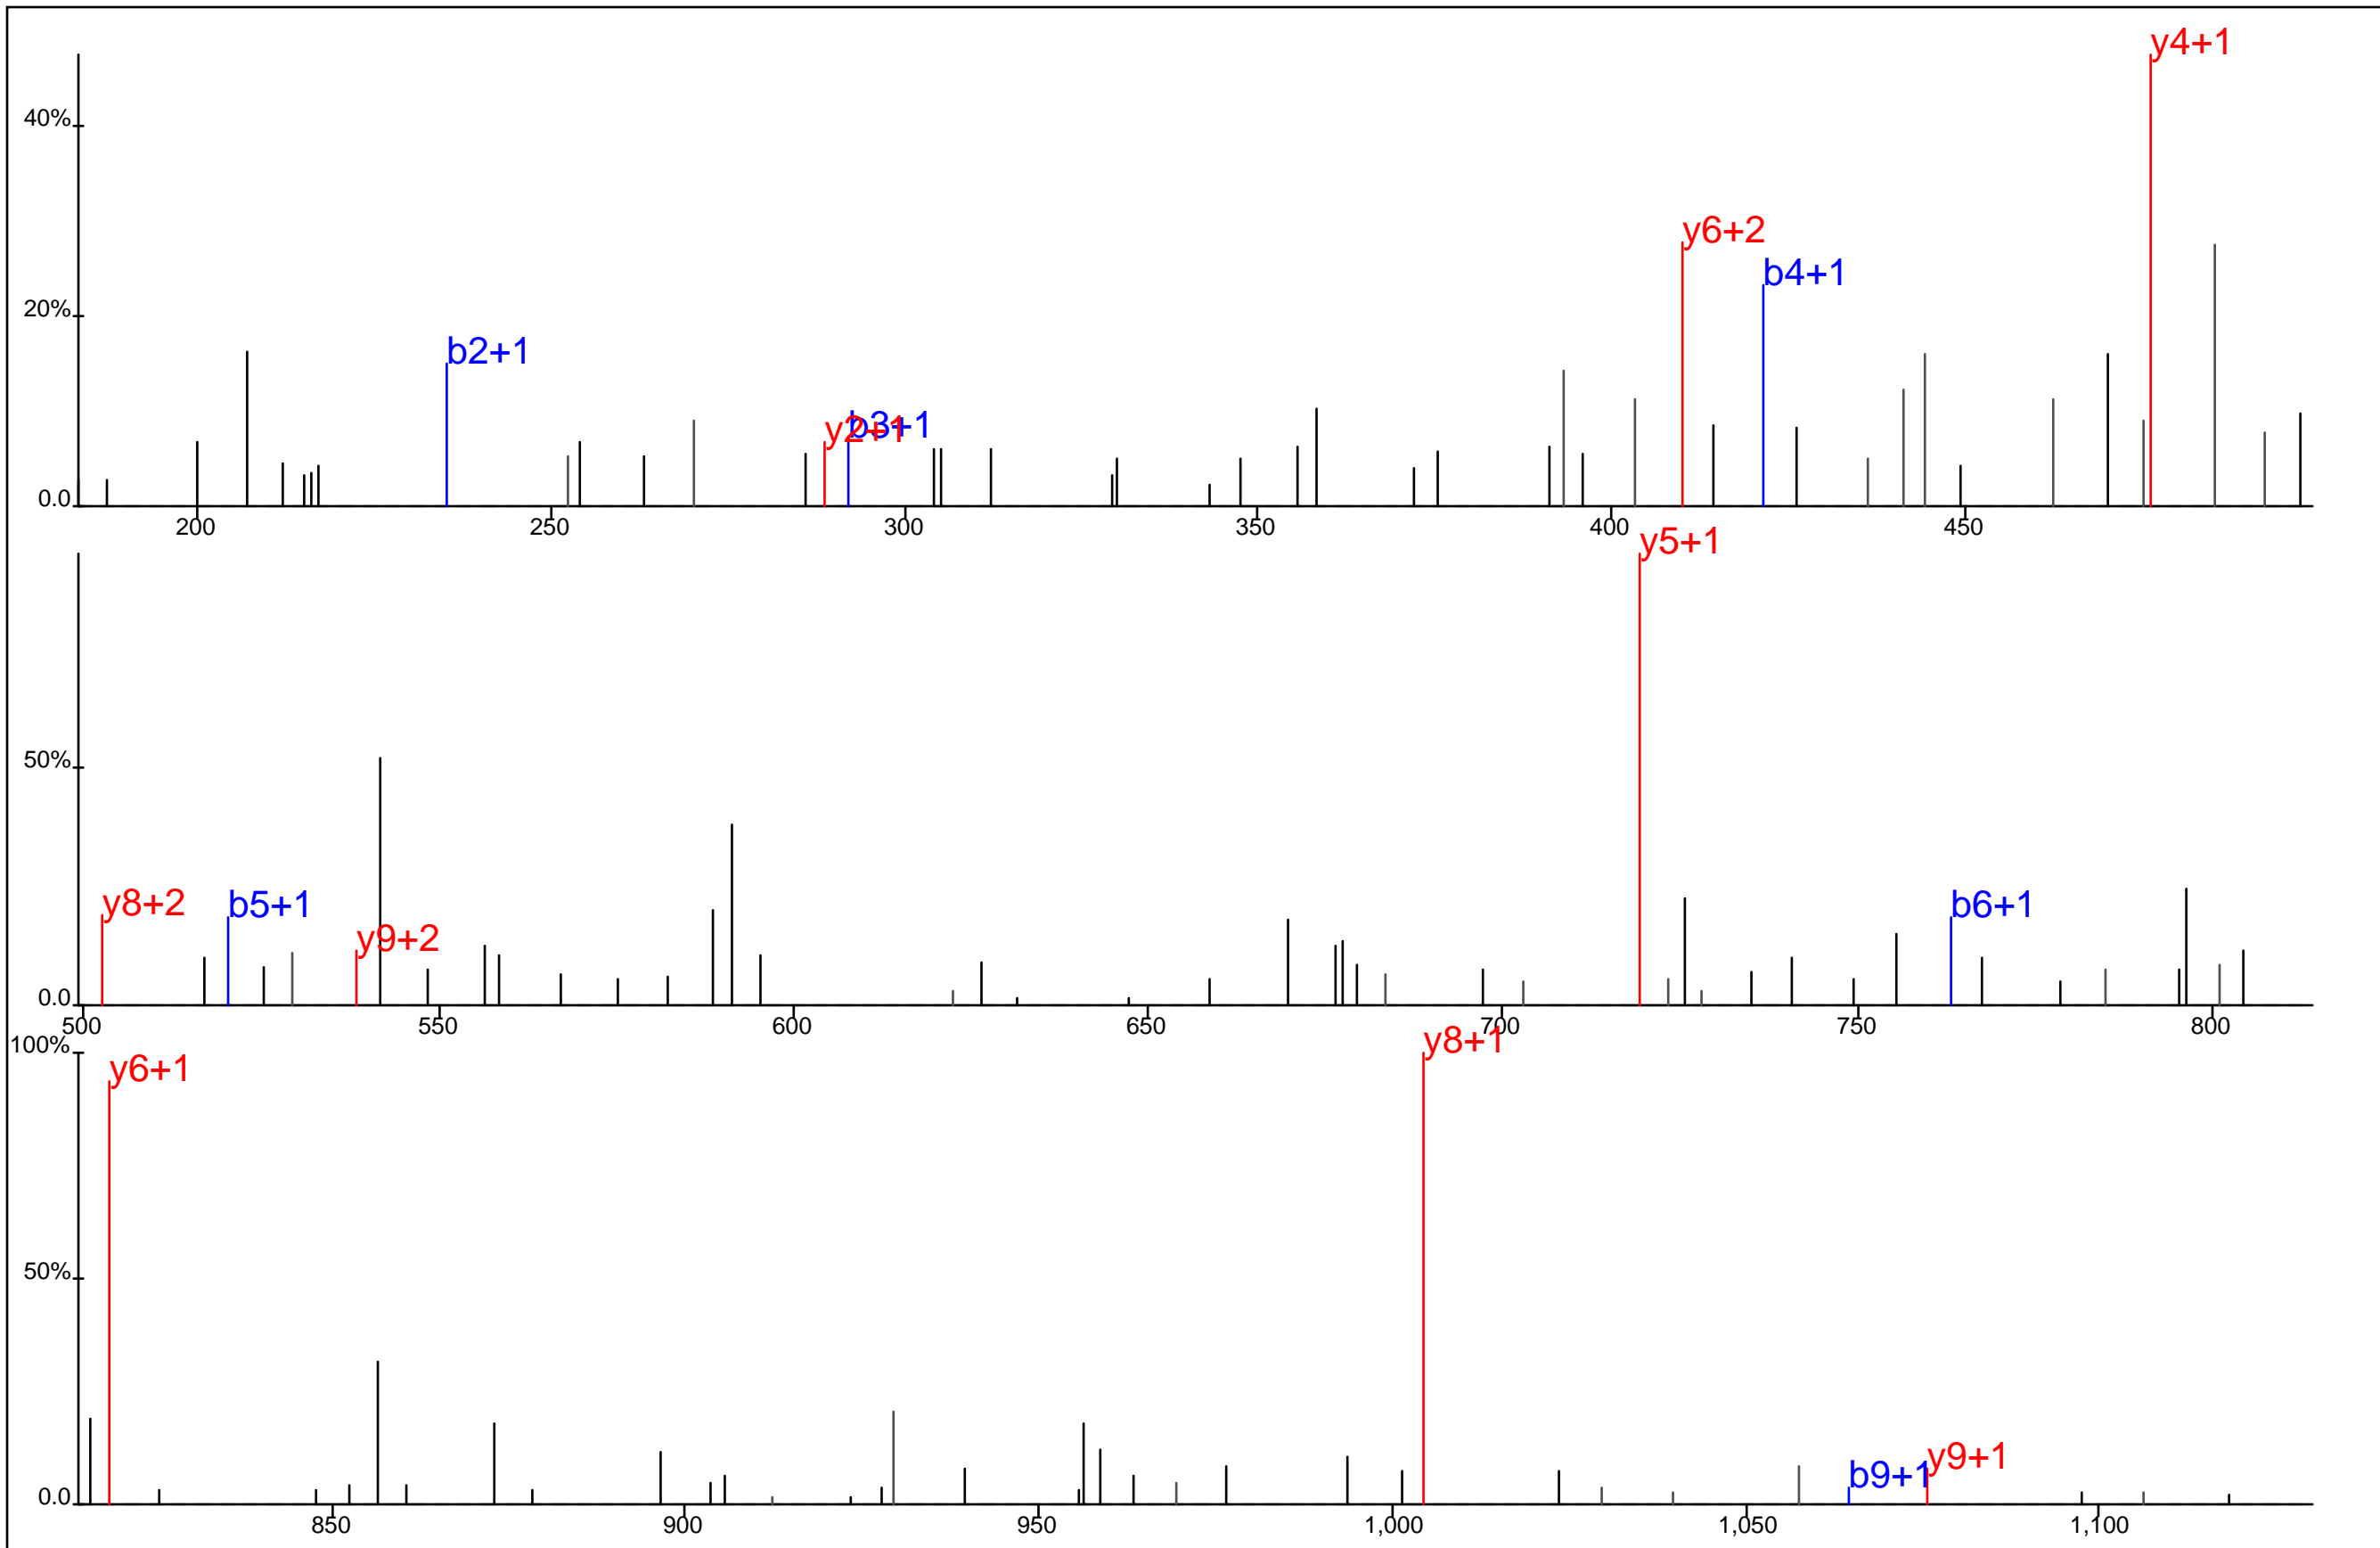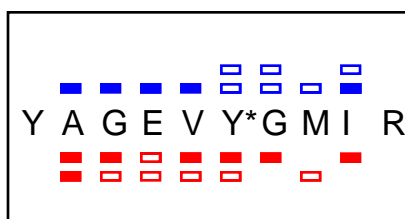

Protein Name: Phosphatidylinositol 4-kinase alpha  
 gi Accession: 0  
 Precursor Mass: 619.7676+2  
 Delta Mass: 0.297 ppm  
 XCorr: 21.96

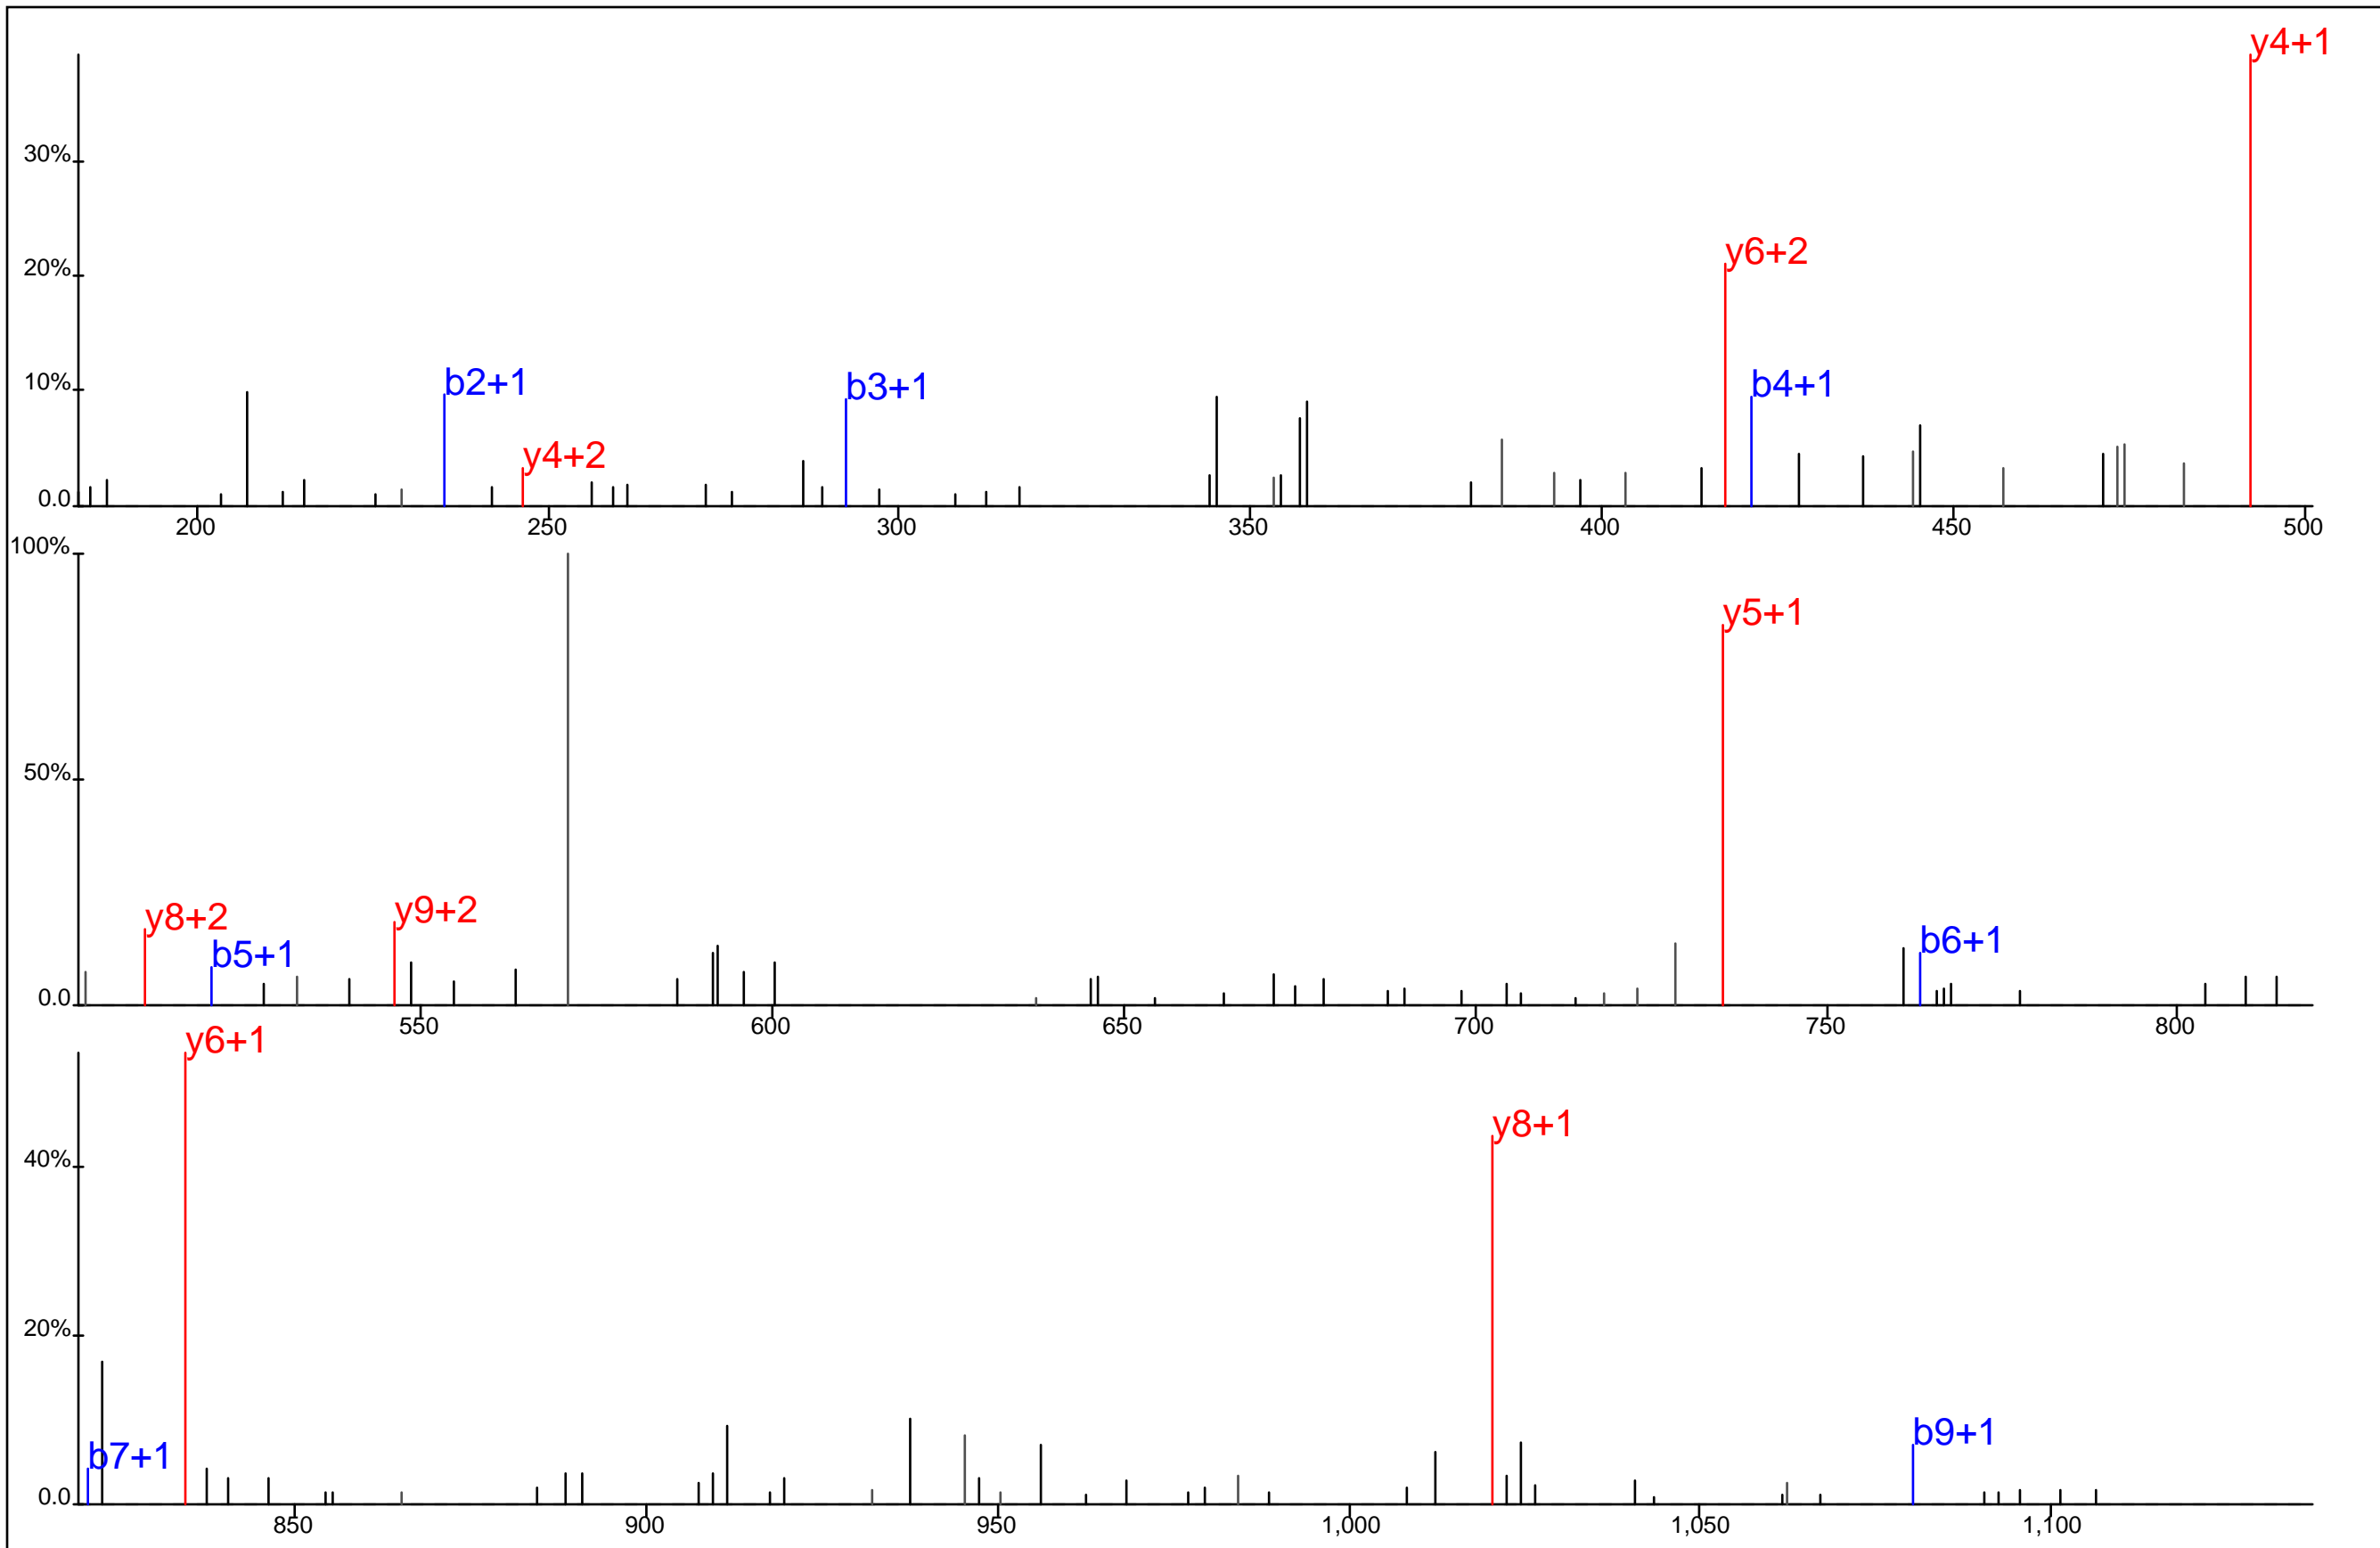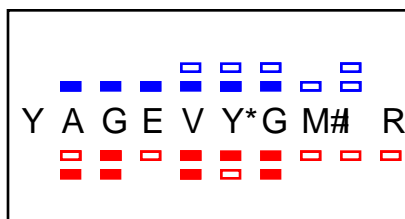

Protein Name: Phosphatidylinositol 4-kinase alpha  
 gi Accession: 0  
 Precursor Mass: 627.7678+2  
 Delta Mass: 4.732 ppm  
 XCorr: 20.52

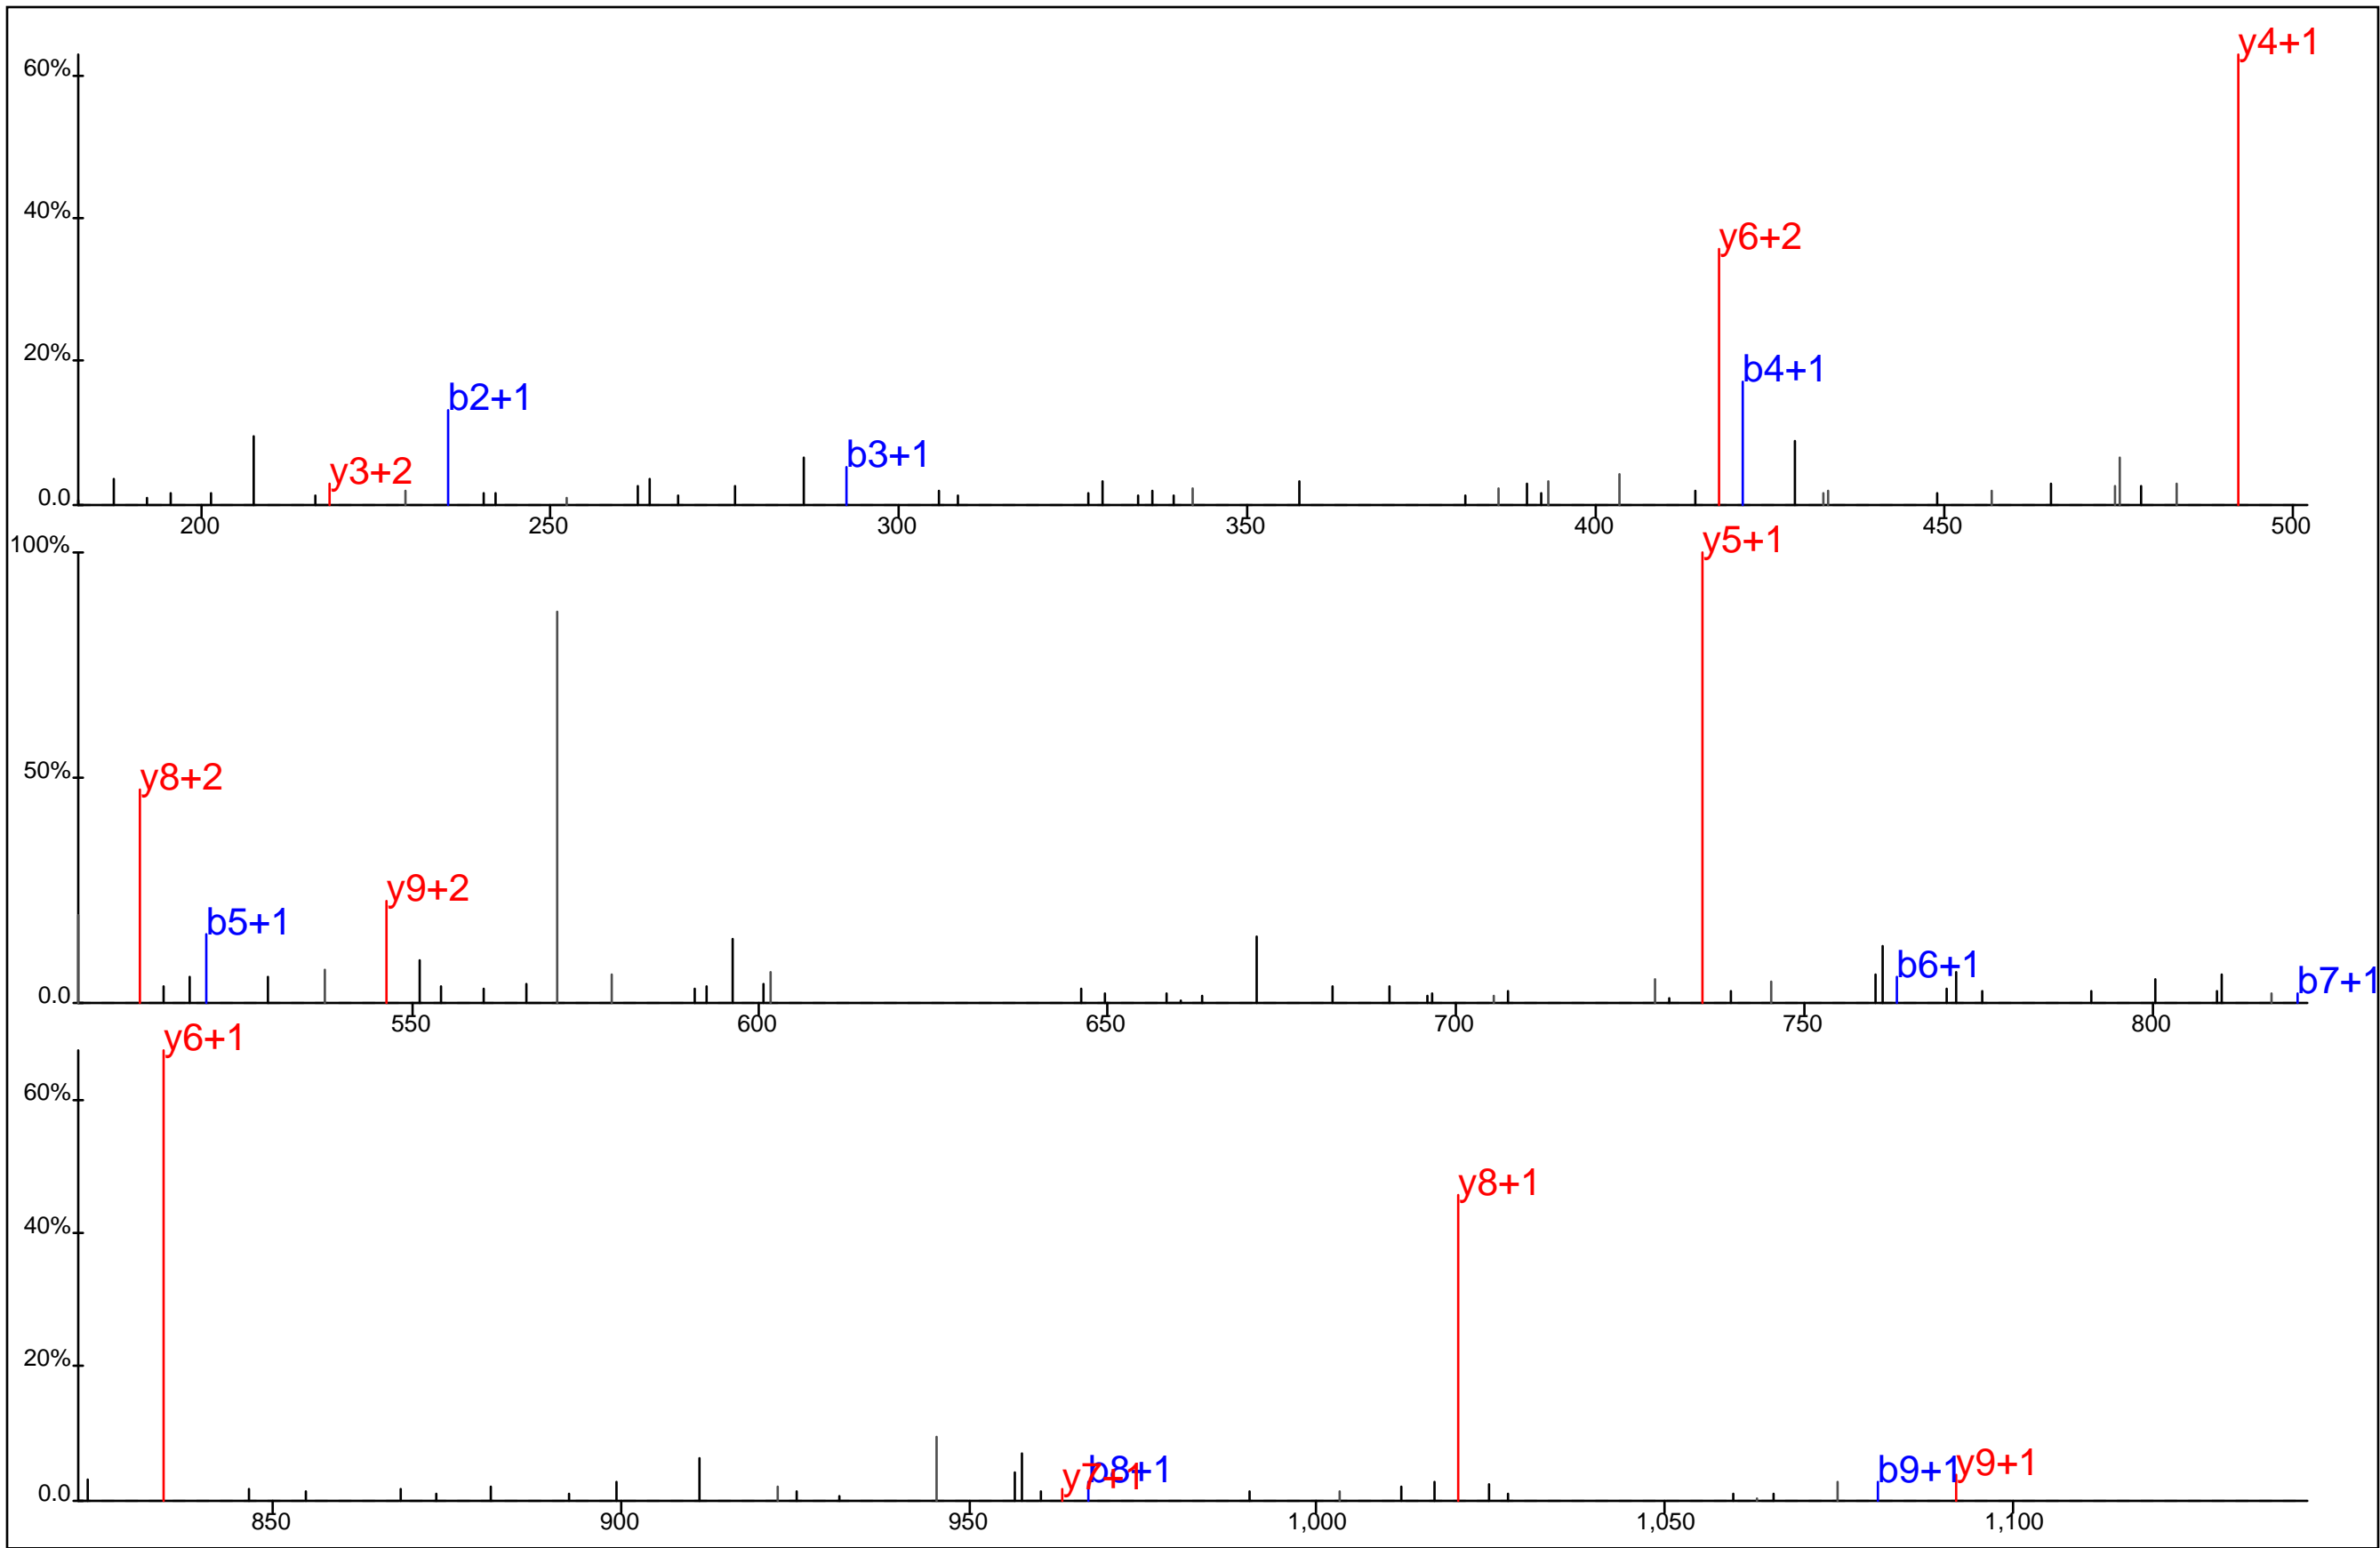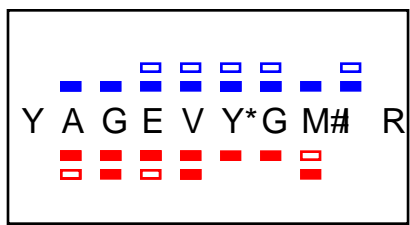

Protein Name: Phosphatidylinositol 4-kinase alpha  
 gi Accession: 0  
 Precursor Mass: 627.7660+2  
 Delta Mass: 1.813 ppm  
 XCorr: 39.8



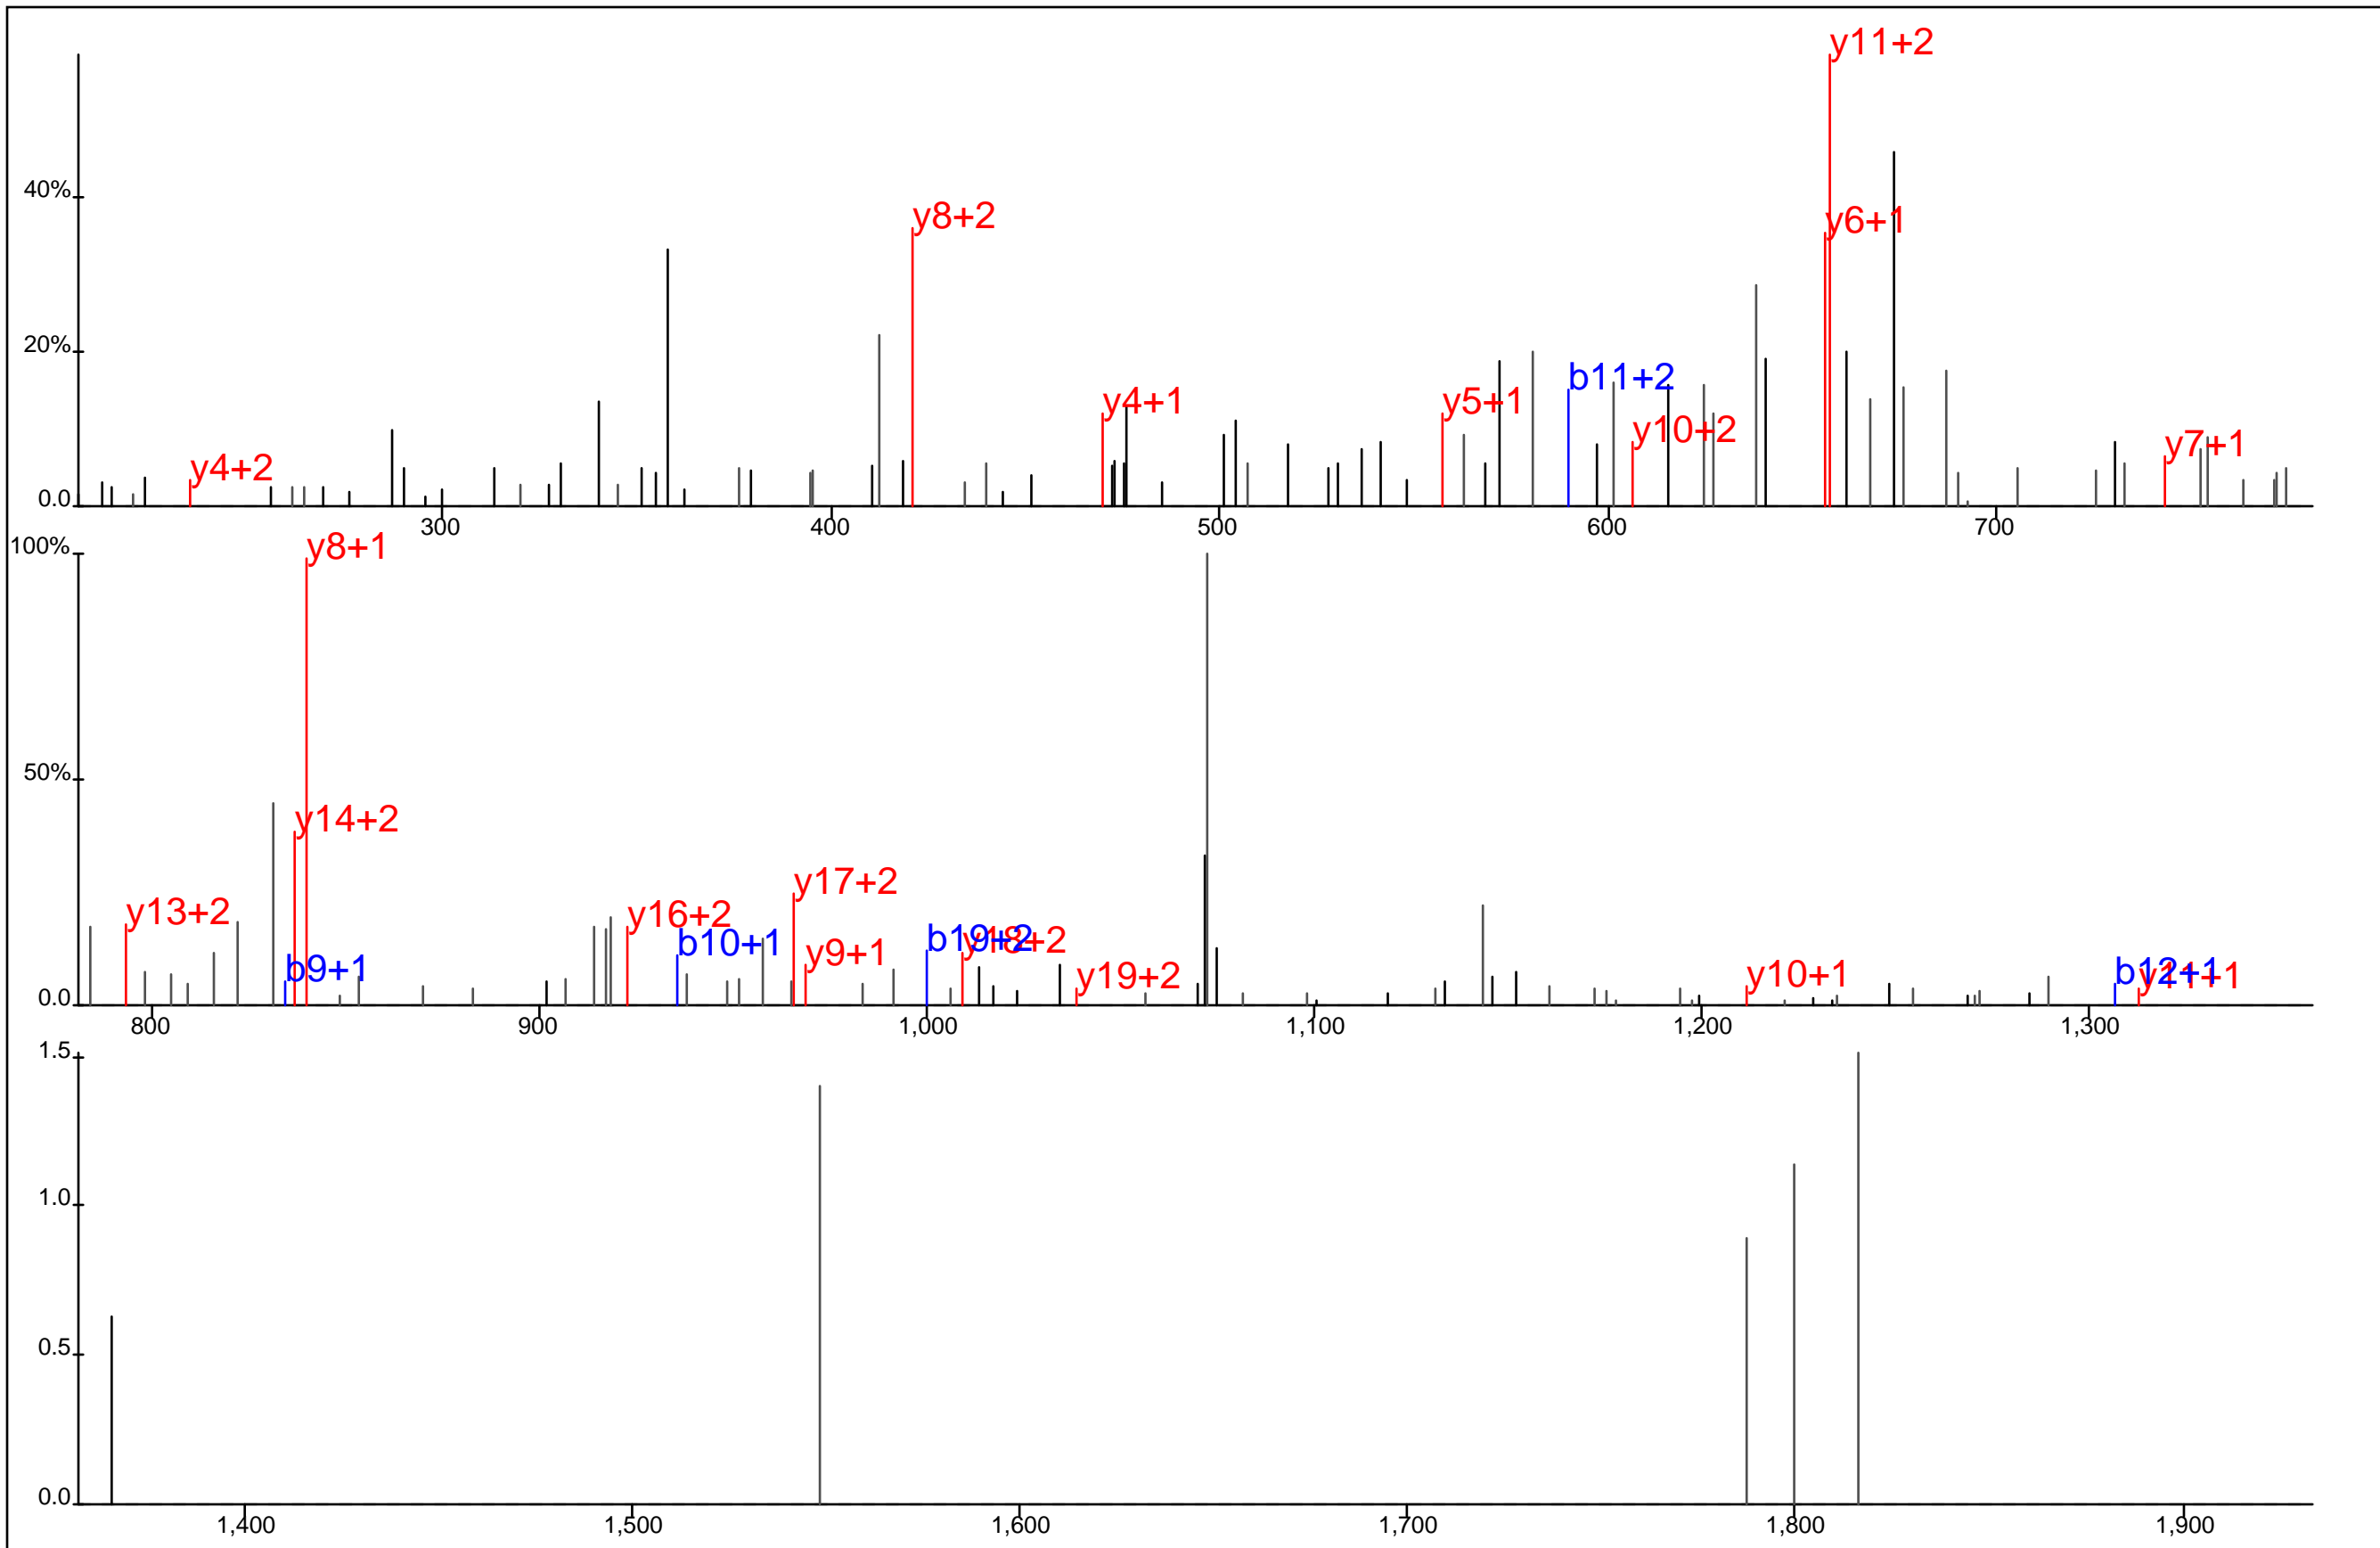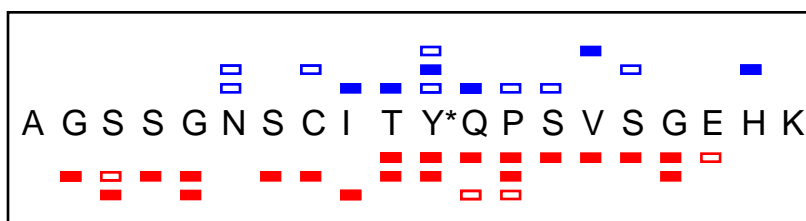

Protein Name: Phosphatidylinositol-4-phosphate 5-kinases type 1 alpha  
 gi Accession: 0  
 Precursor Mass: 715.9677+3  
 Delta Mass: 0.978 ppm  
 XCorr: 26.65

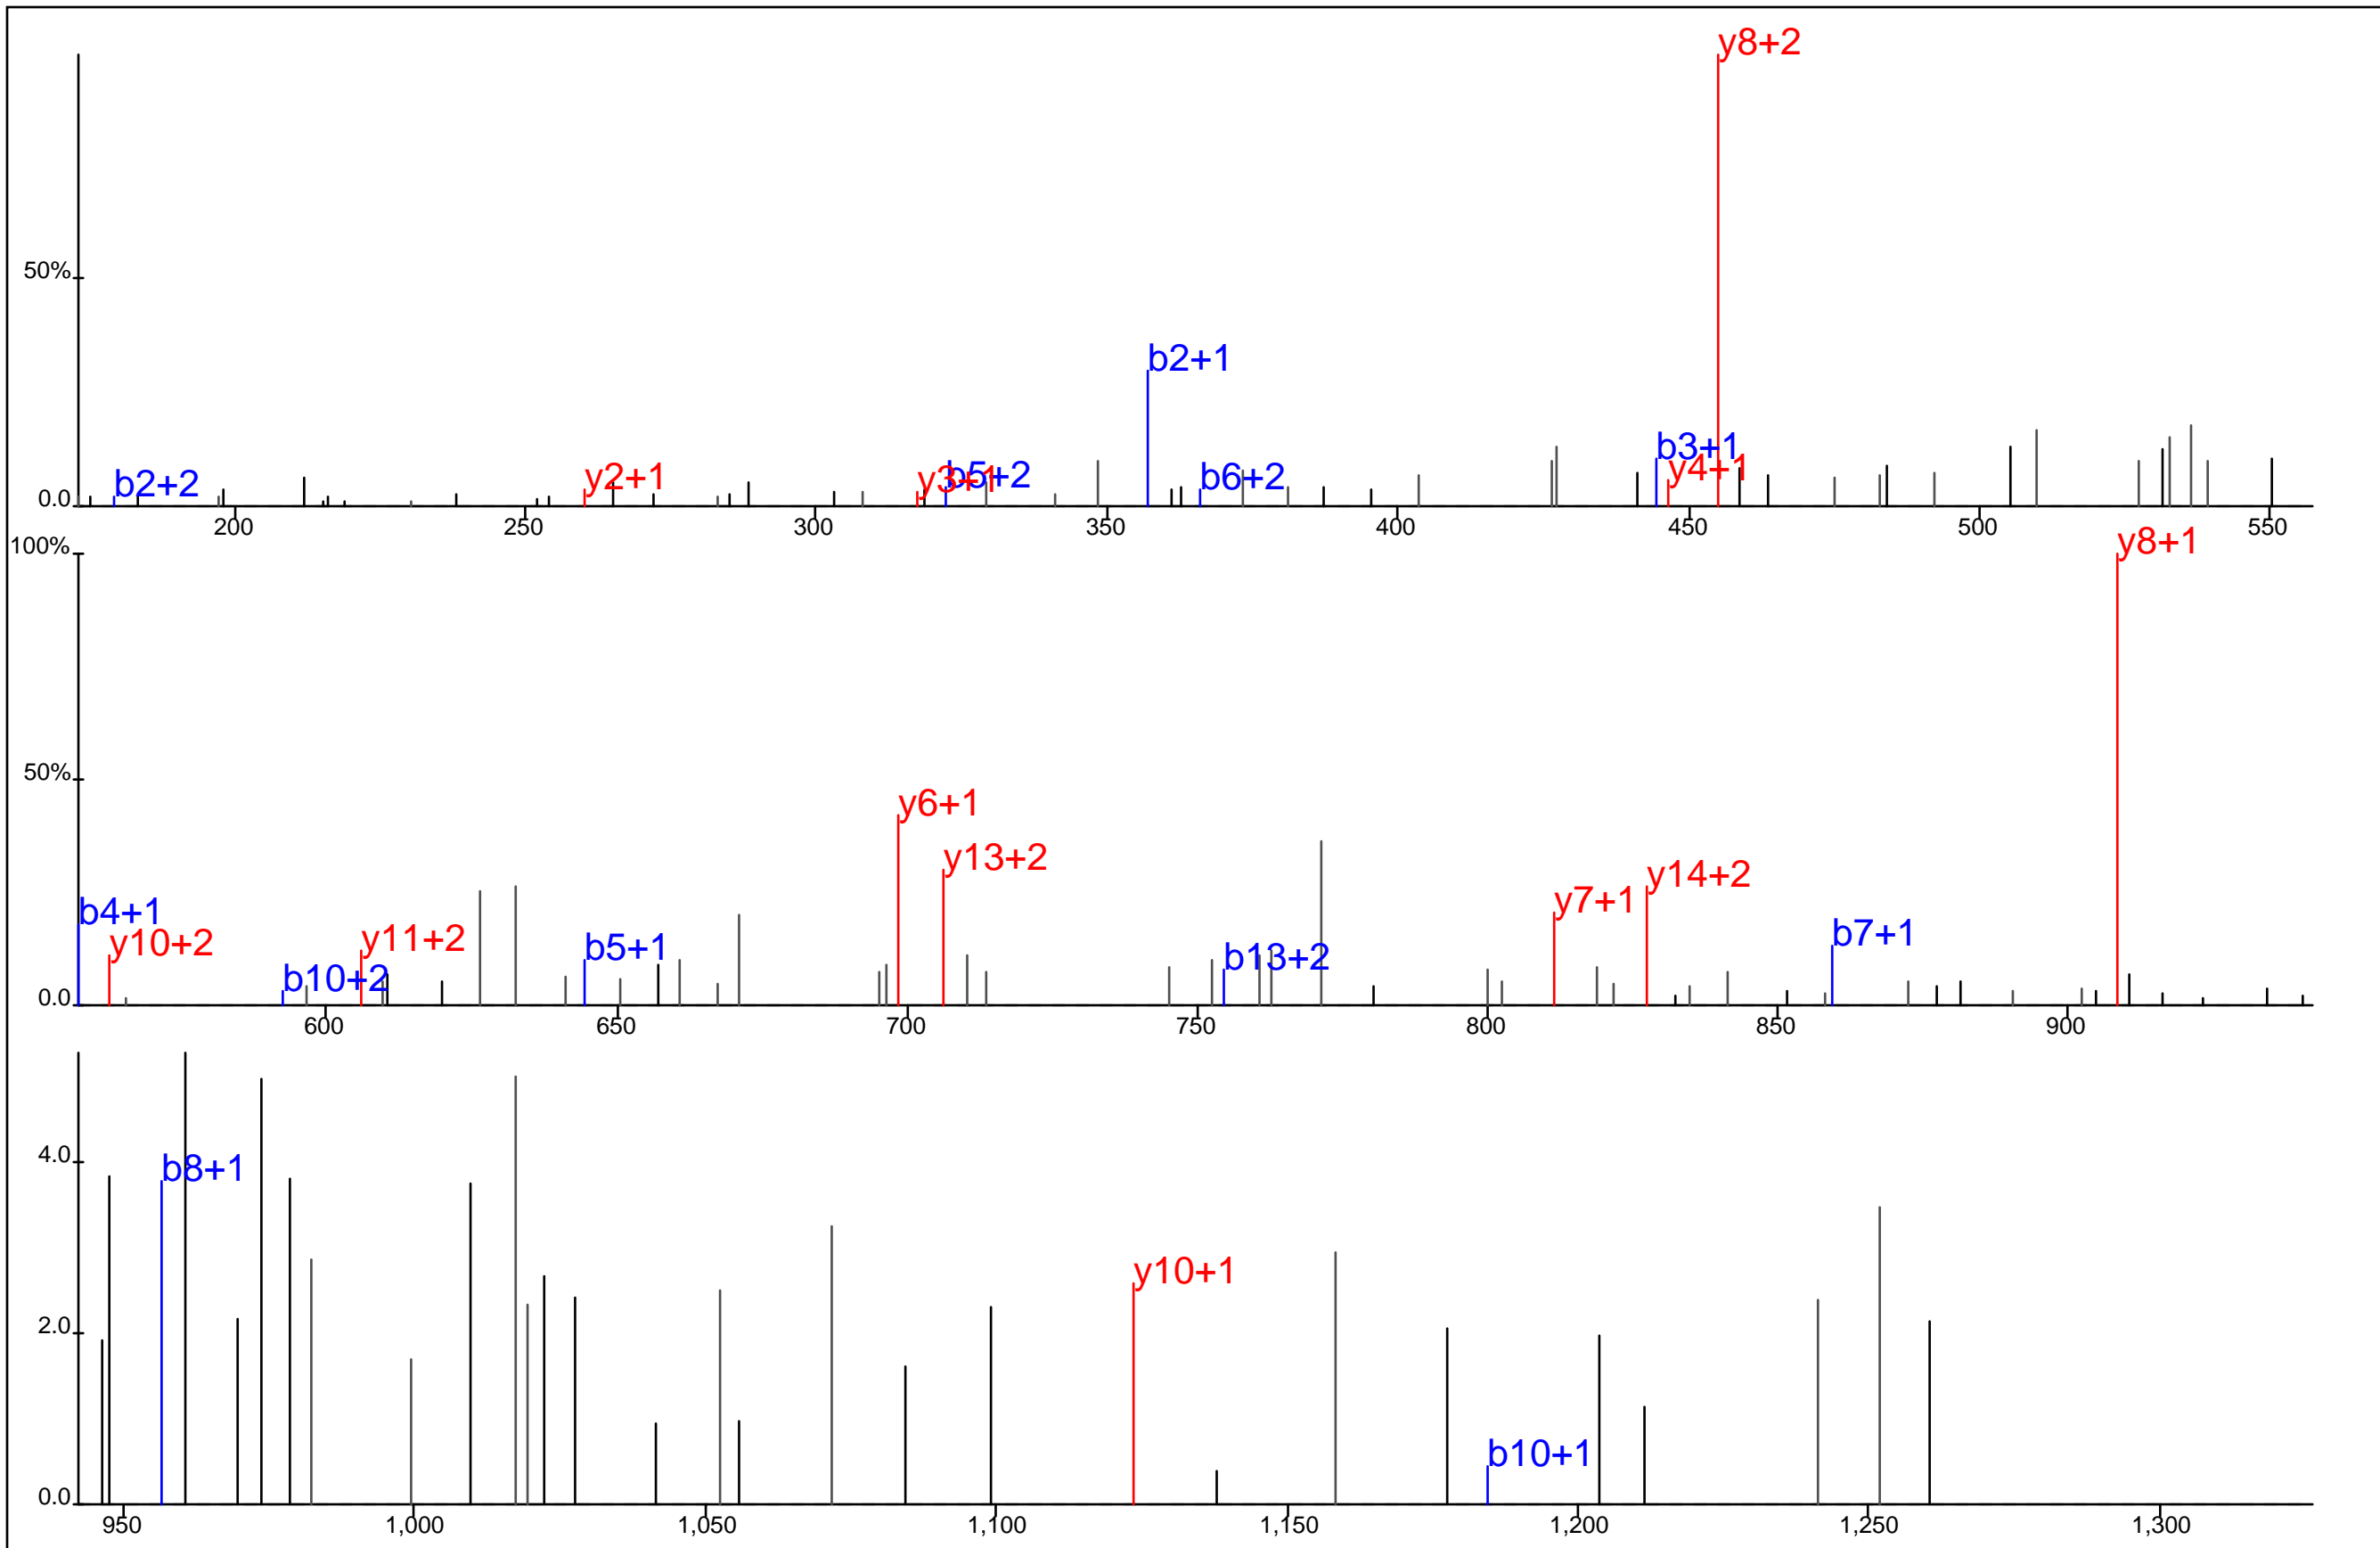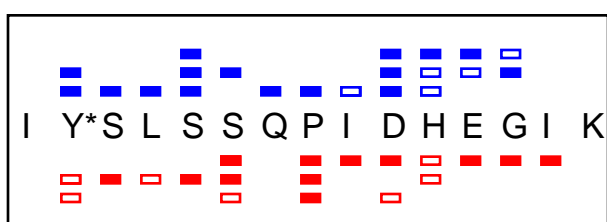

Protein Name: Phosphofurin acidic cluster sorting protein 1  
 gi Accession: 0  
 Precursor Mass: 589.6177+3  
 Delta Mass: 1.492 ppm  
 XCorr: 22.21

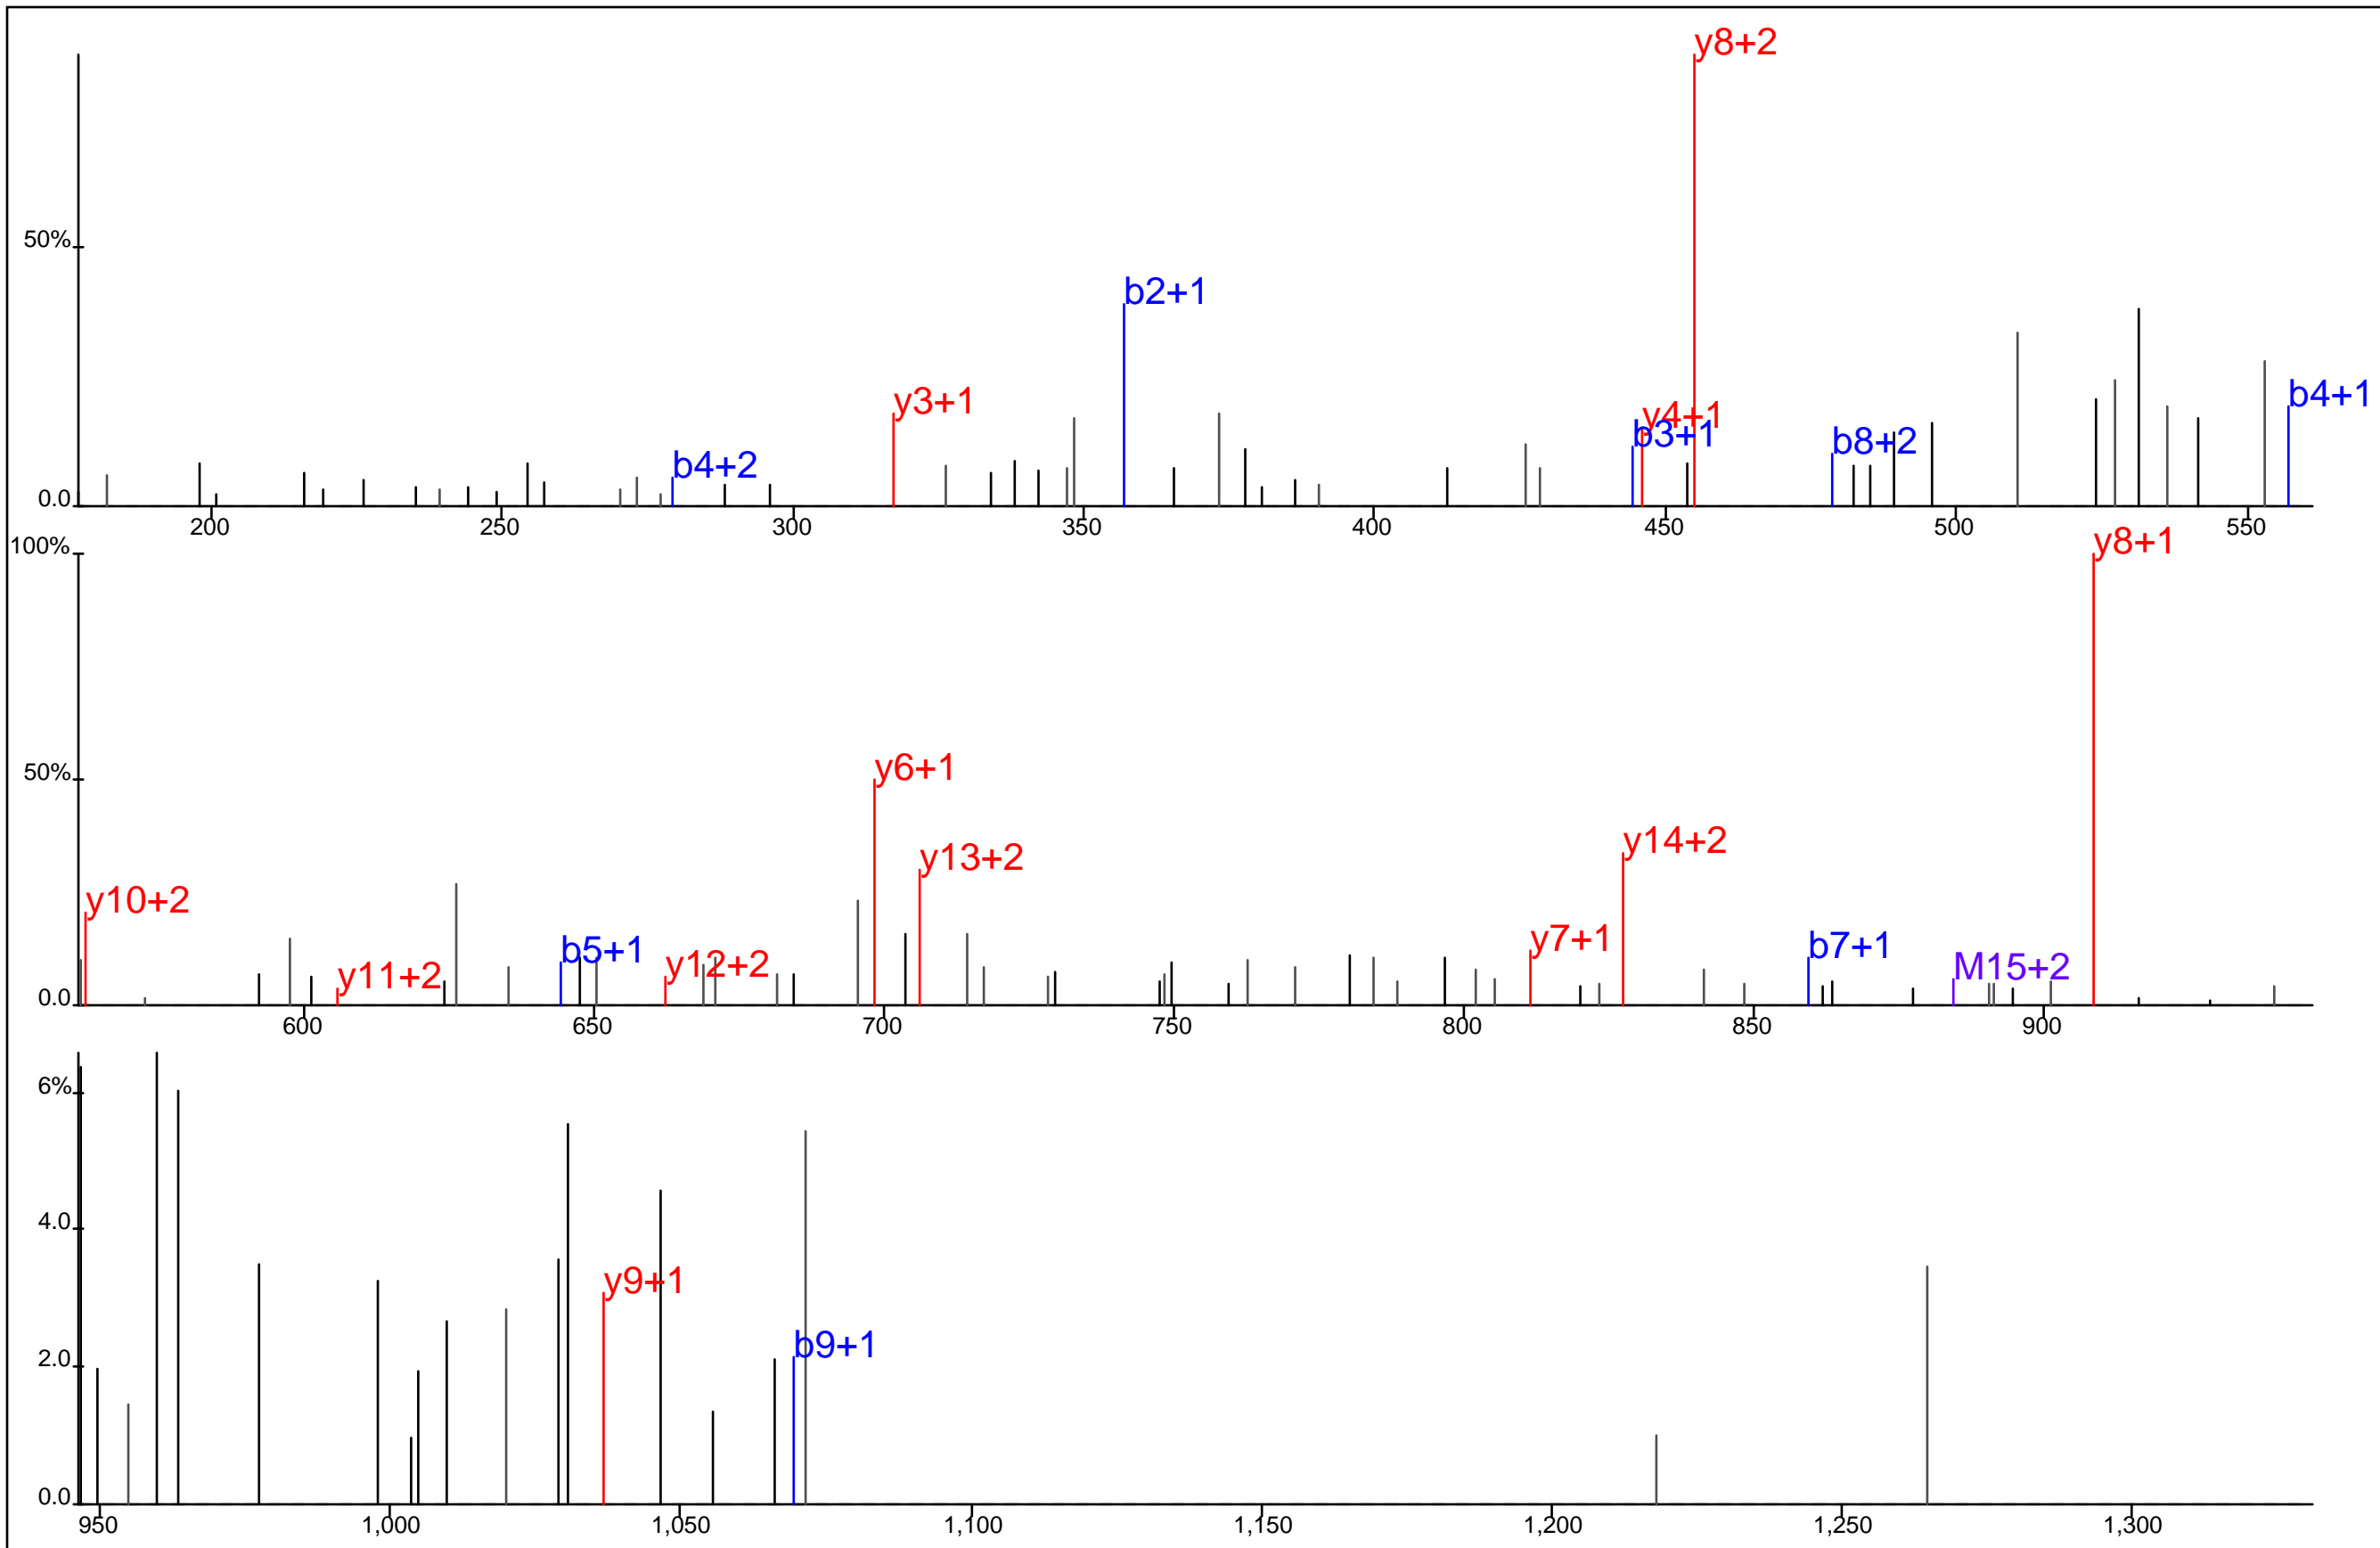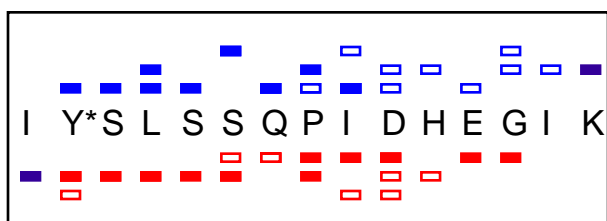

Protein Name: Phosphofurin acidic cluster sorting protein 1  
 gi Accession: 0  
 Precursor Mass: 589.6166+3  
 Delta Mass: 0.374 ppm  
 XCorr: 23.37

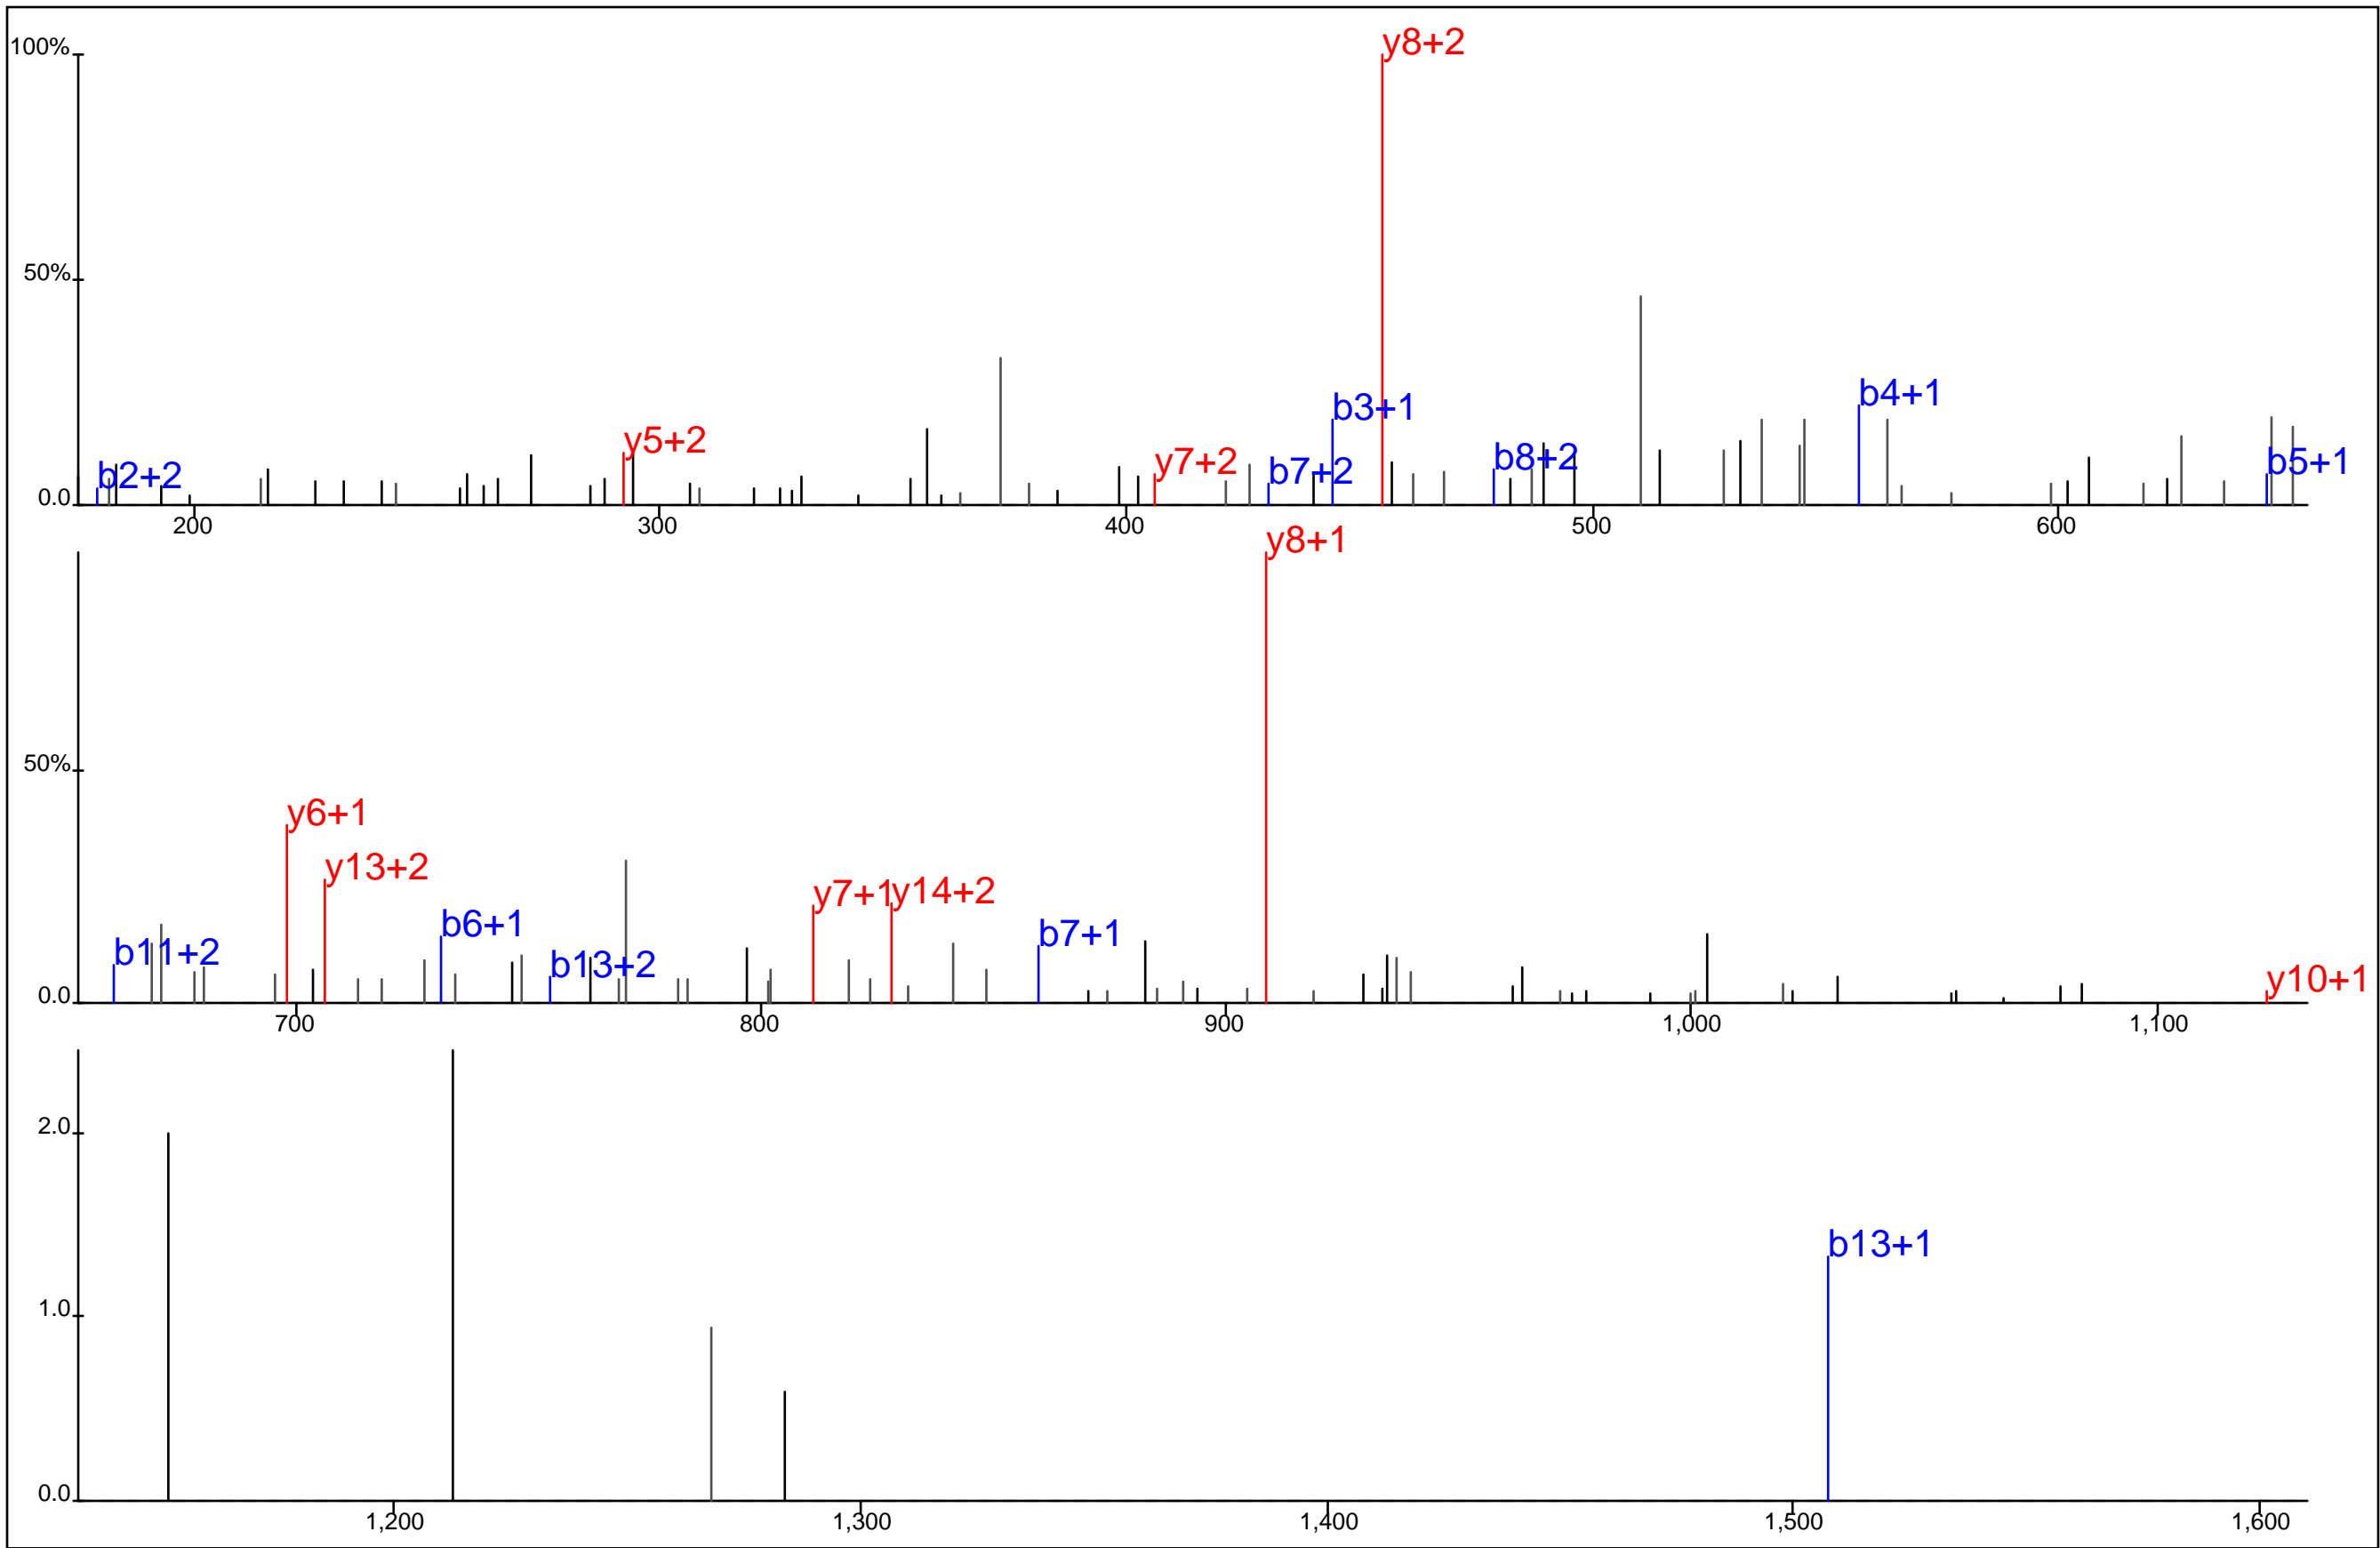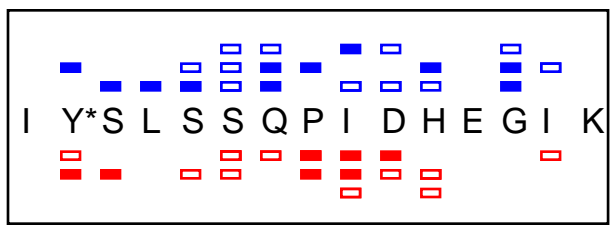

Protein Name: Phosphofurin acidic cluster sorting protein 1  
 gi Accession: 0  
 Precursor Mass: 589.6168+3  
 Delta Mass: 0.063 ppm  
 XCorr: 25.83

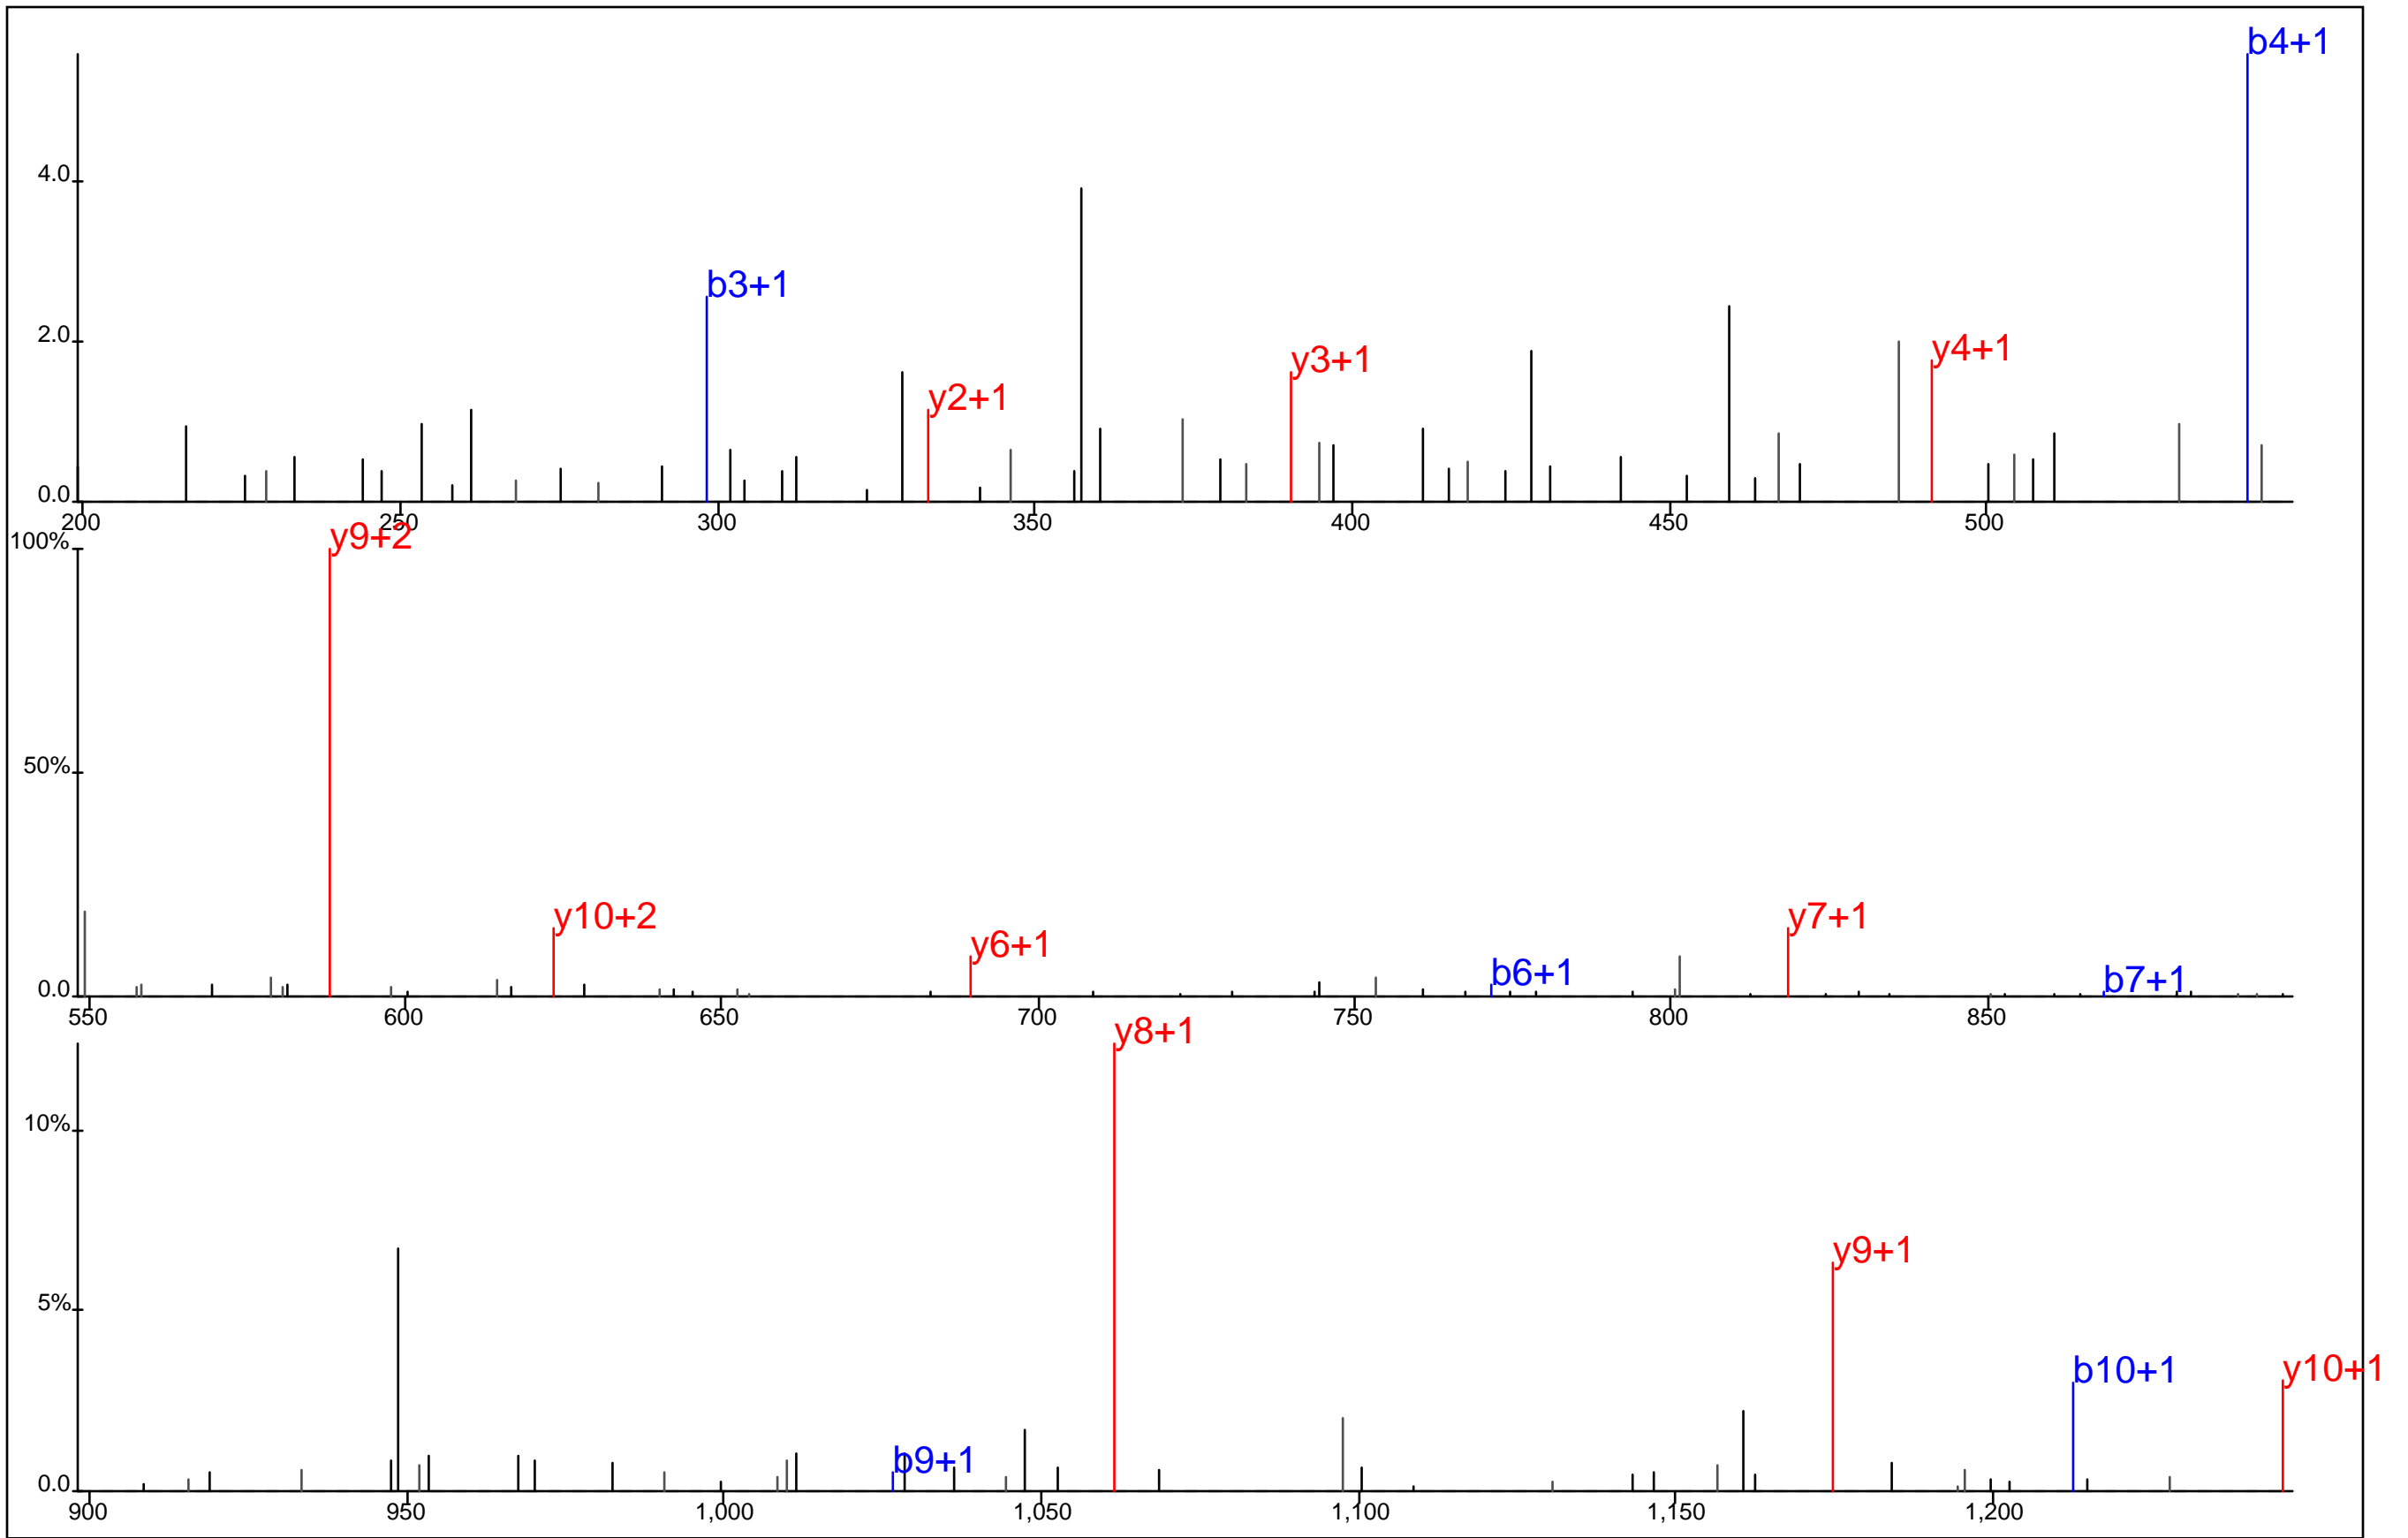

I A L Y\* E T P T G W K  
 ■ ■ ■ ■ ■ ■ ■ ■  
 ■ ■ ■ ■ ■ ■ ■ ■

Protein Name: Phosphoglucomutase 1  
 gi Accession: 0  
 Precursor Mass: 679.8223+2  
 Delta Mass: 1.410 ppm  
 XCorr: 52.23

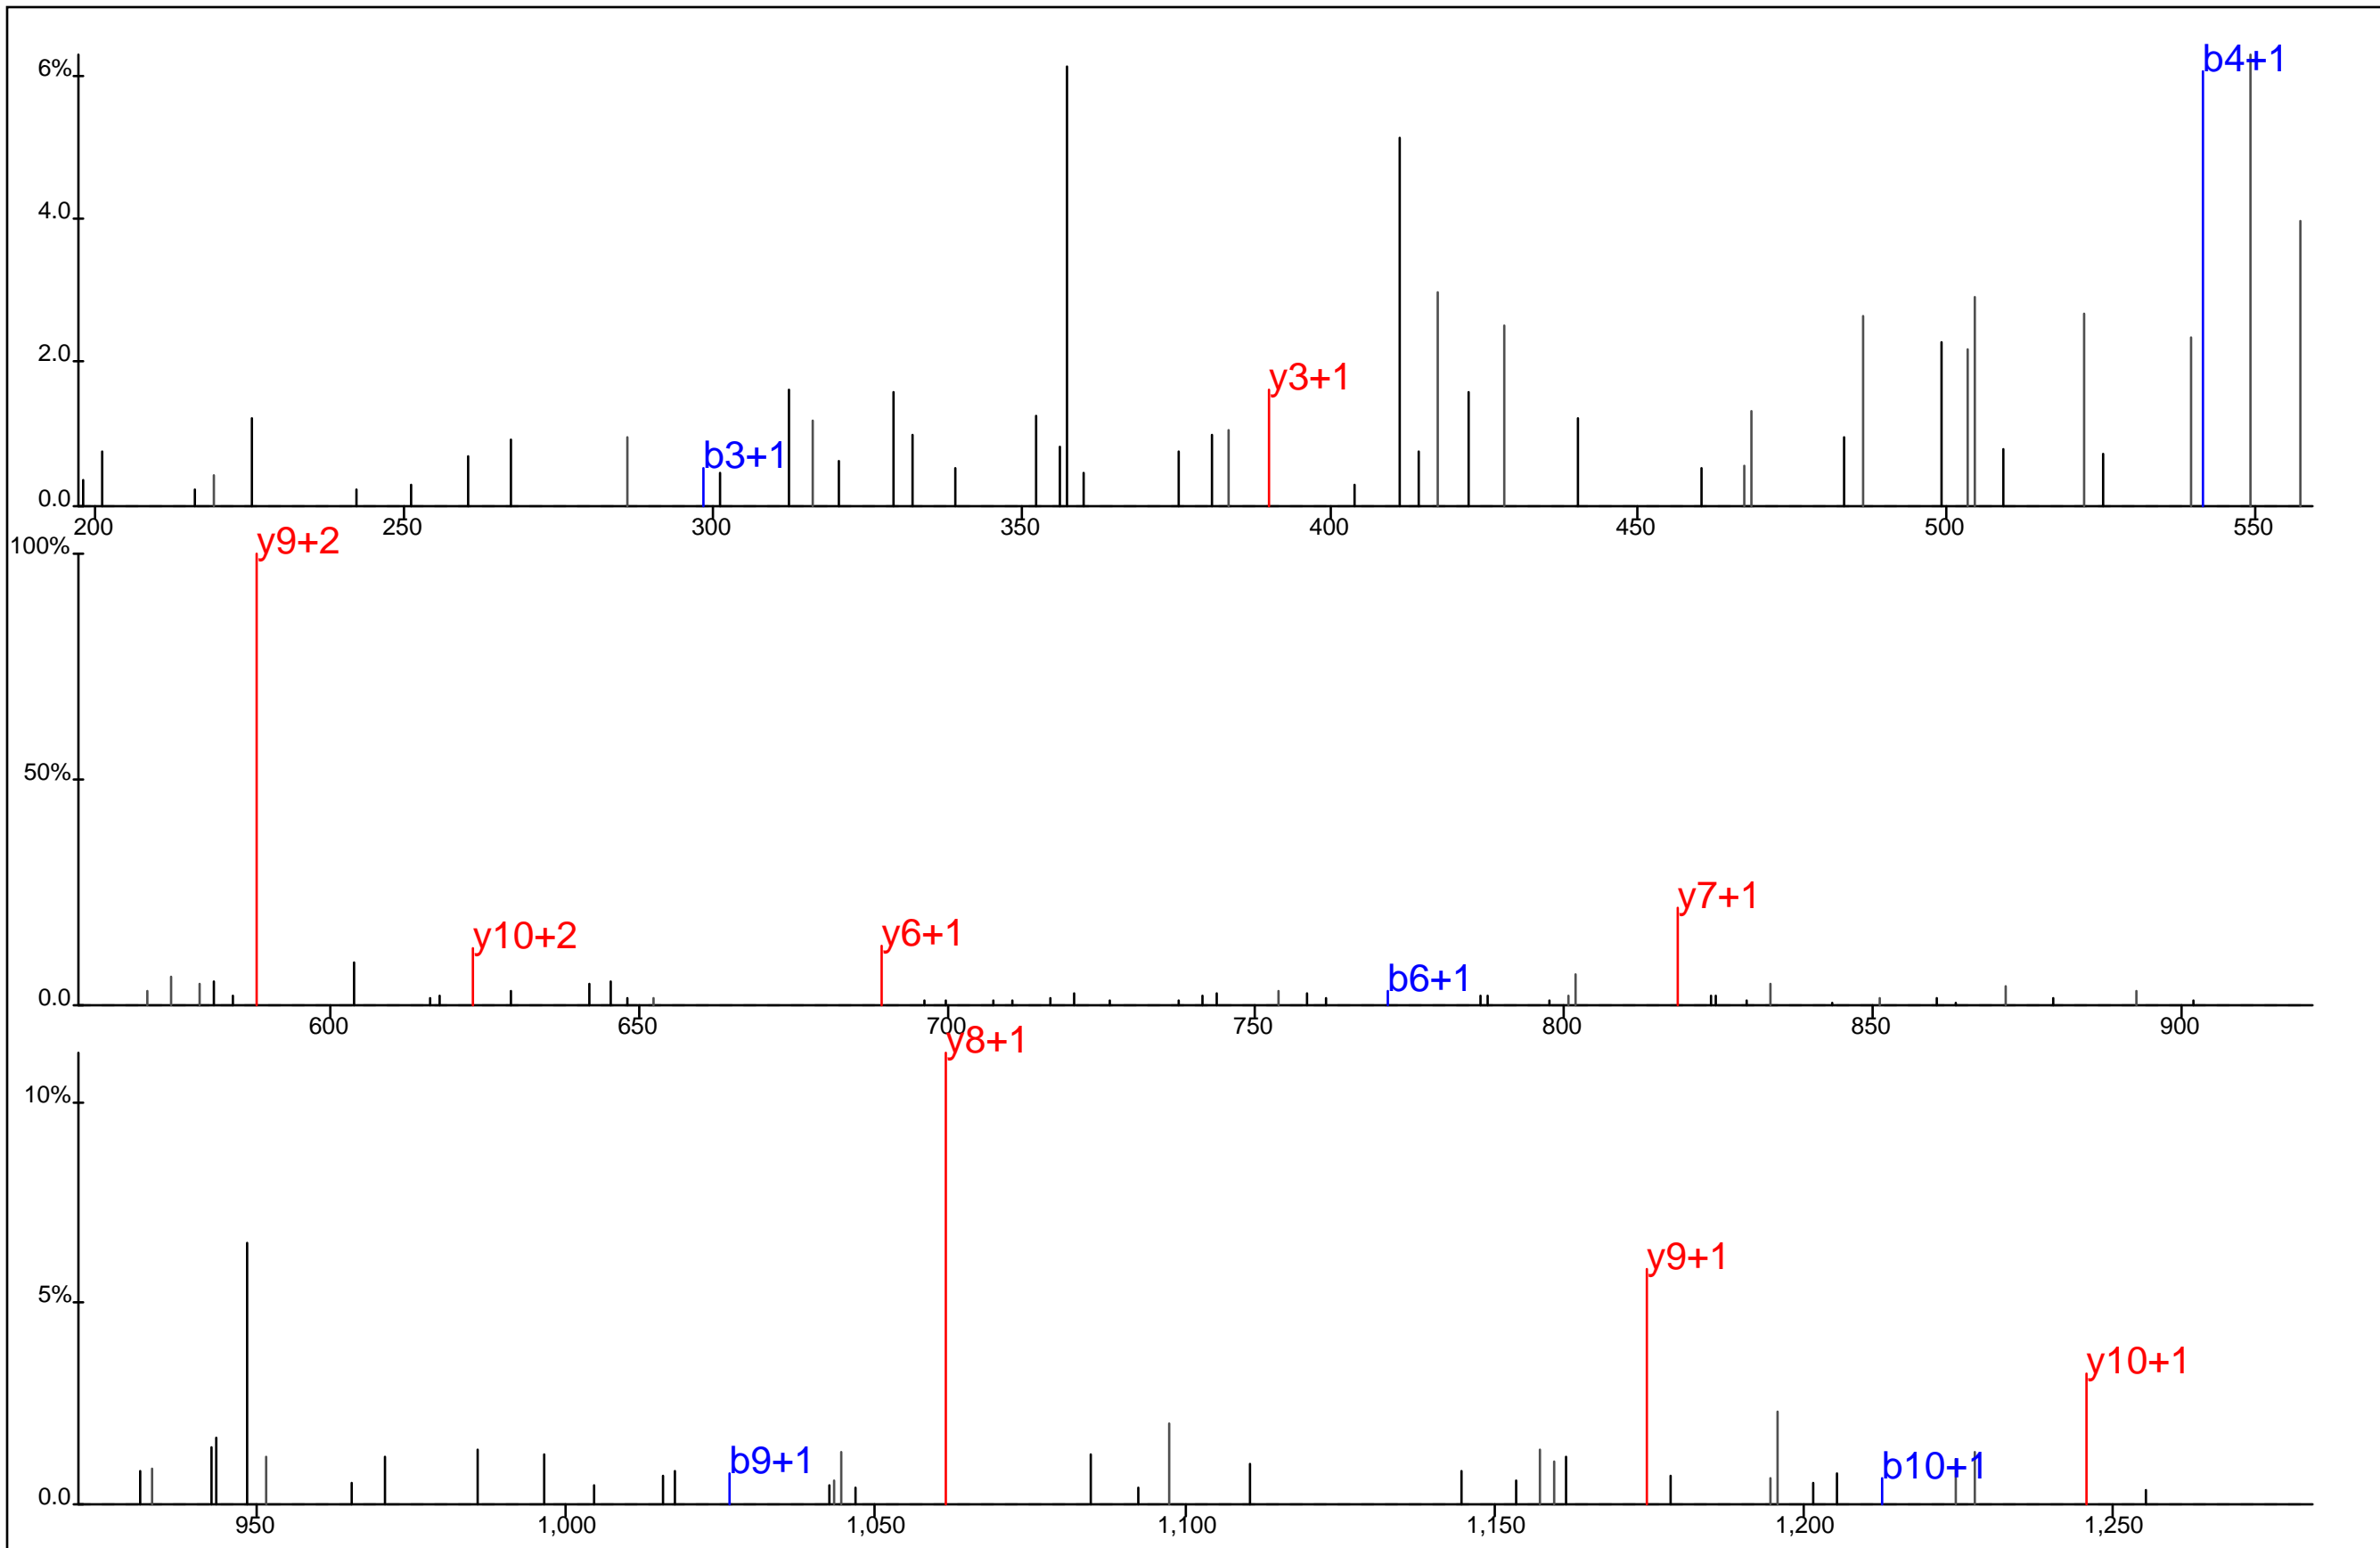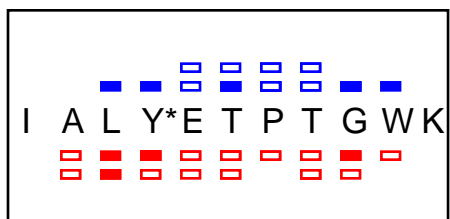

Protein Name: Phosphoglucomutase 1  
 gi Accession: 0  
 Precursor Mass: 679.8249+2  
 Delta Mass: 2.452 ppm  
 XCorr: 38.69

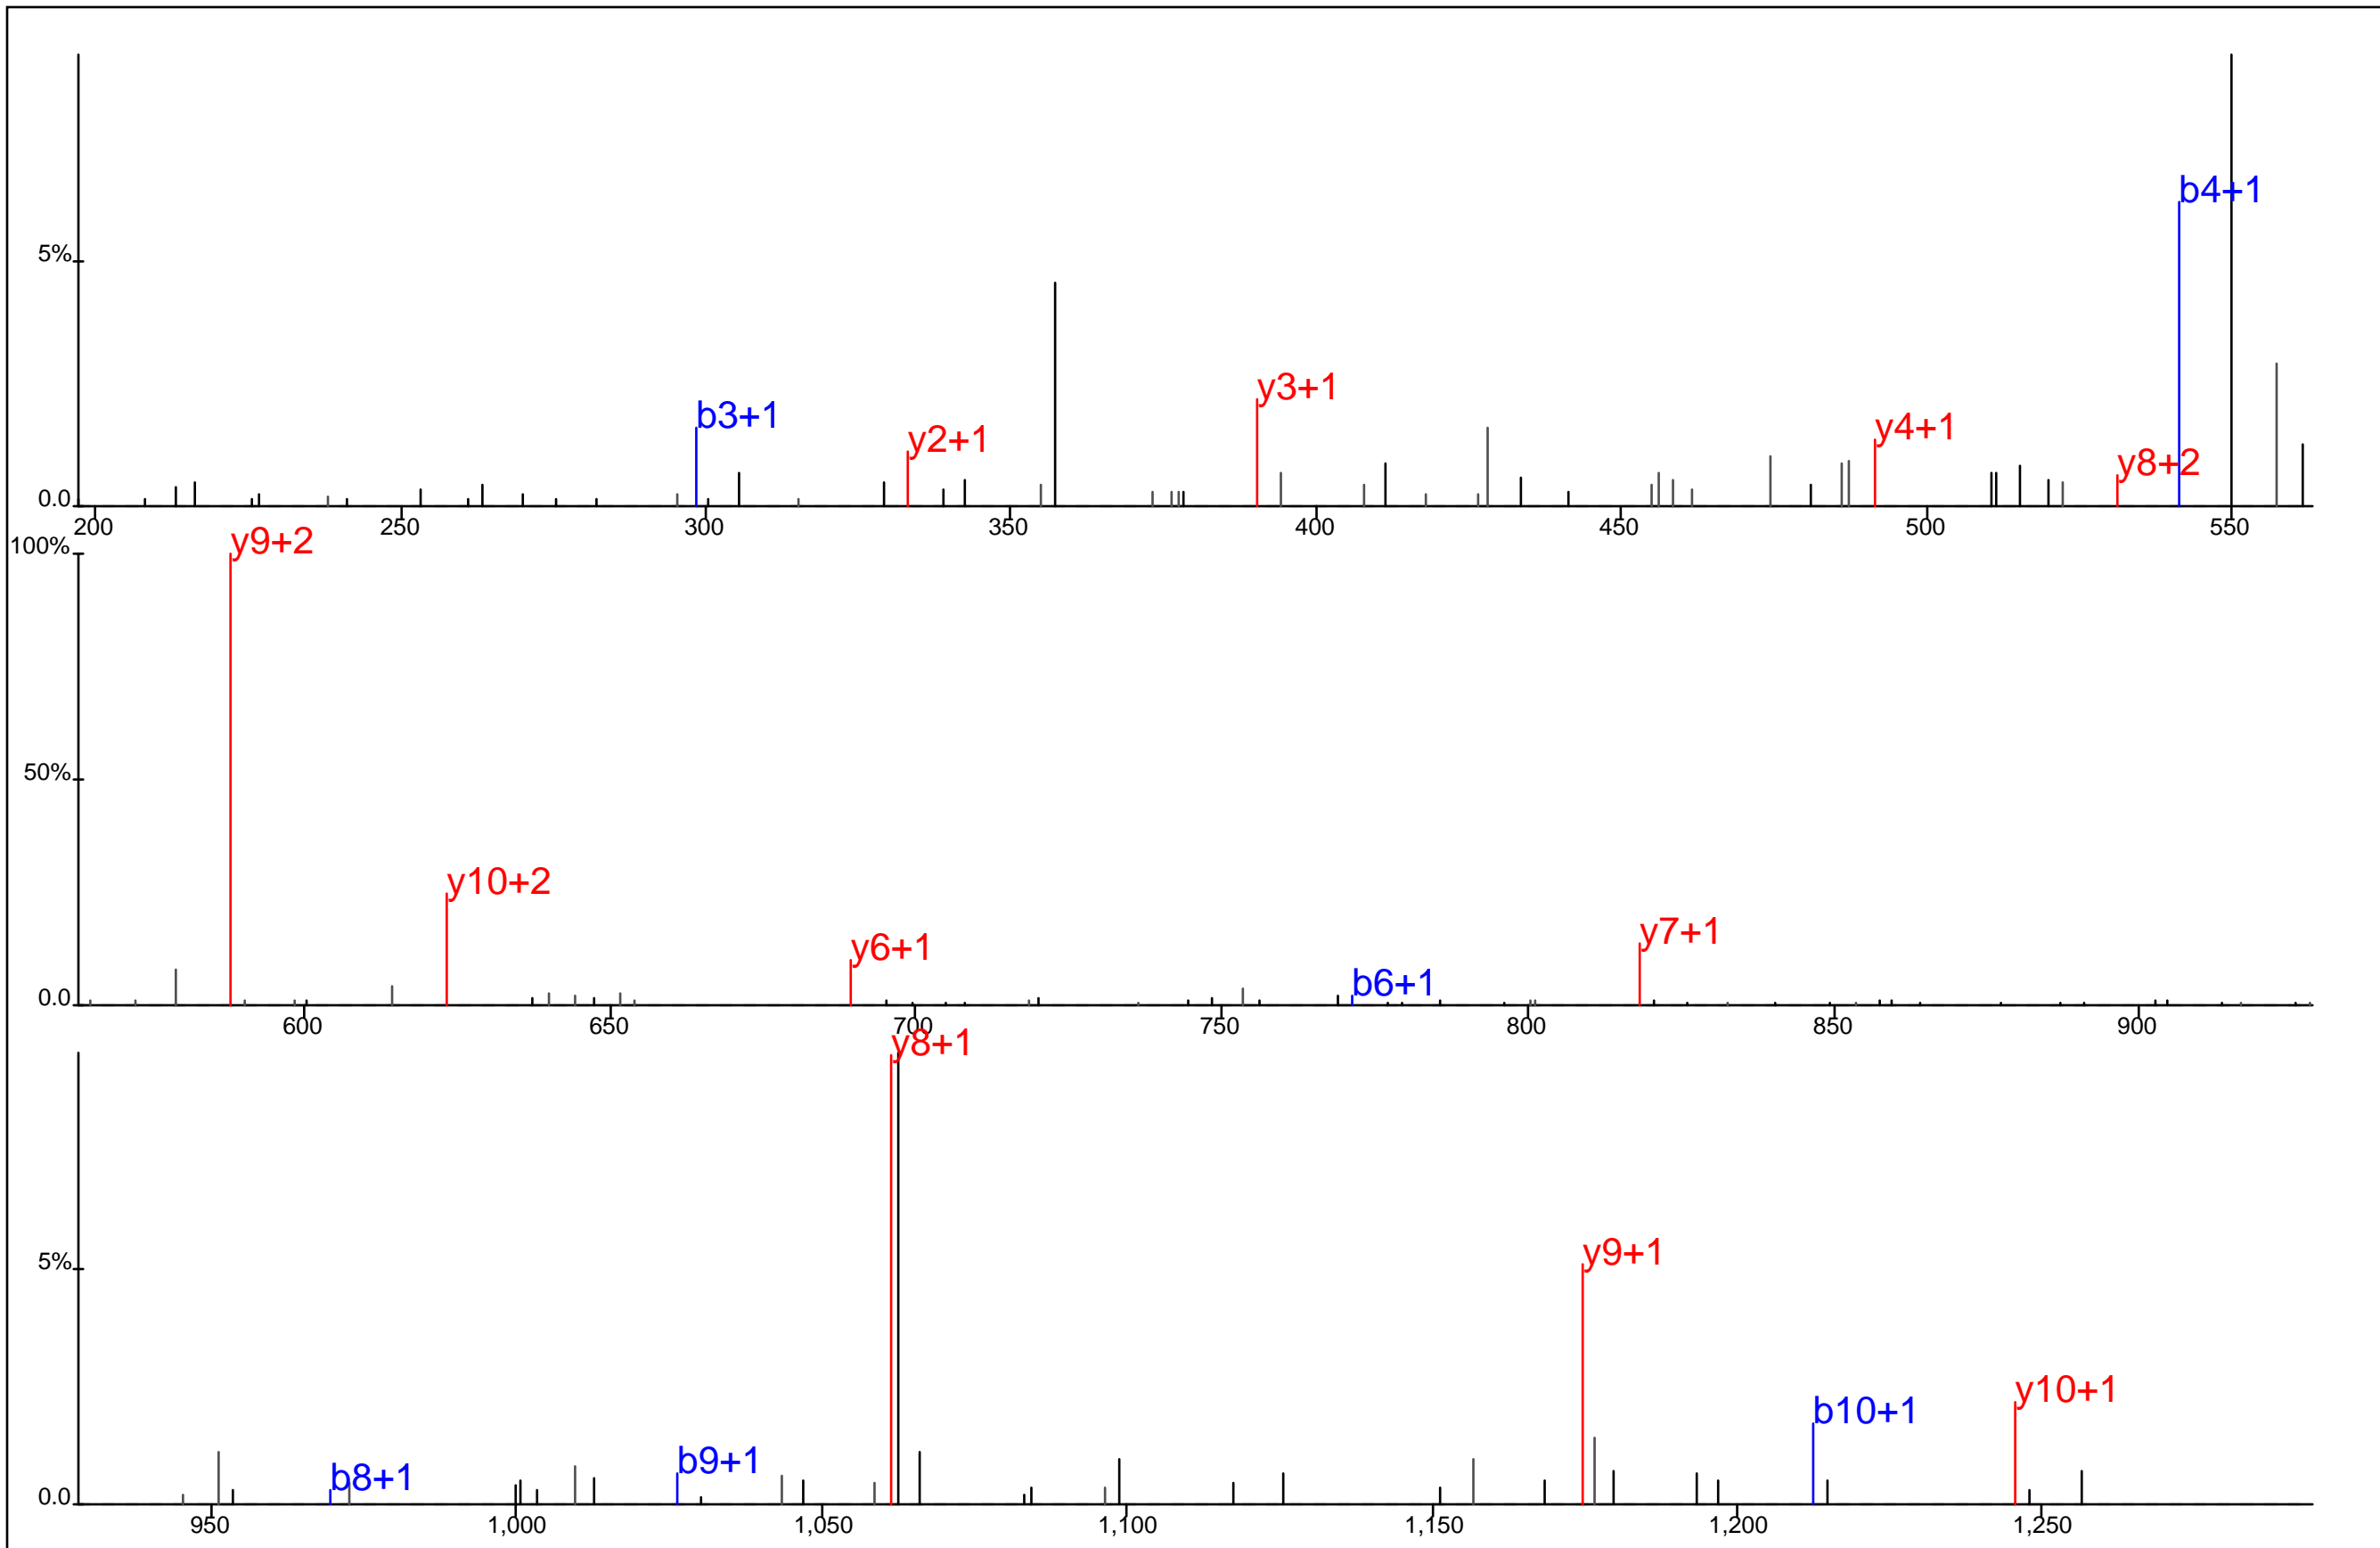

|   |   |   |    |   |   |   |   |   |   |   |
|---|---|---|----|---|---|---|---|---|---|---|
|   |   |   |    |   |   |   |   |   |   |   |
| I | A | L | Y* | E | T | P | T | G | W | K |
|   |   |   |    |   |   |   |   |   |   |   |
|   |   |   |    |   |   |   |   |   |   |   |

Protein Name: Phosphoglucomutase 1  
 gi Accession: 0  
 Precursor Mass: 679.8231+2  
 Delta Mass: 0.153 ppm  
 XCorr: 51.11

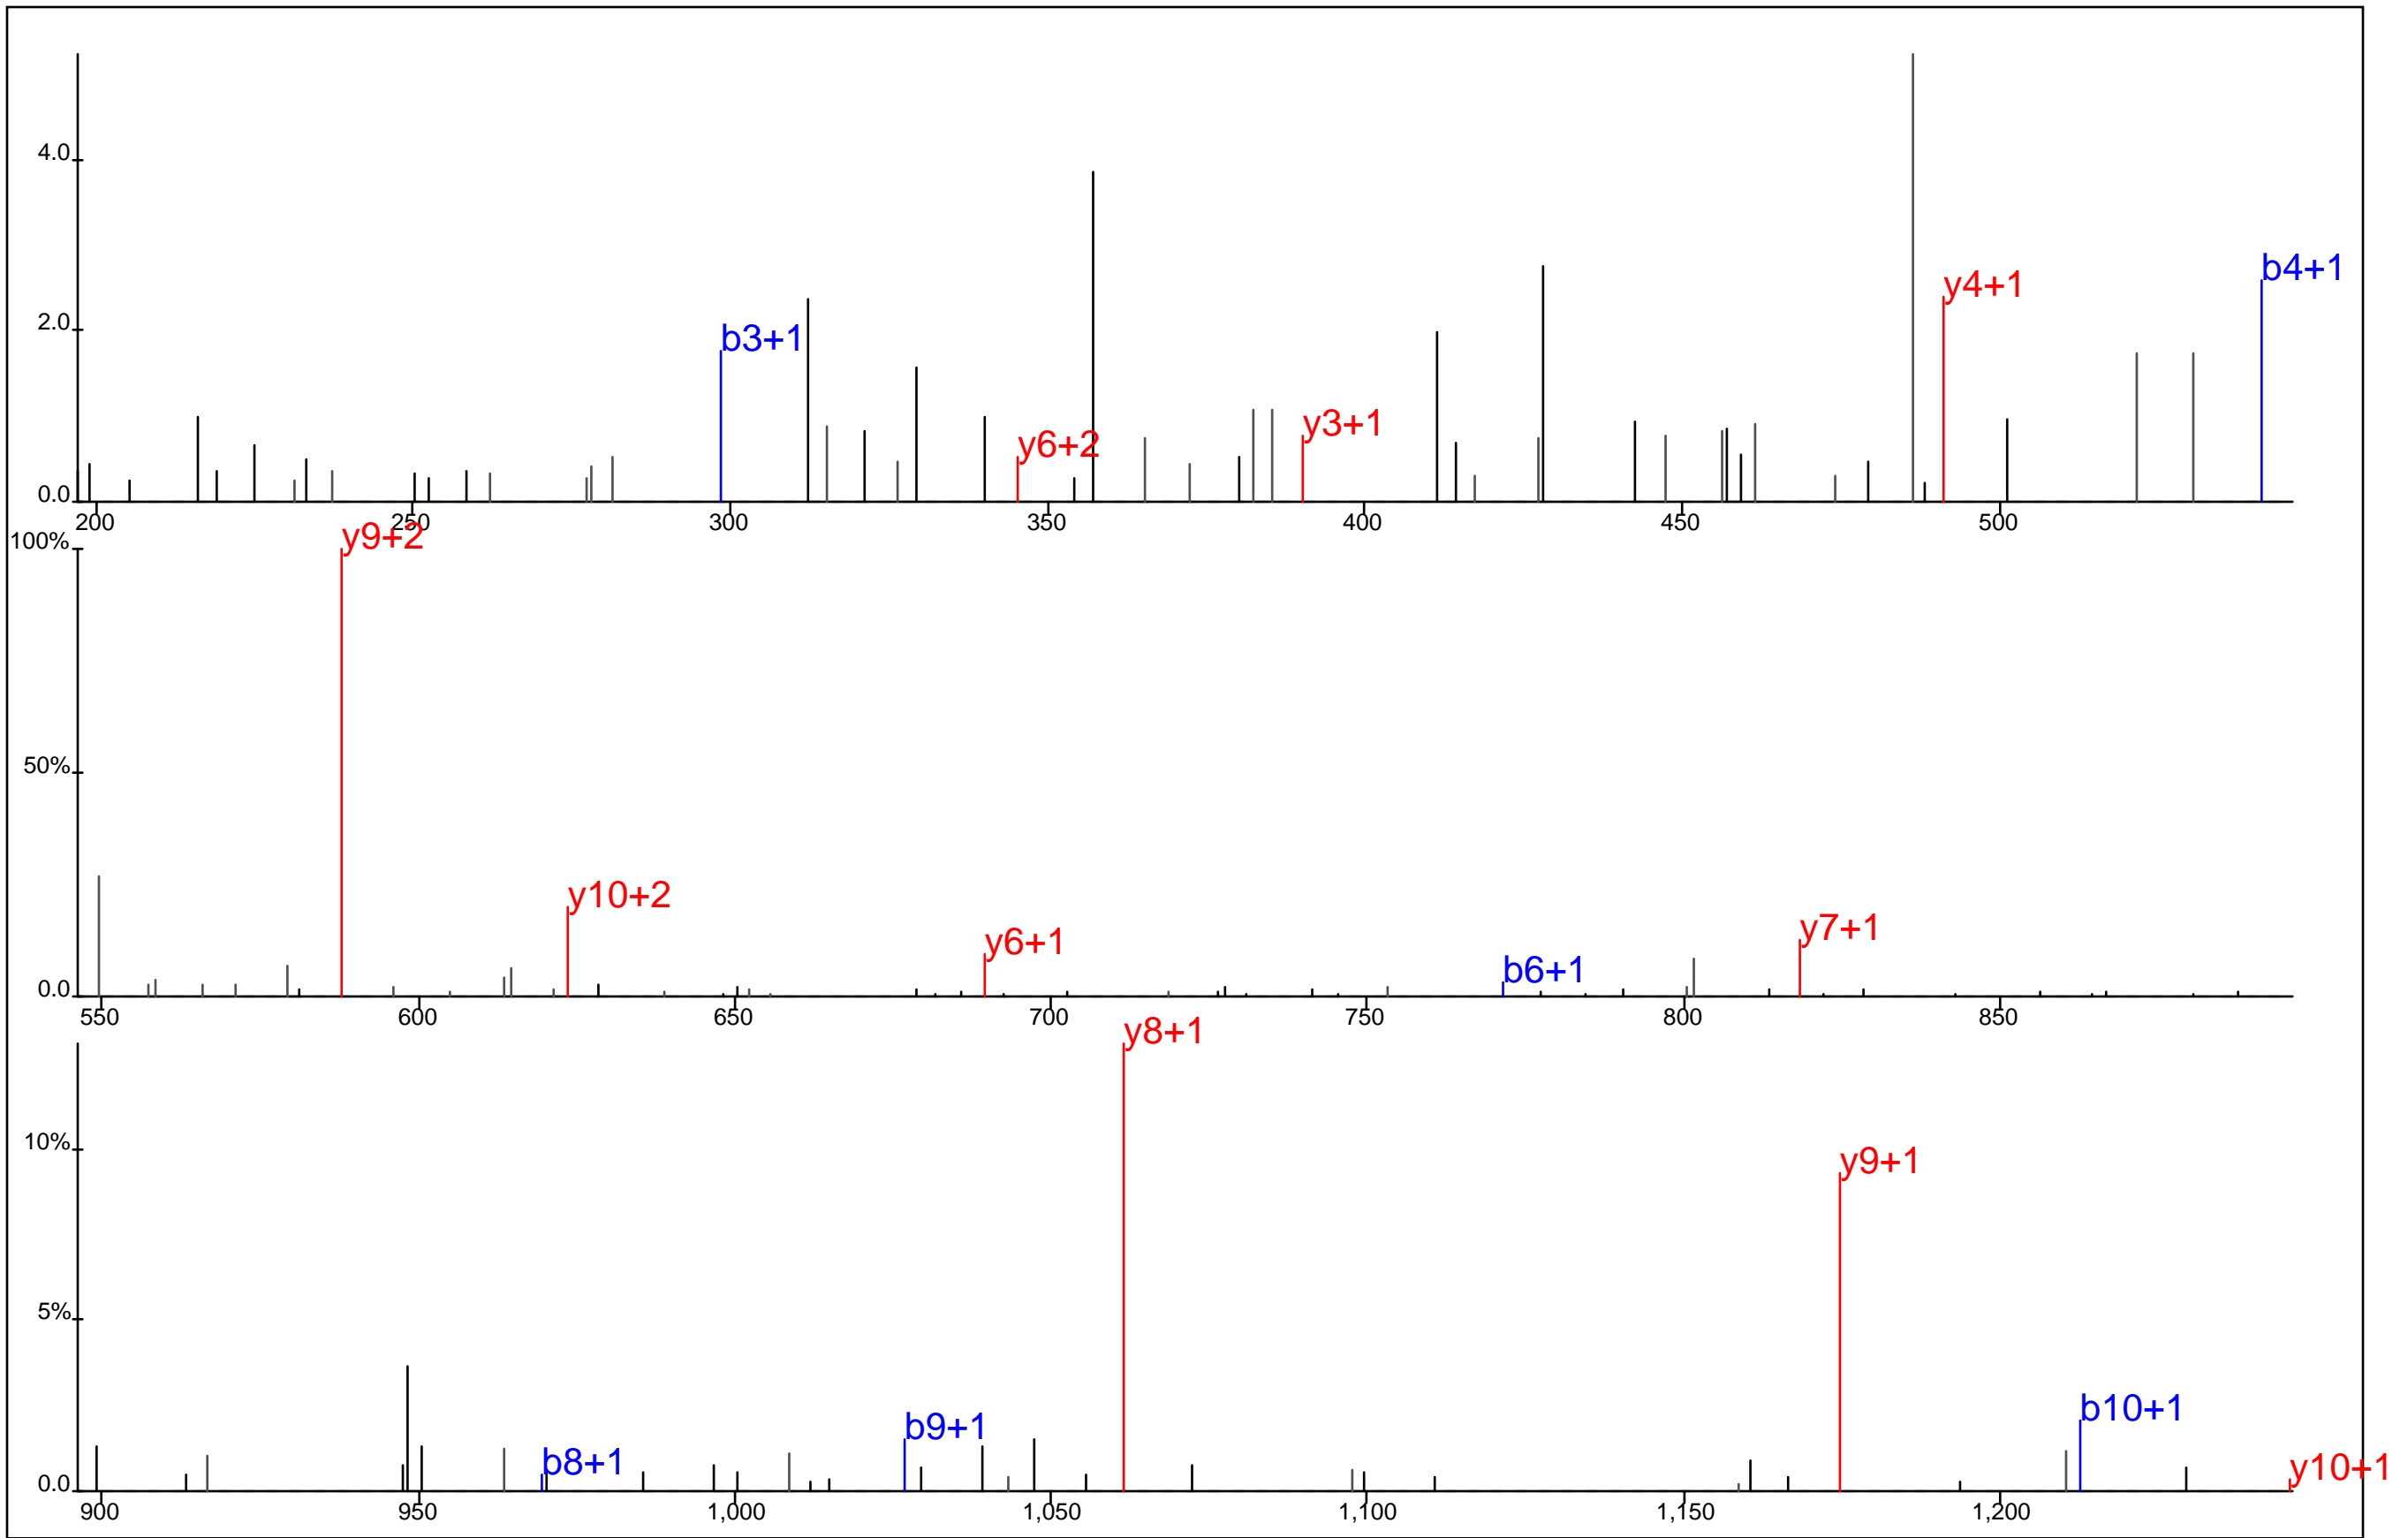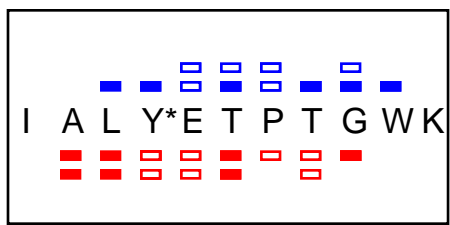

Protein Name: Phosphoglucomutase 1  
 gi Accession: 0  
 Precursor Mass: 679.8246+2  
 Delta Mass: 2.003 ppm  
 XCorr: 30.86





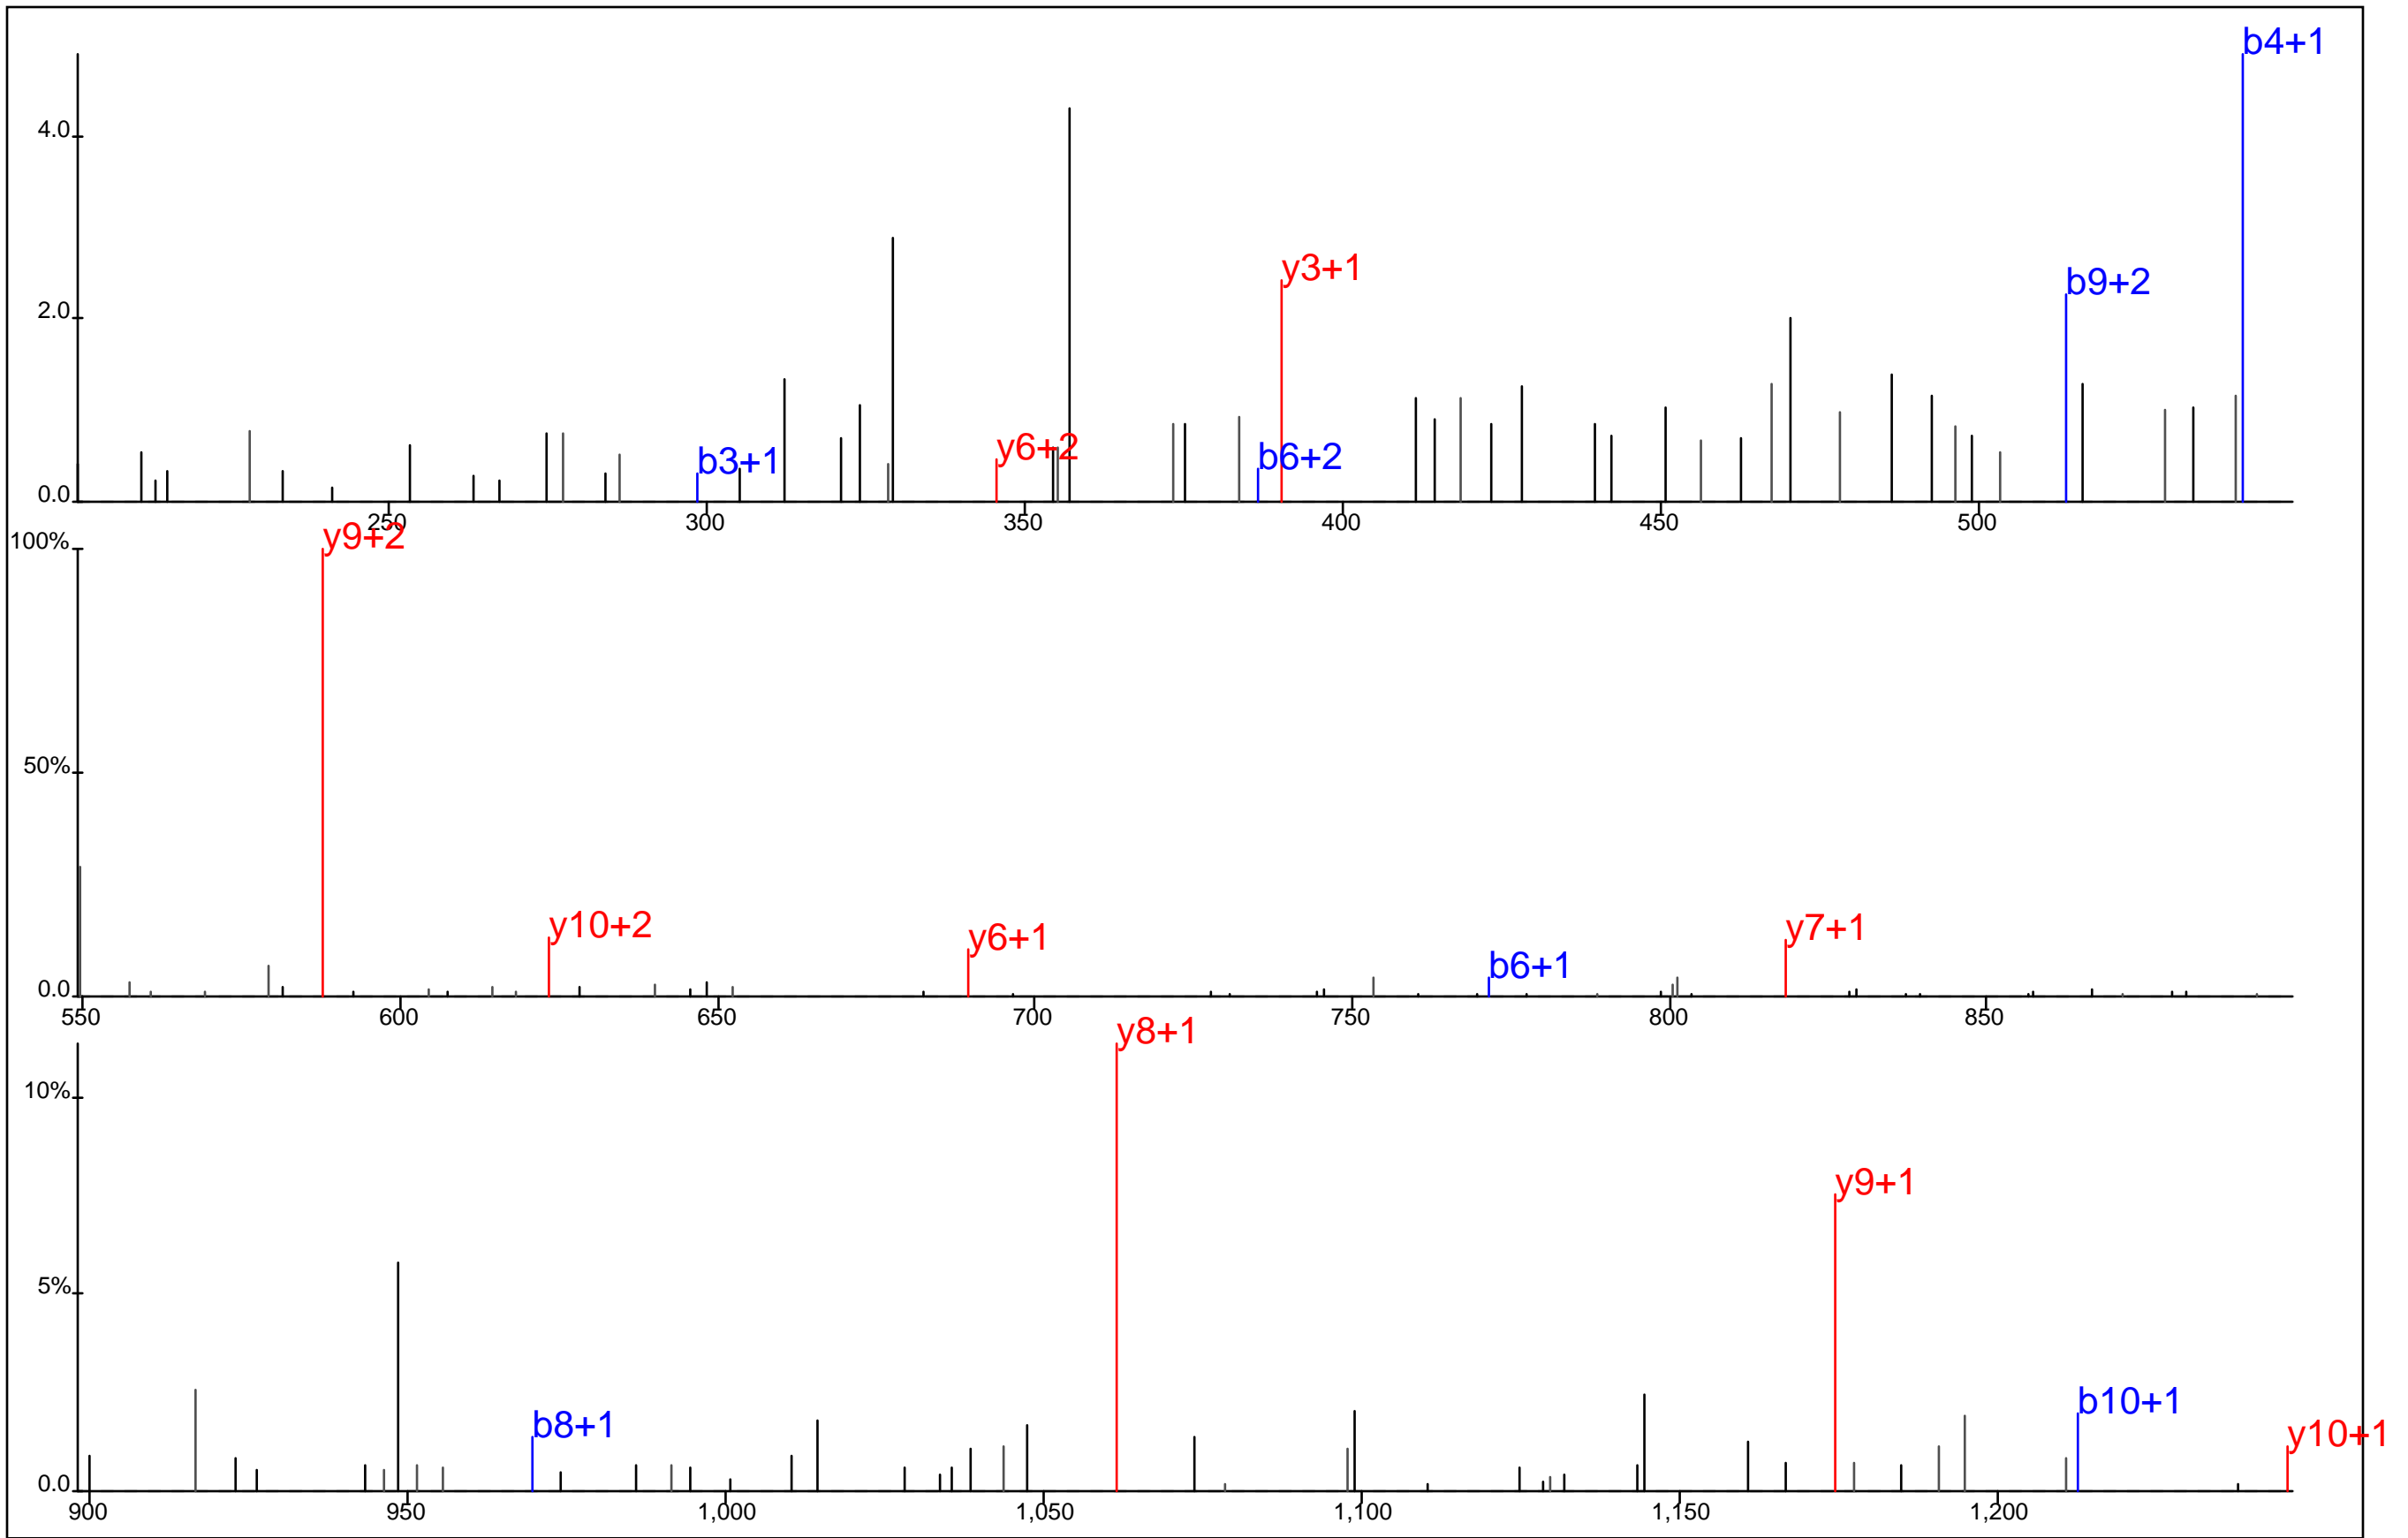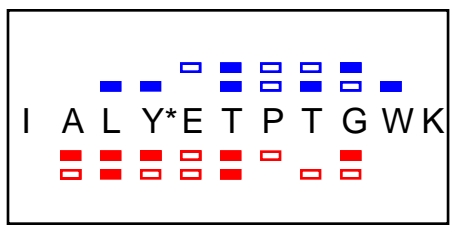

Protein Name: Phosphoglucomutase 1  
 gi Accession: 0  
 Precursor Mass: 679.8187+2  
 Delta Mass: 6.621 ppm  
 XCorr: 36.7

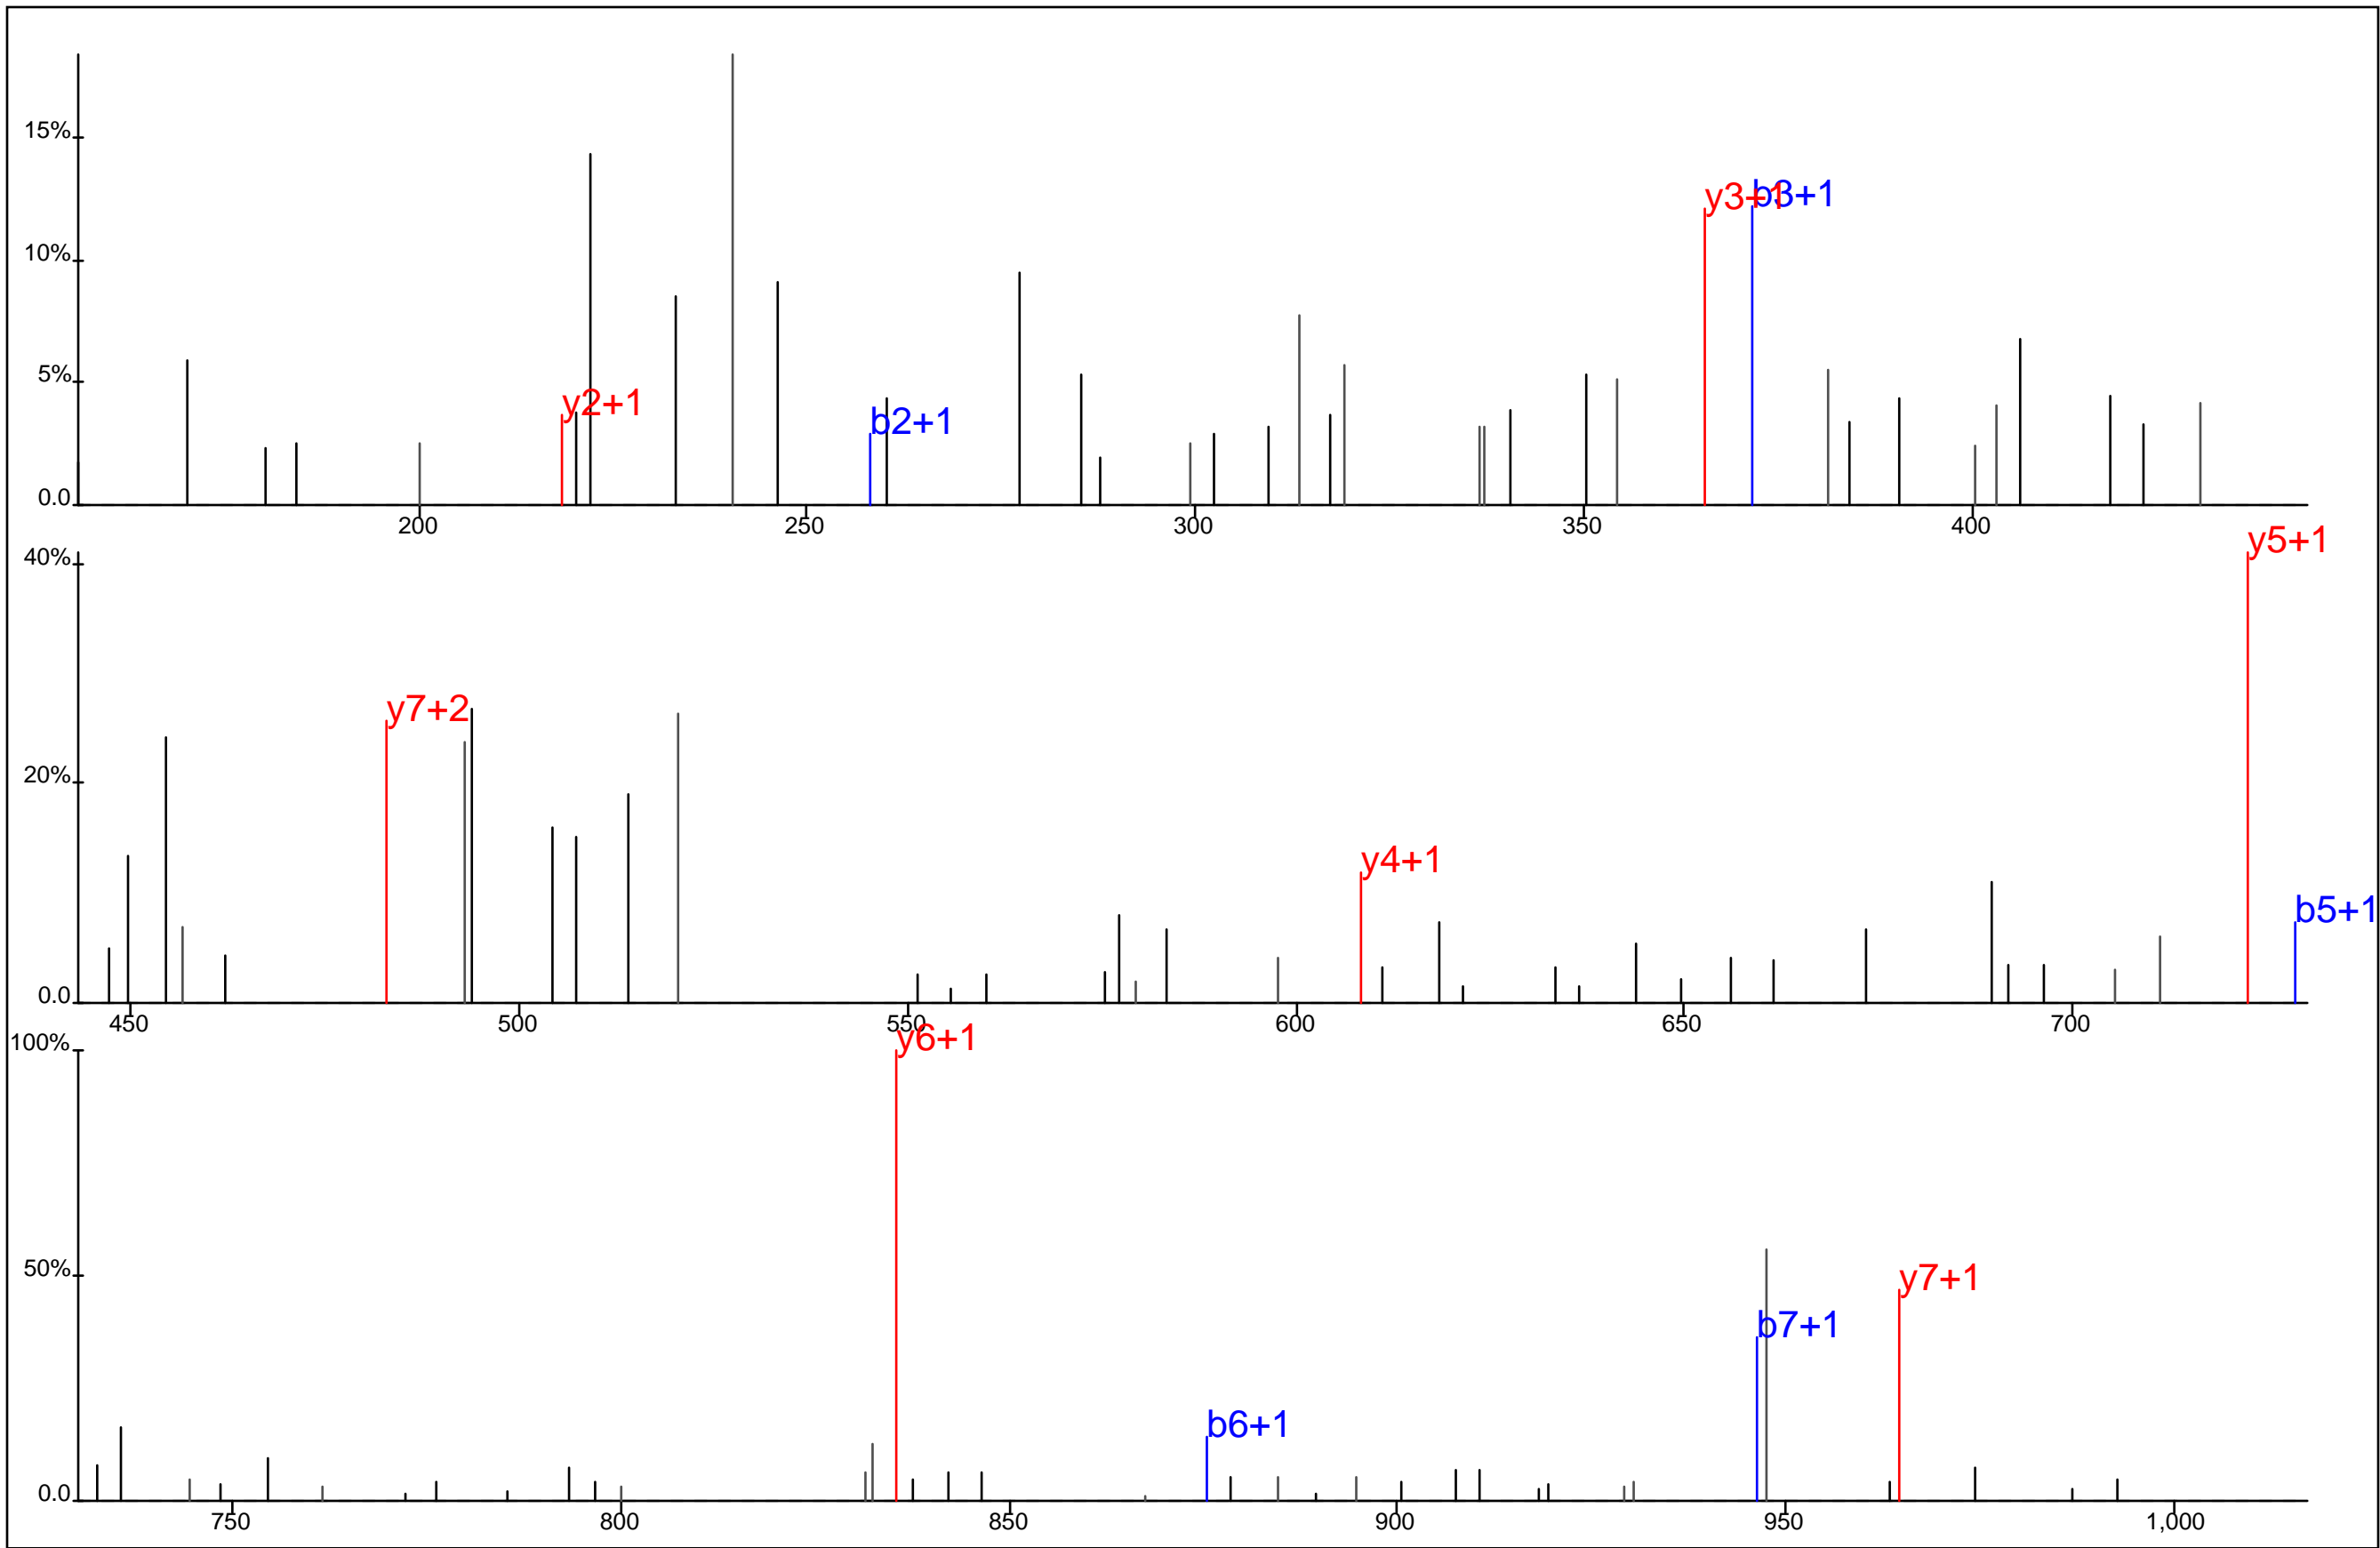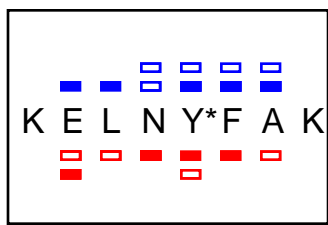

Protein Name: Phosphoglycerate kinase 1  
 gi Accession: 0  
 Precursor Mass: 546.7600+2  
 Delta Mass: 0.231 ppm  
 XCorr: 22.3

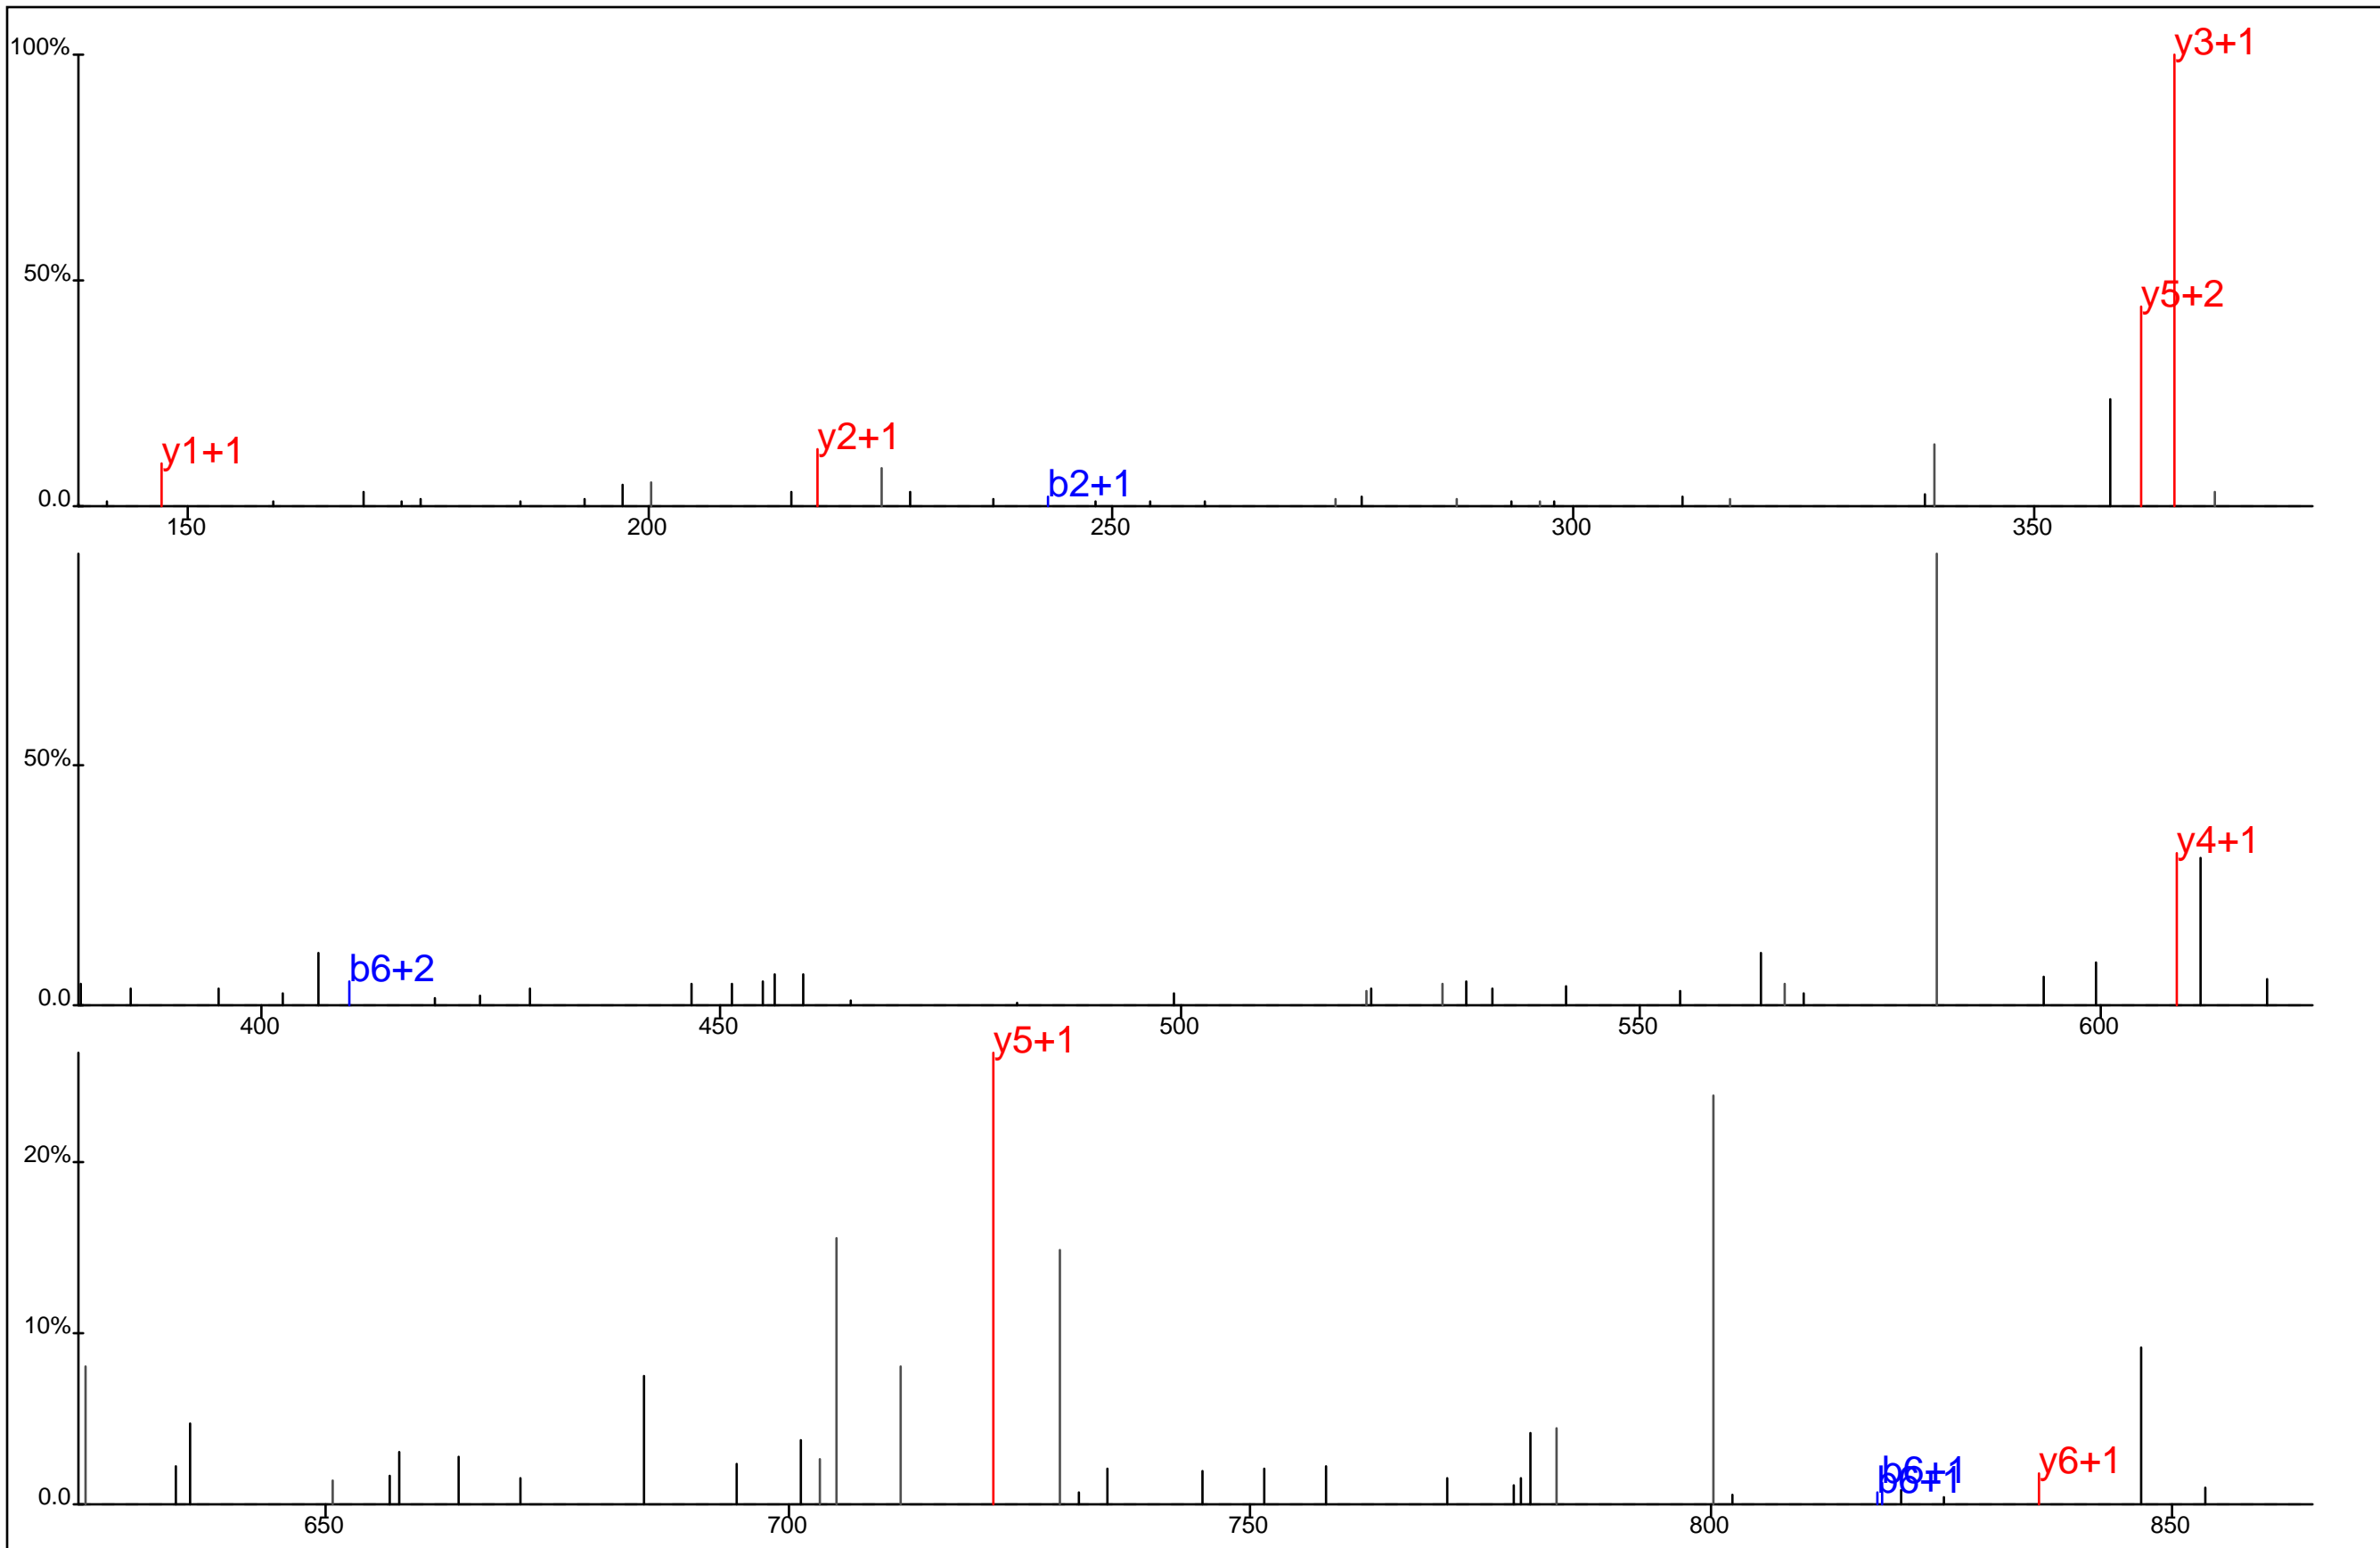

**E L N Y\*F A K**

Protein Name: Phosphoglycerate kinase 1  
 gi Accession: 0  
 Precursor Mass: 482.7125+2  
 Delta Mass: 0.176 ppm  
 XCorr: 24.17

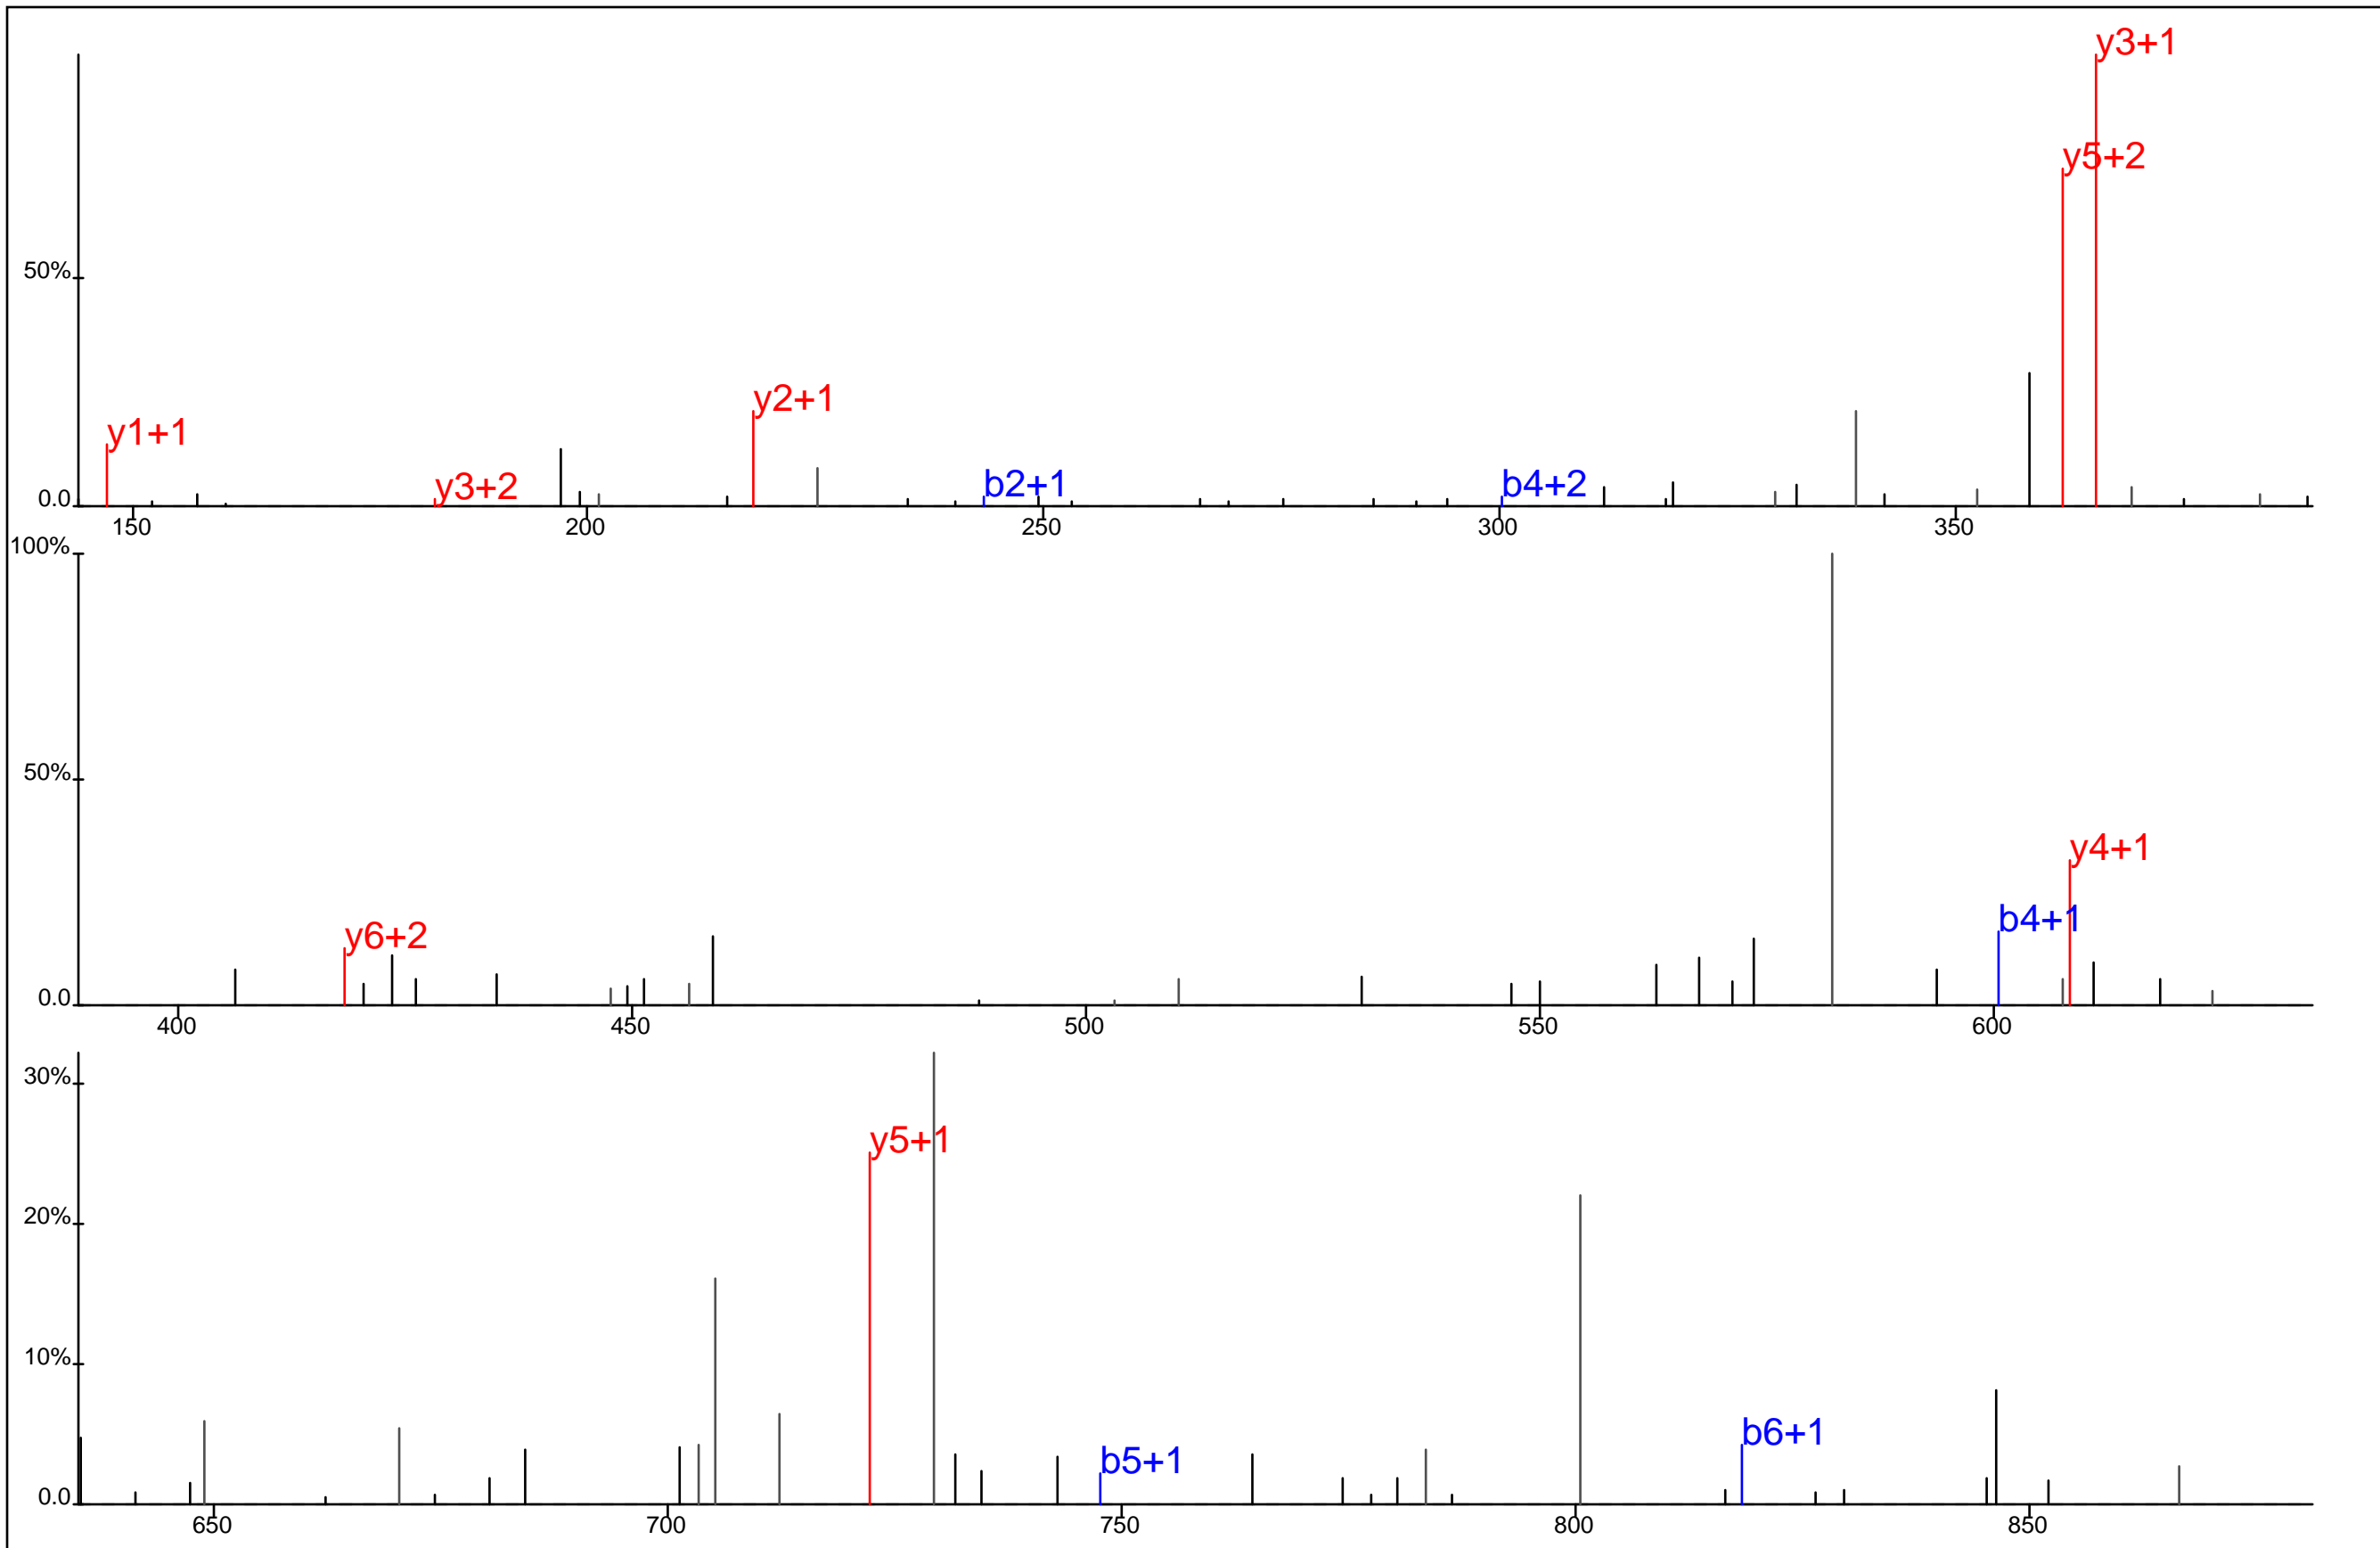

■ ▢ ■ ▢ ■  
 E L N Y\*F A K  
▢ ▢ ▢ ▢ ▢

Protein Name: Phosphoglycerate kinase 1  
 gi Accession: 0  
 Precursor Mass: 482.7124+2  
 Delta Mass: 0.050 ppm  
 XCorr: 27.83

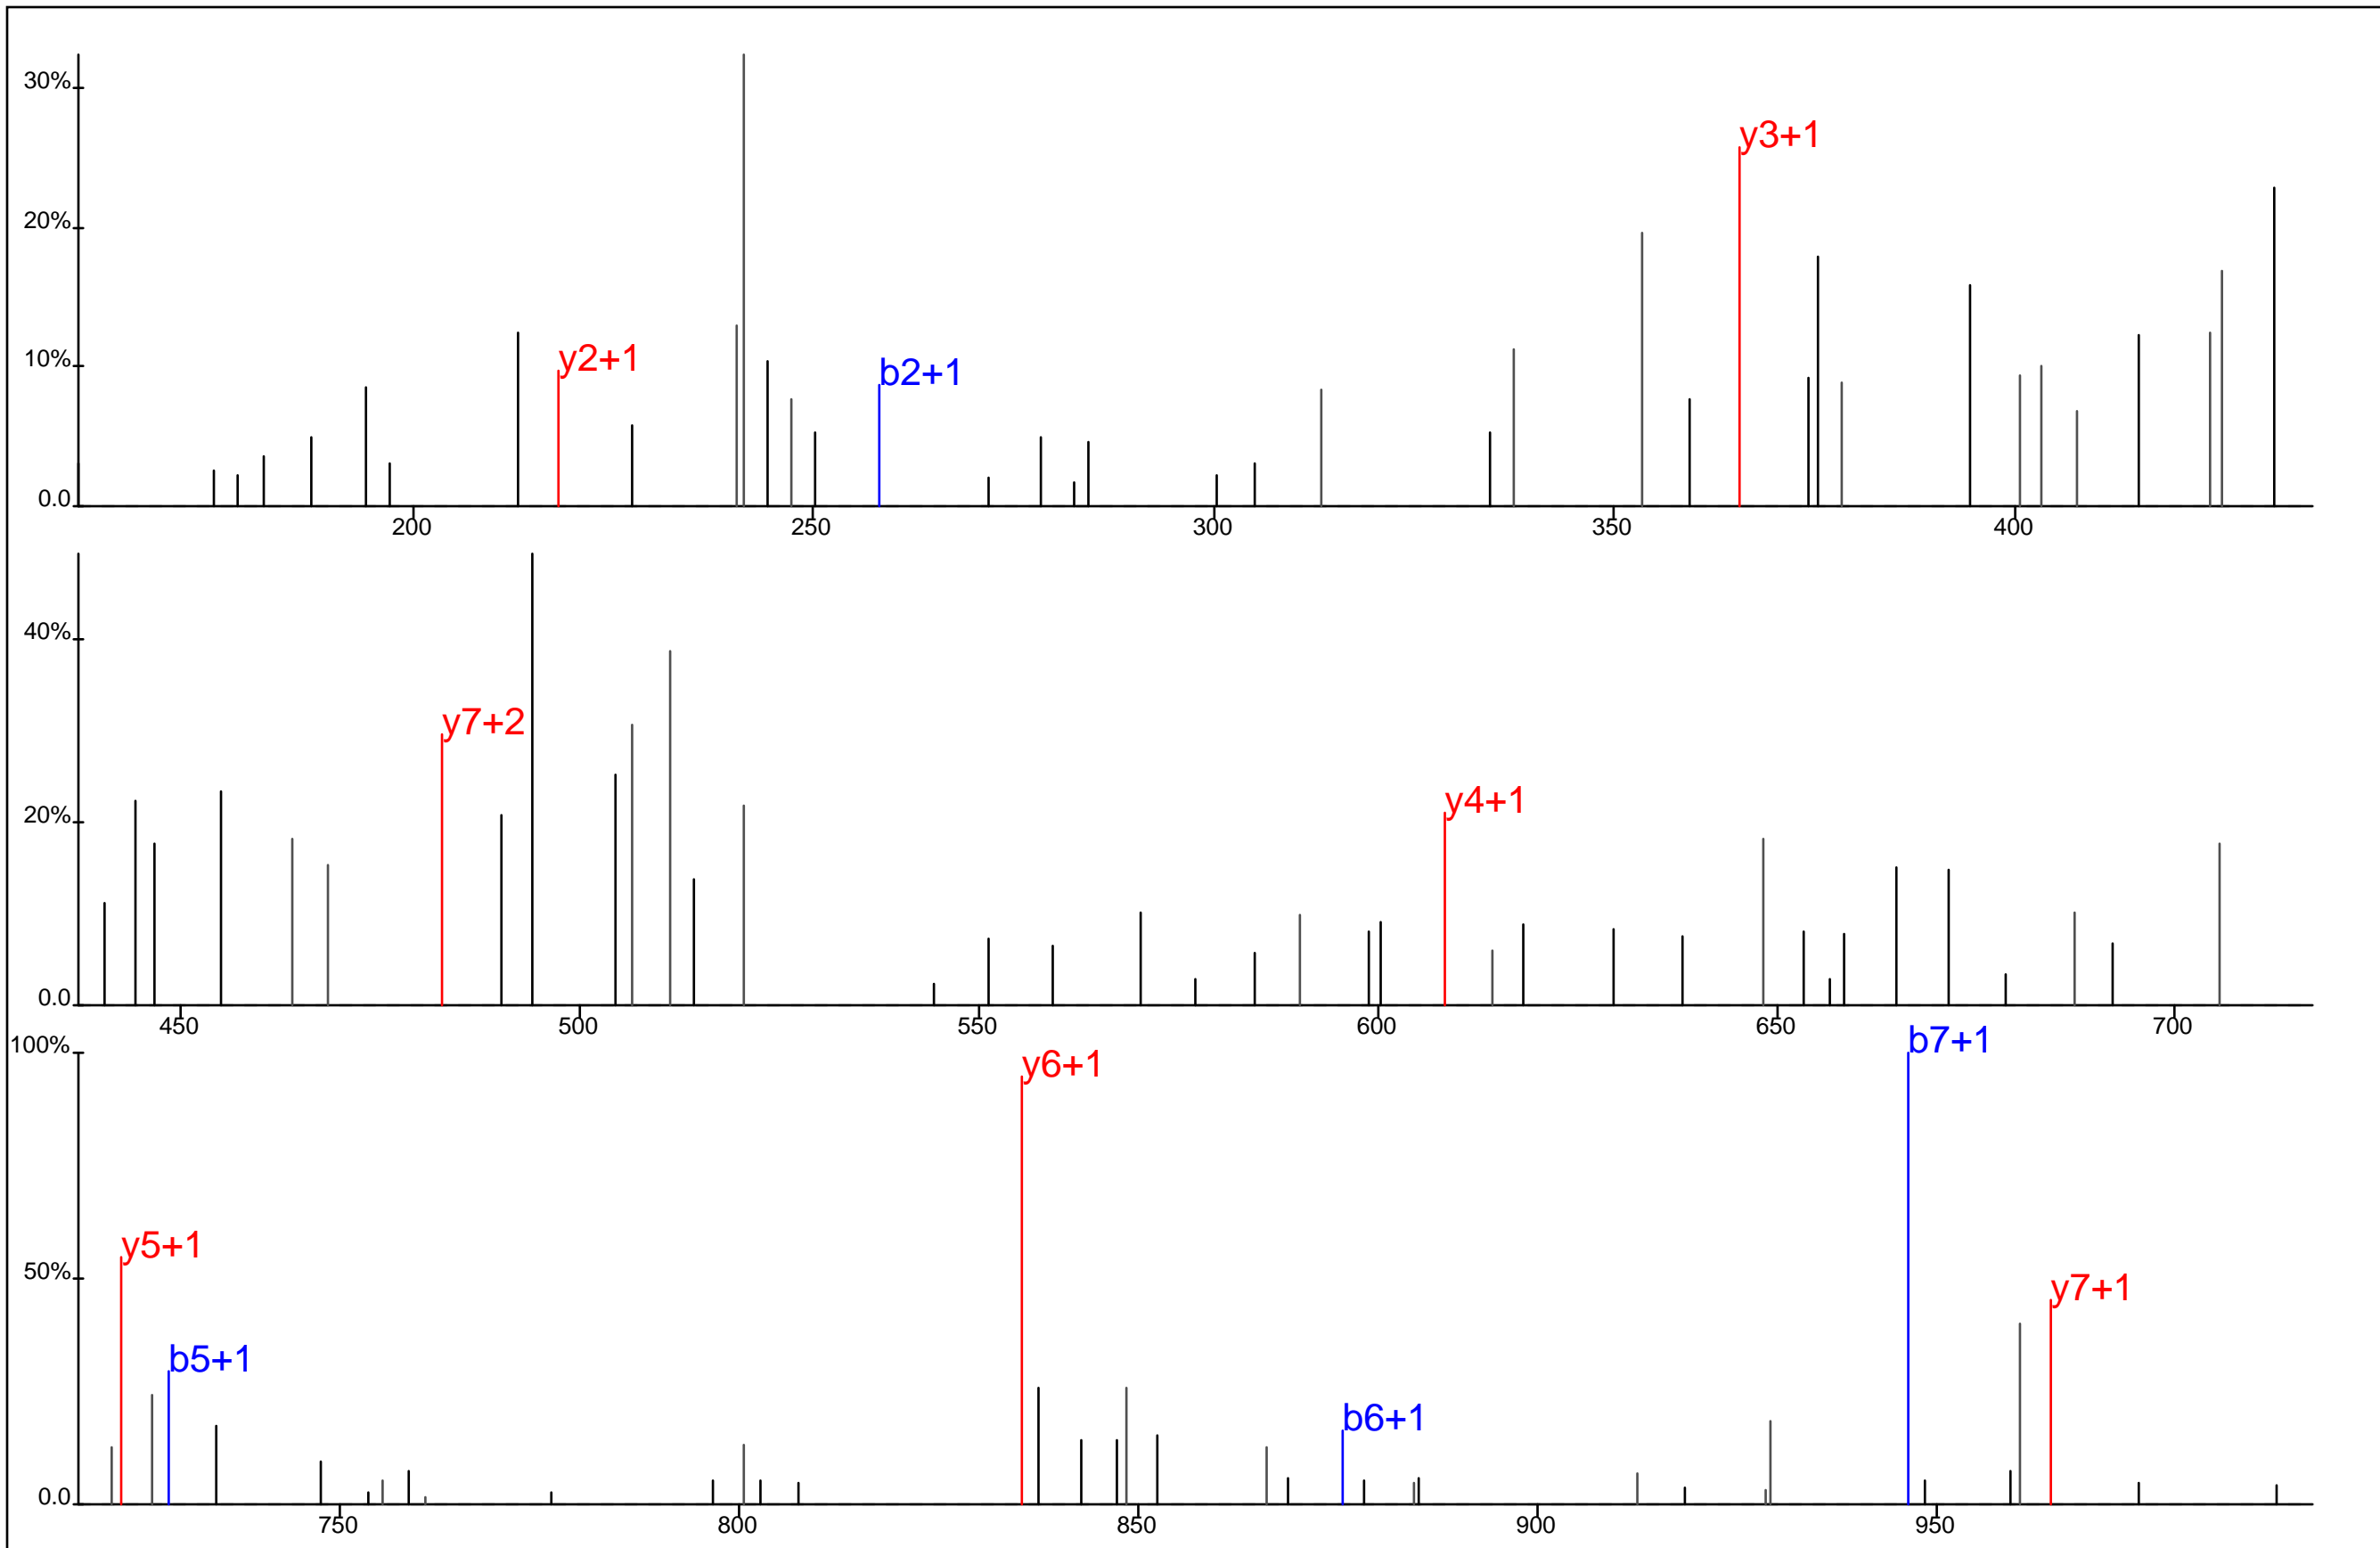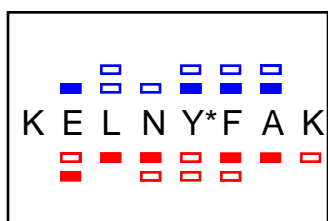

Protein Name: Phosphoglycerate kinase 1  
 gi Accession: 0  
 Precursor Mass: 546.7597+2  
 Delta Mass: 0.328 ppm  
 XCorr: 38.67

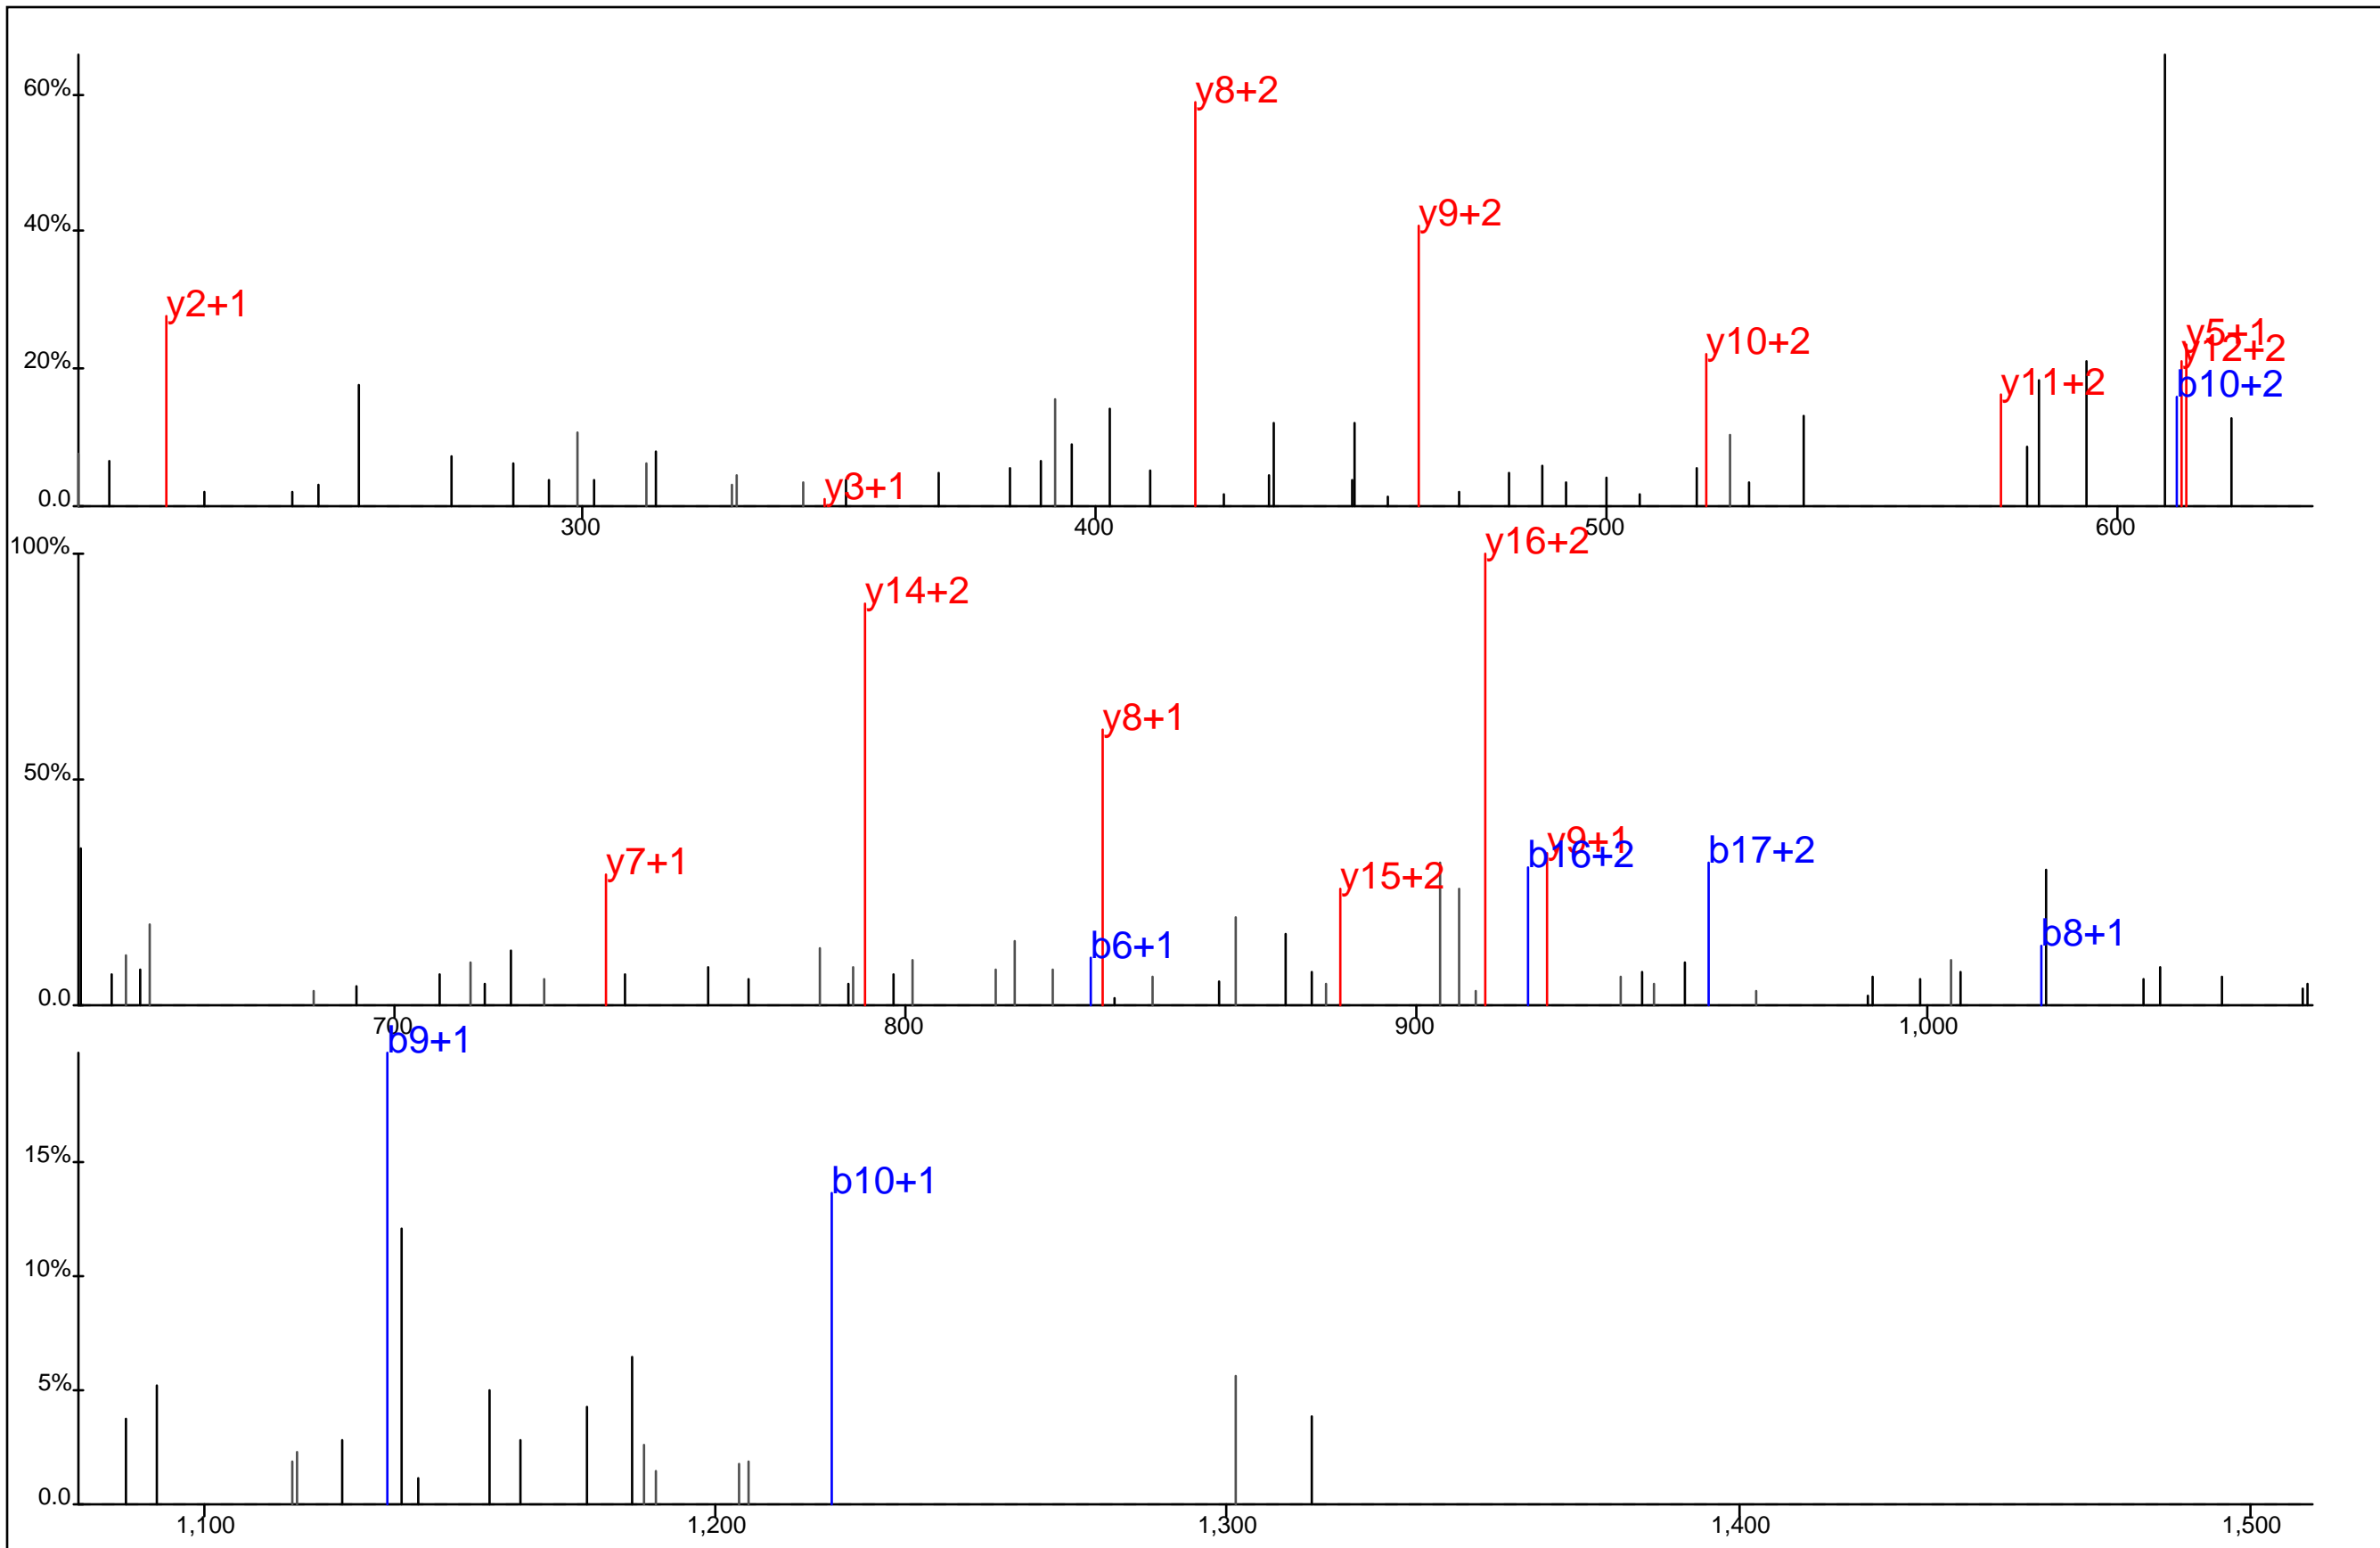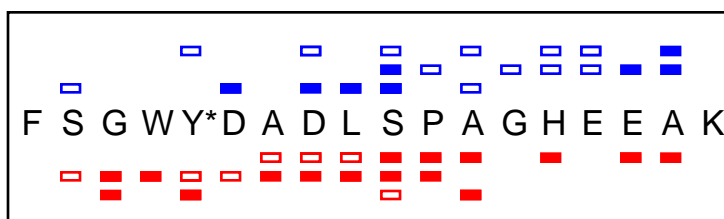

Protein Name: Phosphoglycerate mutase 1  
 gi Accession: 0  
 Precursor Mass: 687.2841+3  
 Delta Mass: 2.669 ppm  
 XCorr: 46.9

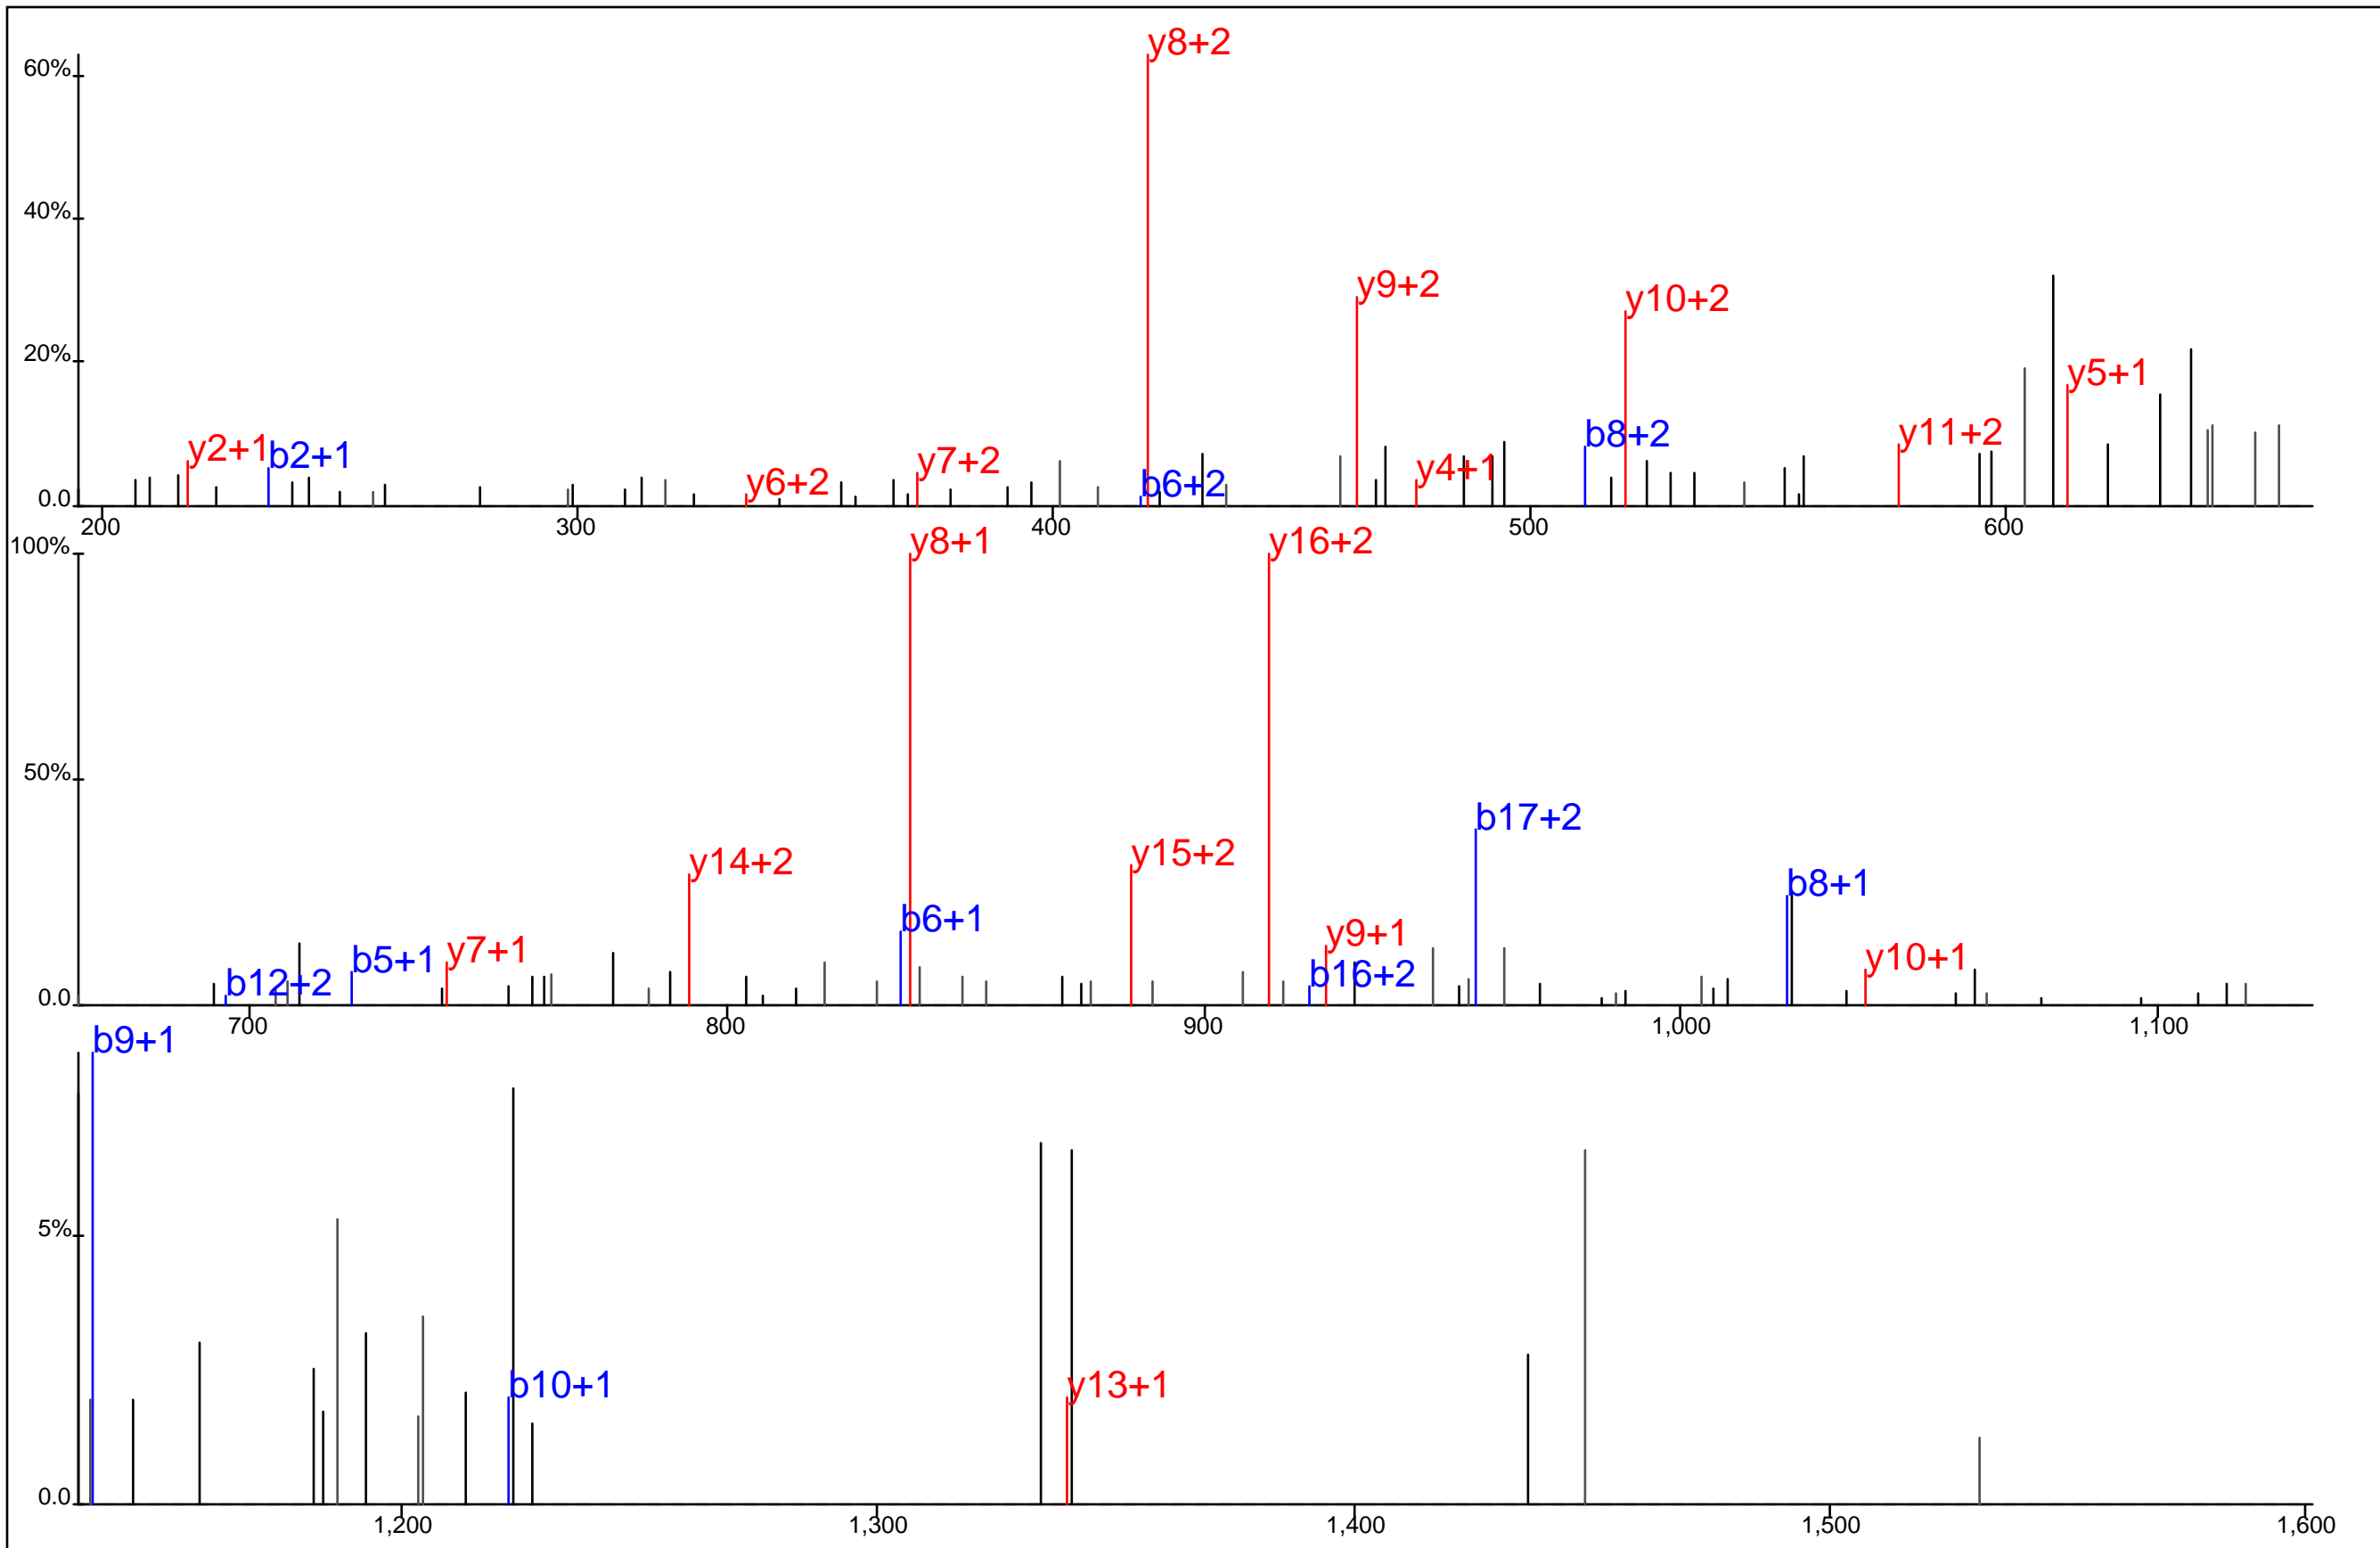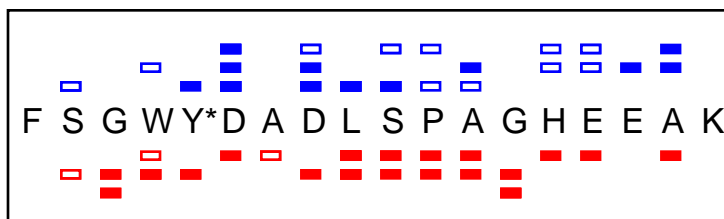

Protein Name: Phosphoglycerate mutase 1  
 gi Accession: 0  
 Precursor Mass: 687.2850+3  
 Delta Mass: 1.425 ppm  
 XCorr: 50.85



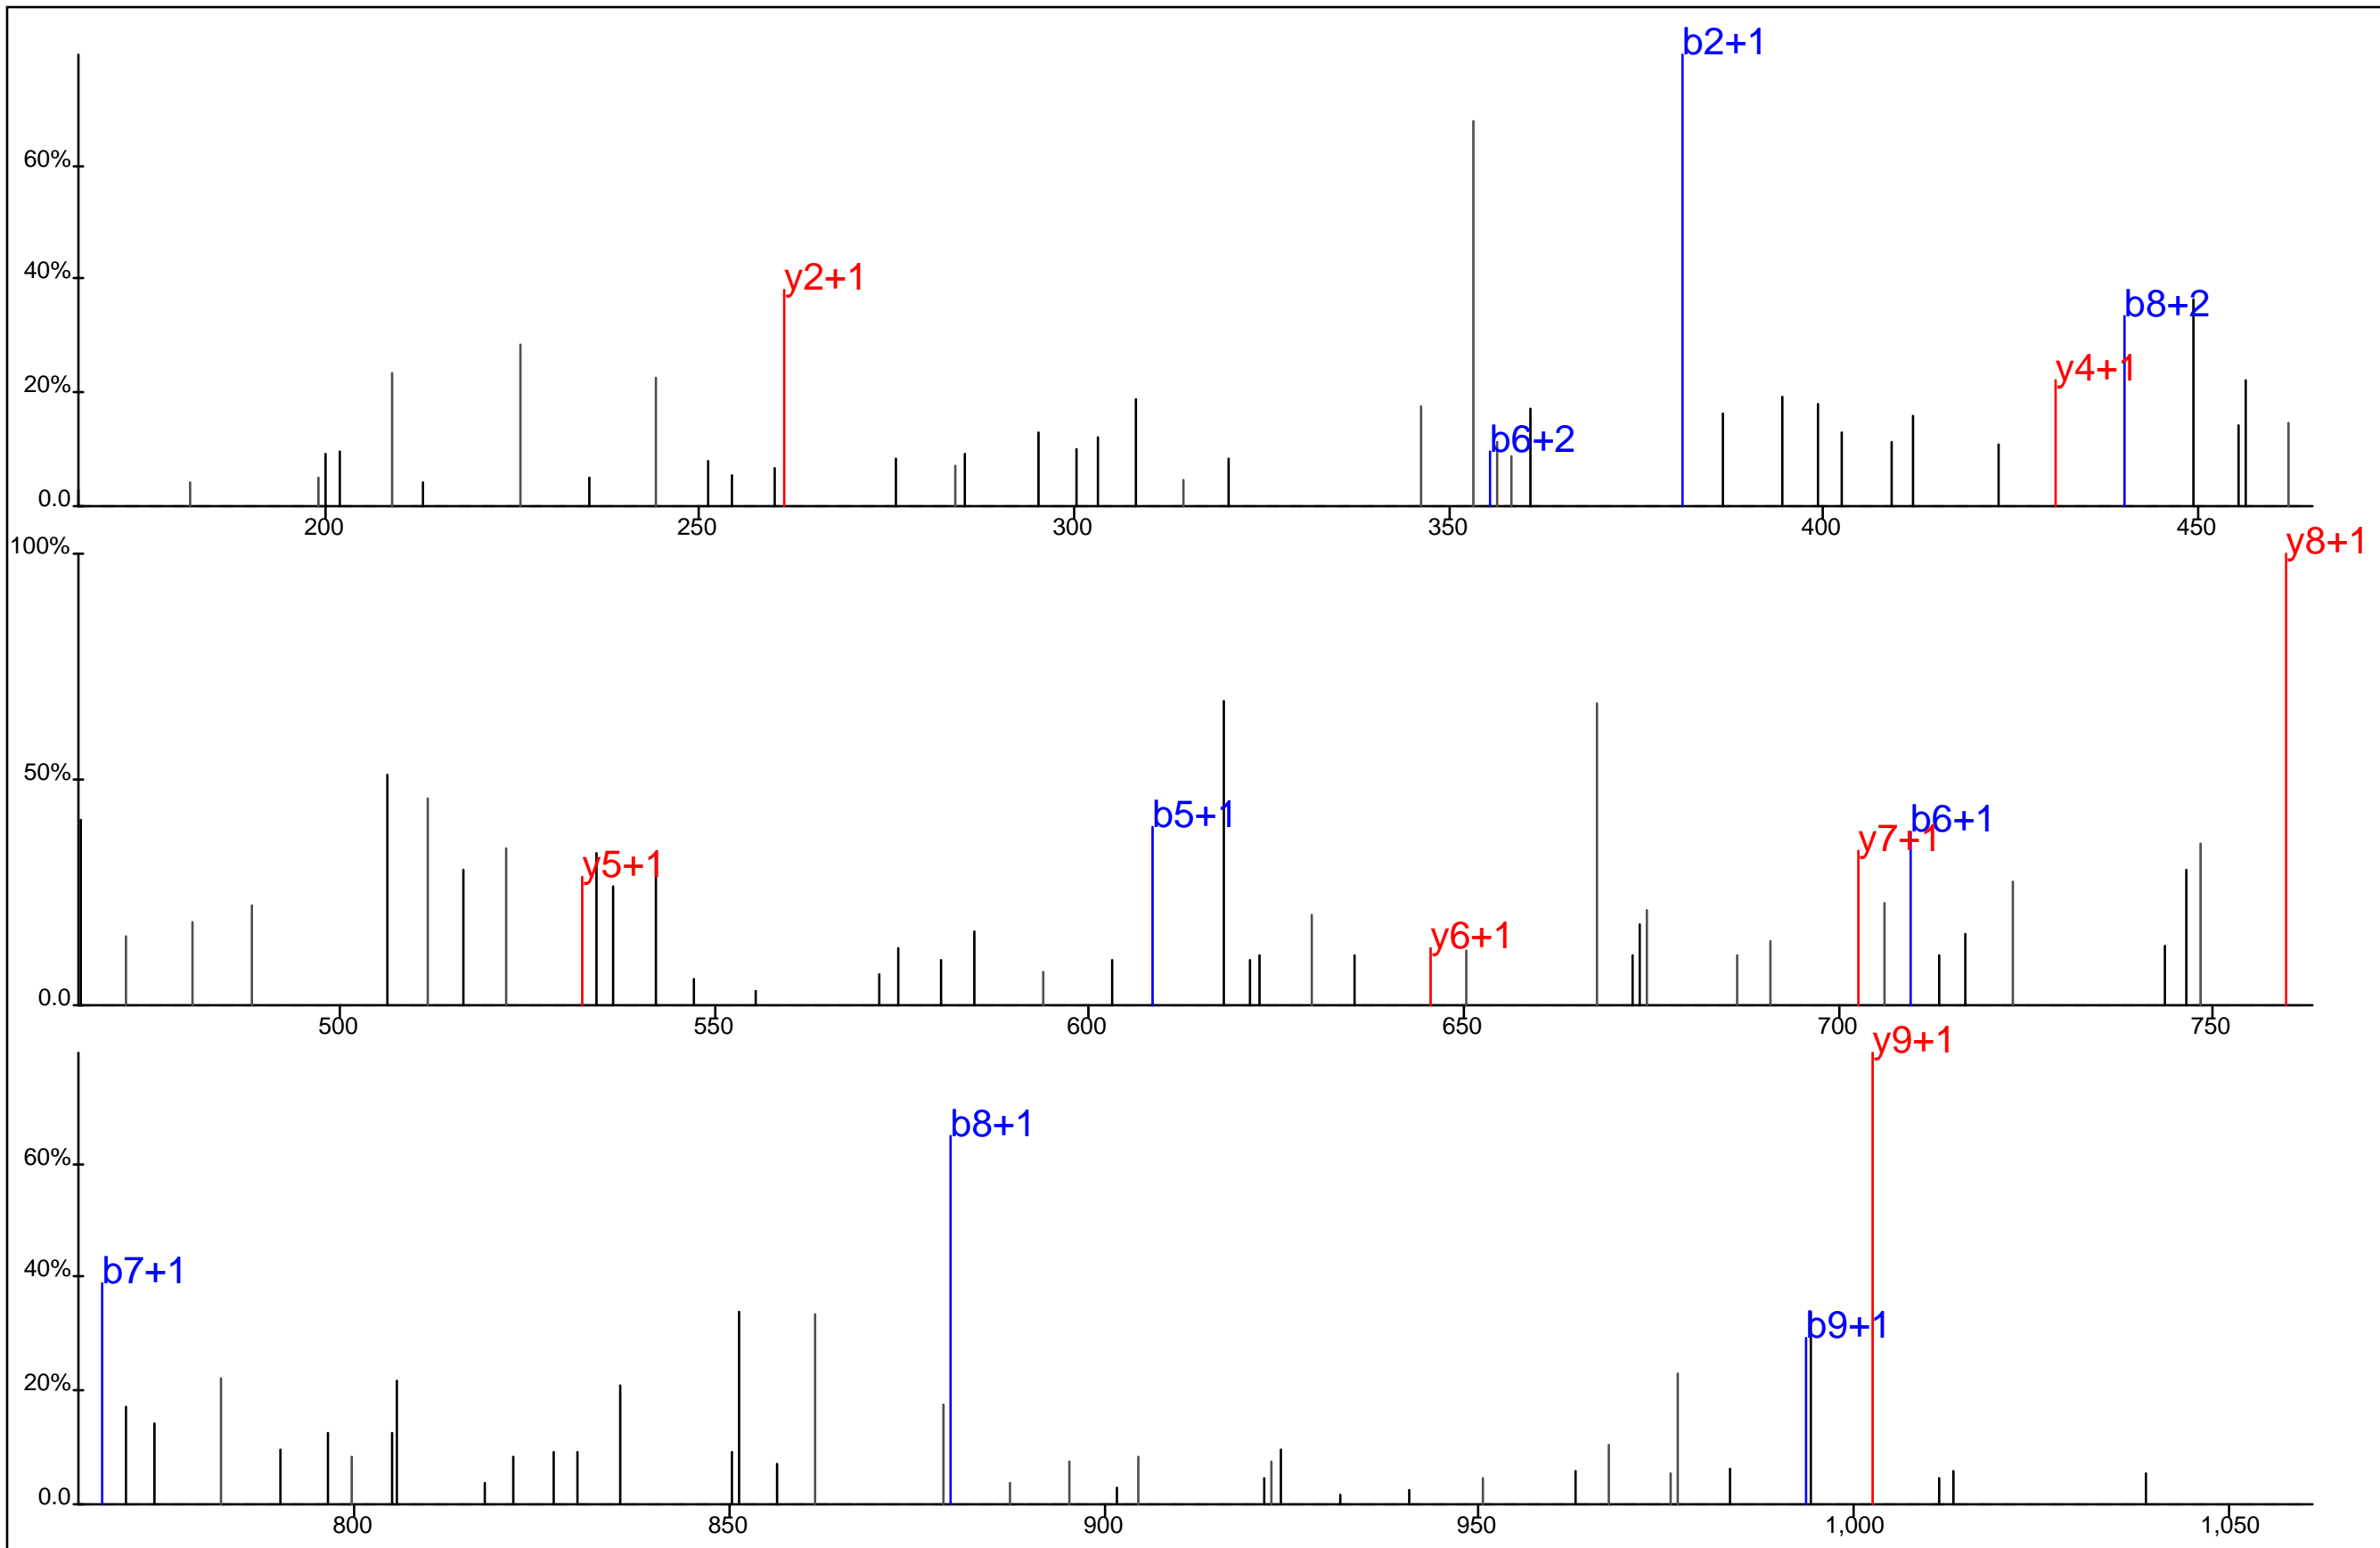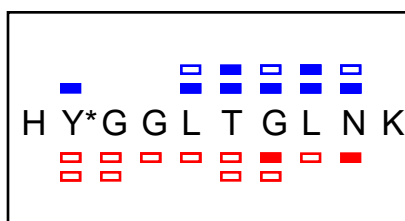

Protein Name: Phosphoglycerate mutase 1  
 gi Accession: 0  
 Precursor Mass: 570.2634+2  
 Delta Mass: 4.311 ppm  
 XCorr: 26.02

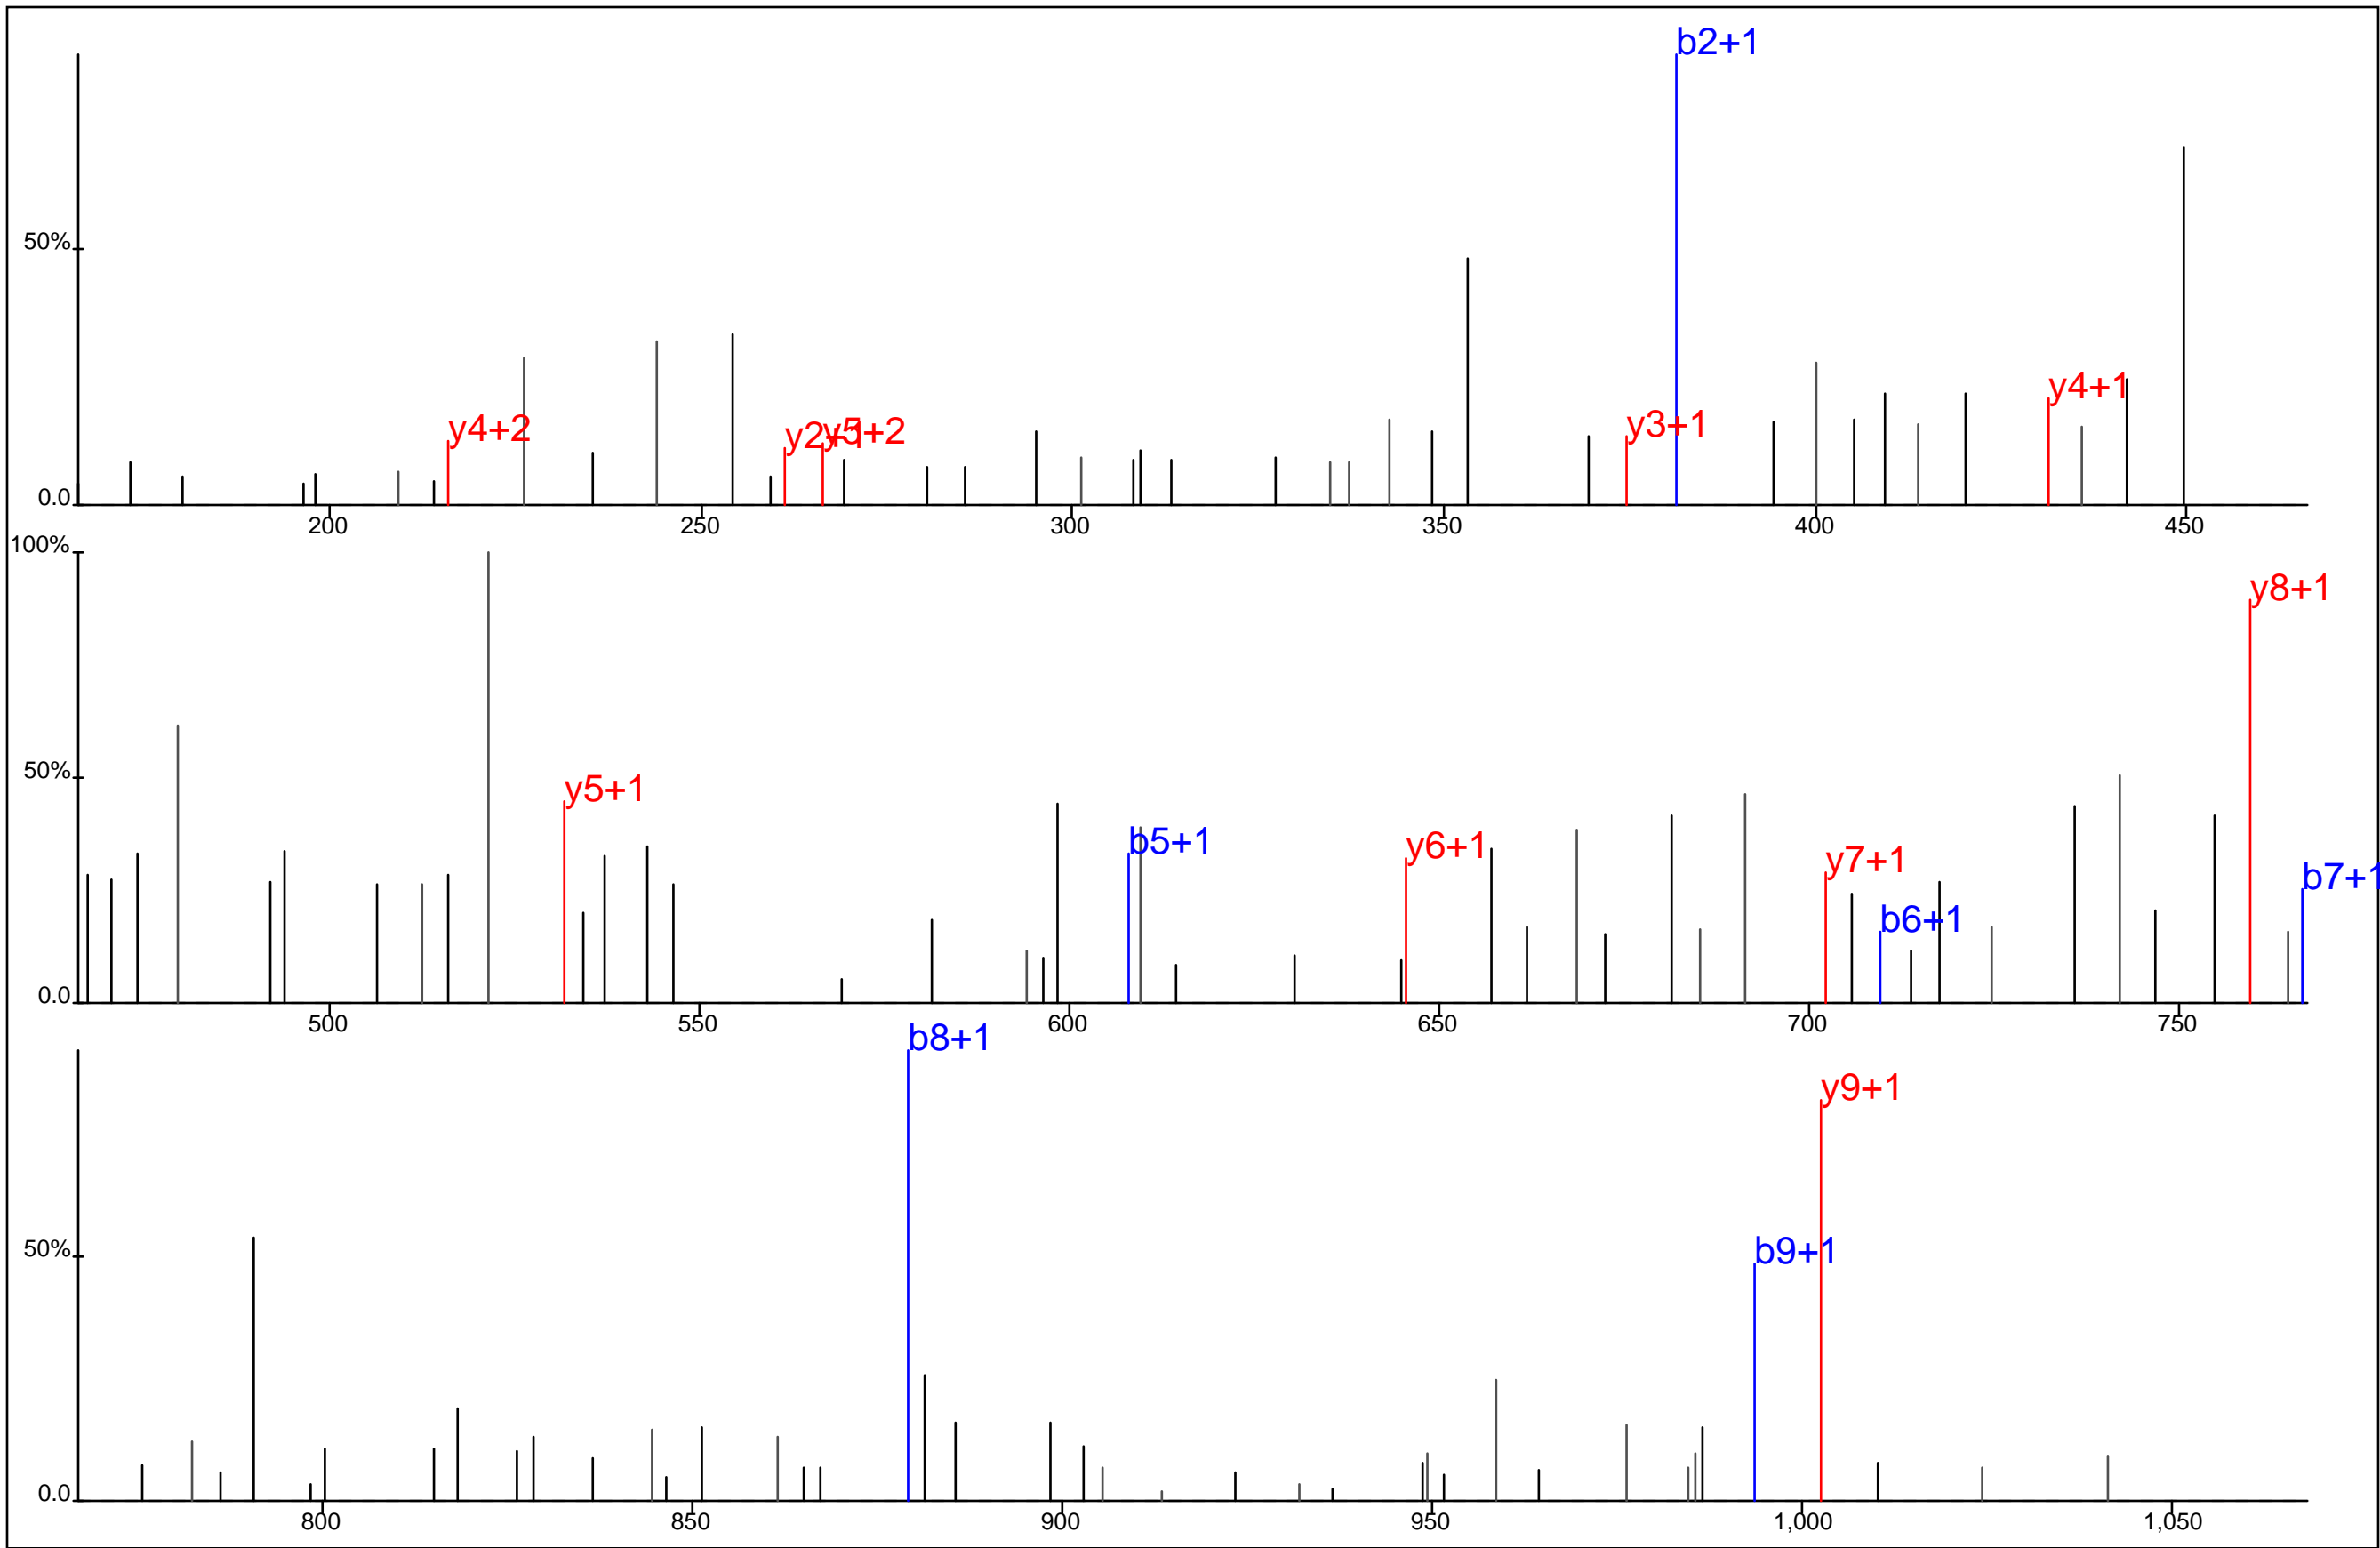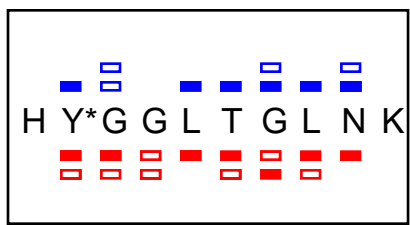

Protein Name: Phosphoglycerate mutase 1  
 gi Accession: 0  
 Precursor Mass: 570.2664+2  
 Delta Mass: 0.937 ppm  
 XCorr: 21.09

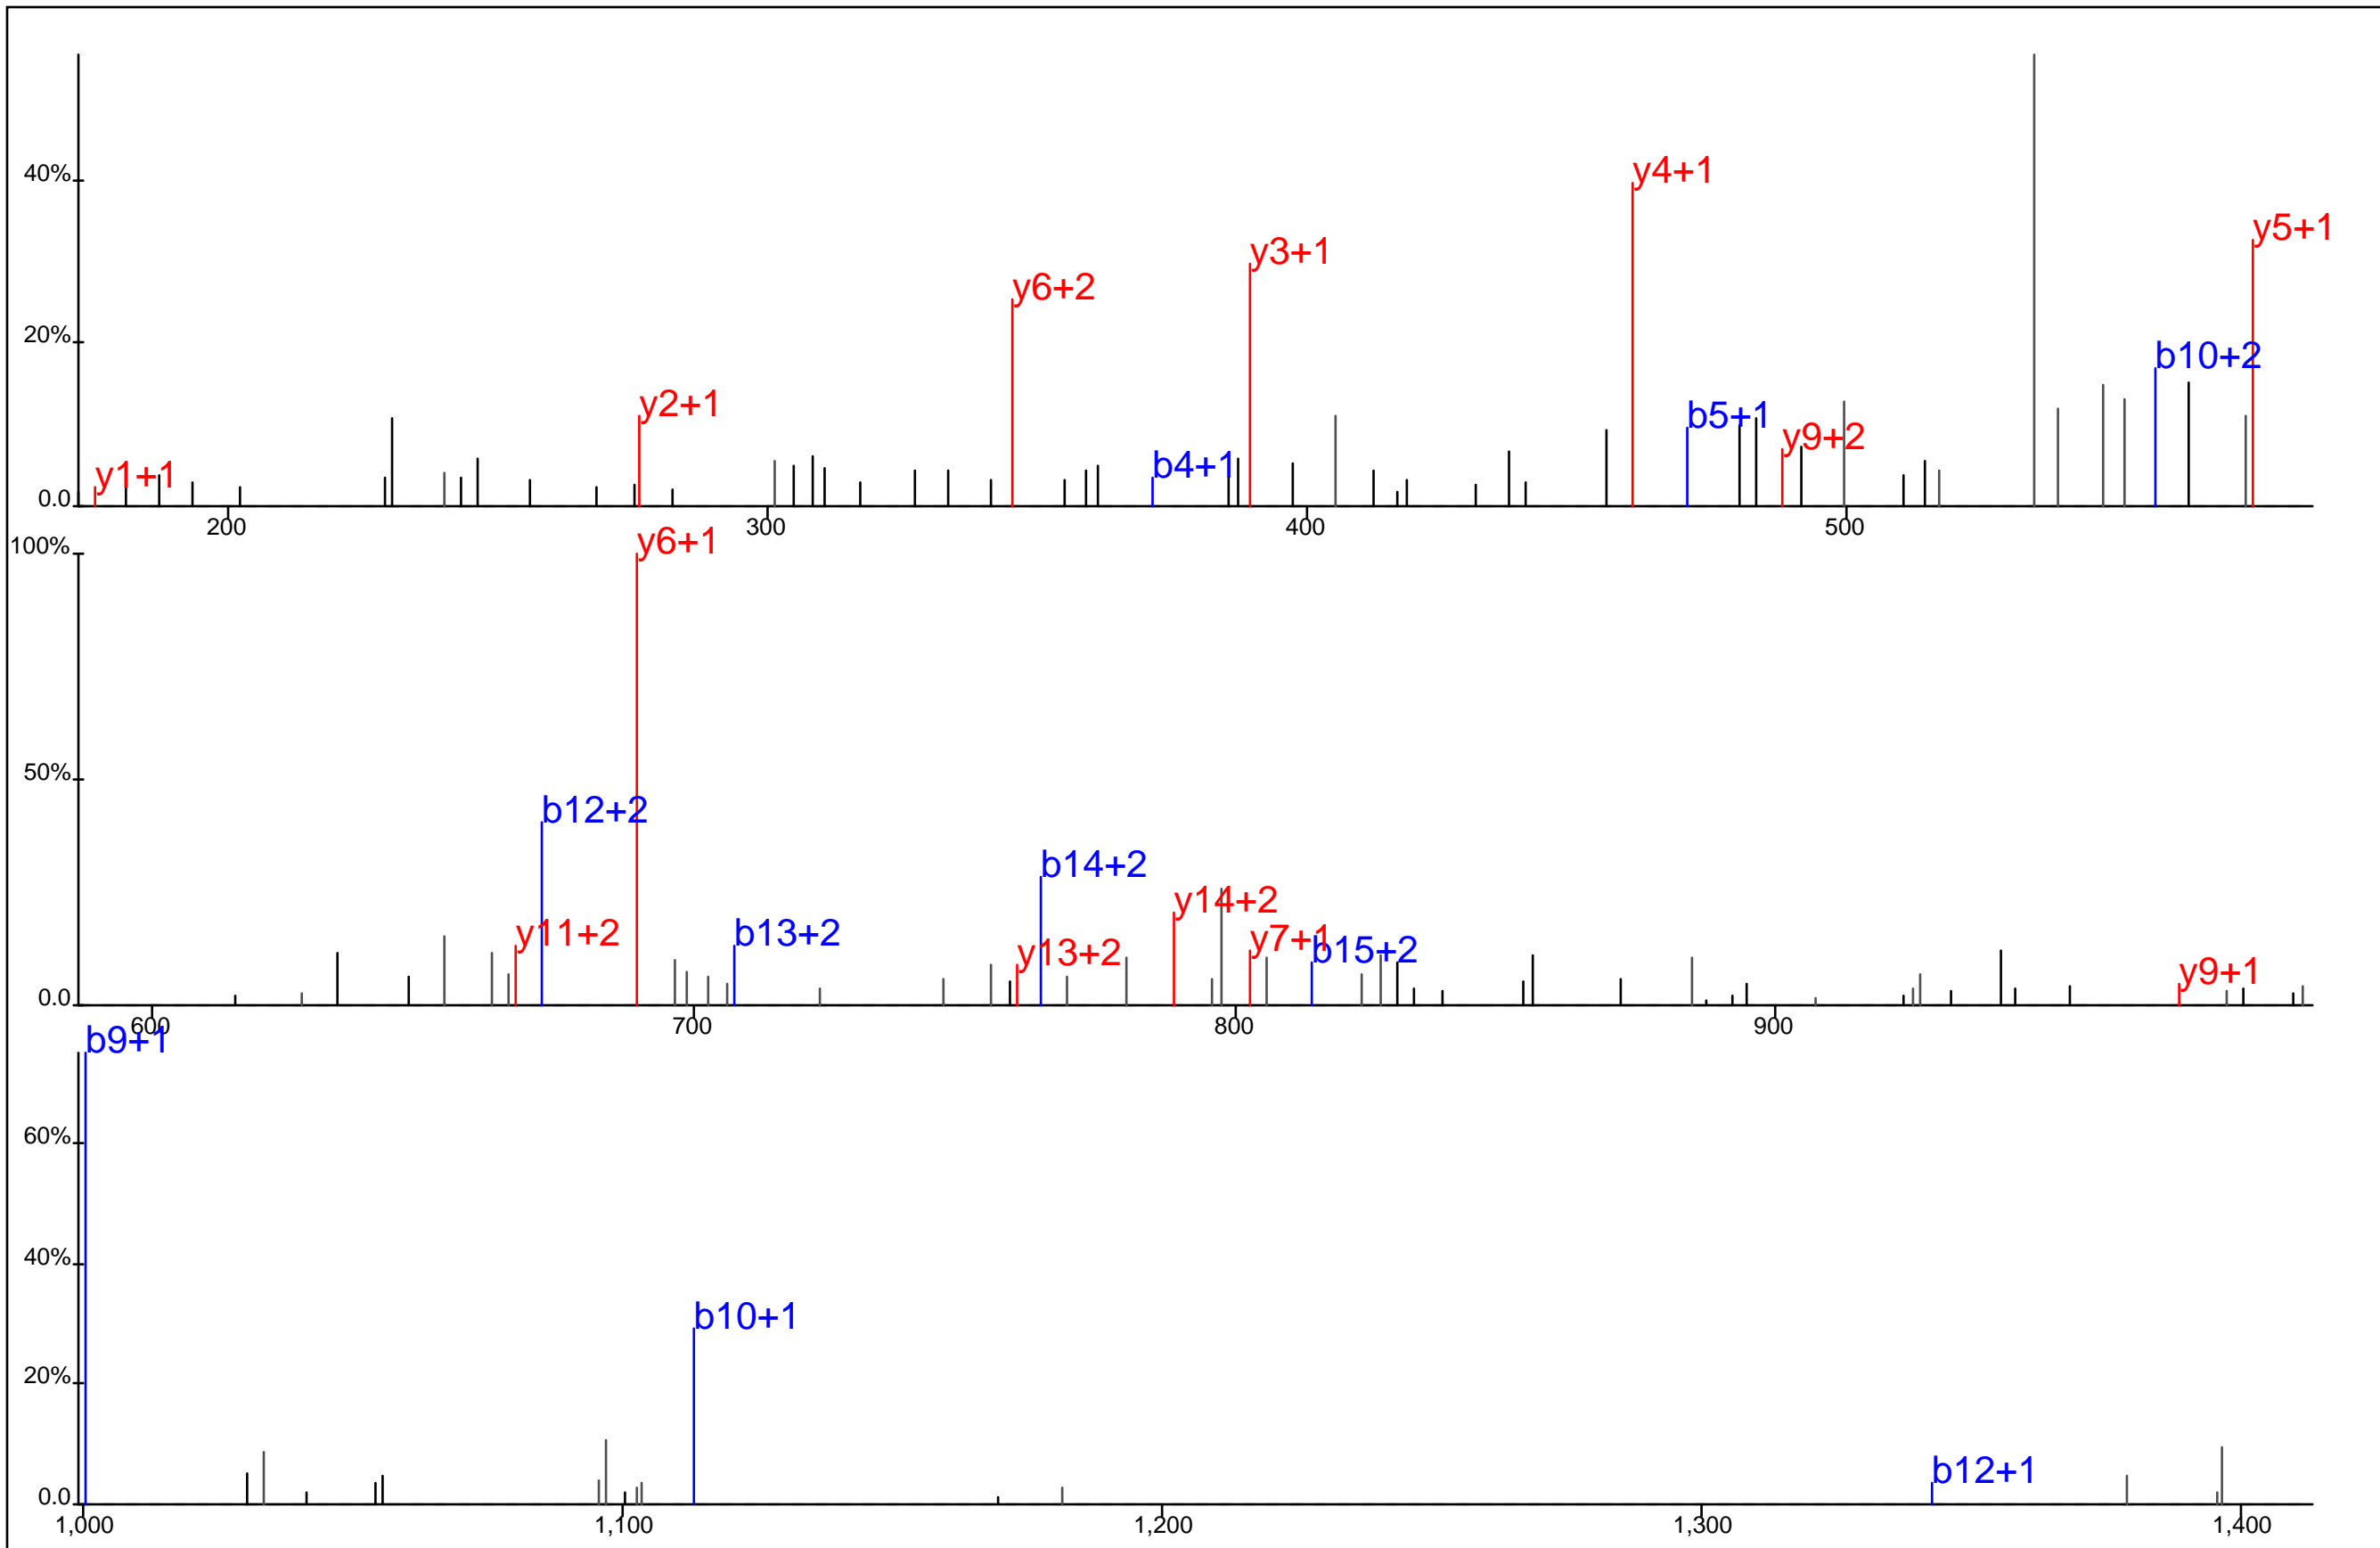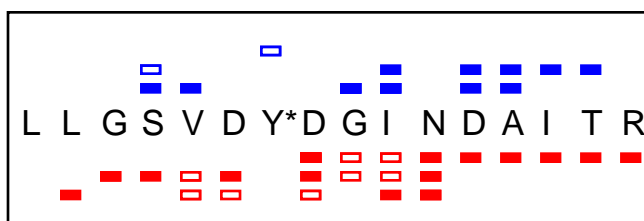

Protein Name: Phosphoinositide 3-kinase C2 beta  
 gi Accession: 0  
 Precursor Mass: 601.2839+3  
 Delta Mass: 0.269 ppm  
 XCorr: 30.43



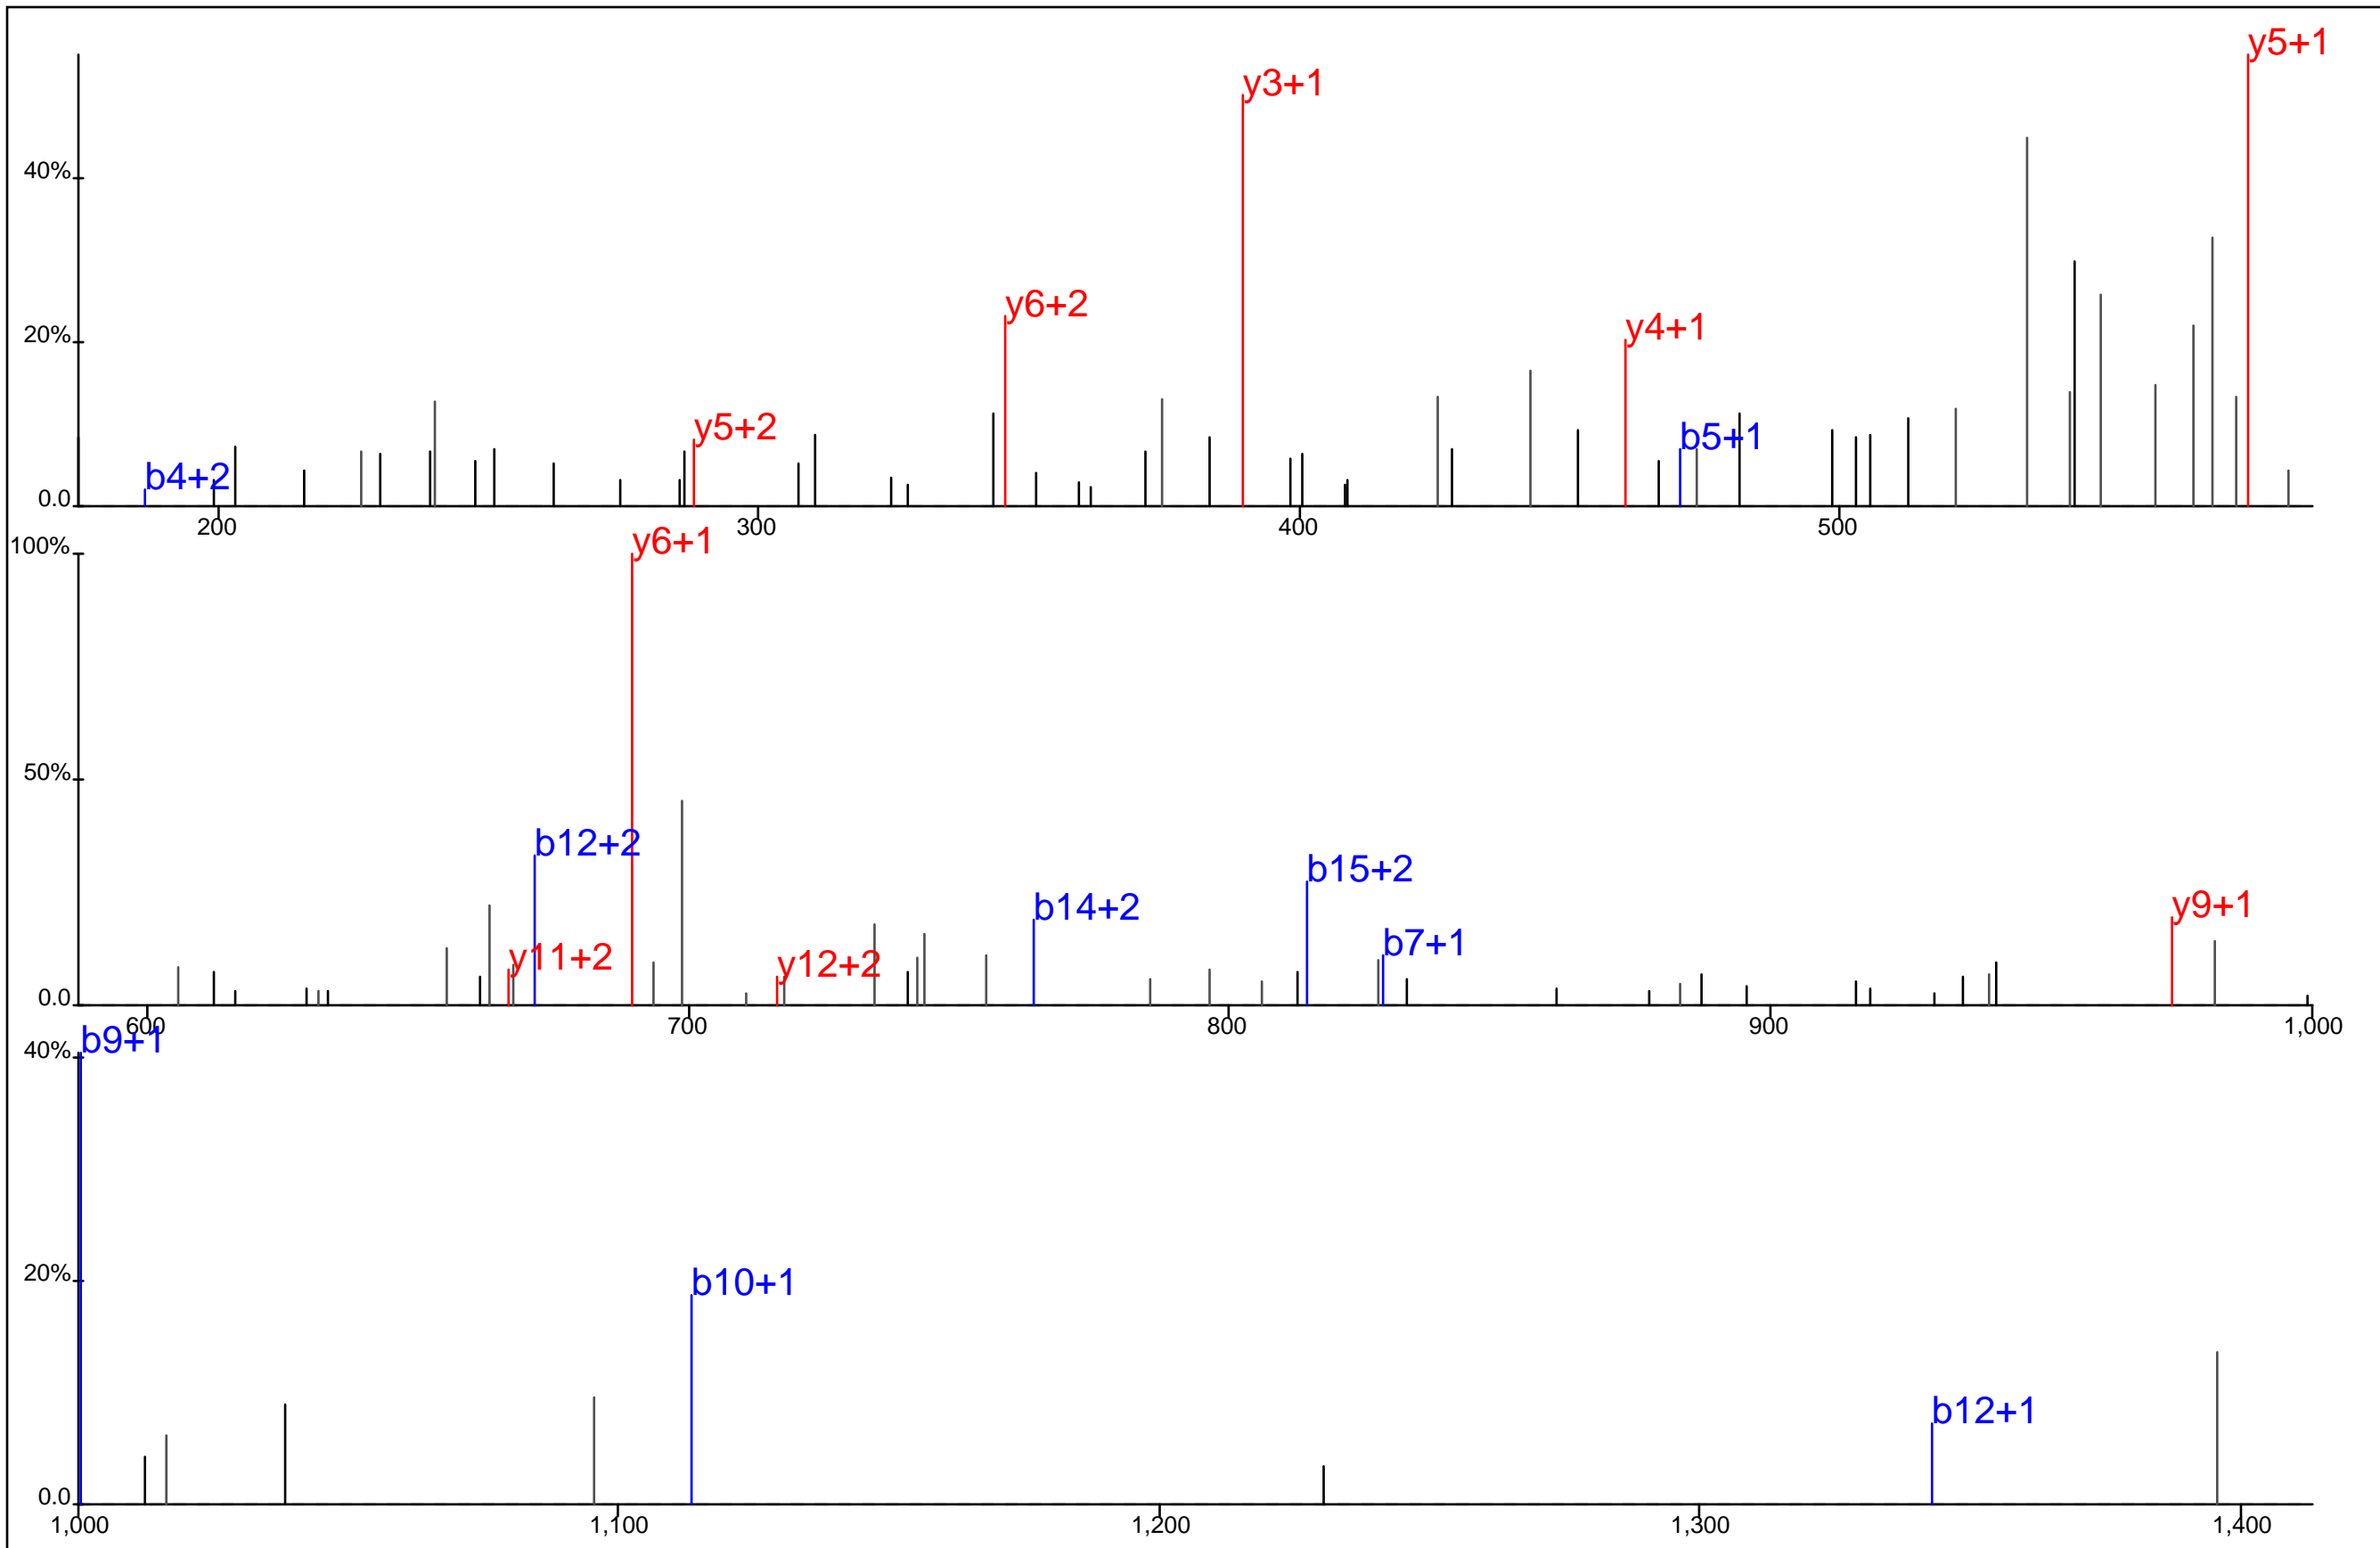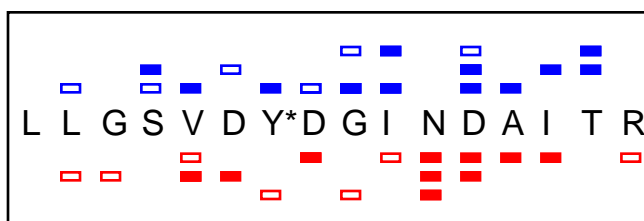

Protein Name: Phosphoinositide 3-kinase C2 beta  
 gi Accession: 0  
 Precursor Mass: 601.2844+3  
 Delta Mass: 0.980 ppm  
 XCorr: 27.98





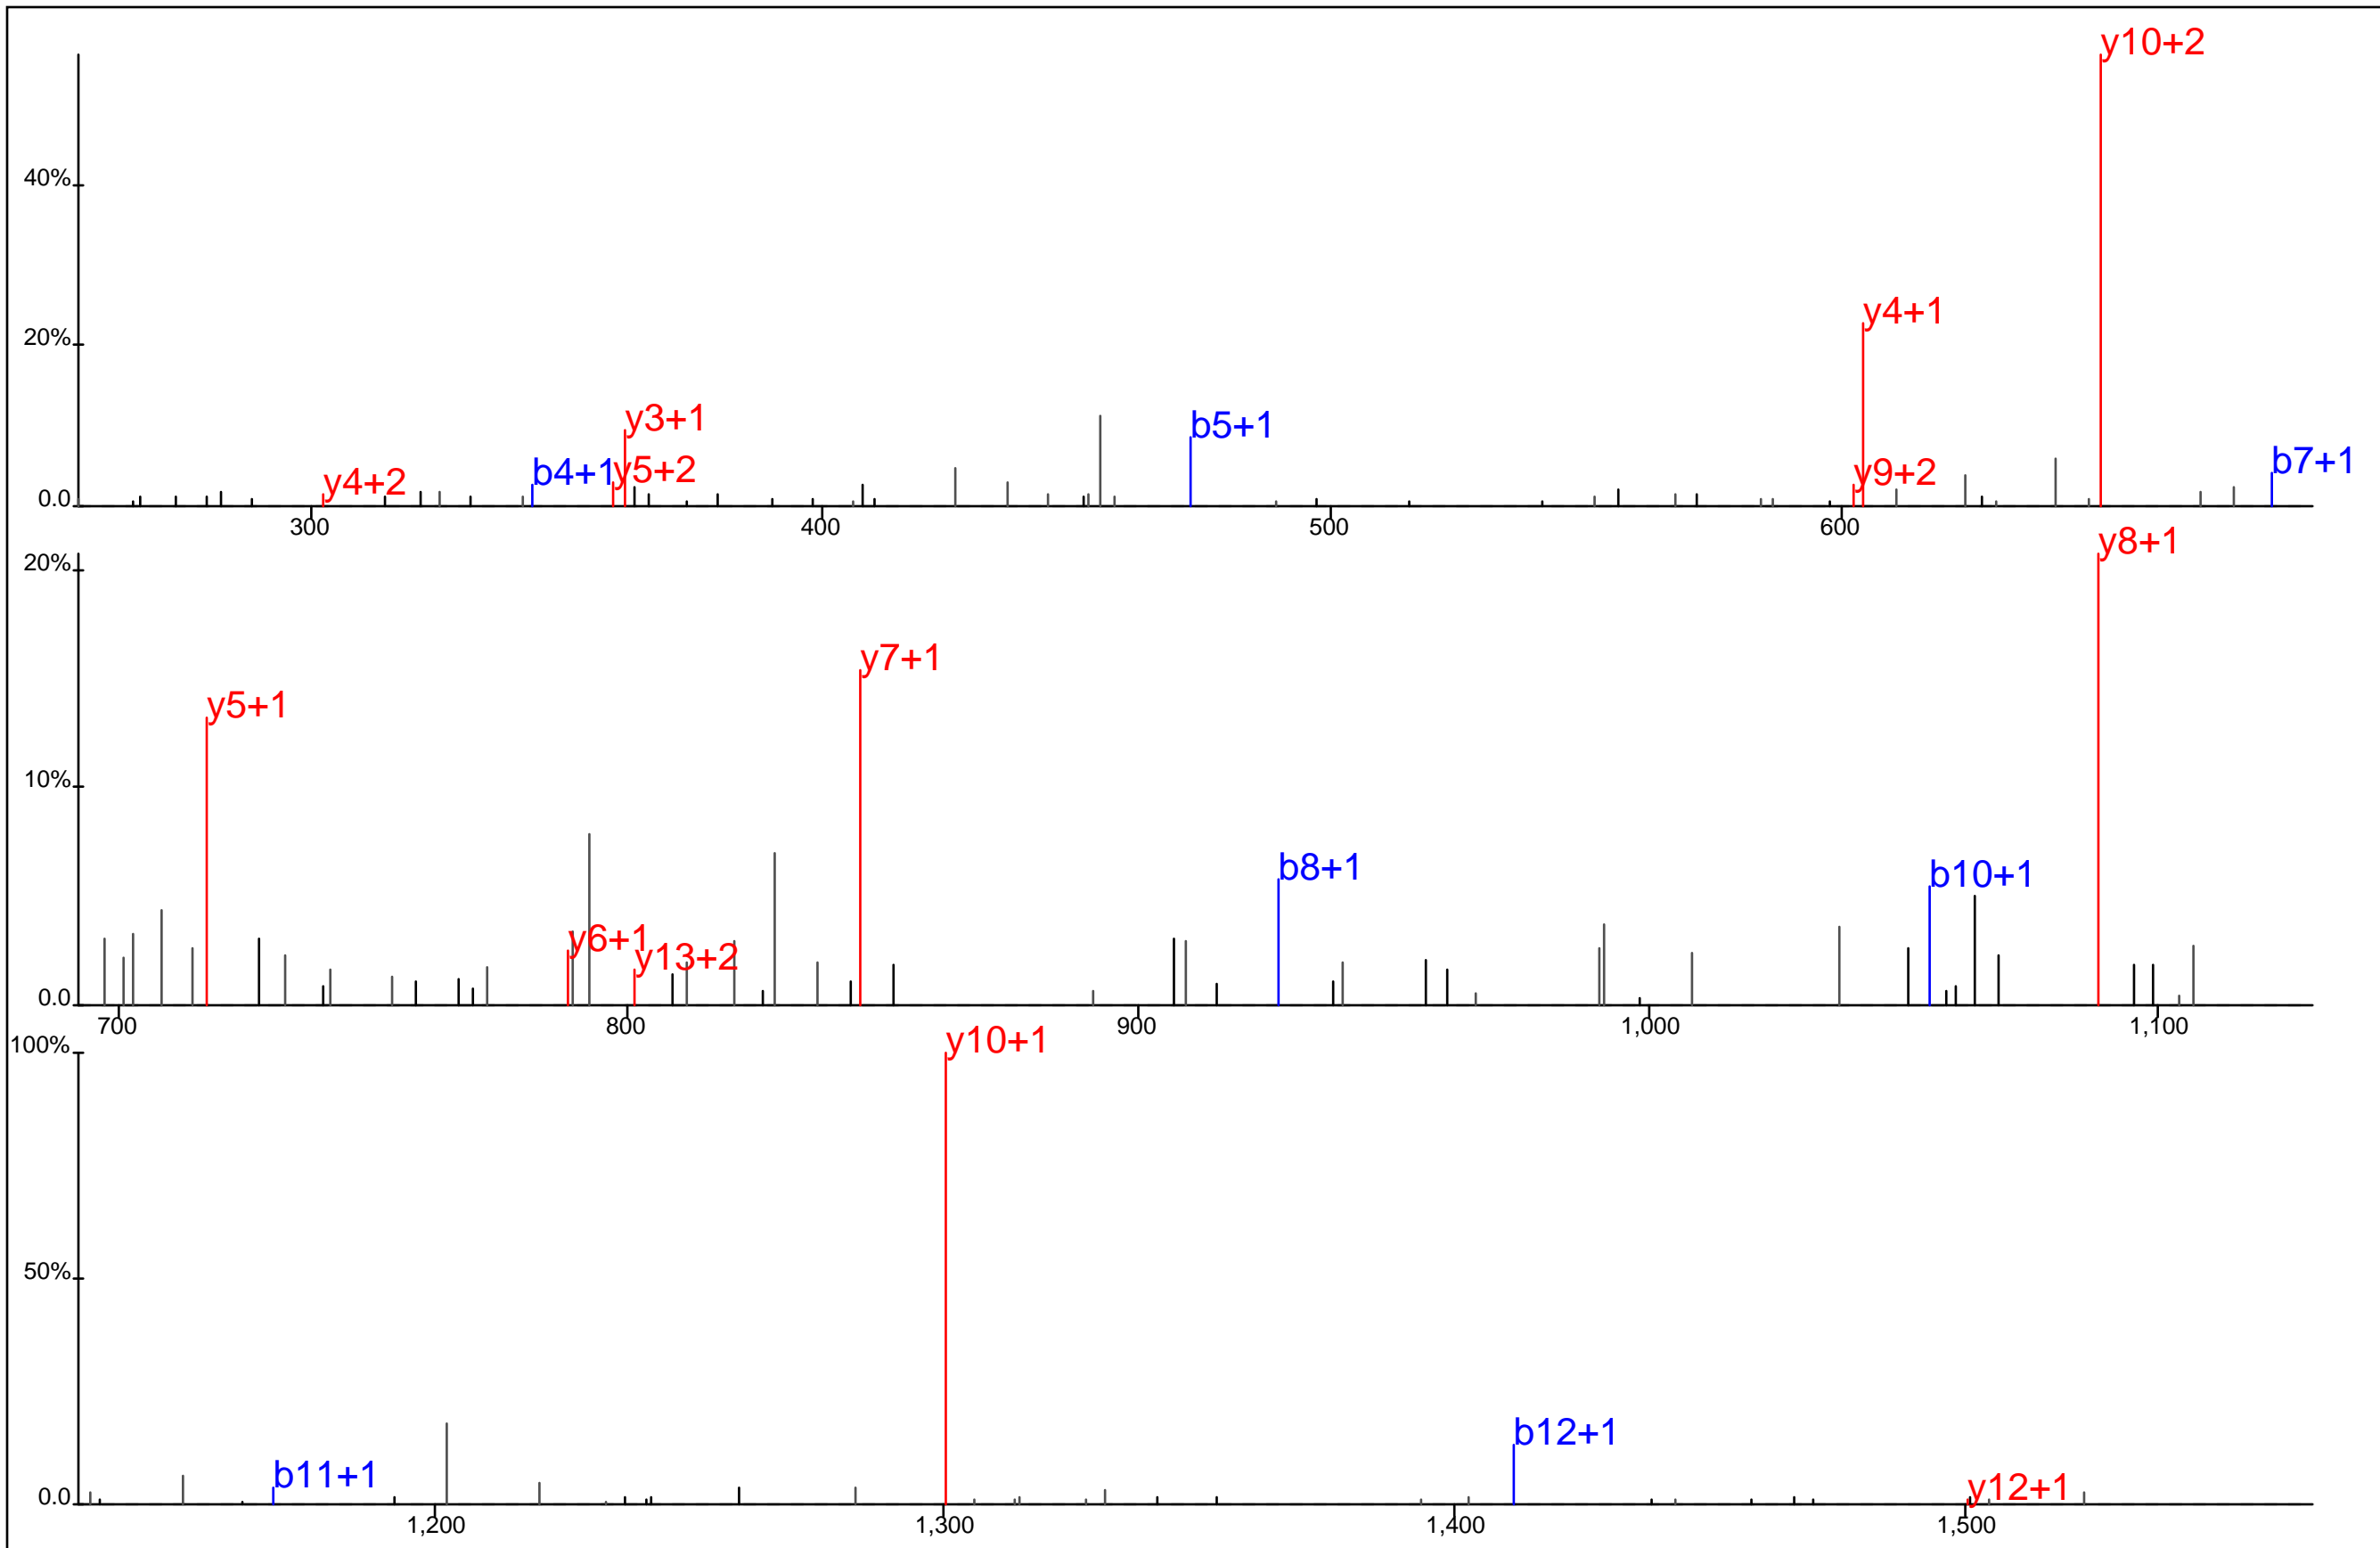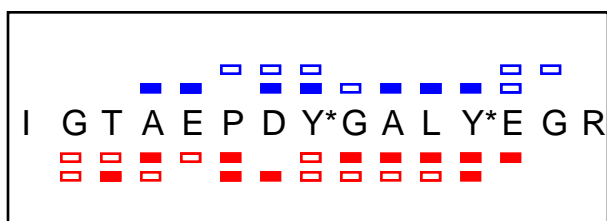

Protein Name: Phospholipase C, gamma 1  
 gi Accession: 0  
 Precursor Mass: 886.3529+2  
 Delta Mass: 0.554 ppm  
 XCorr: 35.98



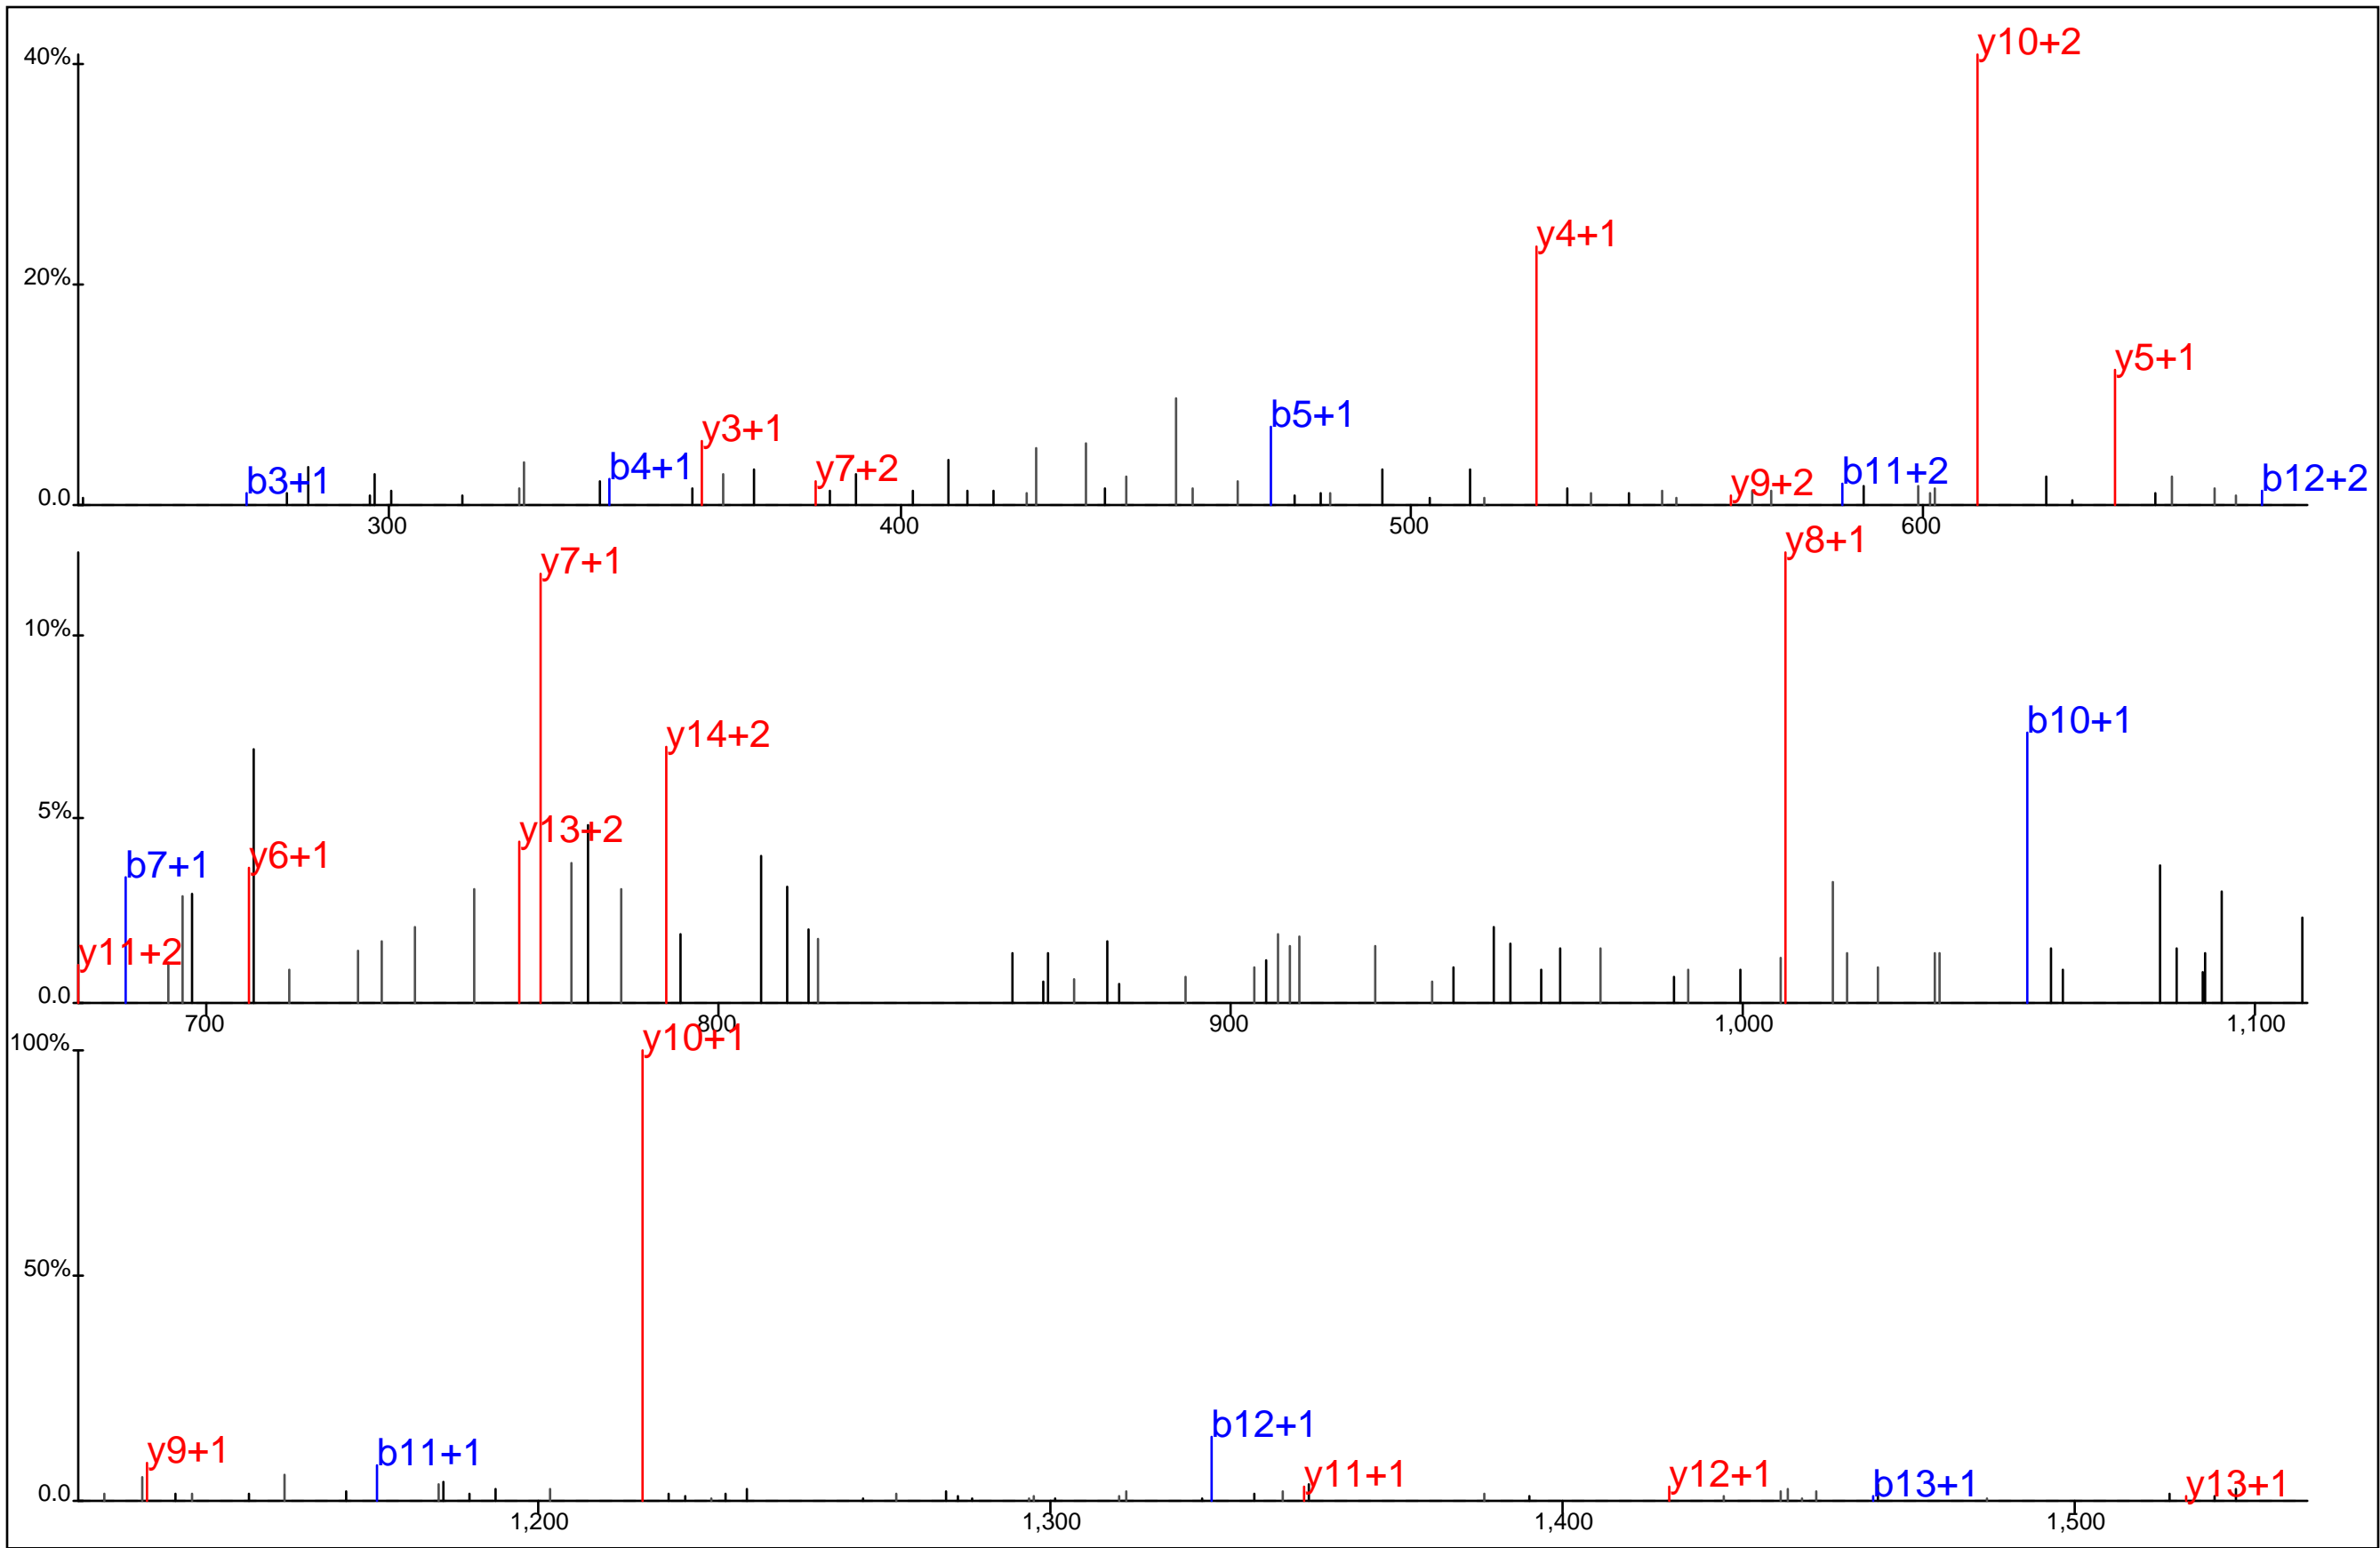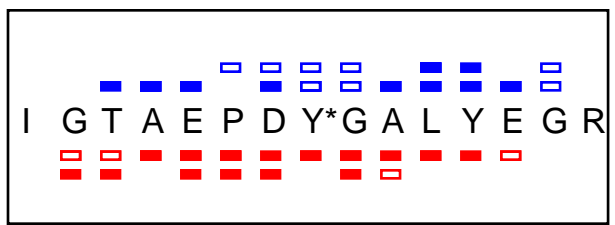

Protein Name: Phospholipase C, gamma 1  
 gi Accession: 0  
 Precursor Mass: 846.3686+2  
 Delta Mass: 0.784 ppm  
 XCorr: 59.66



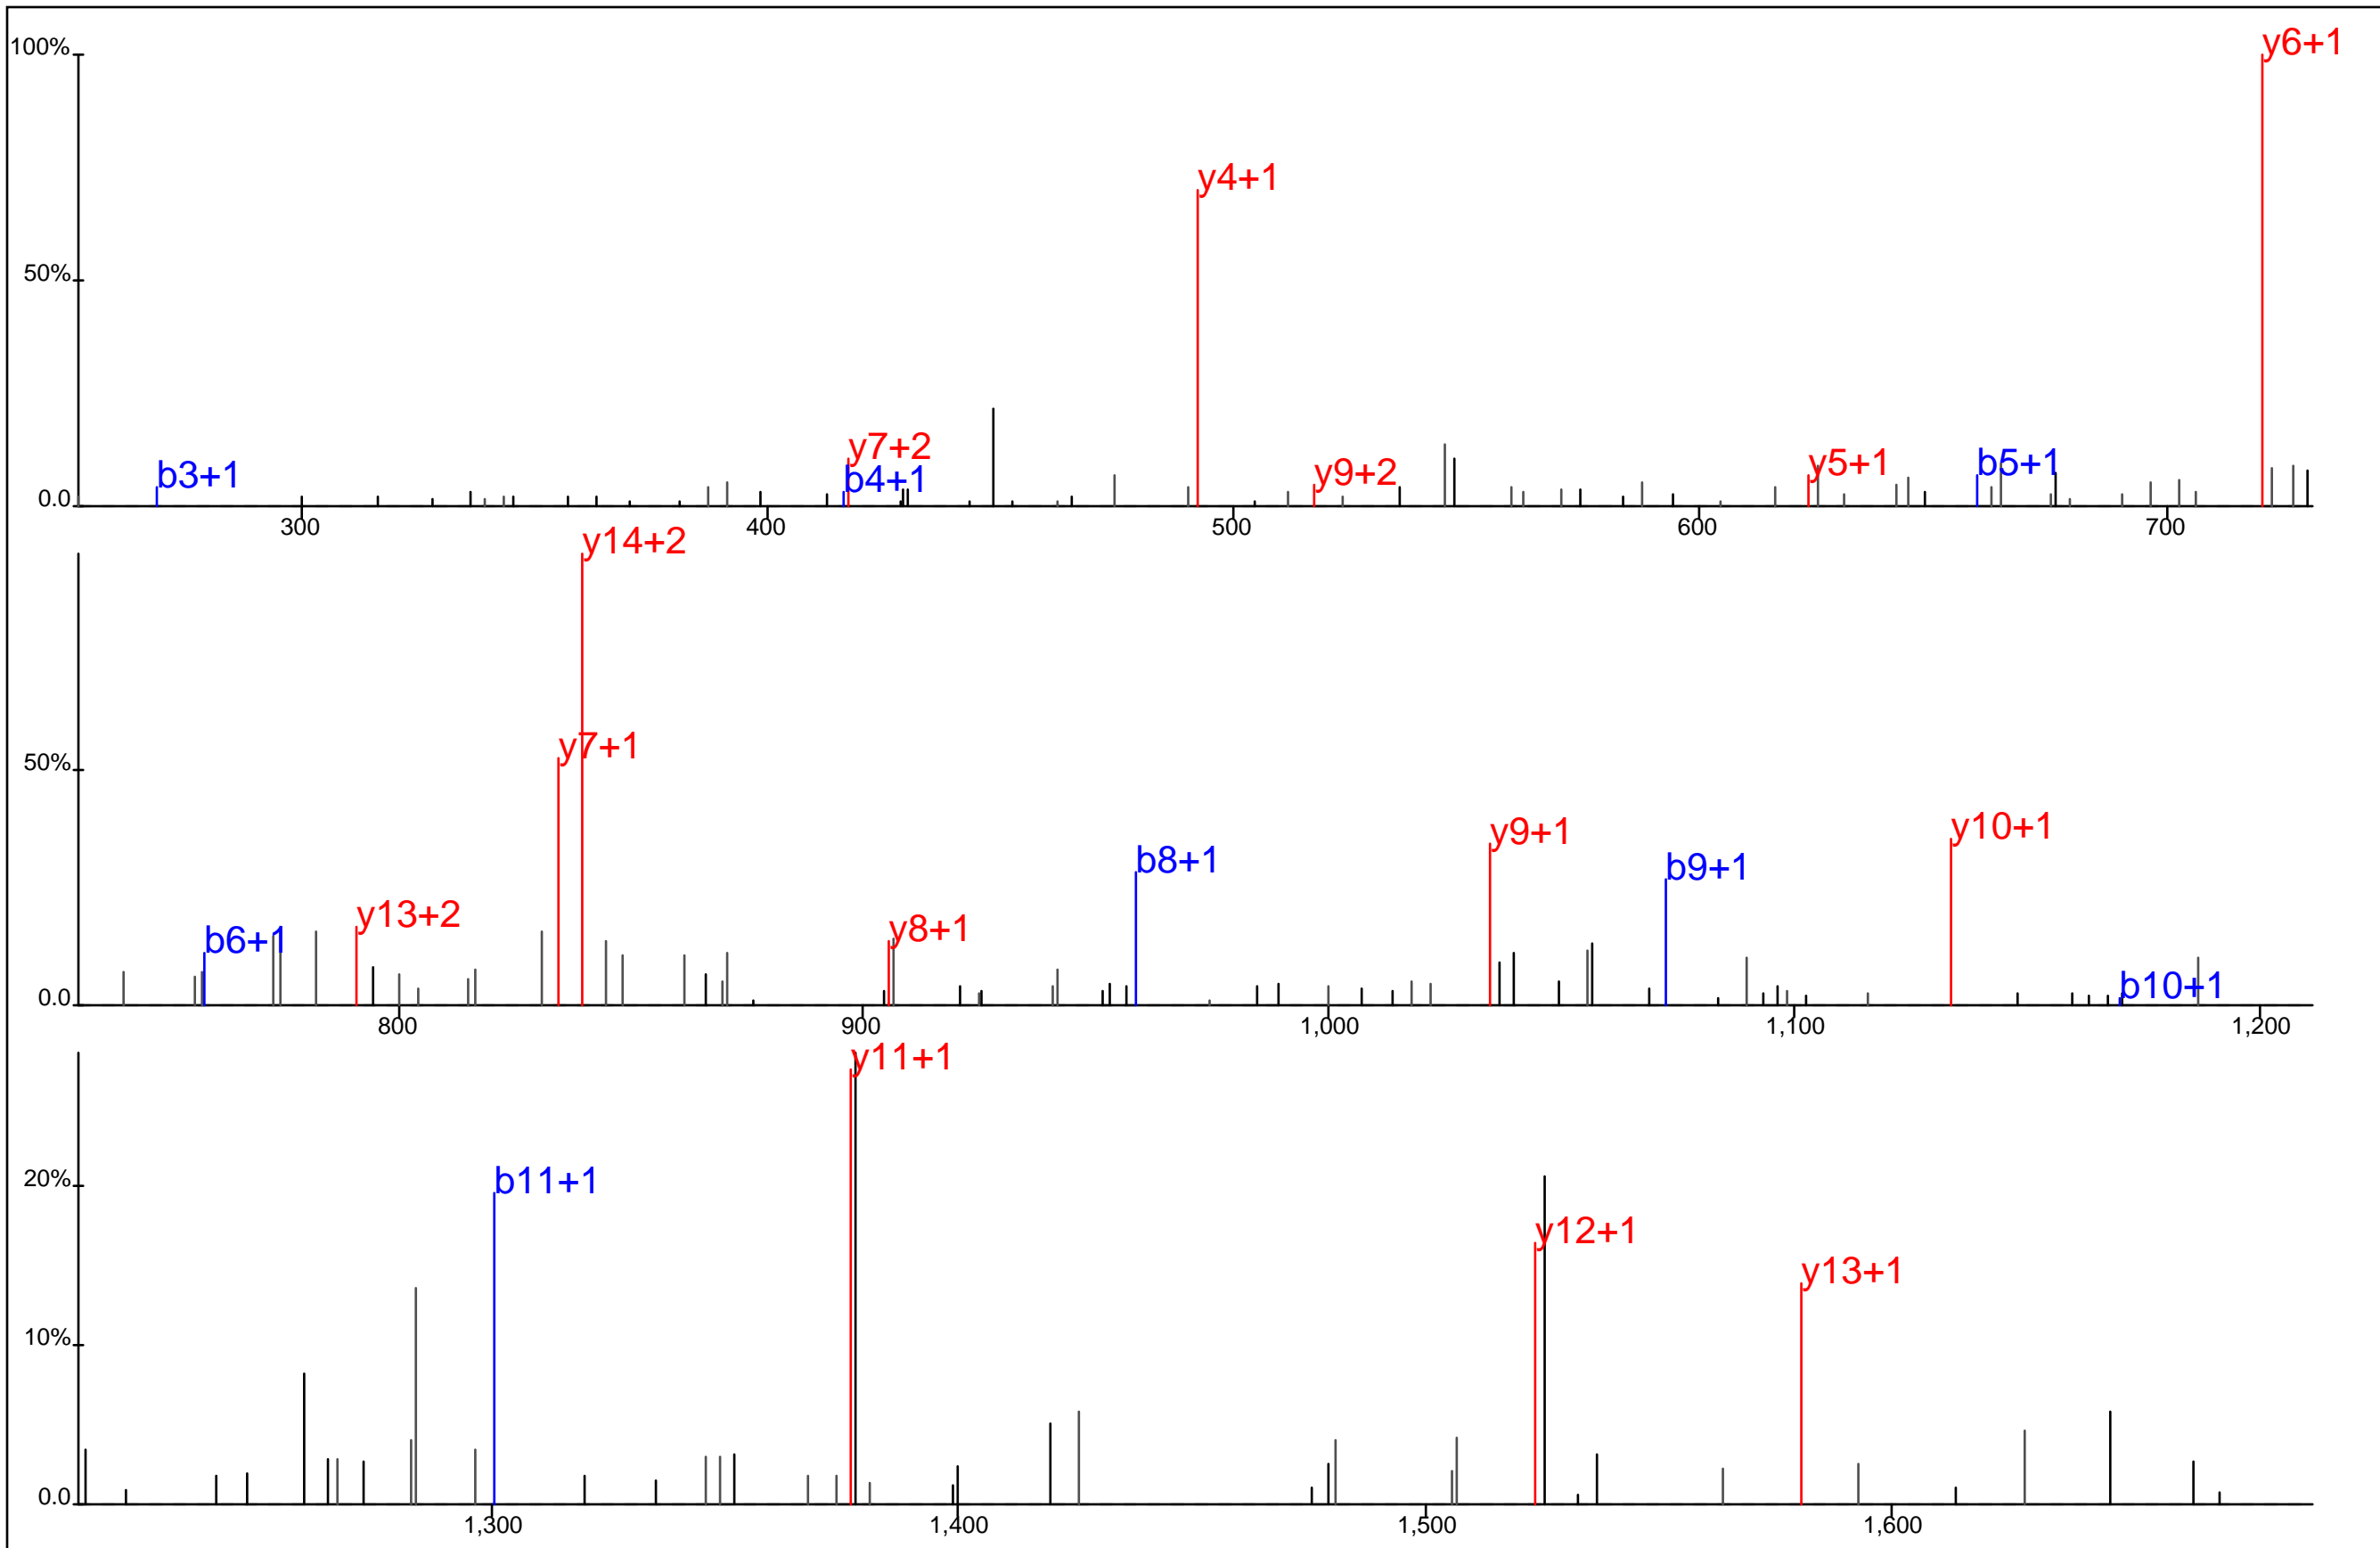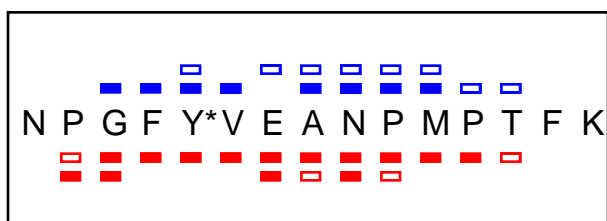

Protein Name: Phospholipase C, gamma 1  
 gi Accession: 0  
 Precursor Mass: 896.3920+2  
 Delta Mass: 2.450 ppm  
 XCorr: 64.91

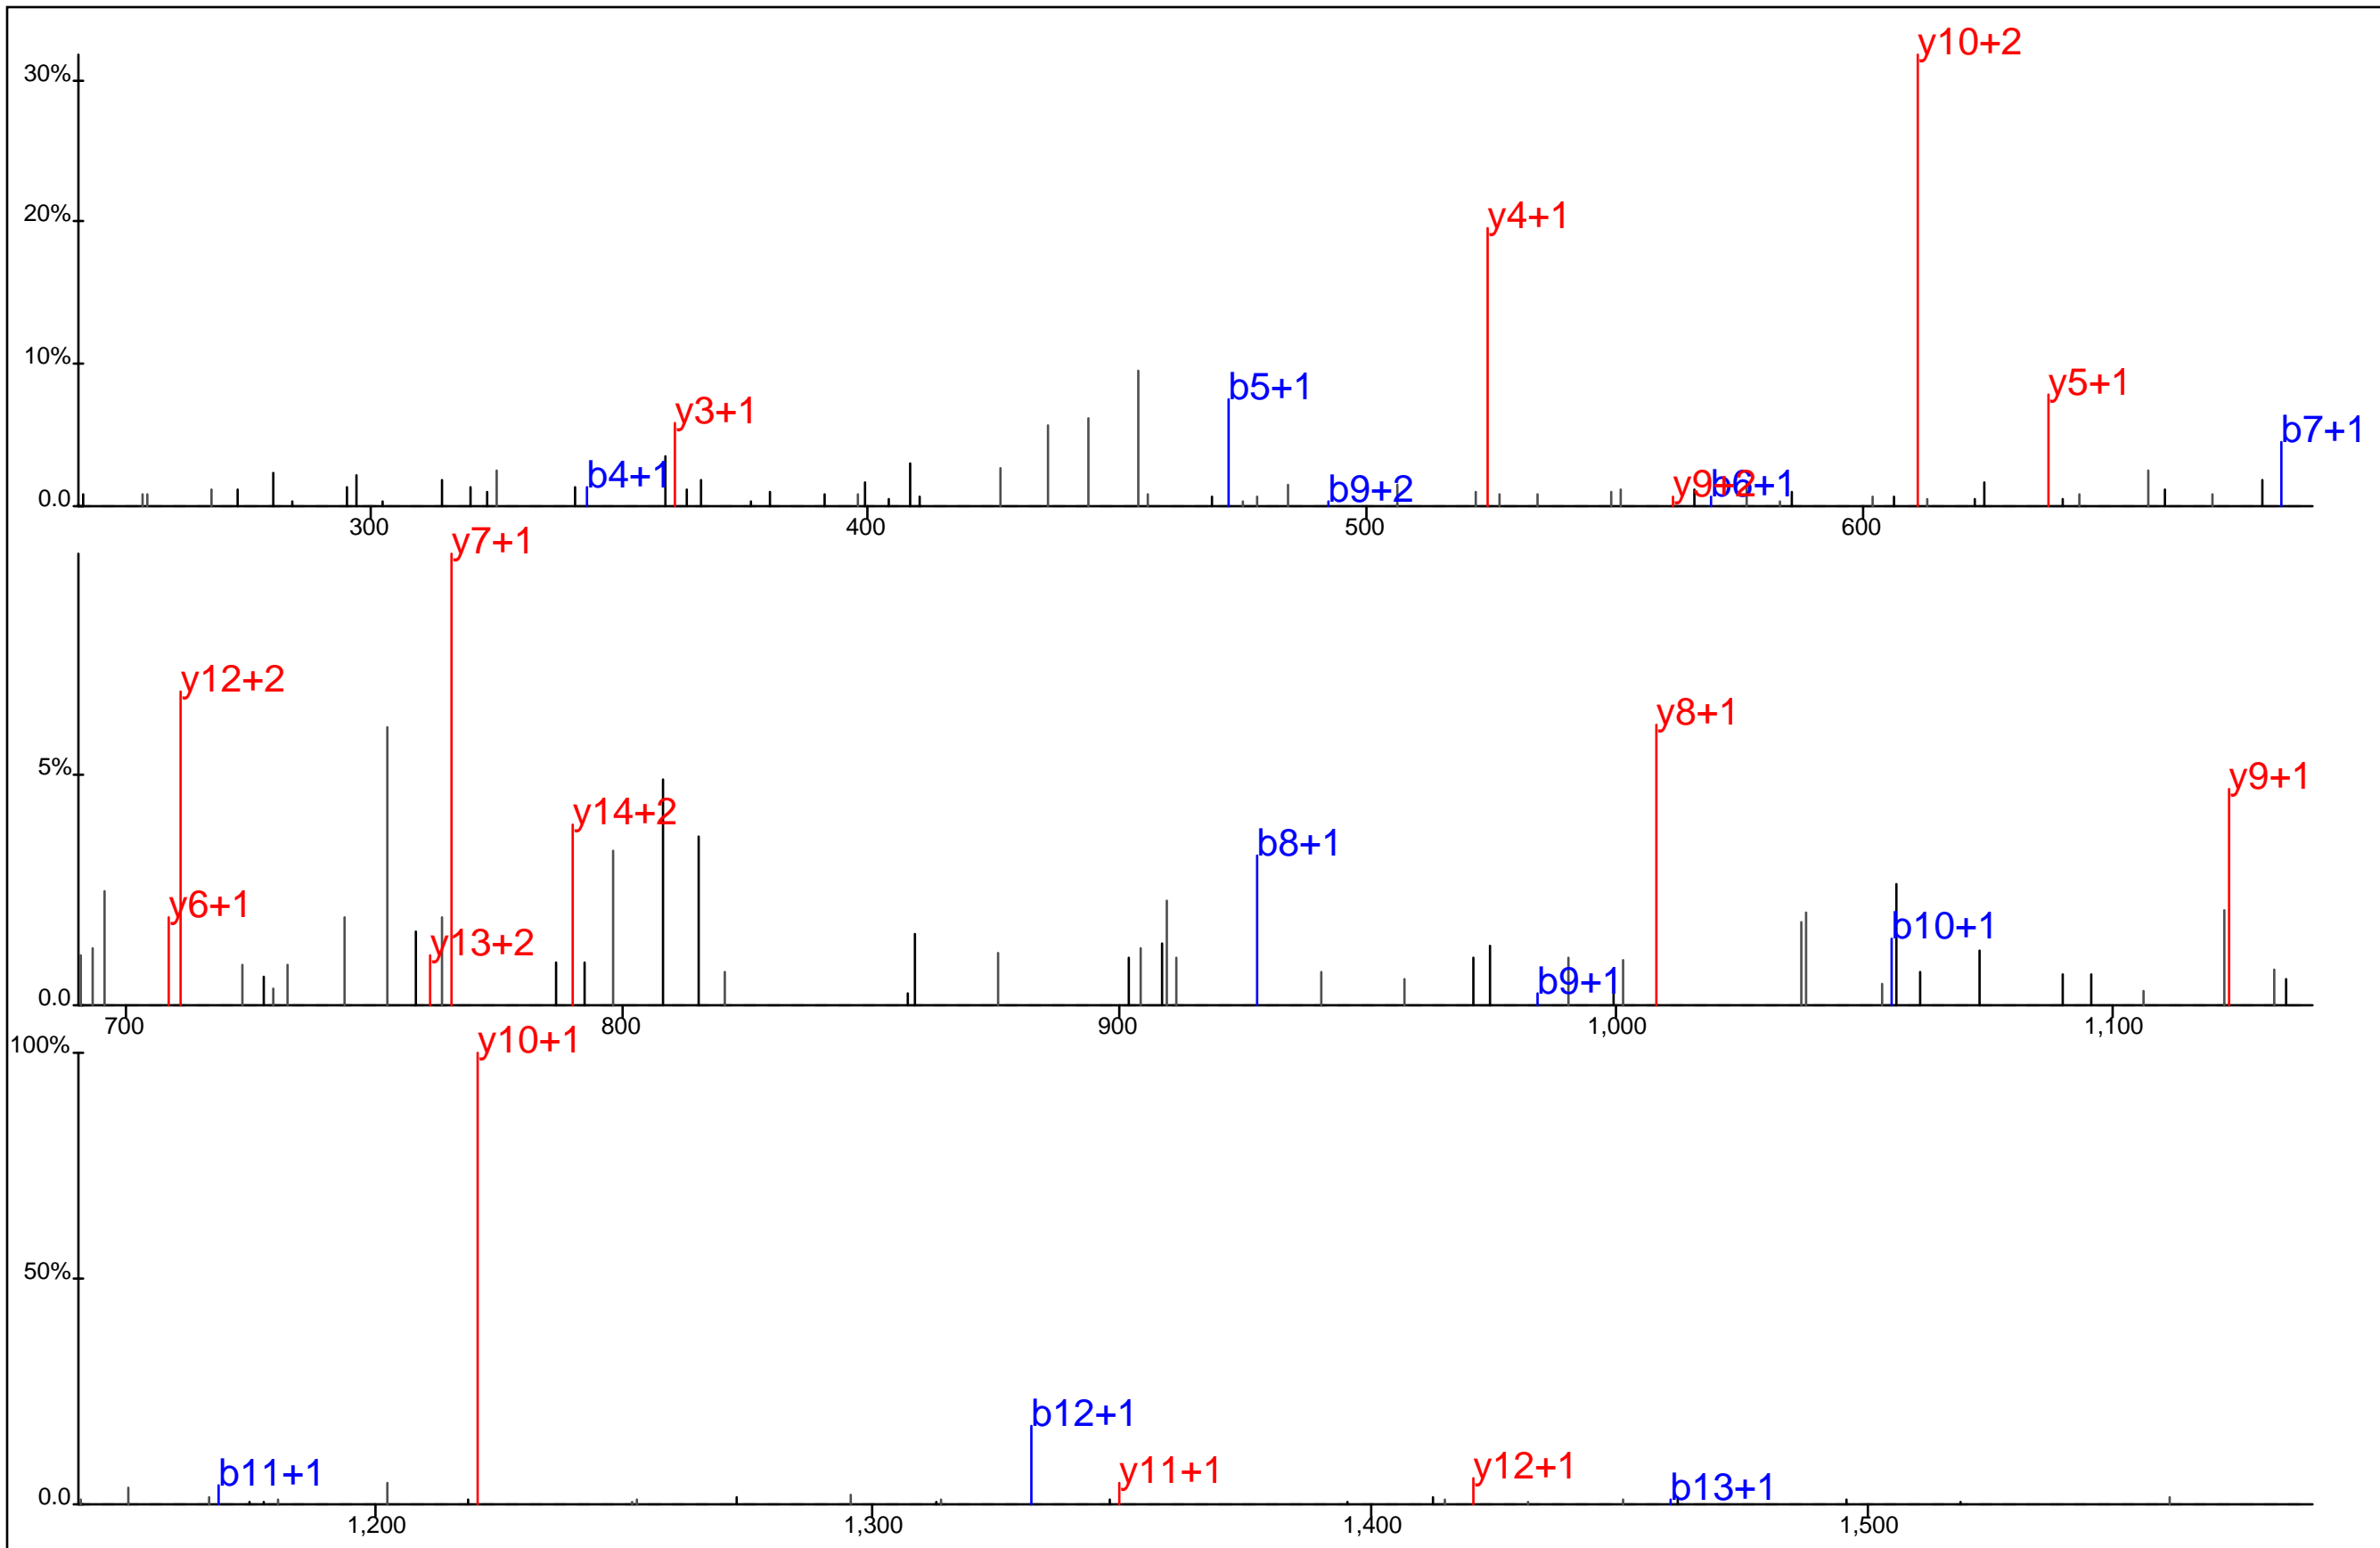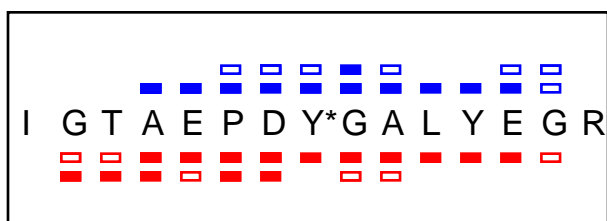

Protein Name: Phospholipase C, gamma 1  
 gi Accession: 0  
 Precursor Mass: 846.3696+2  
 Delta Mass: 0.443 ppm  
 XCorr: 67.69

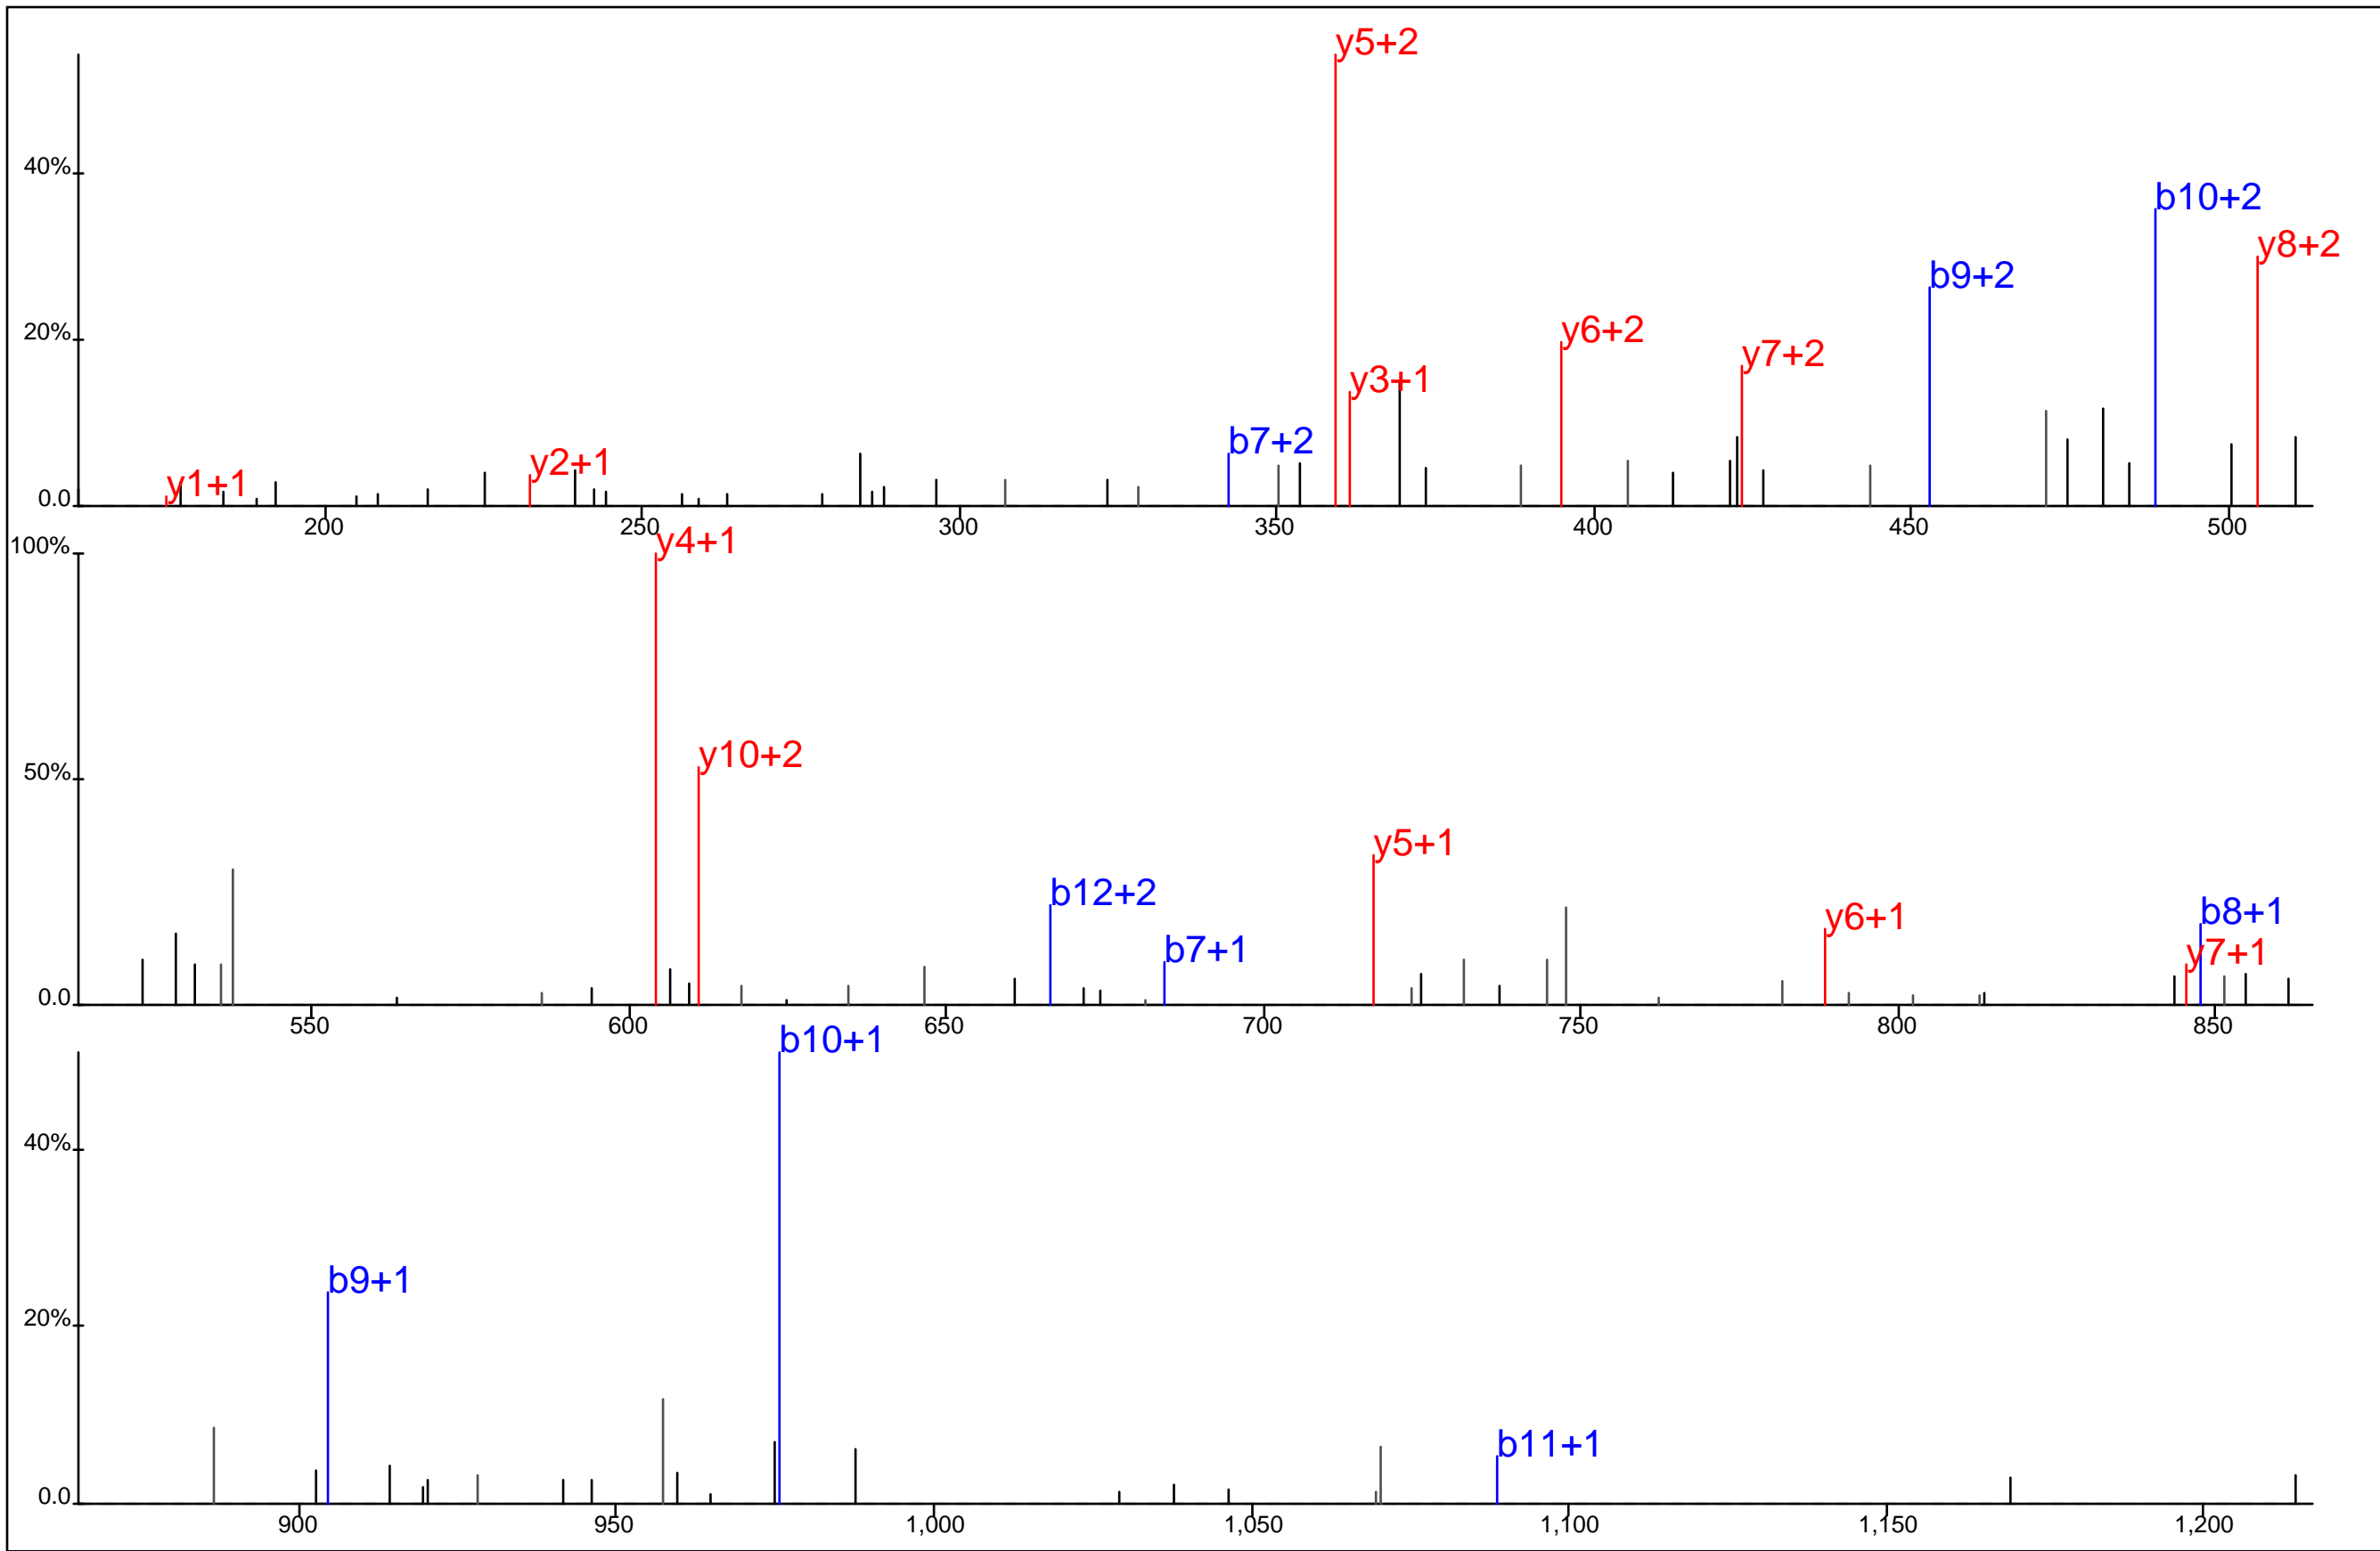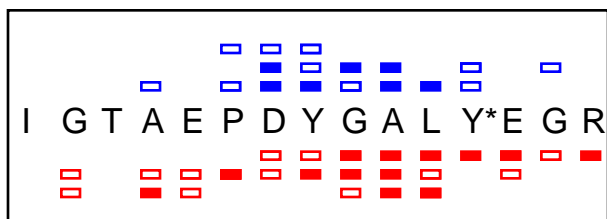

Protein Name: Phospholipase C, gamma 1  
 gi Accession: 0  
 Precursor Mass: 564.5823+3  
 Delta Mass: 0.615 ppm  
 XCorr: 30.46

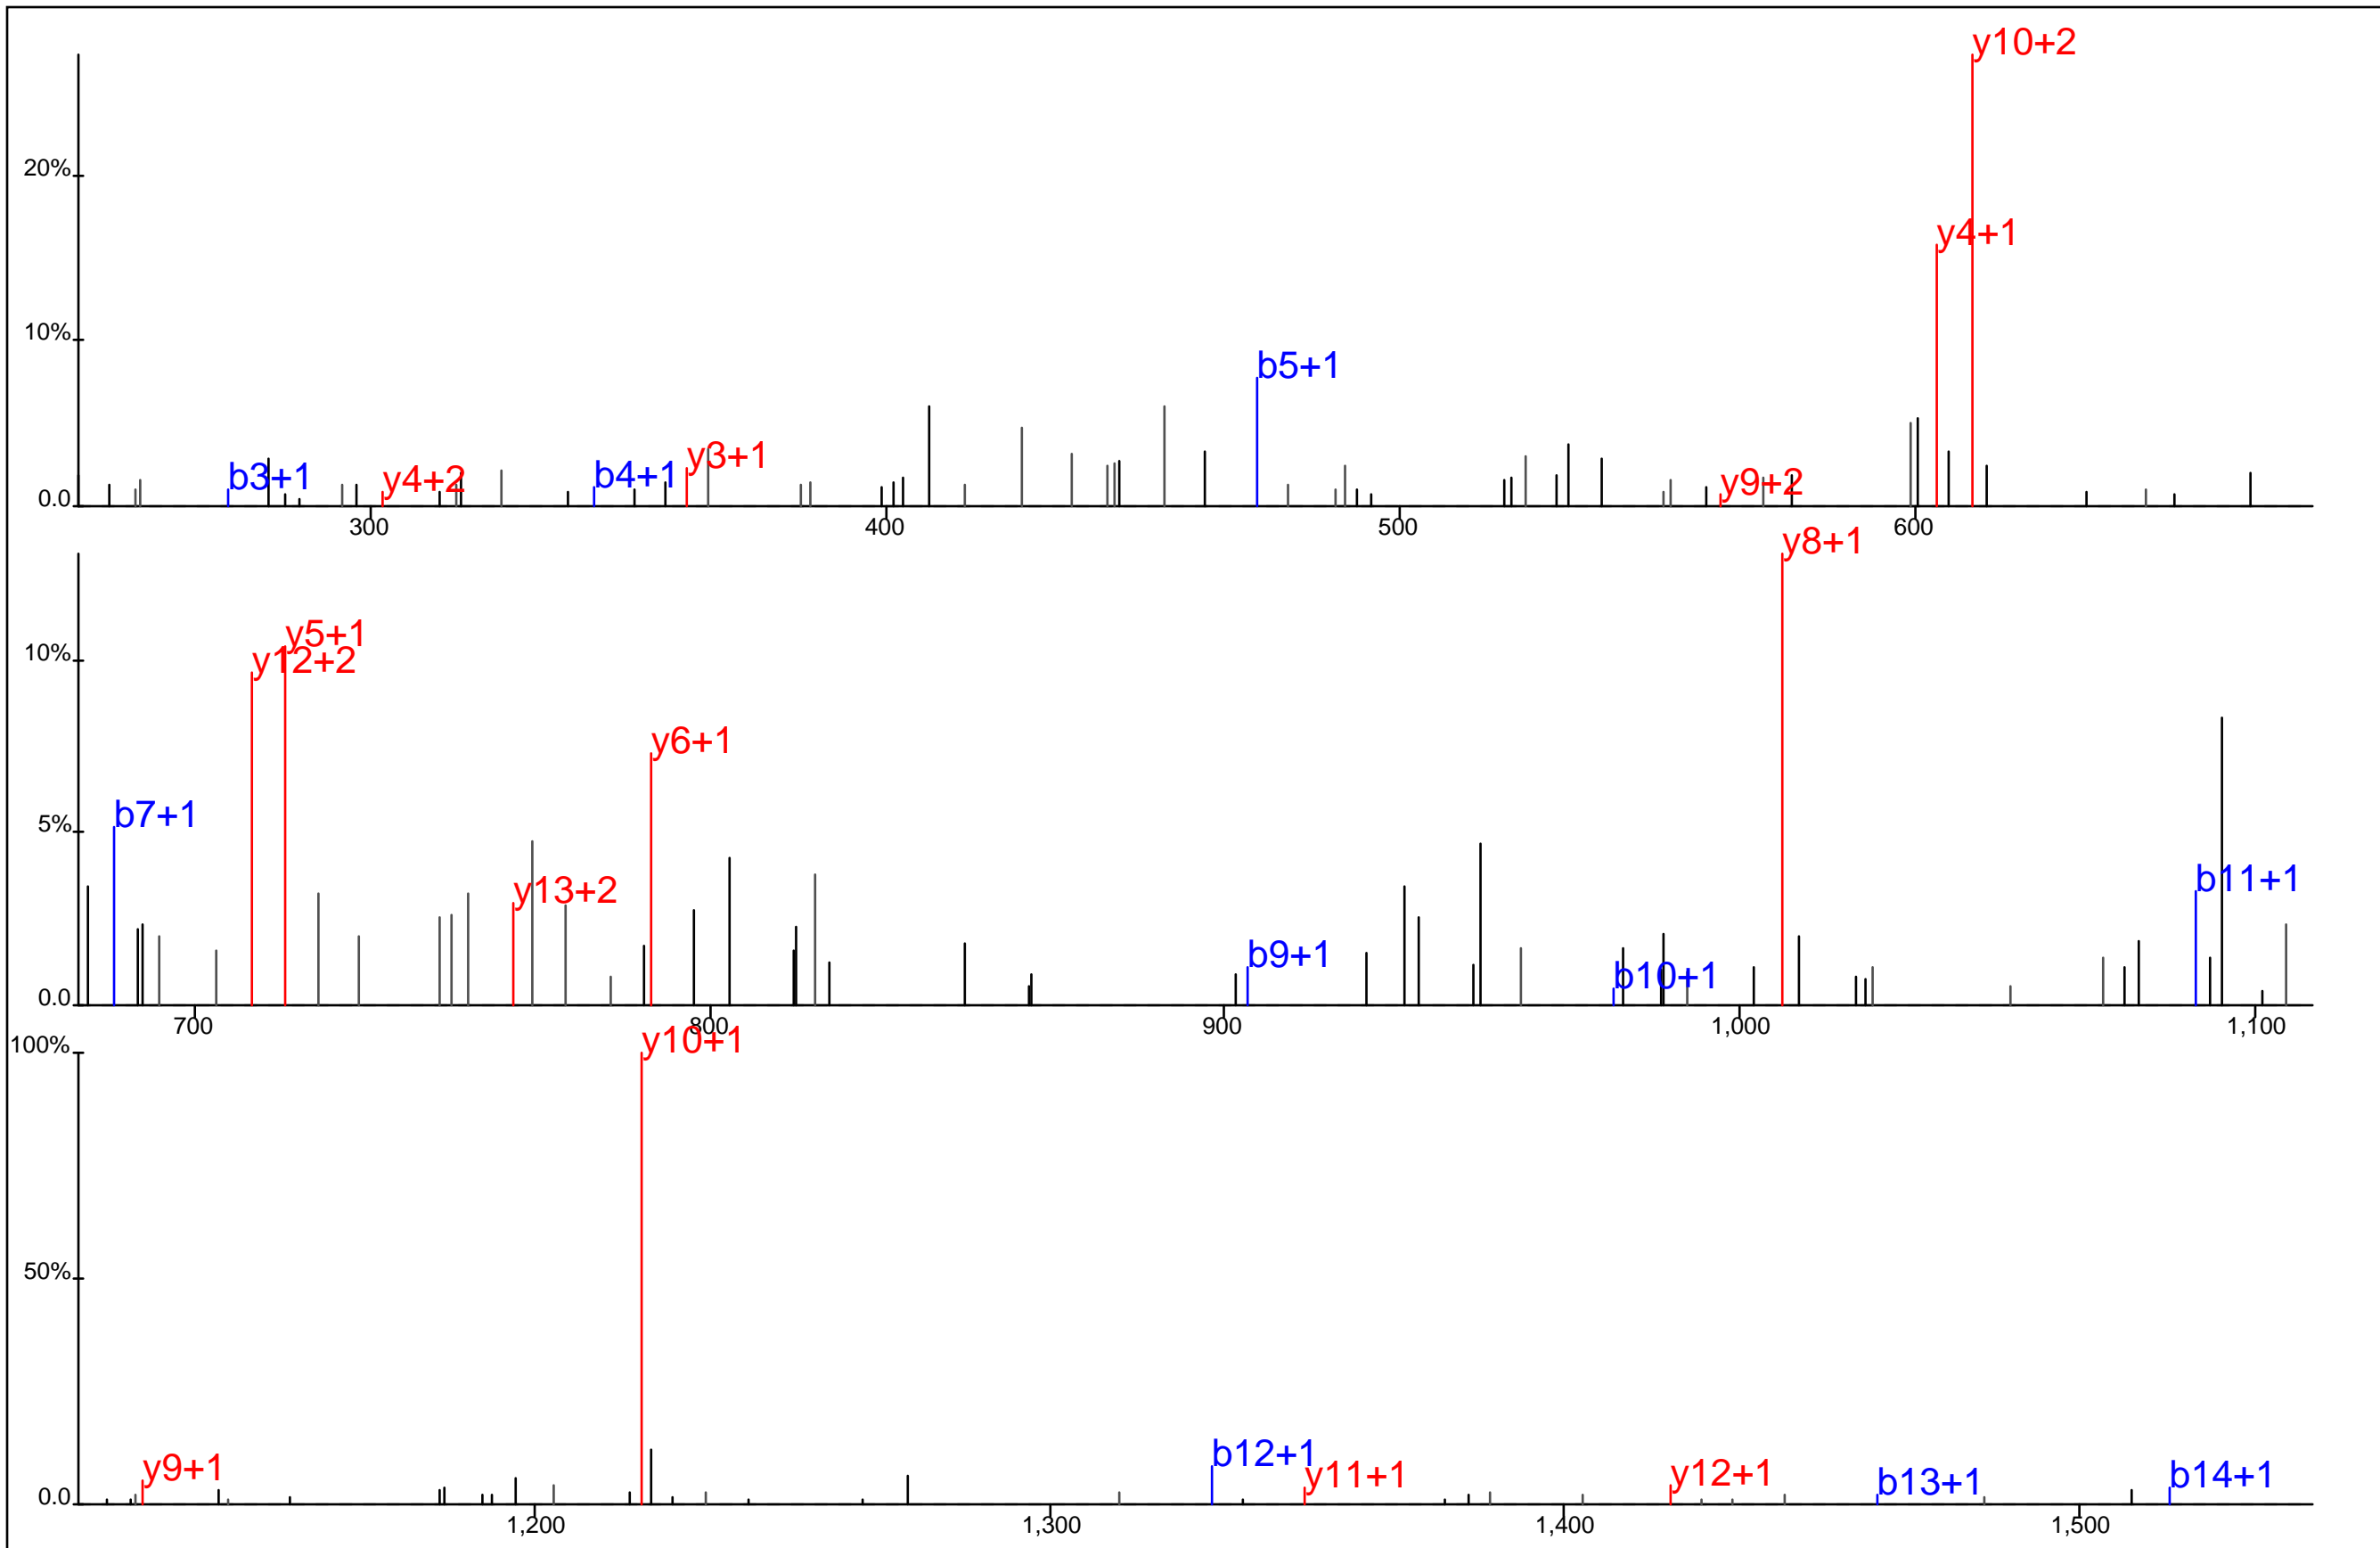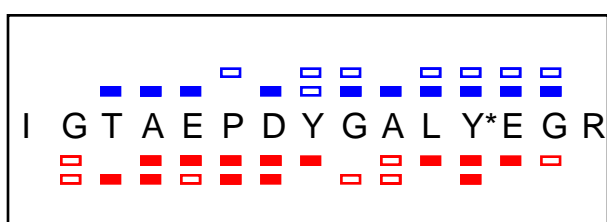

Protein Name: Phospholipase C, gamma 1  
 gi Accession: 0  
 Precursor Mass: 846.3657+2  
 Delta Mass: 4.247 ppm  
 XCorr: 47.01

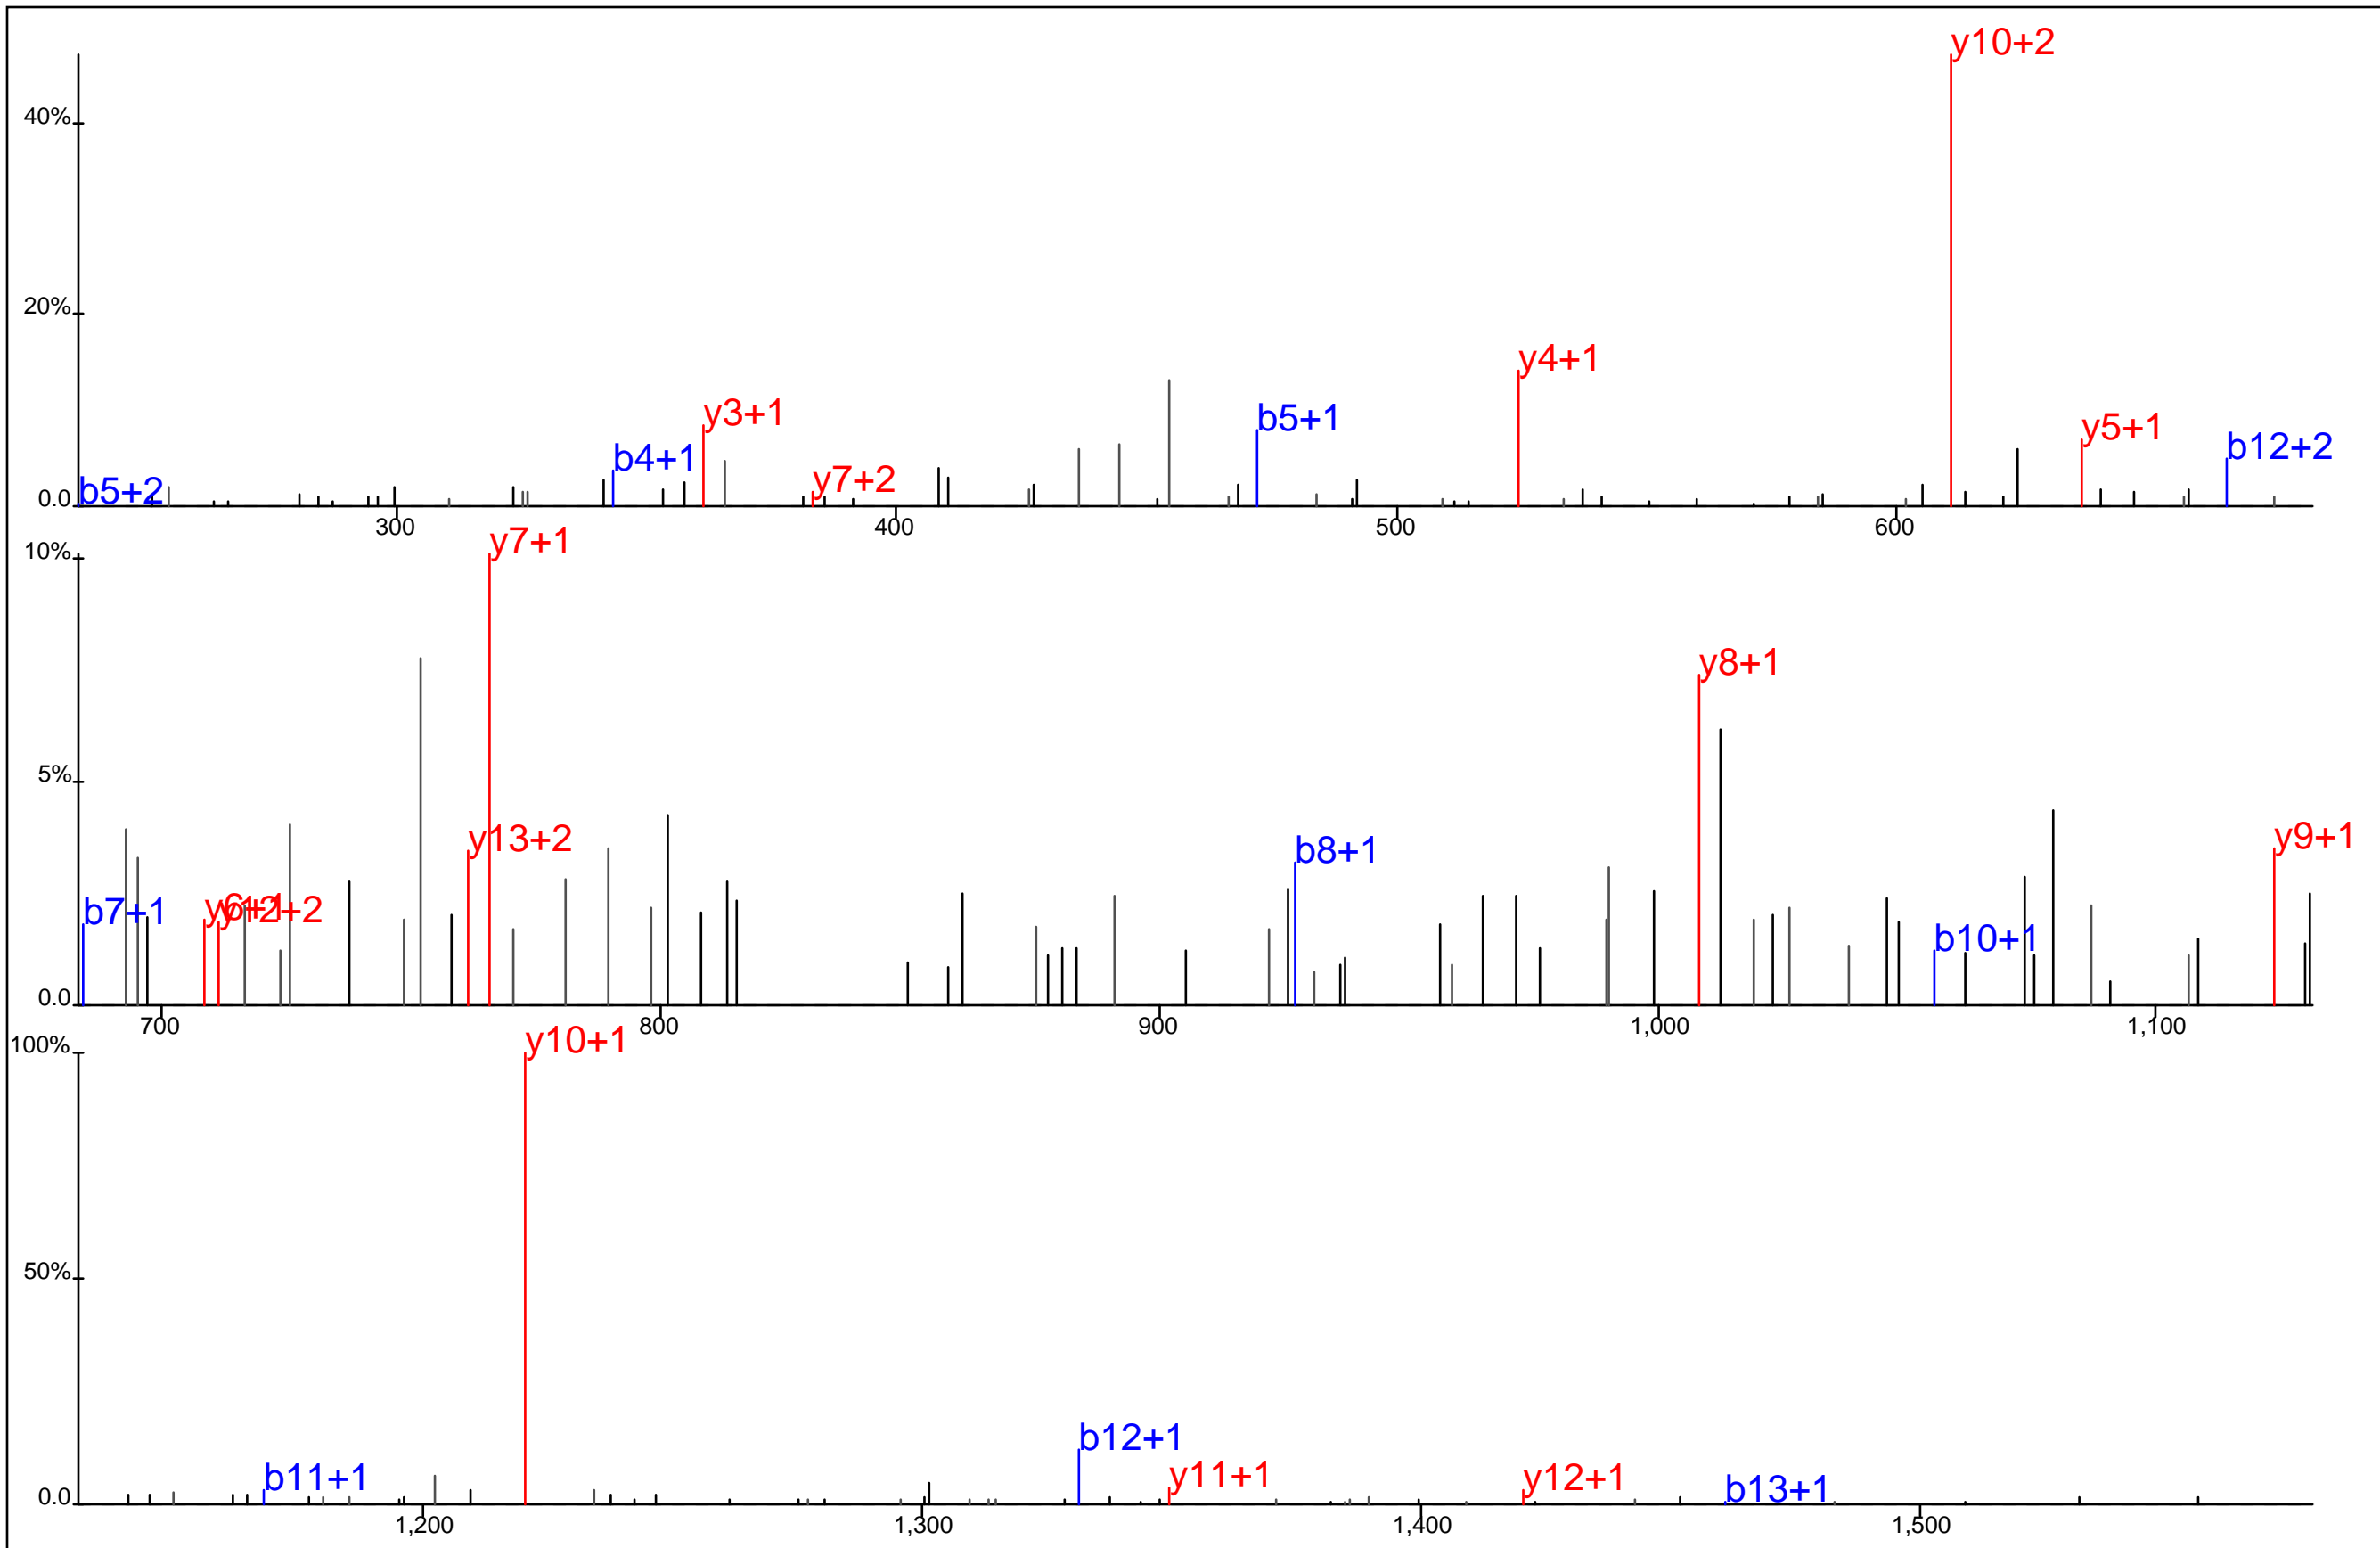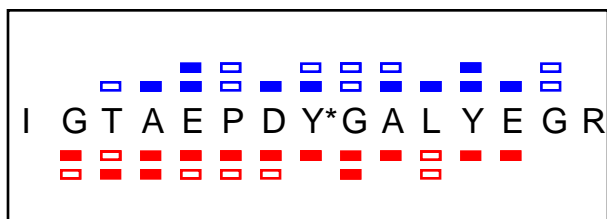

Protein Name: Phospholipase C, gamma 1  
 gi Accession: 0  
 Precursor Mass: 846.3702+2  
 Delta Mass: 1.164 ppm  
 XCorr: 70.92

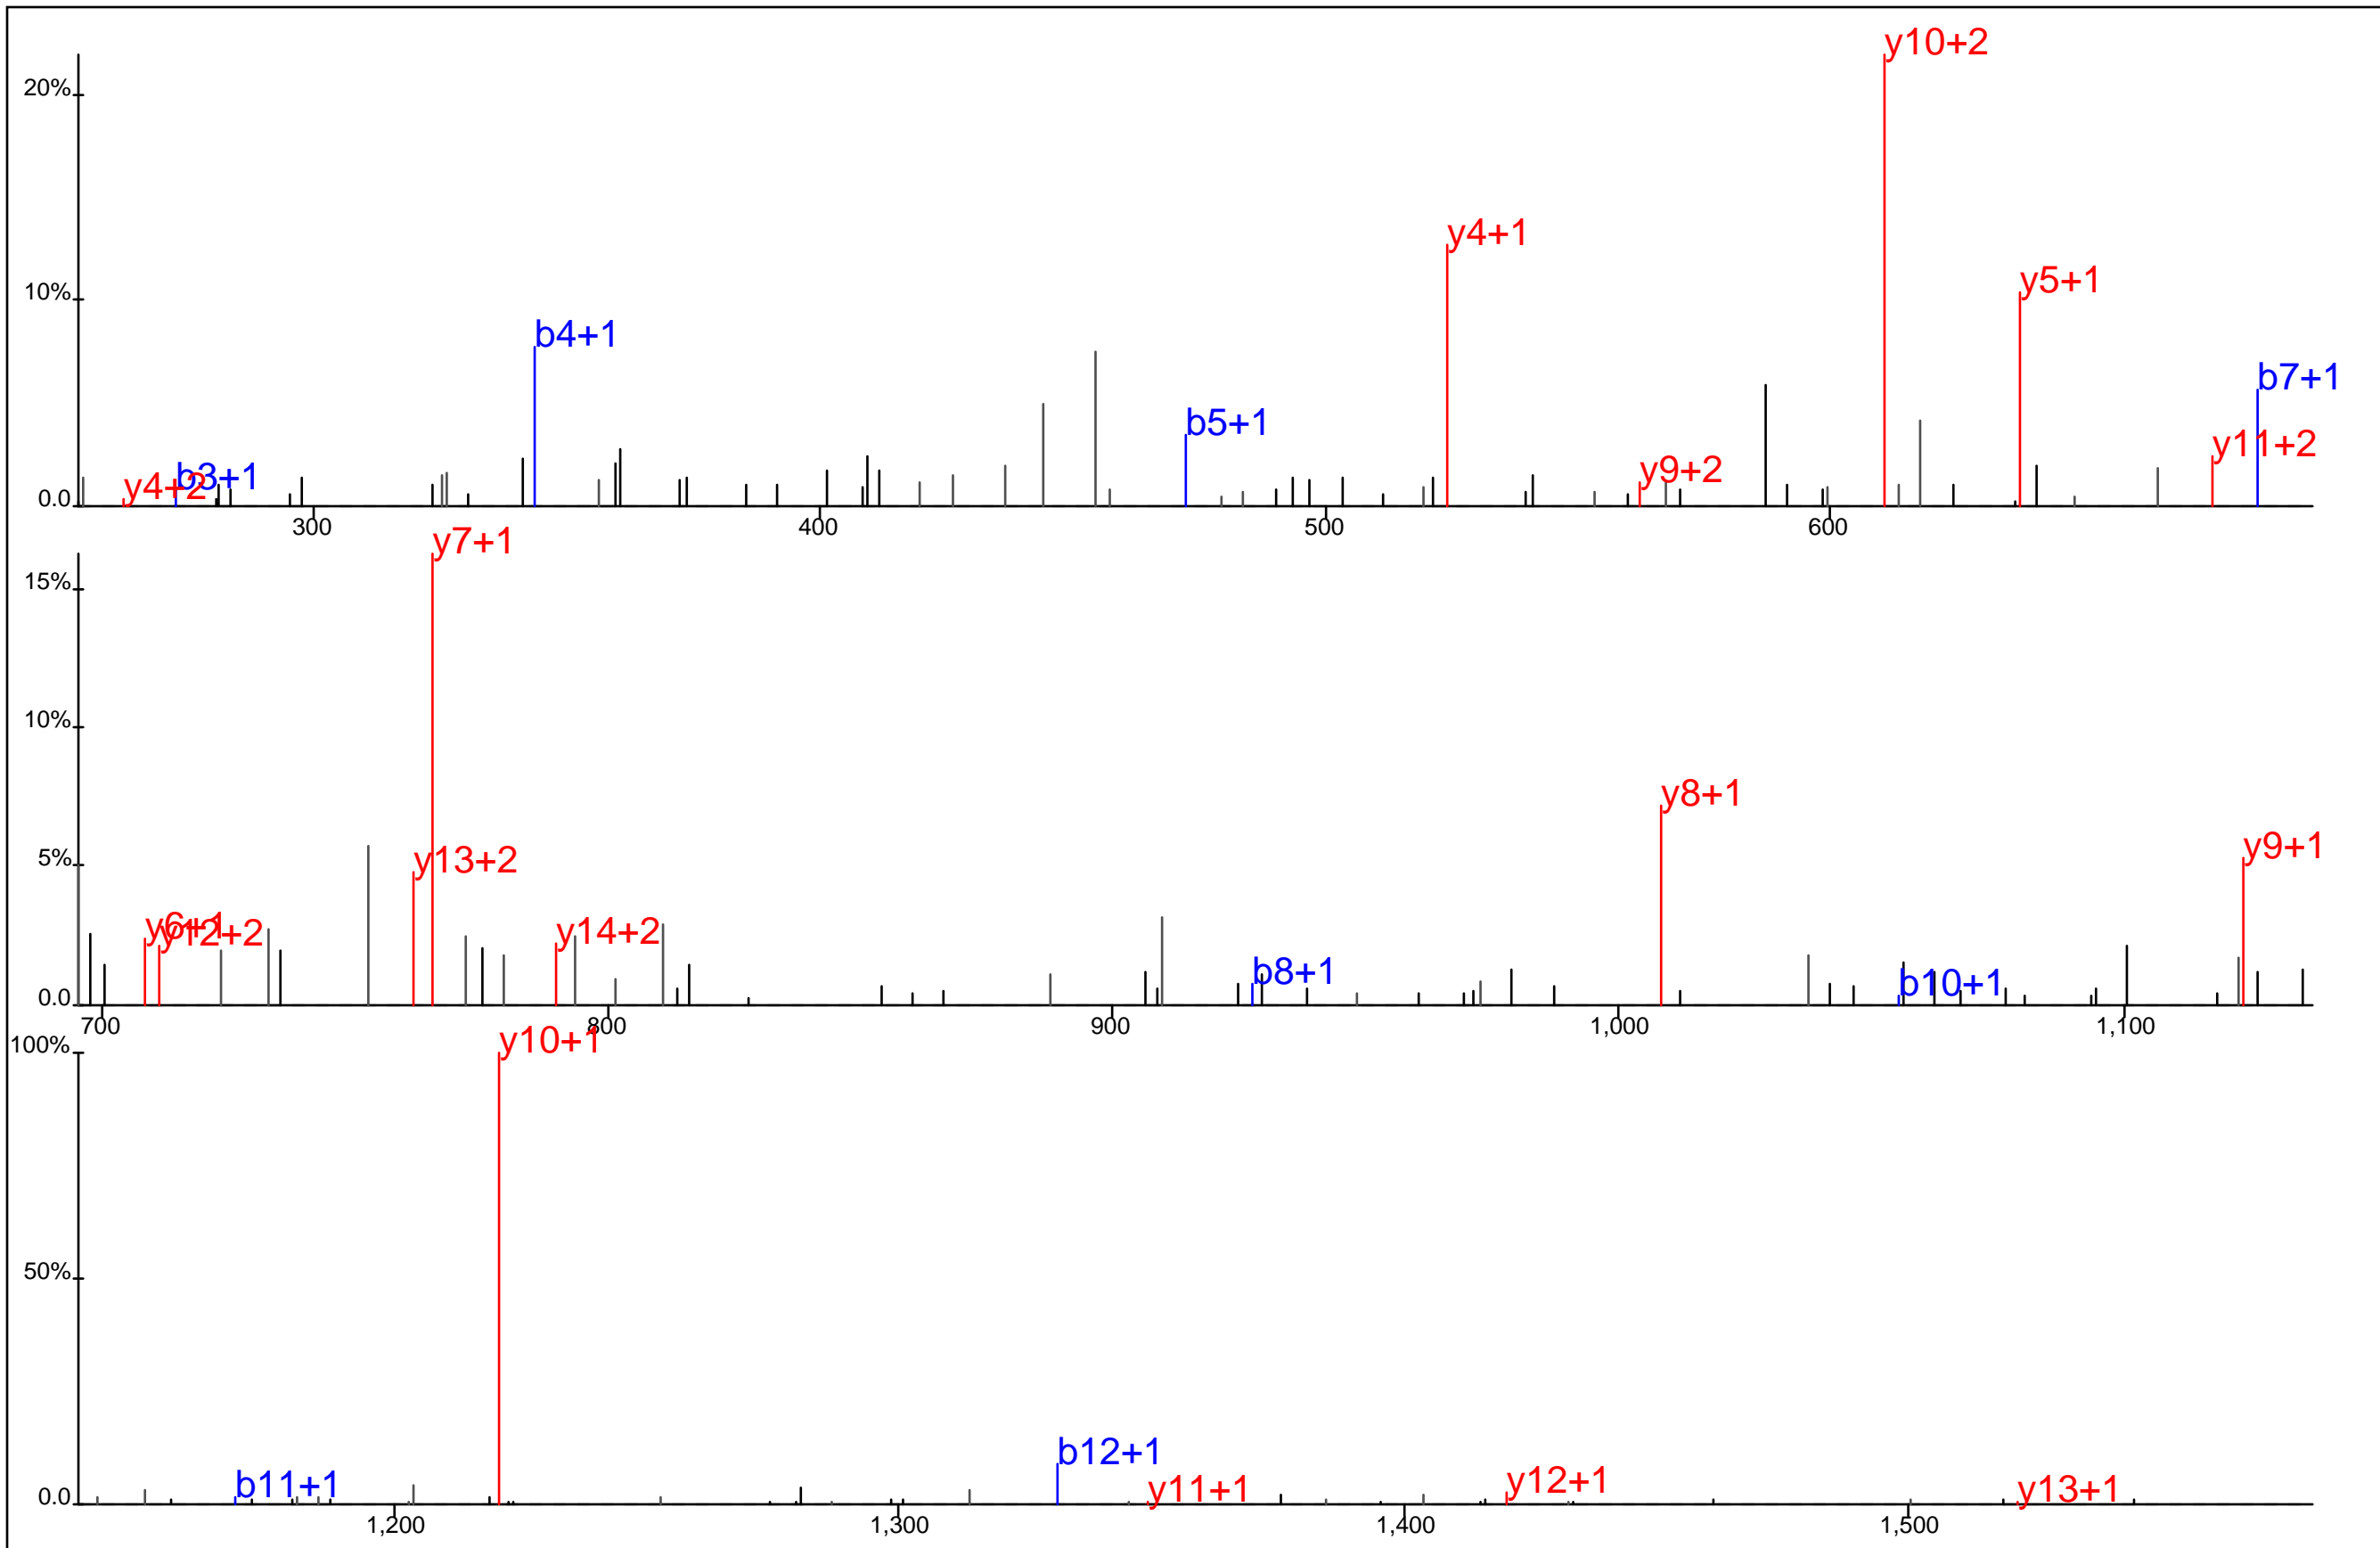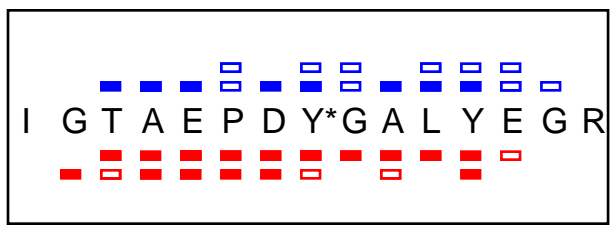

Protein Name: Phospholipase C, gamma 1  
 gi Accession: 0  
 Precursor Mass: 846.3688+2  
 Delta Mass: 0.495 ppm  
 XCorr: 44.22



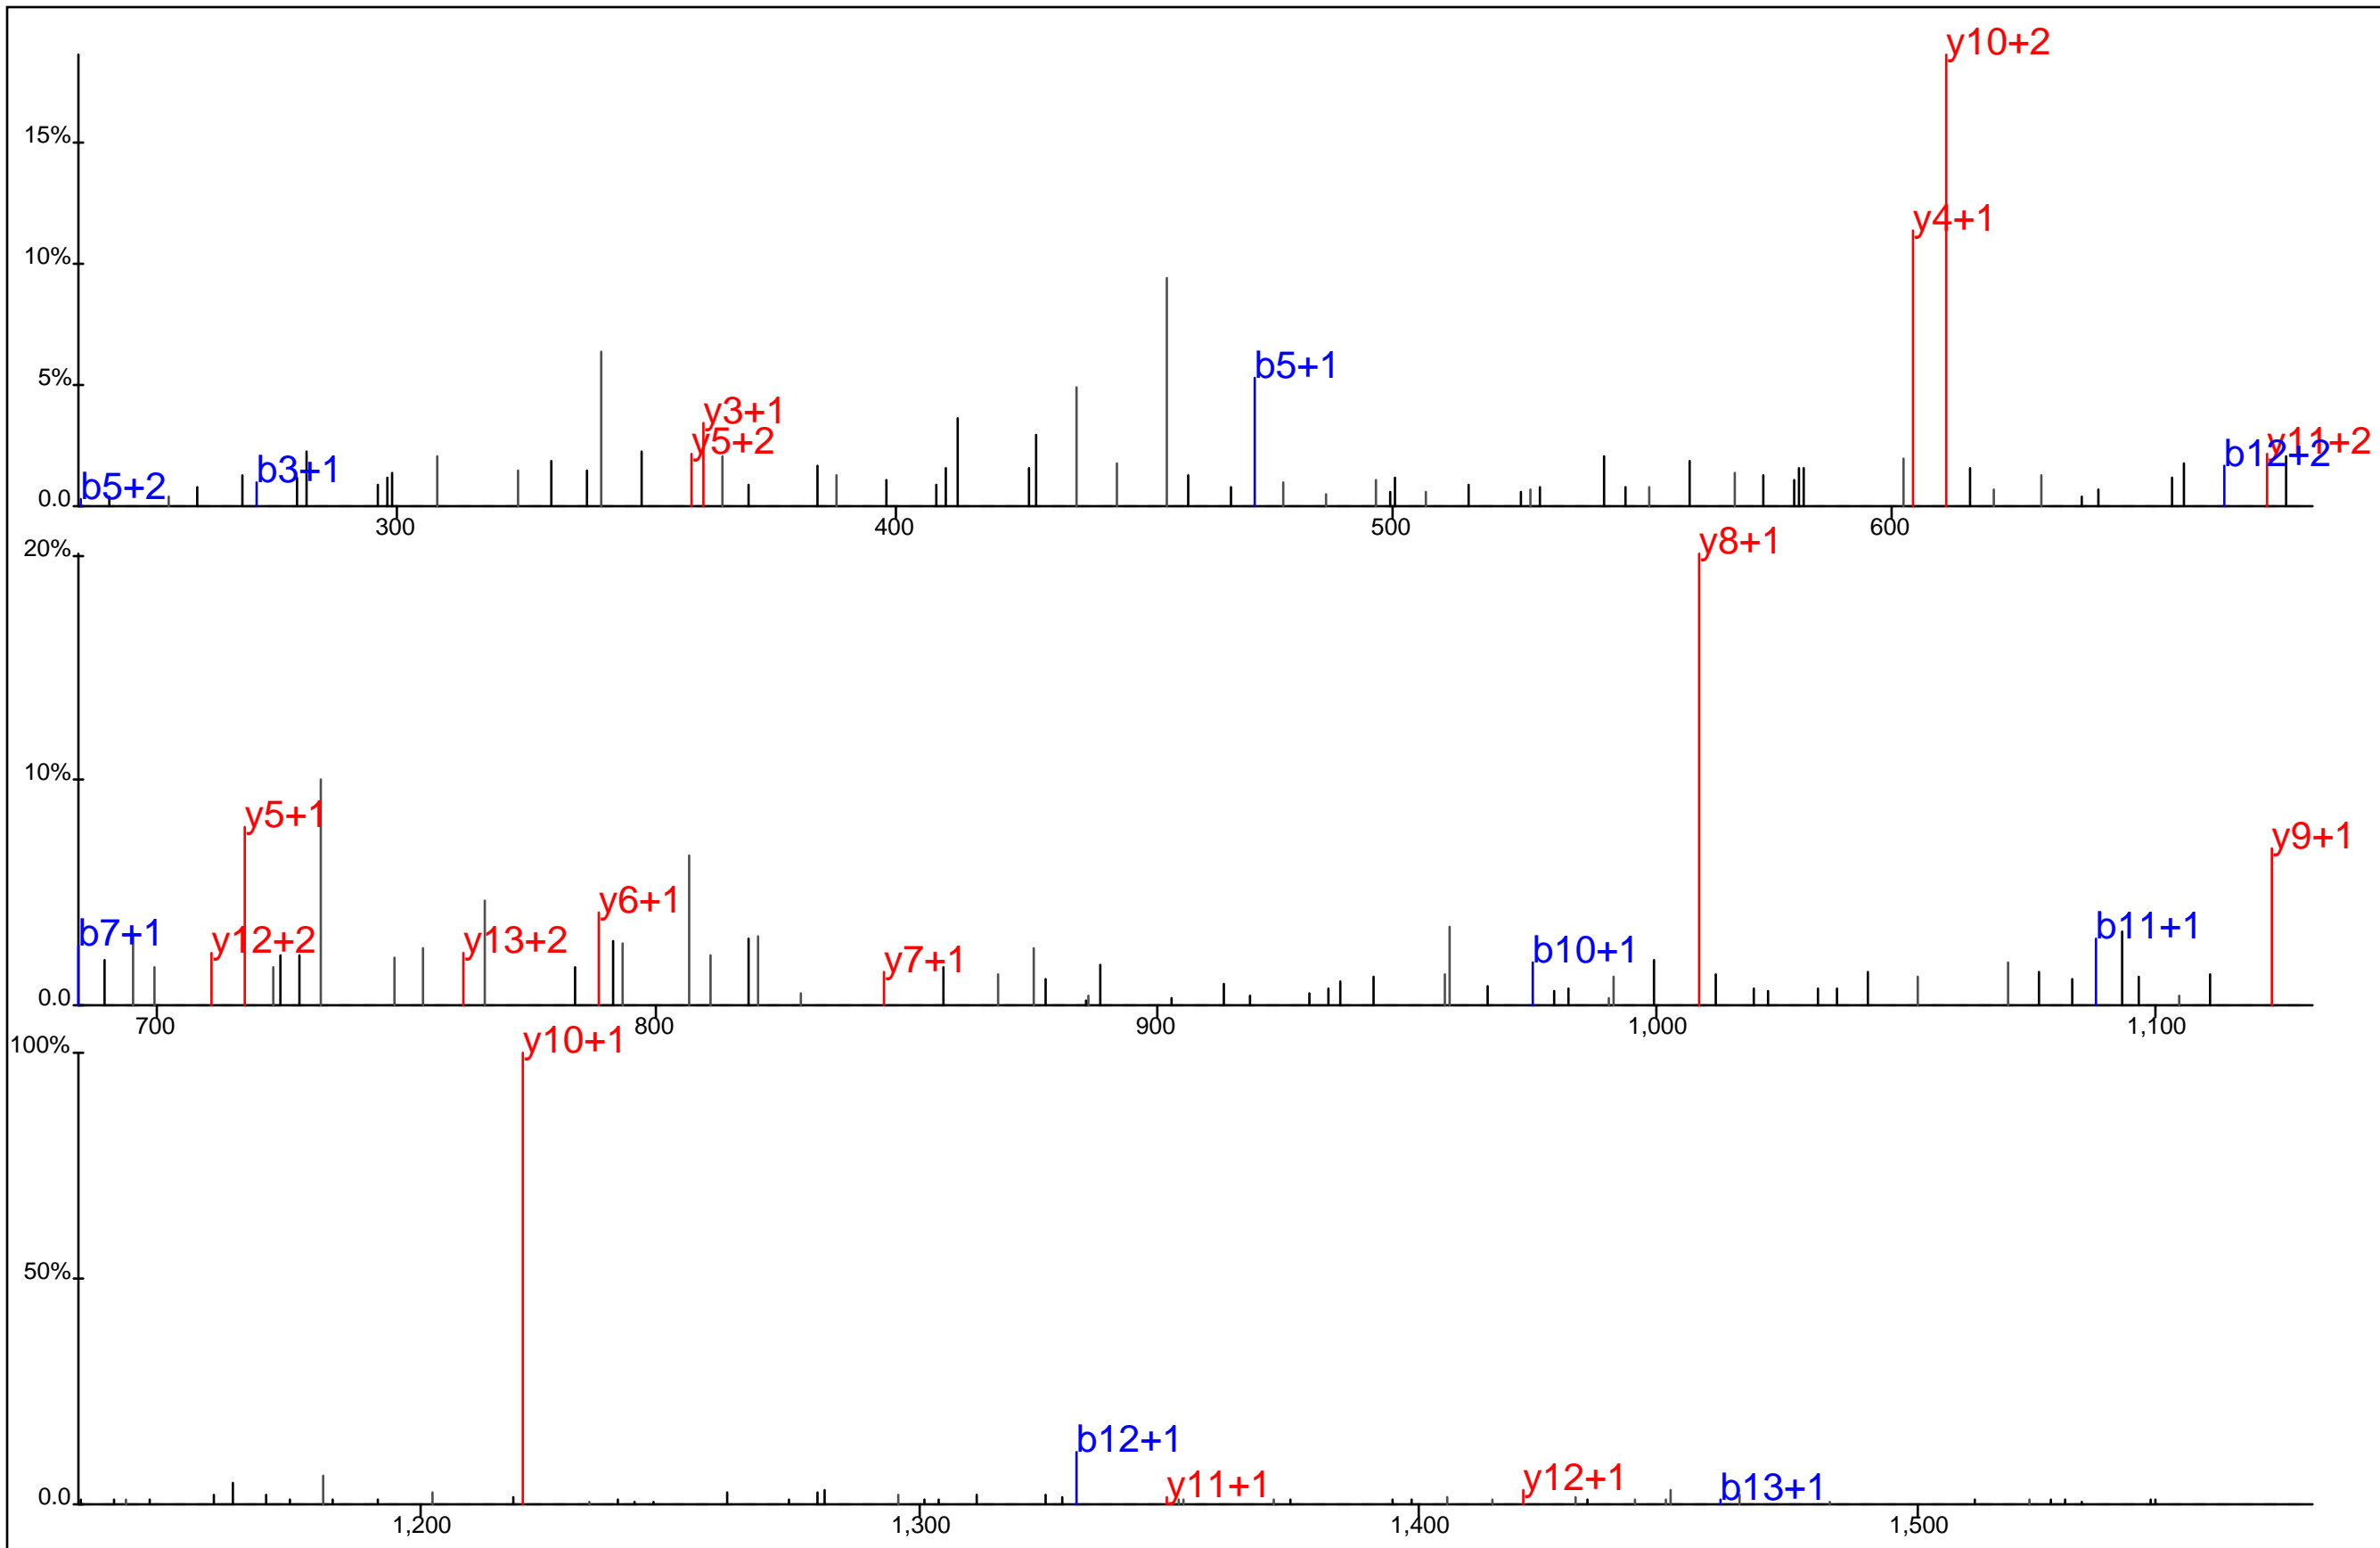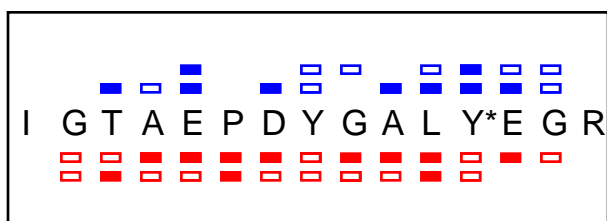

Protein Name: Phospholipase C, gamma 1  
 gi Accession: 0  
 Precursor Mass: 846.3676+2  
 Delta Mass: 1.938 ppm  
 XCorr: 41.99

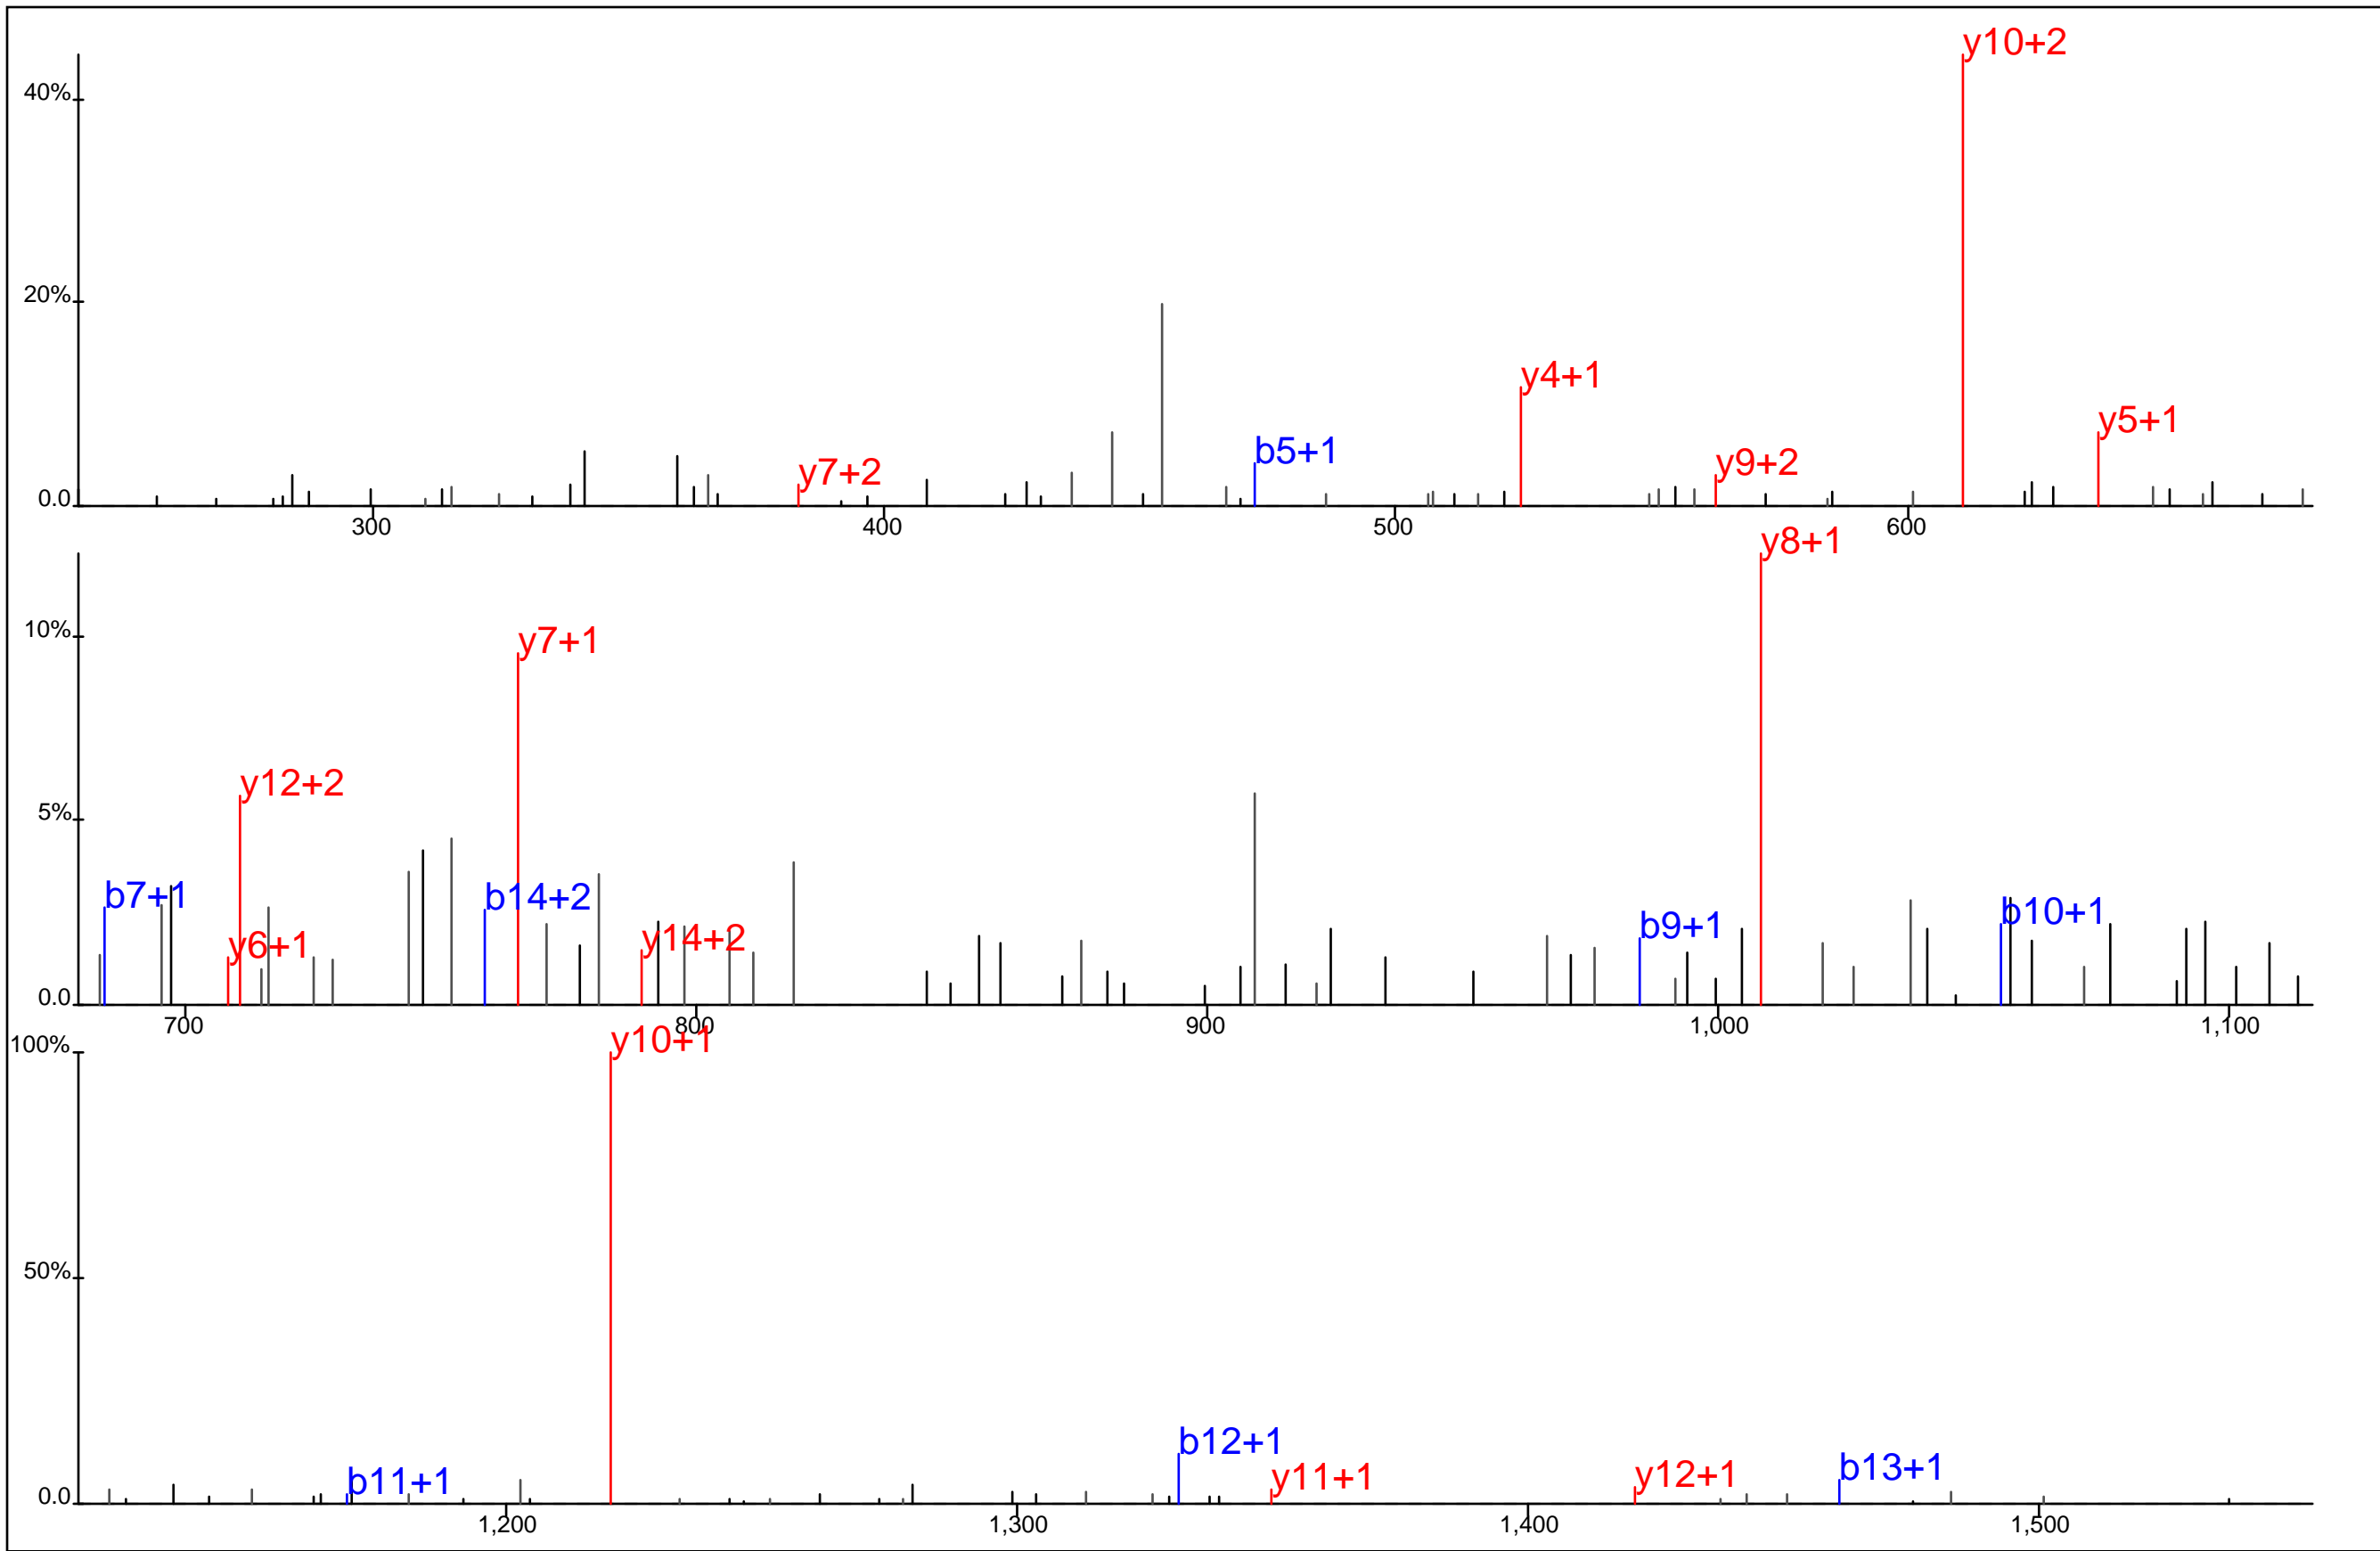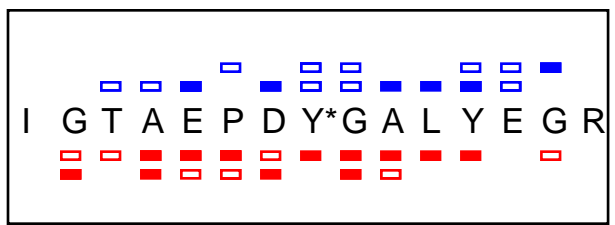

Protein Name: Phospholipase C, gamma 1  
 gi Accession: 0  
 Precursor Mass: 846.3685+2  
 Delta Mass: 0.856 ppm  
 XCorr: 38.32

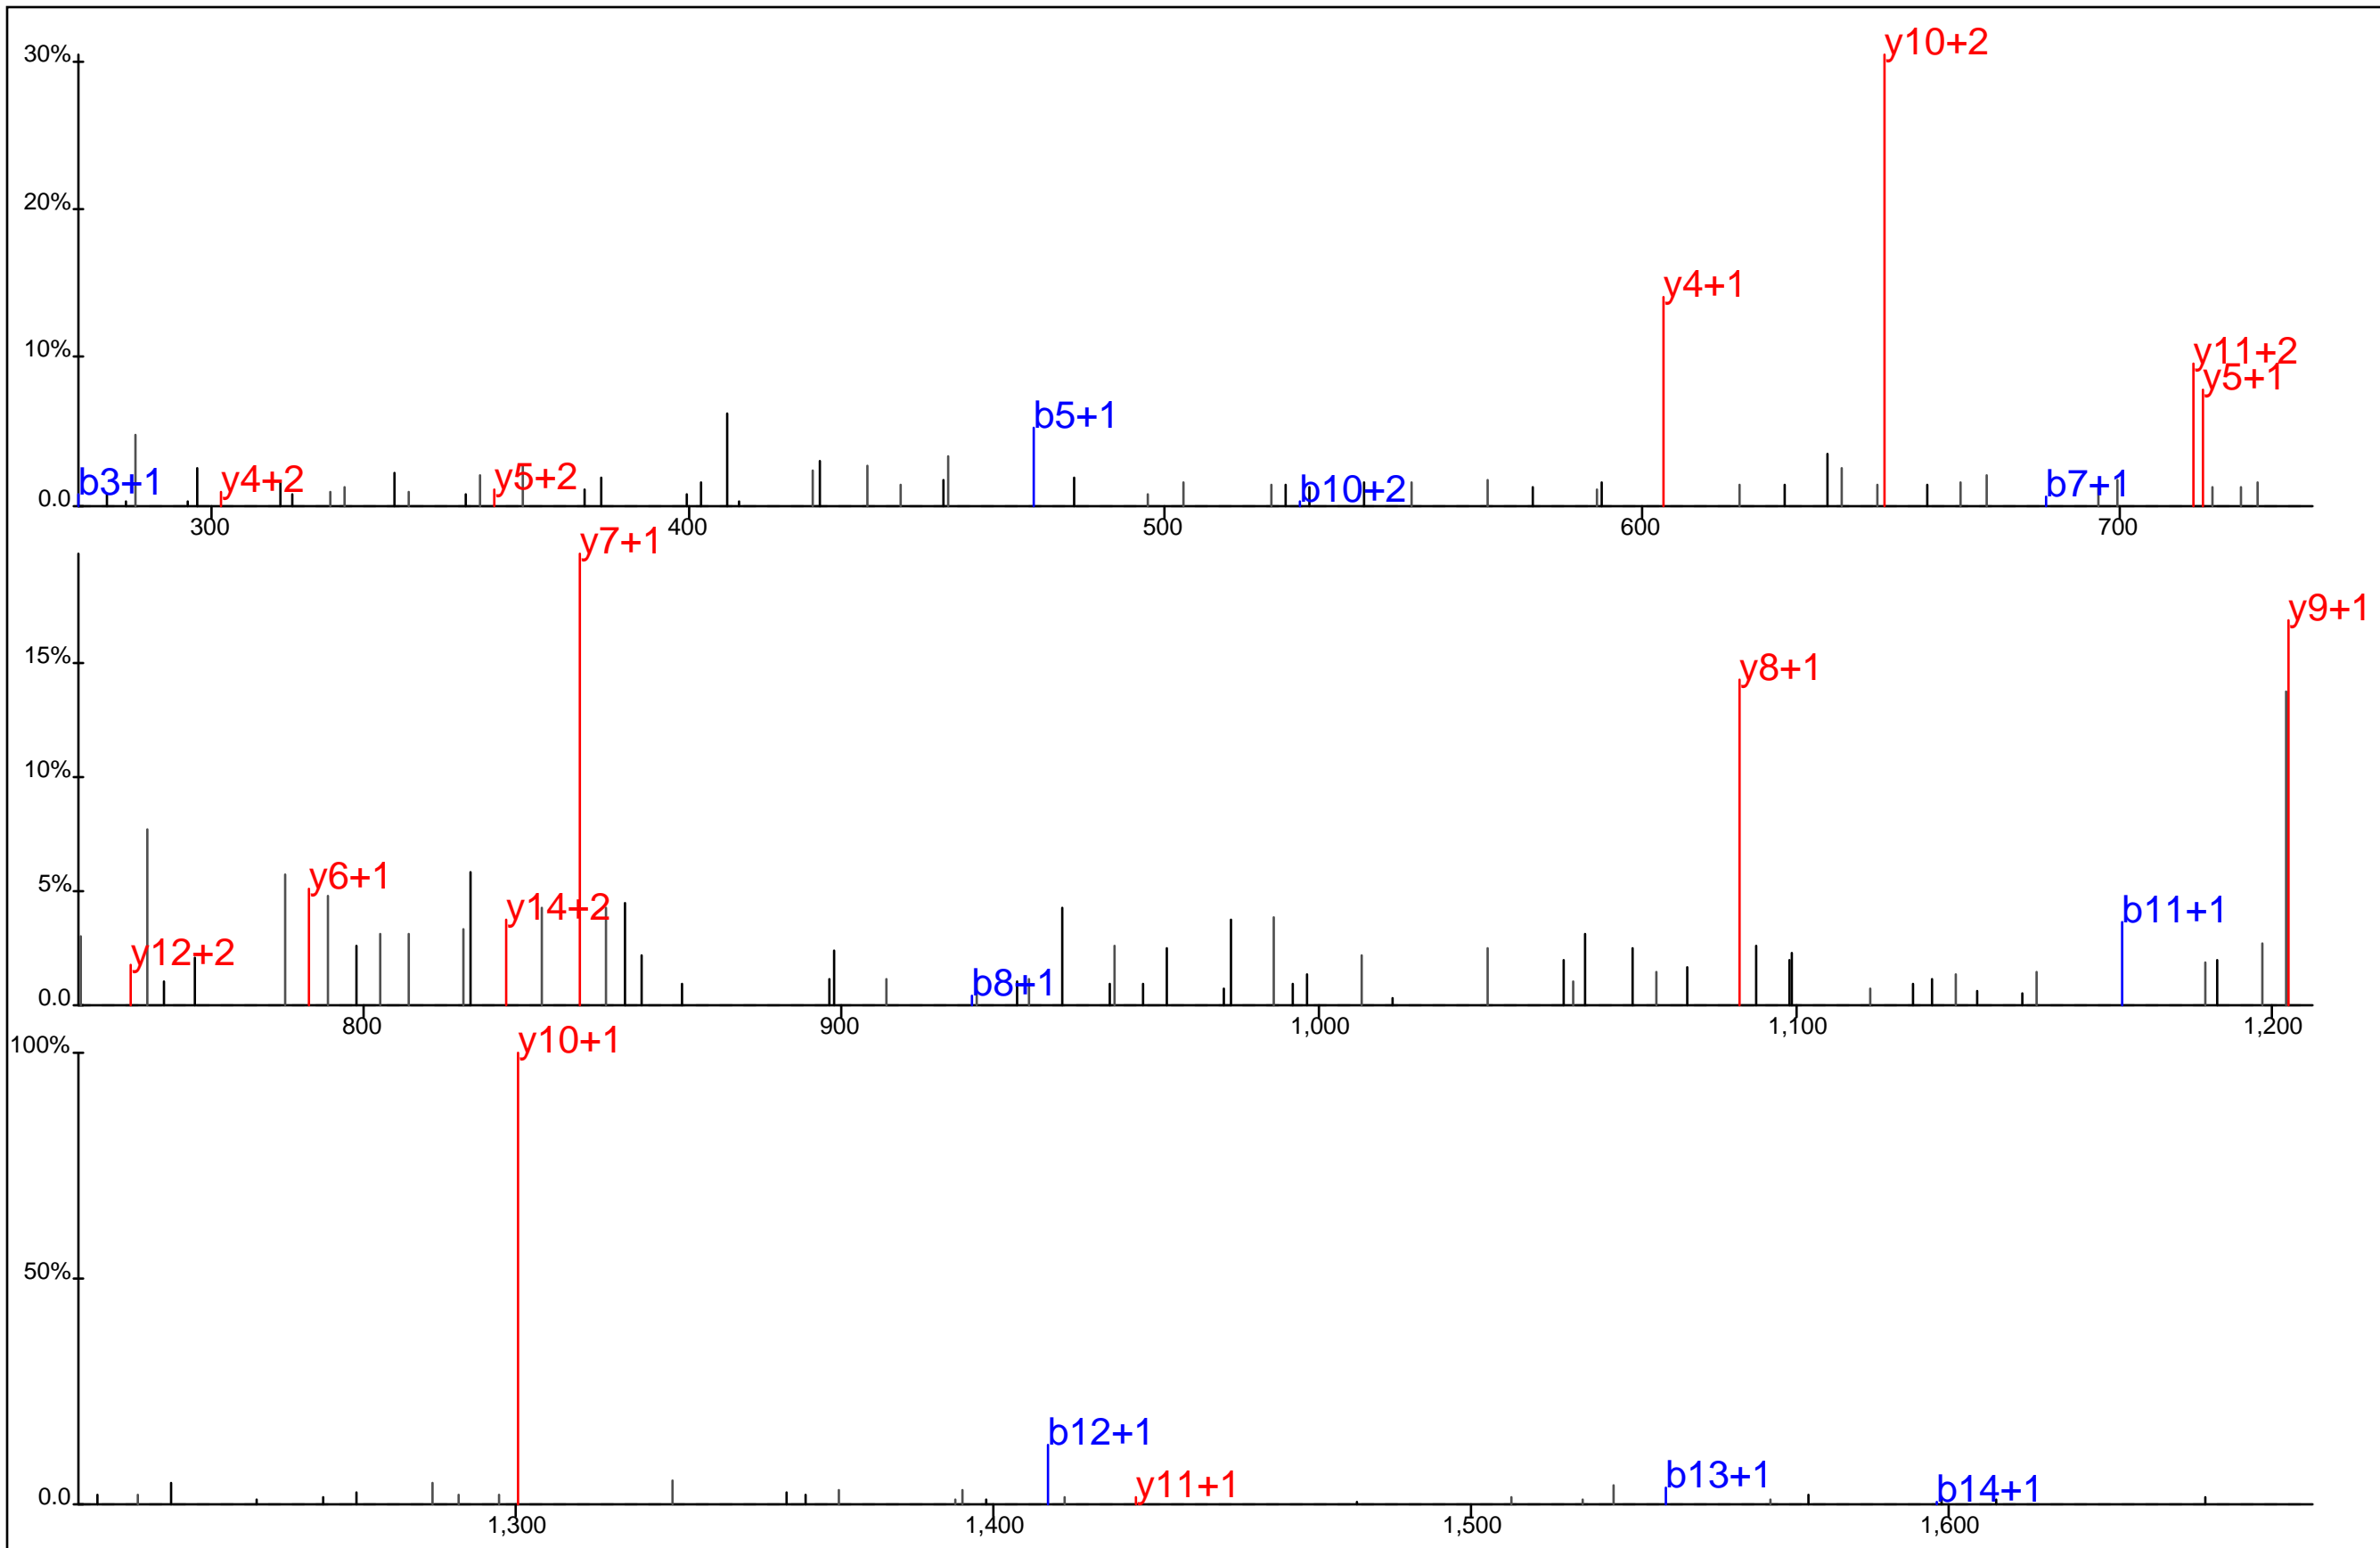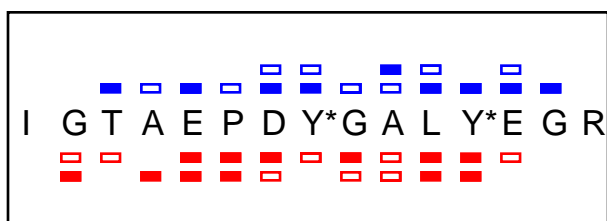

Protein Name: Phospholipase C, gamma 1  
 gi Accession: 0  
 Precursor Mass: 886.3505+2  
 Delta Mass: 2.201 ppm  
 XCorr: 28.23



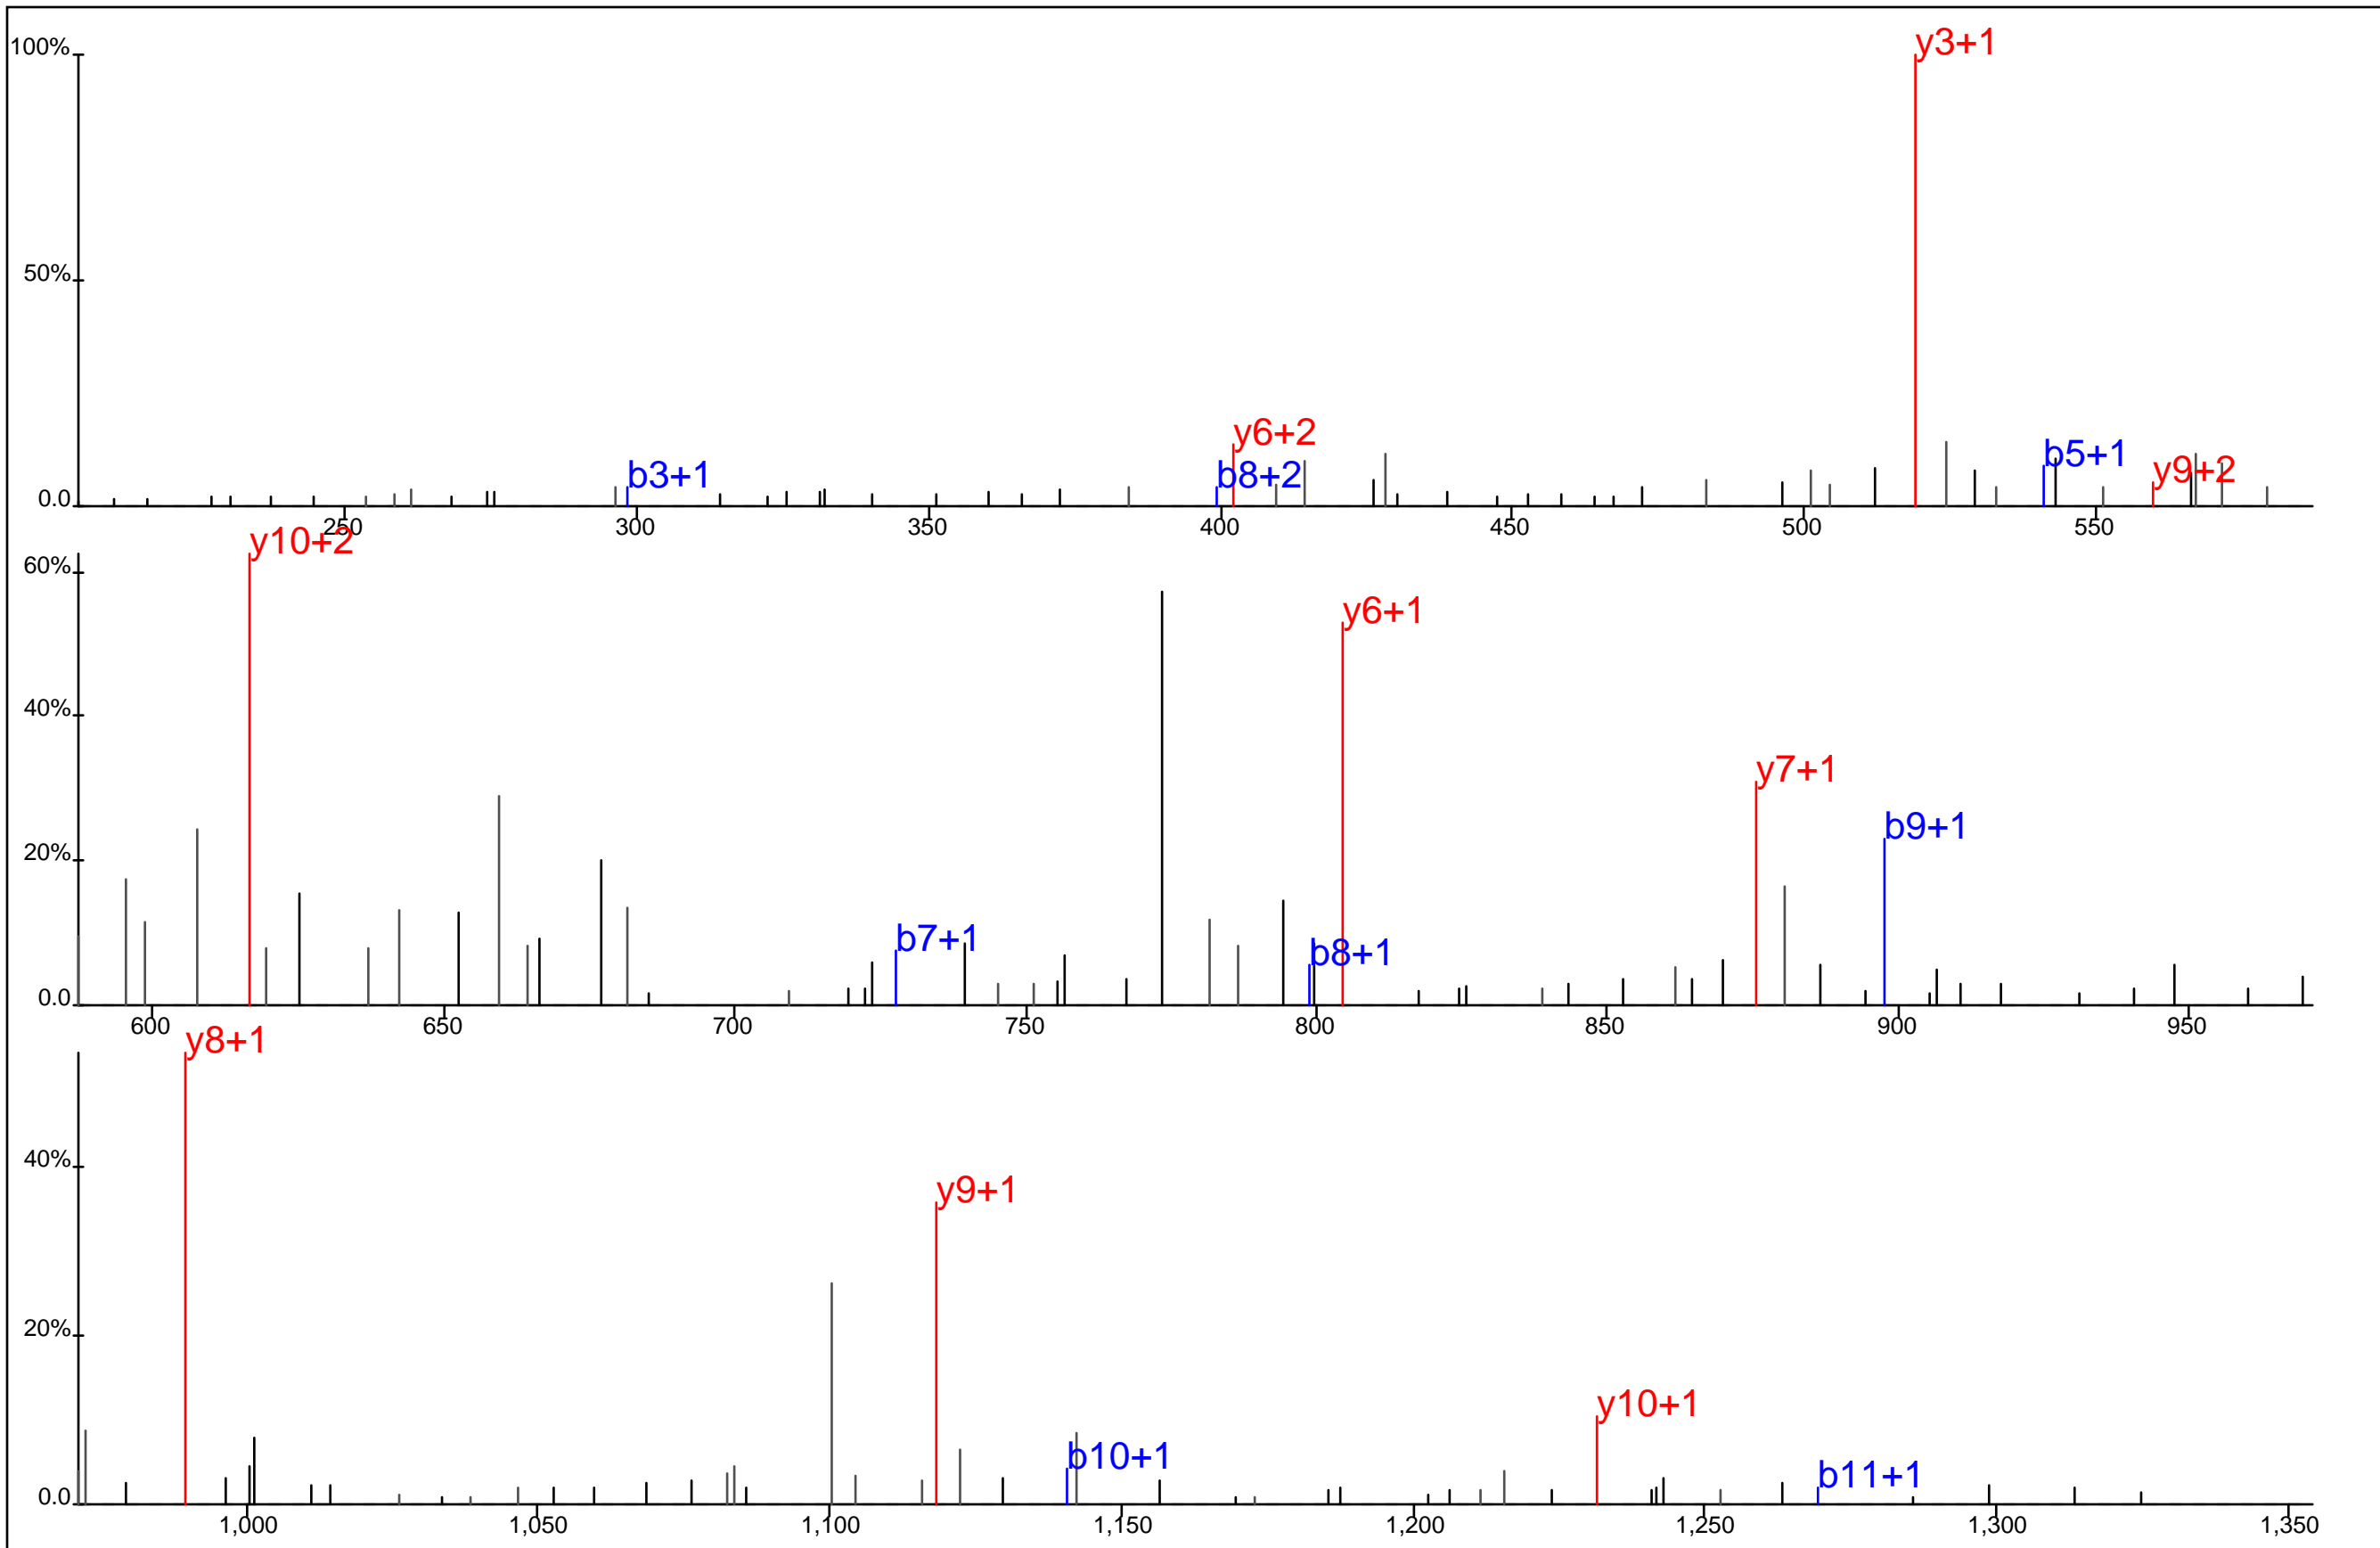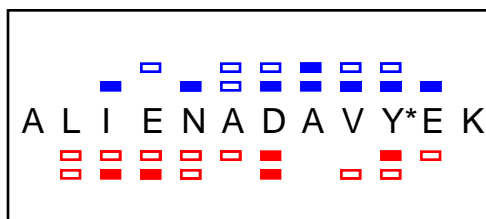

Protein Name: Phospholipase C like 2  
 gi Accession: 0  
 Precursor Mass: 708.3261+2  
 Delta Mass: 0.287 ppm  
 XCorr: 31.35

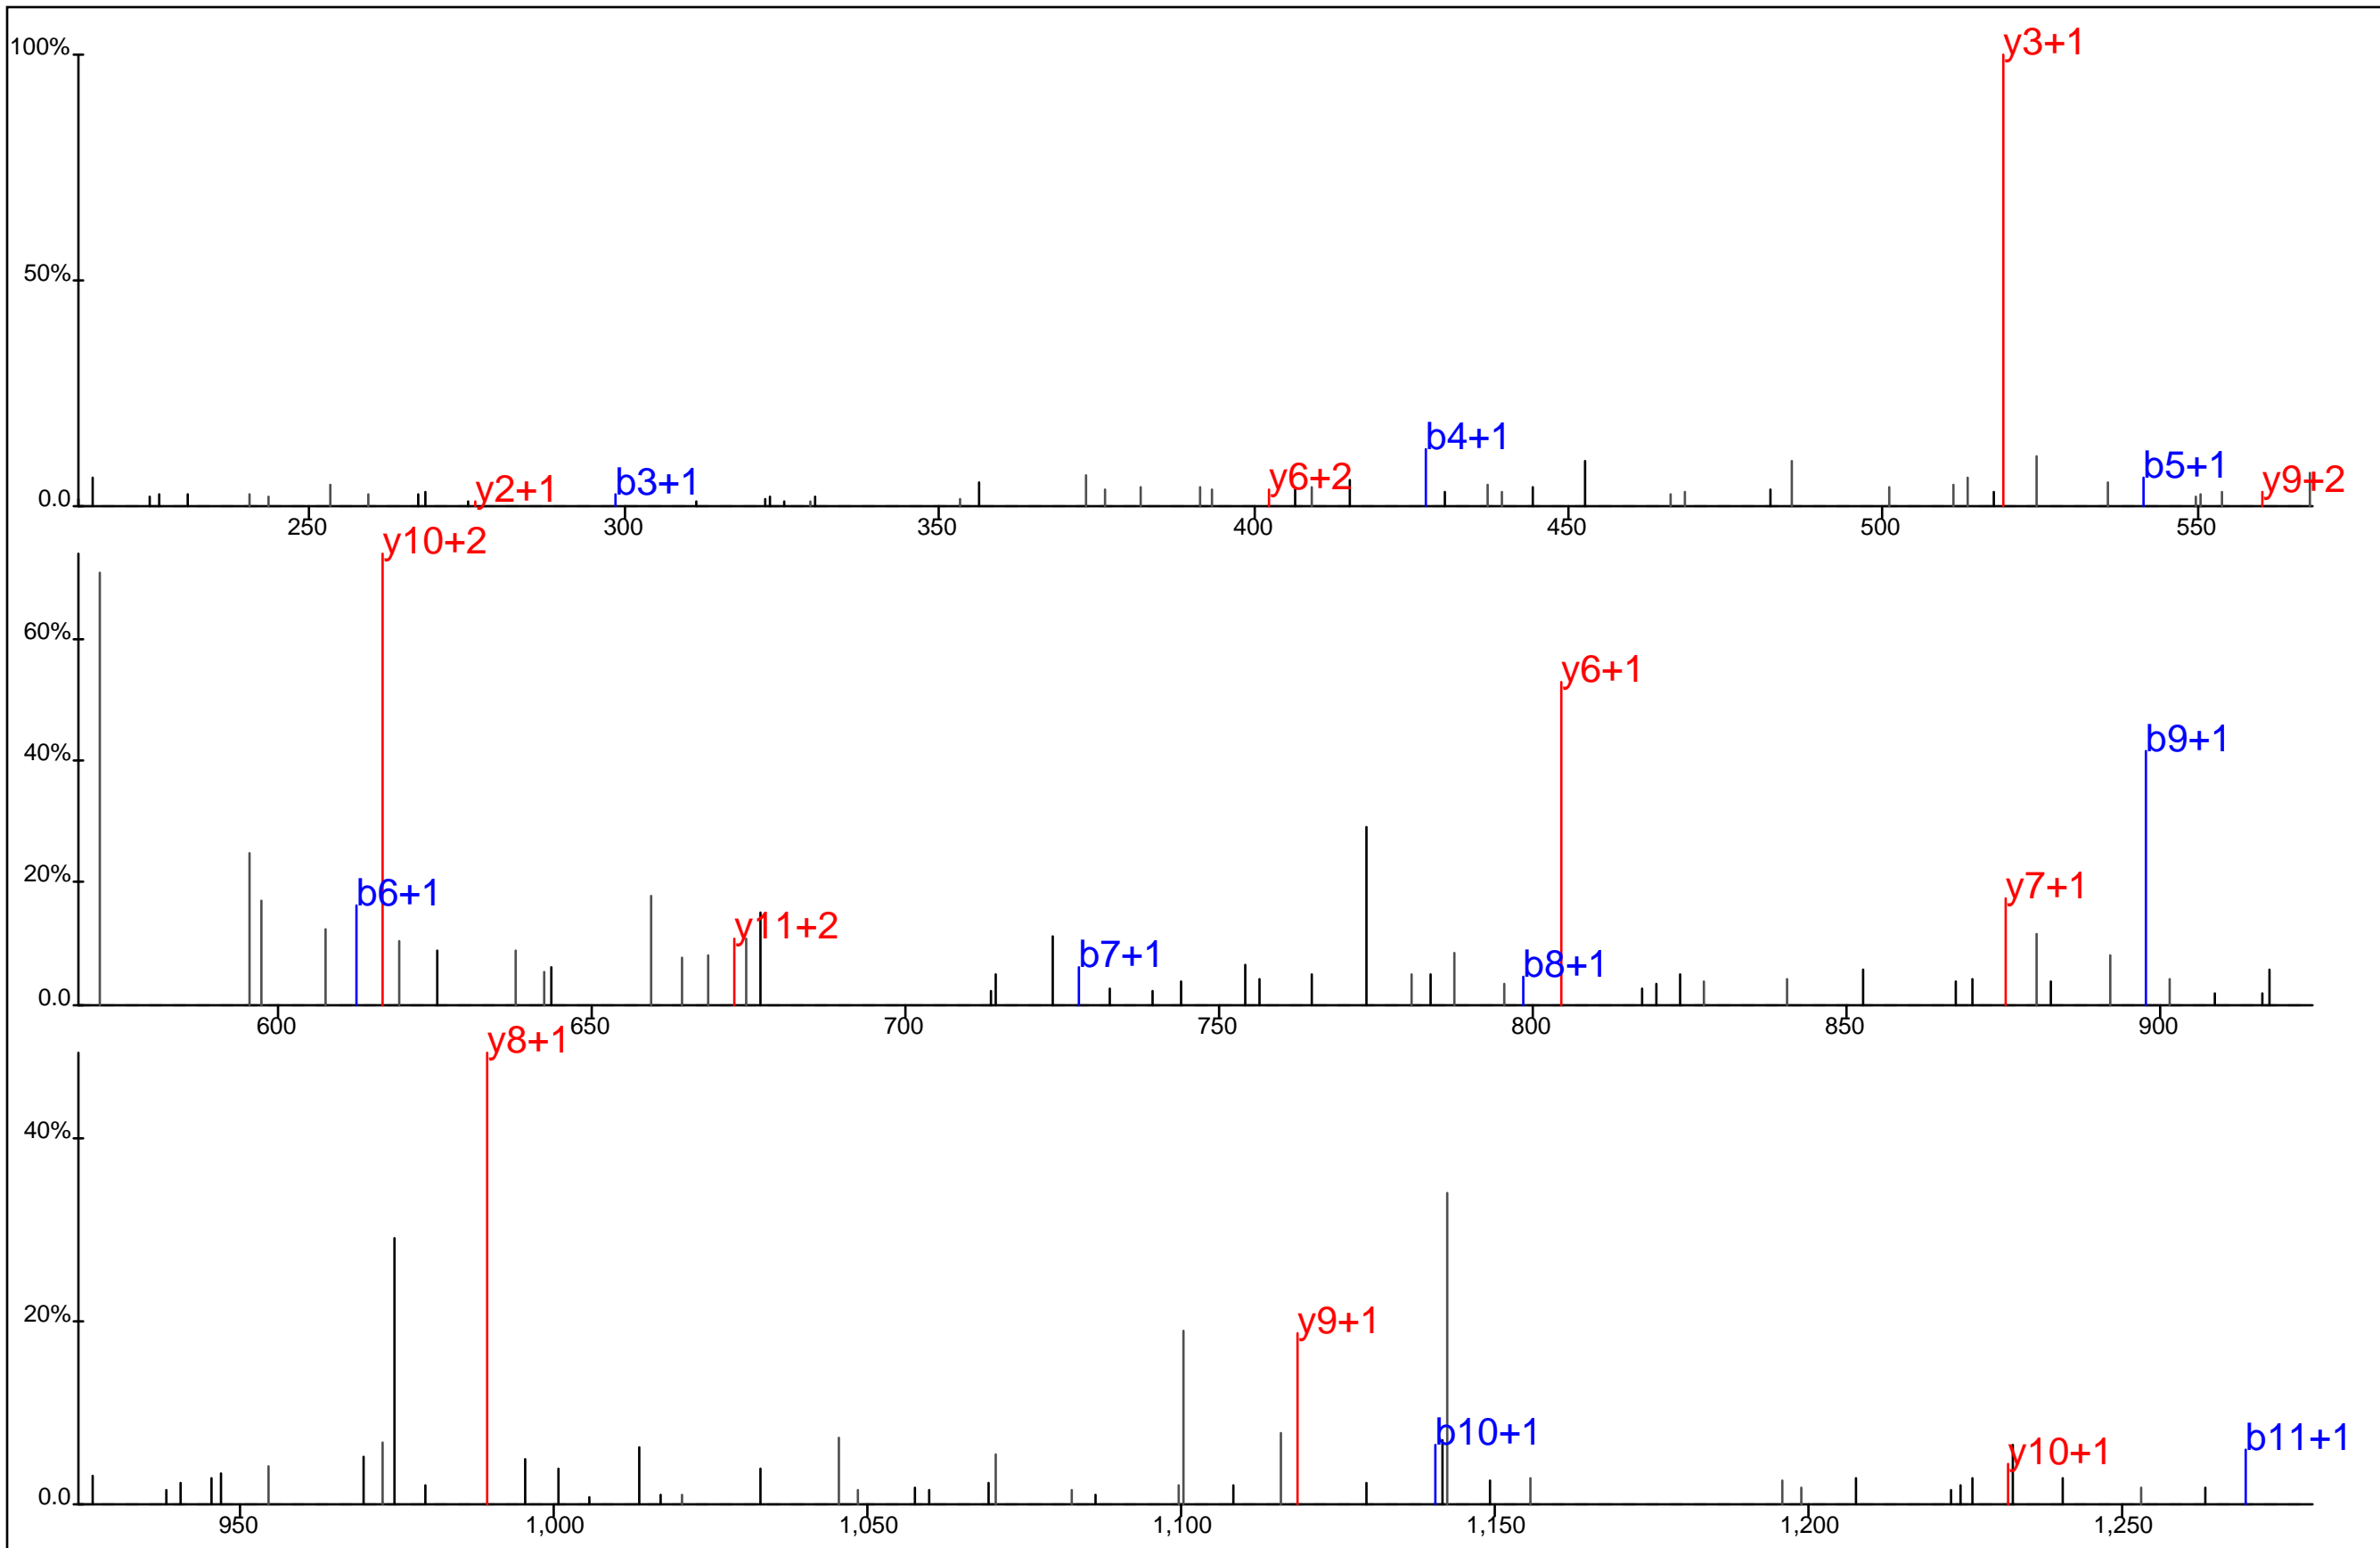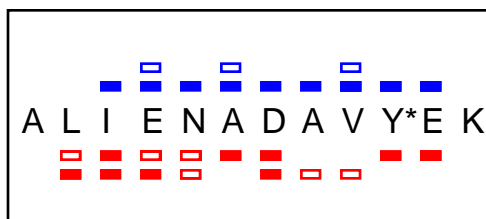

Protein Name: Phospholipase C like 2  
 gi Accession: 0  
 Precursor Mass: 708.3263+2  
 Delta Mass: 0.028 ppm  
 XCorr: 26.05







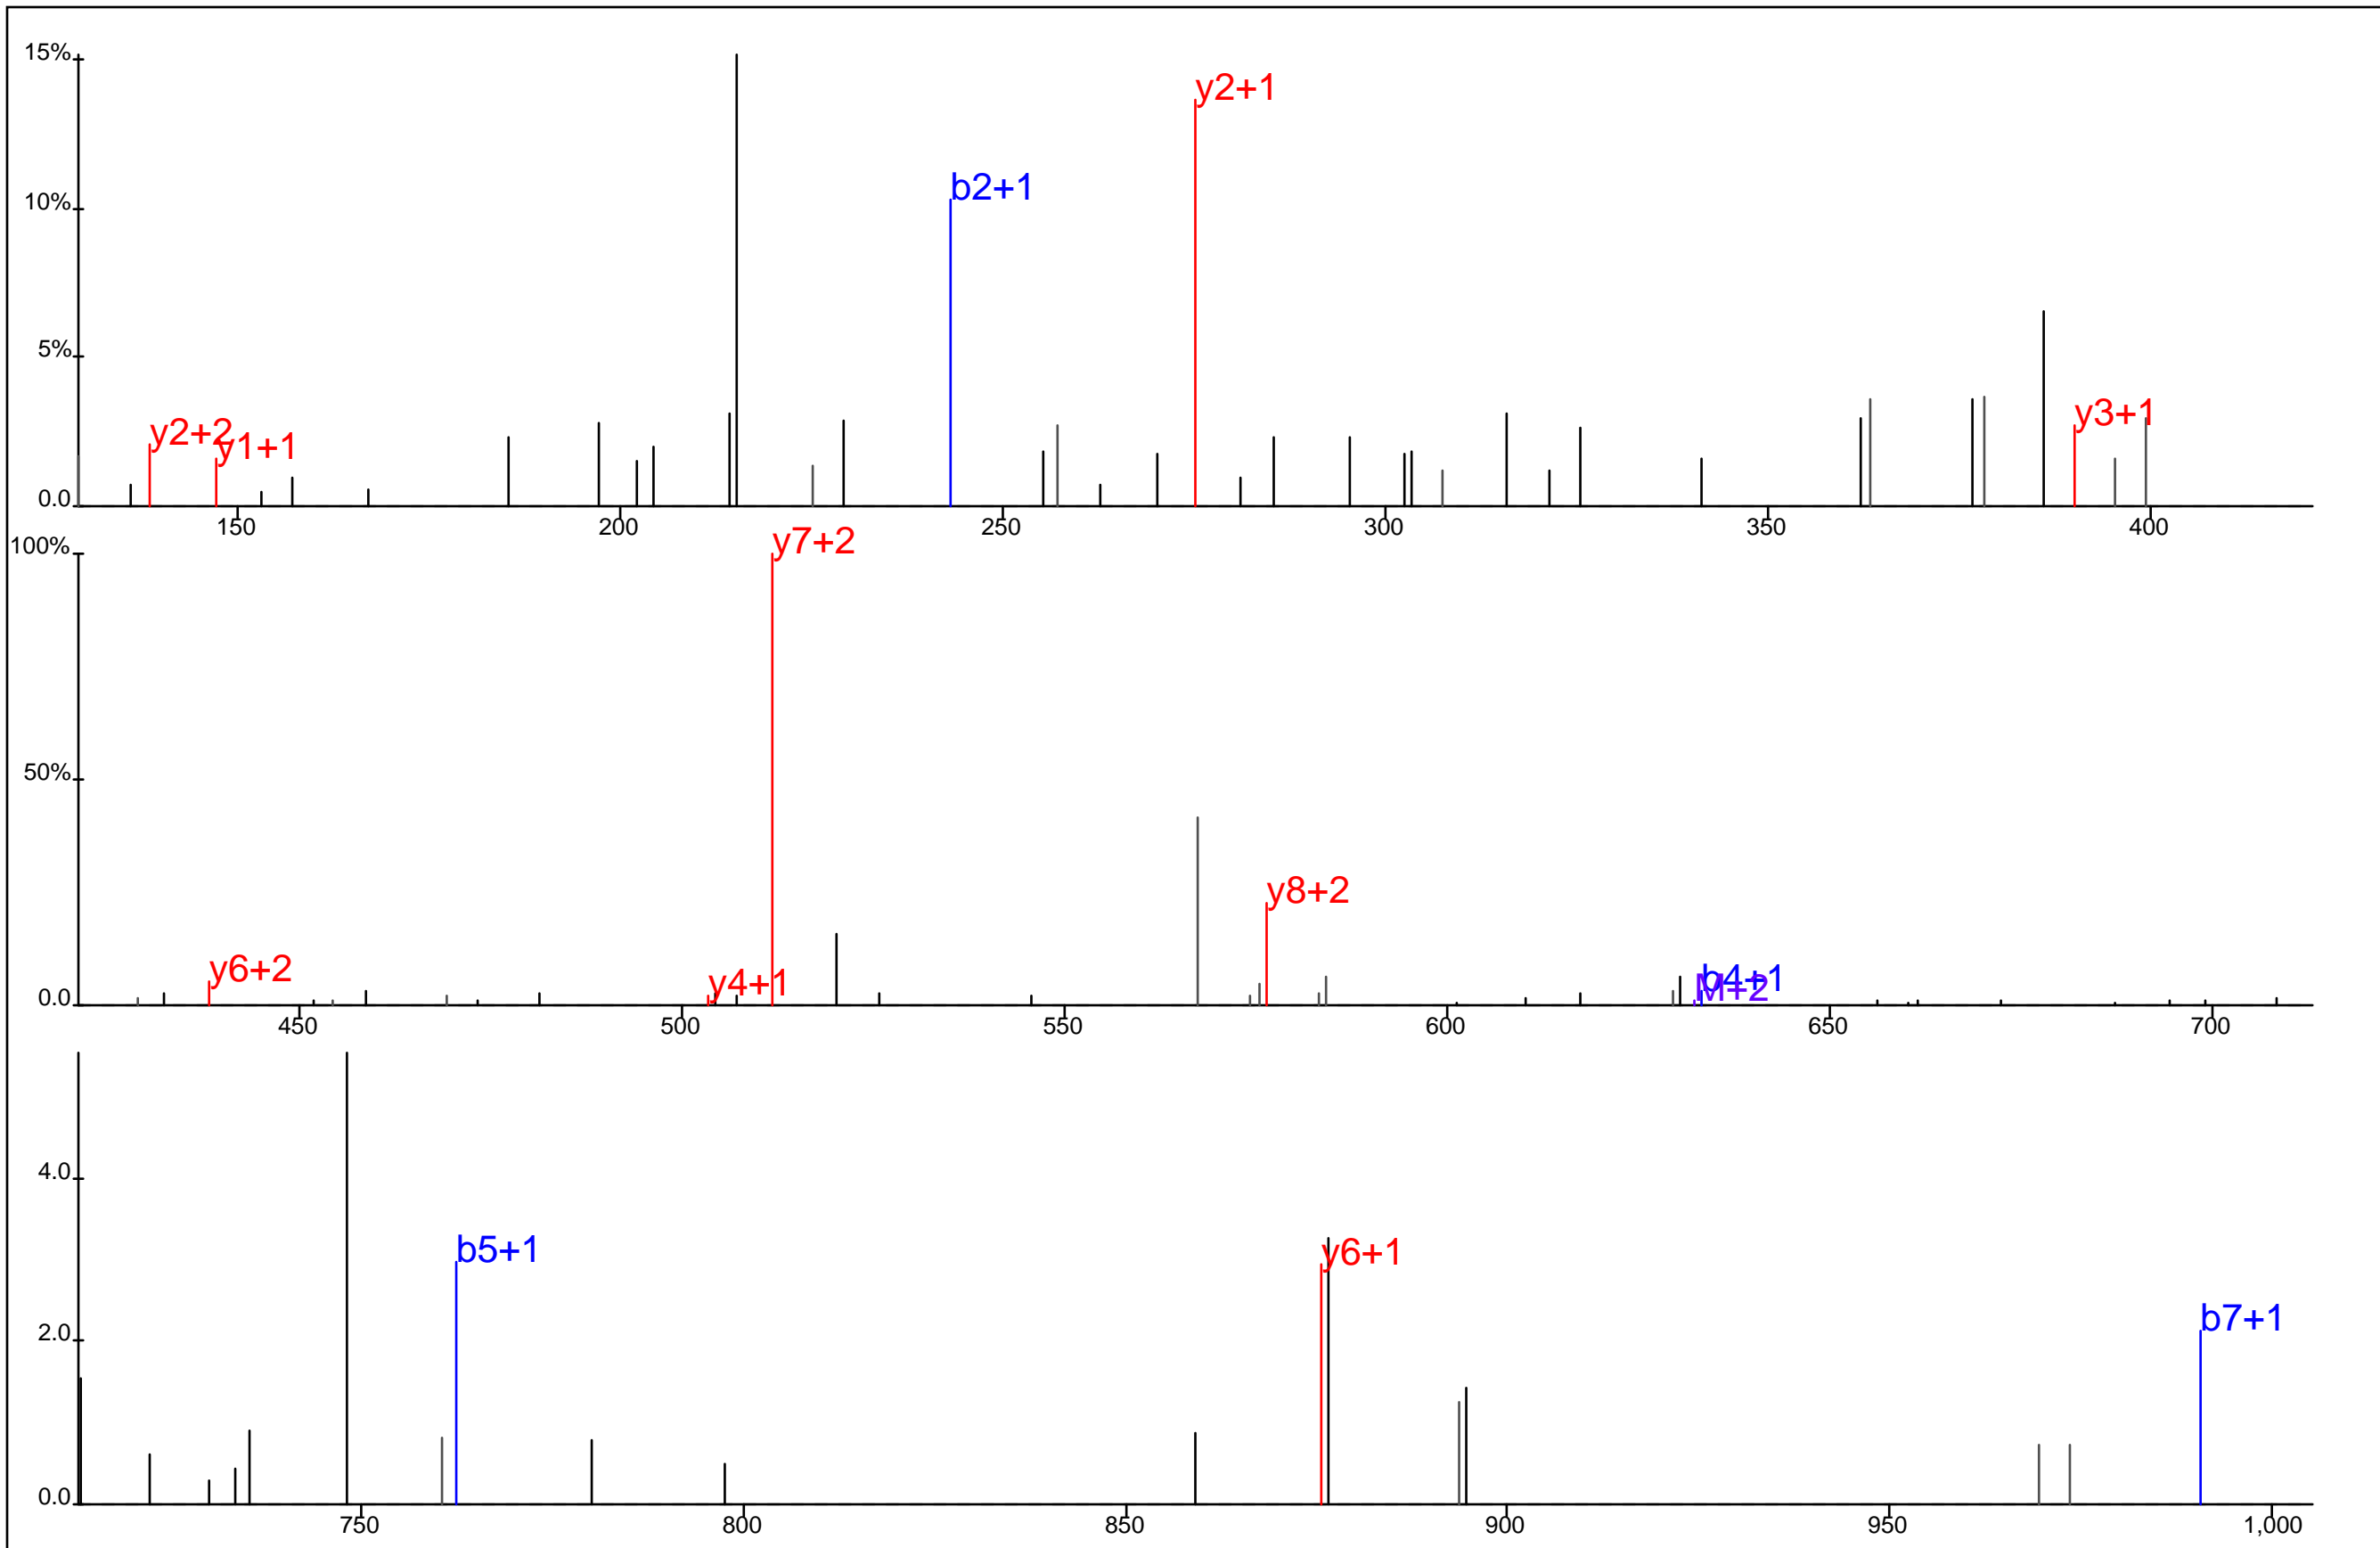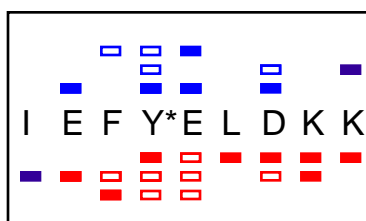

Protein Name: Phosphomannomutase 2  
 gi Accession: 0  
 Precursor Mass: 422.2003+3  
 Delta Mass: 0.266 ppm  
 XCorr: 26.09

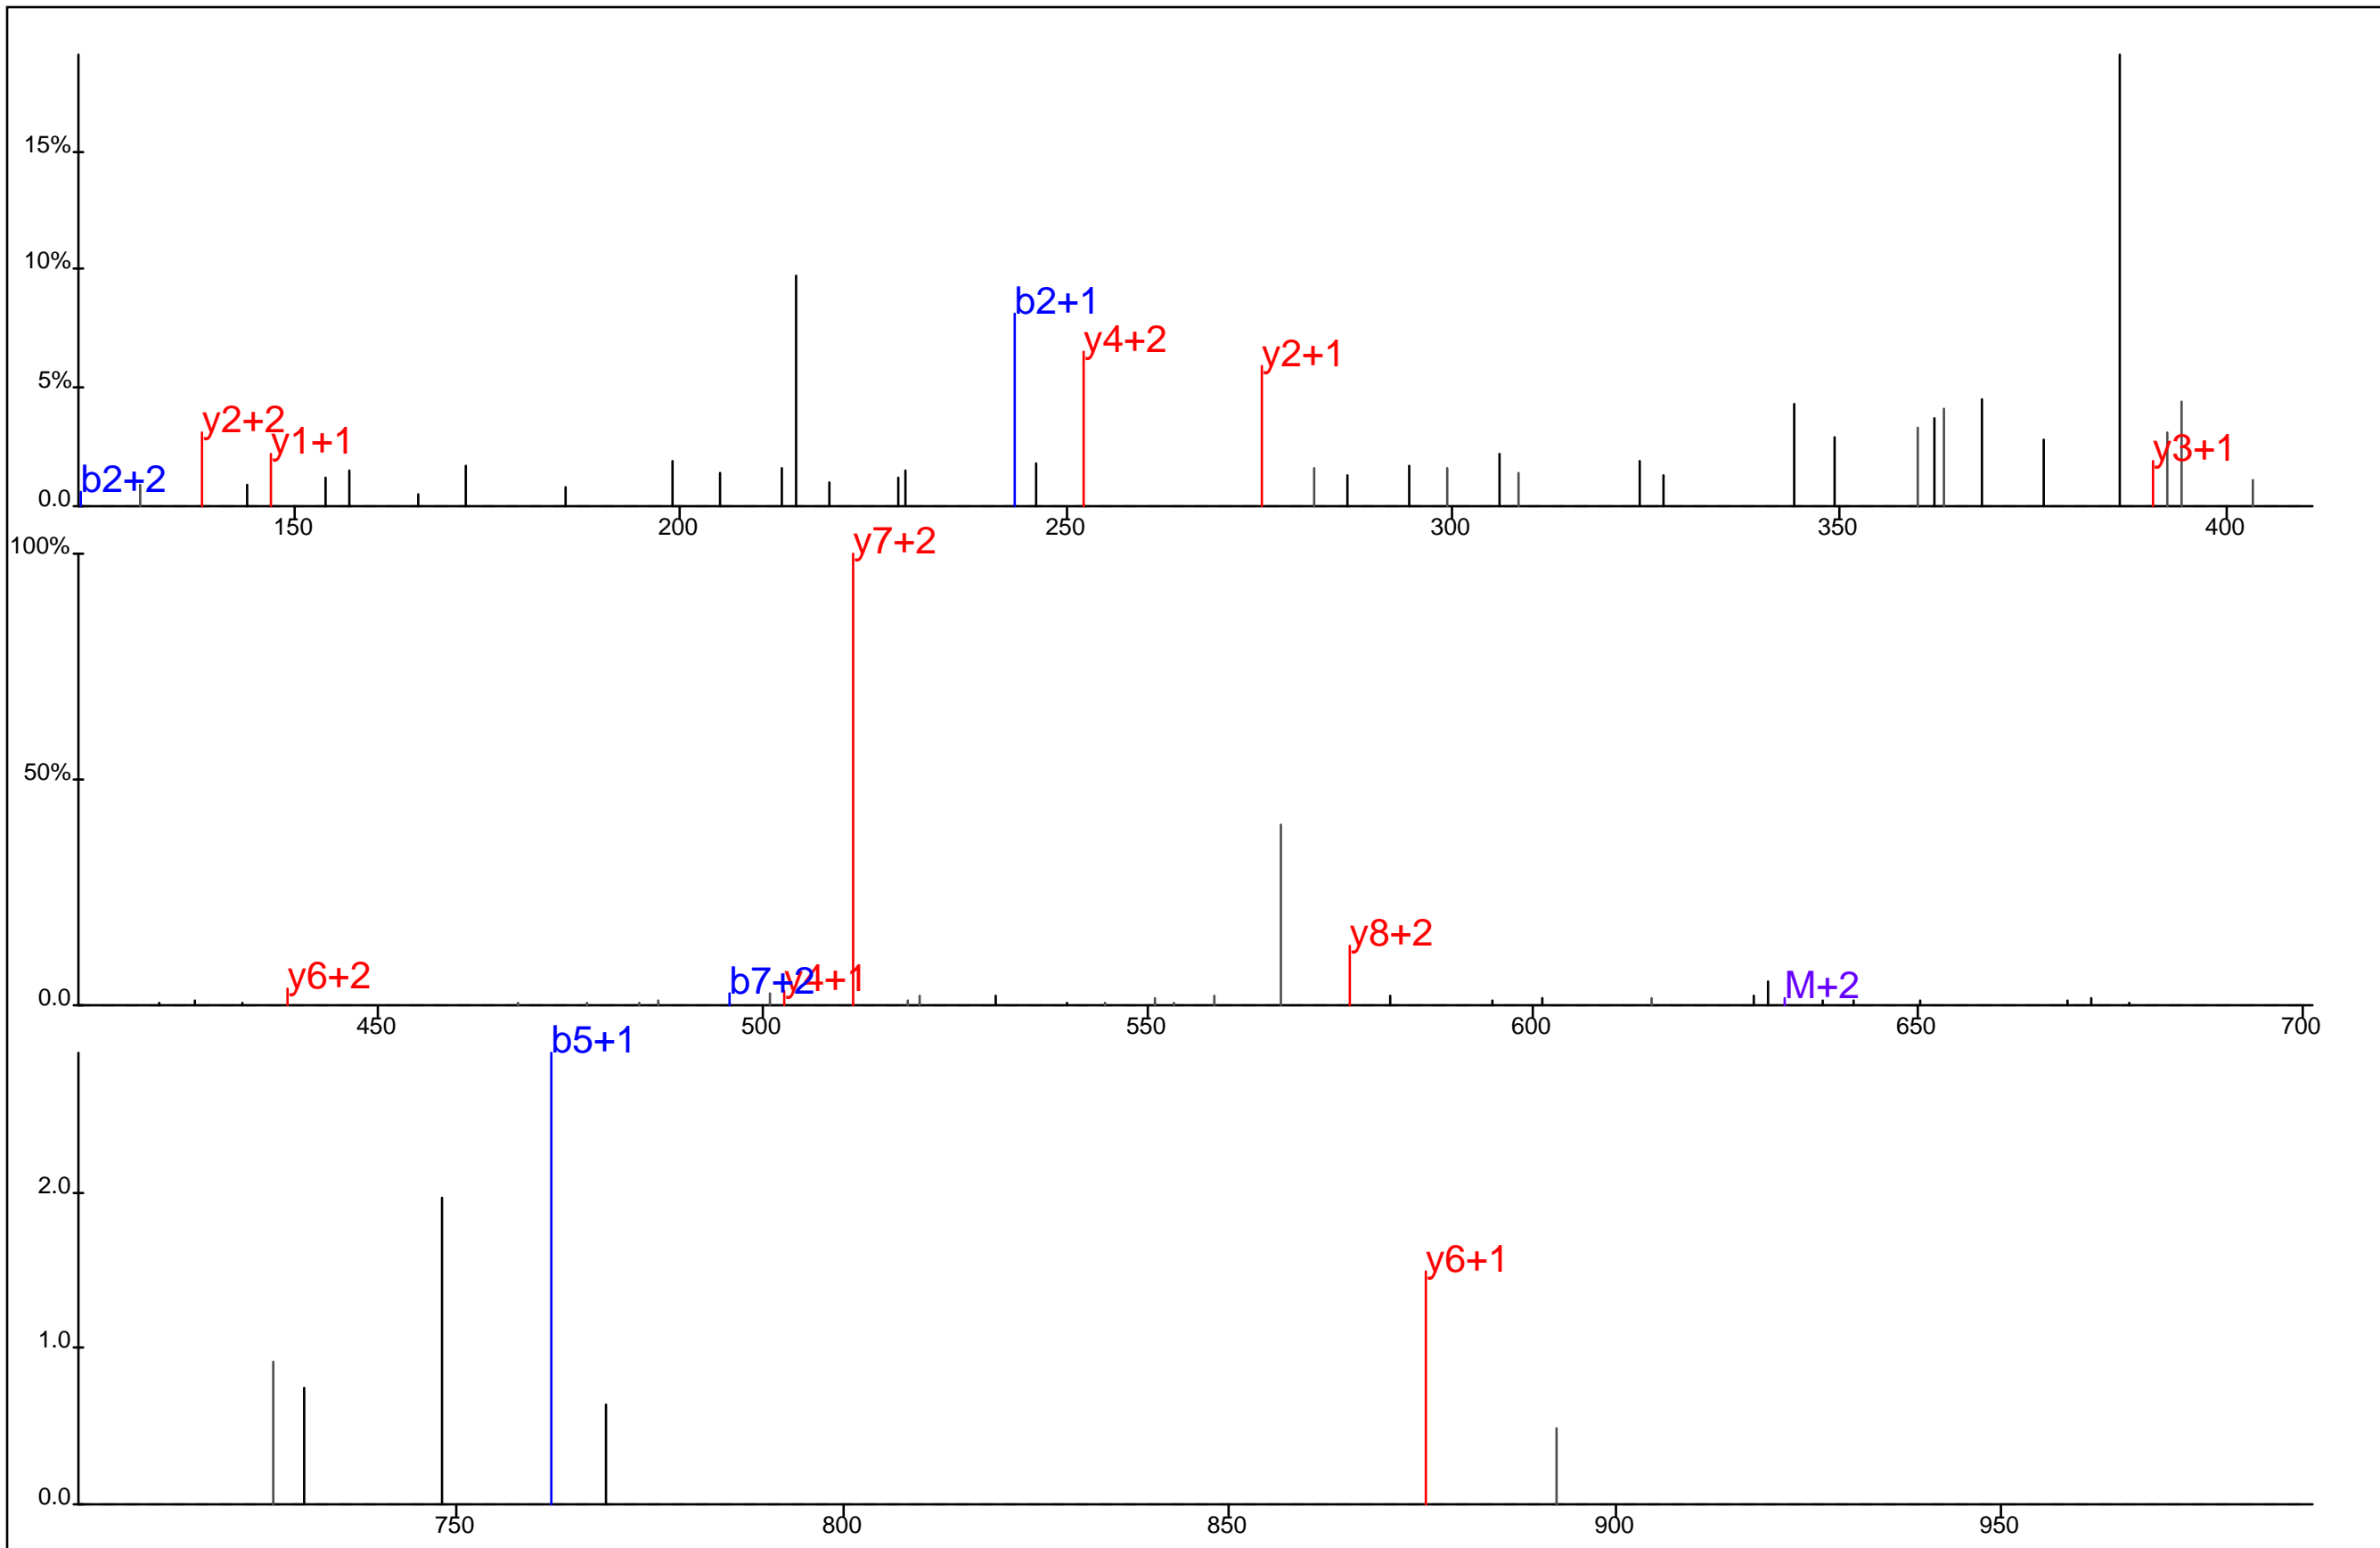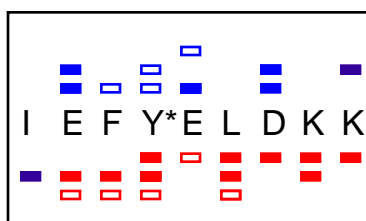

Protein Name: Phosphomannomutase 2  
 gi Accession: 0  
 Precursor Mass: 422.2001+3  
 Delta Mass: 0.312 ppm  
 XCorr: 31.84

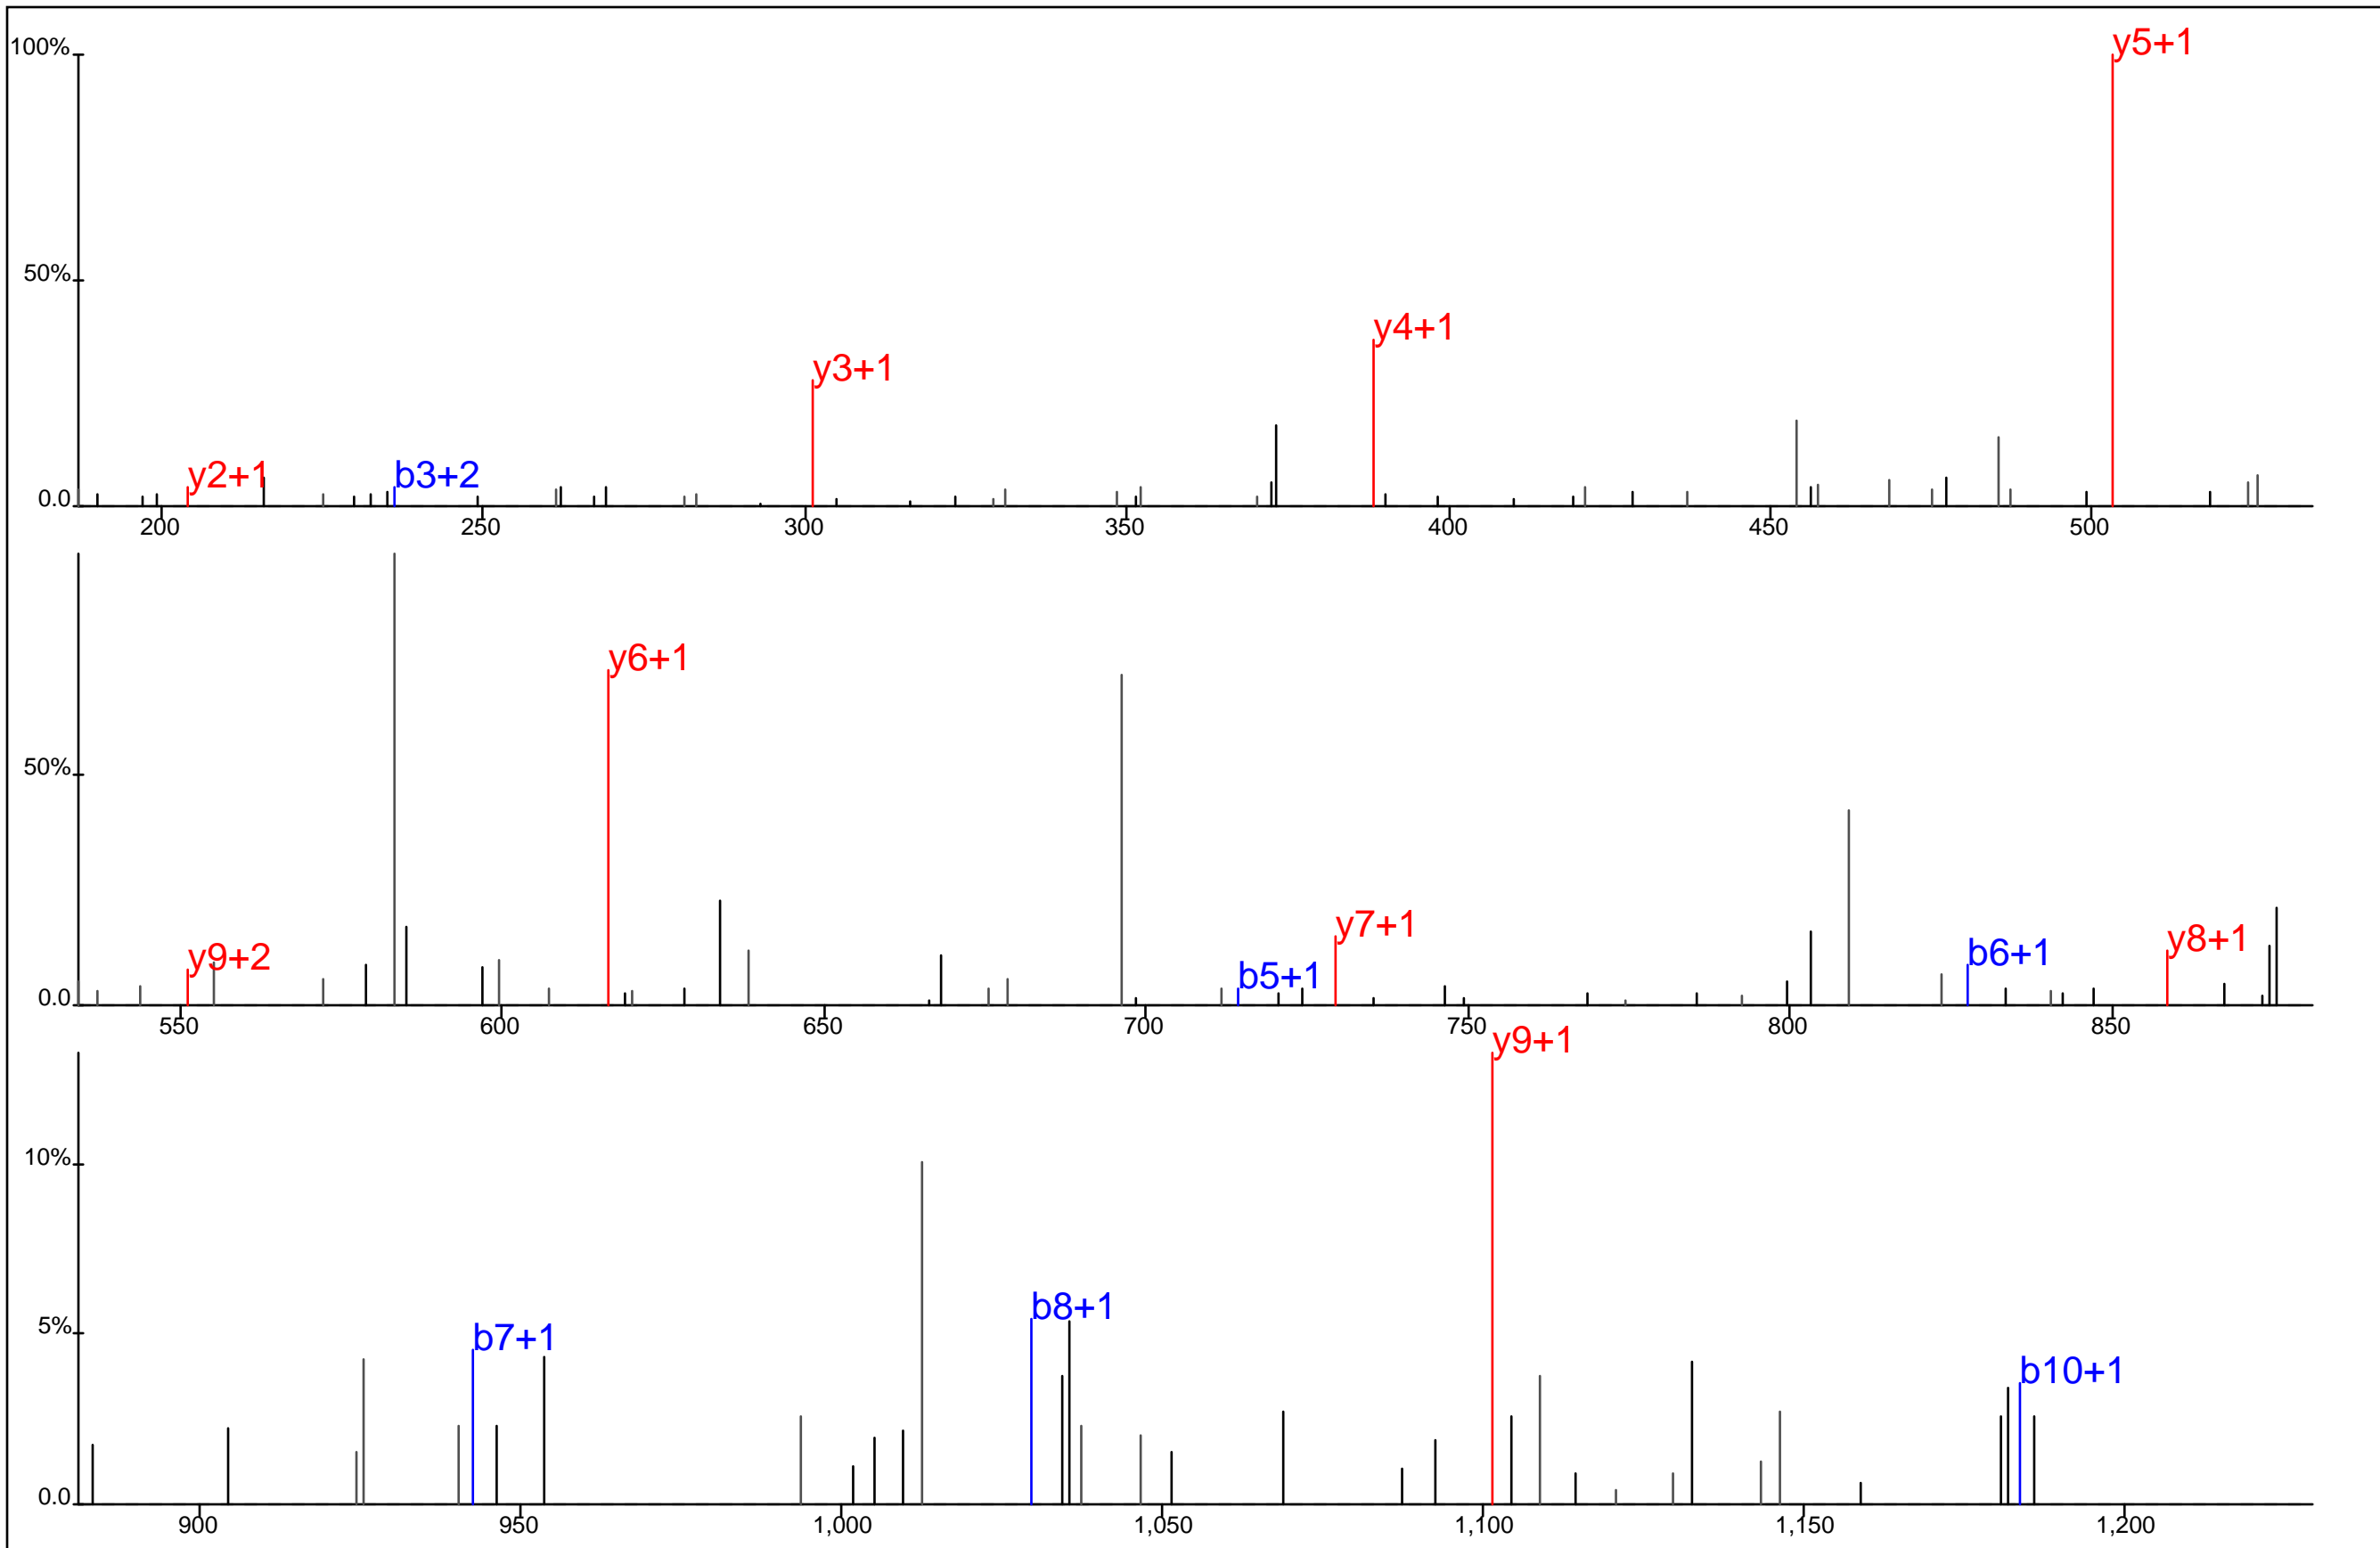

■ ■ ■ ■ ■ ■ ■ ■  
 E V Y\* E L L D S P G K  
■ ■ ■ ■ ■ ■ ■ ■

Protein Name: Phosphorybosylaminoimidazole carboxylase  
 gi Accession: 0  
 Precursor Mass: 665.2999+2  
 Delta Mass: 3.690 ppm  
 XCorr: 48.87

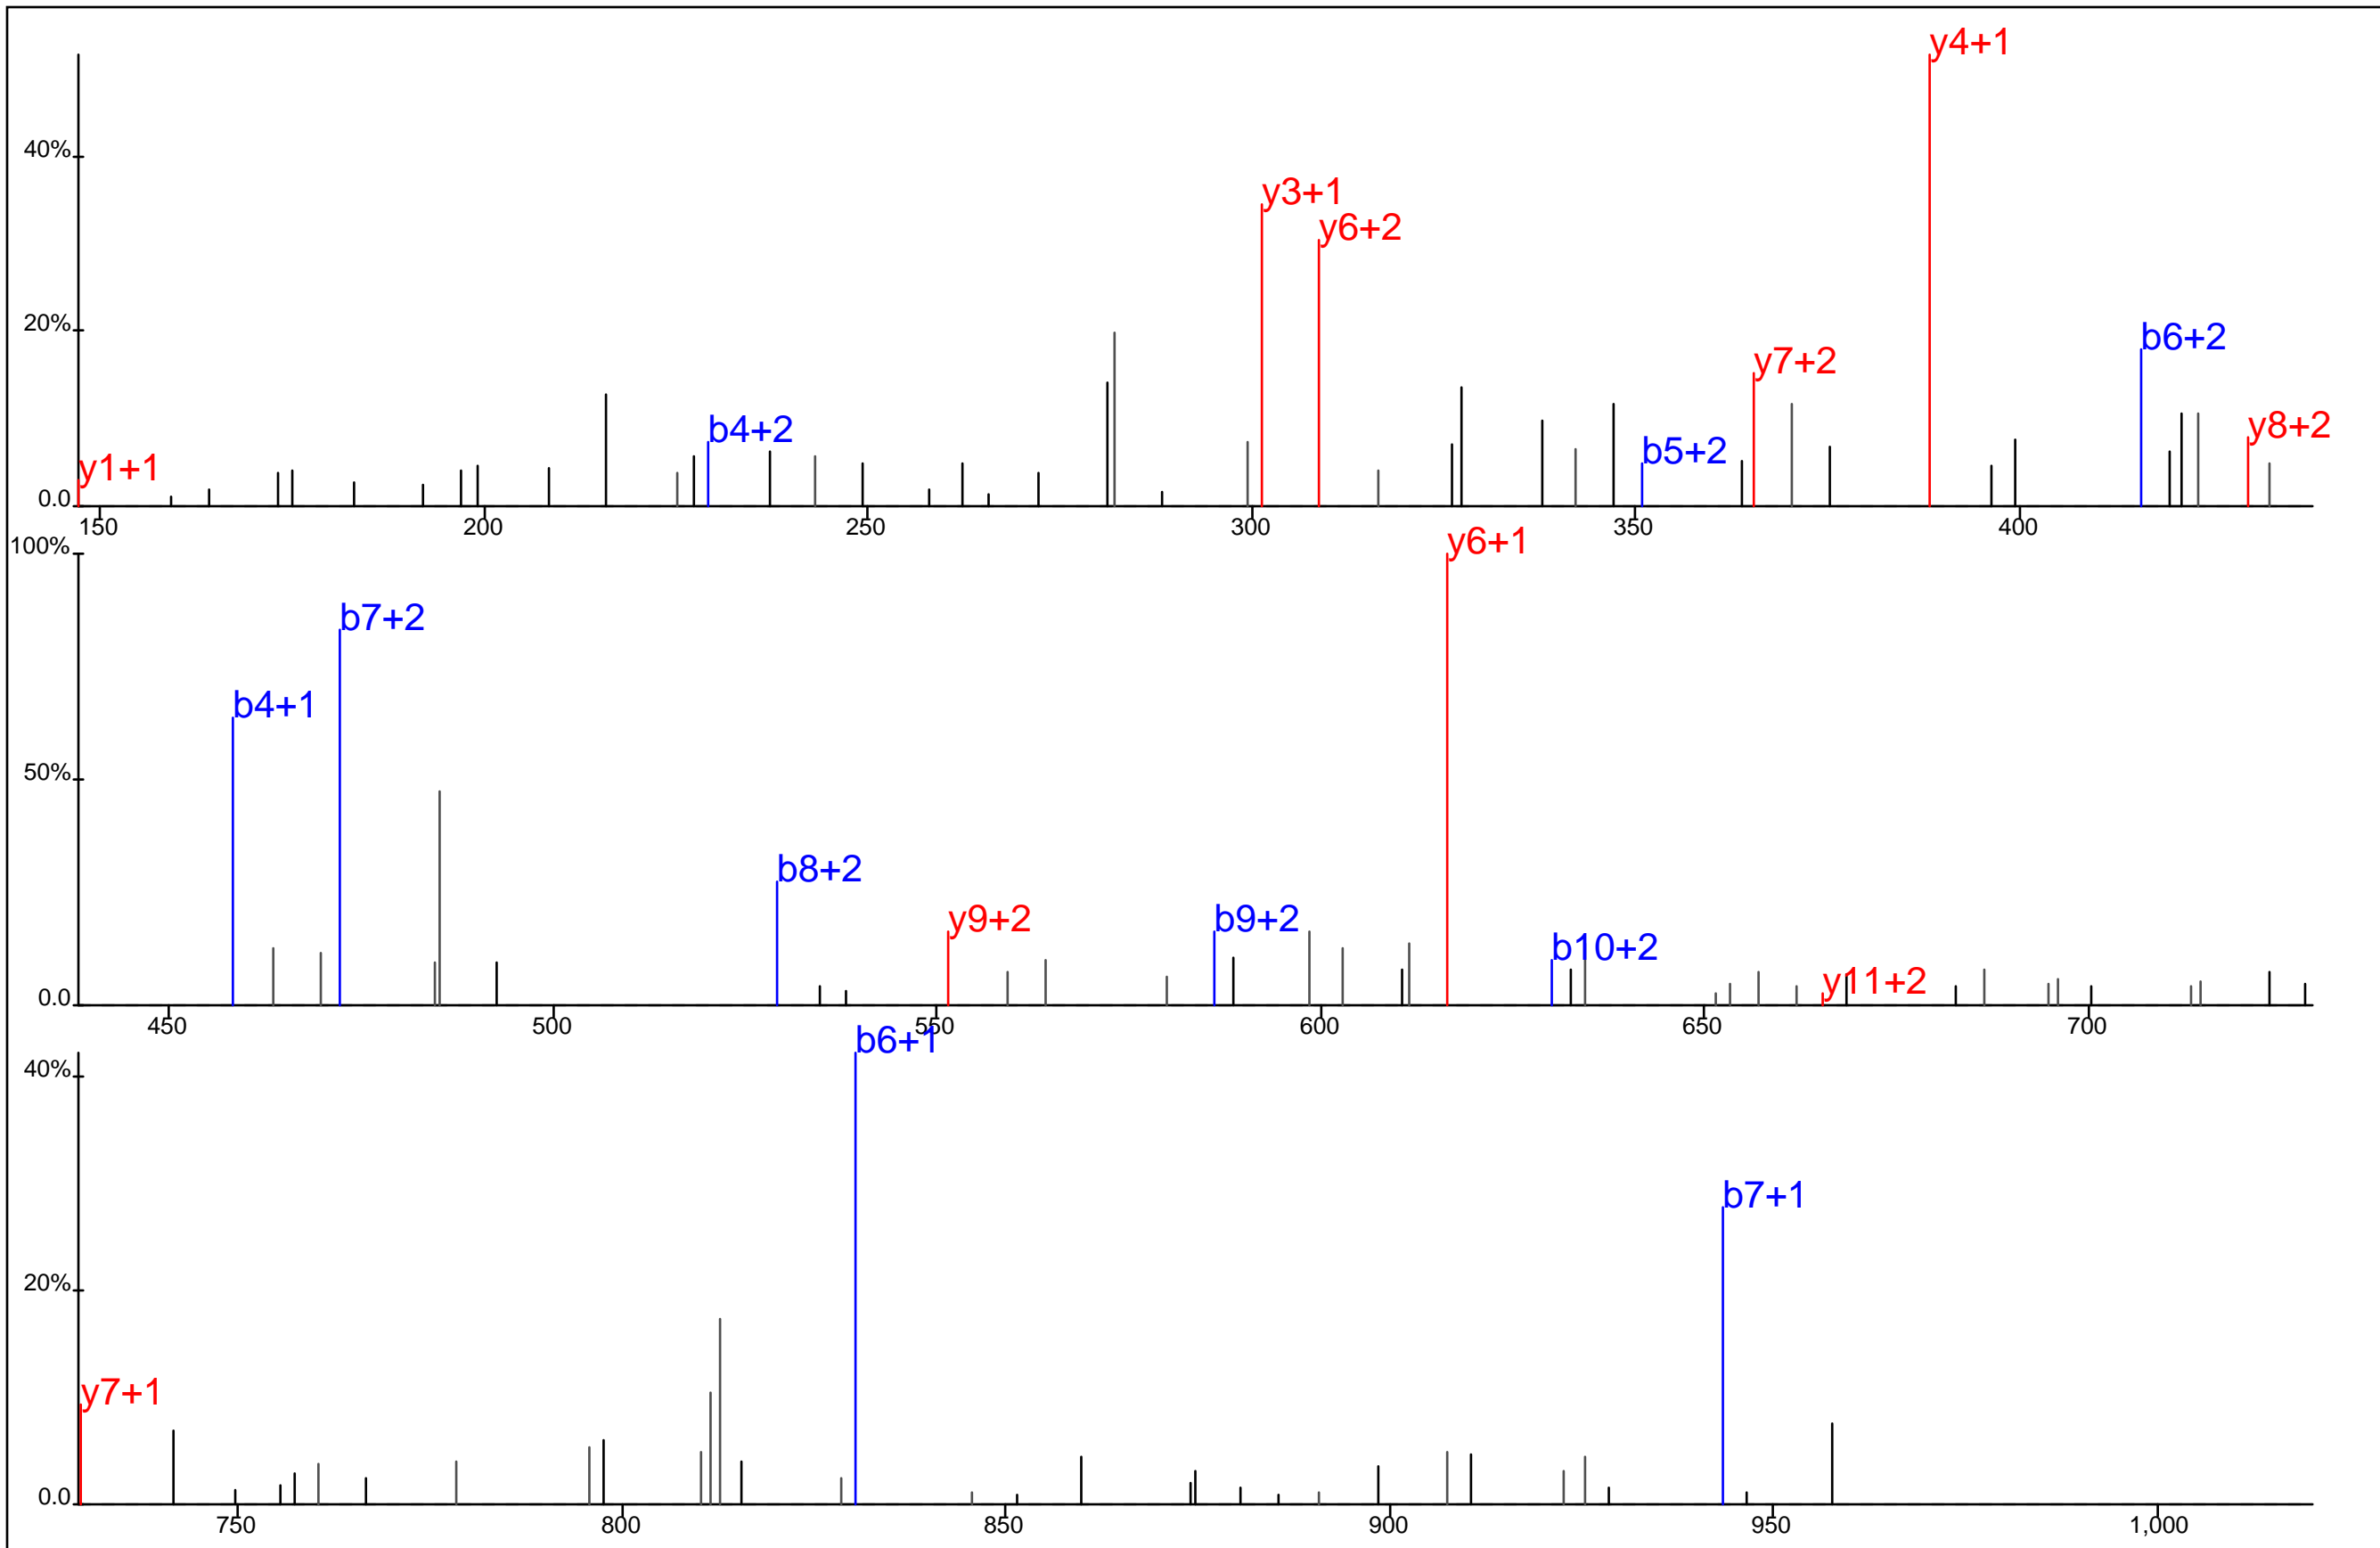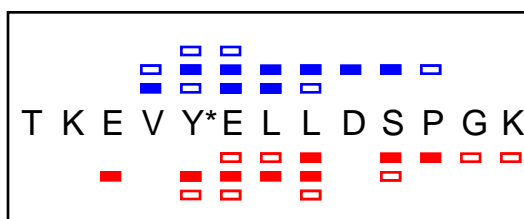

Protein Name: Phosphorybosylaminoimidazole carboxylase  
 gi Accession: 0  
 Precursor Mass: 520.2524+3  
 Delta Mass: 1.776 ppm  
 XCorr: 26.62

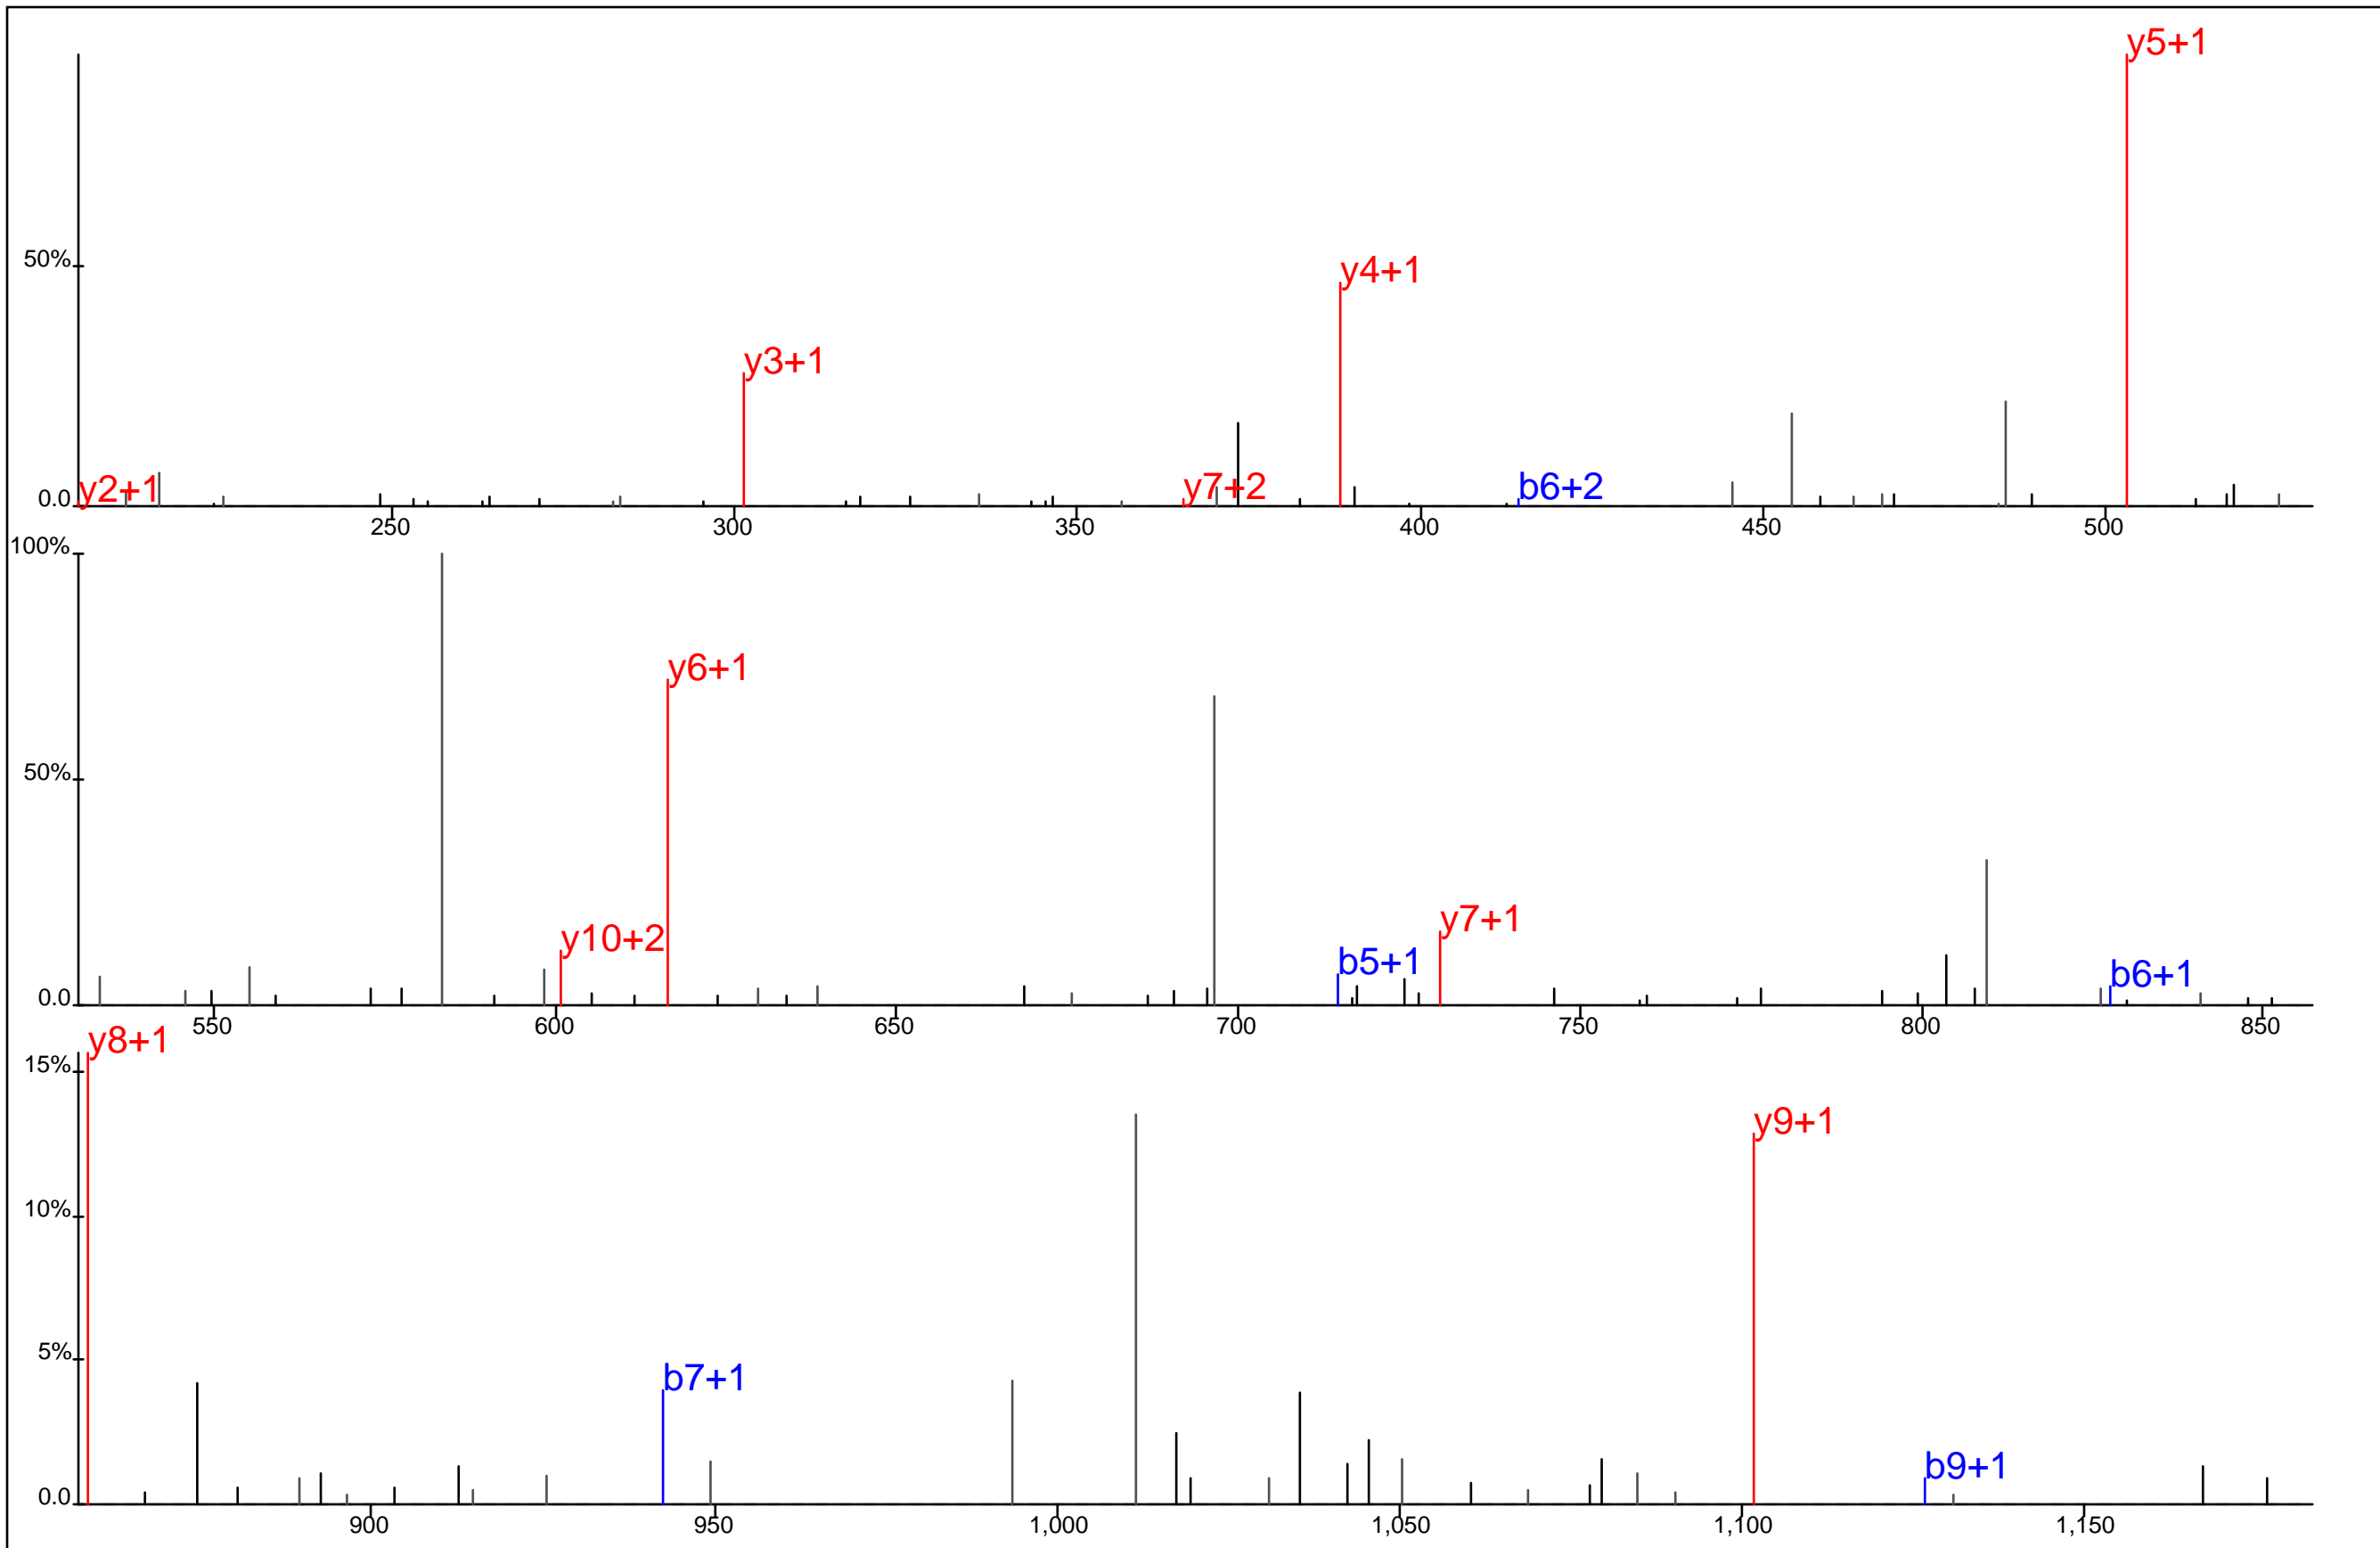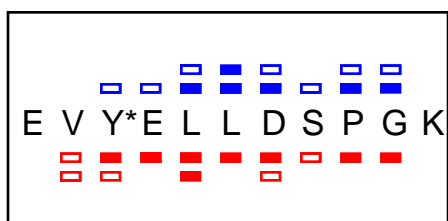

Protein Name: Phosphorybosylaminoimidazole carboxylase  
 gi Accession: 0  
 Precursor Mass: 665.3032+2  
 Delta Mass: 1.268 ppm  
 XCorr: 54.37

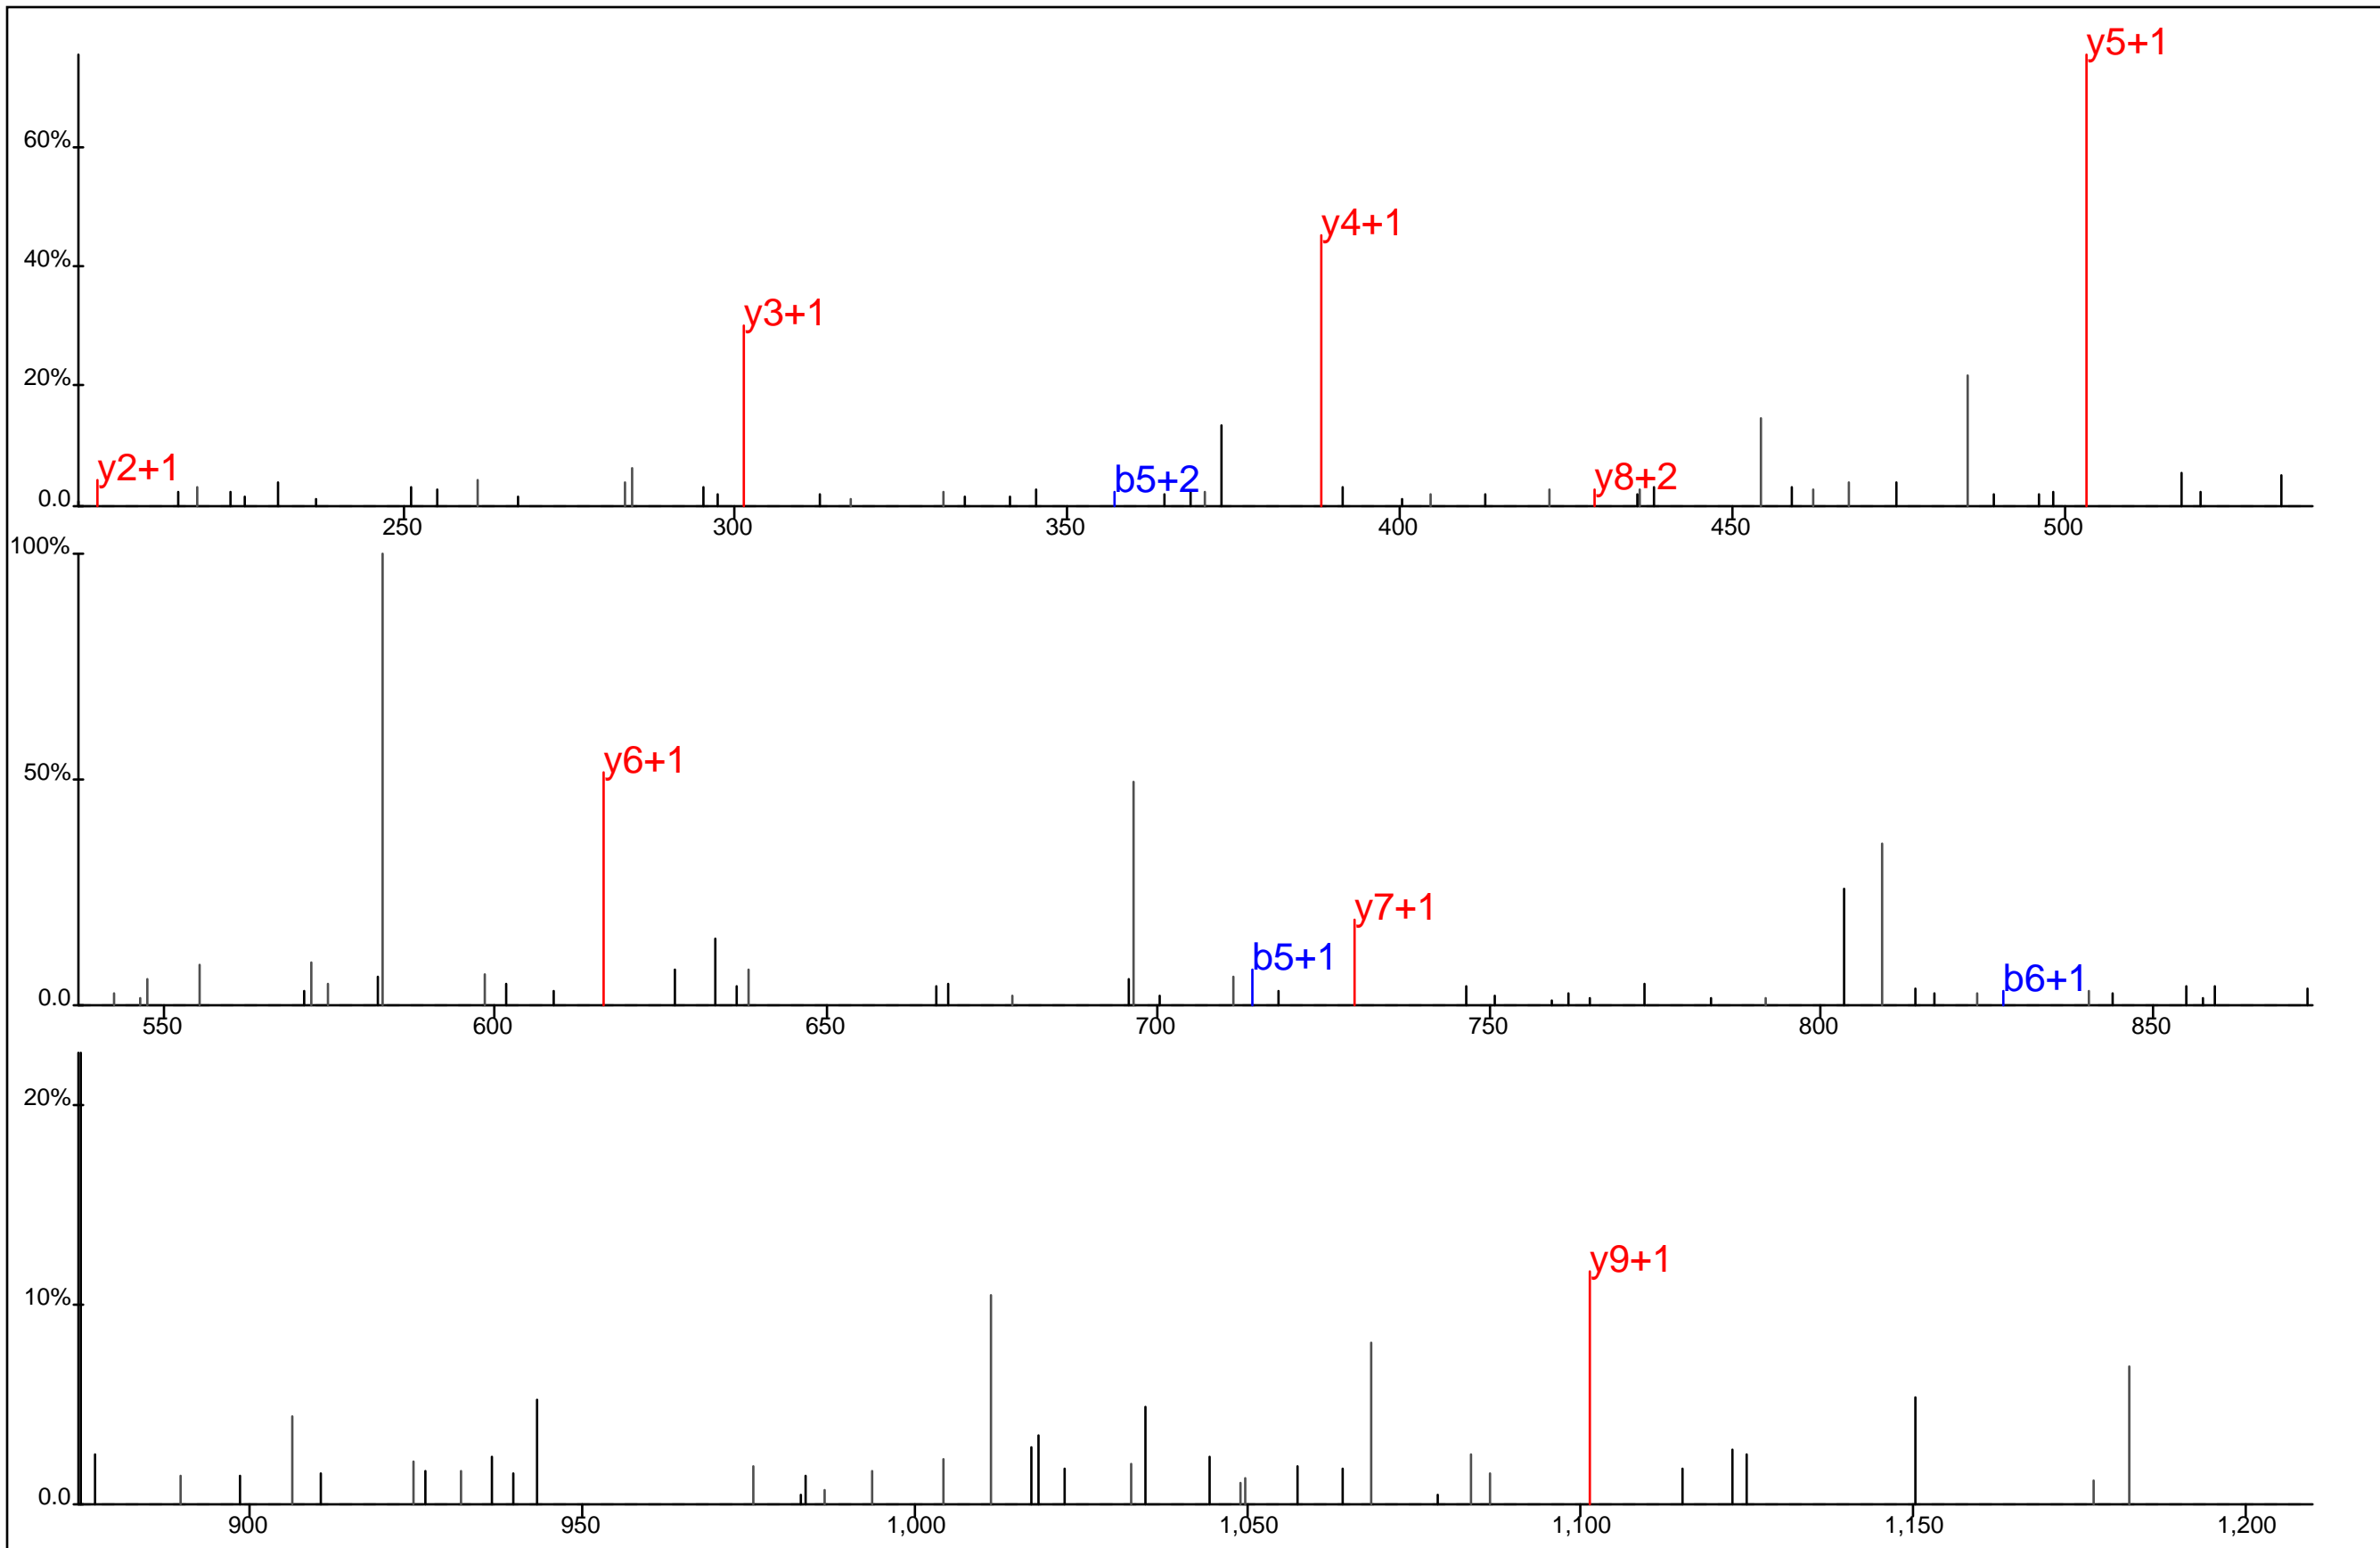

E V Y\* E L L D S P G K

Protein Name: Phosphorybosylaminoimidazole carboxylase  
 gi Accession: 0  
 Precursor Mass: 665.3007+2  
 Delta Mass: 2.405 ppm  
 XCorr: 40.03

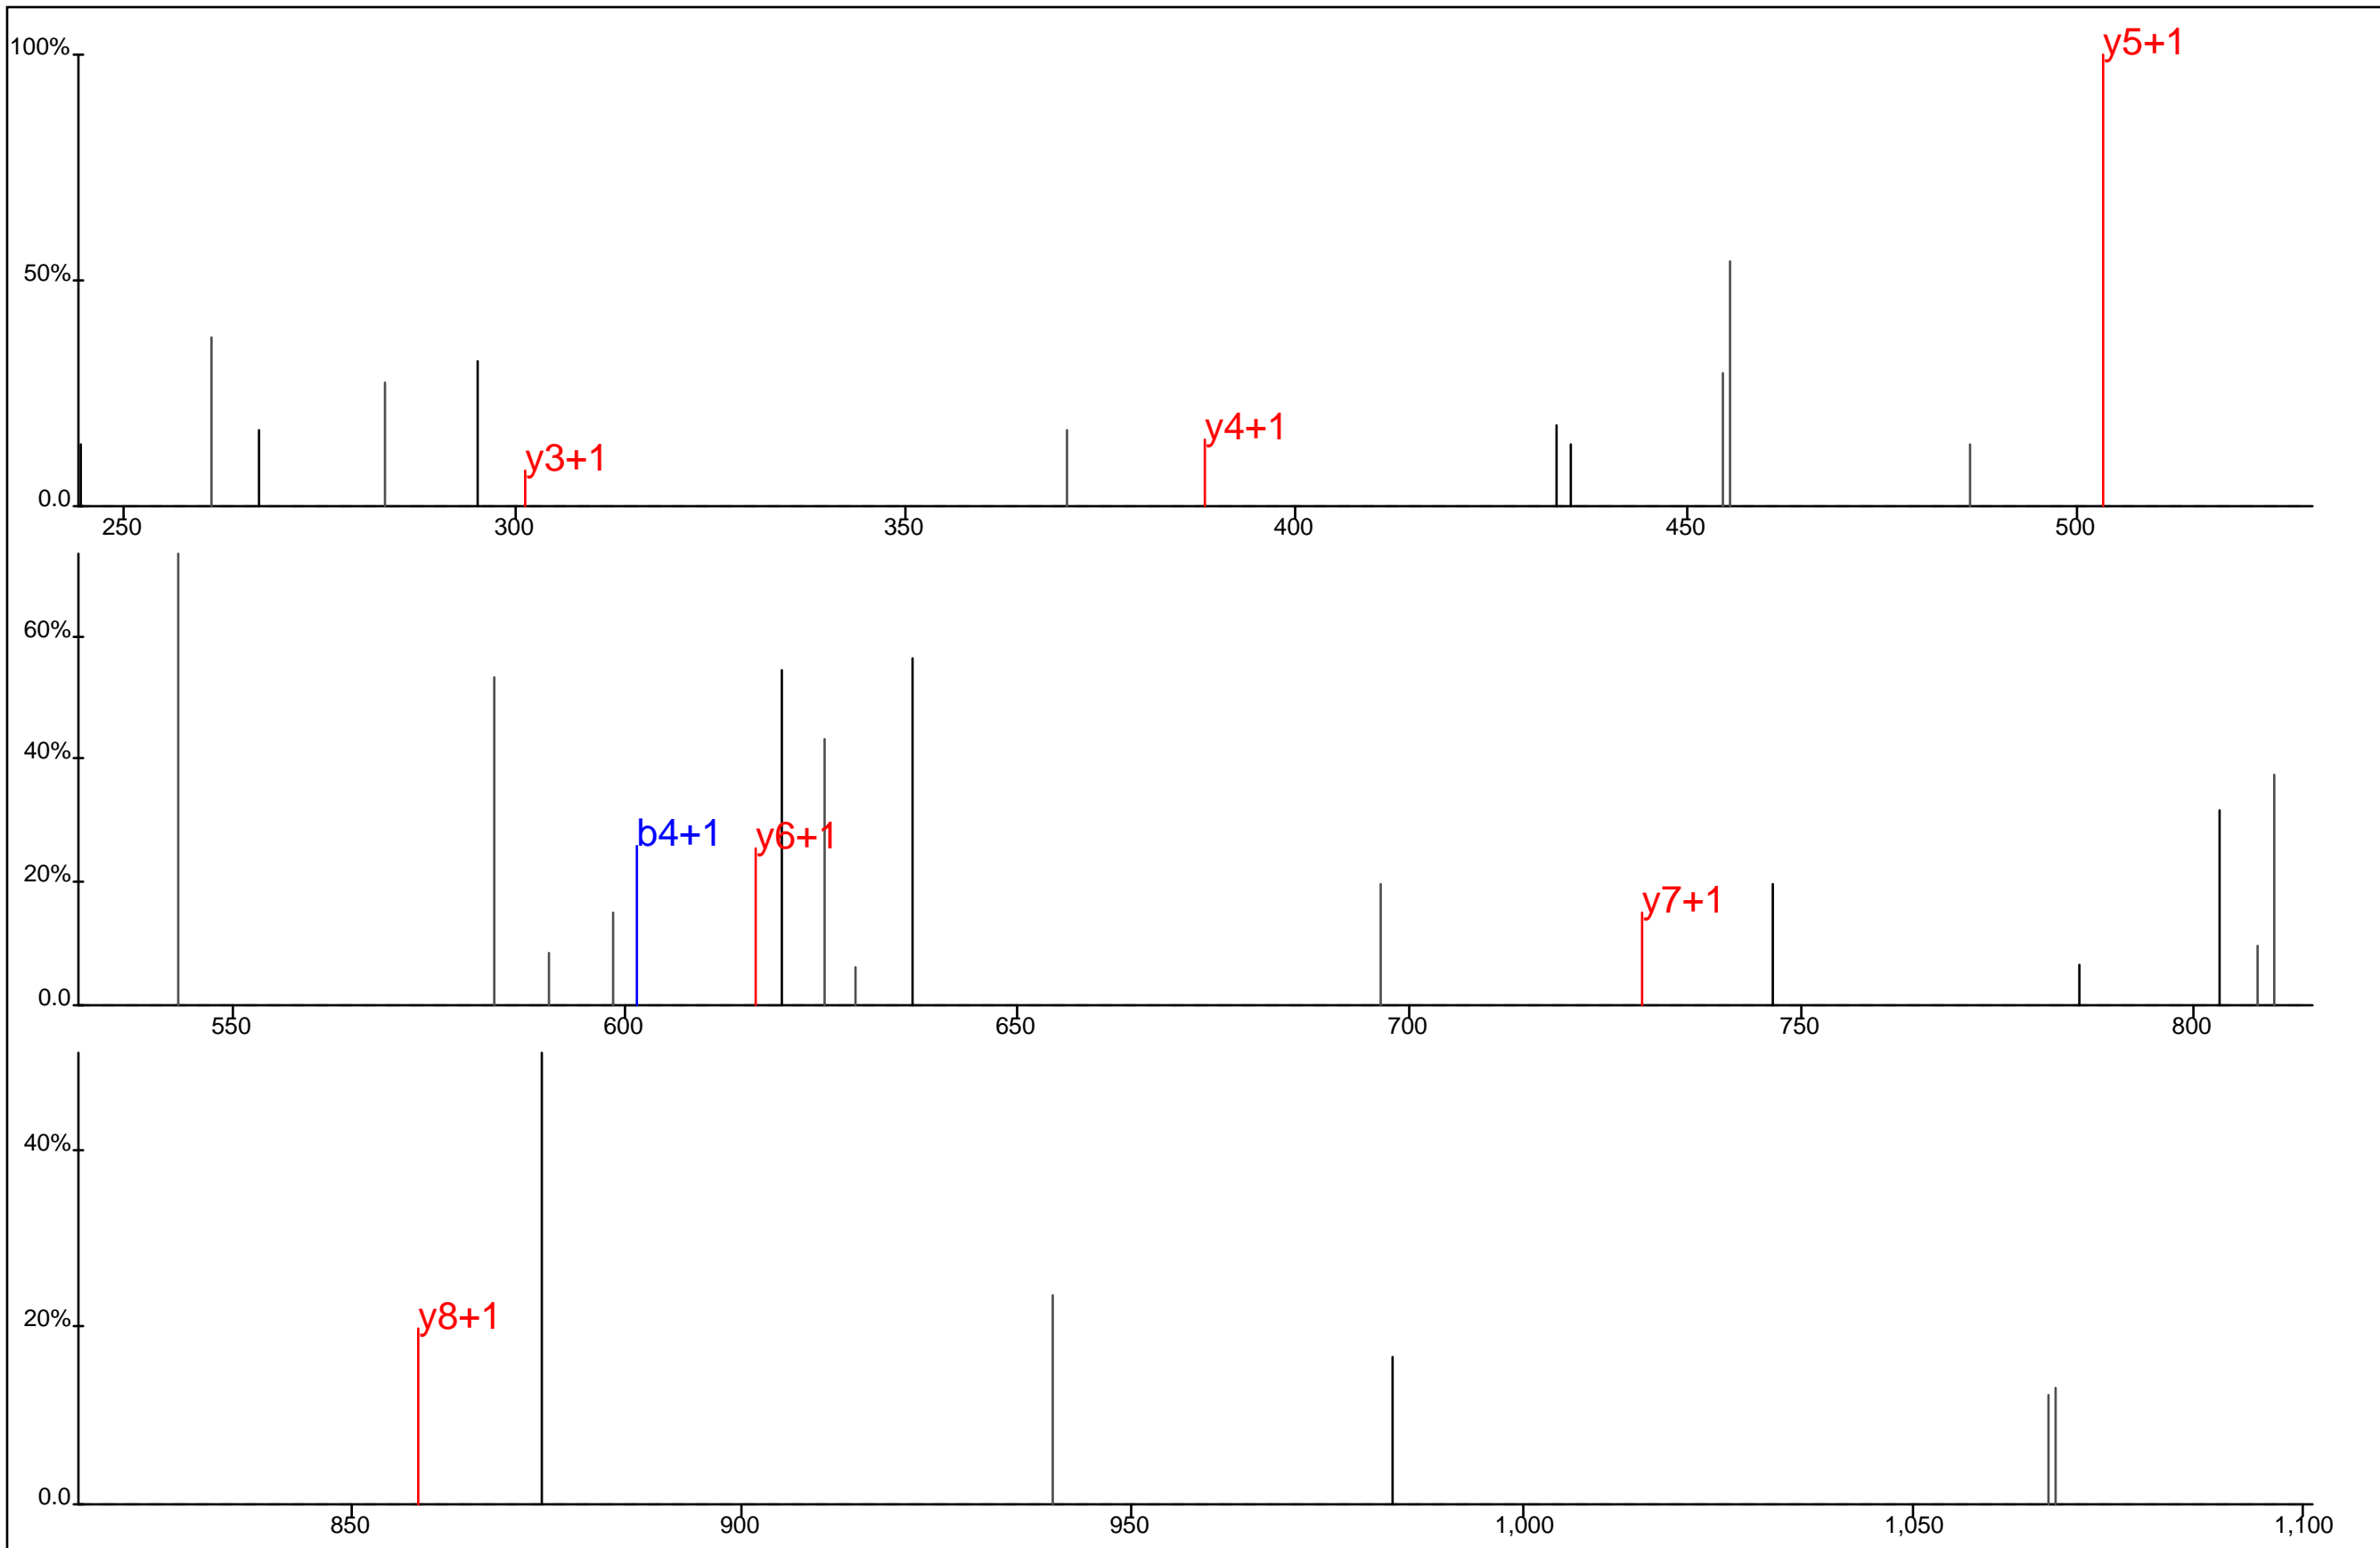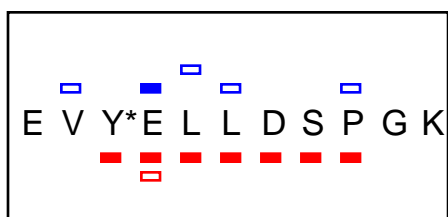

Protein Name: Phosphorybosylaminoimidazole carboxylase  
 gi Accession: 0  
 Precursor Mass: 665.3001+2  
 Delta Mass: 3.323 ppm  
 XCorr: 25.57

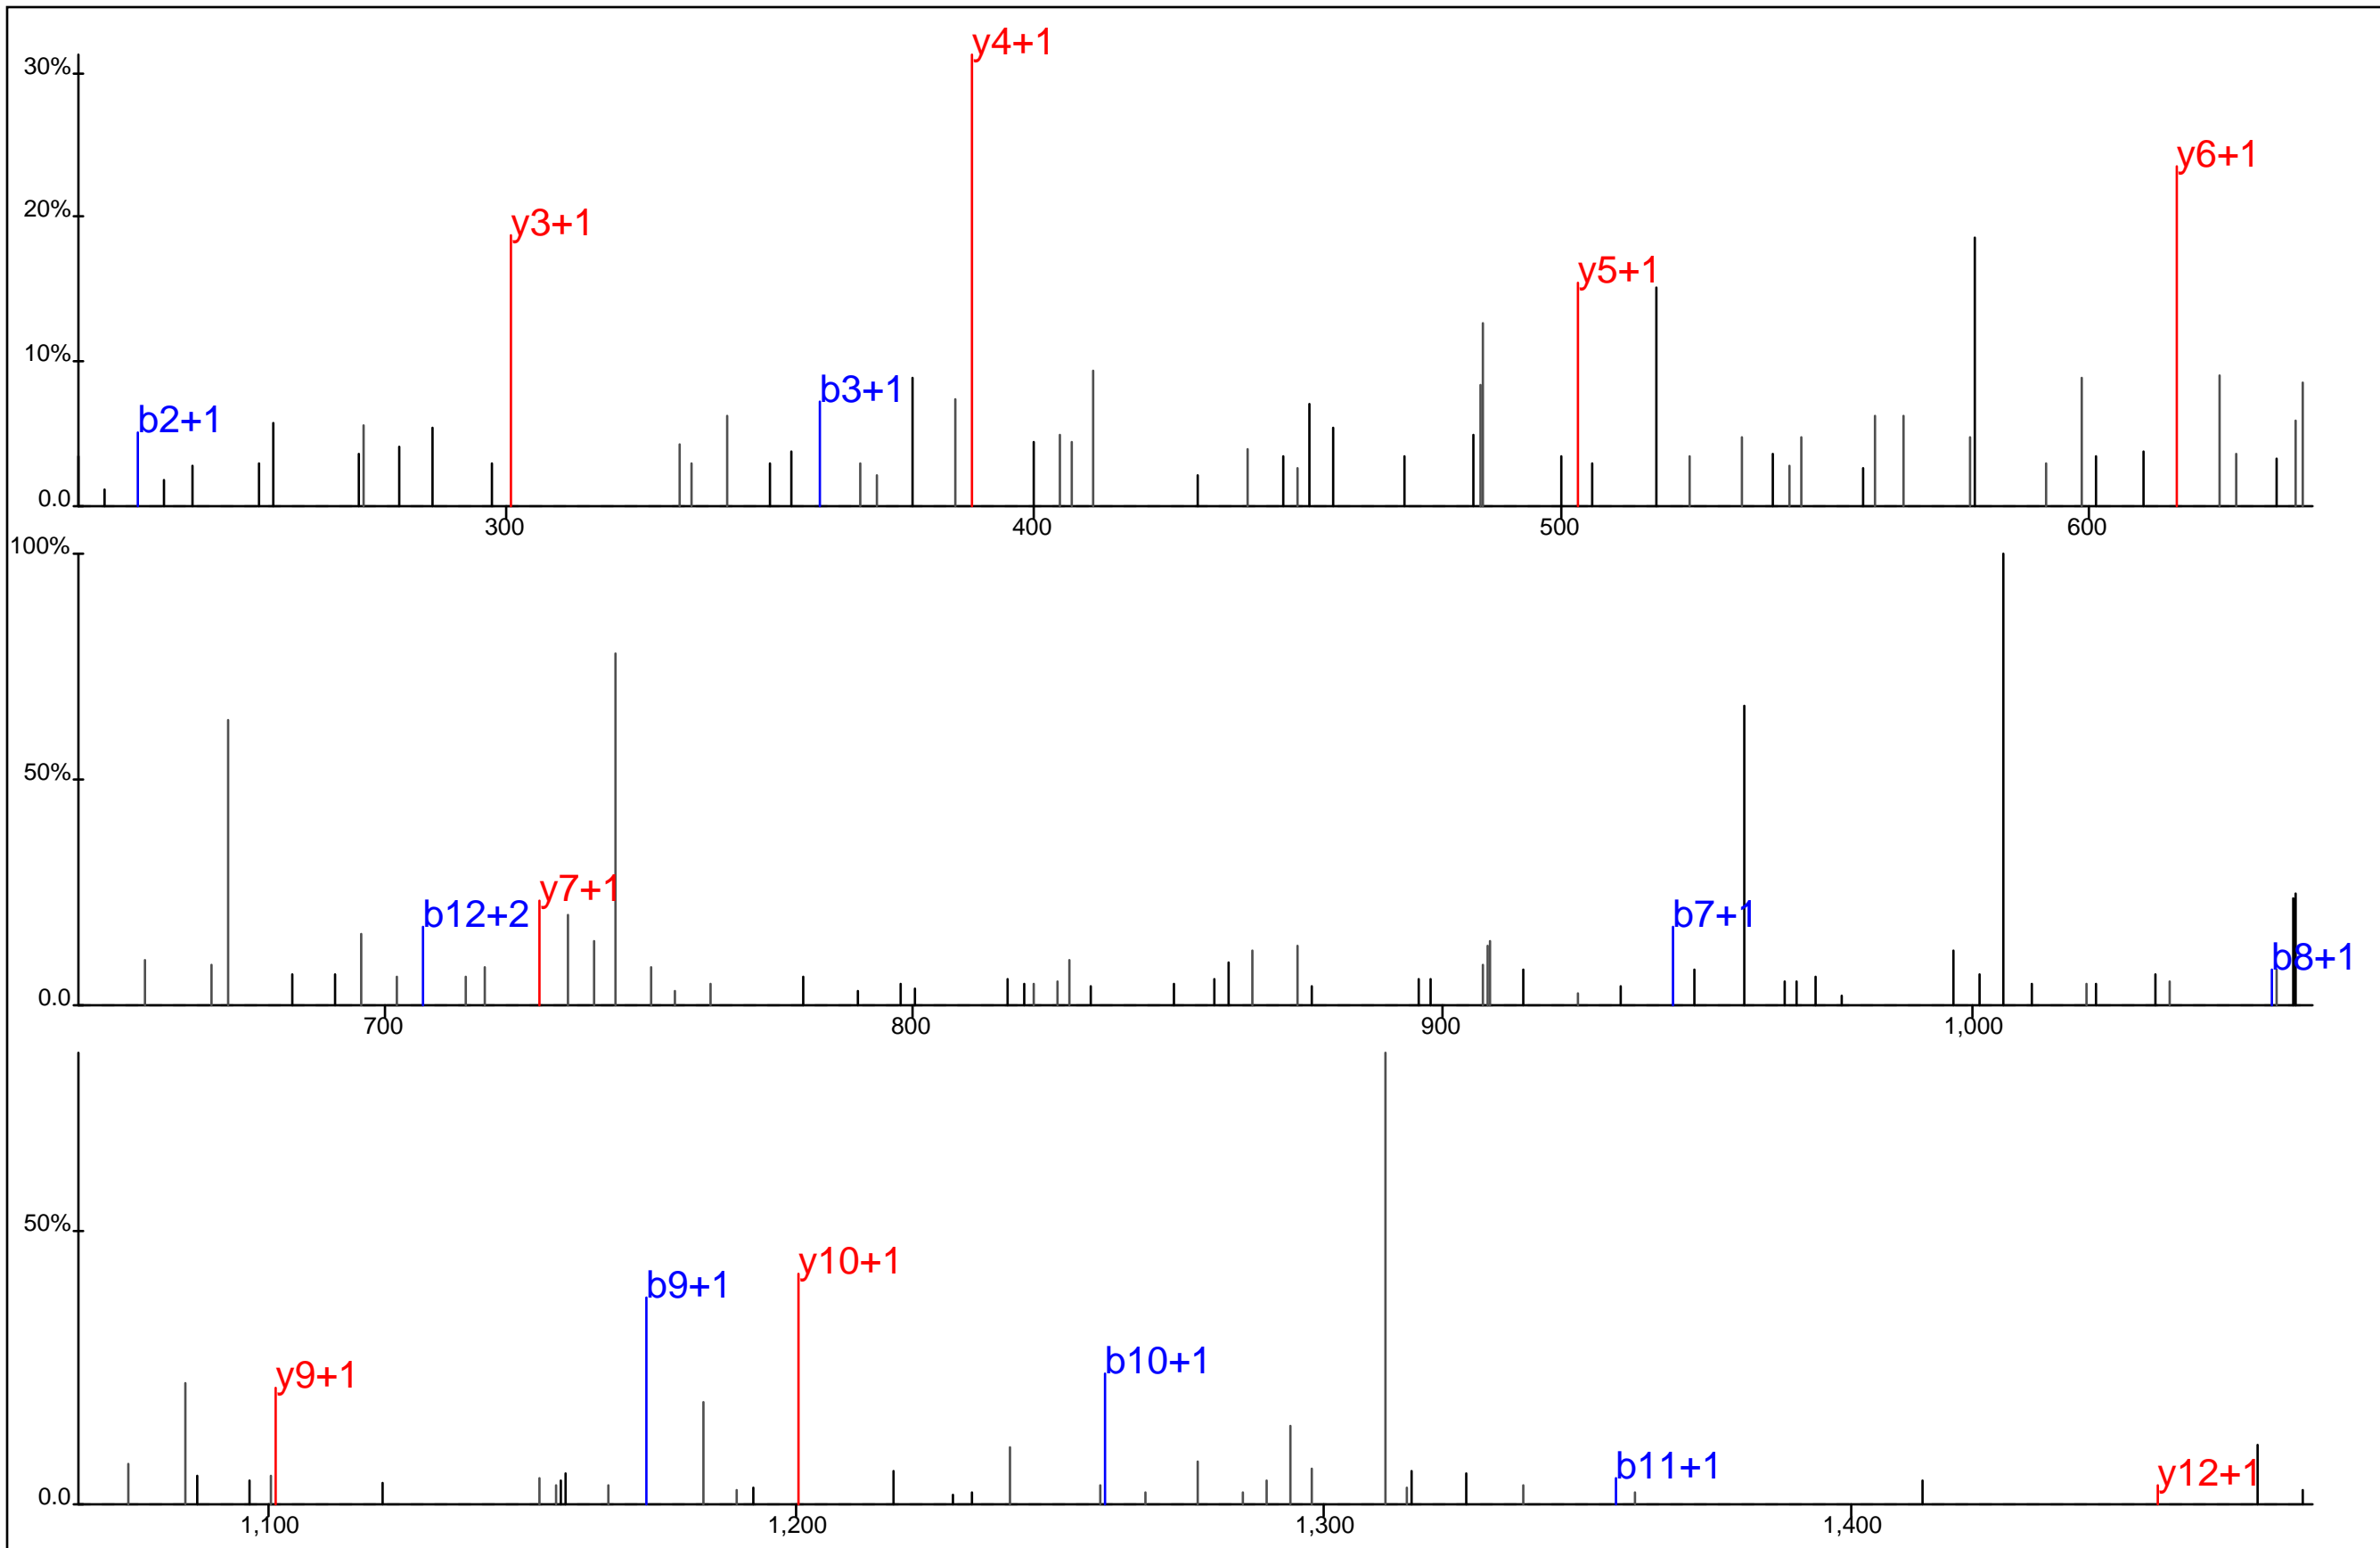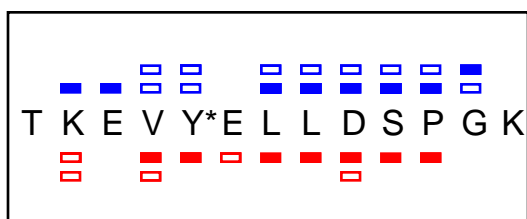

Protein Name: Phosphorybosylaminoimidazole carboxylase  
 gi Accession: 0  
 Precursor Mass: 779.8736+2  
 Delta Mass: 0.055 ppm  
 XCorr: 27.98



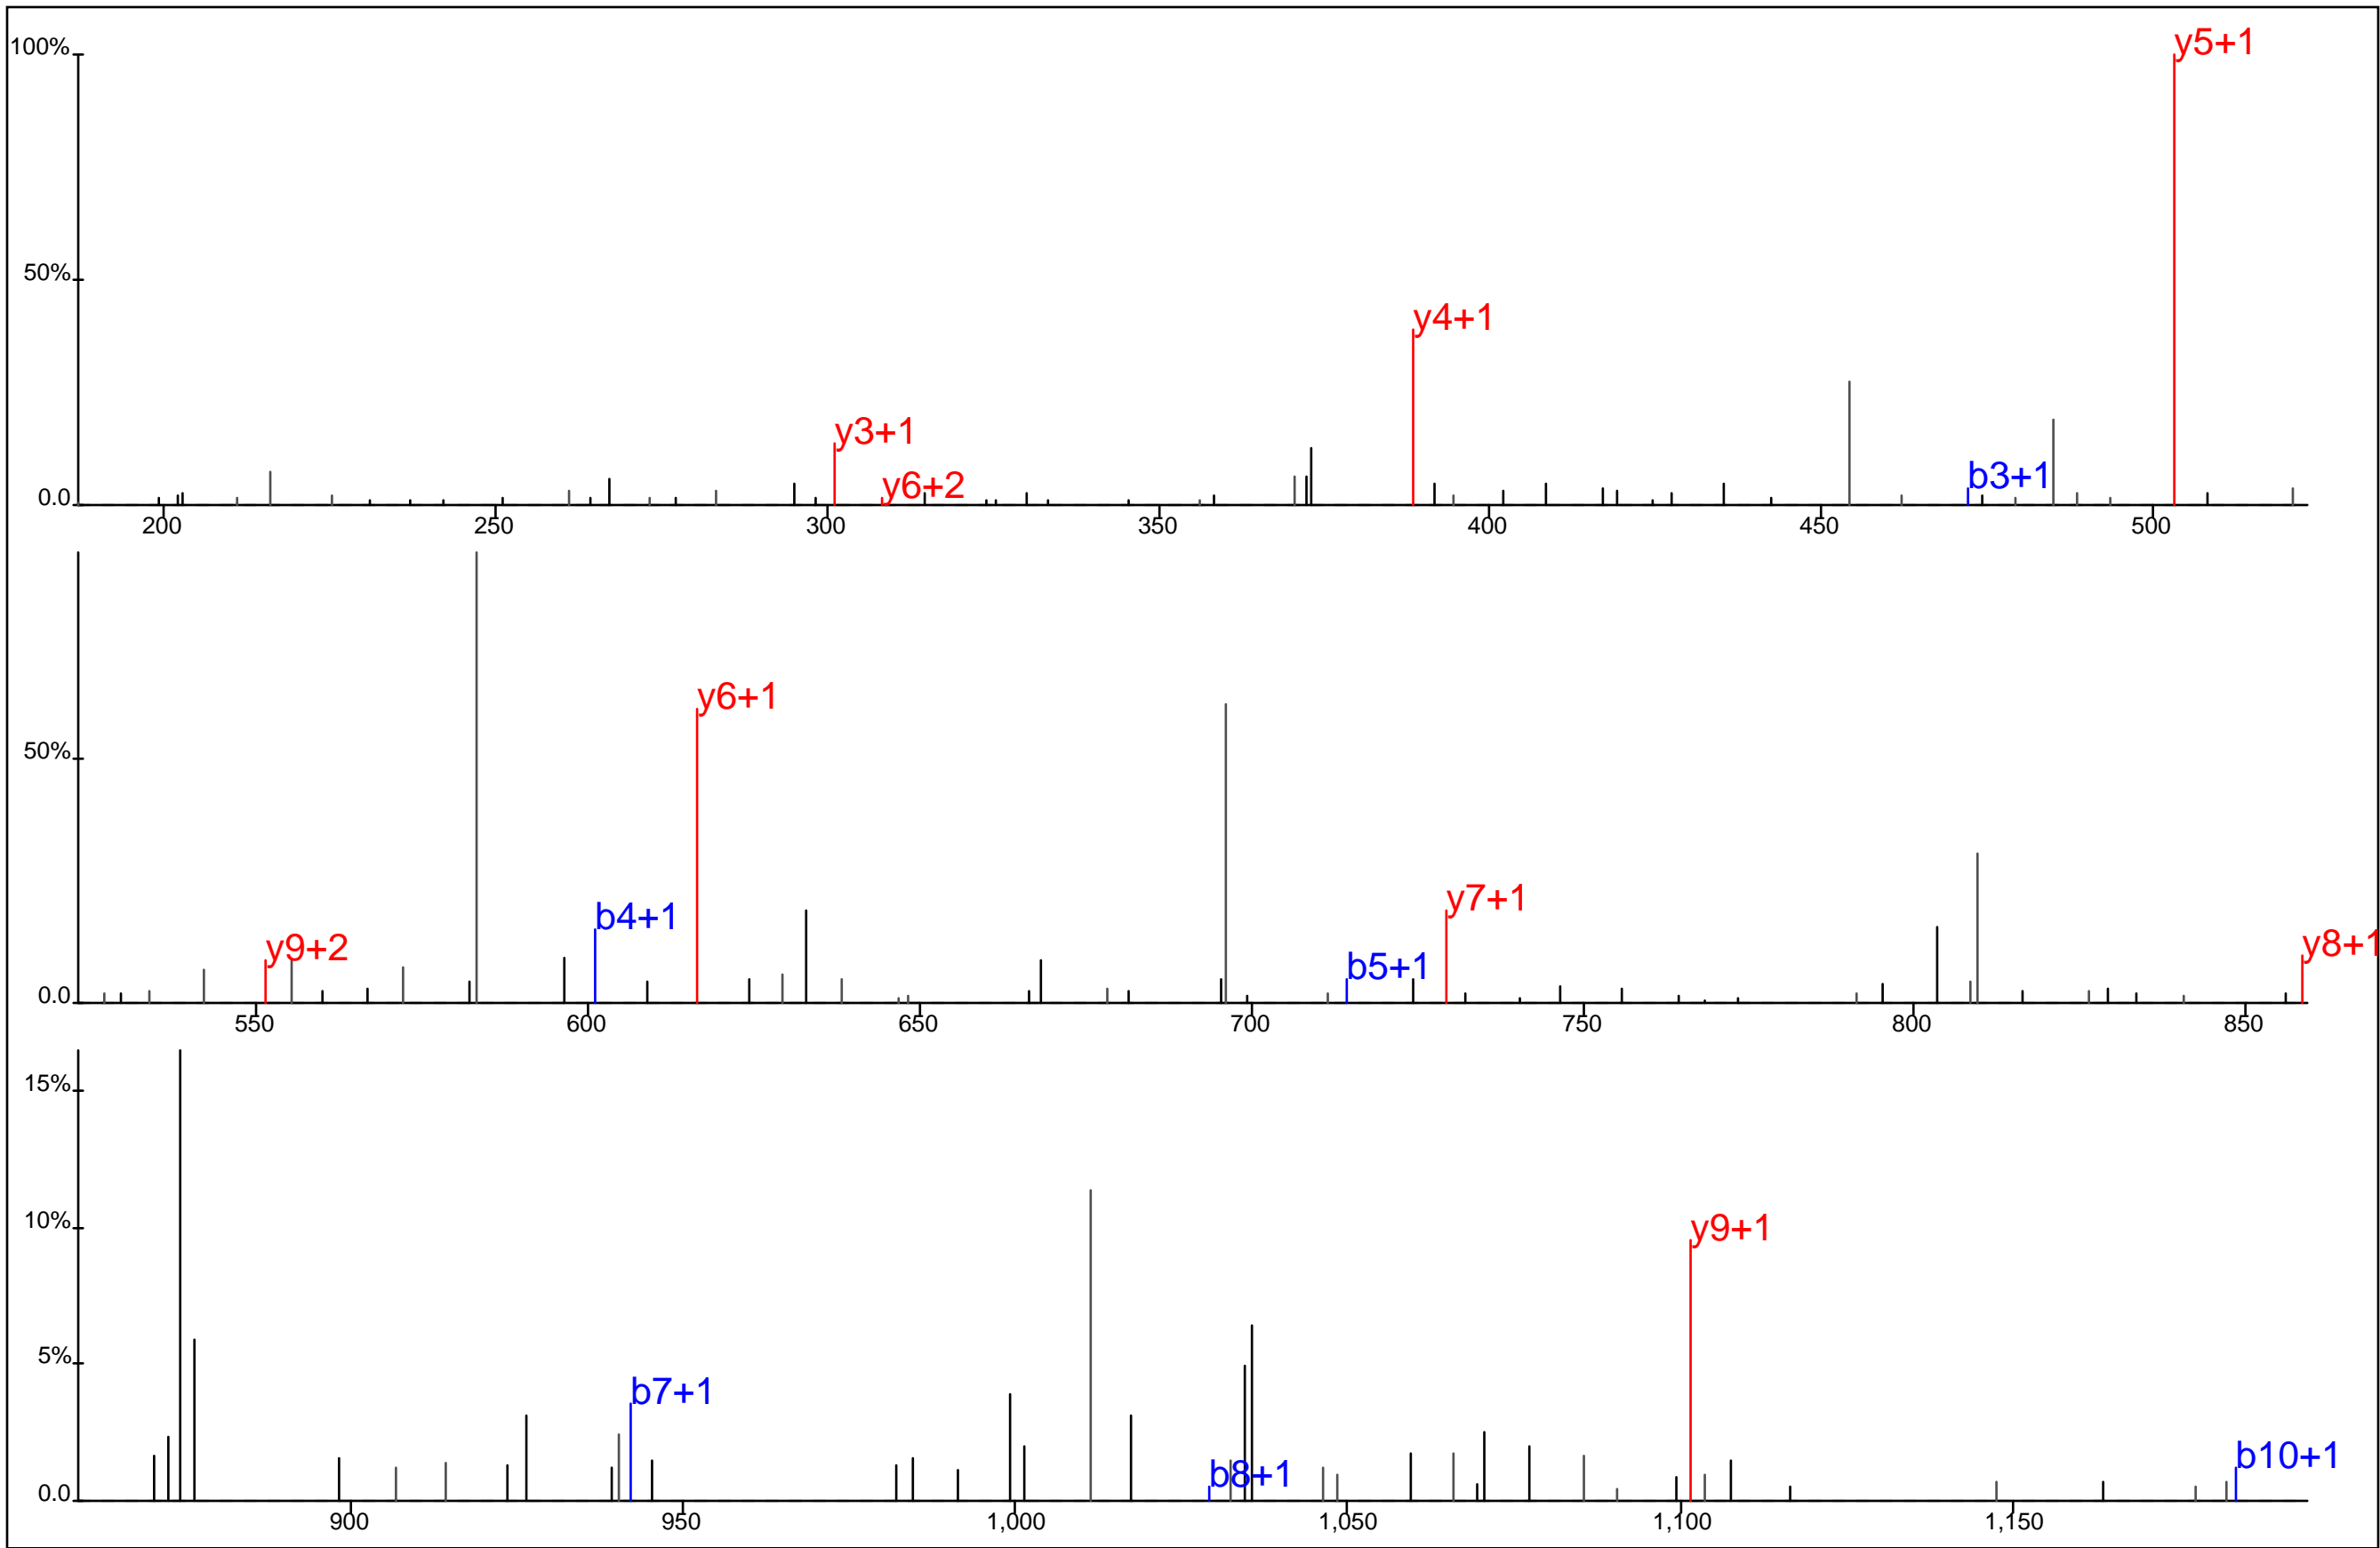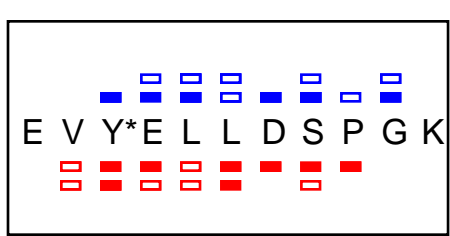

Protein Name: Phosphorybosylaminoimidazole carboxylase  
 gi Accession: 0  
 Precursor Mass: 665.3004+2  
 Delta Mass: 2.864 ppm  
 XCorr: 36.5

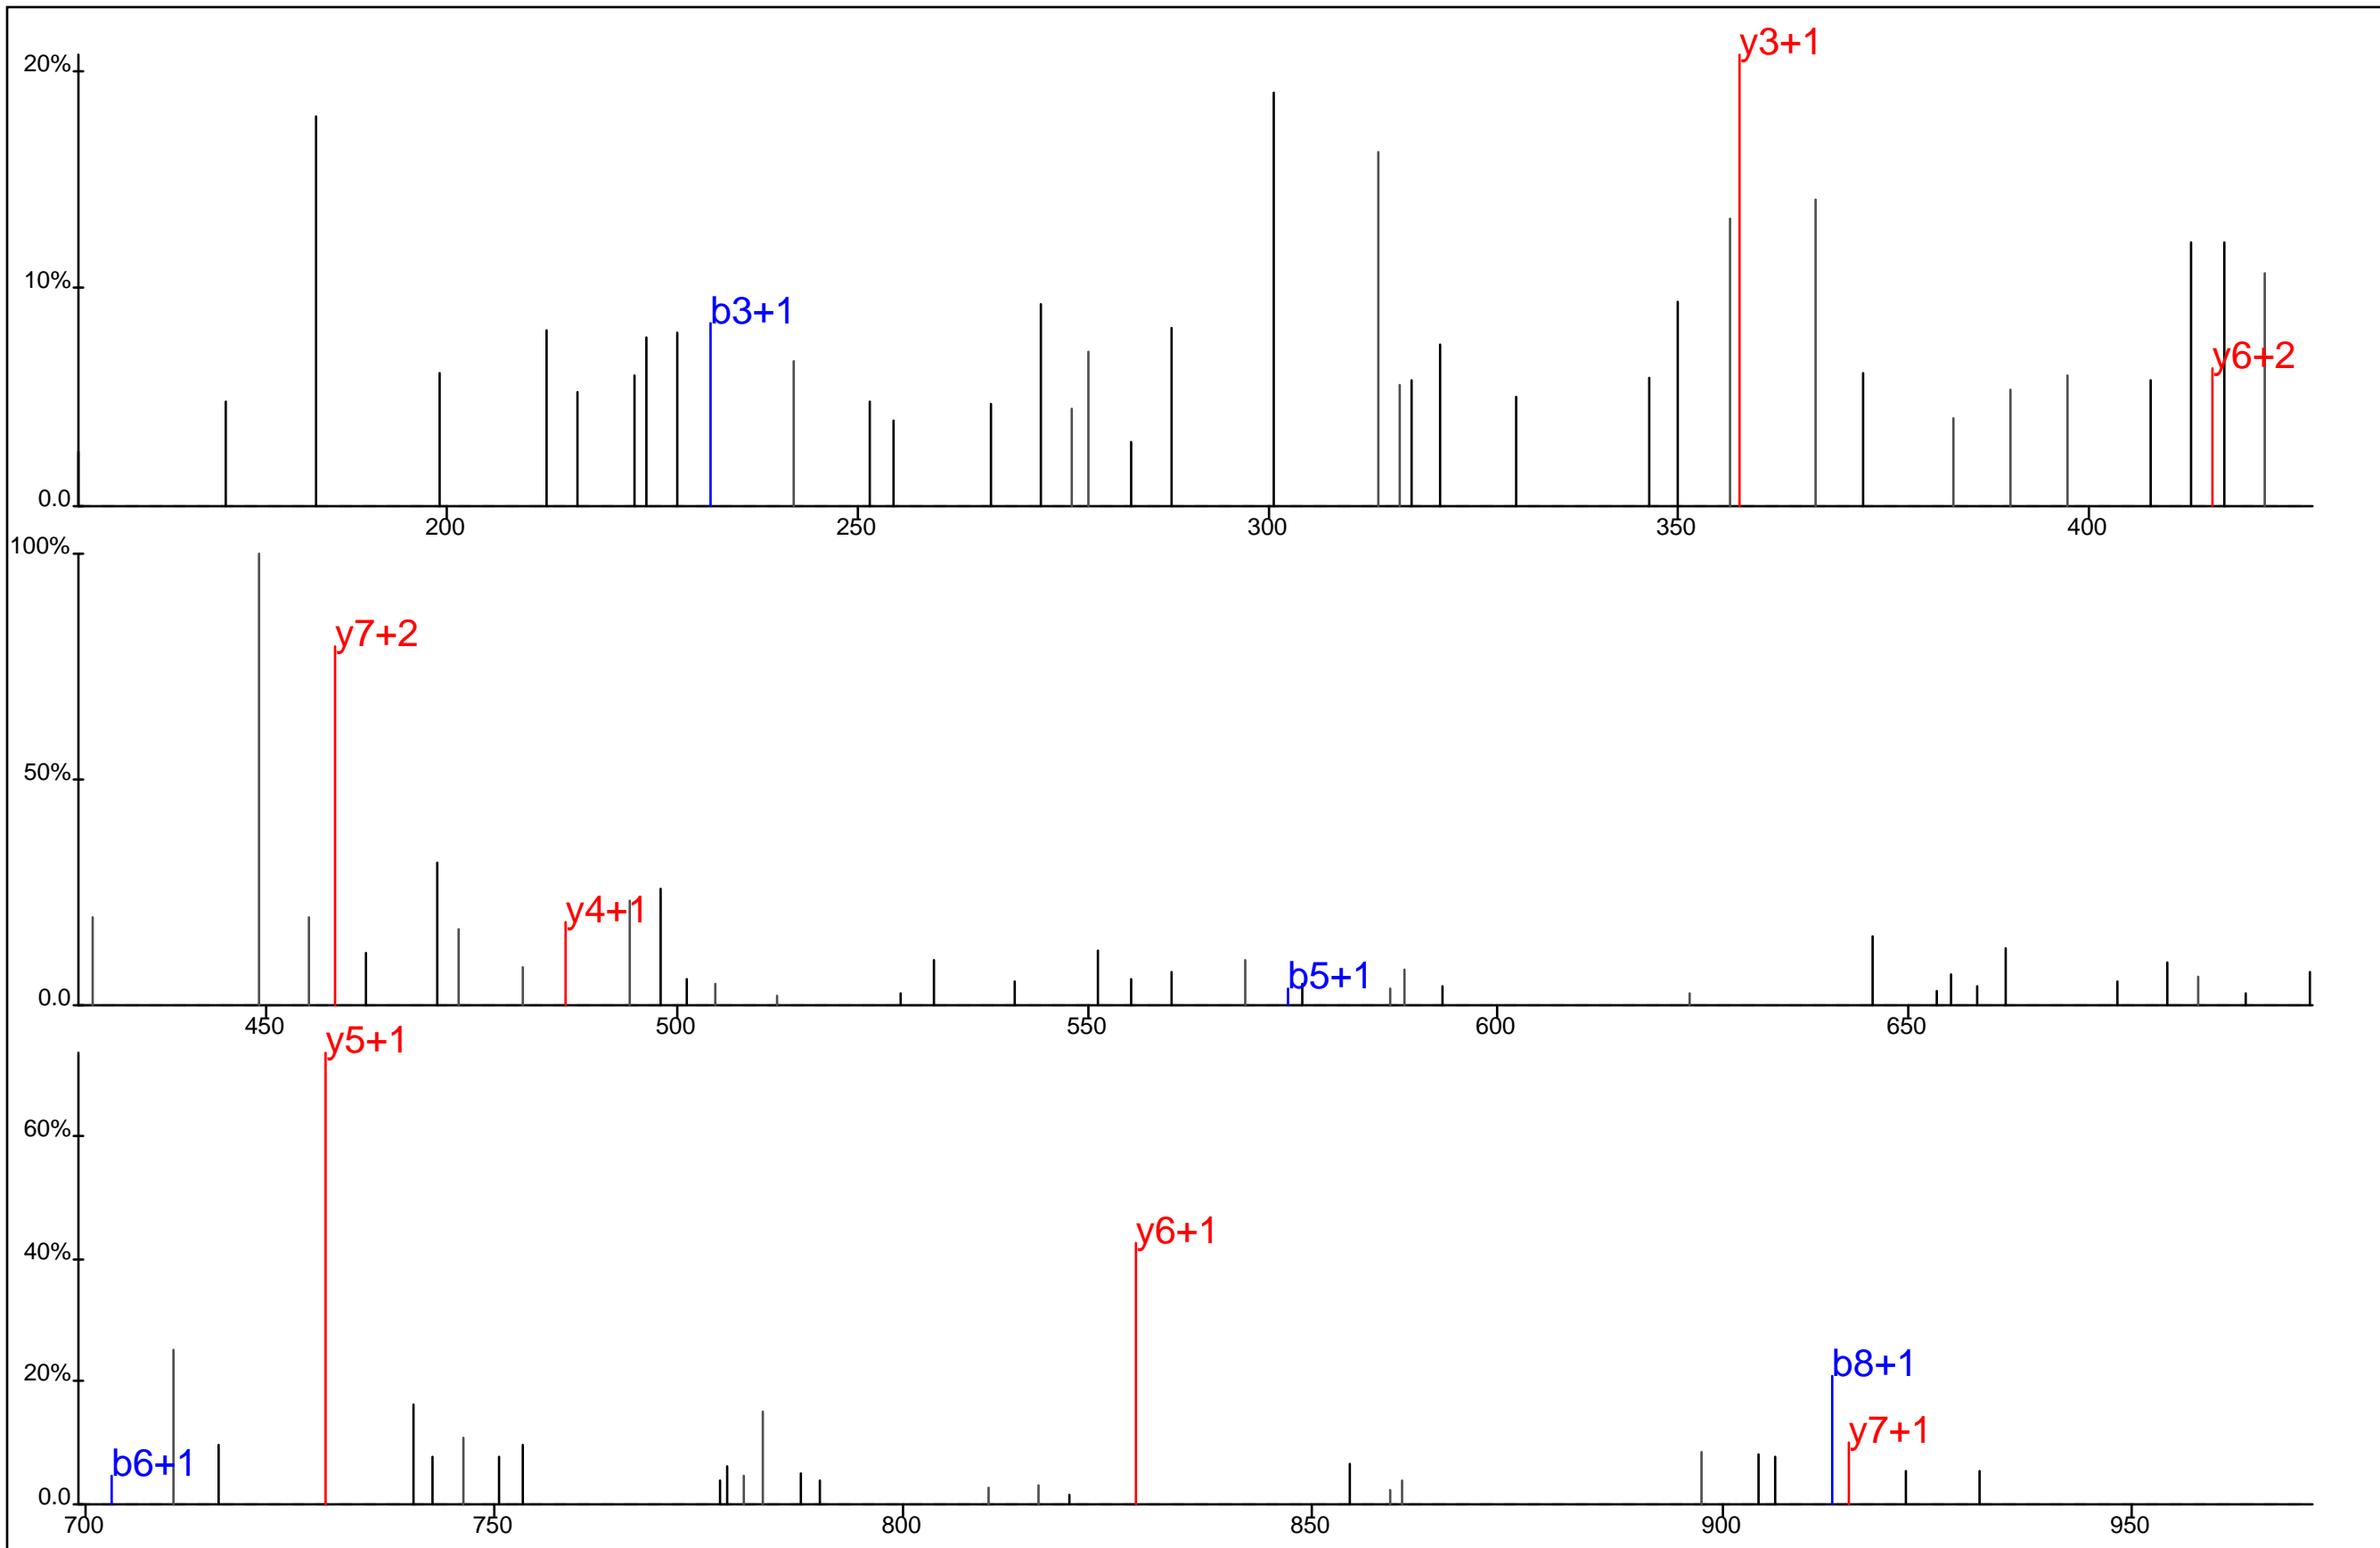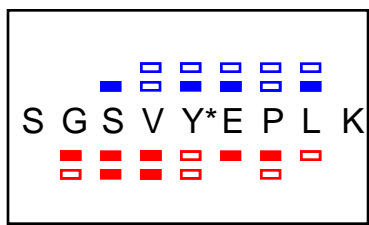

Protein Name: Phosphorylase B kinase, beta  
 gi Accession: 0  
 Precursor Mass: 530.2411+2  
 Delta Mass: 0.734 ppm  
 XCorr: 32.25

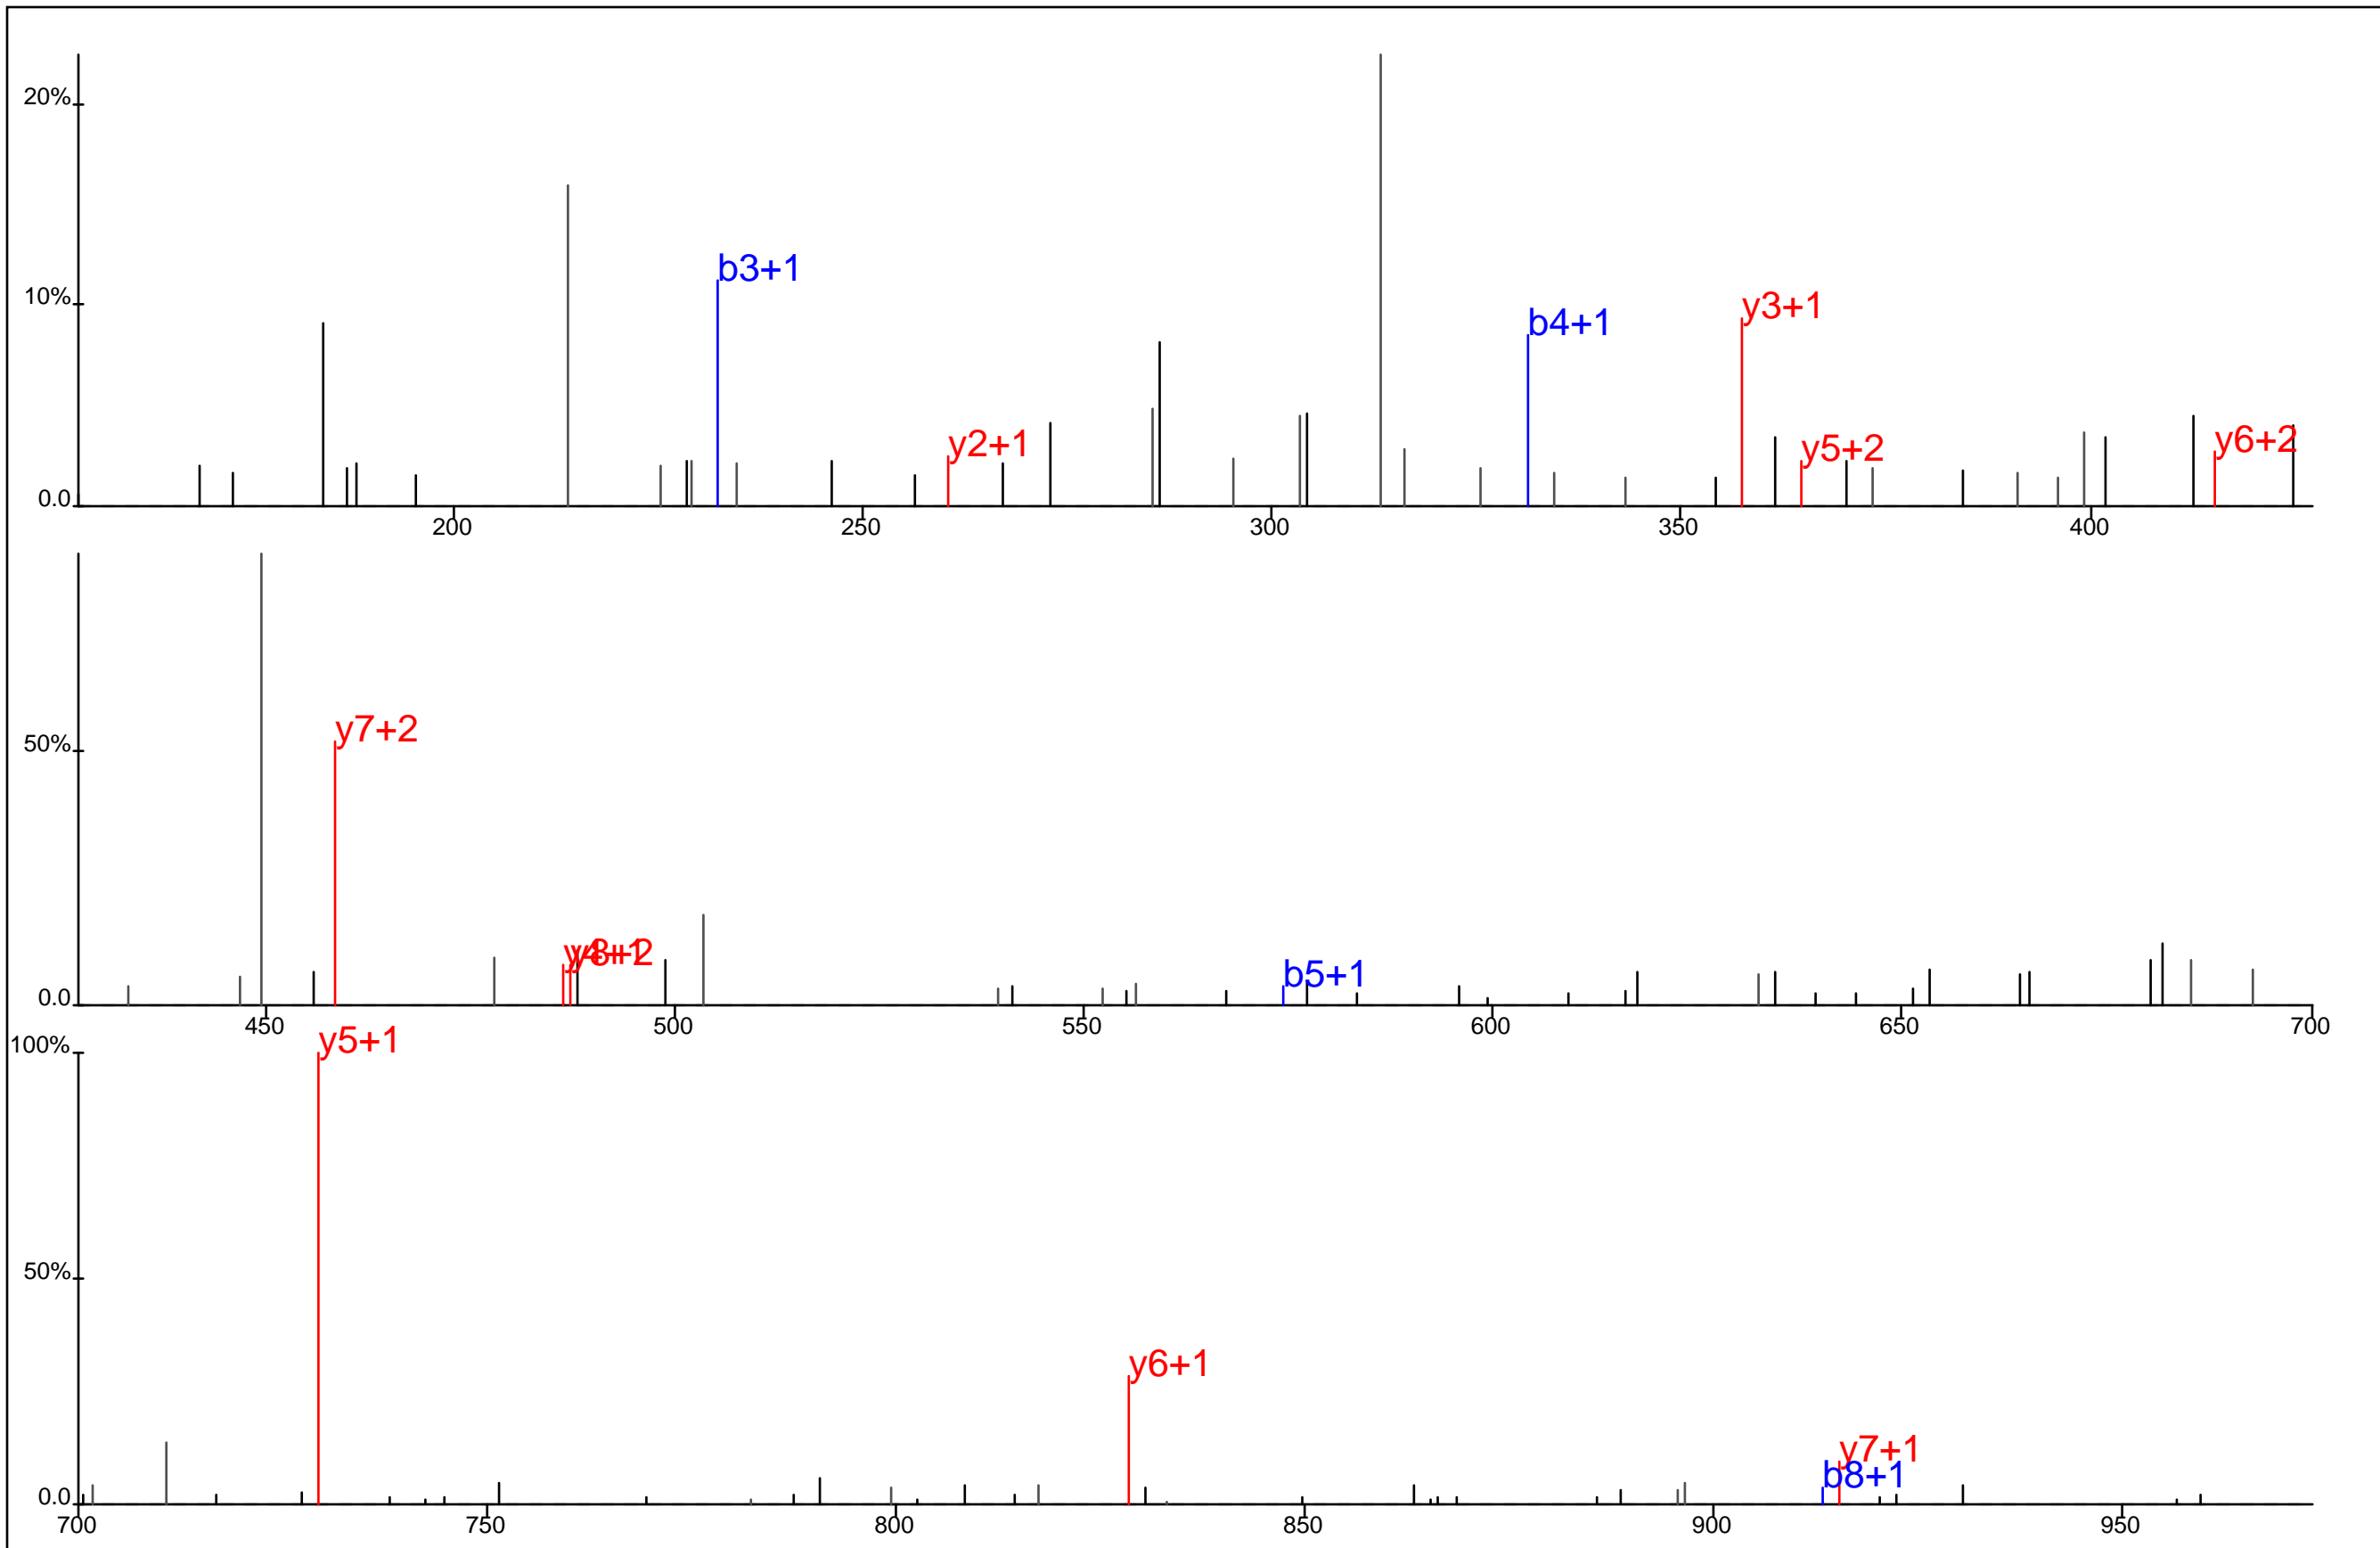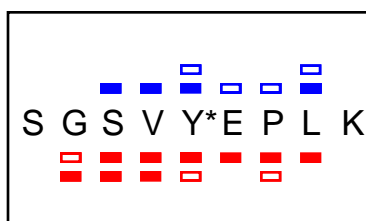

Protein Name: Phosphorylase B kinase, beta  
 gi Accession: 0  
 Precursor Mass: 530.2411+2  
 Delta Mass: 0.849 ppm  
 XCorr: 20.95

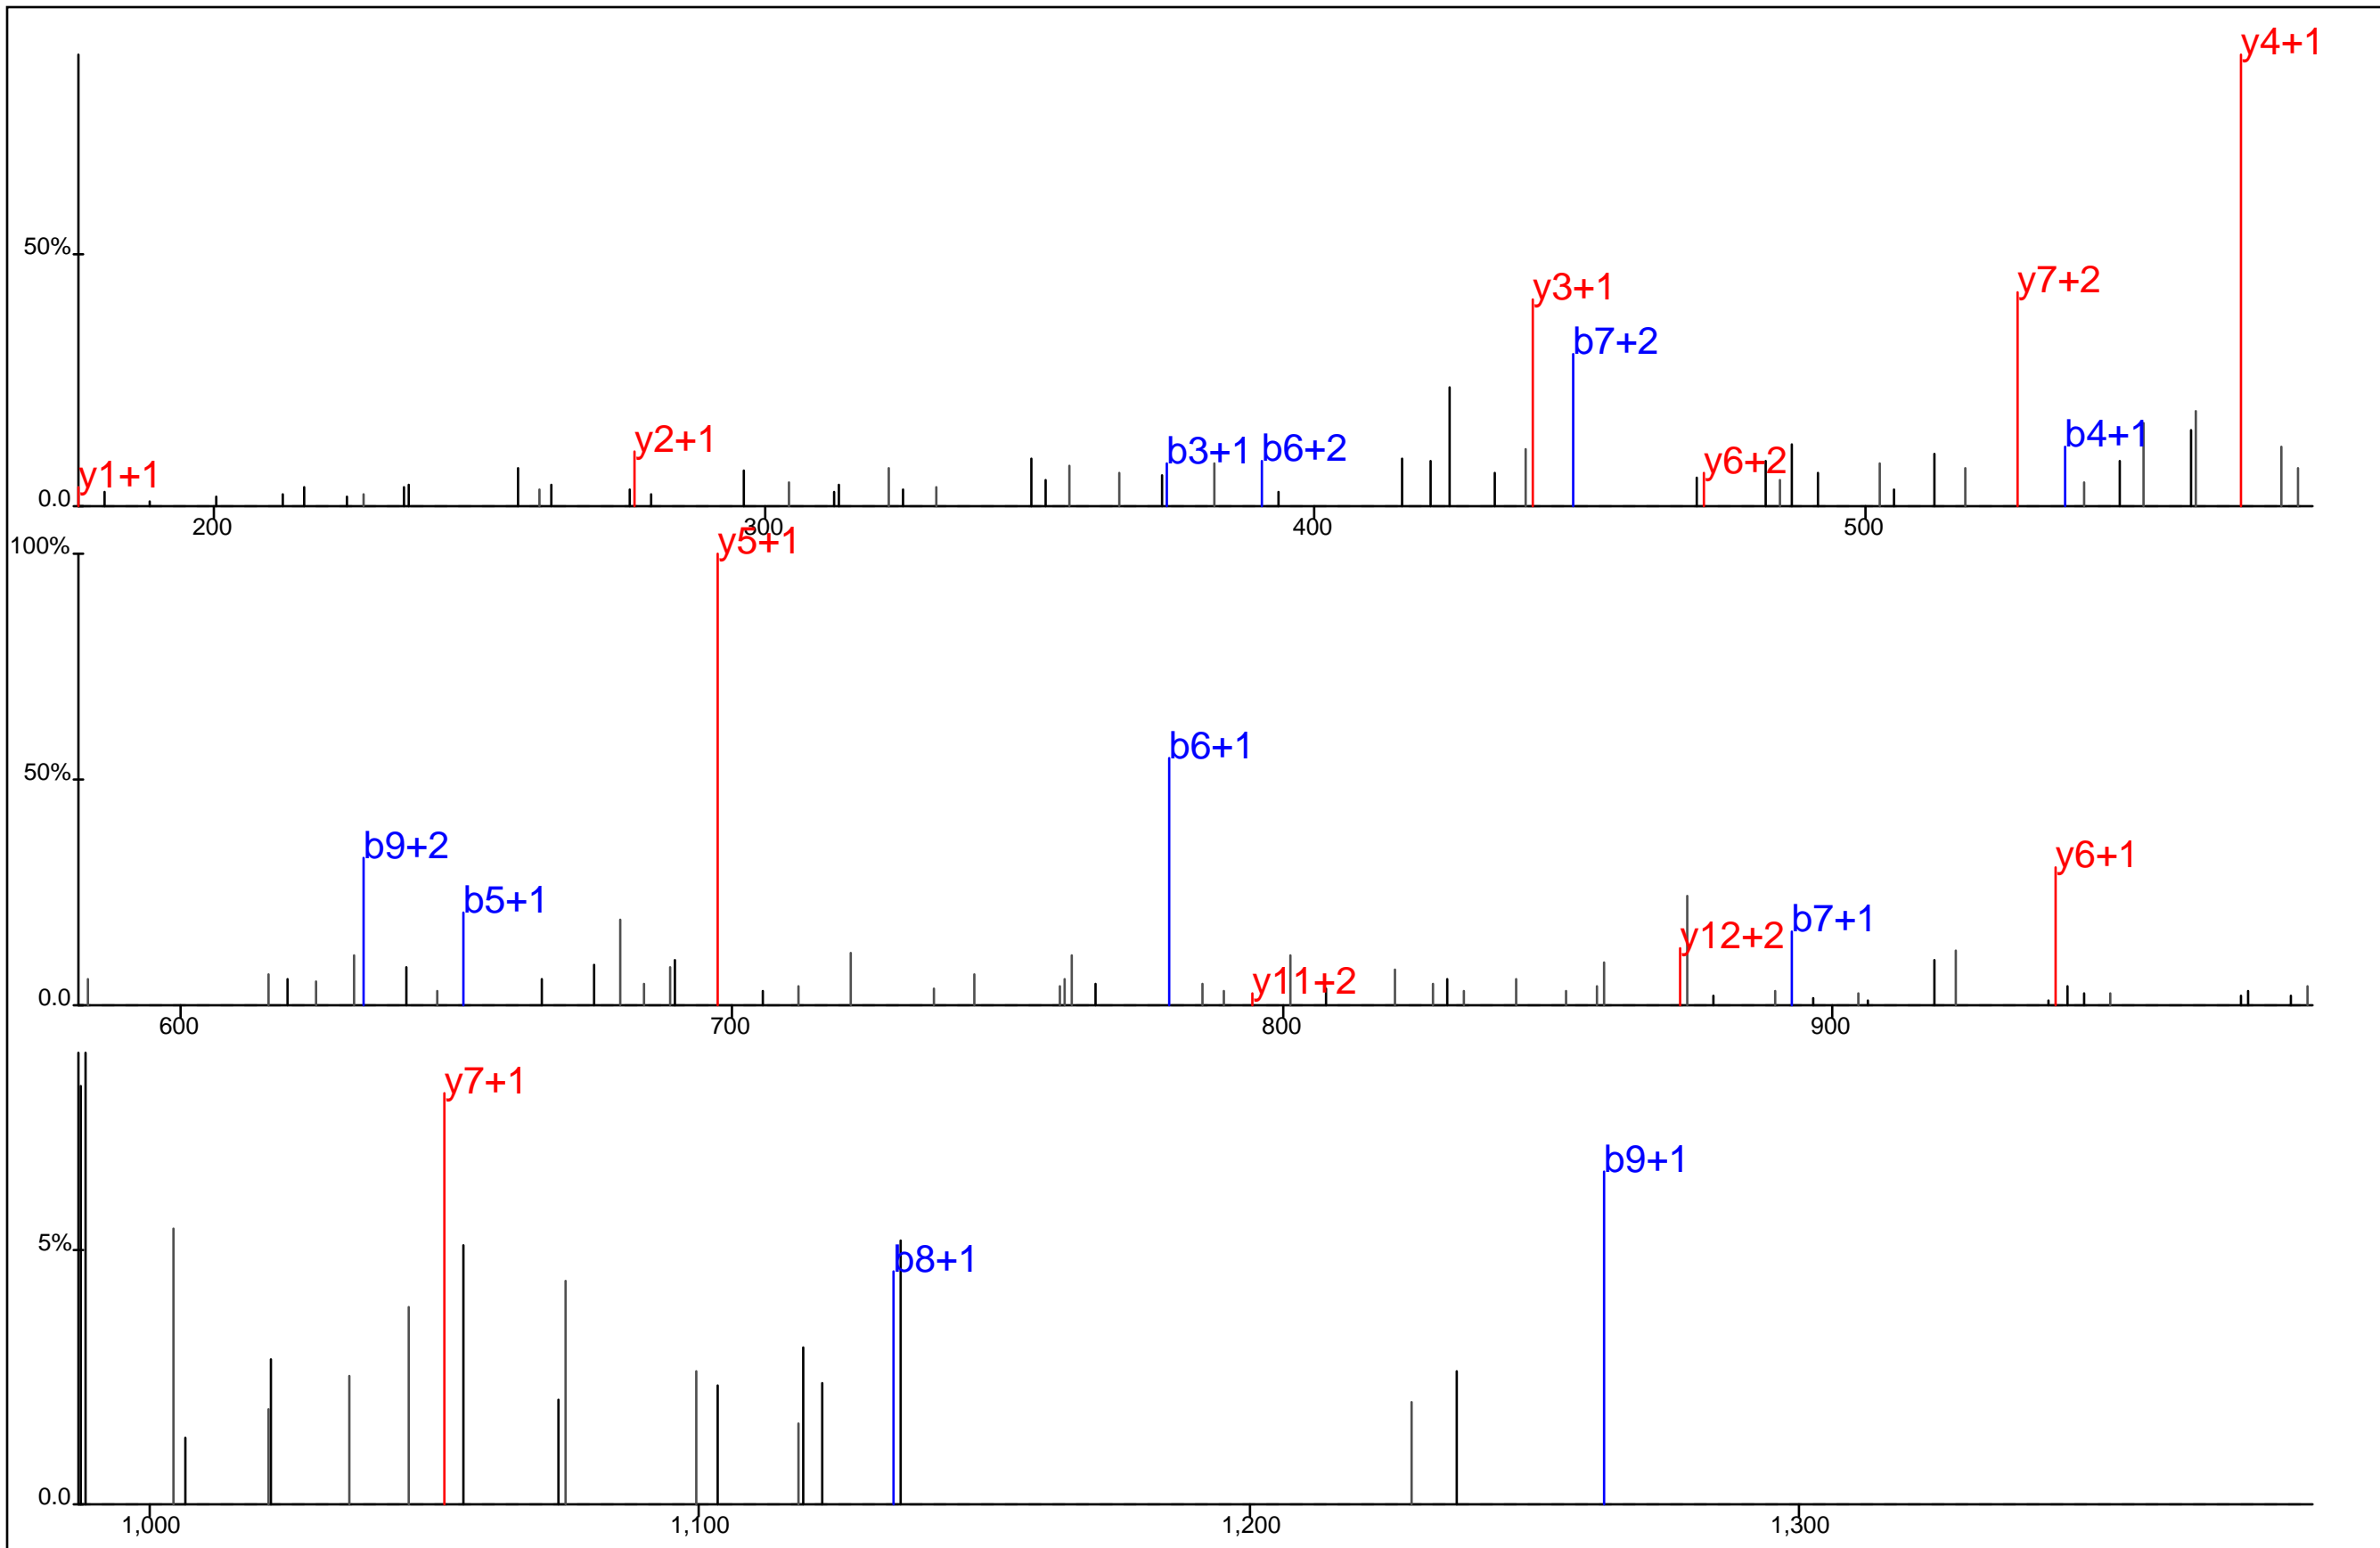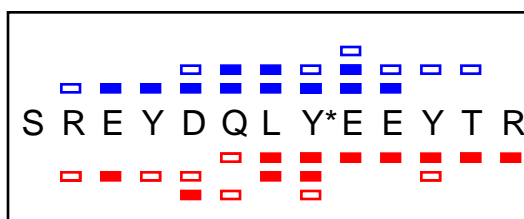

Protein Name: PI 3 kinase, regulatory subunit beta  
 gi Accession: 0  
 Precursor Mass: 611.2549+3  
 Delta Mass: 1.704 ppm  
 XCorr: 39.52

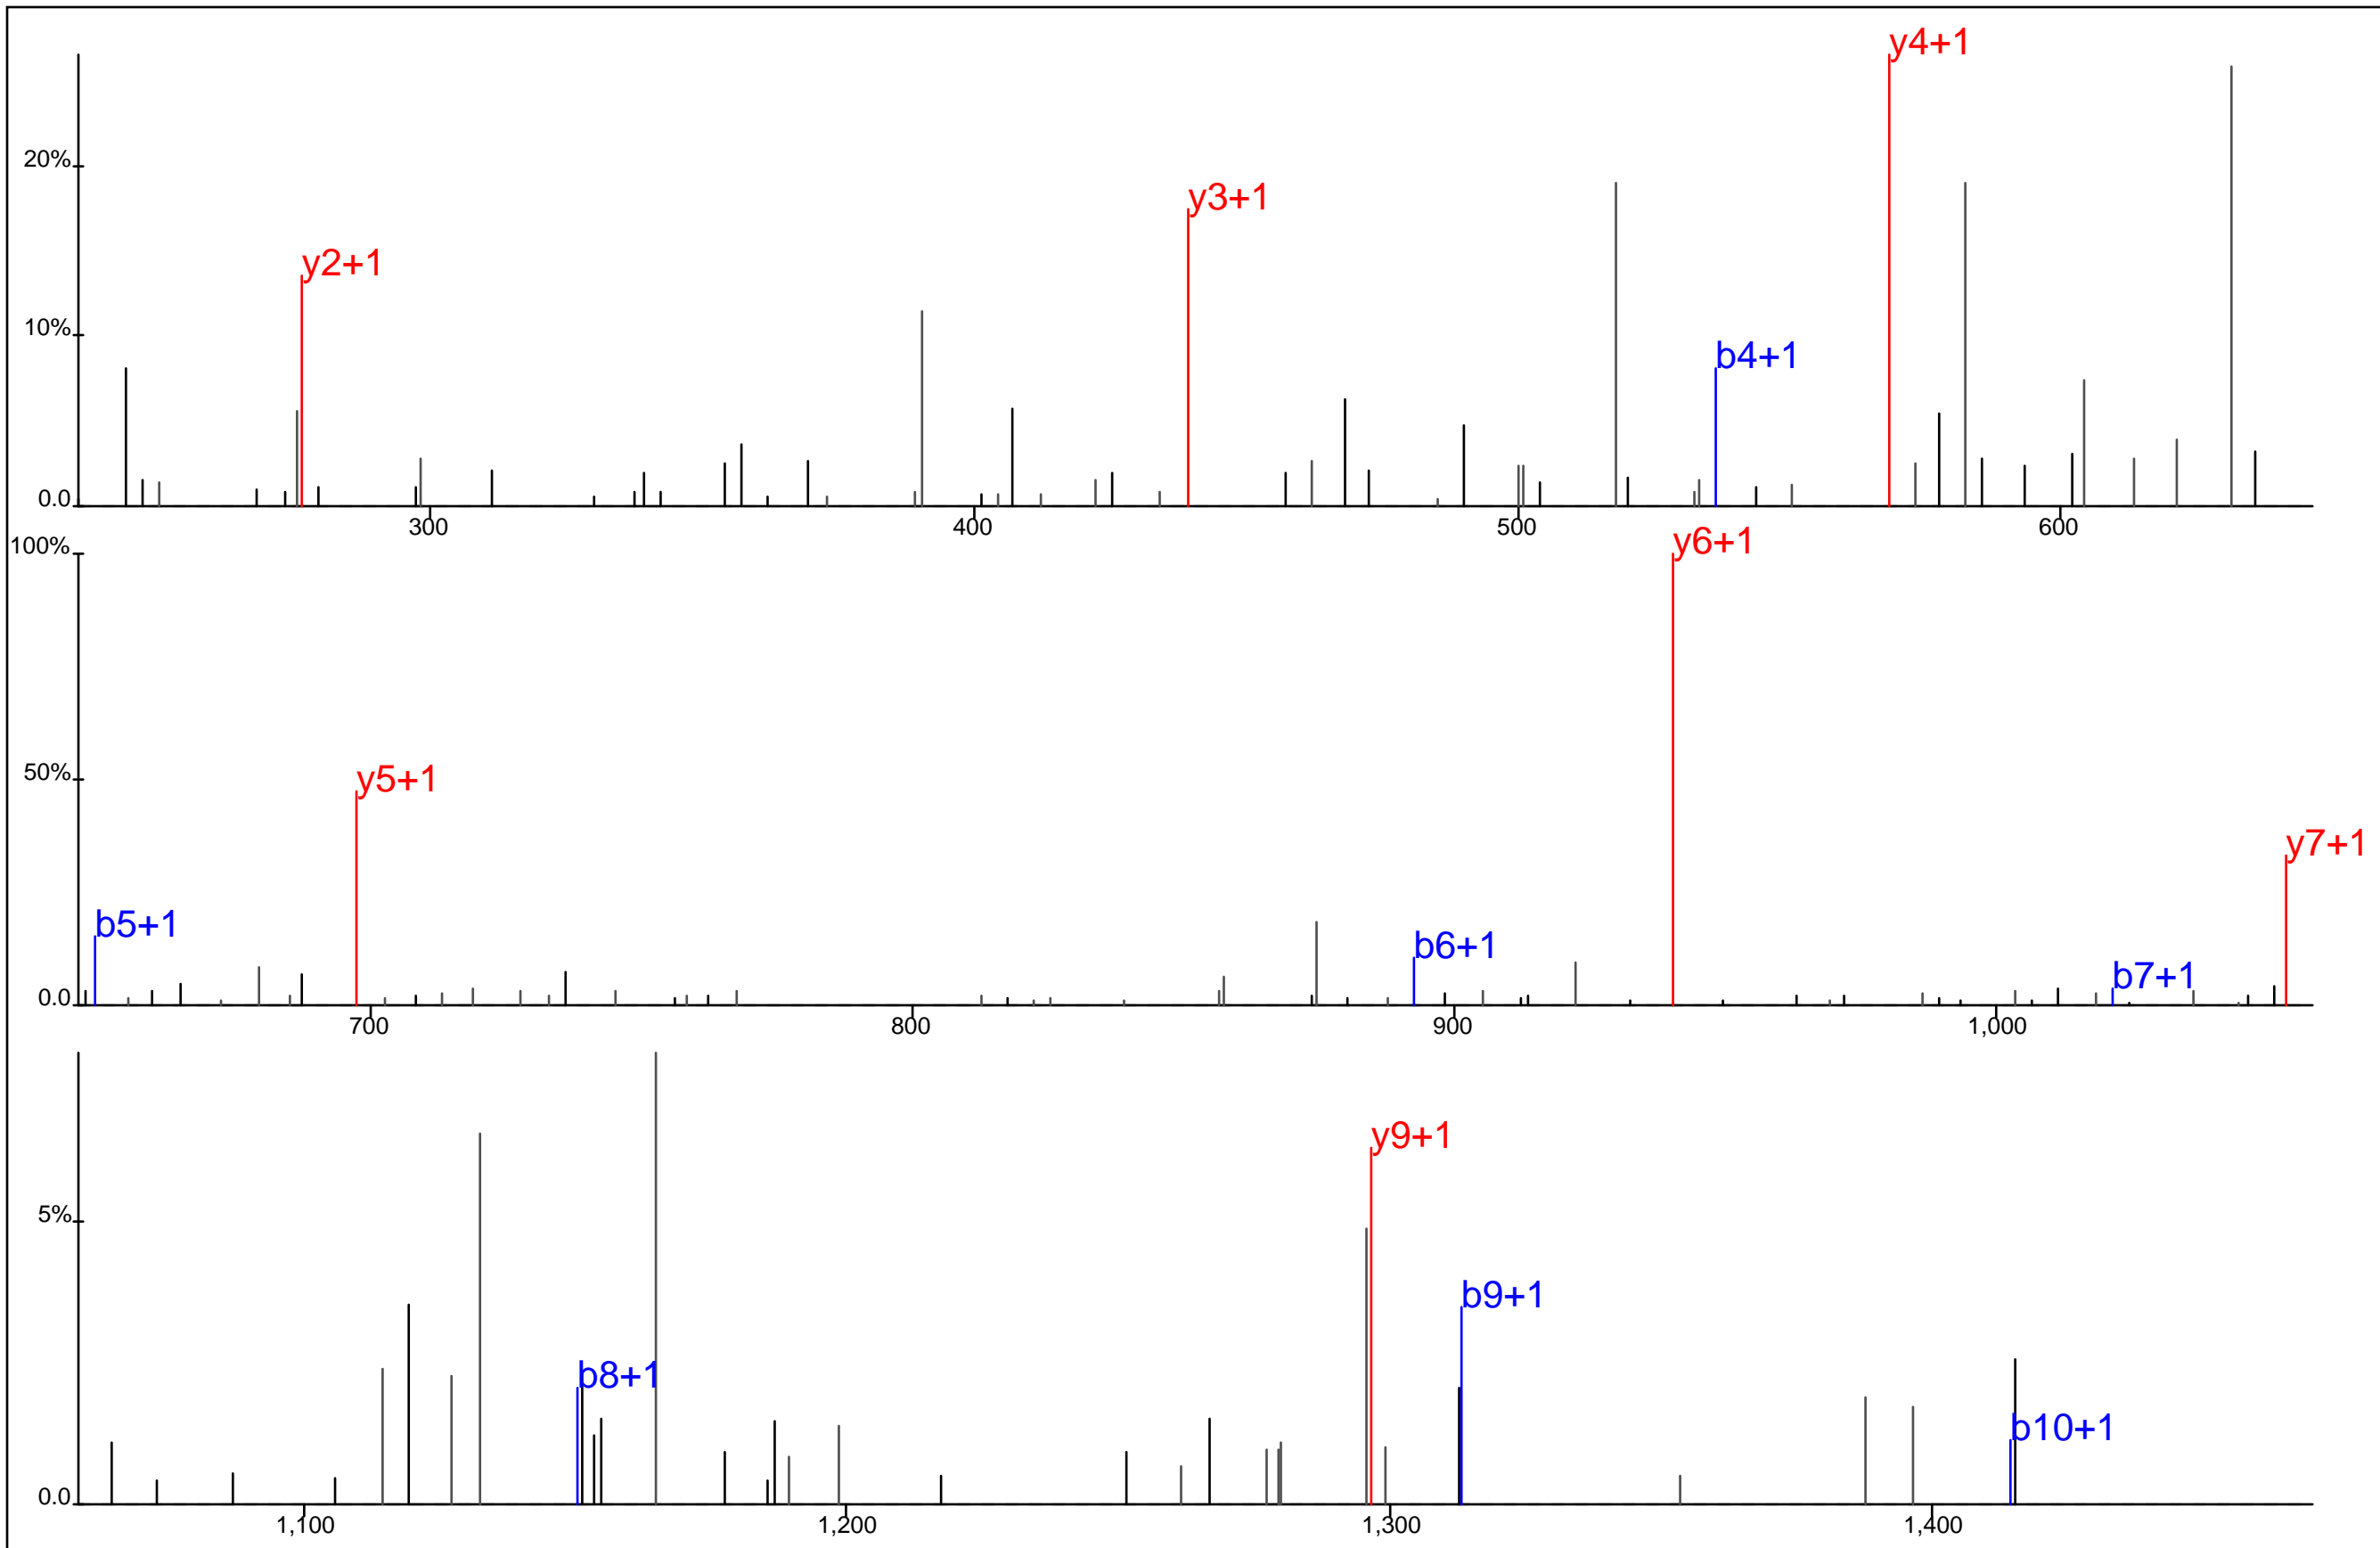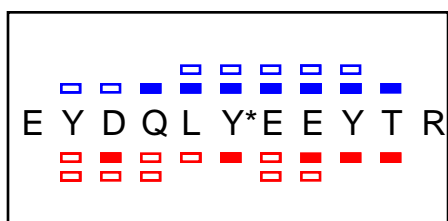

Protein Name: PI 3 kinase, regulatory subunit beta  
 gi Accession: 0  
 Precursor Mass: 794.8140+2  
 Delta Mass: 0.247 ppm  
 XCorr: 44.45

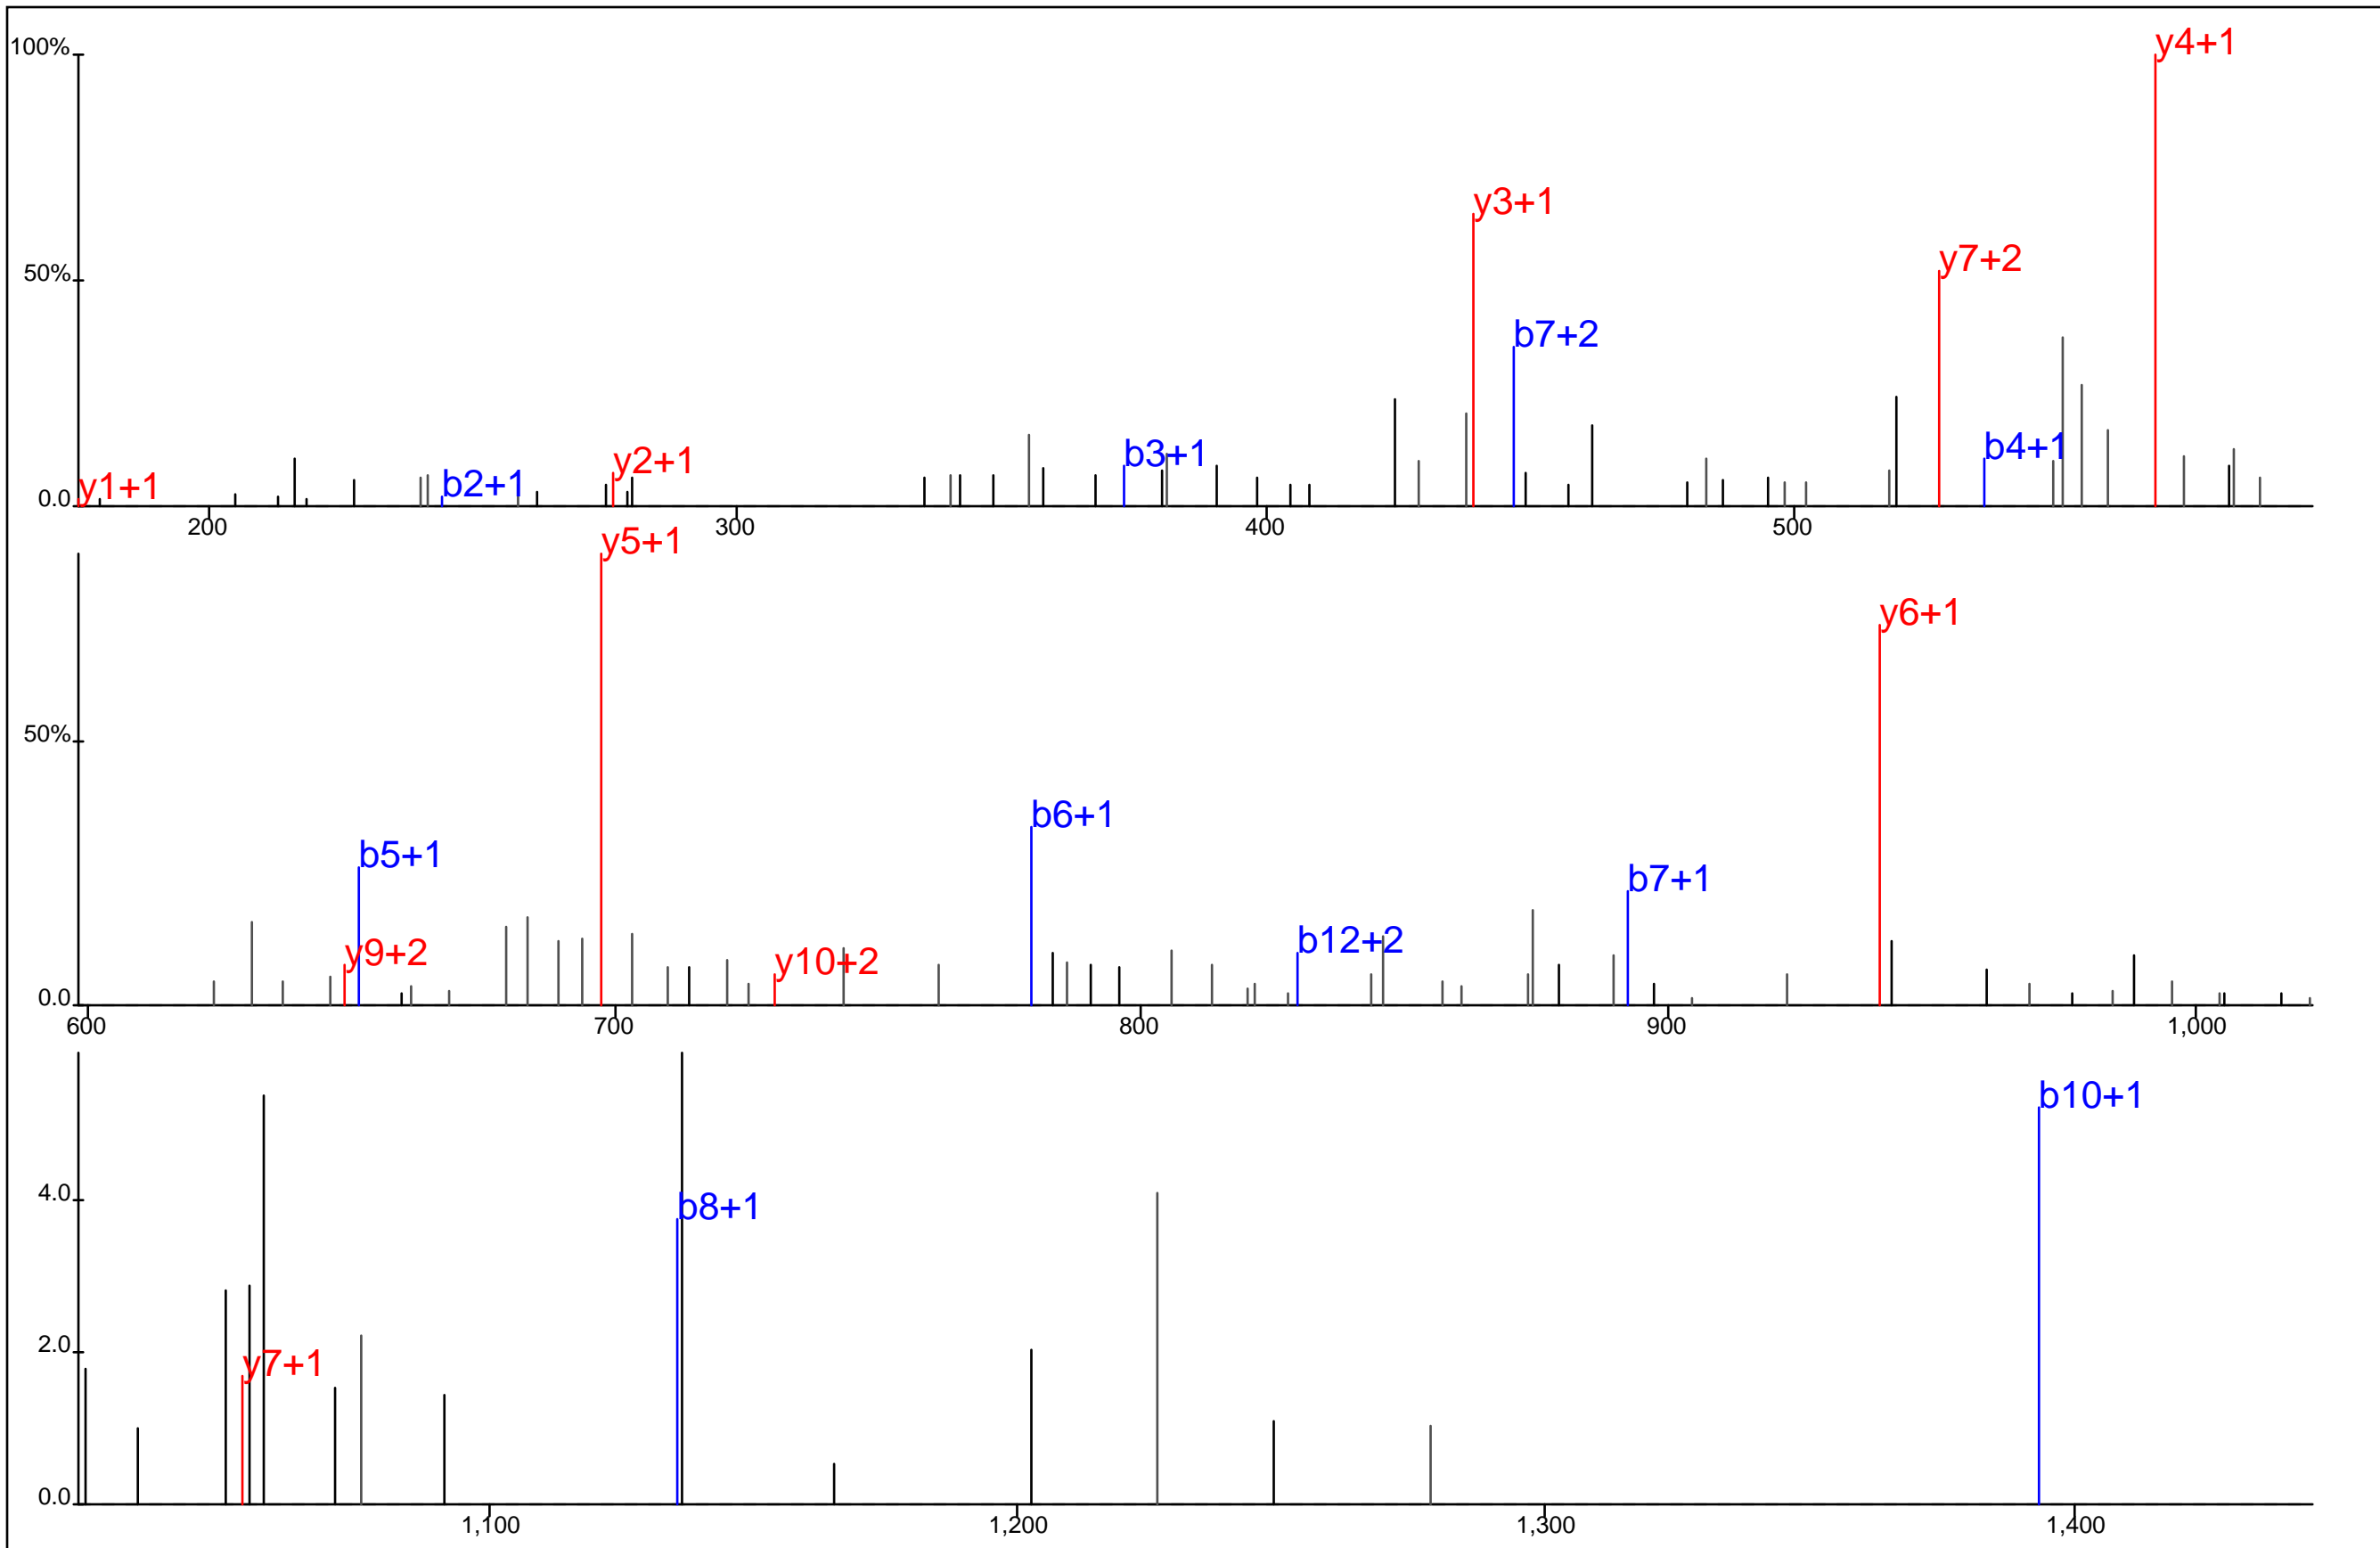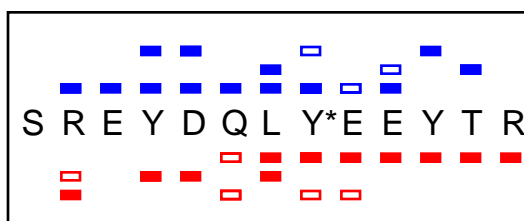

Protein Name: PI 3 kinase, regulatory subunit beta  
 gi Accession: 0  
 Precursor Mass: 611.2521+3  
 Delta Mass: 6.303 ppm  
 XCorr: 29.11

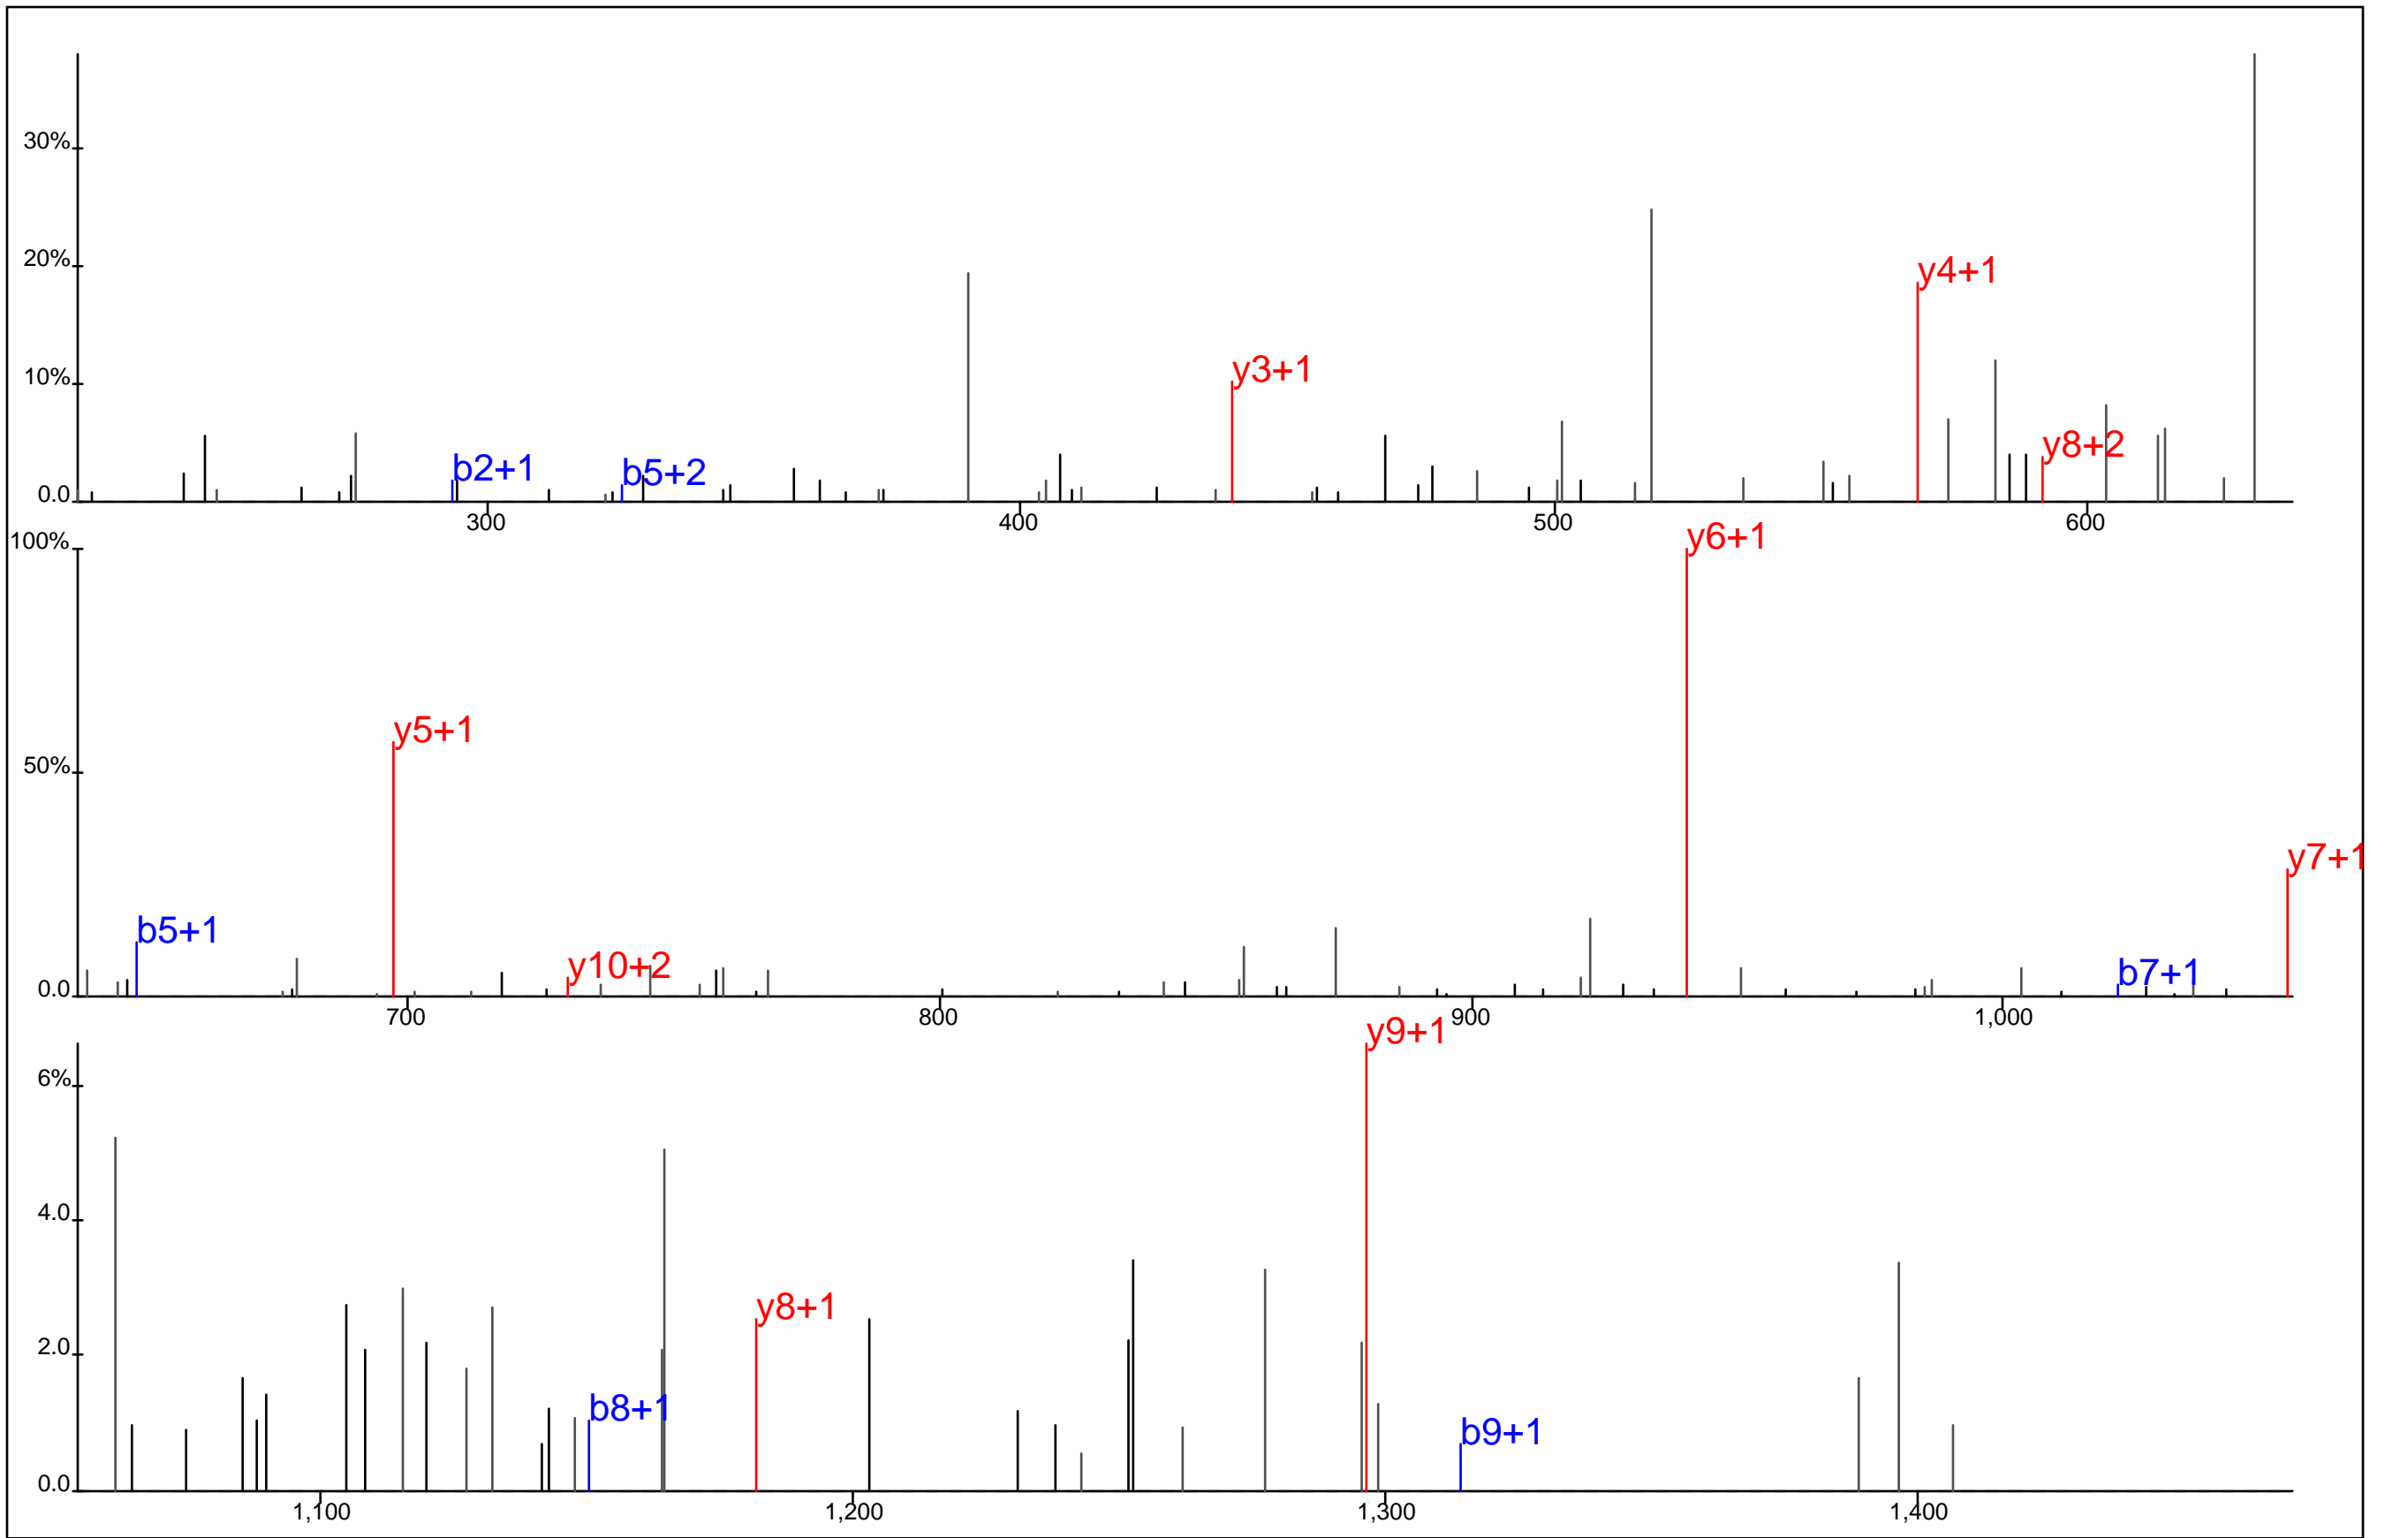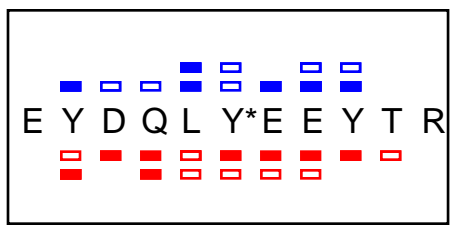

Protein Name: PI 3 kinase, regulatory subunit beta  
 gi Accession: 0  
 Precursor Mass: 794.8143+2  
 Delta Mass: 0.708 ppm  
 XCorr: 31.35





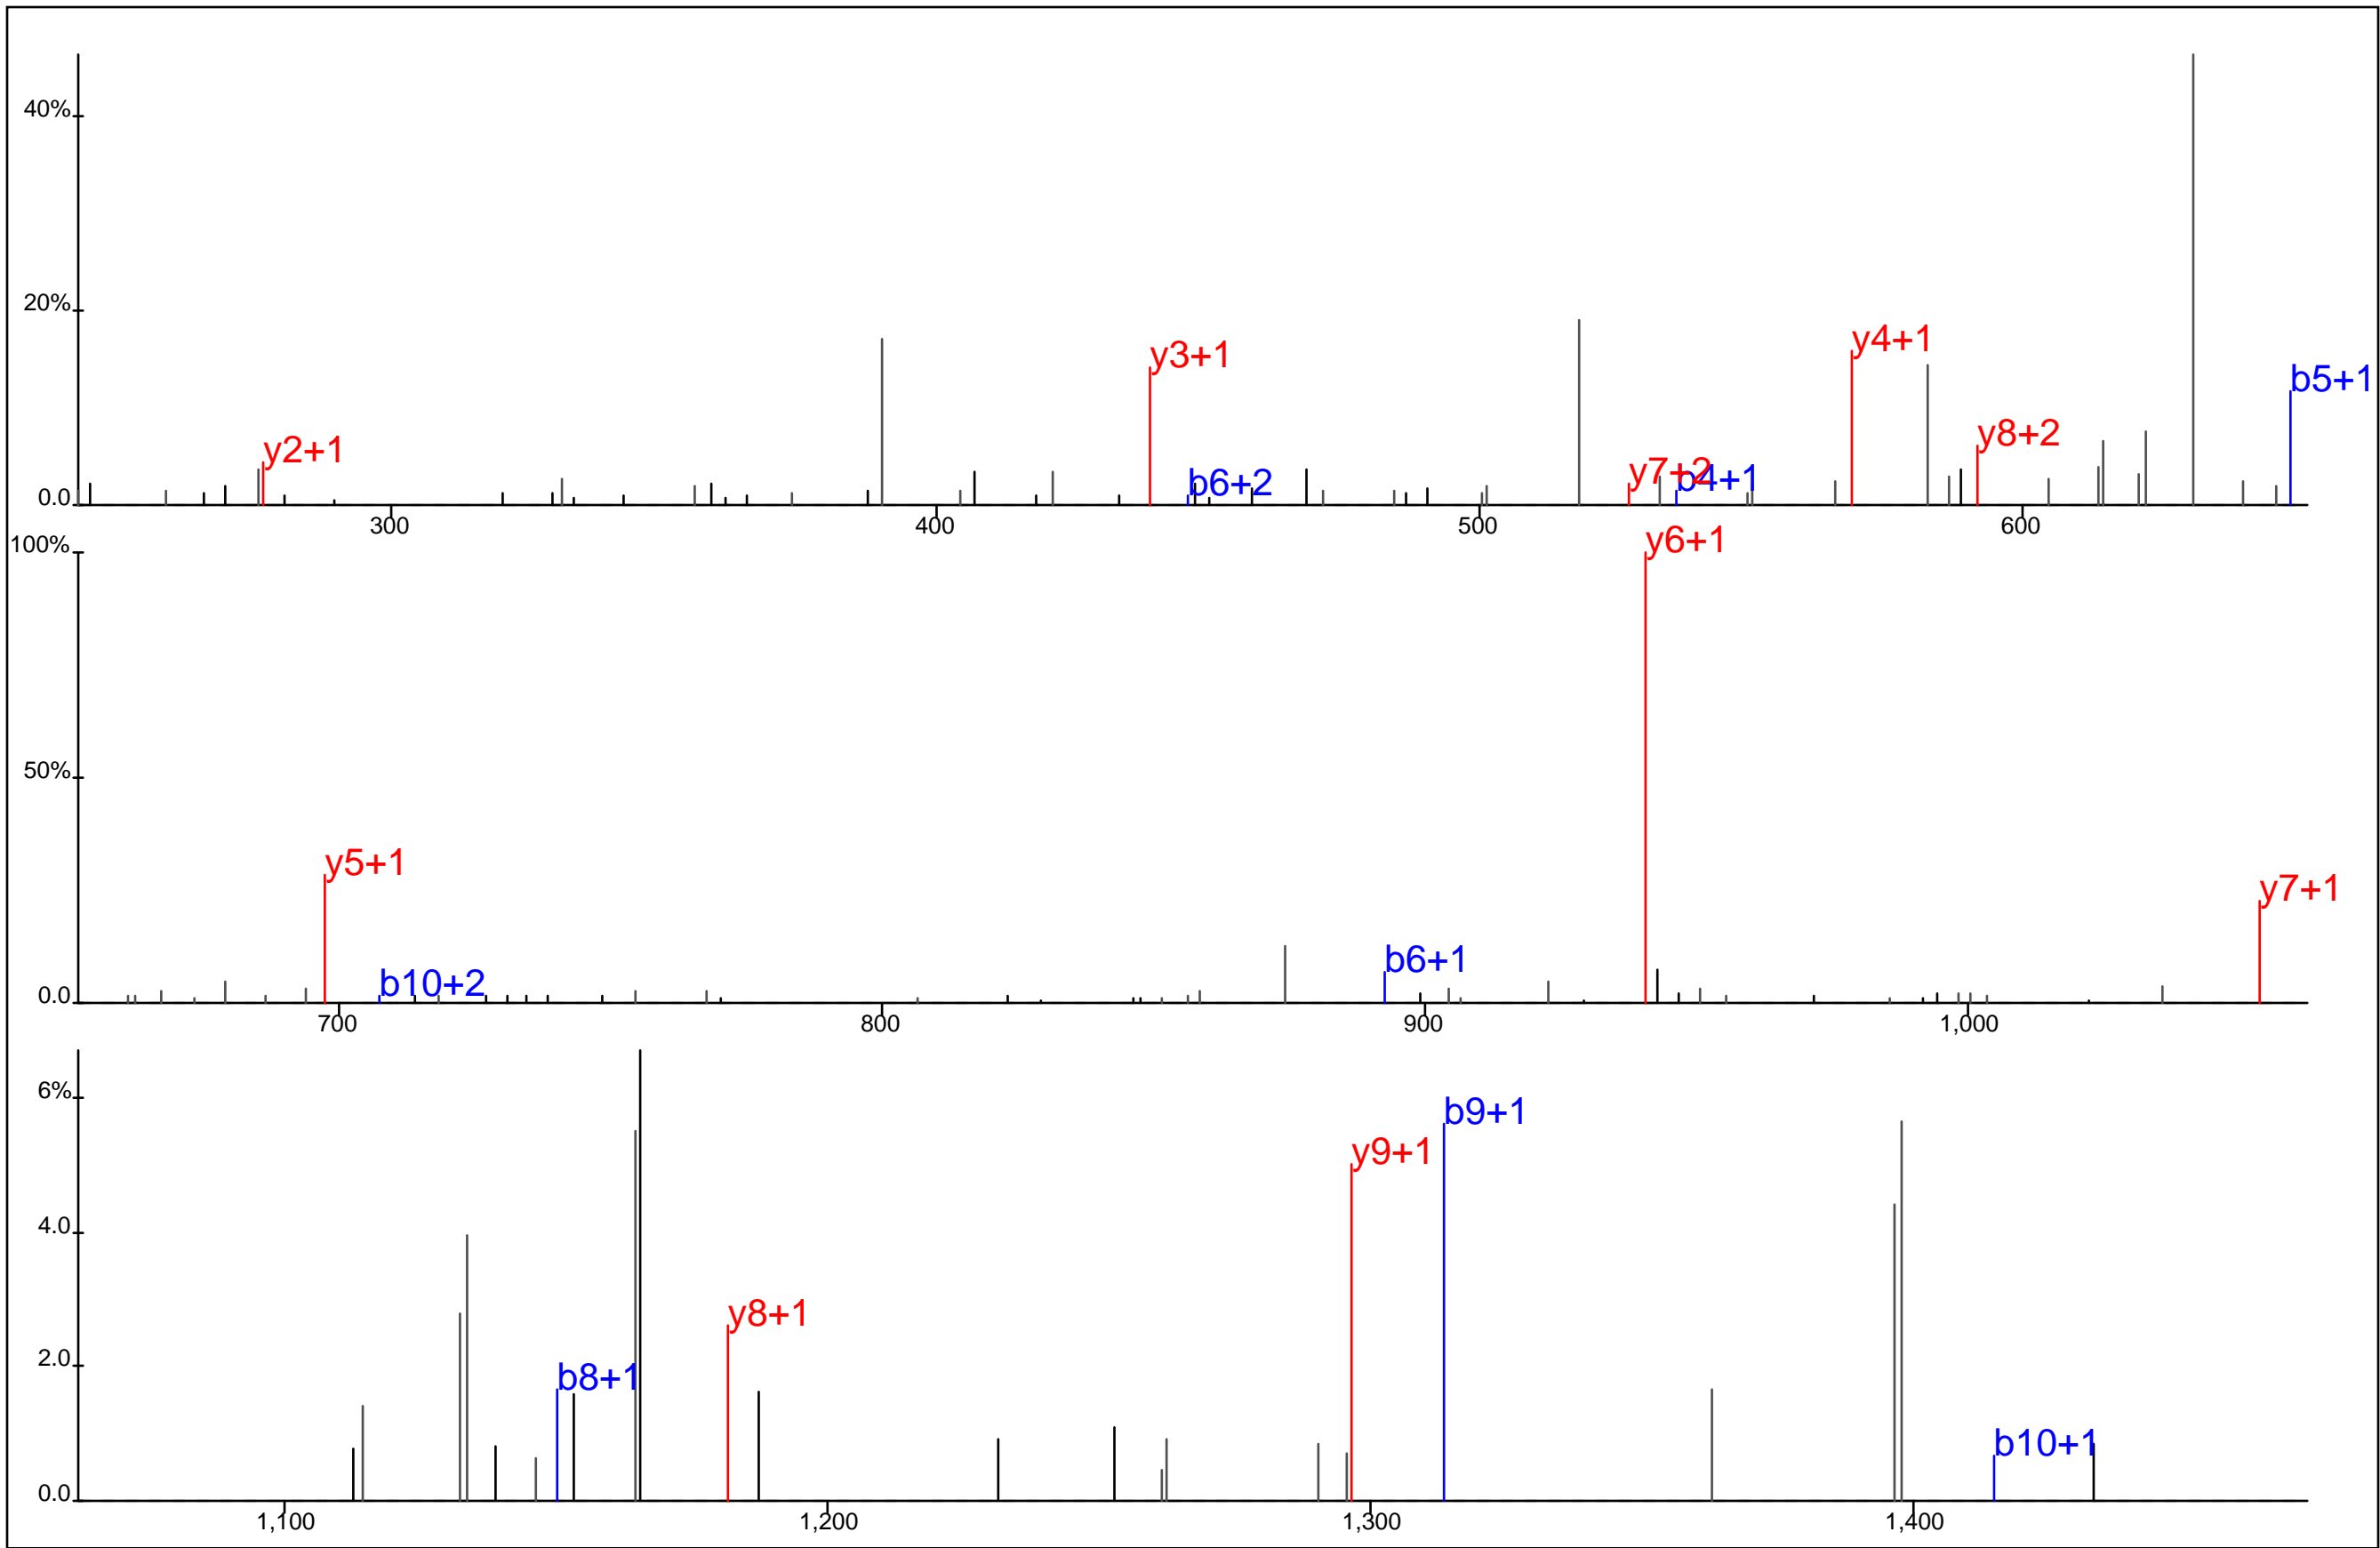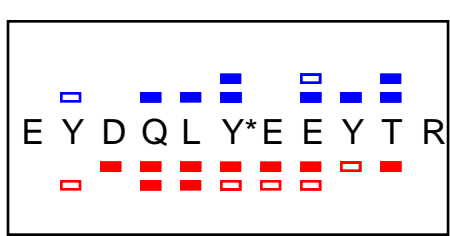

Protein Name: PI 3 kinase, regulatory subunit beta  
 gi Accession: 0  
 Precursor Mass: 794.8117+2  
 Delta Mass: 2.596 ppm  
 XCorr: 51.53

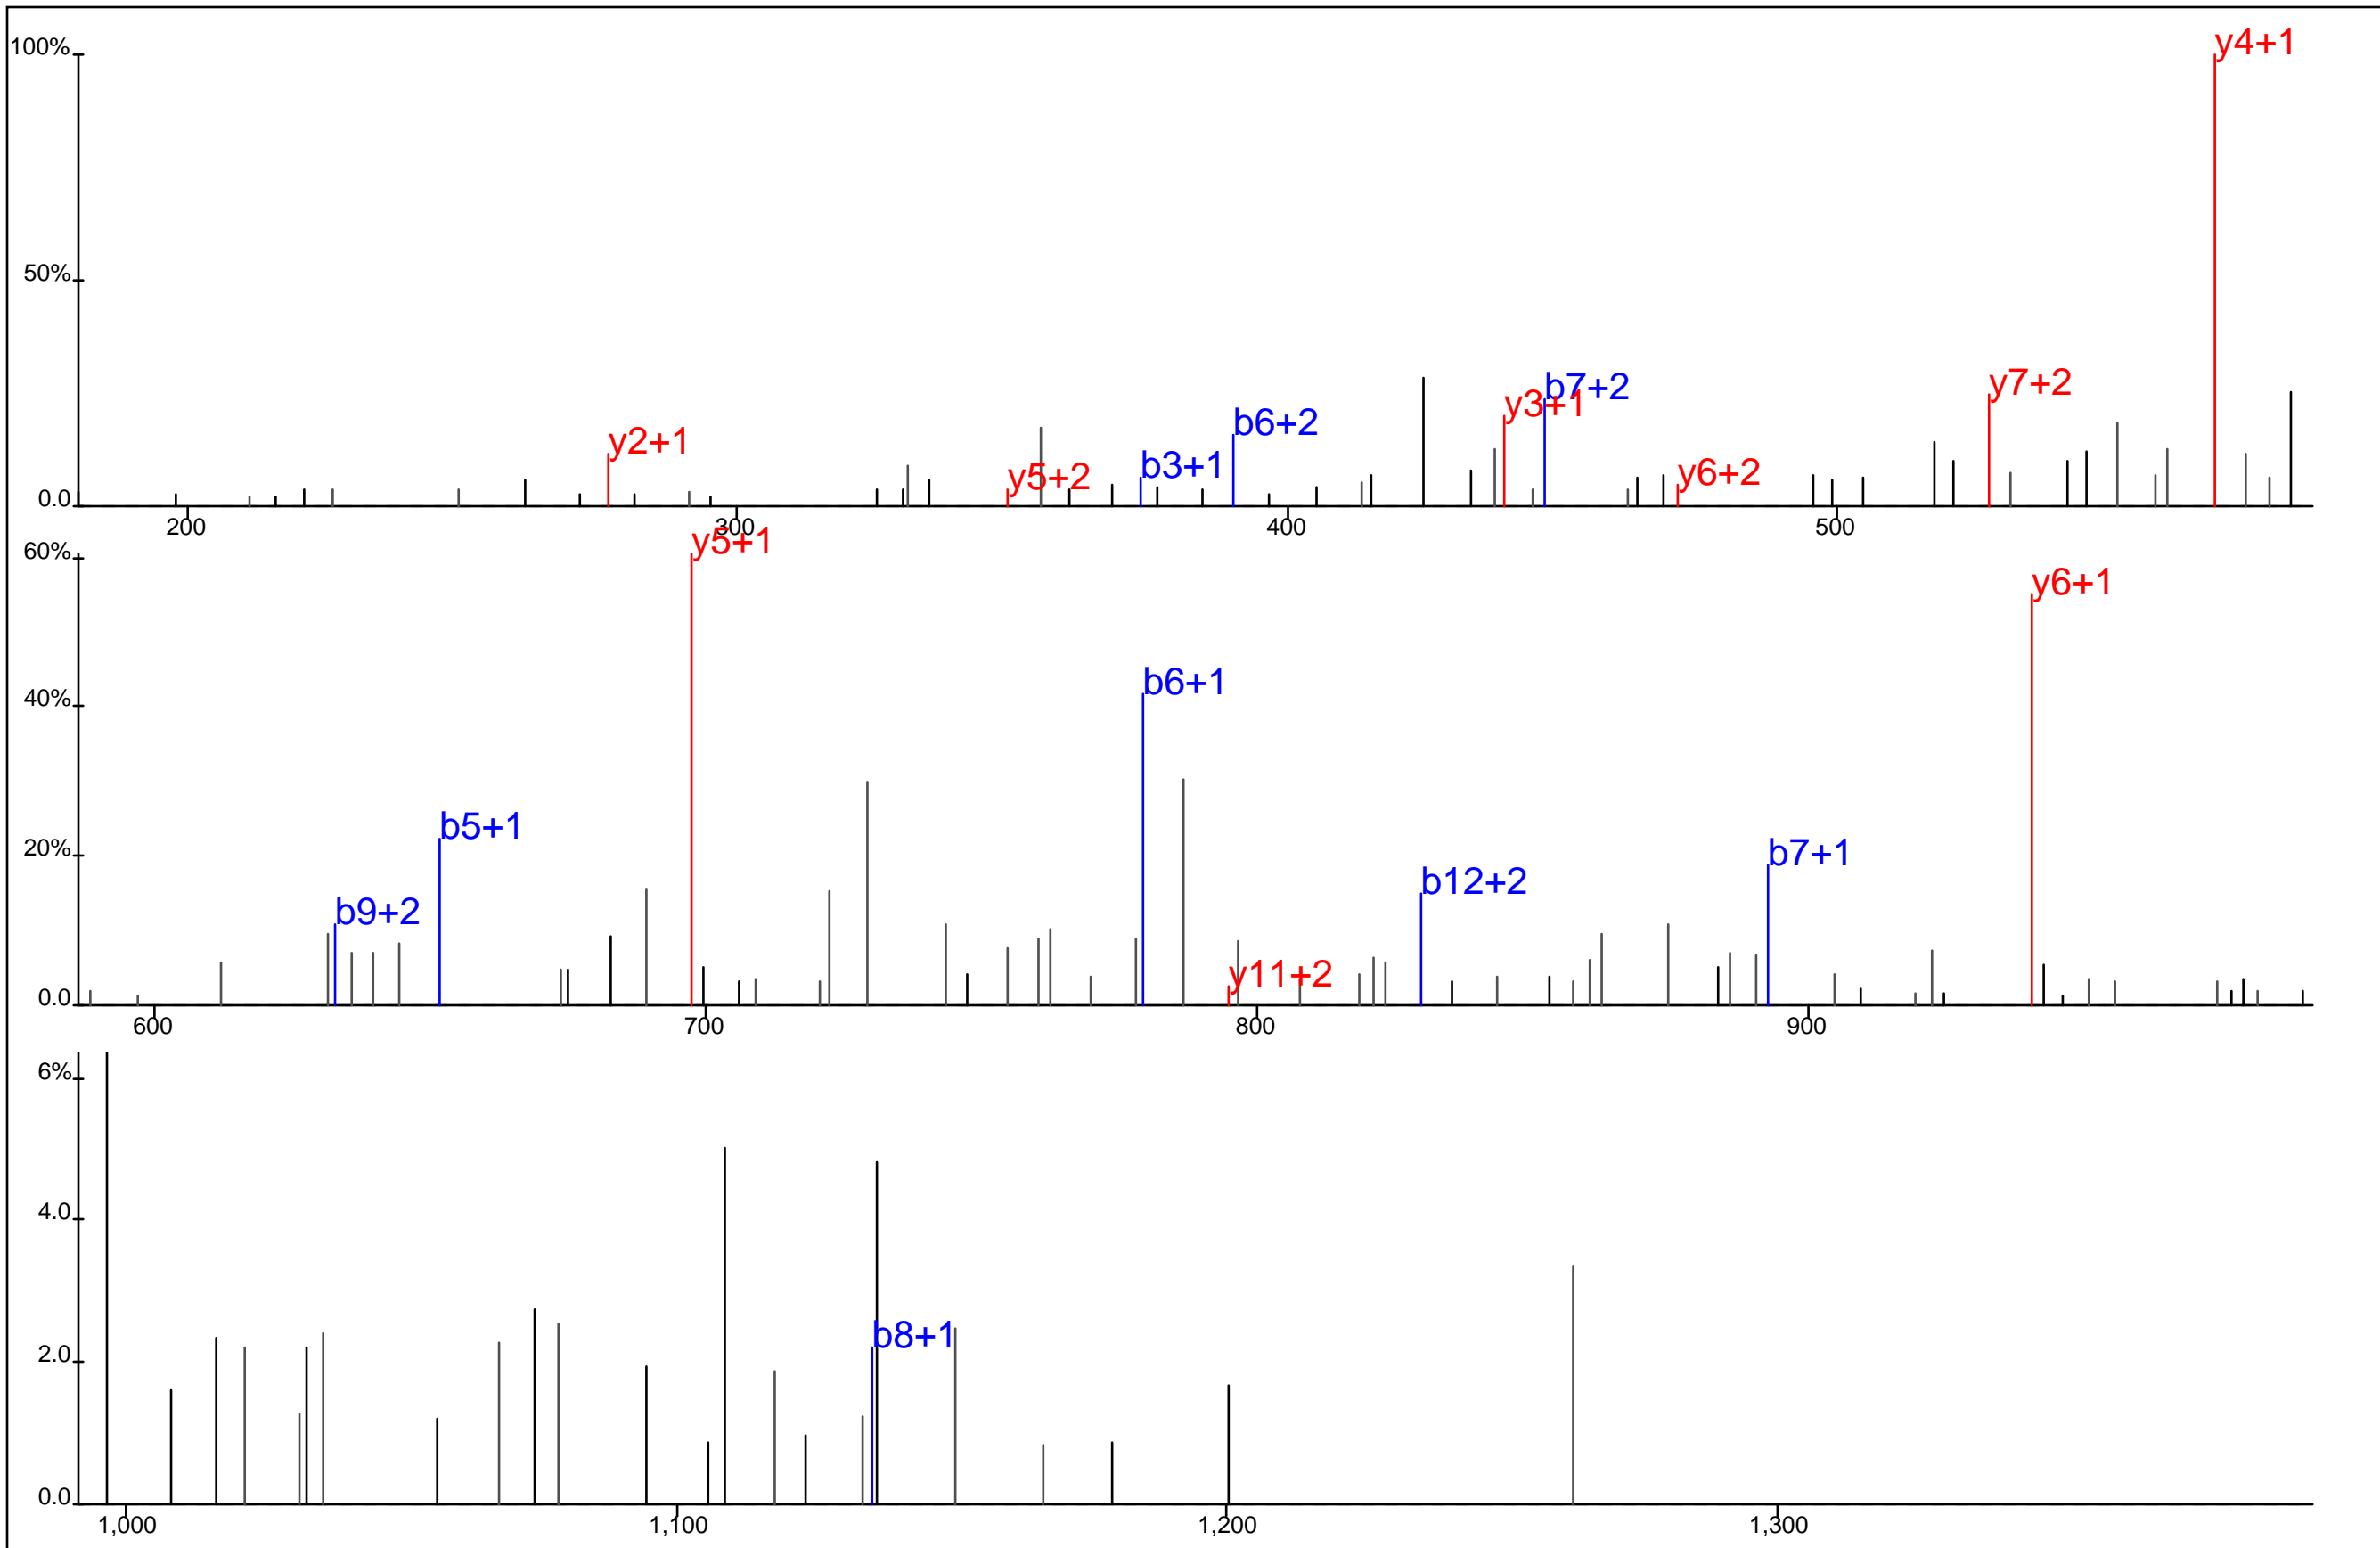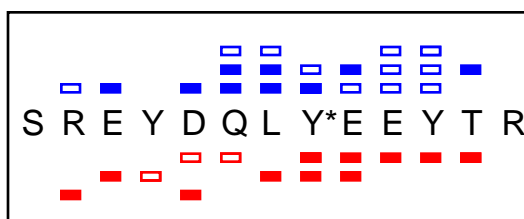

Protein Name: PI 3 kinase, regulatory subunit beta  
 gi Accession: 0  
 Precursor Mass: 611.2538+3  
 Delta Mass: 3.504 ppm  
 XCorr: 28.37

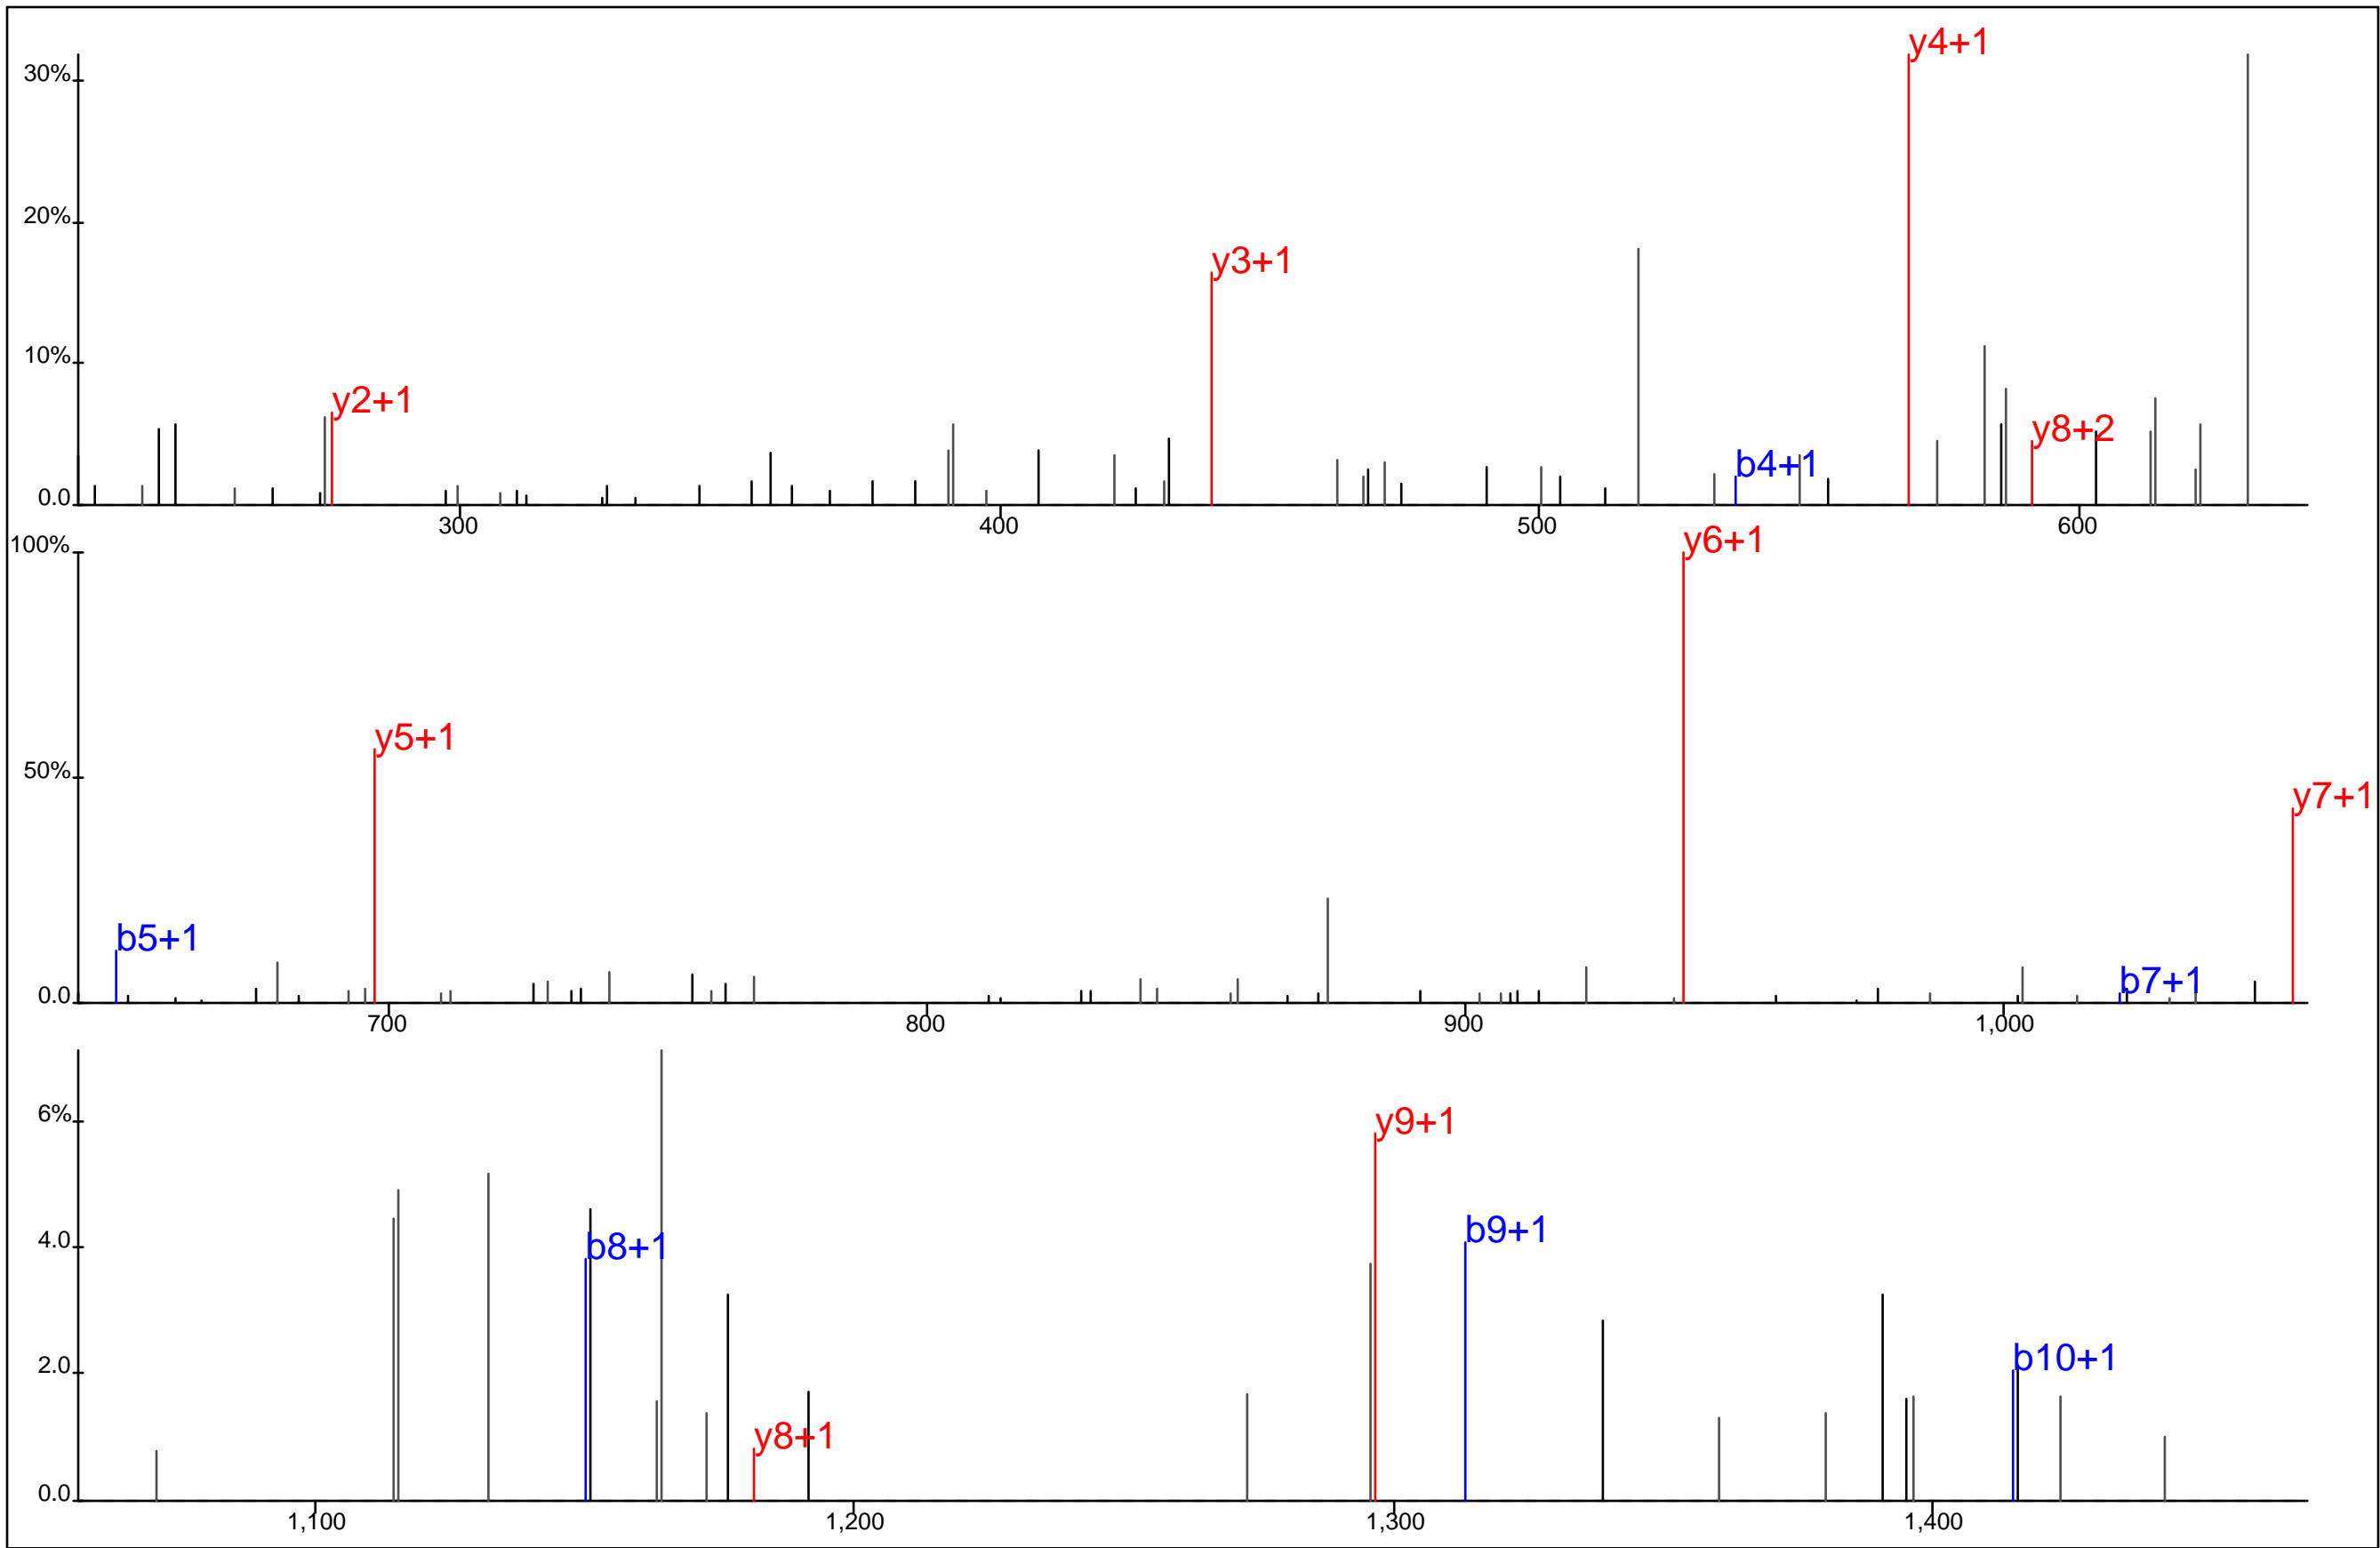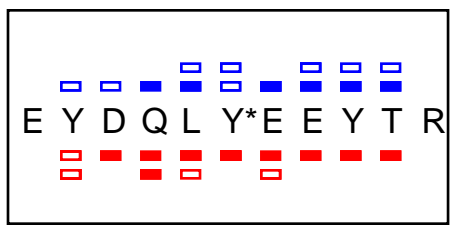

Protein Name: PI 3 kinase, regulatory subunit beta  
 gi Accession: 0  
 Precursor Mass: 794.8132+2  
 Delta Mass: 0.753 ppm  
 XCorr: 41.08

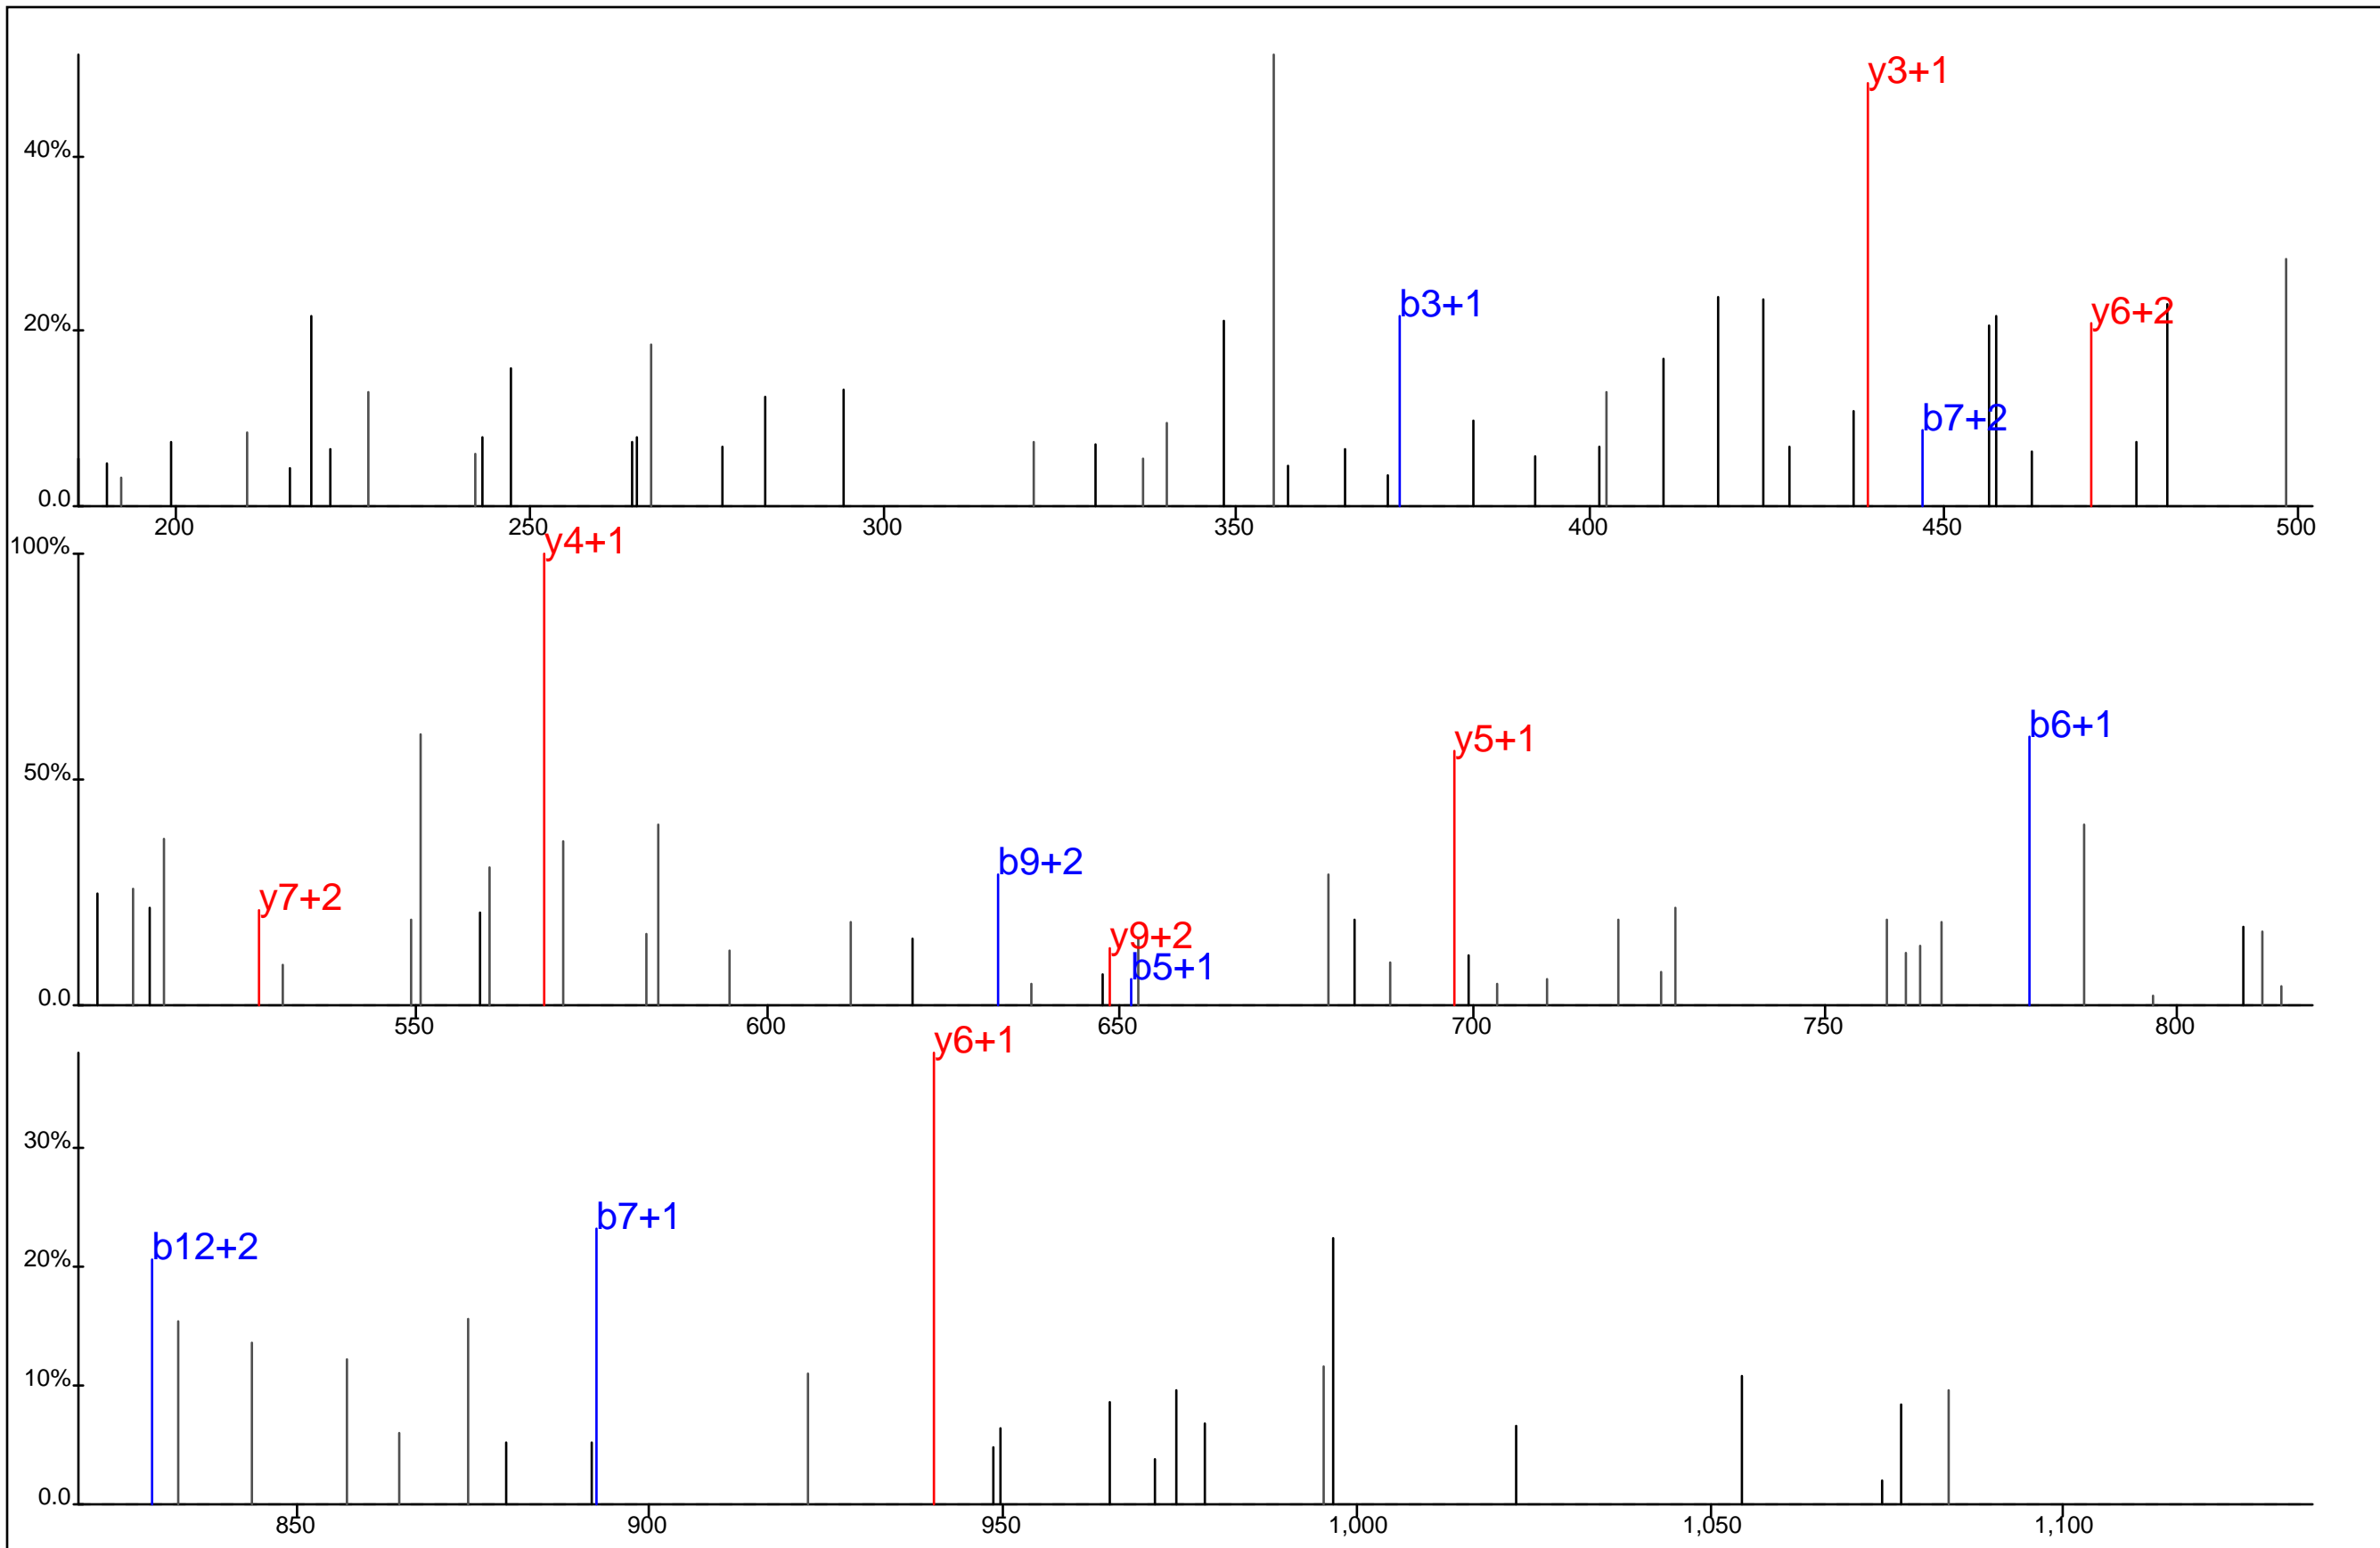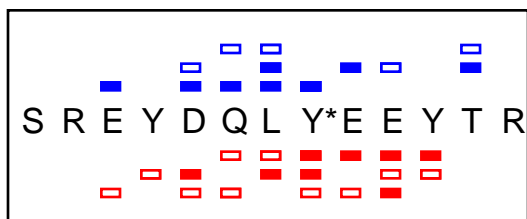

Protein Name: PI 3 kinase, regulatory subunit beta  
 gi Accession: 0  
 Precursor Mass: 611.2554+3  
 Delta Mass: 1.005 ppm  
 XCorr: 33.95

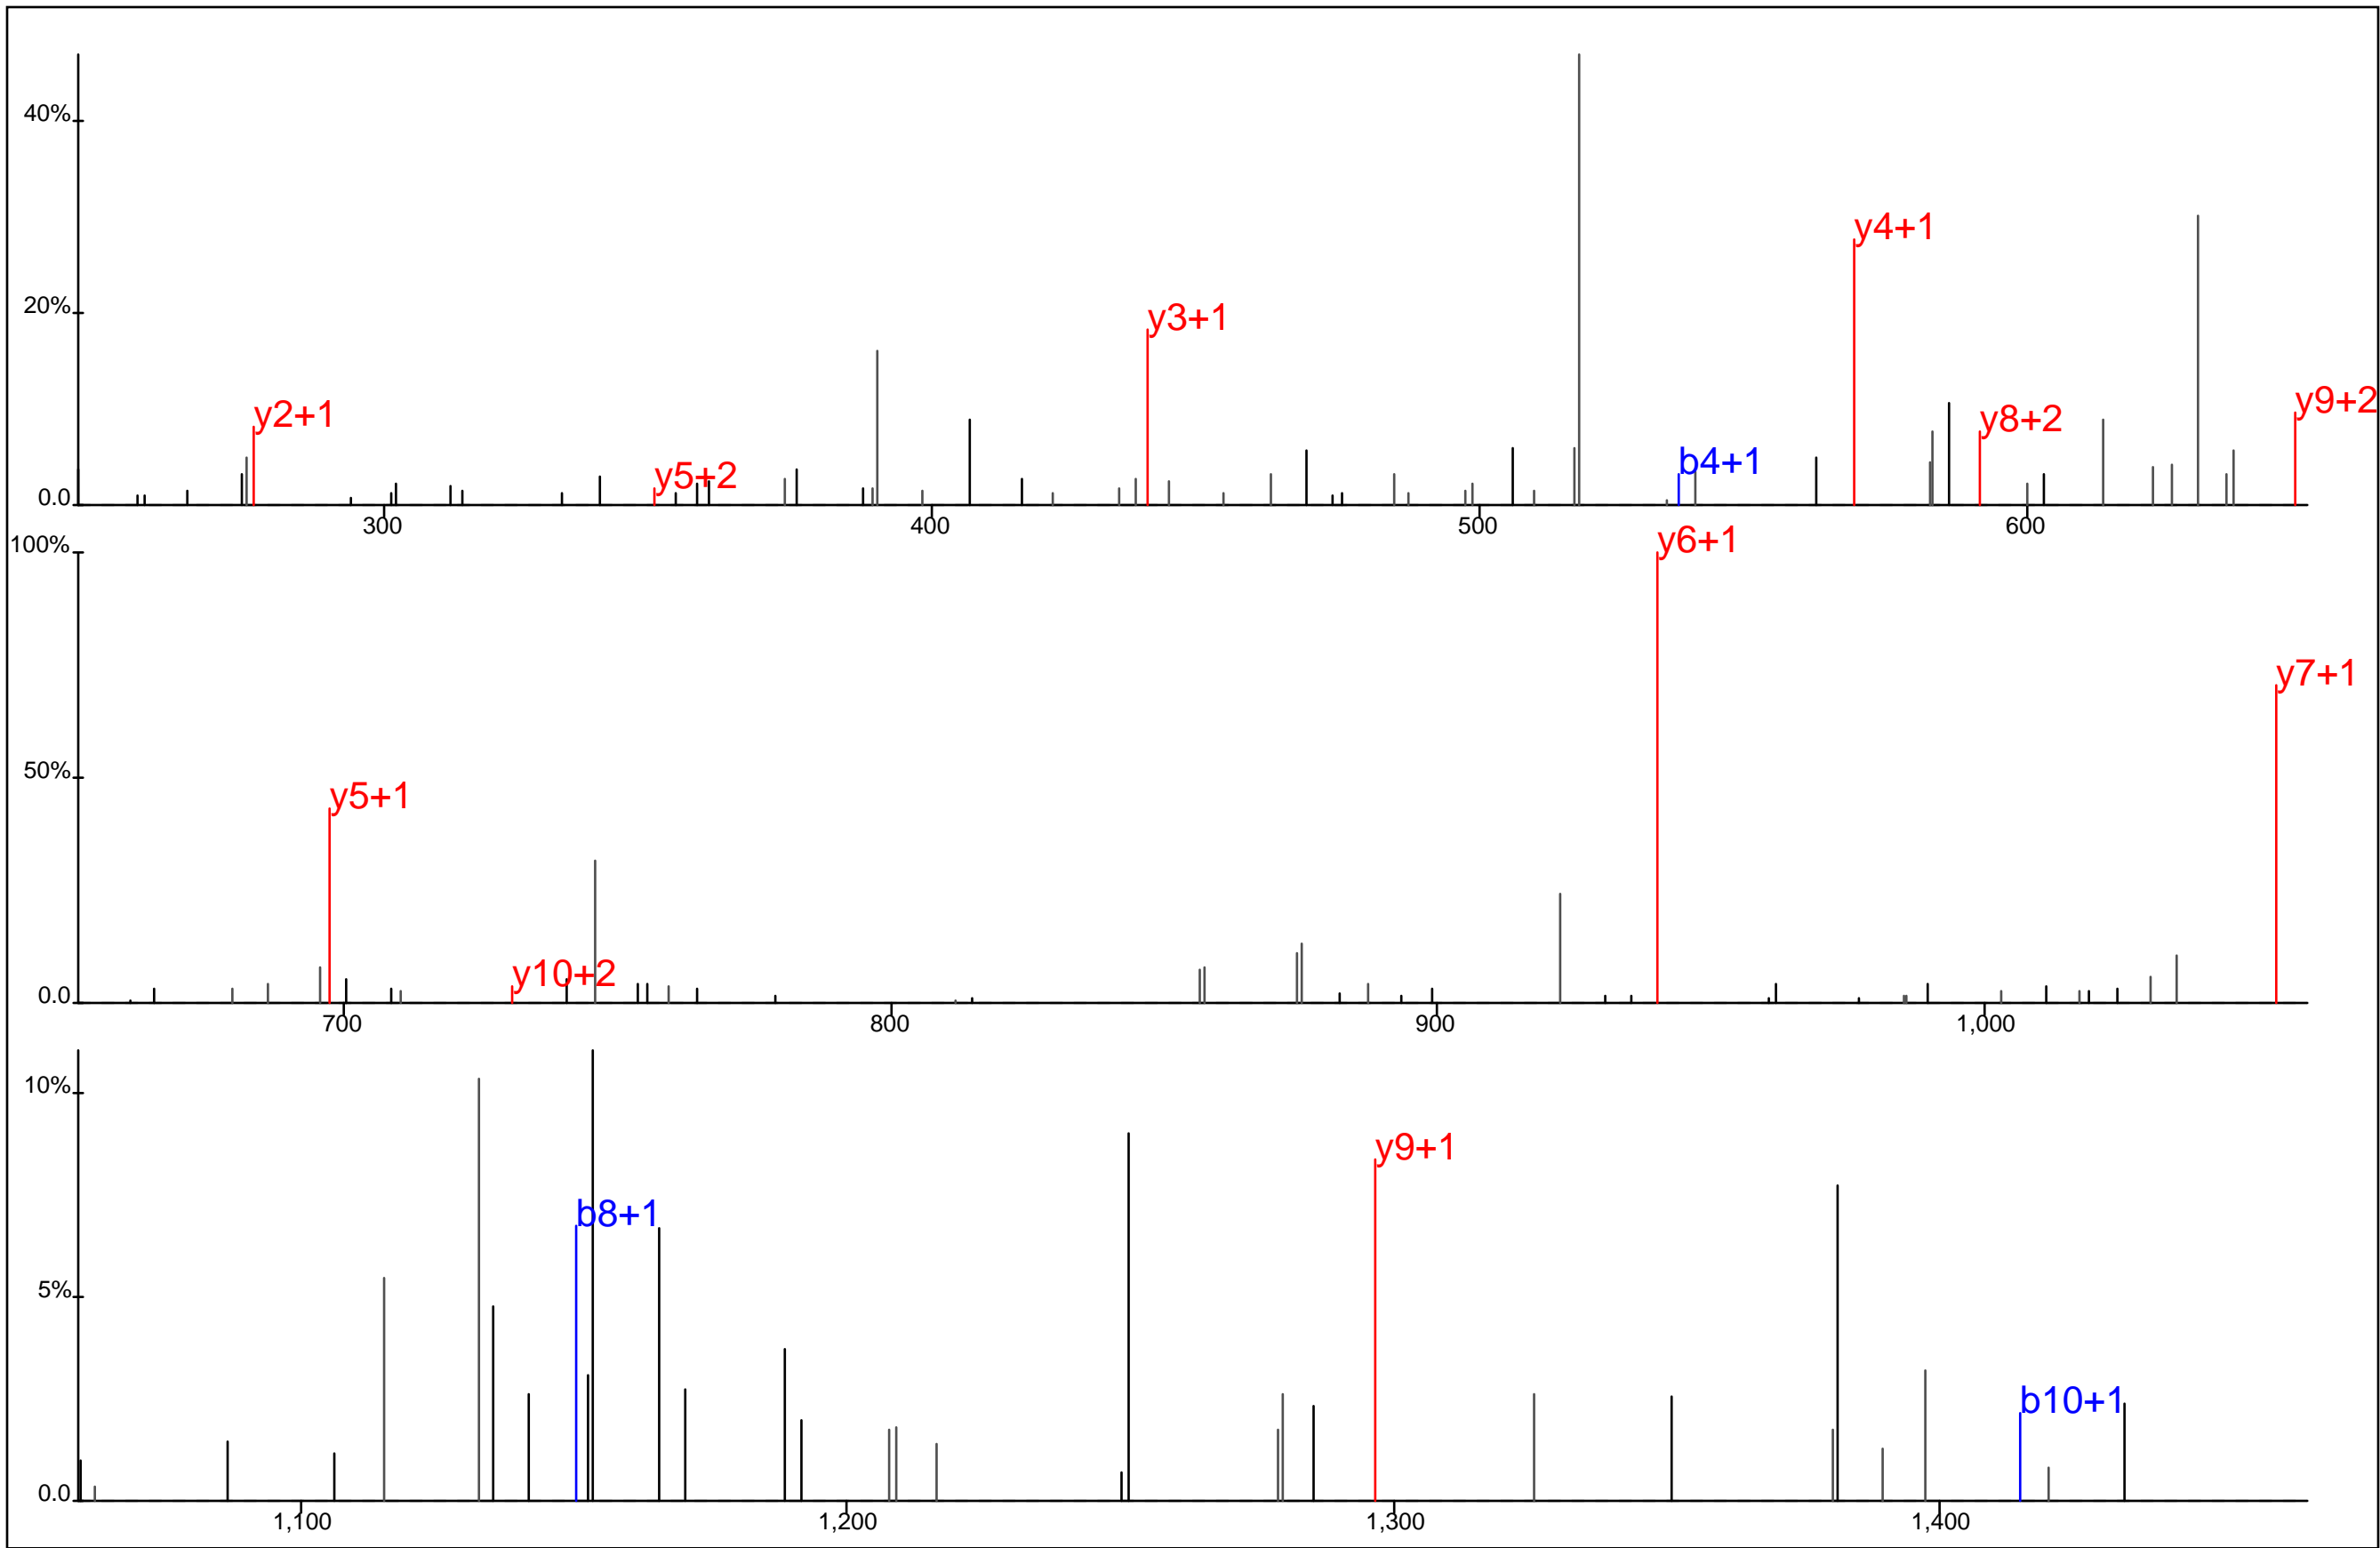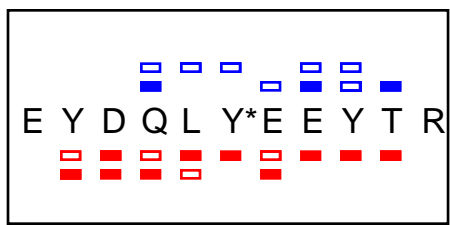

Protein Name: PI 3 kinase, regulatory subunit beta  
 gi Accession: 0  
 Precursor Mass: 794.8112+2  
 Delta Mass: 3.288 ppm  
 XCorr: 46.19

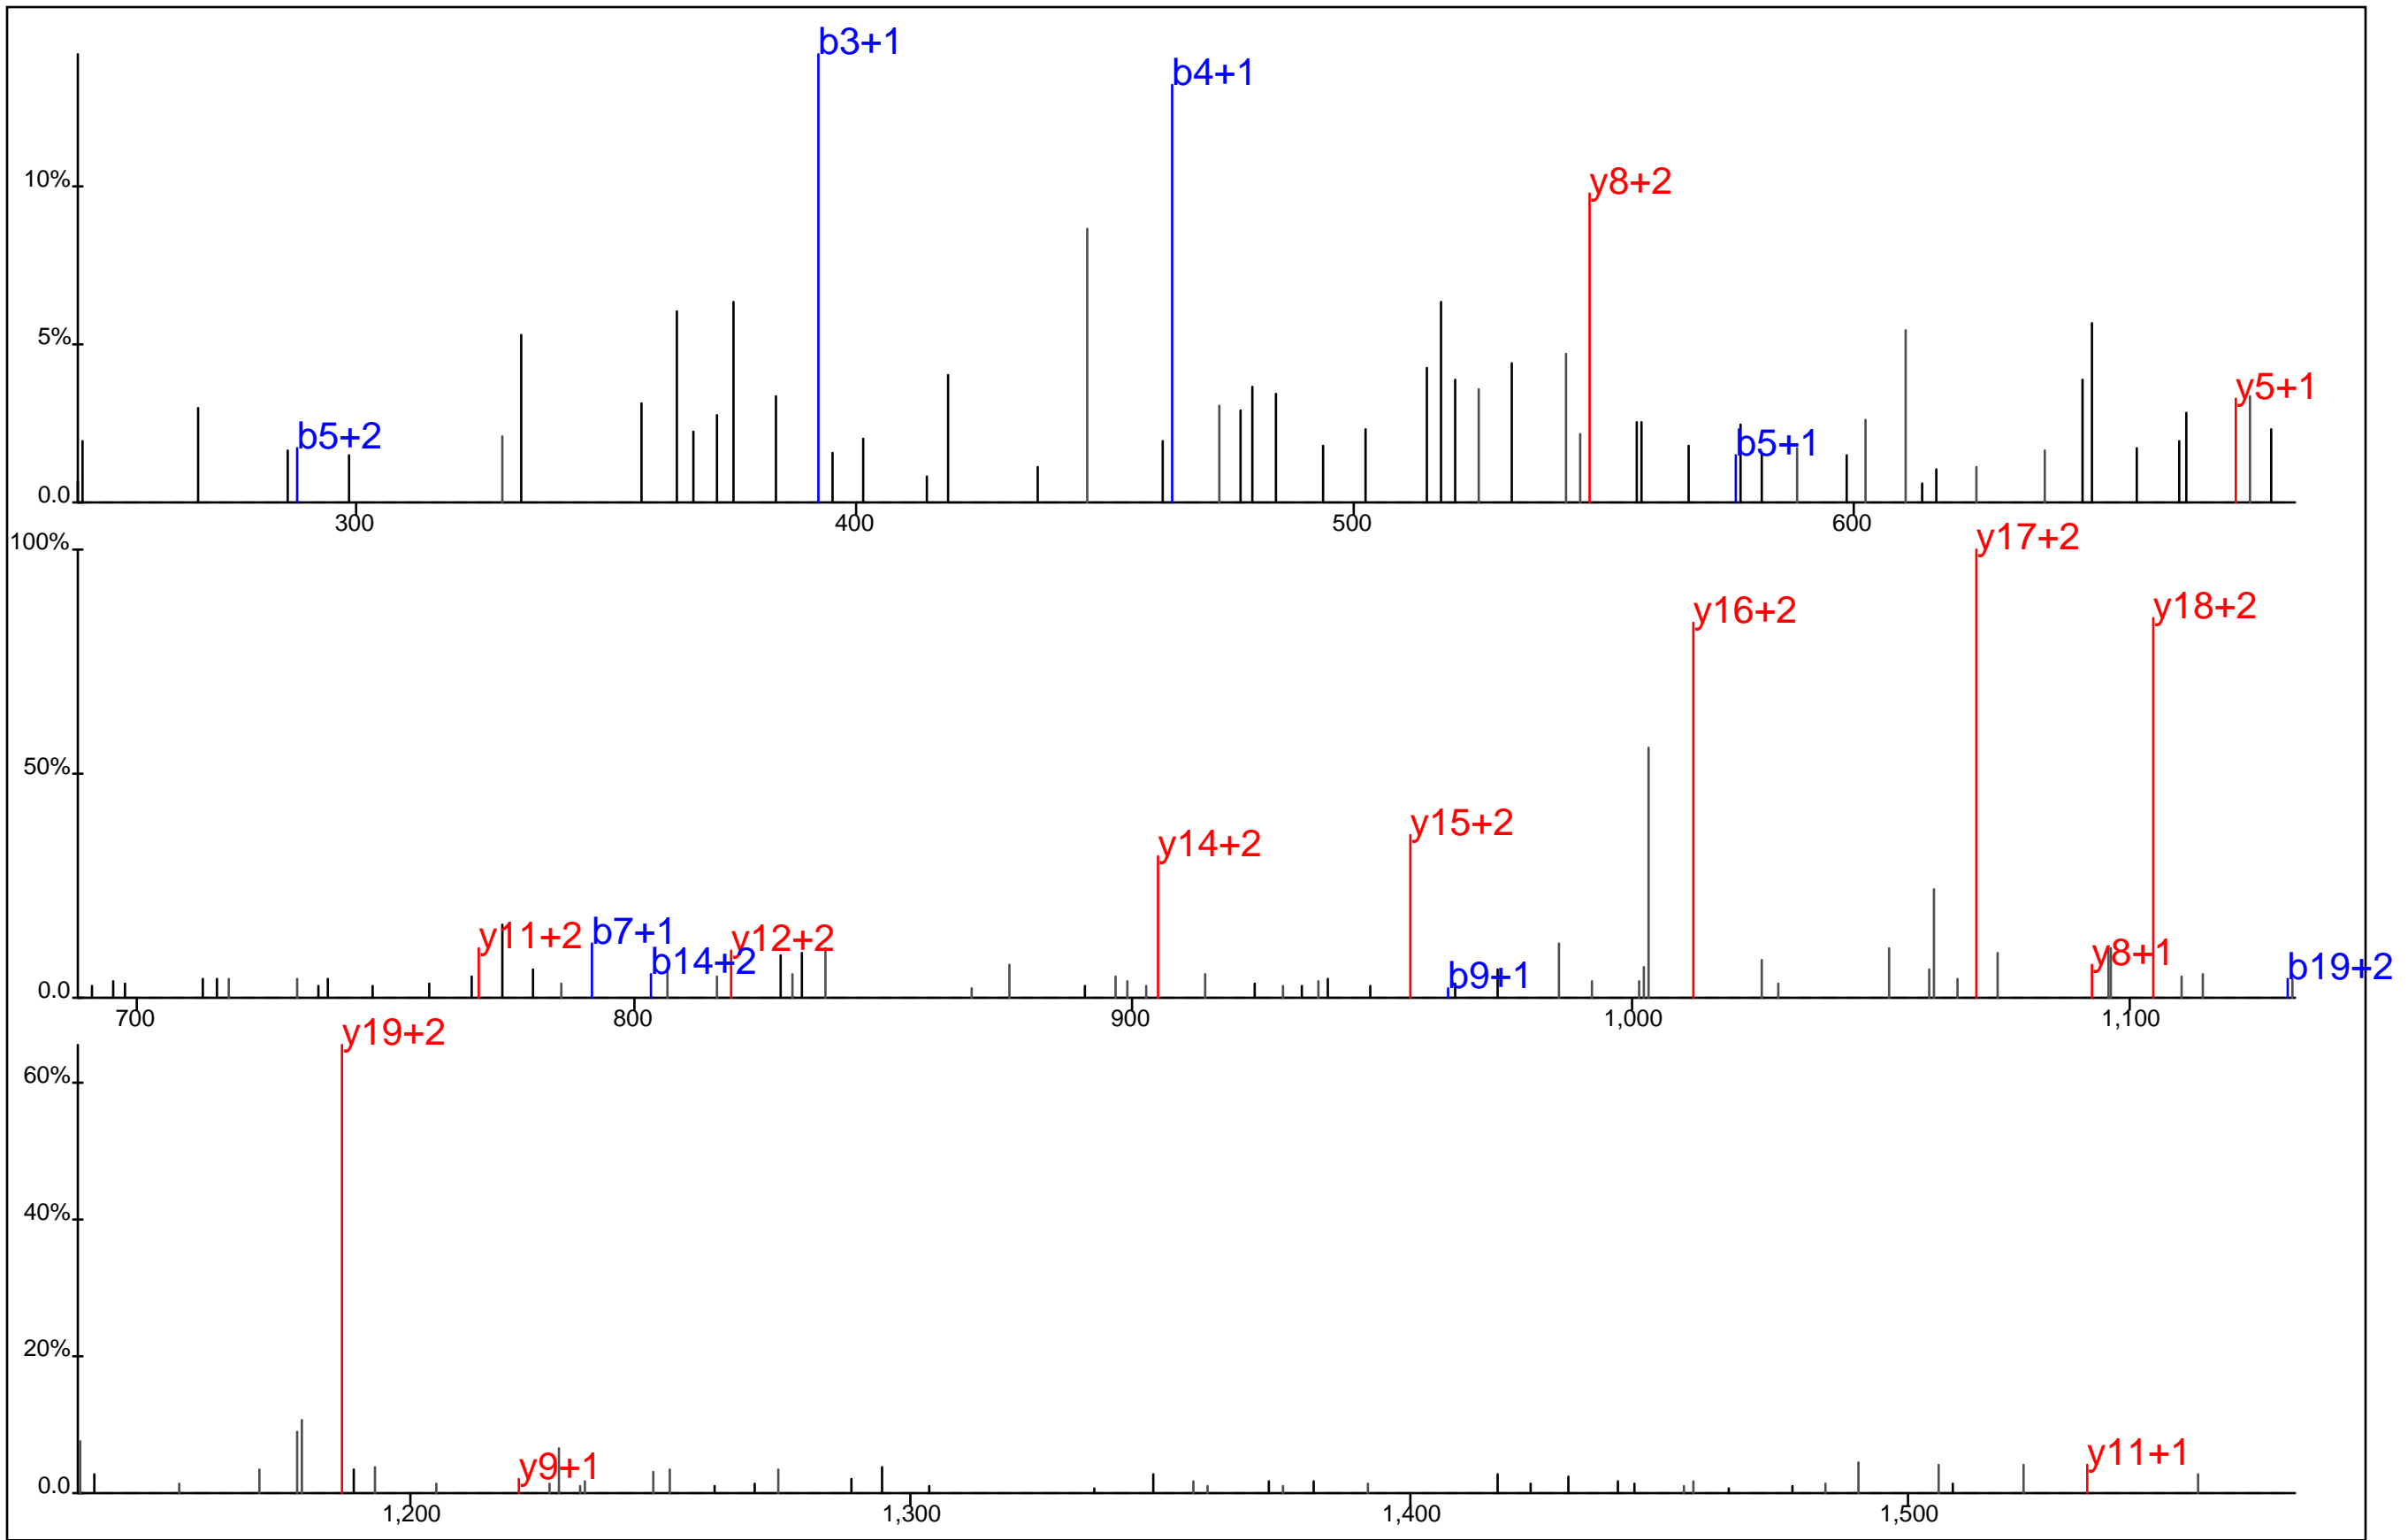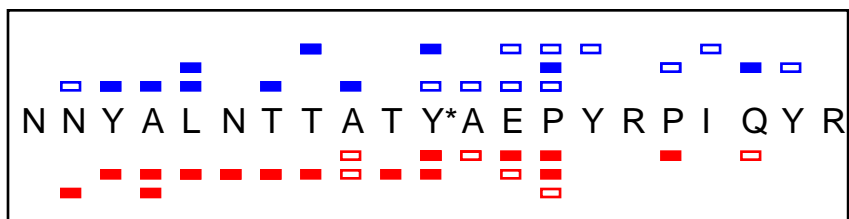

Protein Name: Plakophilin 4  
 gi Accession: 0  
 Precursor Mass: 867.0667+3  
 Delta Mass: 4.707 ppm  
 XCorr: 27.53

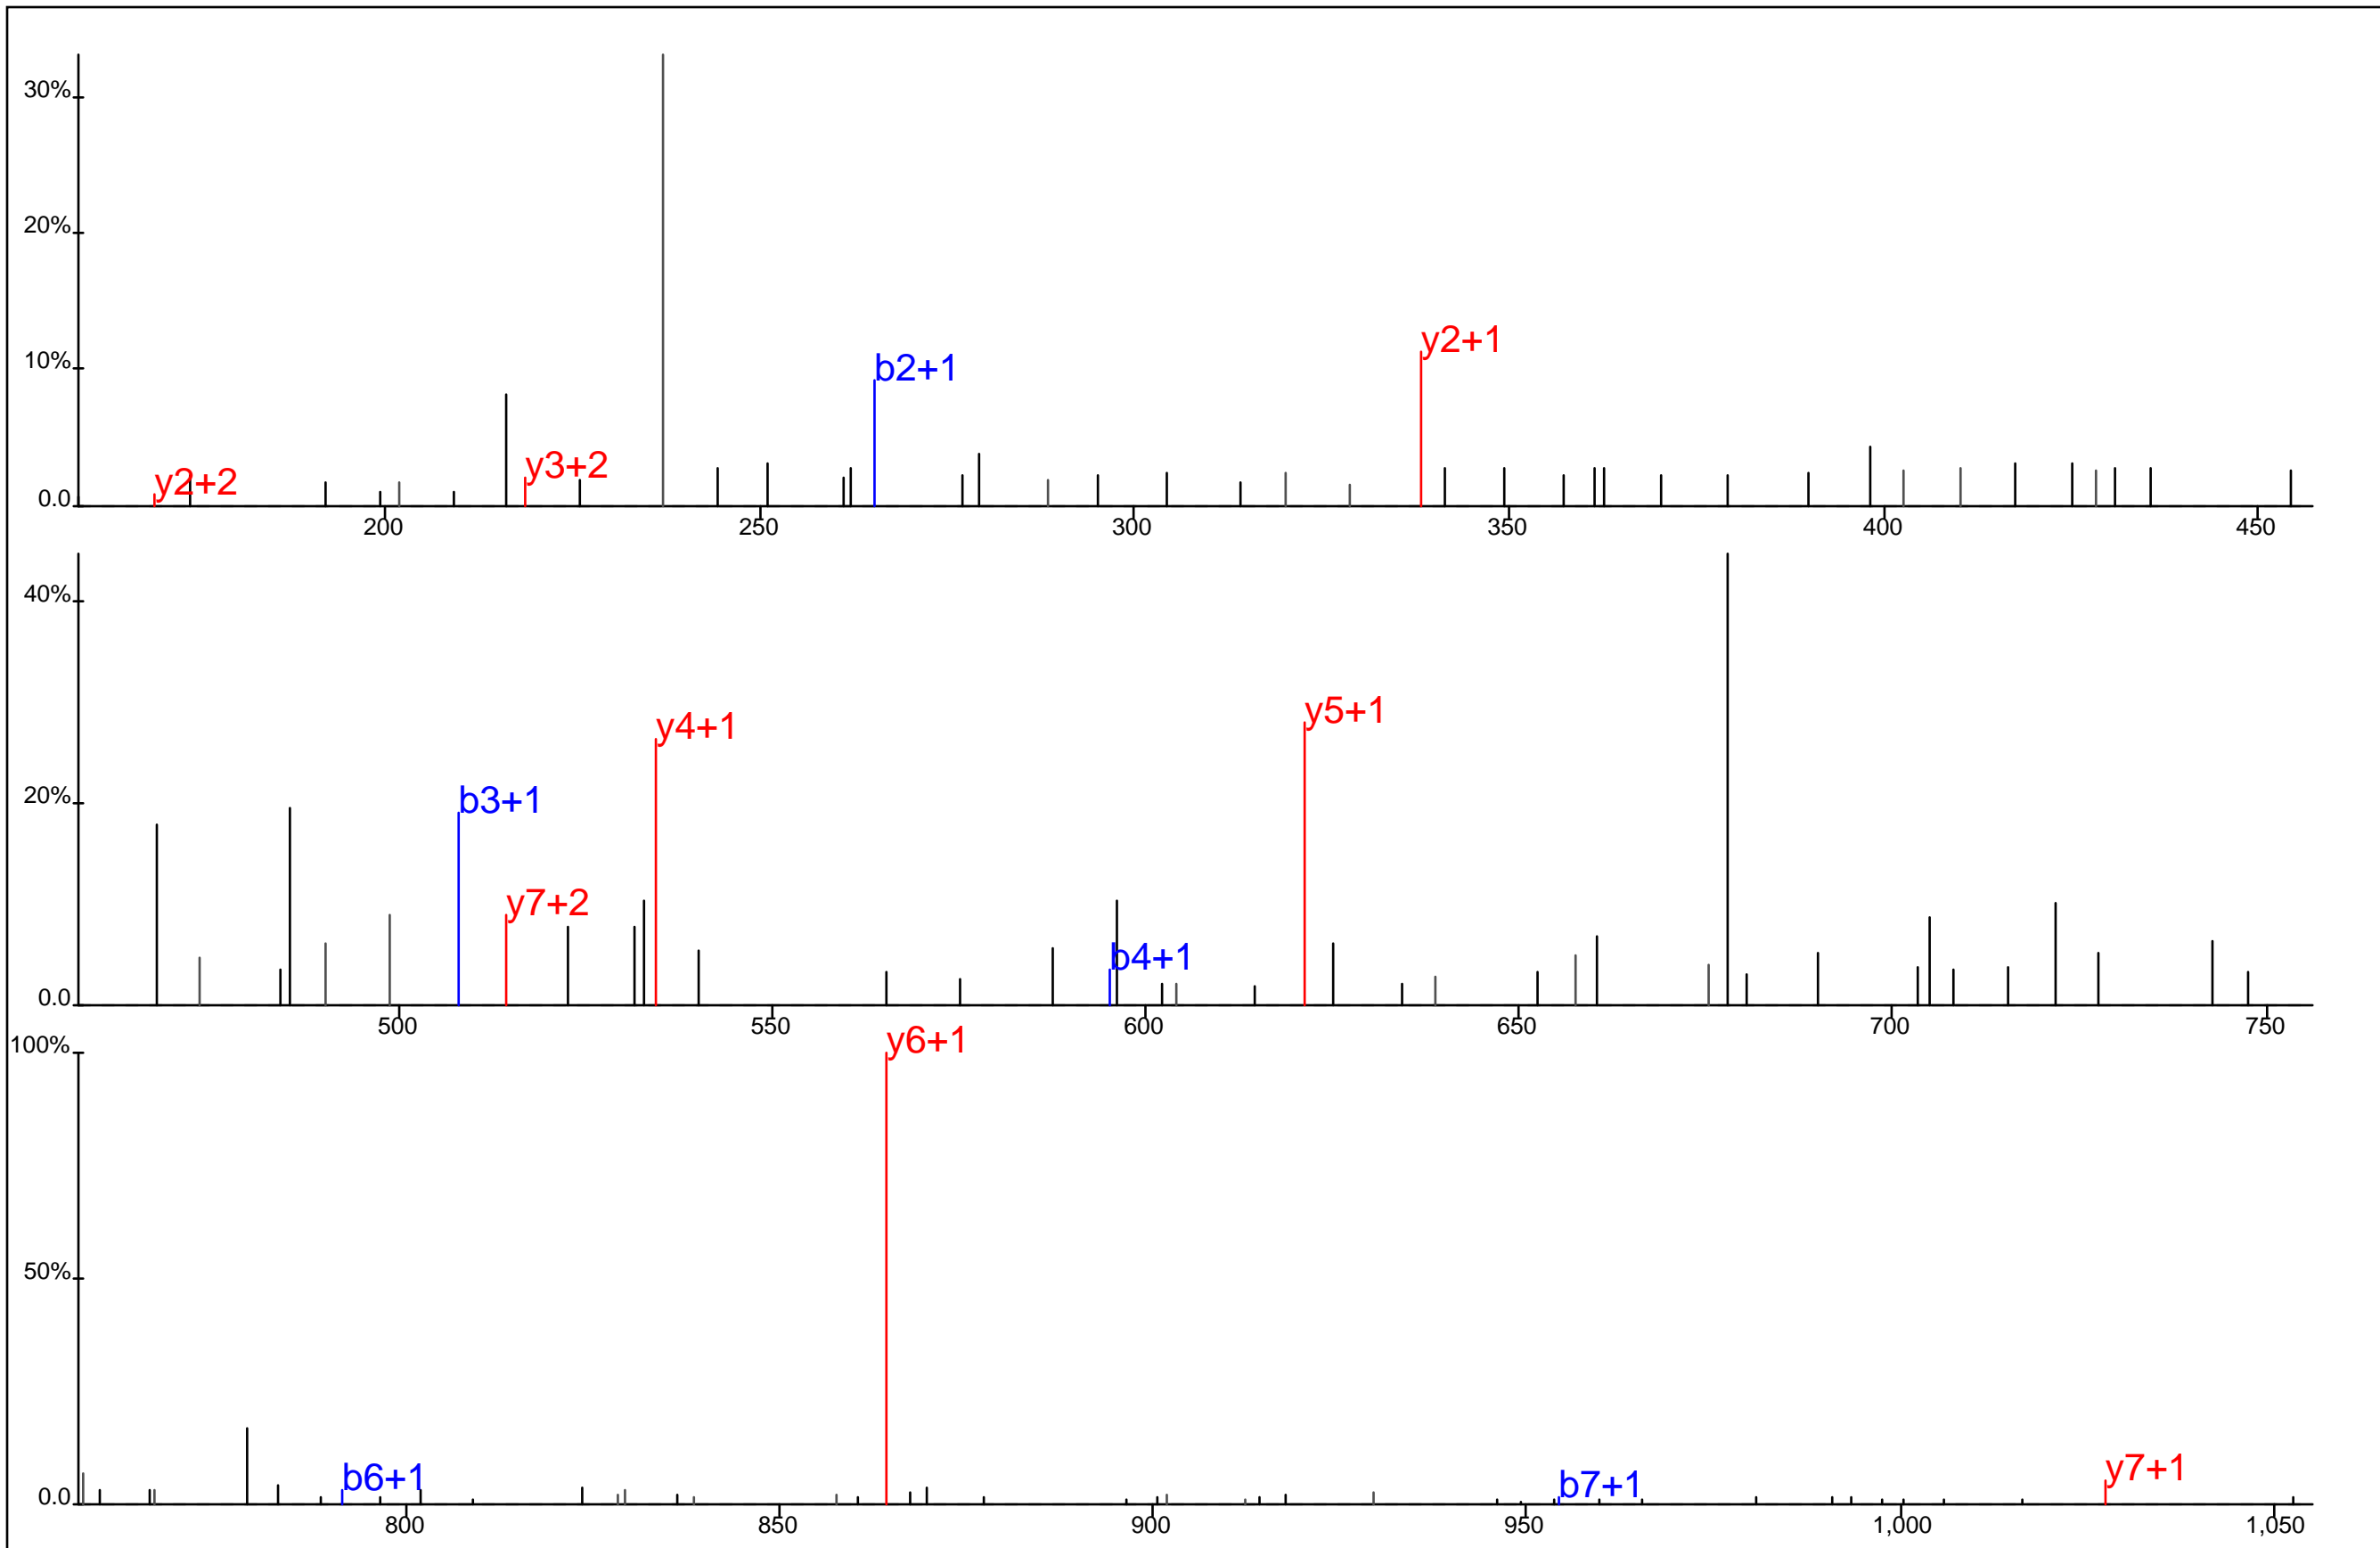

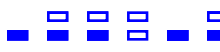
  
 T Y Y\* S P V Y R

Protein Name: Plakophilin 4  
 gi Accession: 0  
 Precursor Mass: 564.7411+2  
 Delta Mass: 1.090 ppm  
 XCorr: 30.71

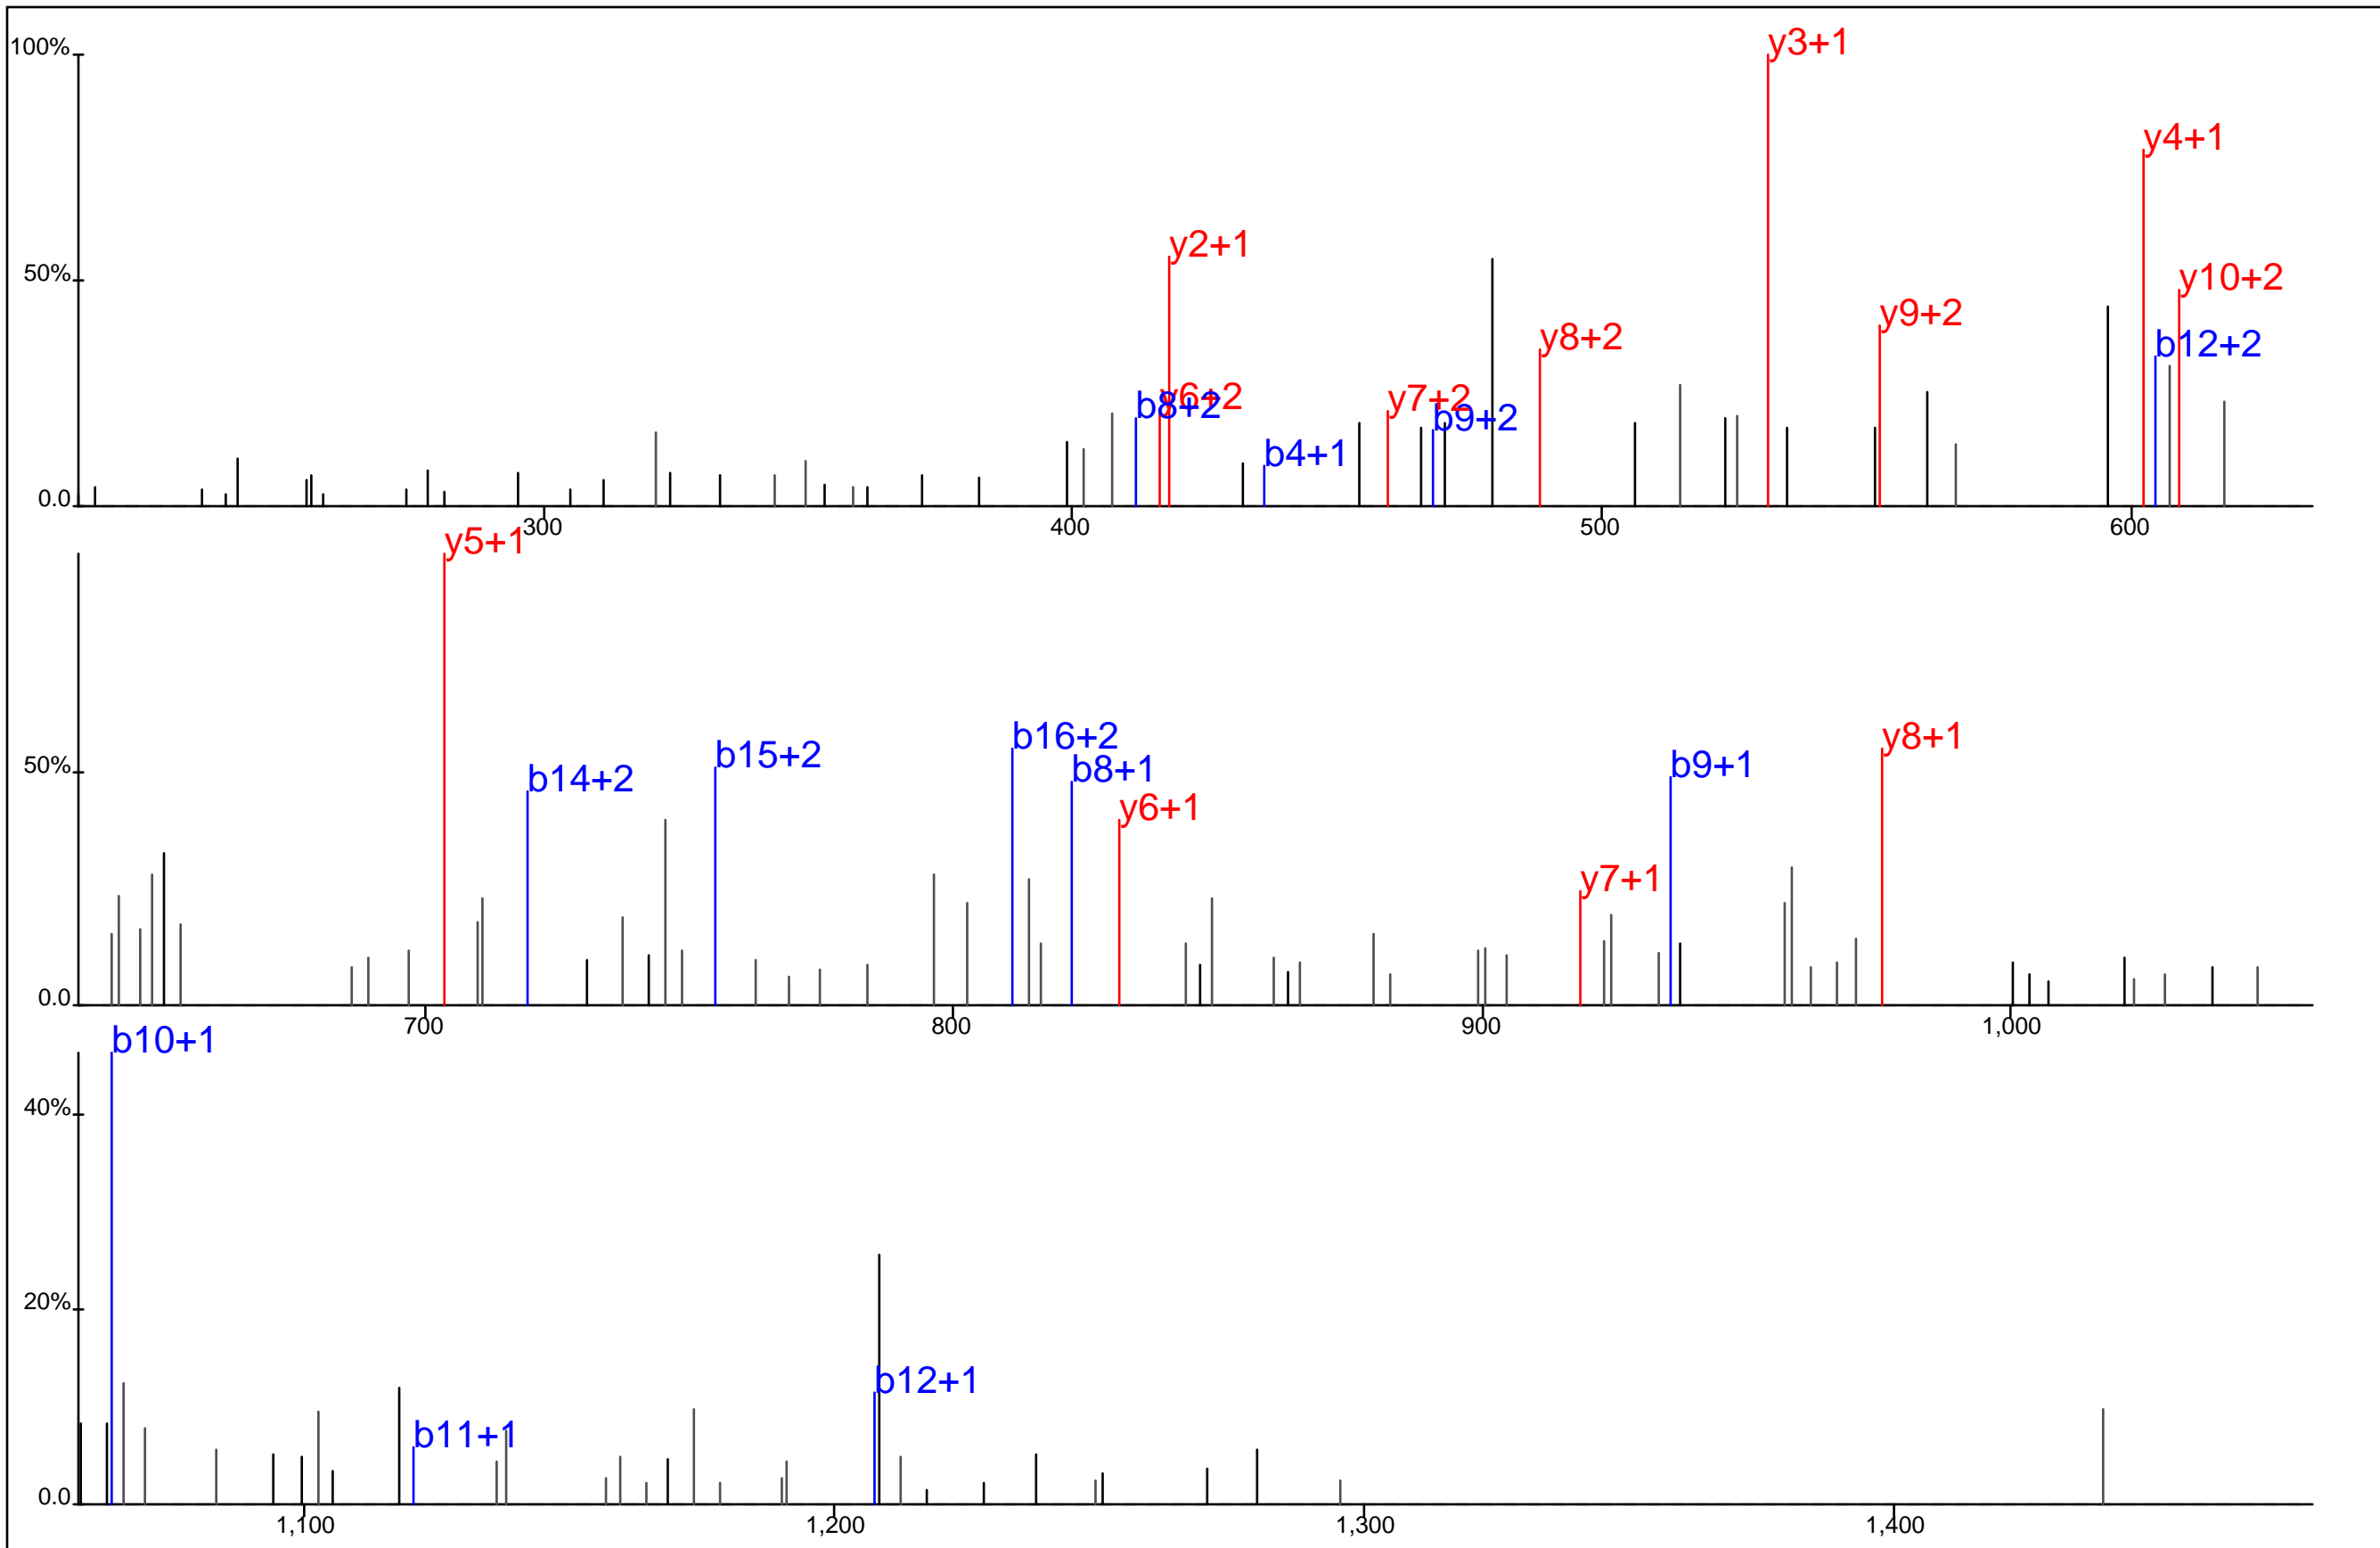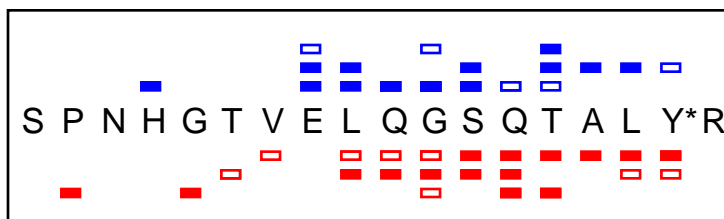

Protein Name: Plakophilin 4  
 gi Accession: 0  
 Precursor Mass: 679.9809+3  
 Delta Mass: 5.302 ppm  
 XCorr: 30.39



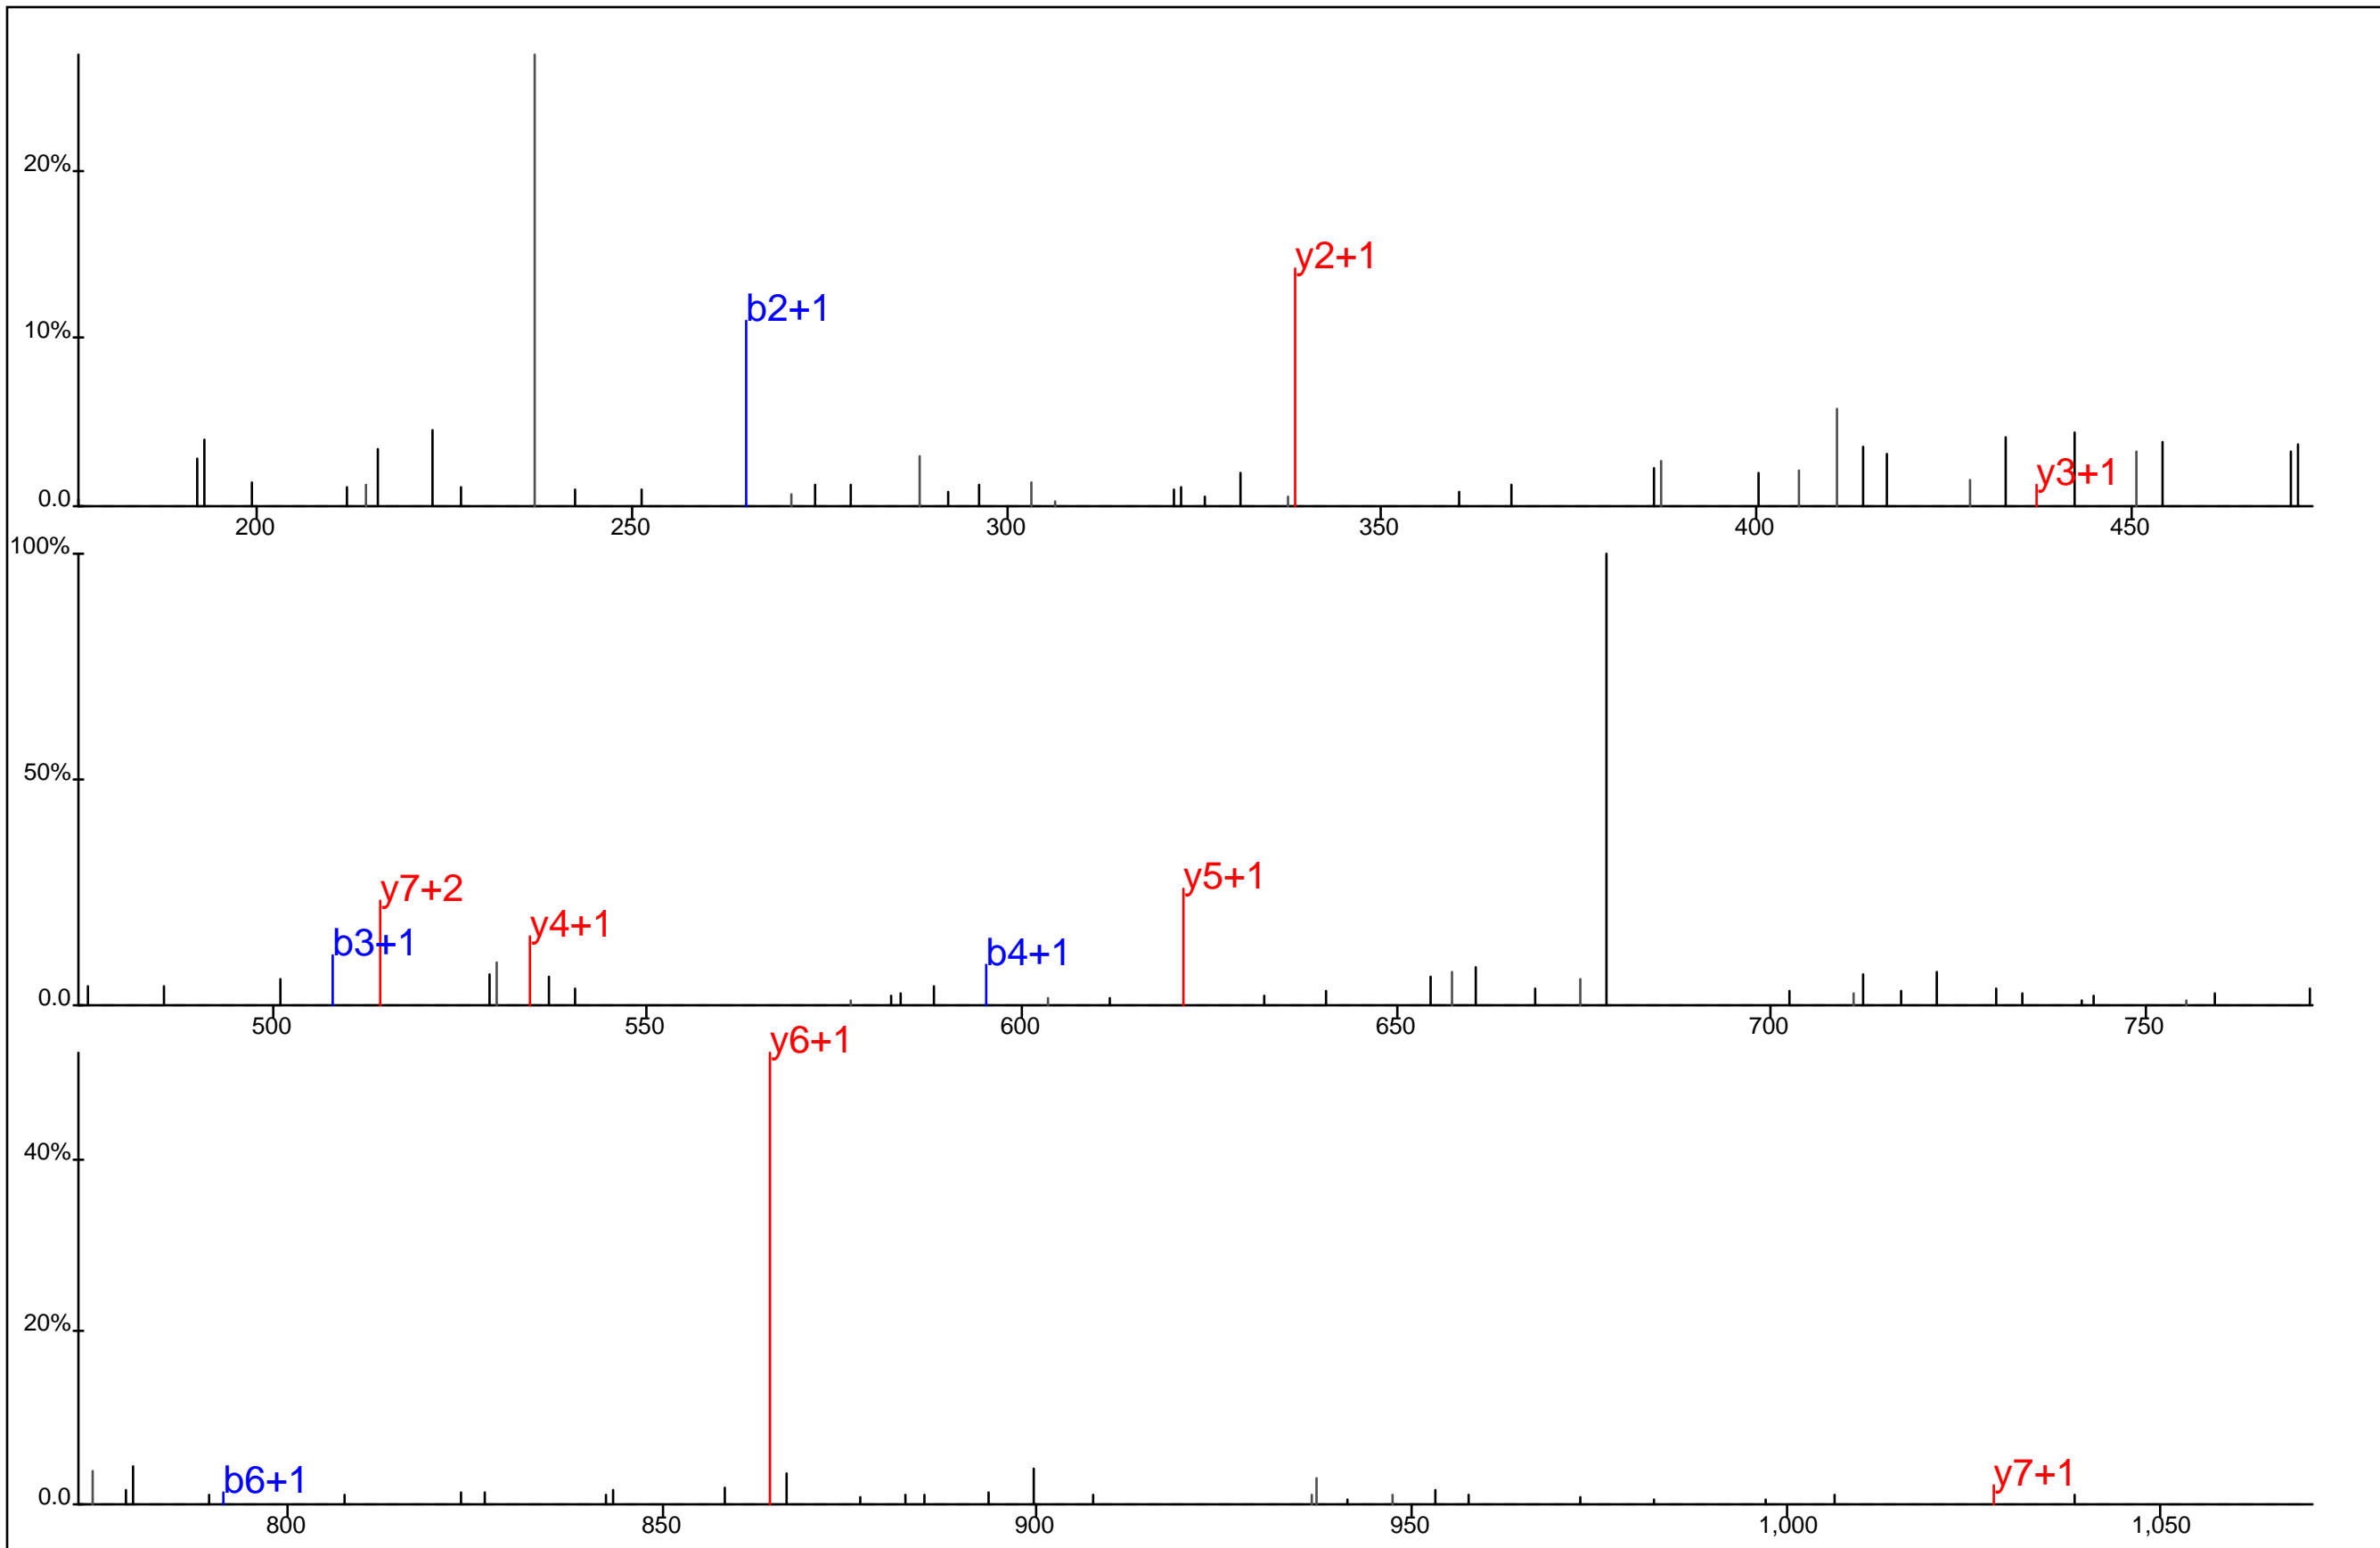

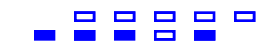
  

  
 T Y Y\* S P V Y R

Protein Name: Plakophilin 4  
 gi Accession: 0  
 Precursor Mass: 564.7425+2  
 Delta Mass: 1.398 ppm  
 XCorr: 20.79

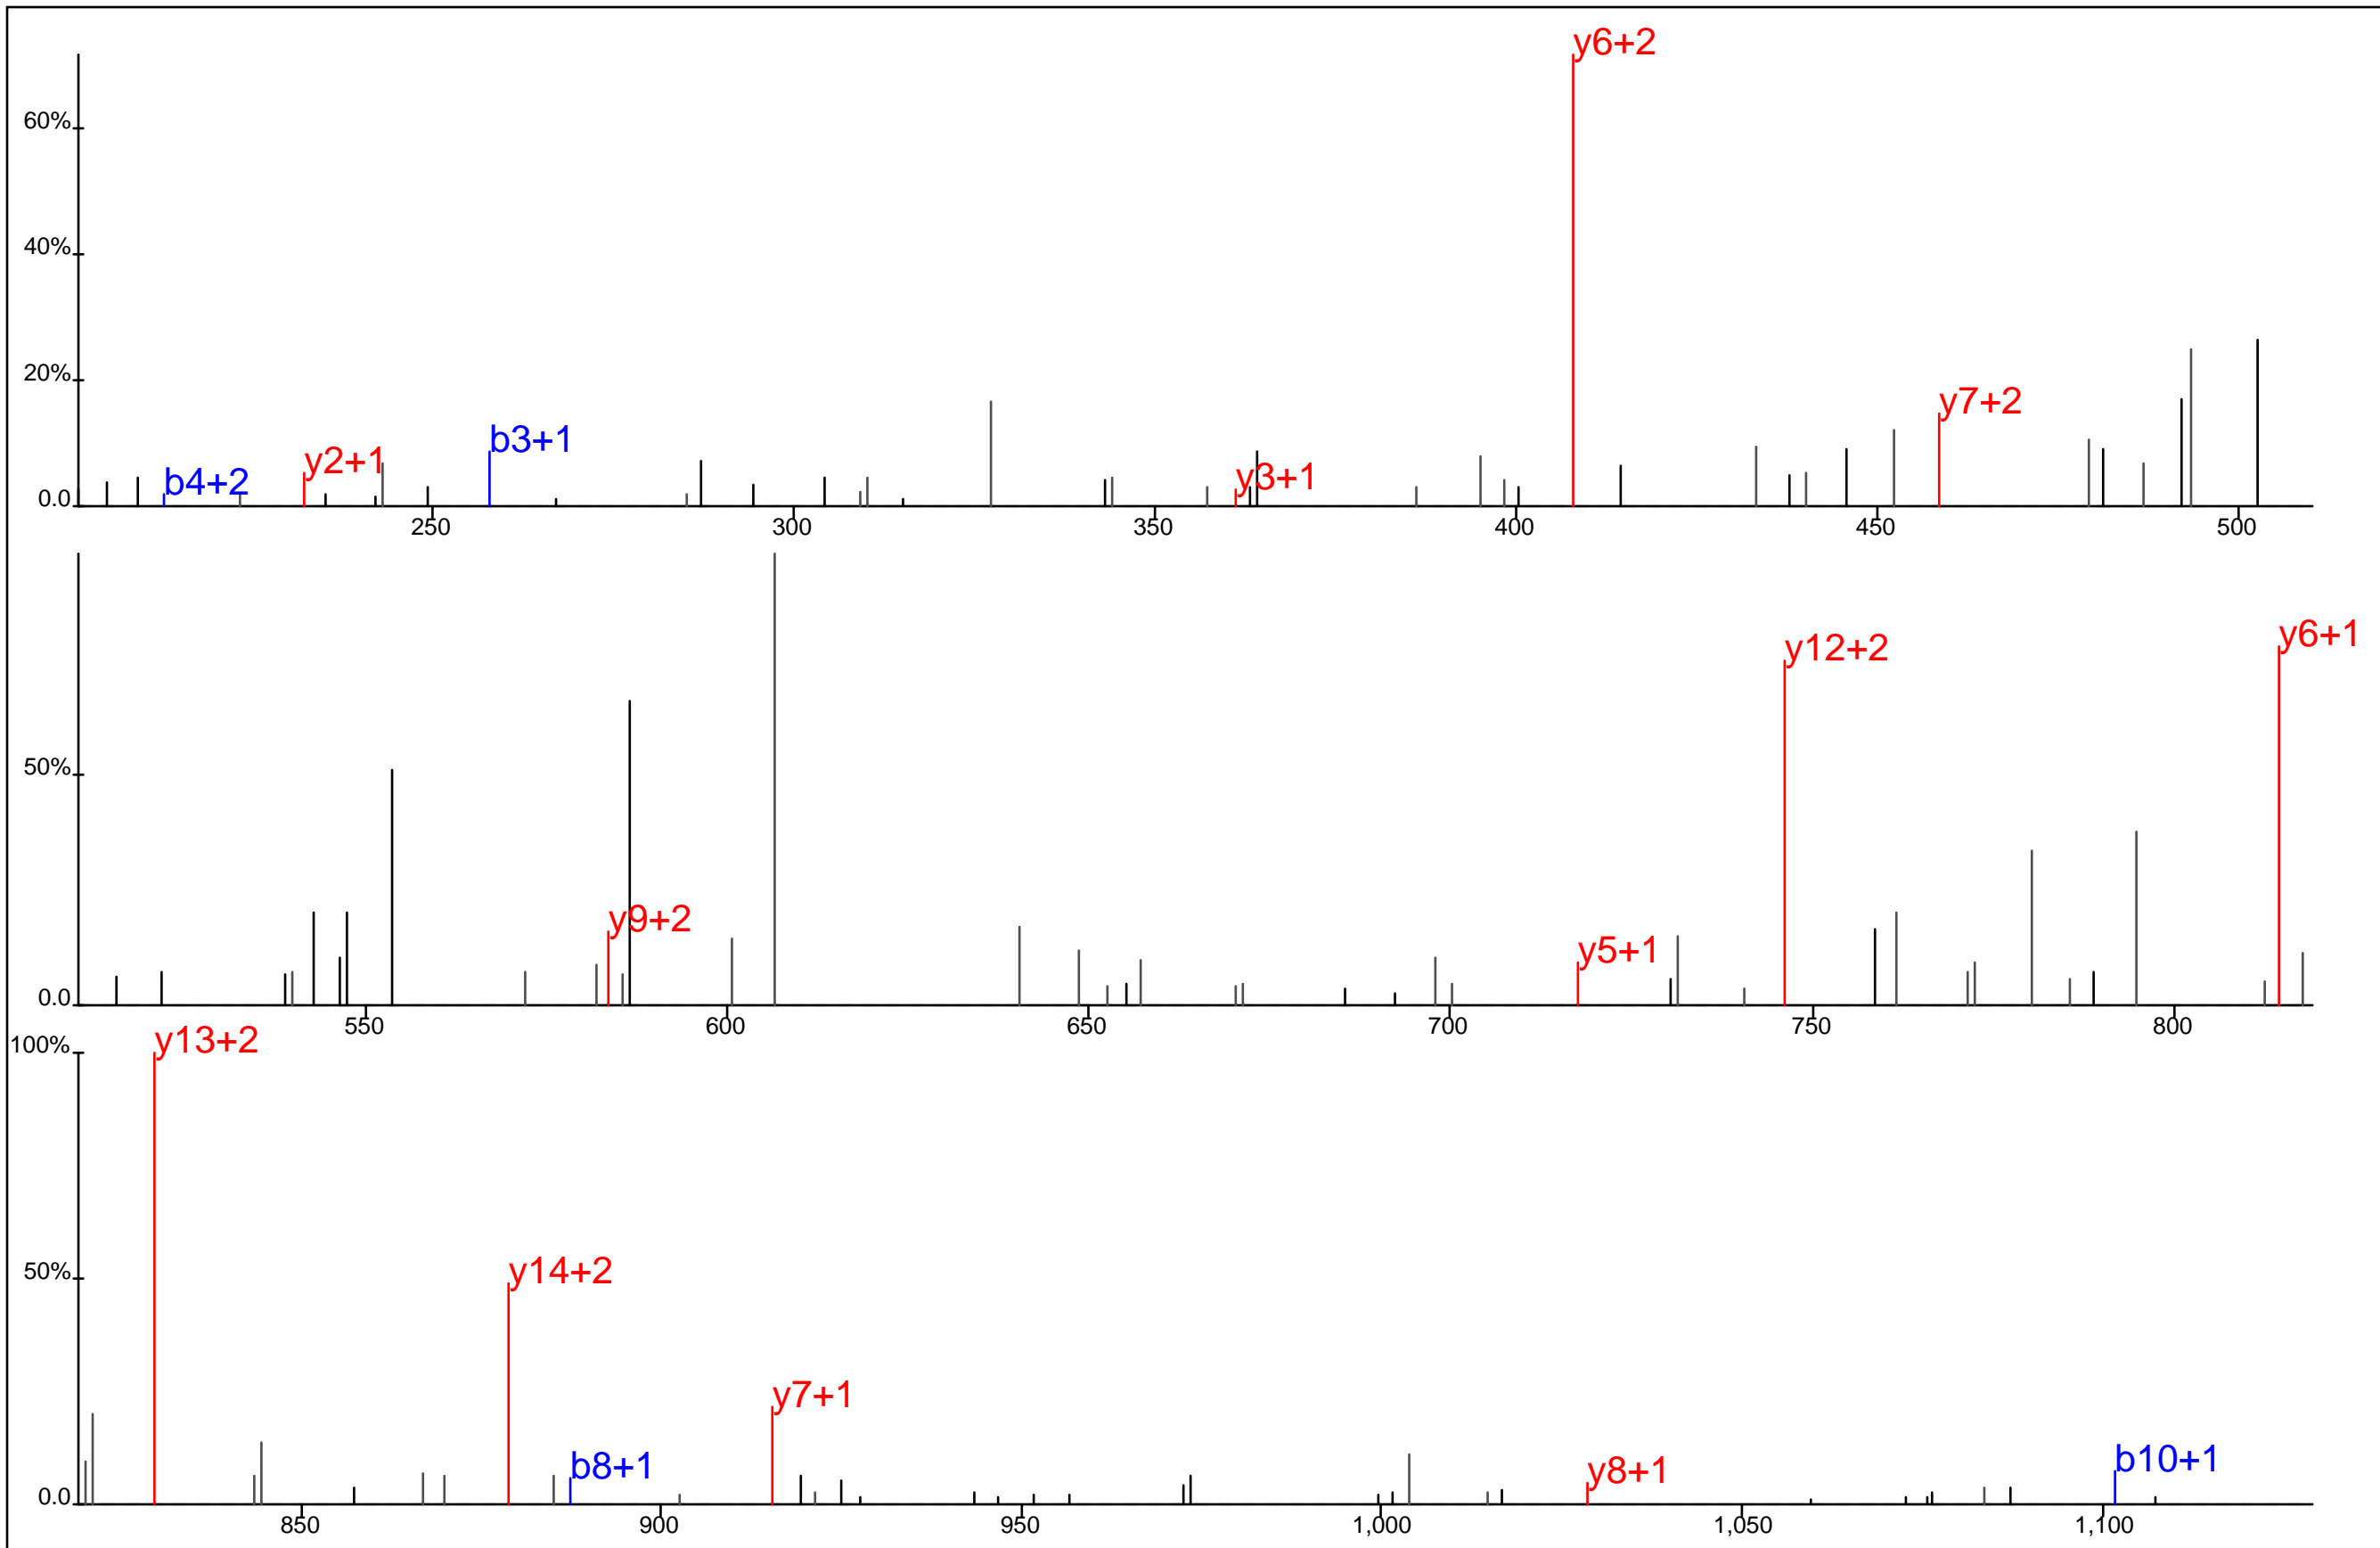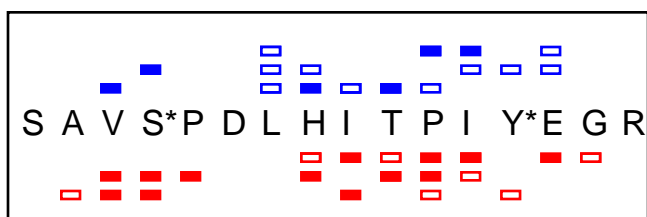

Protein Name: Plakophilin 4  
 gi Accession: 0  
 Precursor Mass: 638.9517+3  
 Delta Mass: 0.322 ppm  
 XCorr: 20.96

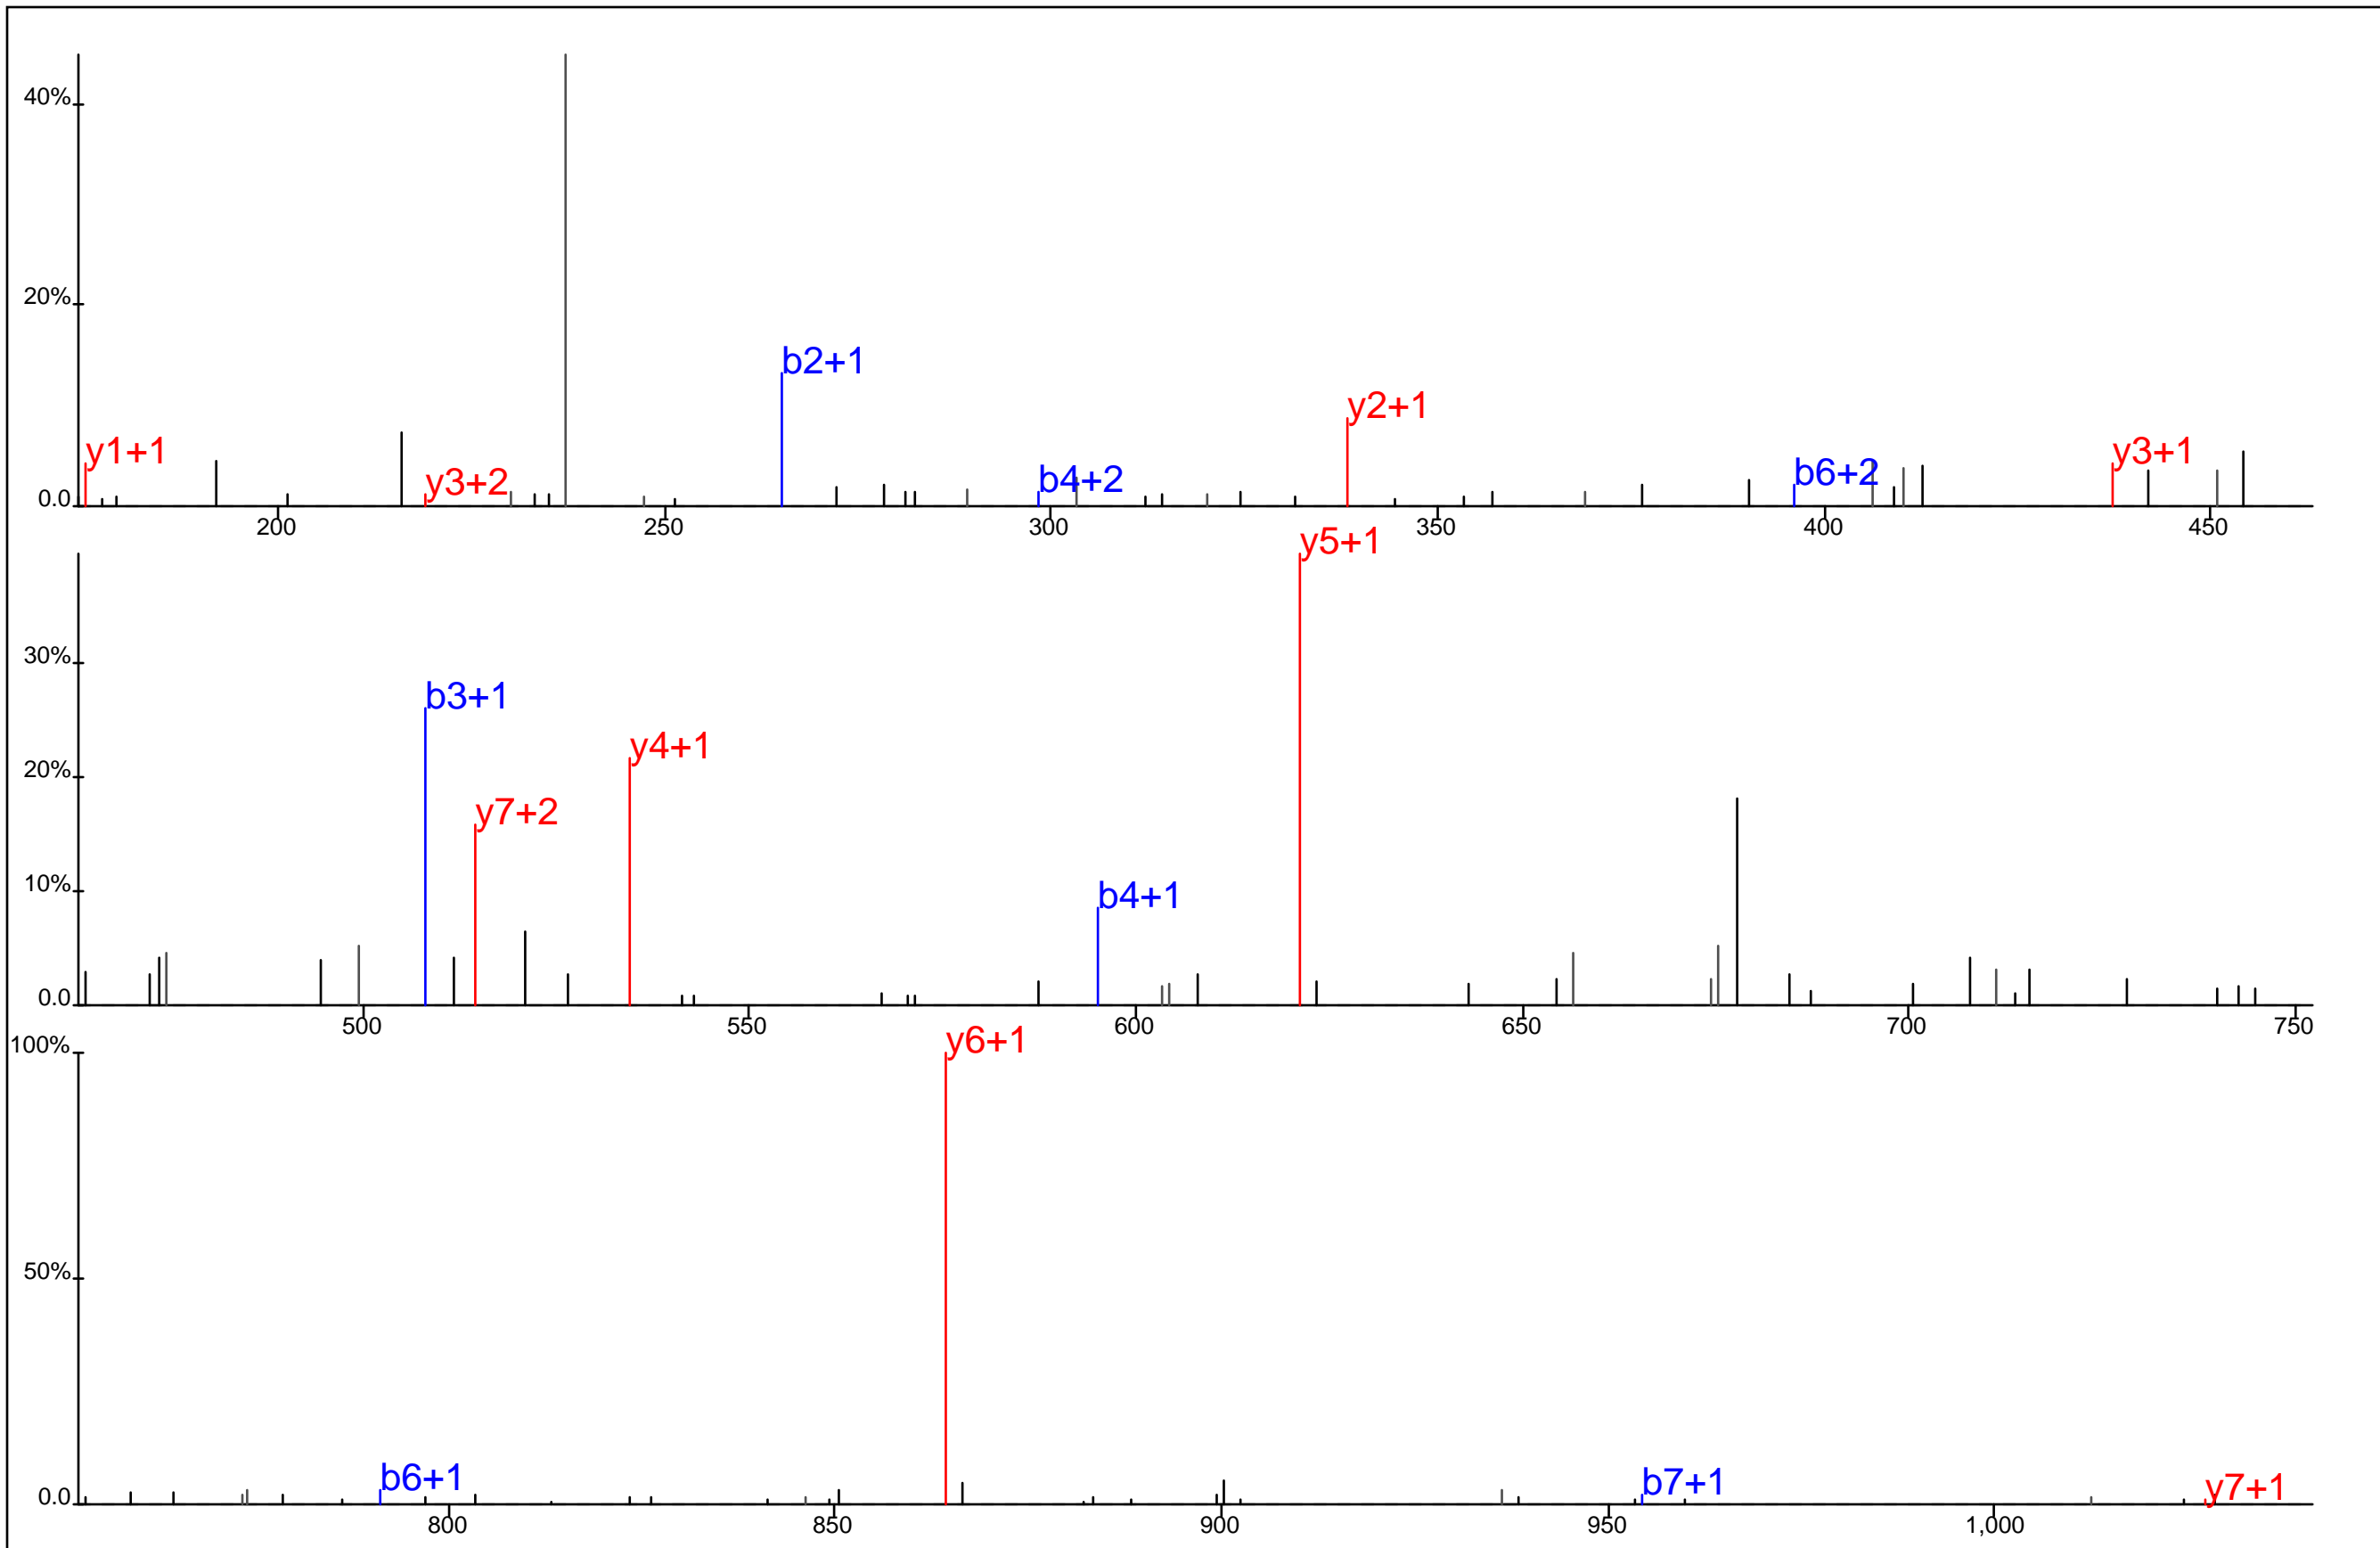

■ □ ■ □ ■ □  
■ □ ■ □ ■ □

T Y Y\* S P V Y R

Protein Name: Plakophilin 4  
 gi Accession: 0  
 Precursor Mass: 564.7428+2  
 Delta Mass: 1.939 ppm  
 XCorr: 26.92

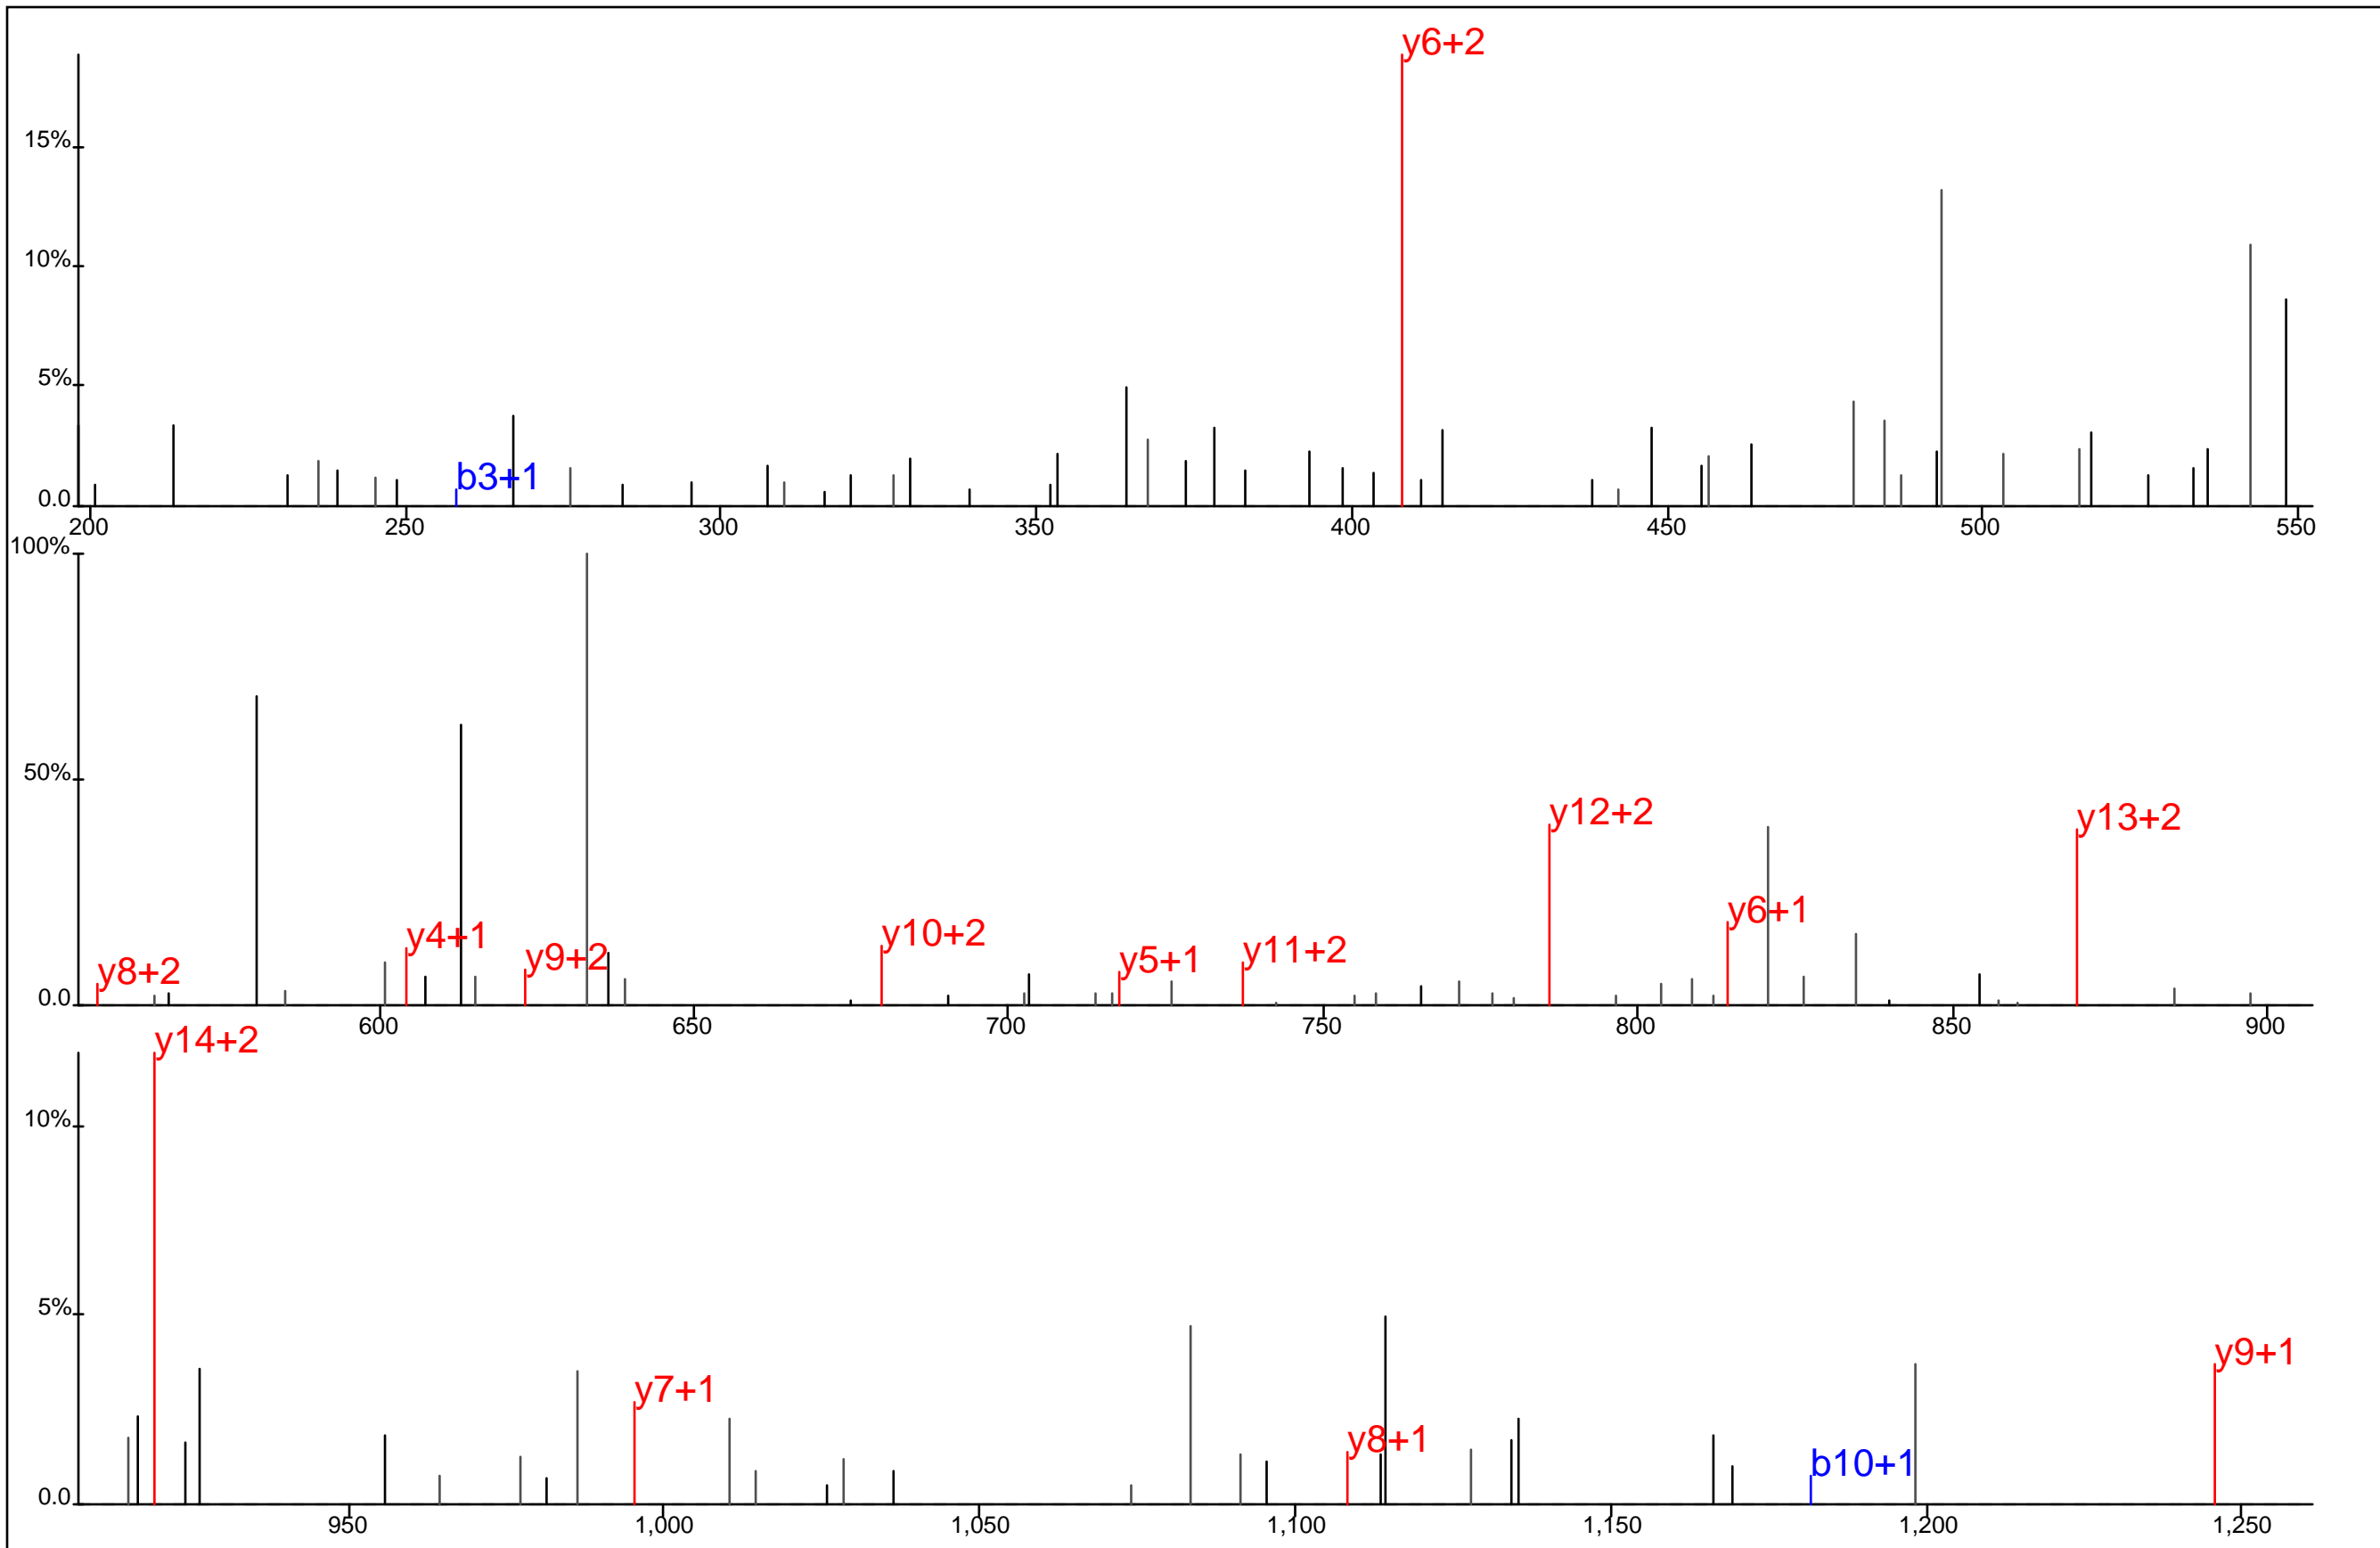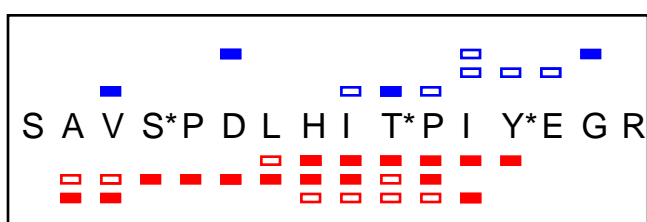

Protein Name: Plakophilin 4  
 gi Accession: 0  
 Precursor Mass: 665.6072+3  
 Delta Mass: 0.426 ppm  
 XCorr: 27.47

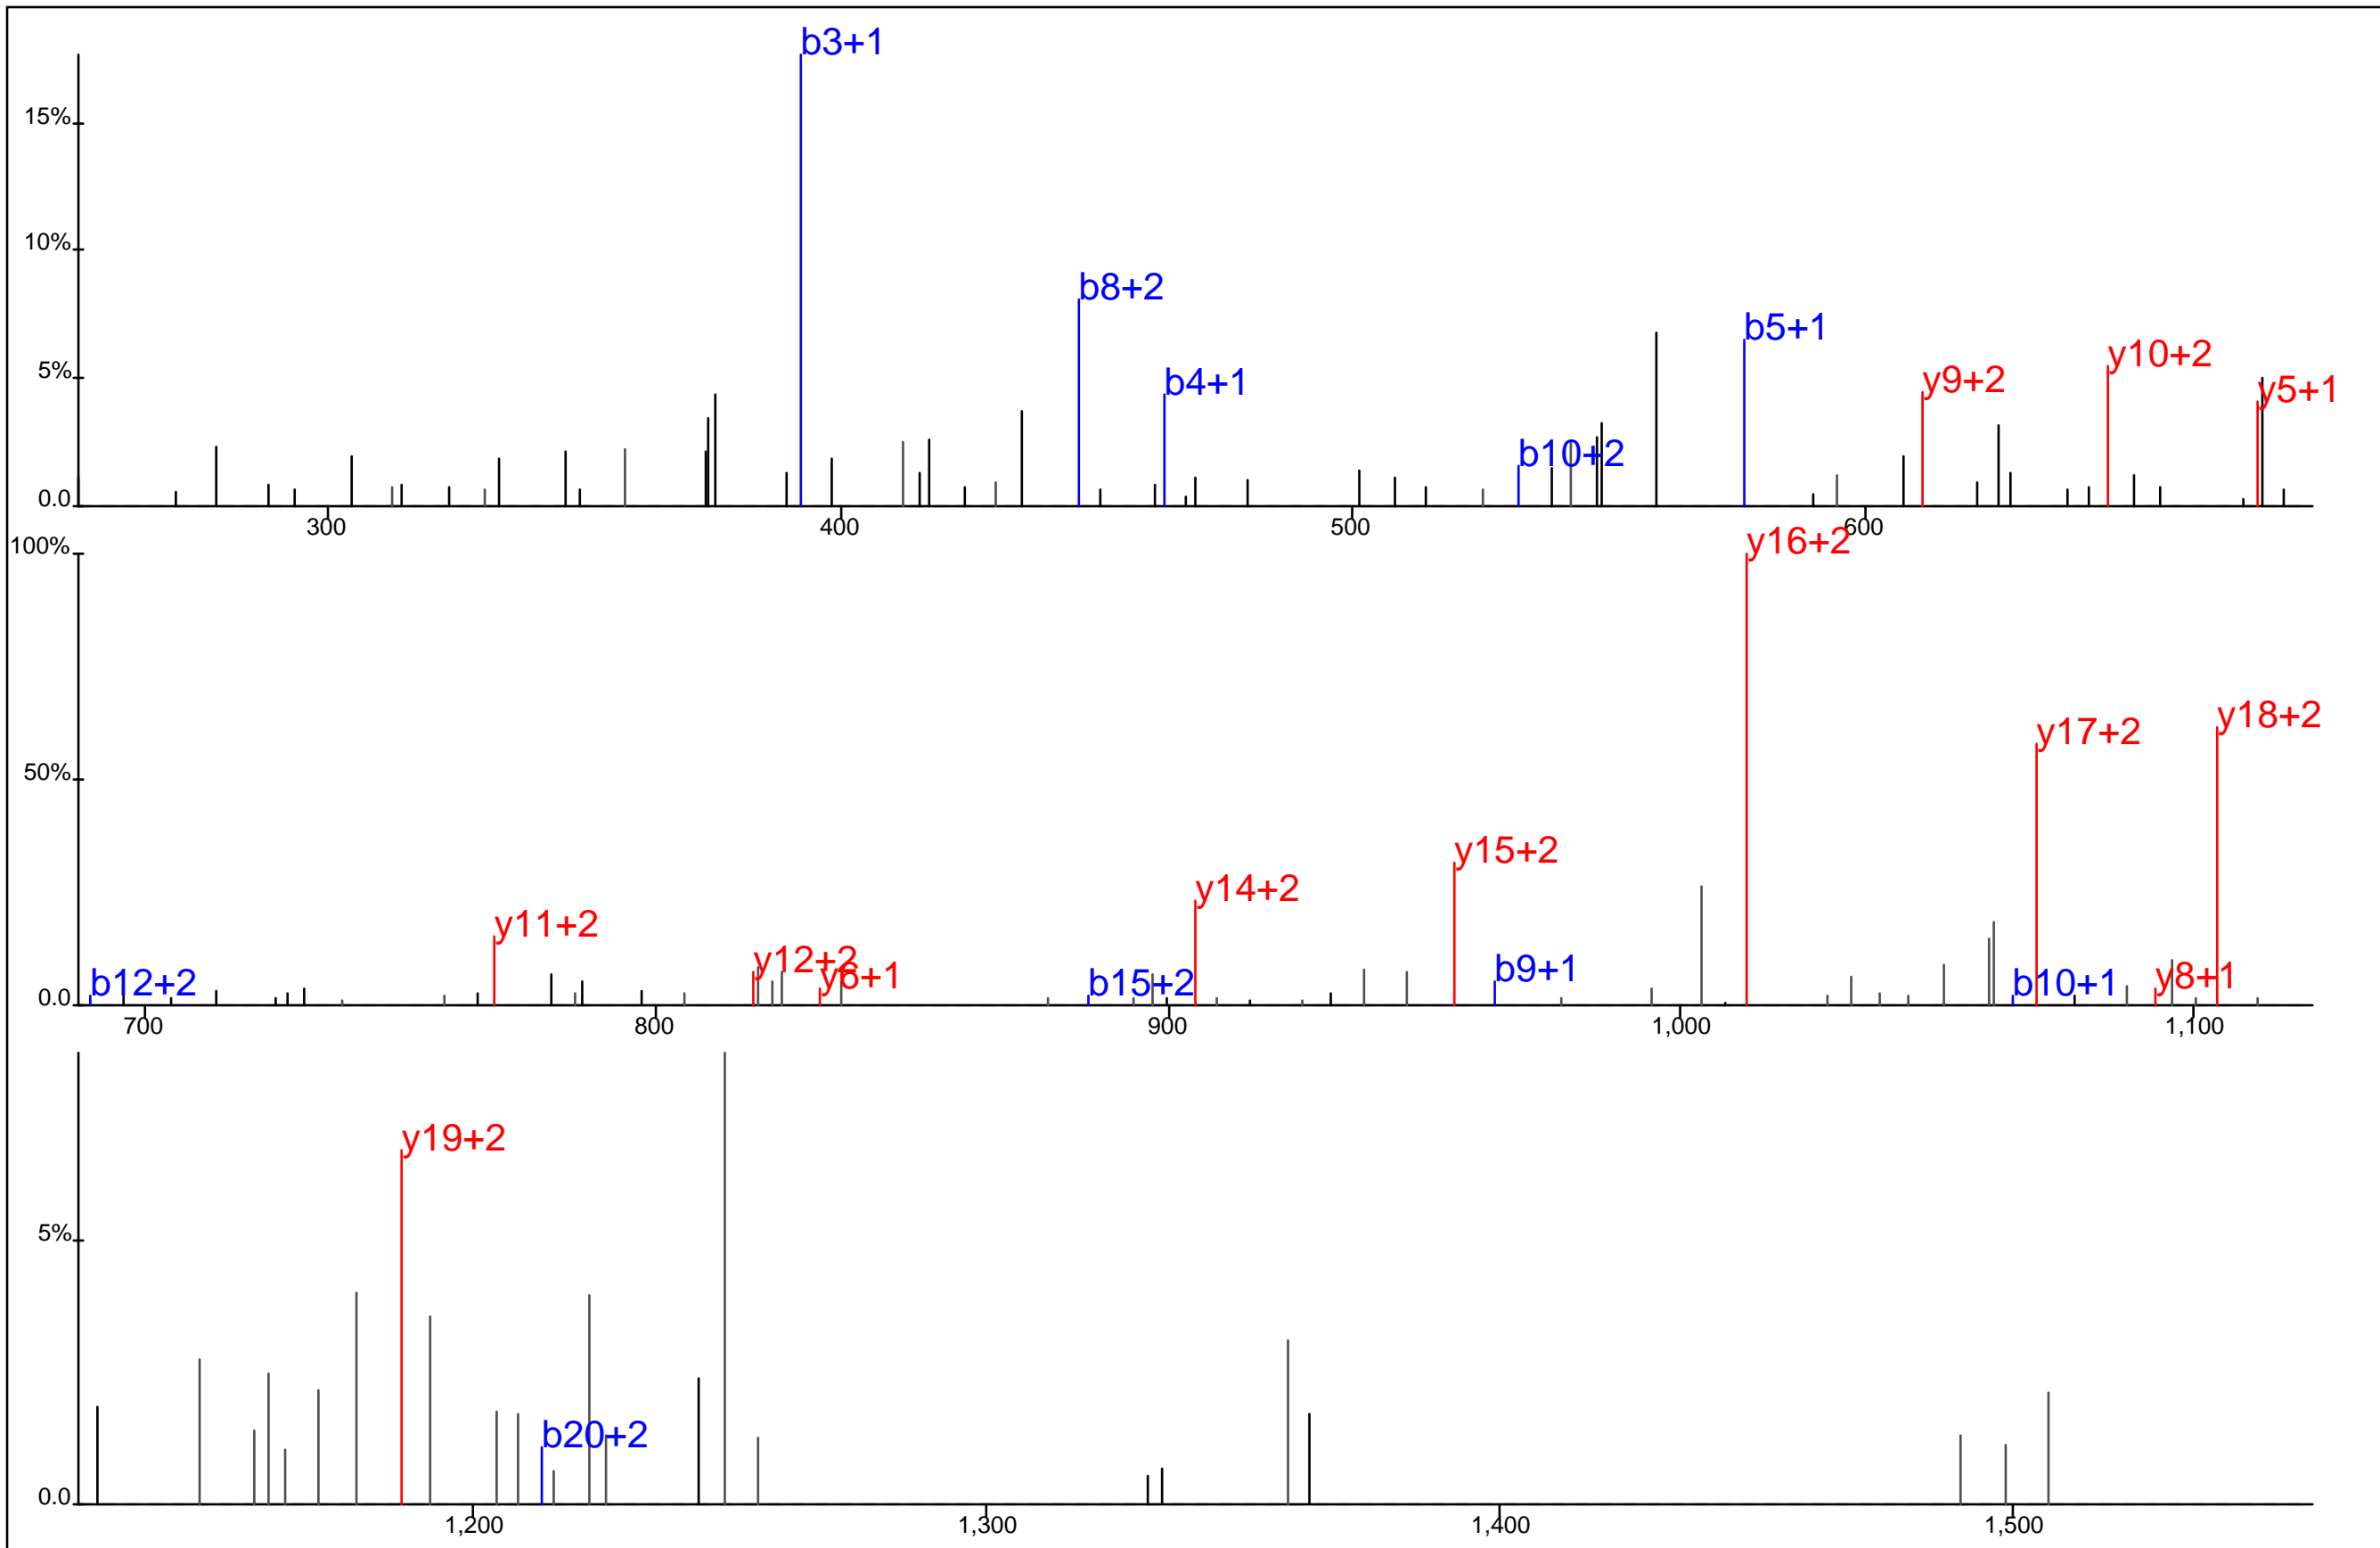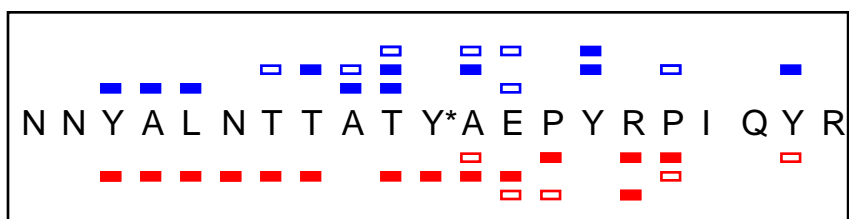

Protein Name: Plakophilin 4  
 gi Accession: 0  
 Precursor Mass: 867.0724+3  
 Delta Mass: 1.916 ppm  
 XCorr: 37.0

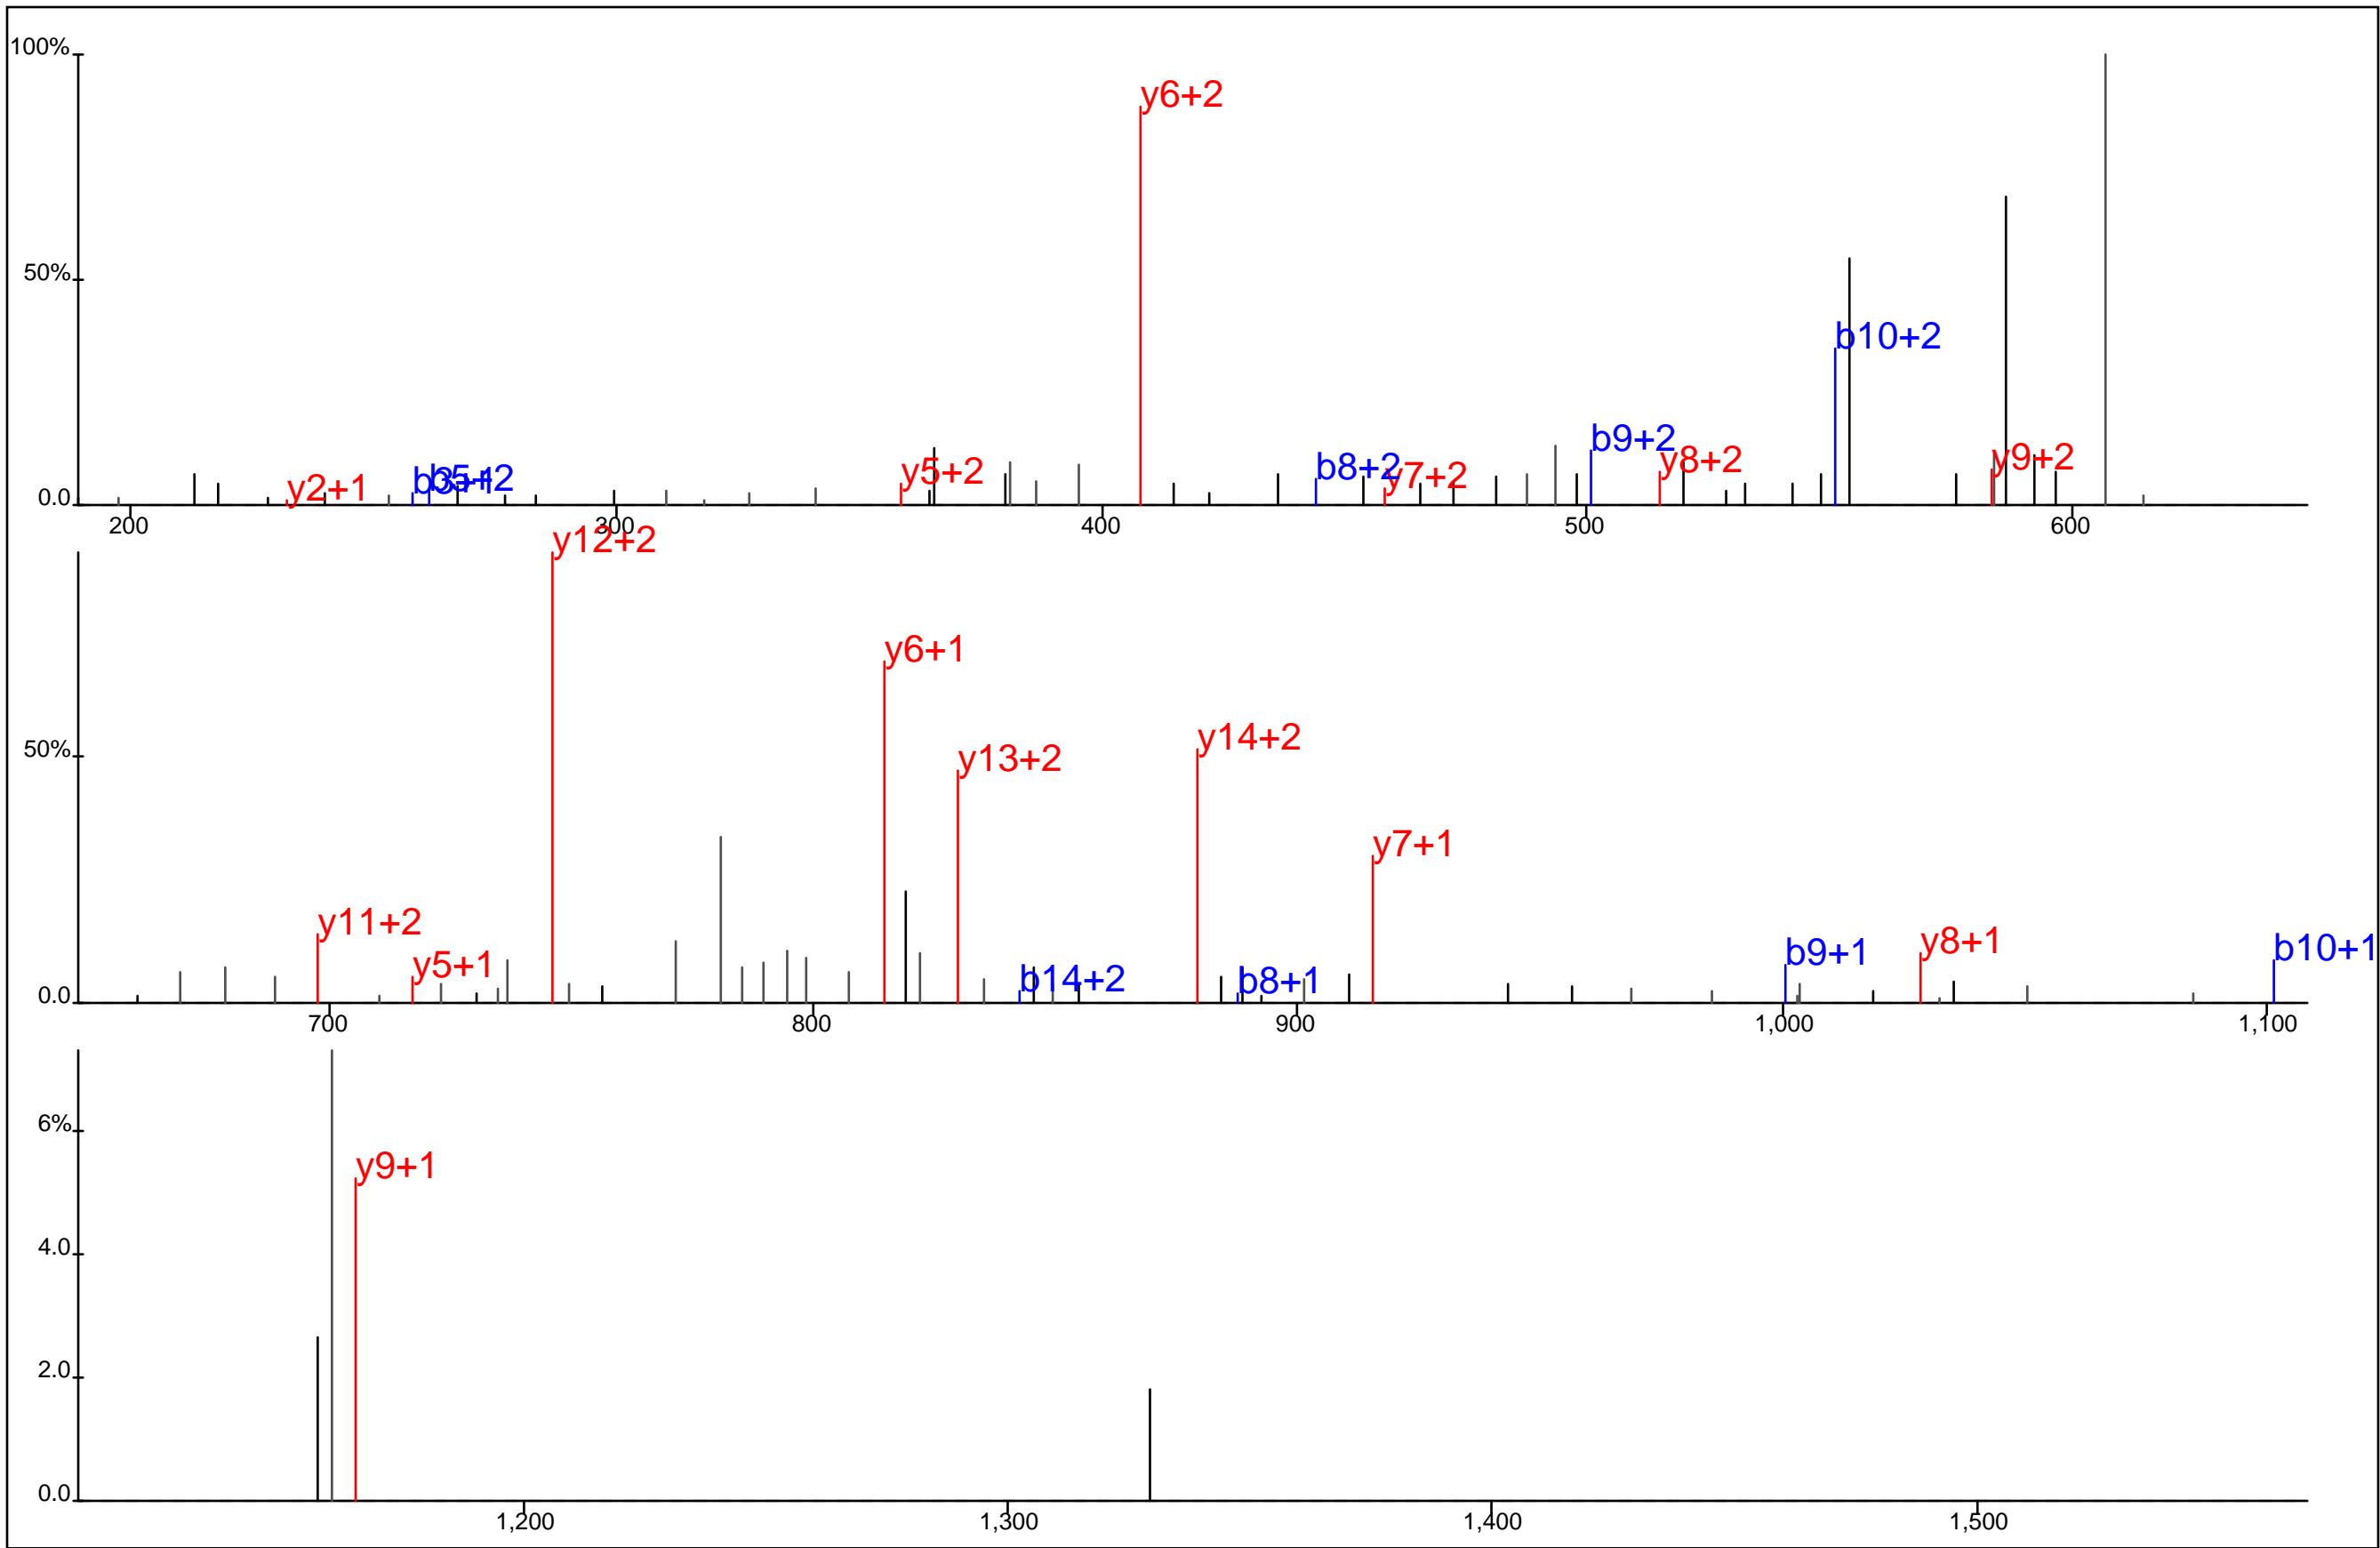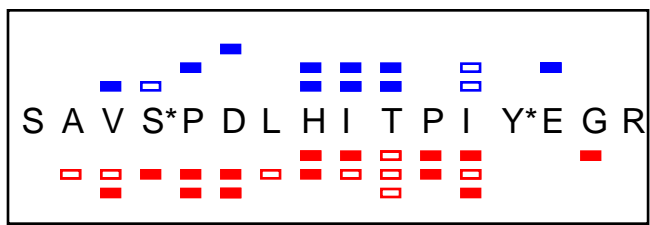

Protein Name: Plakophilin 4  
 gi Accession: 0  
 Precursor Mass: 638.9501+3  
 Delta Mass: 2.165 ppm  
 XCorr: 24.23

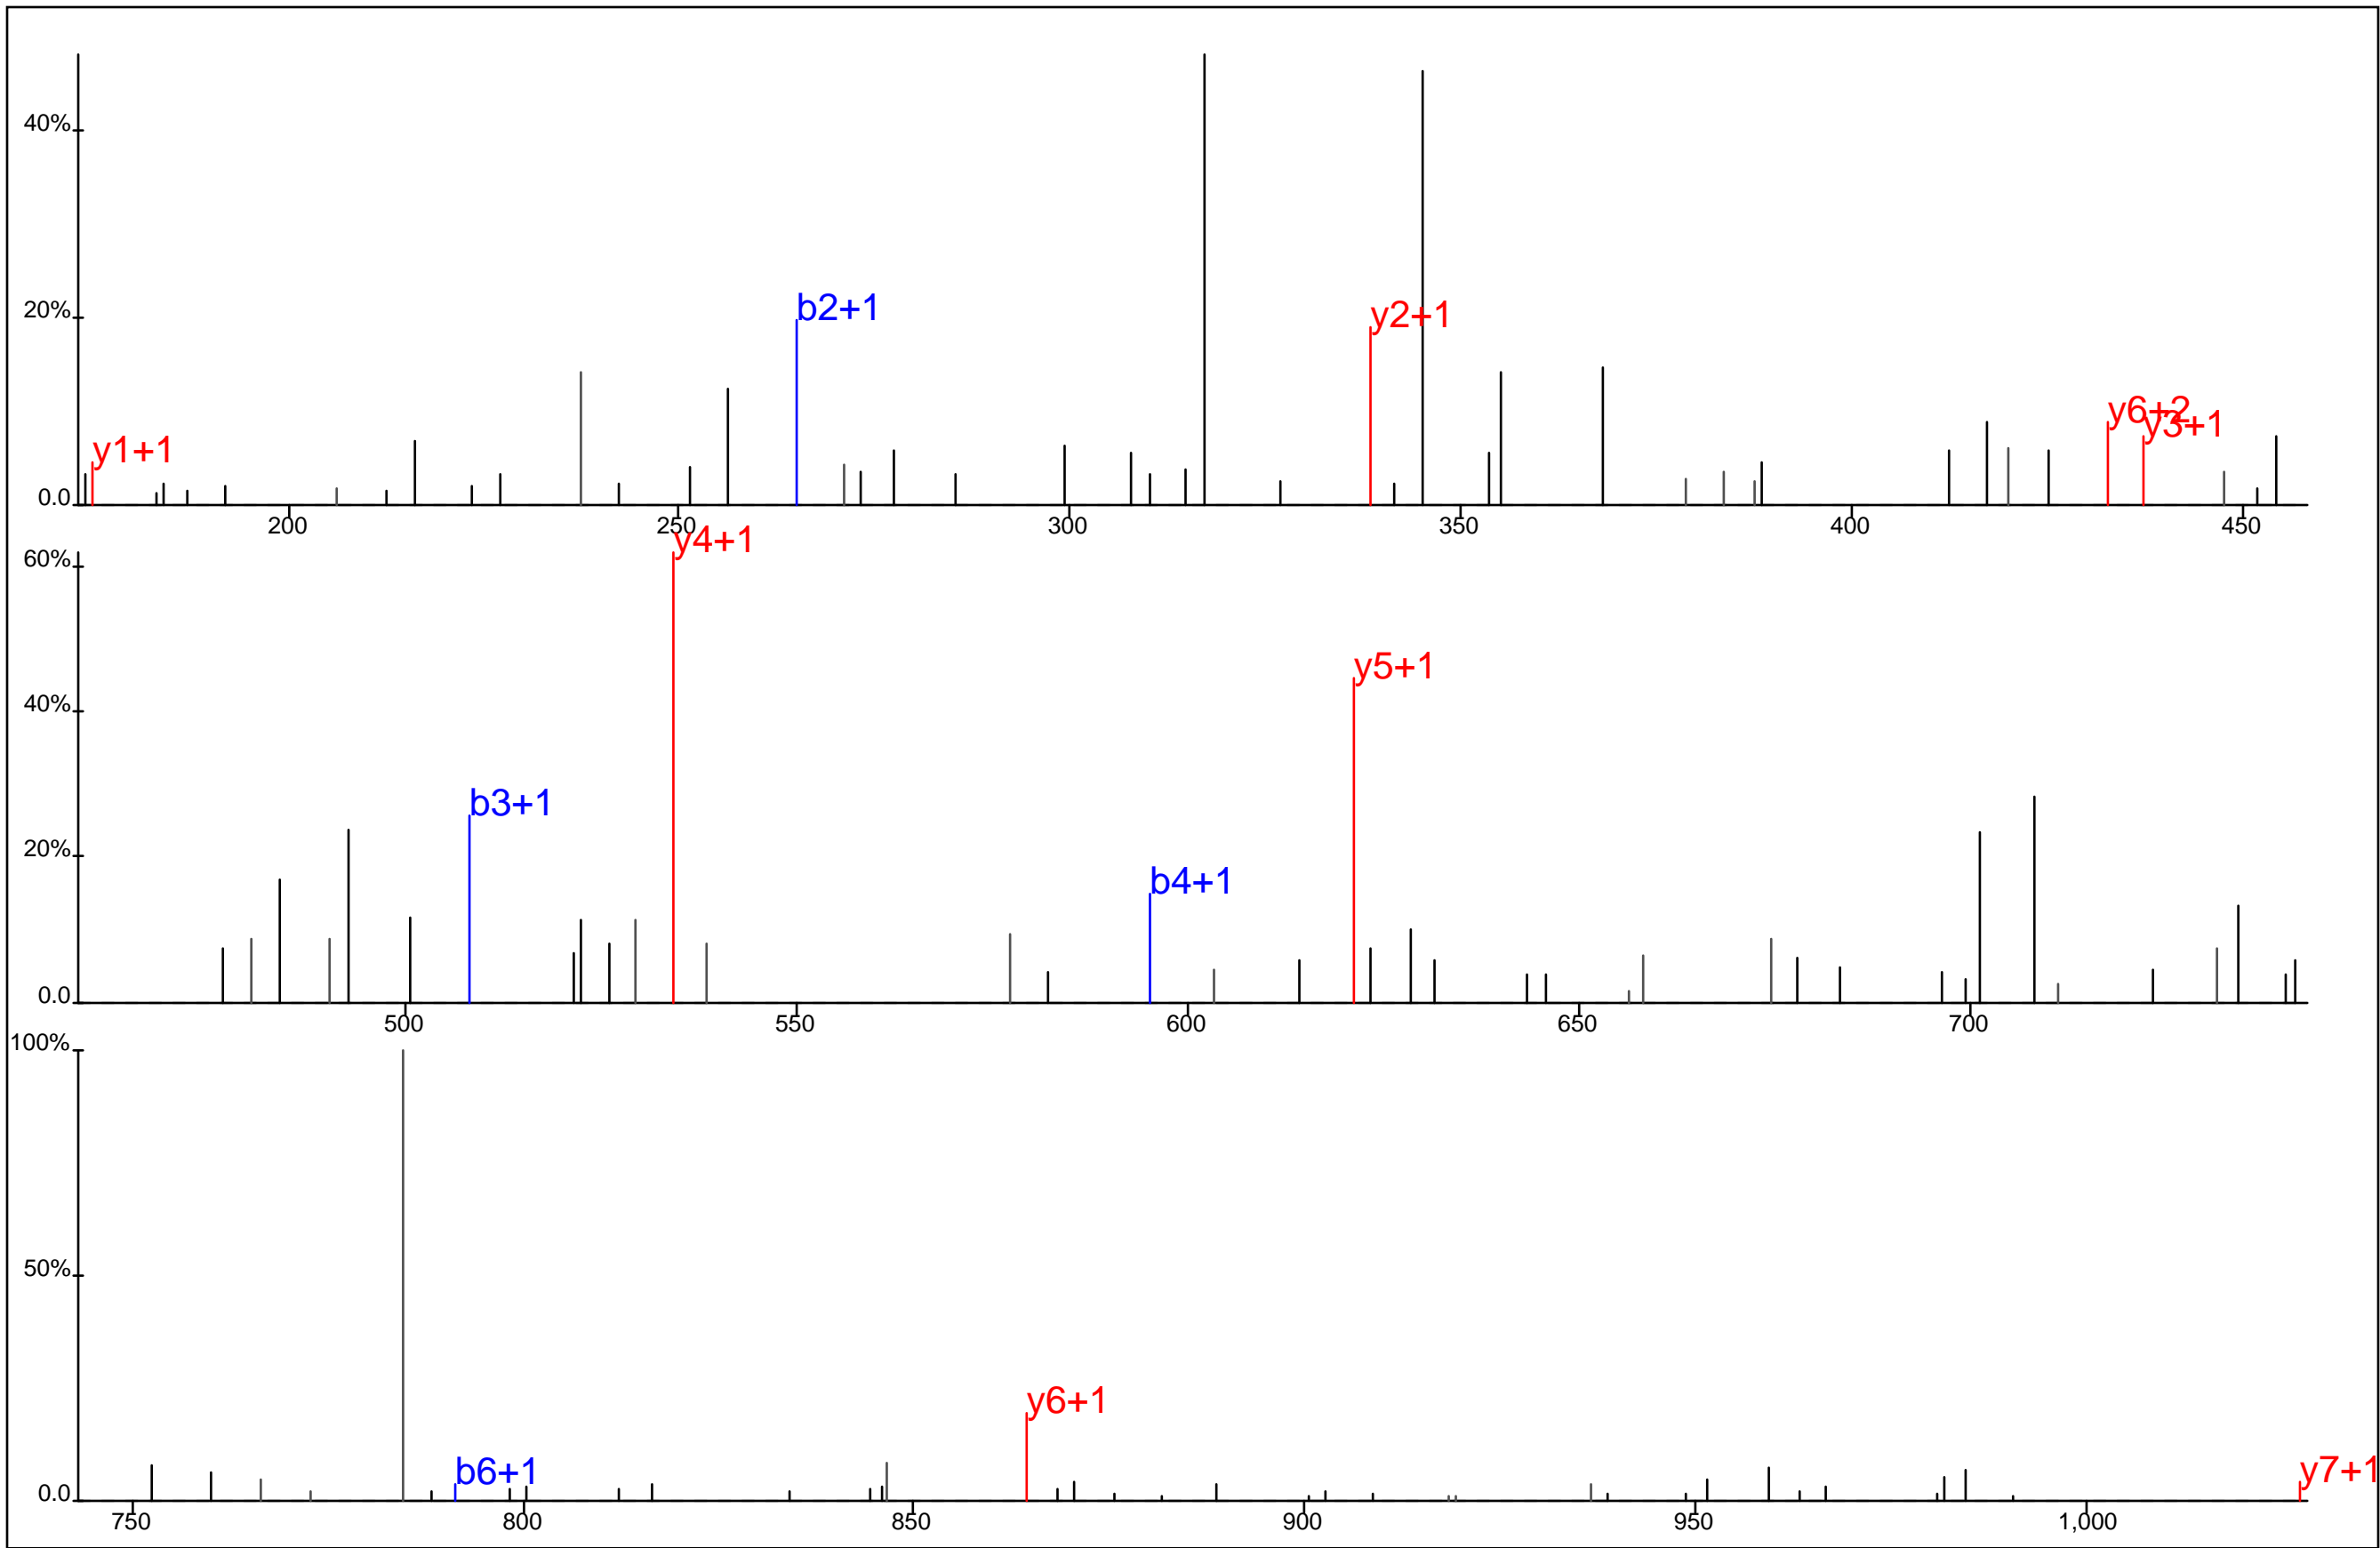

■ ■ ■ ■ ■ ■  
 T Y Y\* S P V Y R  
■ ■ ■ ■ ■ ■

Protein Name: Plakophilin 4  
 gi Accession: 0  
 Precursor Mass: 564.7410+2  
 Delta Mass: 1.198 ppm  
 XCorr: 26.99

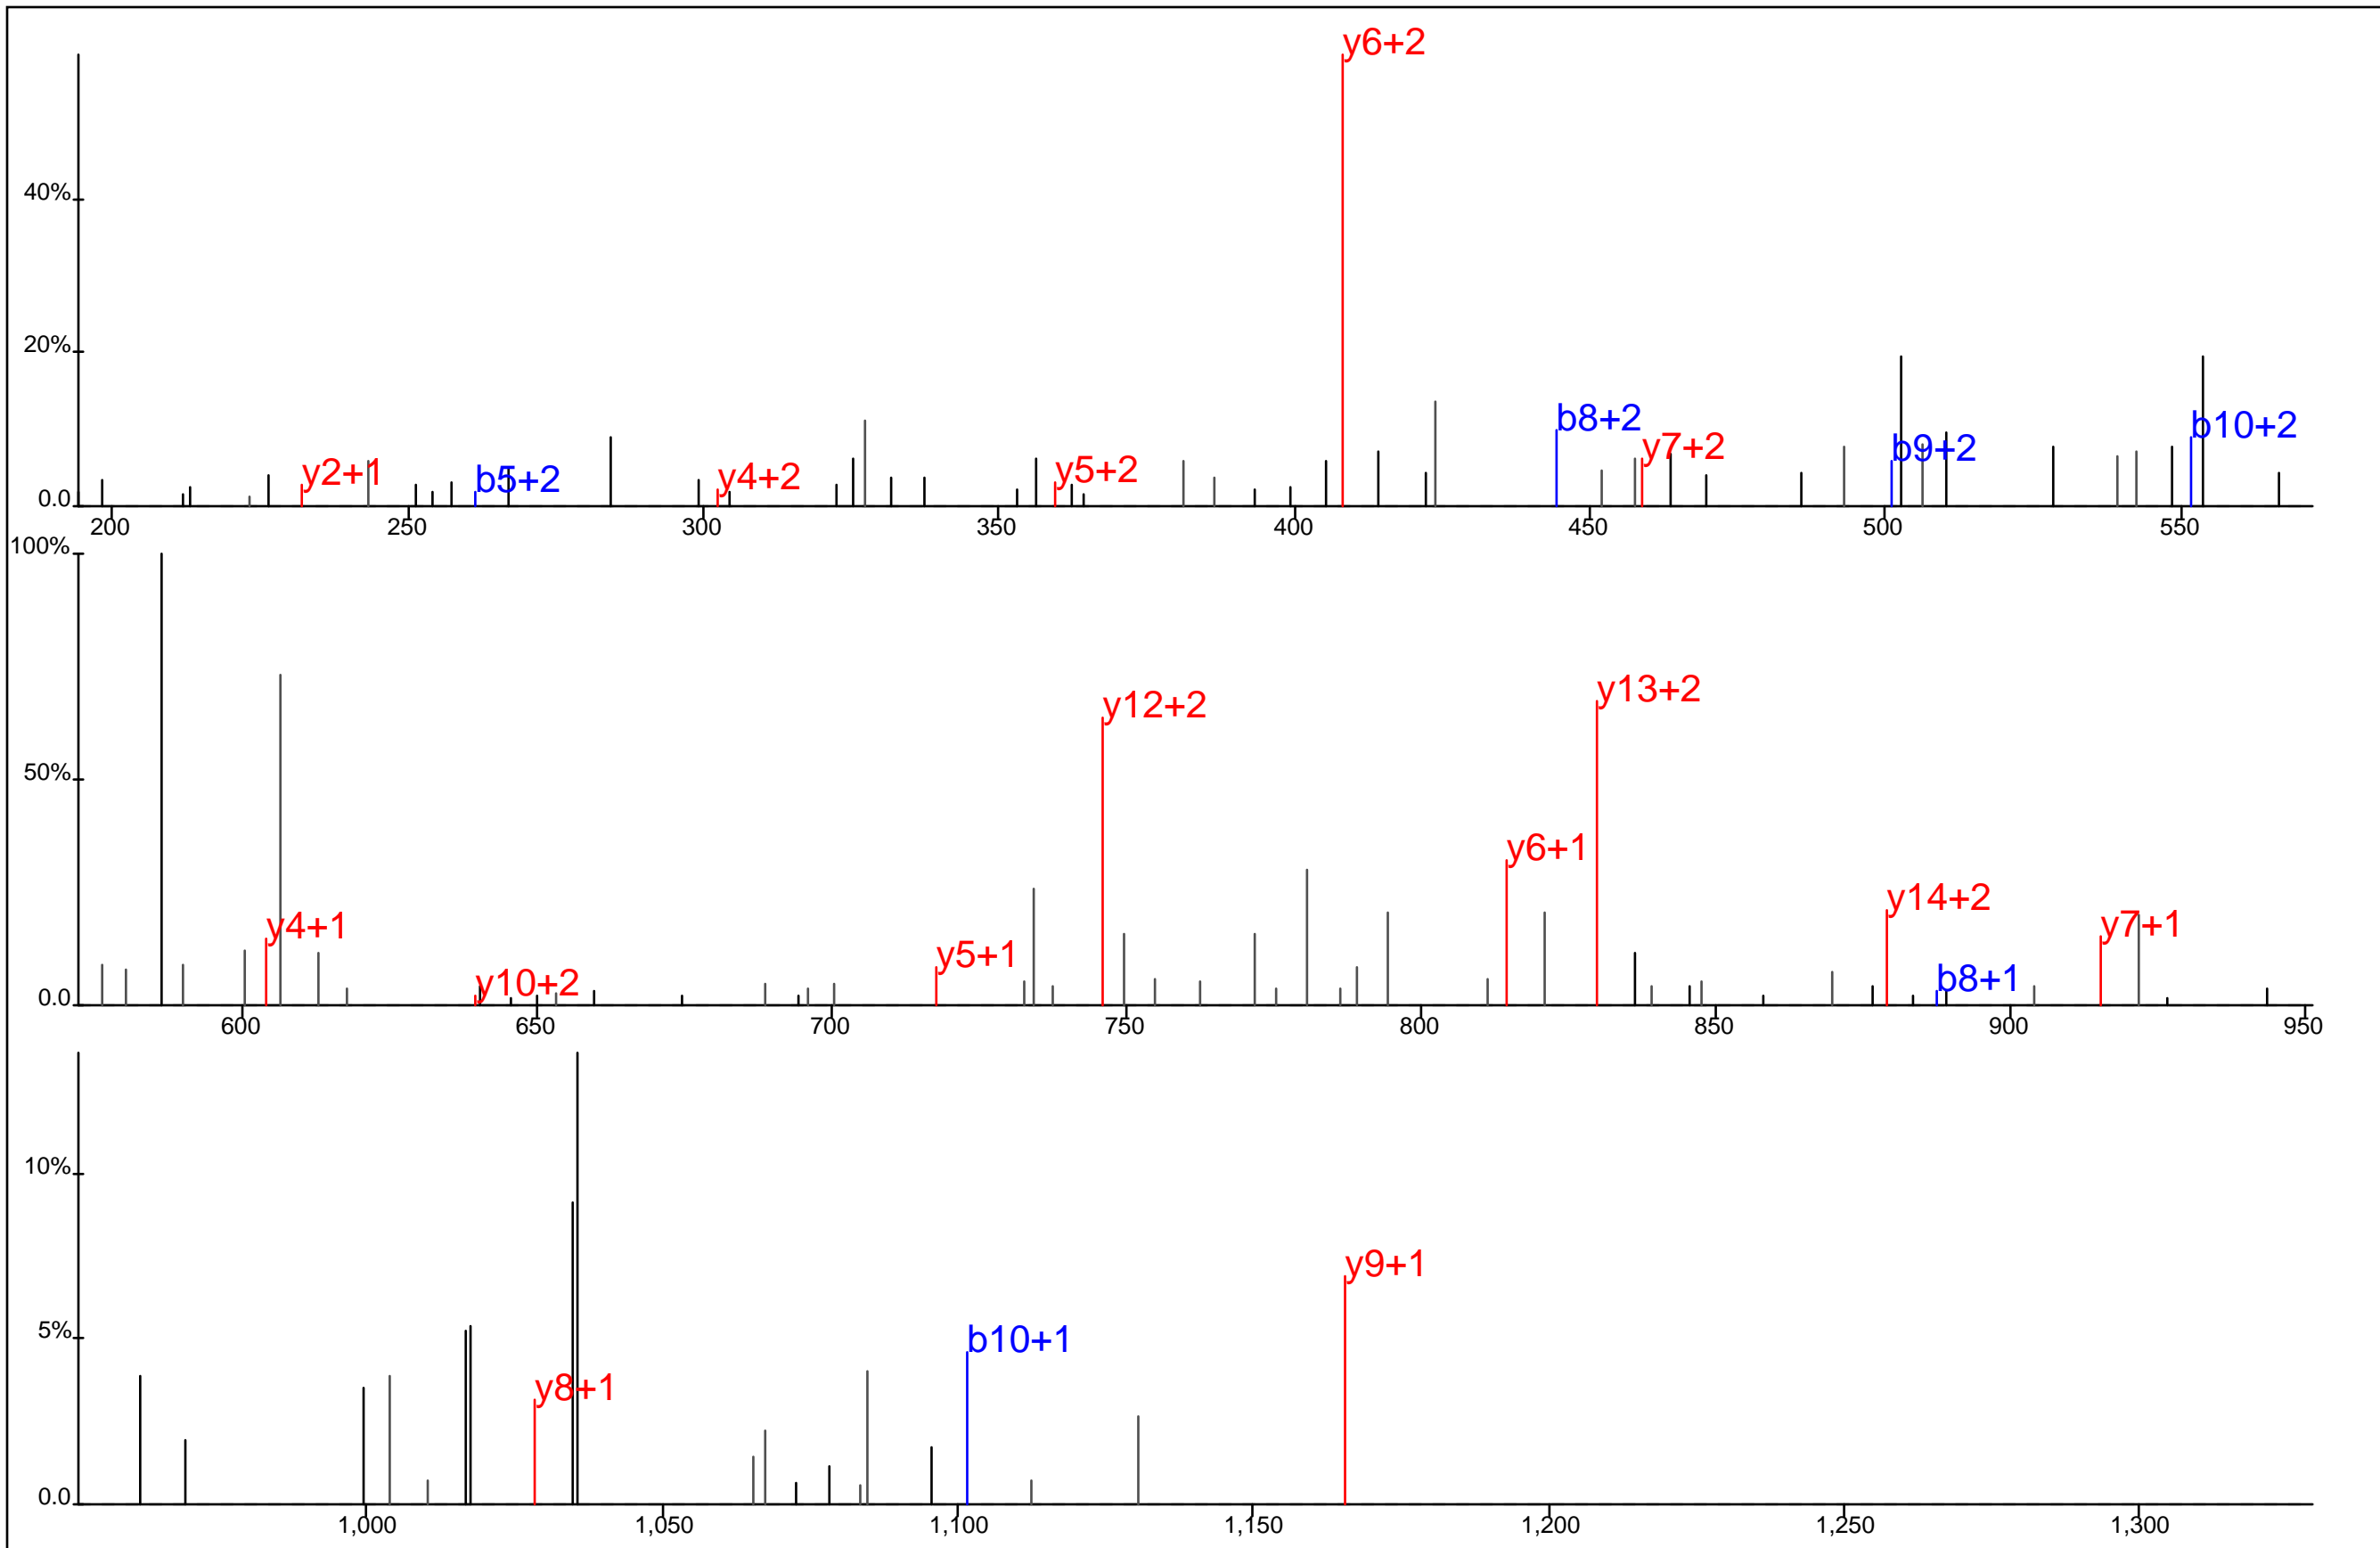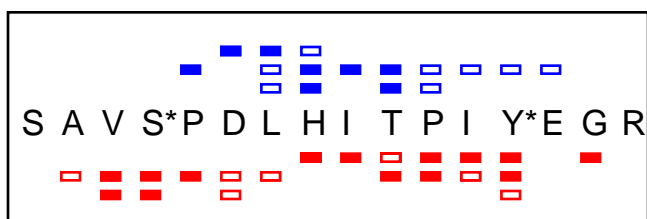

Protein Name: Plakophilin 4  
 gi Accession: 0  
 Precursor Mass: 638.9521+3  
 Delta Mass: 1.086 ppm  
 XCorr: 22.26



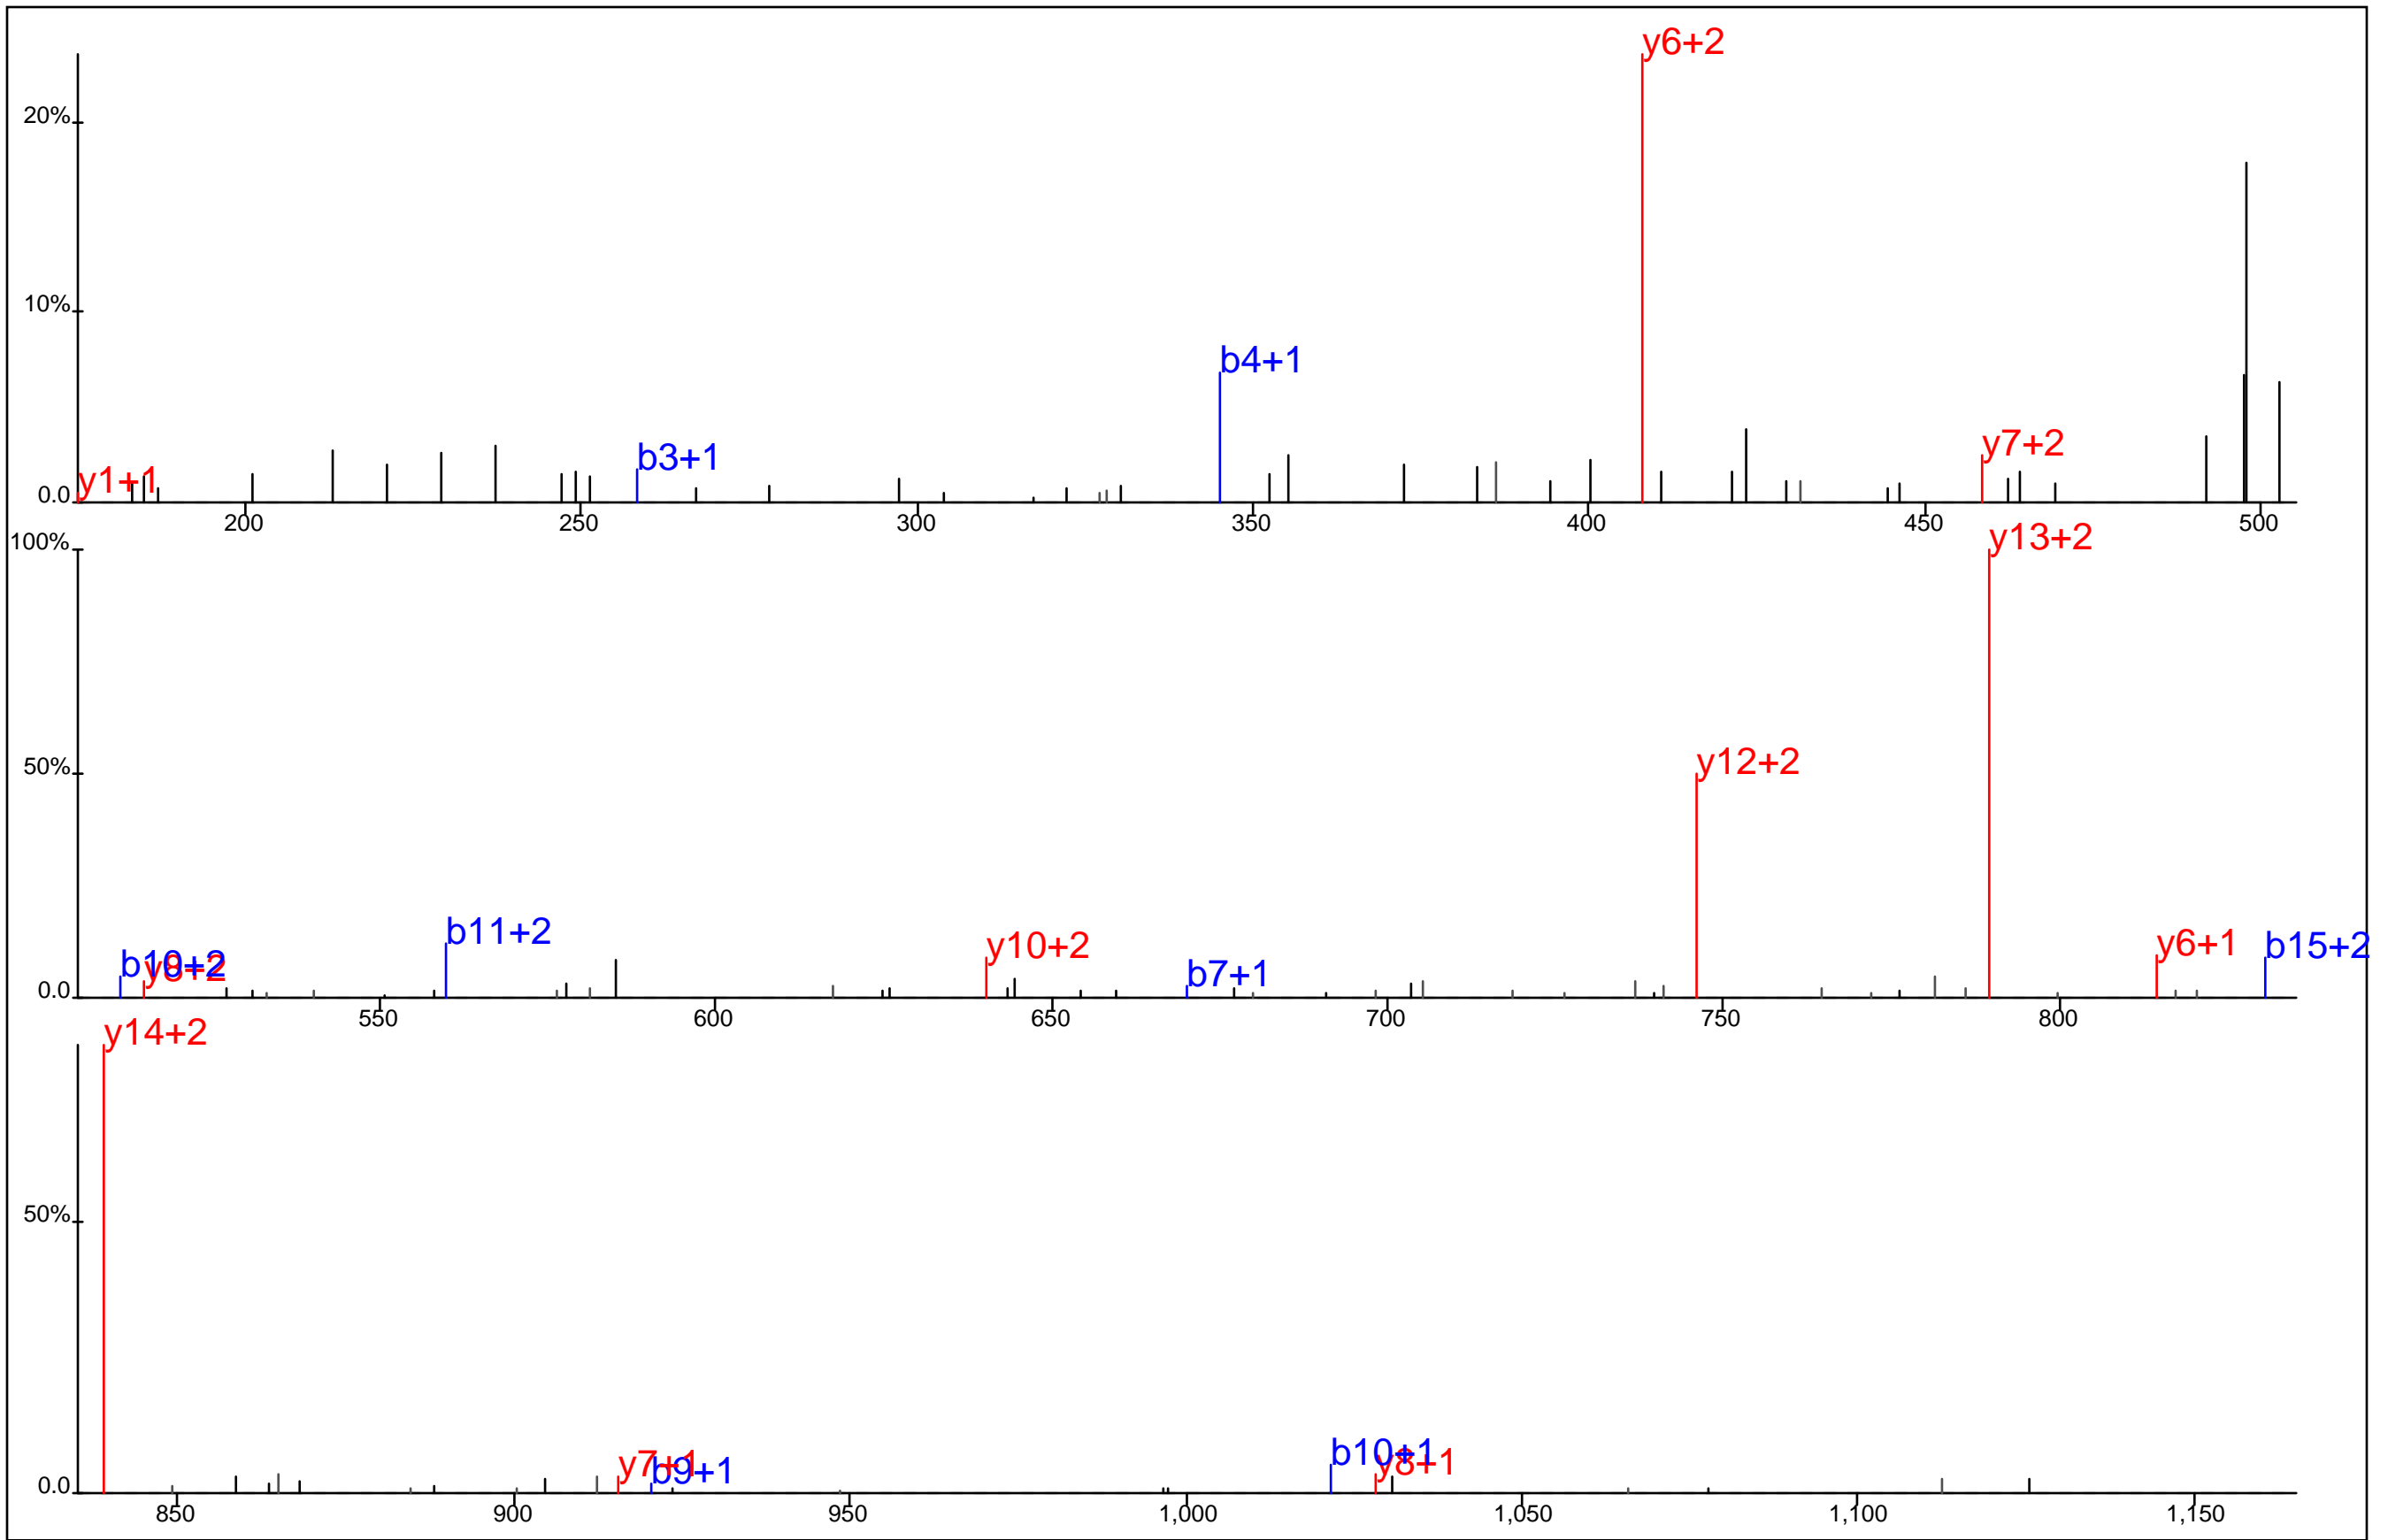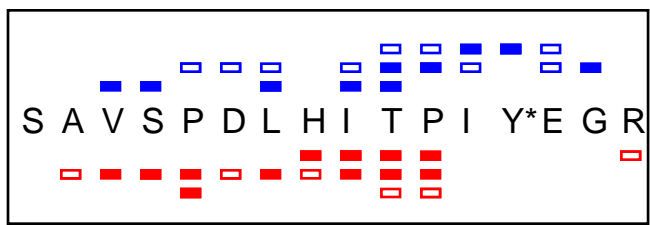

Protein Name: Plakophilin 4  
 gi Accession: 0  
 Precursor Mass: 612.2966+3  
 Delta Mass: 1.013 ppm  
 XCorr: 26.29

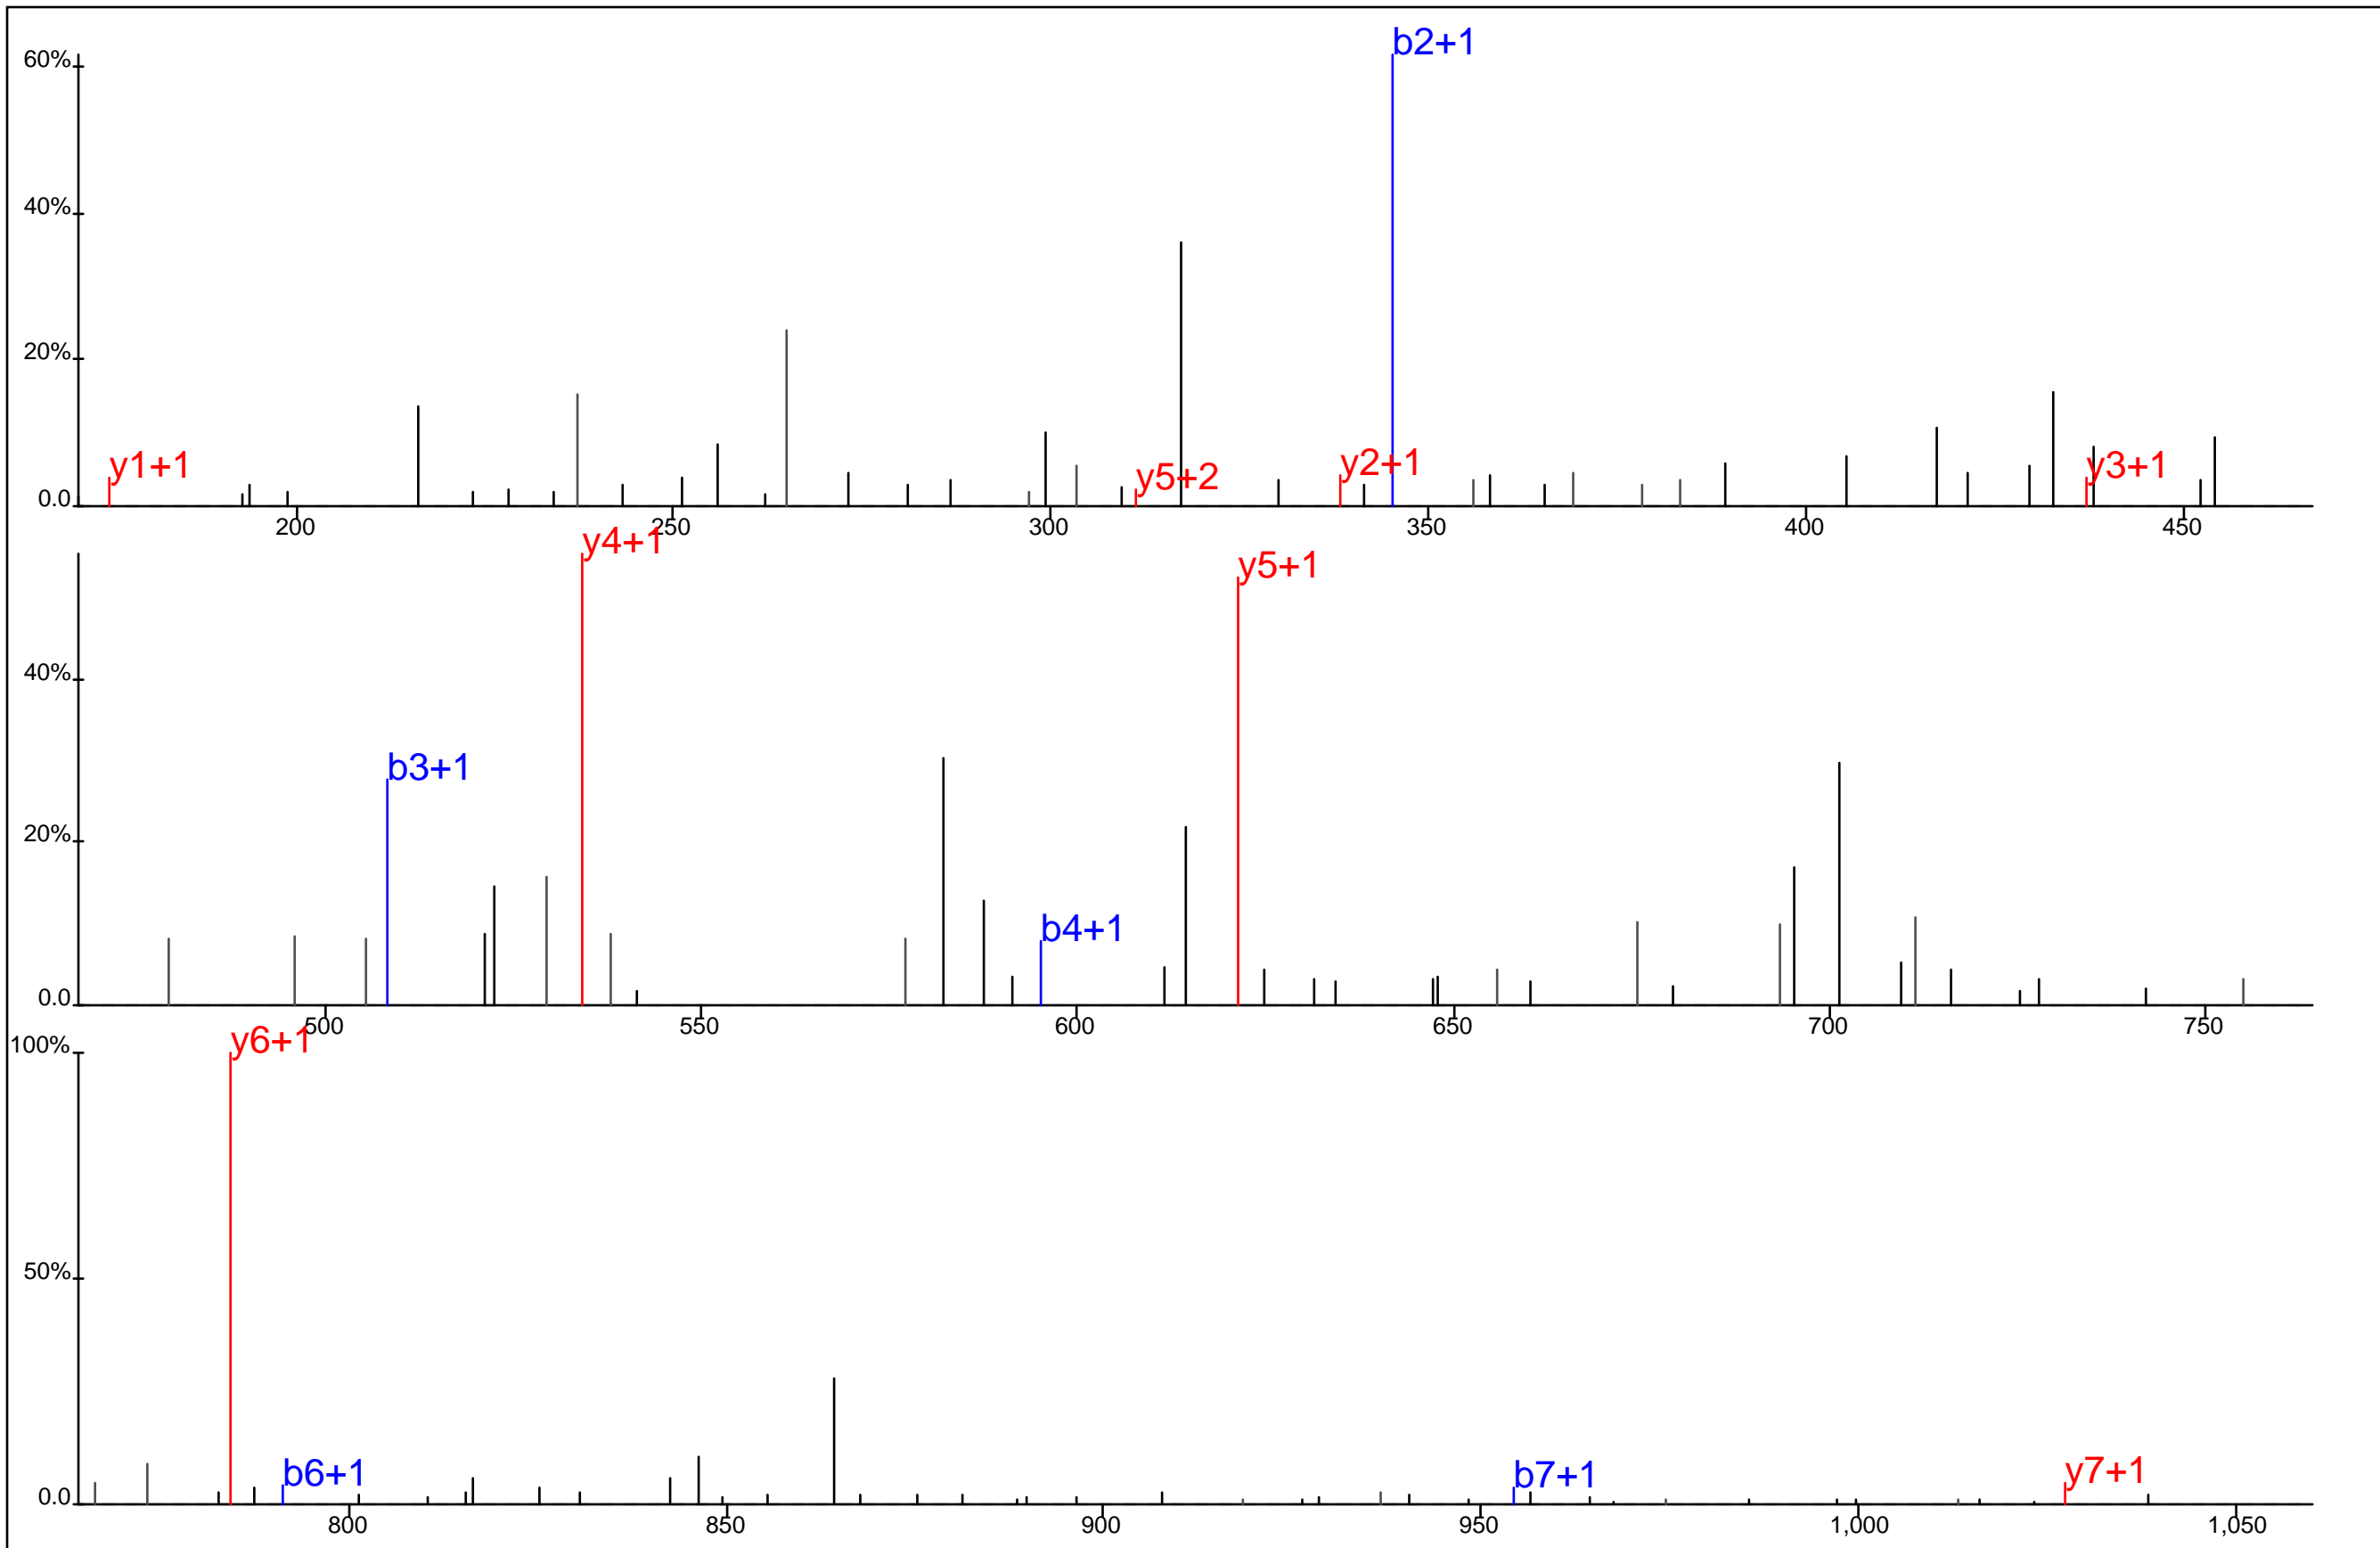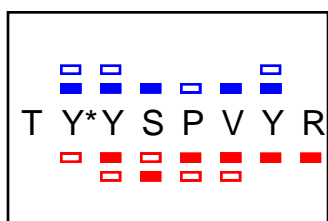

Protein Name: Plakophilin 4  
 gi Accession: 0  
 Precursor Mass: 564.7429+2  
 Delta Mass: 2.155 ppm  
 XCorr: 24.39

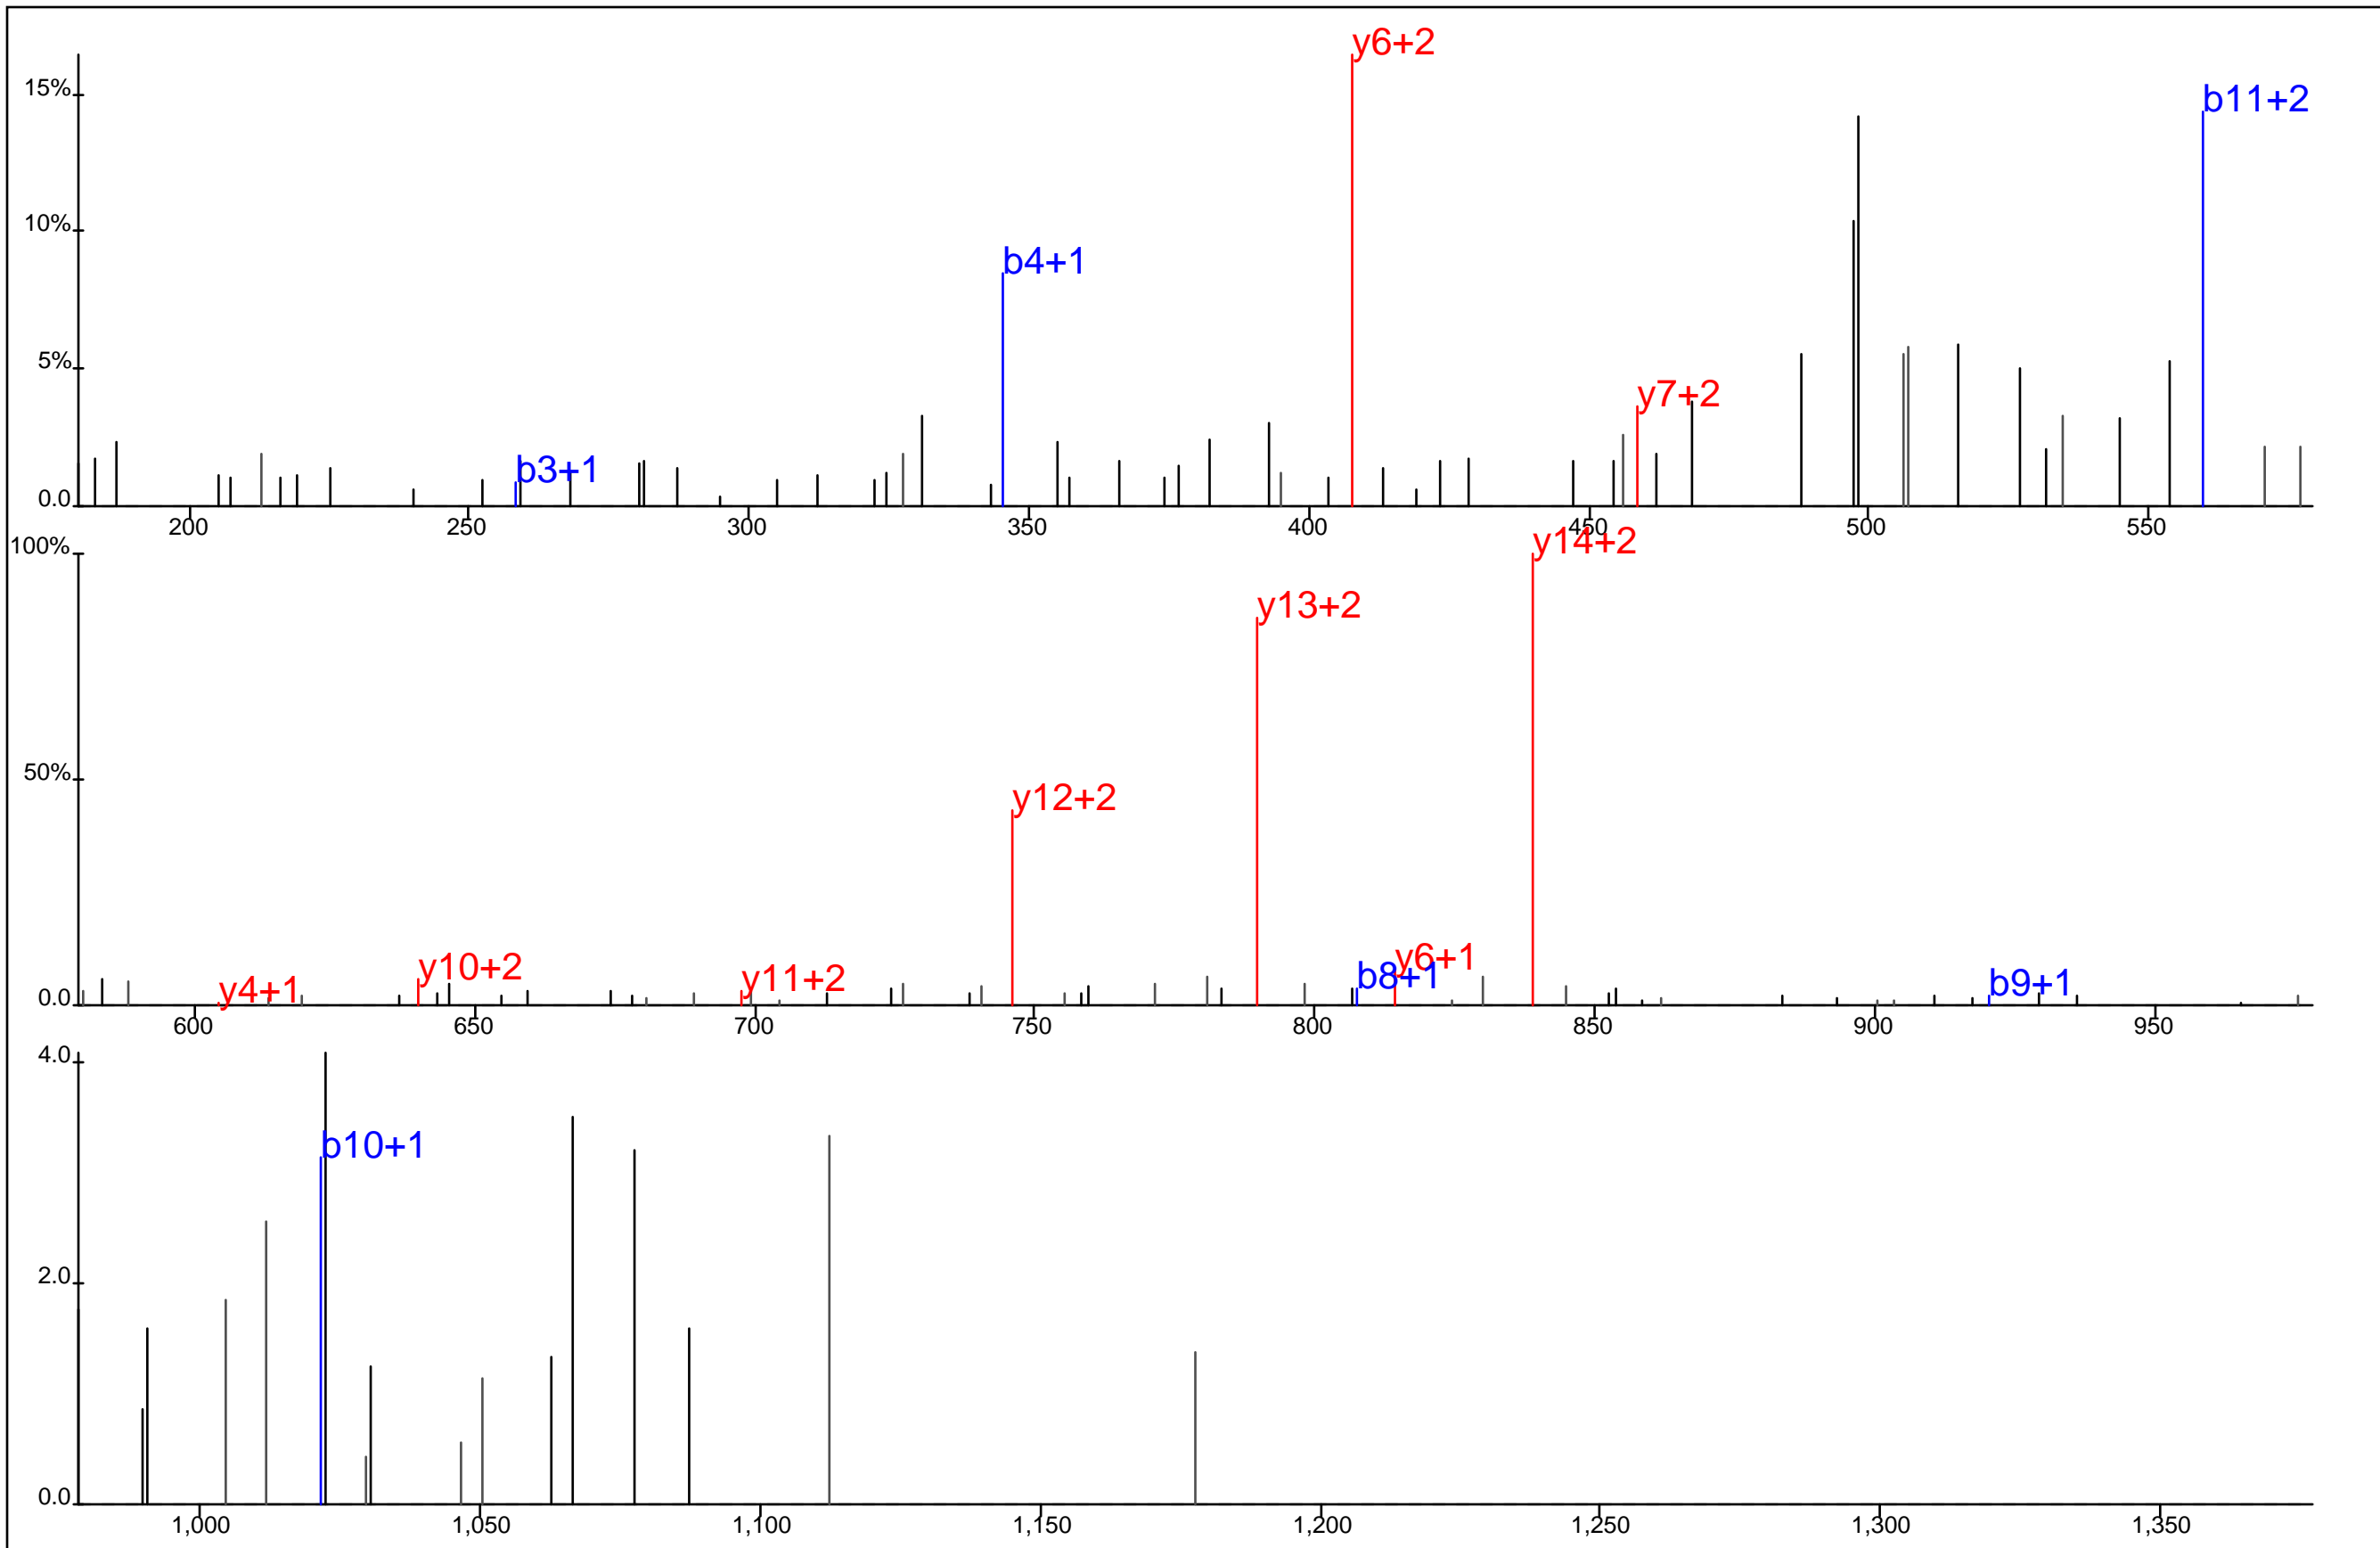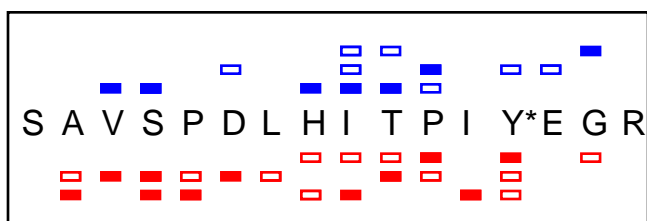

Protein Name: Plakophilin 4  
 gi Accession: 0  
 Precursor Mass: 612.2971+3  
 Delta Mass: 1.711 ppm  
 XCorr: 20.76

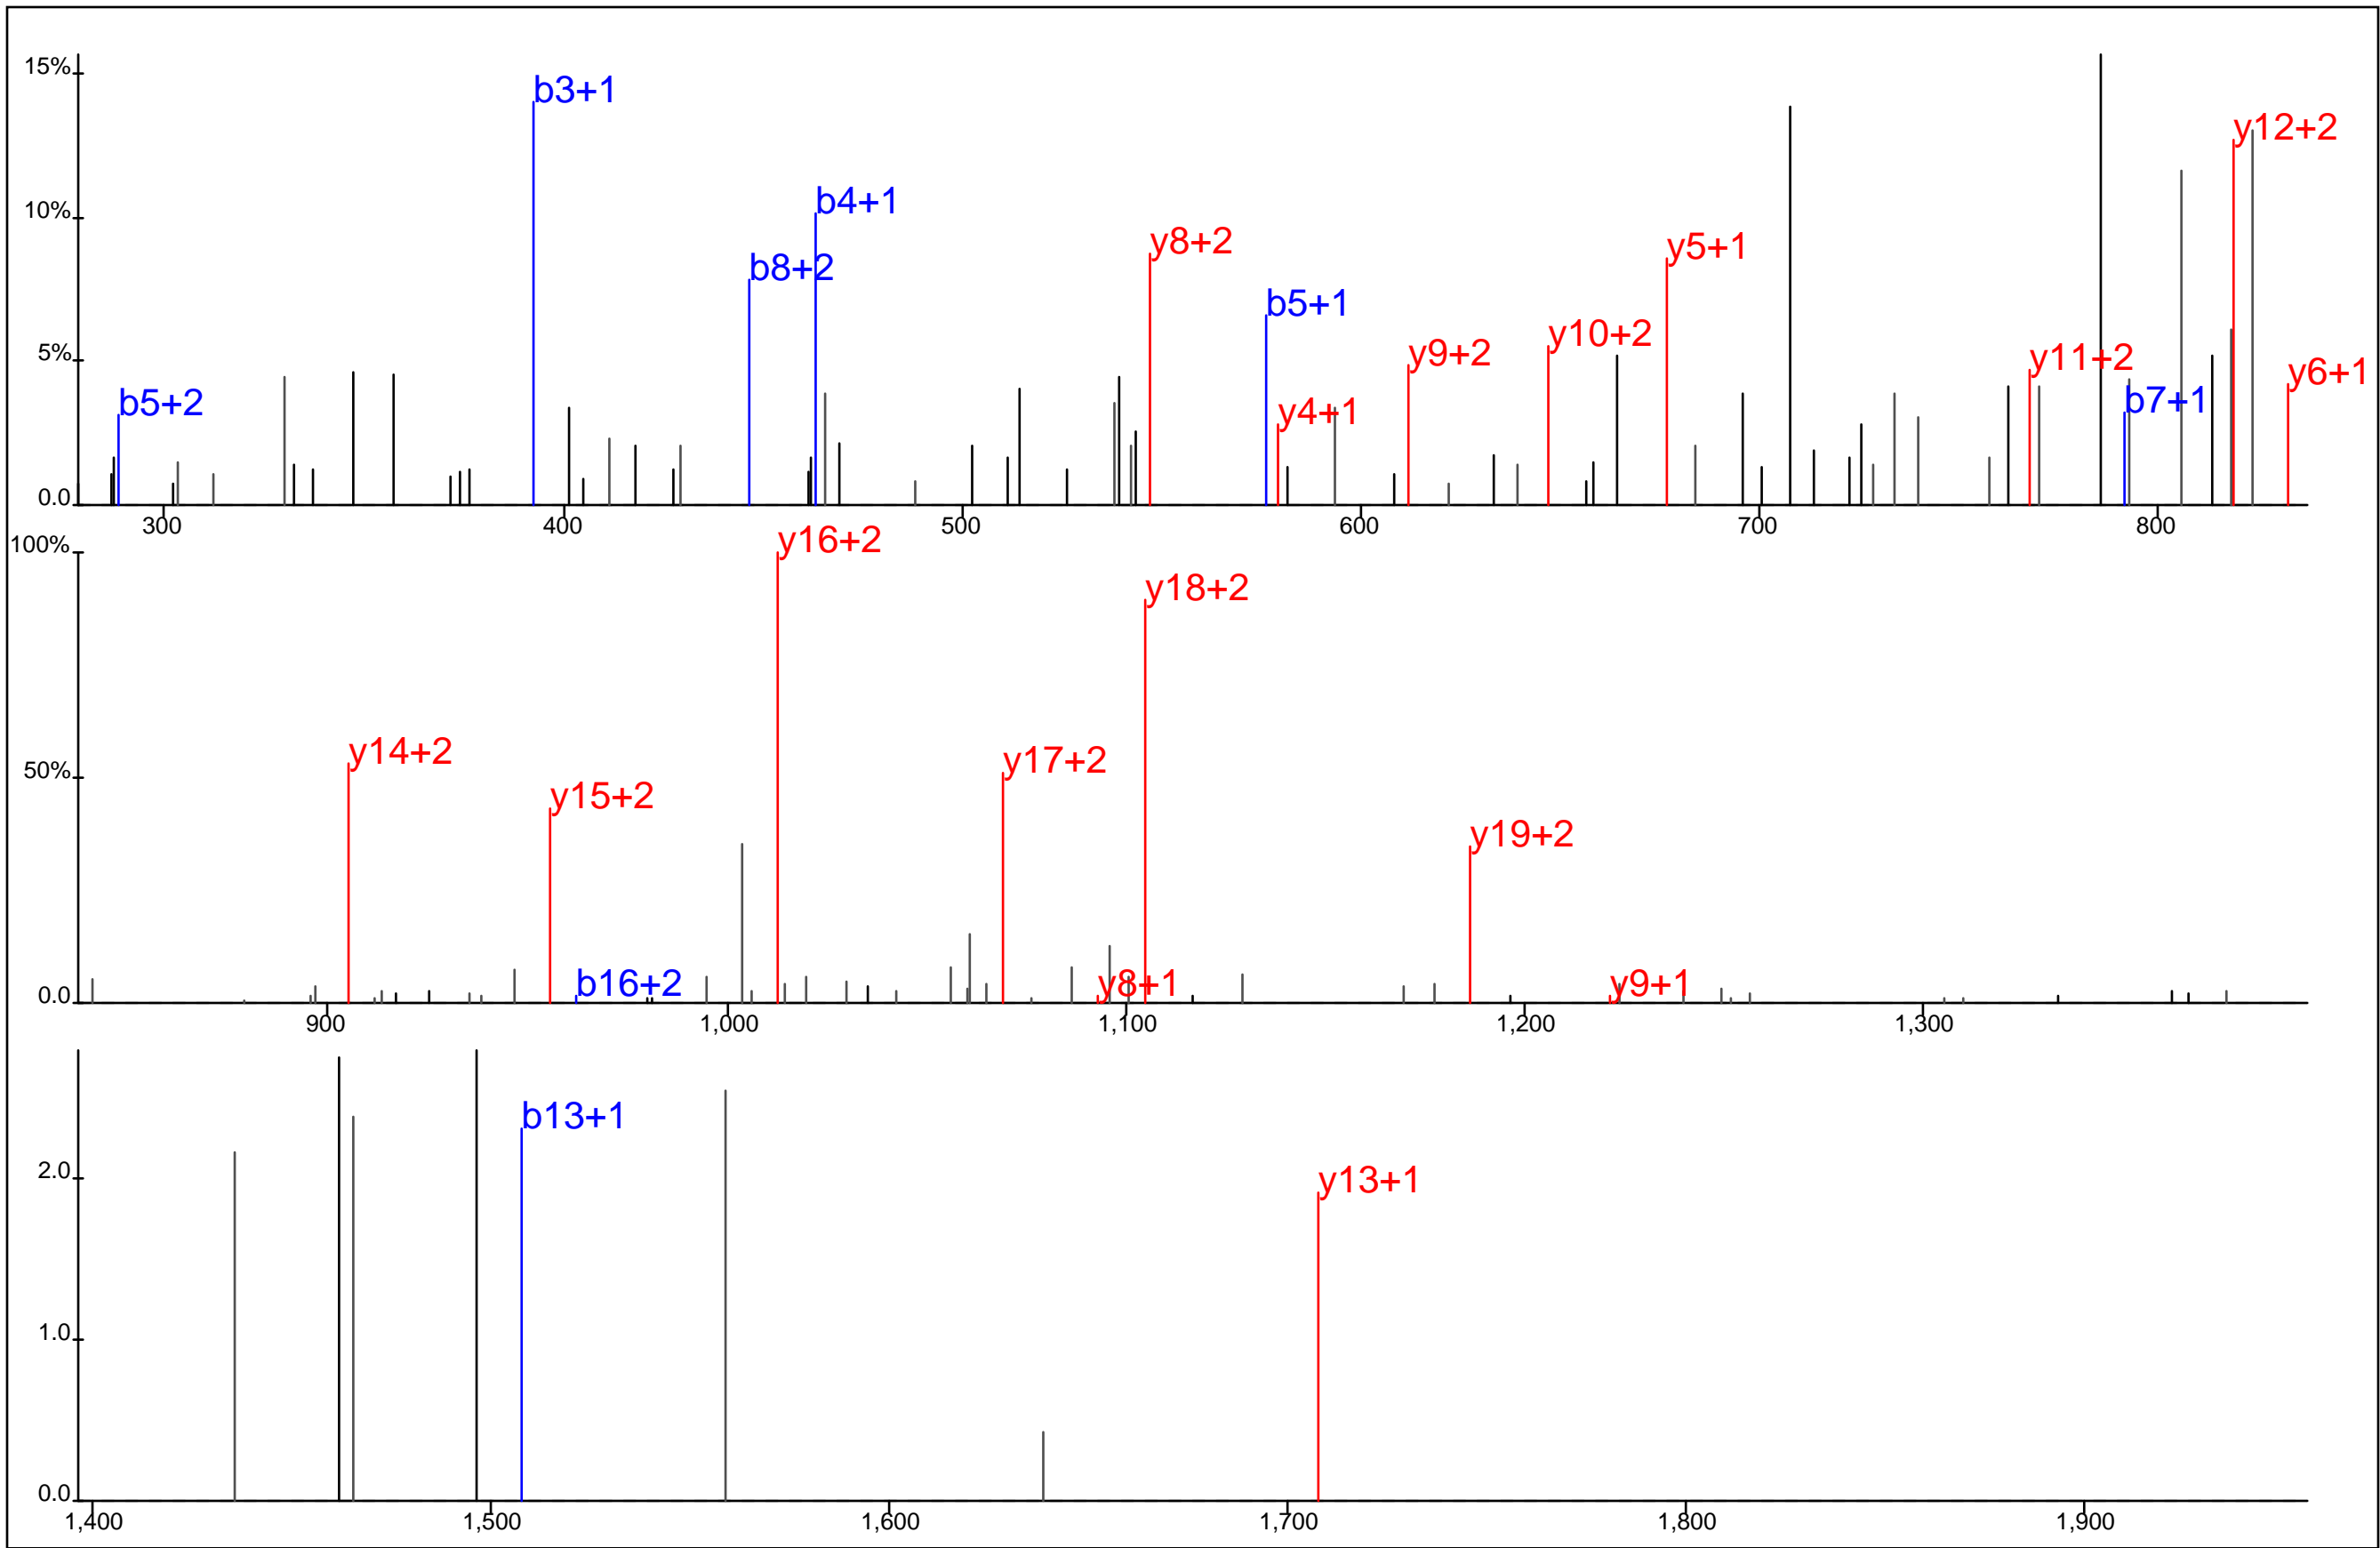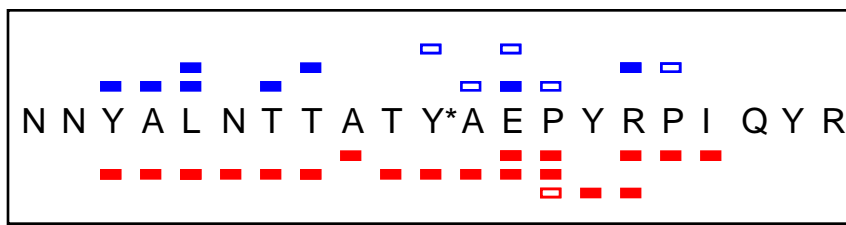

Protein Name: Plakophilin 4  
 gi Accession: 0  
 Precursor Mass: 867.0745+3  
 Delta Mass: 4.311 ppm  
 XCorr: 48.19

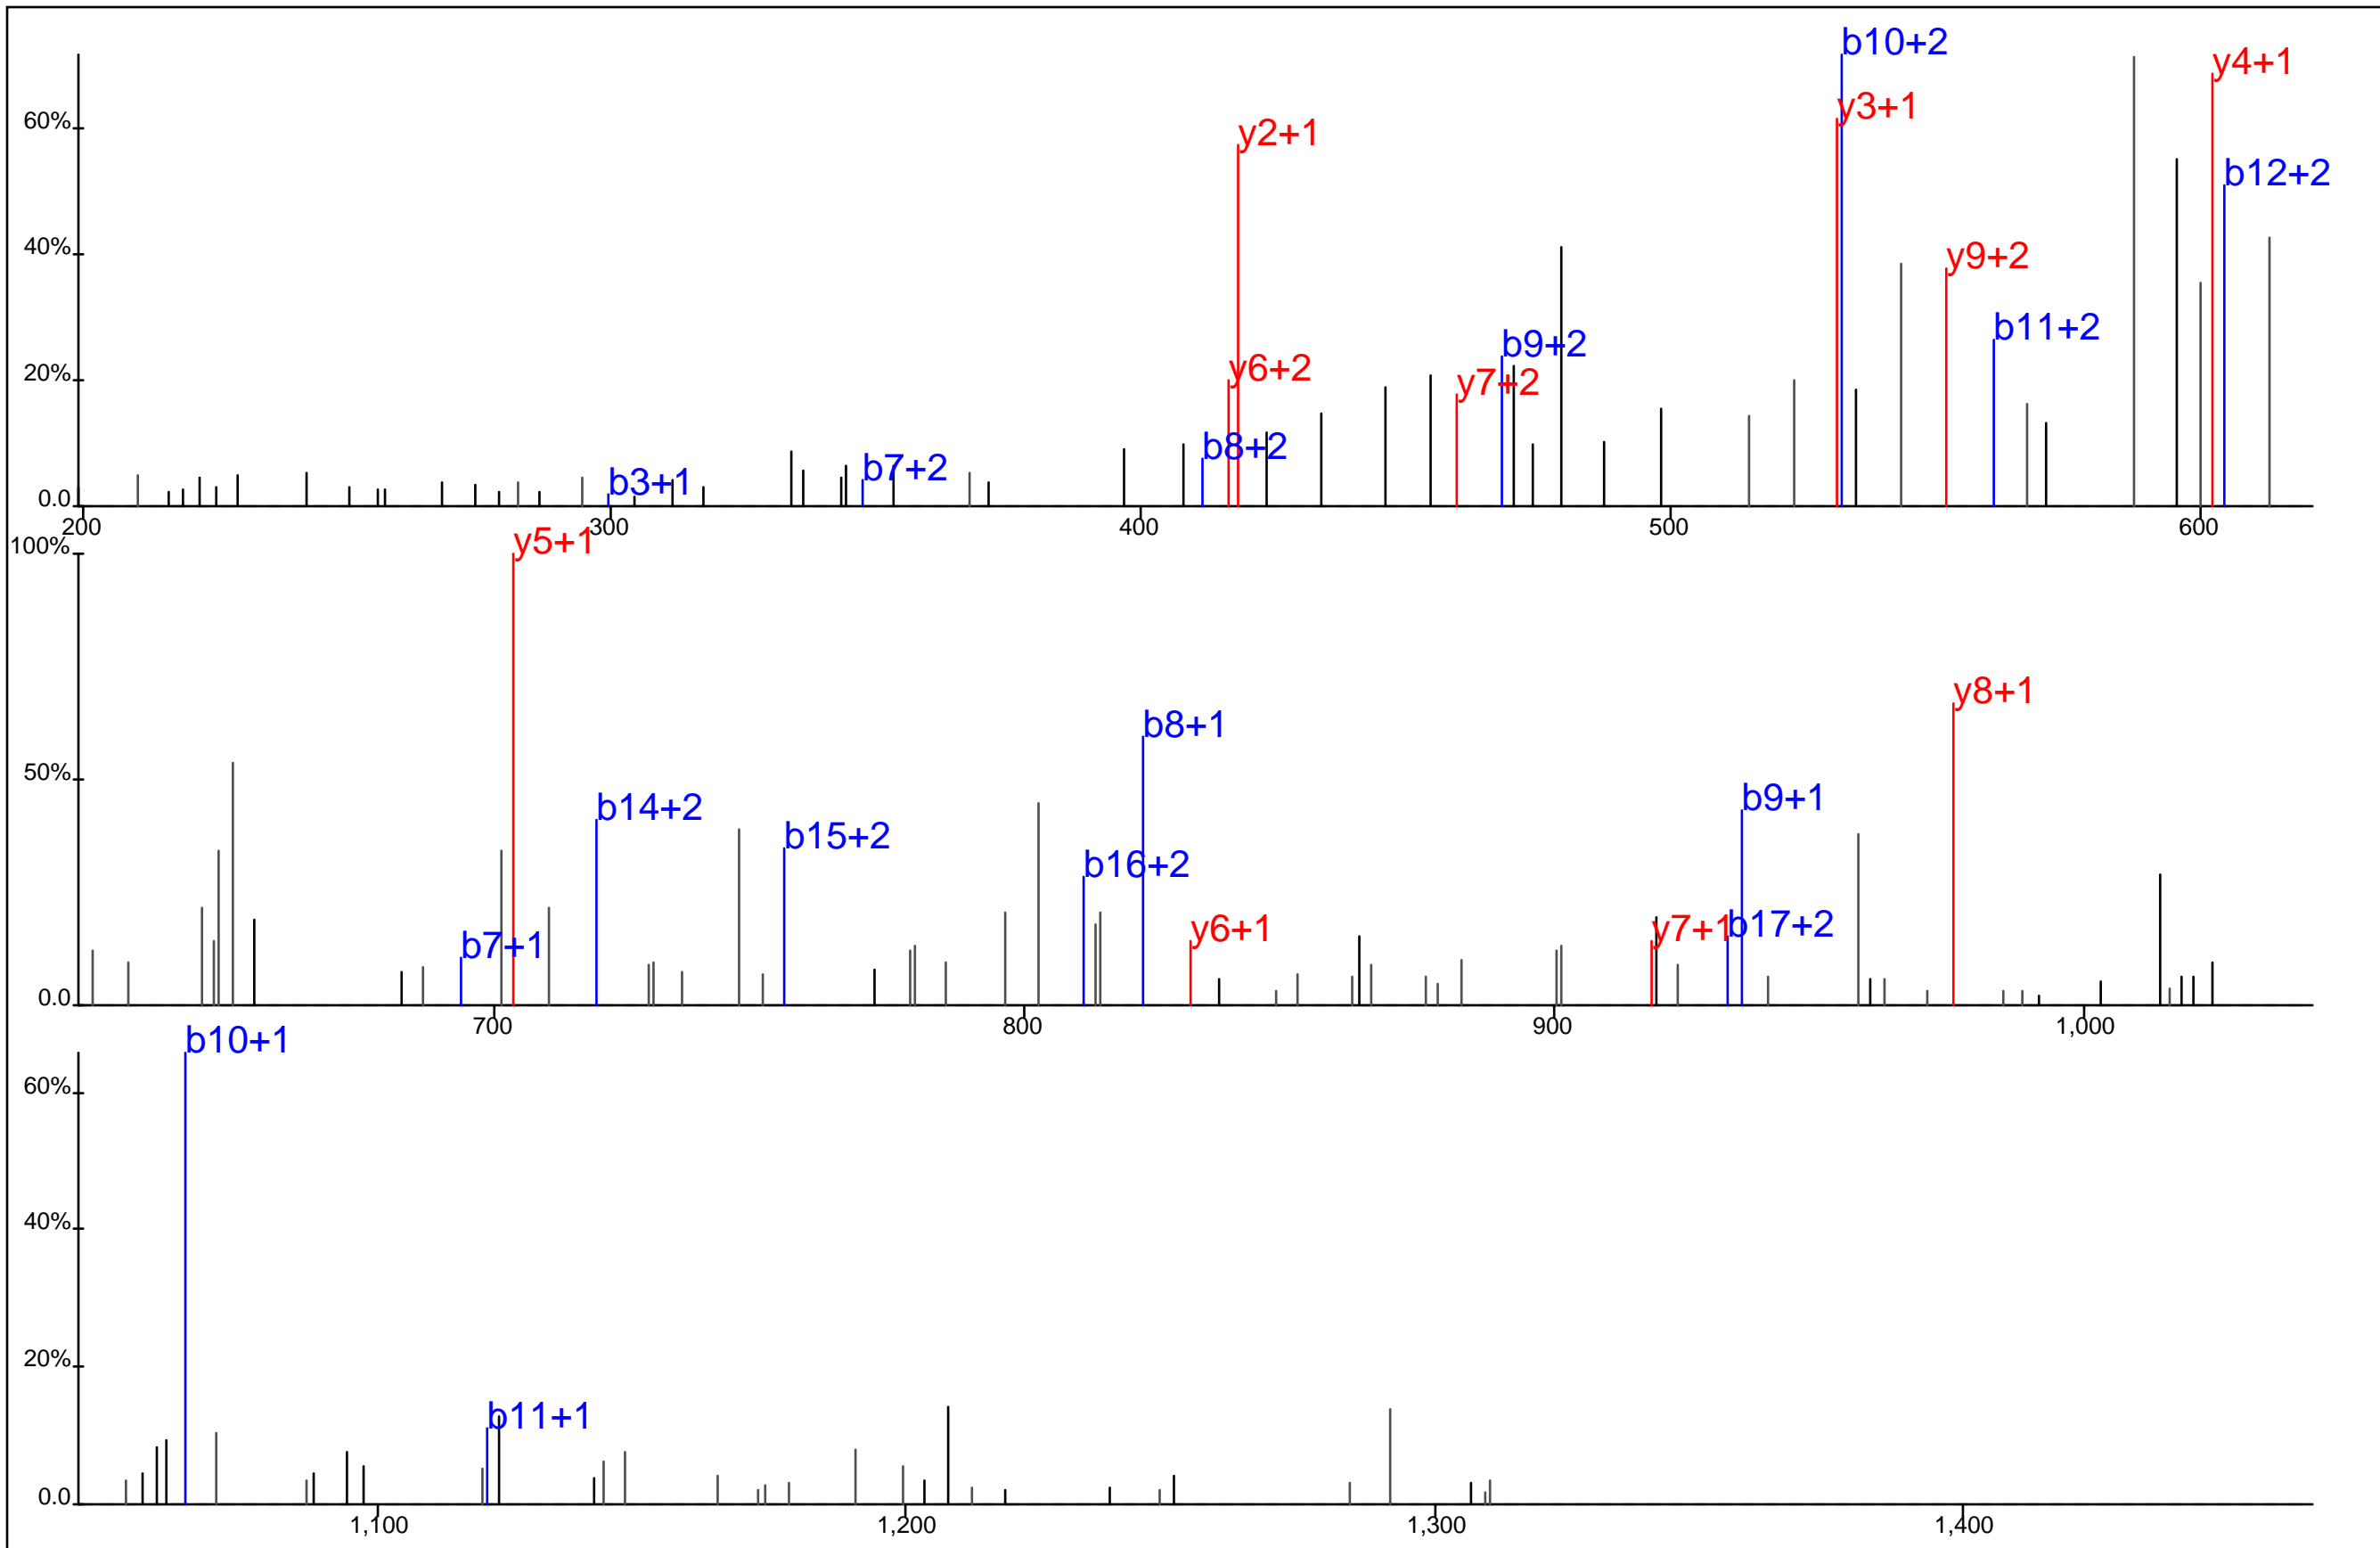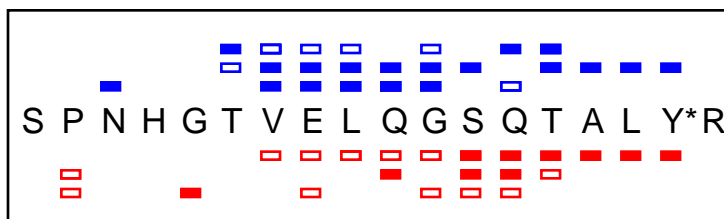

Protein Name: Plakophilin 4  
 gi Accession: 0  
 Precursor Mass: 679.9855+3  
 Delta Mass: 1.527 ppm  
 XCorr: 27.8

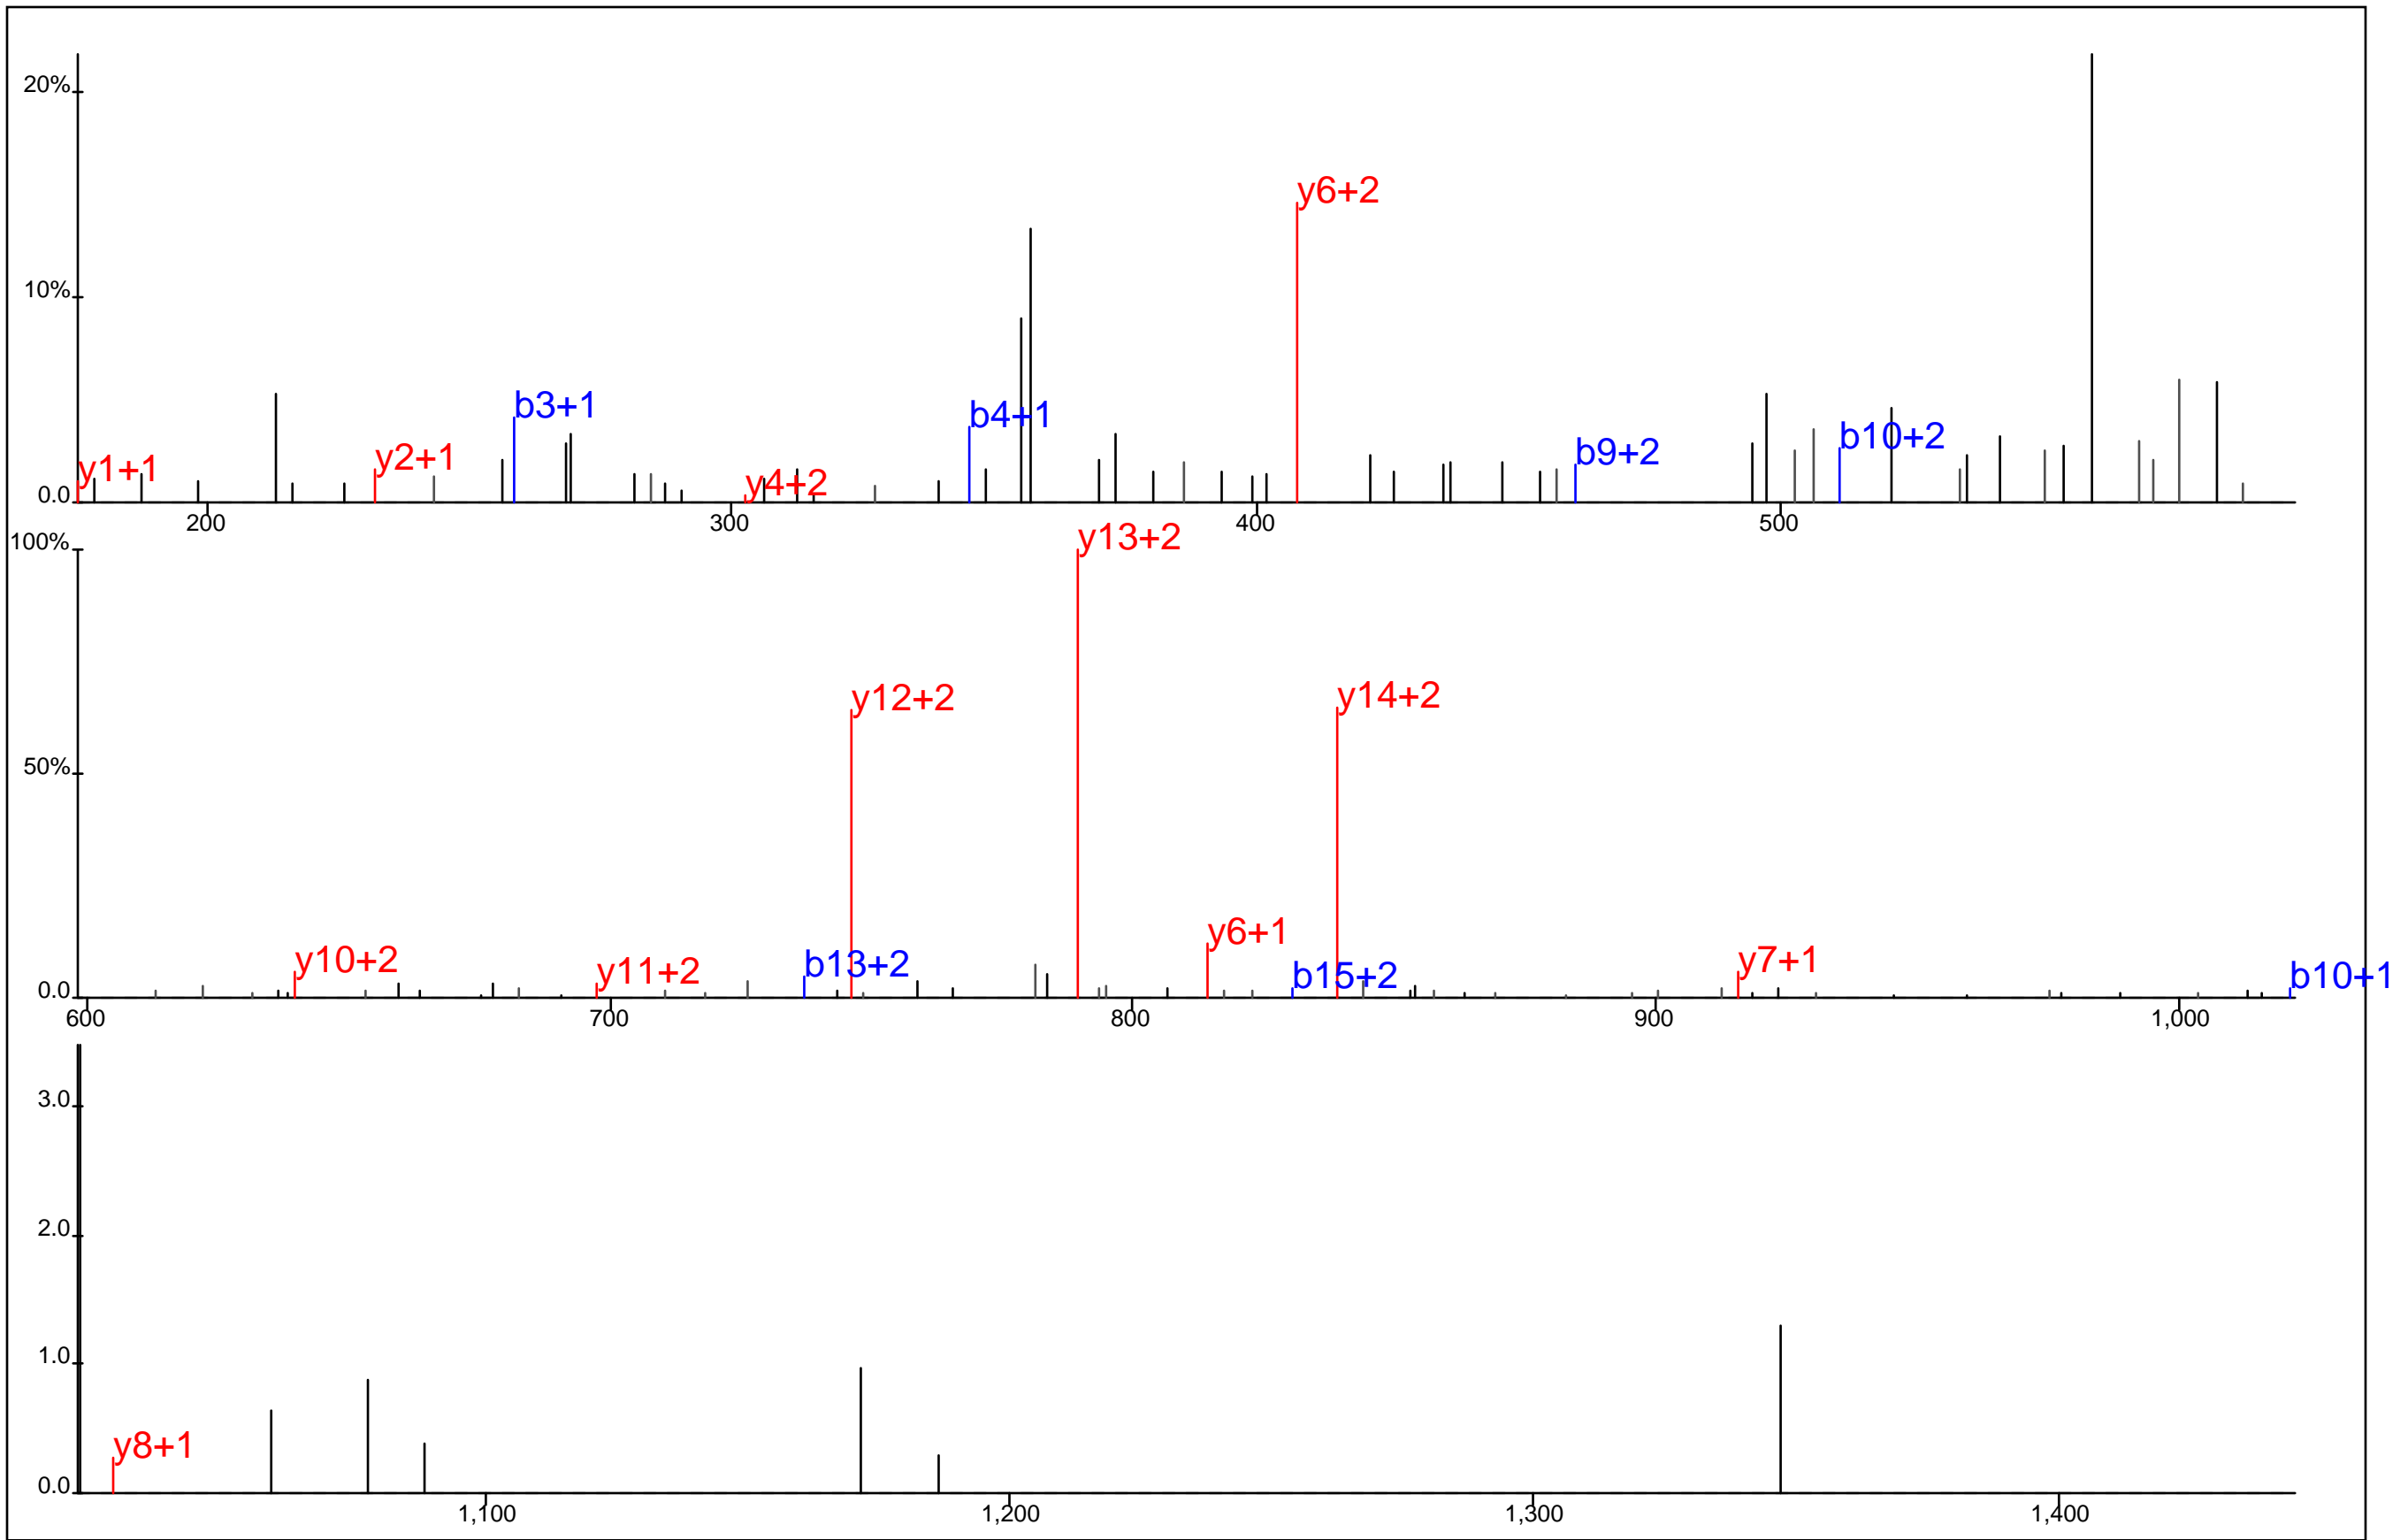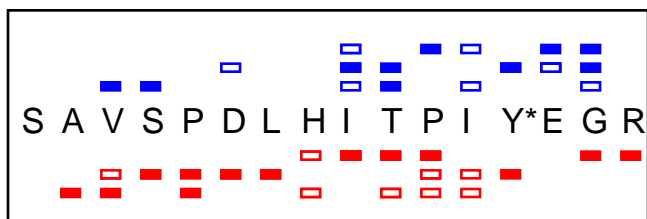

Protein Name: Plakophilin 4  
 gi Accession: 0  
 Precursor Mass: 612.2961+3  
 Delta Mass: 0.116 ppm  
 XCorr: 21.77



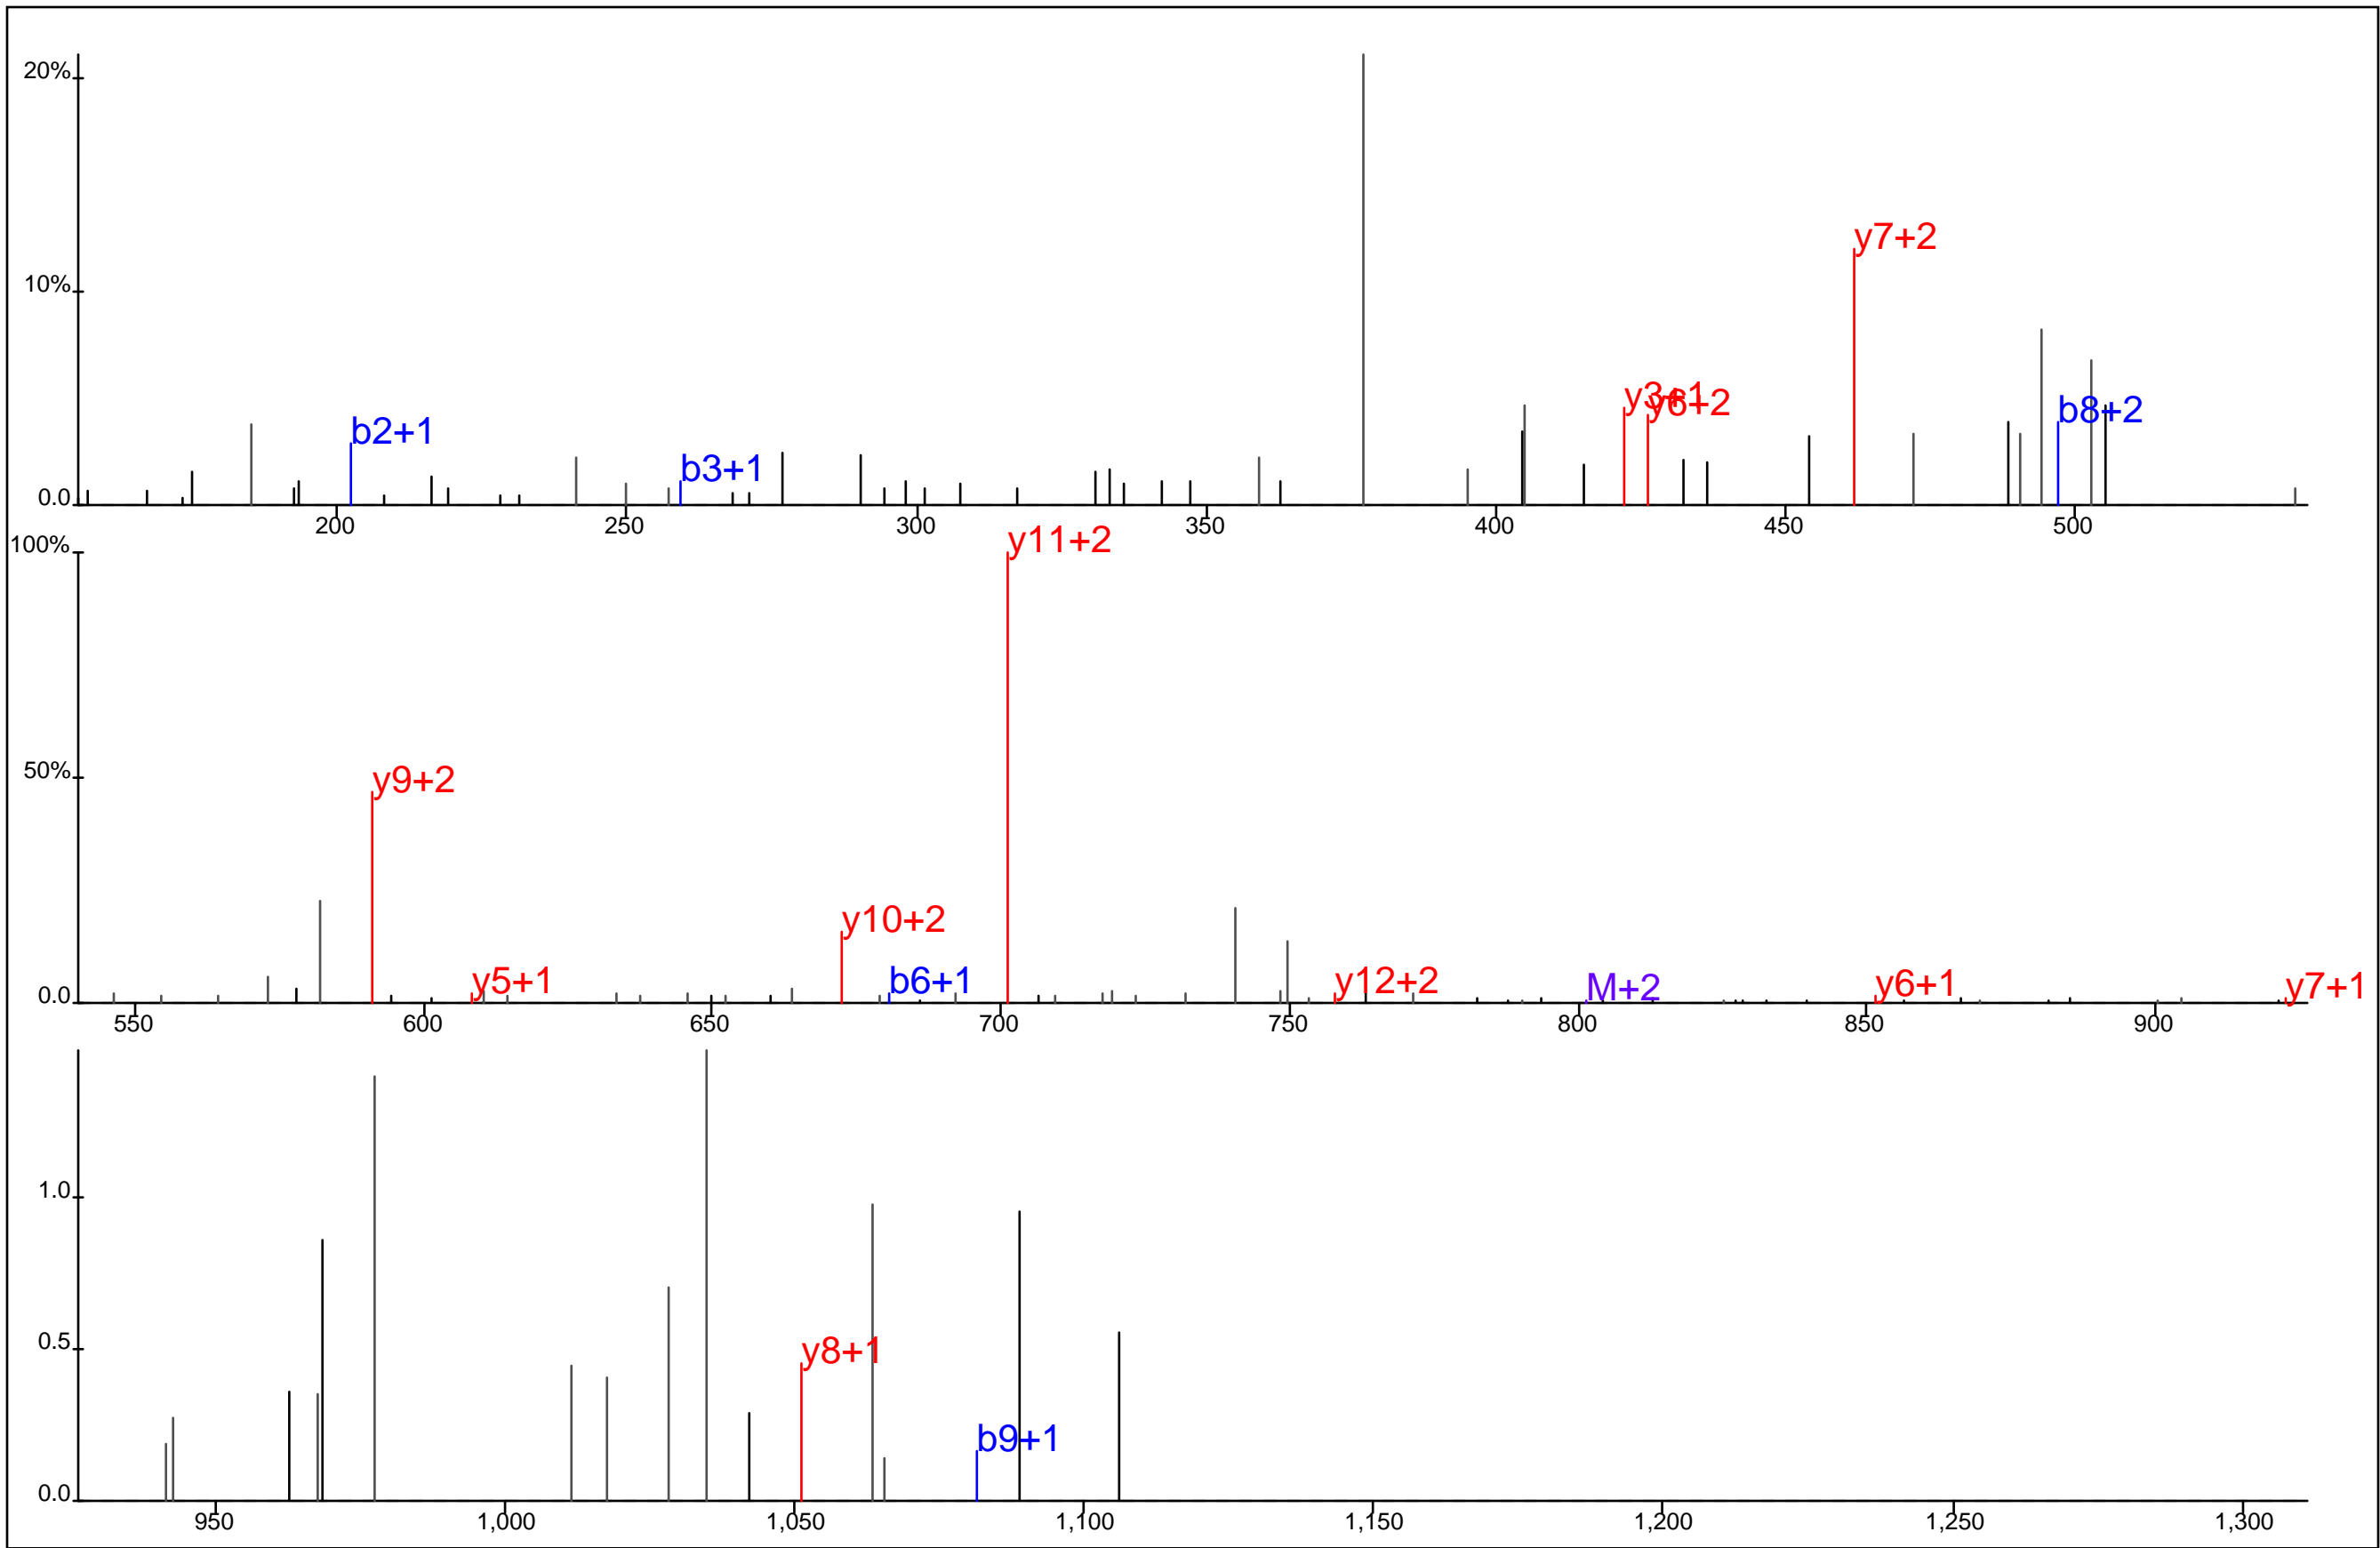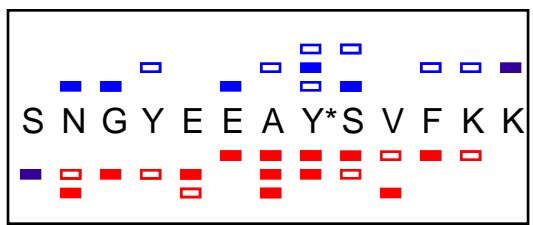

Protein Name: Platelet activating factor acetylhydrolase IB alpha subunit  
 gi Accession: 0  
 Precursor Mass: 534.5680+3  
 Delta Mass: 0.709 ppm  
 XCorr: 25.06



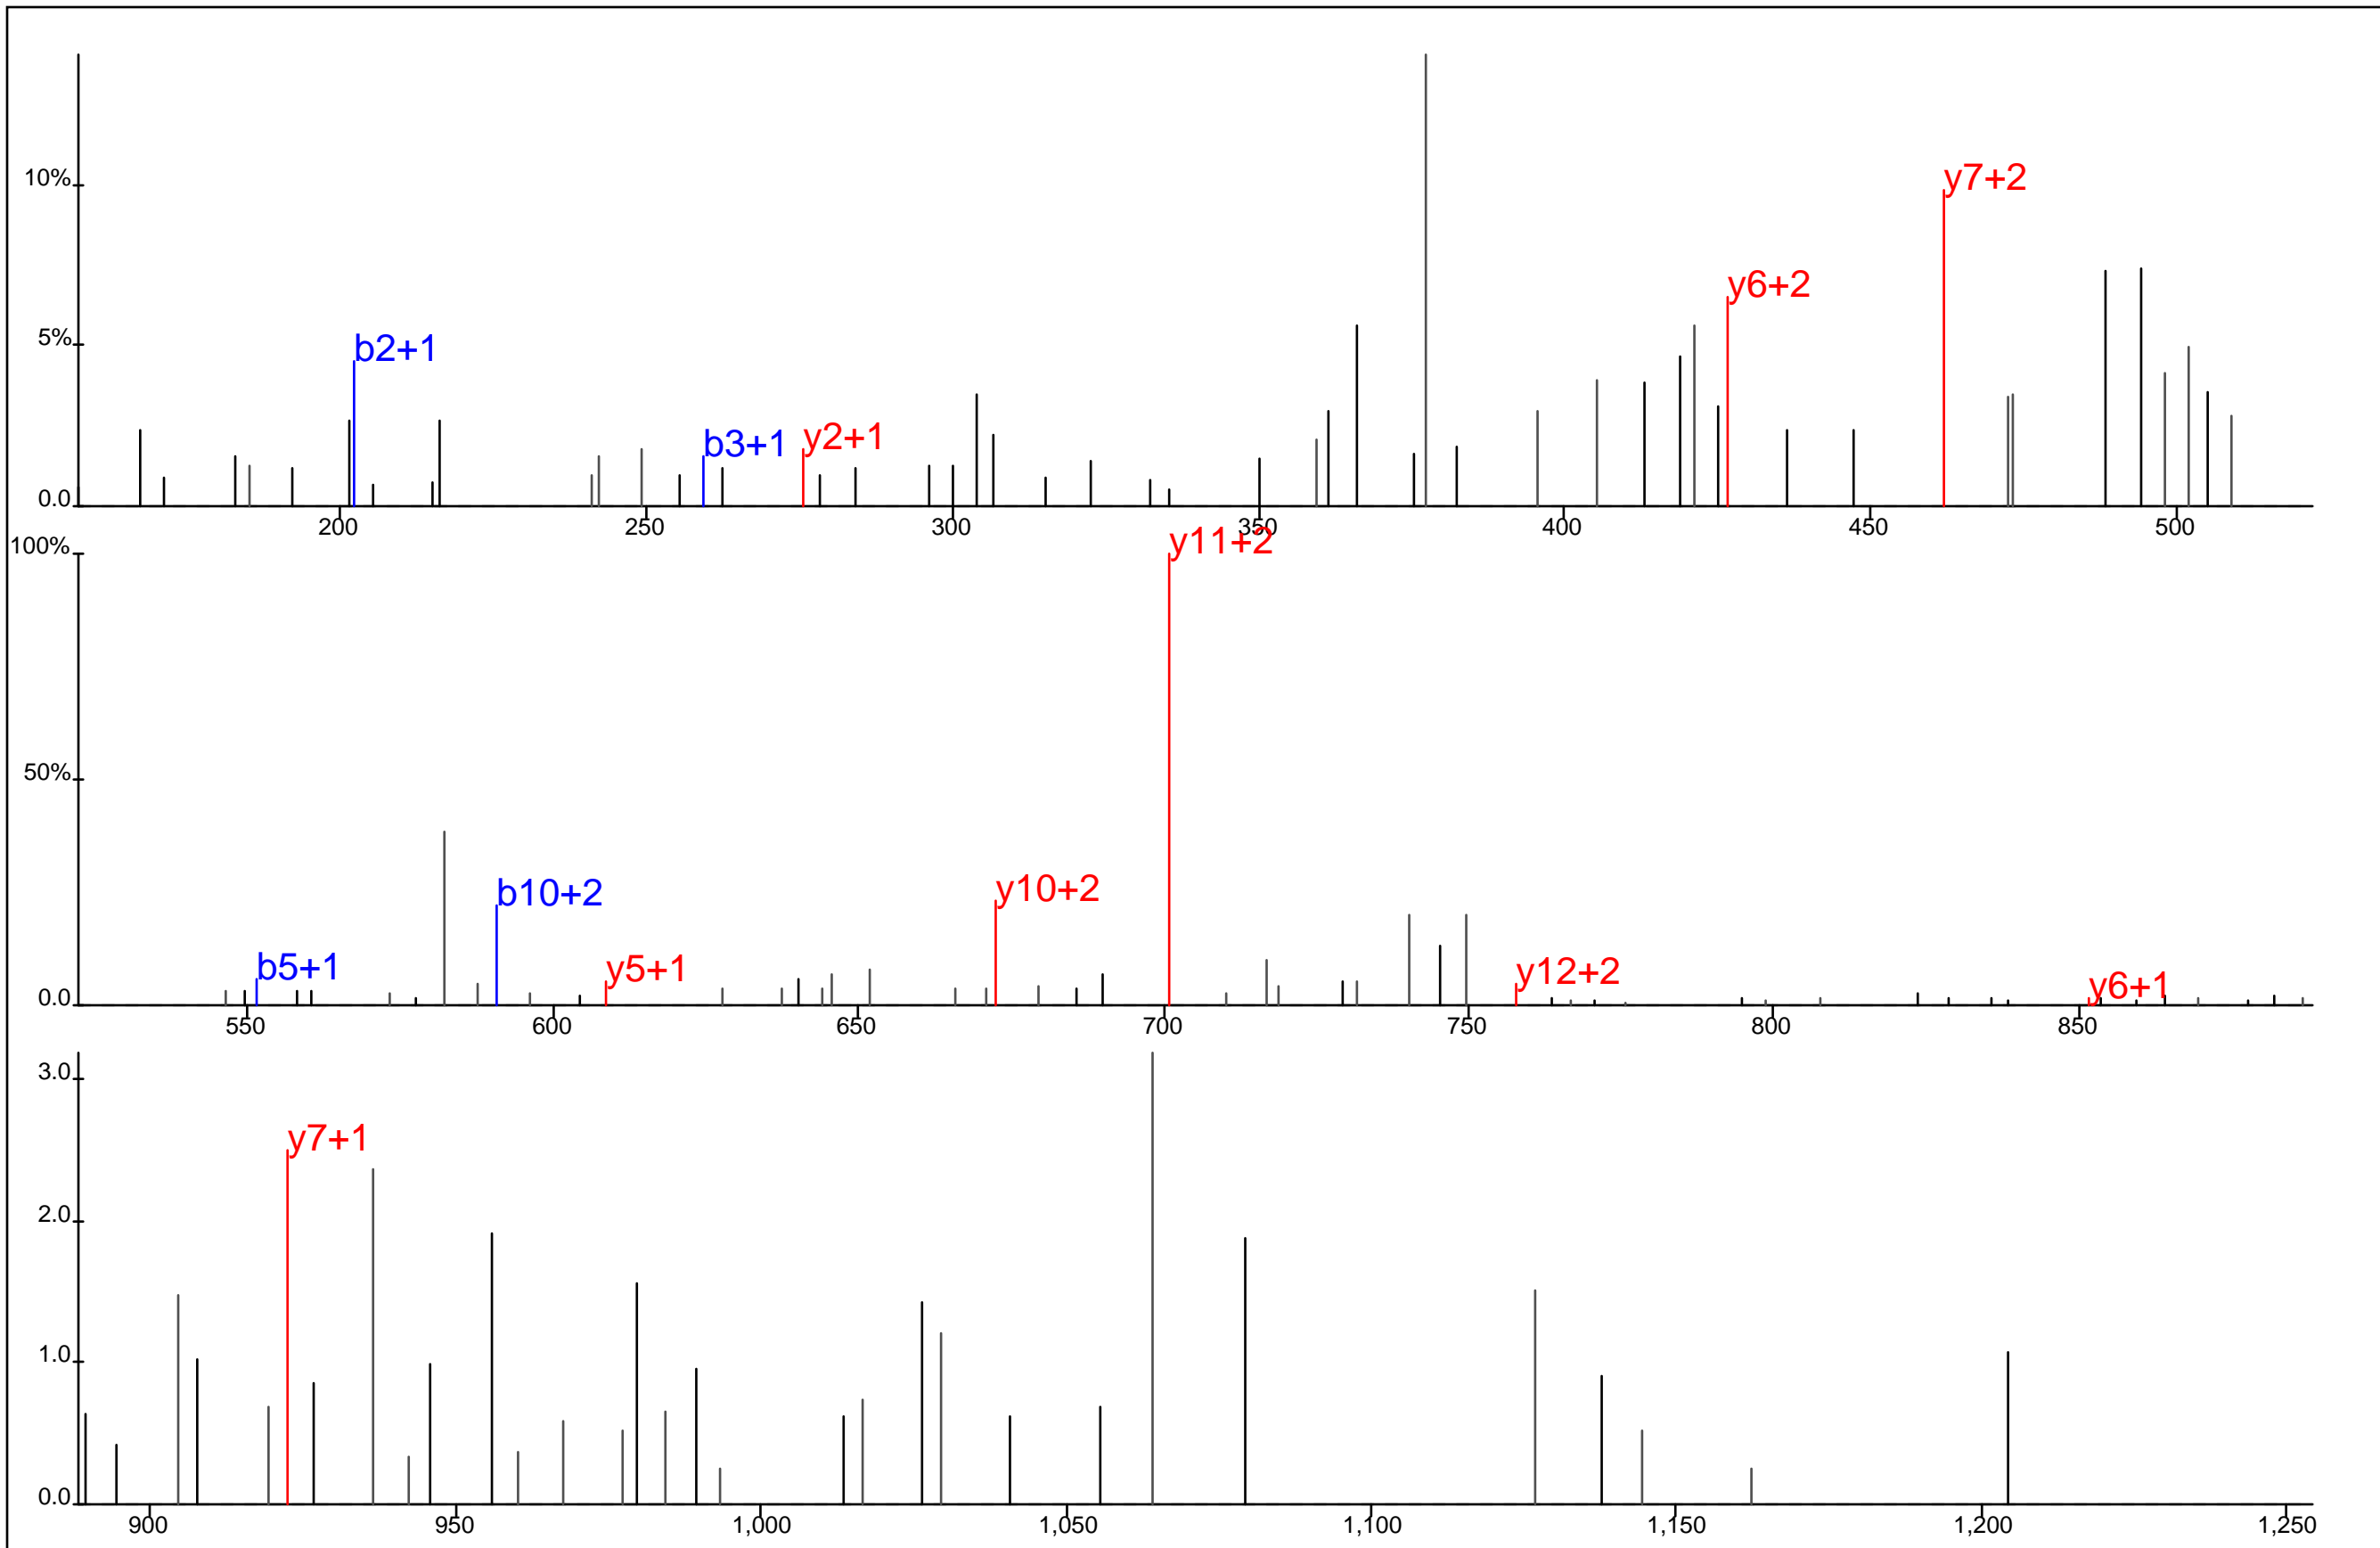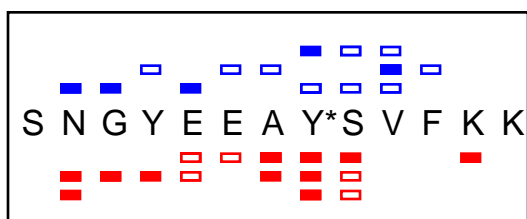

Protein Name: Platelet activating factor acetylhydrolase IB alpha subunit  
 gi Accession: 0  
 Precursor Mass: 534.5677+3  
 Delta Mass: 0.252 ppm  
 XCorr: 21.97

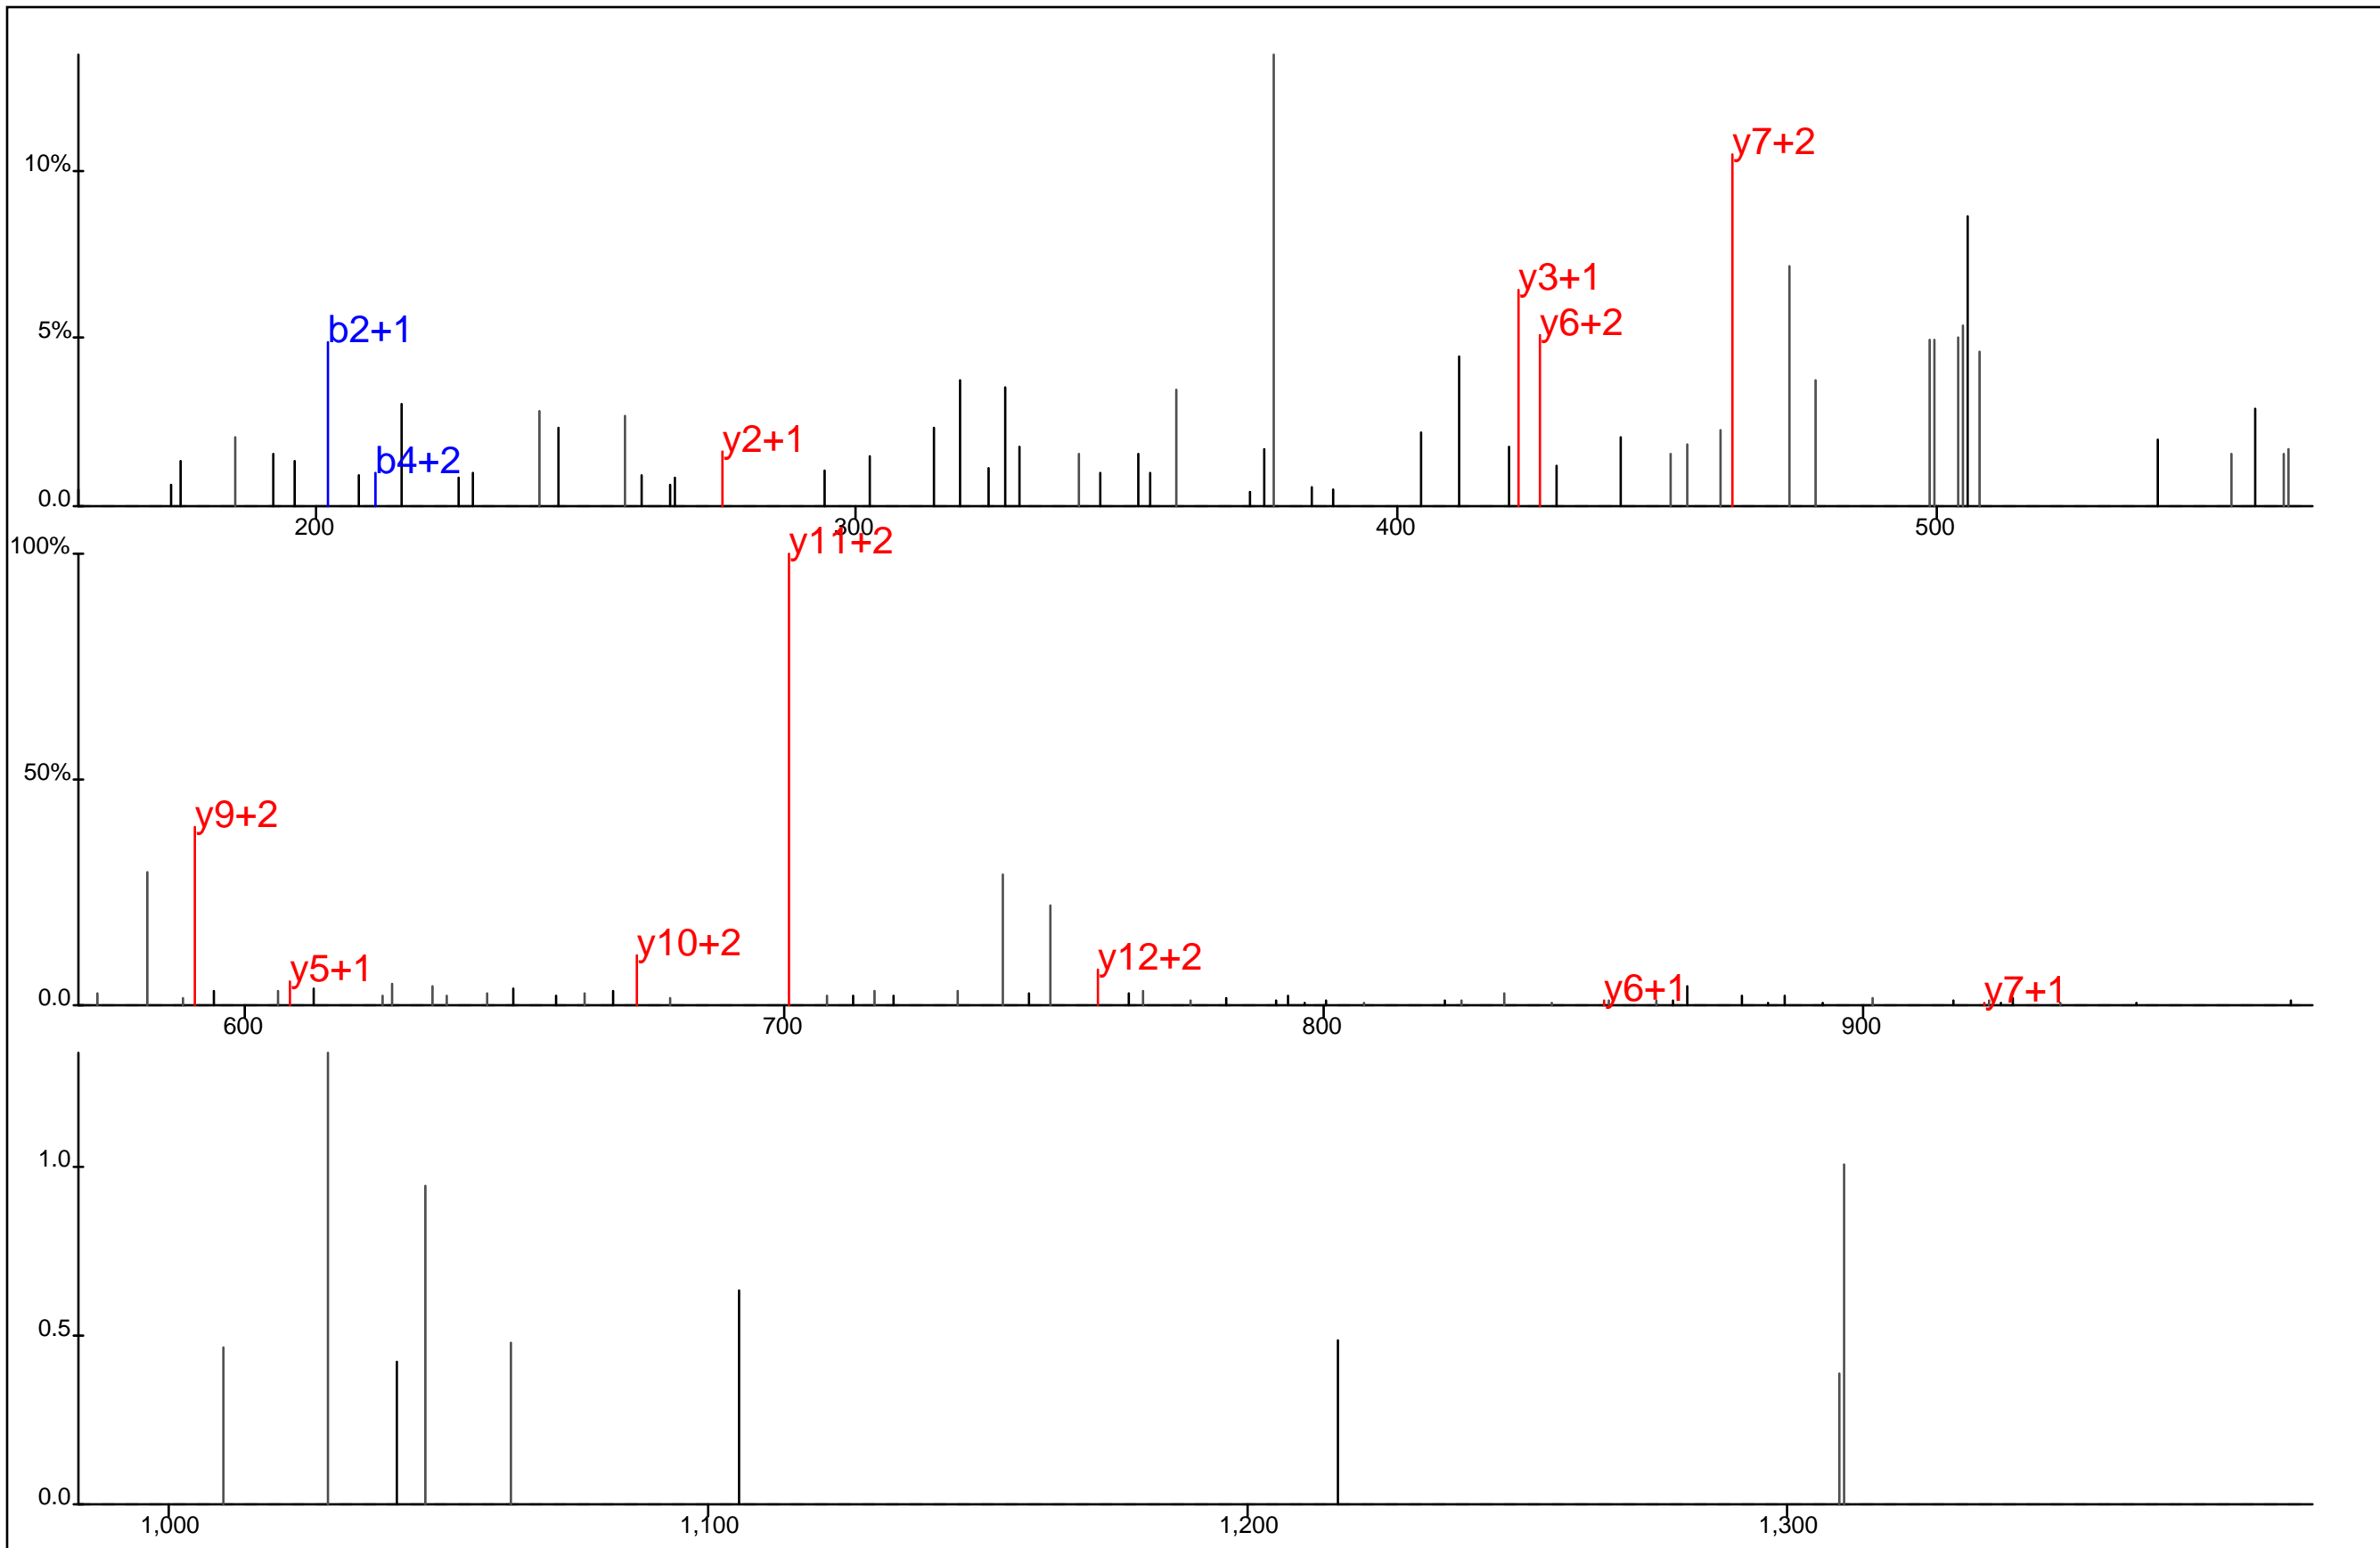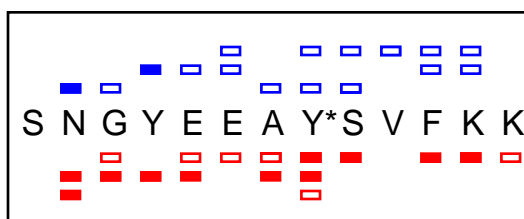

Protein Name: Platelet activating factor acetylhydrolase IB alpha subunit  
 gi Accession: 0  
 Precursor Mass: 534.5682+3  
 Delta Mass: 1.166 ppm  
 XCorr: 20.9

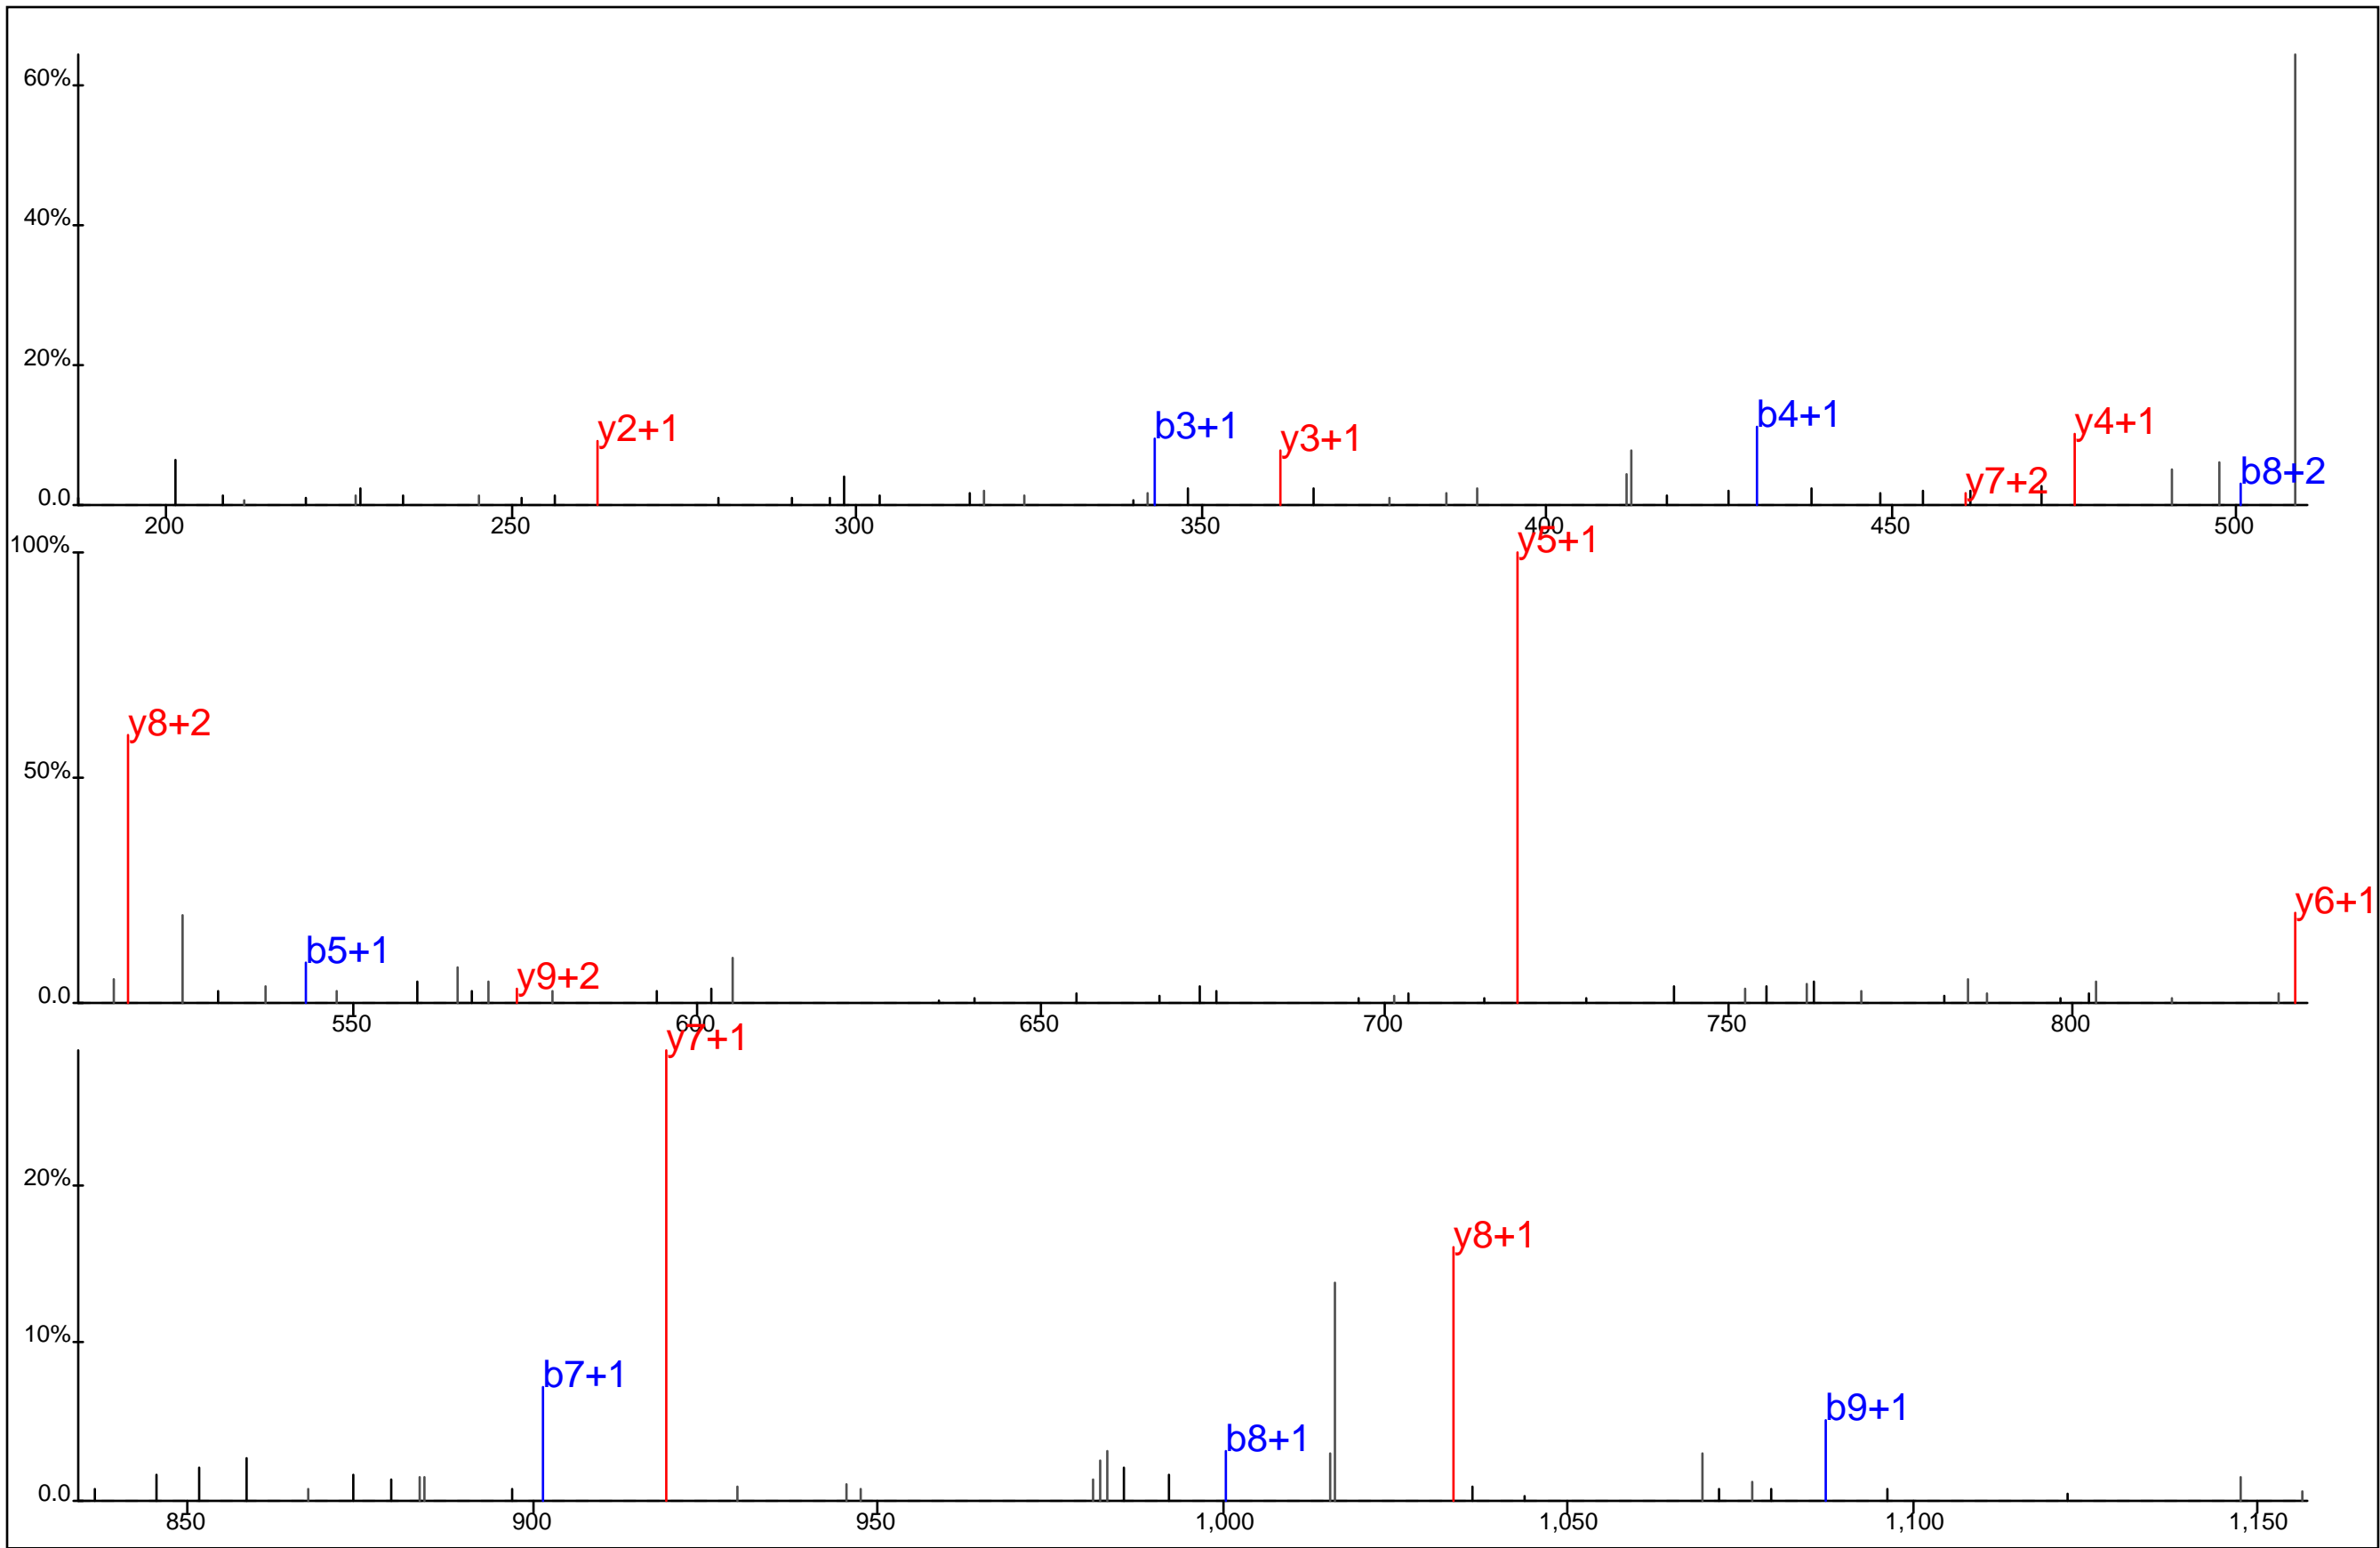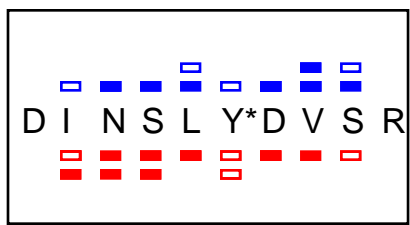

Protein Name: PLC, gamma 2  
 gi Accession: 0  
 Precursor Mass: 631.2762+2  
 Delta Mass: 0.625 ppm  
 XCorr: 51.48

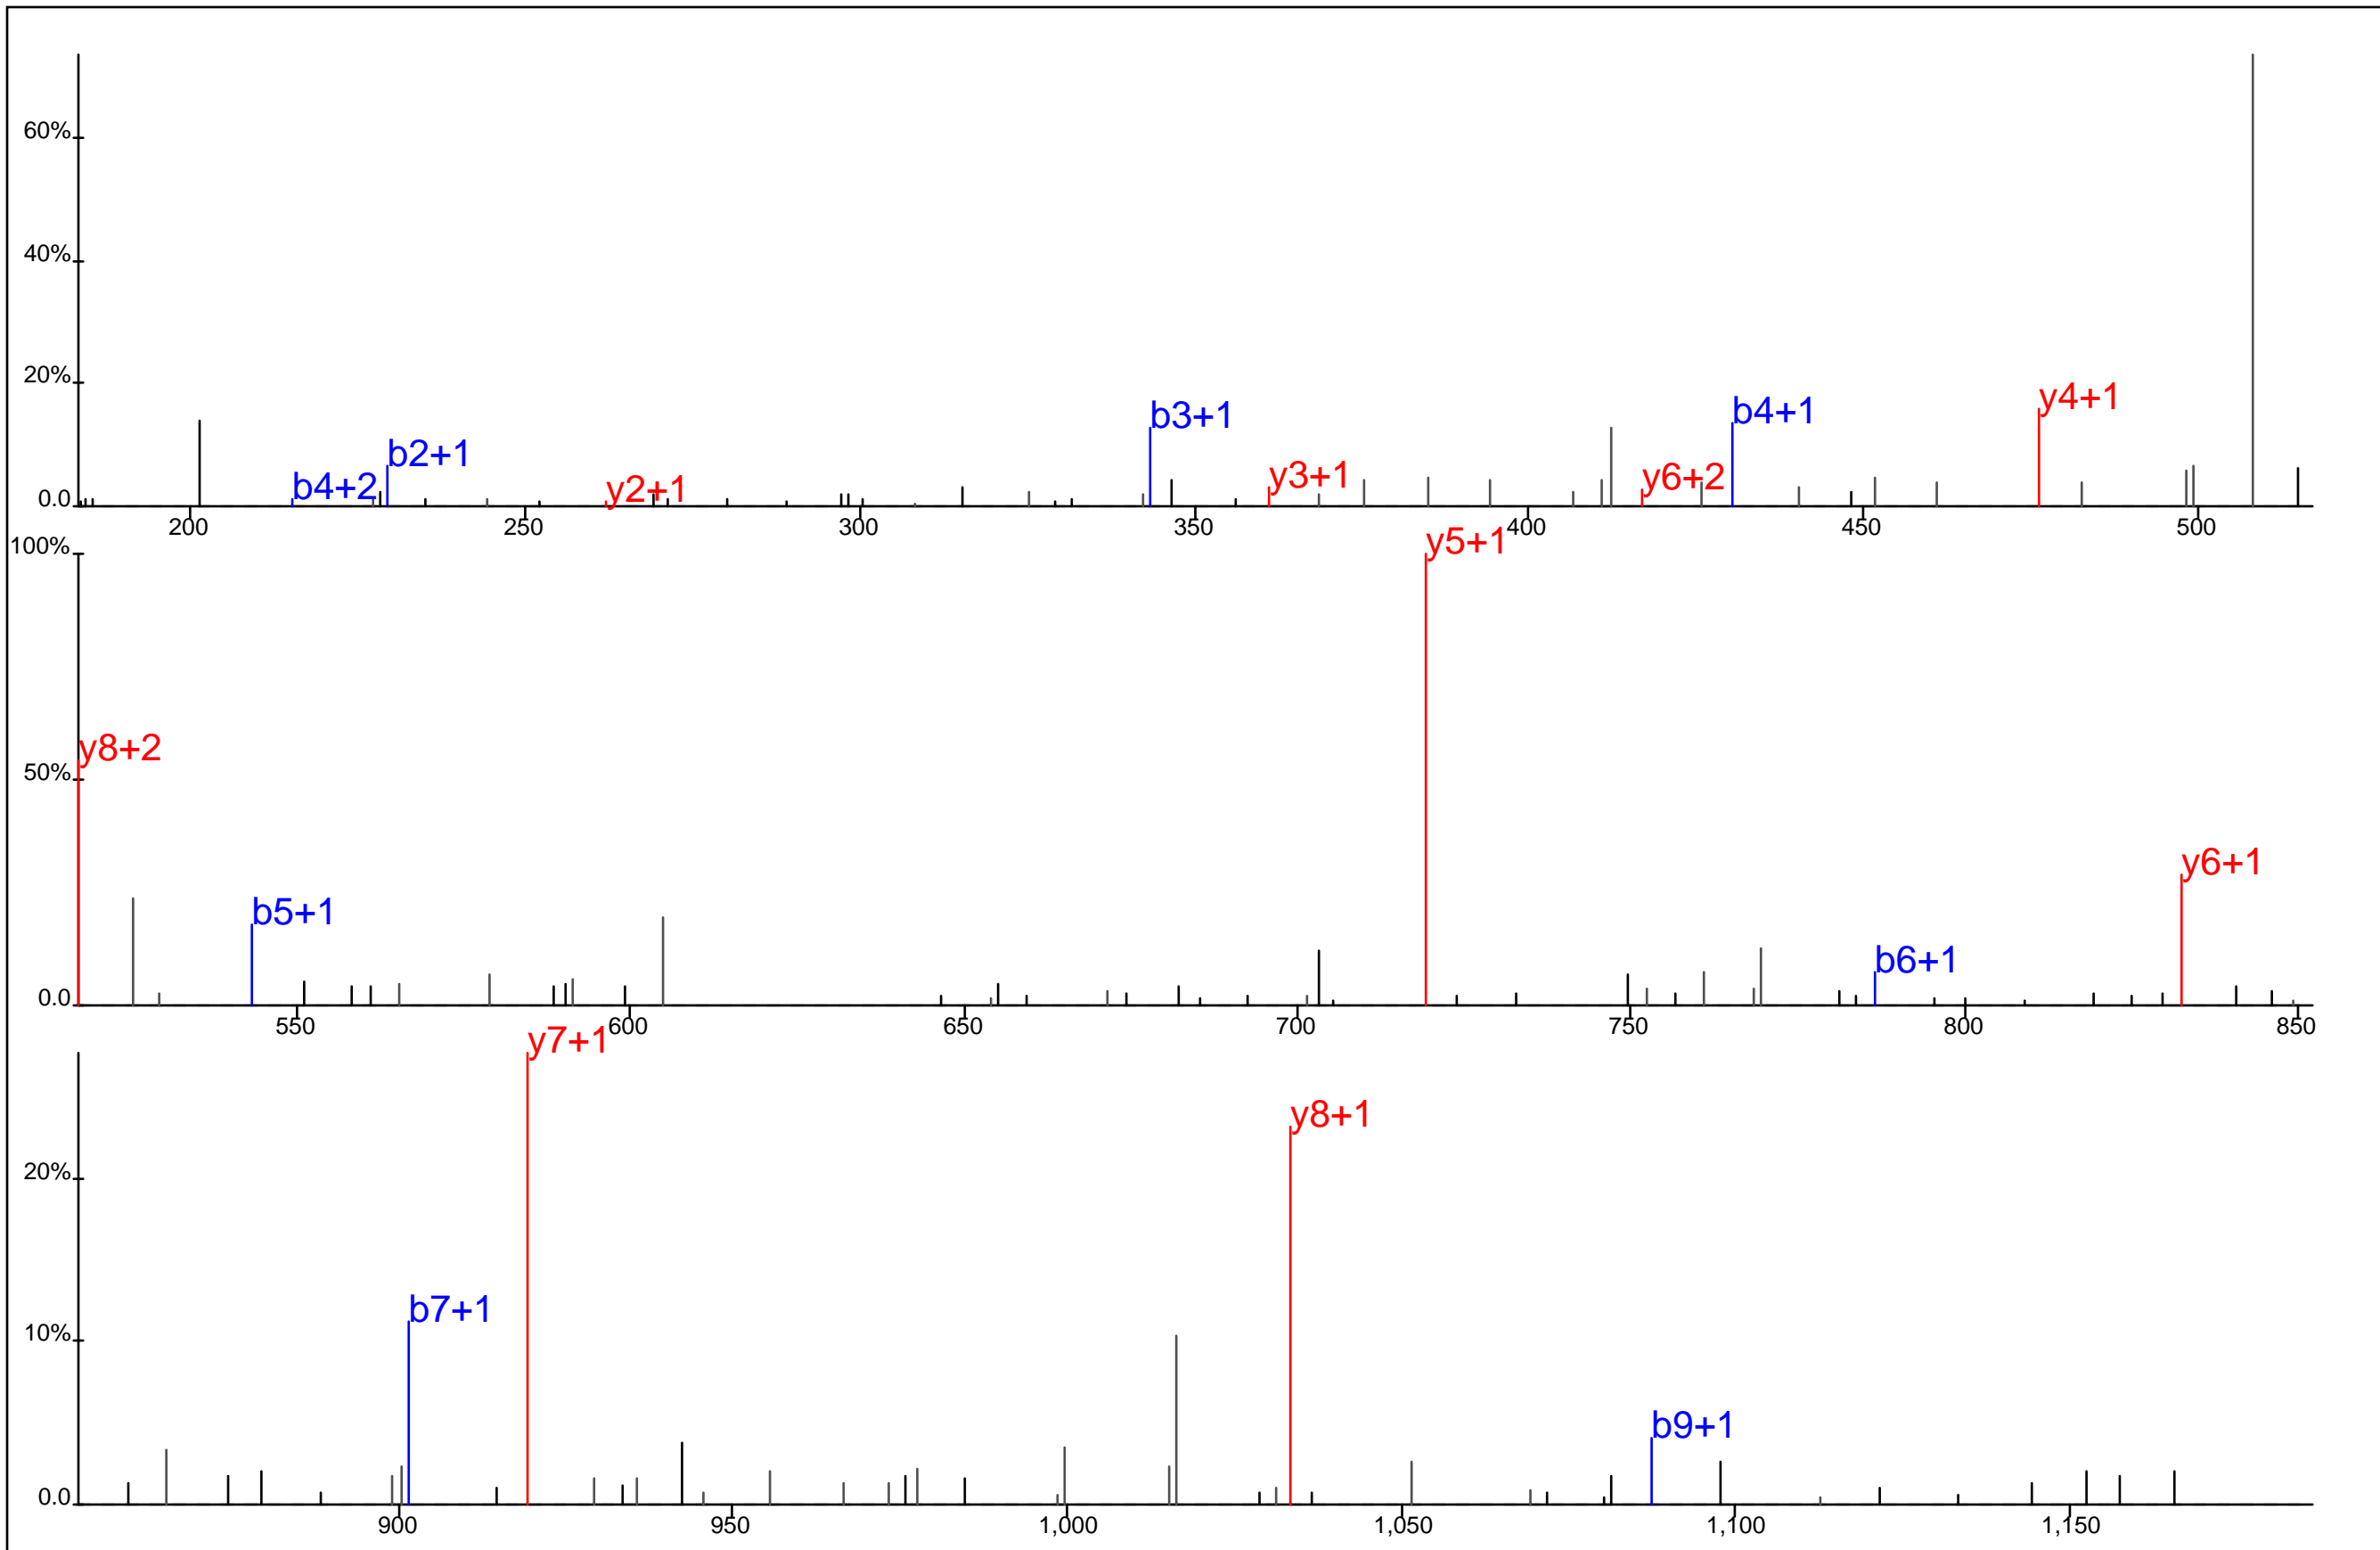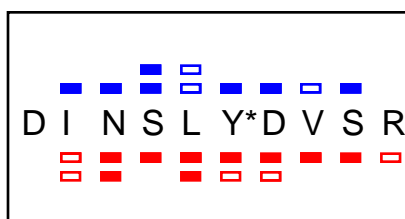

Protein Name: PLC, gamma 2  
 gi Accession: 0  
 Precursor Mass: 631.2761+2  
 Delta Mass: 0.818 ppm  
 XCorr: 42.51

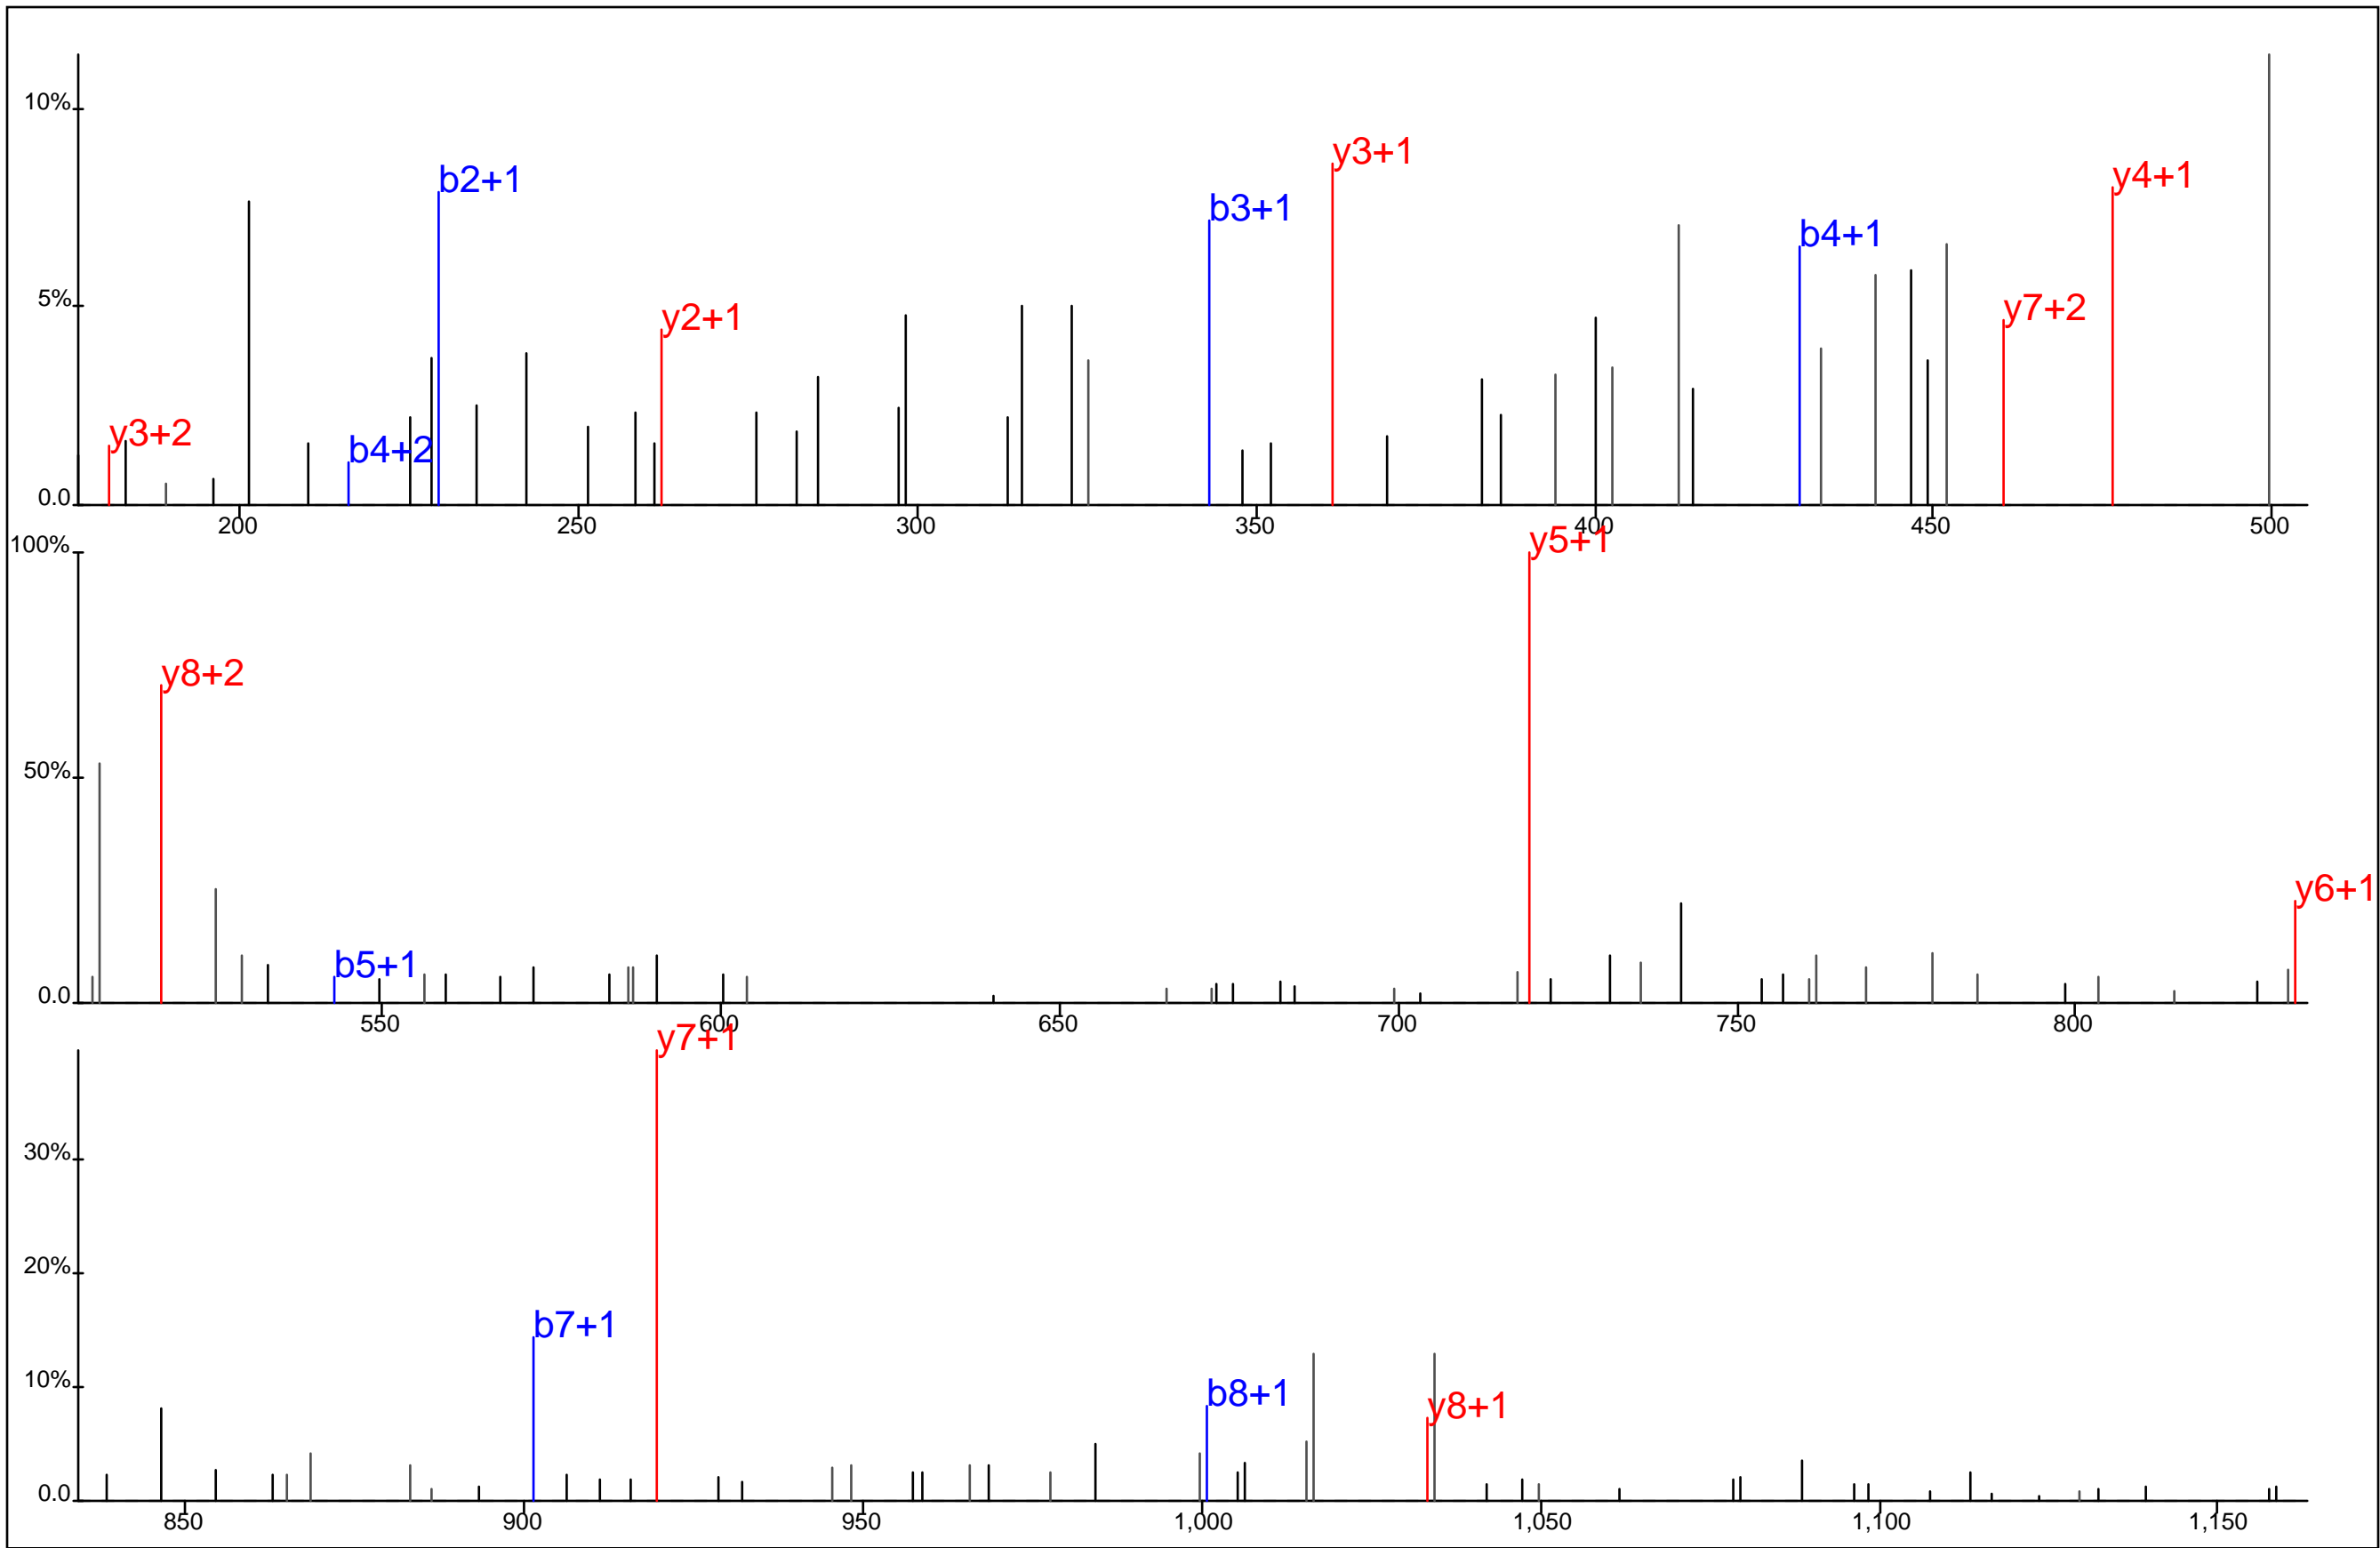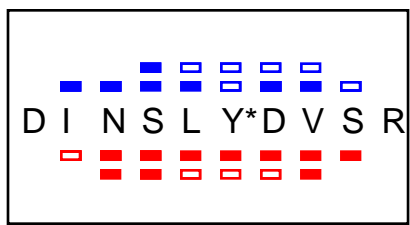

Protein Name: PLC, gamma 2  
 gi Accession: 0  
 Precursor Mass: 631.2764+2  
 Delta Mass: 0.335 ppm  
 XCorr: 25.24

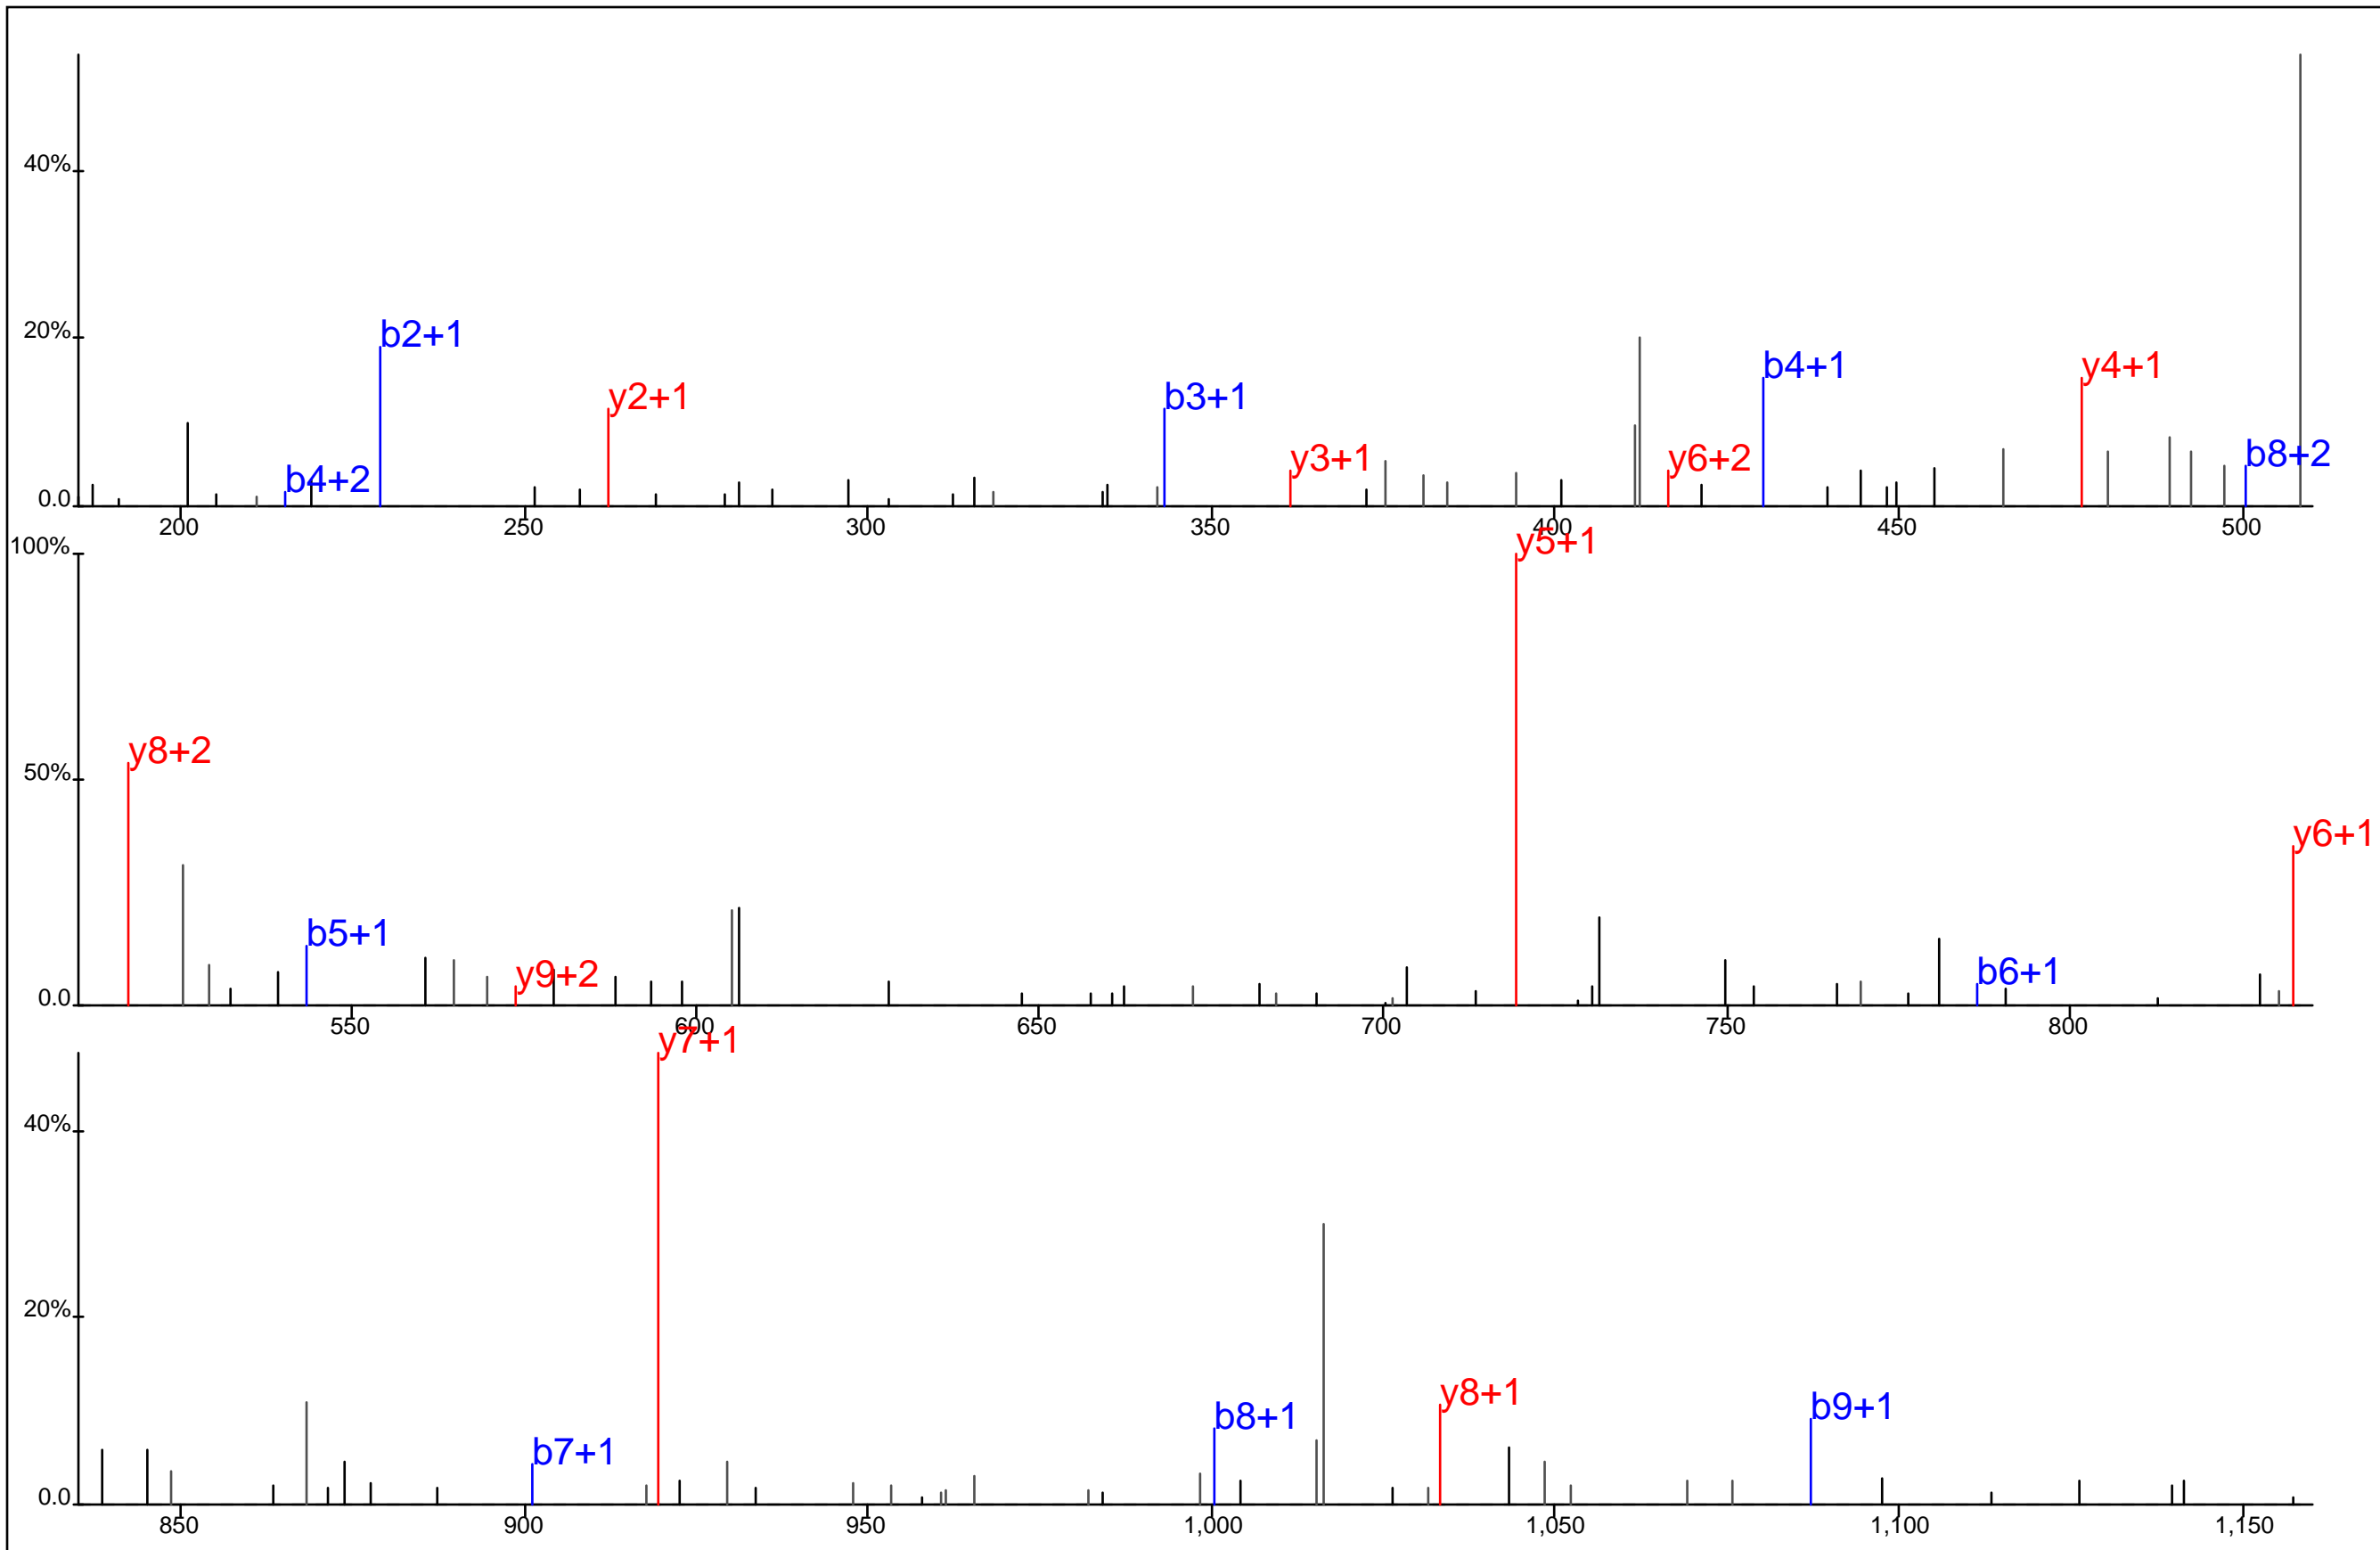

■ ■ ■ ■ ■ ■ ■ ■  
 D I N S L Y\* D V S R  
■ ■ ■ ■ ■ ■ ■ ■

Protein Name: PLC, gamma 2  
 gi Accession: 0  
 Precursor Mass: 631.2762+2  
 Delta Mass: 0.625 ppm  
 XCorr: 43.78

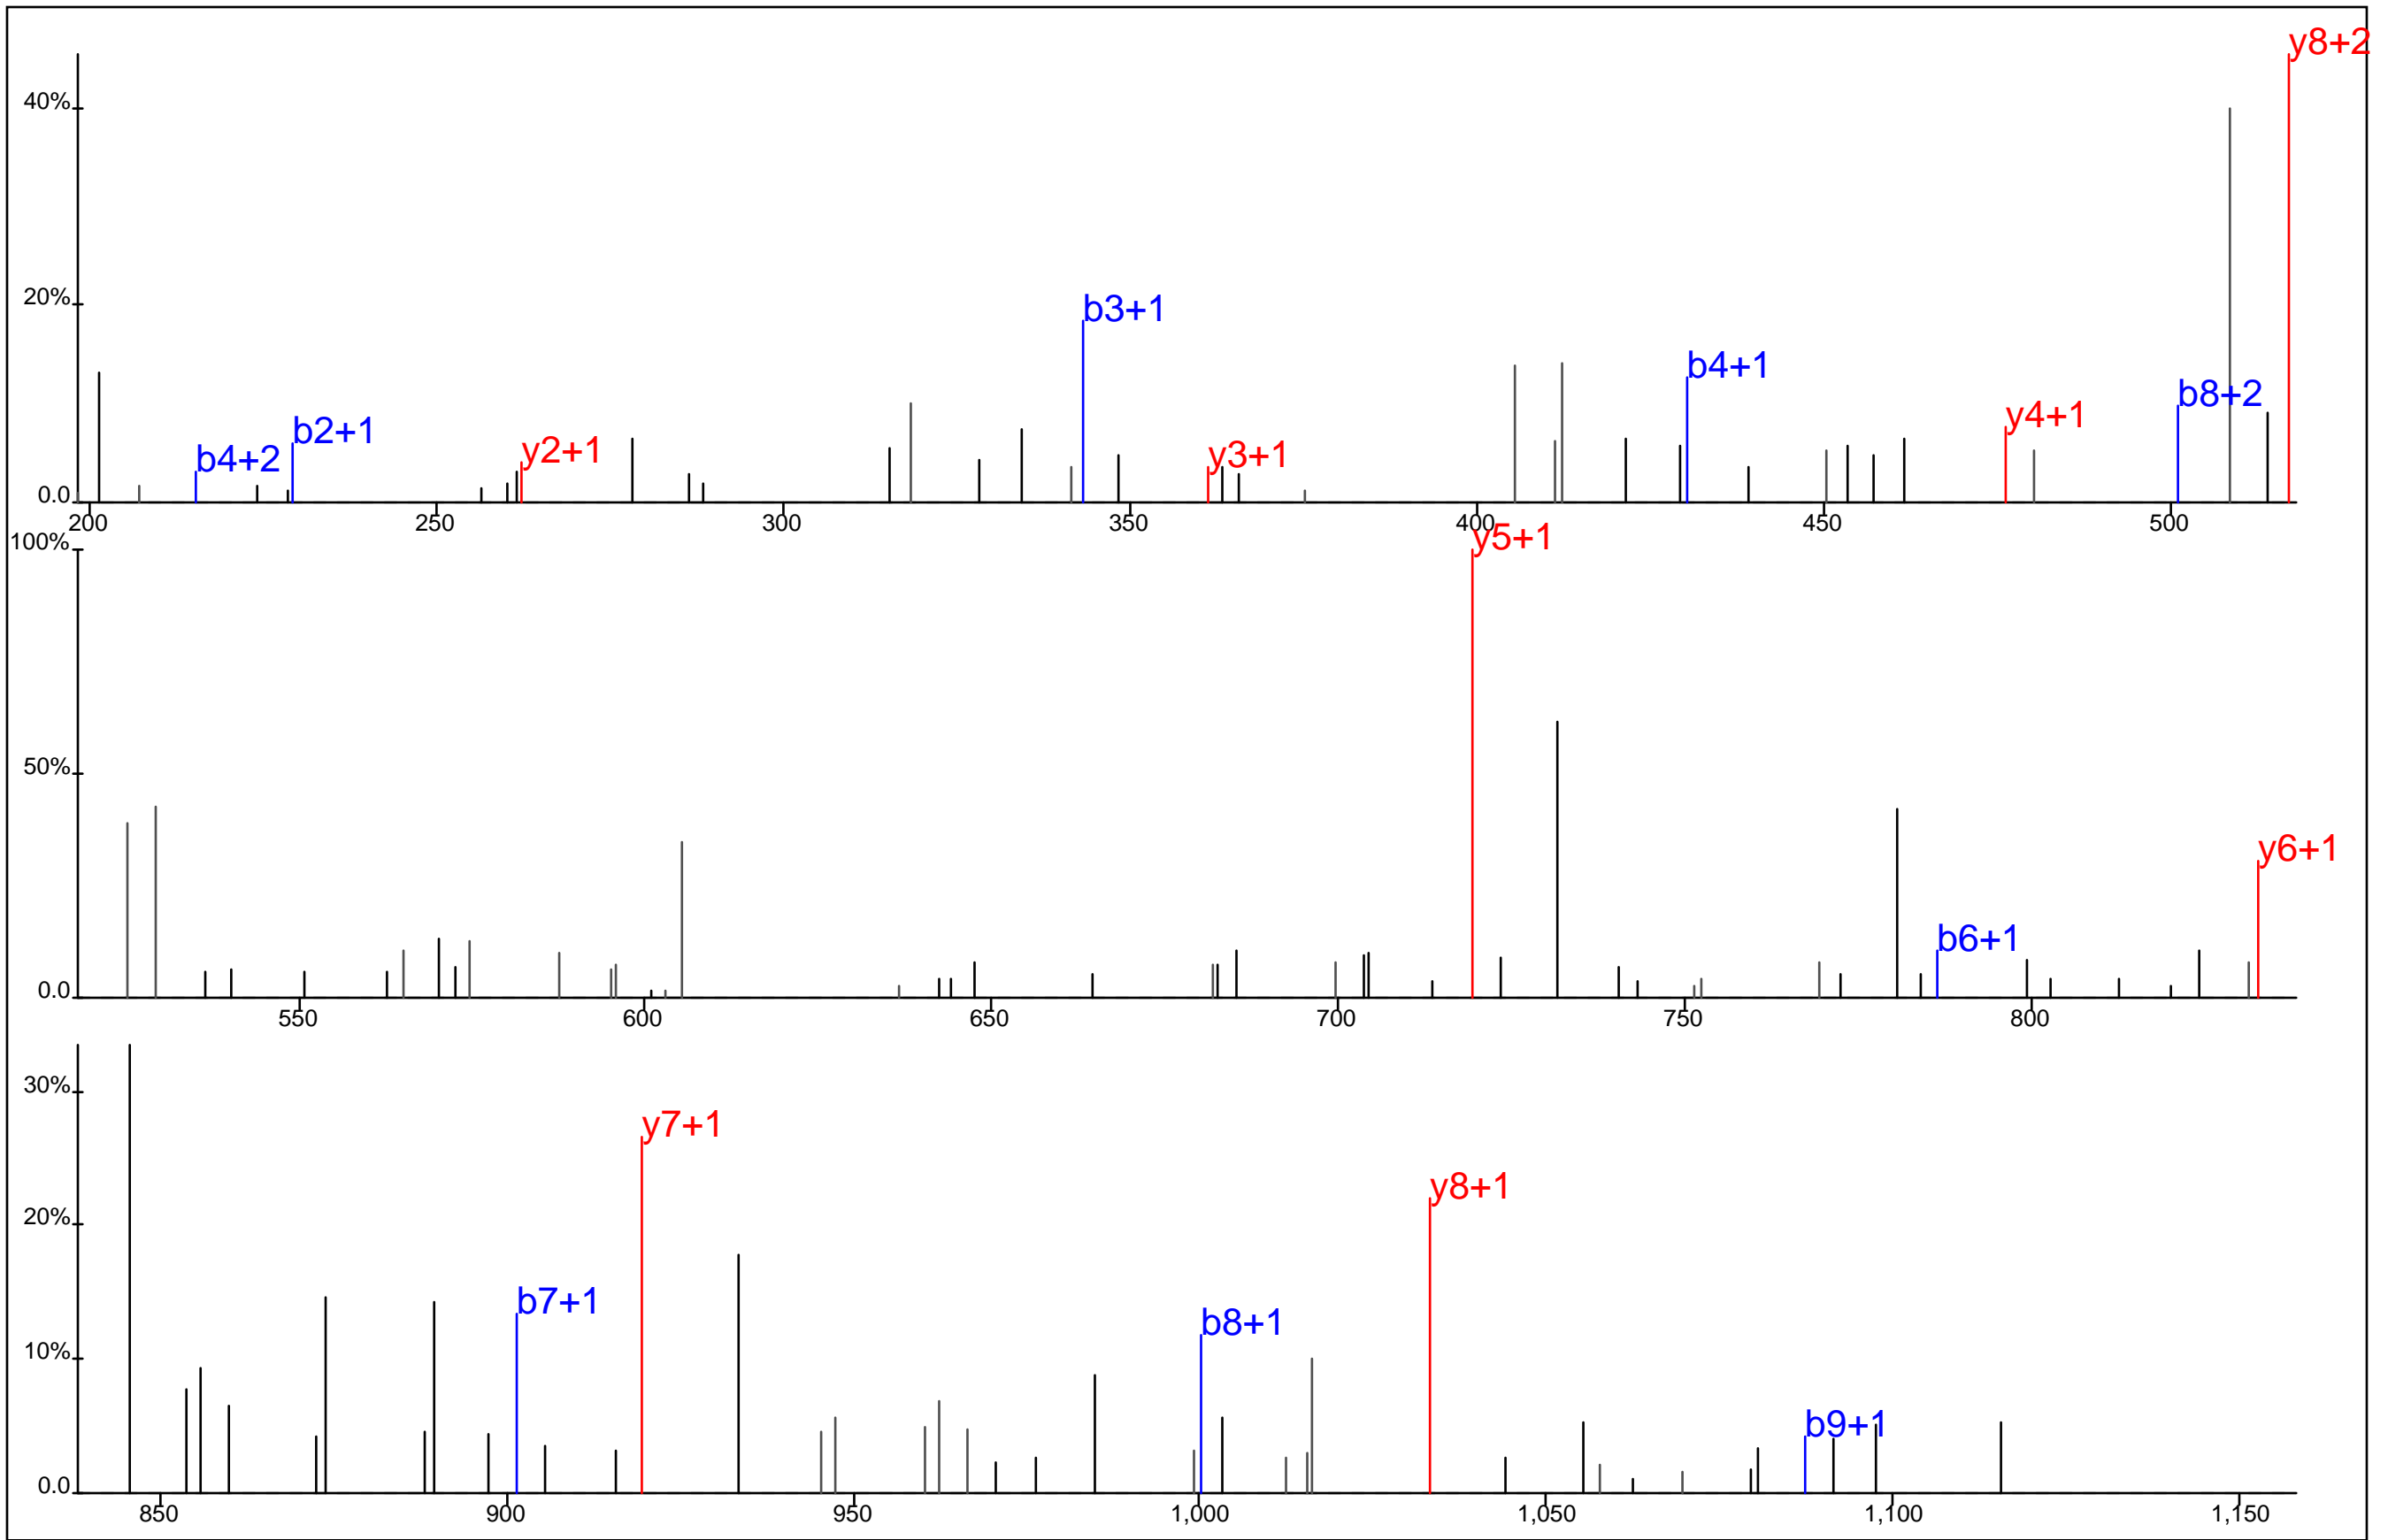

■ ■ ■ ■ ■ ■ ■ ■  
 D I N S L Y\* D V S R  
□ □ □ □ □ □ □ □

Protein Name: PLC, gamma 2  
 gi Accession: 0  
 Precursor Mass: 631.2800+2  
 Delta Mass: 5.328 ppm  
 XCorr: 26.39

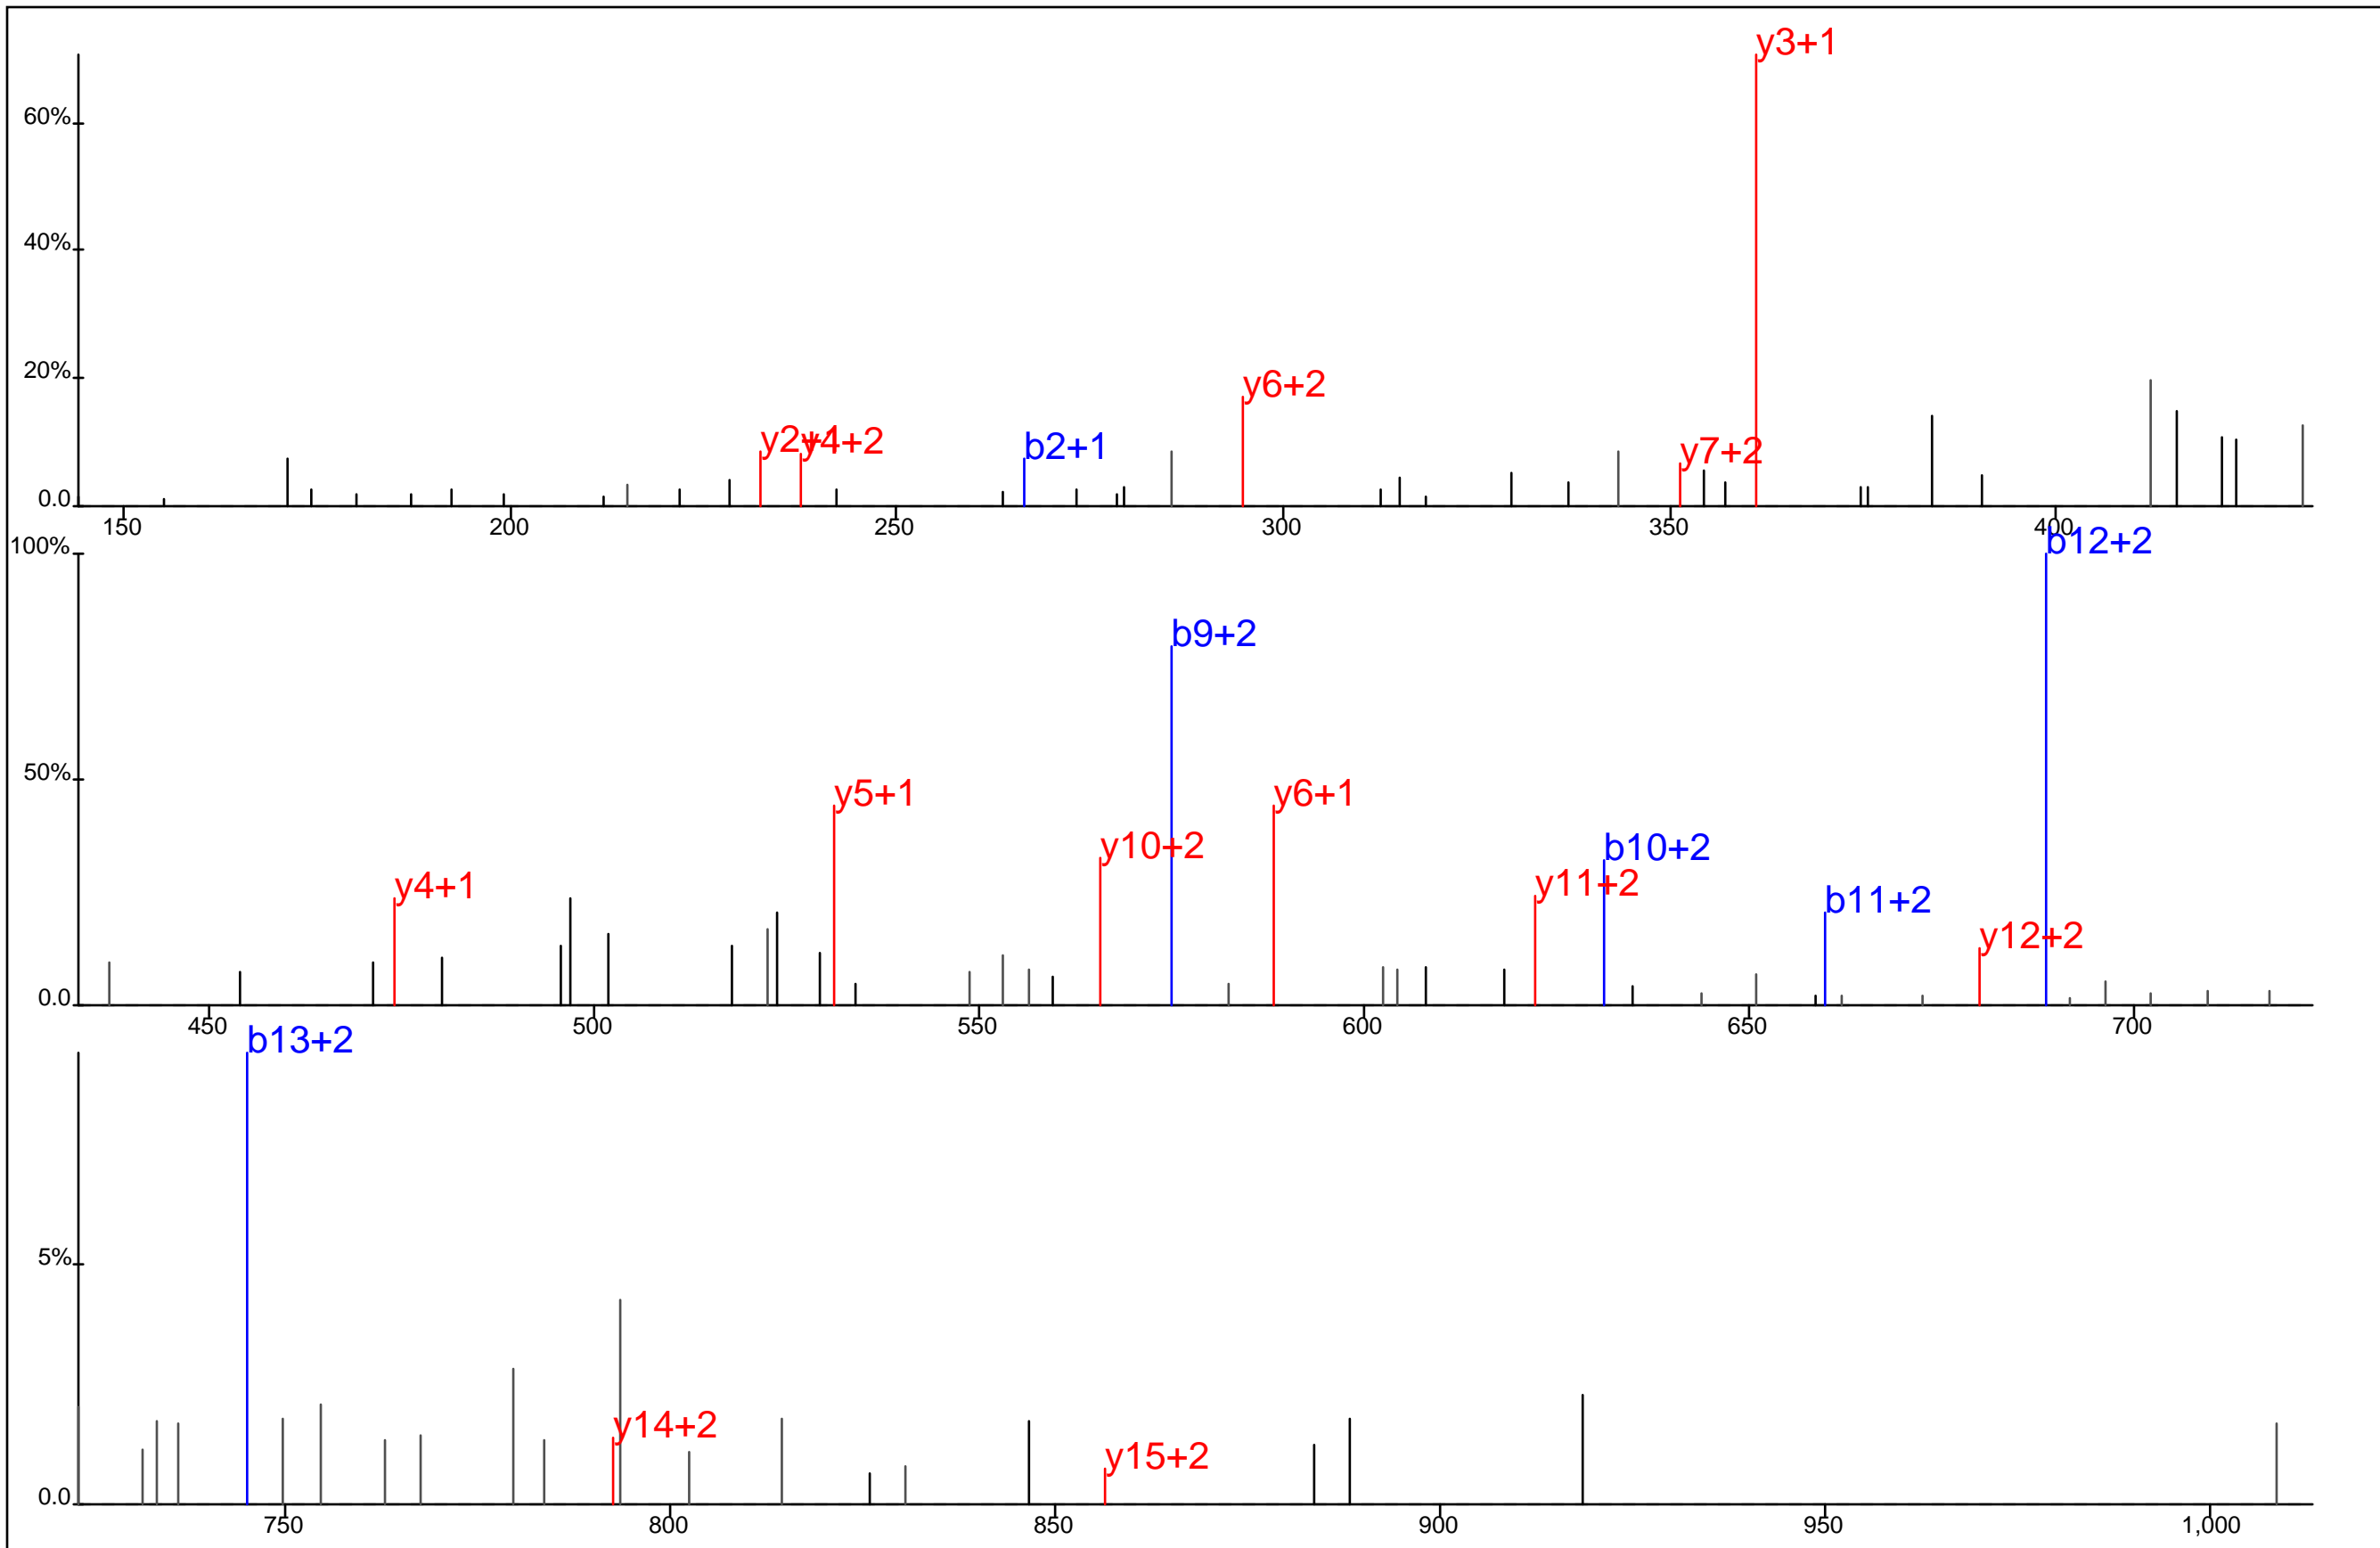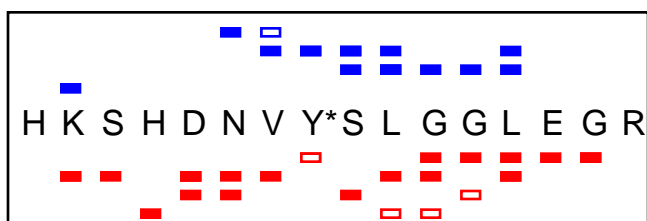

Protein Name: Pleckstrin homology-like domain, family B, member 2  
 gi Accession: 0  
 Precursor Mass: 462.9658+4  
 Delta Mass: 1.285 ppm  
 XCorr: 39.75



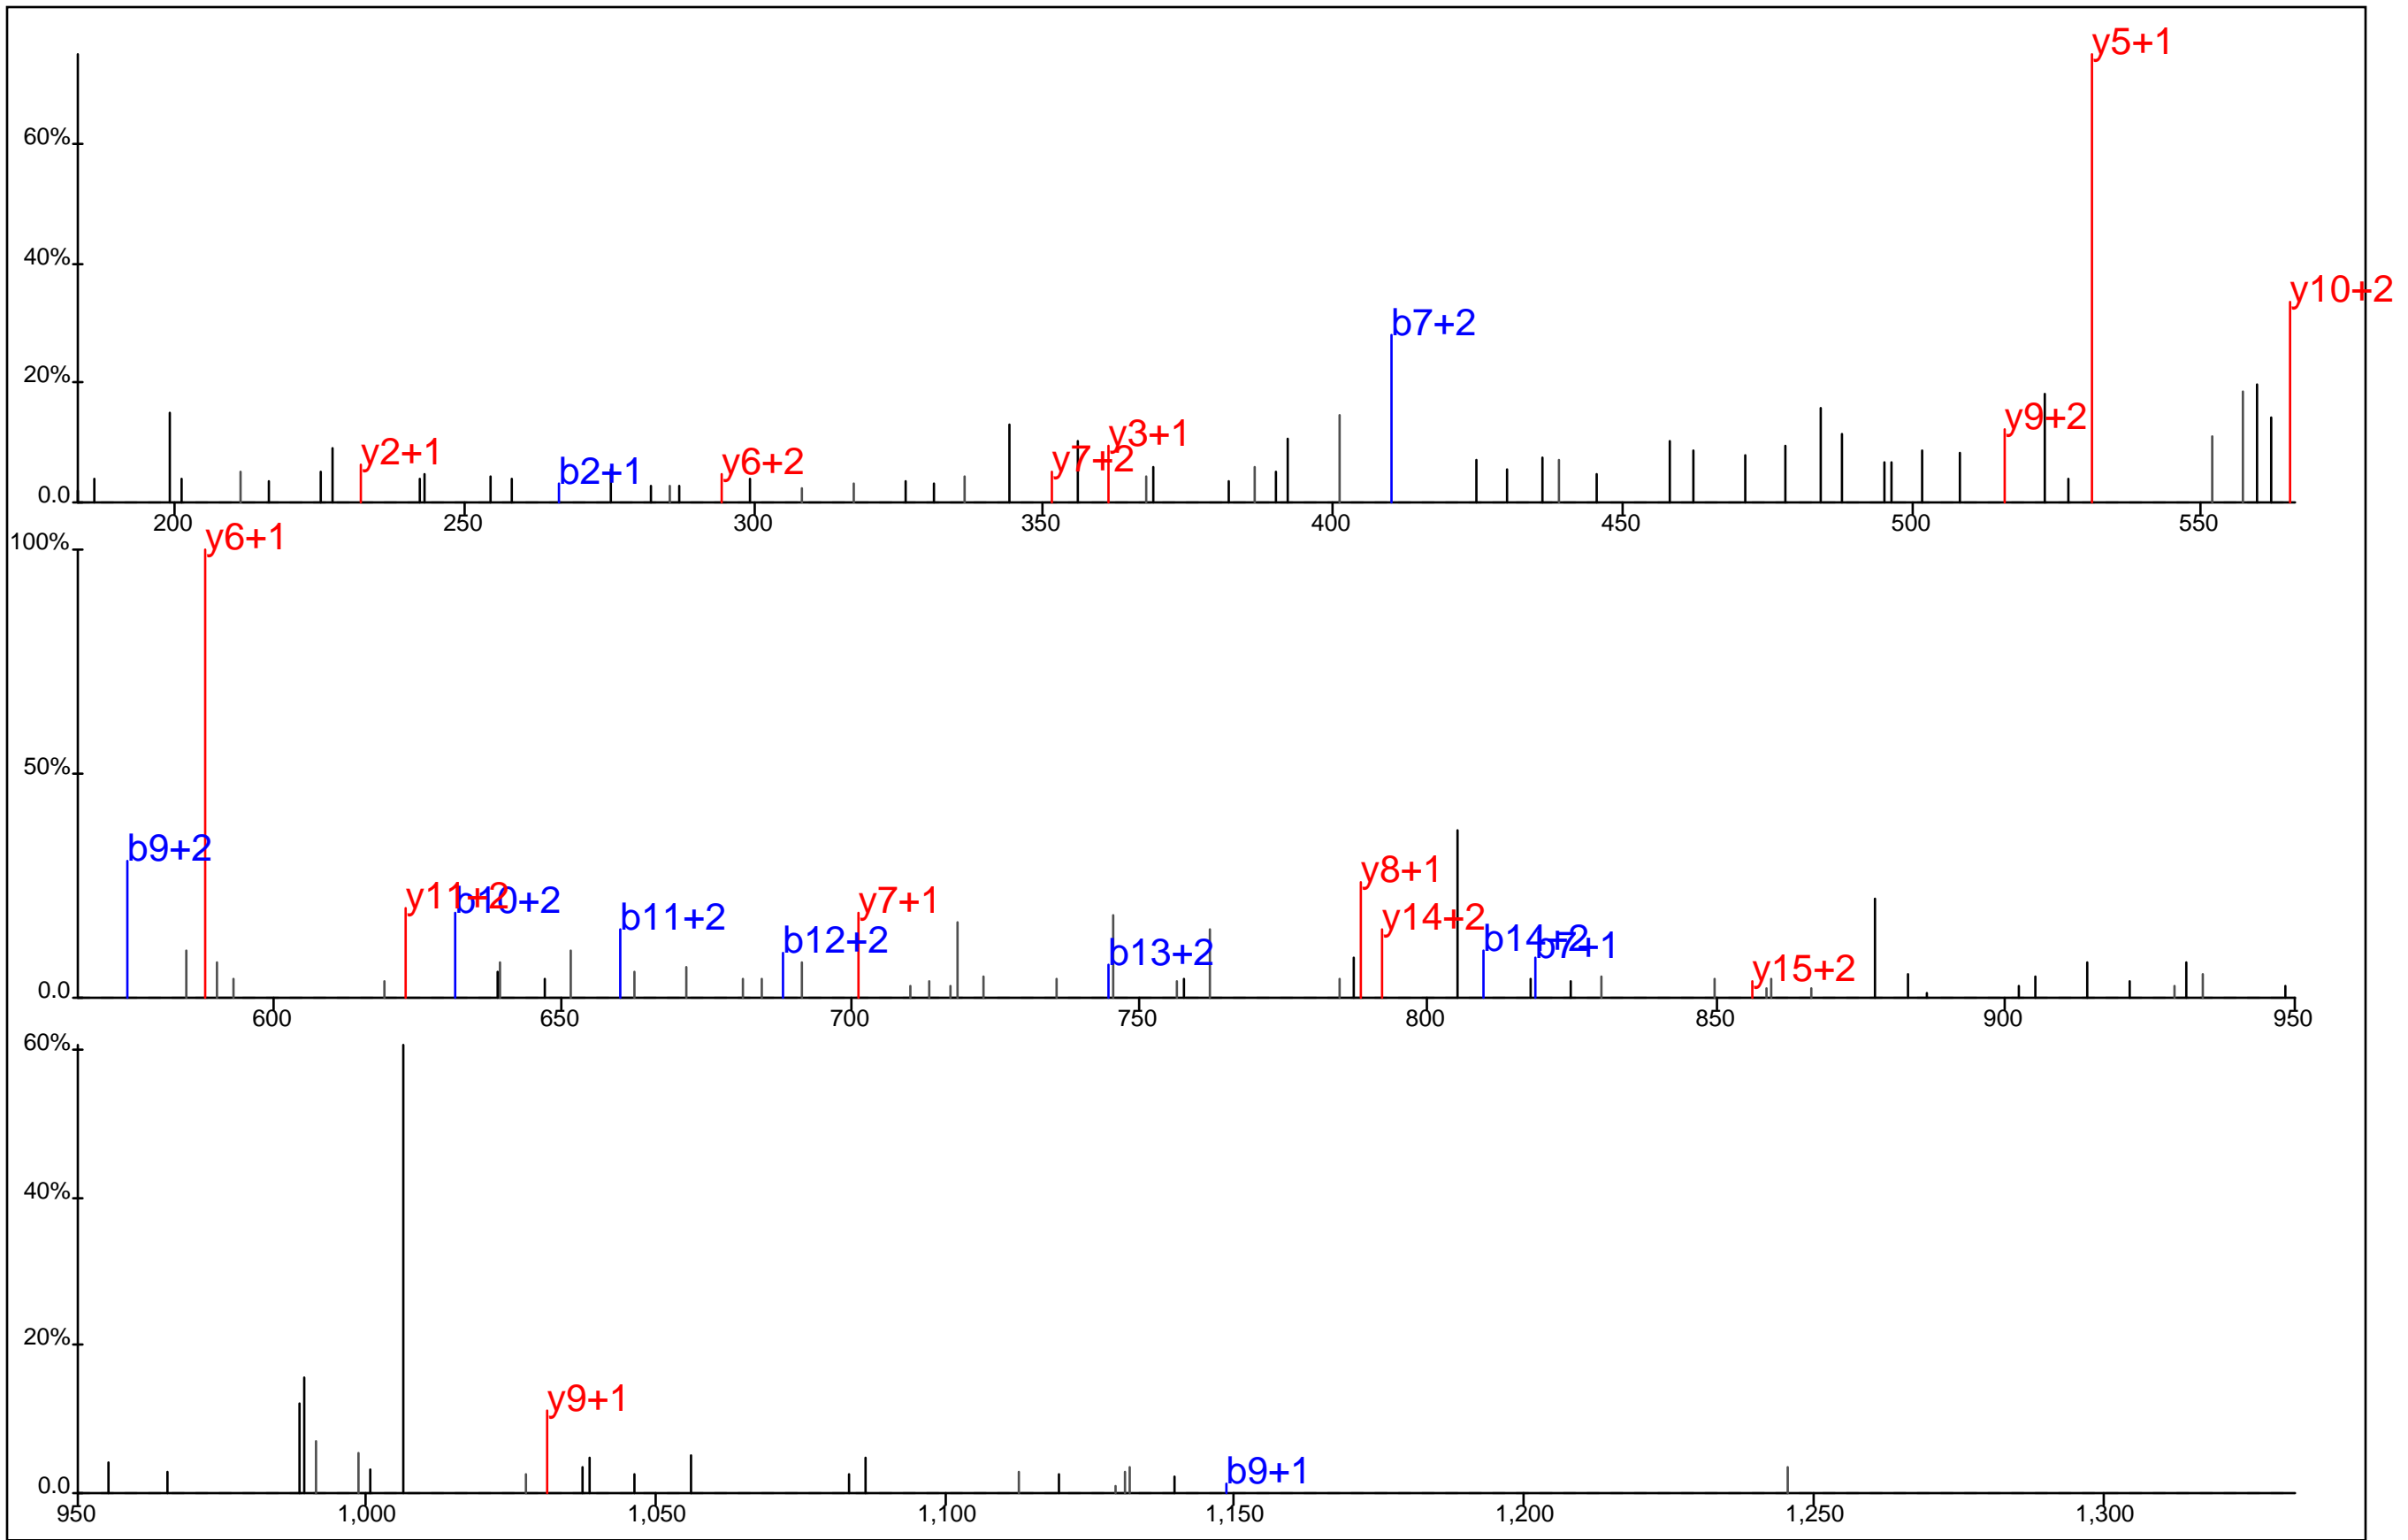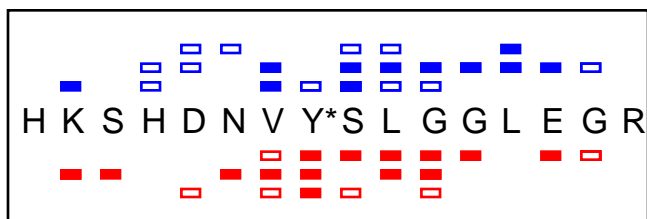

Protein Name: Pleckstrin homology-like domain, family B, member 2  
 gi Accession: 0  
 Precursor Mass: 616.9513+3  
 Delta Mass: 0.269 ppm  
 XCorr: 26.82

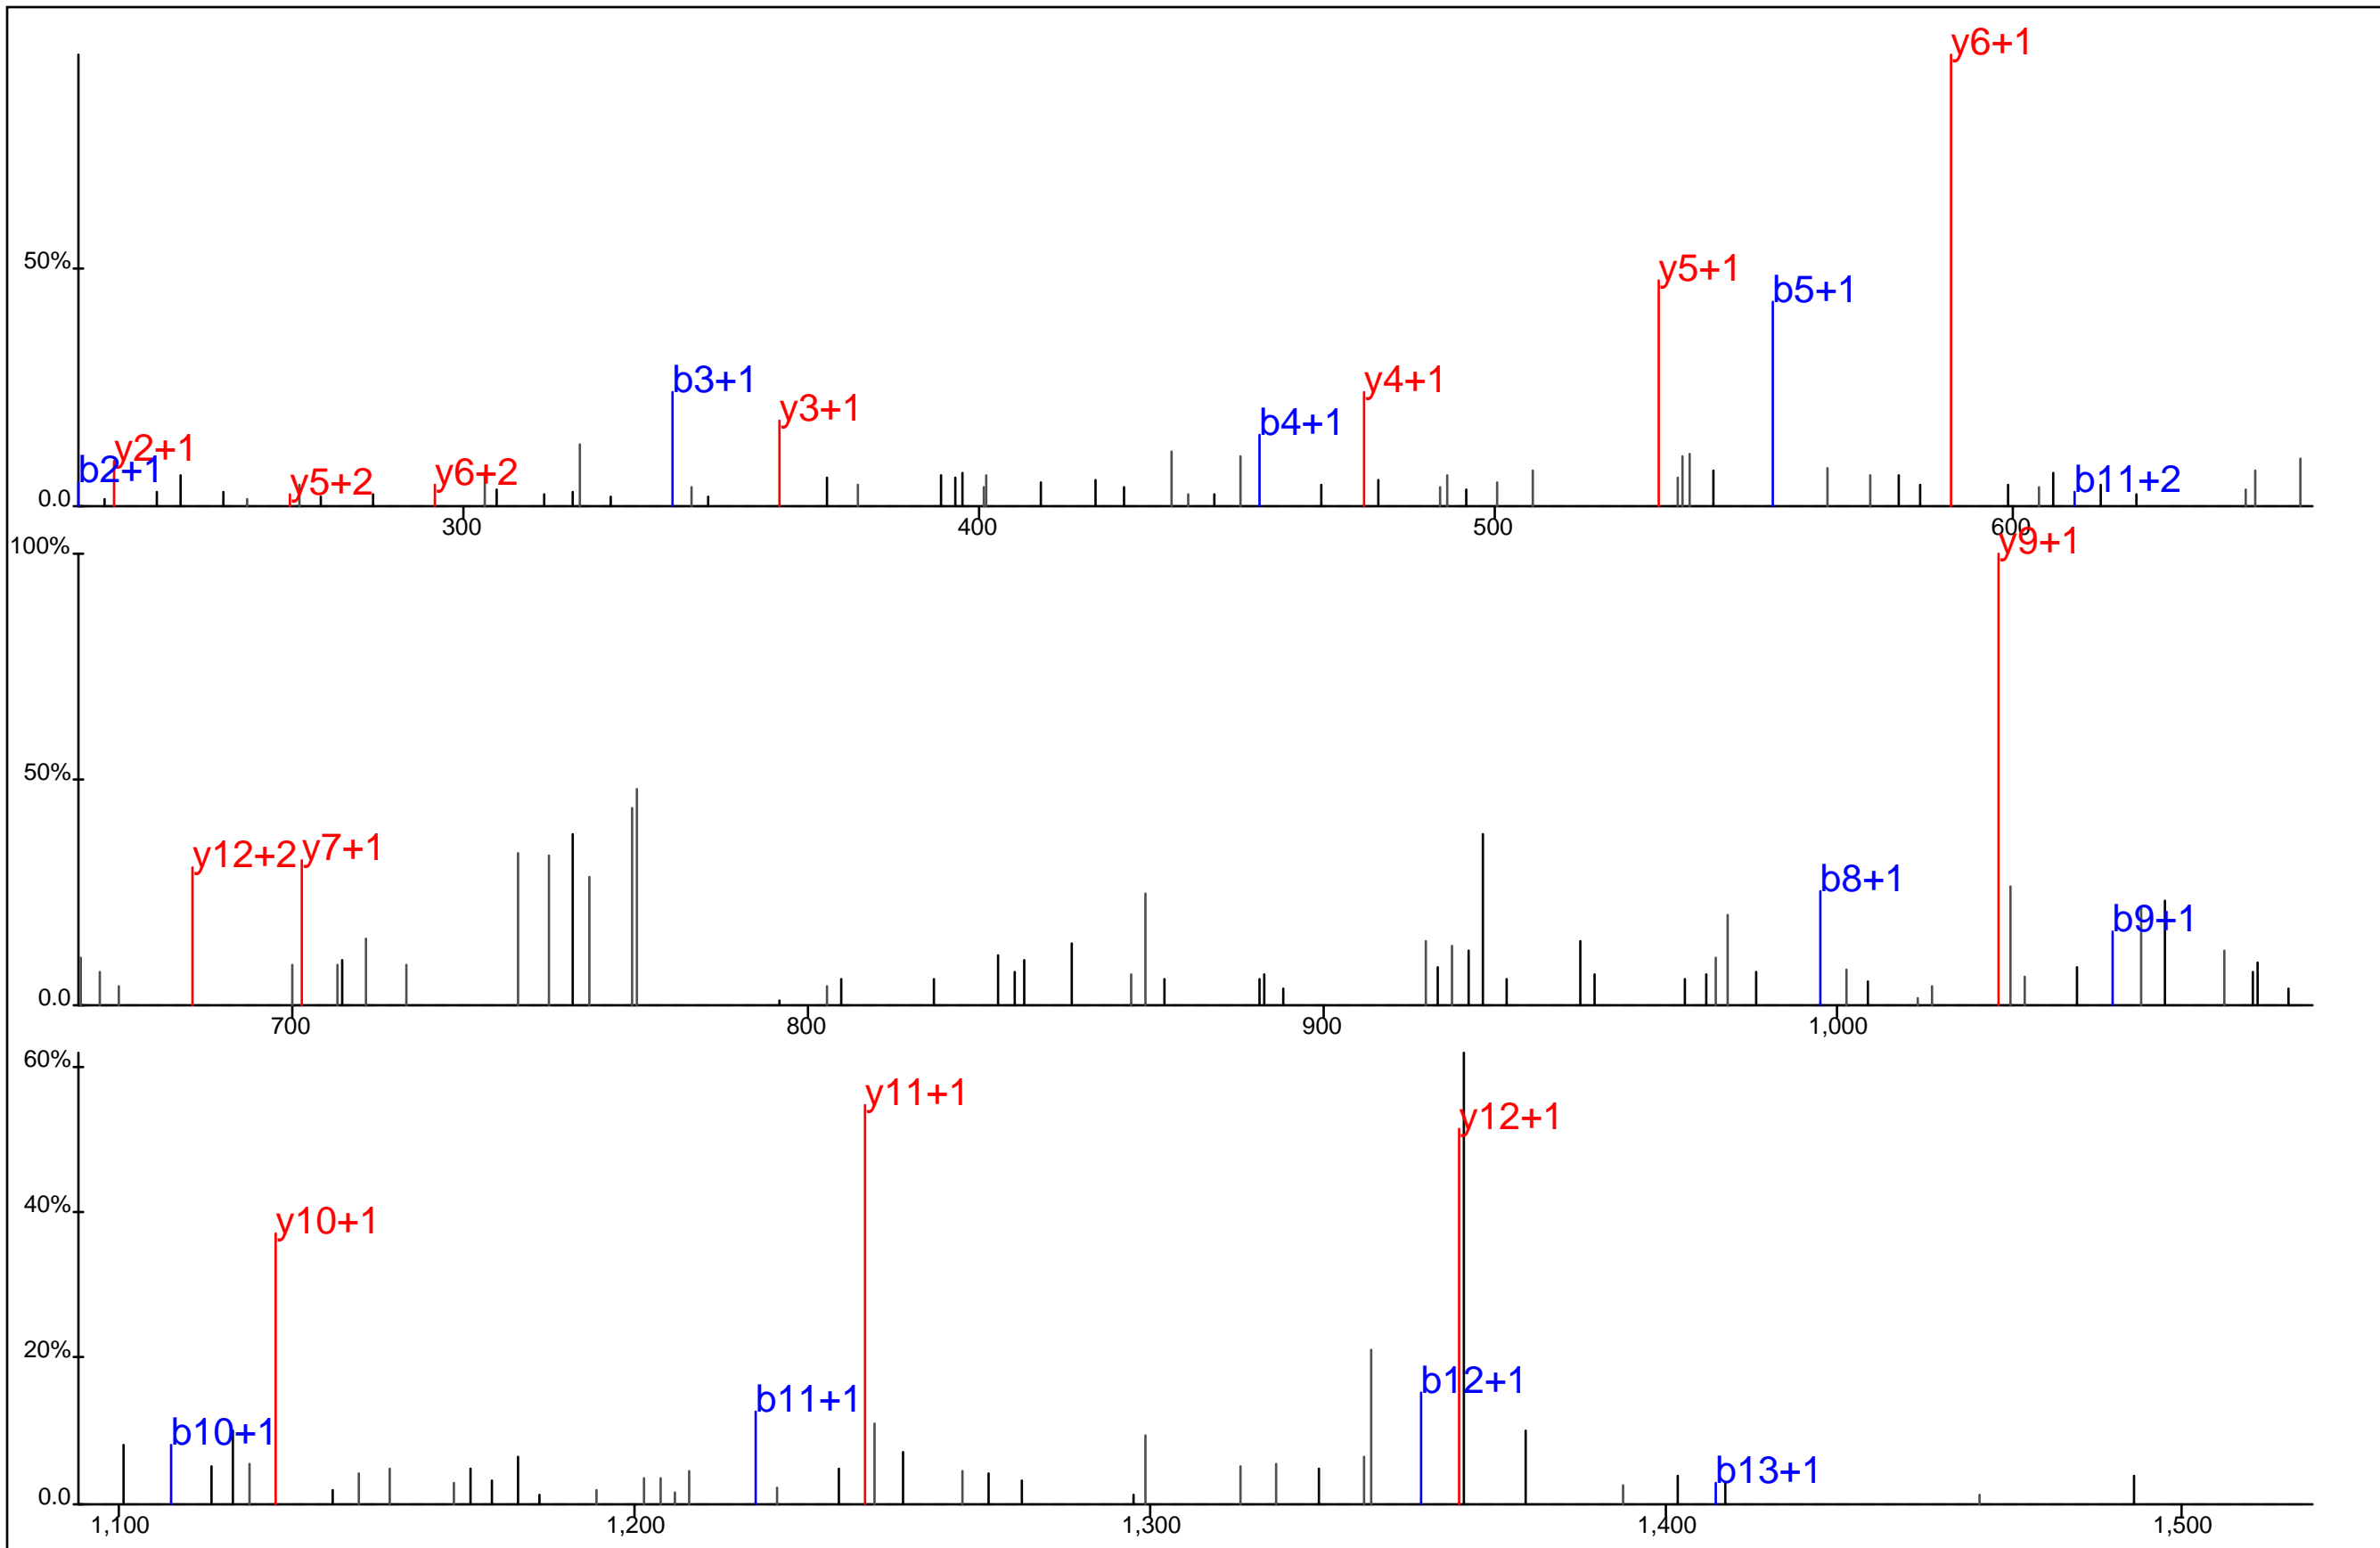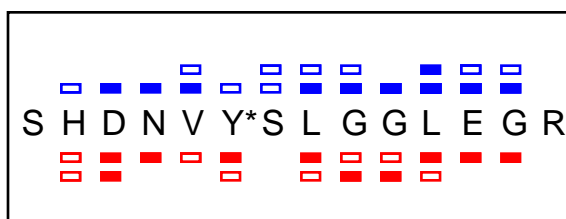

Protein Name: Pleckstrin homology-like domain, family B, member 2  
 gi Accession: 0  
 Precursor Mass: 792.3464+2  
 Delta Mass: 0.400 ppm  
 XCorr: 70.63

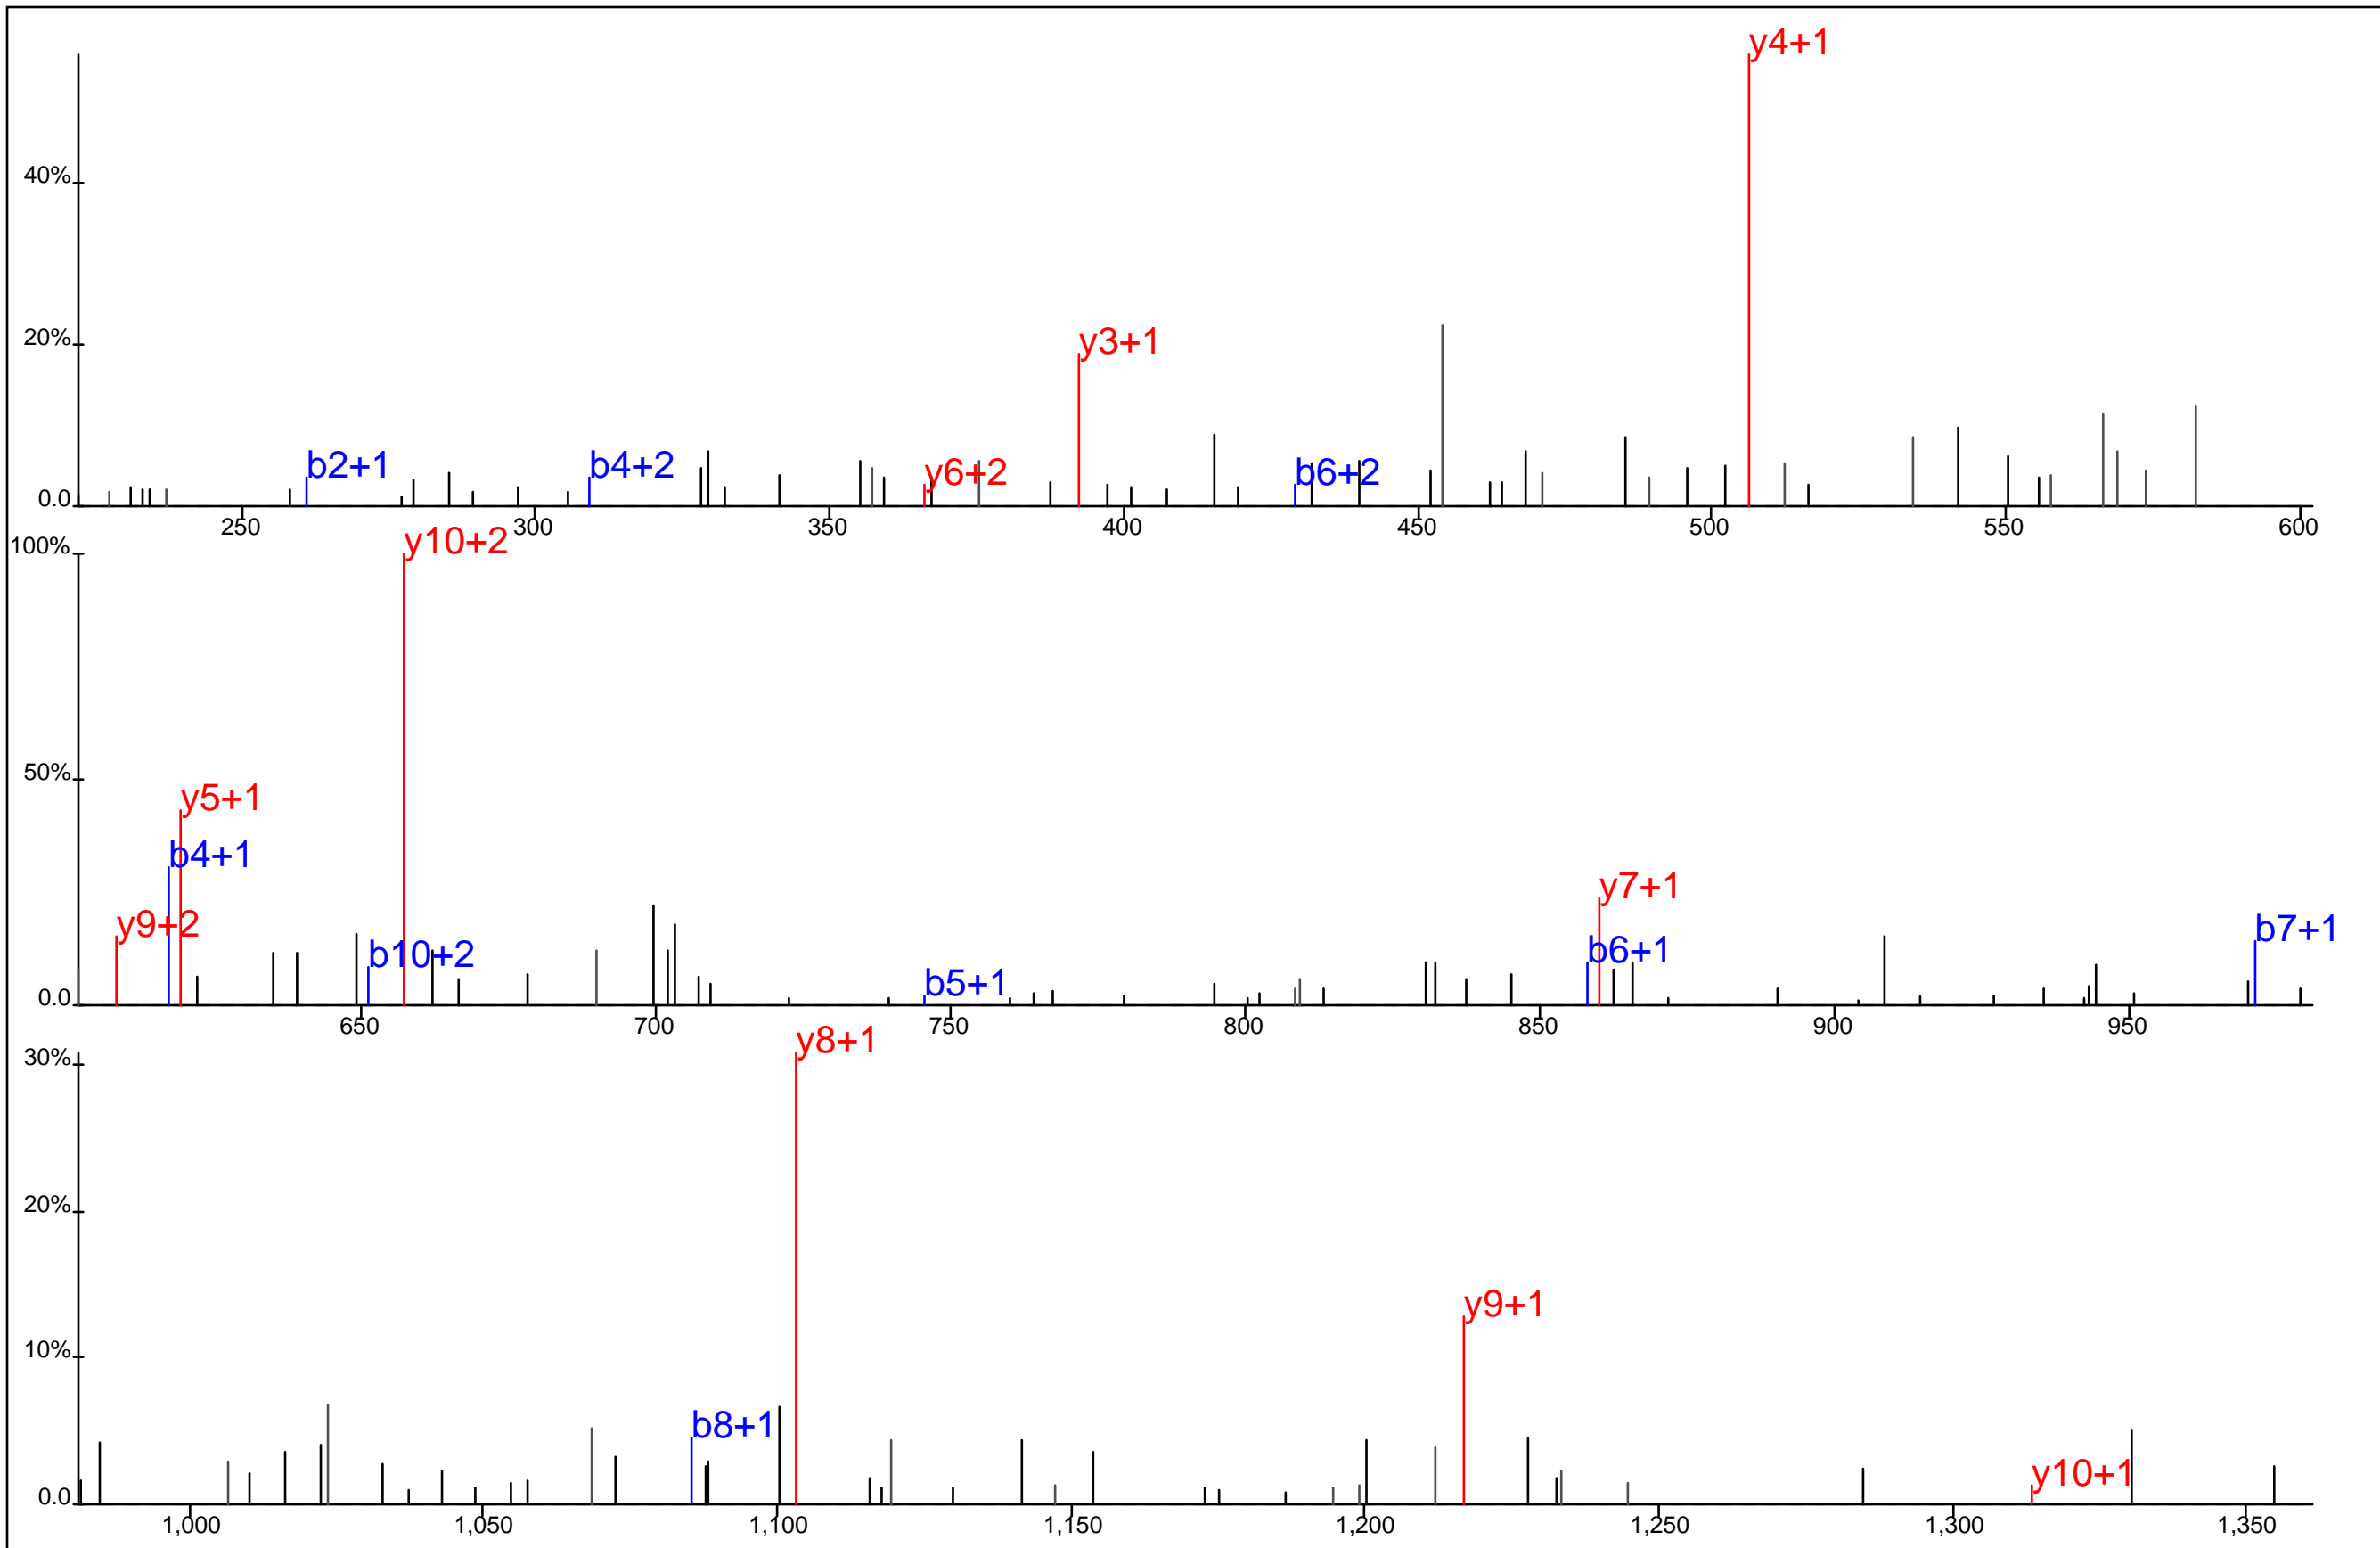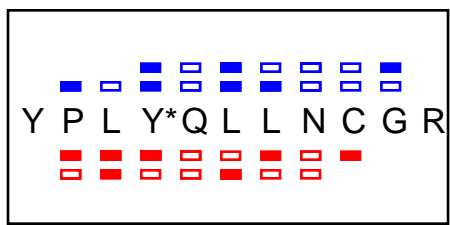

Protein Name: Pleckstrin homology-like domain family B member 3  
 gi Accession: 0  
 Precursor Mass: 738.8364+2  
 Delta Mass: 3.405 ppm  
 XCorr: 34.17

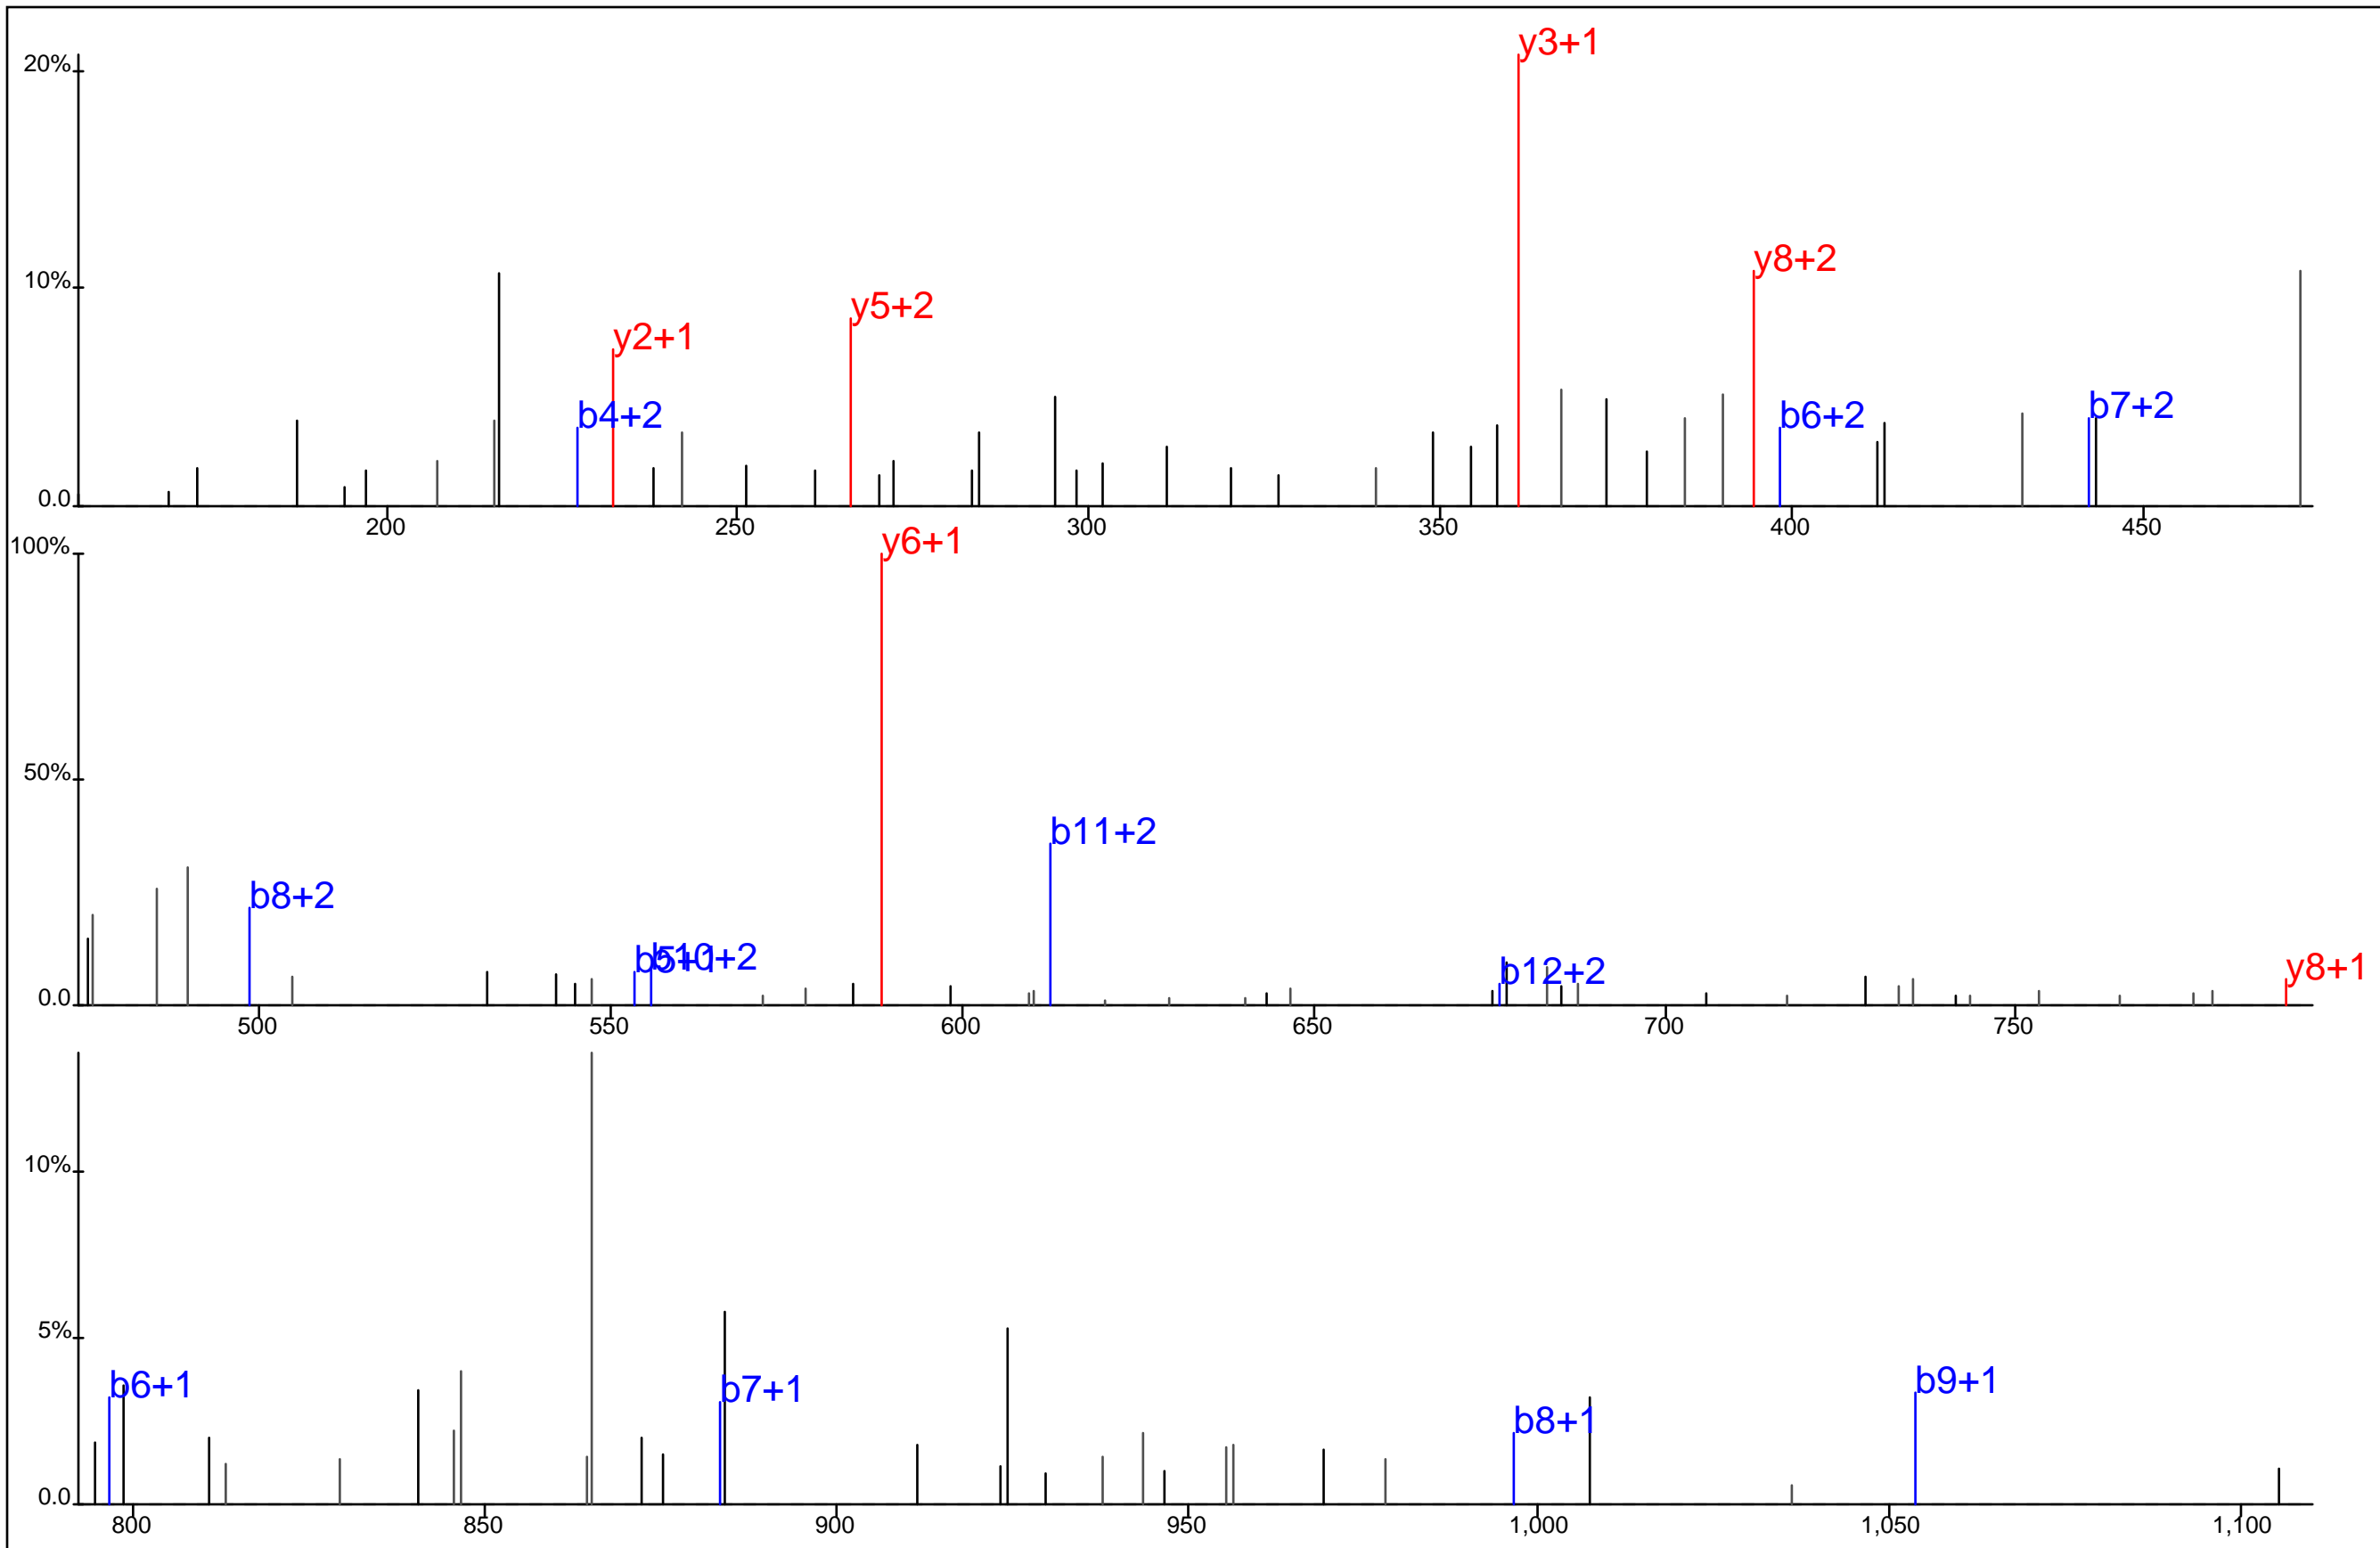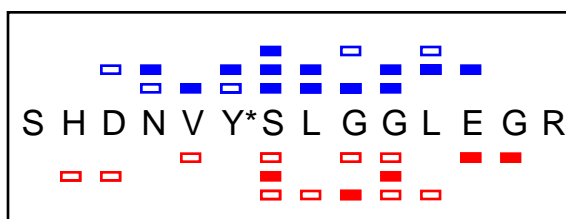

Protein Name: Pleckstrin homology-like domain, family B, member 2  
 gi Accession: 0  
 Precursor Mass: 528.5662+3  
 Delta Mass: 0.534 ppm  
 XCorr: 21.4

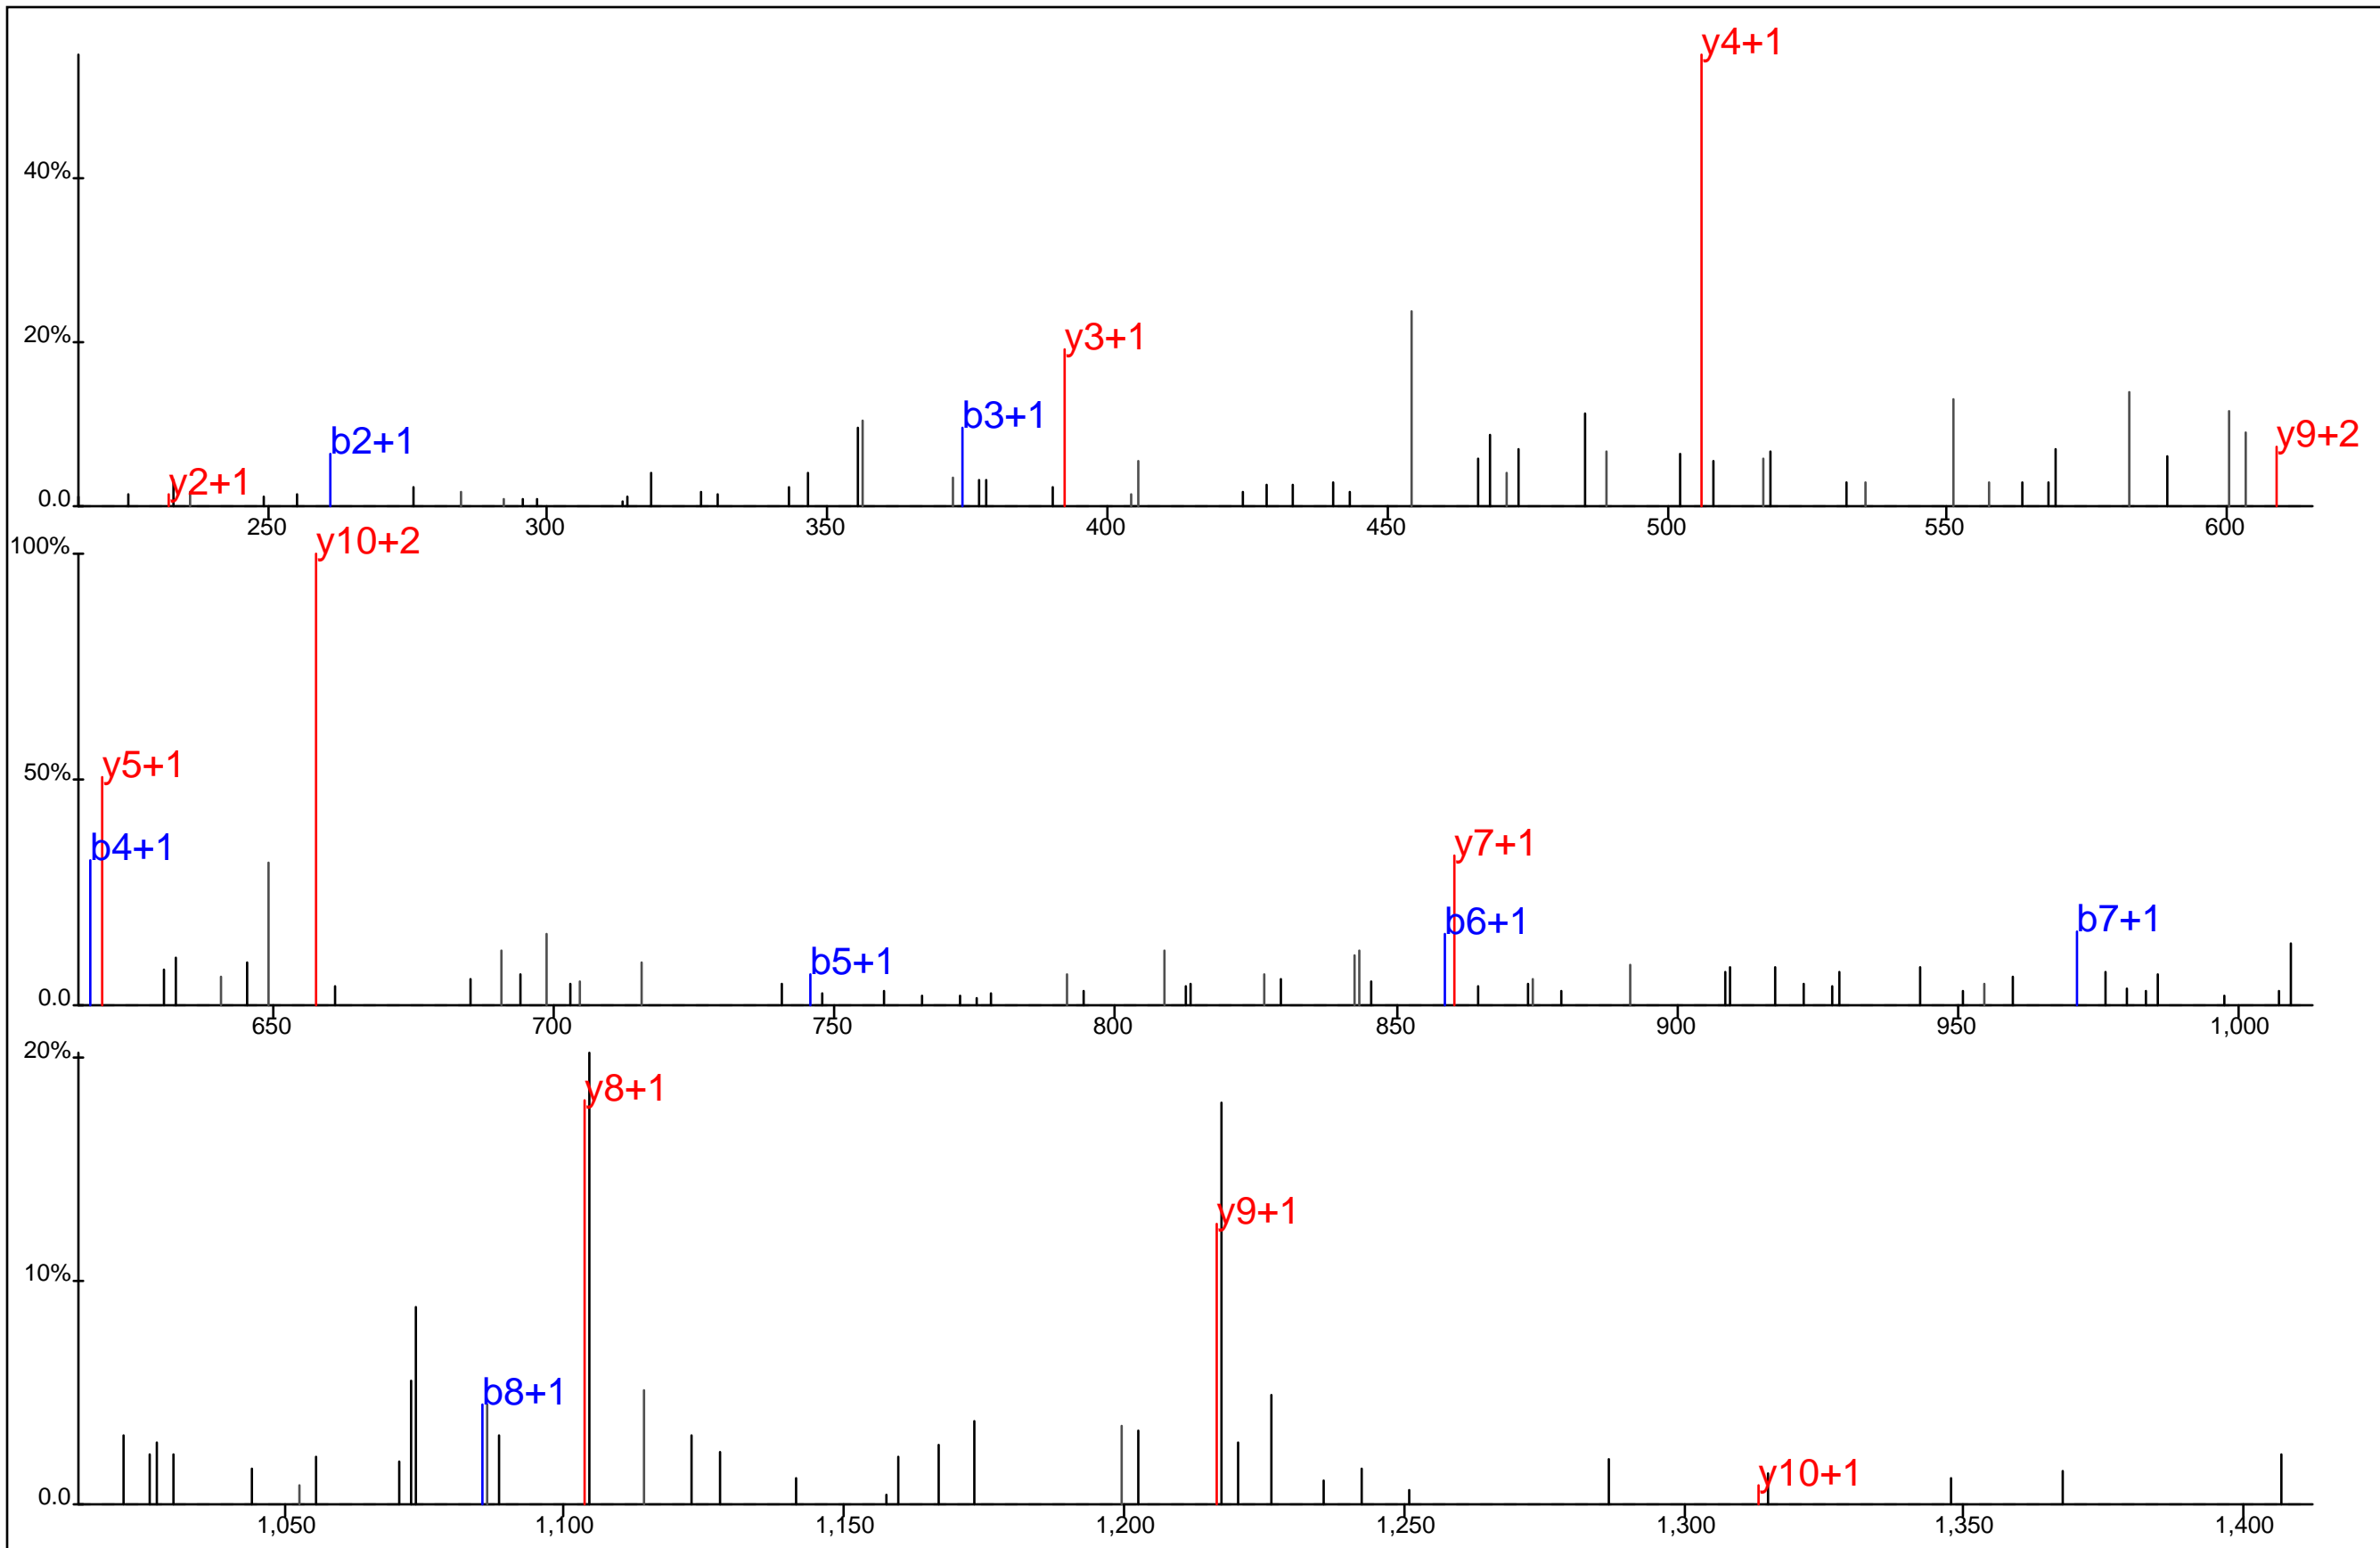

Y P L Y\* Q L L N C G R

Protein Name: Pleckstrin homology-like domain family B member 3  
 gi Accession: 0  
 Precursor Mass: 738.8370+2  
 Delta Mass: 2.496 ppm  
 XCorr: 26.83

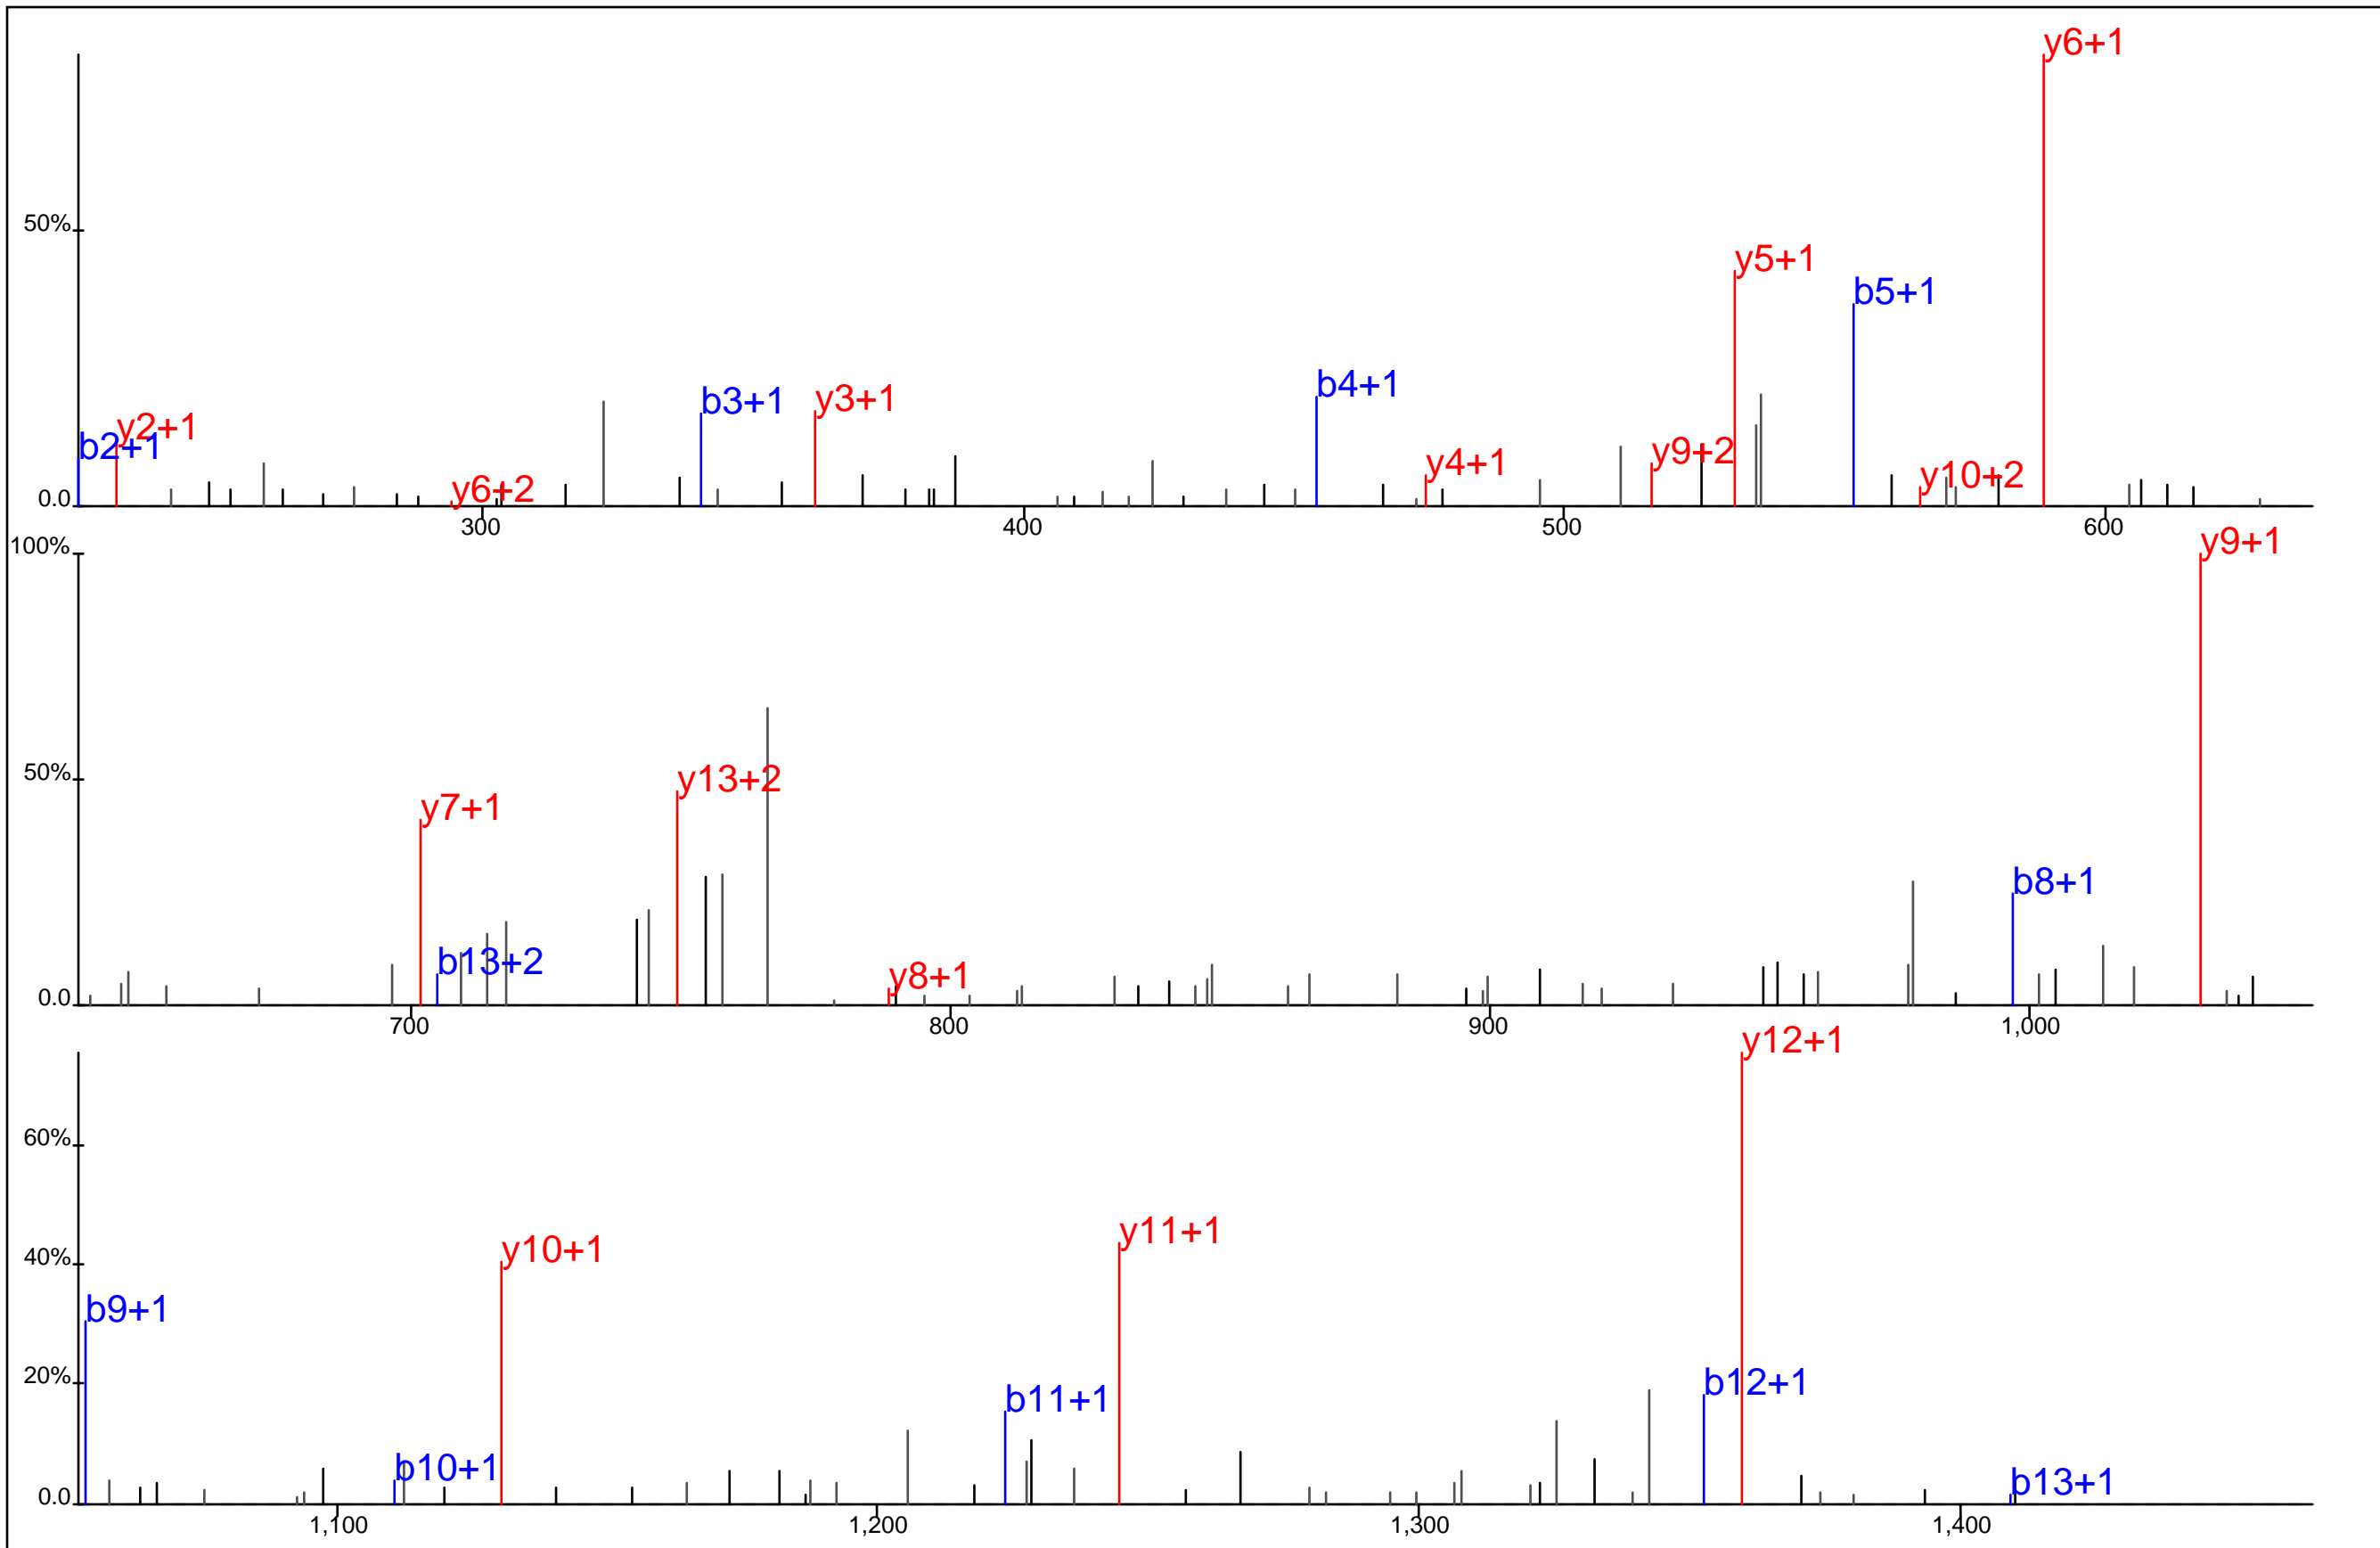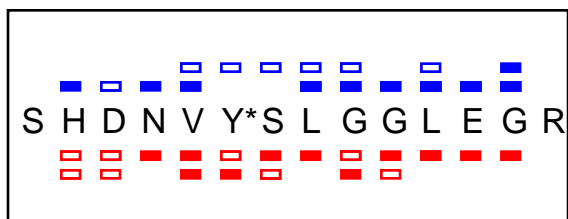

Protein Name: Pleckstrin homology-like domain, family B, member 2  
 gi Accession: 0  
 Precursor Mass: 792.3484+2  
 Delta Mass: 2.944 ppm  
 XCorr: 67.06

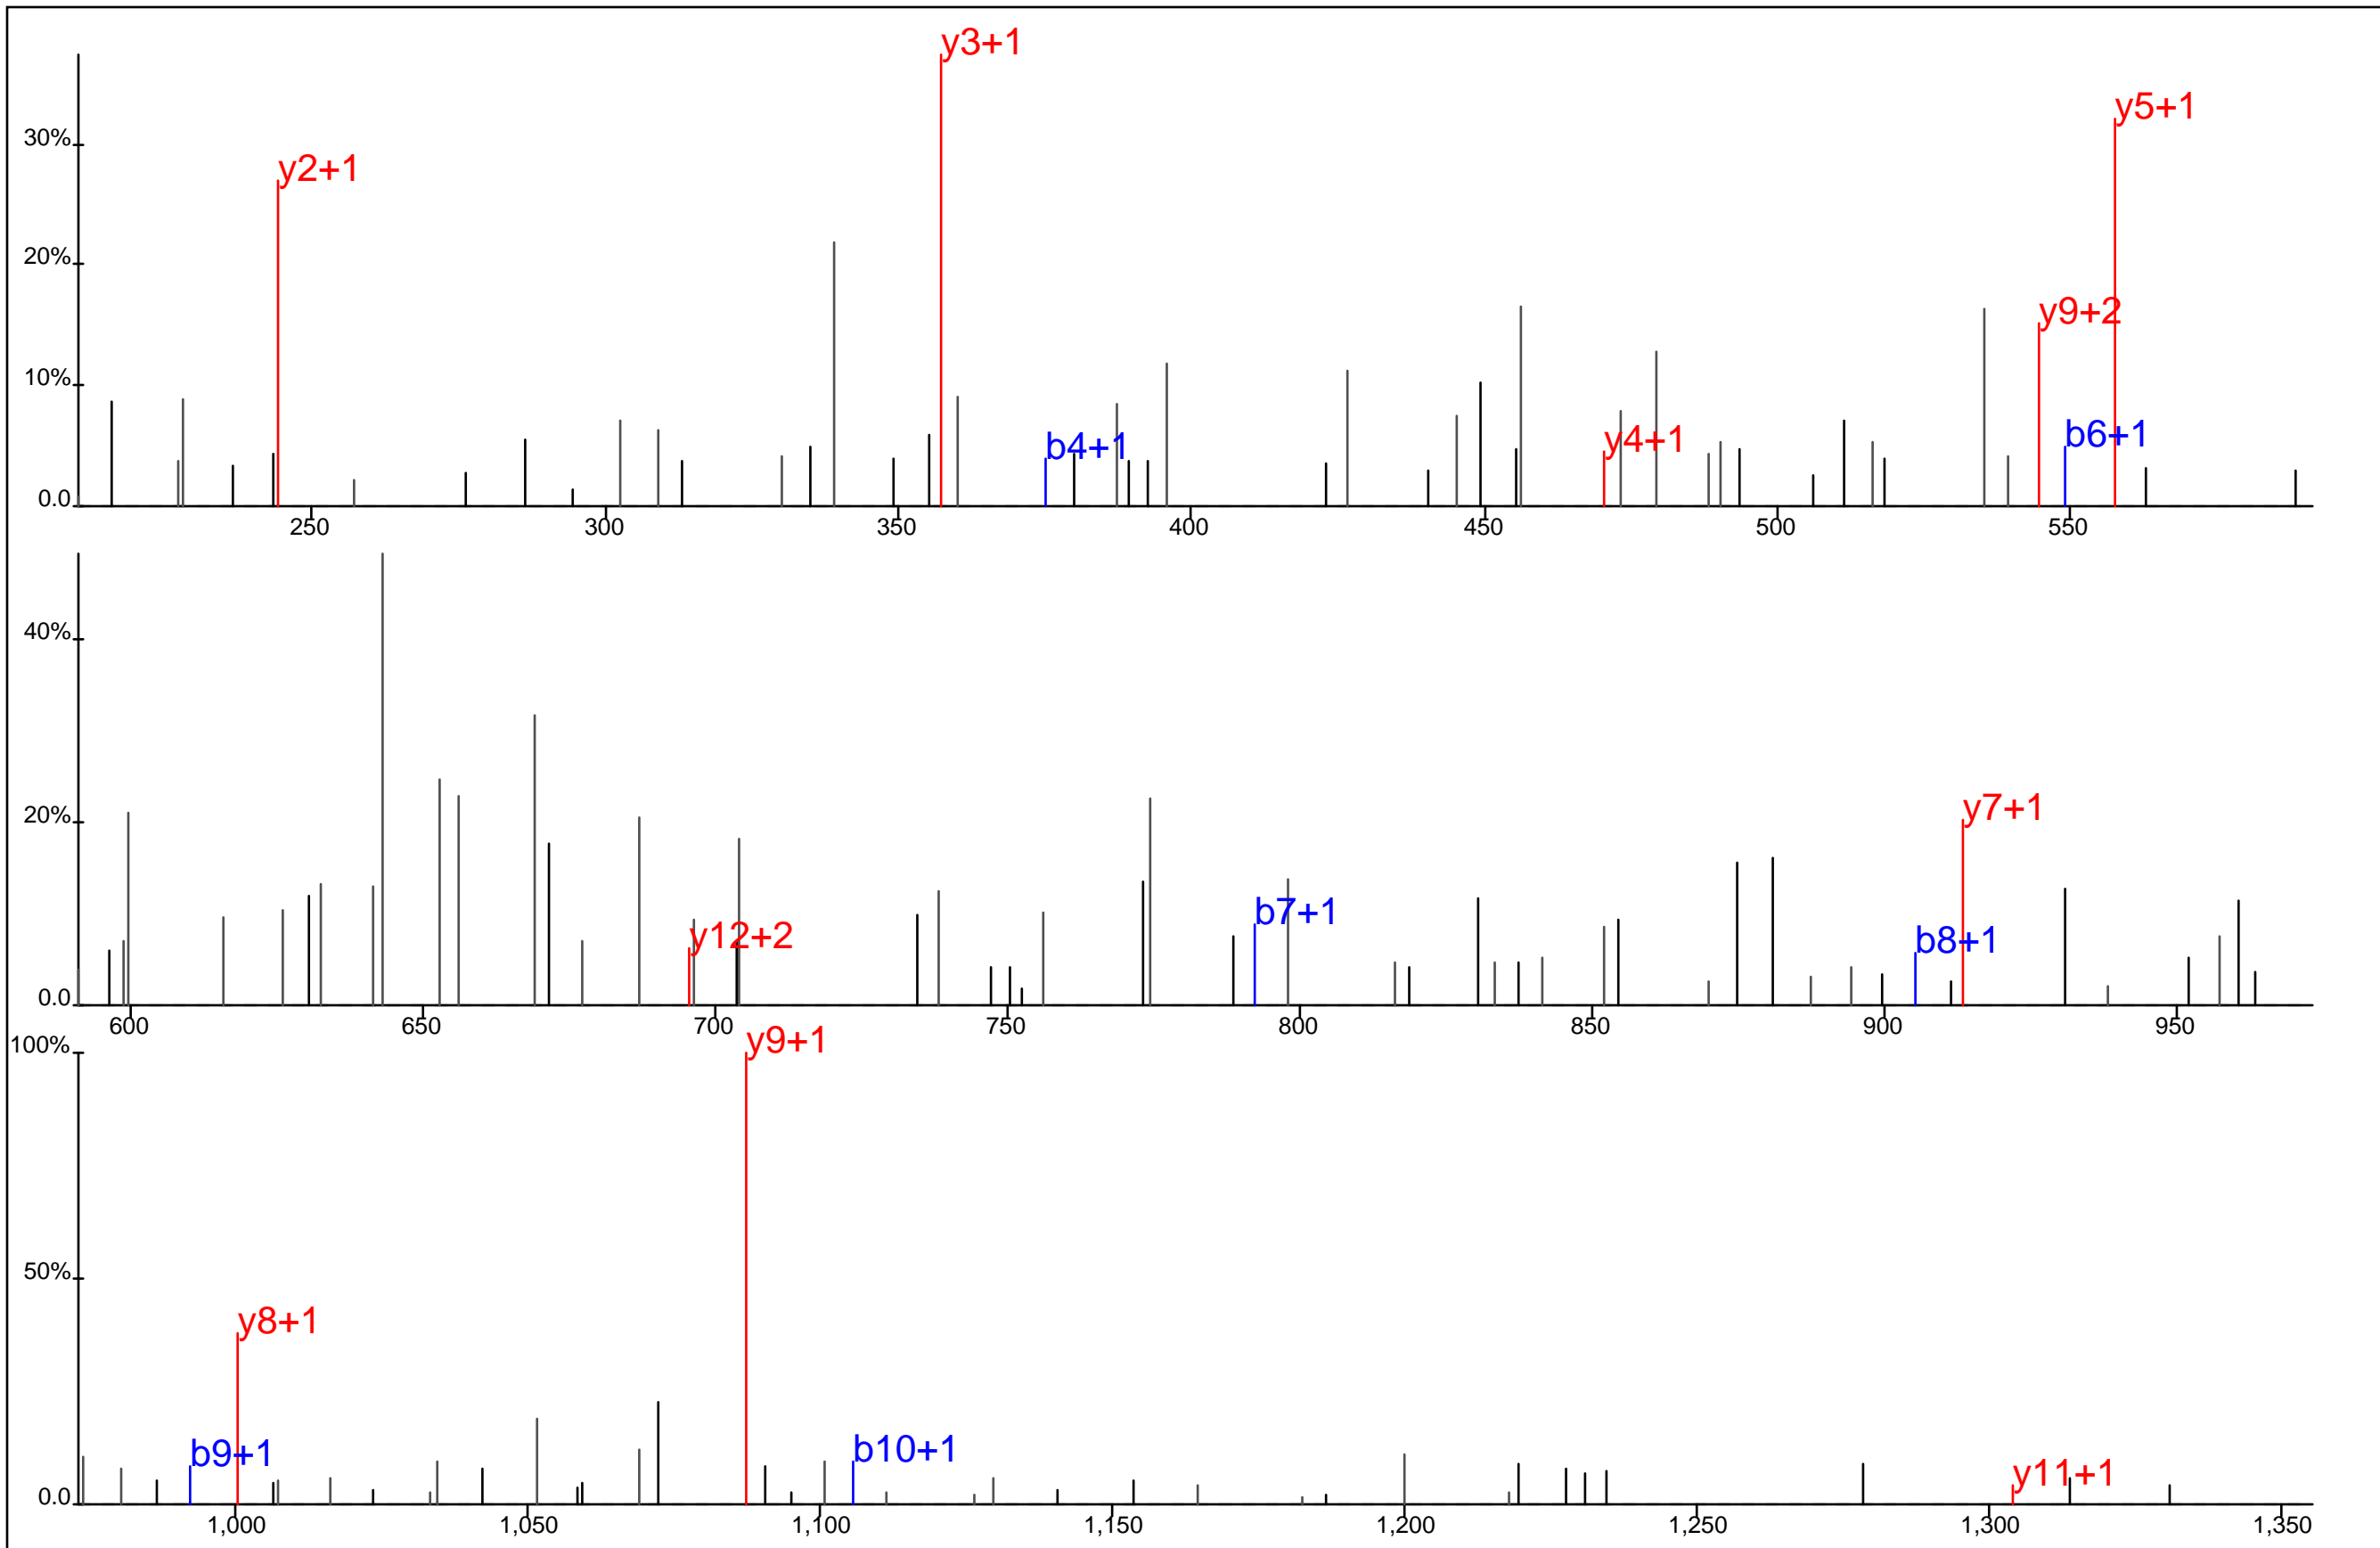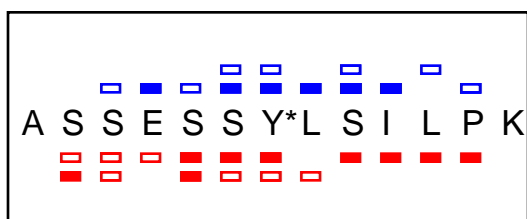

Protein Name: Pleckstrin homology-like domain, family B, member 2  
 gi Accession: 0  
 Precursor Mass: 731.3478+2  
 Delta Mass: 0.724 ppm  
 XCorr: 24.25

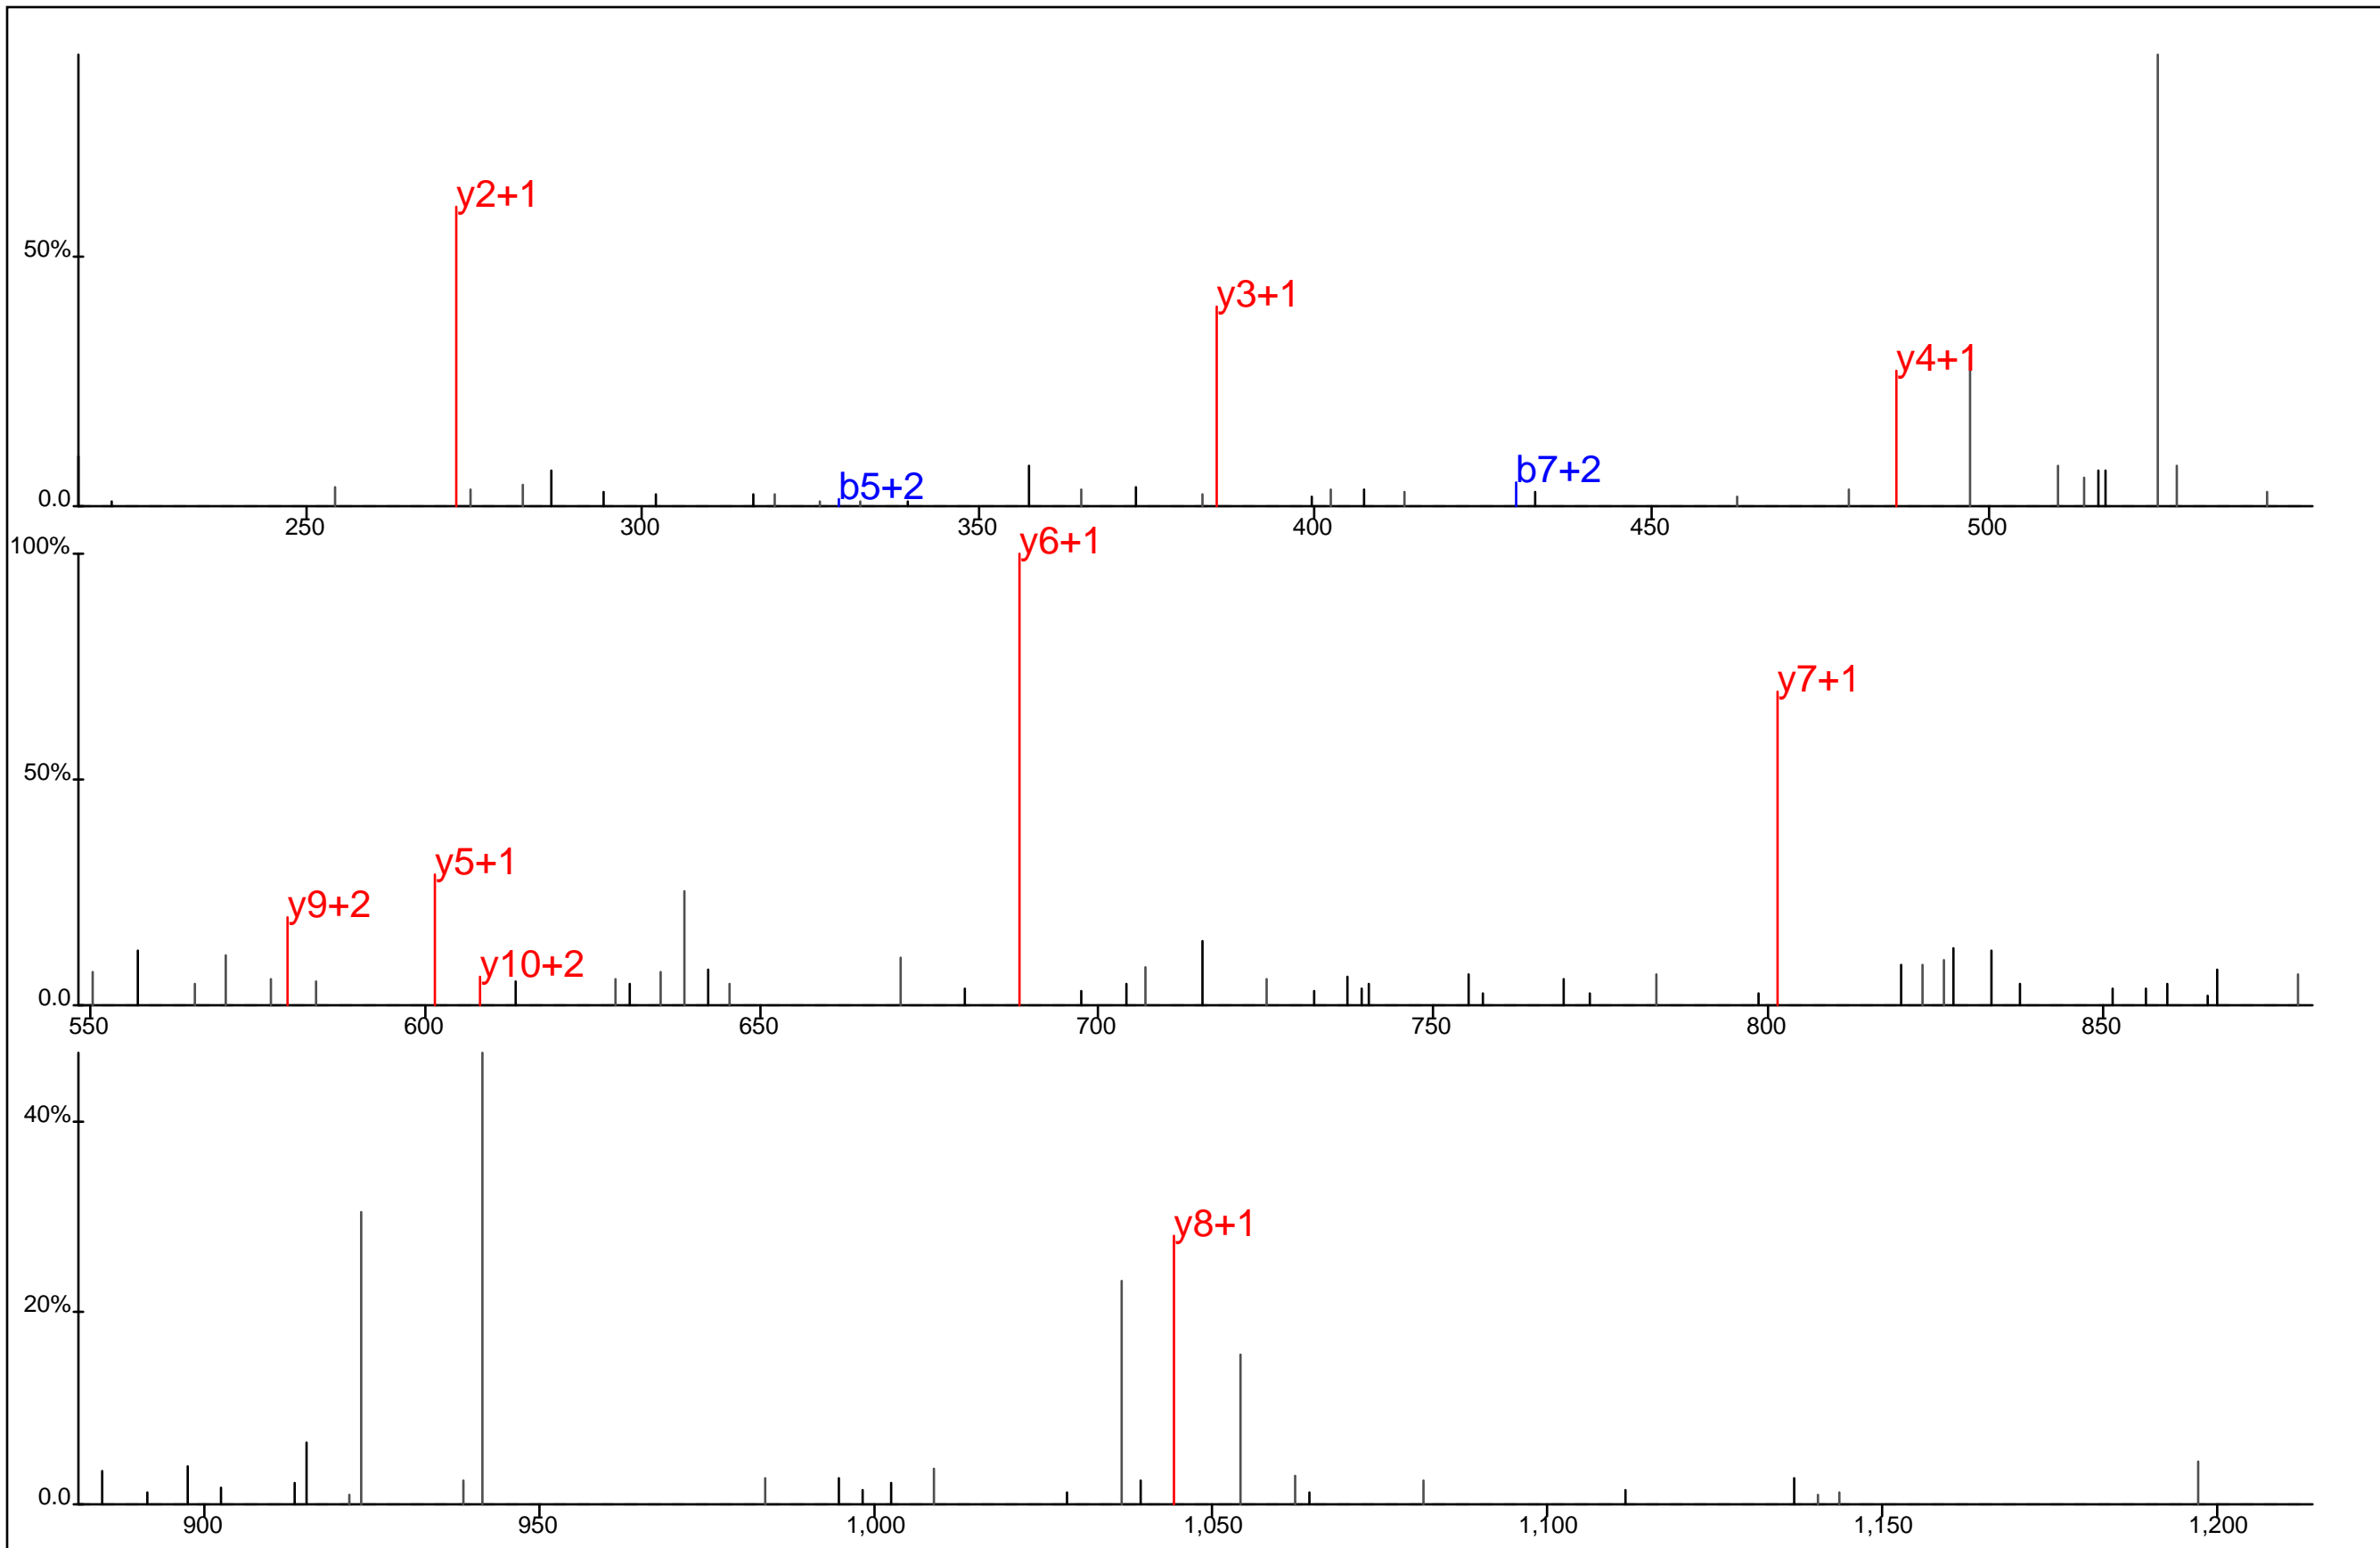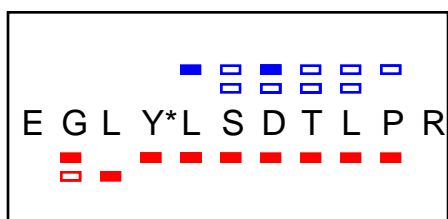

Protein Name: Pleckstrin homology-like domain, family B, member 2  
 gi Accession: 0  
 Precursor Mass: 672.3174+2  
 Delta Mass: 2.410 ppm  
 XCorr: 36.31



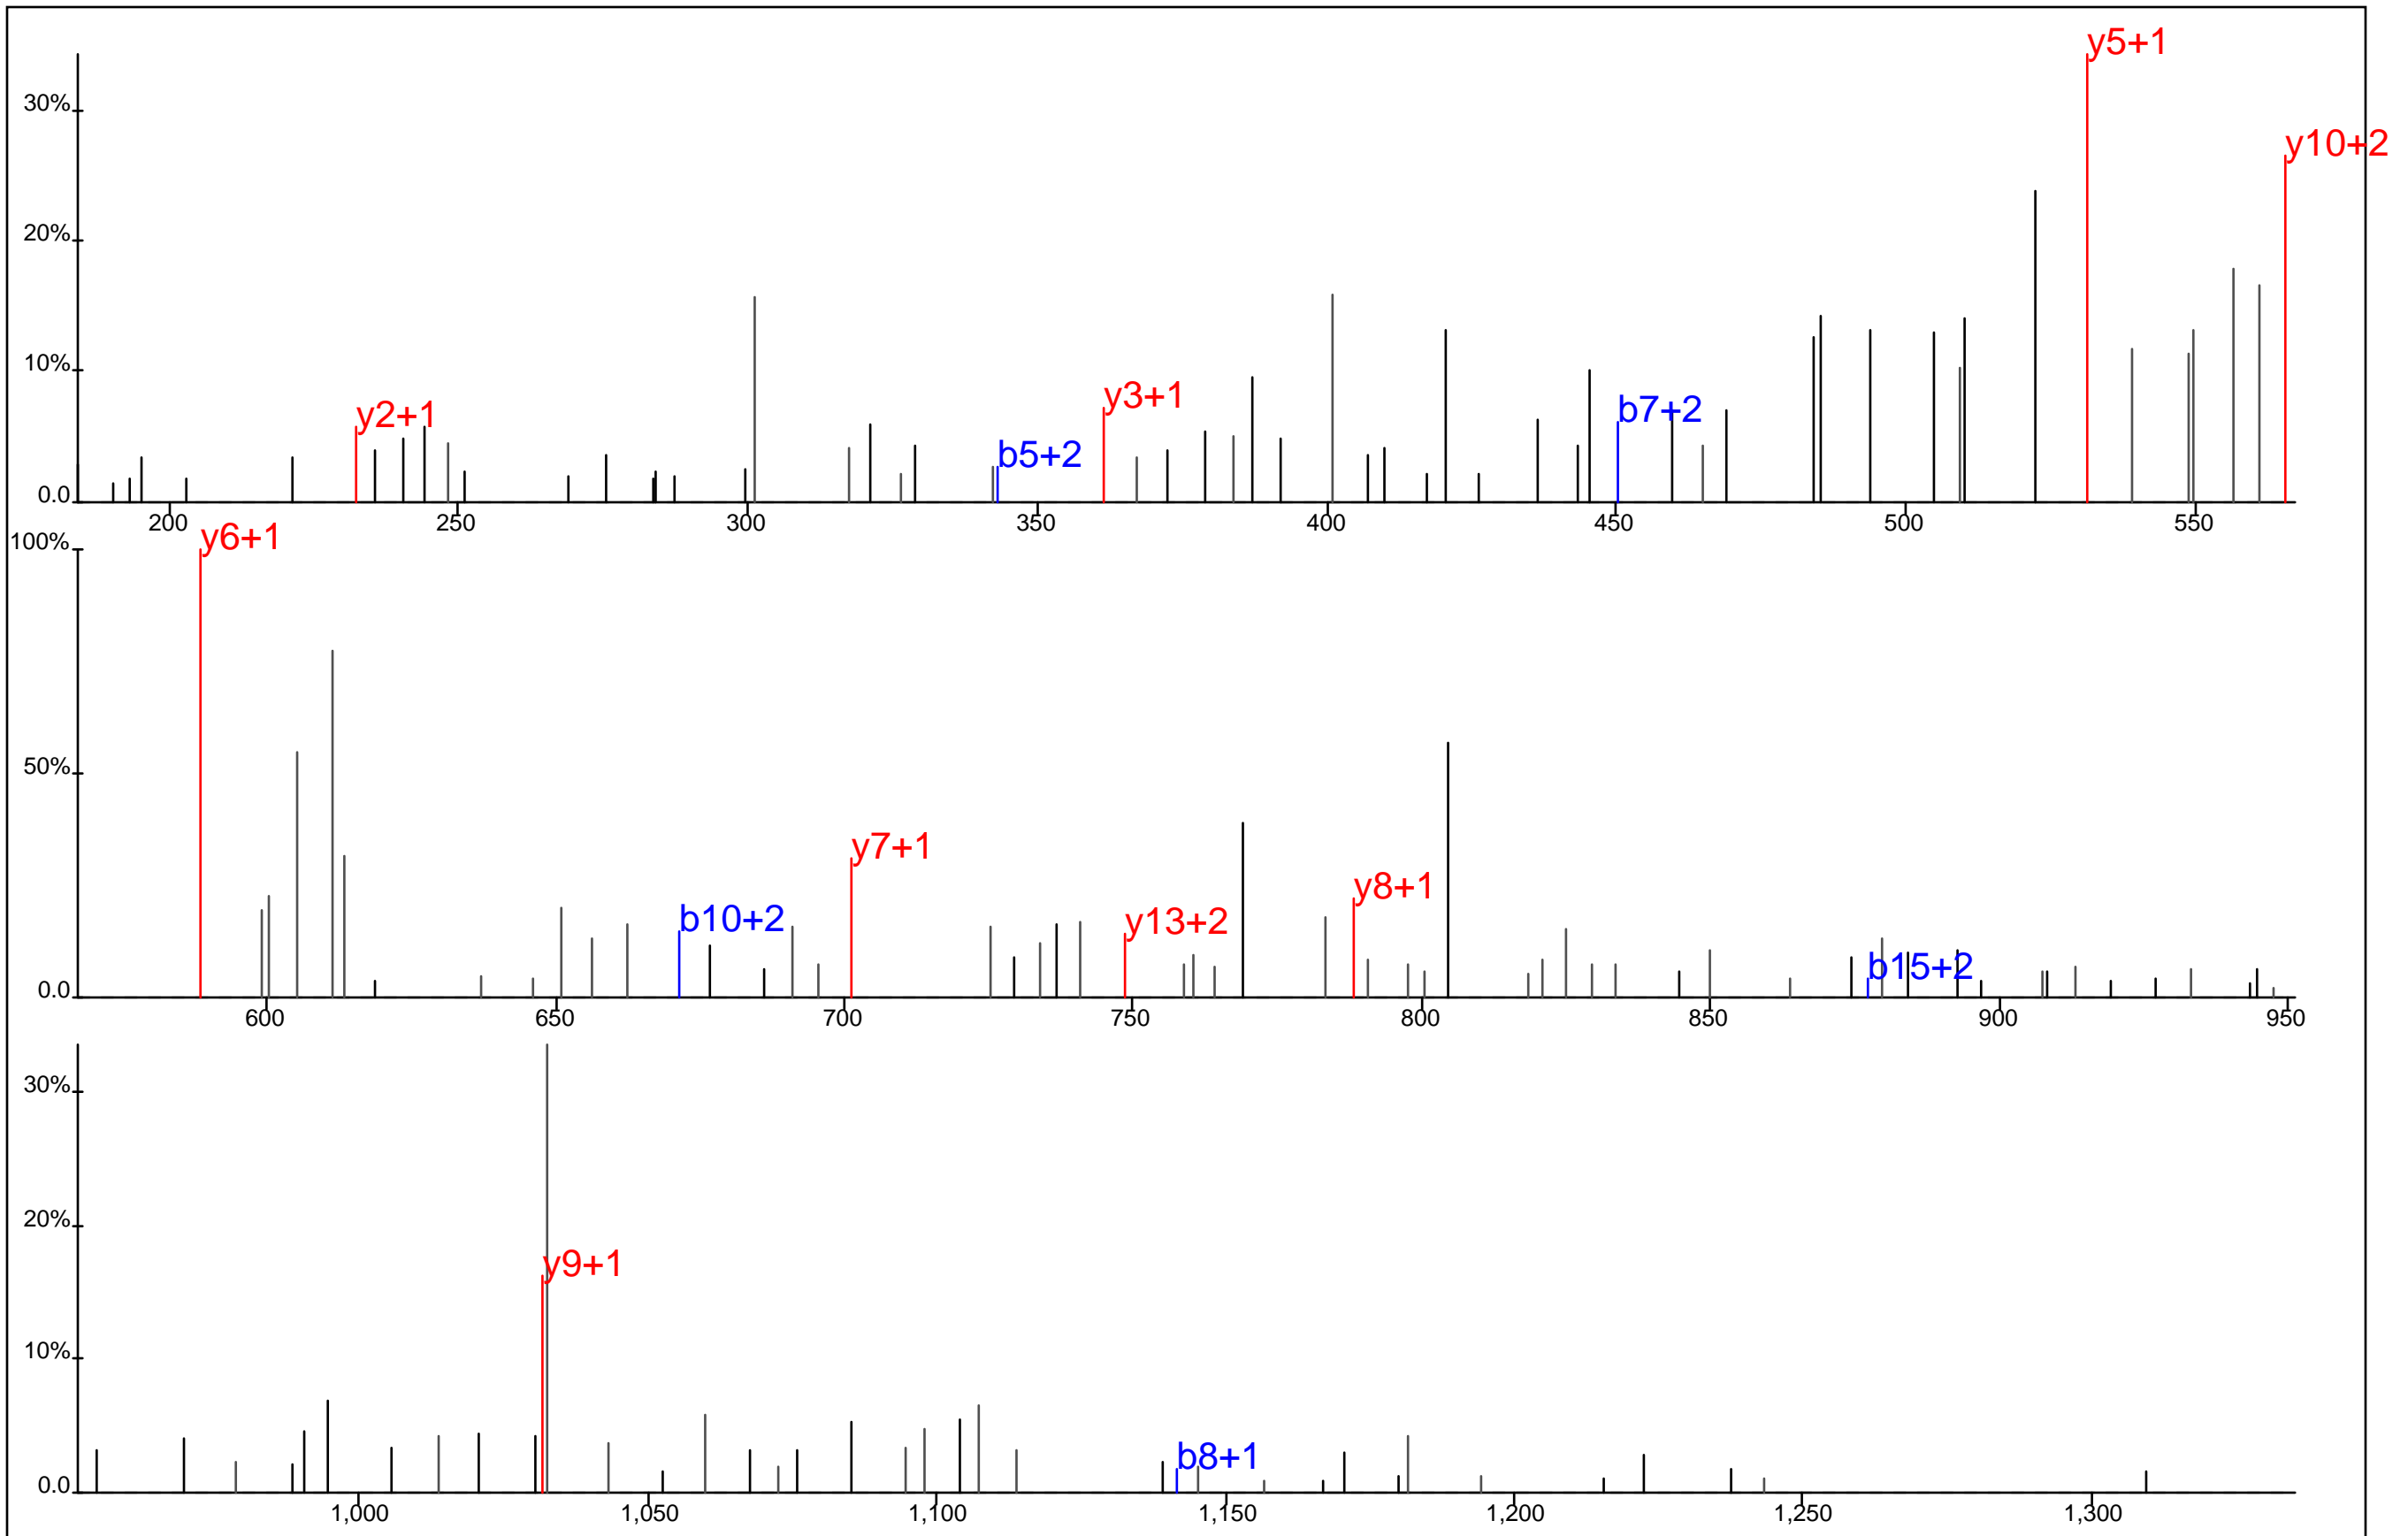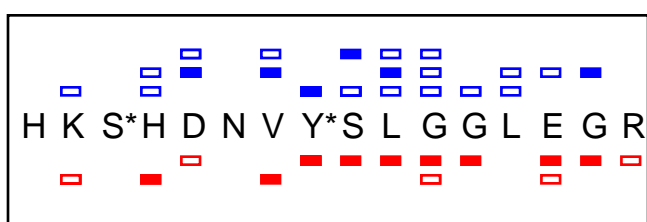

Protein Name: Pleckstrin homology-like domain, family B, member 2  
 gi Accession: 0  
 Precursor Mass: 643.6050+3  
 Delta Mass: 2.379 ppm  
 XCorr: 25.25

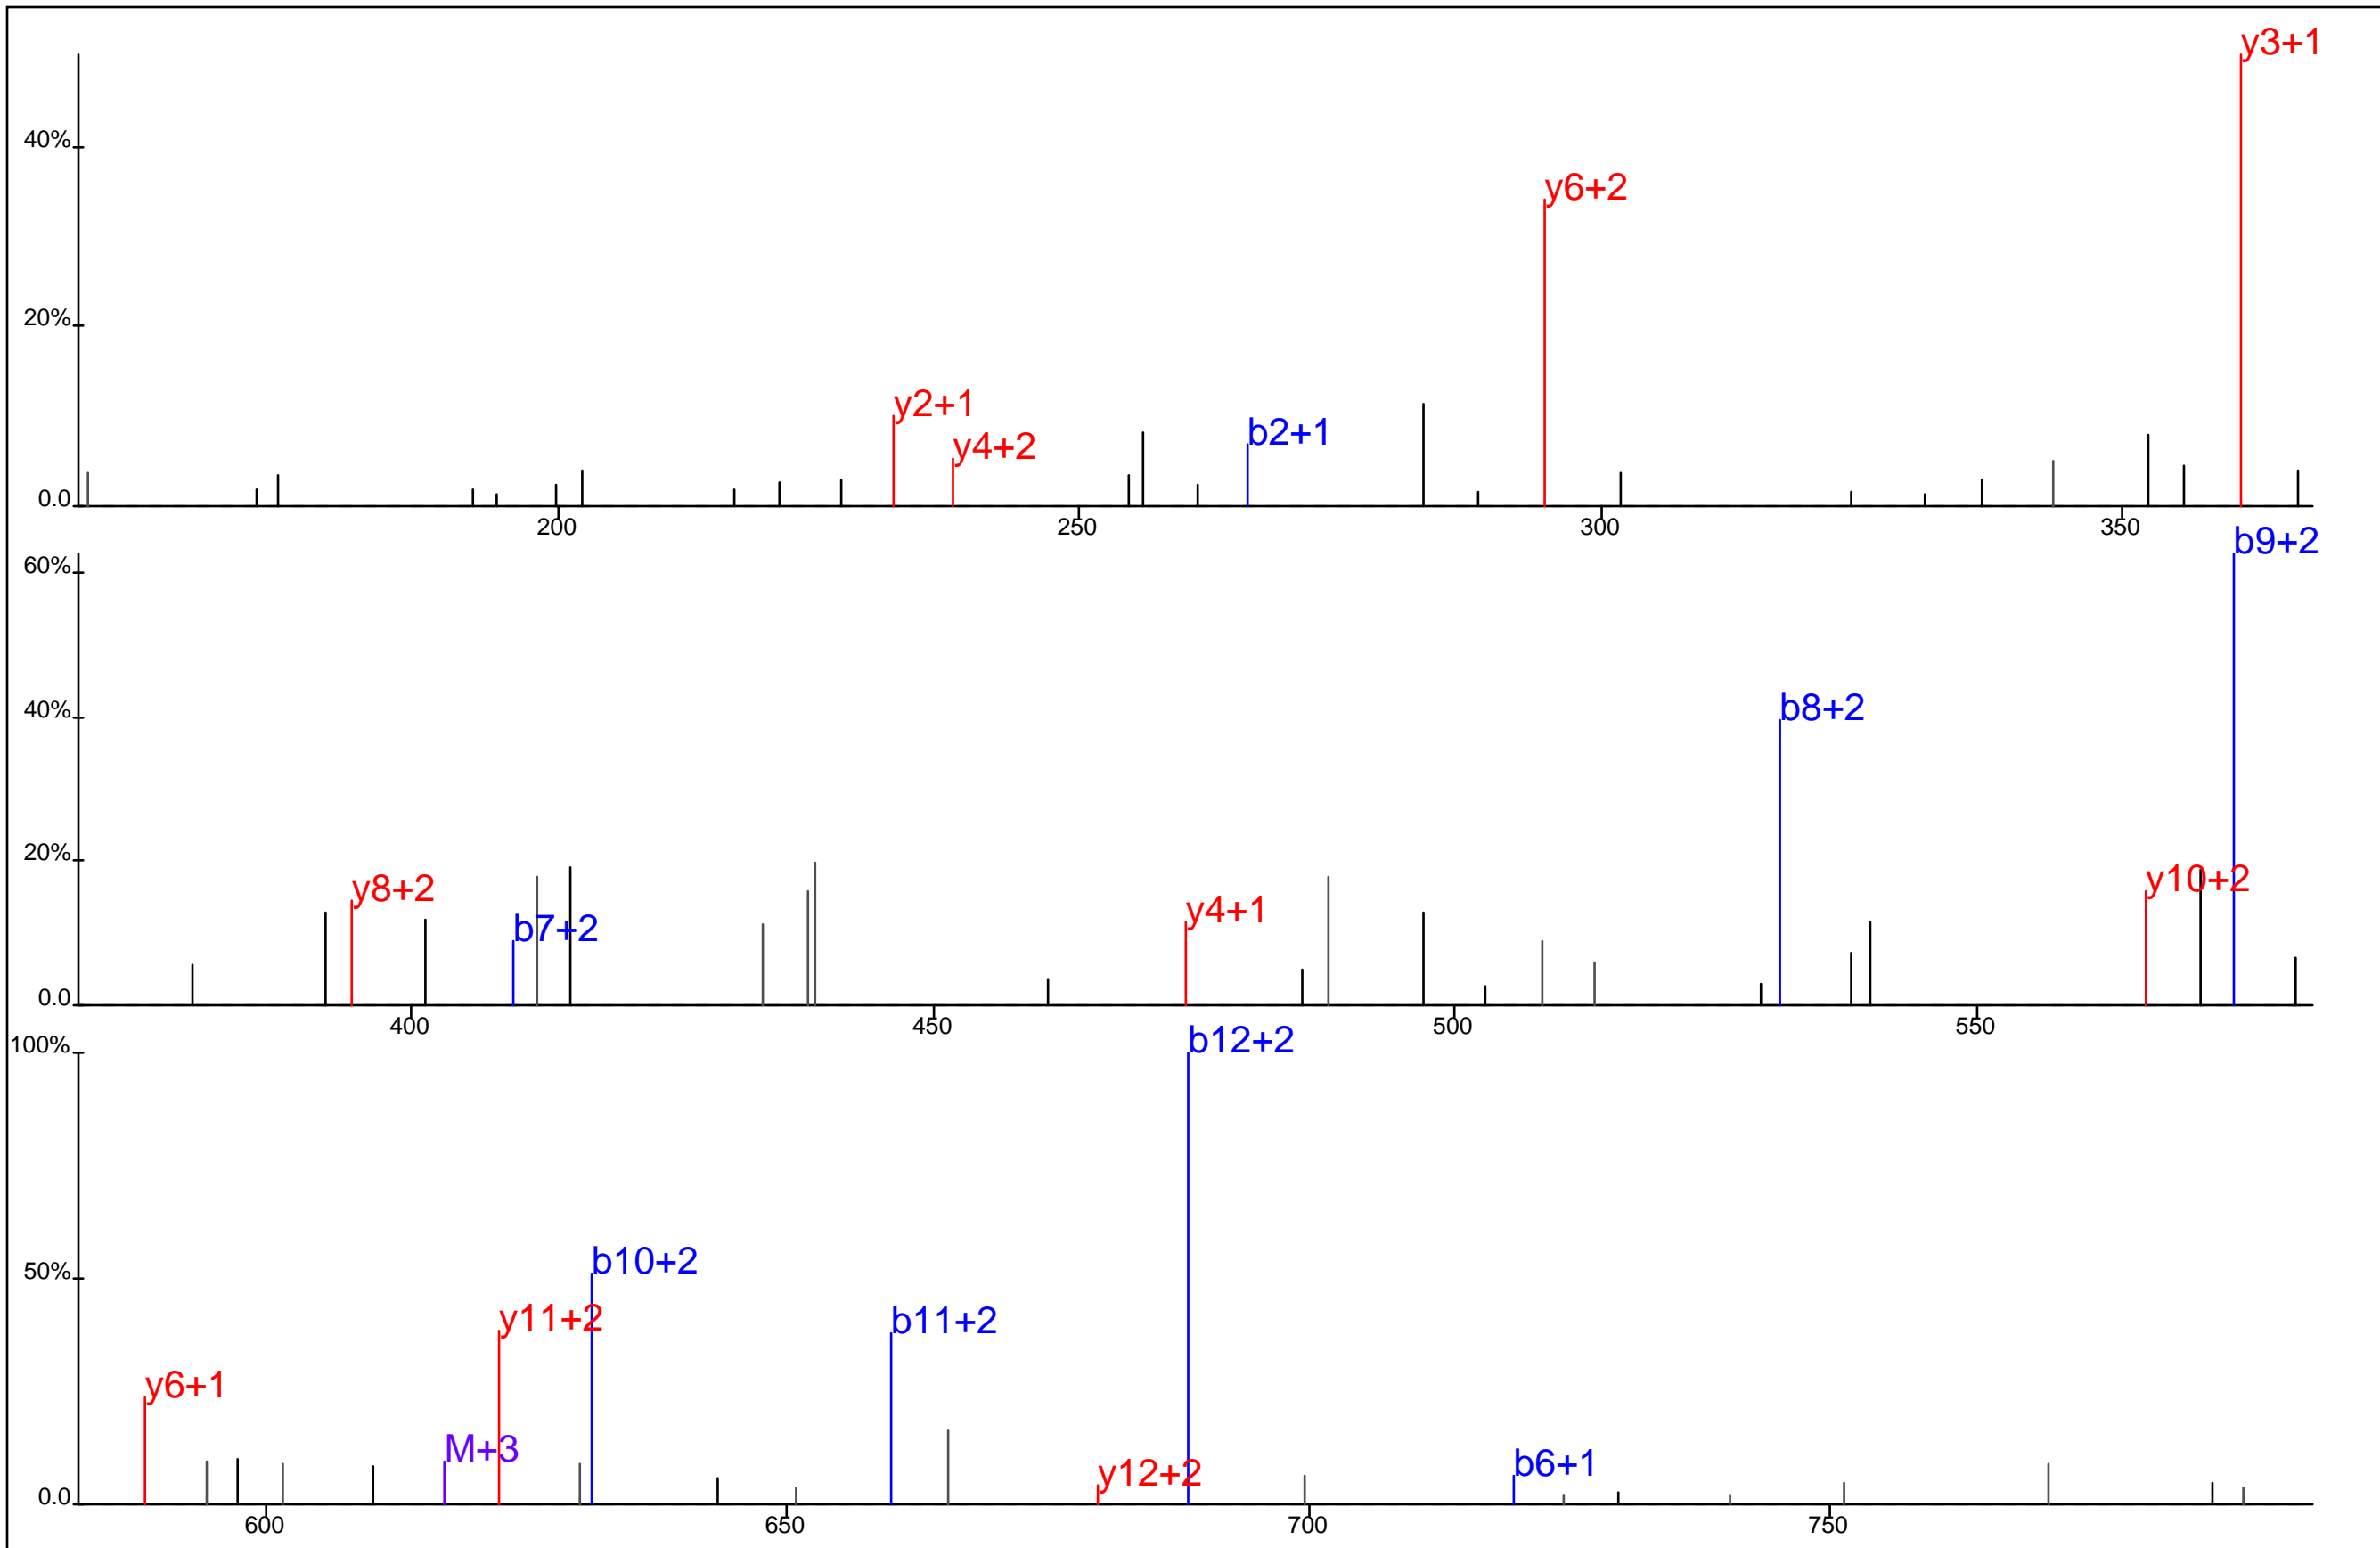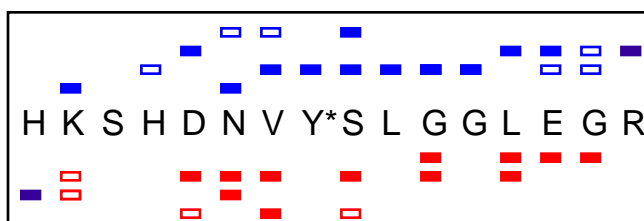

Protein Name: Pleckstrin homology-like domain, family B, member 2  
 gi Accession: 0  
 Precursor Mass: 462.9642+4  
 Delta Mass: 2.081 ppm  
 XCorr: 33.1

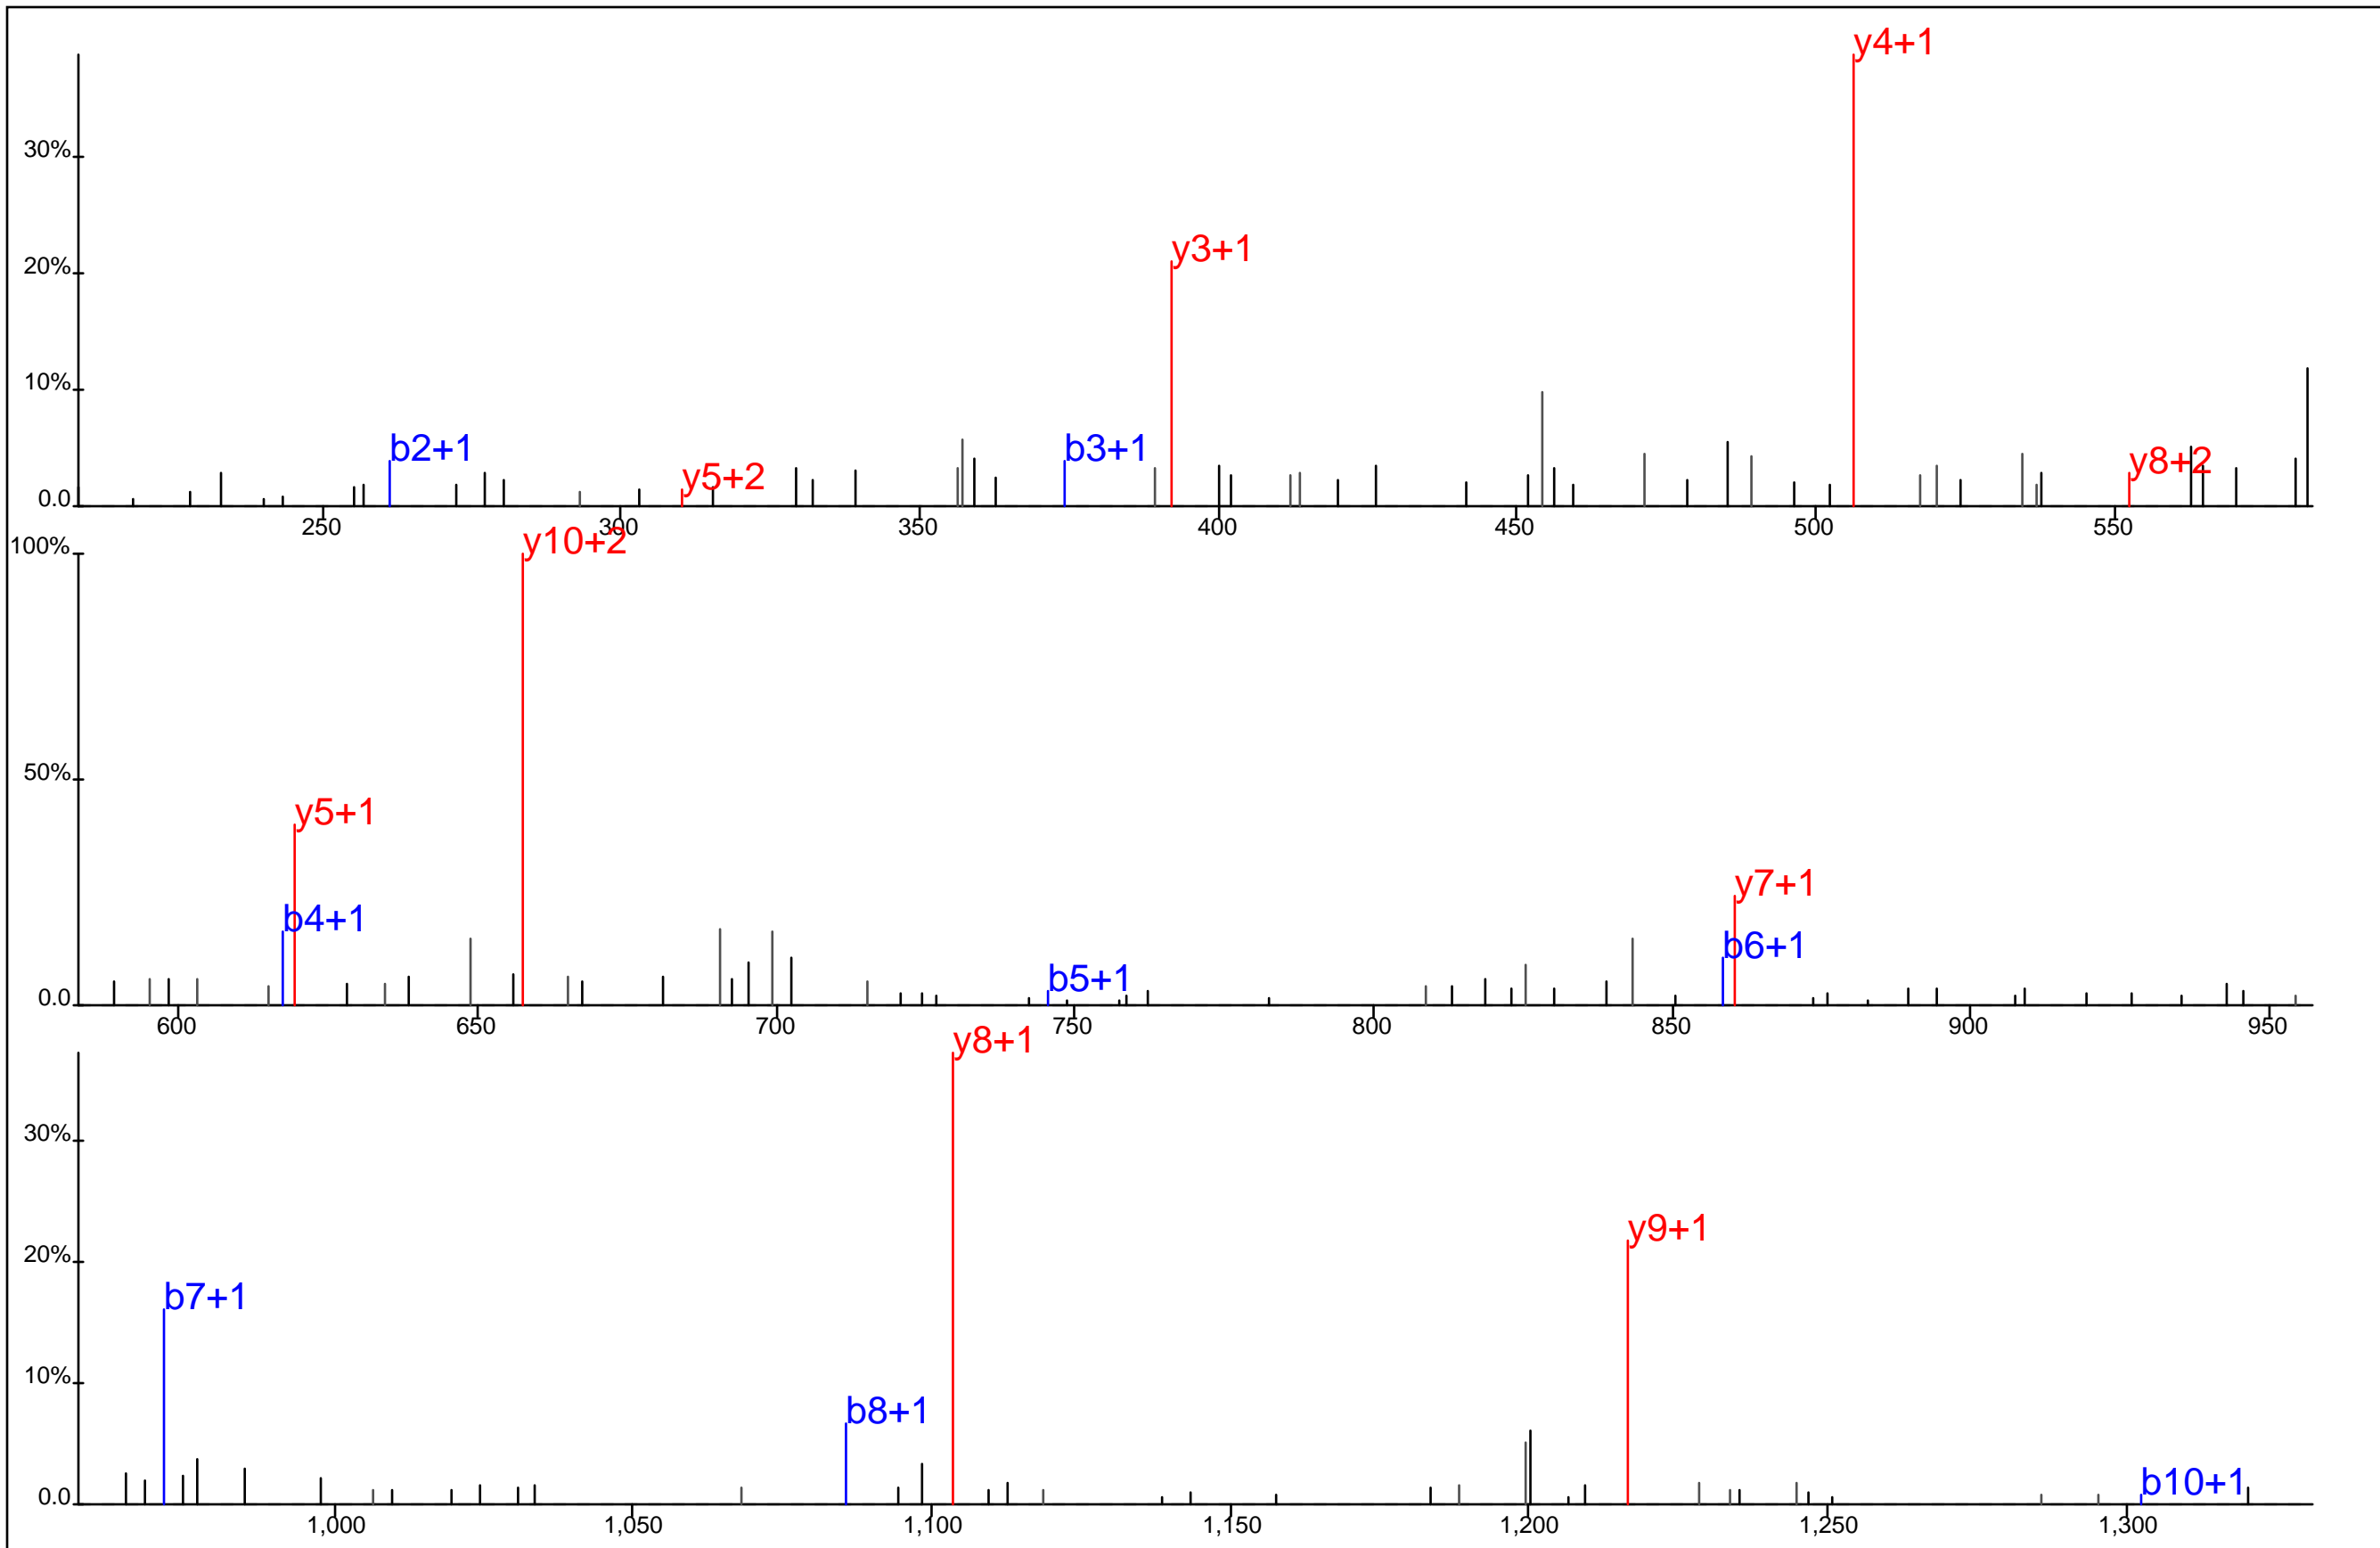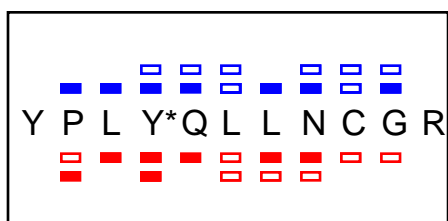

Protein Name: Pleckstrin homology-like domain family B member 3  
 gi Accession: 0  
 Precursor Mass: 738.8417+2  
 Delta Mass: 3.870 ppm  
 XCorr: 31.58

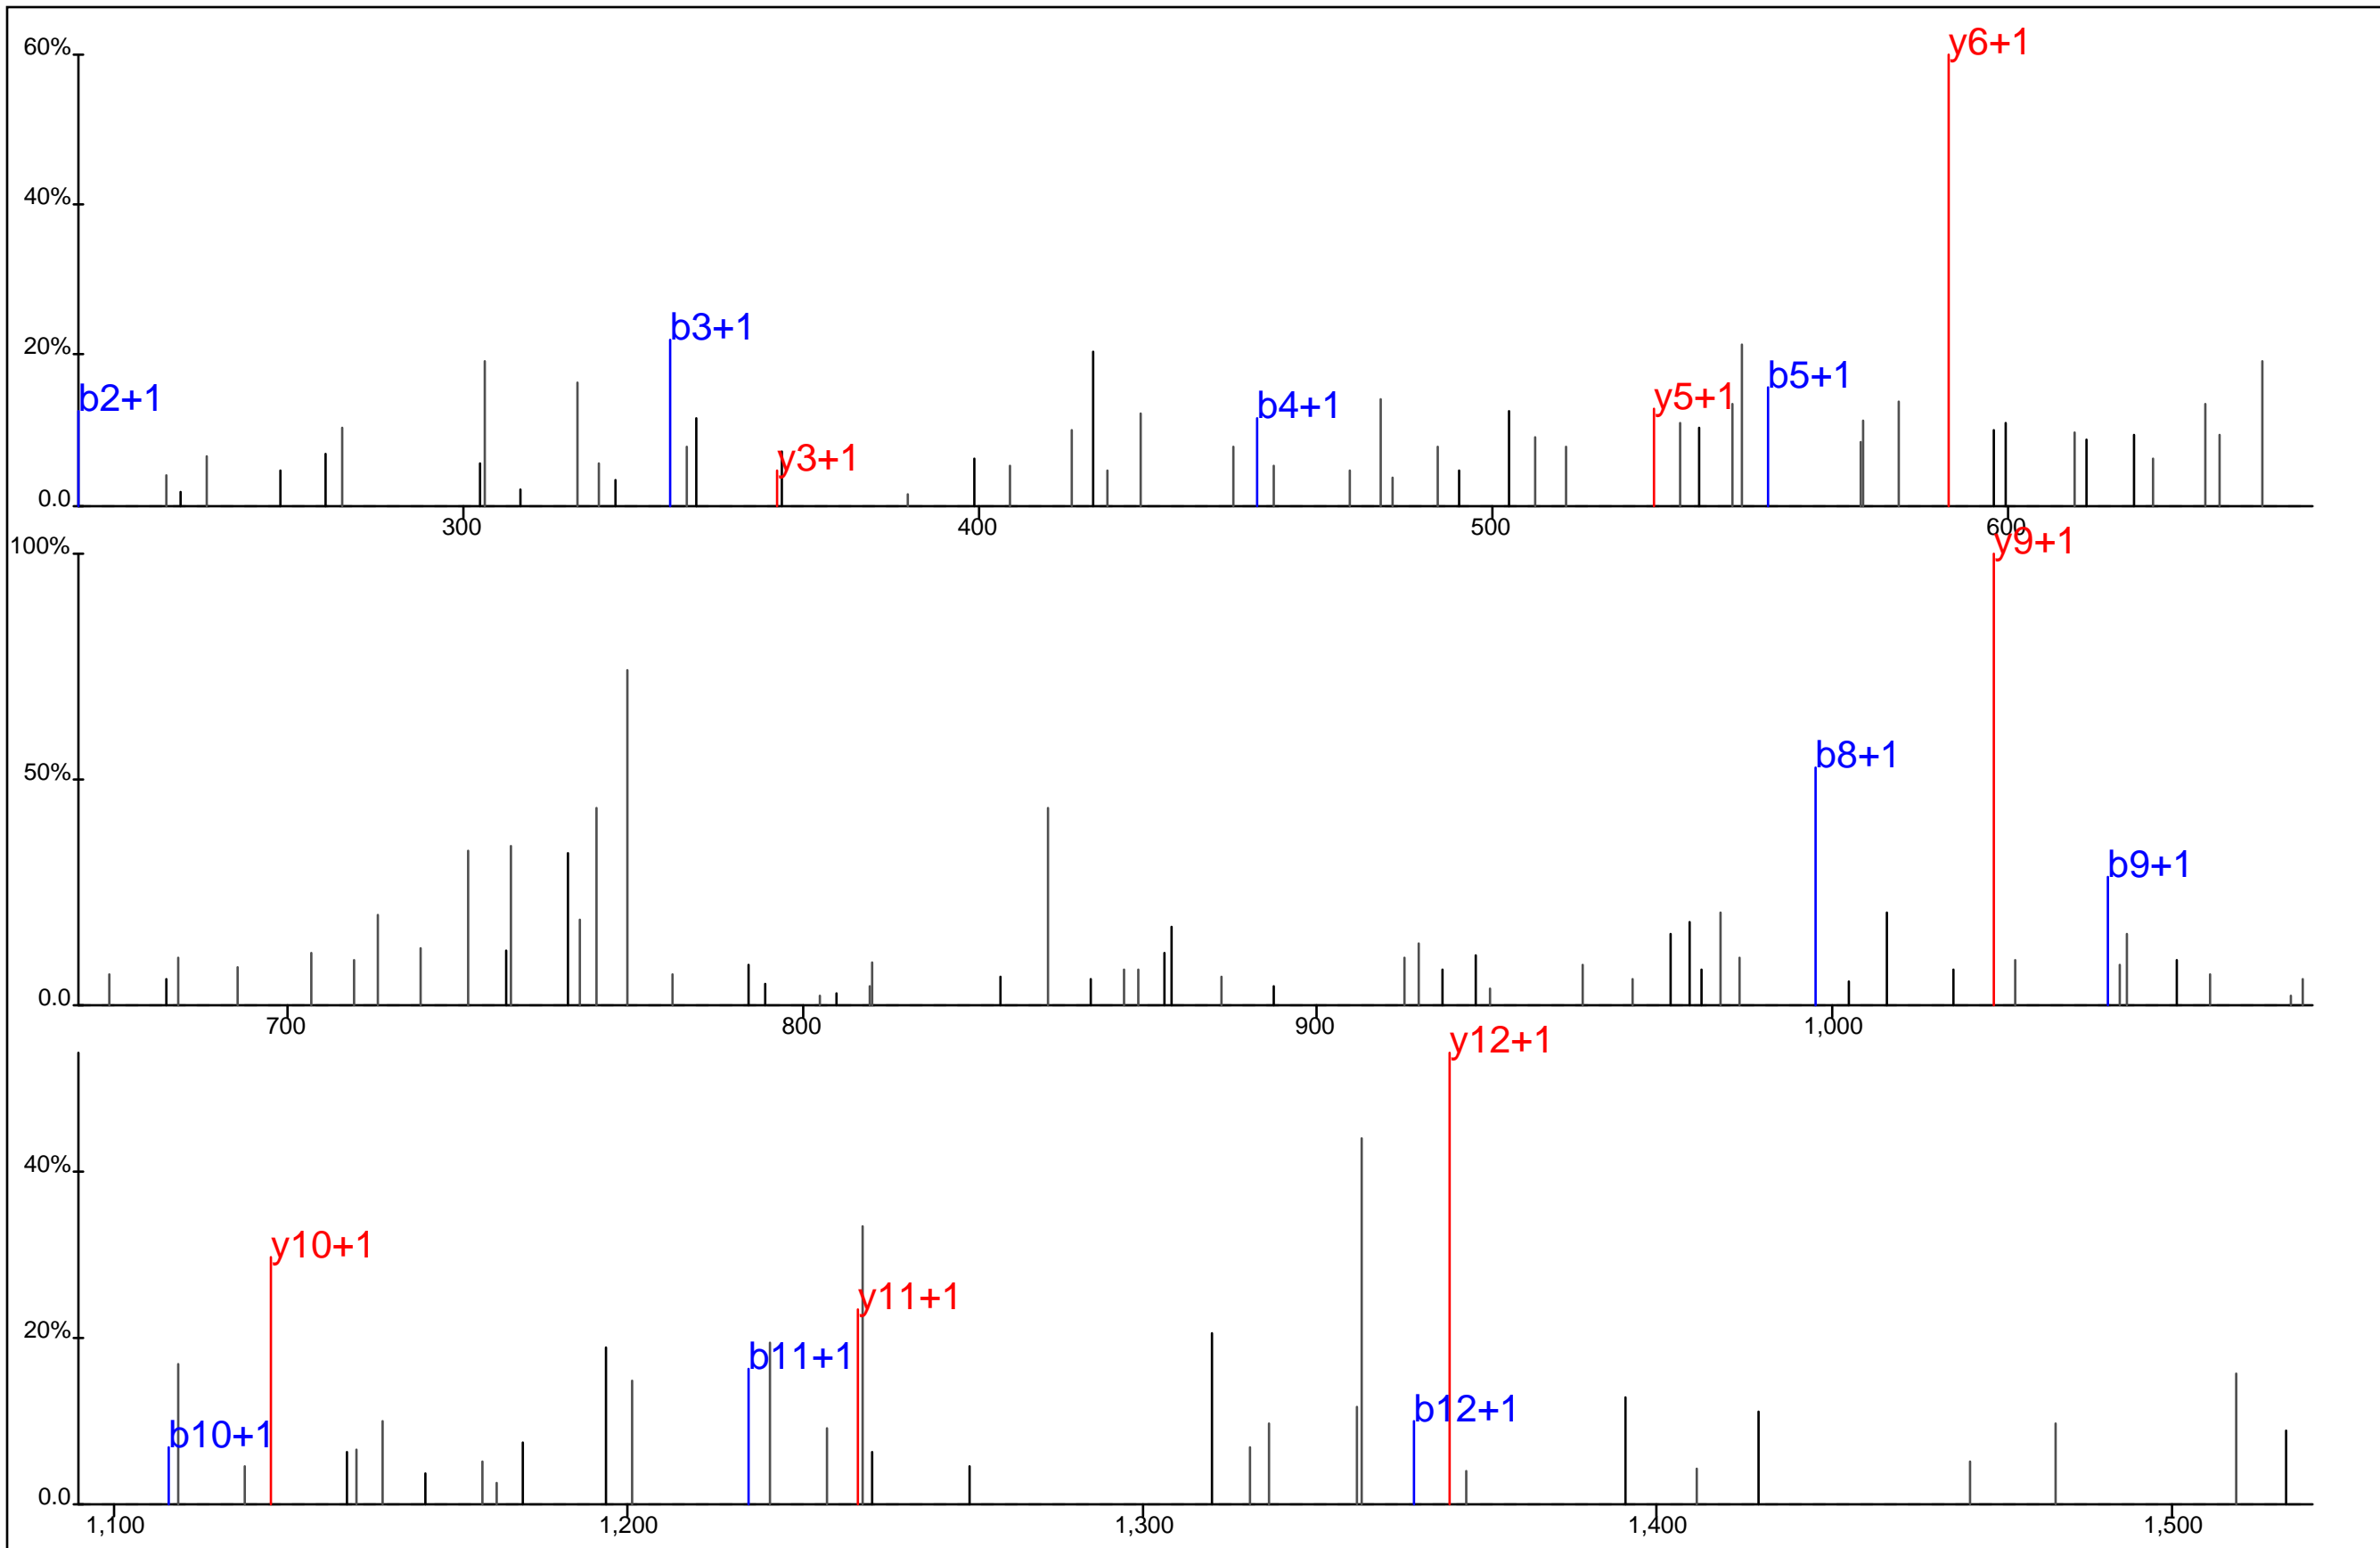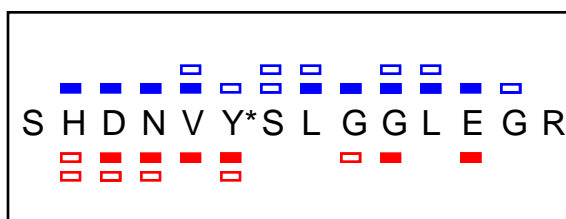

Protein Name: Pleckstrin homology-like domain, family B, member 2  
 gi Accession: 0  
 Precursor Mass: 792.3482+2  
 Delta Mass: 2.636 ppm  
 XCorr: 23.91





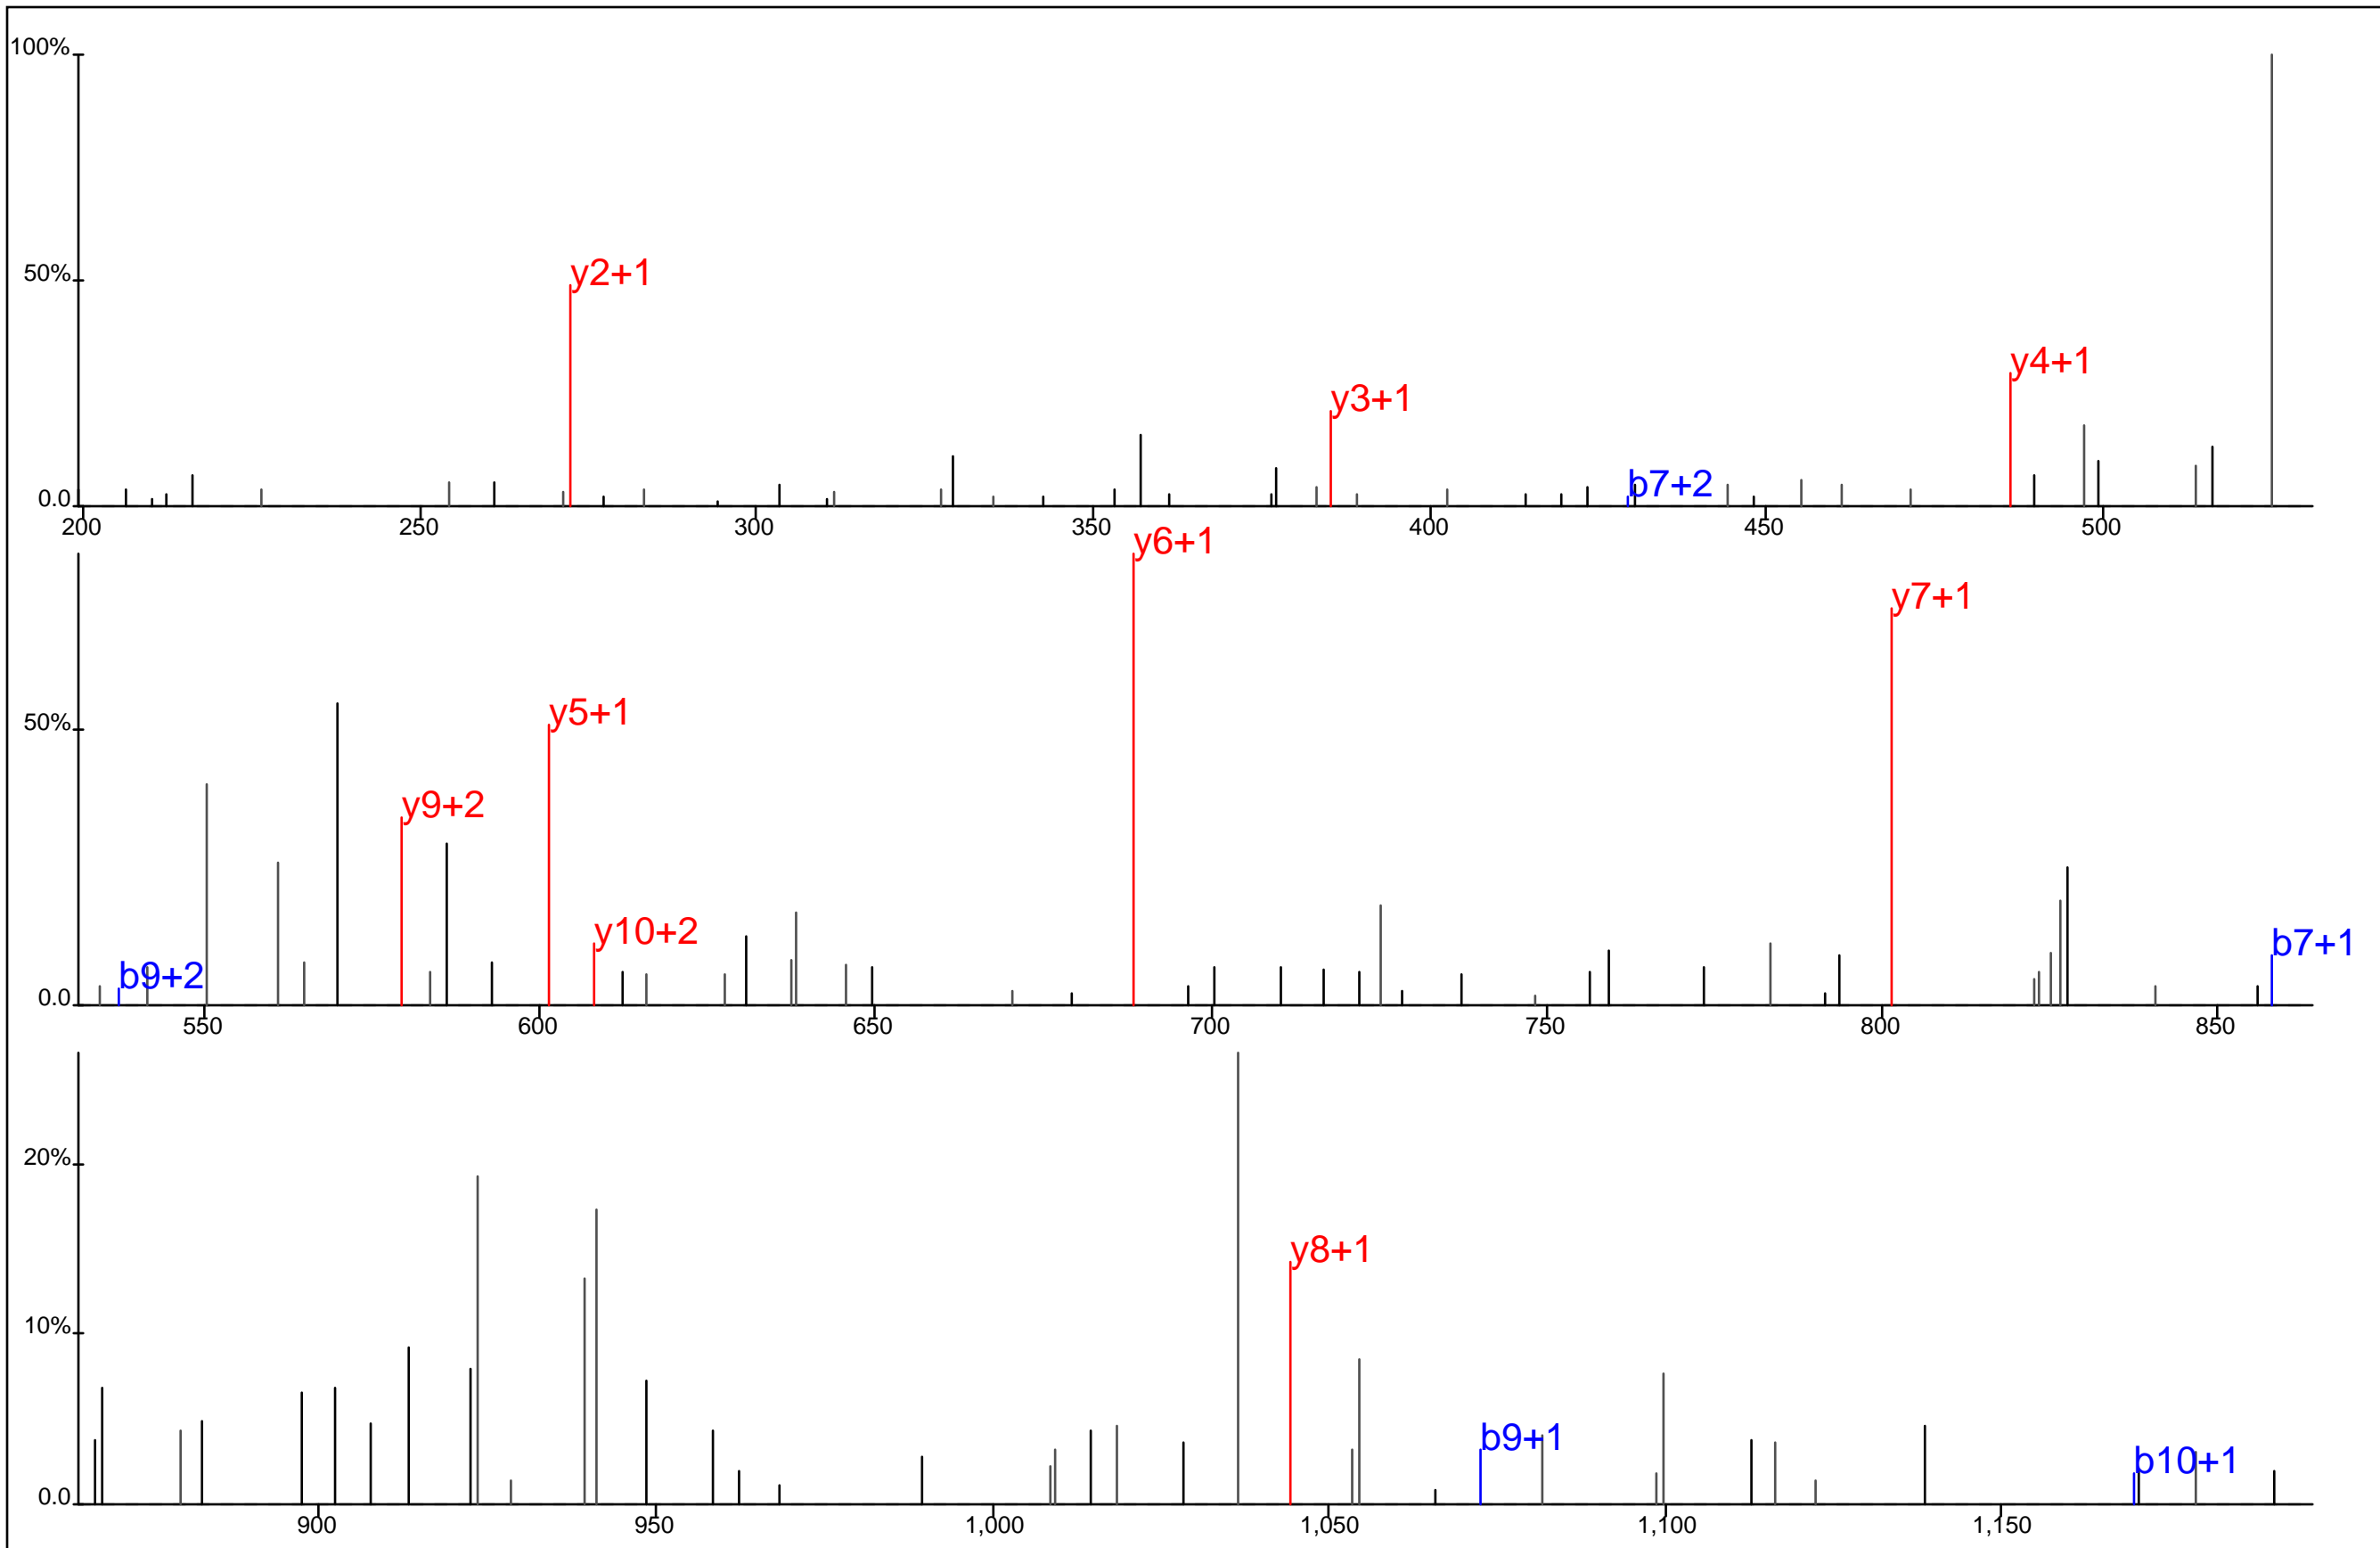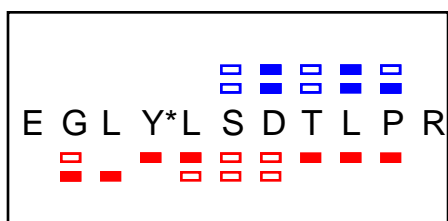

Protein Name: Pleckstrin homology-like domain, family B, member 2  
 gi Accession: 0  
 Precursor Mass: 672.3138+2  
 Delta Mass: 2.950 ppm  
 XCorr: 35.9

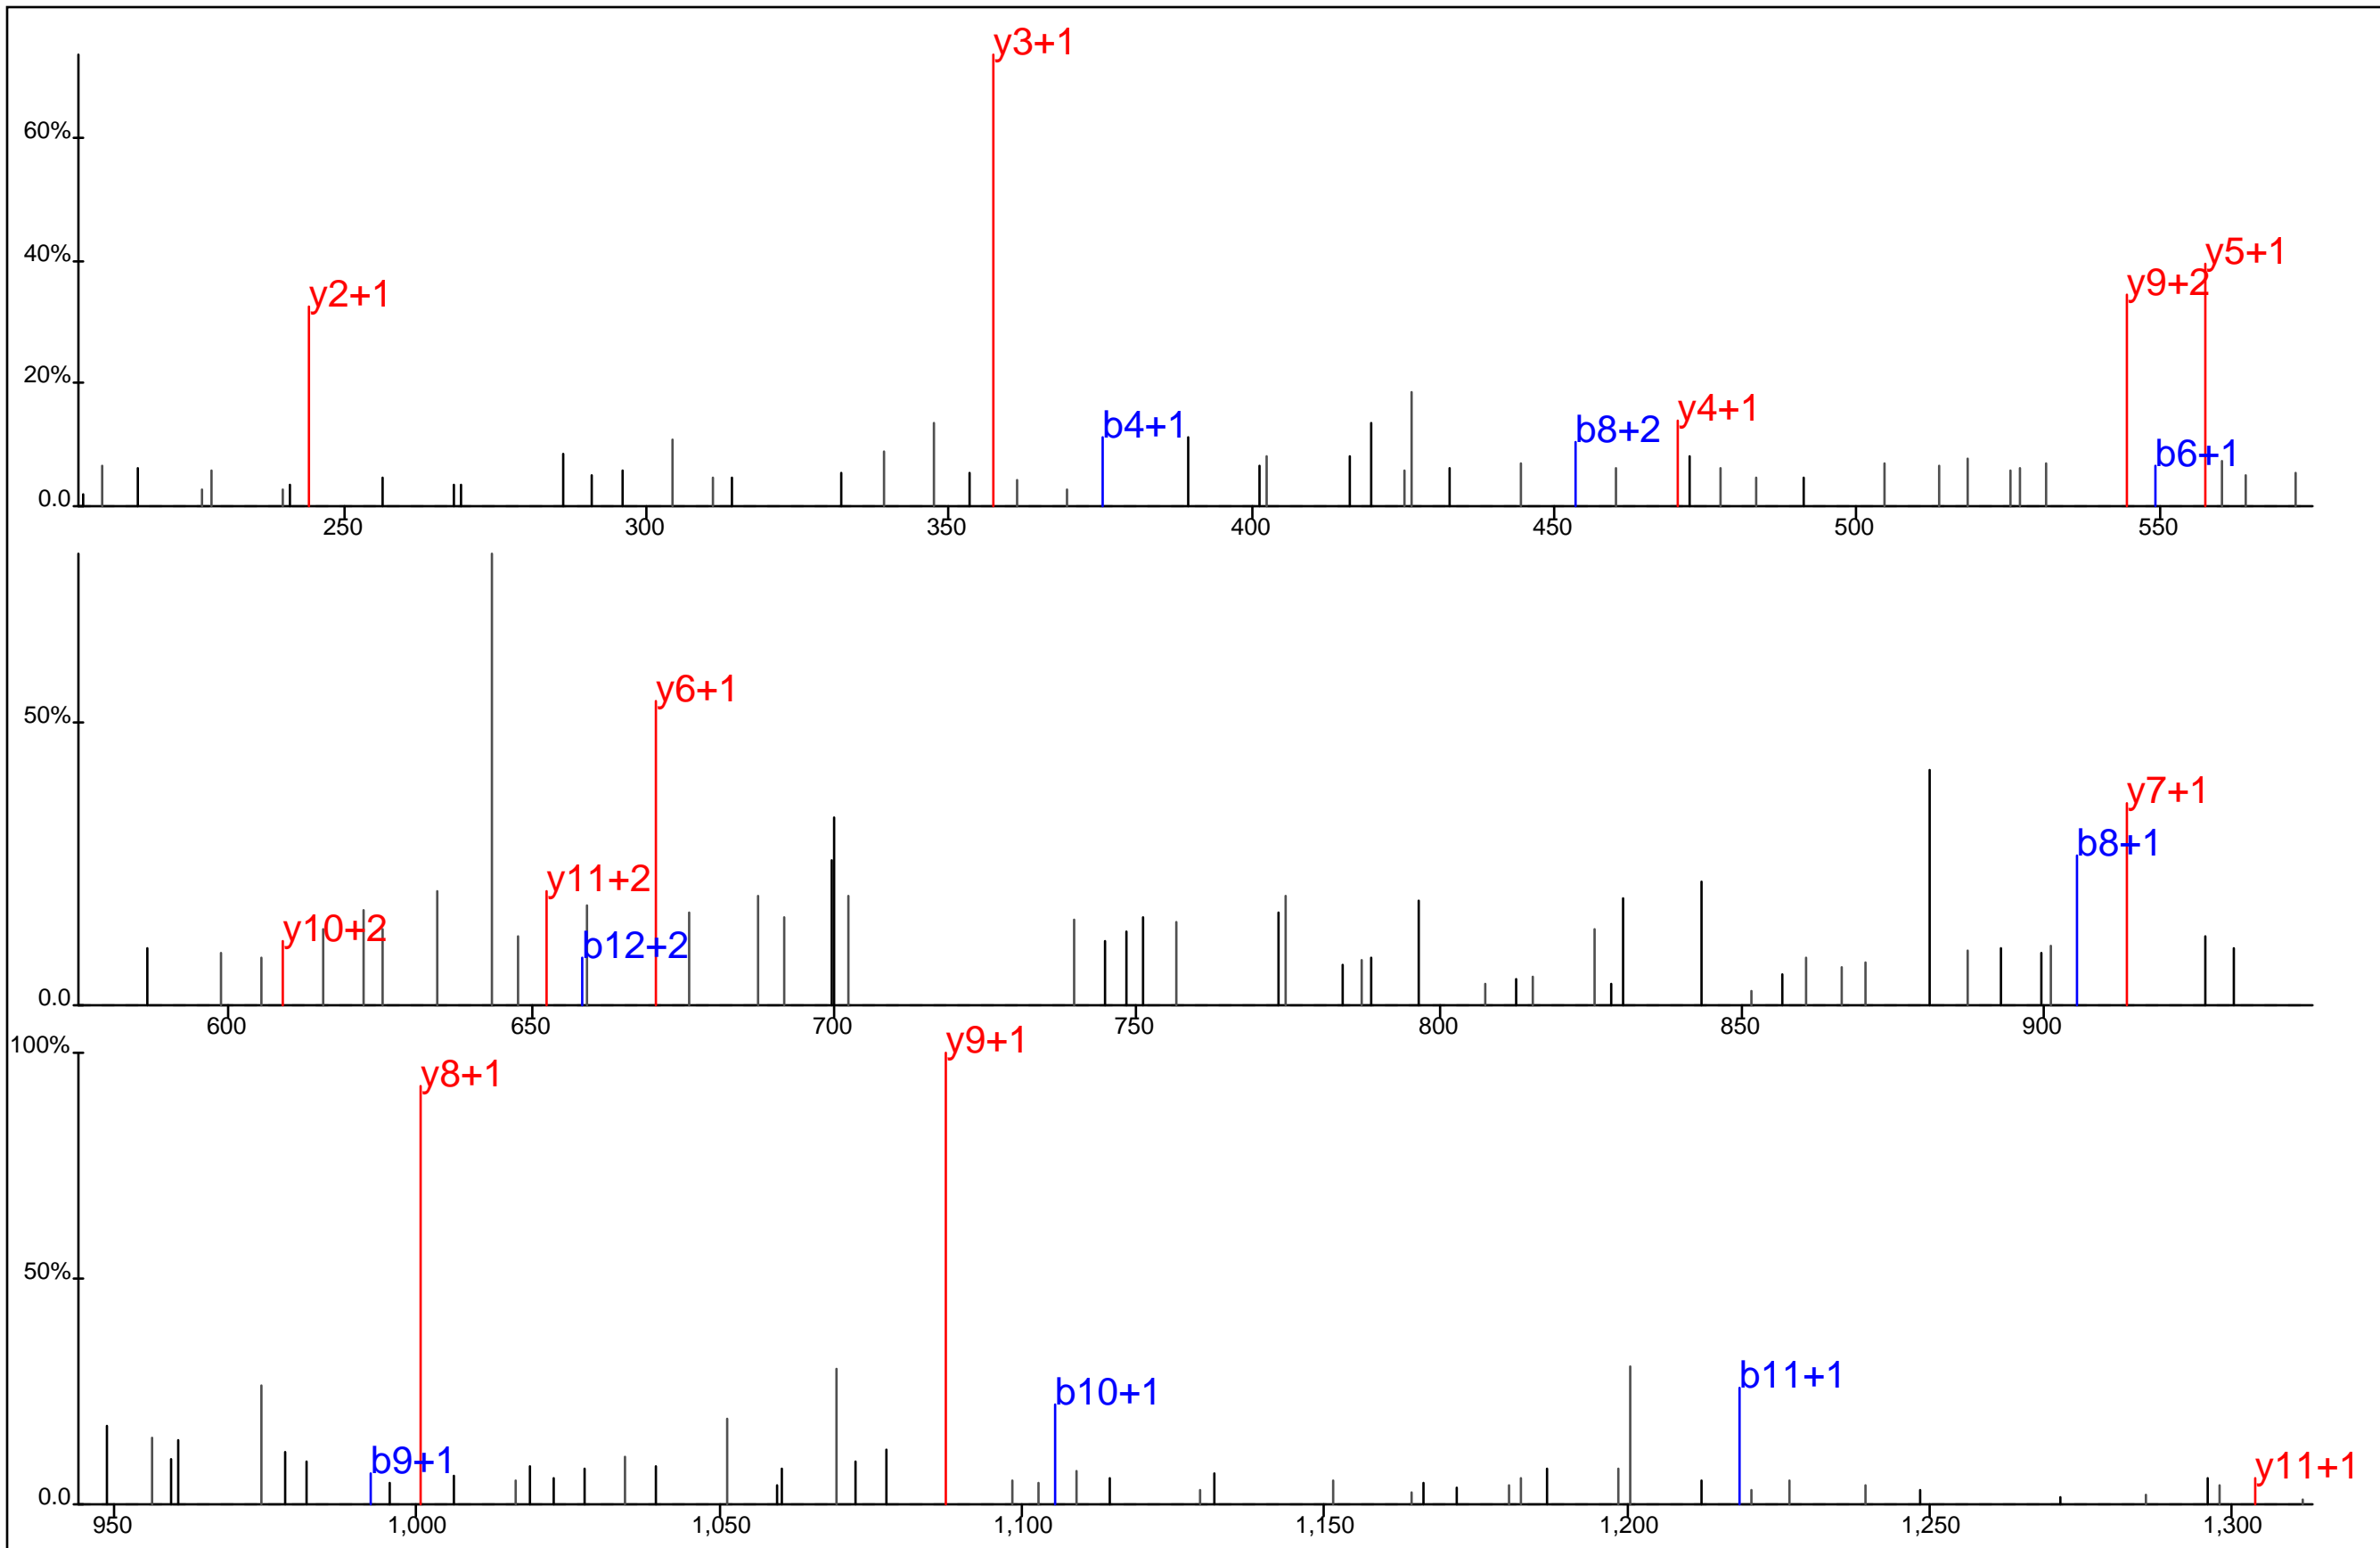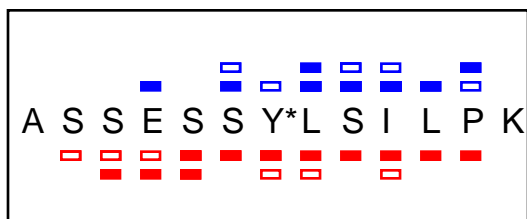

Protein Name: Pleckstrin homology-like domain, family B, member 2  
 gi Accession: 0  
 Precursor Mass: 731.3495+2  
 Delta Mass: 3.146 ppm  
 XCorr: 67.97





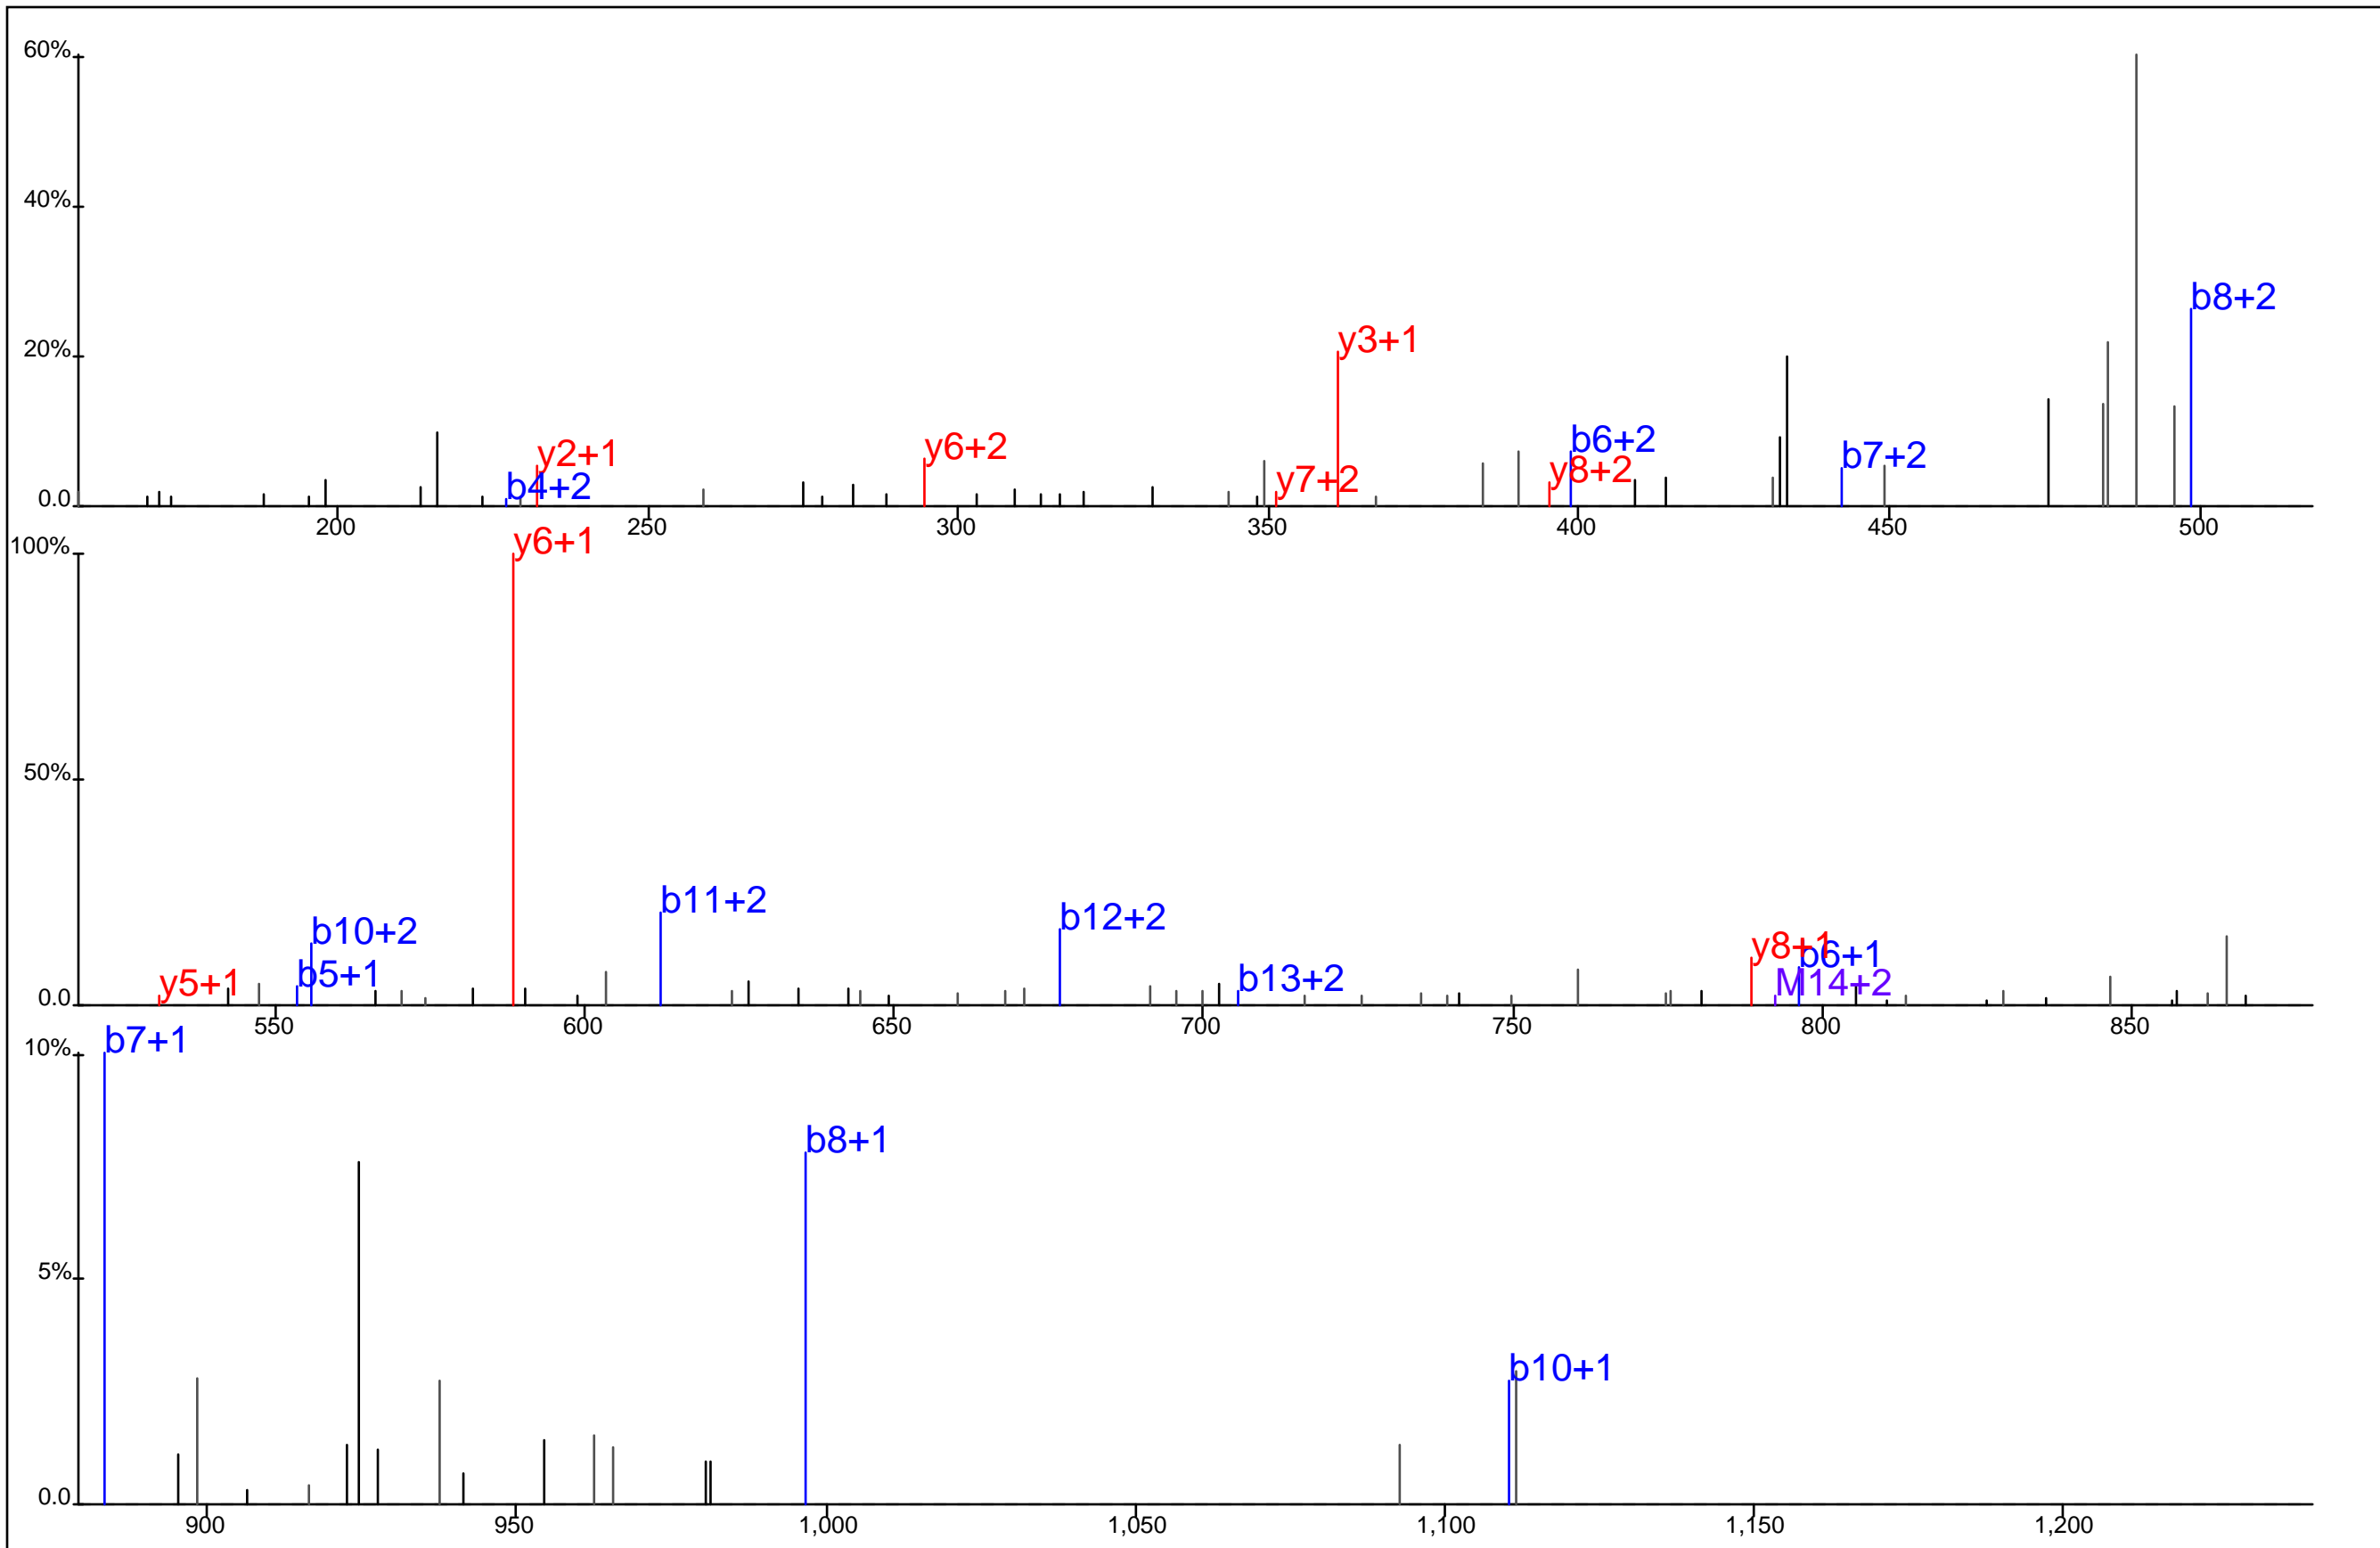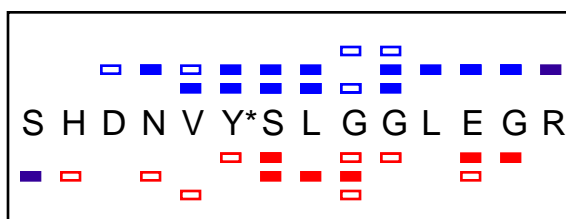

Protein Name: Pleckstrin homology-like domain, family B, member 2  
 gi Accession: 0  
 Precursor Mass: 528.5664+3  
 Delta Mass: 0.187 ppm  
 XCorr: 28.77



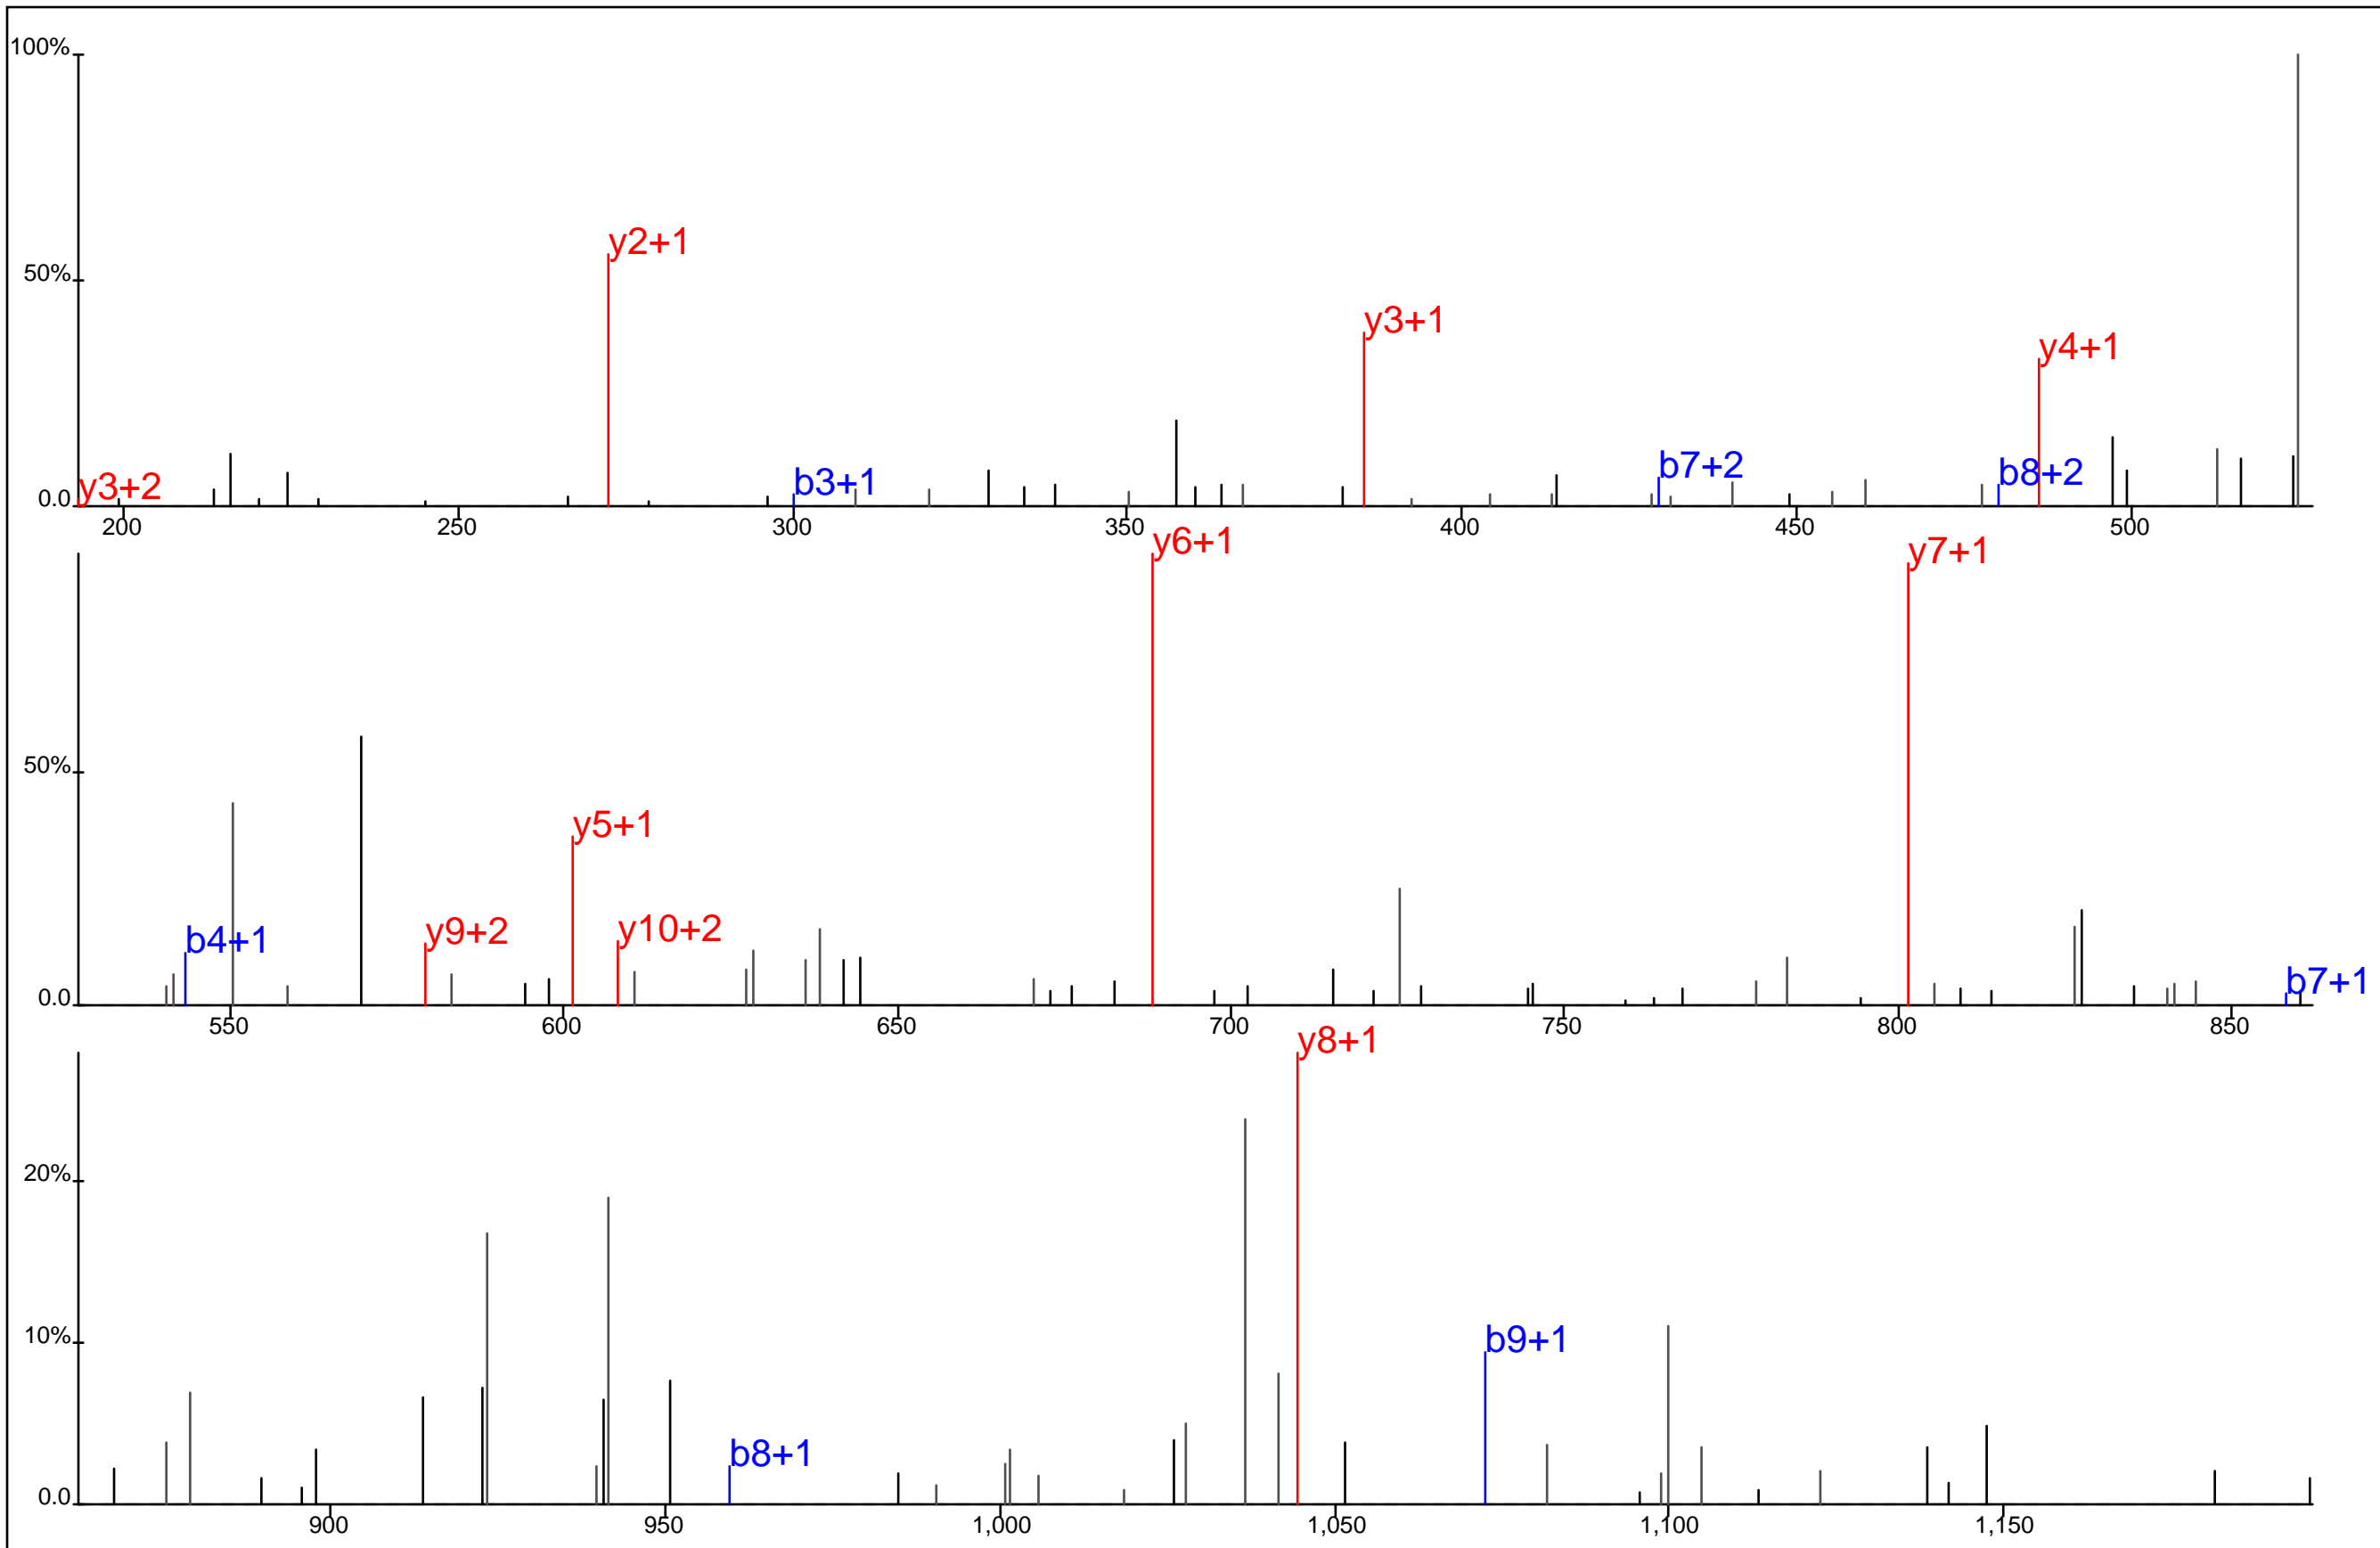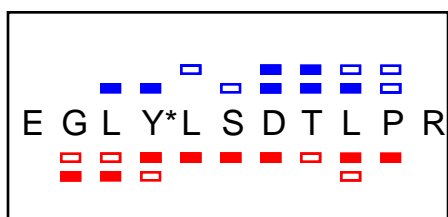

Protein Name: Pleckstrin homology-like domain, family B, member 2  
 gi Accession: 0  
 Precursor Mass: 672.3134+2  
 Delta Mass: 3.587 ppm  
 XCorr: 41.91

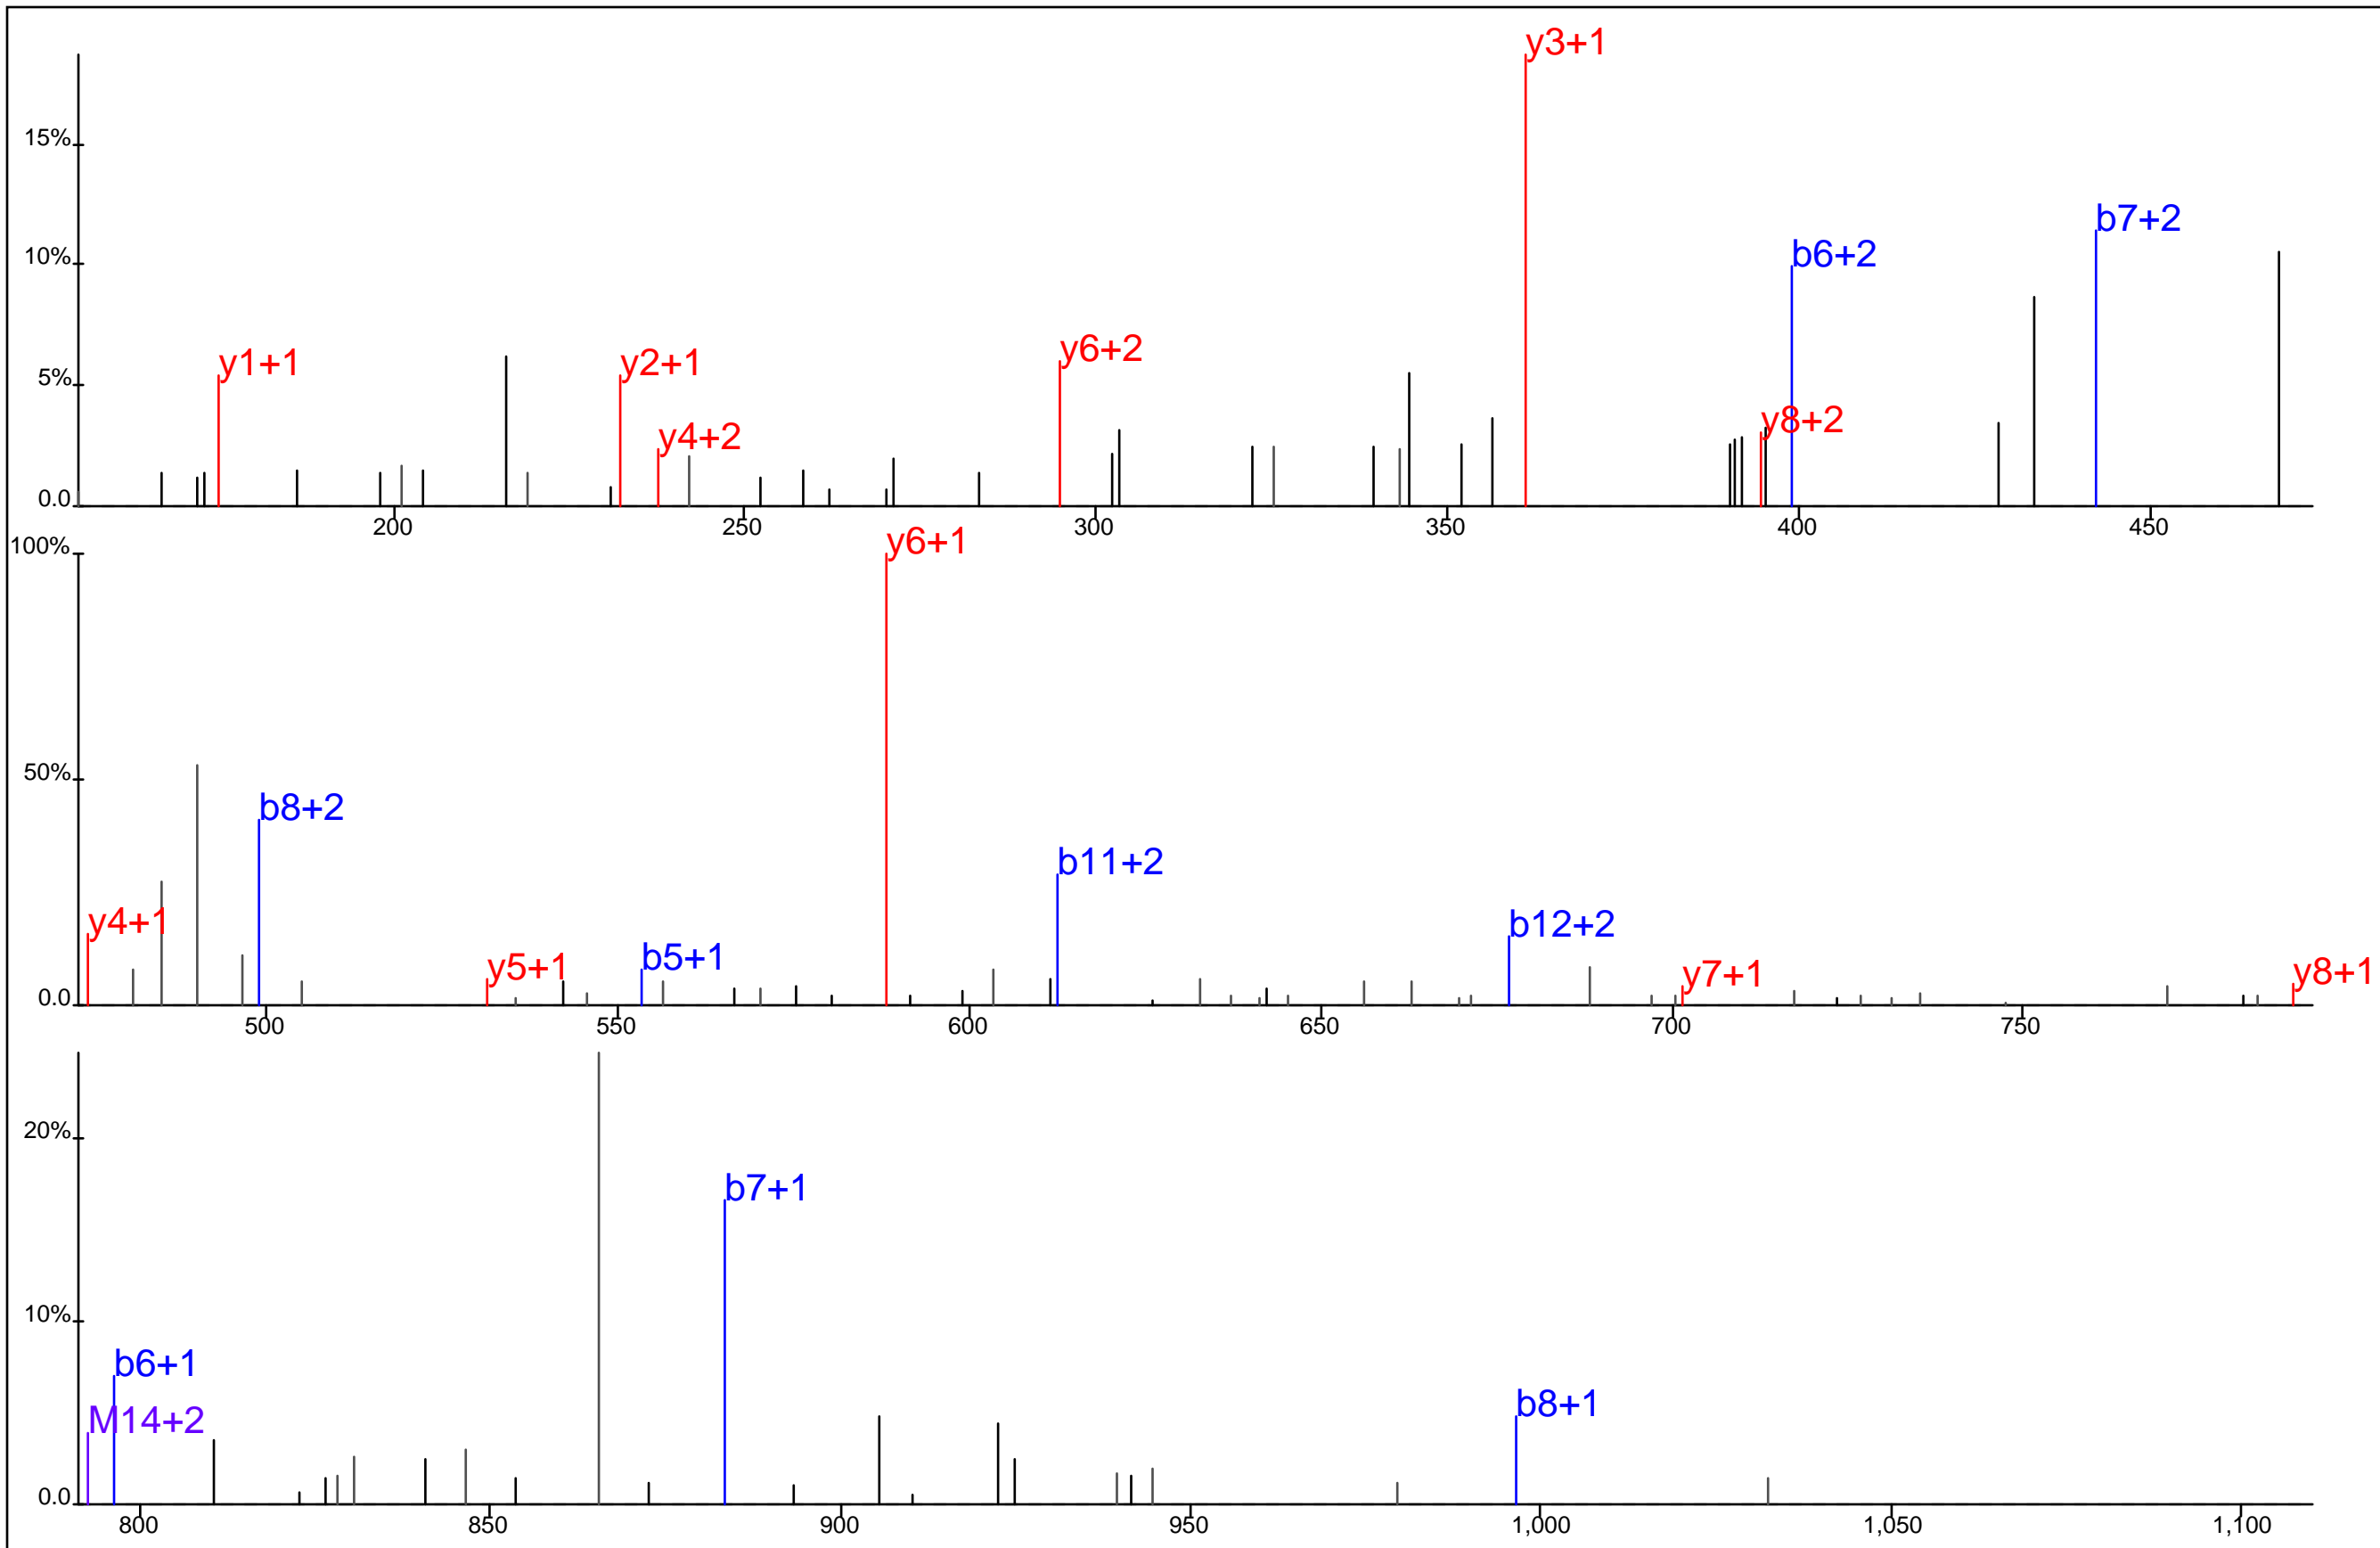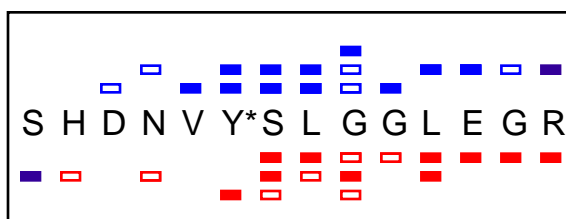

Protein Name: Pleckstrin homology-like domain, family B, member 2  
 gi Accession: 0  
 Precursor Mass: 528.5661+3  
 Delta Mass: 0.765 ppm  
 XCorr: 39.01

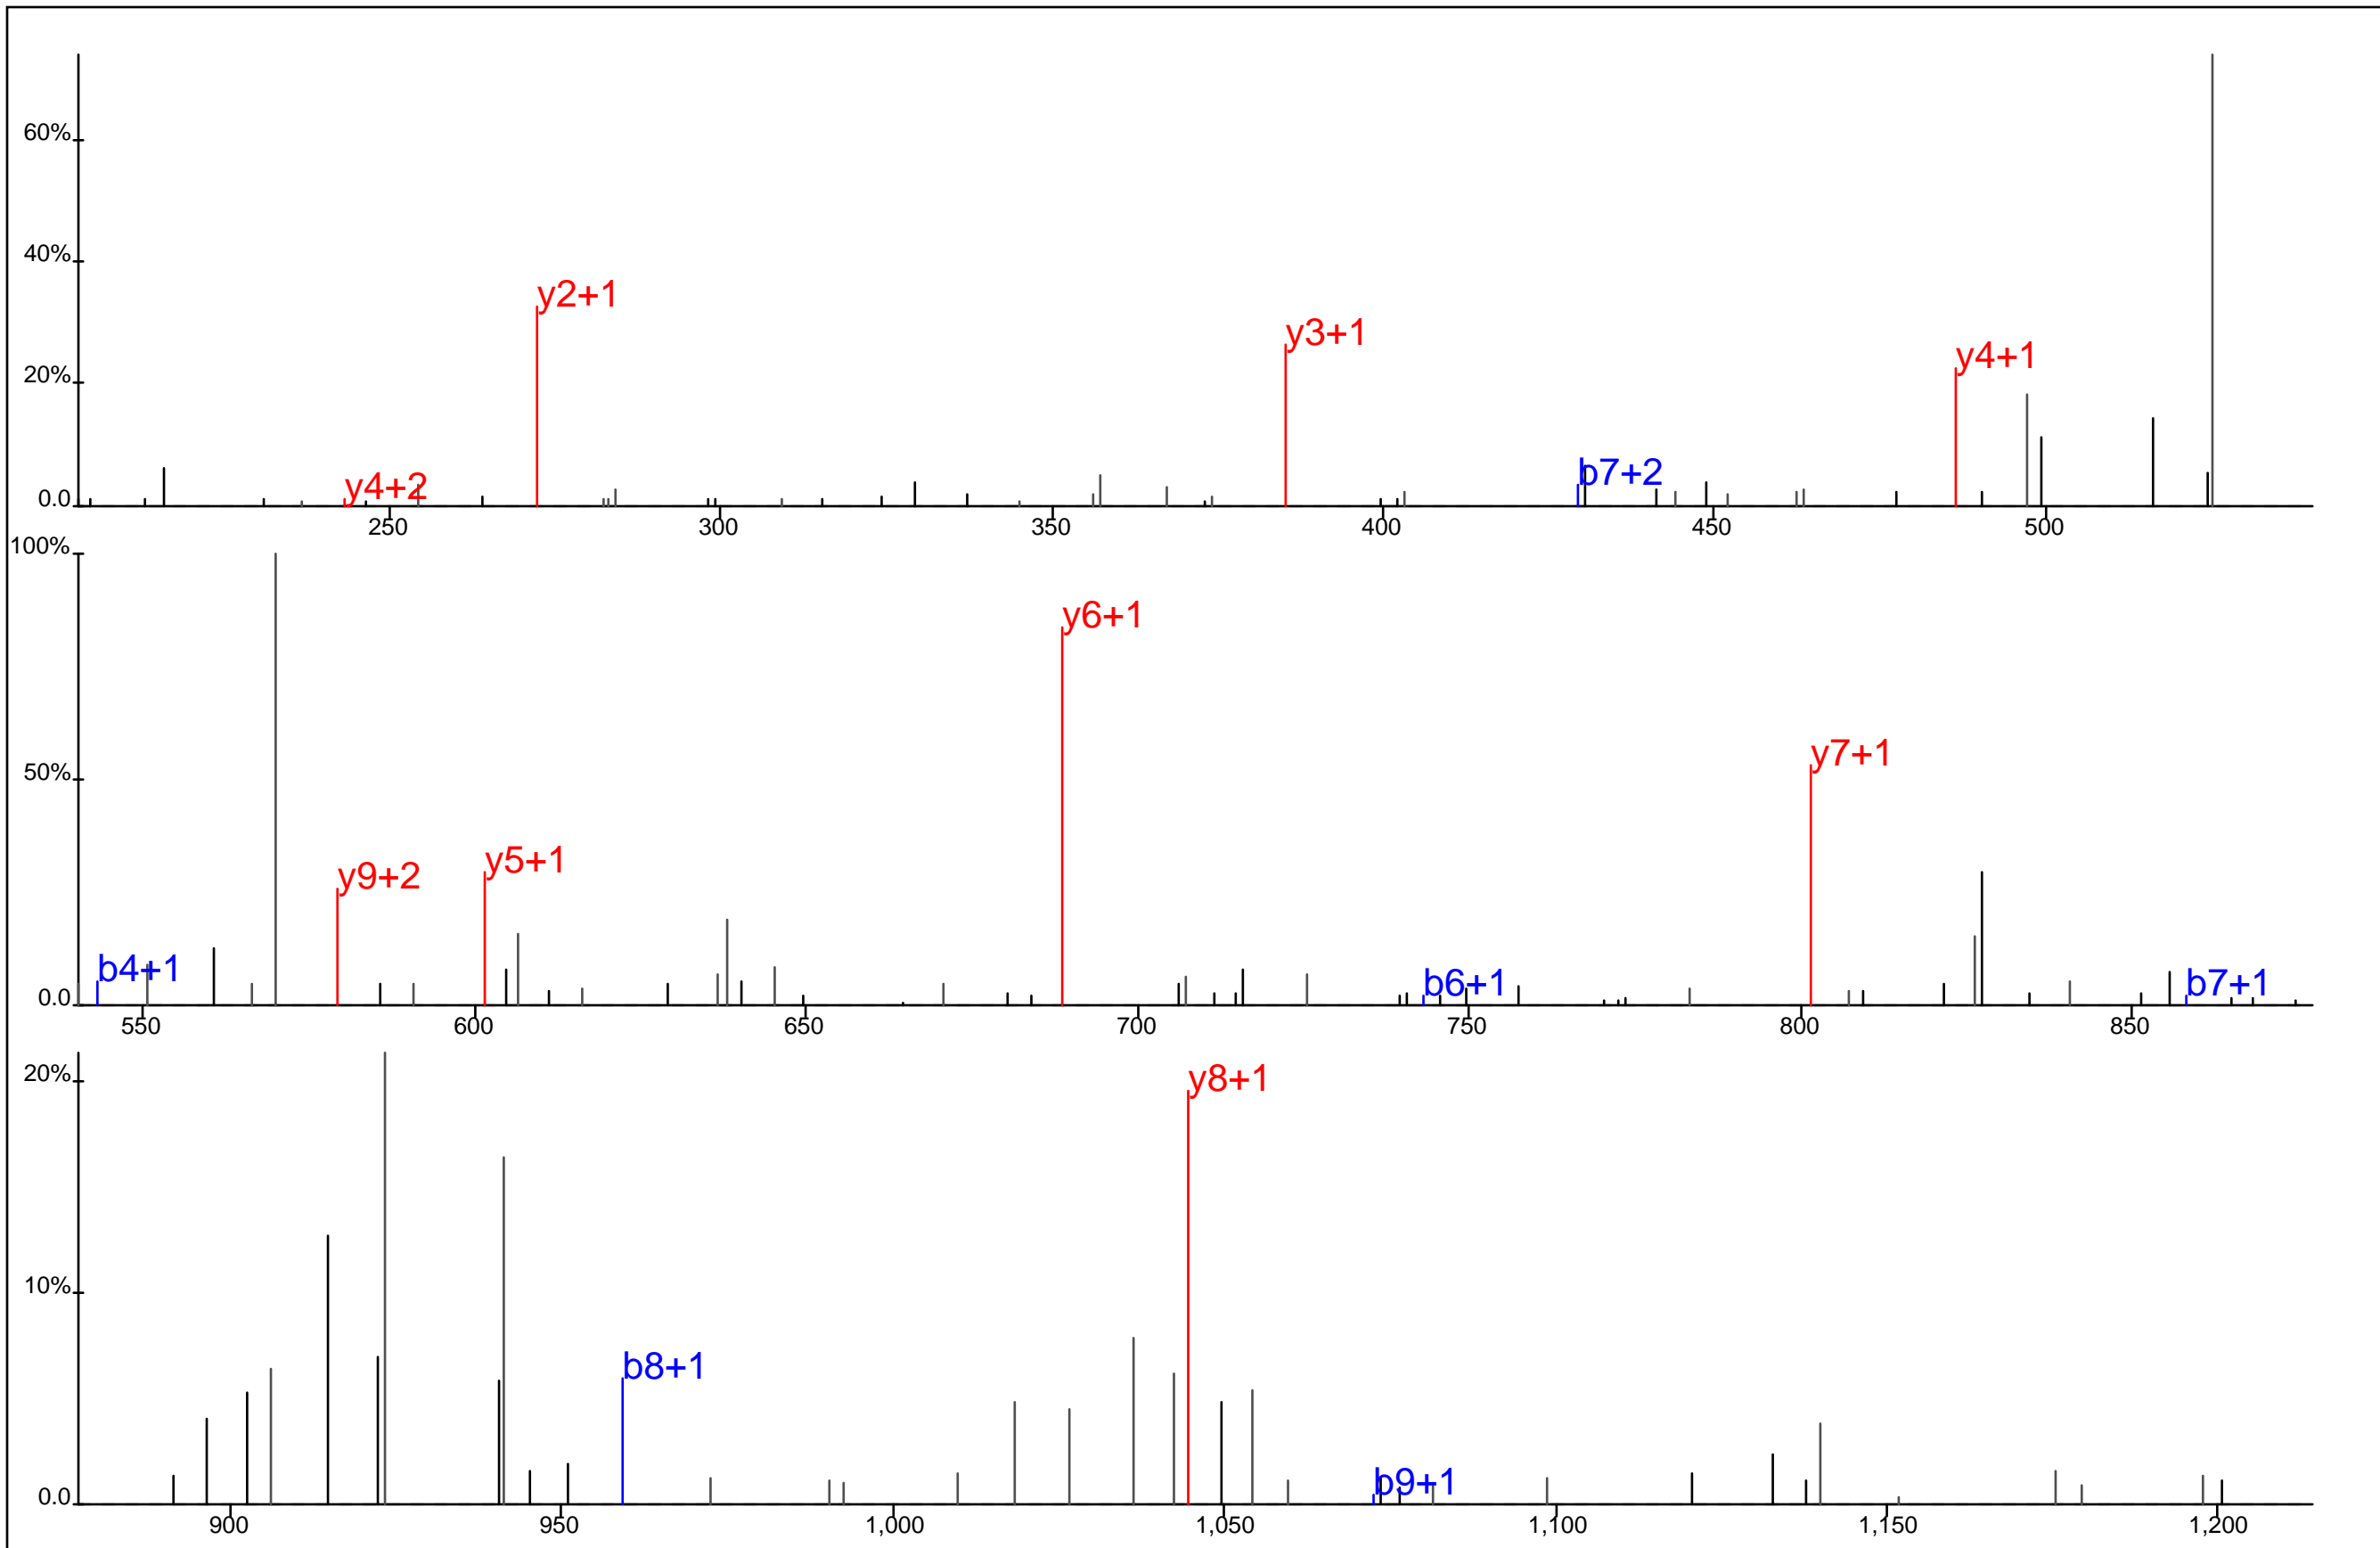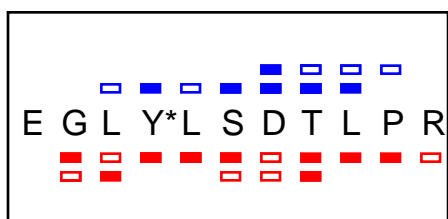

Protein Name: Pleckstrin homology-like domain, family B, member 2  
 gi Accession: 0  
 Precursor Mass: 672.3129+2  
 Delta Mass: 4.314 ppm  
 XCorr: 60.29

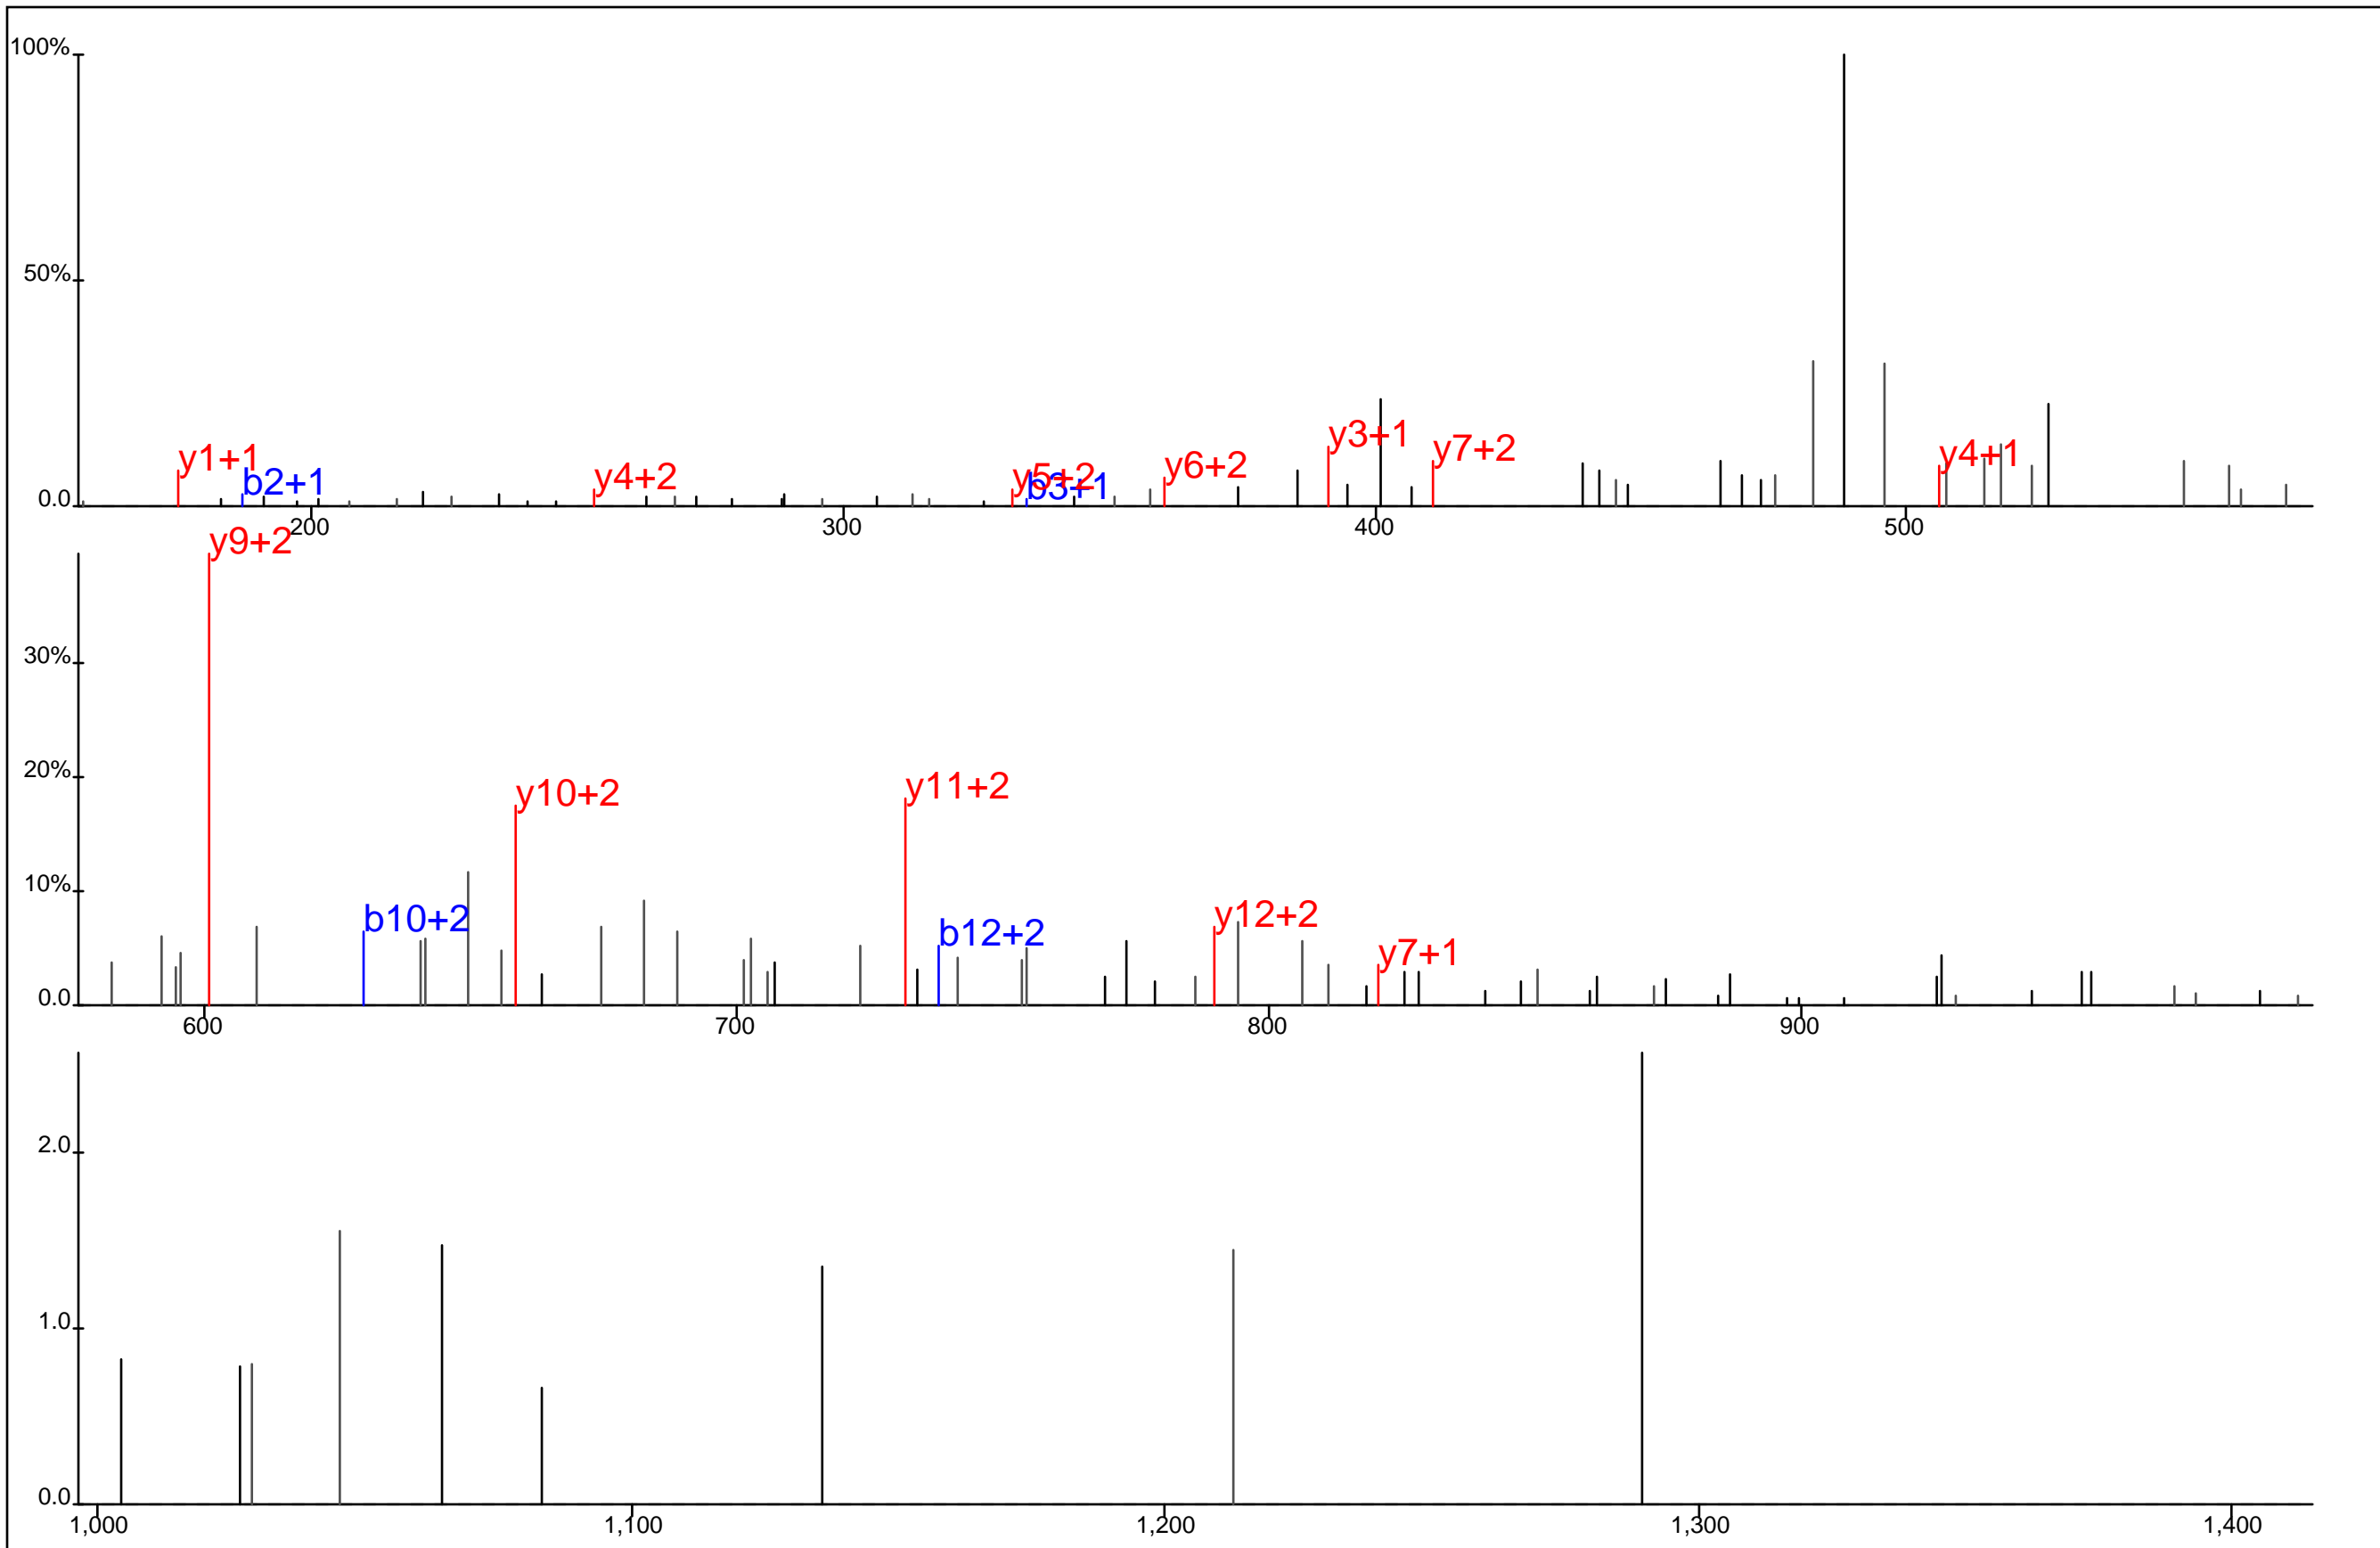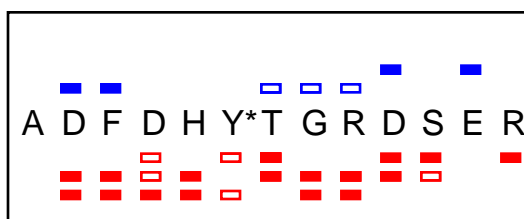

Protein Name: Pleckstrin homology-like domain, family B, member 2  
 gi Accession: 0  
 Precursor Mass: 550.2192+3  
 Delta Mass: 2.681 ppm  
 XCorr: 27.09





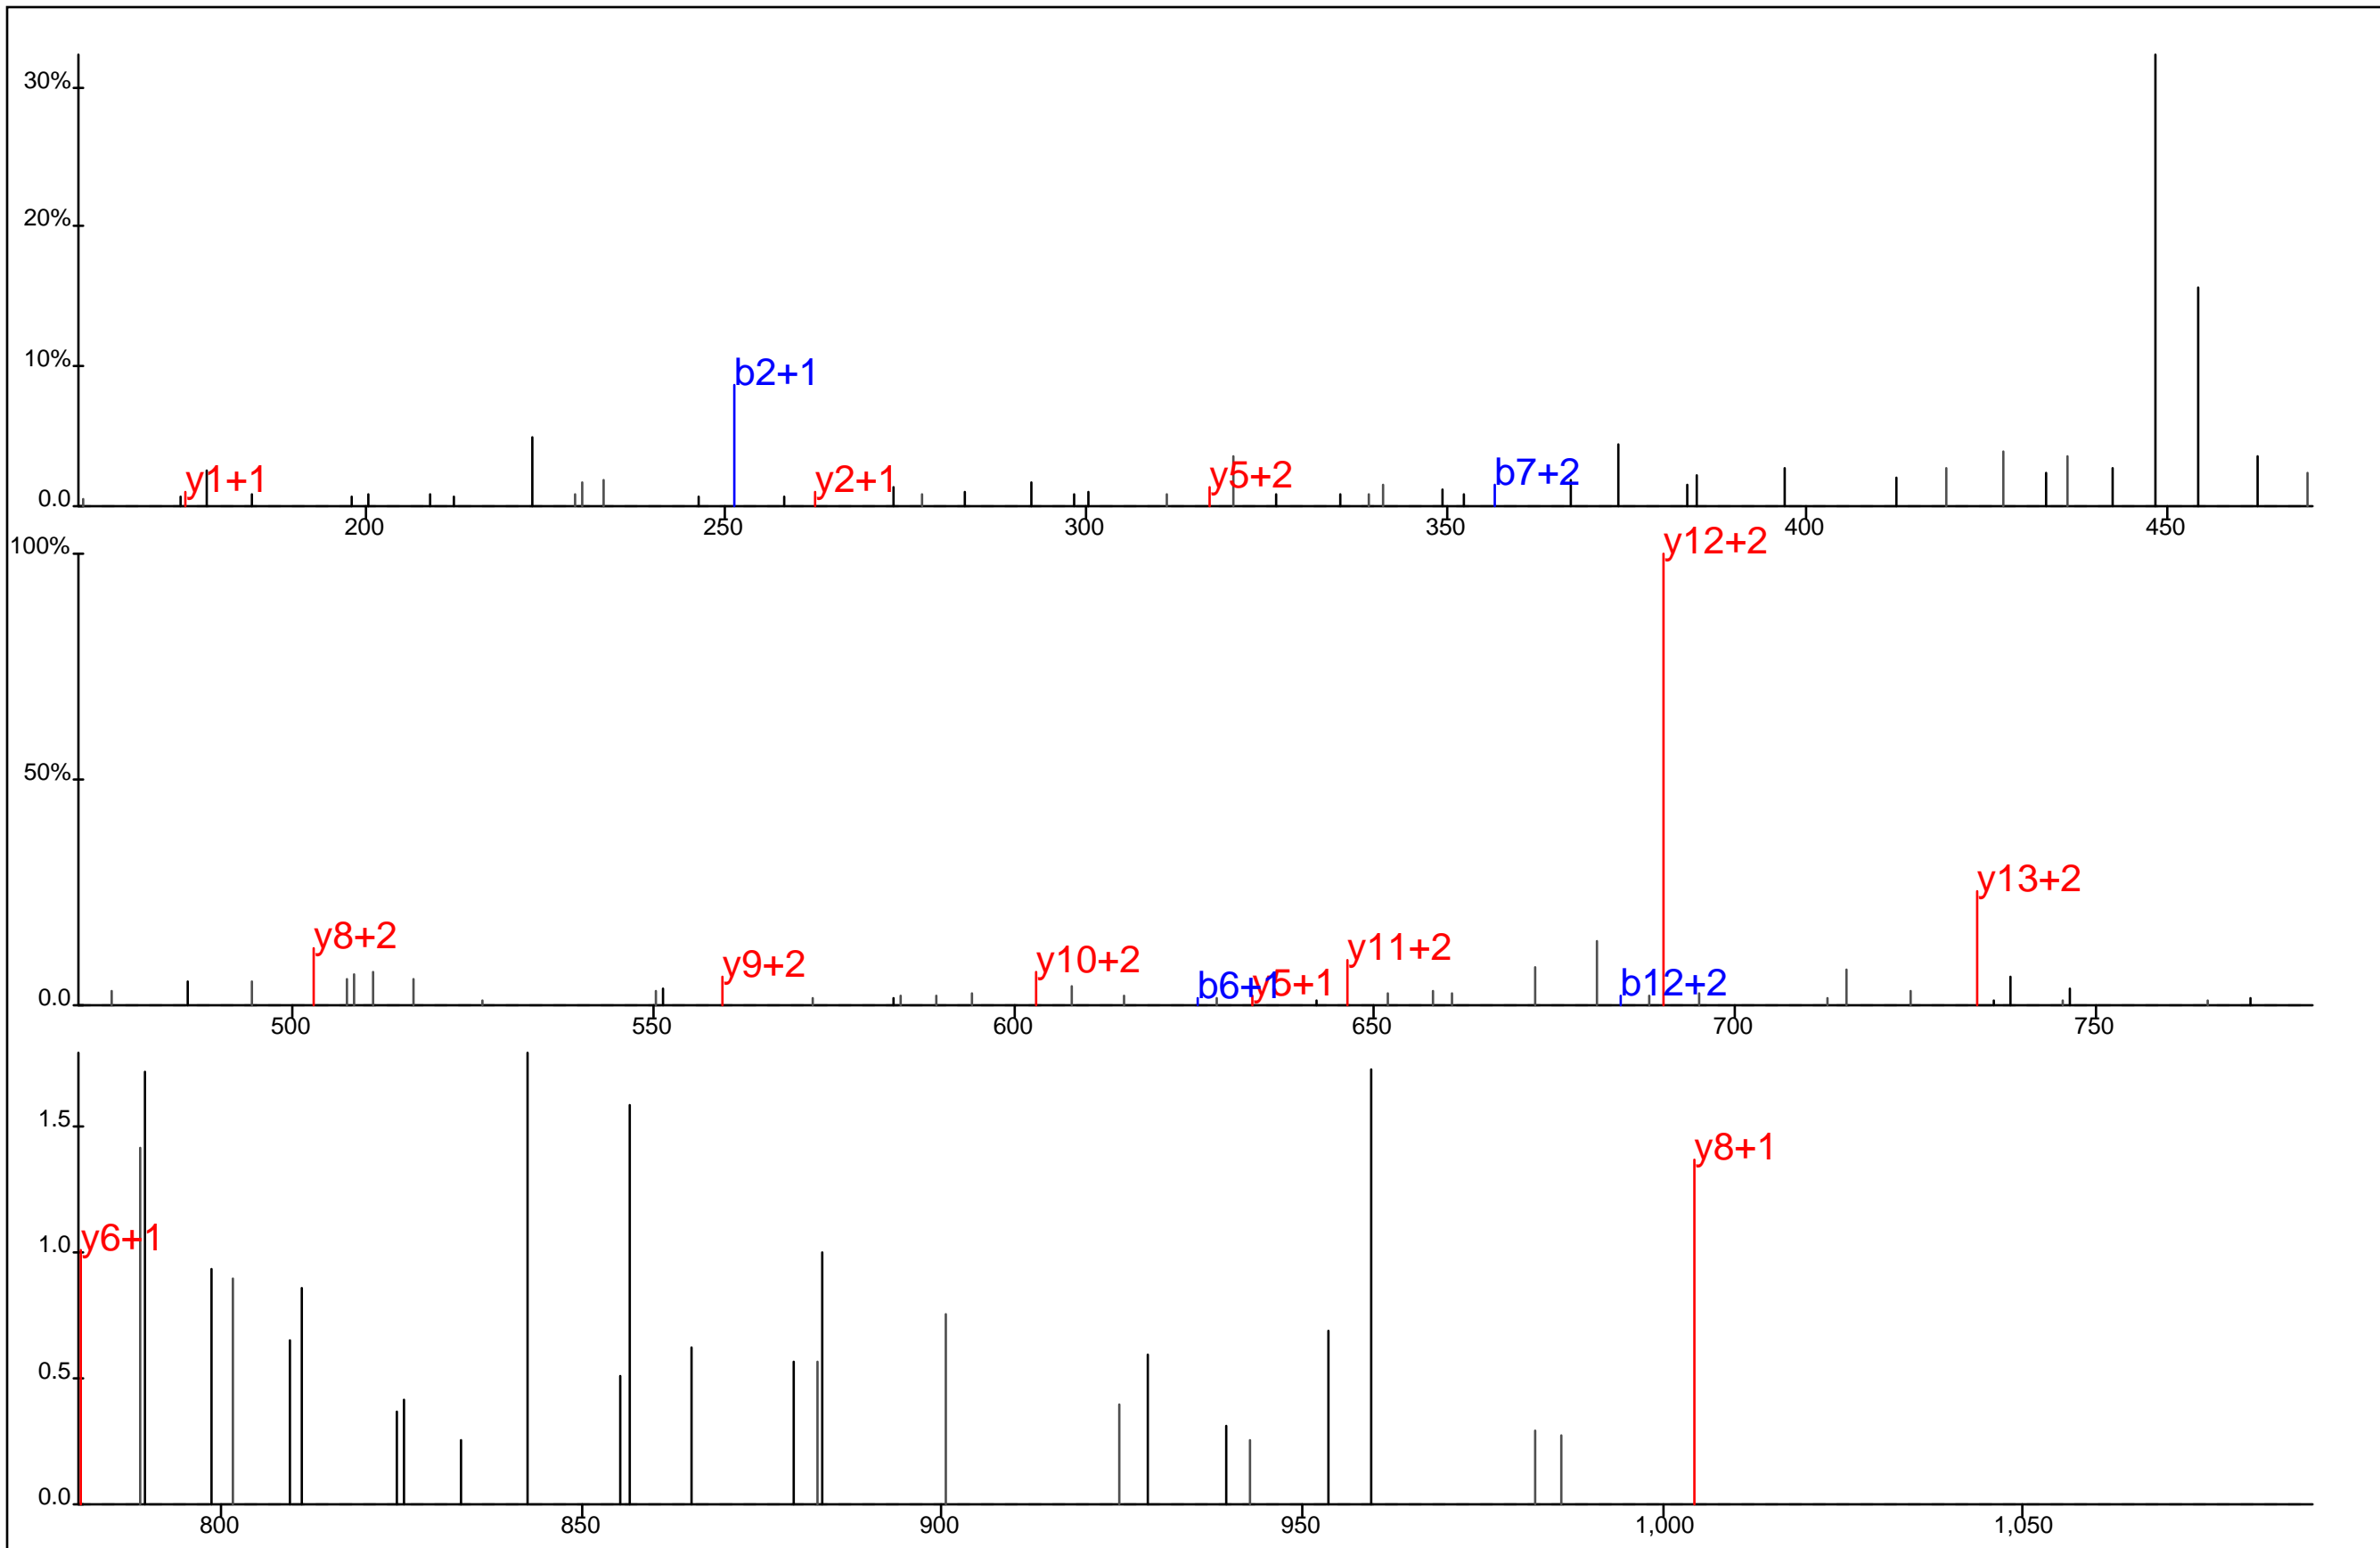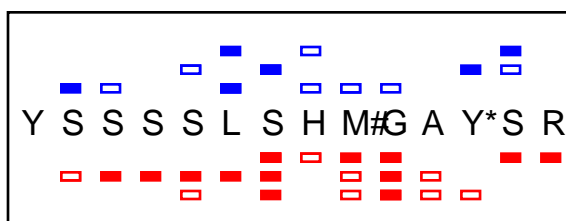

Protein Name: Pleckstrin homology-like domain, family B, member 2  
 gi Accession: 0  
 Precursor Mass: 543.5517+3  
 Delta Mass: 0.303 ppm  
 XCorr: 20.27

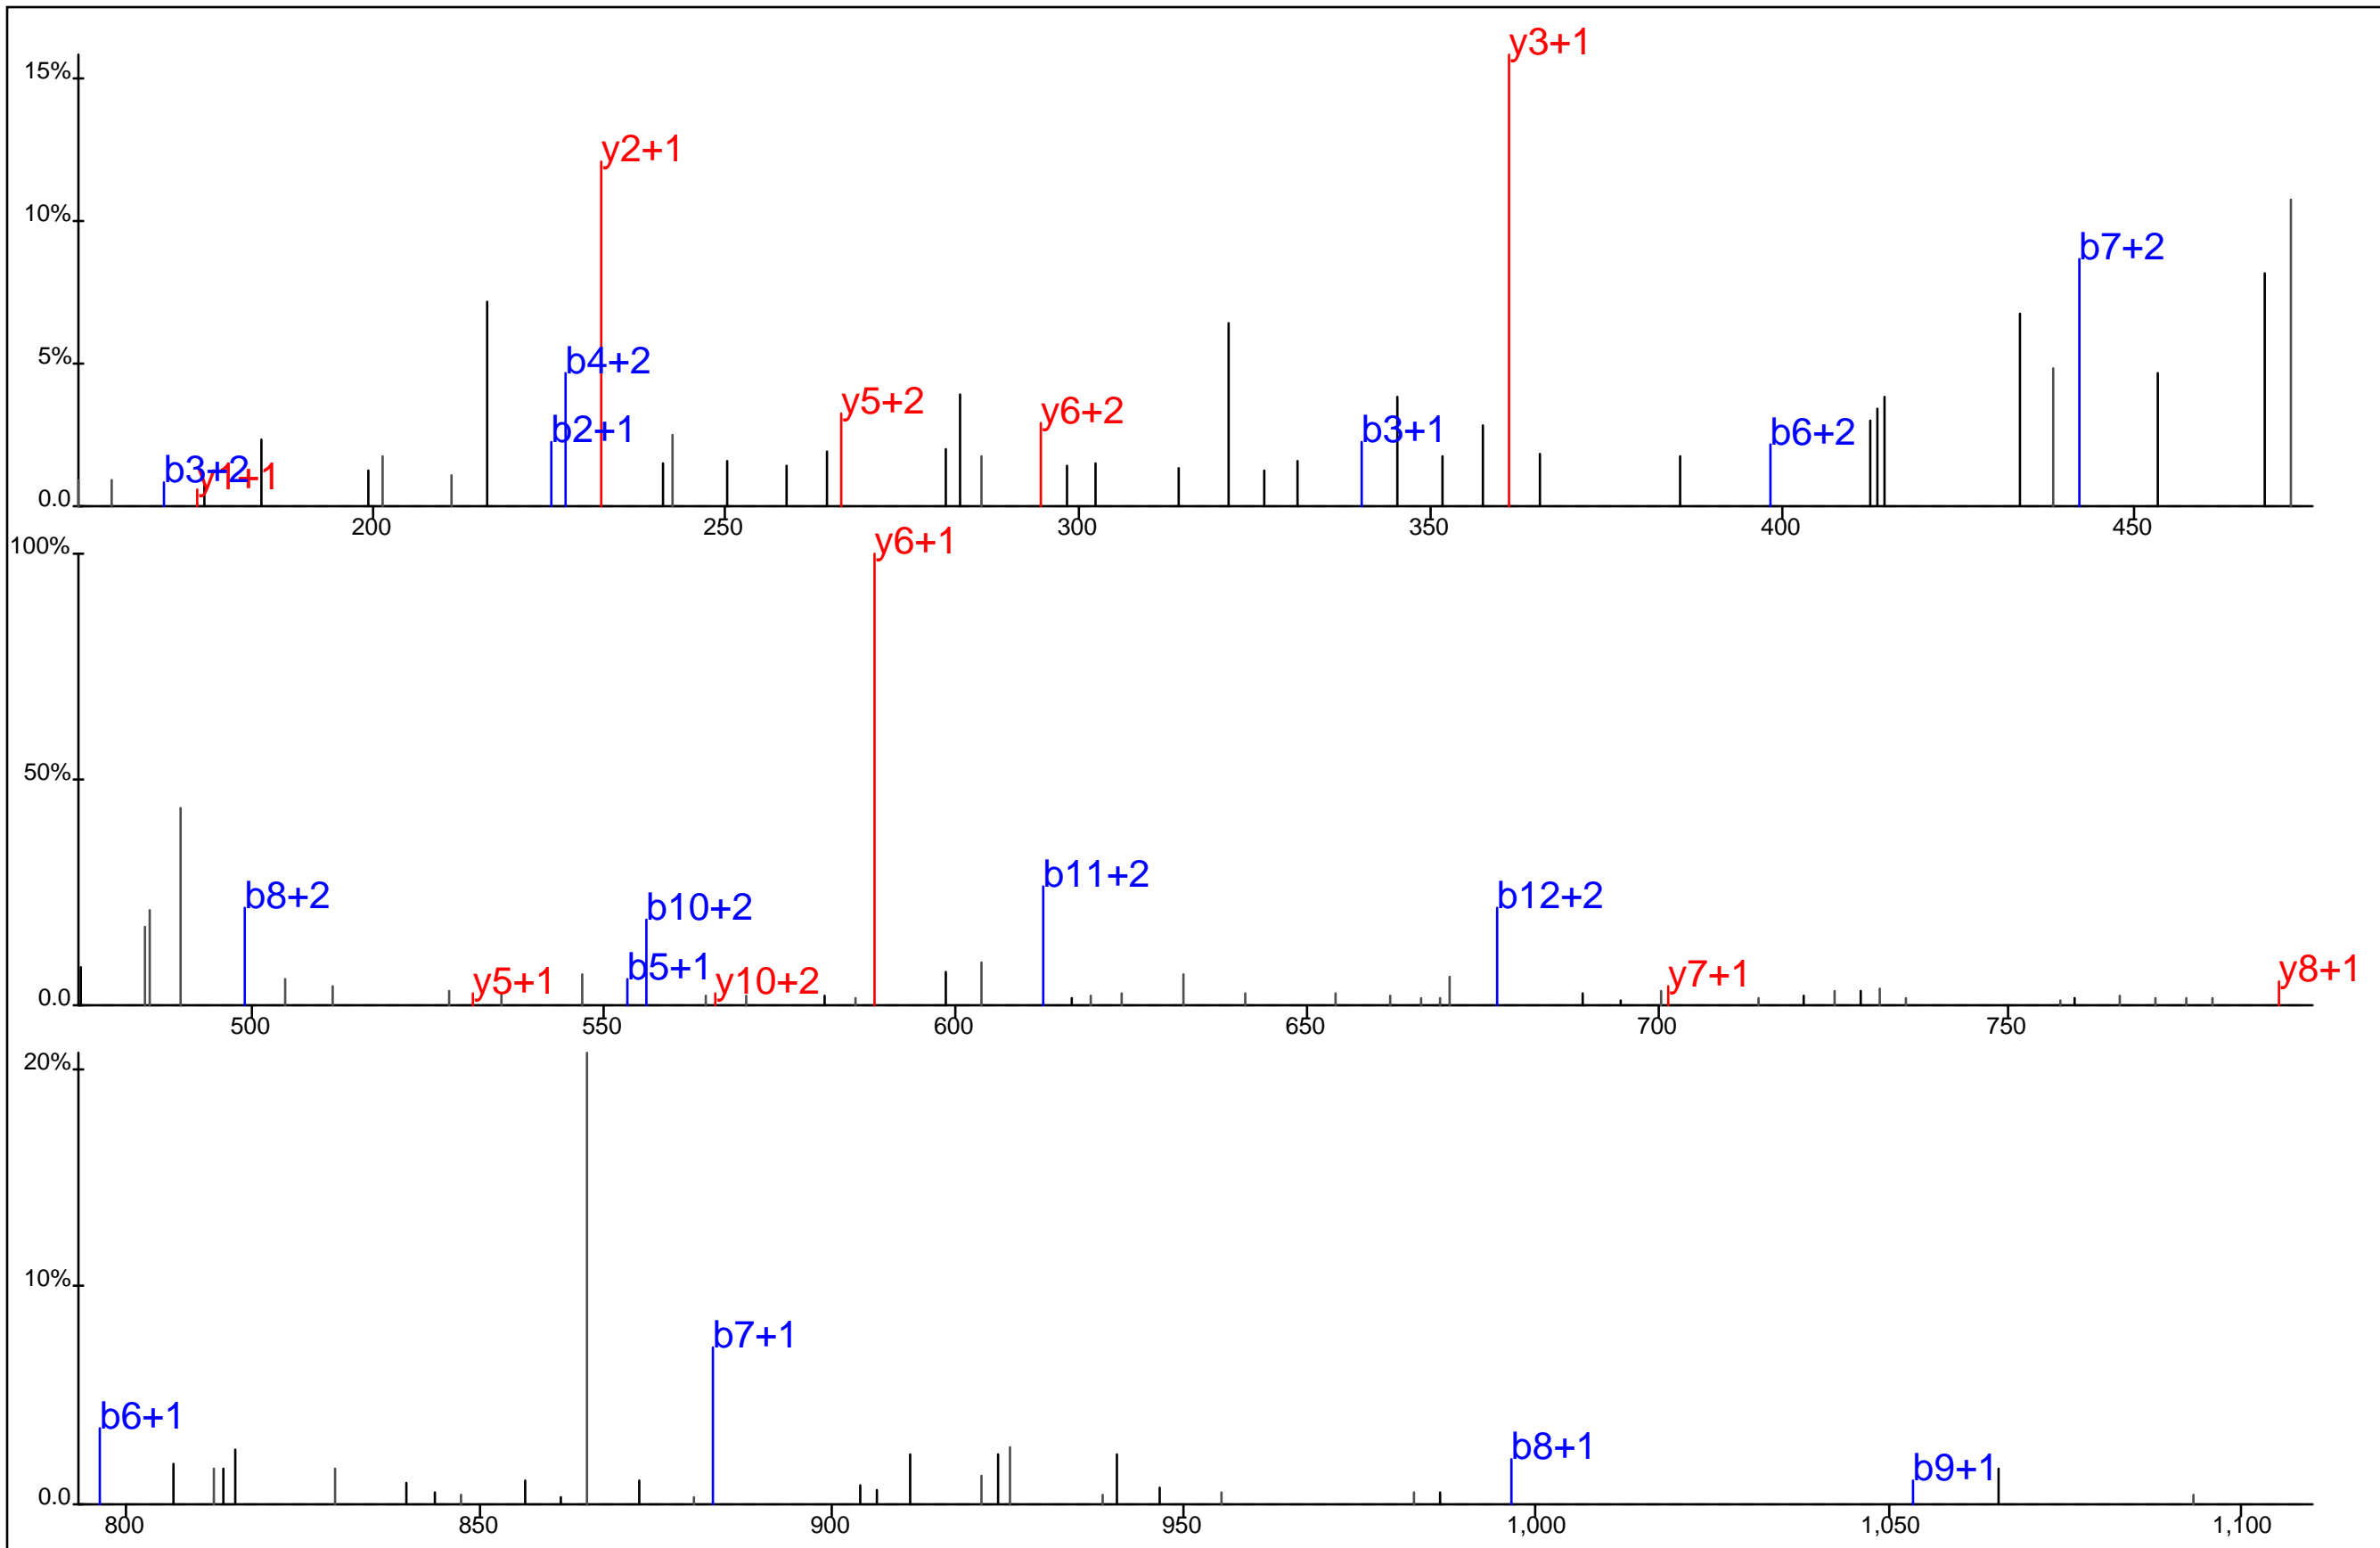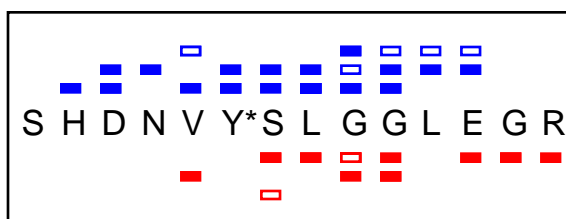

Protein Name: Pleckstrin homology-like domain, family B, member 2  
 gi Accession: 0  
 Precursor Mass: 528.5664+3  
 Delta Mass: 0.187 ppm  
 XCorr: 37.1

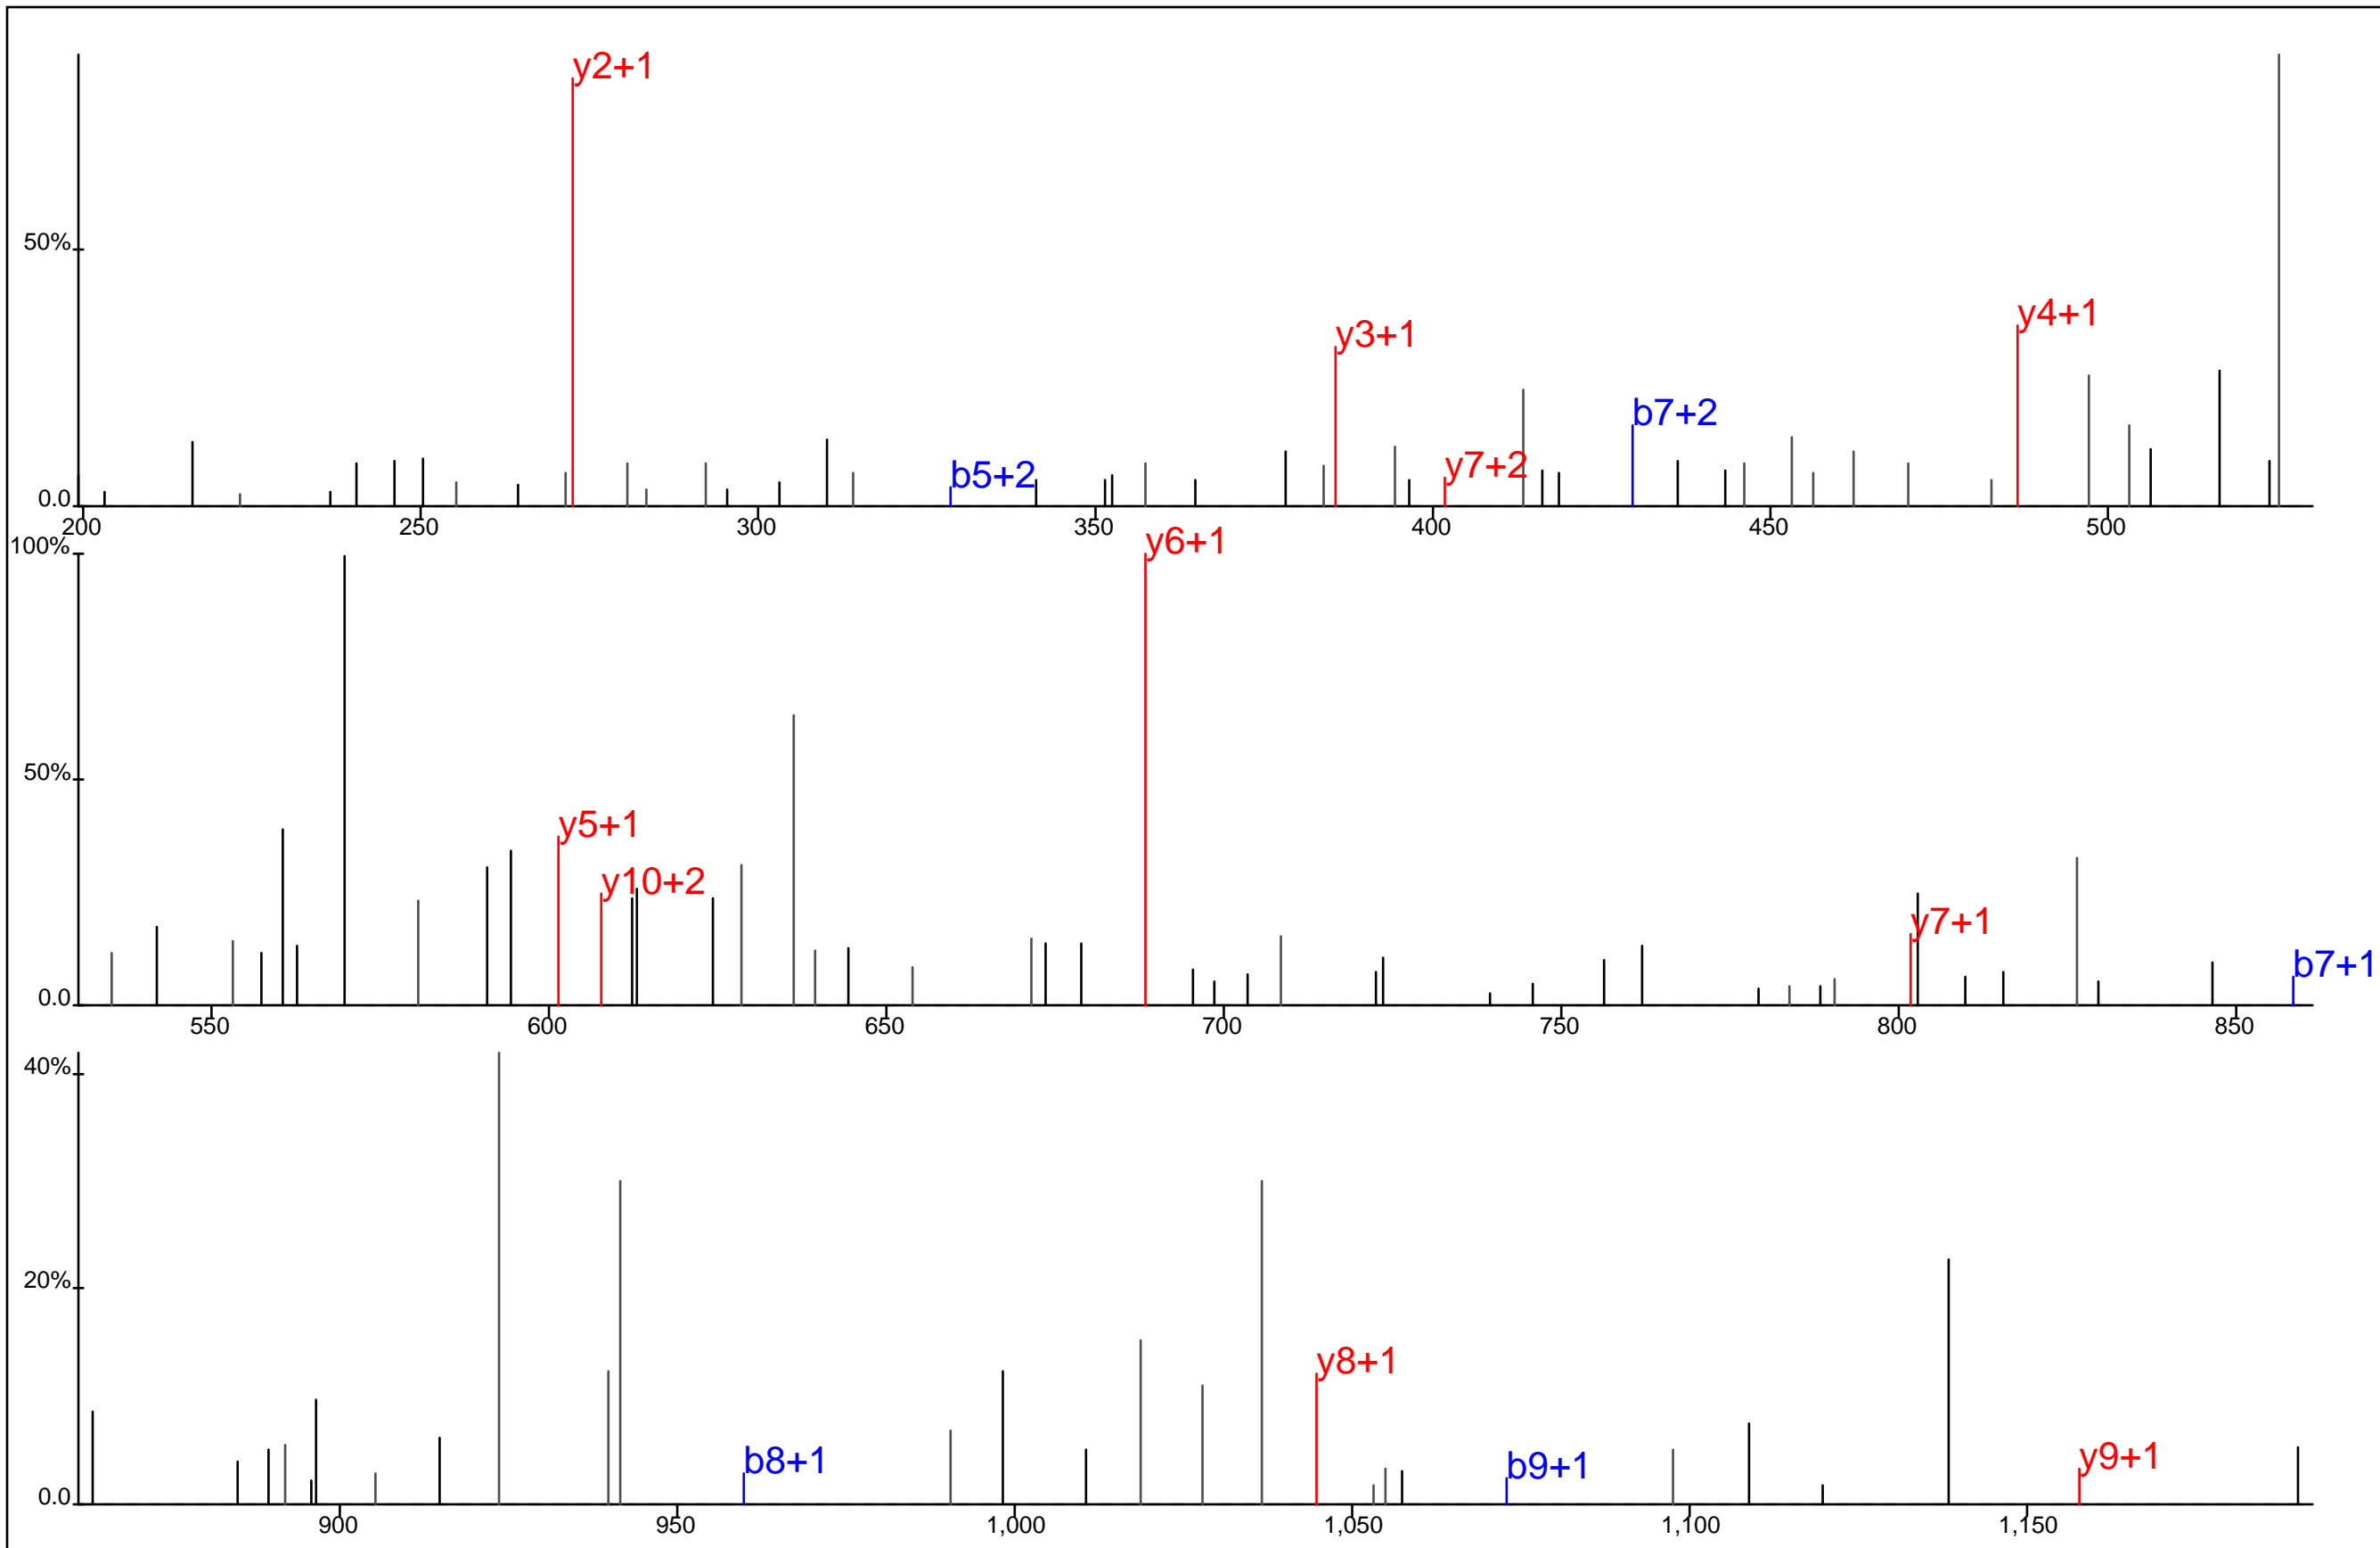

E G L Y\* L S D T L P R  
 □ □ □ □ □ □ □ □ □ □

Protein Name: Pleckstrin homology-like domain, family B, member 2  
 gi Accession: 0  
 Precursor Mass: 672.3148+2  
 Delta Mass: 1.407 ppm  
 XCorr: 20.85

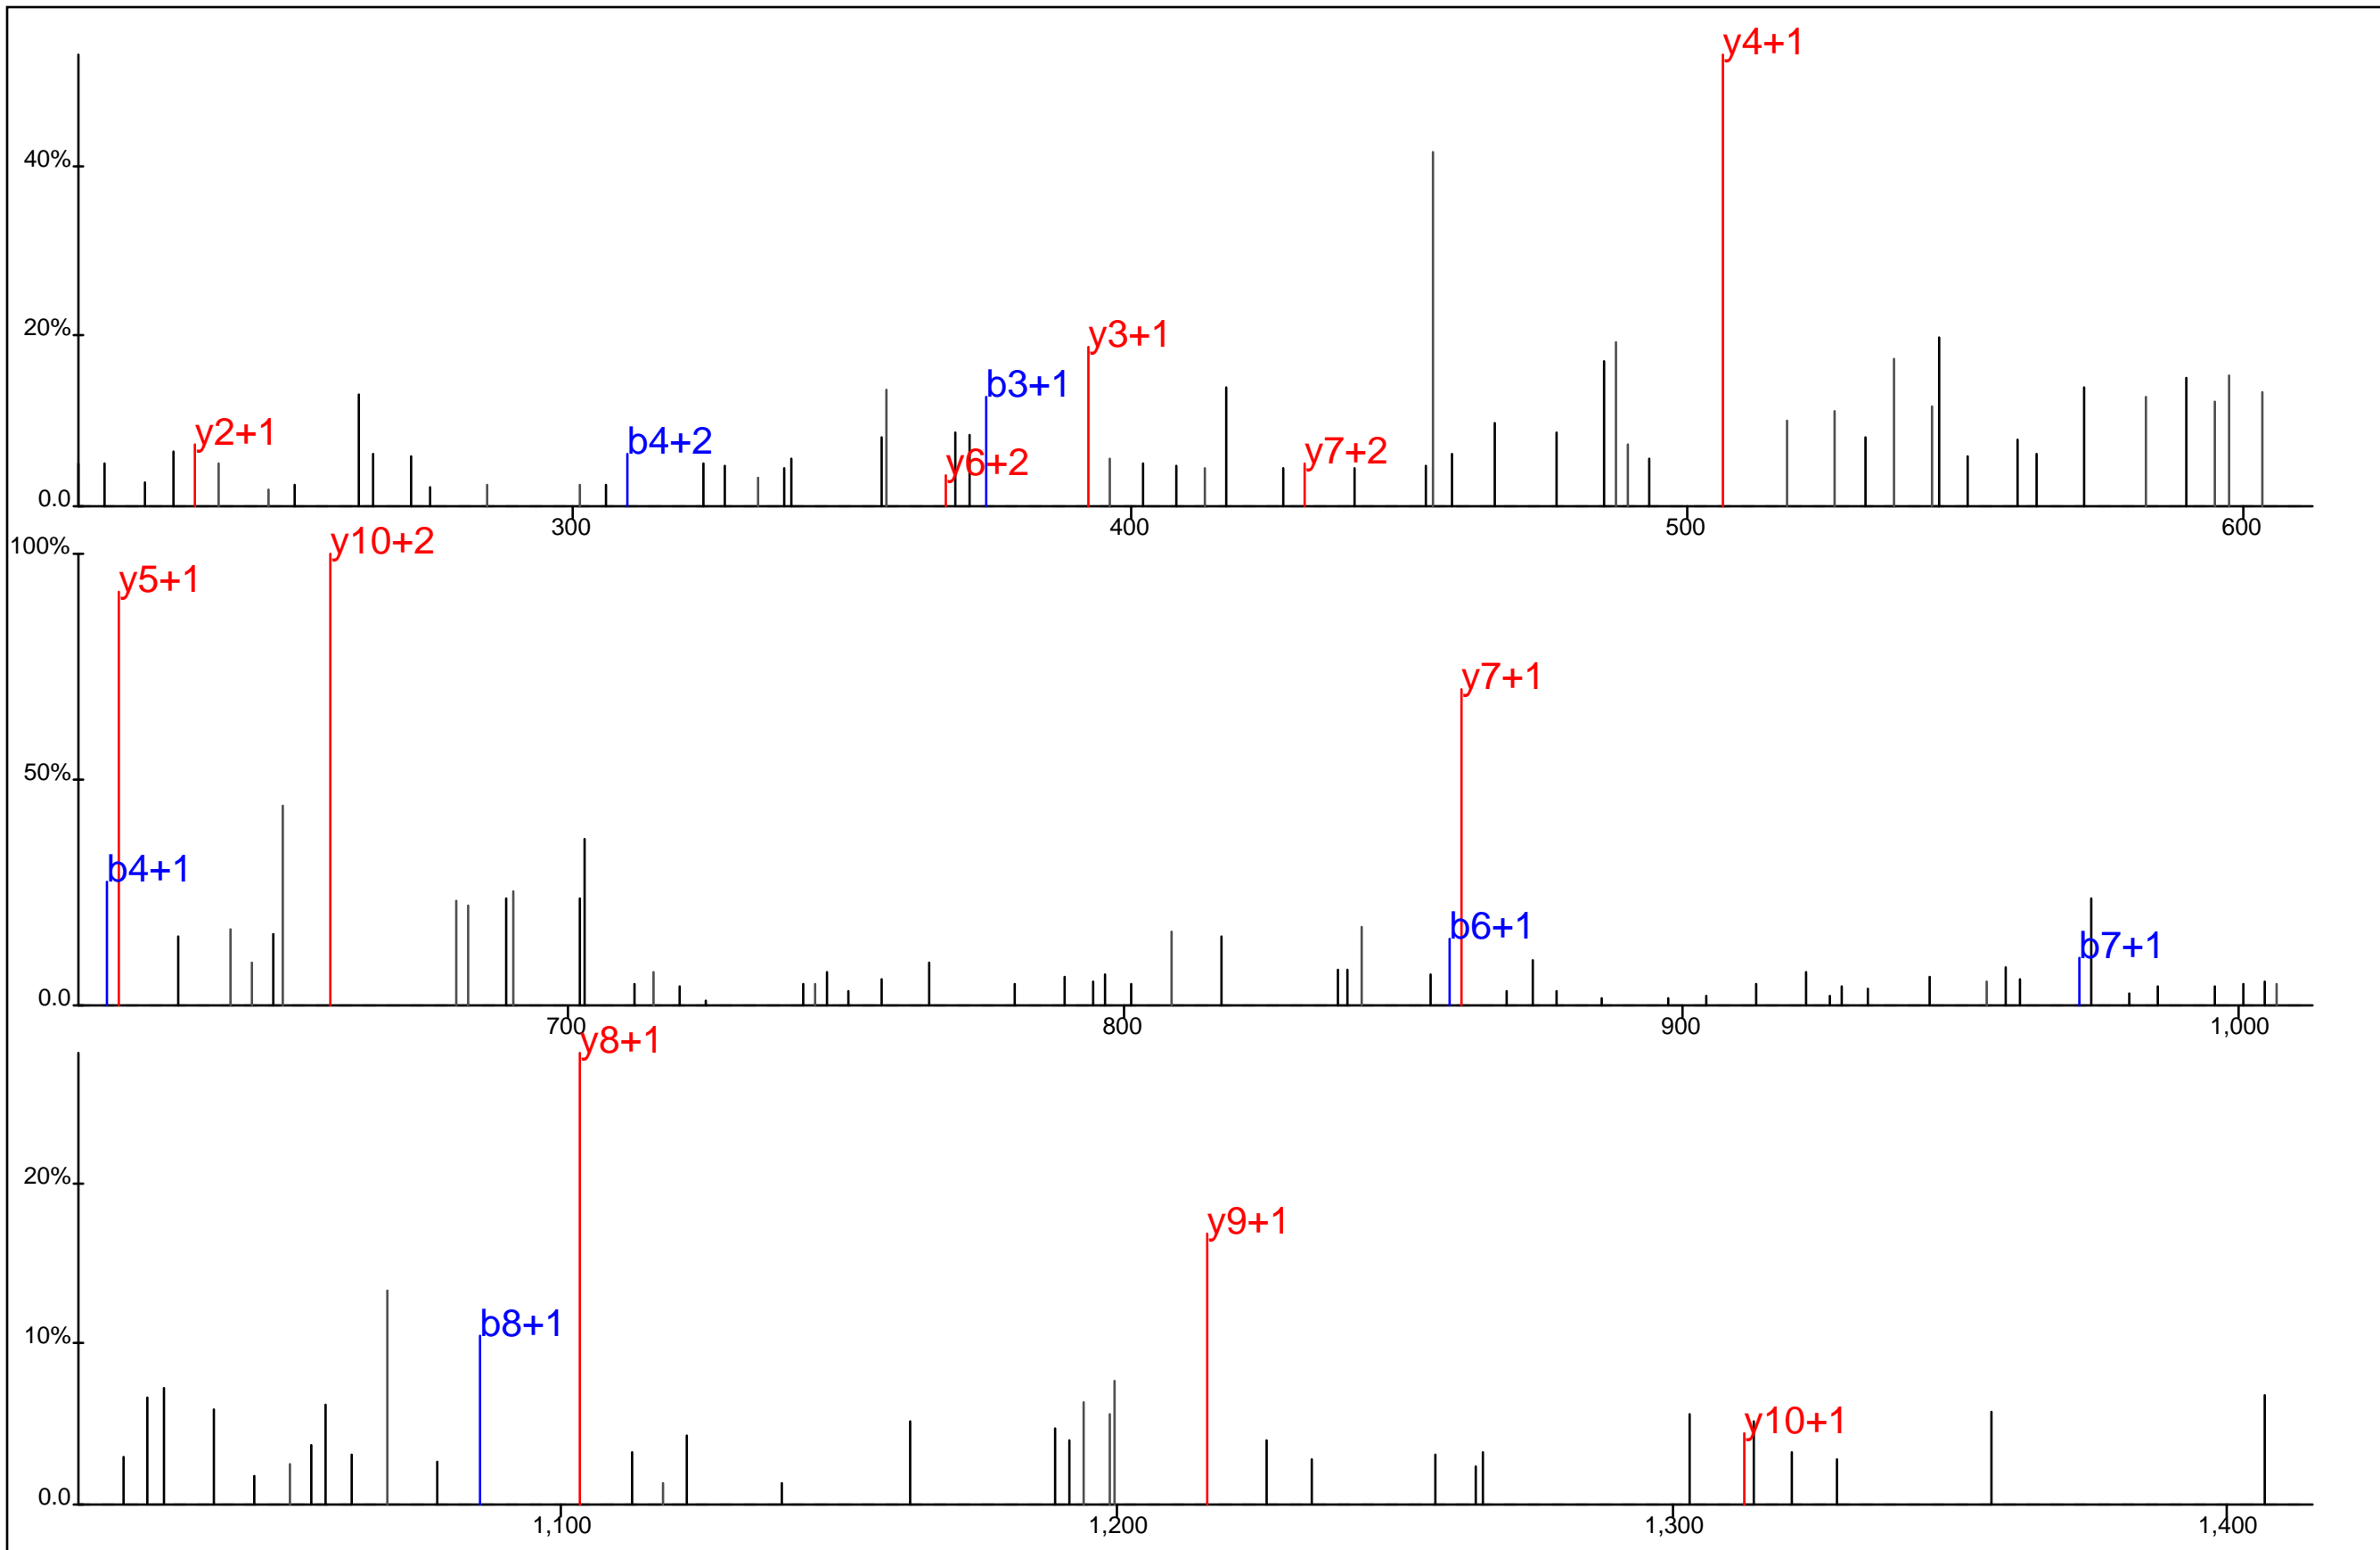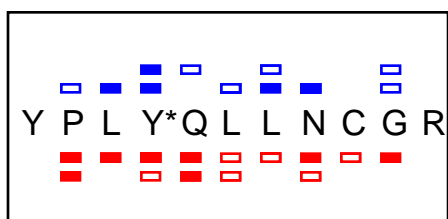

Protein Name: Pleckstrin homology-like domain family B member 3  
 gi Accession: 0  
 Precursor Mass: 738.8378+2  
 Delta Mass: 1.503 ppm  
 XCorr: 28.36

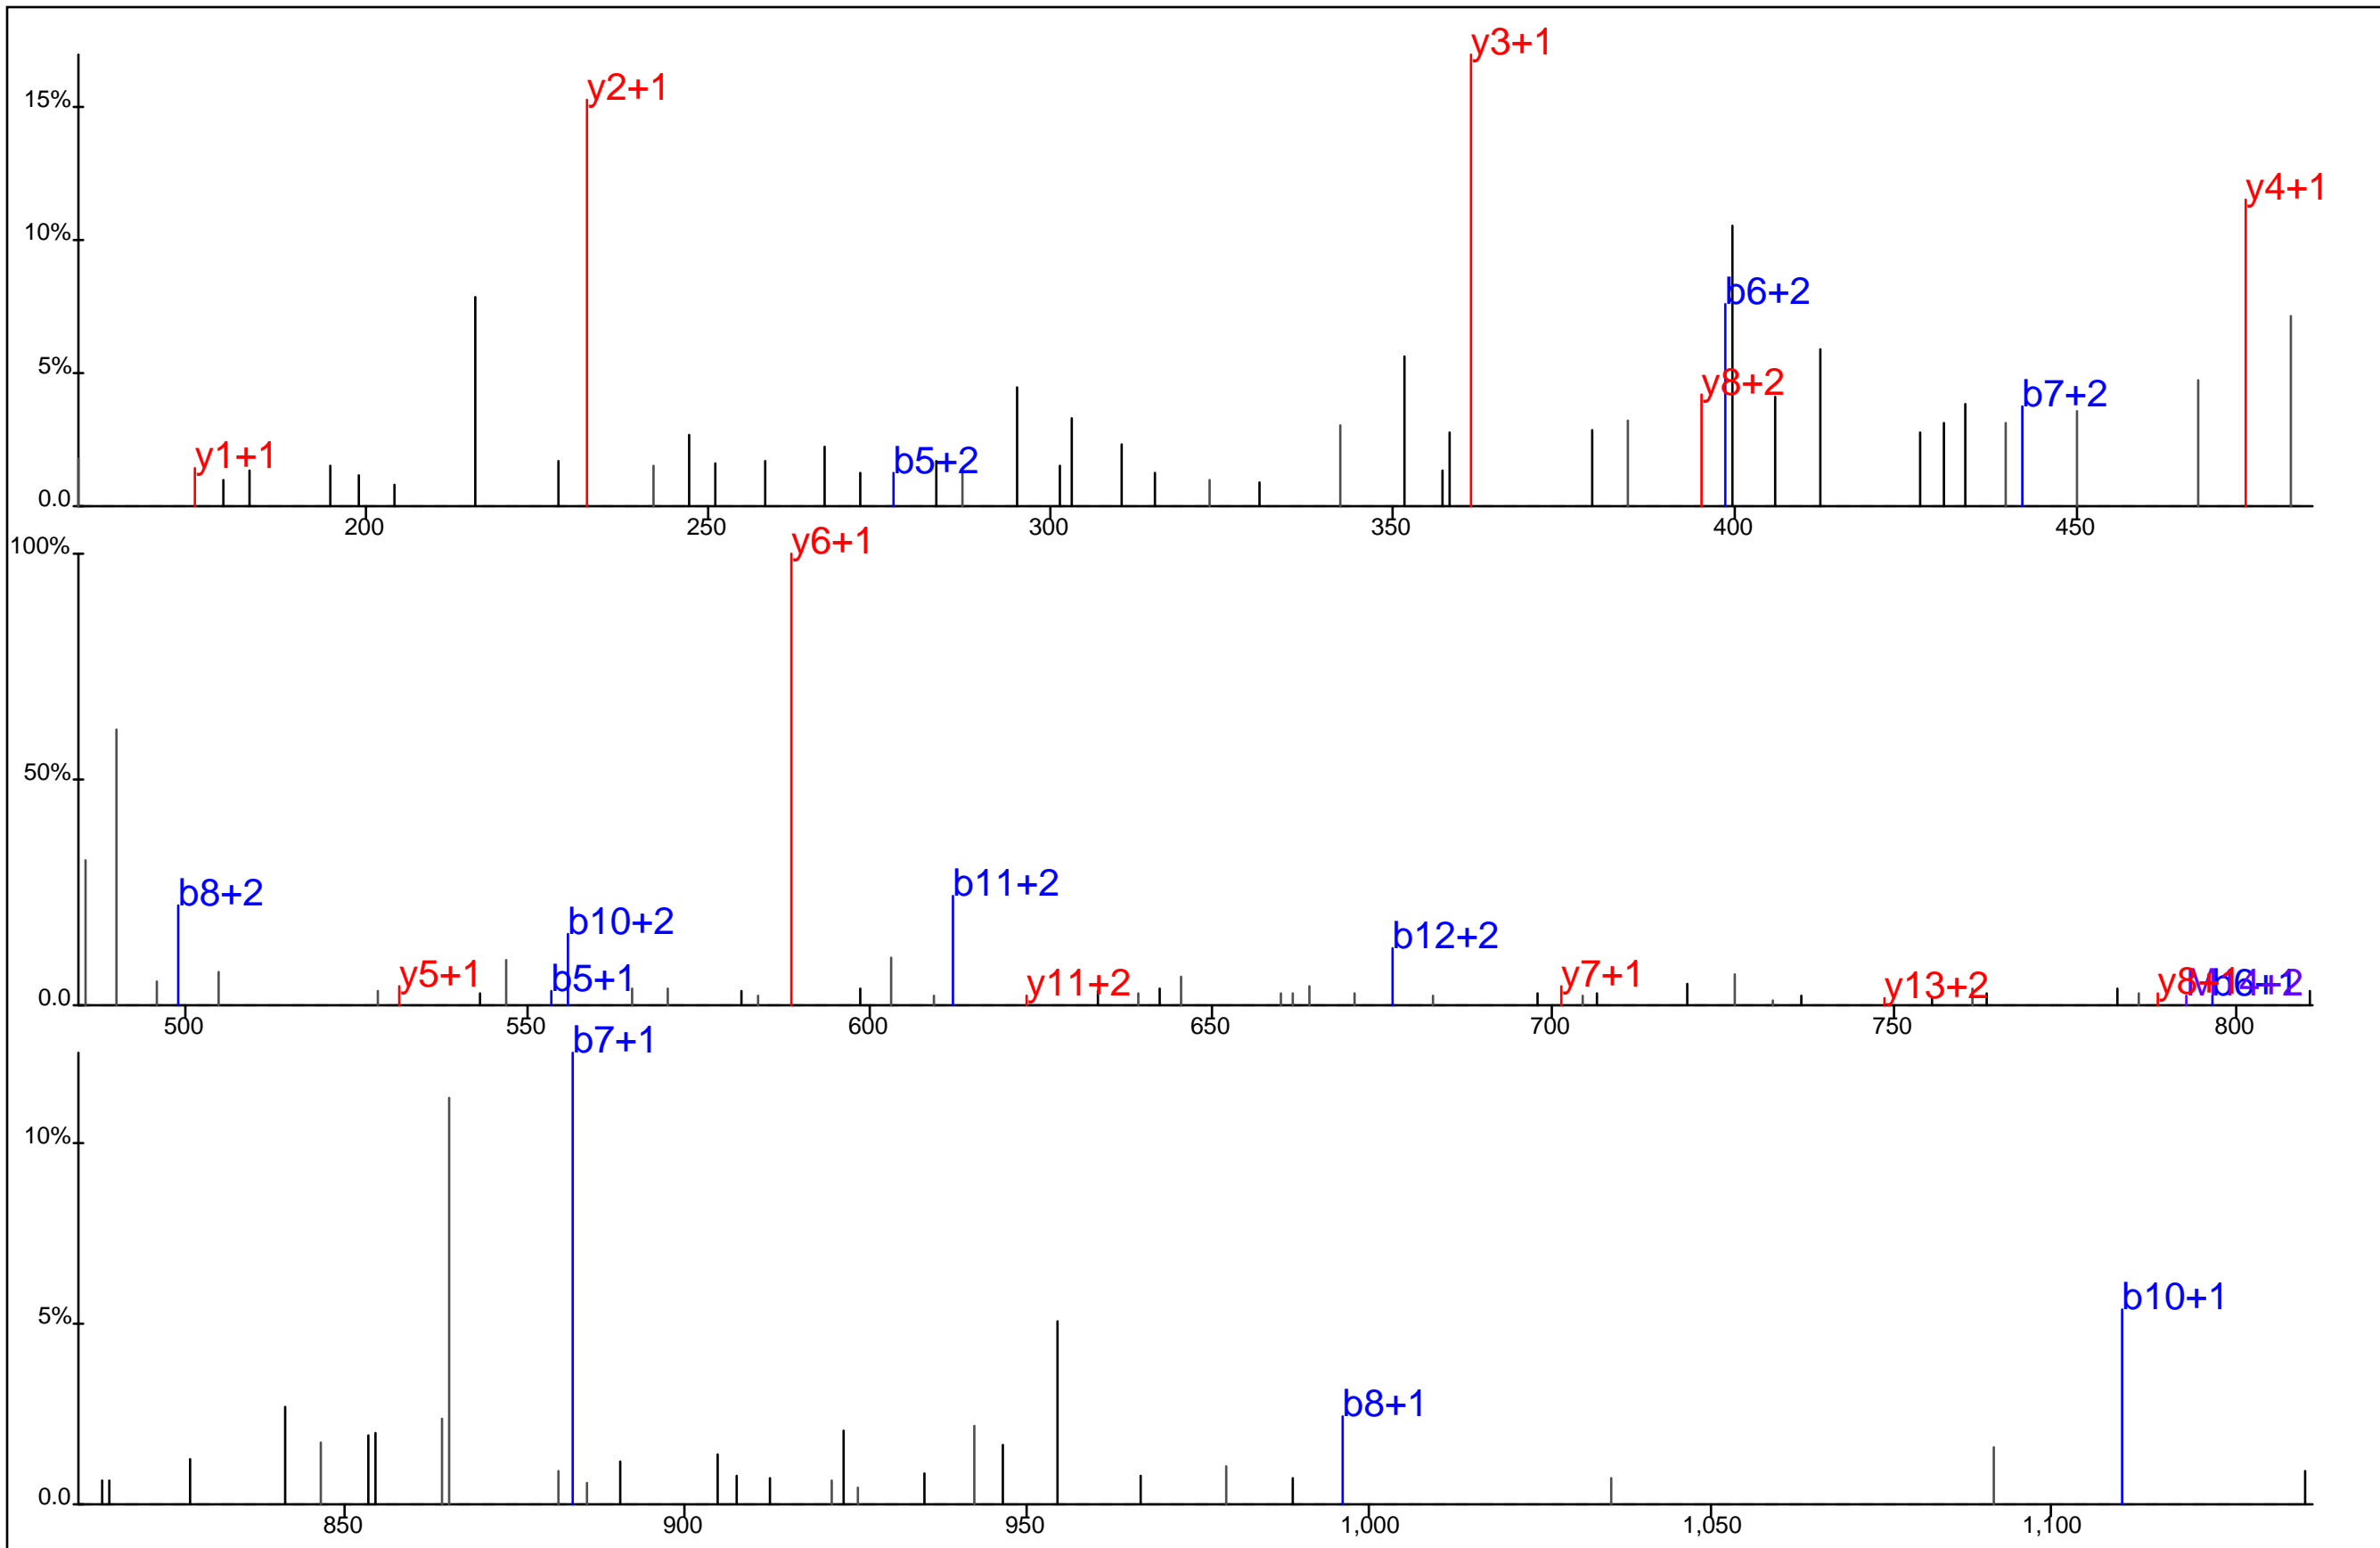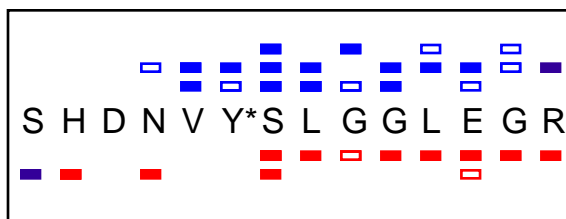

Protein Name: Pleckstrin homology-like domain, family B, member 2  
 gi Accession: 0  
 Precursor Mass: 528.5657+3  
 Delta Mass: 1.458 ppm  
 XCorr: 22.01



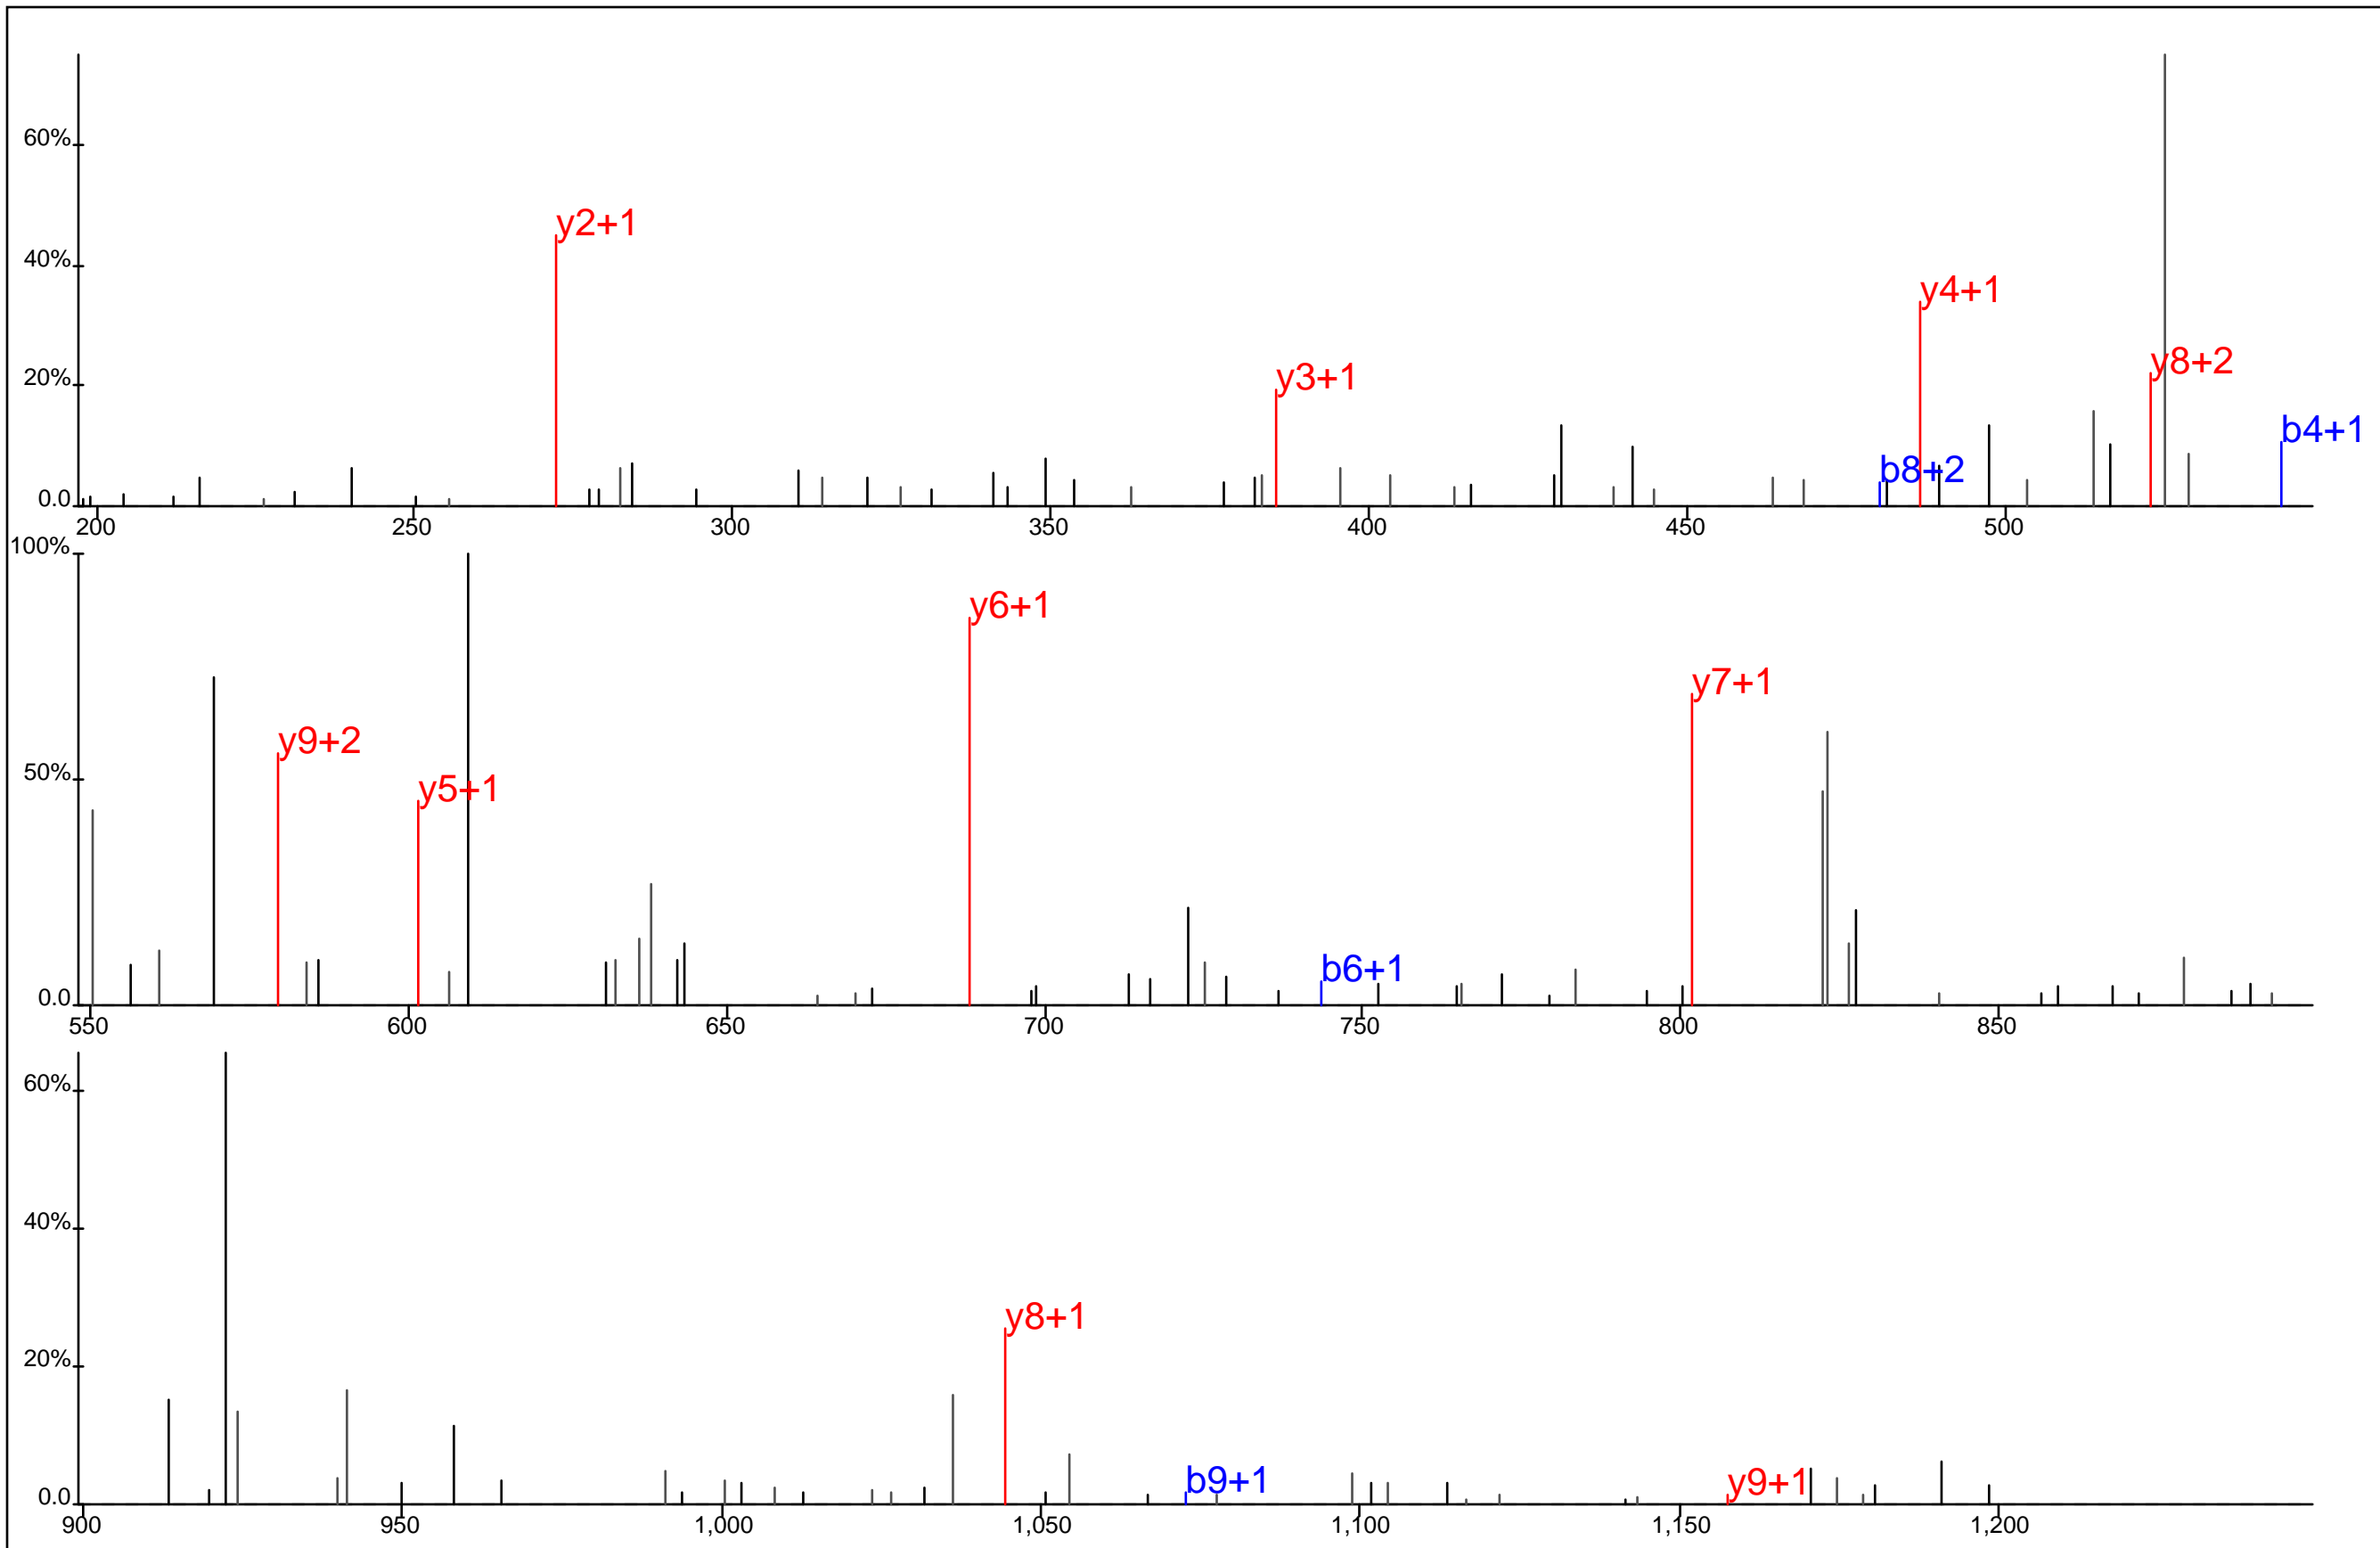

□ □ □ □ □ □ □  
 E G L Y\*L S D T L P R  
□ □ □ □ □ □ □ □

Protein Name: Pleckstrin homology-like domain, family B, member 2  
 gi Accession: 0  
 Precursor Mass: 672.3129+2  
 Delta Mass: 4.314 ppm  
 XCorr: 22.68

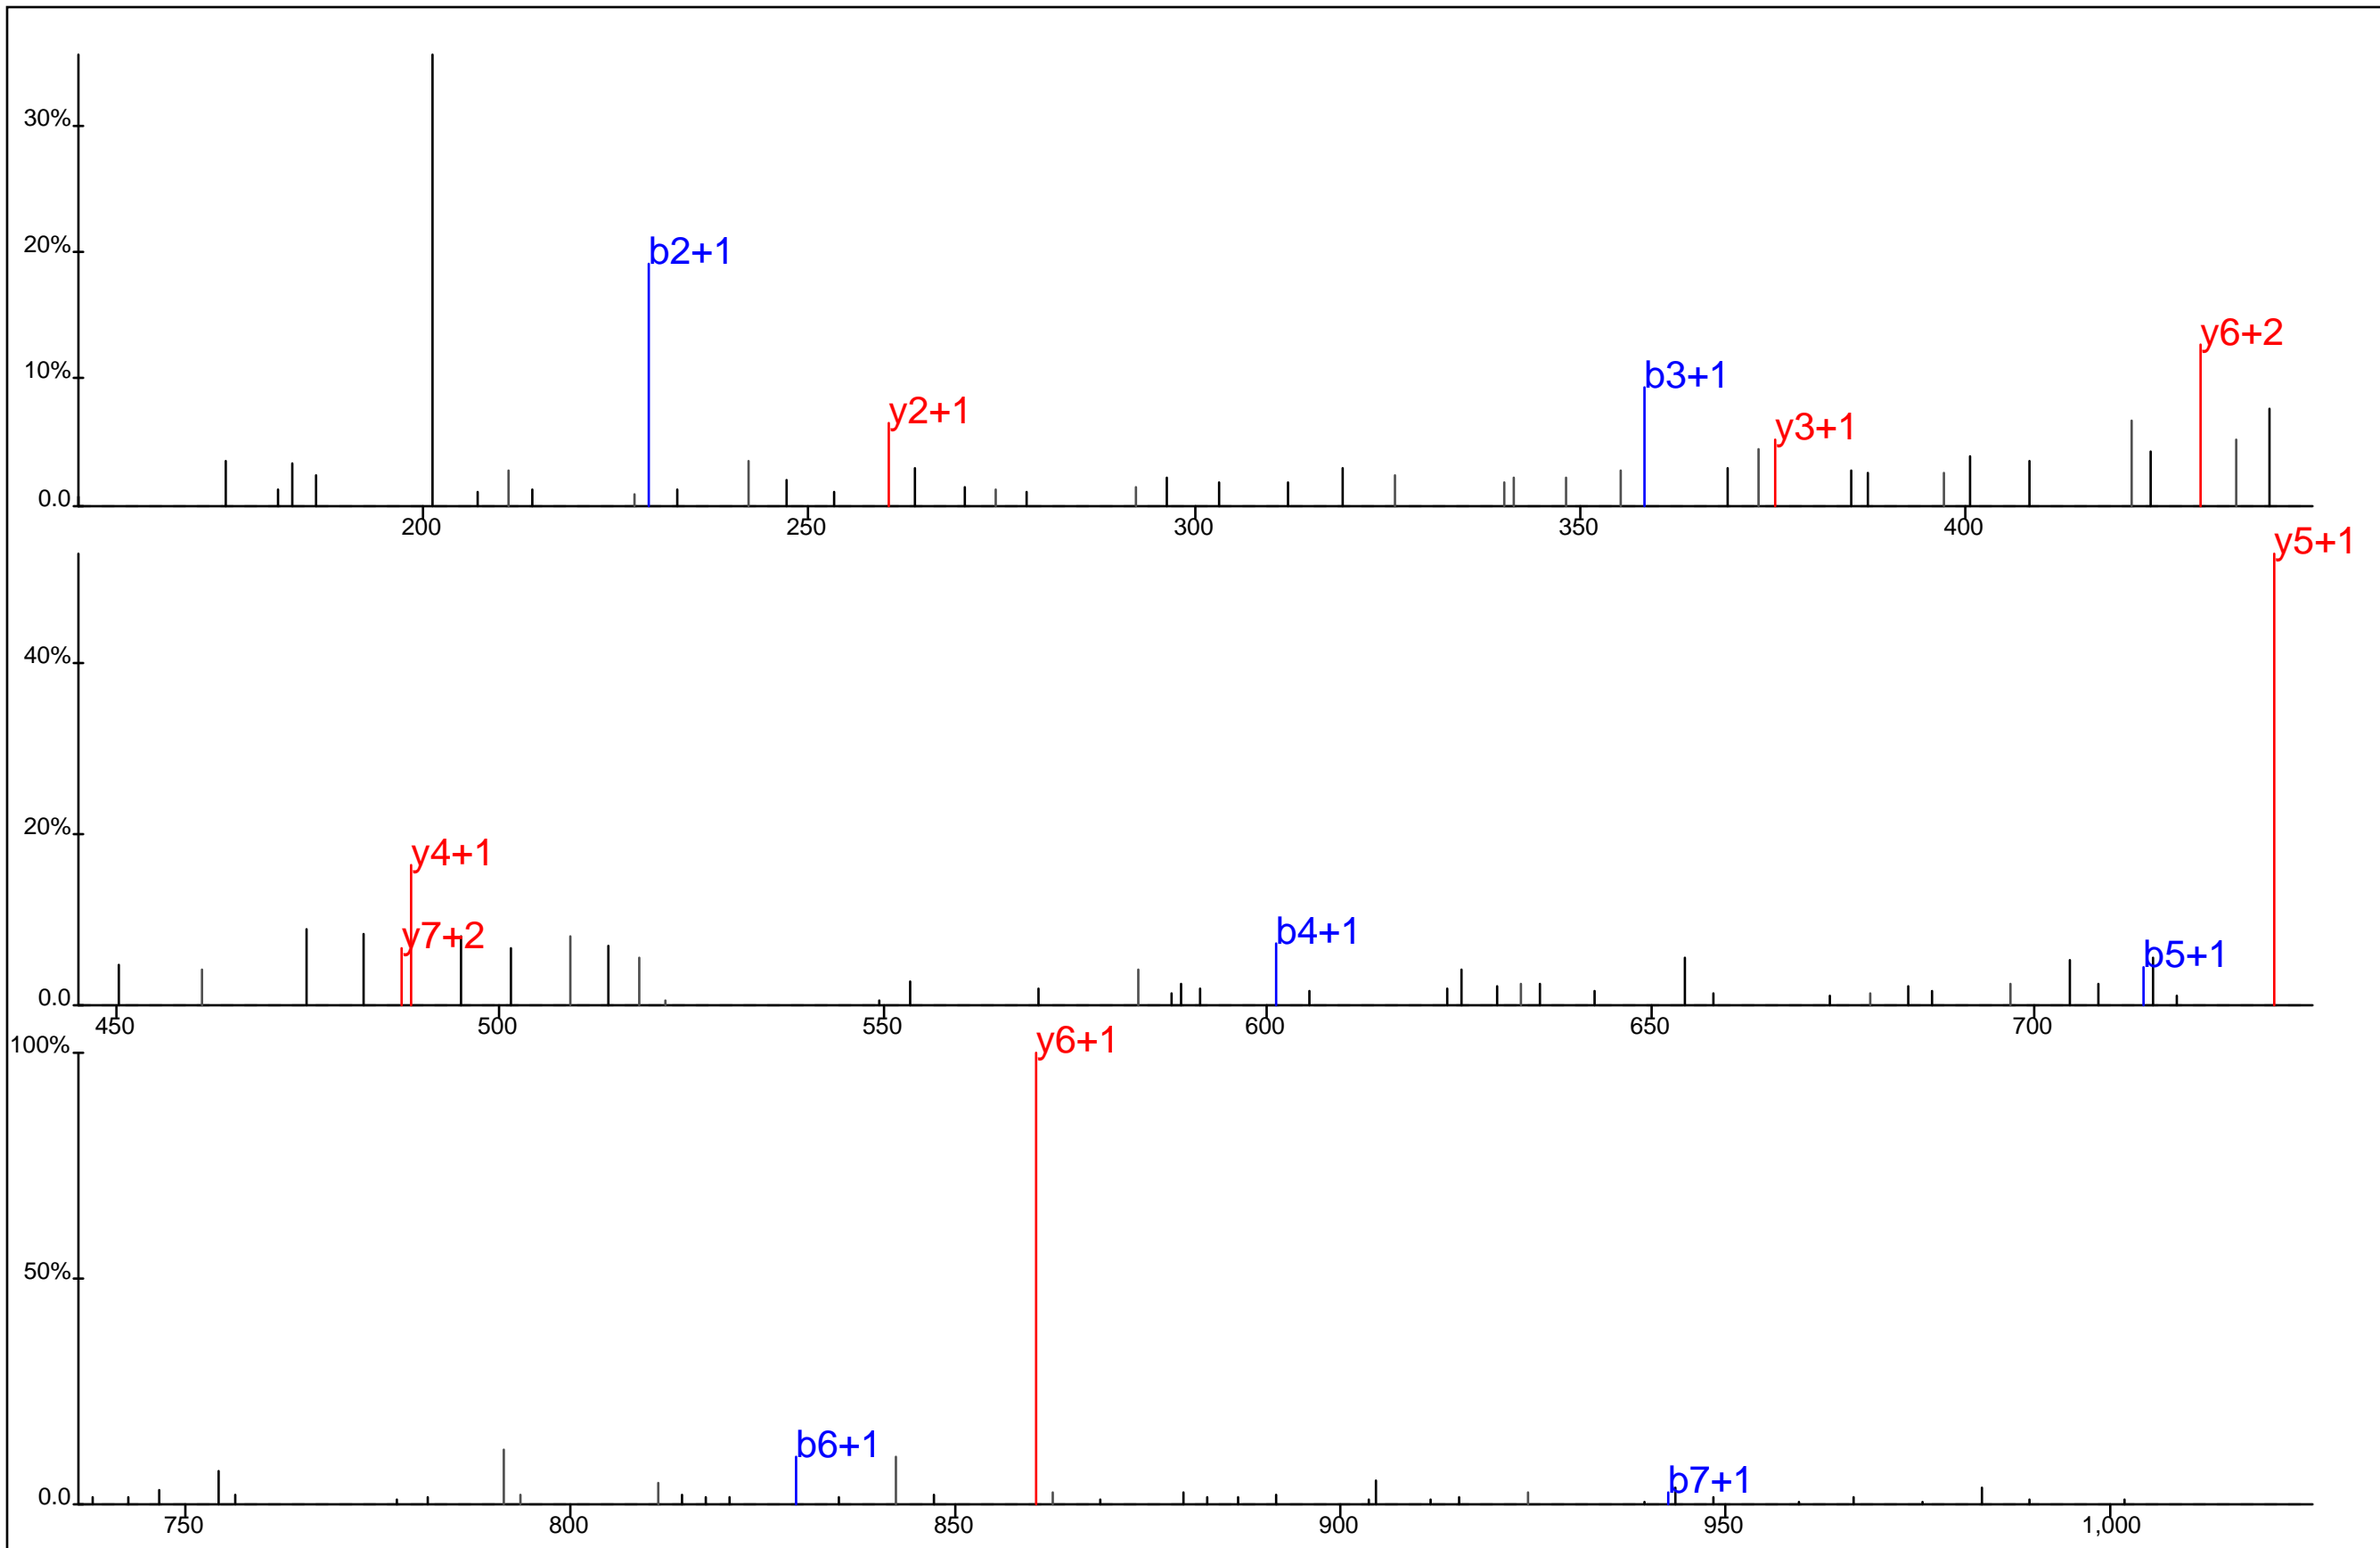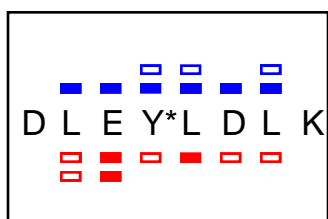

Protein Name: PLEKHA7  
 gi Accession: 0  
 Precursor Mass: 544.7508+2  
 Delta Mass: 2.947 ppm  
 XCorr: 20.36



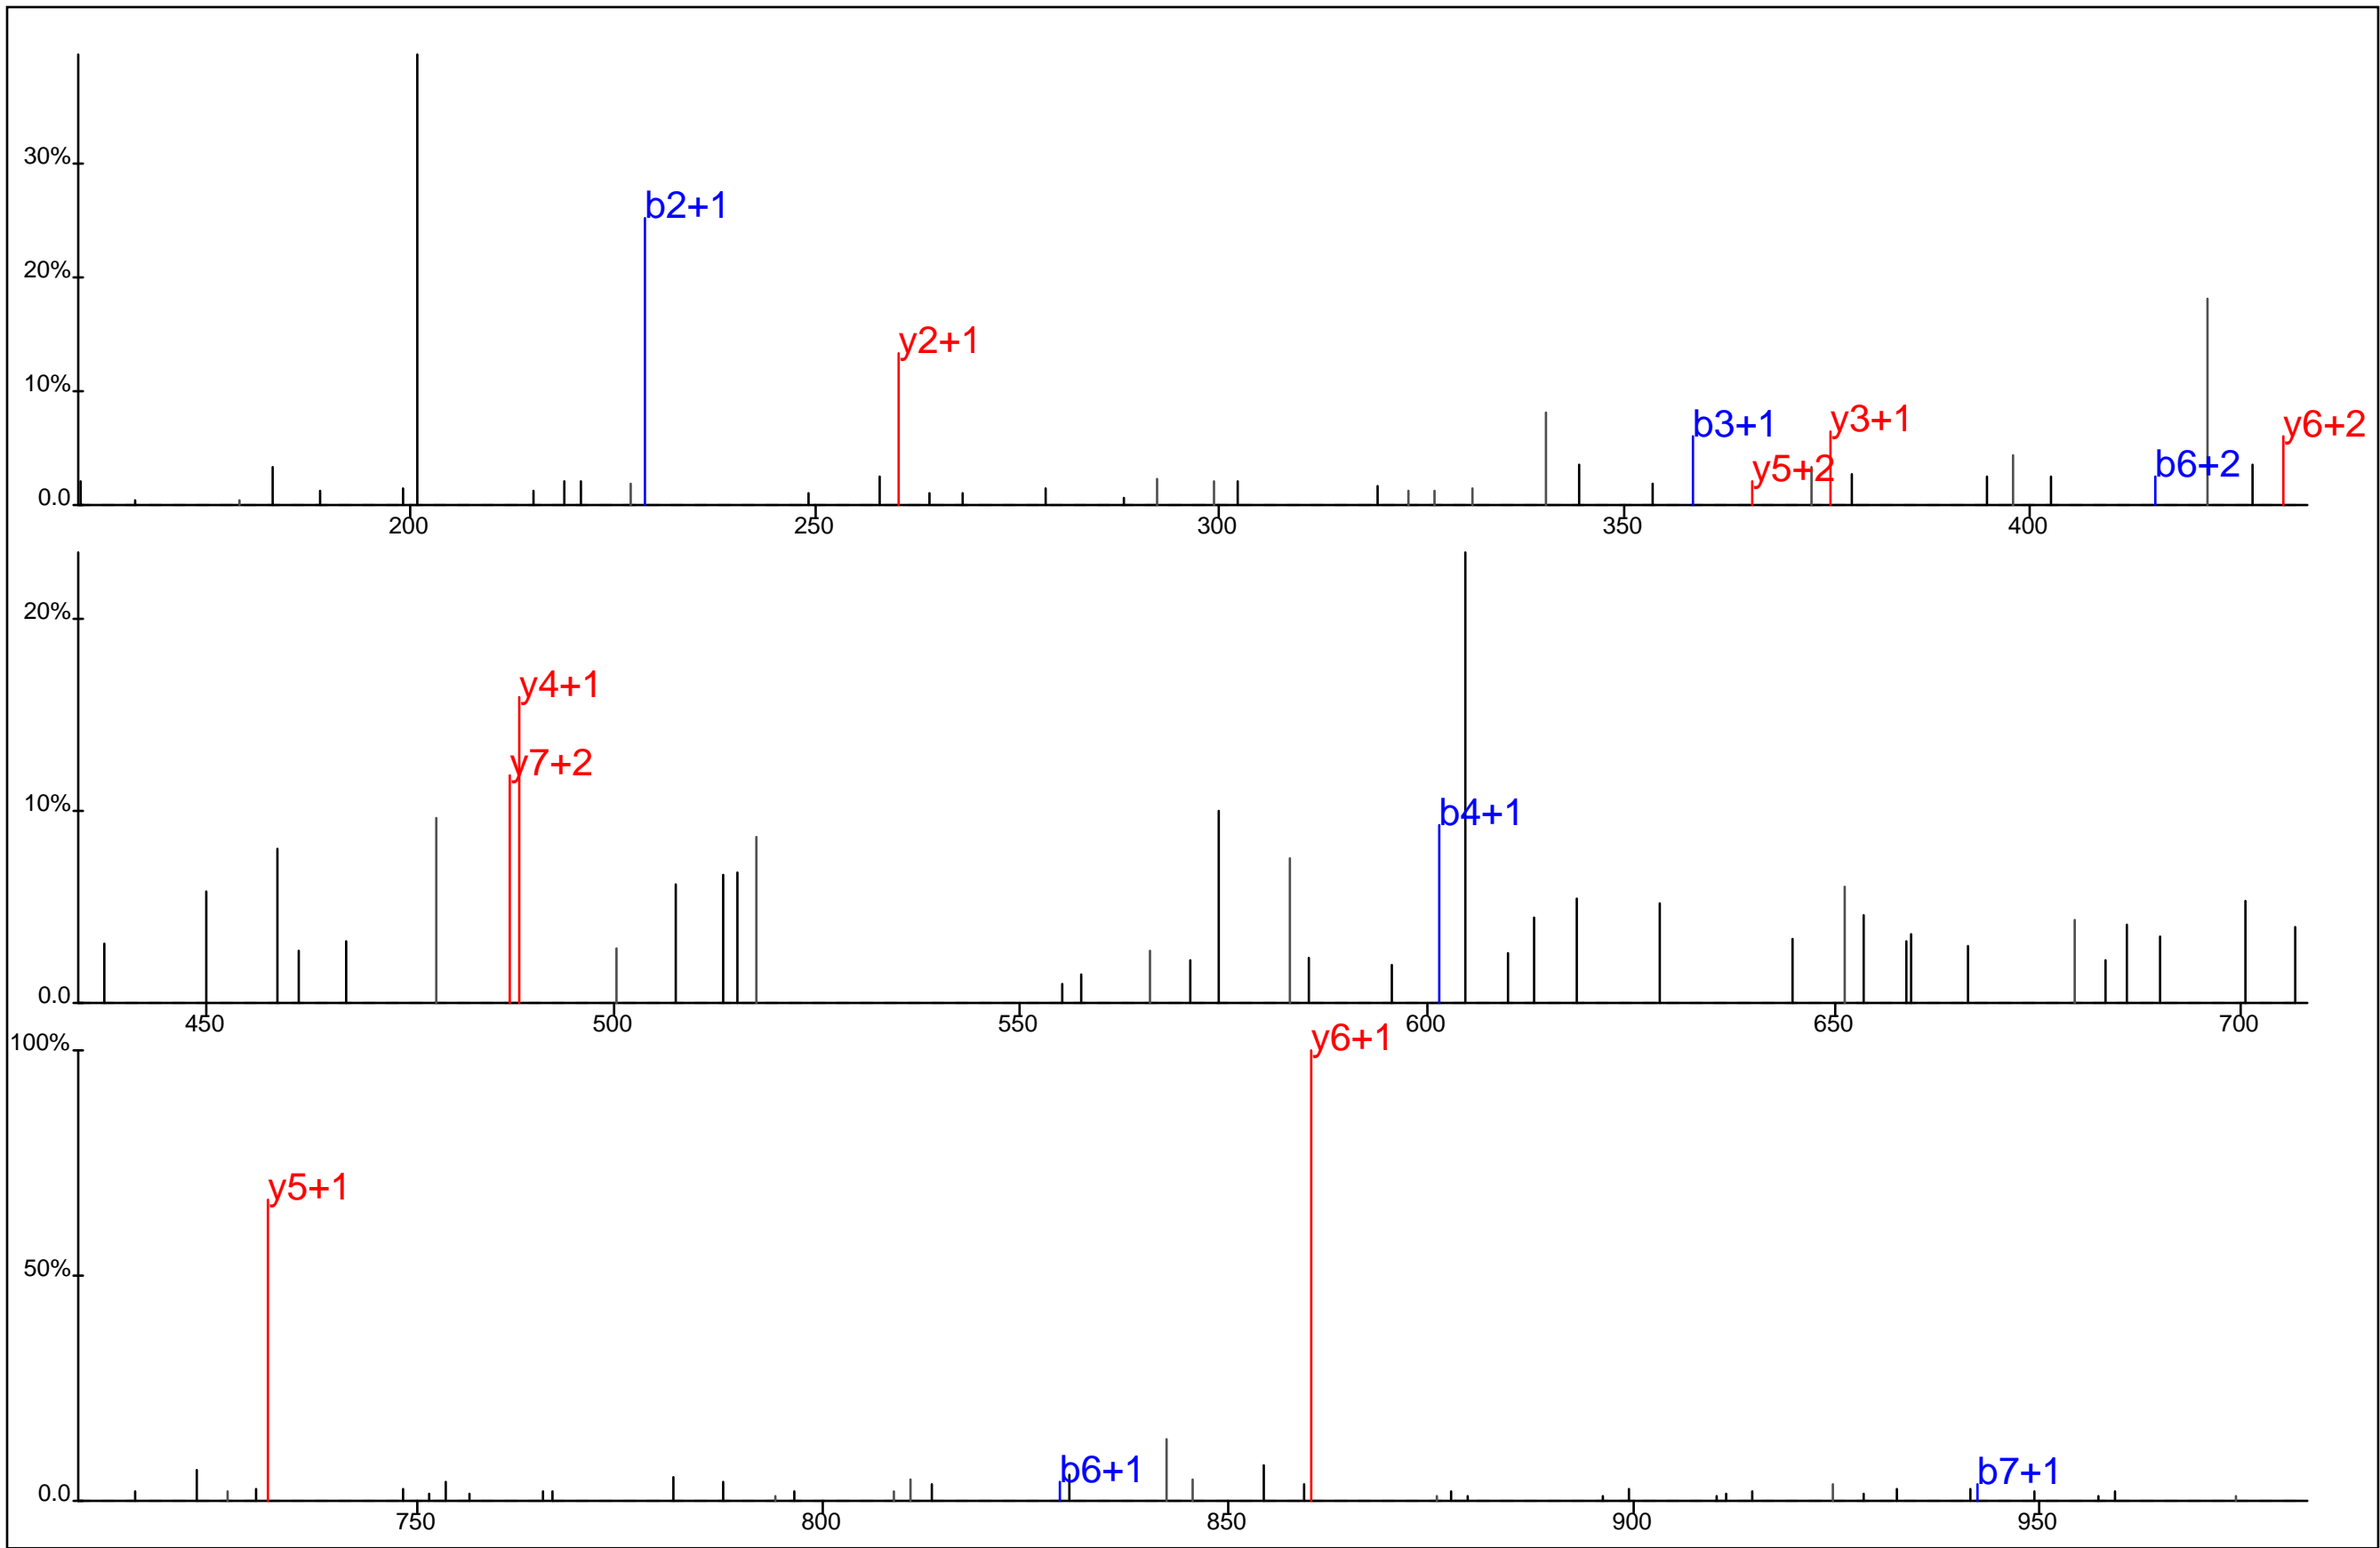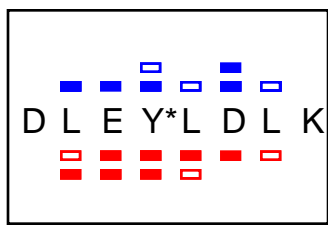

Protein Name: PLEKHA7  
 gi Accession: 0  
 Precursor Mass: 544.7505+2  
 Delta Mass: 2.387 ppm  
 XCorr: 25.91

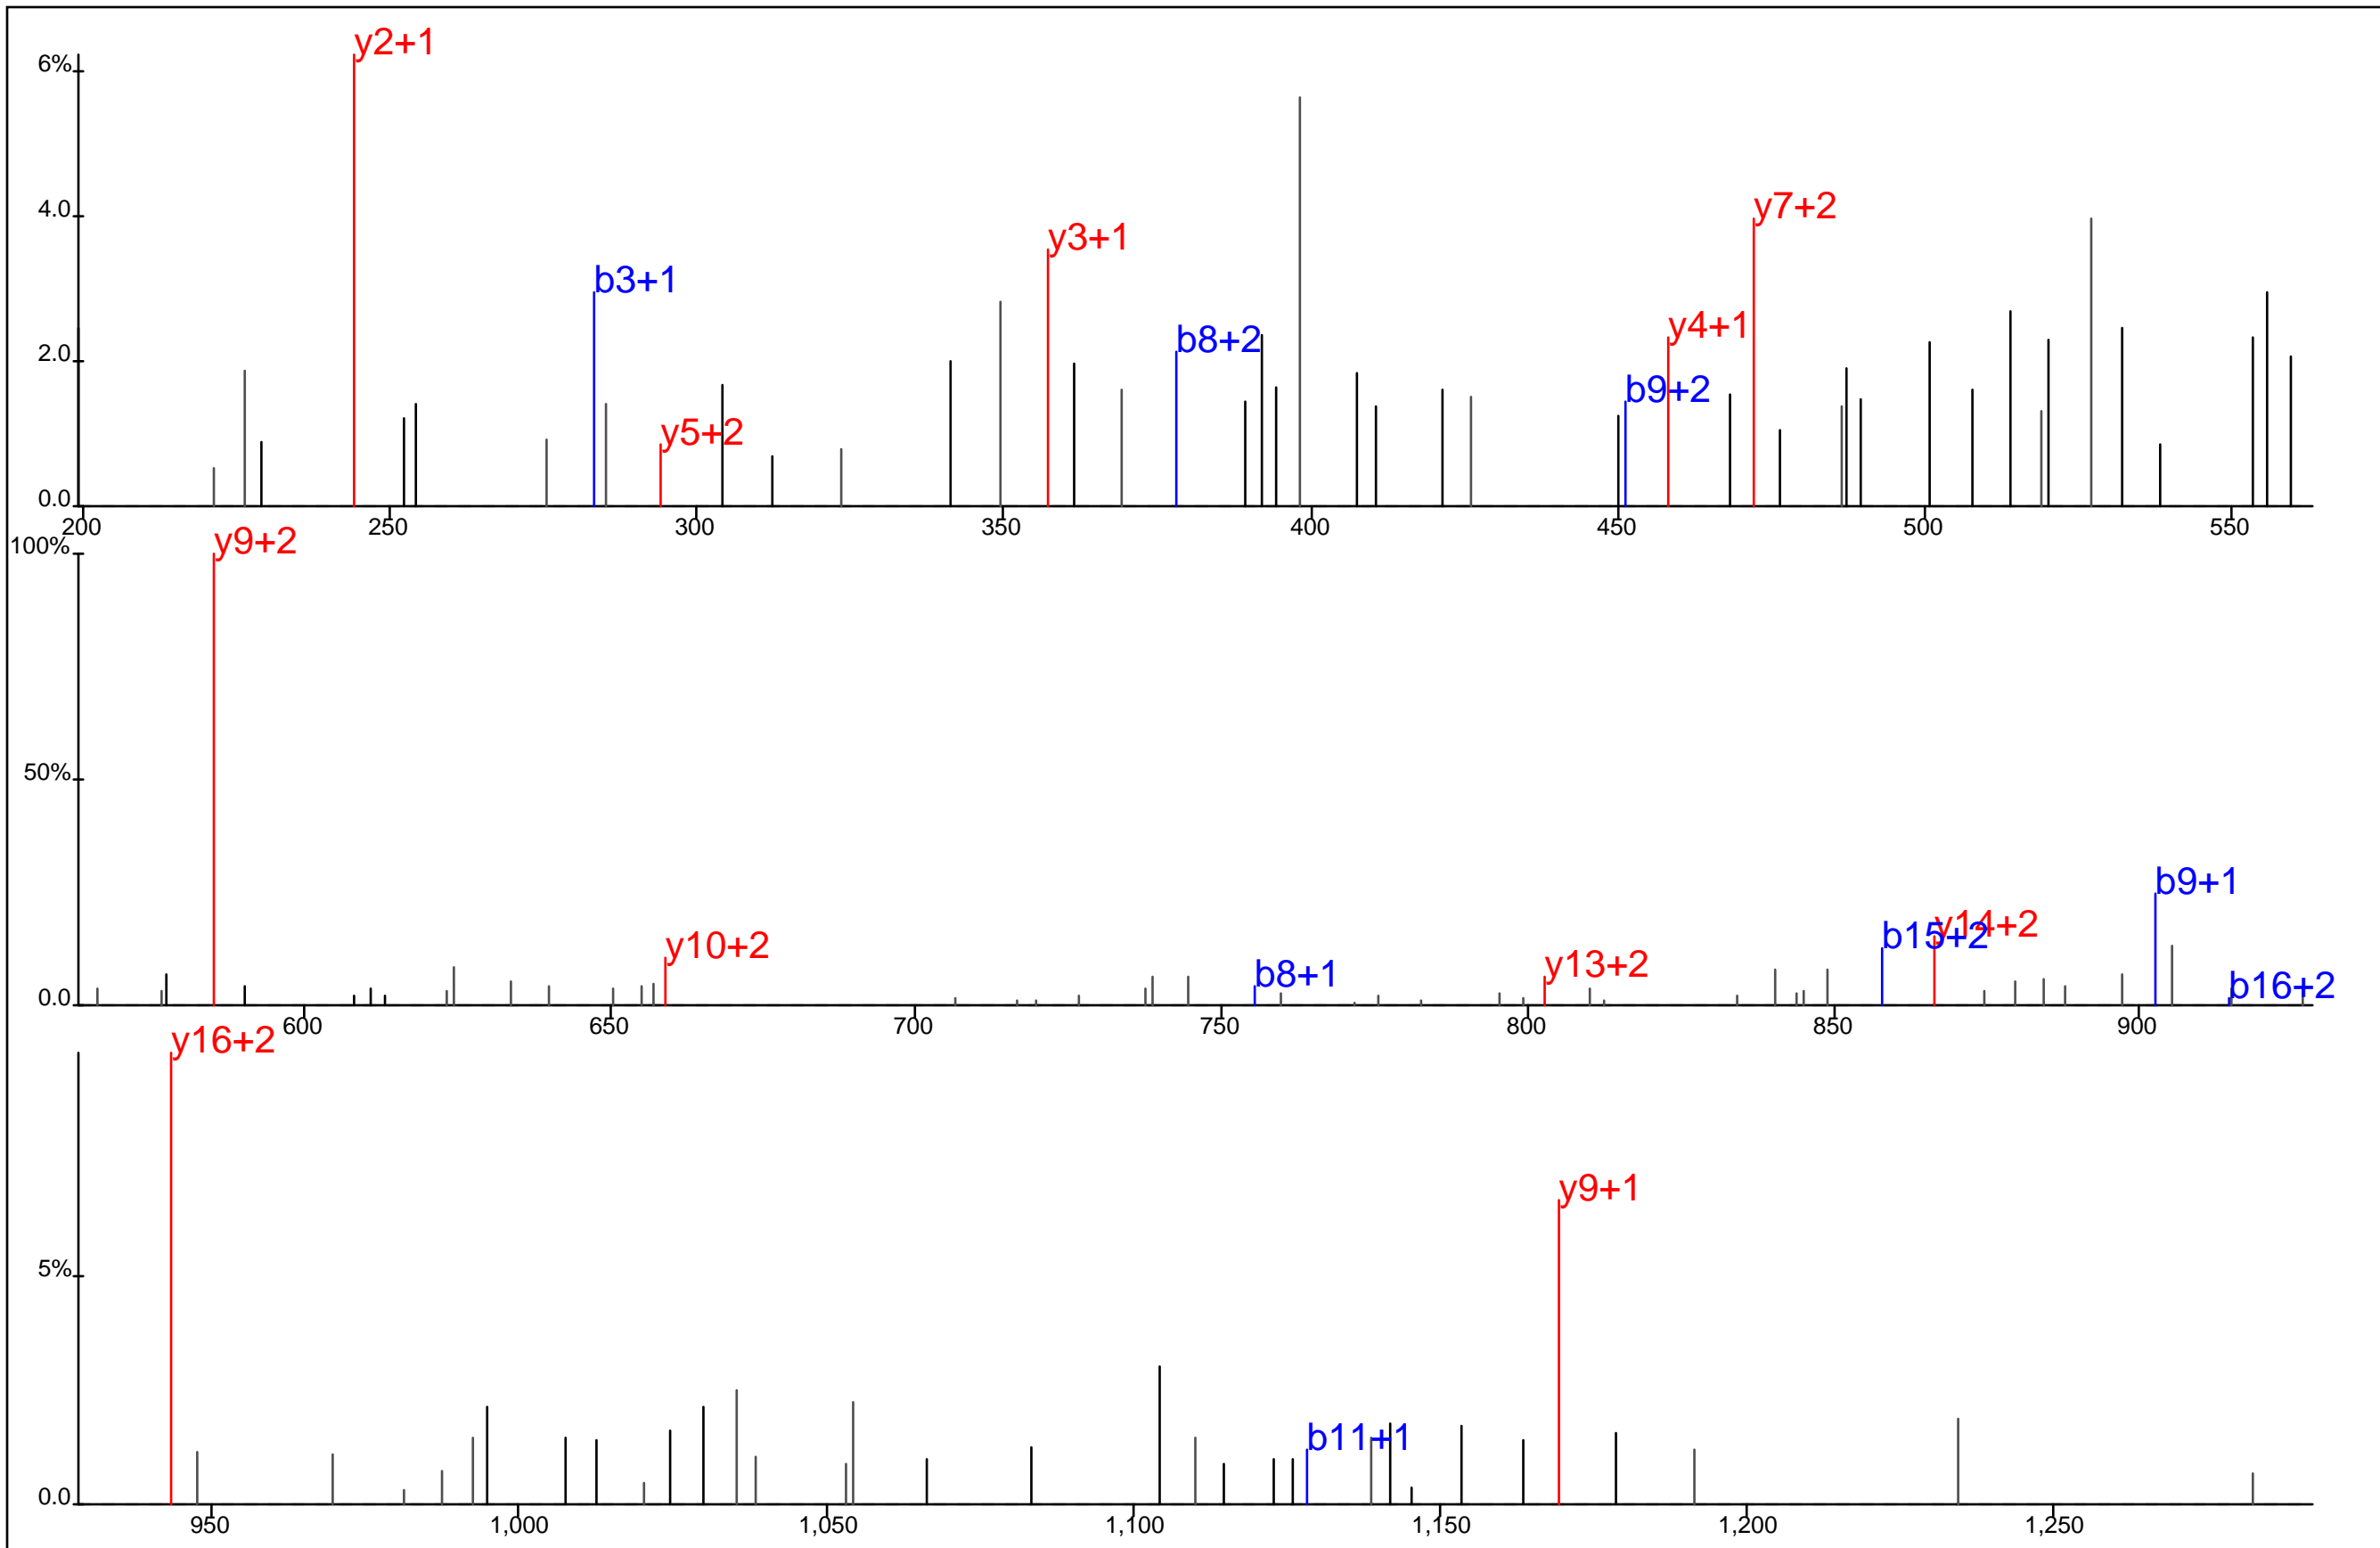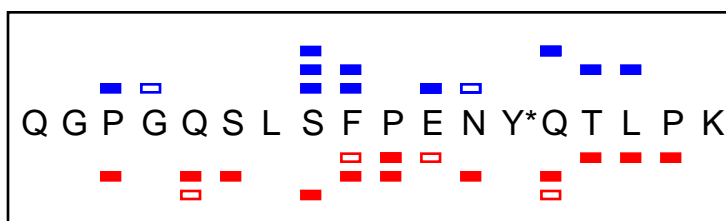

Protein Name: PLEKHA7  
 gi Accession: 0  
 Precursor Mass: 690.9884+3  
 Delta Mass: 1.229 ppm  
 XCorr: 25.83

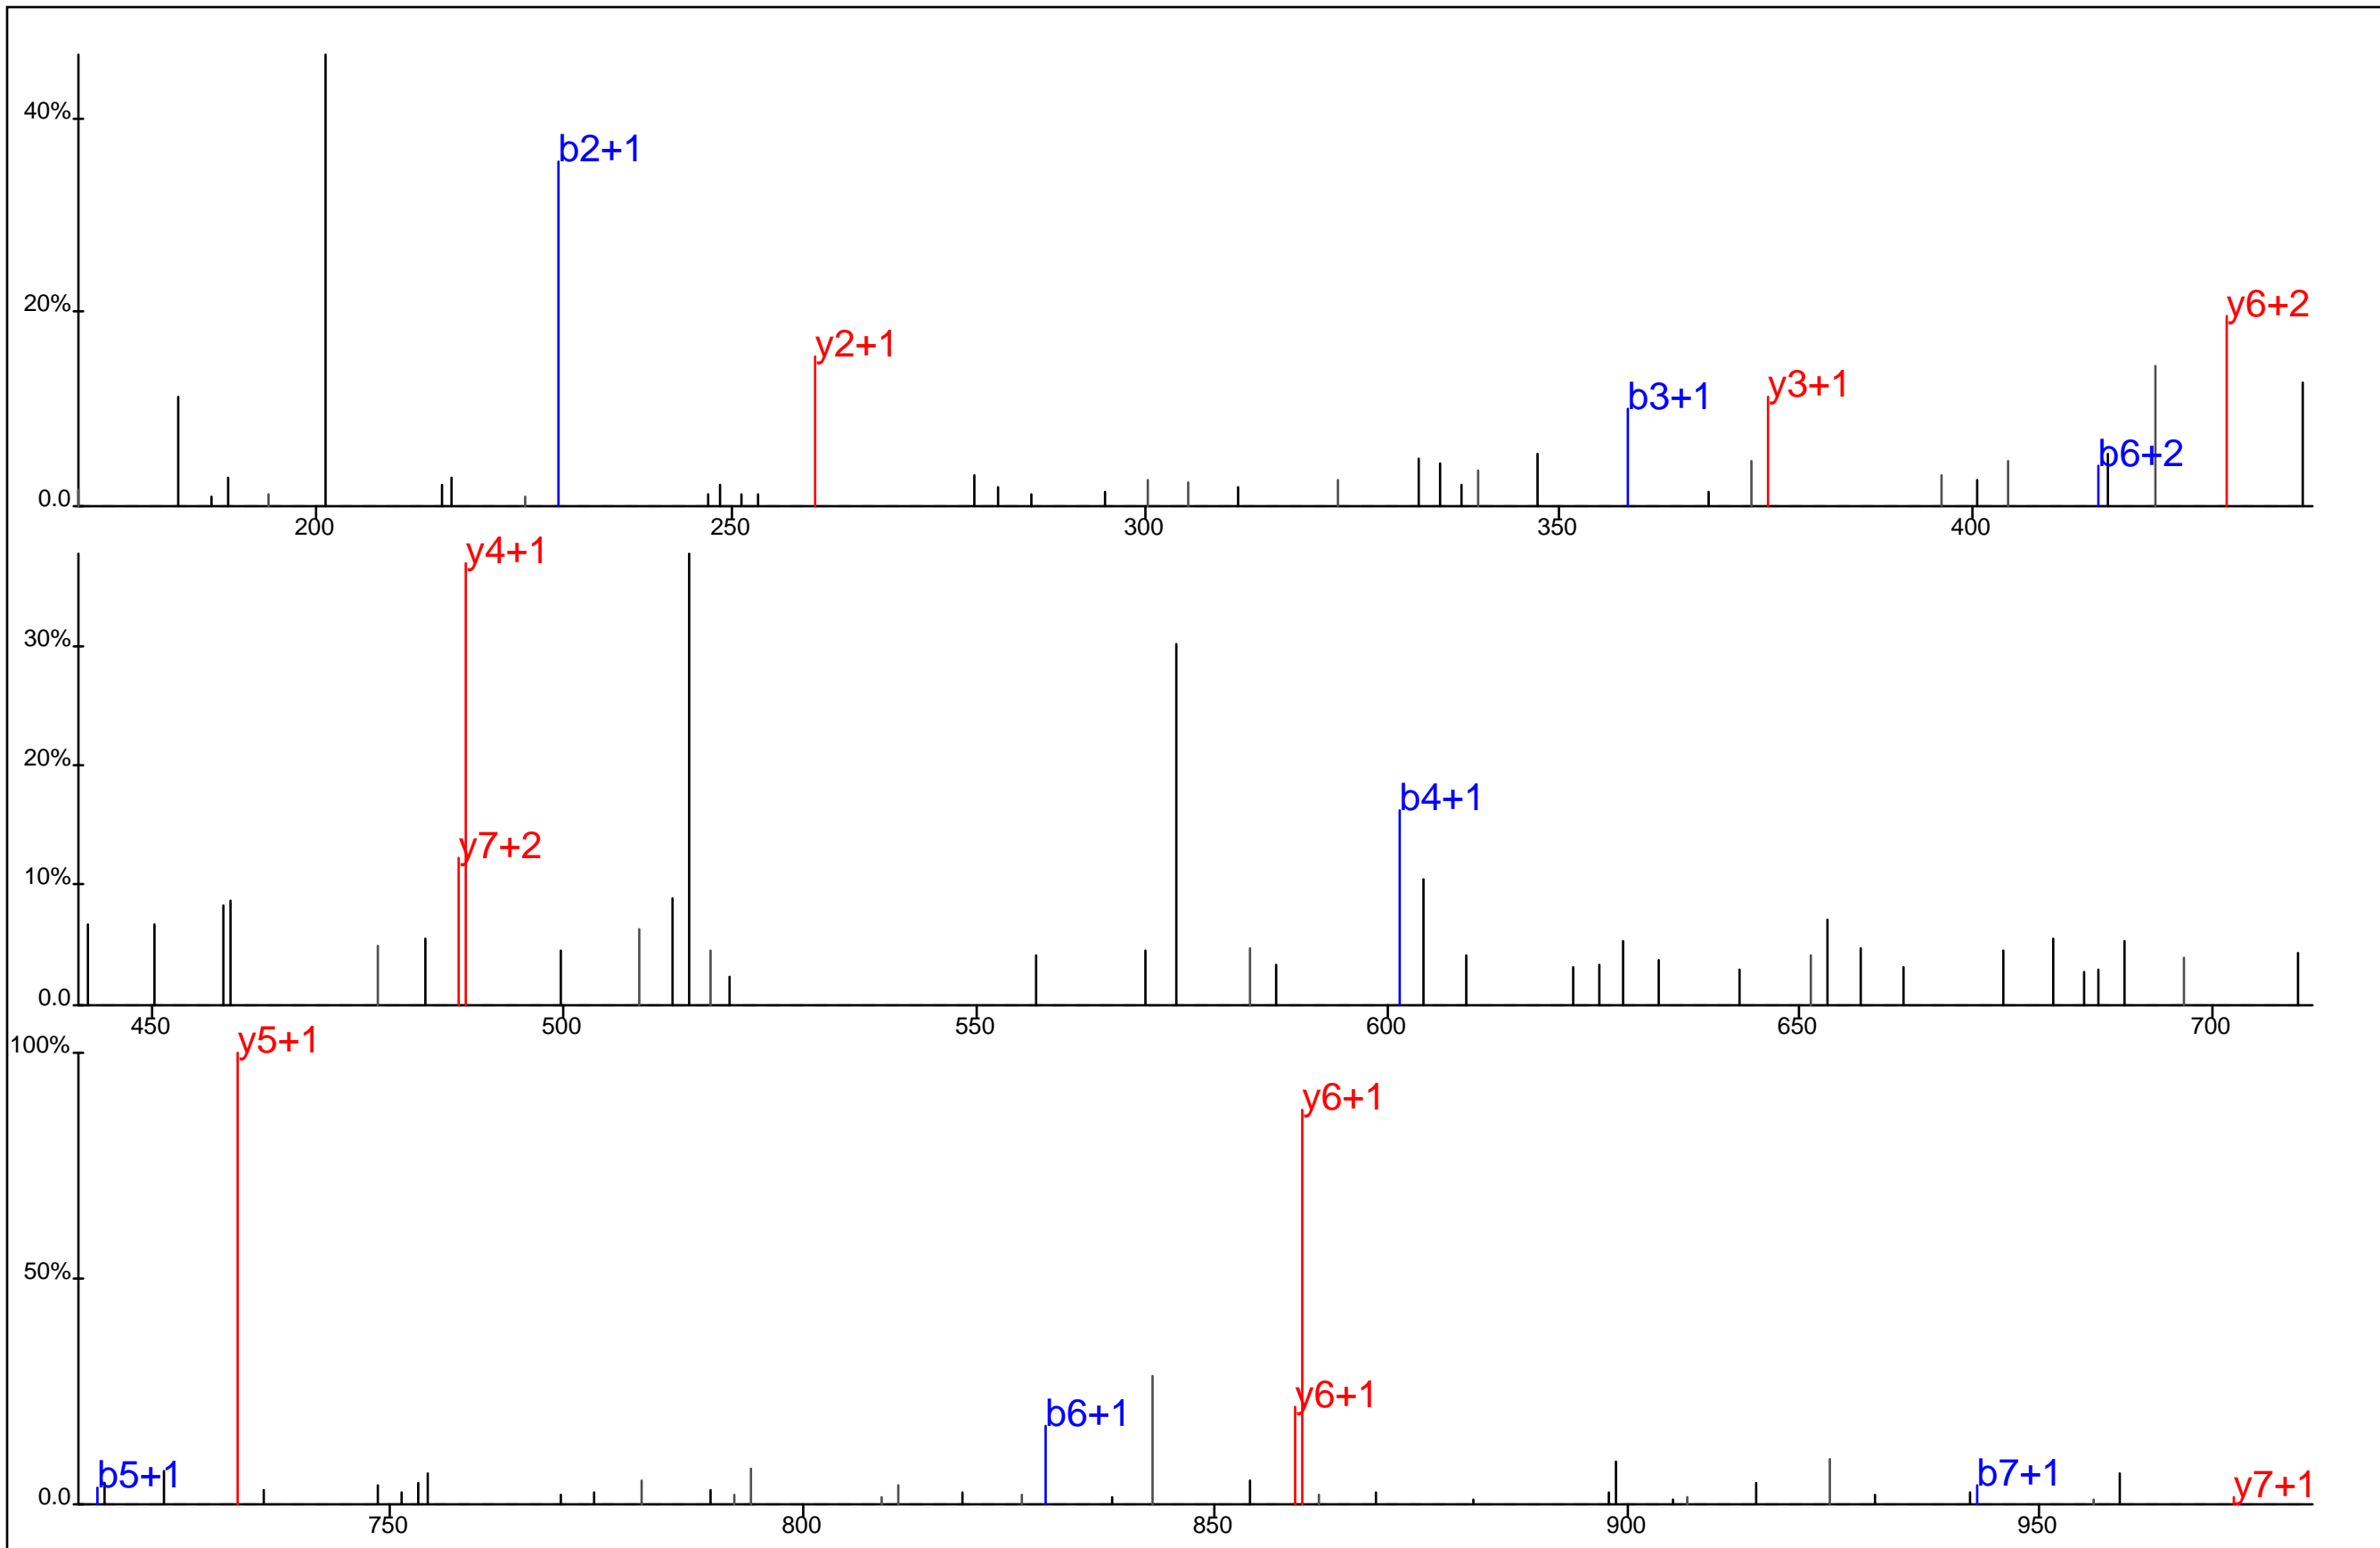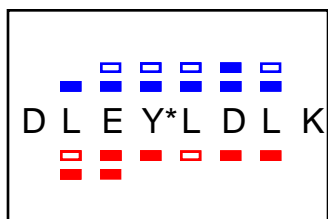

Protein Name: PLEKHA7  
 gi Accession: 0  
 Precursor Mass: 544.7498+2  
 Delta Mass: 1.042 ppm  
 XCorr: 30.71

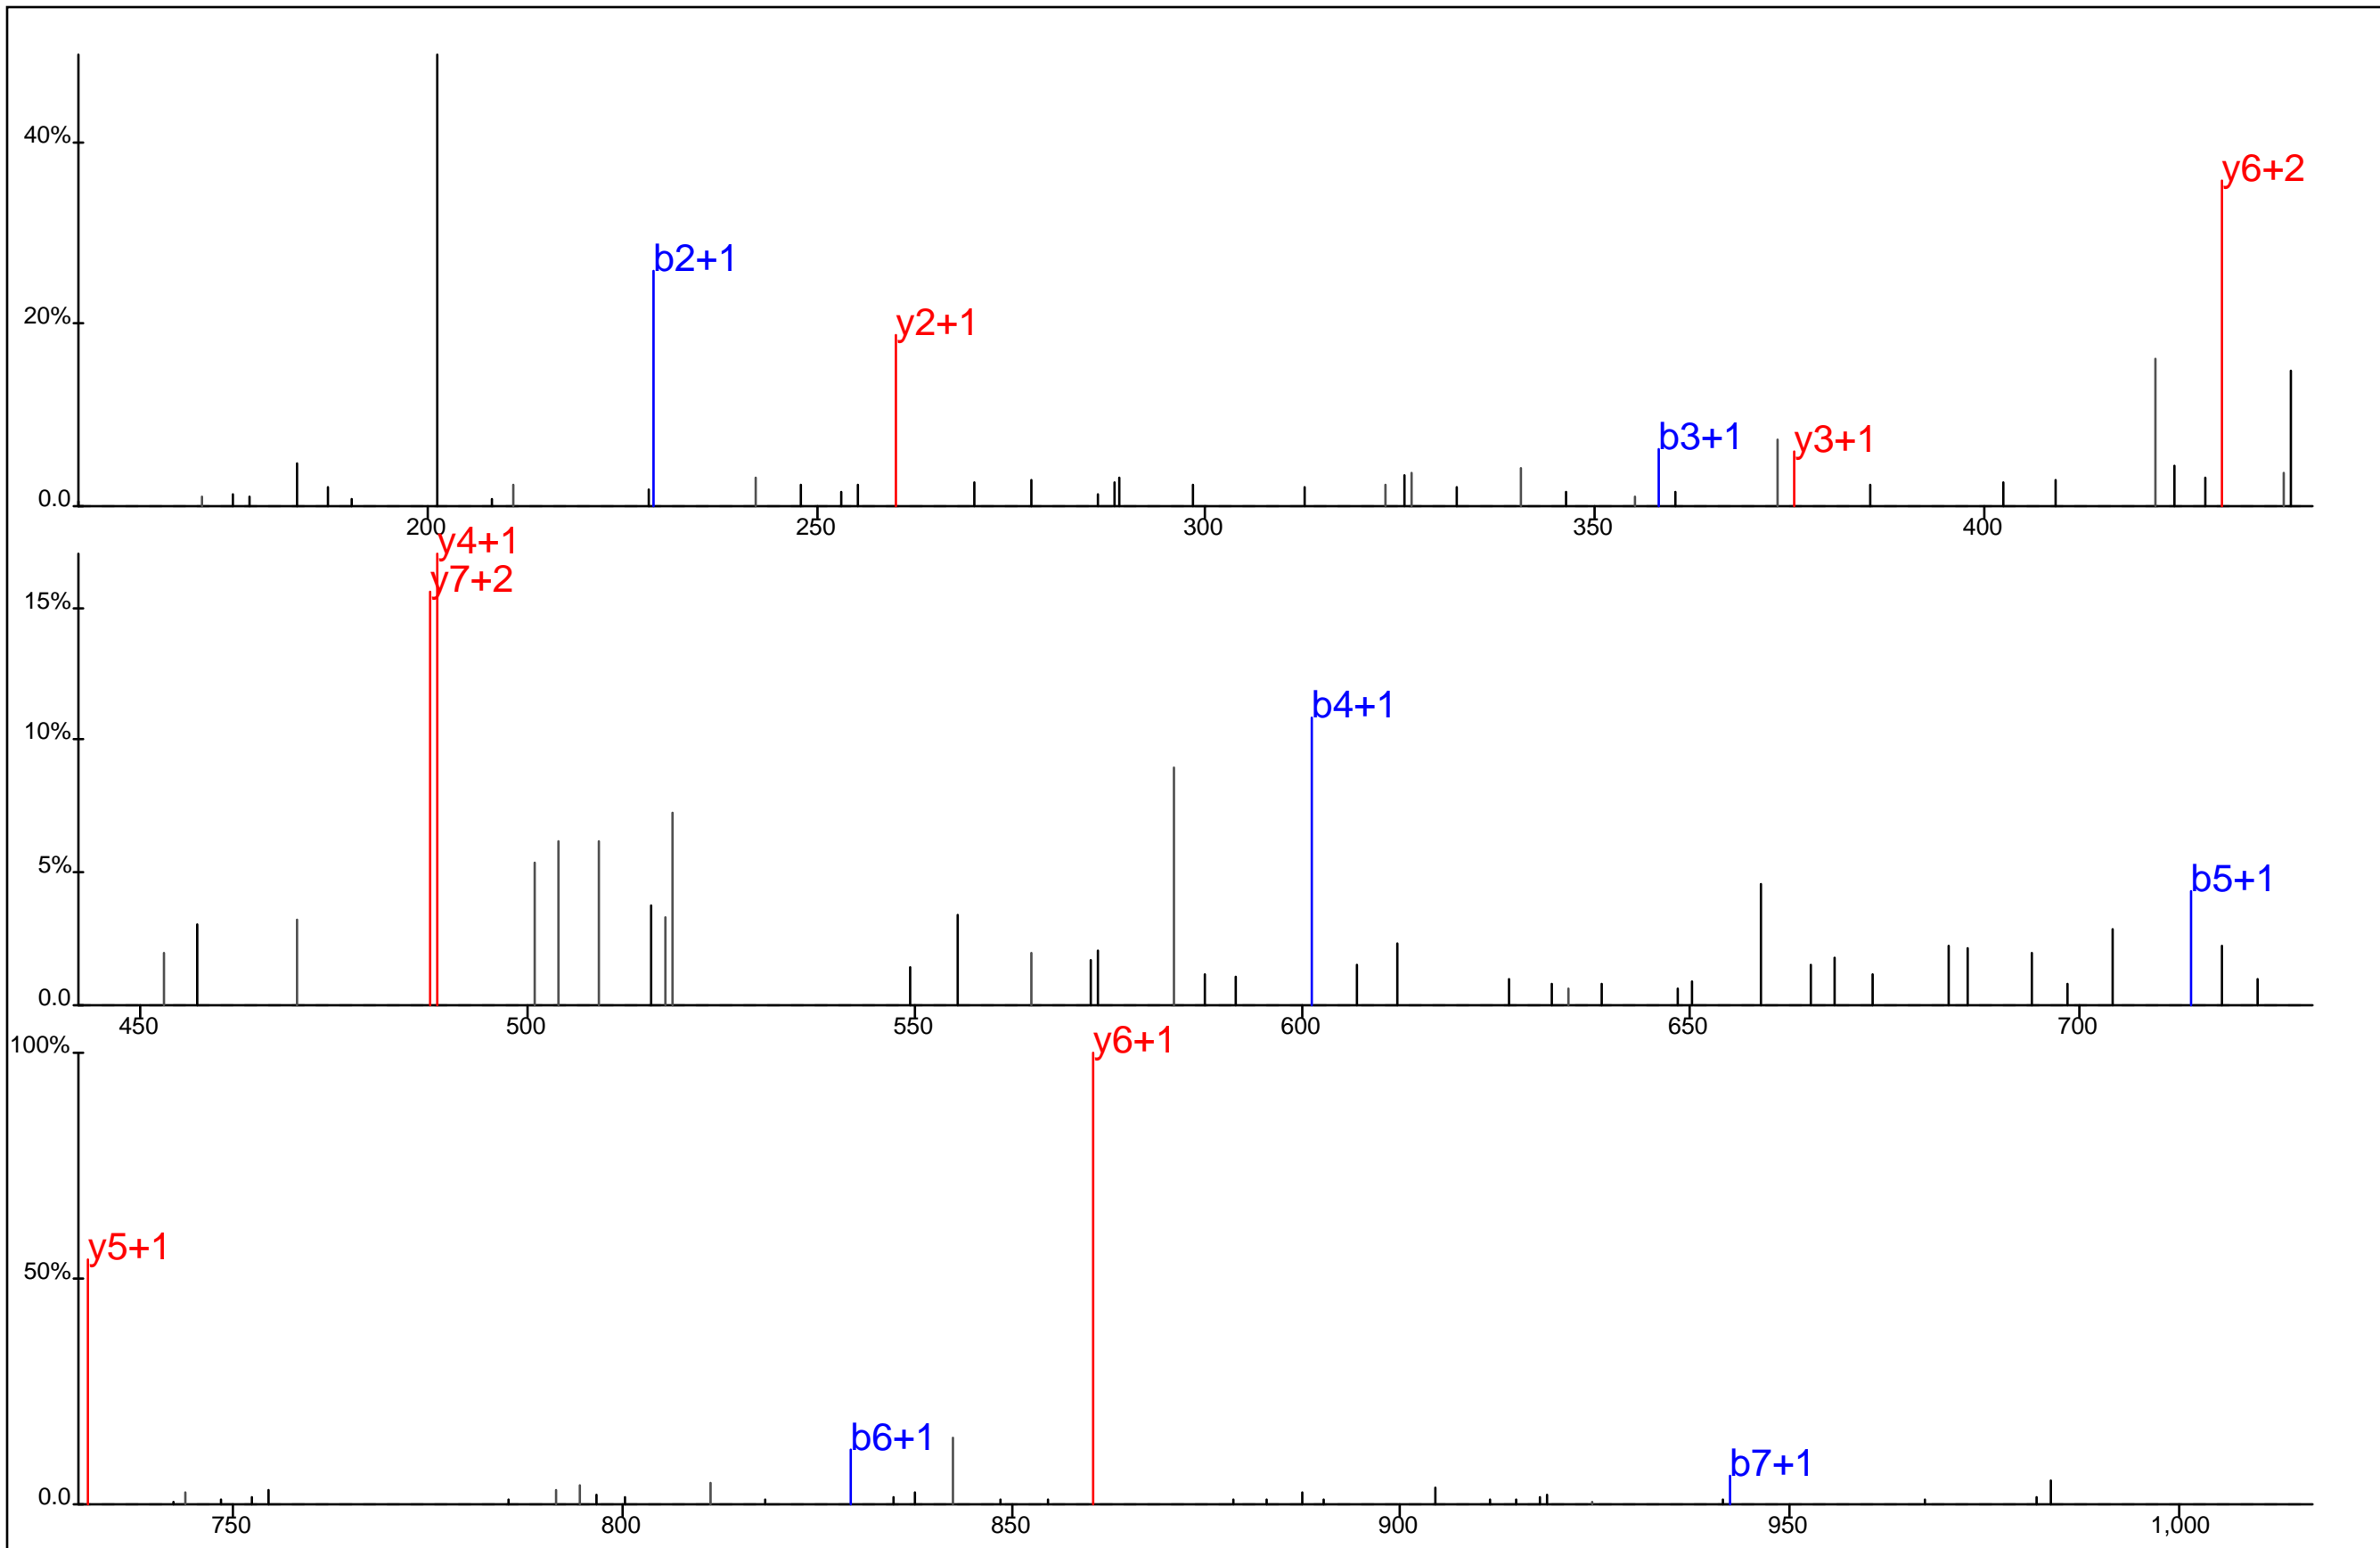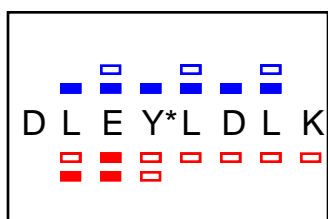

Protein Name: PLEKHA7  
 gi Accession: 0  
 Precursor Mass: 544.7493+2  
 Delta Mass: 0.145 ppm  
 XCorr: 32.6

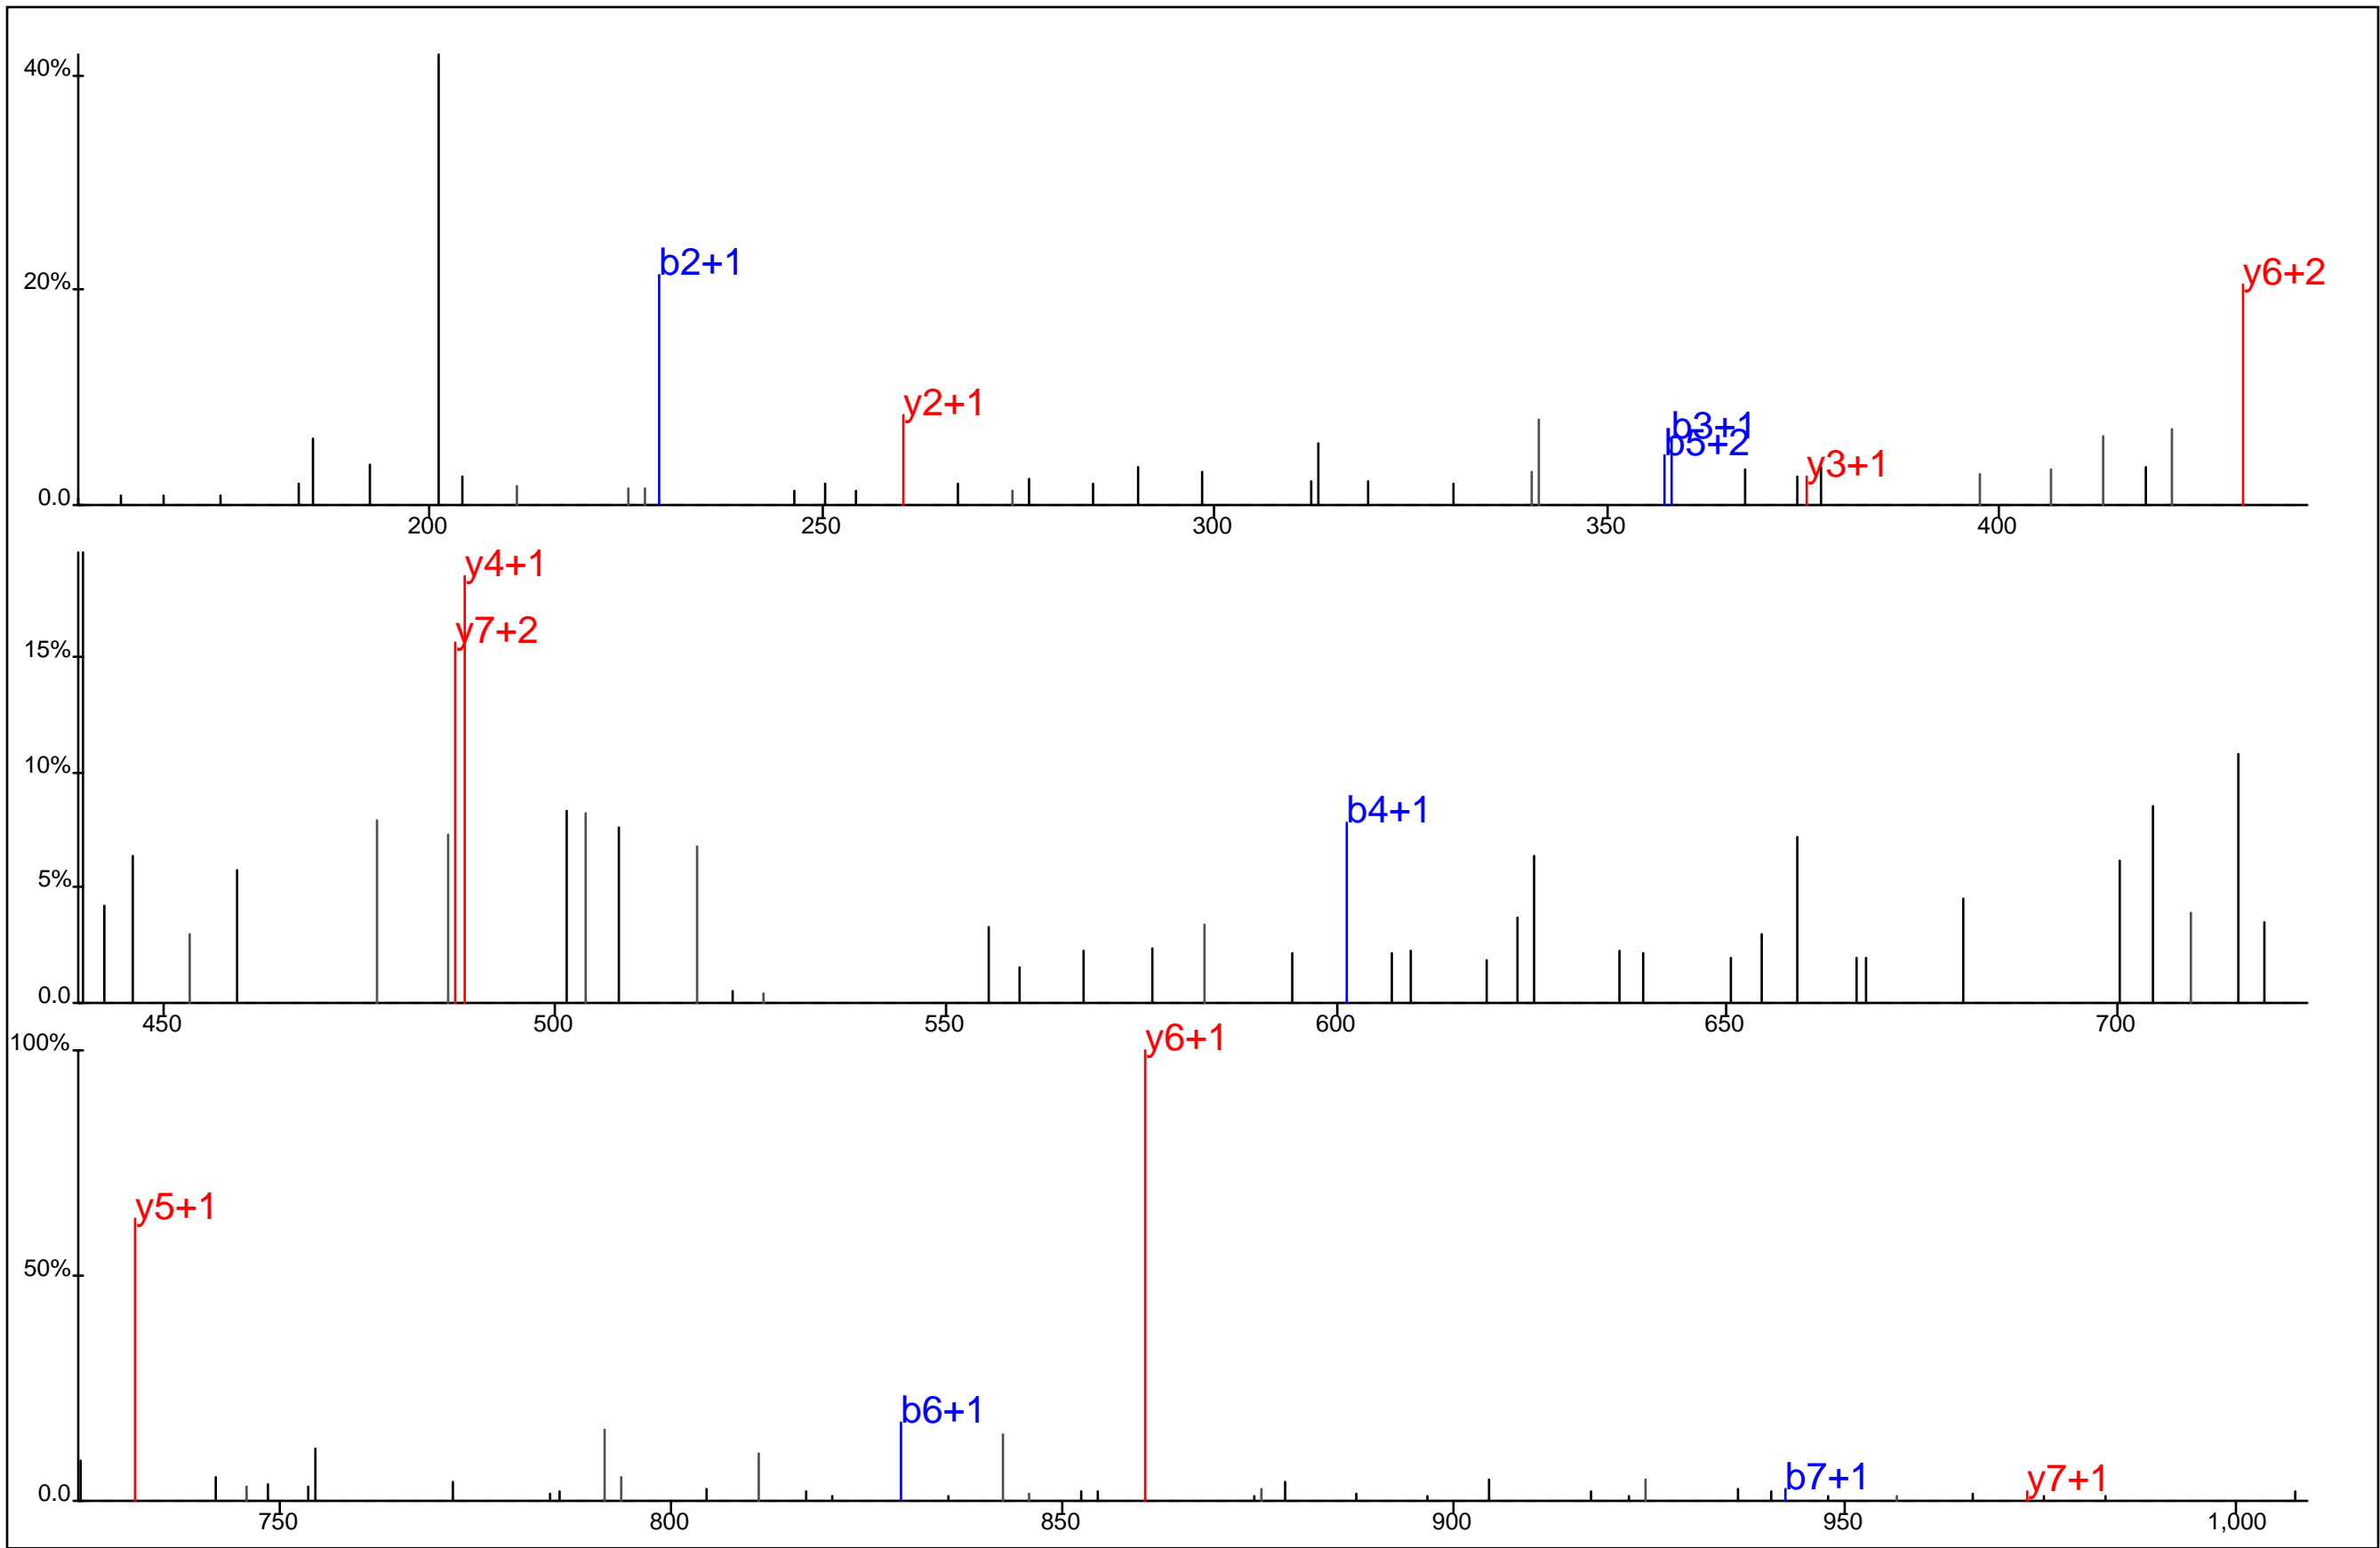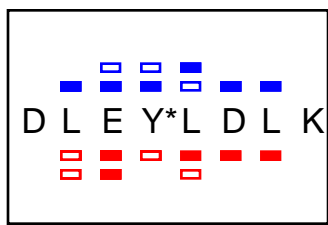

Protein Name: PLEKHA7  
 gi Accession: 0  
 Precursor Mass: 544.7512+2  
 Delta Mass: 3.734 ppm  
 XCorr: 39.84

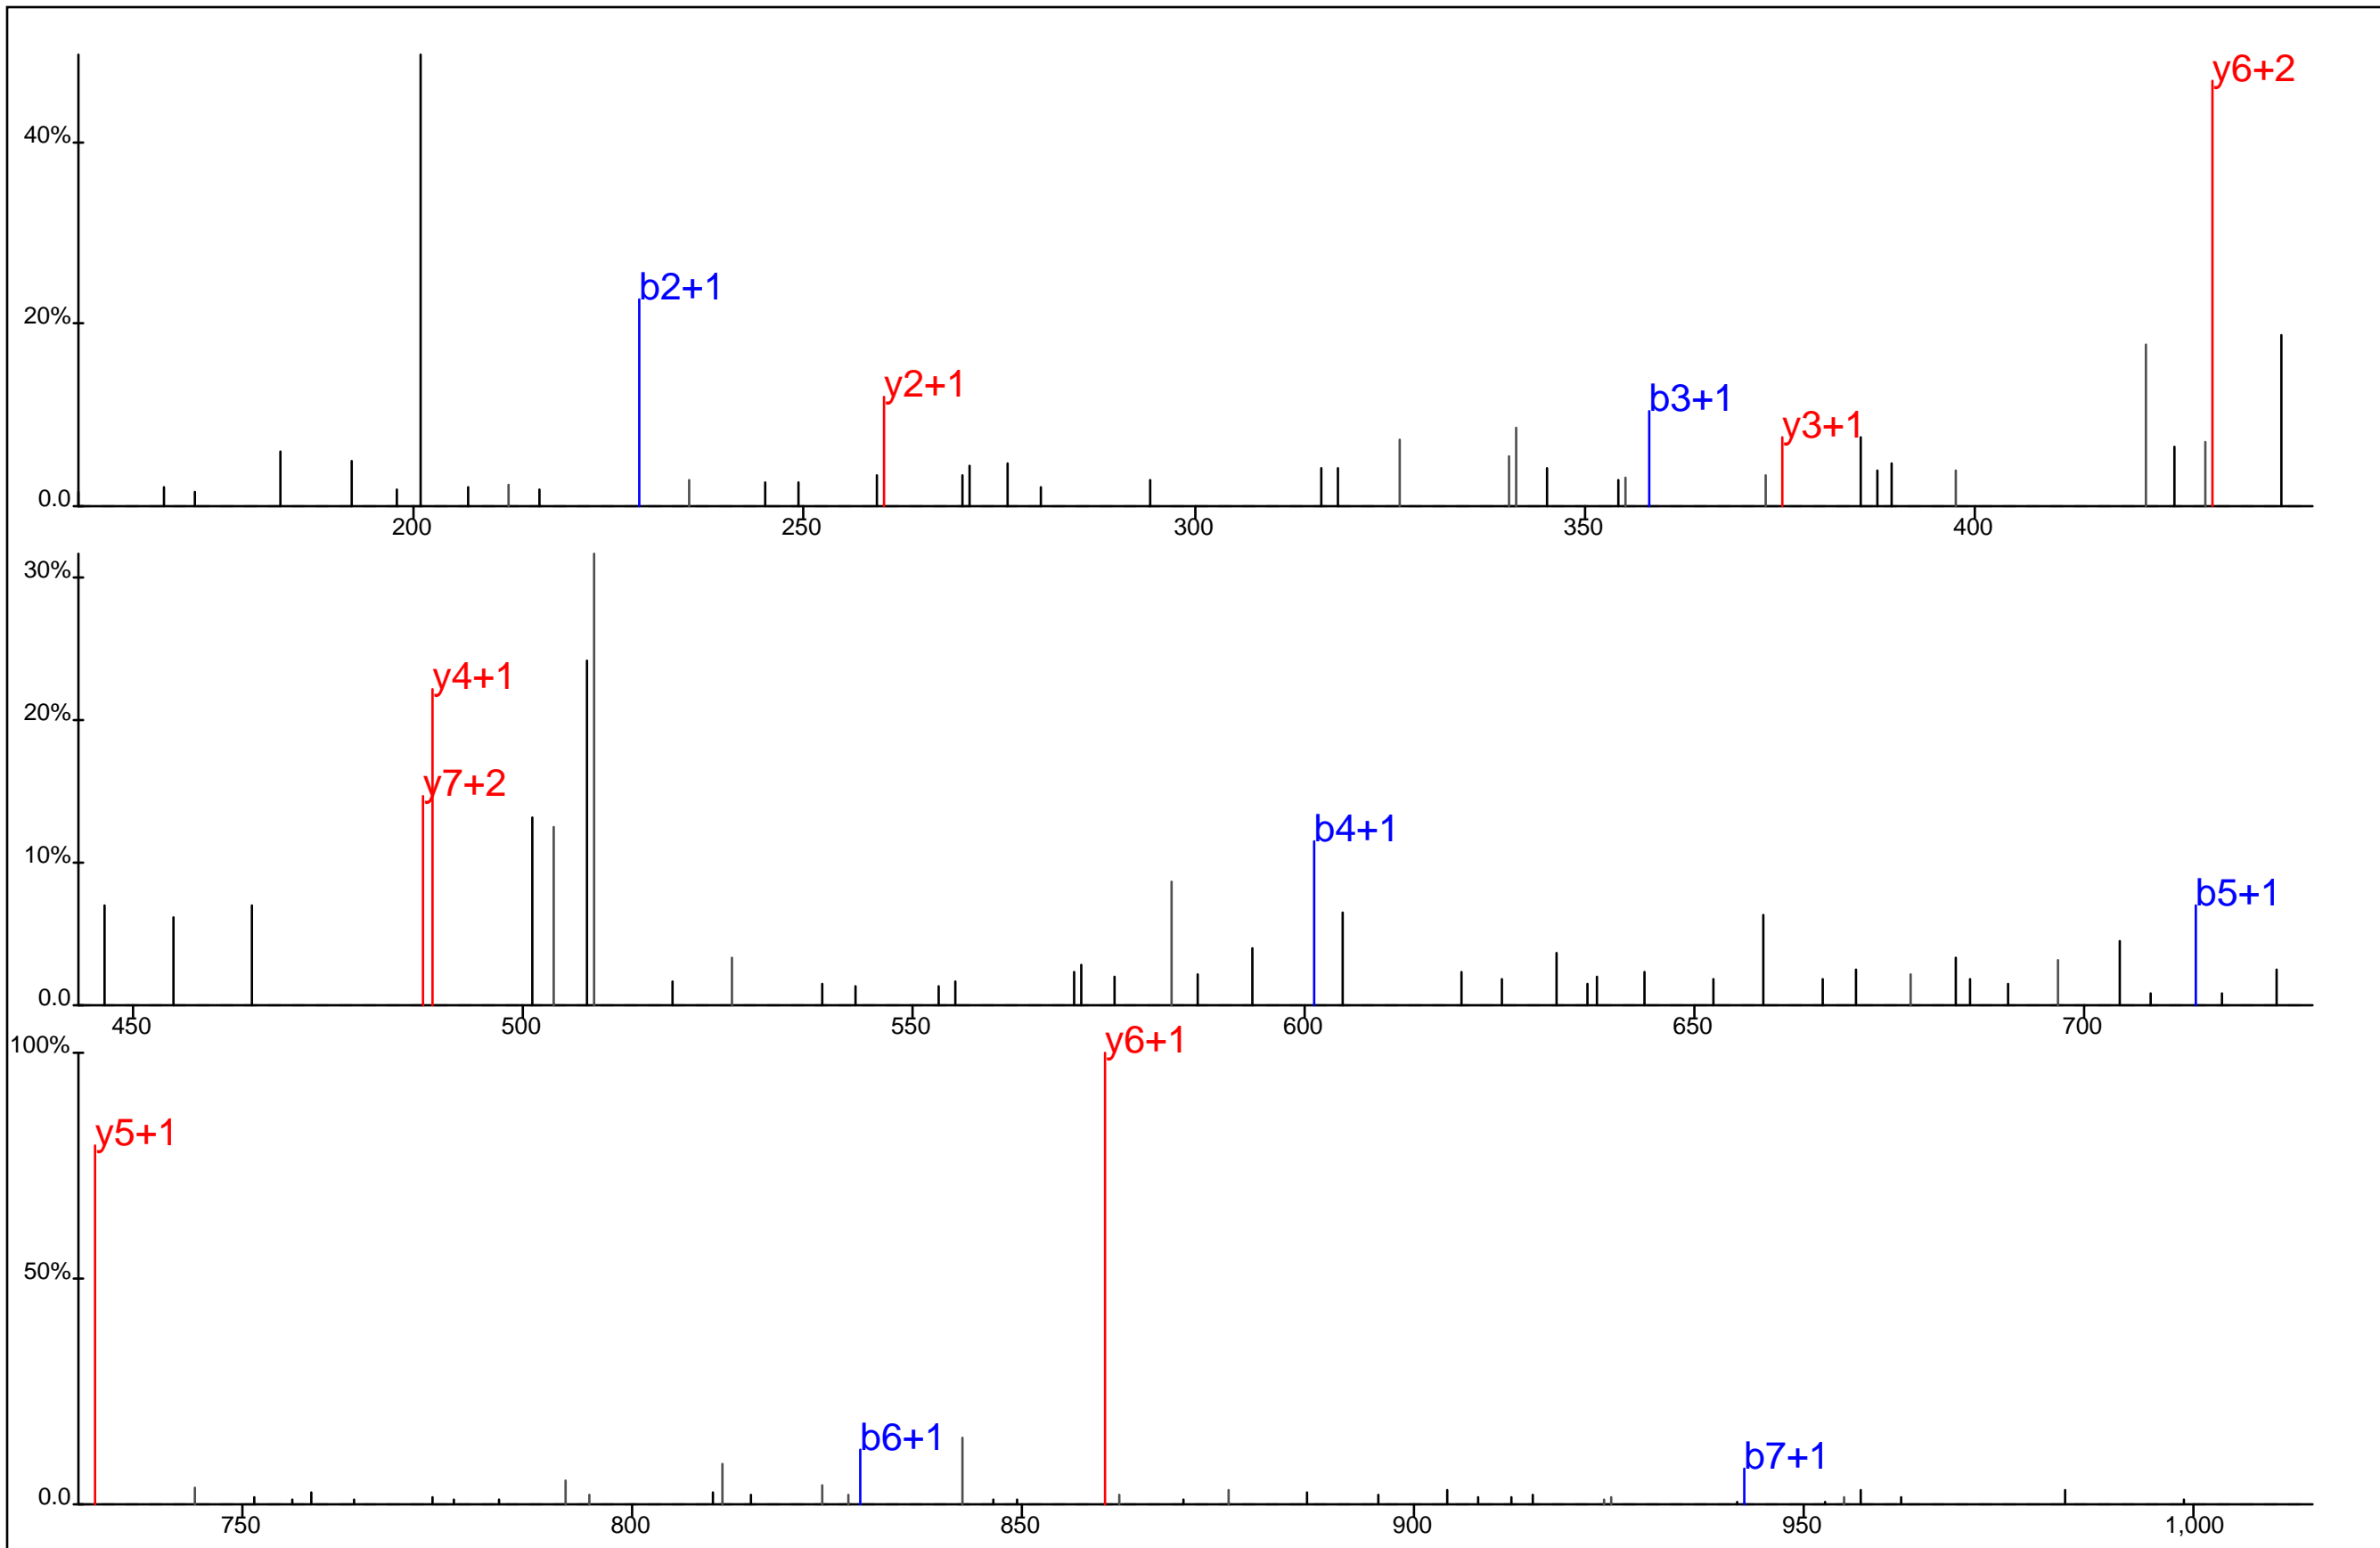

D L E Y\* L D L K

Protein Name: PLEKHA7  
 gi Accession: 0  
 Precursor Mass: 544.7488+2  
 Delta Mass: 0.753 ppm  
 XCorr: 30.34

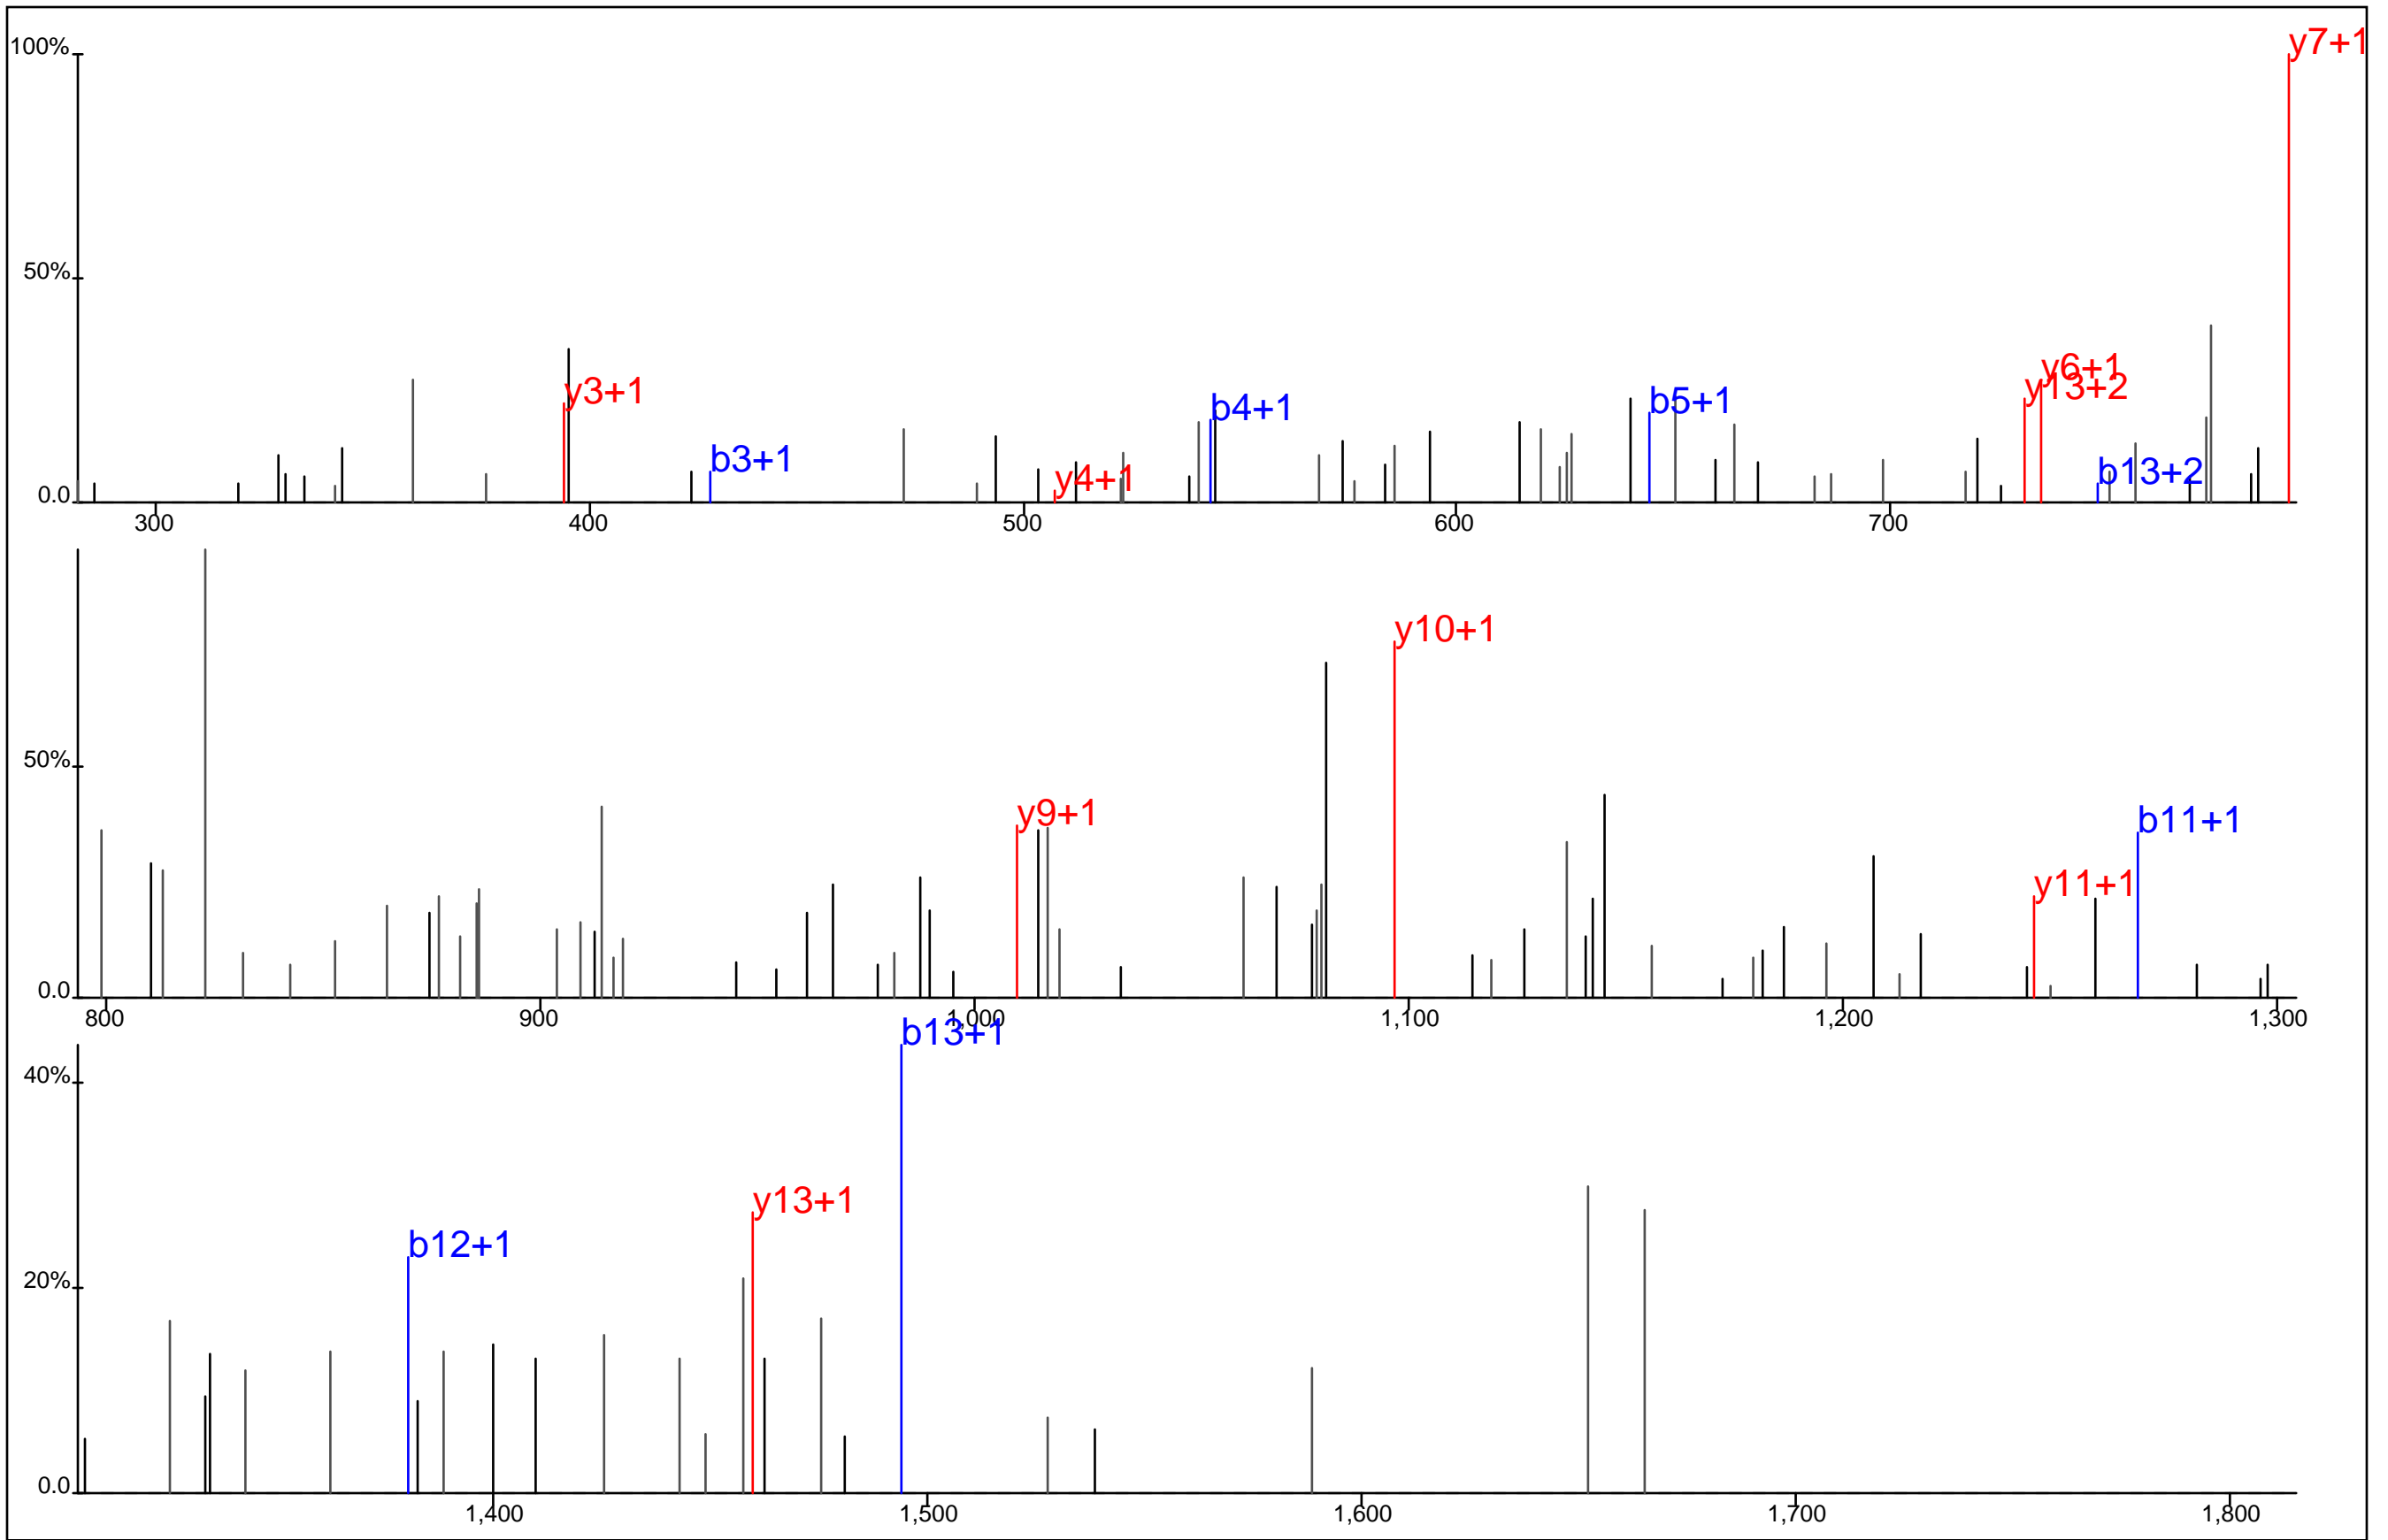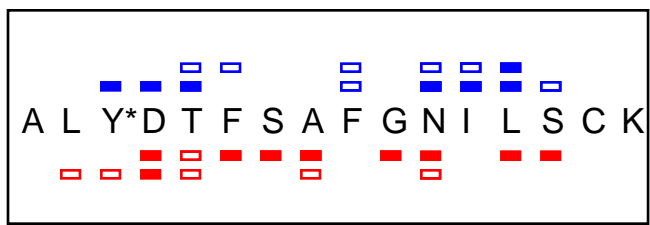

Protein Name: Poly(A) binding protein 4  
 gi Accession: 0  
 Precursor Mass: 943.9200+2  
 Delta Mass: 3.498 ppm  
 XCorr: 30.92

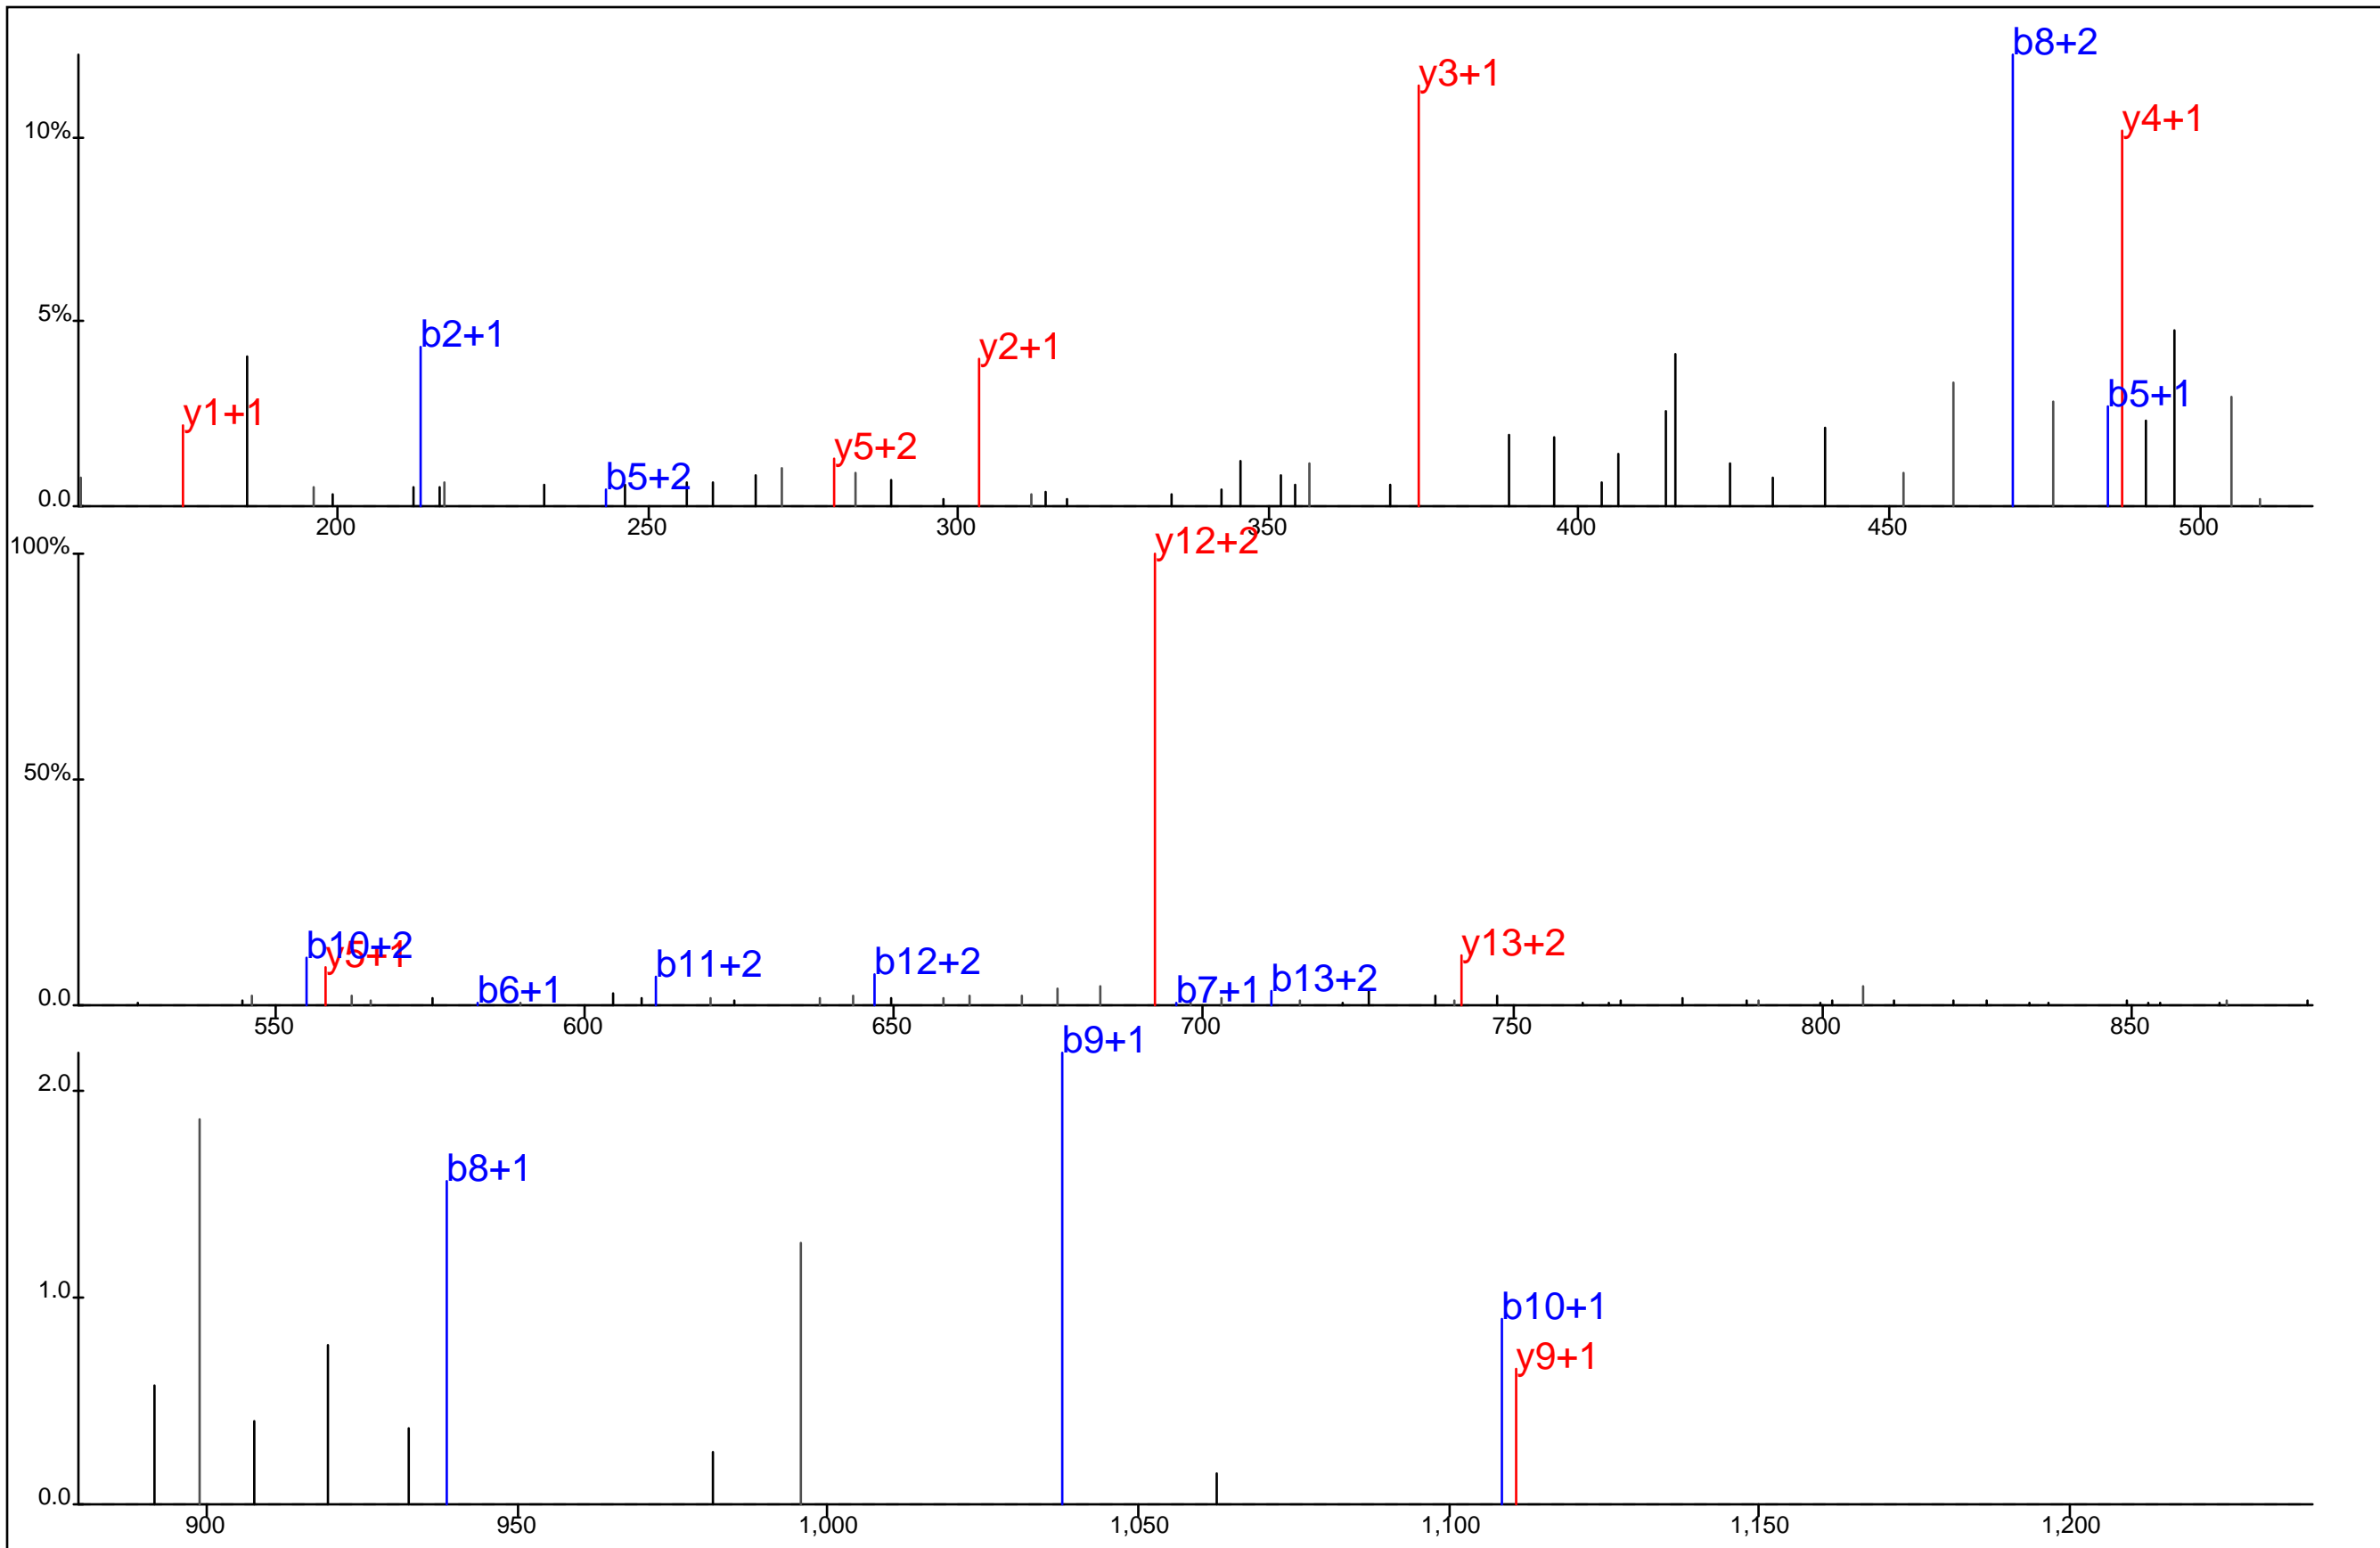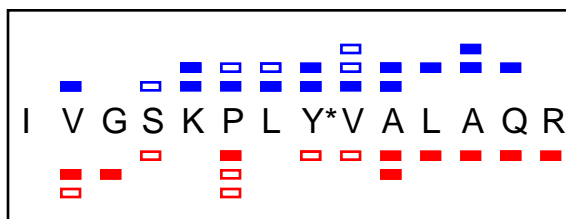

Protein Name: Poly(A) binding protein 4  
 gi Accession: 0  
 Precursor Mass: 532.2952+3  
 Delta Mass: 0.309 ppm  
 XCorr: 29.65





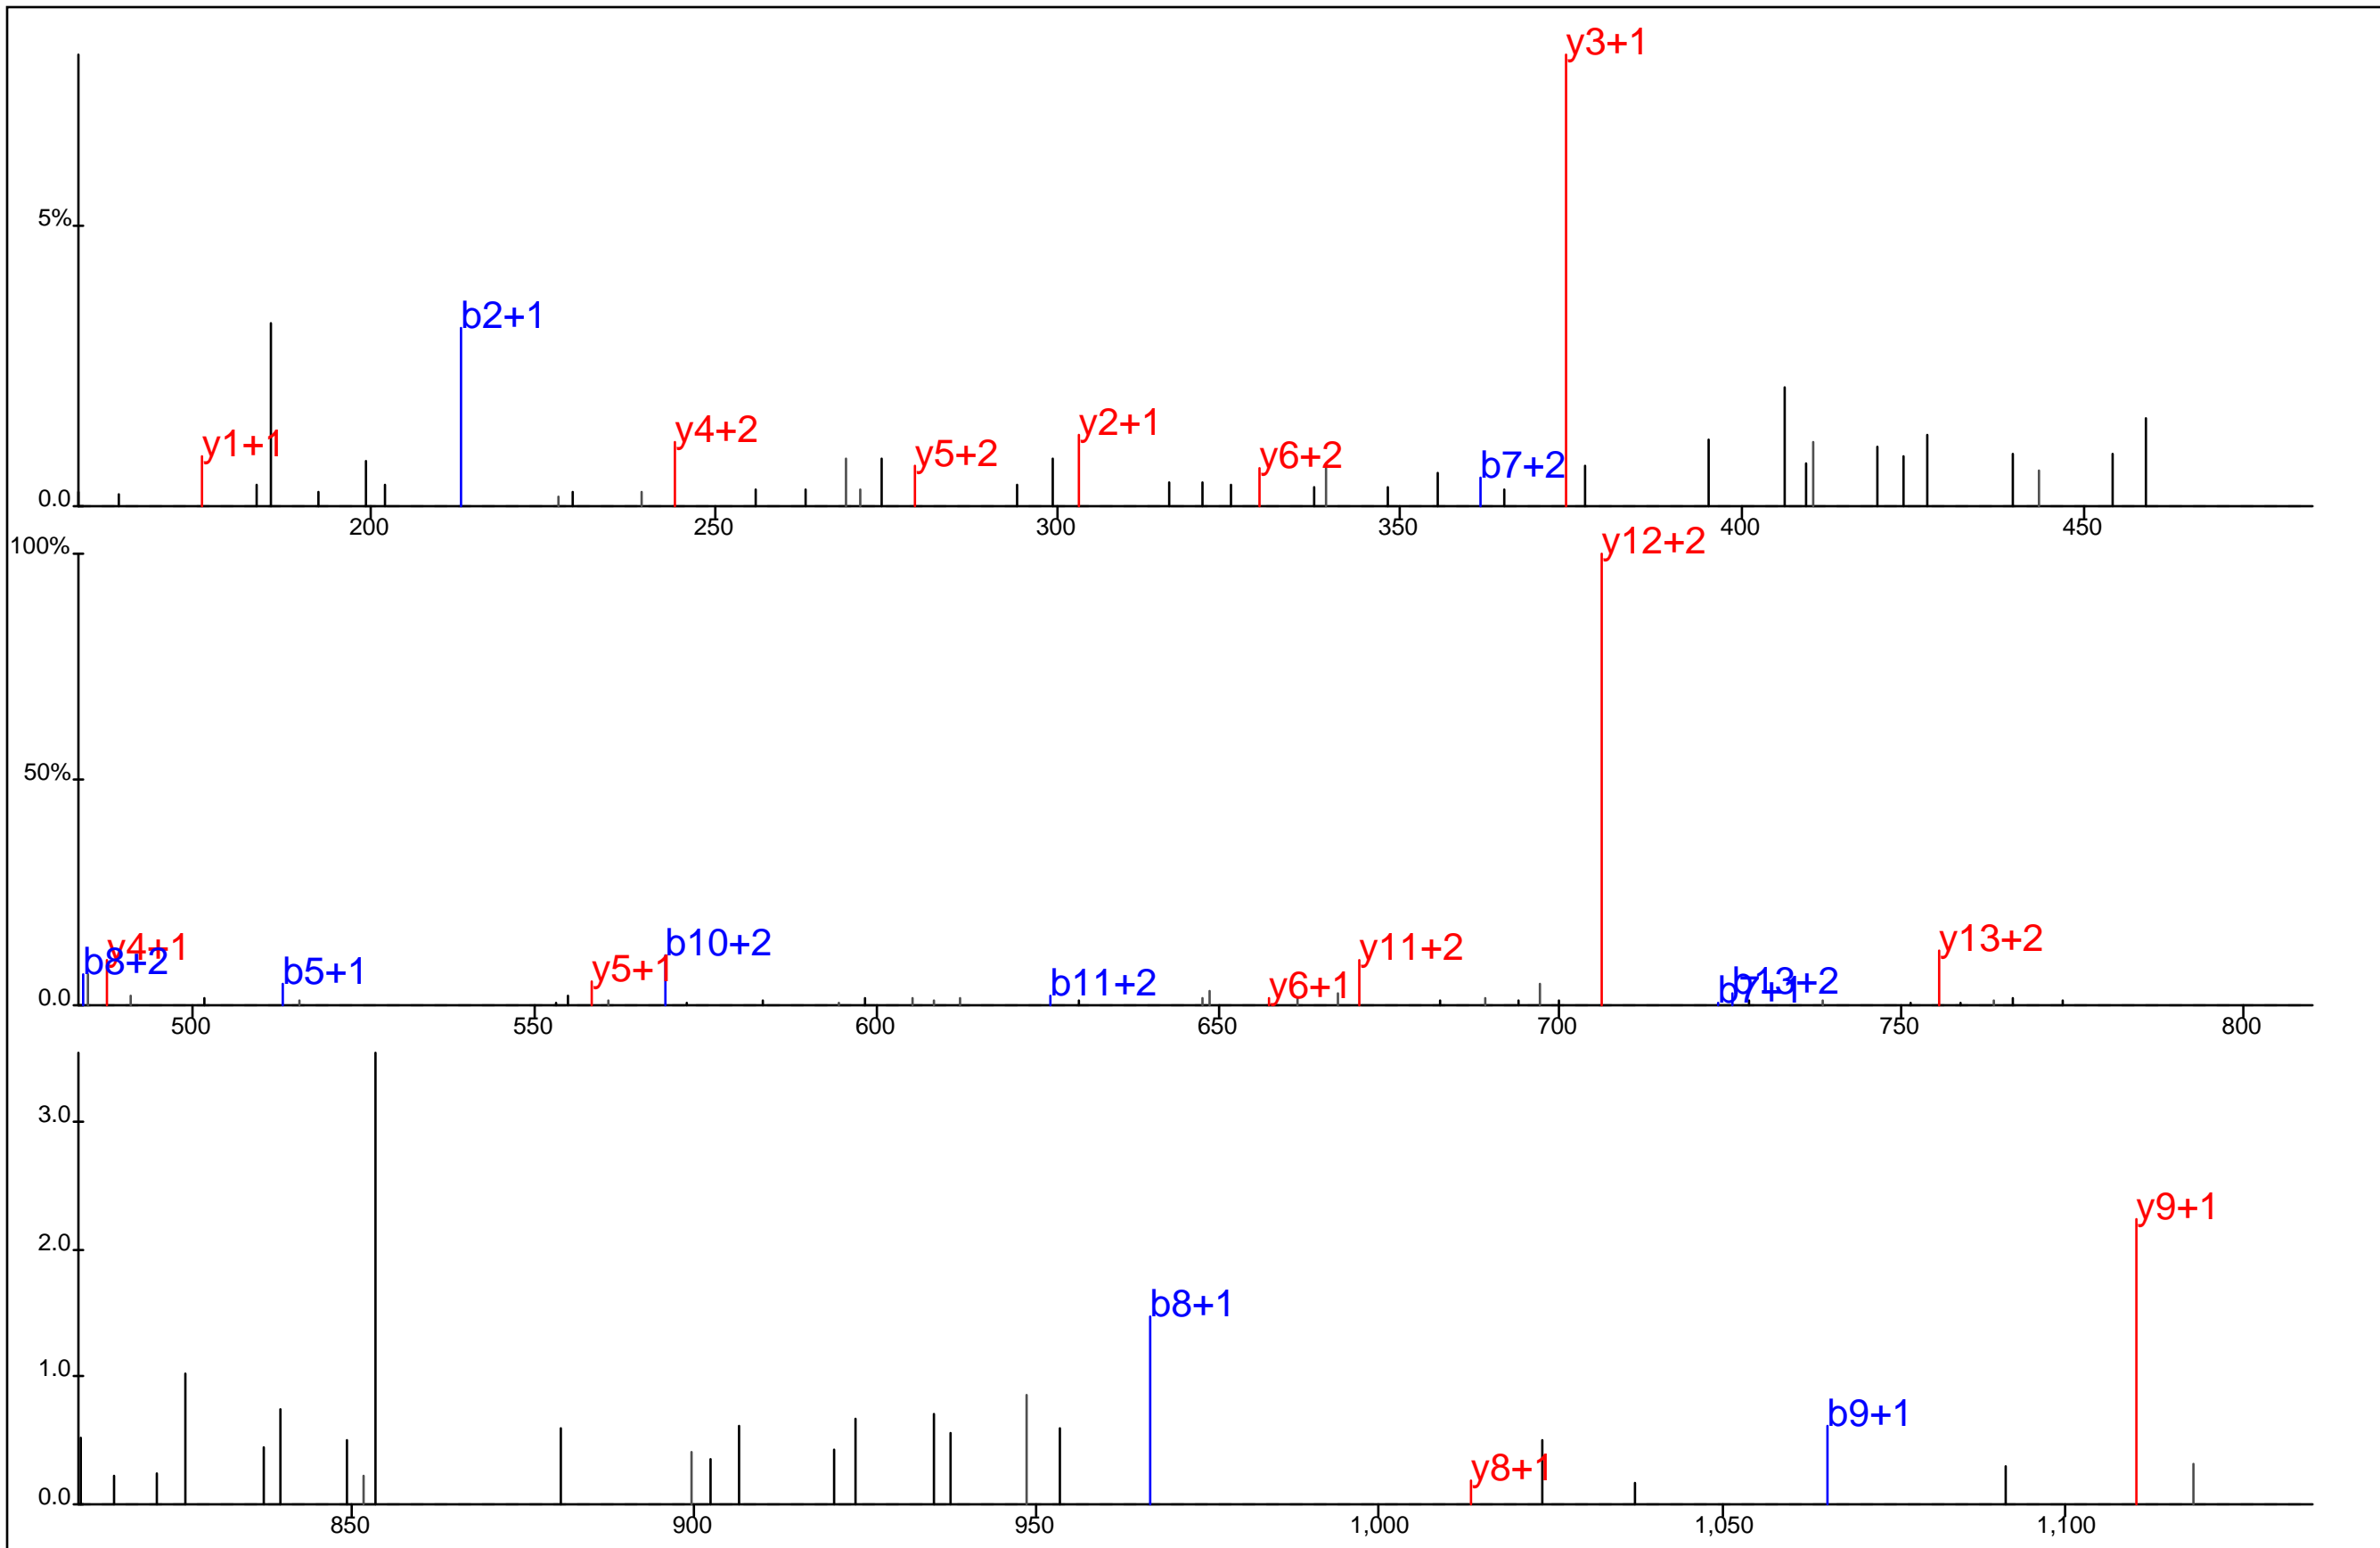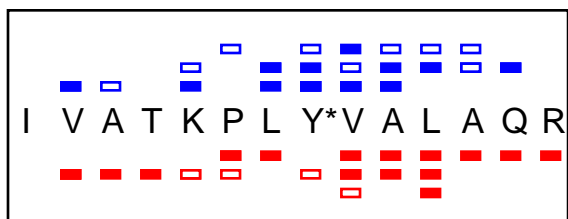

Protein Name: Polyadenylate binding protein 1  
 gi Accession: 0  
 Precursor Mass: 541.6406+3  
 Delta Mass: 2.599 ppm  
 XCorr: 40.55

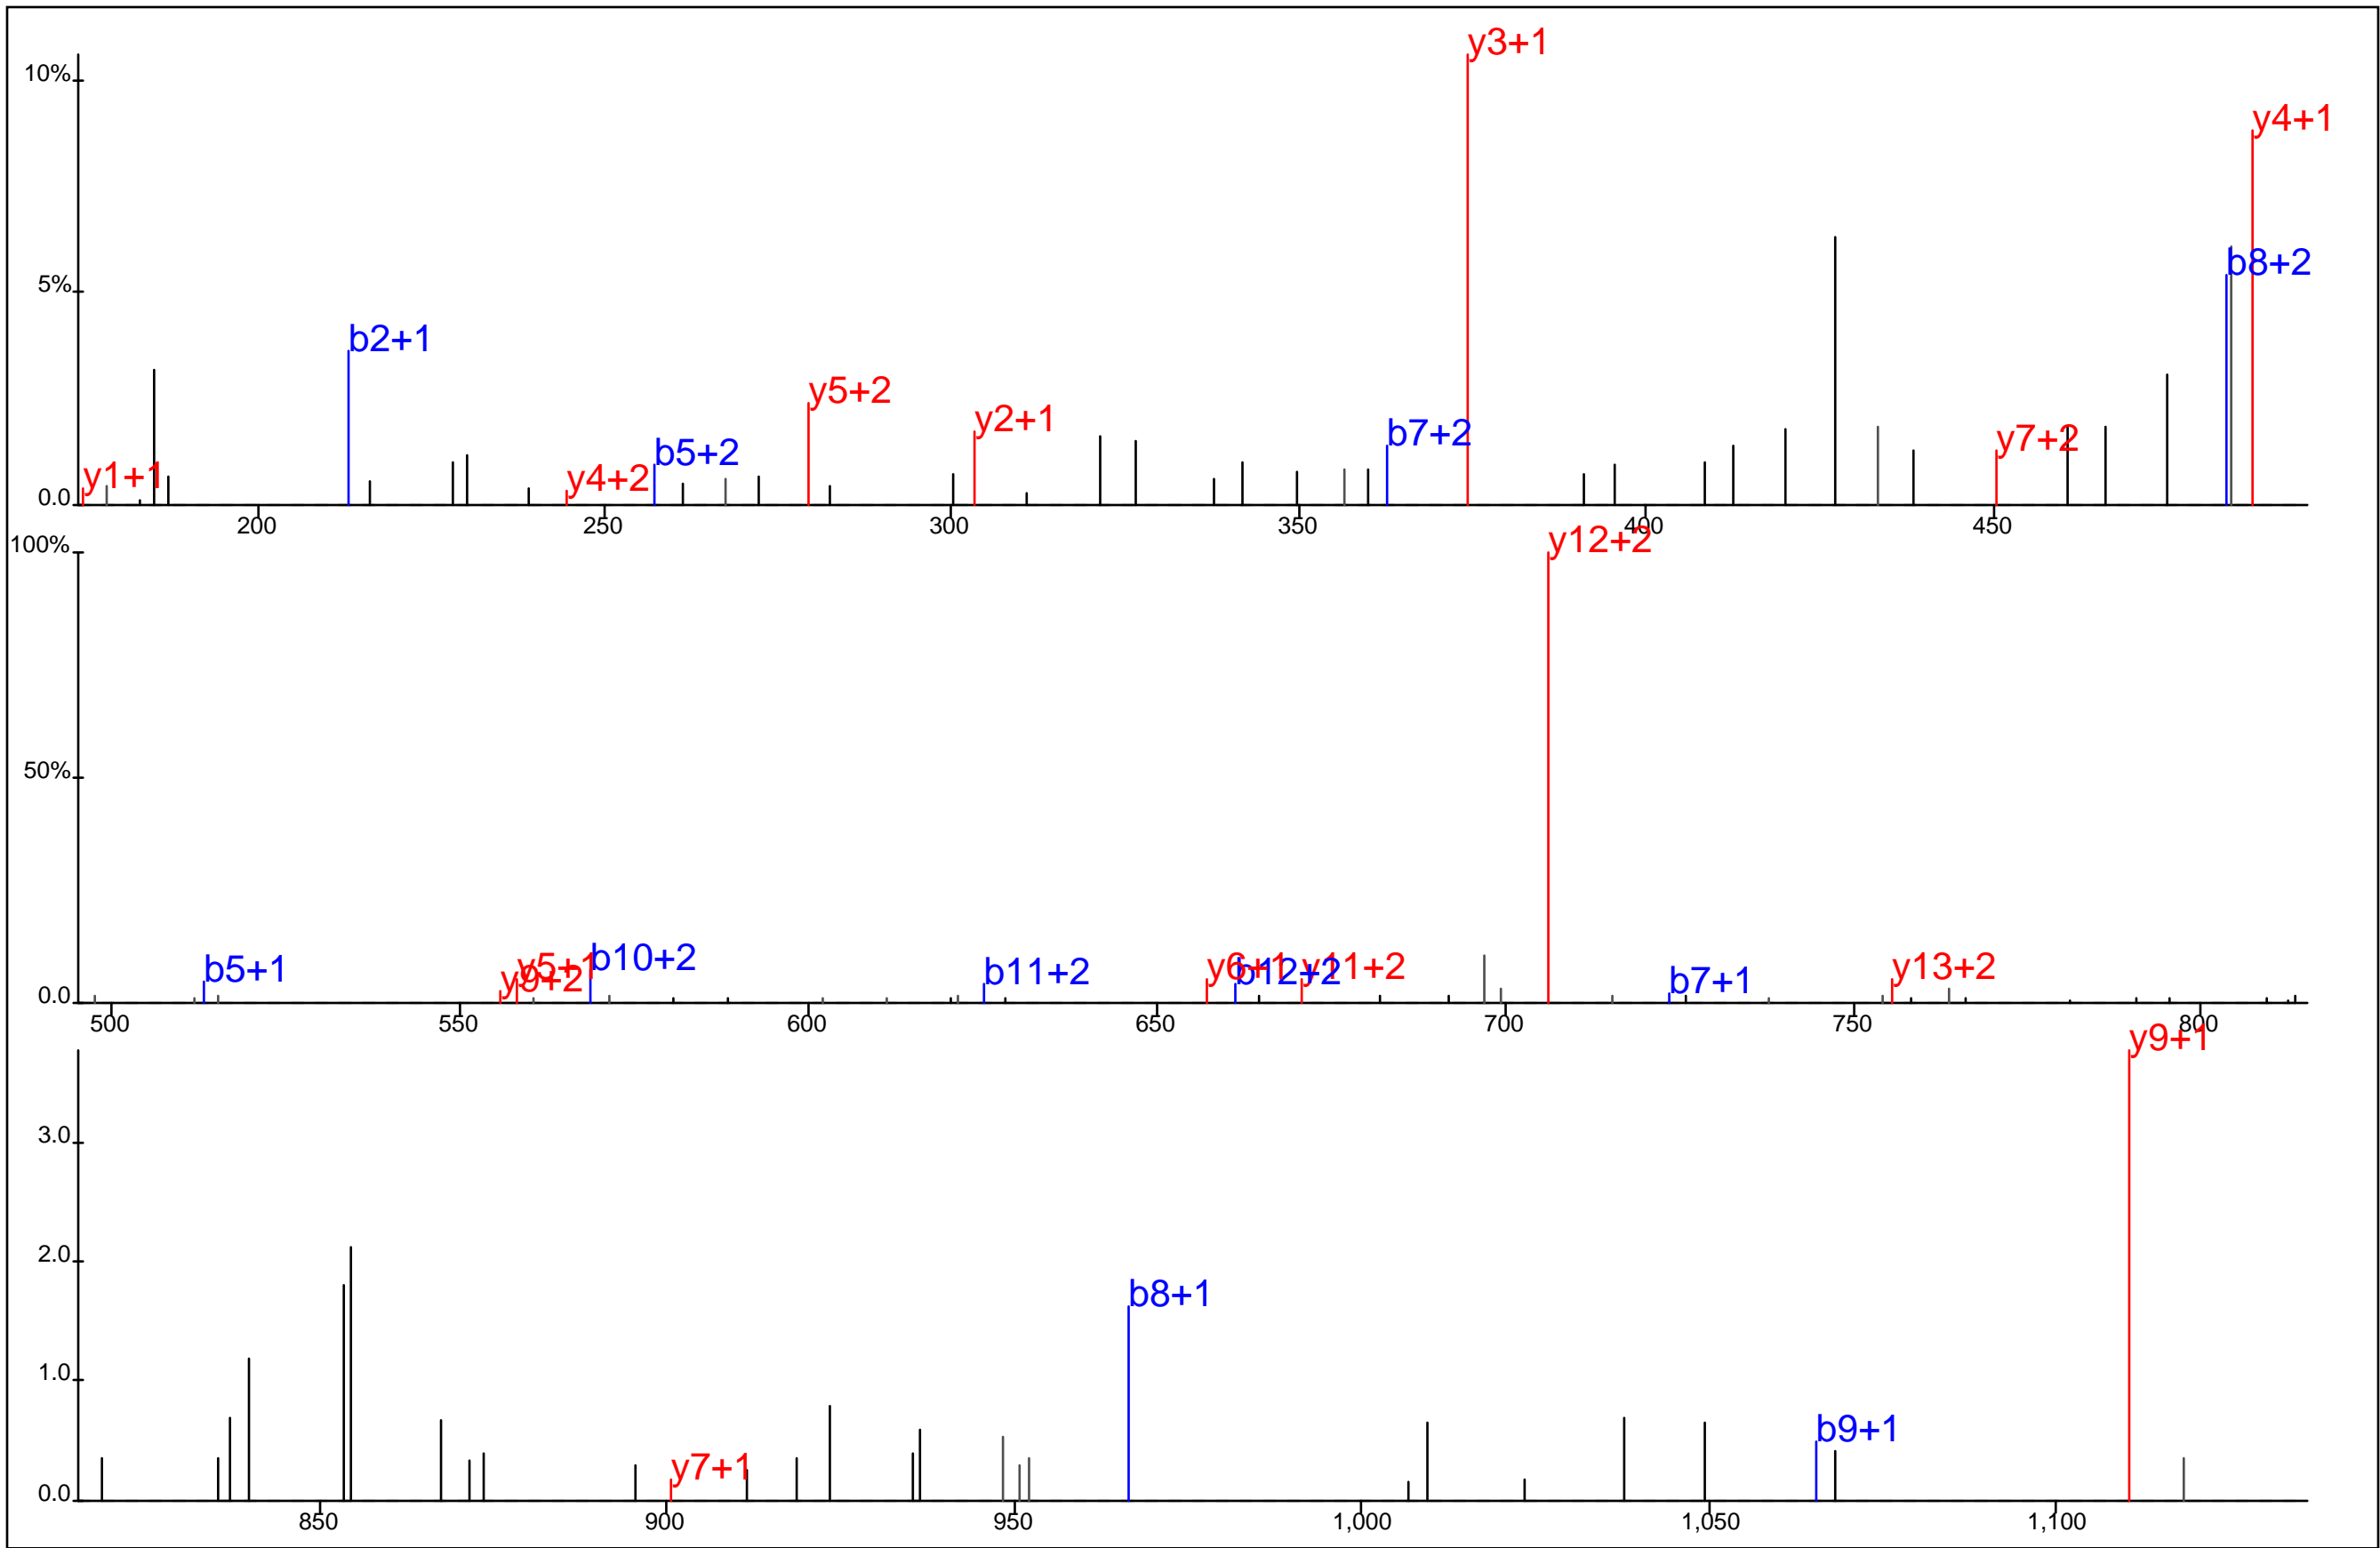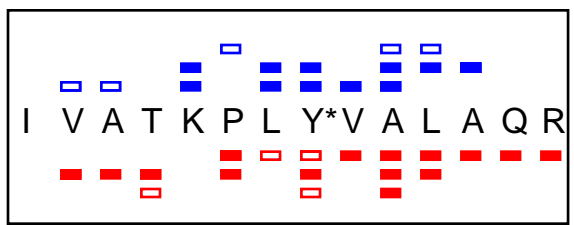

Protein Name: Polyadenylate binding protein 1  
 gi Accession: 0  
 Precursor Mass: 541.6396+3  
 Delta Mass: 0.793 ppm  
 XCorr: 34.31

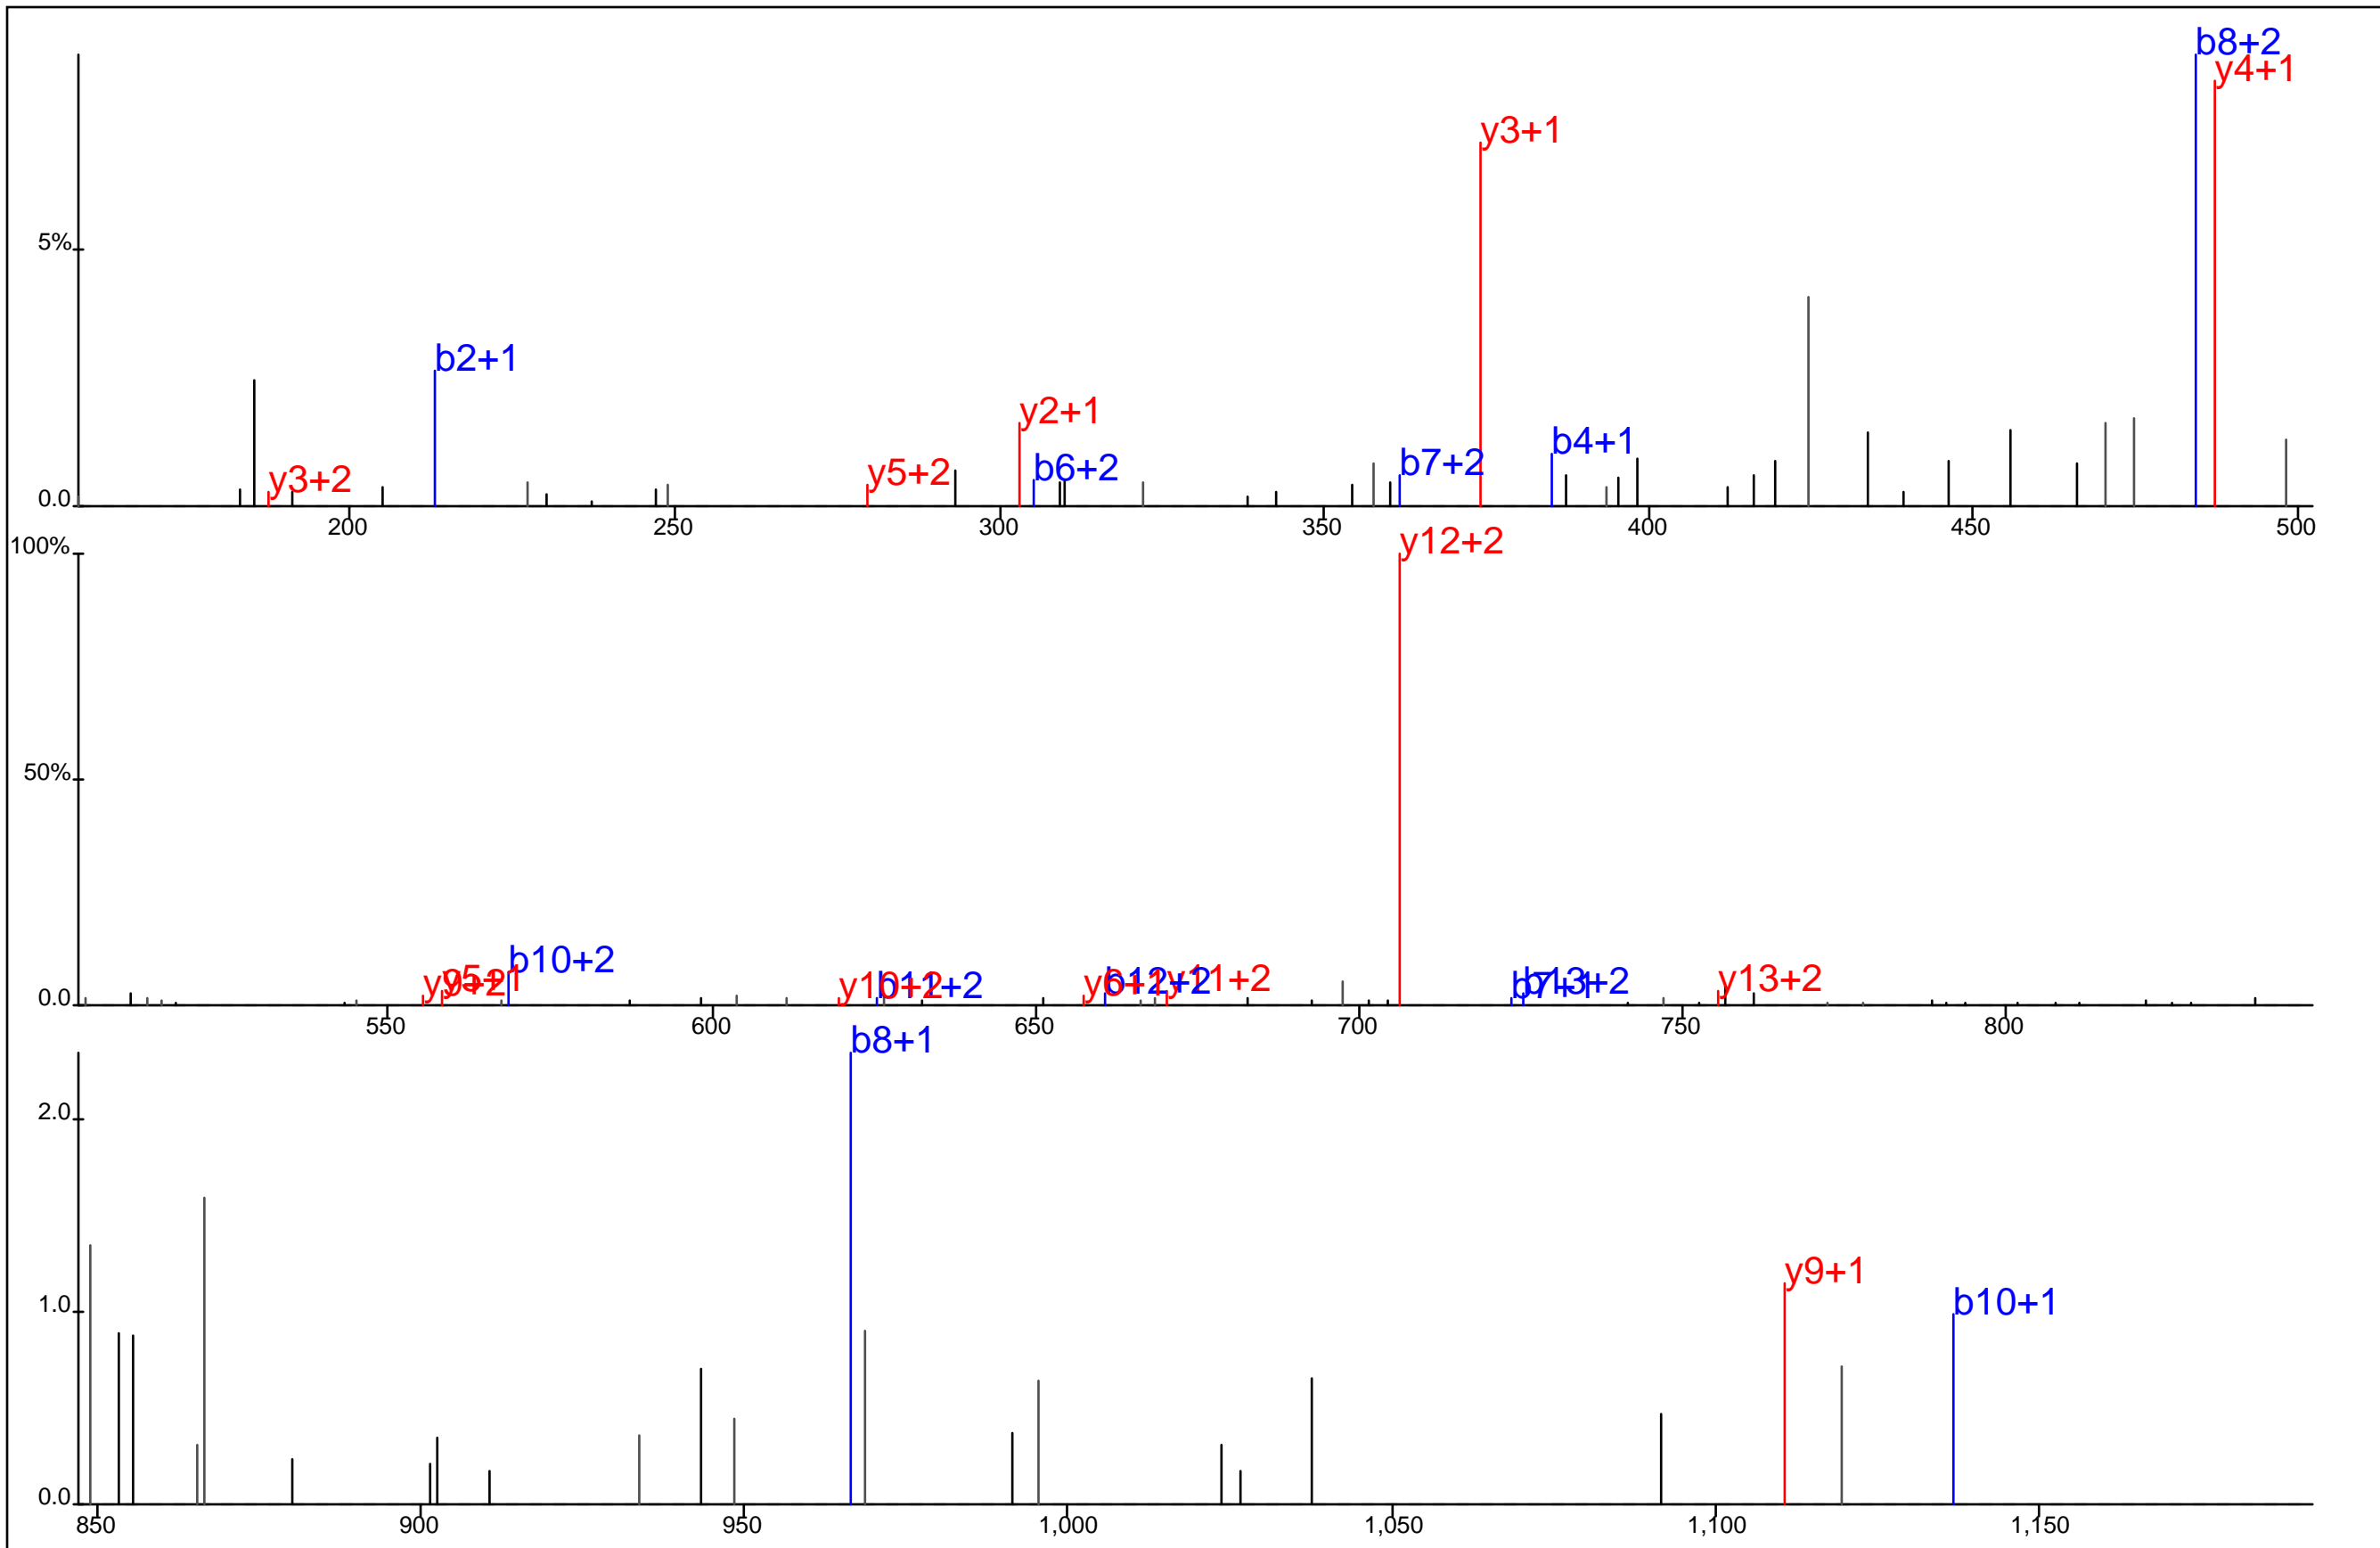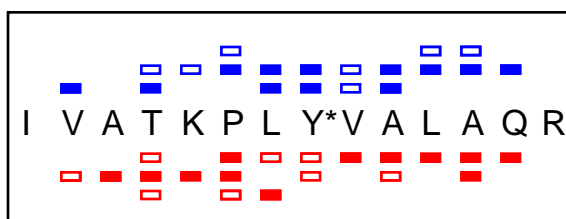

Protein Name: Polyadenylate binding protein 1  
 gi Accession: 0  
 Precursor Mass: 541.6401+3  
 Delta Mass: 1.697 ppm  
 XCorr: 40.46

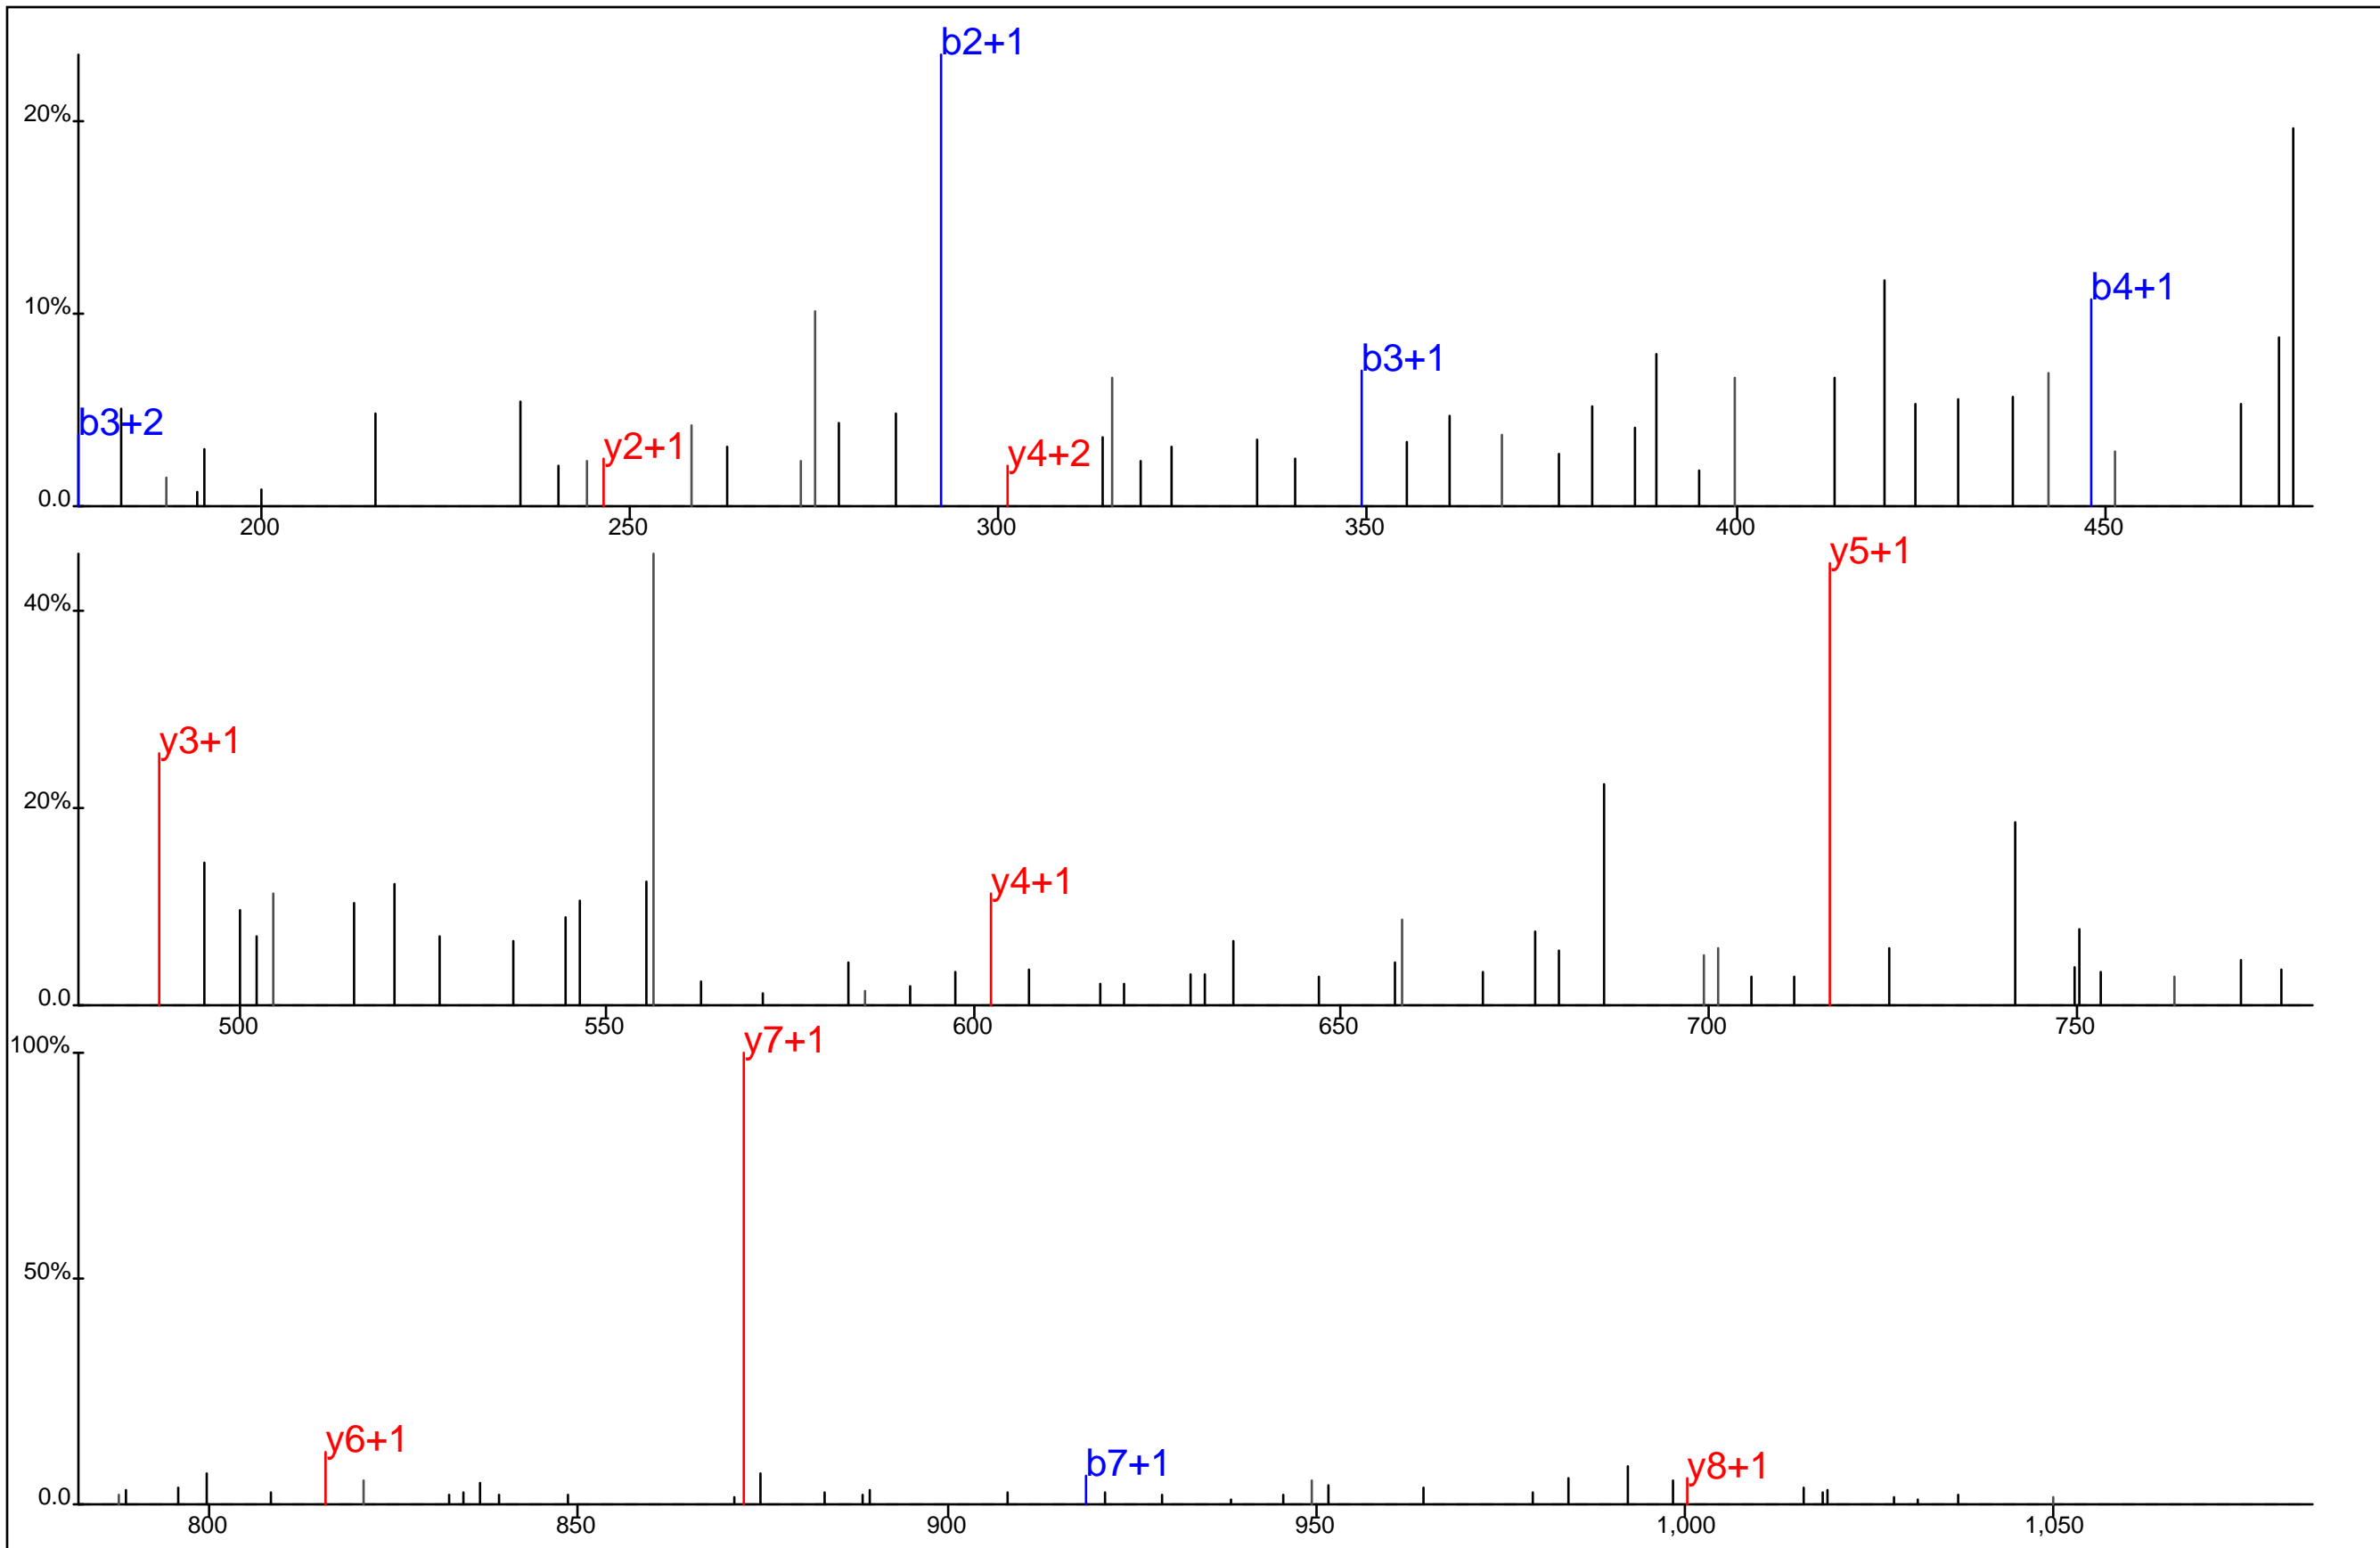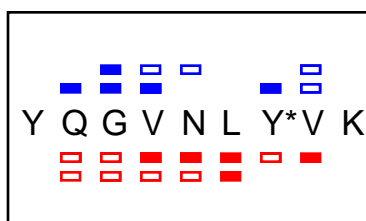

Protein Name: Polyadenylate binding protein 1  
 gi Accession: 0  
 Precursor Mass: 582.2807+2  
 Delta Mass: 3.862 ppm  
 XCorr: 27.59

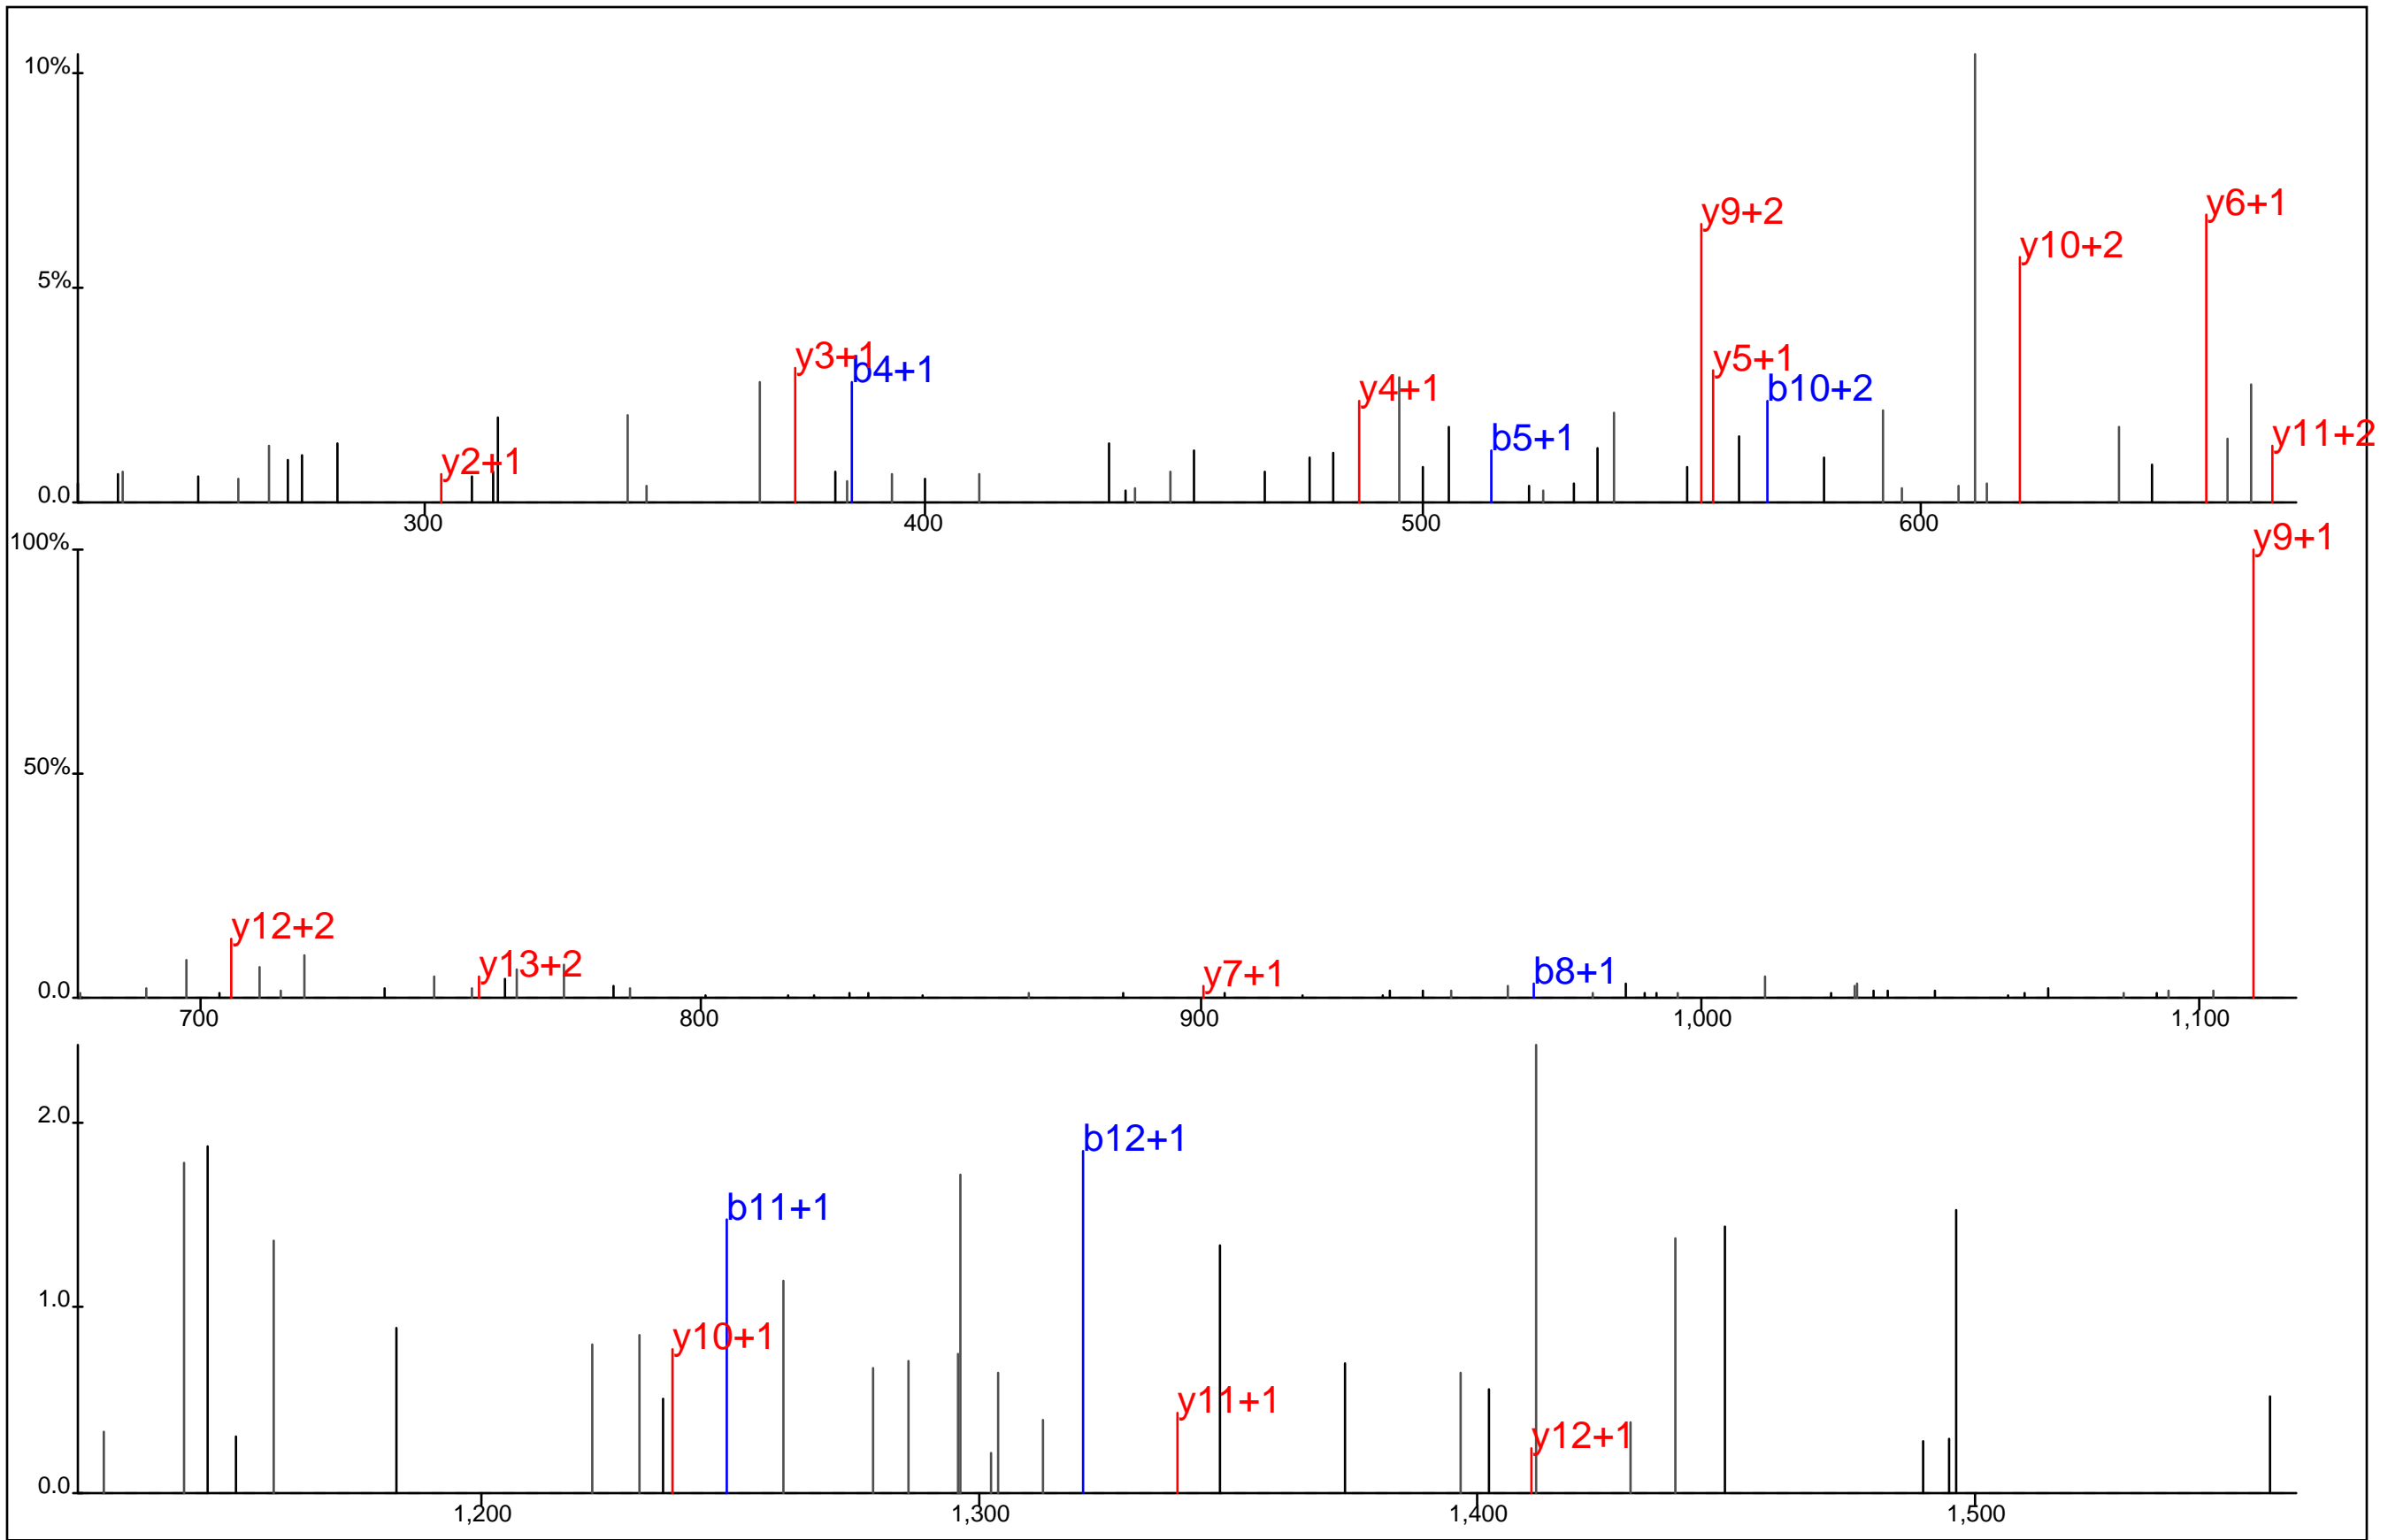

▢ ▢ ▢ ▢ ▢ ▢ ▢ ▢ ▢ ▢ ▢ ▢  
**I V A T K P L Y\*V A L A Q R**  
▢ ▢ ▢ ▢ ▢ ▢ ▢ ▢ ▢ ▢ ▢ ▢

Protein Name: Polyadenylate binding protein 1  
 gi Accession: 0  
 Precursor Mass: 811.9529+2  
 Delta Mass: 2.733 ppm  
 XCorr: 30.74

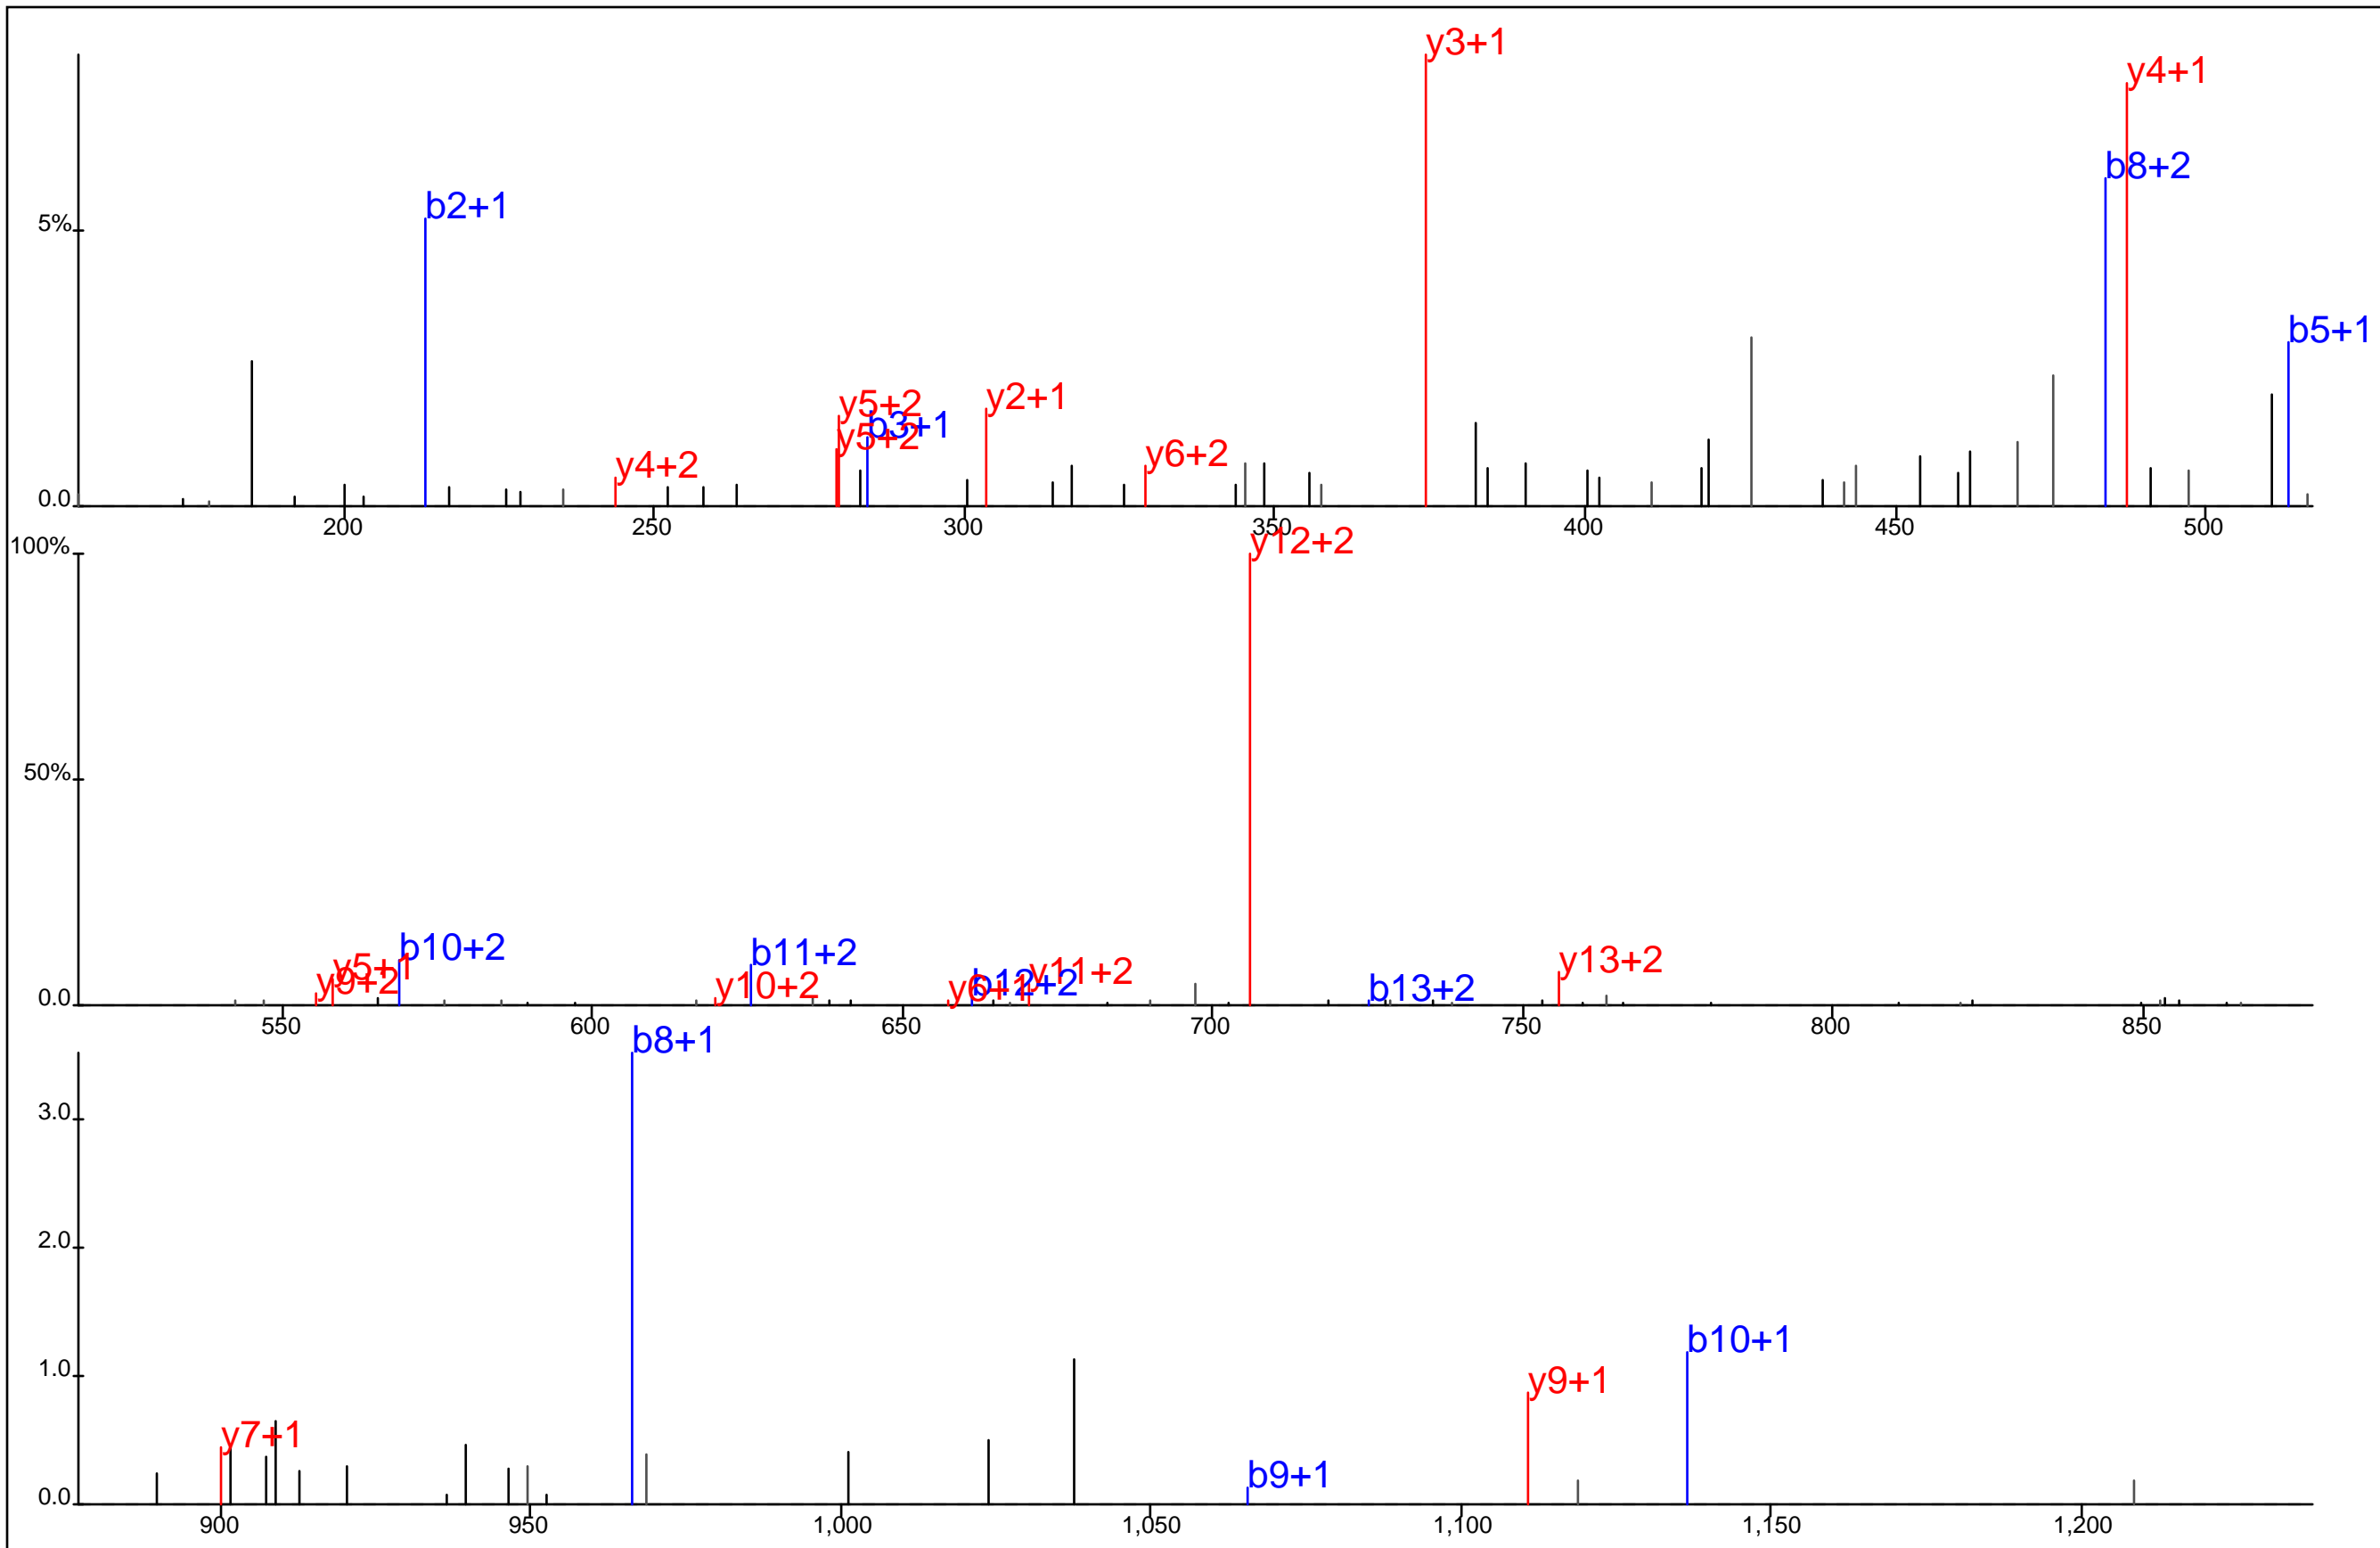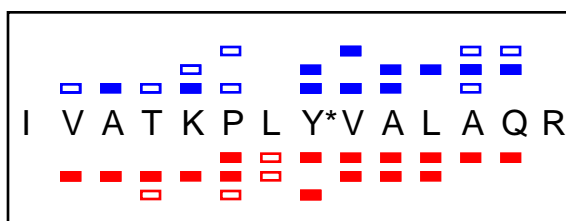

Protein Name: Polyadenylate binding protein 1  
 gi Accession: 0  
 Precursor Mass: 541.6395+3  
 Delta Mass: 0.680 ppm  
 XCorr: 41.15

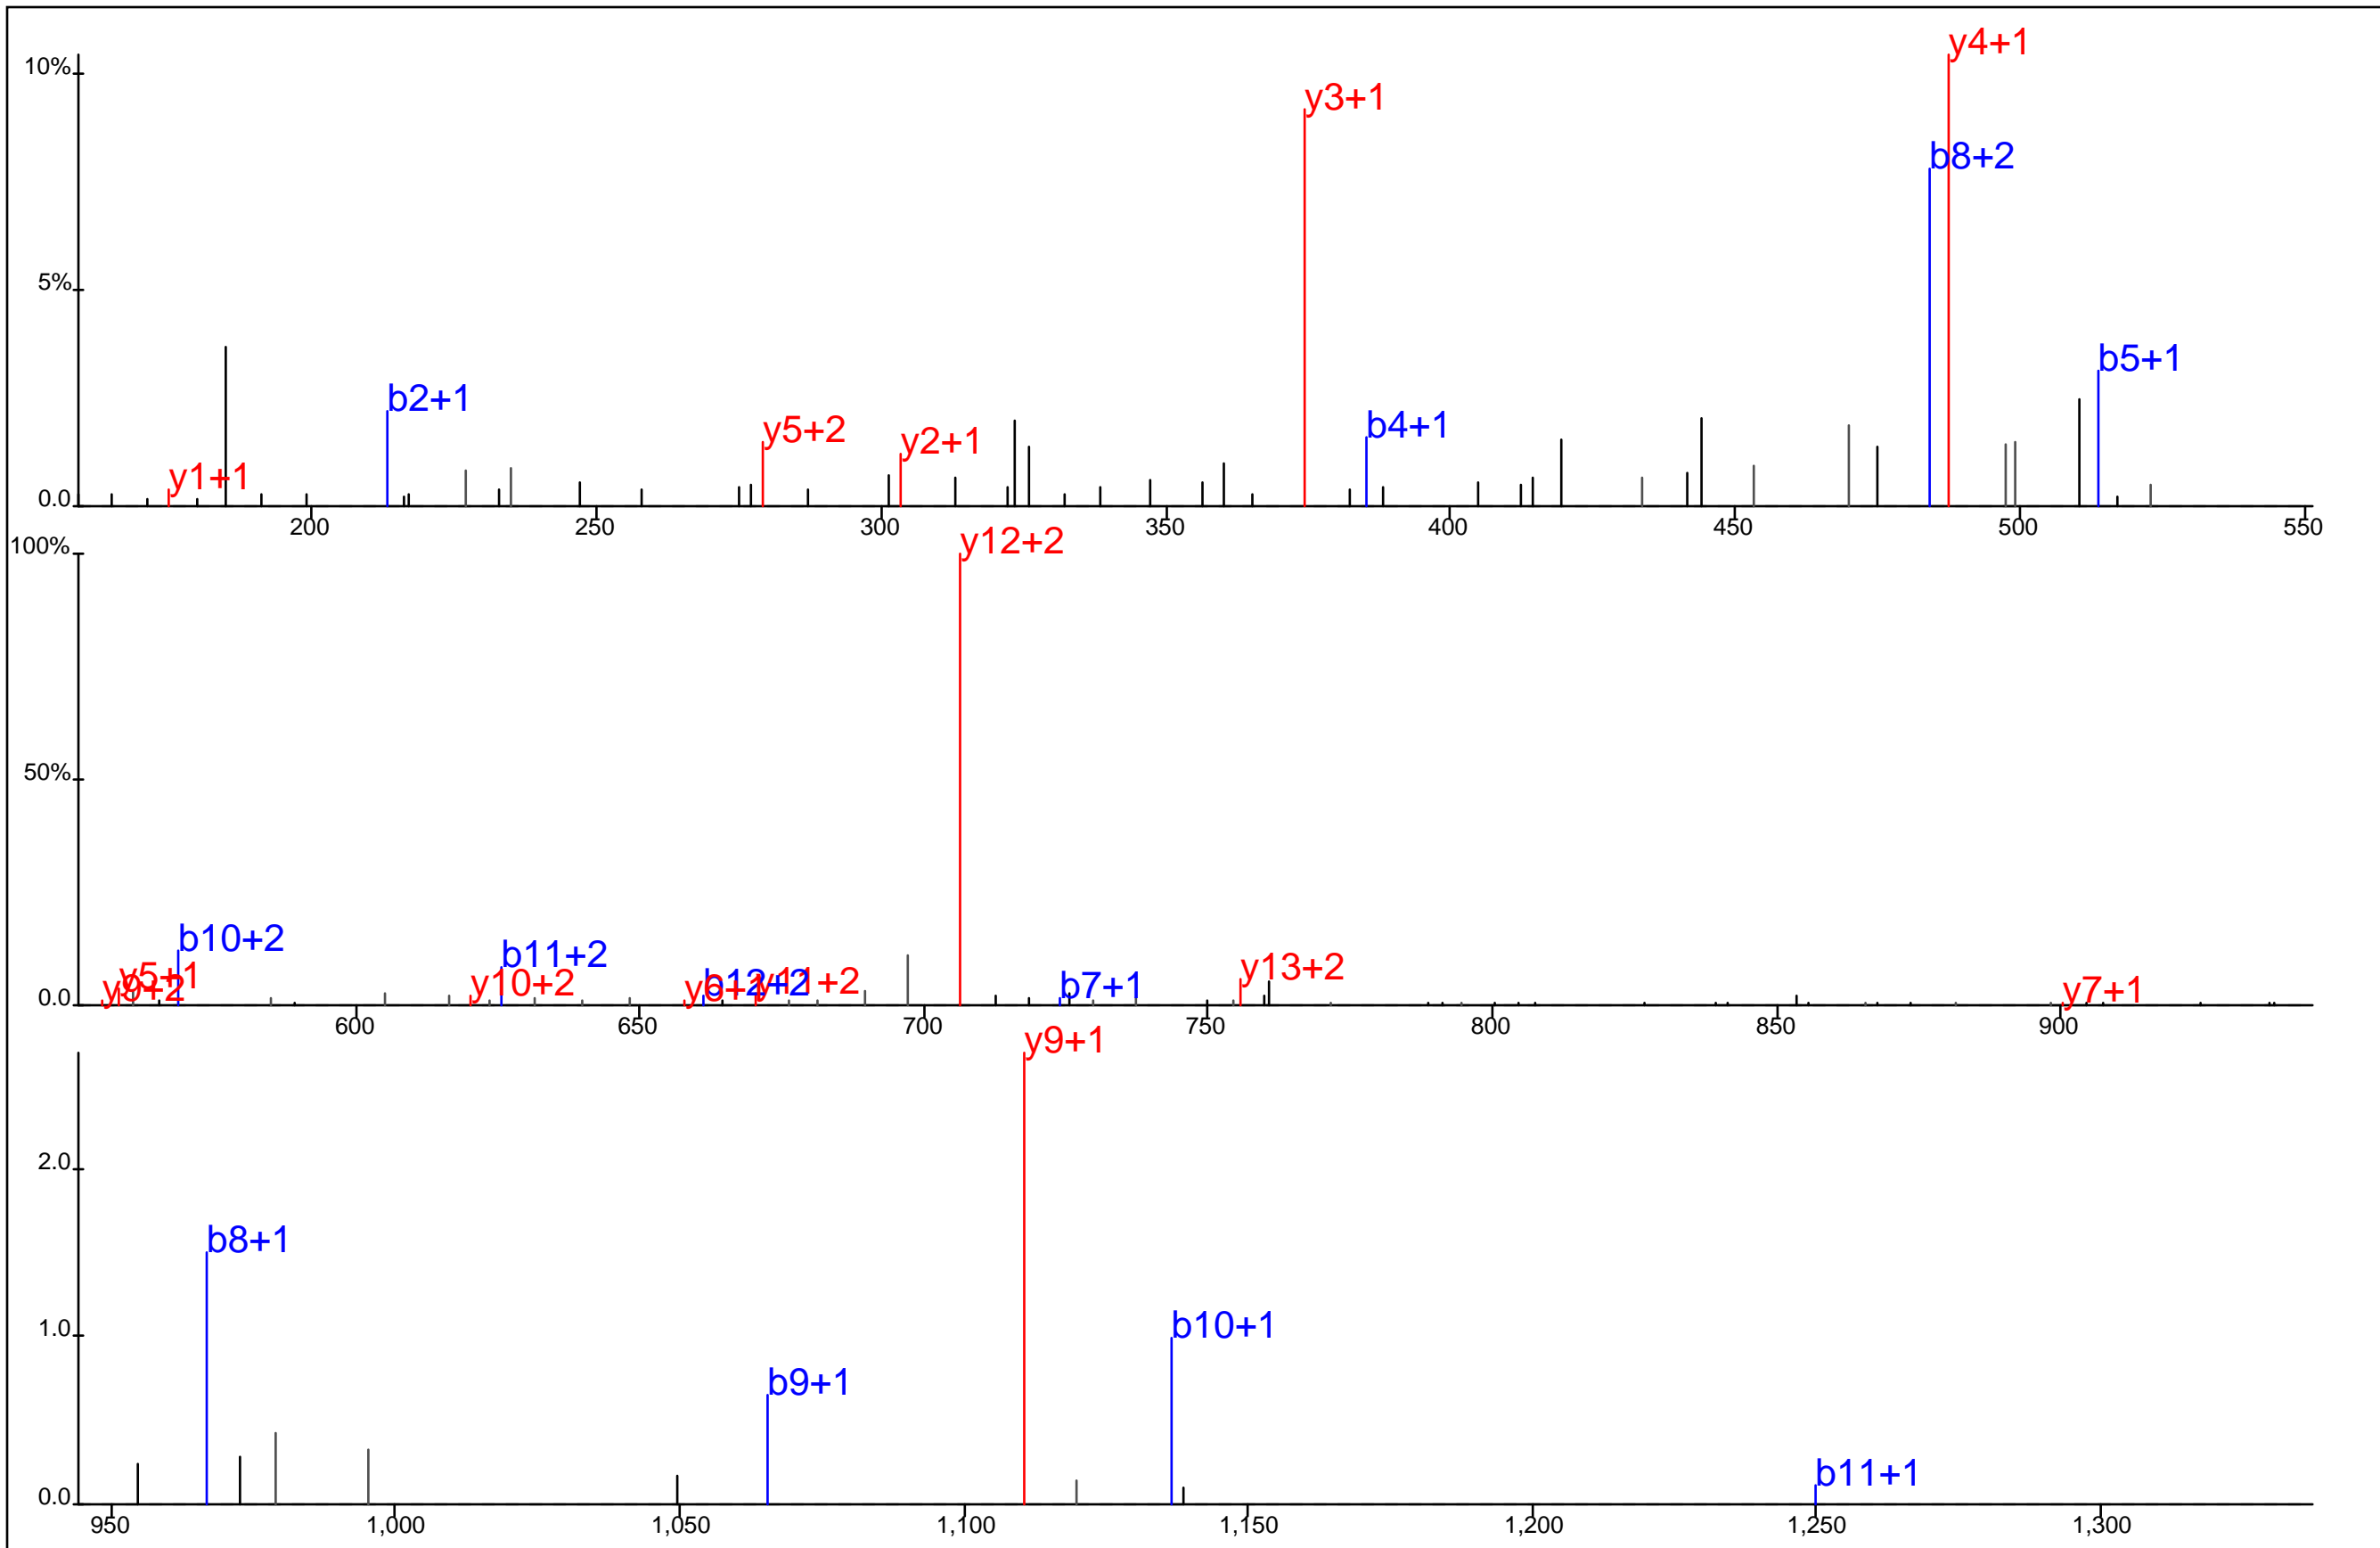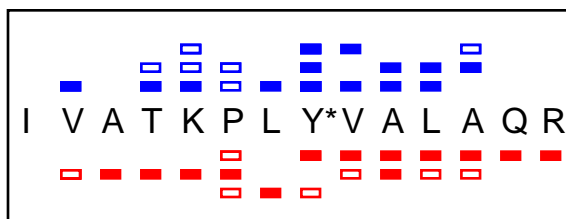

Protein Name: Polyadenylate binding protein 1  
 gi Accession: 0  
 Precursor Mass: 541.6400+3  
 Delta Mass: 1.584 ppm  
 XCorr: 34.61



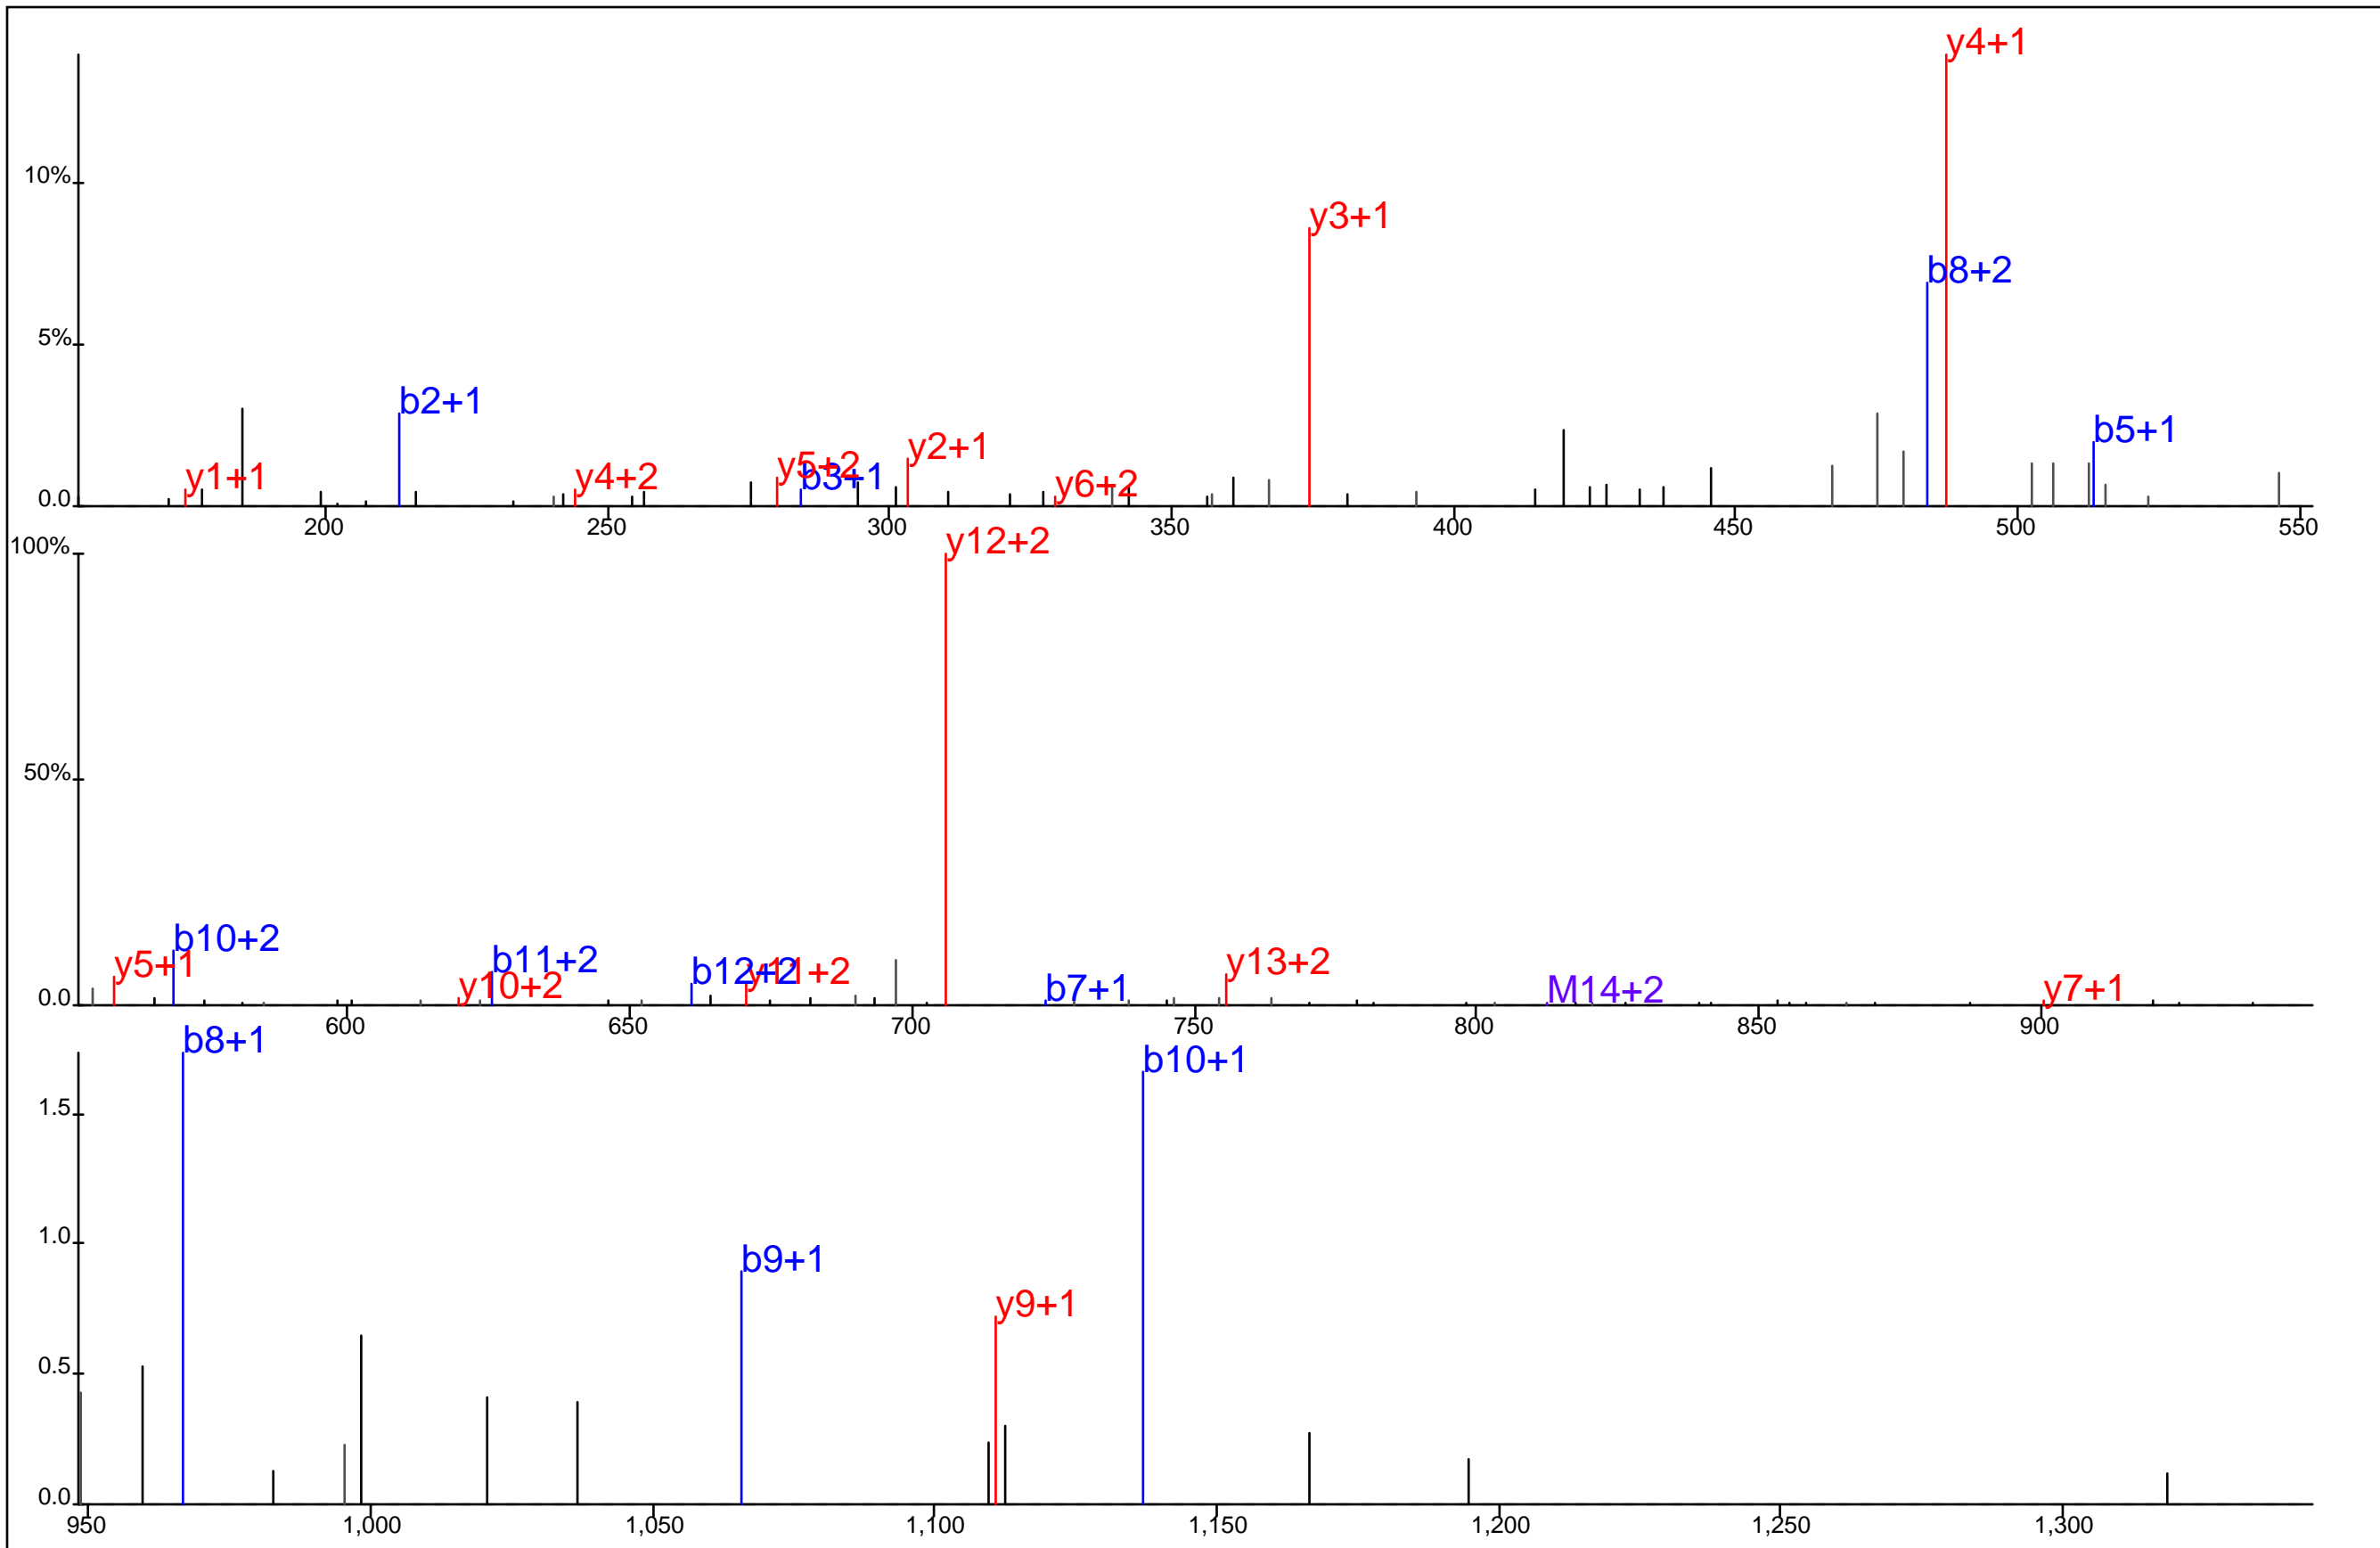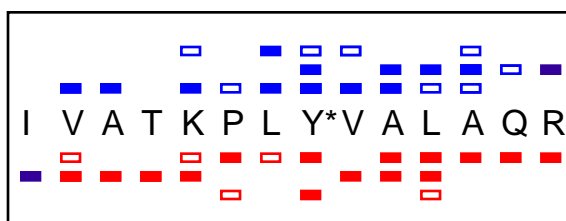

Protein Name: Polyadenylate binding protein 1  
 gi Accession: 0  
 Precursor Mass: 541.6393+3  
 Delta Mass: 0.342 ppm  
 XCorr: 45.57

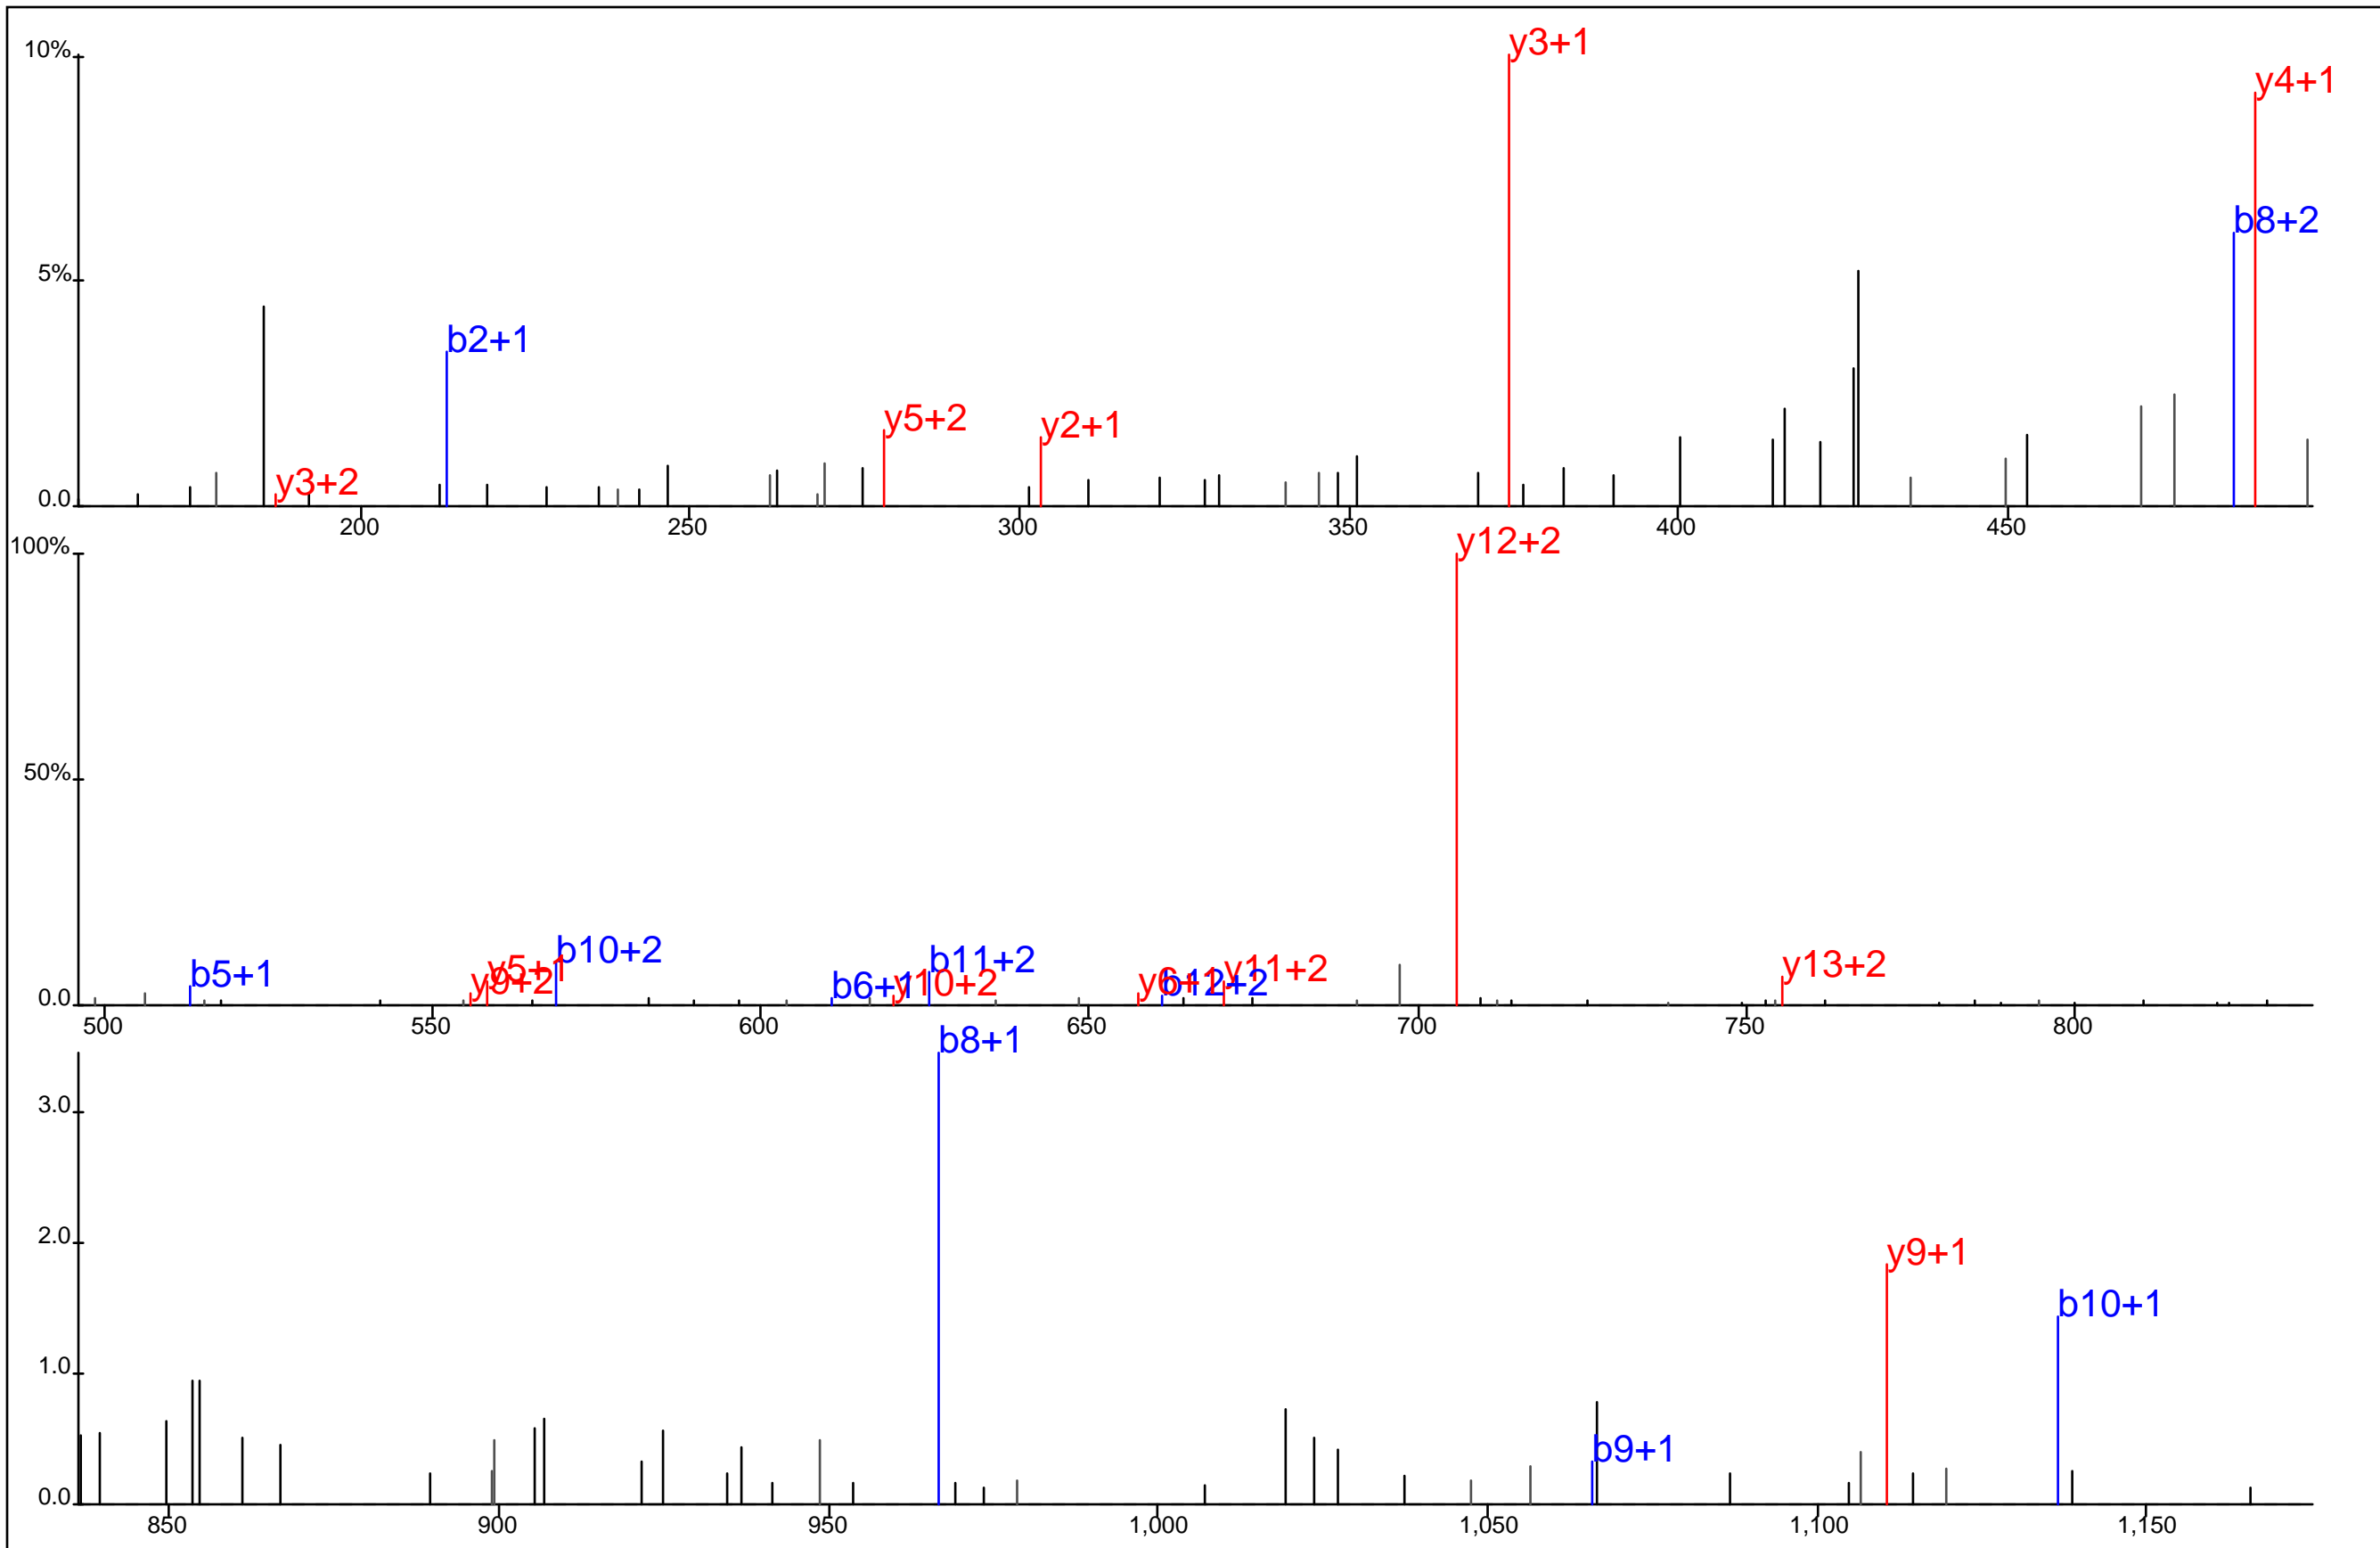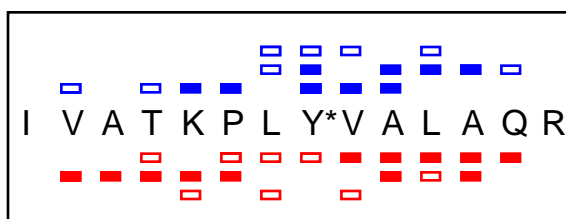

Protein Name: Polyadenylate binding protein 1  
 gi Accession: 0  
 Precursor Mass: 541.6395+3  
 Delta Mass: 0.568 ppm  
 XCorr: 35.0

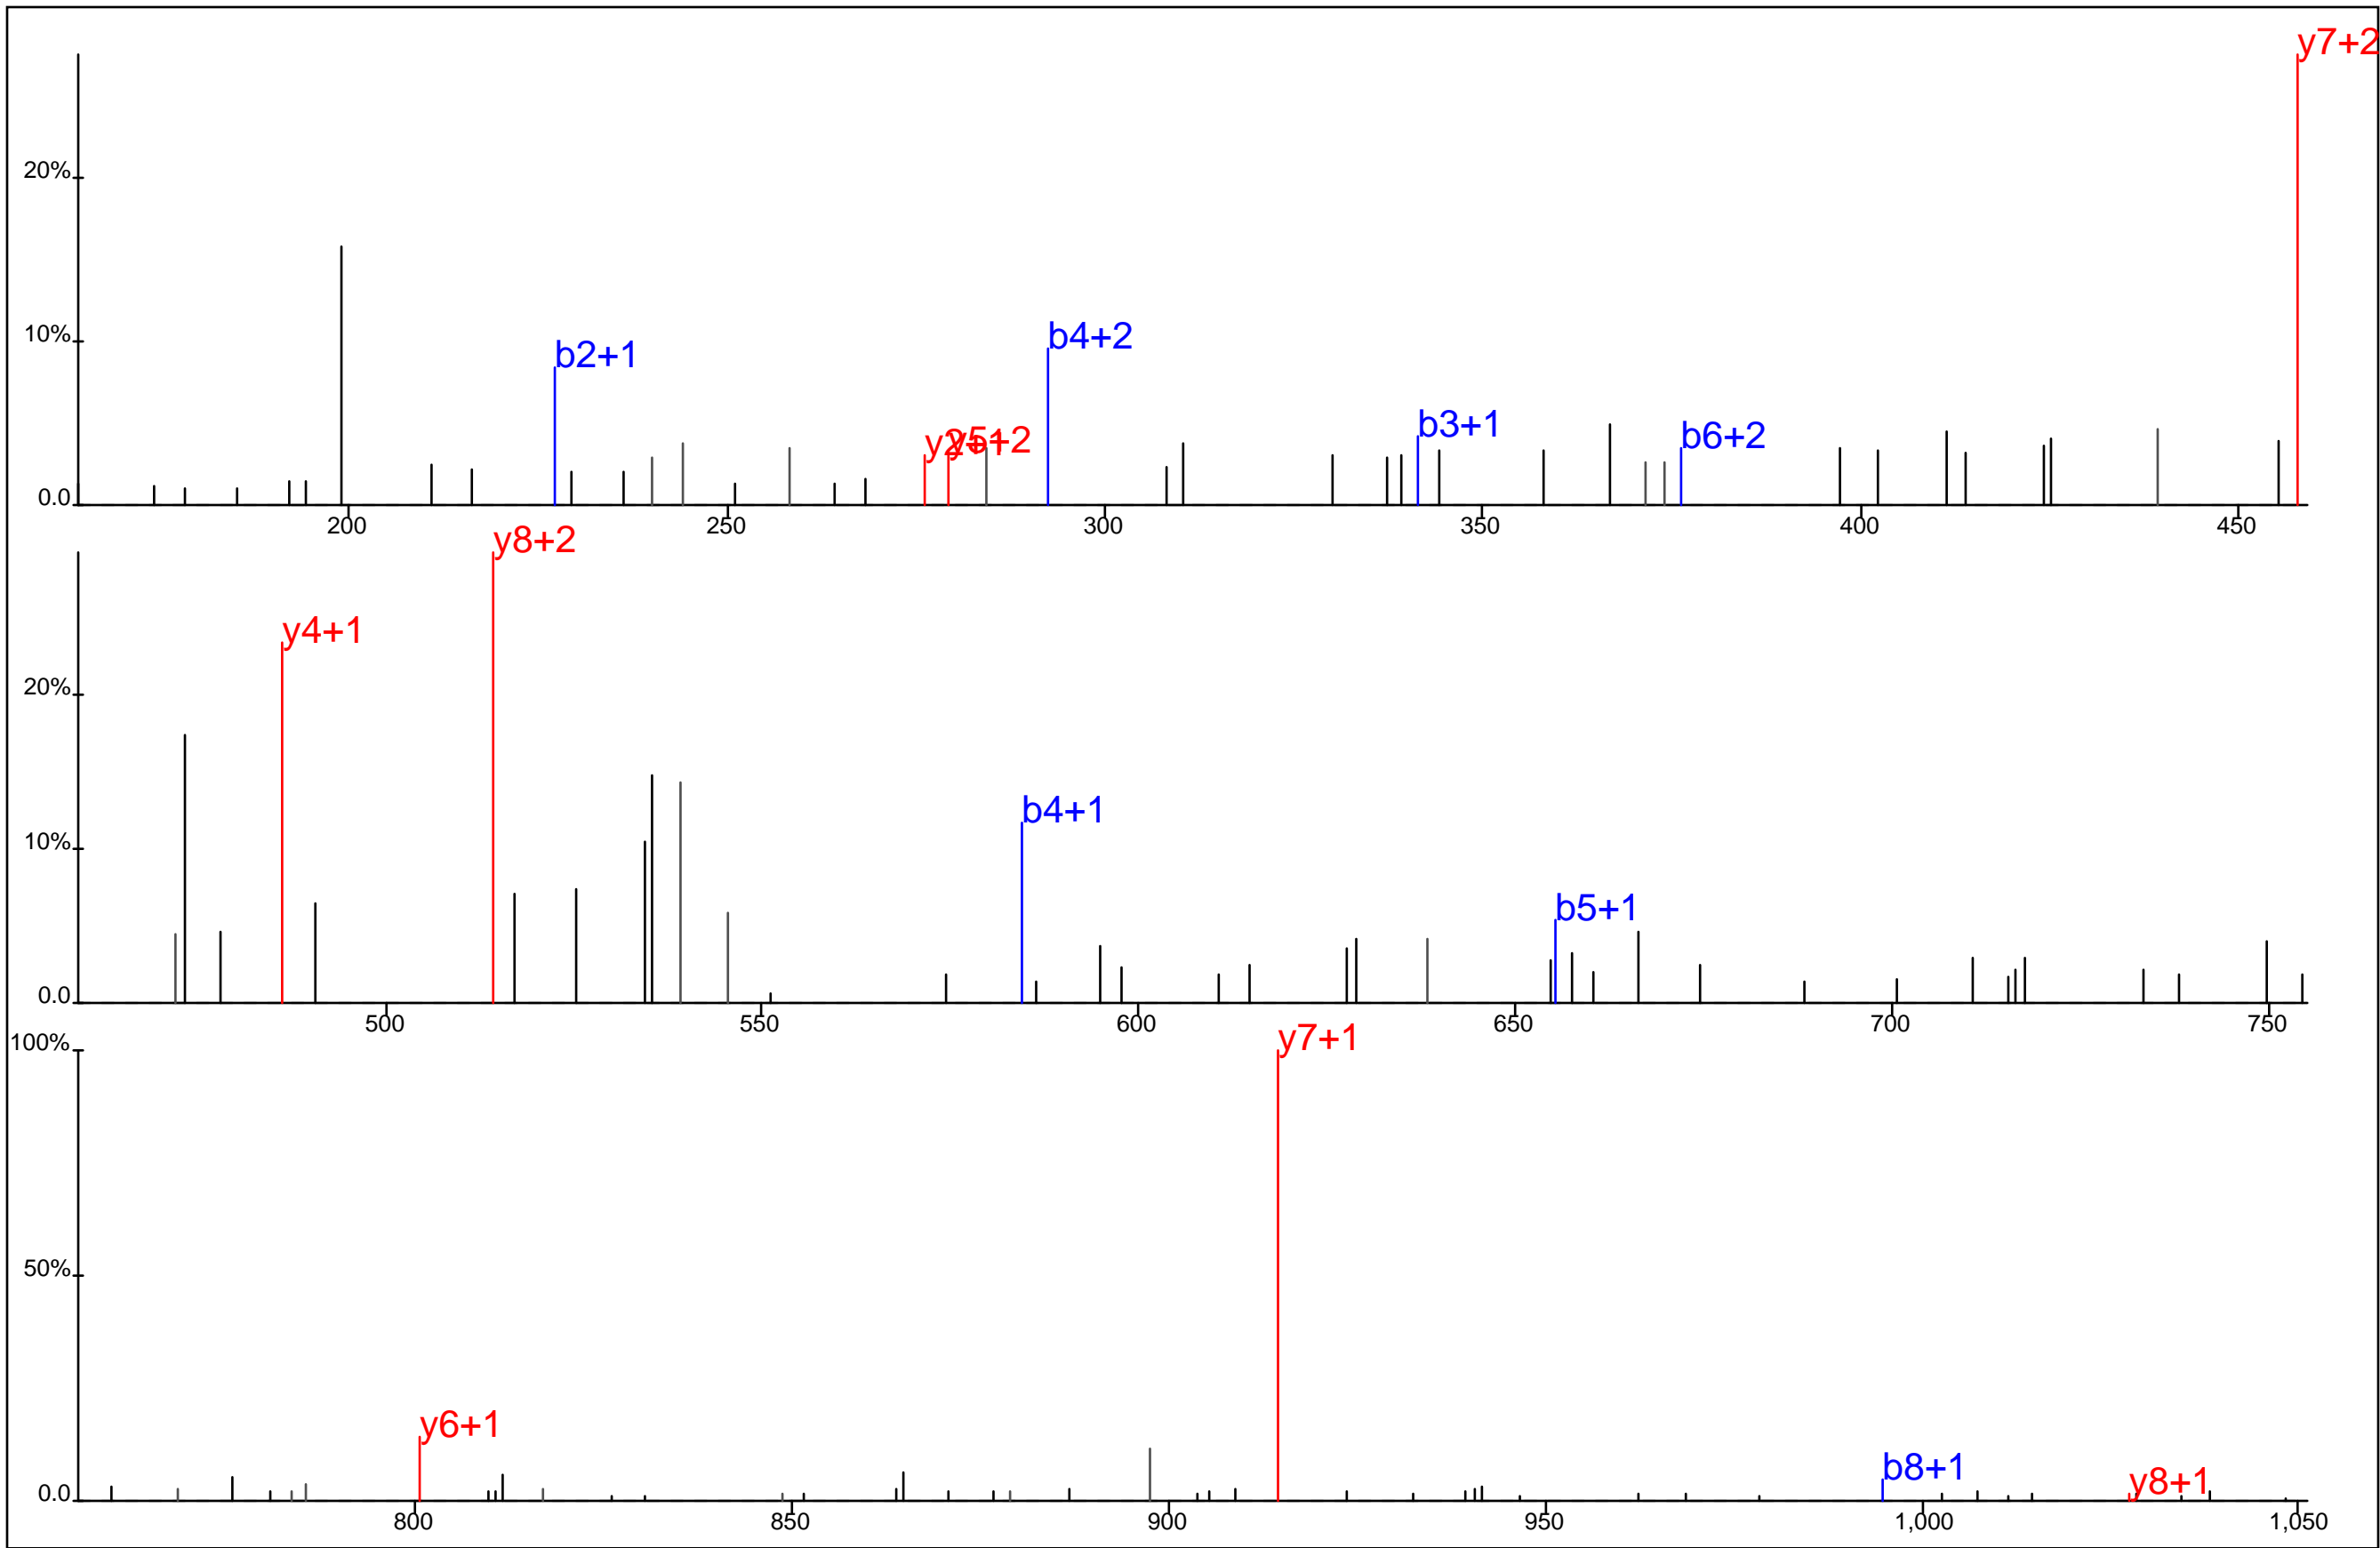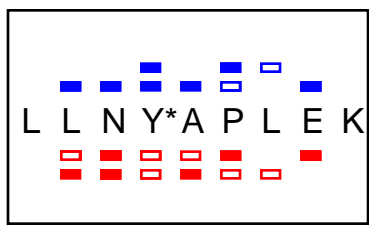

Protein Name: Polymerase II, RNA, subunit L  
 gi Accession: 0  
 Precursor Mass: 570.7871+2  
 Delta Mass: 2.683 ppm  
 XCorr: 30.07



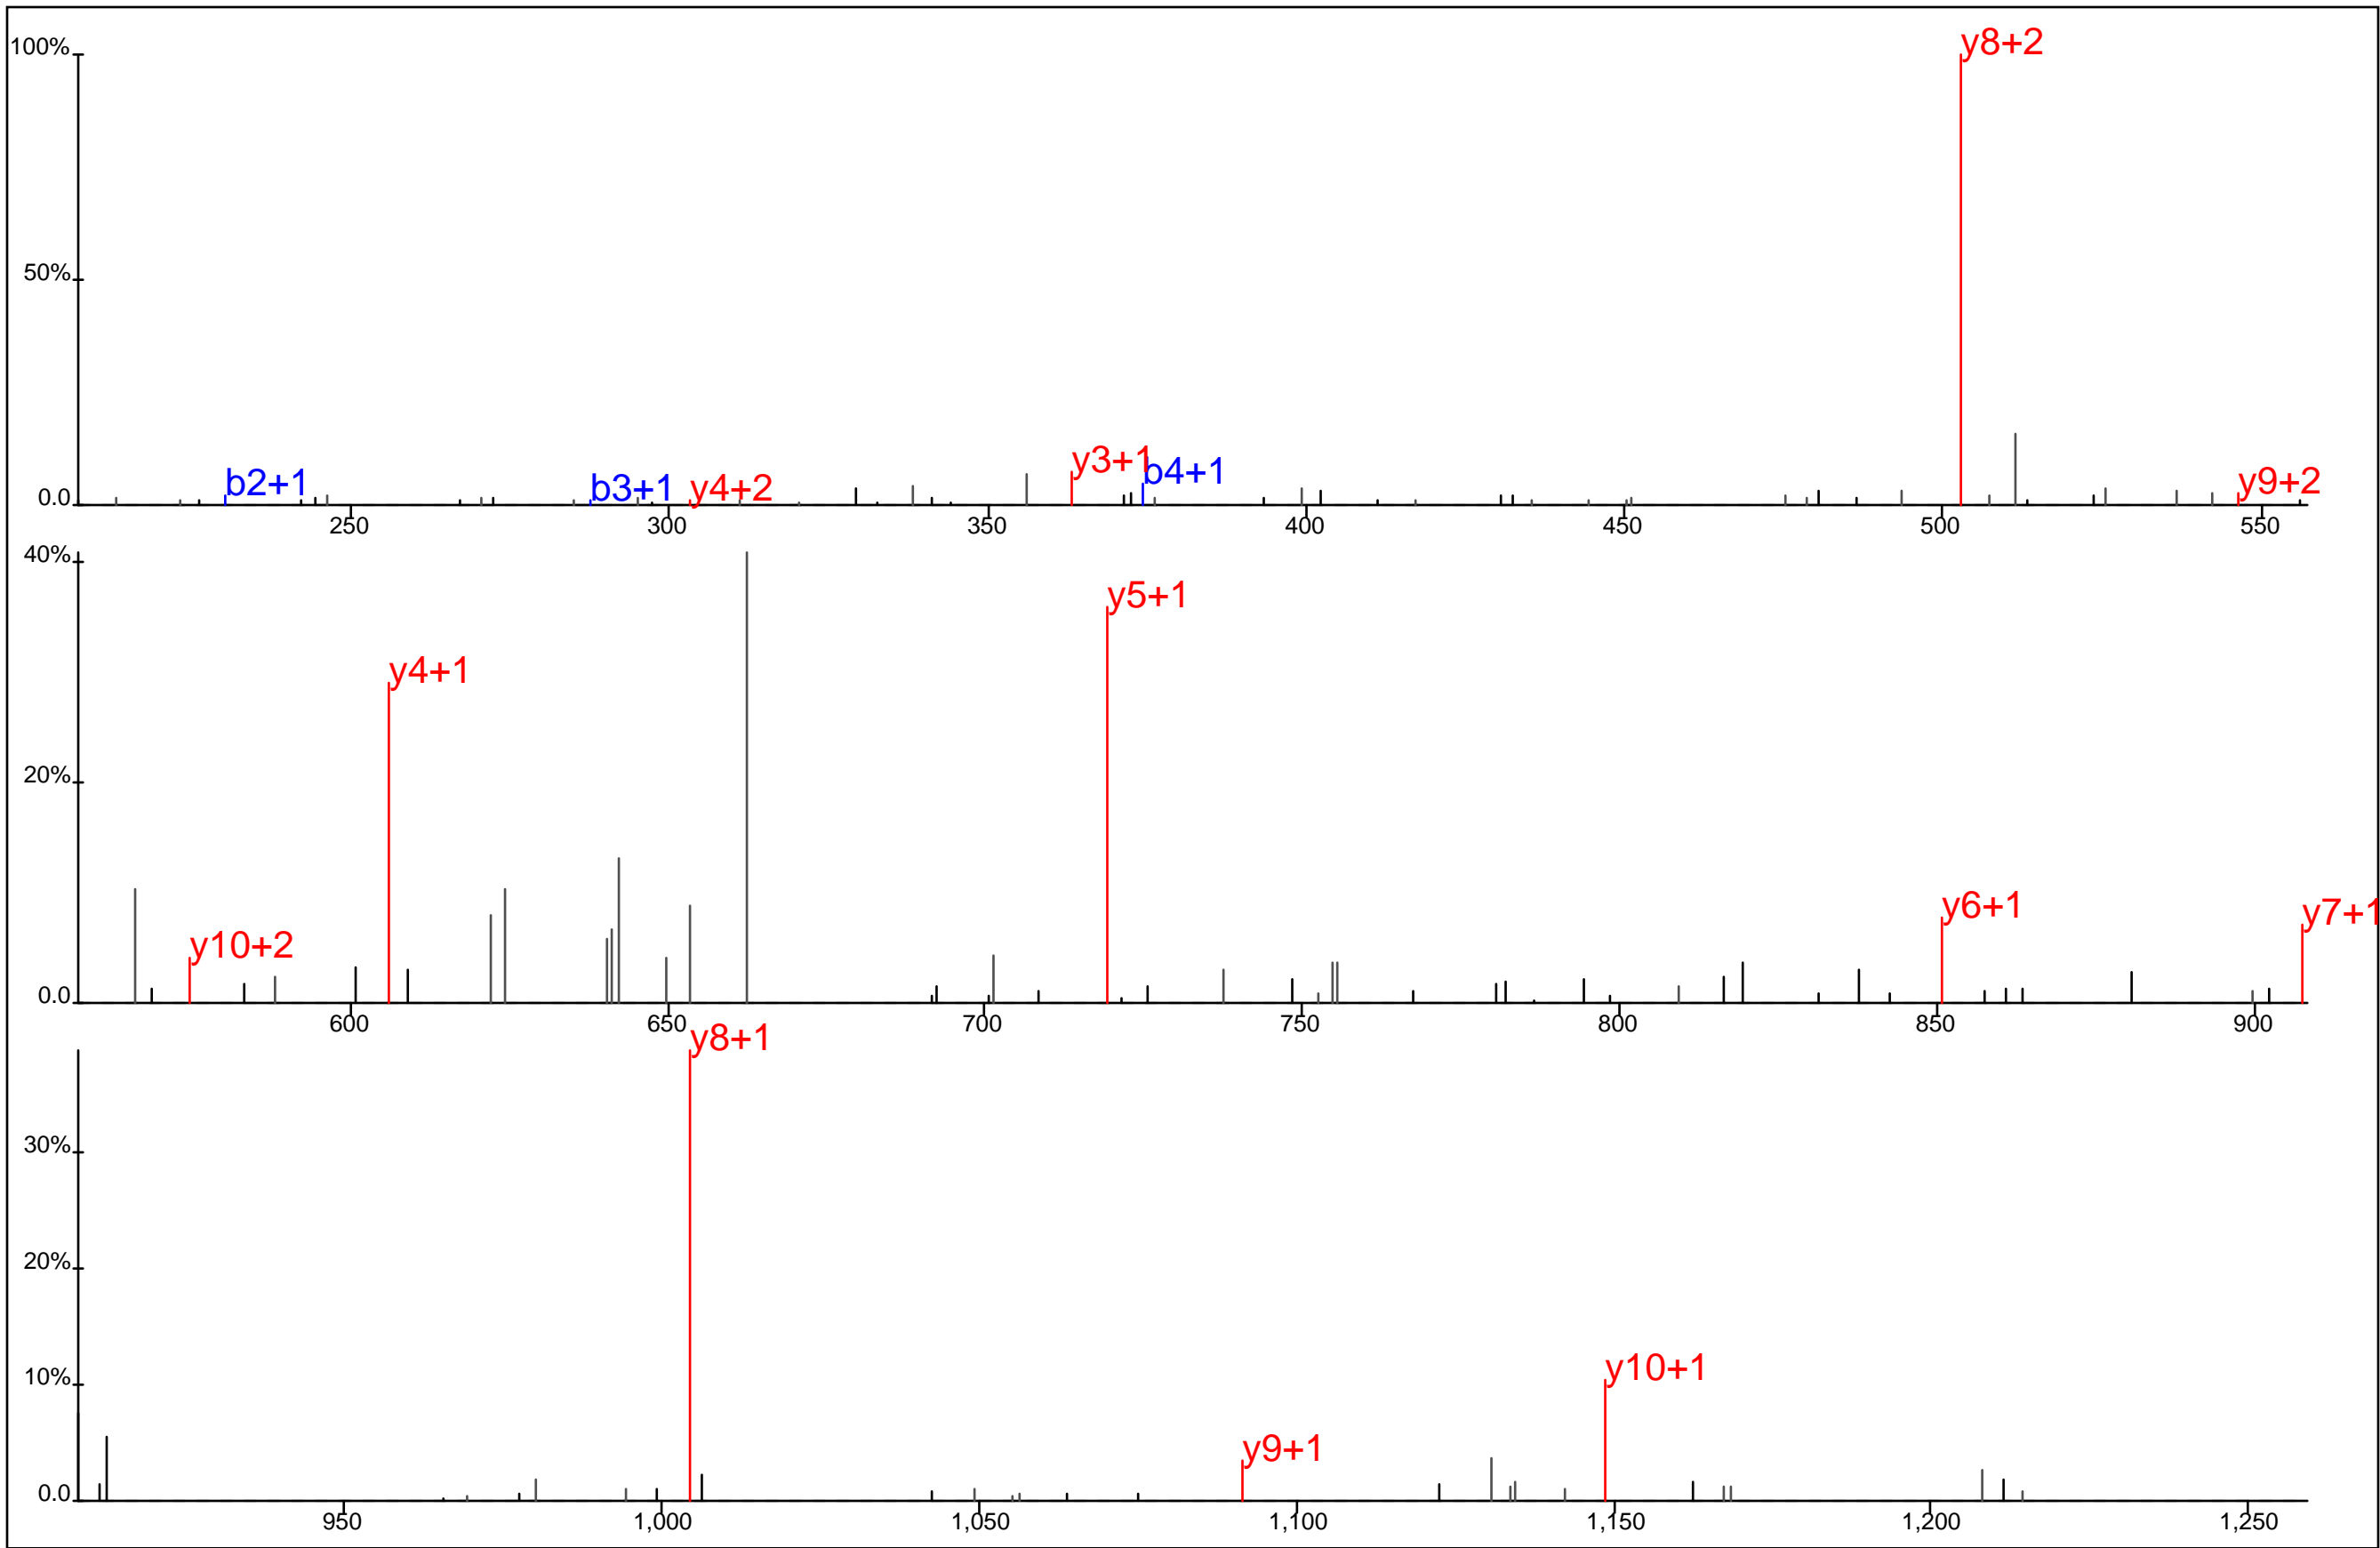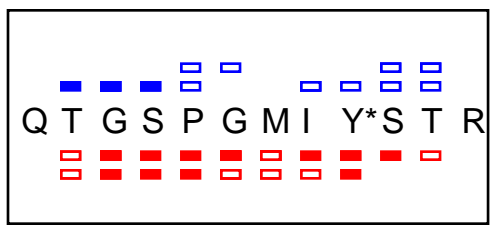

Protein Name: Potassium channel, voltage gated, shaker related subfamily beta, member 2  
 gi Accession: 0  
 Precursor Mass: 689.2953+2  
 Delta Mass: 2.564 ppm  
 XCorr: 52.96

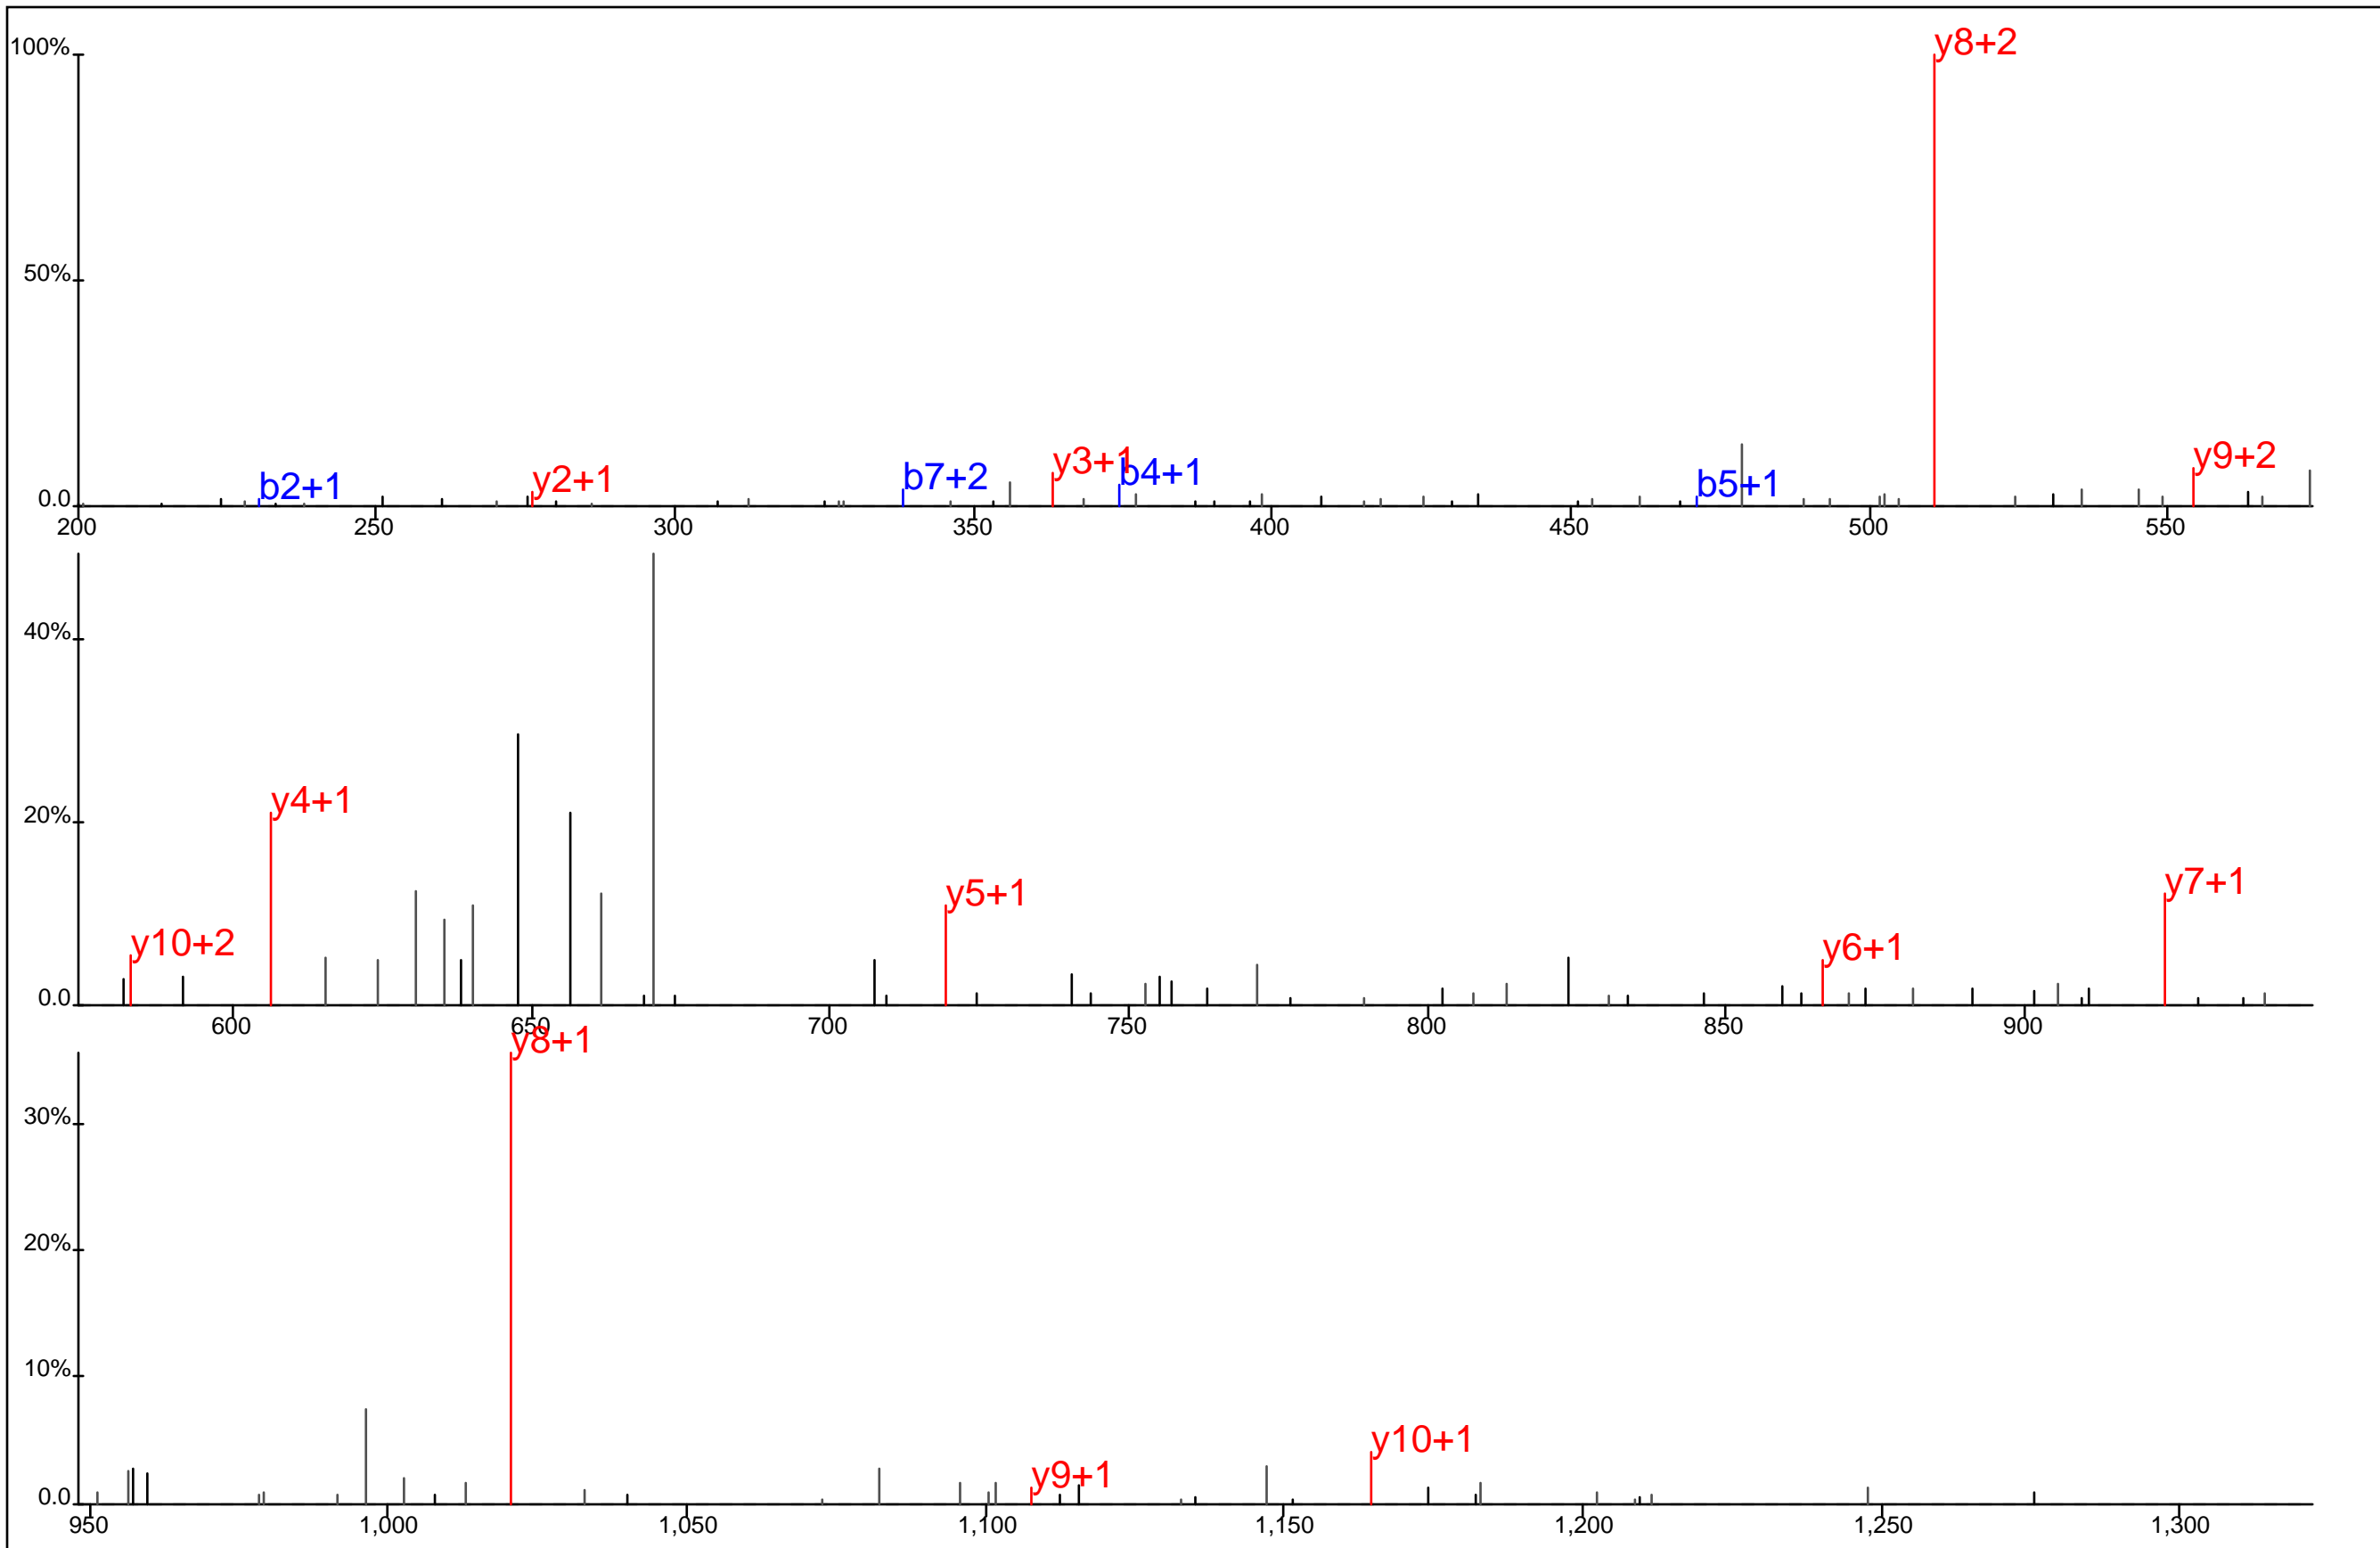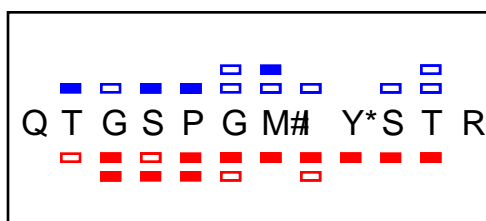

Protein Name: Potassium channel, voltage gated, shaker related subfamily beta, member 2  
 gi Accession: 0  
 Precursor Mass: 697.2957+2  
 Delta Mass: 1.724 ppm  
 XCorr: 45.83



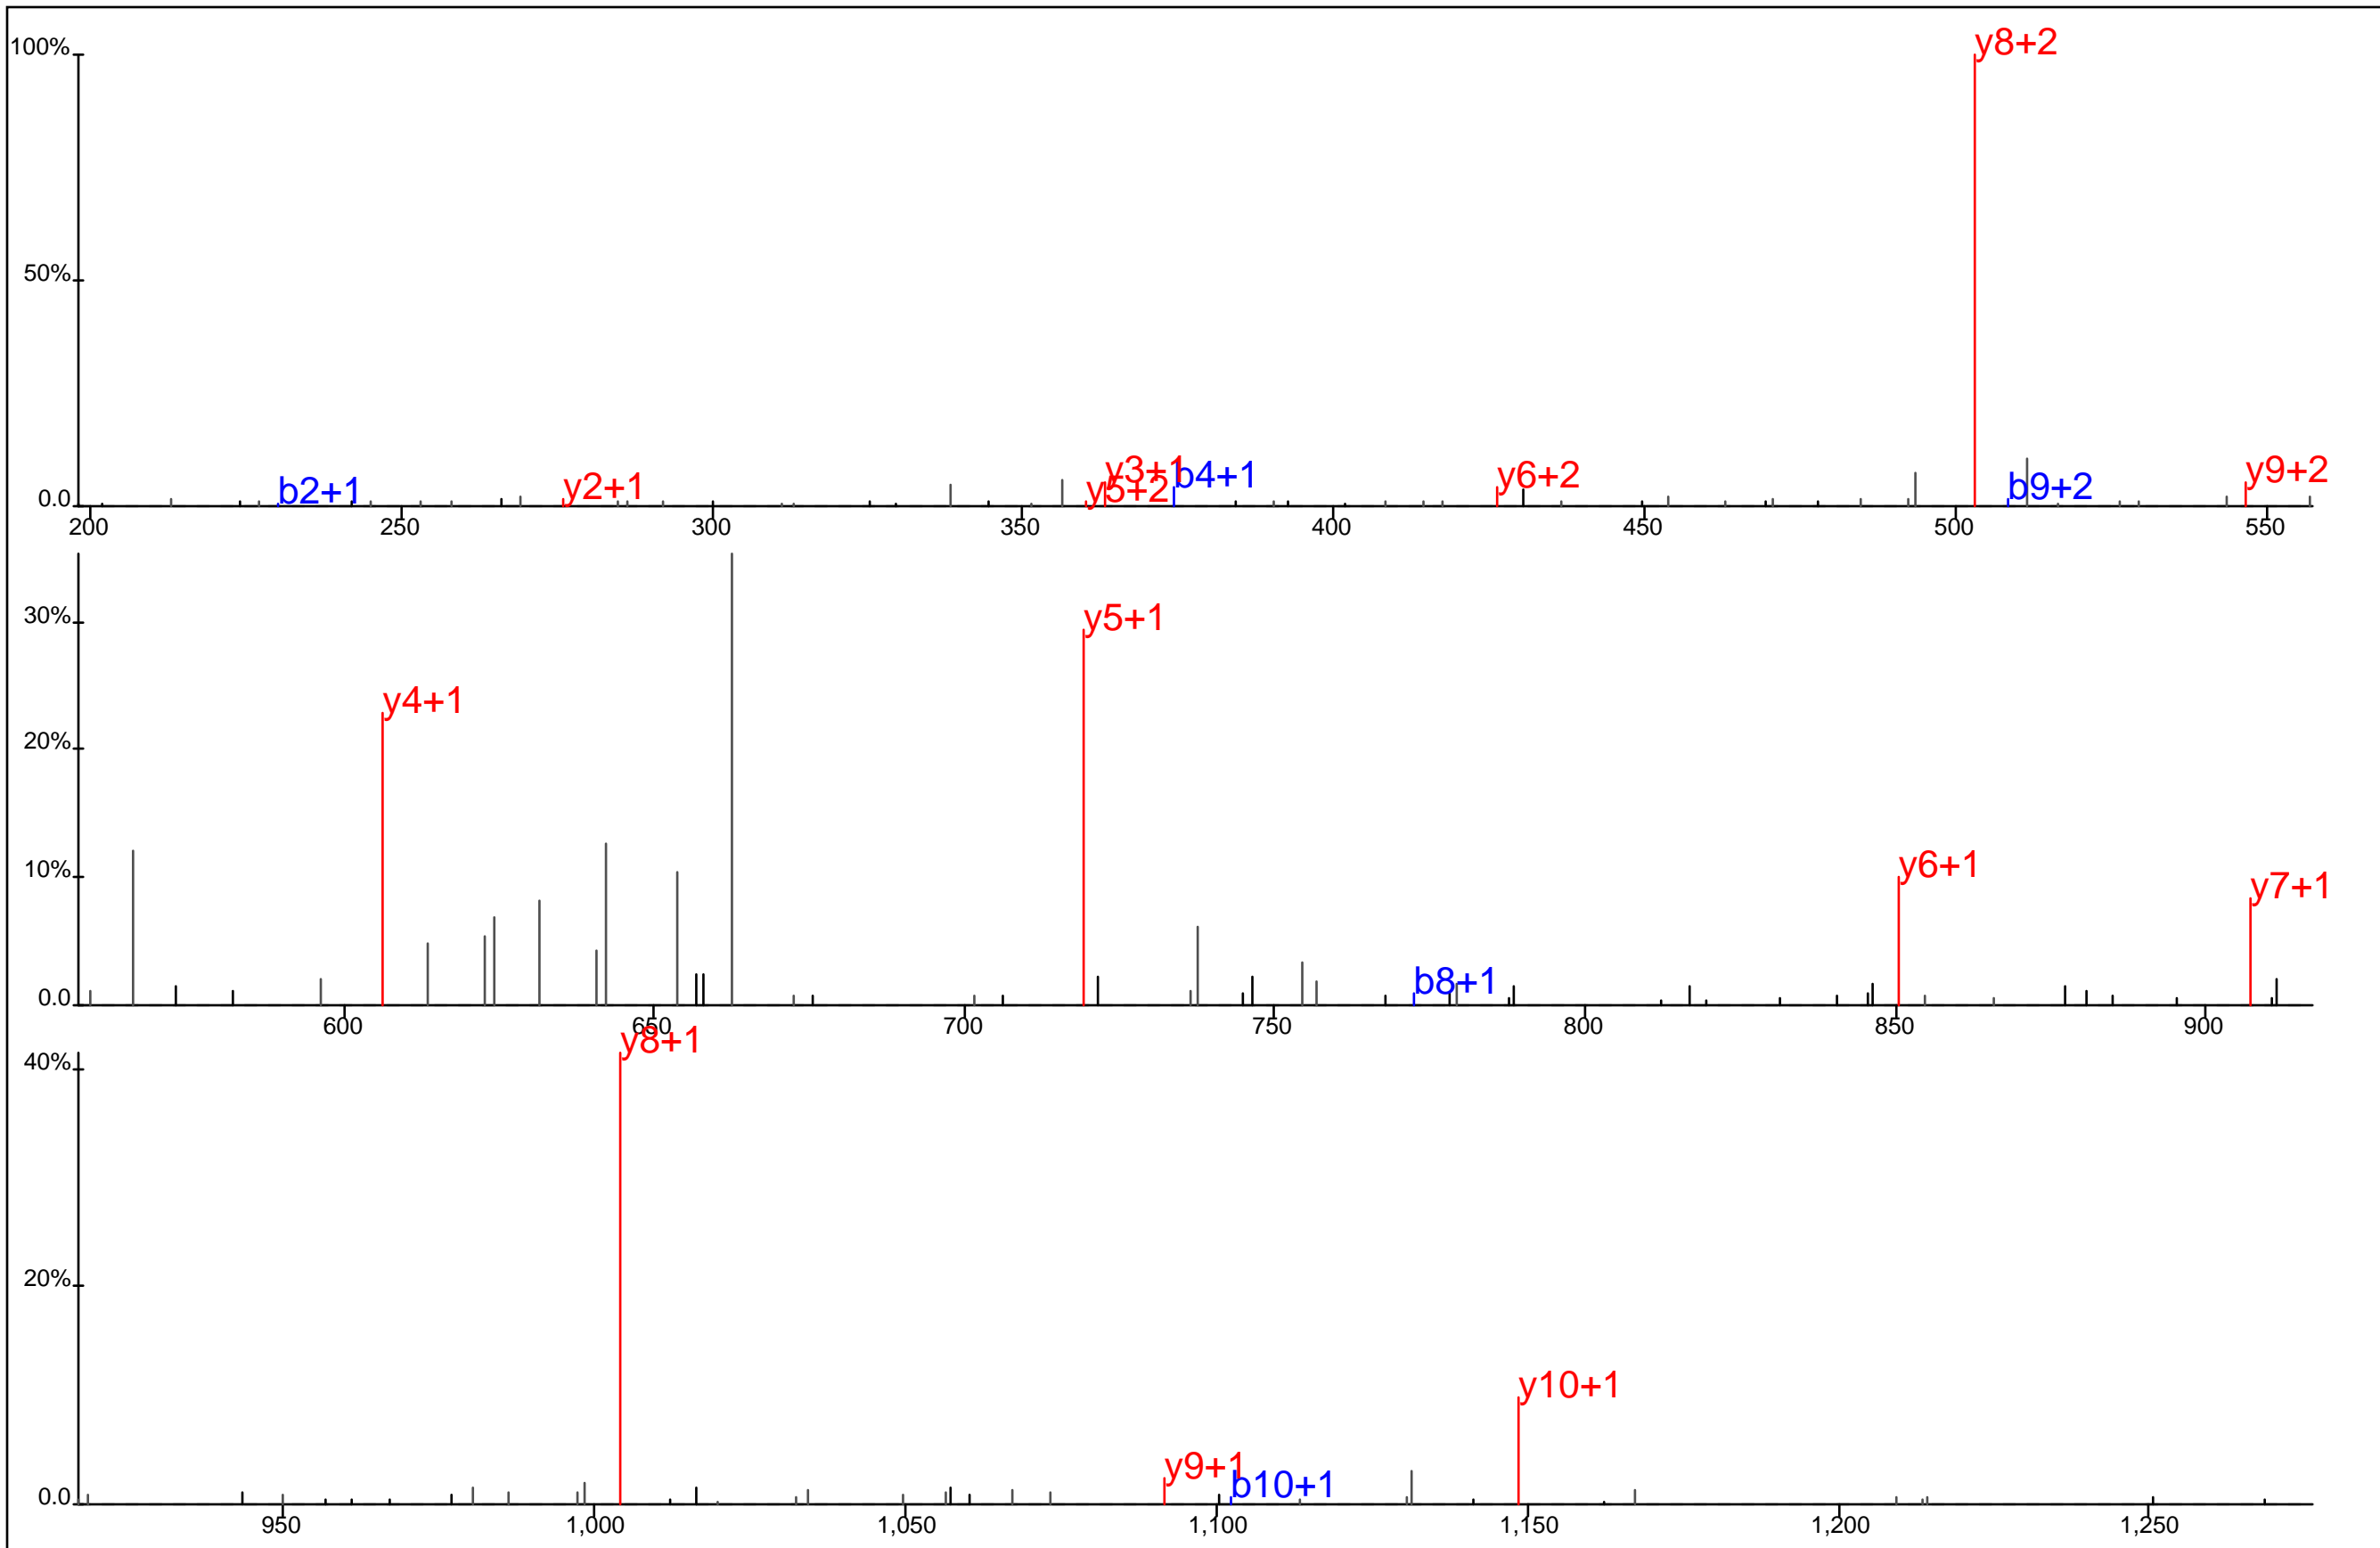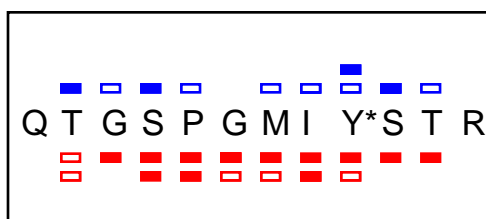

Protein Name: Potassium channel, voltage gated, shaker related subfamily beta, member 2  
 gi Accession: 0  
 Precursor Mass: 689.2988+2  
 Delta Mass: 2.576 ppm  
 XCorr: 70.48



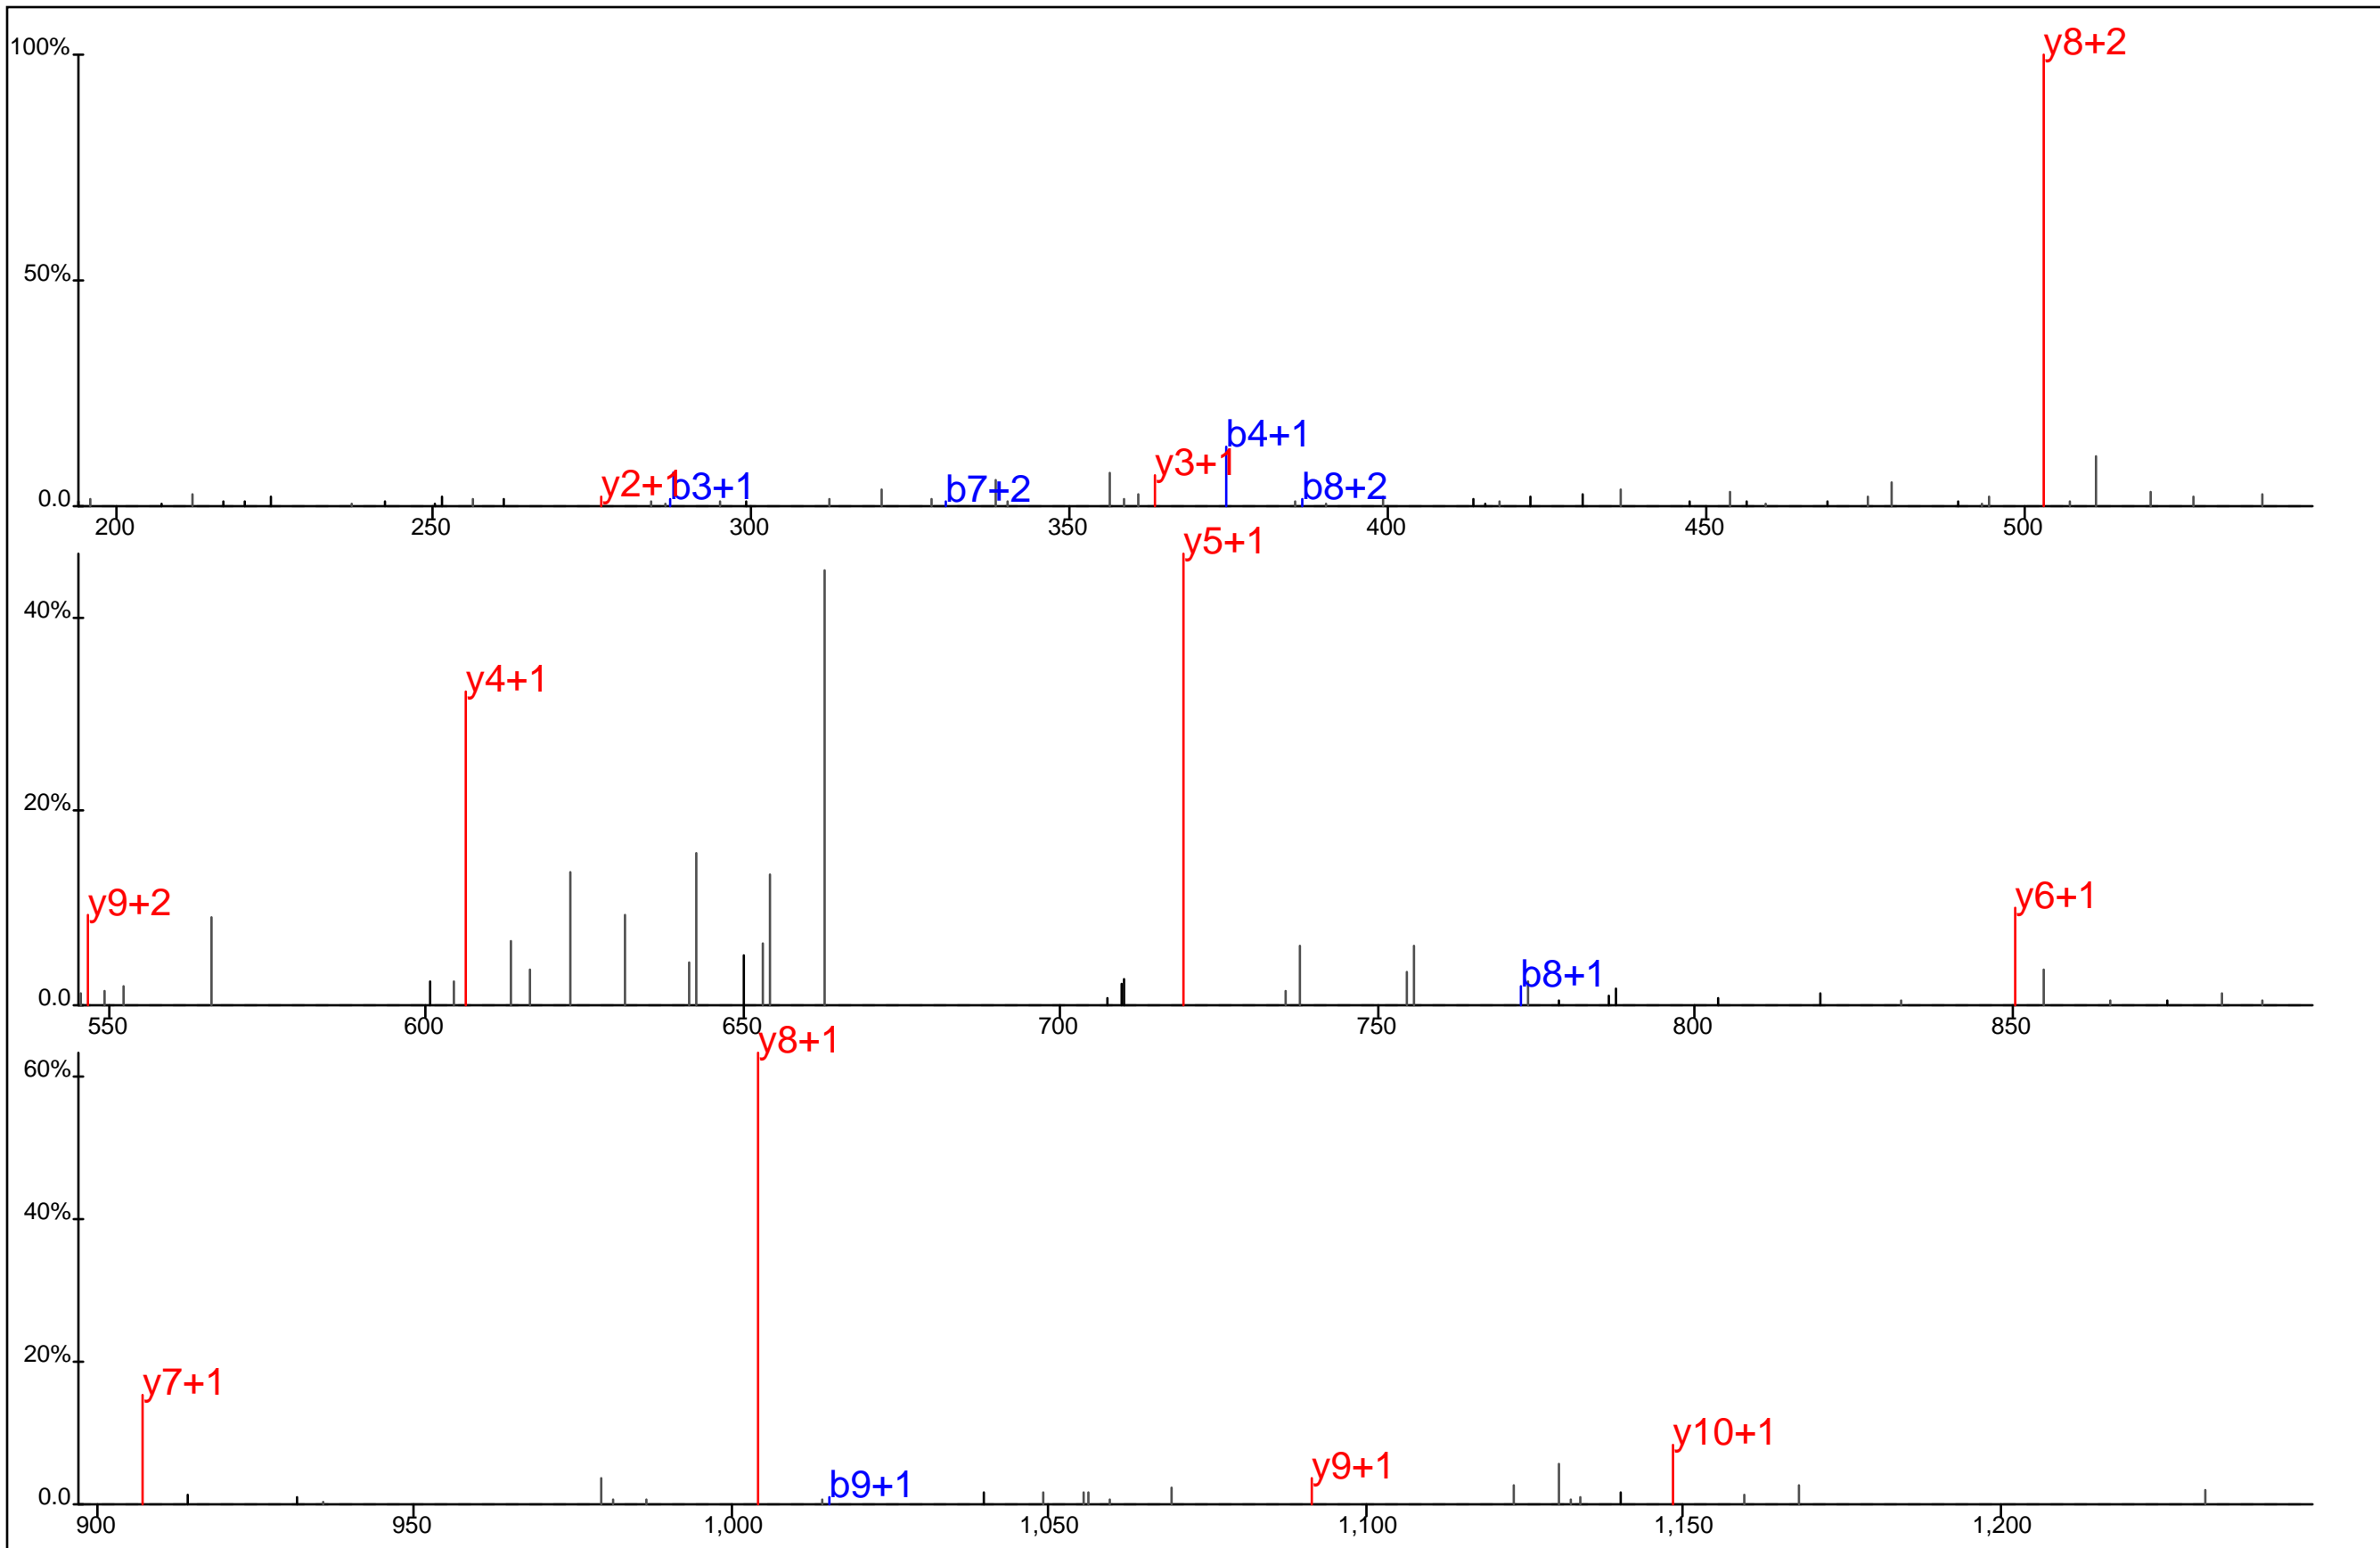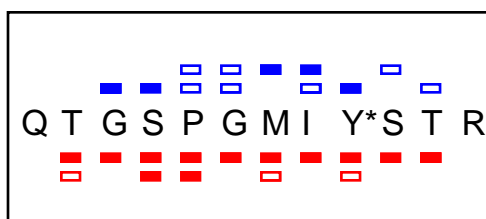

Protein Name: Potassium channel, voltage gated, shaker related subfamily beta, member 2  
 gi Accession: 0  
 Precursor Mass: 689.2982+2  
 Delta Mass: 1.601 ppm  
 XCorr: 64.34



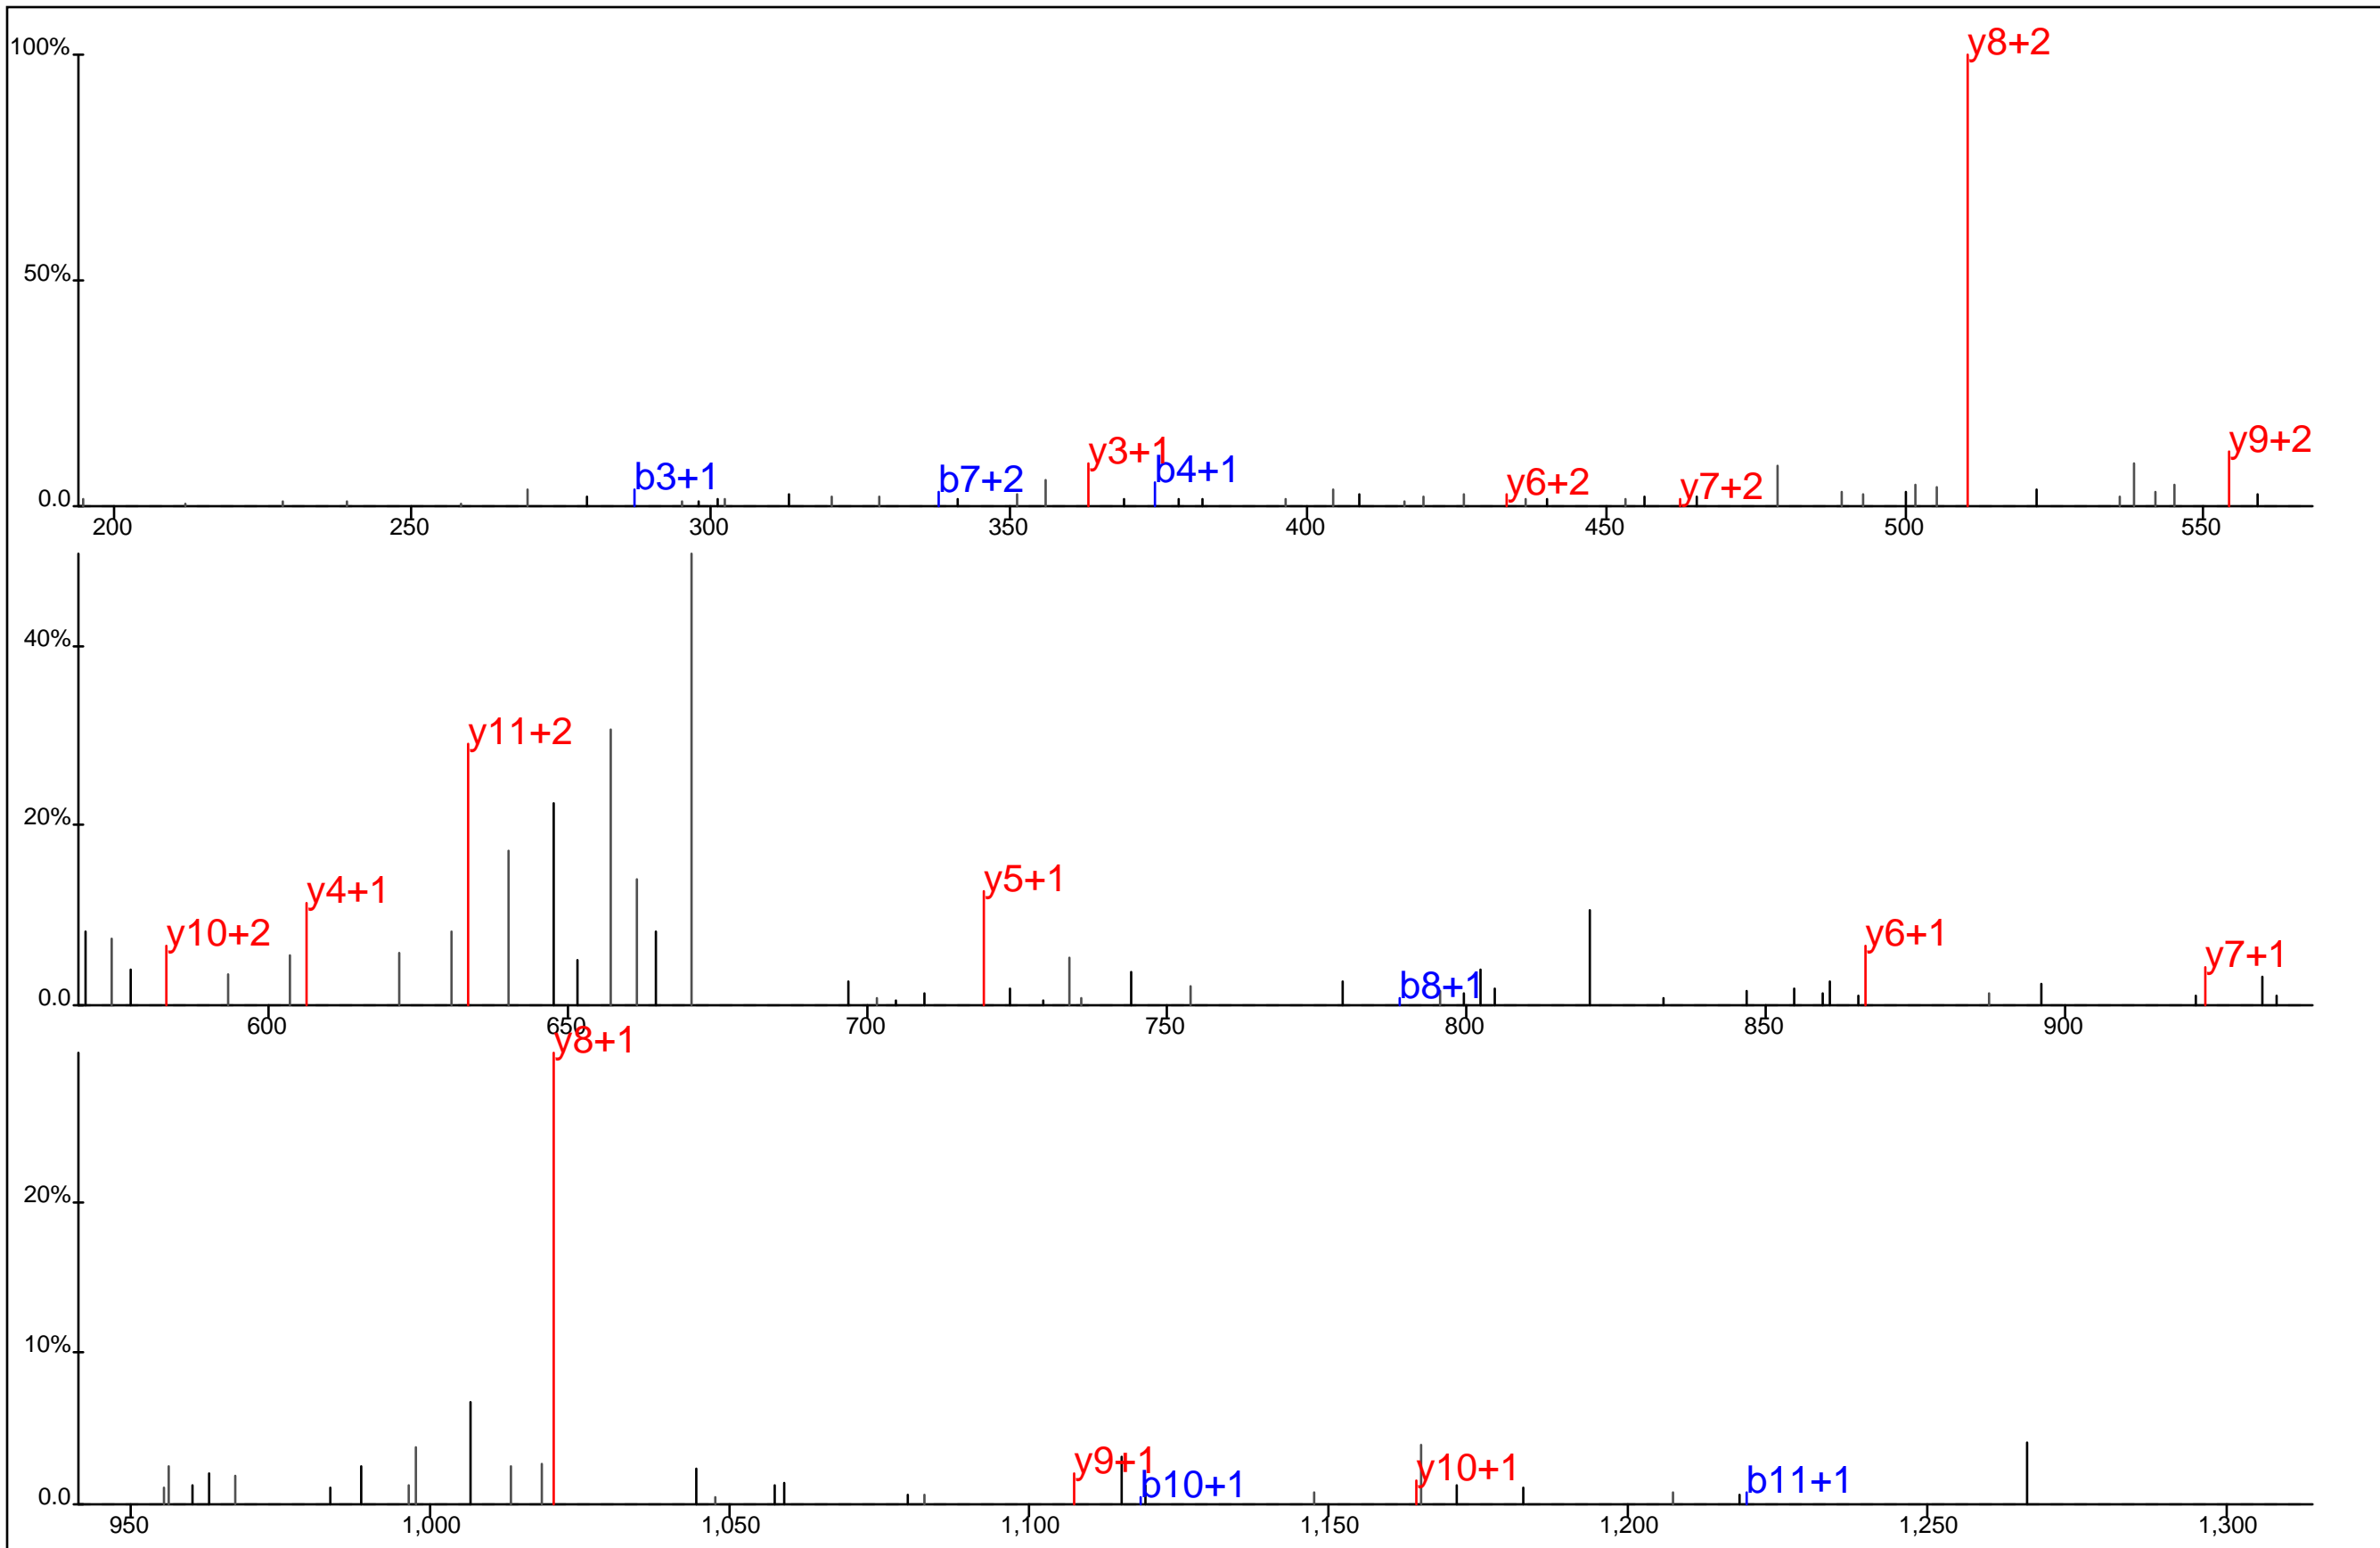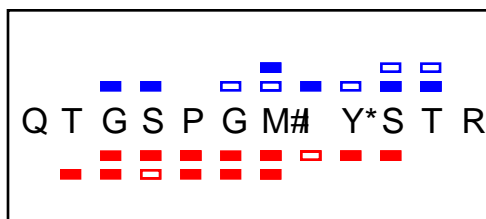

Protein Name: Potassium channel, voltage gated, shaker related subfamily beta, member 2  
 gi Accession: 0  
 Precursor Mass: 697.2975+2  
 Delta Mass: 4.264 ppm  
 XCorr: 30.54

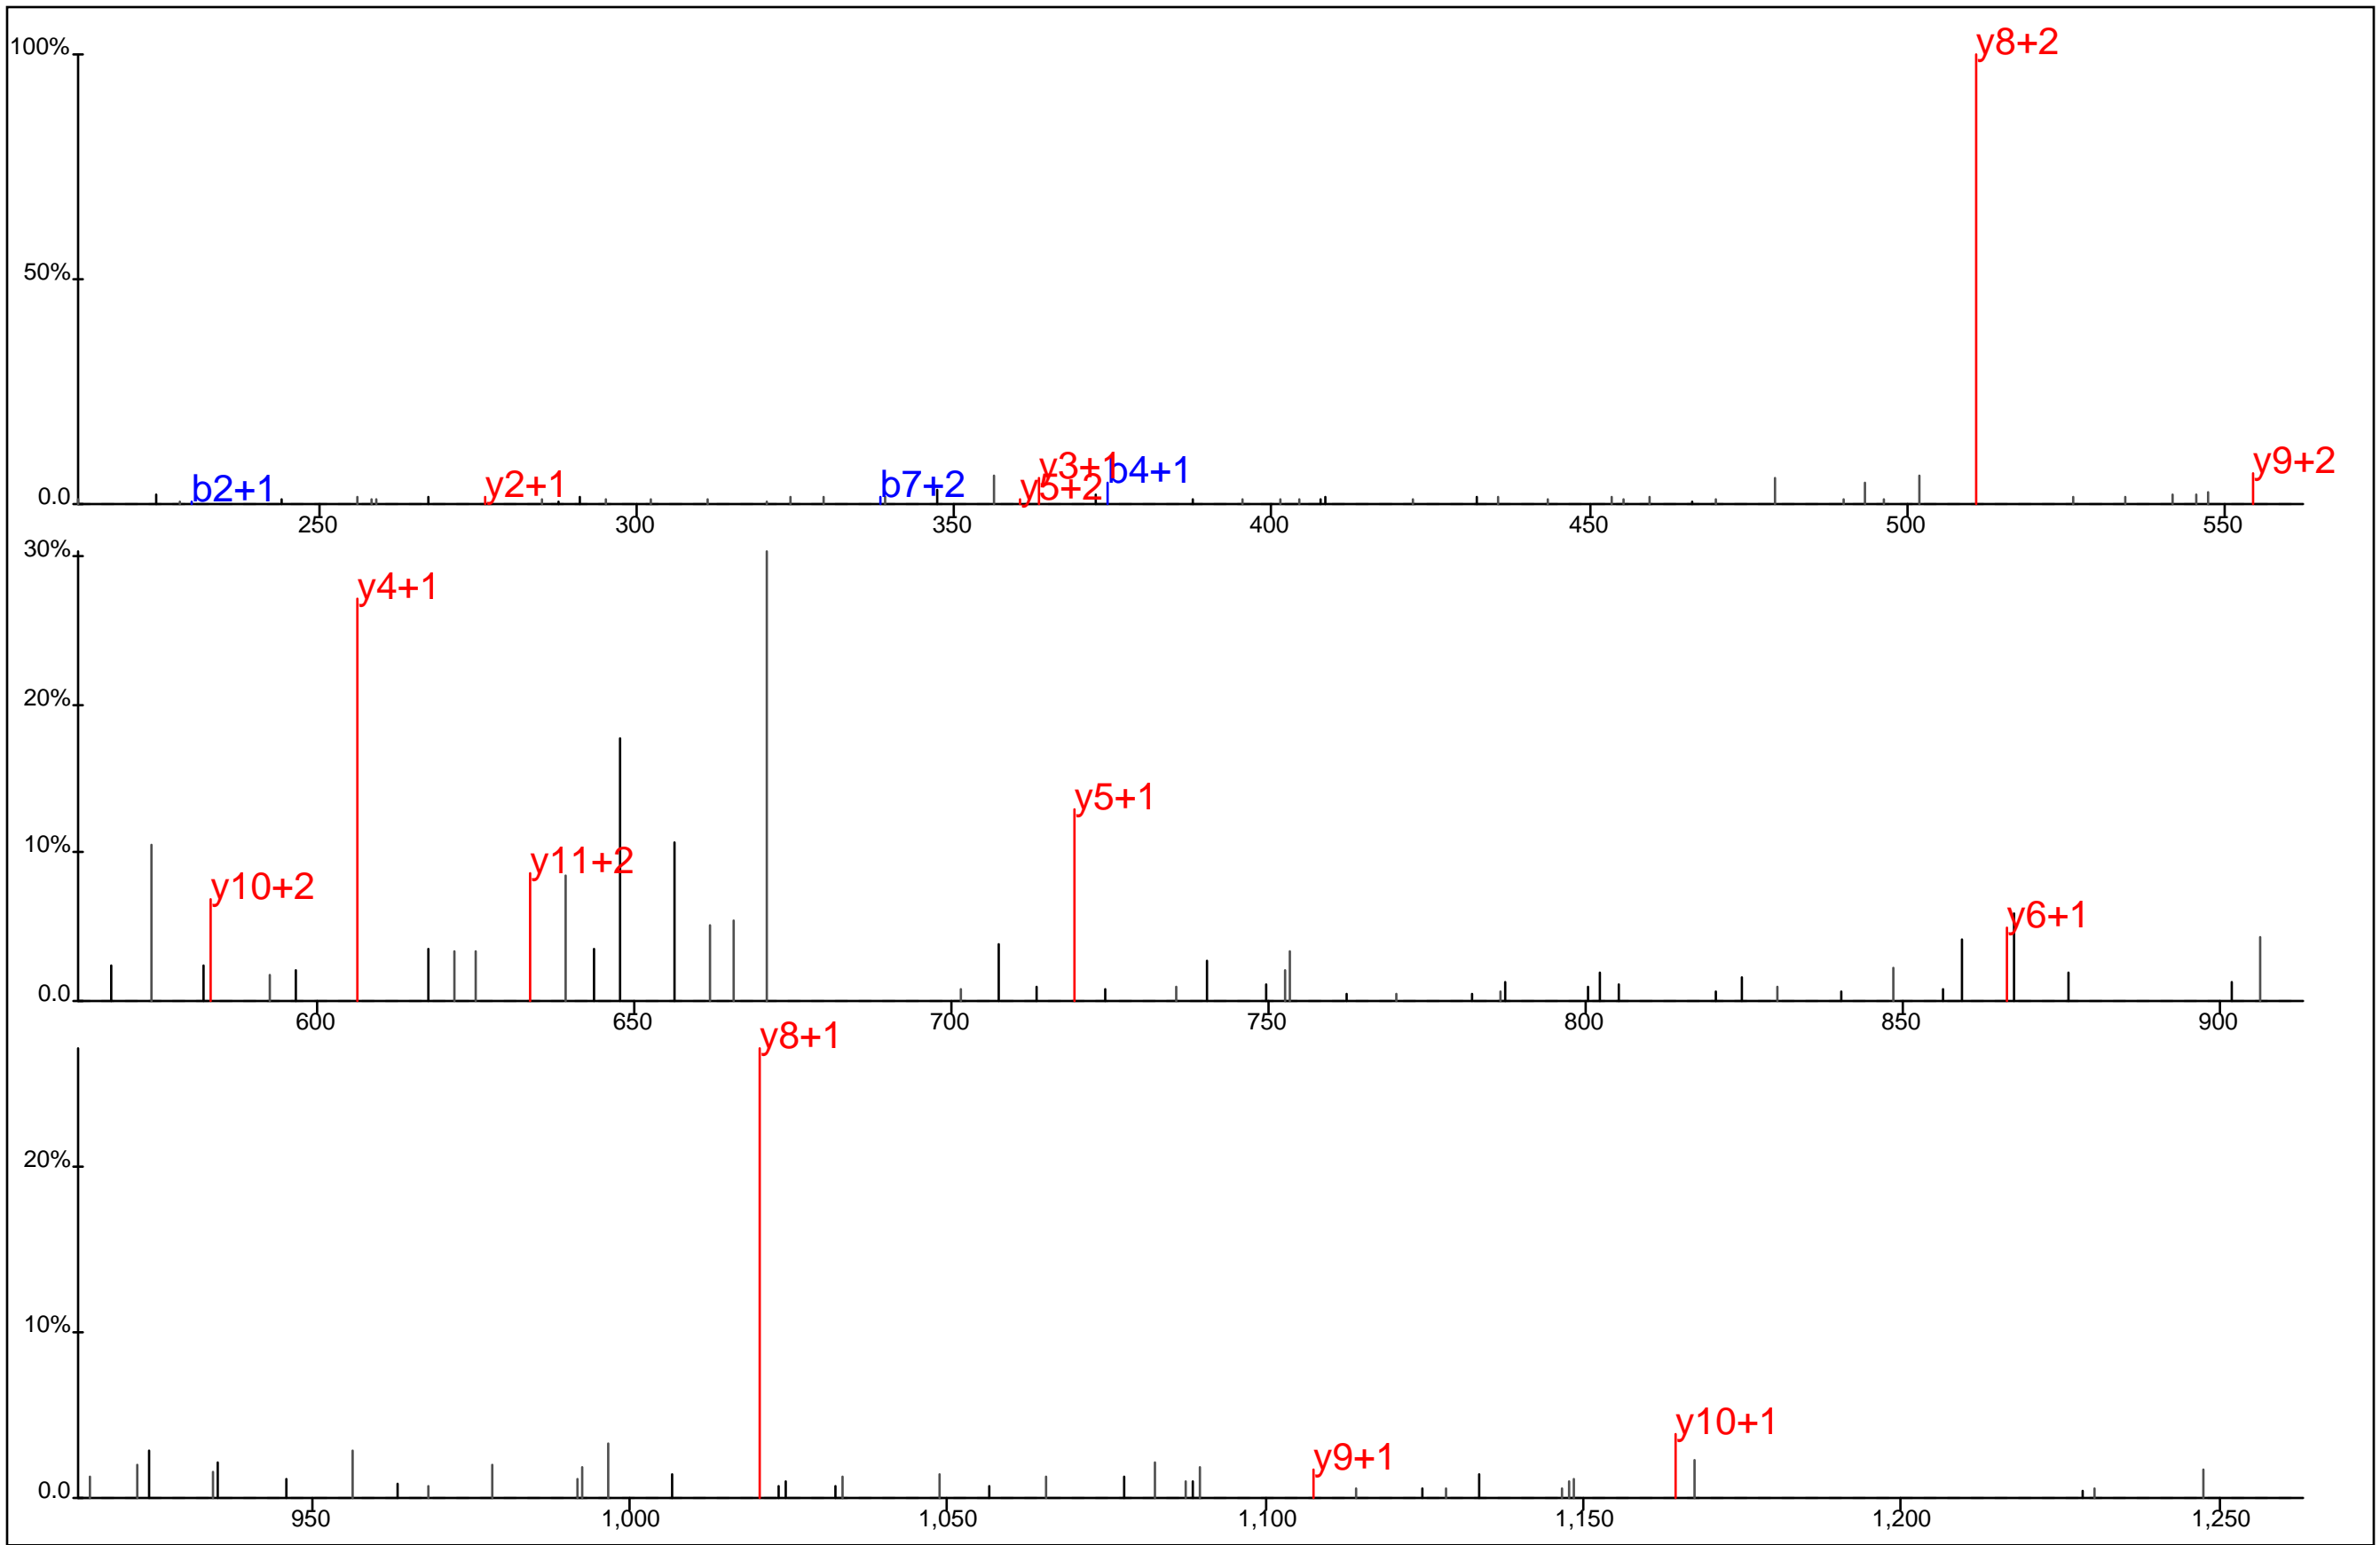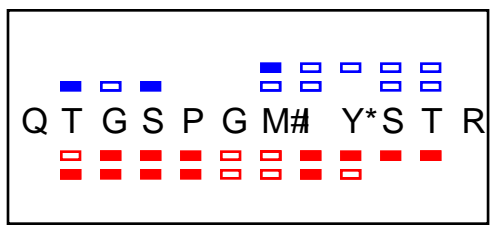

Protein Name: Potassium channel, voltage gated, shaker related subfamily beta, member 2  
 gi Accession: 0  
 Precursor Mass: 697.2910+2  
 Delta Mass: 5.108 ppm  
 XCorr: 40.55

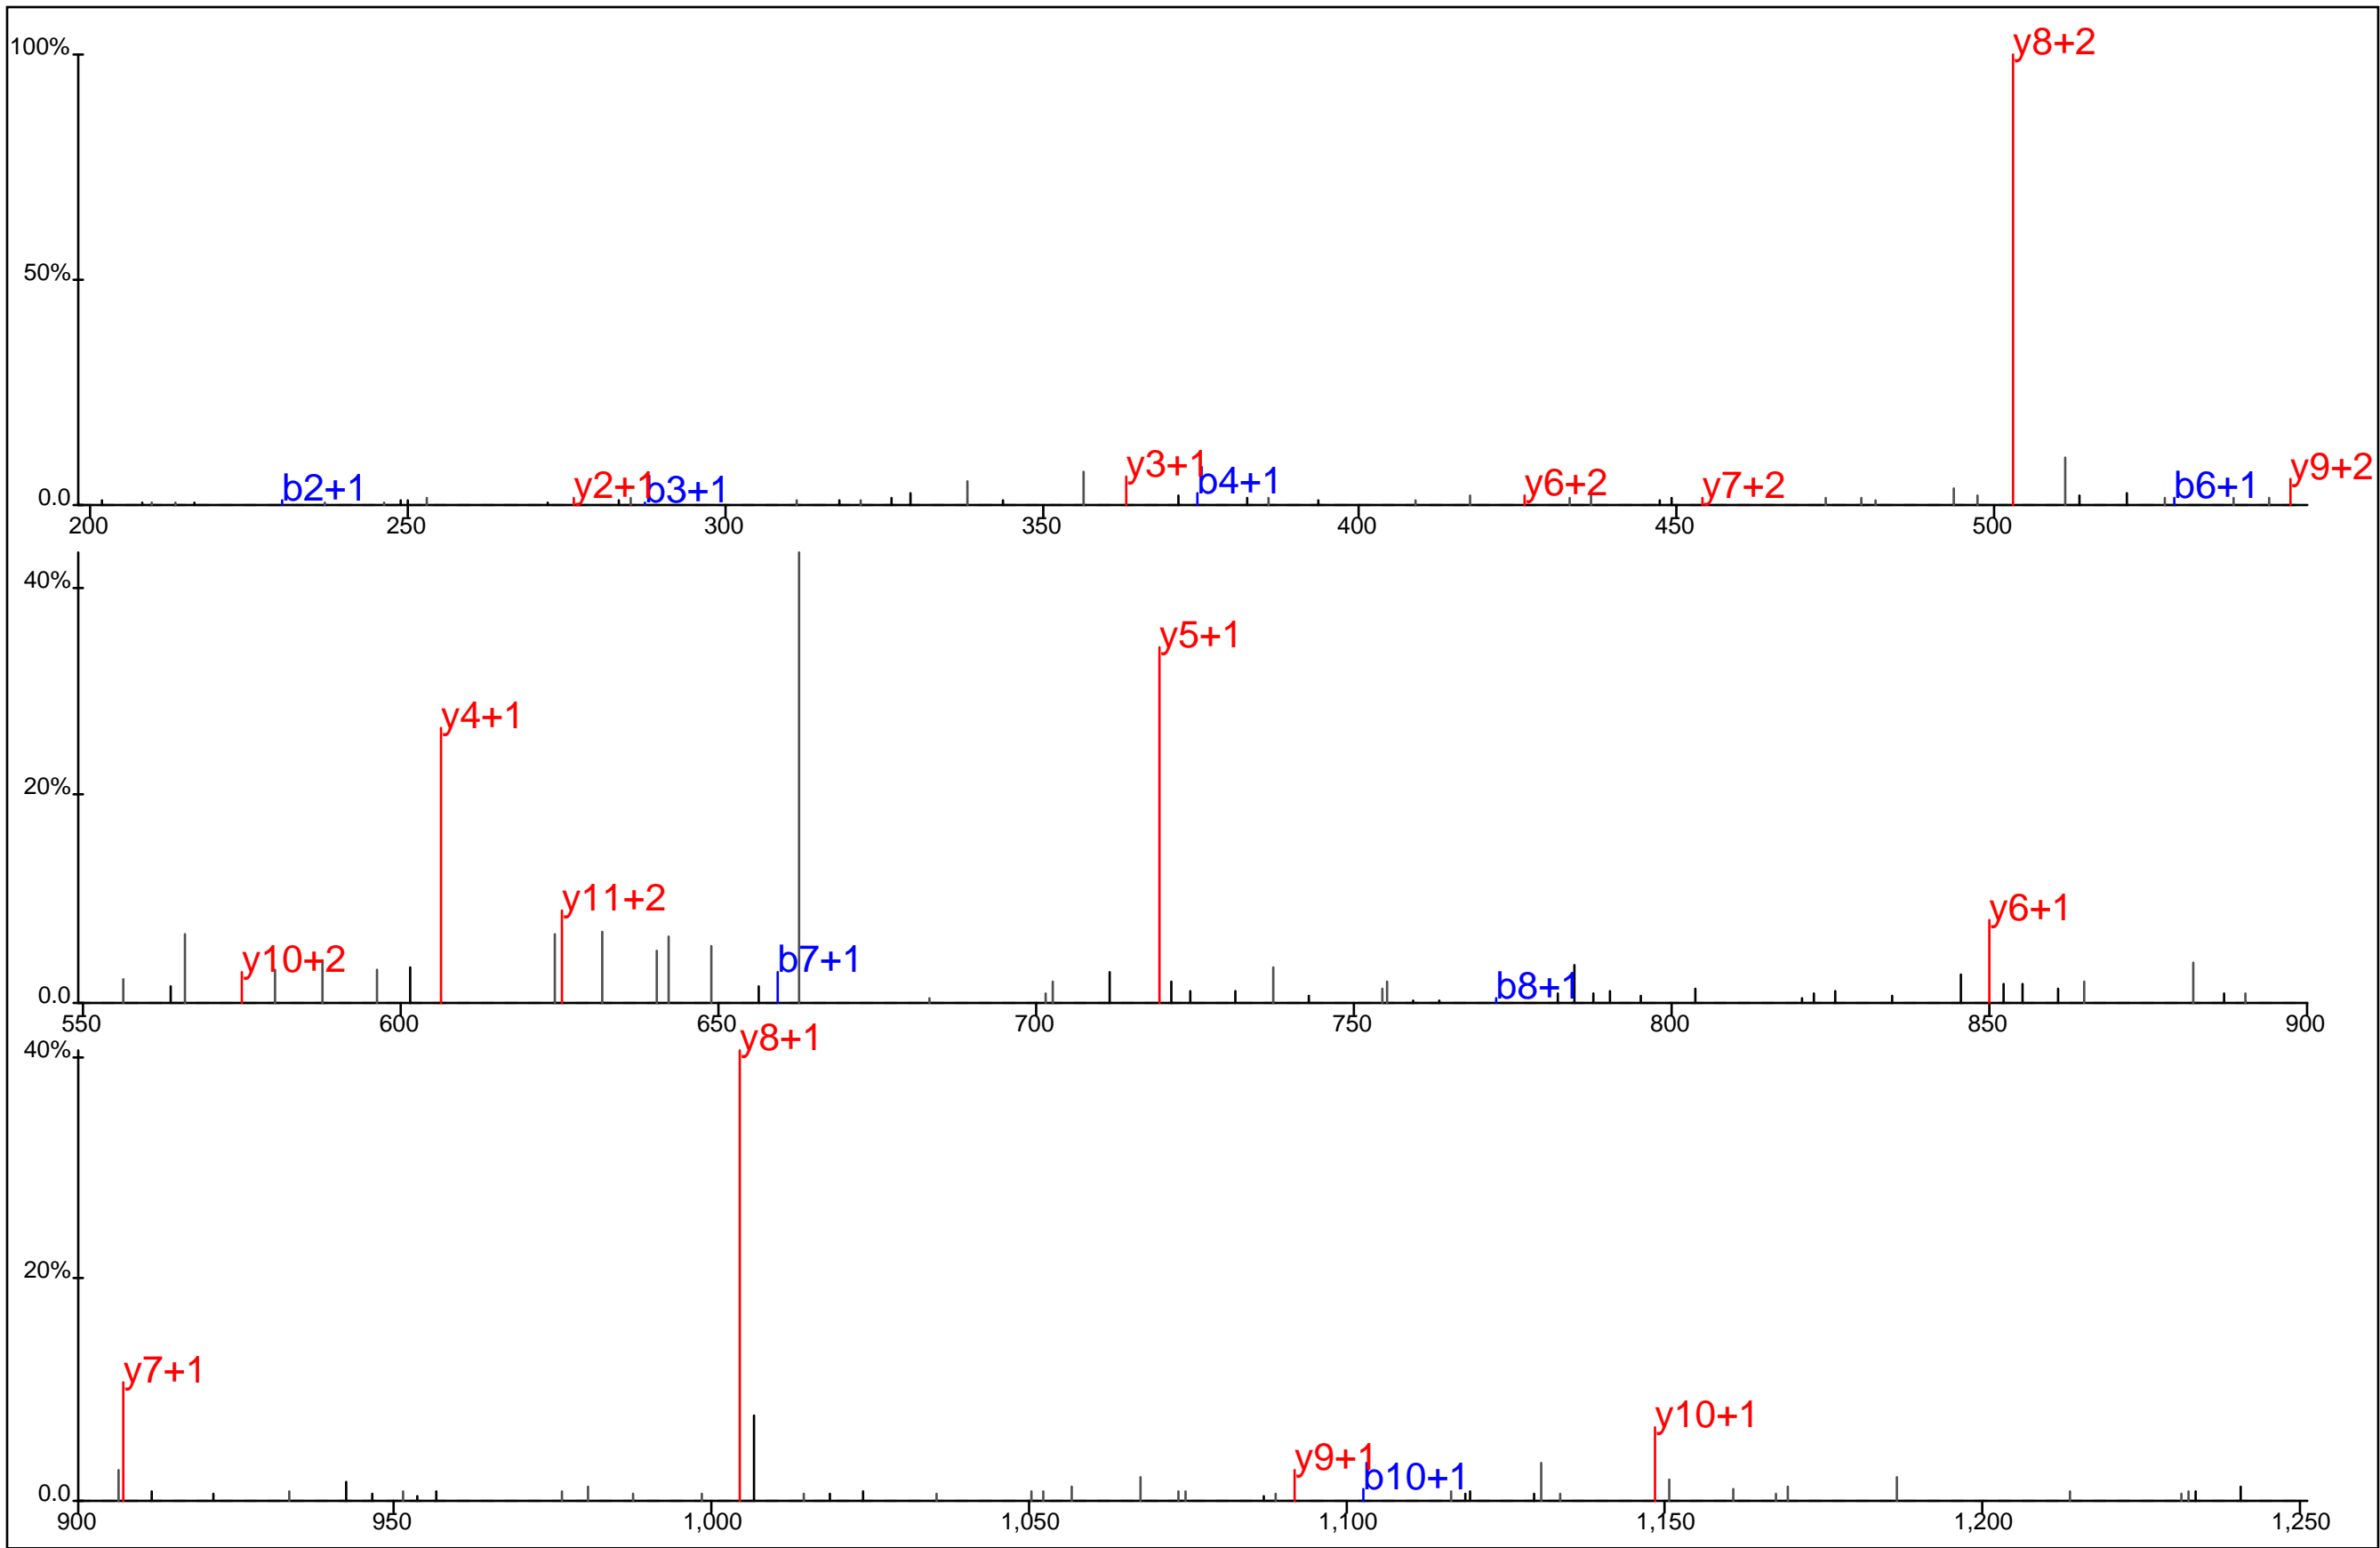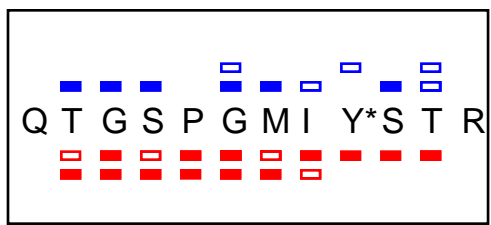

Protein Name: Potassium channel, voltage gated, shaker related subfamily beta, member 2  
 gi Accession: 0  
 Precursor Mass: 689.3000+2  
 Delta Mass: 4.348 ppm  
 XCorr: 54.08

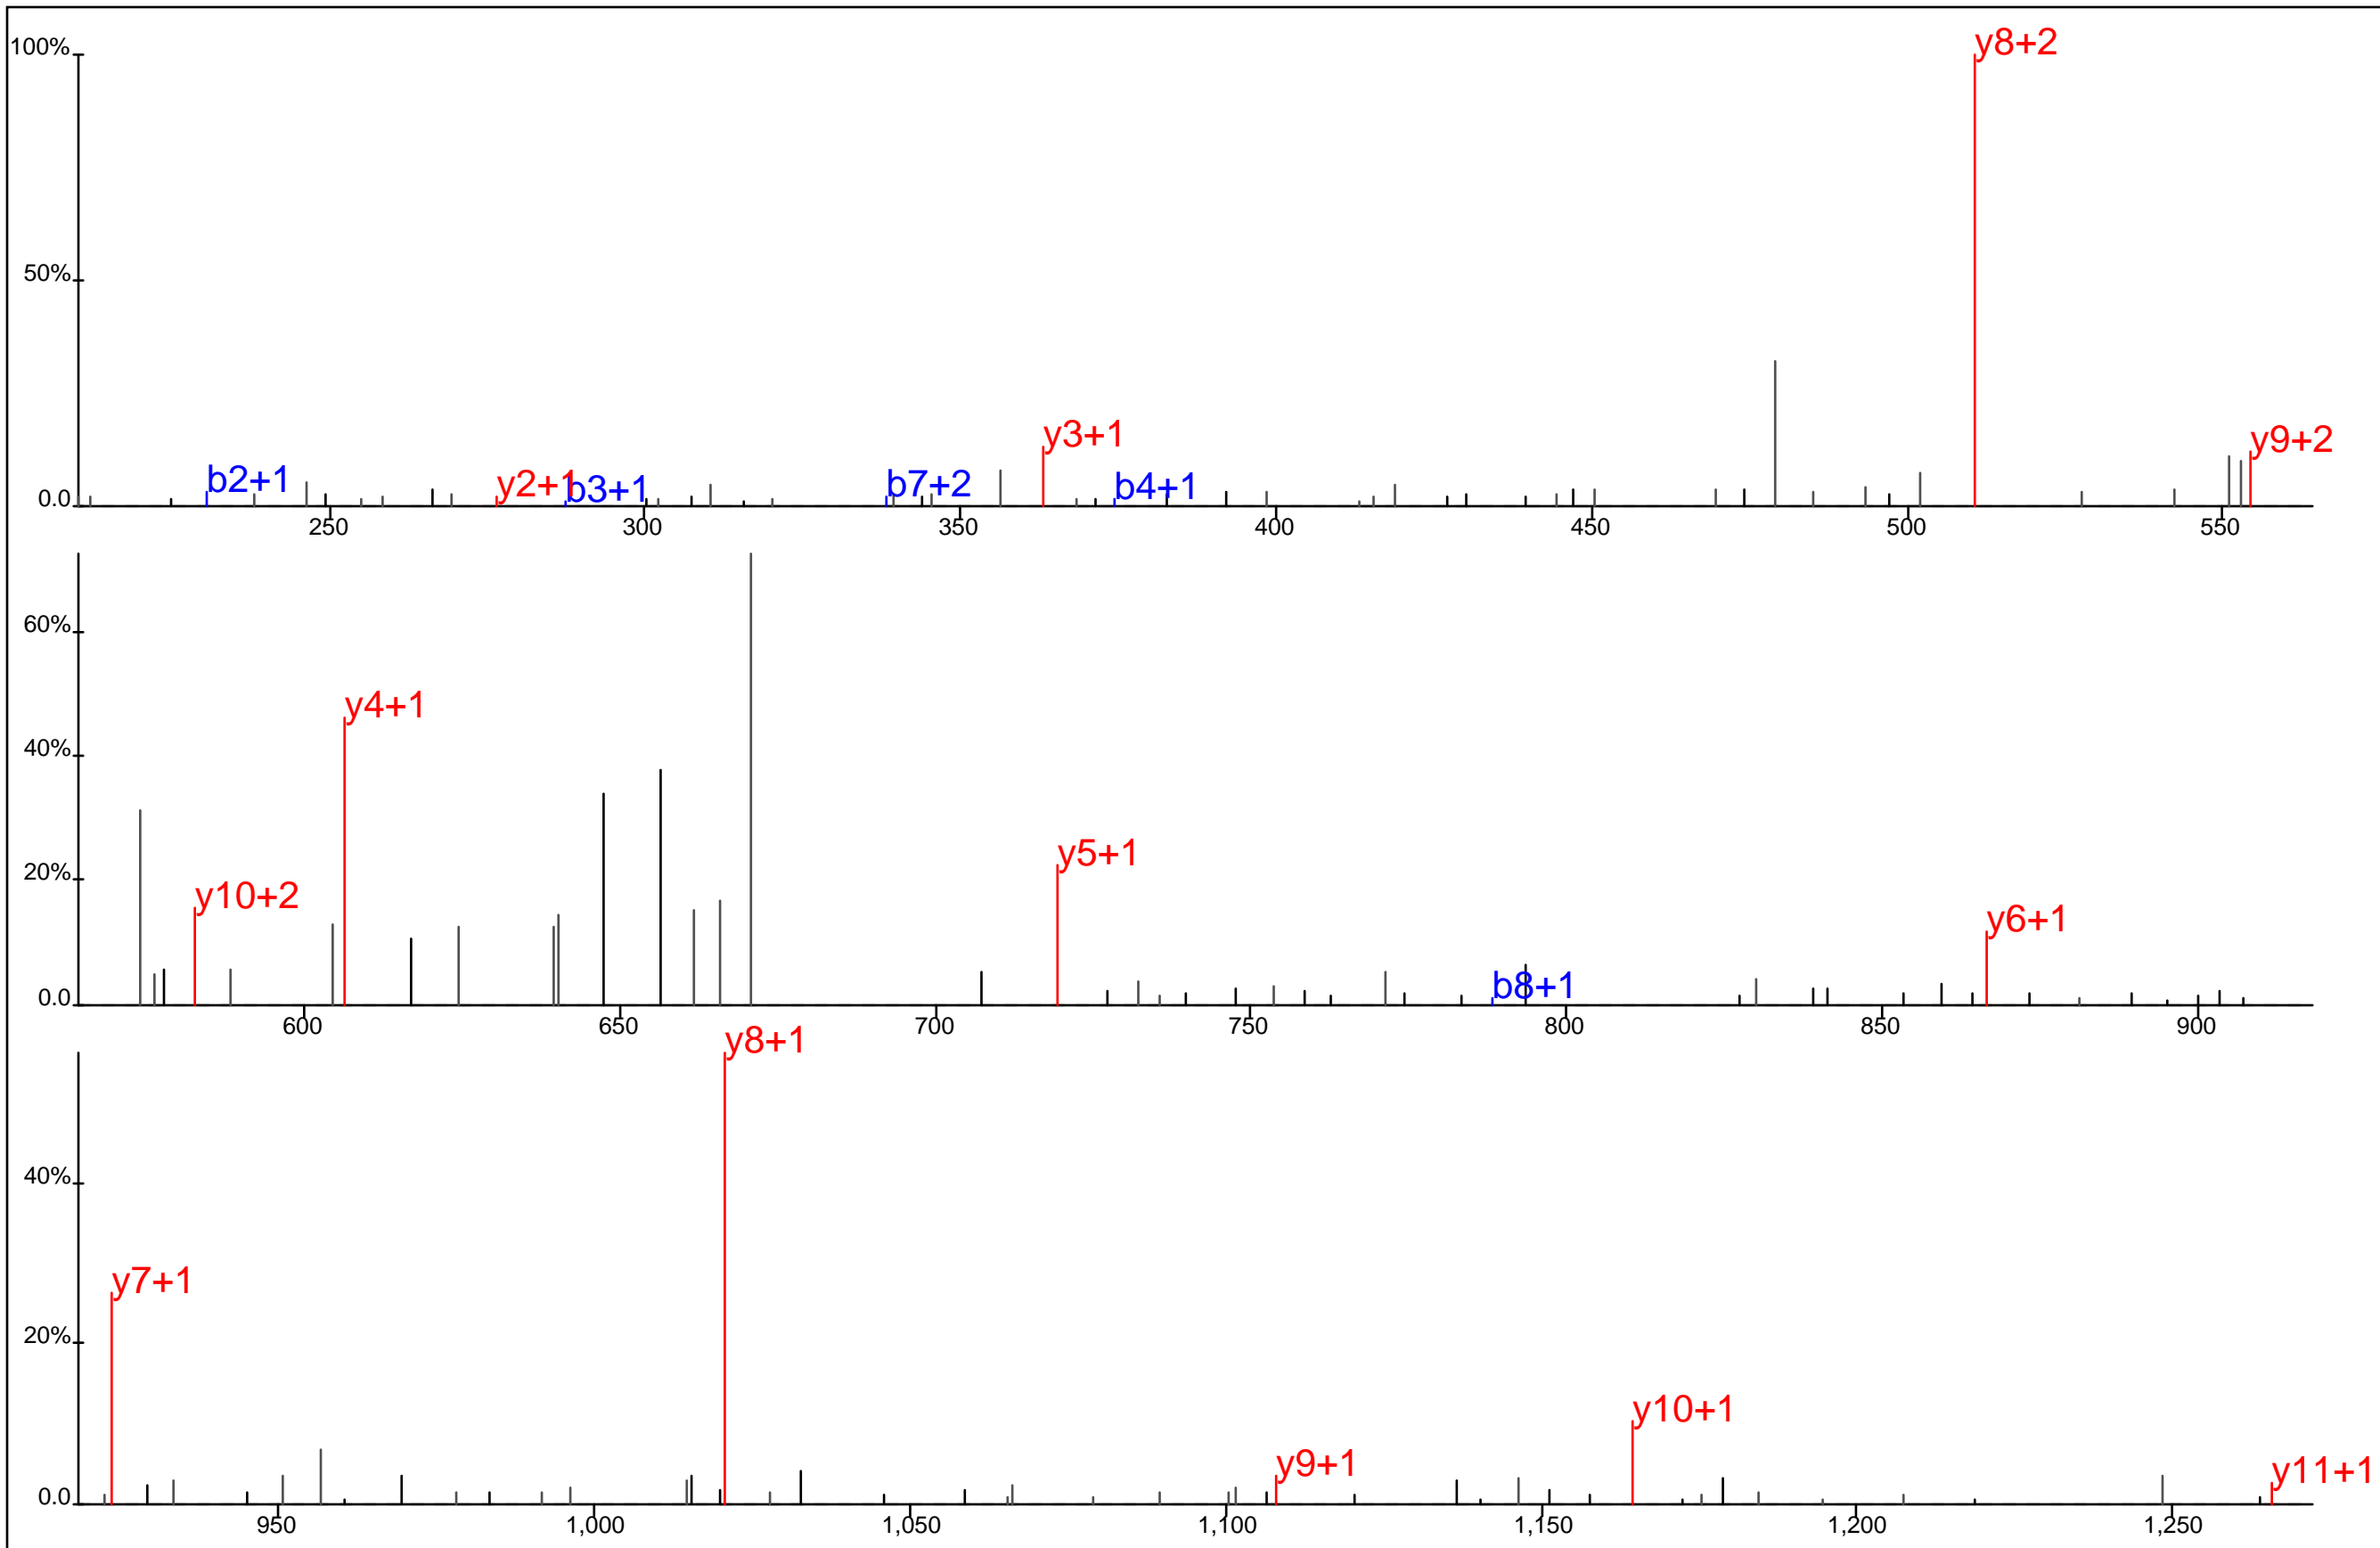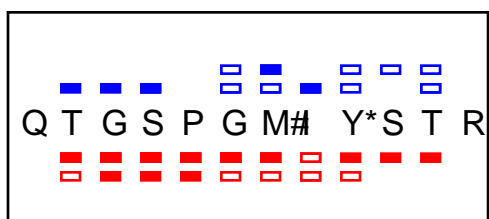

Protein Name: Potassium channel, voltage gated, shaker related subfamily beta, member 2  
 gi Accession: 0  
 Precursor Mass: 697.2960+2  
 Delta Mass: 2.163 ppm  
 XCorr: 54.88

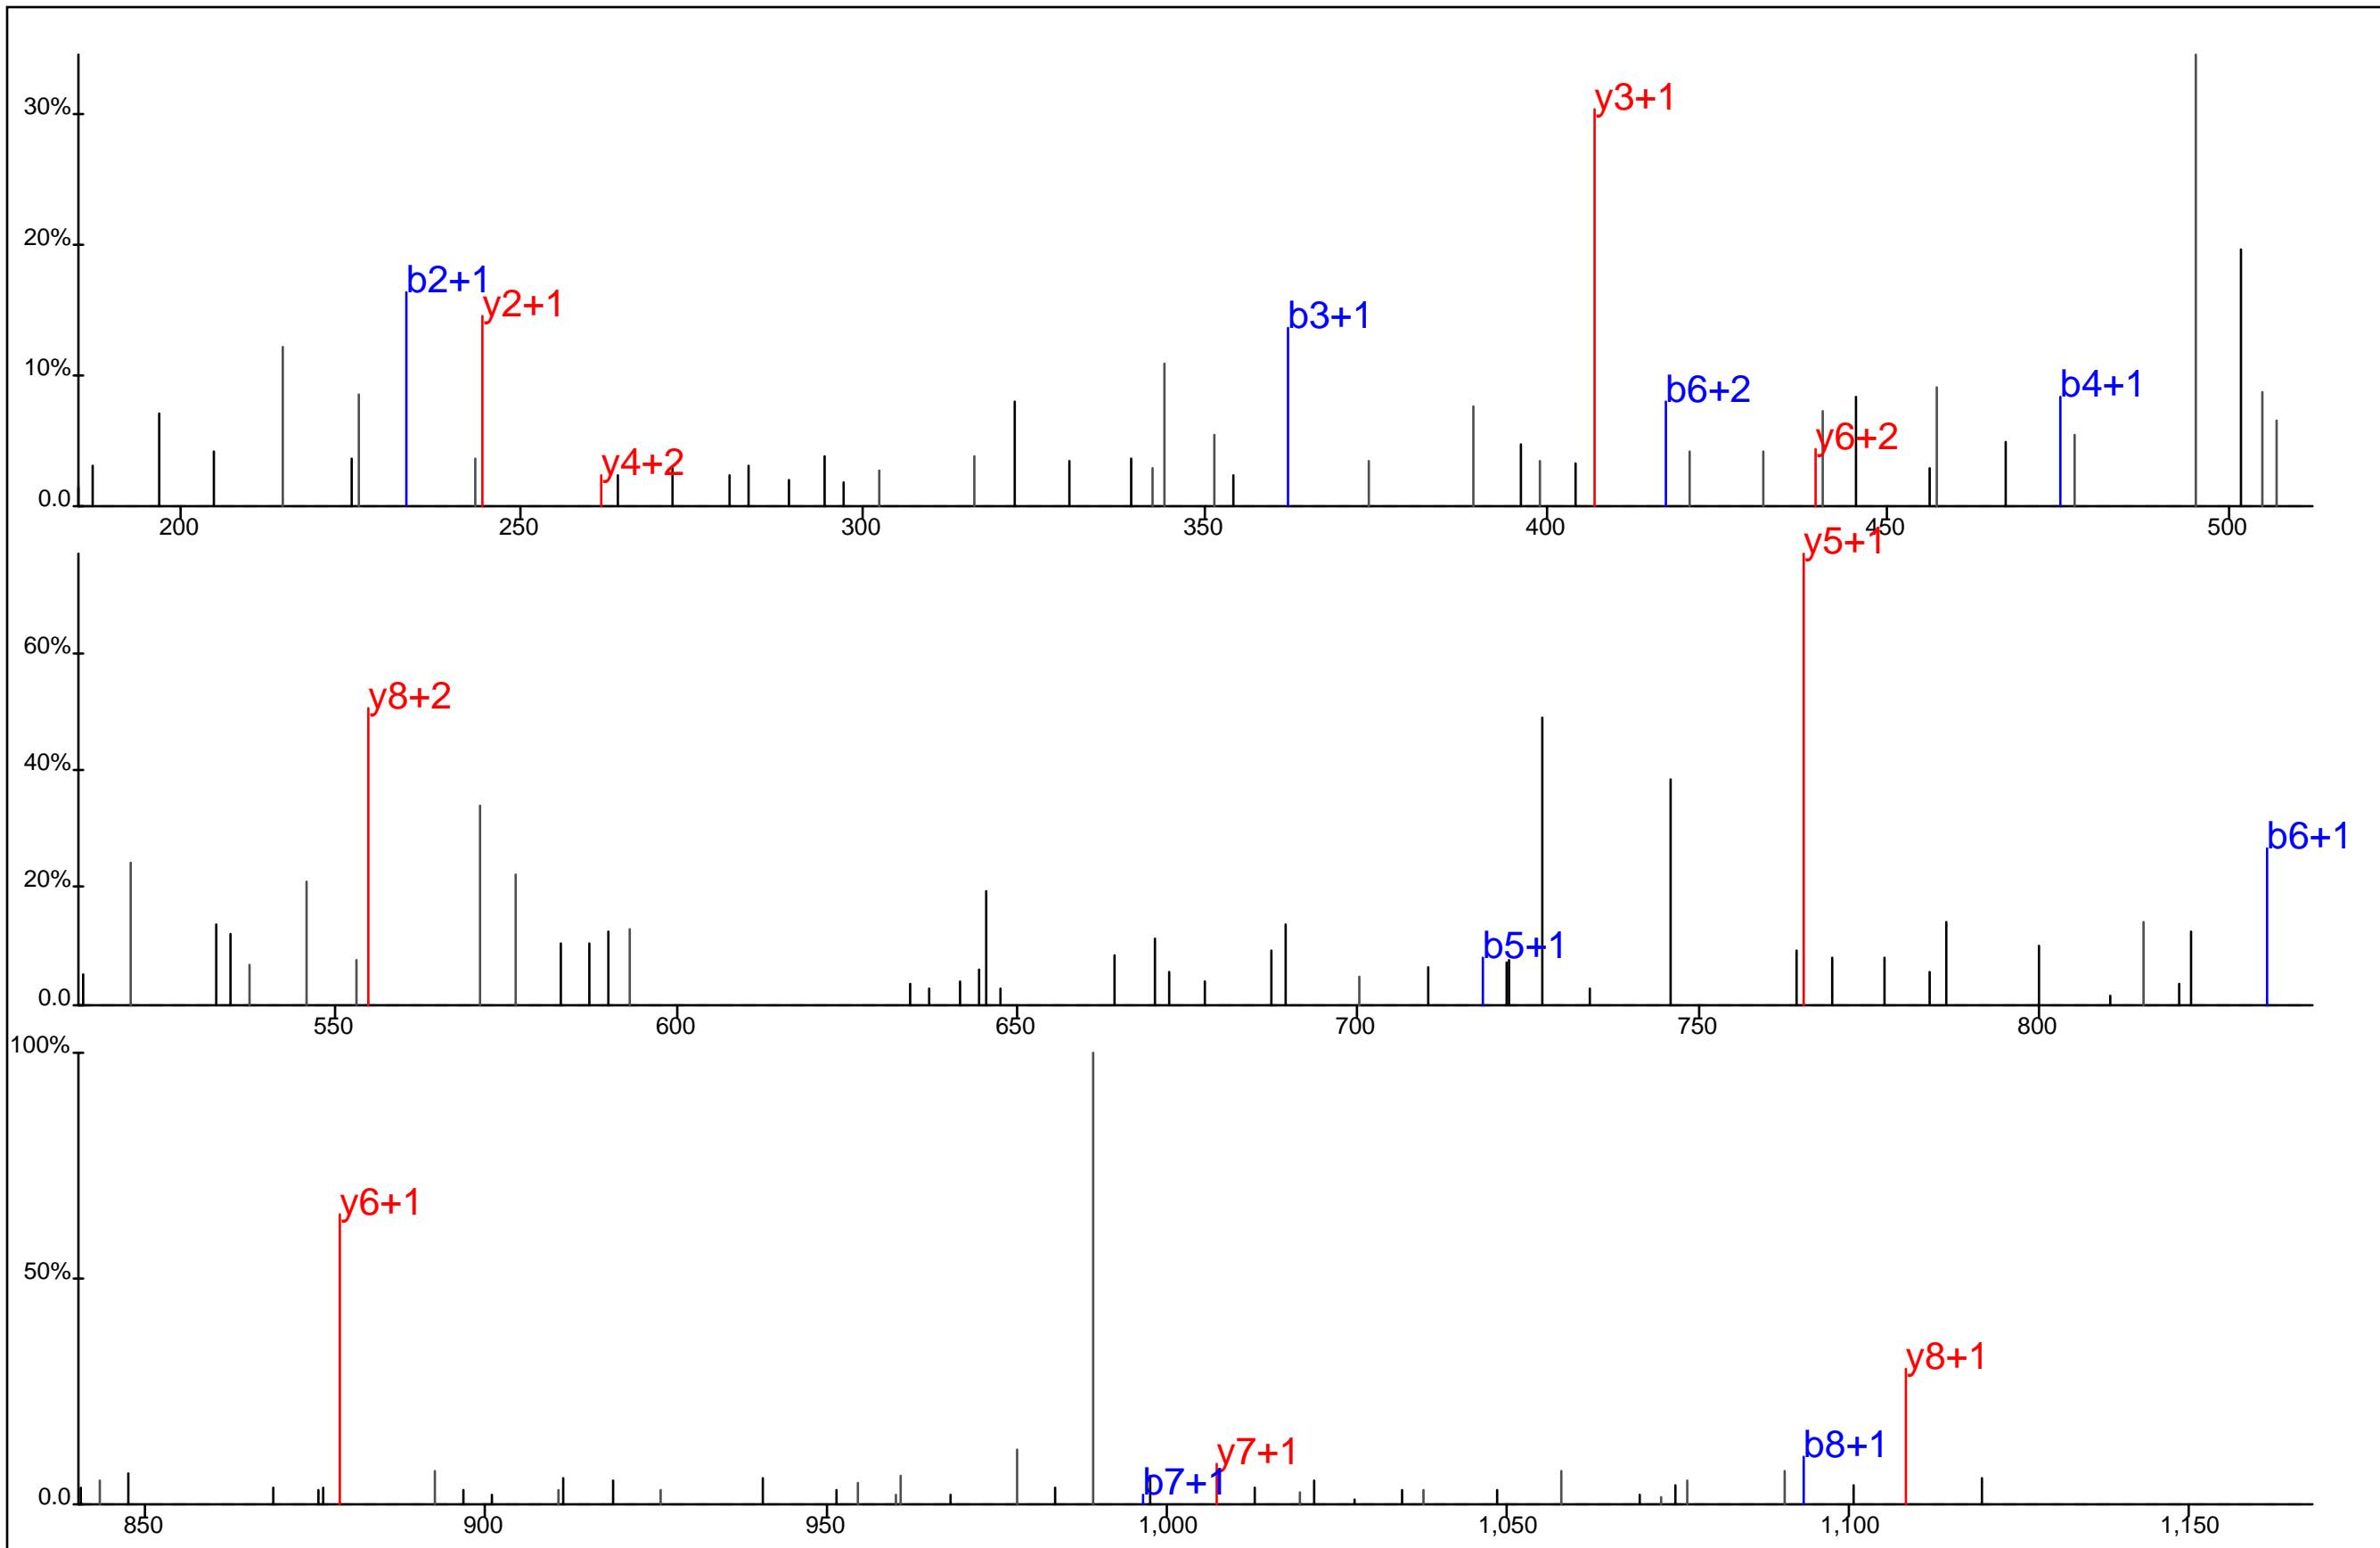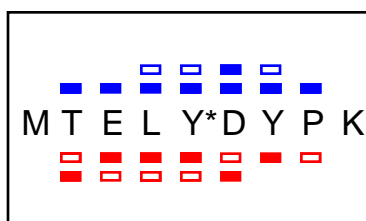

Protein Name: Prolyl endopeptidase  
 gi Accession: 0  
 Precursor Mass: 620.2541+2  
 Delta Mass: 0.500 ppm  
 XCorr: 43.46

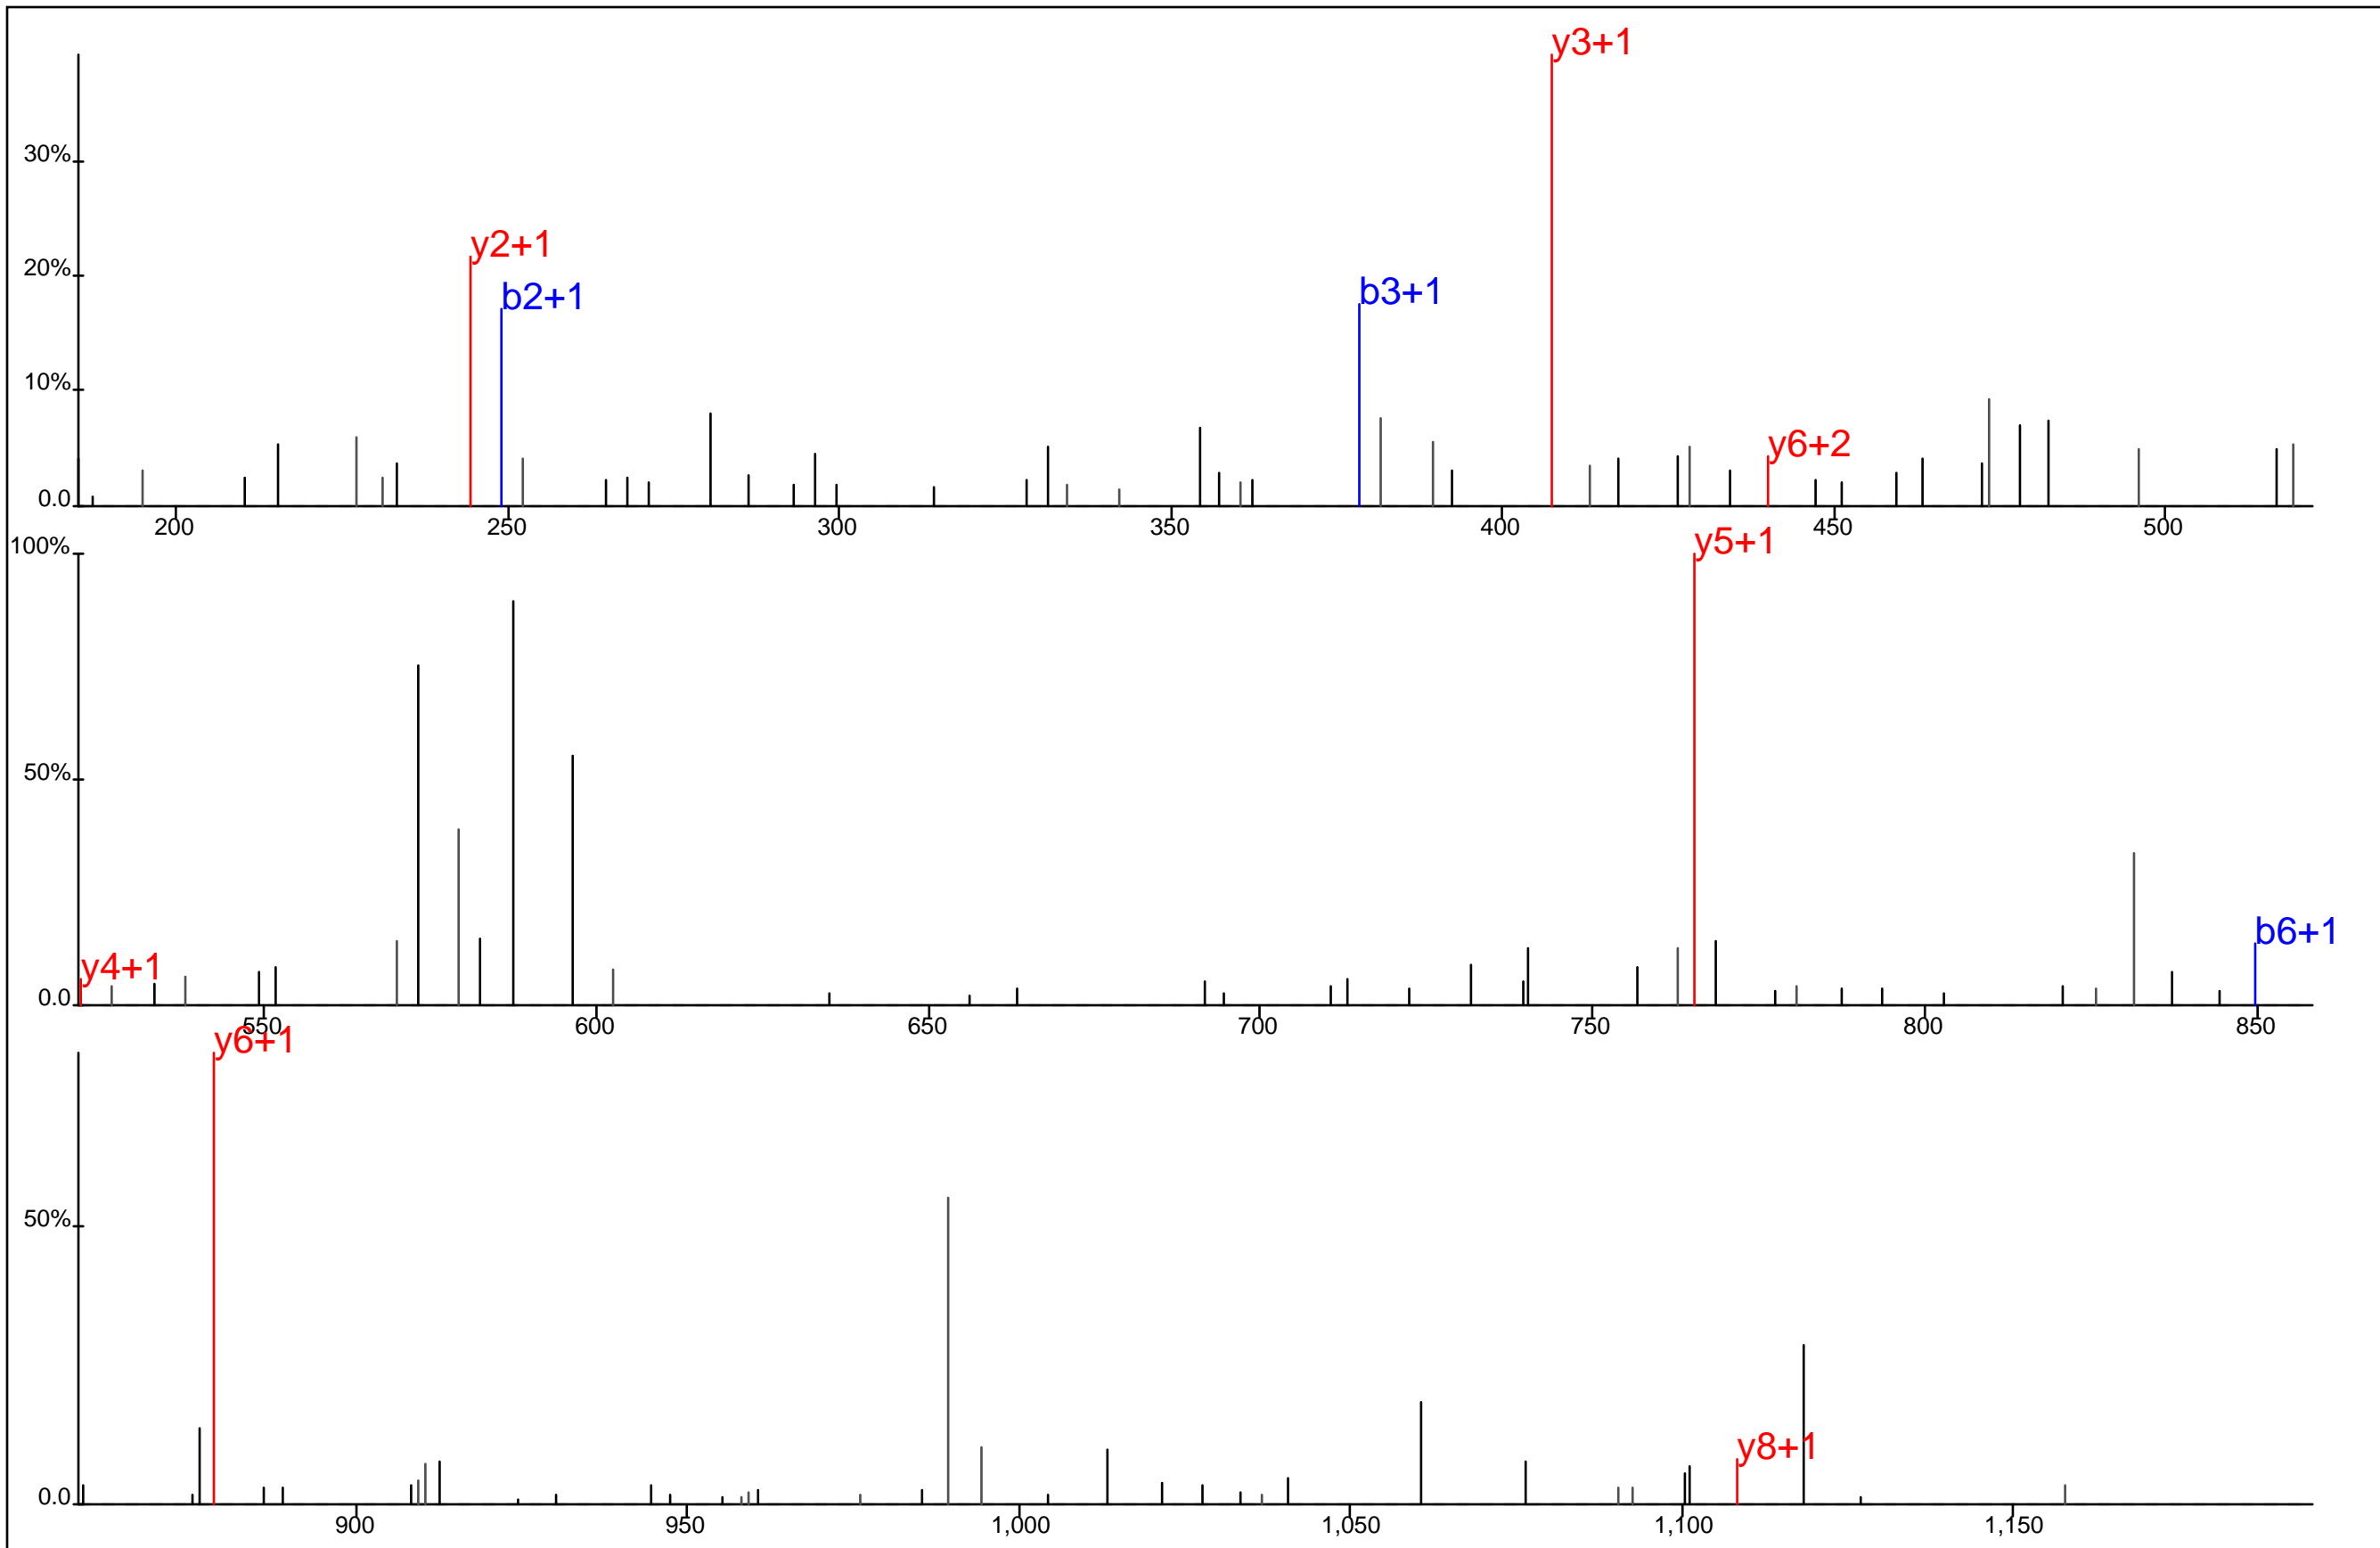

|    |   |   |    |   |   |   |   |
|----|---|---|----|---|---|---|---|
| M# | E | L | Y* | D | Y | P | K |
| ■  | ■ | ■ | ■  | ■ | ■ | ■ | ■ |
| □  | □ | □ | □  | □ | □ | □ | □ |

Protein Name: Prolyl endopeptidase  
 gi Accession: 0  
 Precursor Mass: 628.2523+2  
 Delta Mass: 1.720 ppm  
 XCorr: 26.82



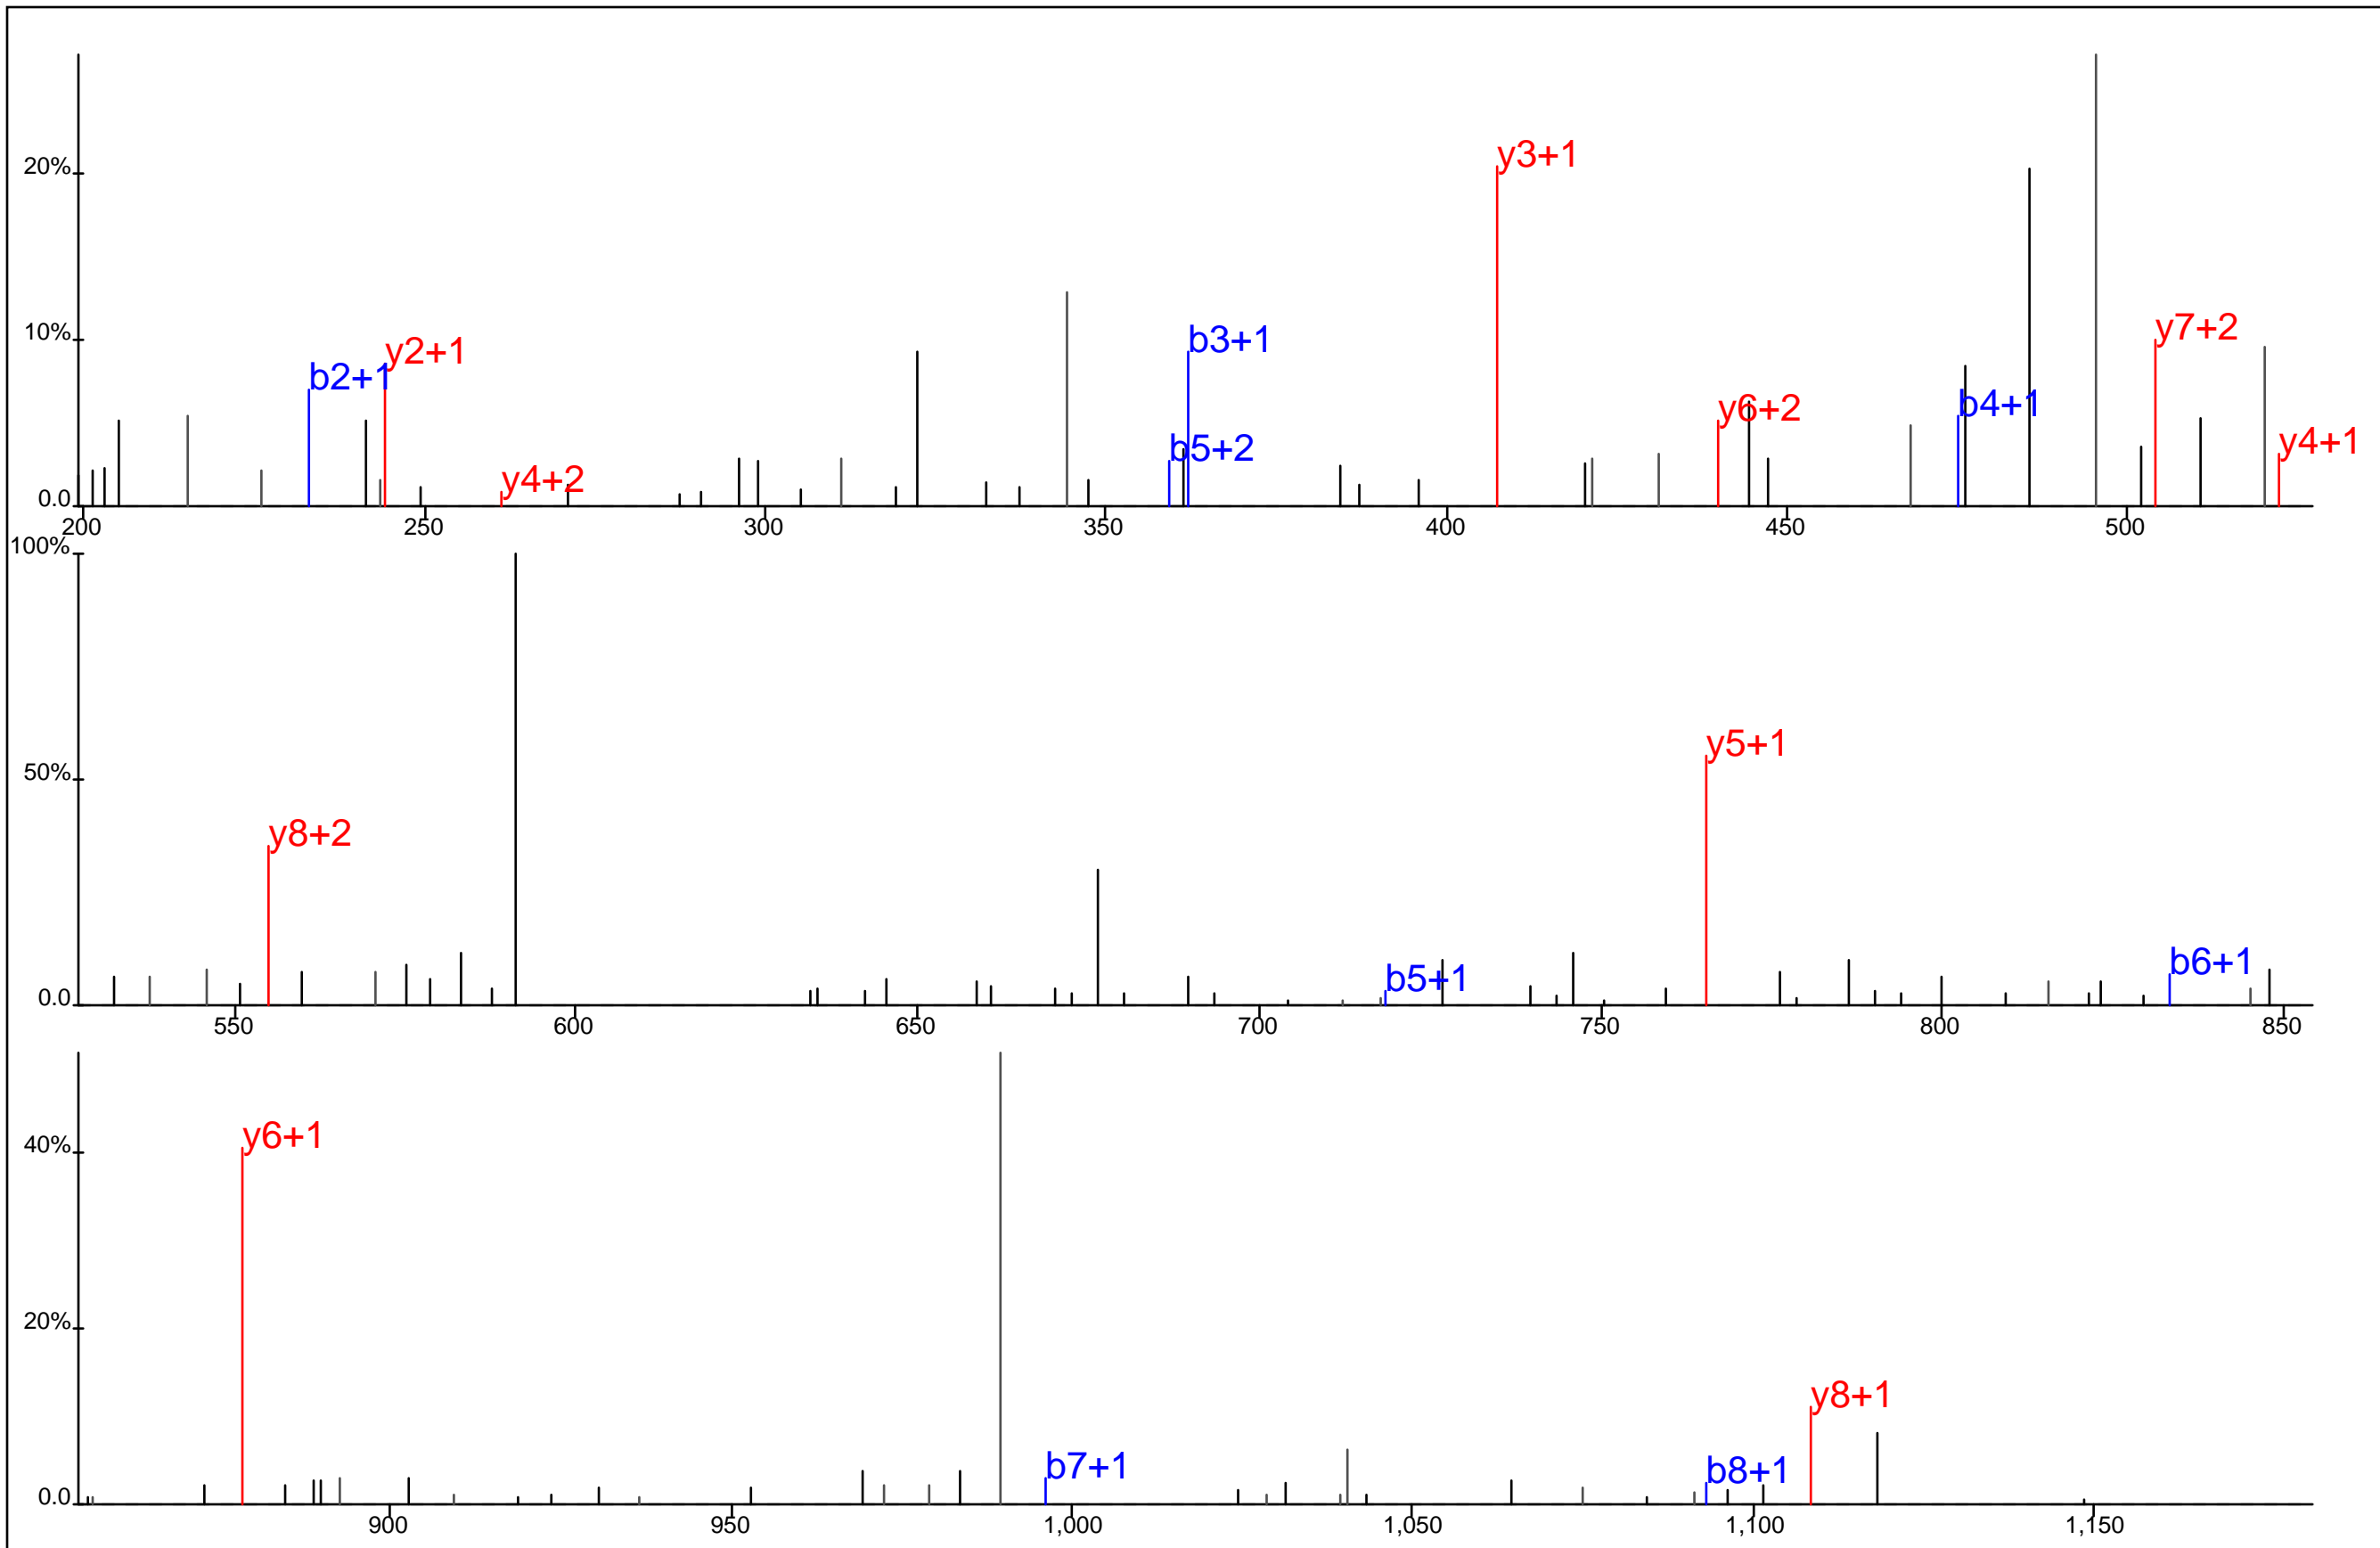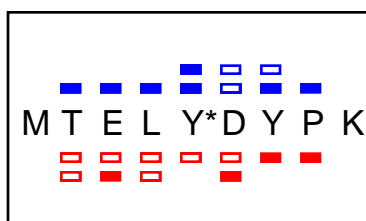

Protein Name: Prolyl endopeptidase  
 gi Accession: 0  
 Precursor Mass: 620.2548+2  
 Delta Mass: 1.683 ppm  
 XCorr: 21.15

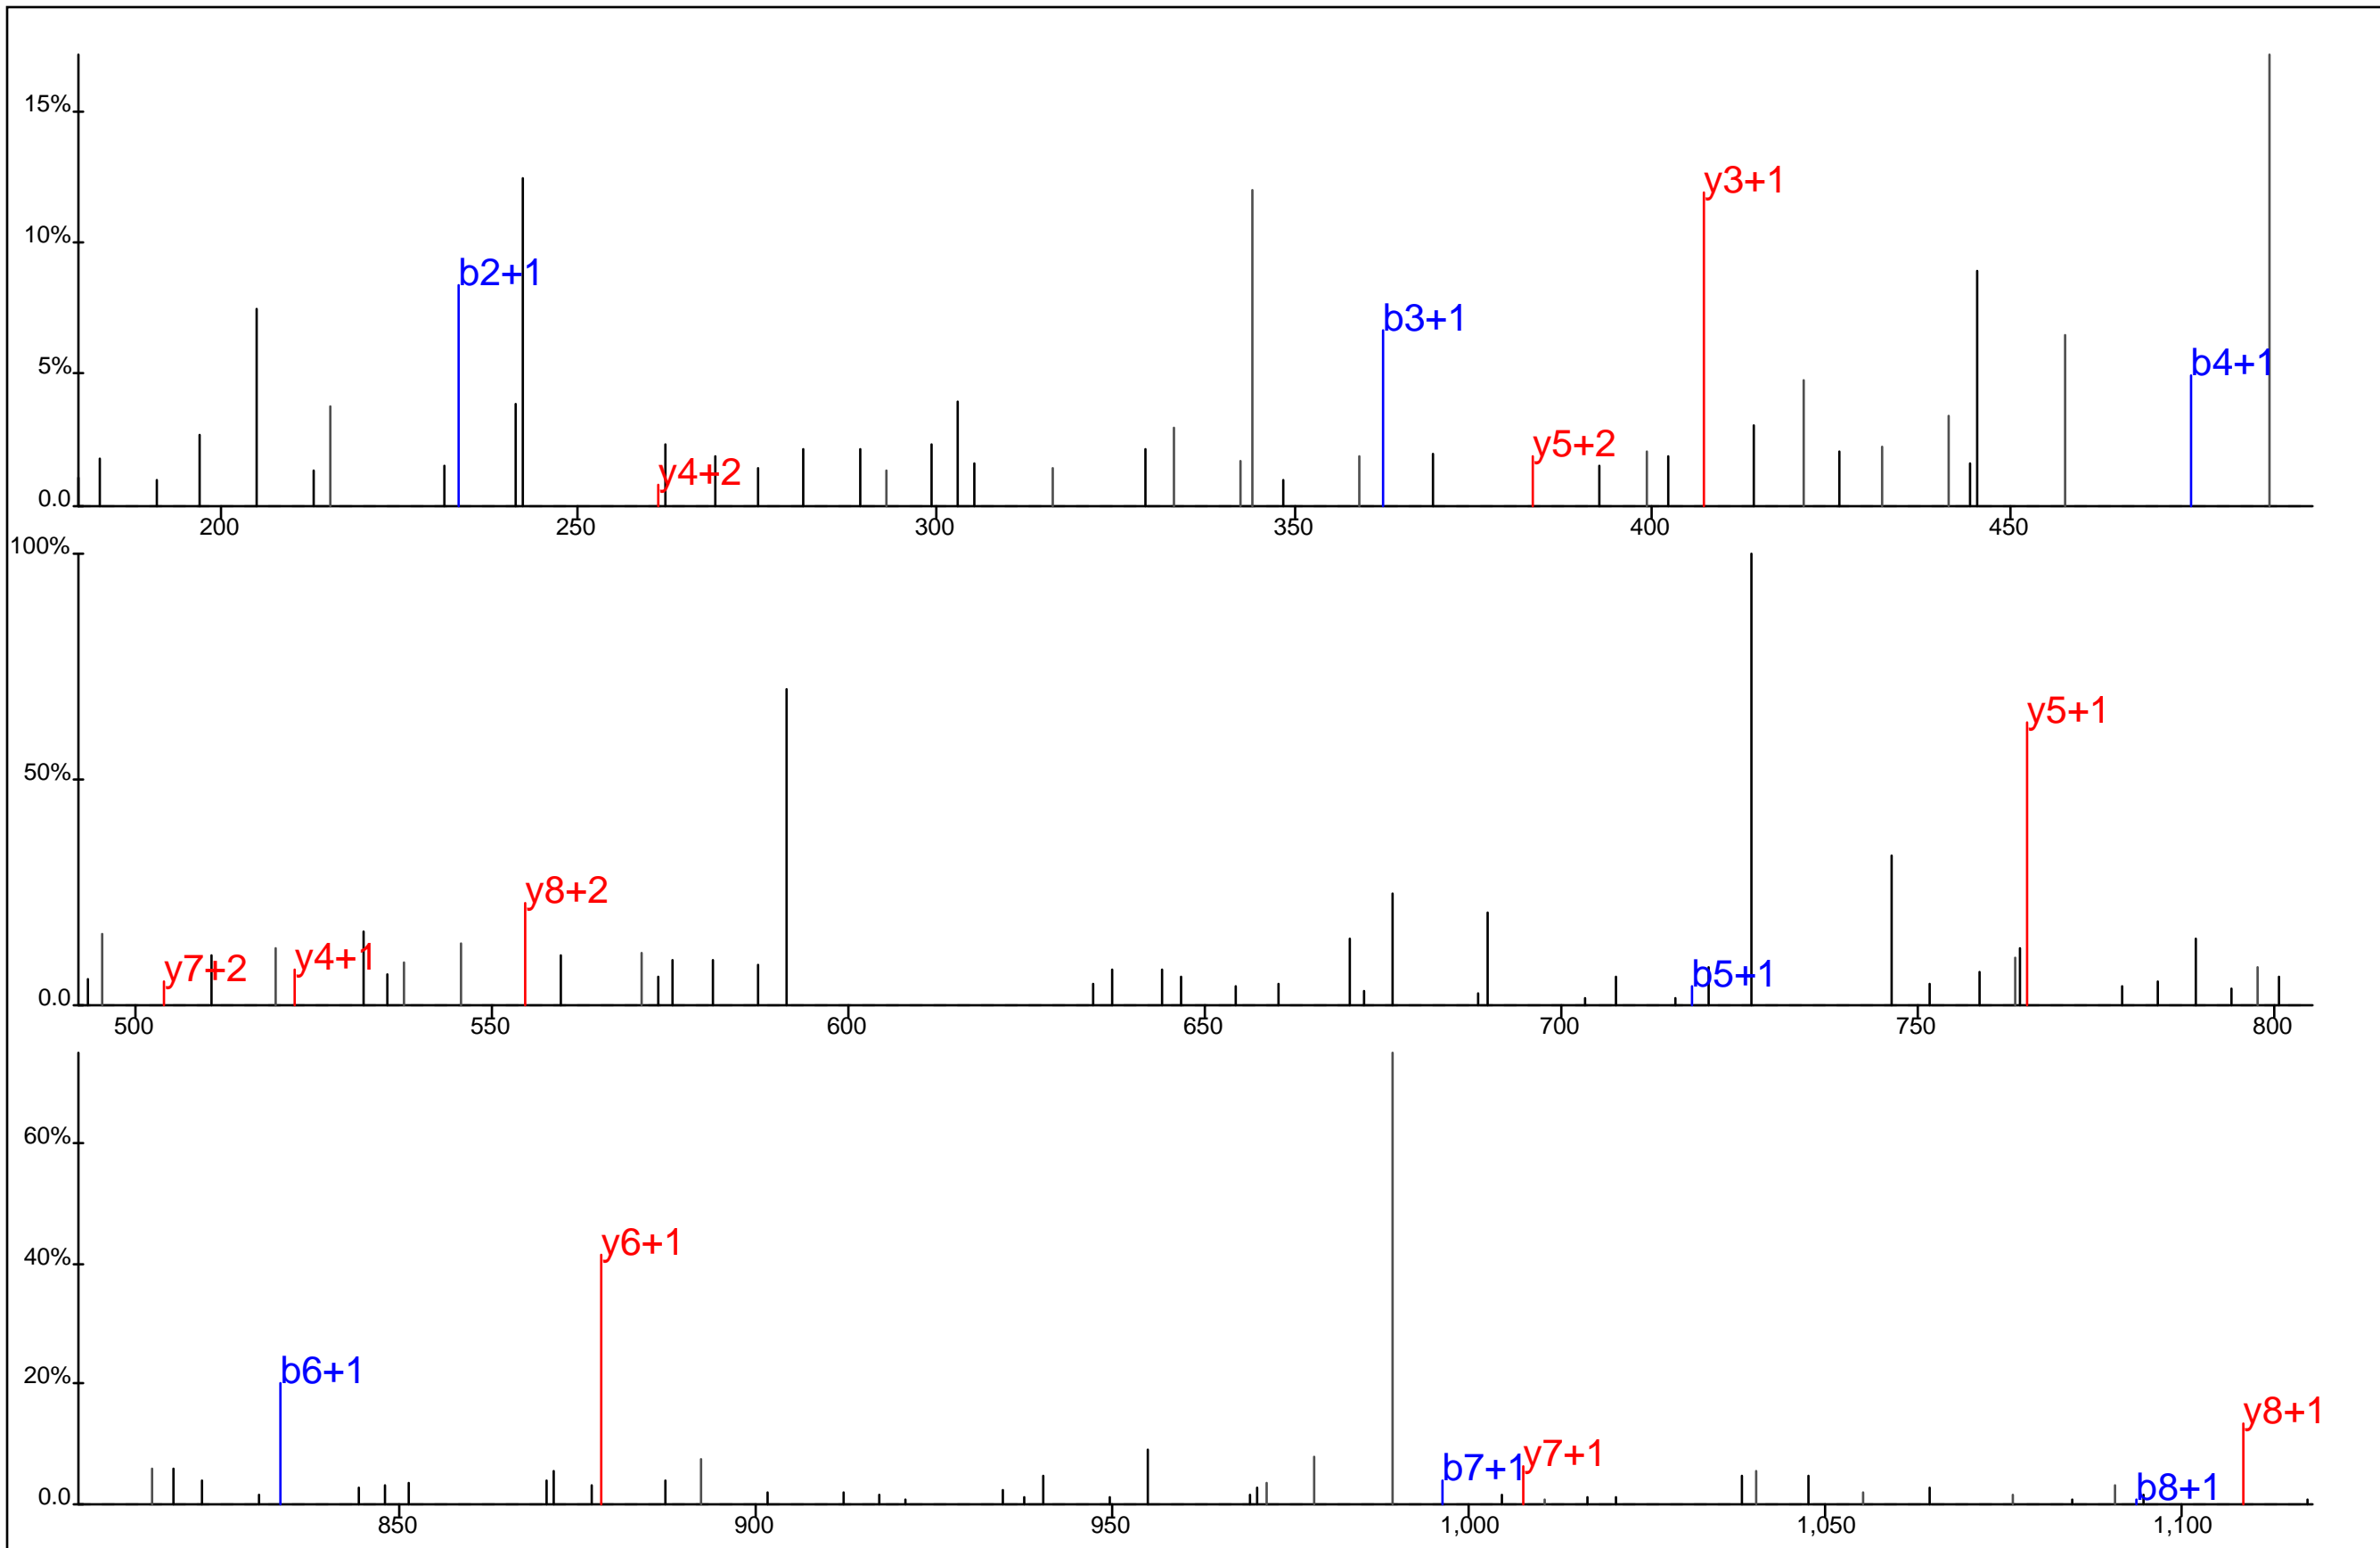

M T E L Y\* D Y P K

Protein Name: Prolyl endopeptidase  
 gi Accession: 0  
 Precursor Mass: 620.2546+2  
 Delta Mass: 1.388 ppm  
 XCorr: 26.08

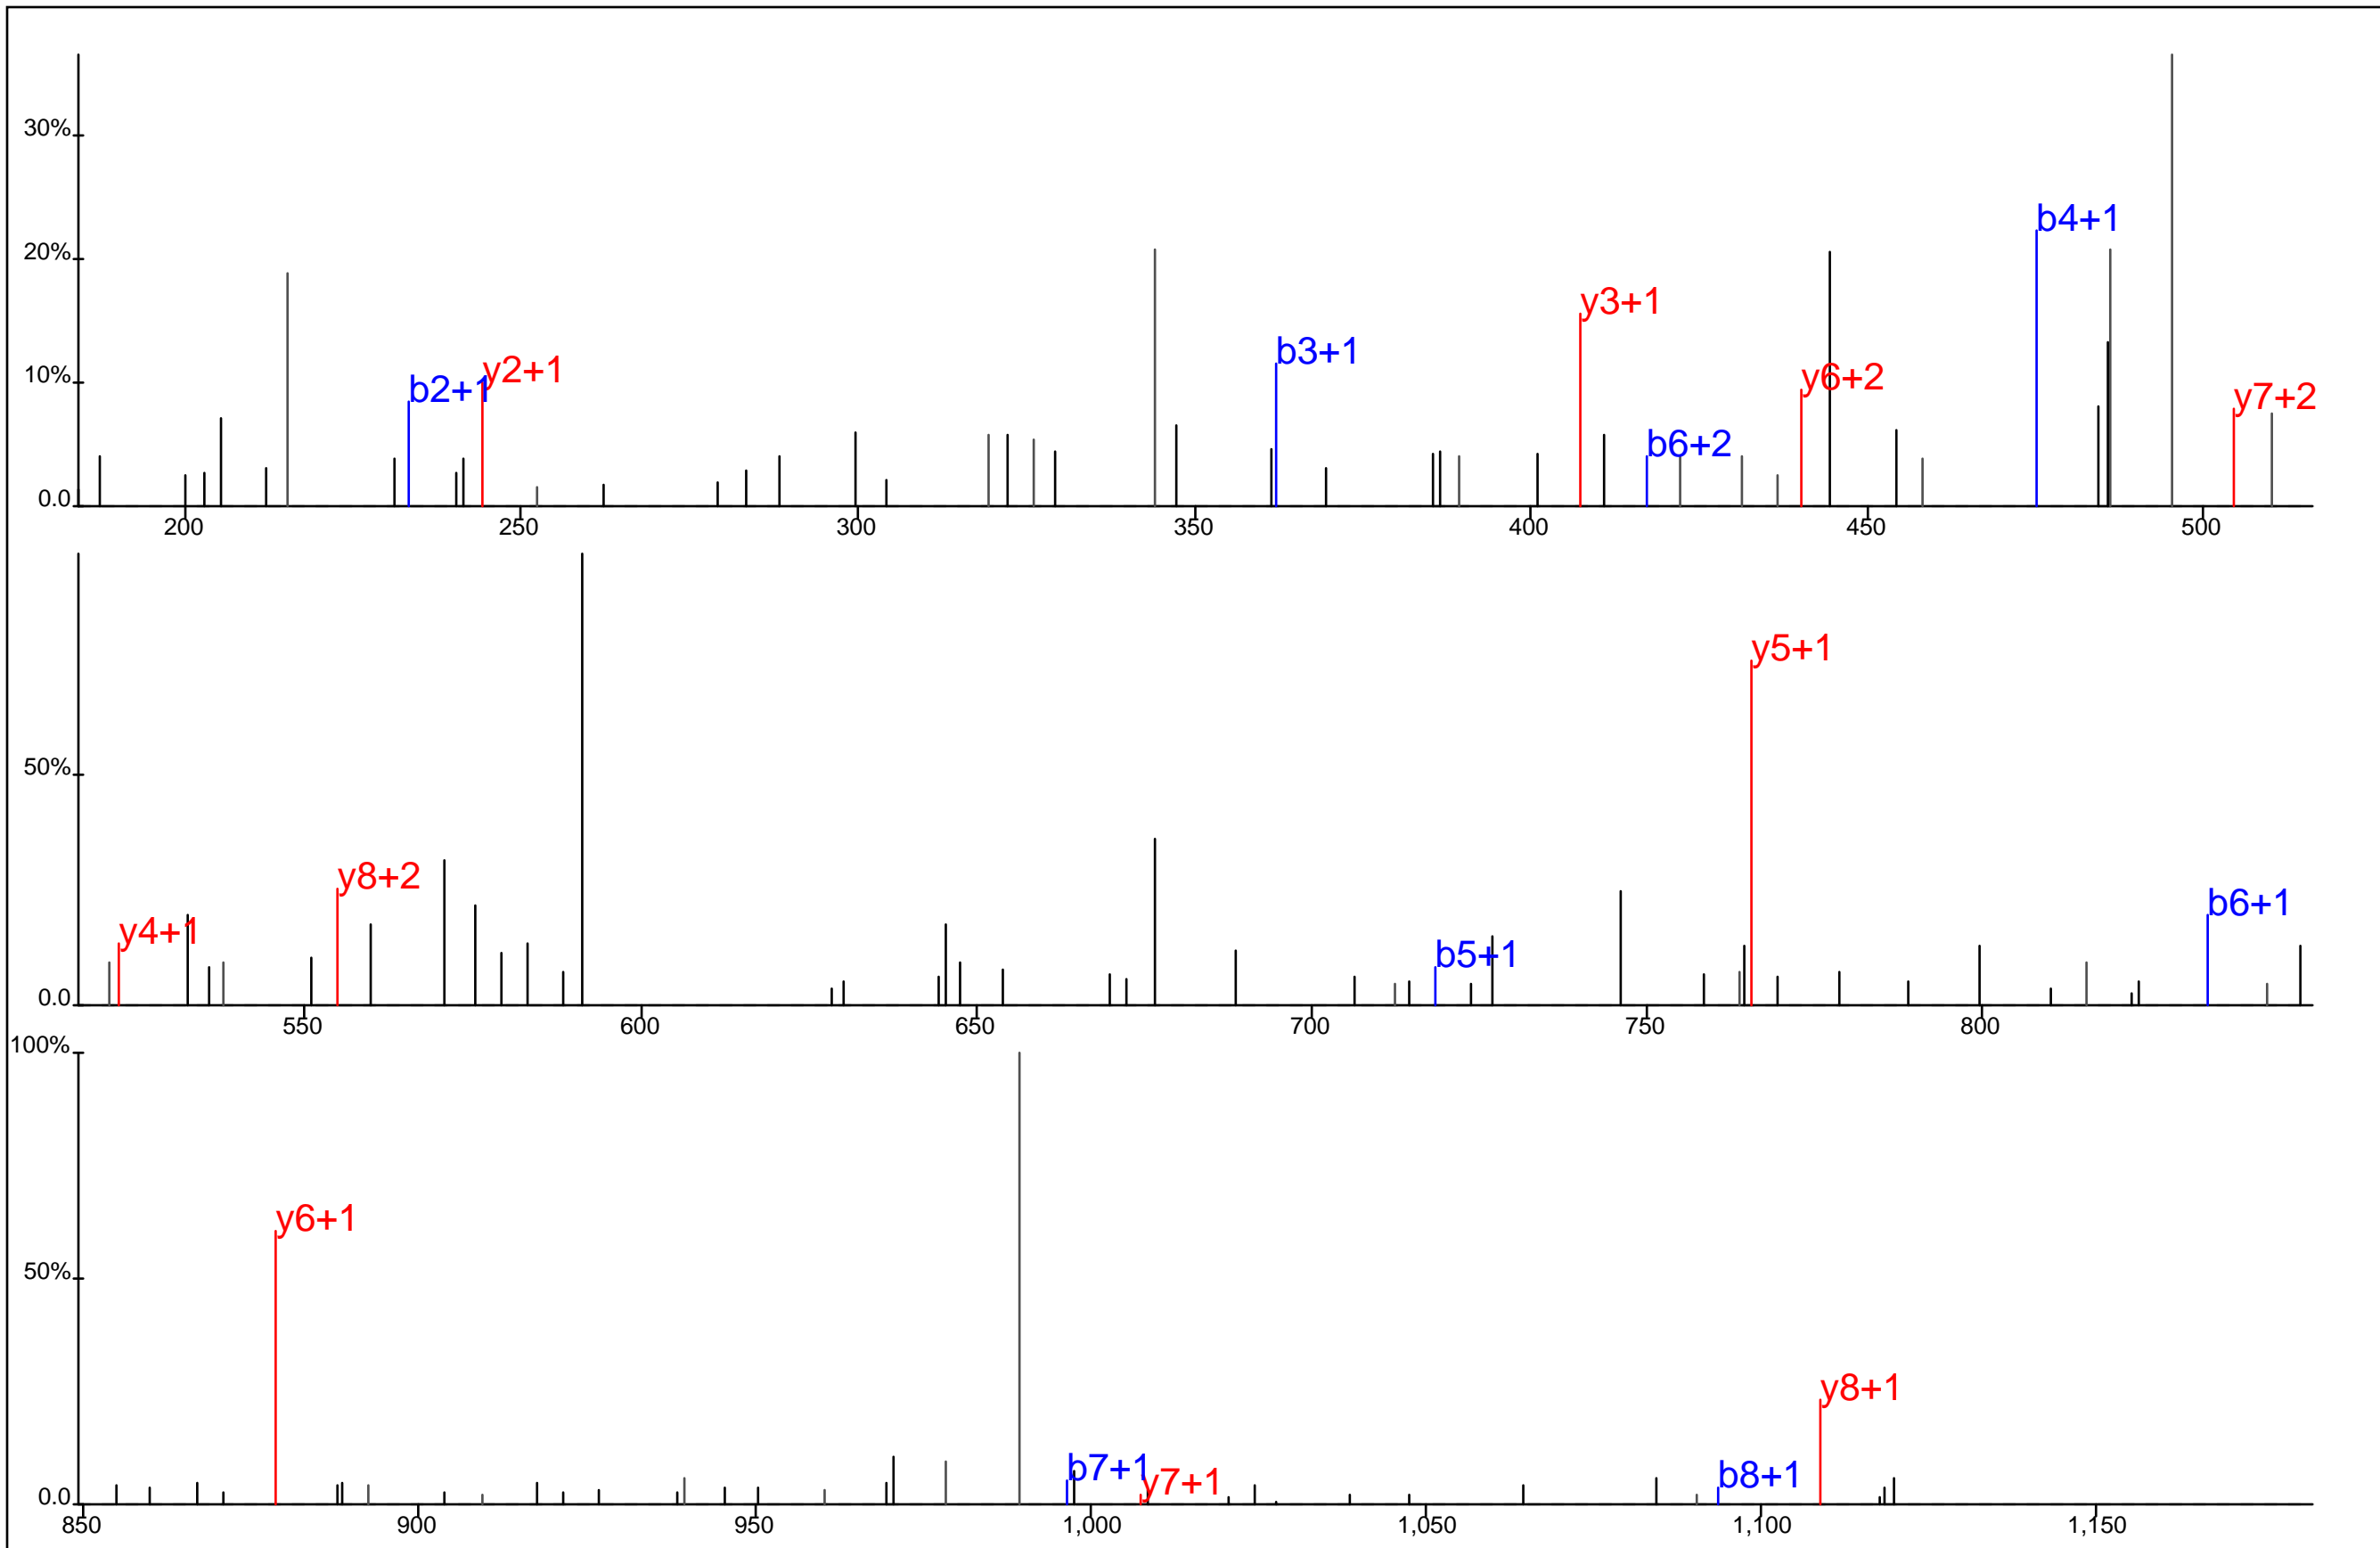

■ ■ ■ ■ ■ ■ ■ ■  
 M T E L Y\* D Y P K  
□ □ □ □ □ □ □ □

Protein Name: Prolyl endopeptidase  
 gi Accession: 0  
 Precursor Mass: 620.2549+2  
 Delta Mass: 1.781 ppm  
 XCorr: 24.28

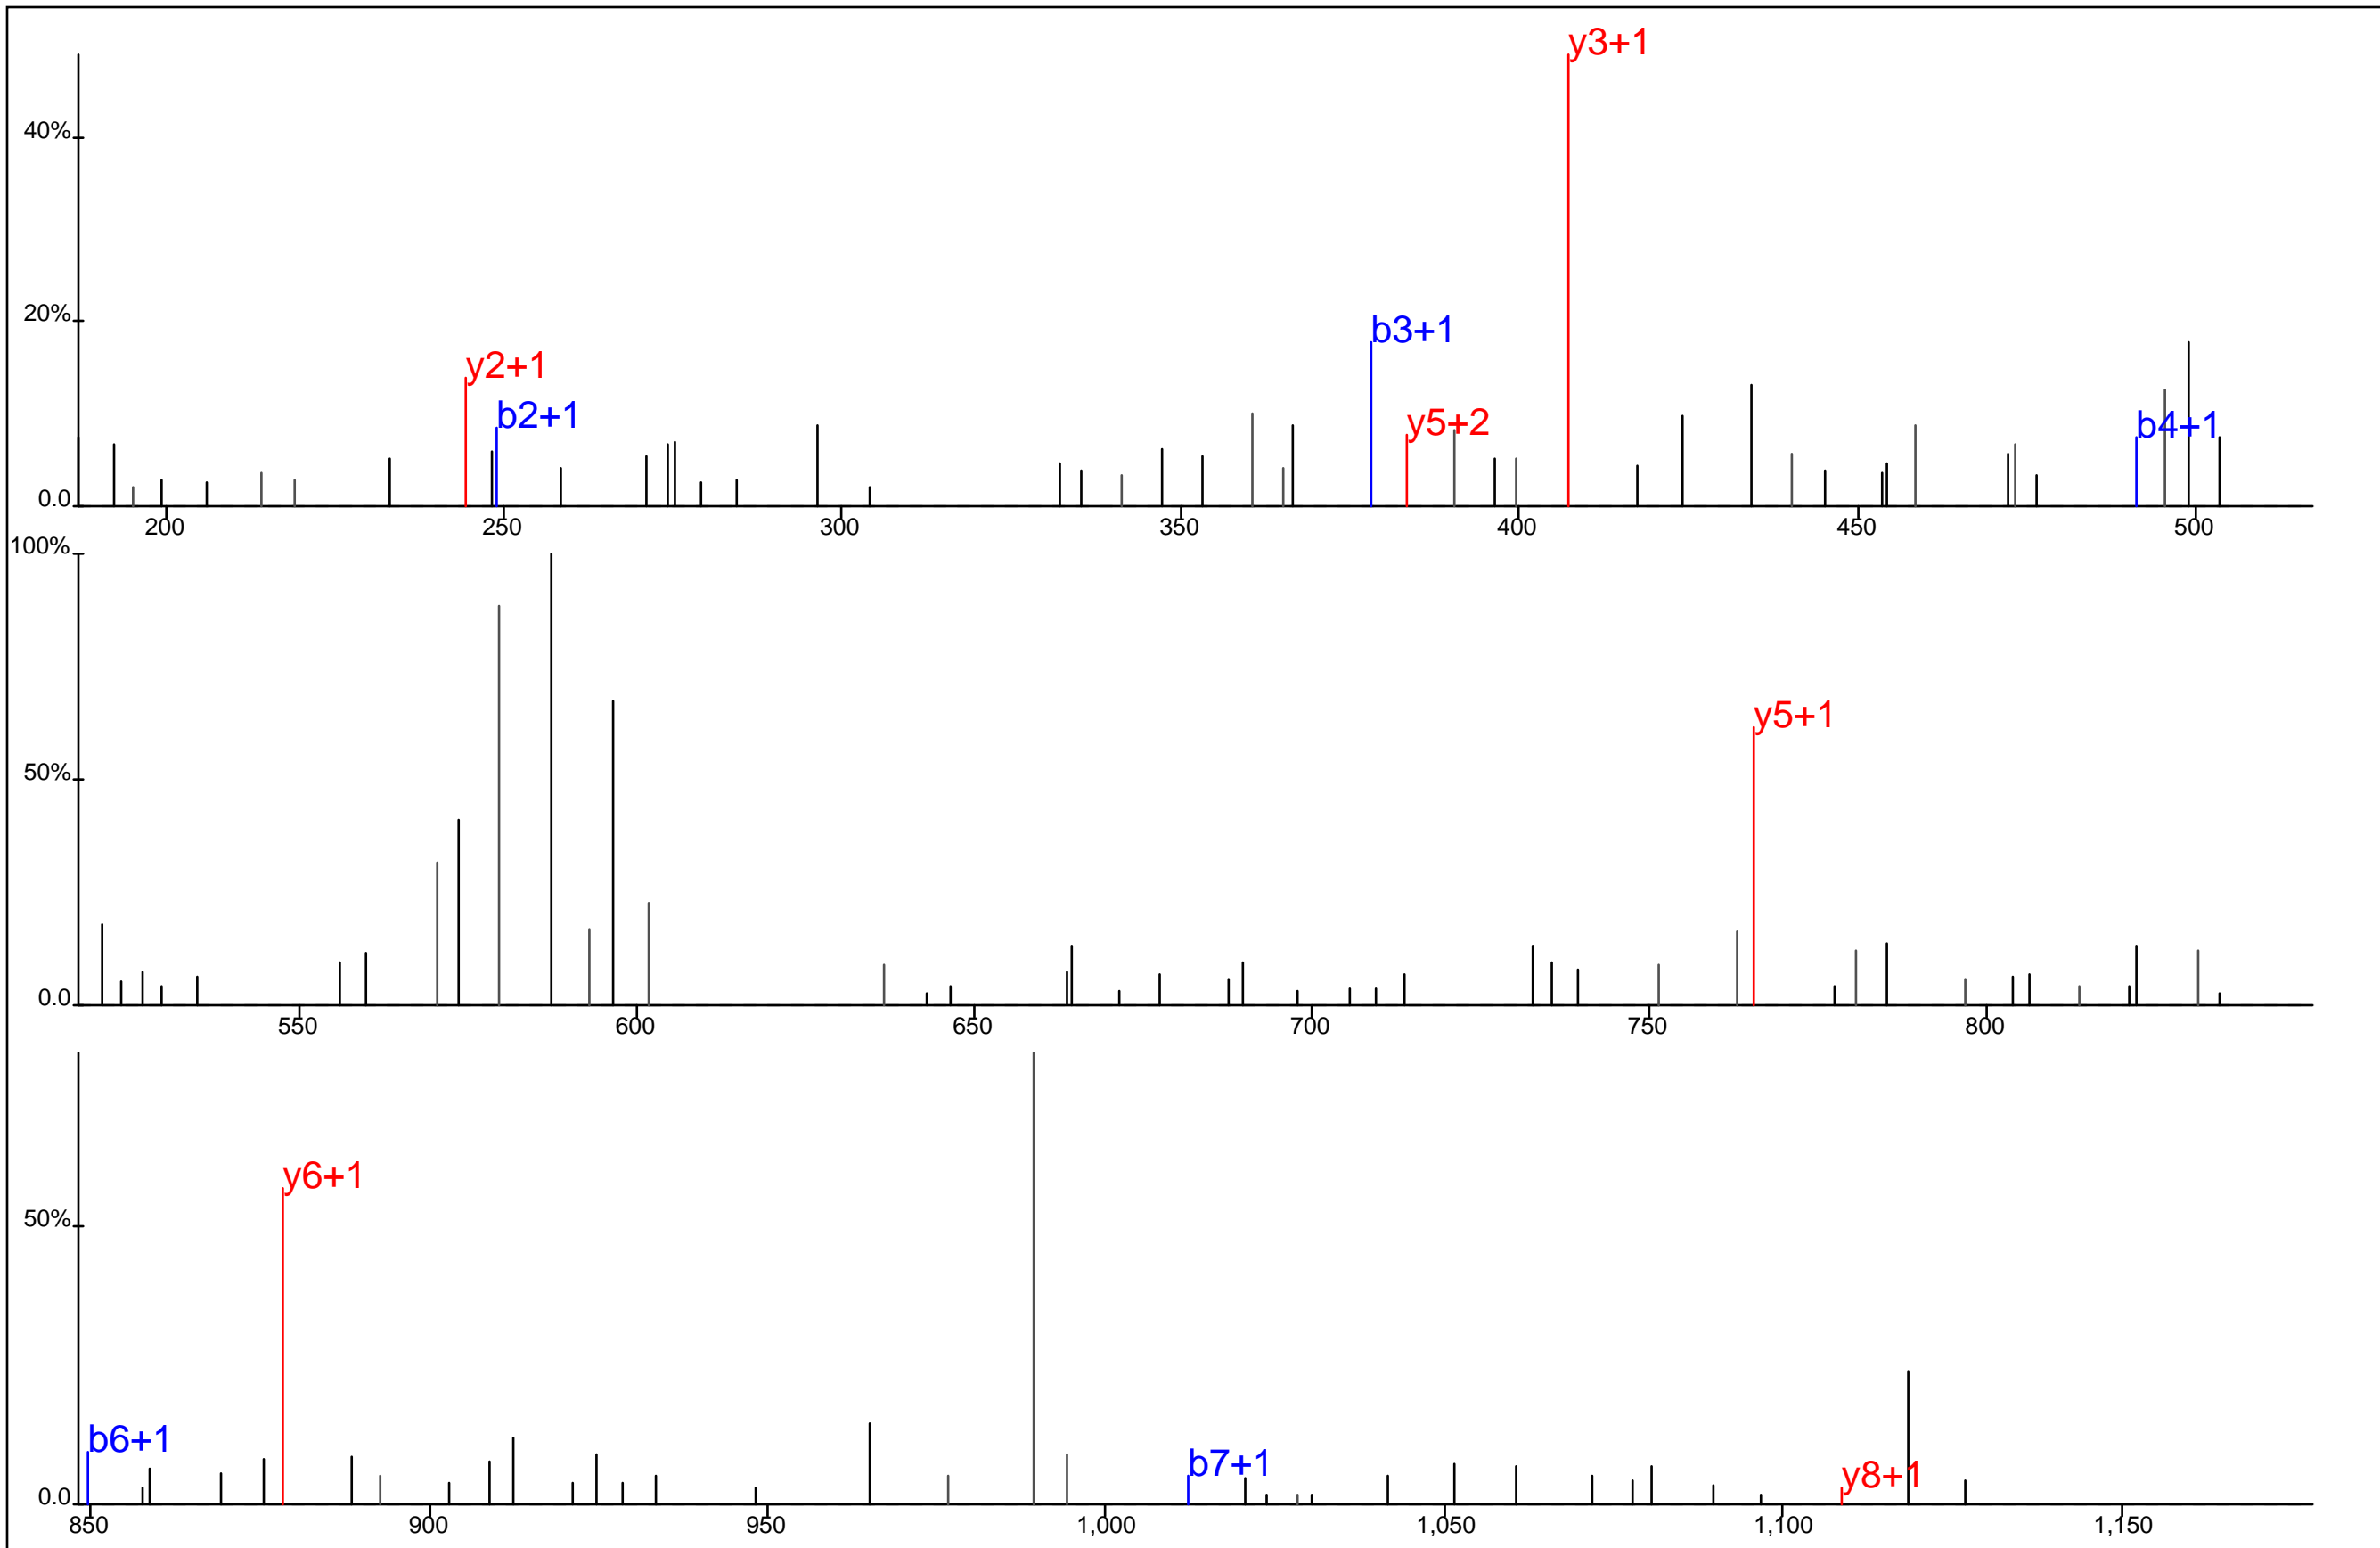

|    |   |   |    |   |   |   |   |
|----|---|---|----|---|---|---|---|
| M# | E | L | Y* | D | Y | P | K |
|    |   |   |    |   |   |   |   |
|    |   |   |    |   |   |   |   |

Protein Name: Prolyl endopeptidase  
 gi Accession: 0  
 Precursor Mass: 628.2516+2  
 Delta Mass: 0.554 ppm  
 XCorr: 21.12

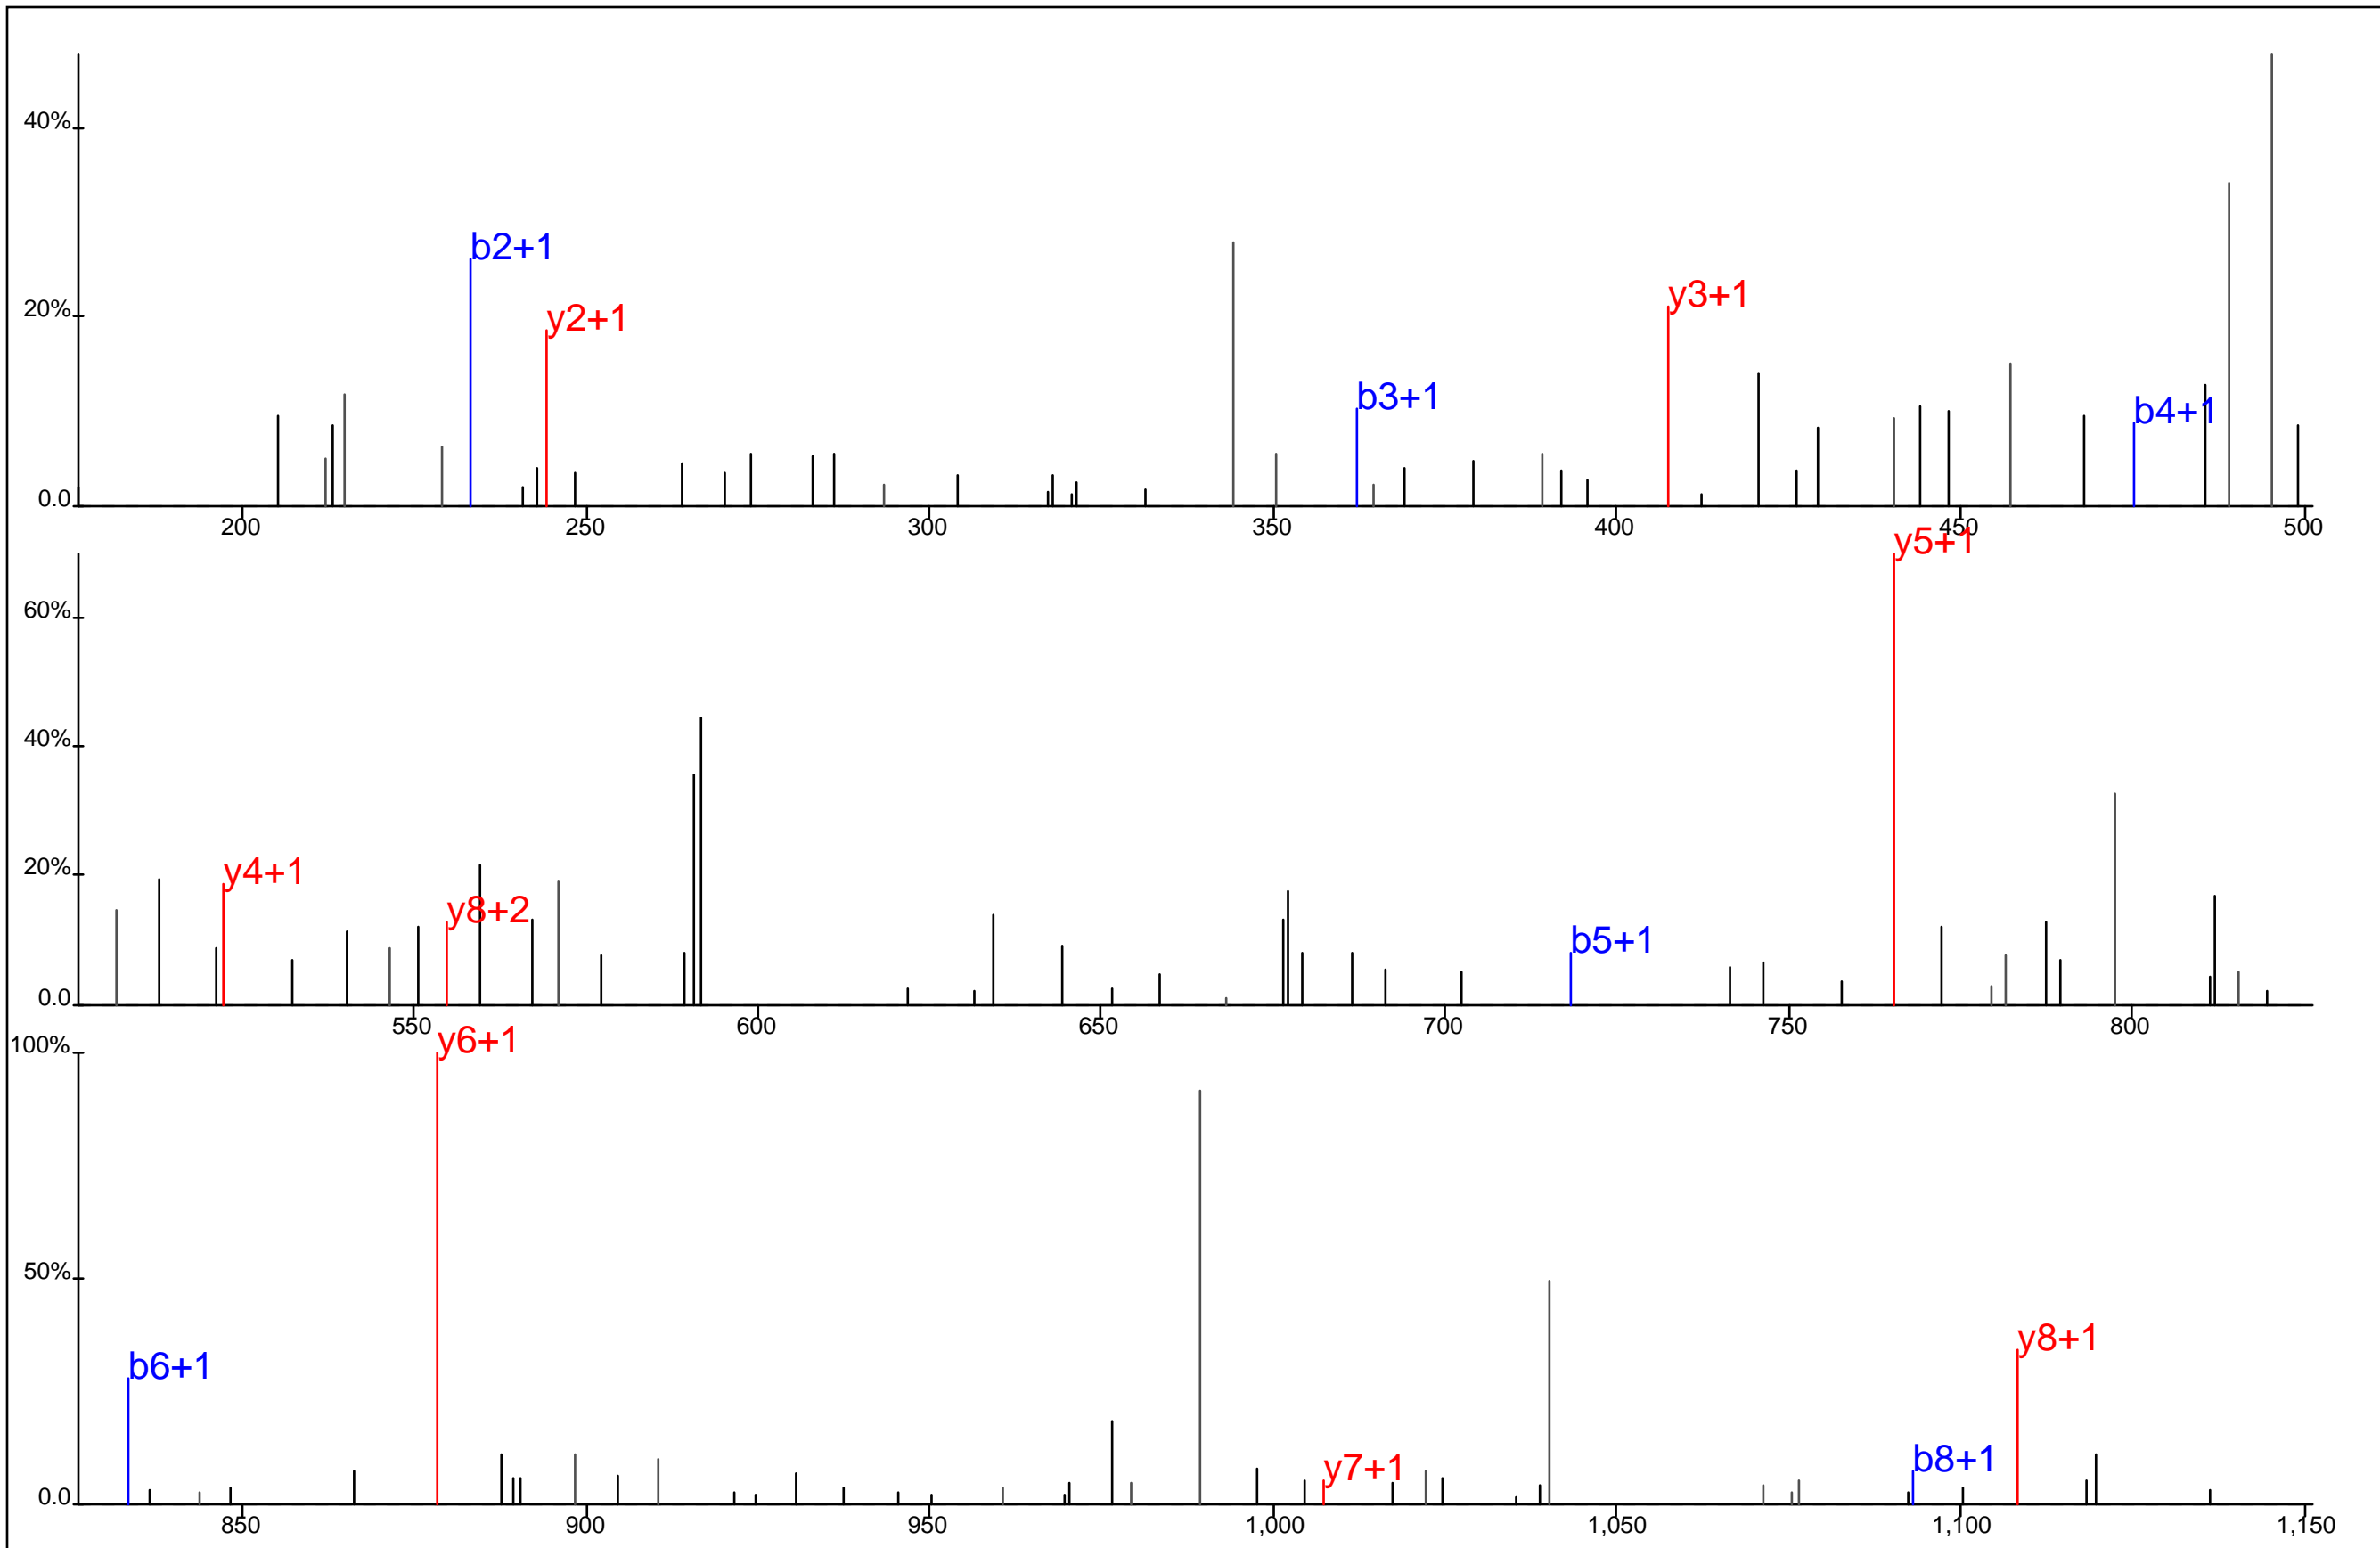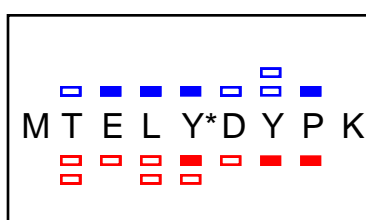

Protein Name: Prolyl endopeptidase  
 gi Accession: 0  
 Precursor Mass: 620.2559+2  
 Delta Mass: 3.455 ppm  
 XCorr: 29.01

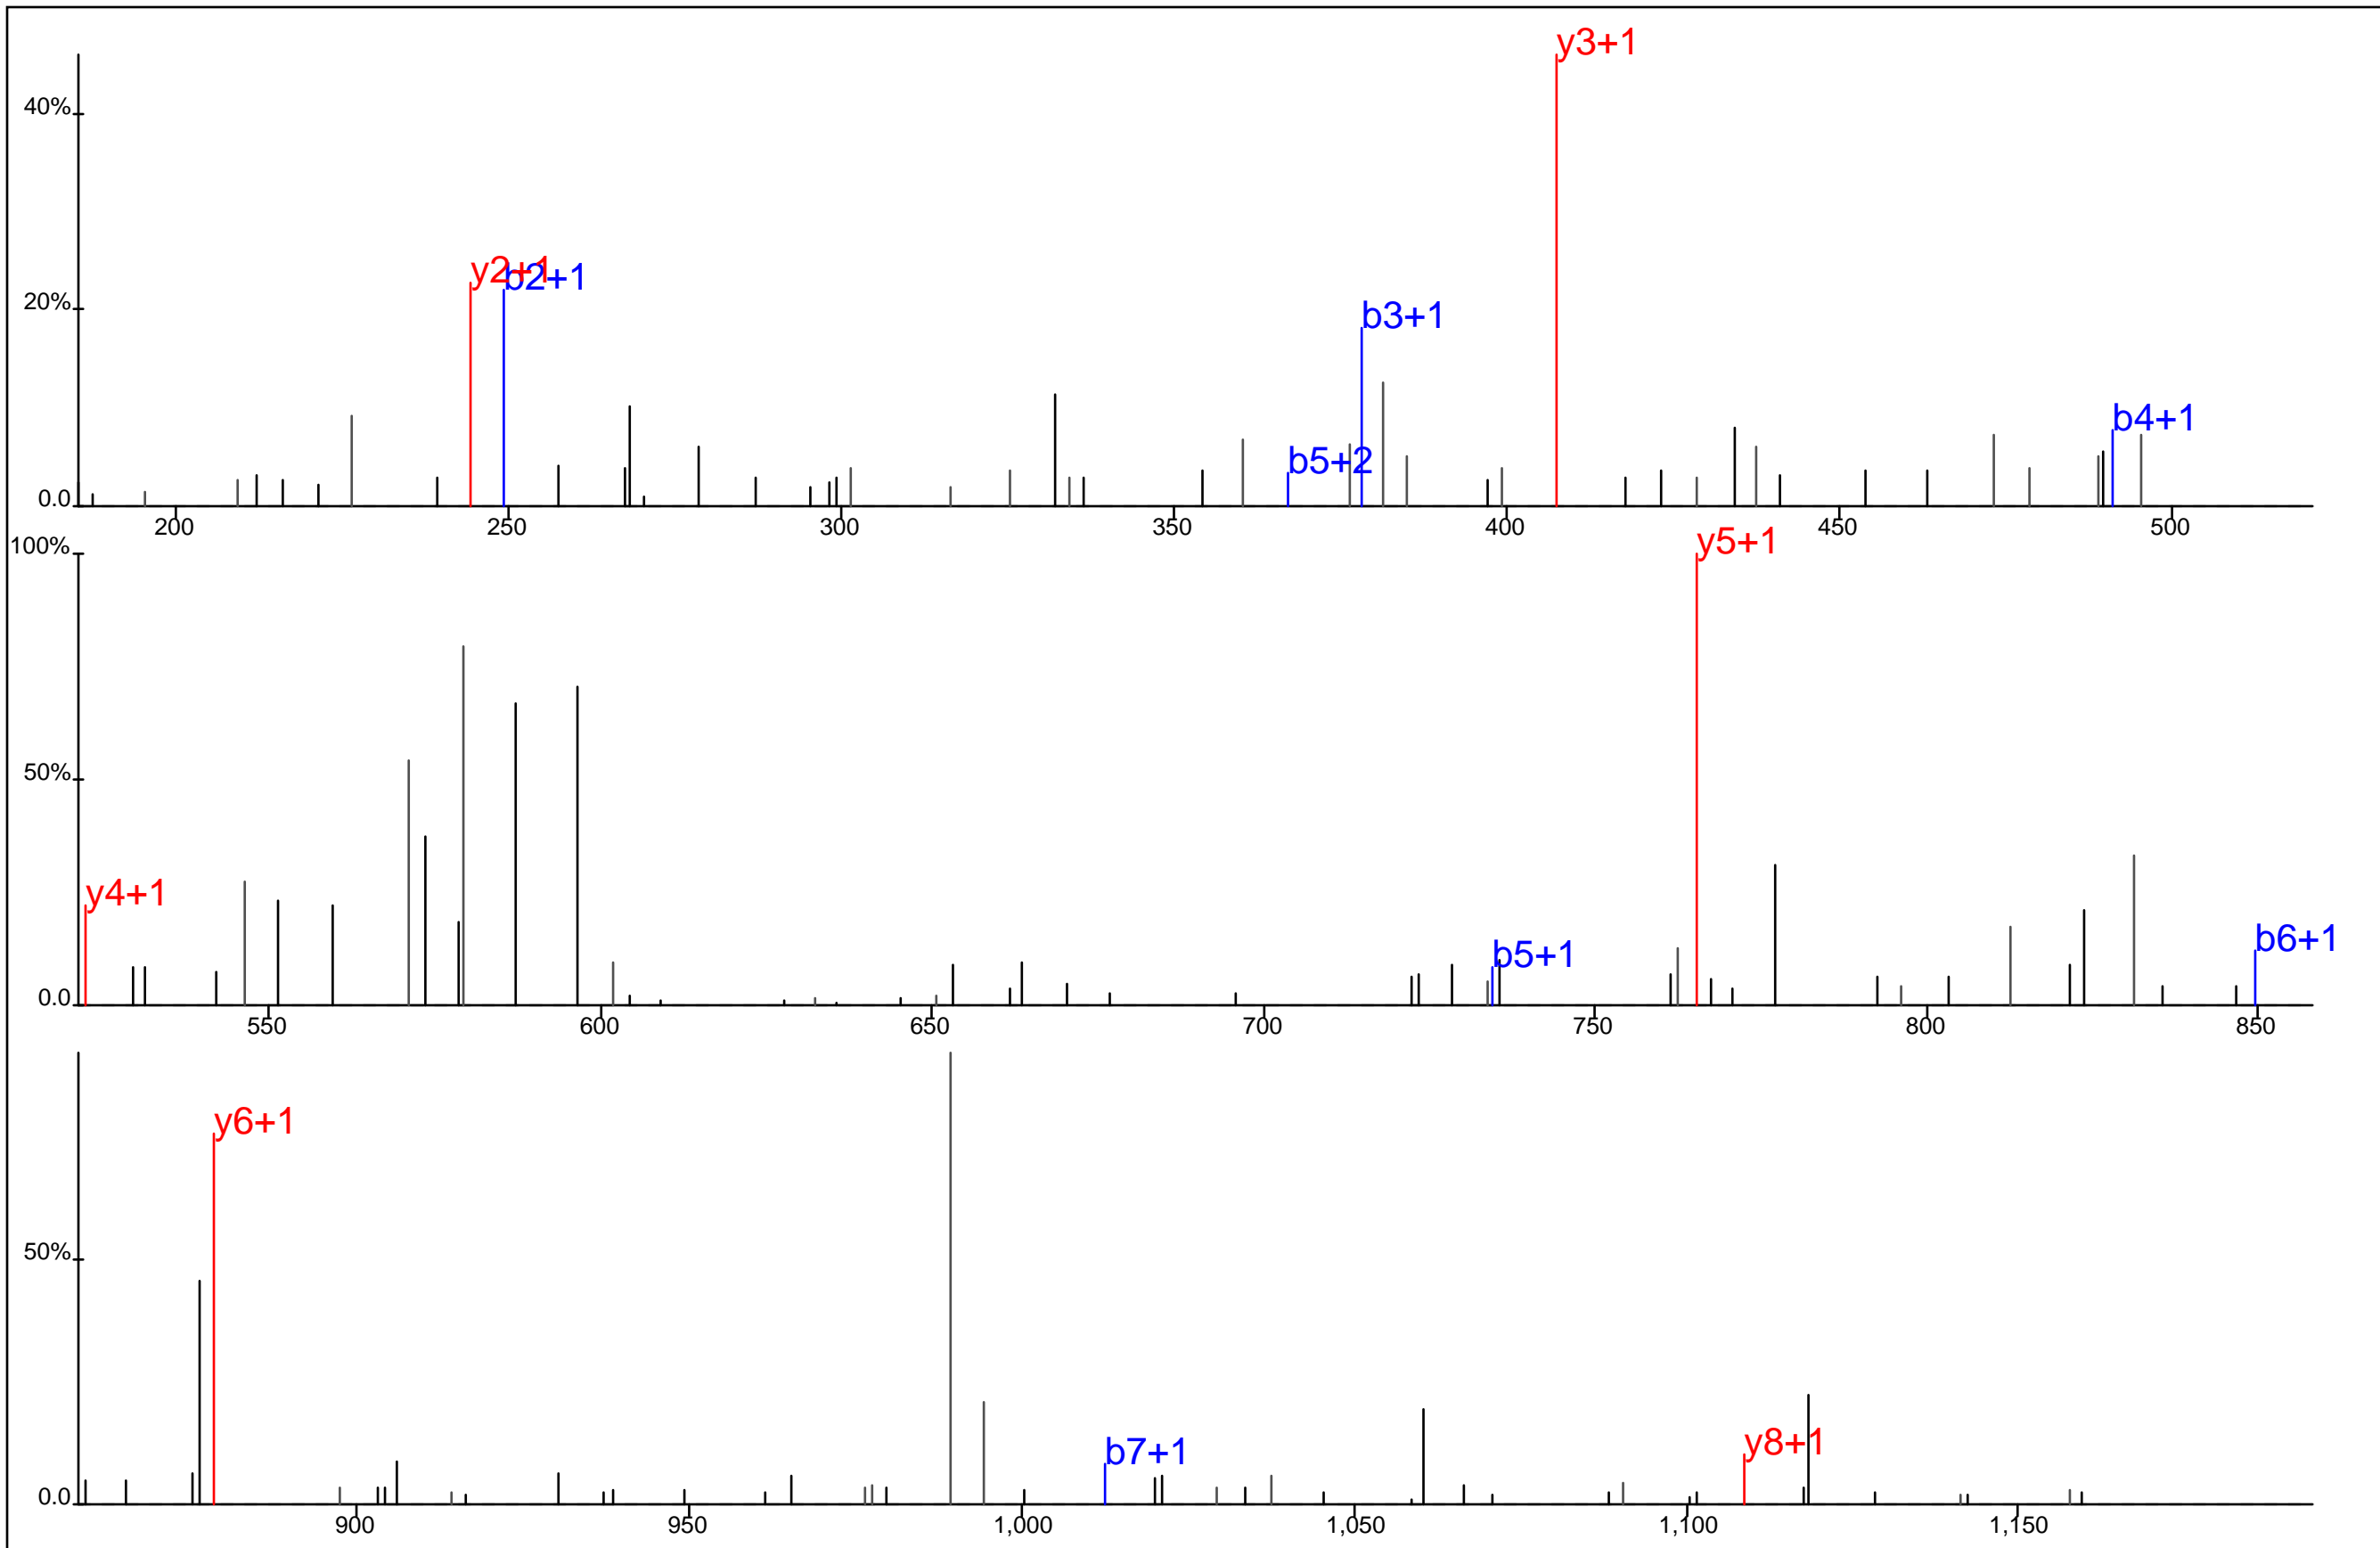

|    |   |   |    |   |   |   |   |
|----|---|---|----|---|---|---|---|
|    | ■ | ■ | ■  | ■ | ■ | ■ | ■ |
| M# | E | L | Y* | D | Y | P | K |
|    | □ | □ | □  | □ | □ | □ | □ |

Protein Name: Prolyl endopeptidase  
 gi Accession: 0  
 Precursor Mass: 628.2495+2  
 Delta Mass: 2.848 ppm  
 XCorr: 24.35

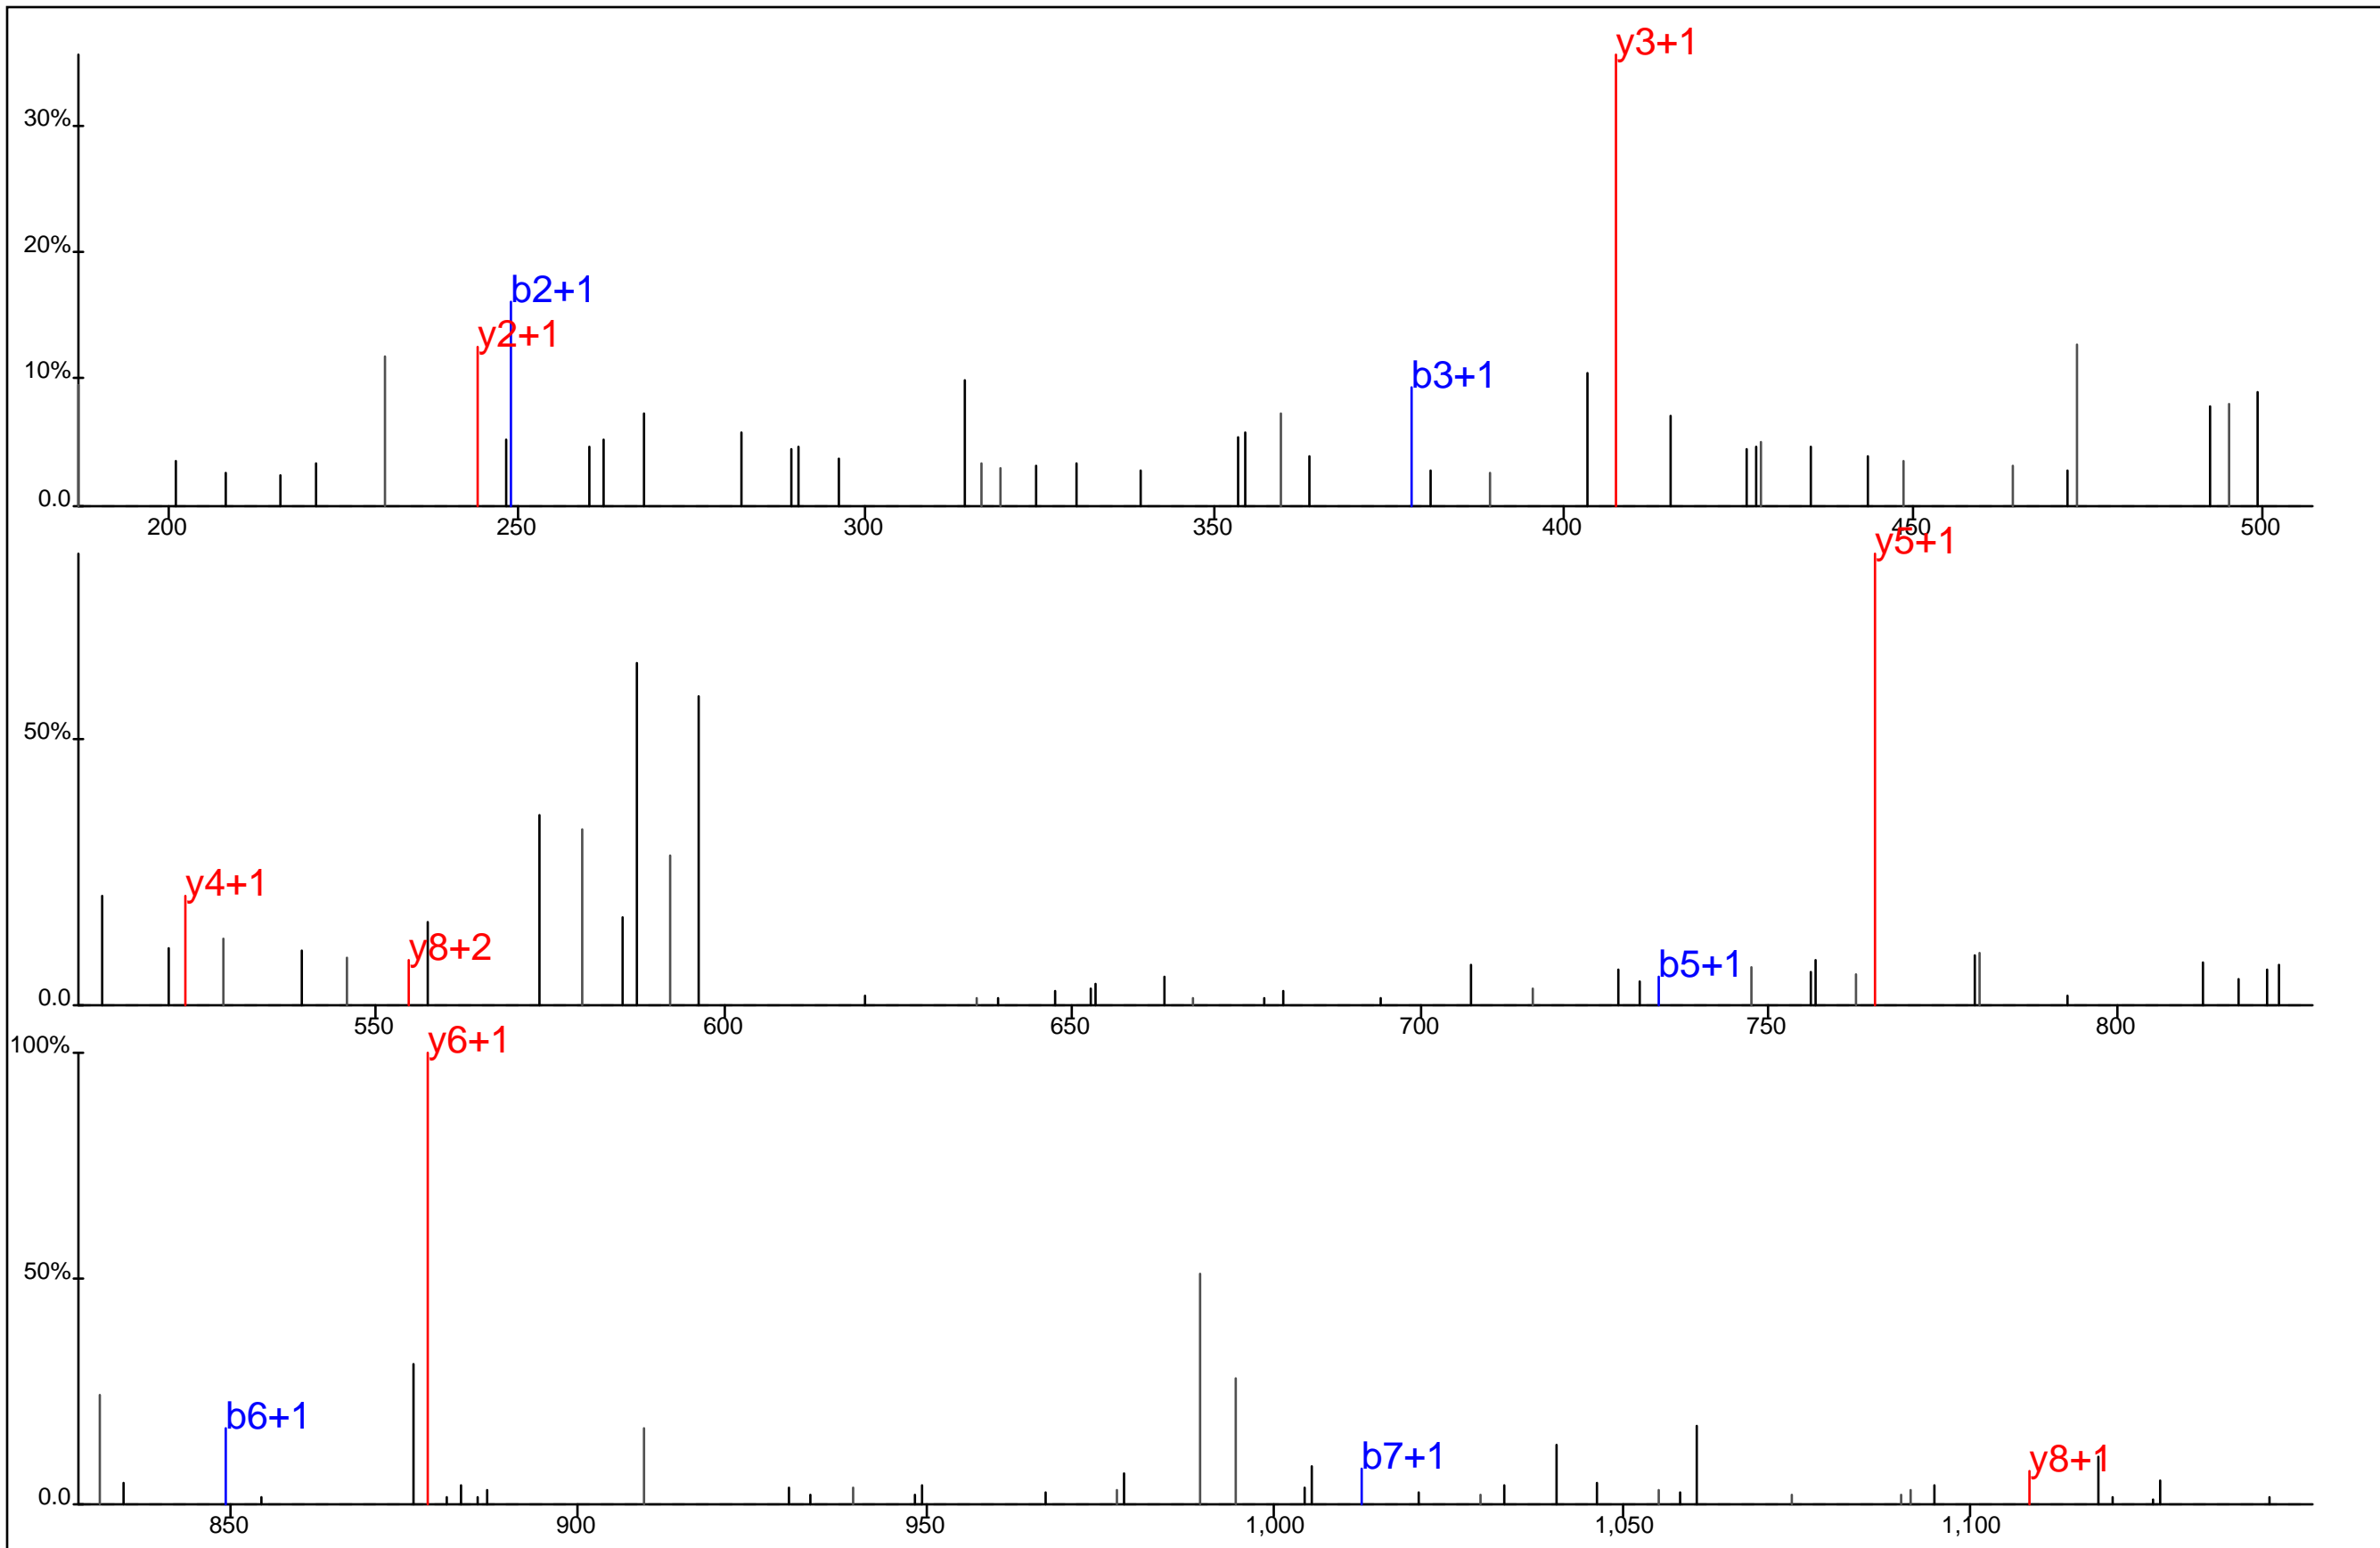

|    |   |   |    |   |   |   |   |
|----|---|---|----|---|---|---|---|
| M# | E | L | Y* | D | Y | P | K |
|    |   |   |    |   |   |   |   |
|    |   |   |    |   |   |   |   |

Protein Name: Prolyl endopeptidase  
 gi Accession: 0  
 Precursor Mass: 628.2498+2  
 Delta Mass: 2.265 ppm  
 XCorr: 29.33

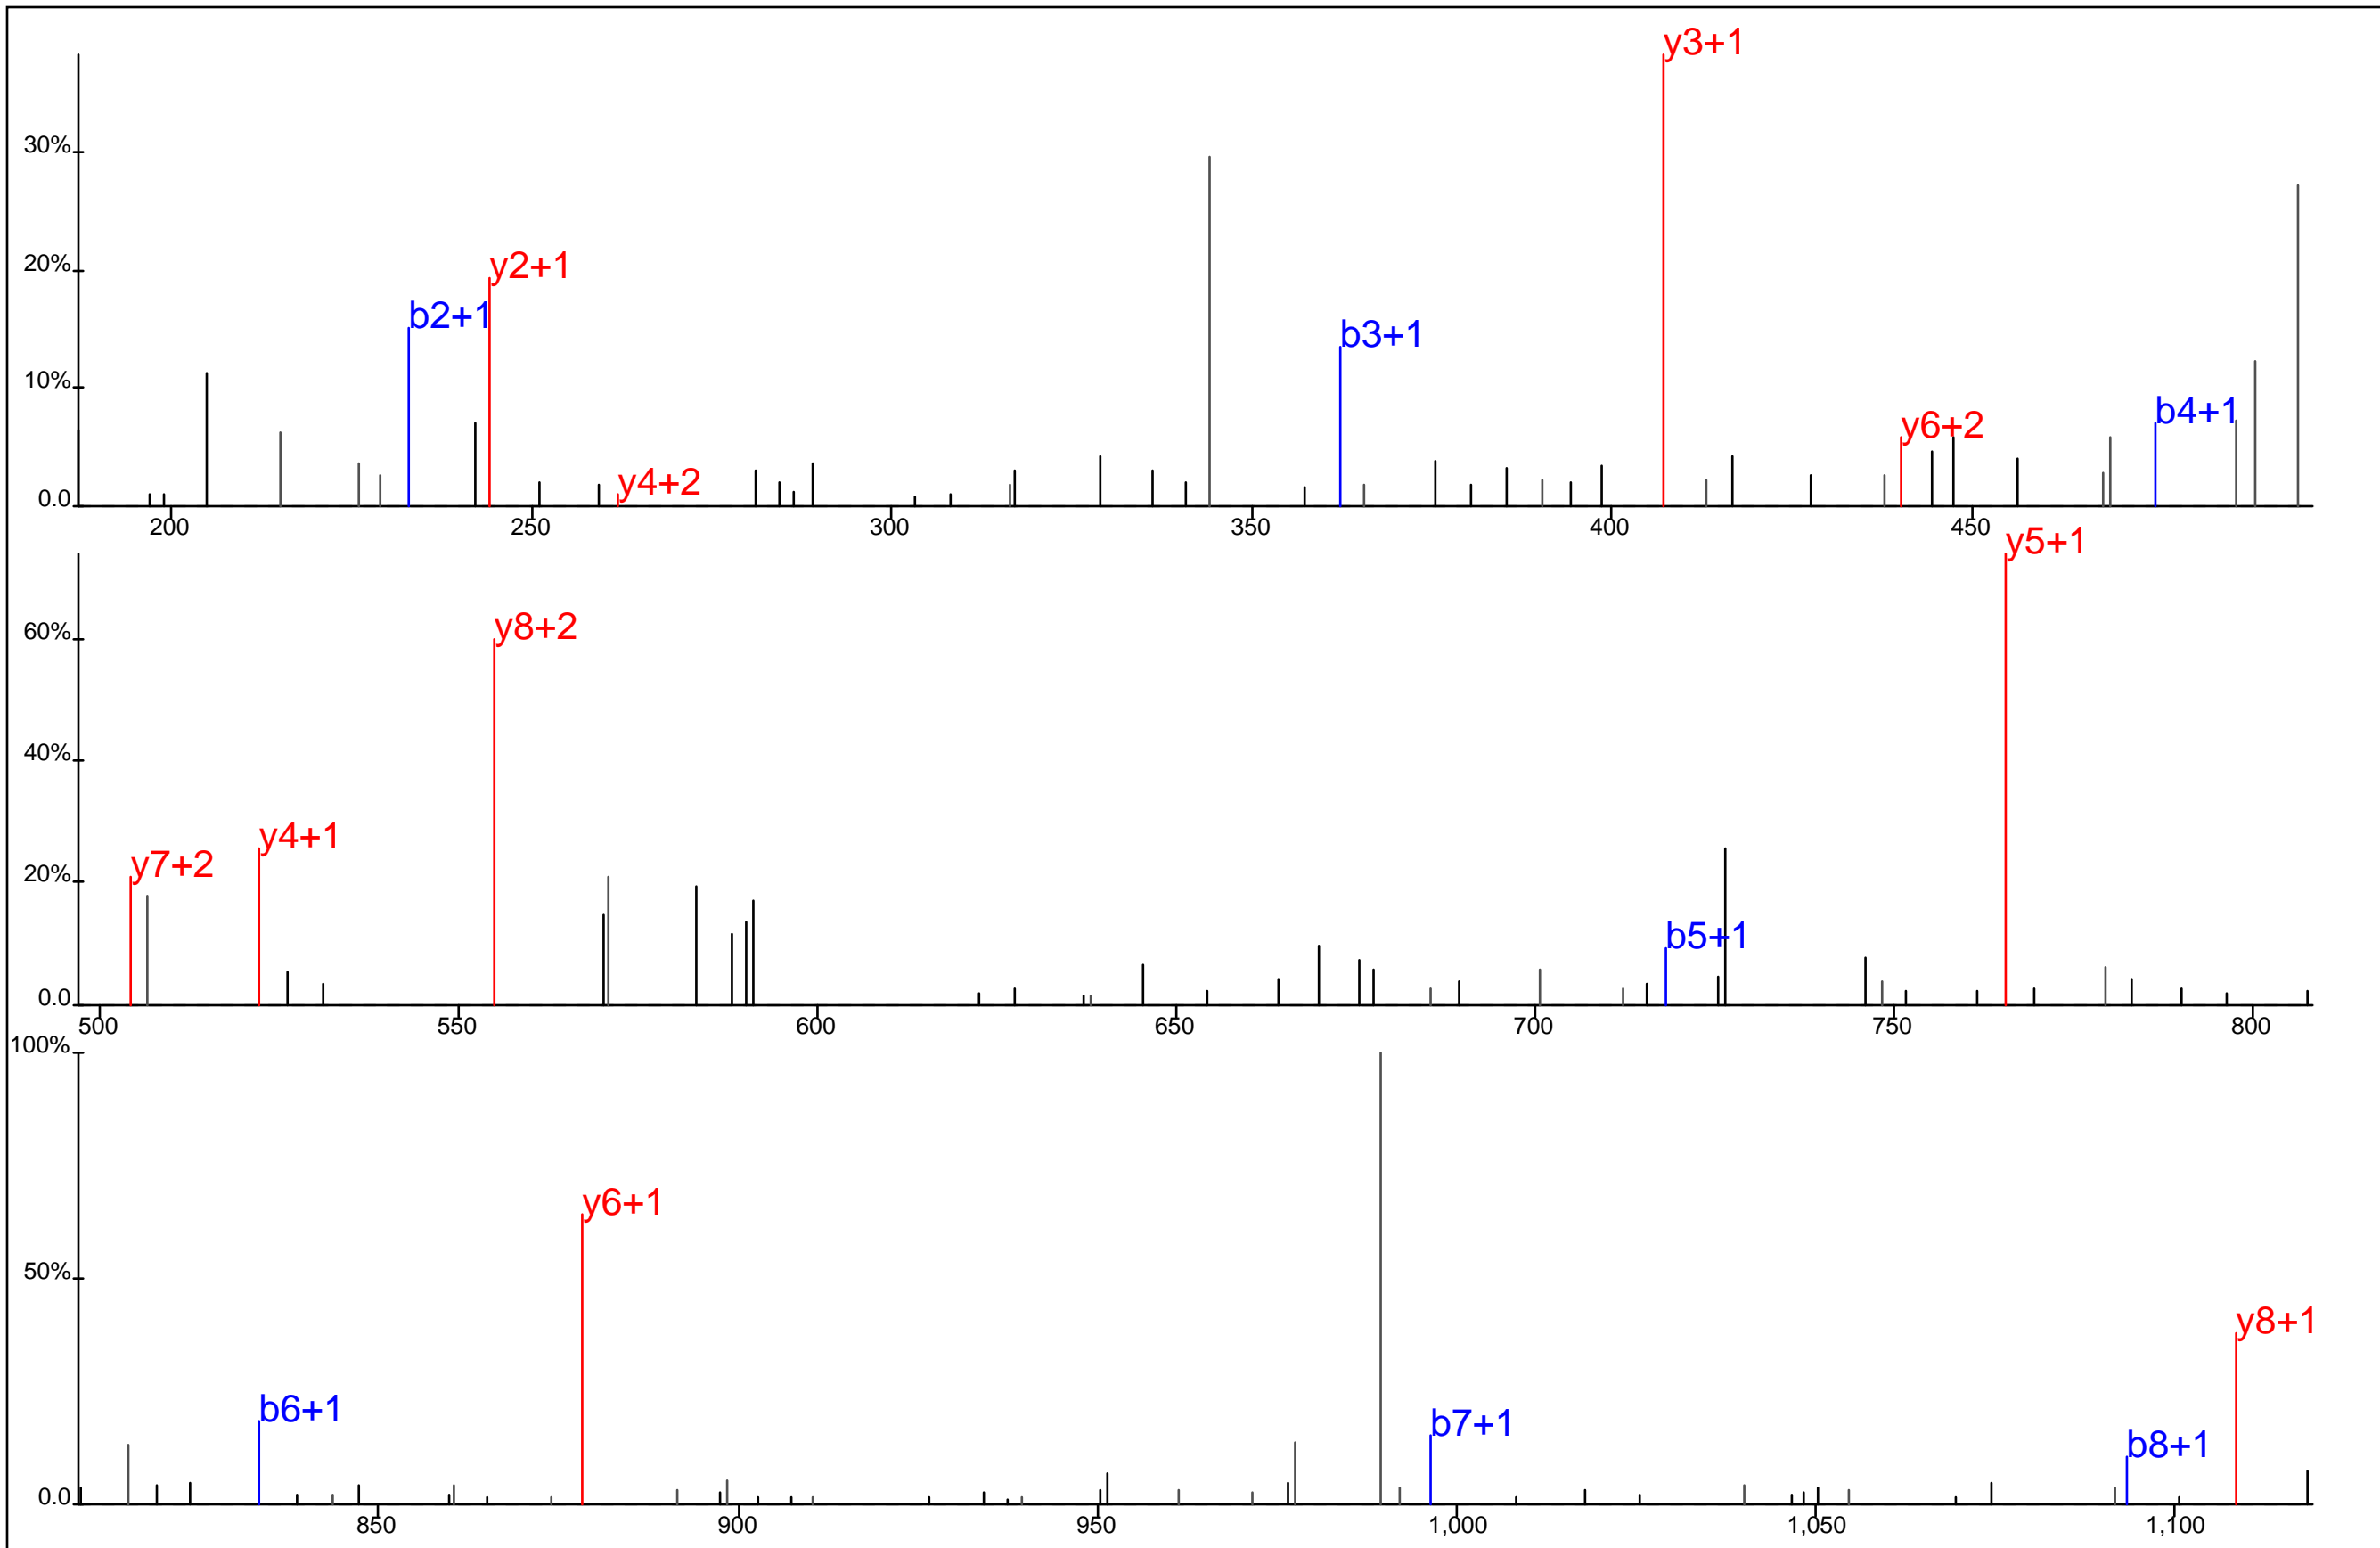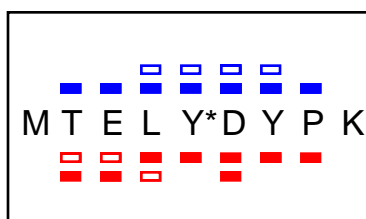

Protein Name: Prolyl endopeptidase  
 gi Accession: 0  
 Precursor Mass: 620.2540+2  
 Delta Mass: 0.303 ppm  
 XCorr: 43.85



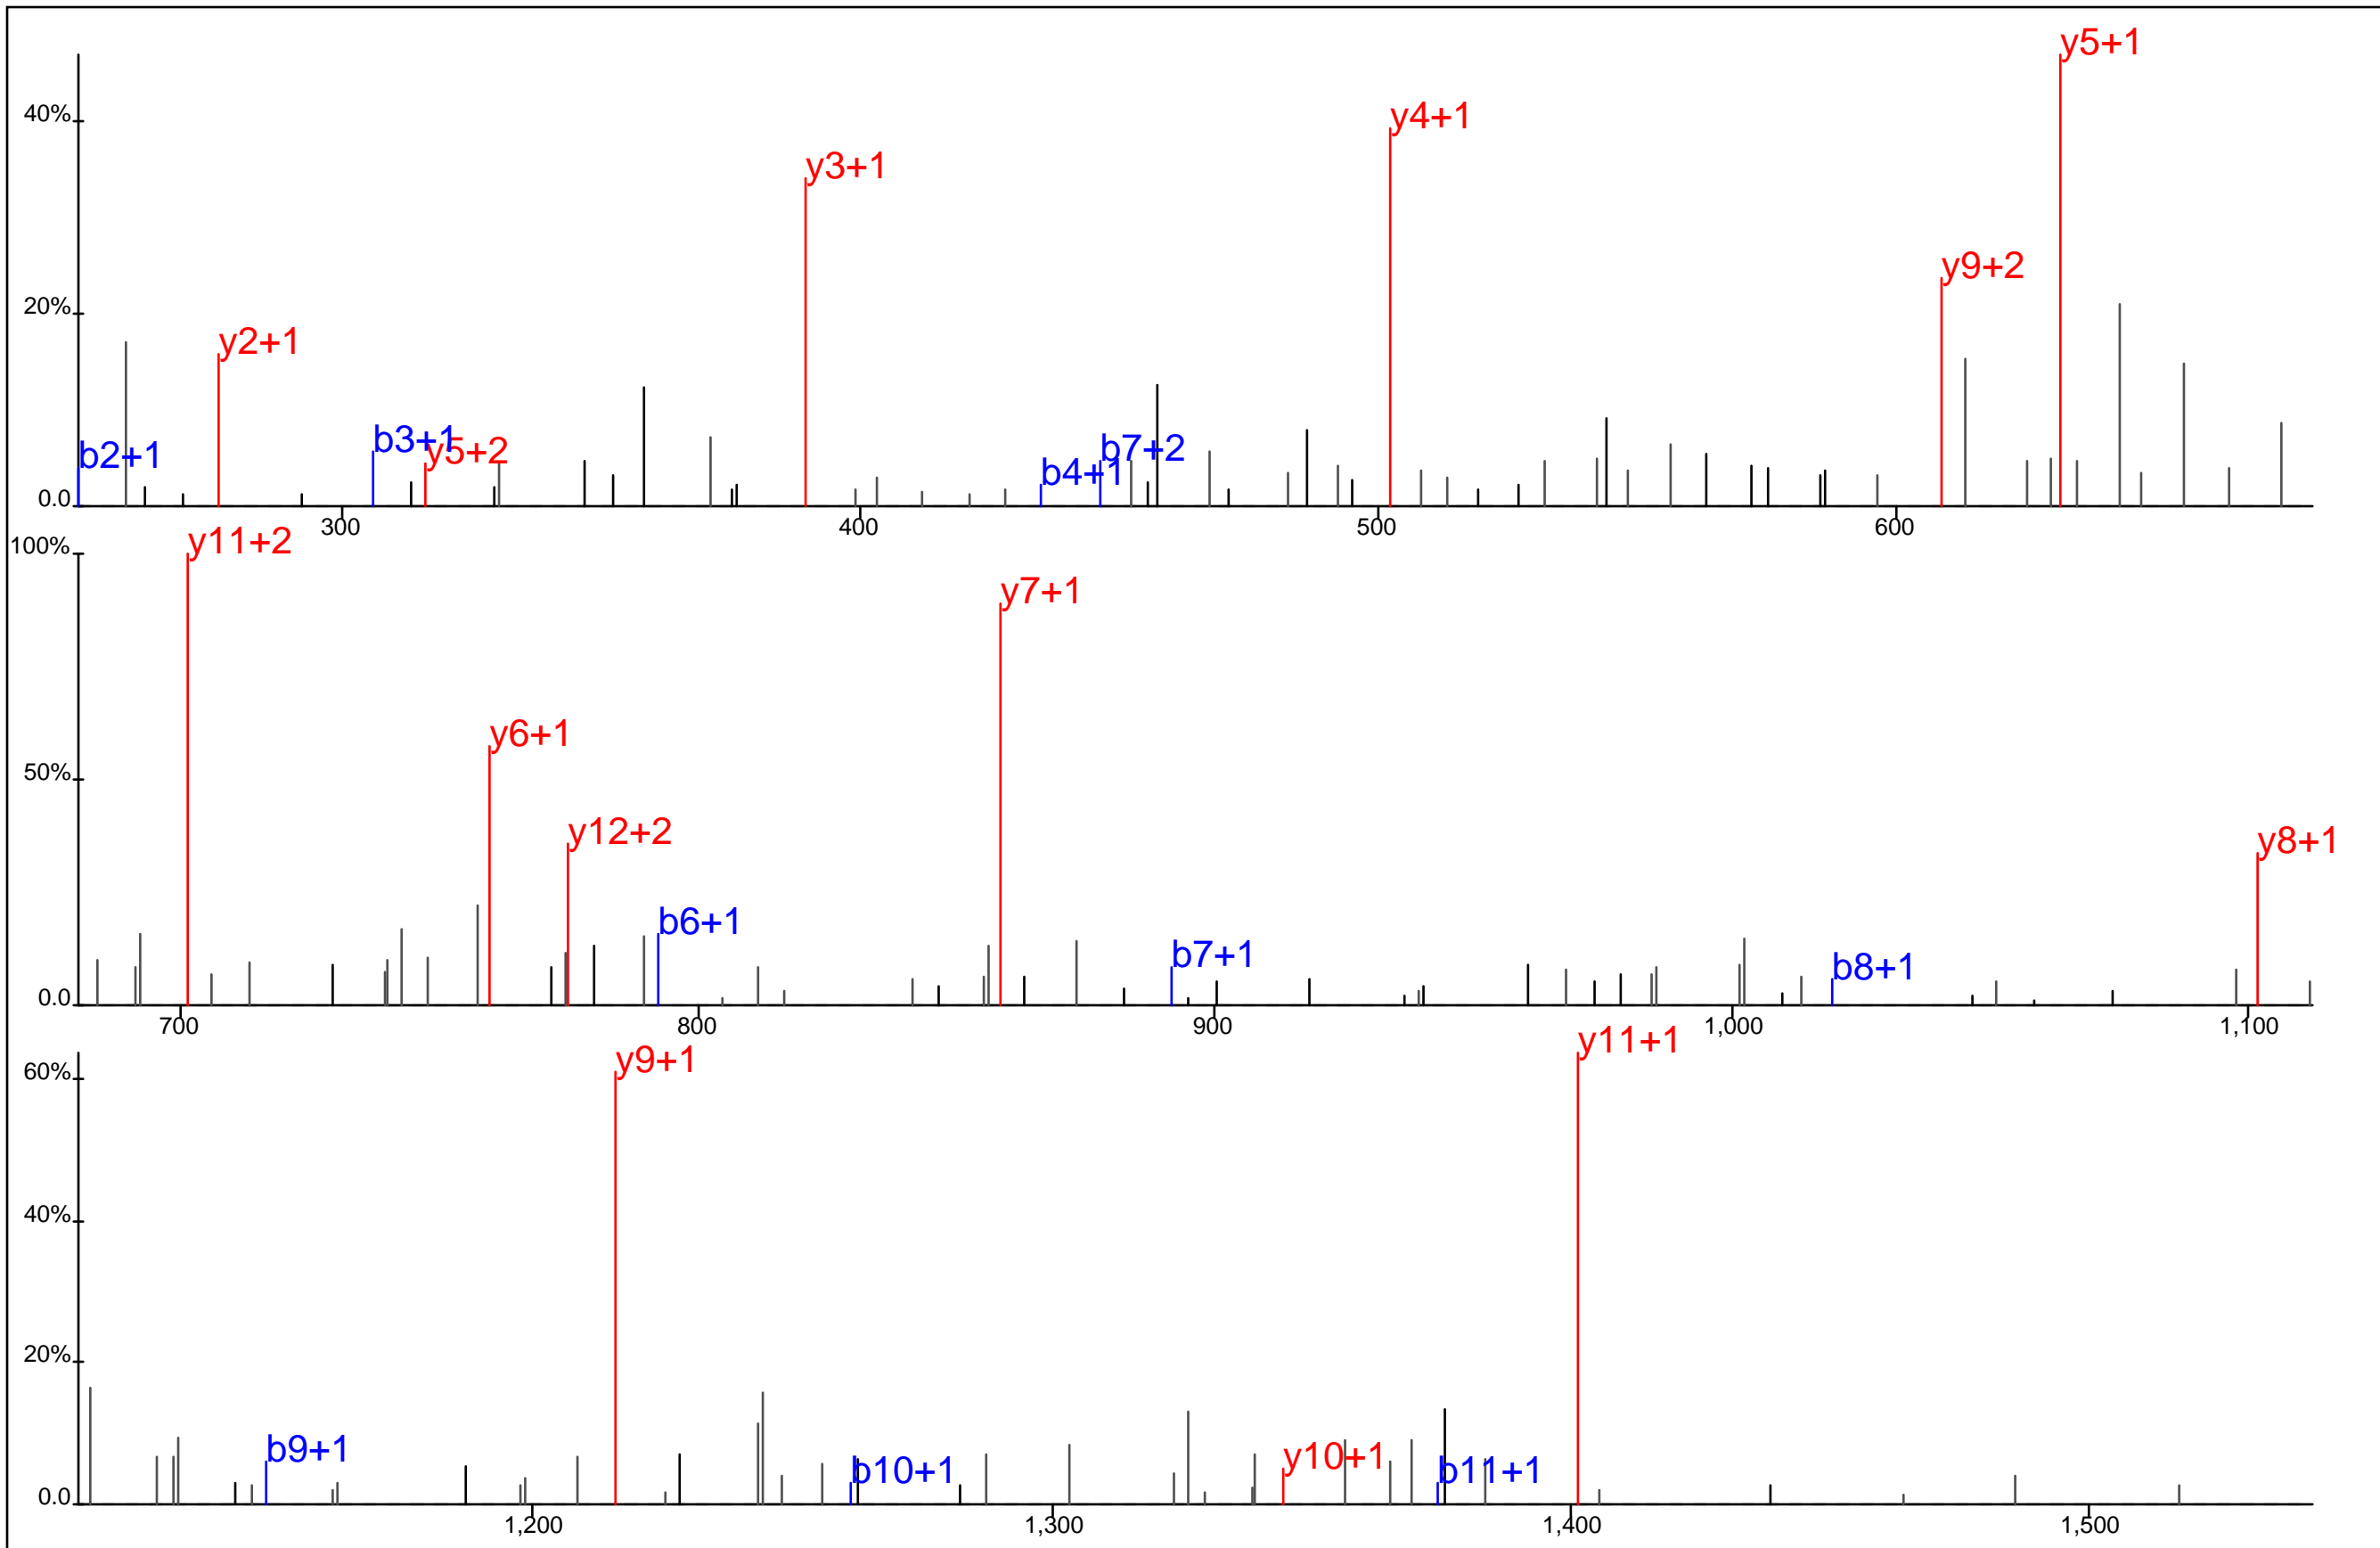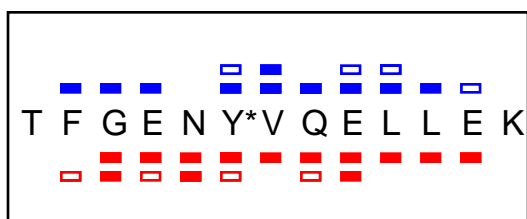

Protein Name: PROSC  
 gi Accession: 0  
 Precursor Mass: 825.3798+2  
 Delta Mass: 3.968 ppm  
 XCorr: 66.31

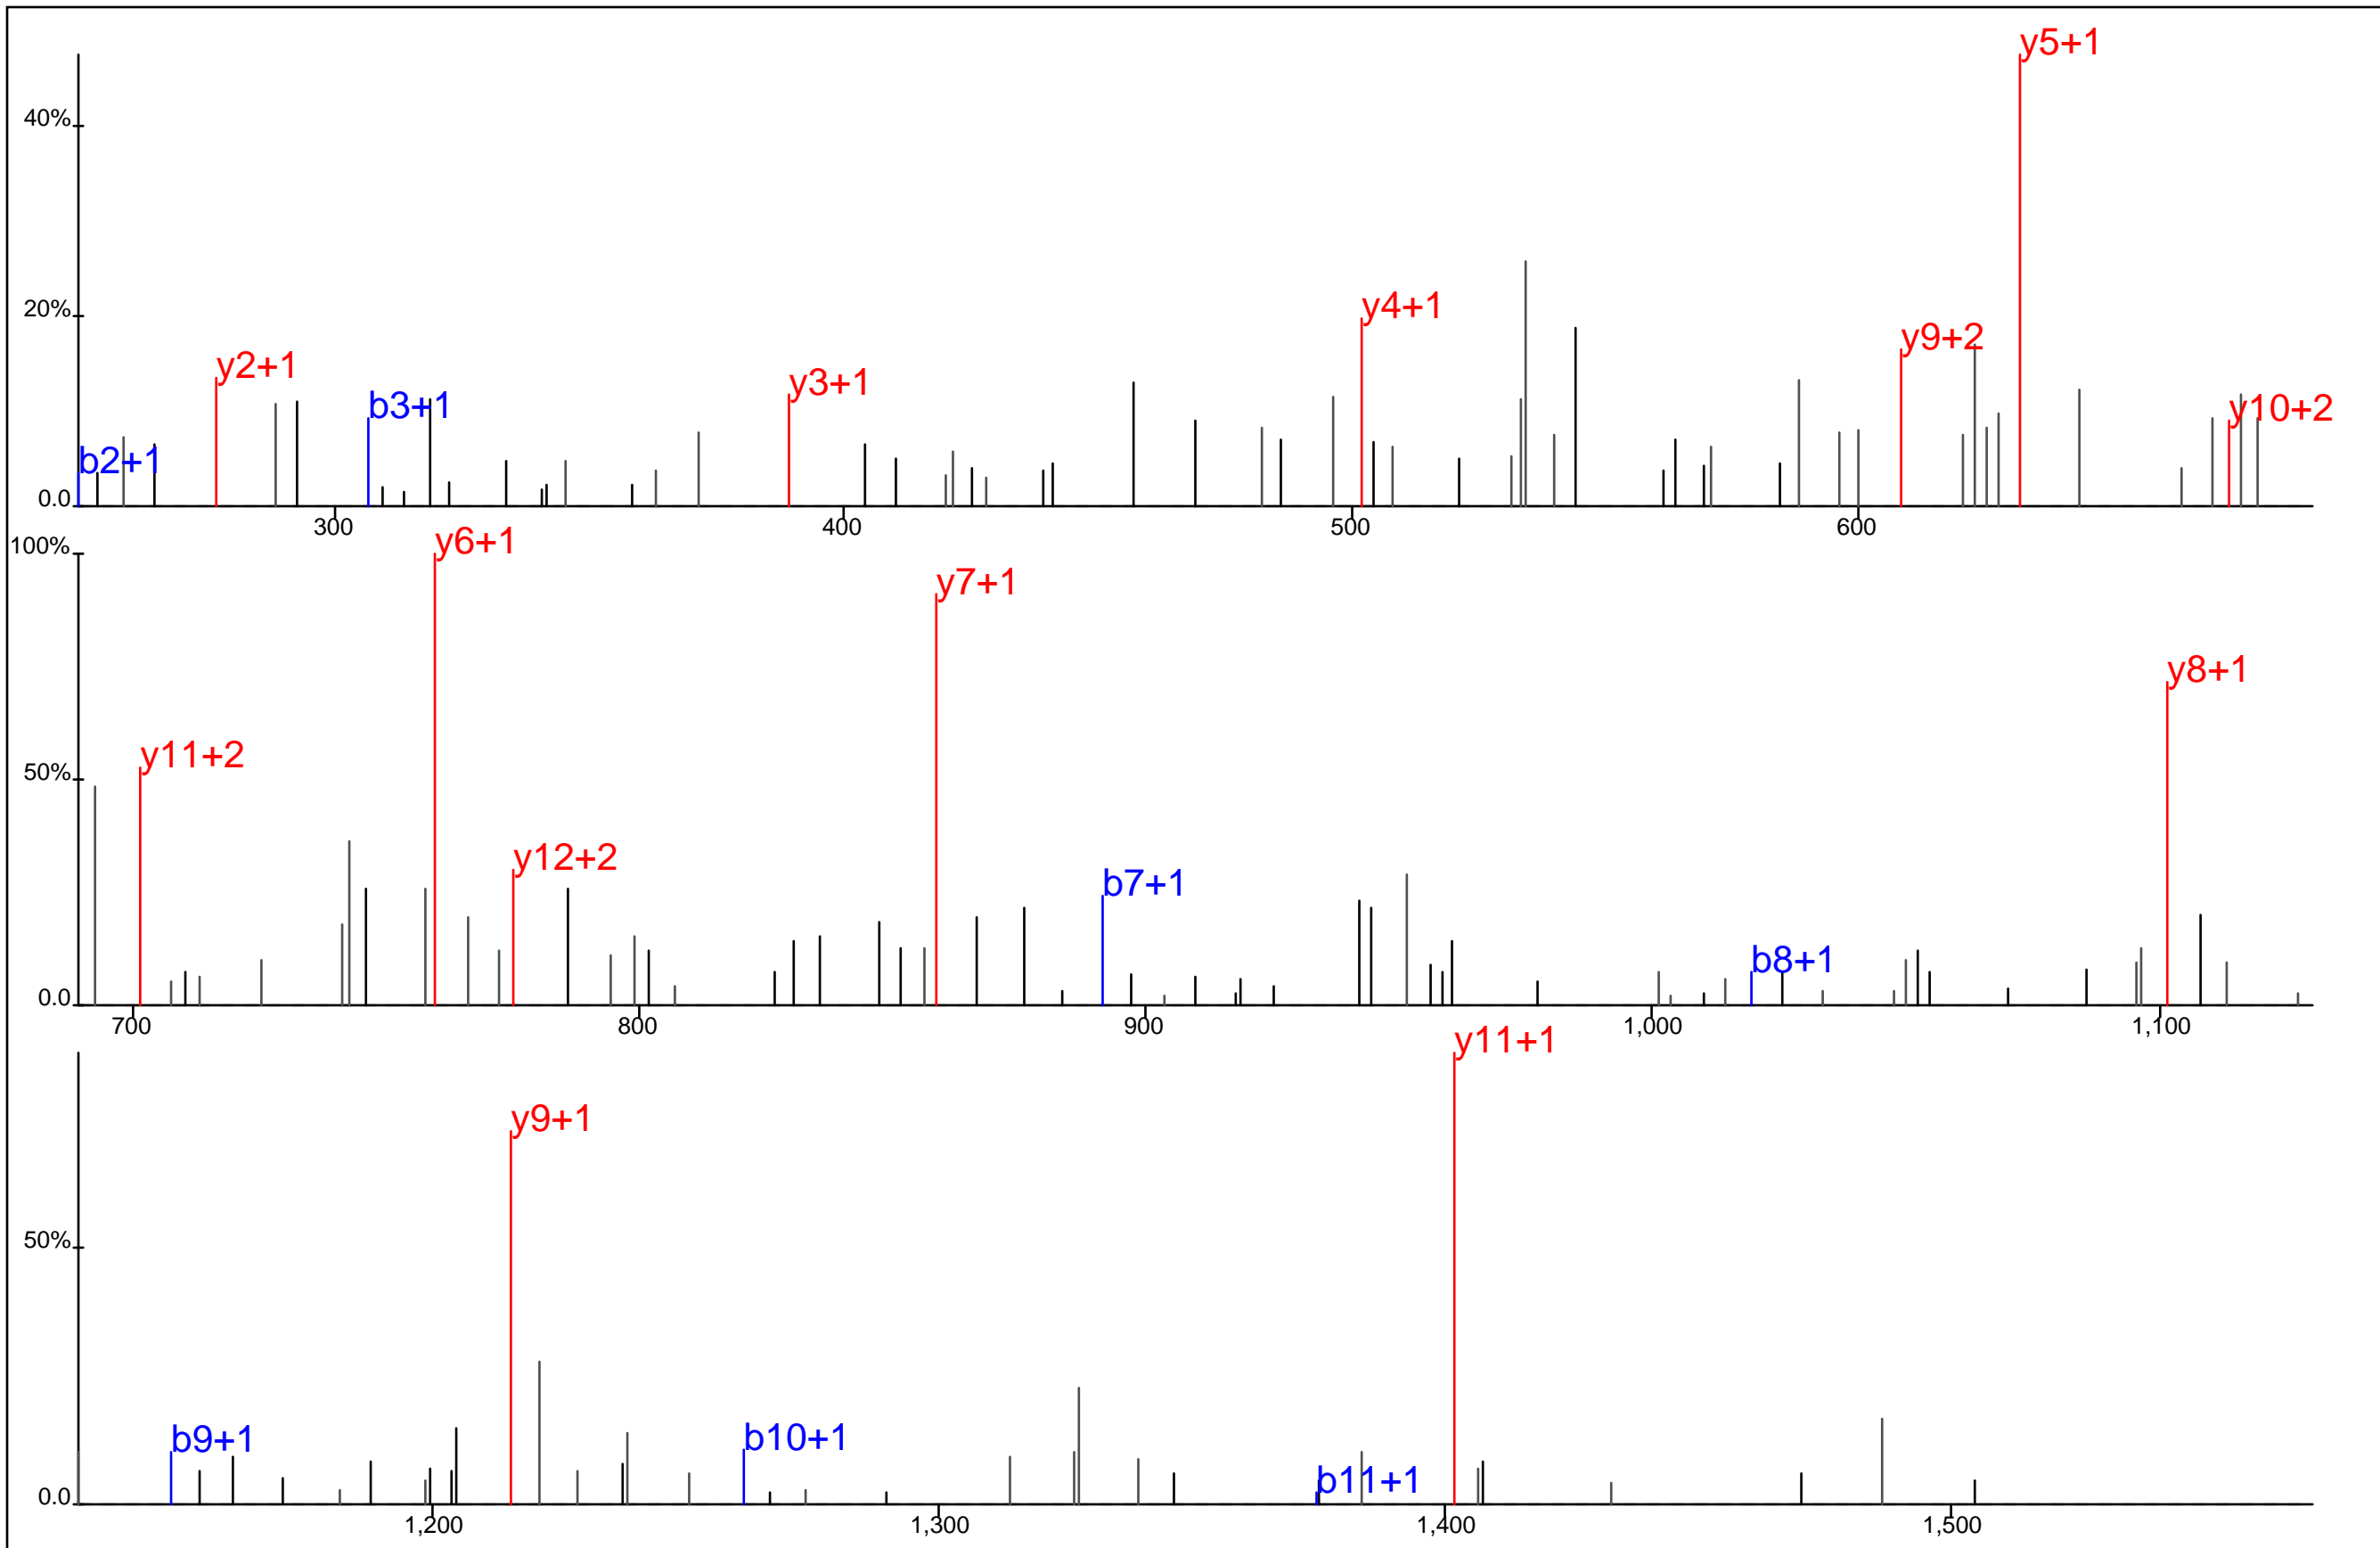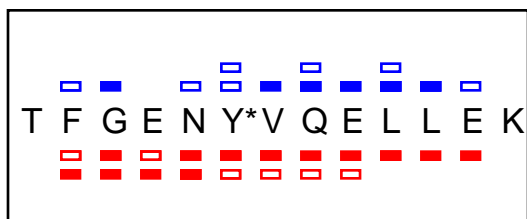

Protein Name: PROSC  
 gi Accession: 0  
 Precursor Mass: 825.3732+2  
 Delta Mass: 4.024 ppm  
 XCorr: 67.21





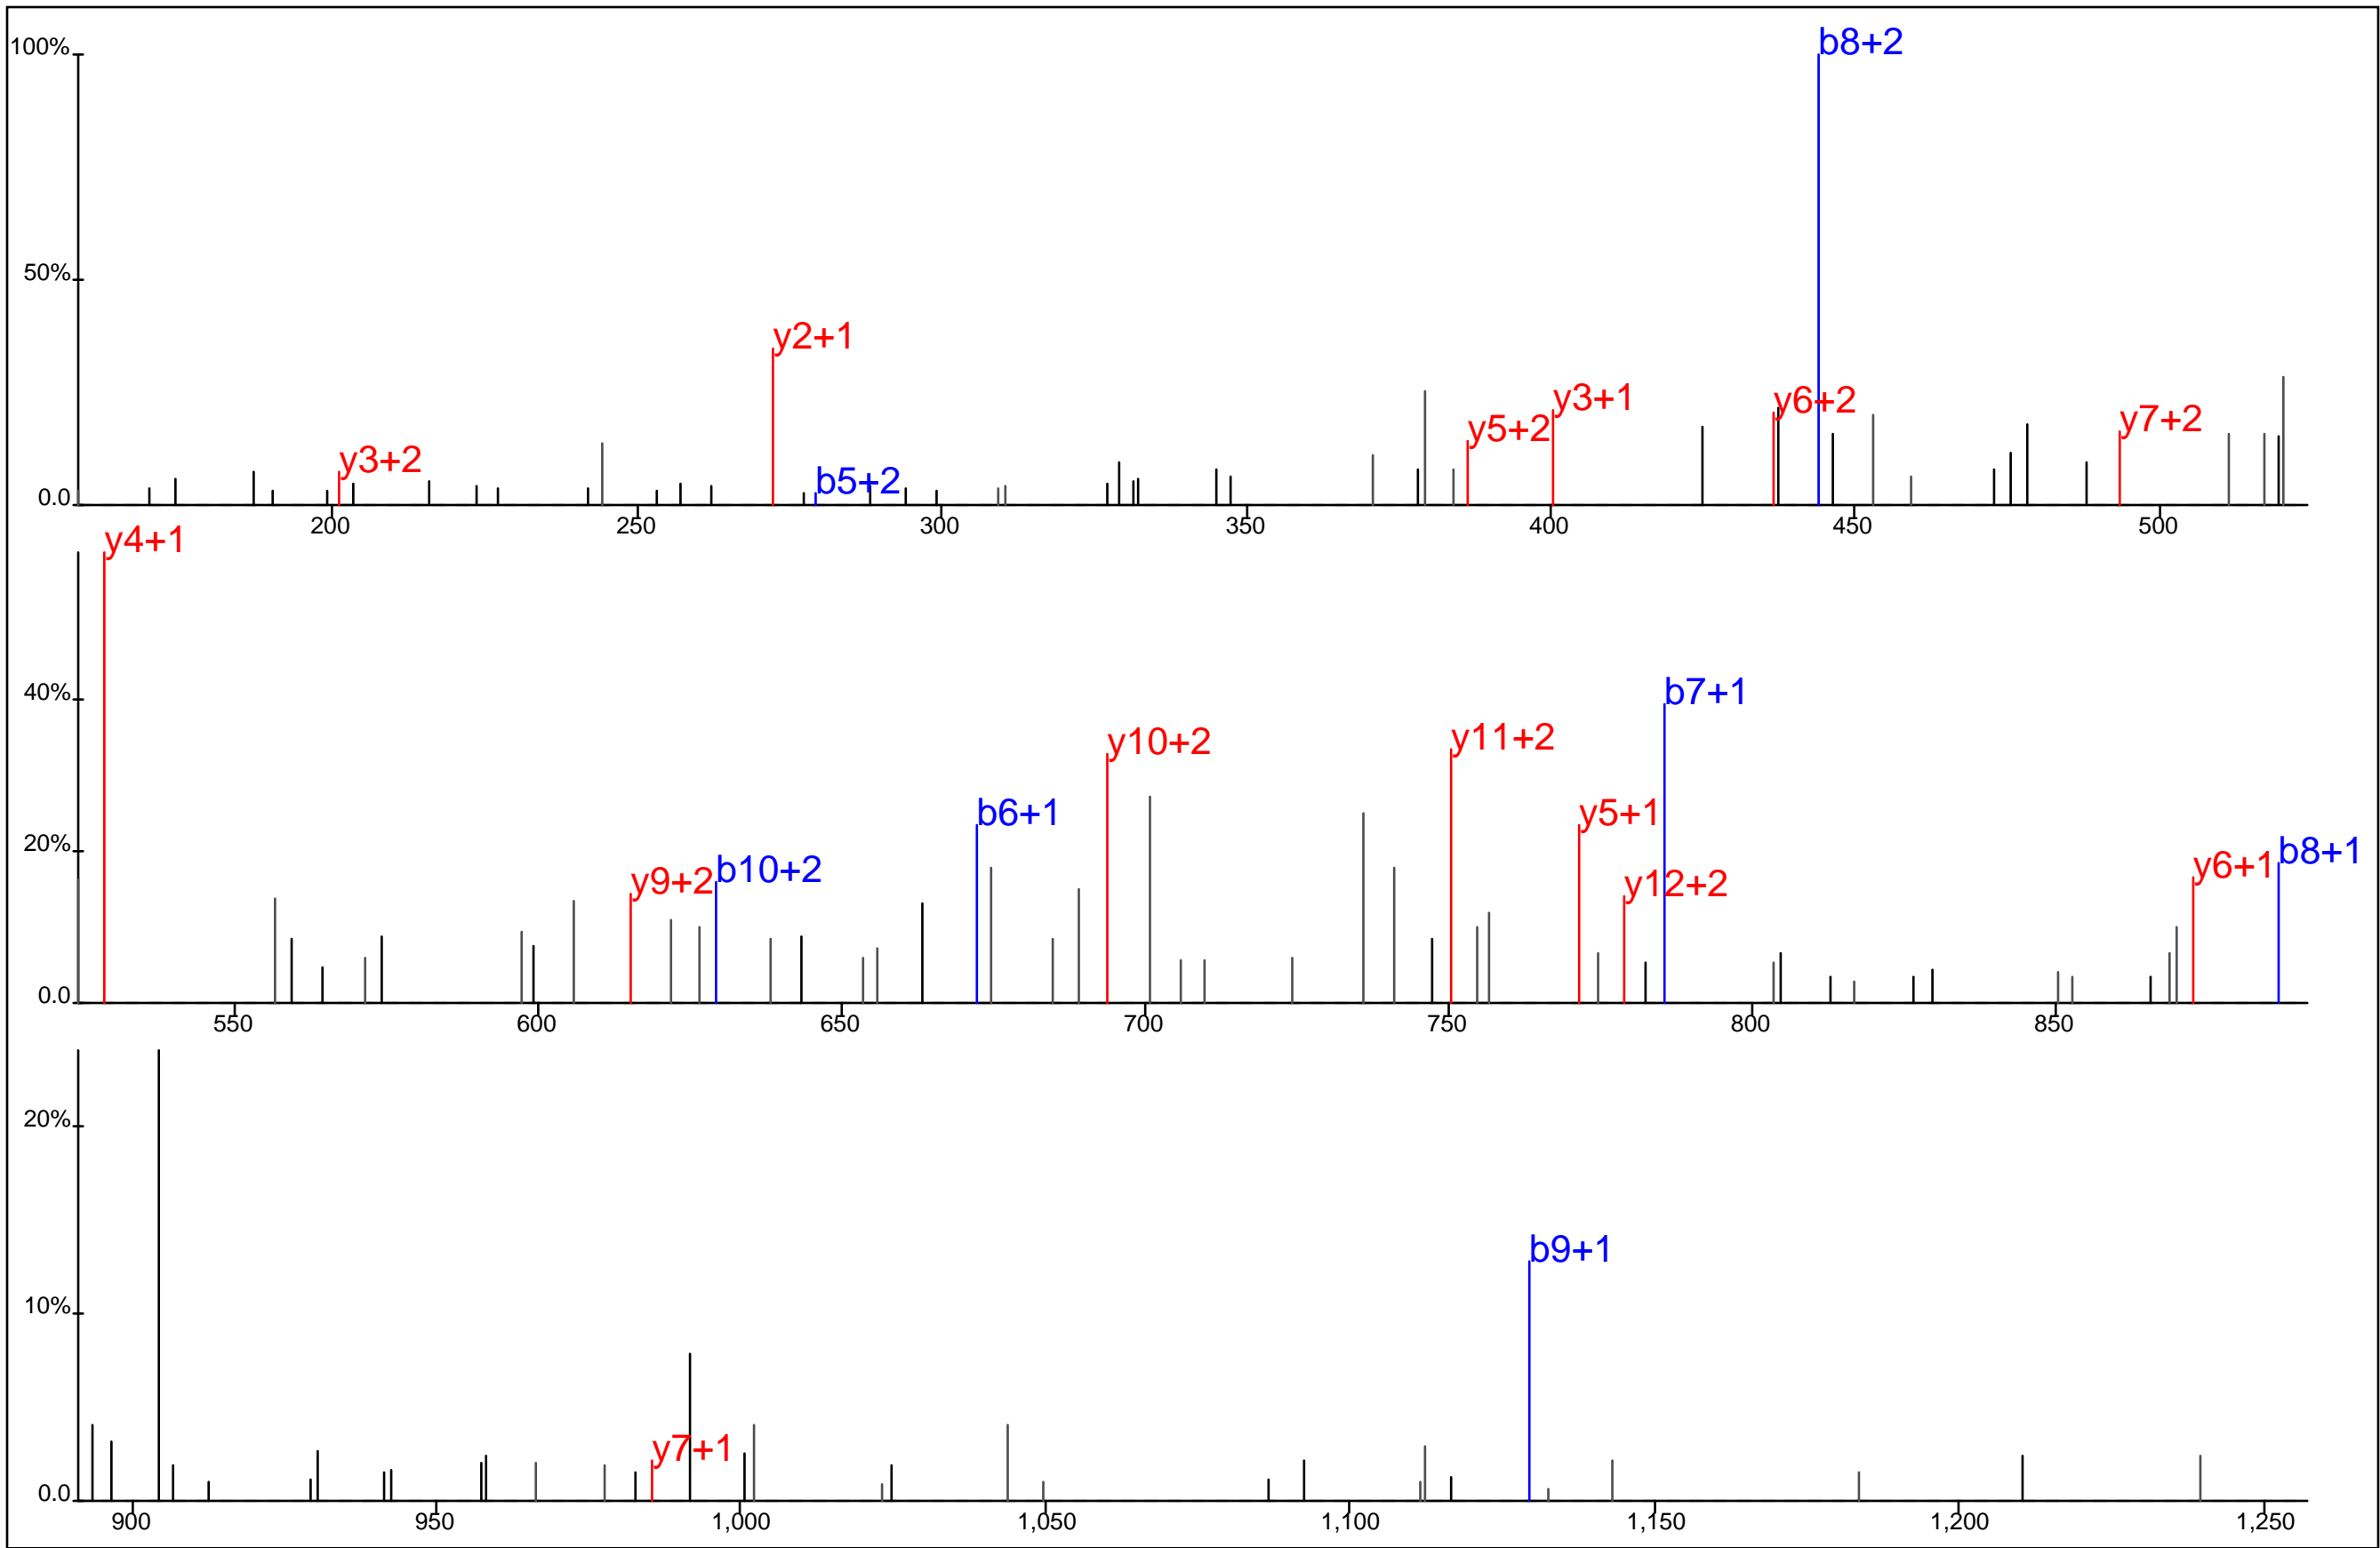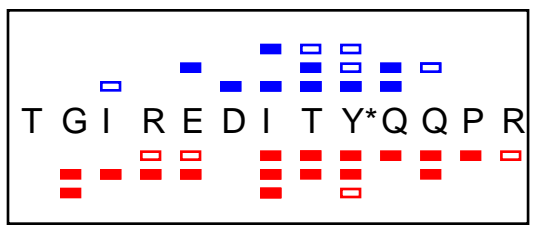

Protein Name: Prostate cancer antigen 1  
 gi Accession: 0  
 Precursor Mass: 552.9289+3  
 Delta Mass: 1.190 ppm  
 XCorr: 29.76

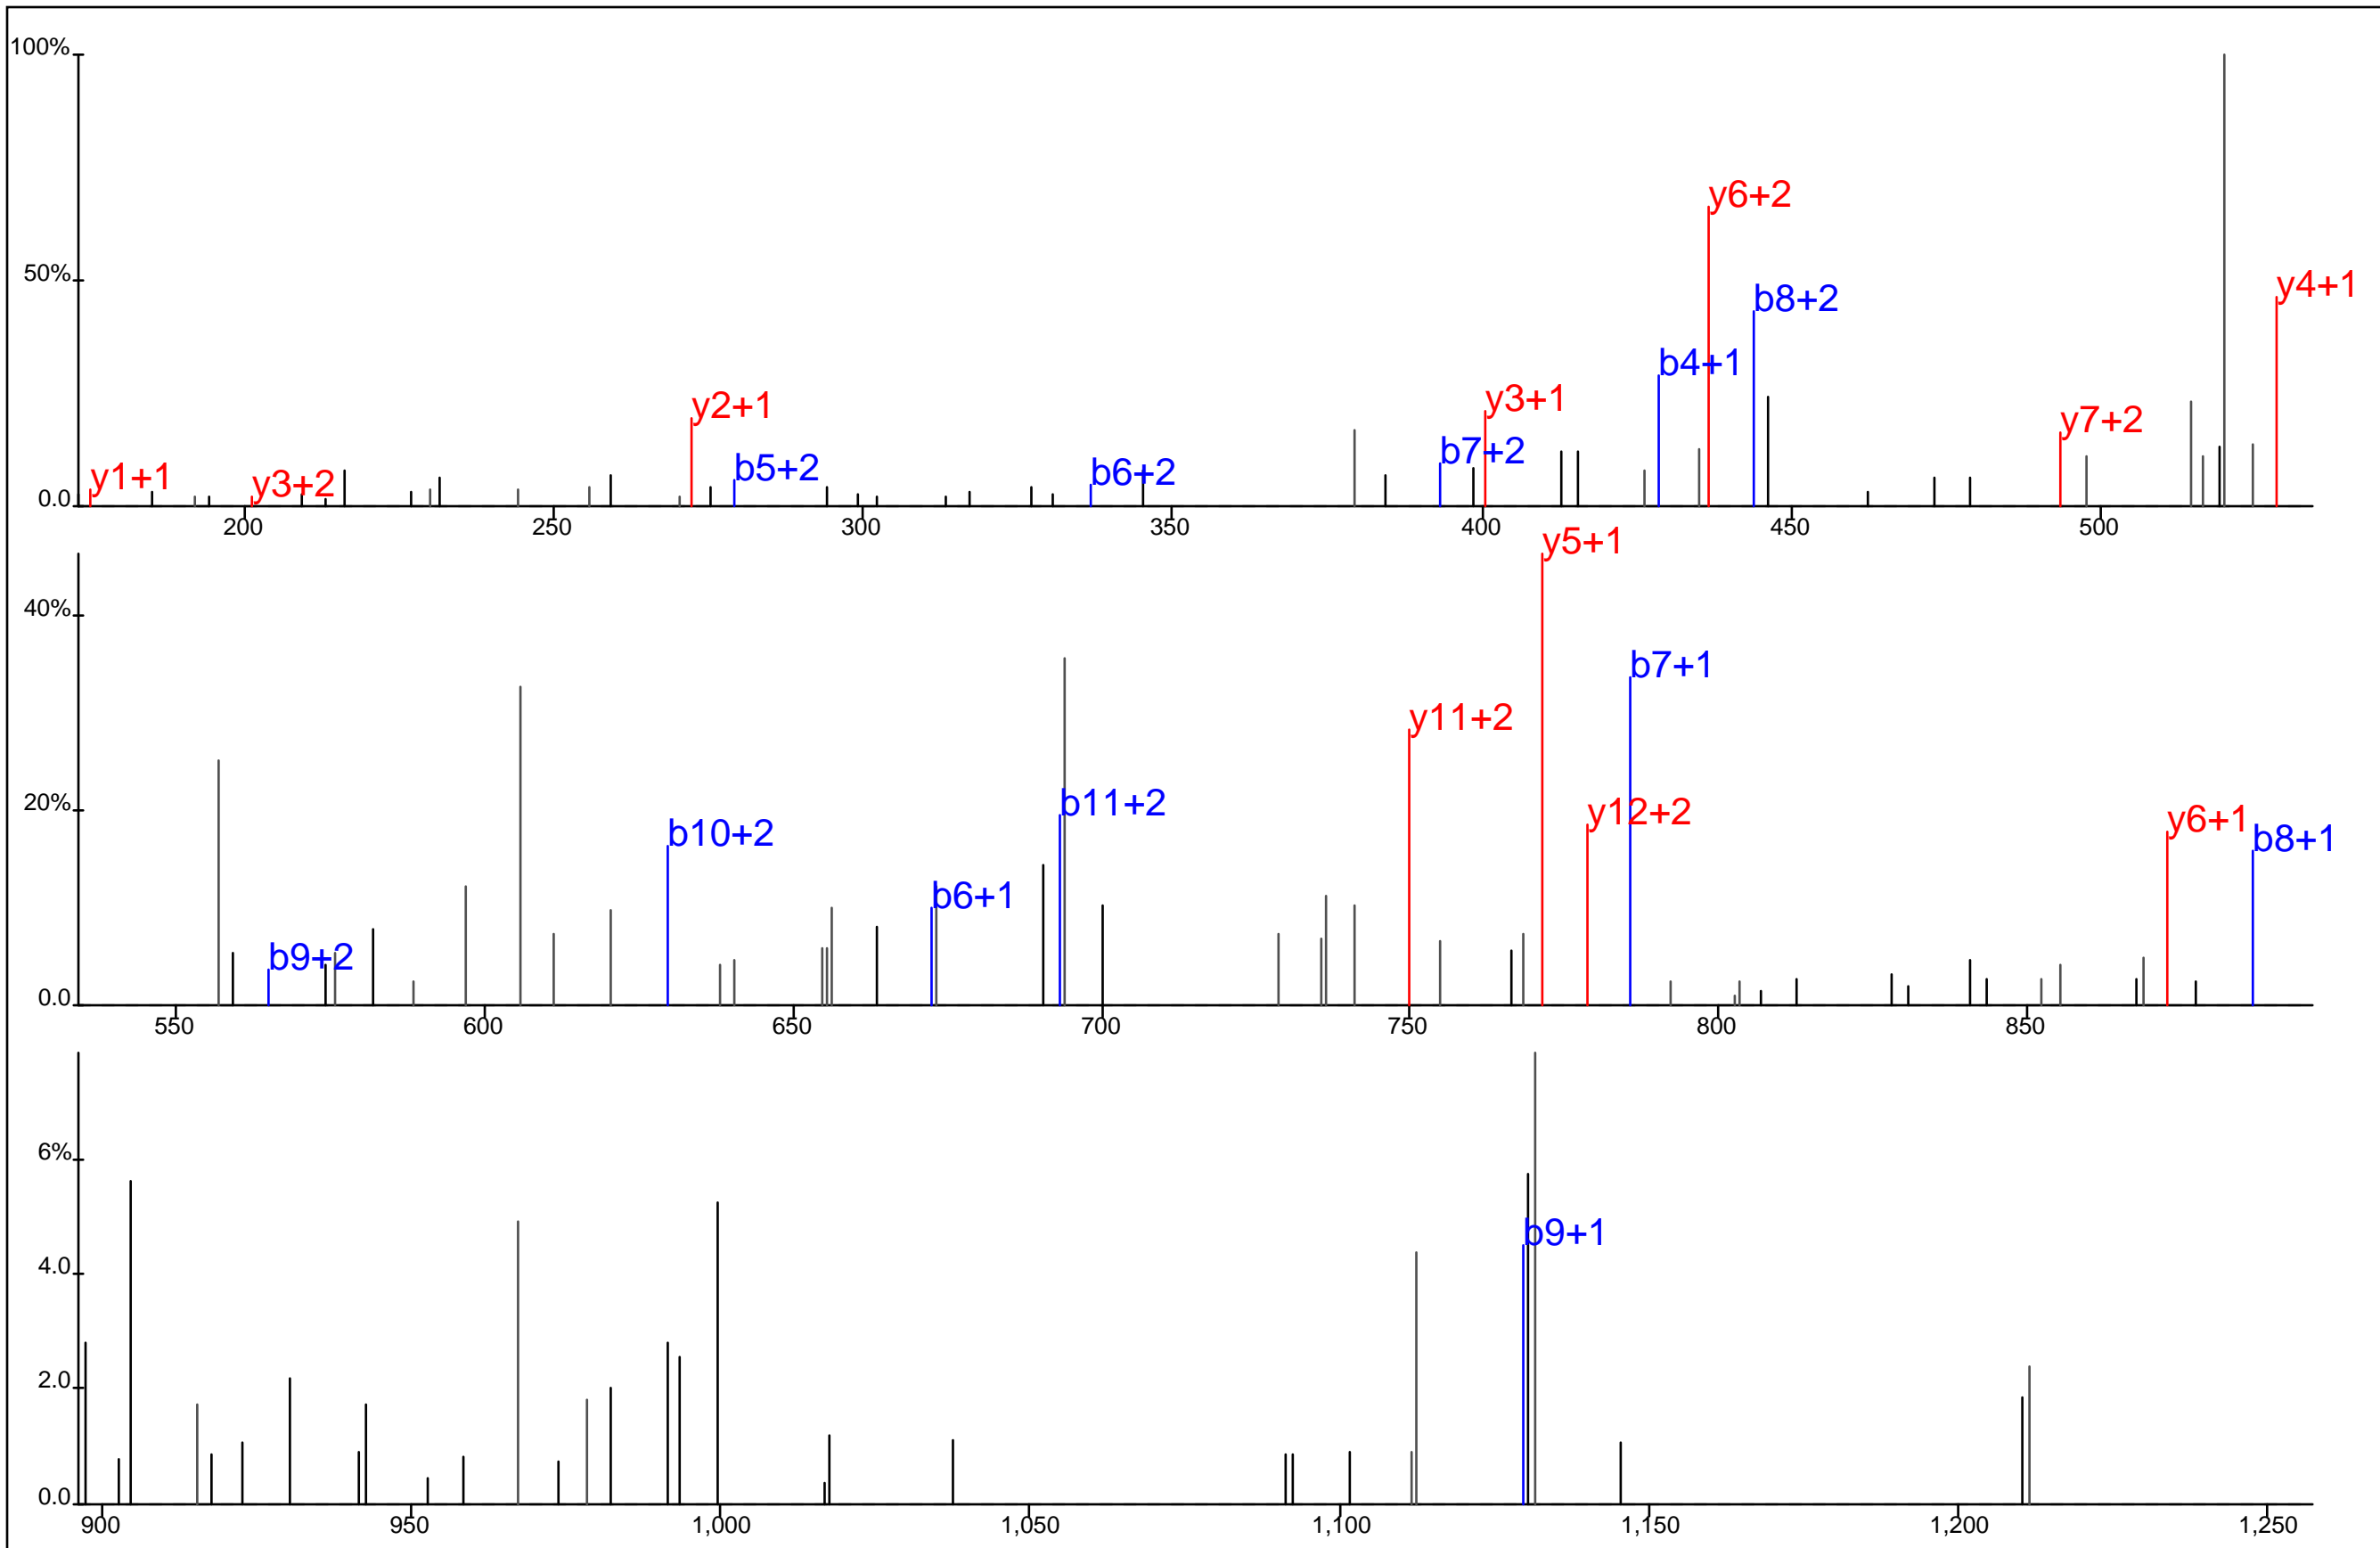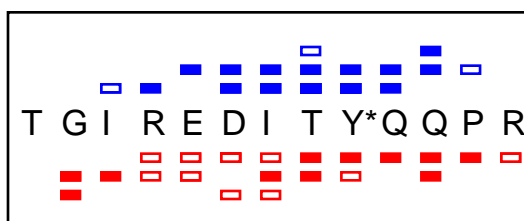

Protein Name: Prostate cancer antigen 1  
 gi Accession: 0  
 Precursor Mass: 552.9297+3  
 Delta Mass: 0.247 ppm  
 XCorr: 33.85

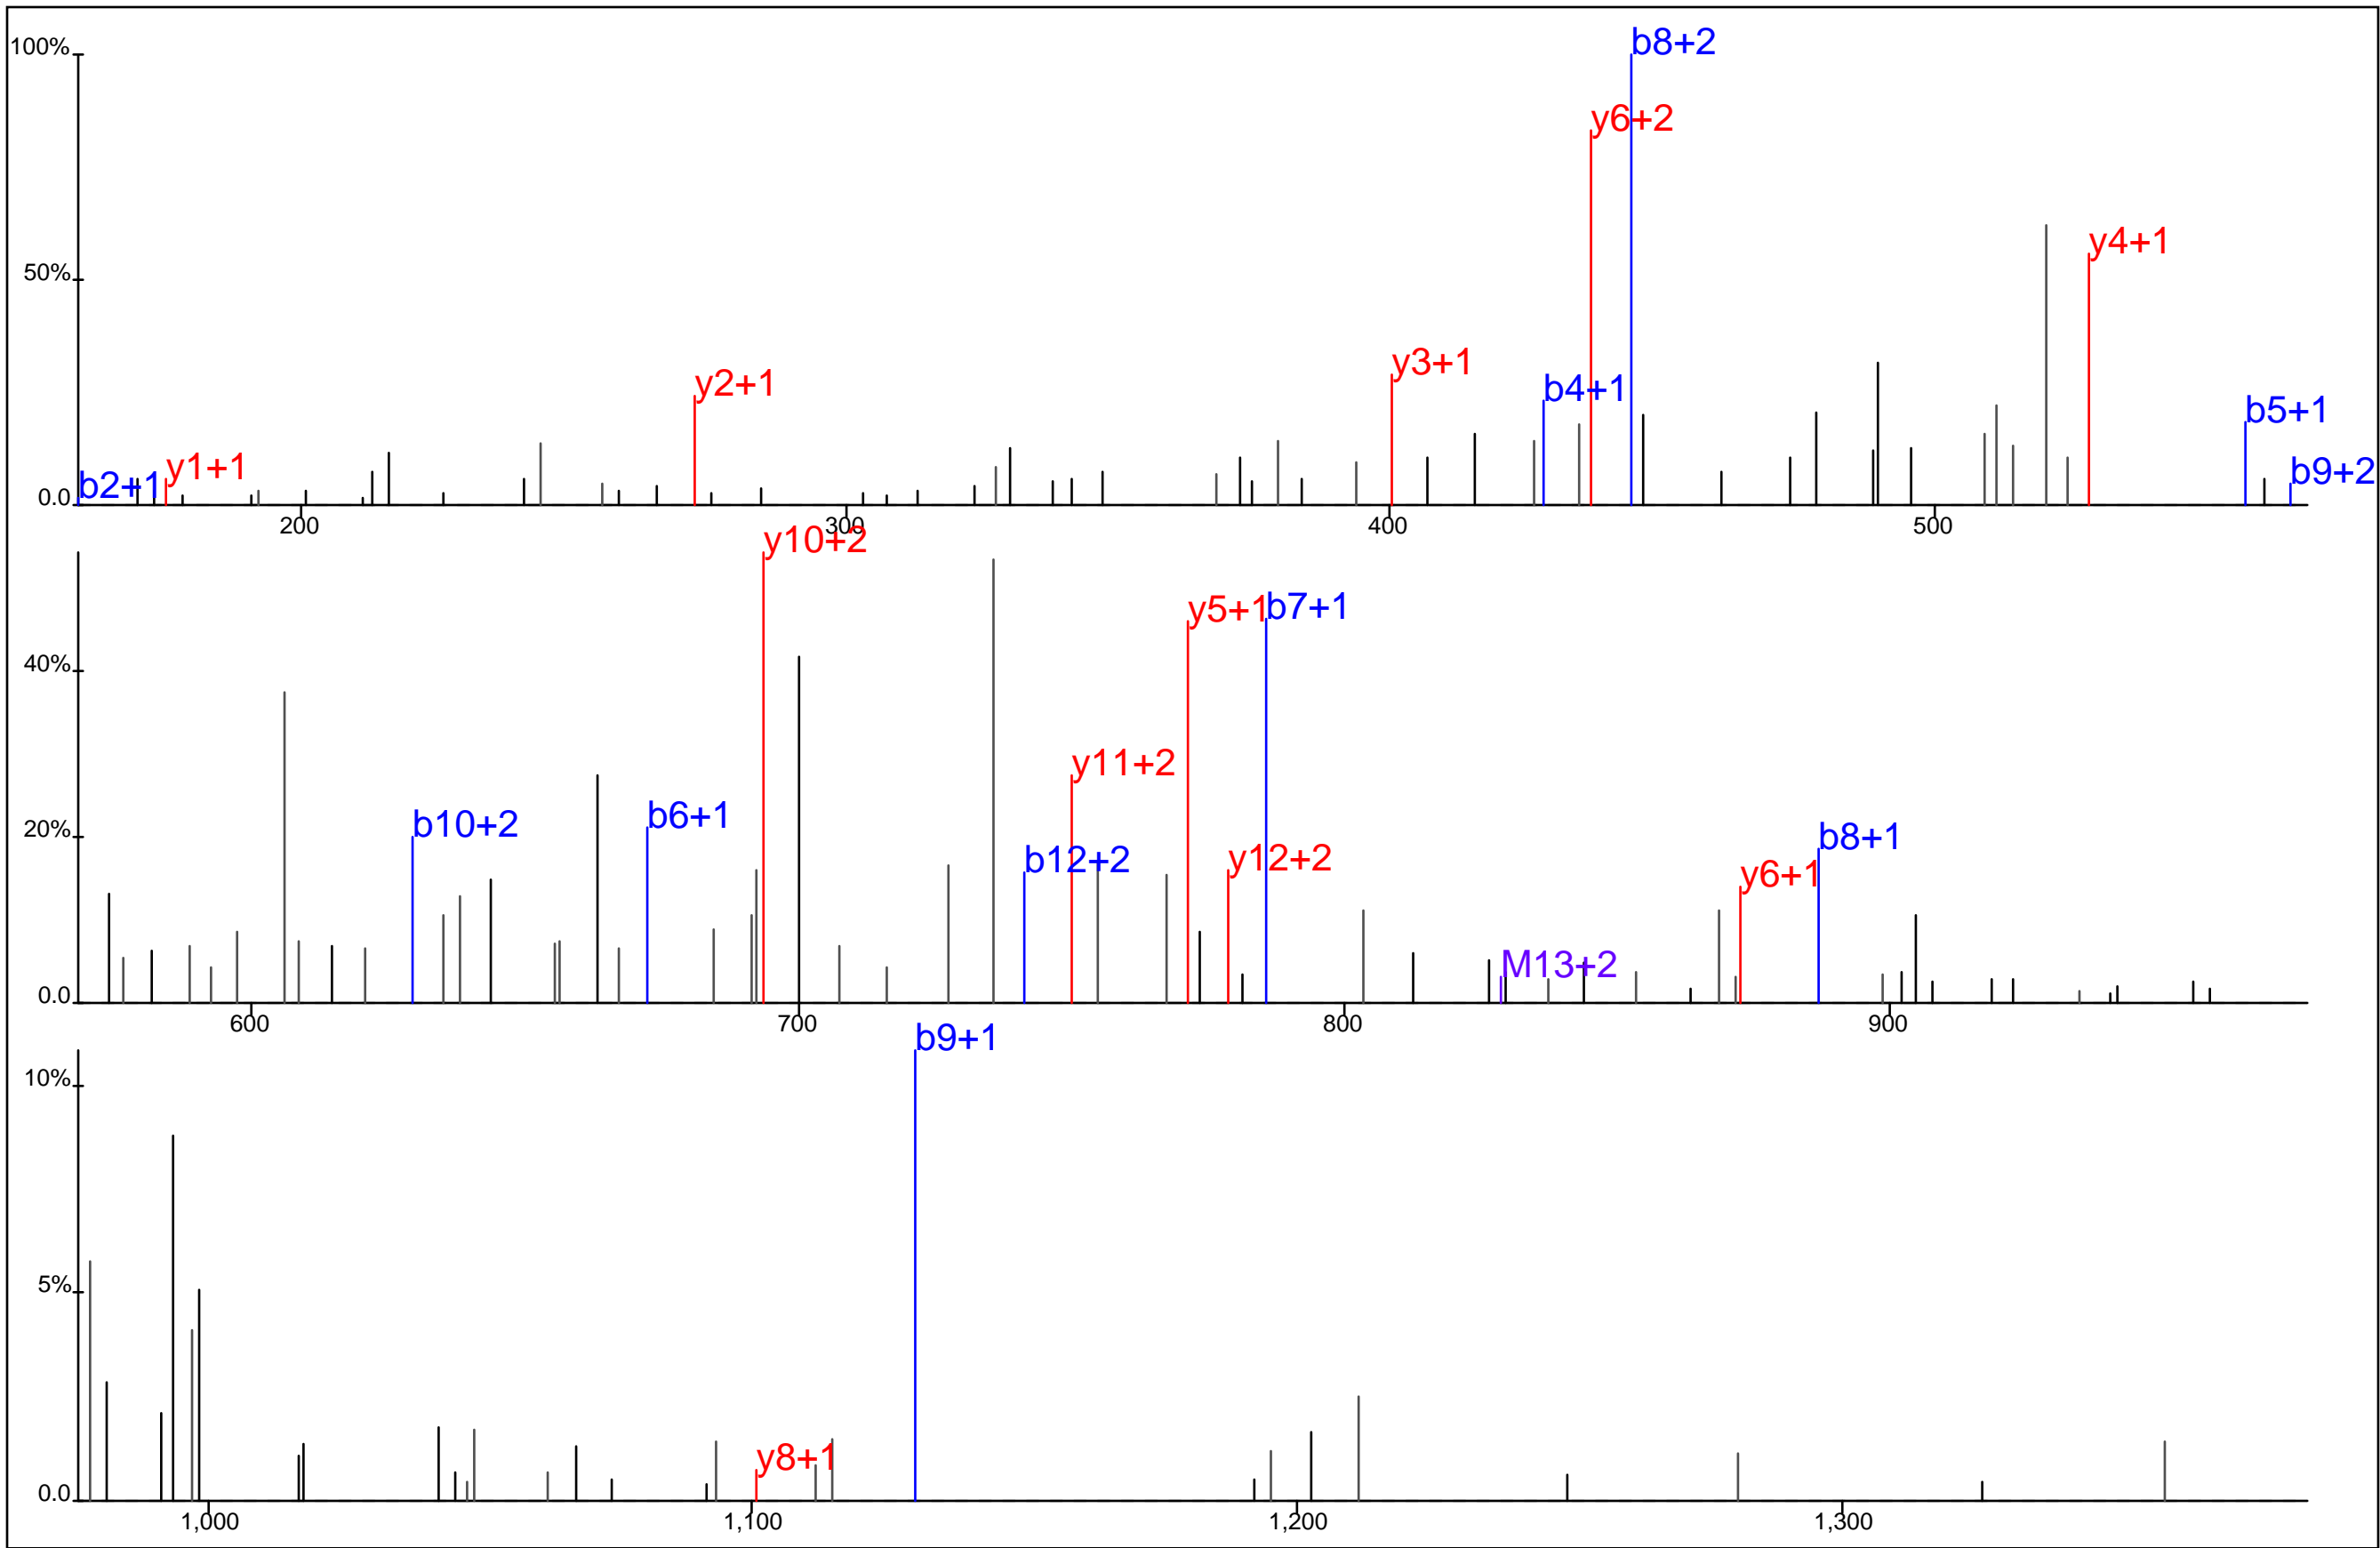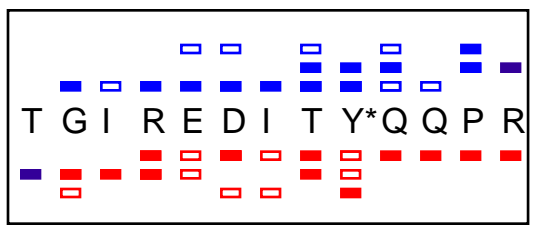

Protein Name: Prostate cancer antigen 1  
 gi Accession: 0  
 Precursor Mass: 552.9281+3  
 Delta Mass: 2.626 ppm  
 XCorr: 33.97

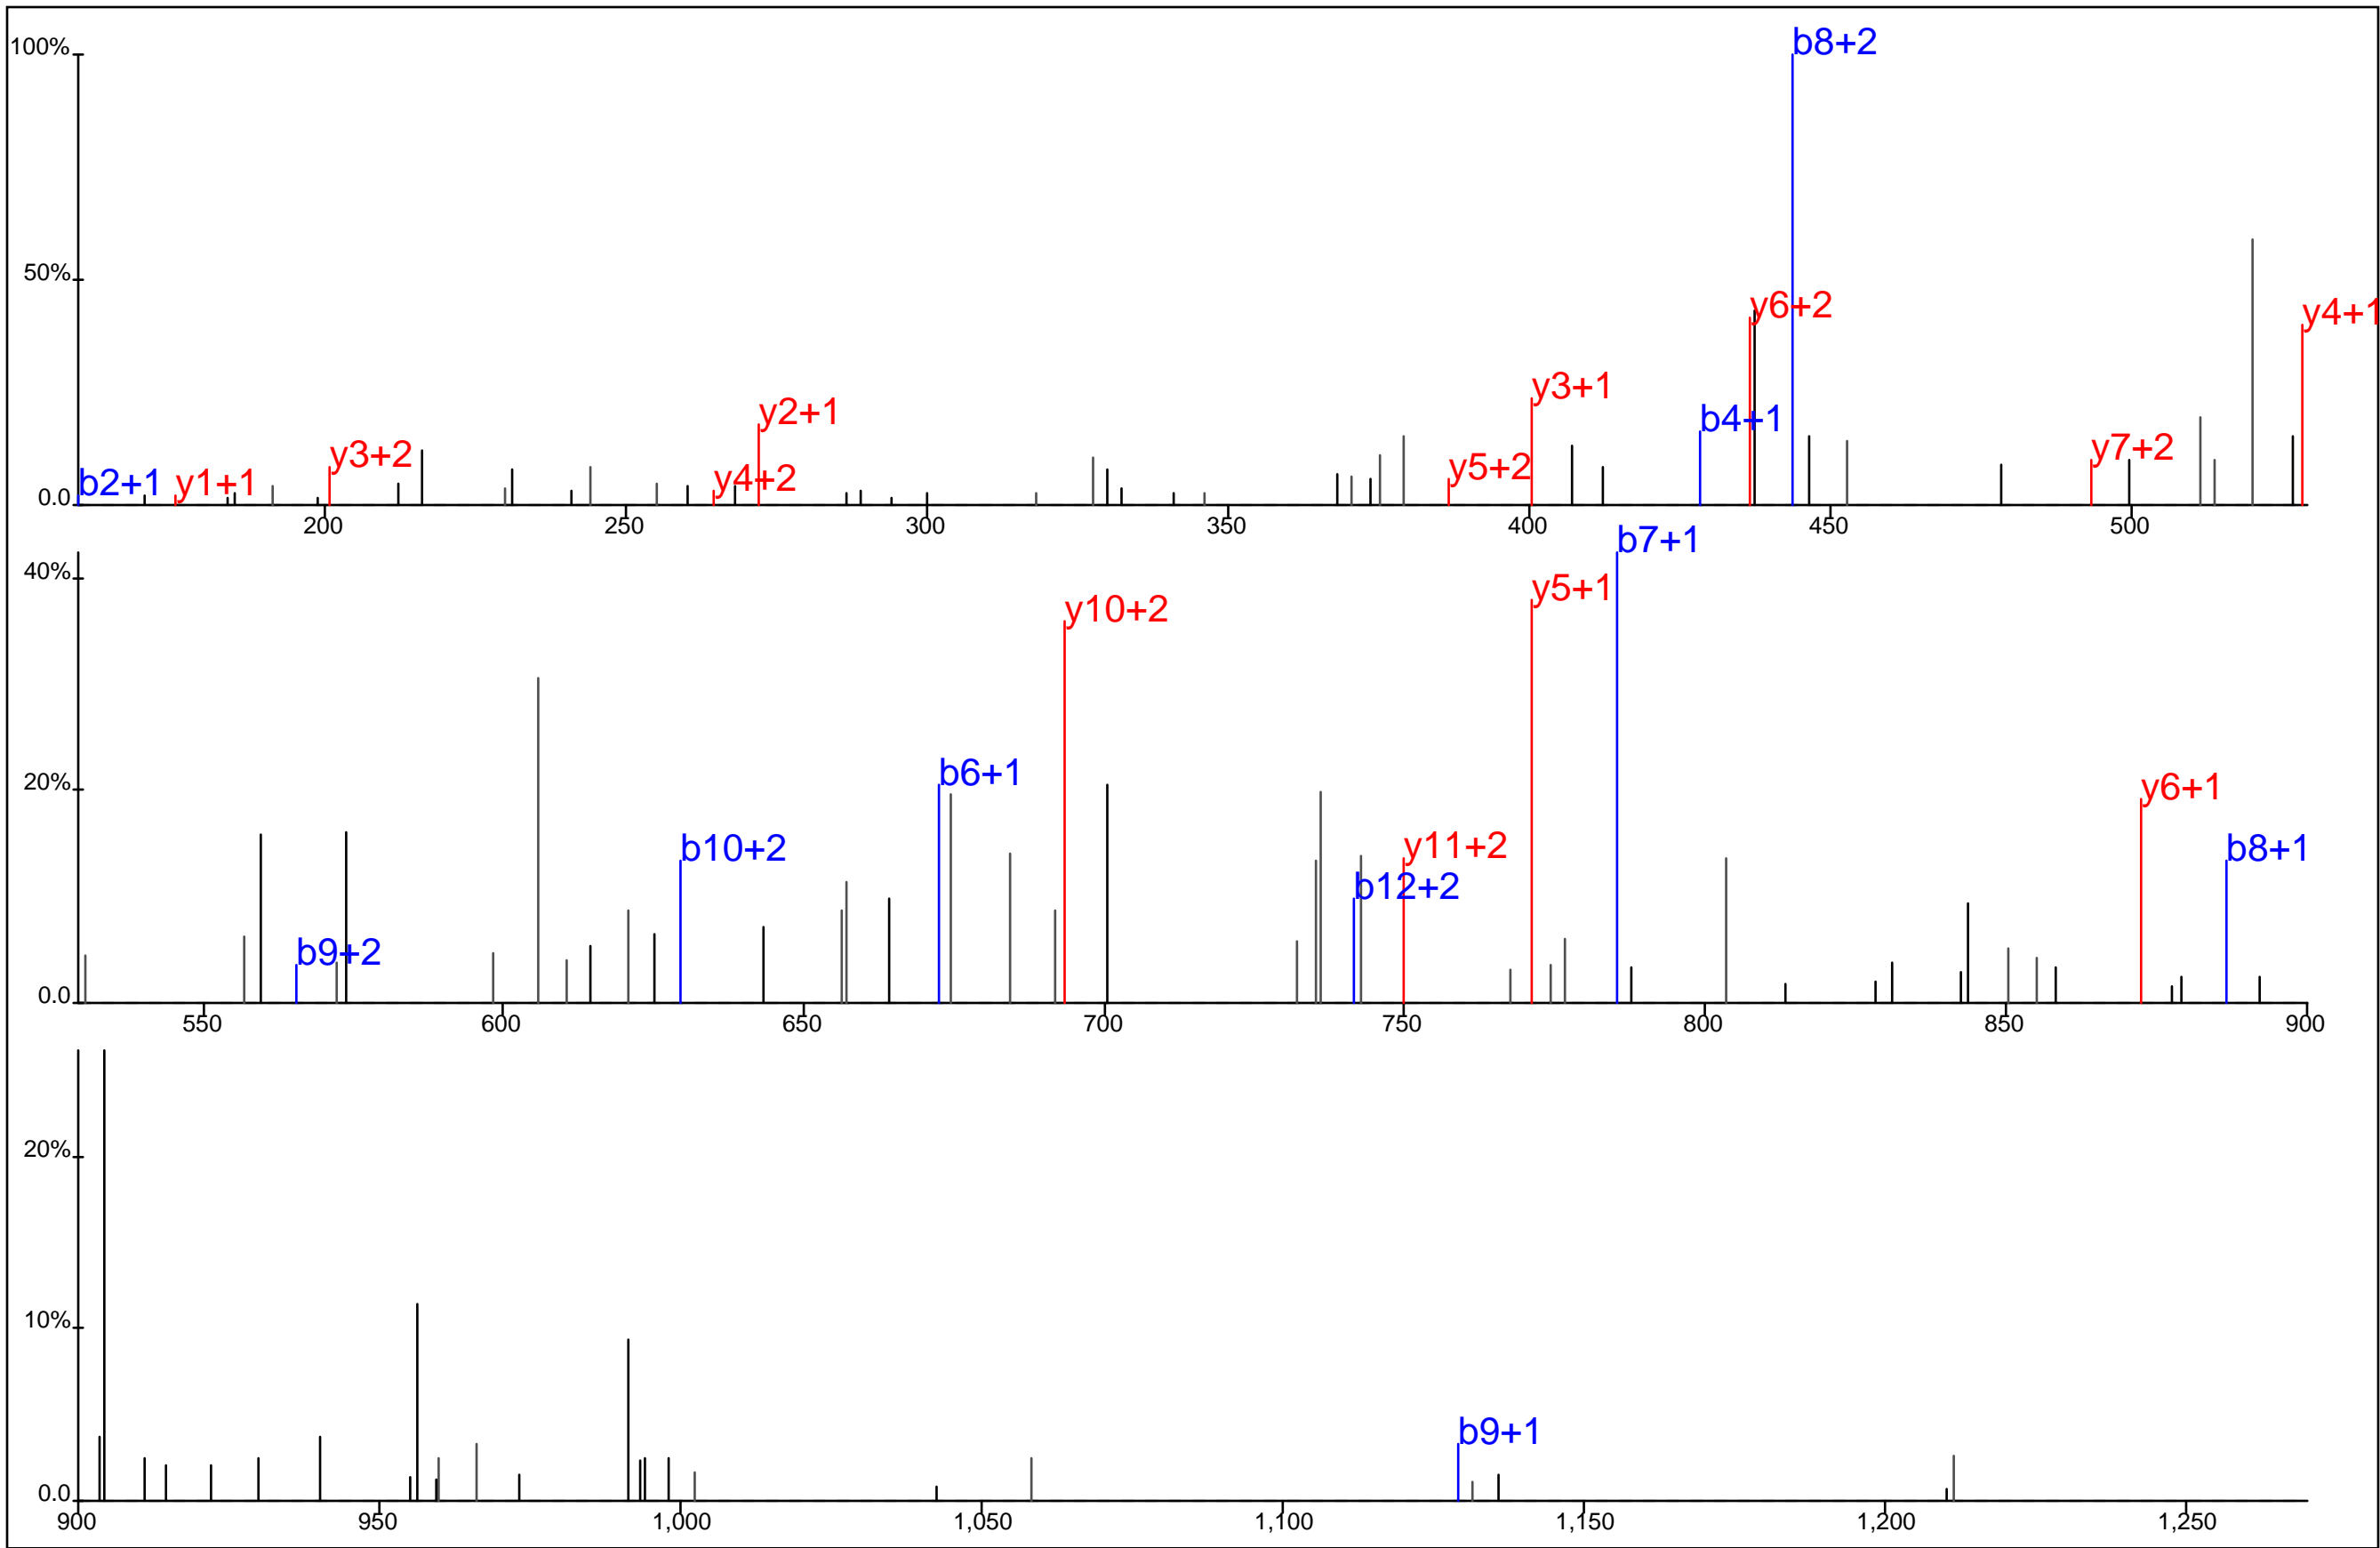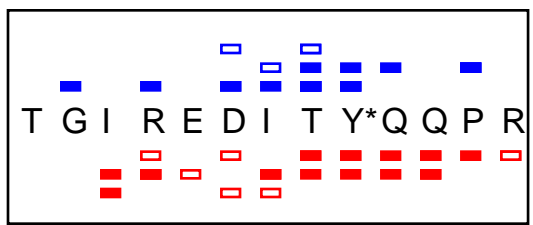

Protein Name: Prostate cancer antigen 1  
 gi Accession: 0  
 Precursor Mass: 552.9310+3  
 Delta Mass: 2.567 ppm  
 XCorr: 20.54



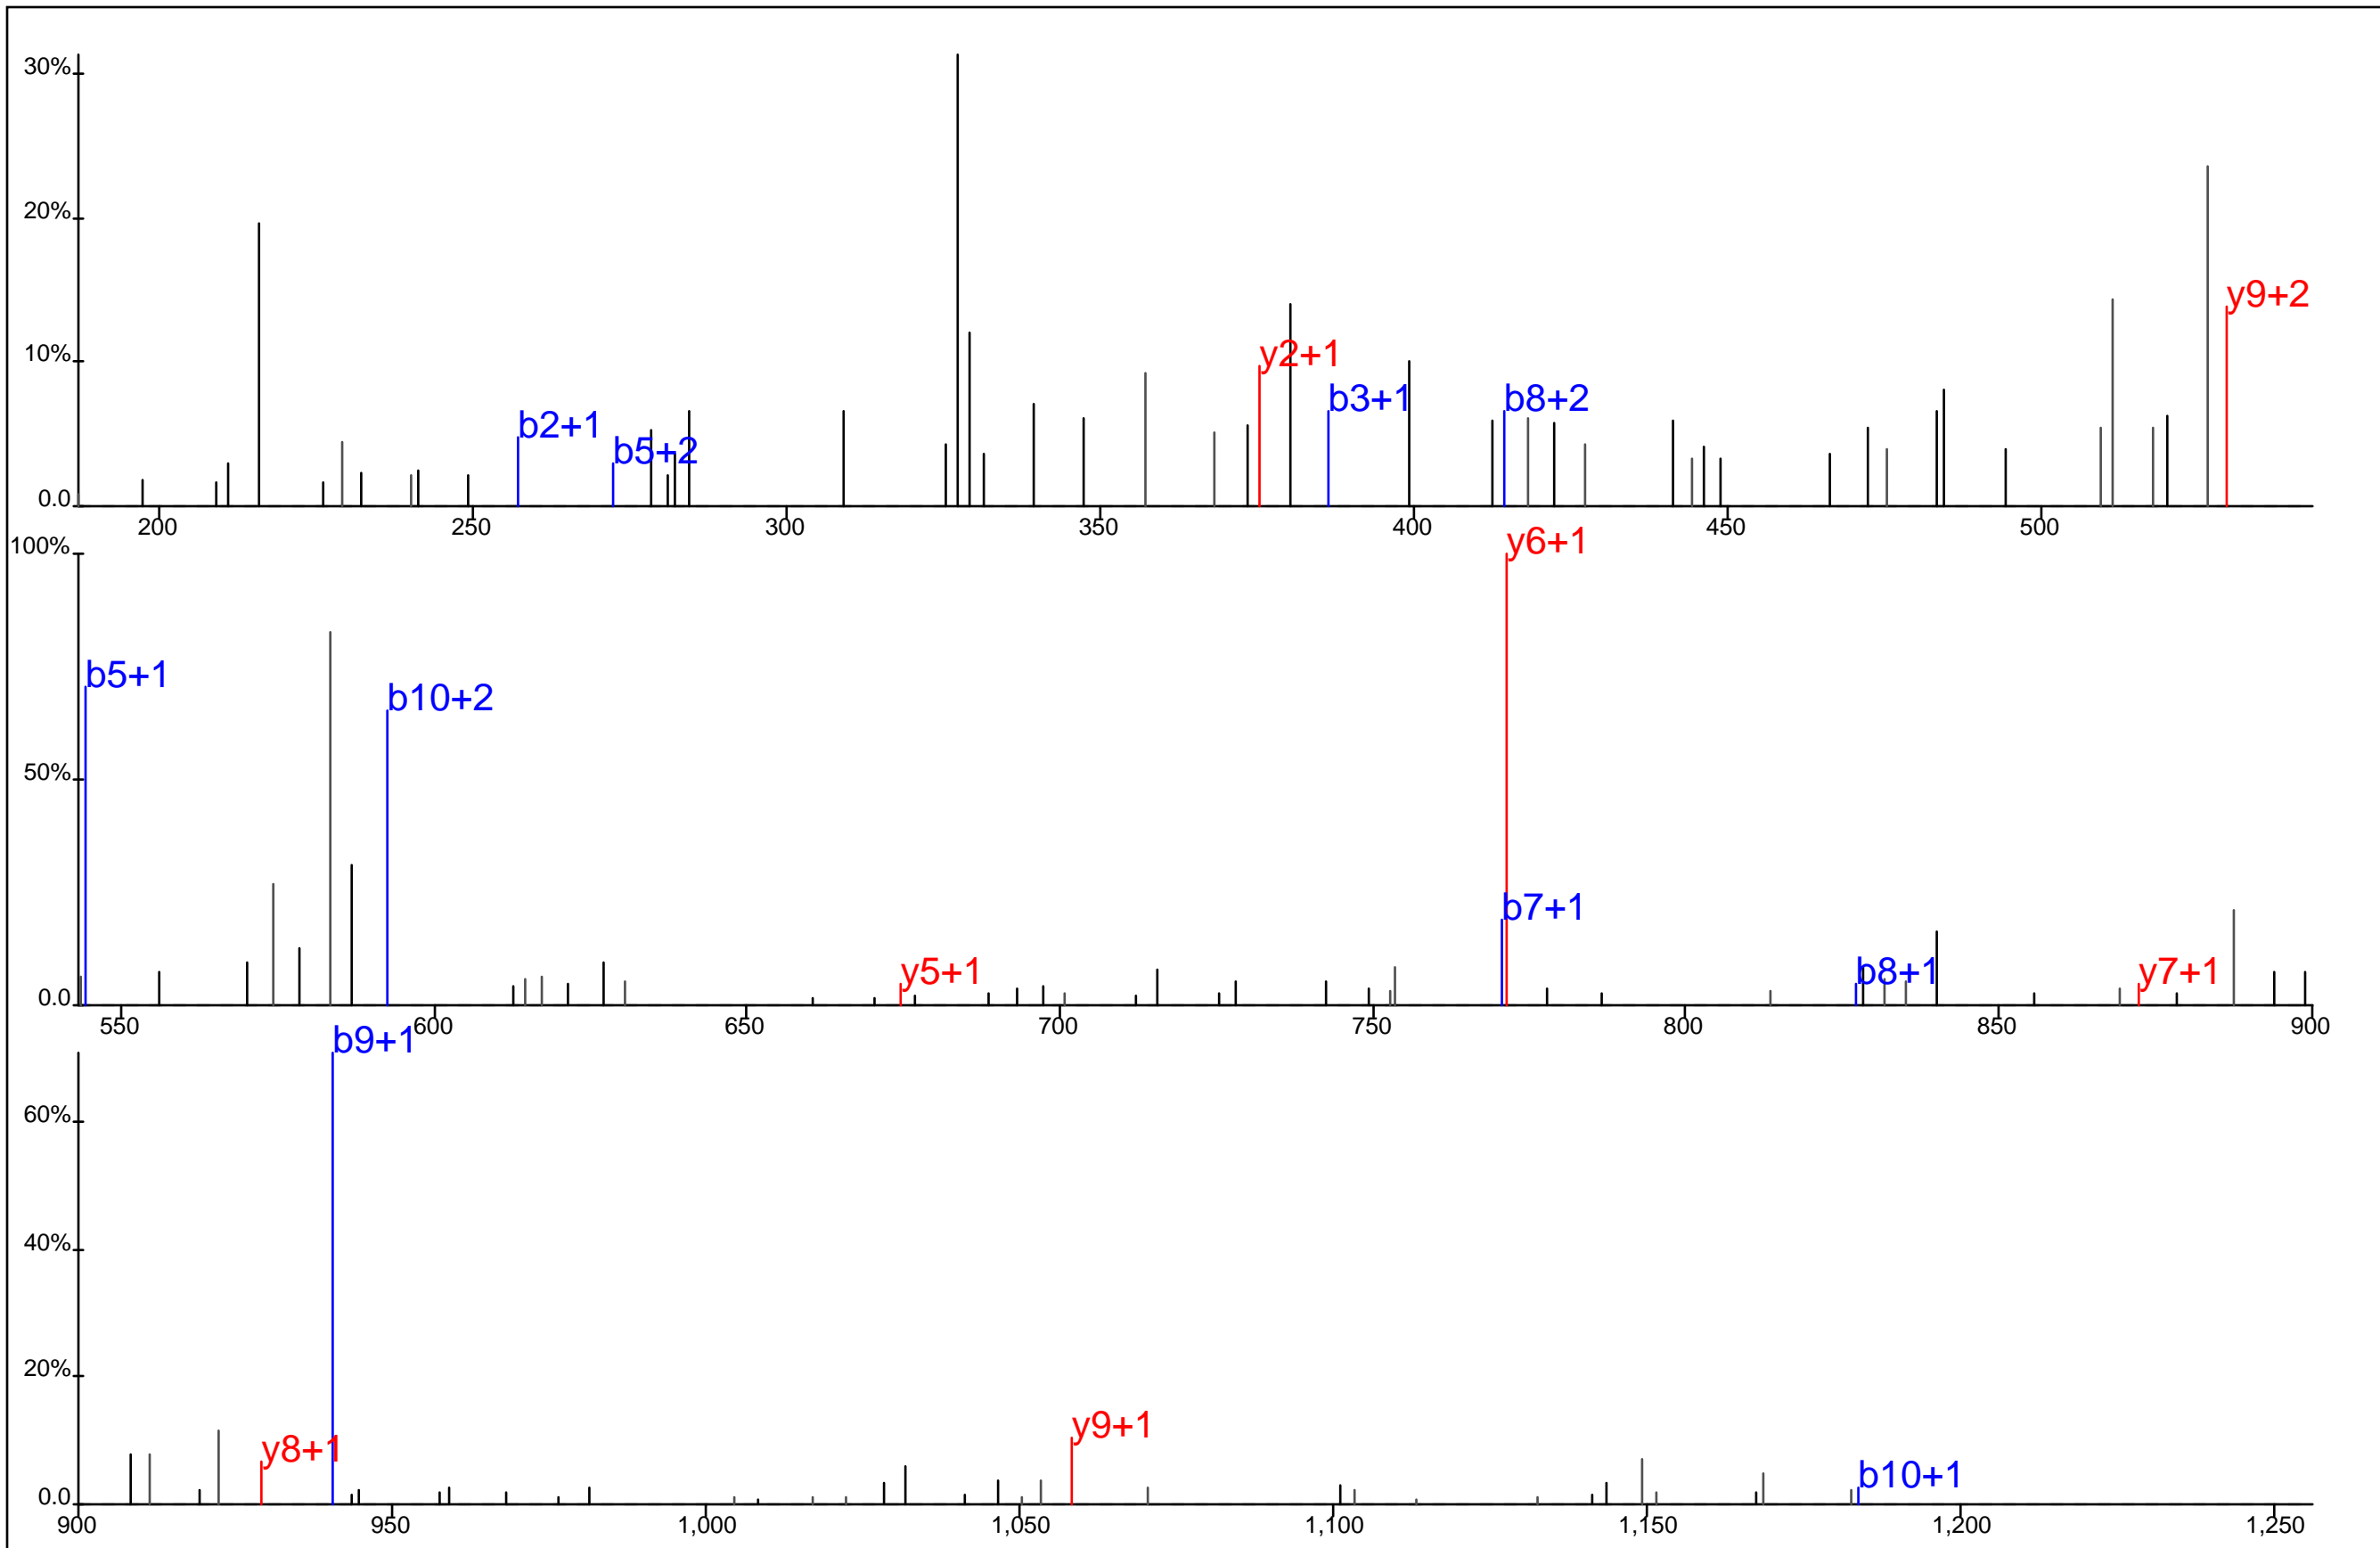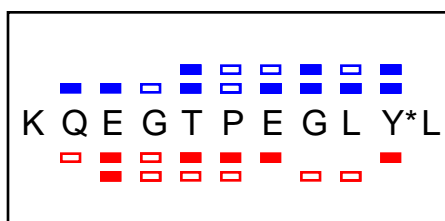

Protein Name: Proteasome 26S subunit, ATPase 1  
 gi Accession: 0  
 Precursor Mass: 657.8031+2  
 Delta Mass: 0.931 ppm  
 XCorr: 21.01





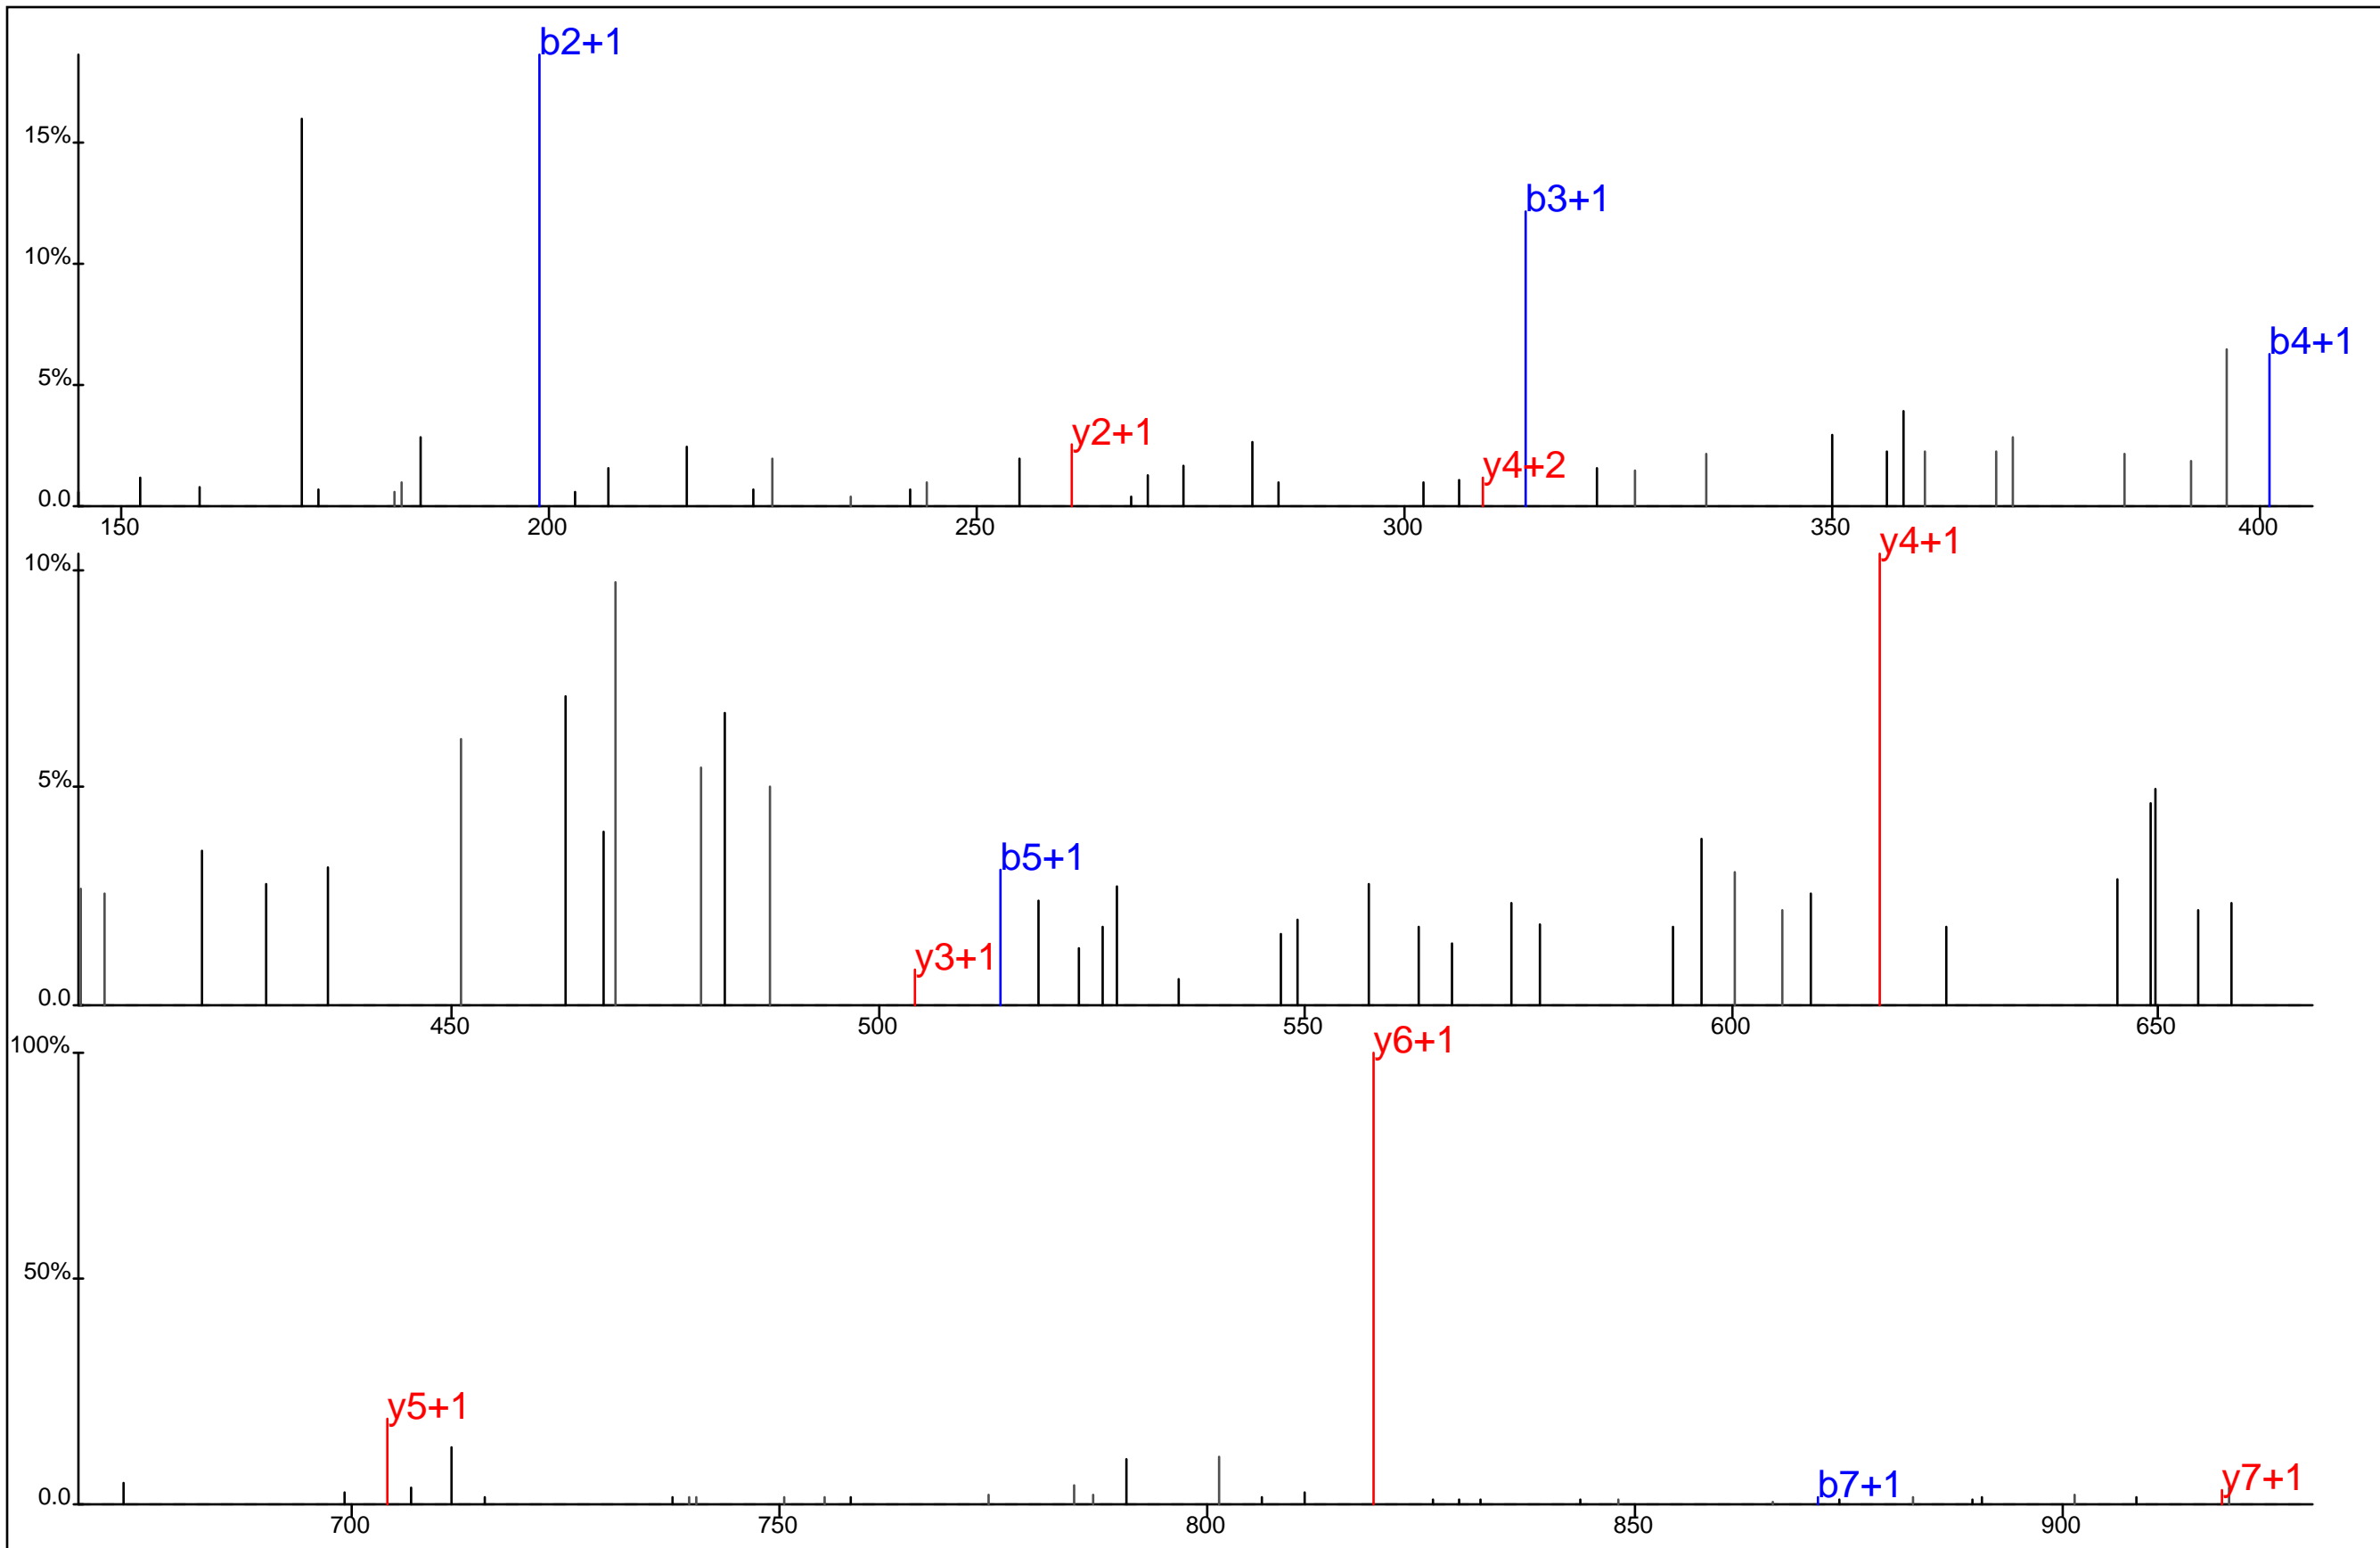

■ ■ ■ ■ ■ ■  
 V V D S L Y\* N K  
□ □ □ □ □ □

Protein Name: Proteasome 26S subunit, non-ATPase, 11  
 gi Accession: 0  
 Precursor Mass: 509.2363+2  
 Delta Mass: 0.016 ppm  
 XCorr: 23.93

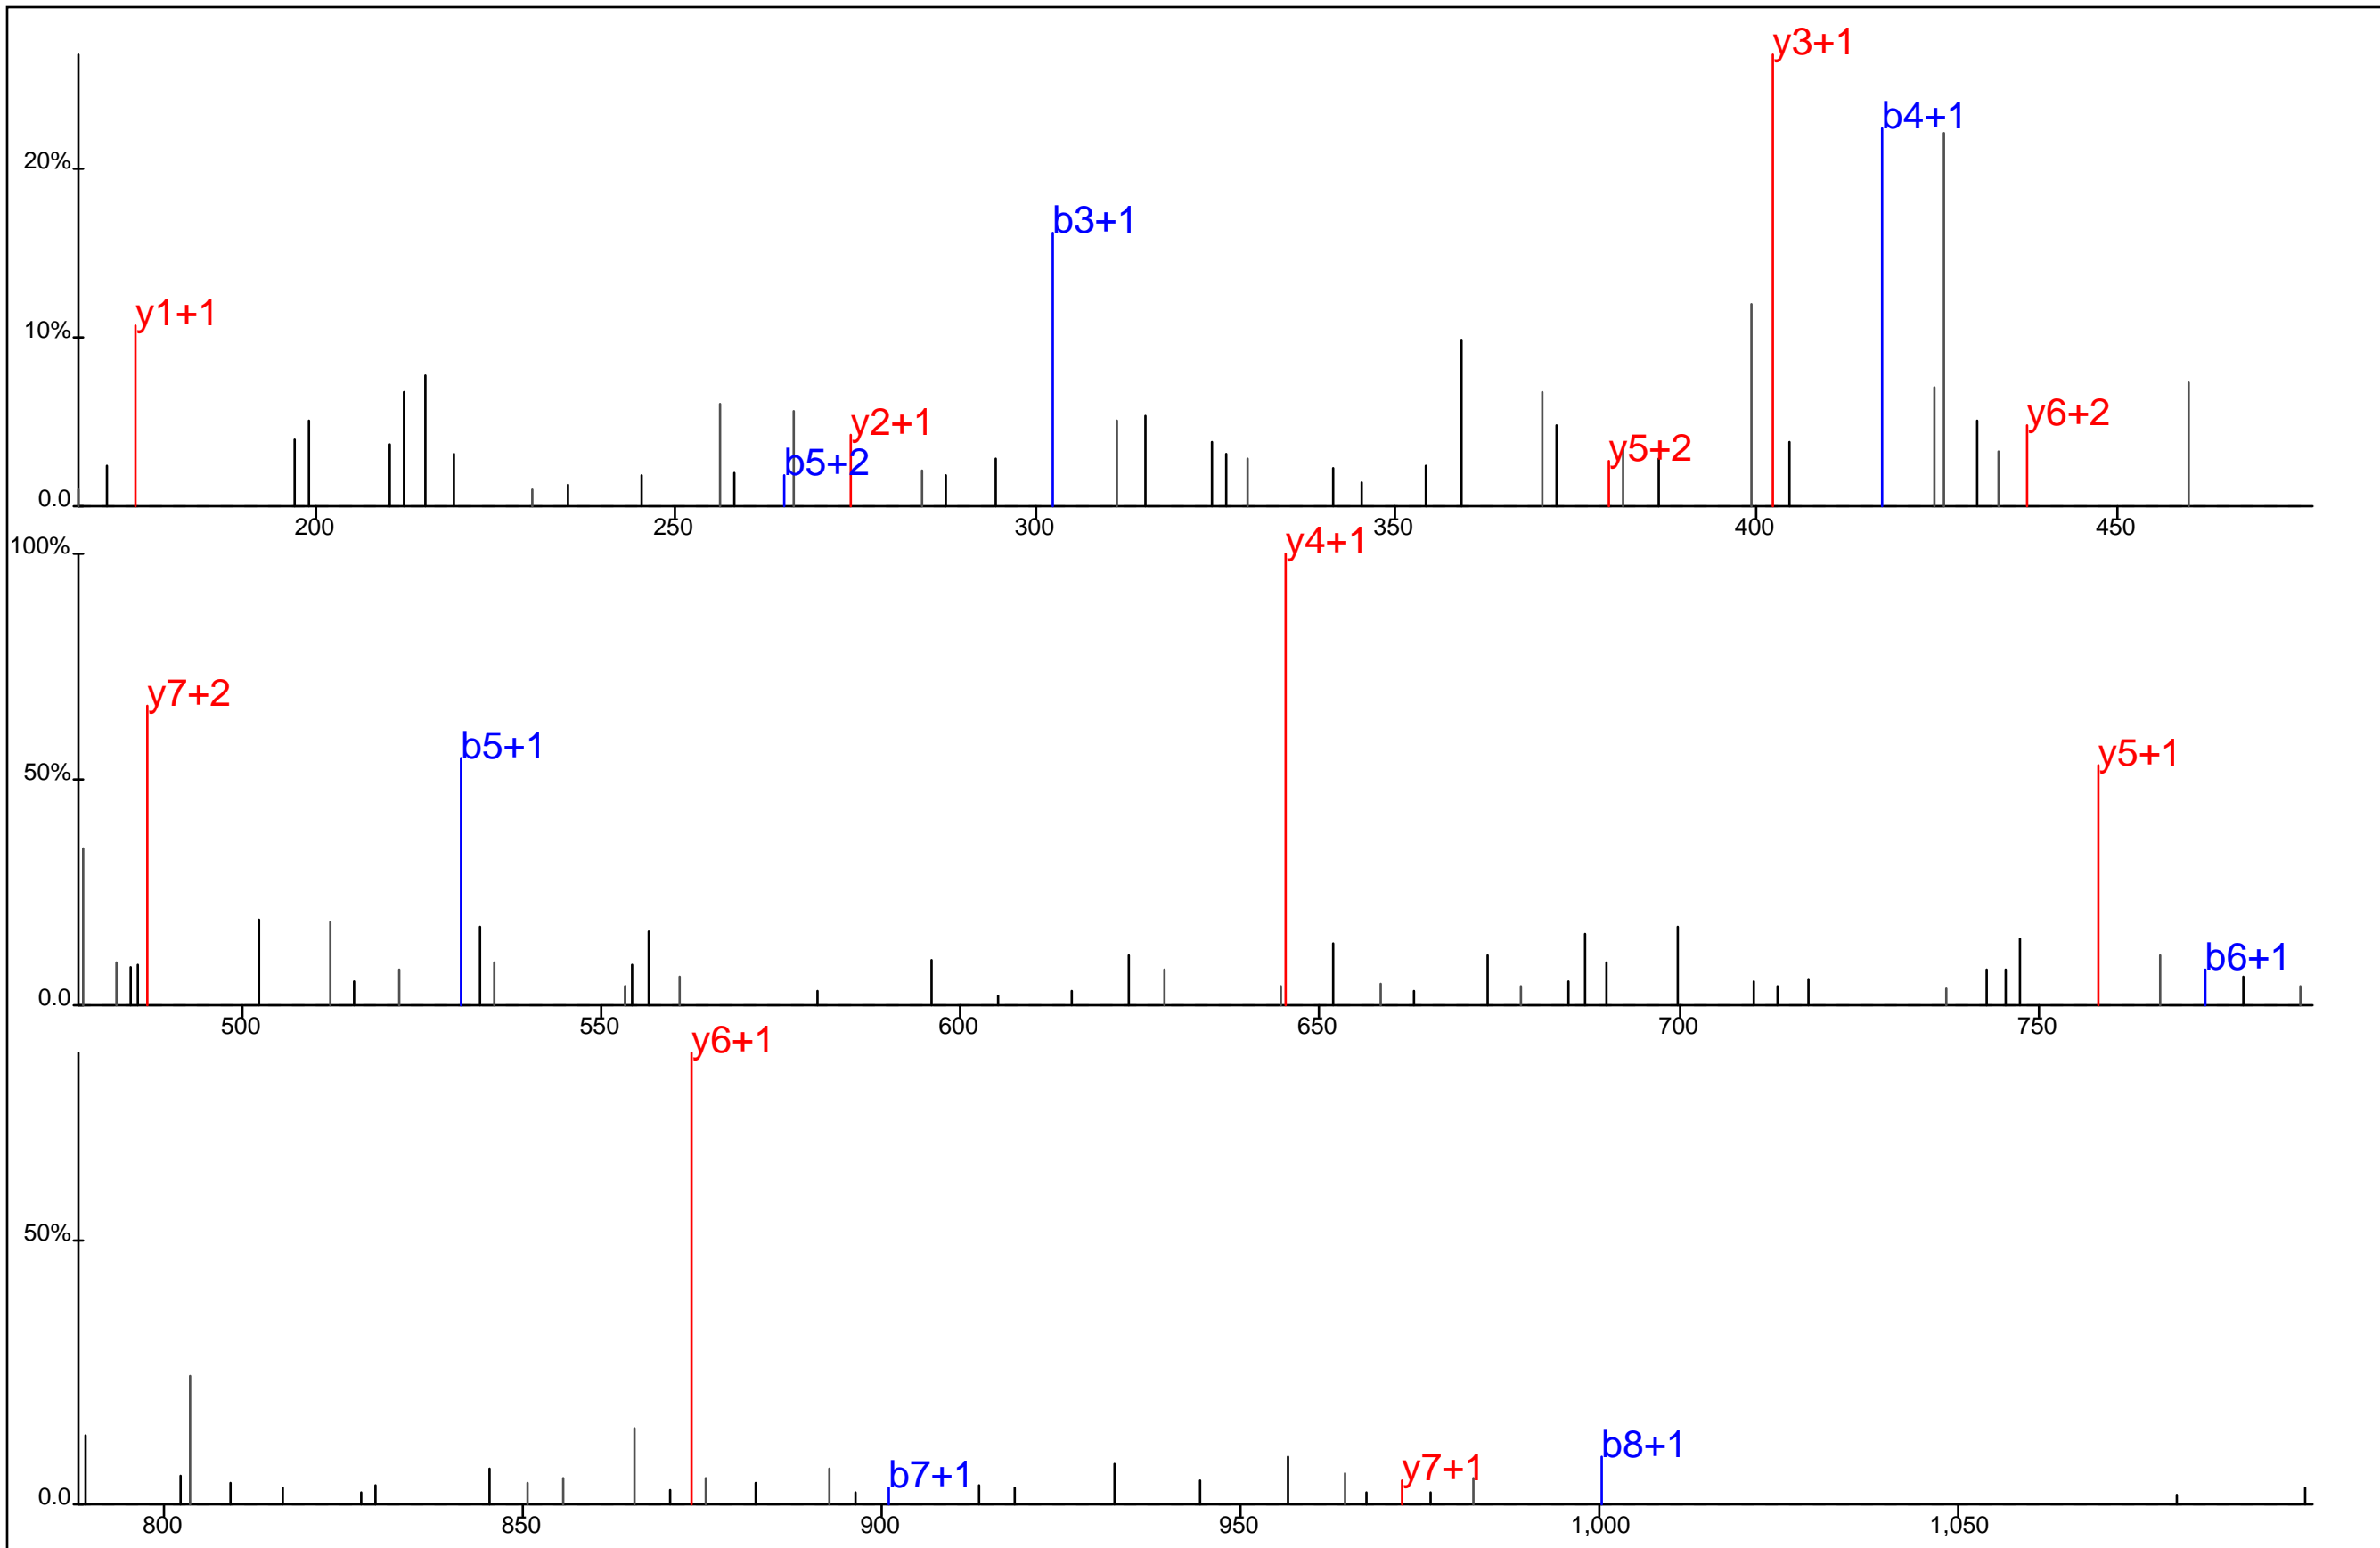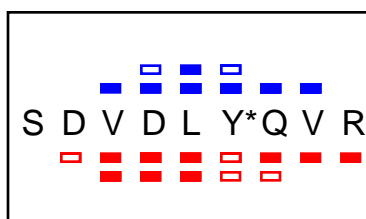

Protein Name: Proteasome 26S subunit, non-ATPase, 9  
 gi Accession: 0  
 Precursor Mass: 587.7604+2  
 Delta Mass: 0.439 ppm  
 XCorr: 35.56

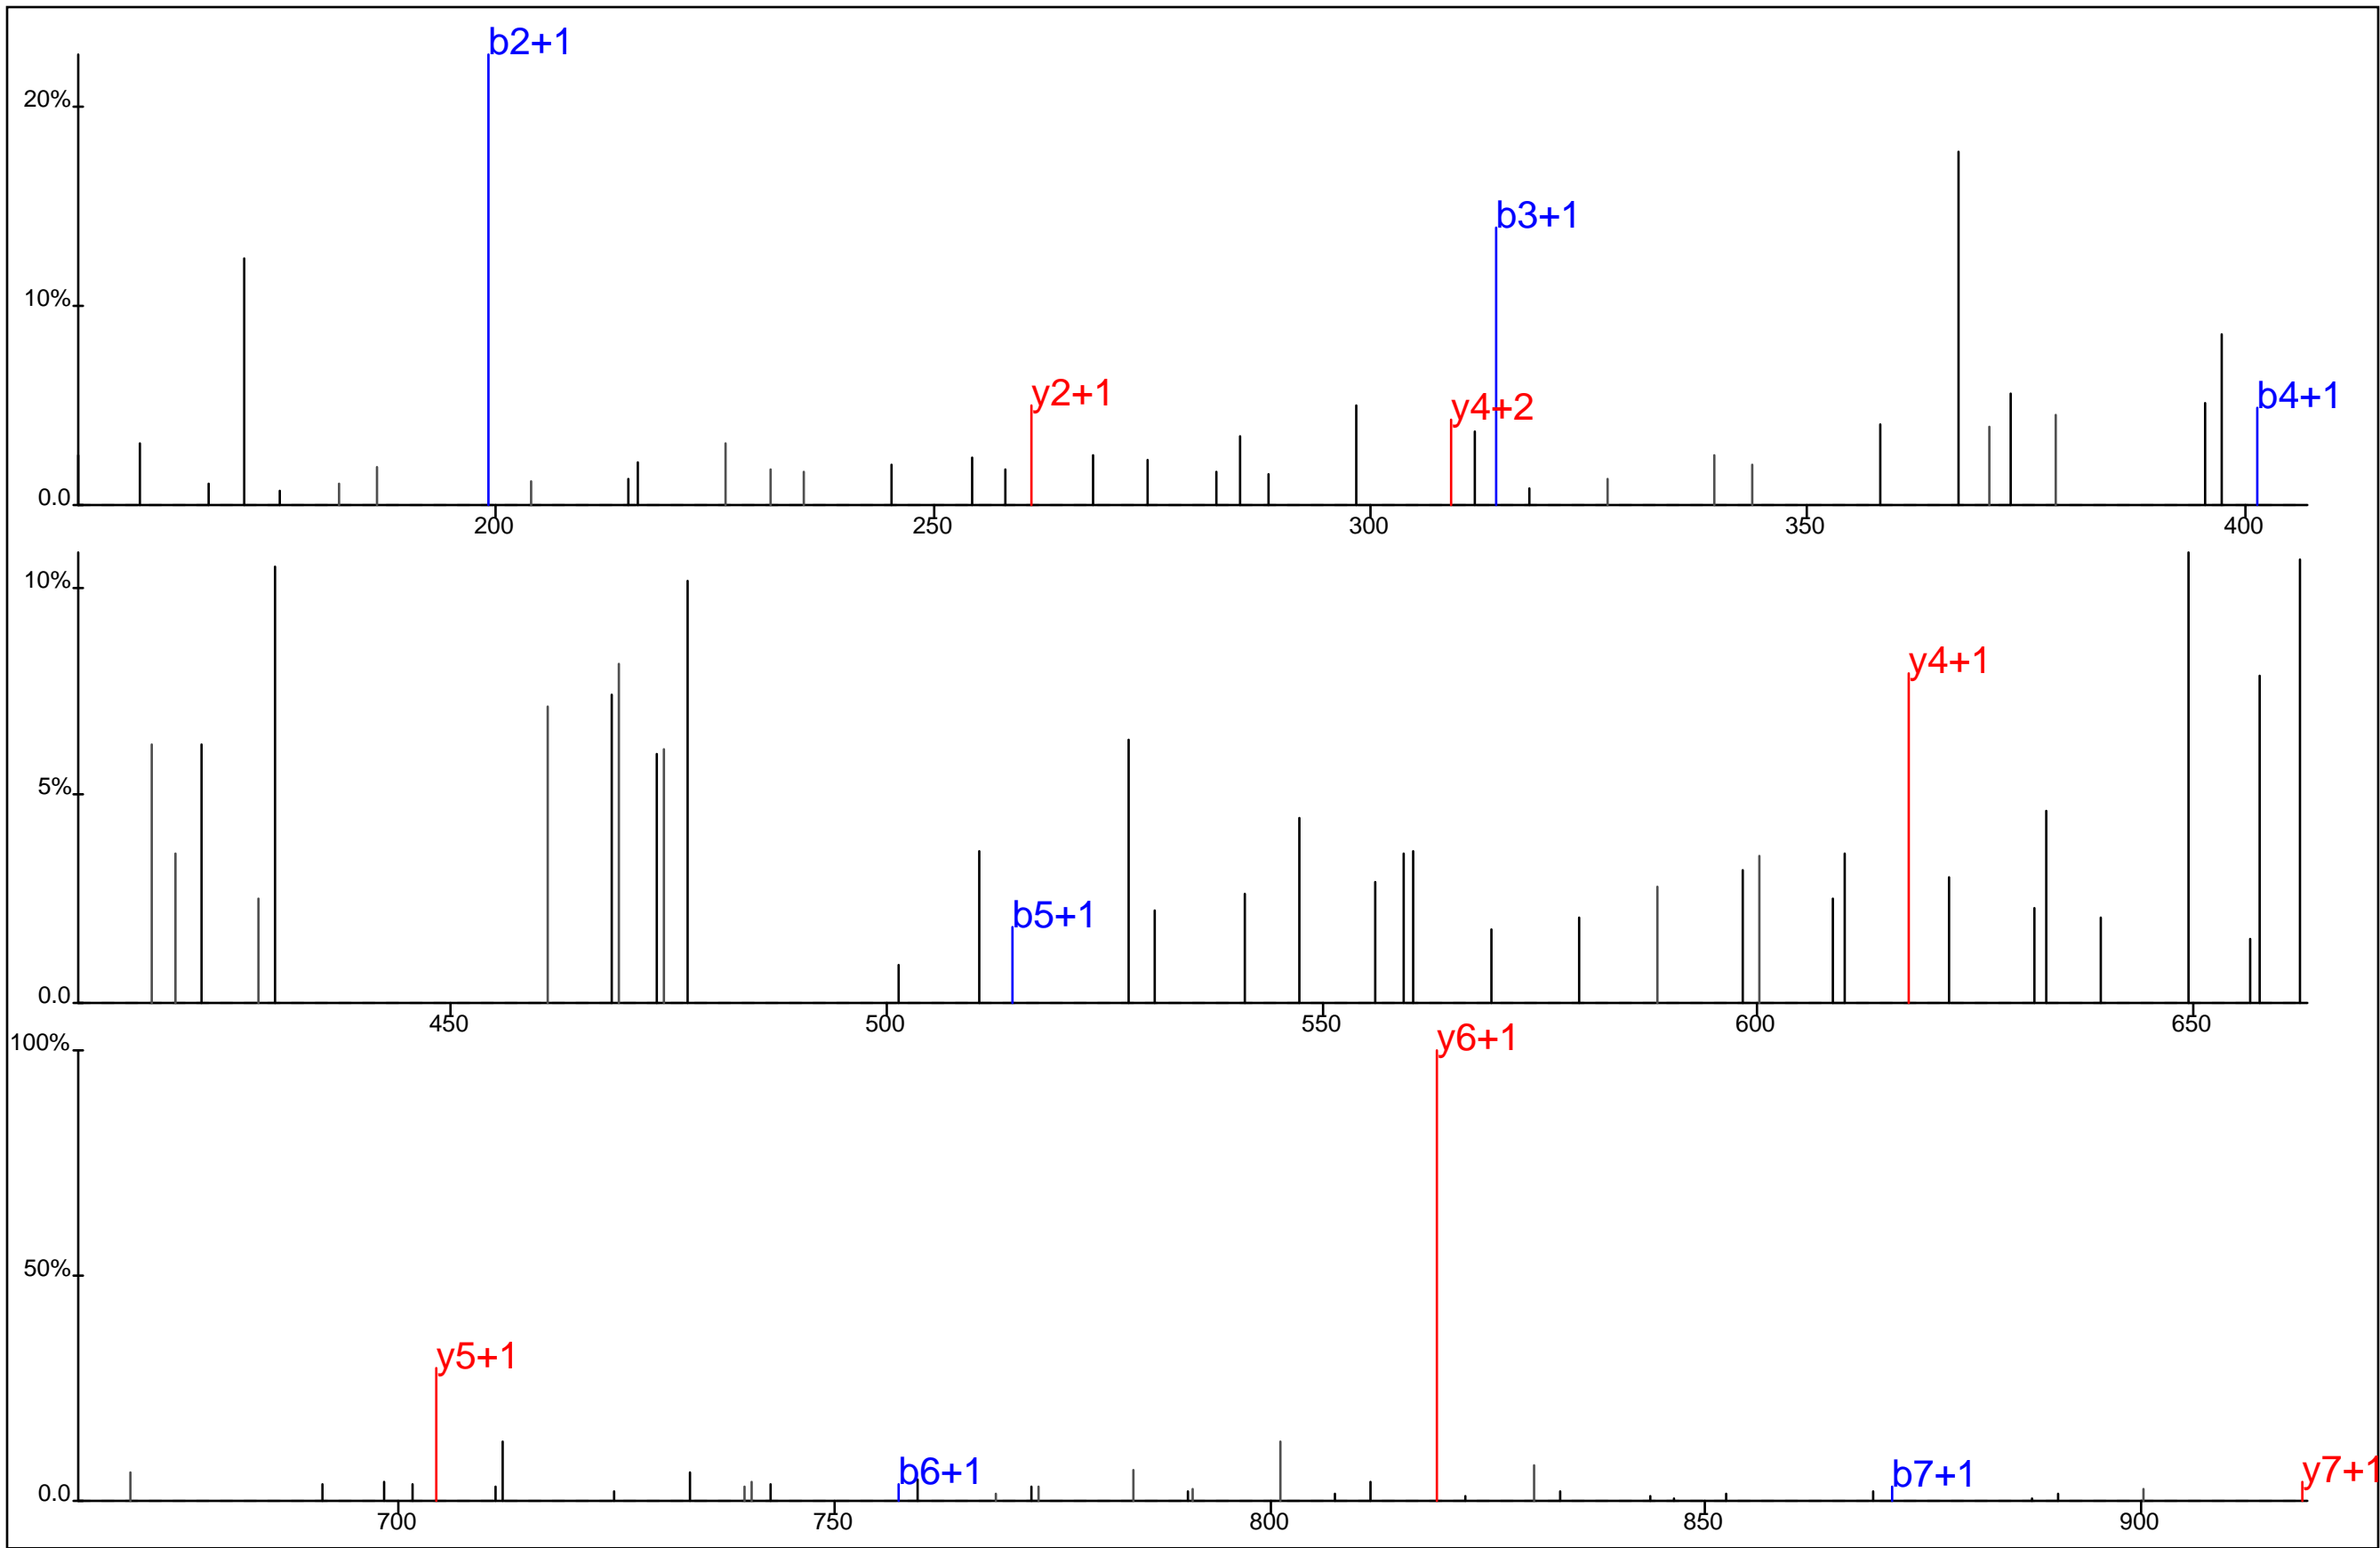

■ ■ ■ ■ ■ ■ ■ ■  
 V V D S L Y\* N K  
■ ■ ■ ■ ■ ■ ■ ■

Protein Name: Proteasome 26S subunit, non-ATPase, 11  
 gi Accession: 0  
 Precursor Mass: 509.2371+2  
 Delta Mass: 1.635 ppm  
 XCorr: 20.1

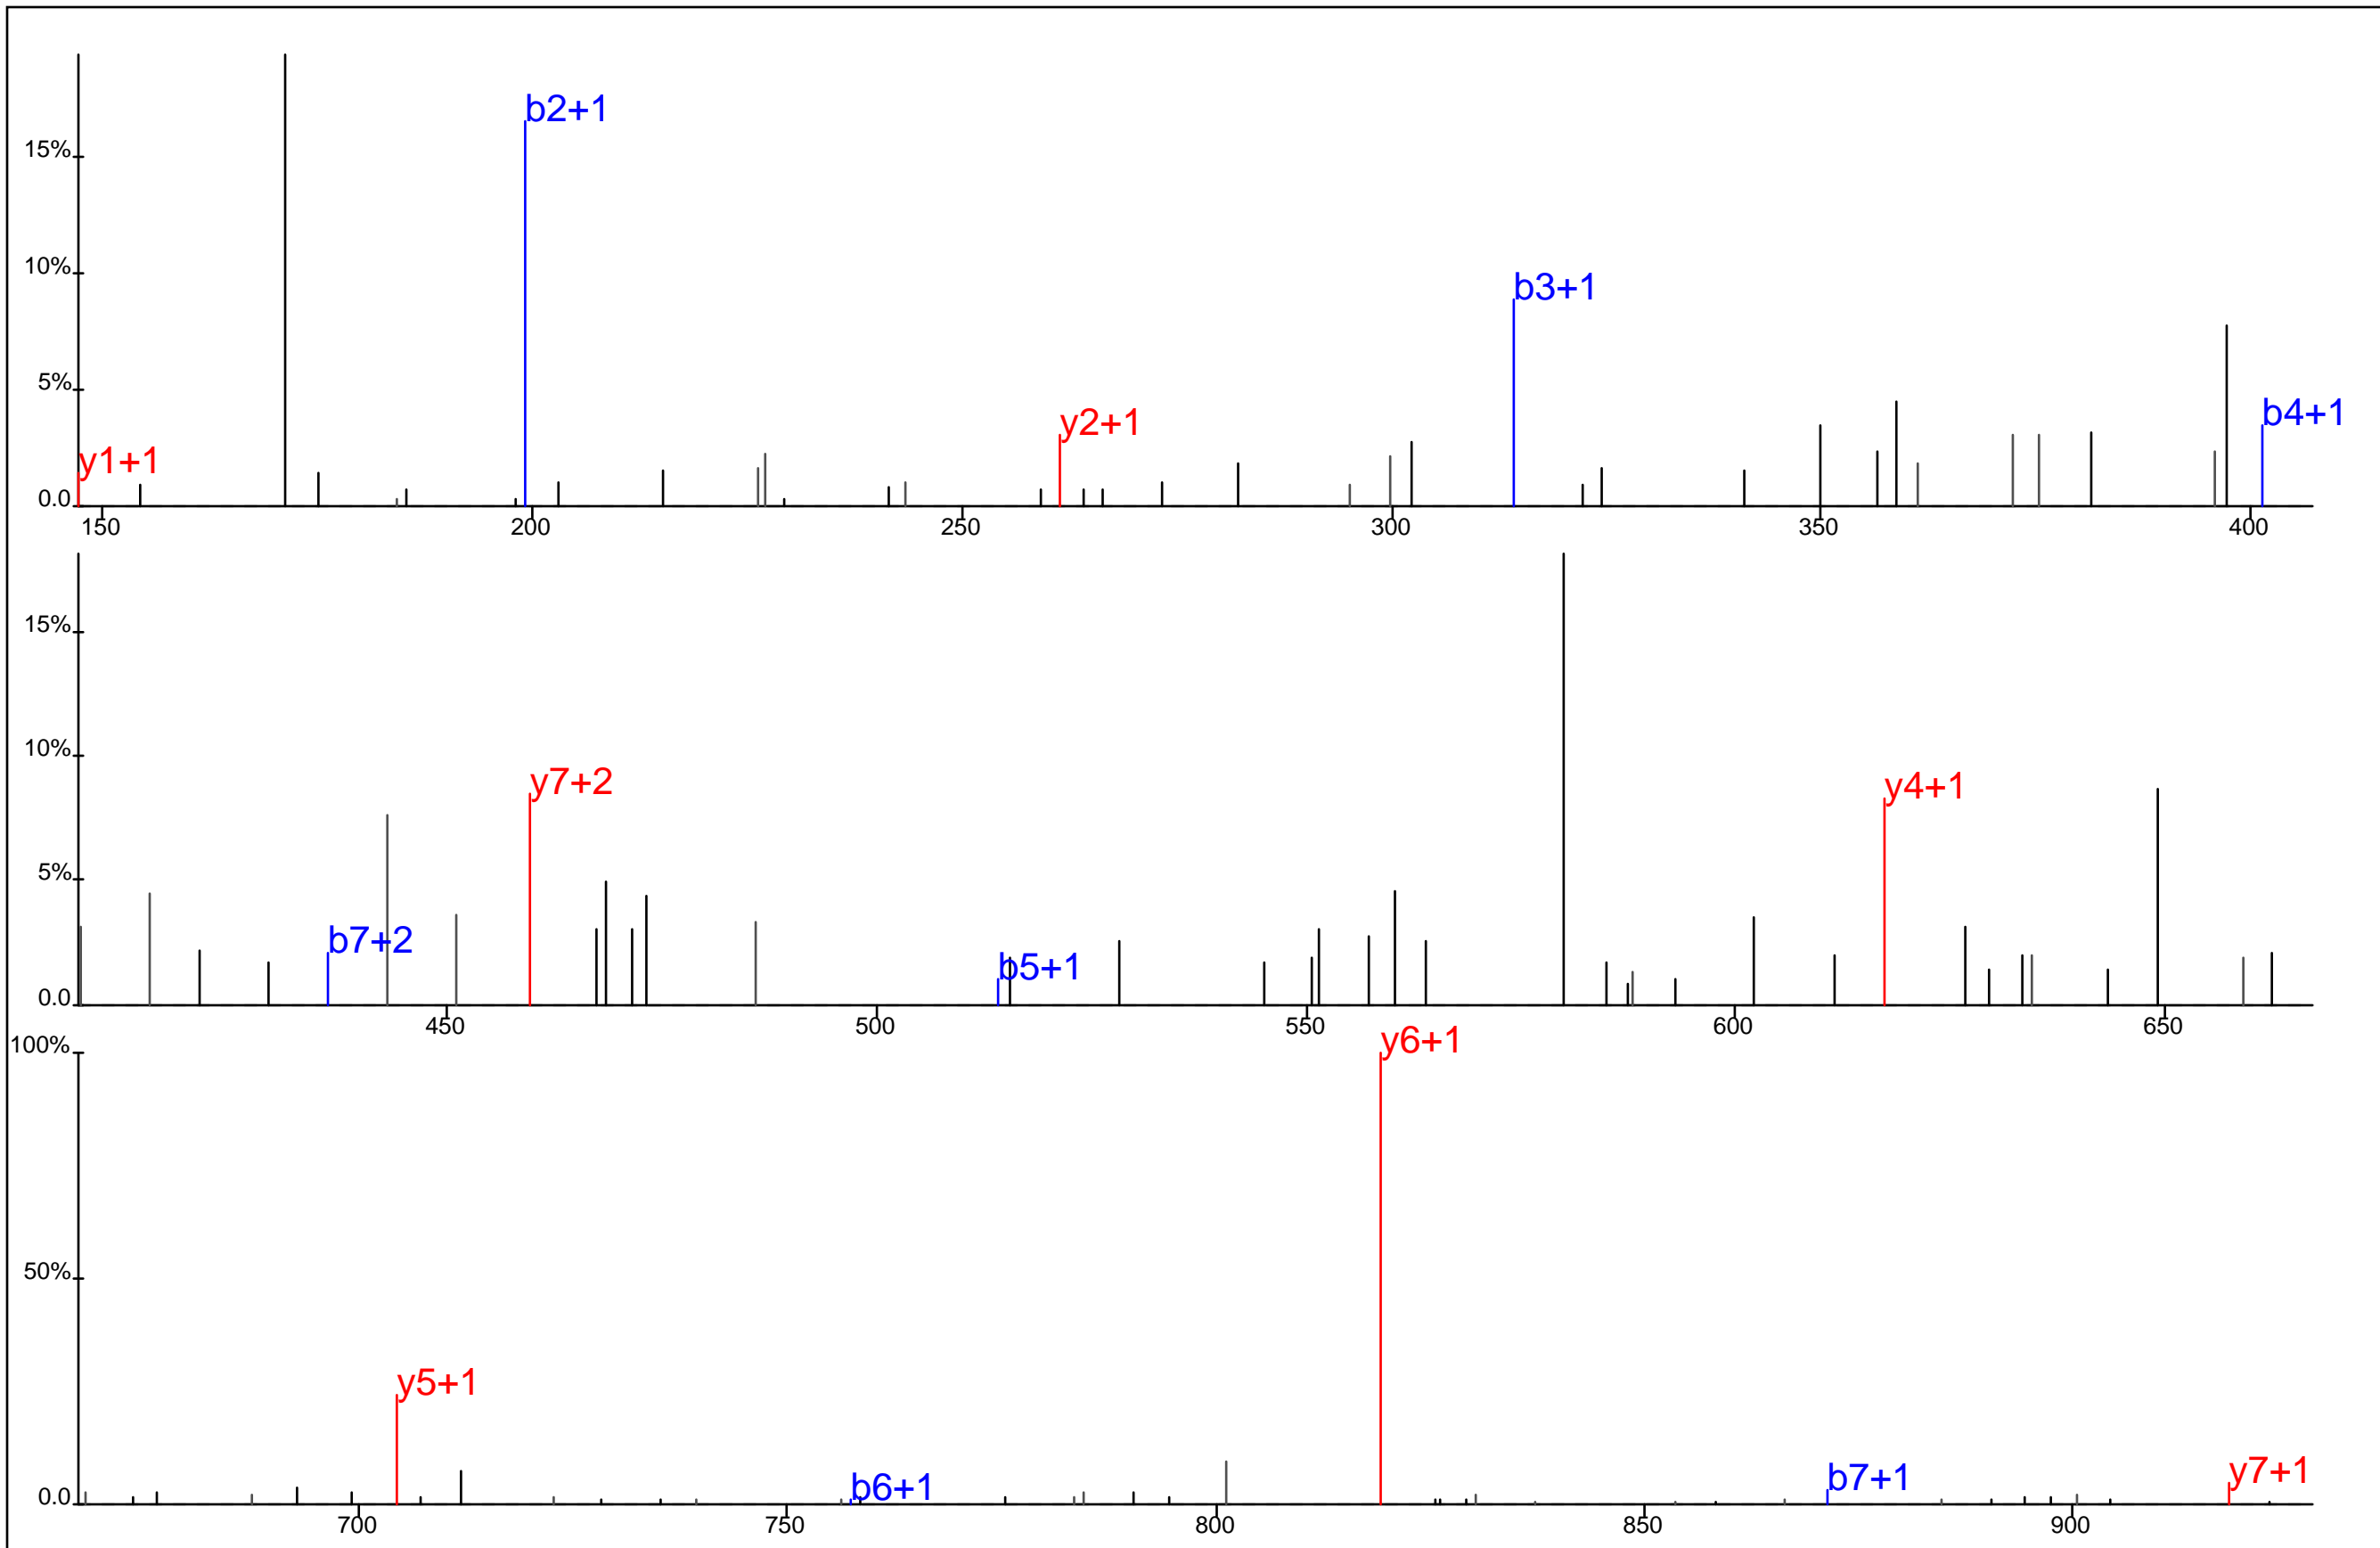

■ ■ ■ ■ ■ ■  
 V V D S L Y\* N K  
□ □ □ □ □ □

Protein Name: Proteasome 26S subunit, non-ATPase, 11  
 gi Accession: 0  
 Precursor Mass: 509.2353+2  
 Delta Mass: 1.844 ppm  
 XCorr: 30.52

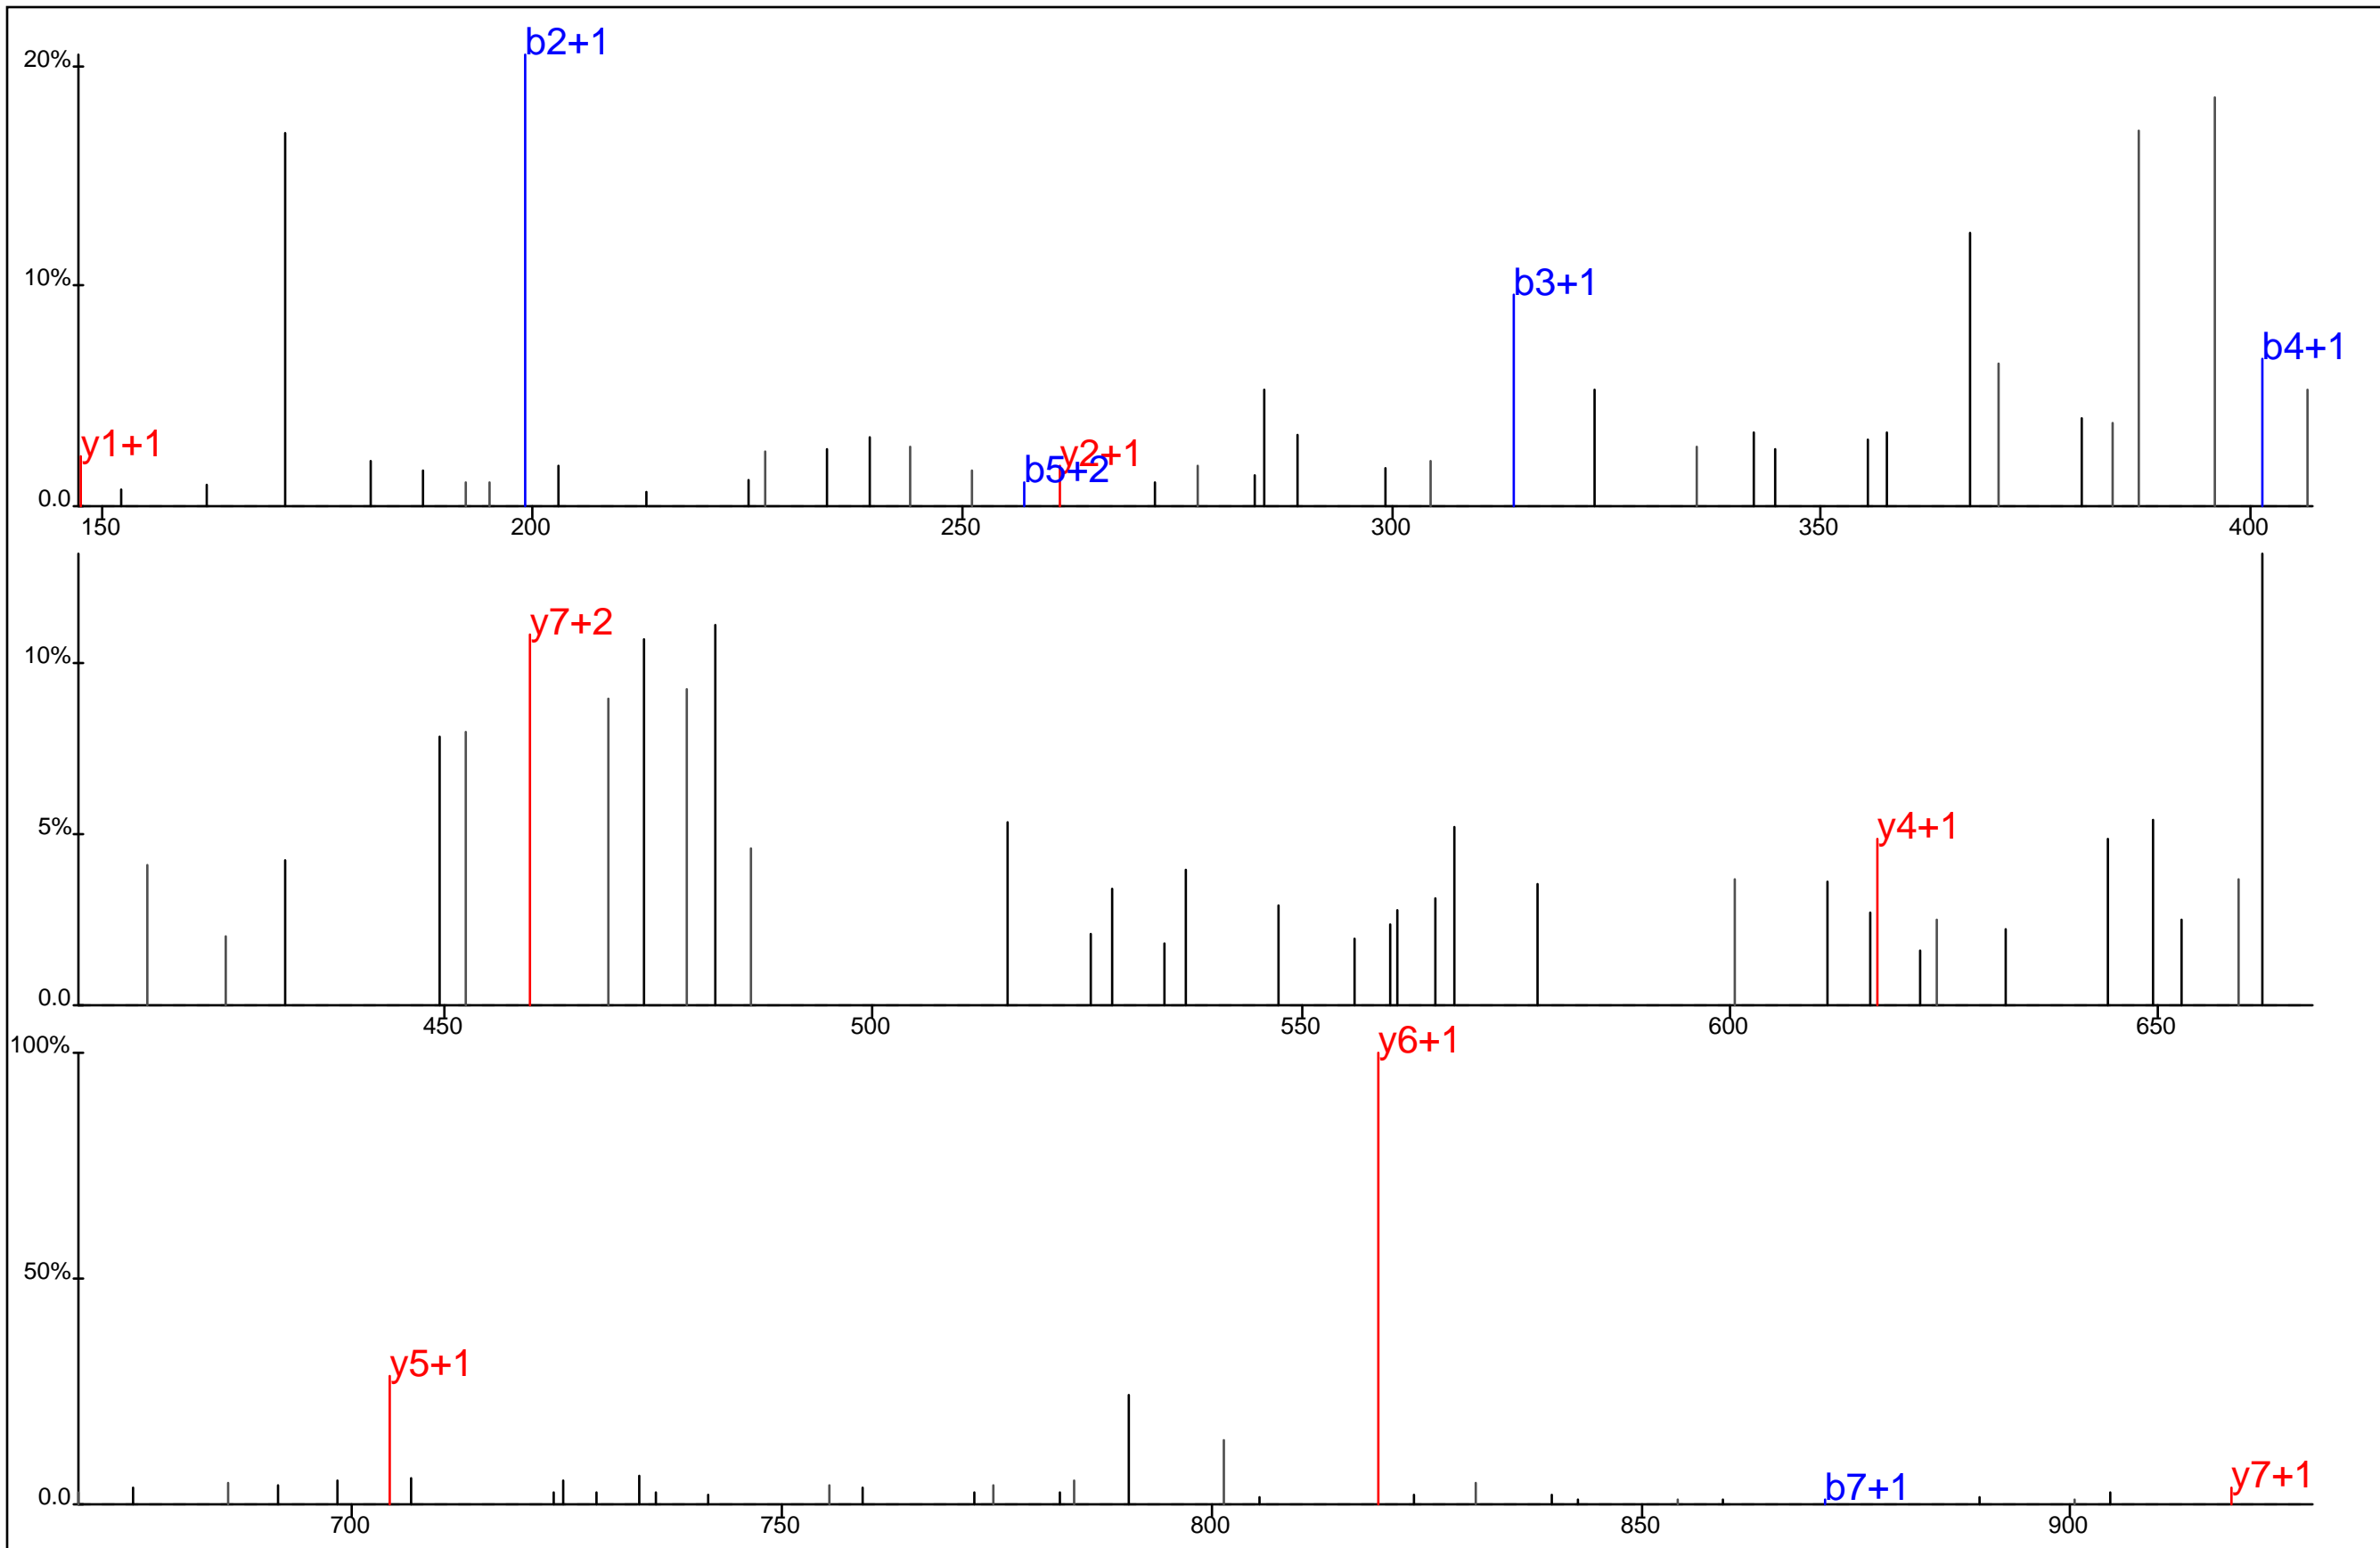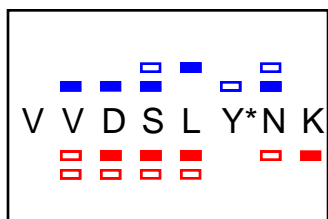

Protein Name: Proteasome 26S subunit, non-ATPase, 11  
 gi Accession: 0  
 Precursor Mass: 509.2364+2  
 Delta Mass: 0.197 ppm  
 XCorr: 22.95



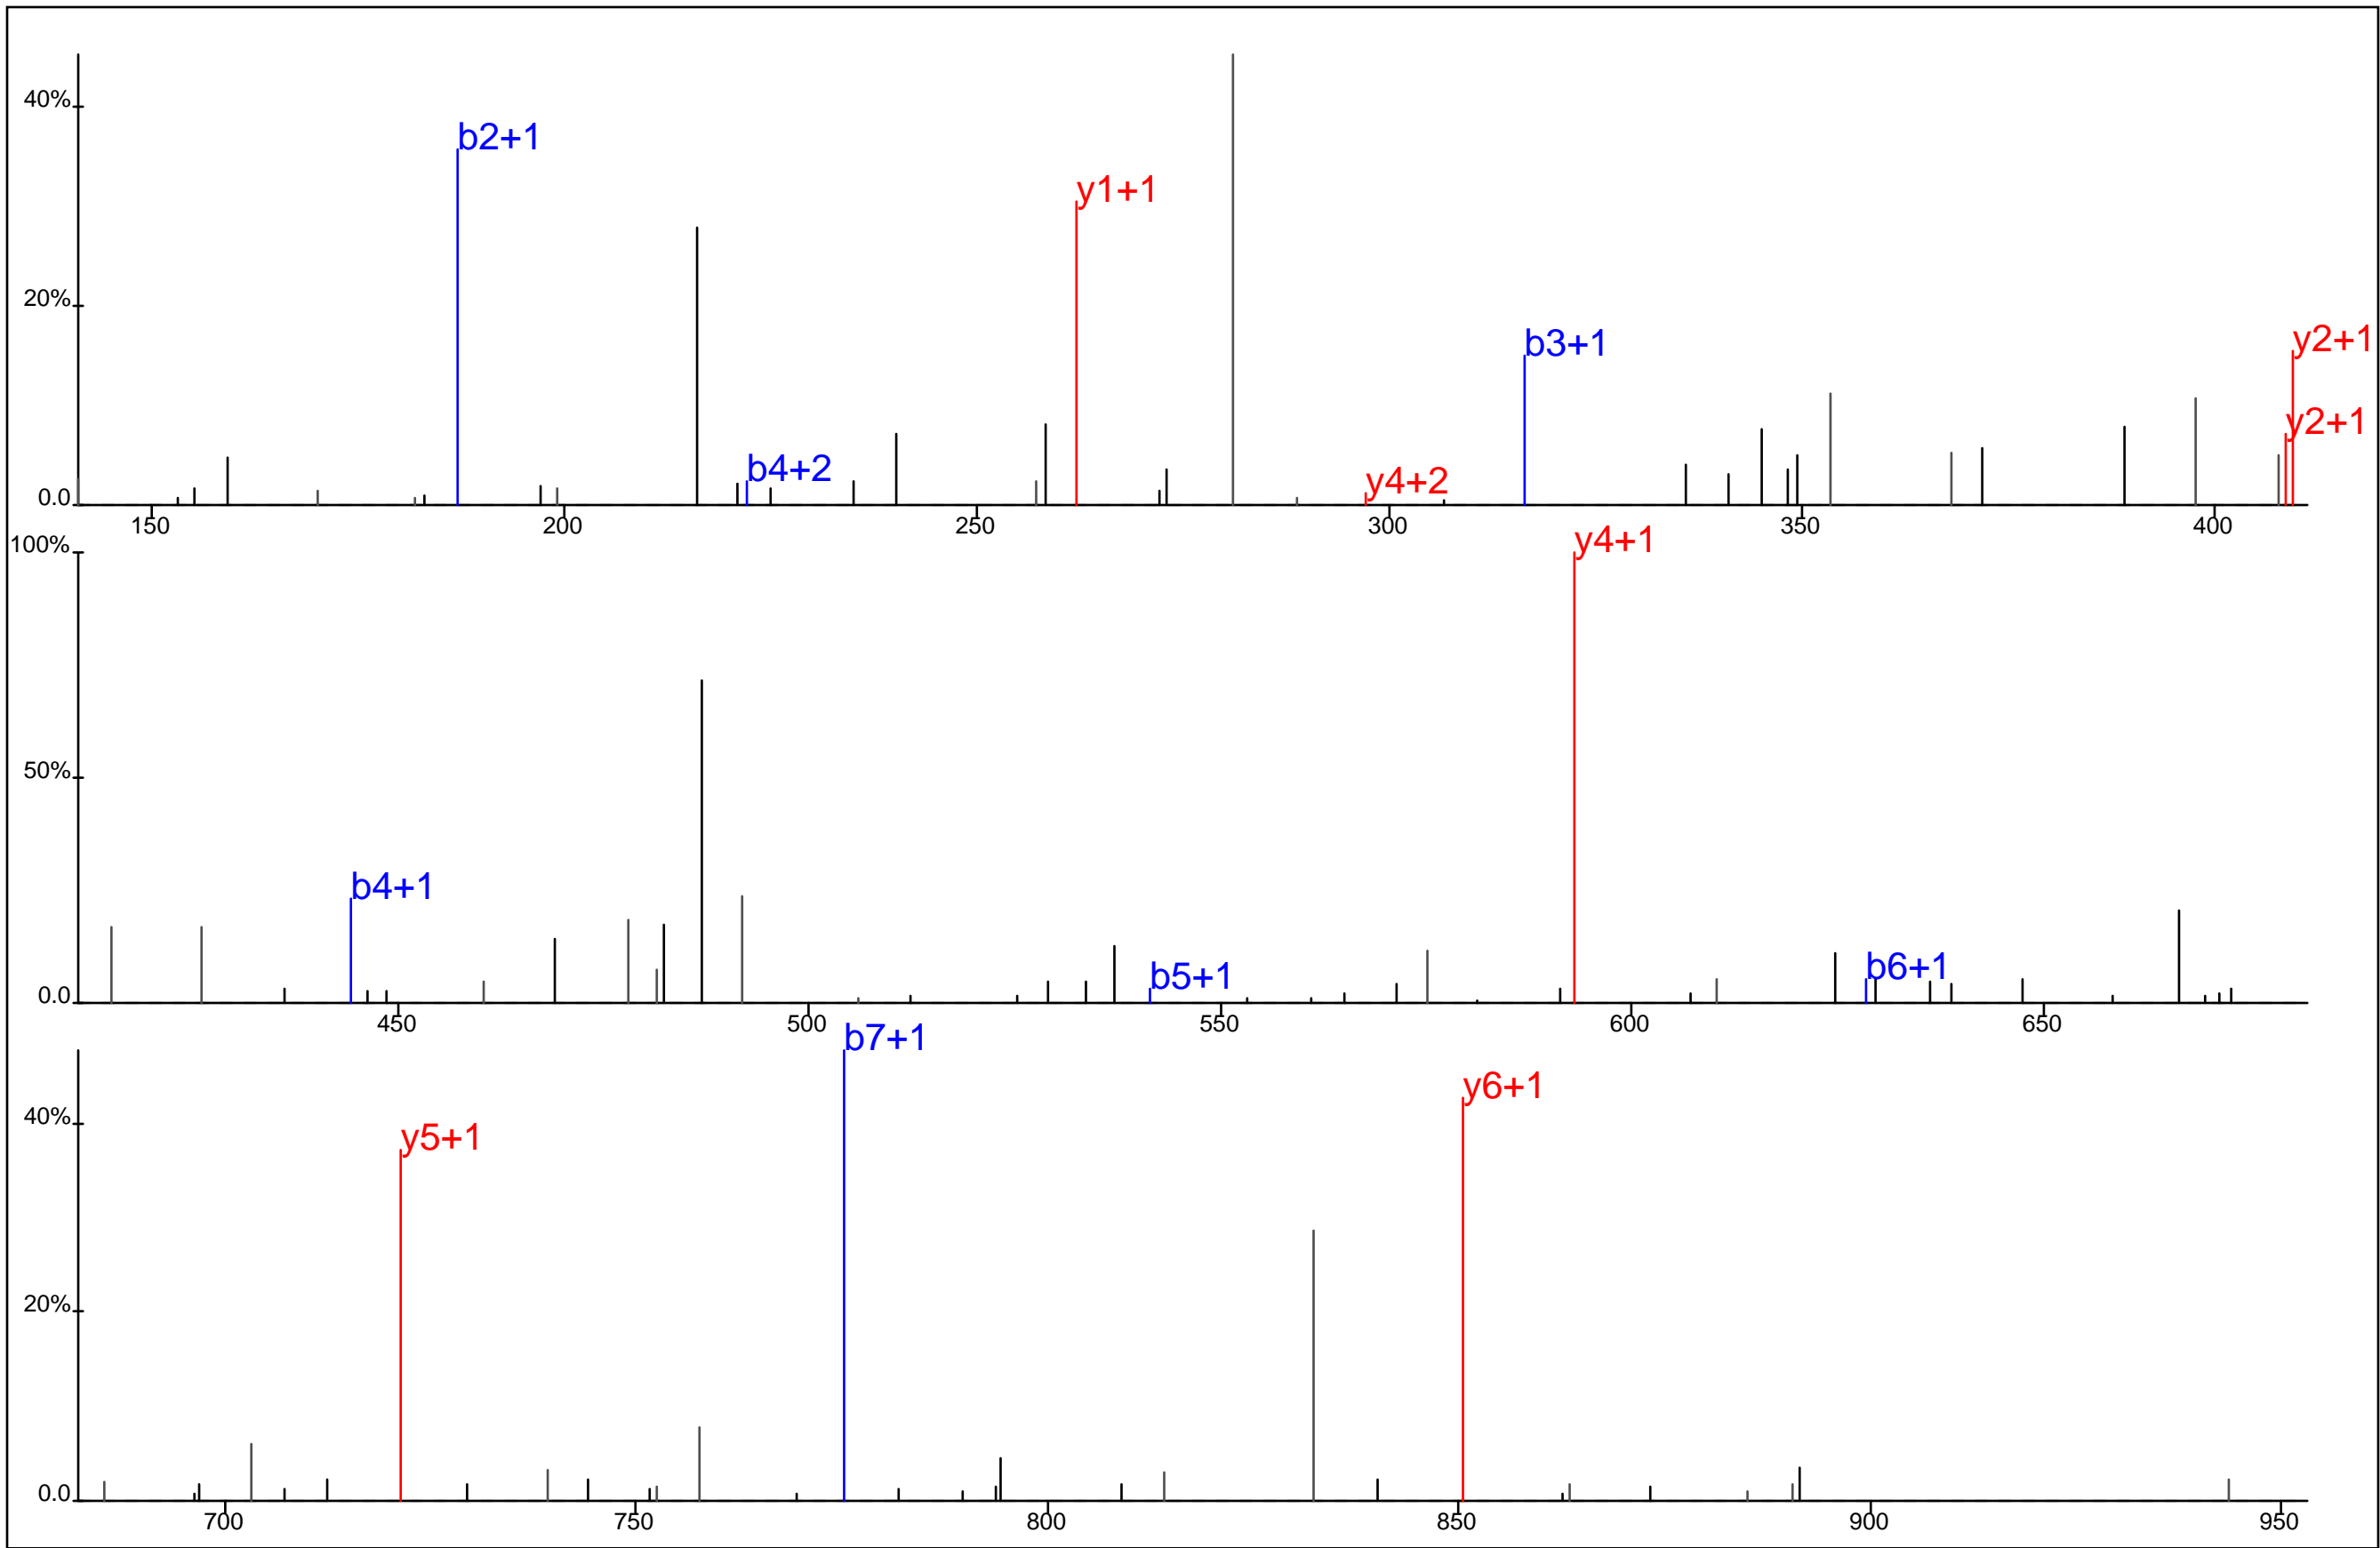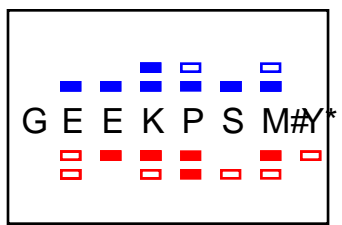

Protein Name: Proteasome activator complex subunit 2  
 gi Accession: 0  
 Precursor Mass: 518.6882+2  
 Delta Mass: 0.199 ppm  
 XCorr: 29.75

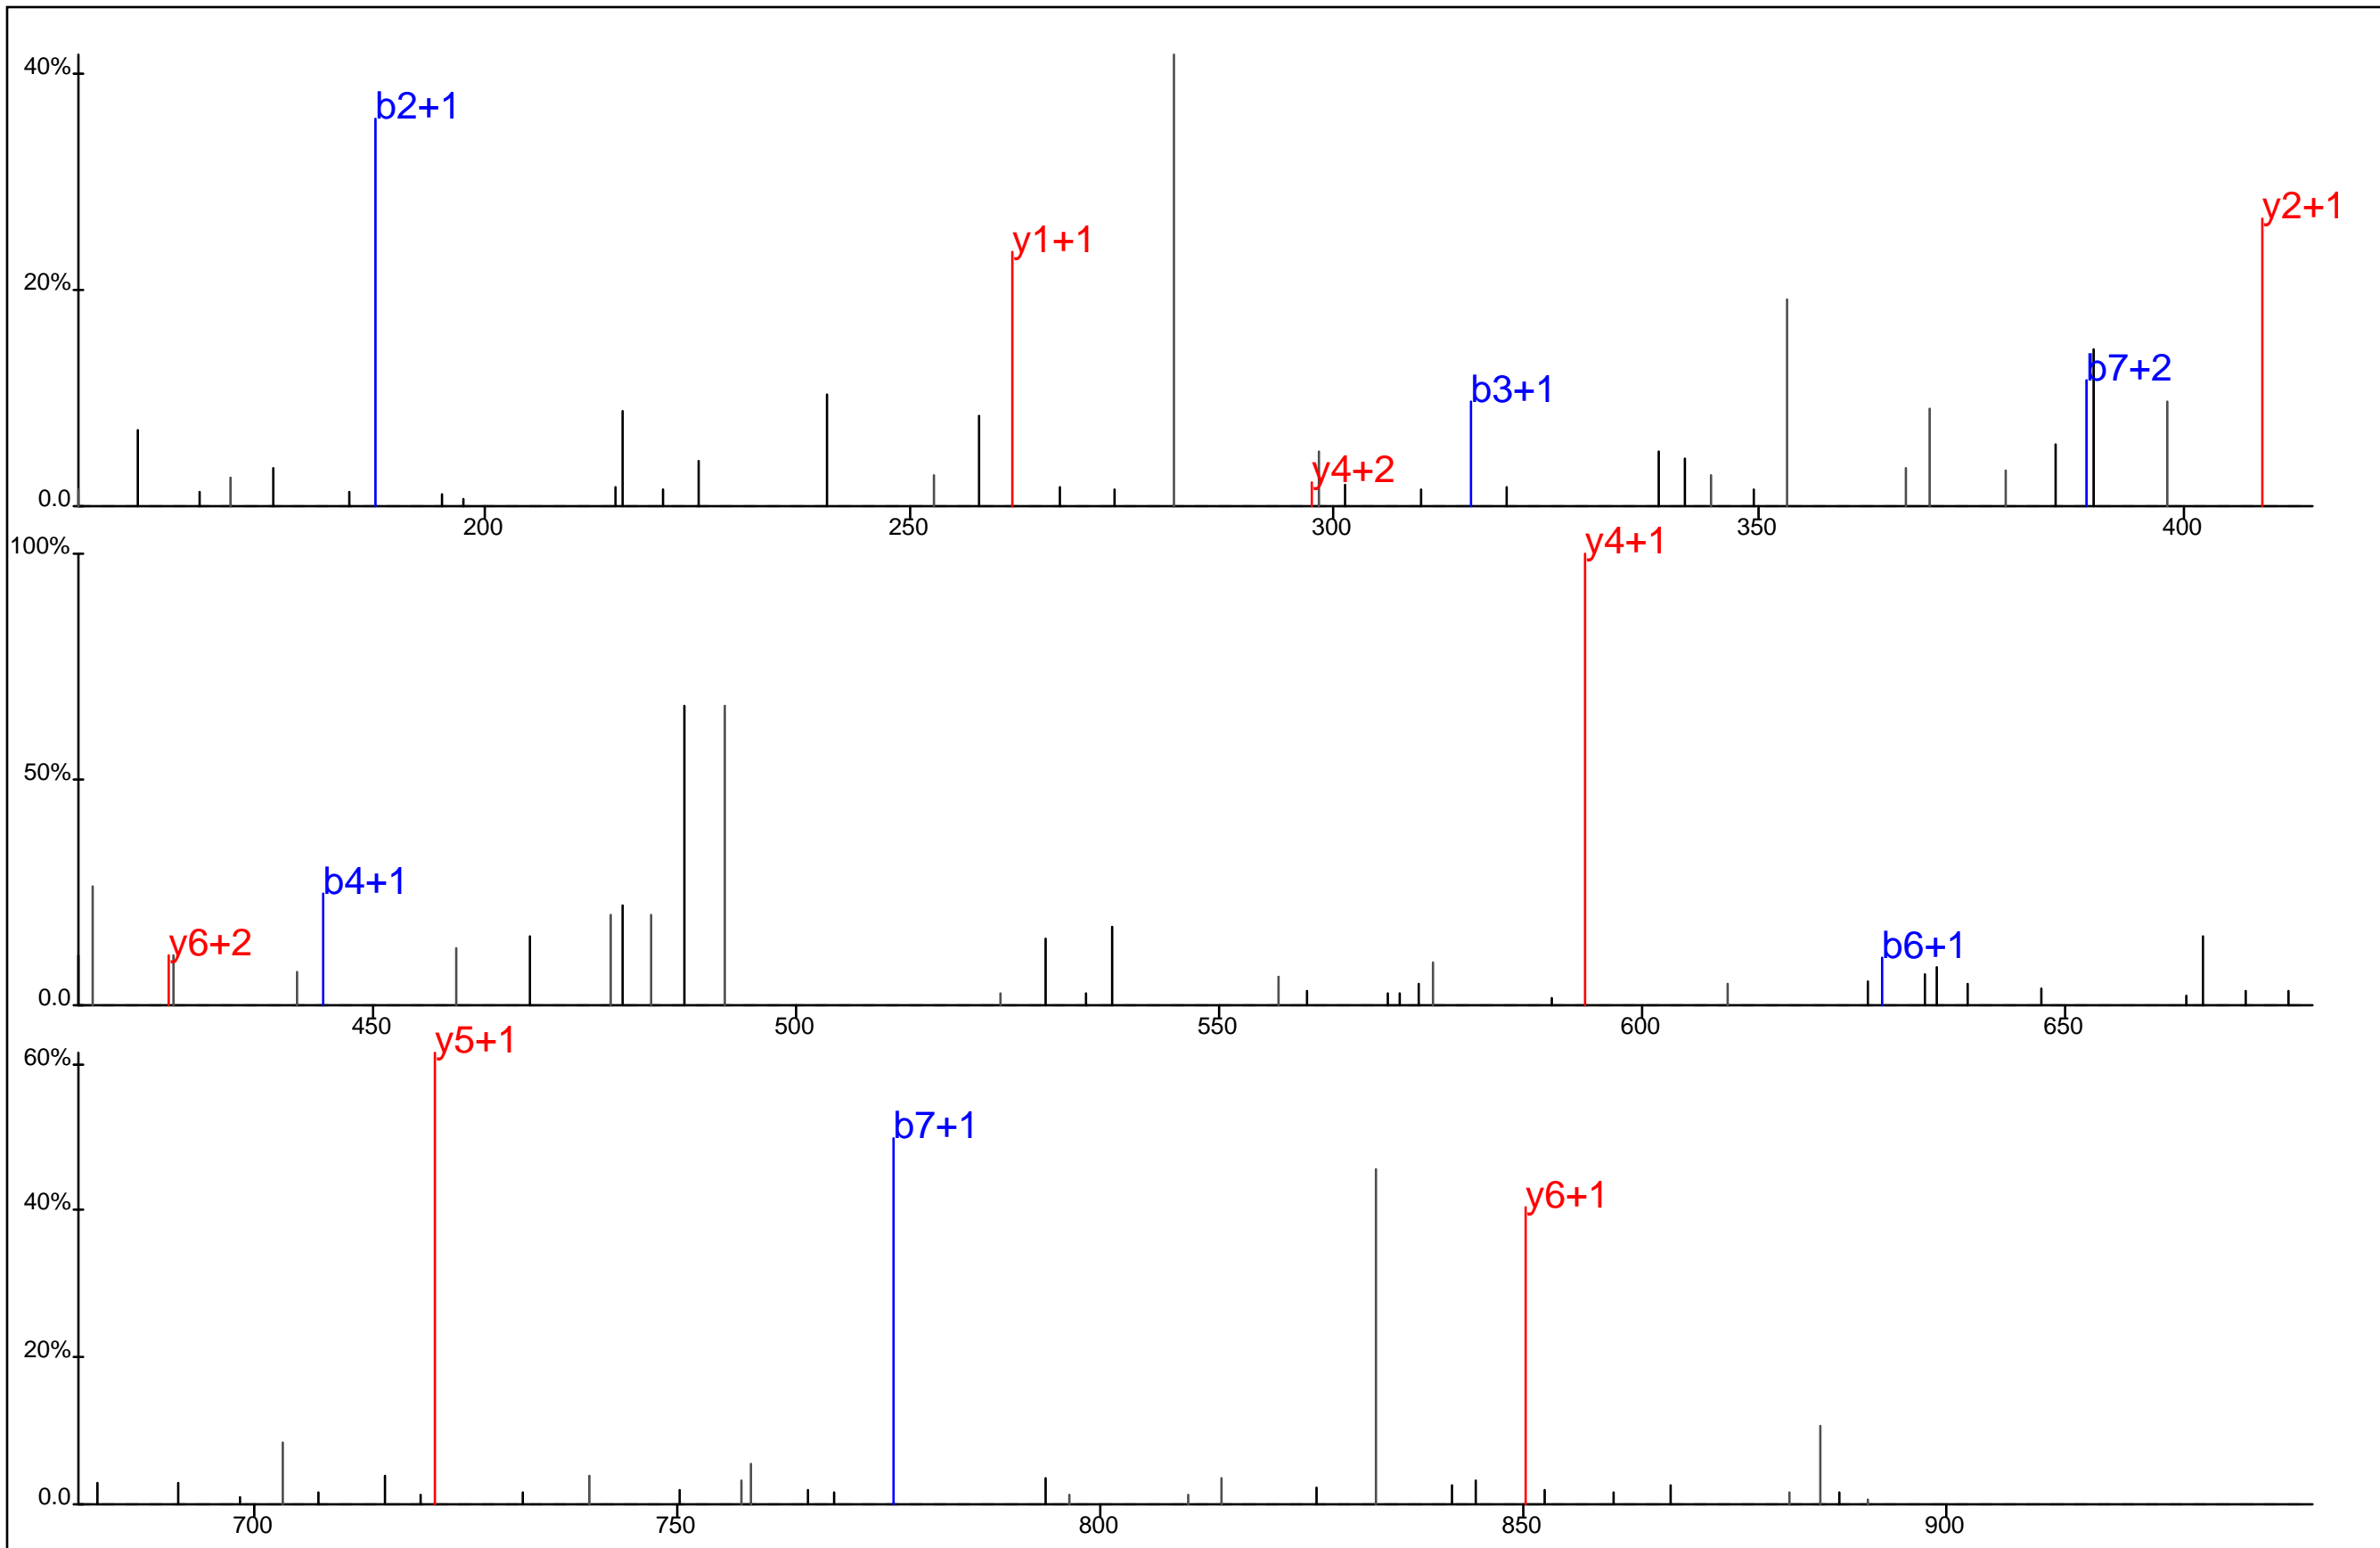

**G E E K P S M#Y\***

Protein Name: Proteasome activator complex subunit 2  
 gi Accession: 0  
 Precursor Mass: 518.6884+2  
 Delta Mass: 0.274 ppm  
 XCorr: 32.0

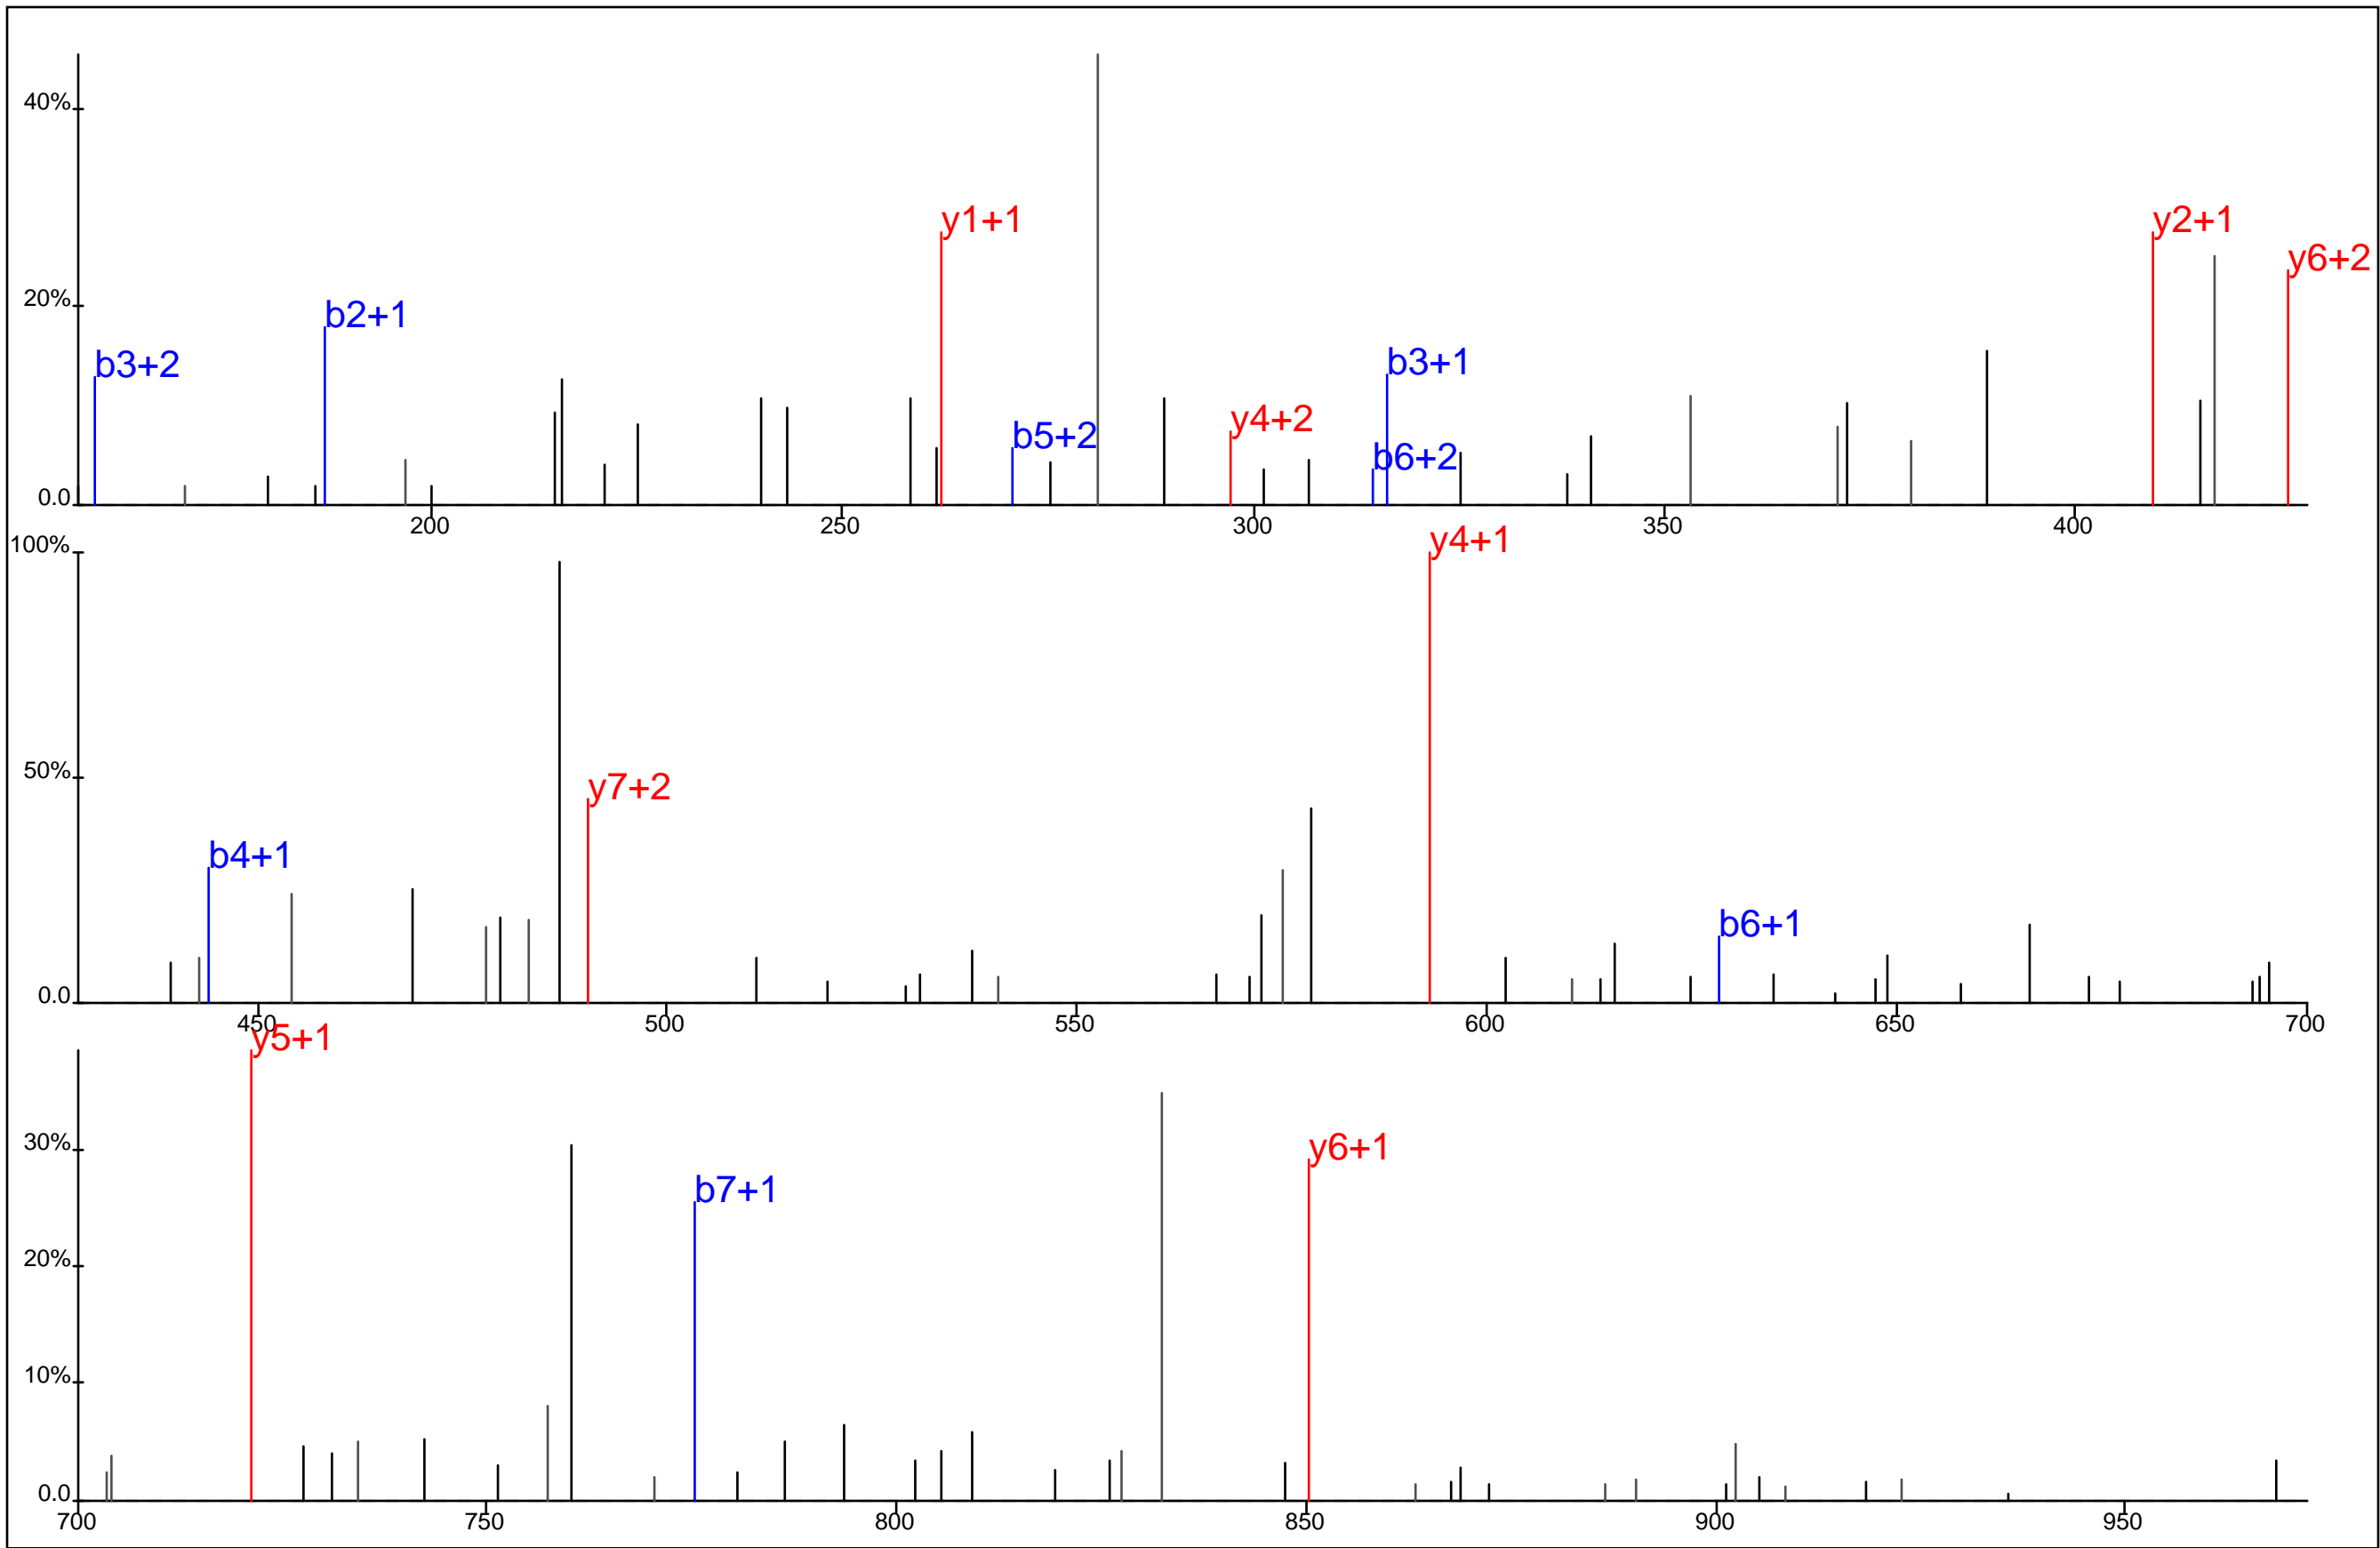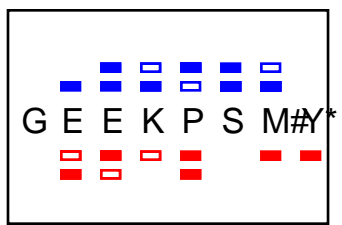

Protein Name: Proteasome activator complex subunit 2  
 gi Accession: 0  
 Precursor Mass: 518.6882+2  
 Delta Mass: 0.081 ppm  
 XCorr: 24.58

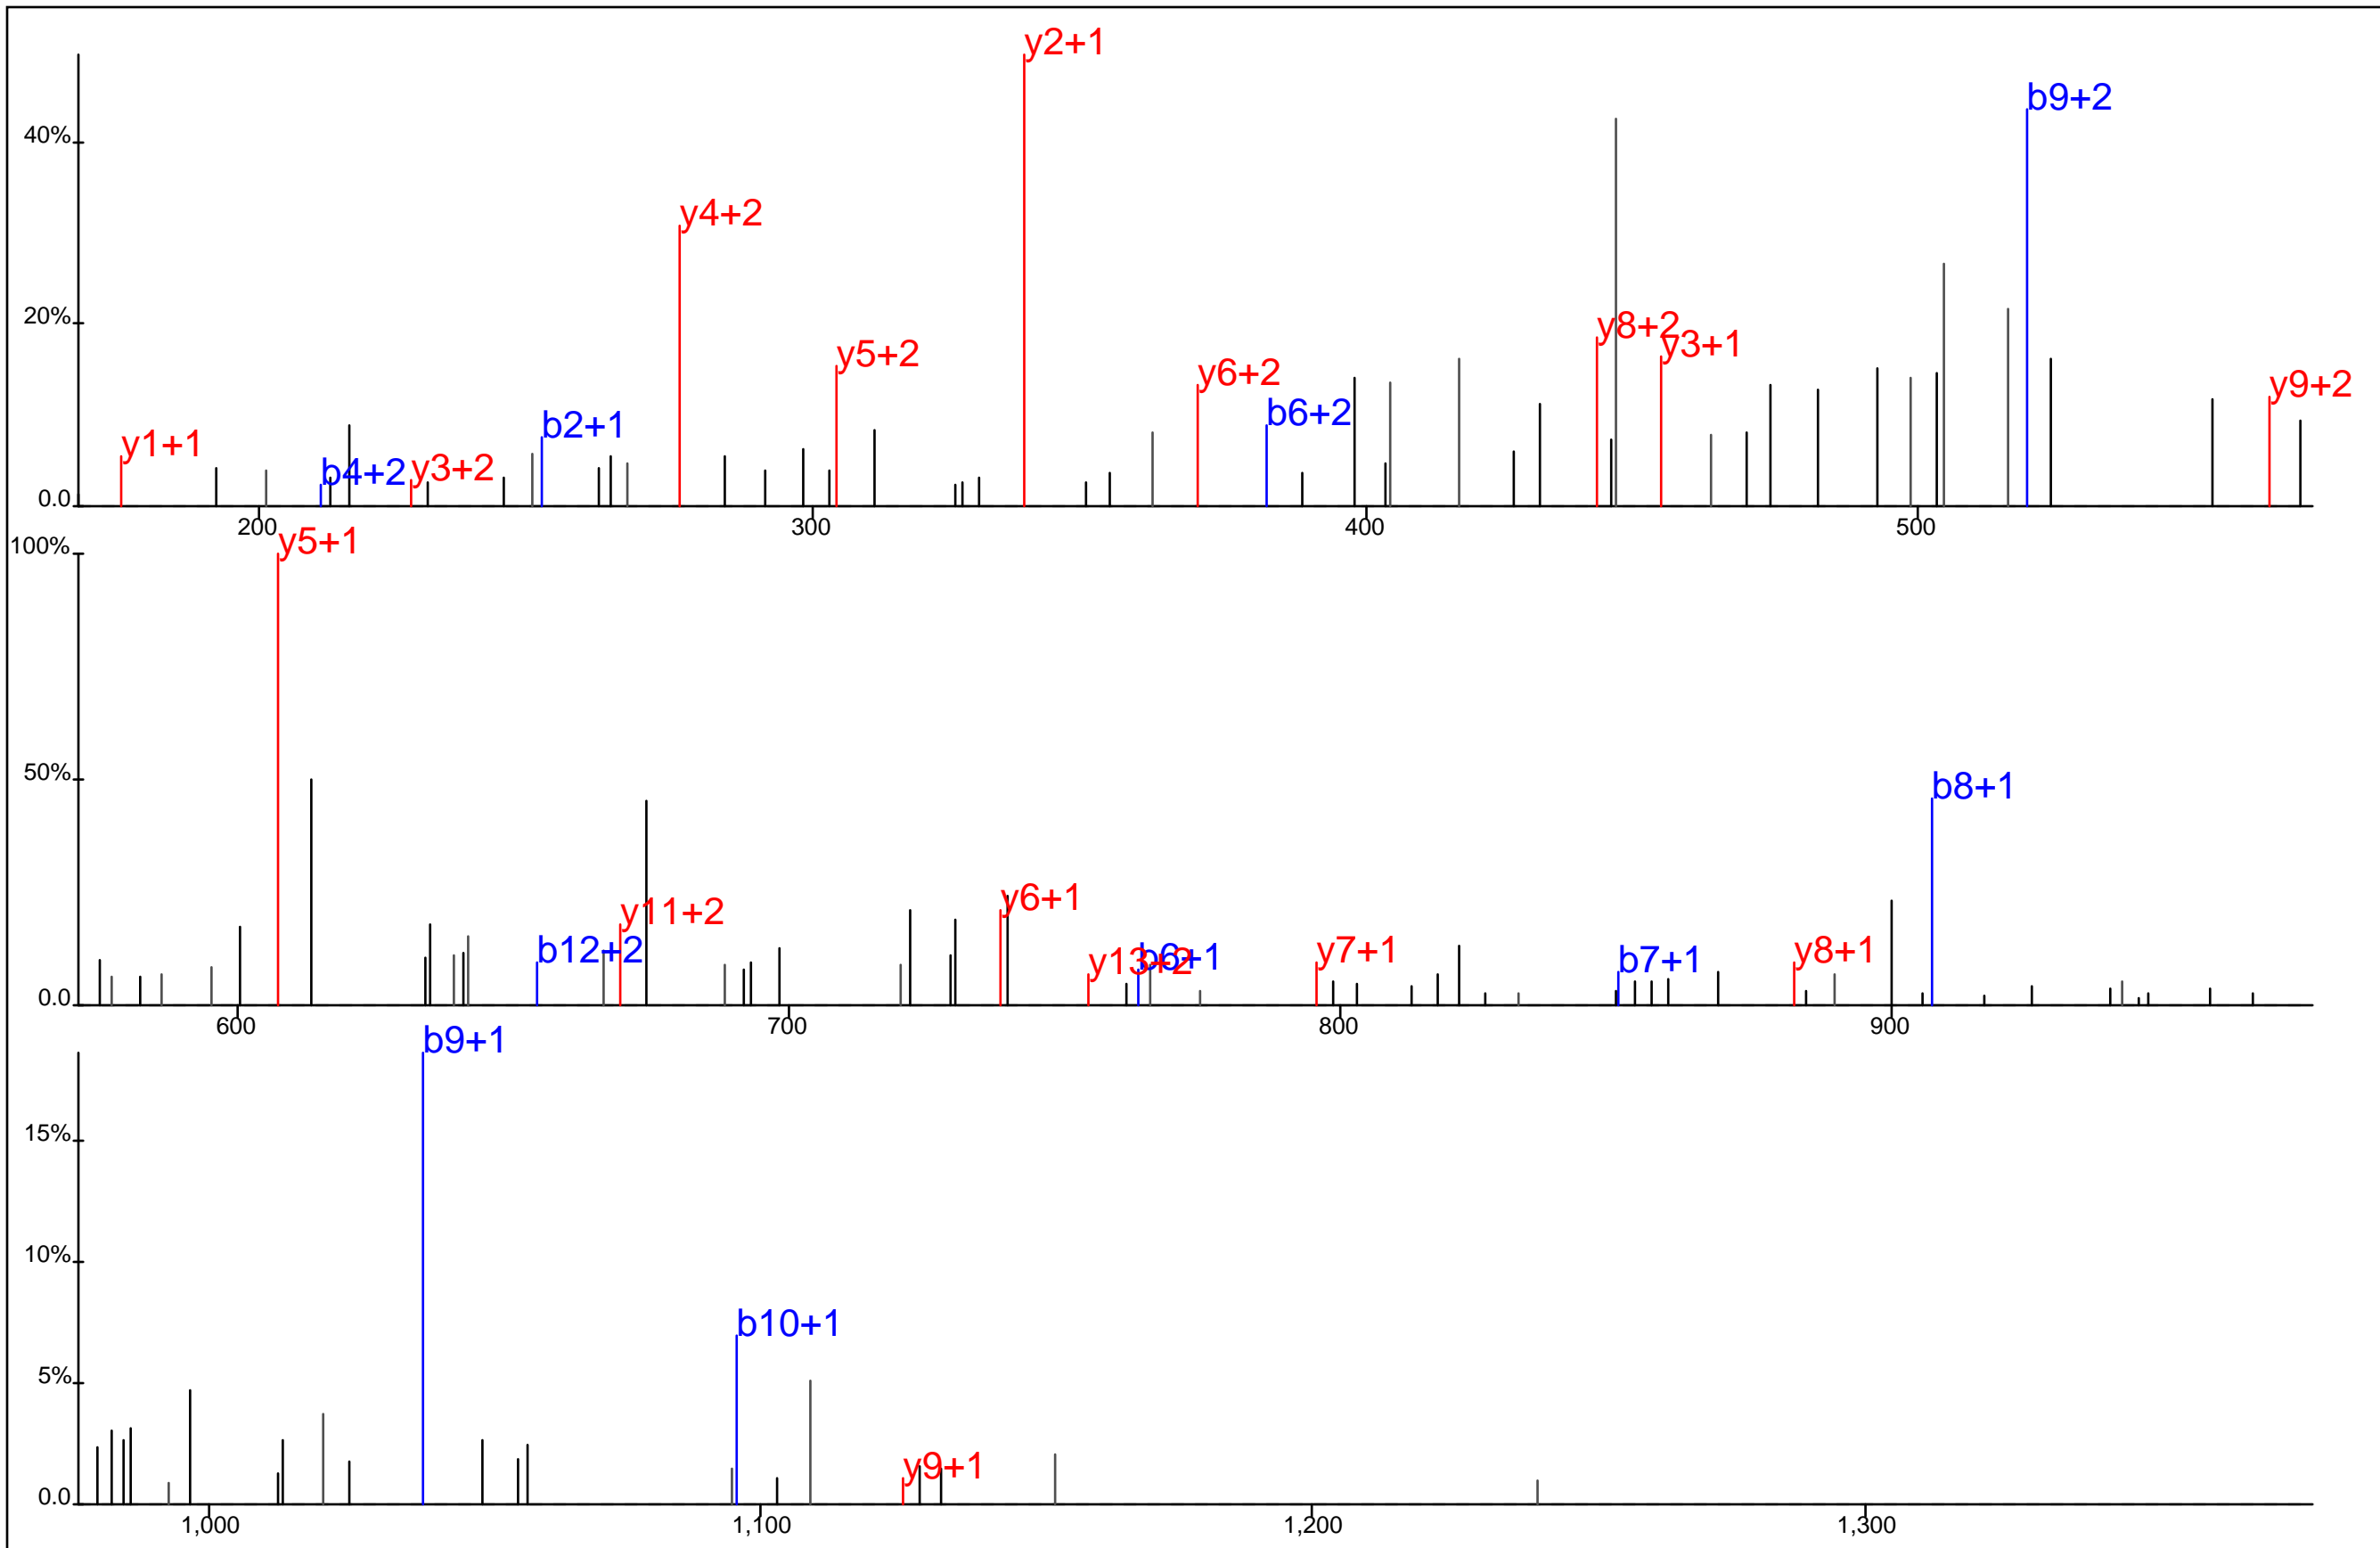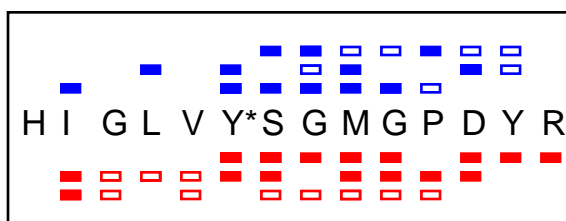

Protein Name: Proteasome subunit alpha type 2  
 gi Accession: 0  
 Precursor Mass: 548.9151+3  
 Delta Mass: 4.102 ppm  
 XCorr: 30.62

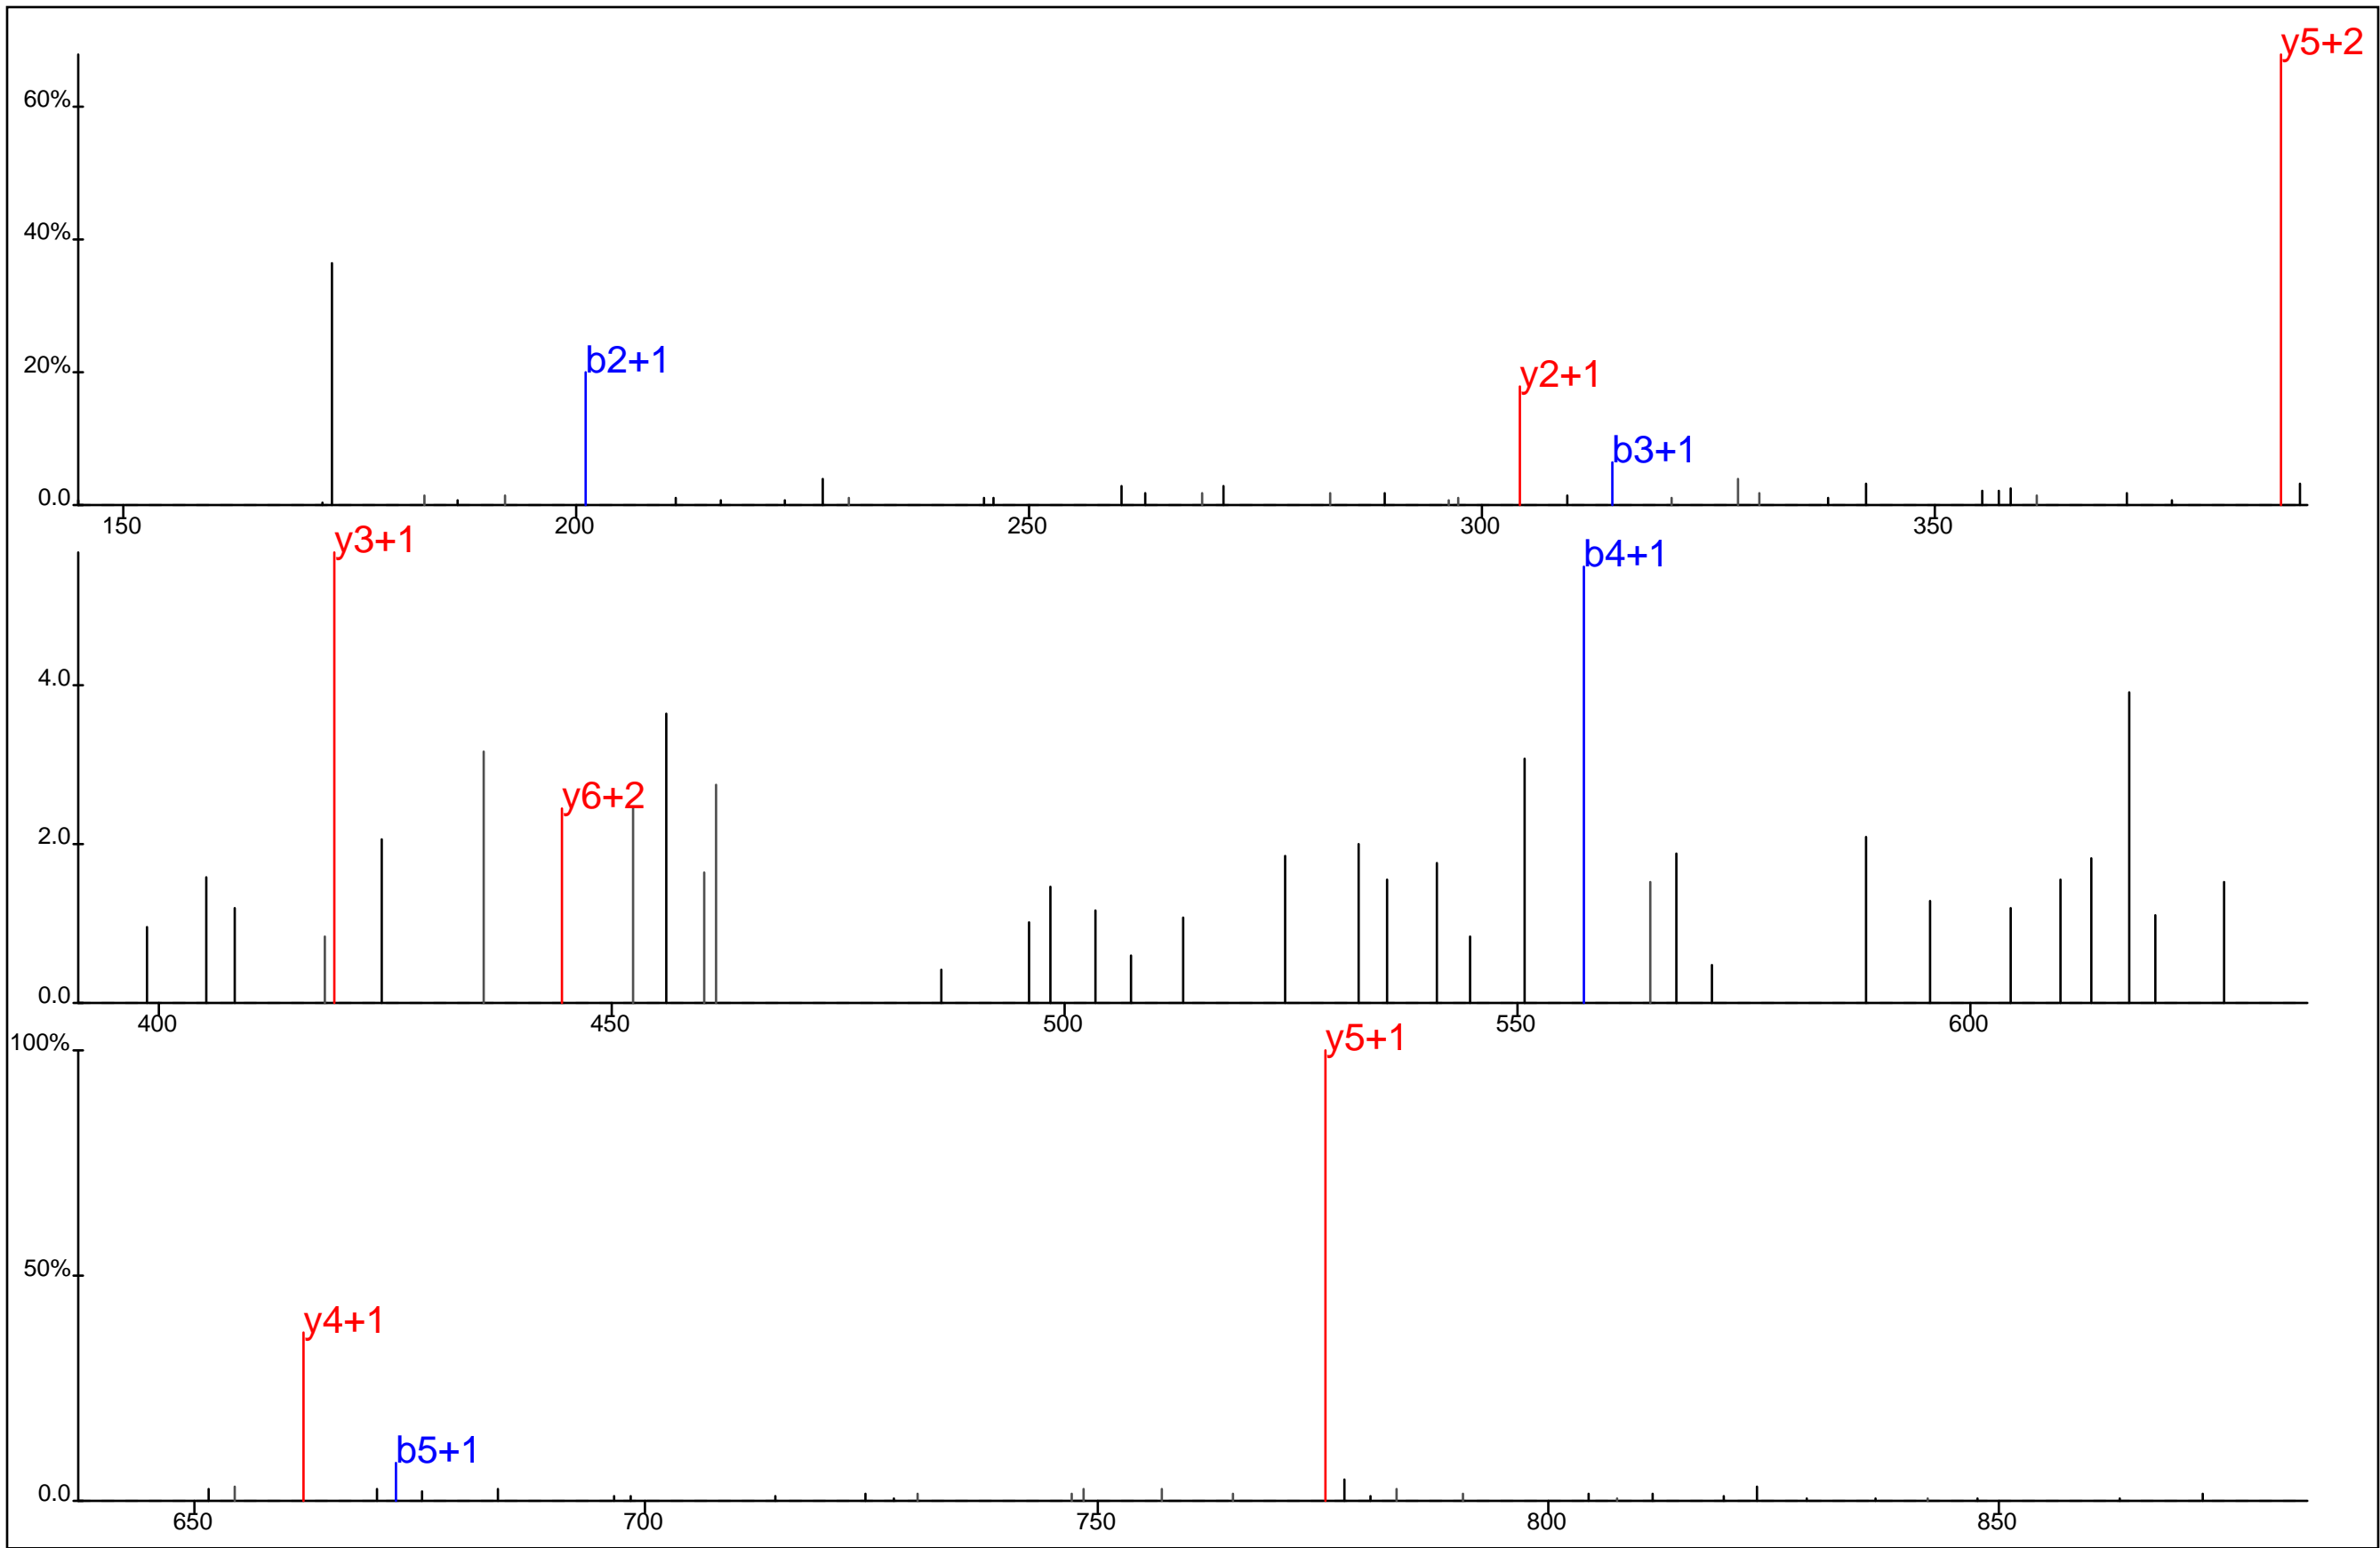

**S I L Y\* D E R**

Protein Name: Proteasome subunit alpha type 2  
 gi Accession: 0  
 Precursor Mass: 488.2129+2  
 Delta Mass: 0.176 ppm  
 XCorr: 22.74

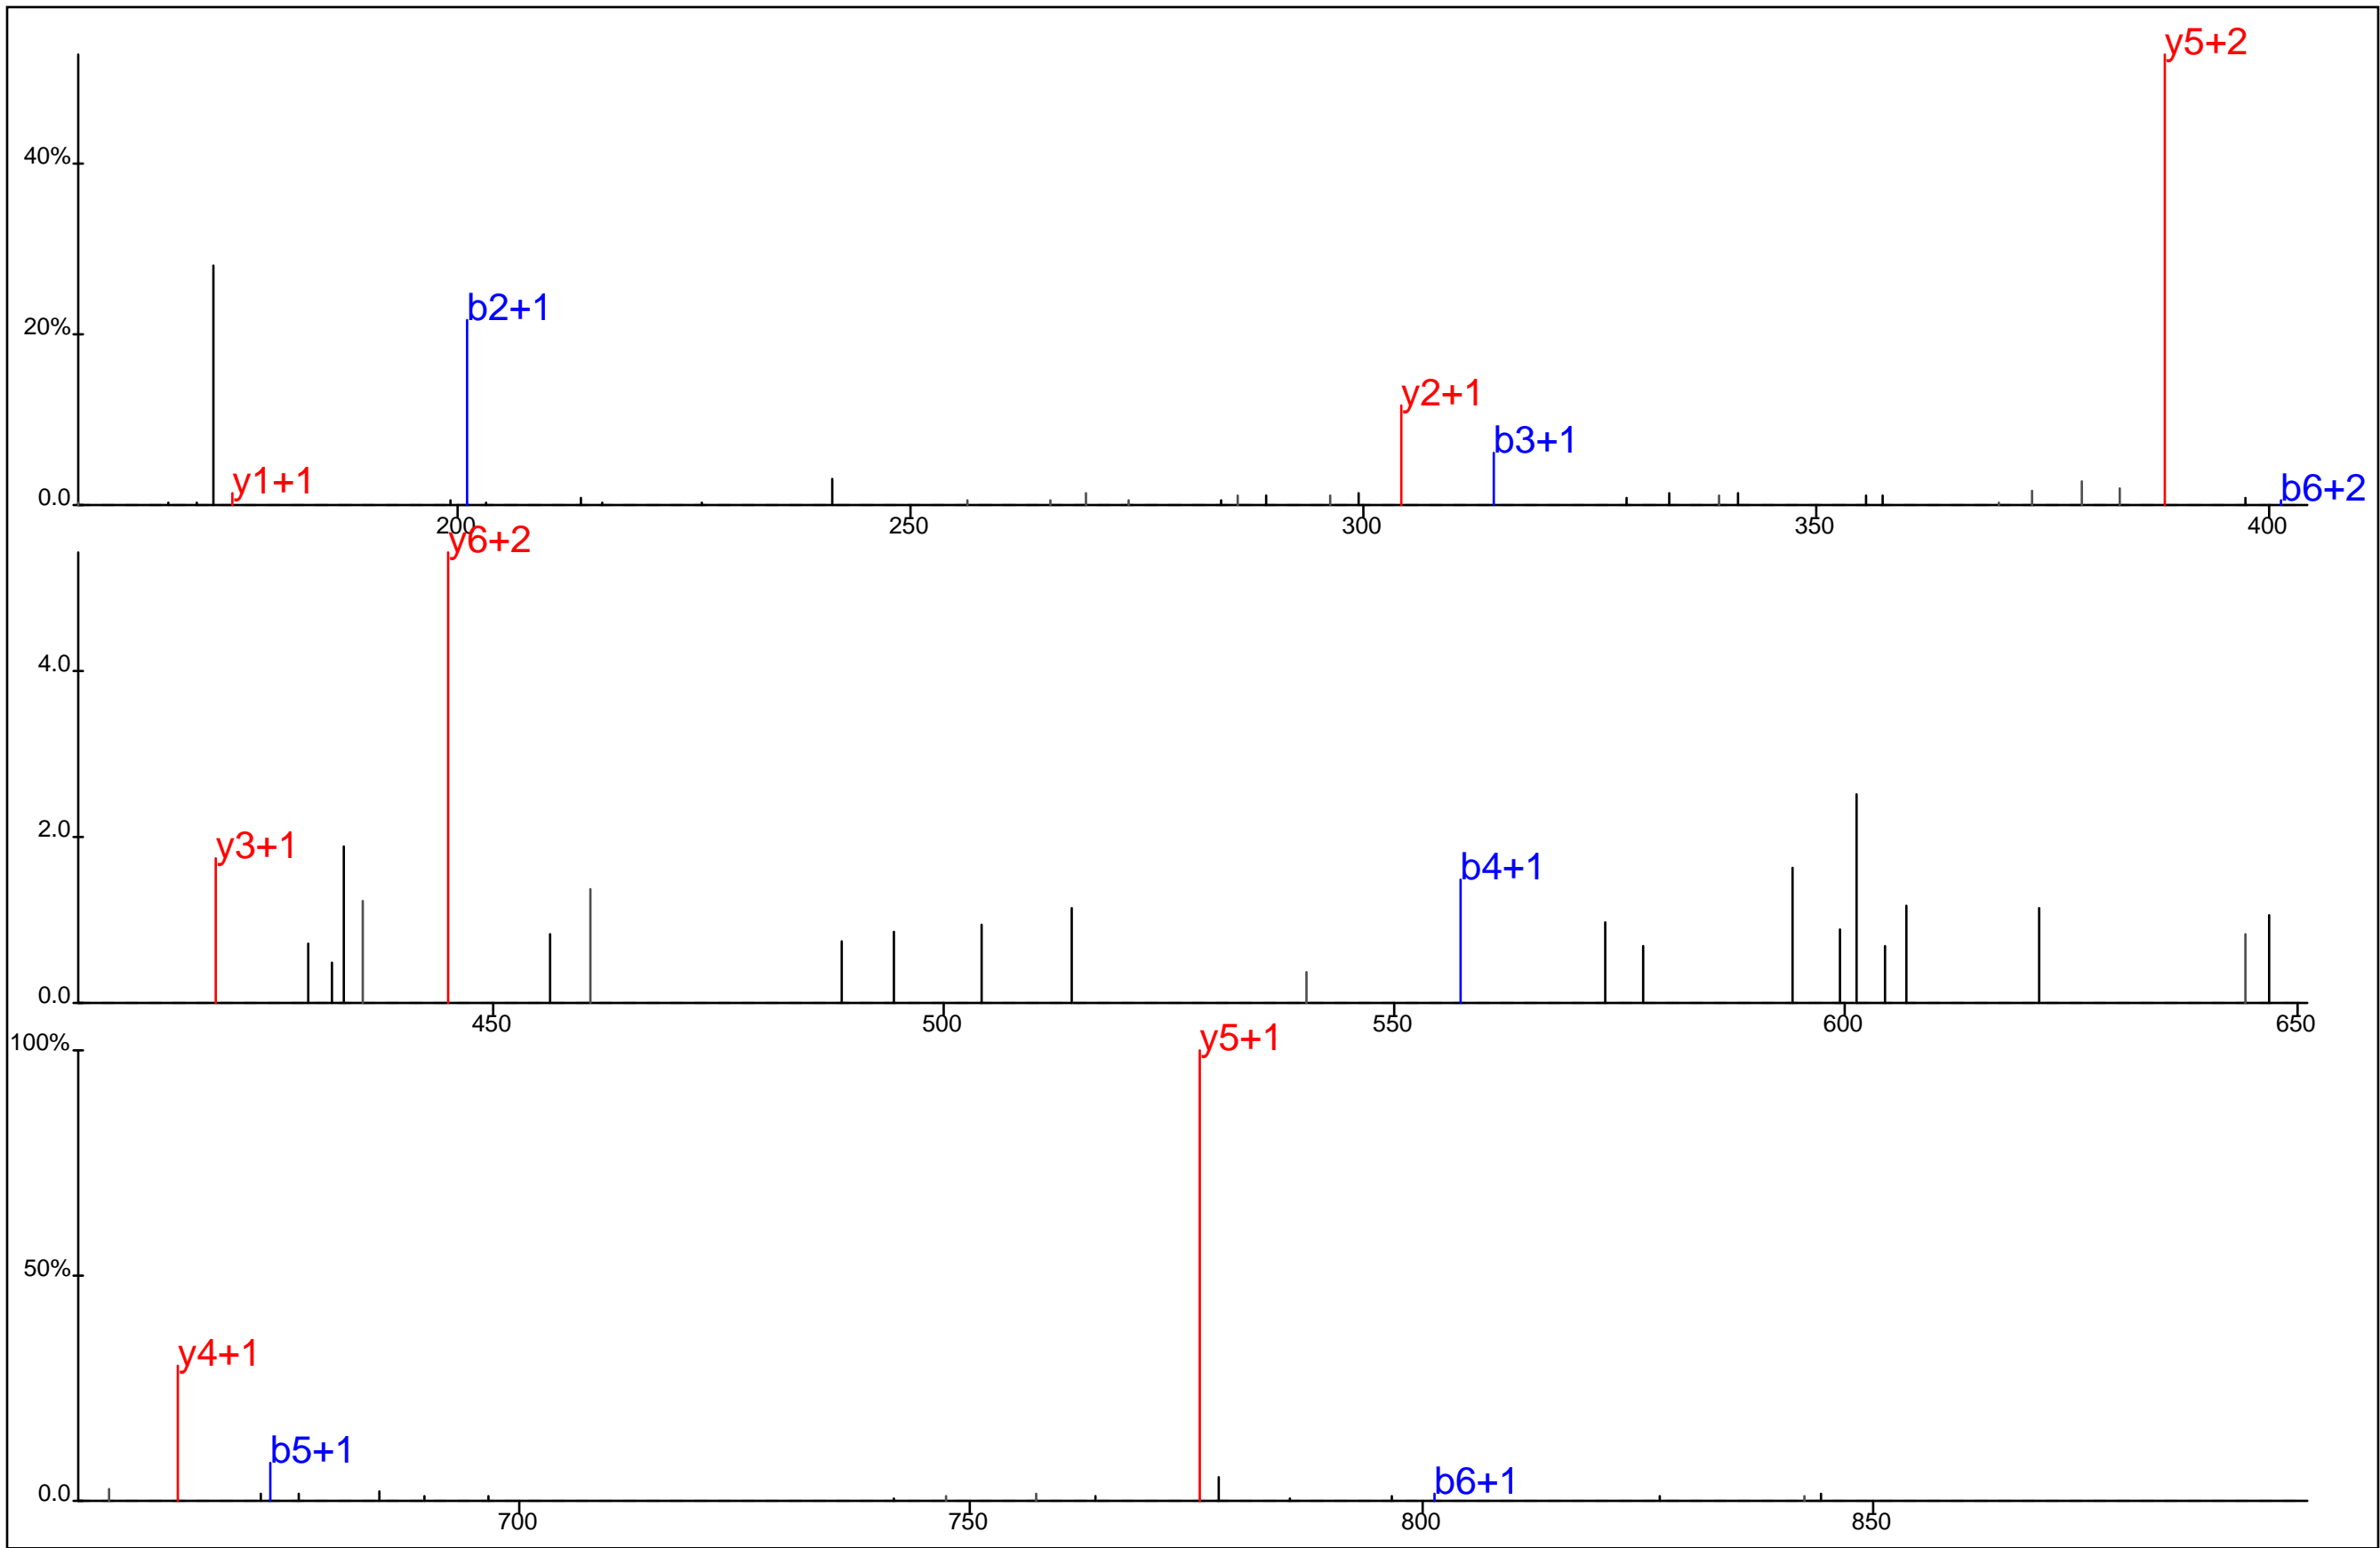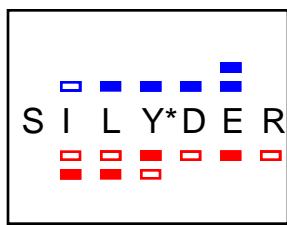

Protein Name: Proteasome subunit alpha type 2  
 gi Accession: 0  
 Precursor Mass: 488.2129+2  
 Delta Mass: 0.176 ppm  
 XCorr: 30.9

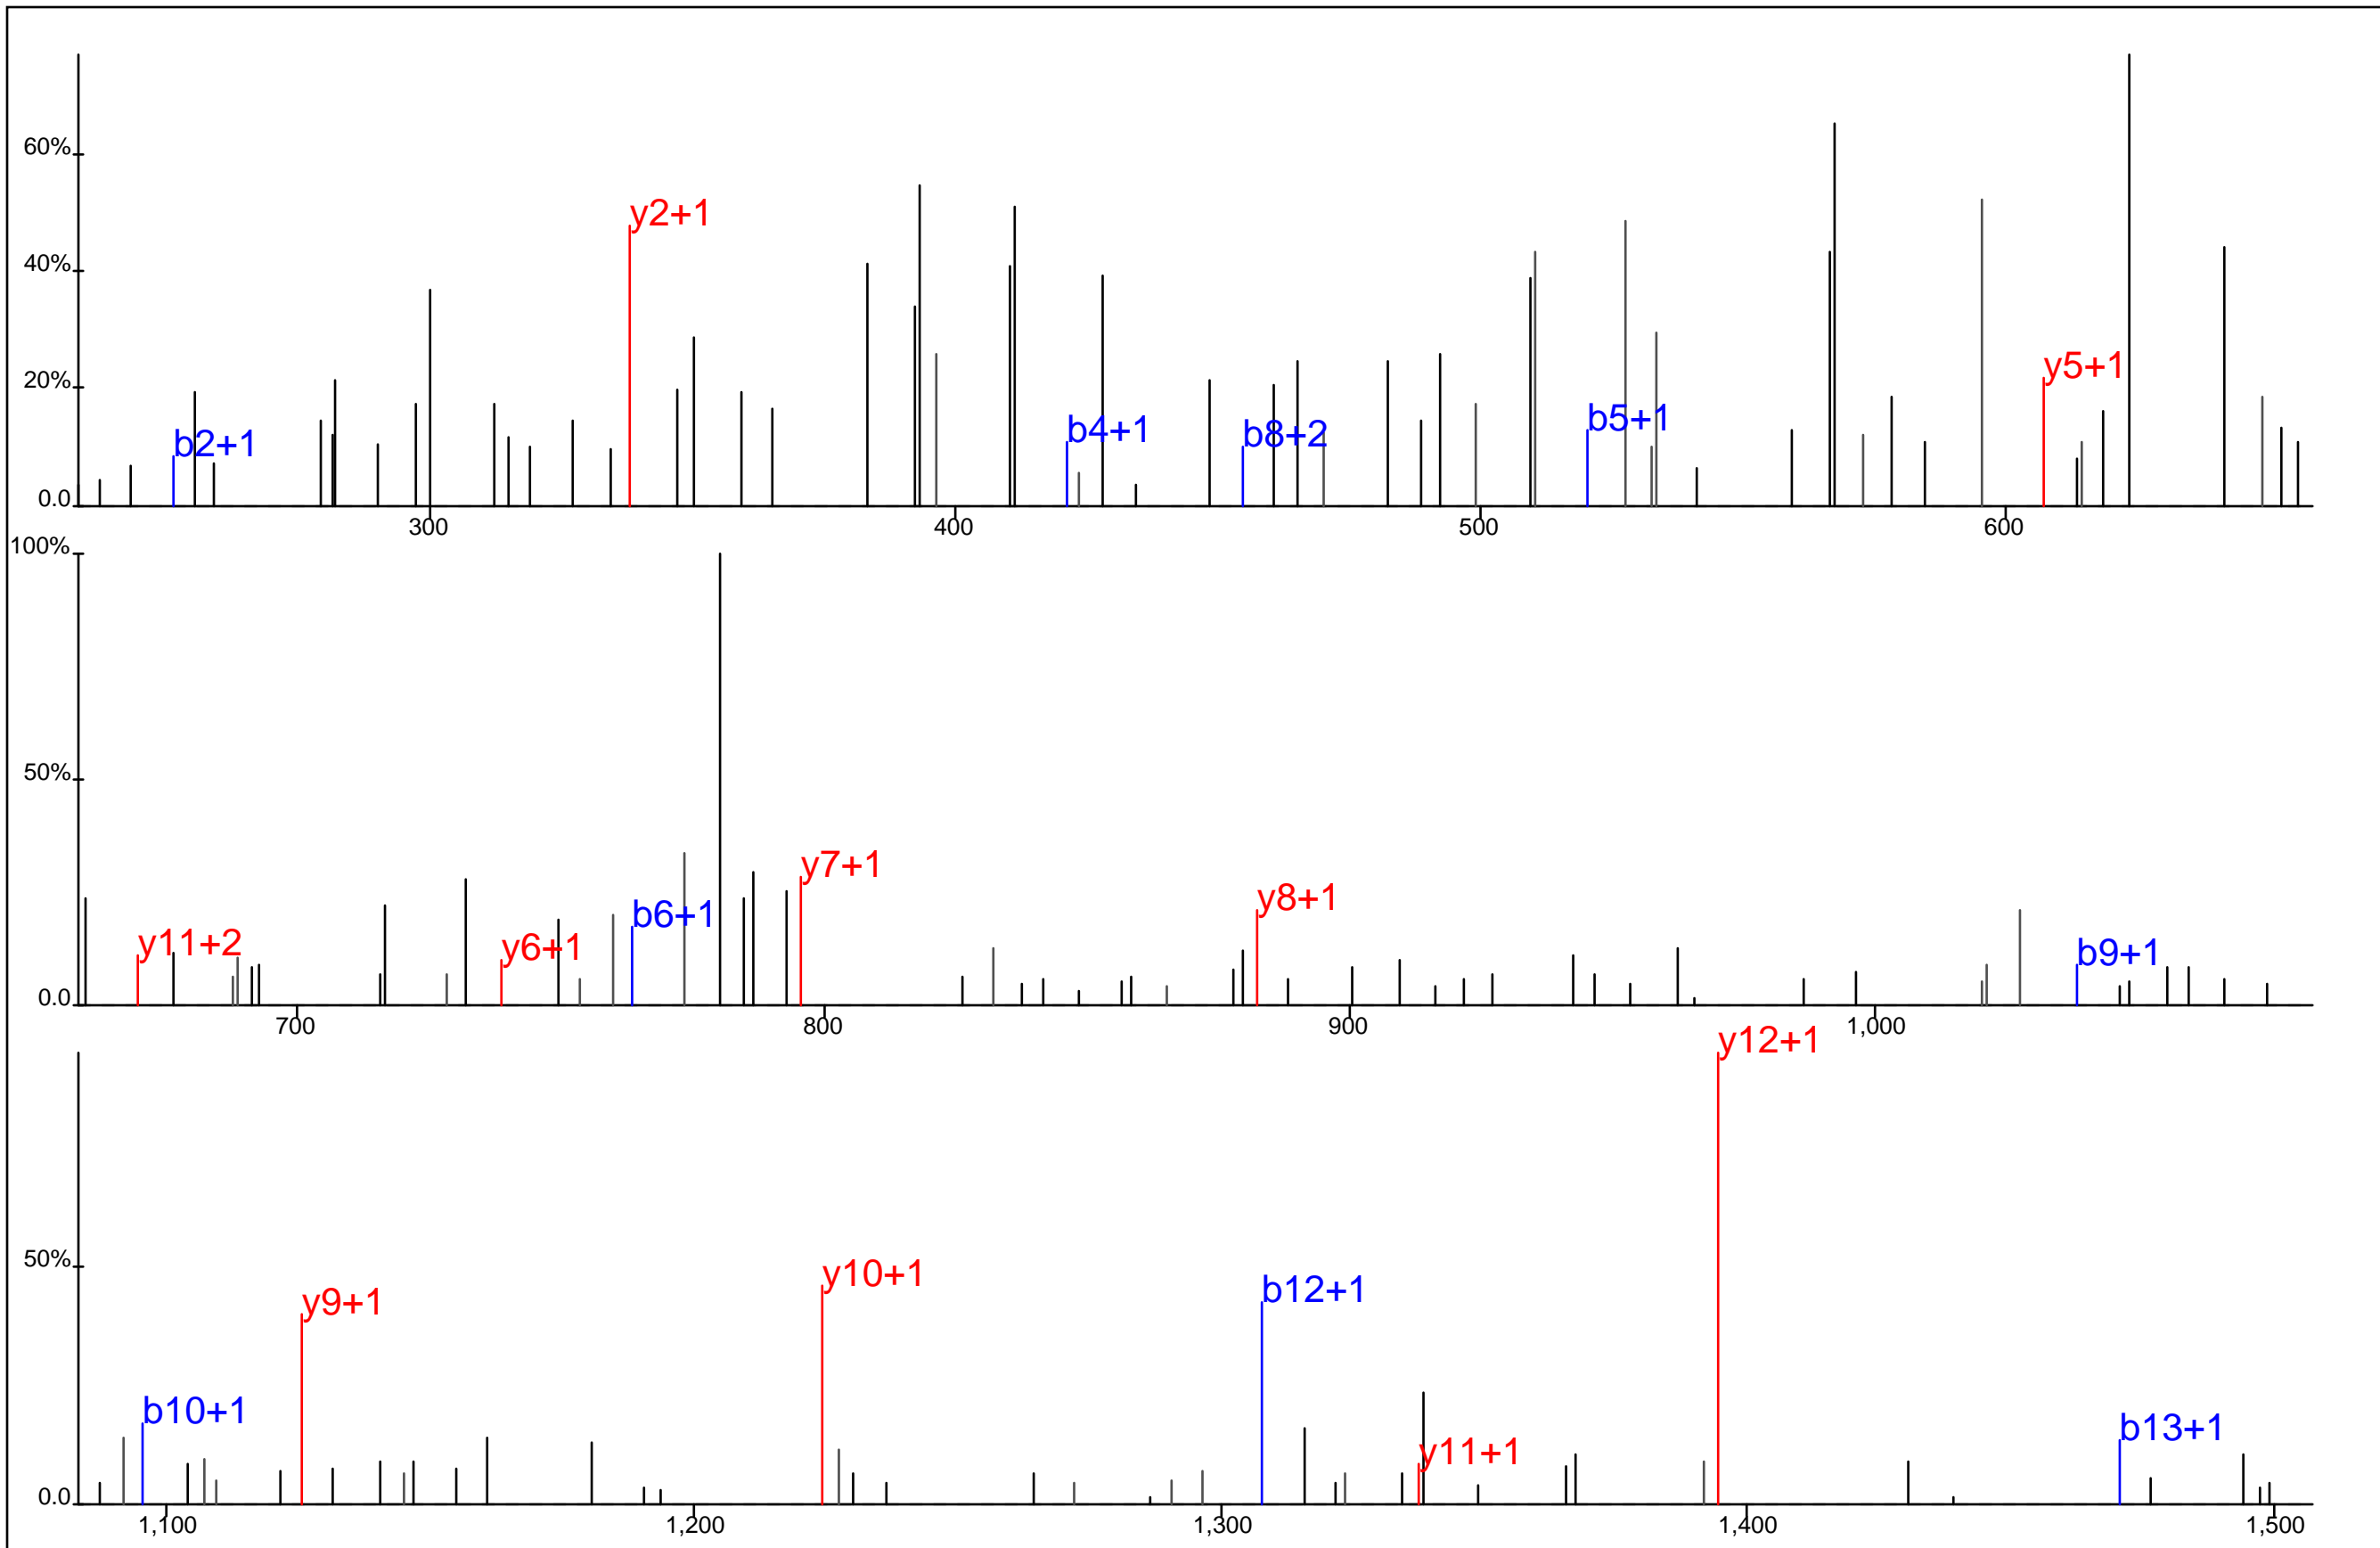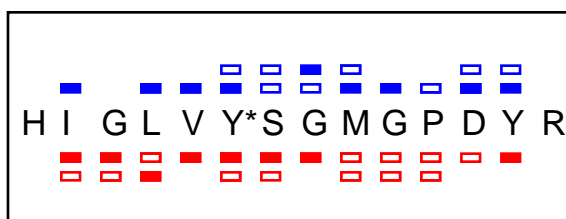

Protein Name: Proteasome subunit alpha type 2  
 gi Accession: 0  
 Precursor Mass: 822.8638+2  
 Delta Mass: 2.199 ppm  
 XCorr: 21.21

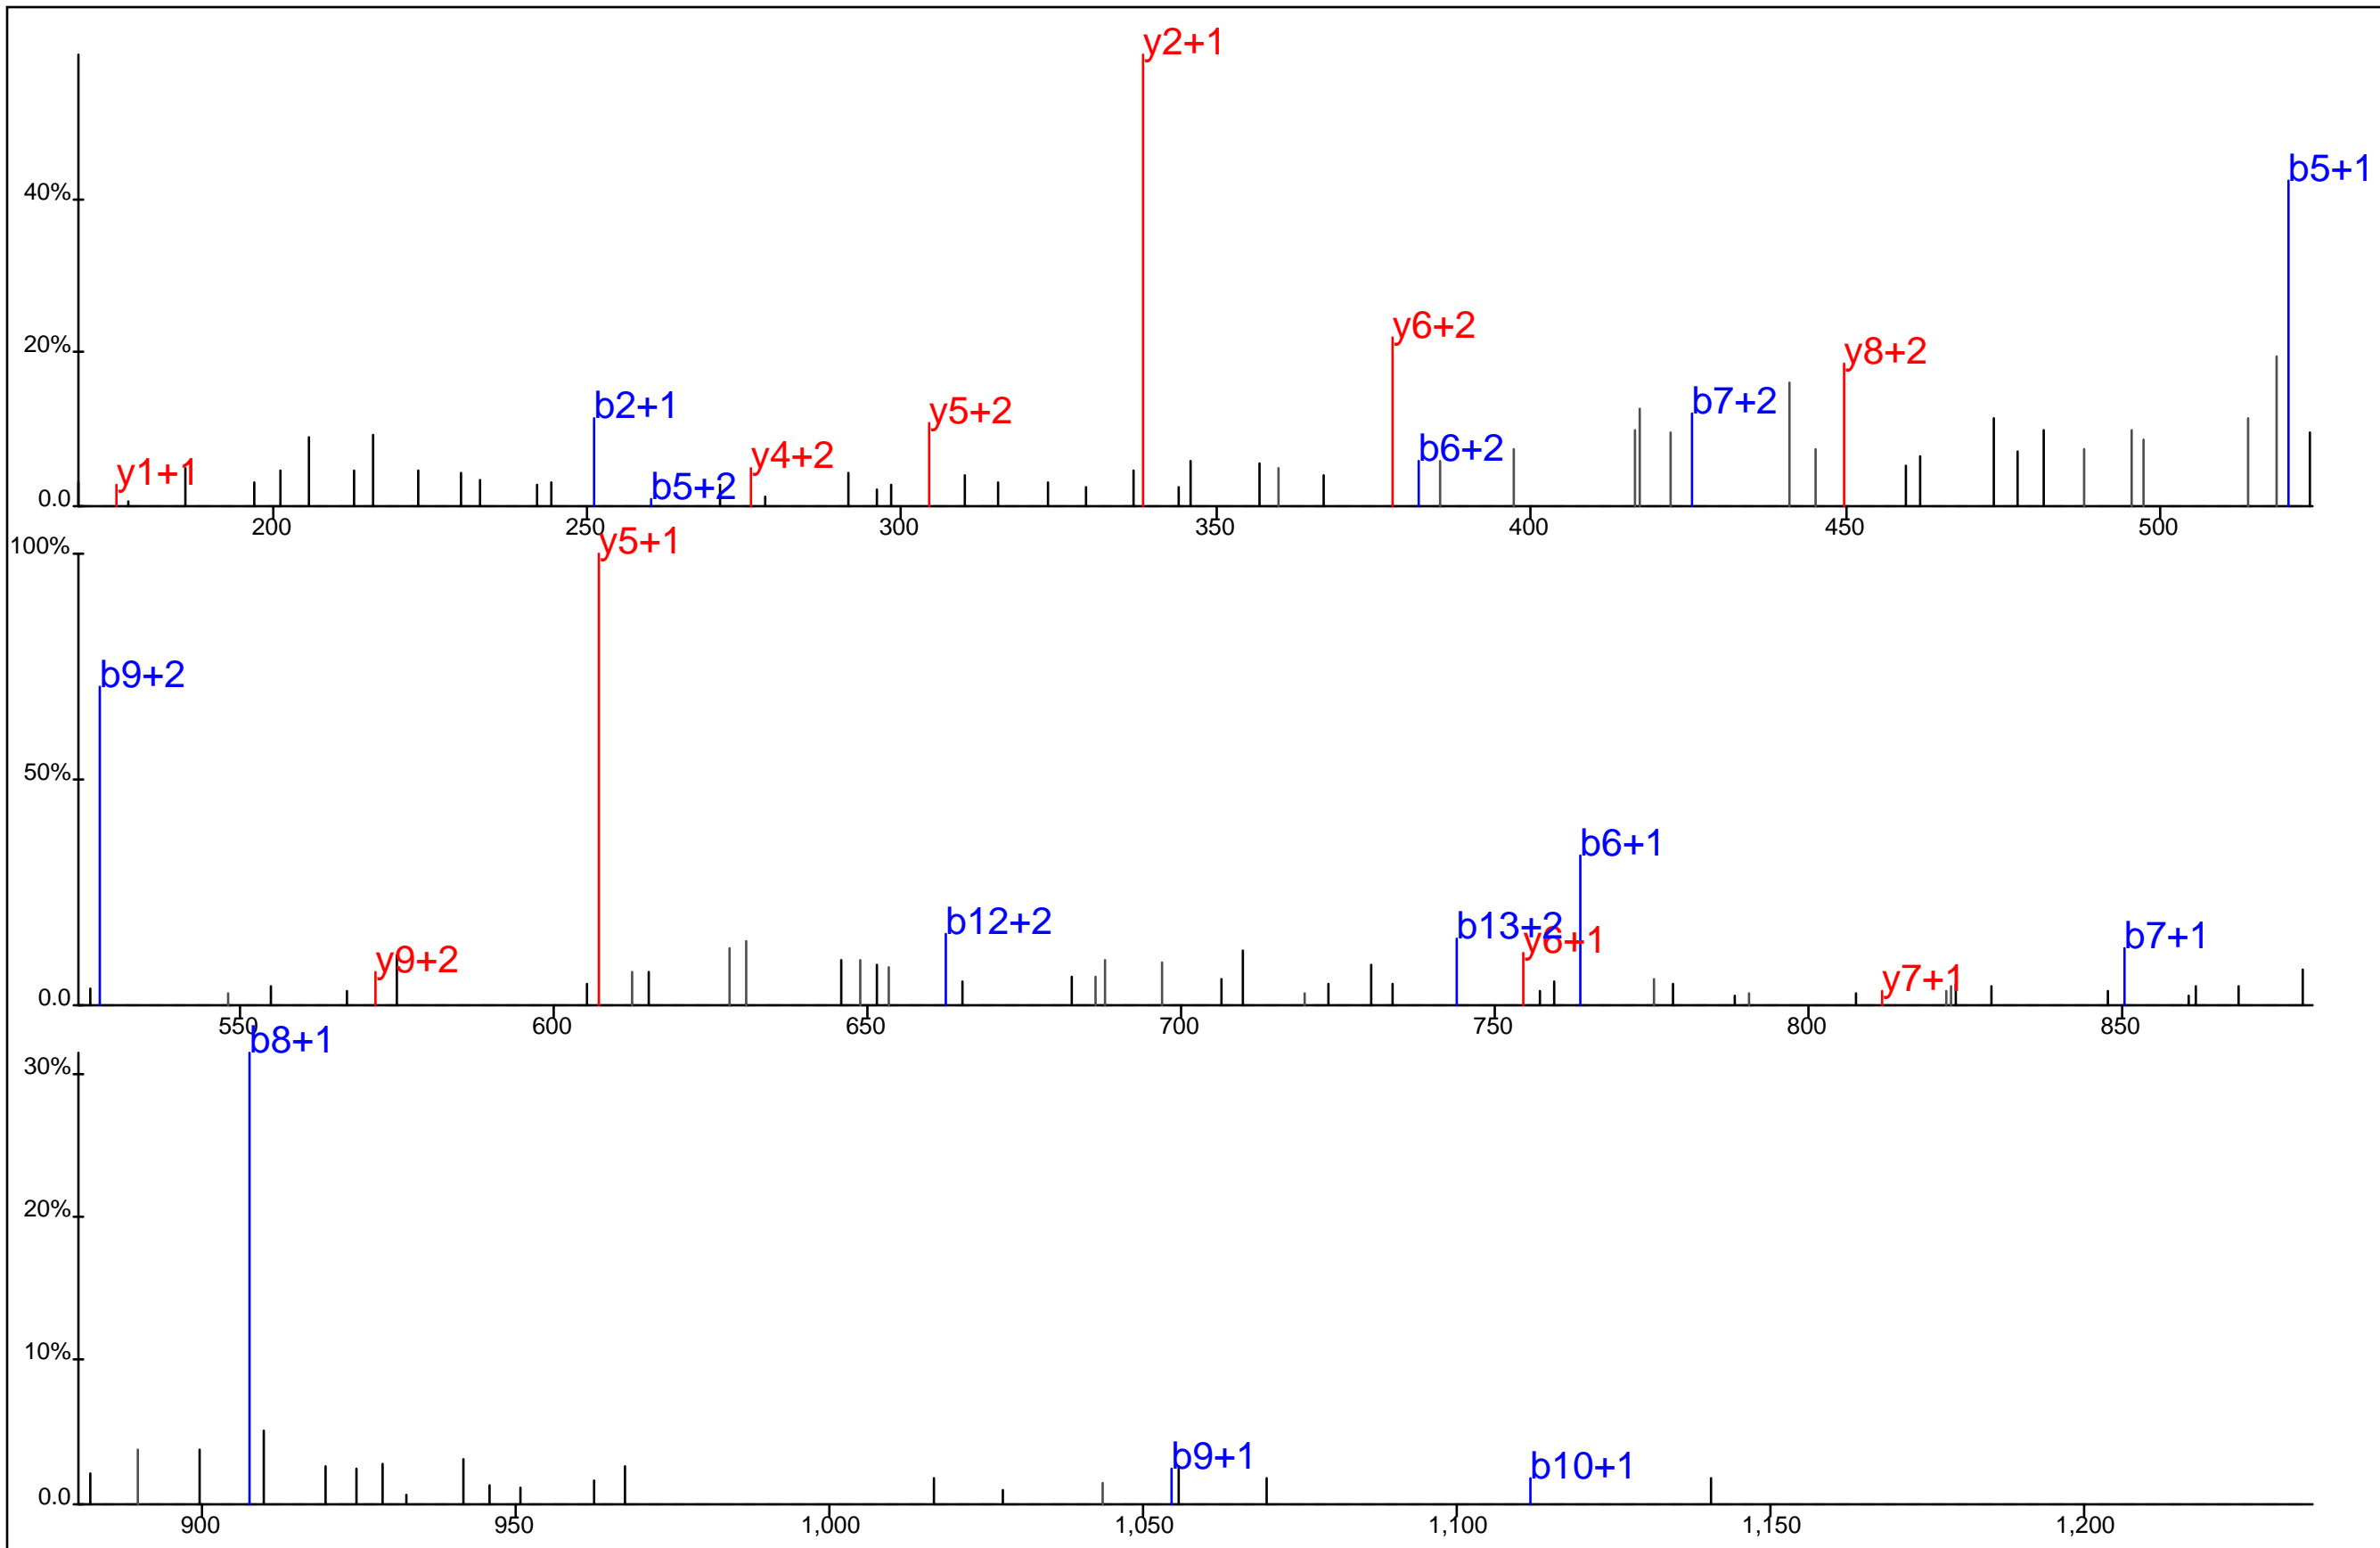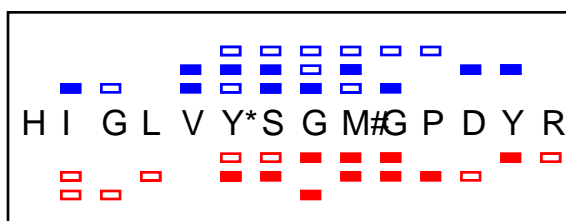

Protein Name: Proteasome subunit alpha type 2  
 gi Accession: 0  
 Precursor Mass: 554.2464+3  
 Delta Mass: 3.452 ppm  
 XCorr: 40.77



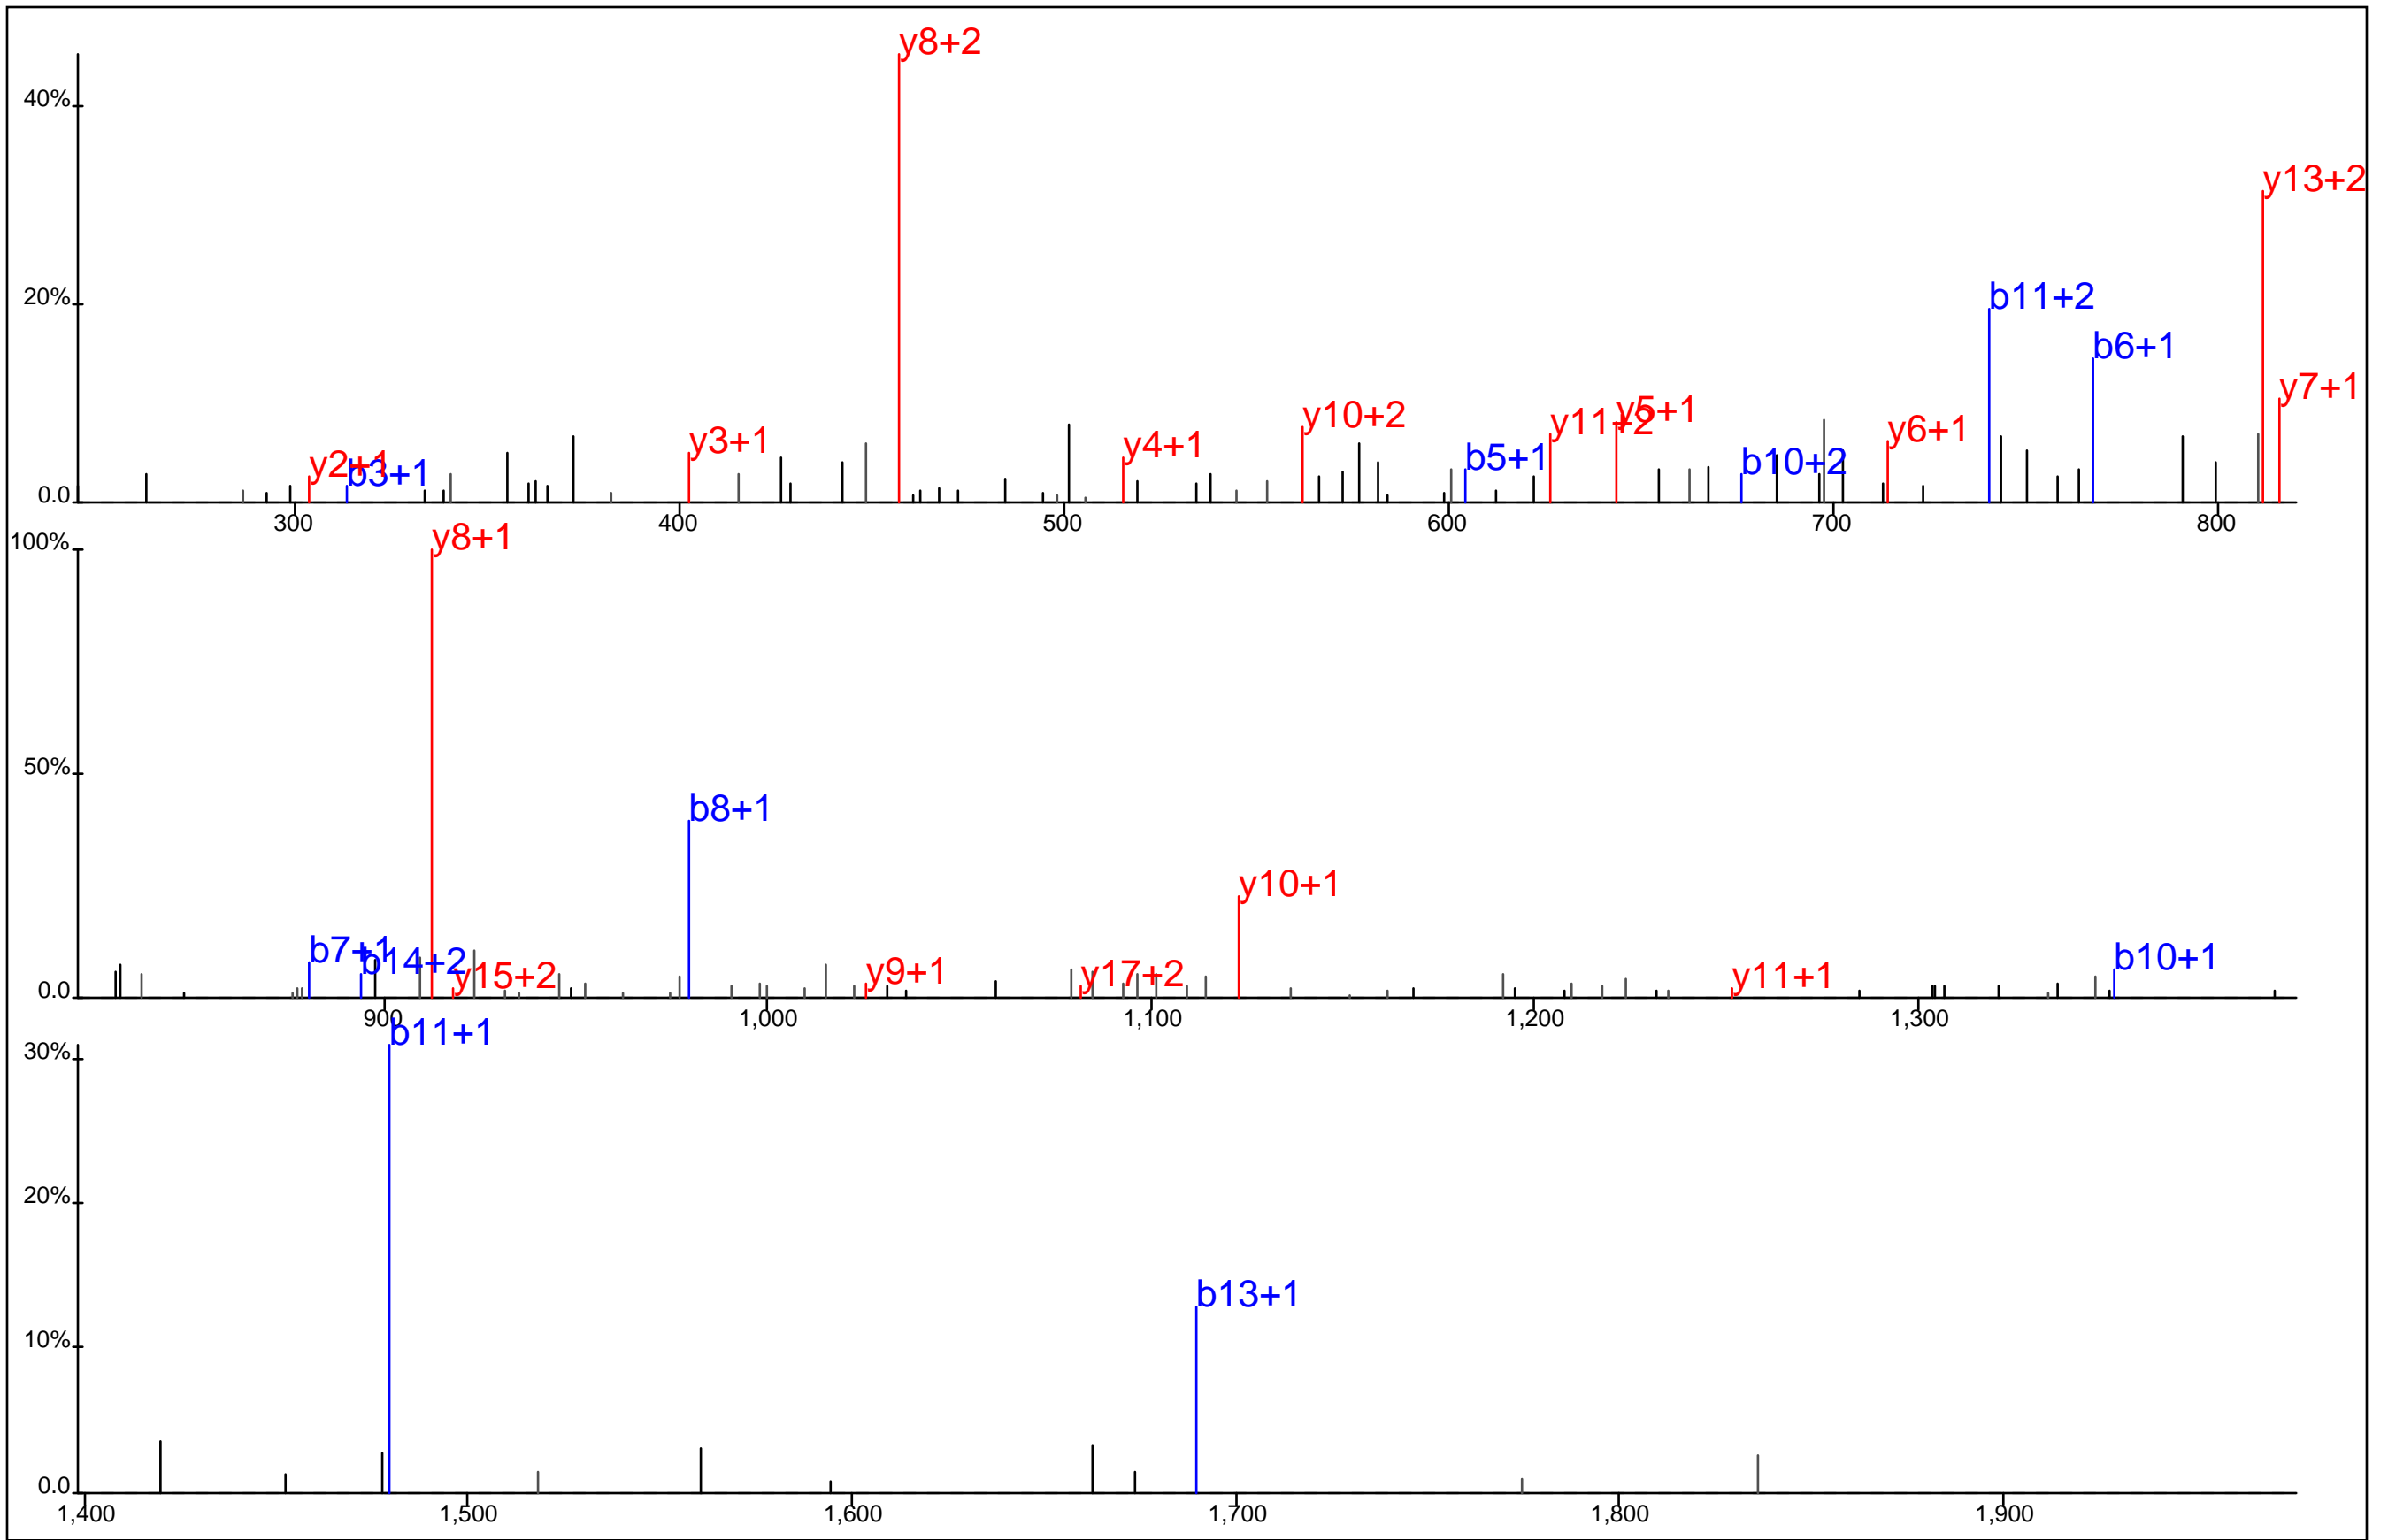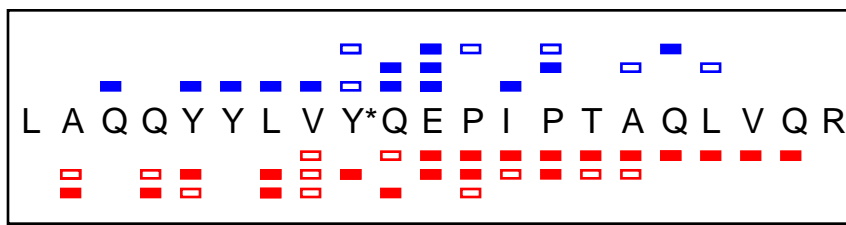

Protein Name: Proteasome subunit alpha type 2  
 gi Accession: 0  
 Precursor Mass: 867.7773+3  
 Delta Mass: 2.332 ppm  
 XCorr: 35.94

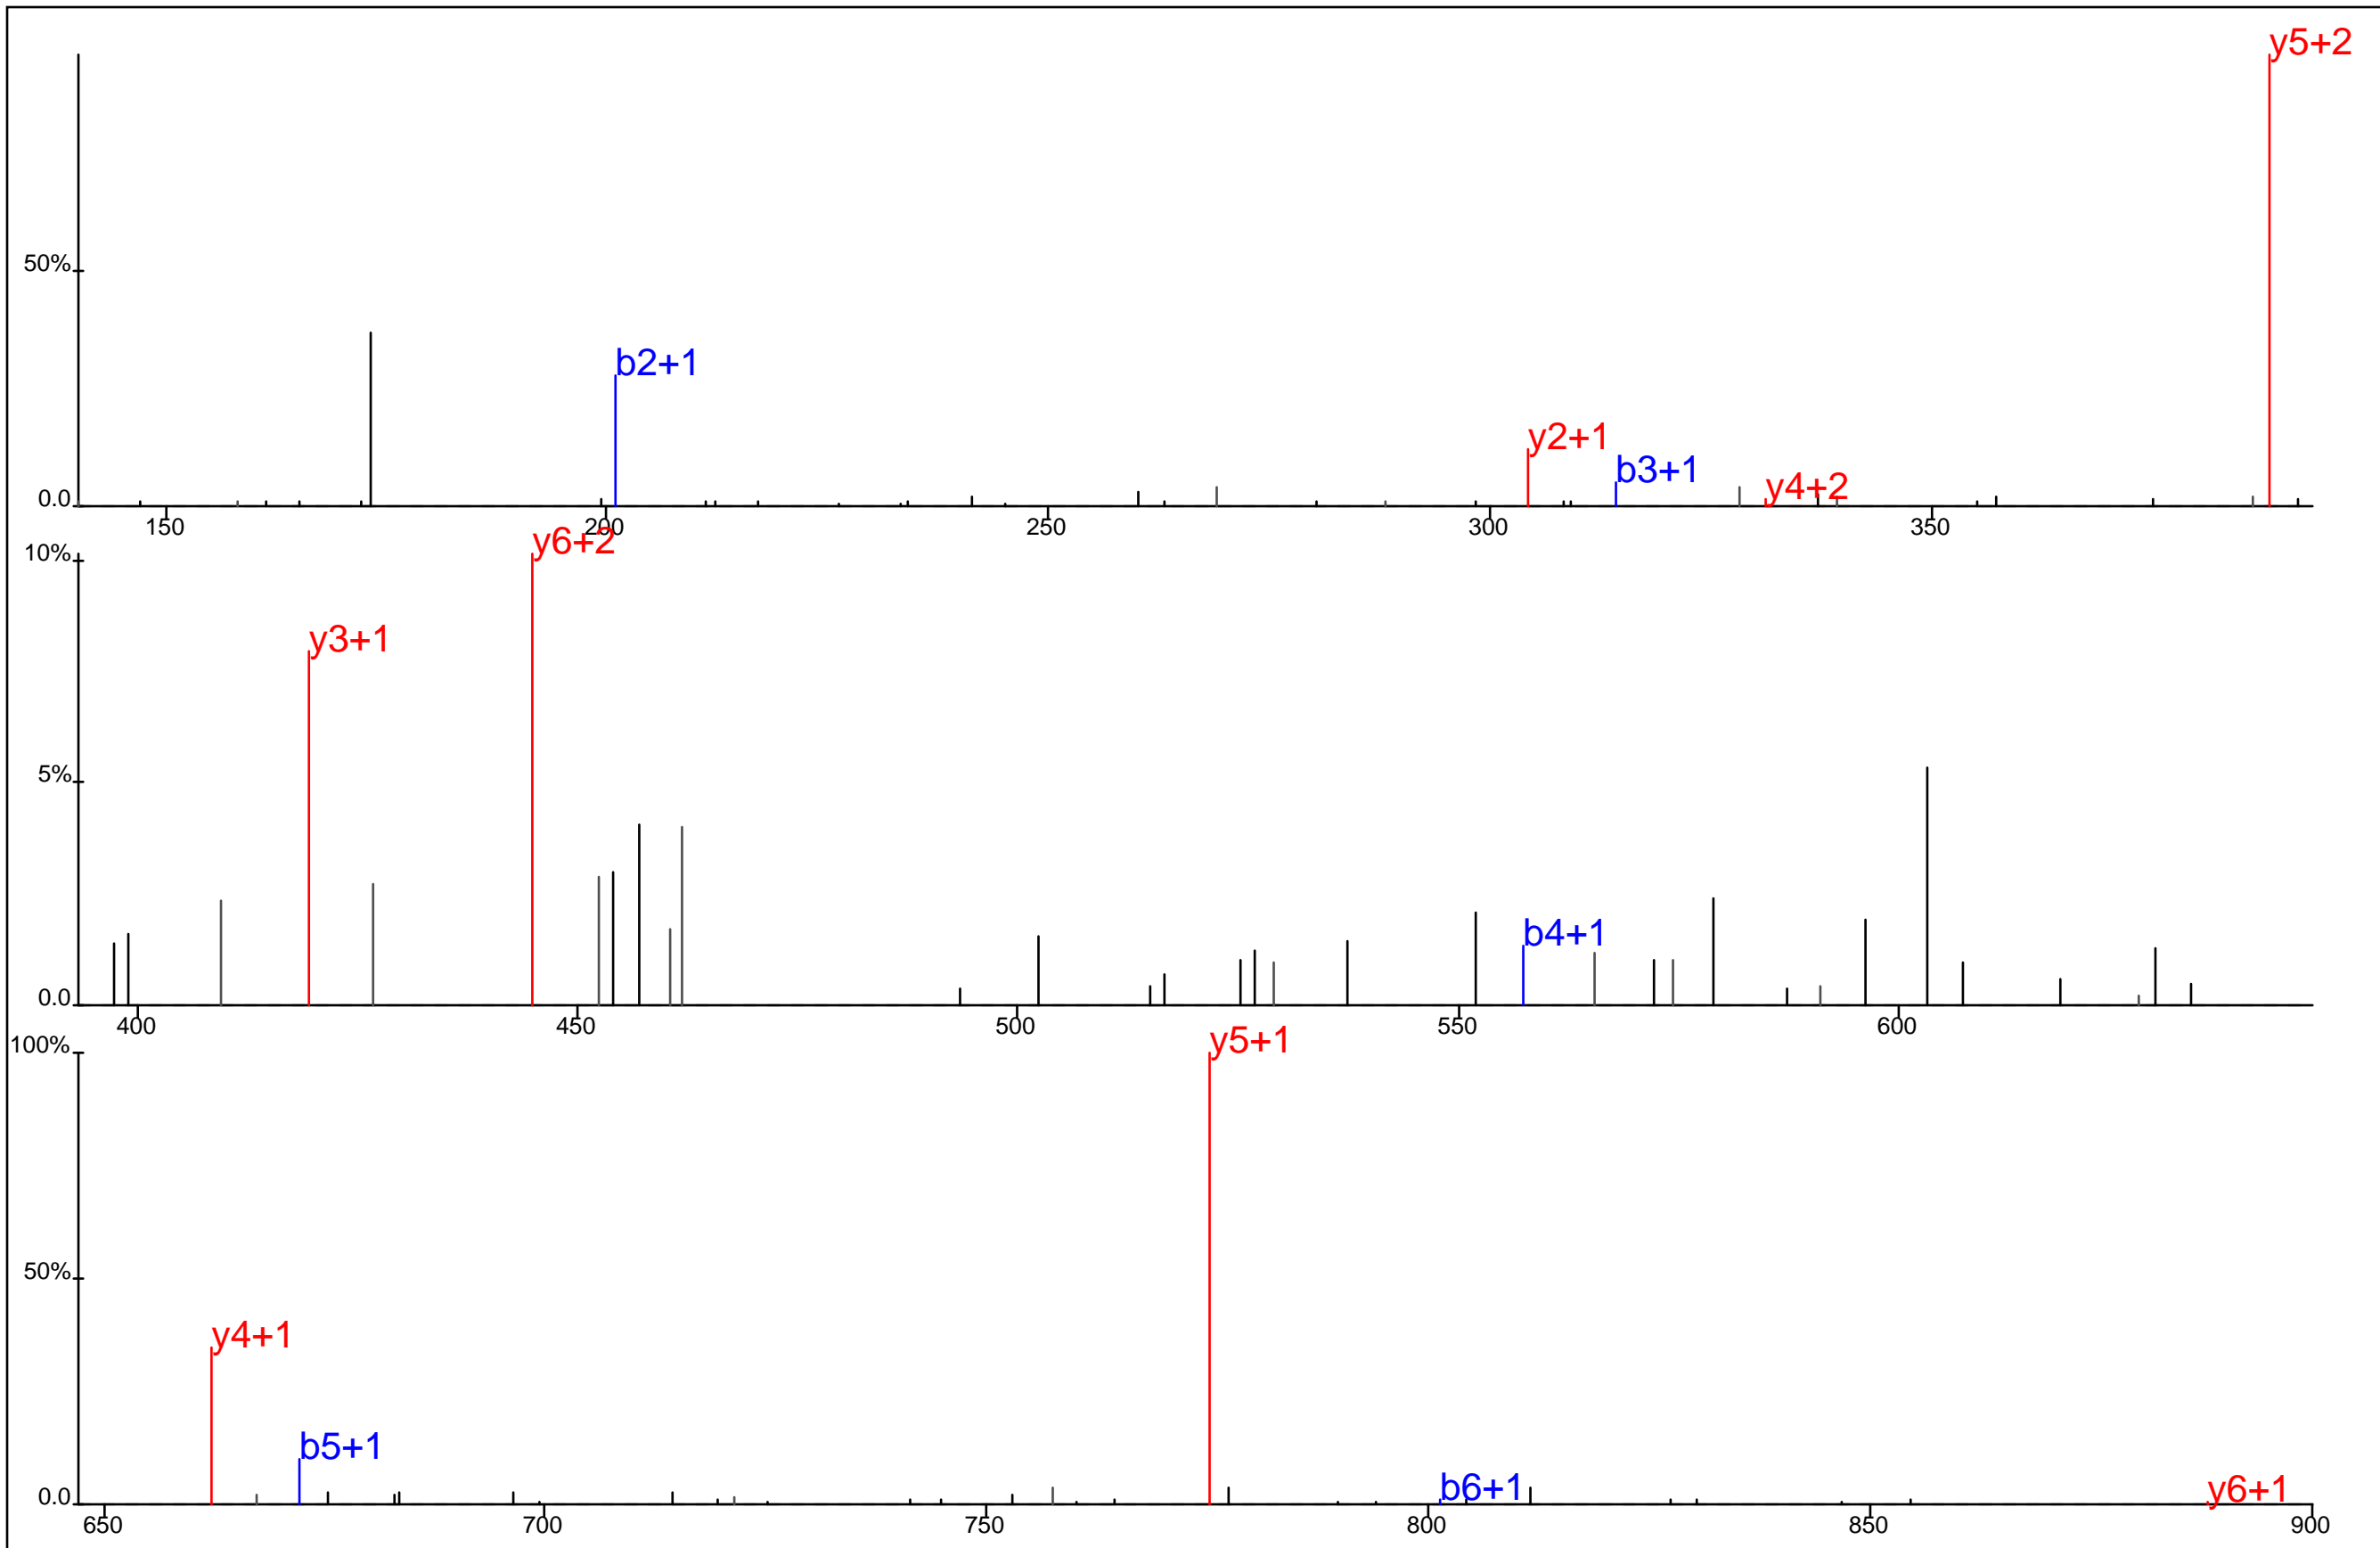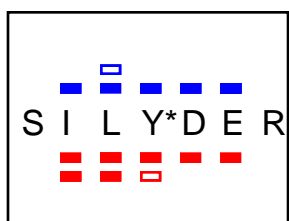

Protein Name: Proteasome subunit alpha type 2  
 gi Accession: 0  
 Precursor Mass: 488.2132+2  
 Delta Mass: 0.927 ppm  
 XCorr: 37.71

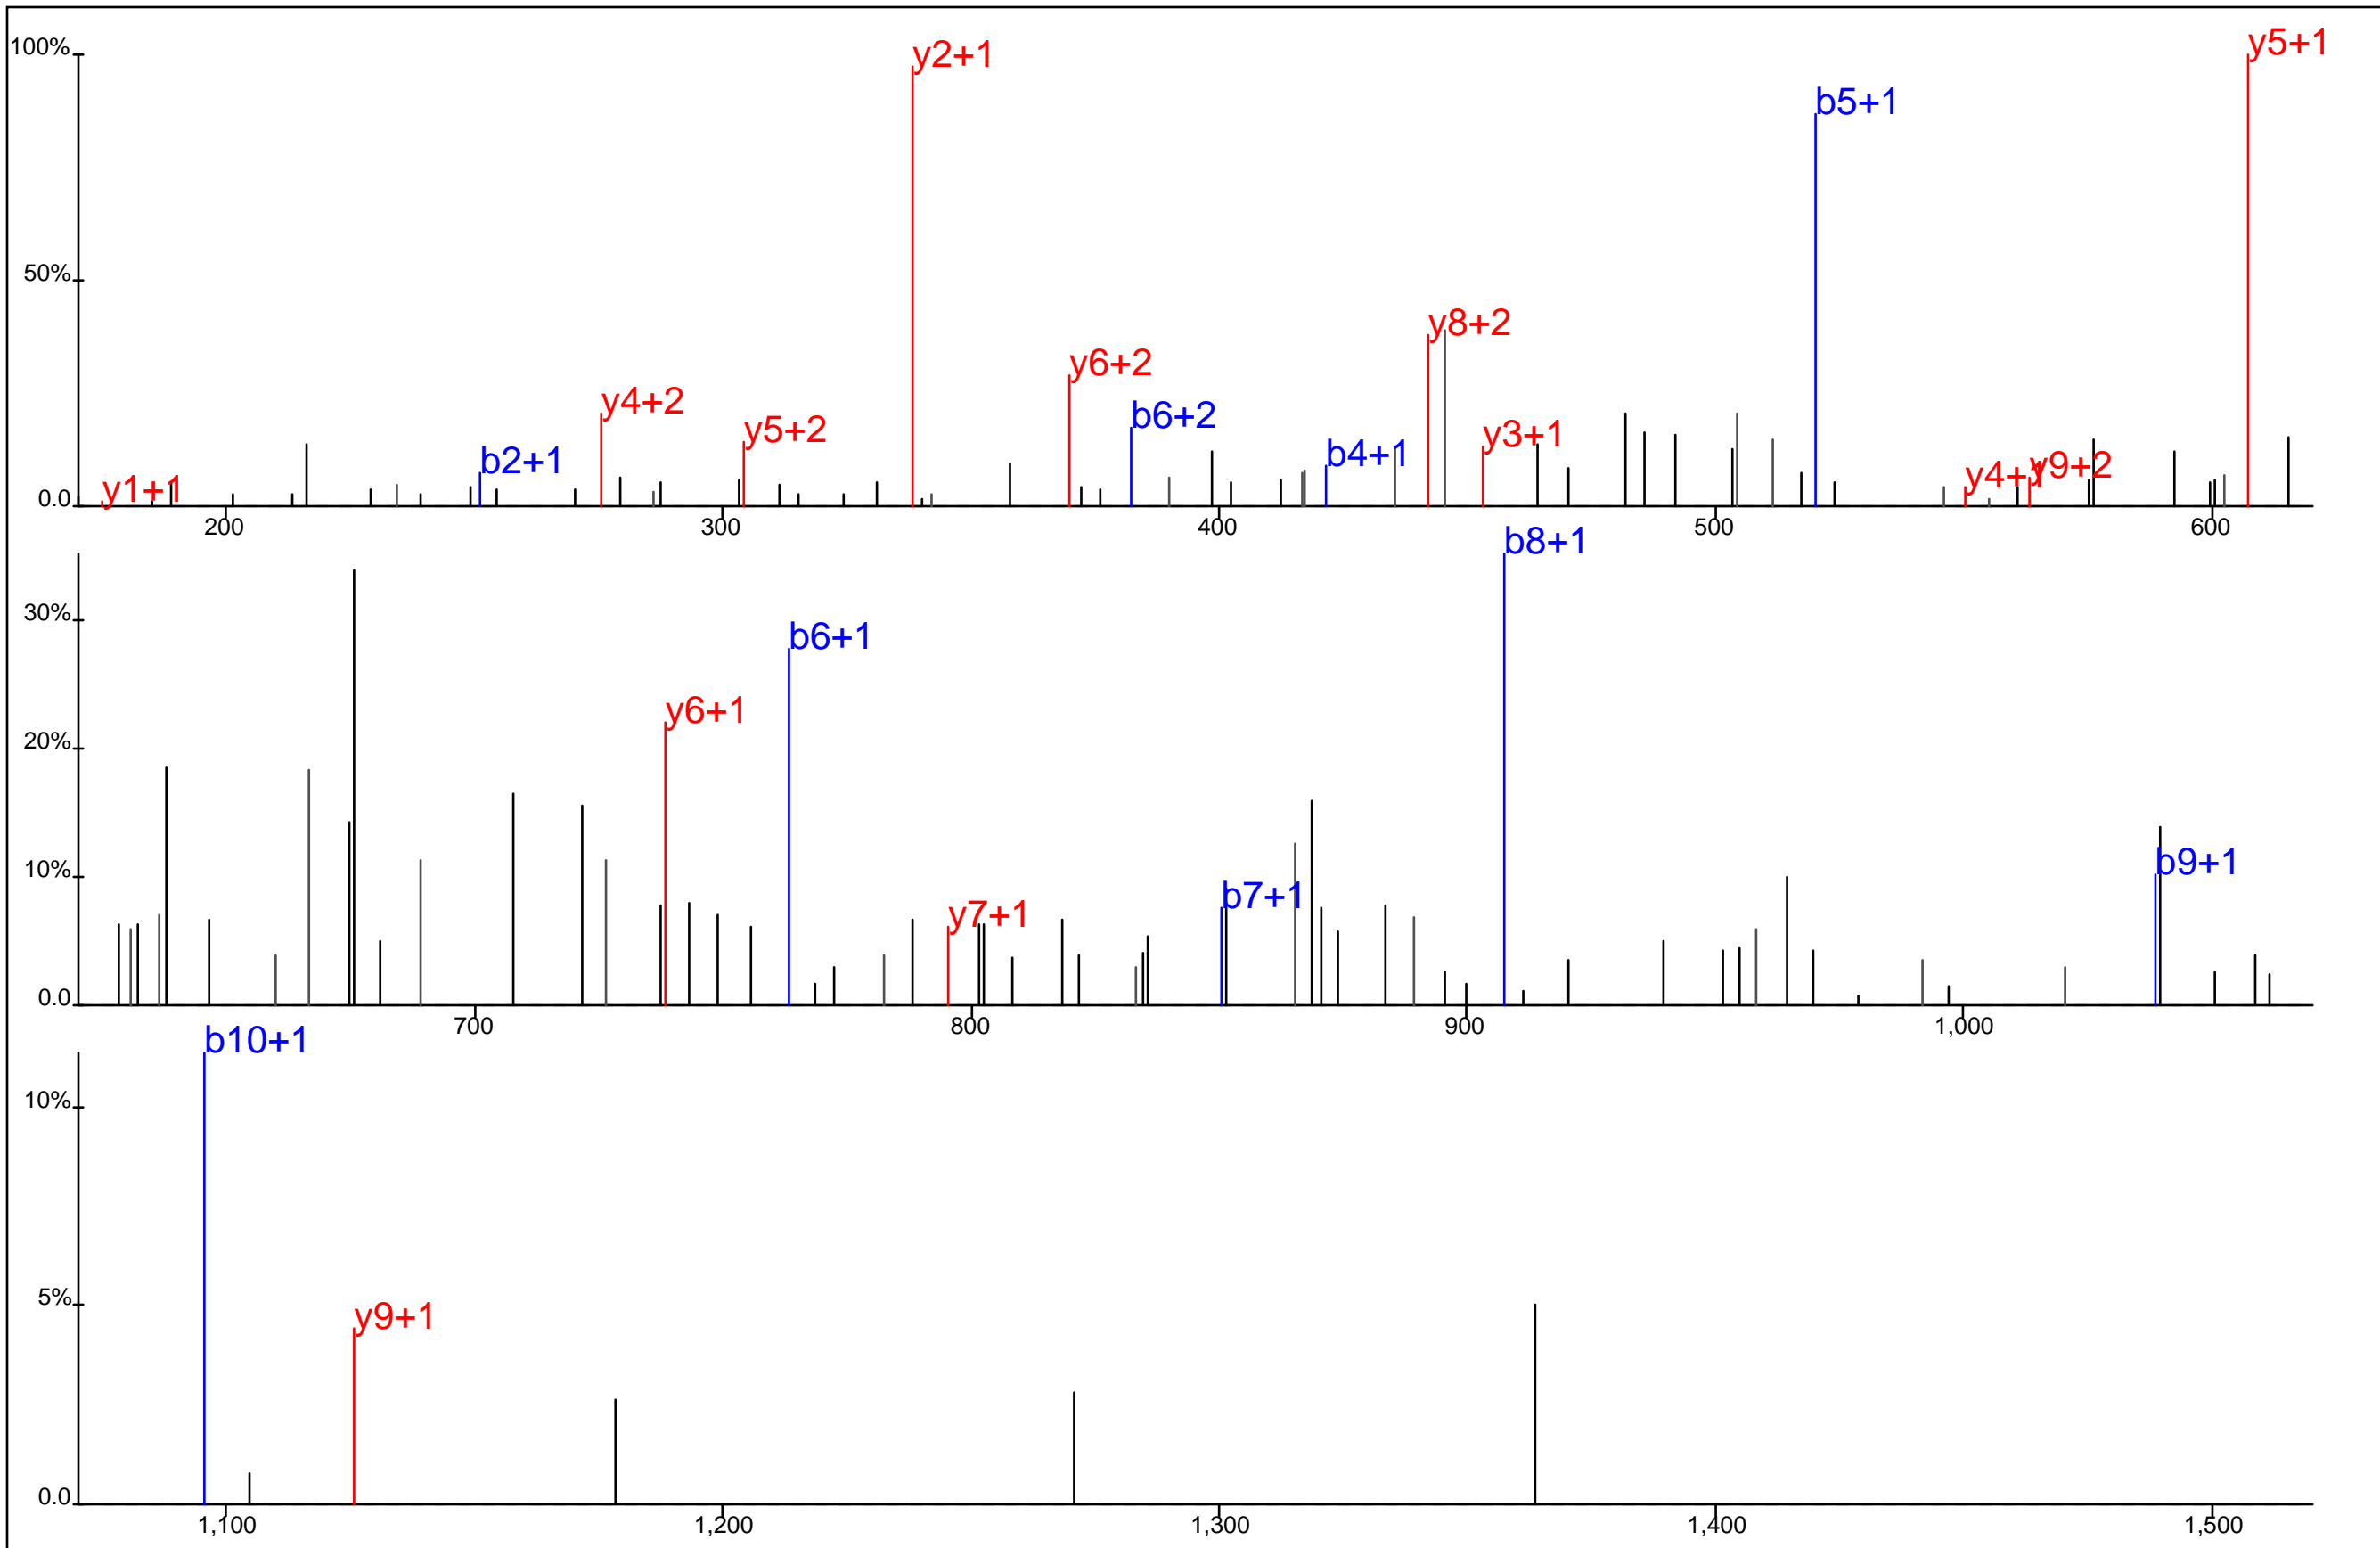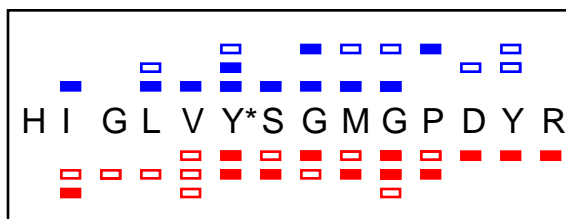

Protein Name: Proteasome subunit alpha type 2  
 gi Accession: 0  
 Precursor Mass: 548.9135+3  
 Delta Mass: 1.096 ppm  
 XCorr: 29.92

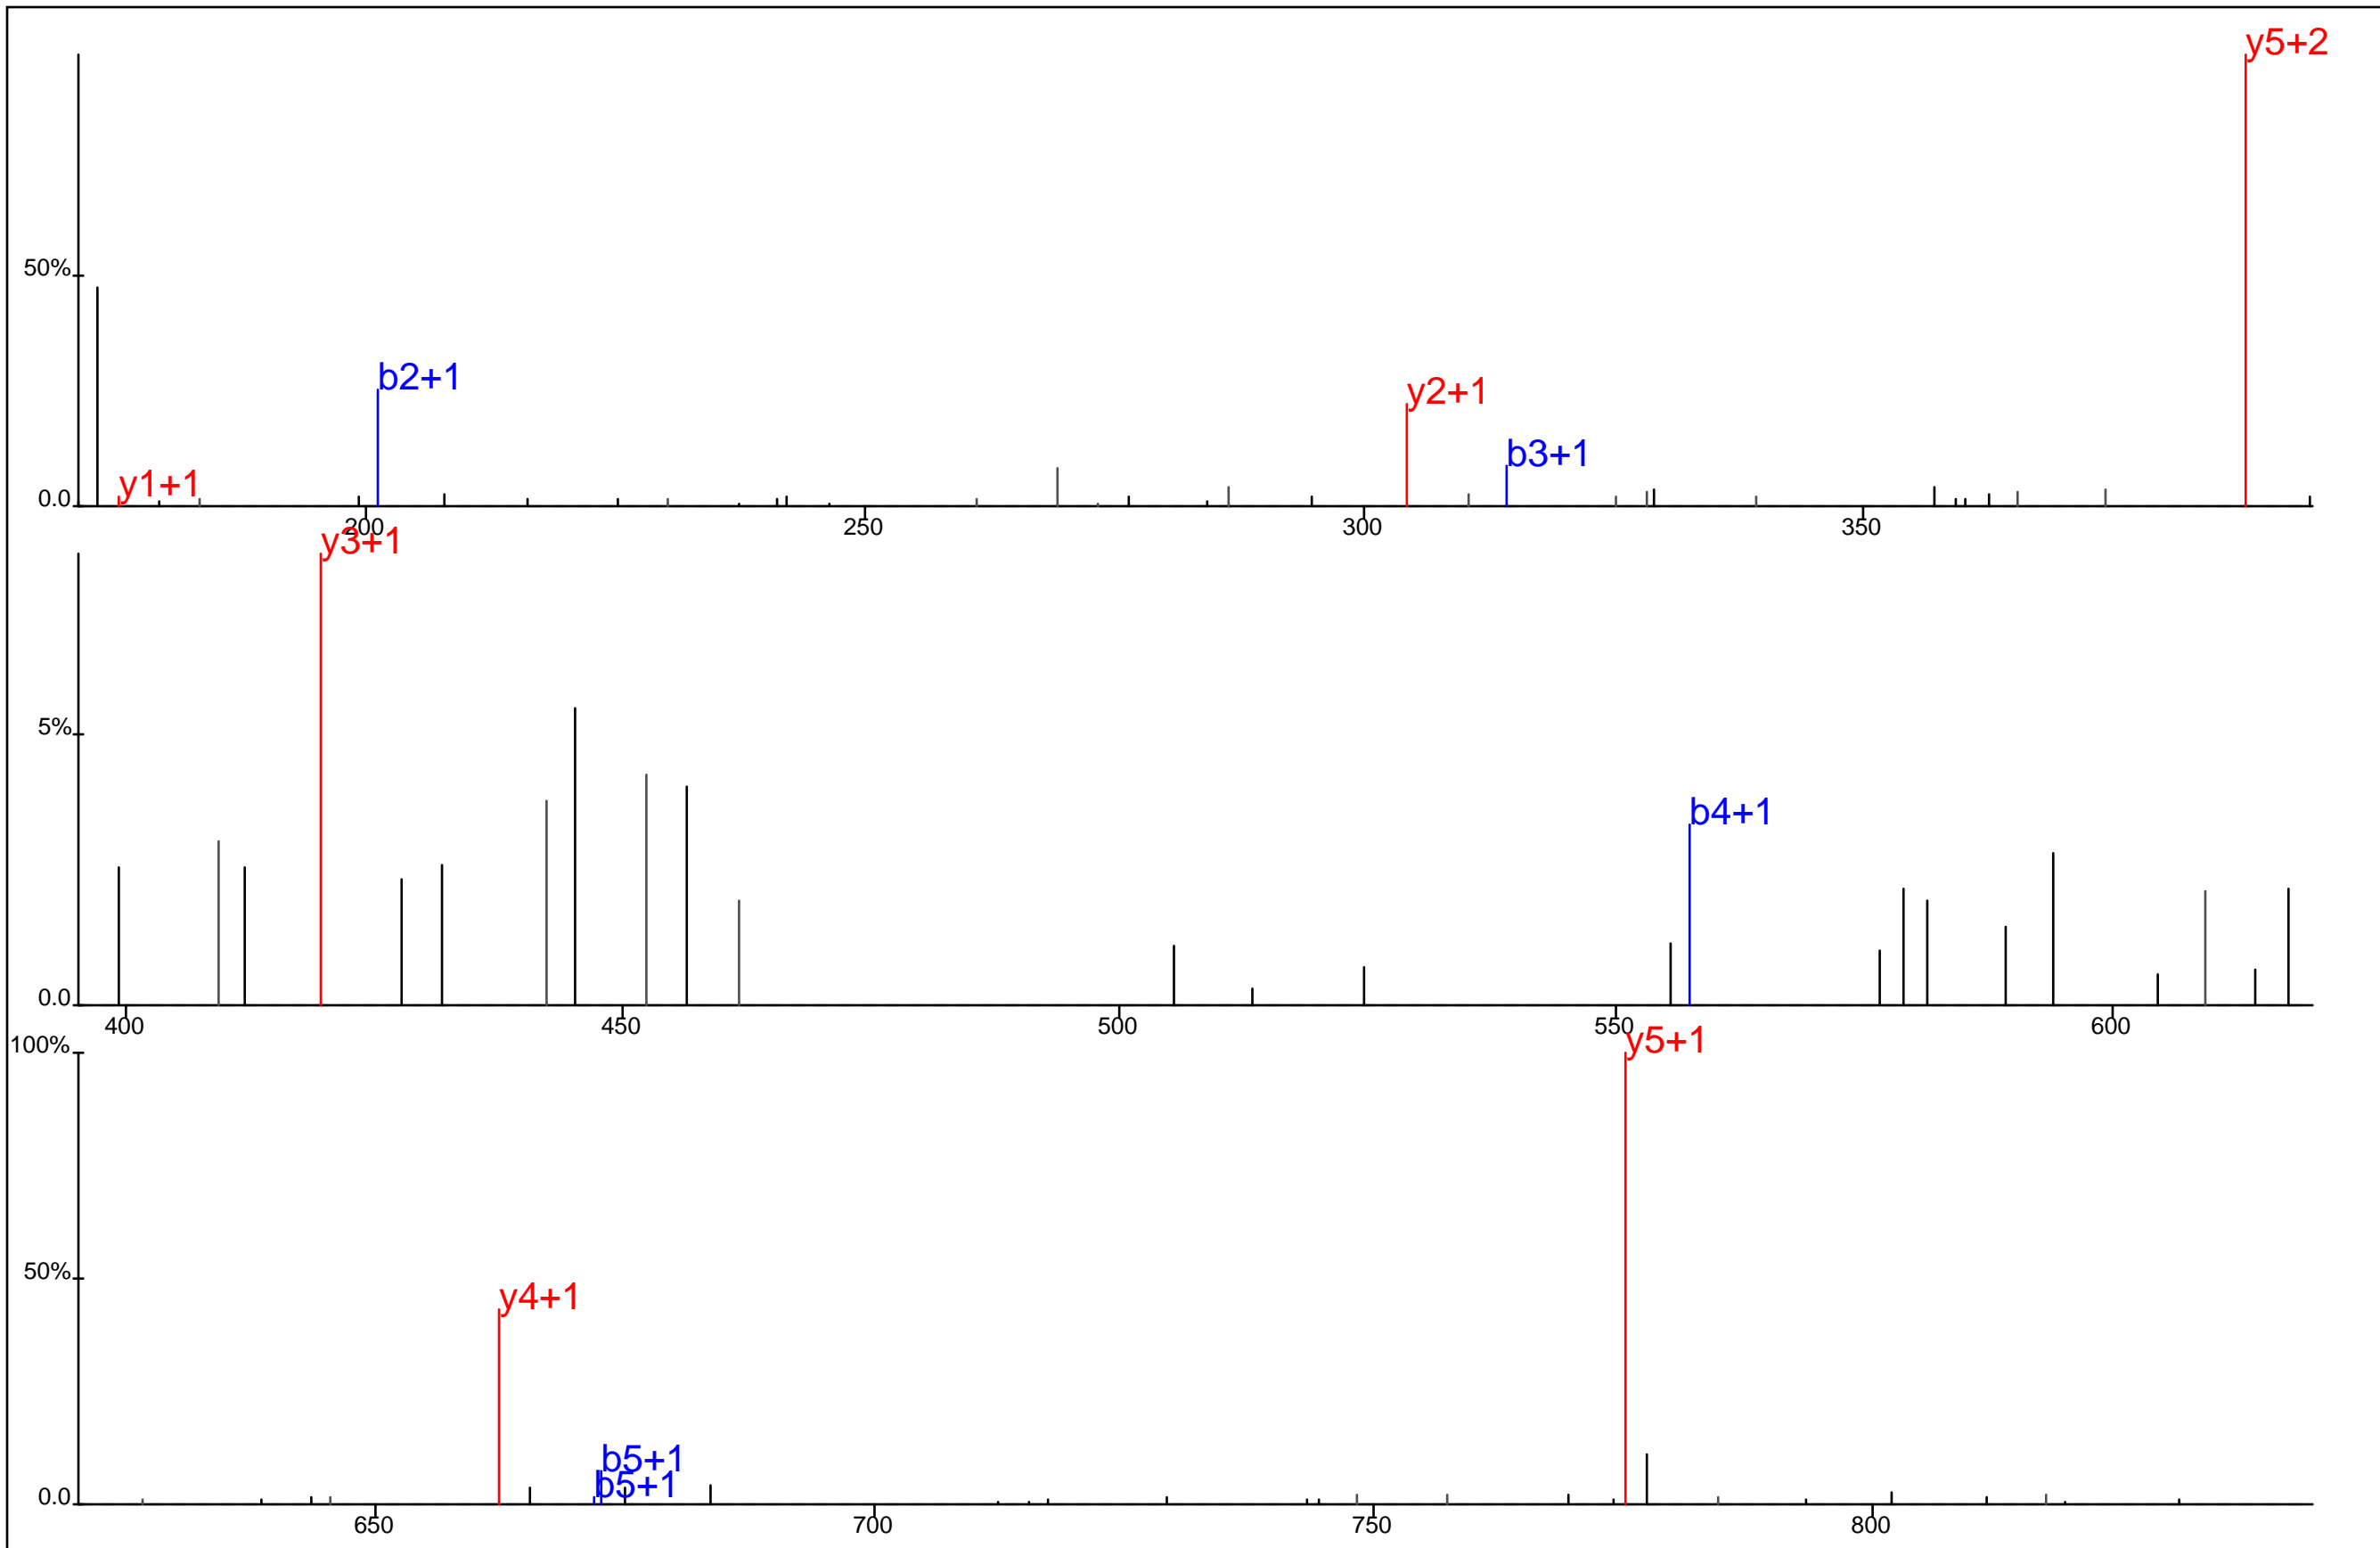

**S I L Y\* D E R**

Protein Name: Proteasome subunit alpha type 2  
 gi Accession: 0  
 Precursor Mass: 488.2130+2  
 Delta Mass: 0.426 ppm  
 XCorr: 25.65

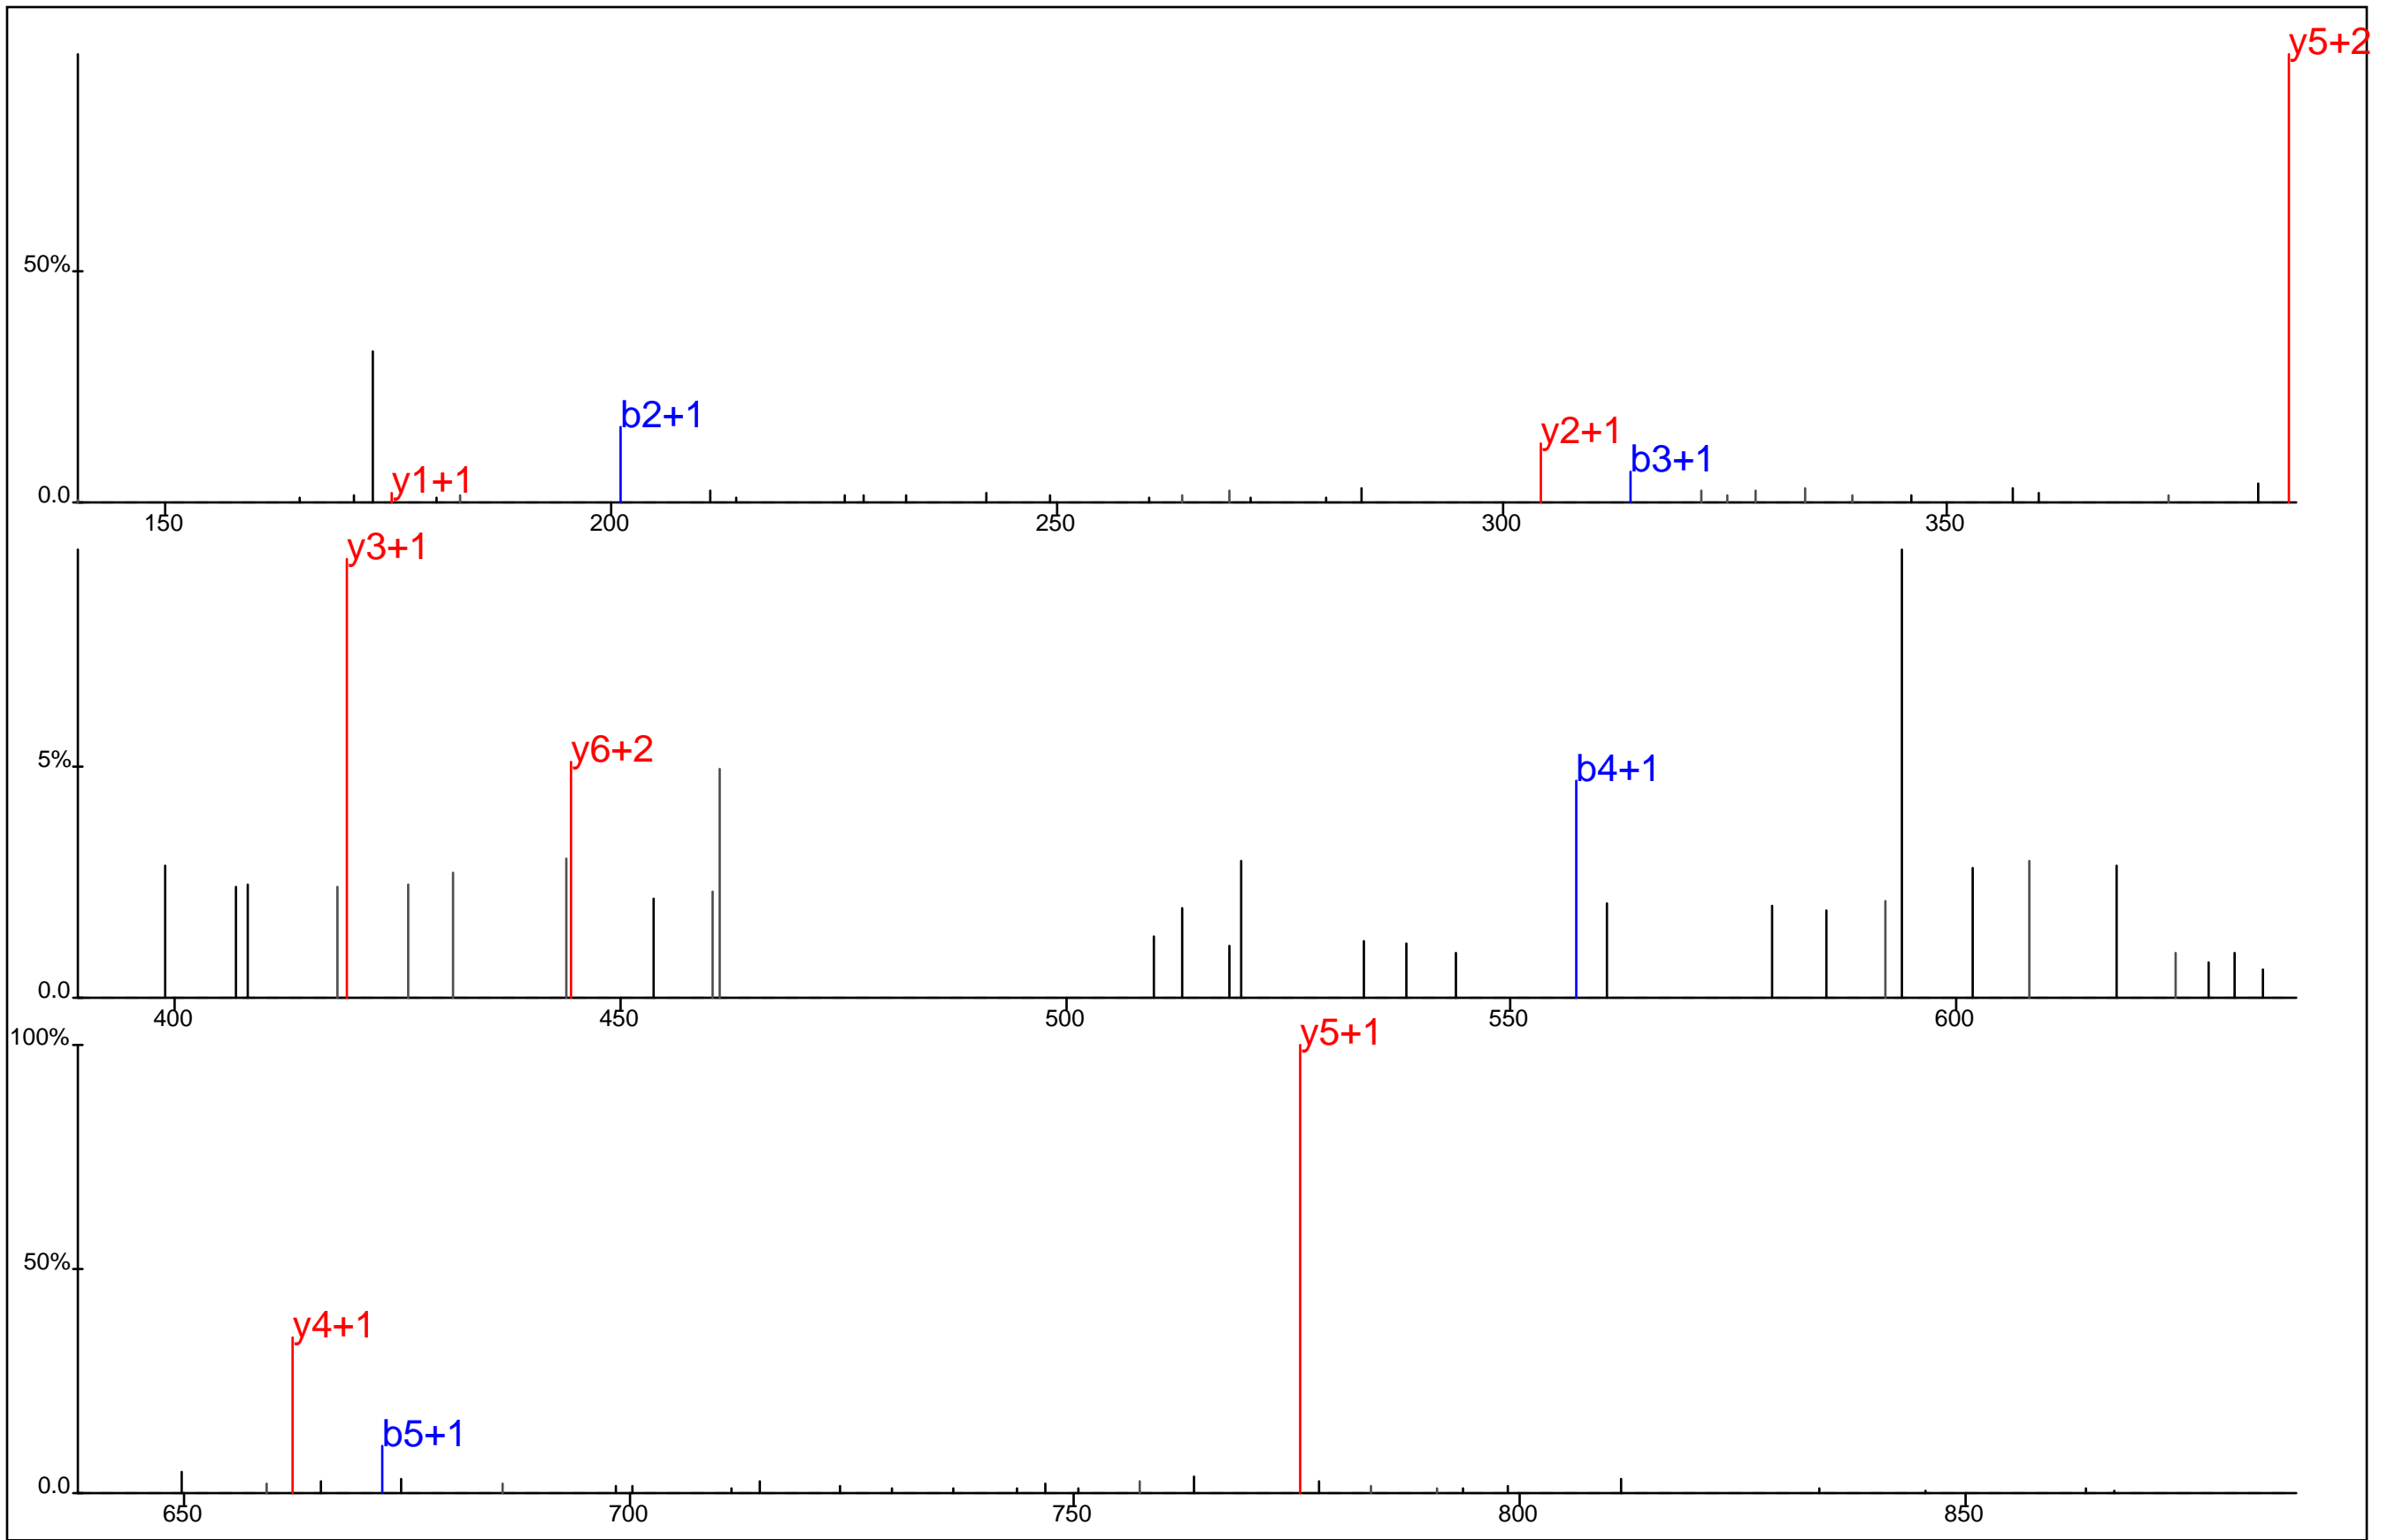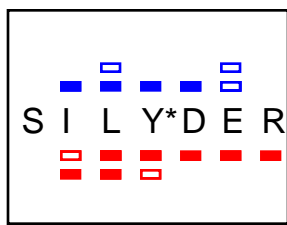

Protein Name: Proteasome subunit alpha type 2  
 gi Accession: 0  
 Precursor Mass: 488.2130+2  
 Delta Mass: 0.490 ppm  
 XCorr: 26.14

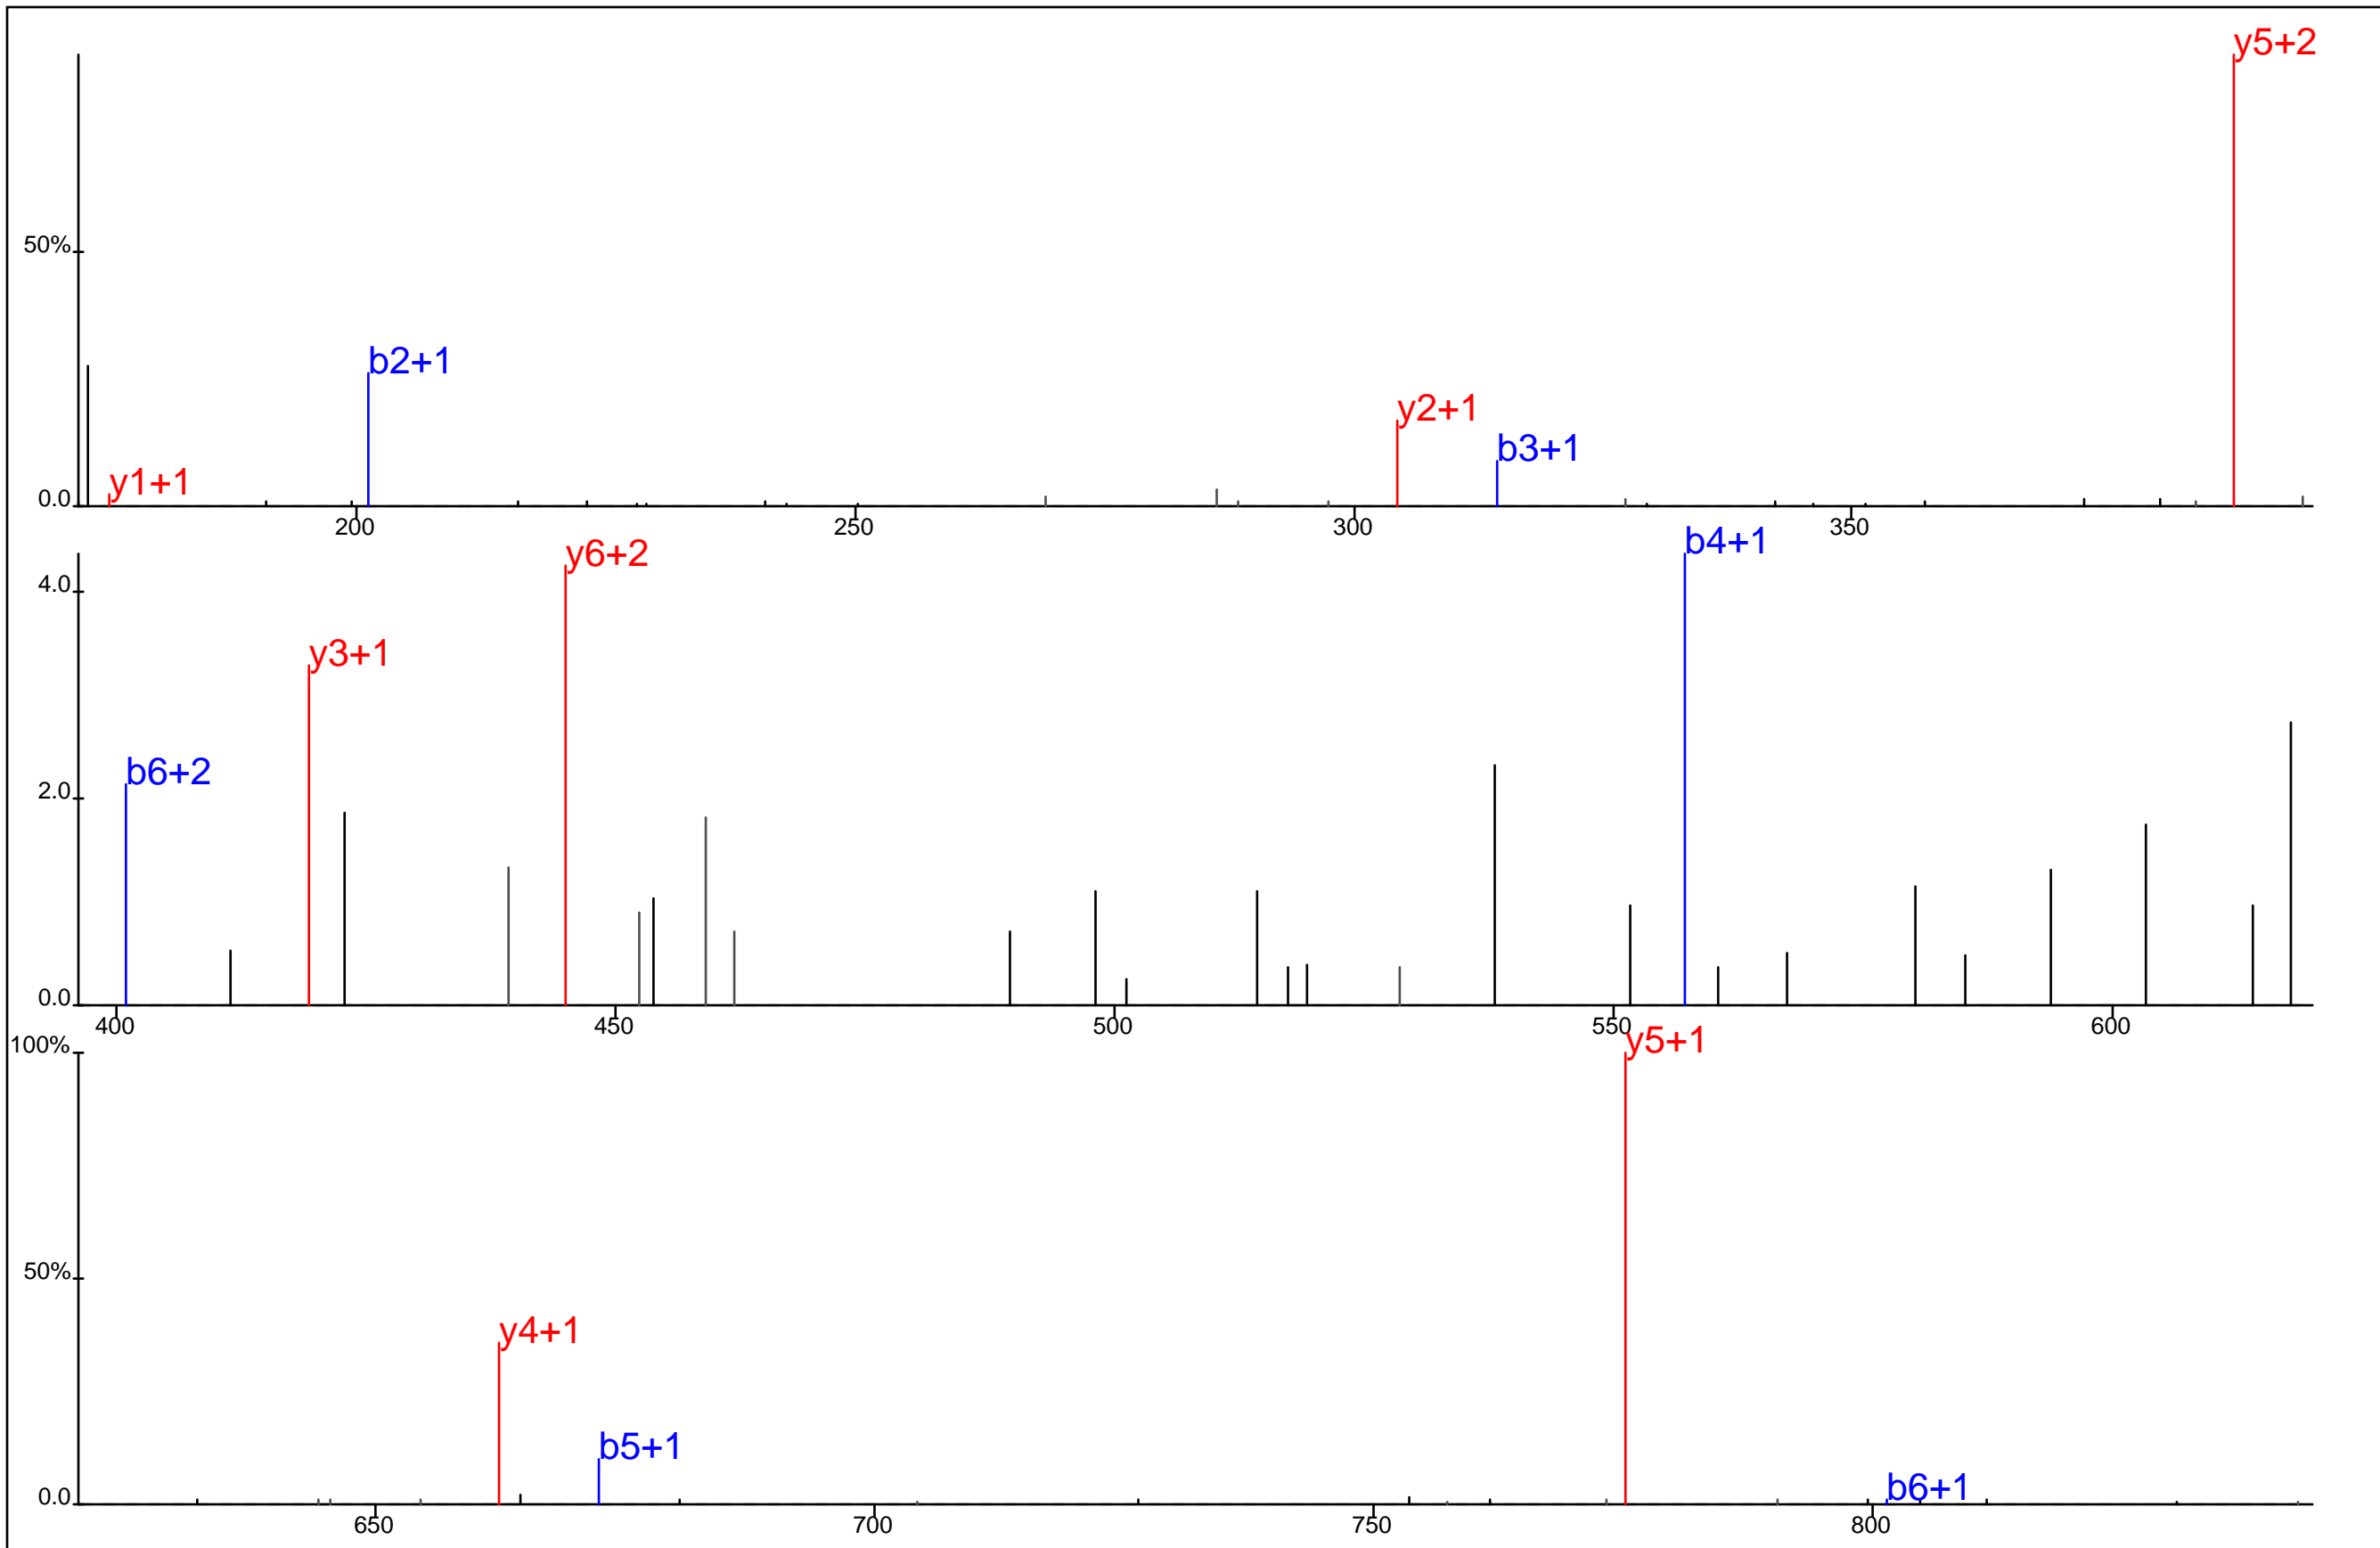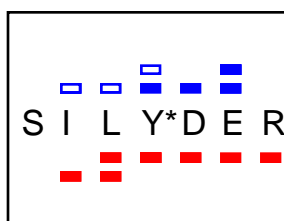

Protein Name: Proteasome subunit alpha type 2  
 gi Accession: 0  
 Precursor Mass: 488.2127+2  
 Delta Mass: 0.135 ppm  
 XCorr: 32.45

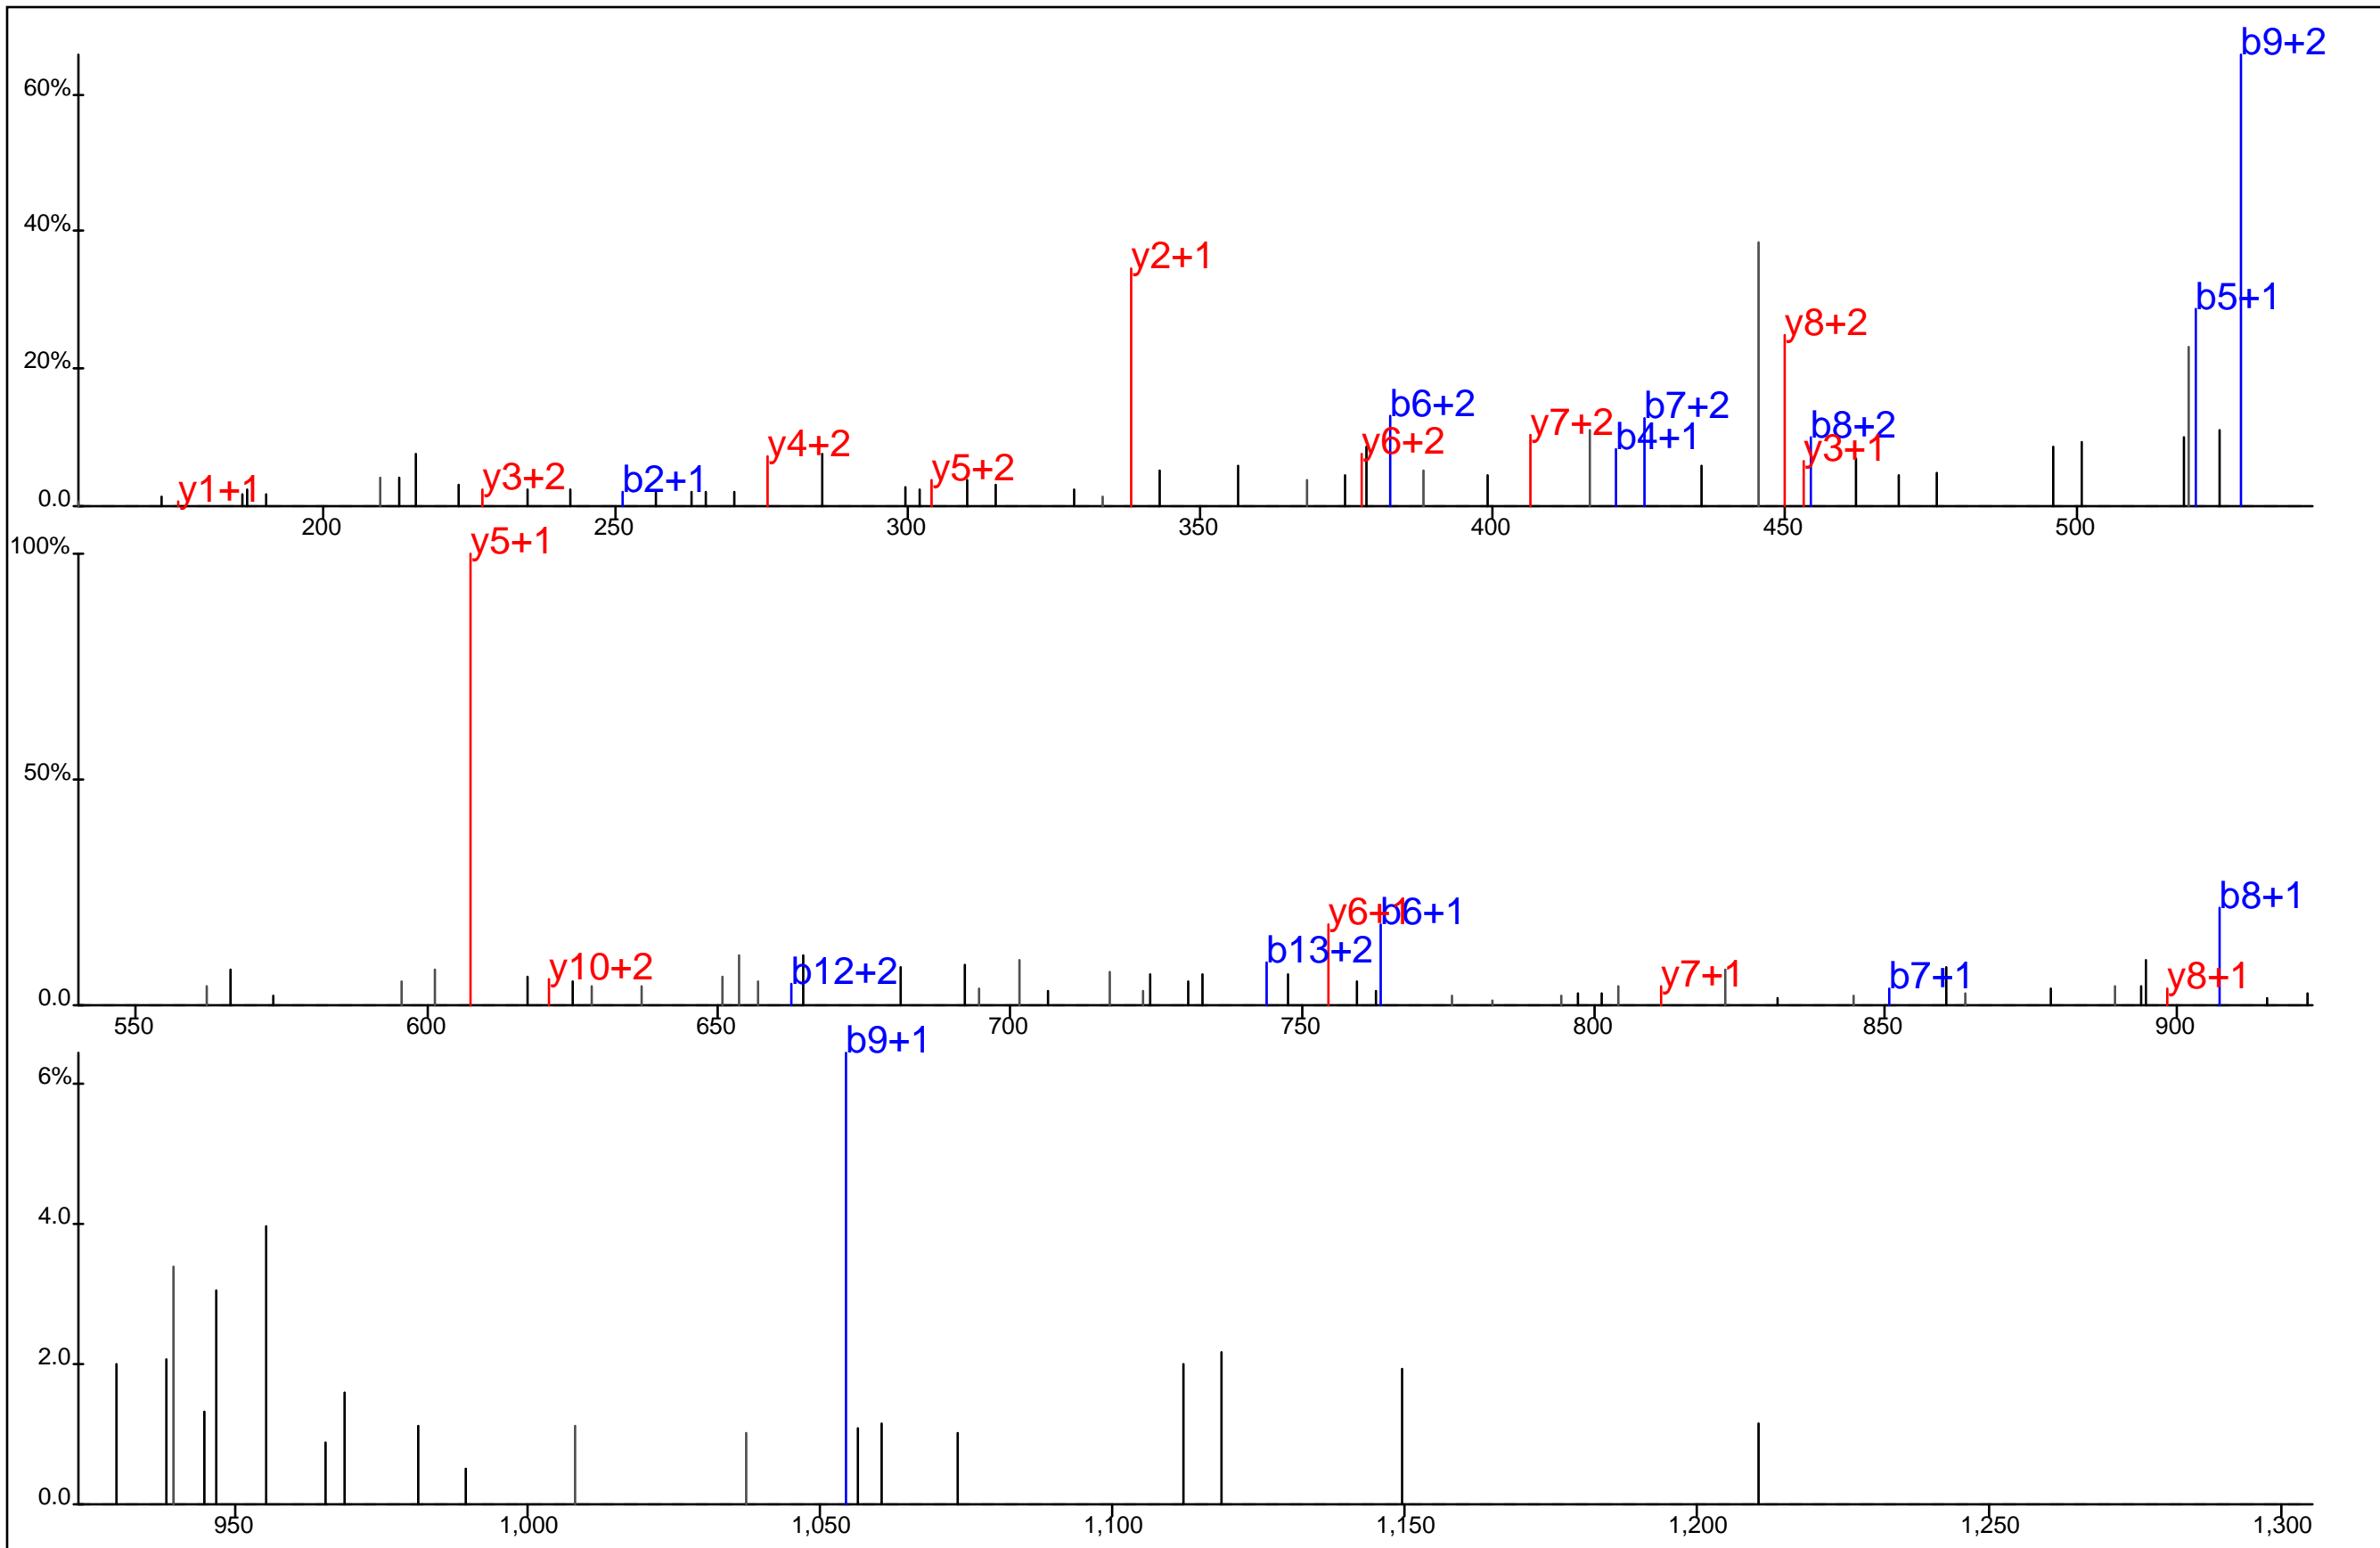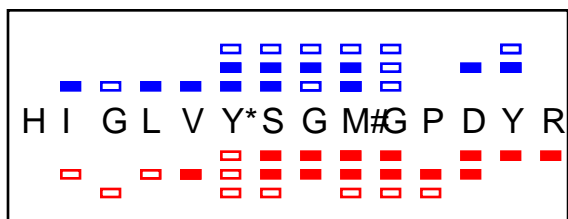

Protein Name: Proteasome subunit alpha type 2  
 gi Accession: 0  
 Precursor Mass: 554.2443+3  
 Delta Mass: 0.296 ppm  
 XCorr: 23.41

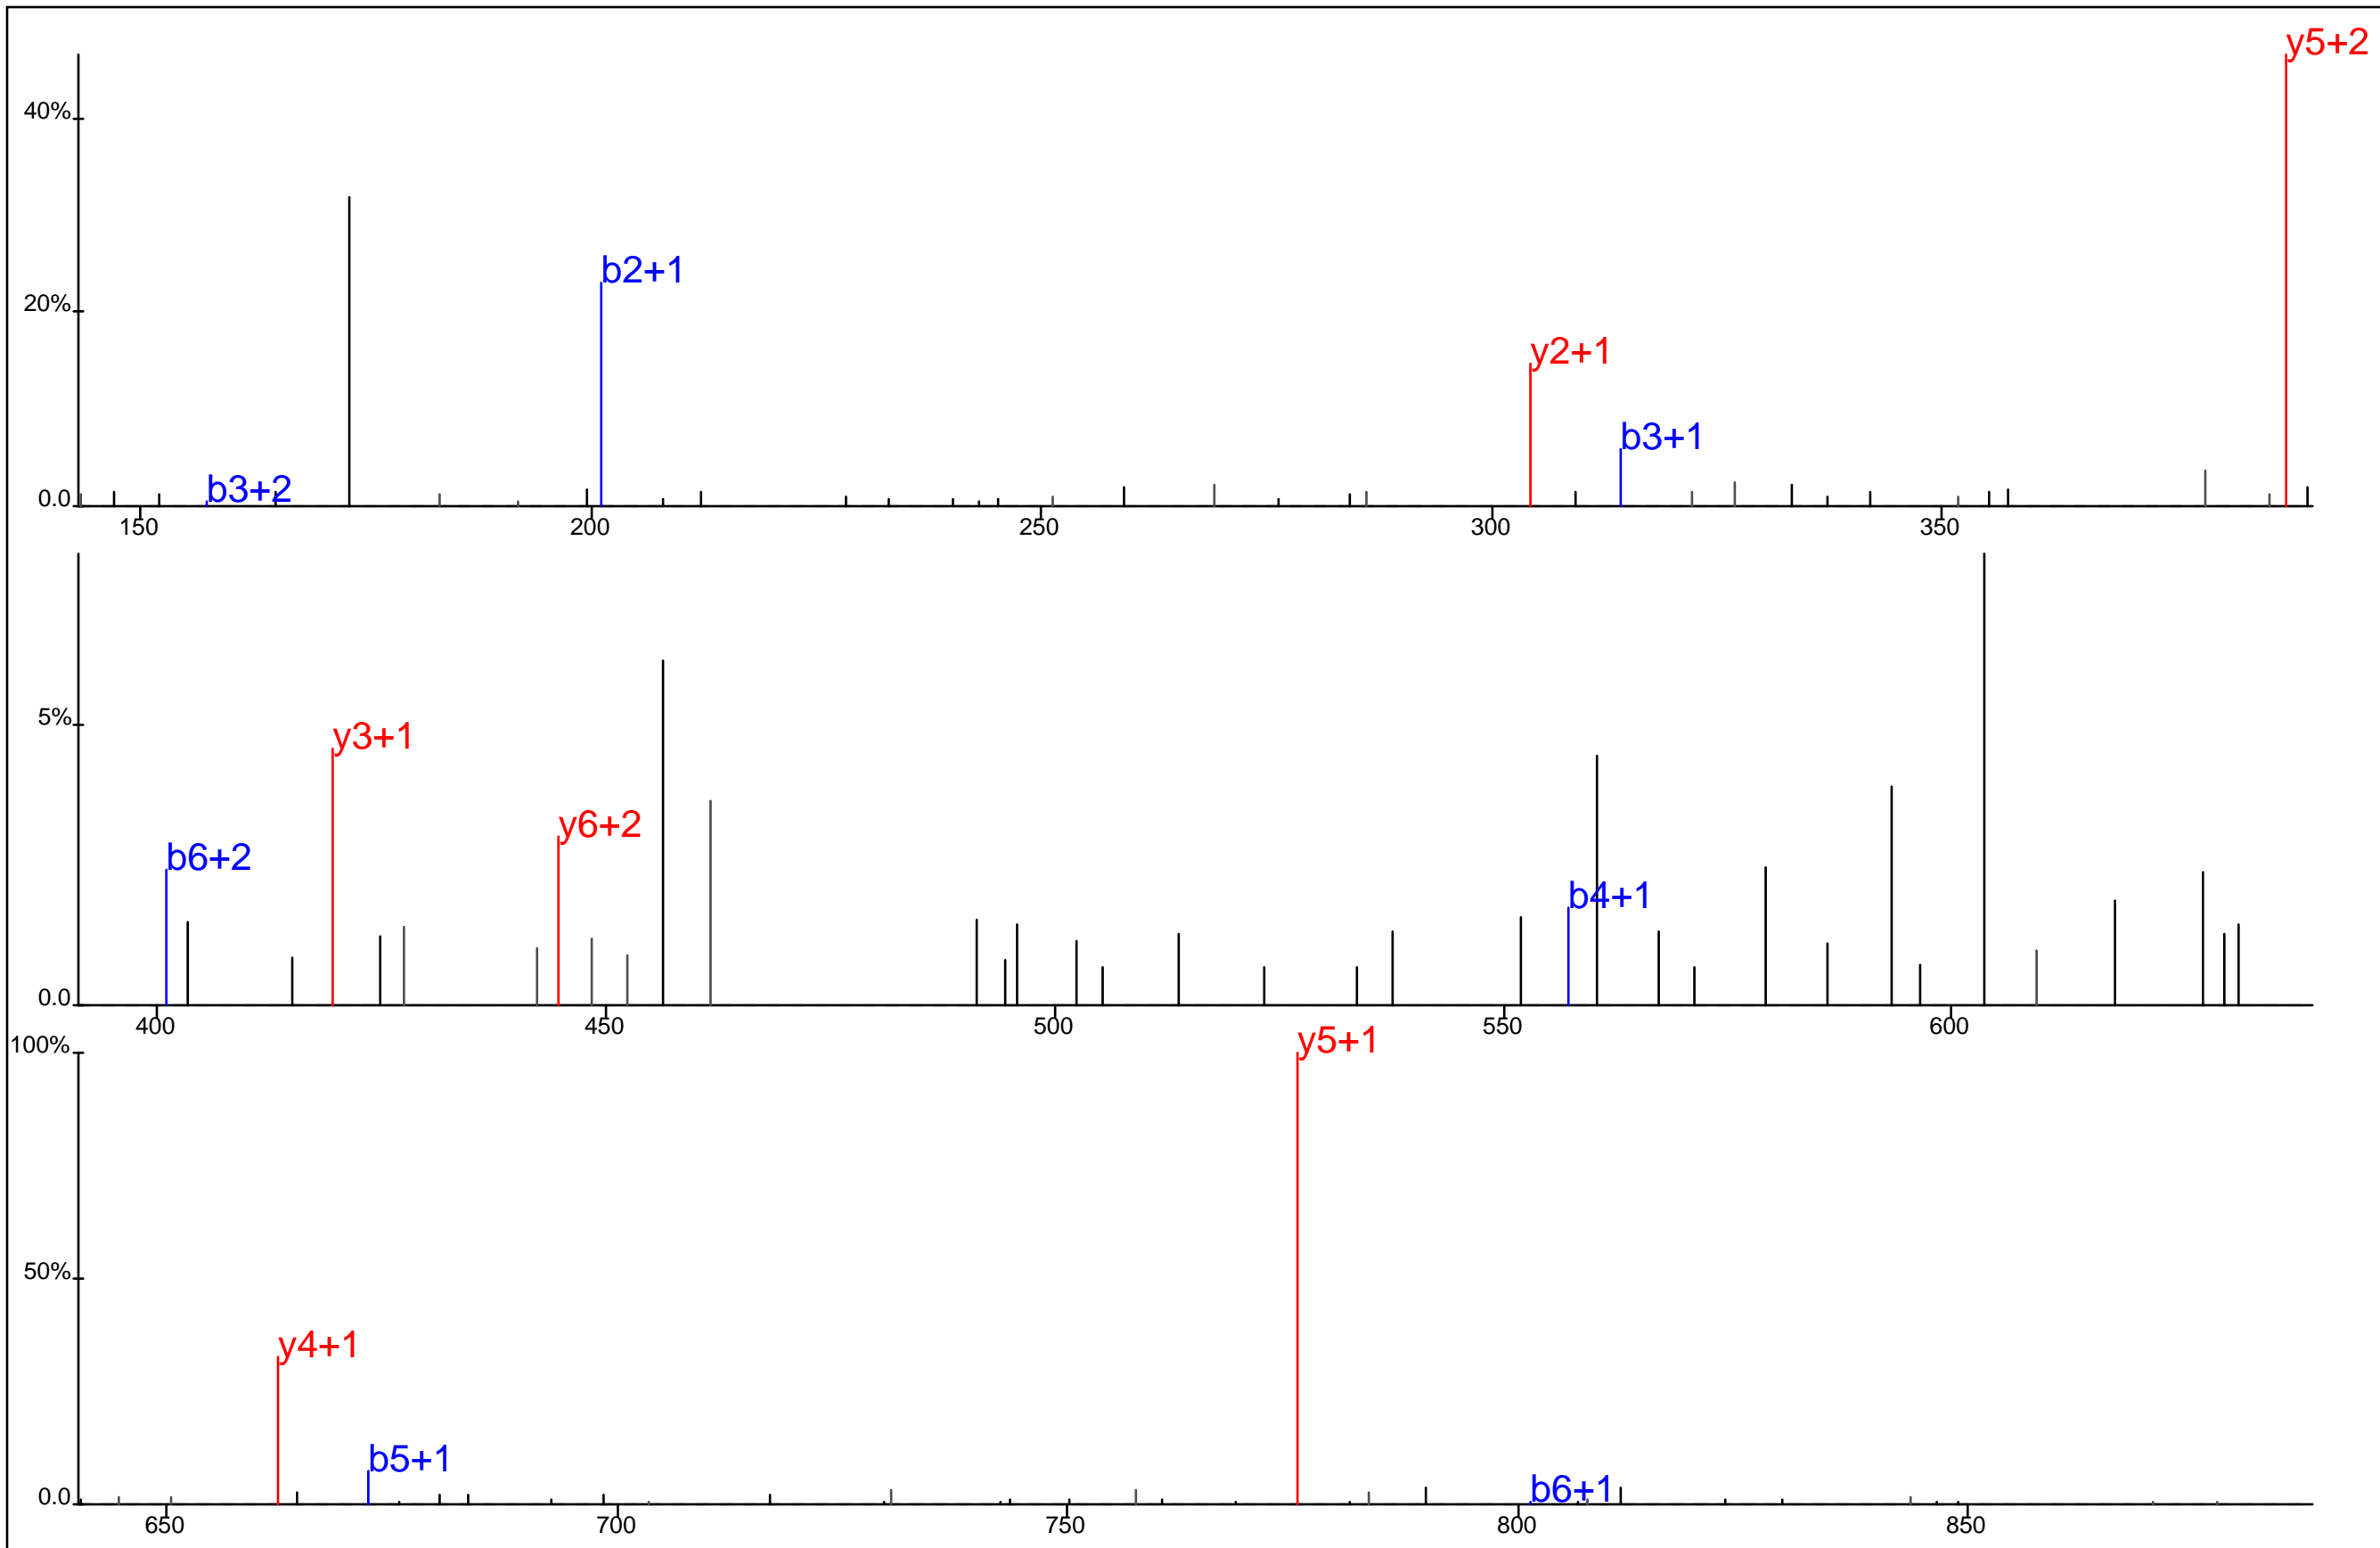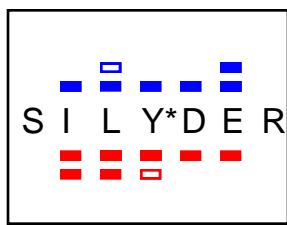

Protein Name: Proteasome subunit alpha type 2  
 gi Accession: 0  
 Precursor Mass: 488.2124+2  
 Delta Mass: 0.763 ppm  
 XCorr: 30.79



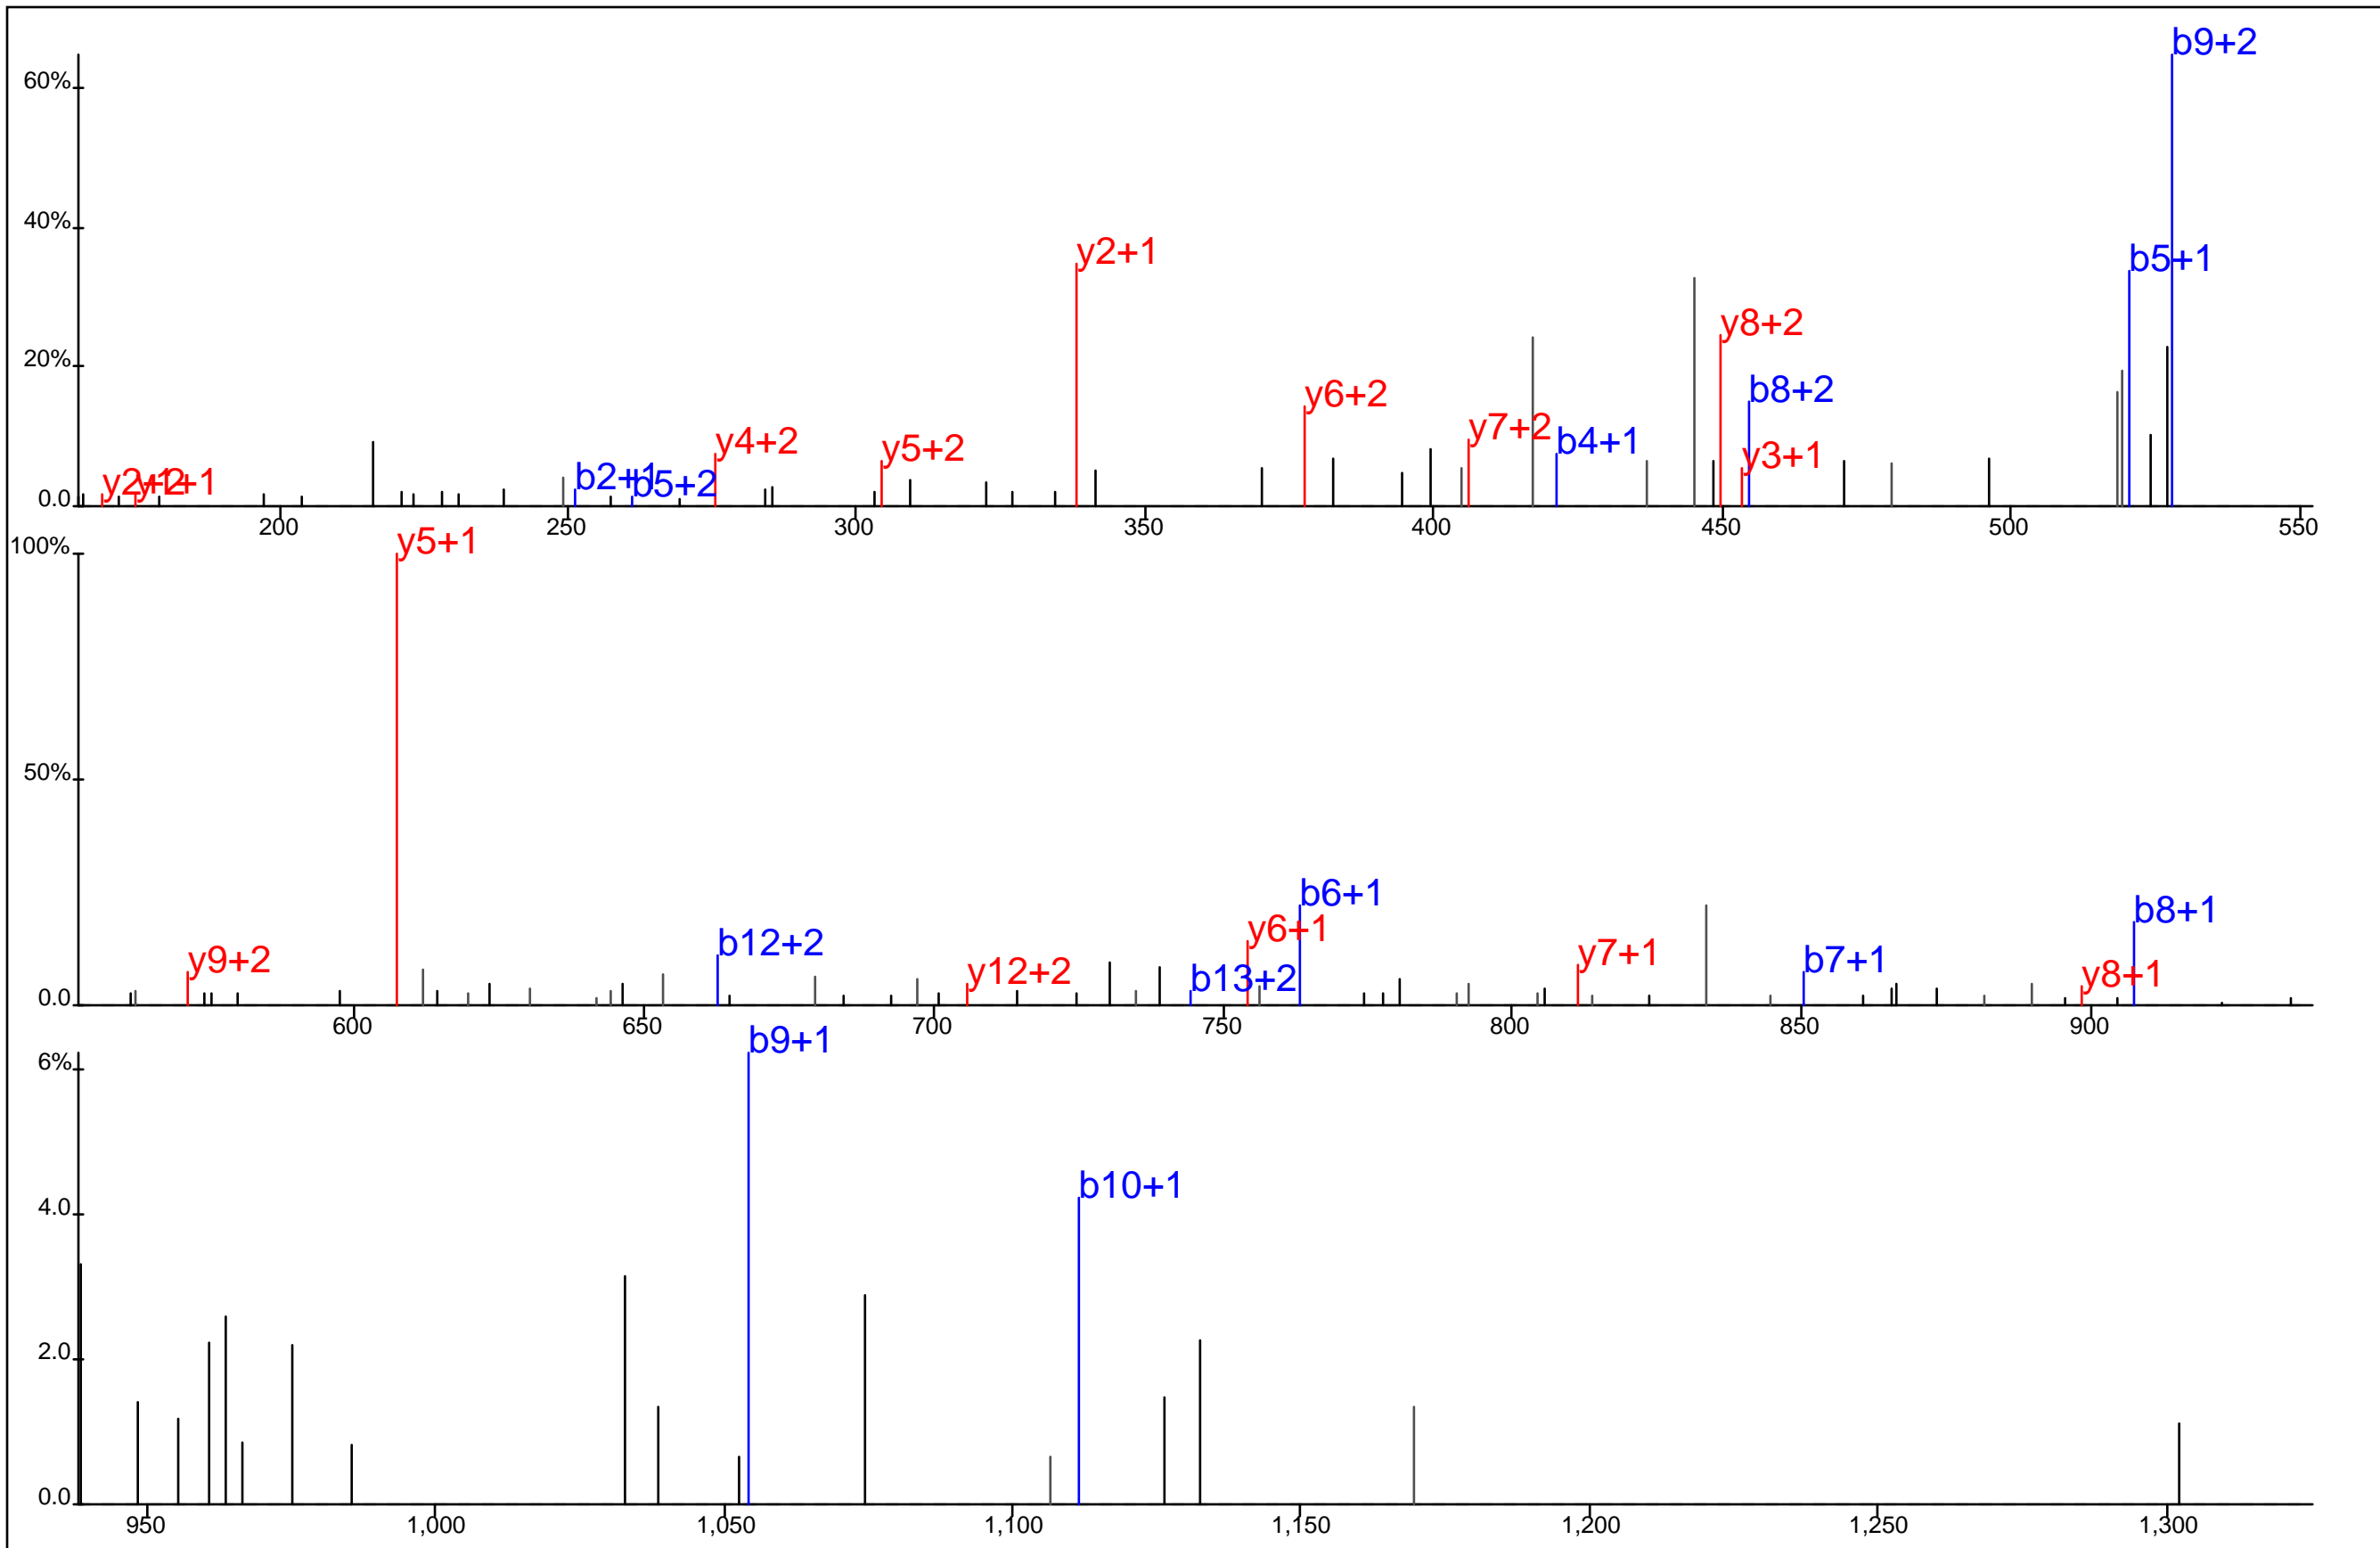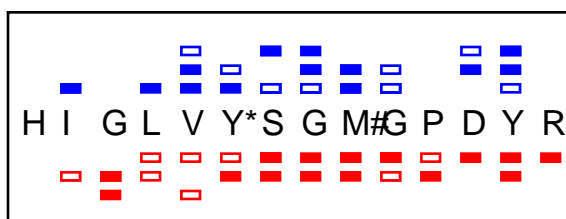

Protein Name: Proteasome subunit alpha type 2  
 gi Accession: 0  
 Precursor Mass: 554.2432+3  
 Delta Mass: 2.282 ppm  
 XCorr: 41.39

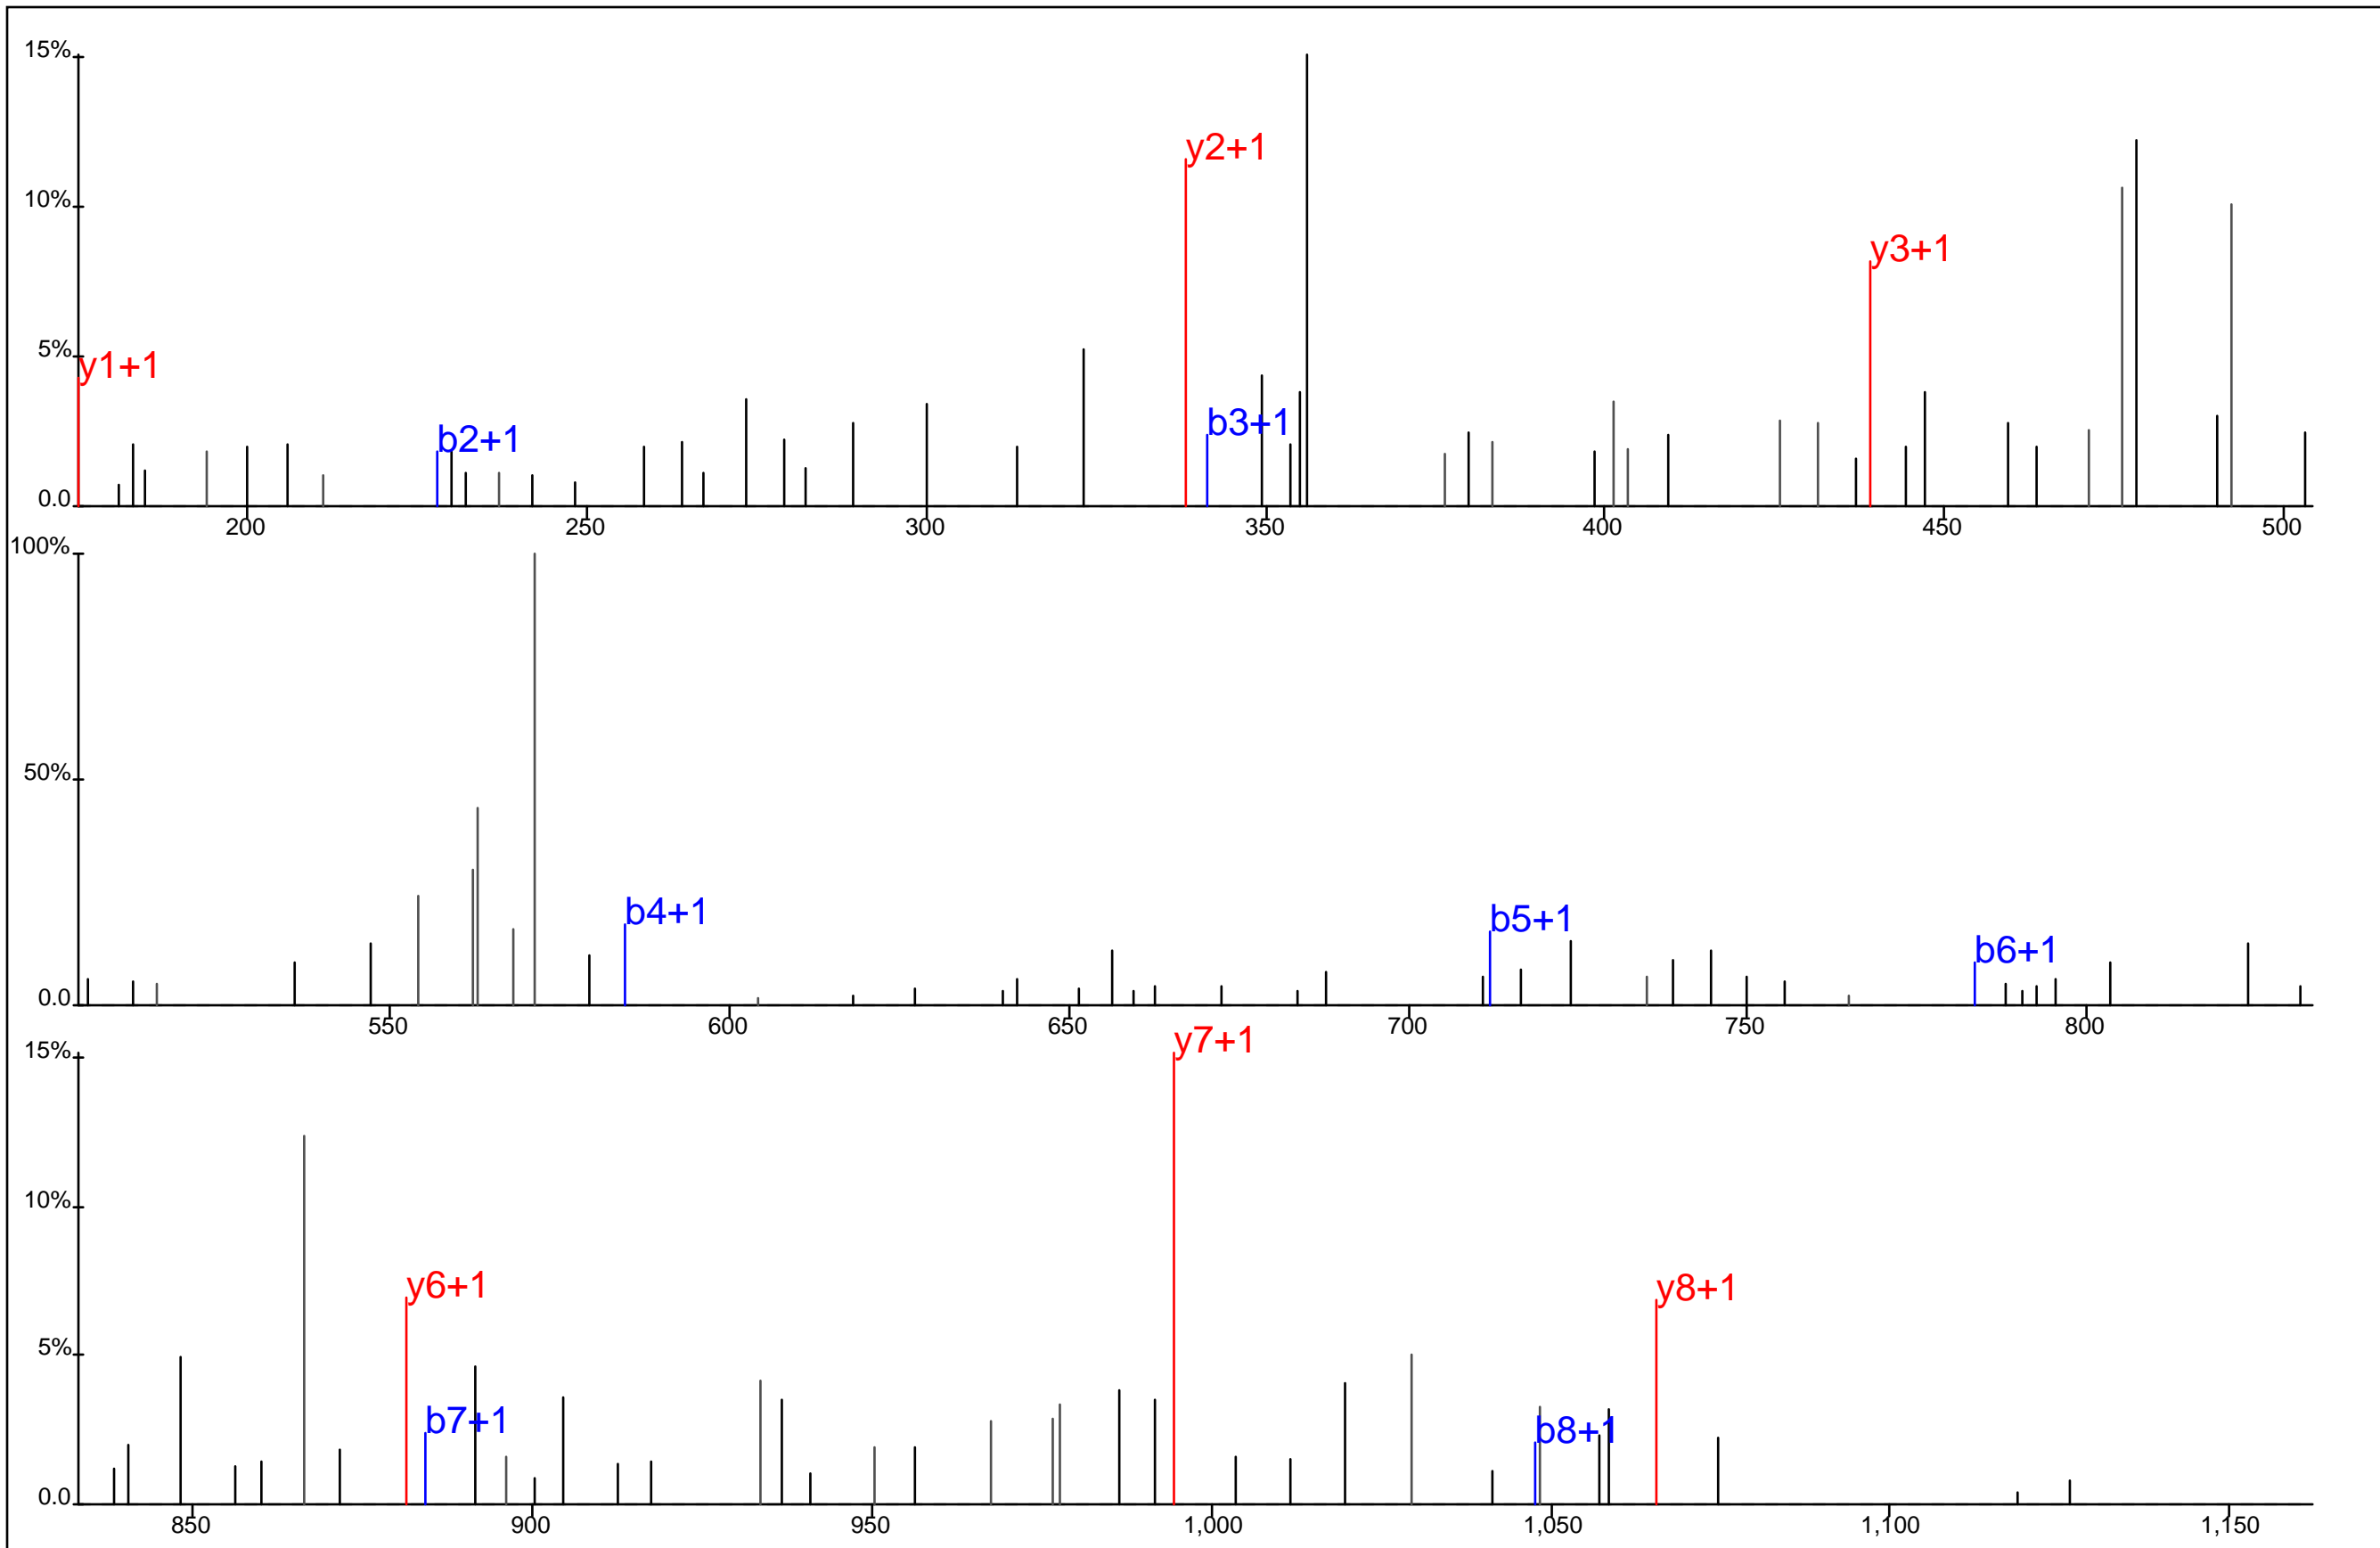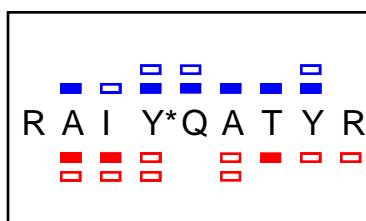

Protein Name: Proteasome subunit beta, type 5  
 gi Accession: 0  
 Precursor Mass: 611.2955+2  
 Delta Mass: 5.097 ppm  
 XCorr: 27.56

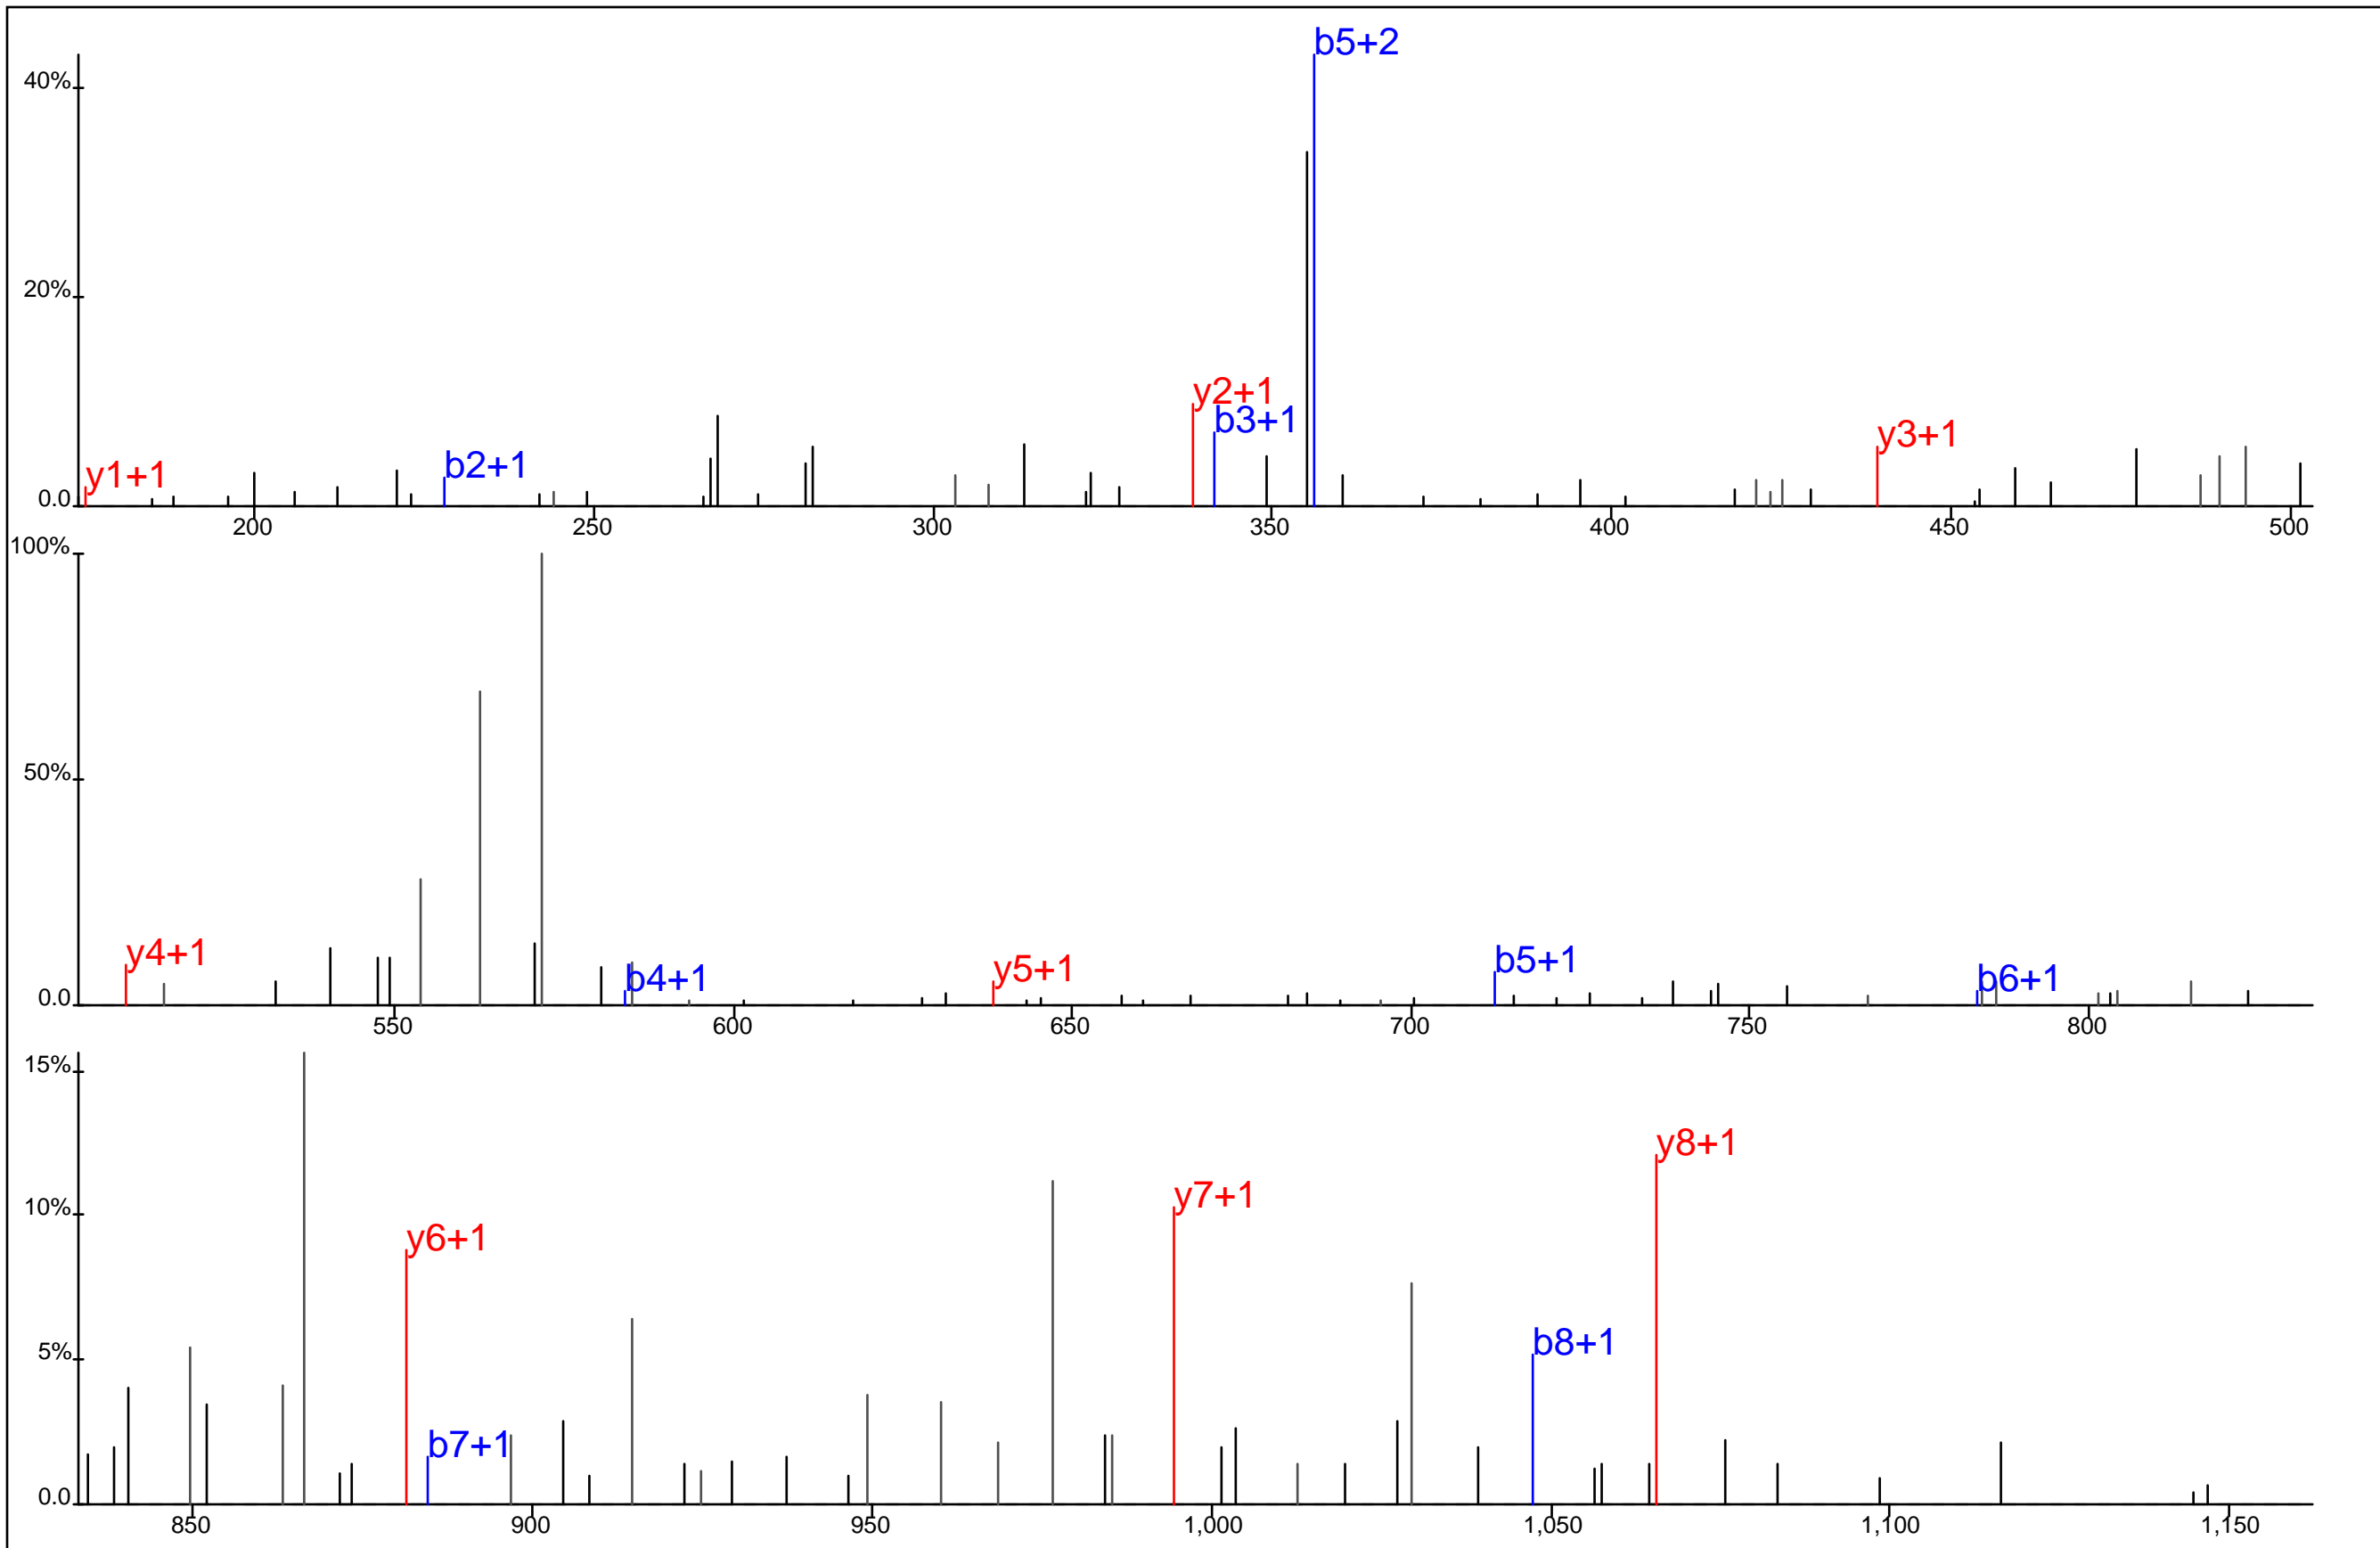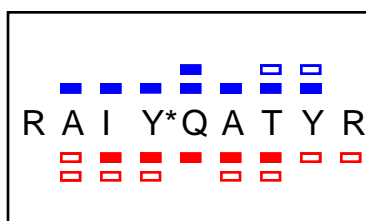

Protein Name: Proteasome subunit beta, type 5  
 gi Accession: 0  
 Precursor Mass: 611.2930+2  
 Delta Mass: 1.000 ppm  
 XCorr: 20.86





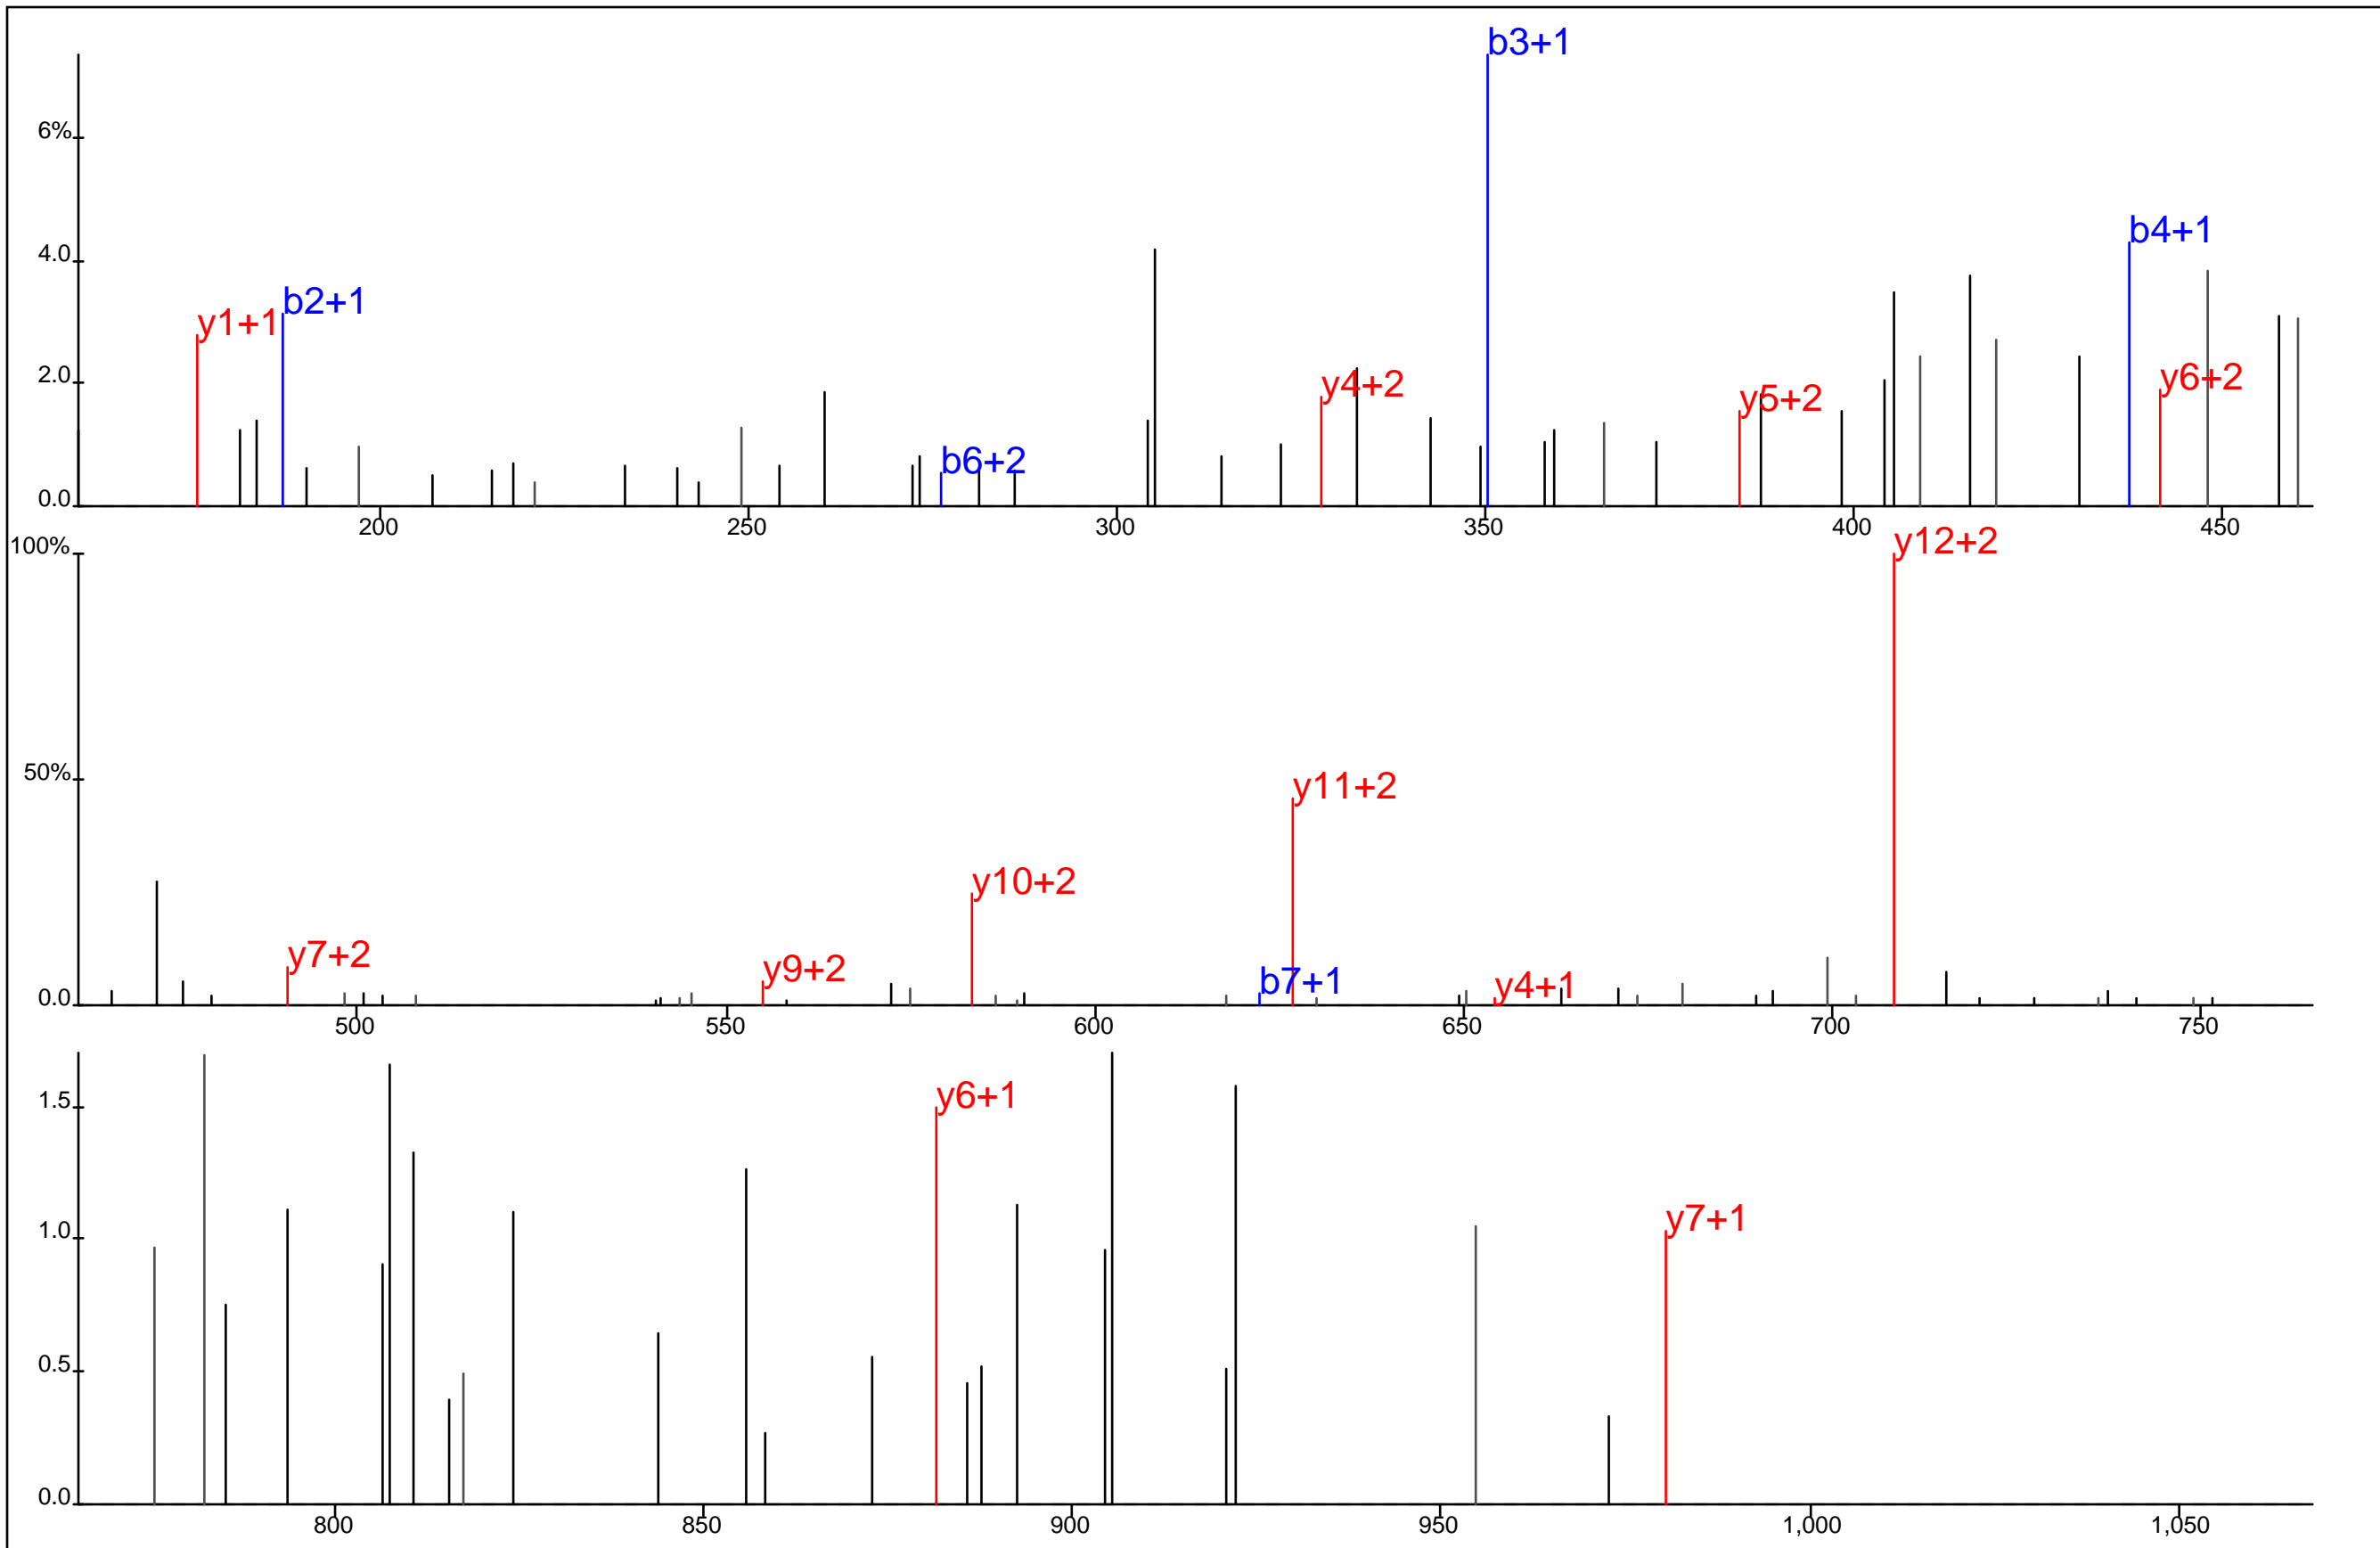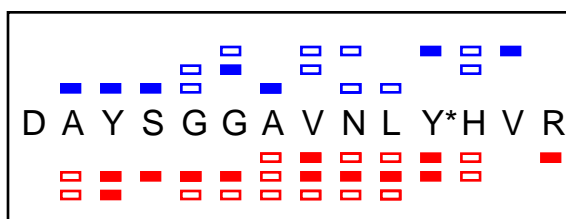

Protein Name: Proteasome subunit beta, type 5  
 gi Accession: 0  
 Precursor Mass: 534.5751+3  
 Delta Mass: 0.042 ppm  
 XCorr: 20.31

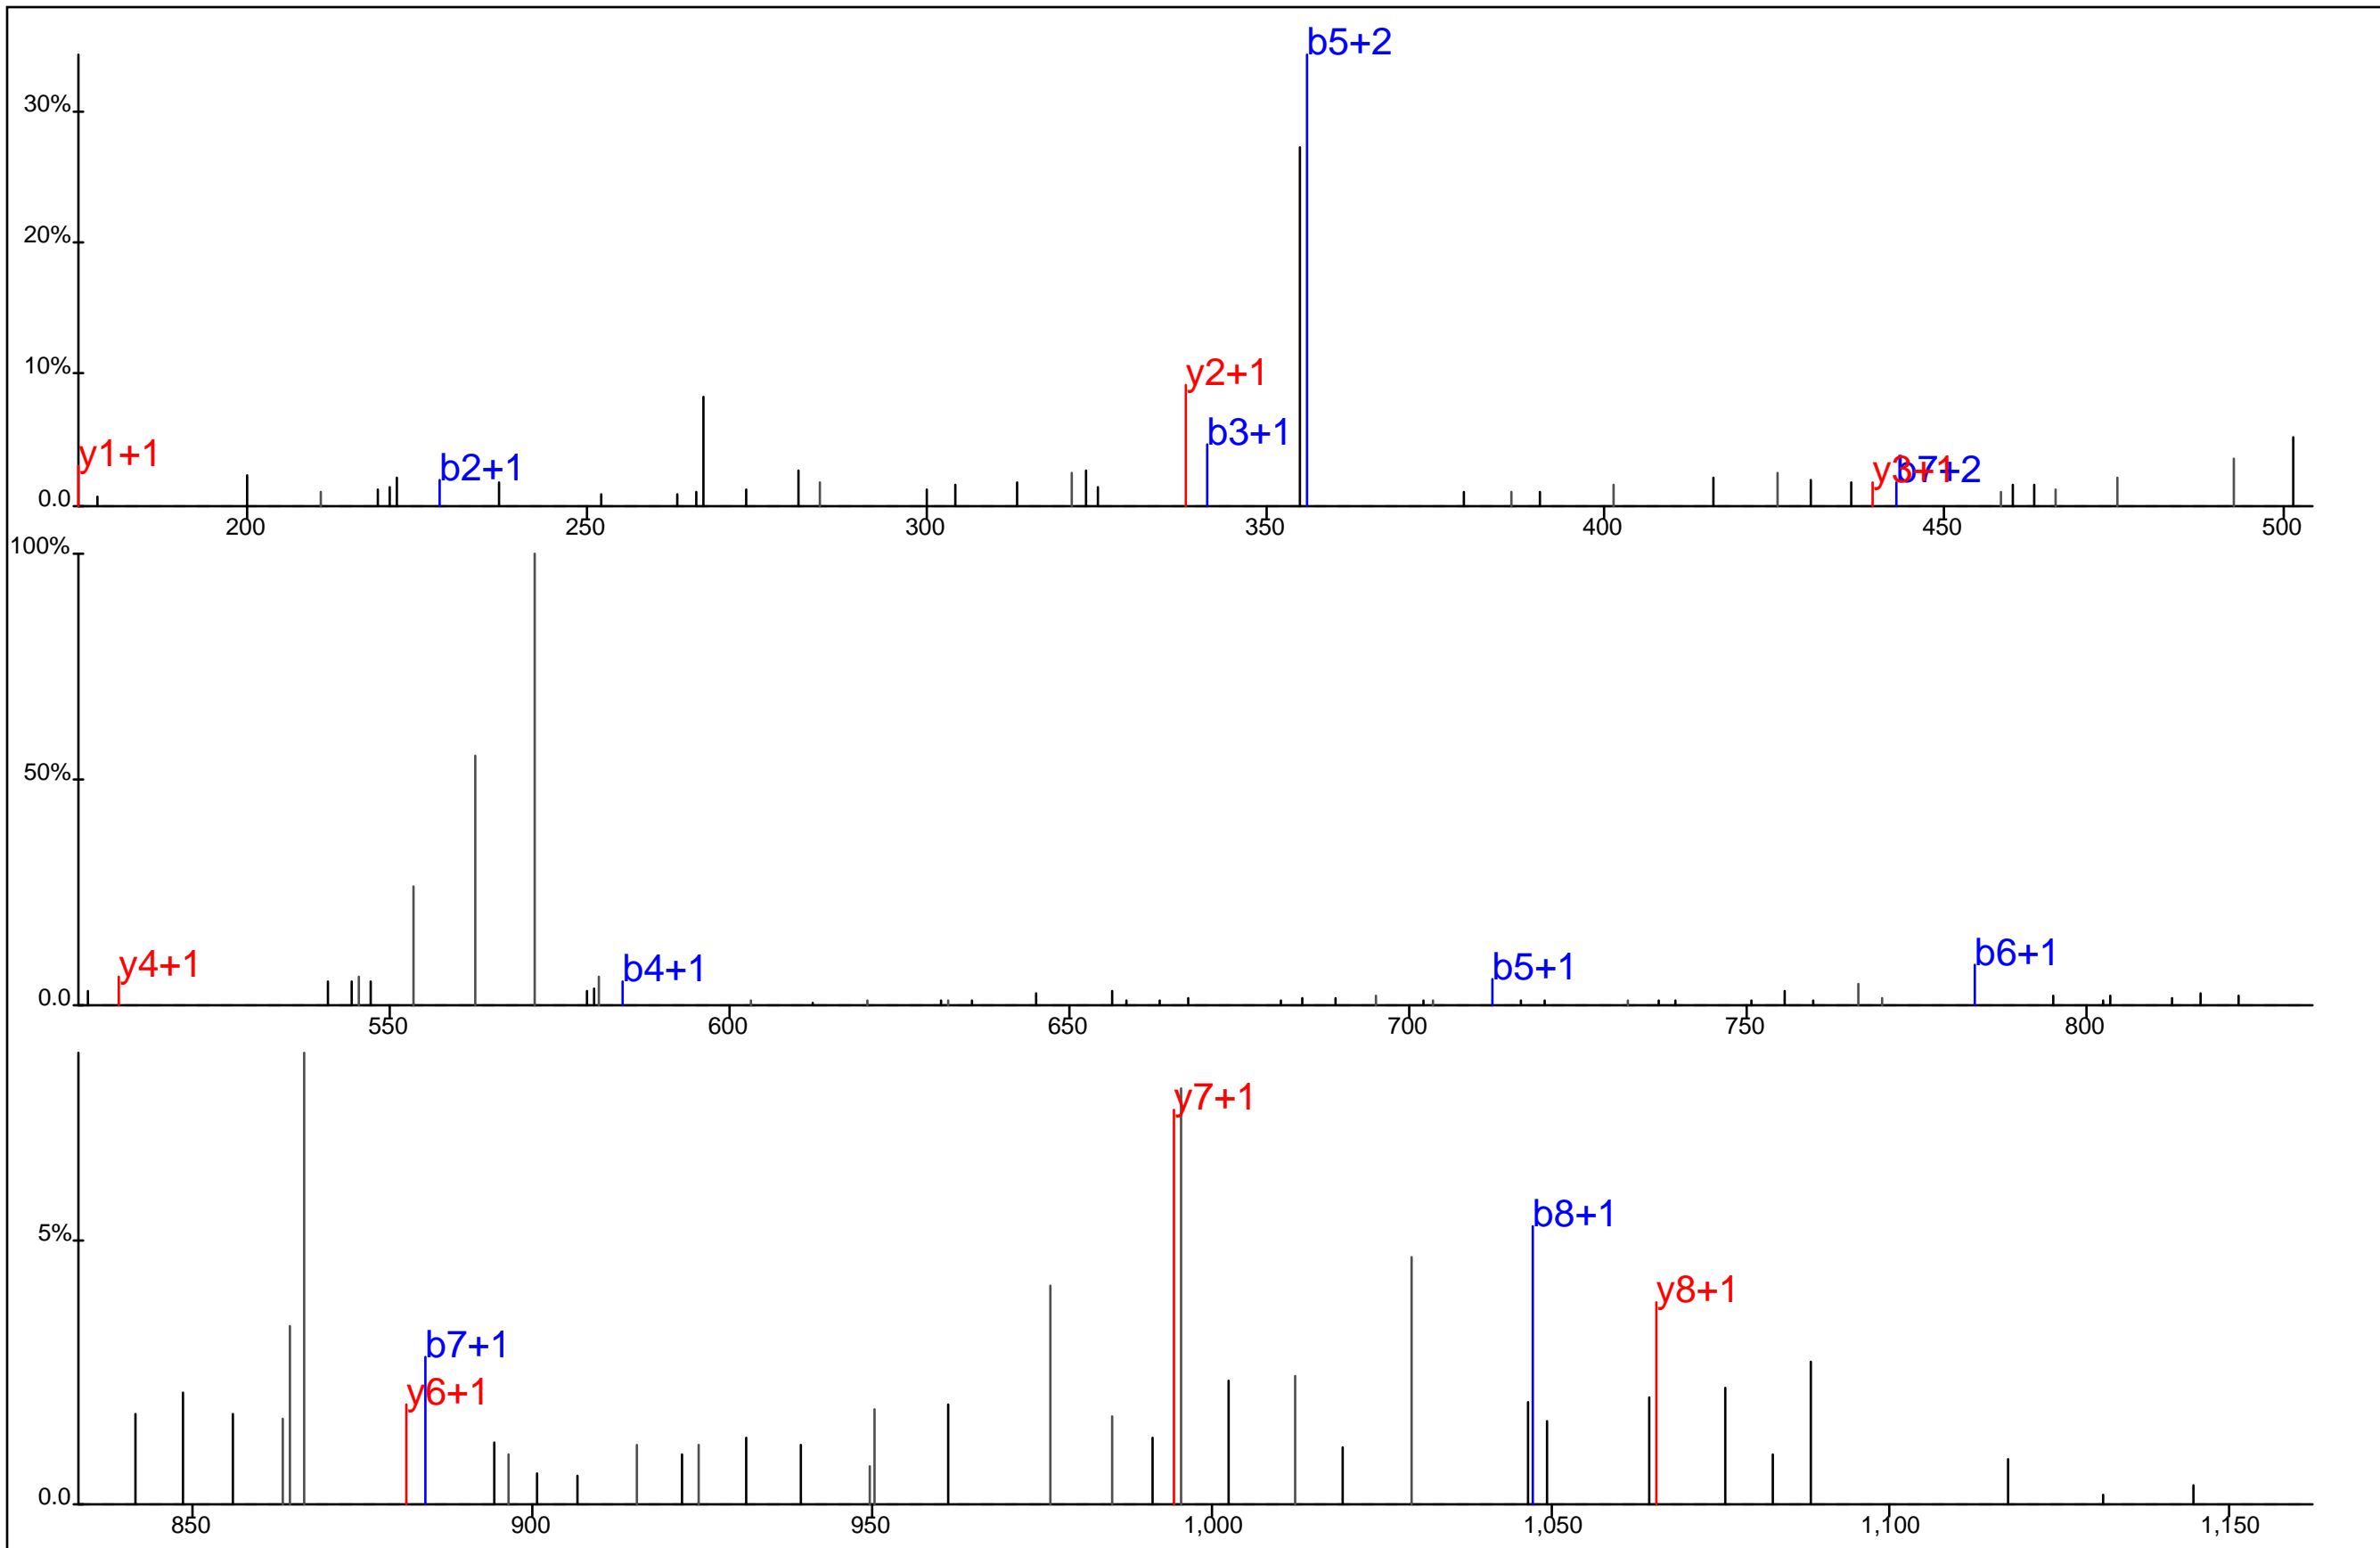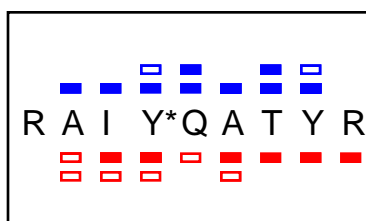

Protein Name: Proteasome subunit beta, type 5  
 gi Accession: 0  
 Precursor Mass: 611.2901+2  
 Delta Mass: 3.797 ppm  
 XCorr: 26.61

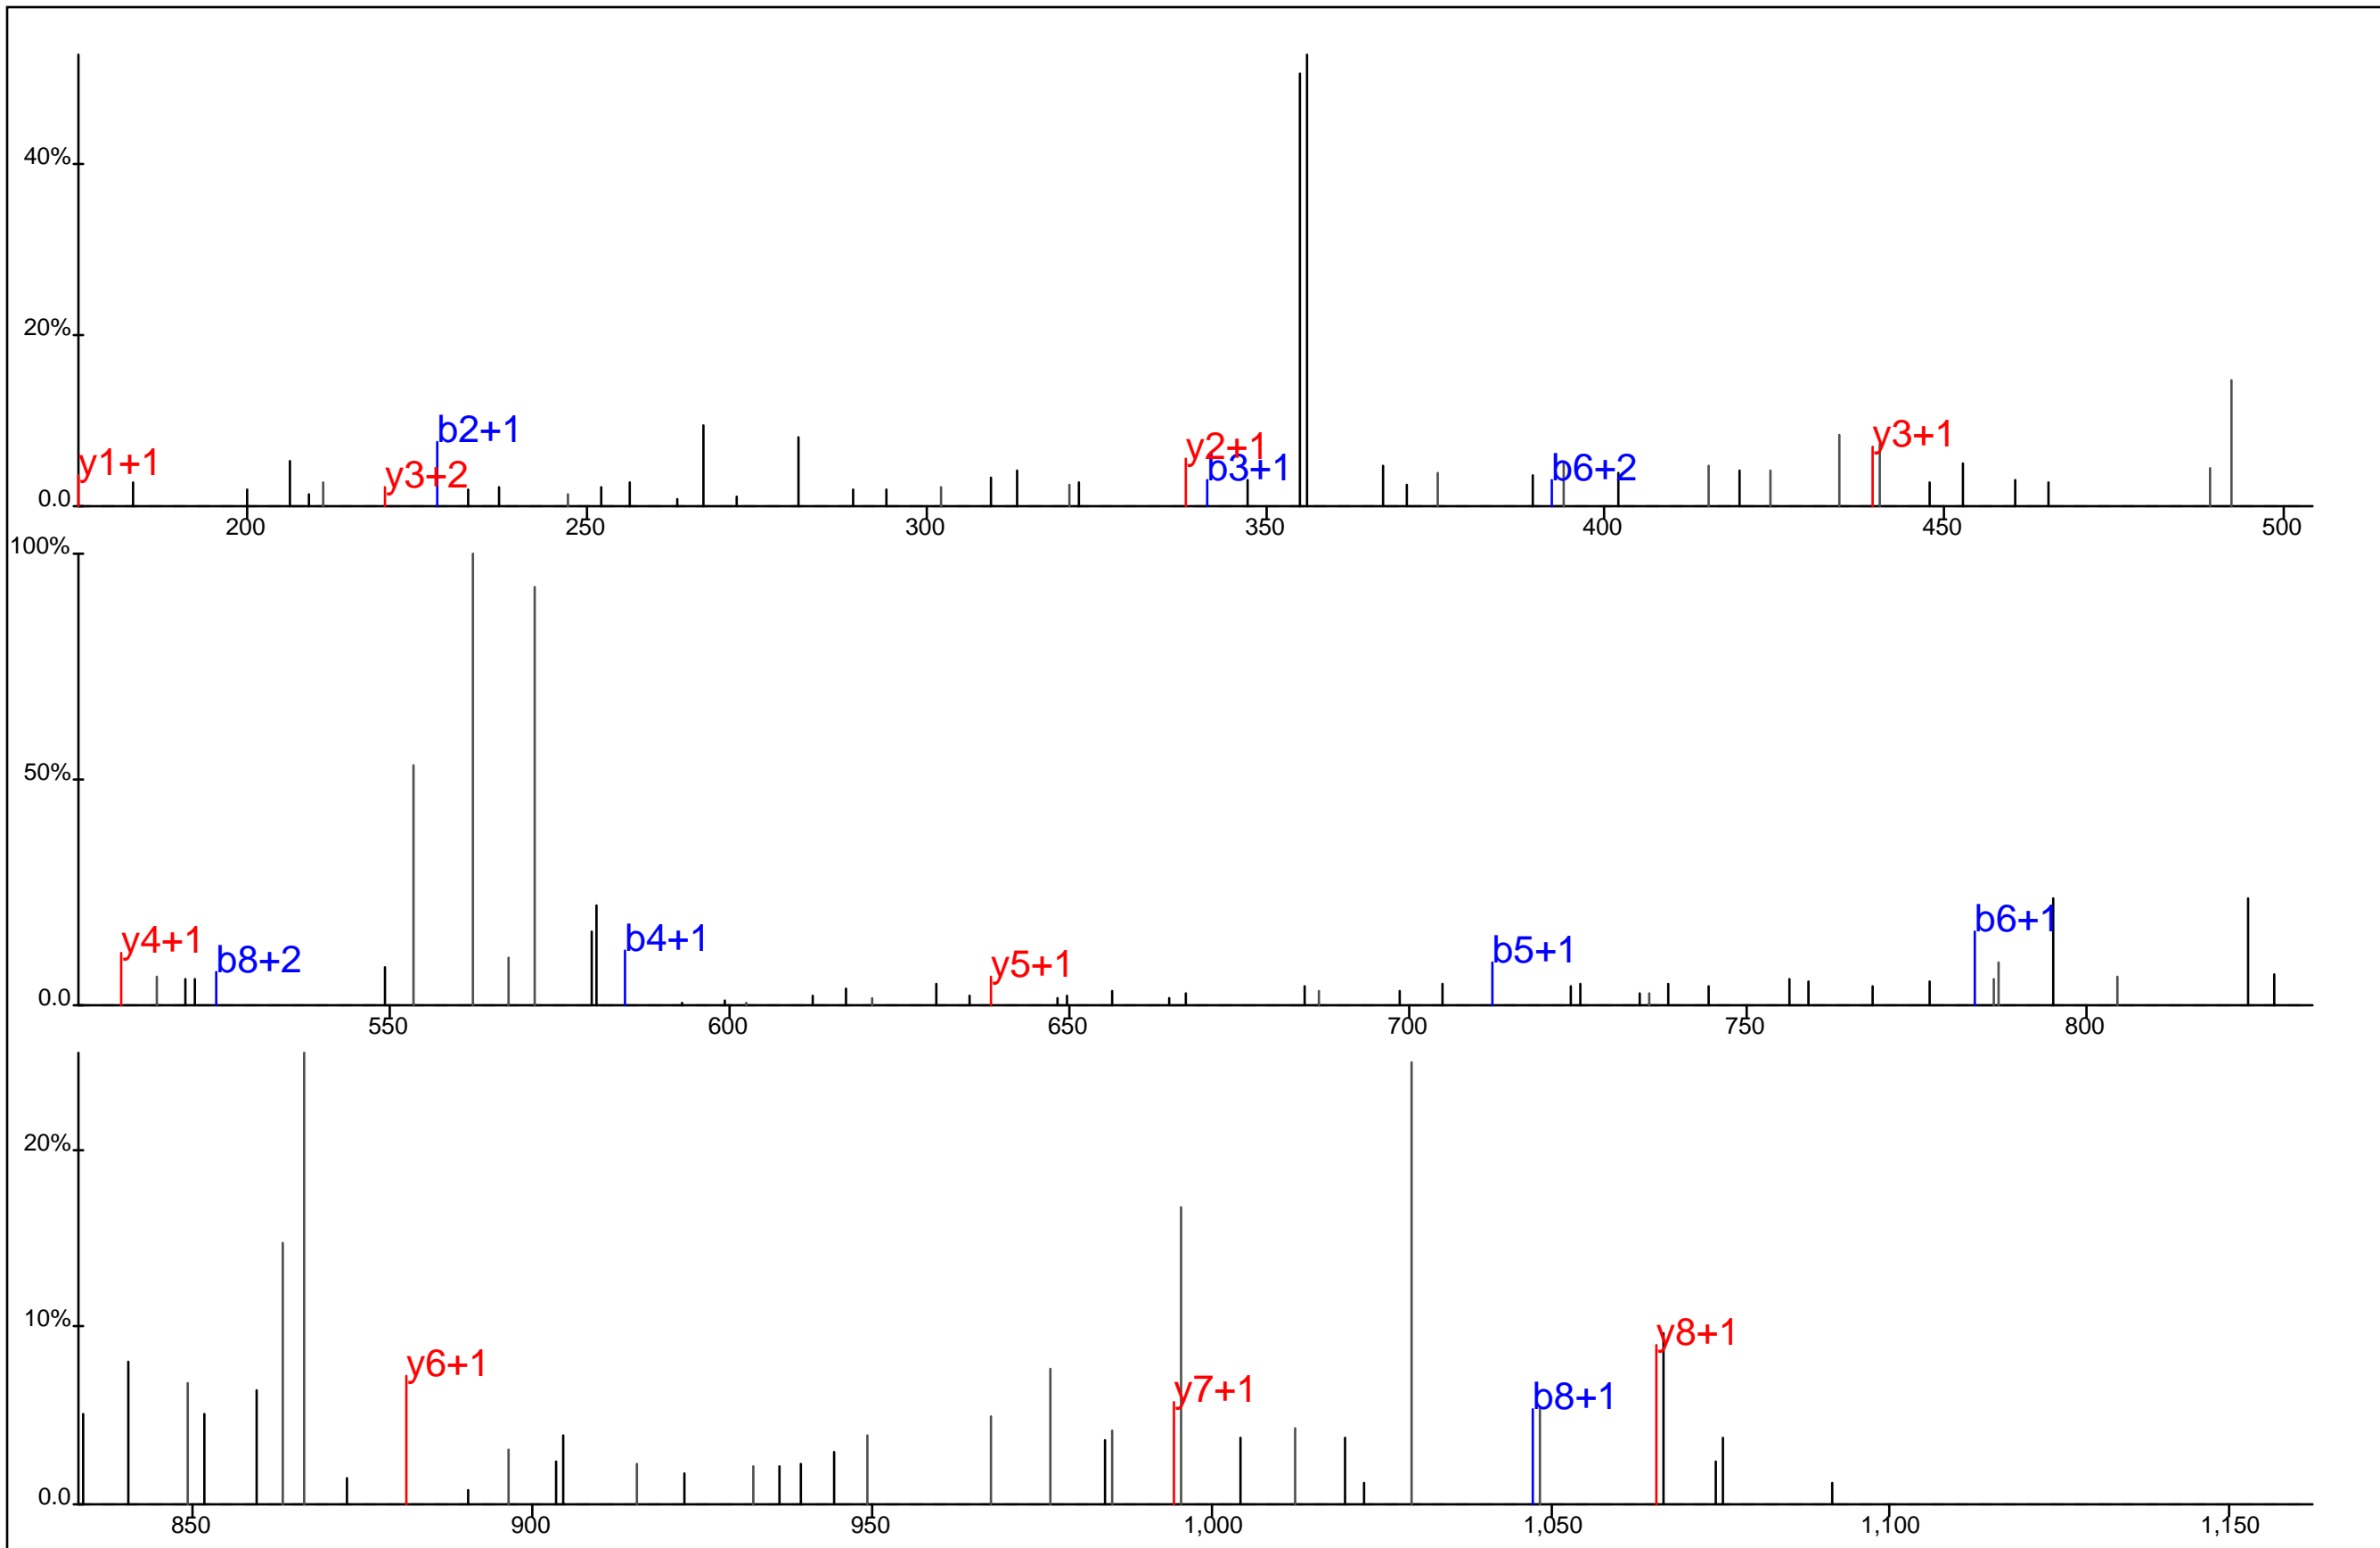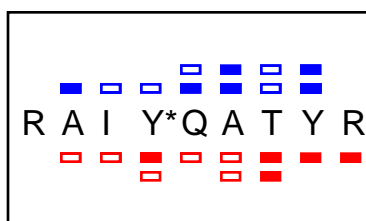

Protein Name: Proteasome subunit beta, type 5  
 gi Accession: 0  
 Precursor Mass: 611.2916+2  
 Delta Mass: 1.398 ppm  
 XCorr: 31.25



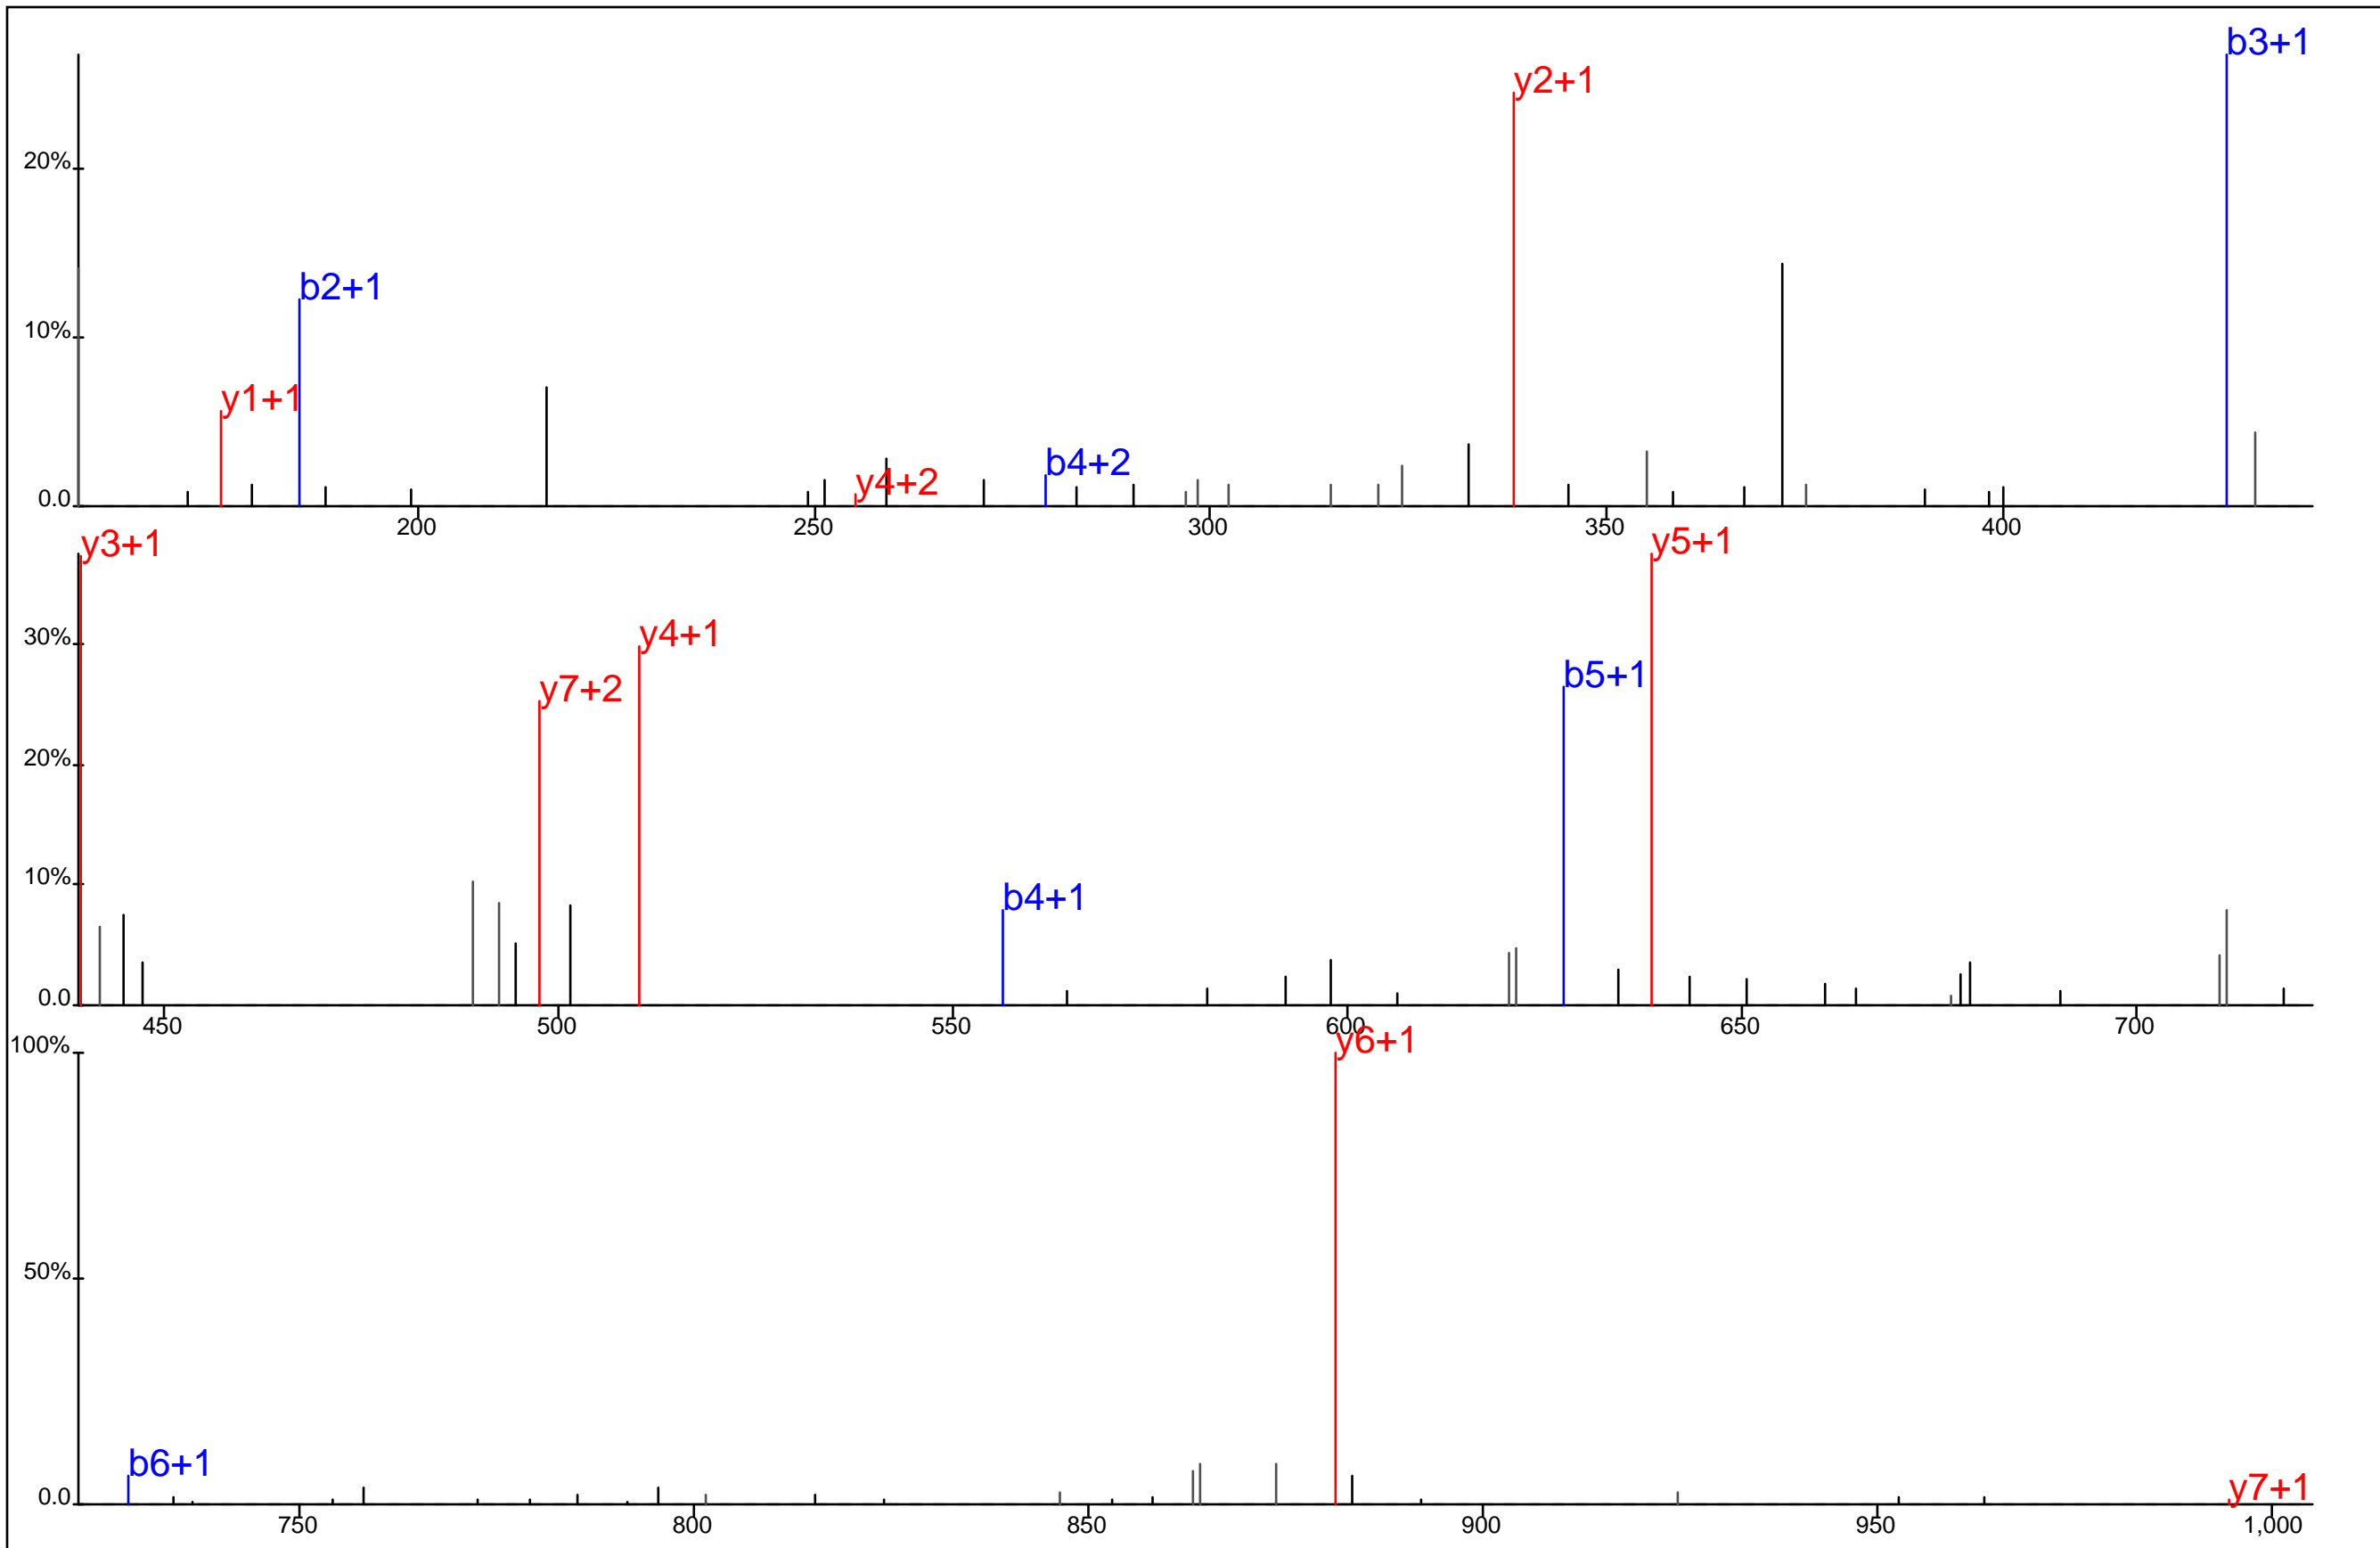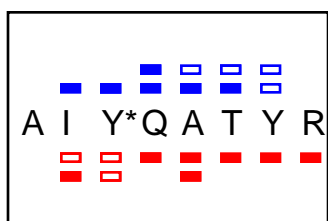

Protein Name: Proteasome subunit beta, type 5  
 gi Accession: 0  
 Precursor Mass: 533.2409+2  
 Delta Mass: 1.798 ppm  
 XCorr: 47.76

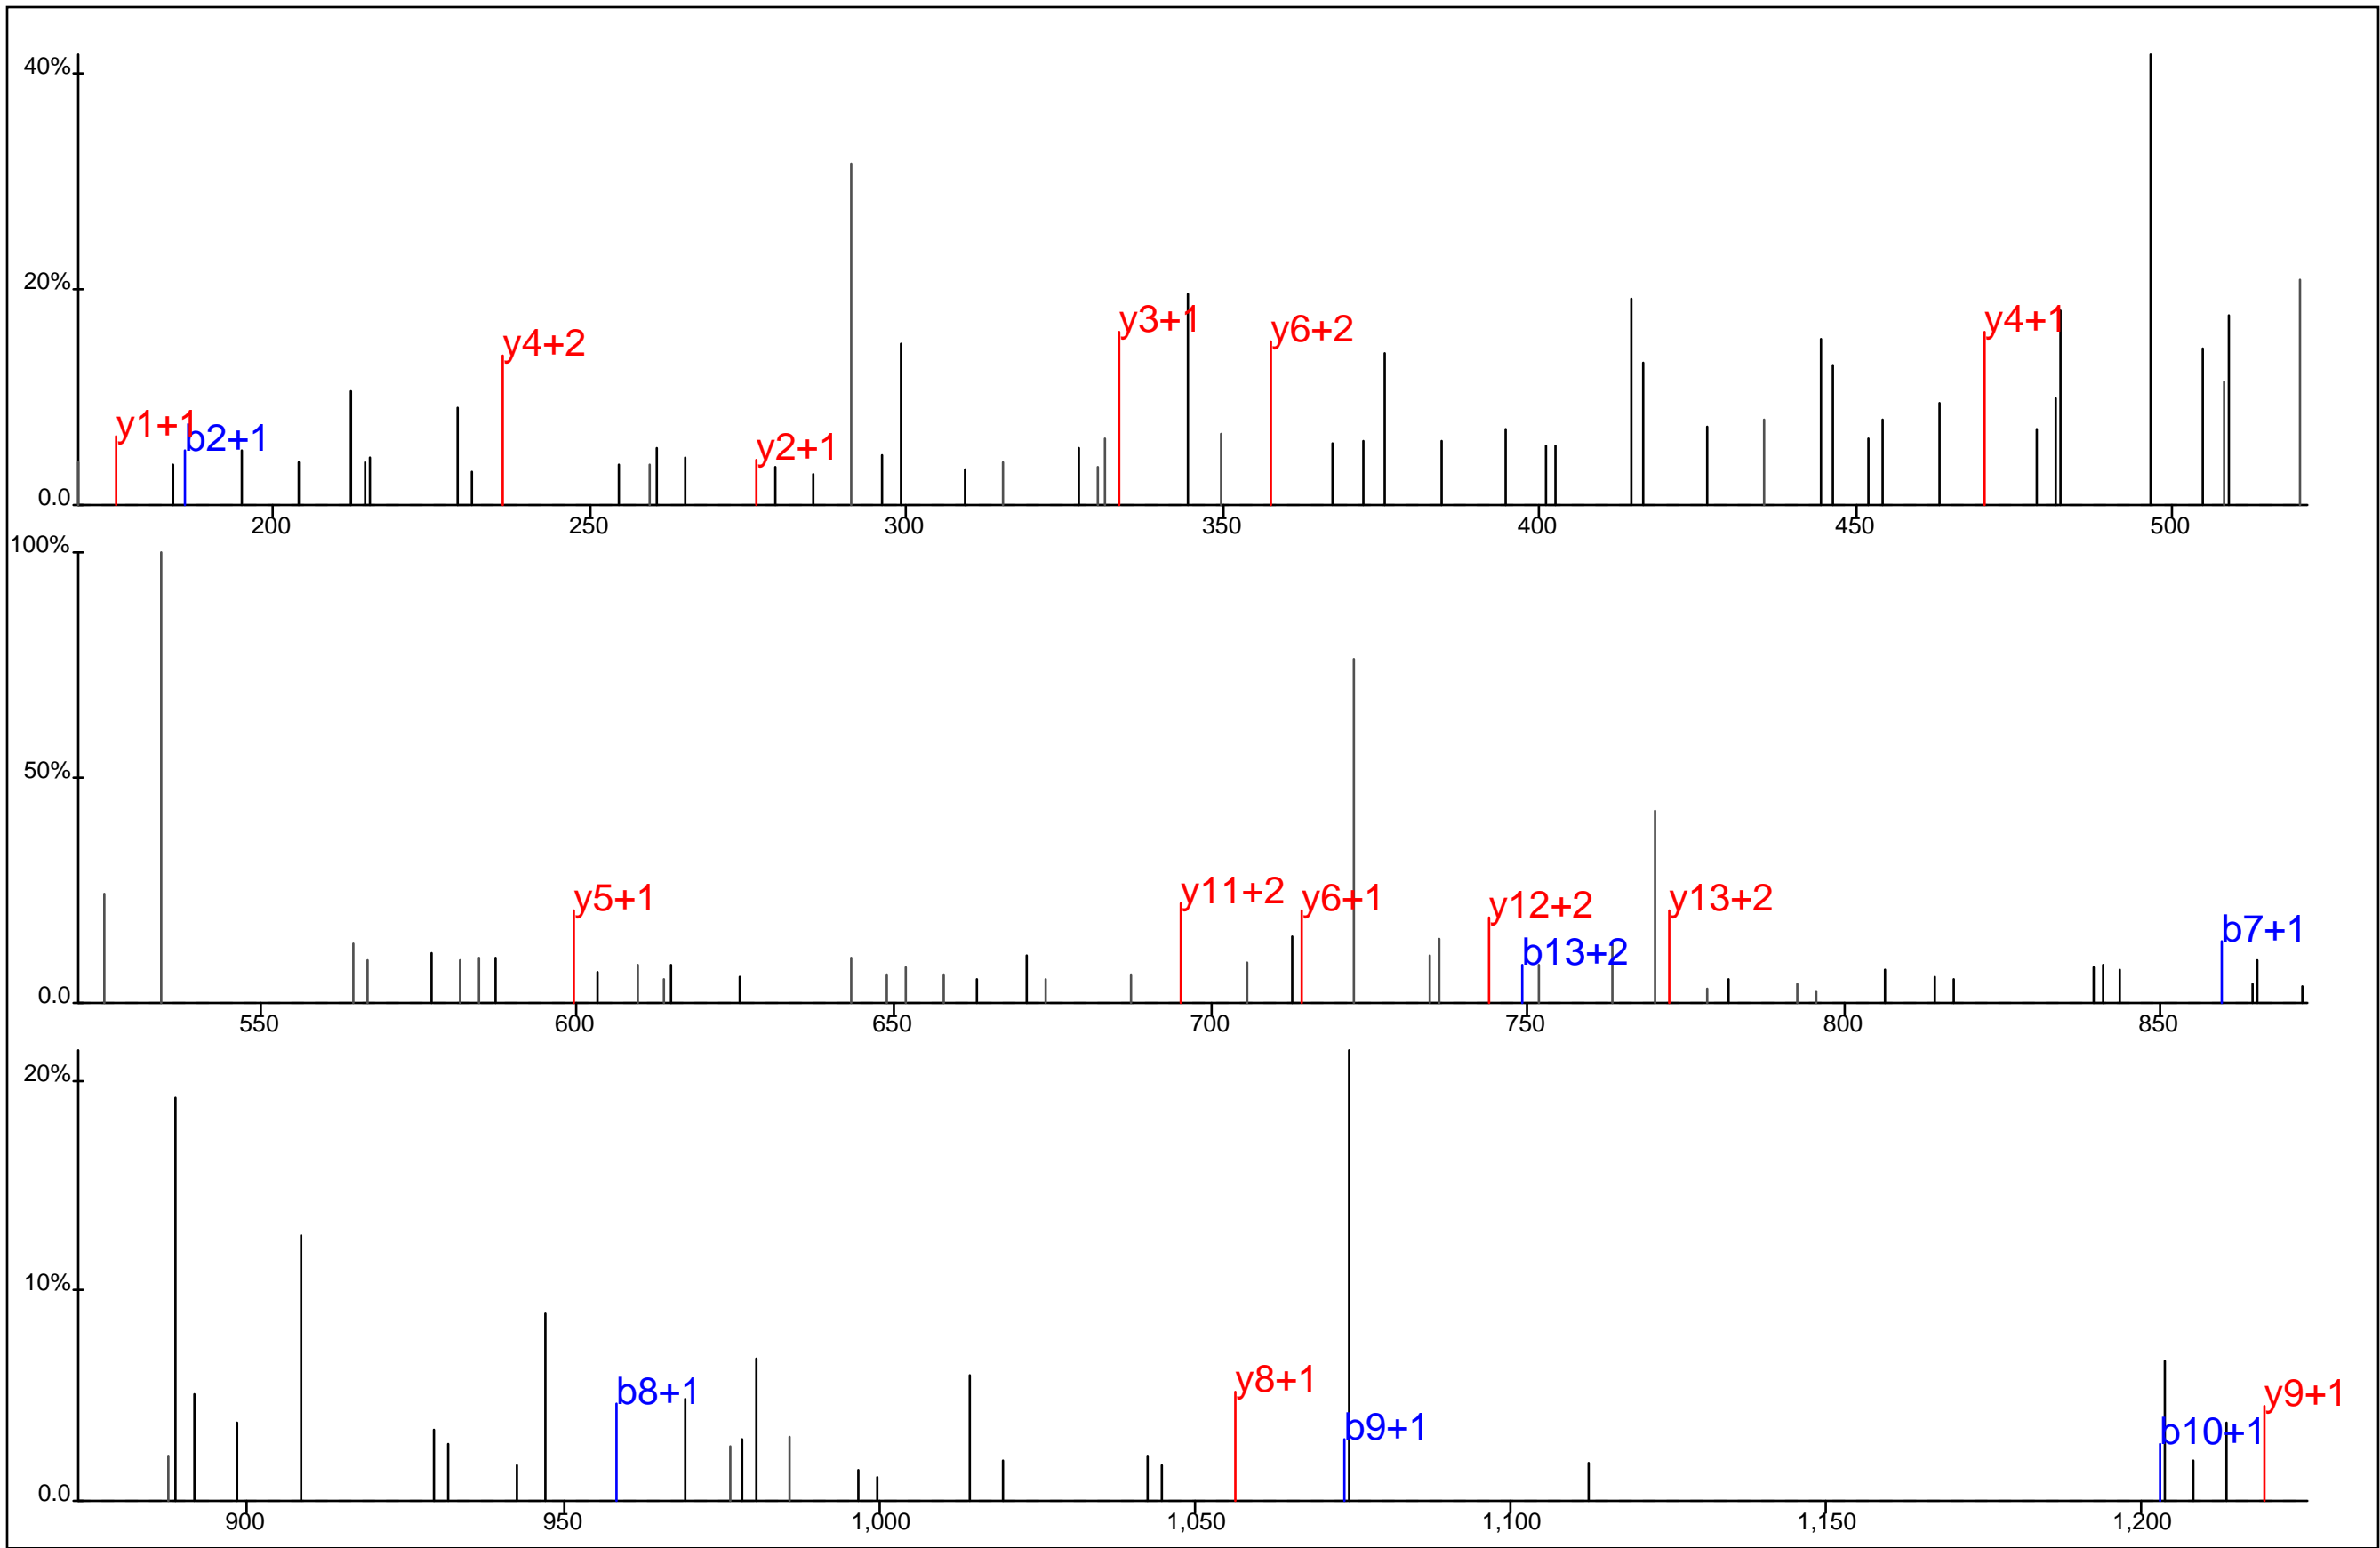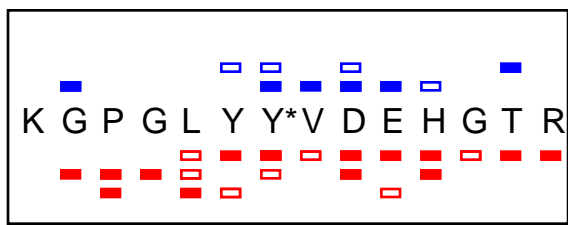

Protein Name: Proteasome subunit, beta type 8  
 gi Accession: 0  
 Precursor Mass: 557.9242+3  
 Delta Mass: 3.217 ppm  
 XCorr: 20.02

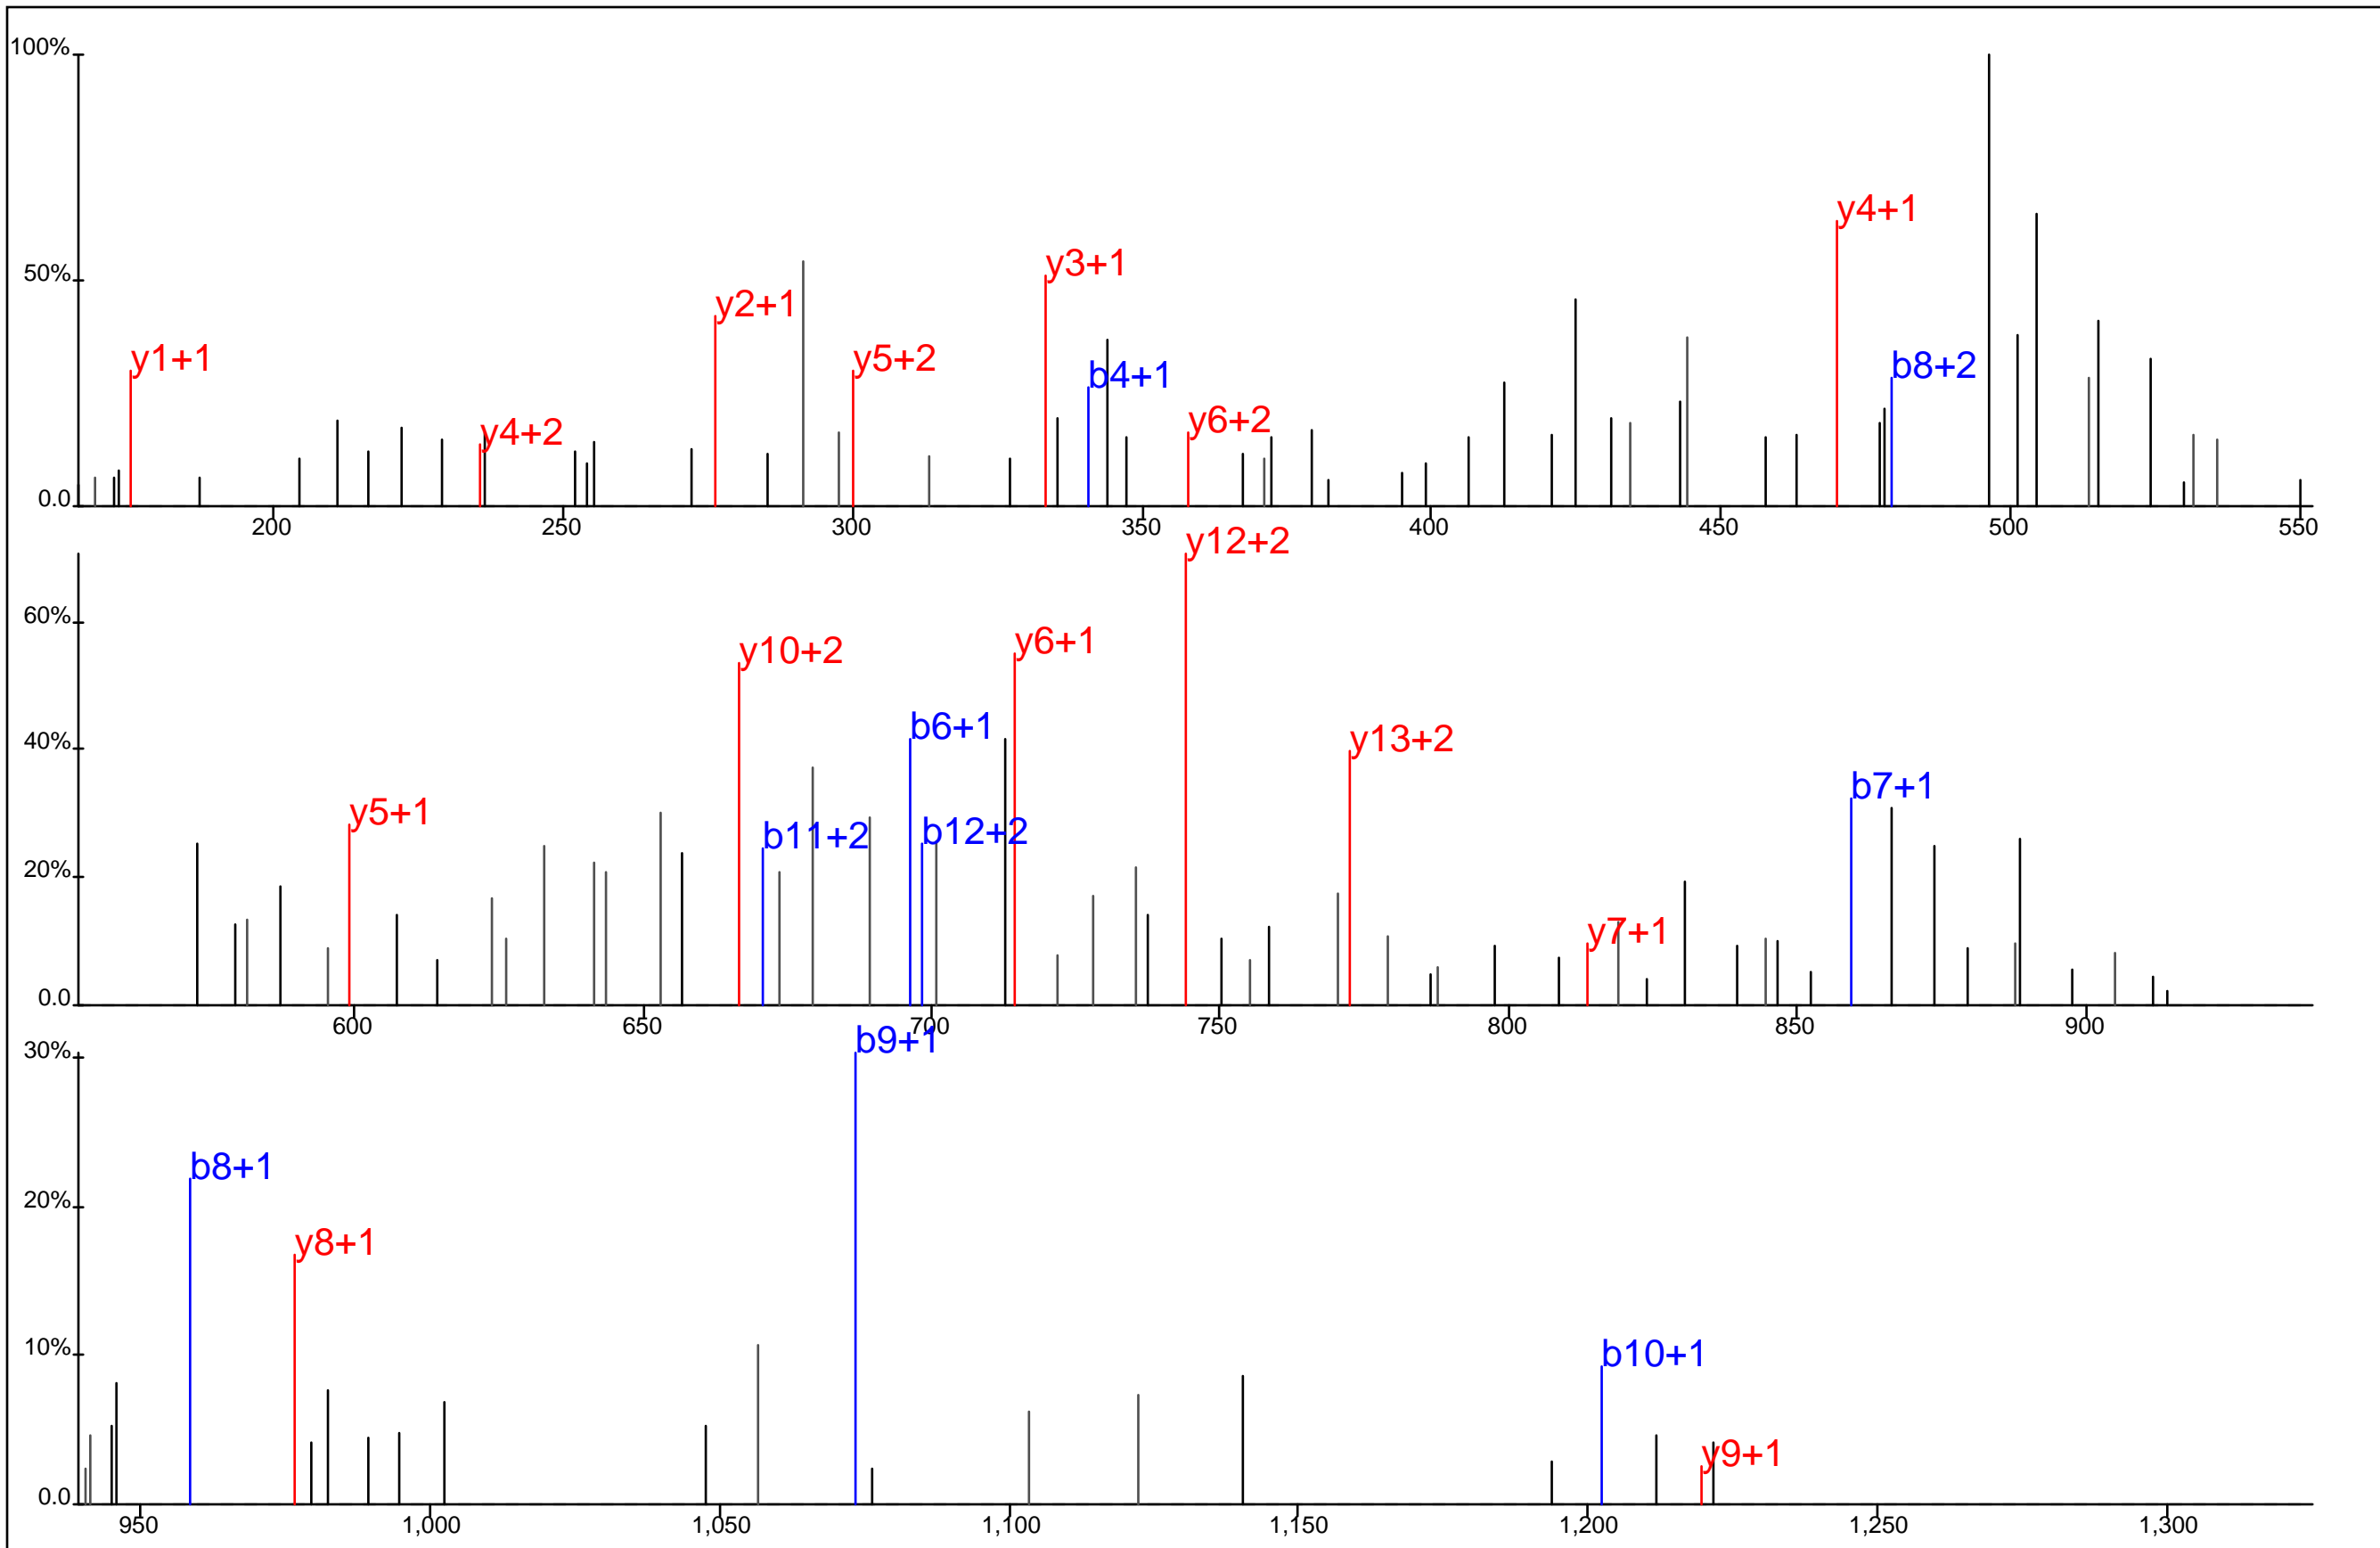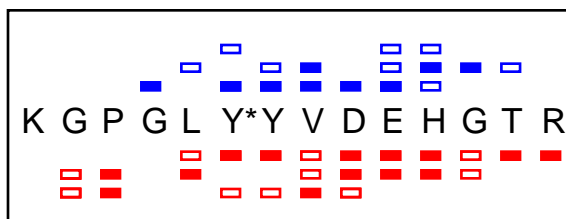

Protein Name: Proteasome subunit, beta type 8  
 gi Accession: 0  
 Precursor Mass: 557.9218+3  
 Delta Mass: 1.163 ppm  
 XCorr: 29.54

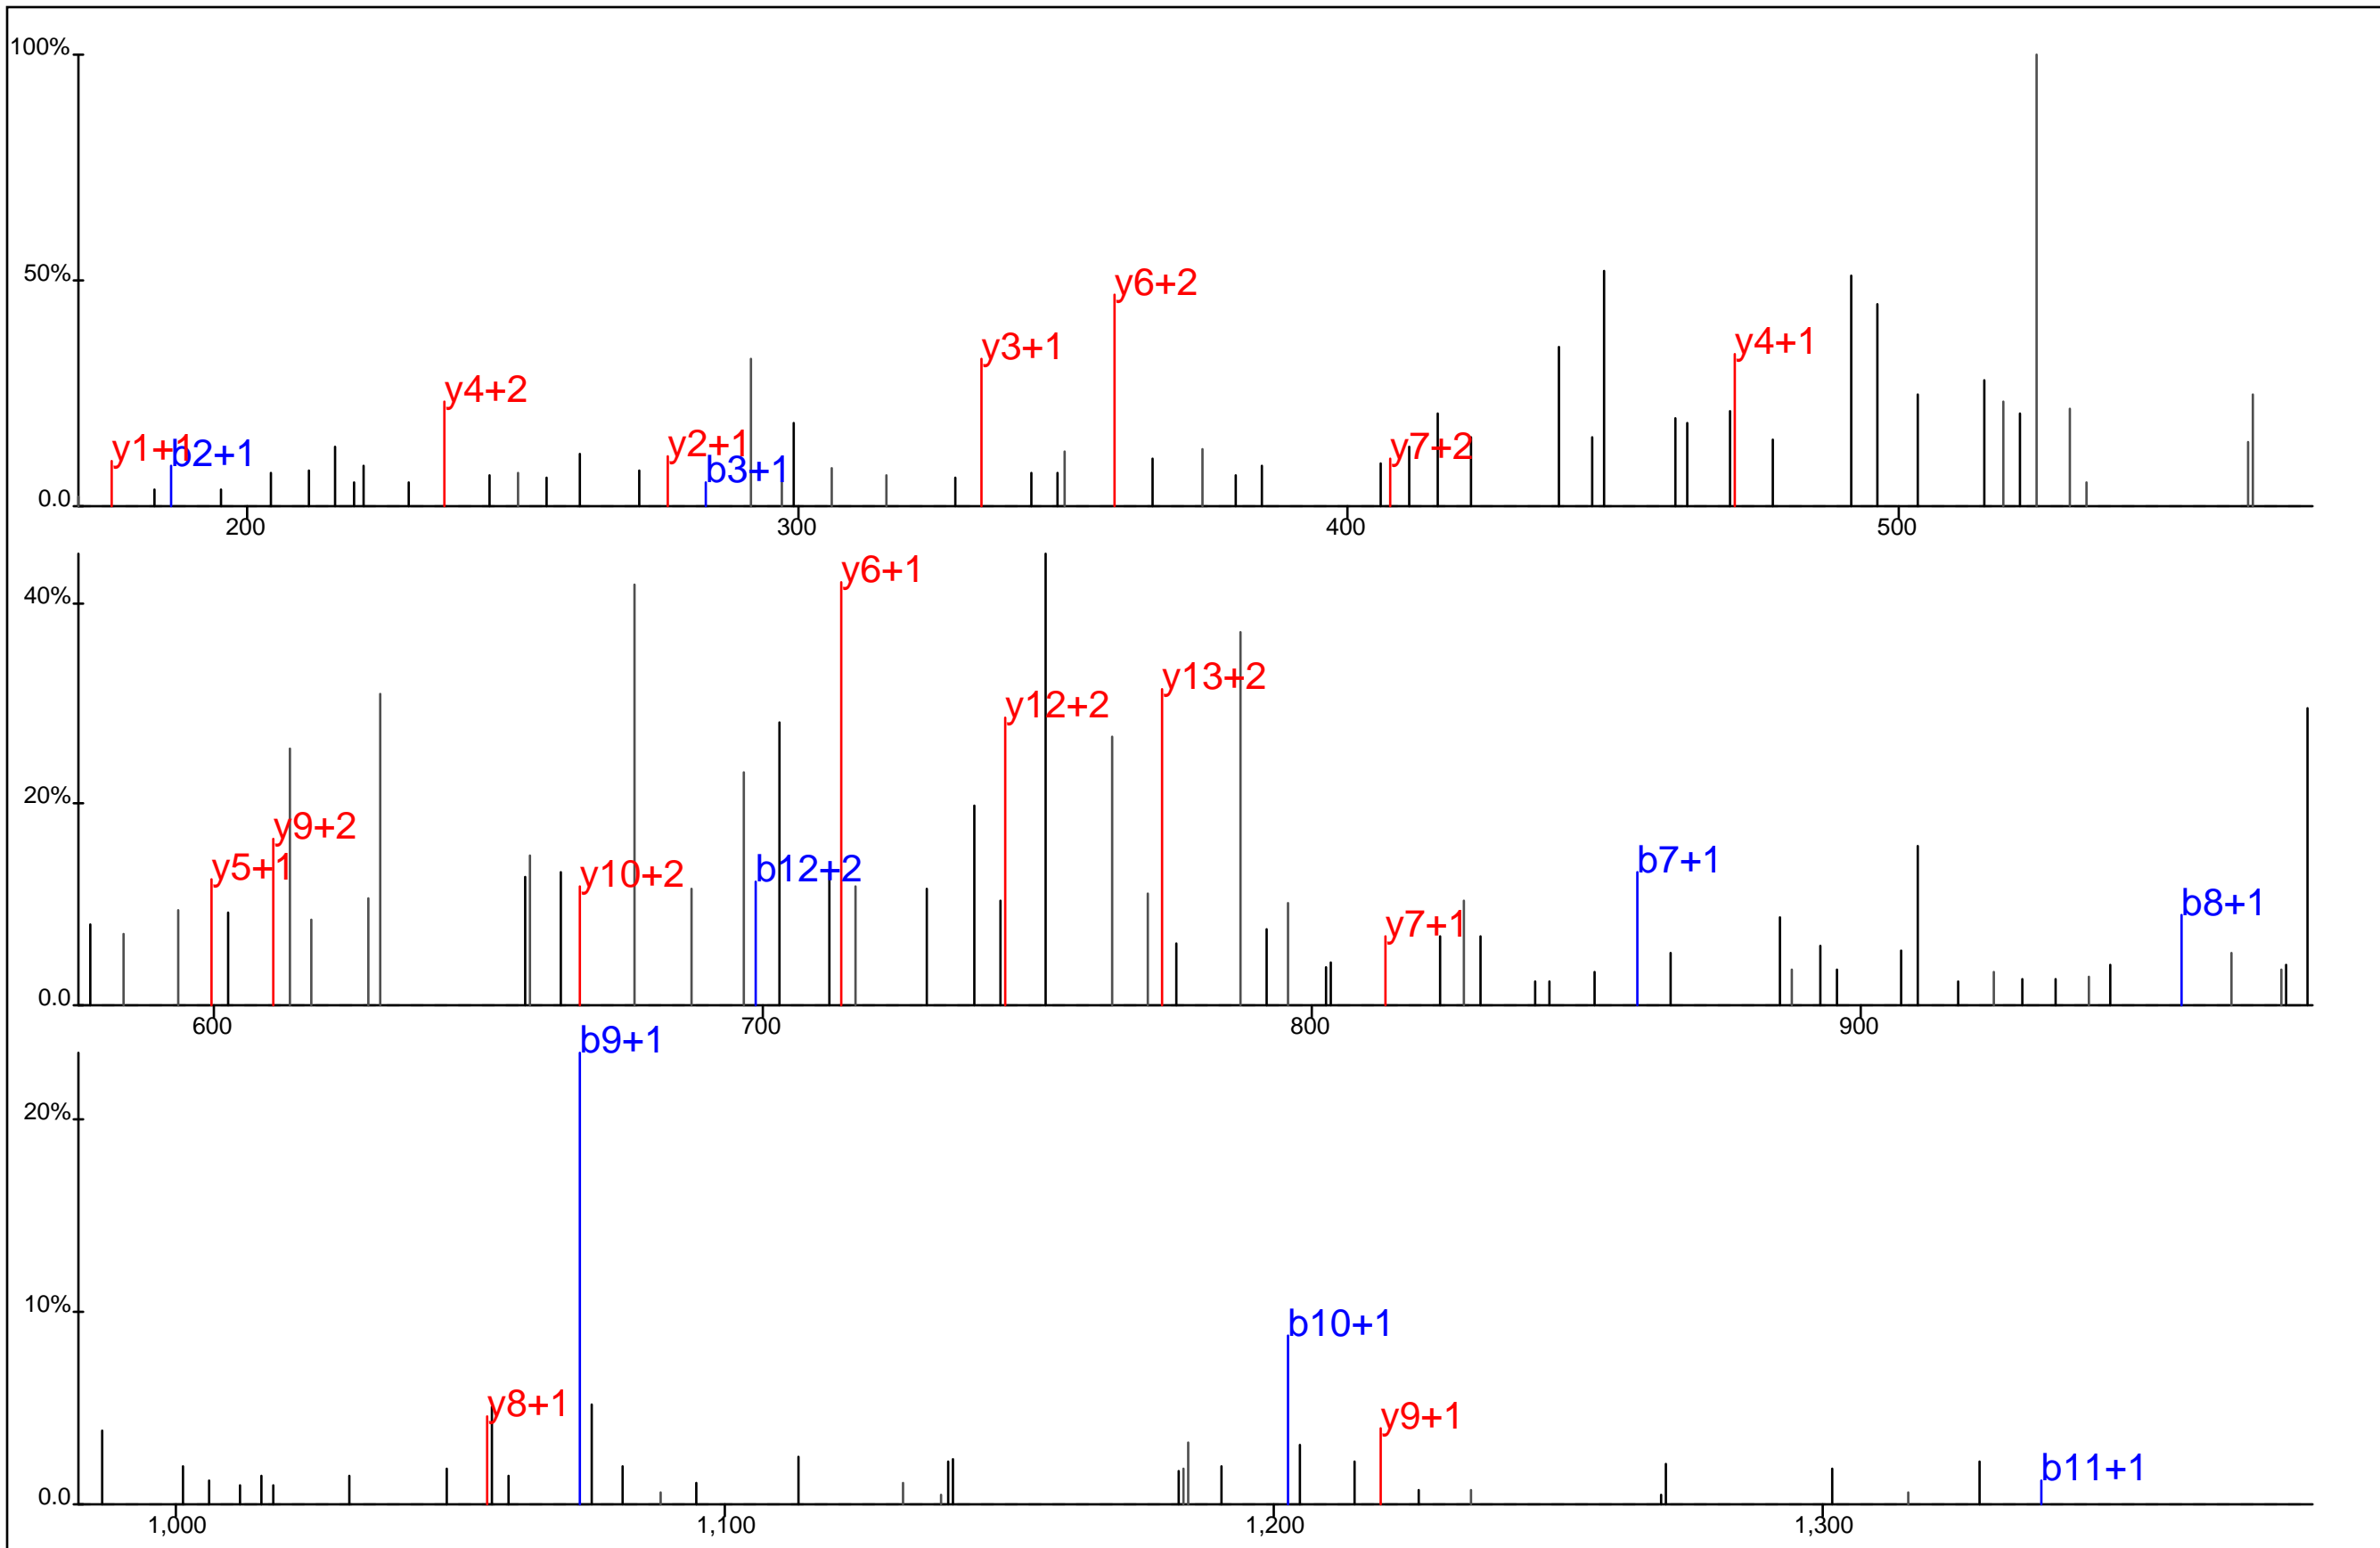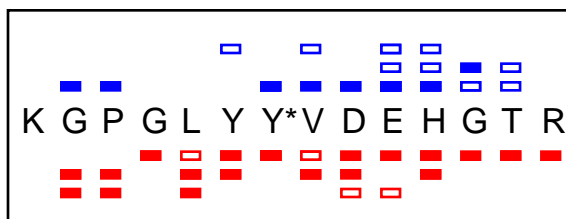

Protein Name: Proteasome subunit, beta type 8  
 gi Accession: 0  
 Precursor Mass: 557.9193+3  
 Delta Mass: 5.655 ppm  
 XCorr: 29.63

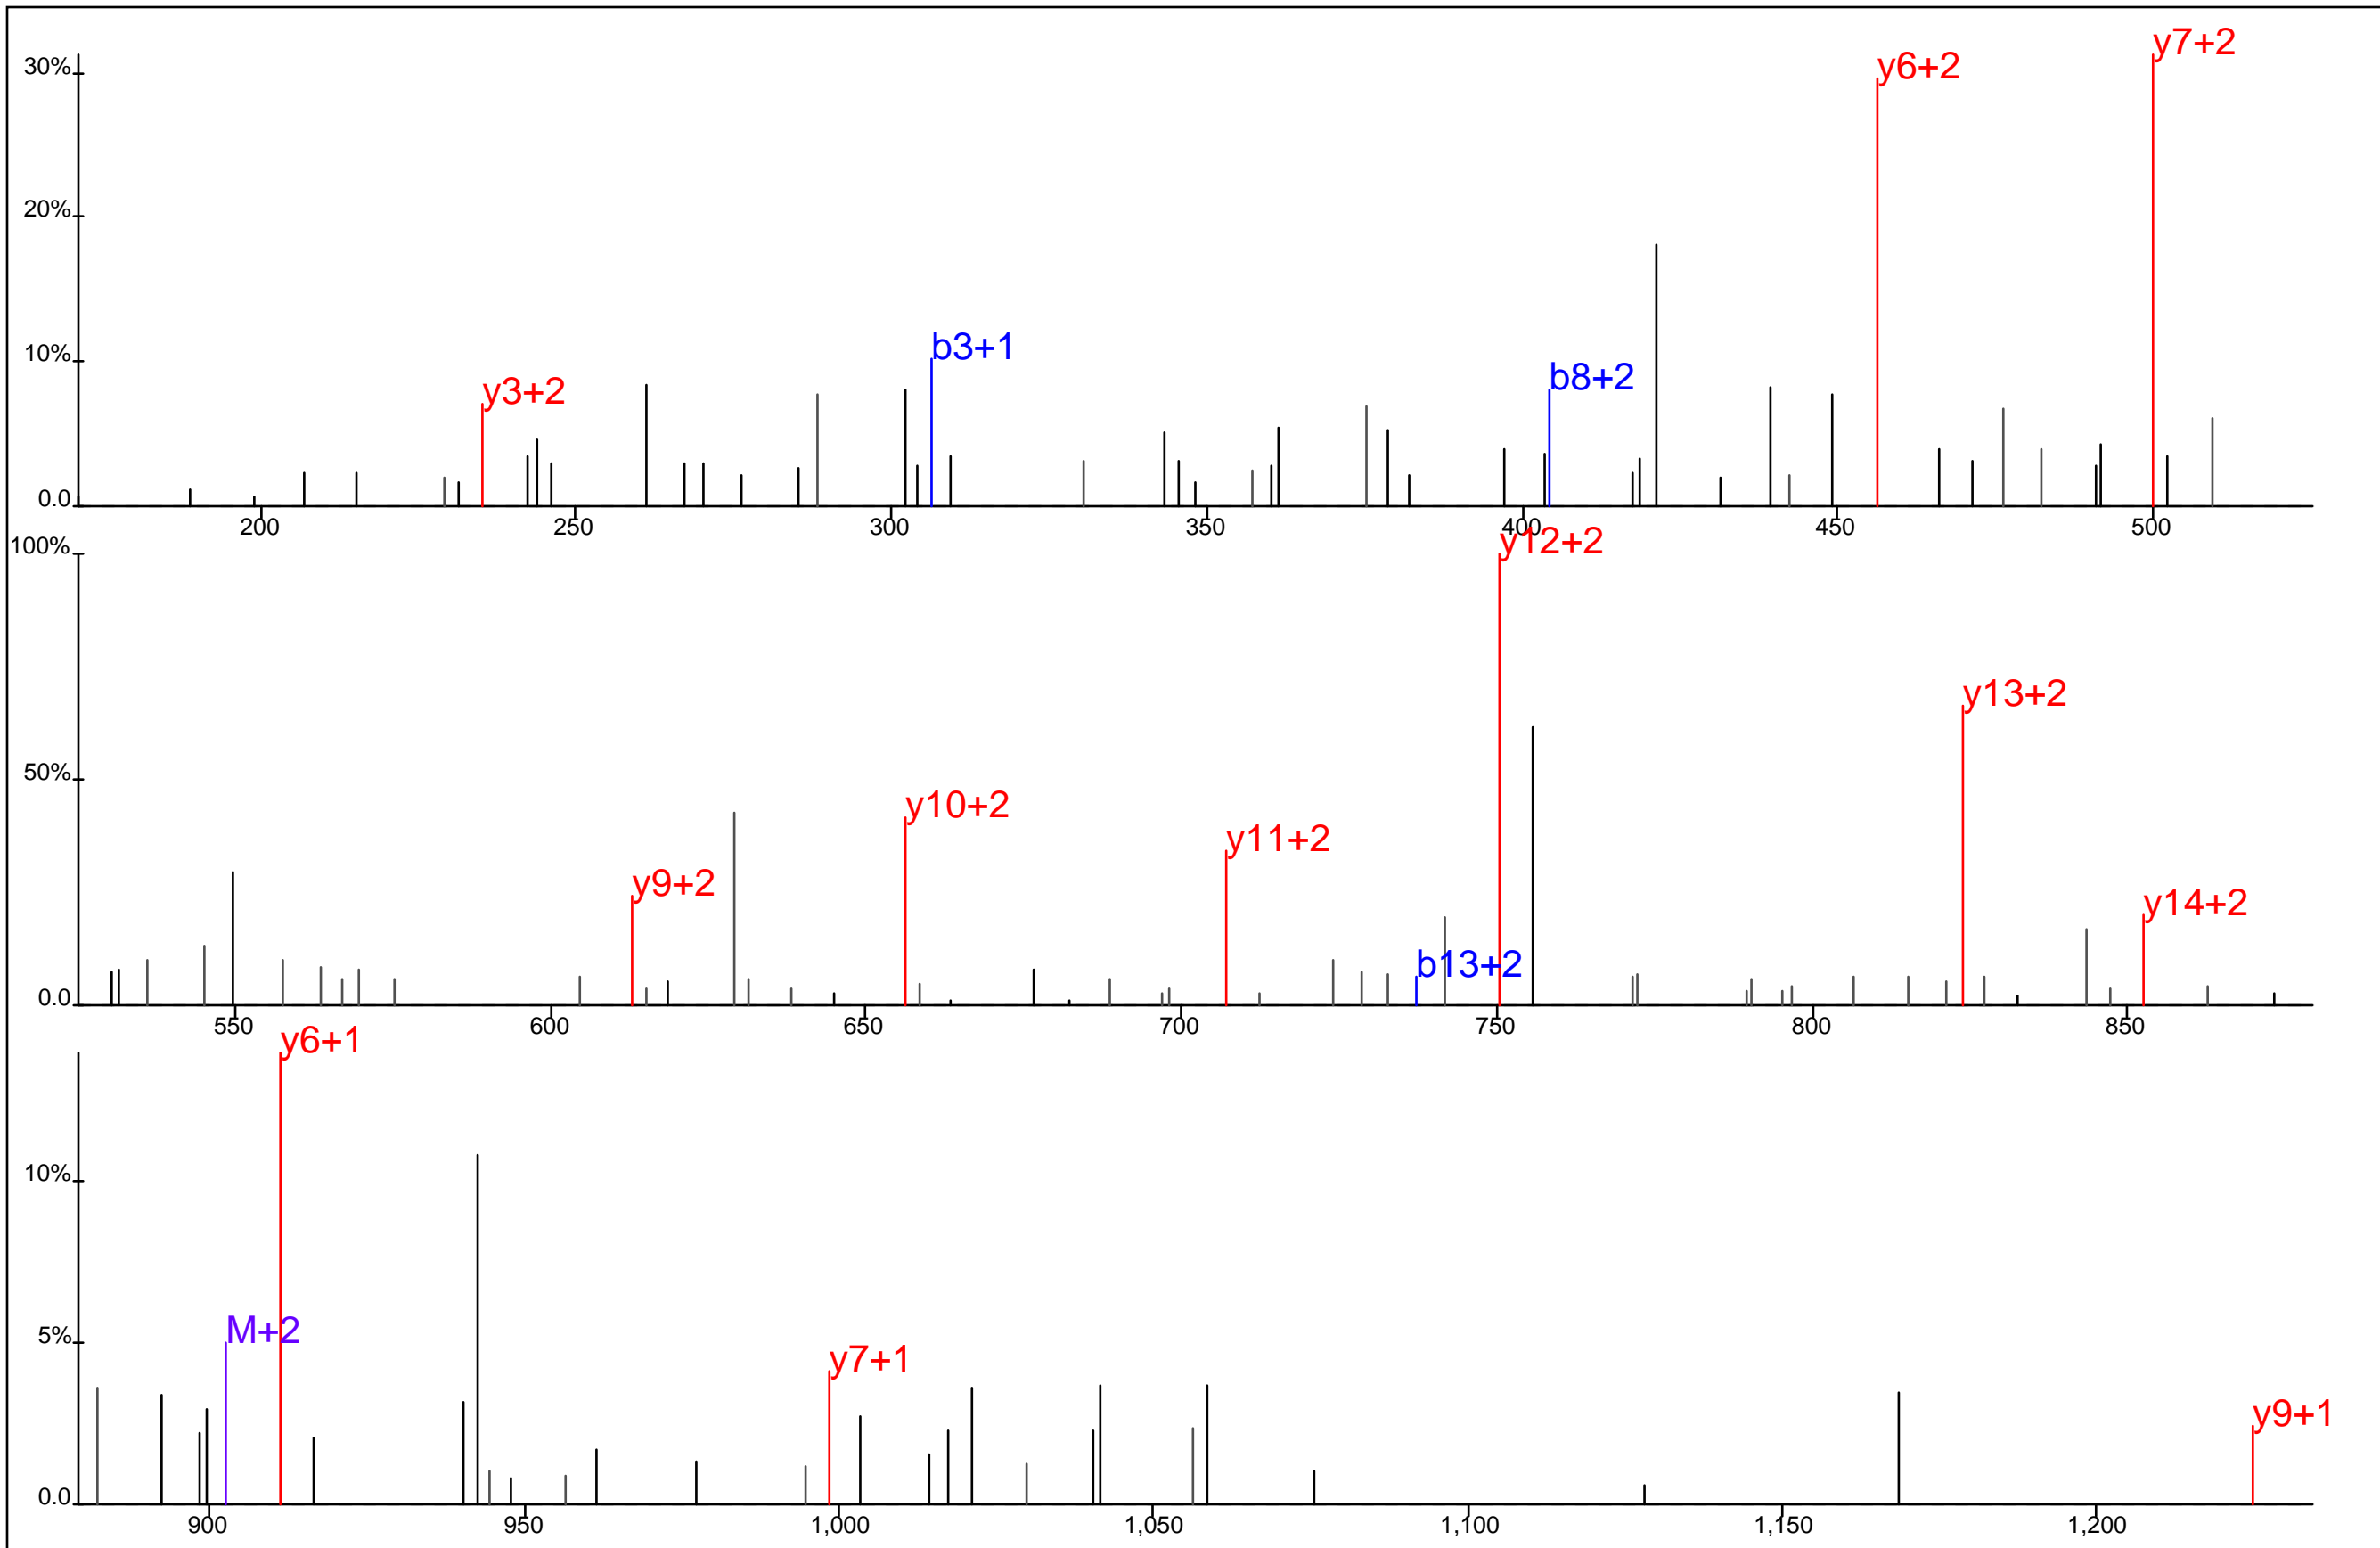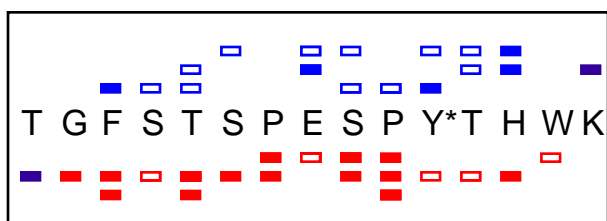

Protein Name: Protein arginine N-methyltransferase 1  
 gi Accession: 0  
 Precursor Mass: 602.2568+3  
 Delta Mass: 1.028 ppm  
 XCorr: 51.46

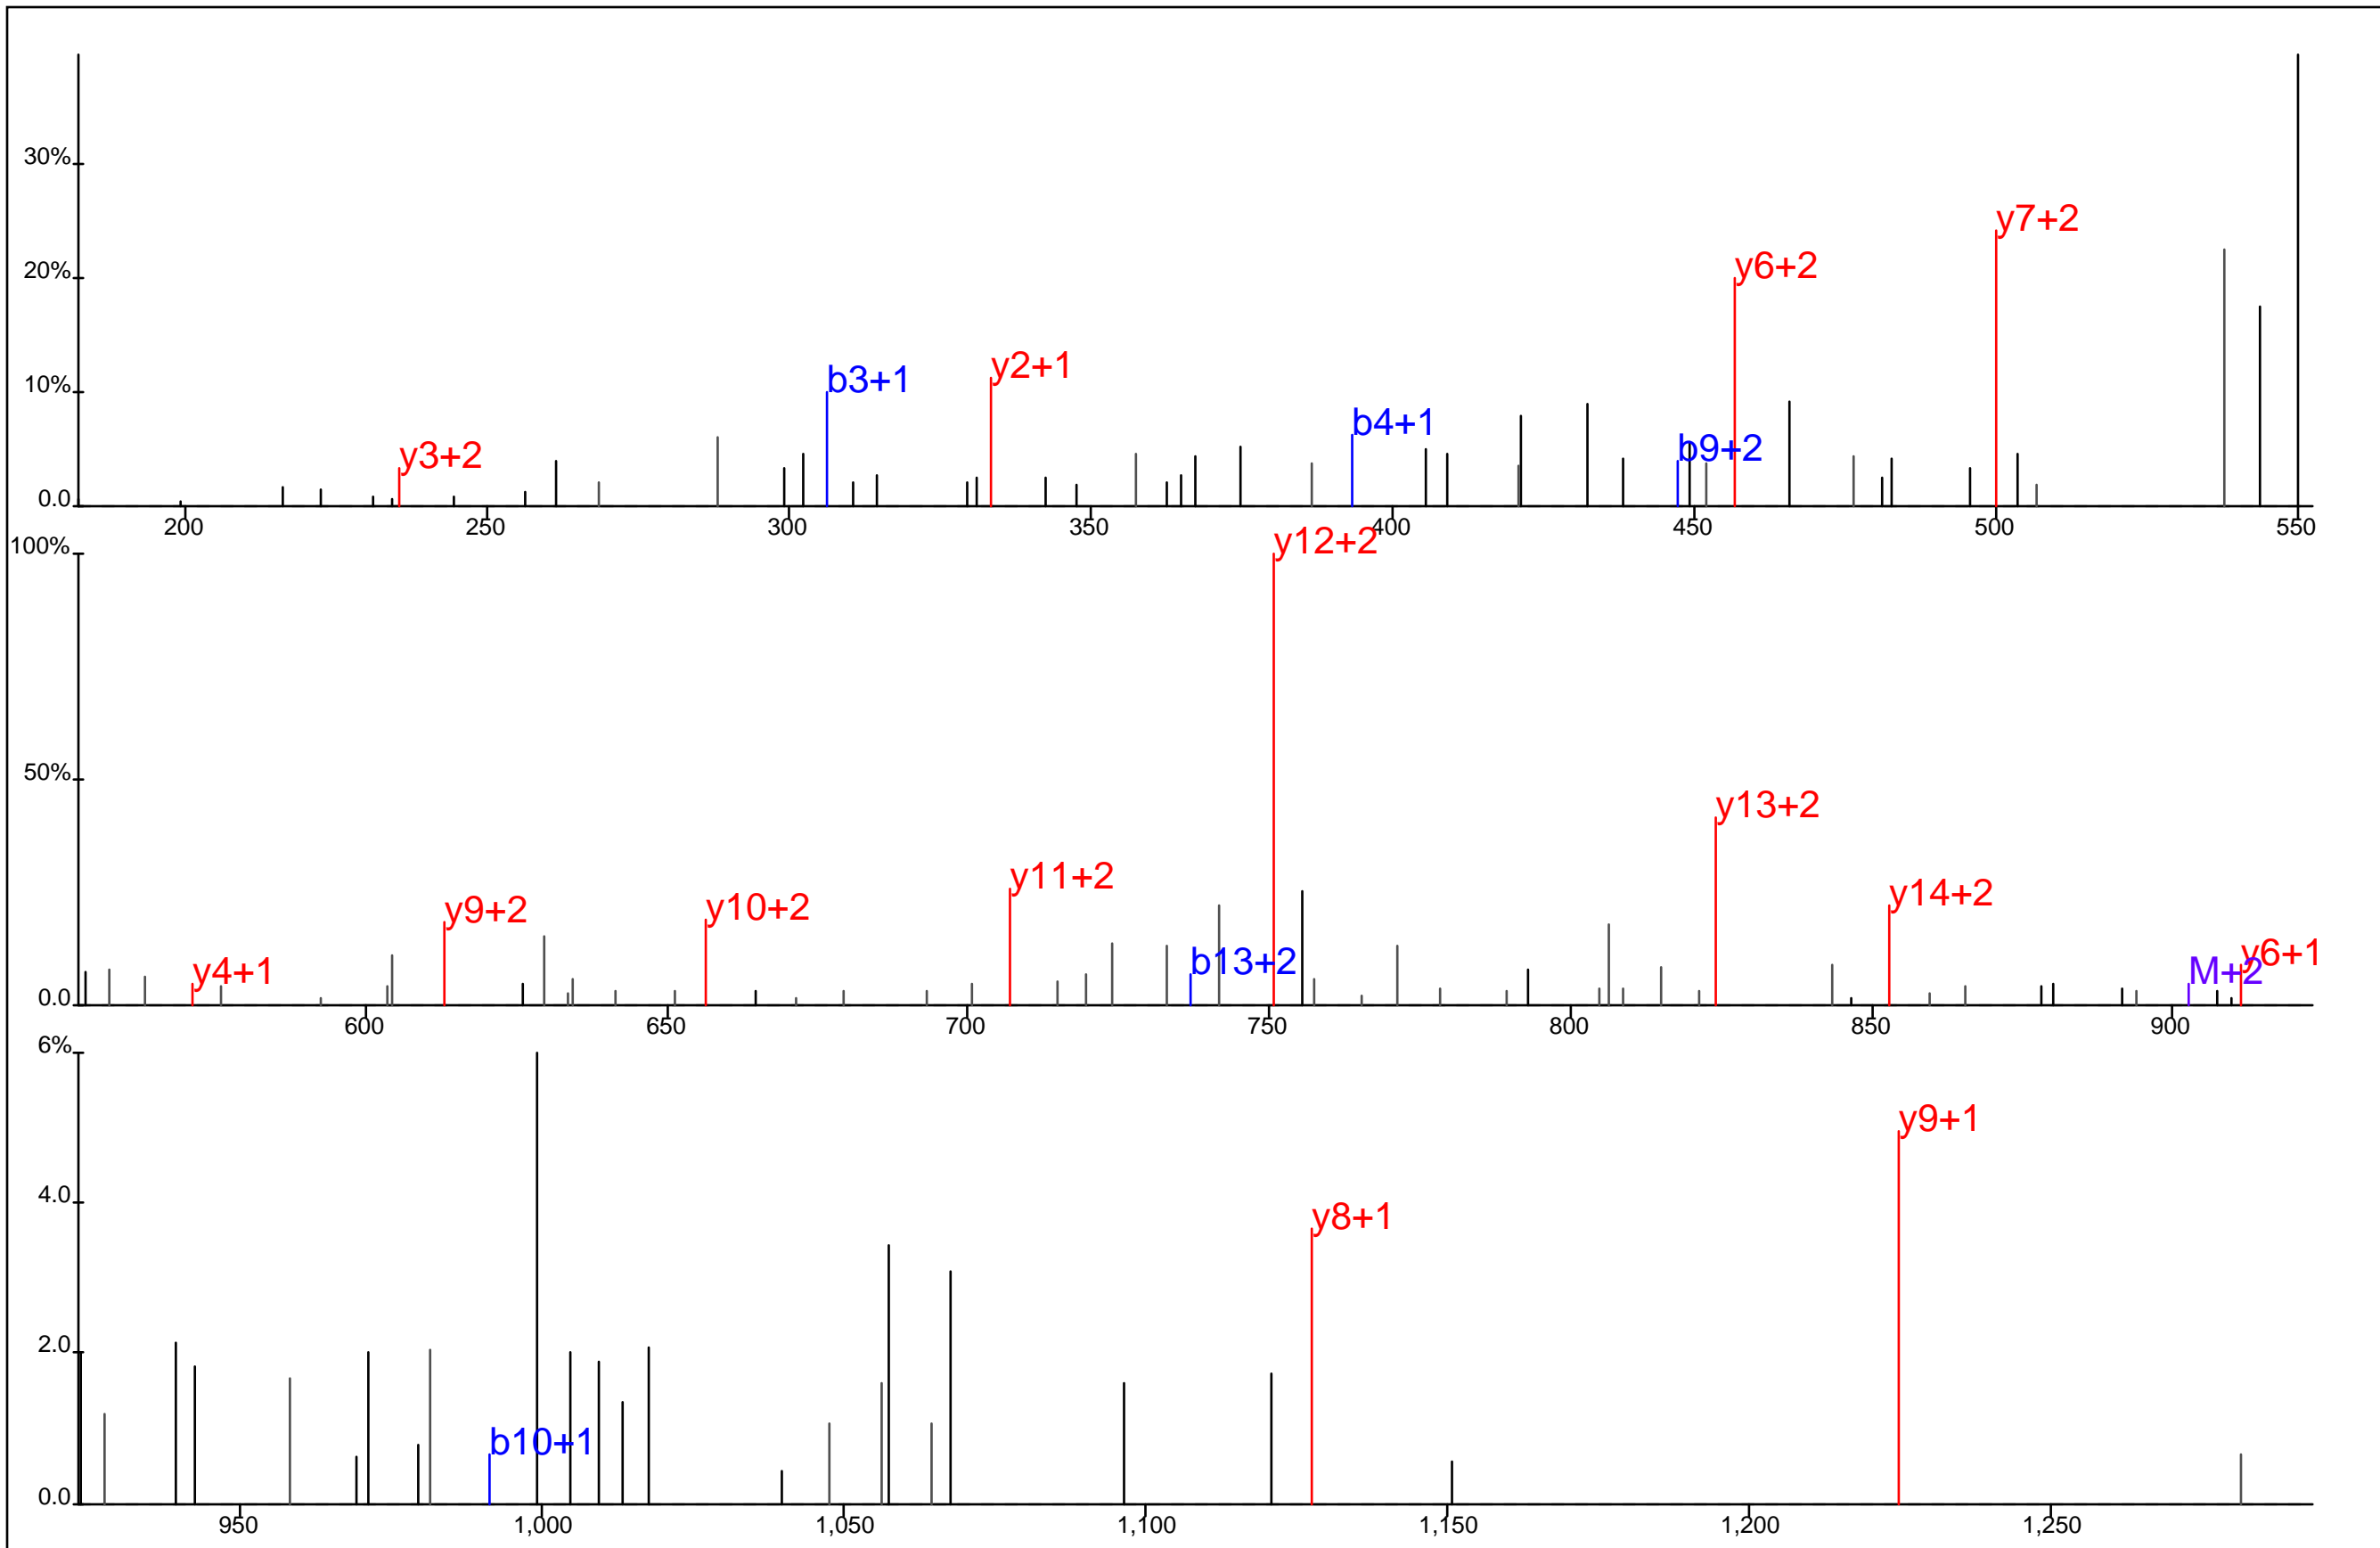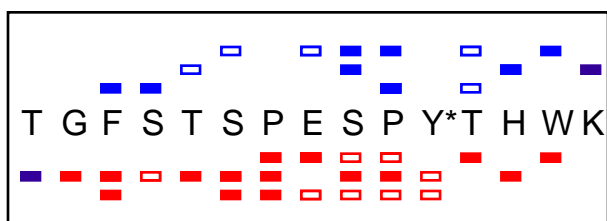

Protein Name: Protein arginine N-methyltransferase 1  
 gi Accession: 0  
 Precursor Mass: 602.2569+3  
 Delta Mass: 0.927 ppm  
 XCorr: 62.64

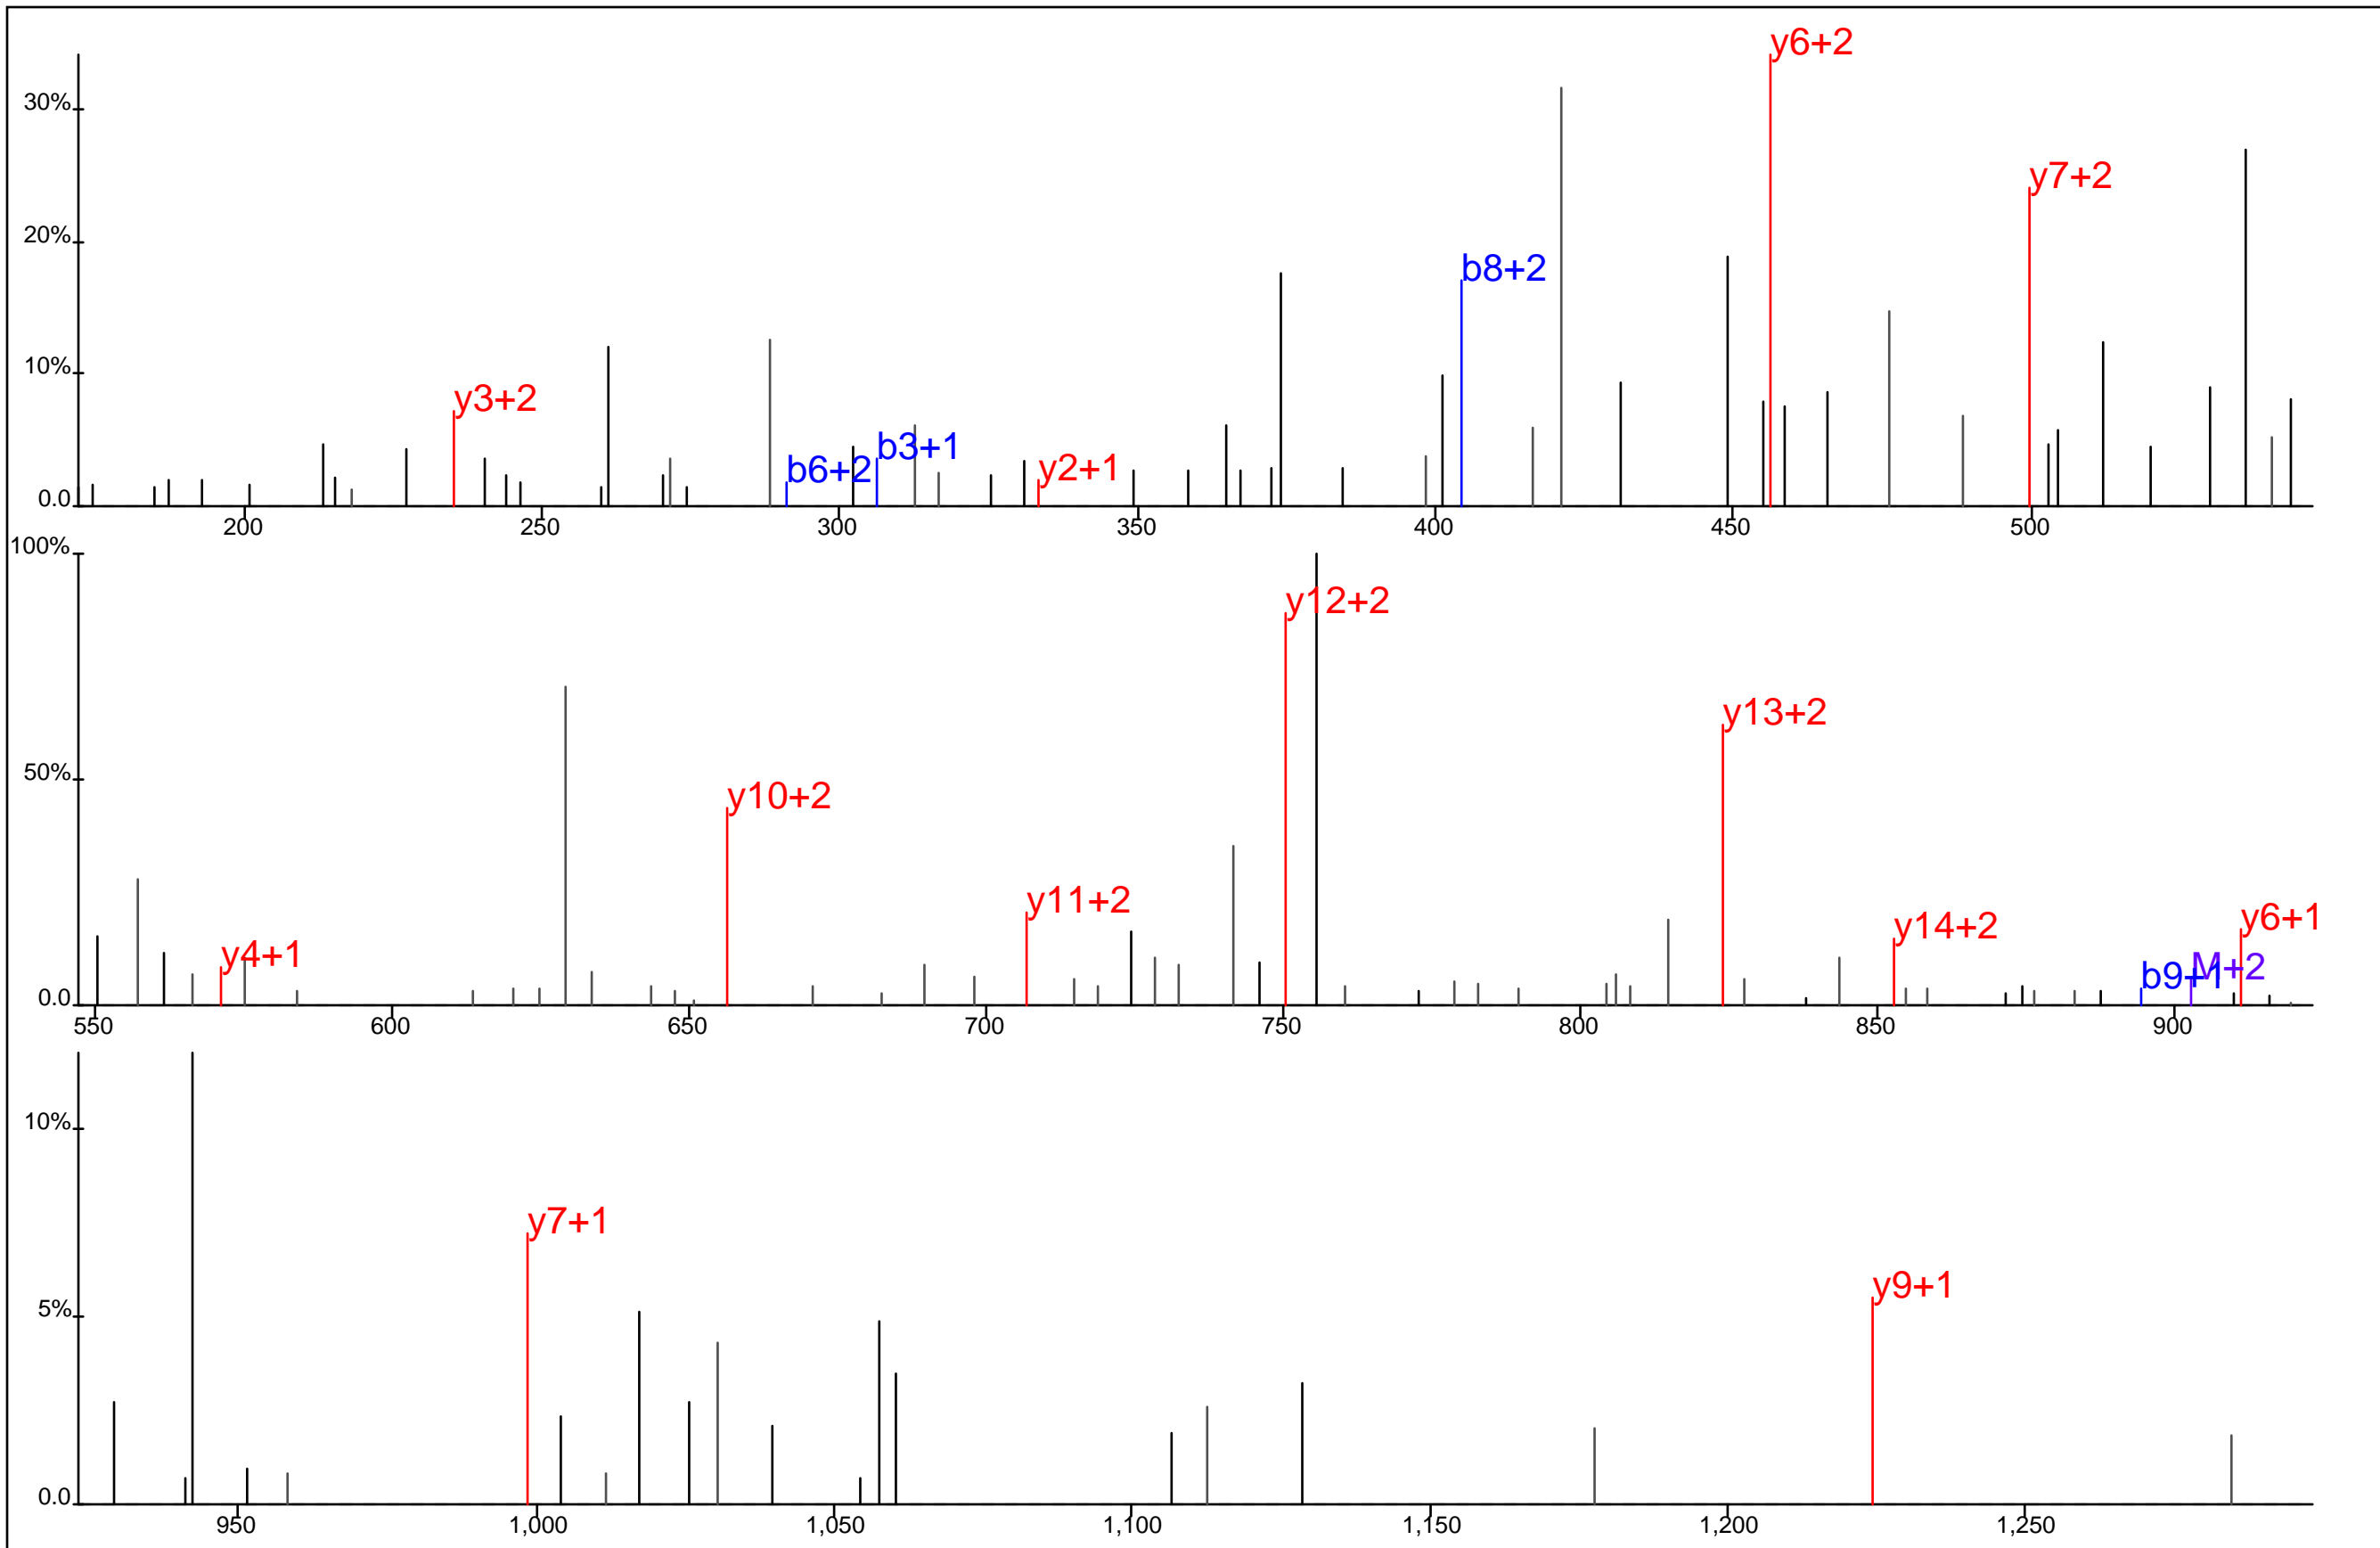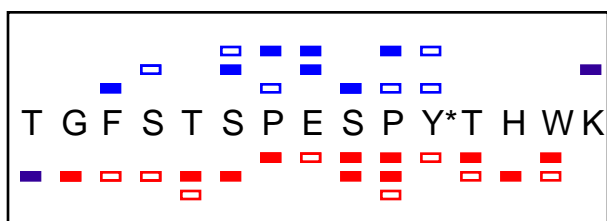

Protein Name: Protein arginine N-methyltransferase 1  
 gi Accession: 0  
 Precursor Mass: 602.2554+3  
 Delta Mass: 3.362 ppm  
 XCorr: 30.42

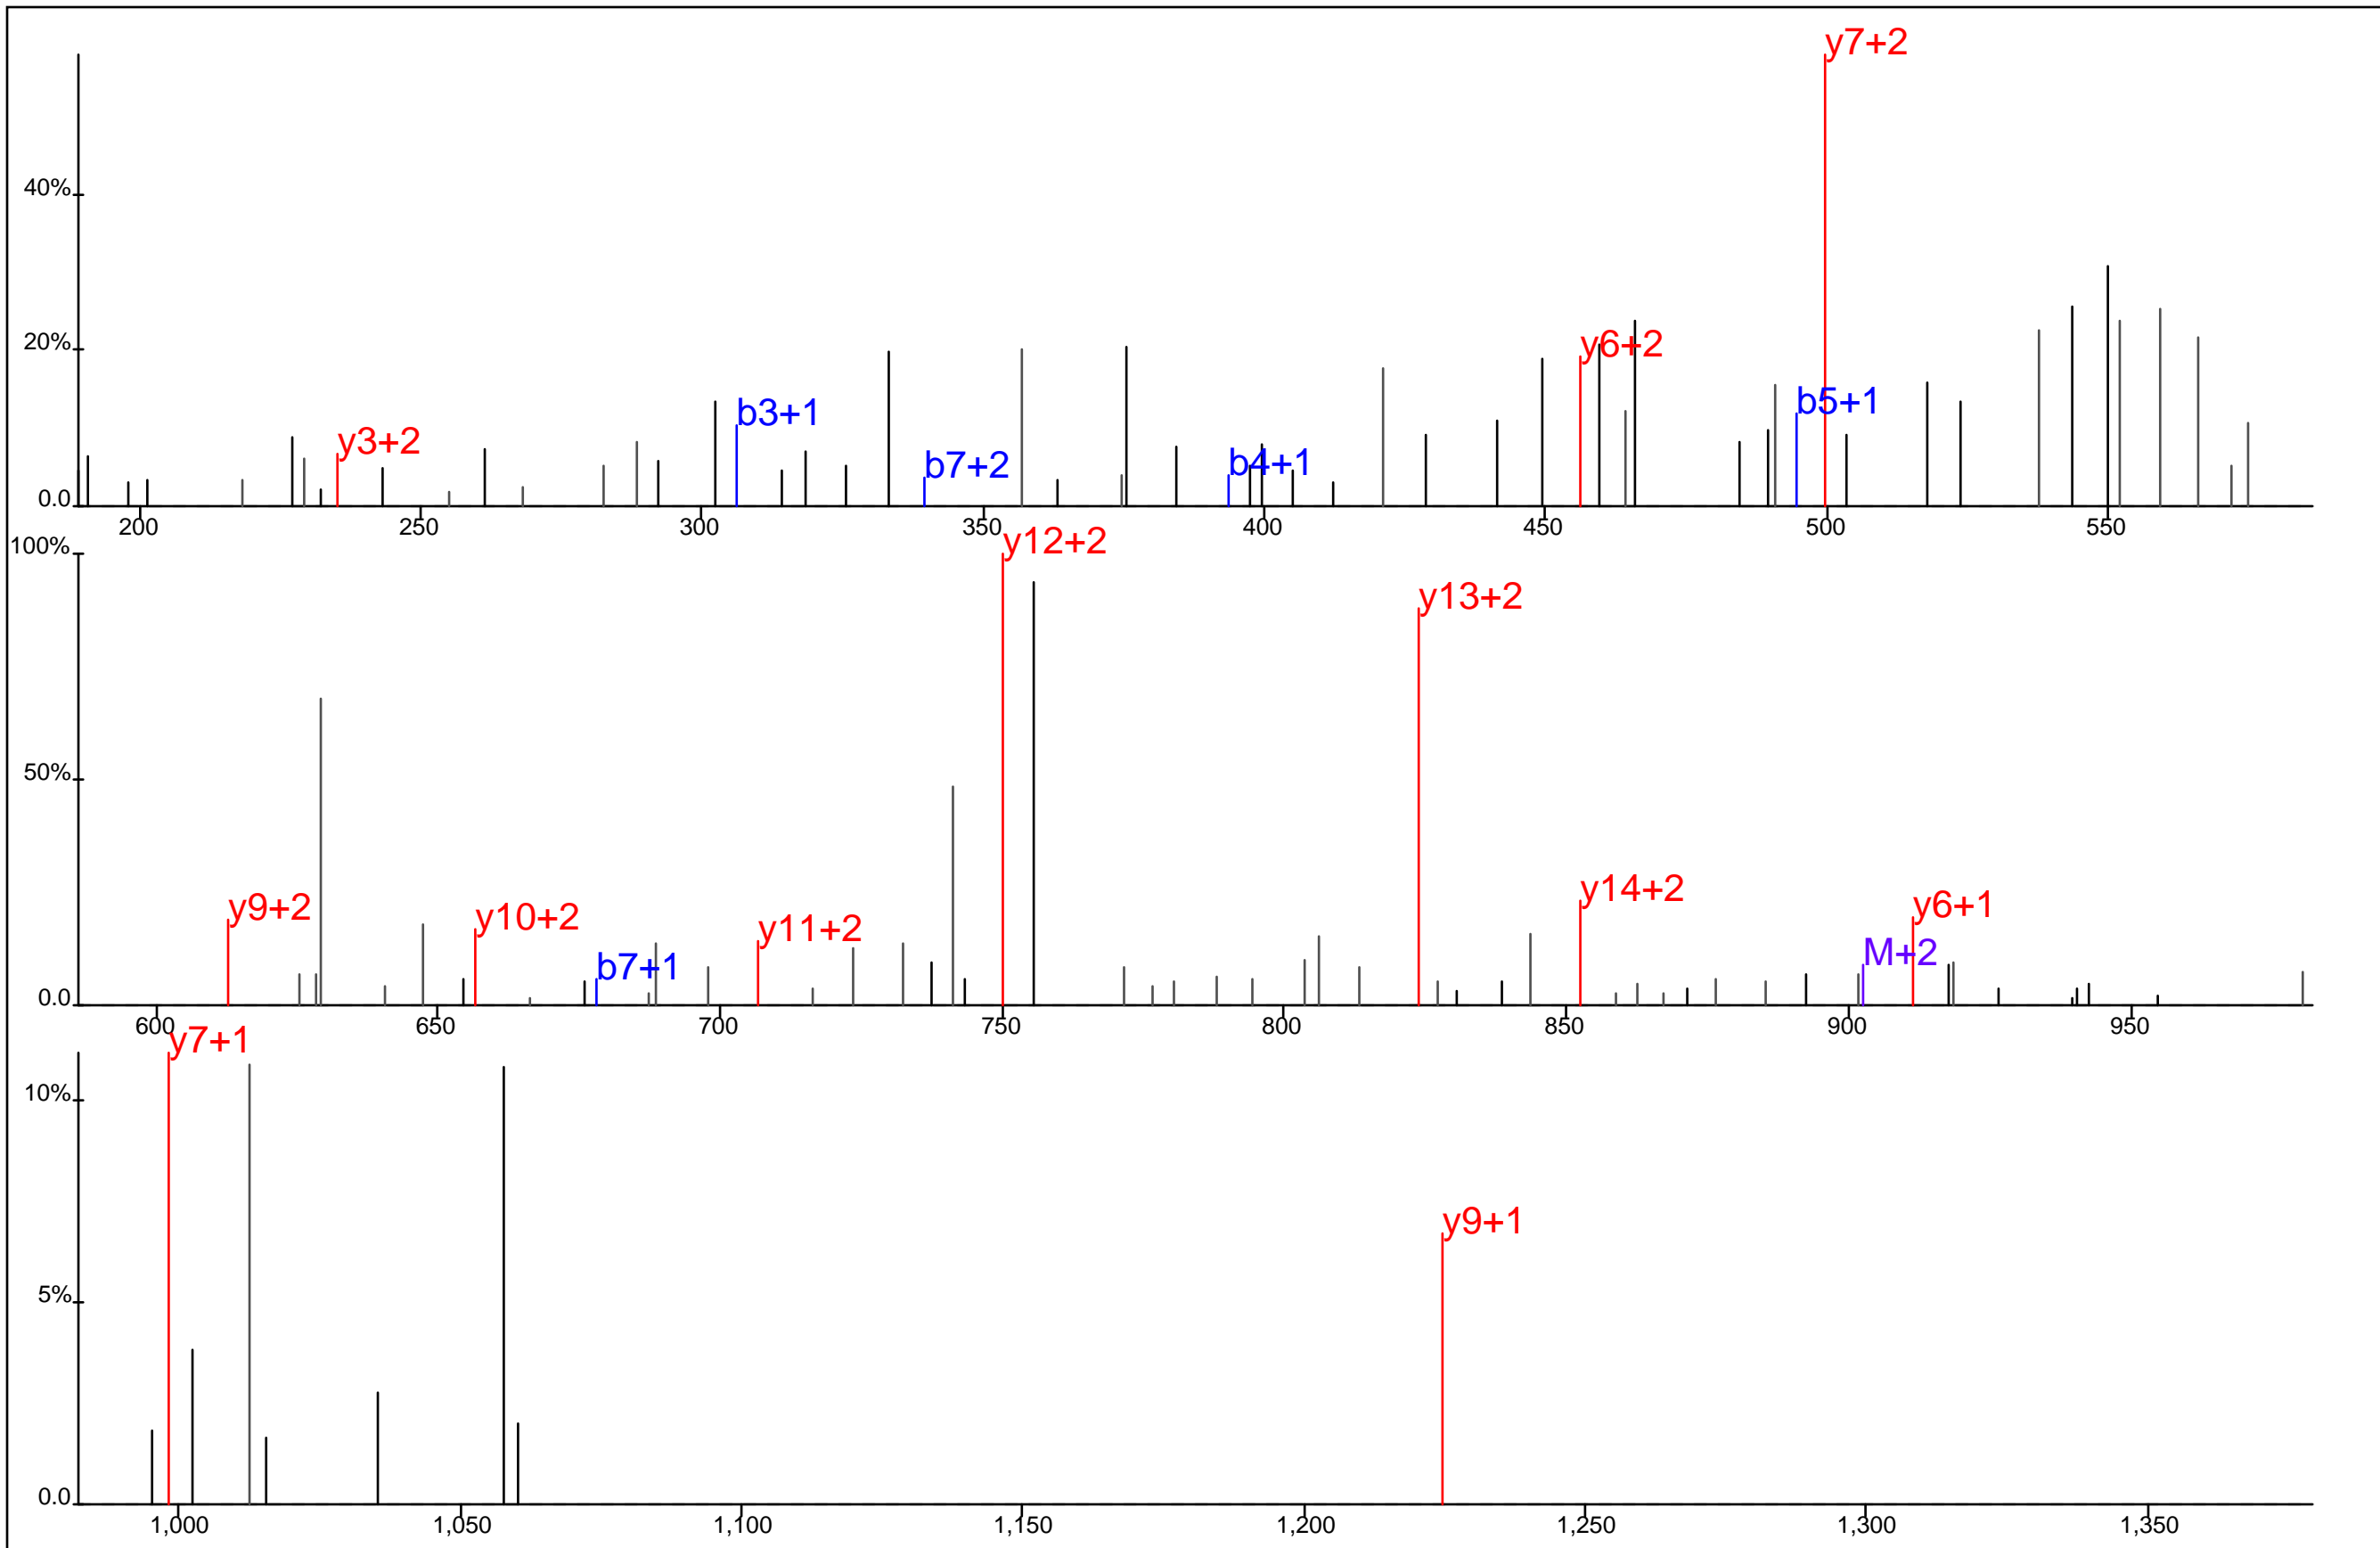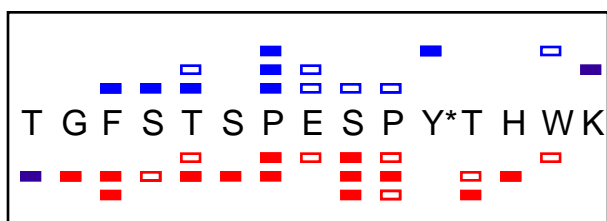

Protein Name: Protein arginine N-methyltransferase 1  
 gi Accession: 0  
 Precursor Mass: 602.2560+3  
 Delta Mass: 2.450 ppm  
 XCorr: 44.79



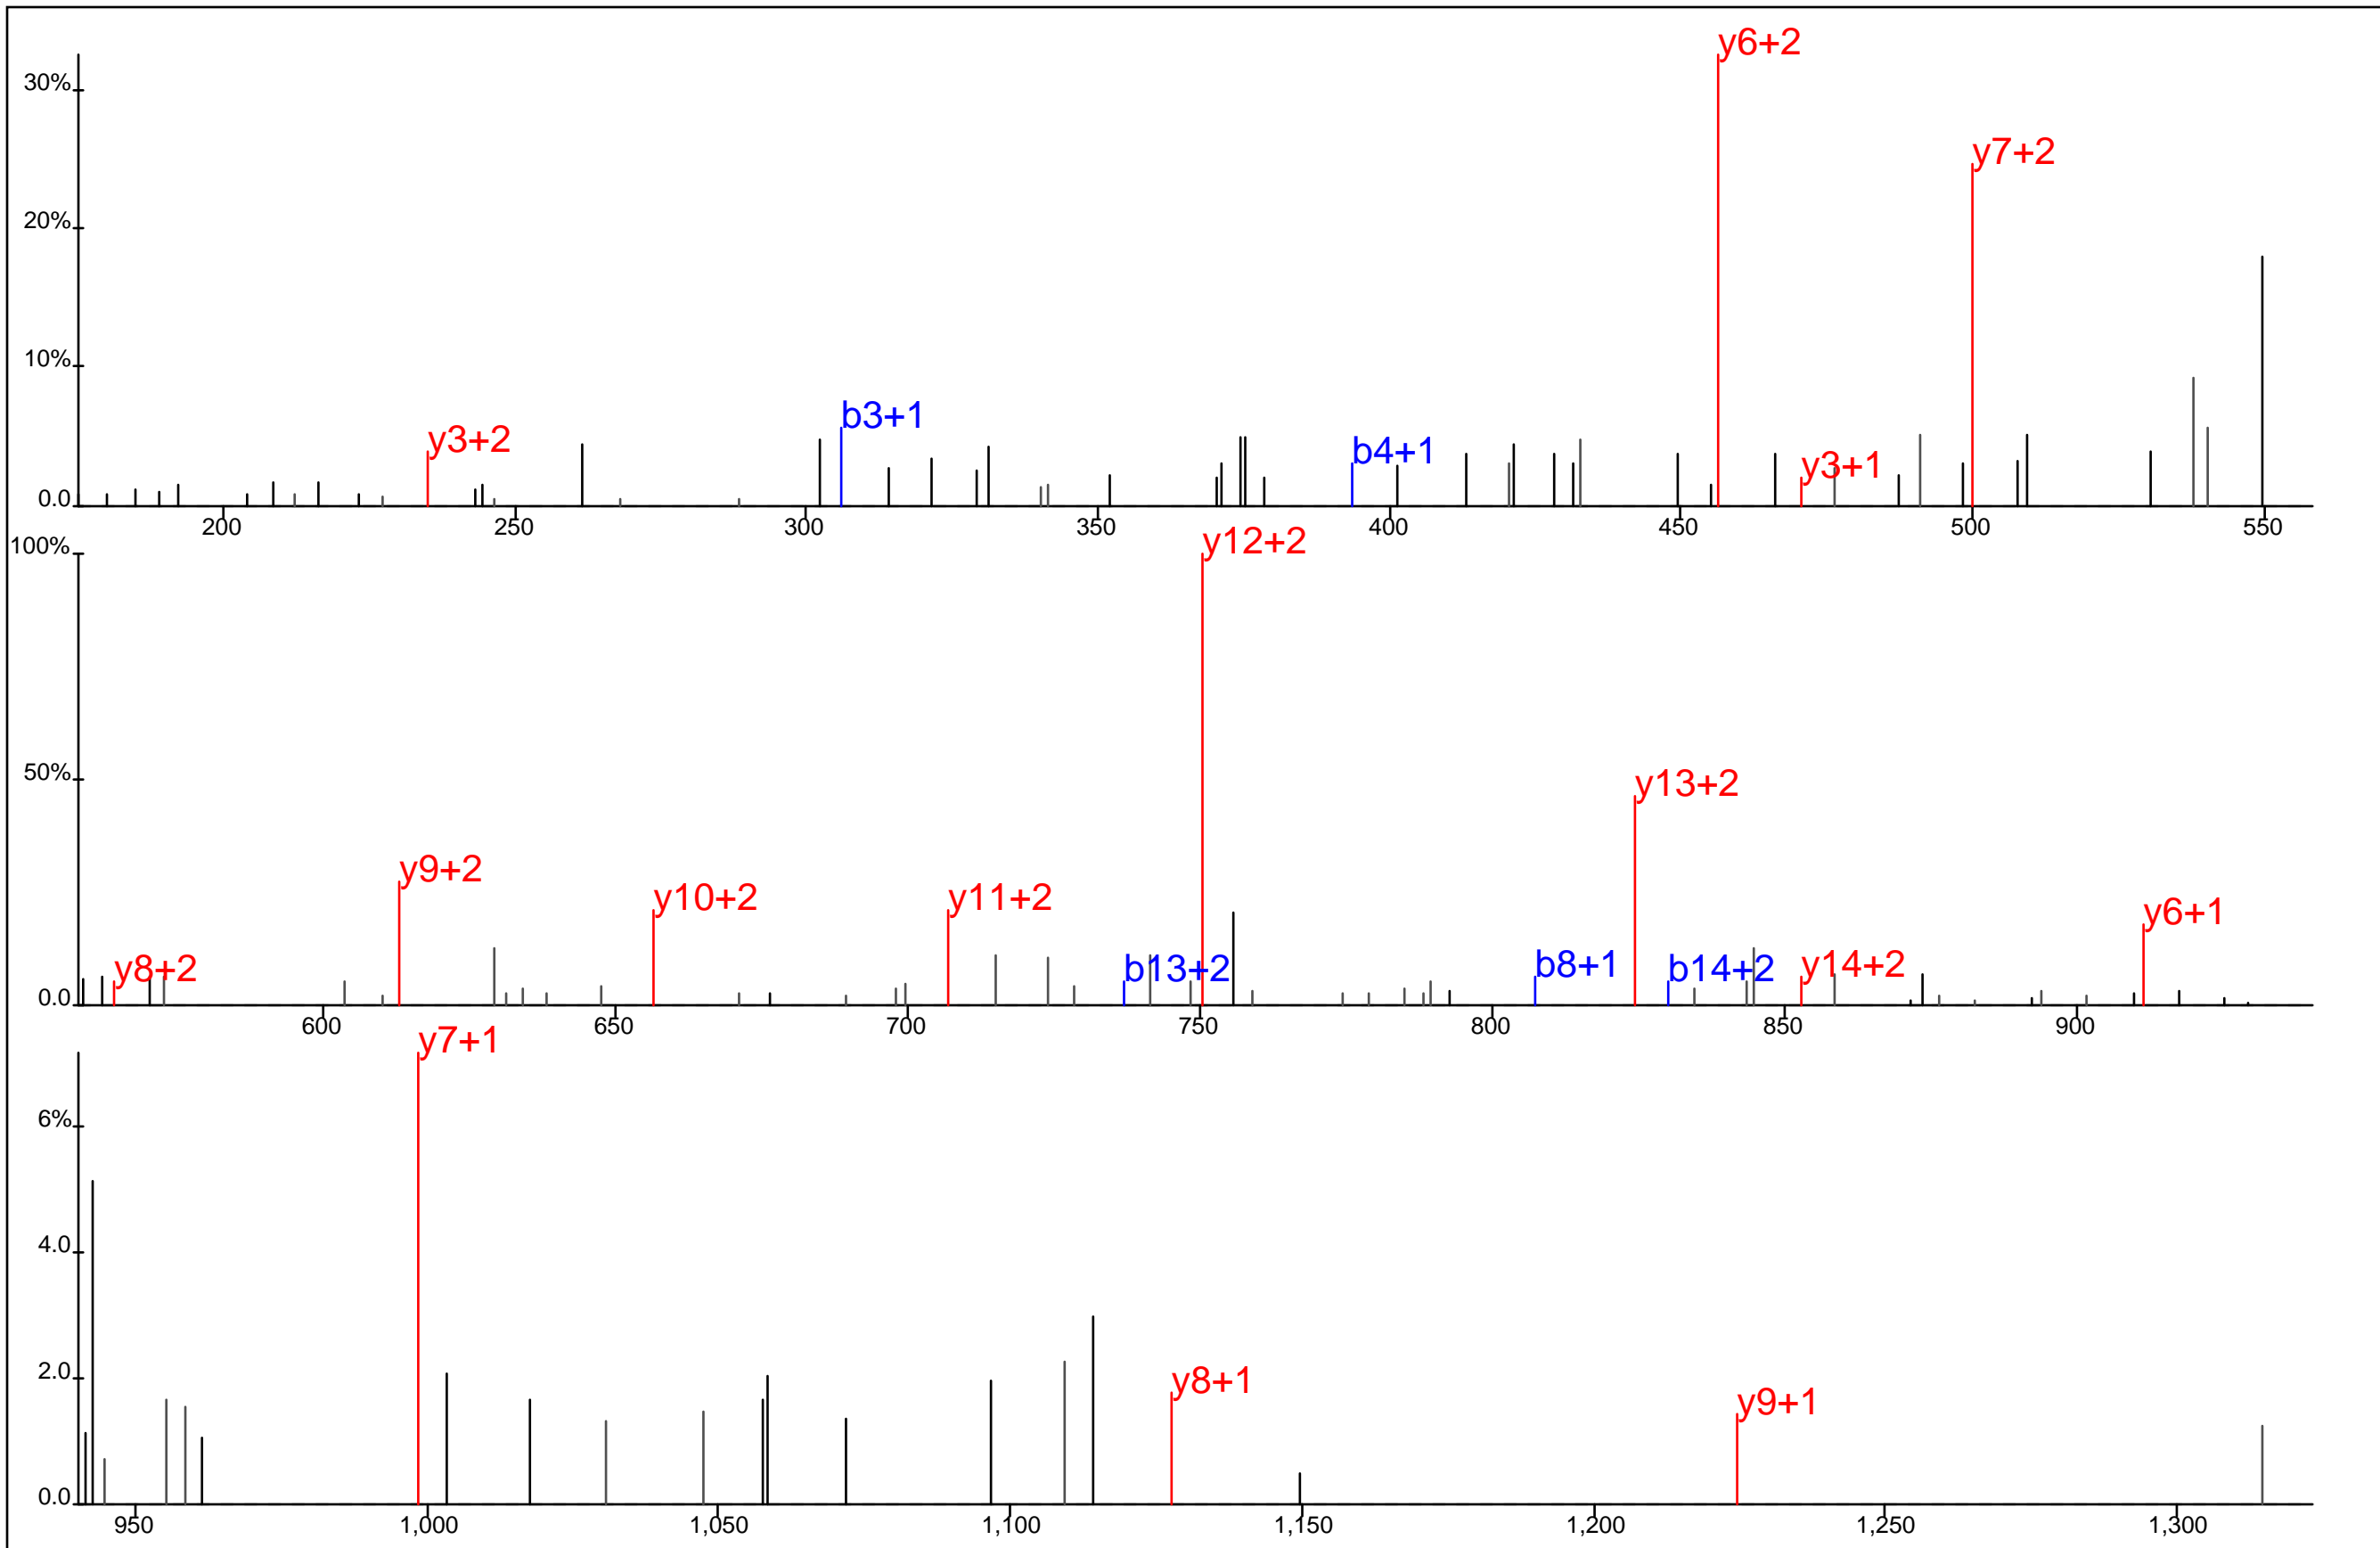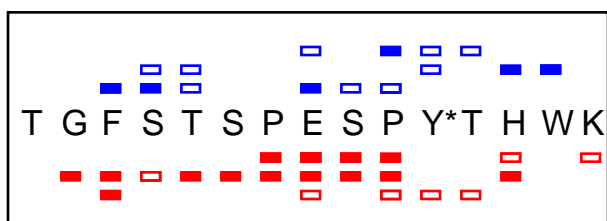

Protein Name: Protein arginine N-methyltransferase 1  
 gi Accession: 0  
 Precursor Mass: 602.2572+3  
 Delta Mass: 0.420 ppm  
 XCorr: 48.45

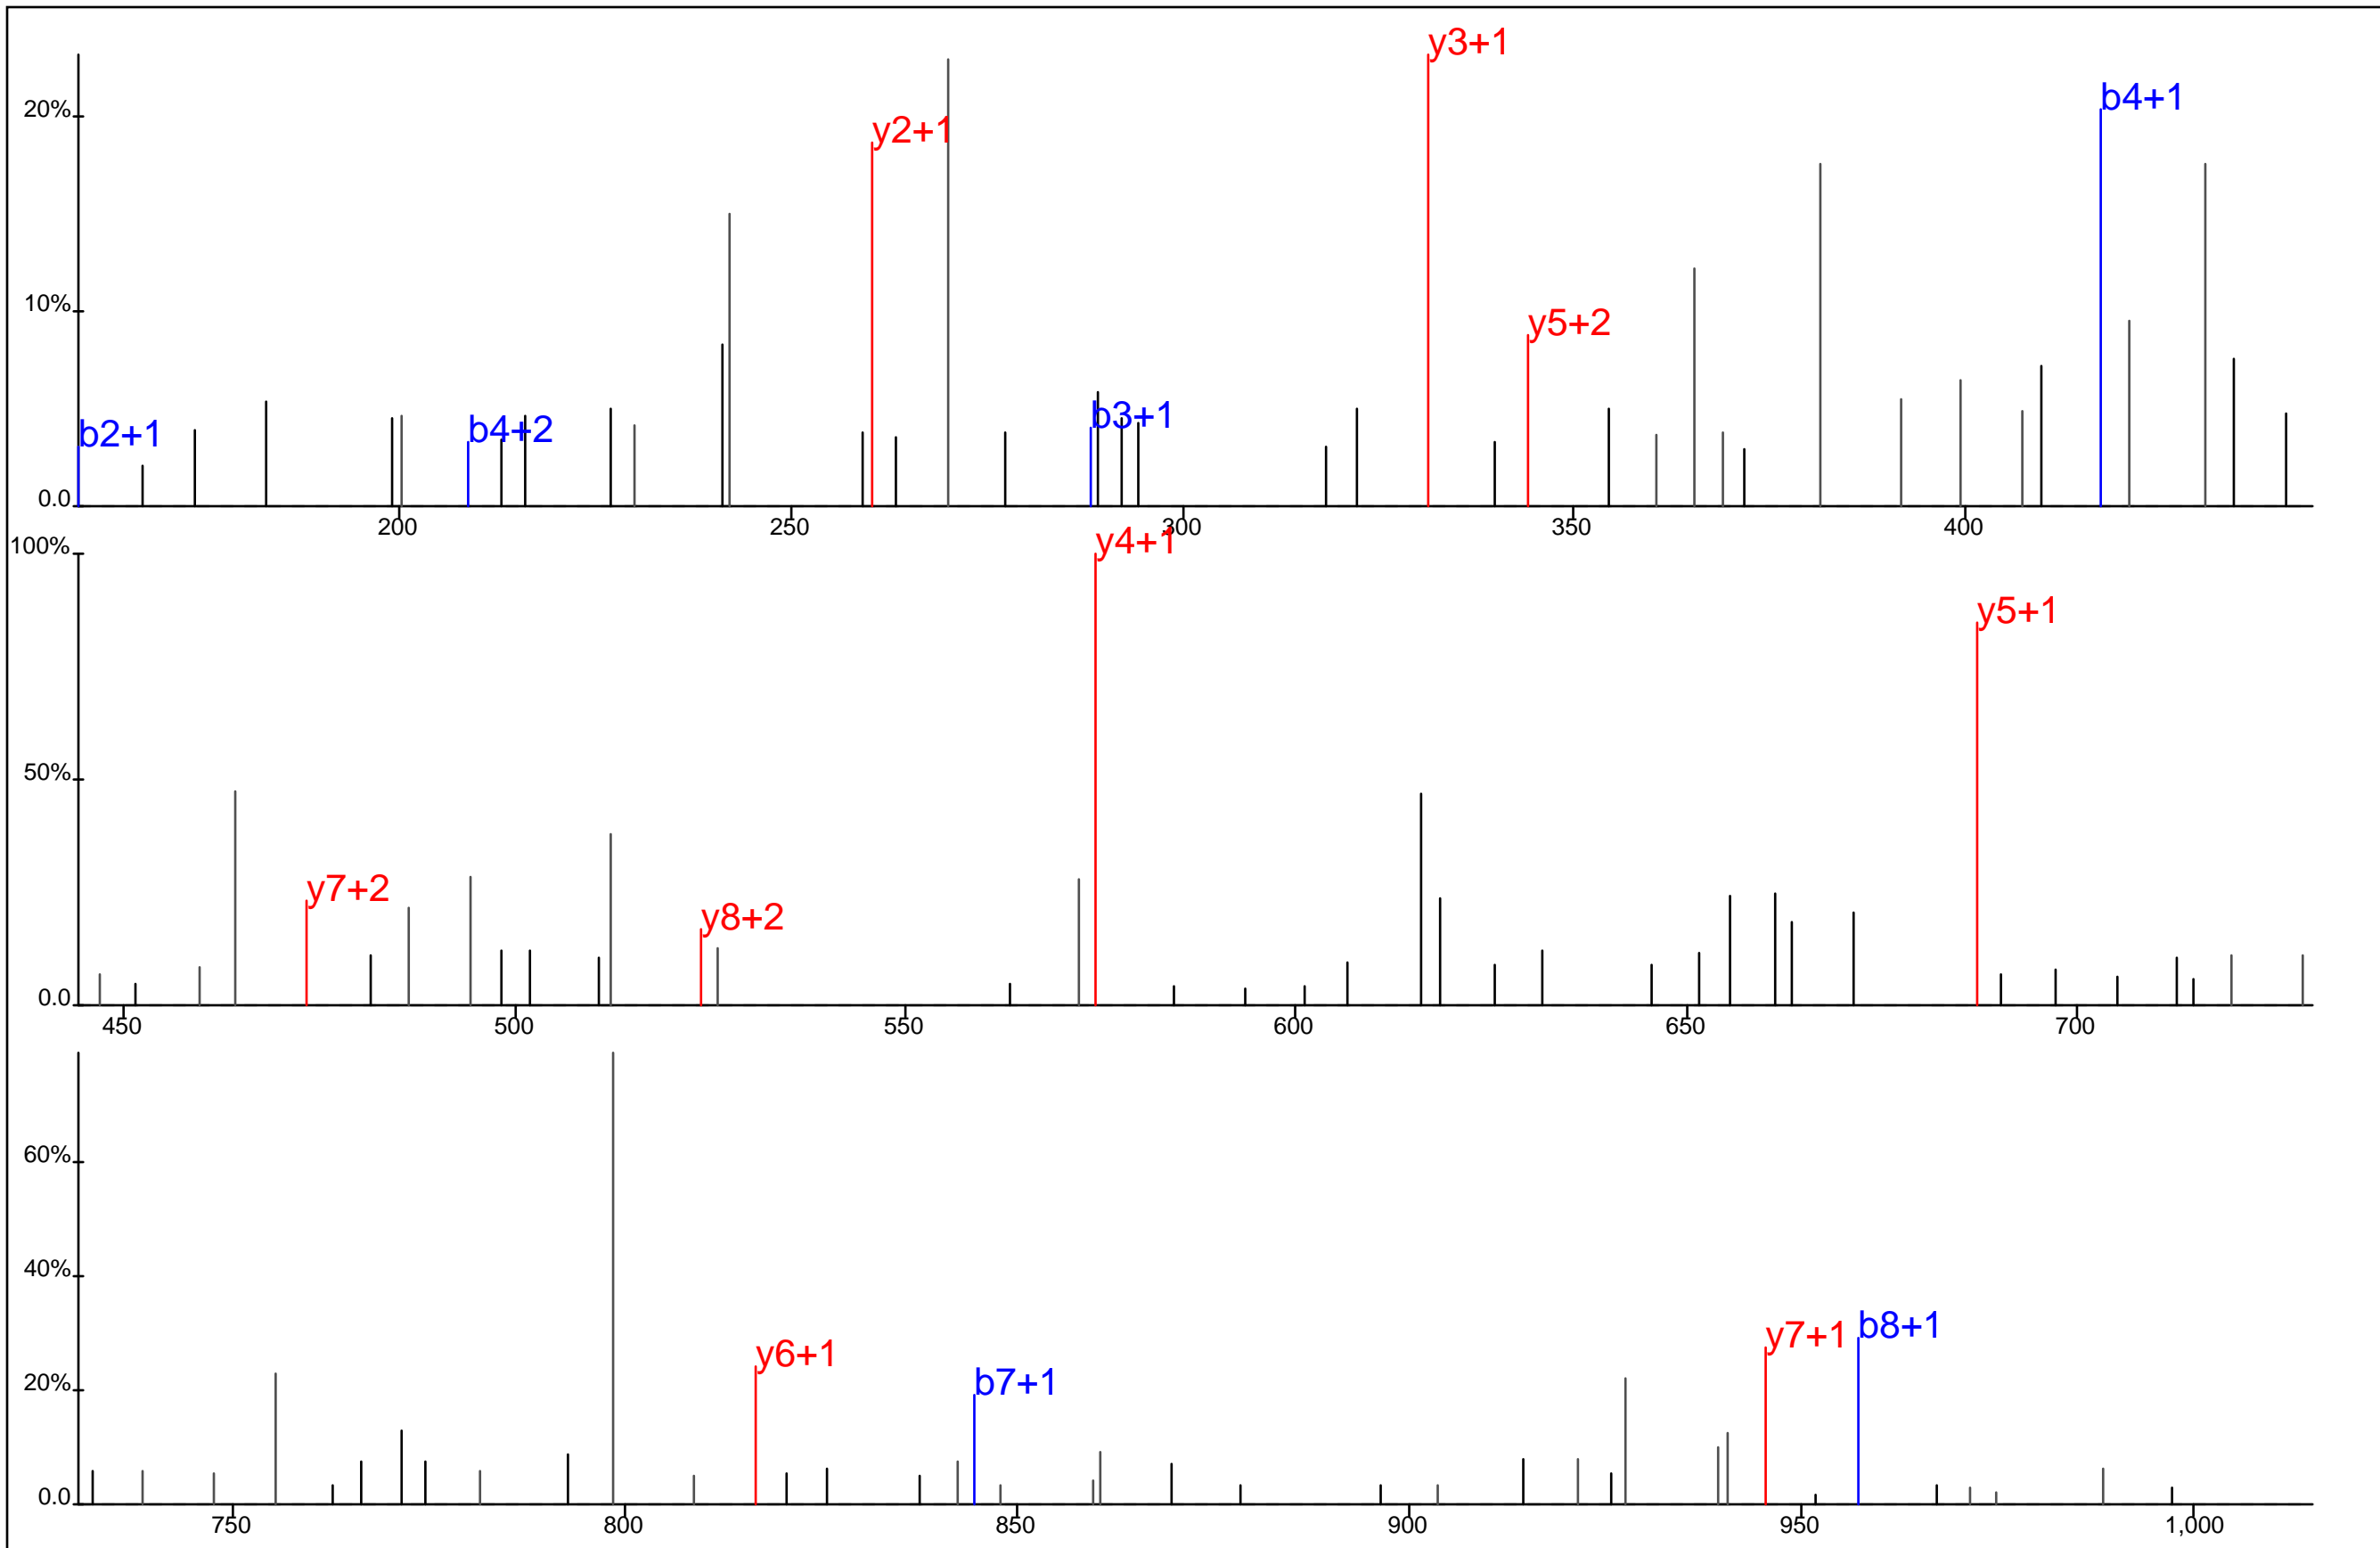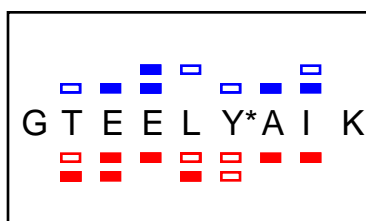

Protein Name: Protein kinase C alpha  
 gi Accession: 0  
 Precursor Mass: 552.2541+2  
 Delta Mass: 0.988 ppm  
 XCorr: 35.62

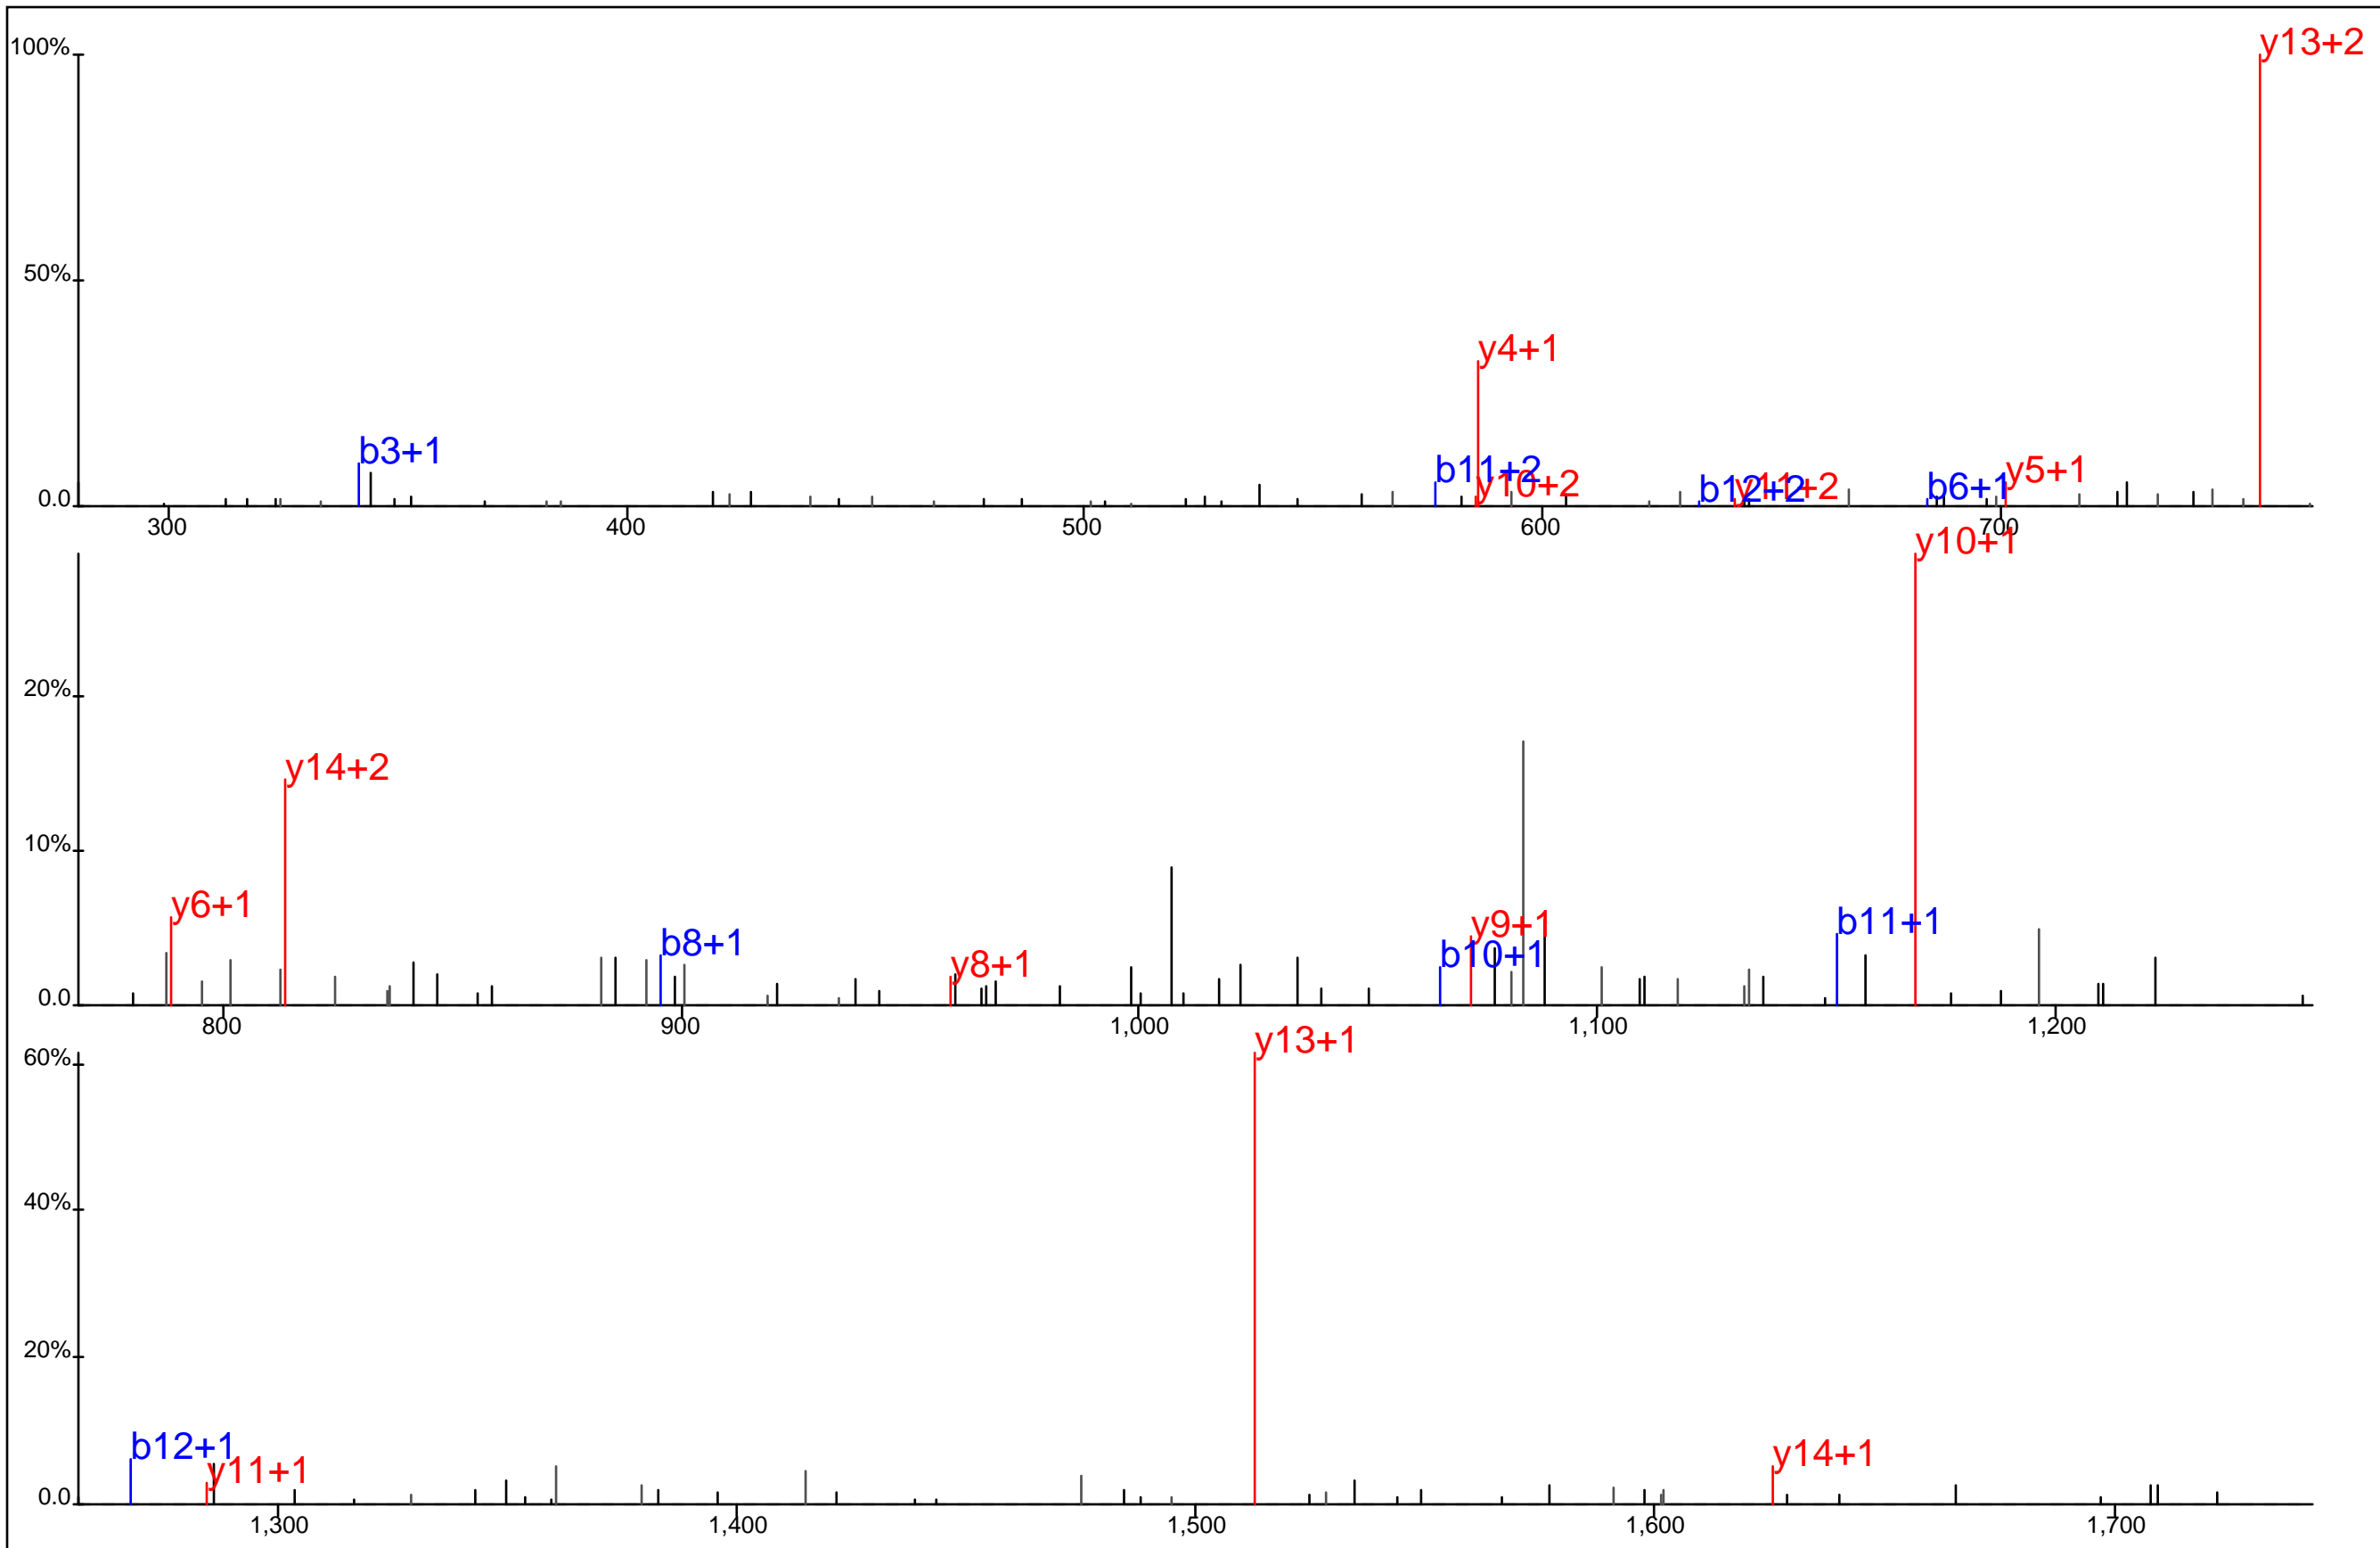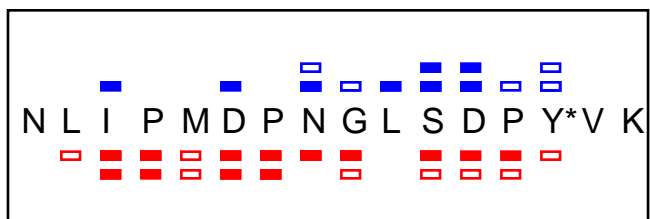

Protein Name: Protein kinase C alpha  
 gi Accession: 0  
 Precursor Mass: 926.9316+2  
 Delta Mass: 0.515 ppm  
 XCorr: 23.08

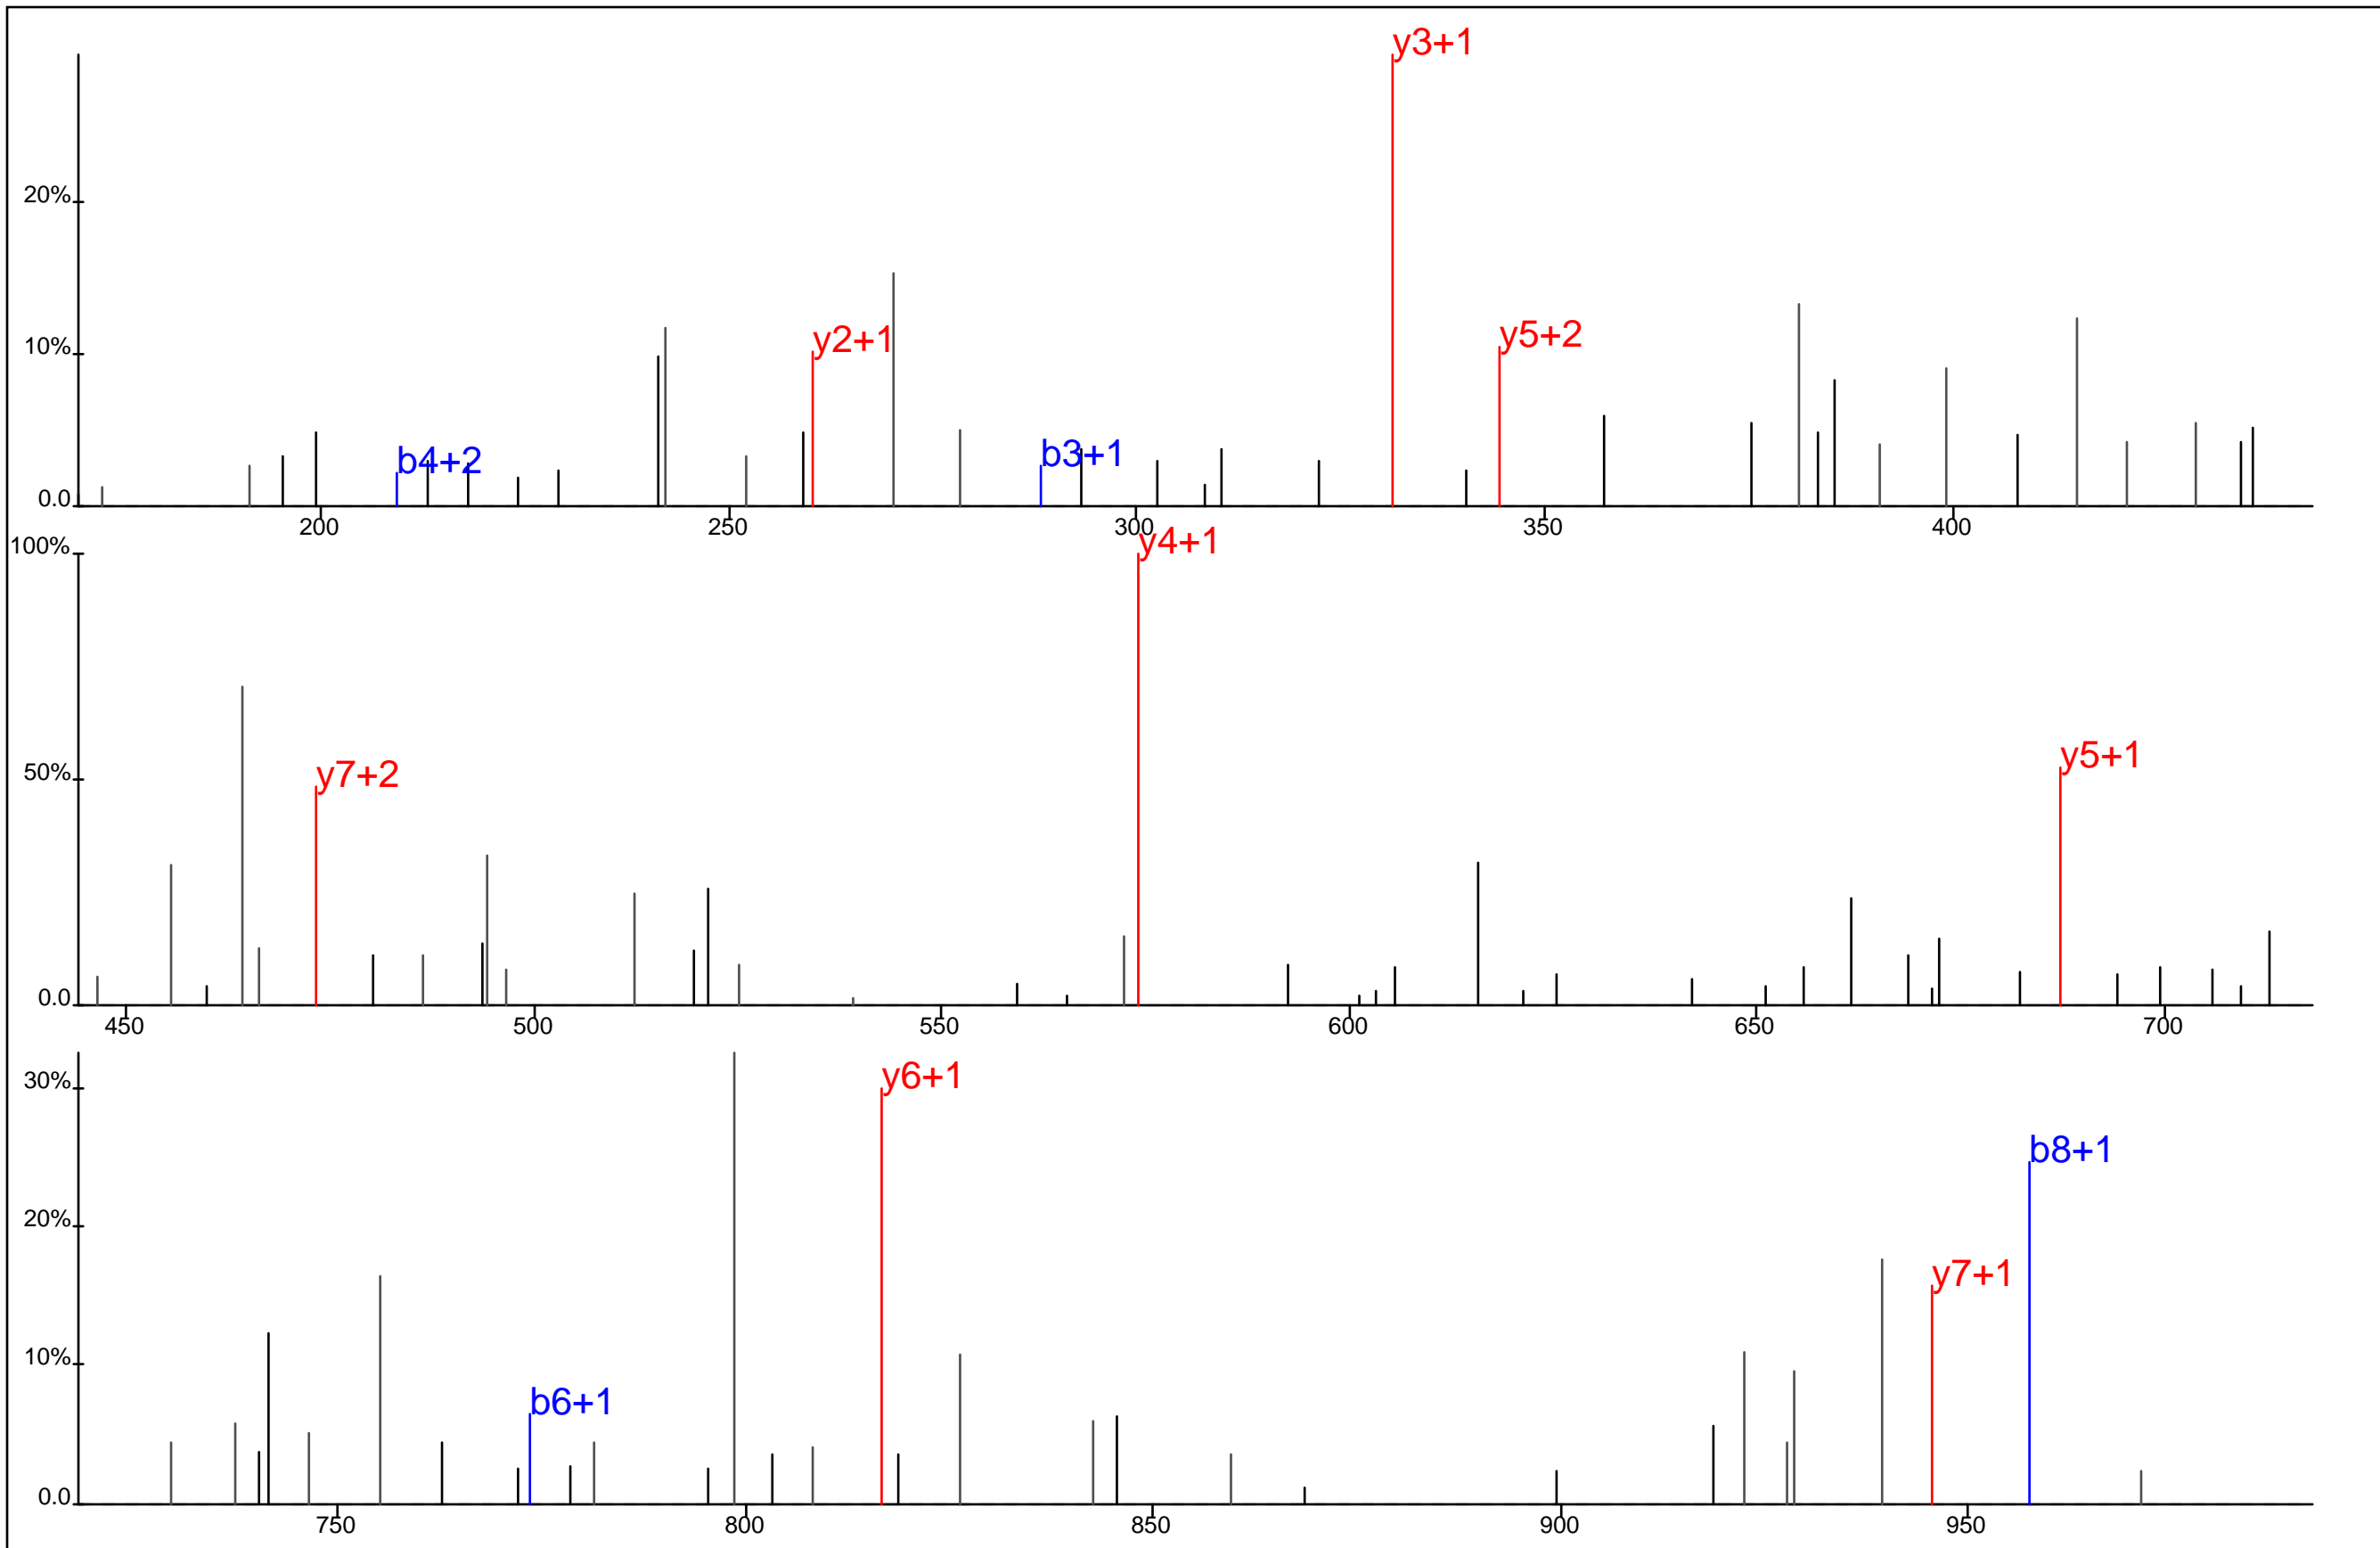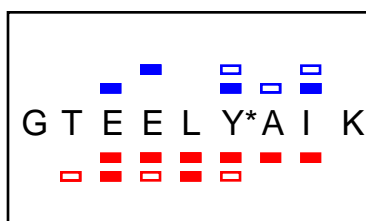

Protein Name: Protein kinase C alpha  
 gi Accession: 0  
 Precursor Mass: 552.2551+2  
 Delta Mass: 0.894 ppm  
 XCorr: 31.65

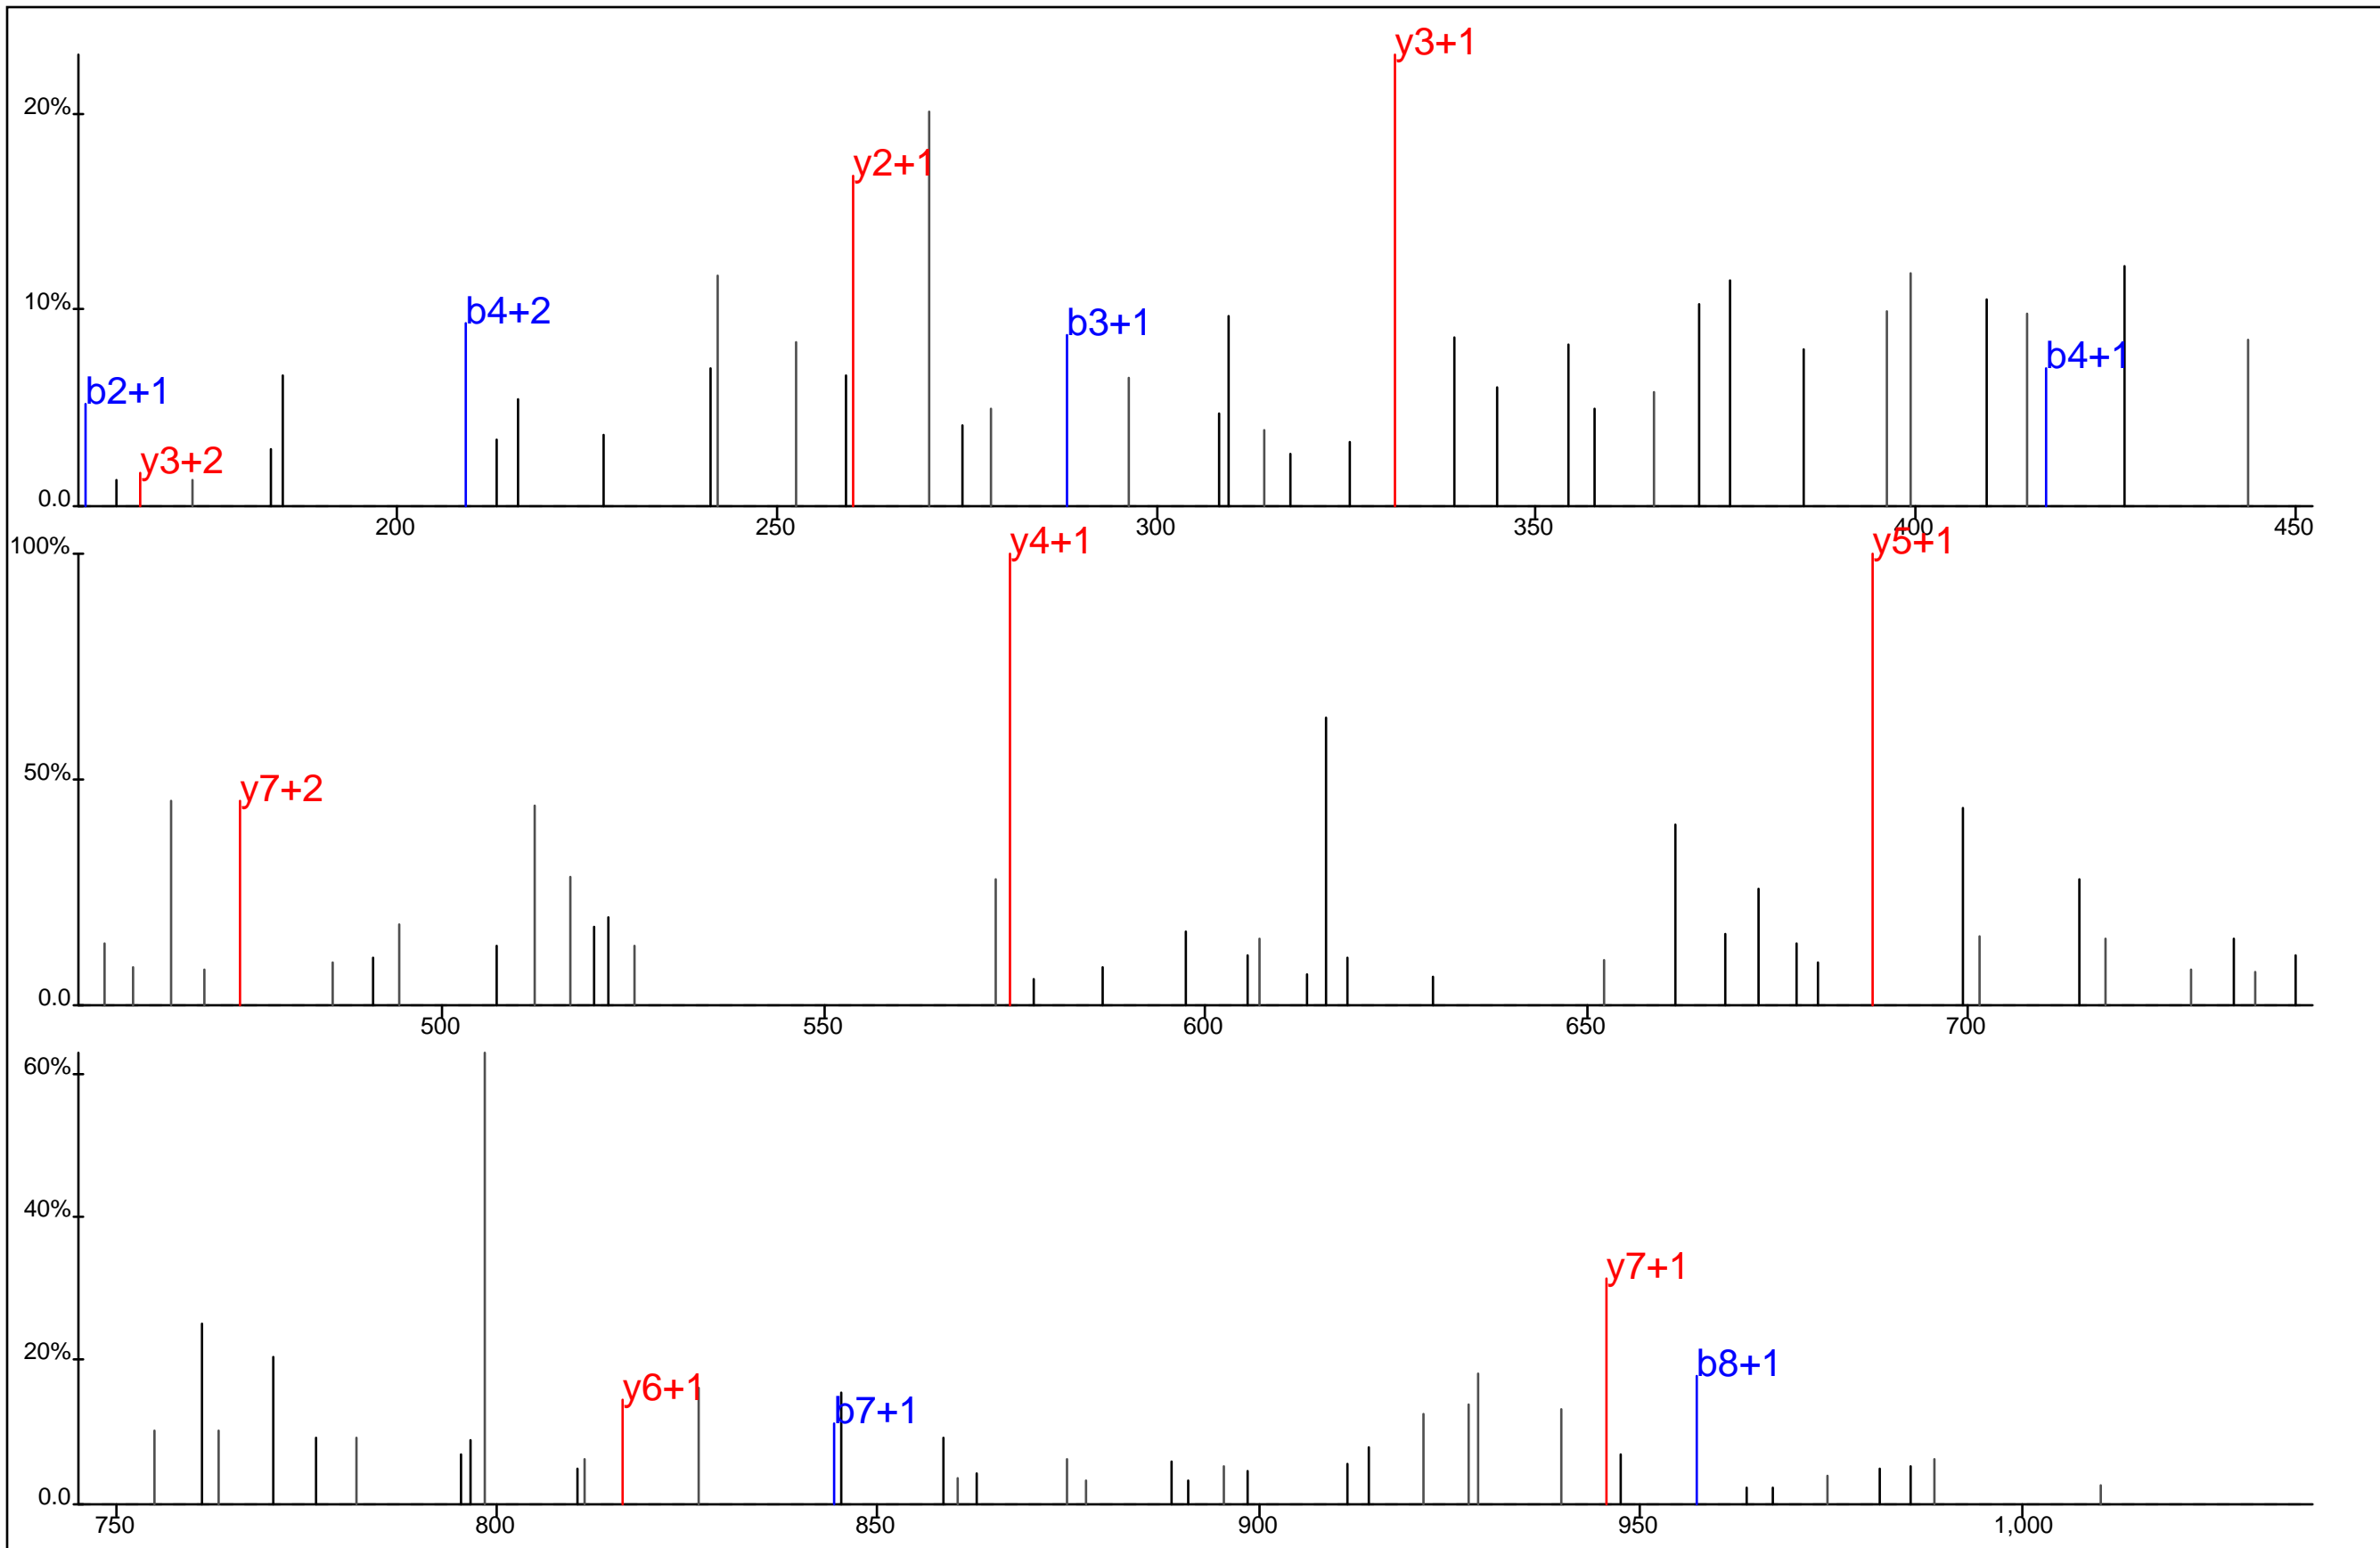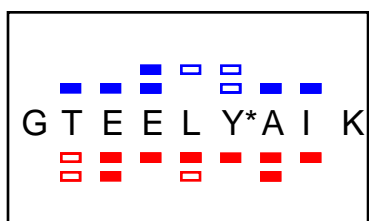

Protein Name: Protein kinase C alpha  
 gi Accession: 0  
 Precursor Mass: 552.2549+2  
 Delta Mass: 0.562 ppm  
 XCorr: 21.43

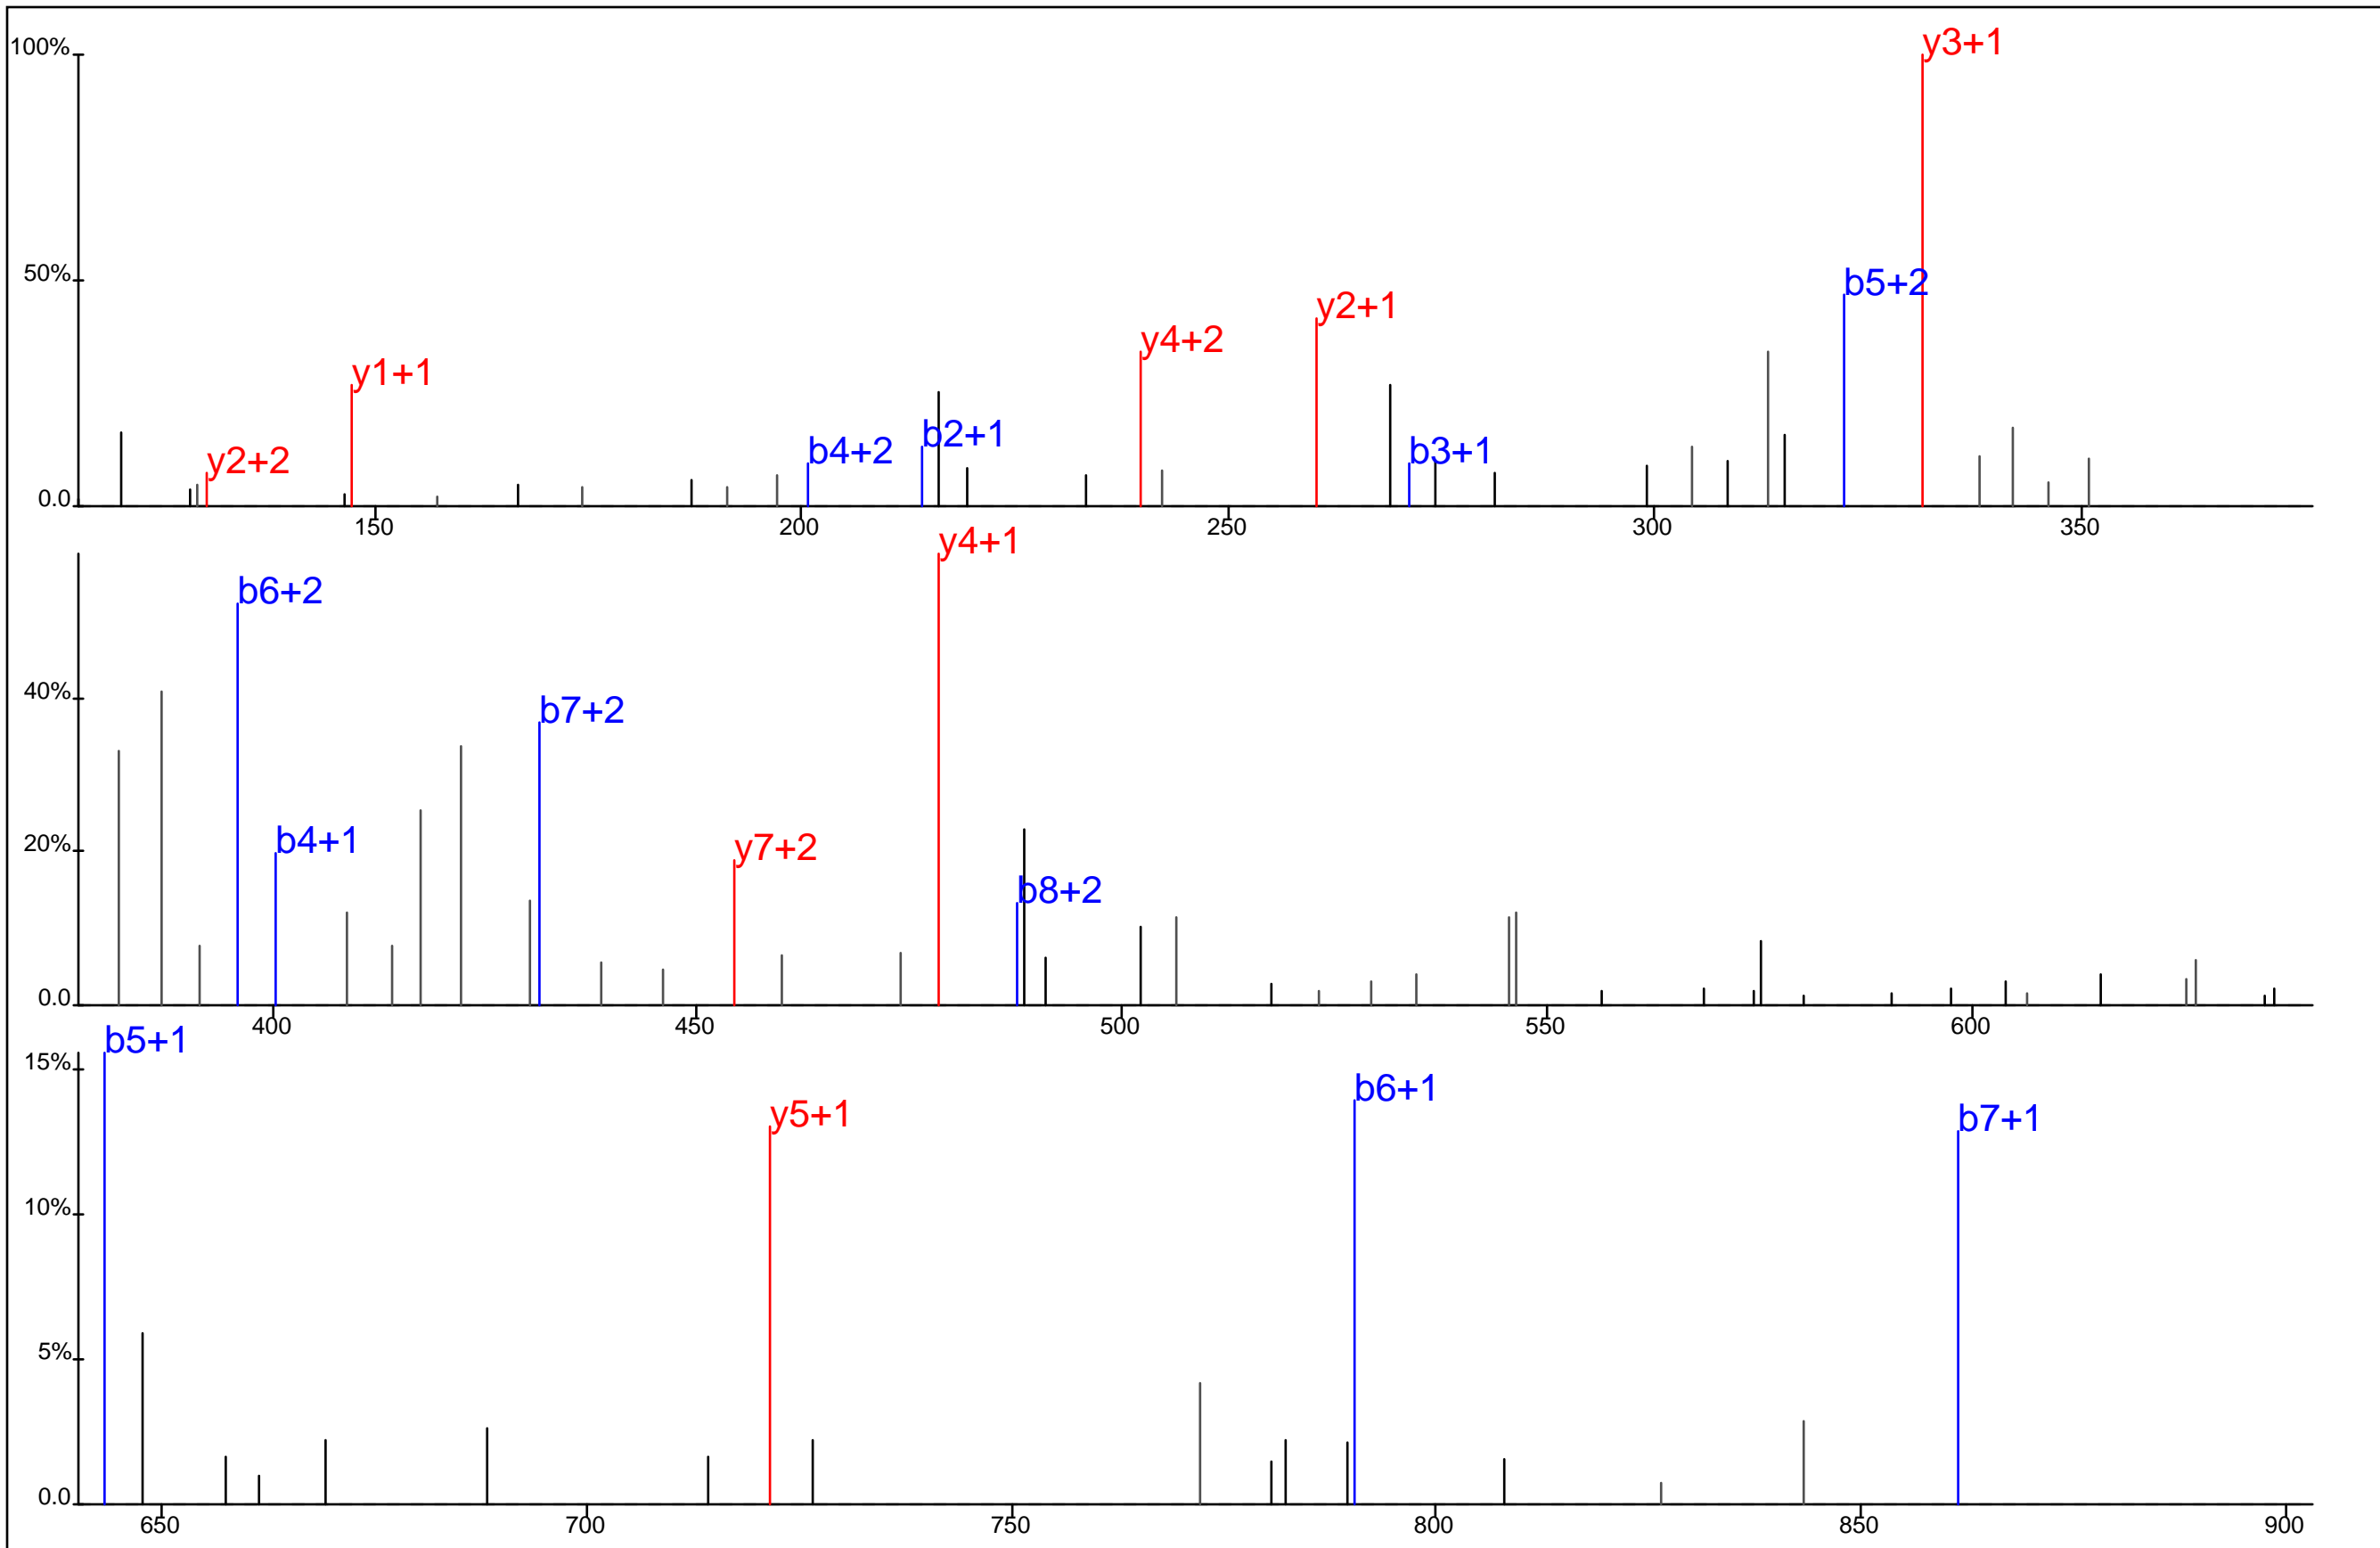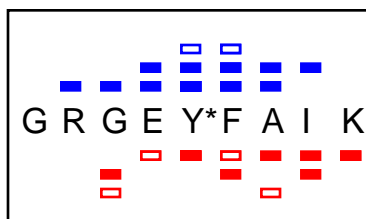

Protein Name: Protein kinase C delta  
 gi Accession: 0  
 Precursor Mass: 374.1779+3  
 Delta Mass: 0.316 ppm  
 XCorr: 37.51

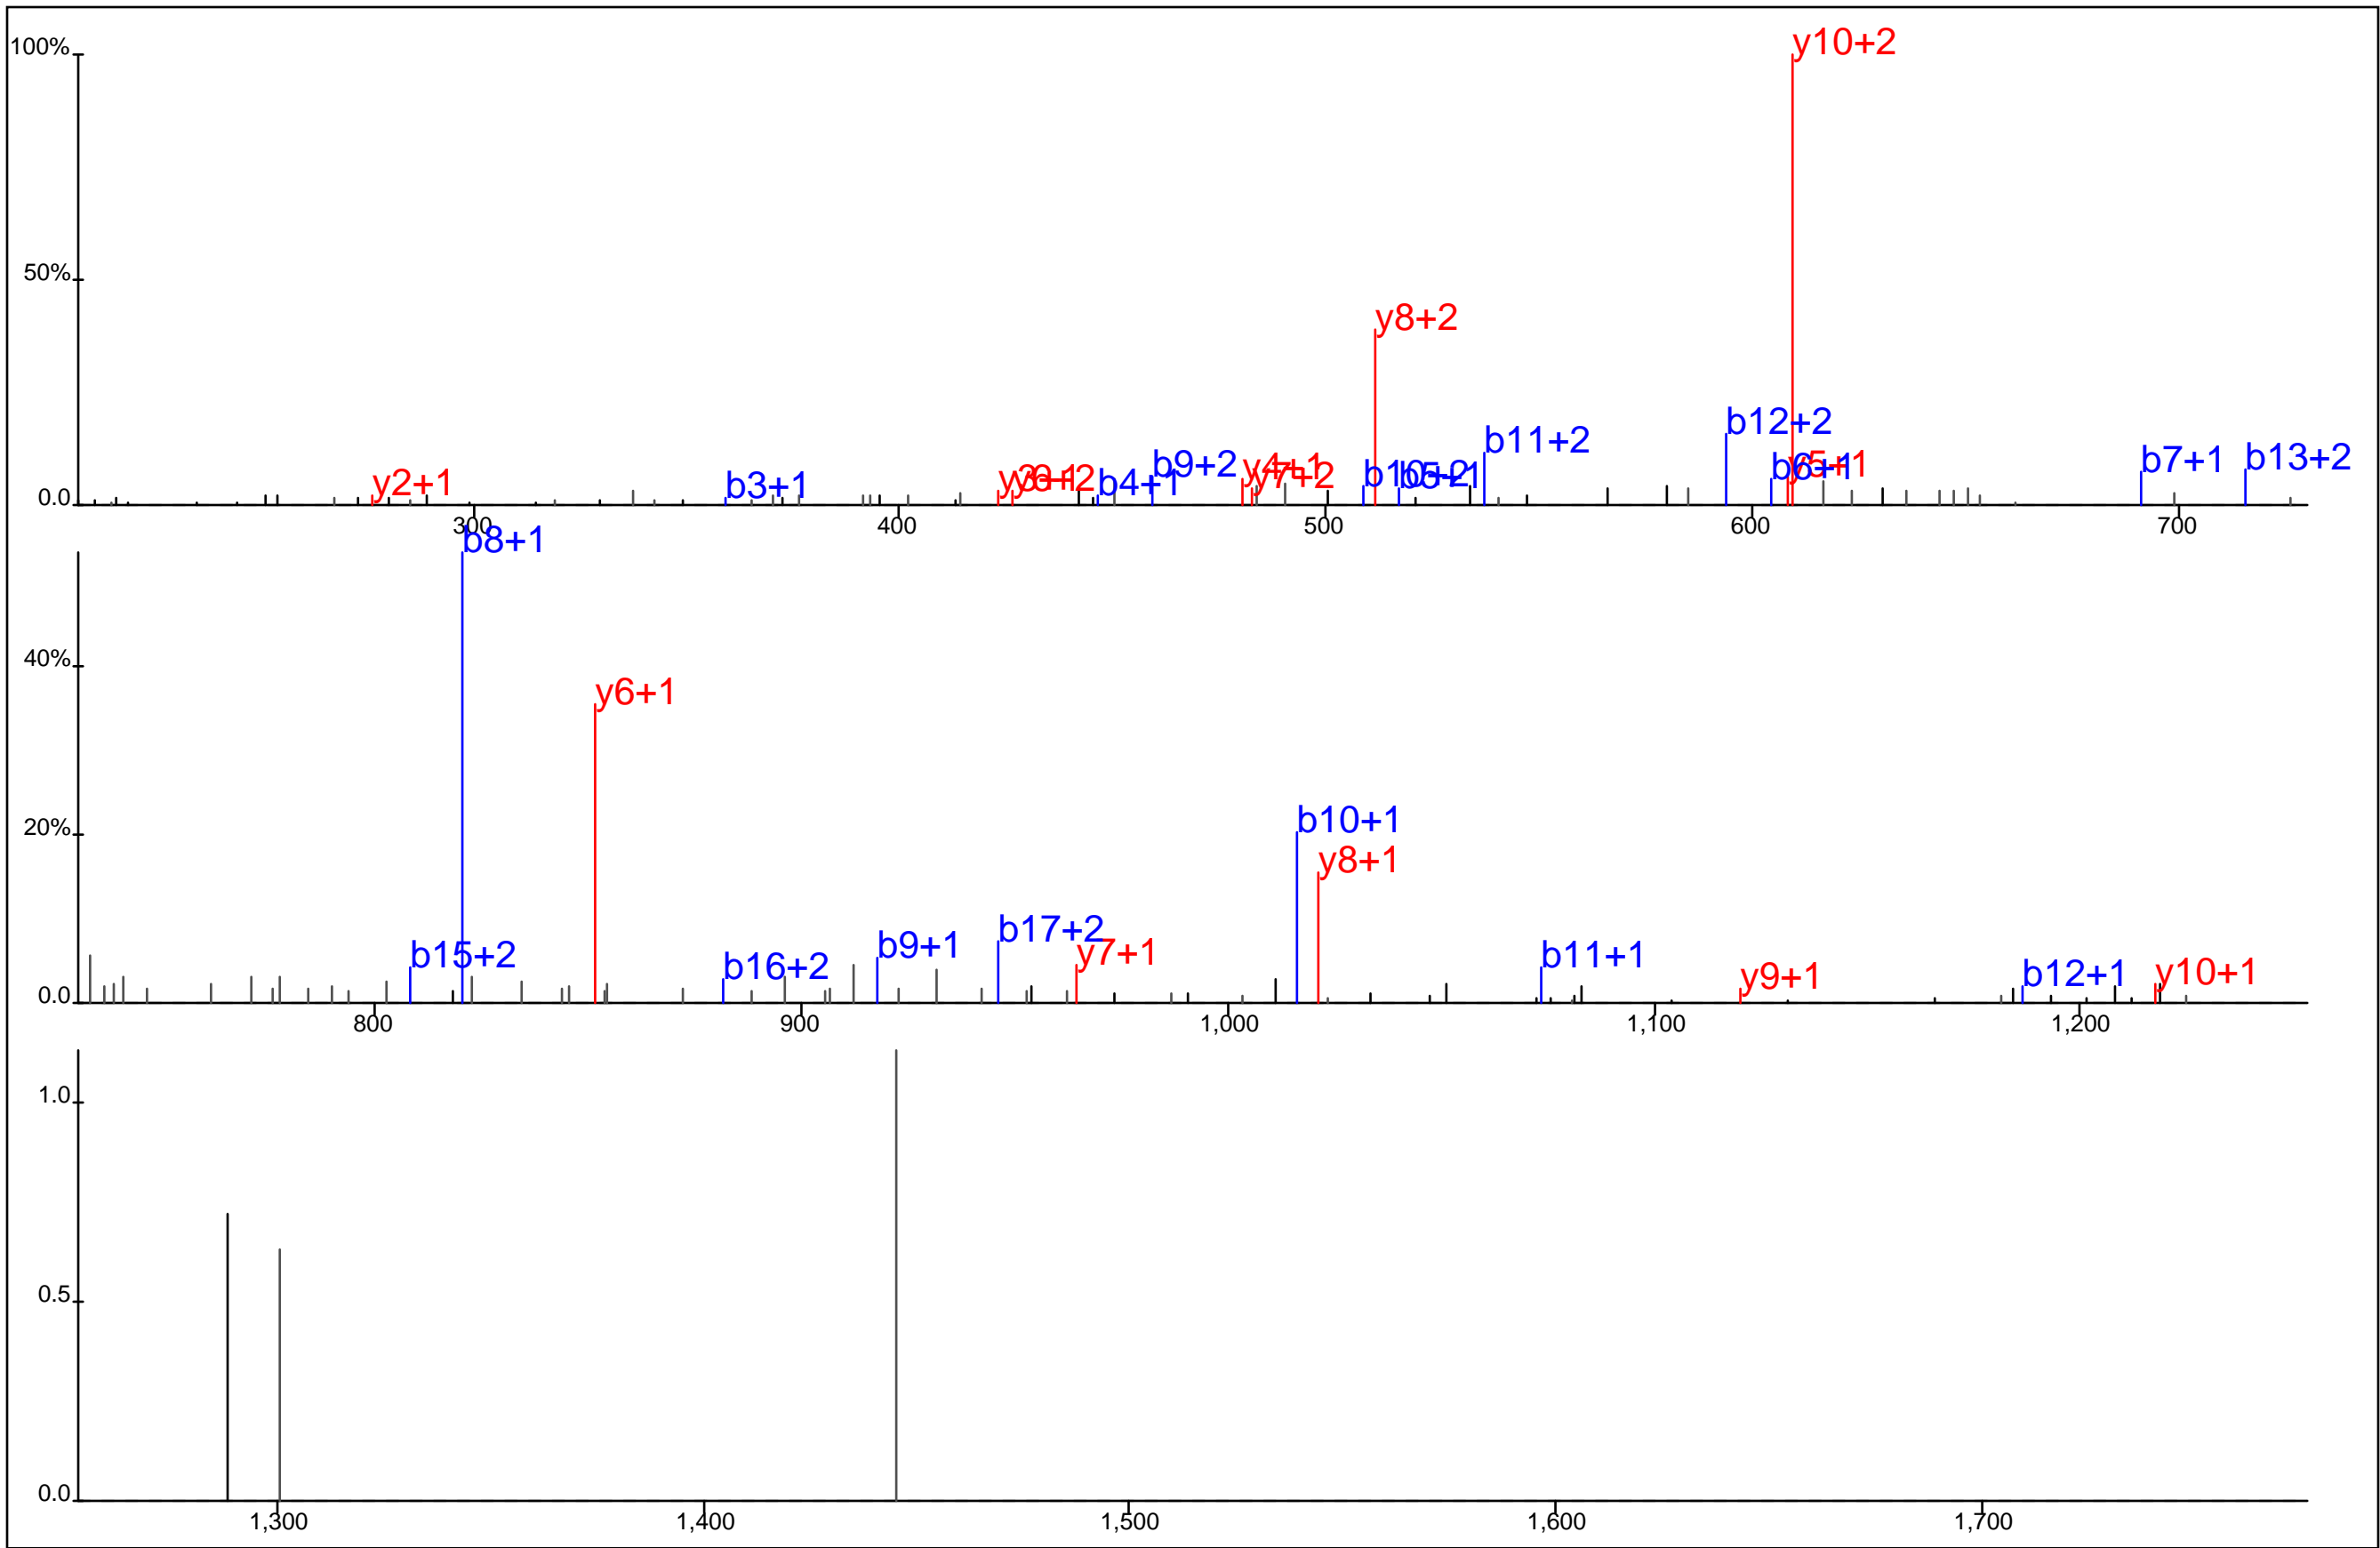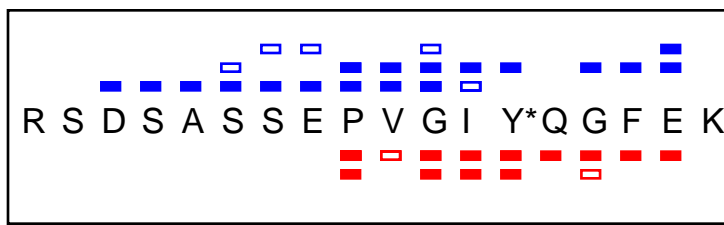

Protein Name: Protein kinase C delta  
 gi Accession: 0  
 Precursor Mass: 679.6370+3  
 Delta Mass: 0.220 ppm  
 XCorr: 56.3

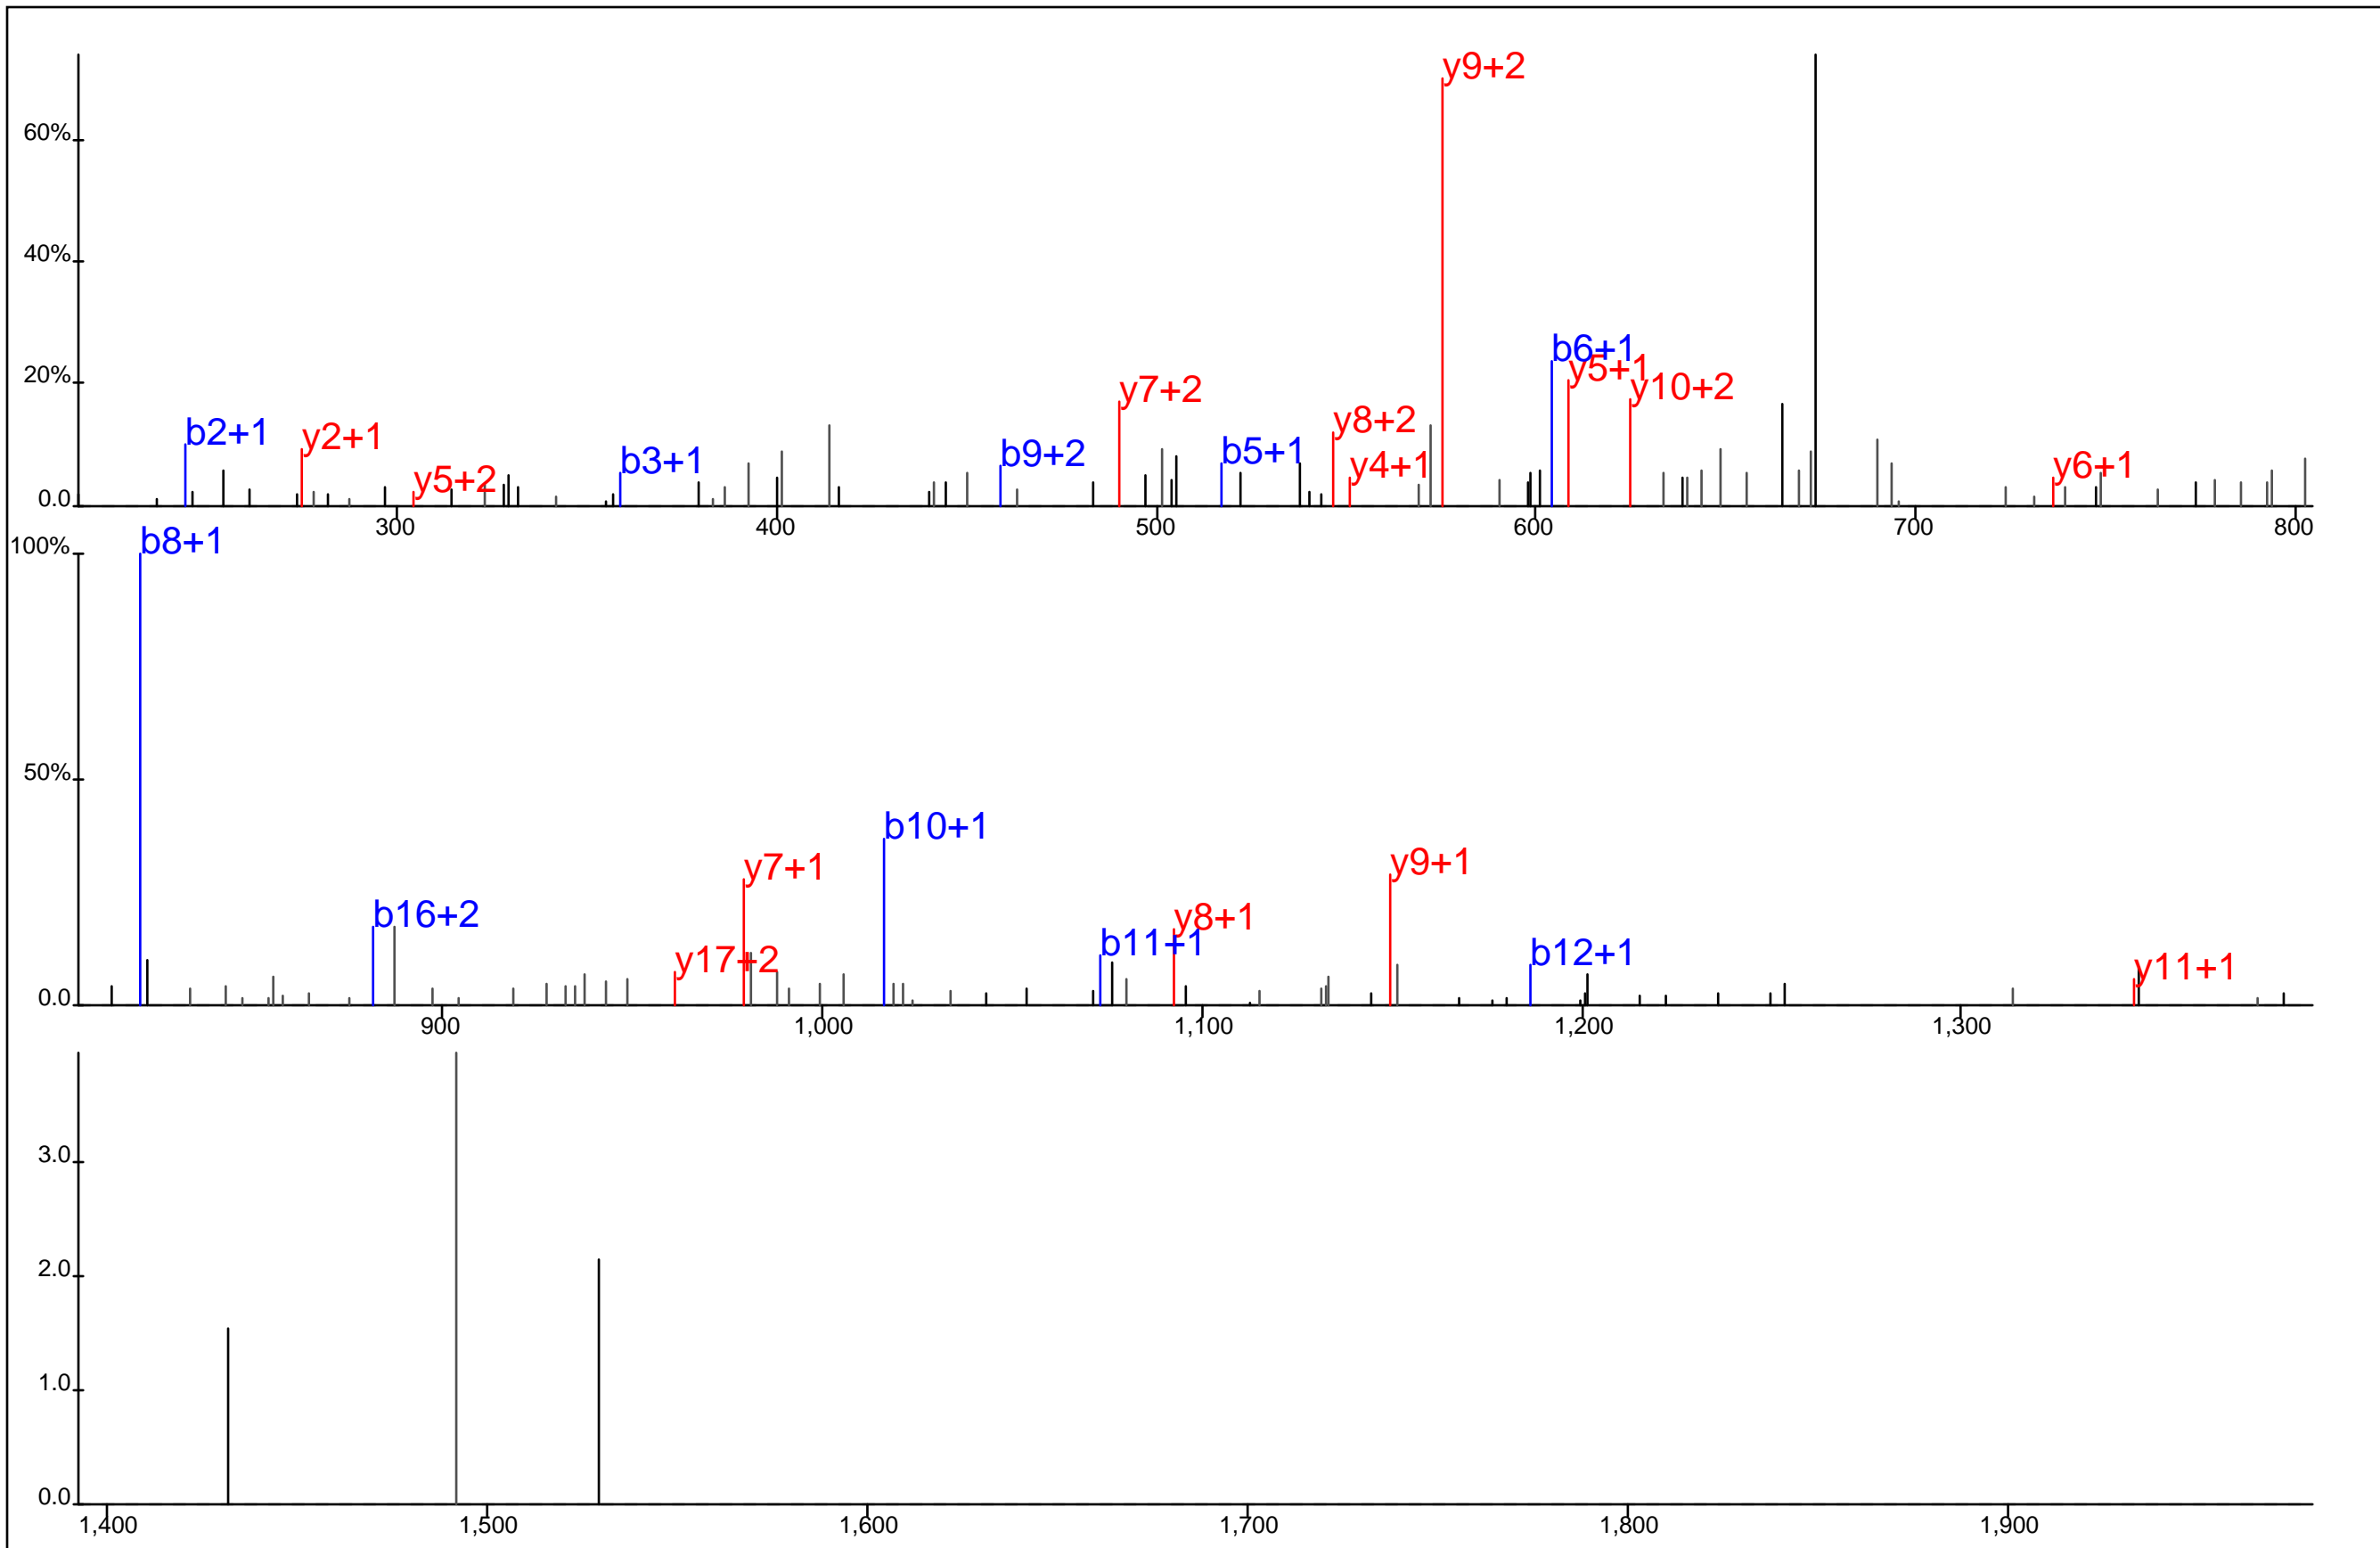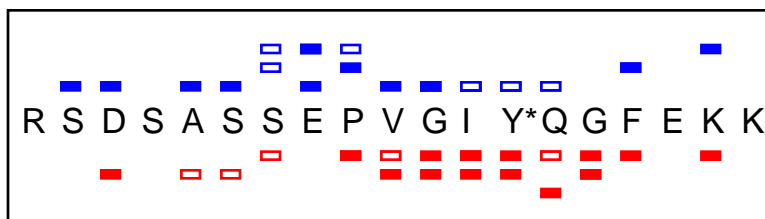

Protein Name: Protein kinase C delta  
 gi Accession: 0  
 Precursor Mass: 722.3367+3  
 Delta Mass: 2.133 ppm  
 XCorr: 30.54



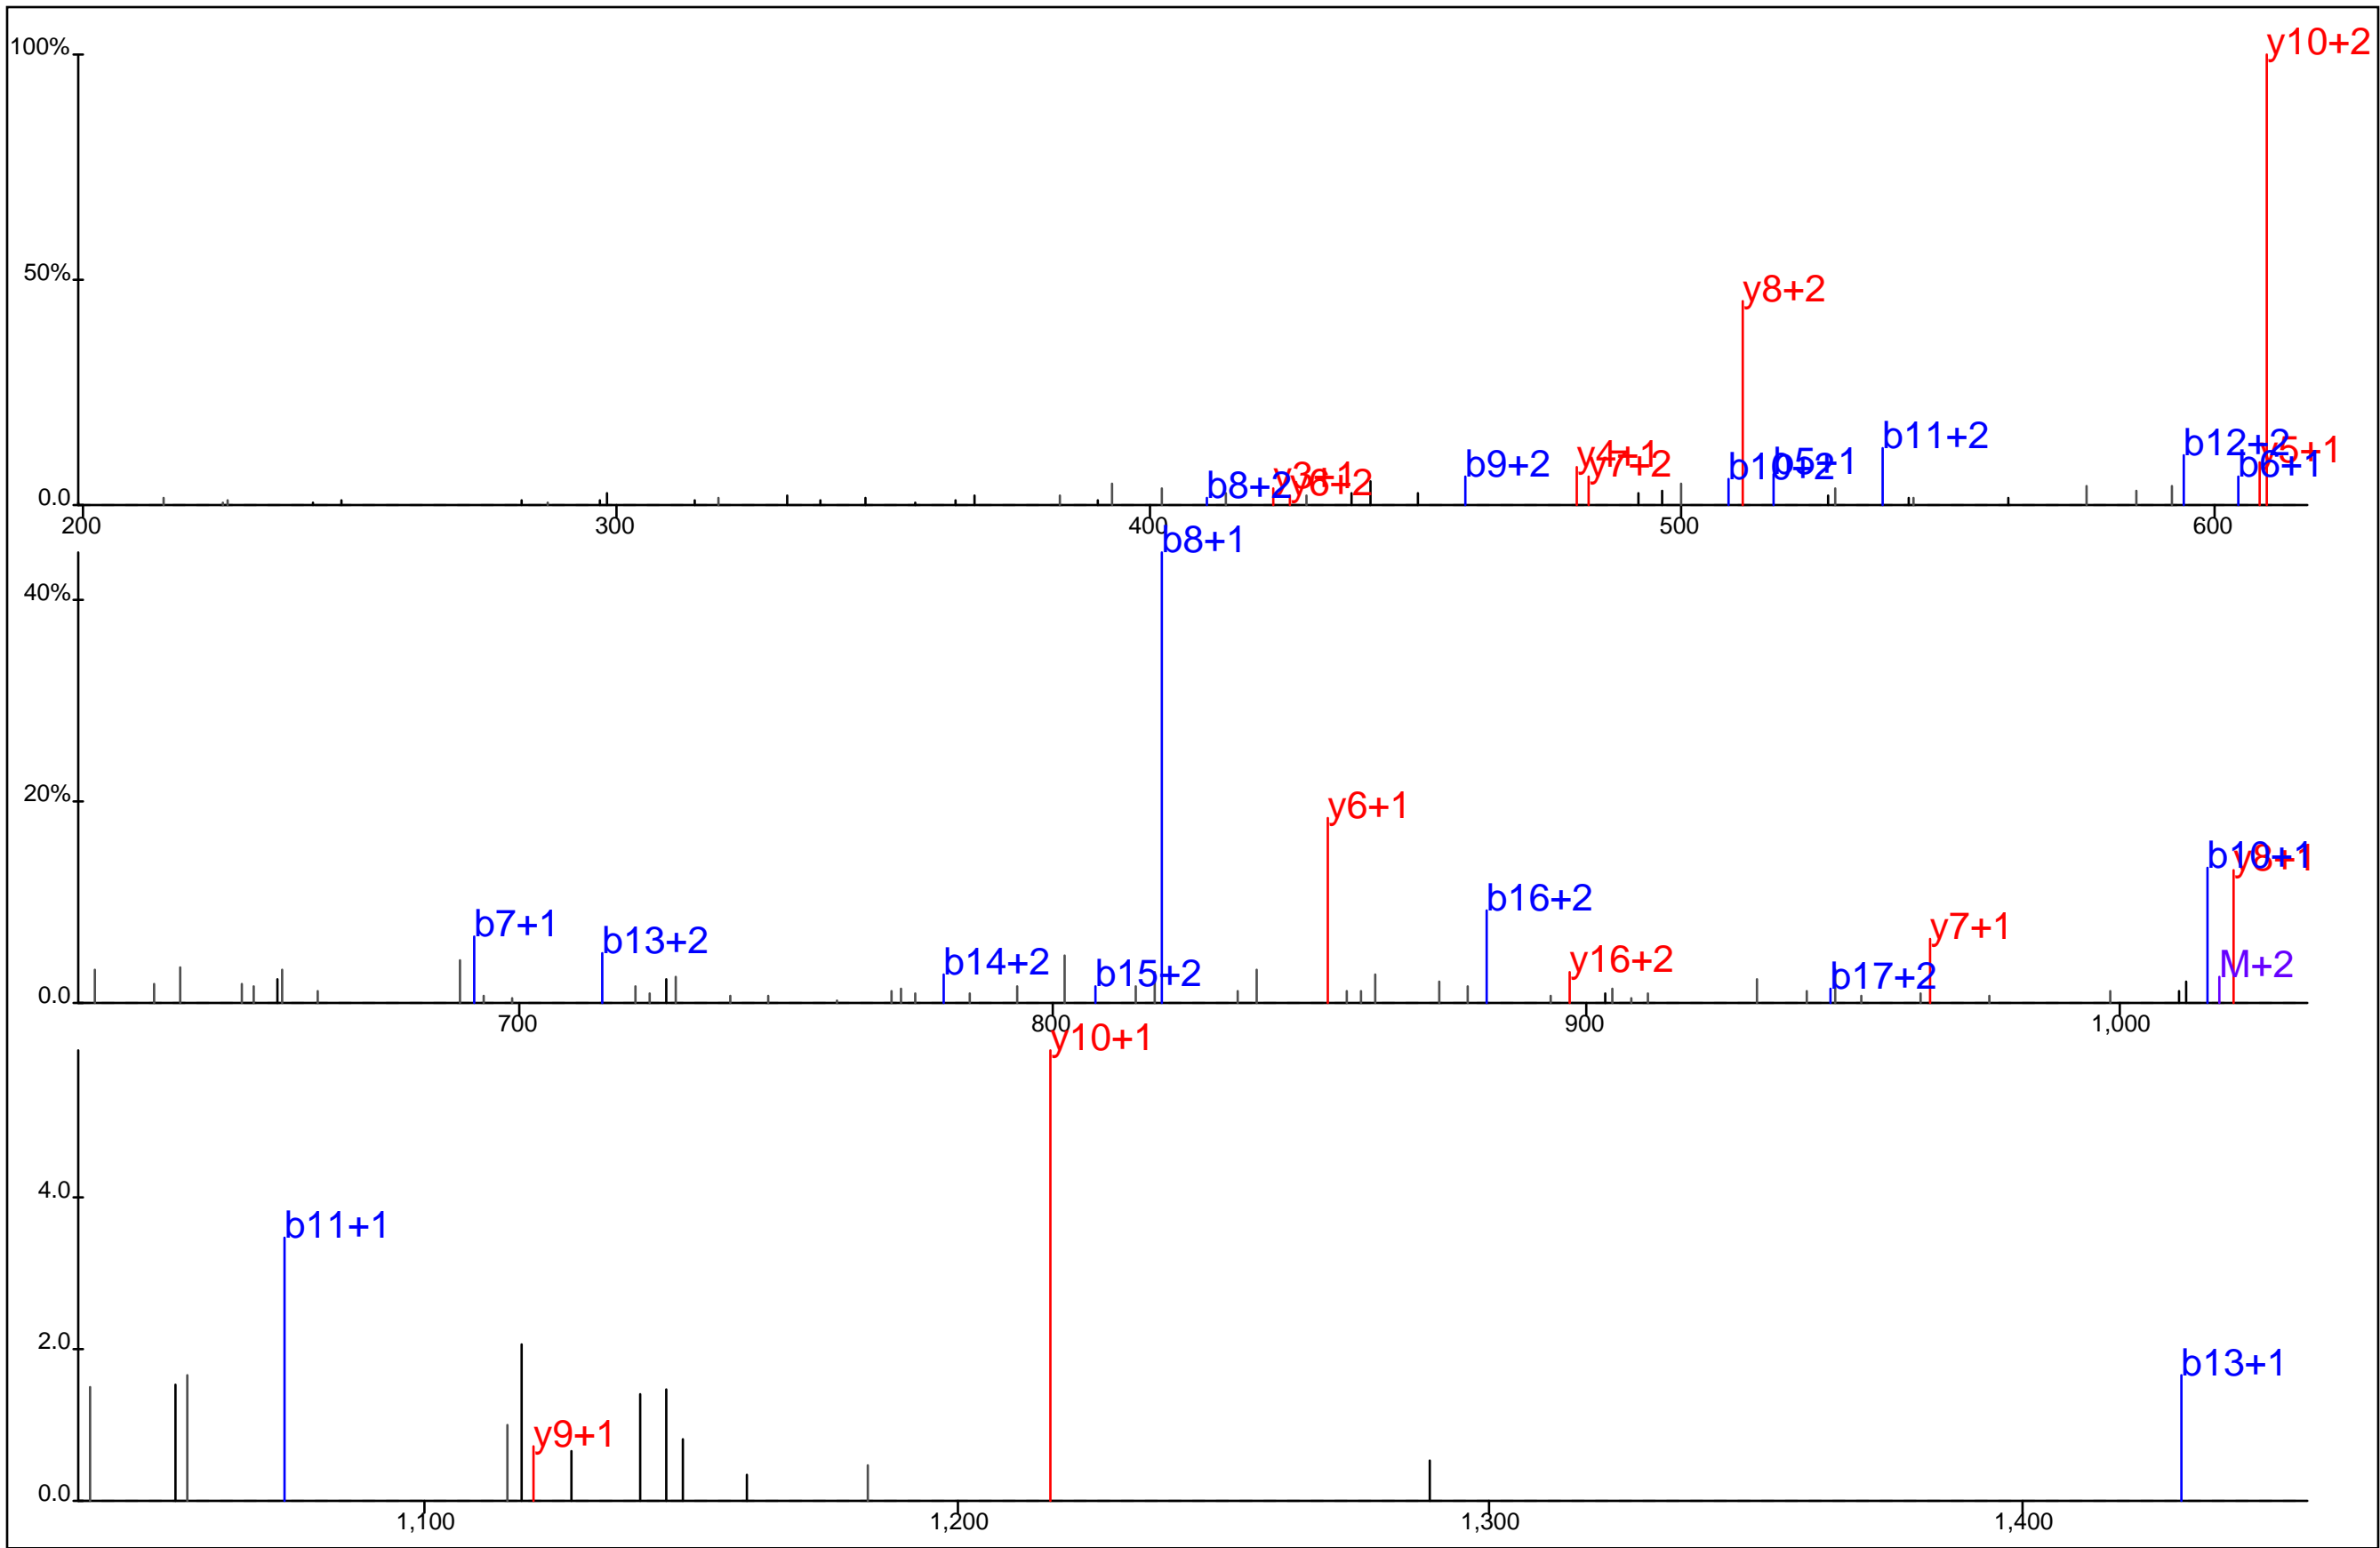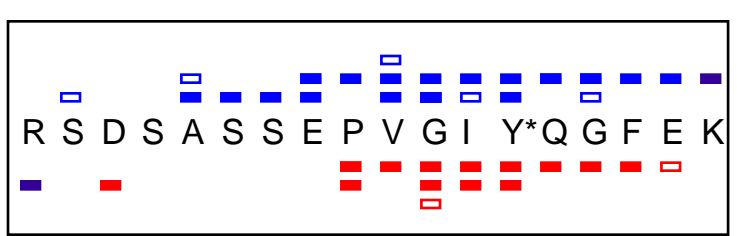

Protein Name: Protein kinase C delta  
 gi Accession: 0  
 Precursor Mass: 679.6370+3  
 Delta Mass: 0.220 ppm  
 XCorr: 49.07

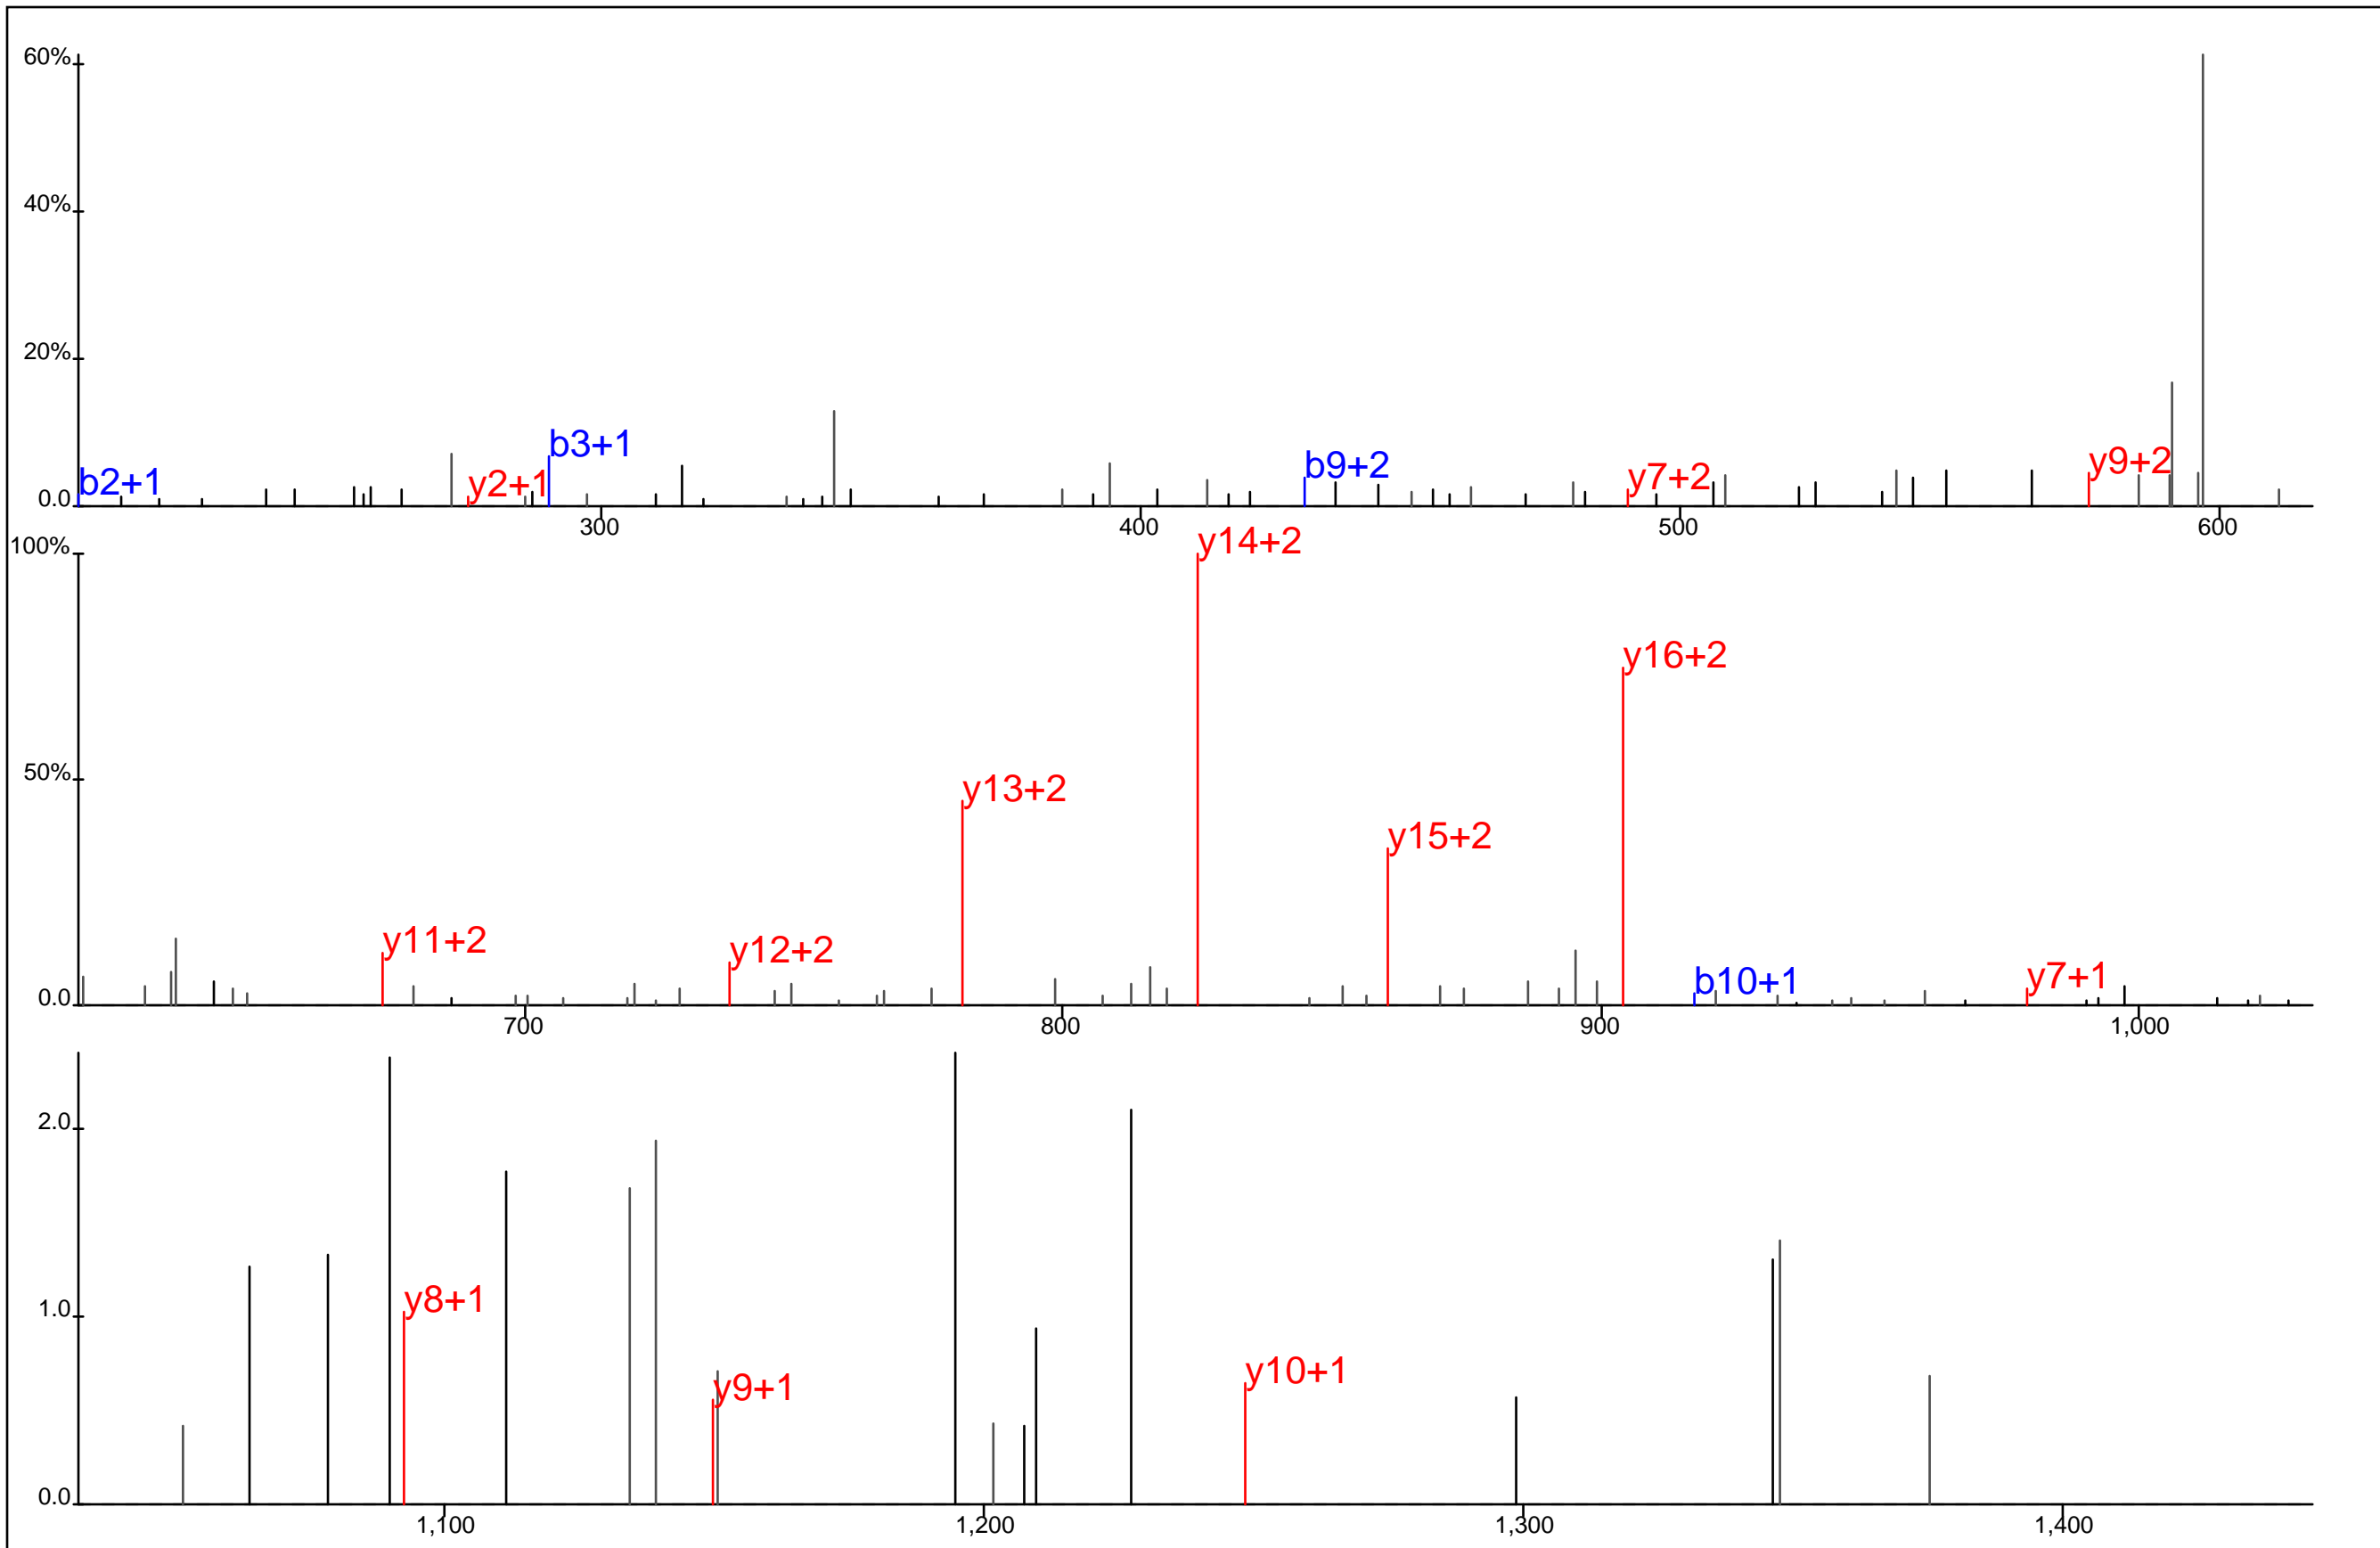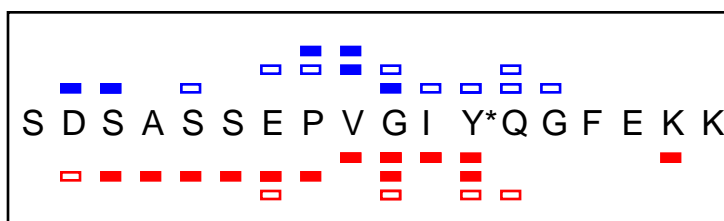

Protein Name: Protein kinase C delta  
 gi Accession: 0  
 Precursor Mass: 670.3033+3  
 Delta Mass: 2.677 ppm  
 XCorr: 22.32

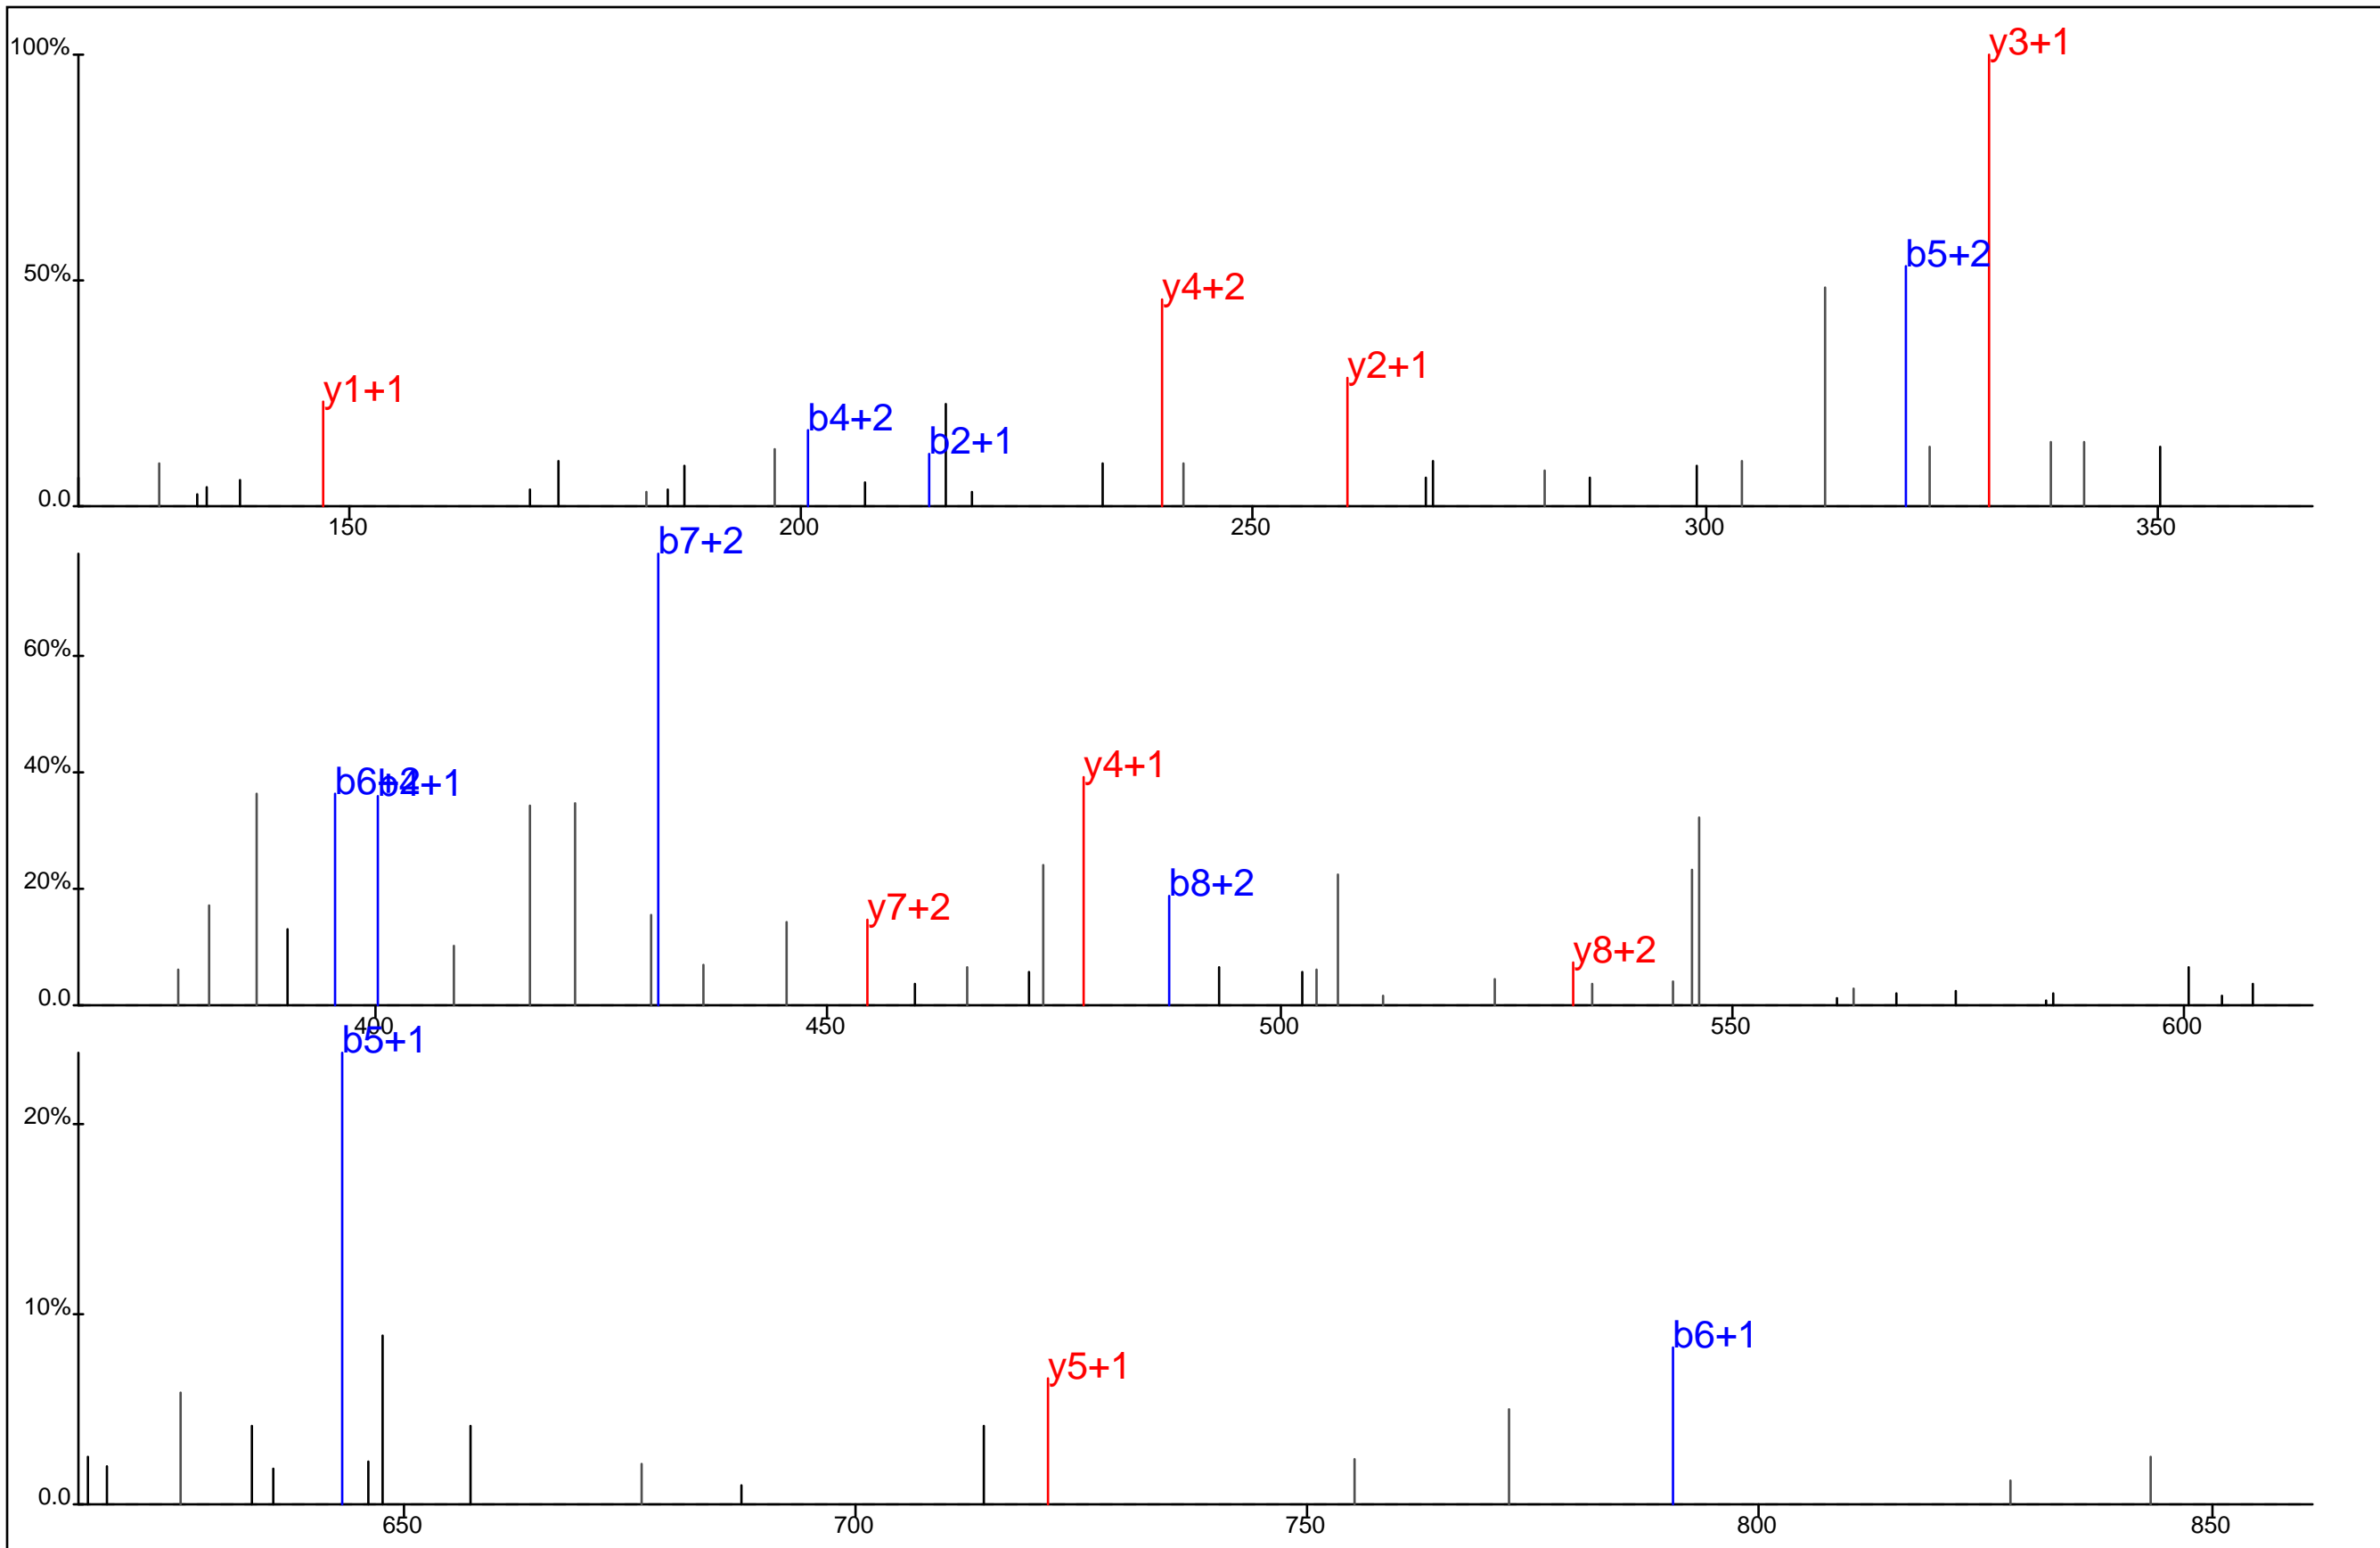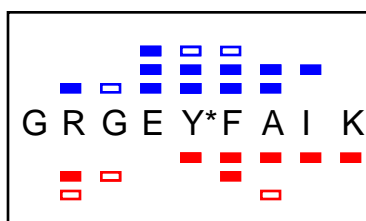

Protein Name: Protein kinase C delta  
 gi Accession: 0  
 Precursor Mass: 374.1779+3  
 Delta Mass: 0.562 ppm  
 XCorr: 35.43

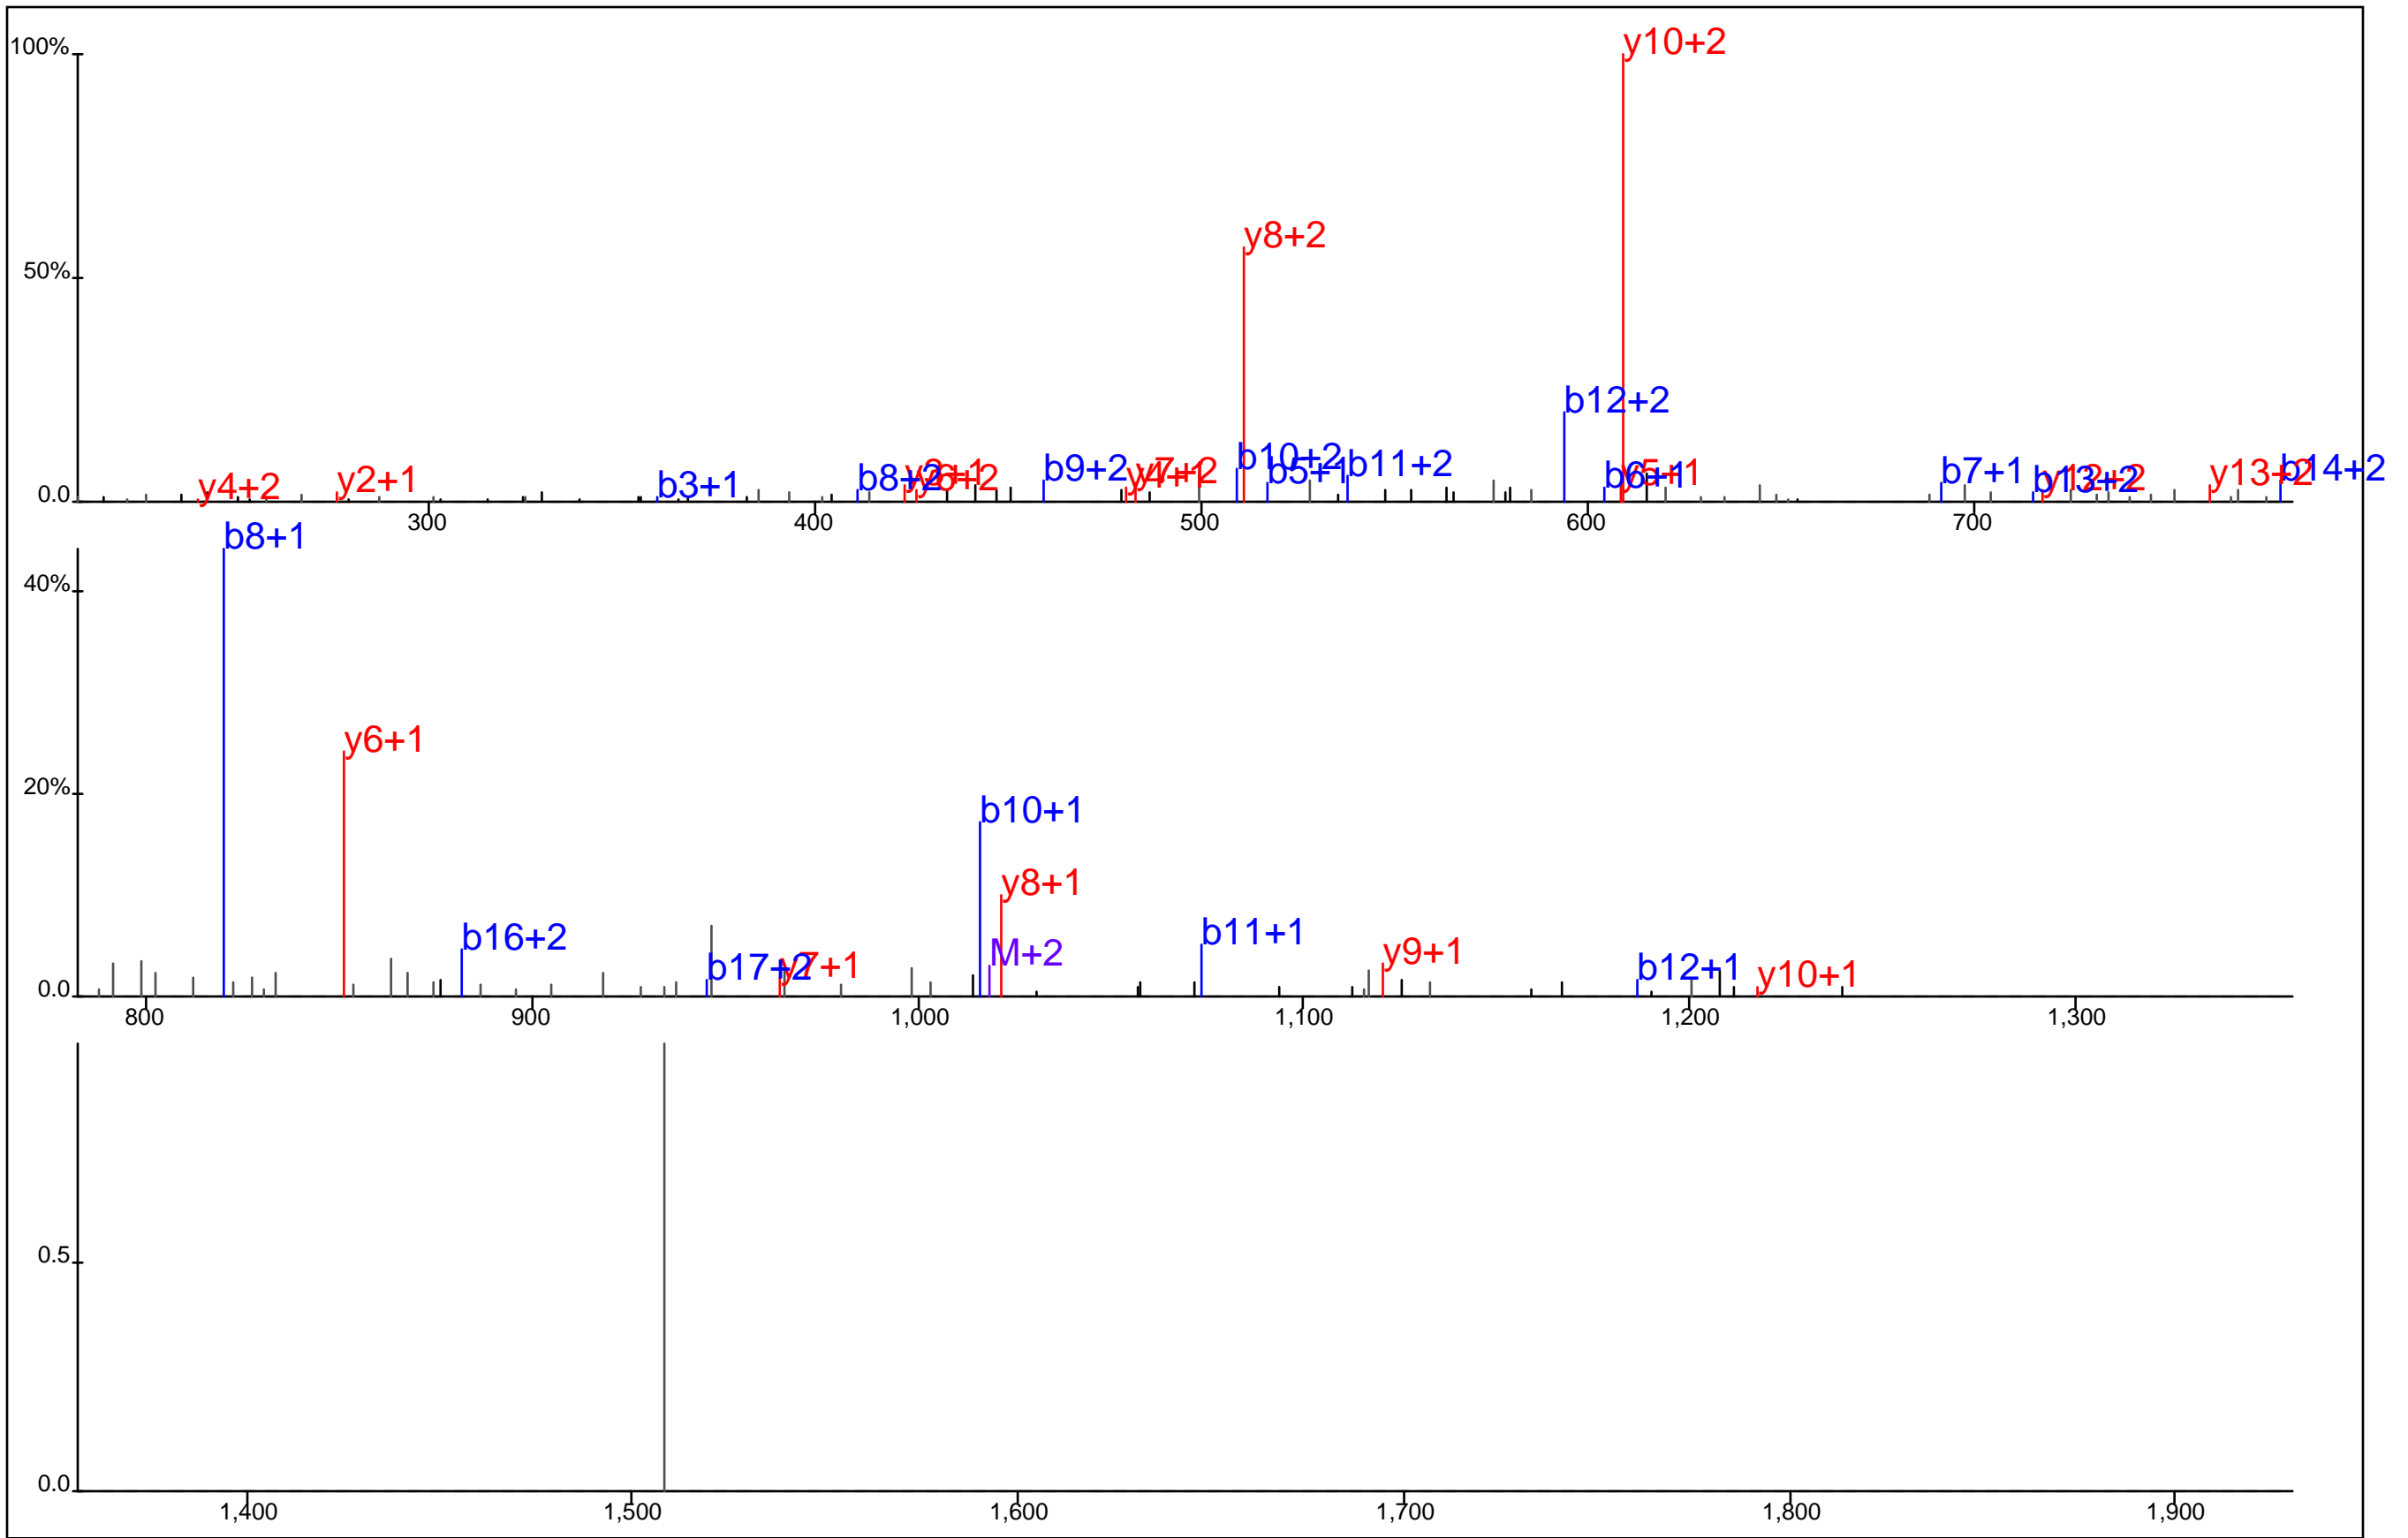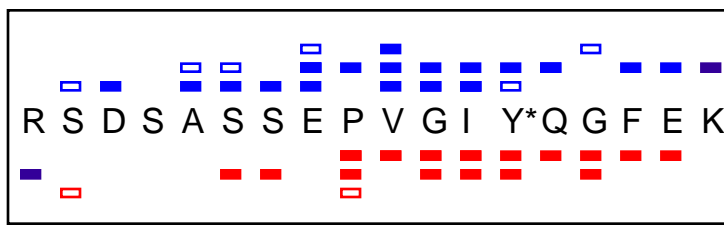

Protein Name: Protein kinase C delta  
 gi Accession: 0  
 Precursor Mass: 679.6371+3  
 Delta Mass: 0.310 ppm  
 XCorr: 42.74

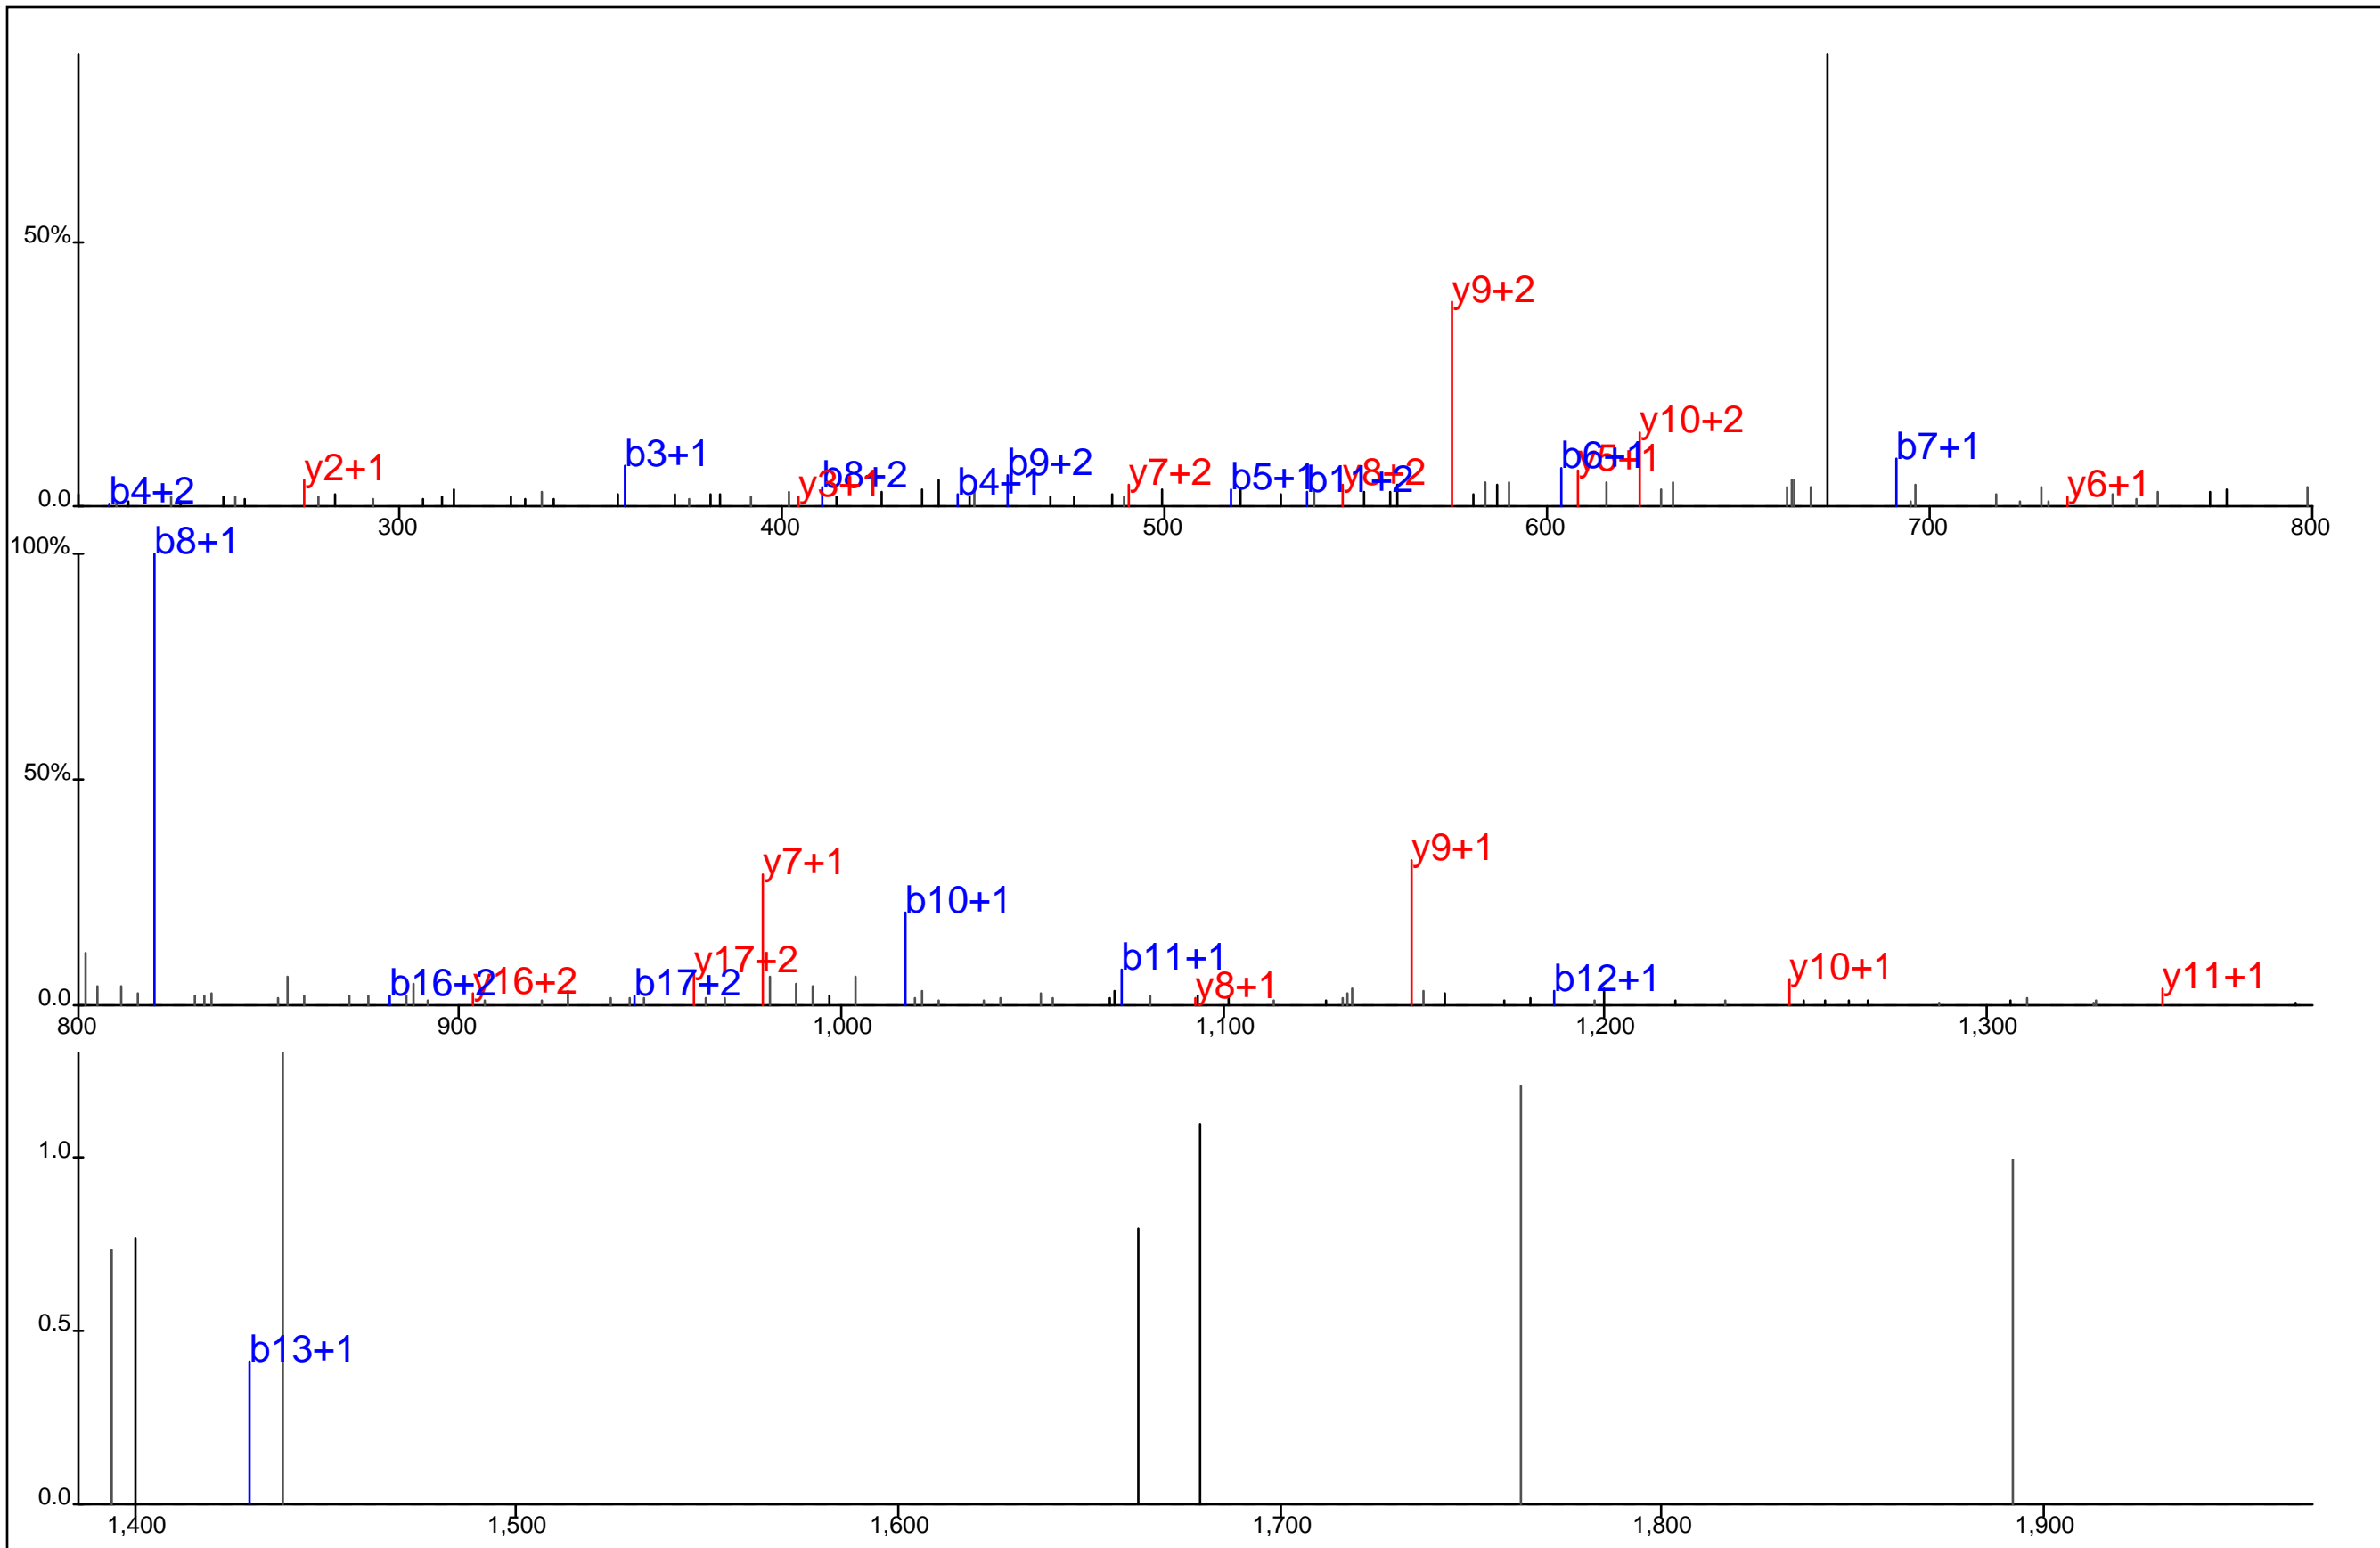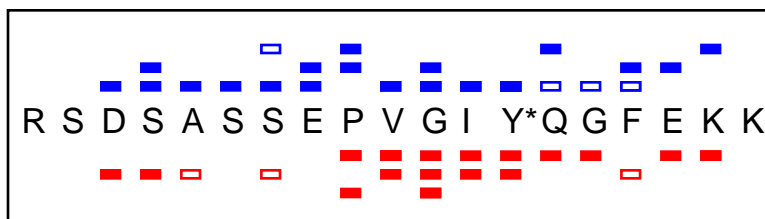

Protein Name: Protein kinase C delta  
 gi Accession: 0  
 Precursor Mass: 722.3341+3  
 Delta Mass: 1.504 ppm  
 XCorr: 38.62

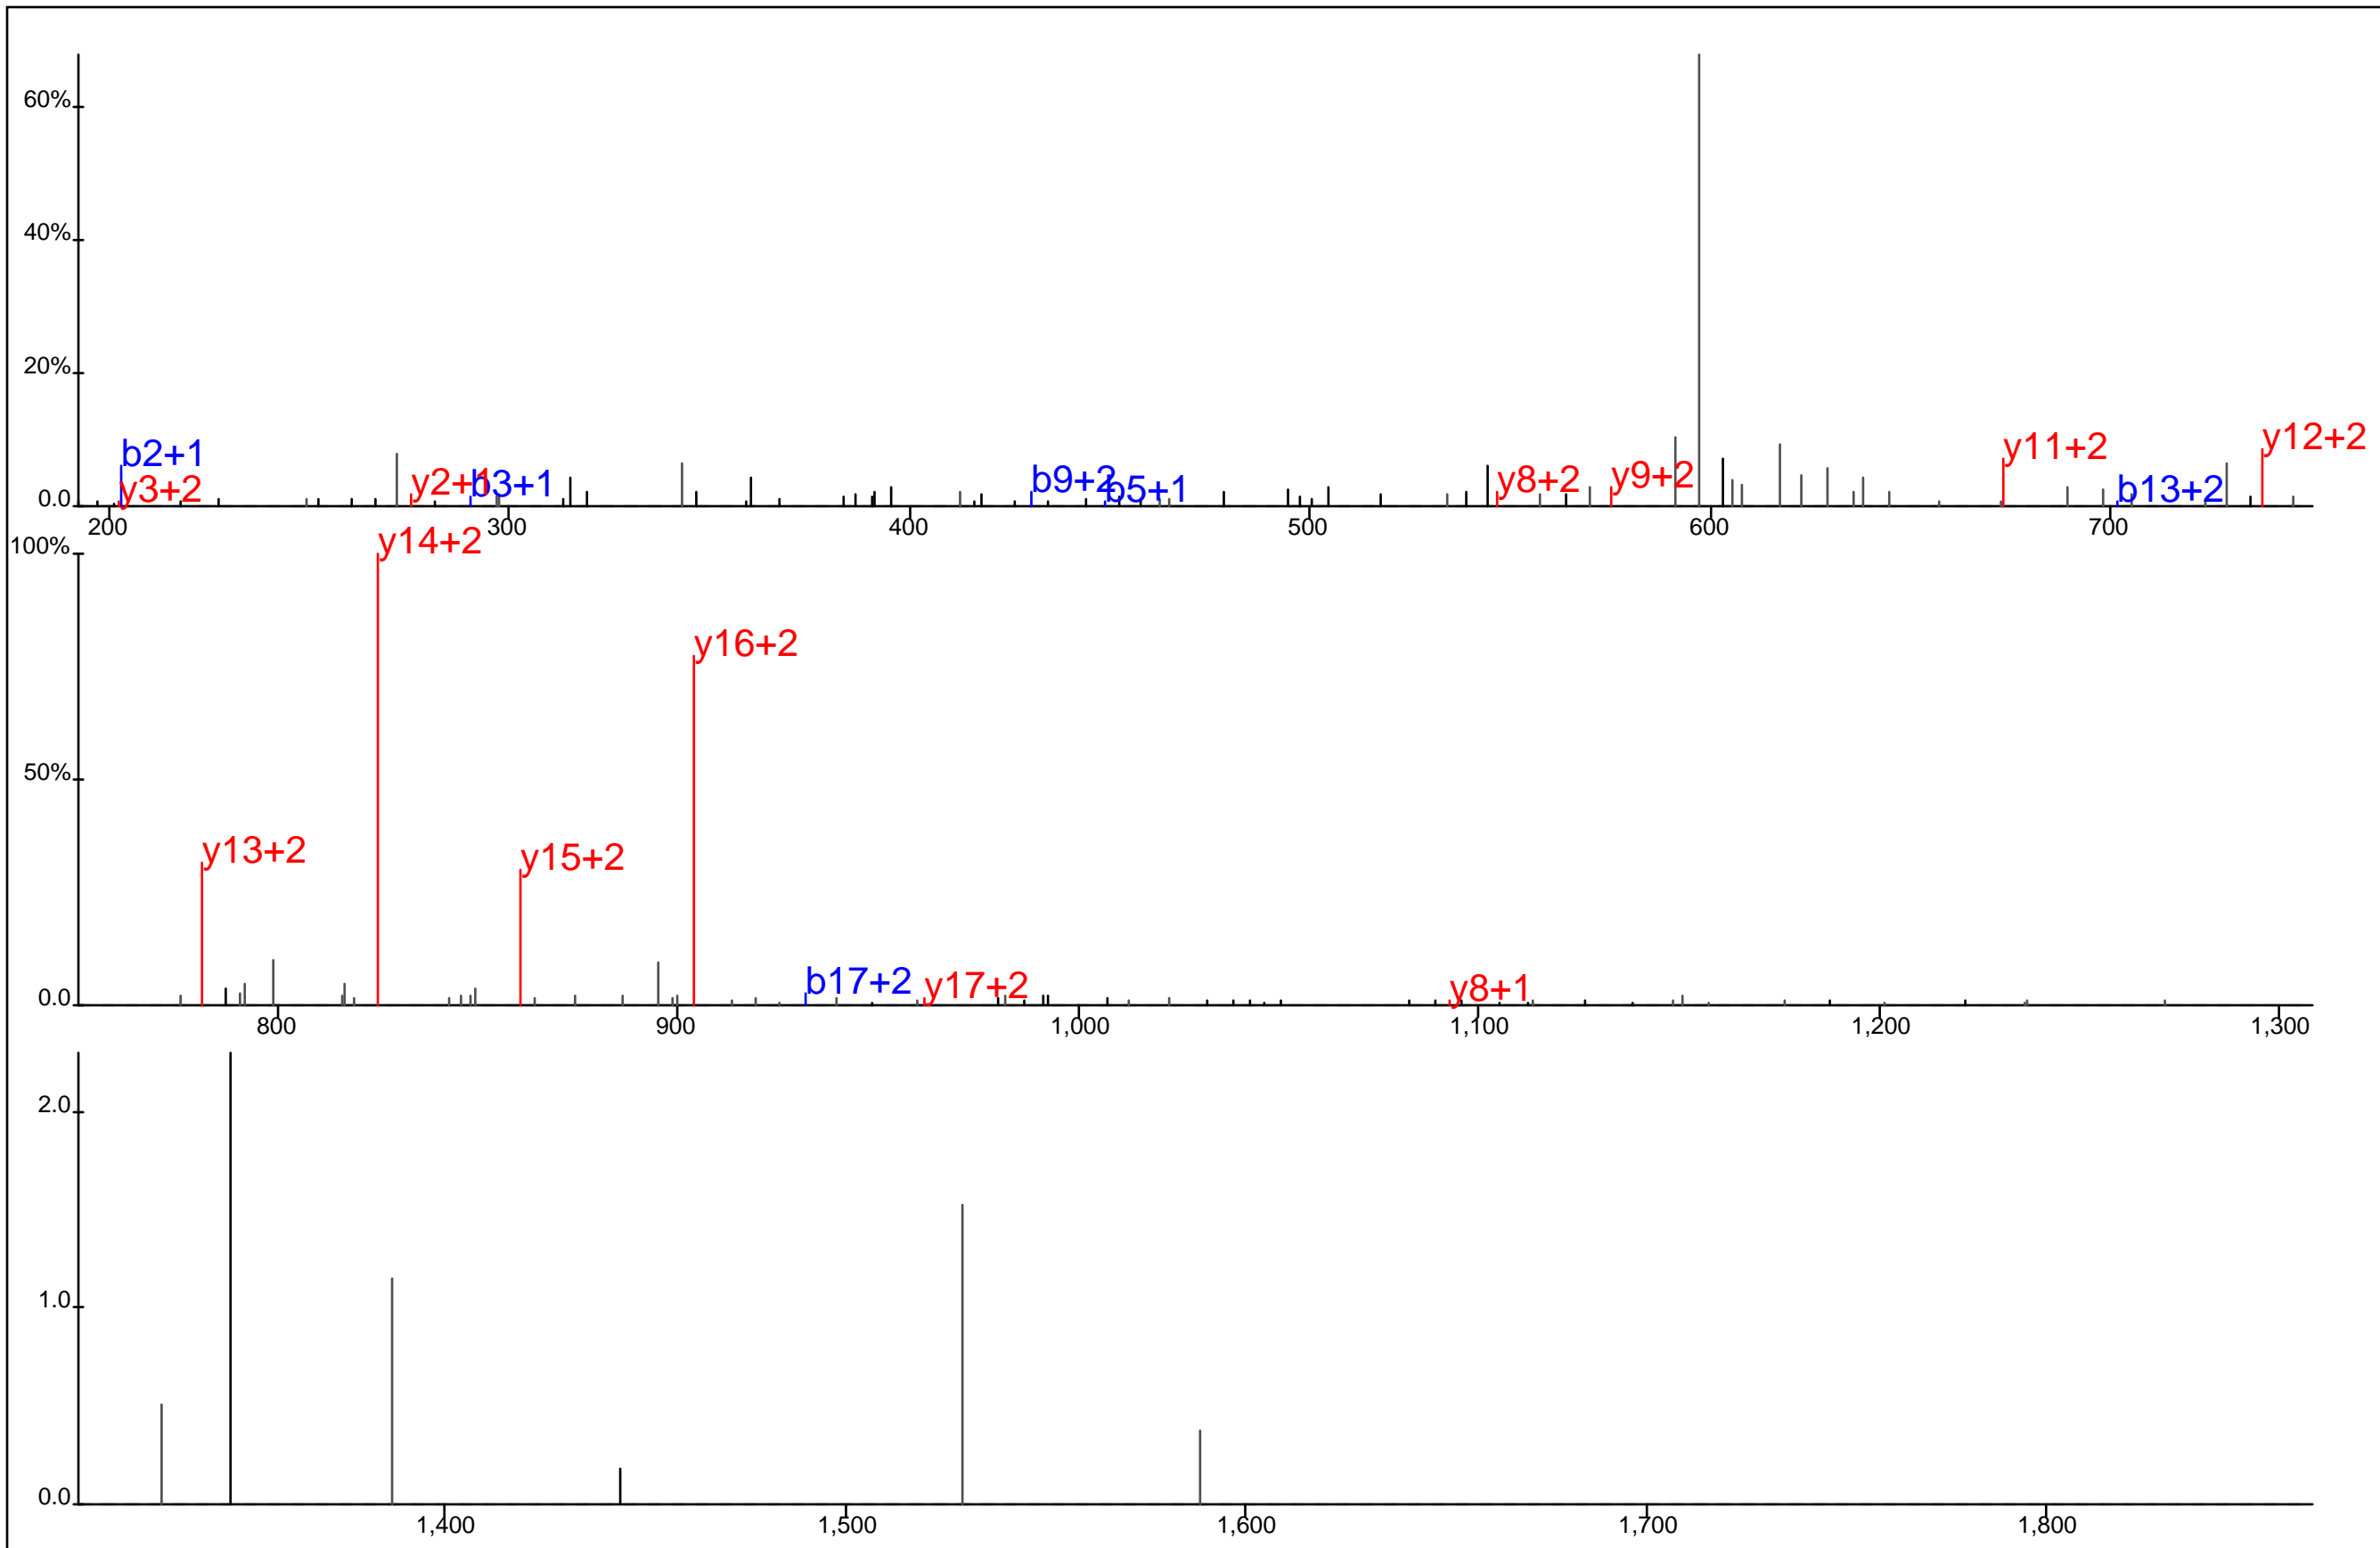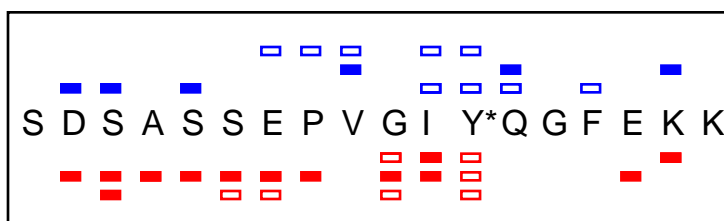

Protein Name: Protein kinase C delta  
 gi Accession: 0  
 Precursor Mass: 670.3013+3  
 Delta Mass: 0.239 ppm  
 XCorr: 21.19

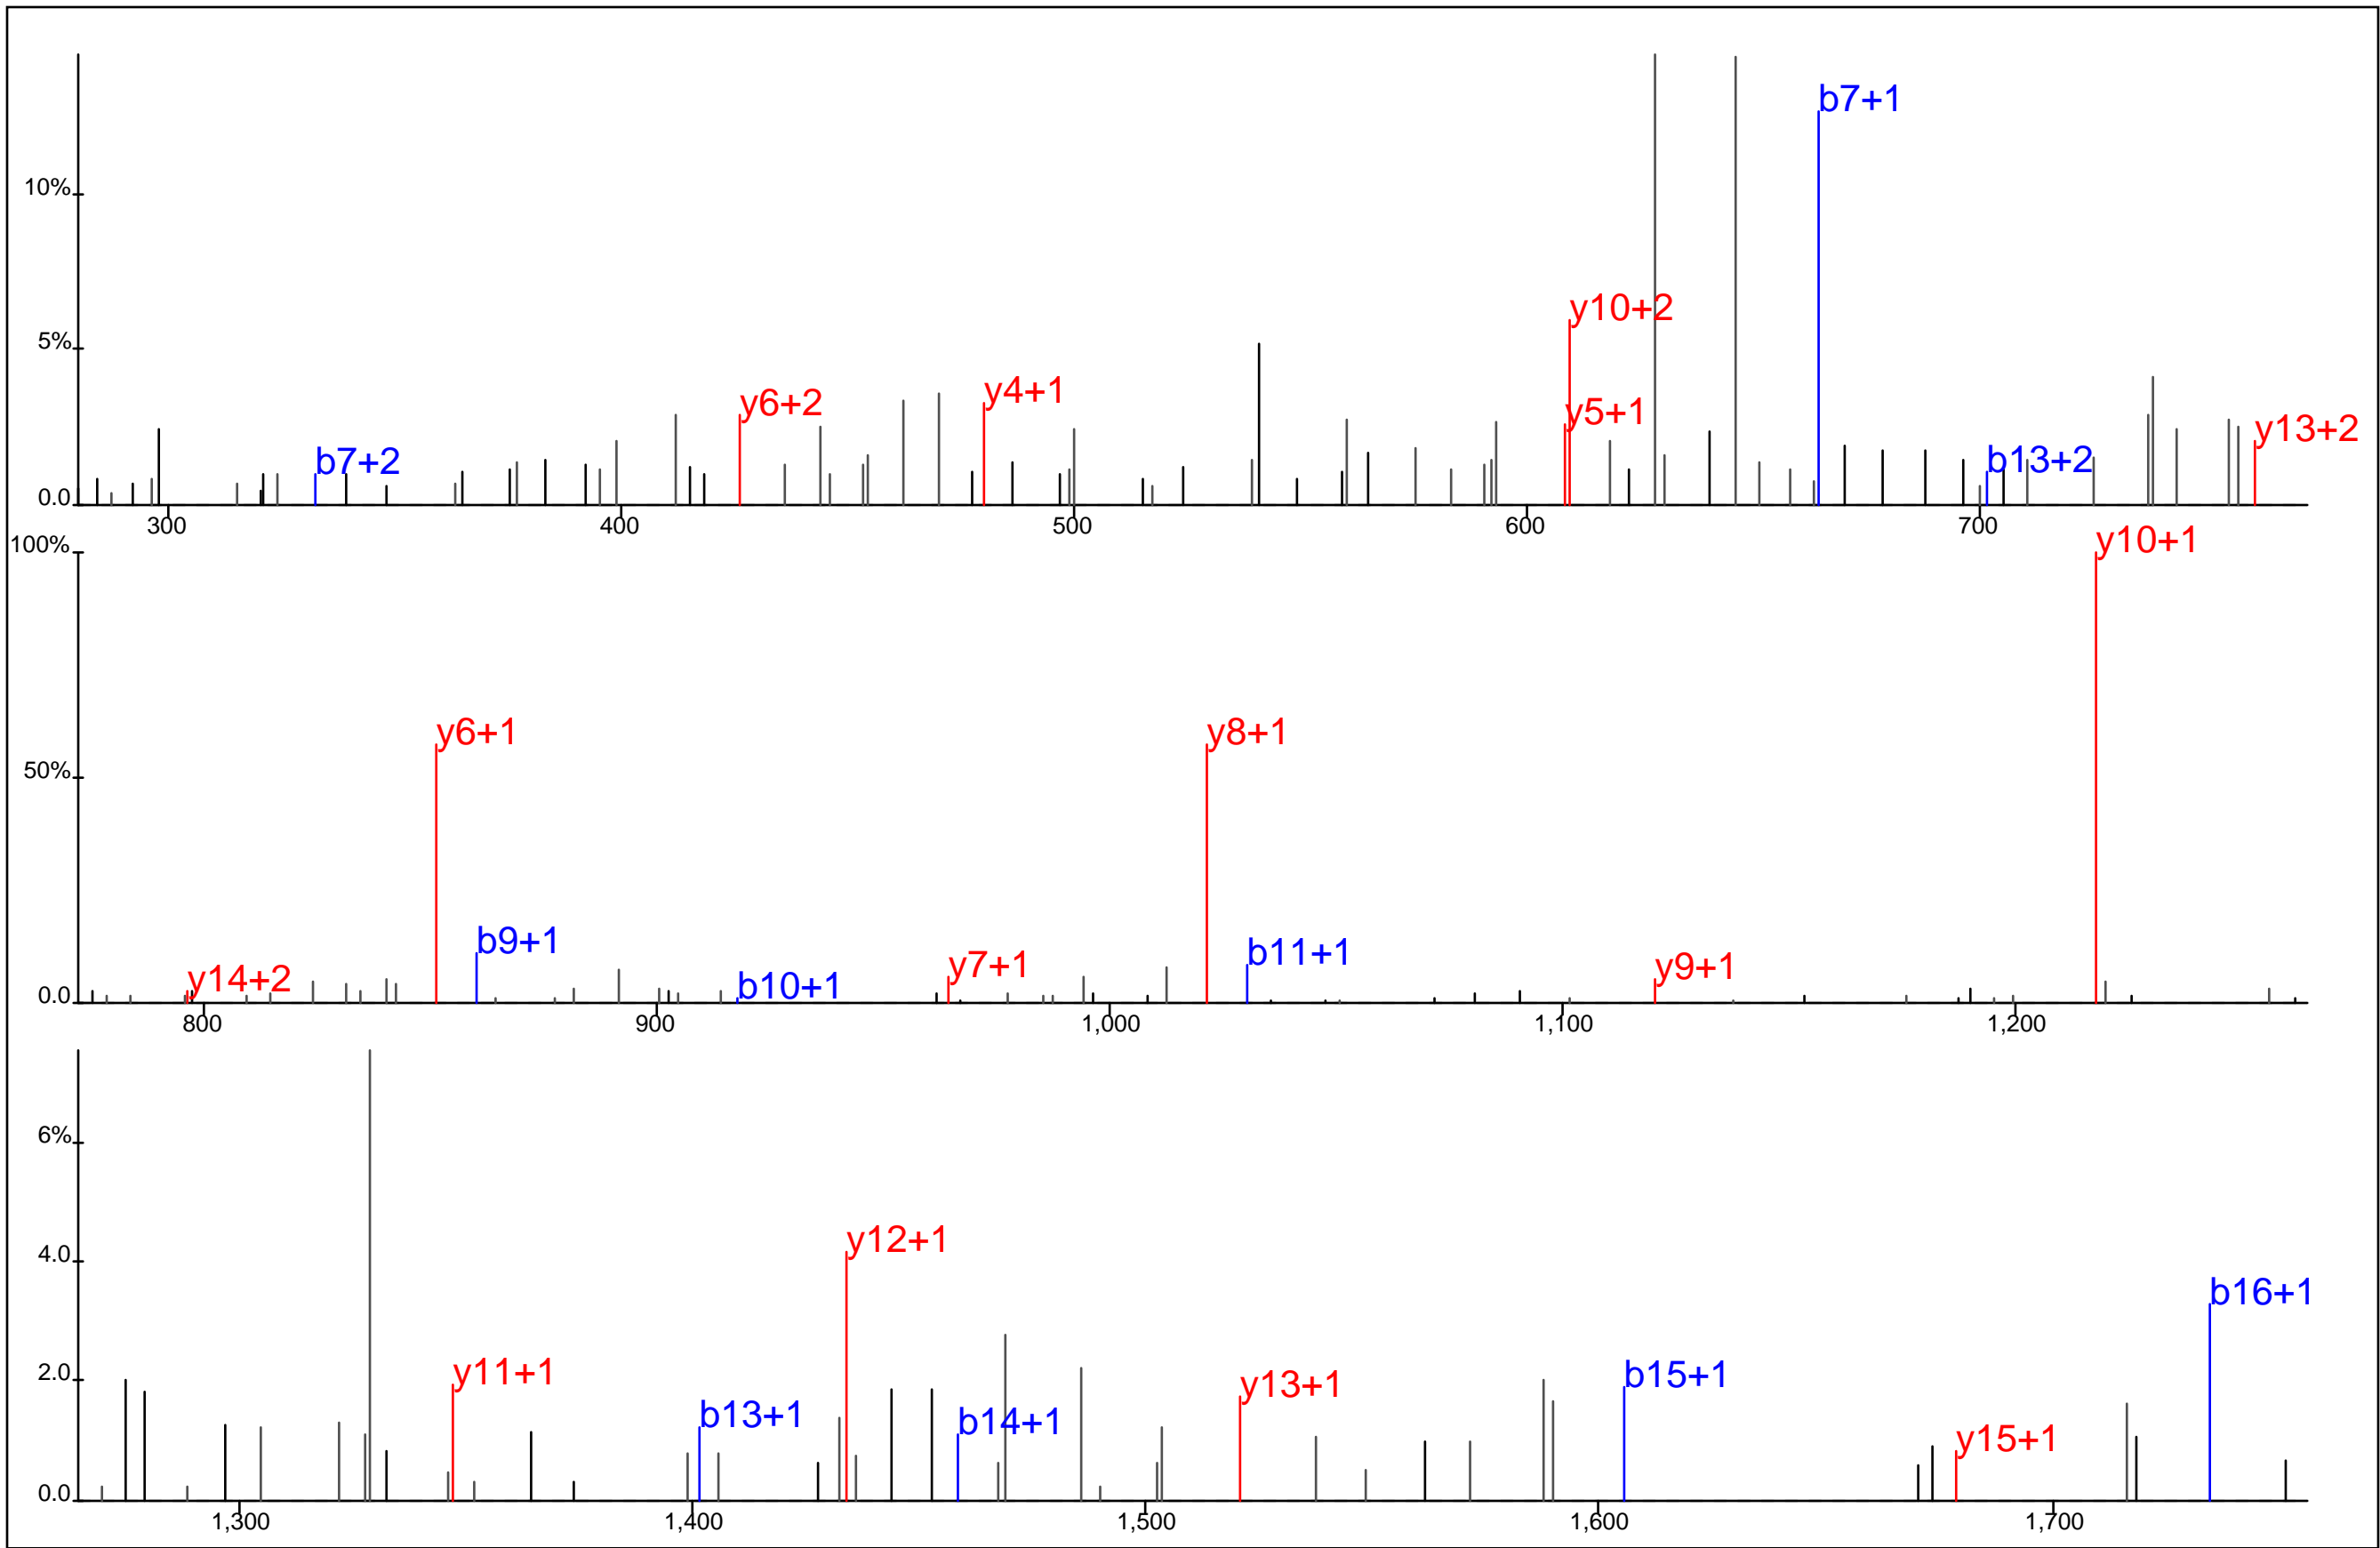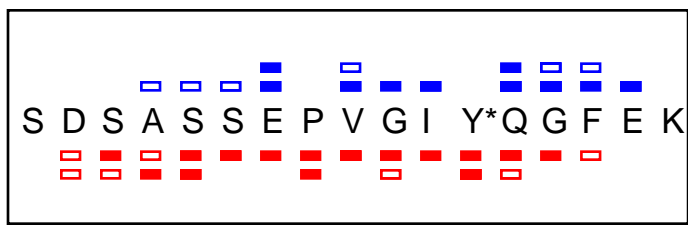

Protein Name: Protein kinase C delta  
 gi Accession: 0  
 Precursor Mass: 940.9016+2  
 Delta Mass: 0.523 ppm  
 XCorr: 59.69

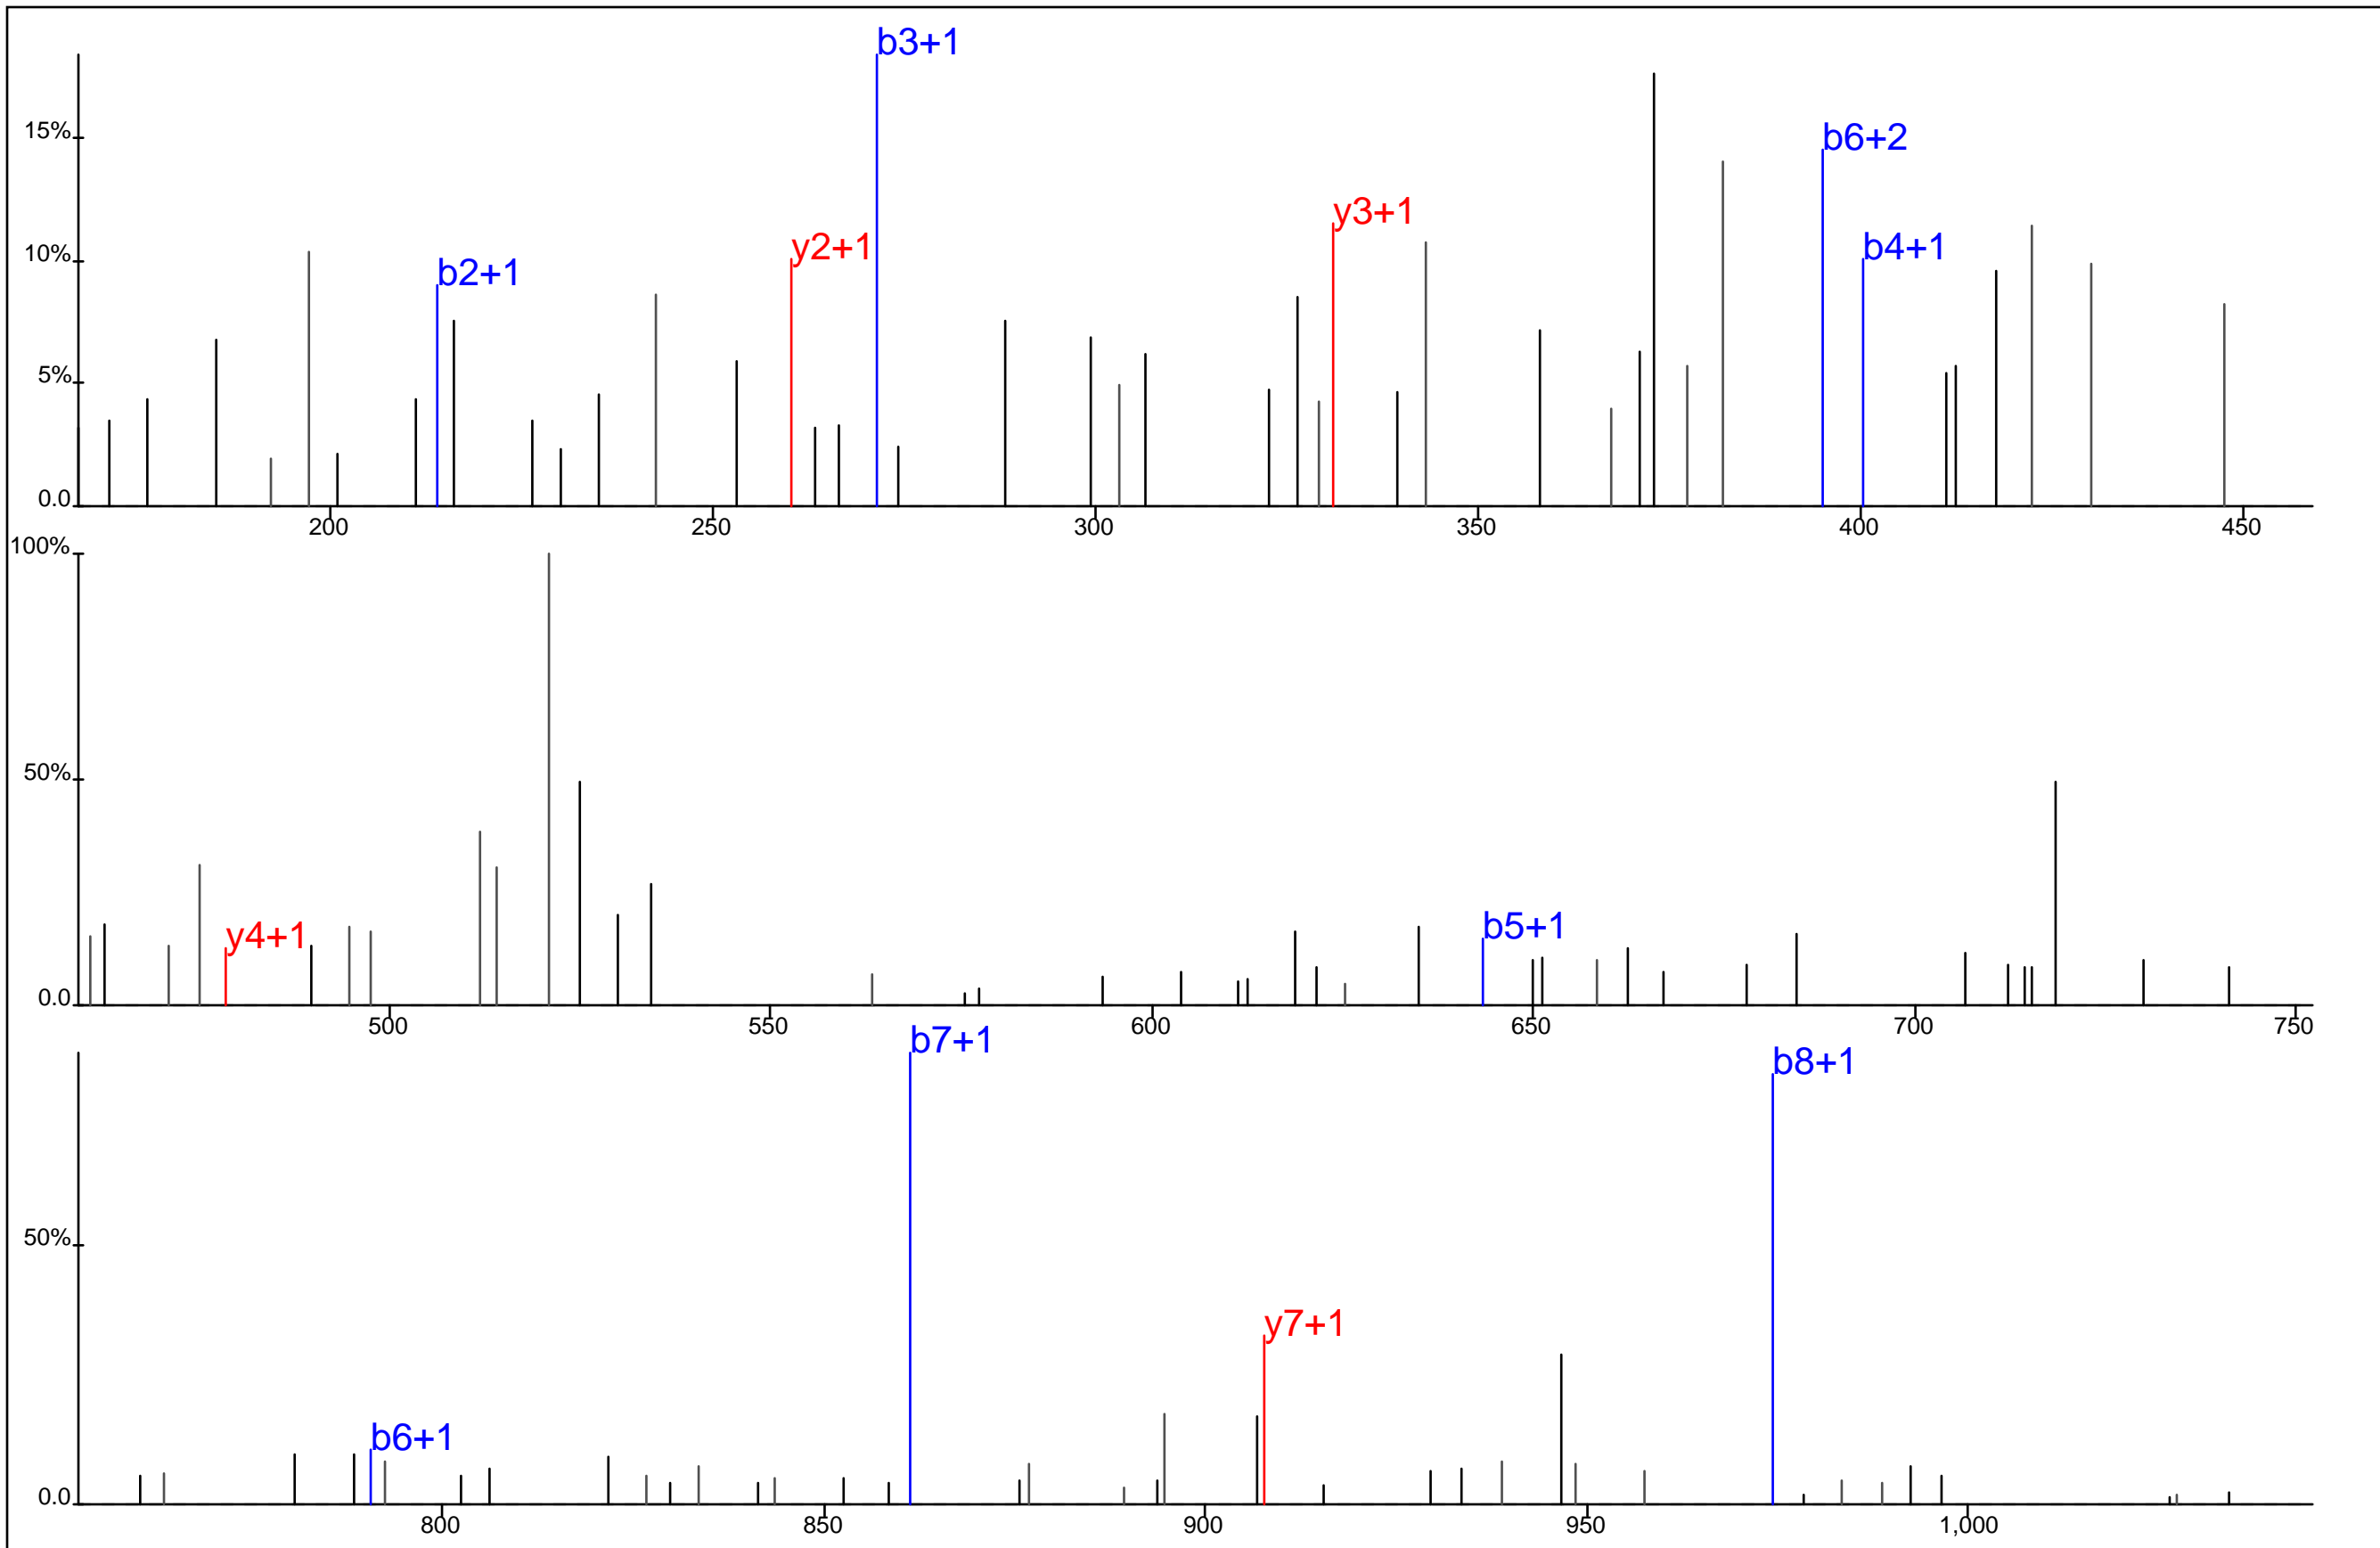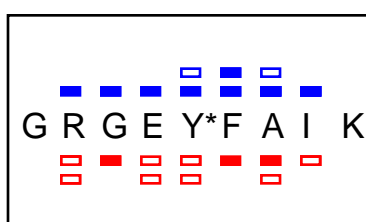

Protein Name: Protein kinase C delta  
 gi Accession: 0  
 Precursor Mass: 560.7623+2  
 Delta Mass: 1.142 ppm  
 XCorr: 23.39



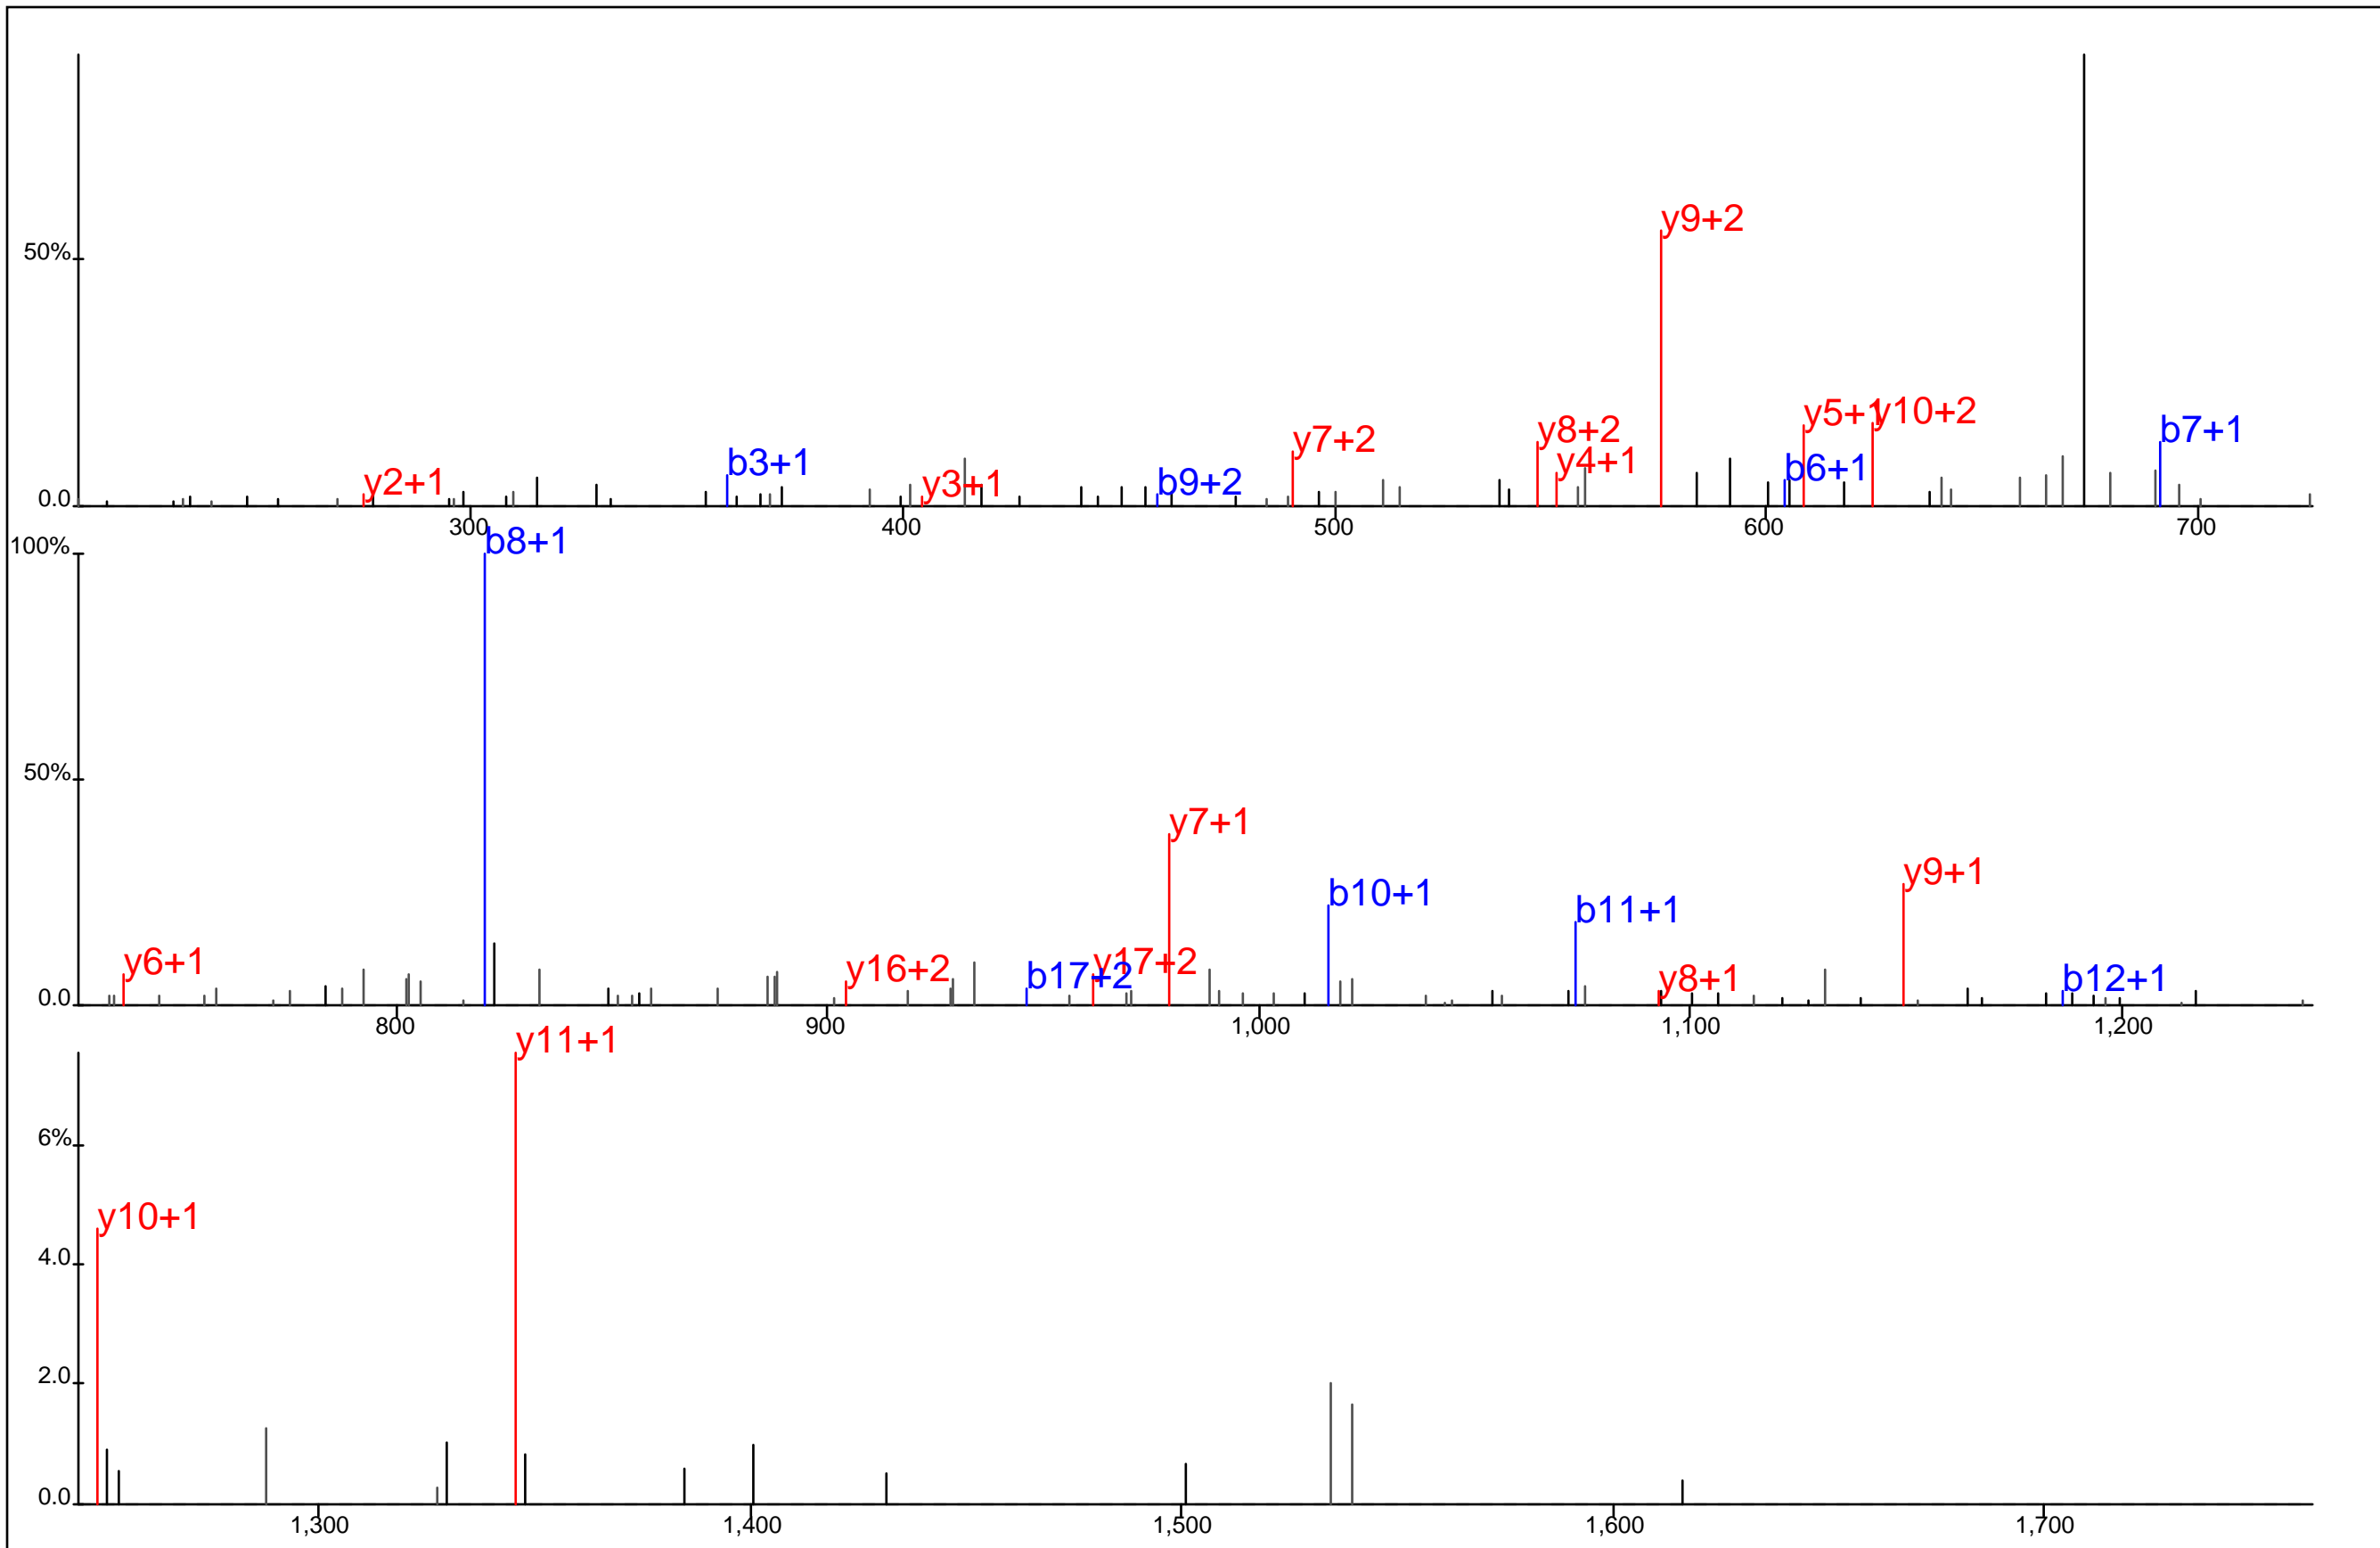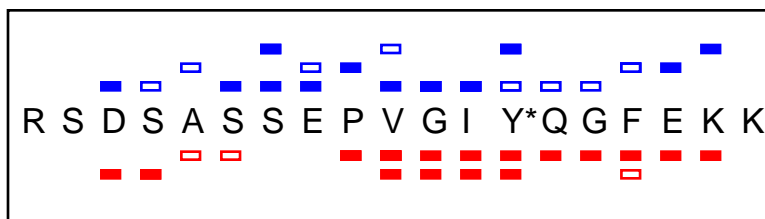

Protein Name: Protein kinase C delta  
 gi Accession: 0  
 Precursor Mass: 722.3371+3  
 Delta Mass: 2.641 ppm  
 XCorr: 32.03

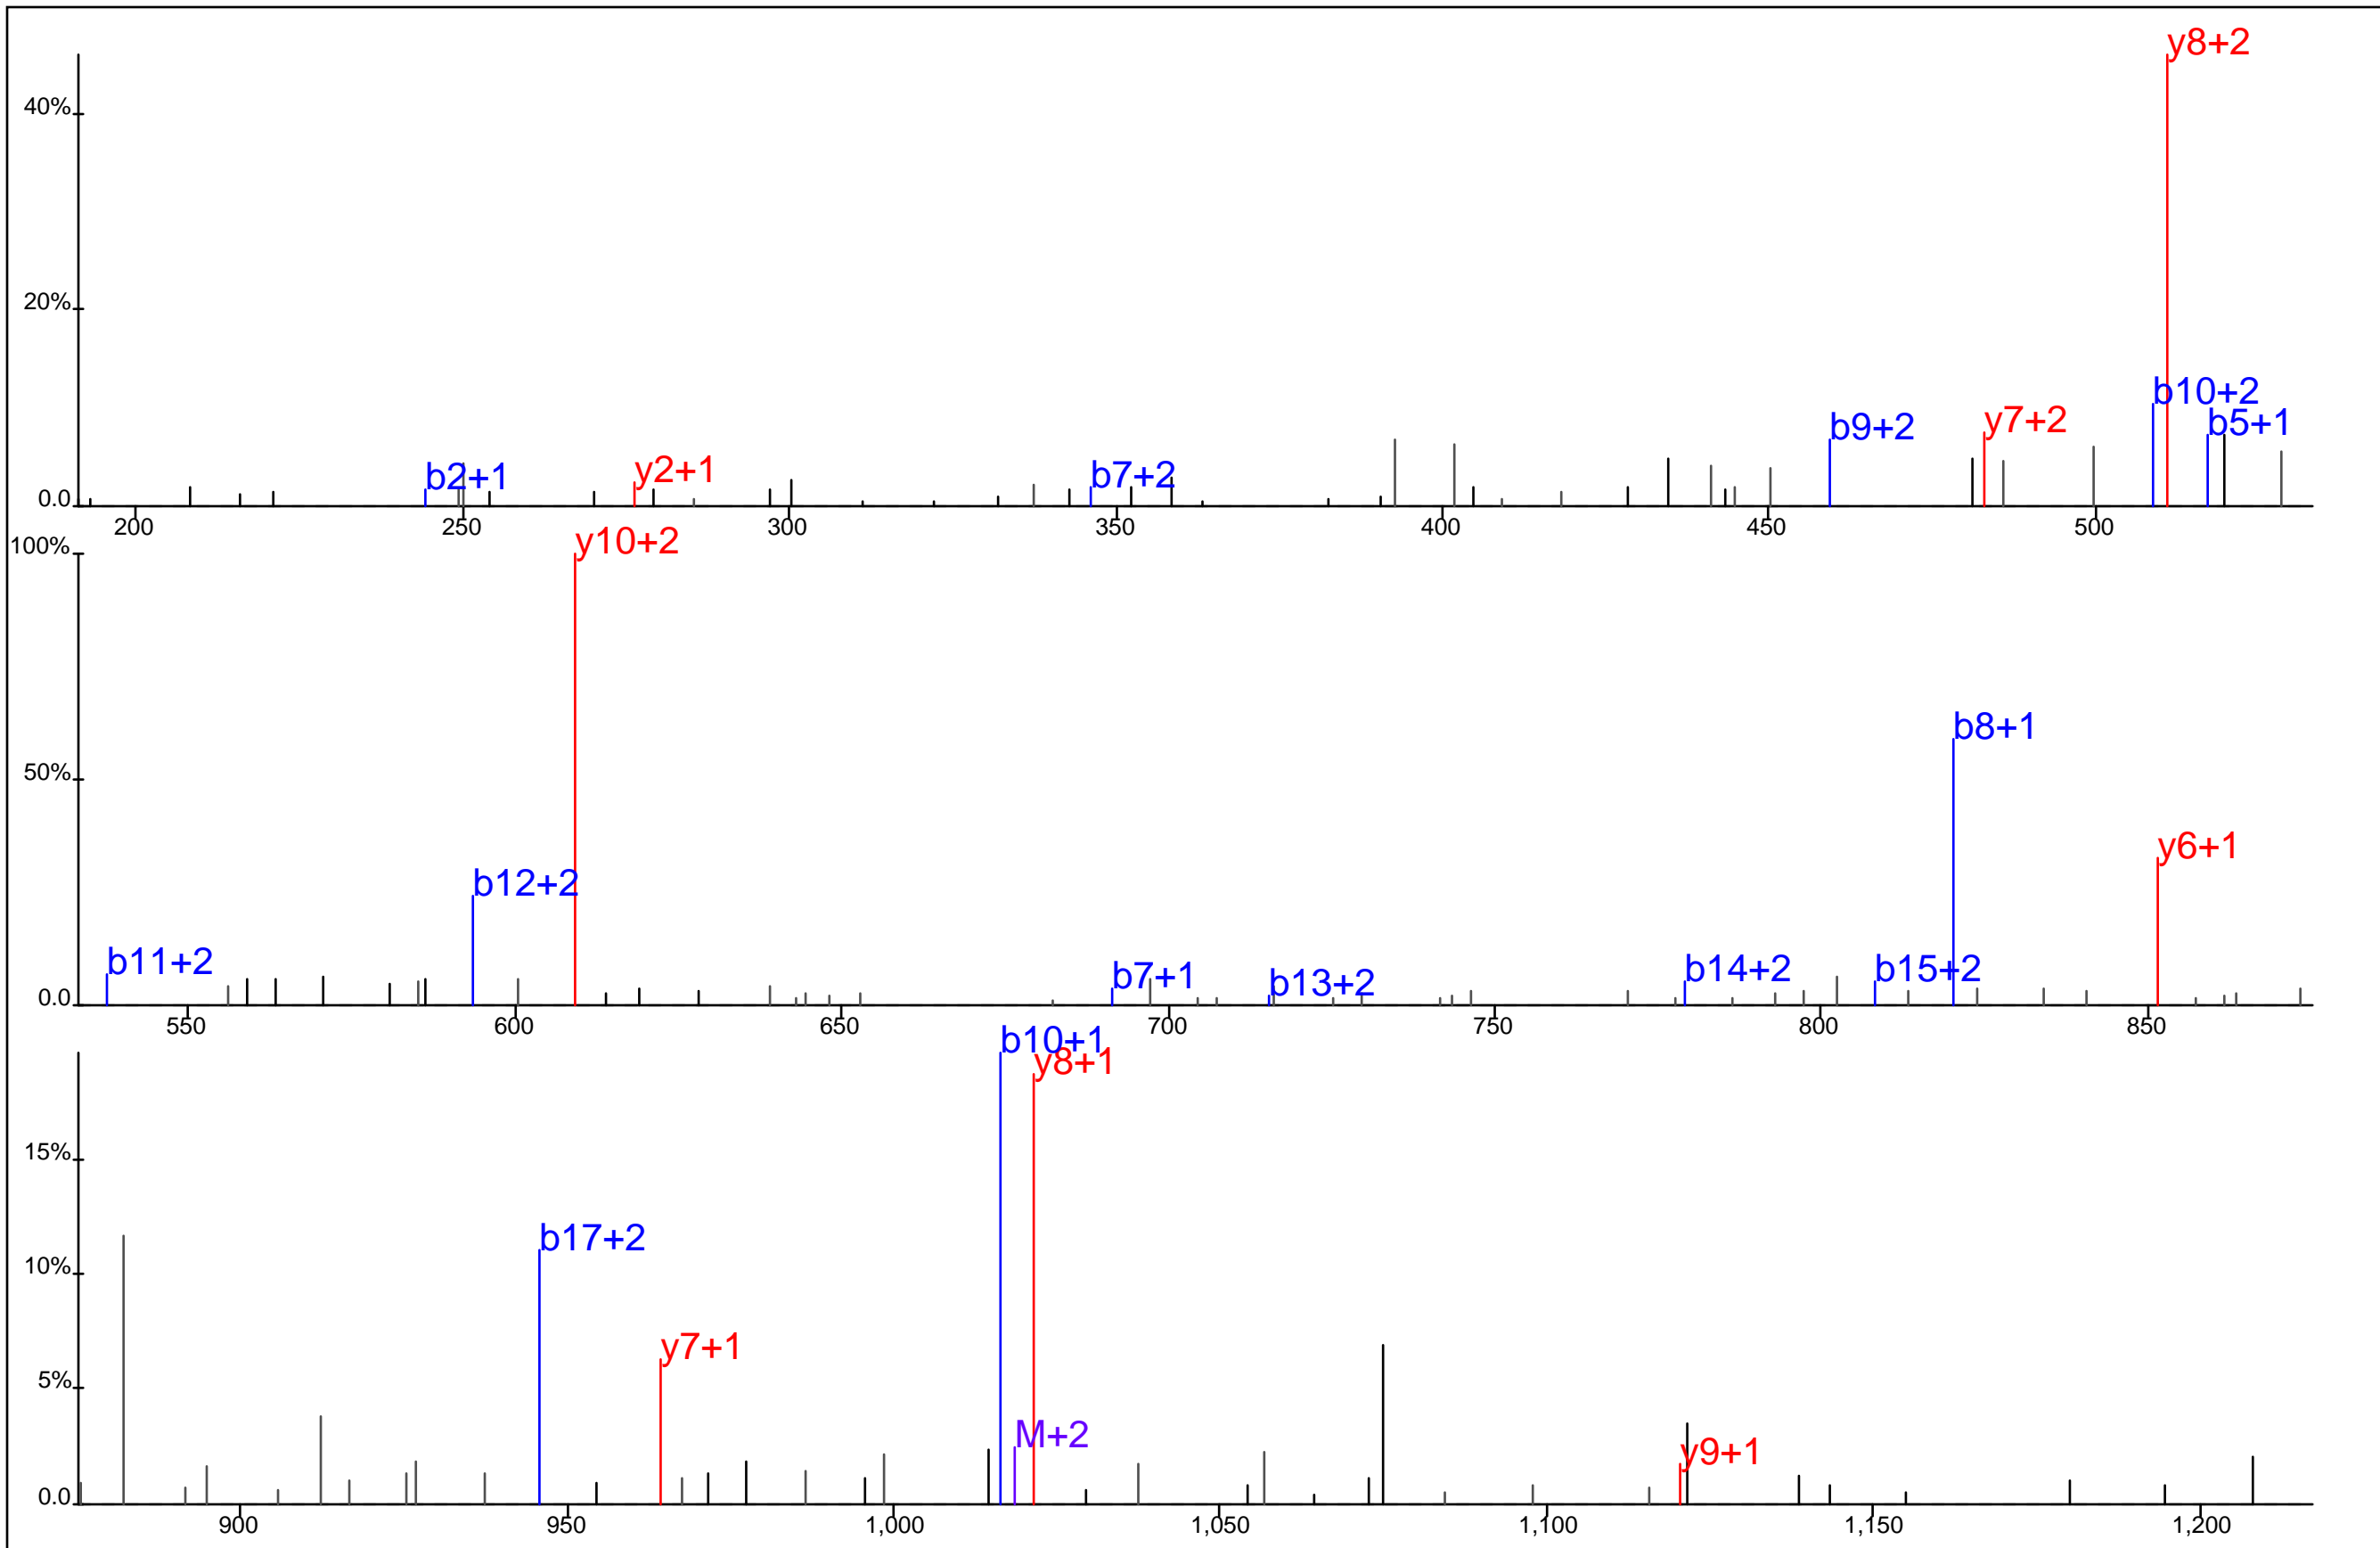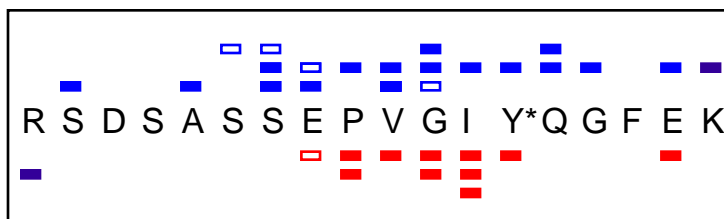

Protein Name: Protein kinase C delta  
 gi Accession: 0  
 Precursor Mass: 679.6360+3  
 Delta Mass: 1.219 ppm  
 XCorr: 39.76

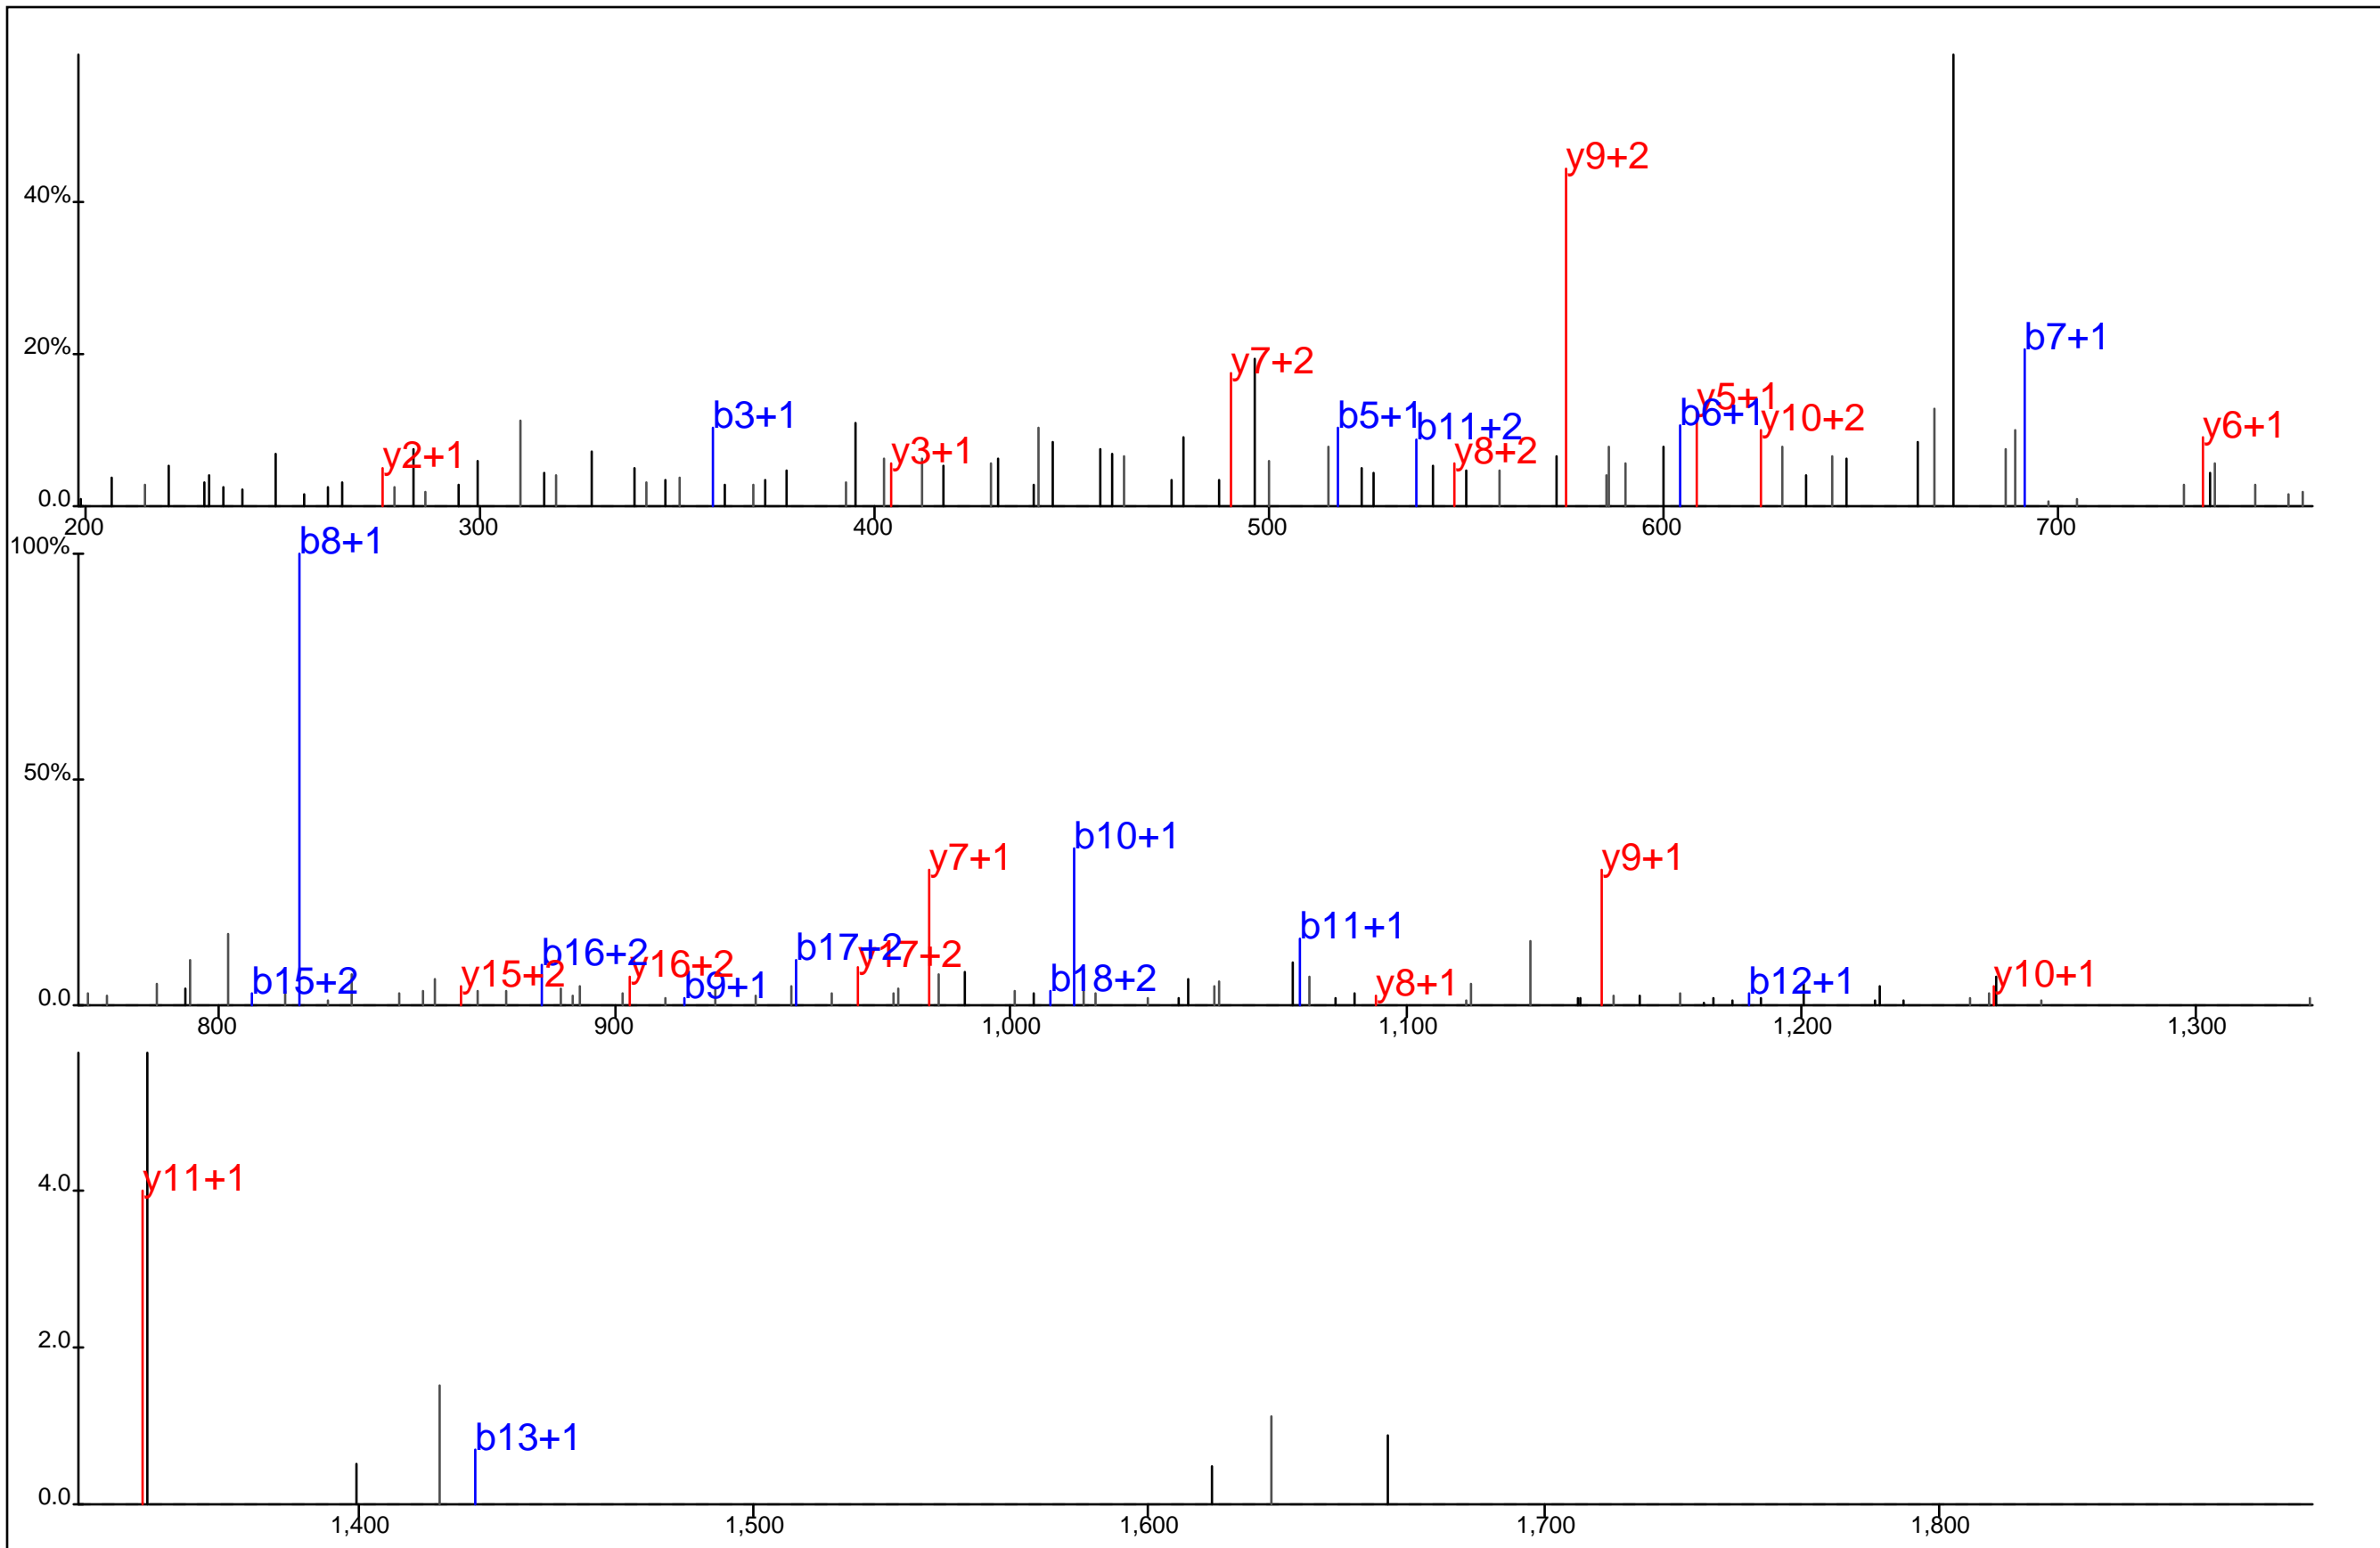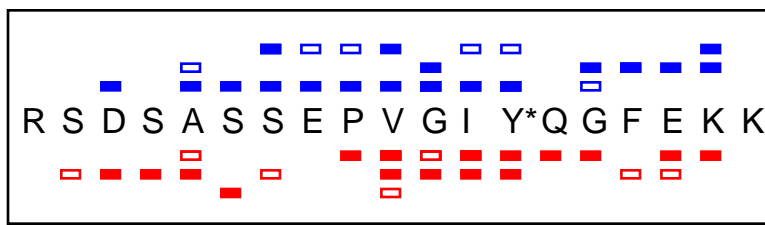

Protein Name: Protein kinase C delta  
 gi Accession: 0  
 Precursor Mass: 722.3343+3  
 Delta Mass: 1.249 ppm  
 XCorr: 39.96

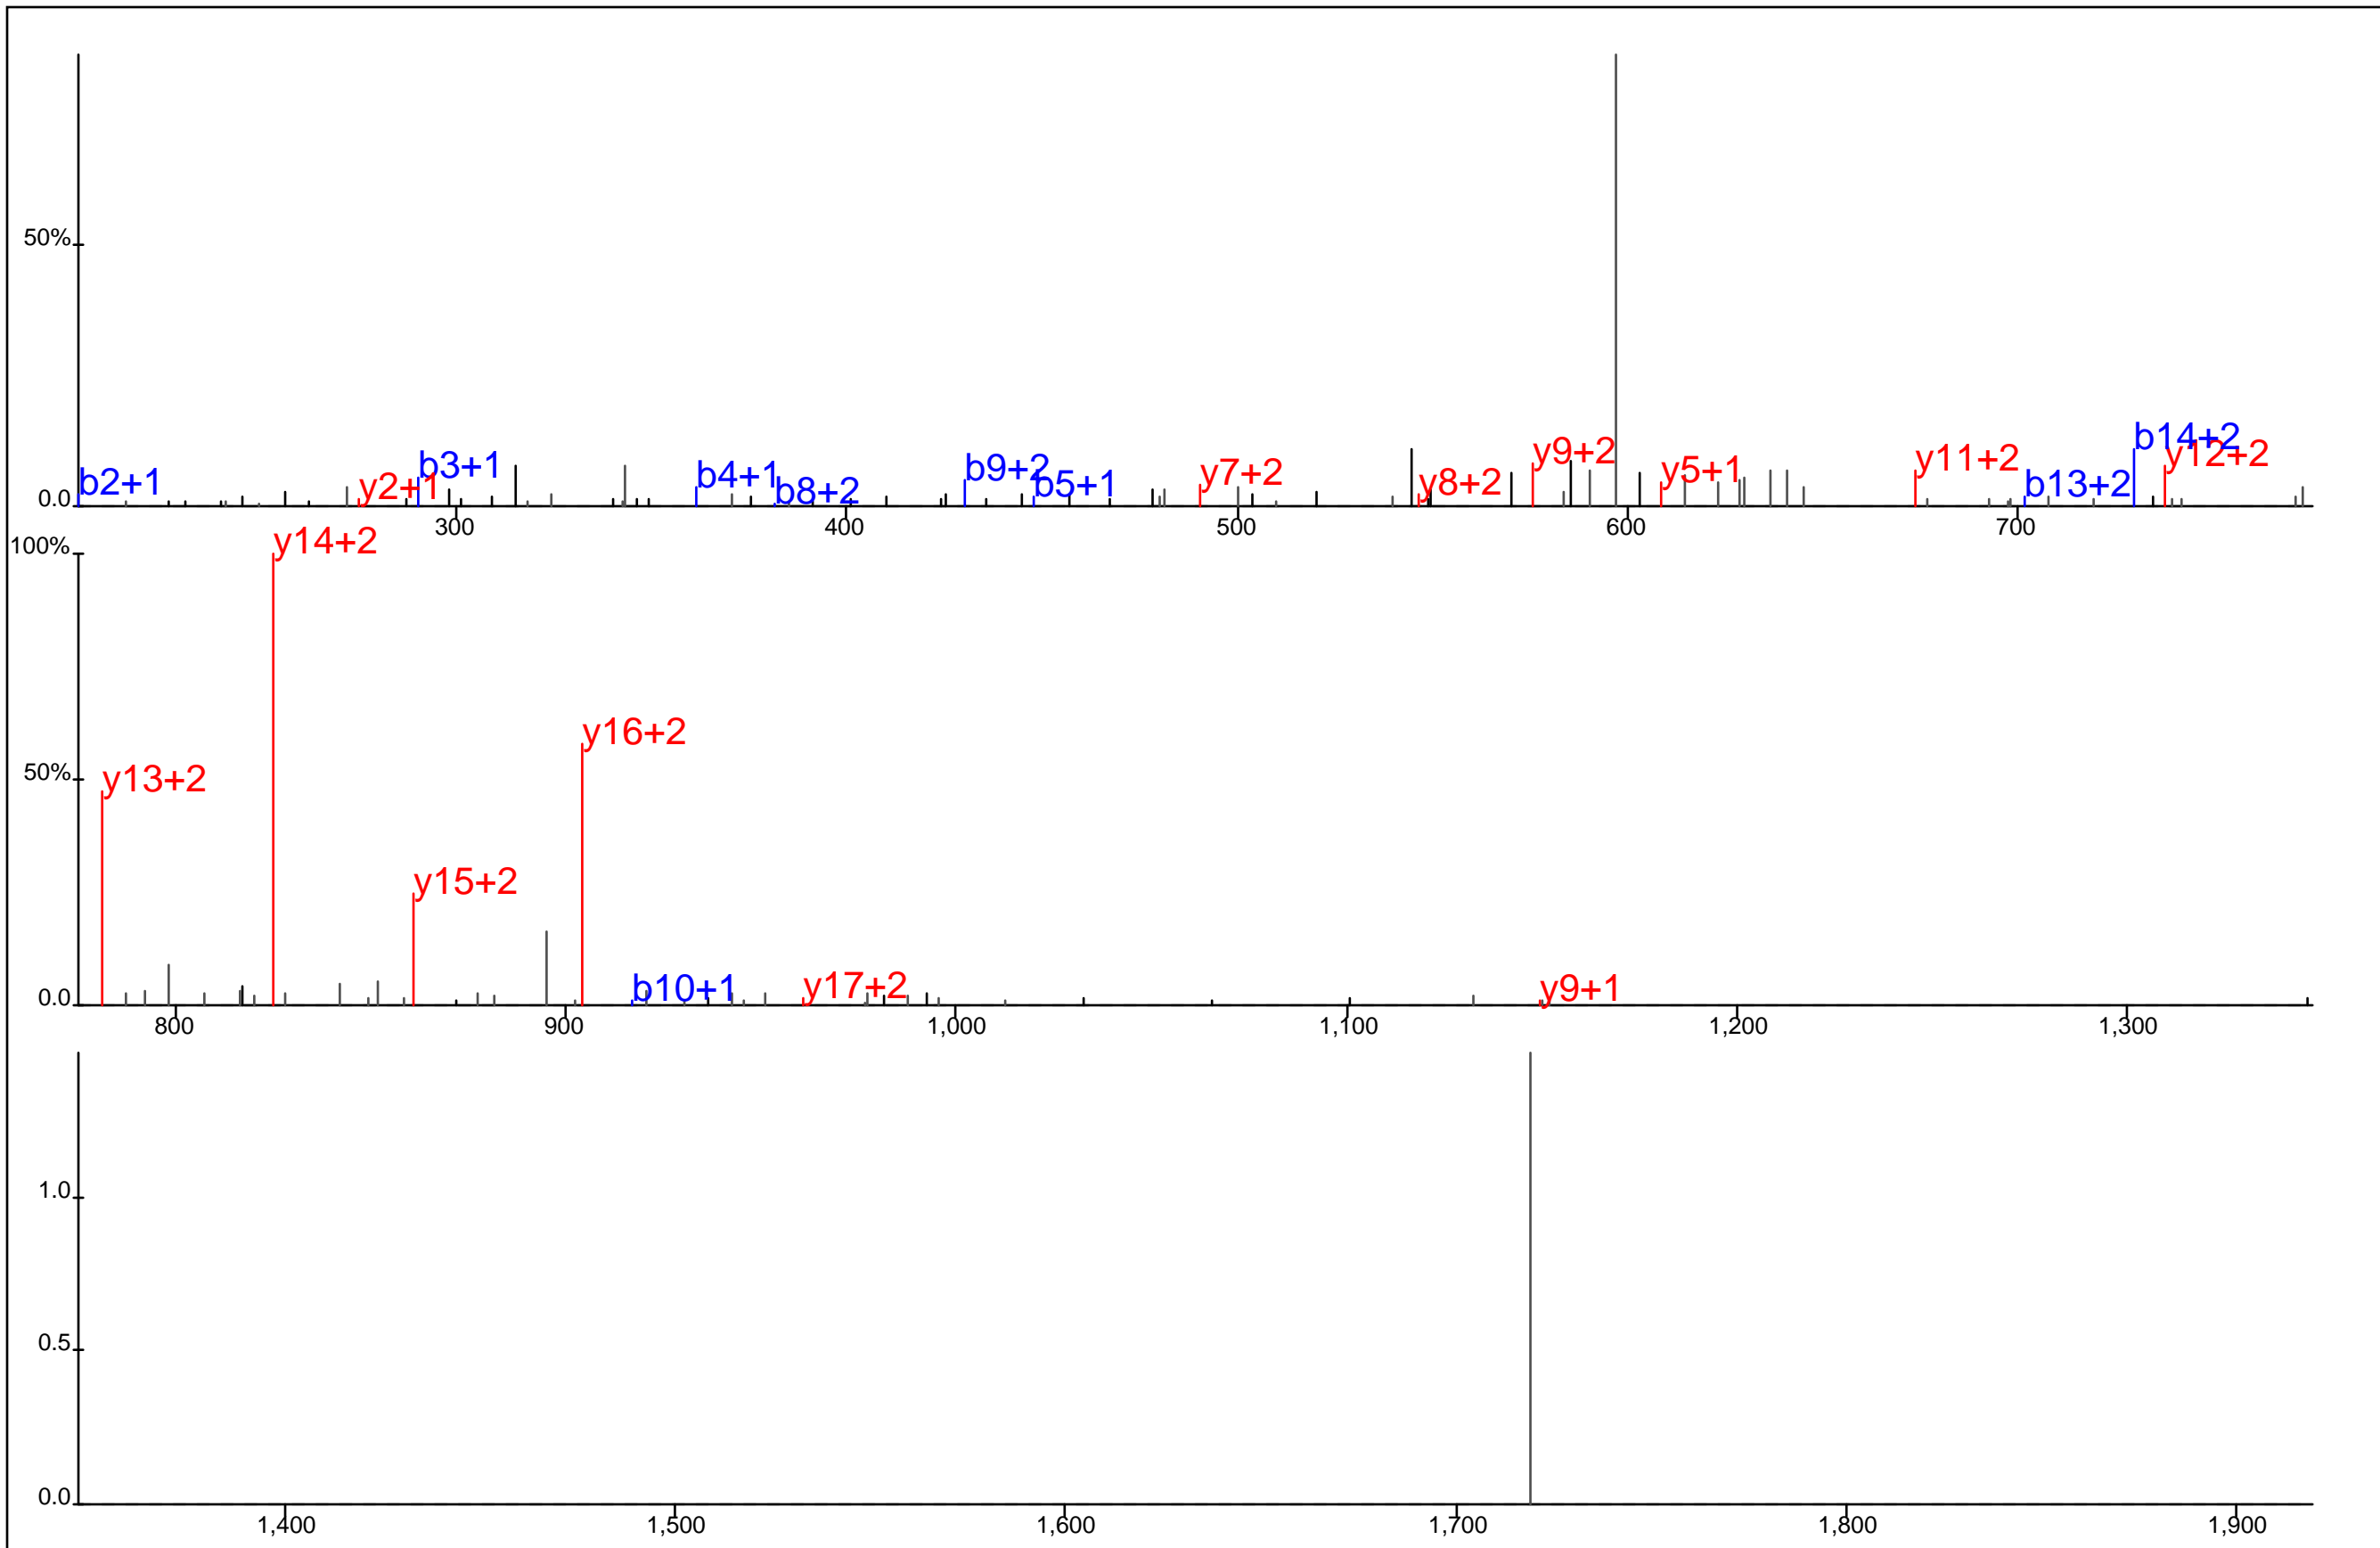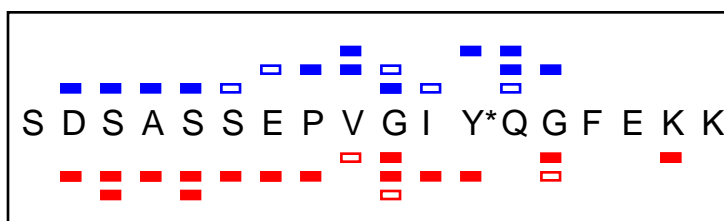

Protein Name: Protein kinase C delta  
 gi Accession: 0  
 Precursor Mass: 670.3002+3  
 Delta Mass: 1.881 ppm  
 XCorr: 29.93



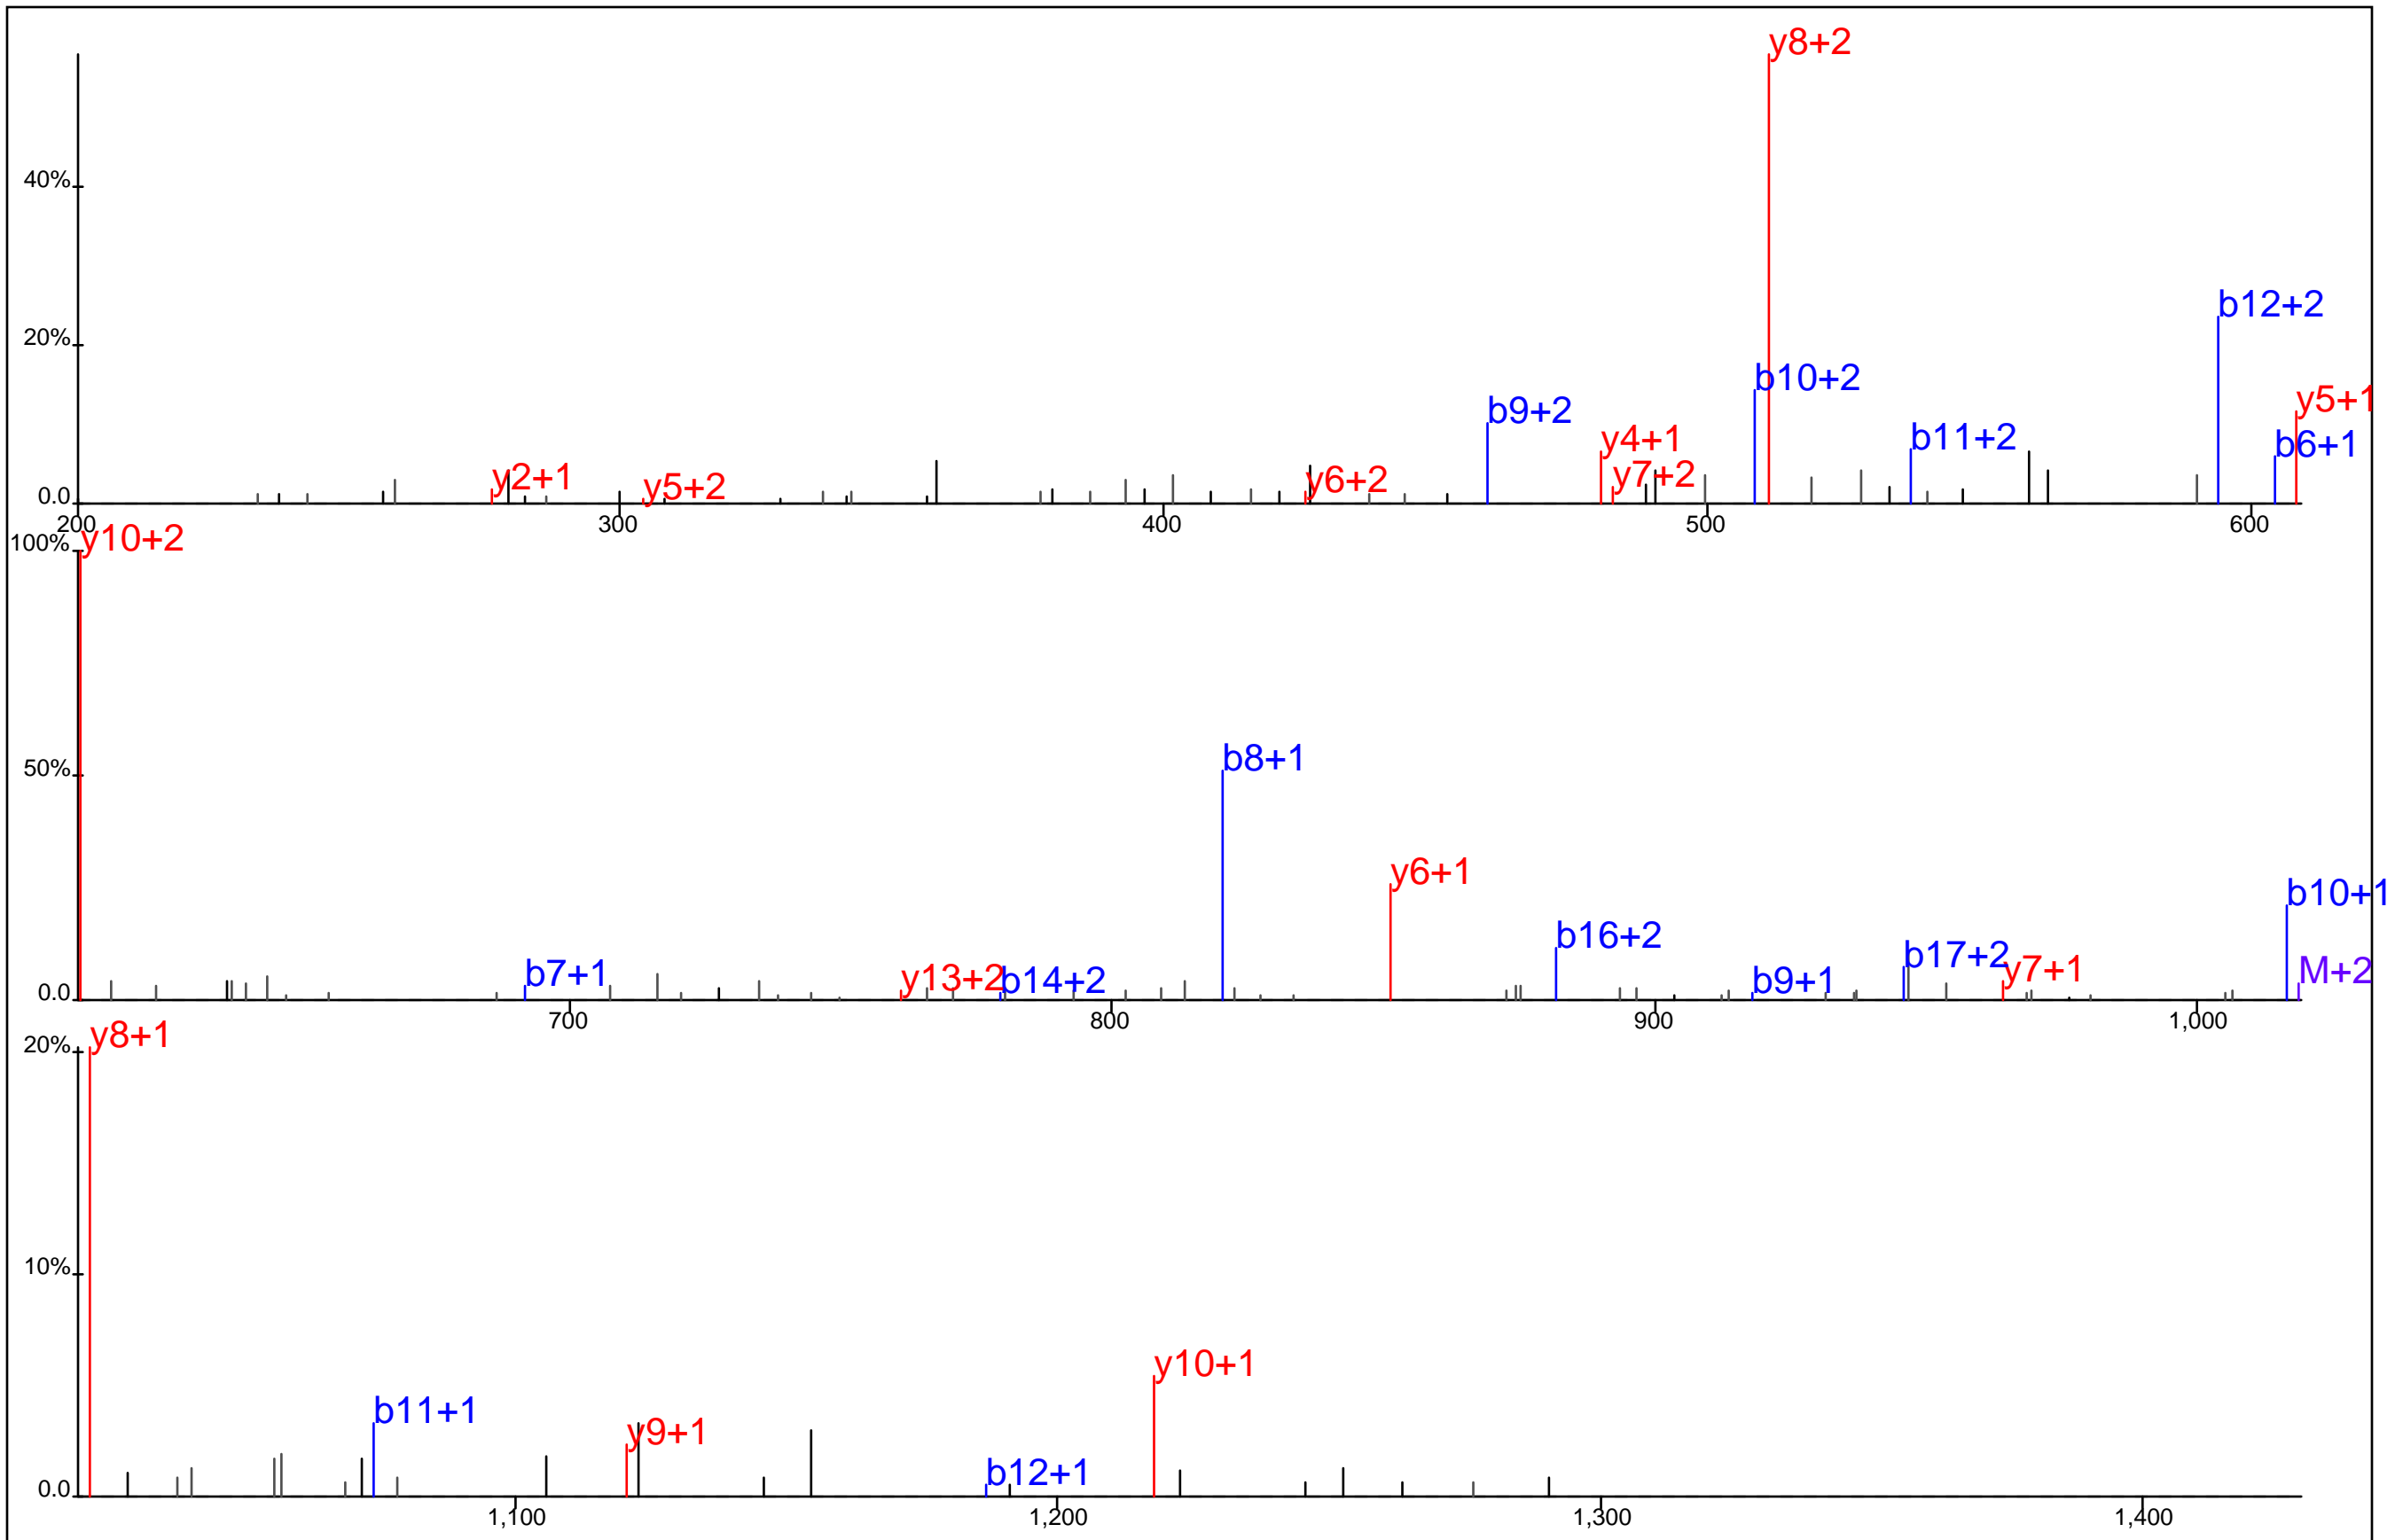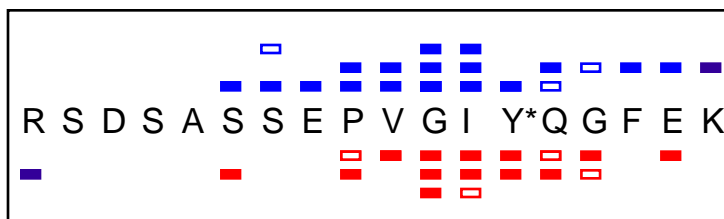

Protein Name: Protein kinase C delta  
 gi Accession: 0  
 Precursor Mass: 679.6382+3  
 Delta Mass: 1.928 ppm  
 XCorr: 47.65



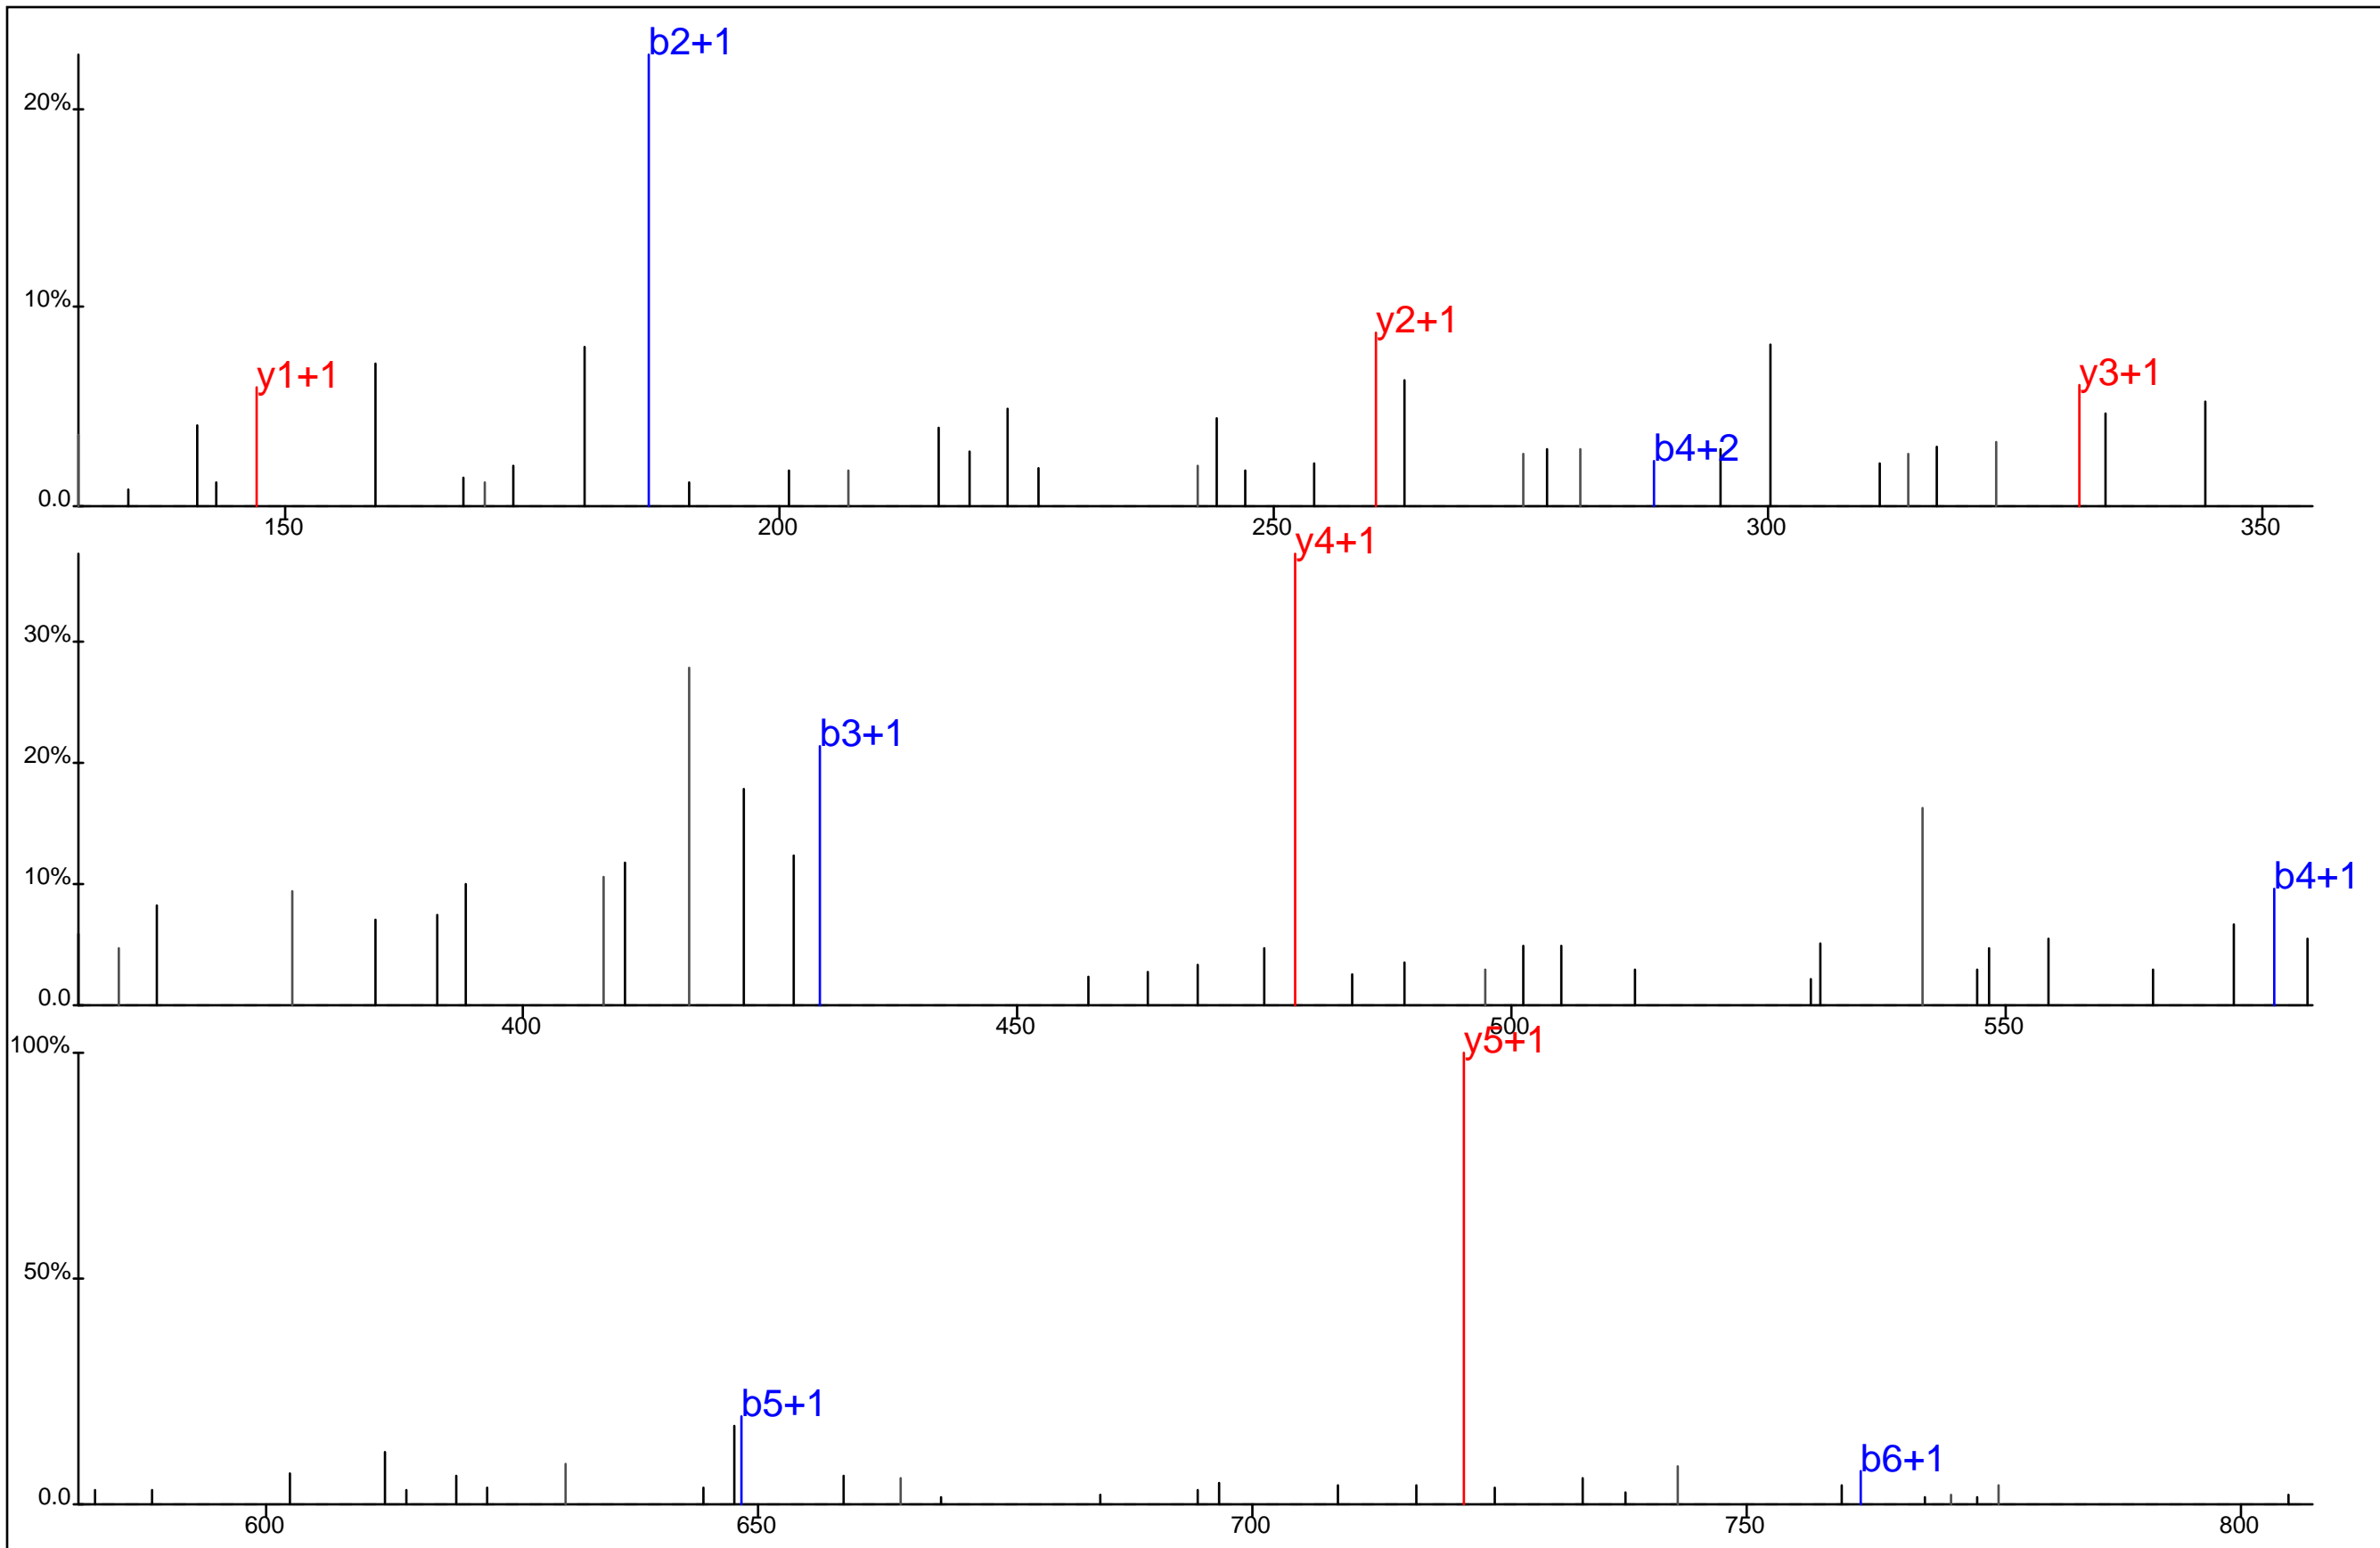

**G E Y\* F A I K**

Protein Name: Protein kinase C delta  
 gi Accession: 0  
 Precursor Mass: 454.2022+2  
 Delta Mass: 1.102 ppm  
 XCorr: 26.53



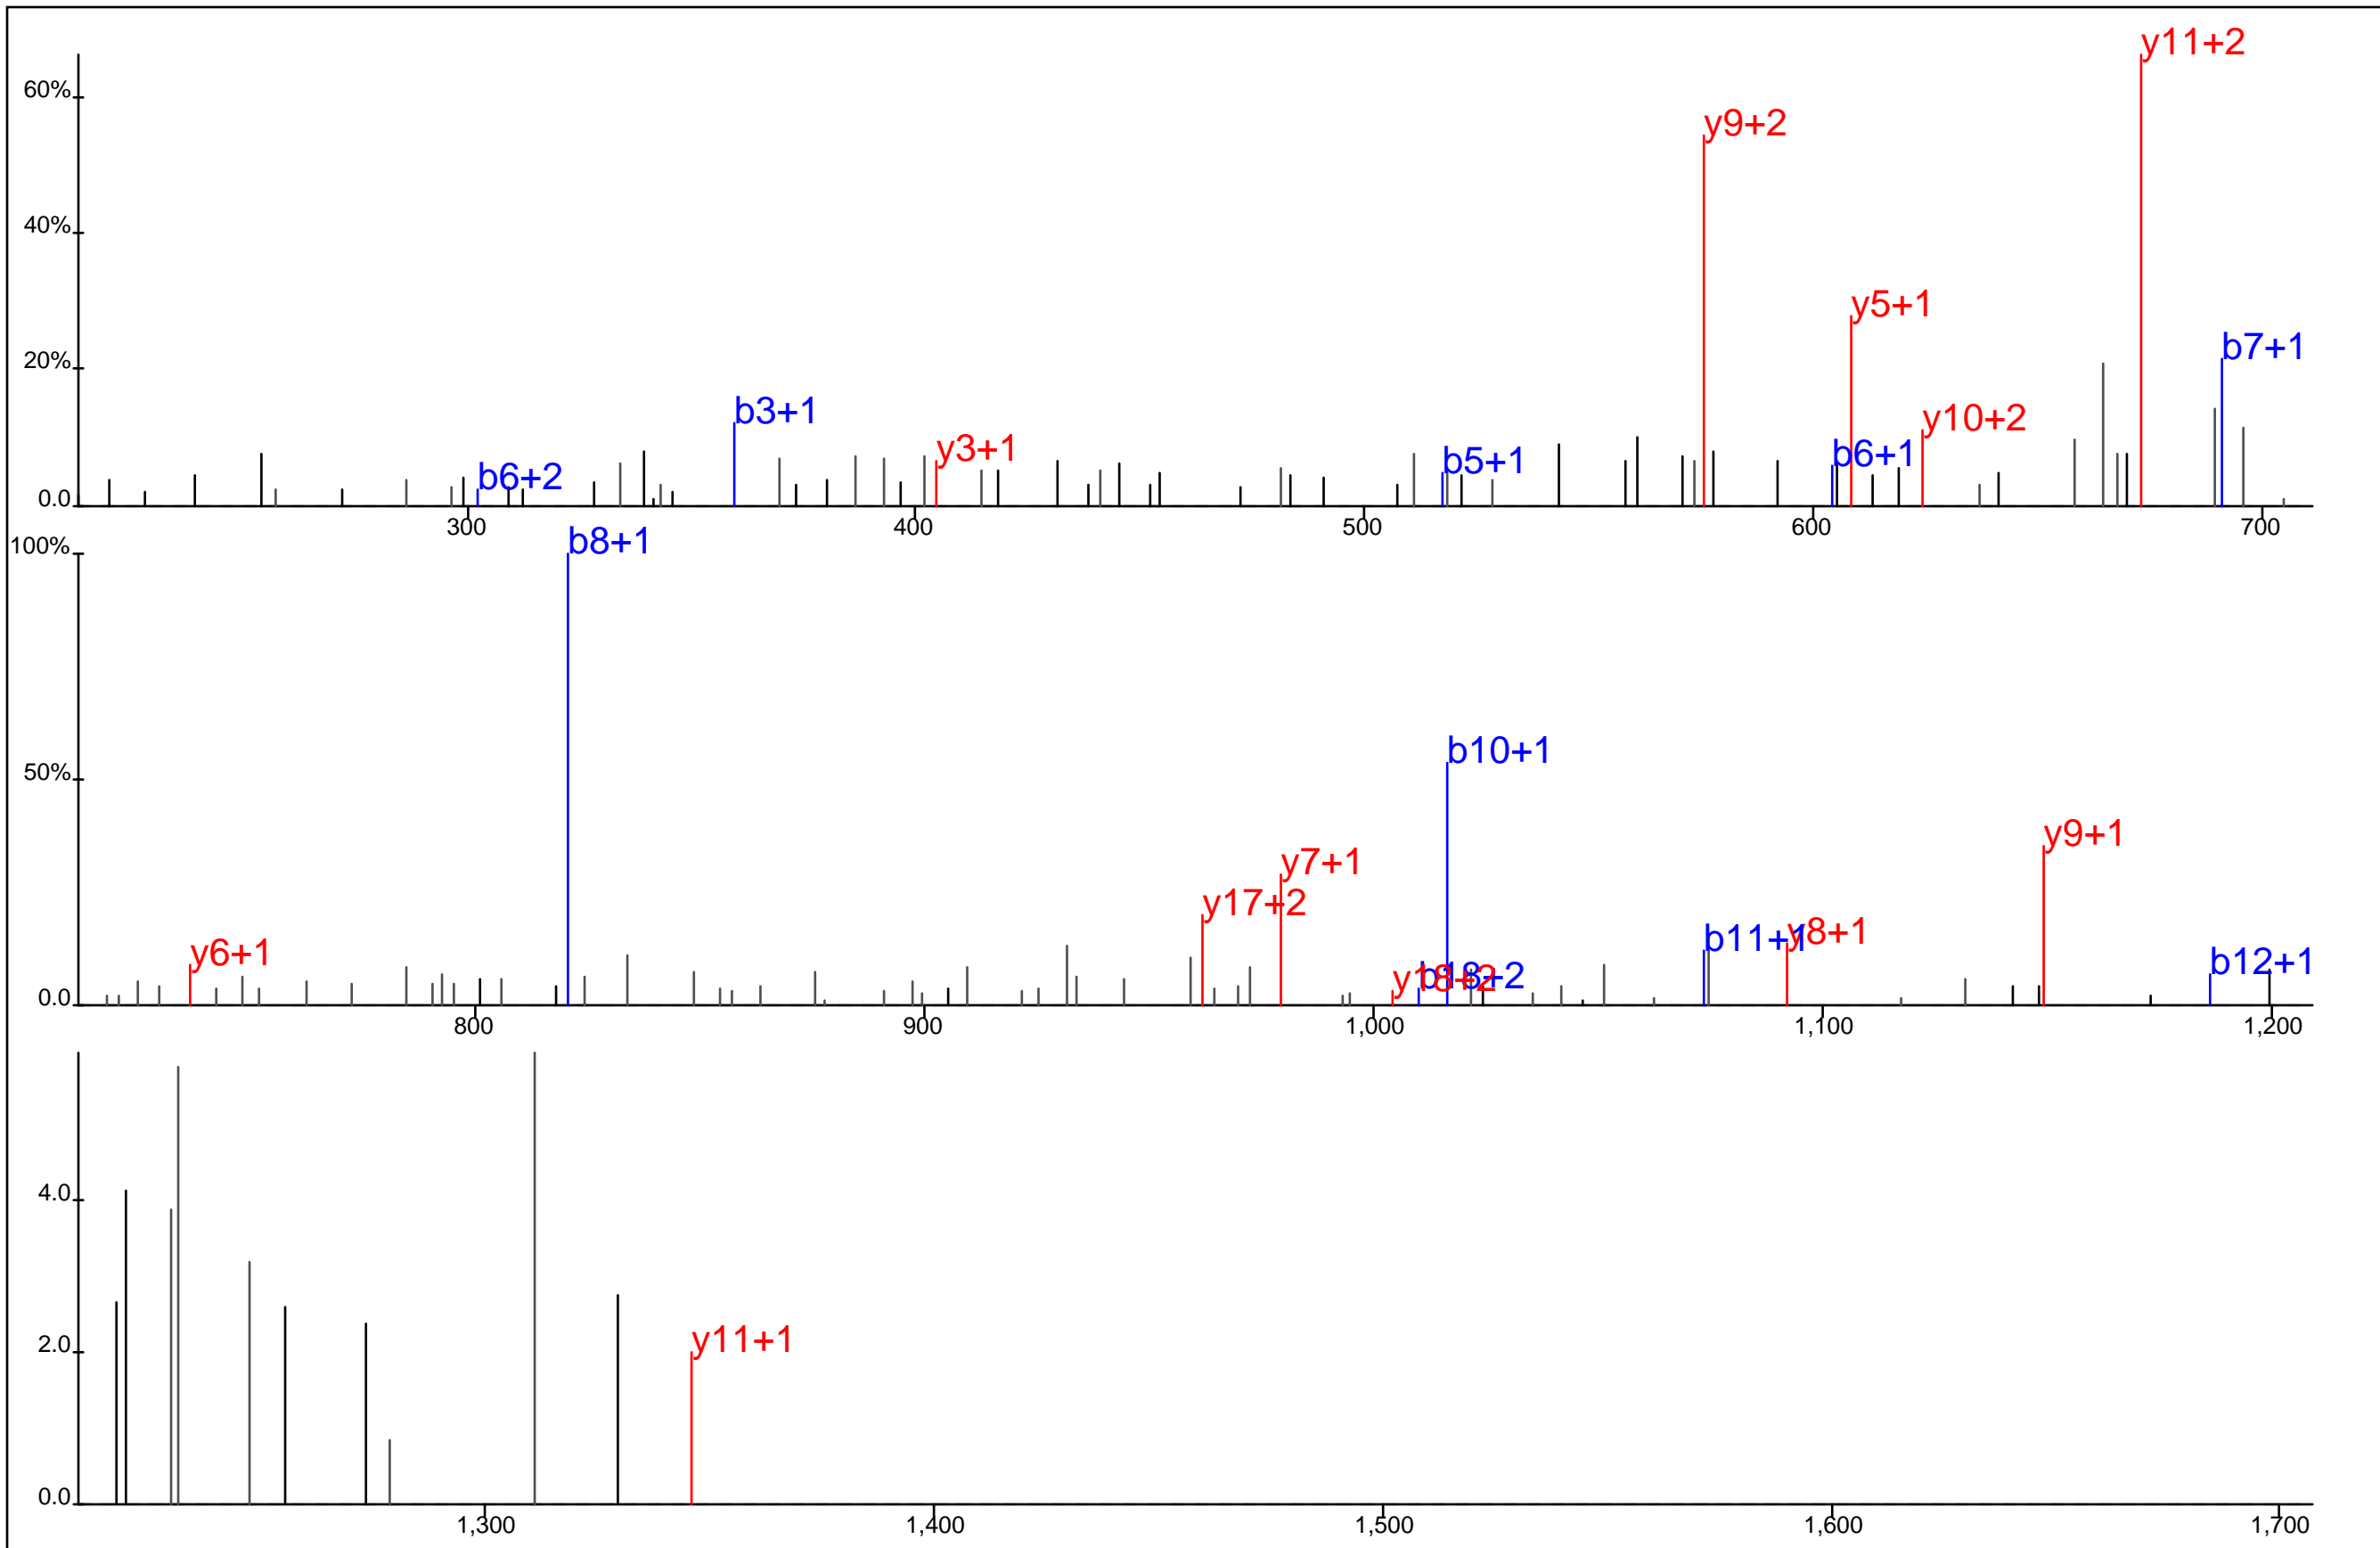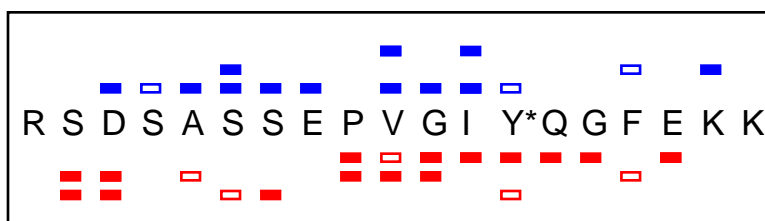

Protein Name: Protein kinase C delta  
 gi Accession: 0  
 Precursor Mass: 722.3336+3  
 Delta Mass: 2.265 ppm  
 XCorr: 26.23

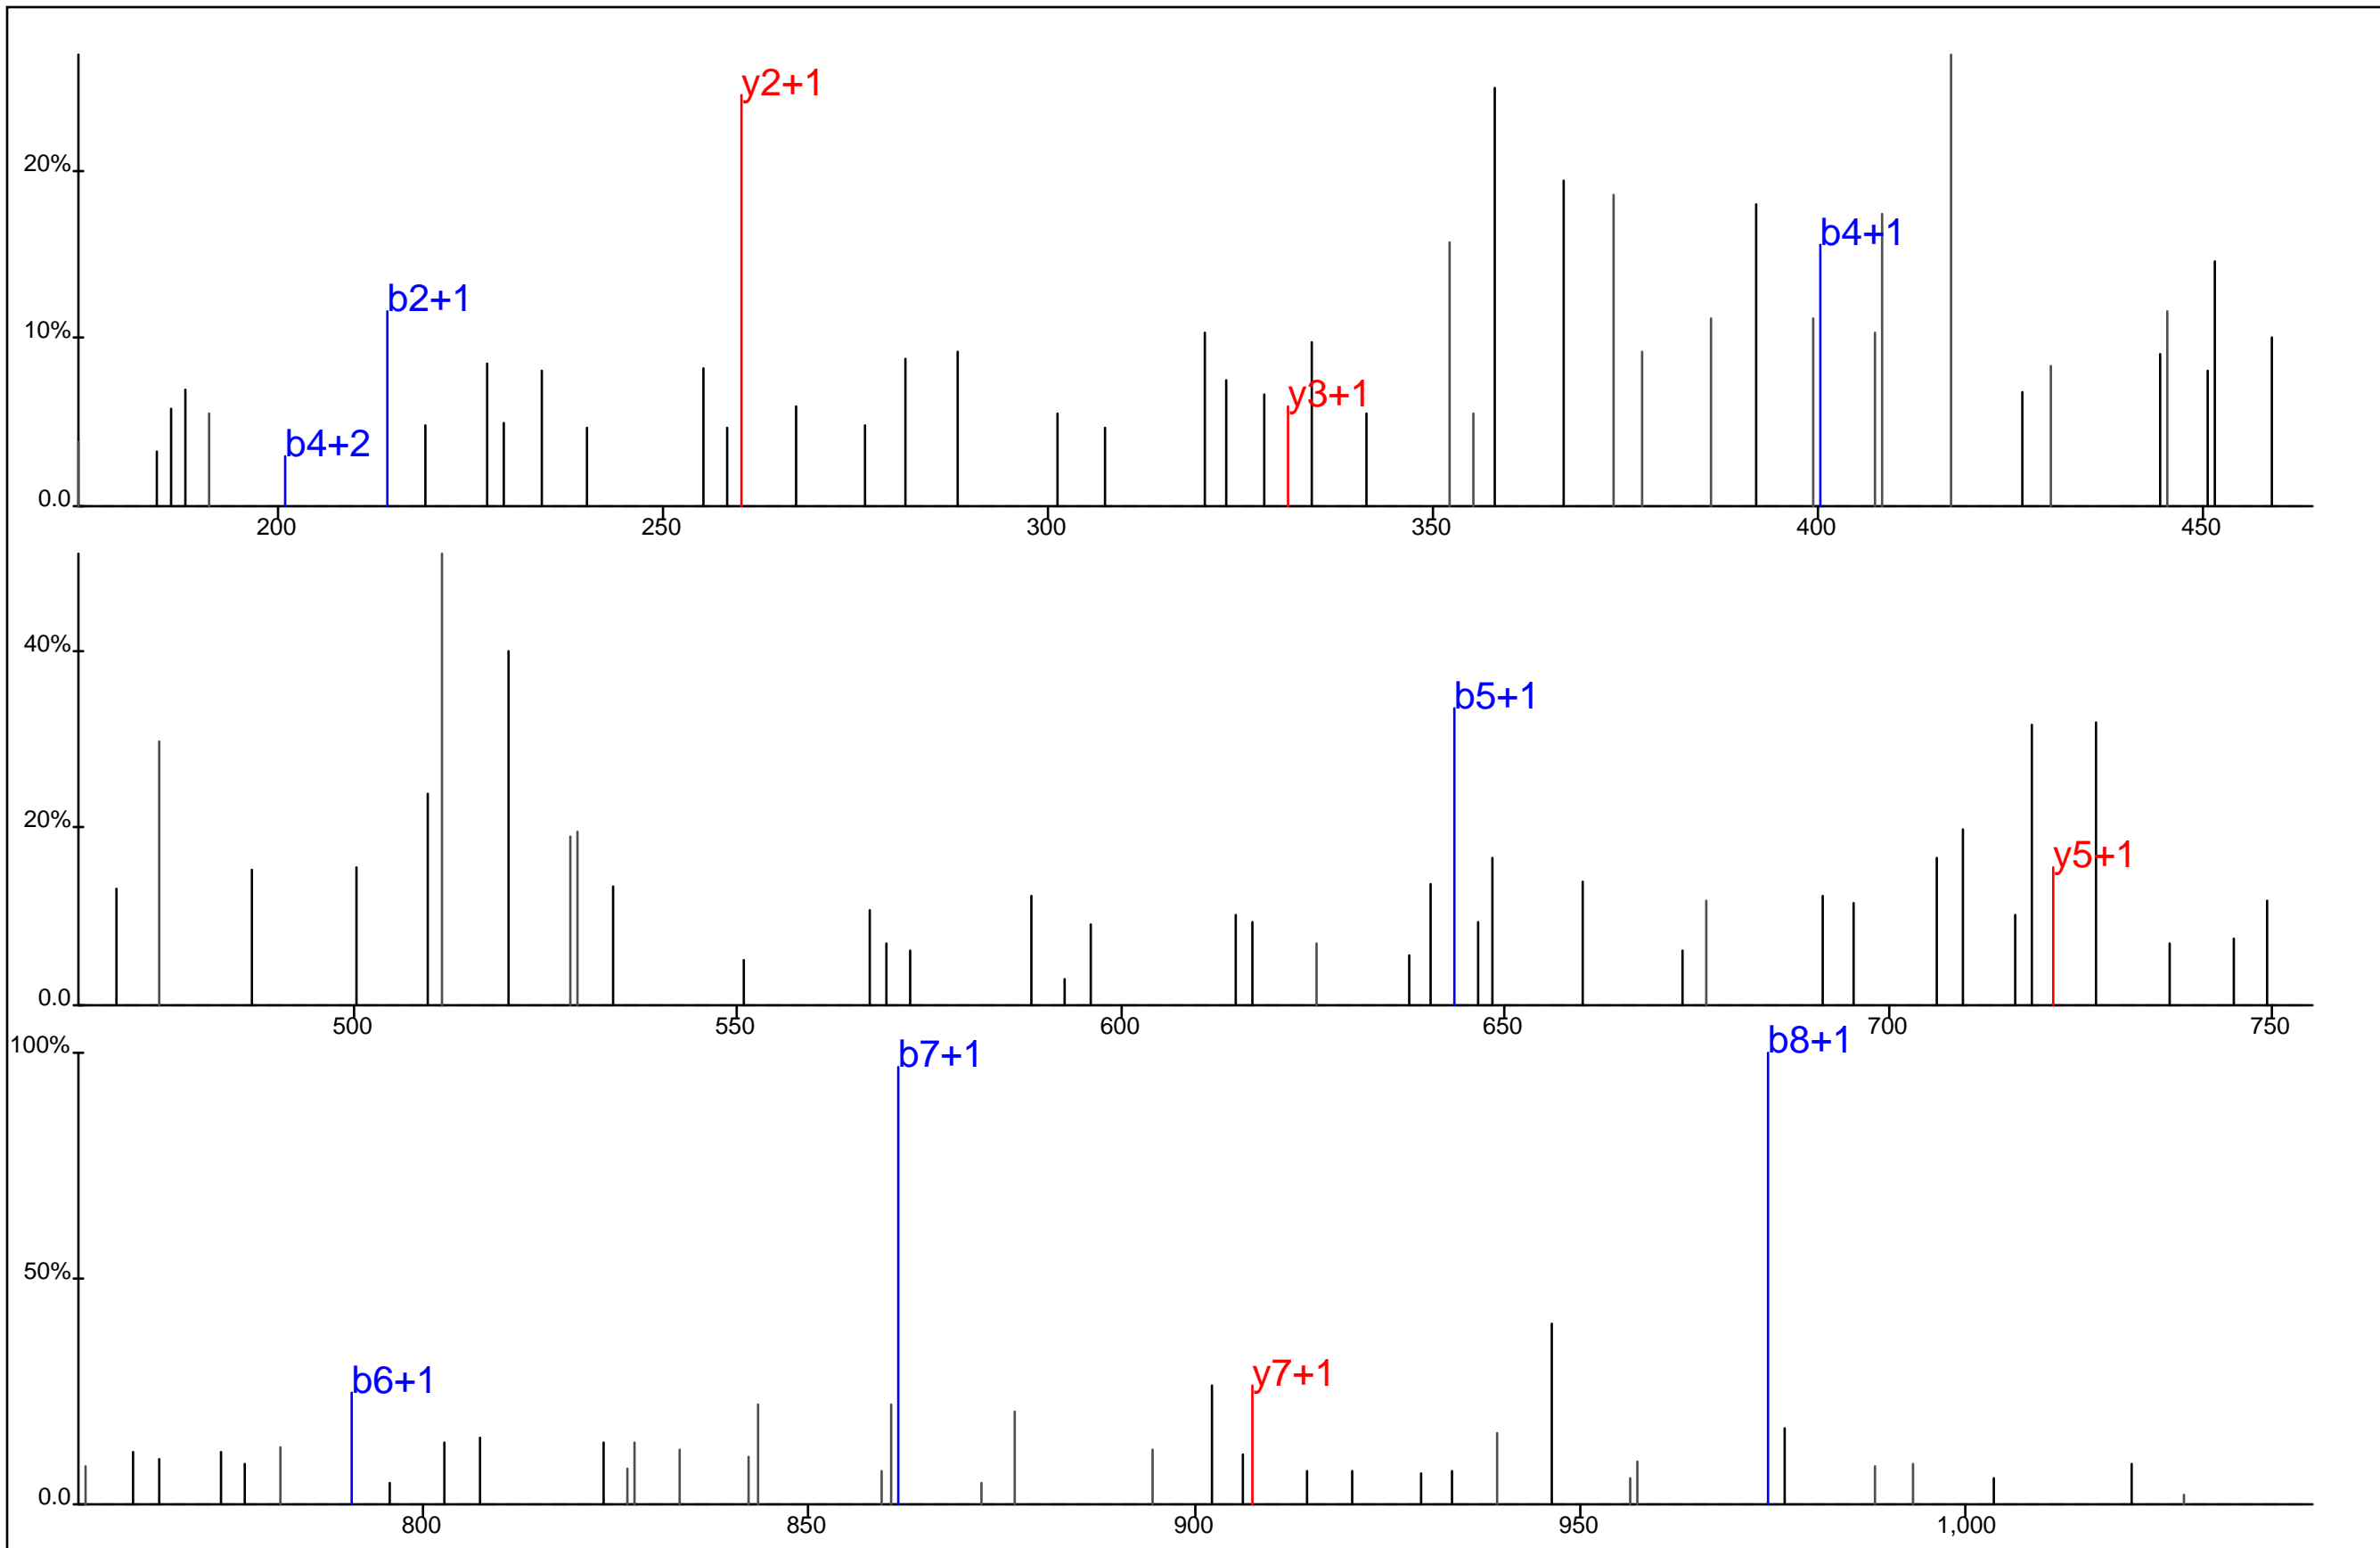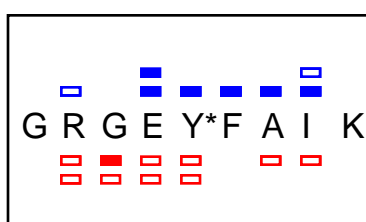

Protein Name: Protein kinase C delta  
 gi Accession: 0  
 Precursor Mass: 560.7624+2  
 Delta Mass: 1.033 ppm  
 XCorr: 21.55

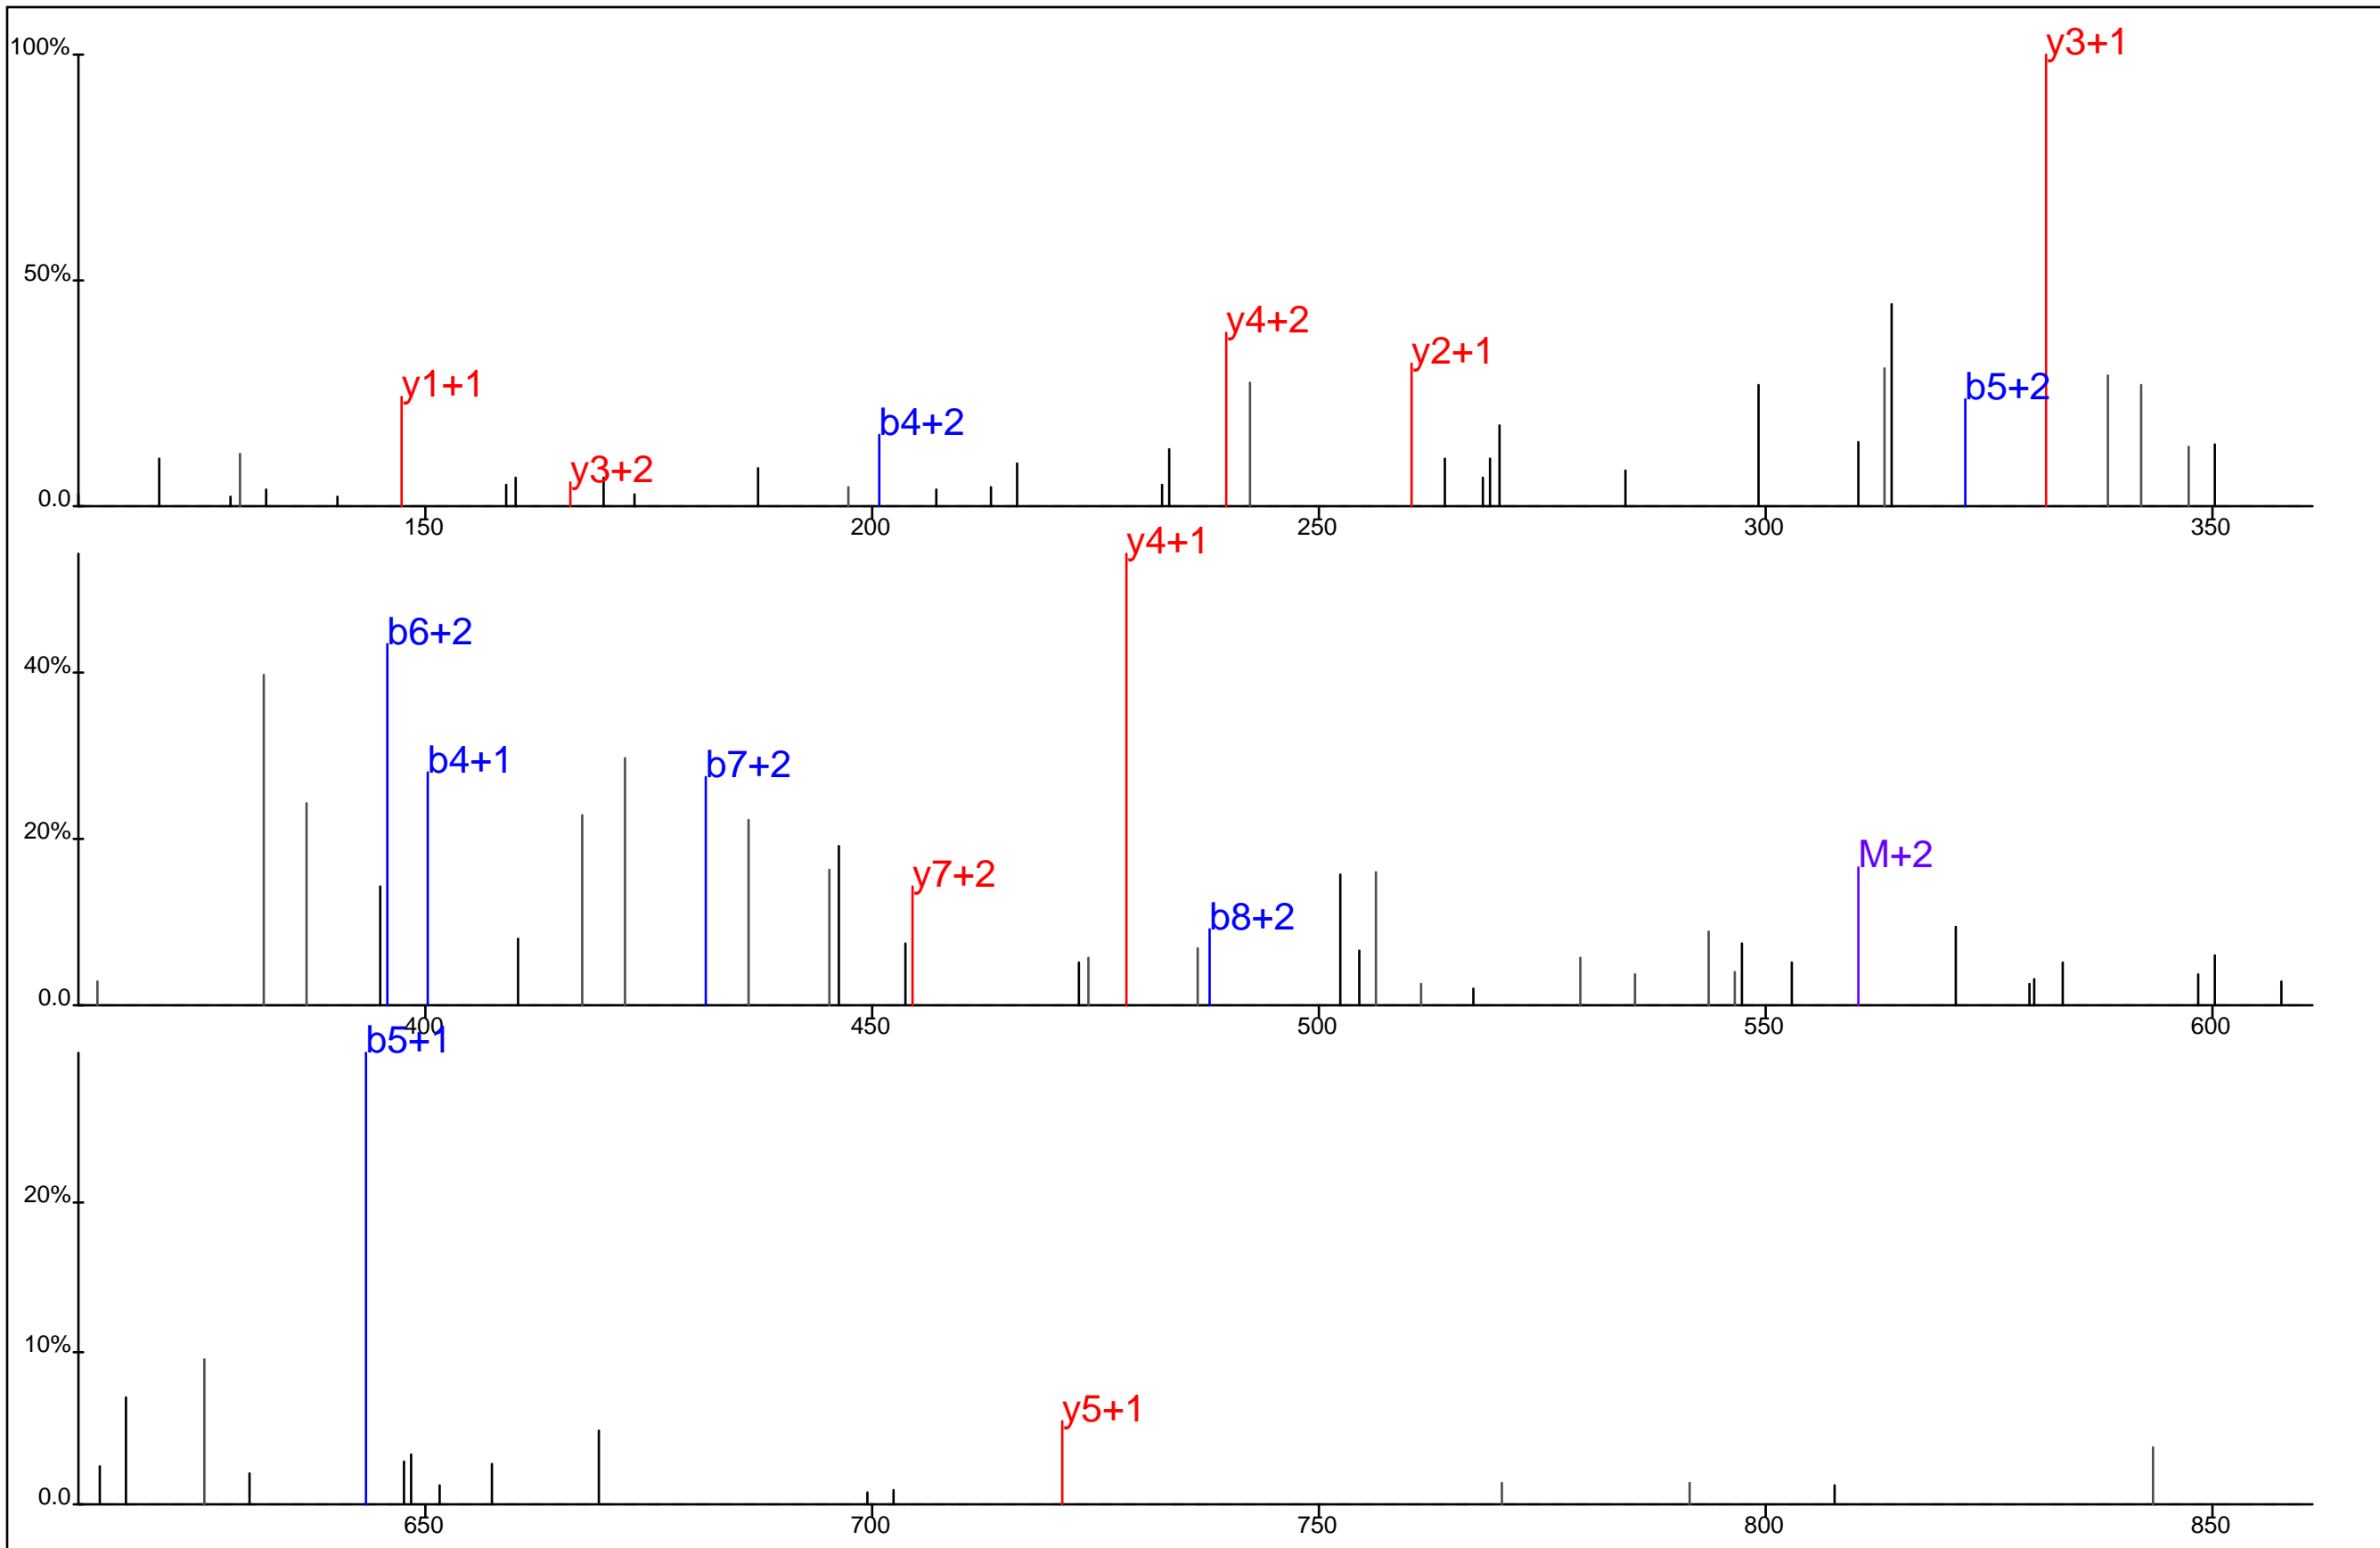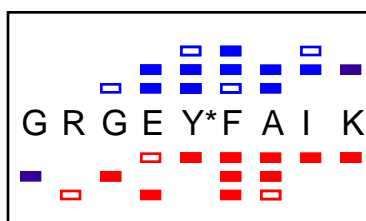

Protein Name: Protein kinase C delta  
 gi Accession: 0  
 Precursor Mass: 374.1782+3  
 Delta Mass: 1.135 ppm  
 XCorr: 32.69

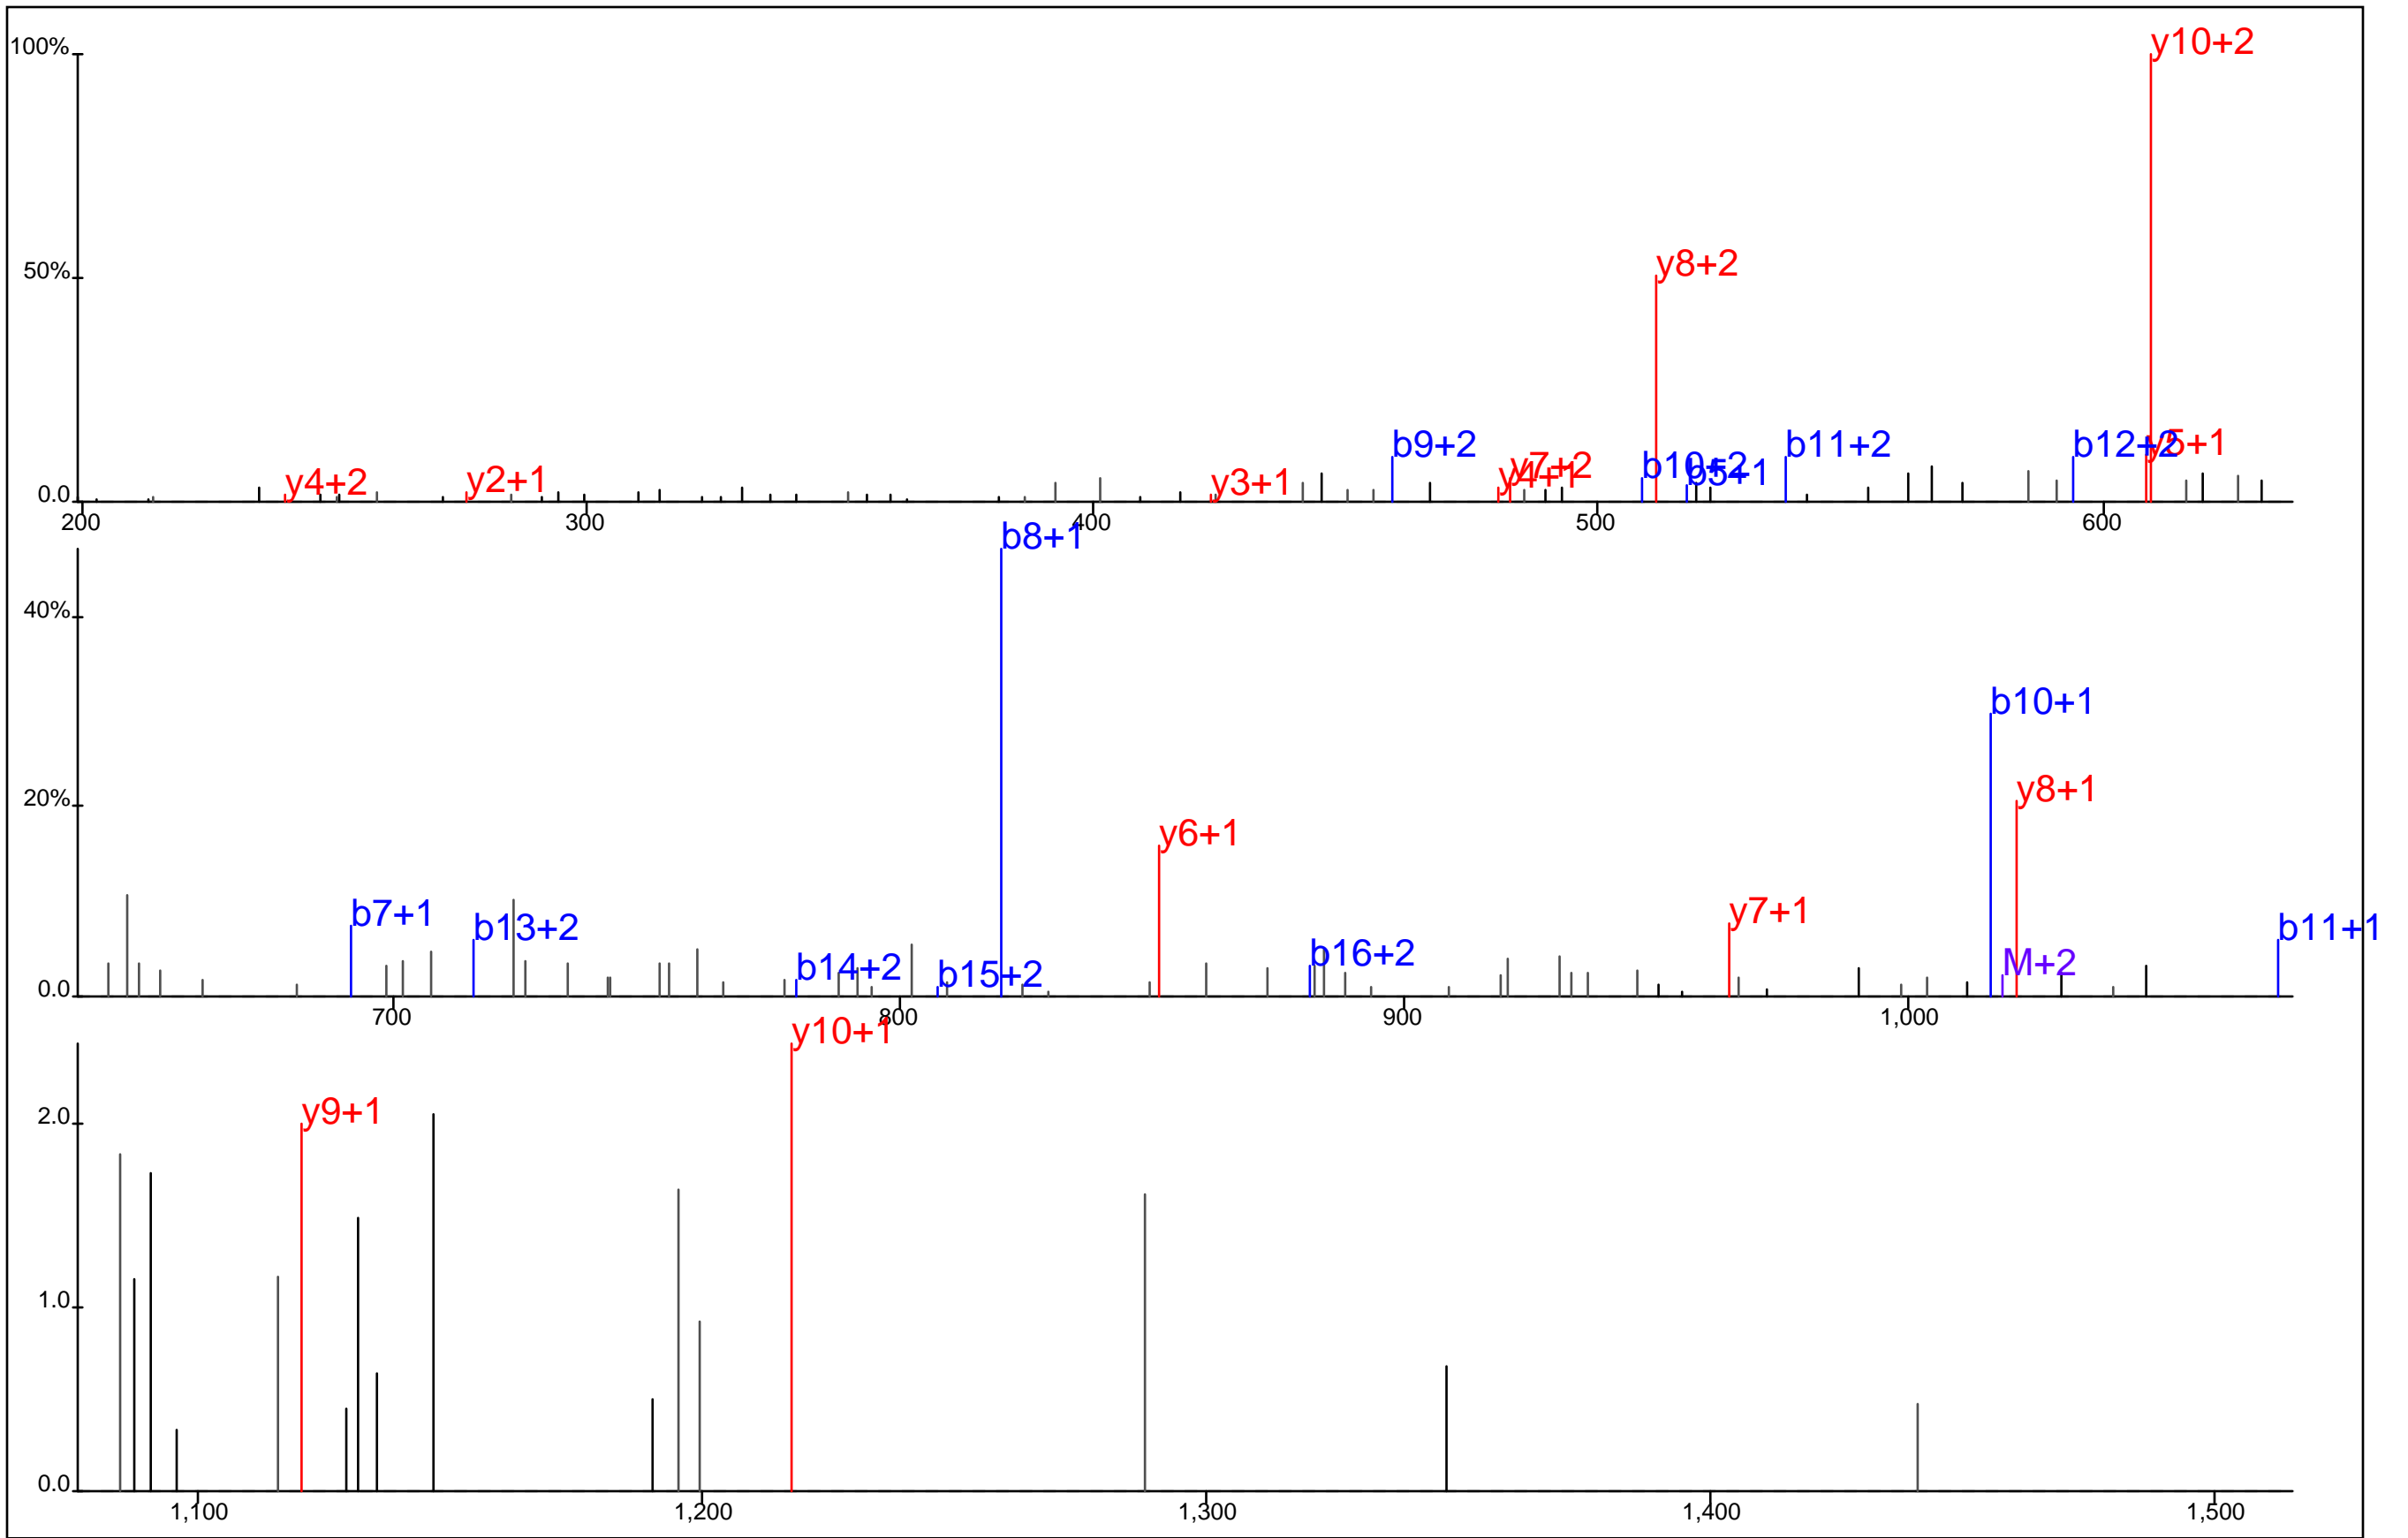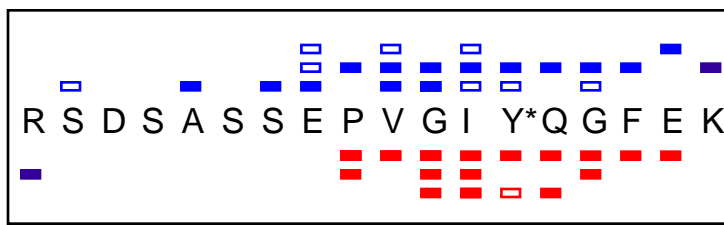

Protein Name: Protein kinase C delta  
 gi Accession: 0  
 Precursor Mass: 679.6367+3  
 Delta Mass: 0.319 ppm  
 XCorr: 33.08

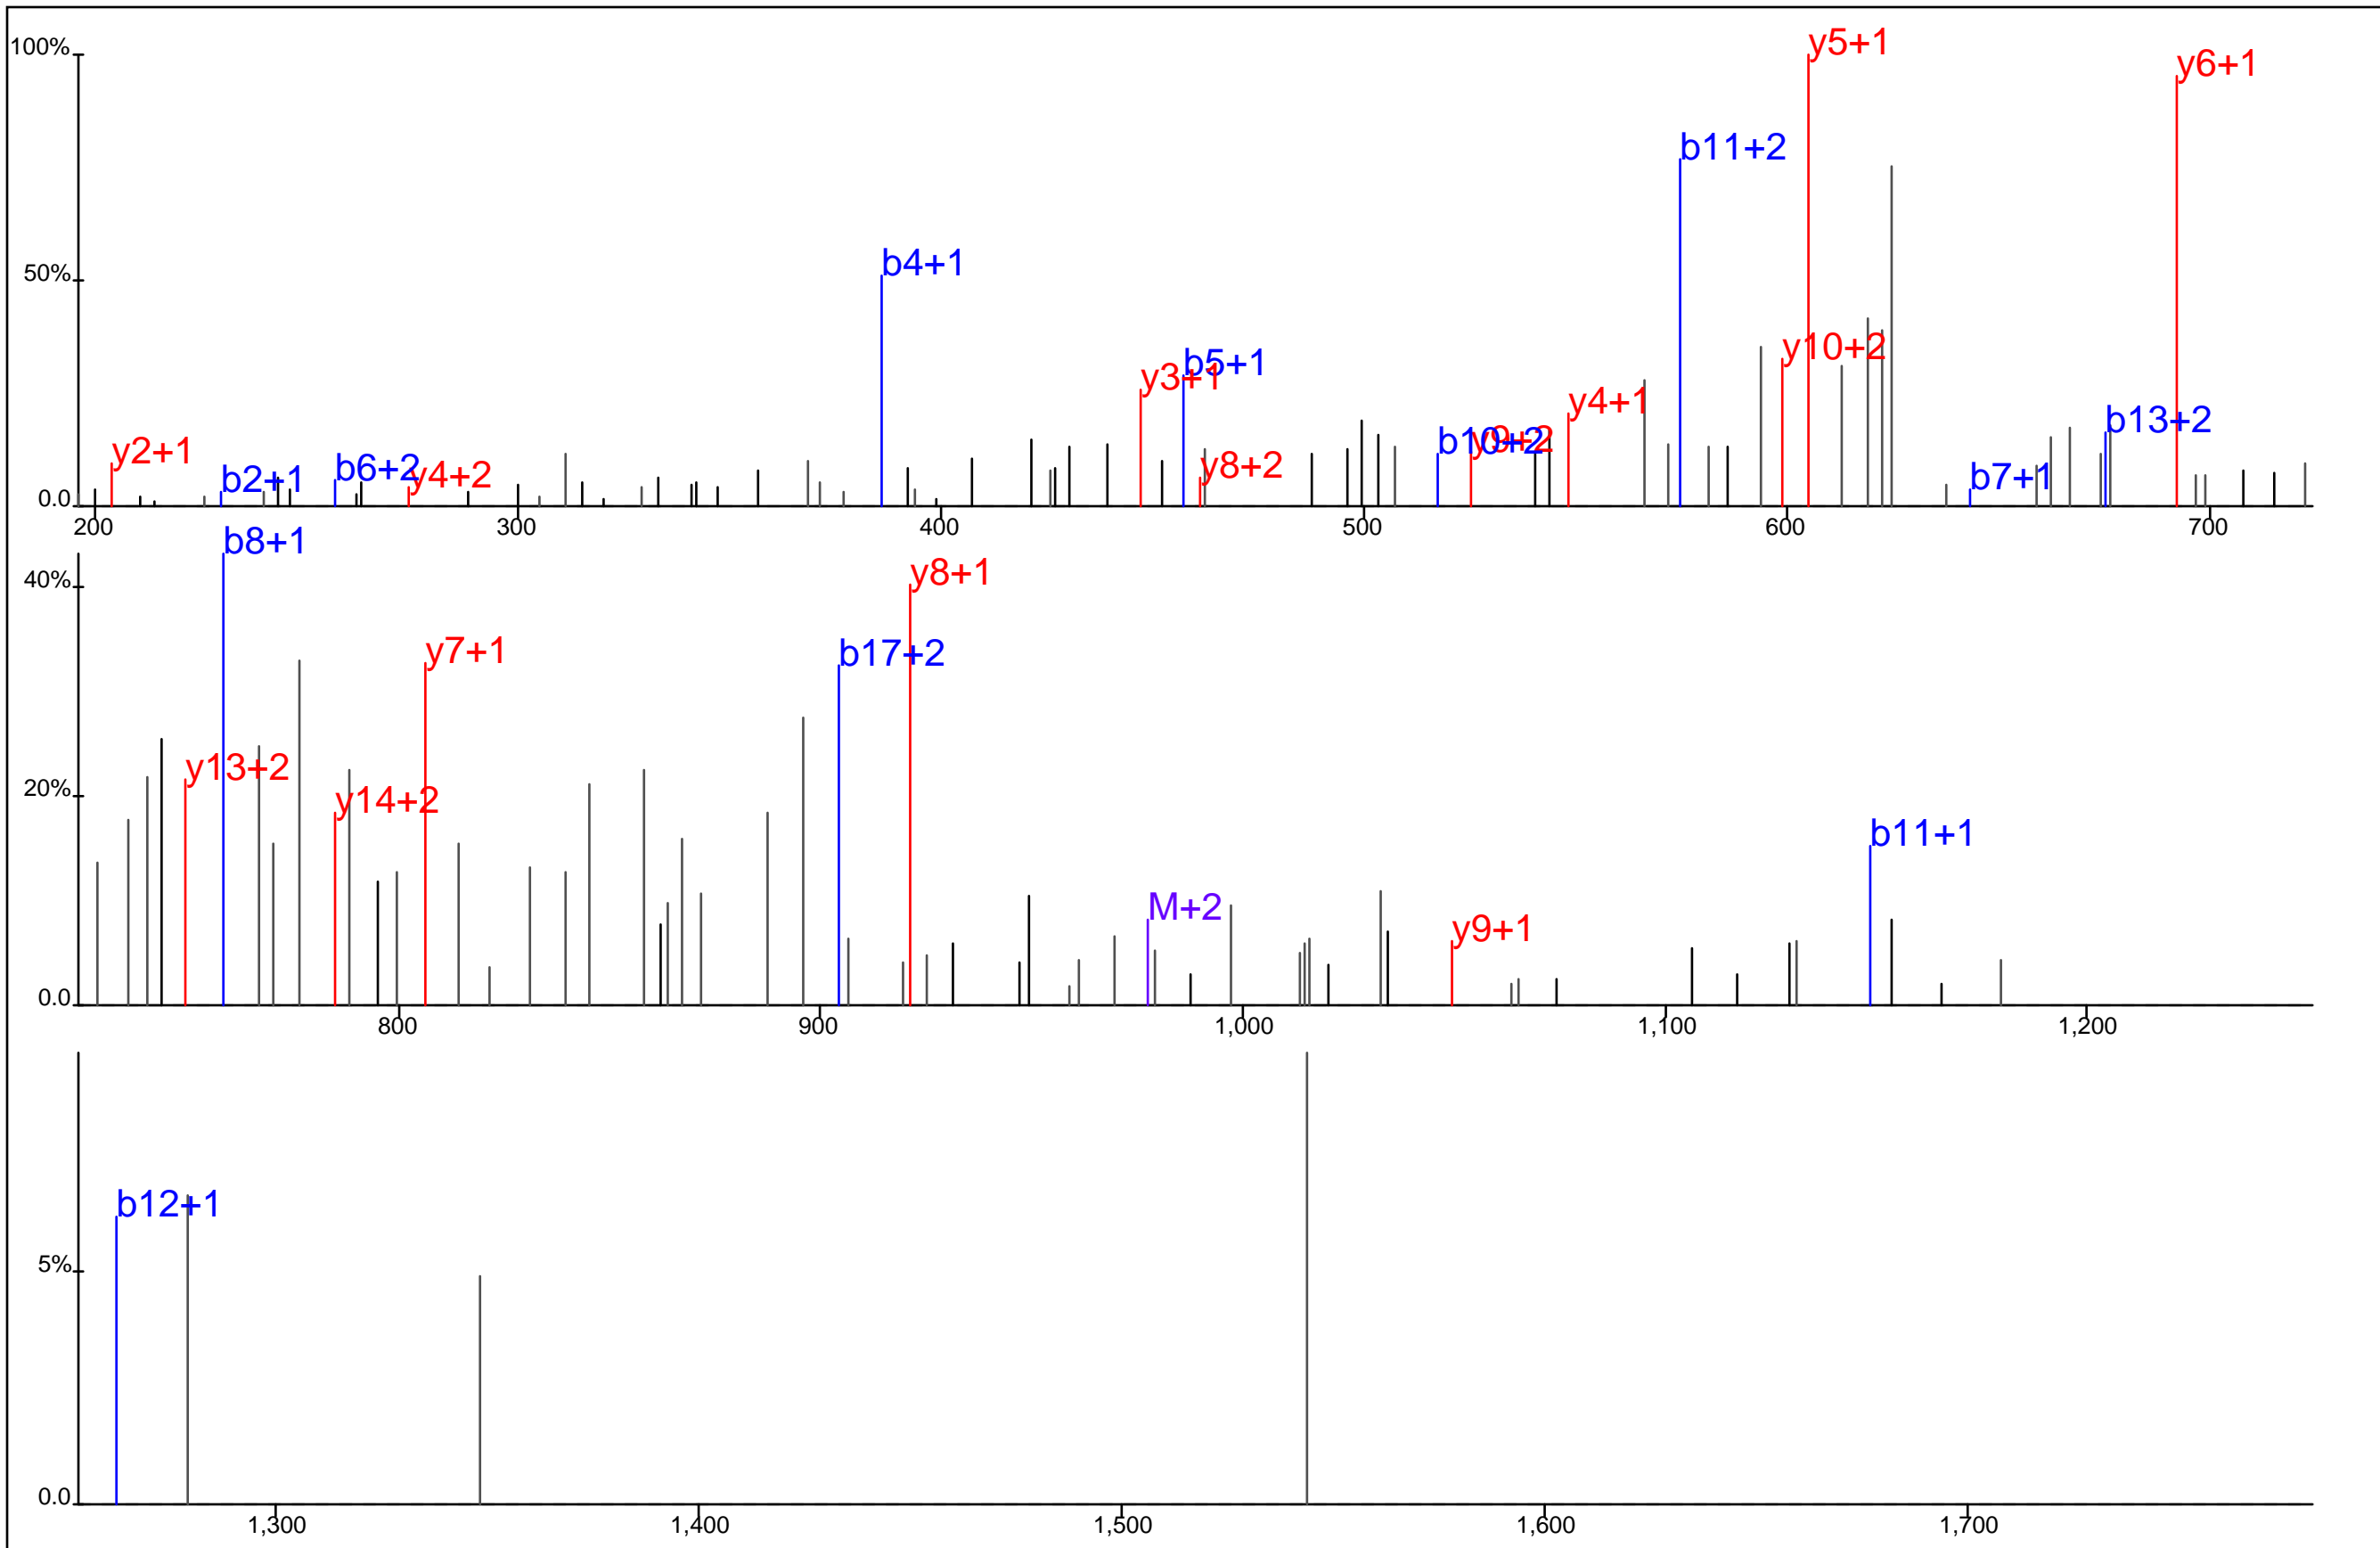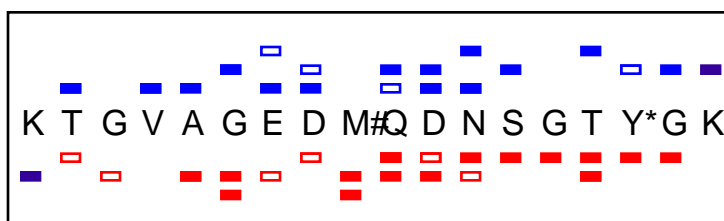

Protein Name: Protein kinase C delta  
 gi Accession: 0  
 Precursor Mass: 651.9316+3  
 Delta Mass: 4.714 ppm  
 XCorr: 39.56



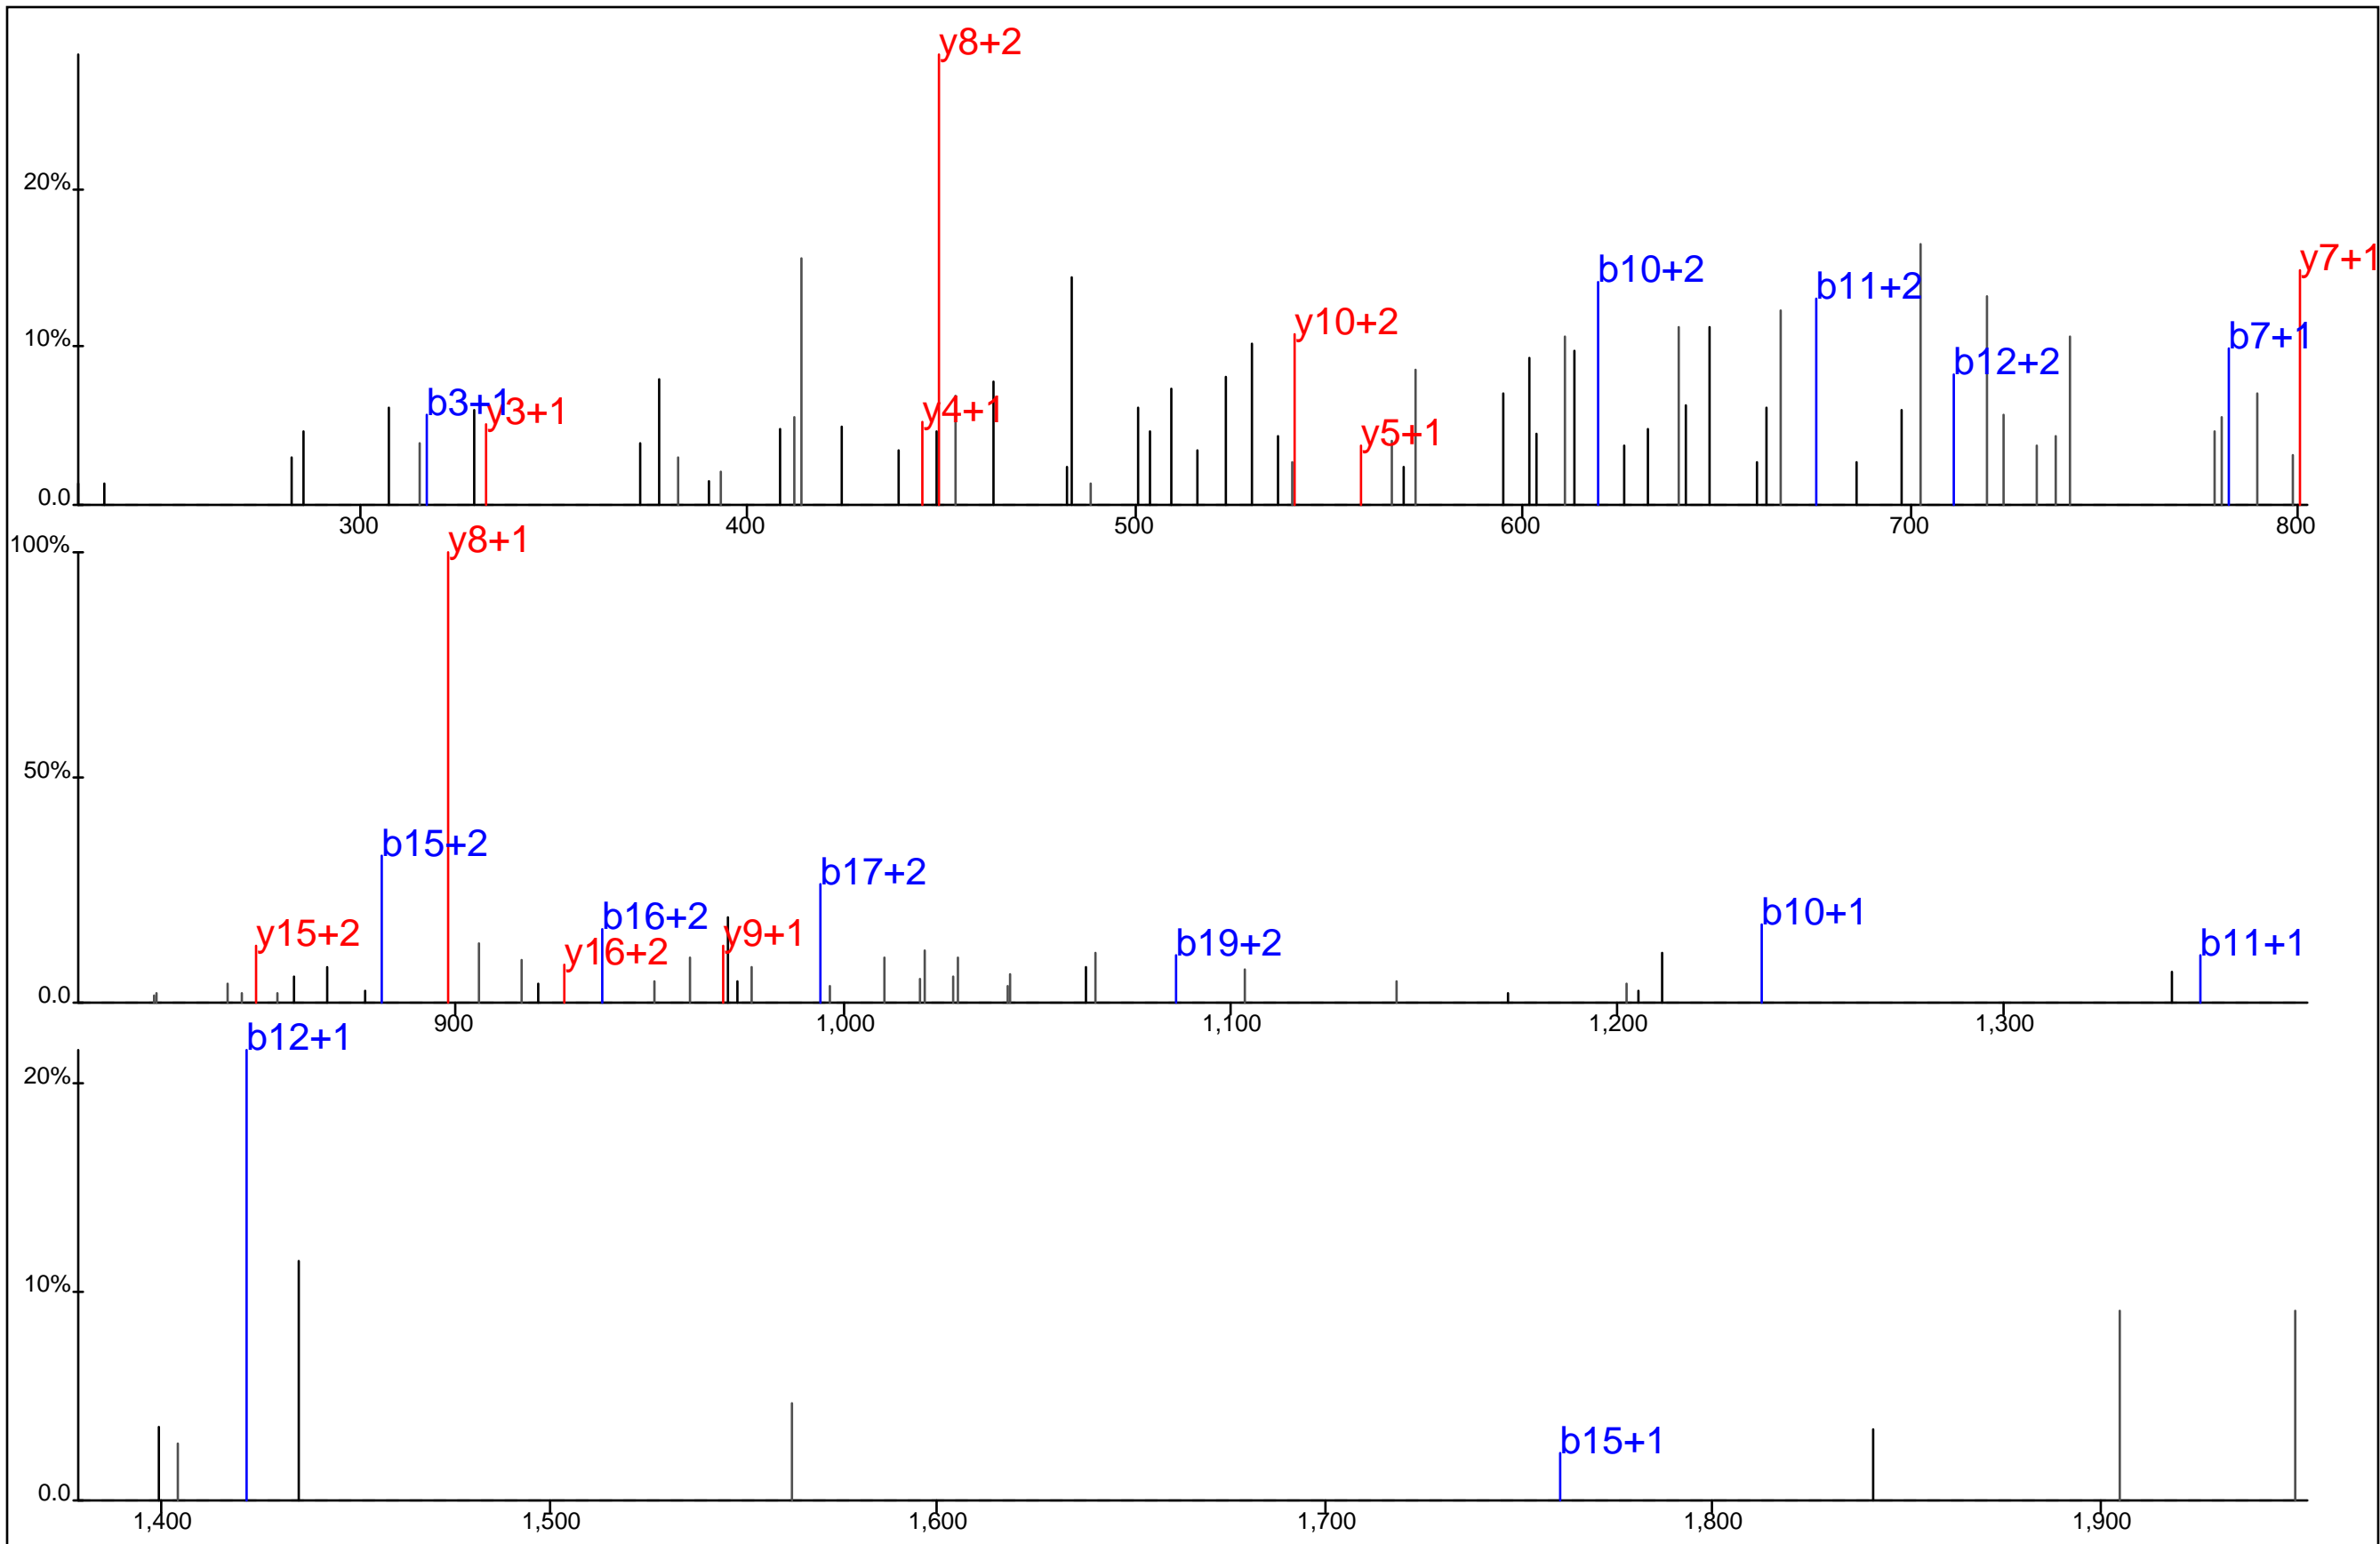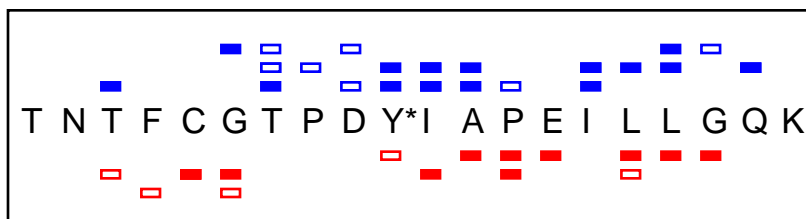

Protein Name: Protein kinase C, theta  
 gi Accession: 0  
 Precursor Mass: 773.3627+3  
 Delta Mass: 1.630 ppm  
 XCorr: 25.23

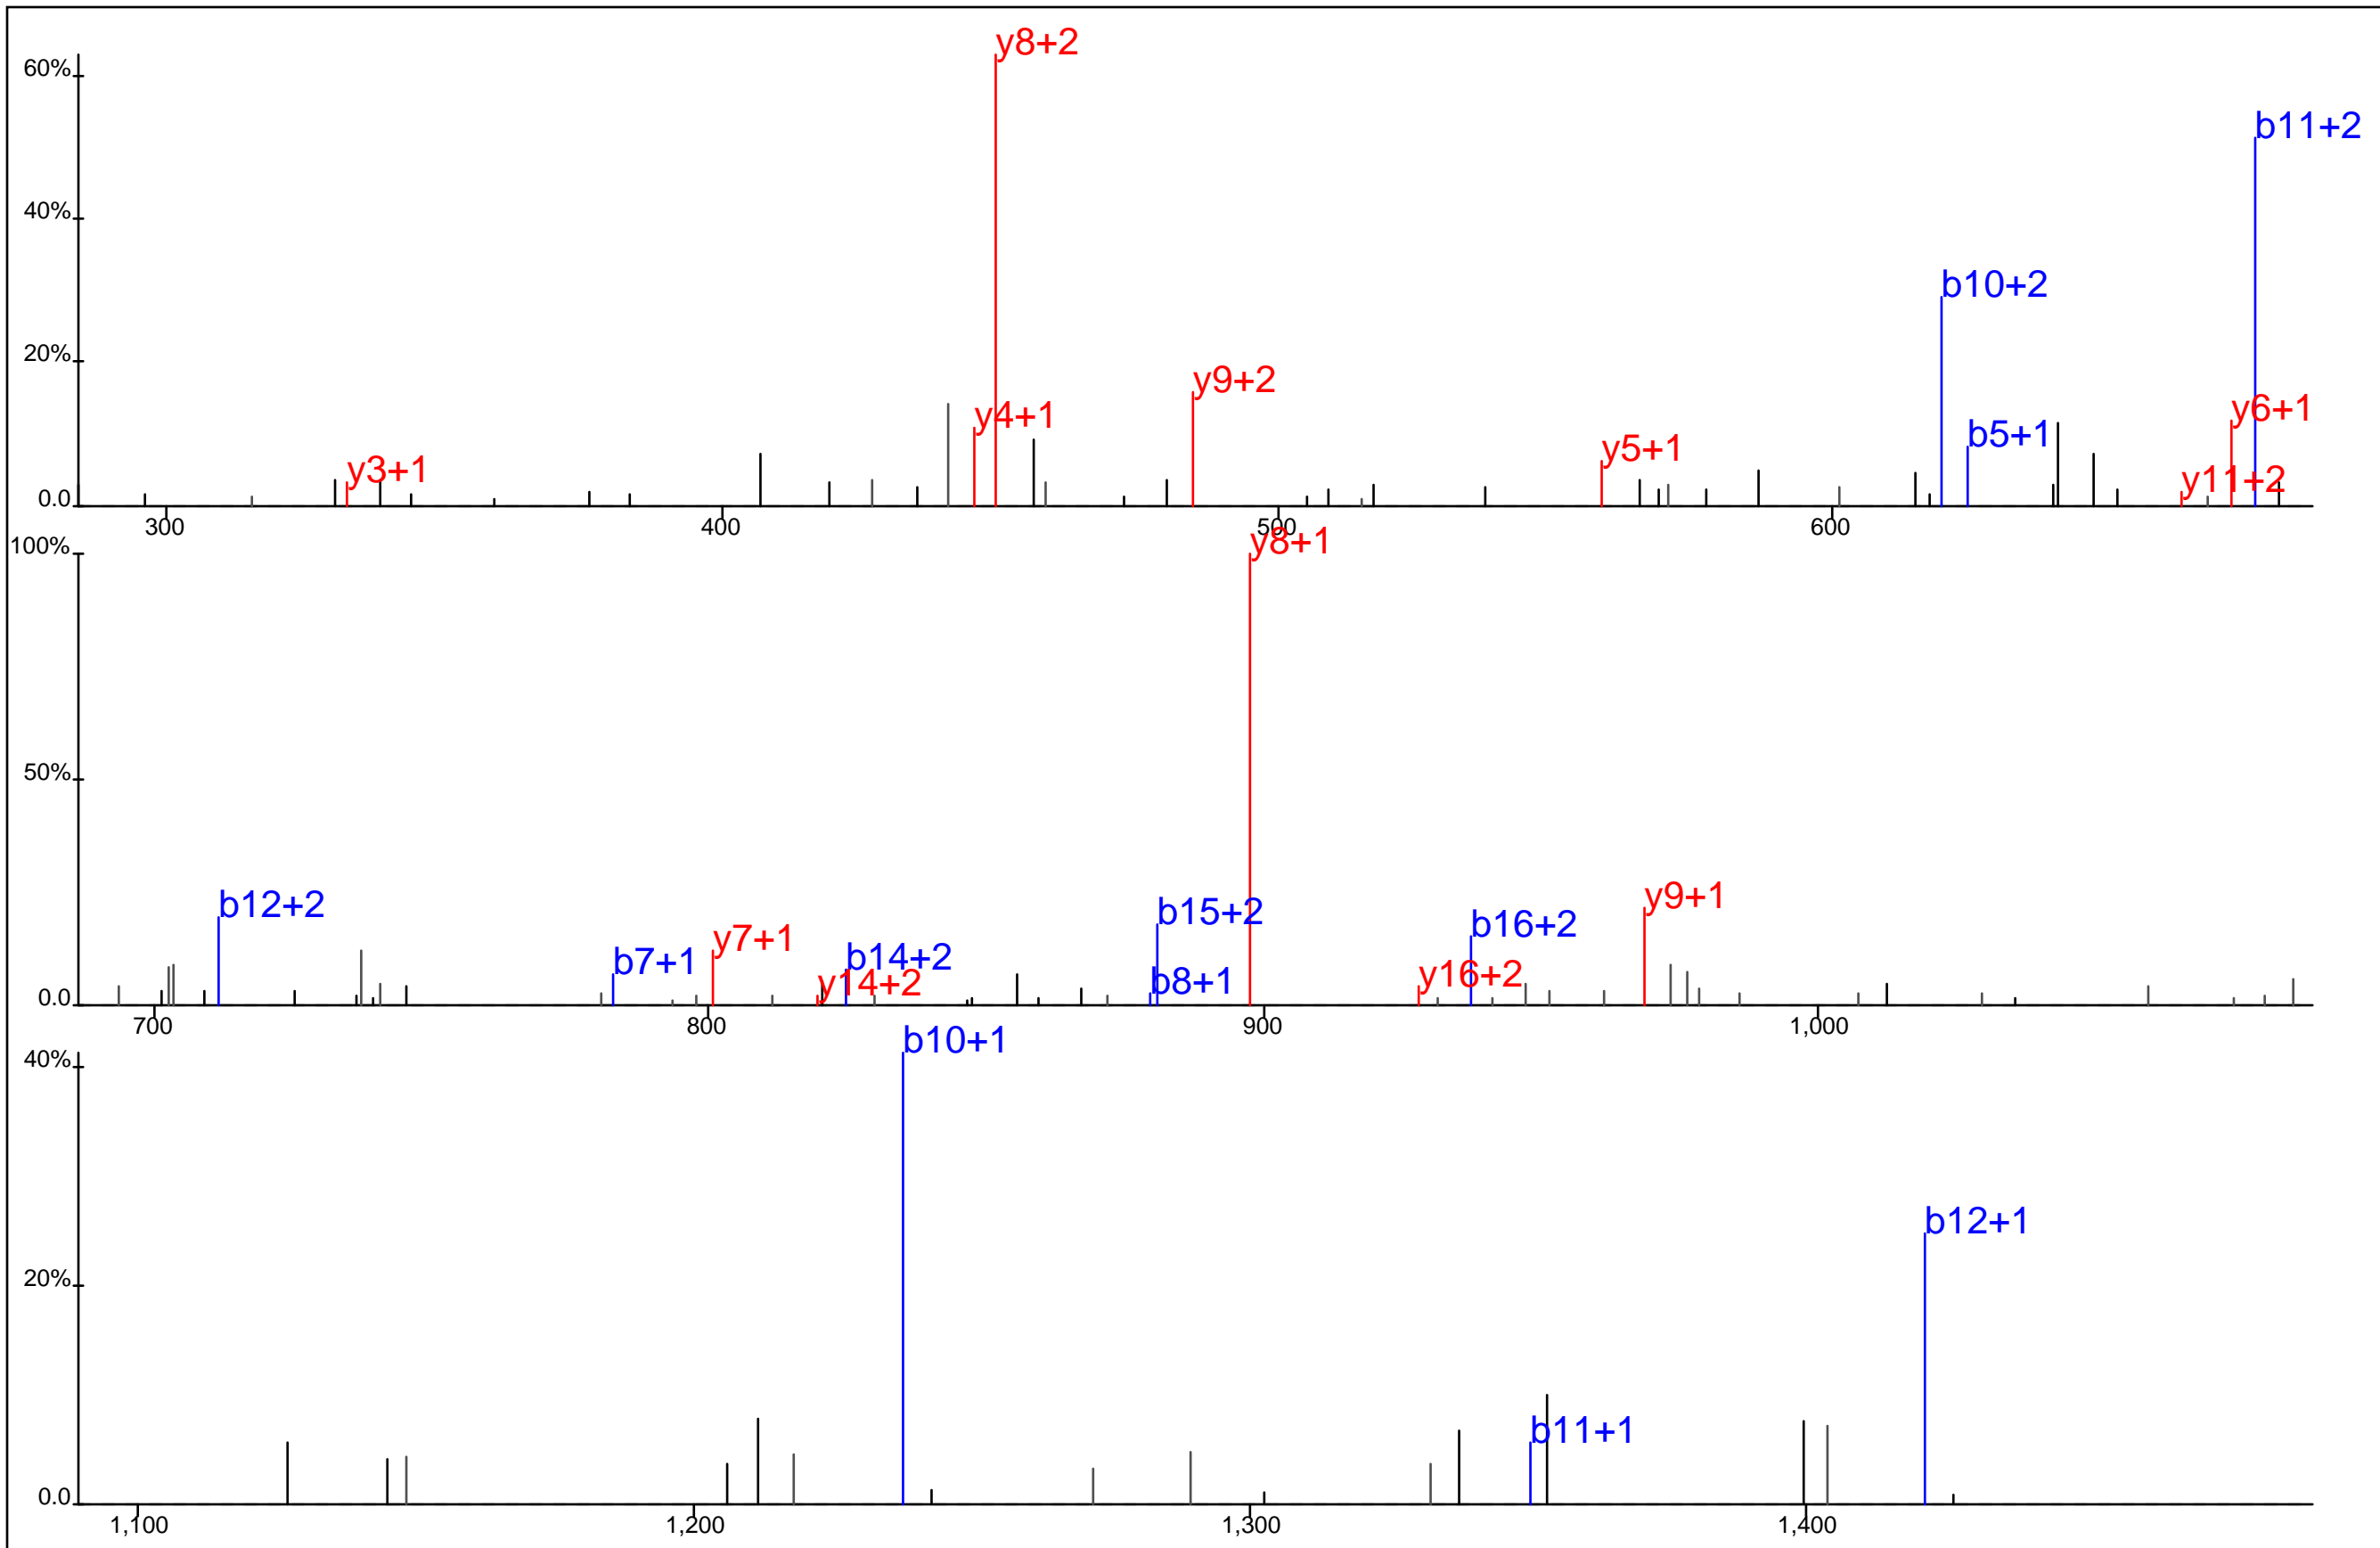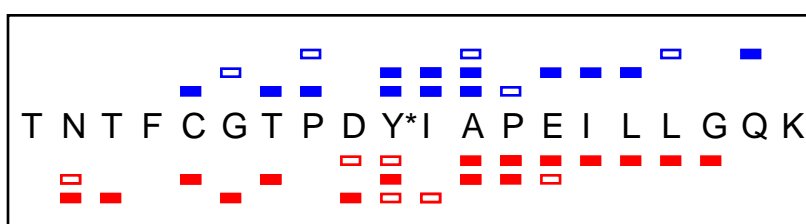

Protein Name: Protein kinase C, theta  
 gi Accession: 0  
 Precursor Mass: 773.3618+3  
 Delta Mass: 2.894 ppm  
 XCorr: 35.49



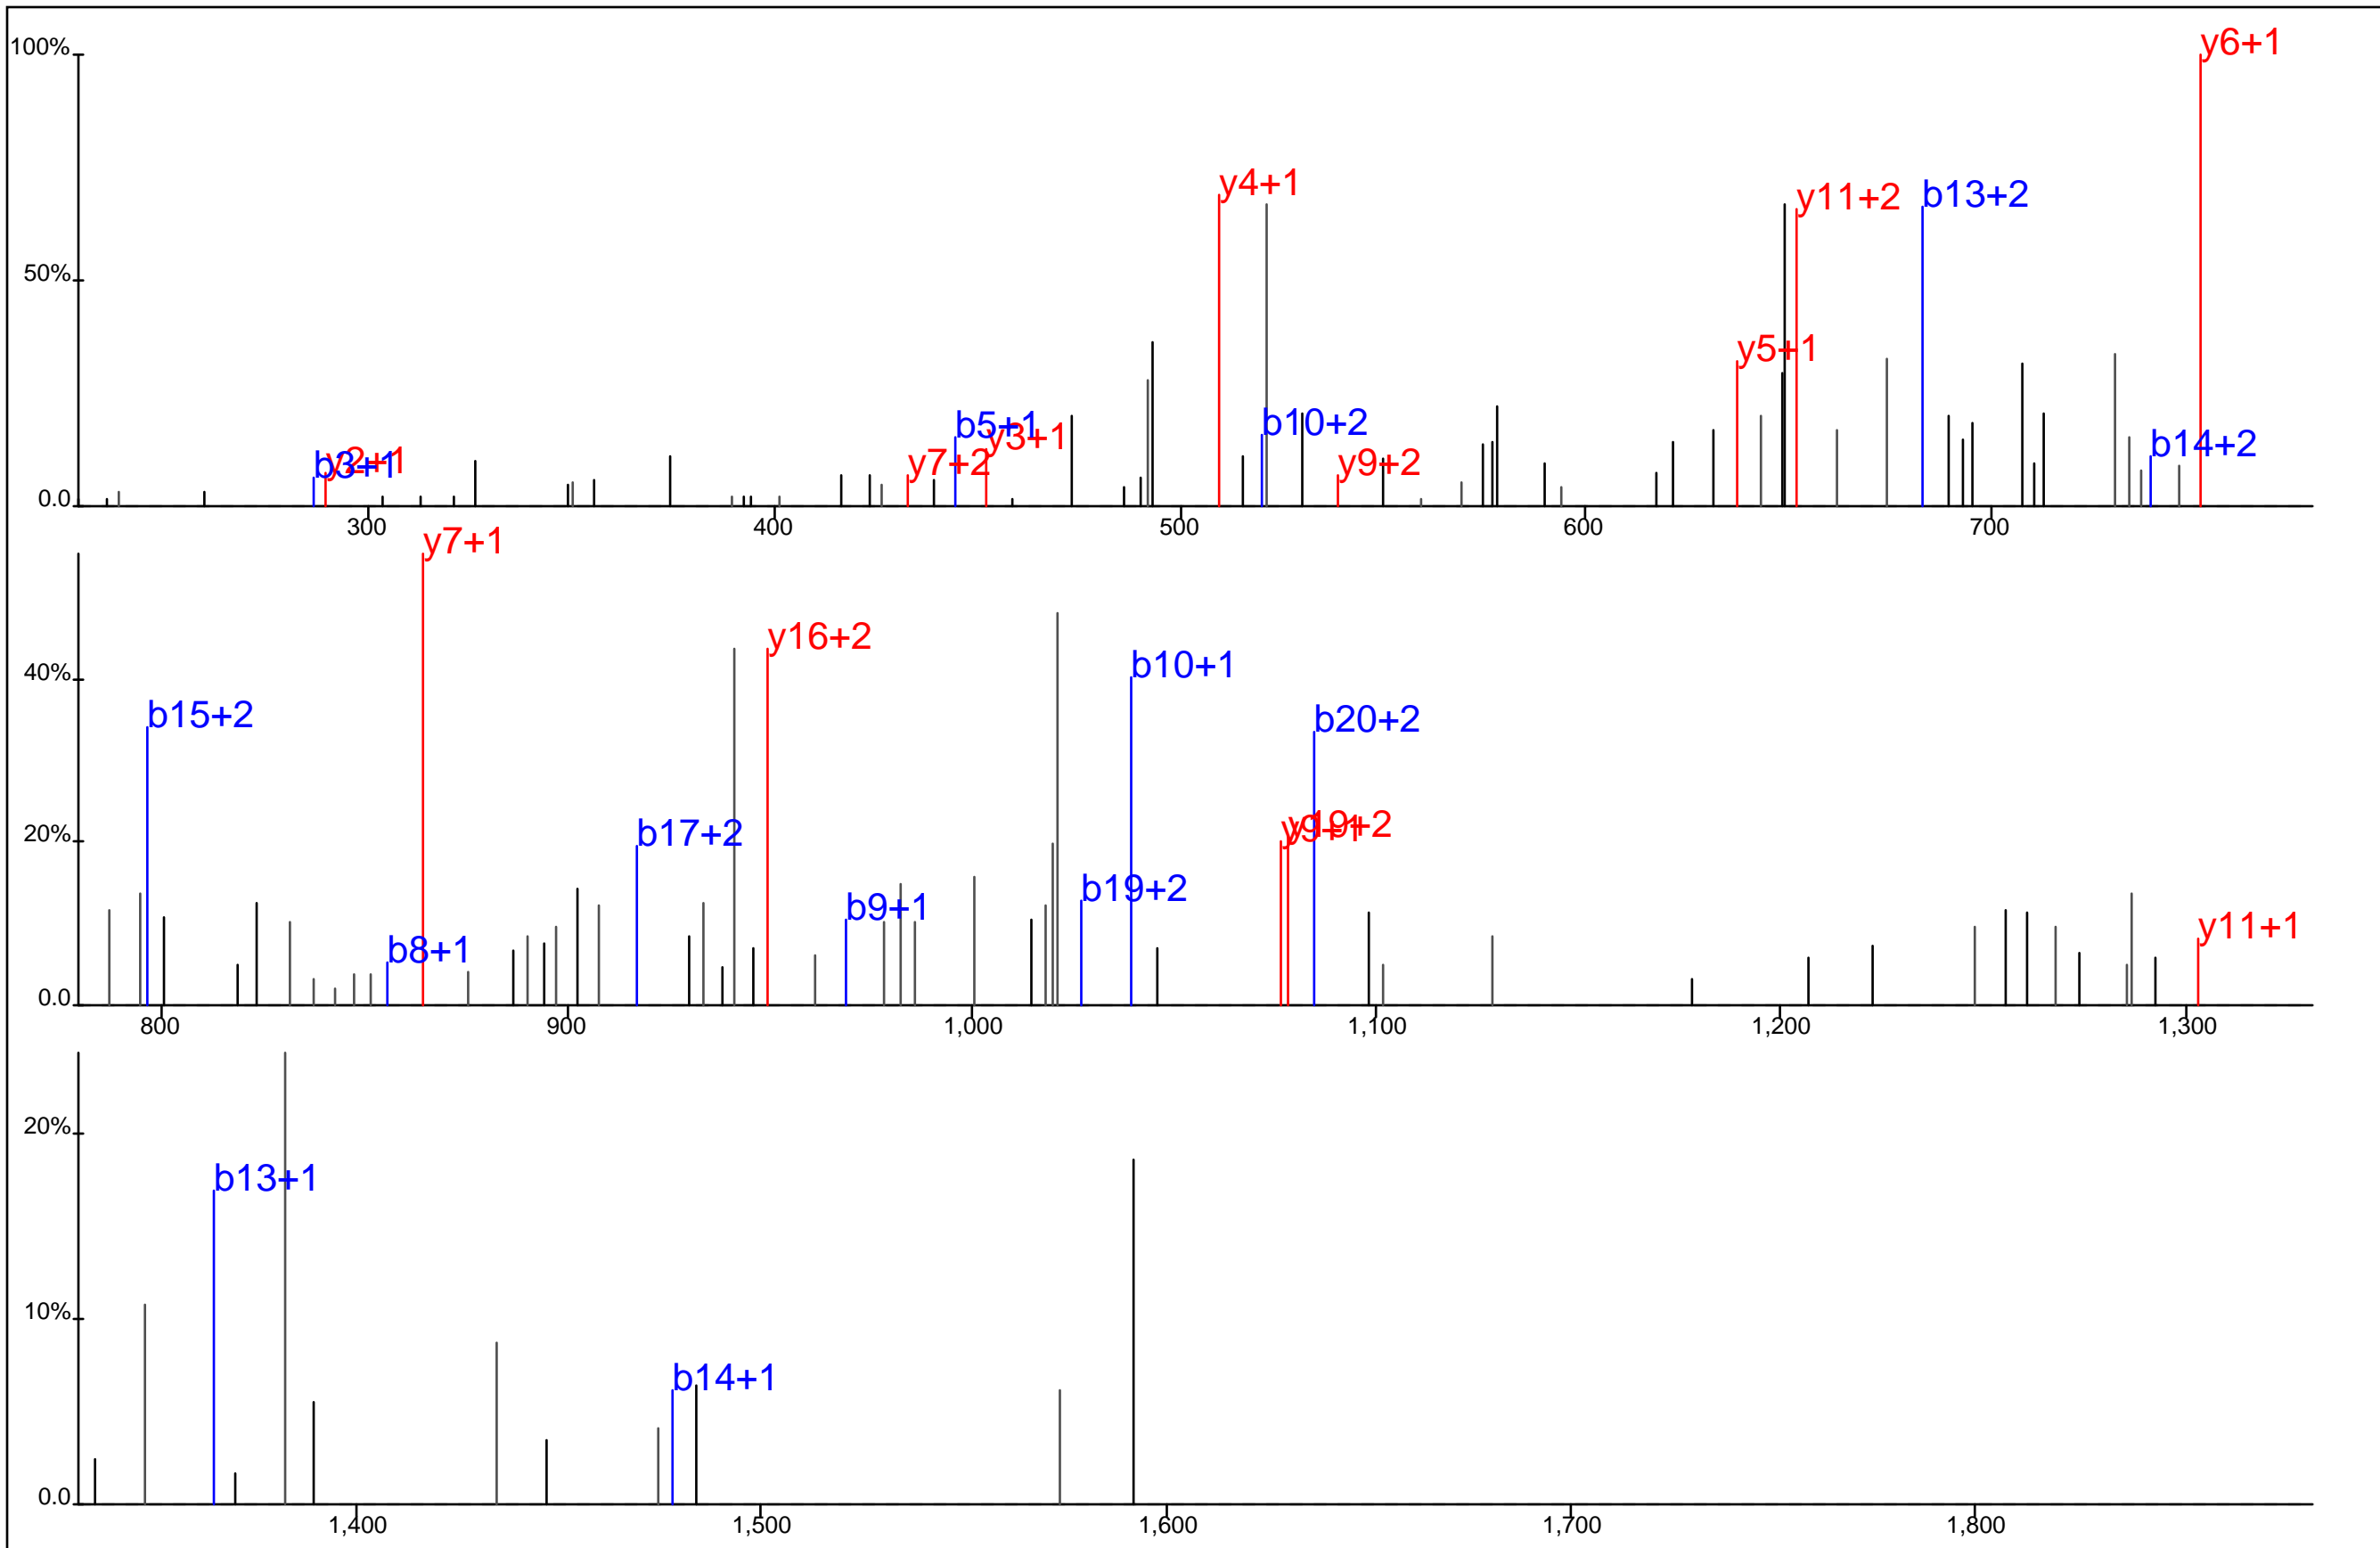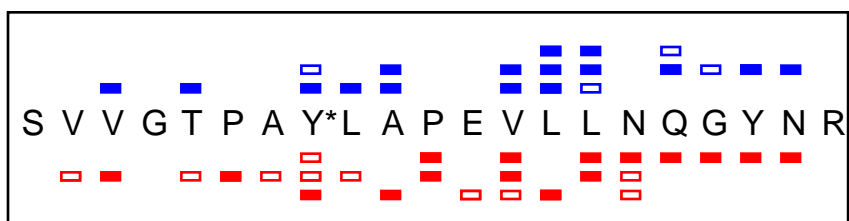

Protein Name: Protein kinase D2  
 gi Accession: 0  
 Precursor Mass: 781.0576+3  
 Delta Mass: 0.198 ppm  
 XCorr: 22.55

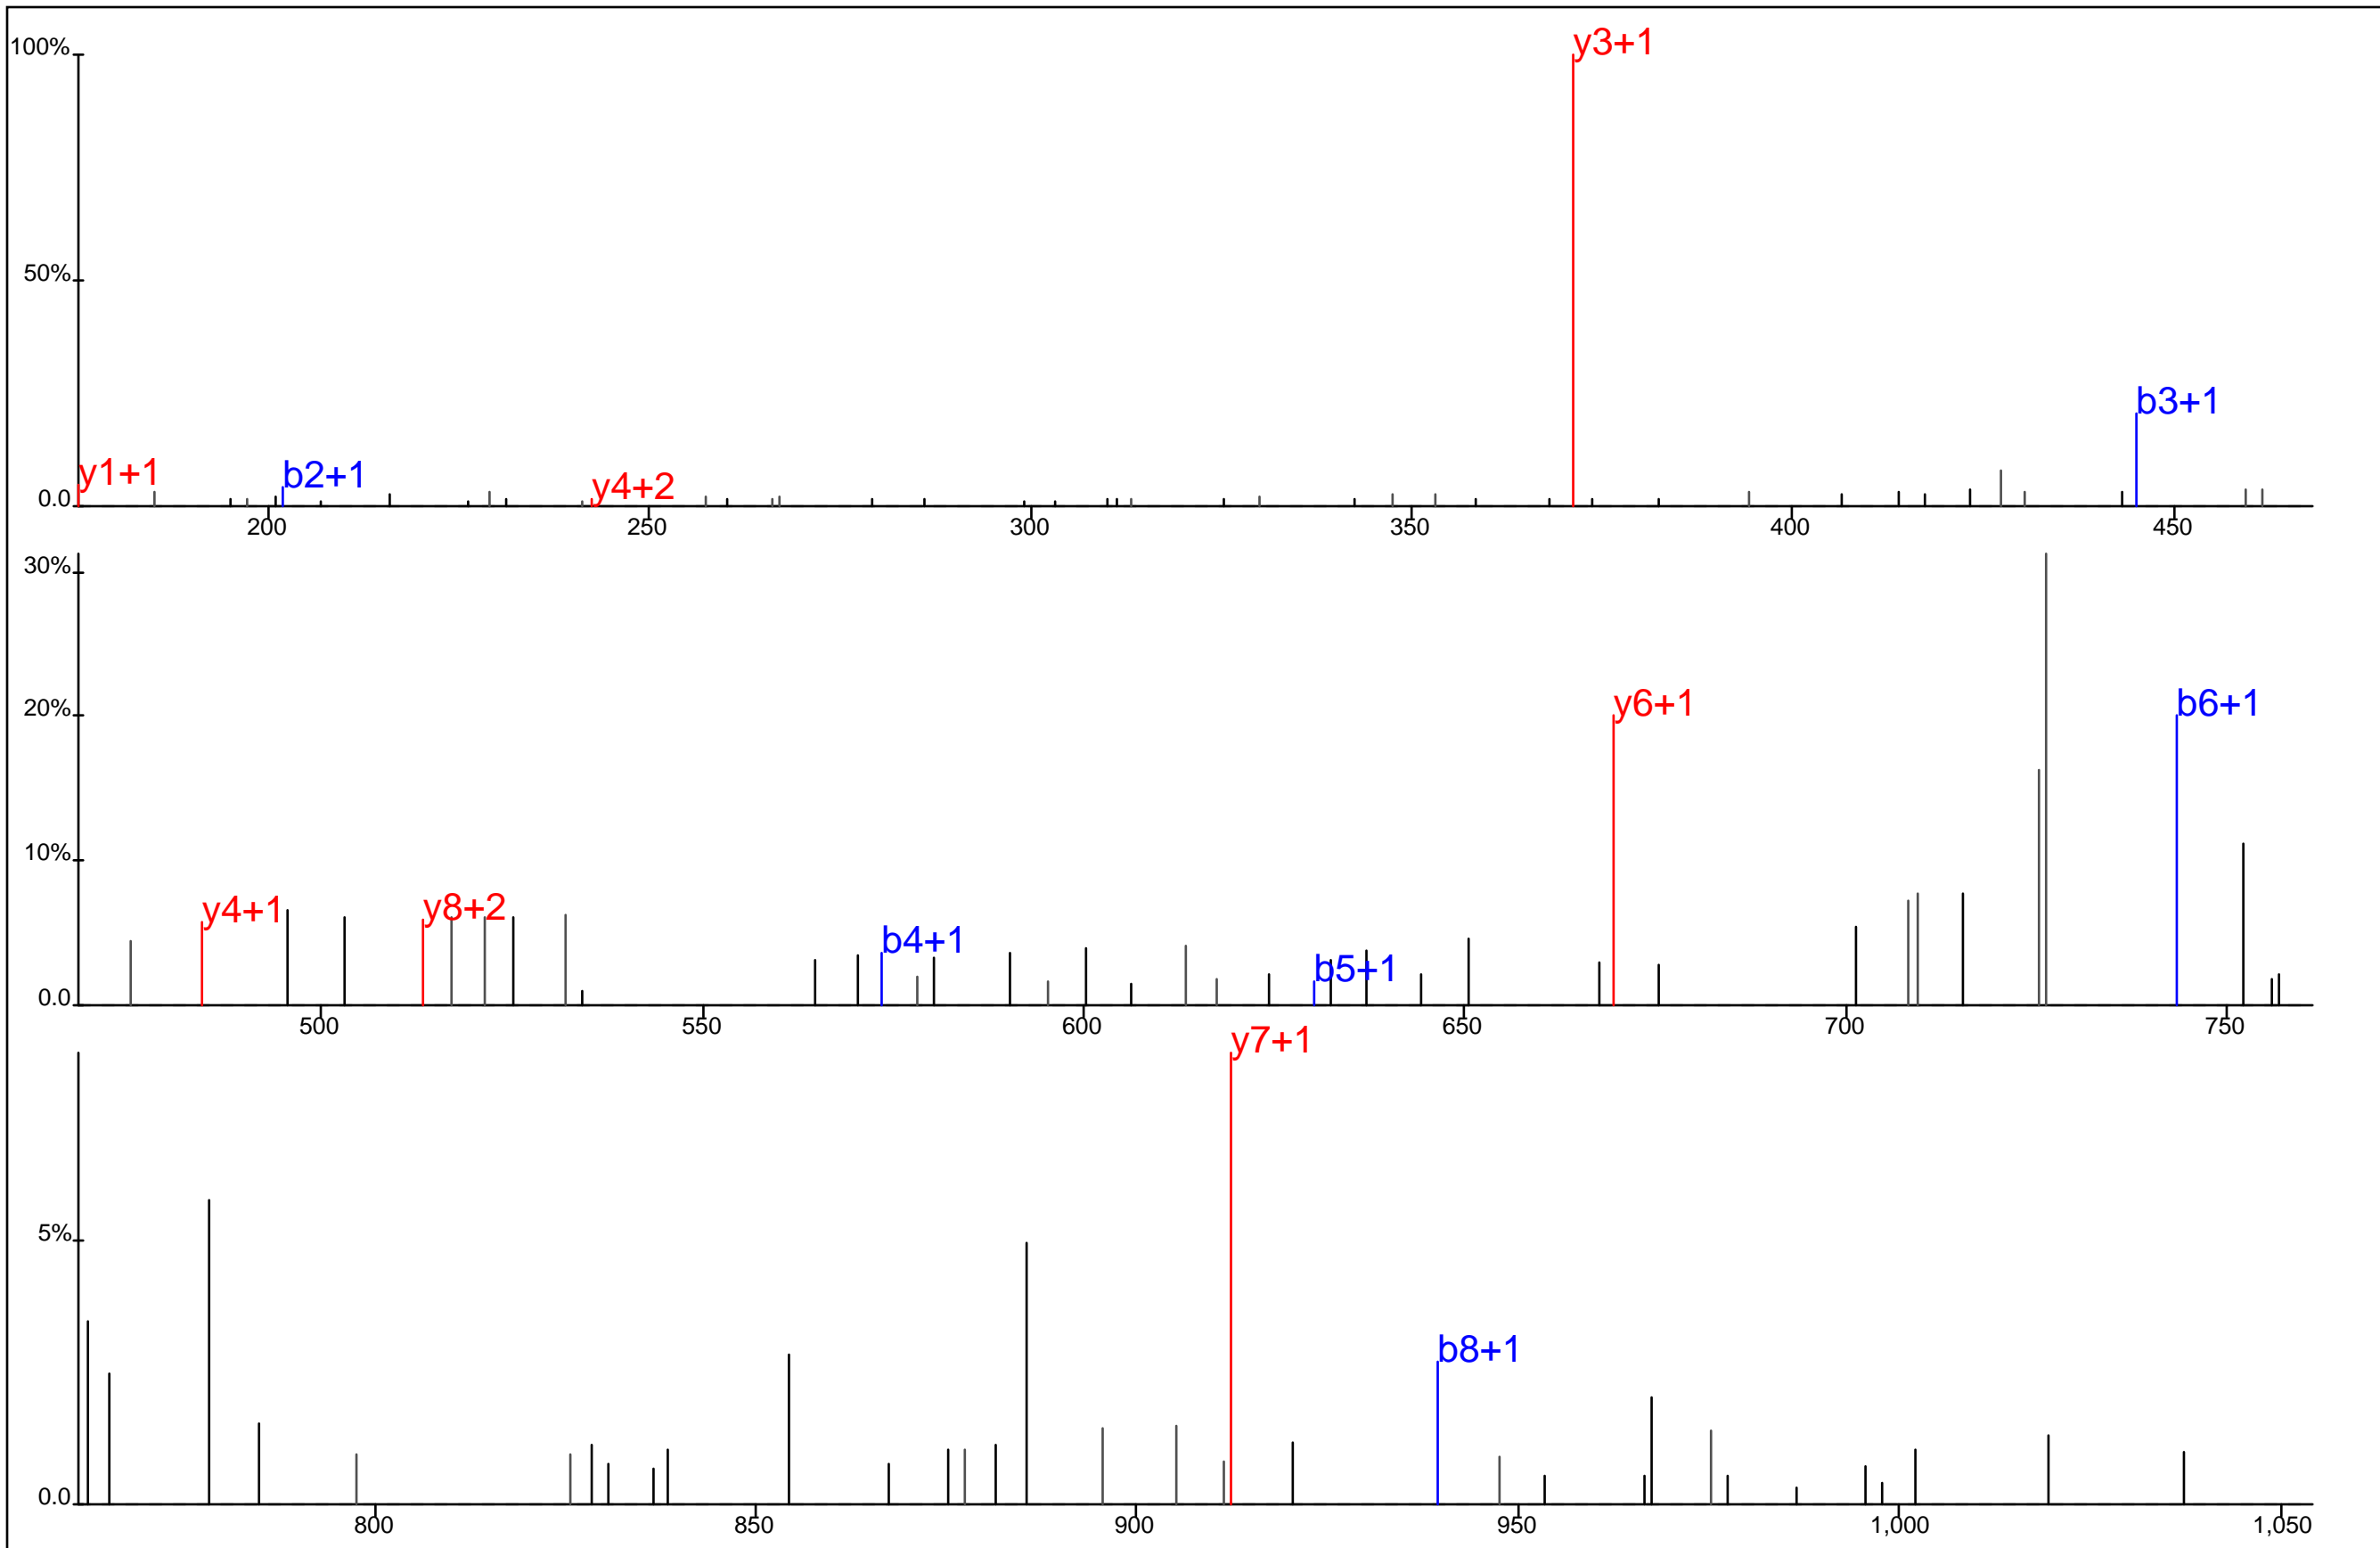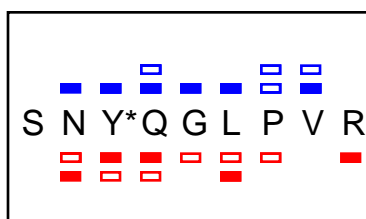

Protein Name: Protein kinase serine/arginine specific 2  
 gi Accession: 0  
 Precursor Mass: 557.2597+2  
 Delta Mass: 2.965 ppm  
 XCorr: 20.06

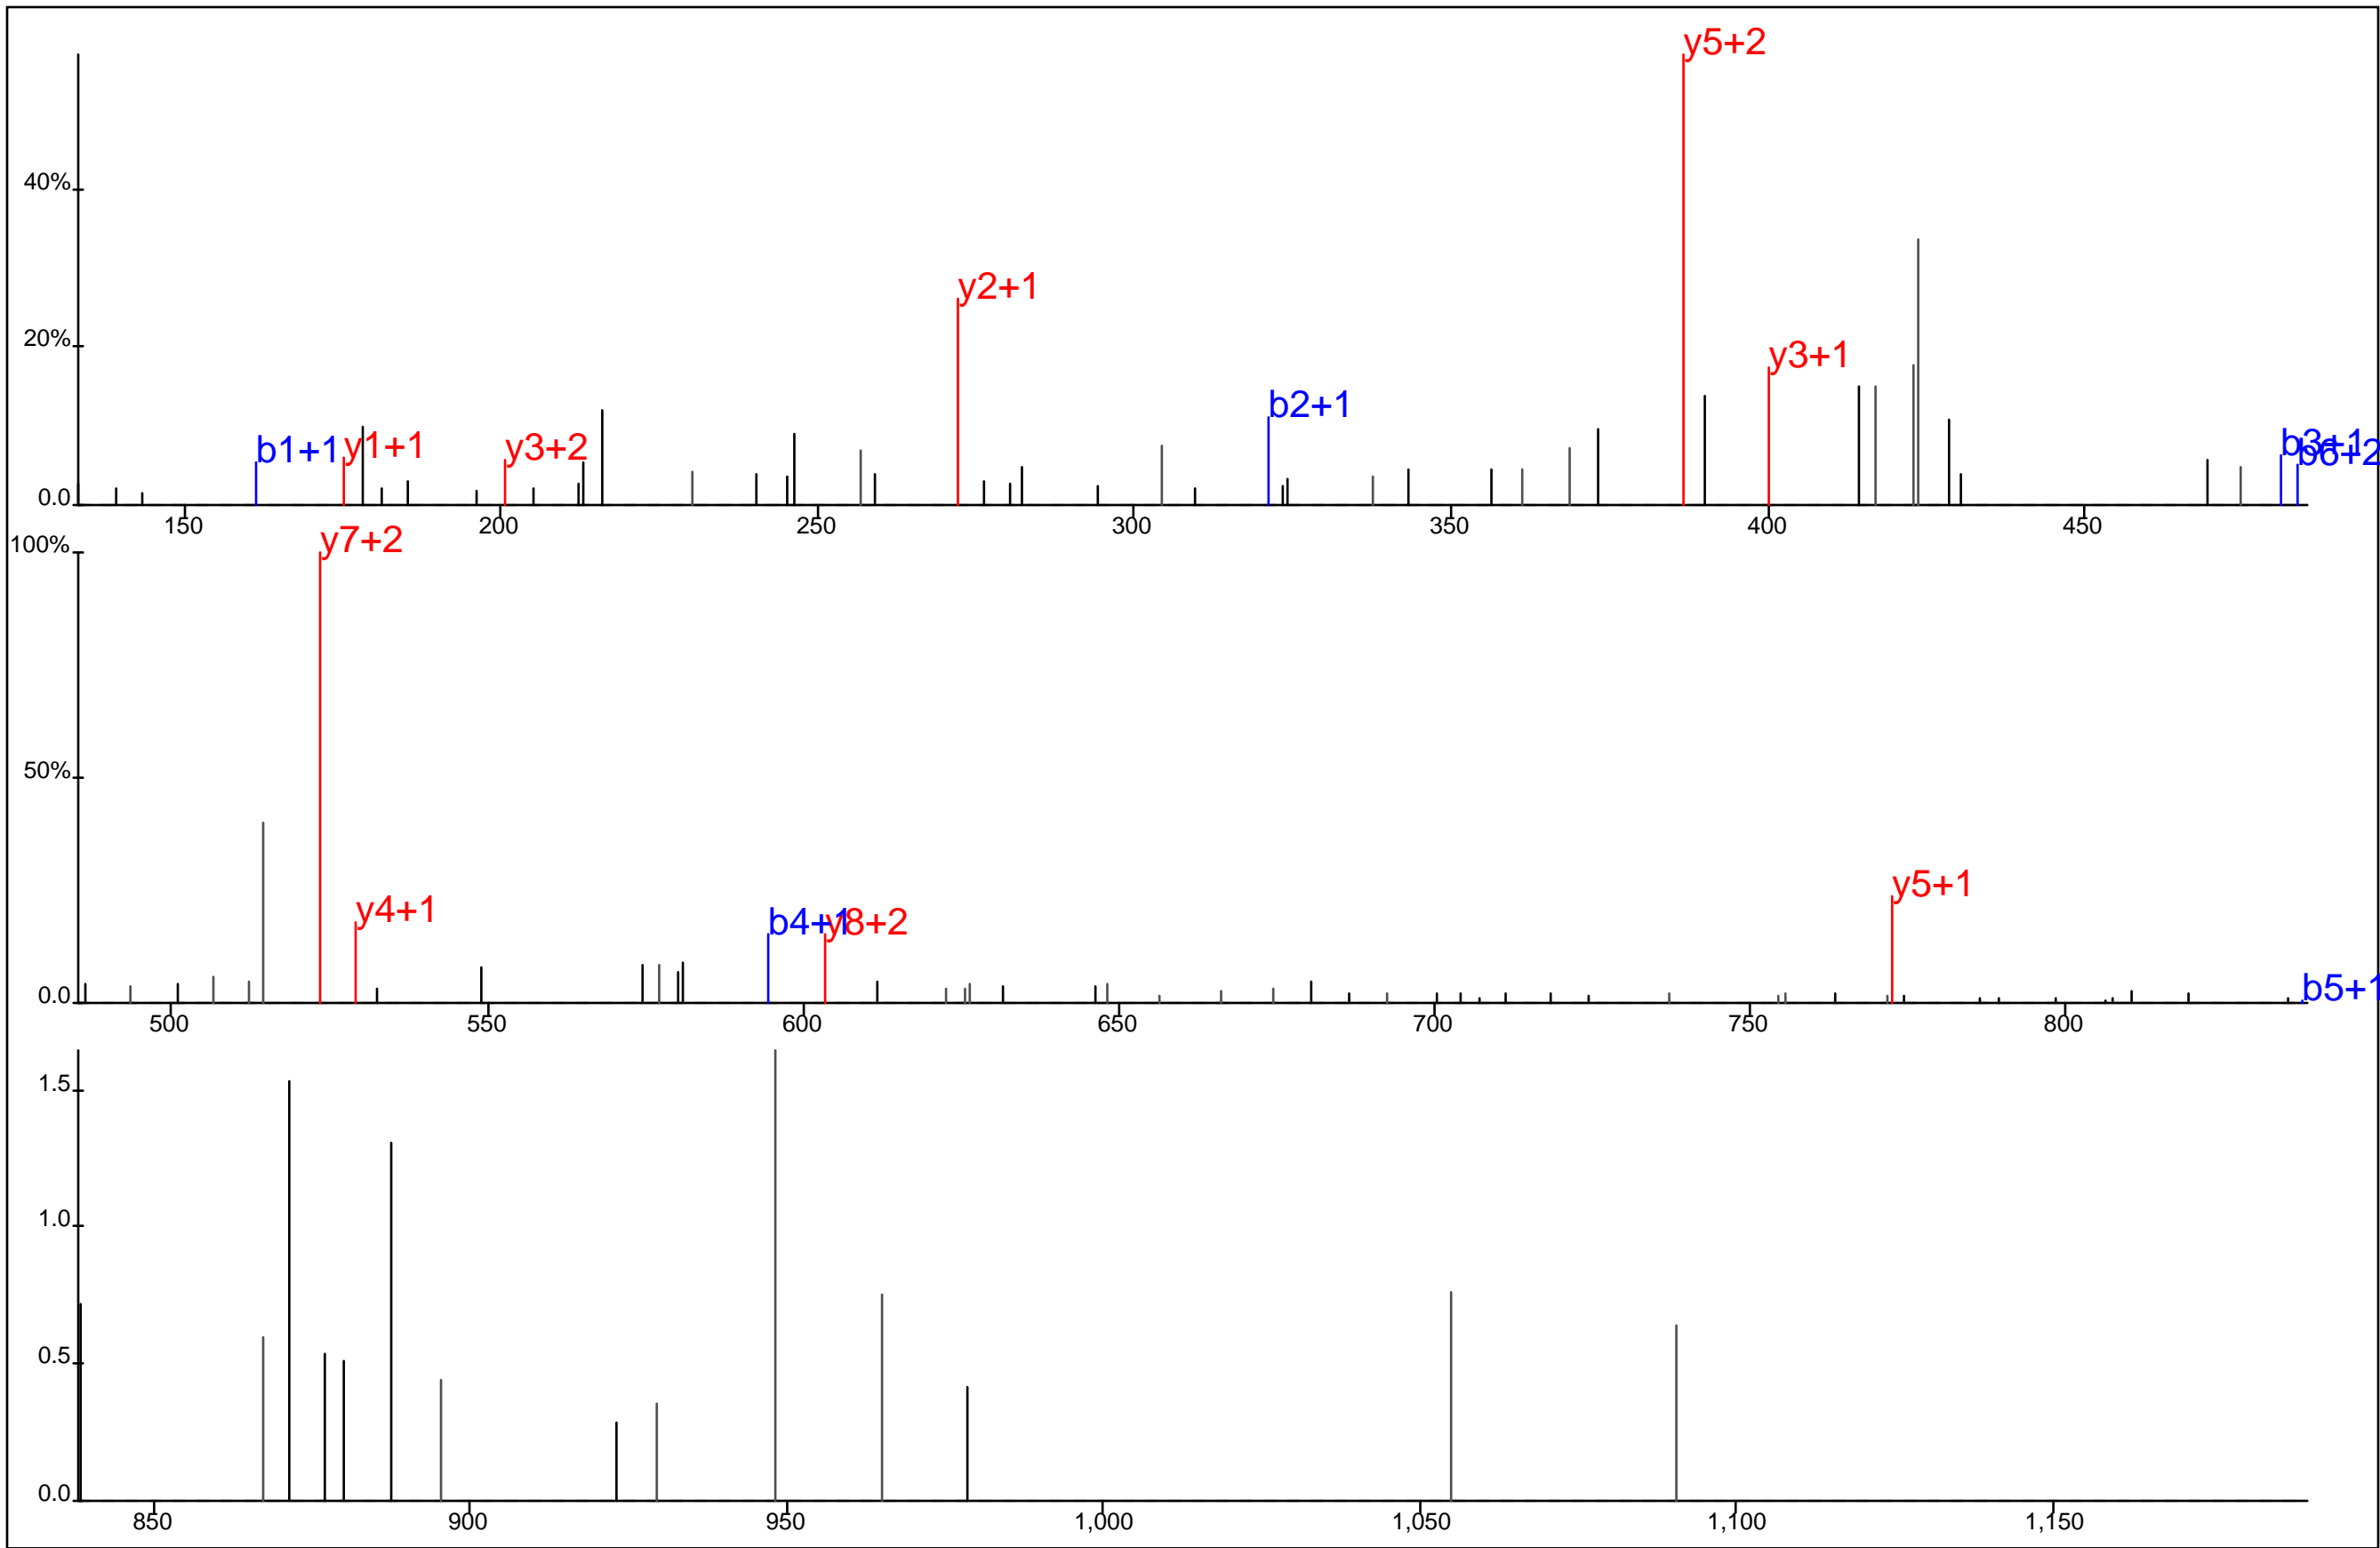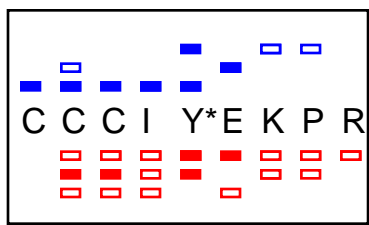

Protein Name: Protein phosphatase 1, regulatory subunit 11  
 gi Accession: 0  
 Precursor Mass: 455.8419+3  
 Delta Mass: 2.790 ppm  
 XCorr: 22.3

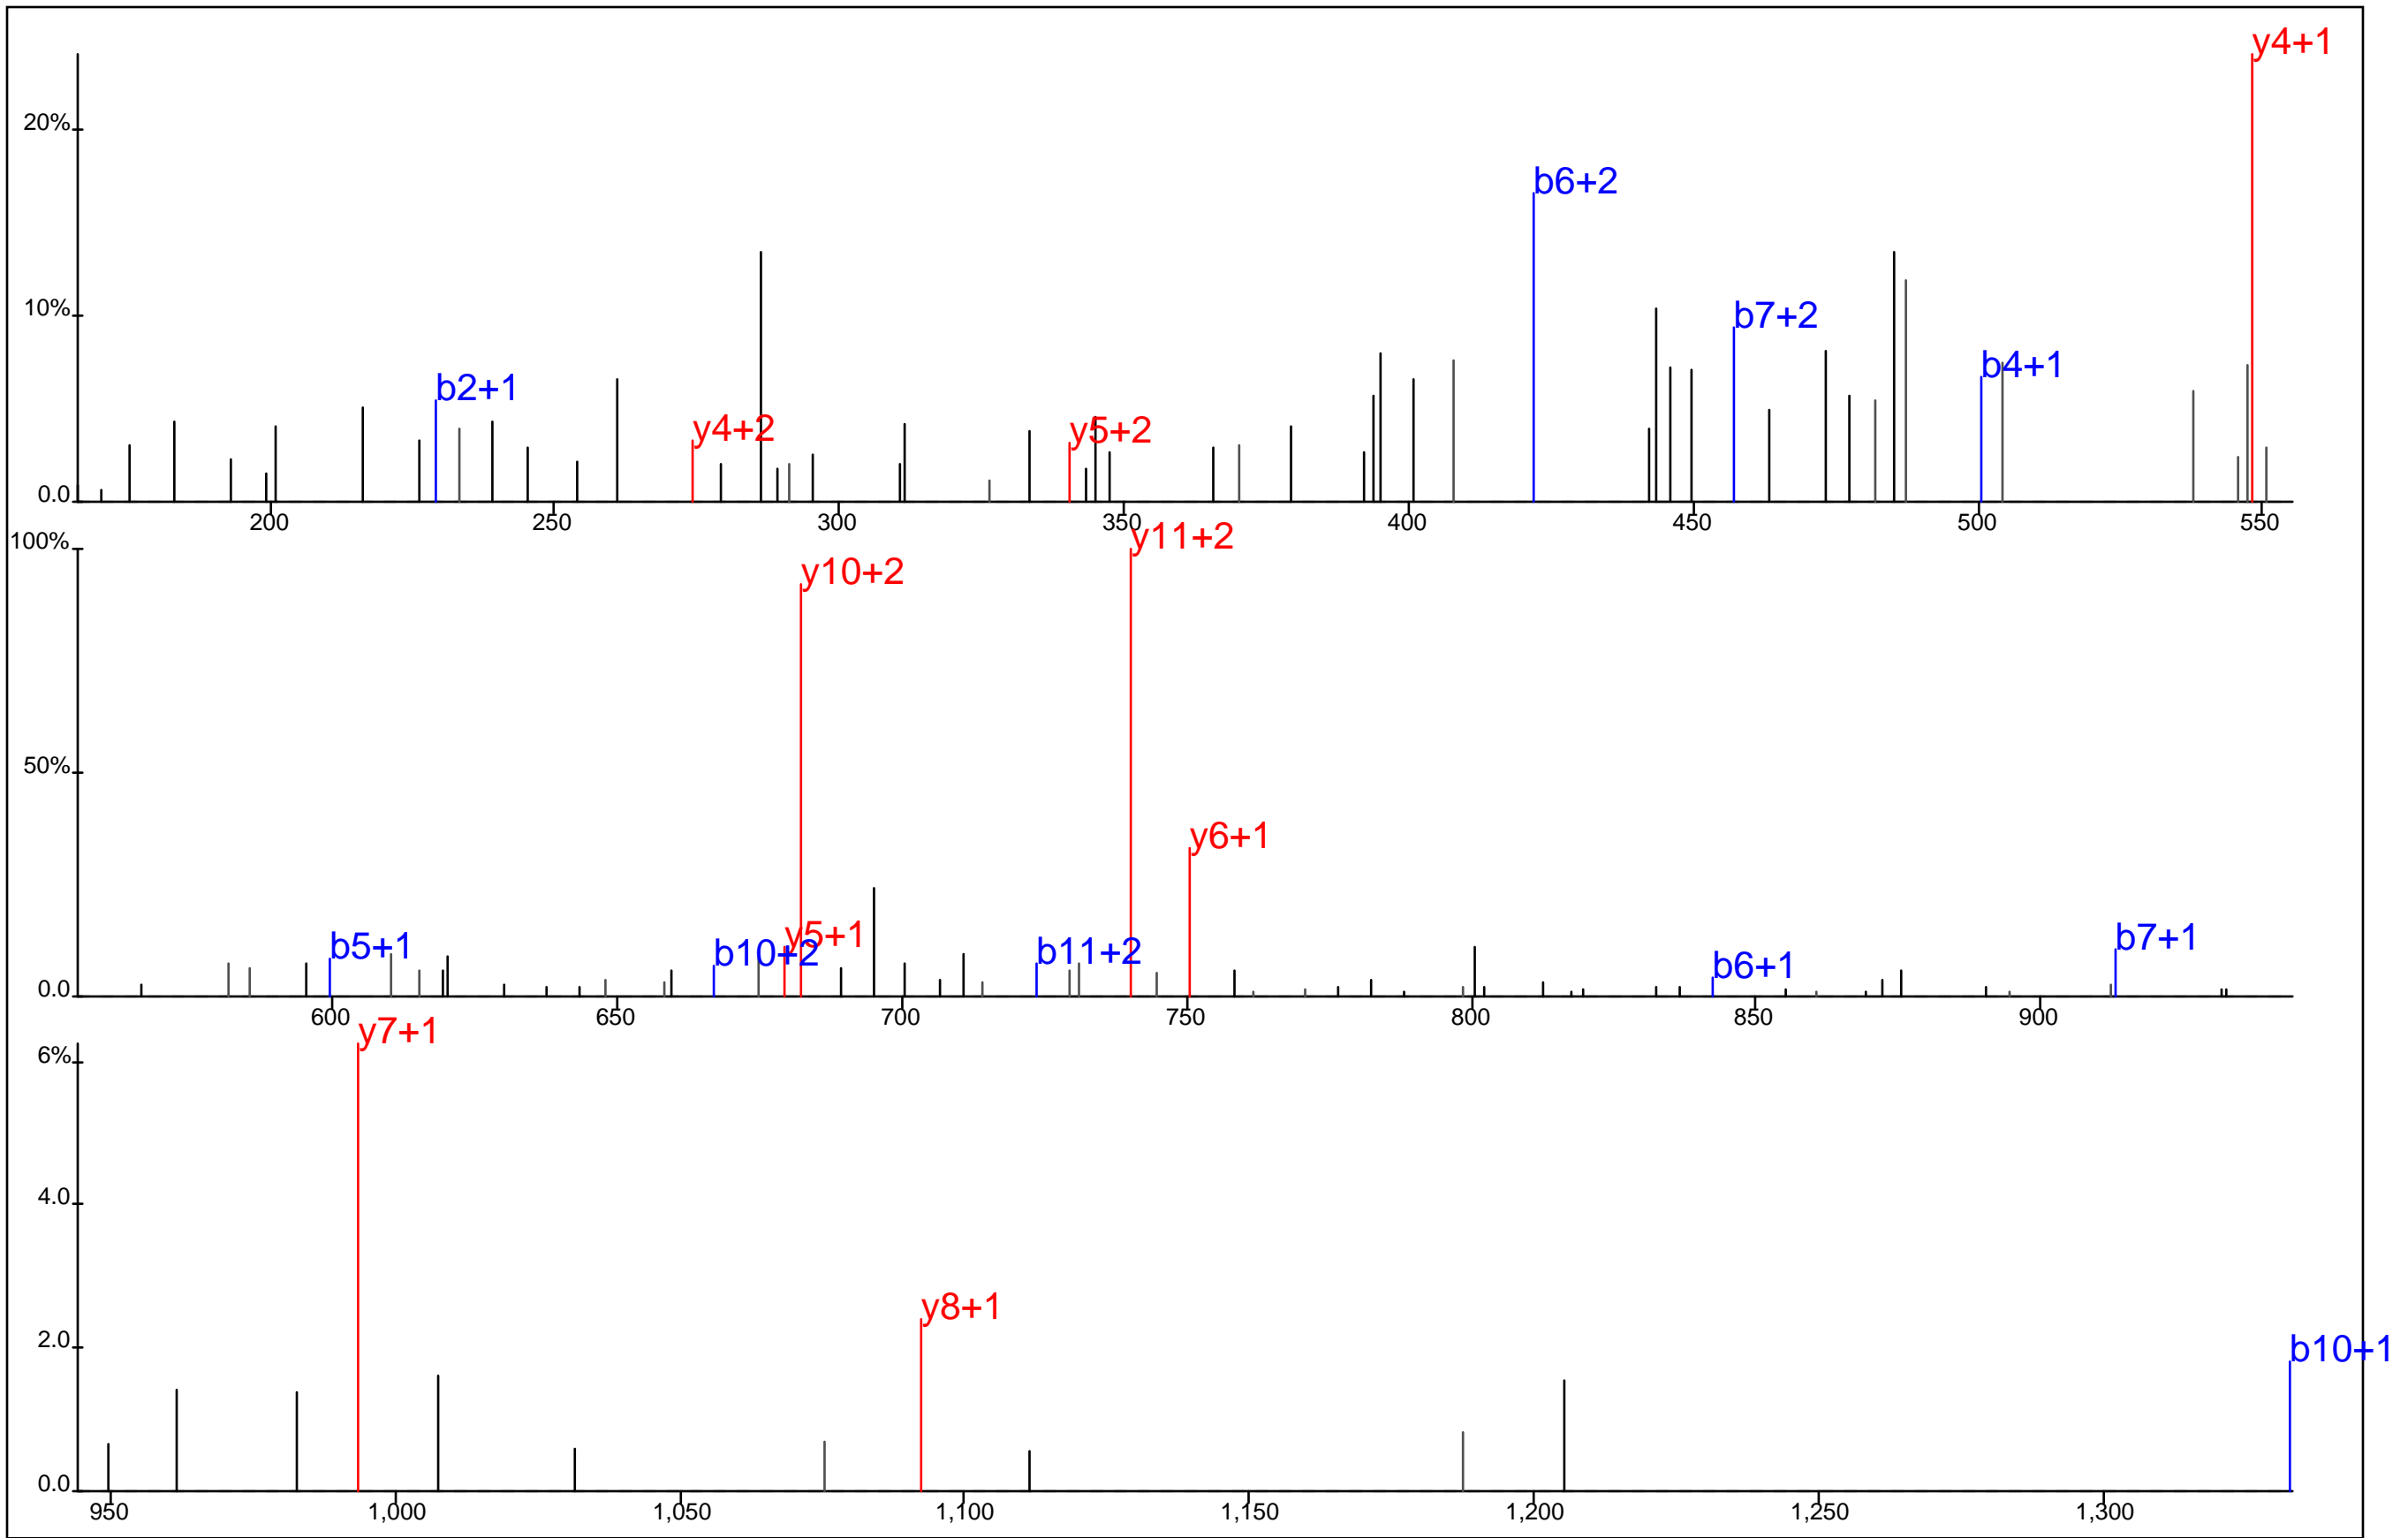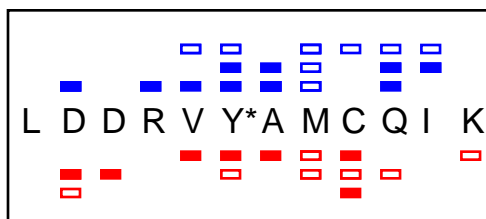

Protein Name: Protein transport protein Sec24B  
 gi Accession: 0  
 Precursor Mass: 531.2383+3  
 Delta Mass: 0.206 ppm  
 XCorr: 20.2

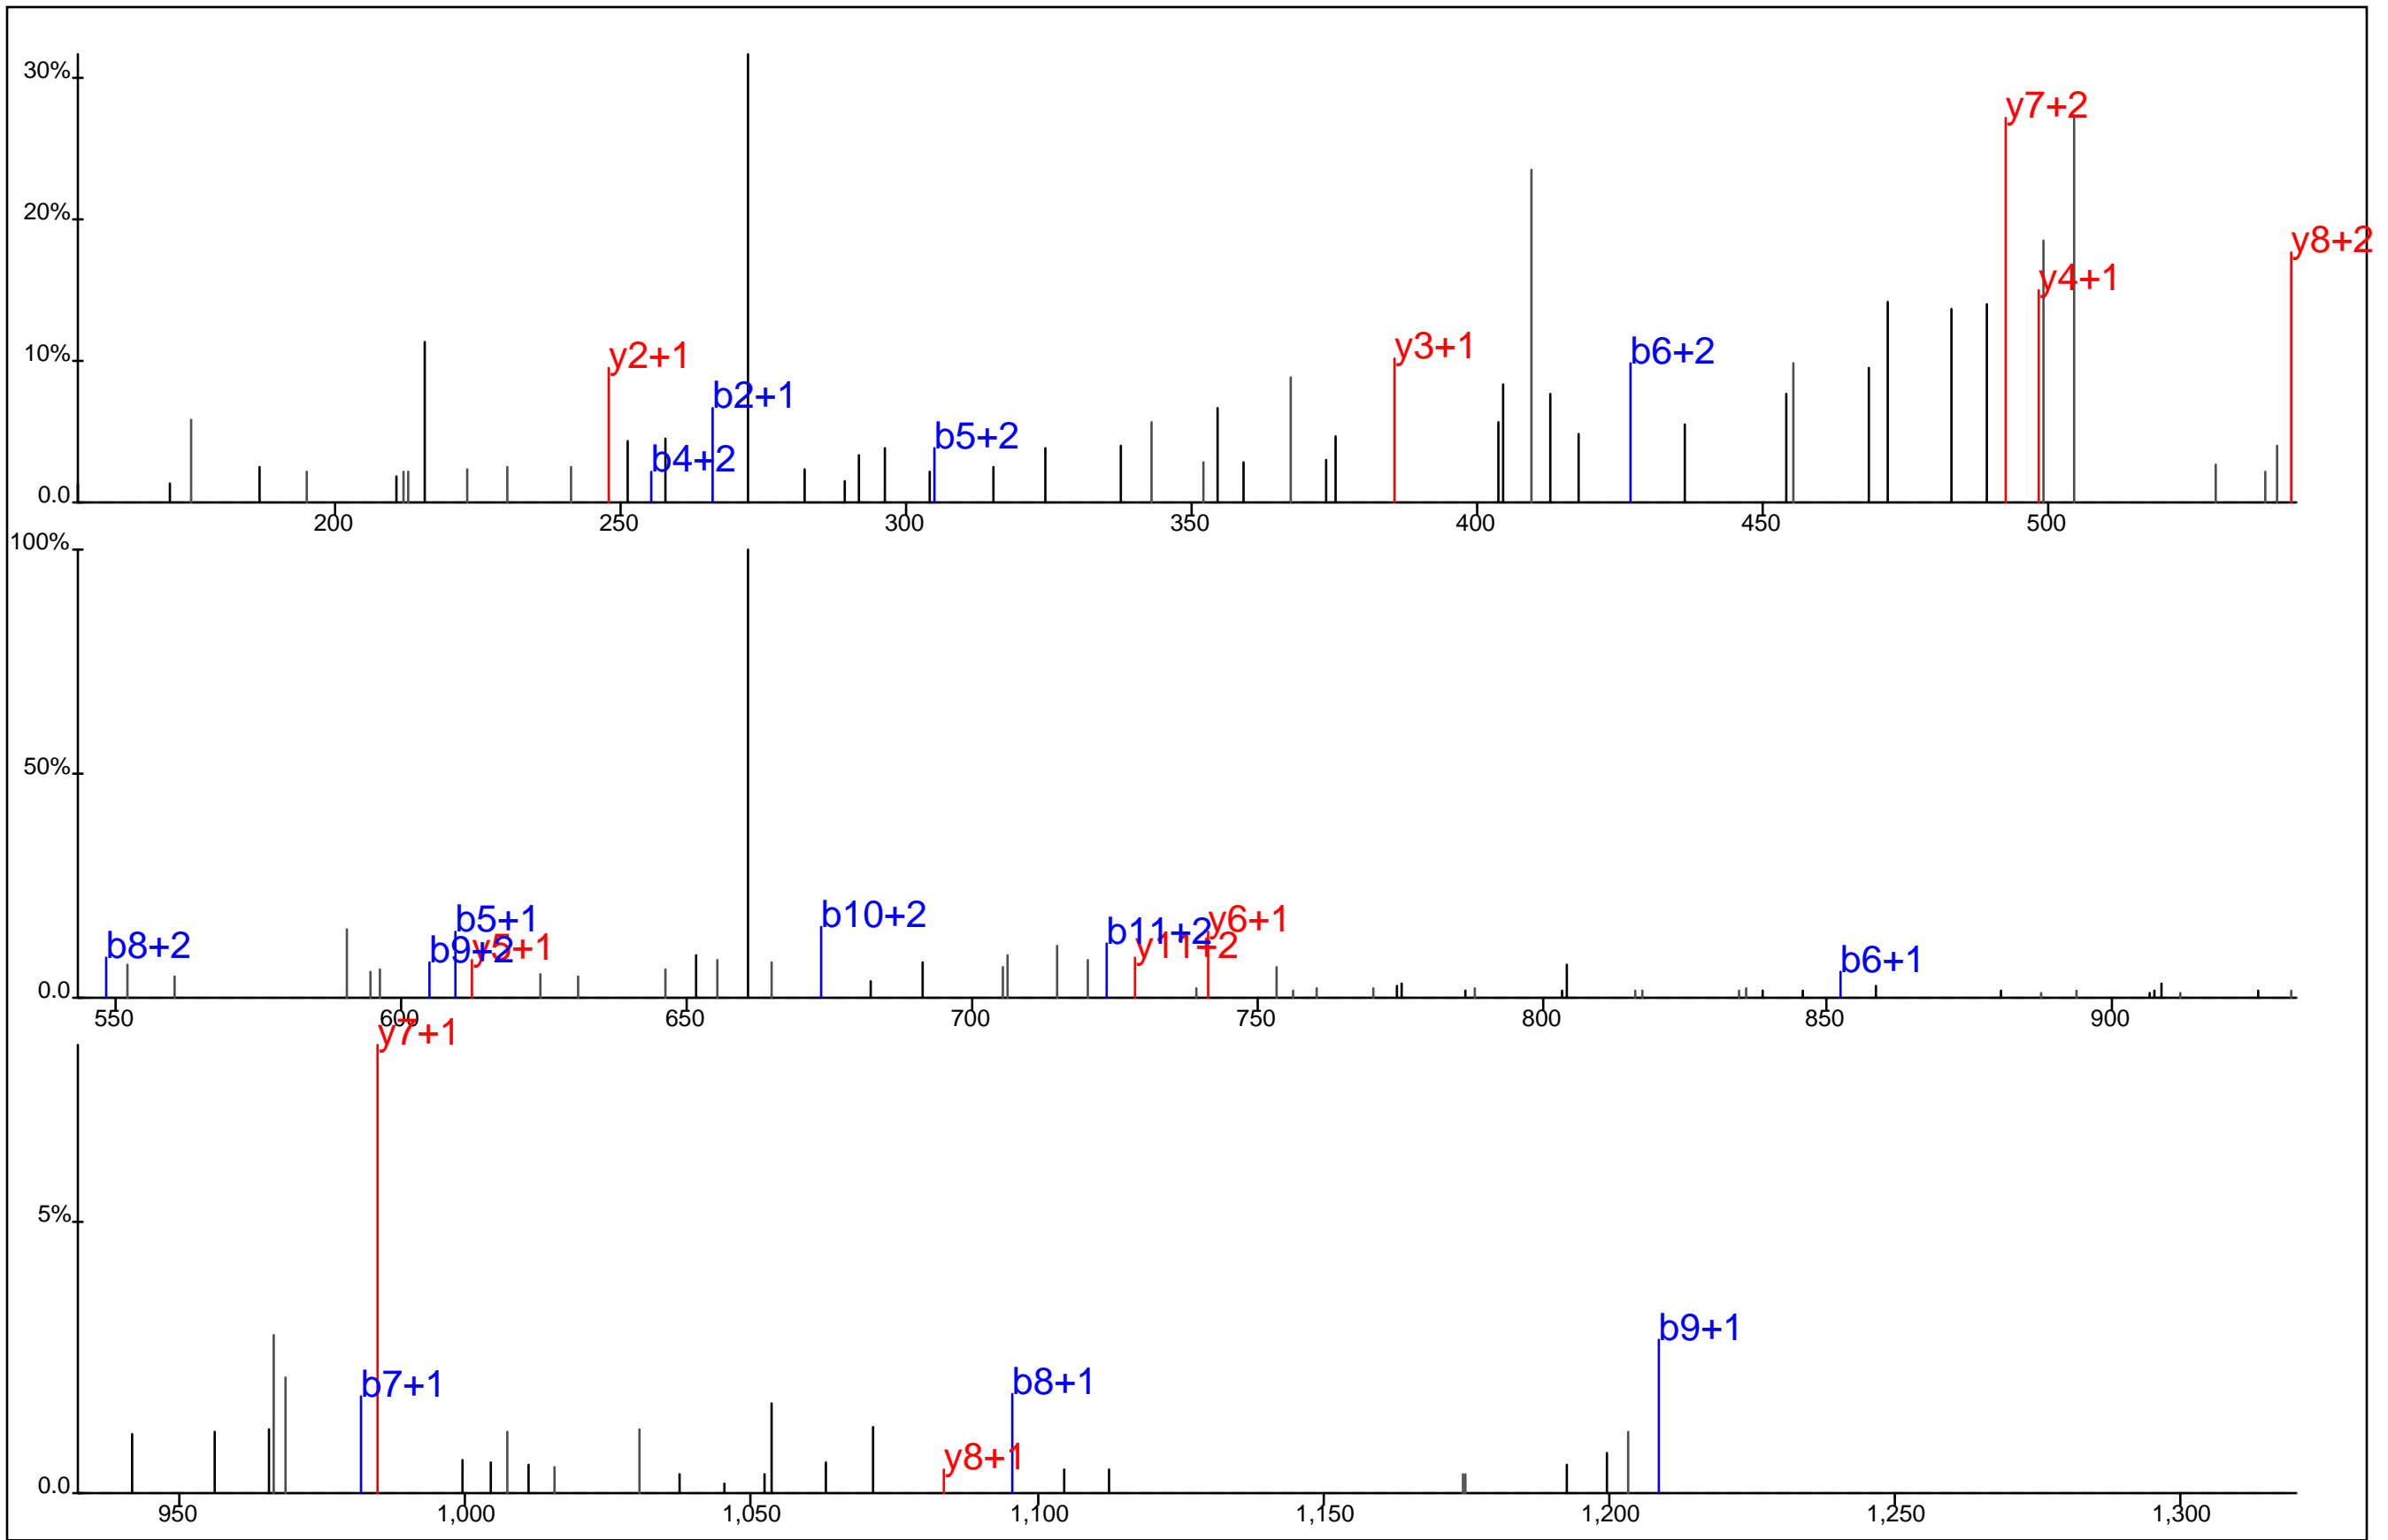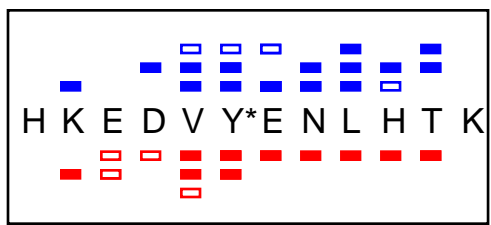

Protein Name: Protein tyrosine phosphatase, non-receptor type 6  
 gi Accession: 0  
 Precursor Mass: 531.5734+3  
 Delta Mass: 3.071 ppm  
 XCorr: 22.89



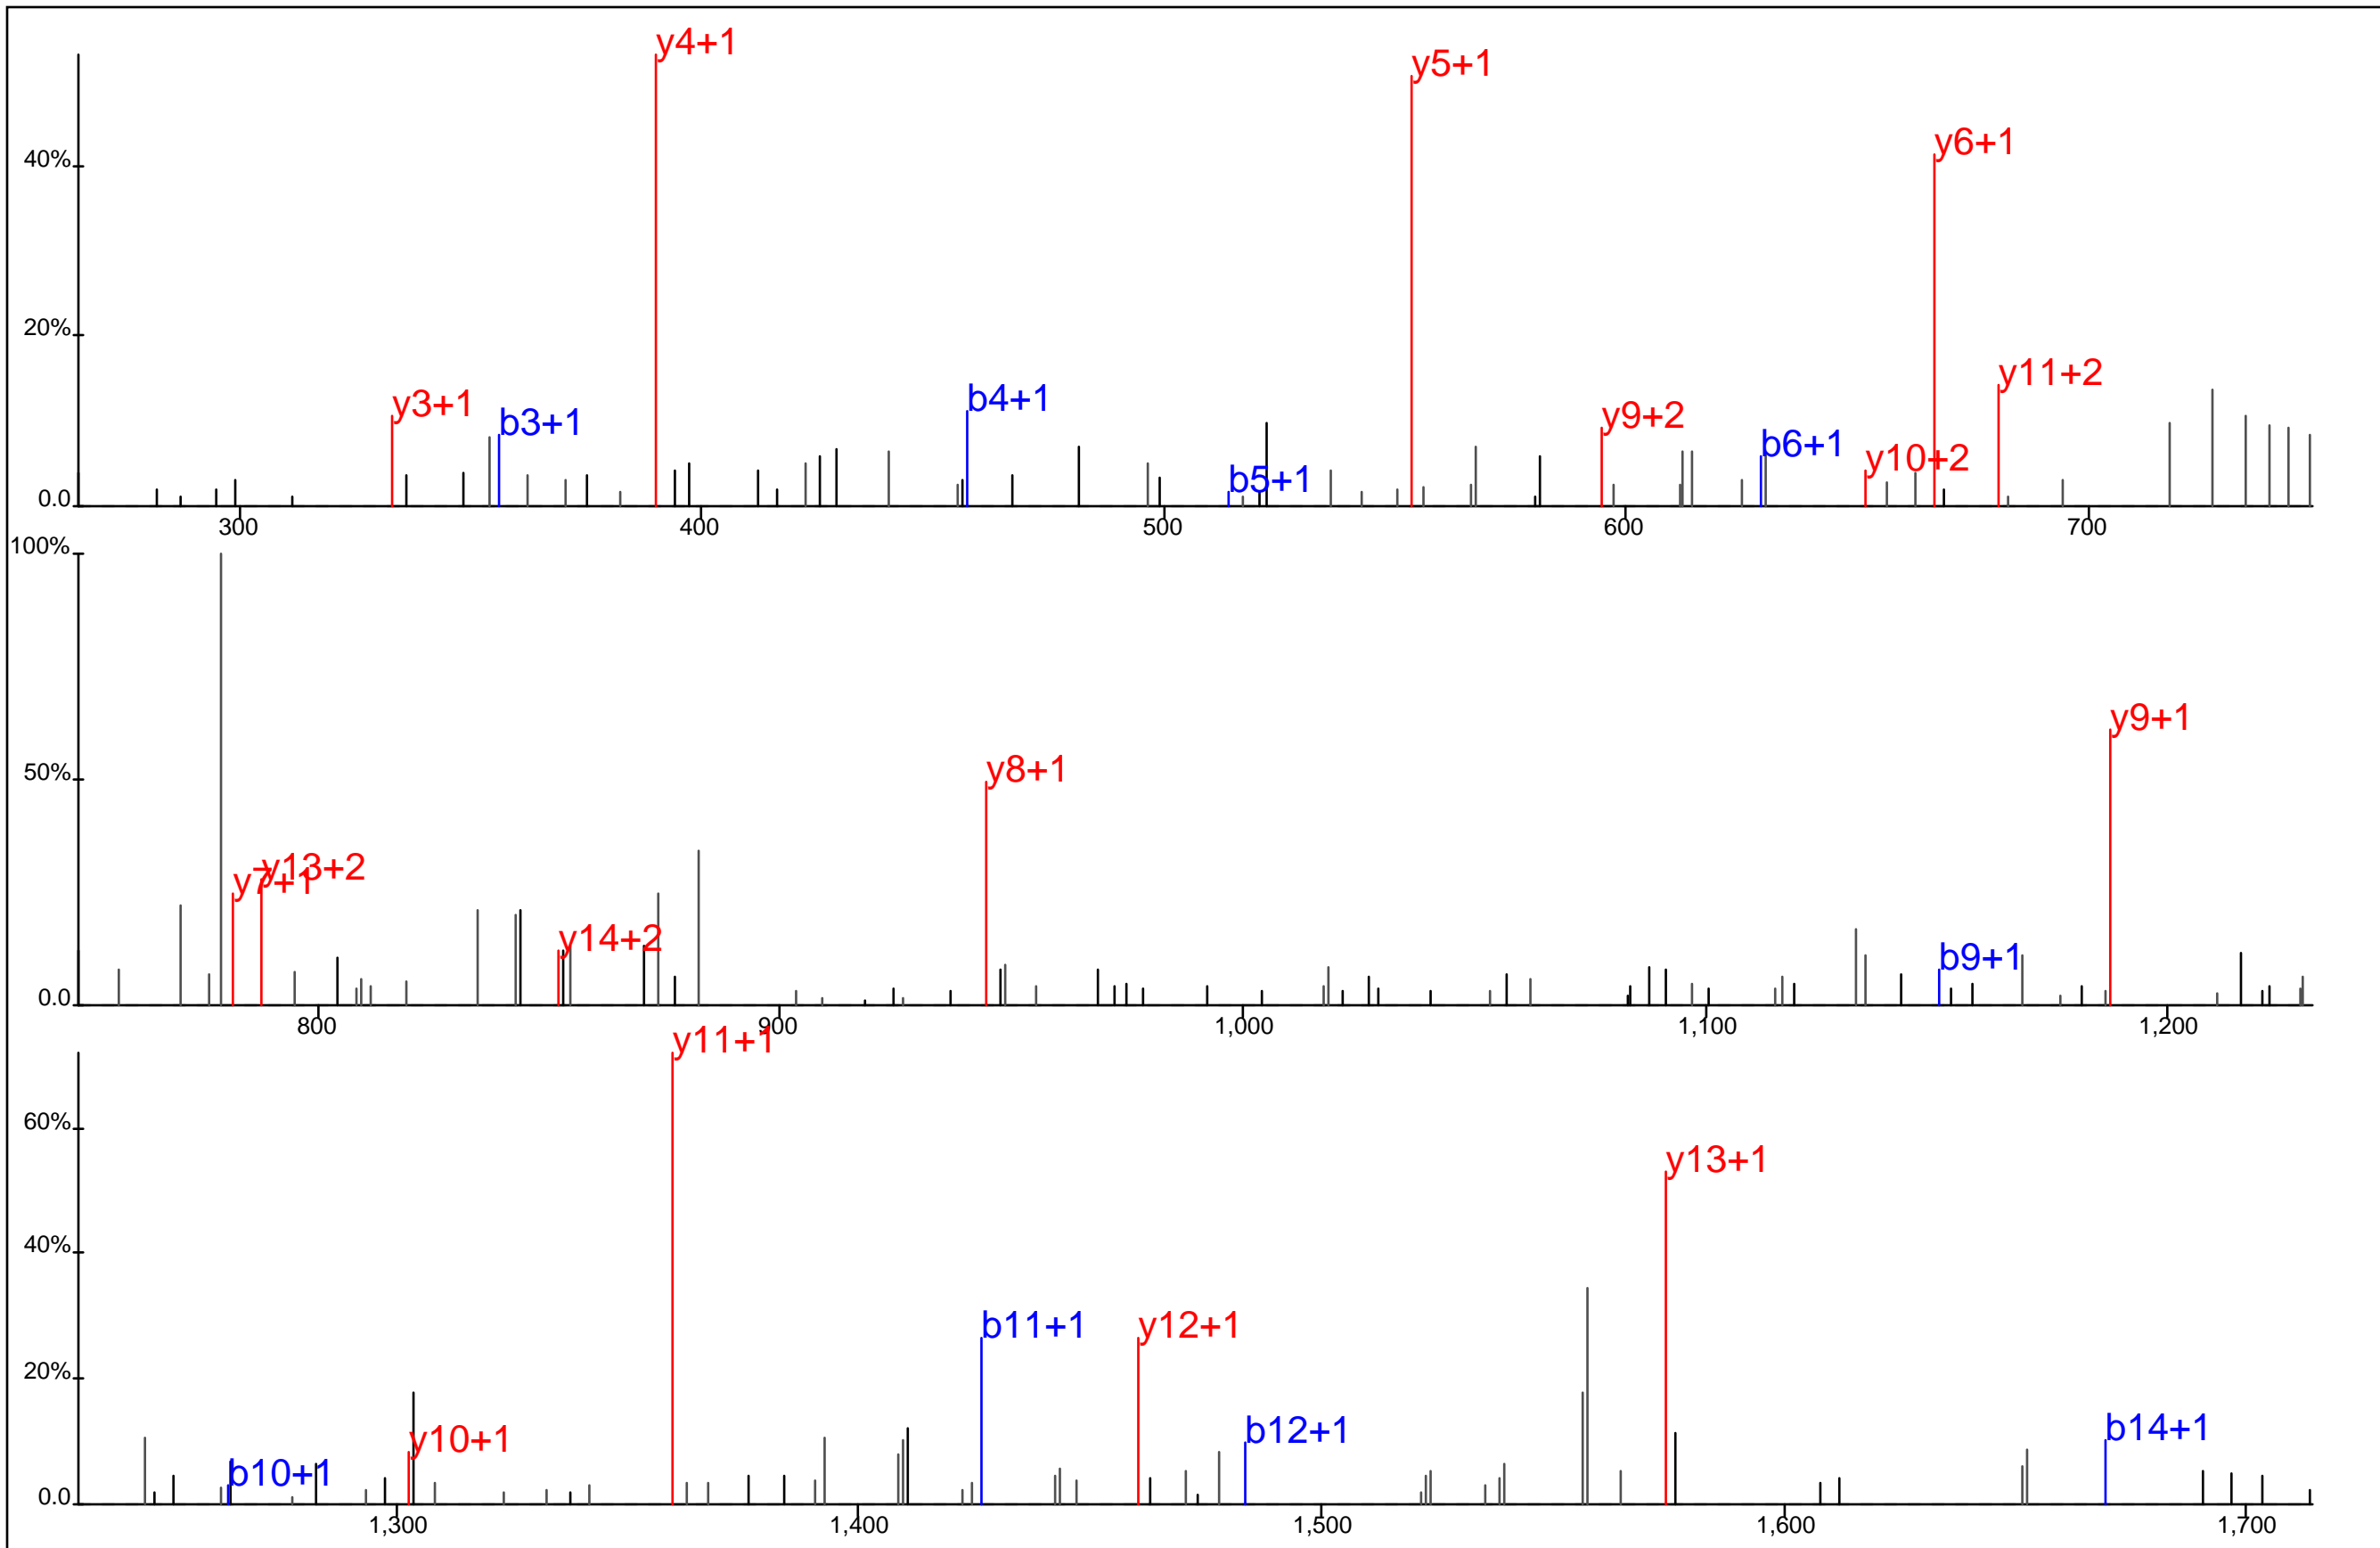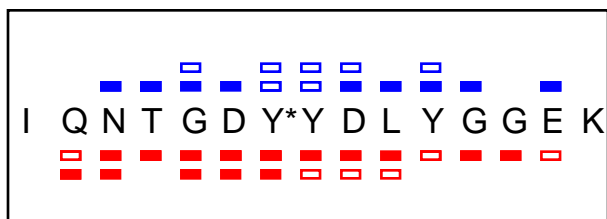

Protein Name: Protein tyrosine phosphatase, non-receptor type 11  
 gi Accession: 0  
 Precursor Mass: 908.3772+2  
 Delta Mass: 0.090 ppm  
 XCorr: 78.43

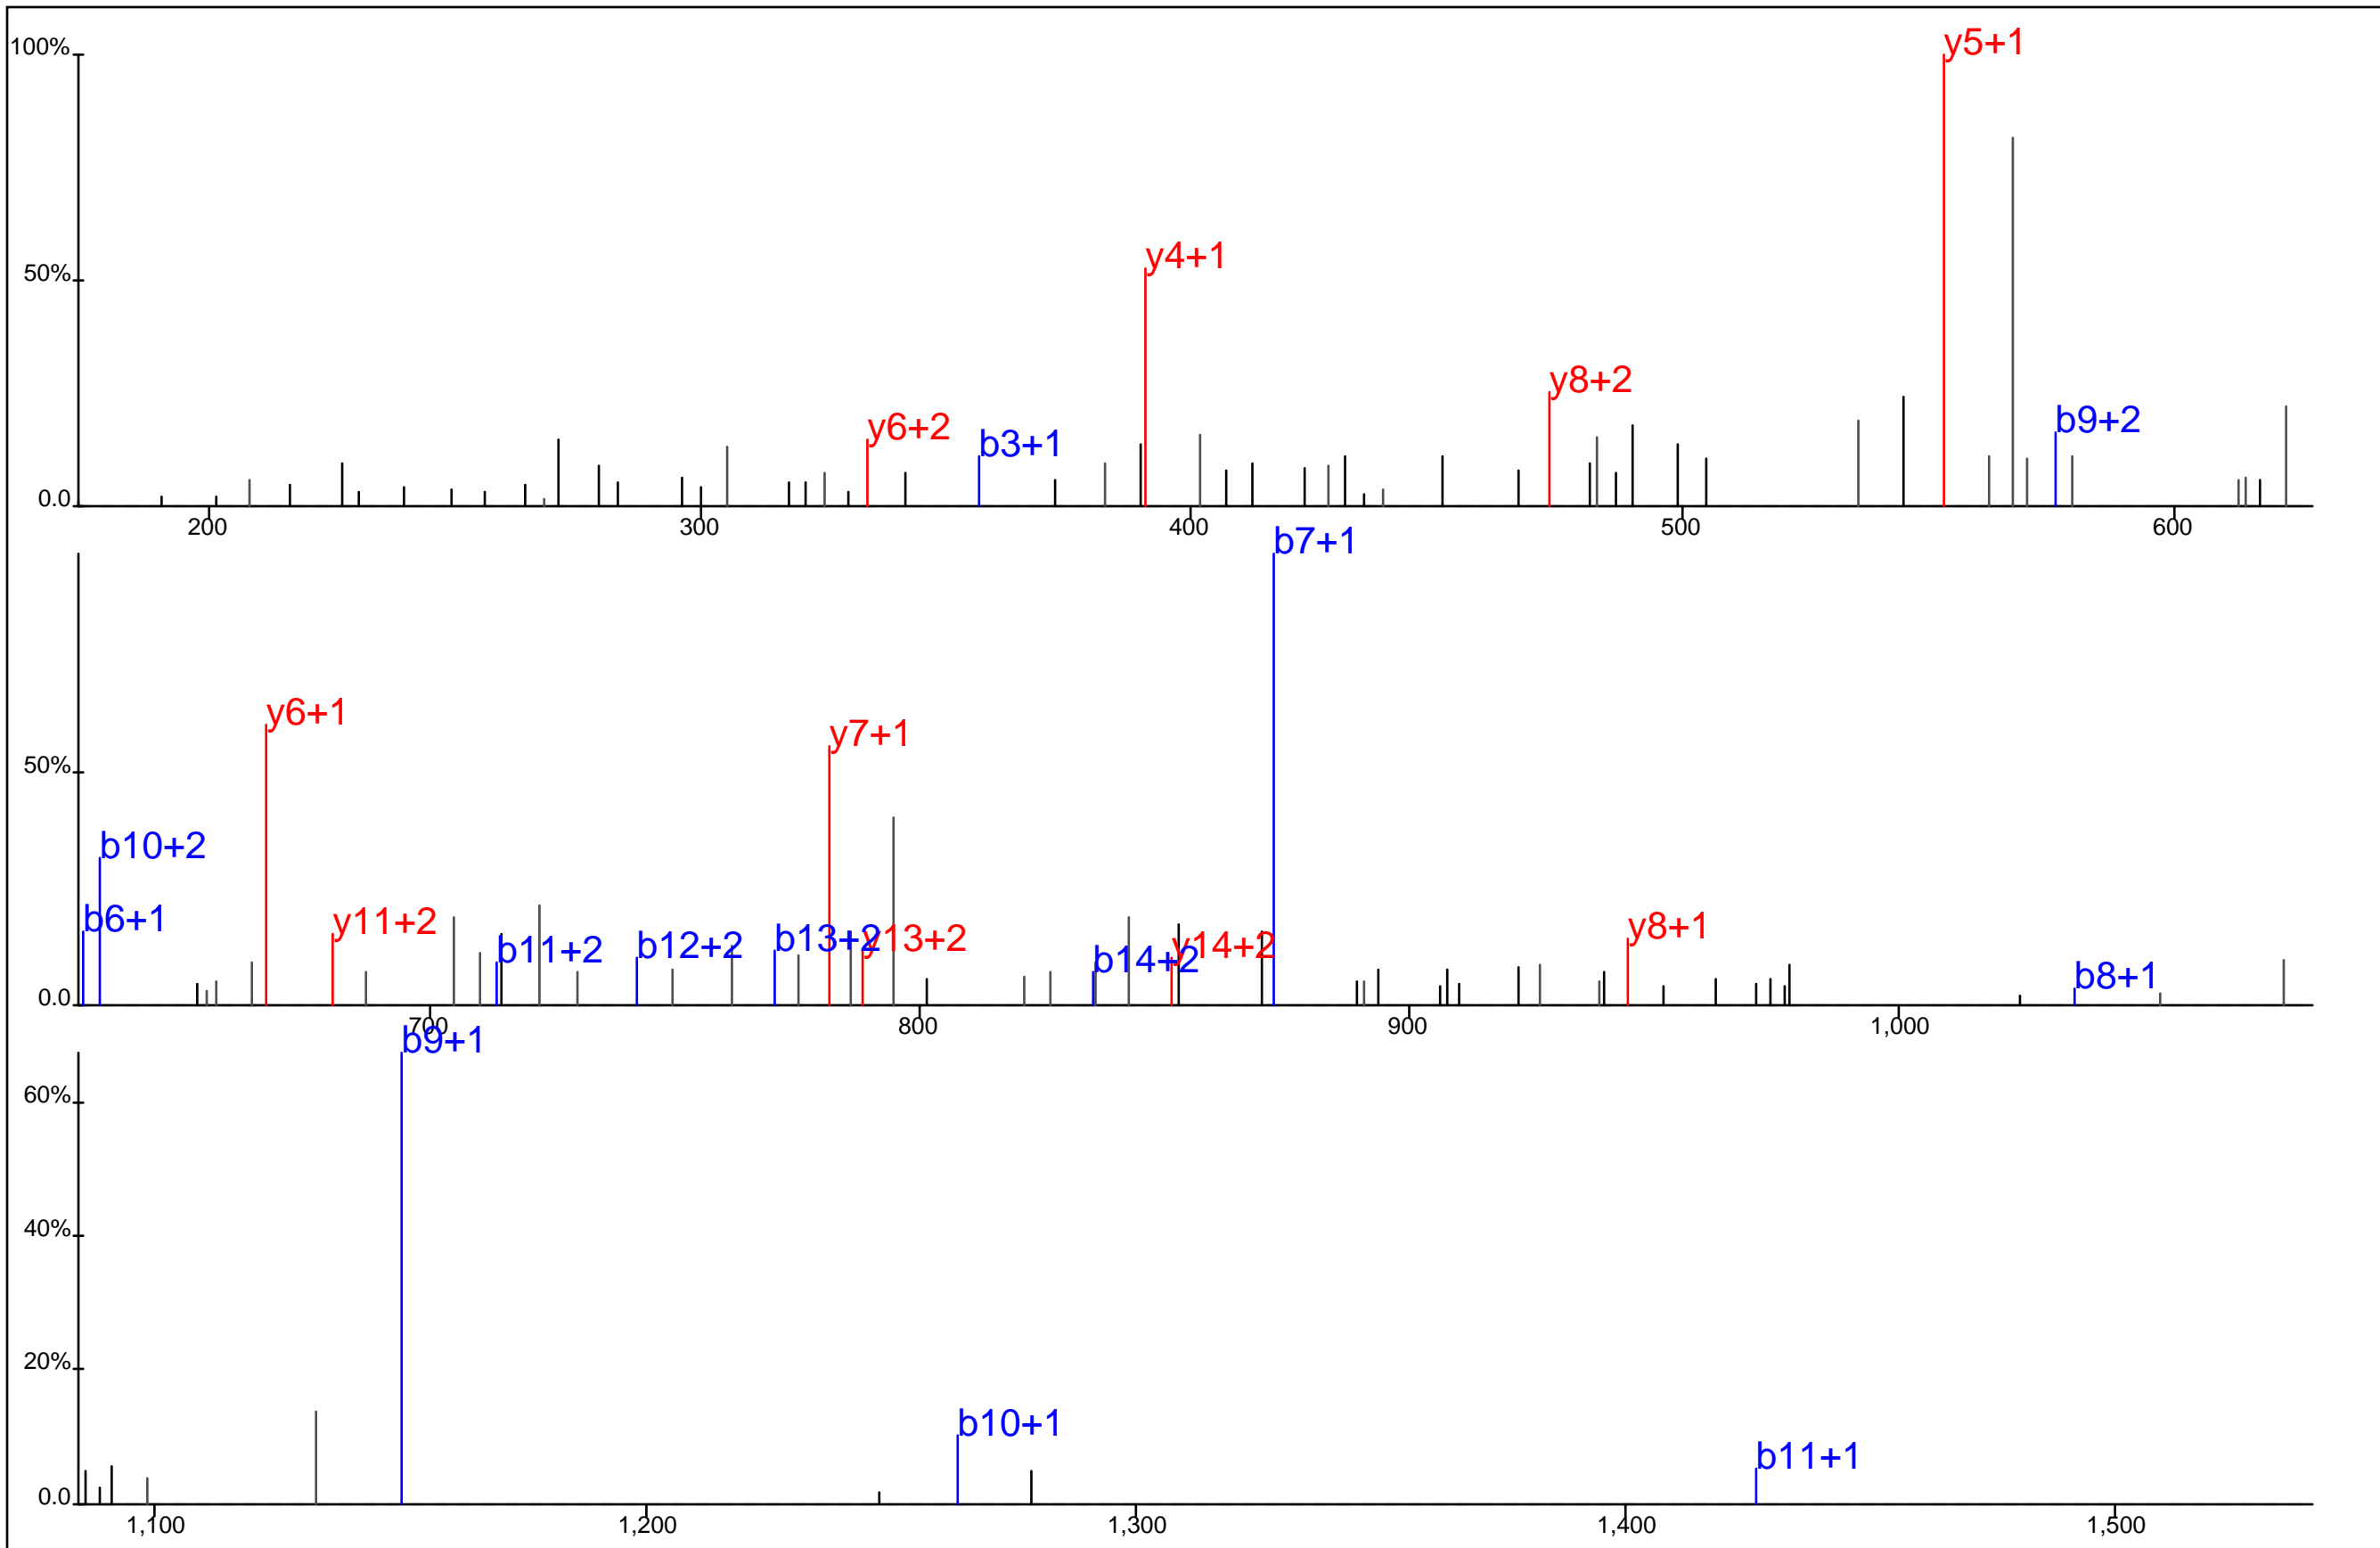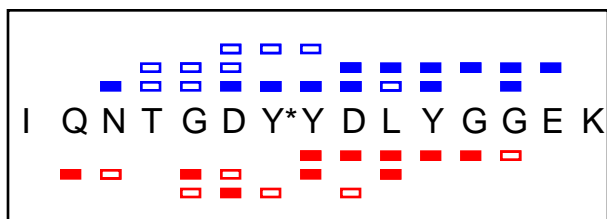

Protein Name: Protein tyrosine phosphatase, non-receptor type 11  
 gi Accession: 0  
 Precursor Mass: 605.9186+3  
 Delta Mass: 3.358 ppm  
 XCorr: 33.73



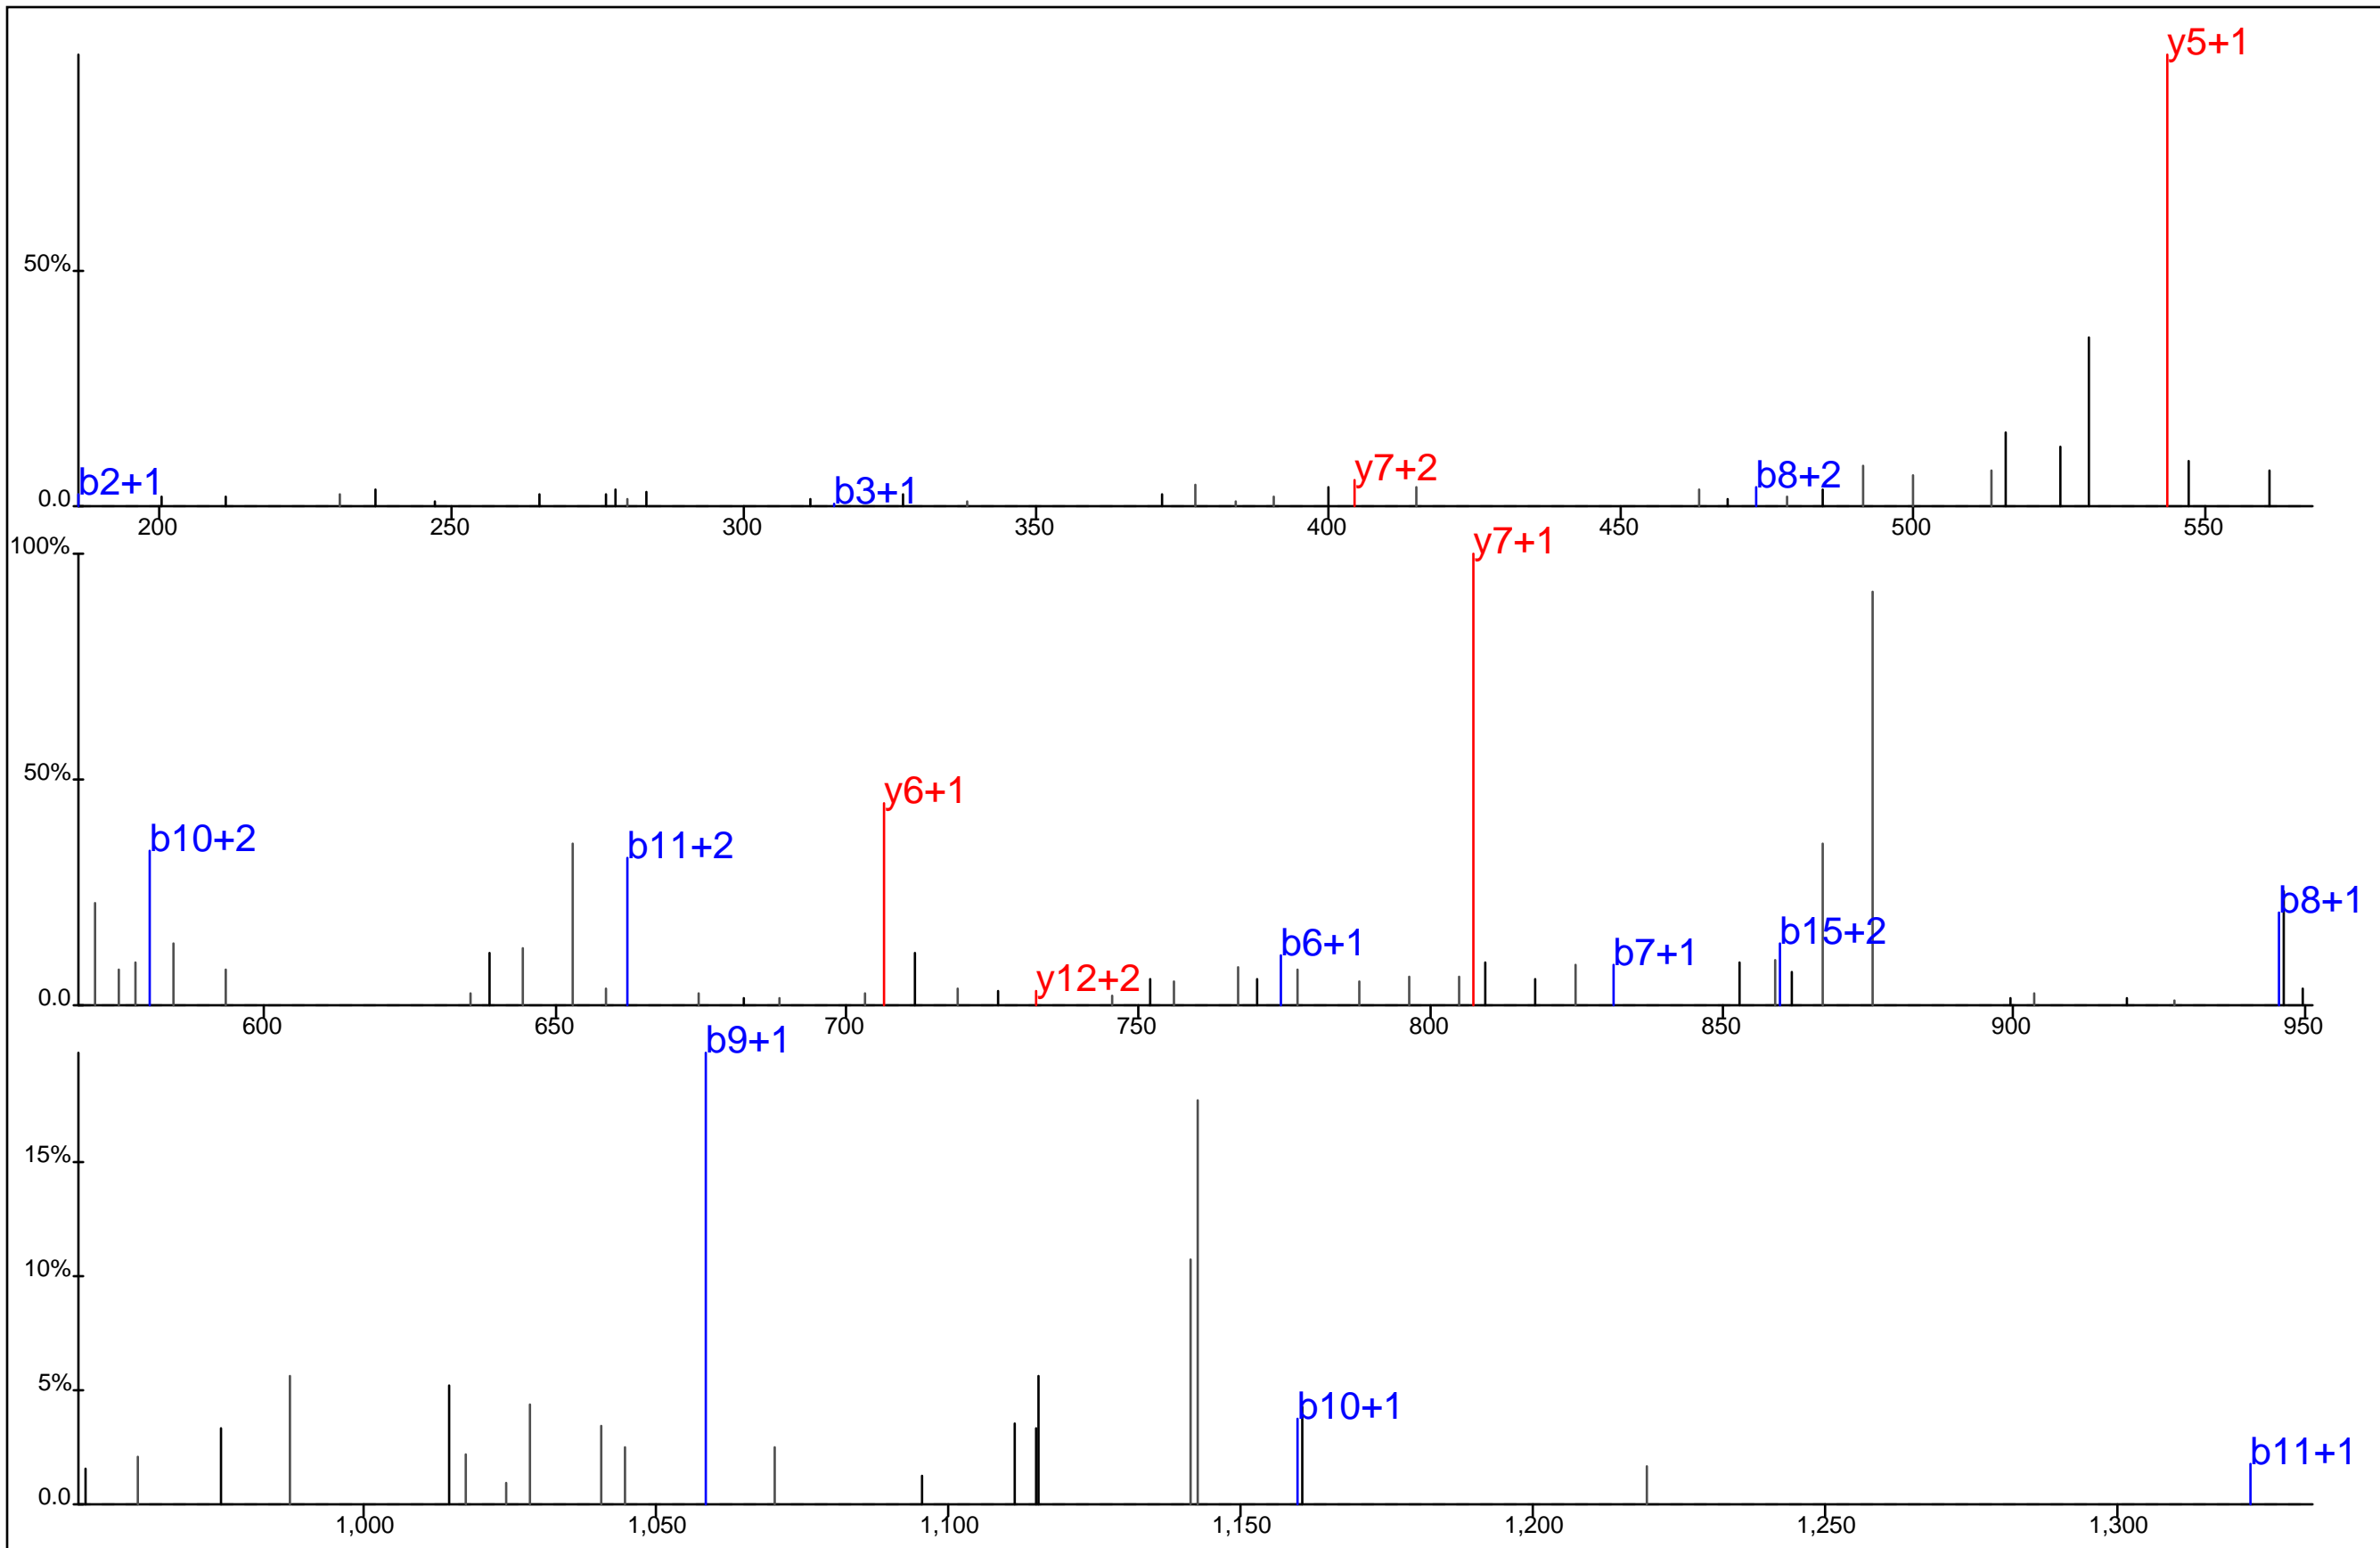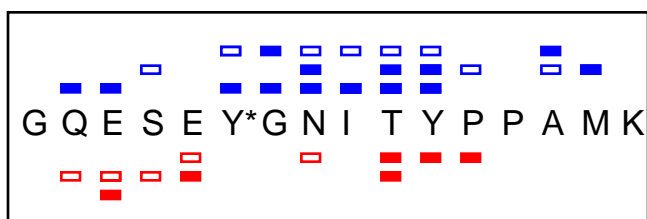

Protein Name: Protein tyrosine phosphatase, non-receptor type 6  
 gi Accession: 0  
 Precursor Mass: 622.2647+3  
 Delta Mass: 1.446 ppm  
 XCorr: 22.7

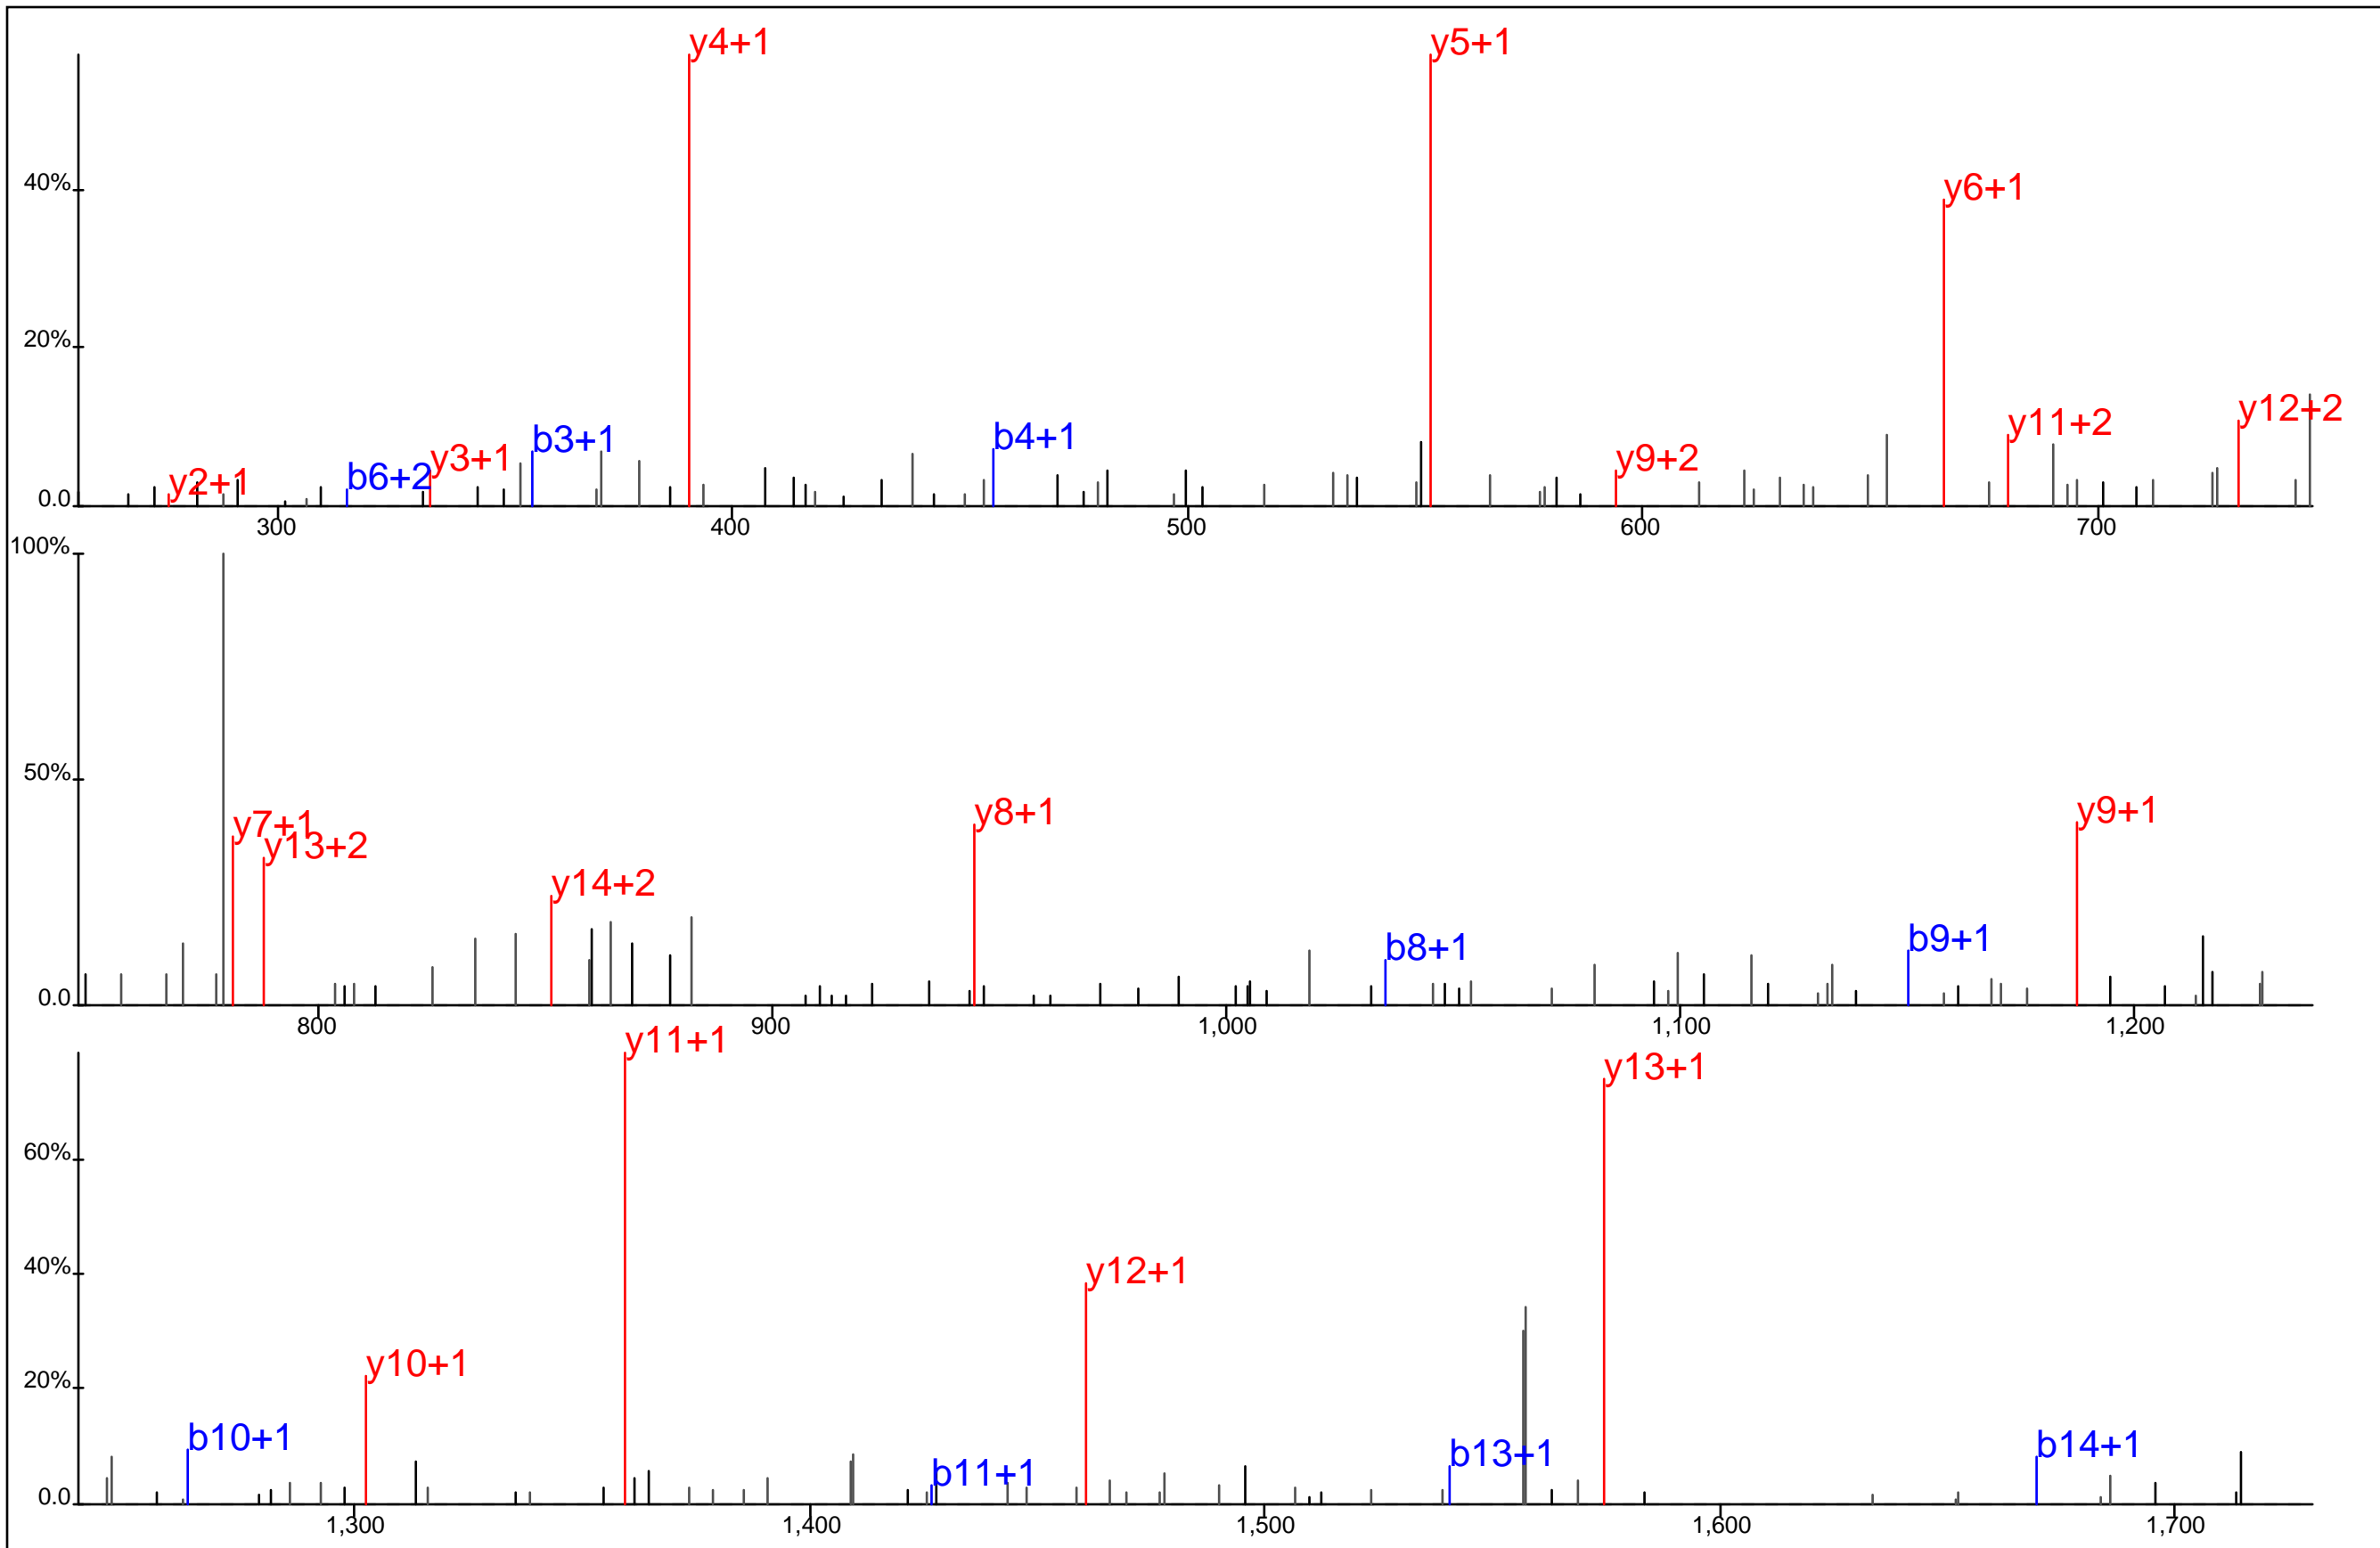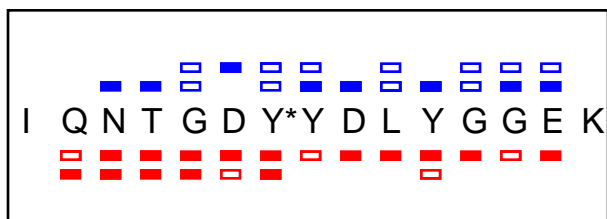

Protein Name: Protein tyrosine phosphatase, non-receptor type 11  
 gi Accession: 0  
 Precursor Mass: 908.3782+2  
 Delta Mass: 1.053 ppm  
 XCorr: 88.79



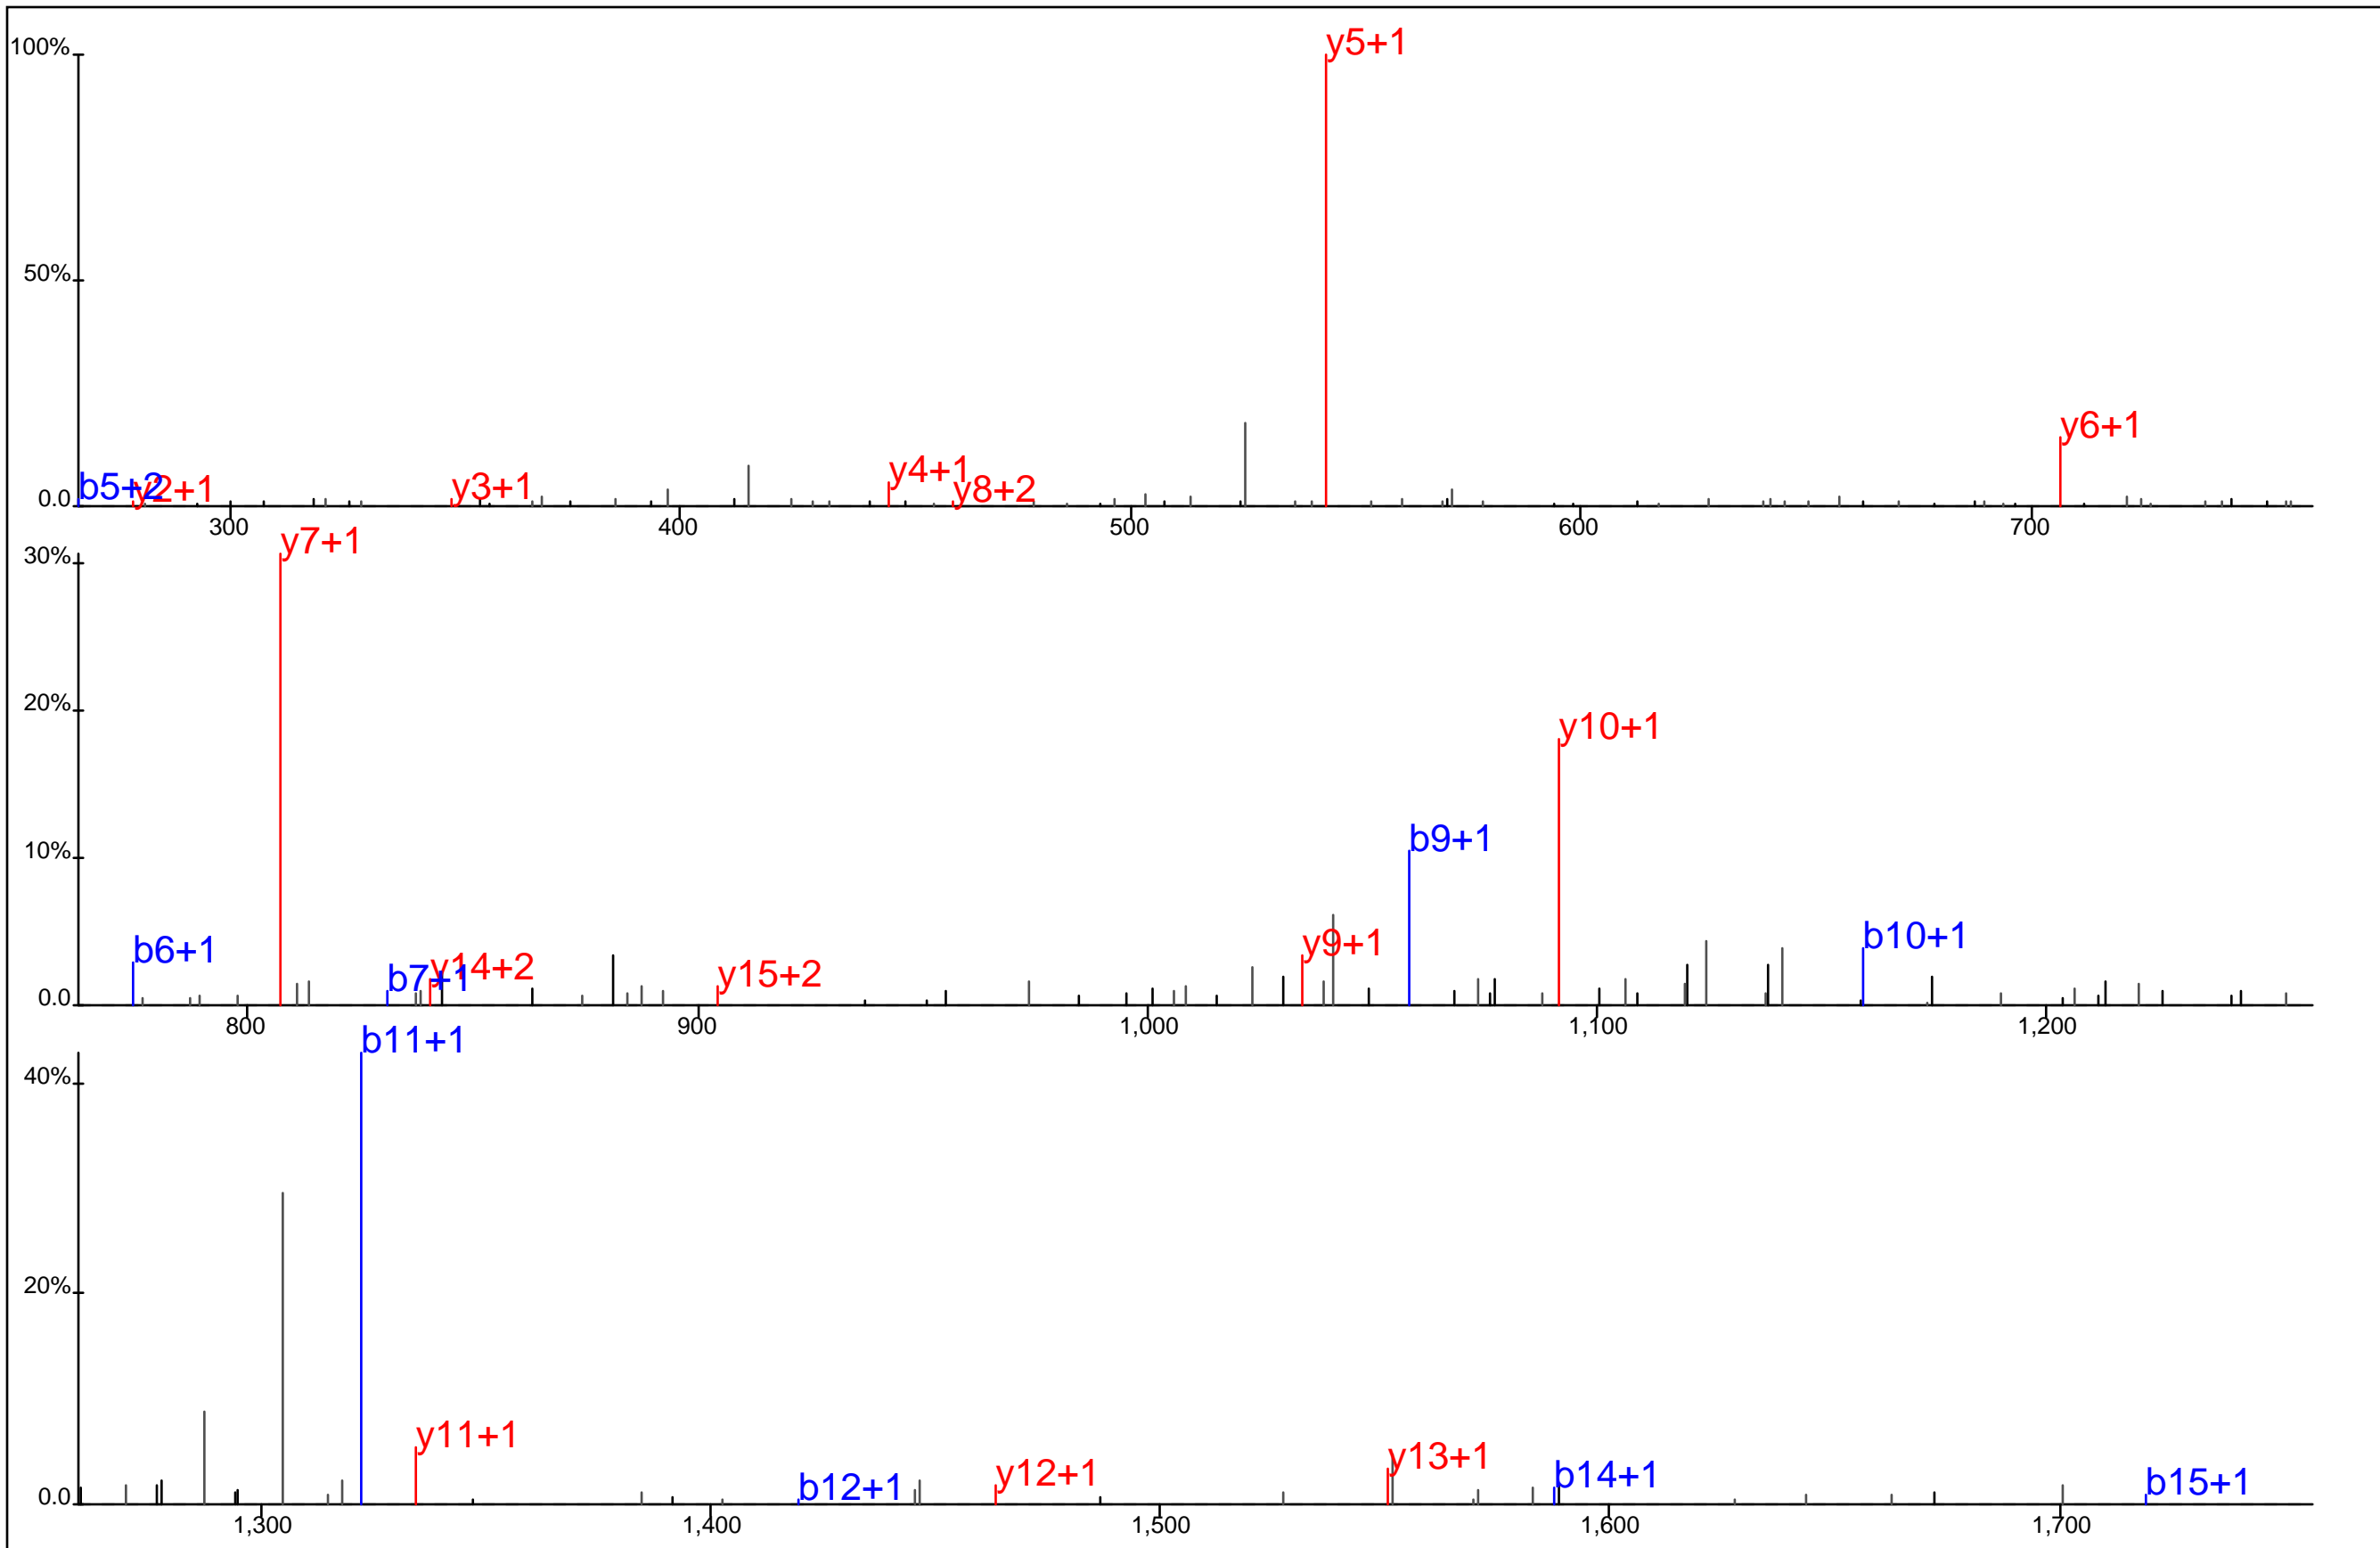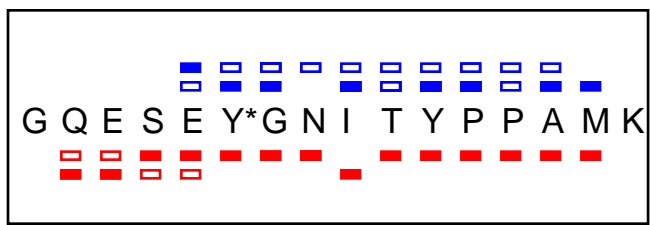

Protein Name: Protein tyrosine phosphatase, non-receptor type 6  
 gi Accession: 0  
 Precursor Mass: 932.8957+2  
 Delta Mass: 0.983 ppm  
 XCorr: 46.24

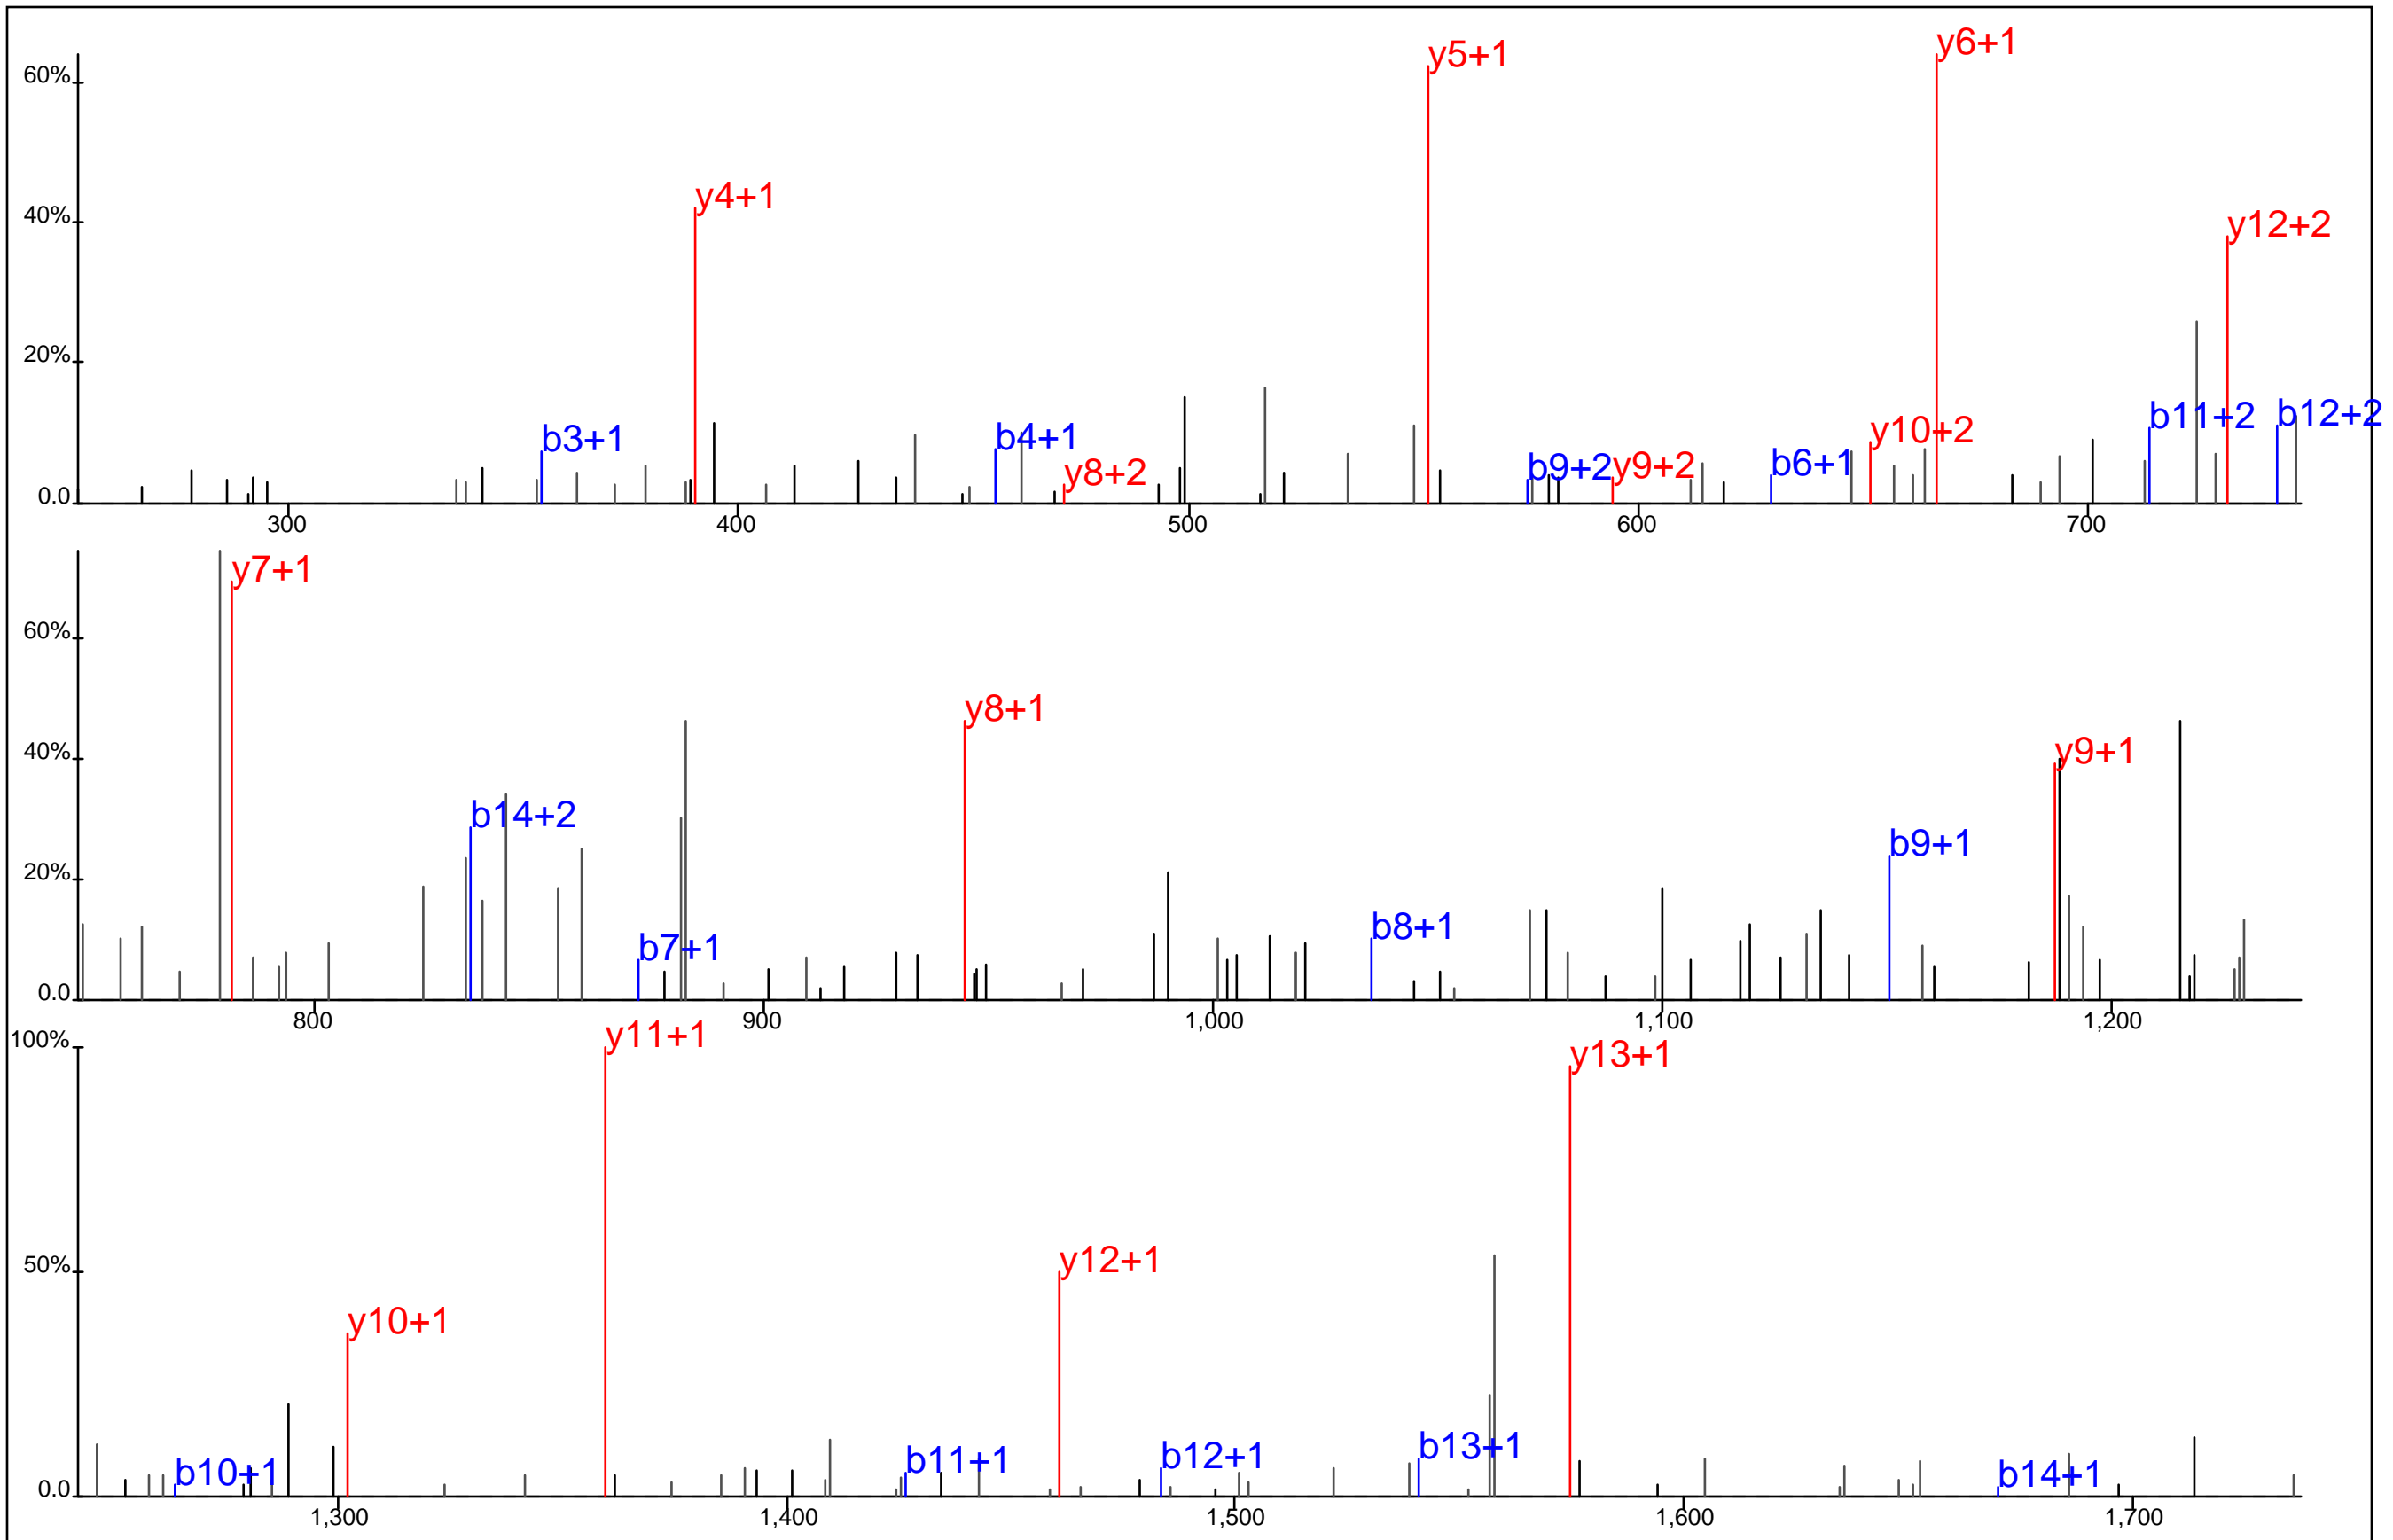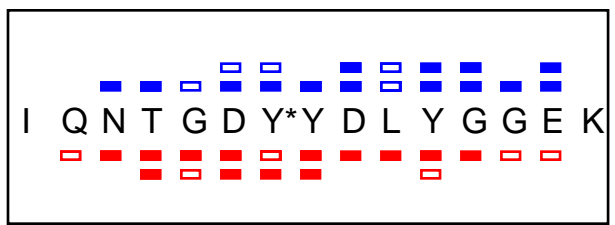

Protein Name: Protein tyrosine phosphatase, non-receptor type 11  
 gi Accession: 0  
 Precursor Mass: 908.3777+2  
 Delta Mass: 0.448 ppm  
 XCorr: 53.98

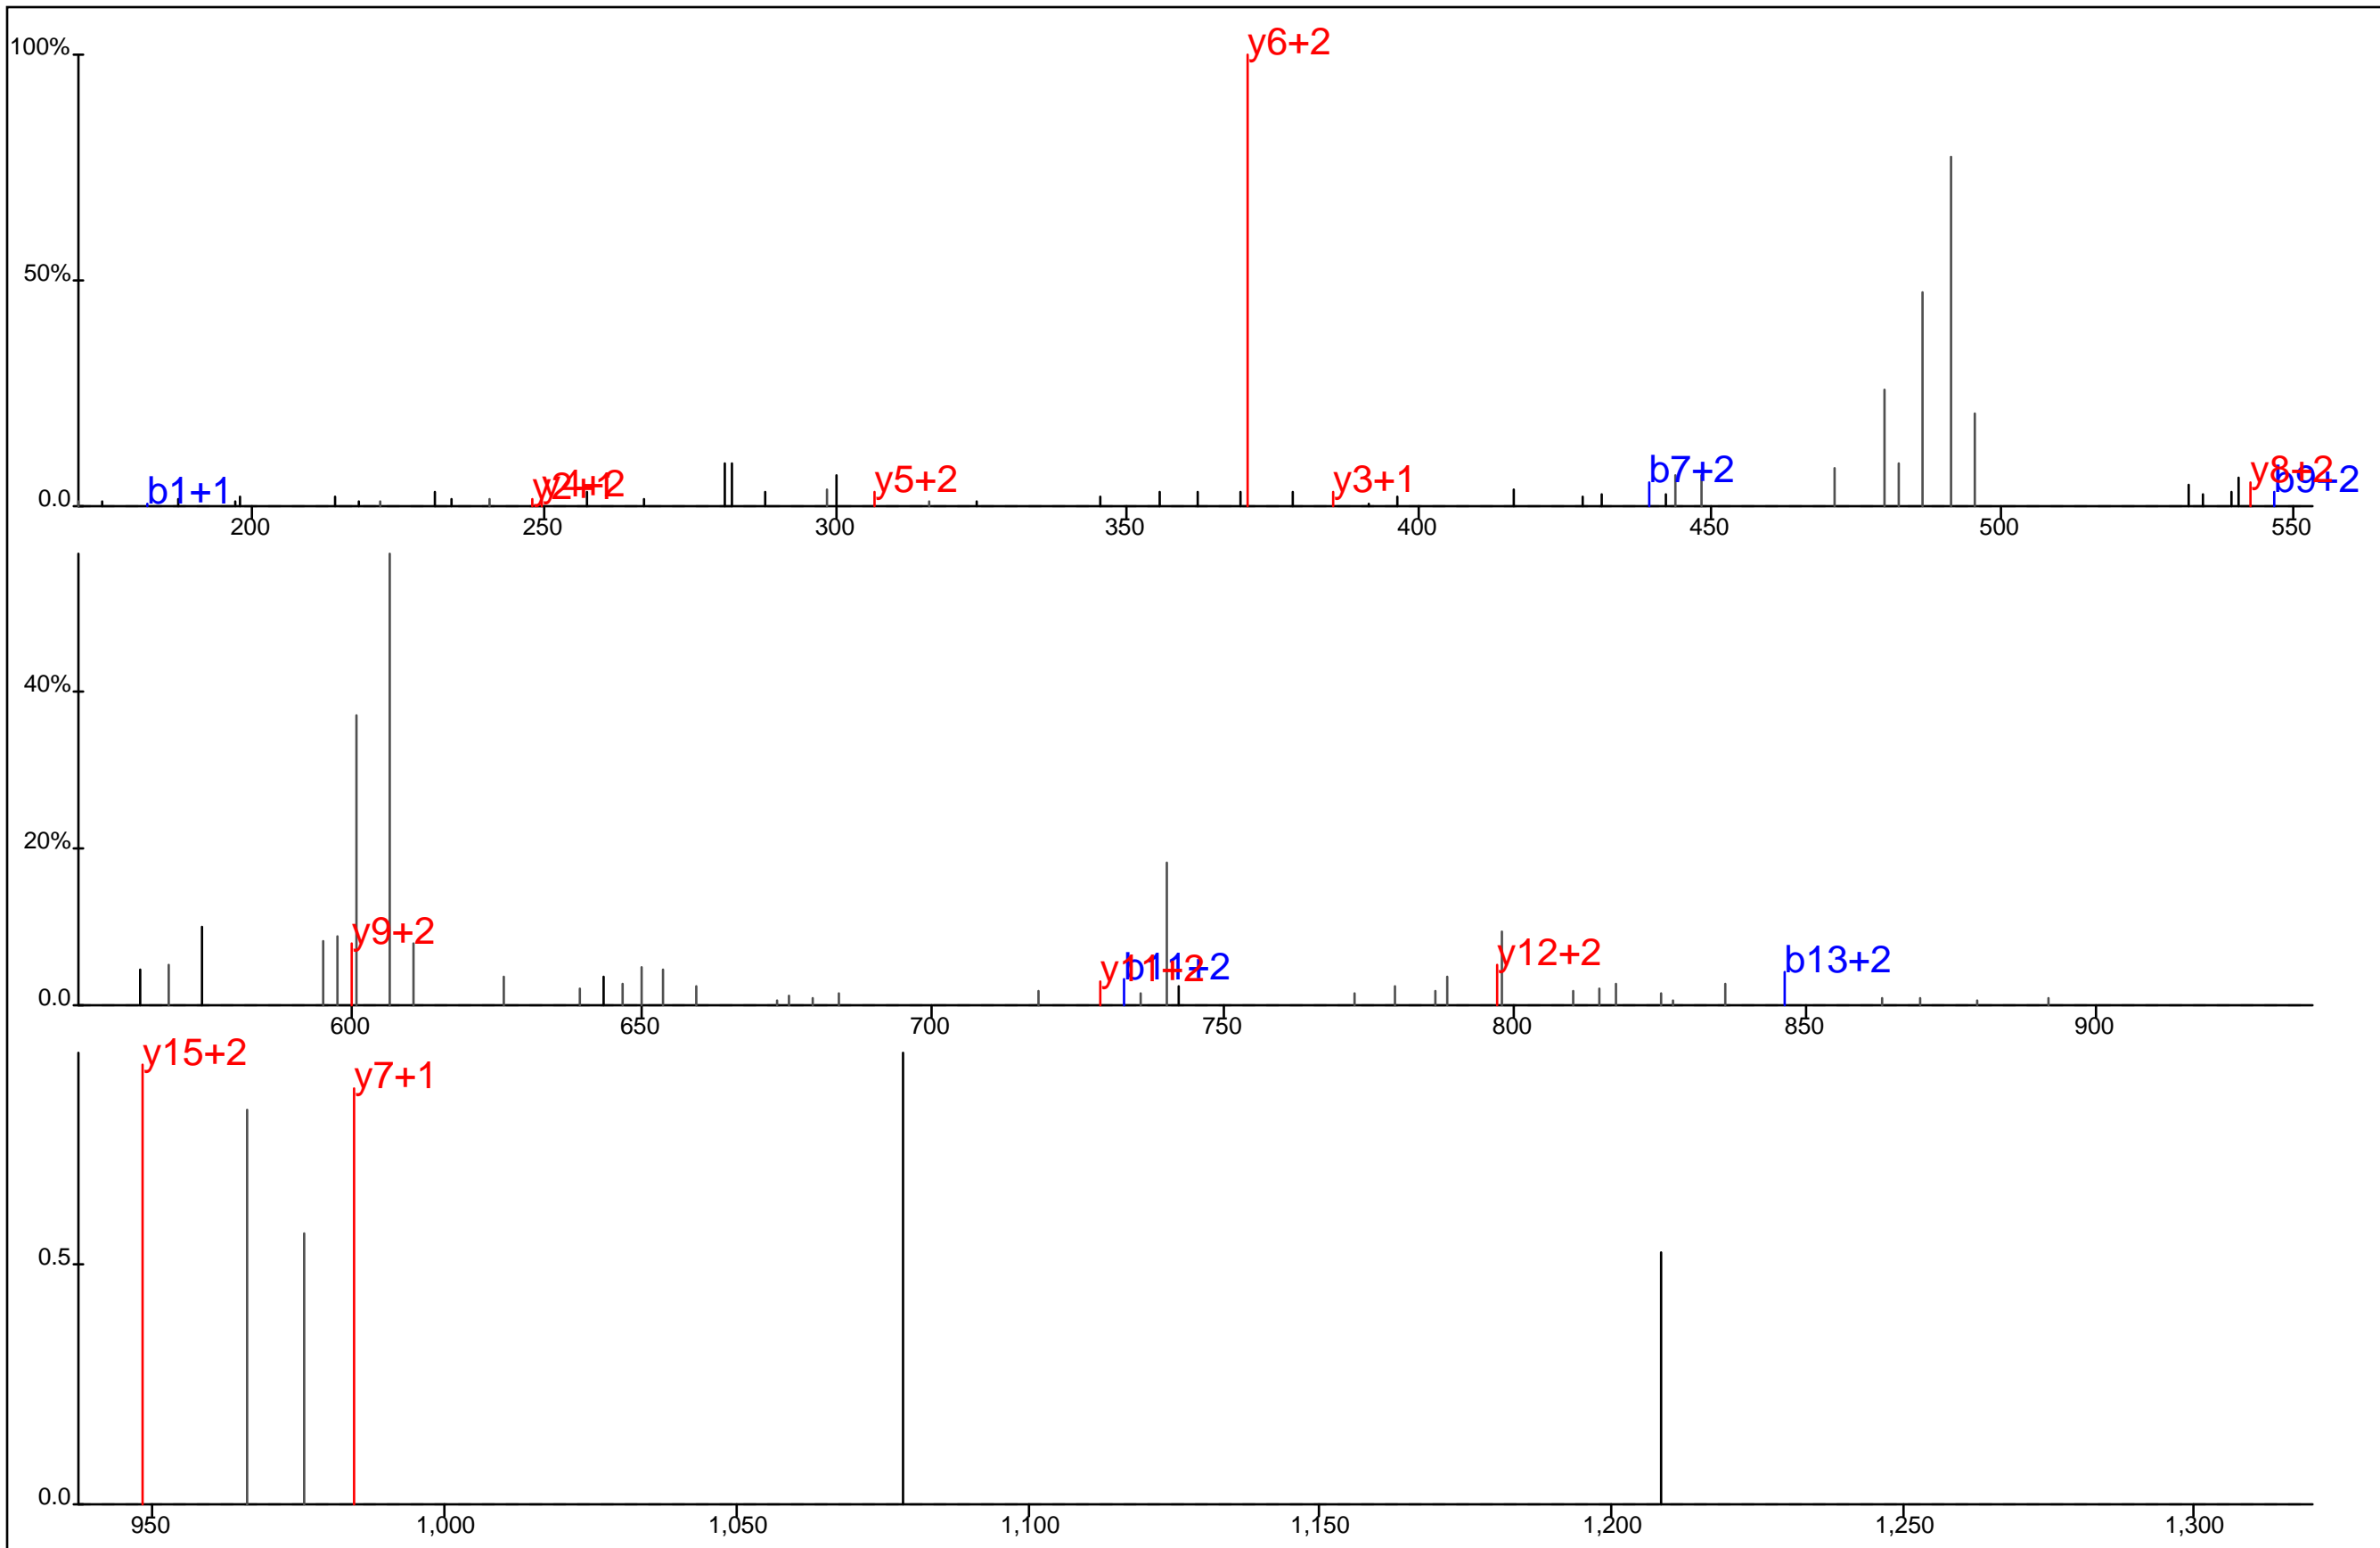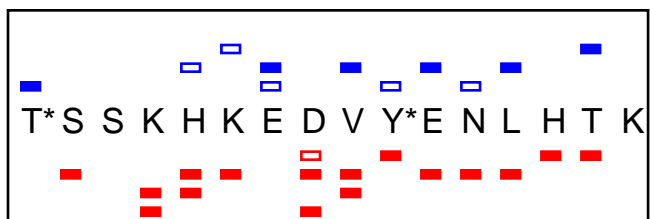

Protein Name: Protein tyrosine phosphatase, non-receptor type 6  
 gi Accession: 0  
 Precursor Mass: 519.7267+4  
 Delta Mass: 0.703 ppm  
 XCorr: 21.26

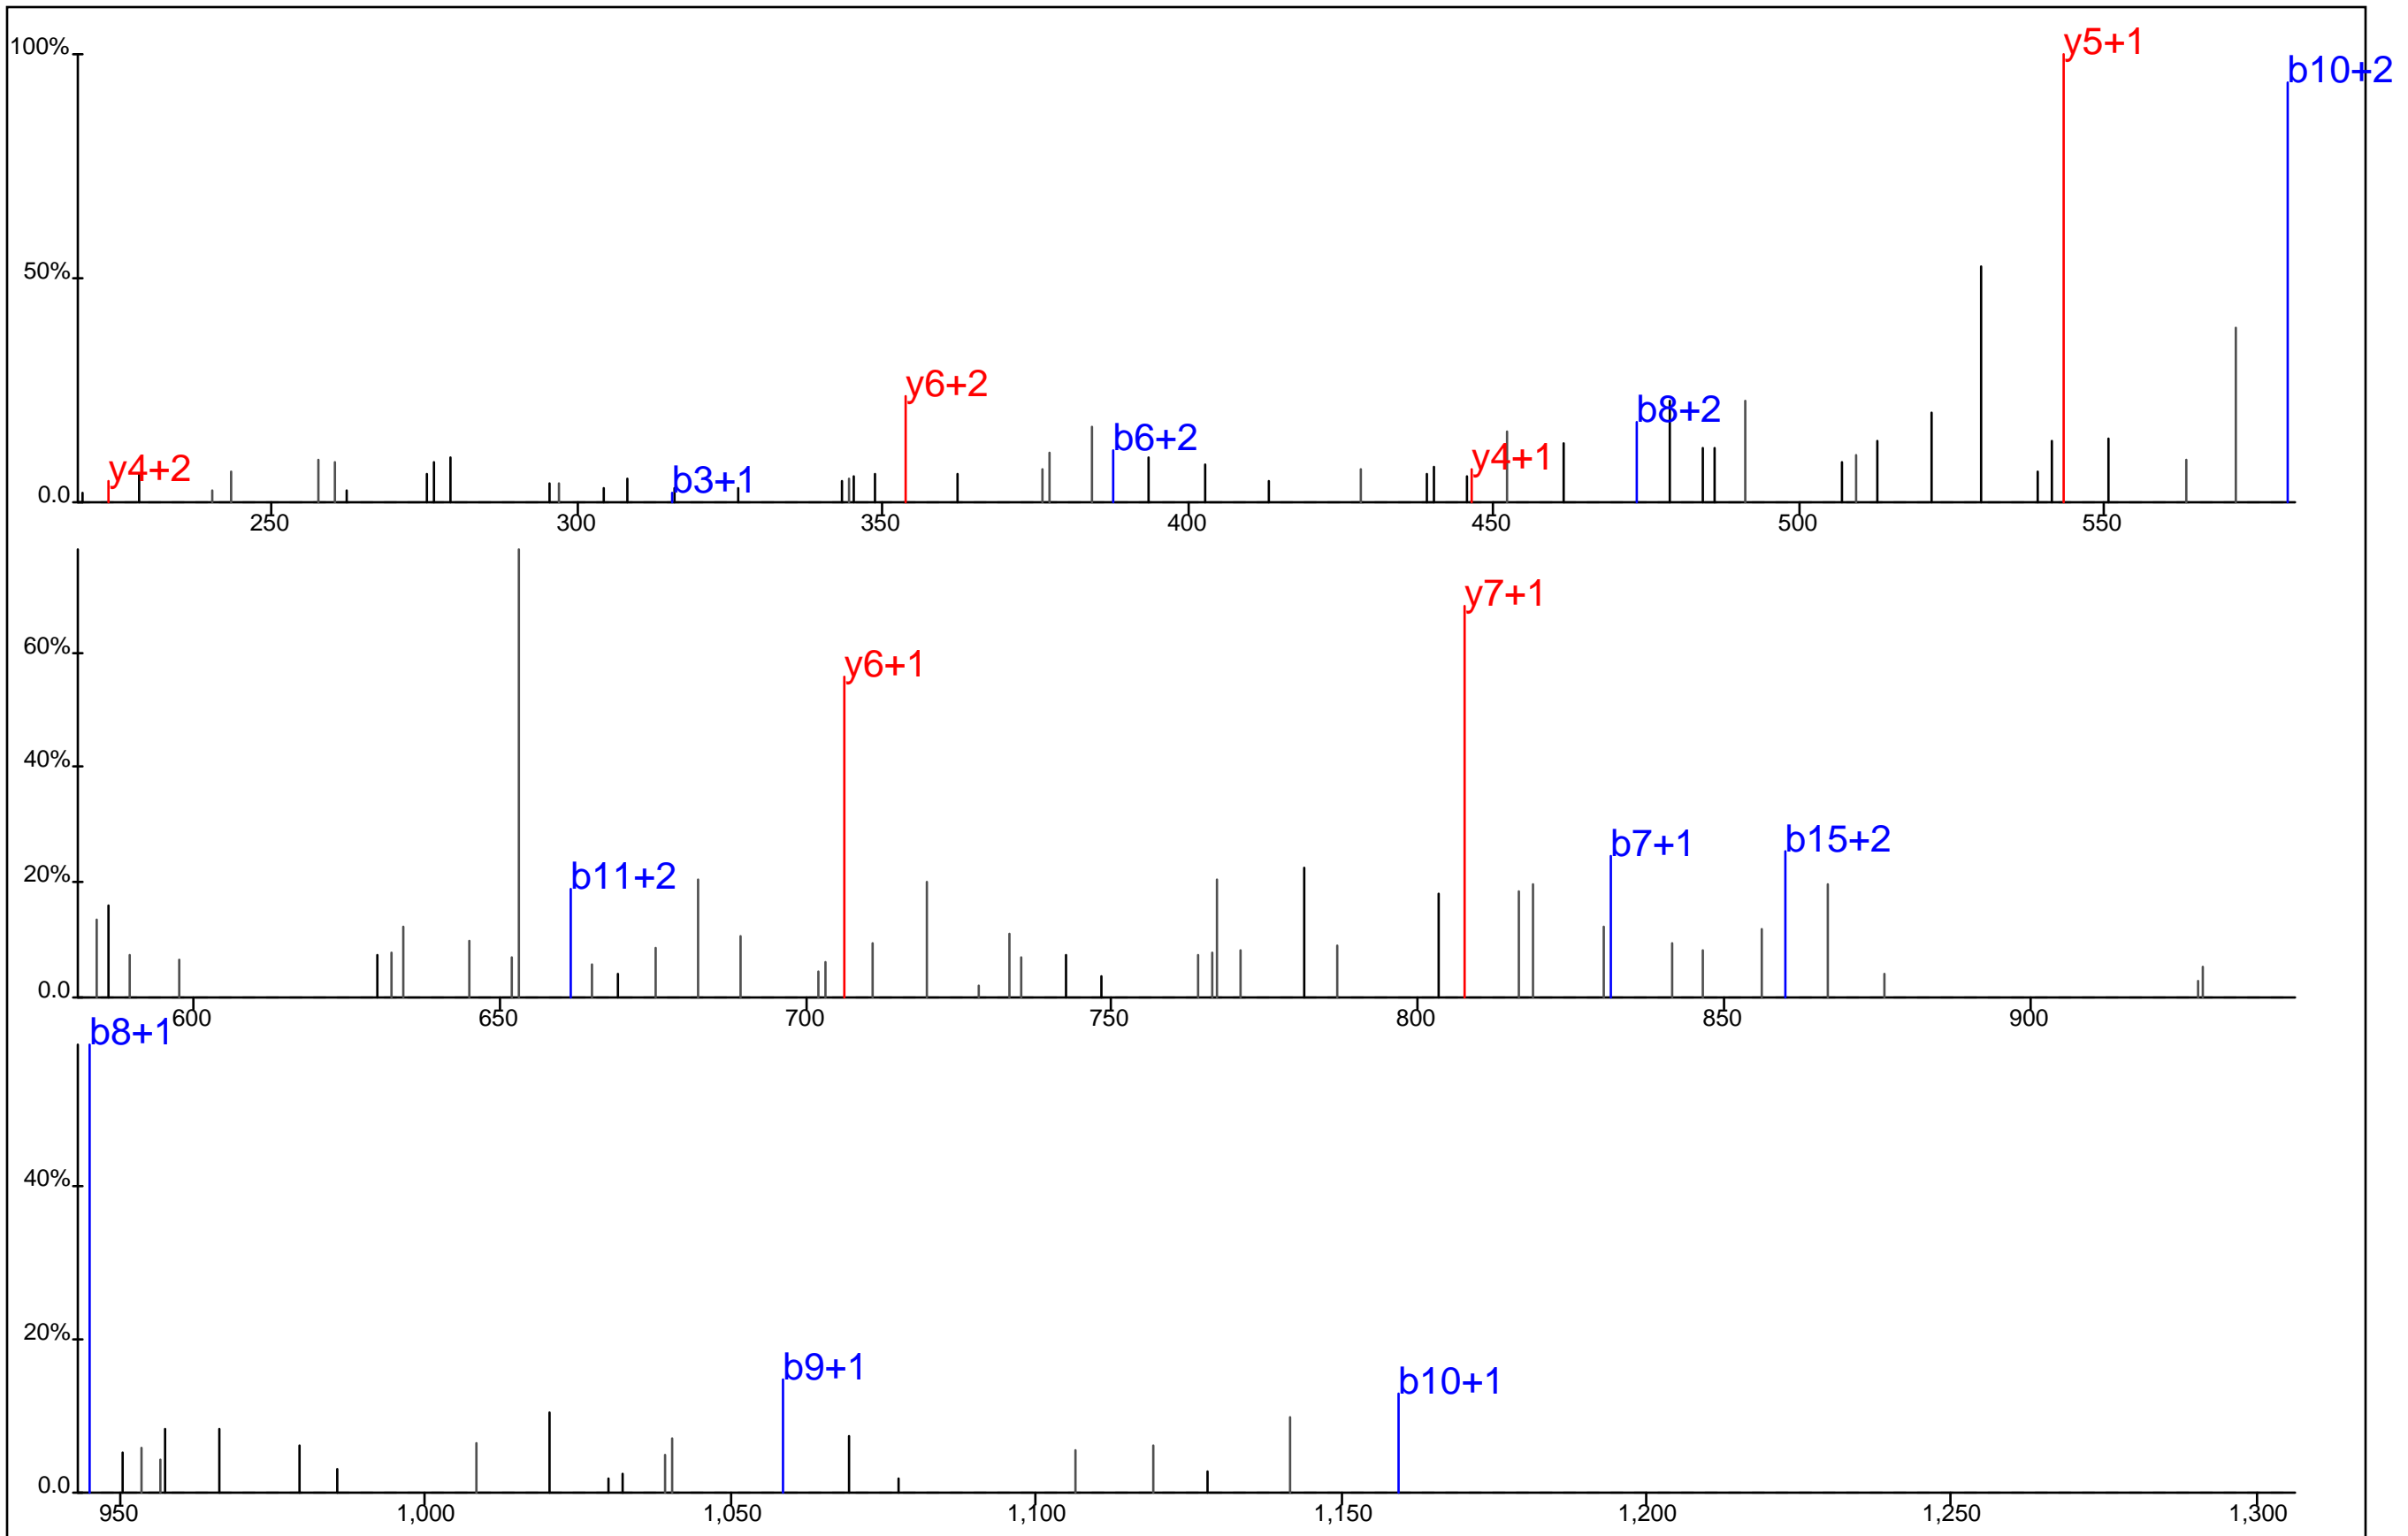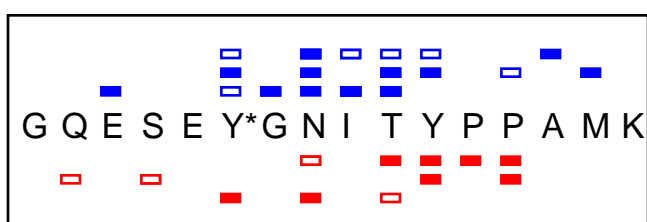

Protein Name: Protein tyrosine phosphatase, non-receptor type 6  
 gi Accession: 0  
 Precursor Mass: 622.2648+3  
 Delta Mass: 1.347 ppm  
 XCorr: 23.68

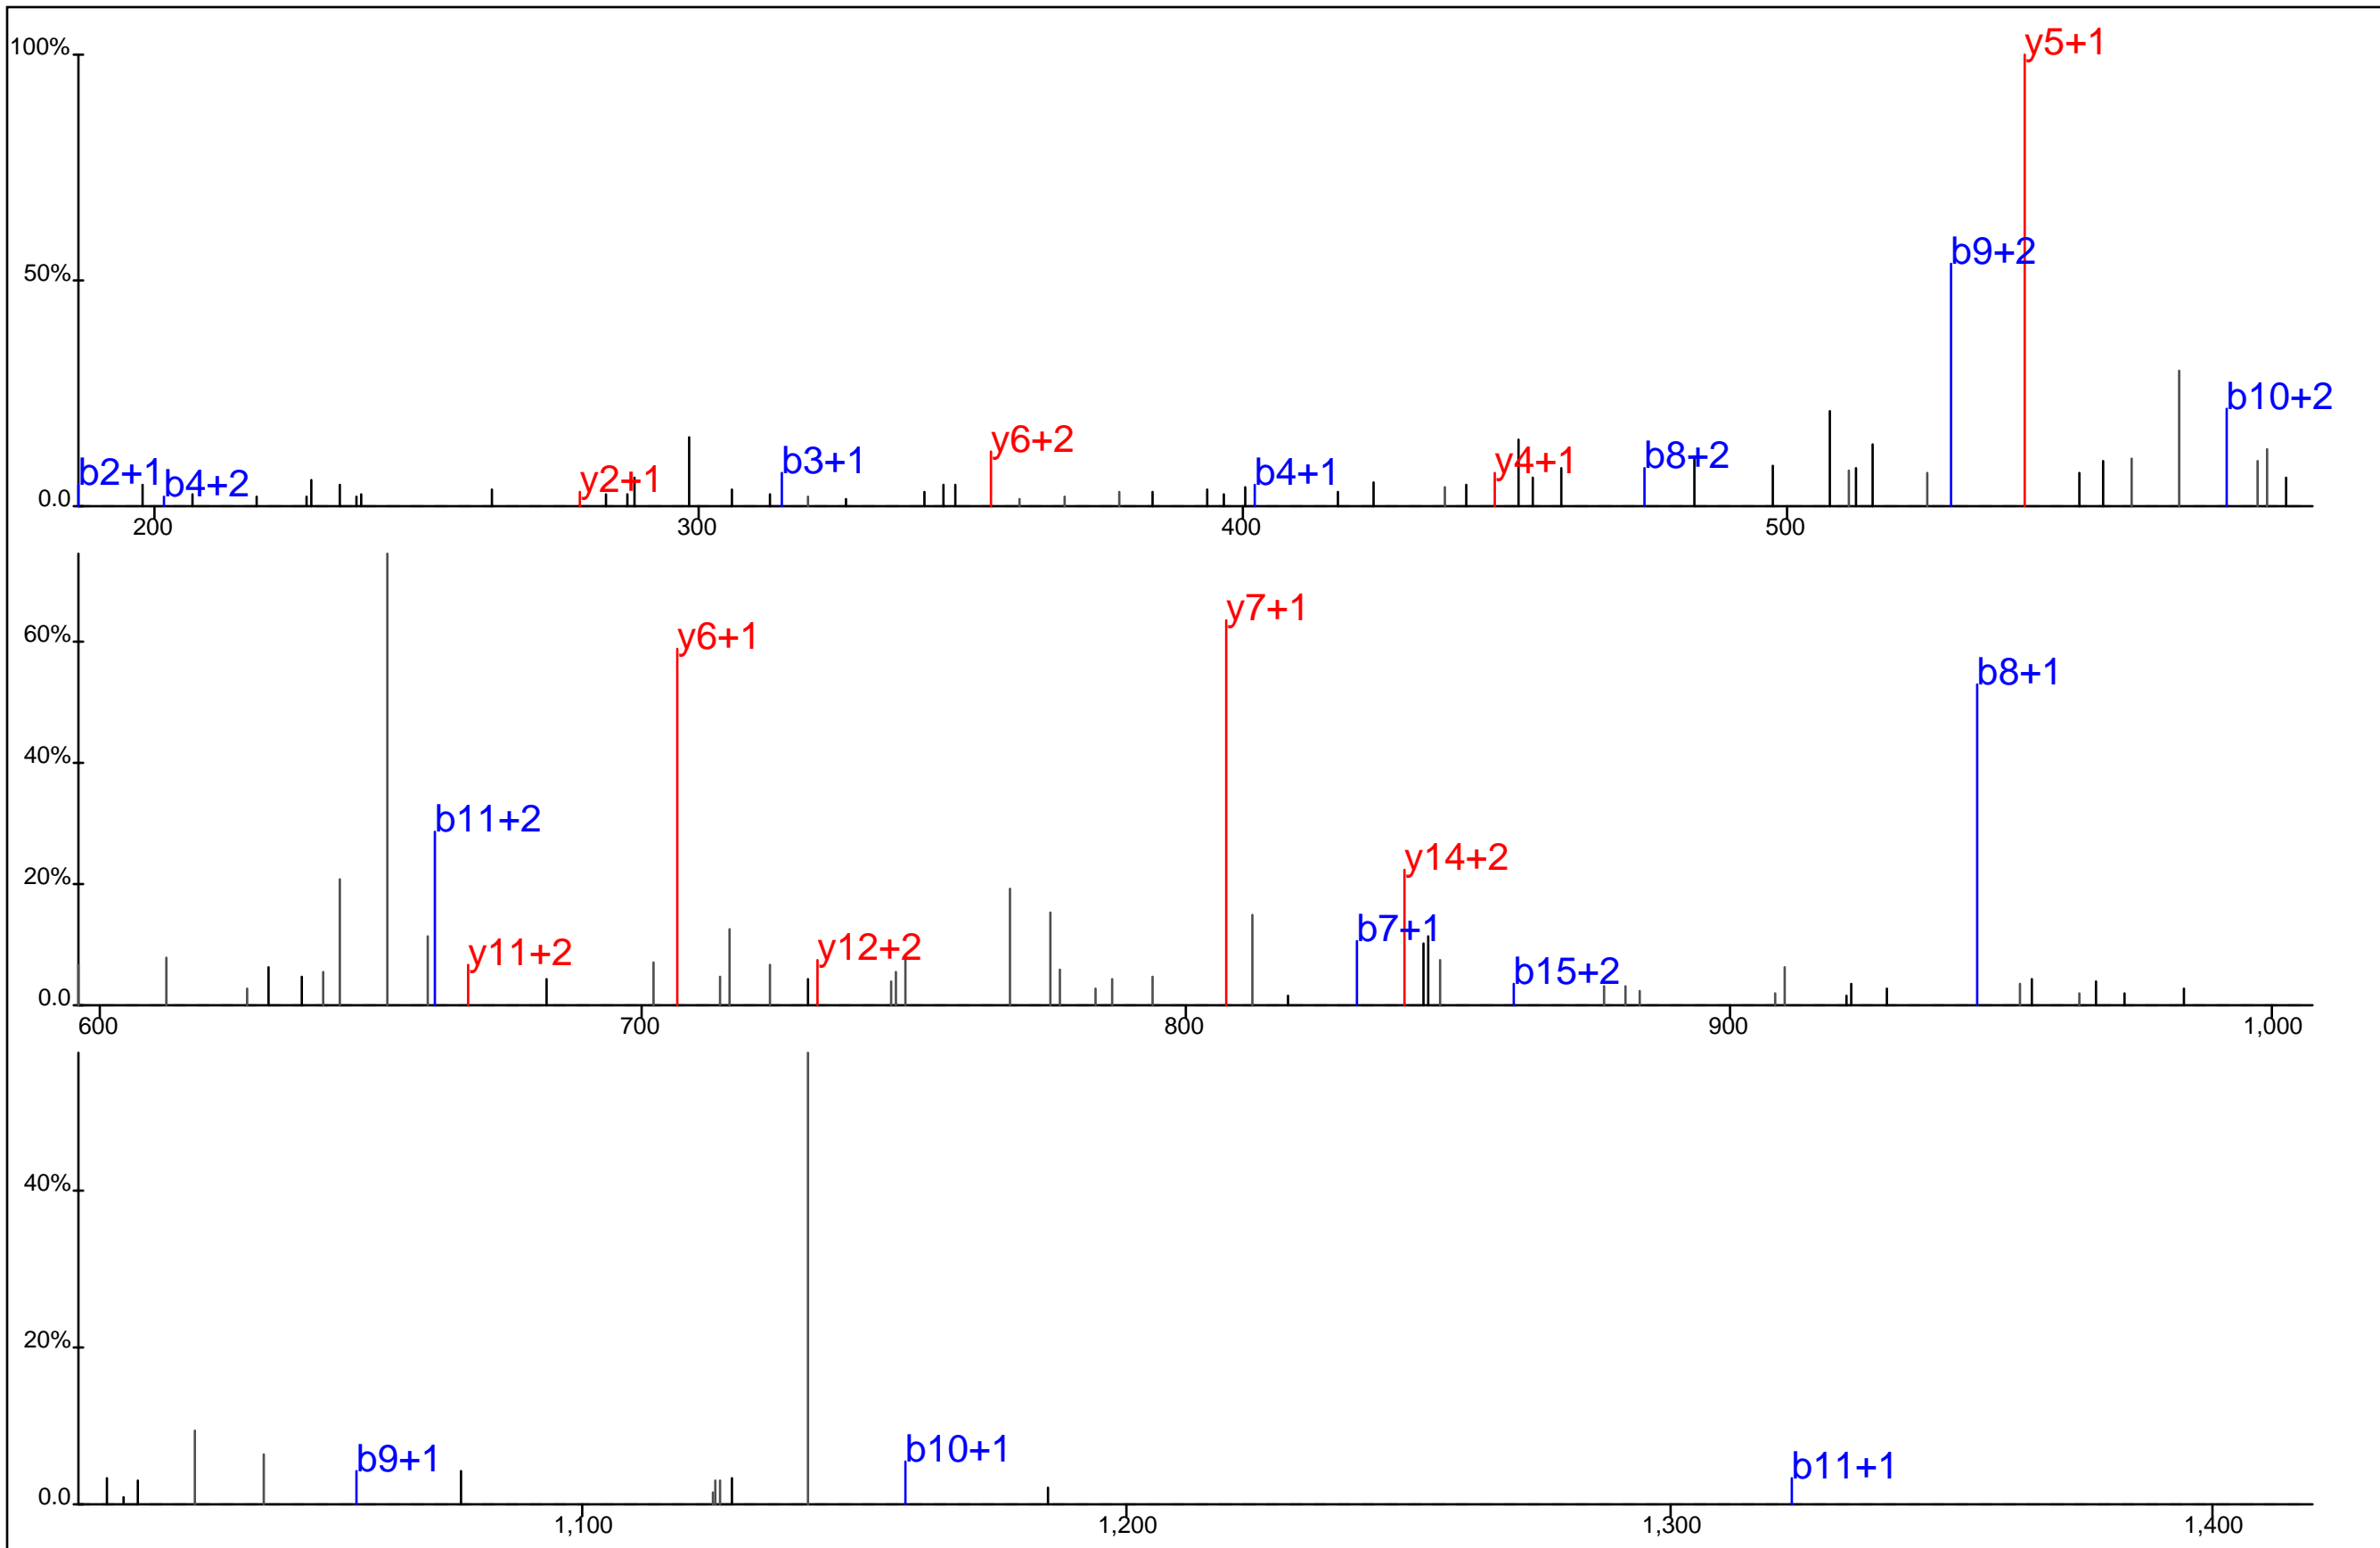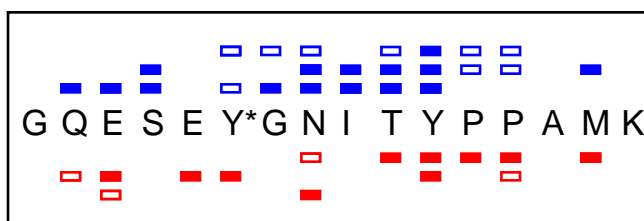

Protein Name: Protein tyrosine phosphatase, non-receptor type 6  
 gi Accession: 0  
 Precursor Mass: 622.2650+3  
 Delta Mass: 1.052 ppm  
 XCorr: 25.87



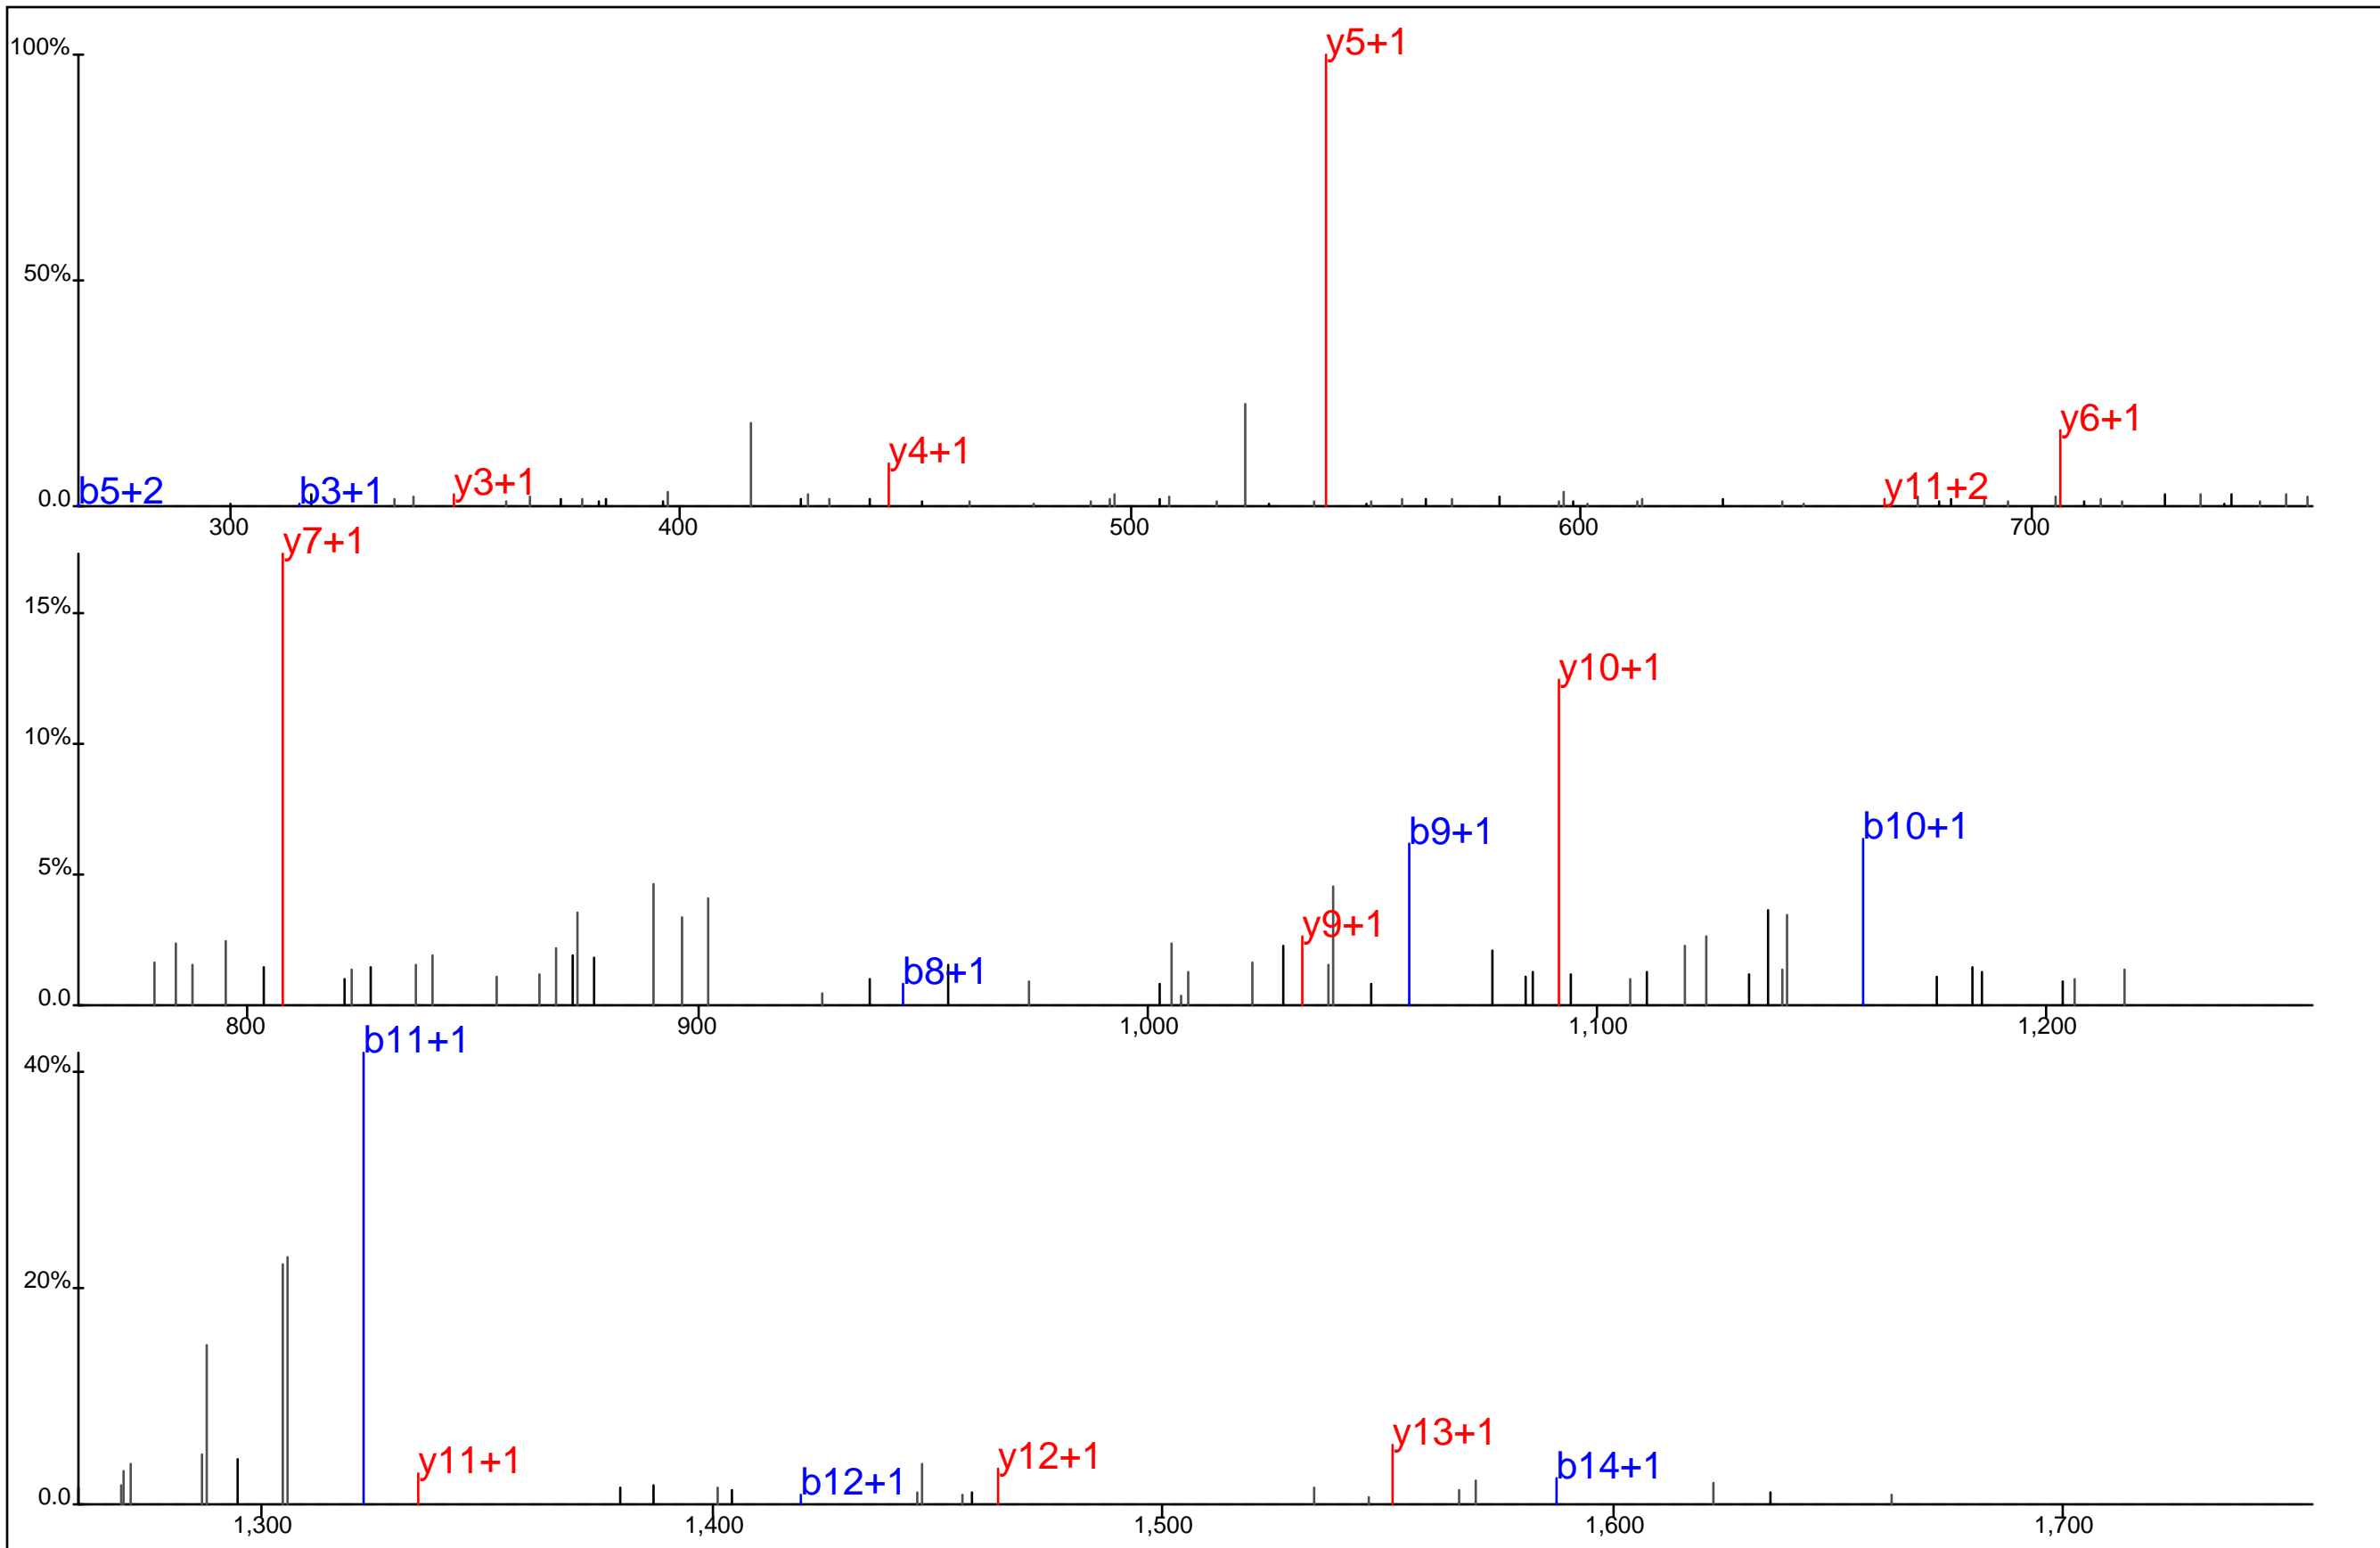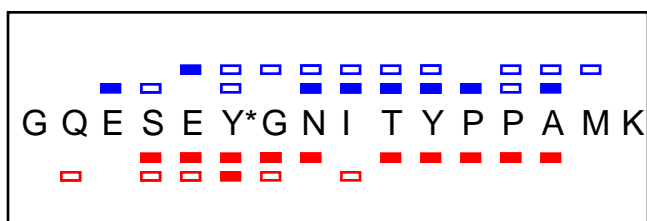

Protein Name: Protein tyrosine phosphatase, non-receptor type 6  
 gi Accession: 0  
 Precursor Mass: 932.8931+2  
 Delta Mass: 1.832 ppm  
 XCorr: 50.88

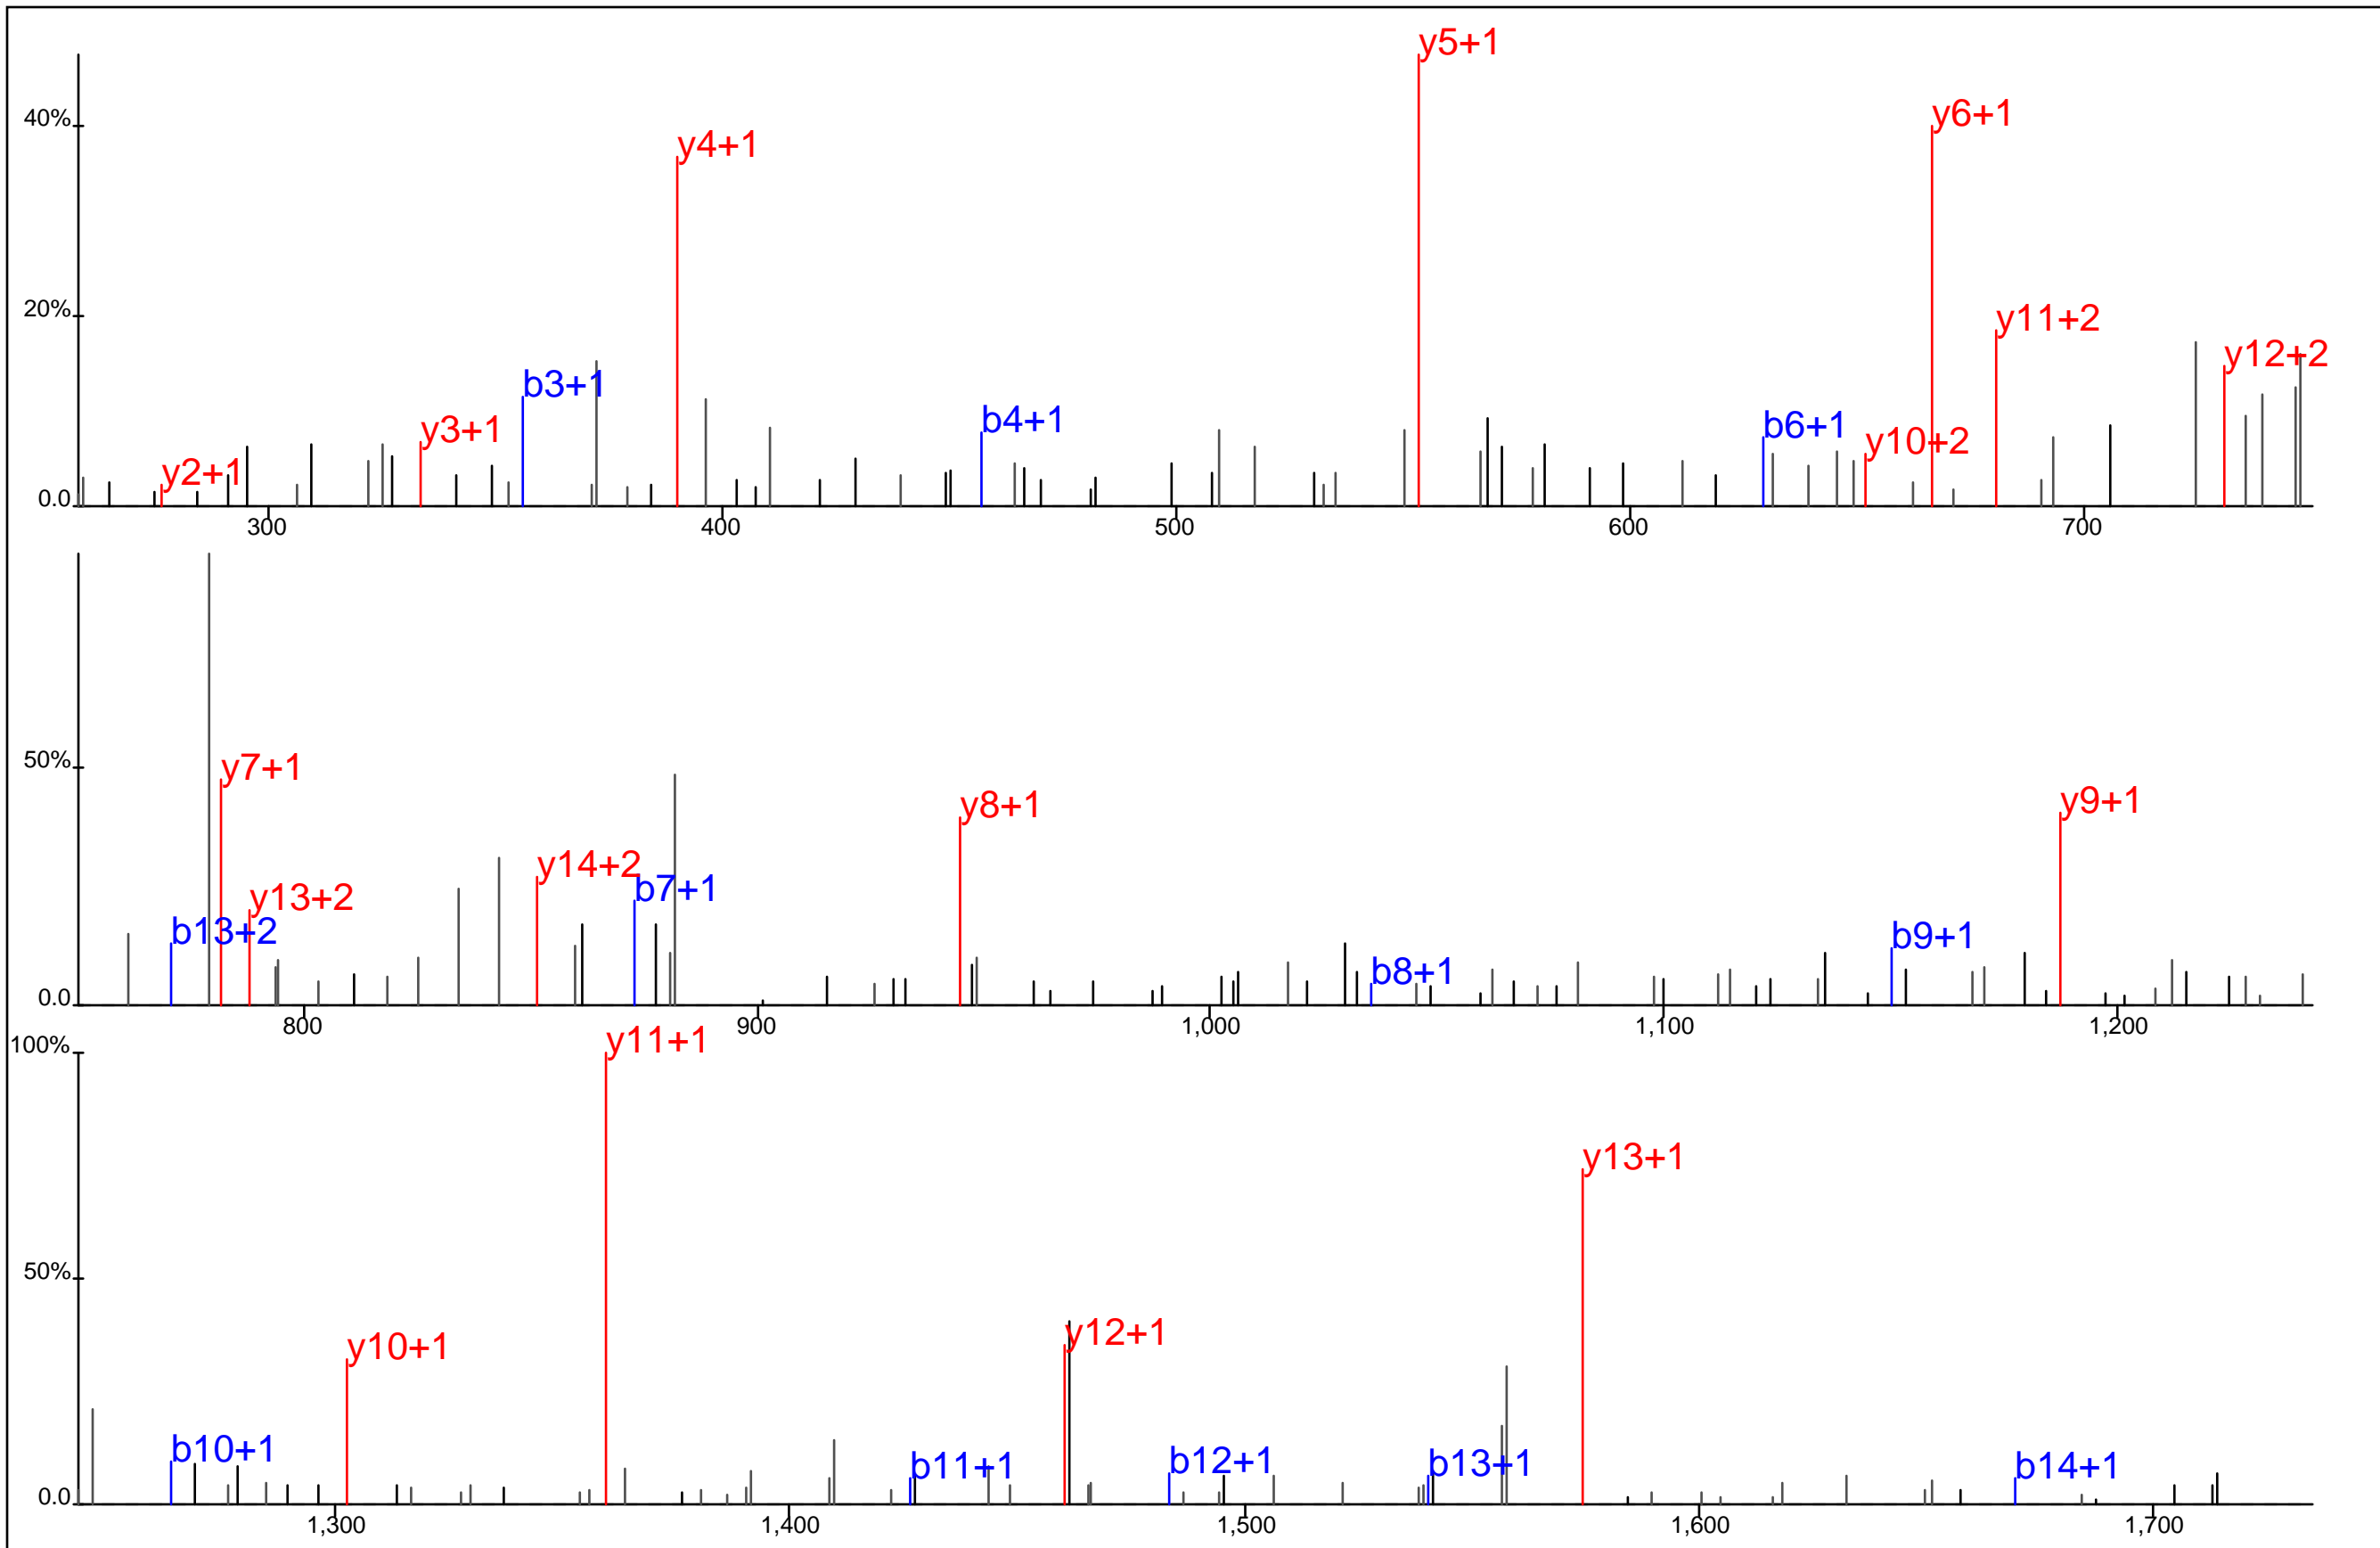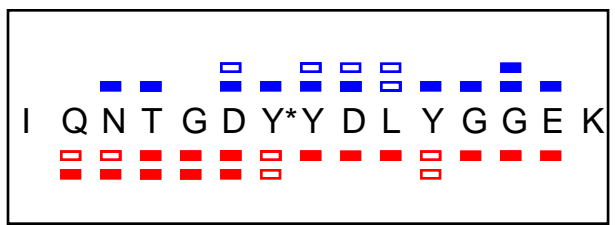

Protein Name: Protein tyrosine phosphatase, non-receptor type 11  
 gi Accession: 0  
 Precursor Mass: 908.3773+2  
 Delta Mass: 0.044 ppm  
 XCorr: 90.92

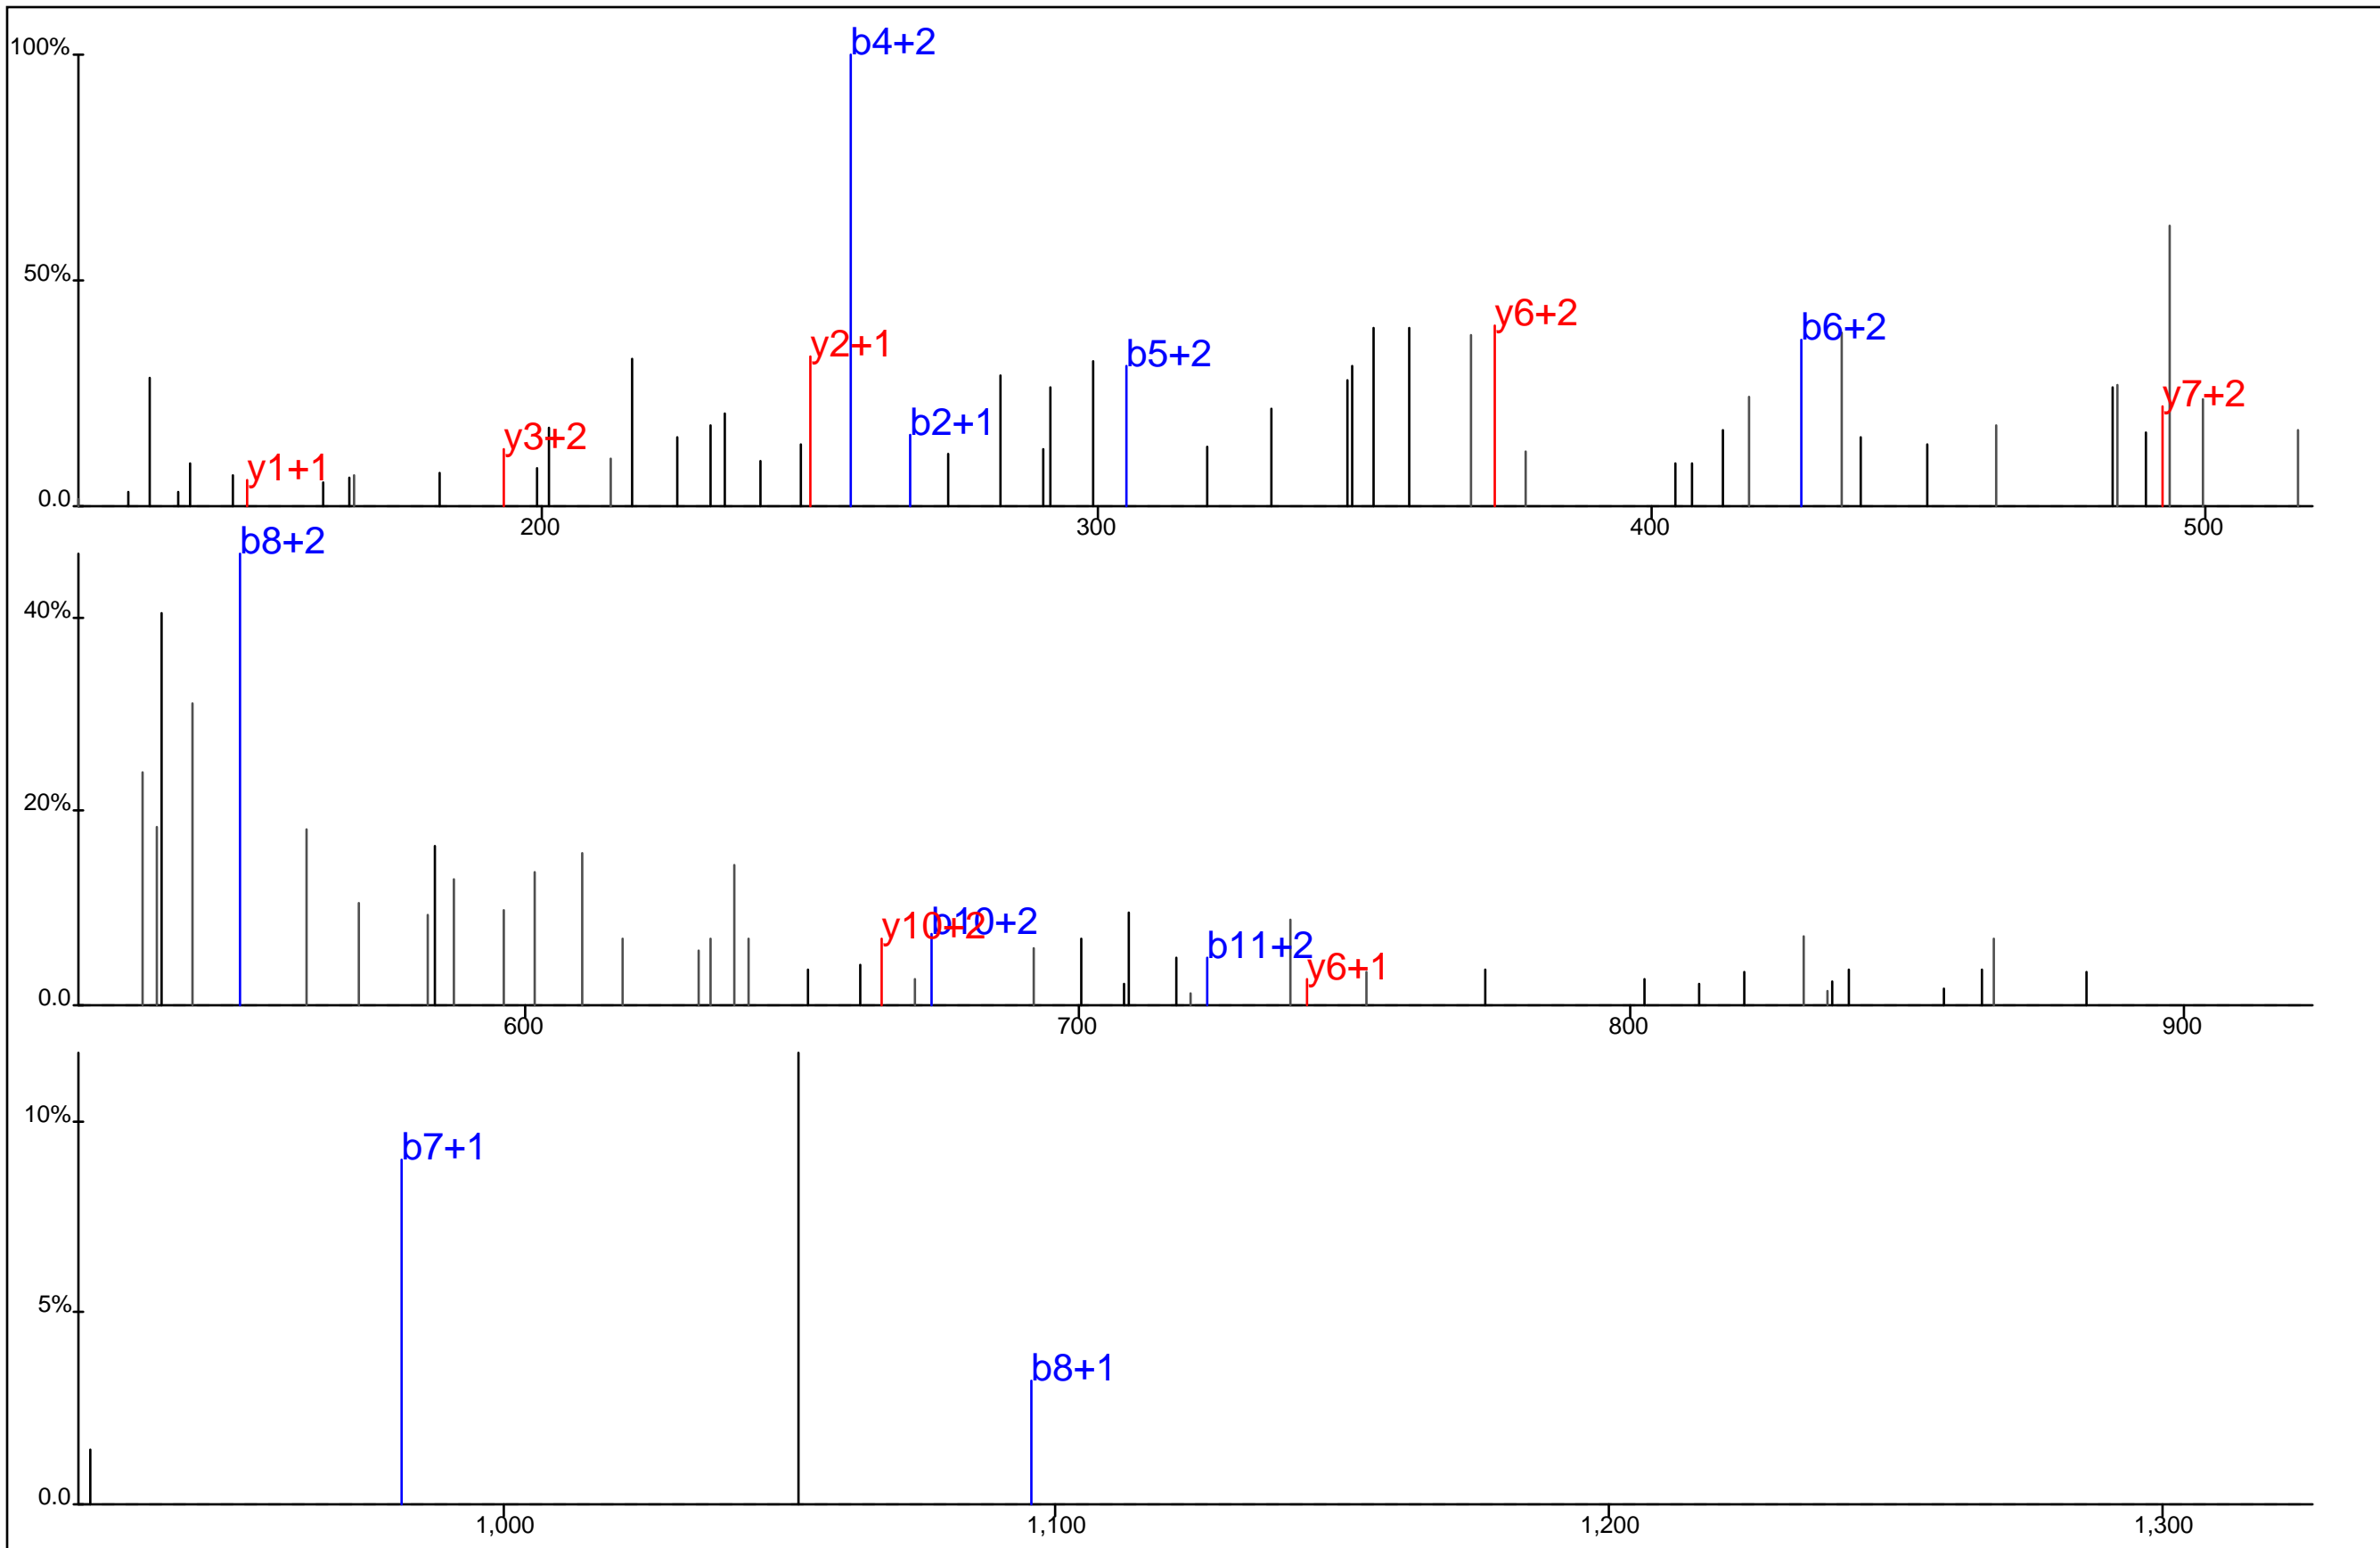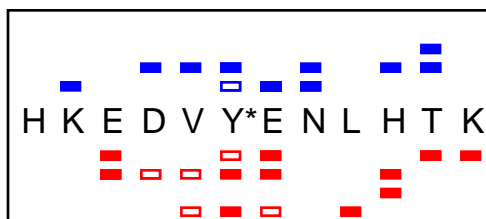

Protein Name: Protein tyrosine phosphatase, non-receptor type 6  
 gi Accession: 0  
 Precursor Mass: 398.9338+4  
 Delta Mass: 1.788 ppm  
 XCorr: 20.97

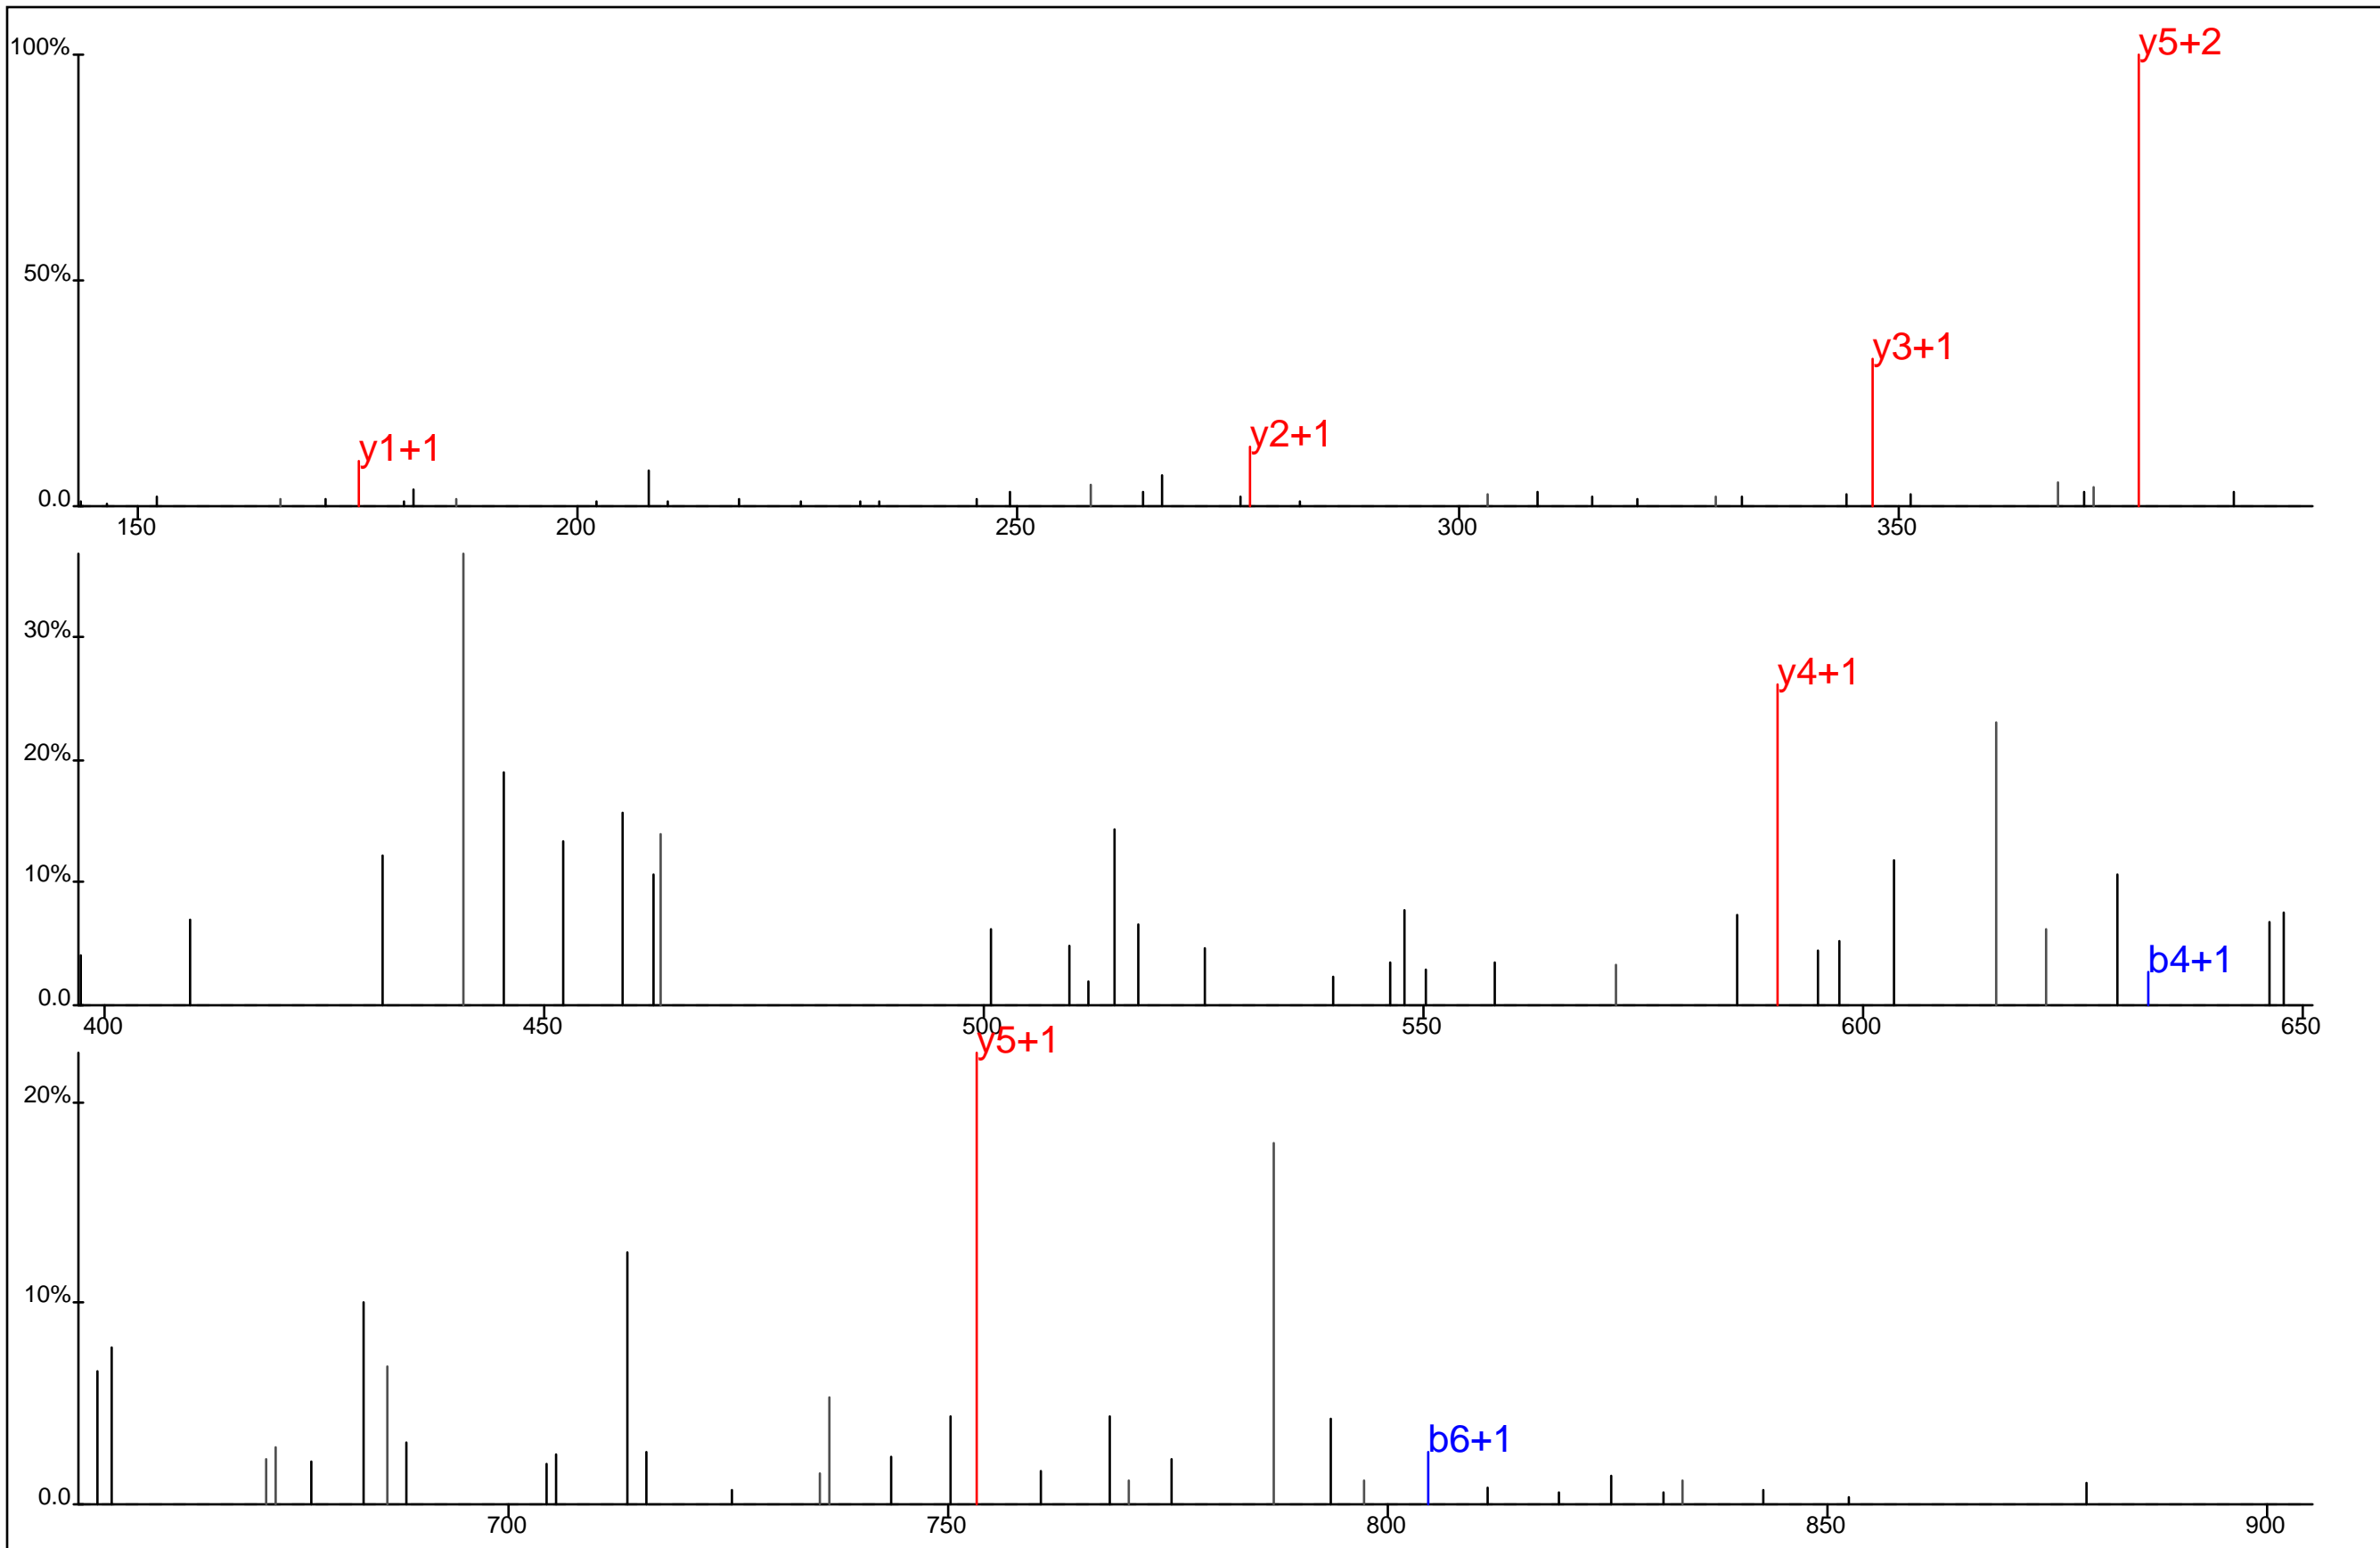

□ □ □ □ □  
 Q P Y Y\* A T R  
□ □ □ □ □

Protein Name: Protein tyrosine phosphatase, non-receptor type 6  
 gi Accession: 0  
 Precursor Mass: 489.7074+2  
 Delta Mass: 0.546 ppm  
 XCorr: 21.99

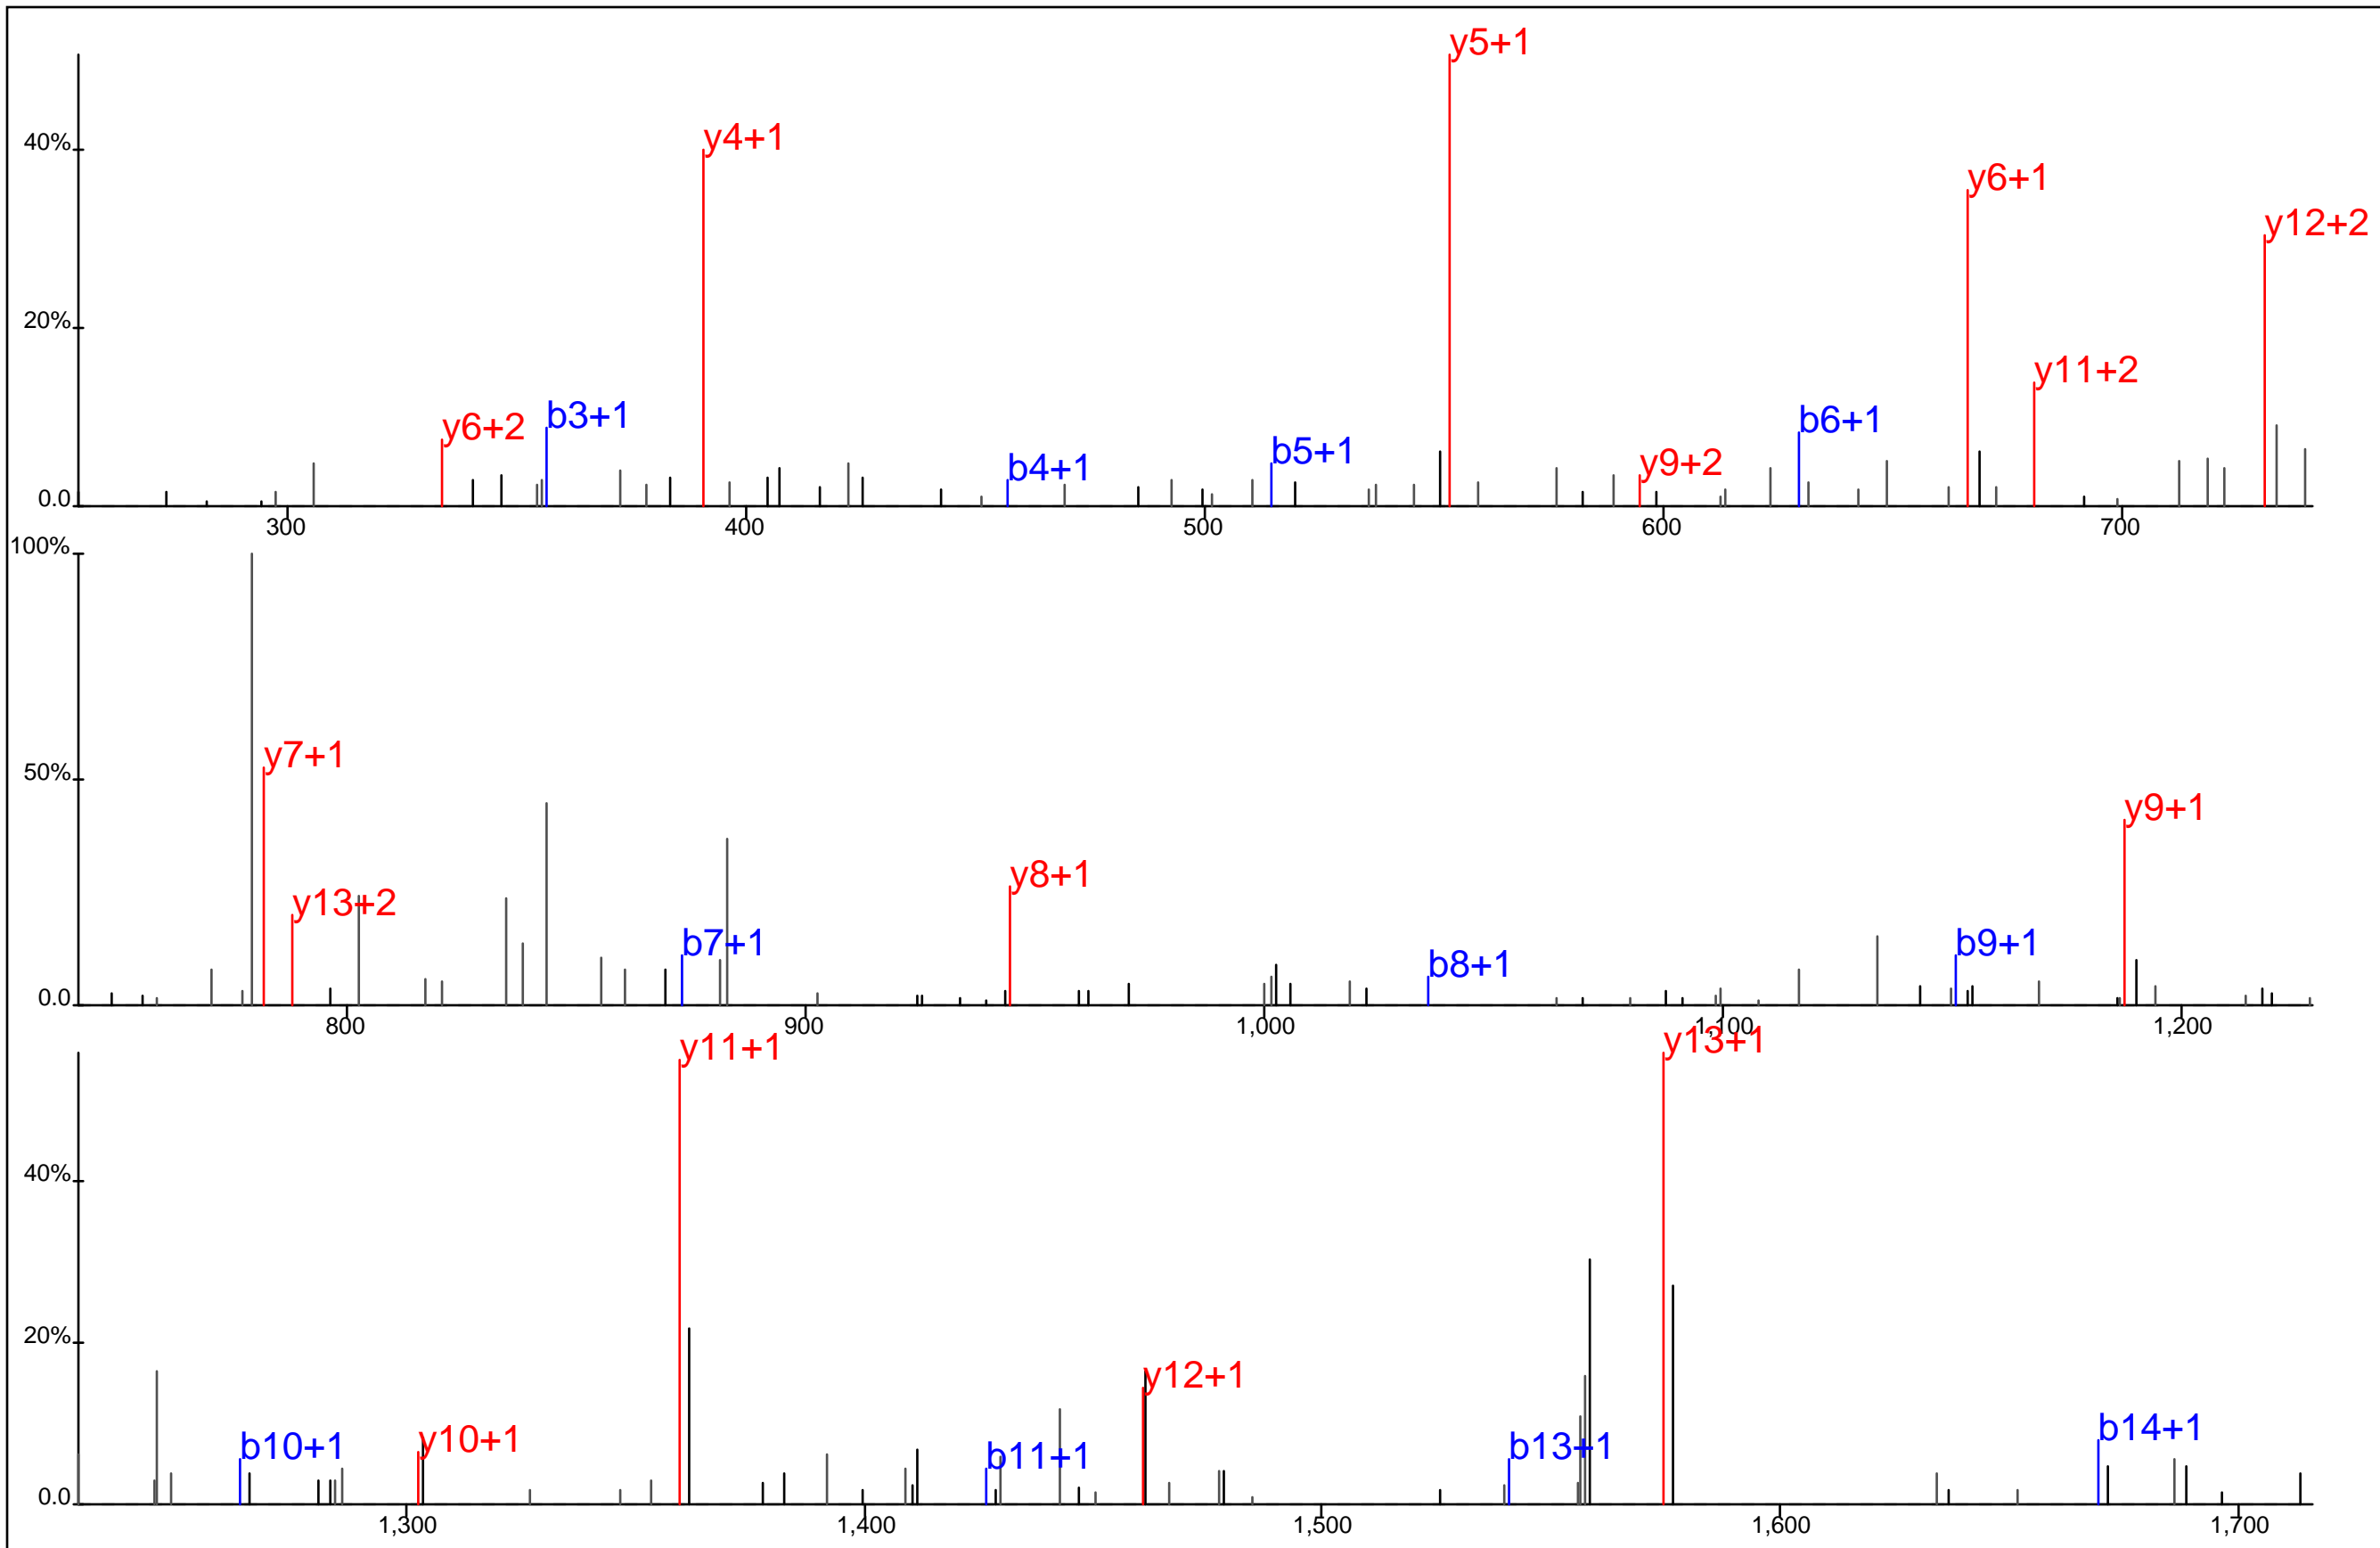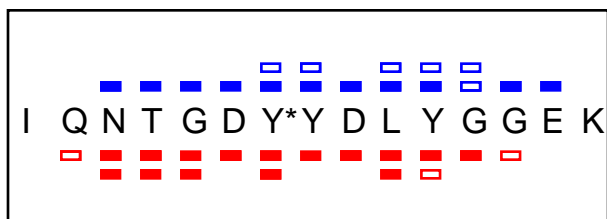

Protein Name: Protein tyrosine phosphatase, non-receptor type 11  
 gi Accession: 0  
 Precursor Mass: 908.3772+2  
 Delta Mass: 0.090 ppm  
 XCorr: 85.72

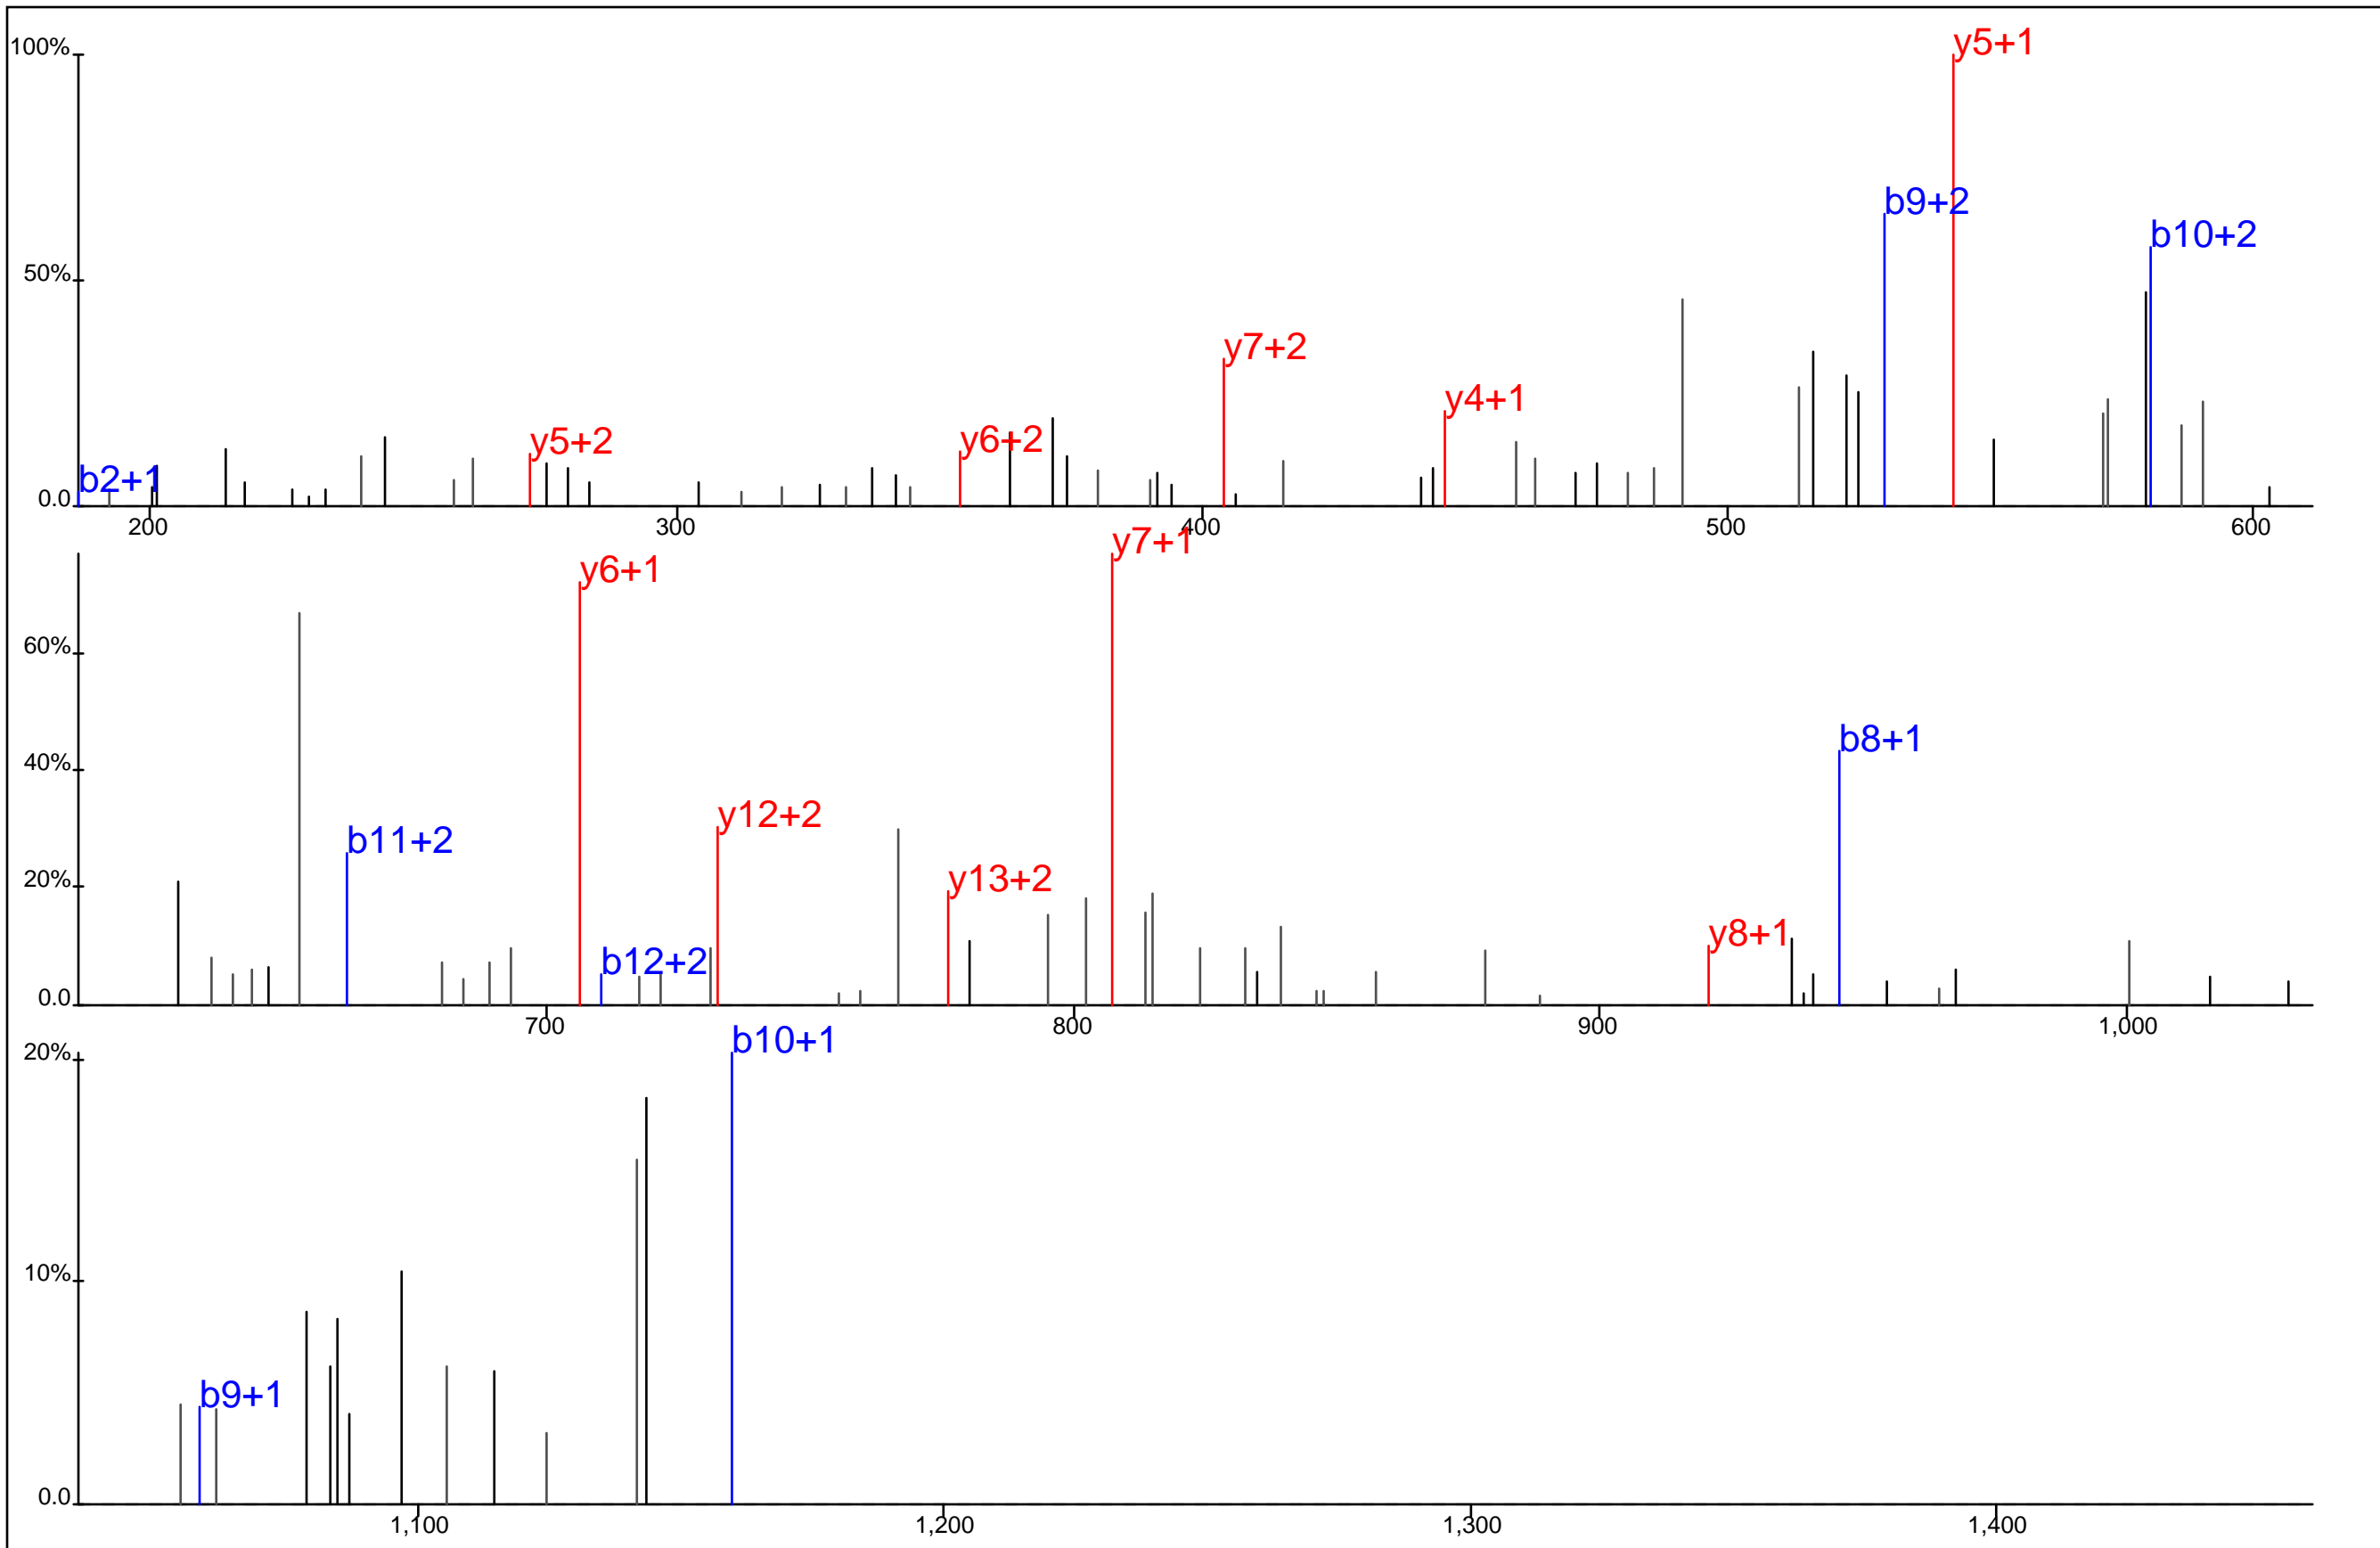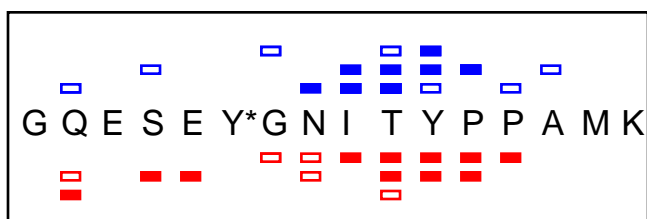

Protein Name: Protein tyrosine phosphatase, non-receptor type 6  
 gi Accession: 0  
 Precursor Mass: 622.2637+3  
 Delta Mass: 3.016 ppm  
 XCorr: 20.72

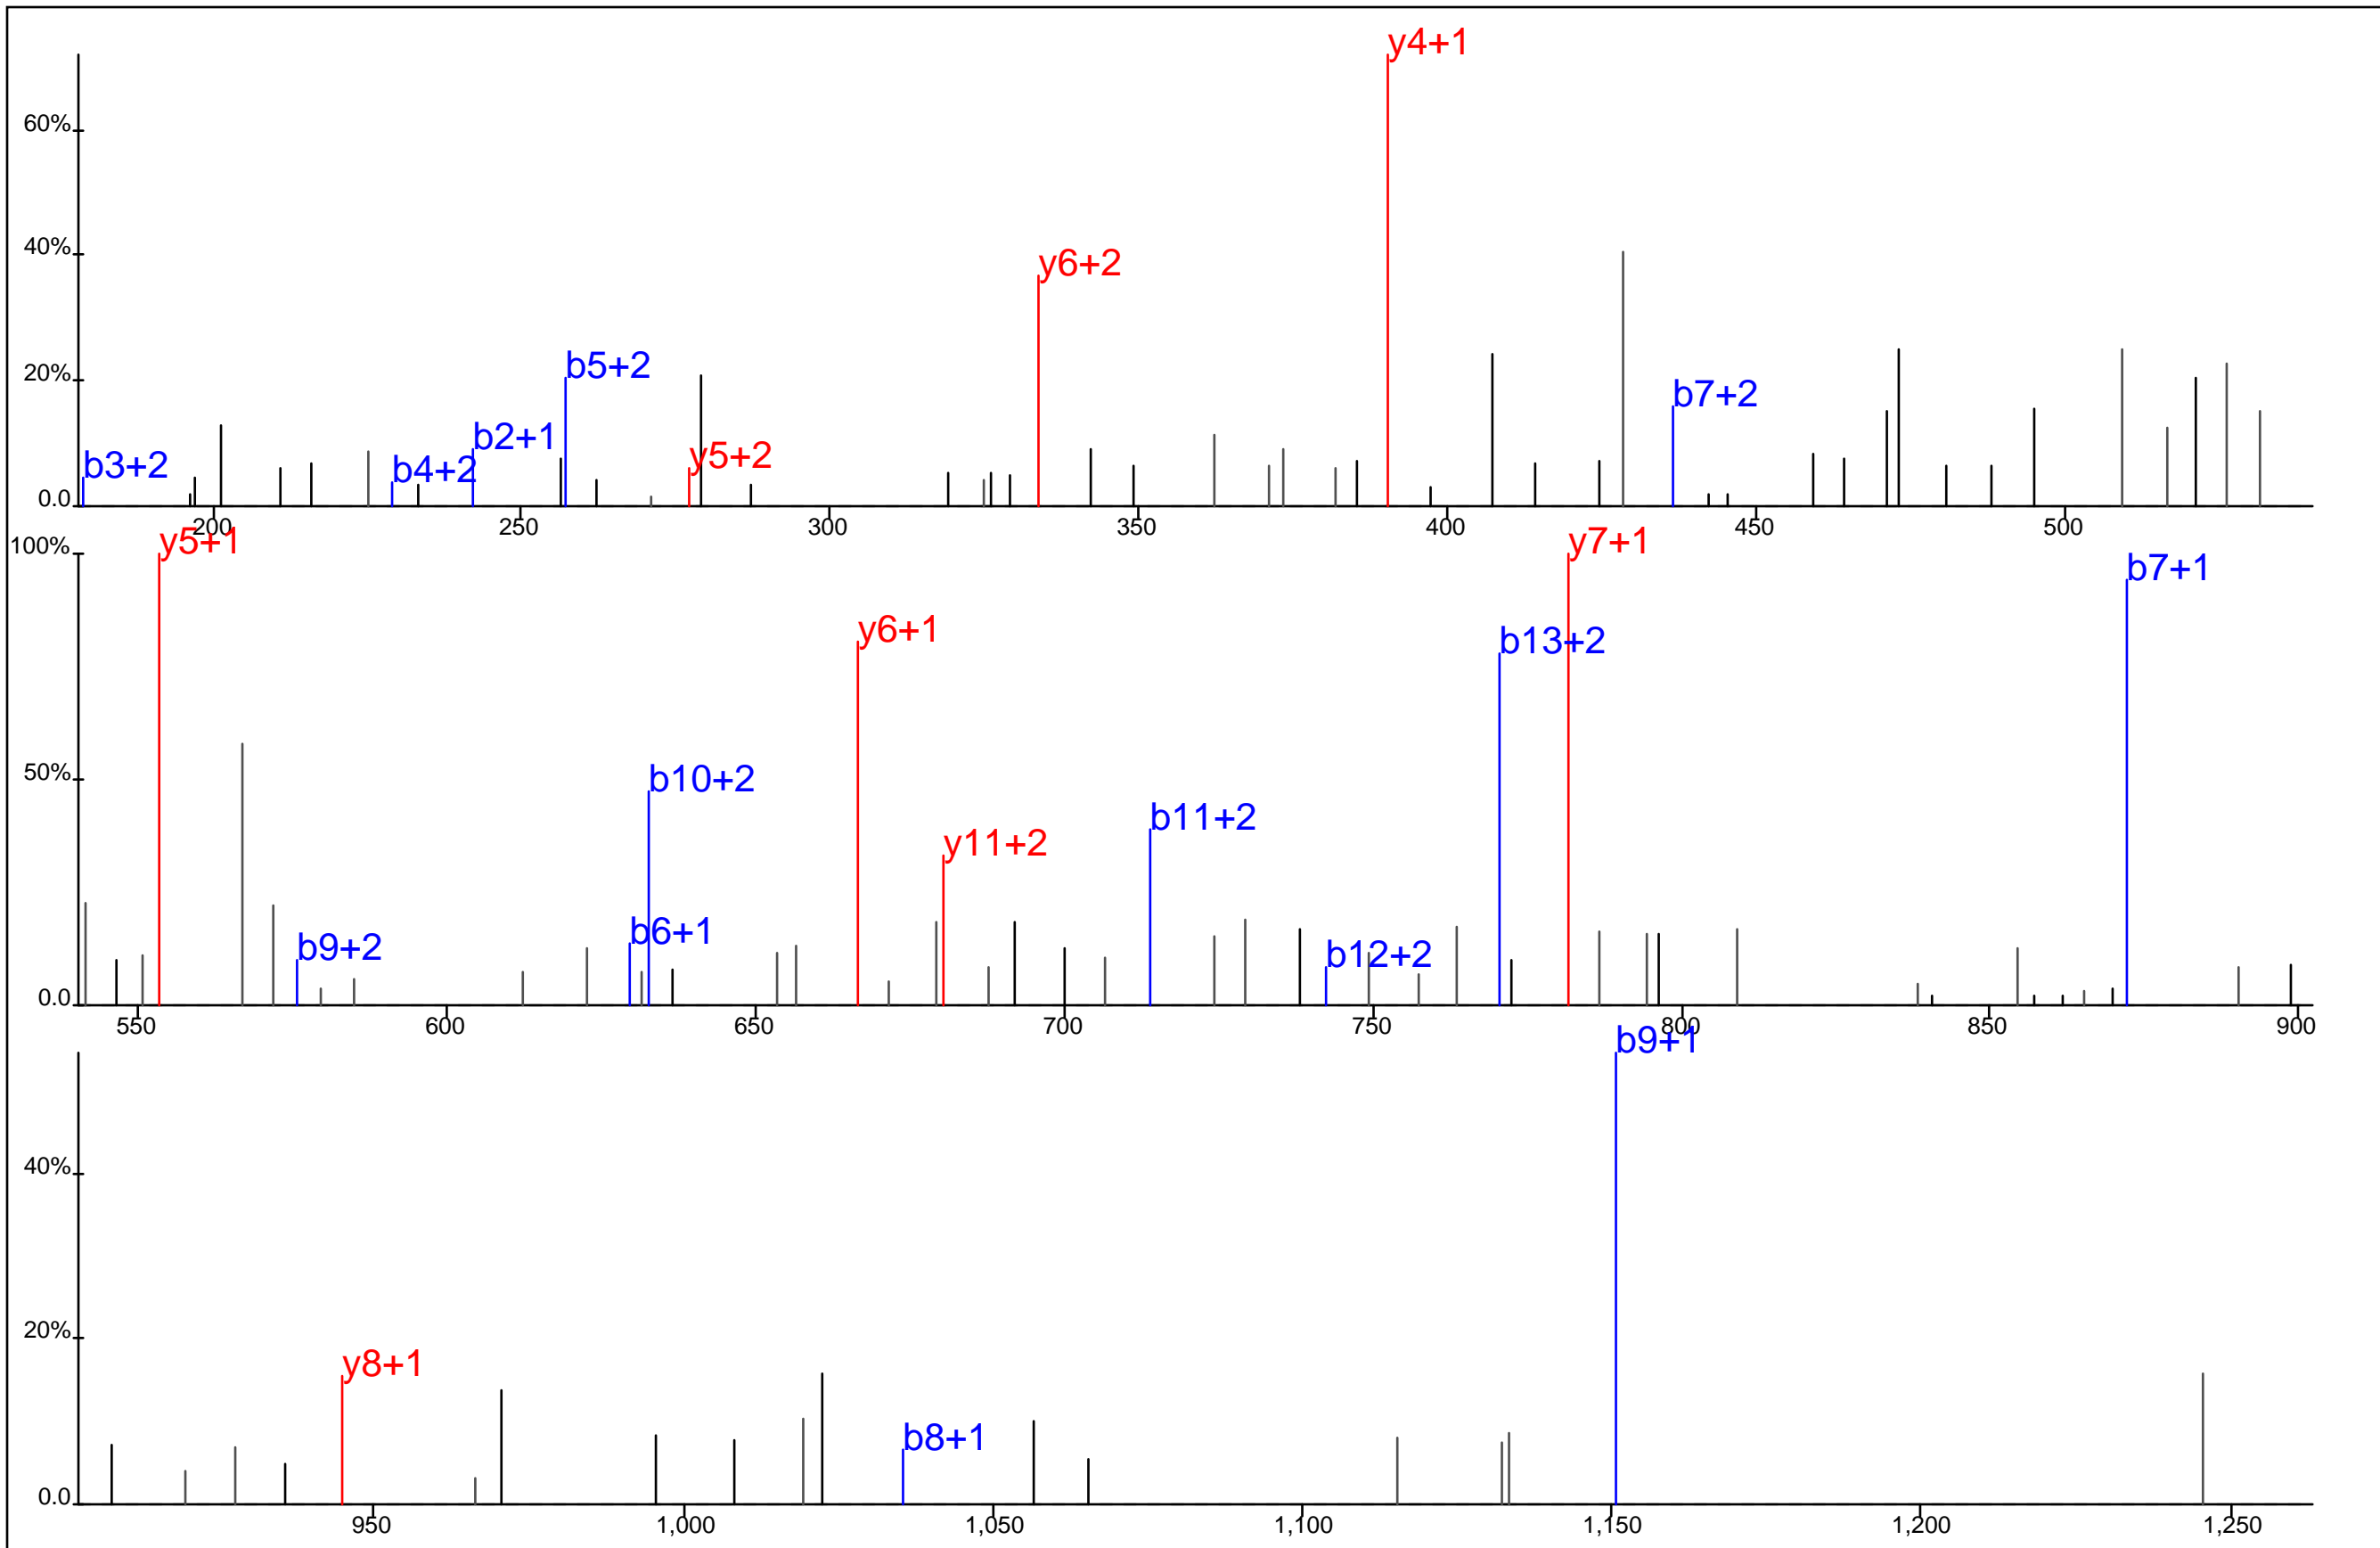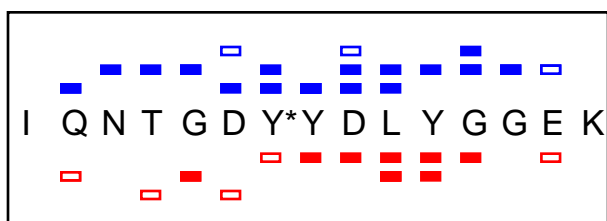

Protein Name: Protein tyrosine phosphatase, non-receptor type 11  
 gi Accession: 0  
 Precursor Mass: 605.9213+3  
 Delta Mass: 1.181 ppm  
 XCorr: 33.87

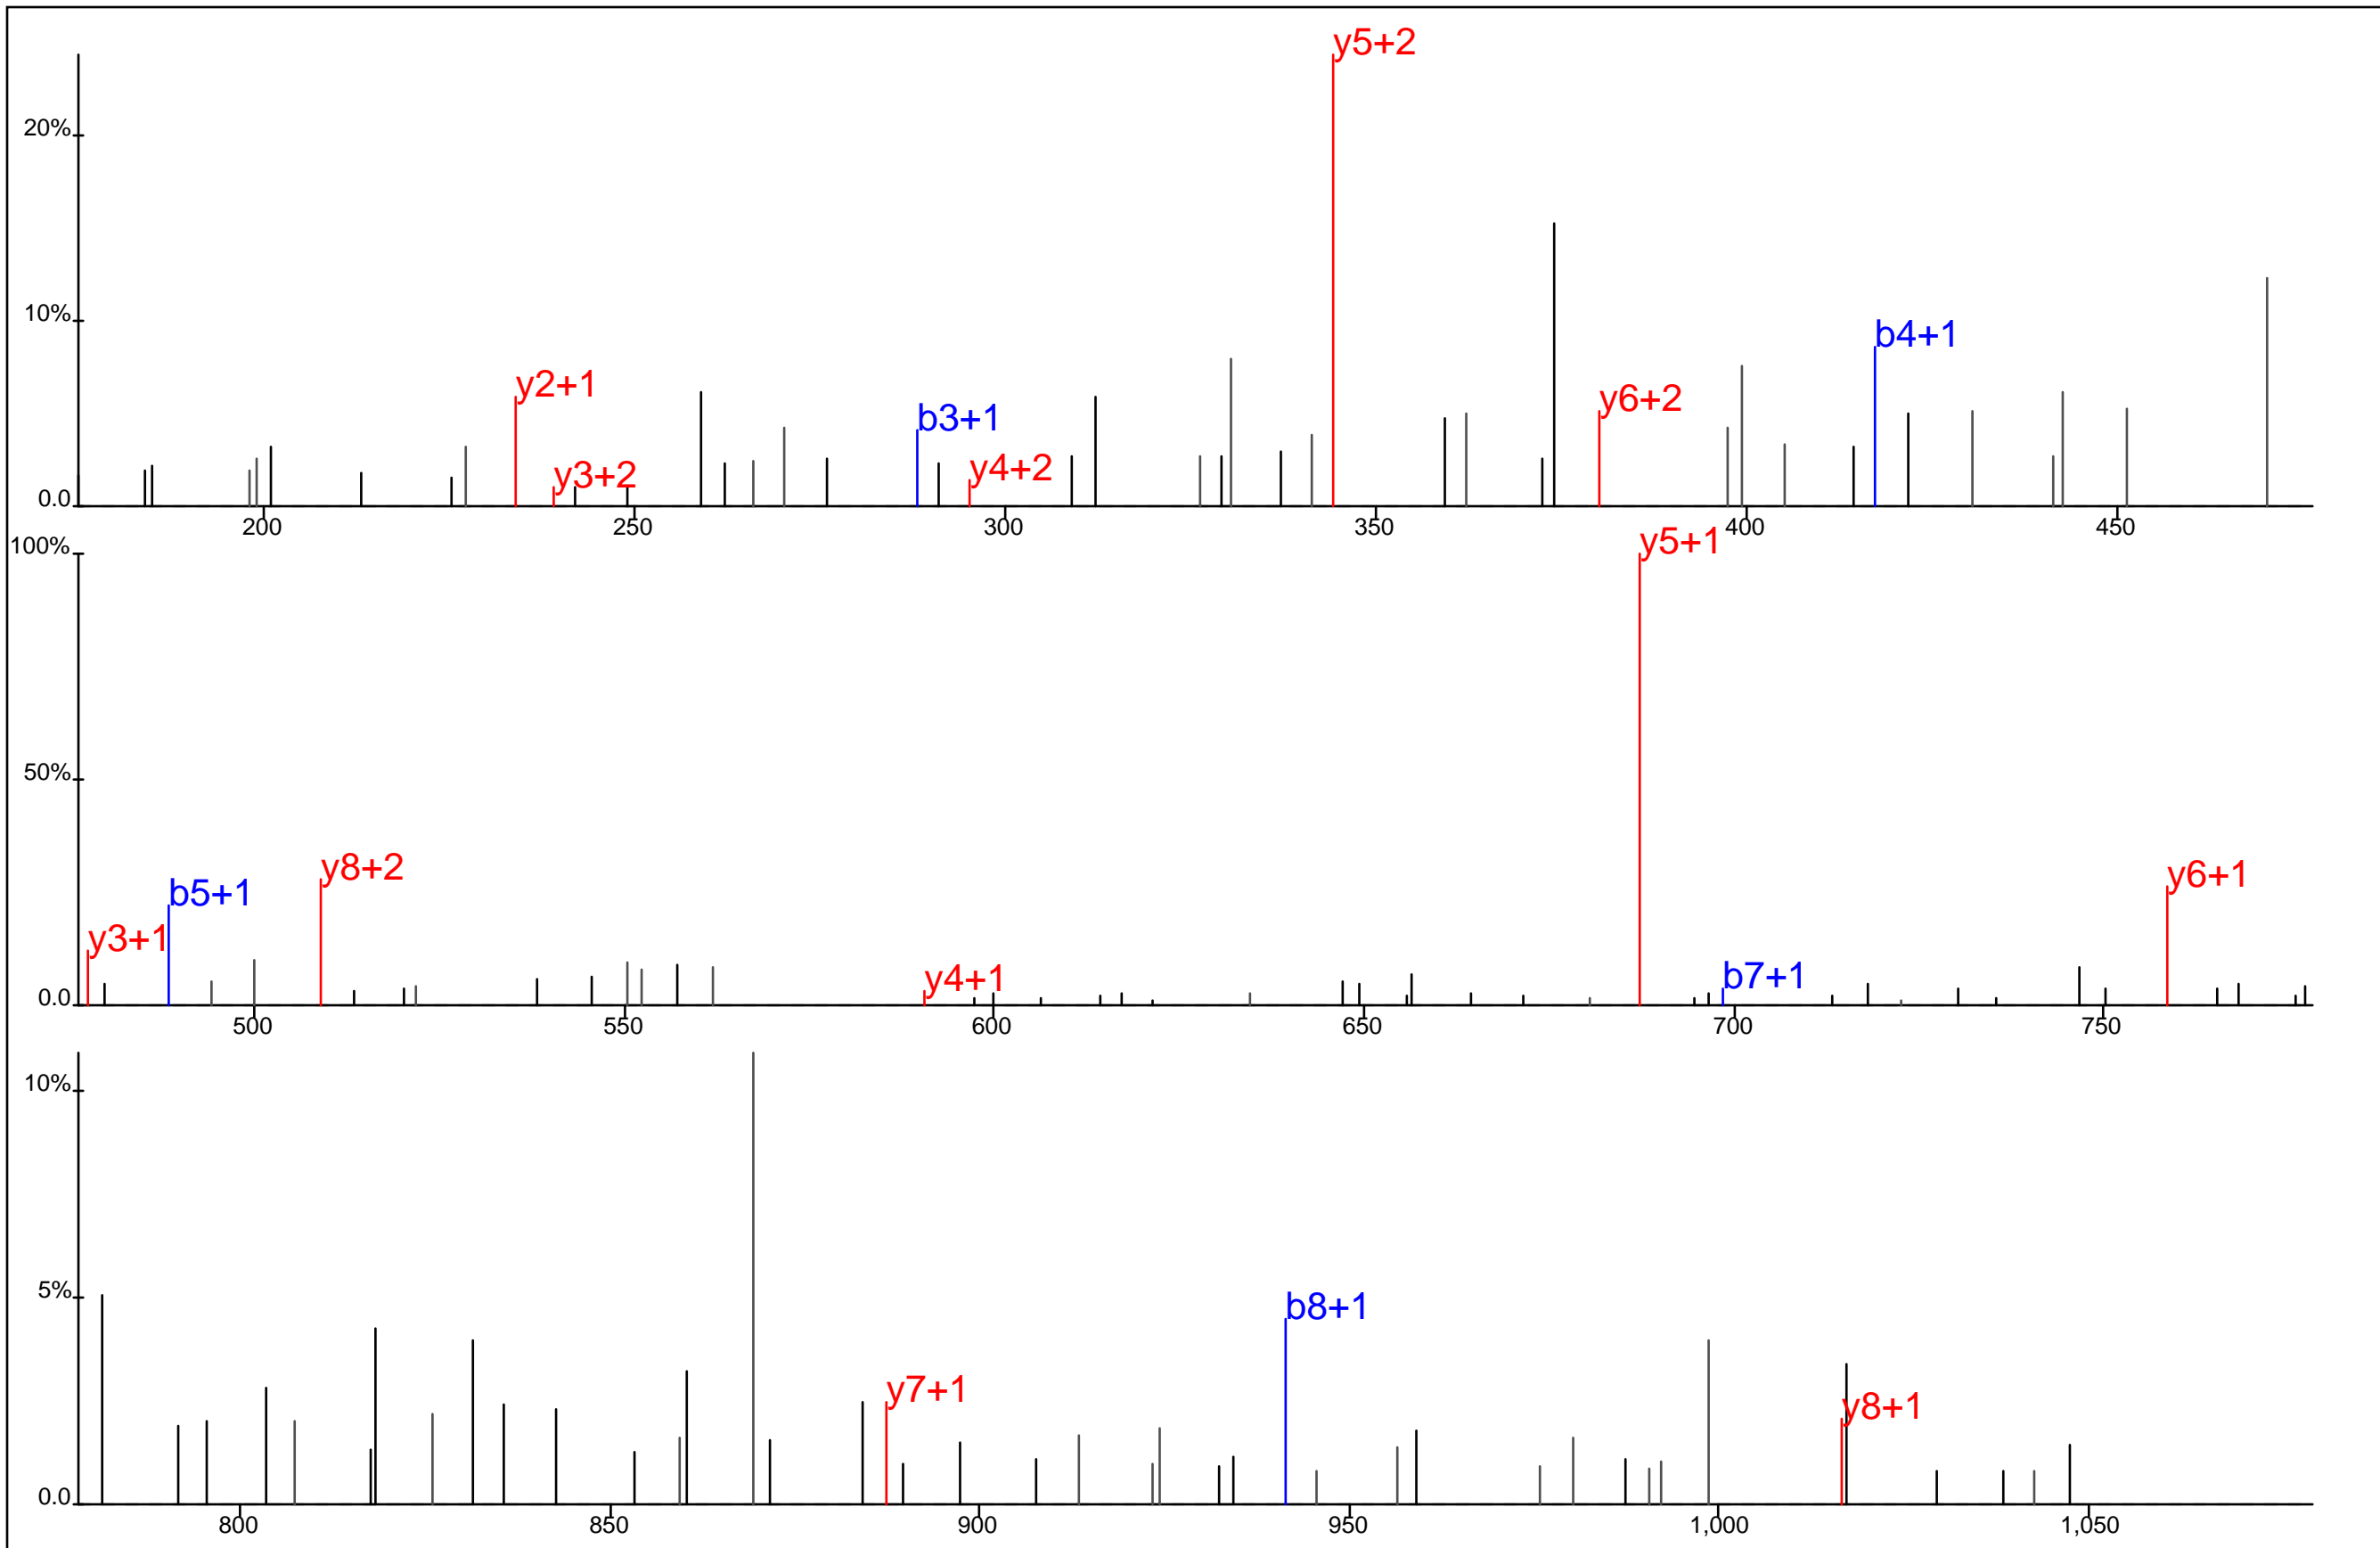

■ ■ ■ ■ ■ ■ ■ ■  
 S A E E A P L Y\* S K  
■ ■ ■ ■ ■ ■ ■ ■

Protein Name: Protein tyrosine phosphatase nonreceptor type 18  
 gi Accession: 0  
 Precursor Mass: 587.7546+2  
 Delta Mass: 0.708 ppm  
 XCorr: 38.16



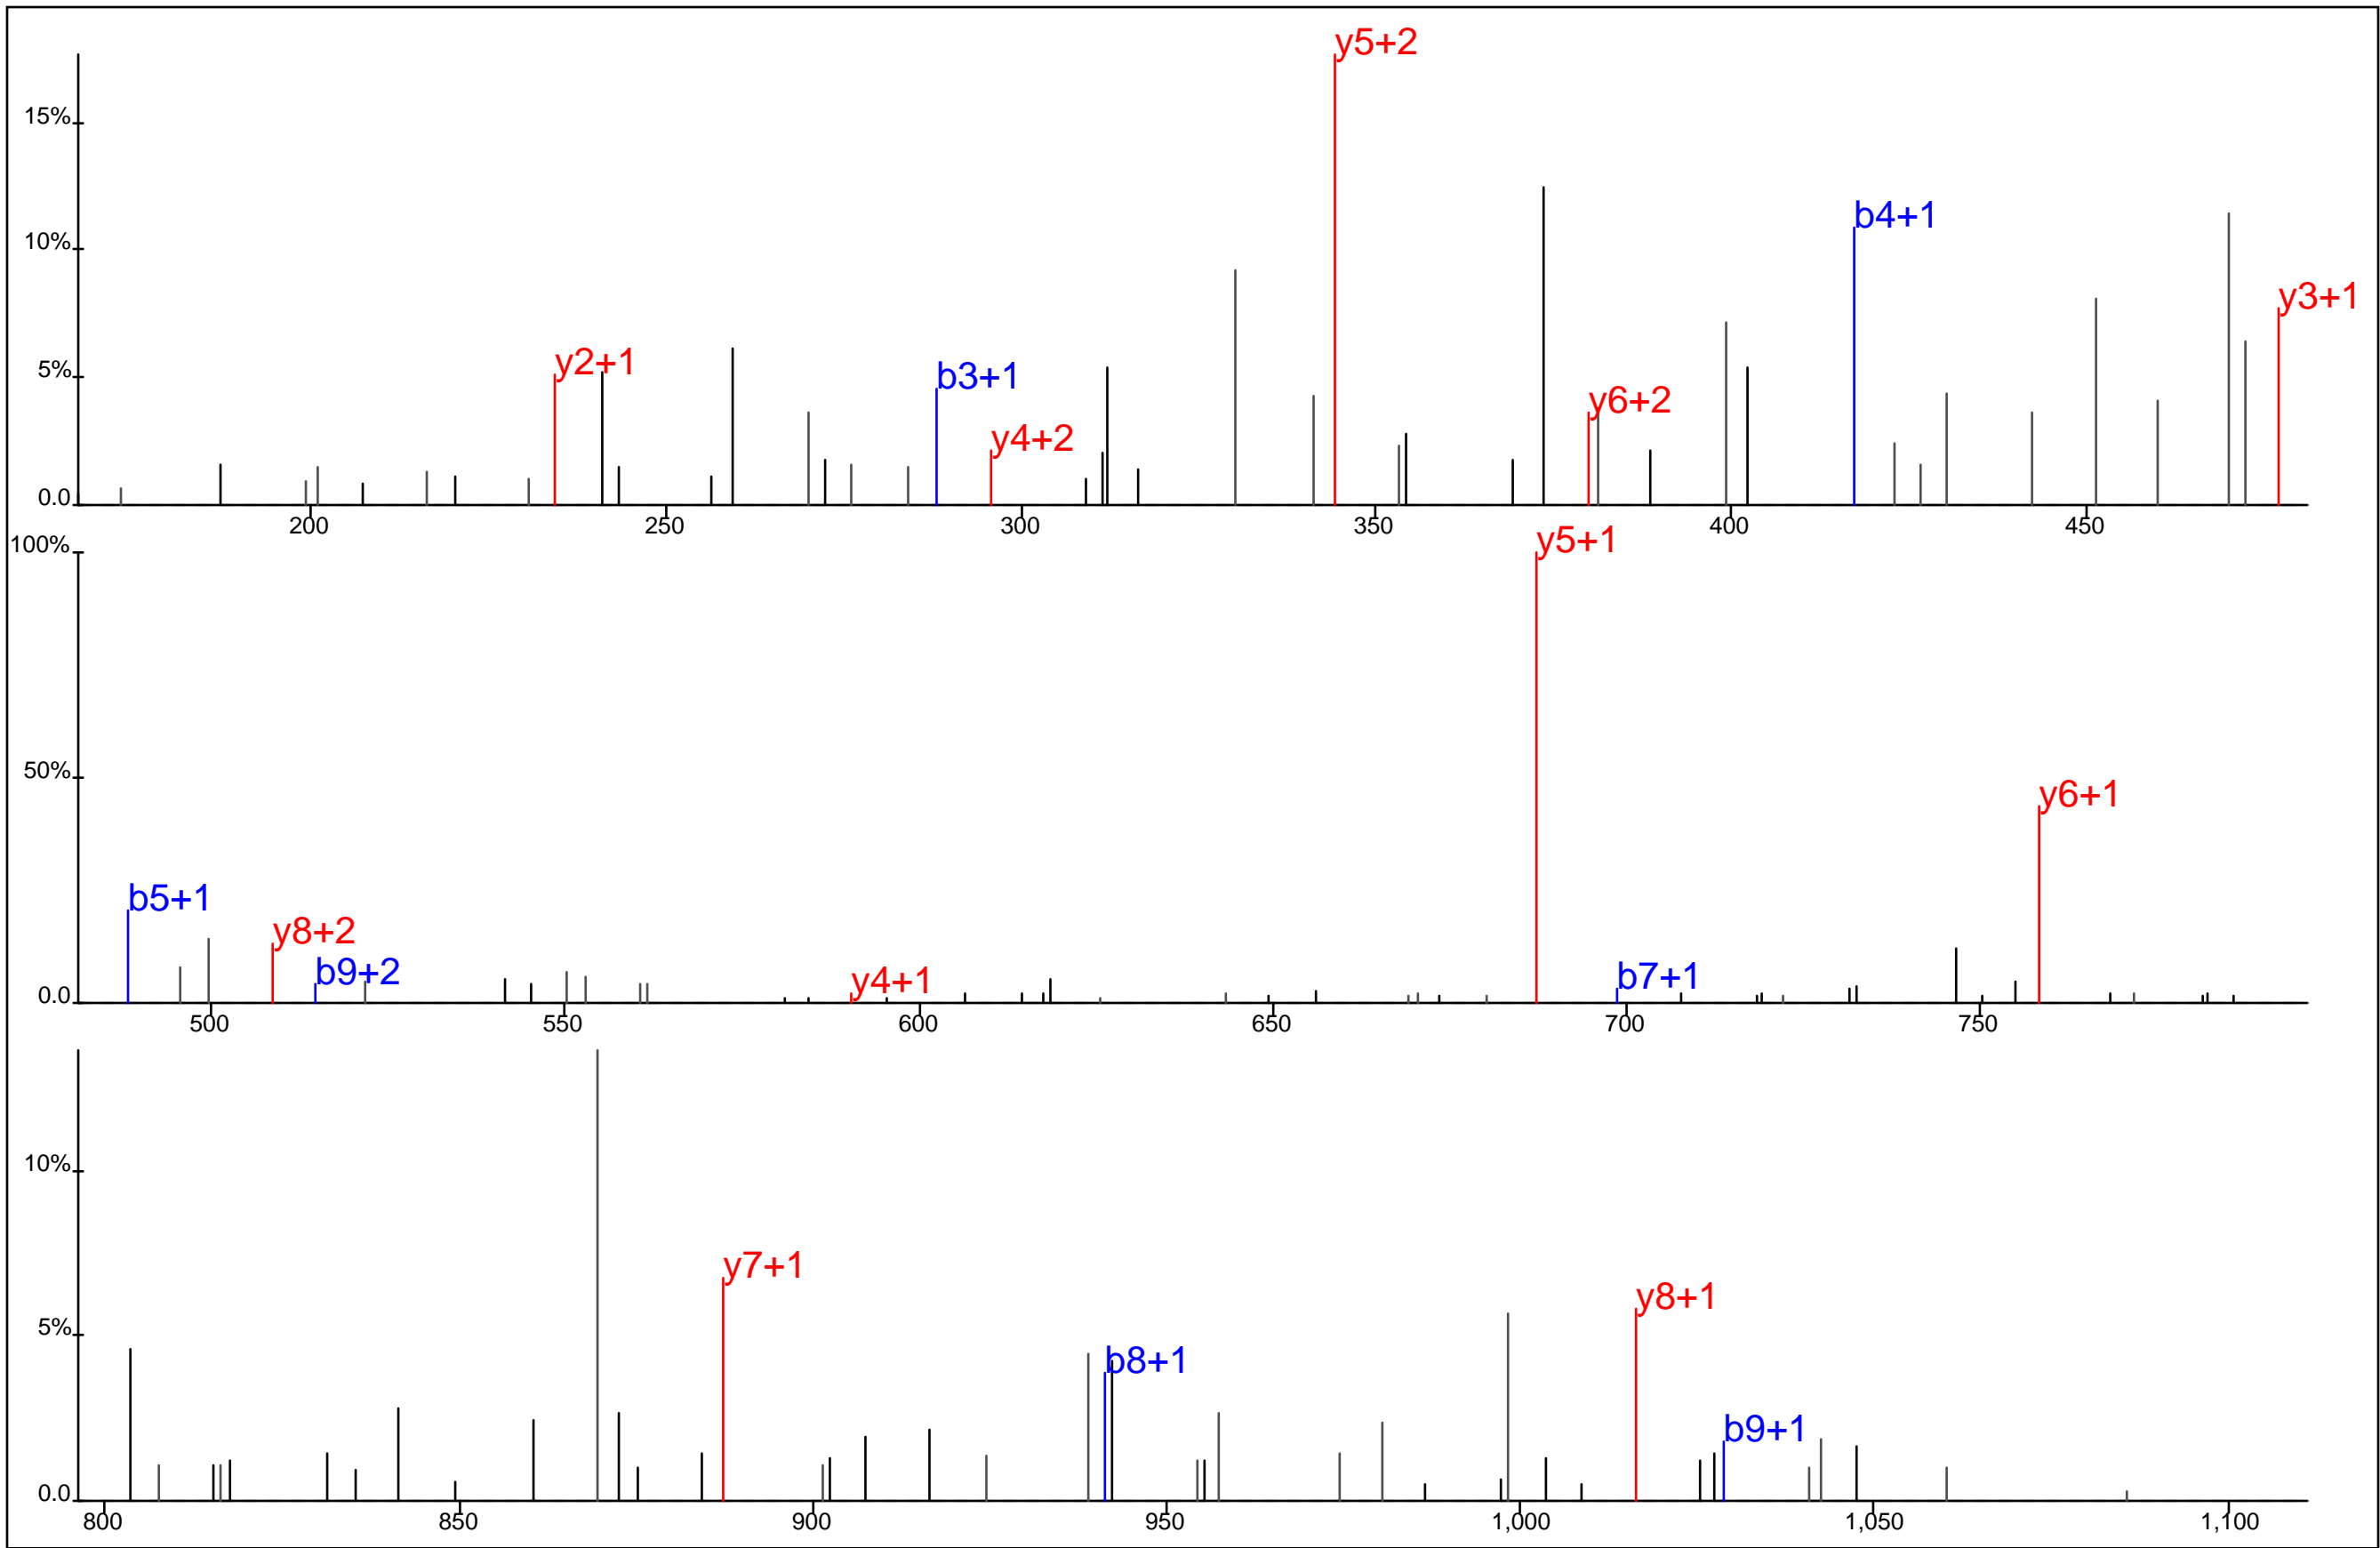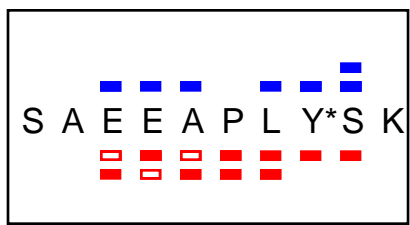

Protein Name: Protein tyrosine phosphatase nonreceptor type 18  
 gi Accession: 0  
 Precursor Mass: 587.7524+2  
 Delta Mass: 4.451 ppm  
 XCorr: 30.88

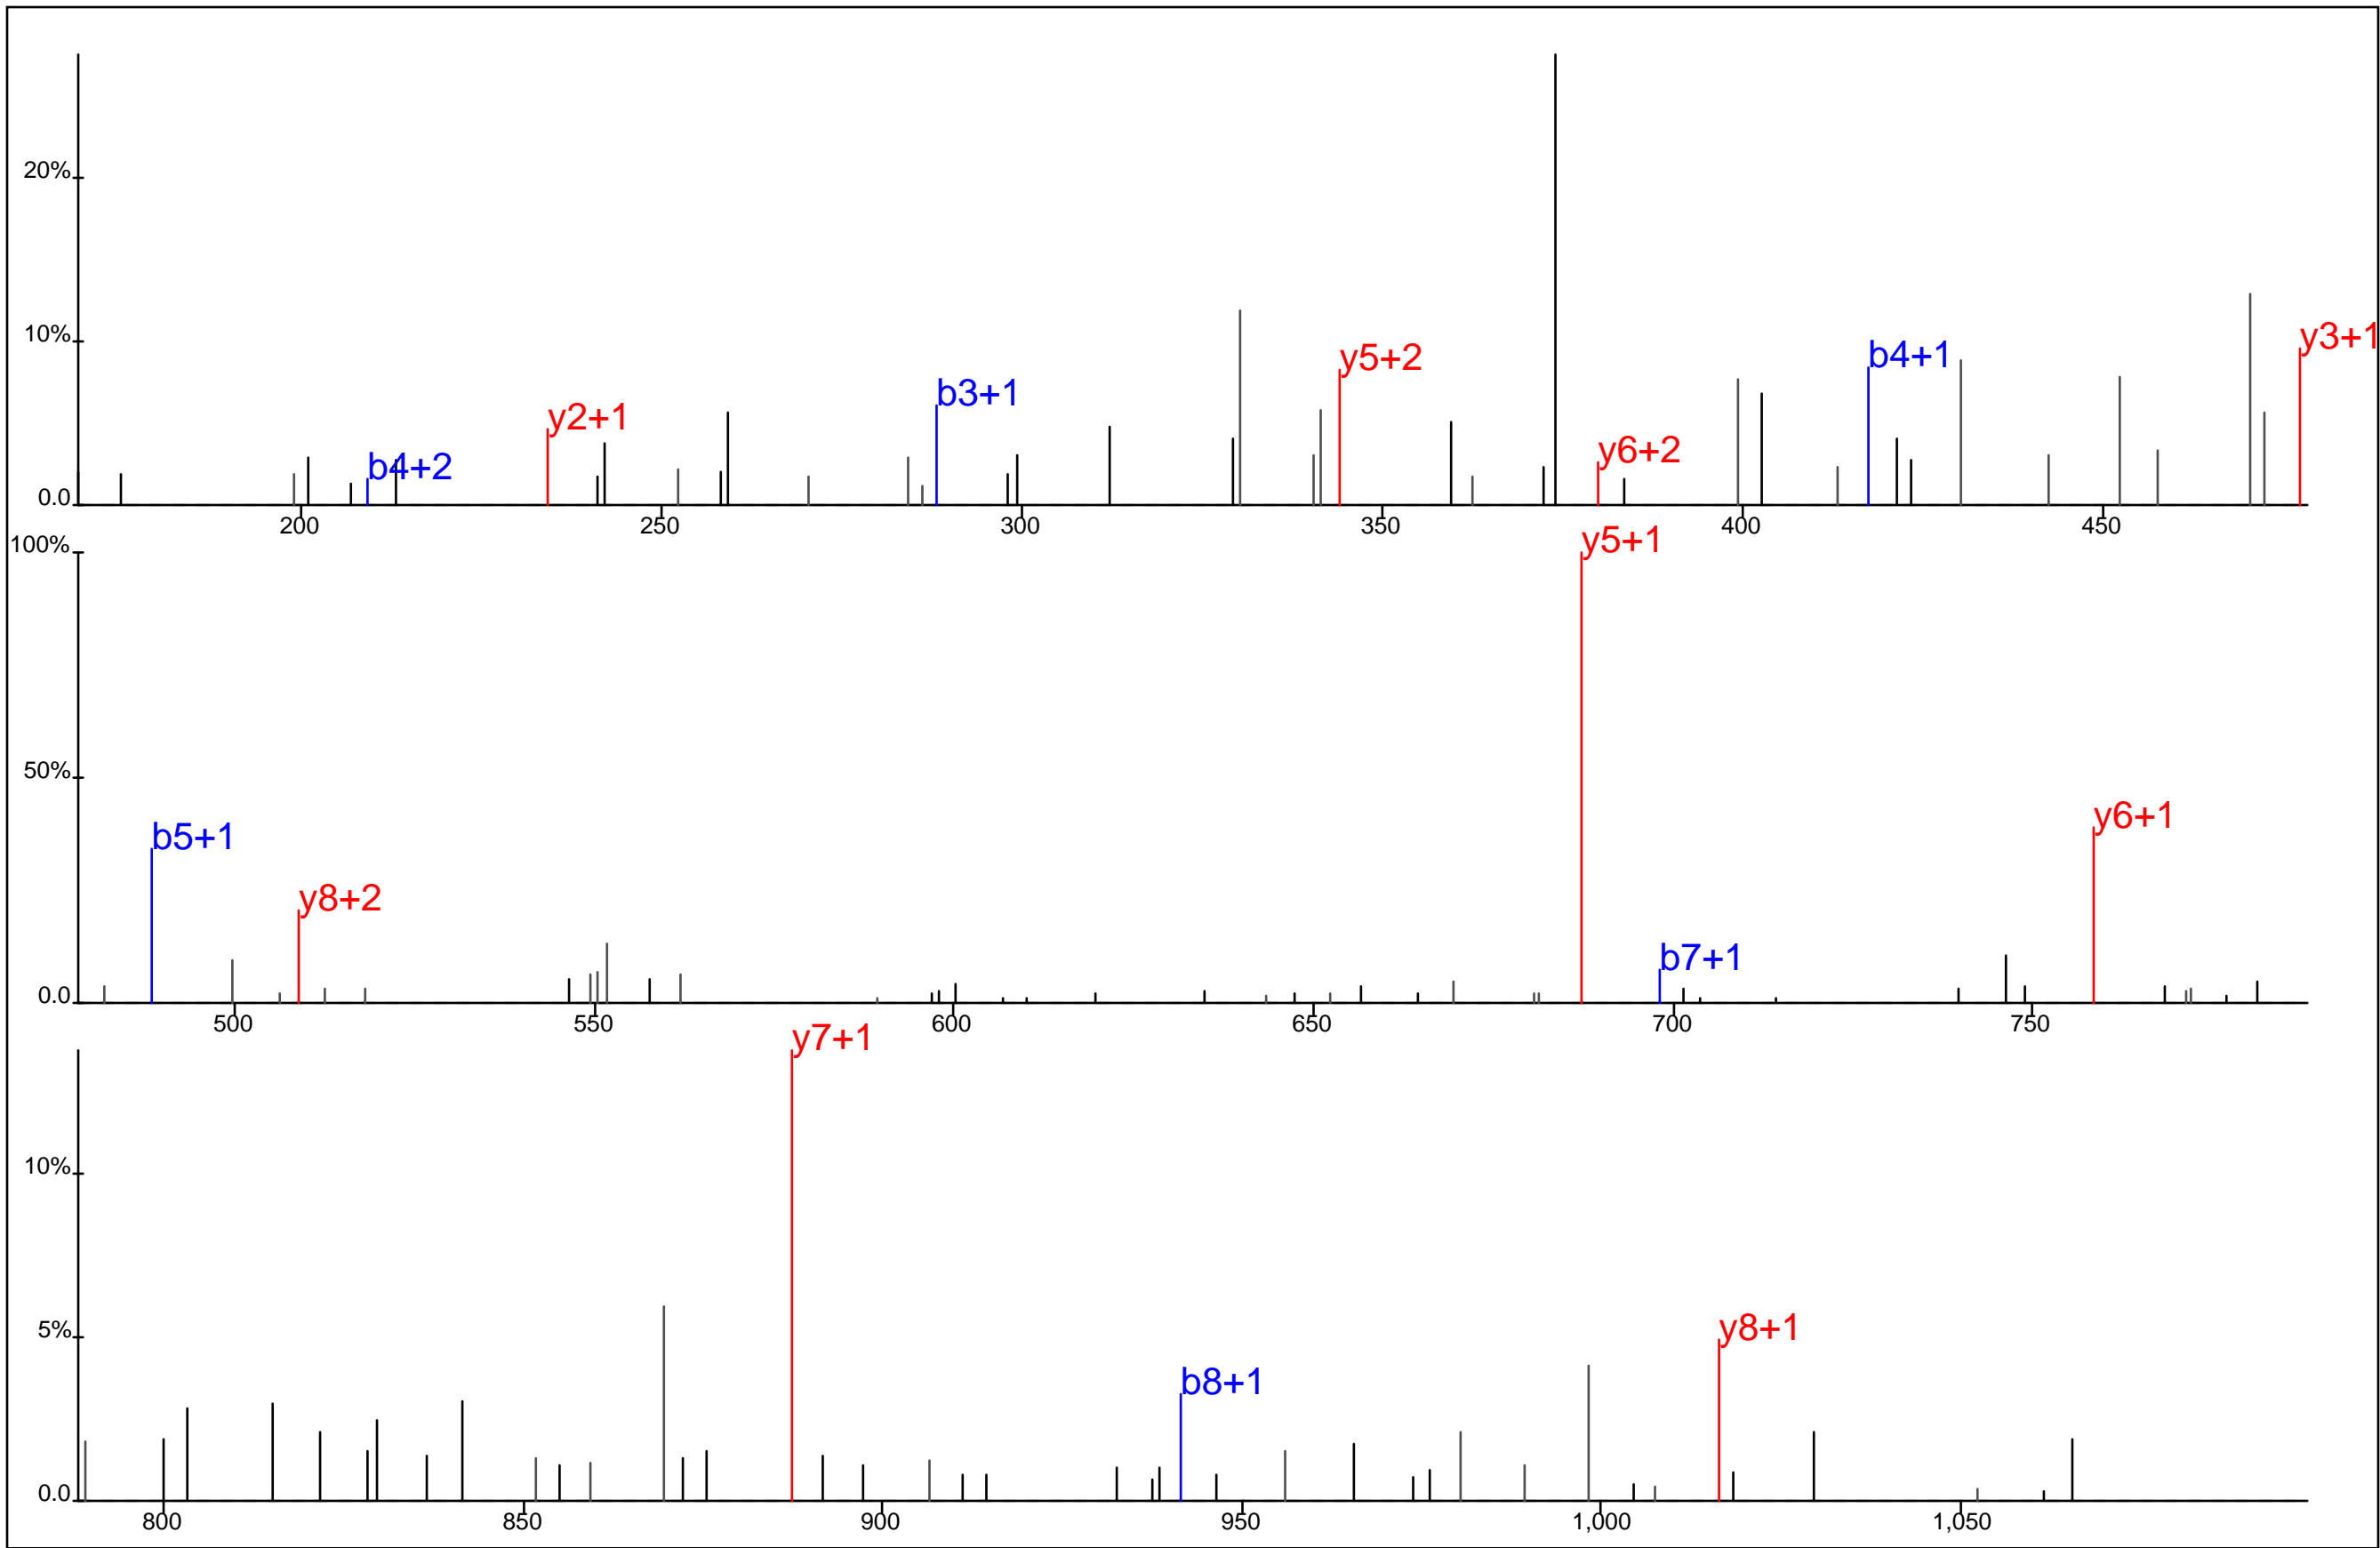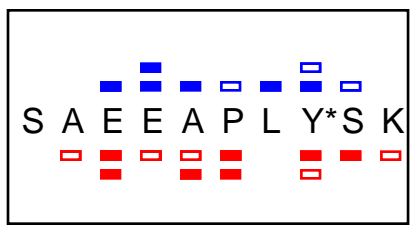

Protein Name: Protein tyrosine phosphatase nonreceptor type 18  
 gi Accession: 0  
 Precursor Mass: 587.7548+2  
 Delta Mass: 0.293 ppm  
 XCorr: 24.69



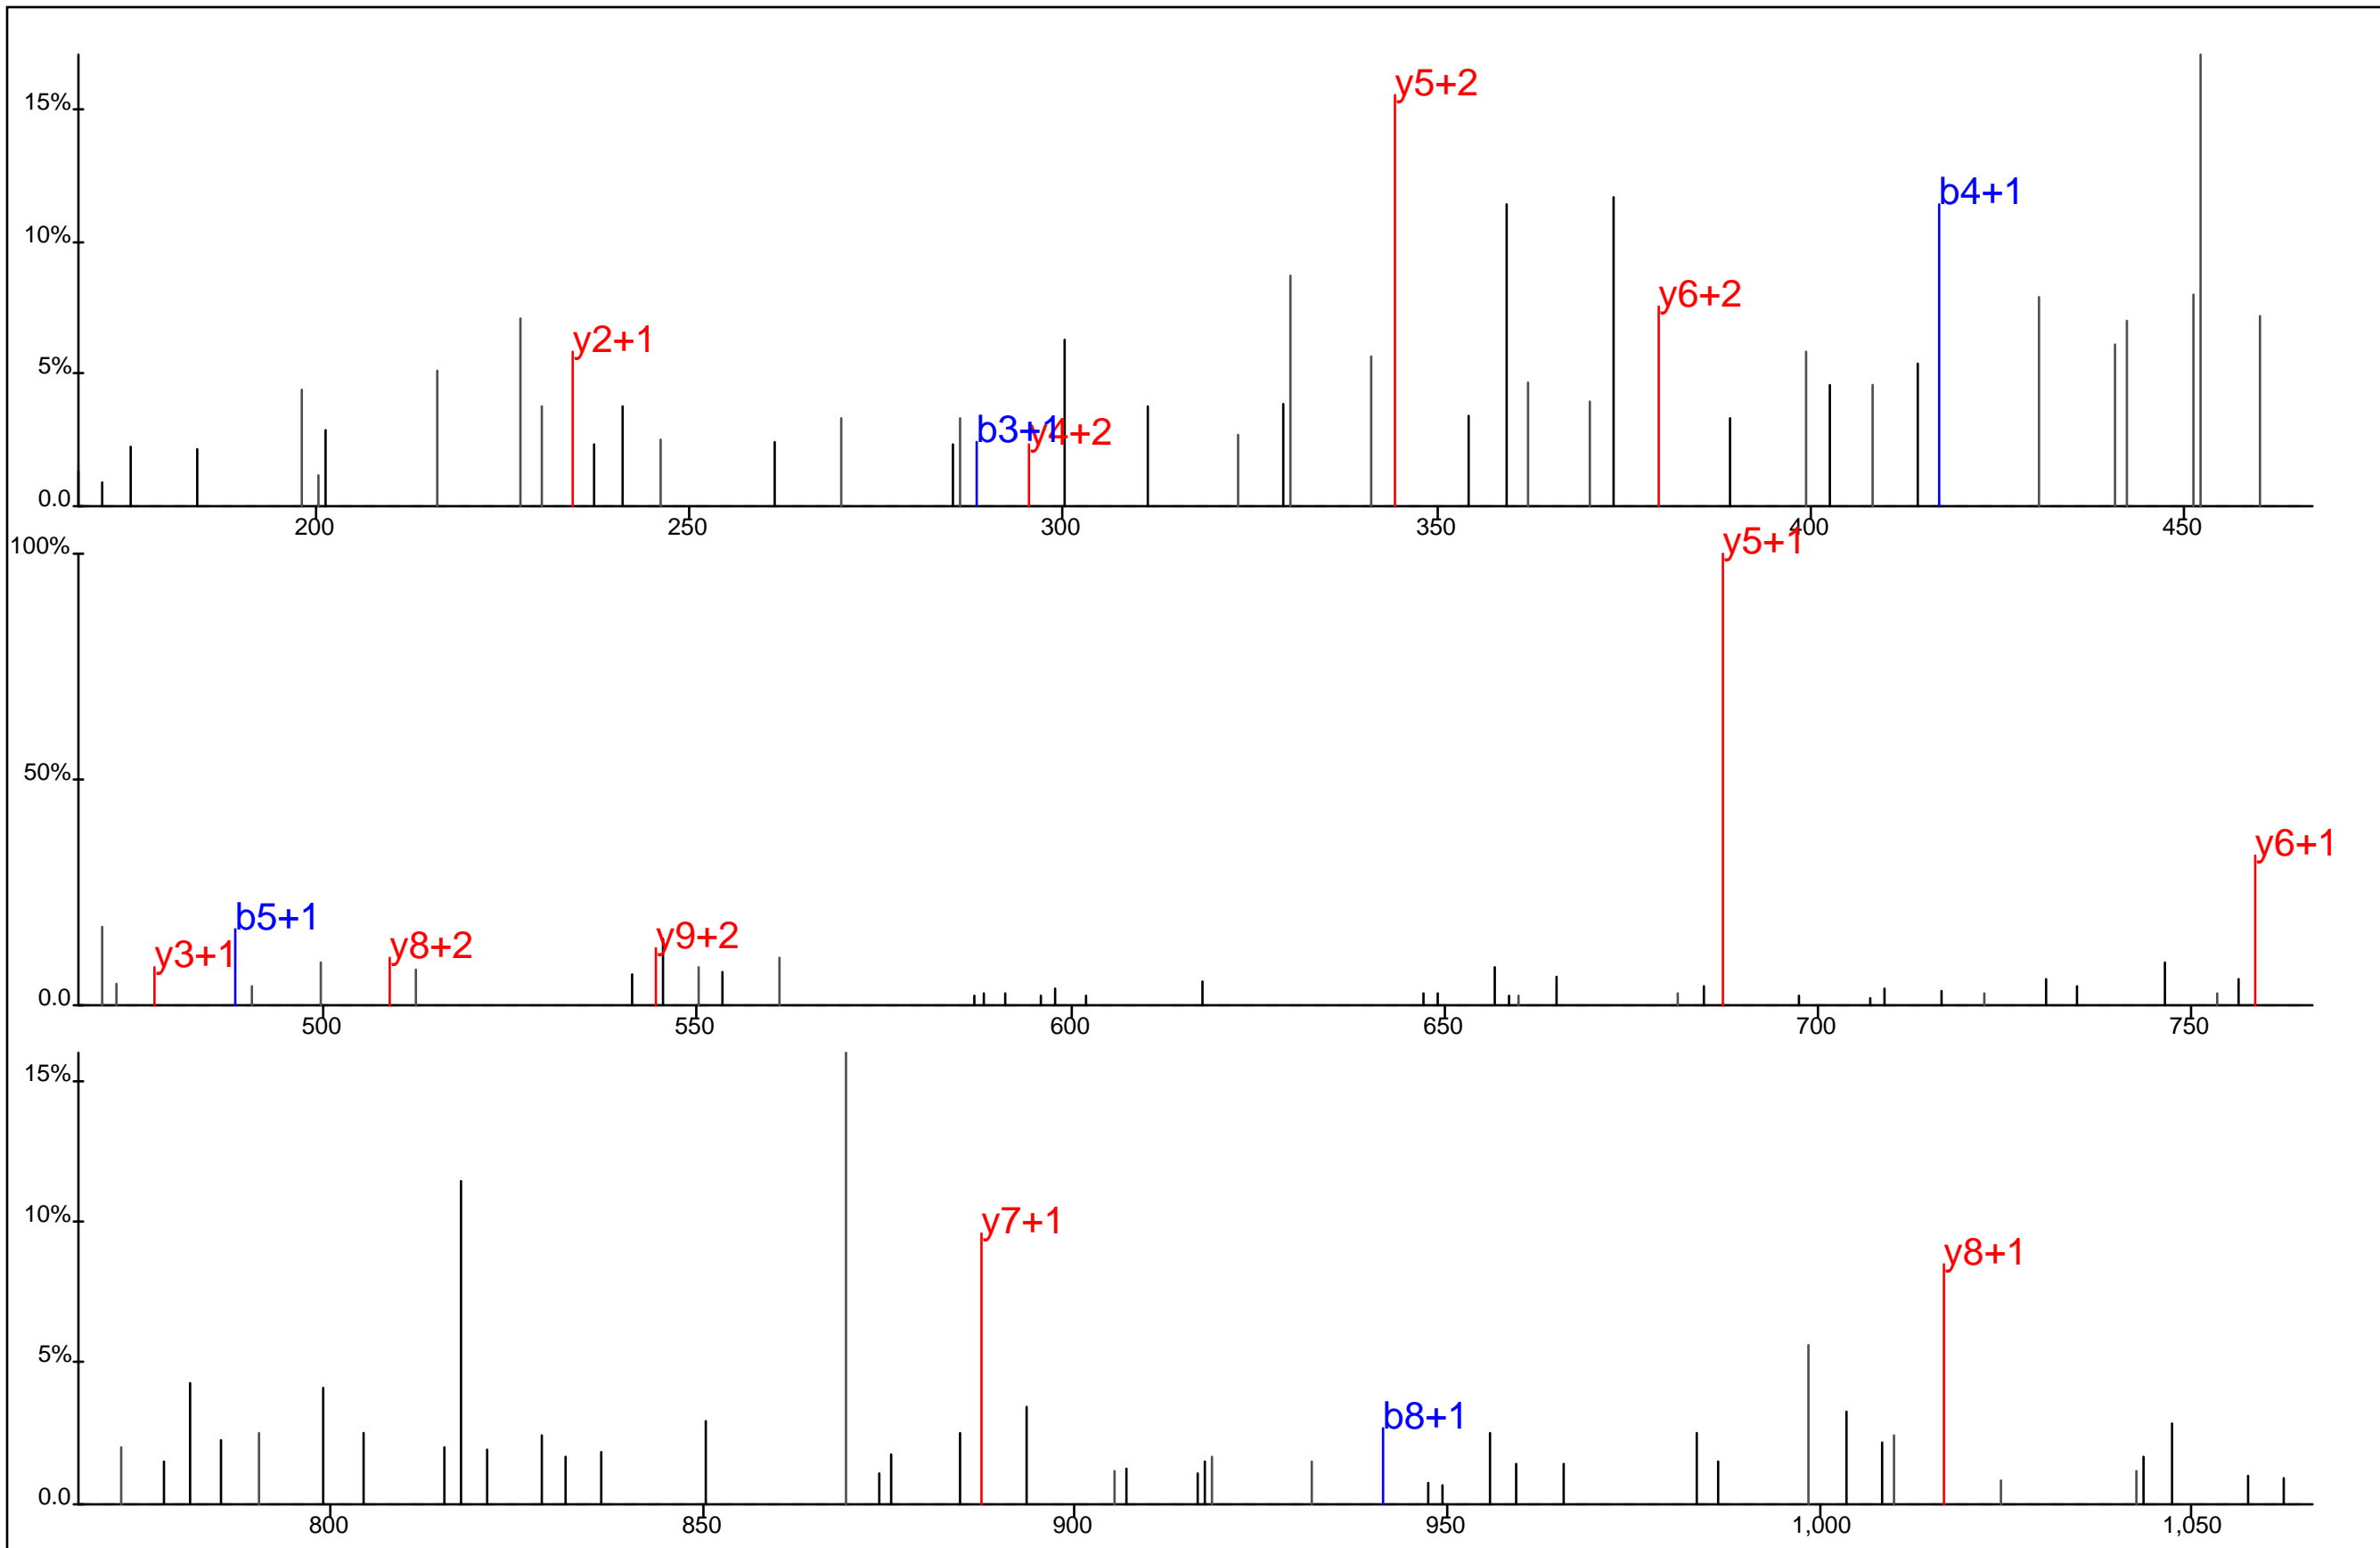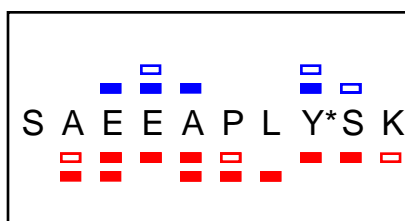

Protein Name: Protein tyrosine phosphatase nonreceptor type 18  
 gi Accession: 0  
 Precursor Mass: 587.7529+2  
 Delta Mass: 3.619 ppm  
 XCorr: 21.6

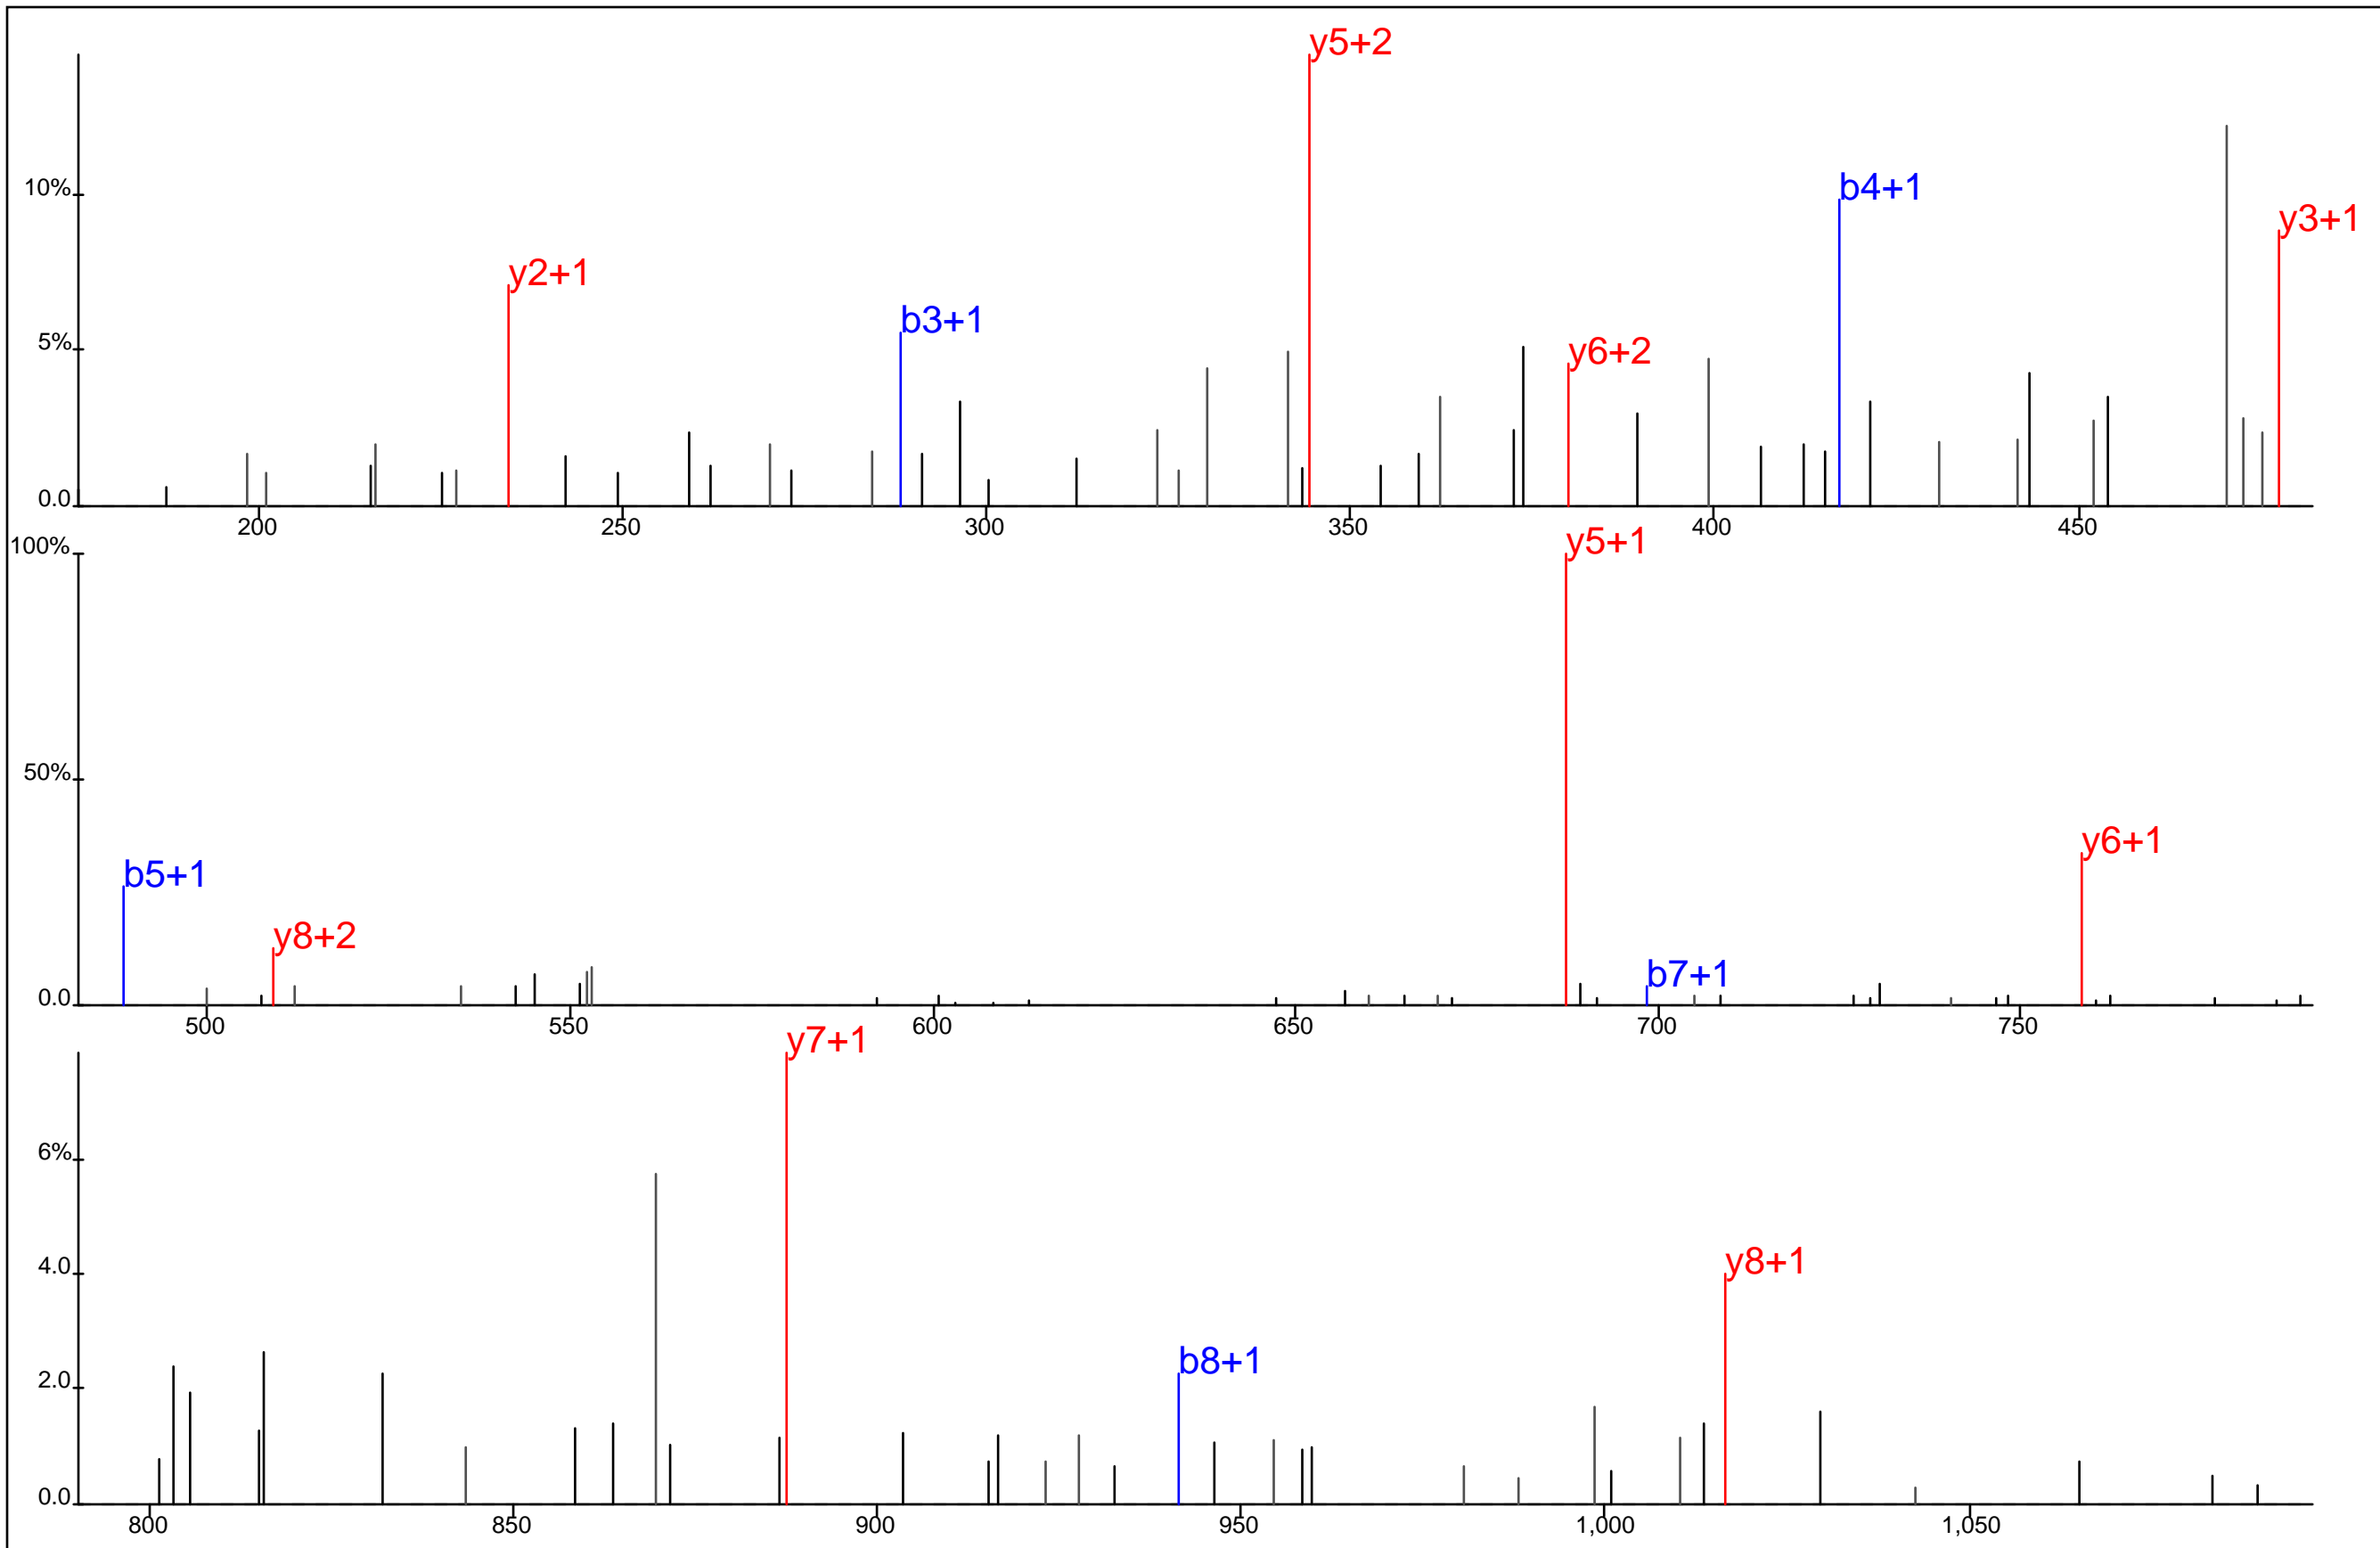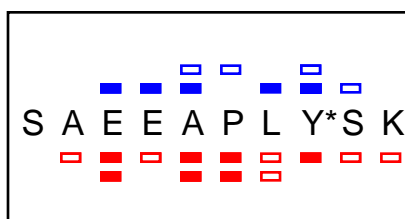

Protein Name: Protein tyrosine phosphatase nonreceptor type 18  
 gi Accession: 0  
 Precursor Mass: 587.7542+2  
 Delta Mass: 1.437 ppm  
 XCorr: 36.46

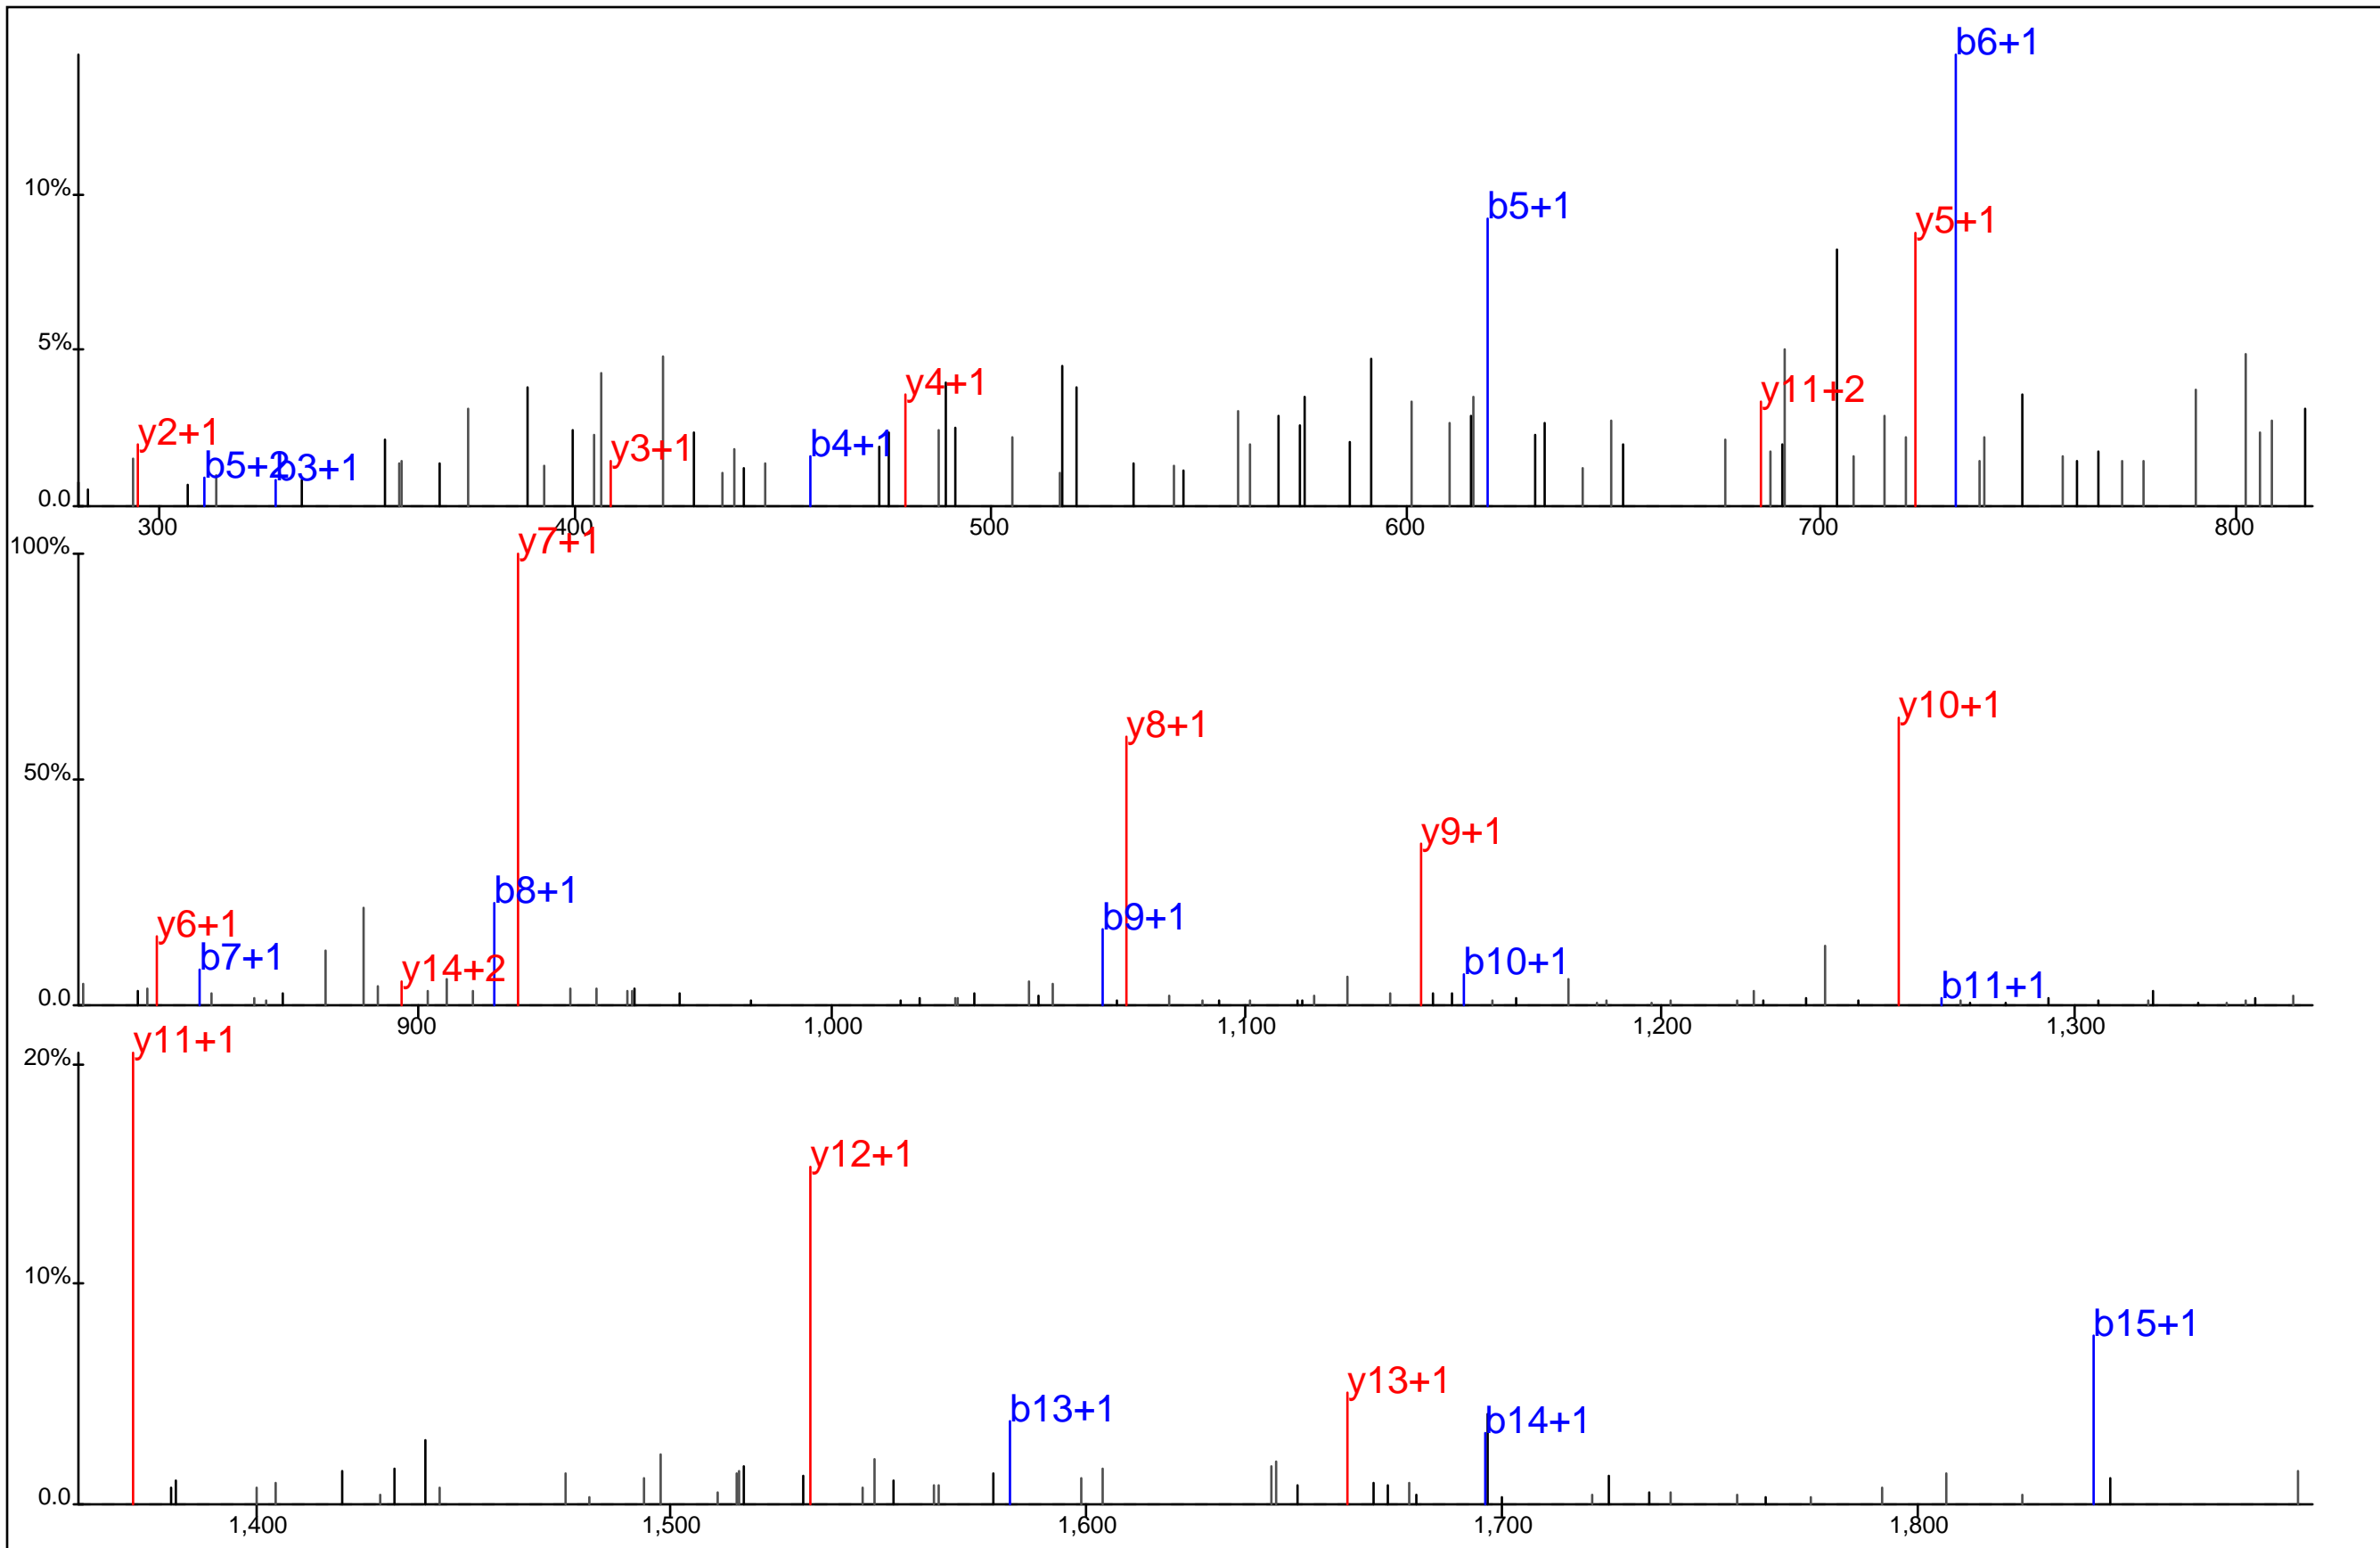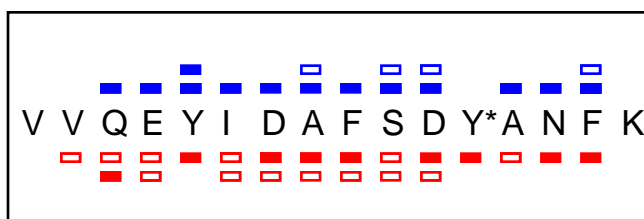

Protein Name: Protein tyrosine phosphatase, receptor type, alpha  
 gi Accession: 0  
 Precursor Mass: 994.9392+2  
 Delta Mass: 1.715 ppm  
 XCorr: 59.96

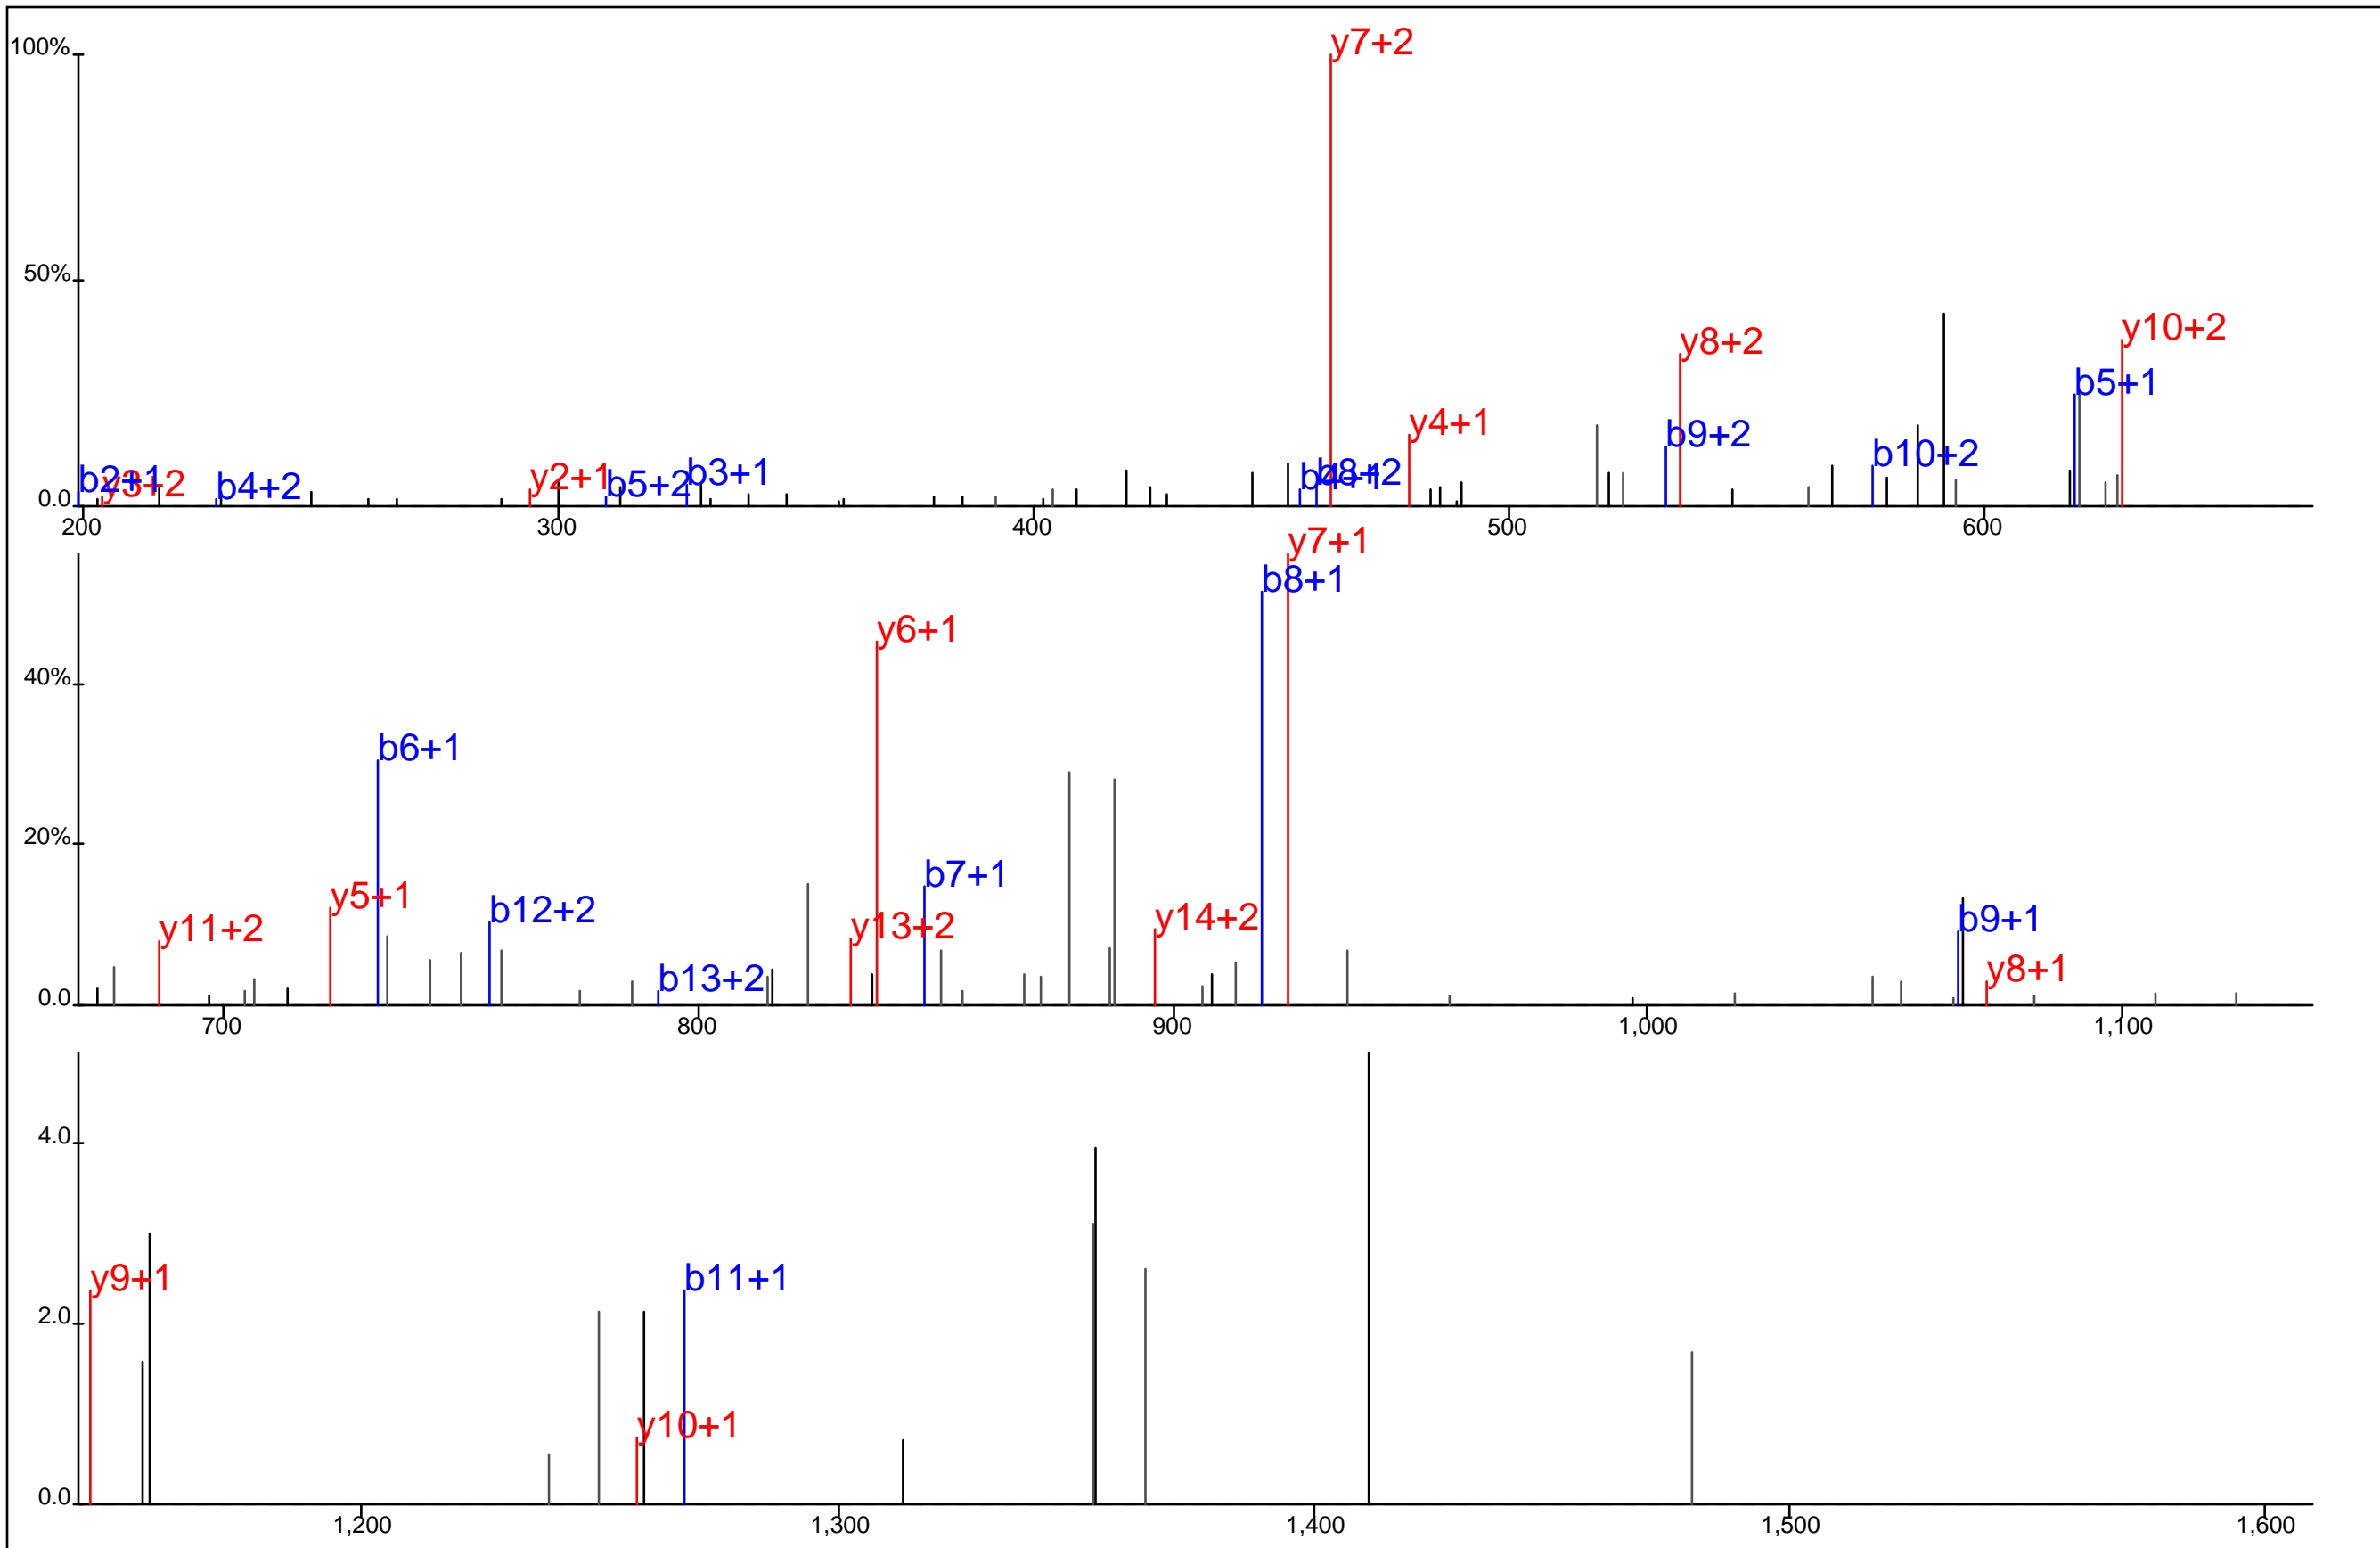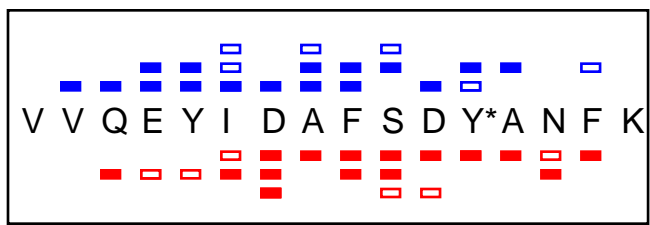

Protein Name: Protein tyrosine phosphatase, receptor type, alpha  
 gi Accession: 0  
 Precursor Mass: 663.6278+3  
 Delta Mass: 0.573 ppm  
 XCorr: 45.77

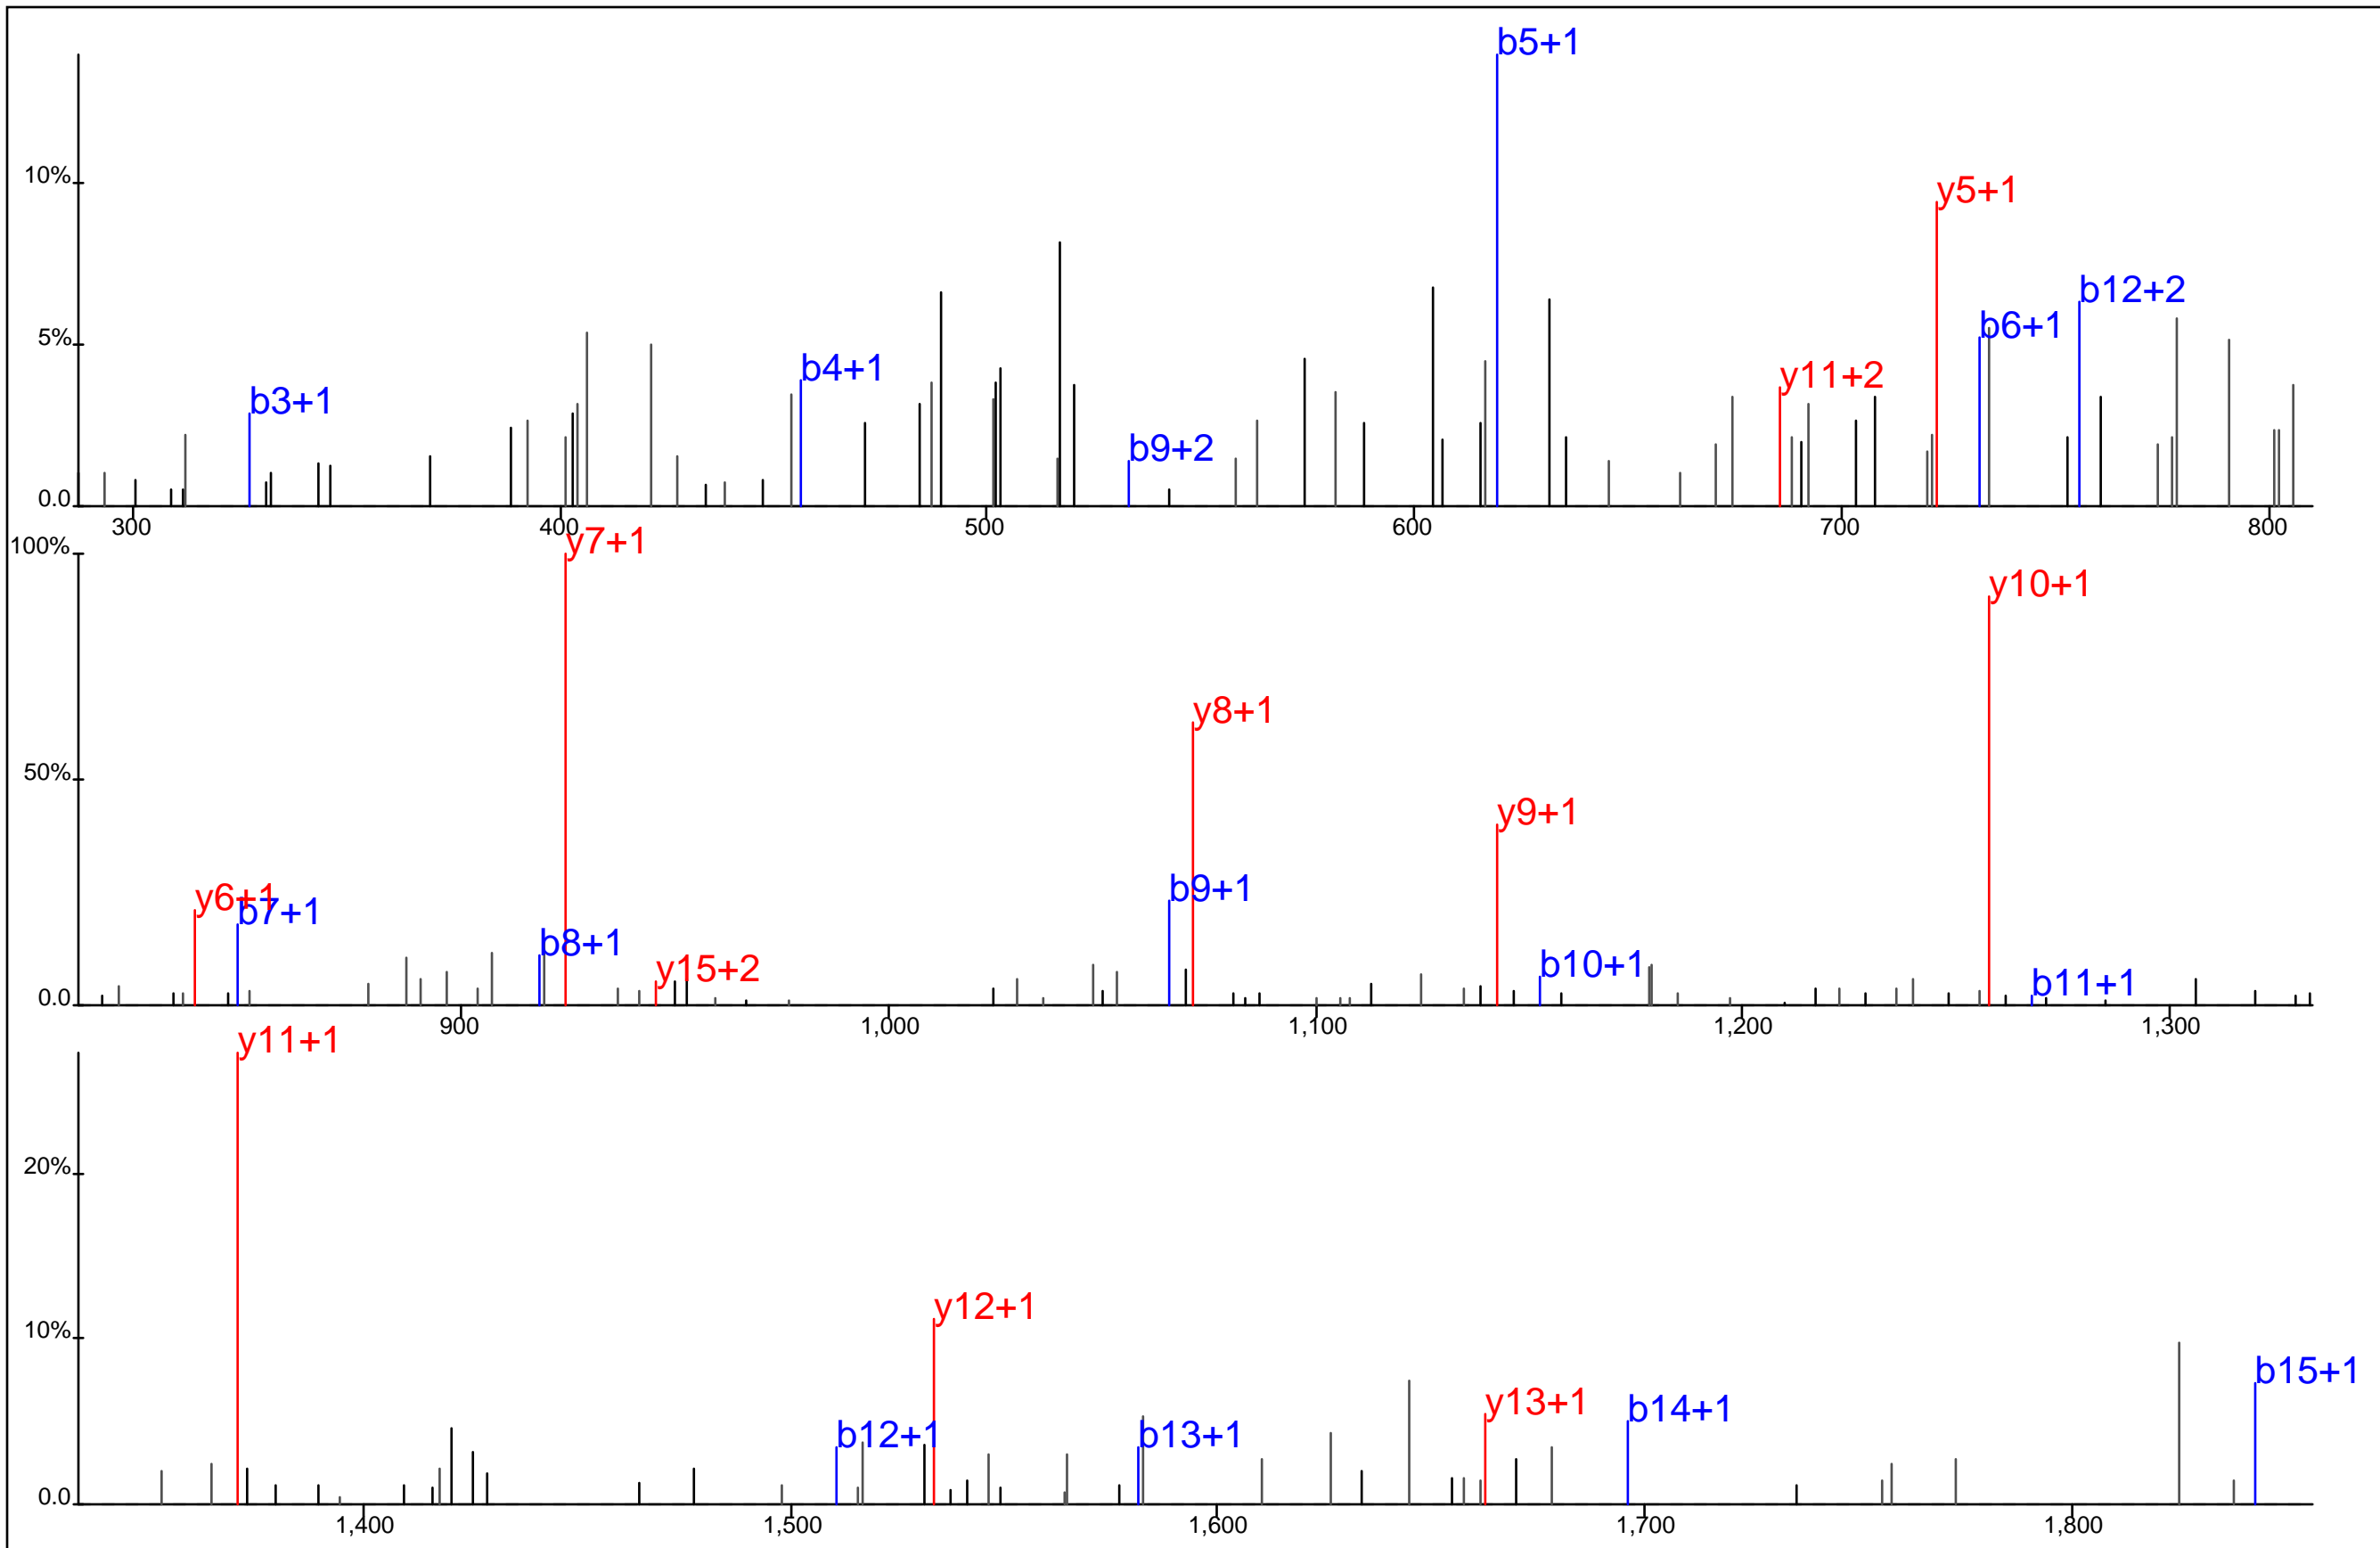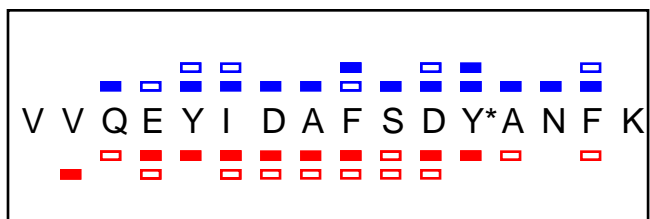

Protein Name: Protein tyrosine phosphatase, receptor type, alpha  
 gi Accession: 0  
 Precursor Mass: 994.9364+2  
 Delta Mass: 1.109 ppm  
 XCorr: 63.74



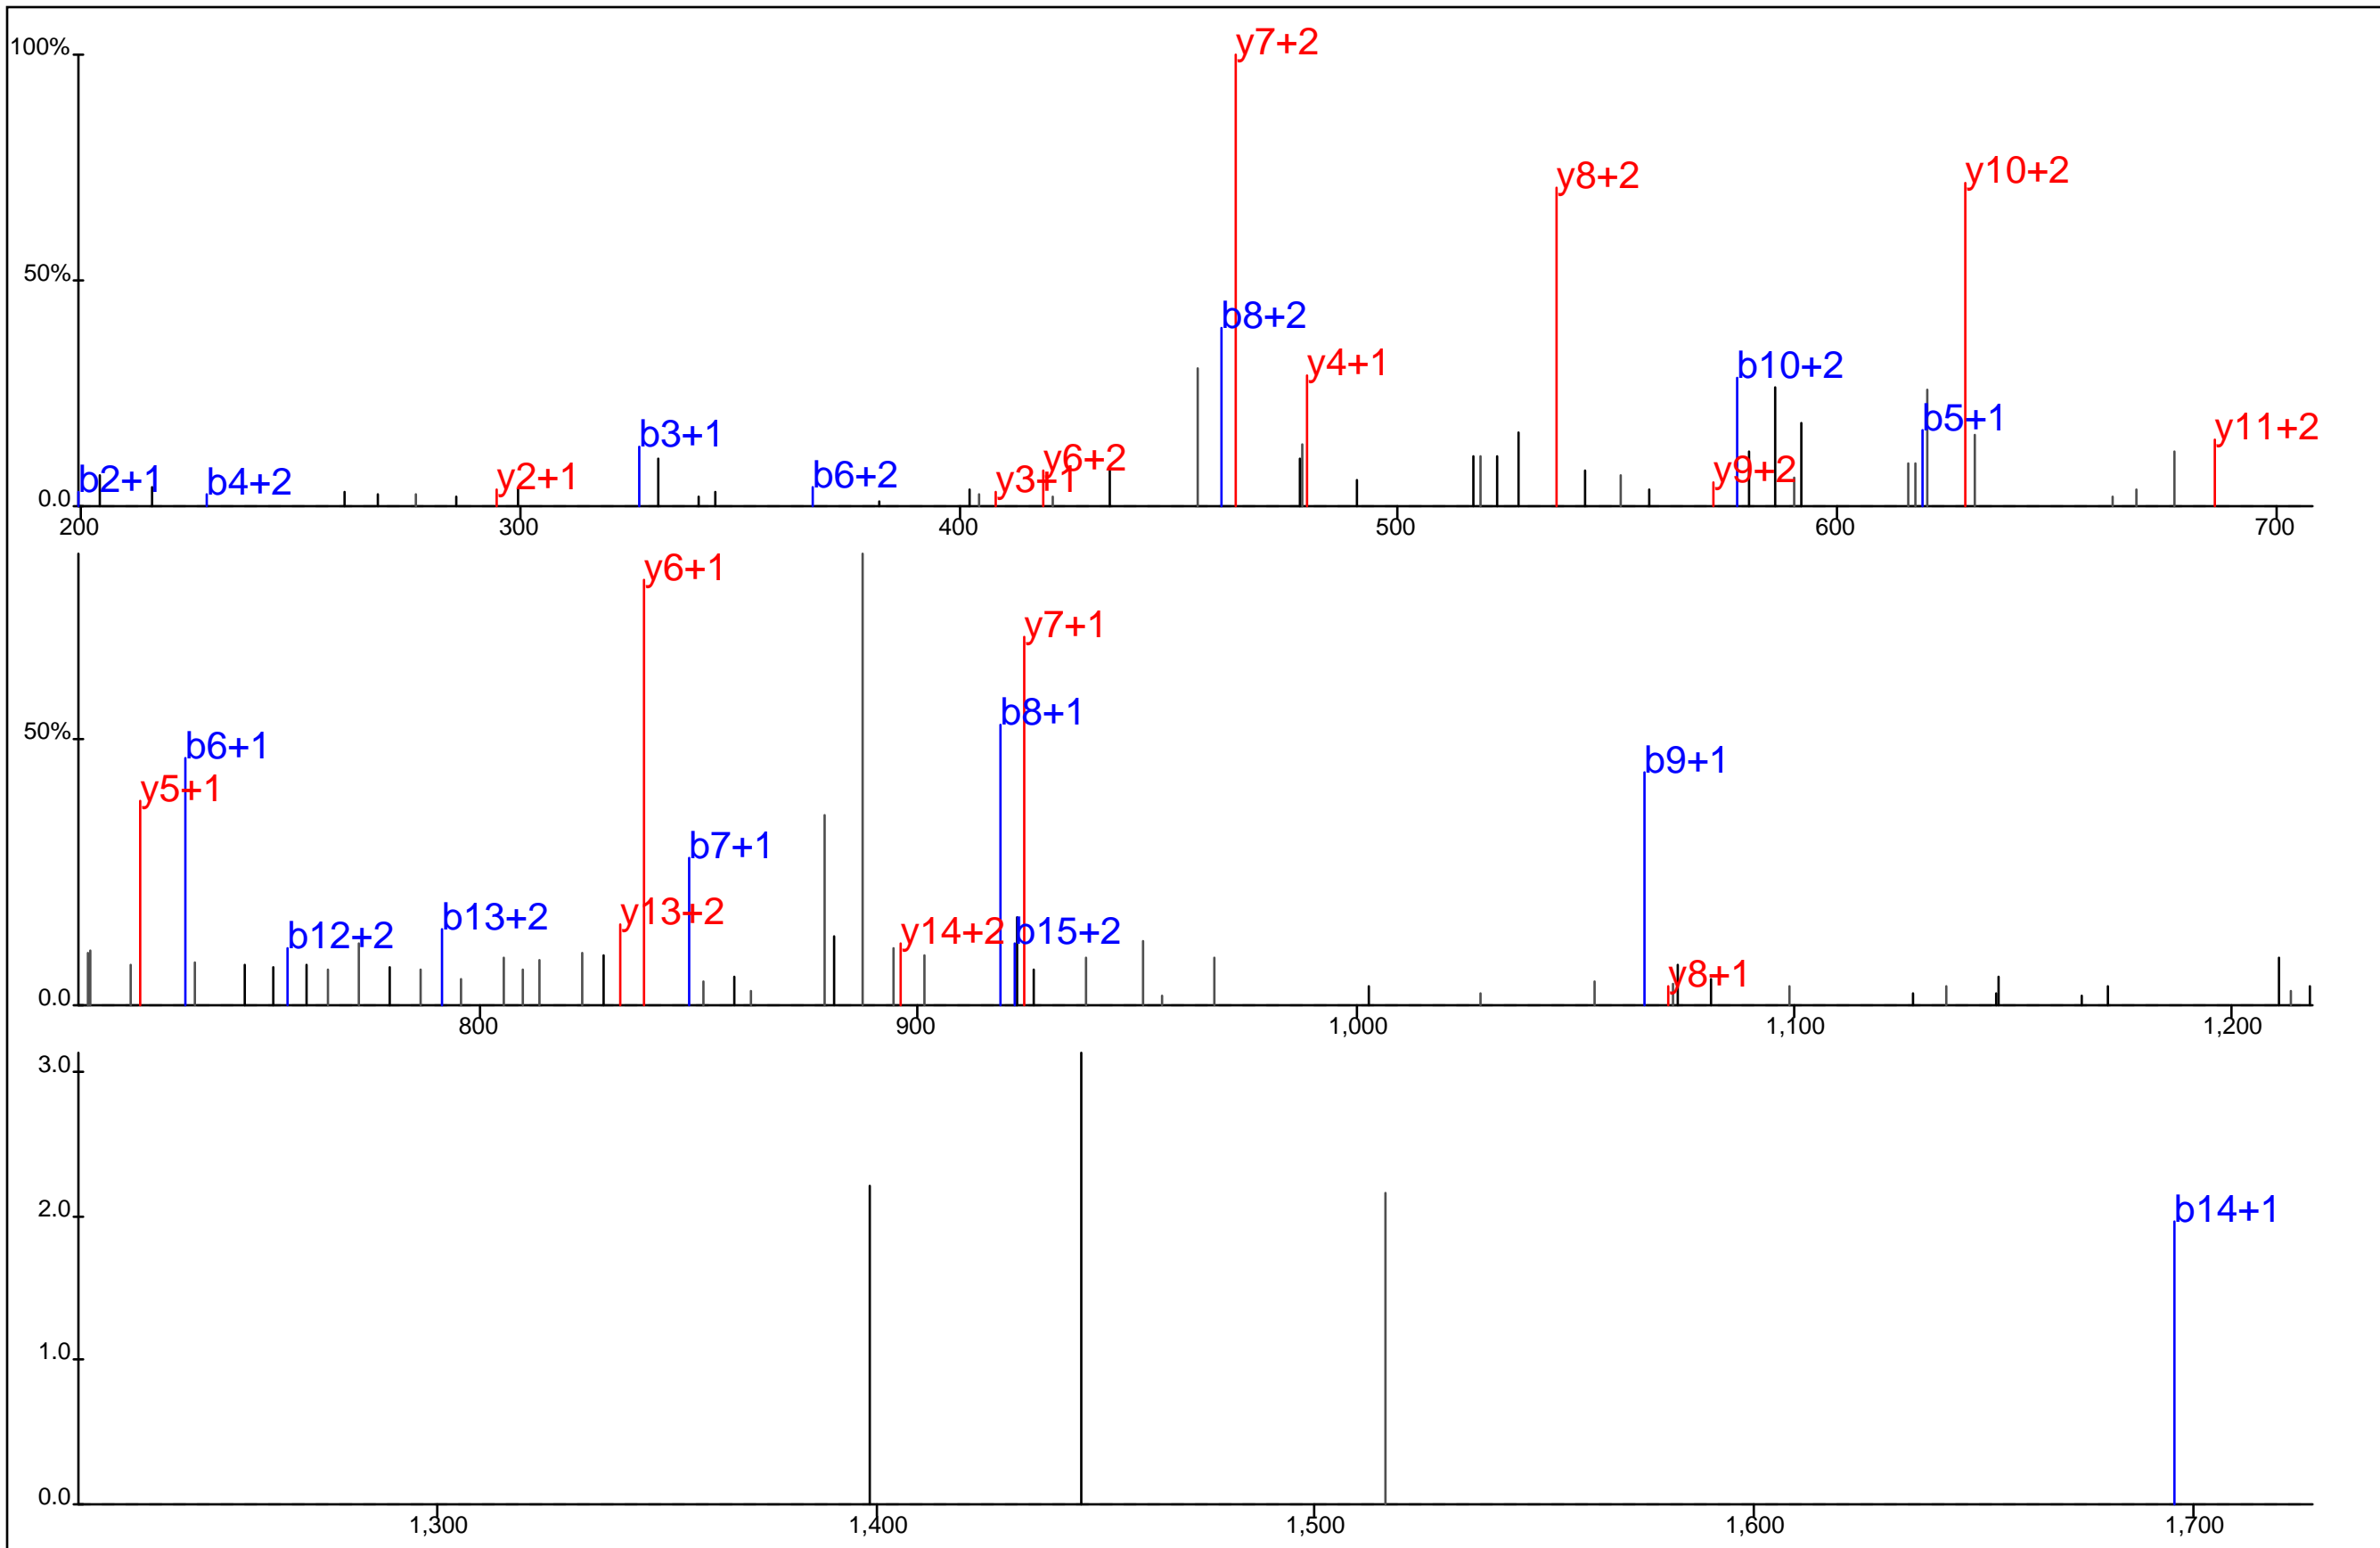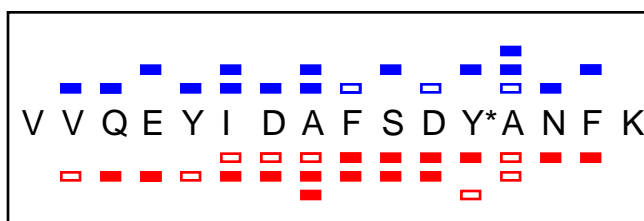

Protein Name: Protein tyrosine phosphatase, receptor type, alpha  
 gi Accession: 0  
 Precursor Mass: 663.6274+3  
 Delta Mass: 0.020 ppm  
 XCorr: 48.37

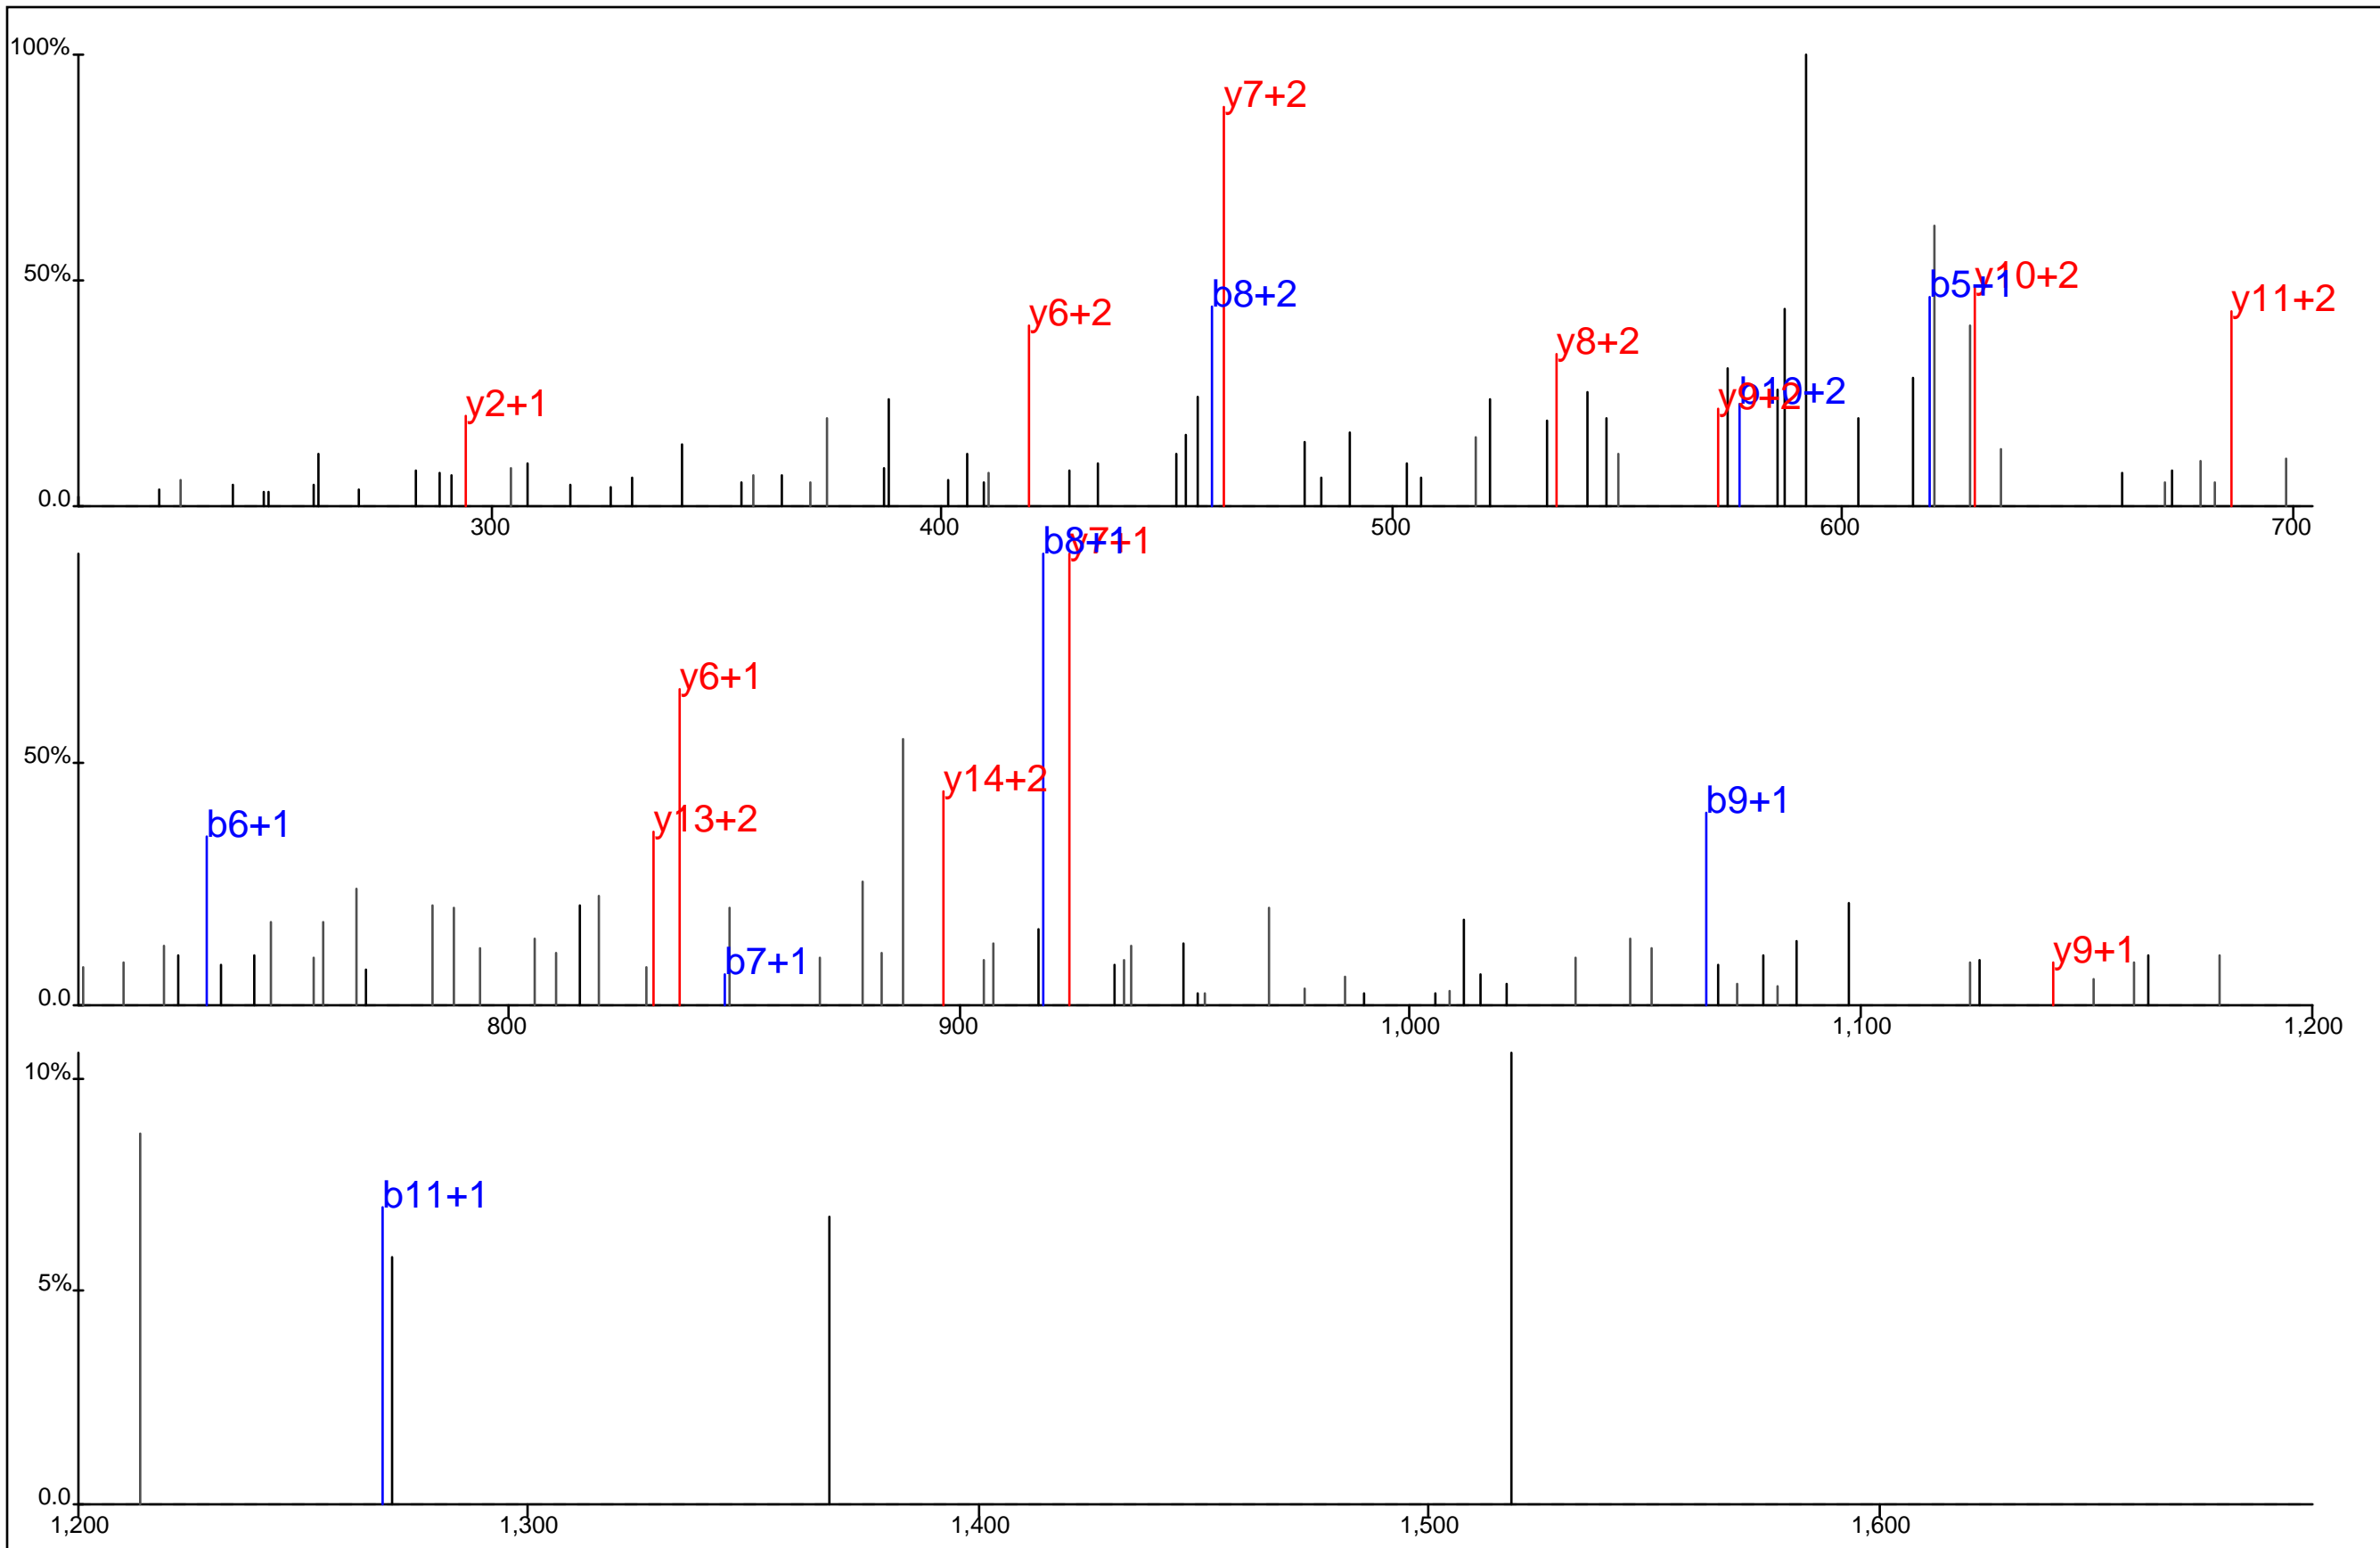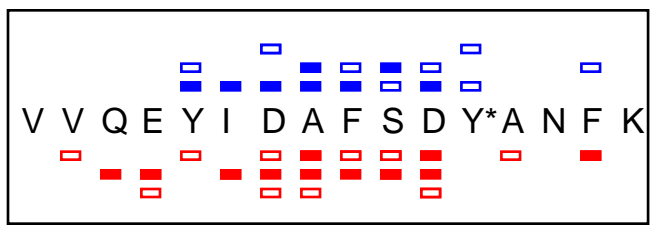

Protein Name: Protein tyrosine phosphatase, receptor type, alpha  
 gi Accession: 0  
 Precursor Mass: 663.6282+3  
 Delta Mass: 1.125 ppm  
 XCorr: 23.53

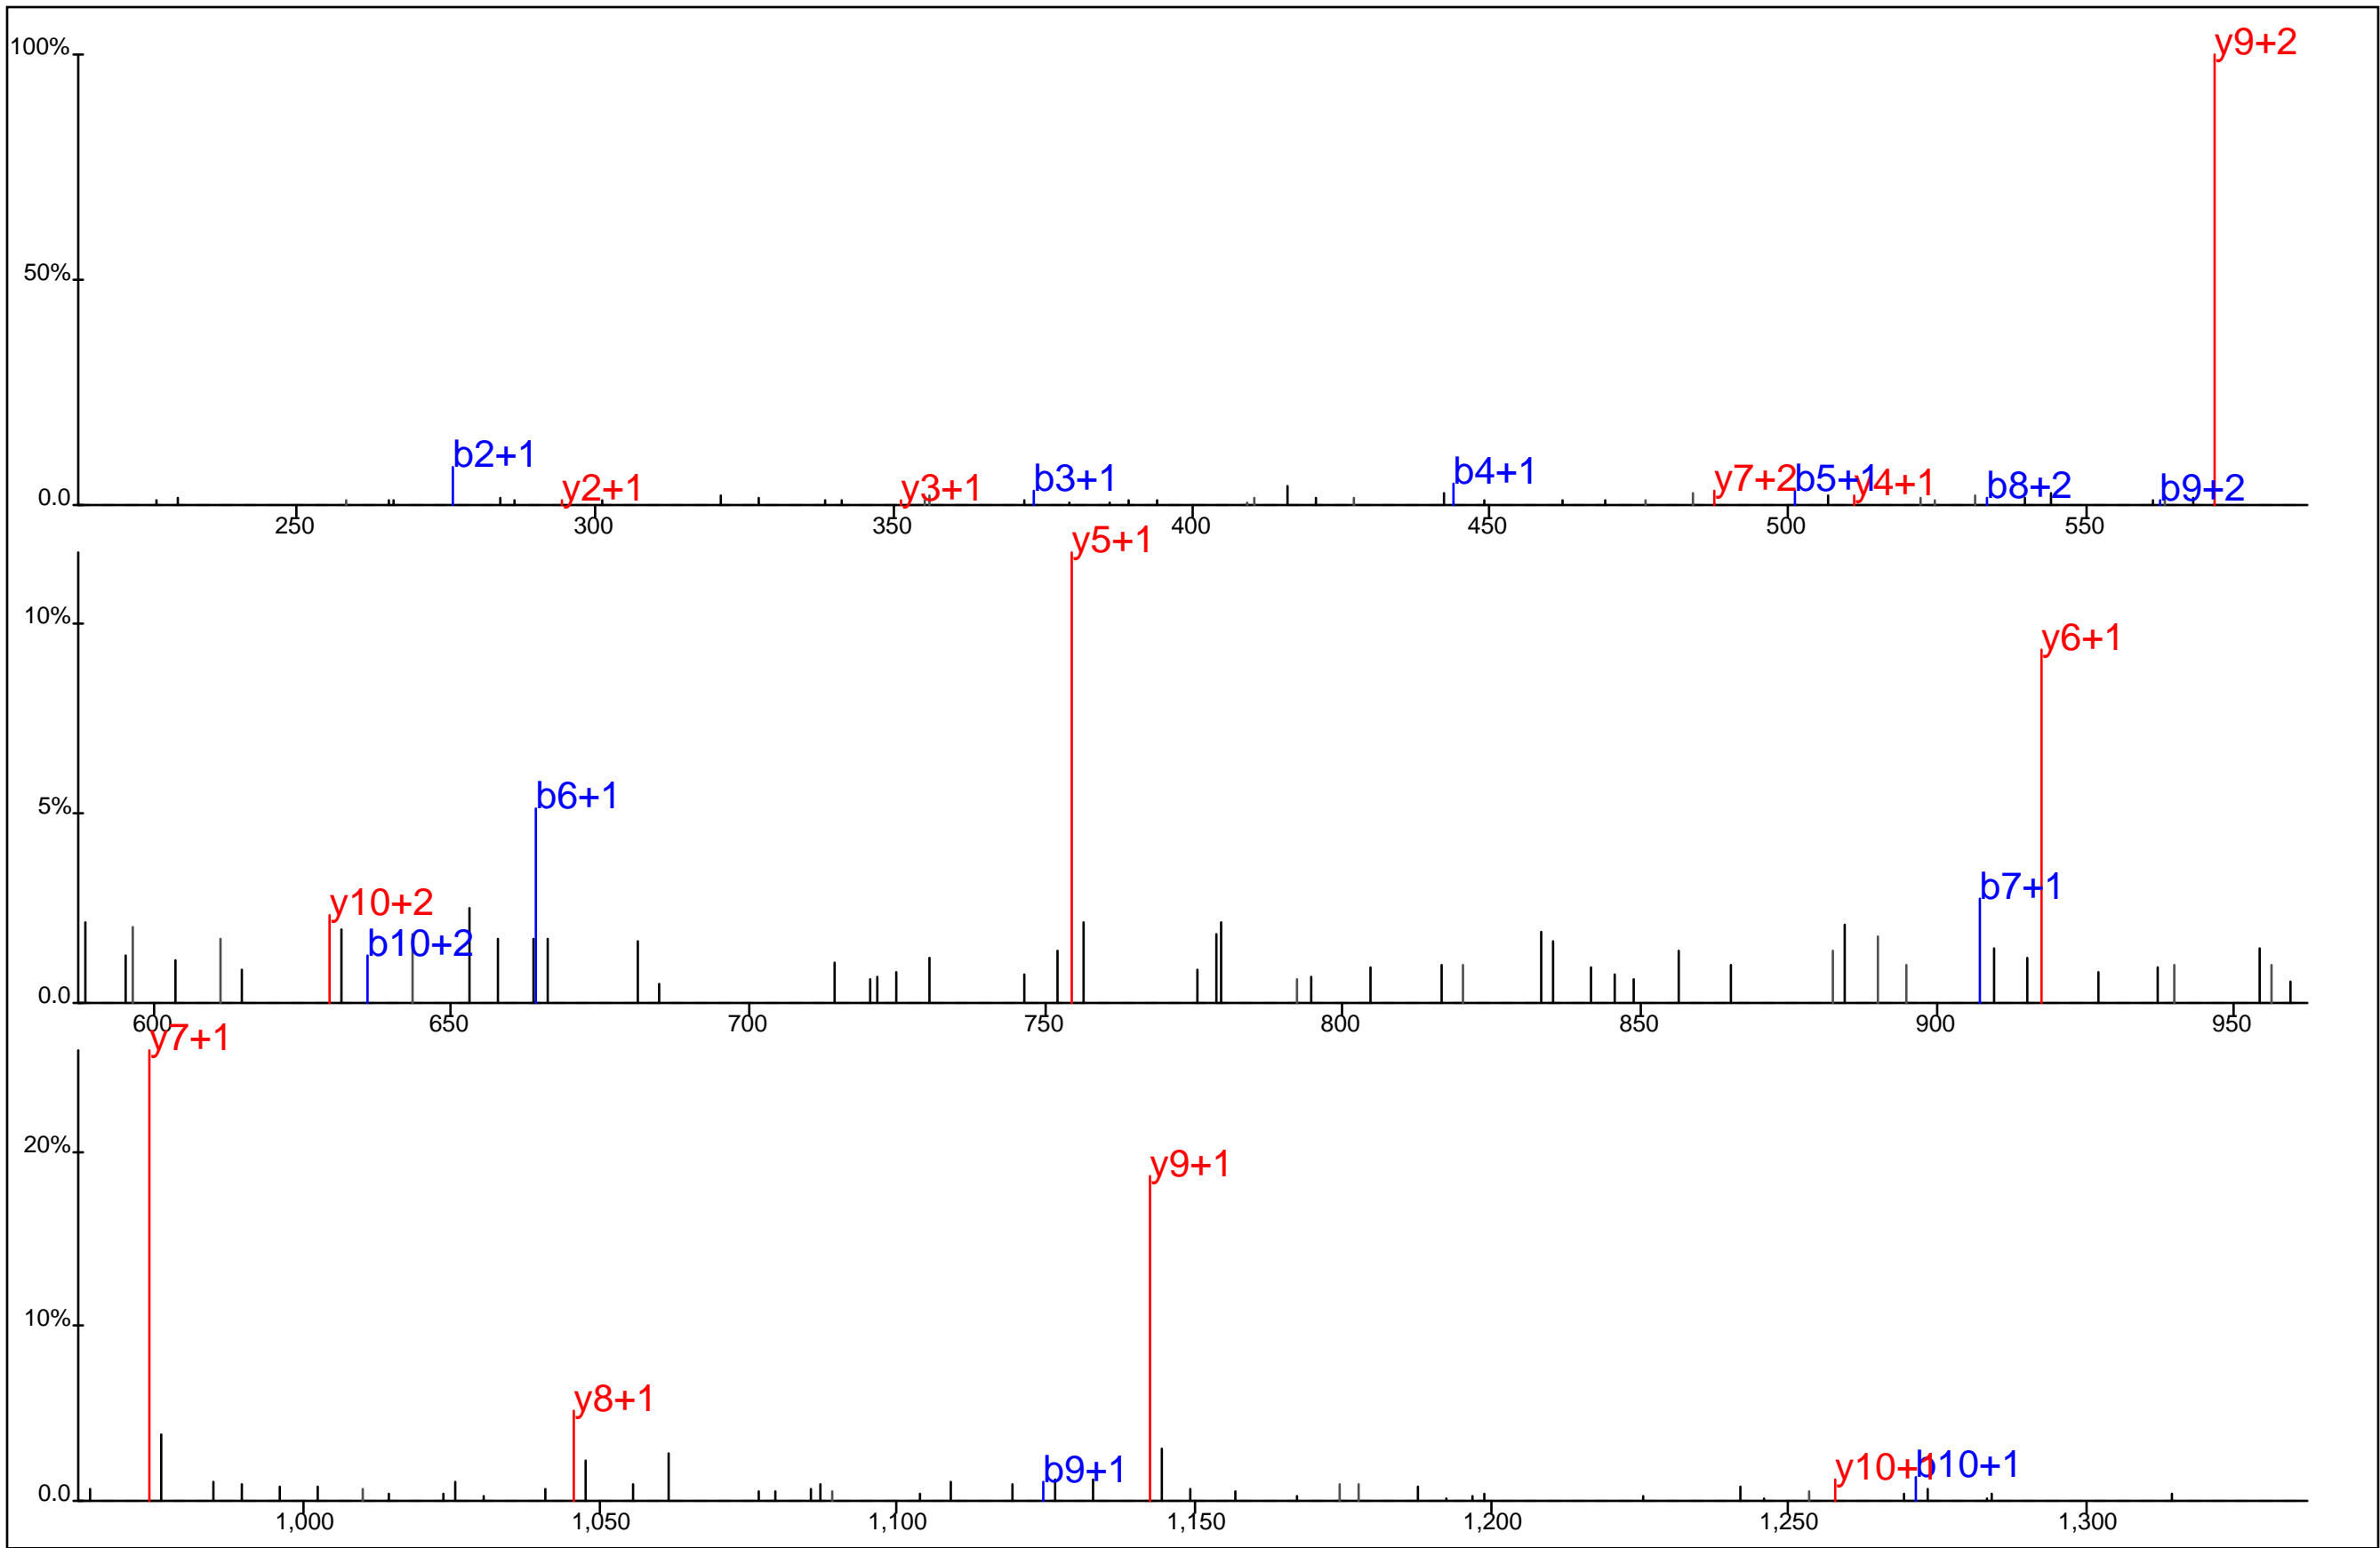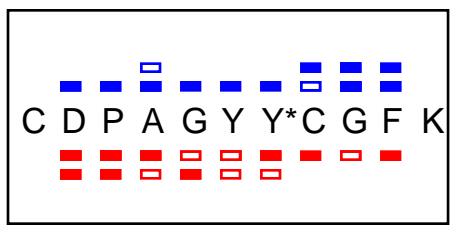

Protein Name: Proteasome subunit alpha type 6  
 gi Accession: 0  
 Precursor Mass: 709.2507+2  
 Delta Mass: 0.837 ppm  
 XCorr: 50.61

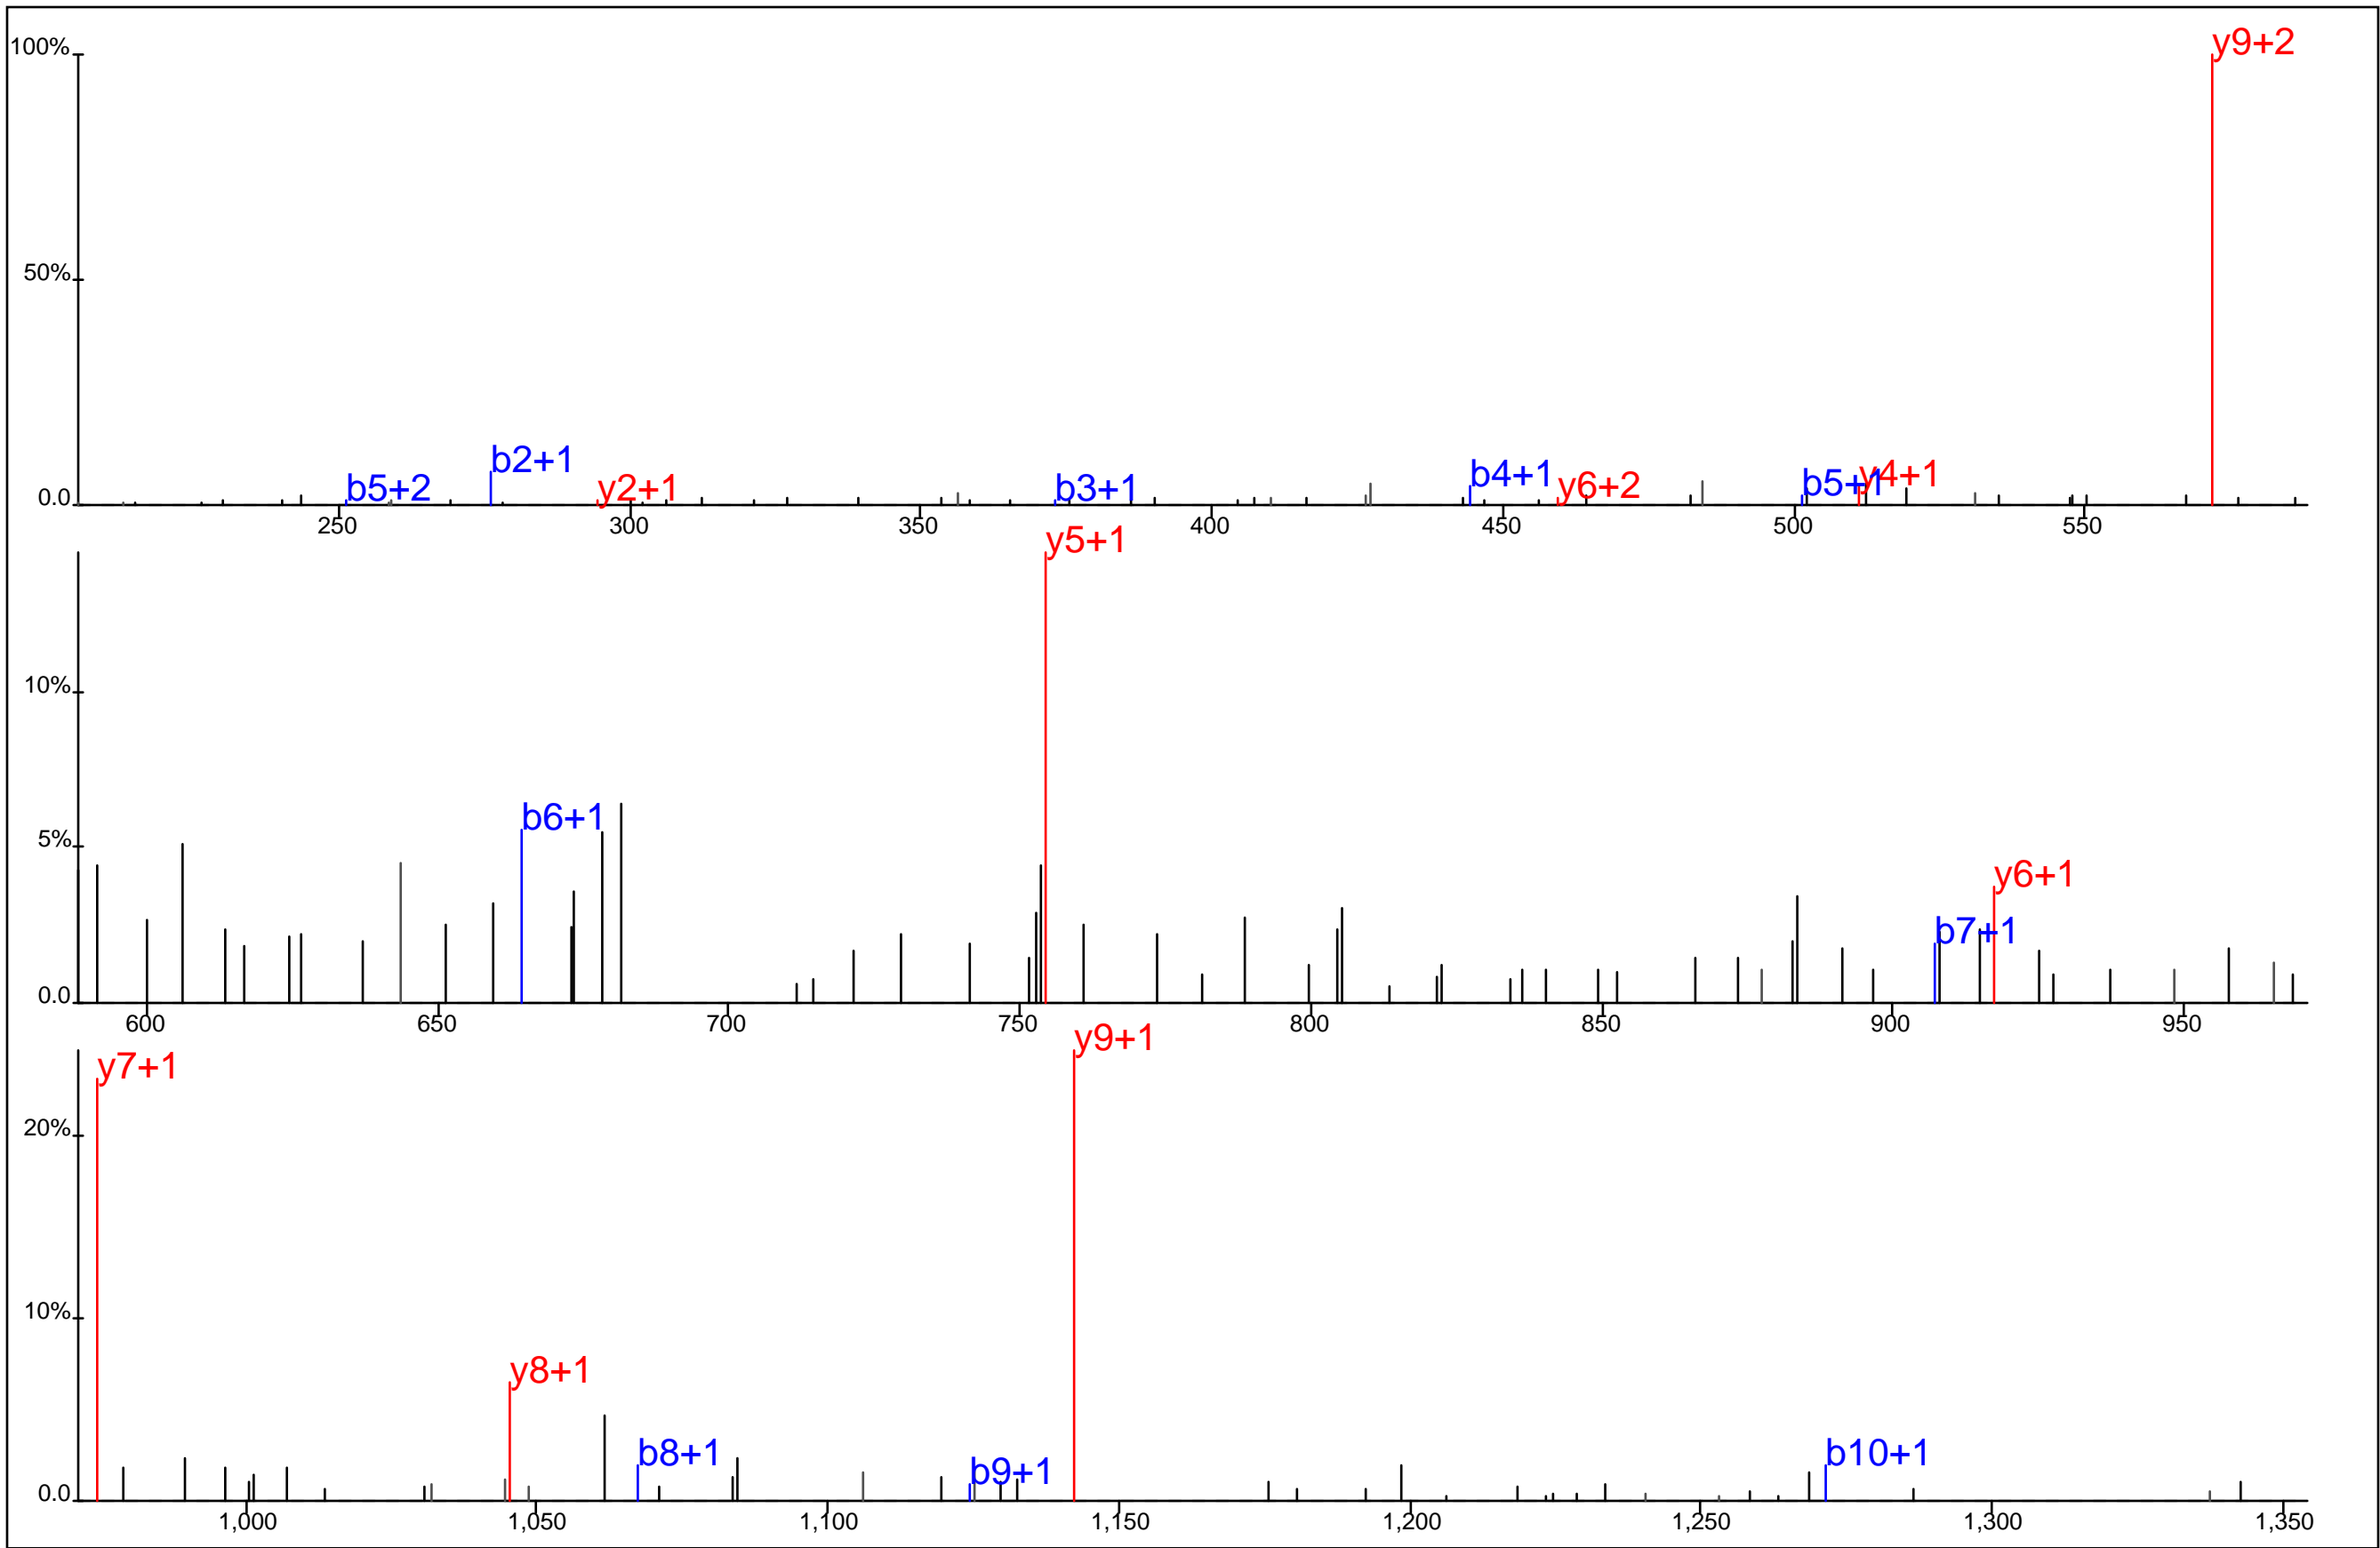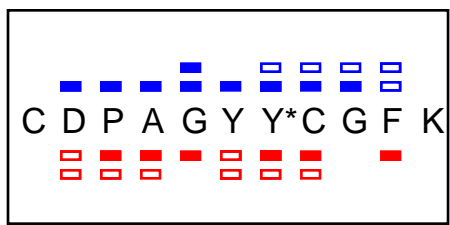

Protein Name: Proteasome subunit alpha type 6  
 gi Accession: 0  
 Precursor Mass: 709.2496+2  
 Delta Mass: 2.300 ppm  
 XCorr: 20.1

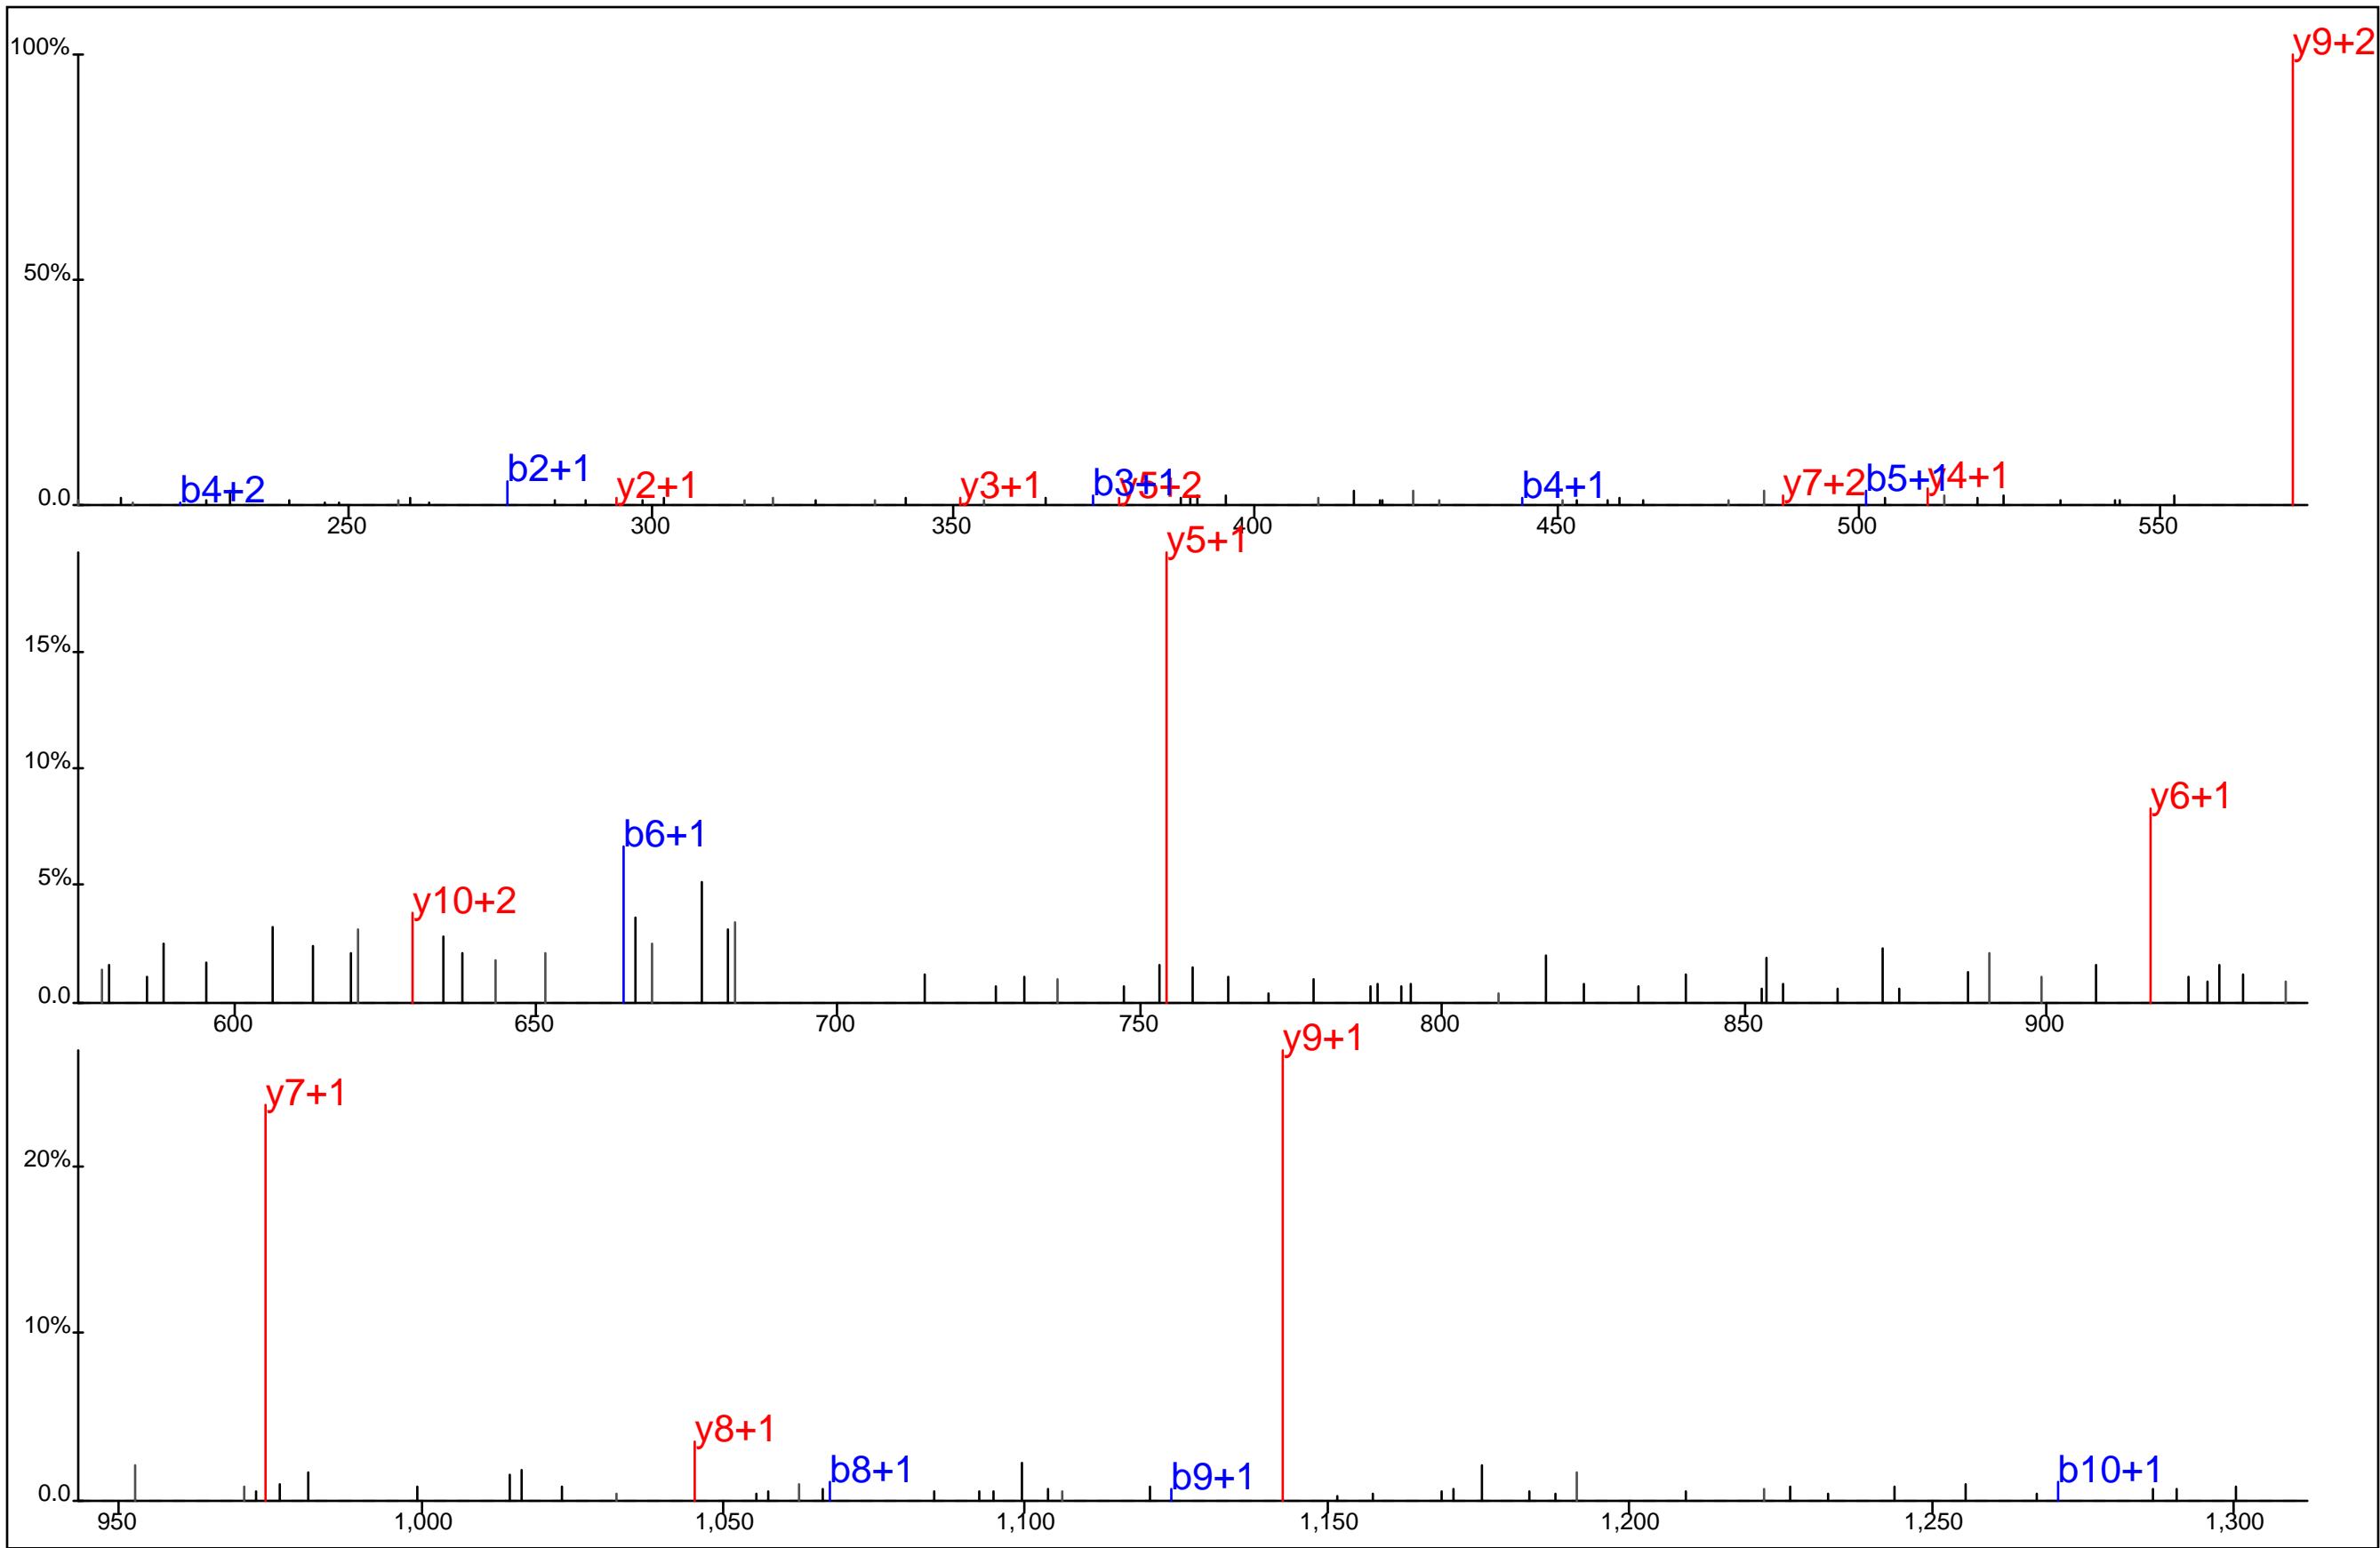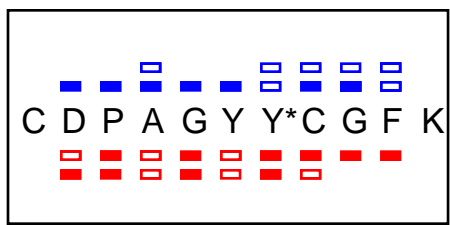

Protein Name: Proteasome subunit alpha type 6  
 gi Accession: 0  
 Precursor Mass: 709.2526+2  
 Delta Mass: 1.833 ppm  
 XCorr: 30.27



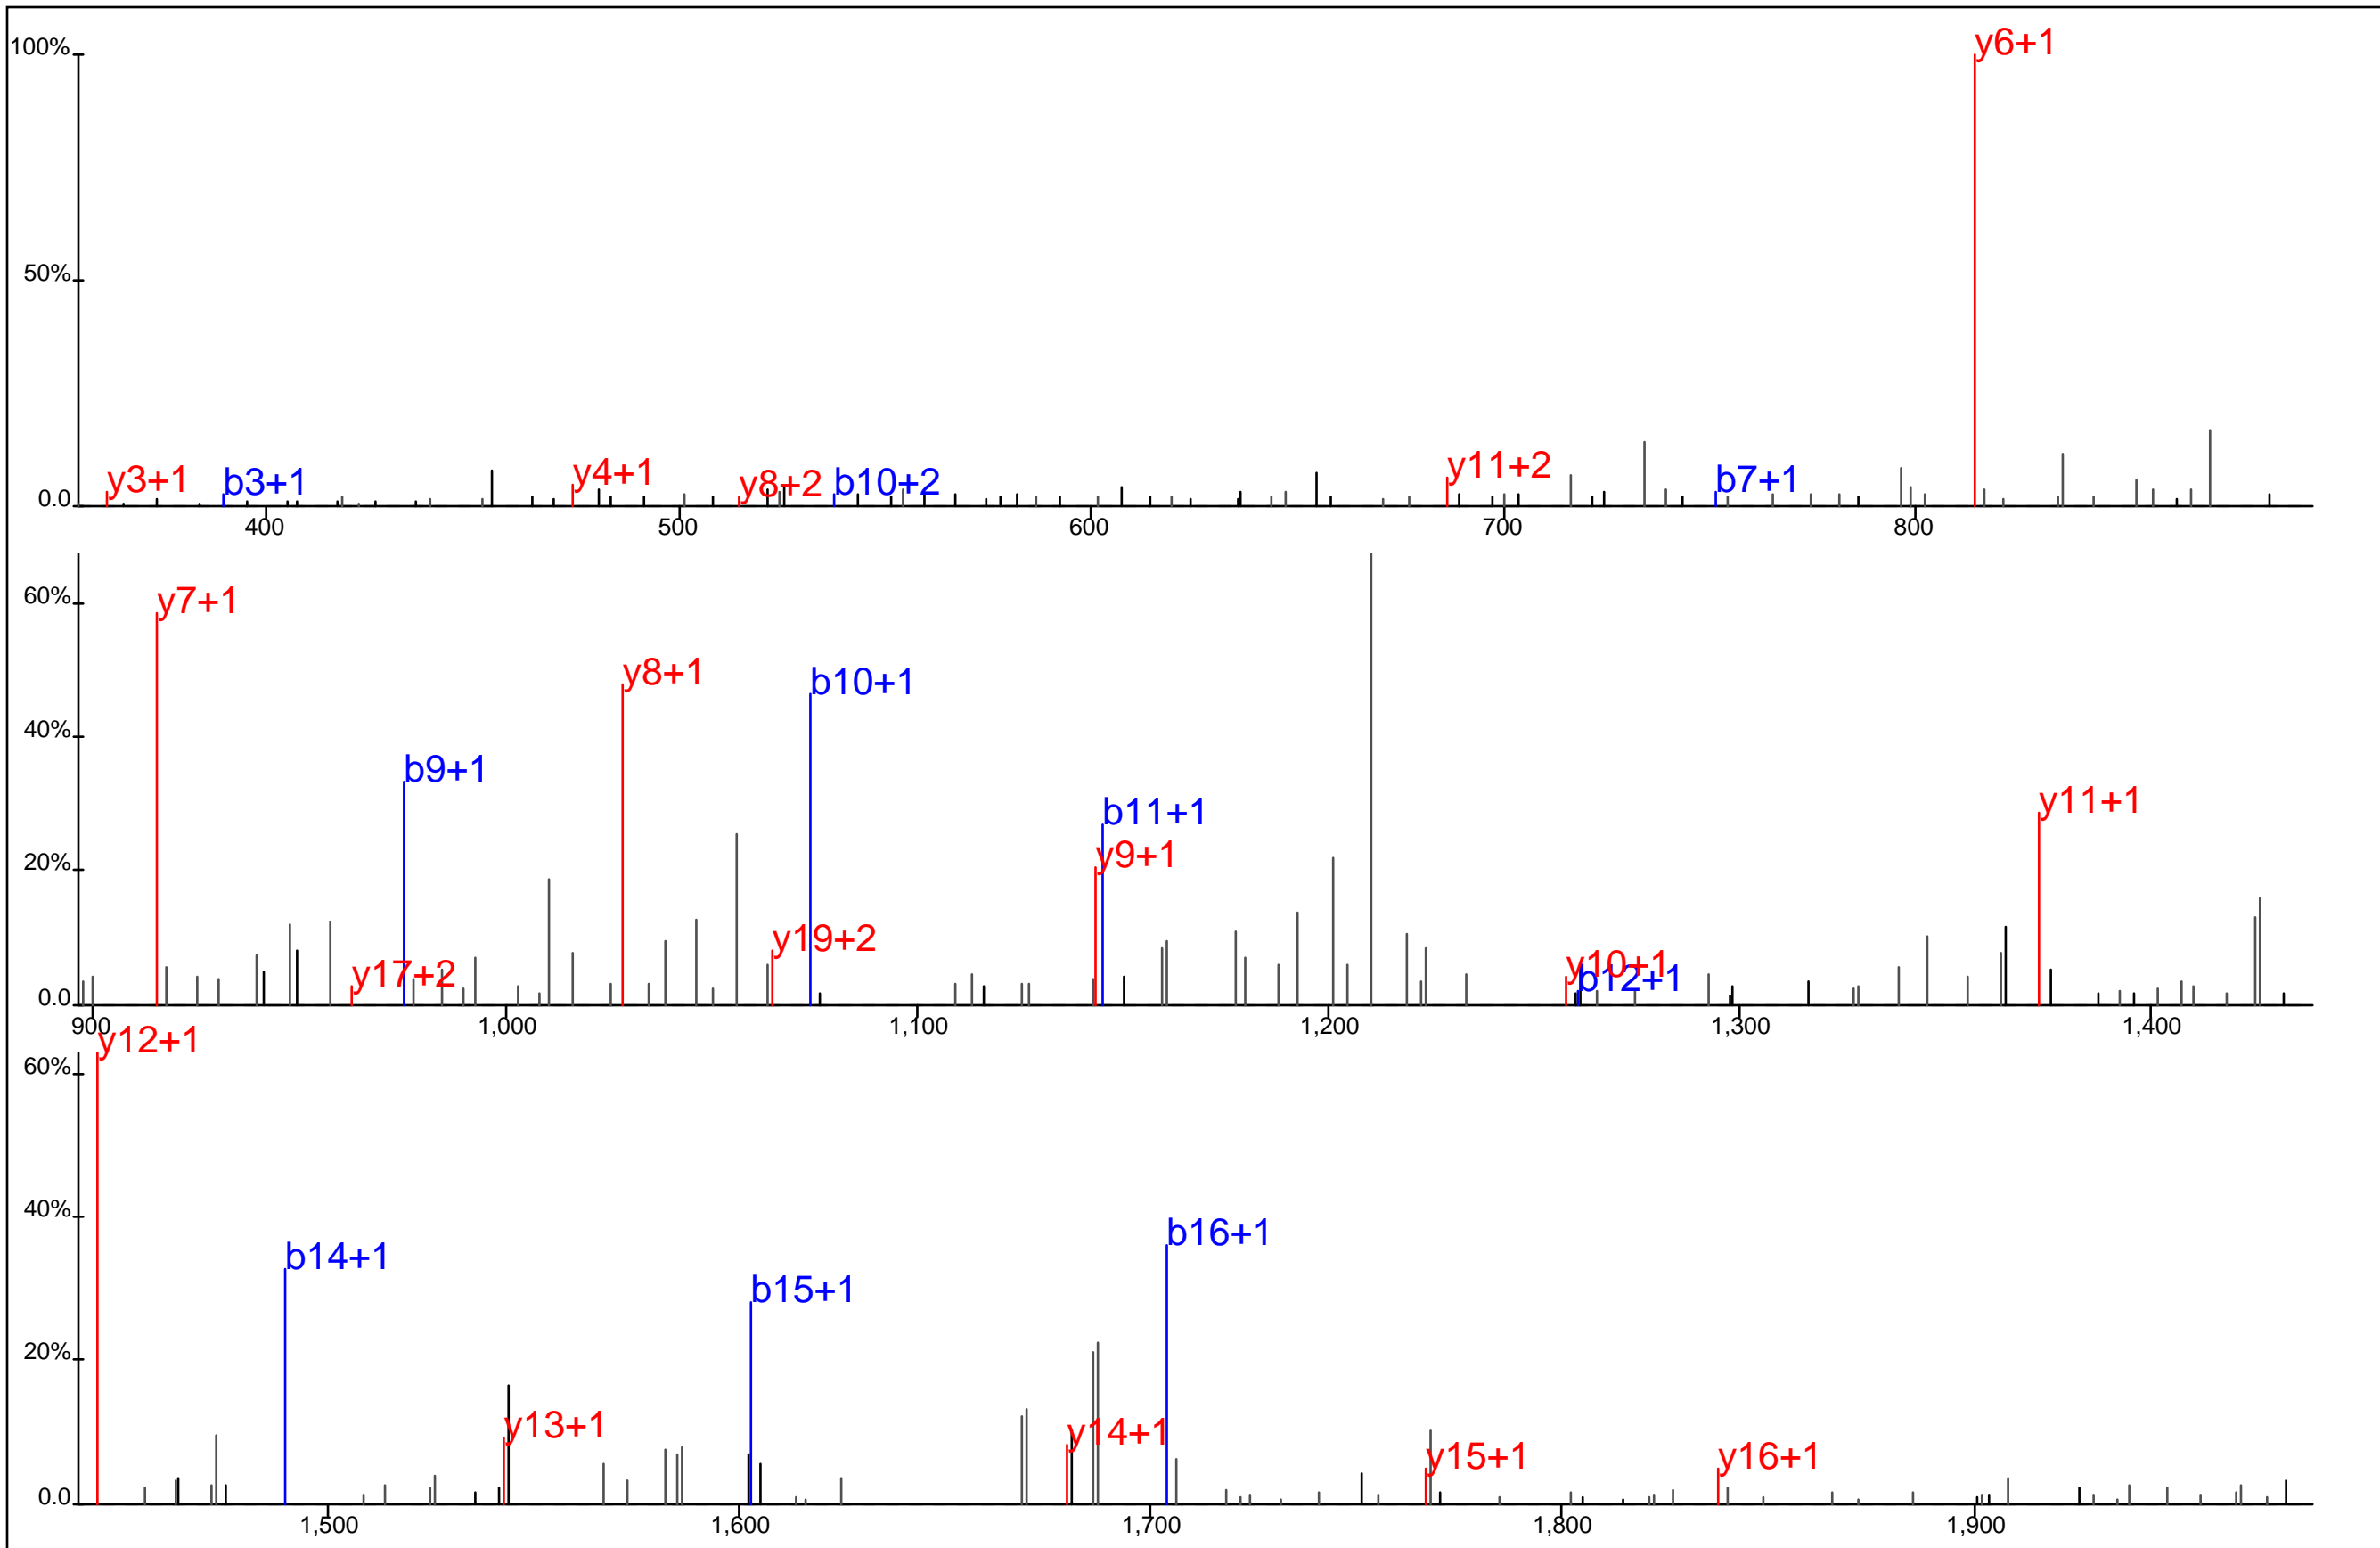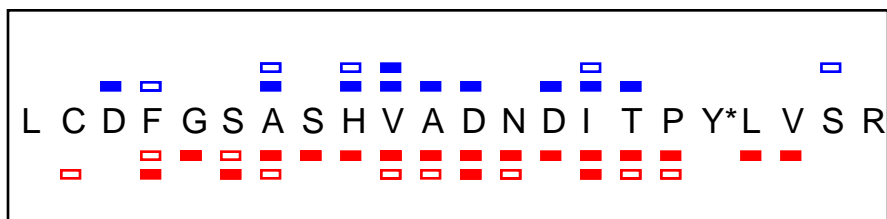

Protein Name: PRP4 pre-mRNA processing factor 4 homolog B  
 gi Accession: 0  
 Precursor Mass: 1,259.0575+2  
 Delta Mass: 1.537 ppm  
 XCorr: 57.73

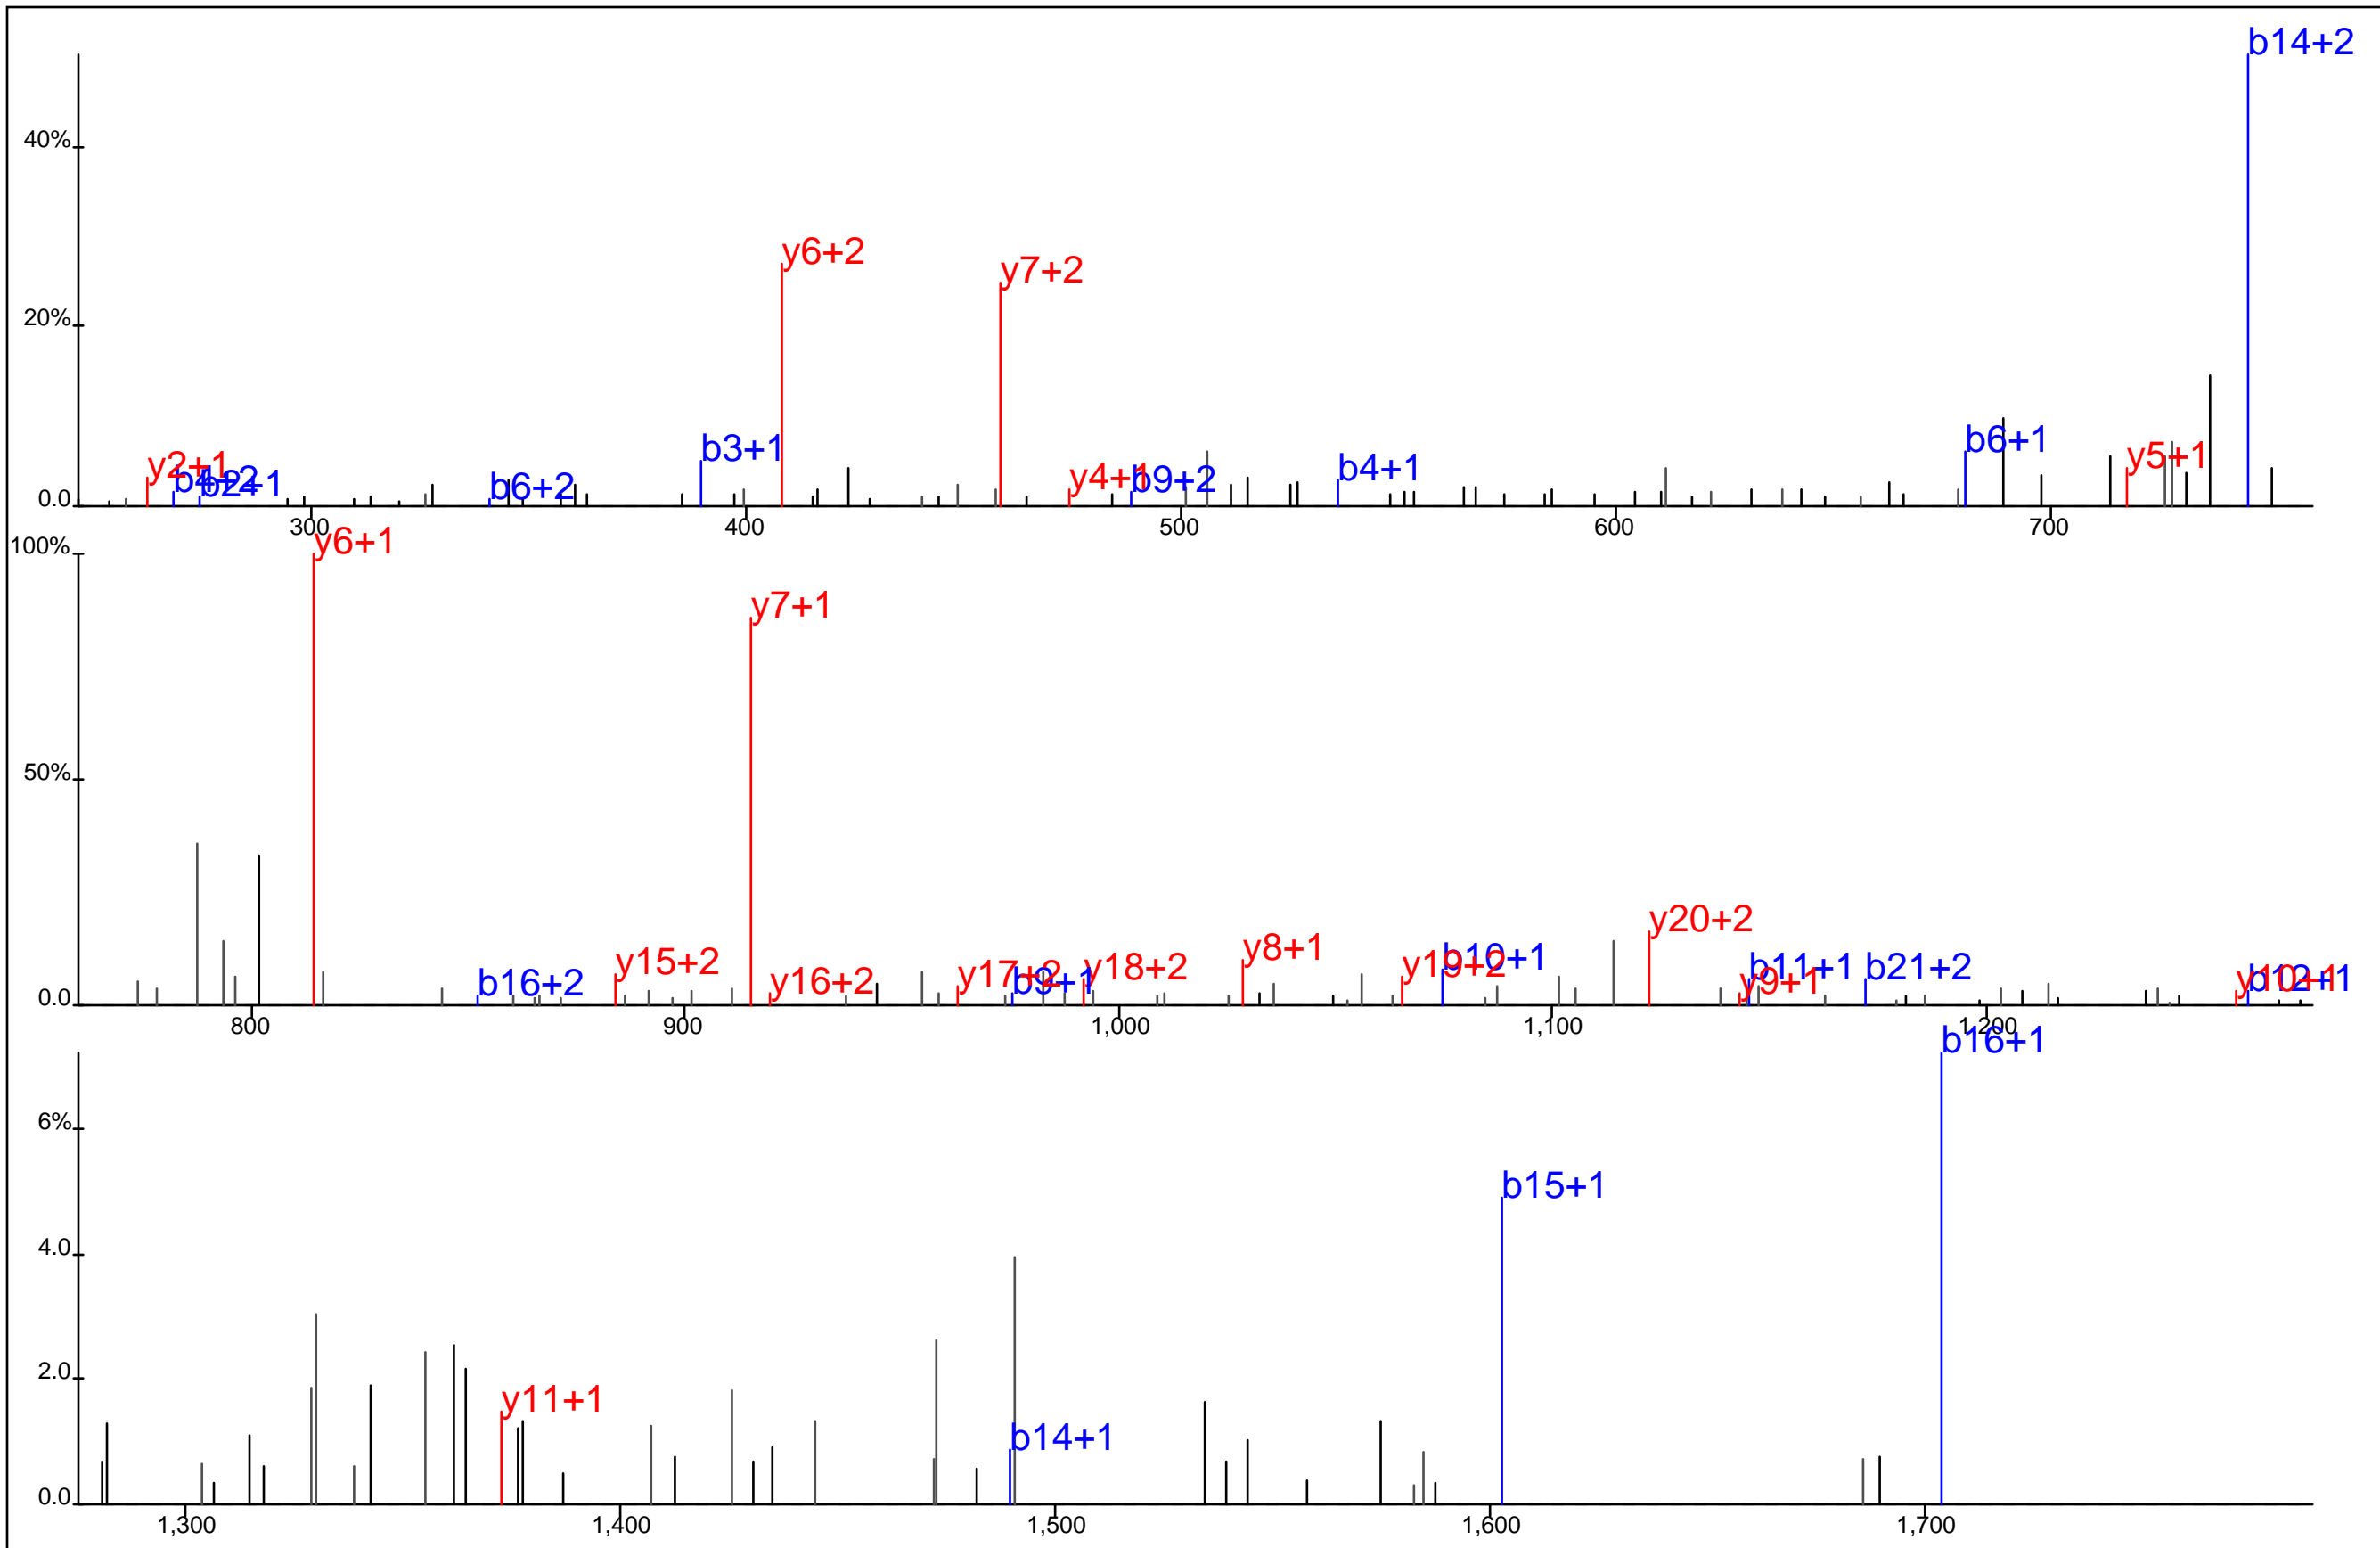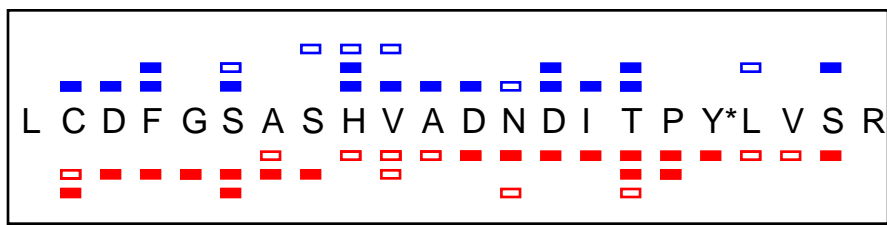

Protein Name: PRP4 pre-mRNA processing factor 4 homolog B  
 gi Accession: 0  
 Precursor Mass: 839.7085+3  
 Delta Mass: 0.257 ppm  
 XCorr: 36.23



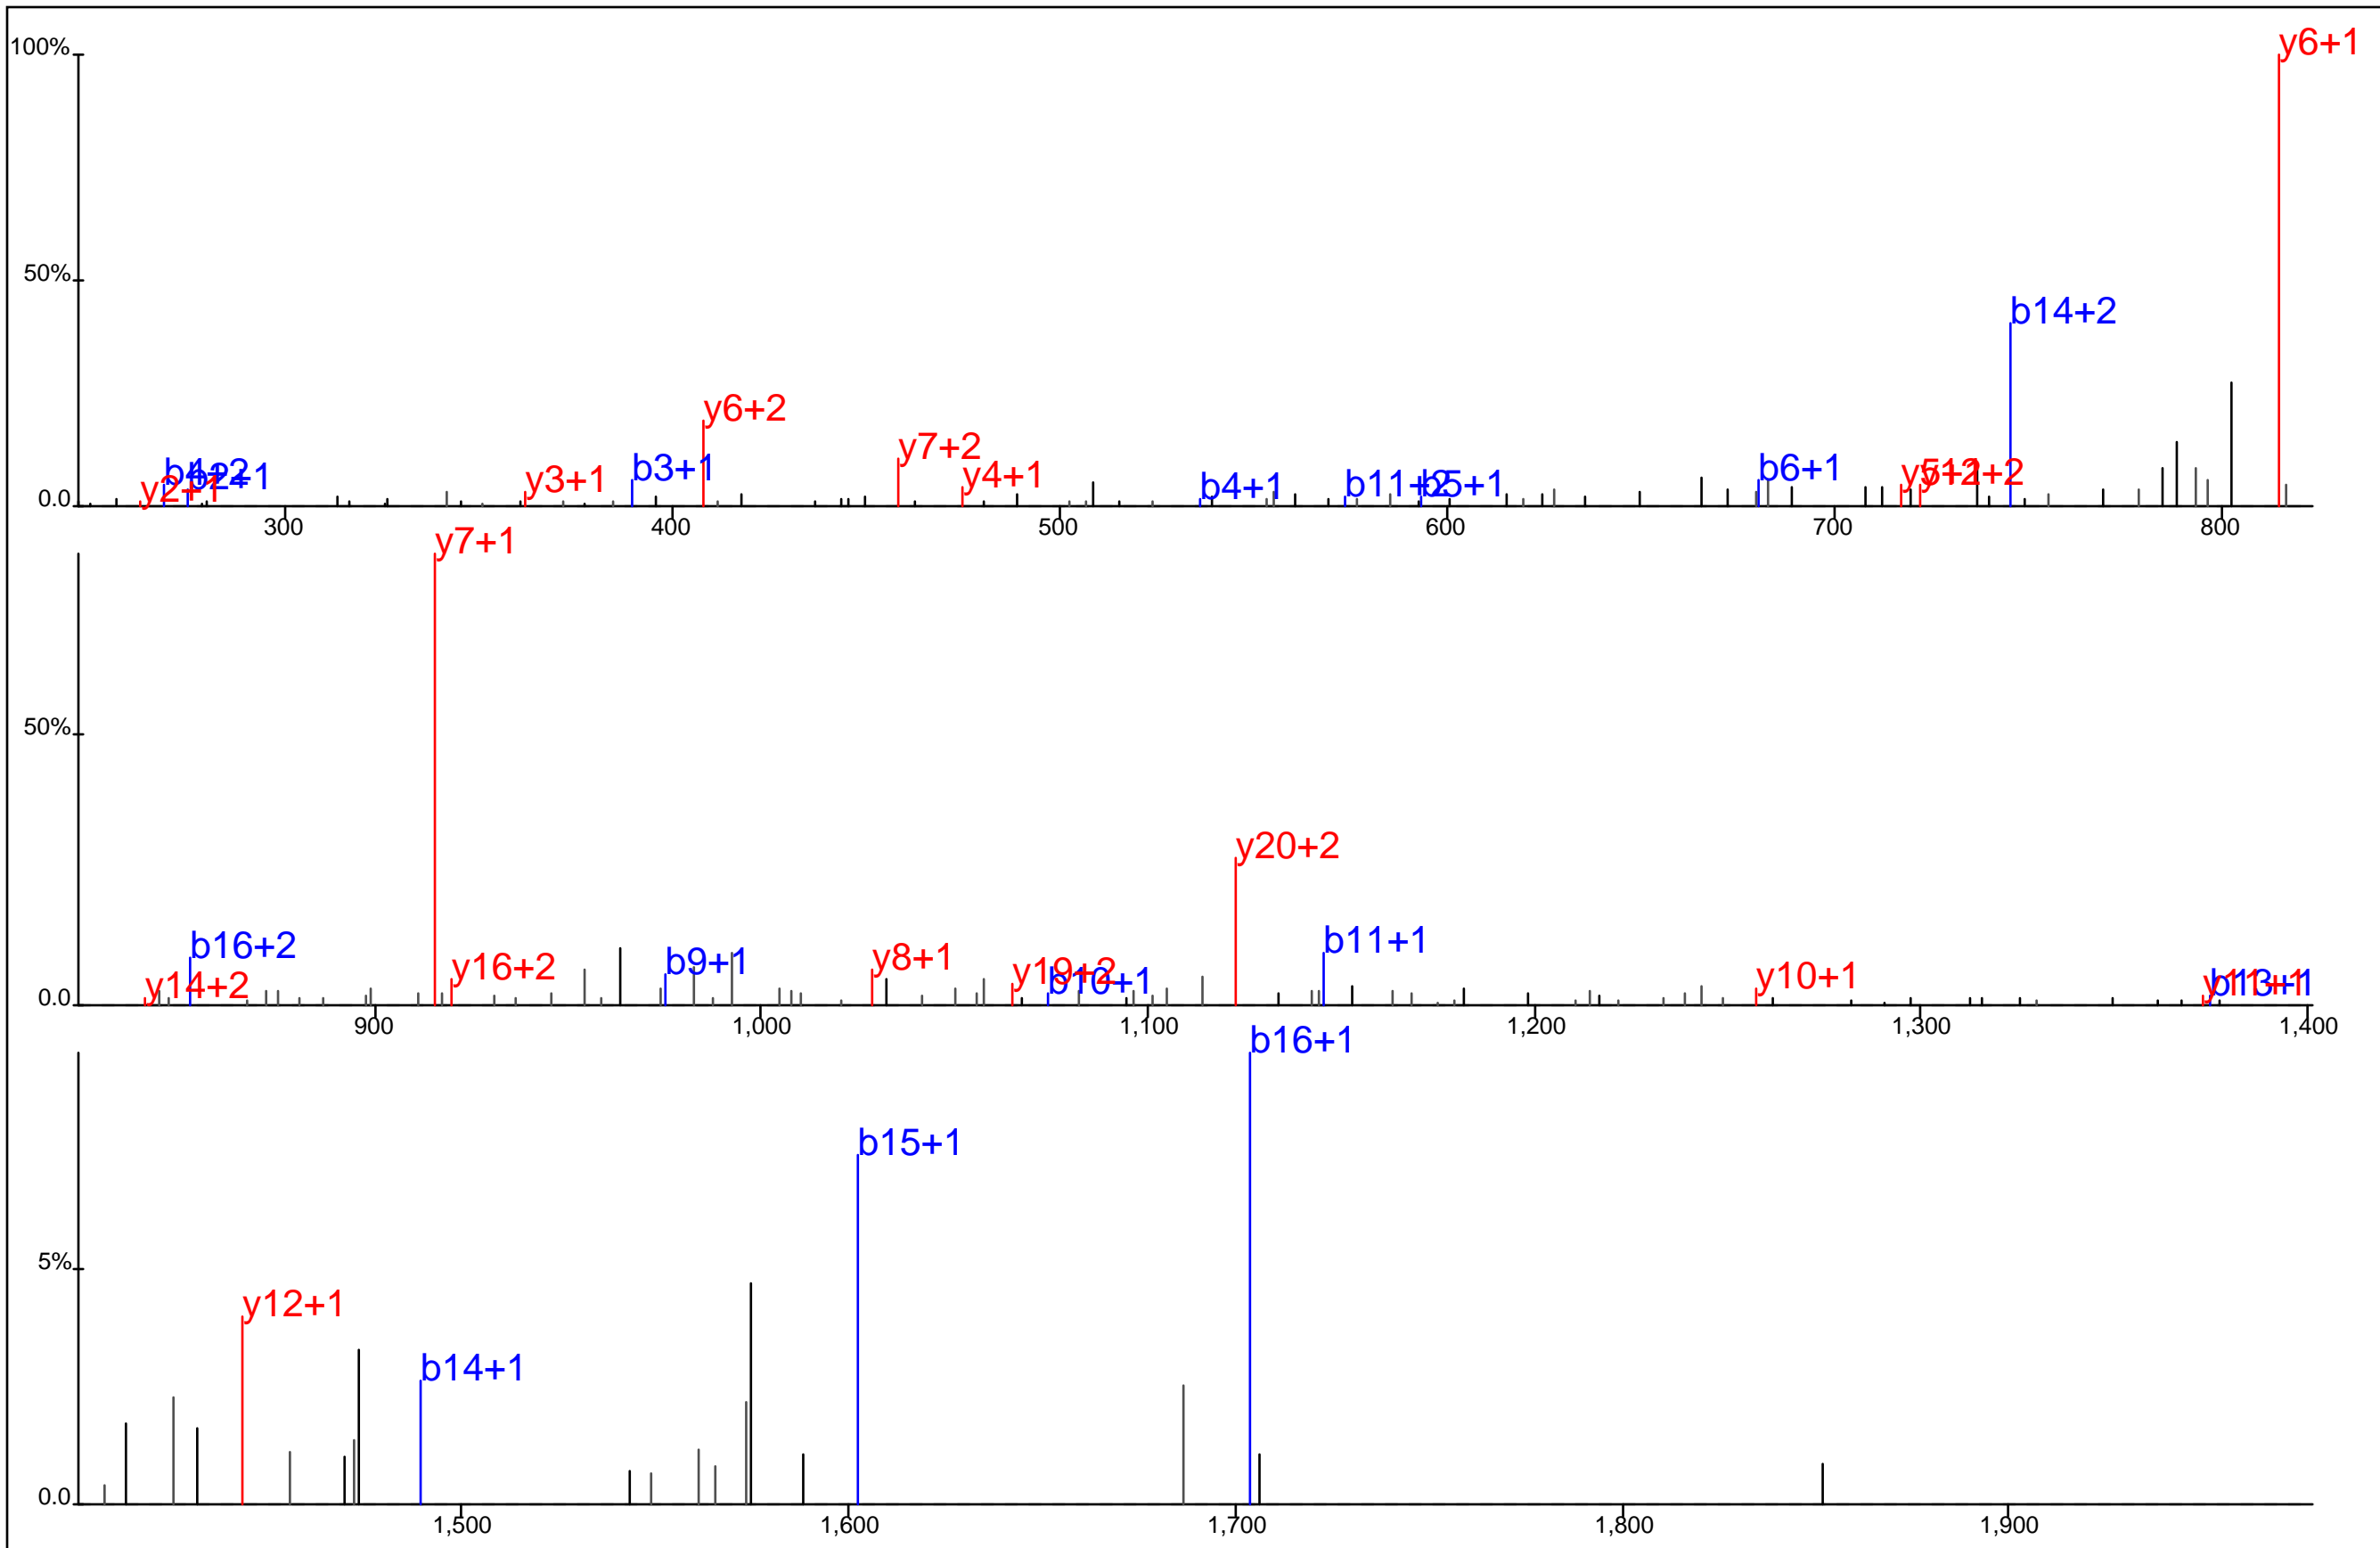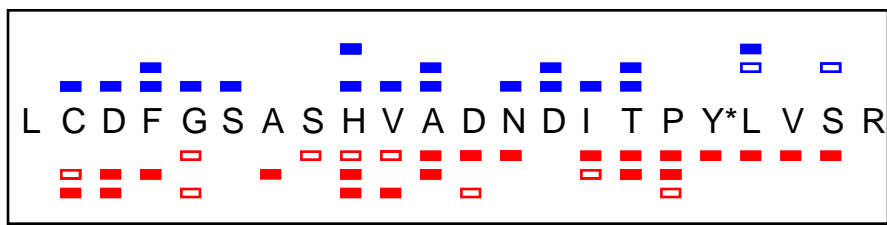

Protein Name: PRP4 pre-mRNA processing factor 4 homolog B  
 gi Accession: 0  
 Precursor Mass: 839.7103+3  
 Delta Mass: 1.853 ppm  
 XCorr: 49.03

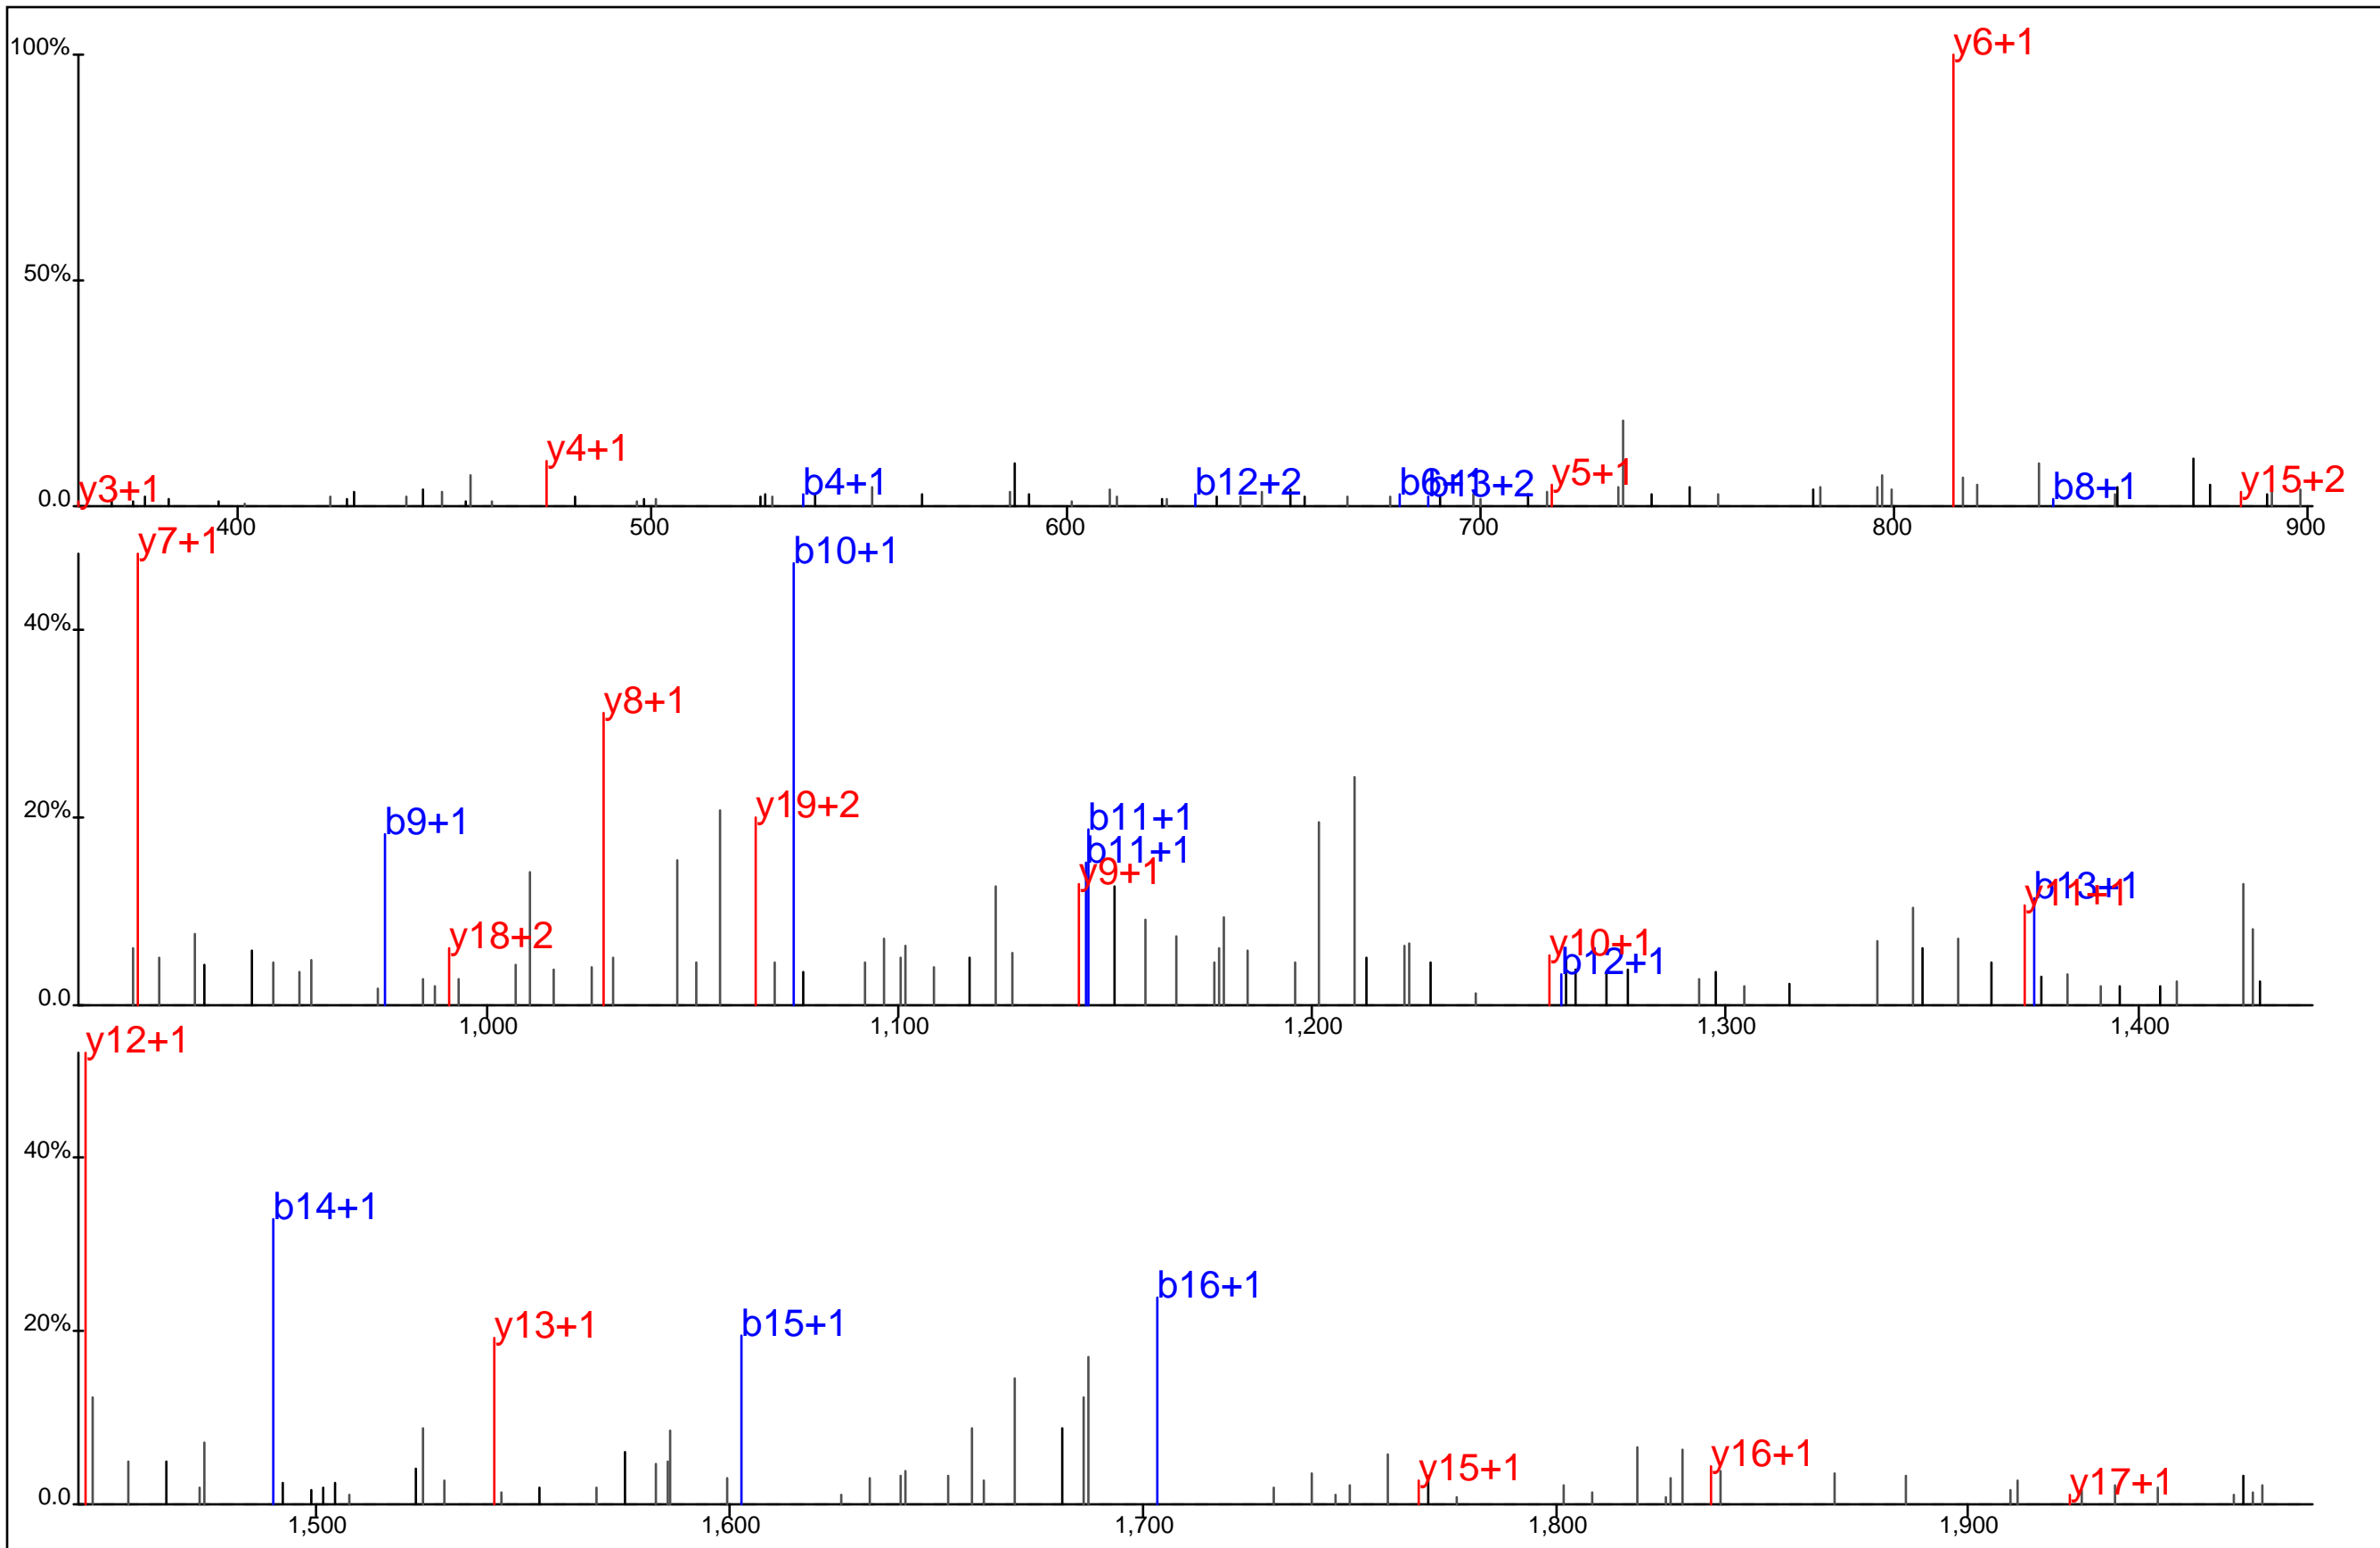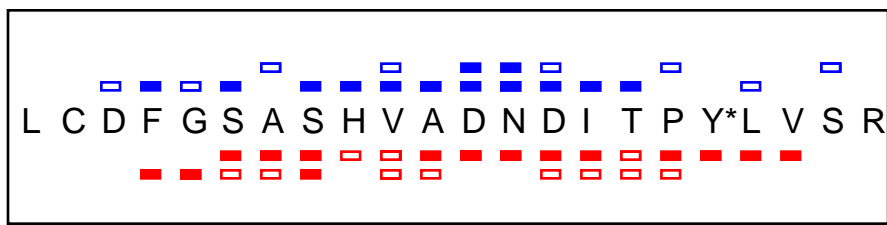

Protein Name: PRP4 pre-mRNA processing factor 4 homolog B  
 gi Accession: 0  
 Precursor Mass: 1,259.0634+2  
 Delta Mass: 3.119 ppm  
 XCorr: 36.46



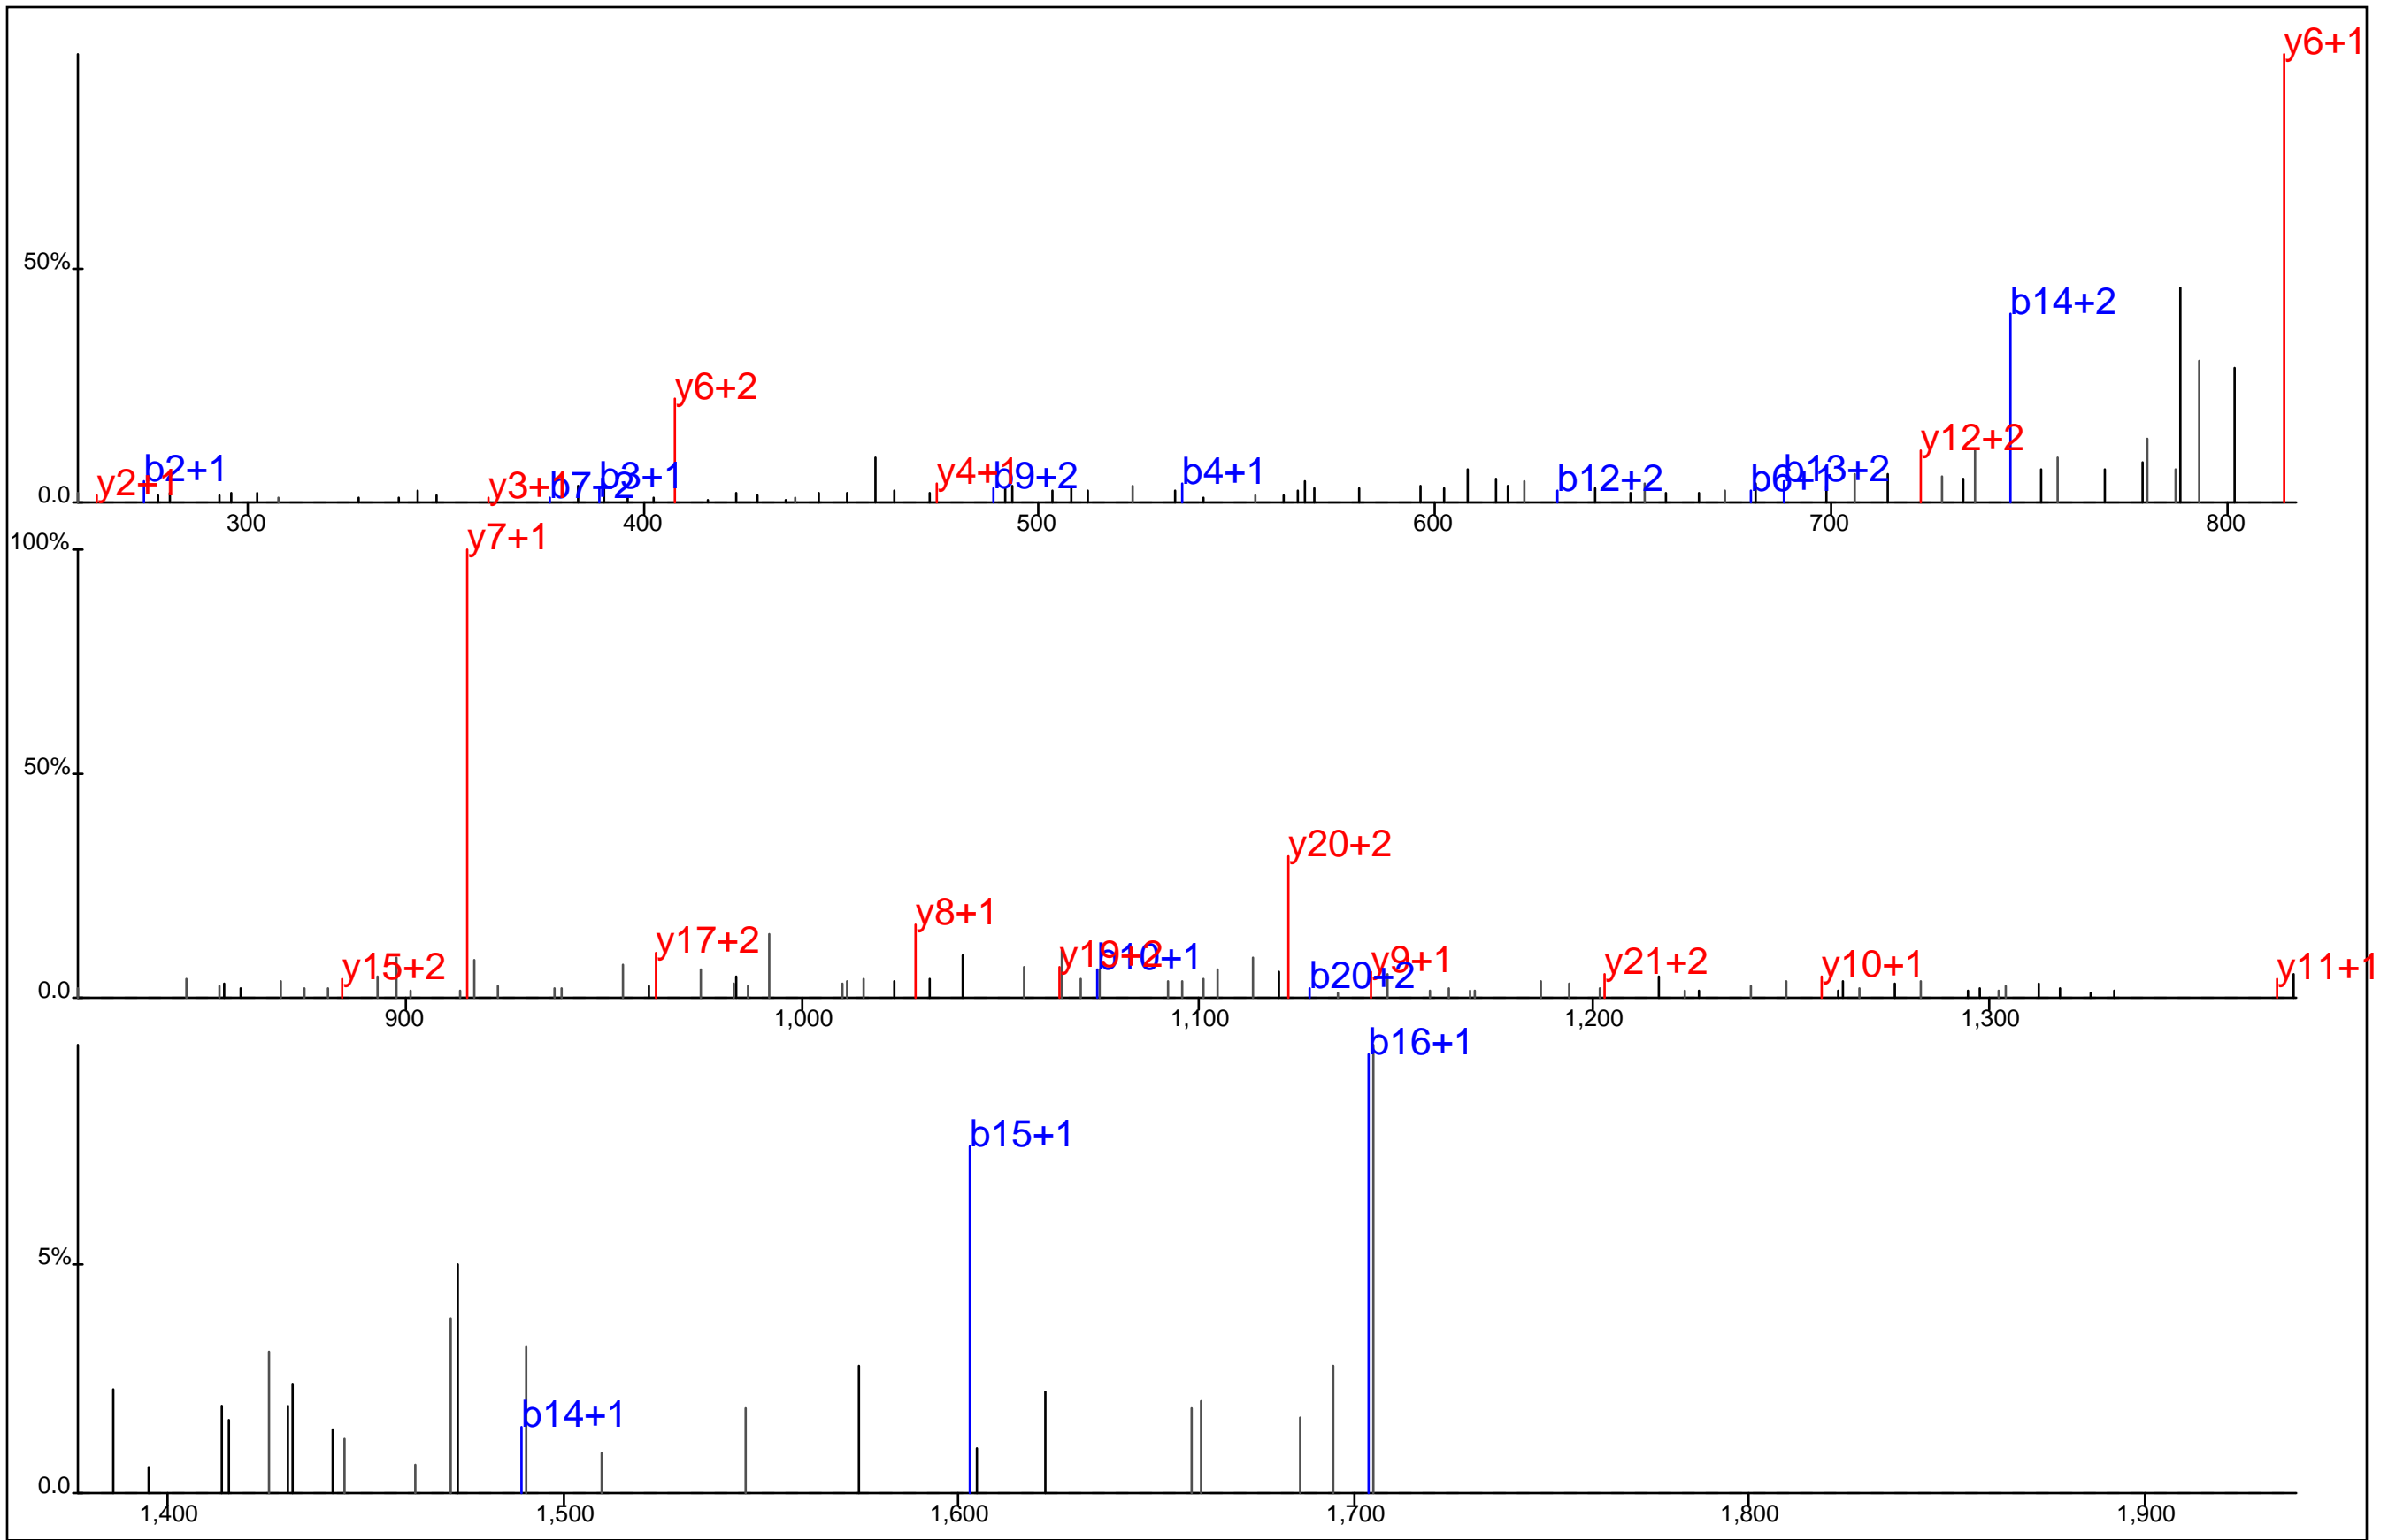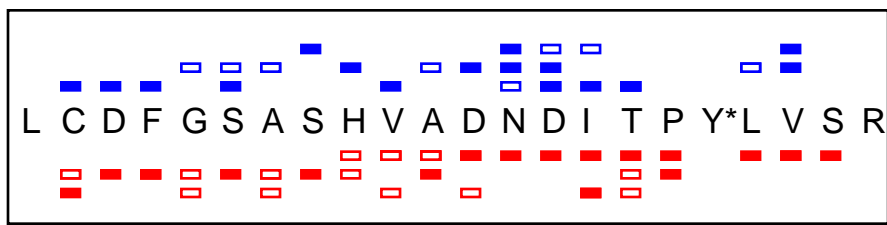

Protein Name: PRP4 pre-mRNA processing factor 4 homolog B  
 gi Accession: 0  
 Precursor Mass: 839.7101+3  
 Delta Mass: 1.708 ppm  
 XCorr: 29.12

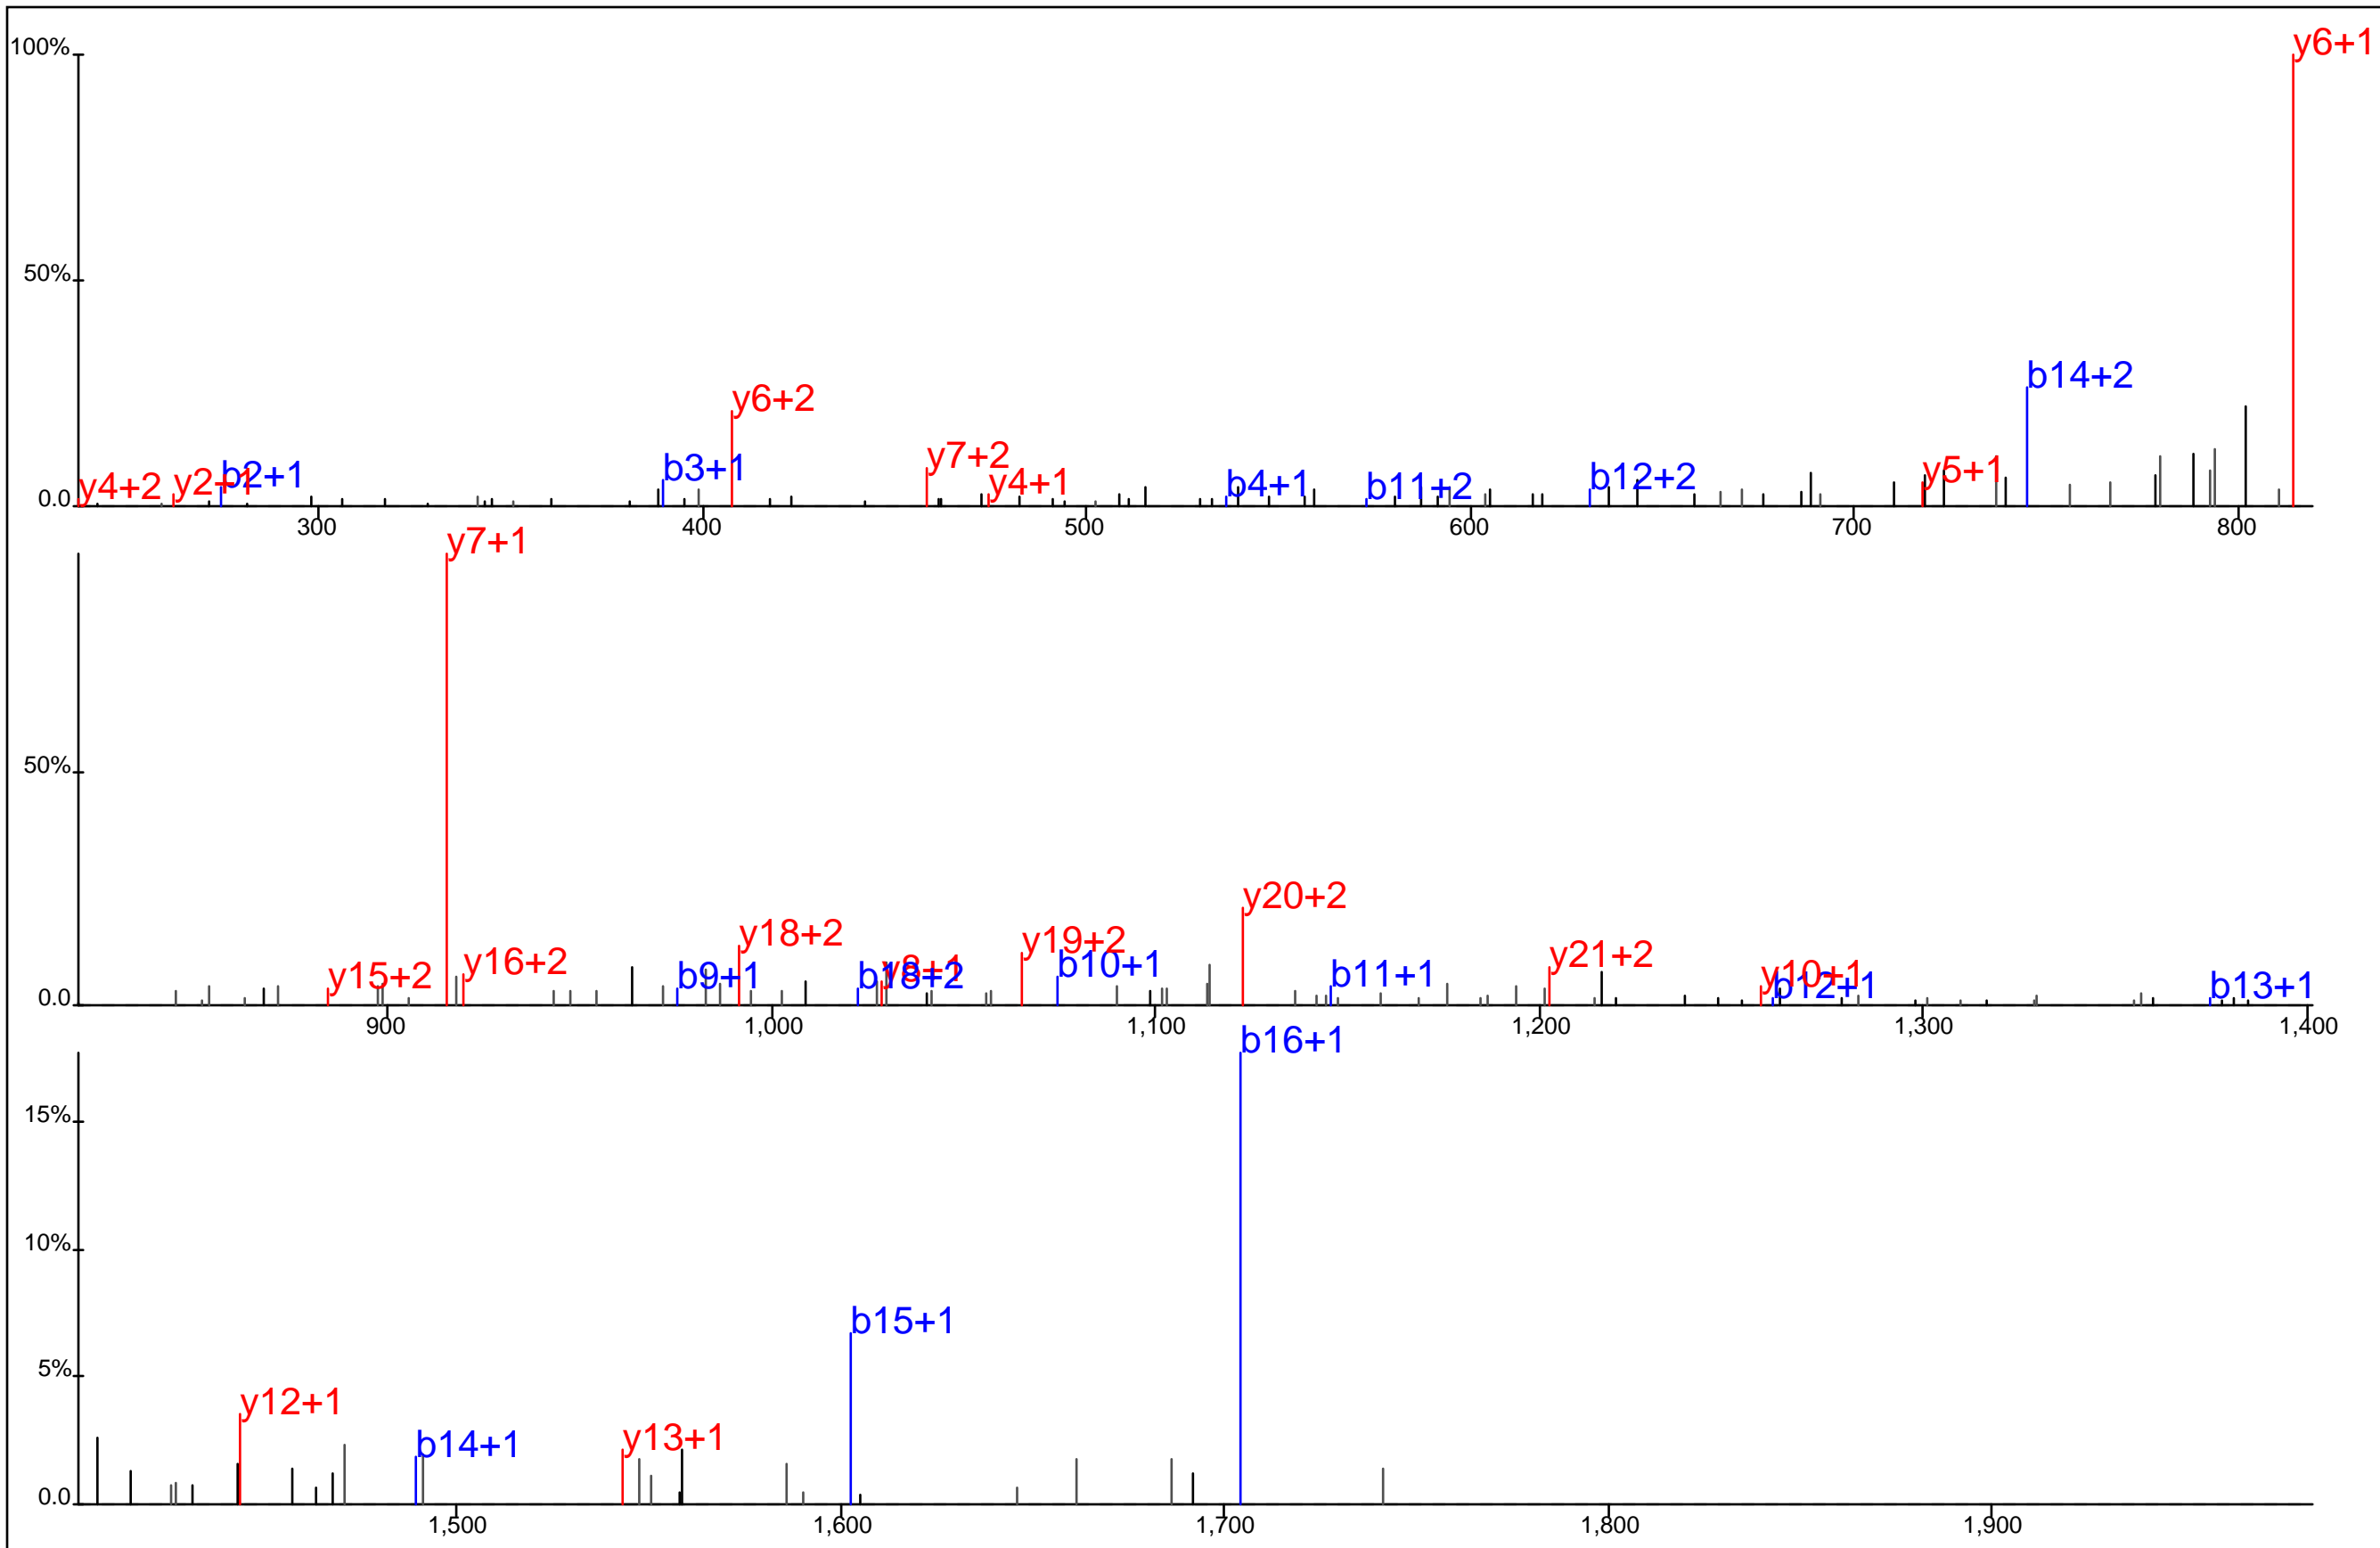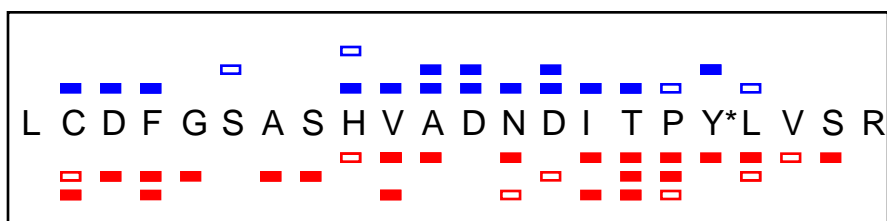

Protein Name: PRP4 pre-mRNA processing factor 4 homolog B  
 gi Accession: 0  
 Precursor Mass: 839.7079+3  
 Delta Mass: 0.984 ppm  
 XCorr: 46.1

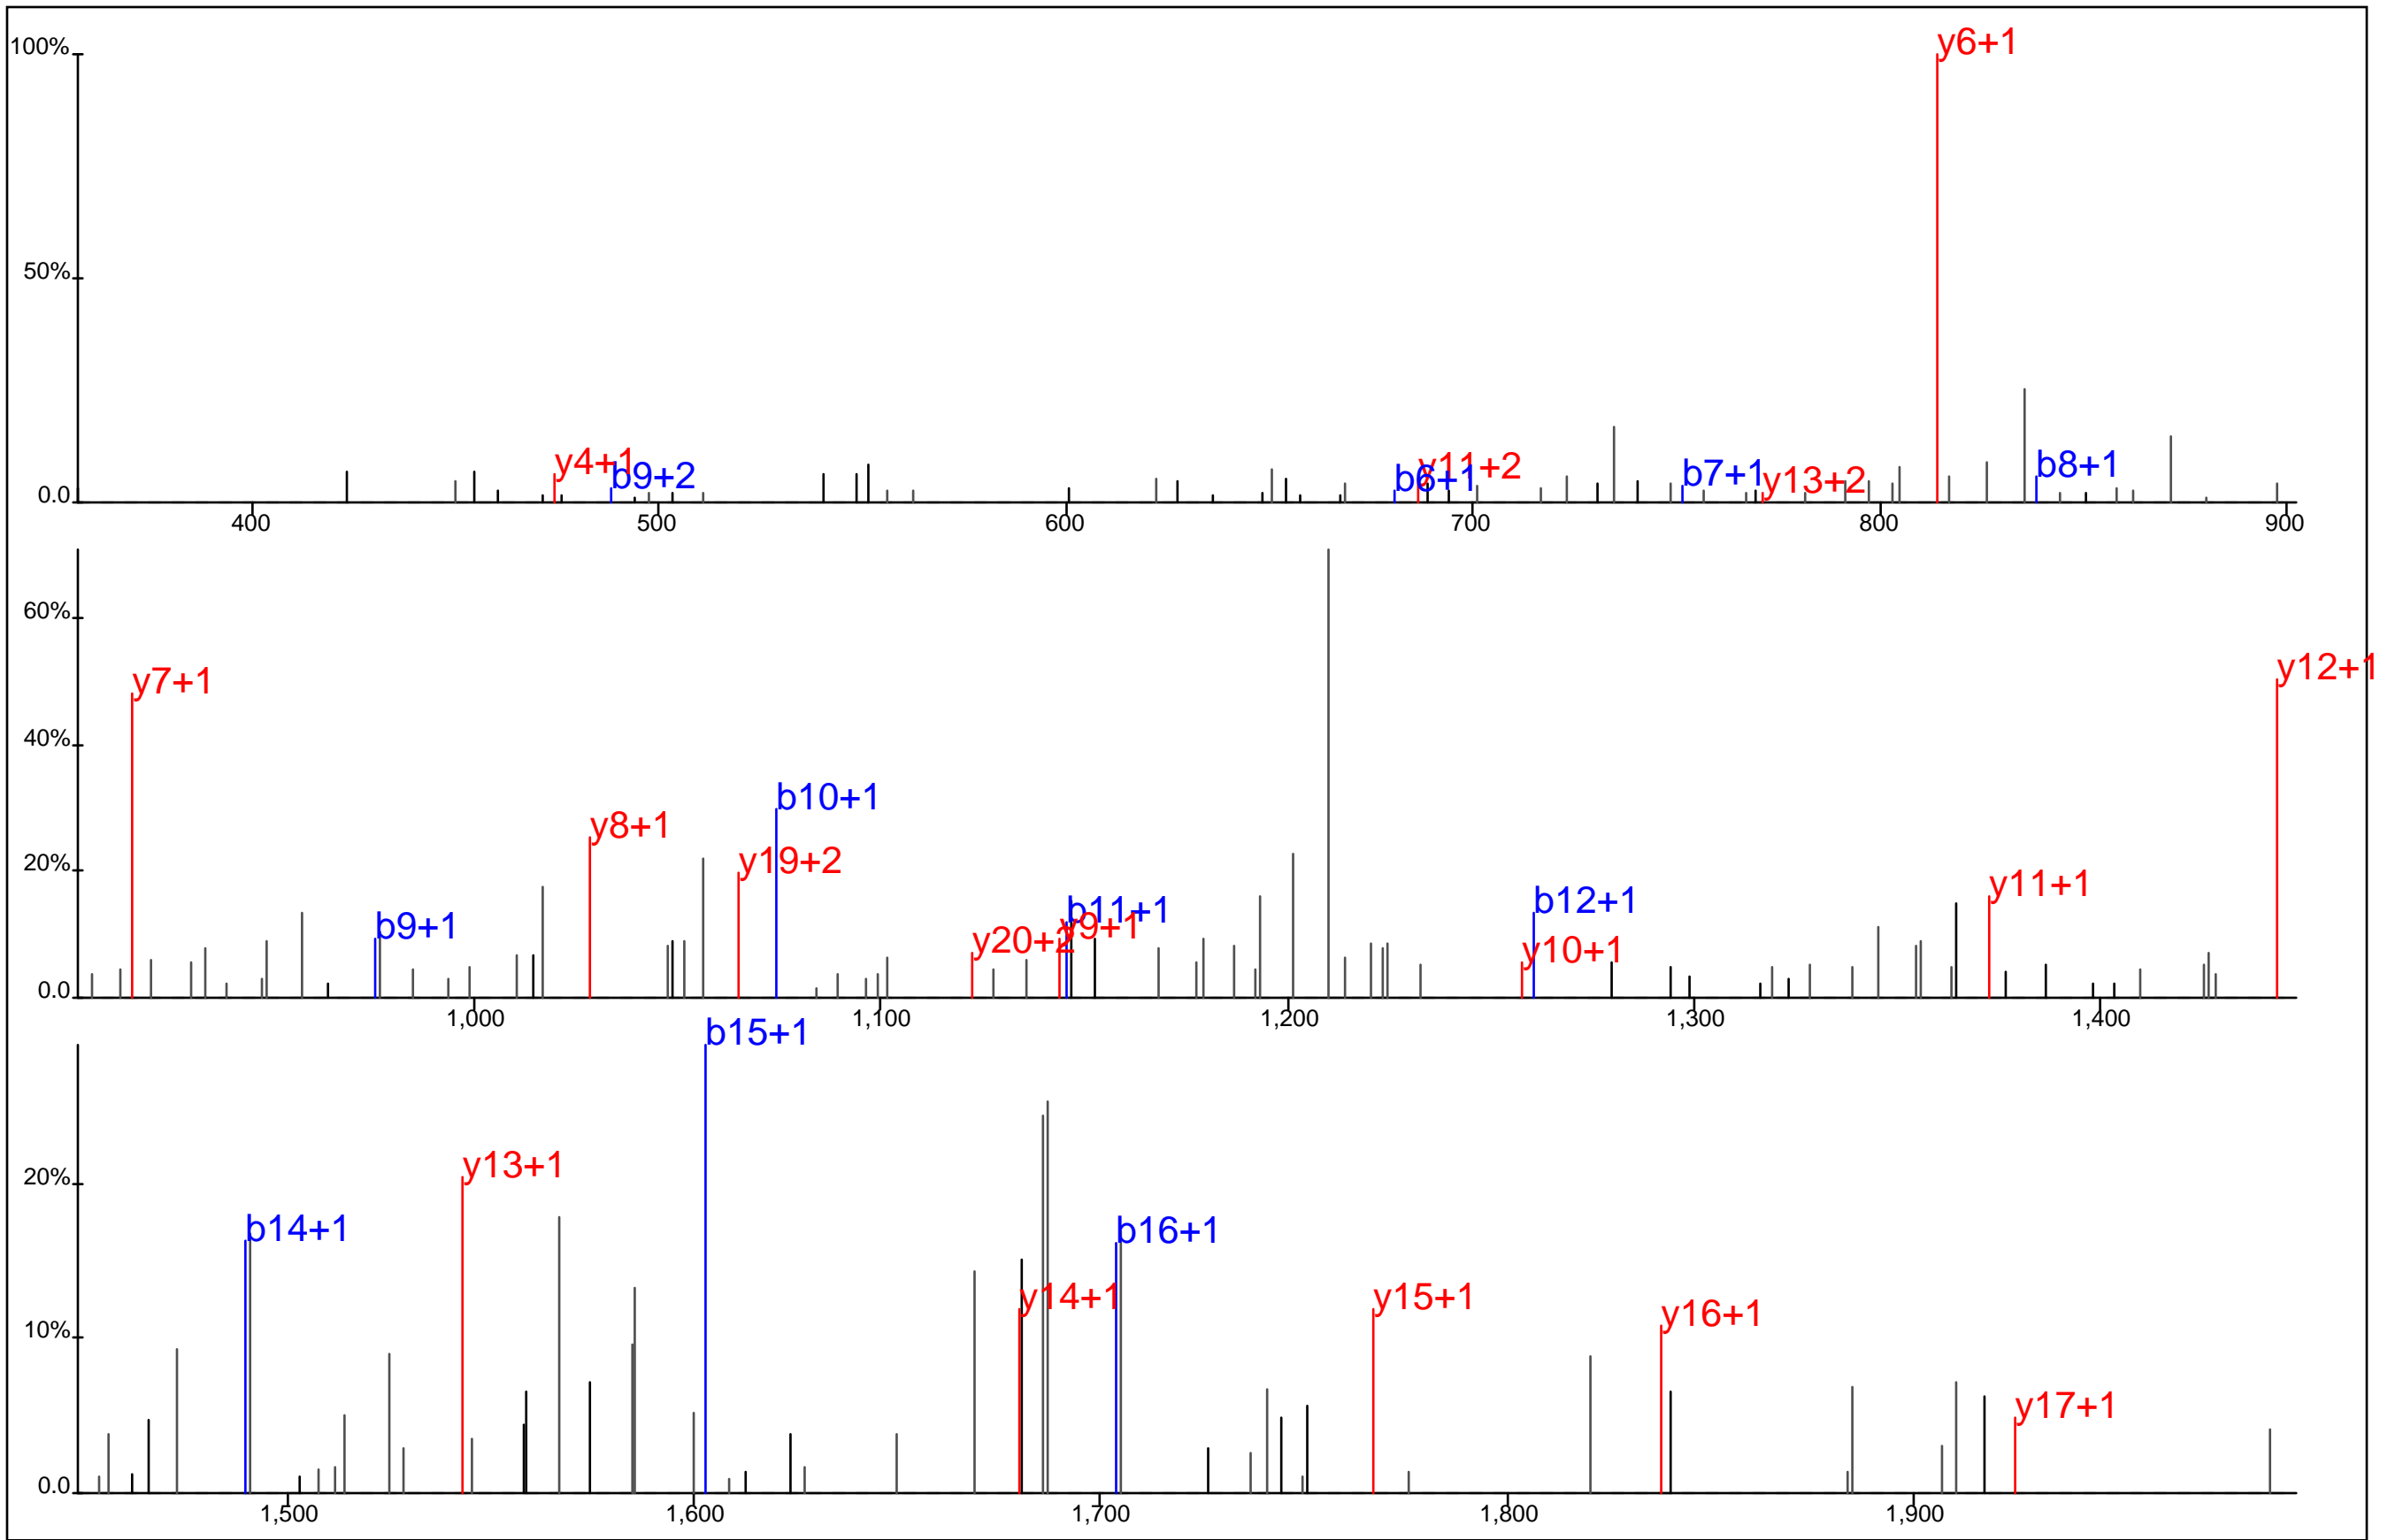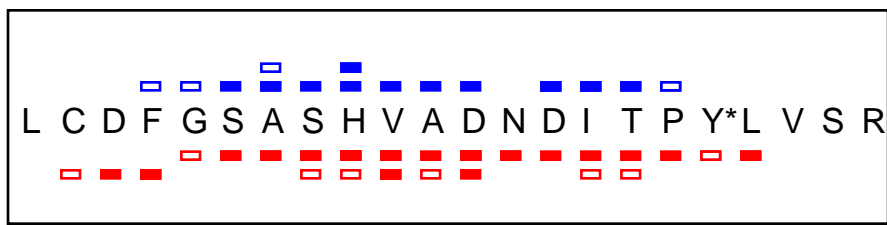

Protein Name: PRP4 pre-mRNA processing factor 4 homolog B  
 gi Accession: 0  
 Precursor Mass: 1,259.0543+2  
 Delta Mass: 4.059 ppm  
 XCorr: 49.87

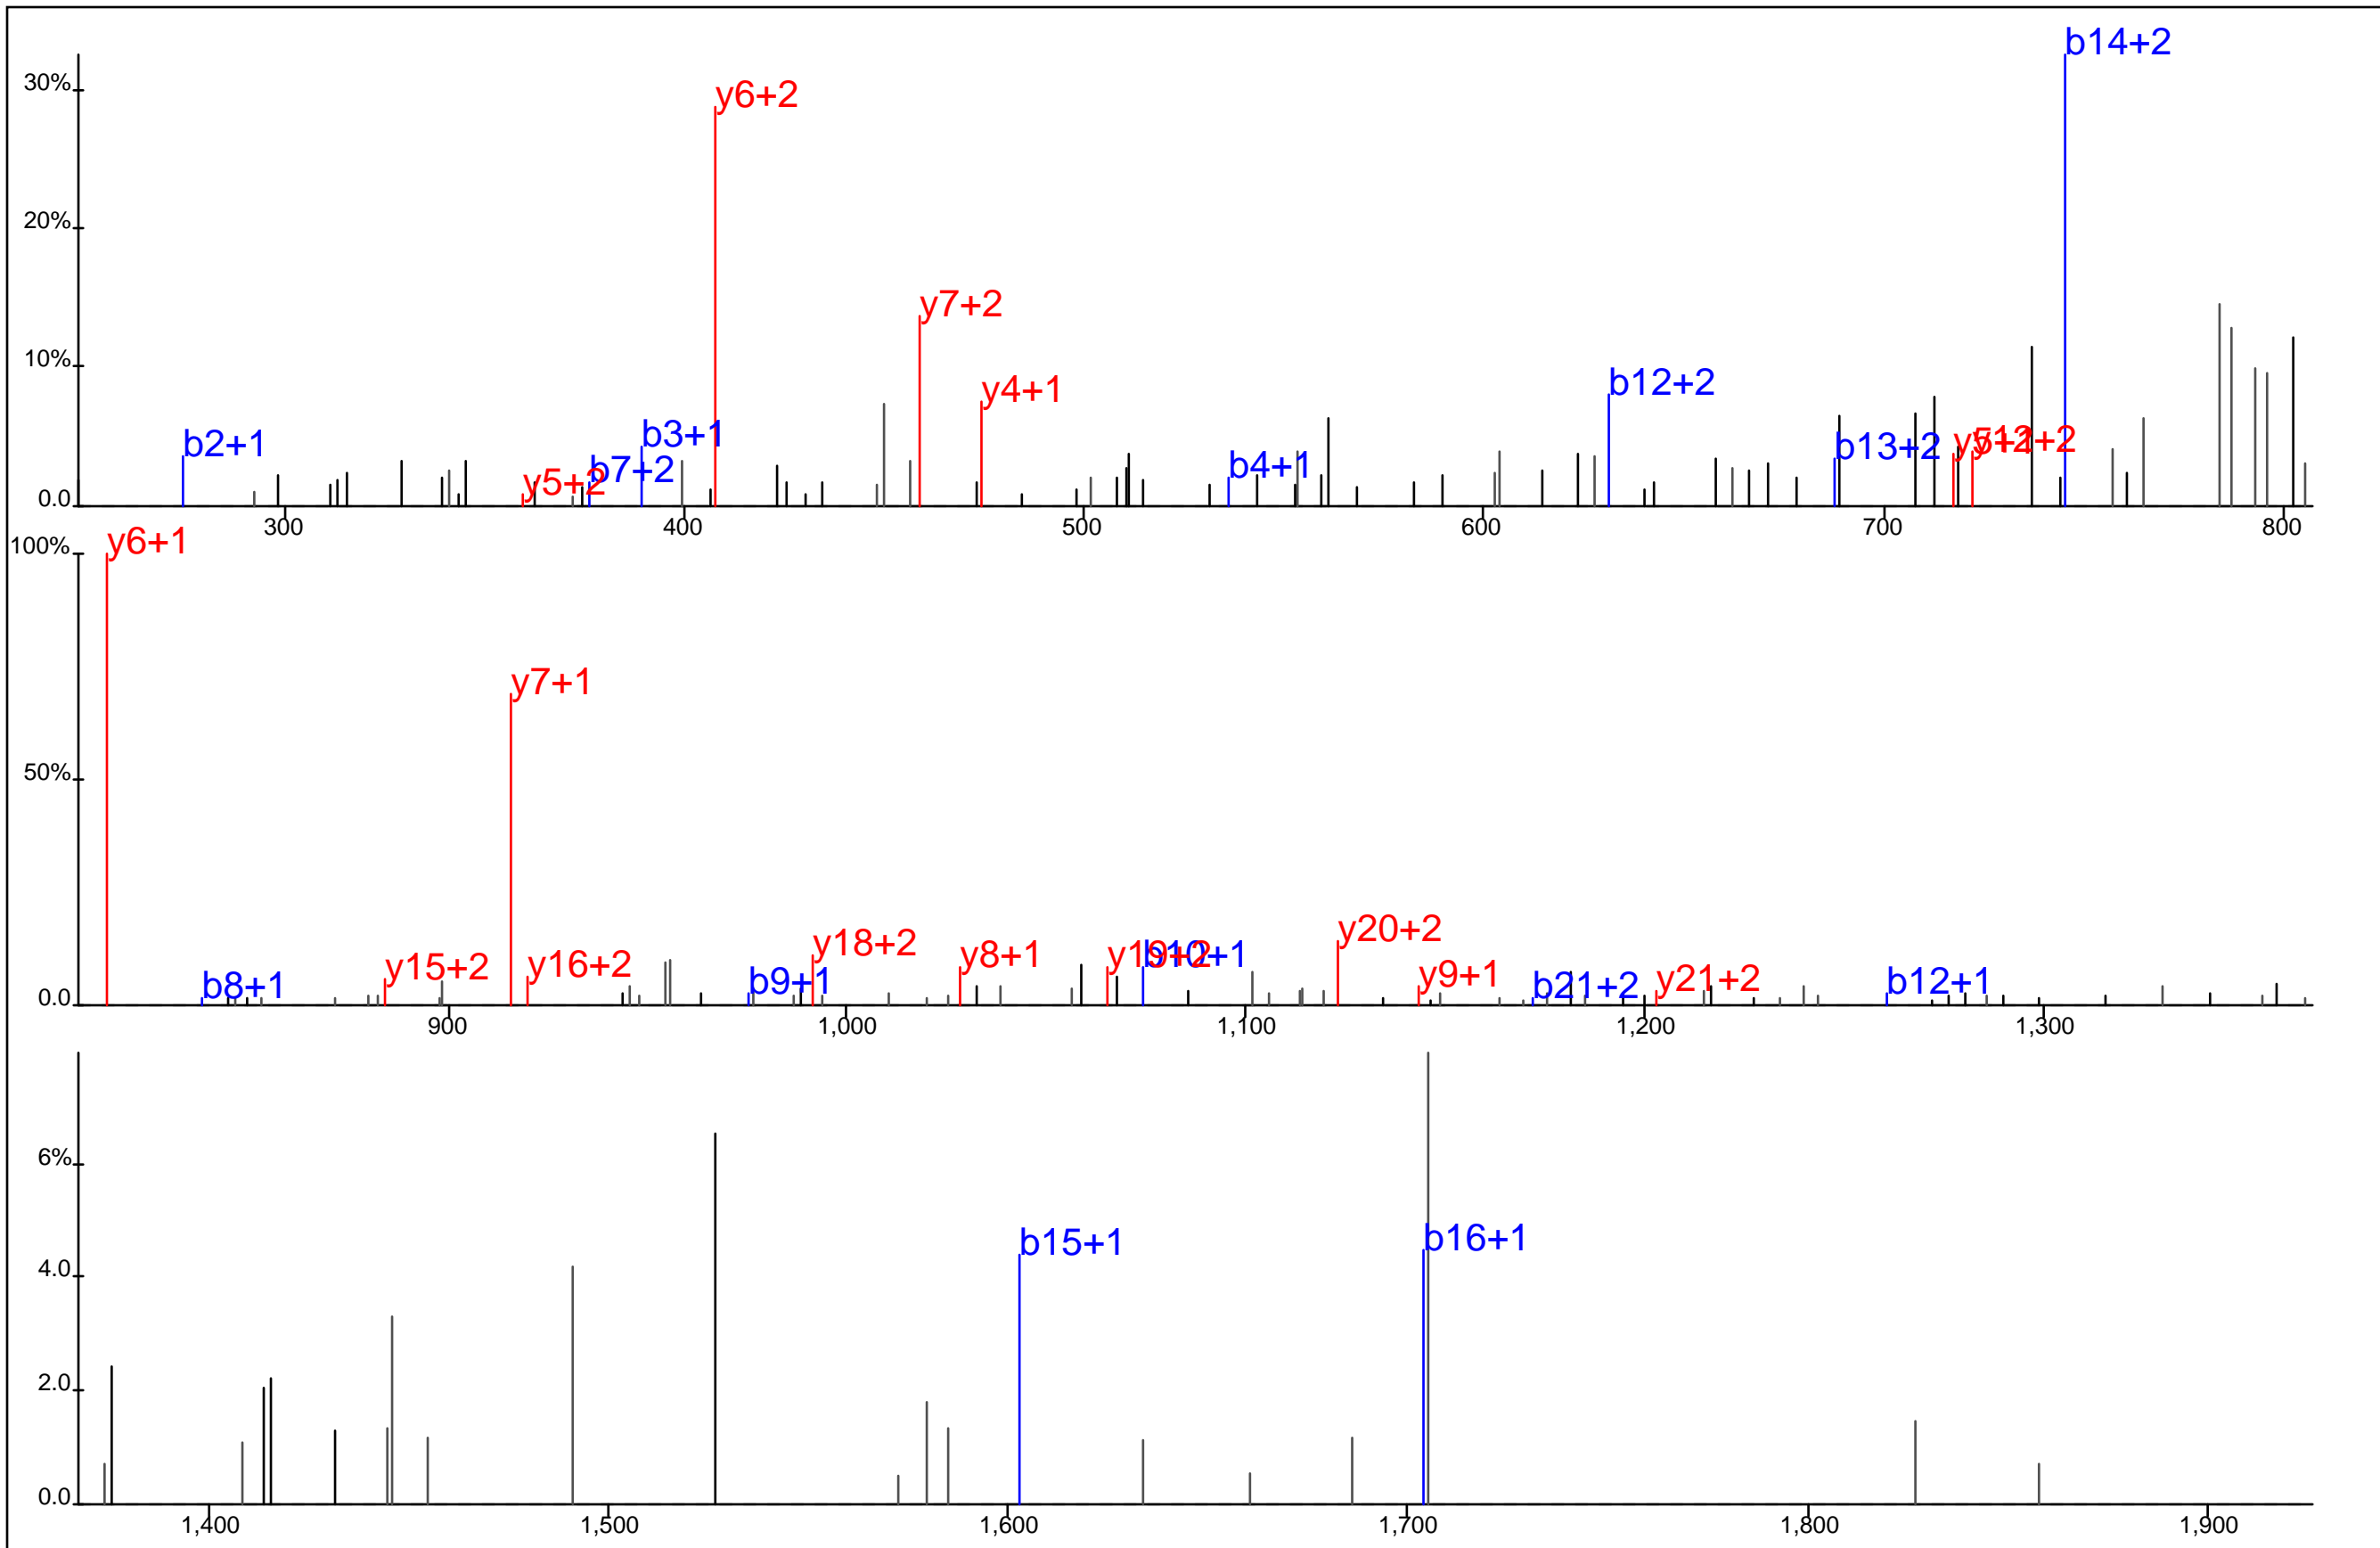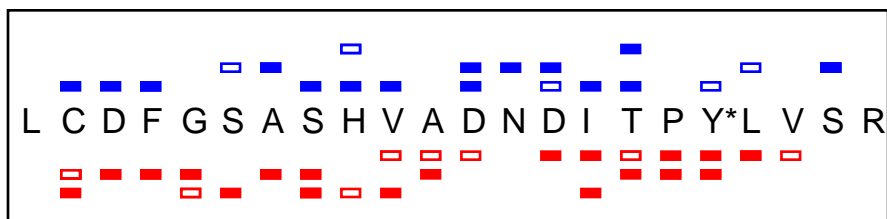

Protein Name: PRP4 pre-mRNA processing factor 4 homolog B  
 gi Accession: 0  
 Precursor Mass: 839.7103+3  
 Delta Mass: 1.853 ppm  
 XCorr: 30.11

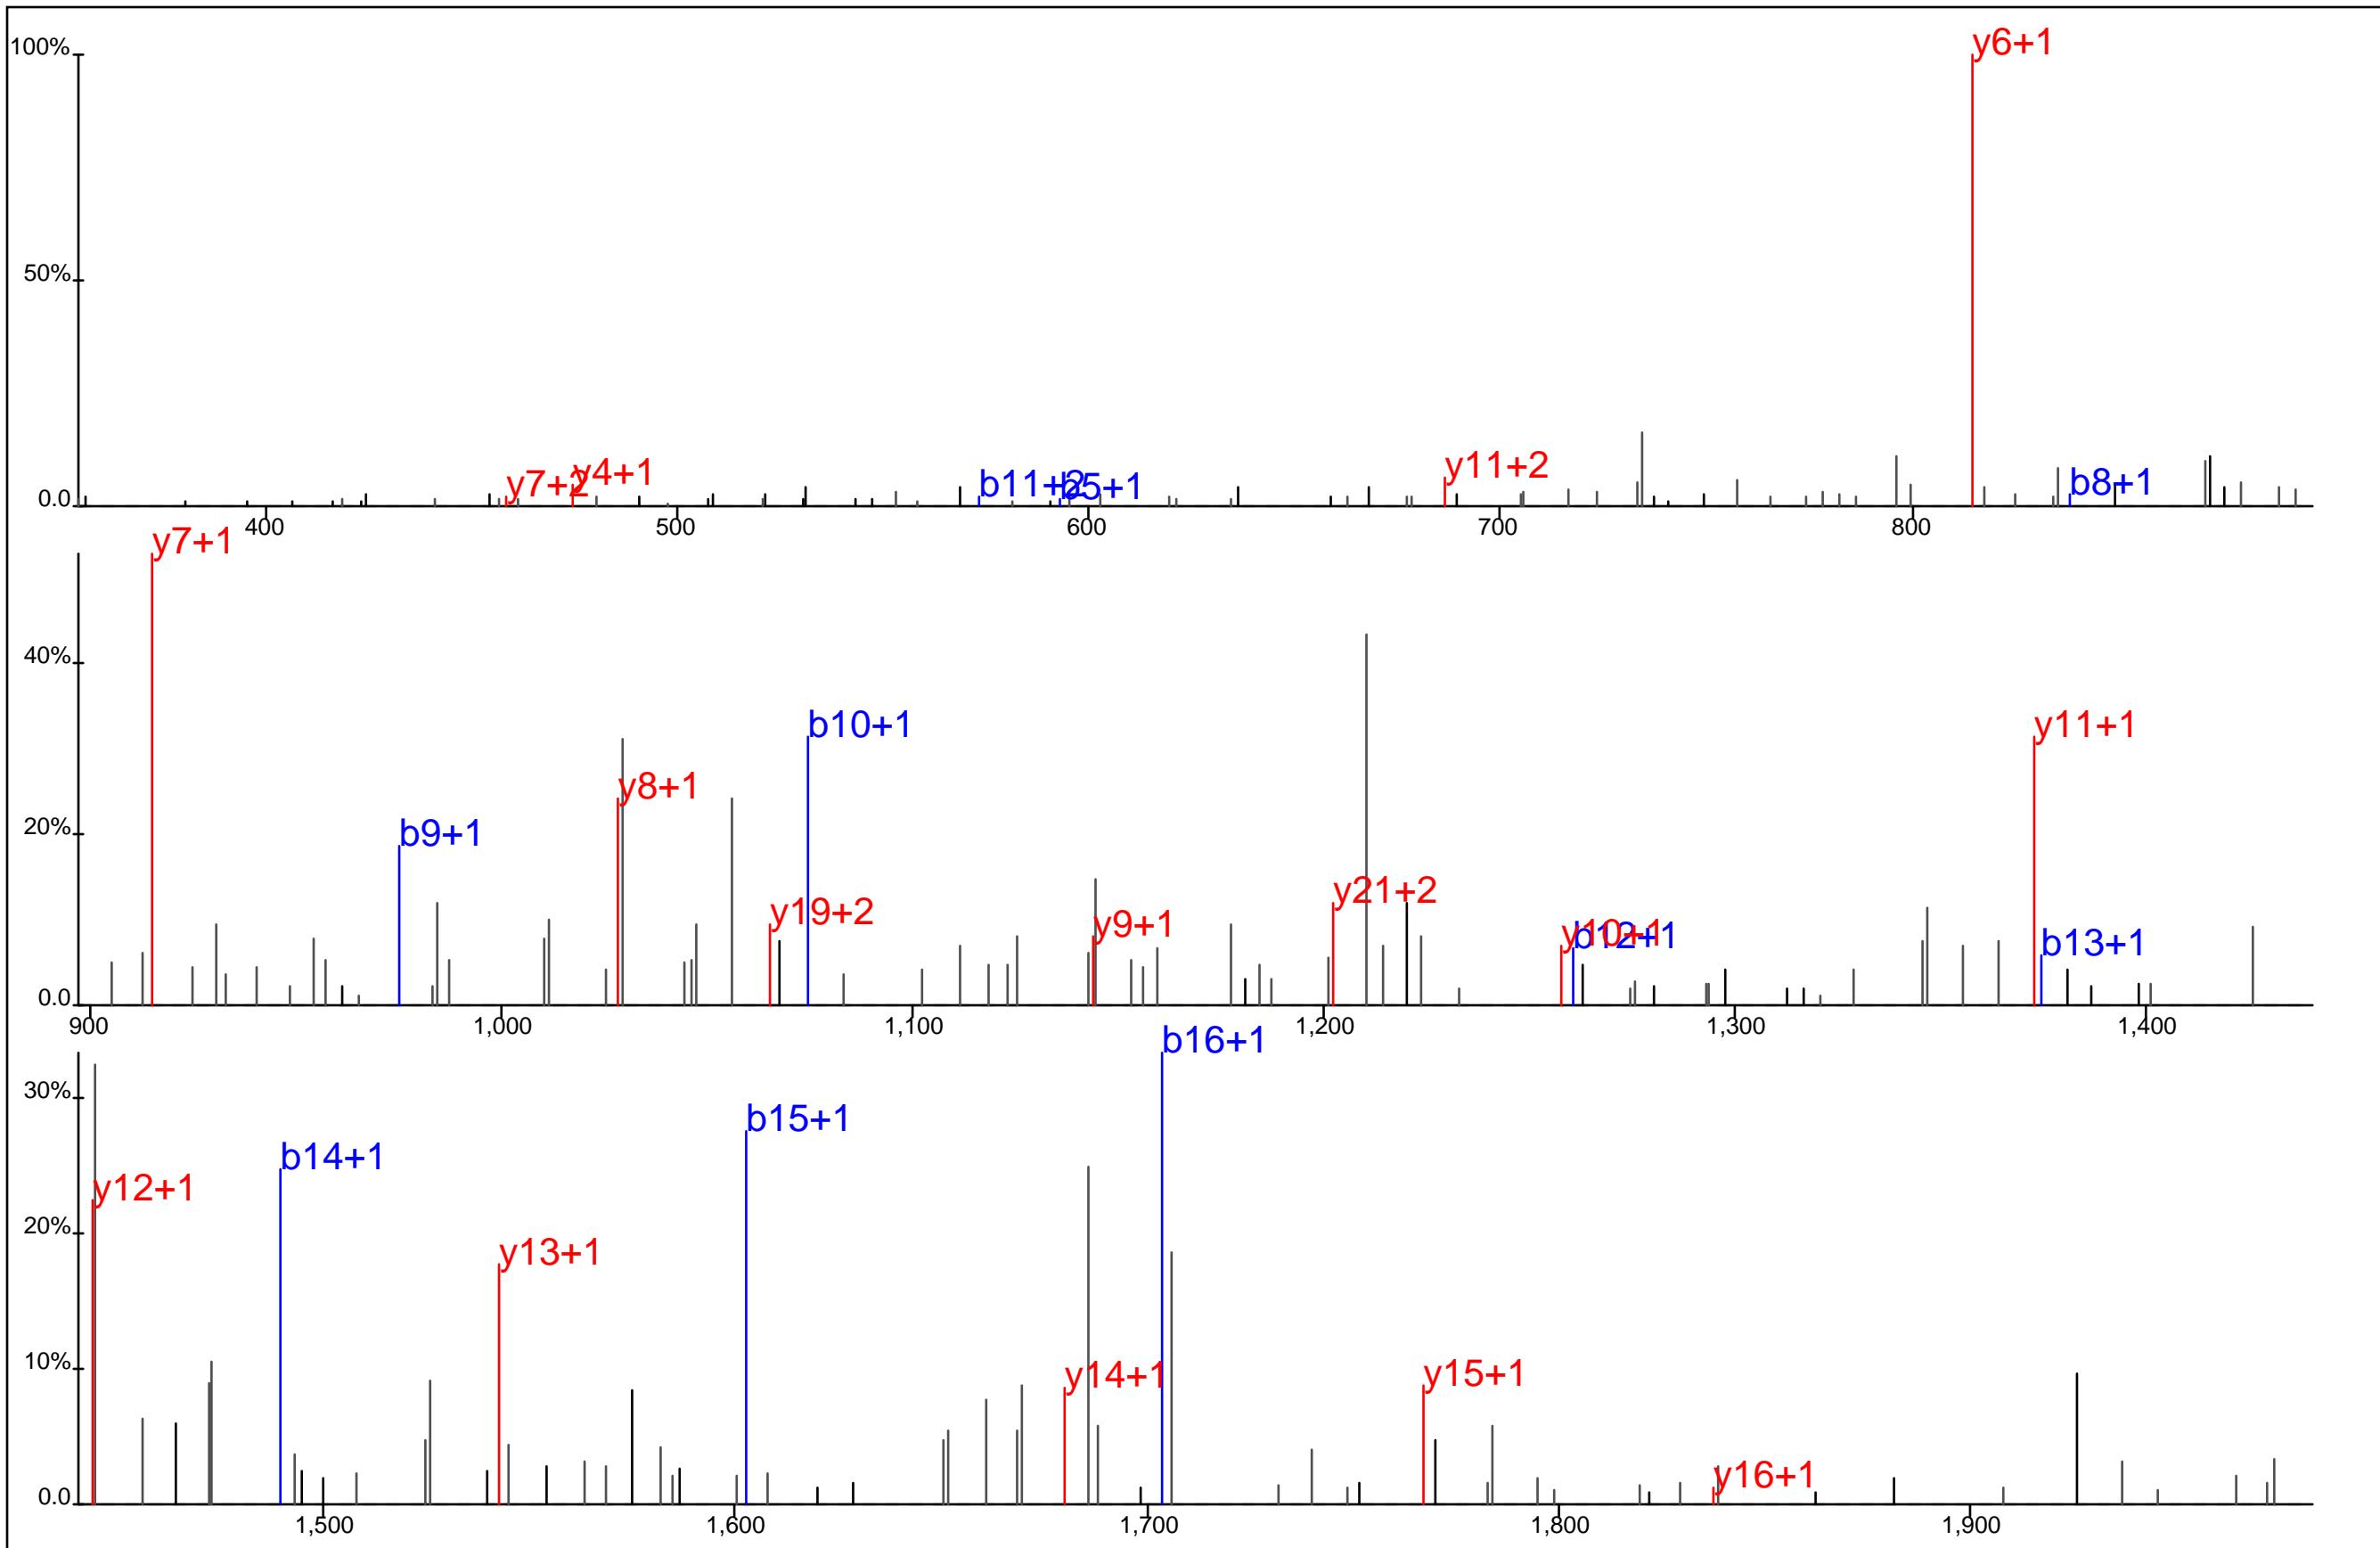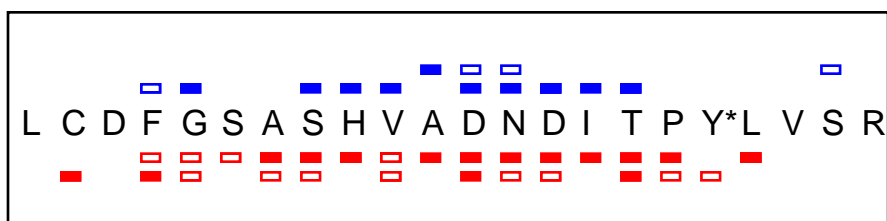

Protein Name: PRP4 pre-mRNA processing factor 4 homolog B  
 gi Accession: 0  
 Precursor Mass: 1,259.0583+2  
 Delta Mass: 0.857 ppm  
 XCorr: 45.0



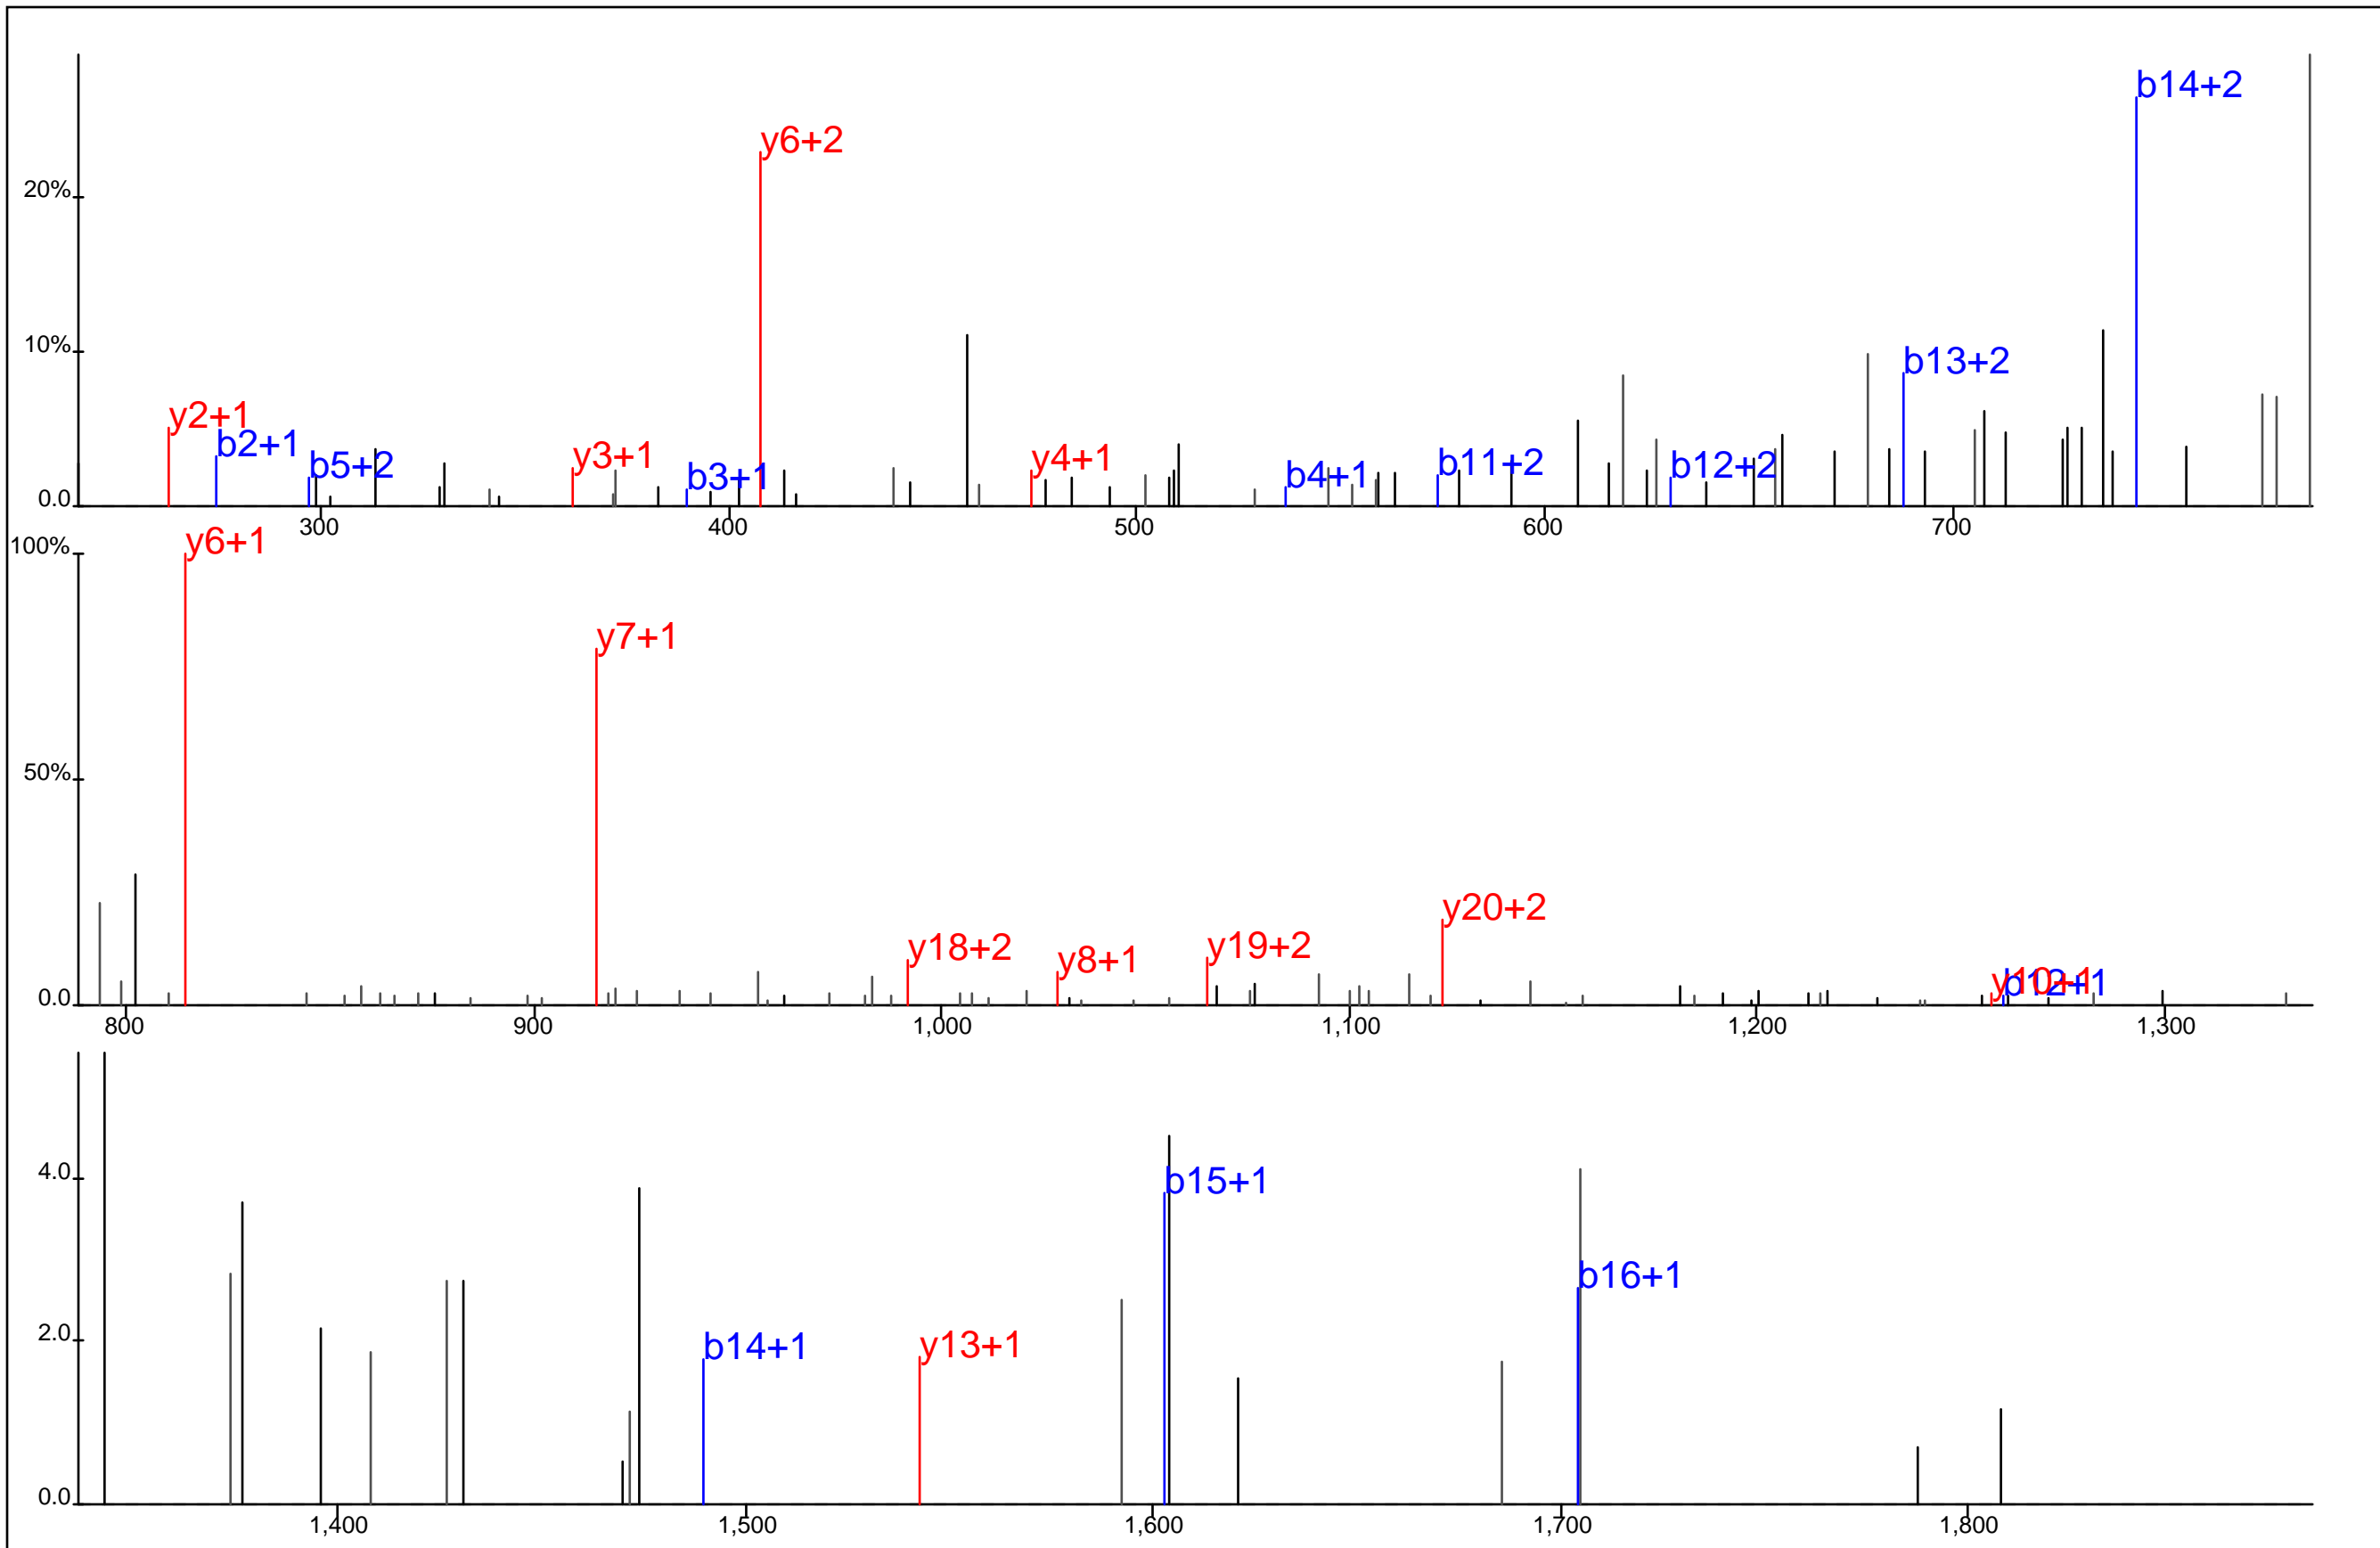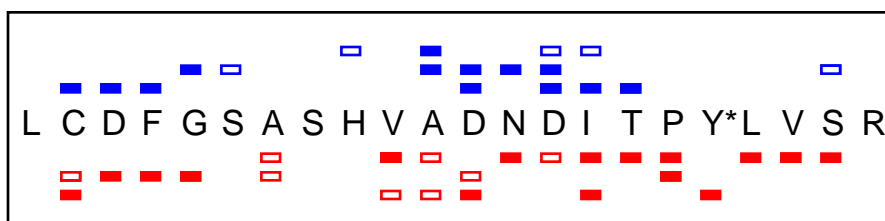

Protein Name: PRP4 pre-mRNA processing factor 4 homolog B  
 gi Accession: 0  
 Precursor Mass: 839.7086+3  
 Delta Mass: 0.111 ppm  
 XCorr: 27.01

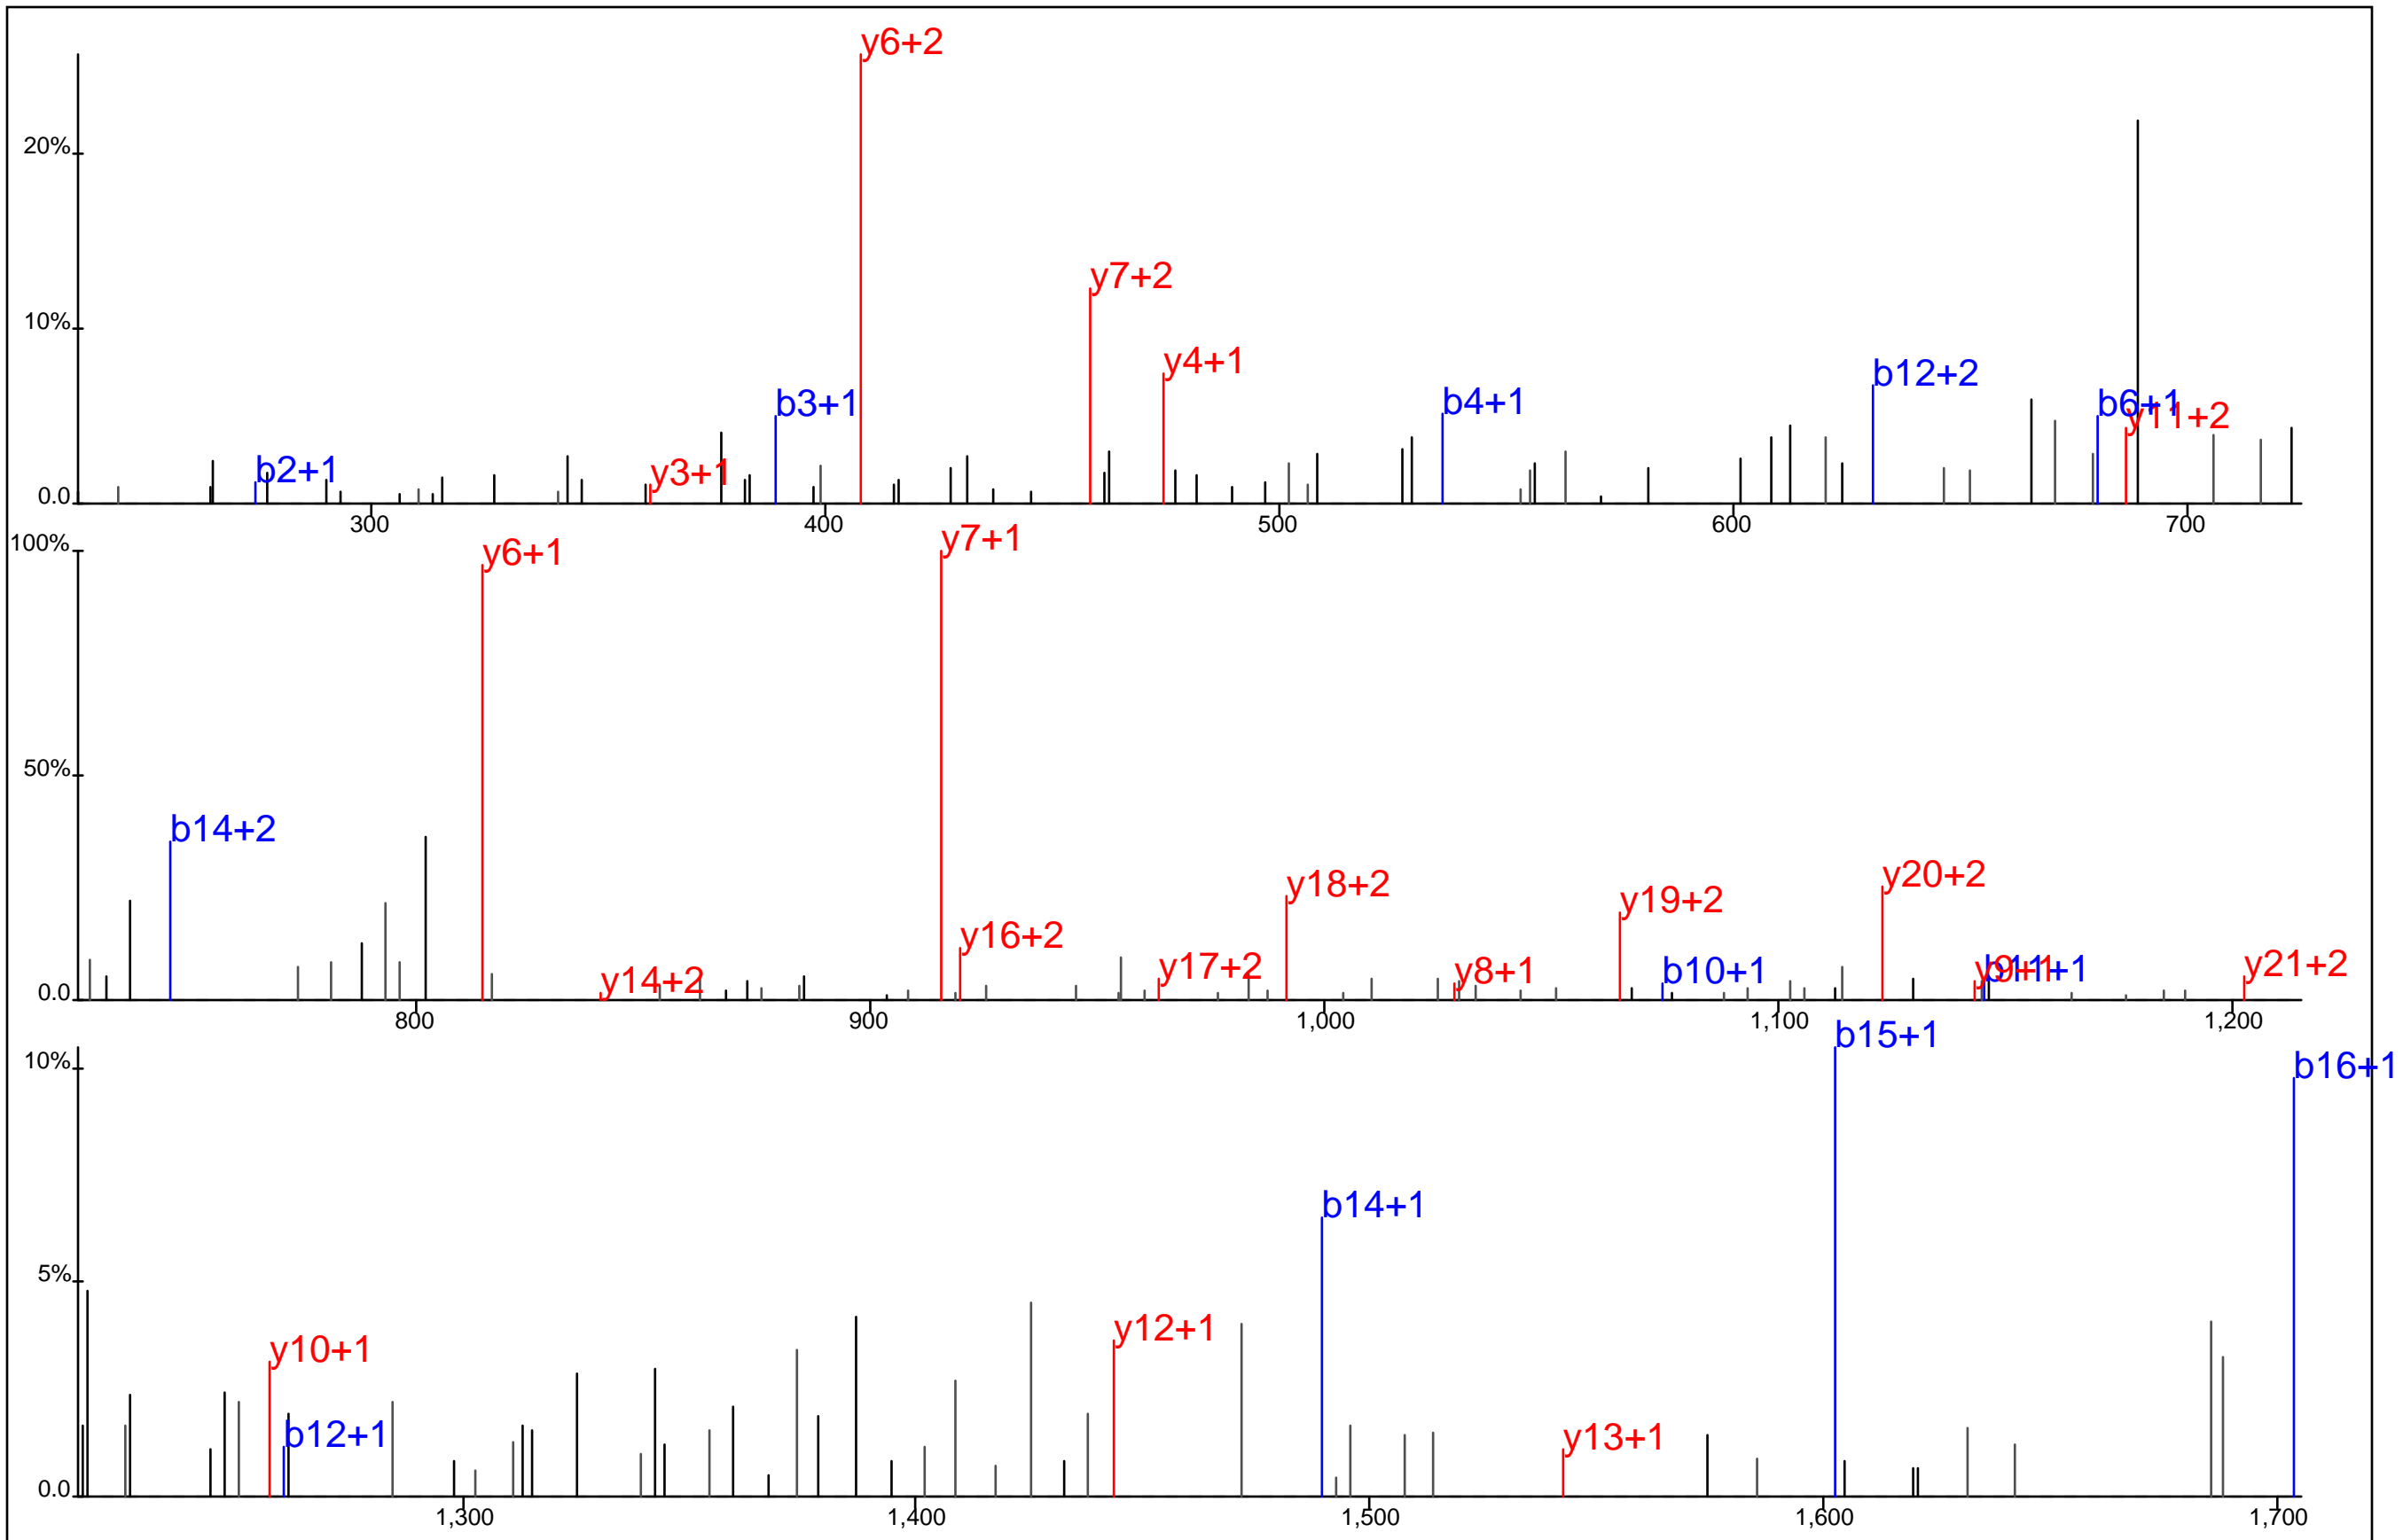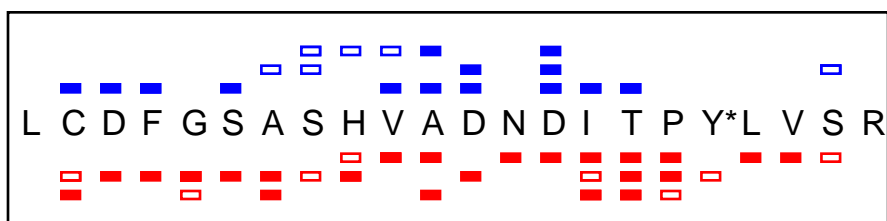

Protein Name: PRP4 pre-mRNA processing factor 4 homolog B  
 gi Accession: 0  
 Precursor Mass: 839.7091+3  
 Delta Mass: 0.470 ppm  
 XCorr: 39.02

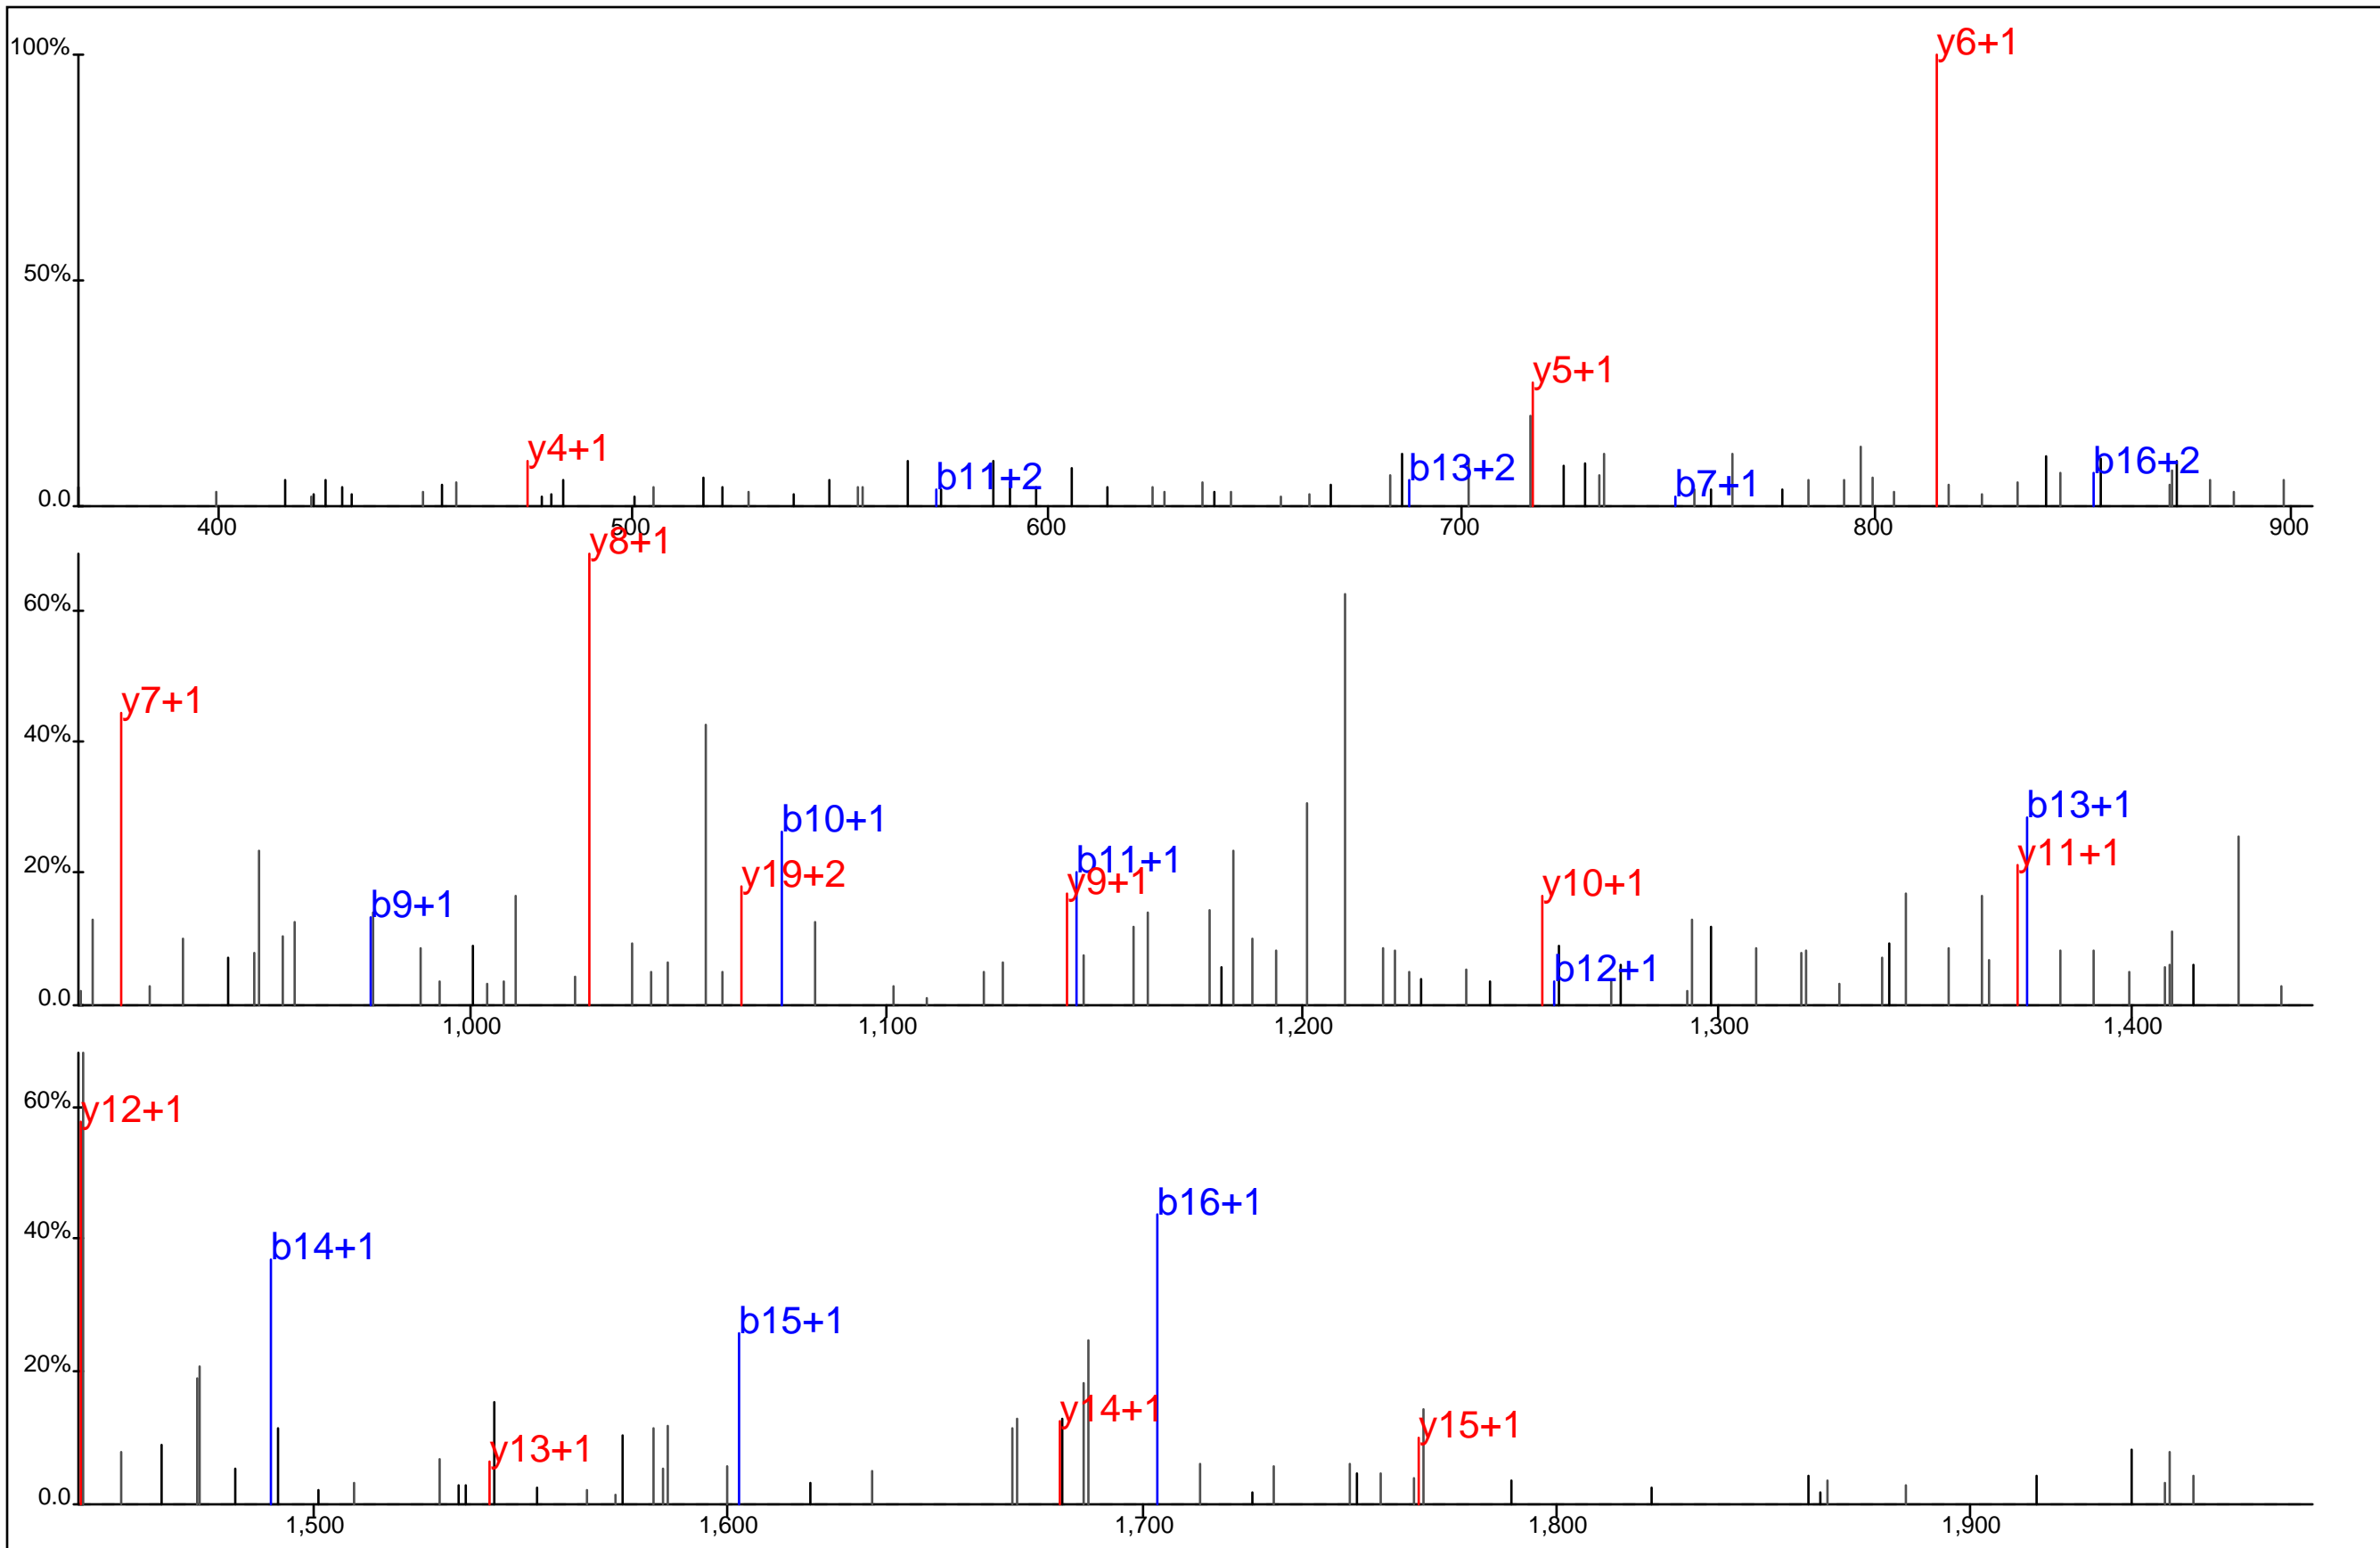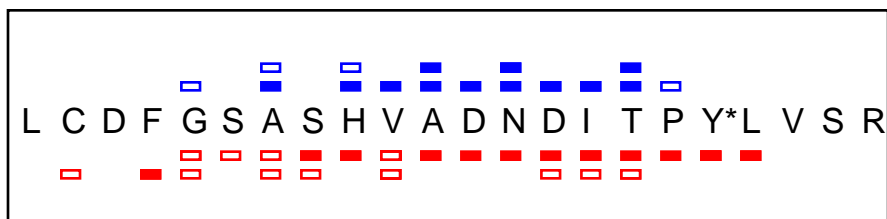

Protein Name: PRP4 pre-mRNA processing factor 4 homolog B  
 gi Accession: 0  
 Precursor Mass: 1,259.0524+2  
 Delta Mass: 5.610 ppm  
 XCorr: 41.57

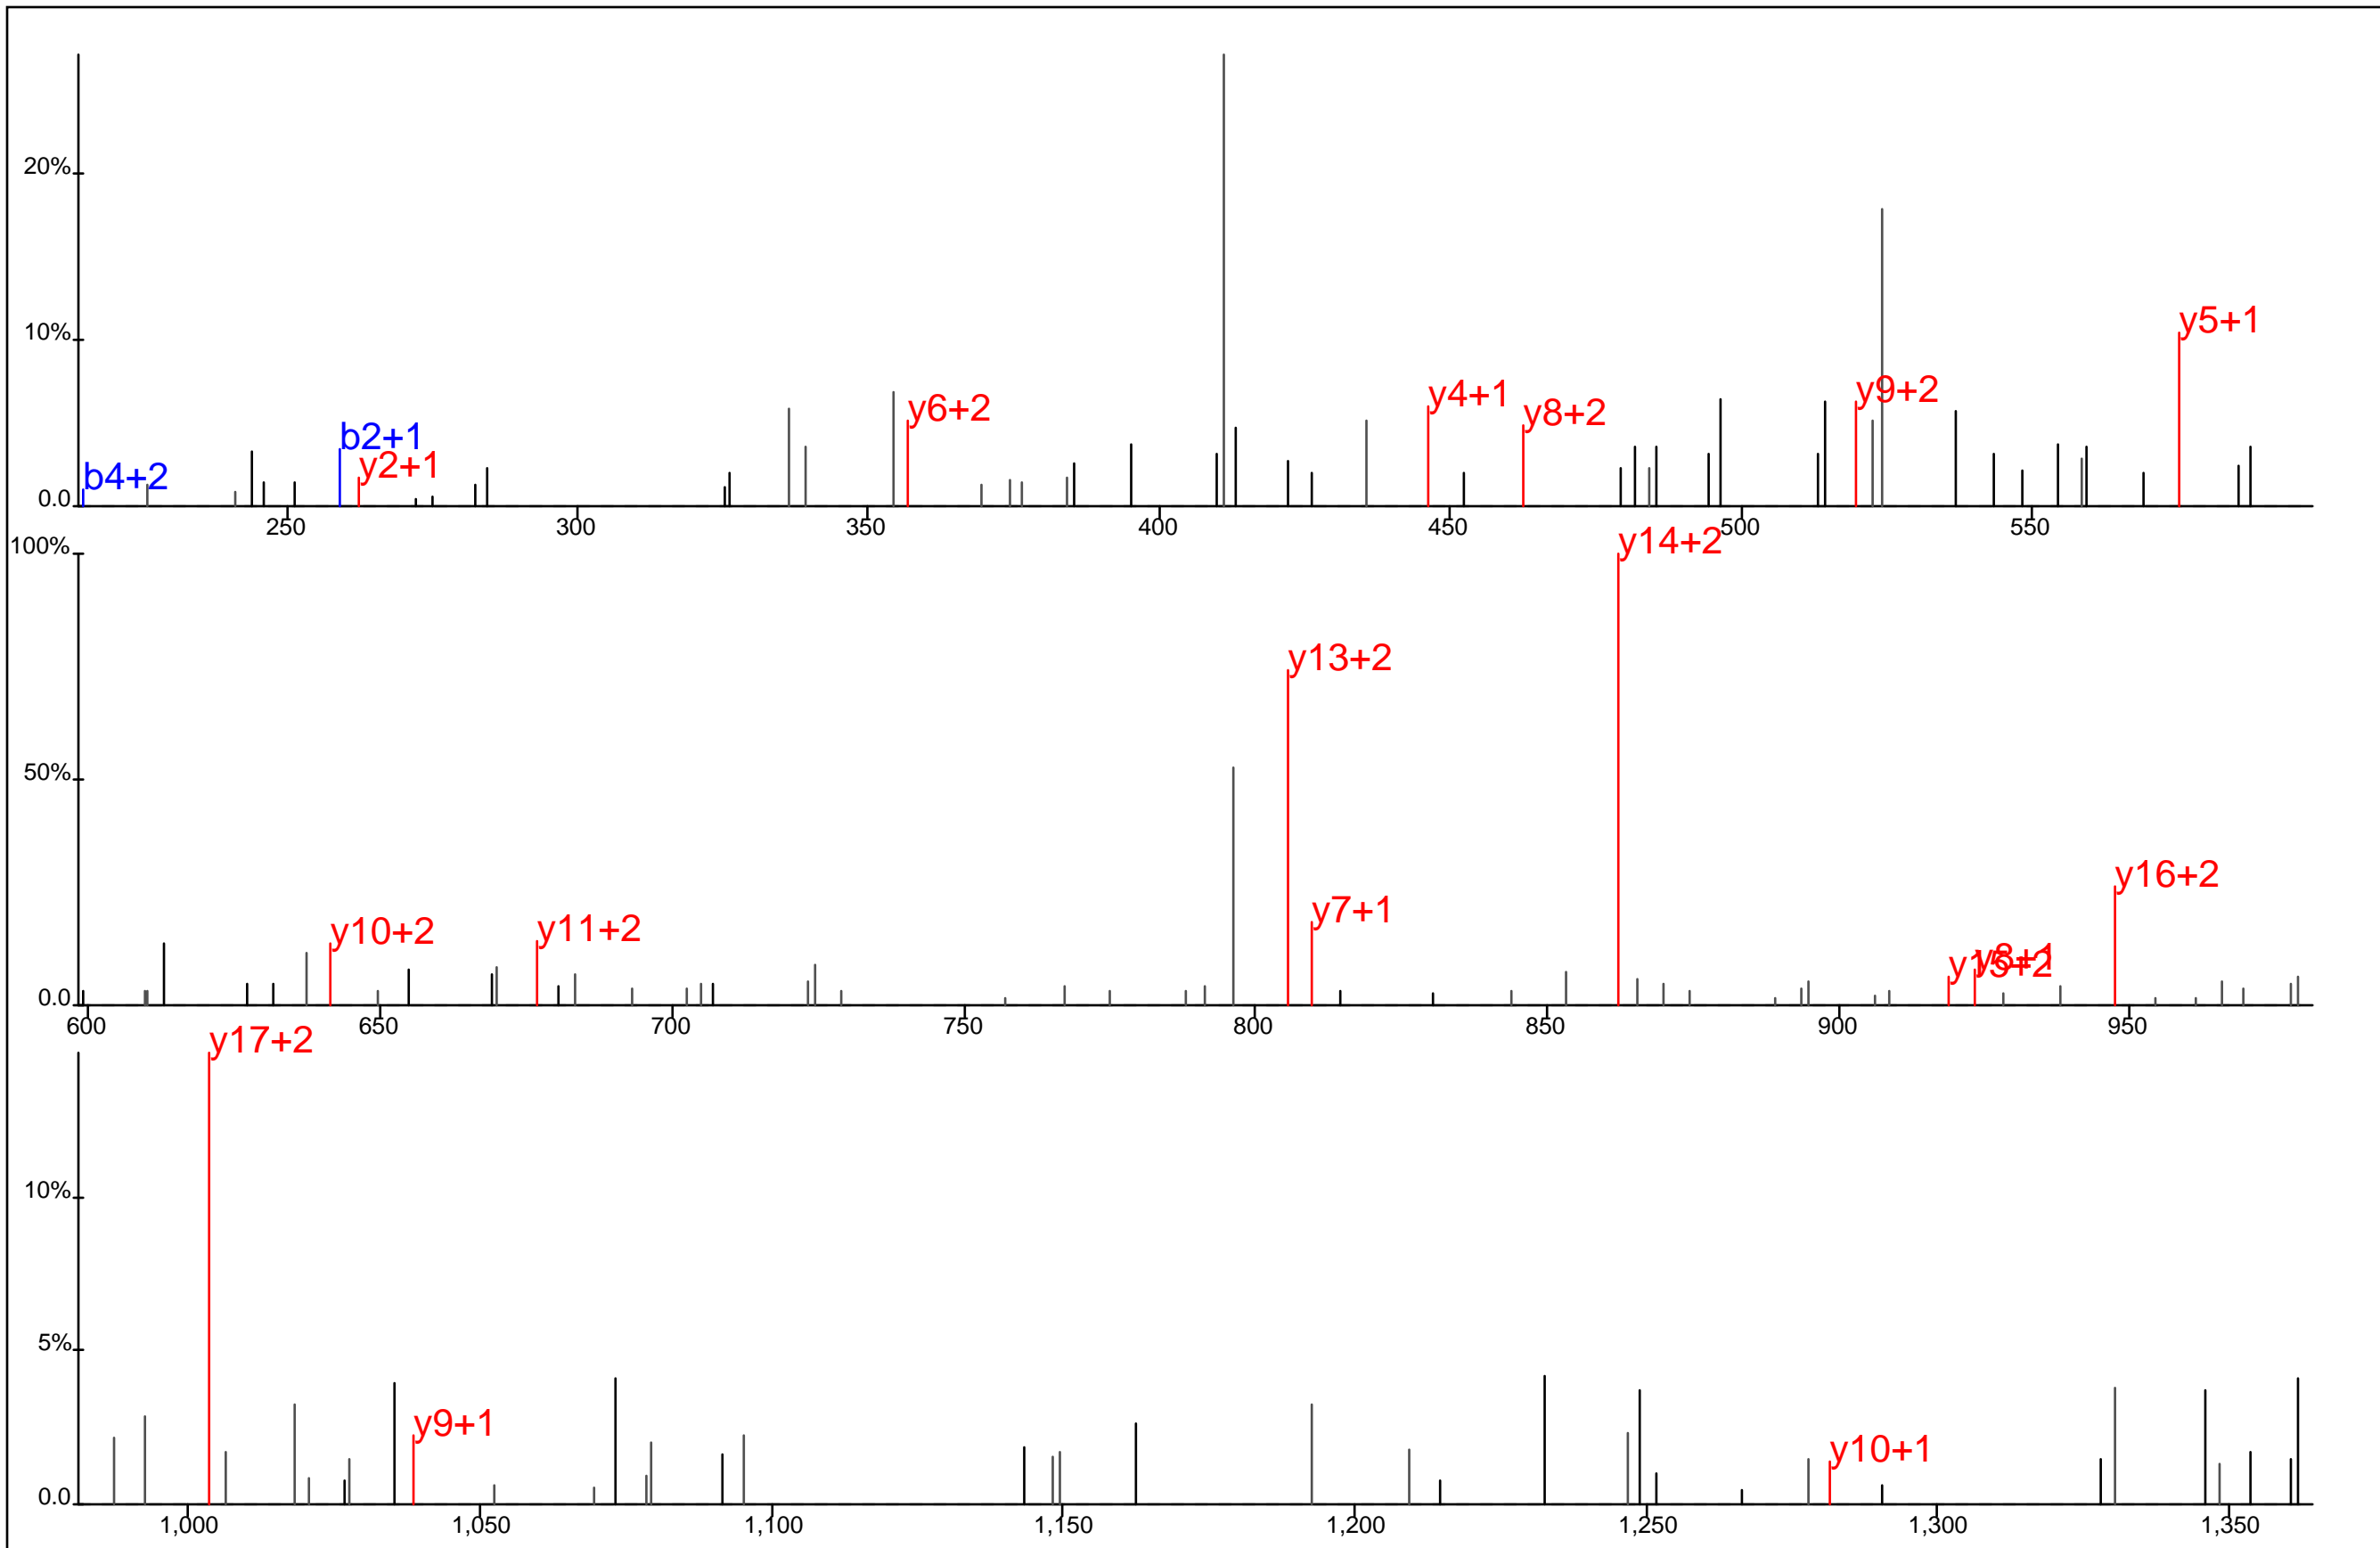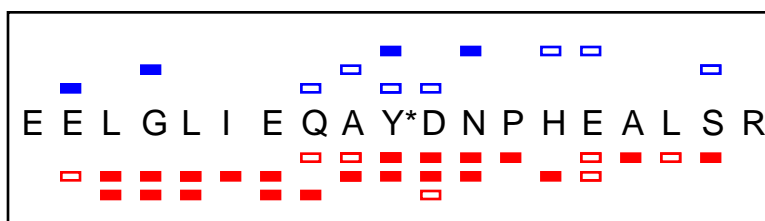

Protein Name: PRPF8  
 gi Accession: 0  
 Precursor Mass: 755.3459+3  
 Delta Mass: 0.118 ppm  
 XCorr: 39.99

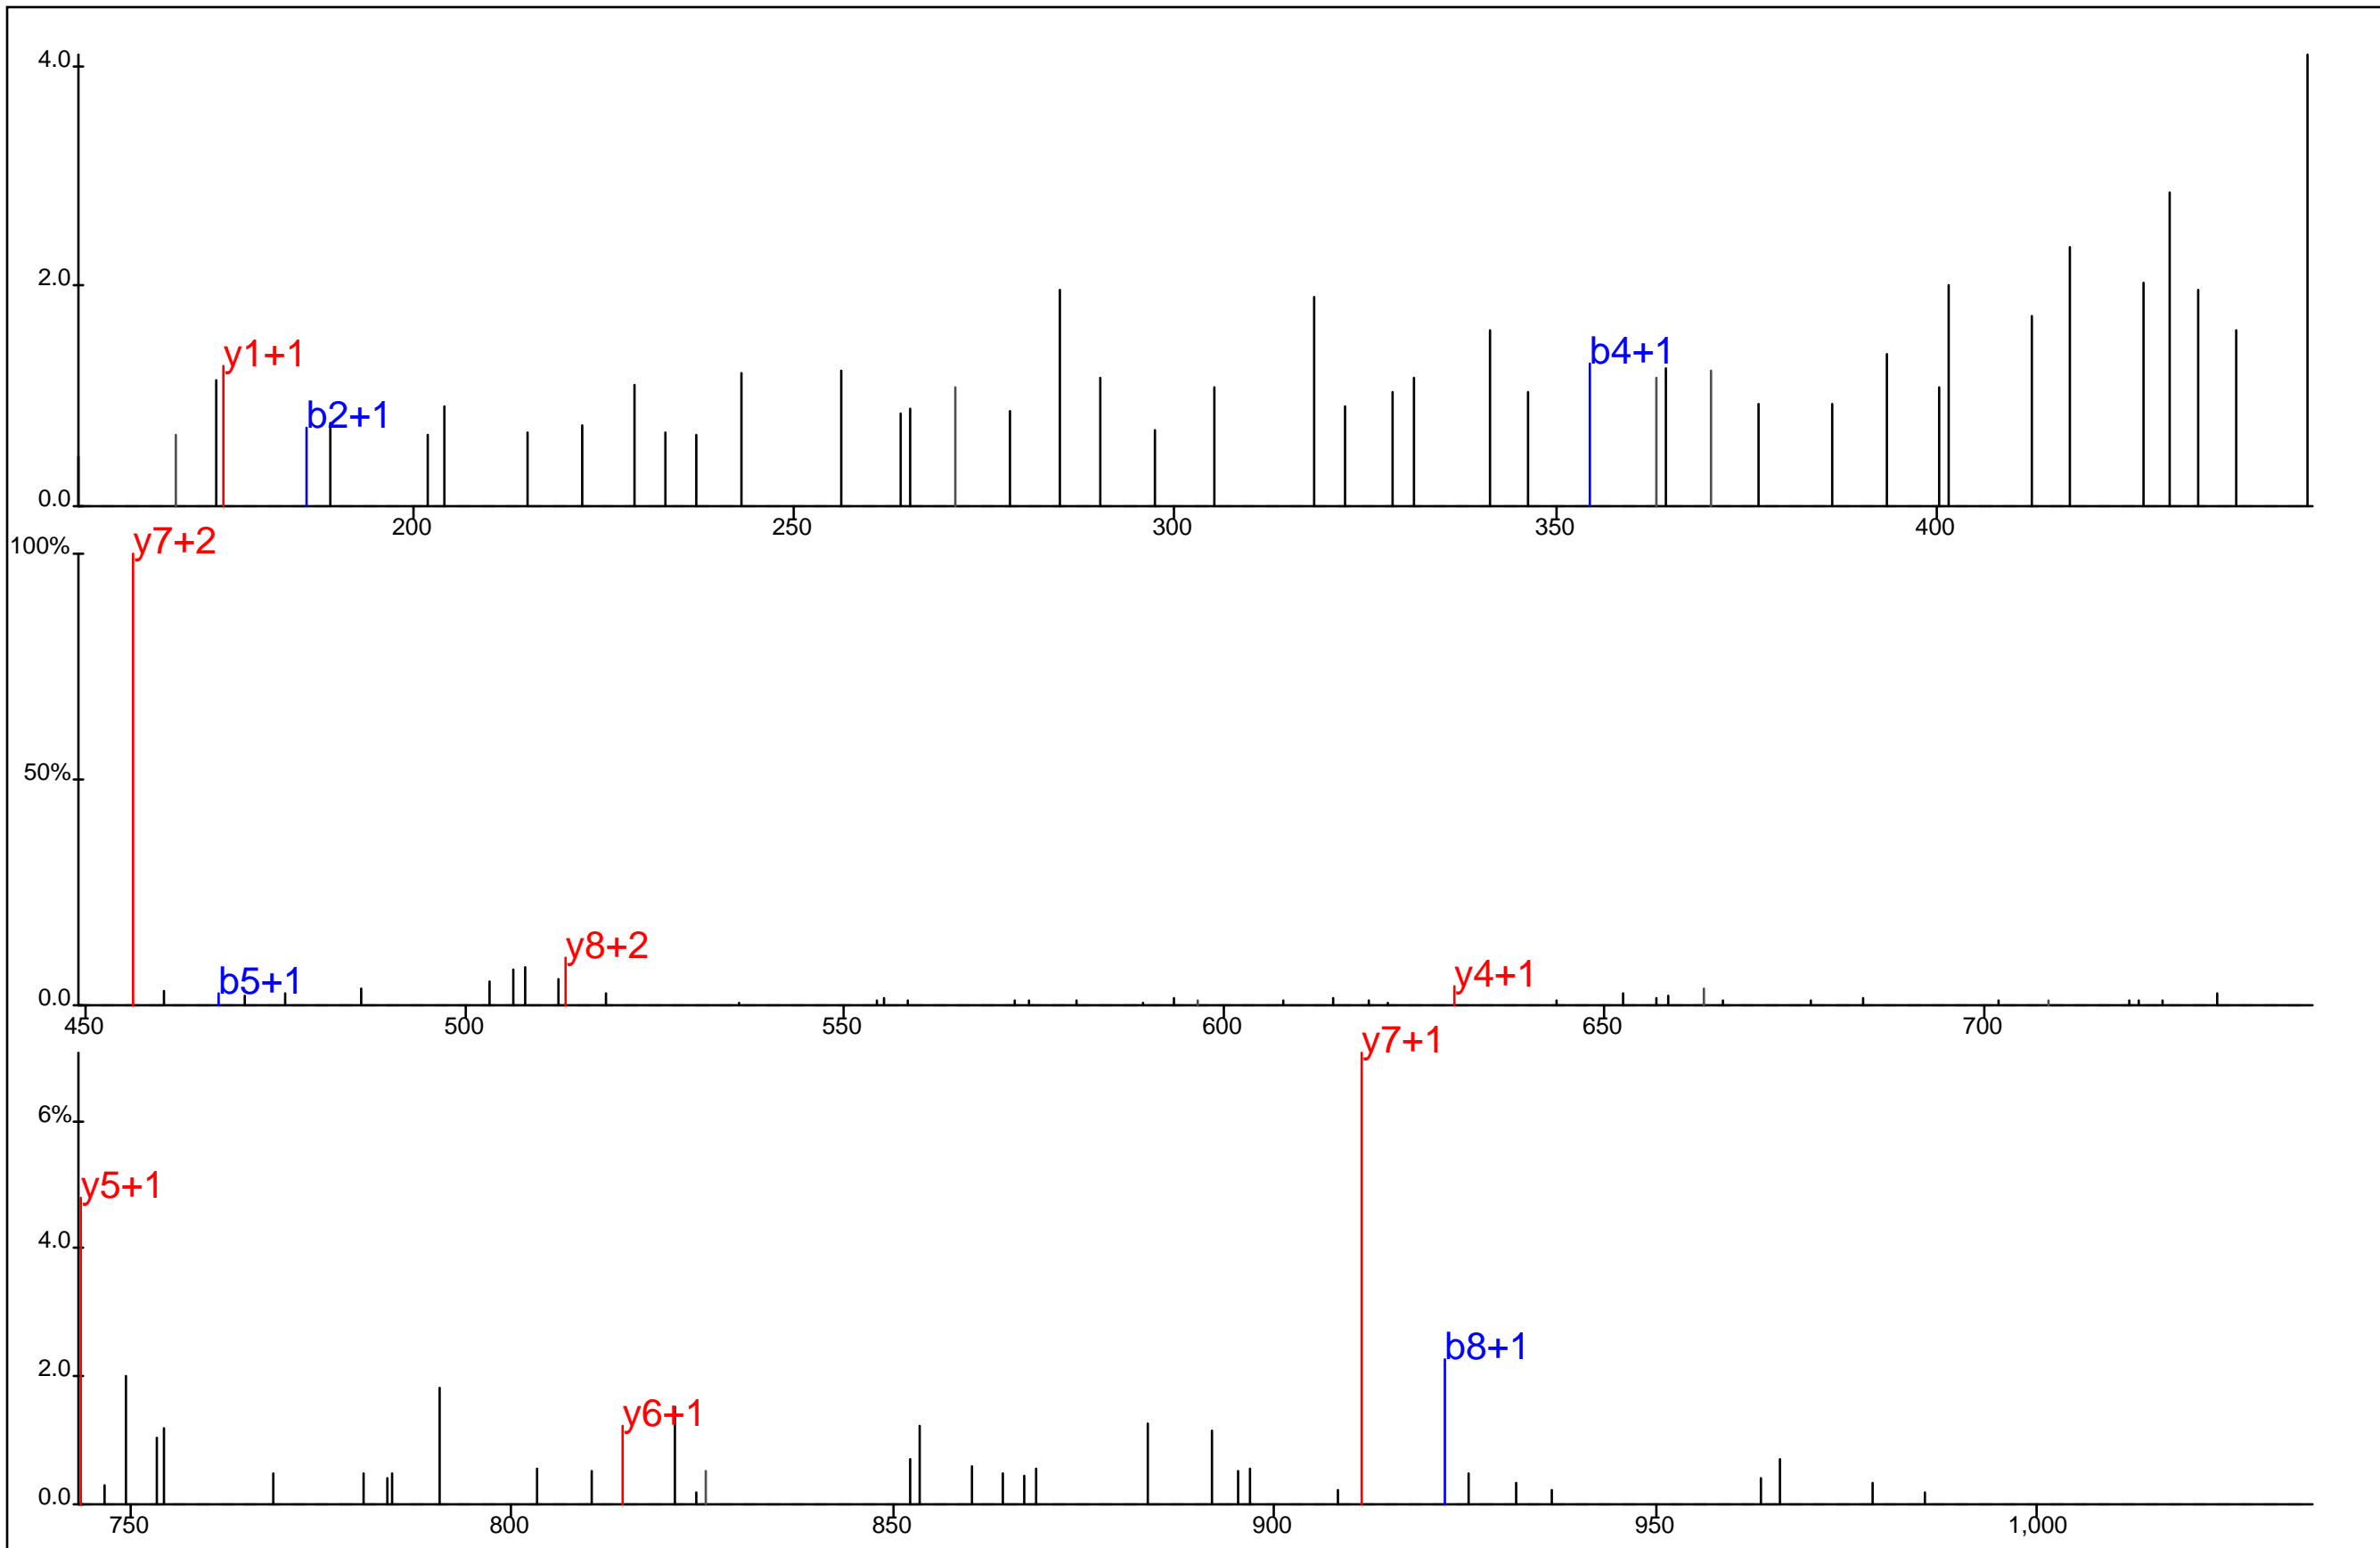

■ □ ■ □ ■ □ ■ □  
 A N P A L Y\*V L R  
□ ■ □ ■ □ ■ □ ■

Protein Name: PRPF8  
 gi Accession: 0  
 Precursor Mass: 548.7814+2  
 Delta Mass: 0.398 ppm  
 XCorr: 21.41

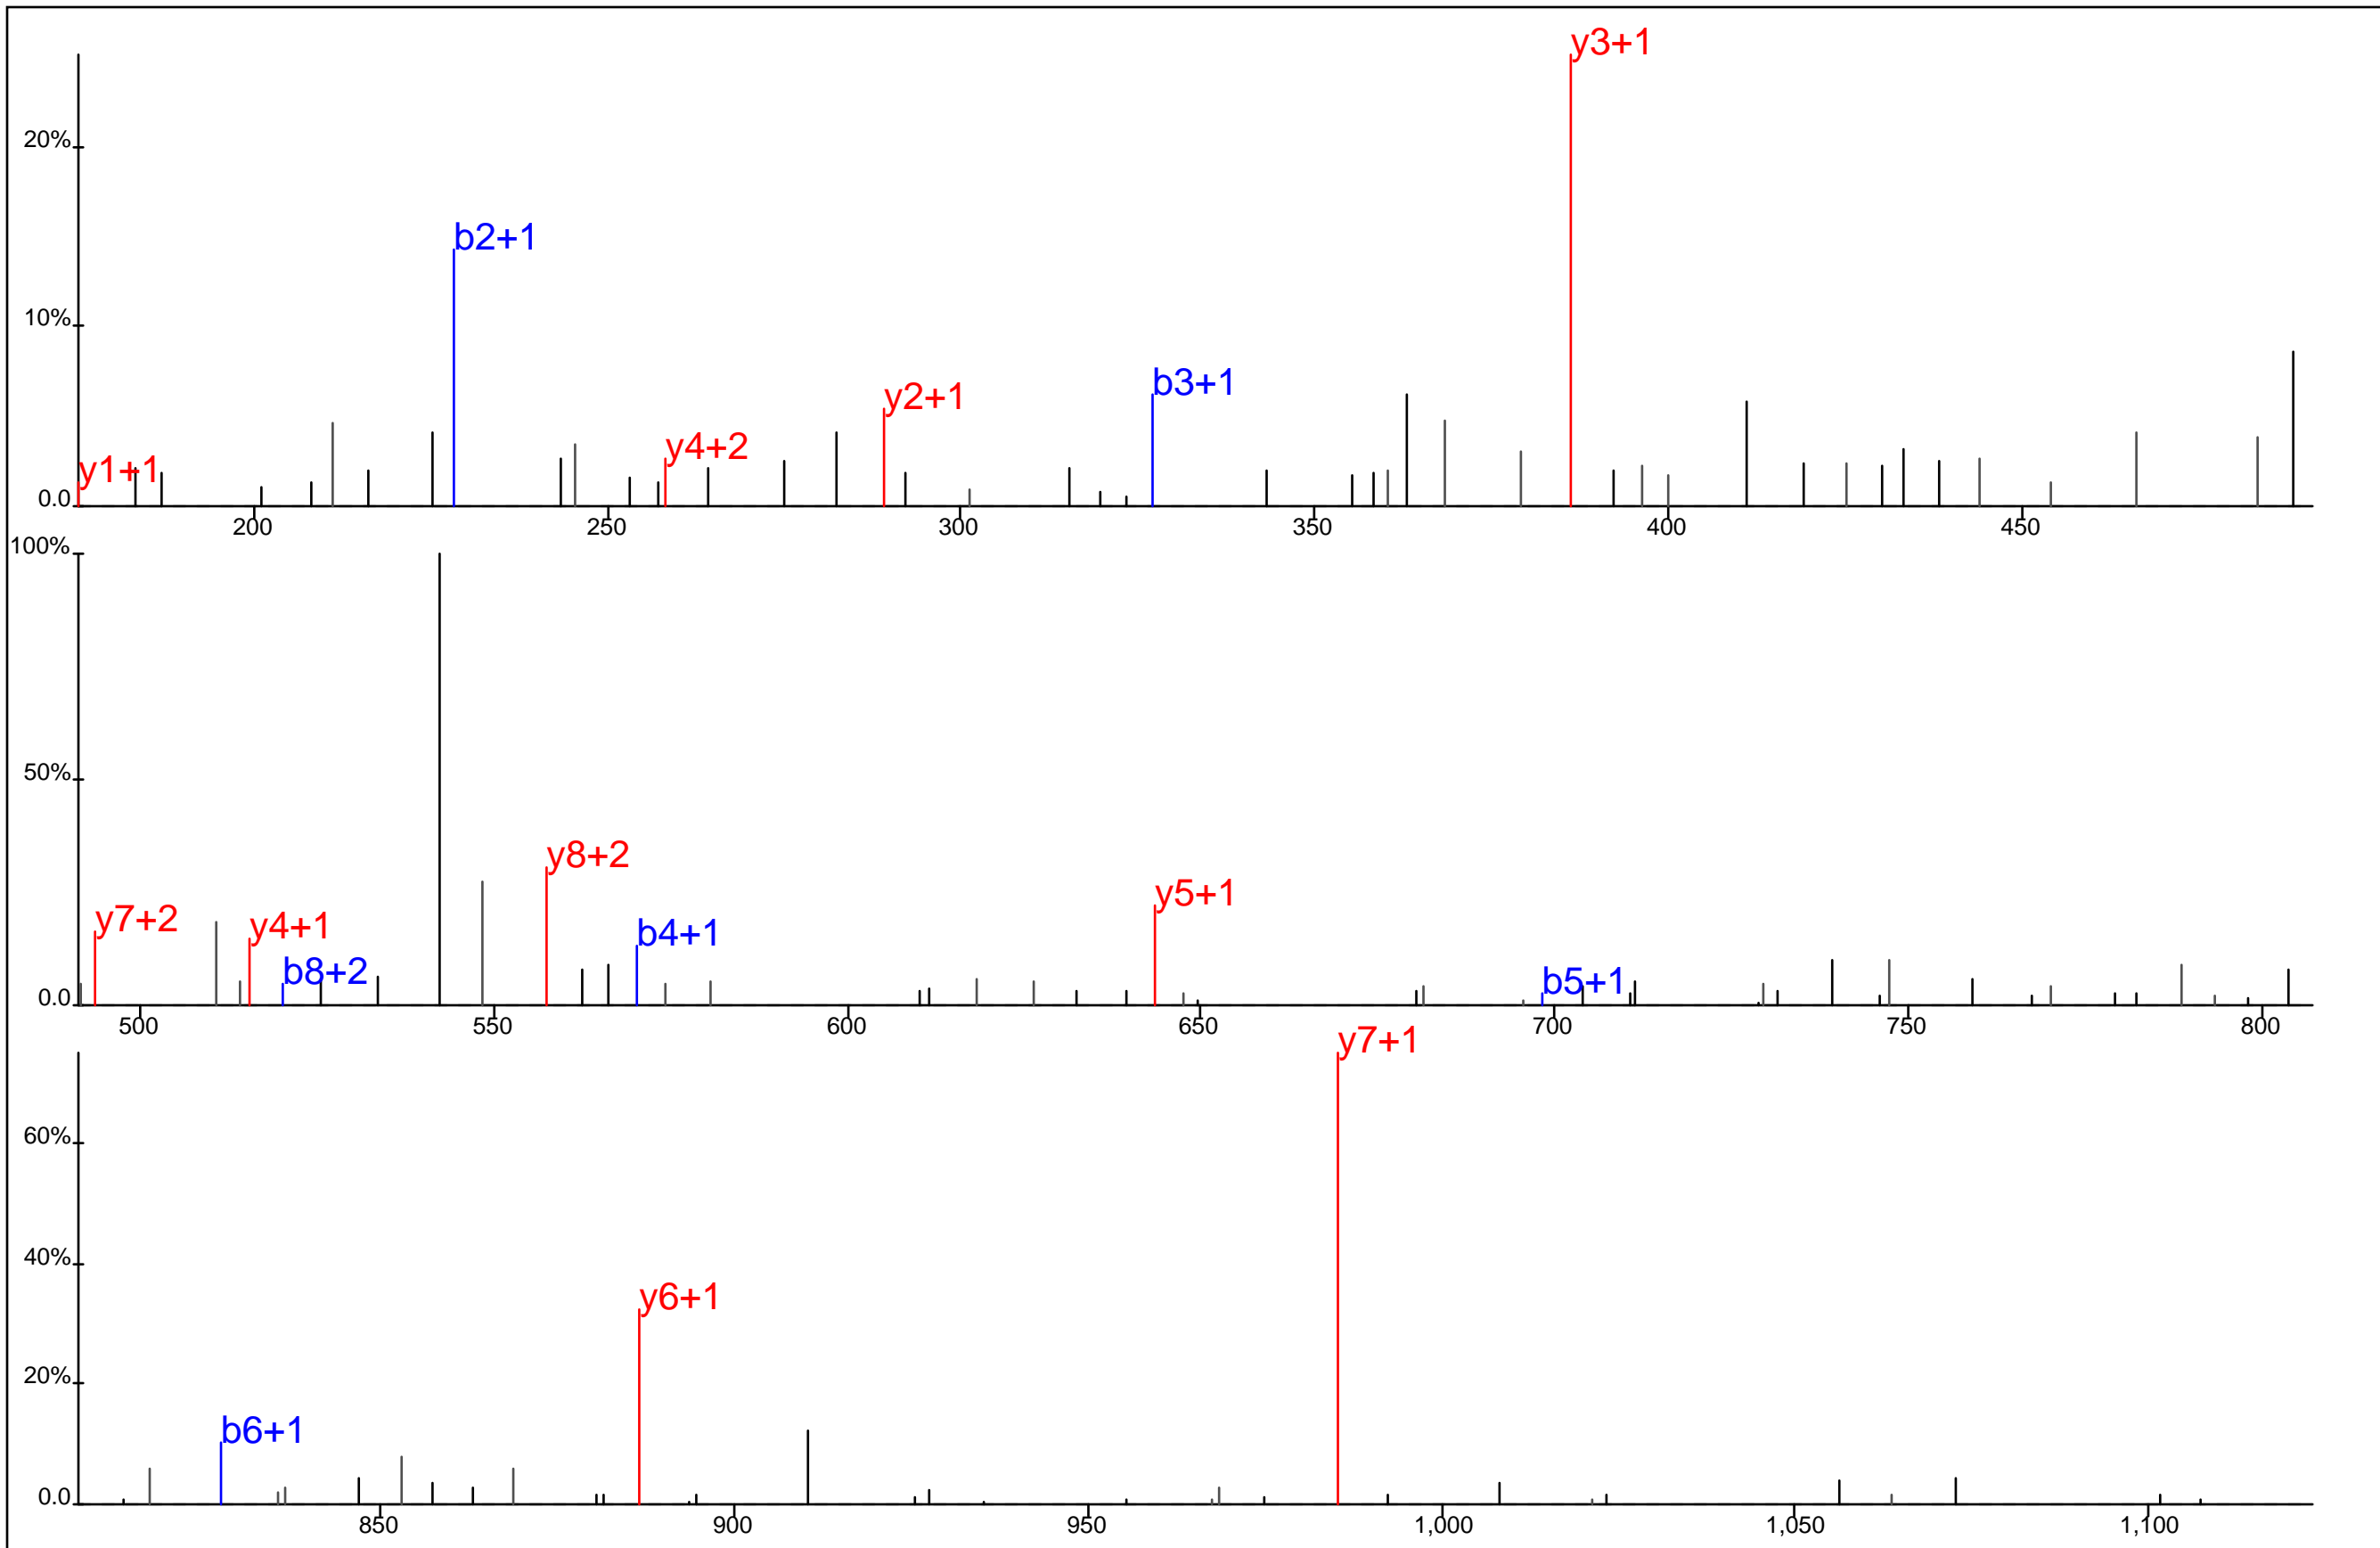

▢ ▢ ▢ ▢ ▢ ▢ ▢  
 V Q V Y\*Q E P N R  
▢ ▢ ▢ ▢ ▢ ▢ ▢

Protein Name: PRPP synthetase associated protein 2  
 gi Accession: 0  
 Precursor Mass: 606.7746+2  
 Delta Mass: 0.871 ppm  
 XCorr: 21.48

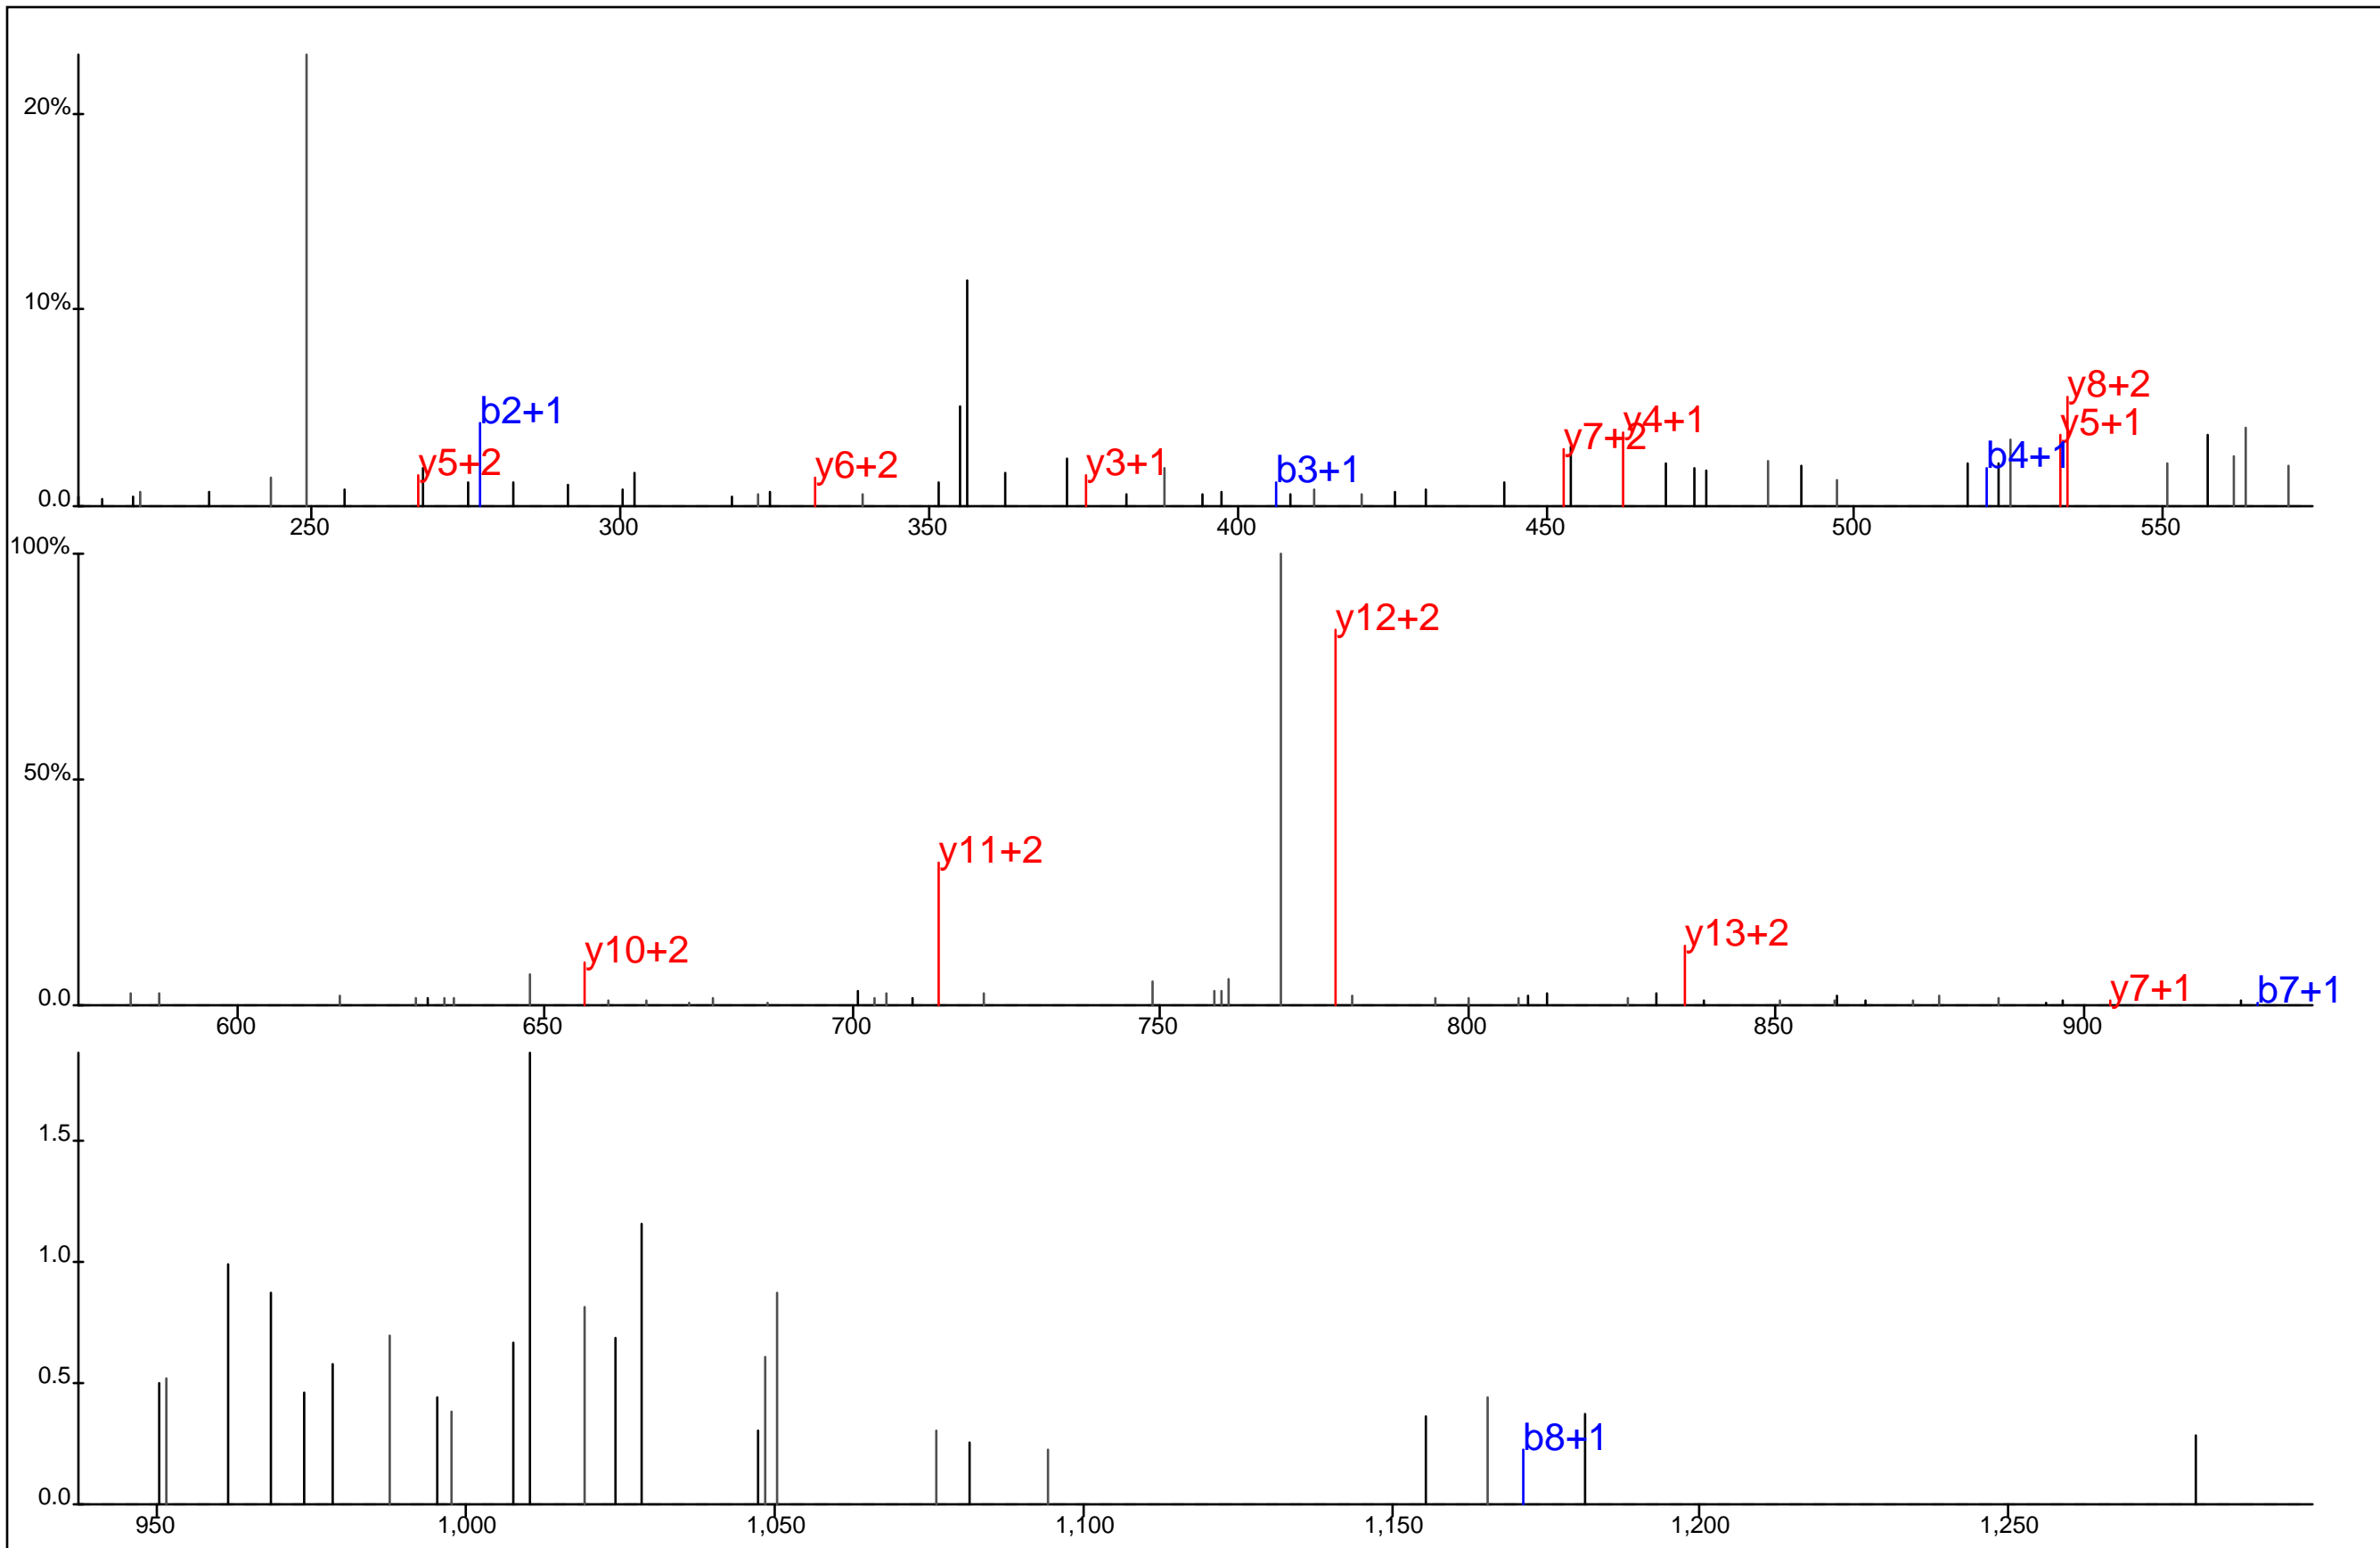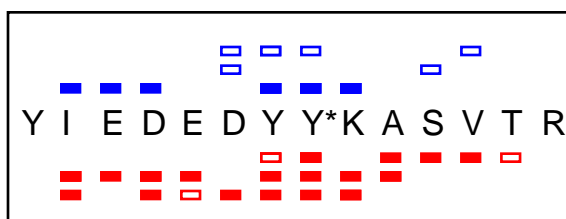

Protein Name: PTK2B protein tyrosine kinase 2 beta  
 gi Accession: 0  
 Precursor Mass: 611.2664+3  
 Delta Mass: 3.252 ppm  
 XCorr: 24.88

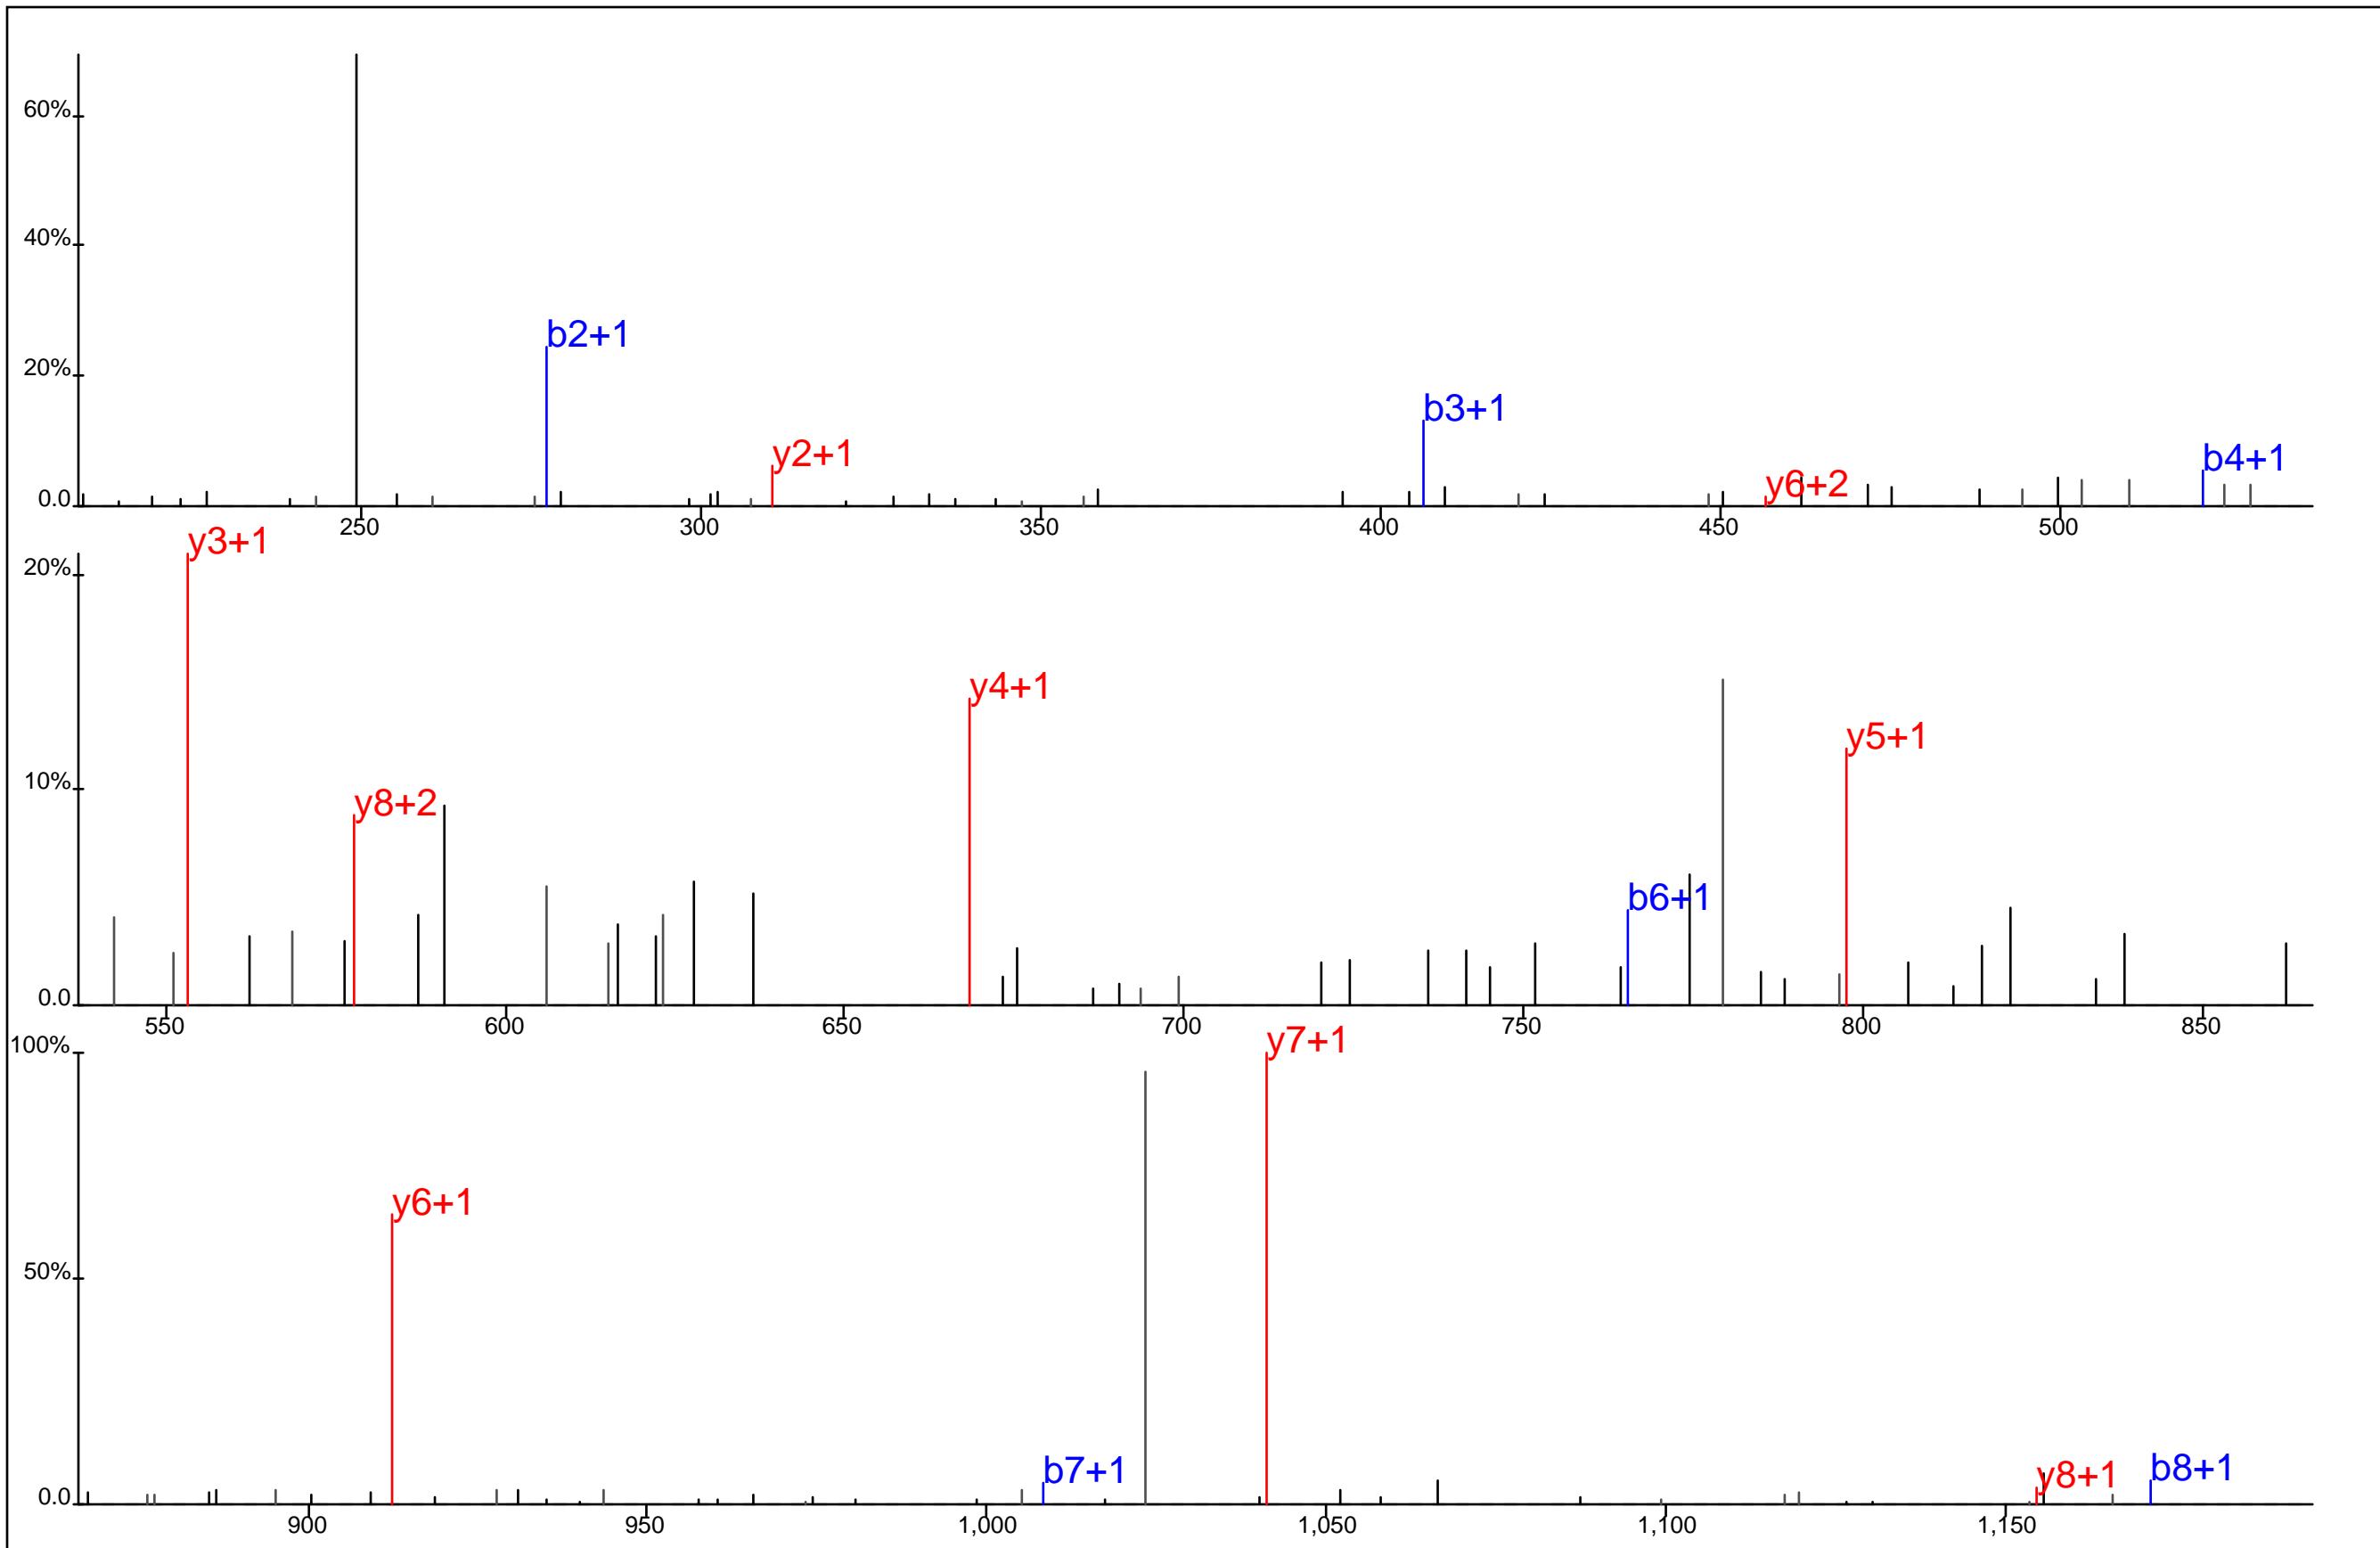

■ ■ ■ ■ ■ ■ ■ ■  
 Y I E D E D Y\*Y K  
■ ■ ■ ■ ■ ■ ■ ■

Protein Name: PTK2B protein tyrosine kinase 2 beta  
 gi Accession: 0  
 Precursor Mass: 659.2501+2  
 Delta Mass: 0.481 ppm  
 XCorr: 39.86



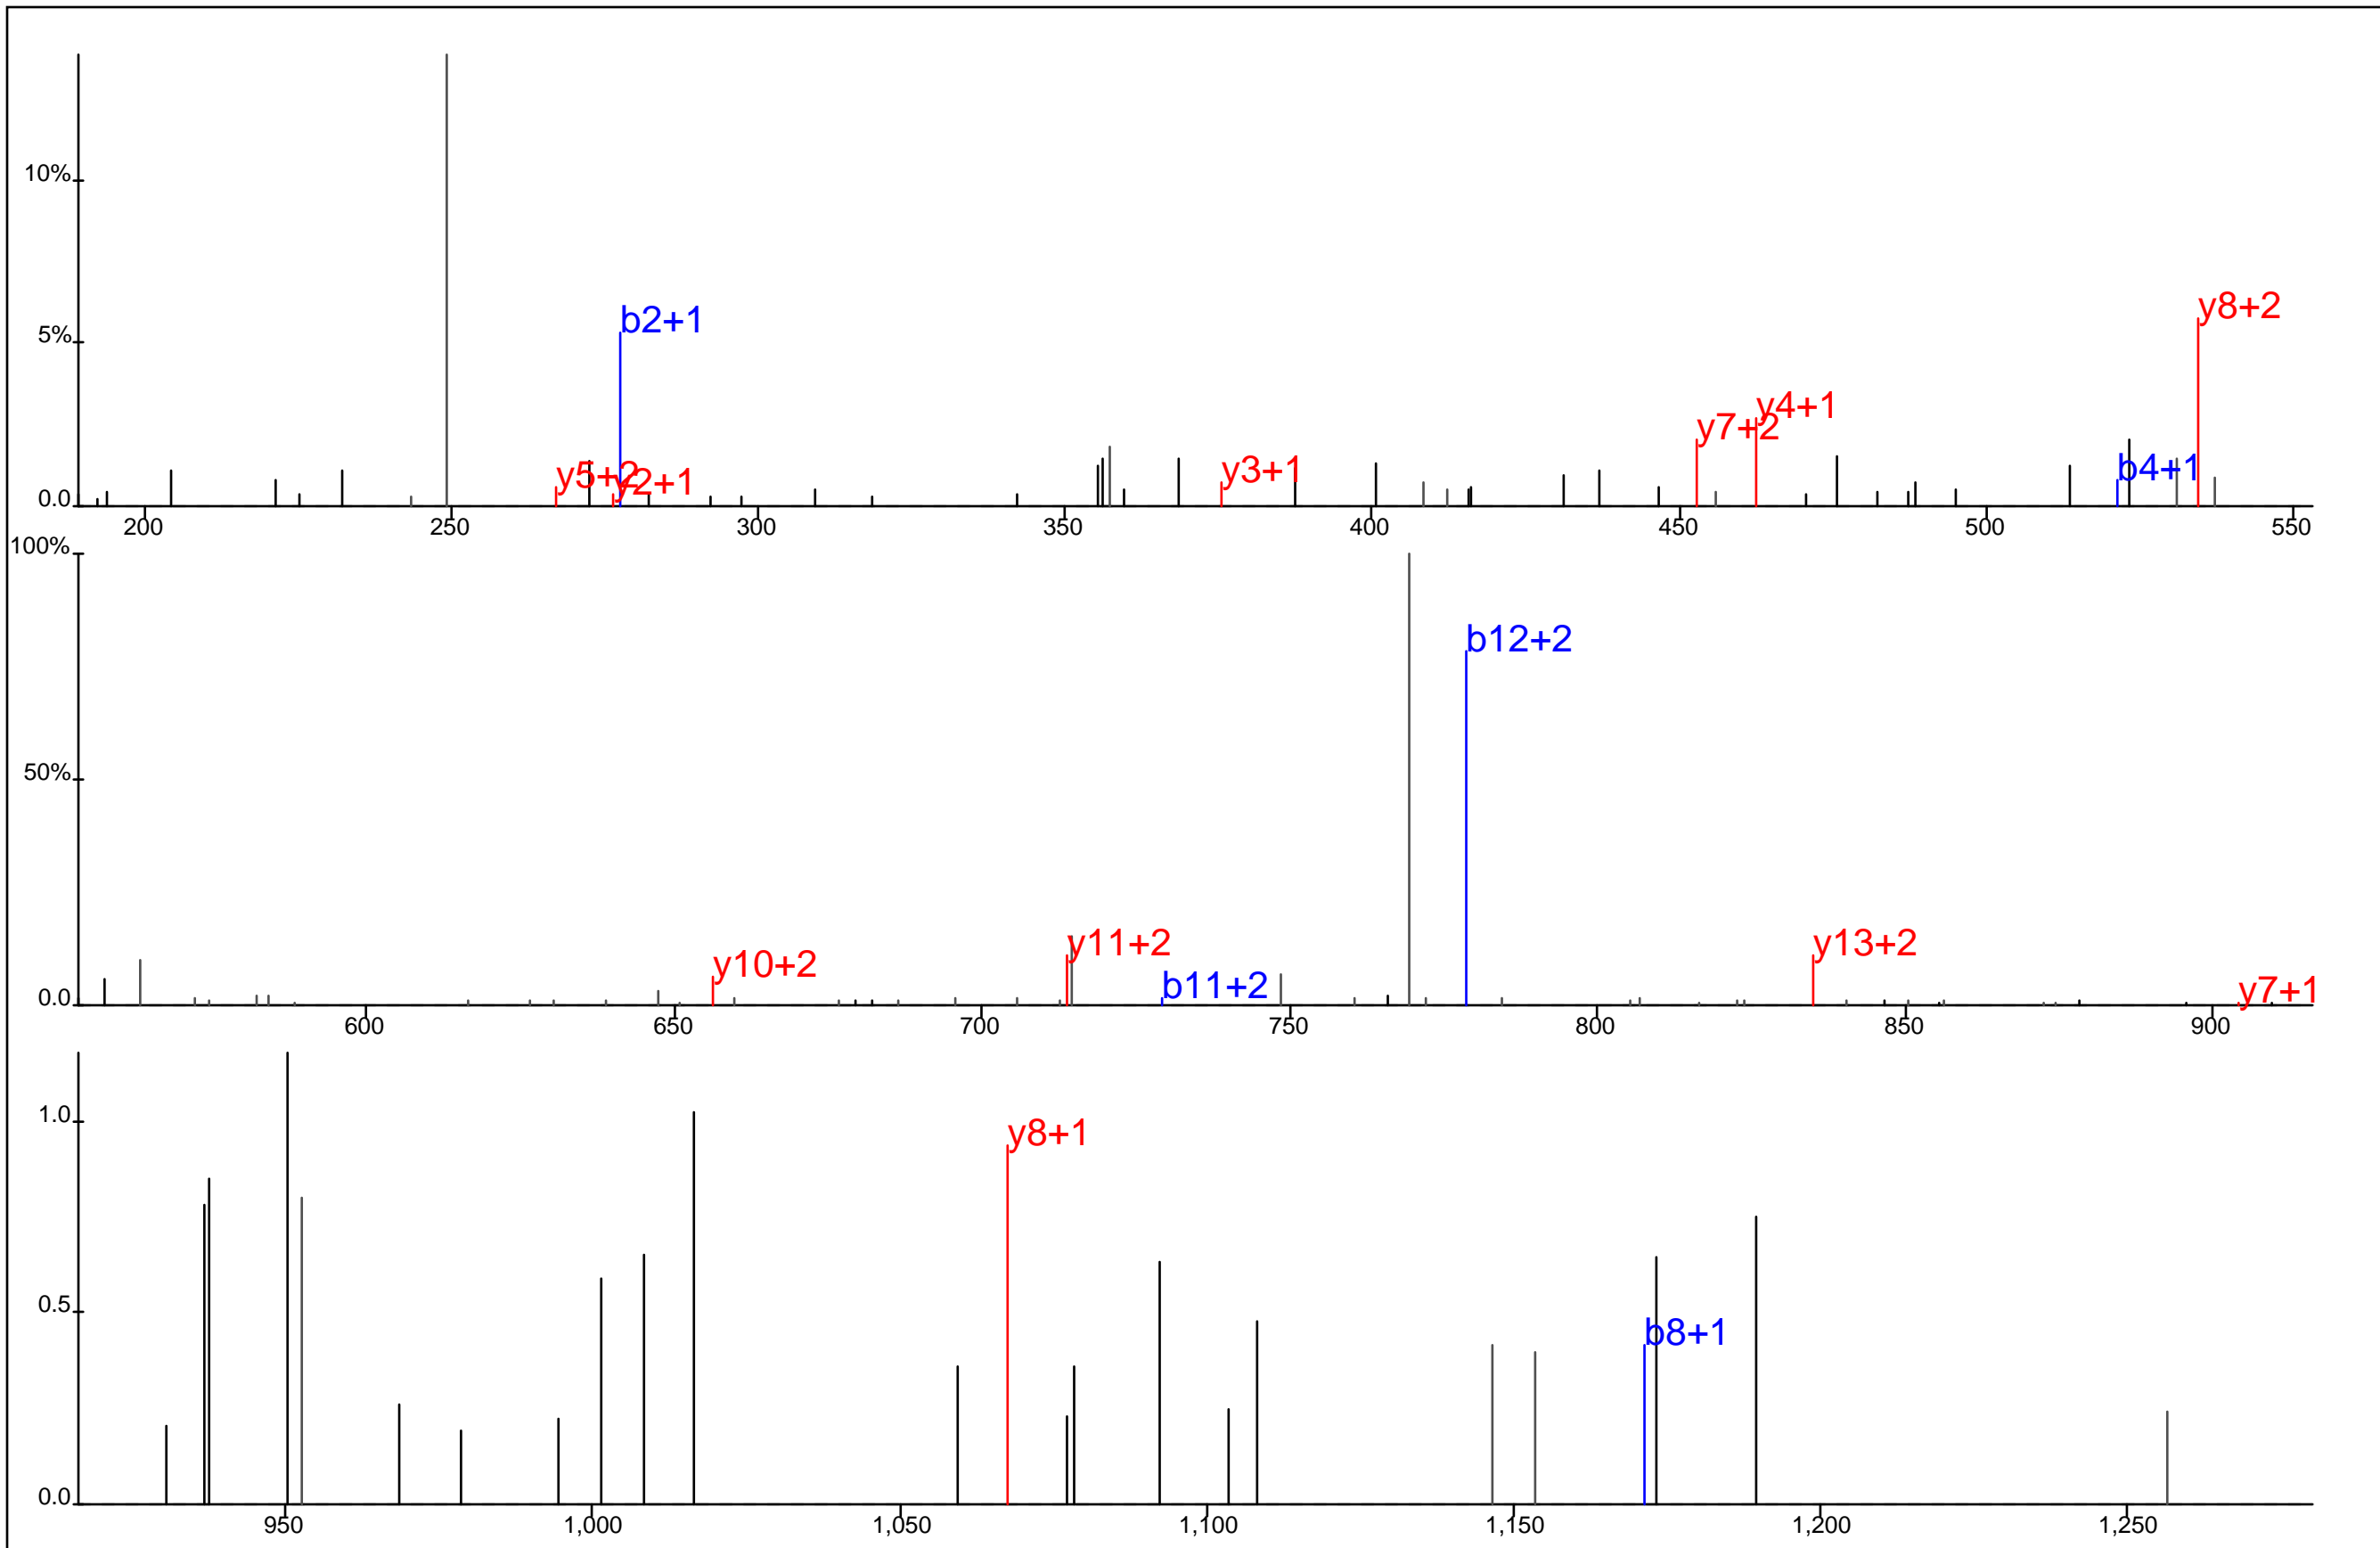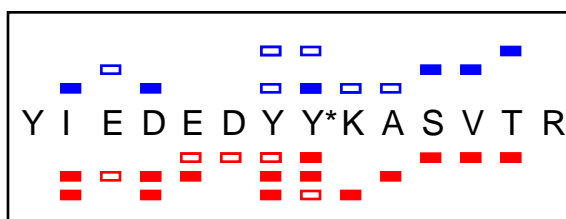

Protein Name: PTK2B protein tyrosine kinase 2 beta  
 gi Accession: 0  
 Precursor Mass: 611.2650+3  
 Delta Mass: 1.054 ppm  
 XCorr: 20.67

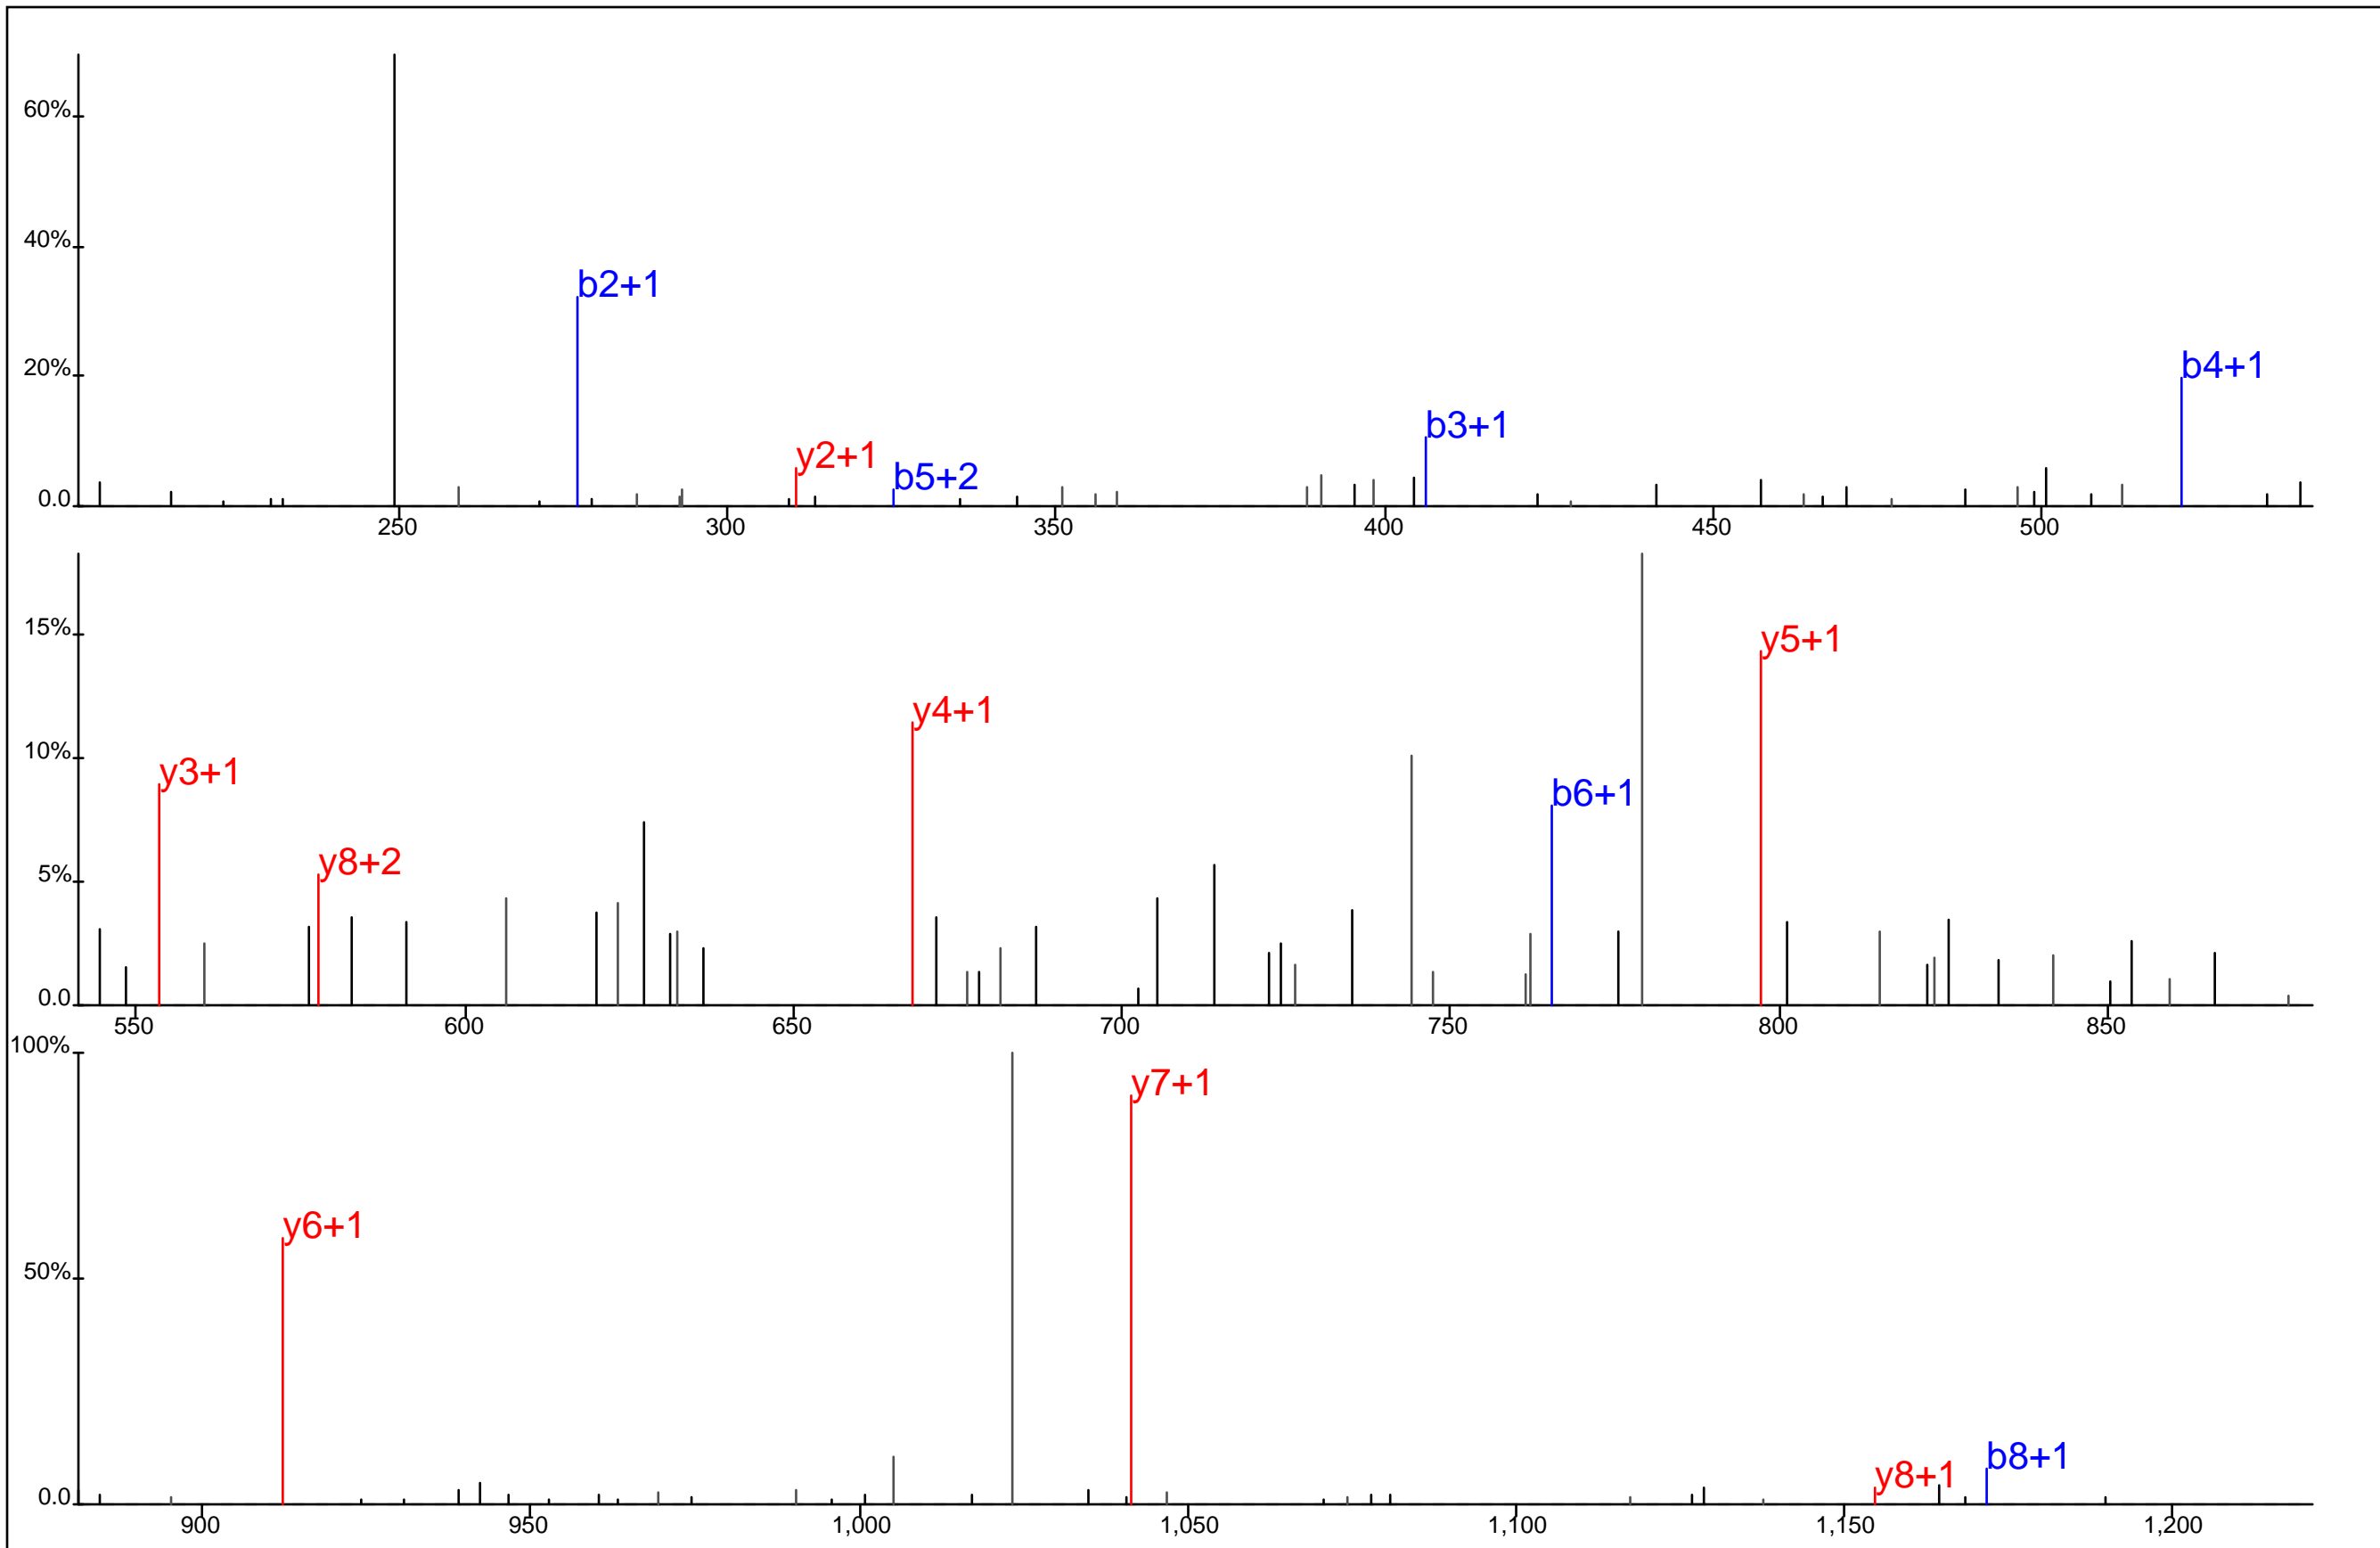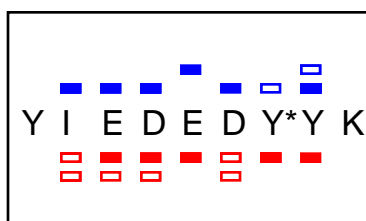

Protein Name: PTK2B protein tyrosine kinase 2 beta  
 gi Accession: 0  
 Precursor Mass: 659.2476+2  
 Delta Mass: 3.224 ppm  
 XCorr: 40.18

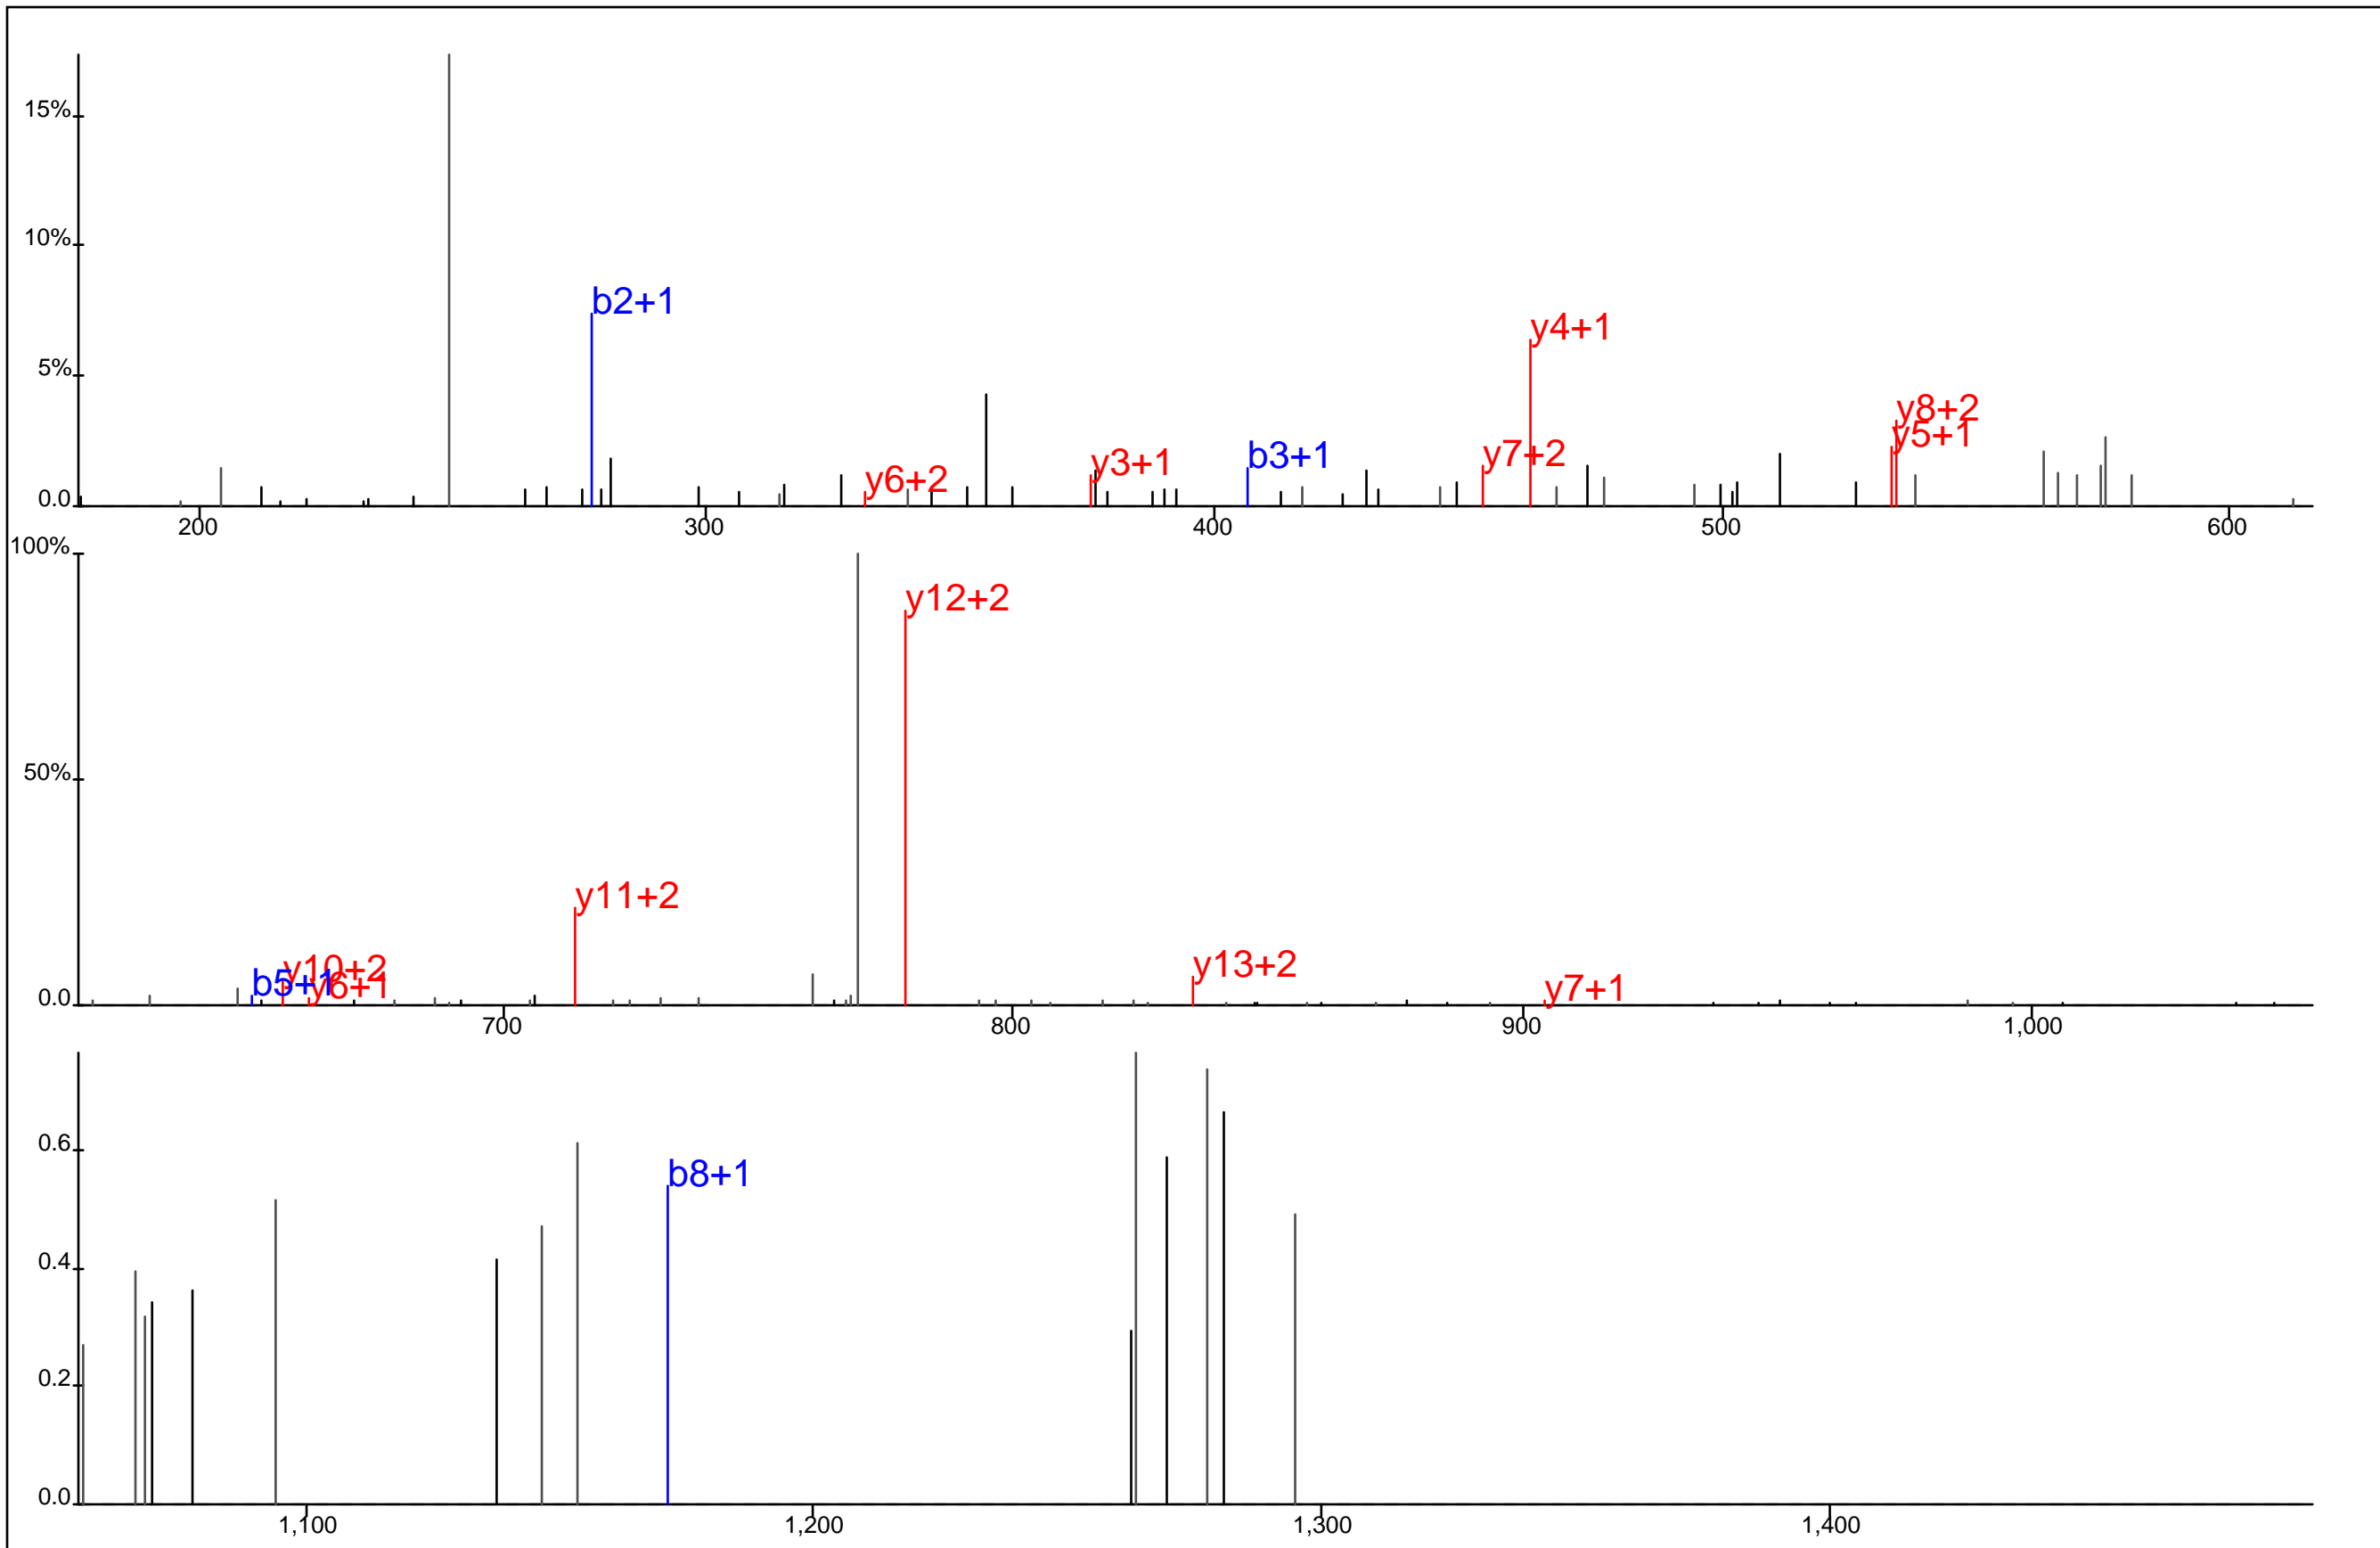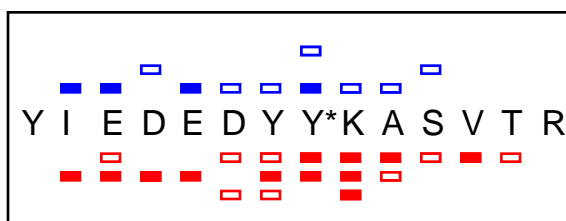

Protein Name: PTK2B protein tyrosine kinase 2 beta  
 gi Accession: 0  
 Precursor Mass: 611.2647+3  
 Delta Mass: 0.553 ppm  
 XCorr: 29.64

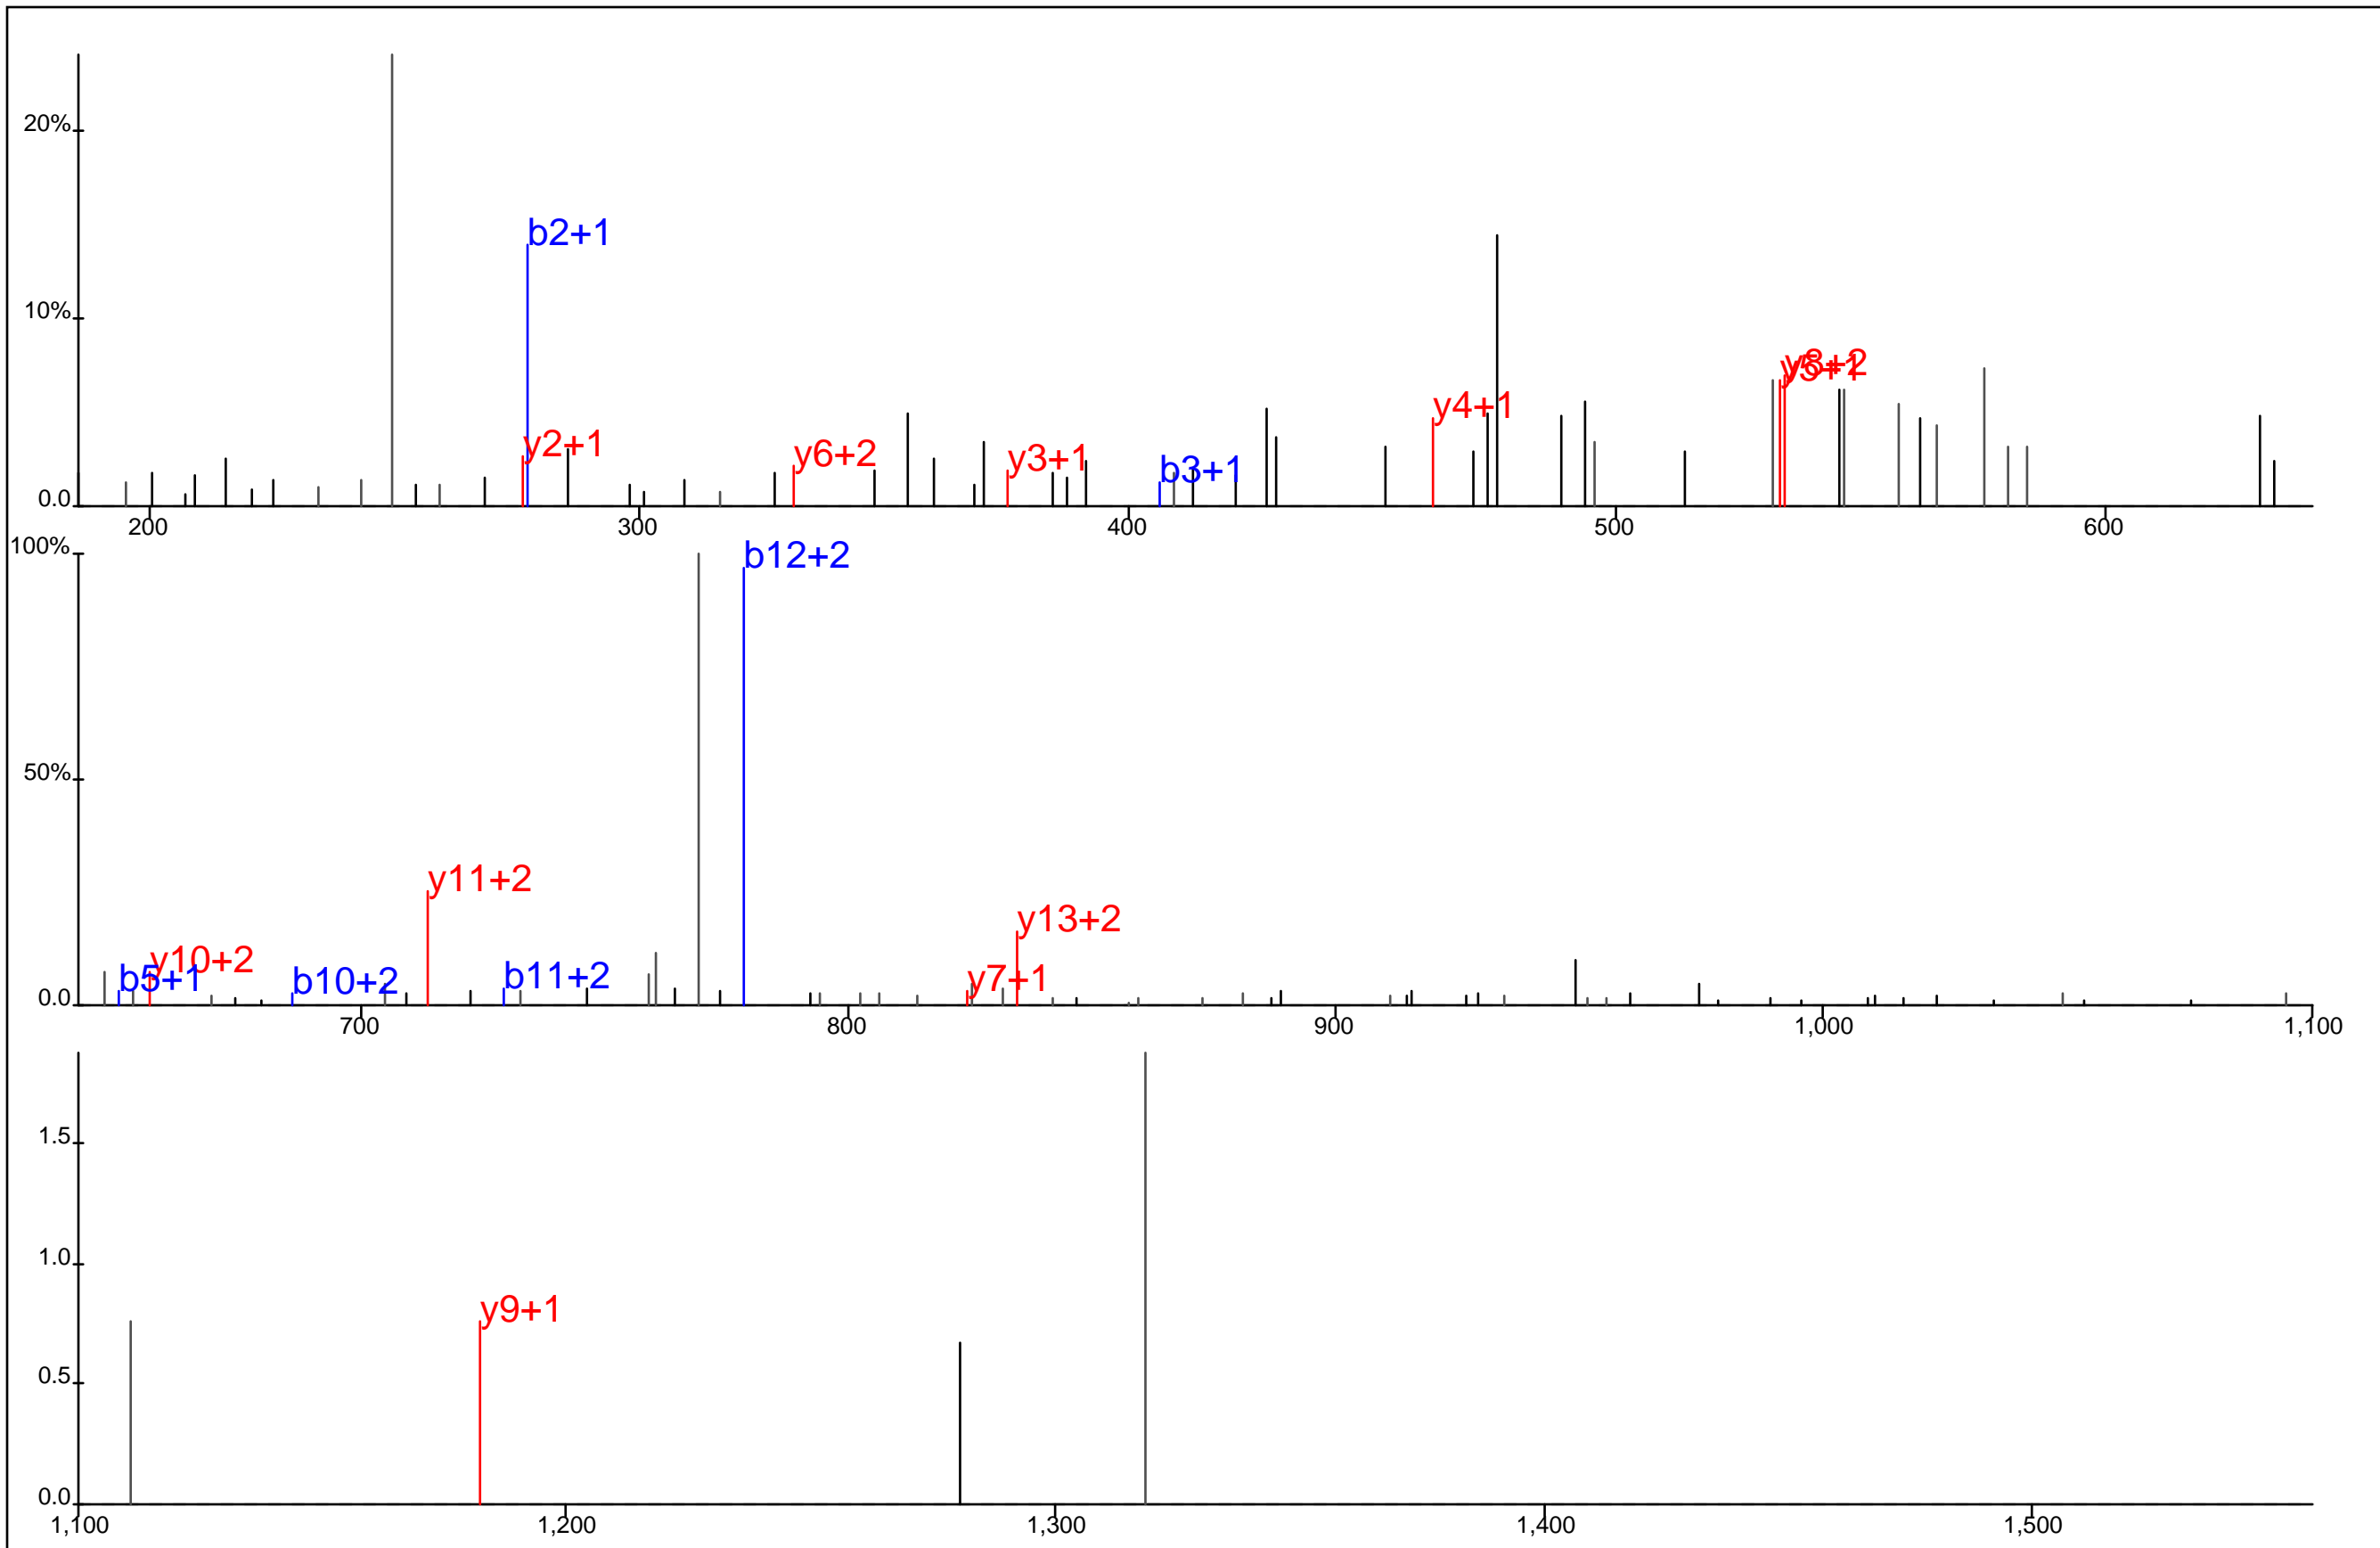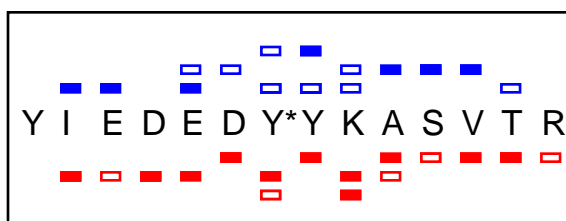

Protein Name: PTK2B protein tyrosine kinase 2 beta  
 gi Accession: 0  
 Precursor Mass: 611.2629+3  
 Delta Mass: 2.346 ppm  
 XCorr: 24.17

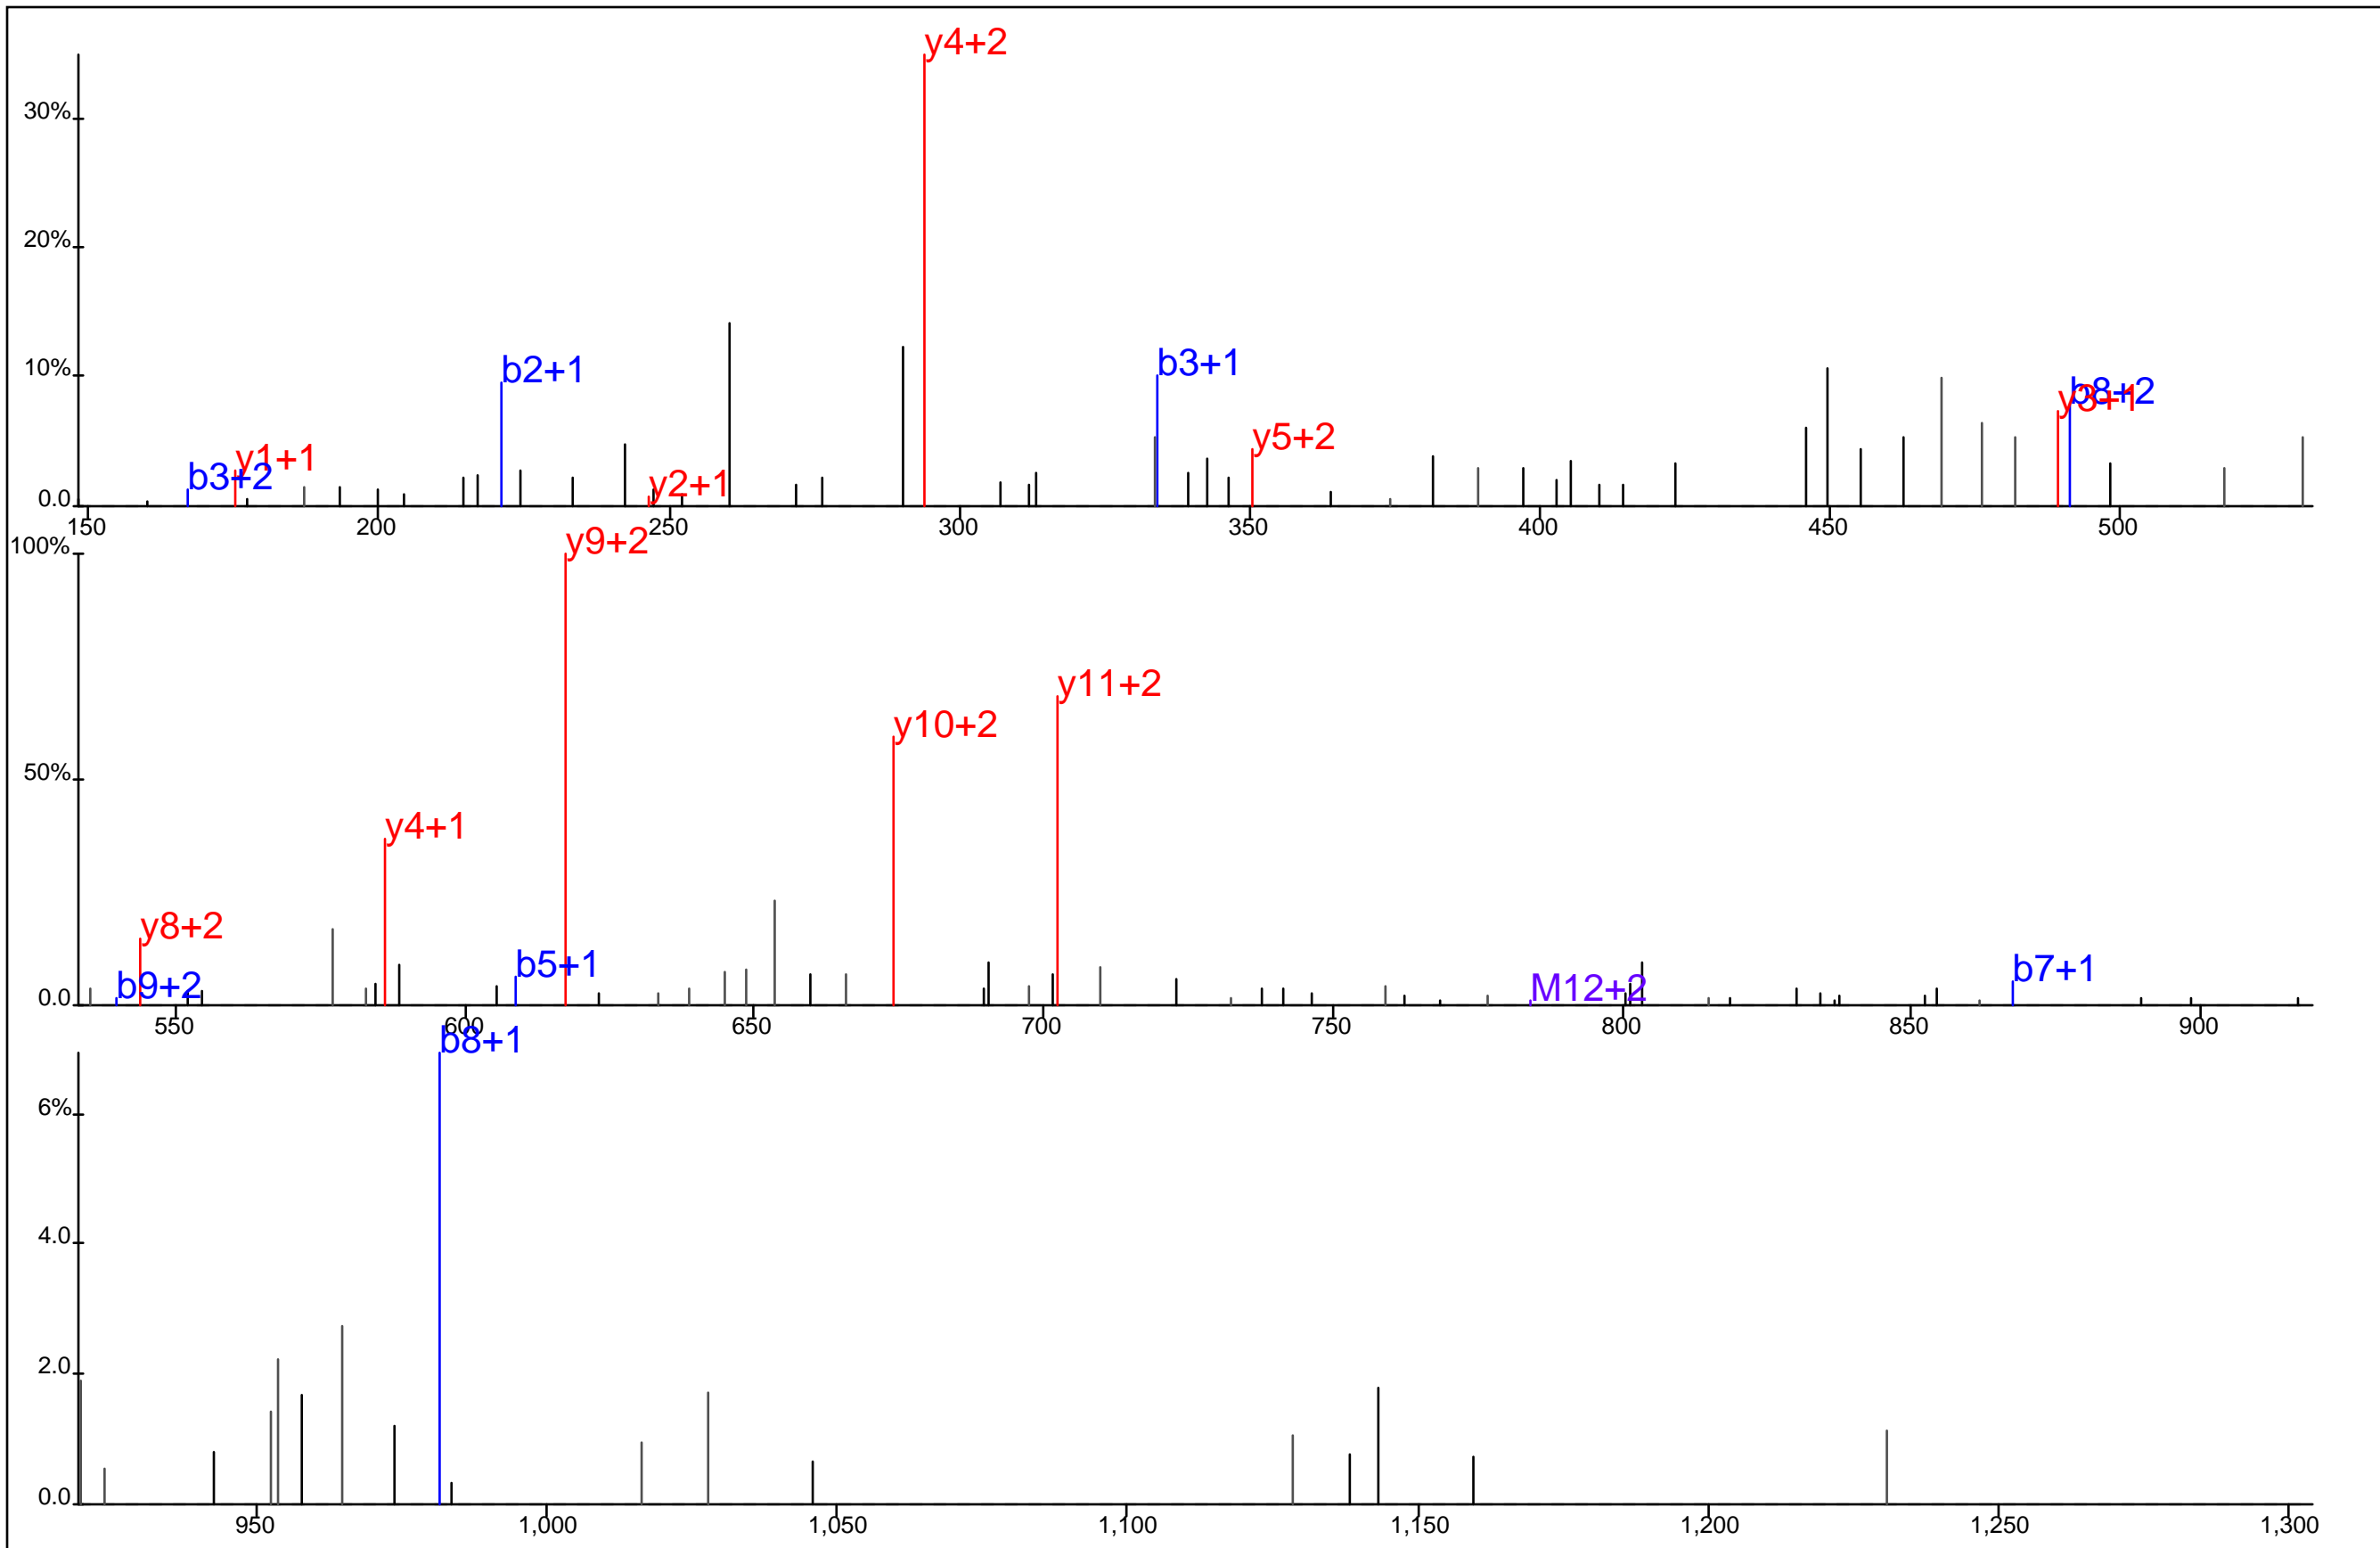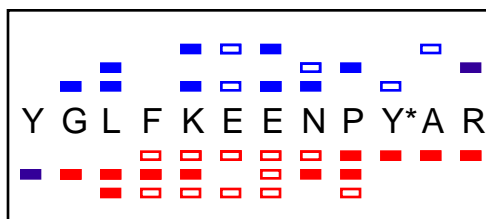

Protein Name: PTTG binding factor  
 gi Accession: 0  
 Precursor Mass: 522.9015+3  
 Delta Mass: 5.666 ppm  
 XCorr: 28.68

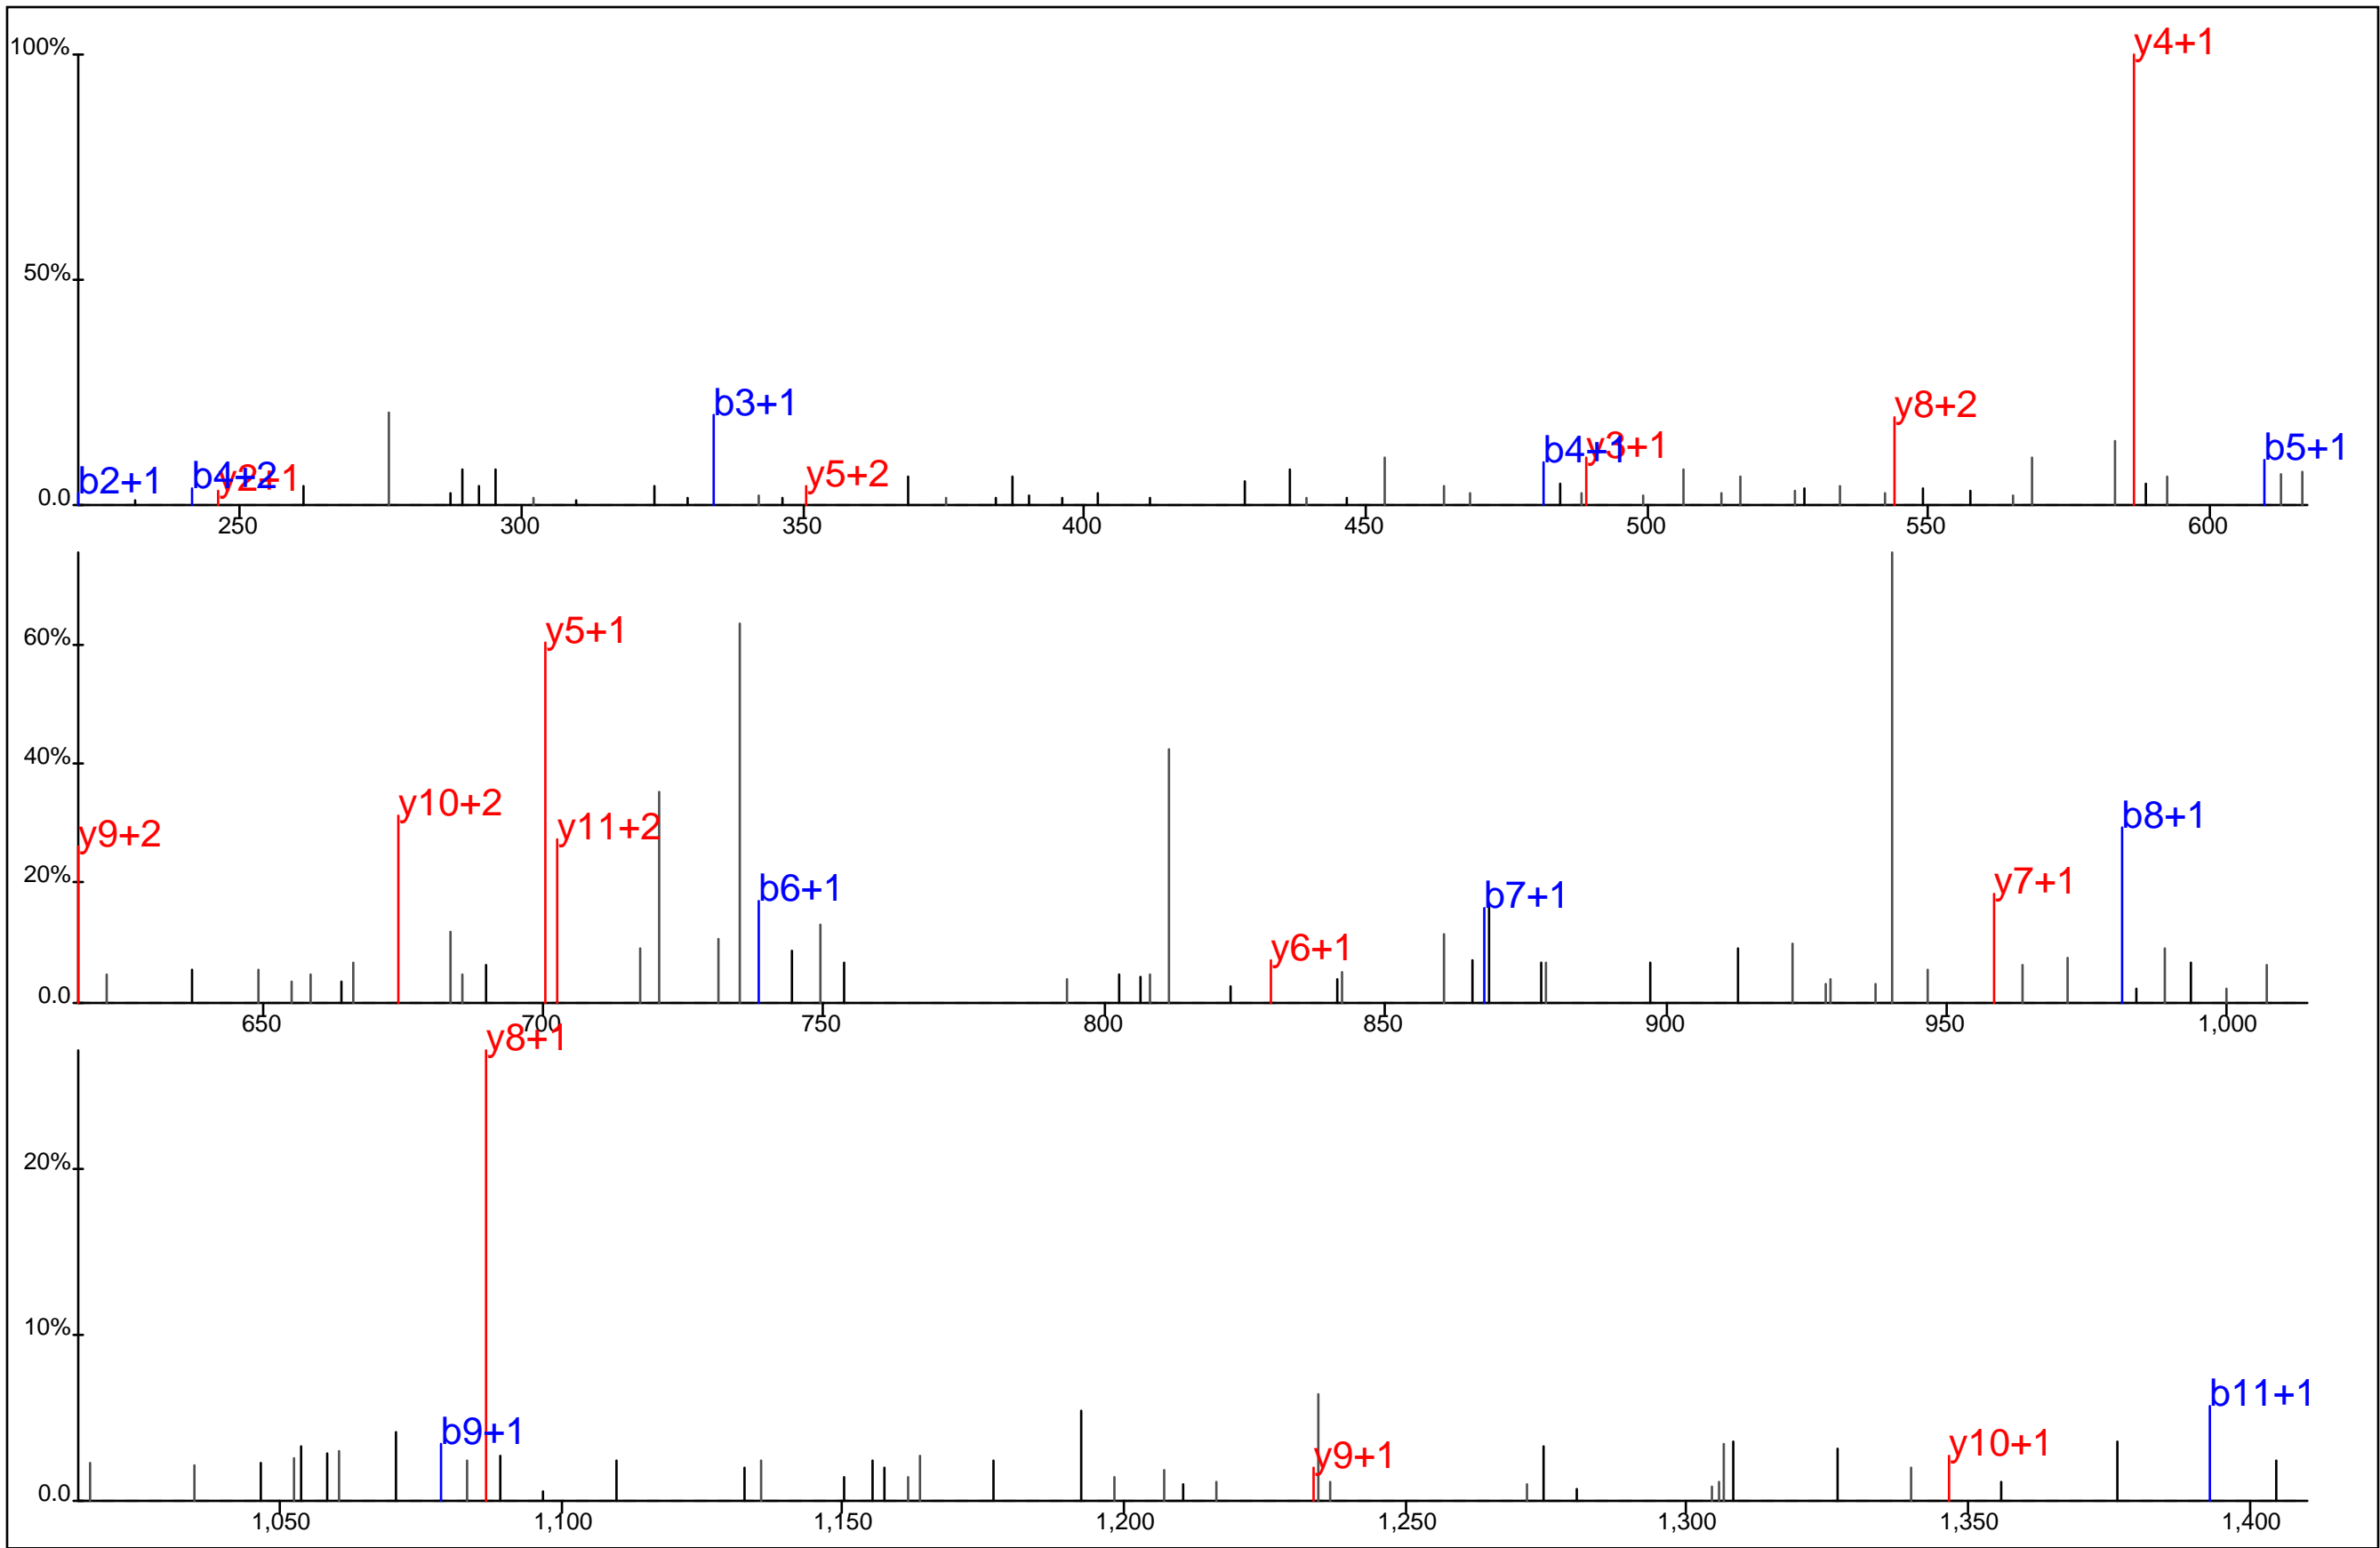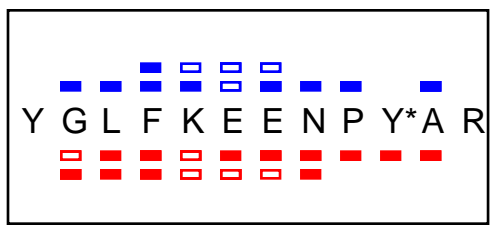

Protein Name: PTTG binding factor  
 gi Accession: 0  
 Precursor Mass: 783.8528+2  
 Delta Mass: 0.320 ppm  
 XCorr: 33.33

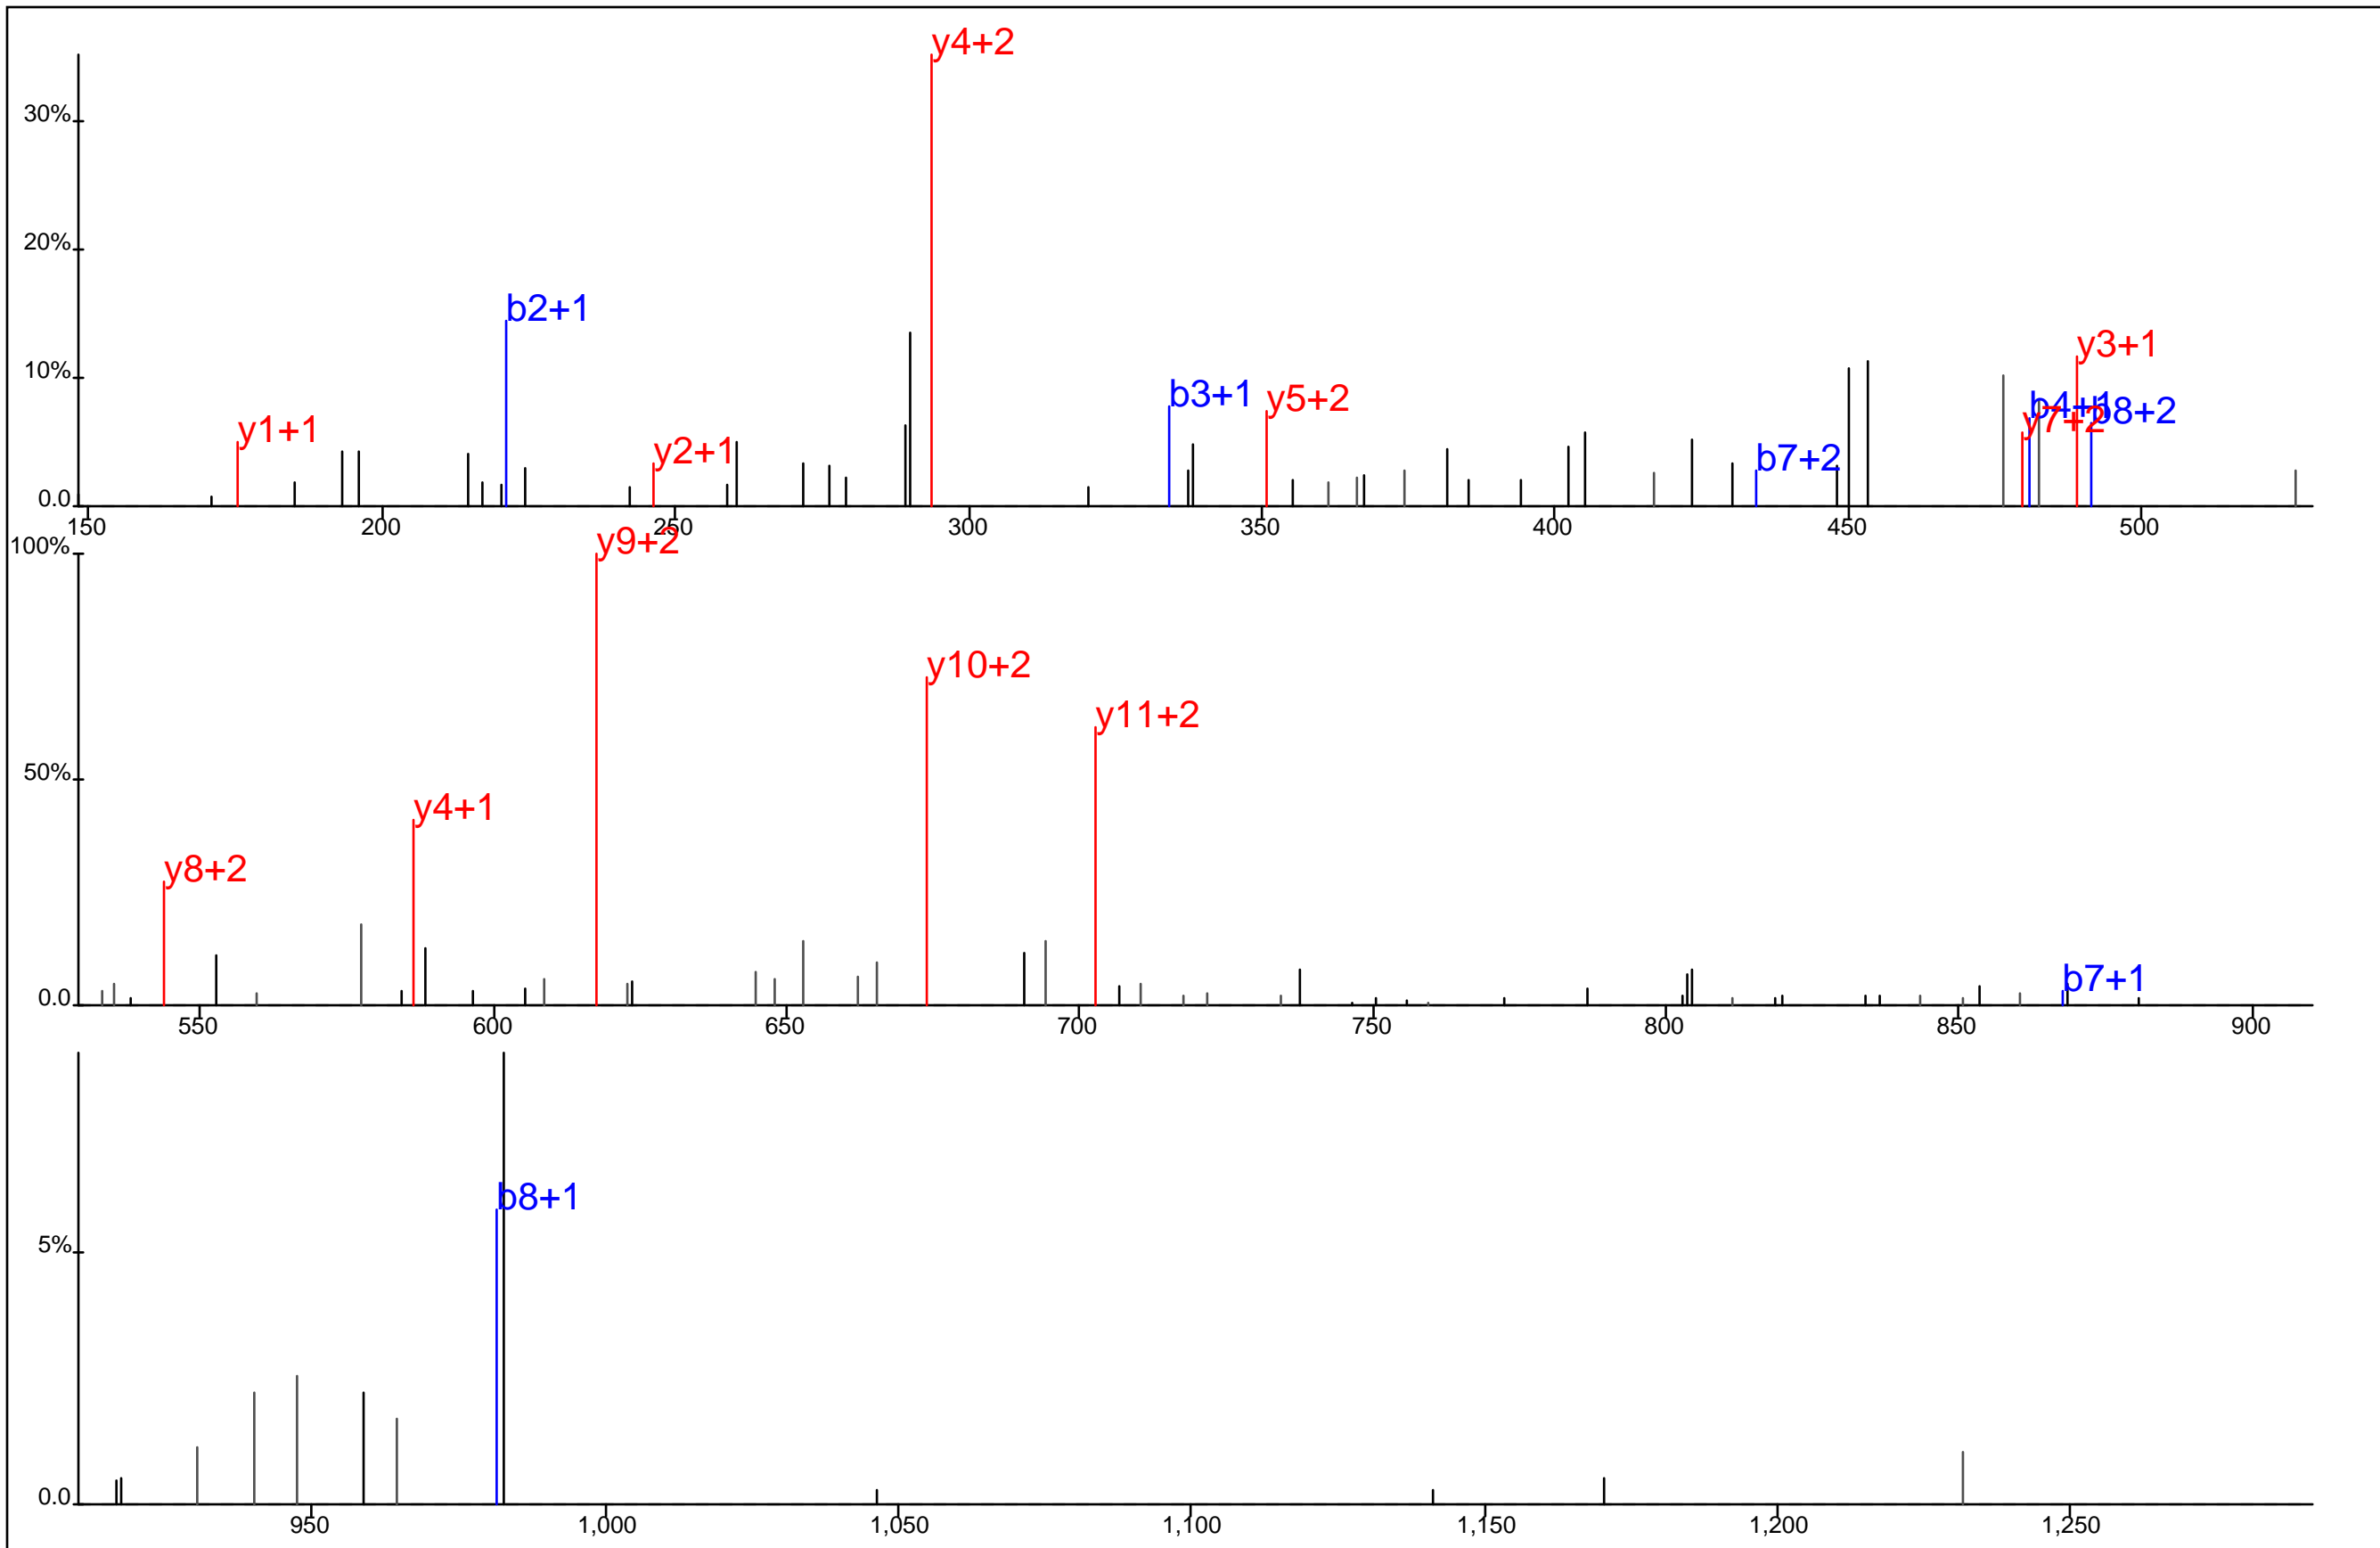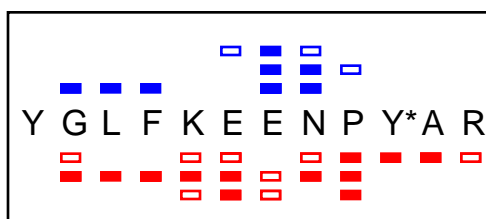

Protein Name: PTTG binding factor  
 gi Accession: 0  
 Precursor Mass: 522.9031+3  
 Delta Mass: 2.510 ppm  
 XCorr: 30.2

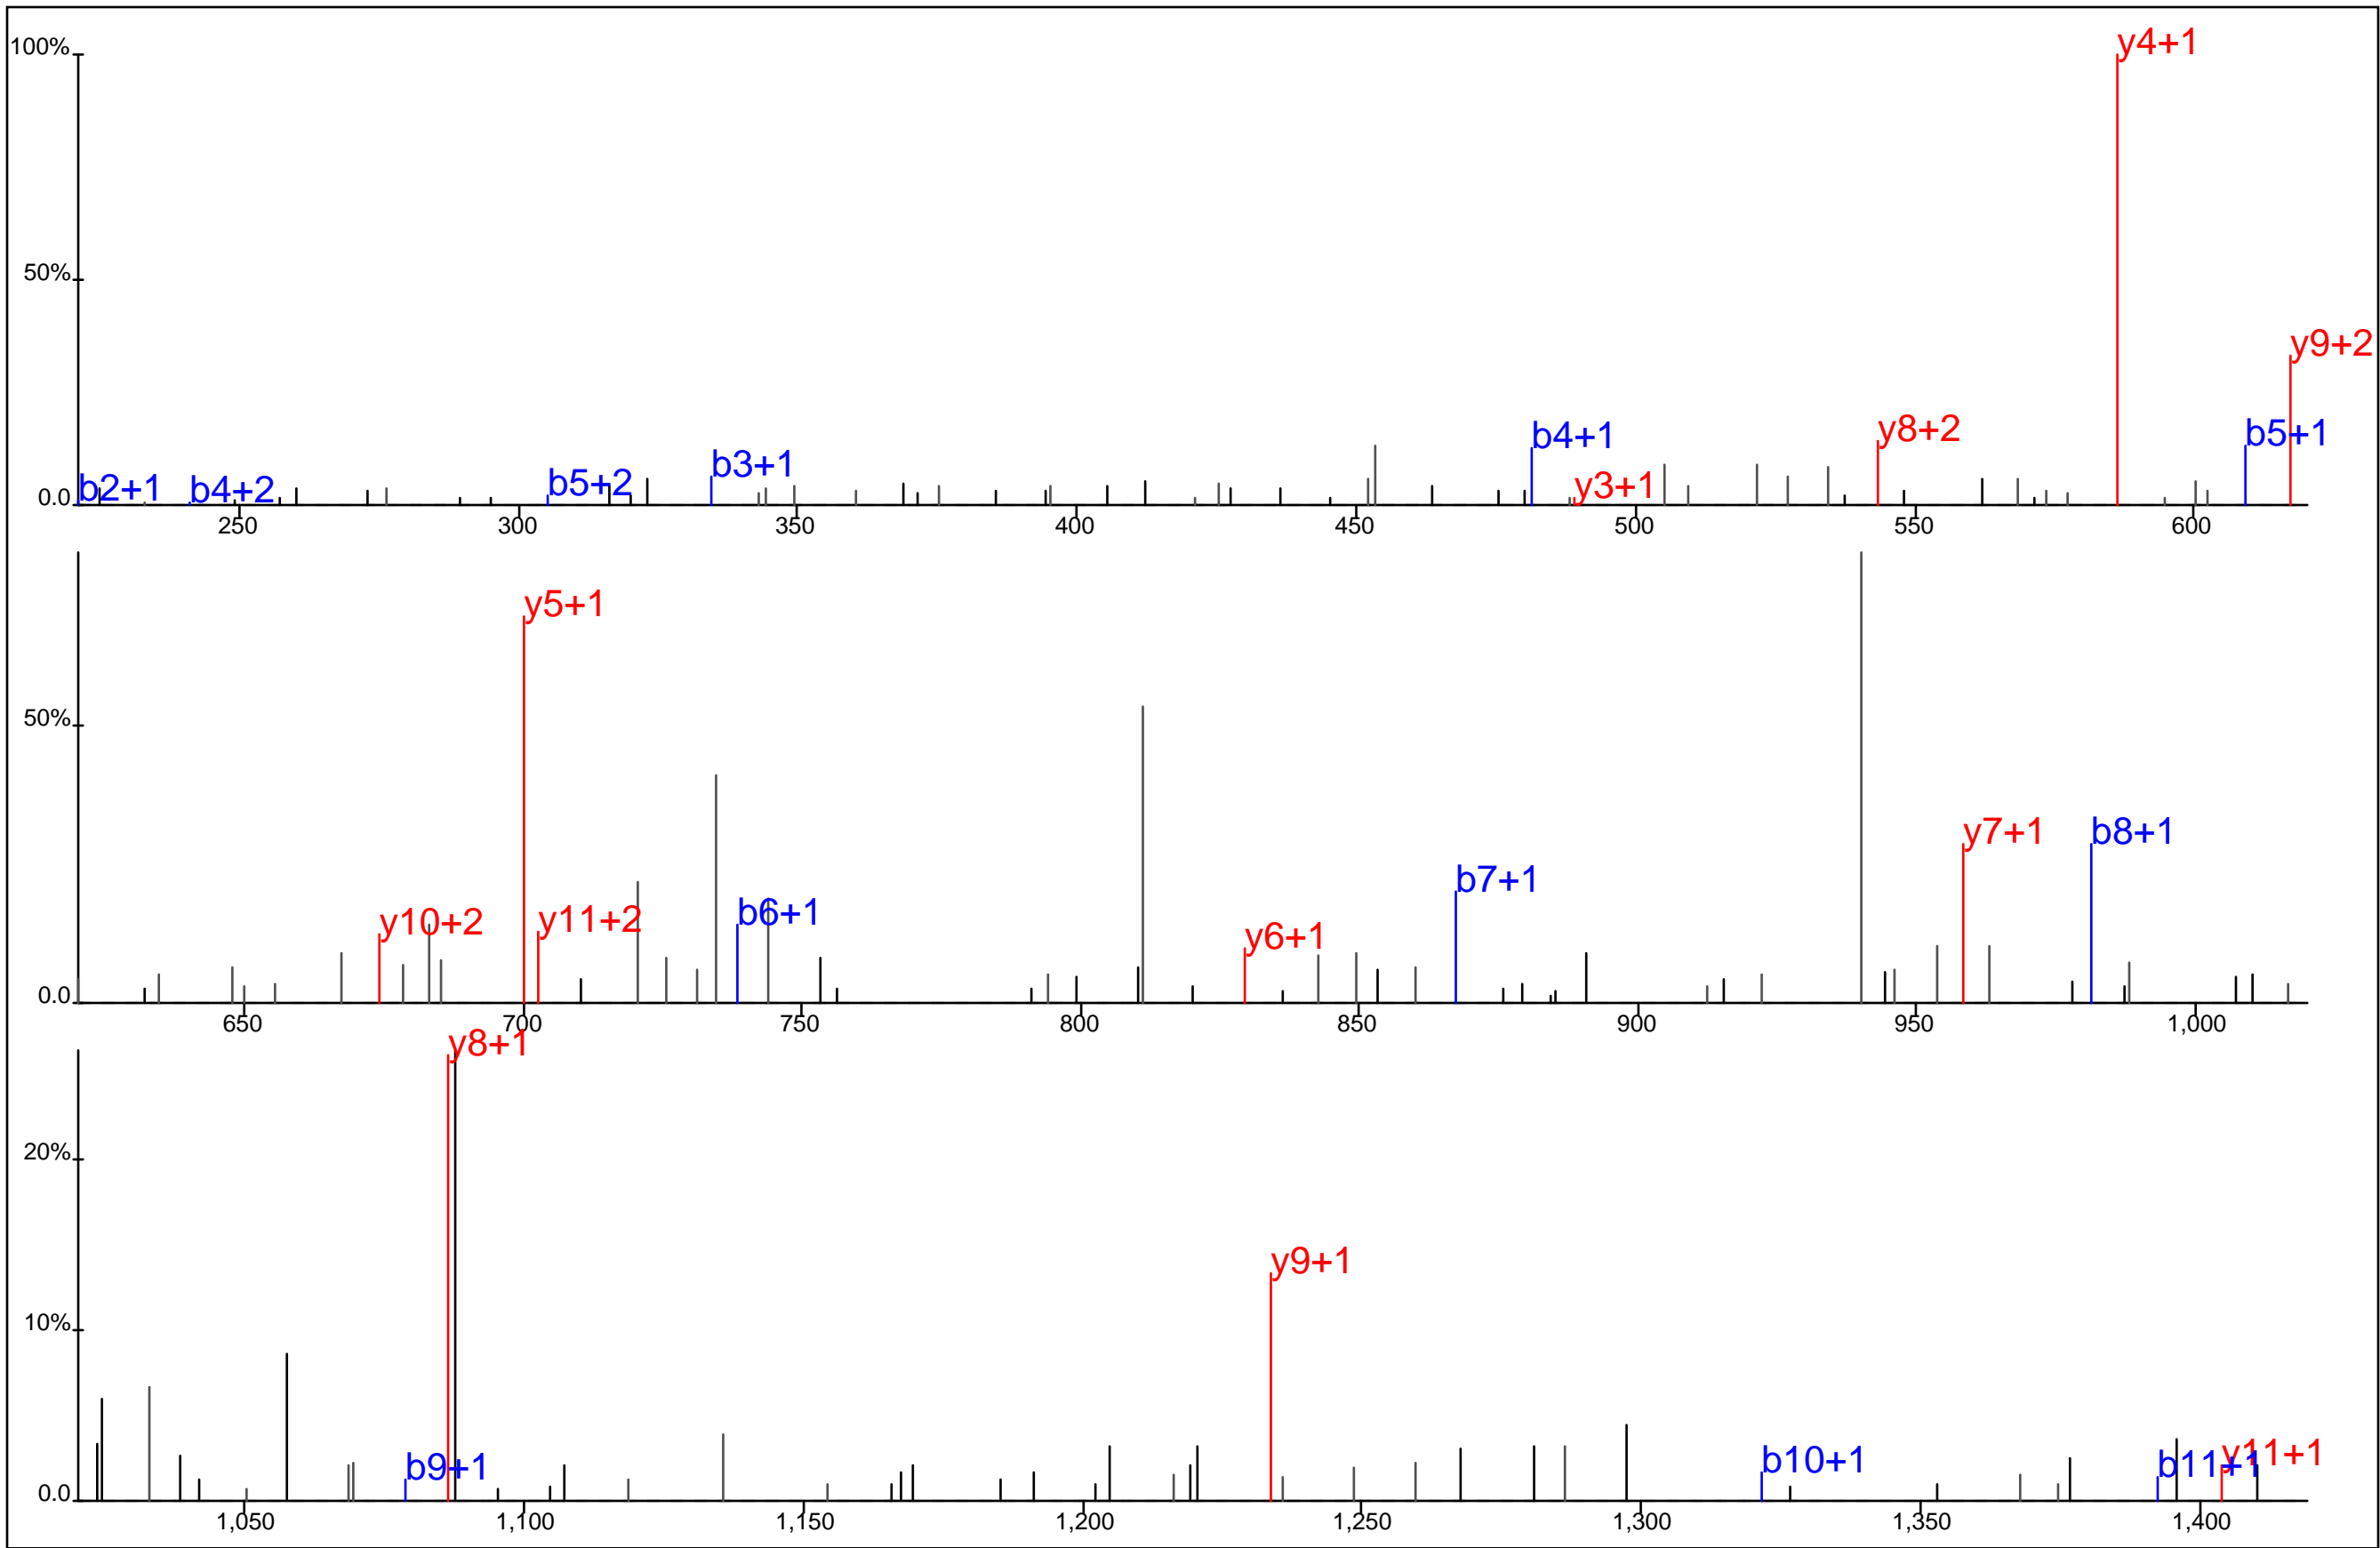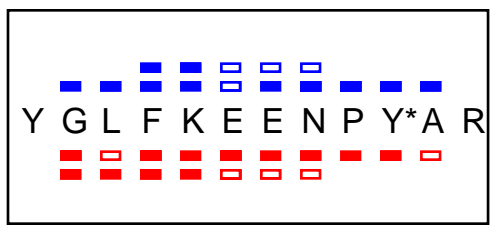

Protein Name: PTTG binding factor  
 gi Accession: 0  
 Precursor Mass: 783.8521+2  
 Delta Mass: 1.177 ppm  
 XCorr: 32.13



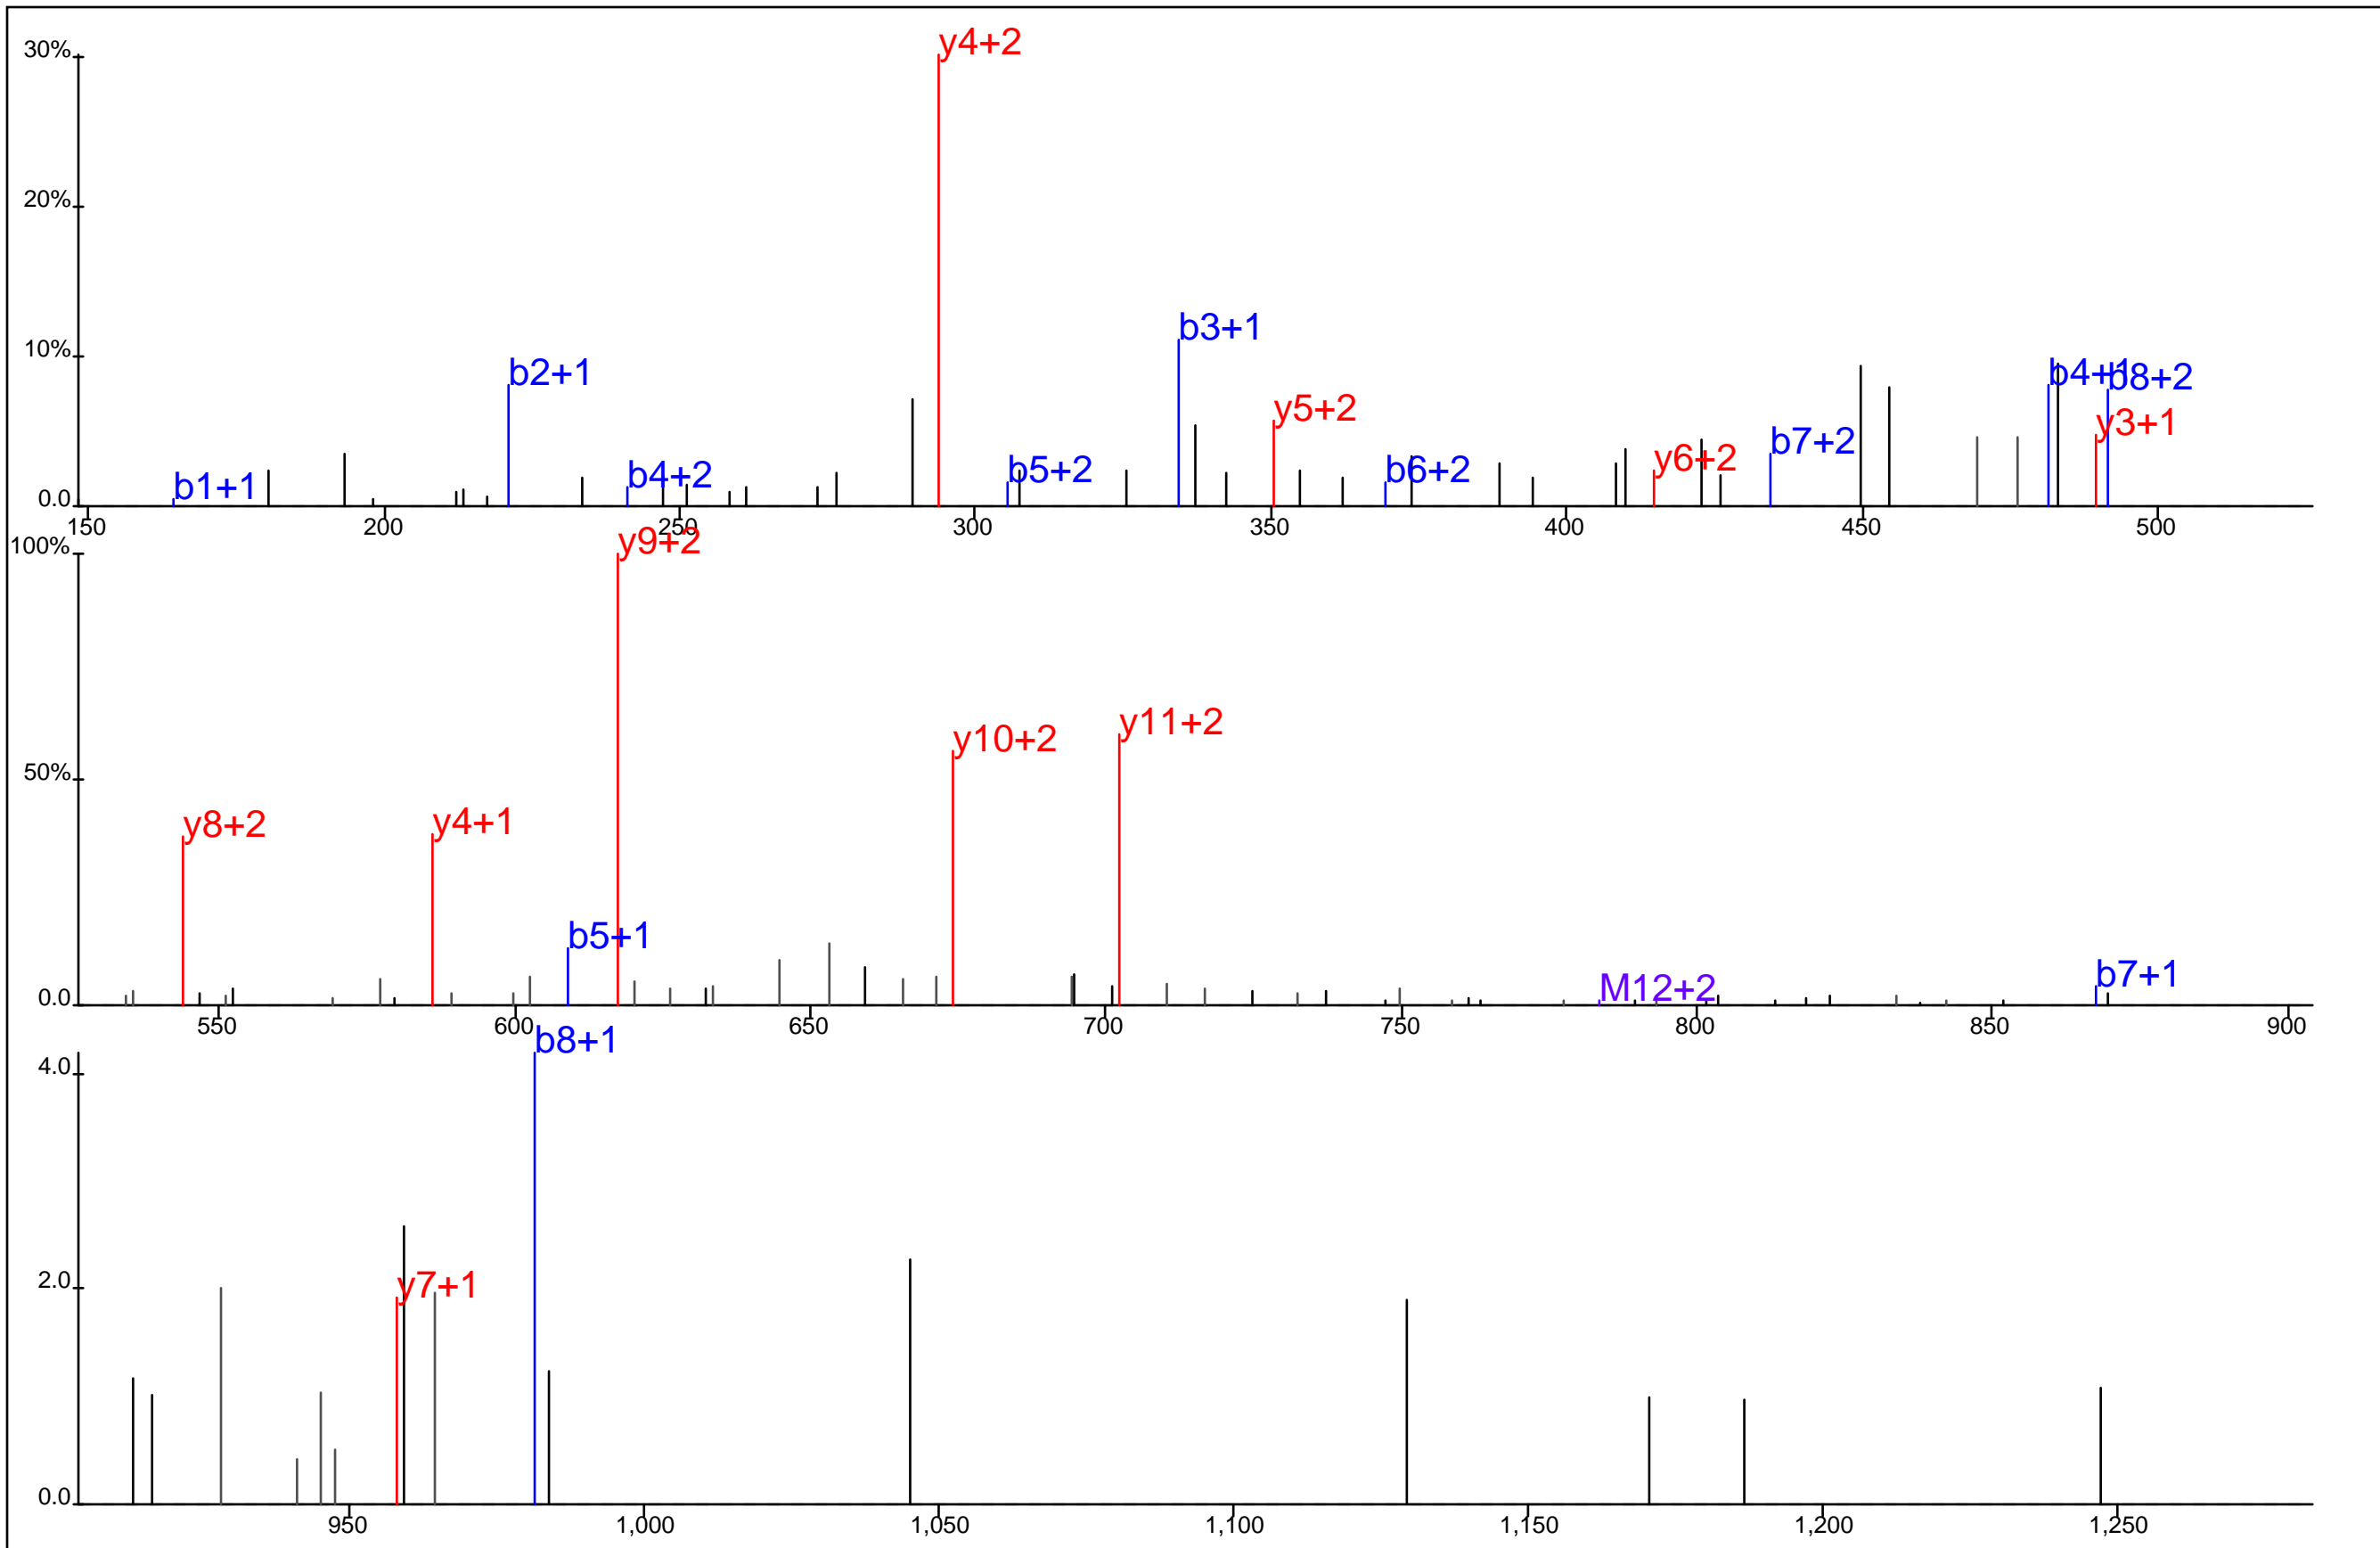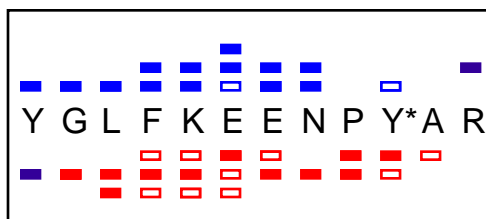

Protein Name: PTTG binding factor  
 gi Accession: 0  
 Precursor Mass: 522.9047+3  
 Delta Mass: 0.528 ppm  
 XCorr: 30.62

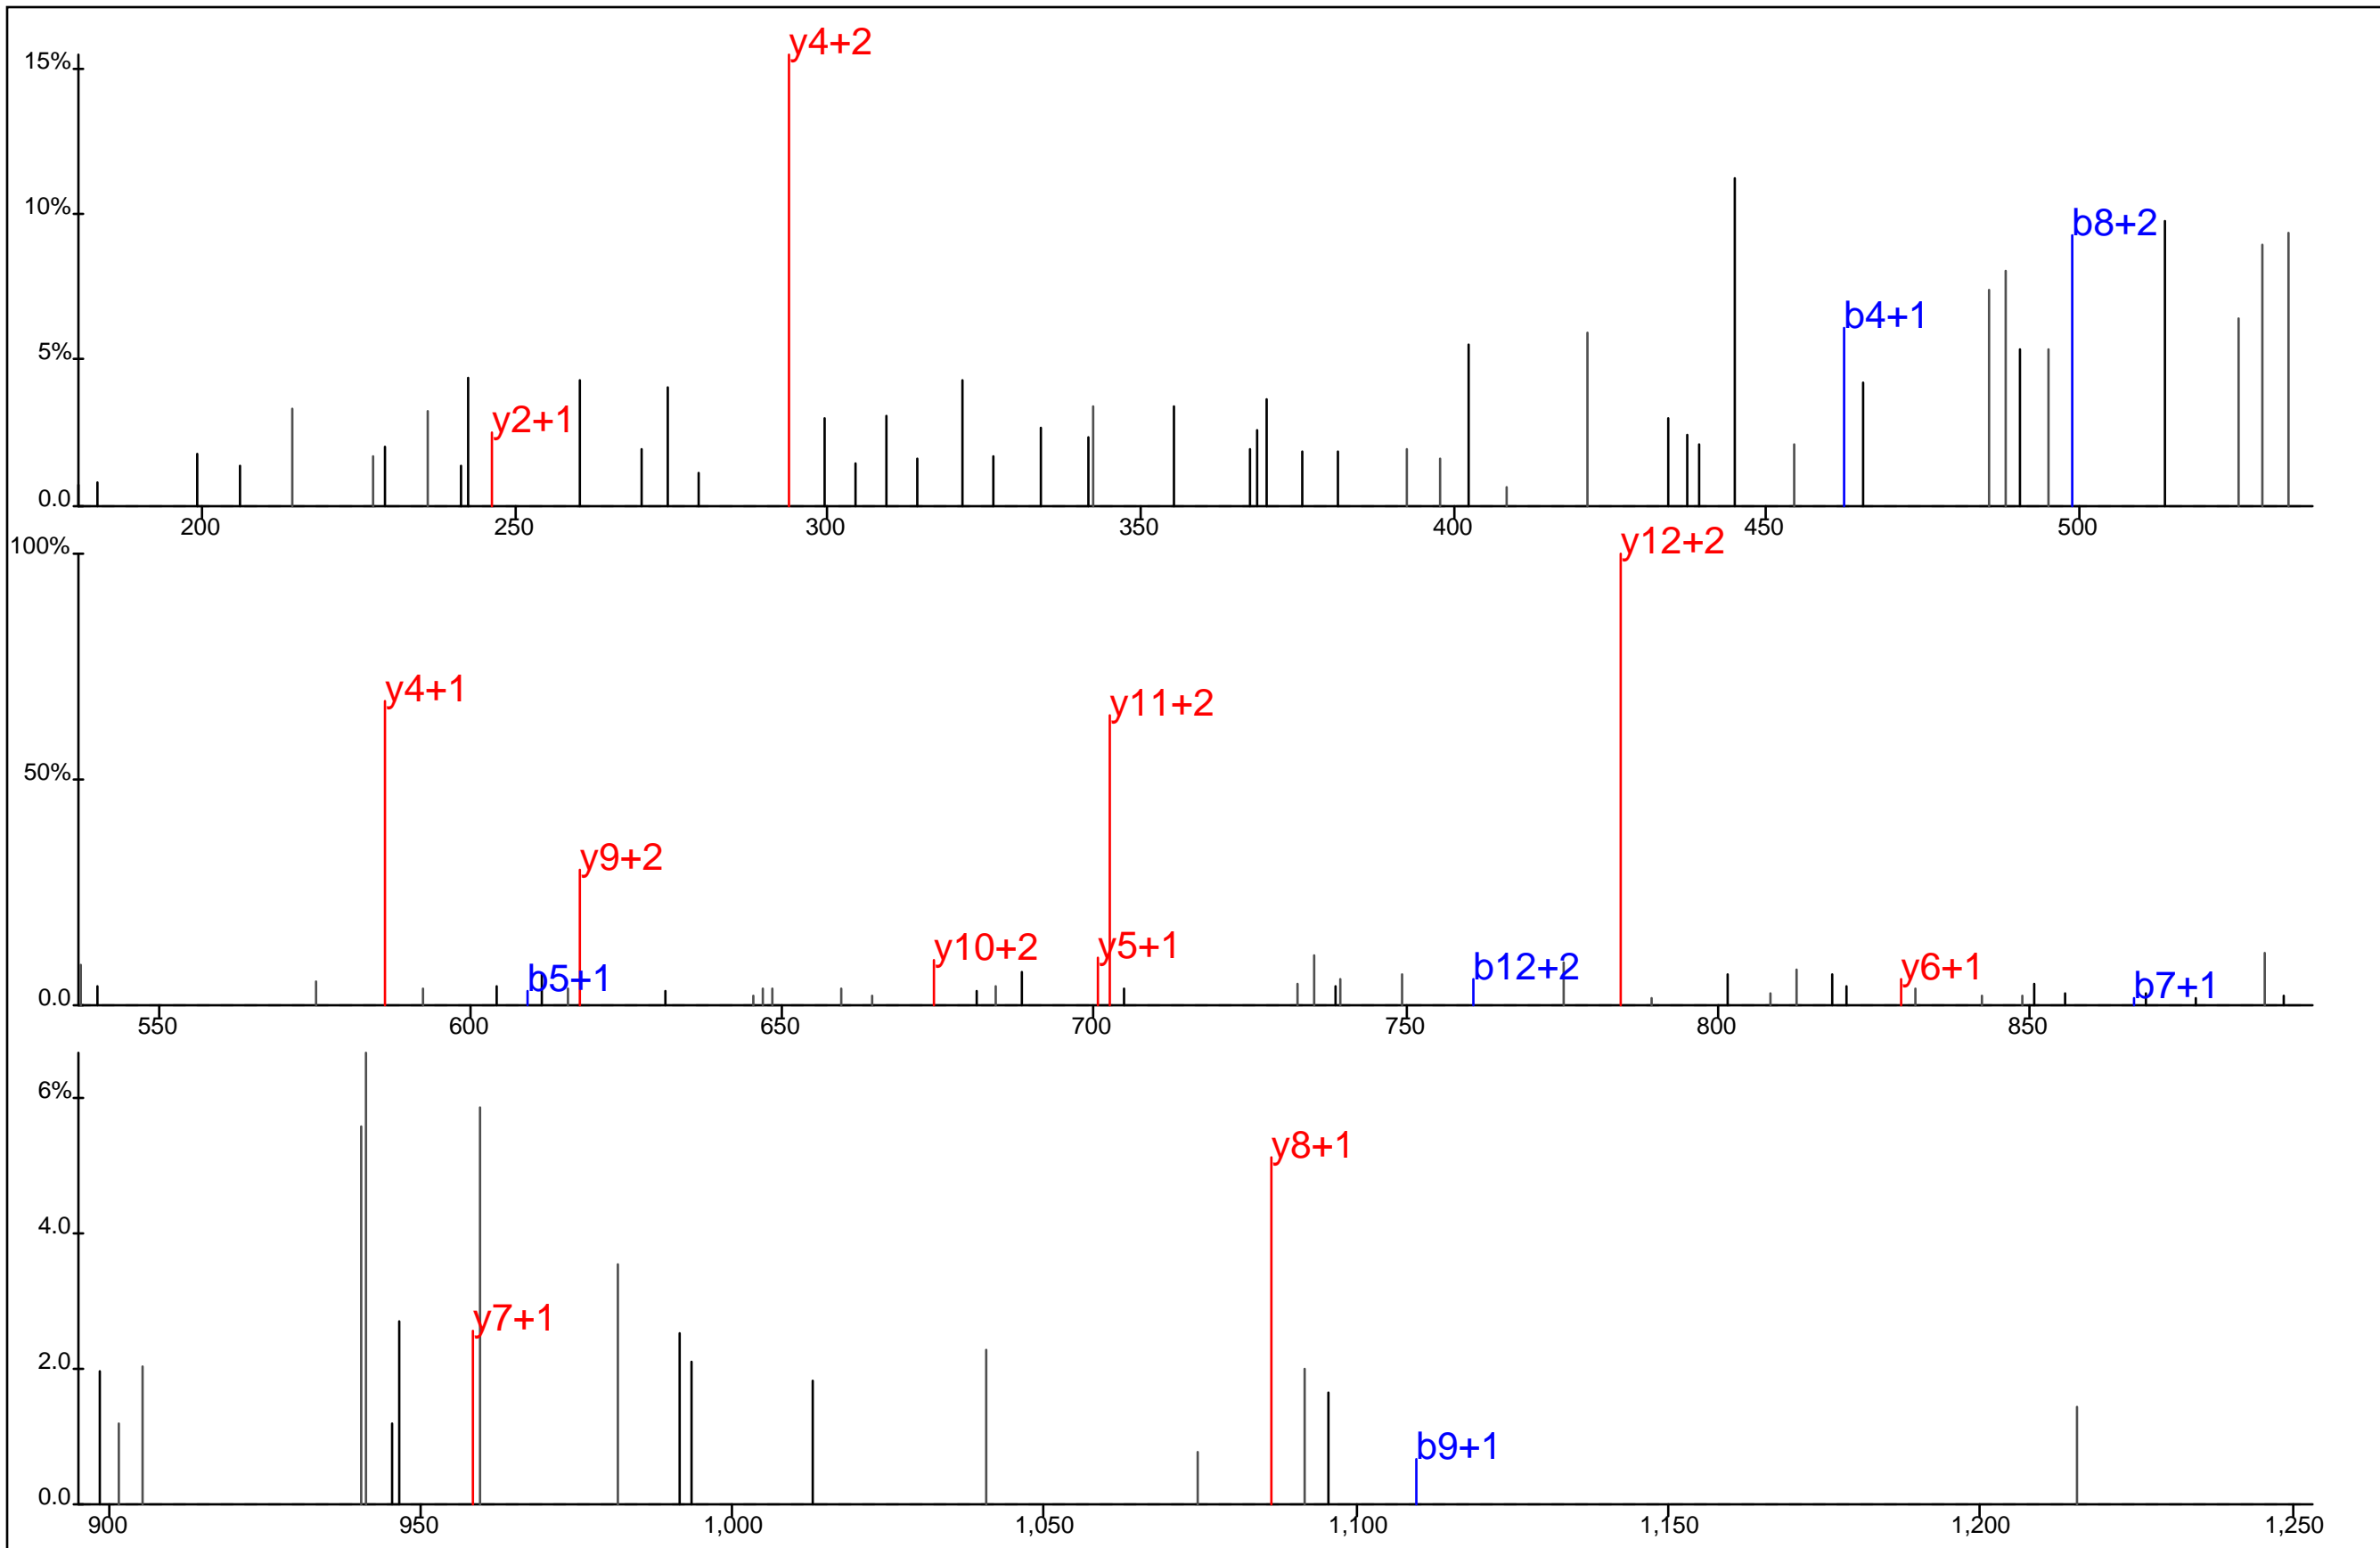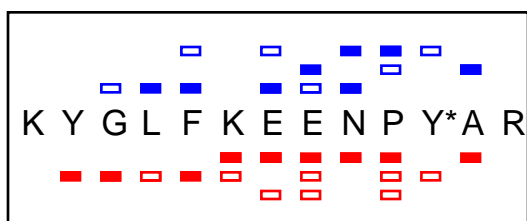

Protein Name: PTTG binding factor  
 gi Accession: 0  
 Precursor Mass: 565.6033+3  
 Delta Mass: 0.896 ppm  
 XCorr: 21.43

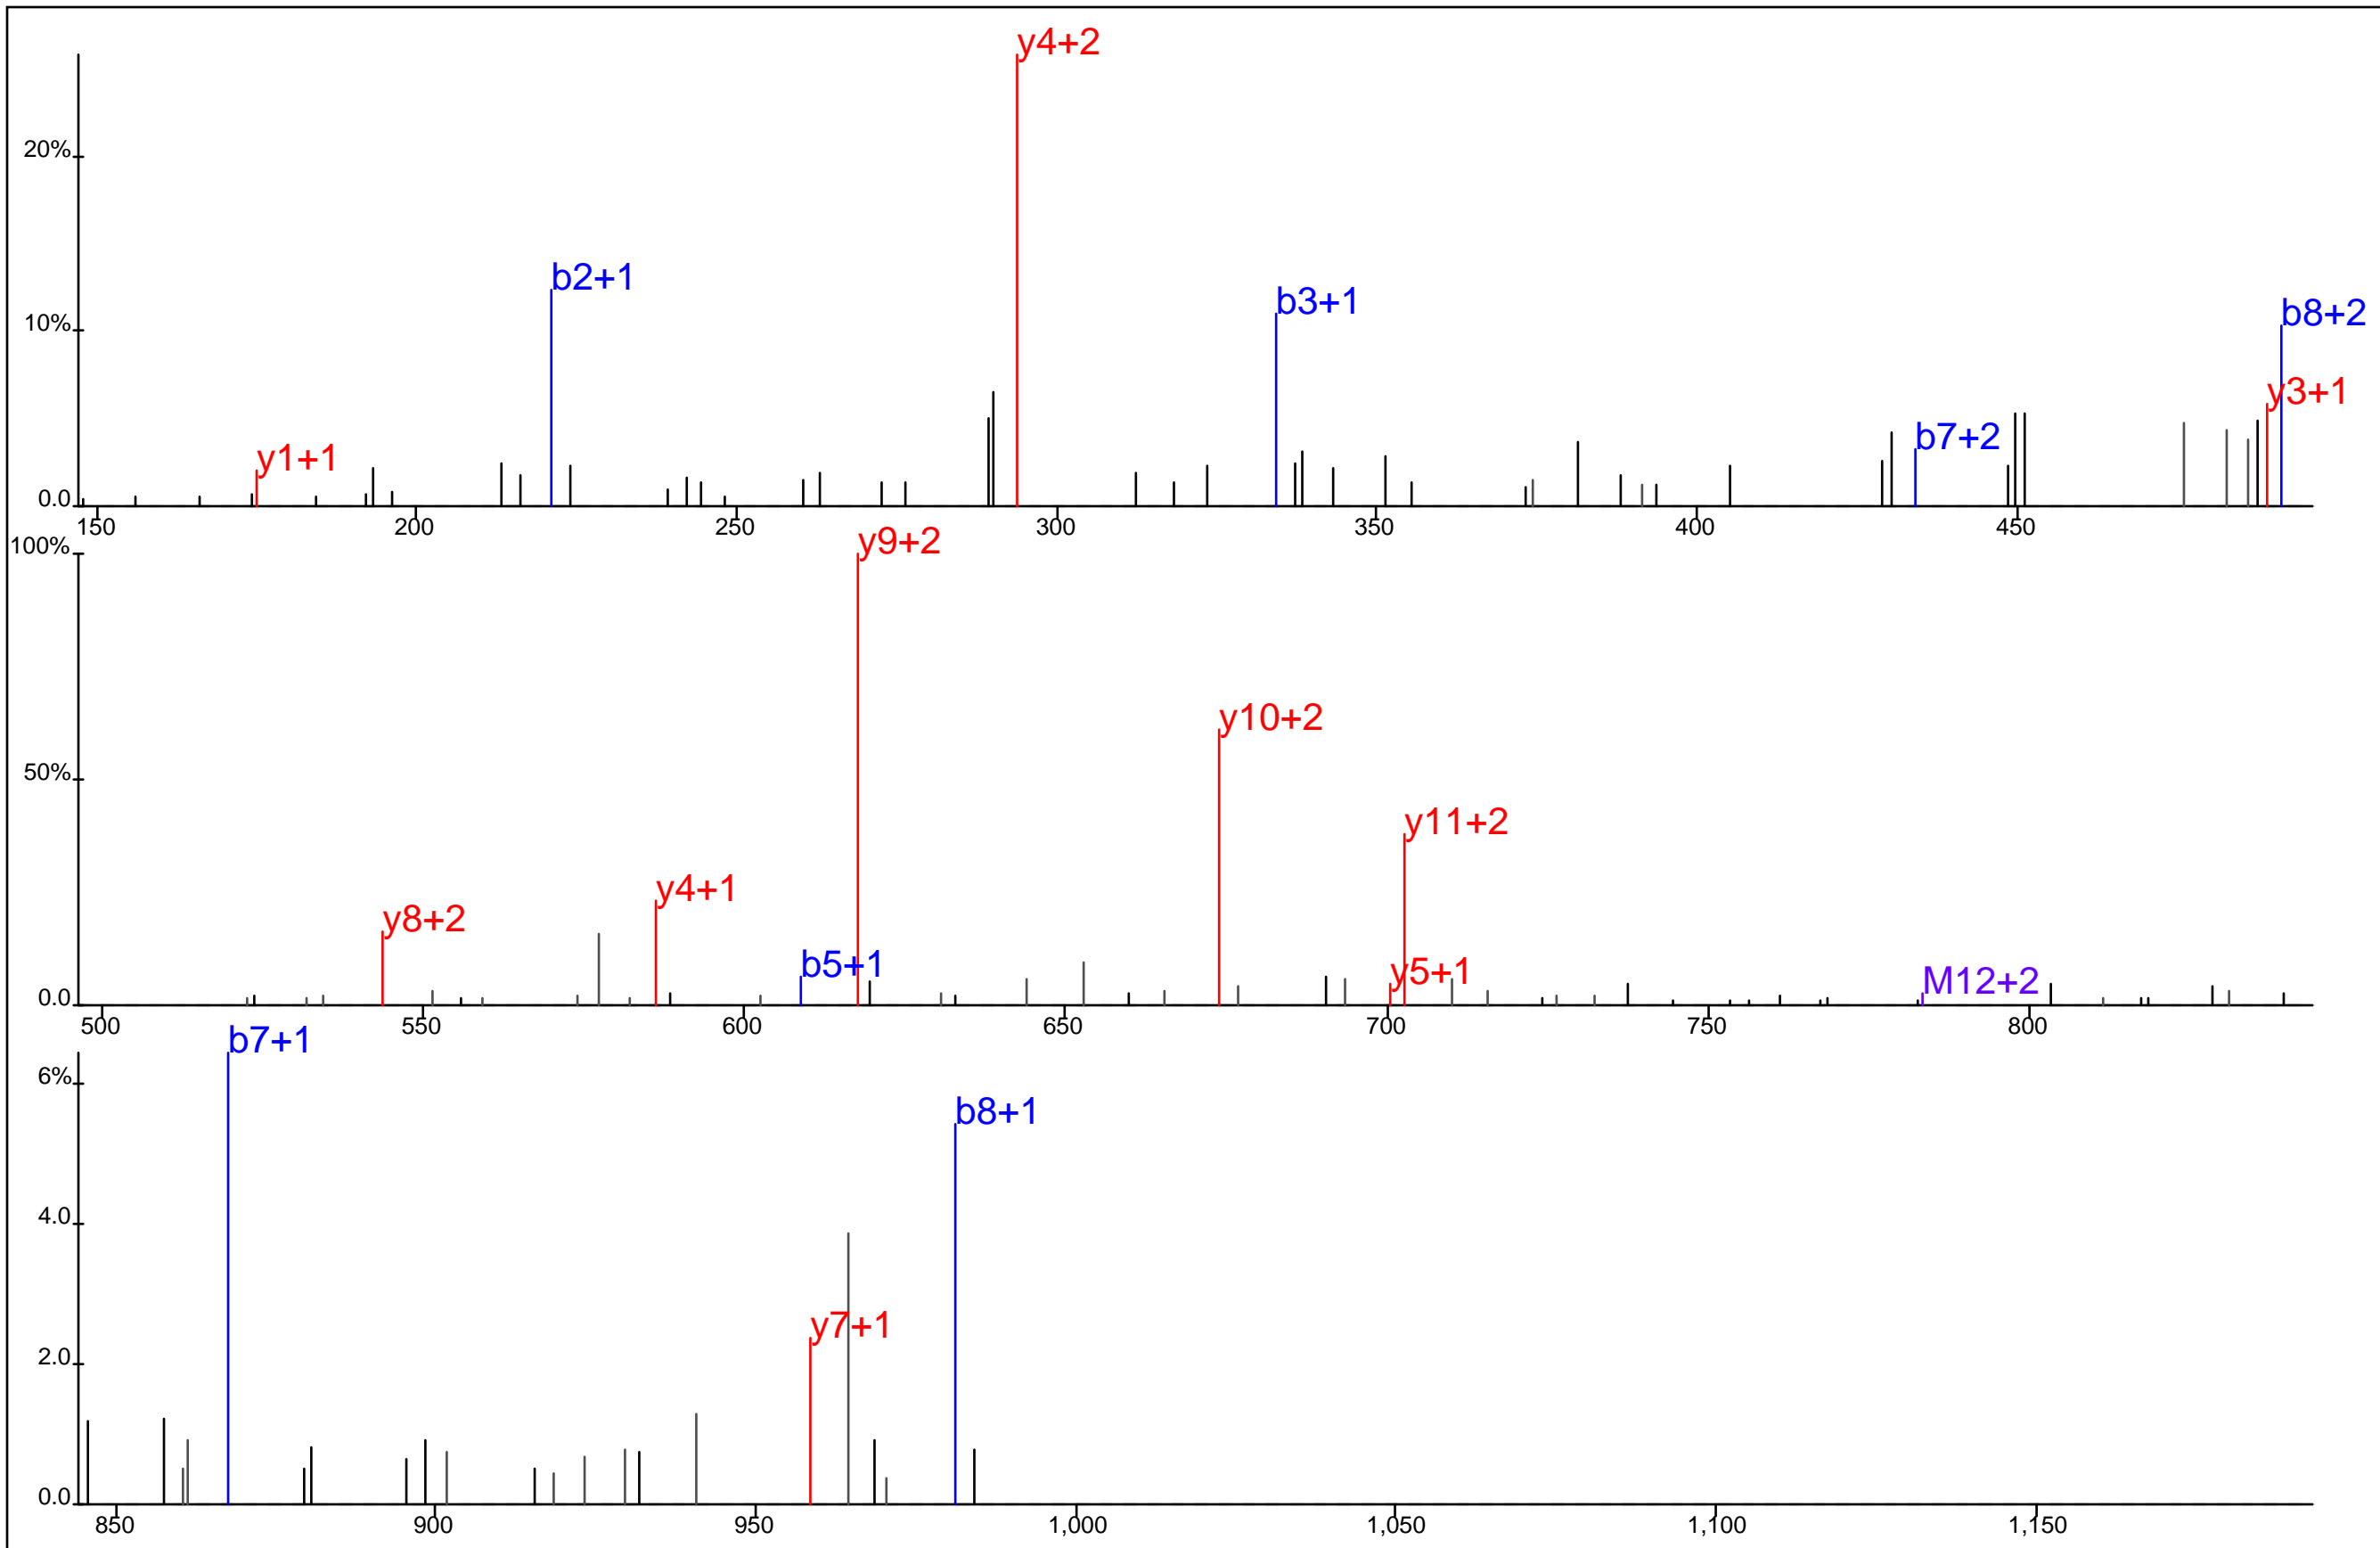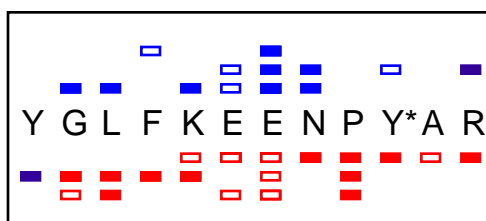

Protein Name: PTTG binding factor  
 gi Accession: 0  
 Precursor Mass: 522.9033+3  
 Delta Mass: 2.277 ppm  
 XCorr: 28.03

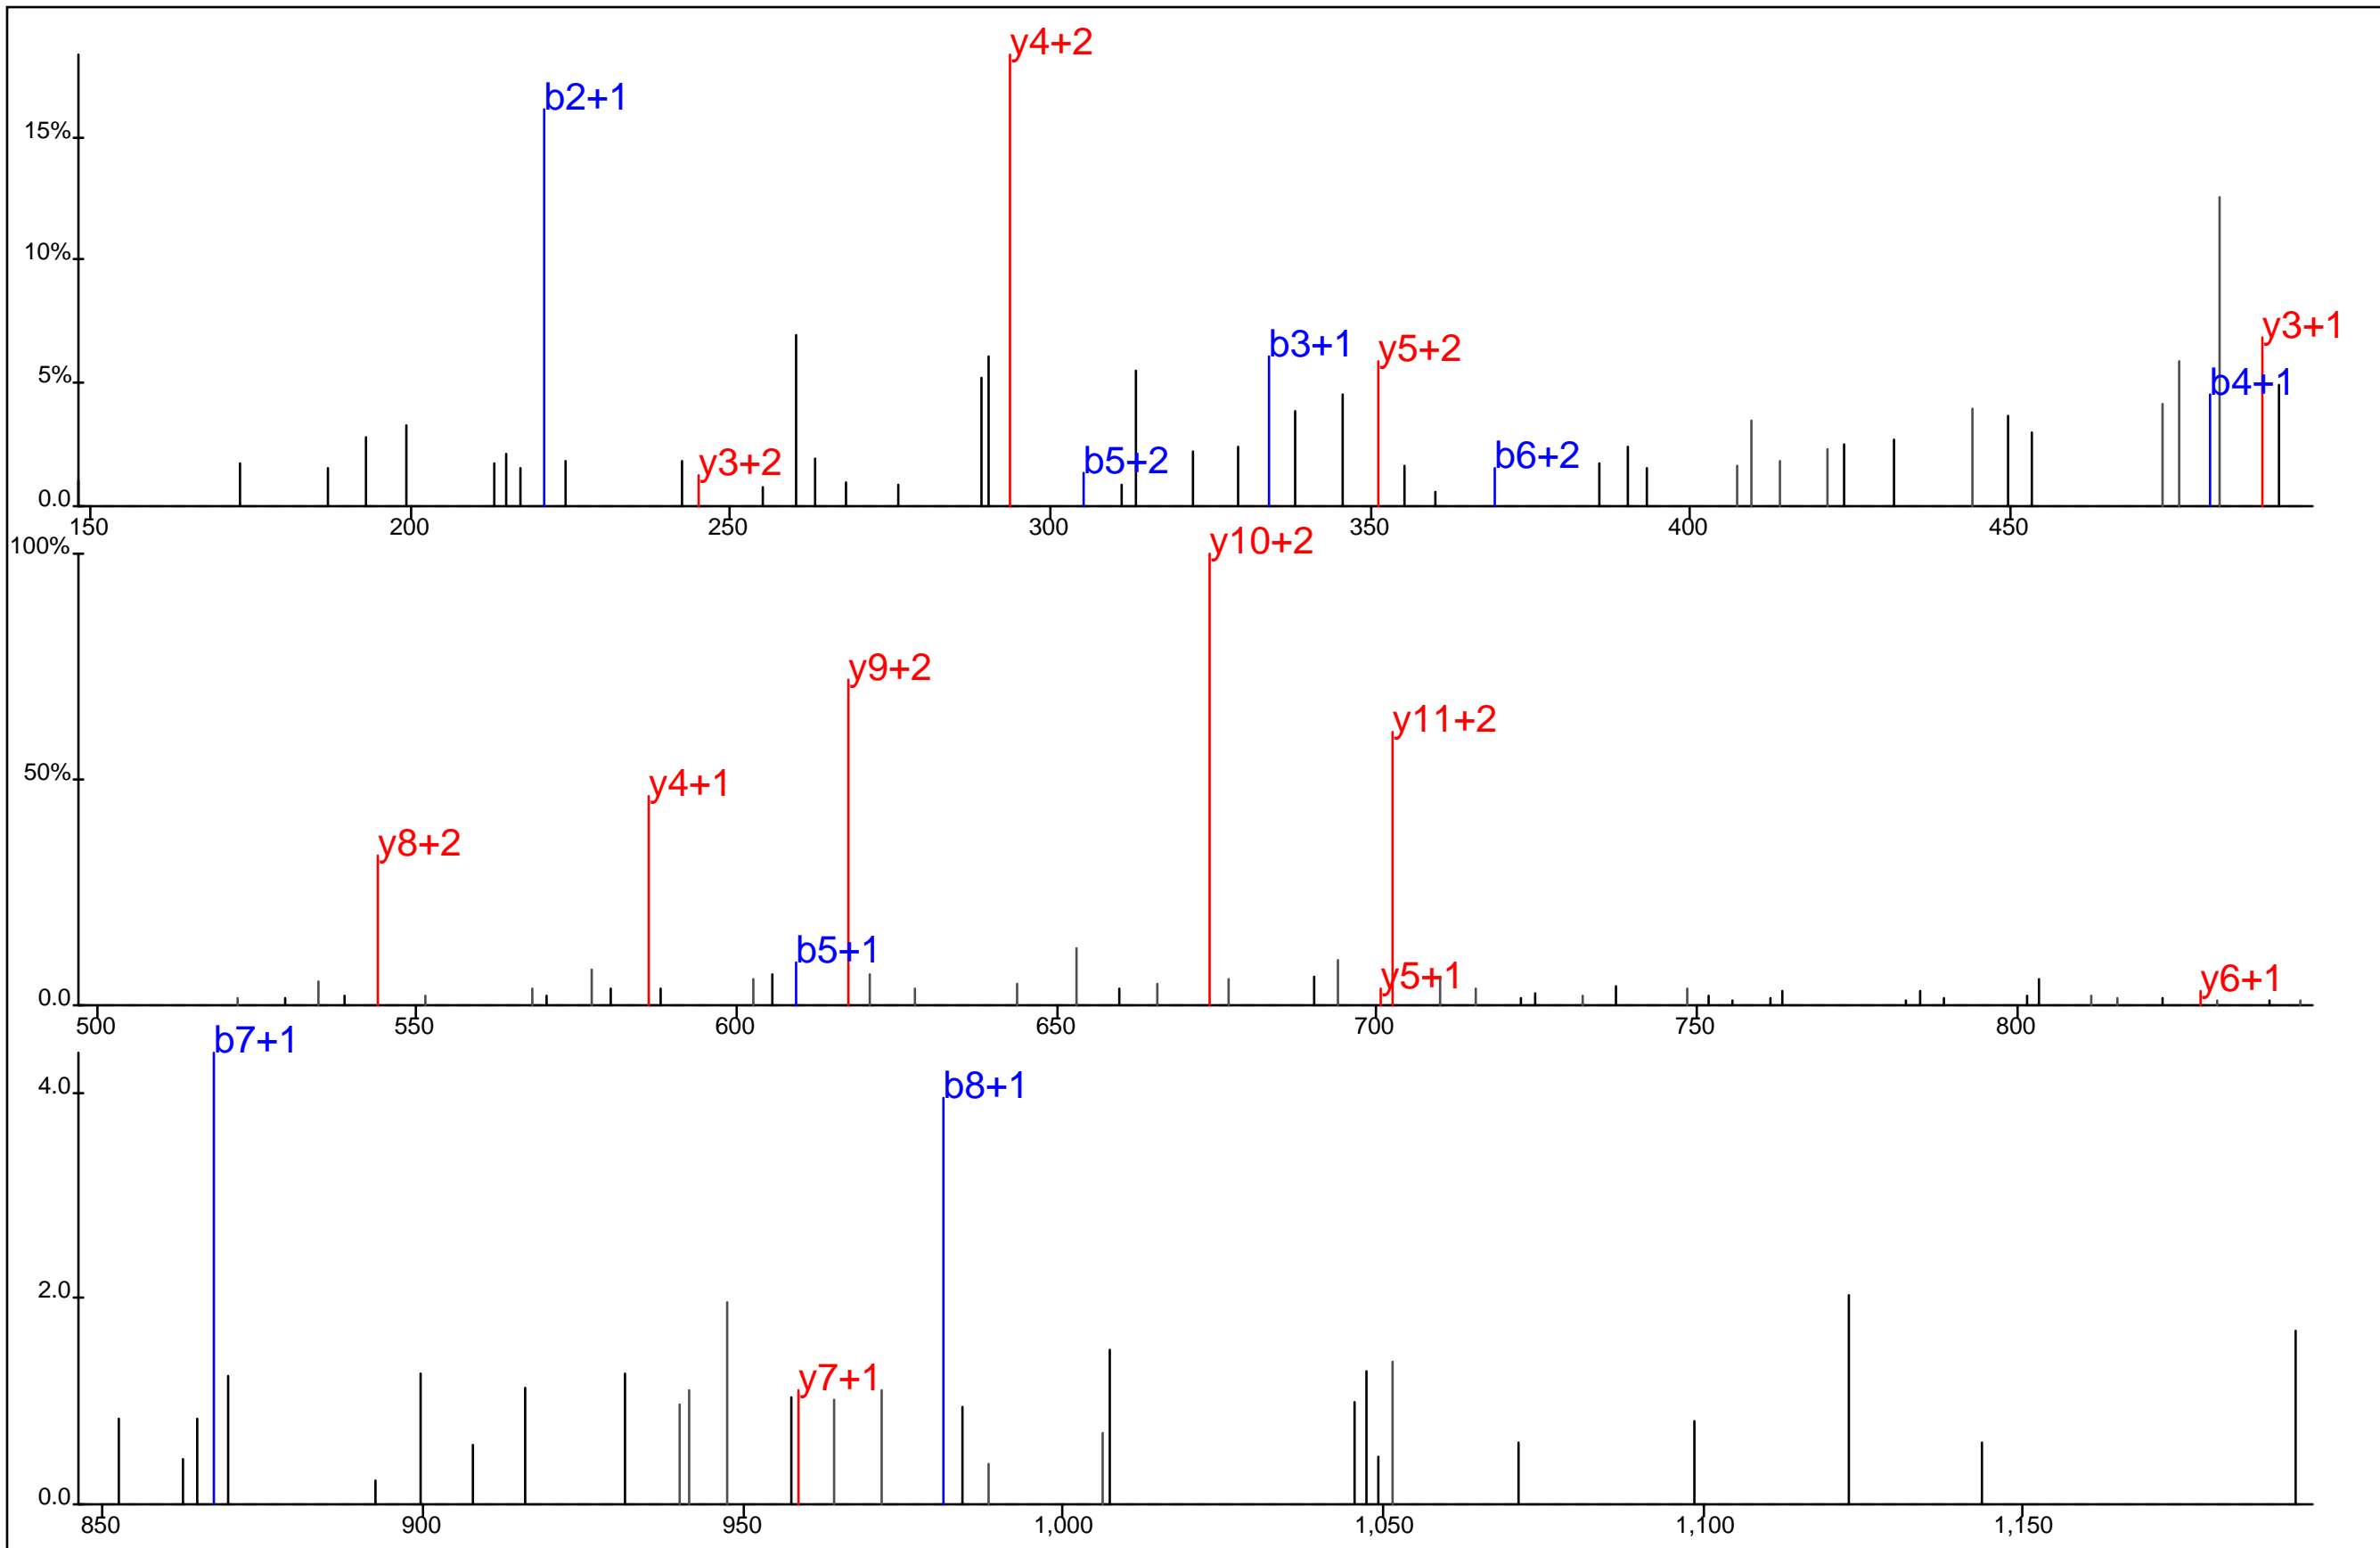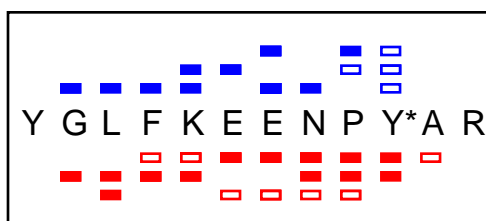

Protein Name: PTTG binding factor  
 gi Accession: 0  
 Precursor Mass: 522.9016+3  
 Delta Mass: 5.432 ppm  
 XCorr: 32.98

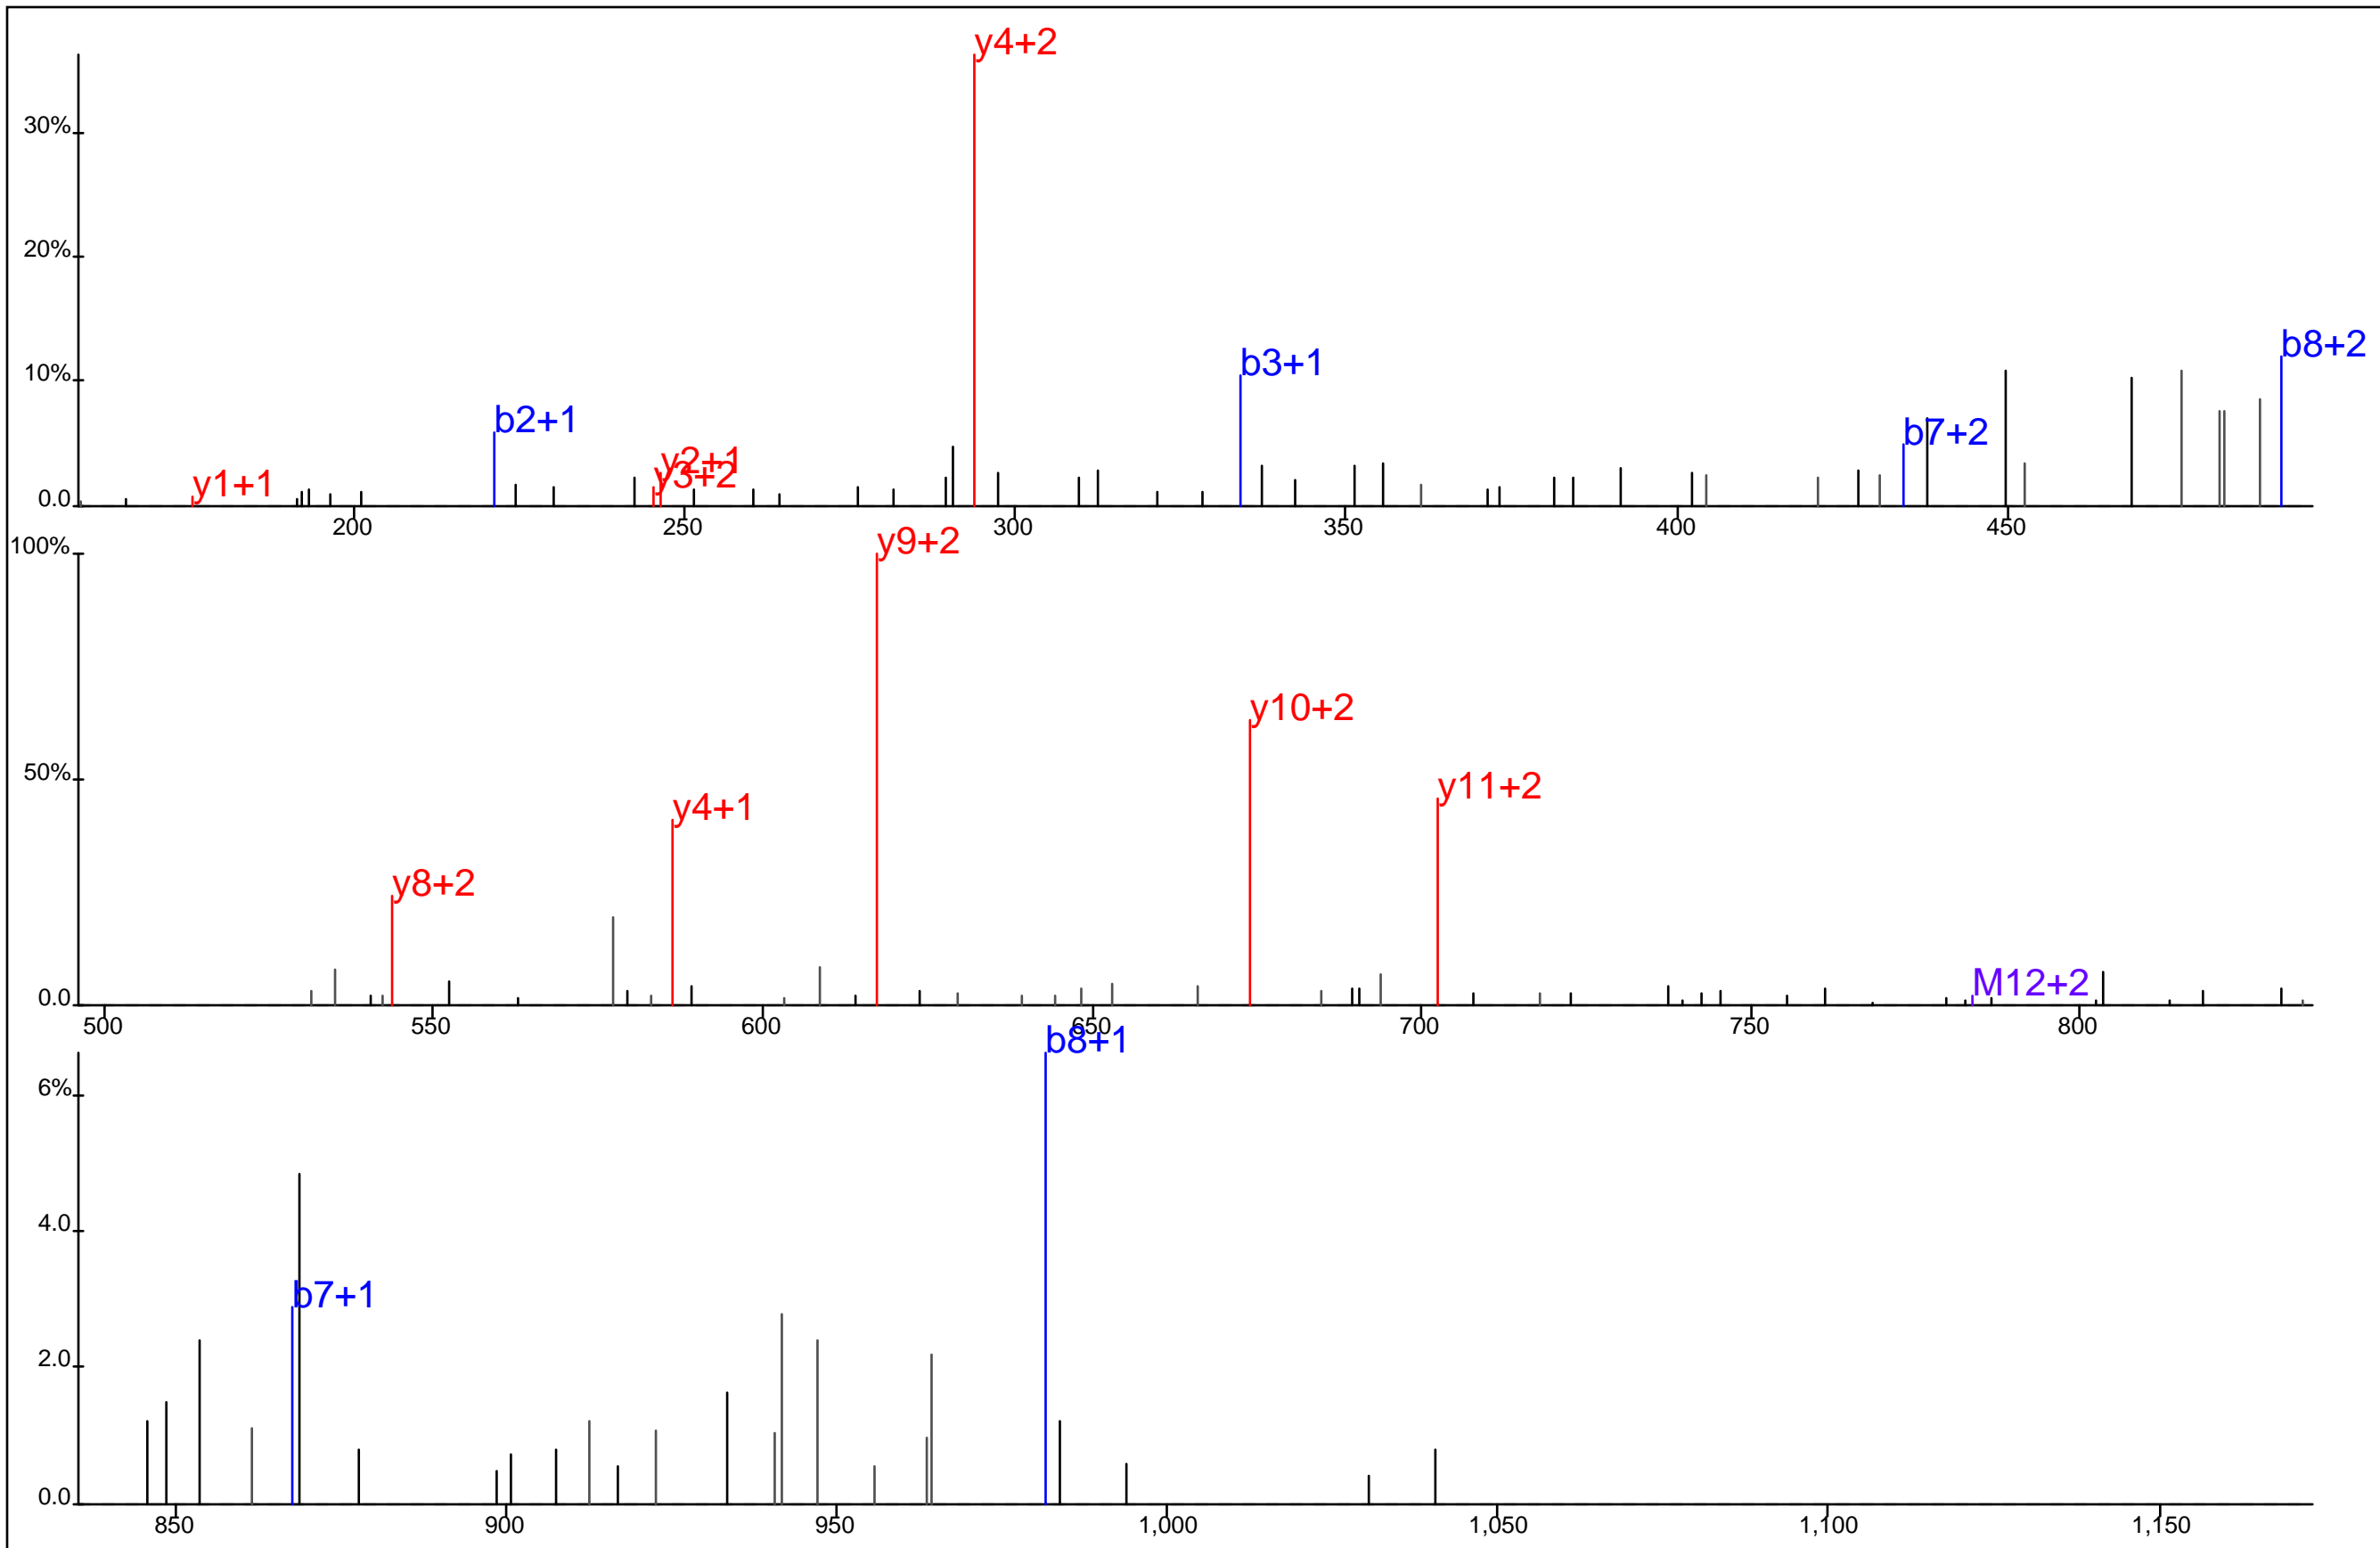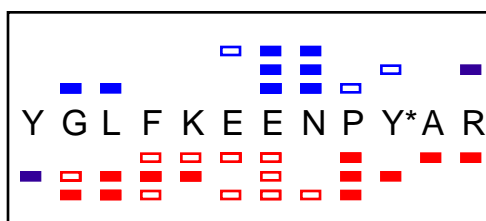

Protein Name: PTTG binding factor  
 gi Accession: 0  
 Precursor Mass: 522.9031+3  
 Delta Mass: 2.510 ppm  
 XCorr: 30.06

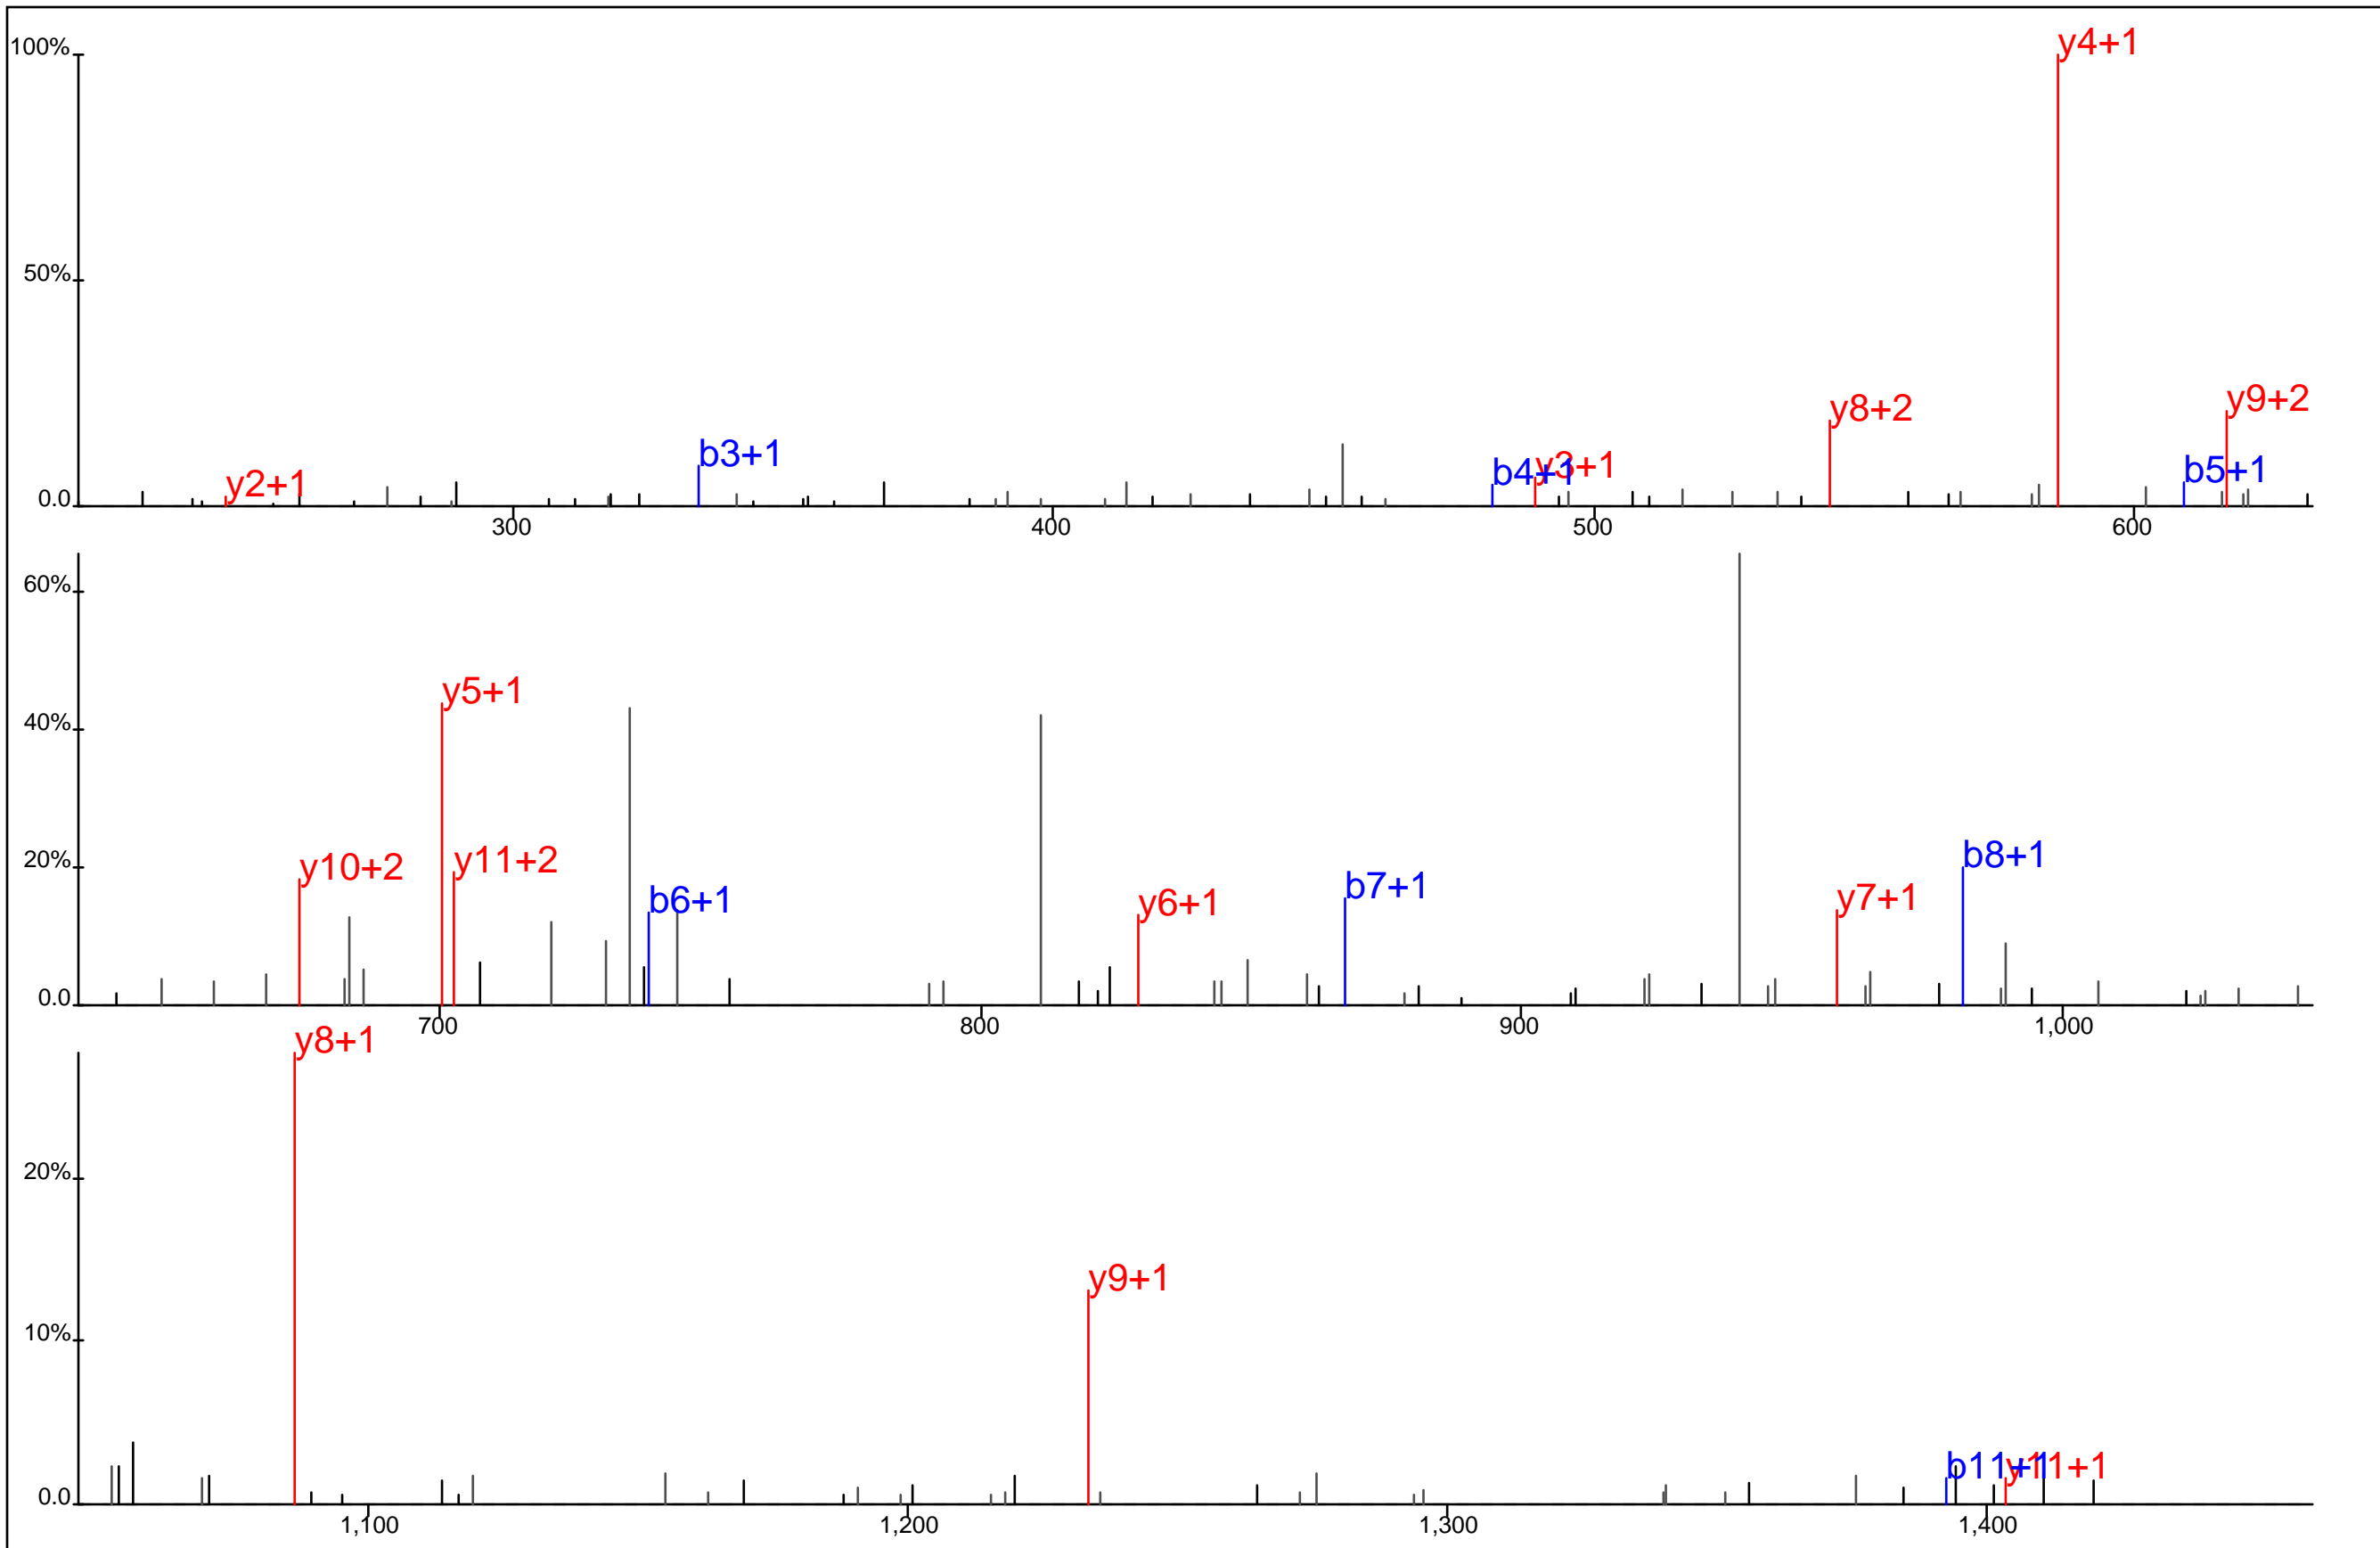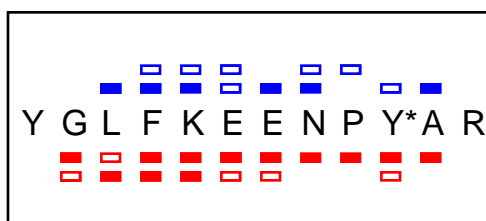

Protein Name: PTTG binding factor  
 gi Accession: 0  
 Precursor Mass: 783.8532+2  
 Delta Mass: 0.225 ppm  
 XCorr: 36.76

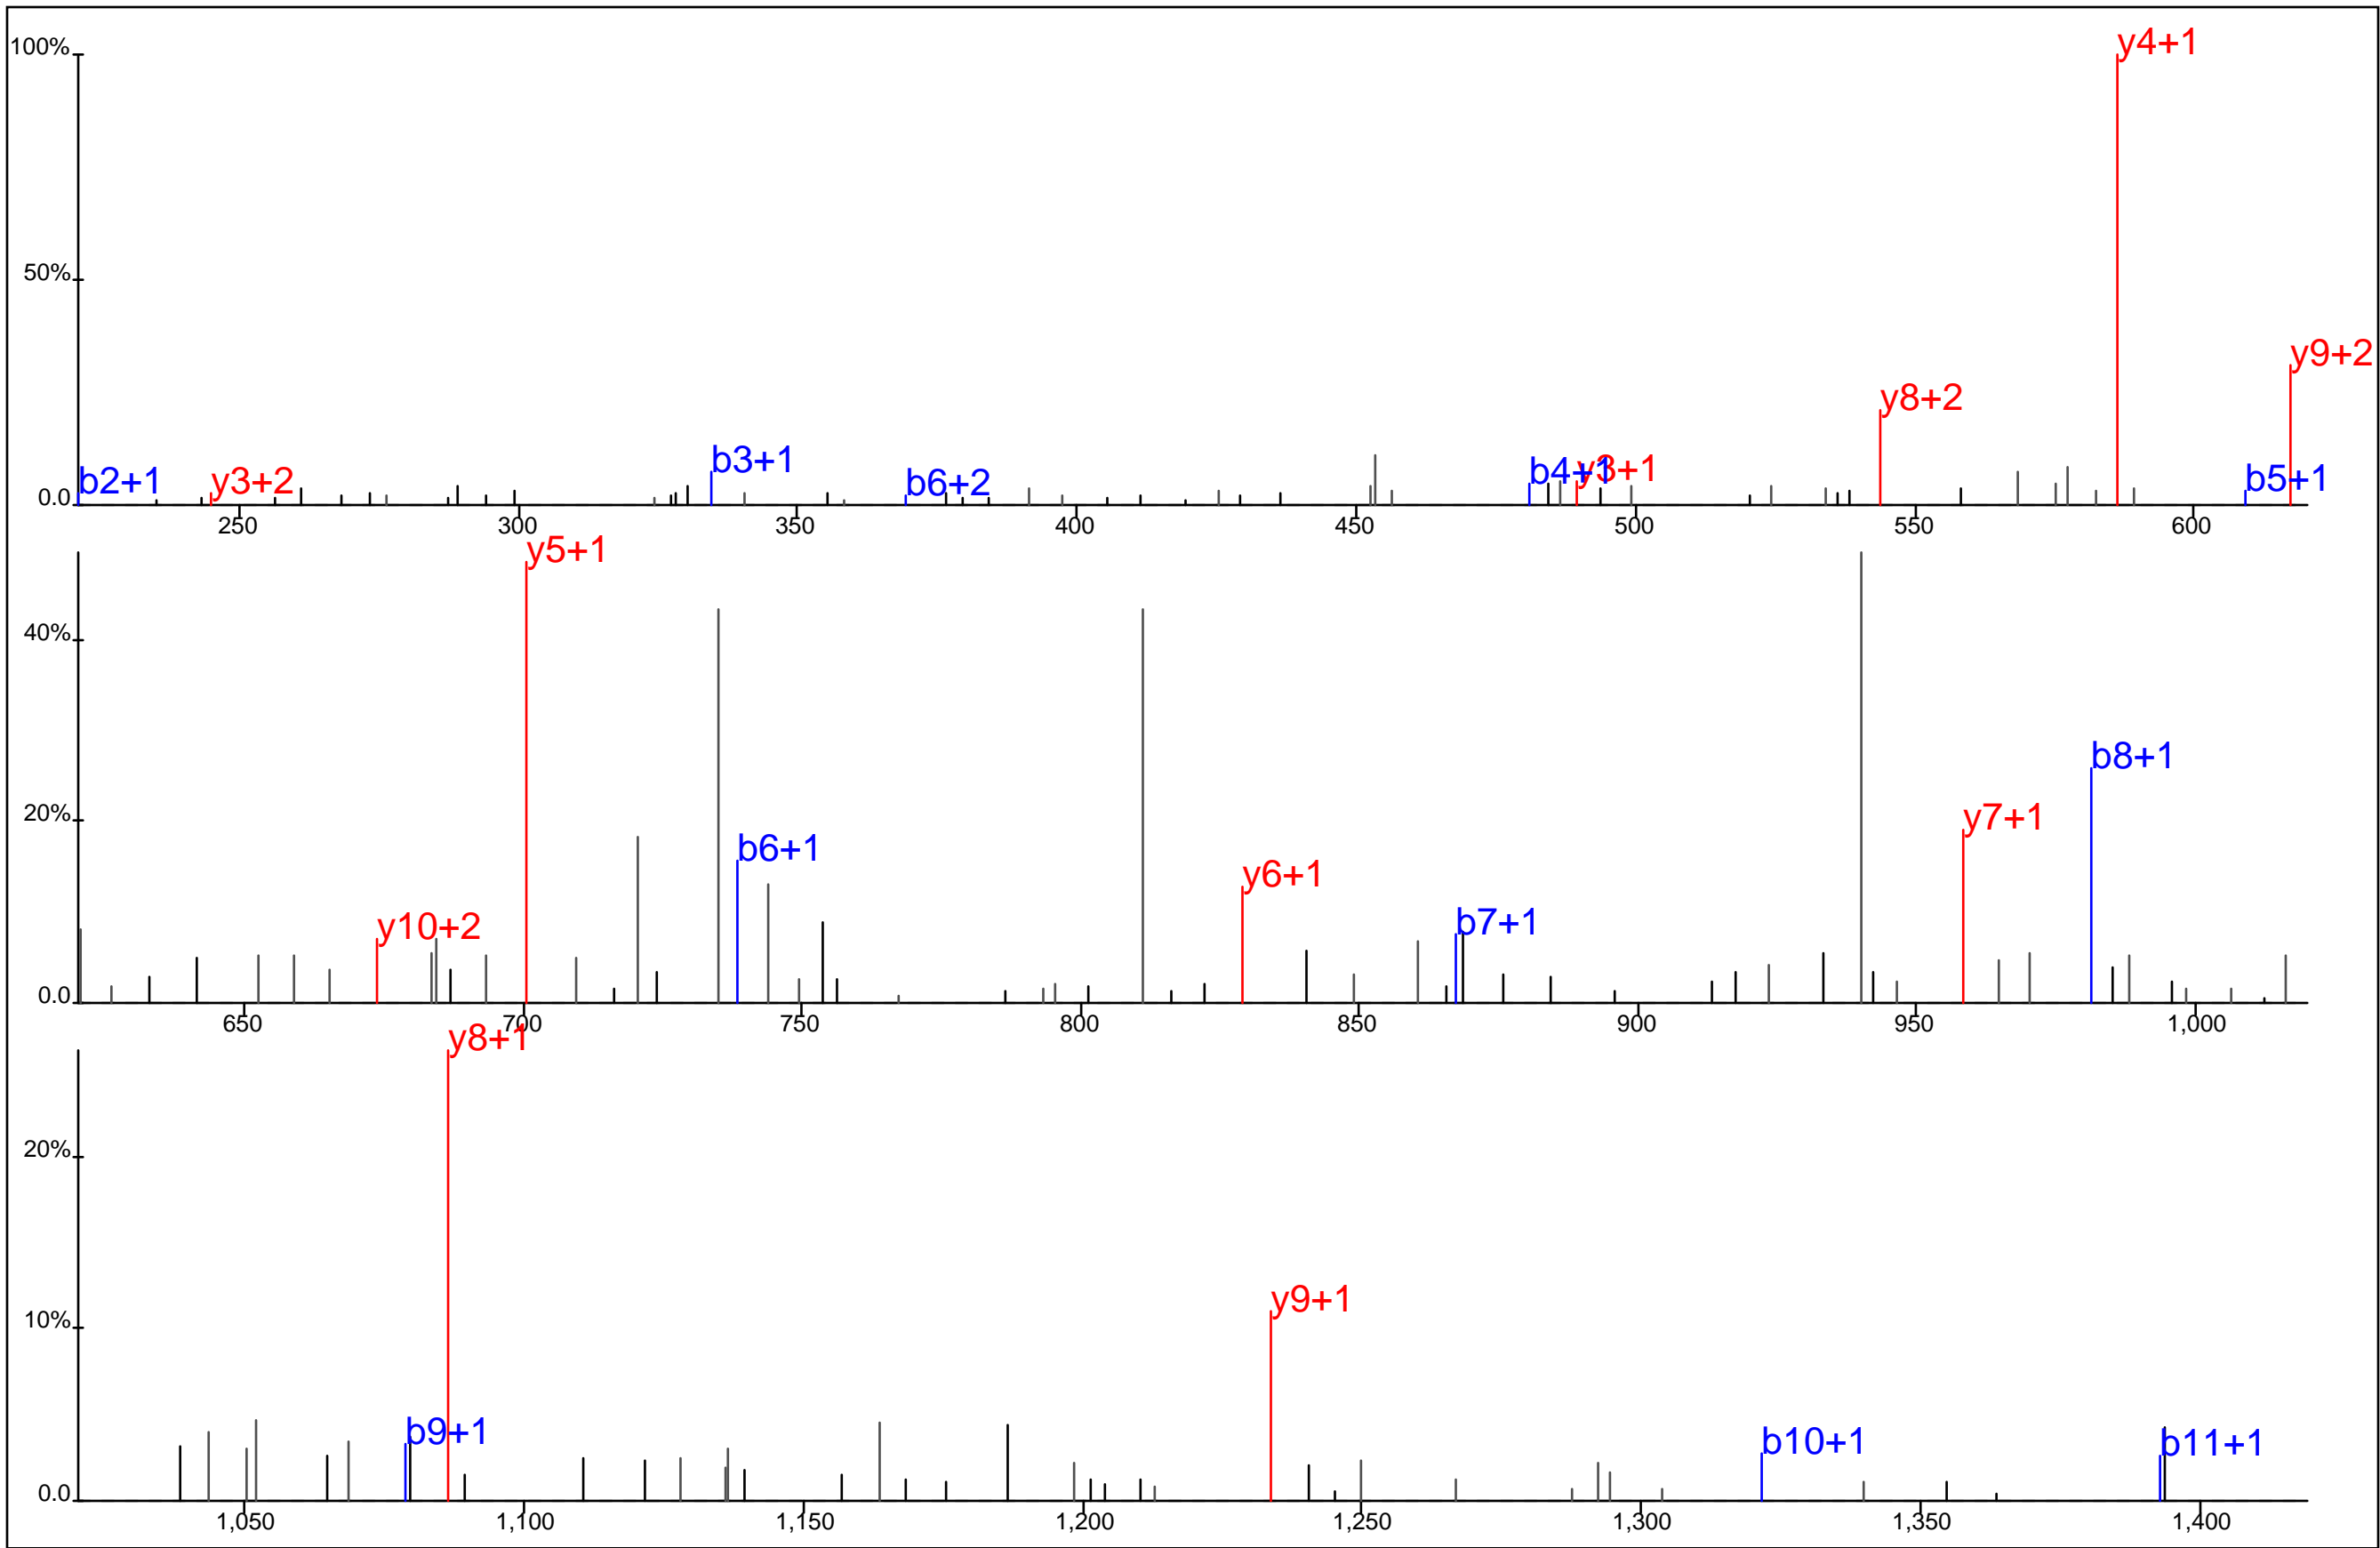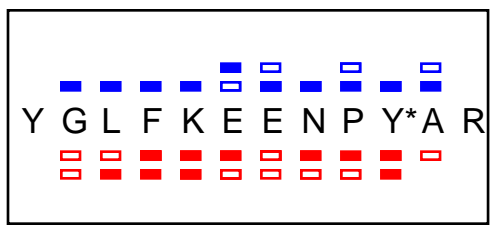

Protein Name: PTTG binding factor  
 gi Accession: 0  
 Precursor Mass: 783.8525+2  
 Delta Mass: 0.632 ppm  
 XCorr: 38.42

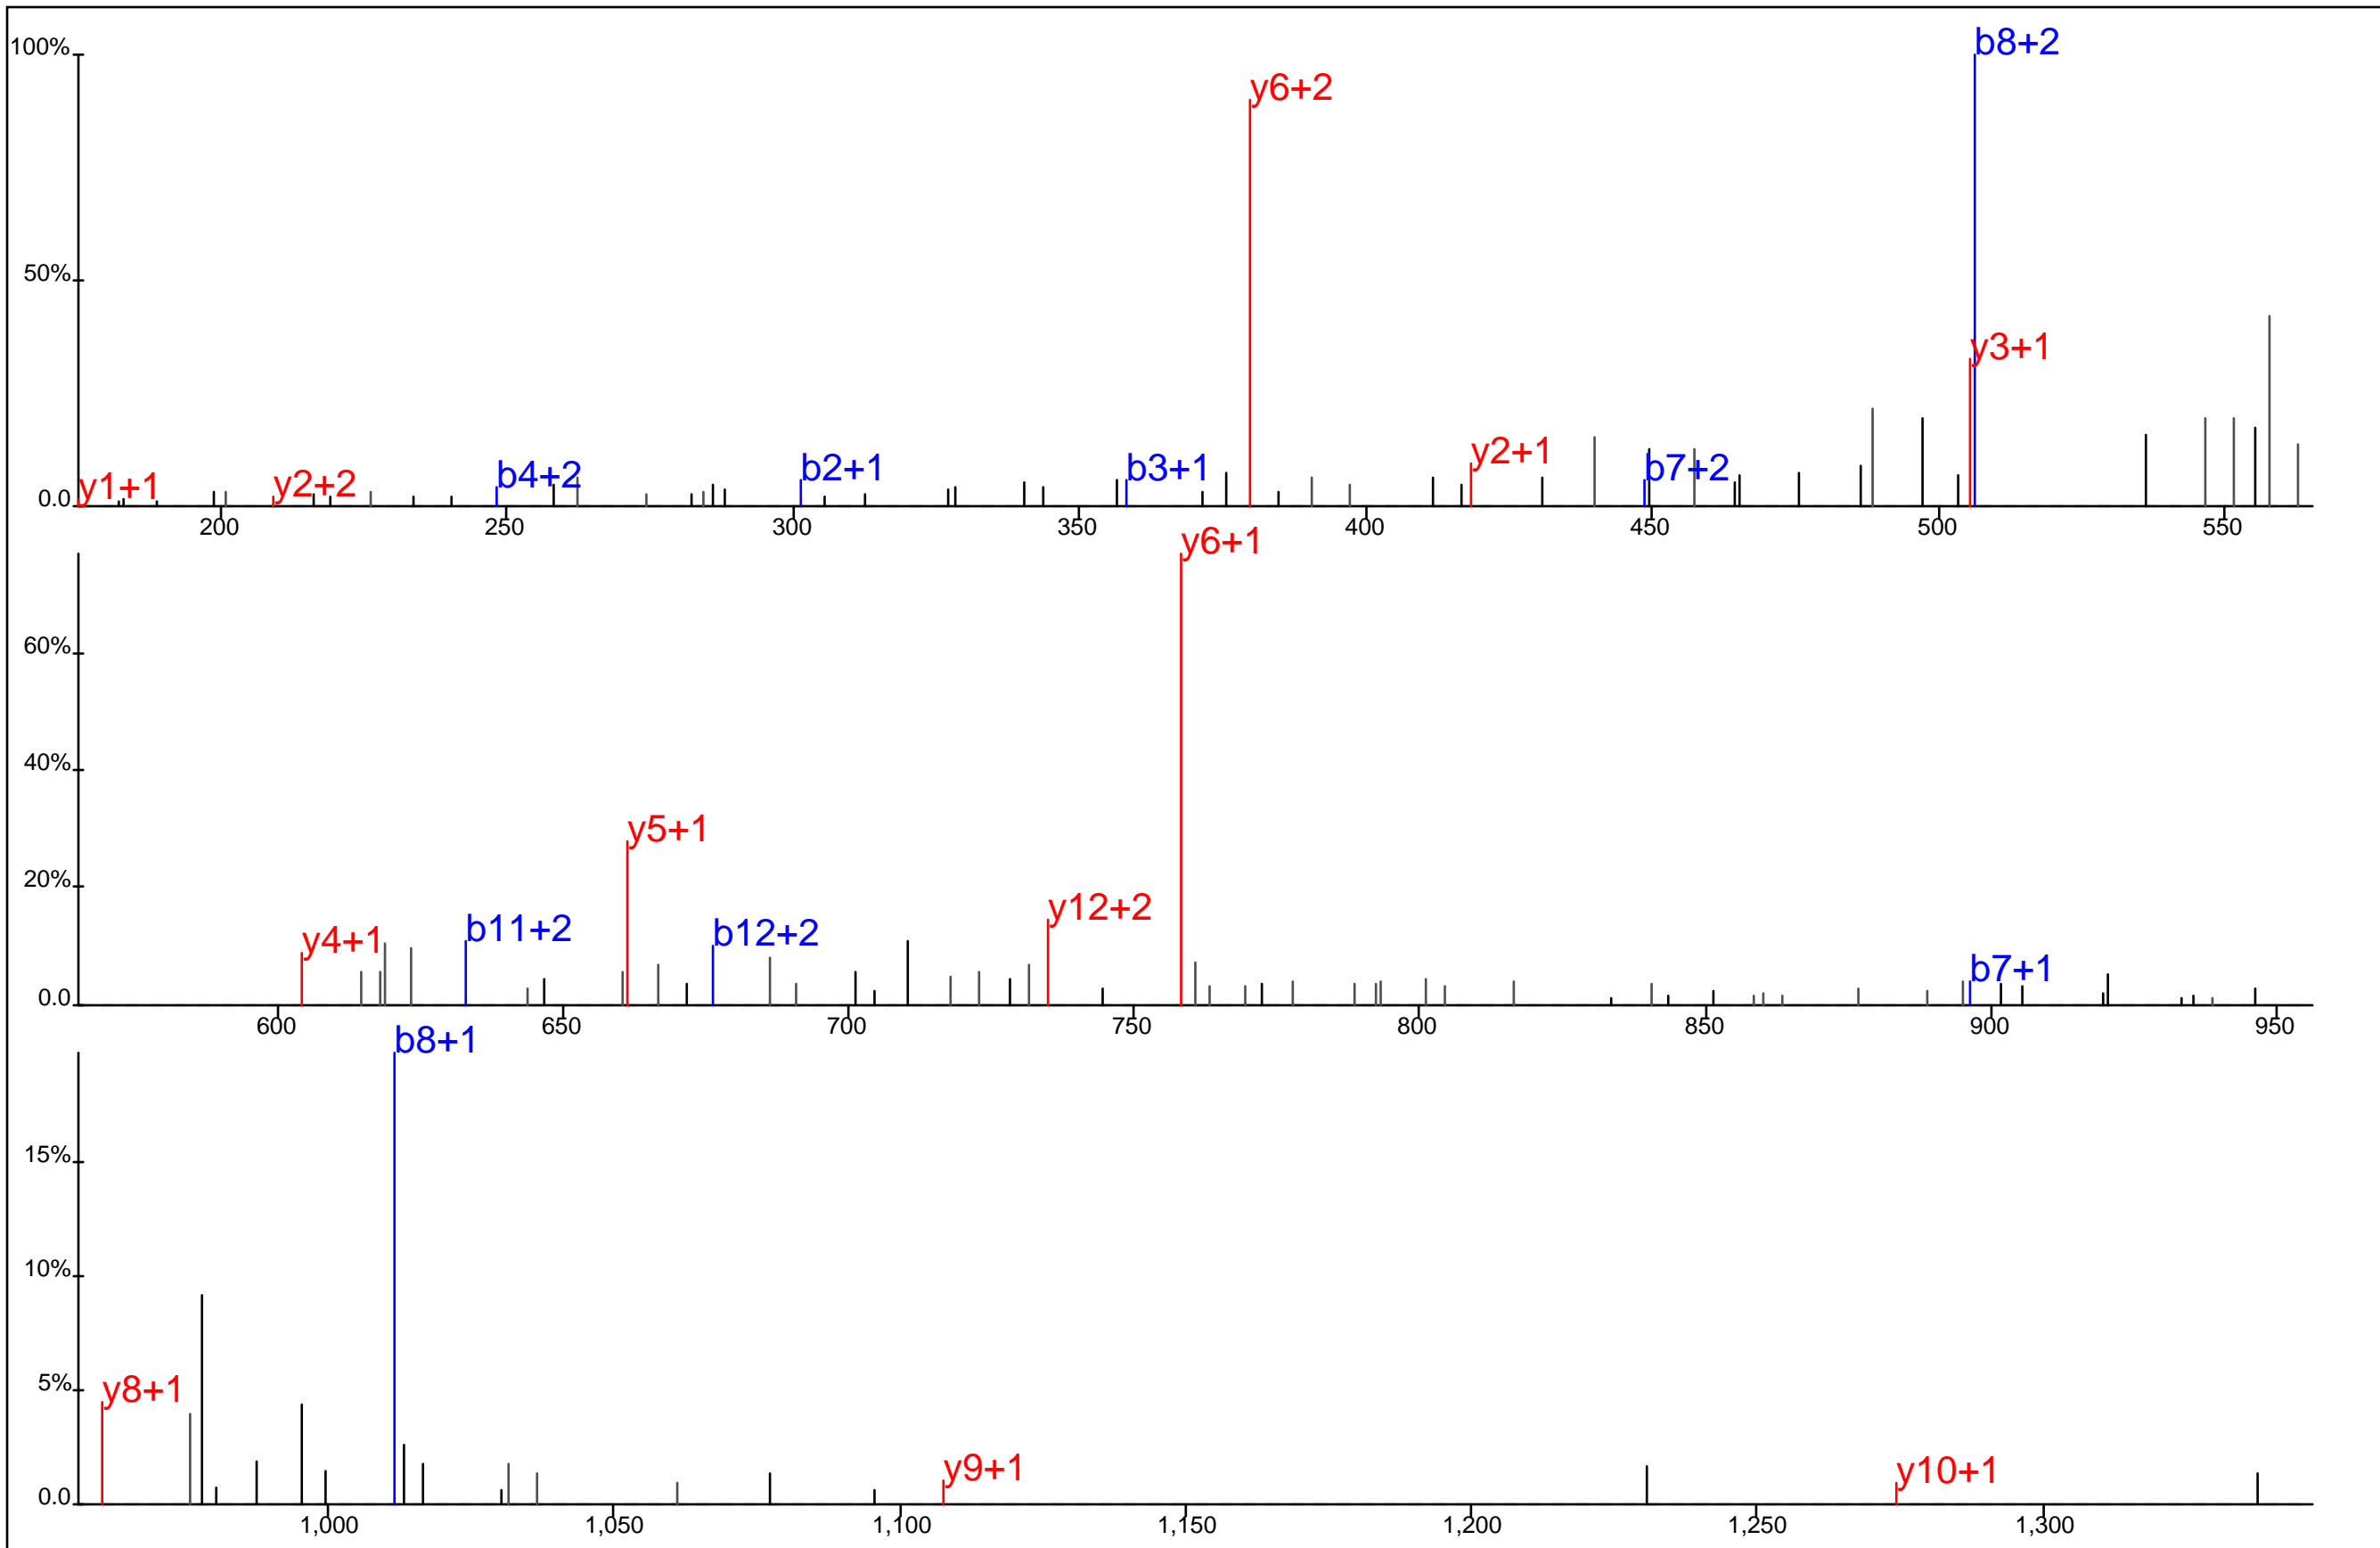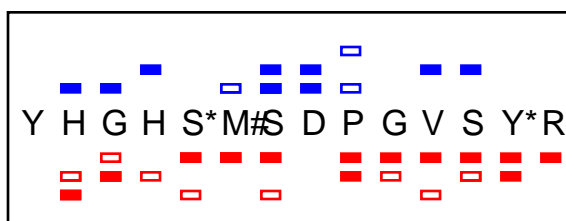

Protein Name: Pyruvate dehydrogenase E1 alpha subunit, testis specific form  
 gi Accession: 0  
 Precursor Mass: 590.2113+3  
 Delta Mass: 0.417 ppm  
 XCorr: 33.94



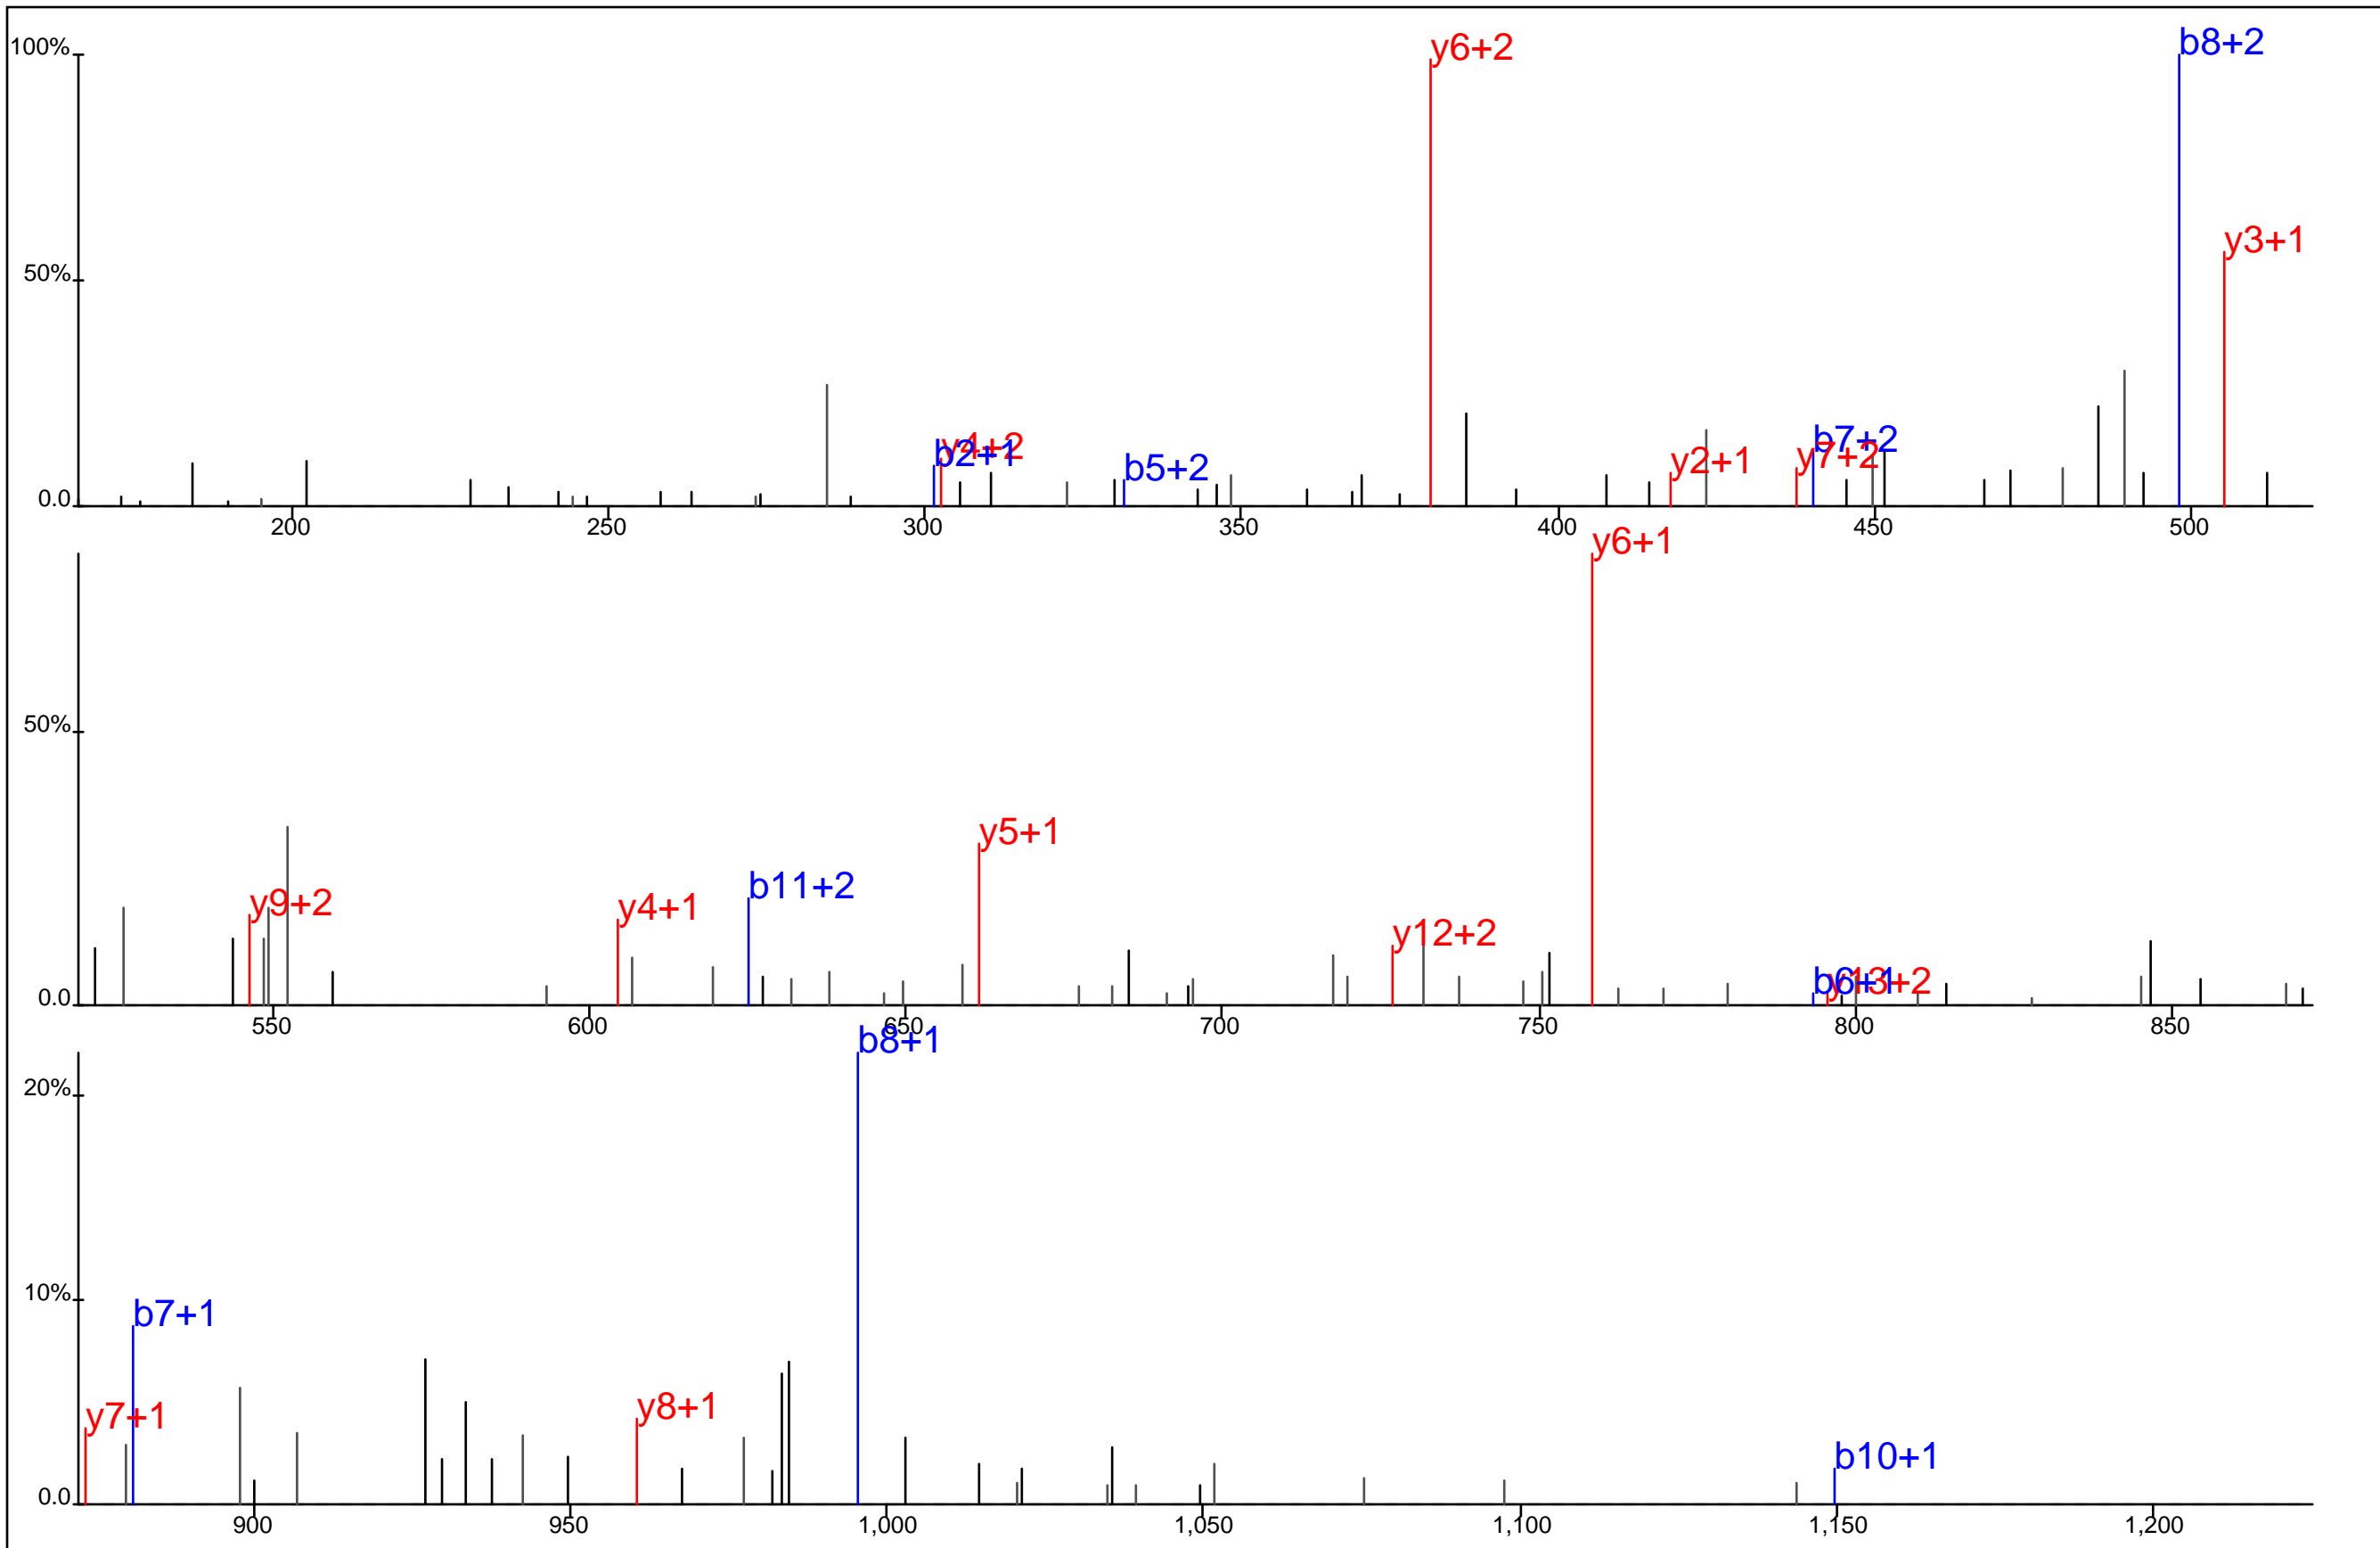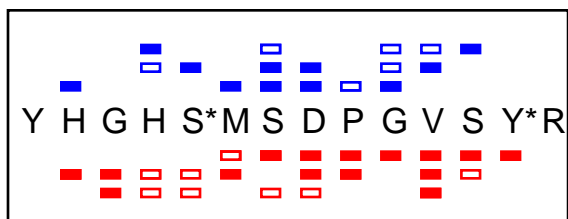

Protein Name: Pyruvate dehydrogenase E1 alpha subunit, testis specific form  
 gi Accession: 0  
 Precursor Mass: 584.8801+3  
 Delta Mass: 1.109 ppm  
 XCorr: 27.66

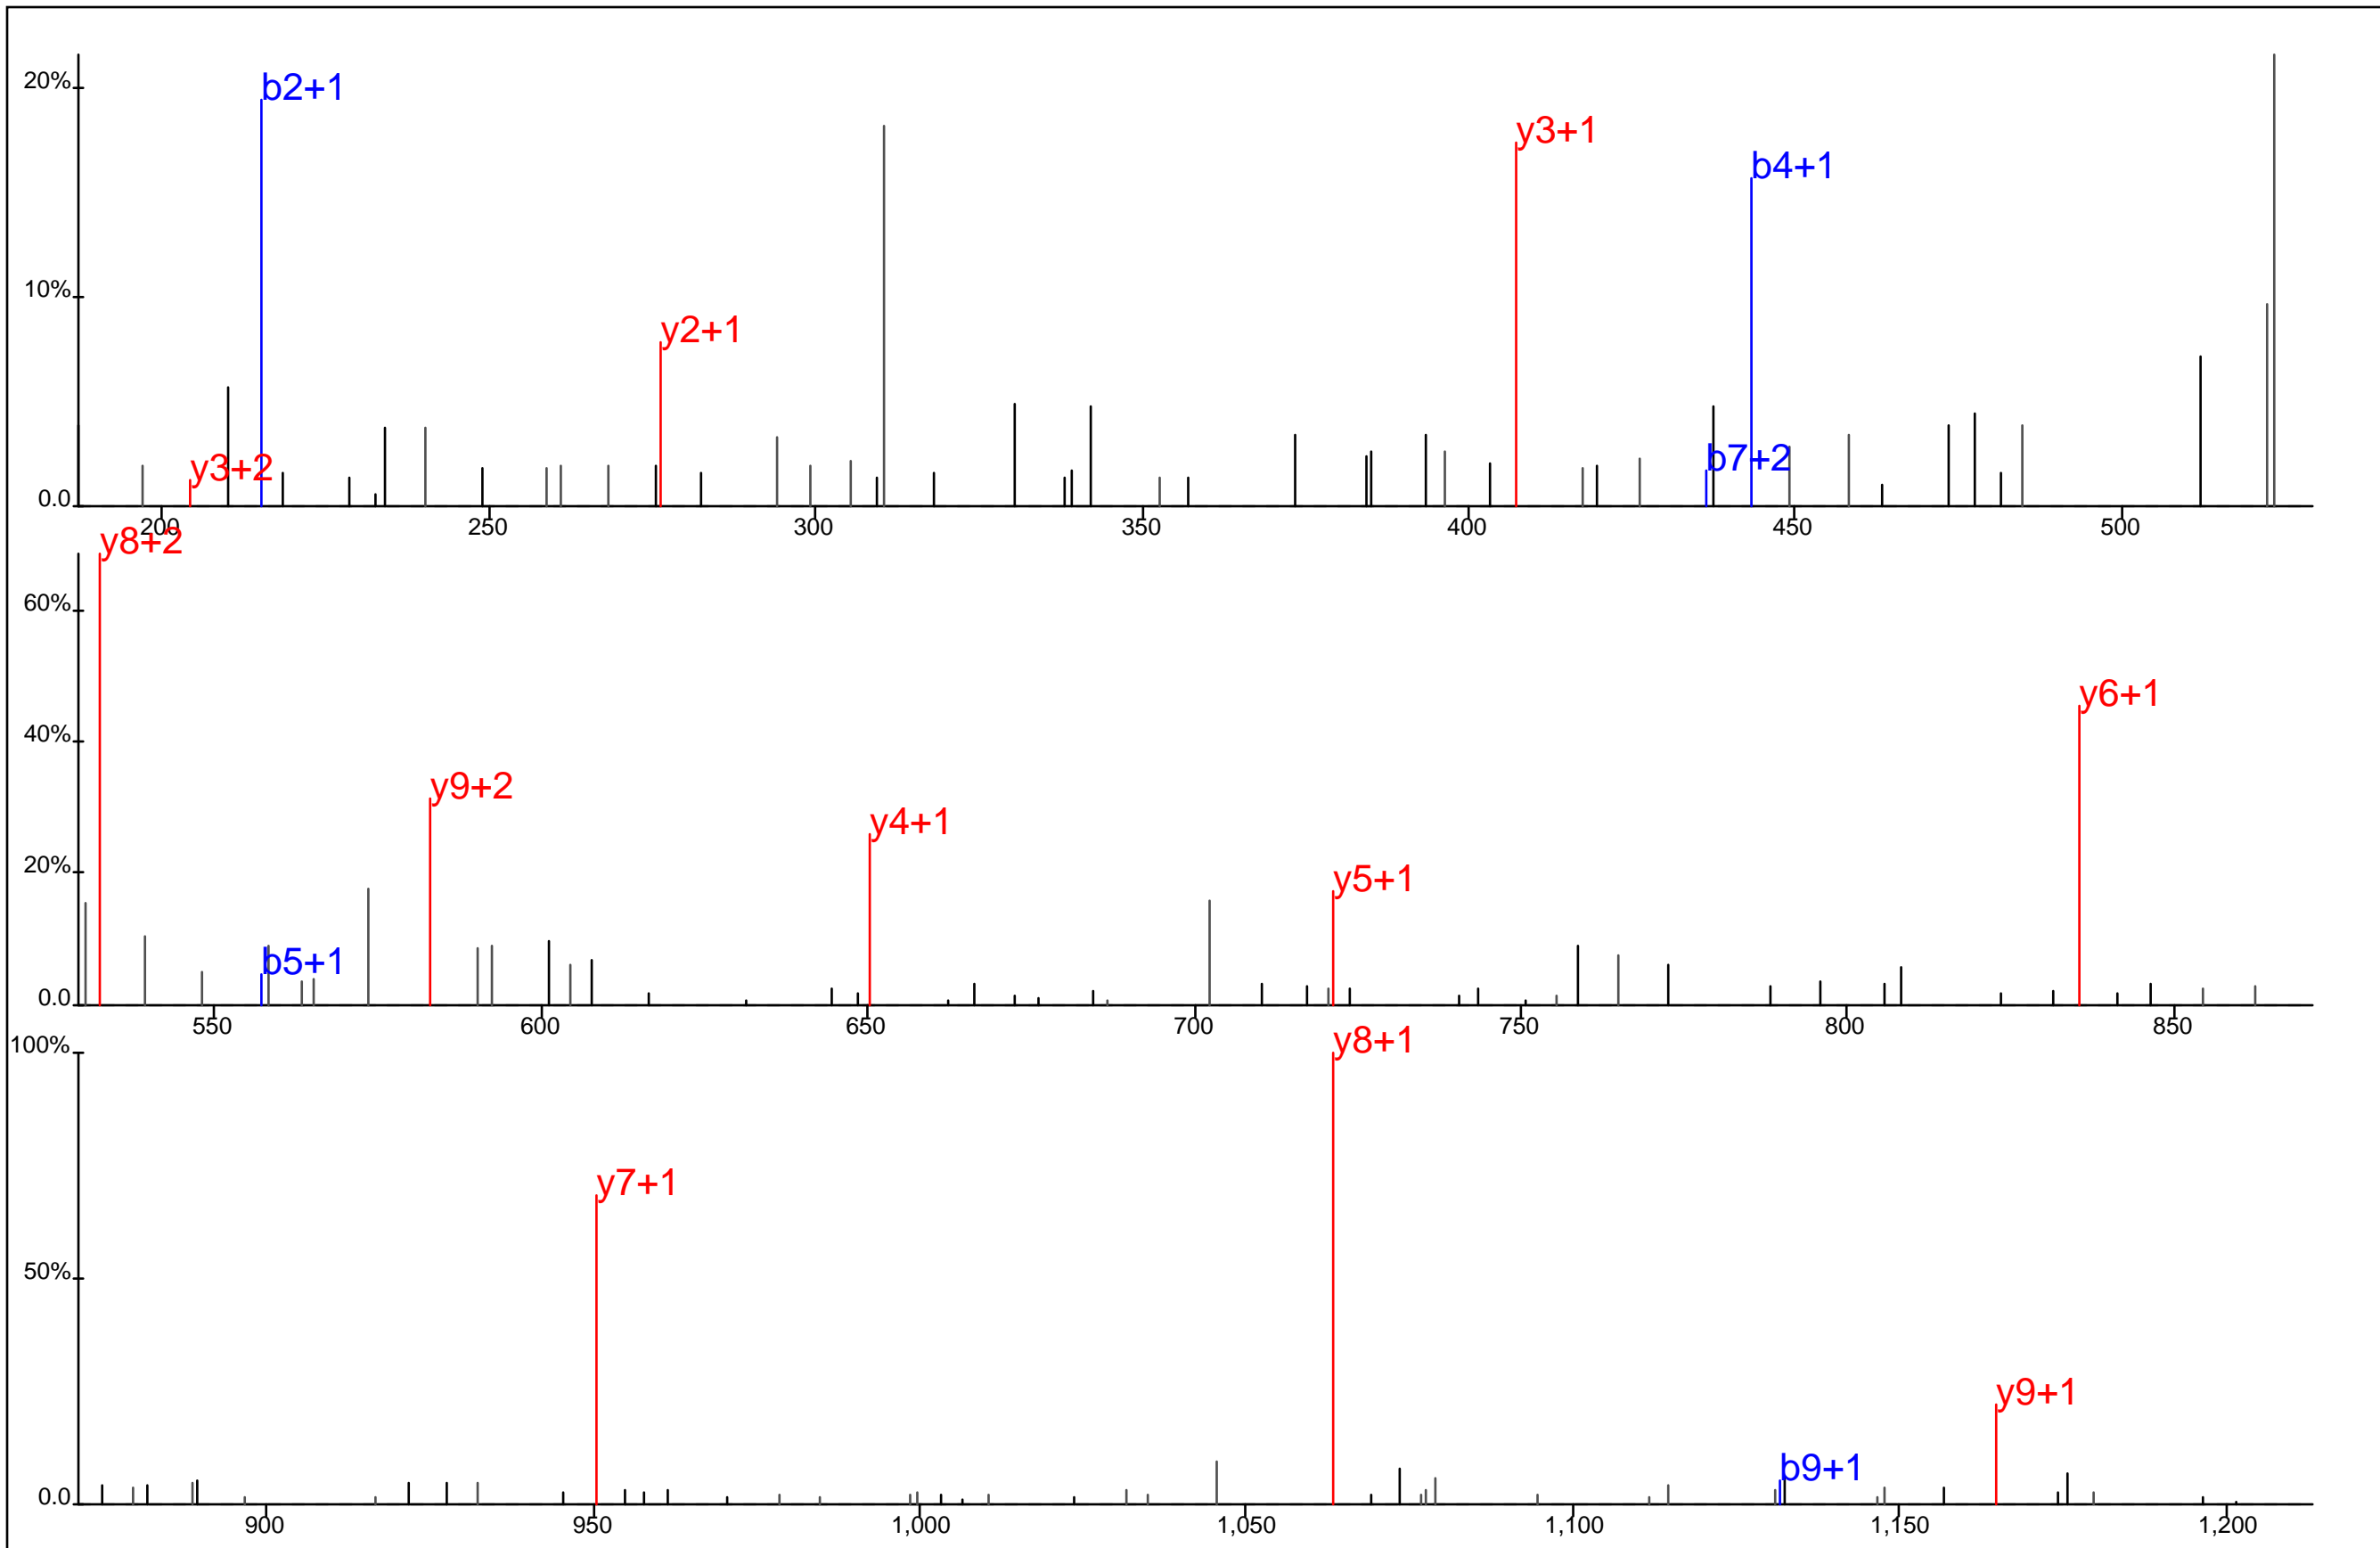

■ □ ■ □ ■ □ ■ □  
 I T L D N A Y\* M E K  
■ □ ■ □ ■ □ ■ □

Protein Name: Pyruvate kinase 3  
 gi Accession: 0  
 Precursor Mass: 639.2772+2  
 Delta Mass: 0.975 ppm  
 XCorr: 60.55



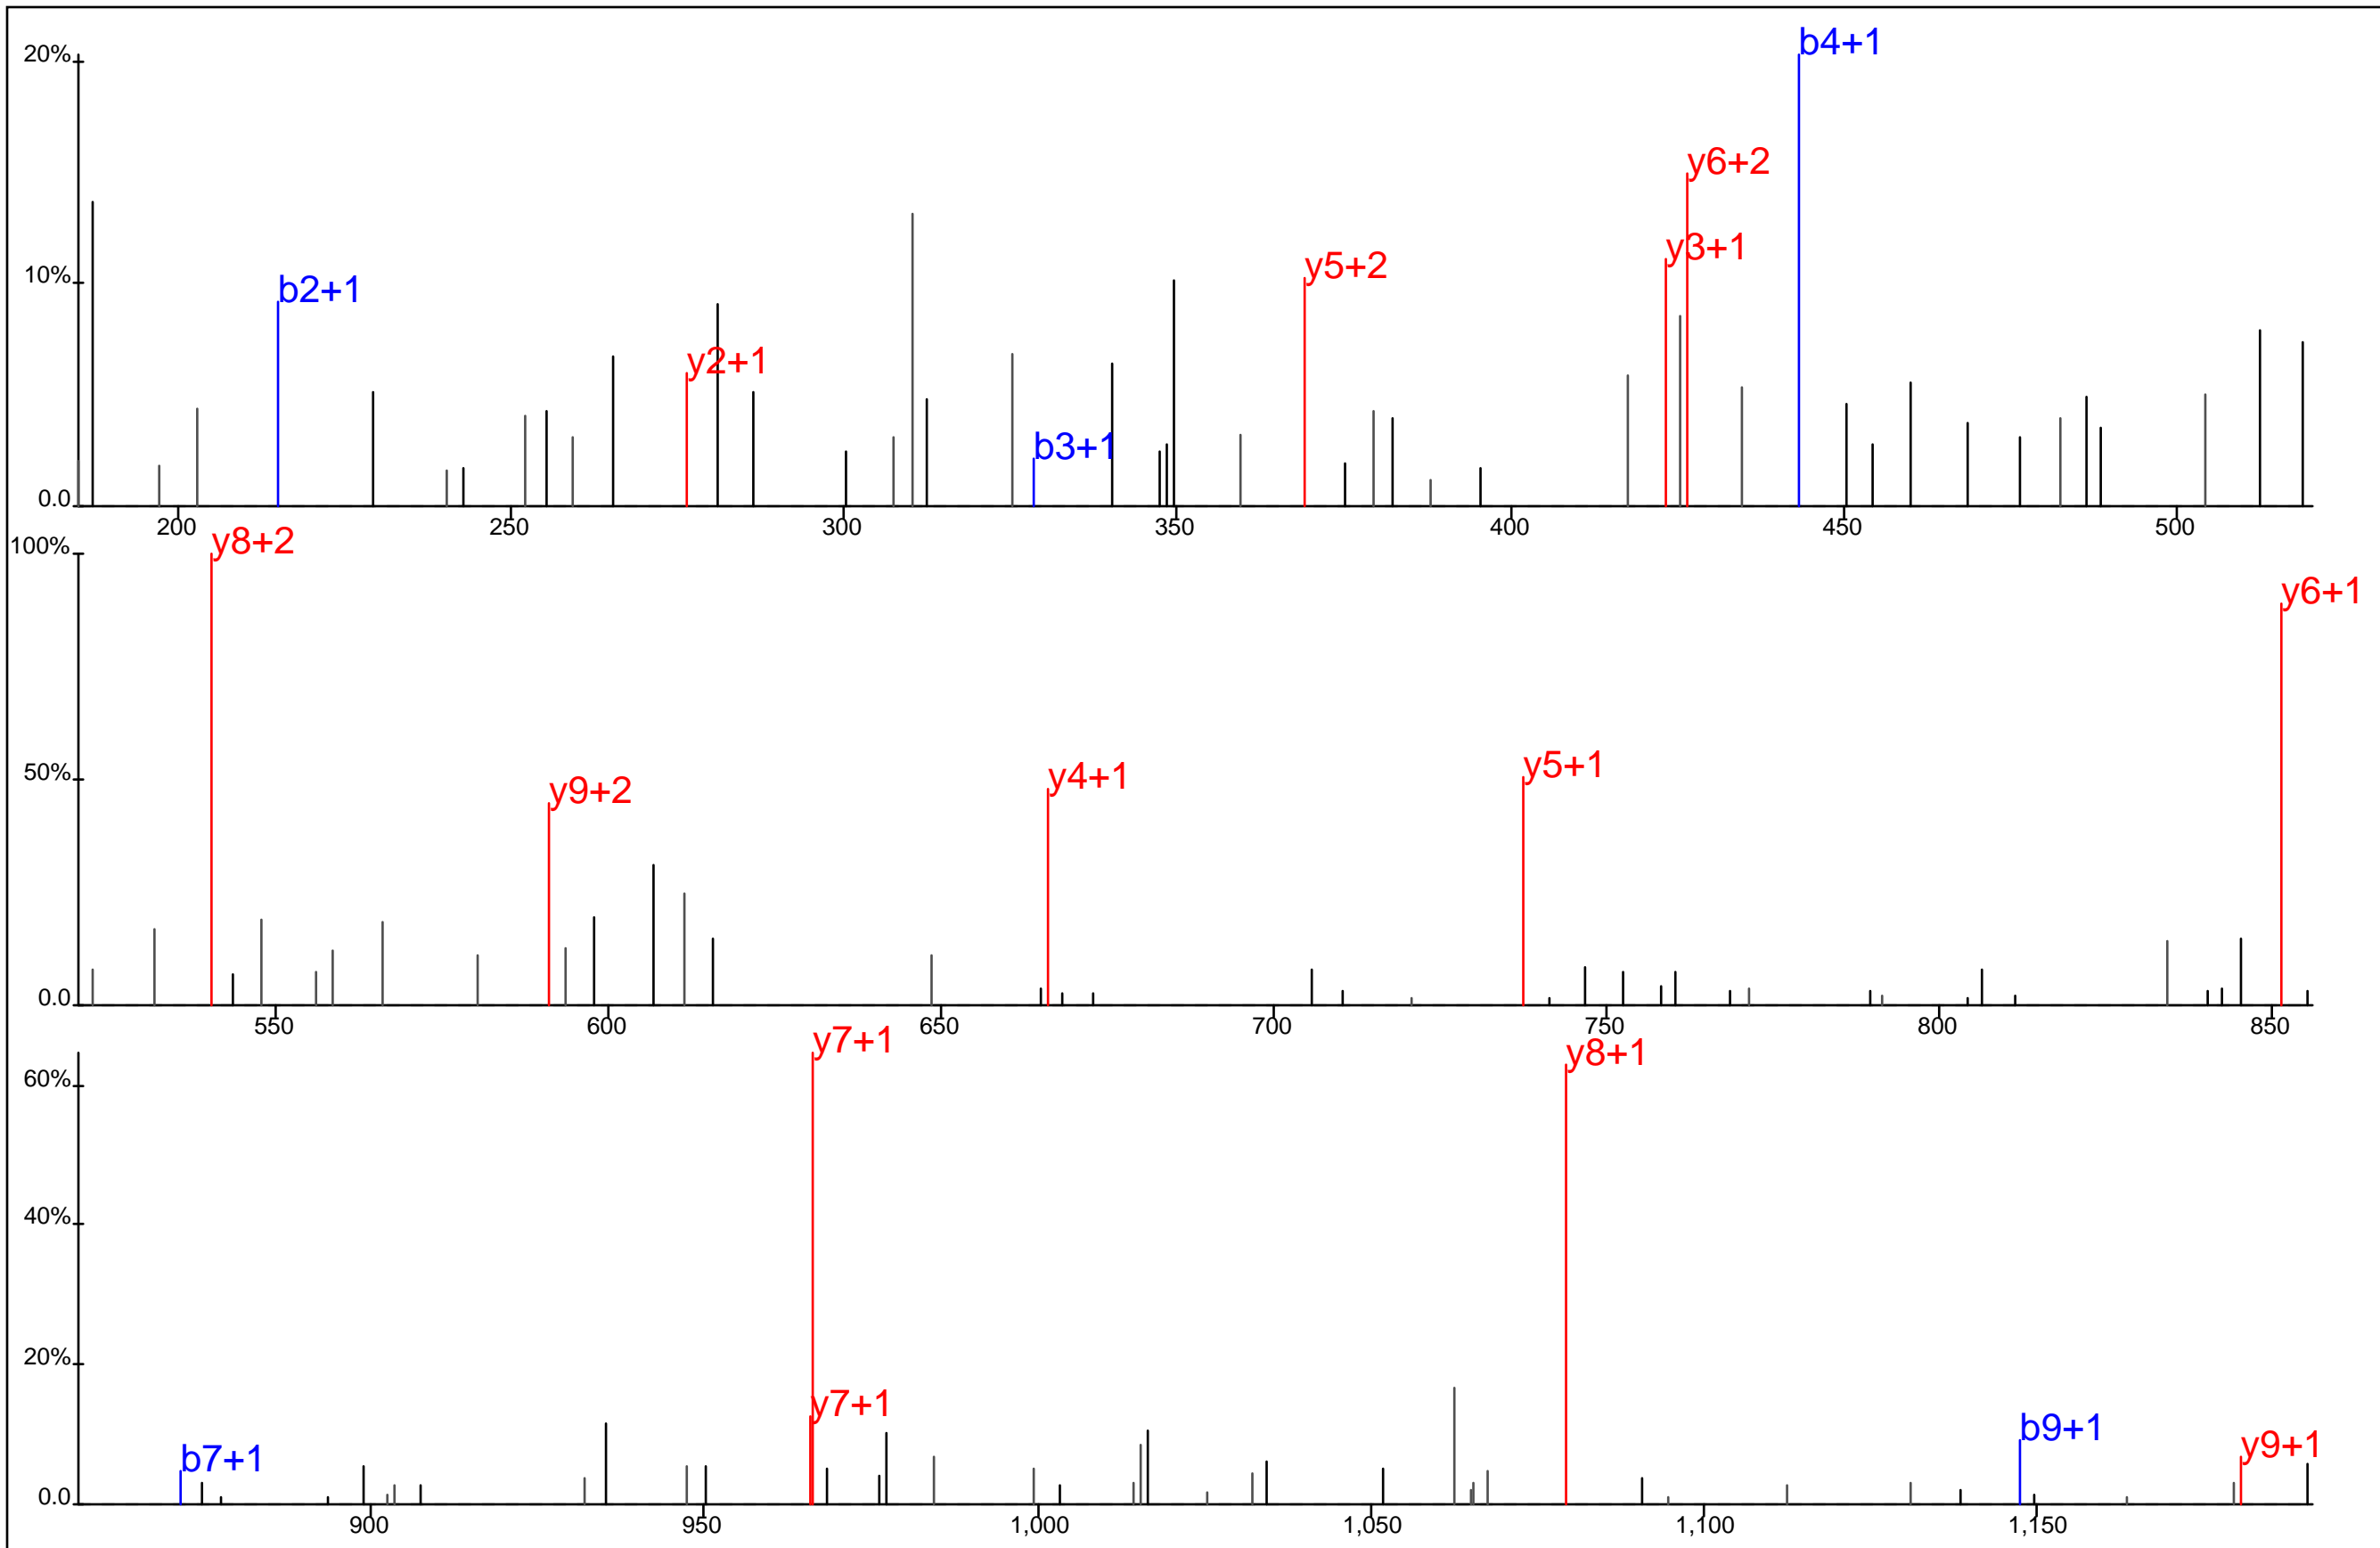

■ ■ ■ ■ ■ ■ ■ ■  
 I T L D N A Y\* M # E K  
■ ■ ■ ■ ■ ■ ■ ■

Protein Name: Pyruvate kinase 3  
 gi Accession: 0  
 Precursor Mass: 647.2776+2  
 Delta Mass: 3.718 ppm  
 XCorr: 47.96

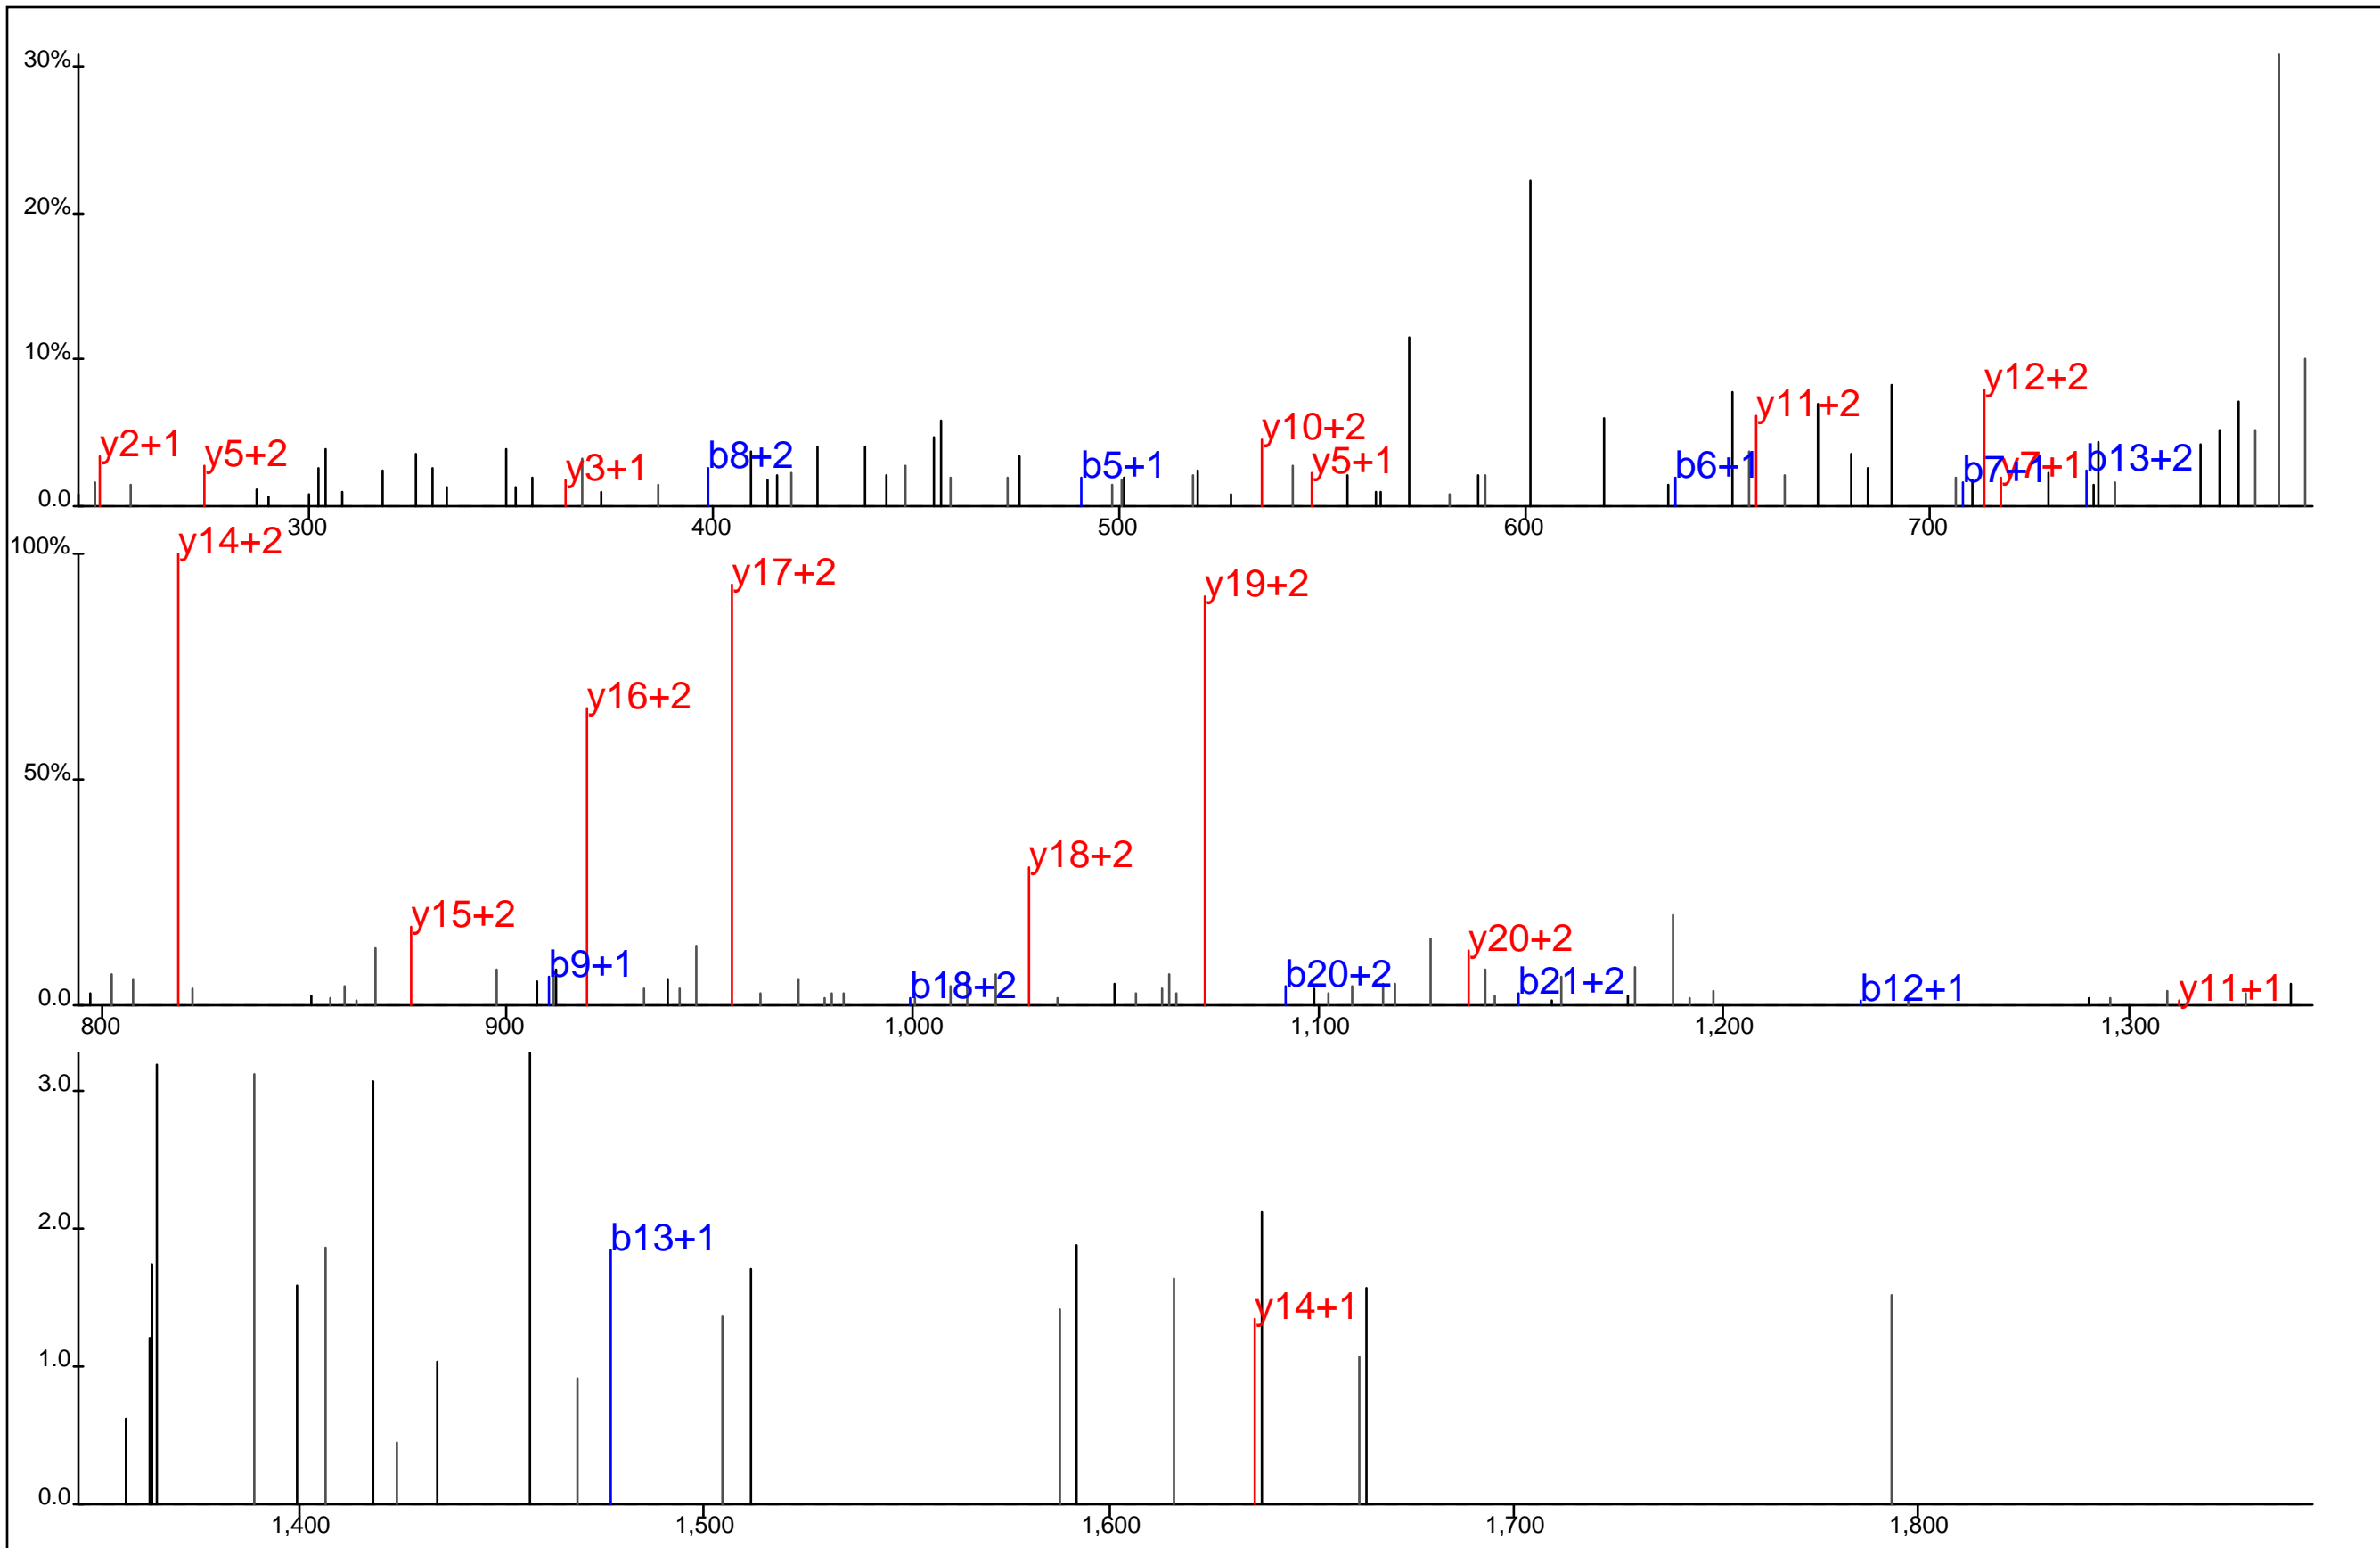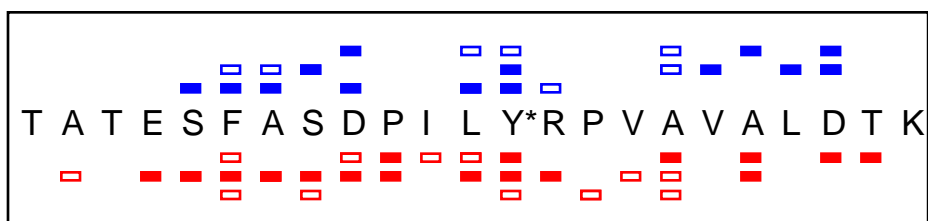

Protein Name: Pyruvate kinase 3  
 gi Accession: 0  
 Precursor Mass: 849.0931+3  
 Delta Mass: 2.414 ppm  
 XCorr: 30.93

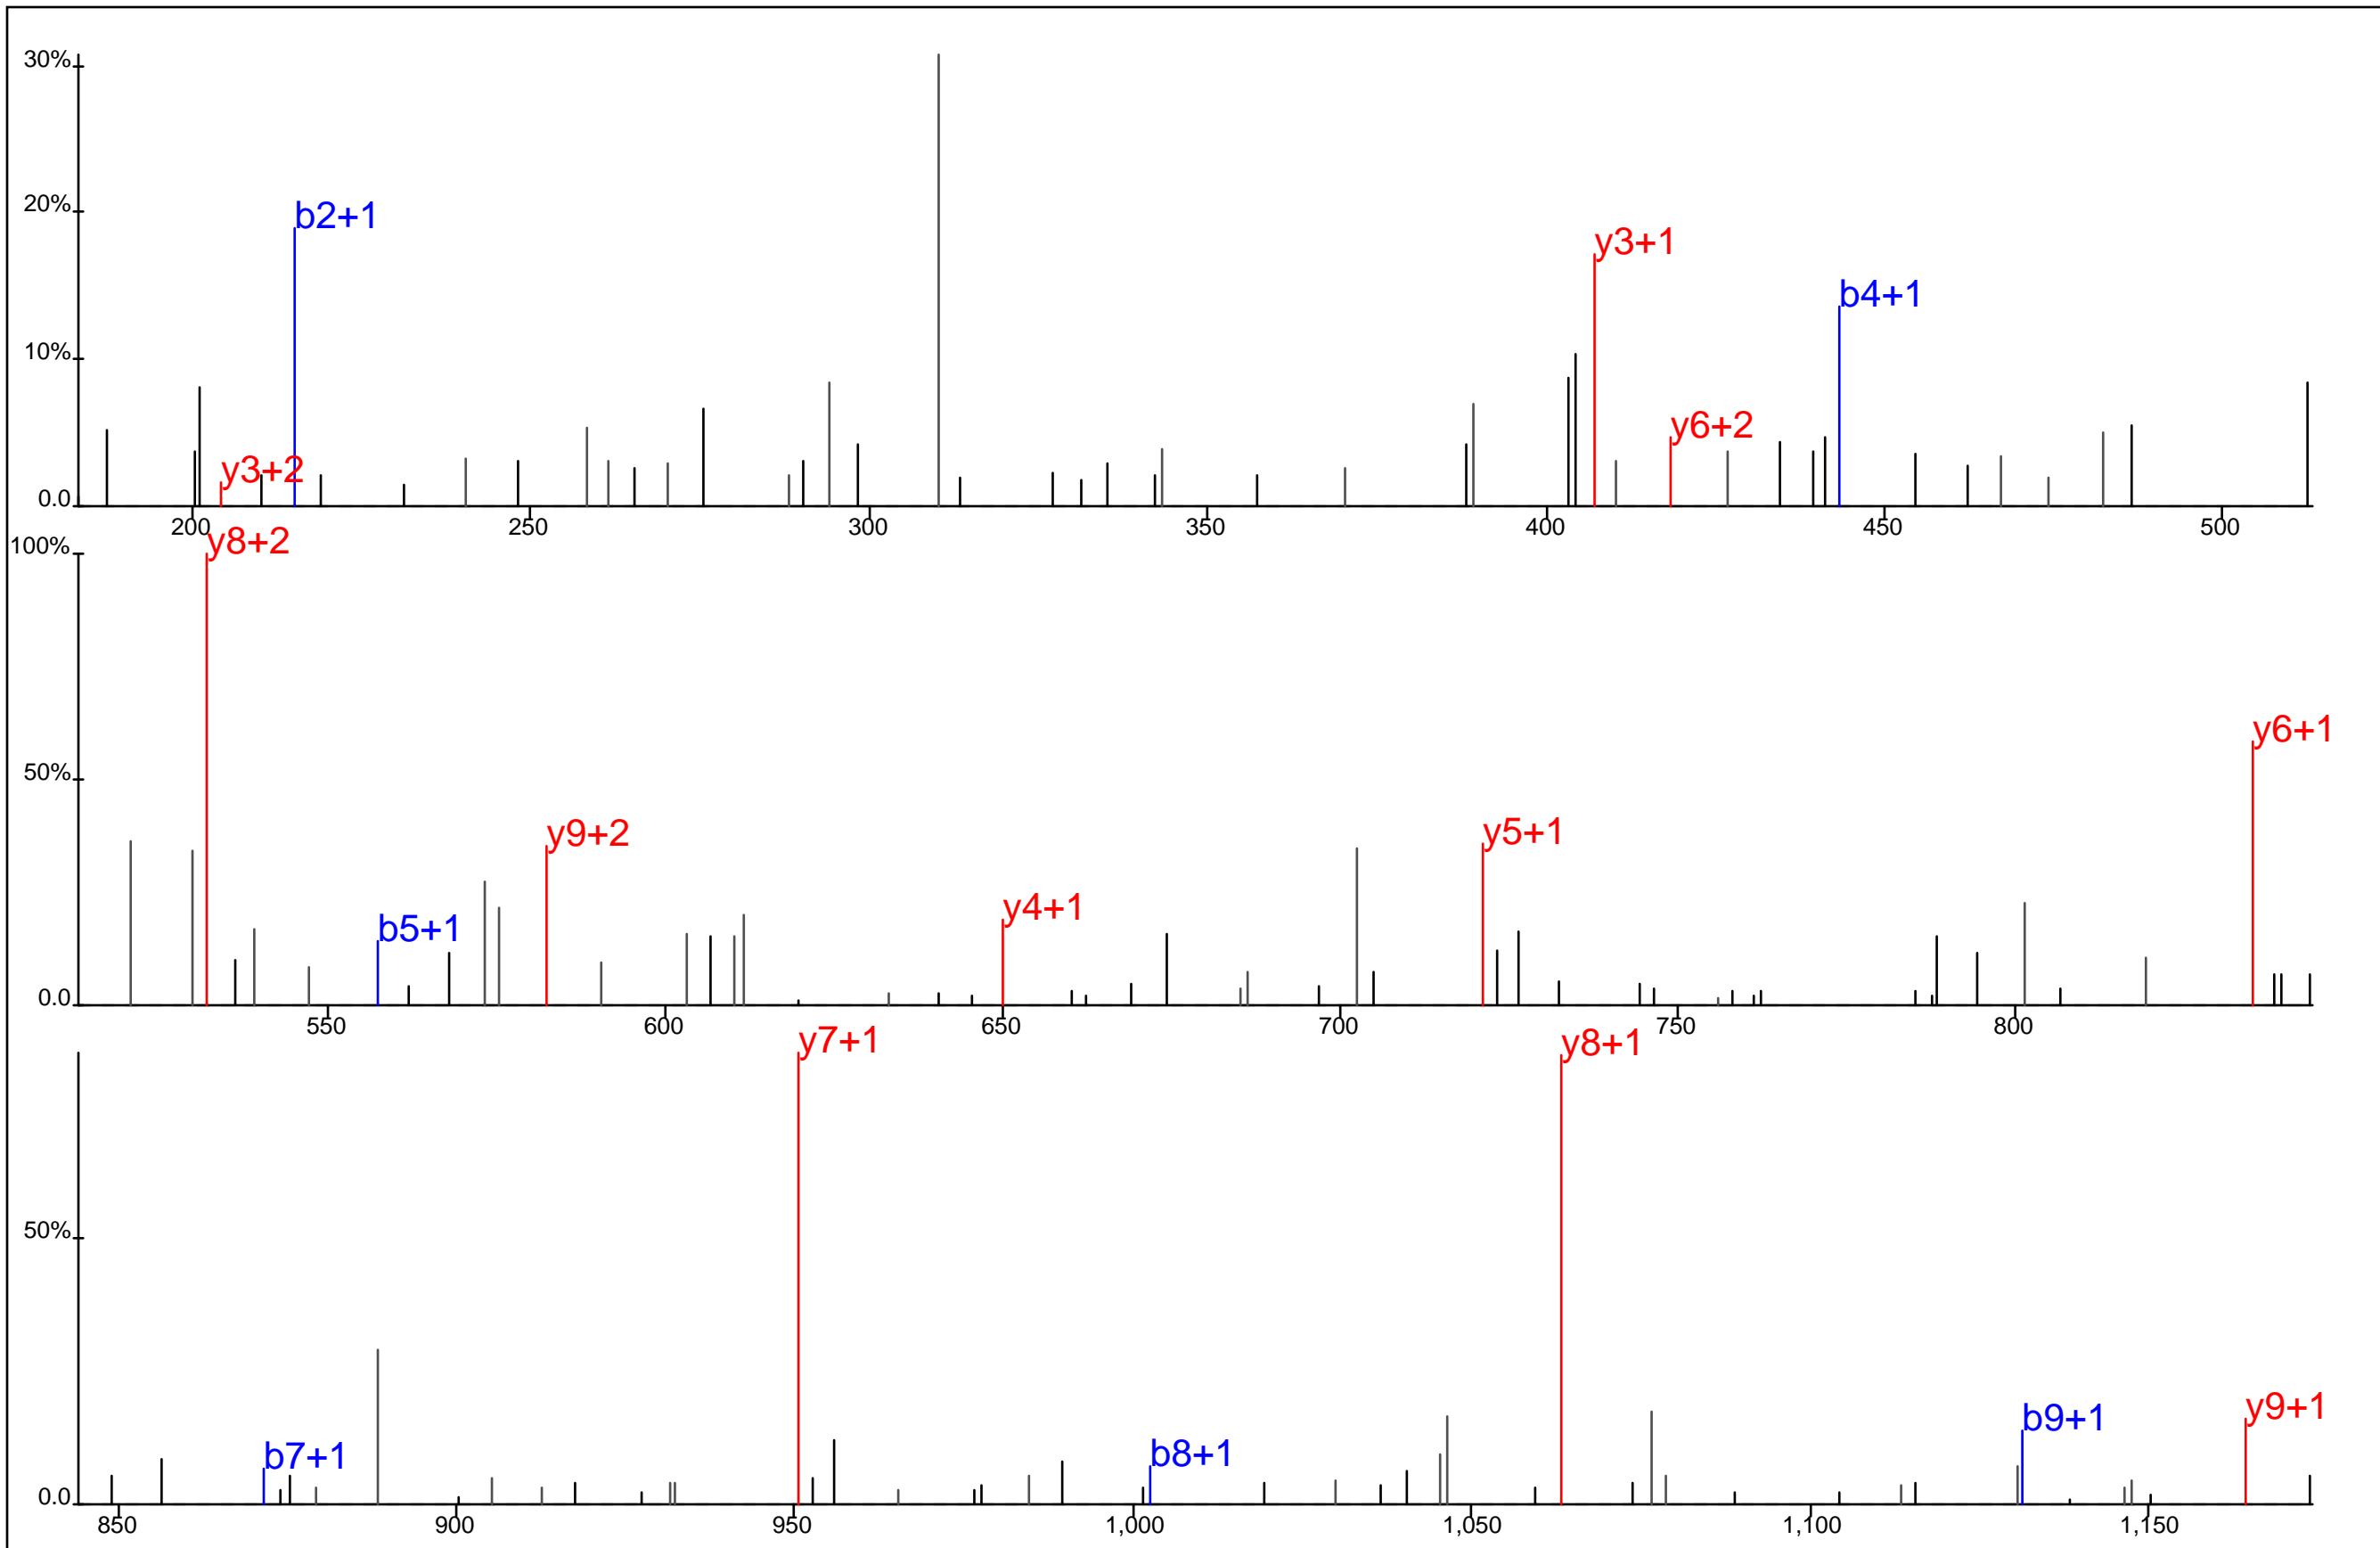

■ □ ■ □ ■ □ ■ □  
 I T L D N A Y\* M E K  
■ □ ■ □ ■ □ ■ □

Protein Name: Pyruvate kinase 3  
 gi Accession: 0  
 Precursor Mass: 639.2780+2  
 Delta Mass: 0.266 ppm  
 XCorr: 47.15

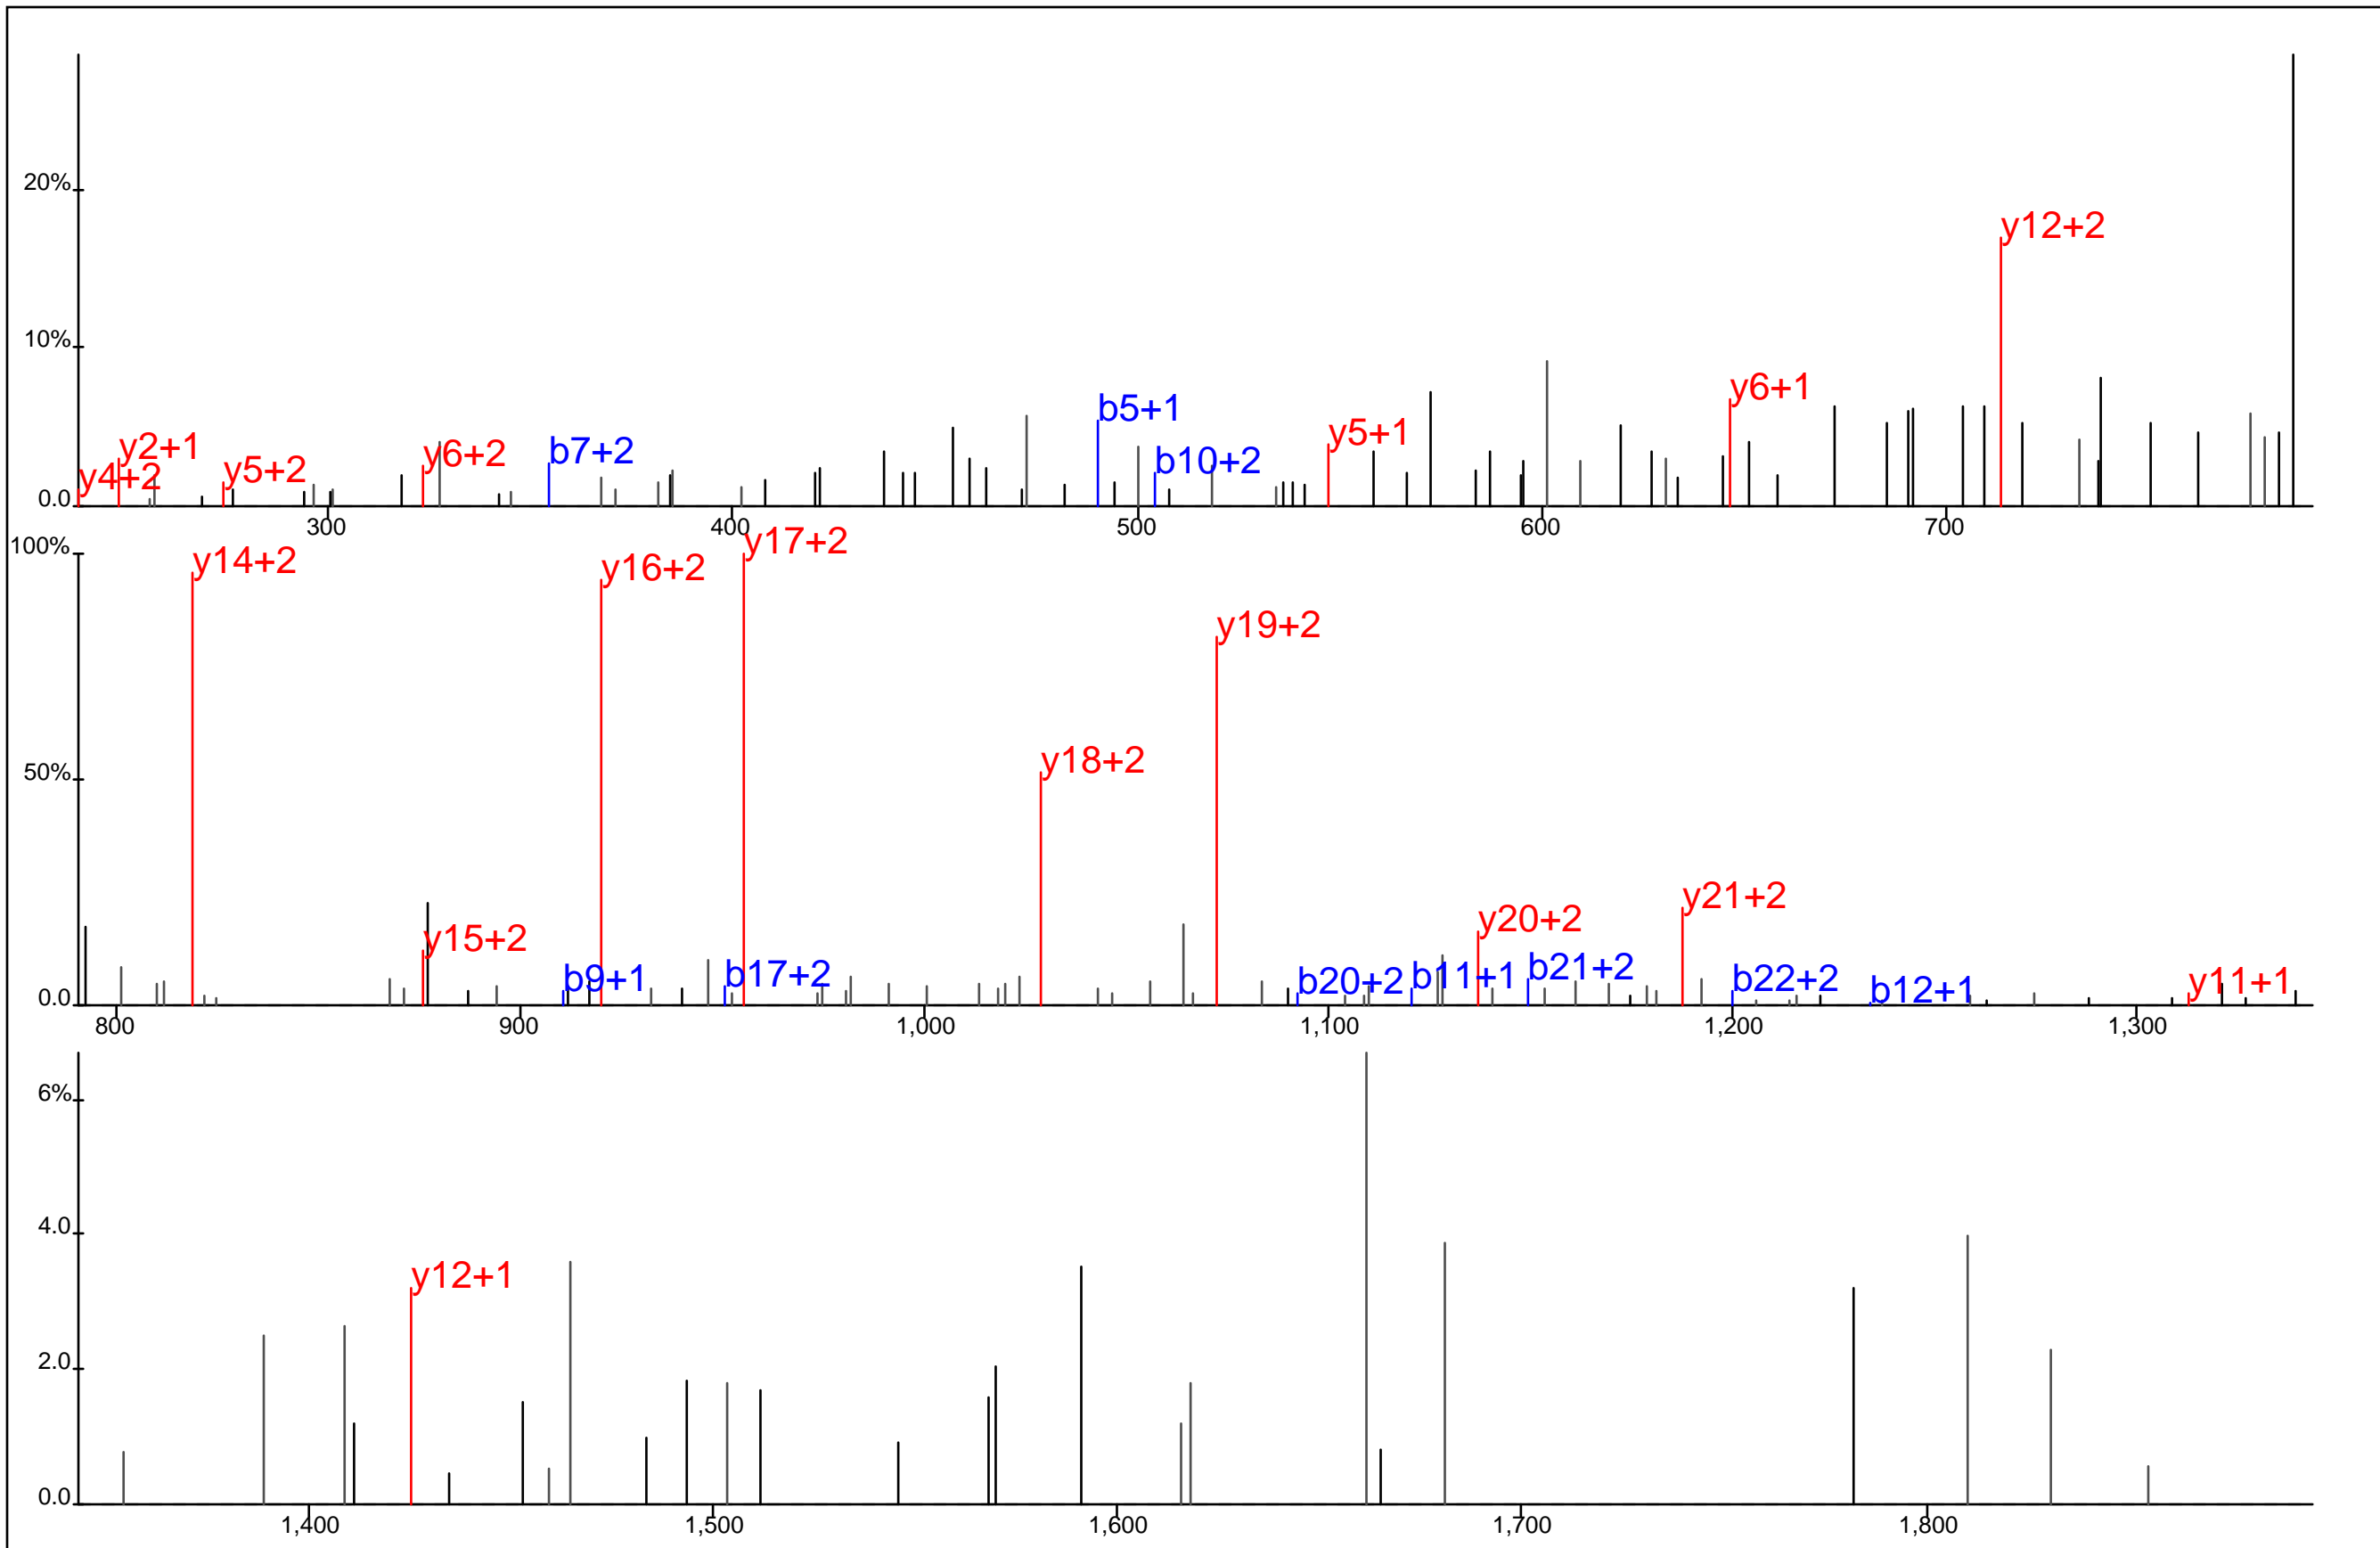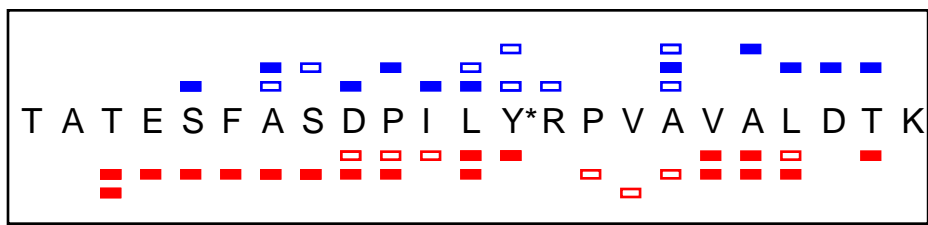

Protein Name: Pyruvate kinase 3  
 gi Accession: 0  
 Precursor Mass: 849.0885+3  
 Delta Mass: 2.982 ppm  
 XCorr: 36.47

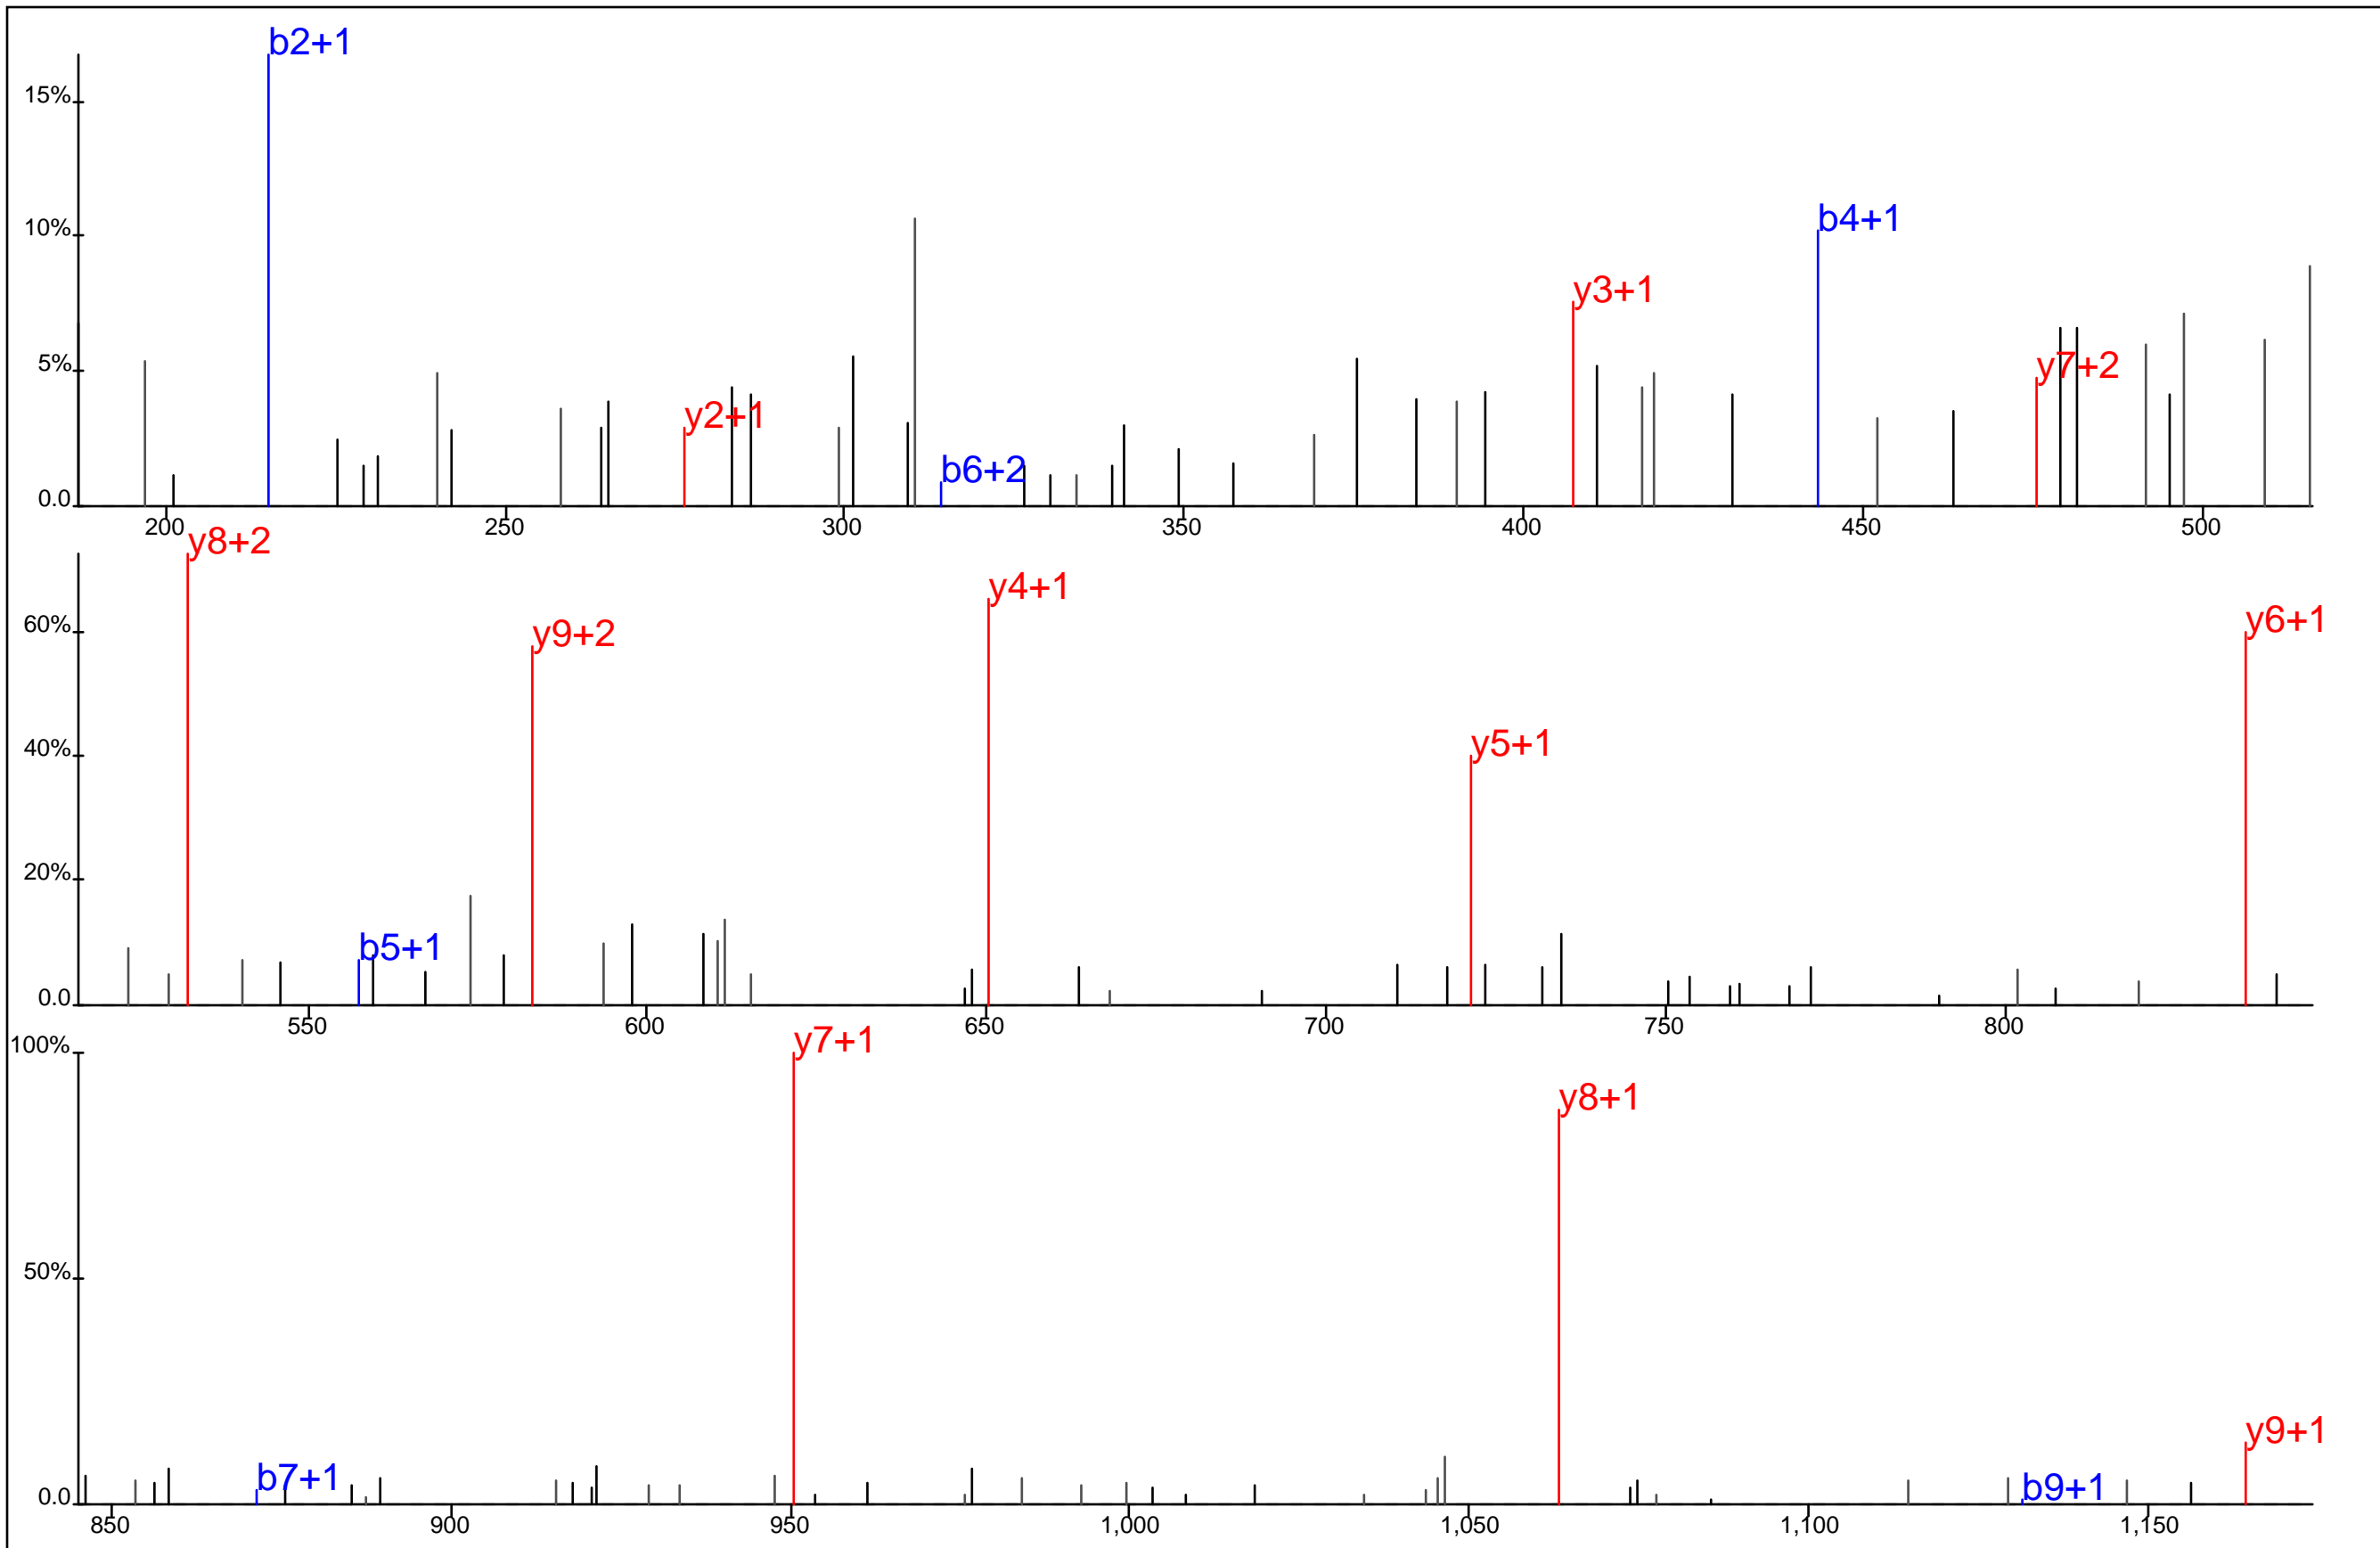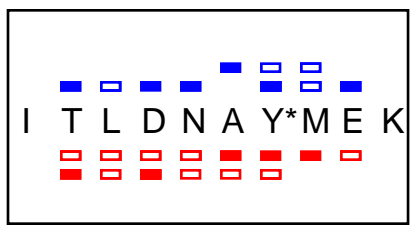

Protein Name: Pyruvate kinase 3  
 gi Accession: 0  
 Precursor Mass: 639.2773+2  
 Delta Mass: 0.689 ppm  
 XCorr: 53.39



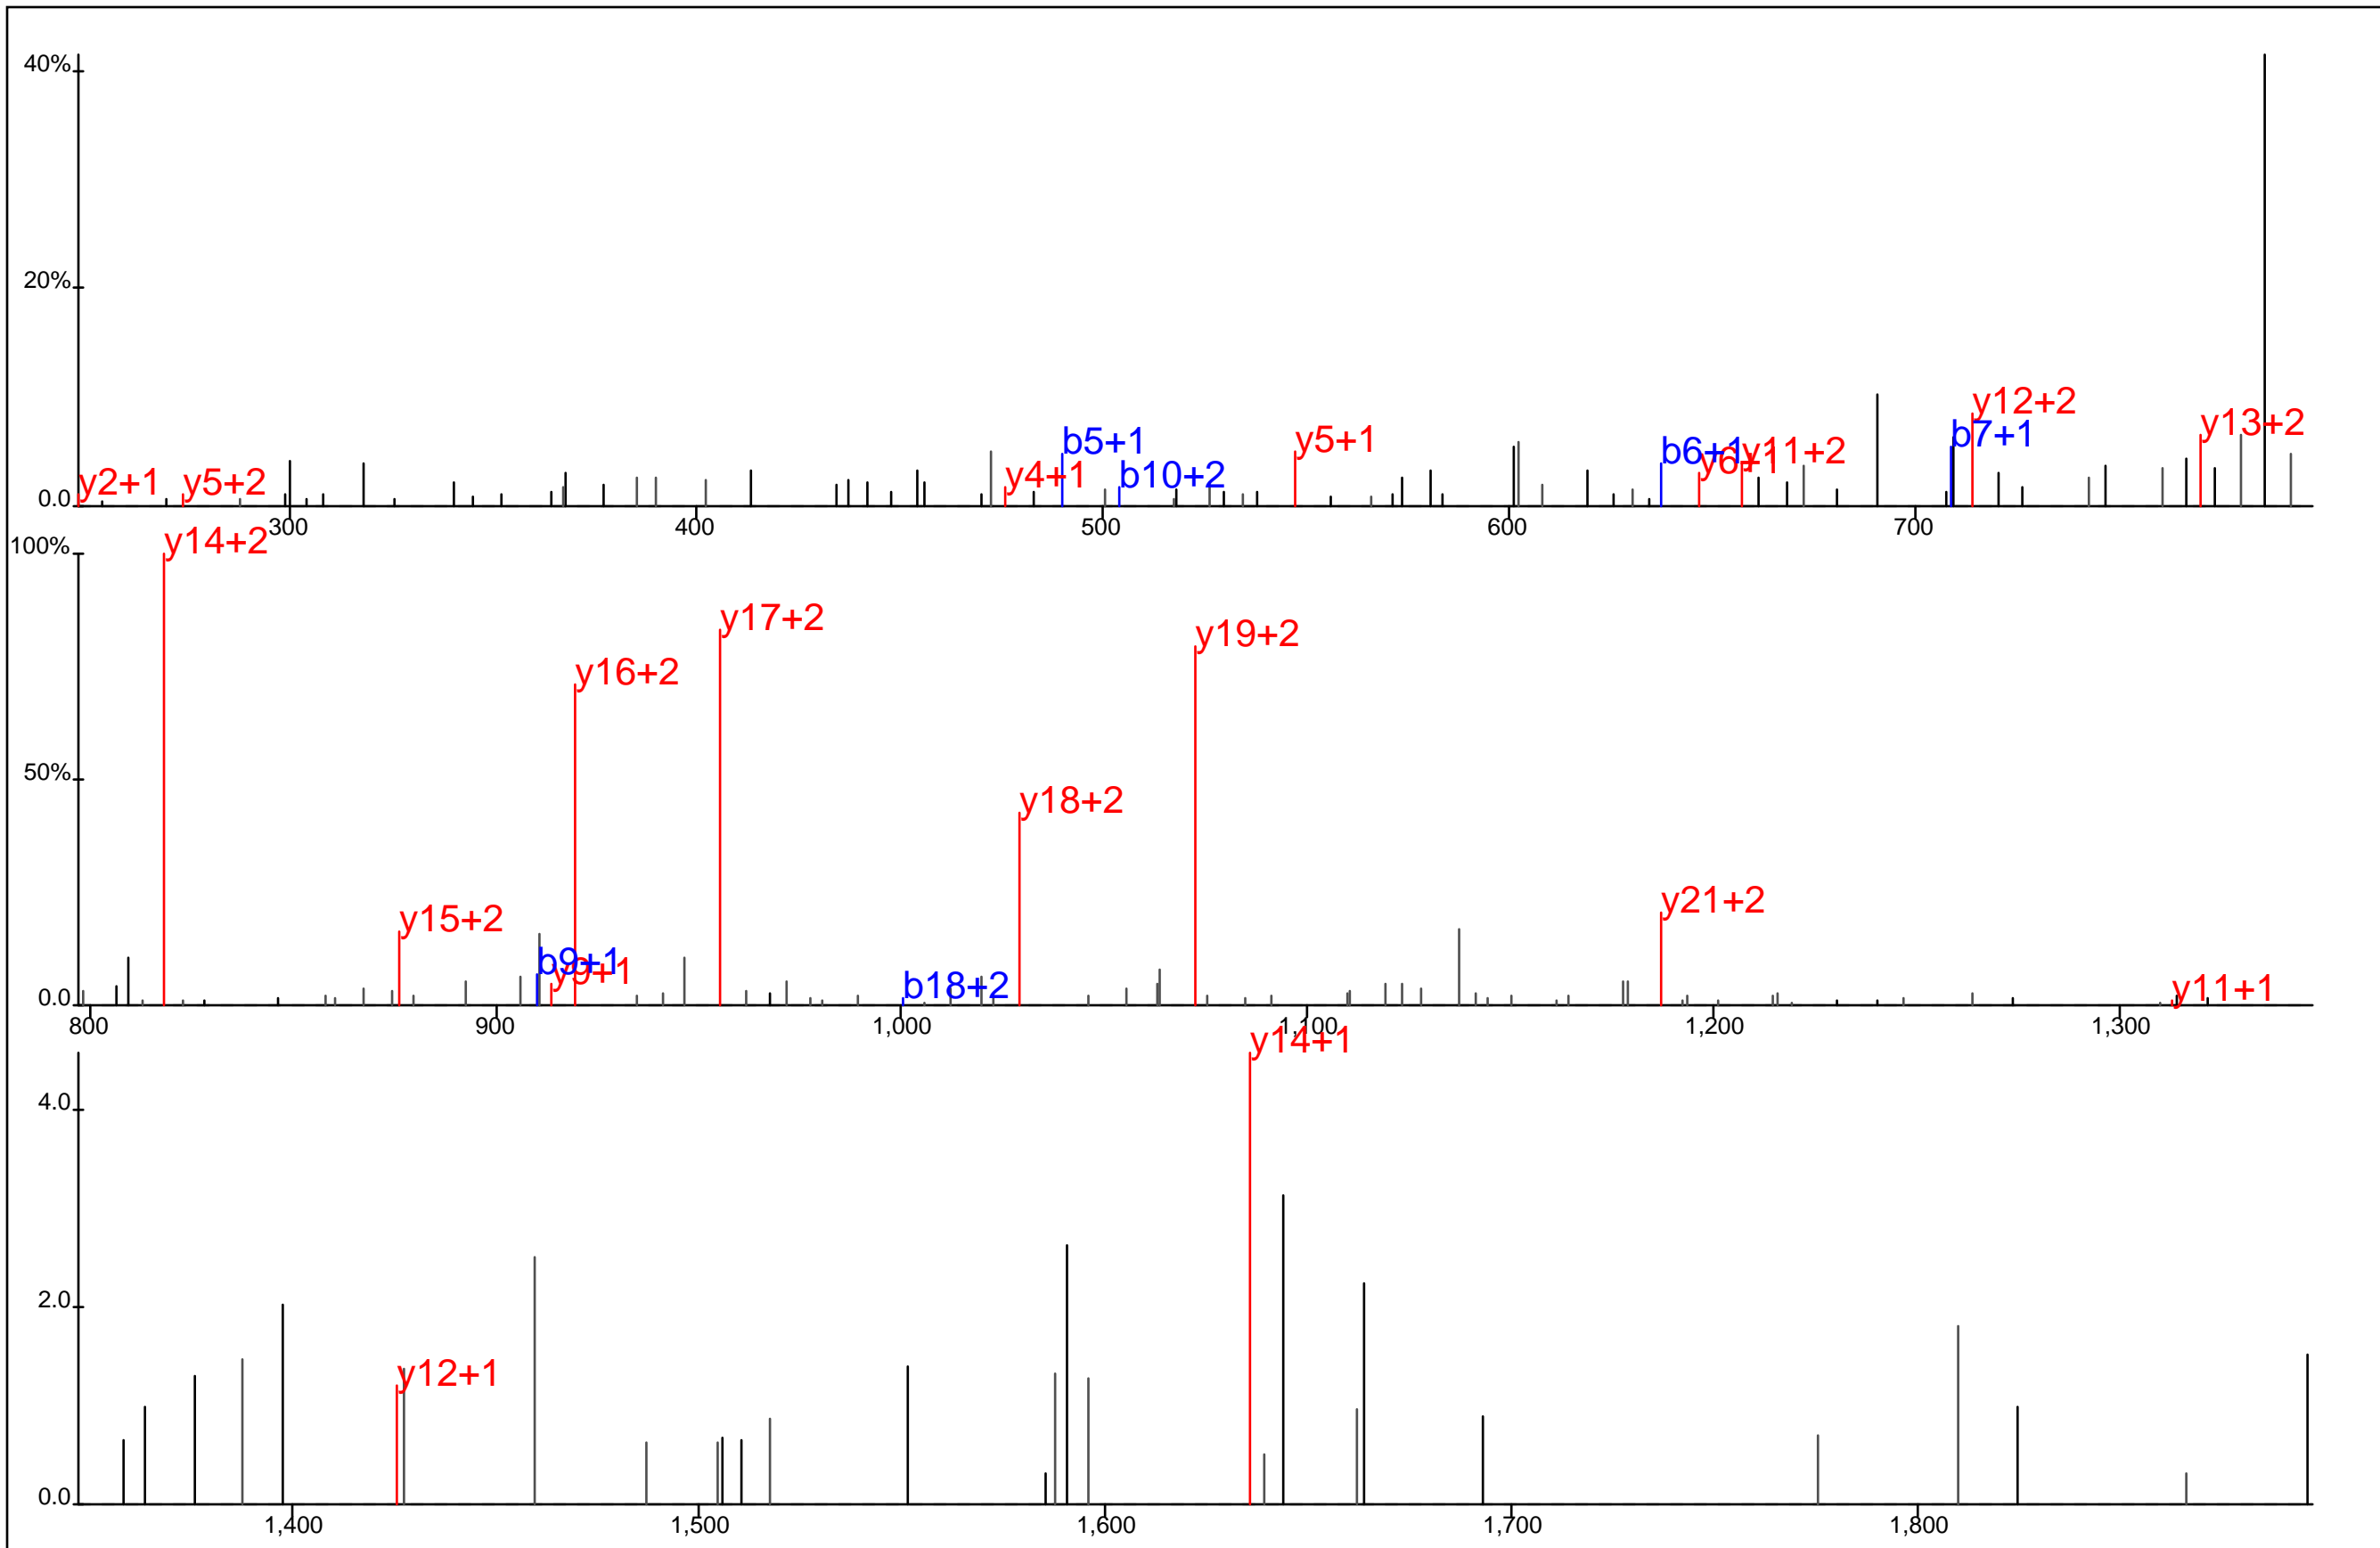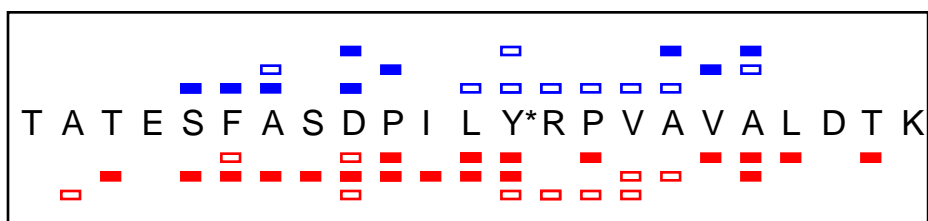

Protein Name: Pyruvate kinase 3  
 gi Accession: 0  
 Precursor Mass: 849.0967+3  
 Delta Mass: 6.658 ppm  
 XCorr: 38.02

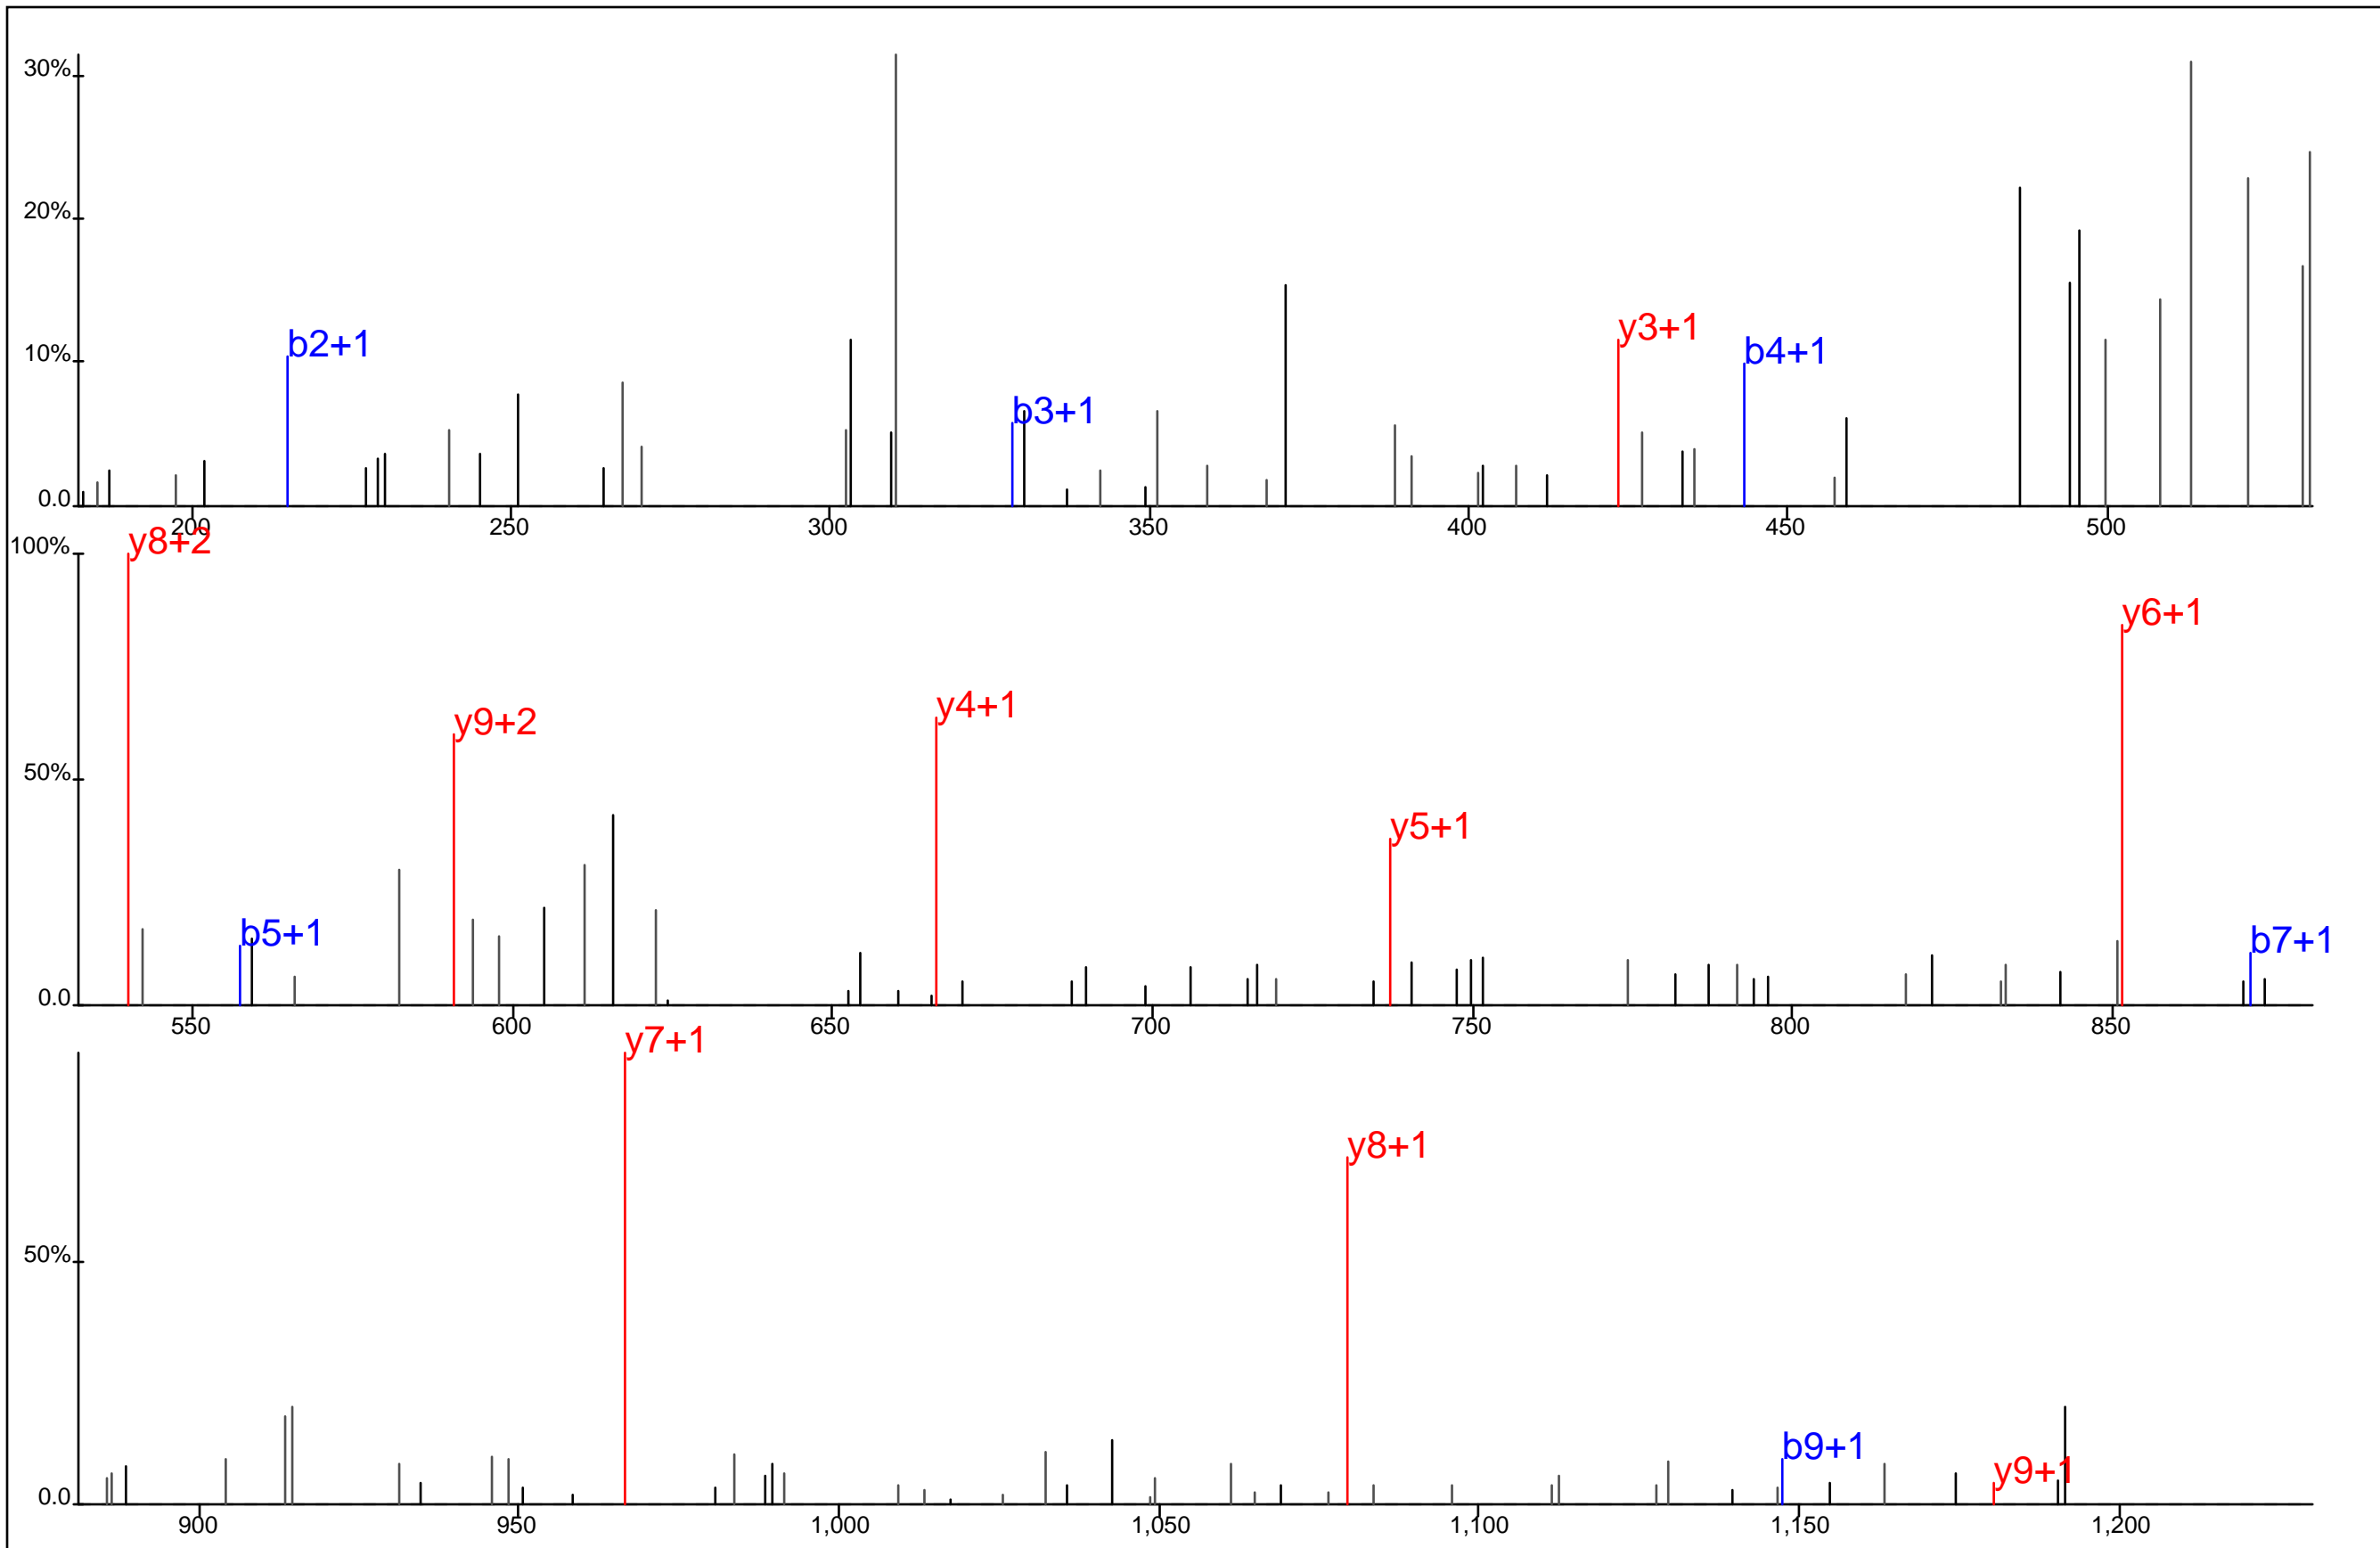

▢ ▢ ▢ ▢ ▢ ▢ ▢ ▢ ▢ ▢  
 I T L D N A Y\* M # E K  
▢ ▢ ▢ ▢ ▢ ▢ ▢ ▢ ▢ ▢

Protein Name: Pyruvate kinase 3  
 gi Accession: 0  
 Precursor Mass: 647.2775+2  
 Delta Mass: 3.436 ppm  
 XCorr: 53.59

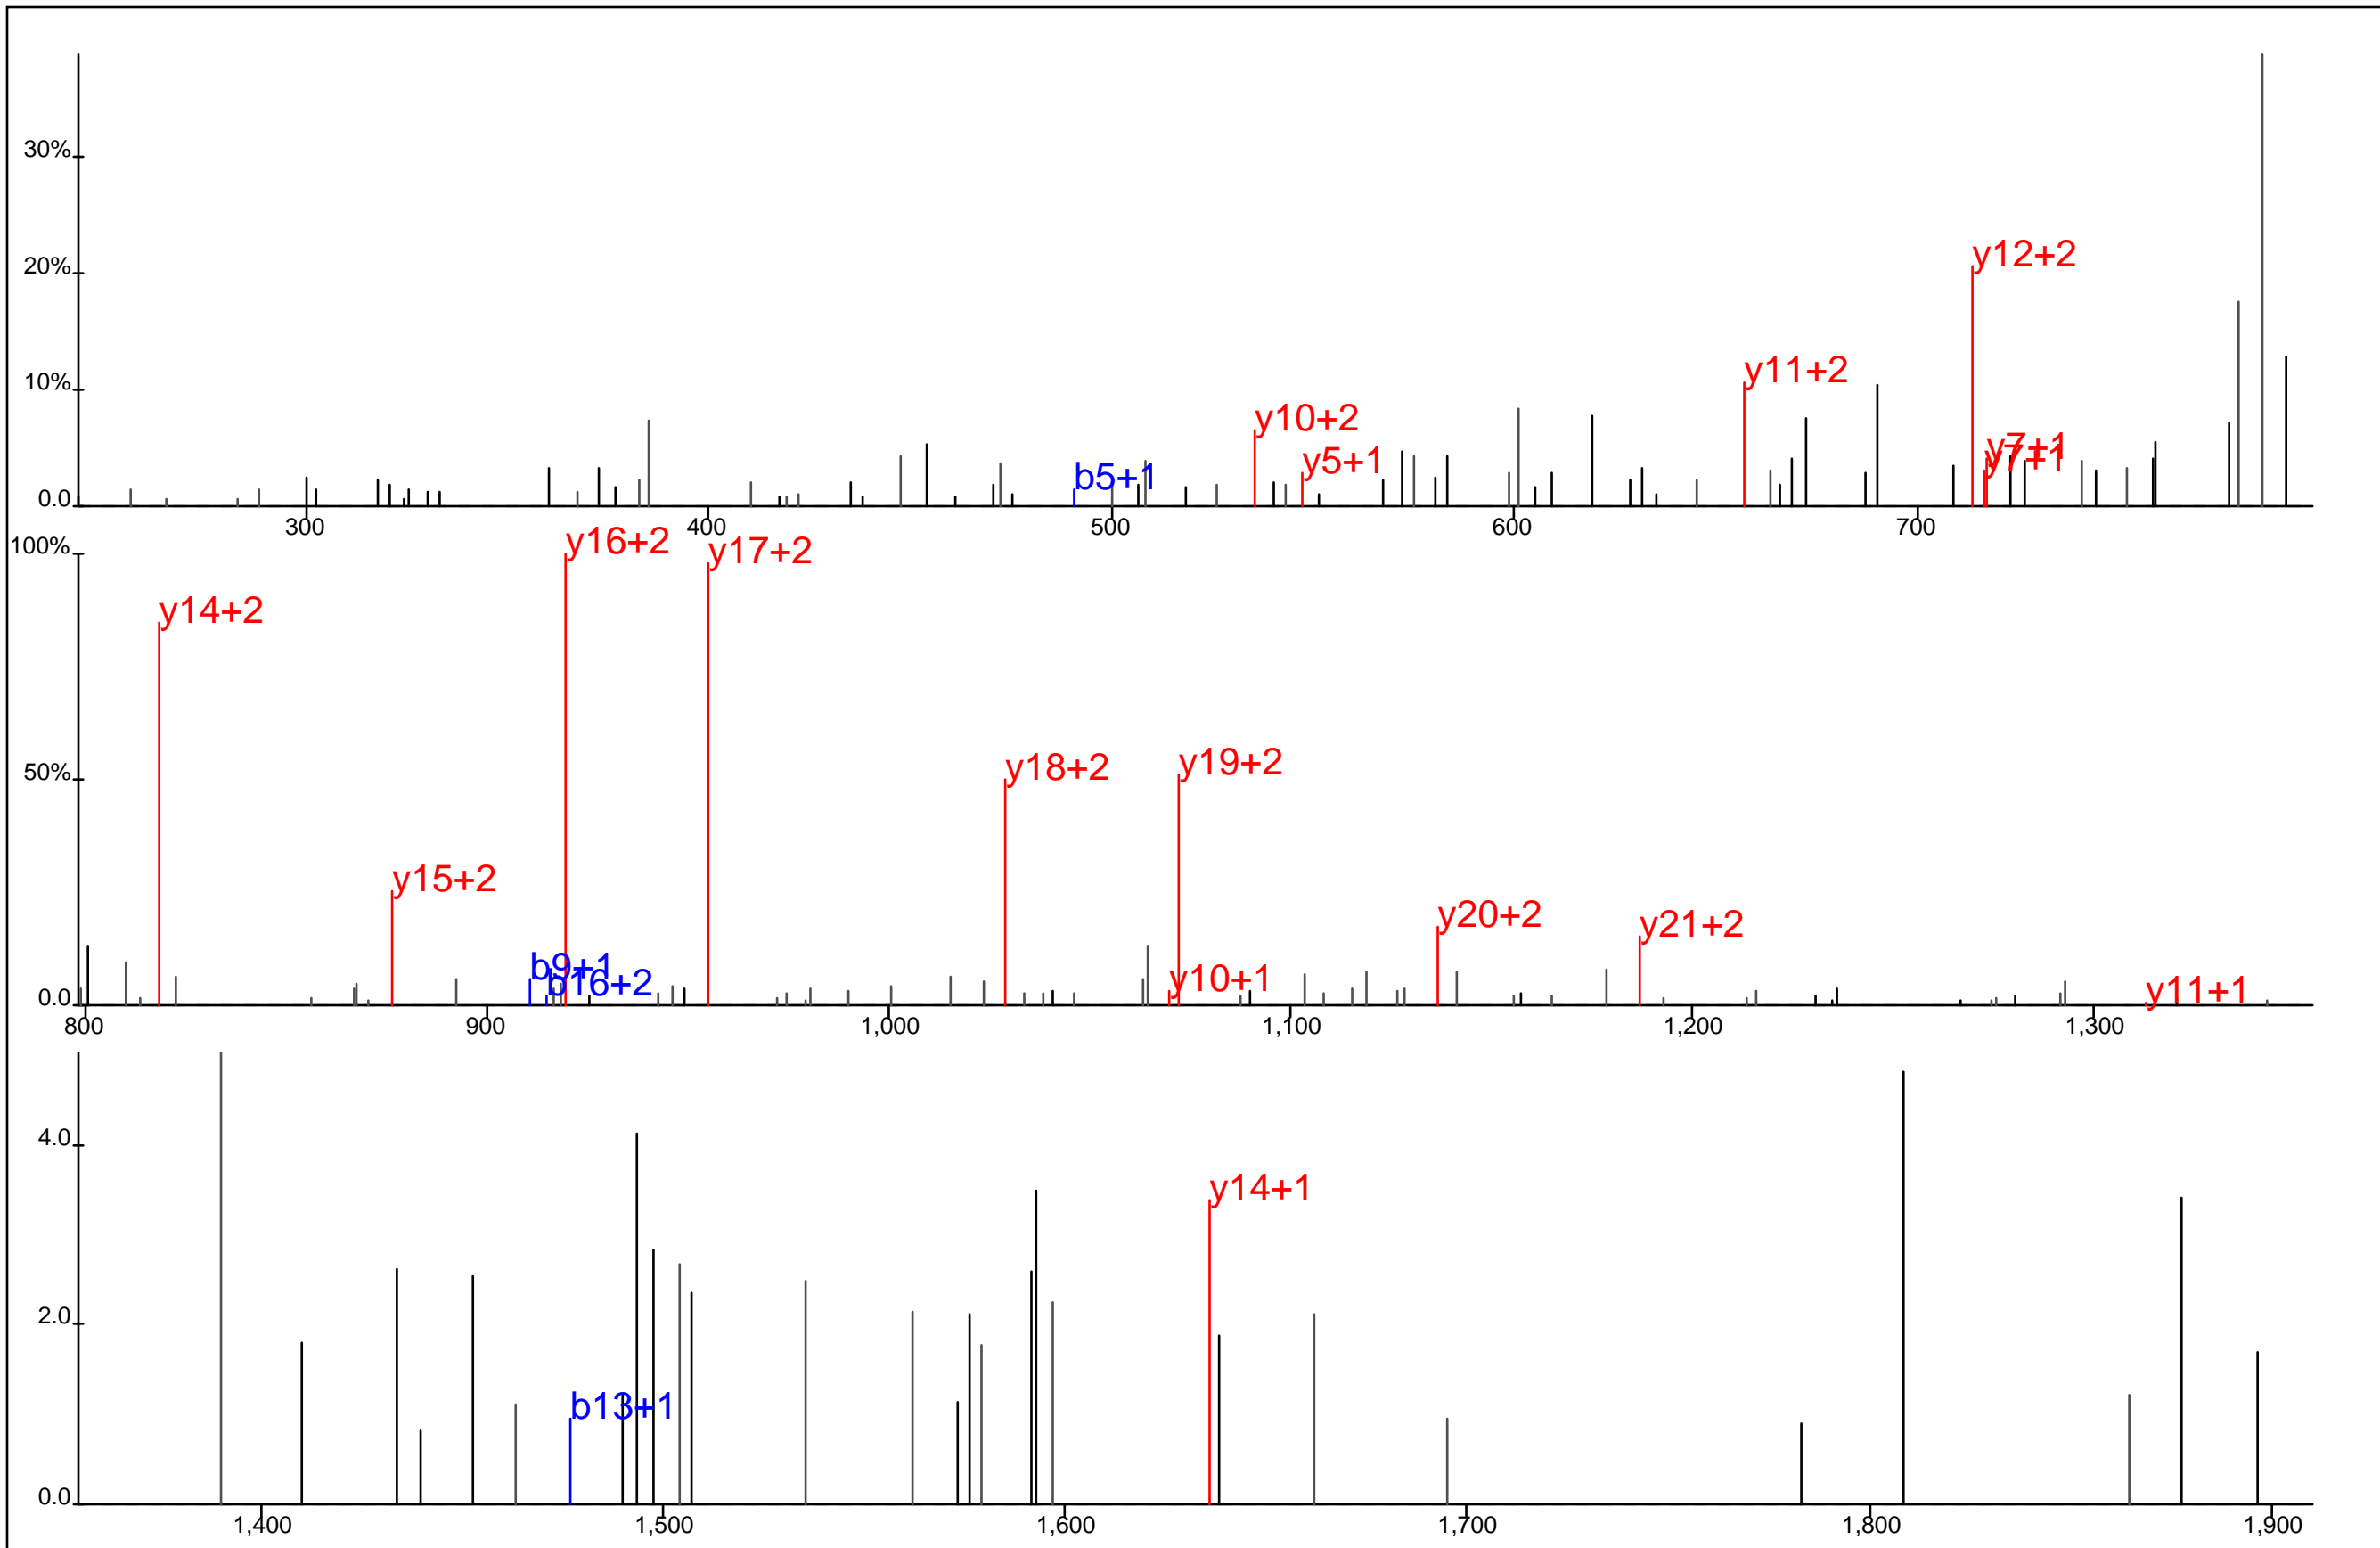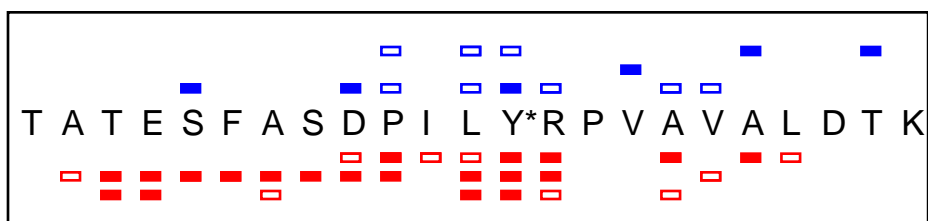

Protein Name: Pyruvate kinase 3  
 gi Accession: 0  
 Precursor Mass: 849.0911+3  
 Delta Mass: 0.110 ppm  
 XCorr: 46.59

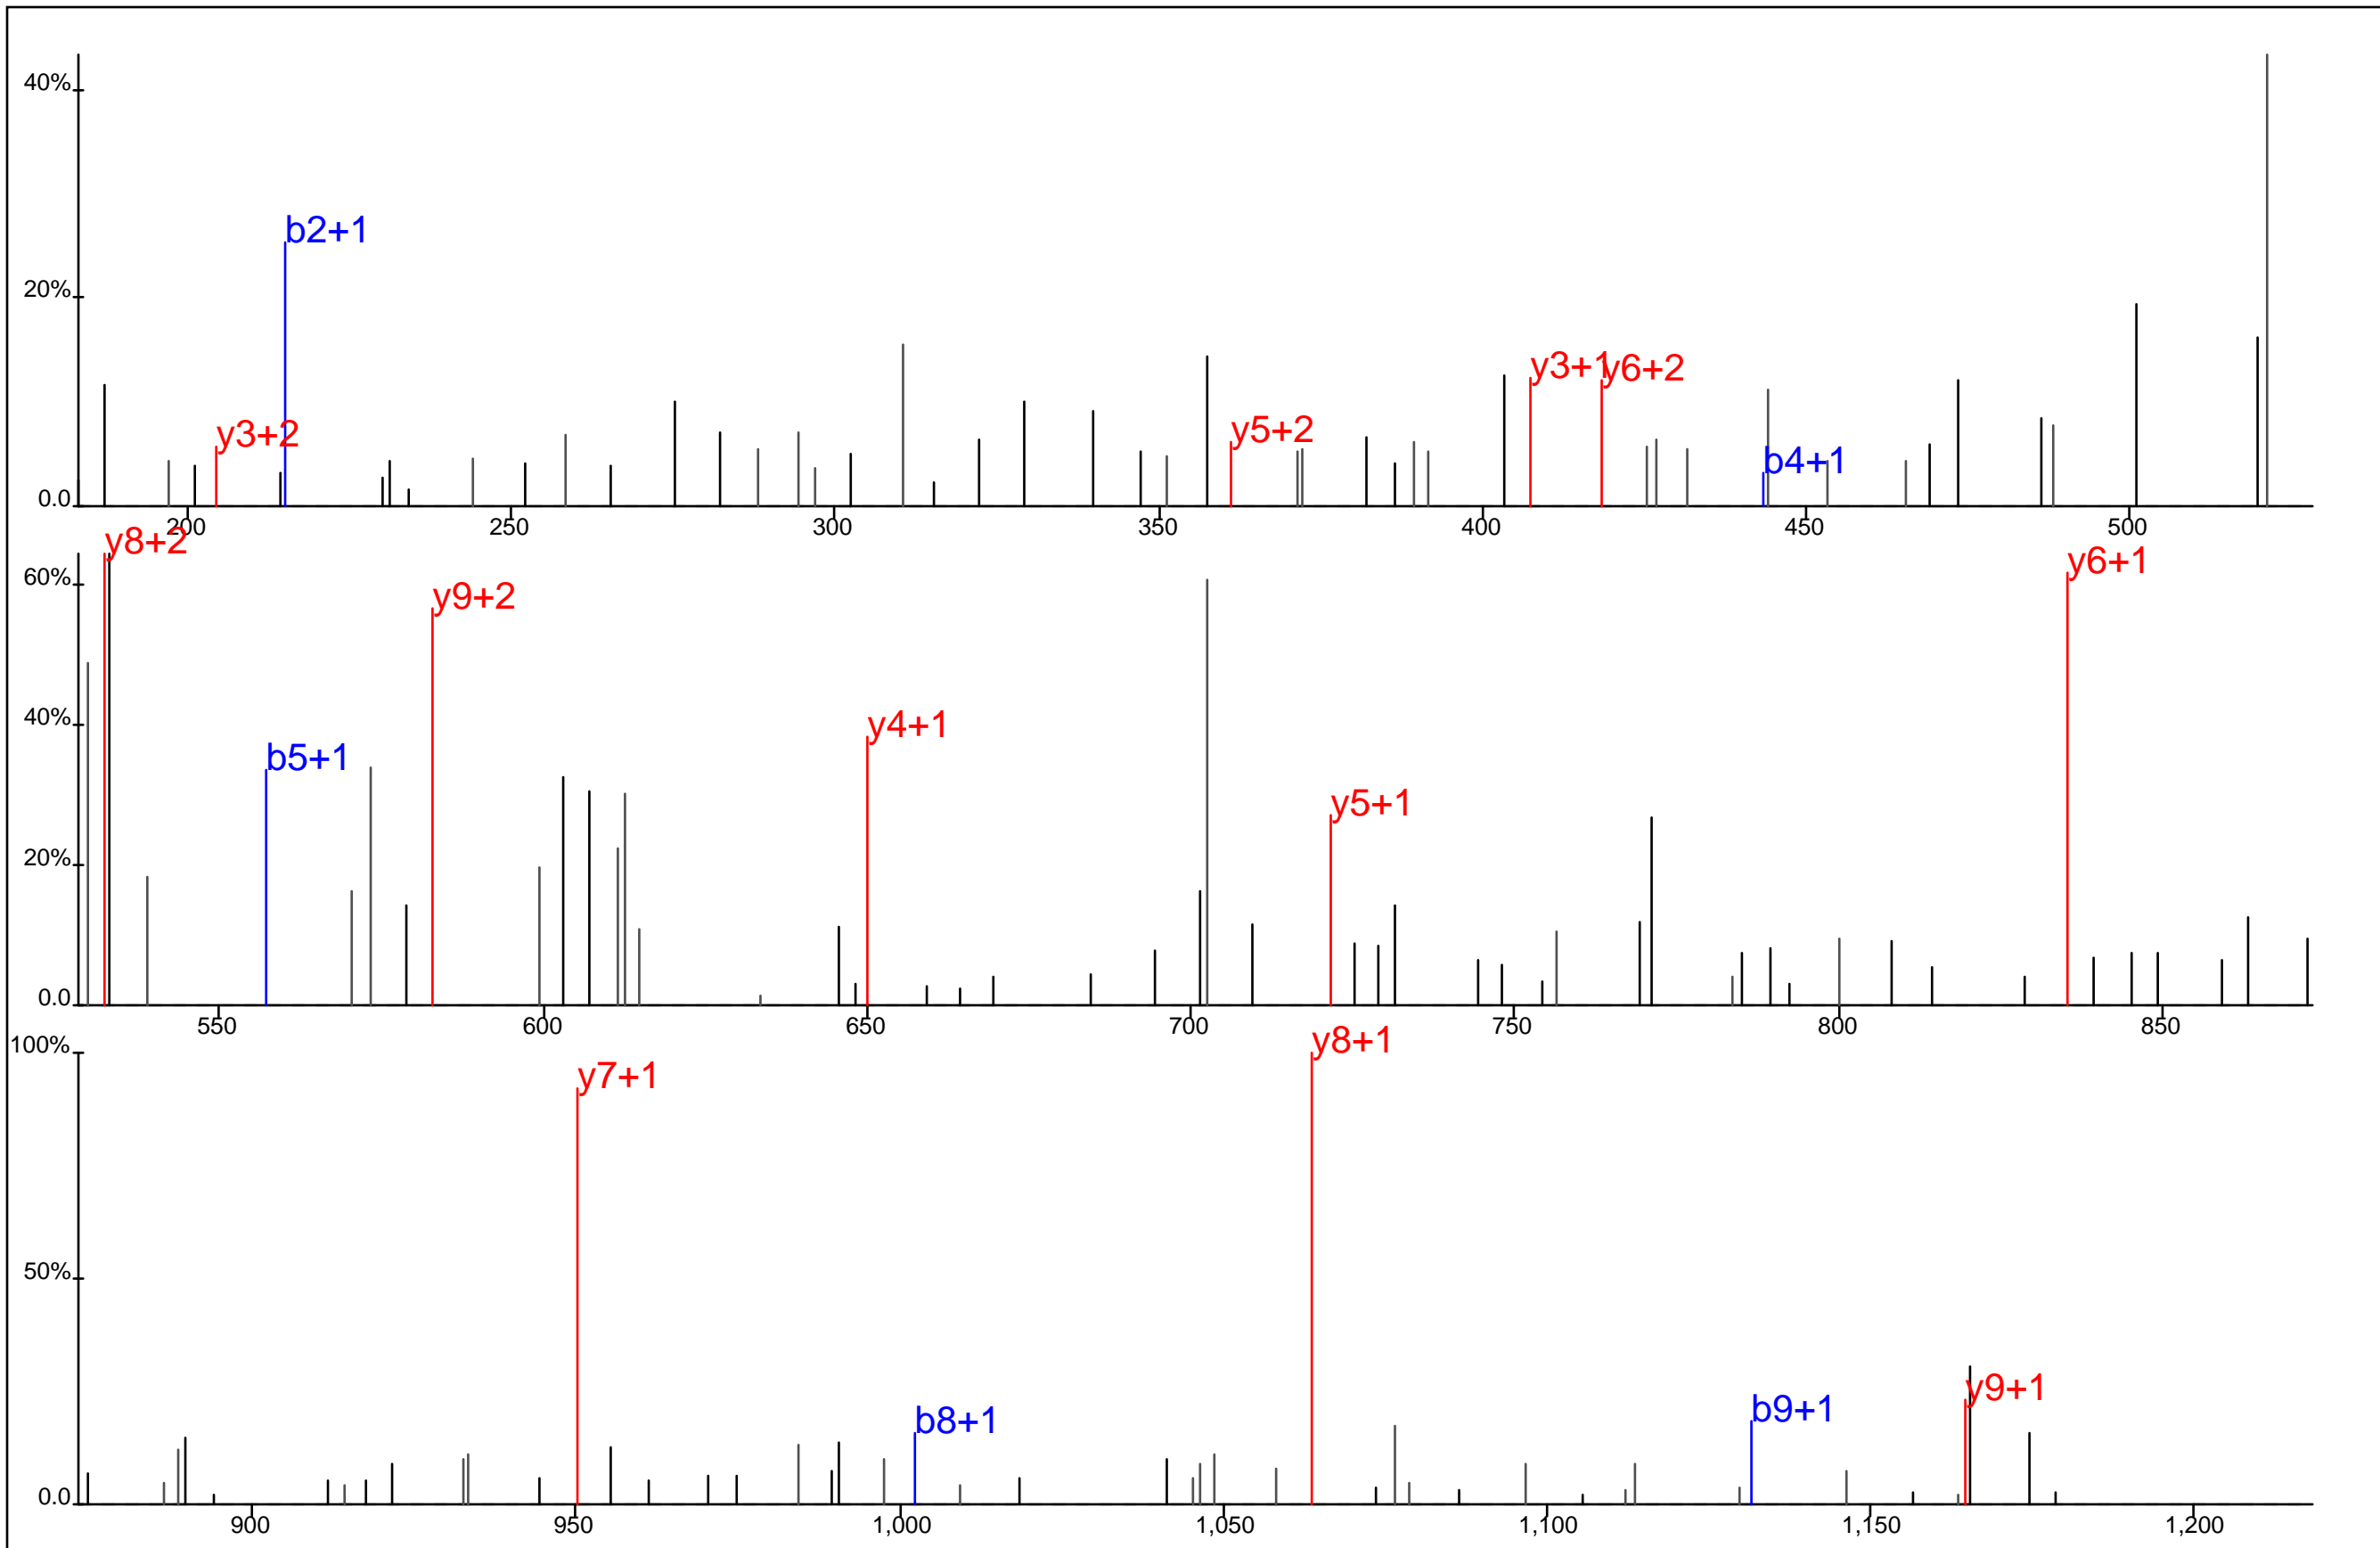

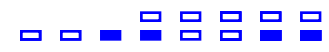
  
**I T L D N A Y\* M E K**
  


Protein Name: Pyruvate kinase 3  
 gi Accession: 0  
 Precursor Mass: 639.2759+2  
 Delta Mass: 2.982 ppm  
 XCorr: 34.72

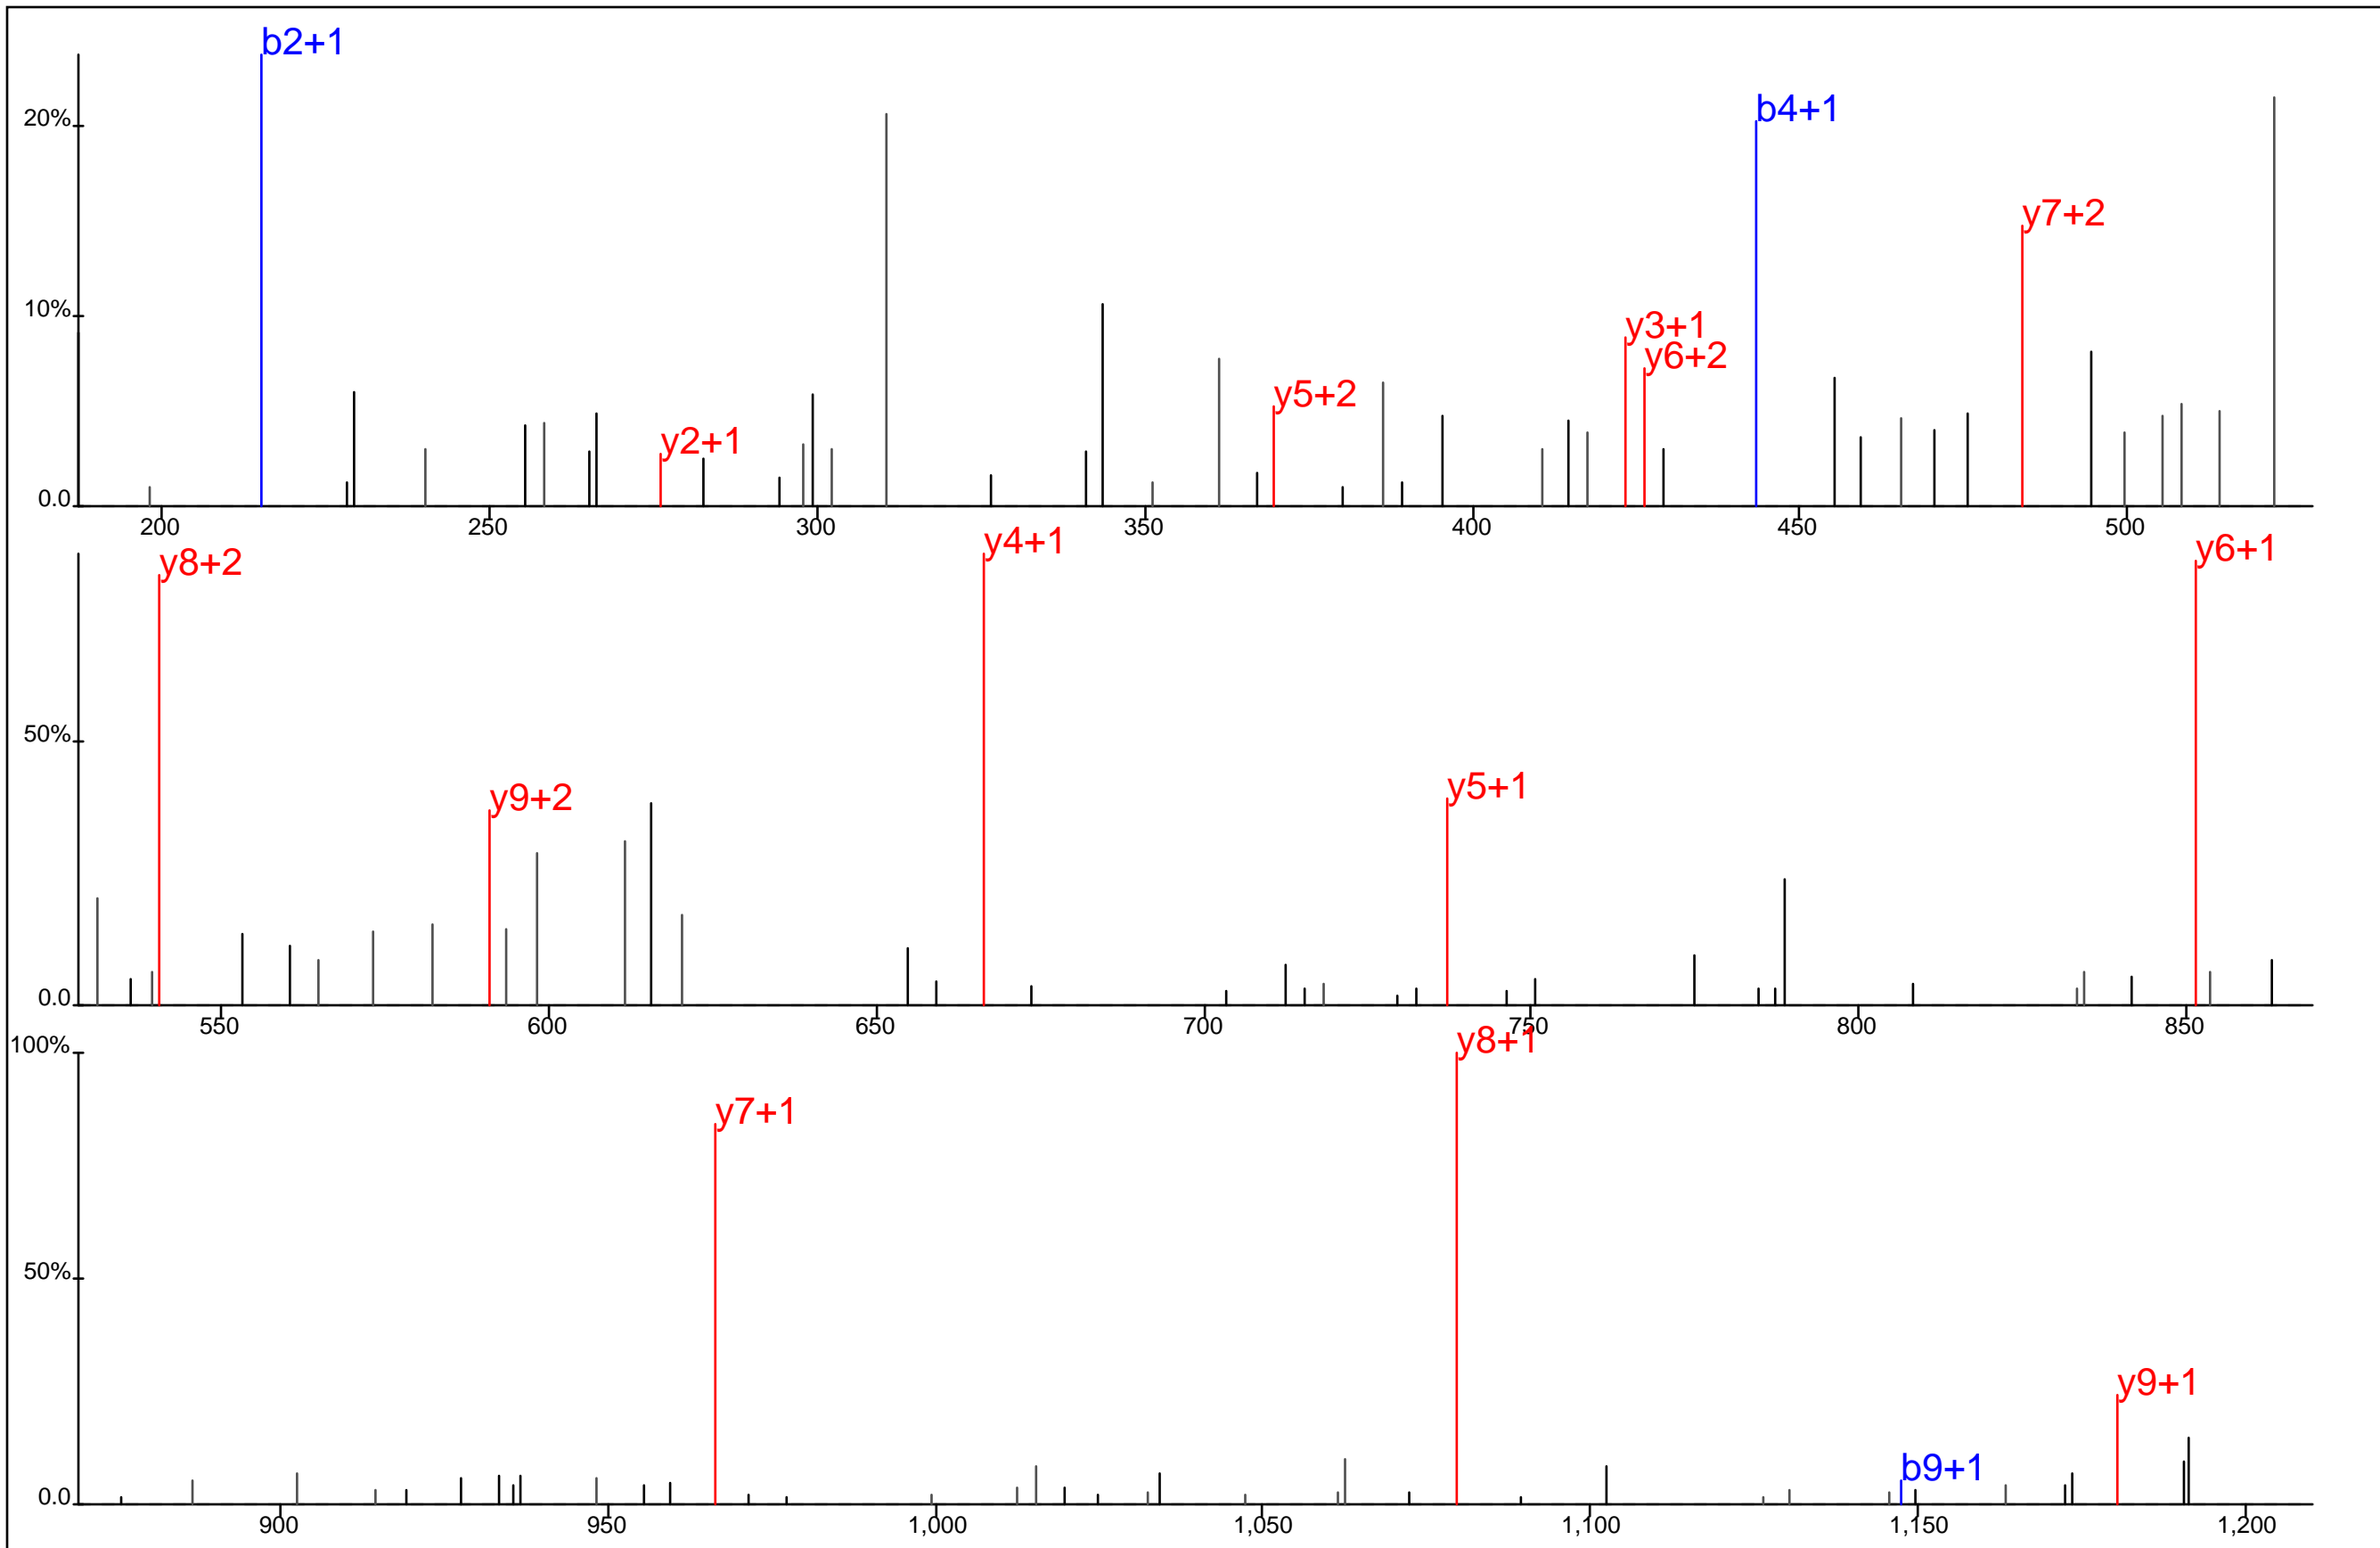

■ □ ▤ ▥ ▦ ▧ ▨ ▩  
■ □ ▤ ▥ ▦ ▧ ▨ ▩

Protein Name: Pyruvate kinase 3  
 gi Accession: 0  
 Precursor Mass: 647.2736+2  
 Delta Mass: 2.509 ppm  
 XCorr: 54.7

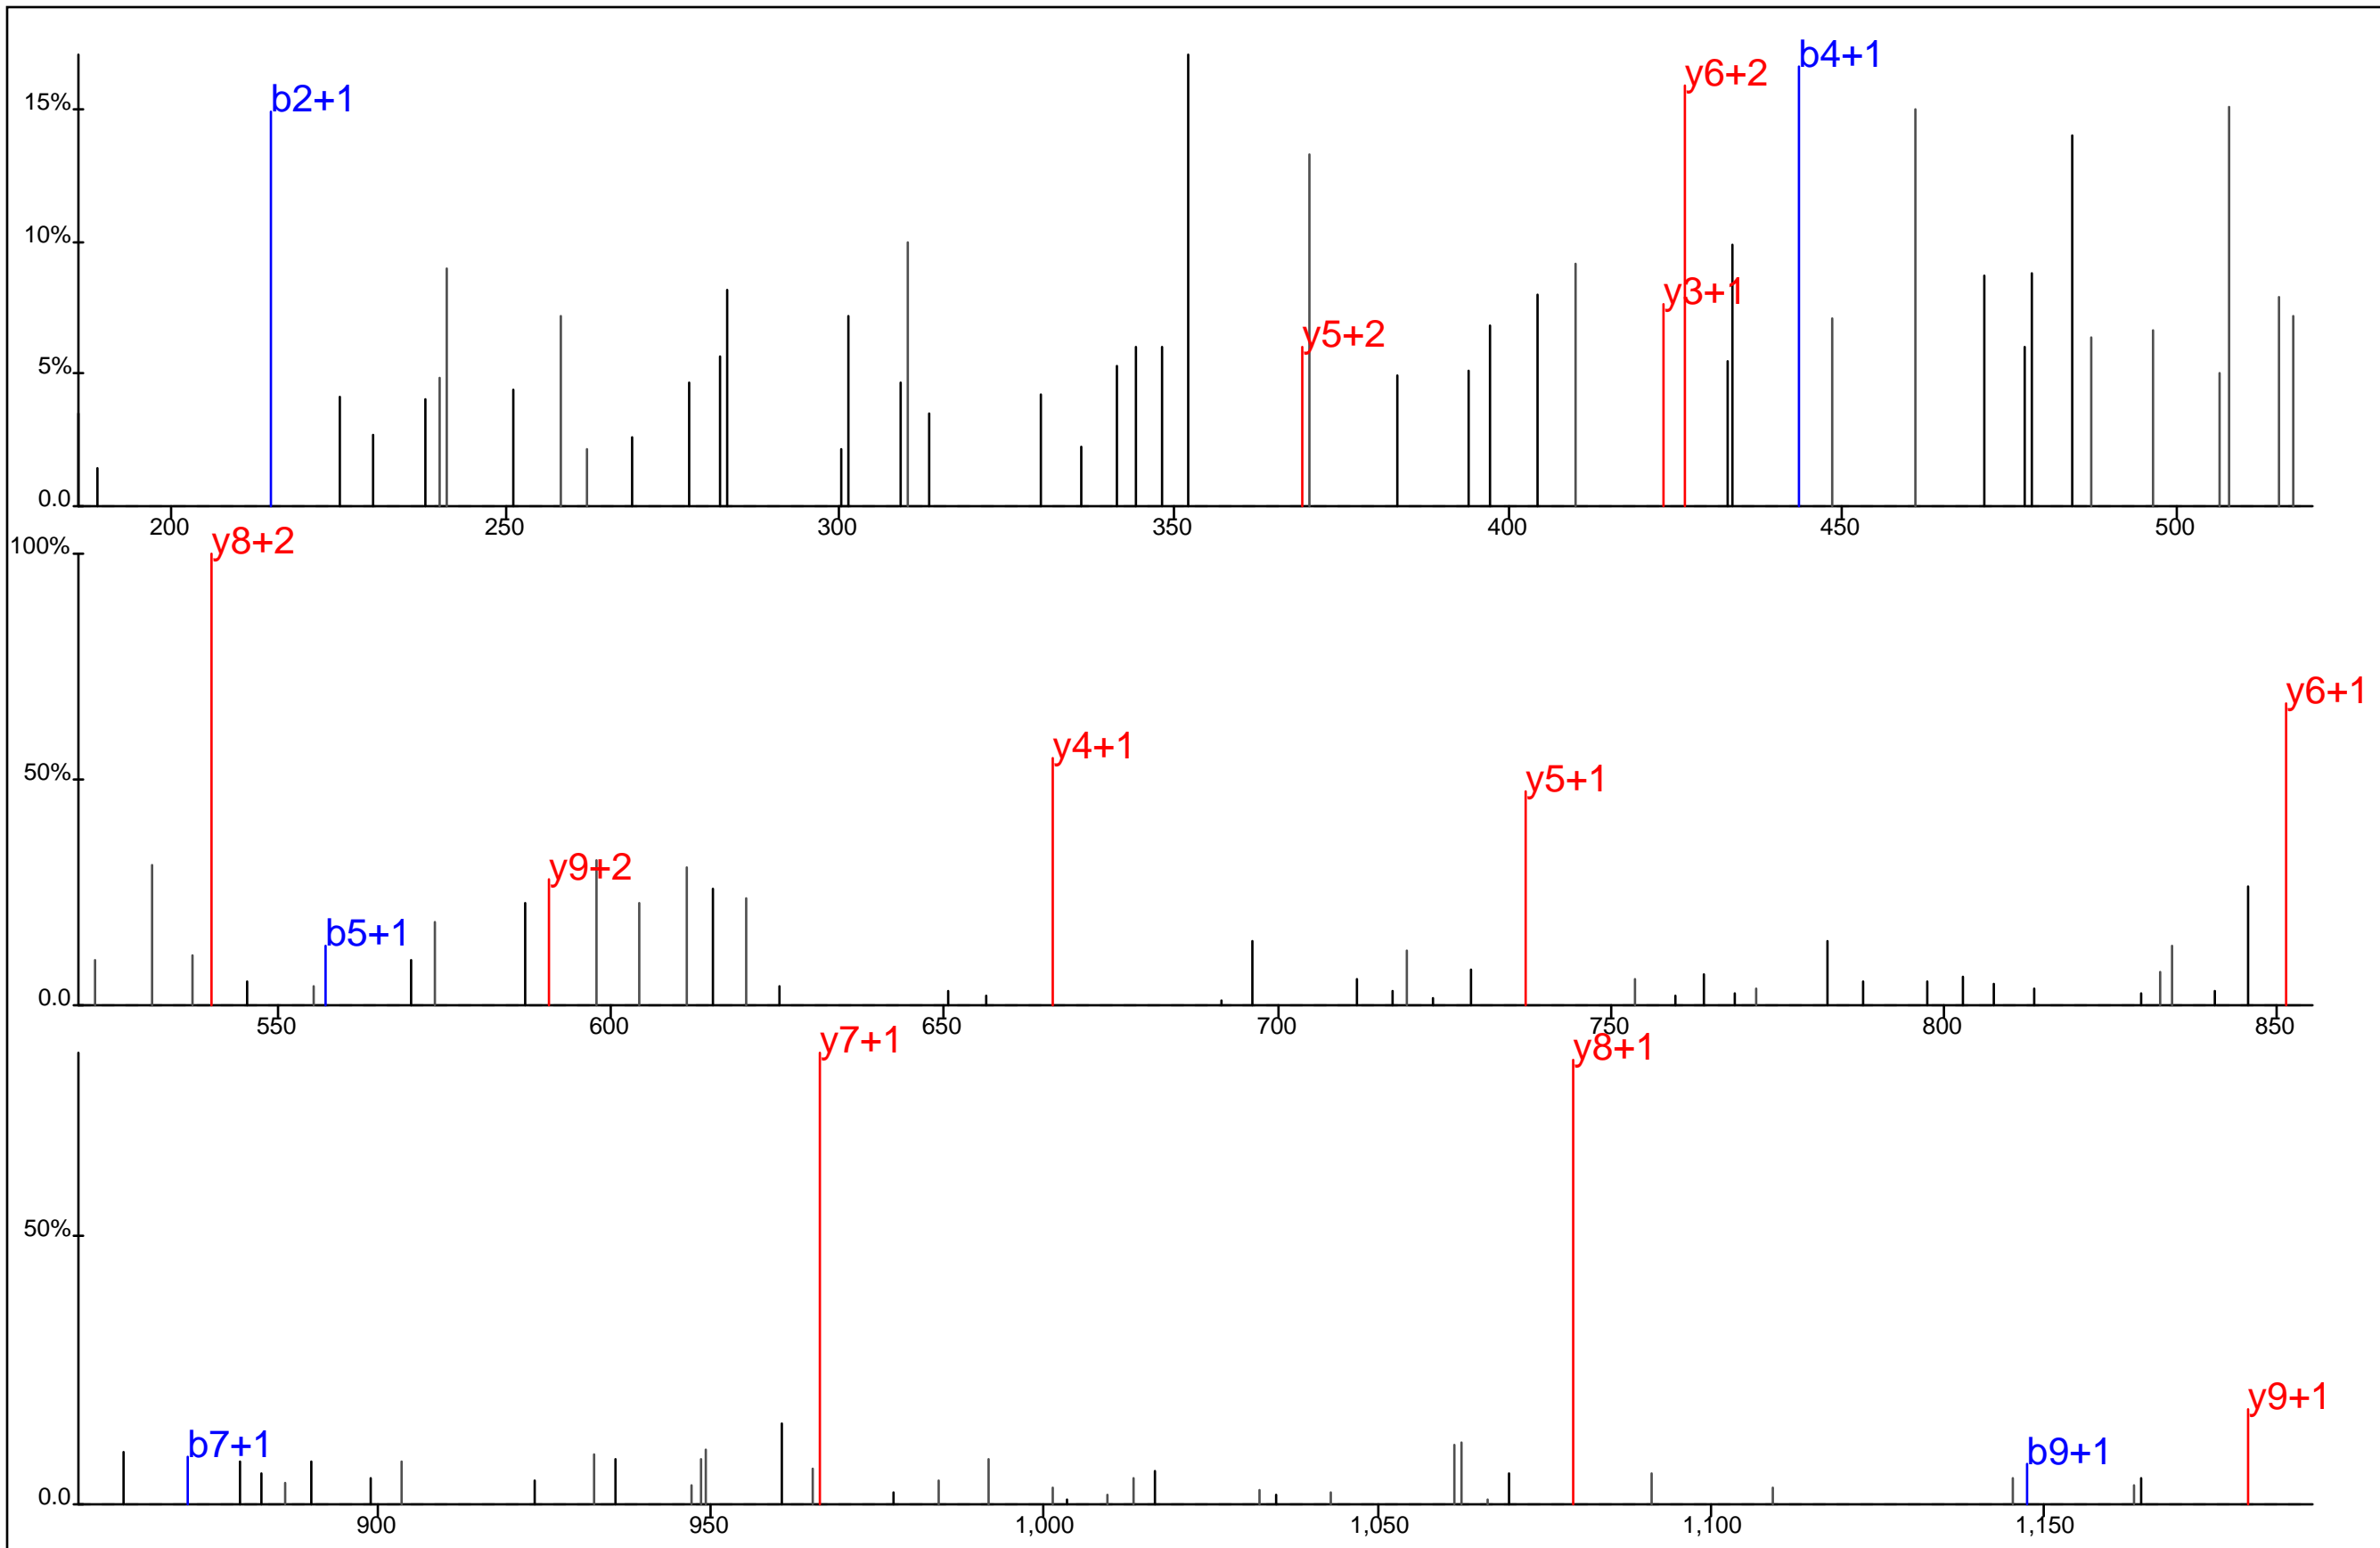

▢ ▢ ▢ ▢ ▢ ▢ ▢ ▢  
▢ ▢ ▢ ▢ ▢ ▢ ▢ ▢  
**I T L D N A Y\* M # E K**

Protein Name: Pyruvate kinase 3  
 gi Accession: 0  
 Precursor Mass: 647.2762+2  
 Delta Mass: 1.548 ppm  
 XCorr: 49.57

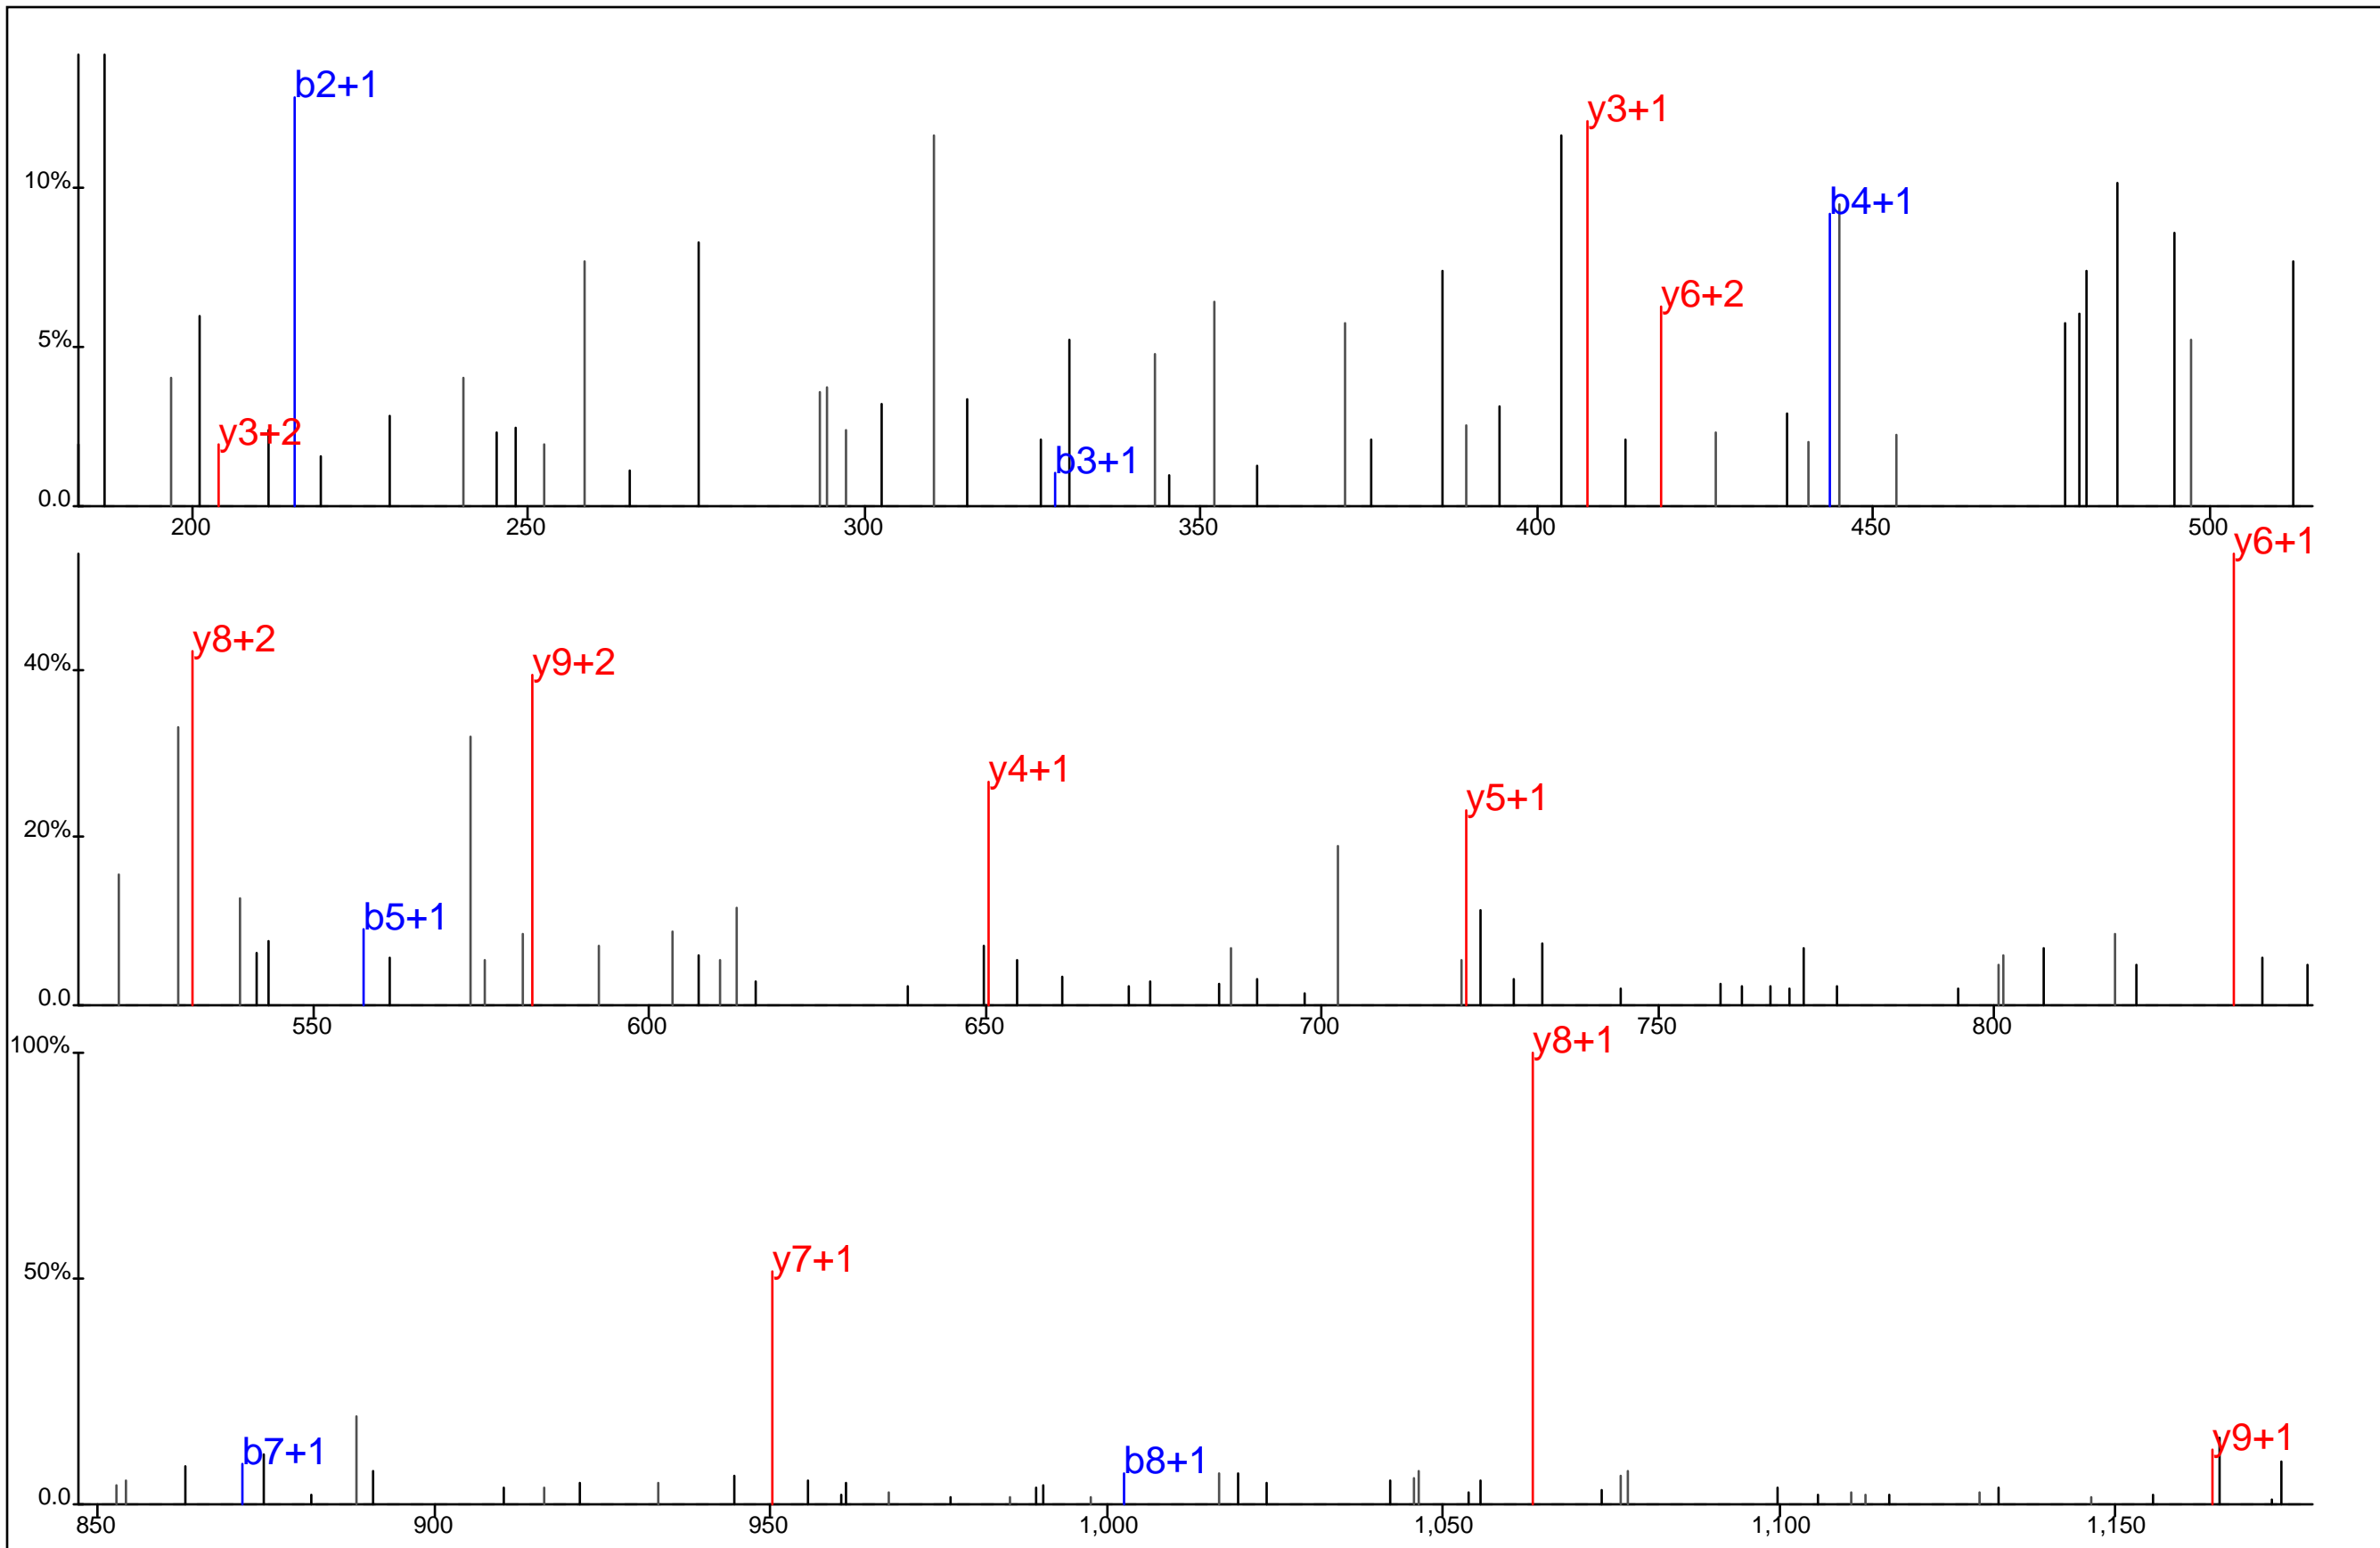

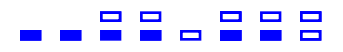
  
**I T L D N A Y\* M E K**
  


Protein Name: Pyruvate kinase 3  
 gi Accession: 0  
 Precursor Mass: 639.2775+2  
 Delta Mass: 0.498 ppm  
 XCorr: 42.29

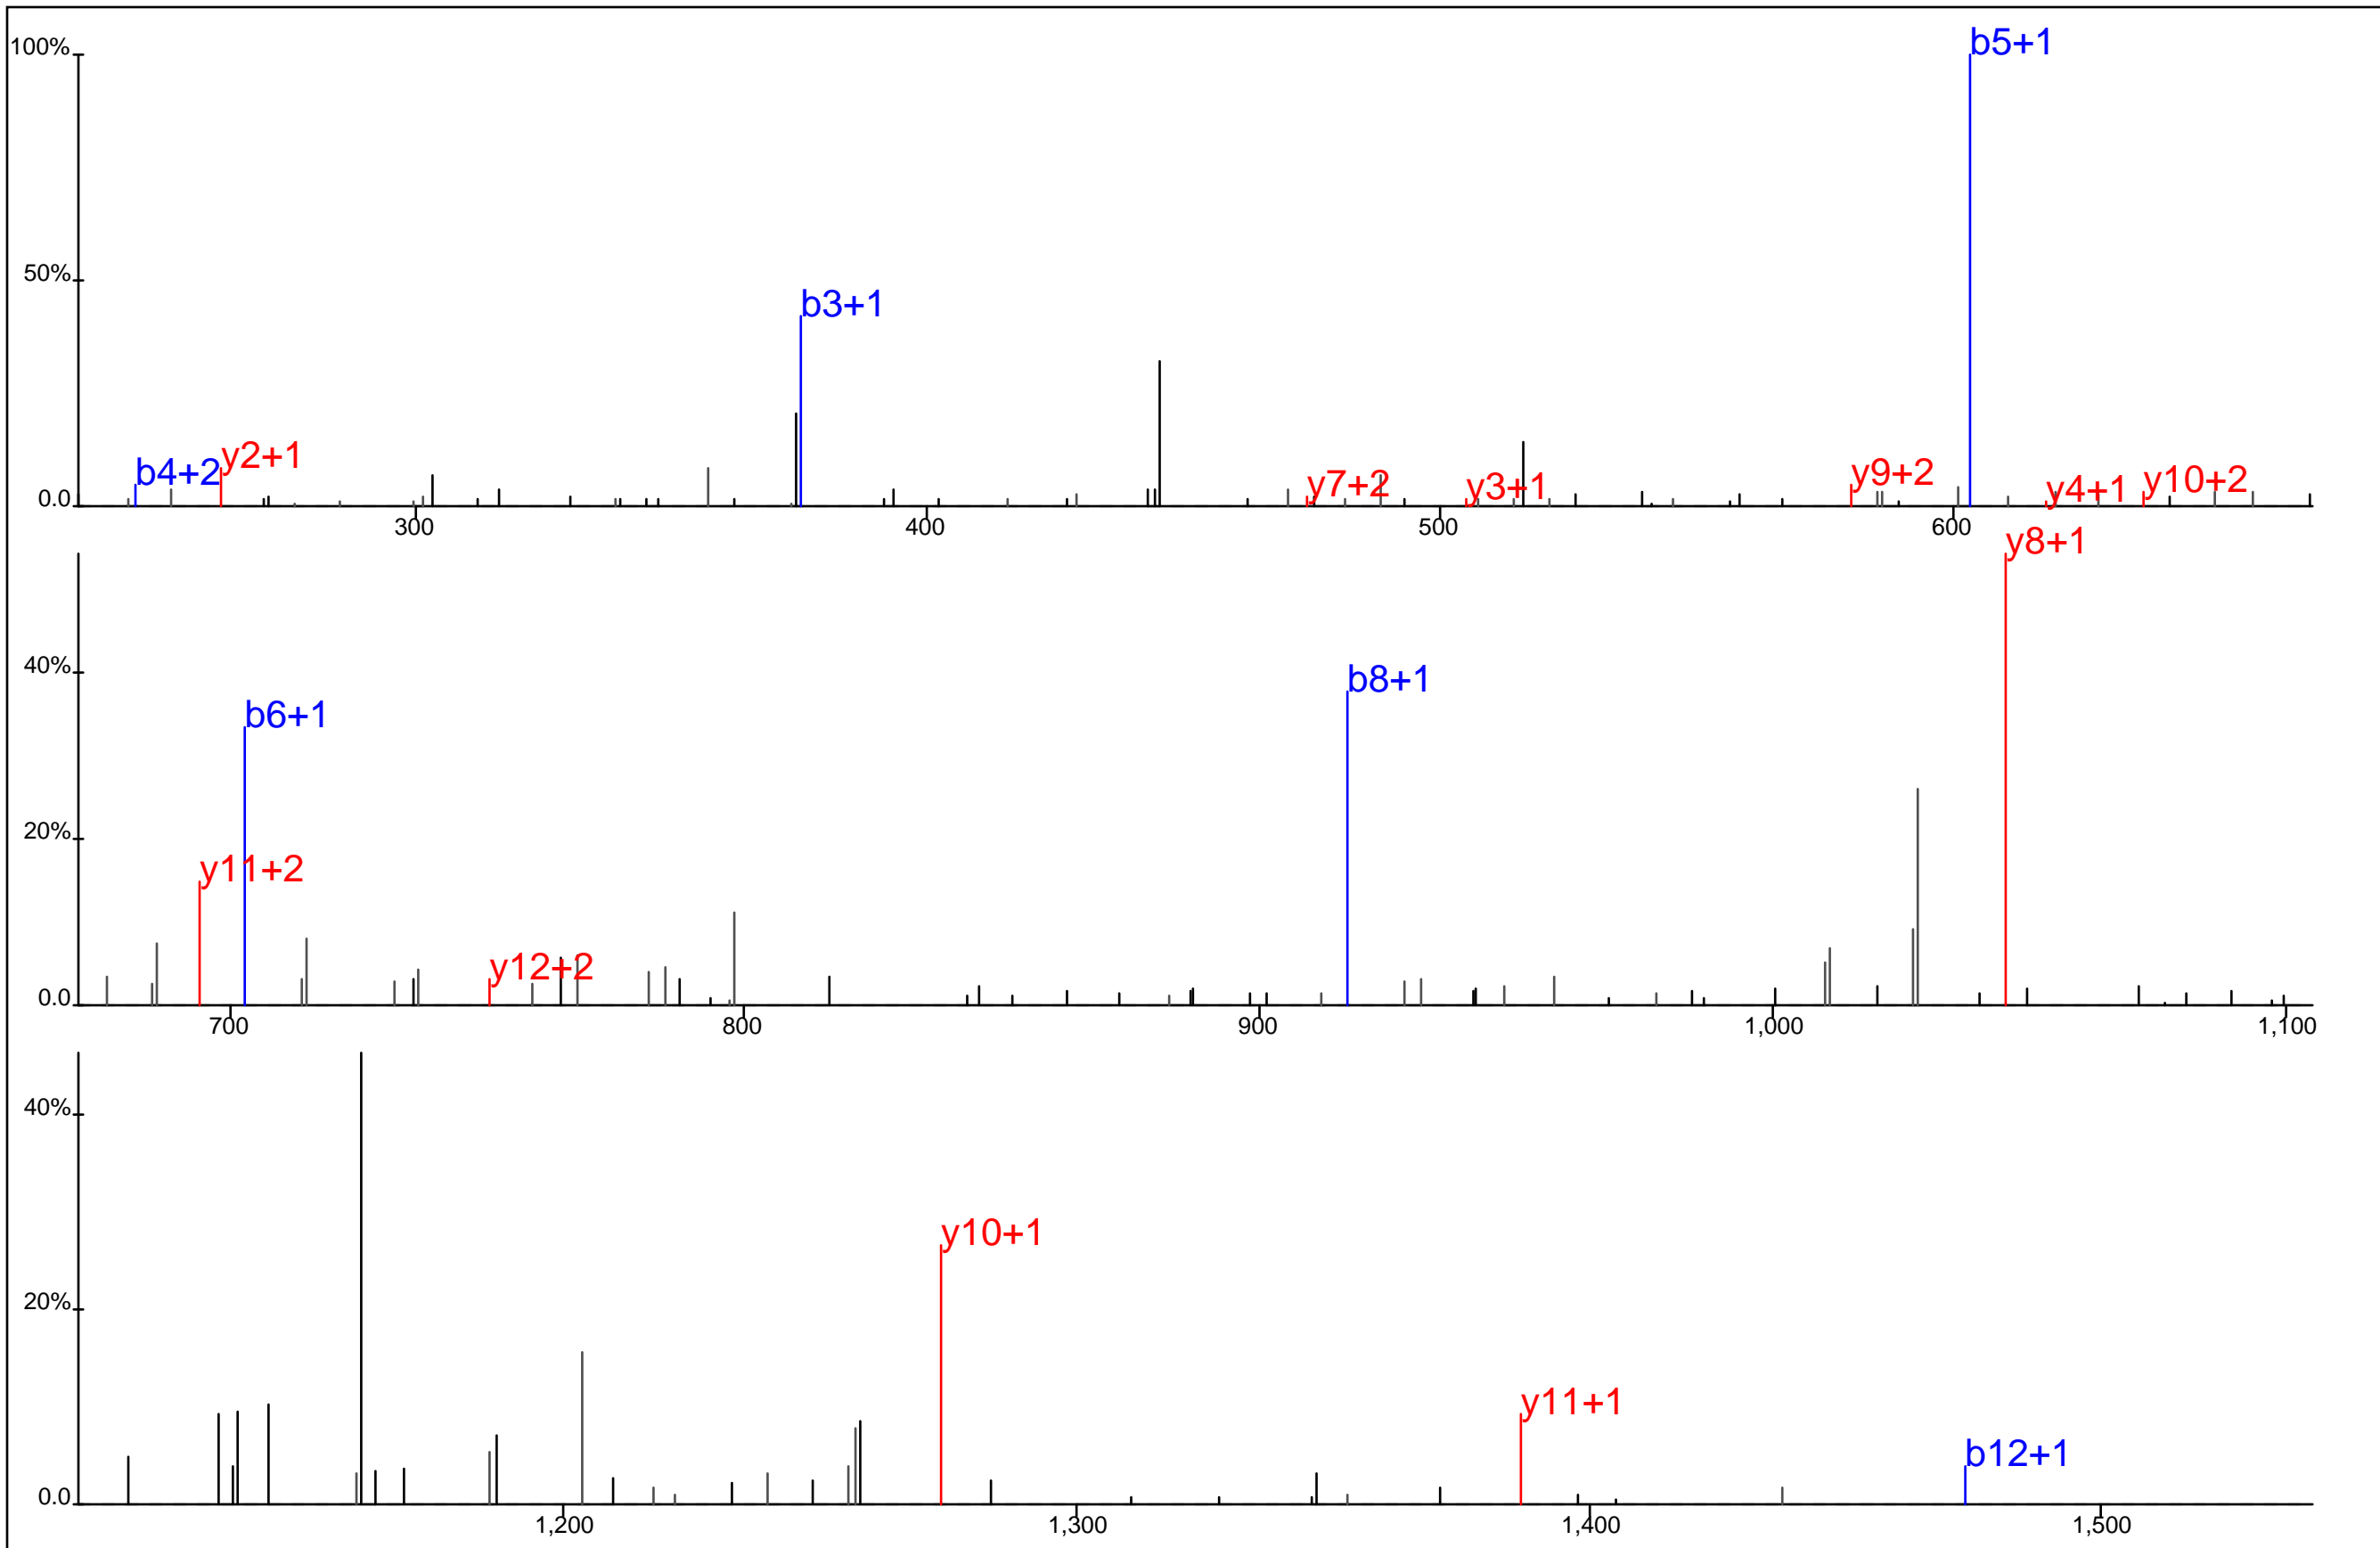

**F N I D L V S K L L Y\* S R**

Protein Name: Rab geranylgeranyltransferase, component A  
 gi Accession: 0  
 Precursor Mass: 824.4322+2  
 Delta Mass: 3.976 ppm  
 XCorr: 51.76



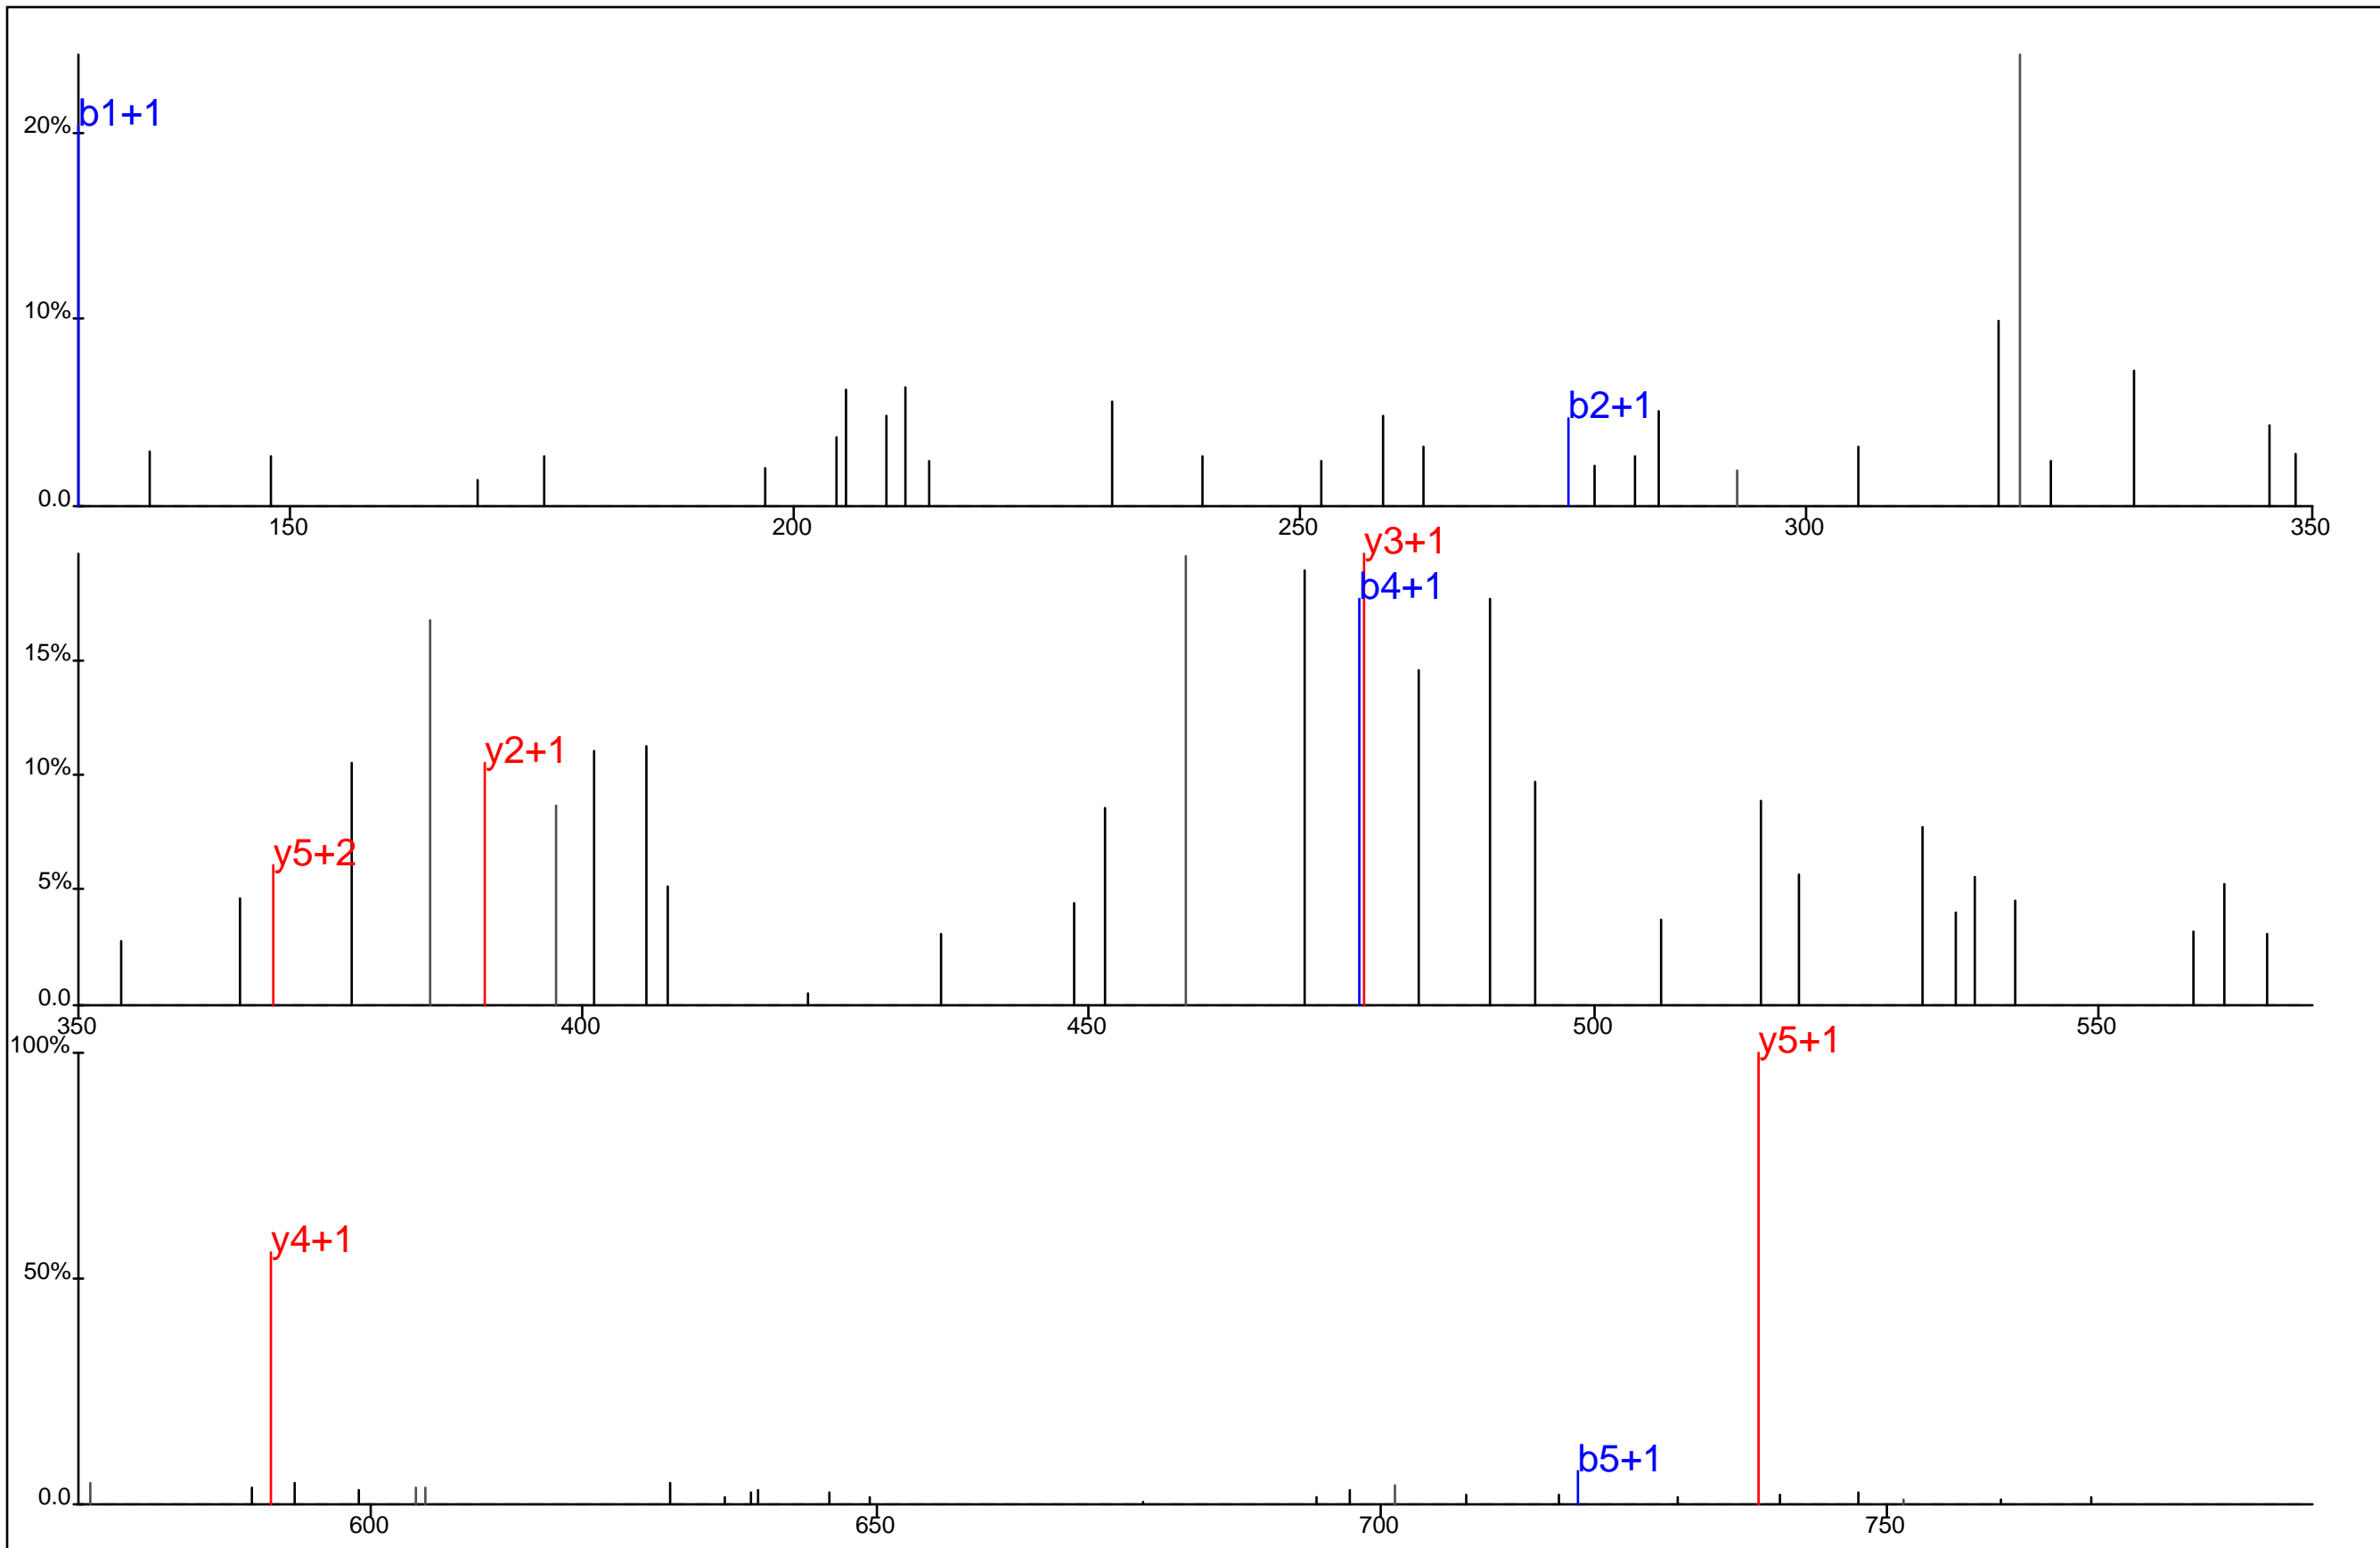

■ ■ ■ ■  
 K F L S Y\* K  
□ □ □ □

Protein Name: RAD18  
 gi Accession: 0  
 Precursor Mass: 433.2150+2  
 Delta Mass: 1.012 ppm  
 XCorr: 20.87

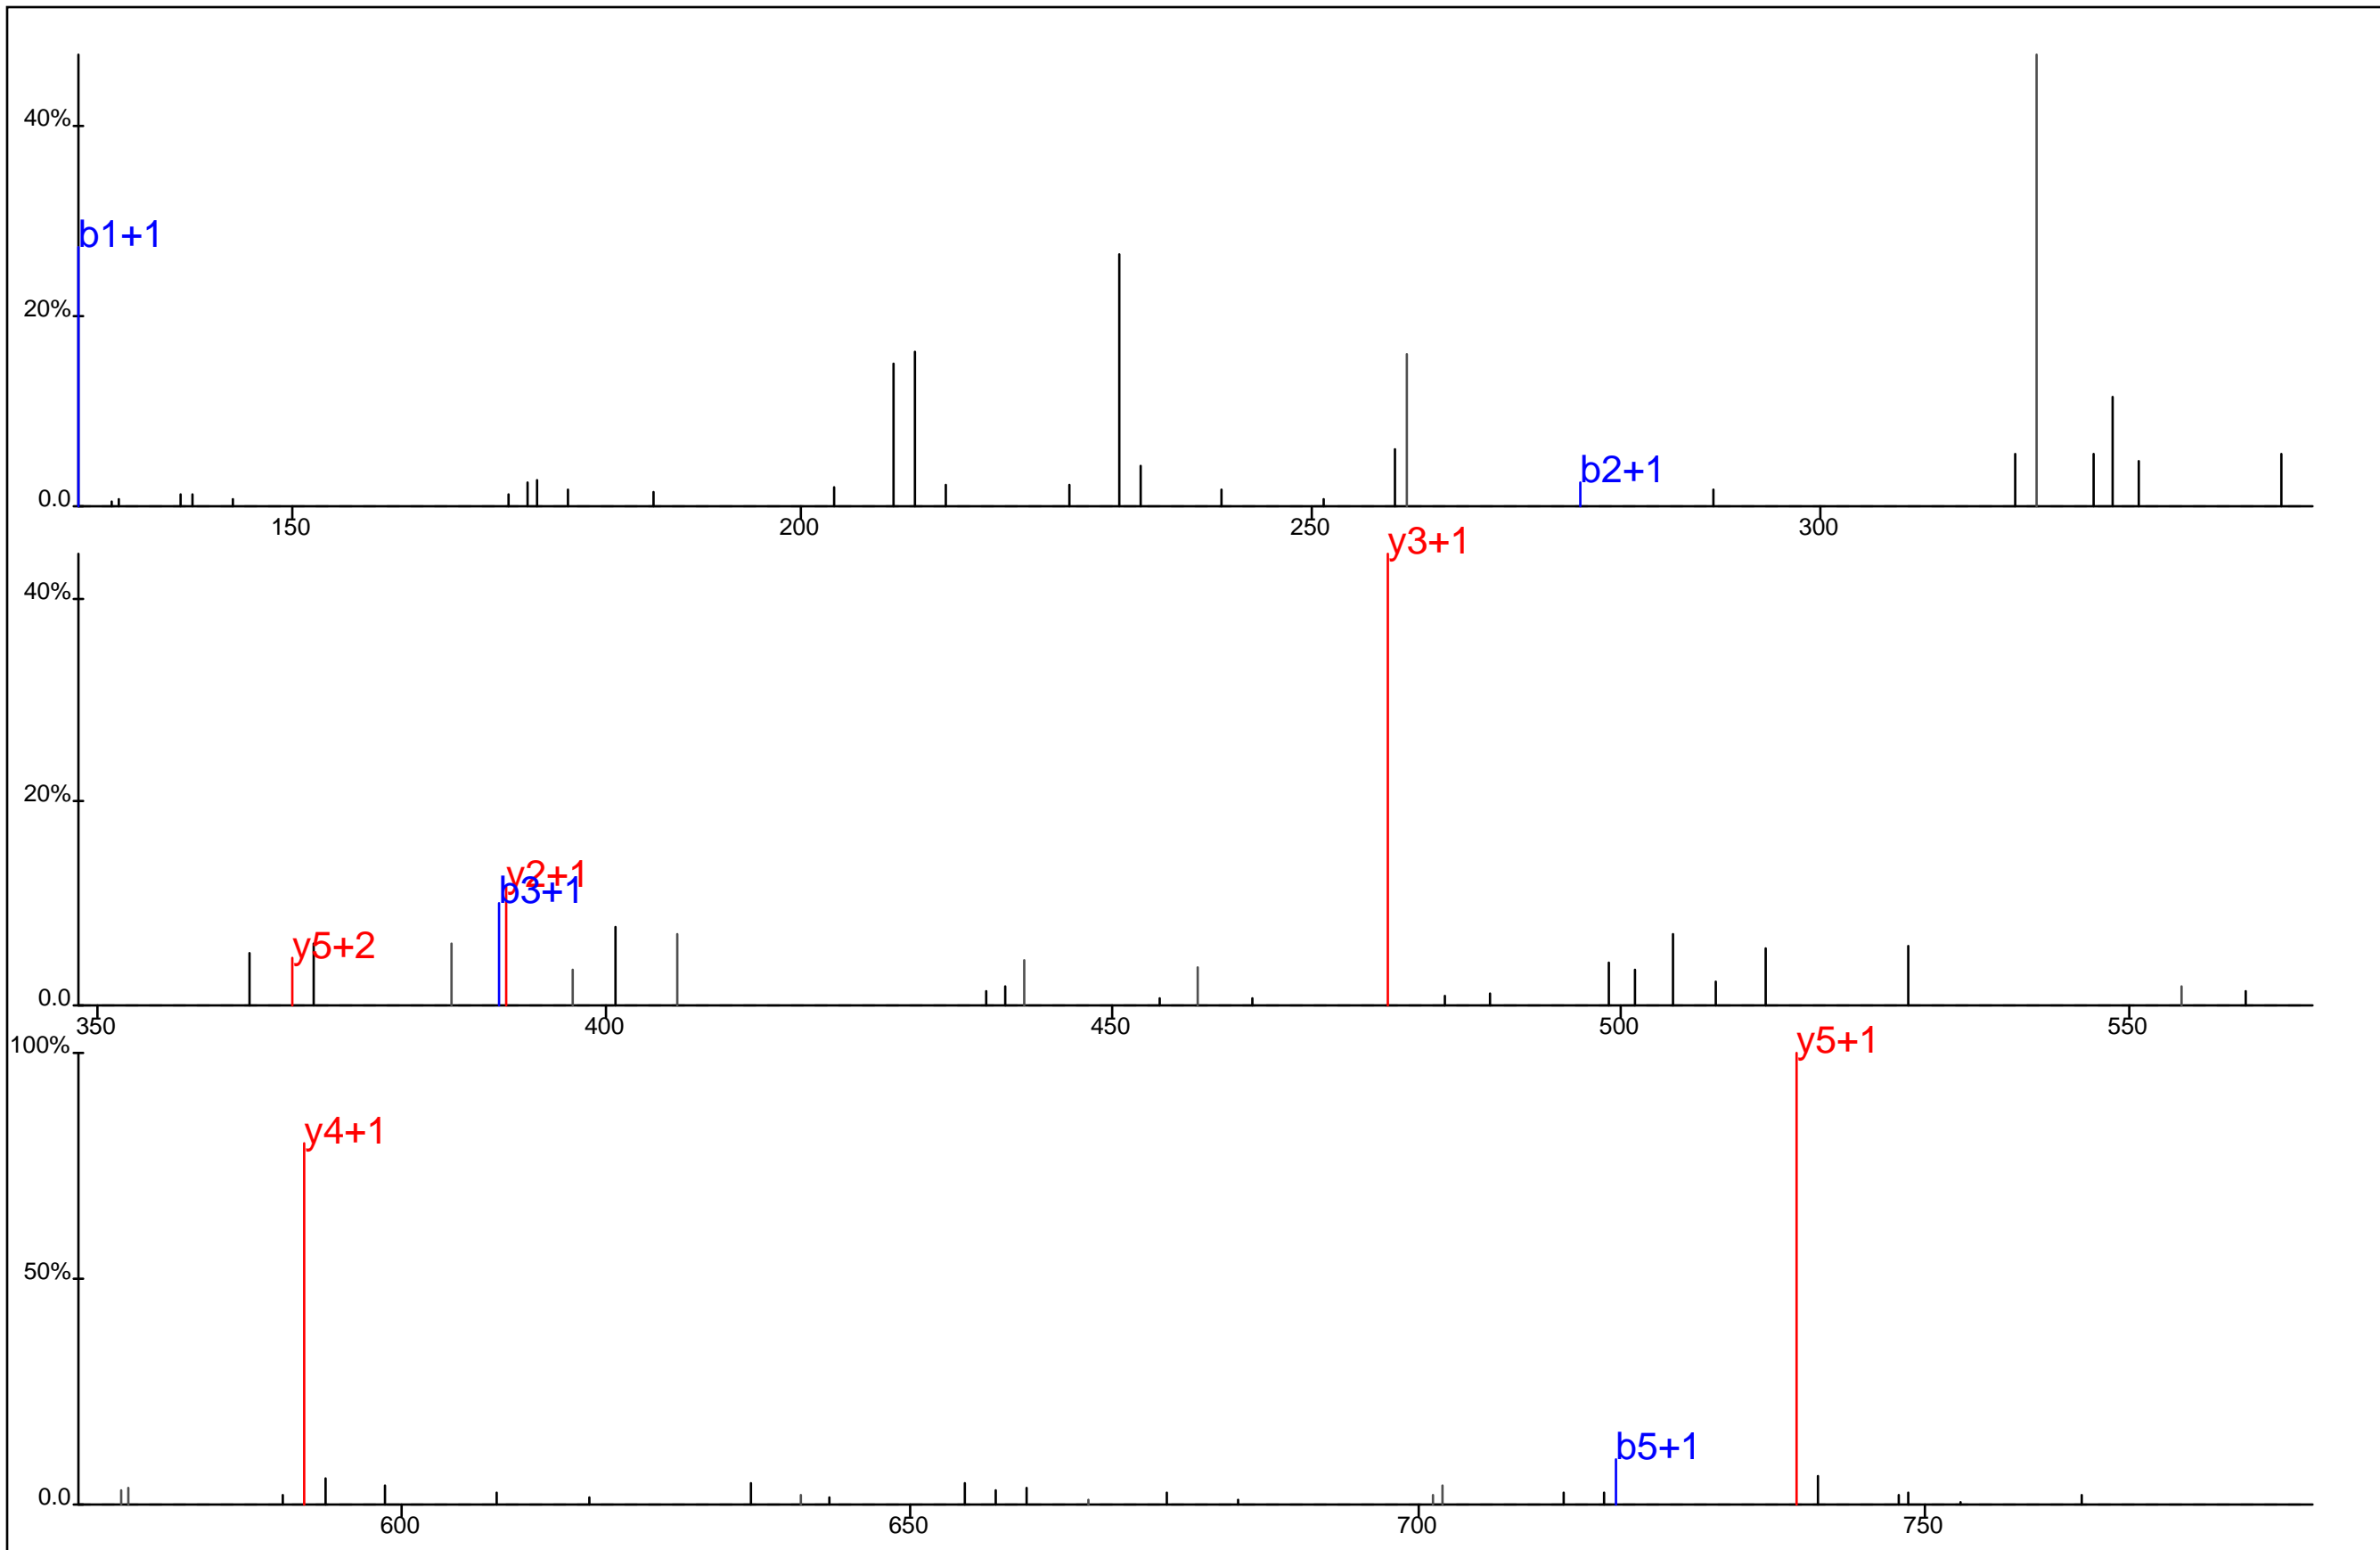

▢ ▢ ▢ ▢ ▢  
 K F L S Y\* K  
▢ ▢ ▢ ▢ ▢

Protein Name: RAD18  
 gi Accession: 0  
 Precursor Mass: 433.2148+2  
 Delta Mass: 0.589 ppm  
 XCorr: 34.9





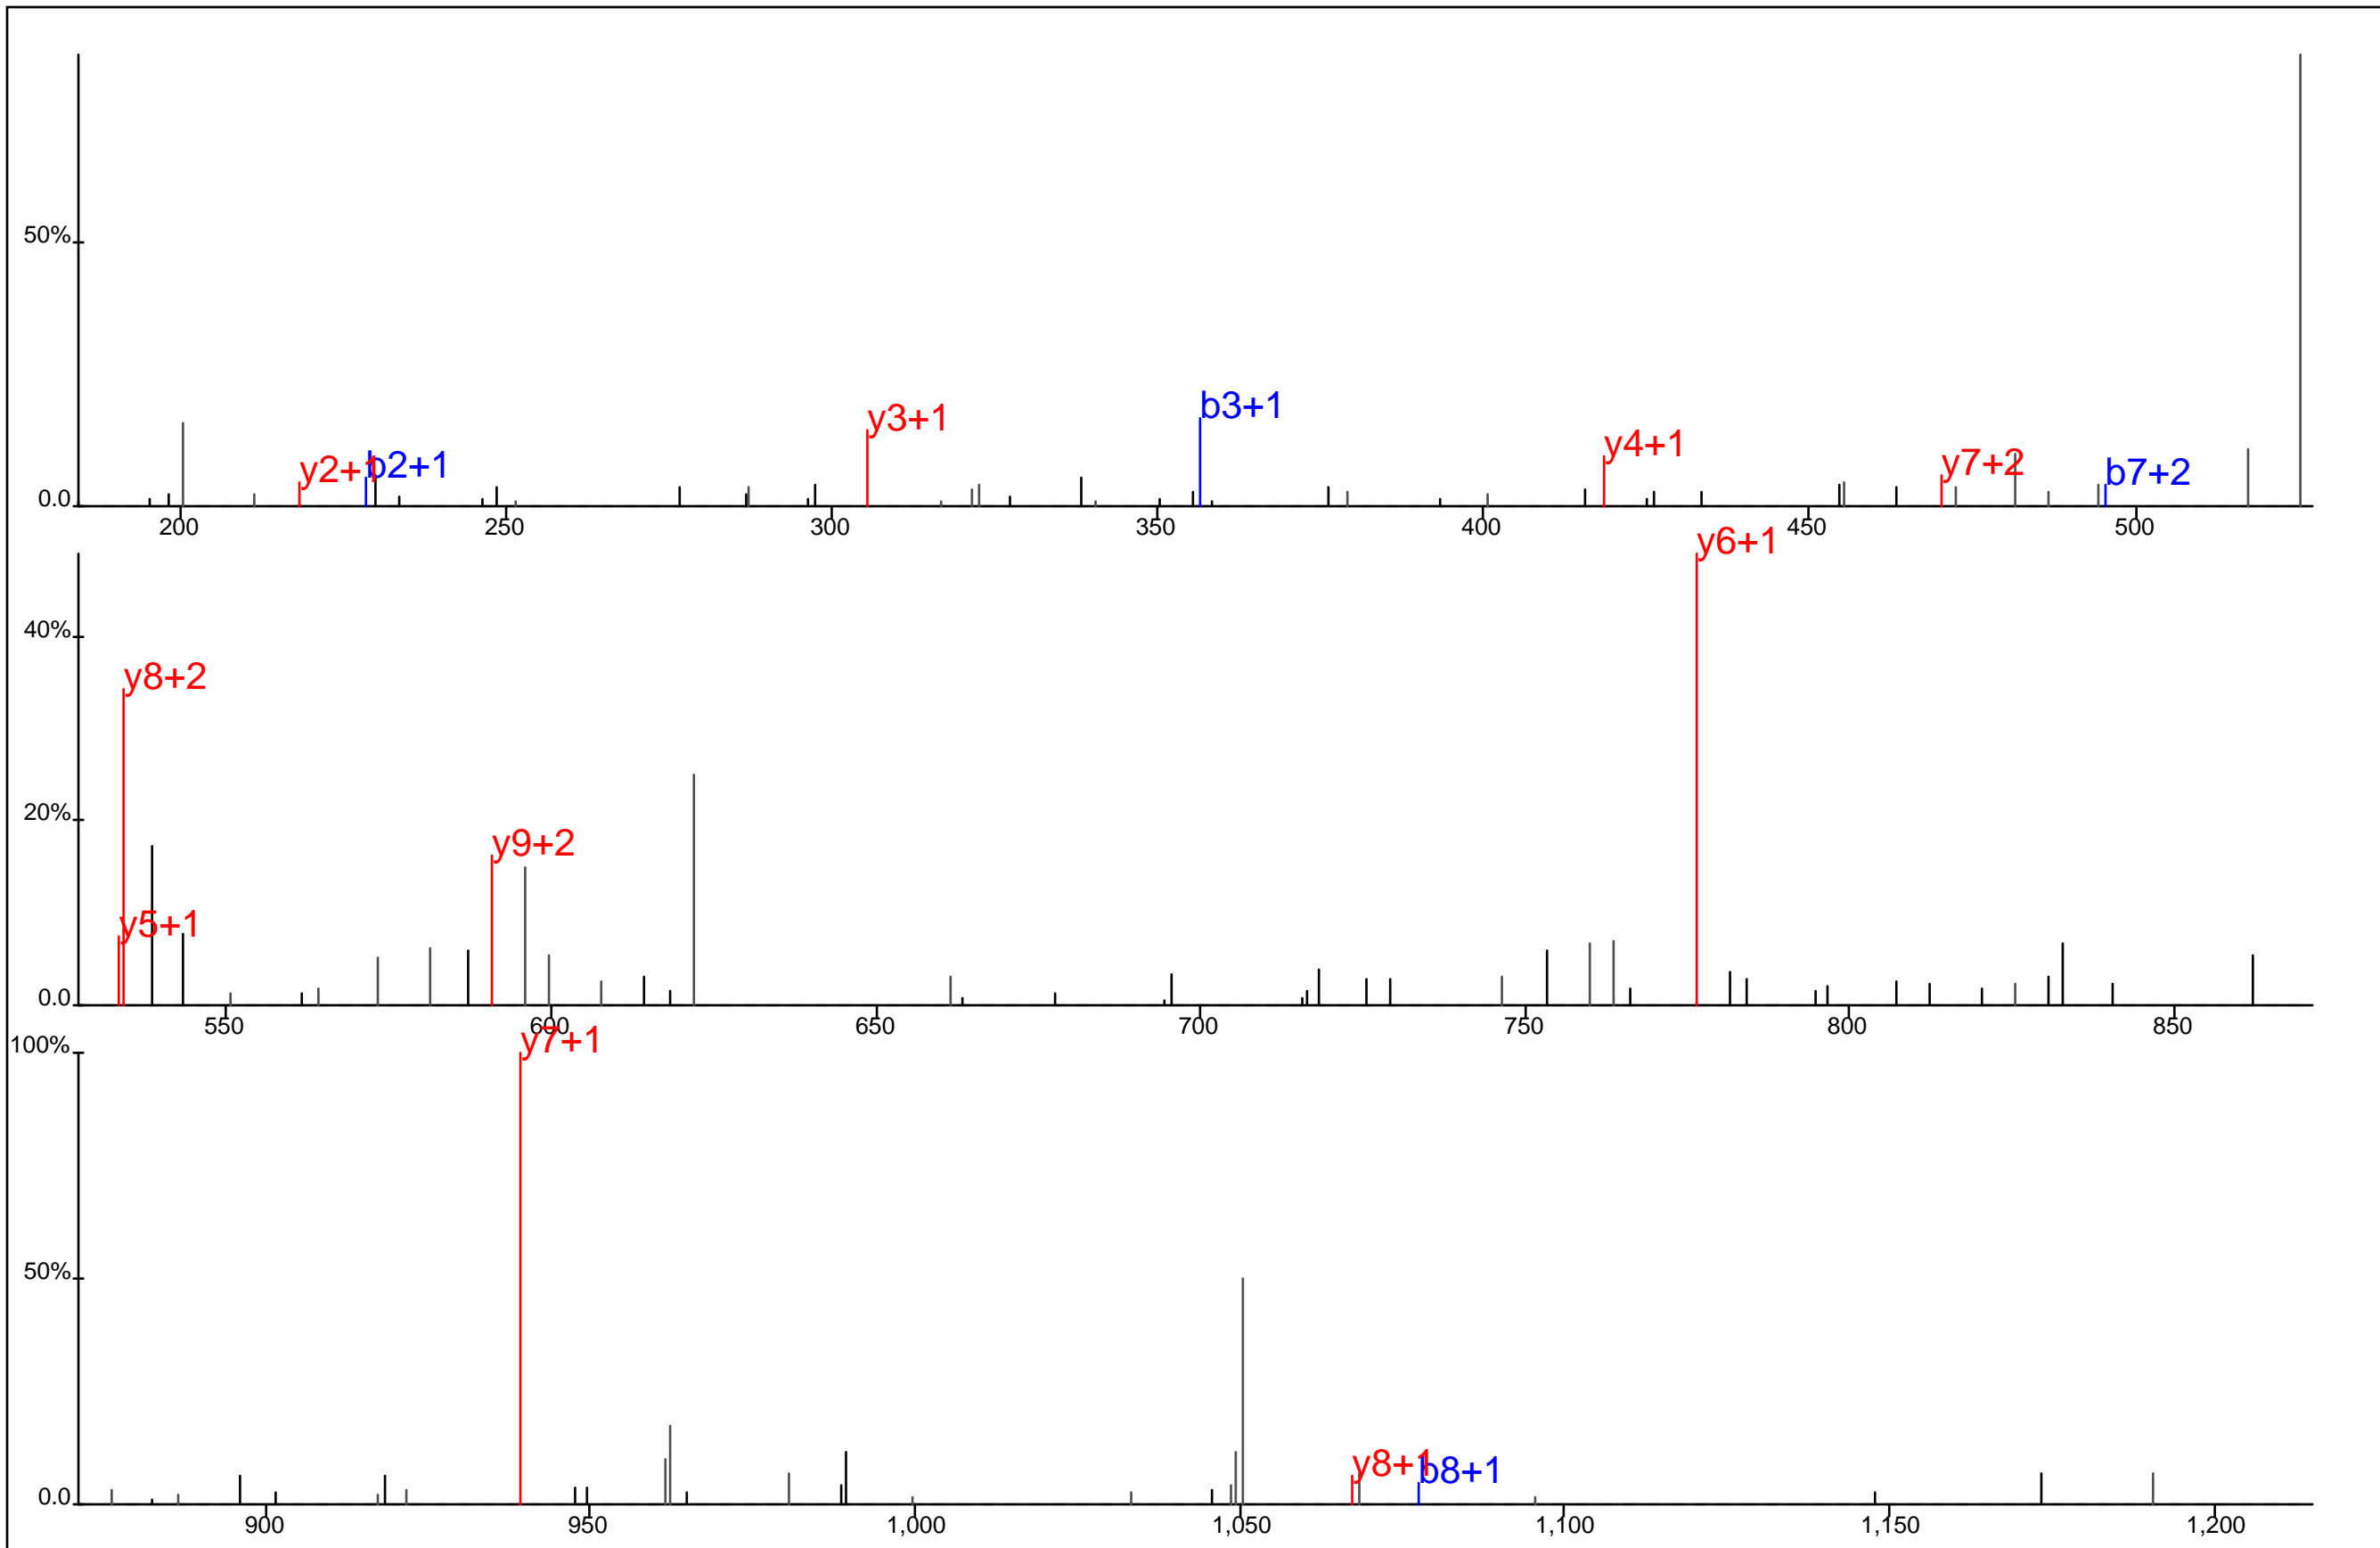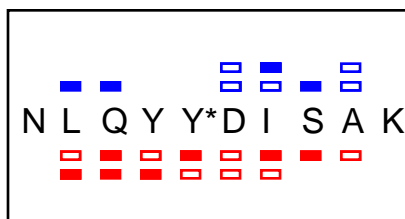

Protein Name: RAN, member RAS oncogene family  
 gi Accession: 0  
 Precursor Mass: 647.7858+2  
 Delta Mass: 5.478 ppm  
 XCorr: 22.71

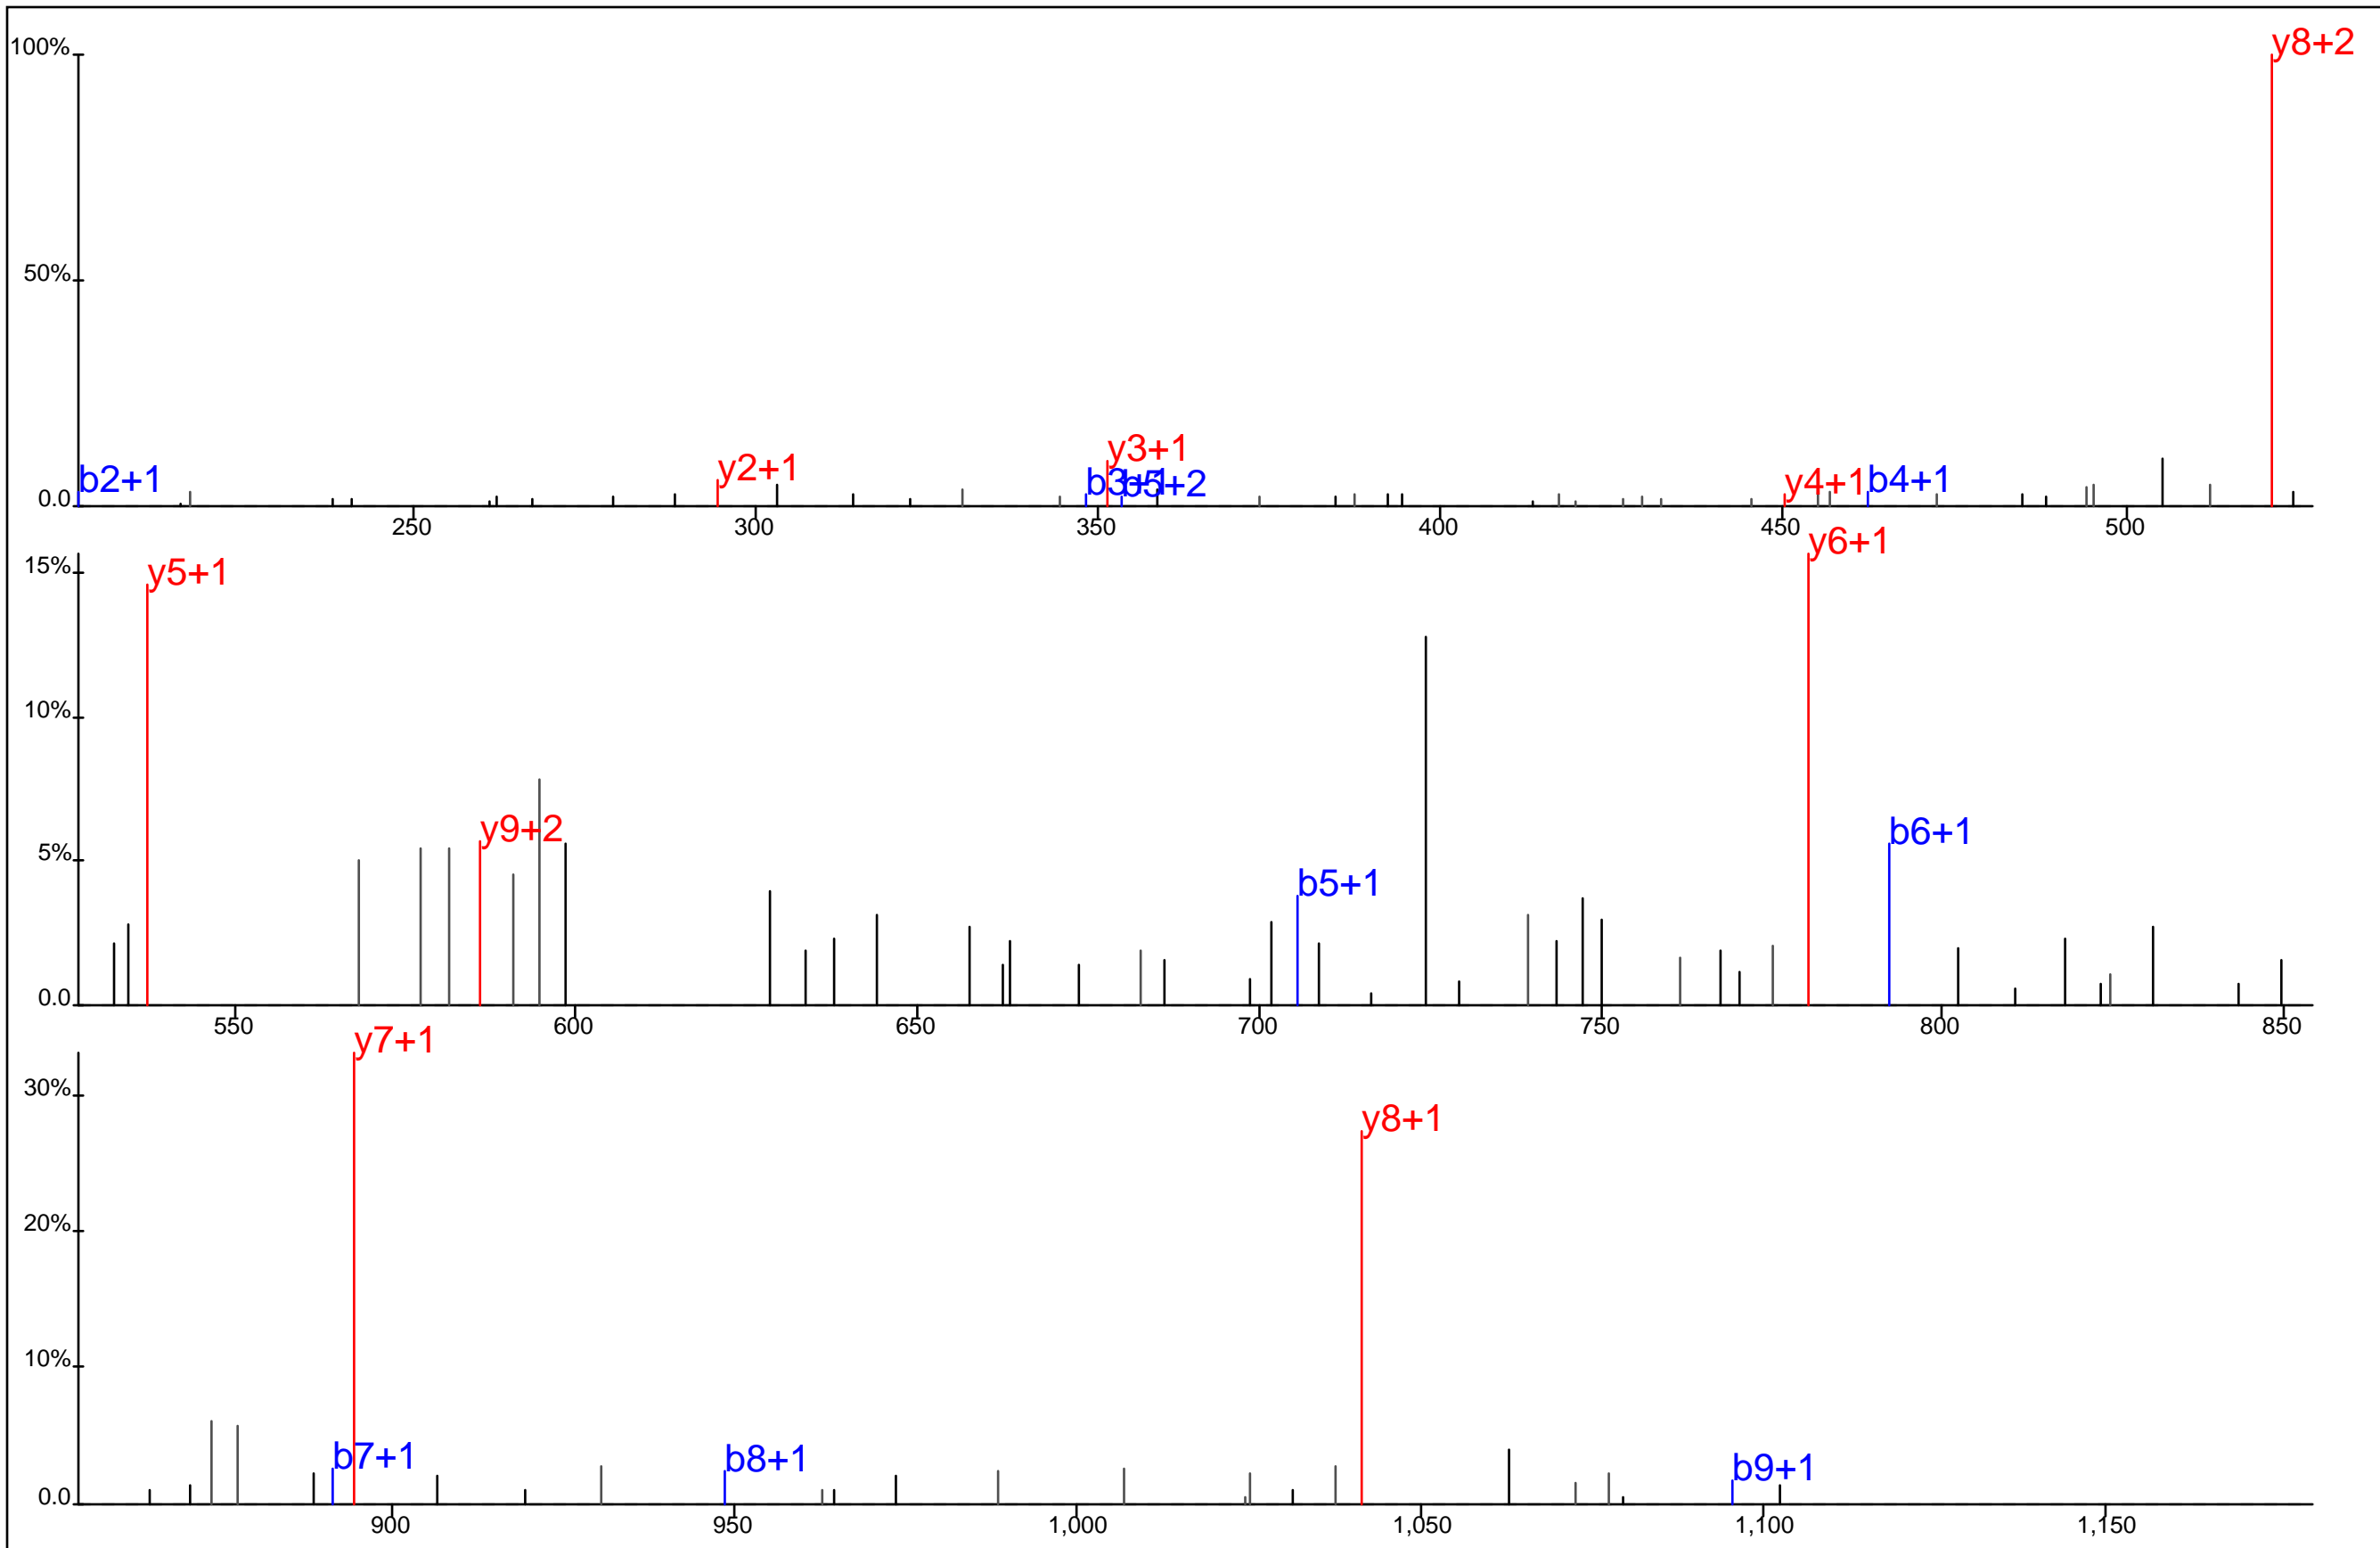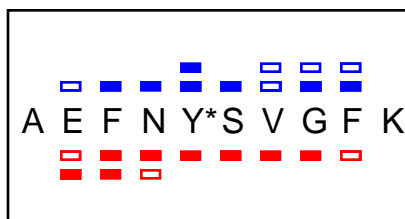

Protein Name: RAP1-interacting adaptor molecule  
 gi Accession: 0  
 Precursor Mass: 621.2668+2  
 Delta Mass: 2.089 ppm  
 XCorr: 30.04

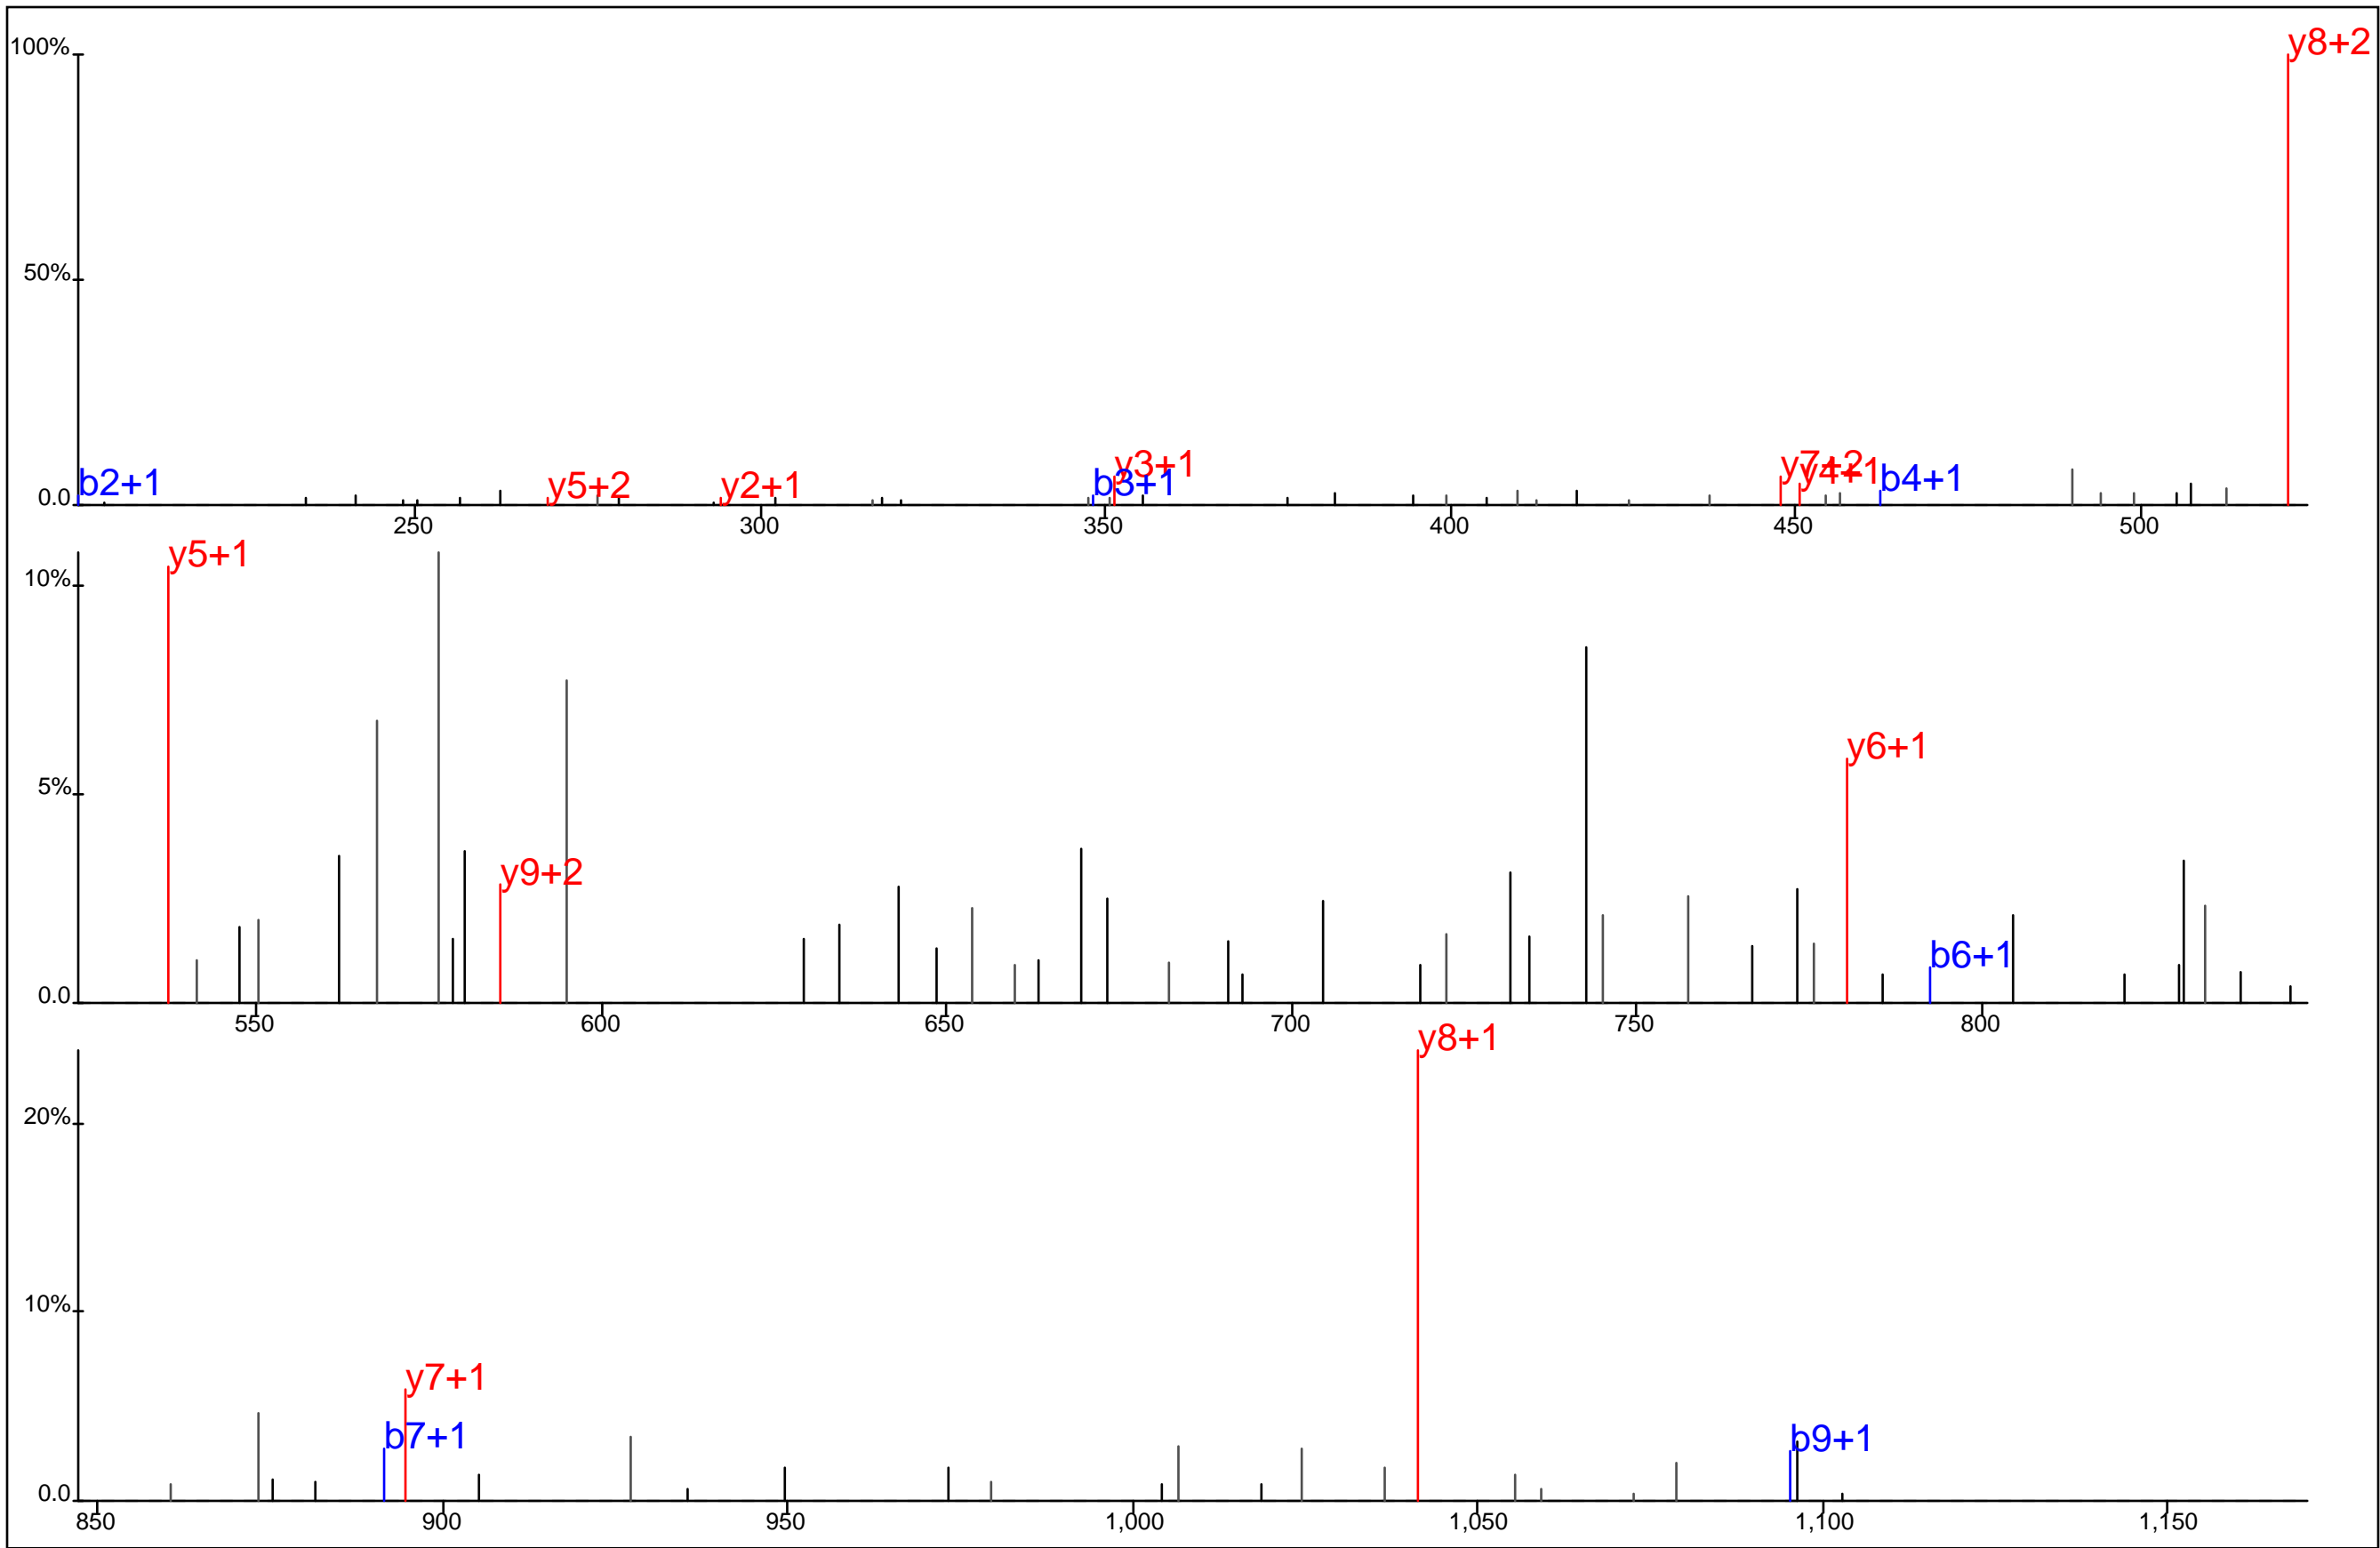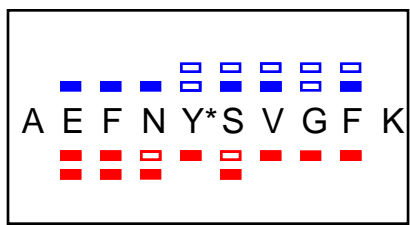

Protein Name: RAP1-interacting adaptor molecule  
 gi Accession: 0  
 Precursor Mass: 621.2678+2  
 Delta Mass: 3.662 ppm  
 XCorr: 31.77

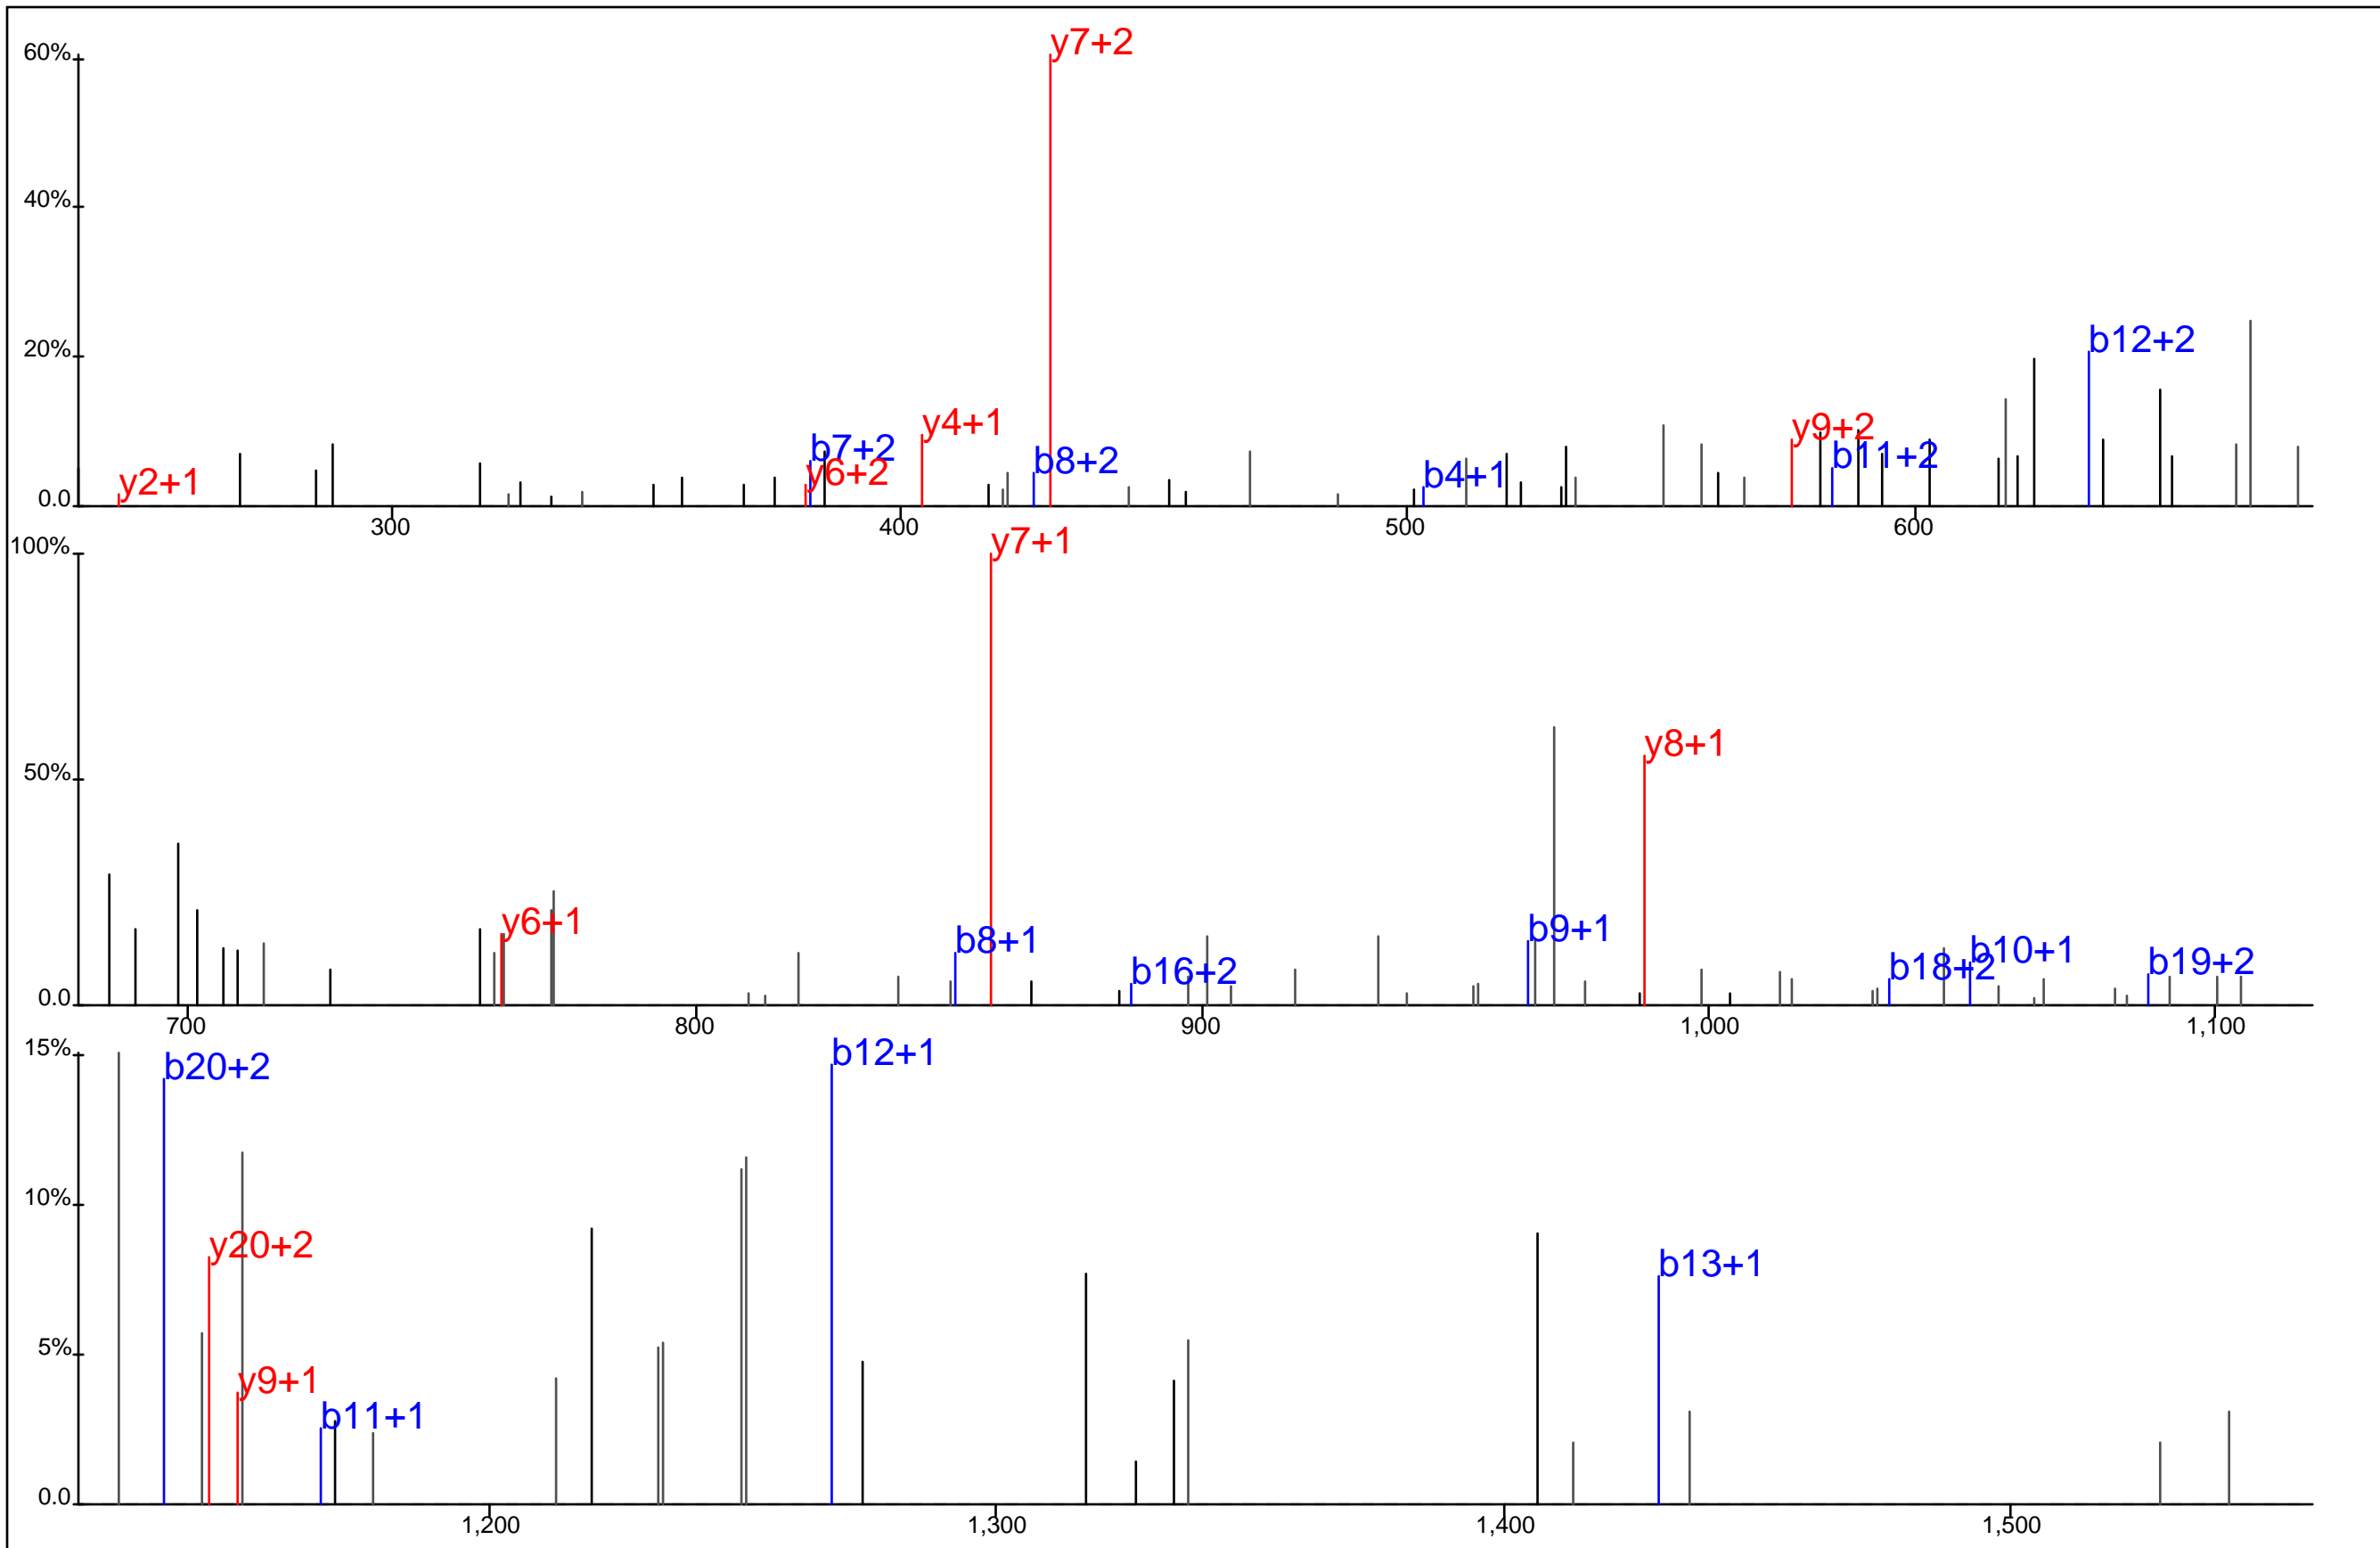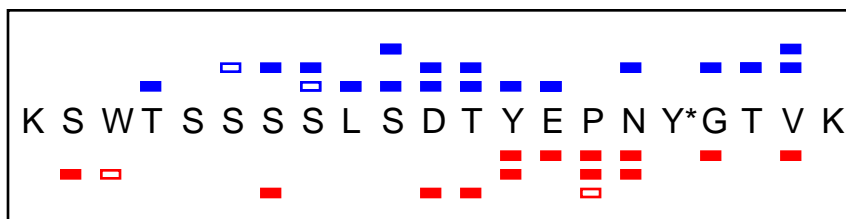

Protein Name: Rap guanine nucleotide exchange factor GEF 6  
 gi Accession: 0  
 Precursor Mass: 806.3566+3  
 Delta Mass: 0.301 ppm  
 XCorr: 27.3



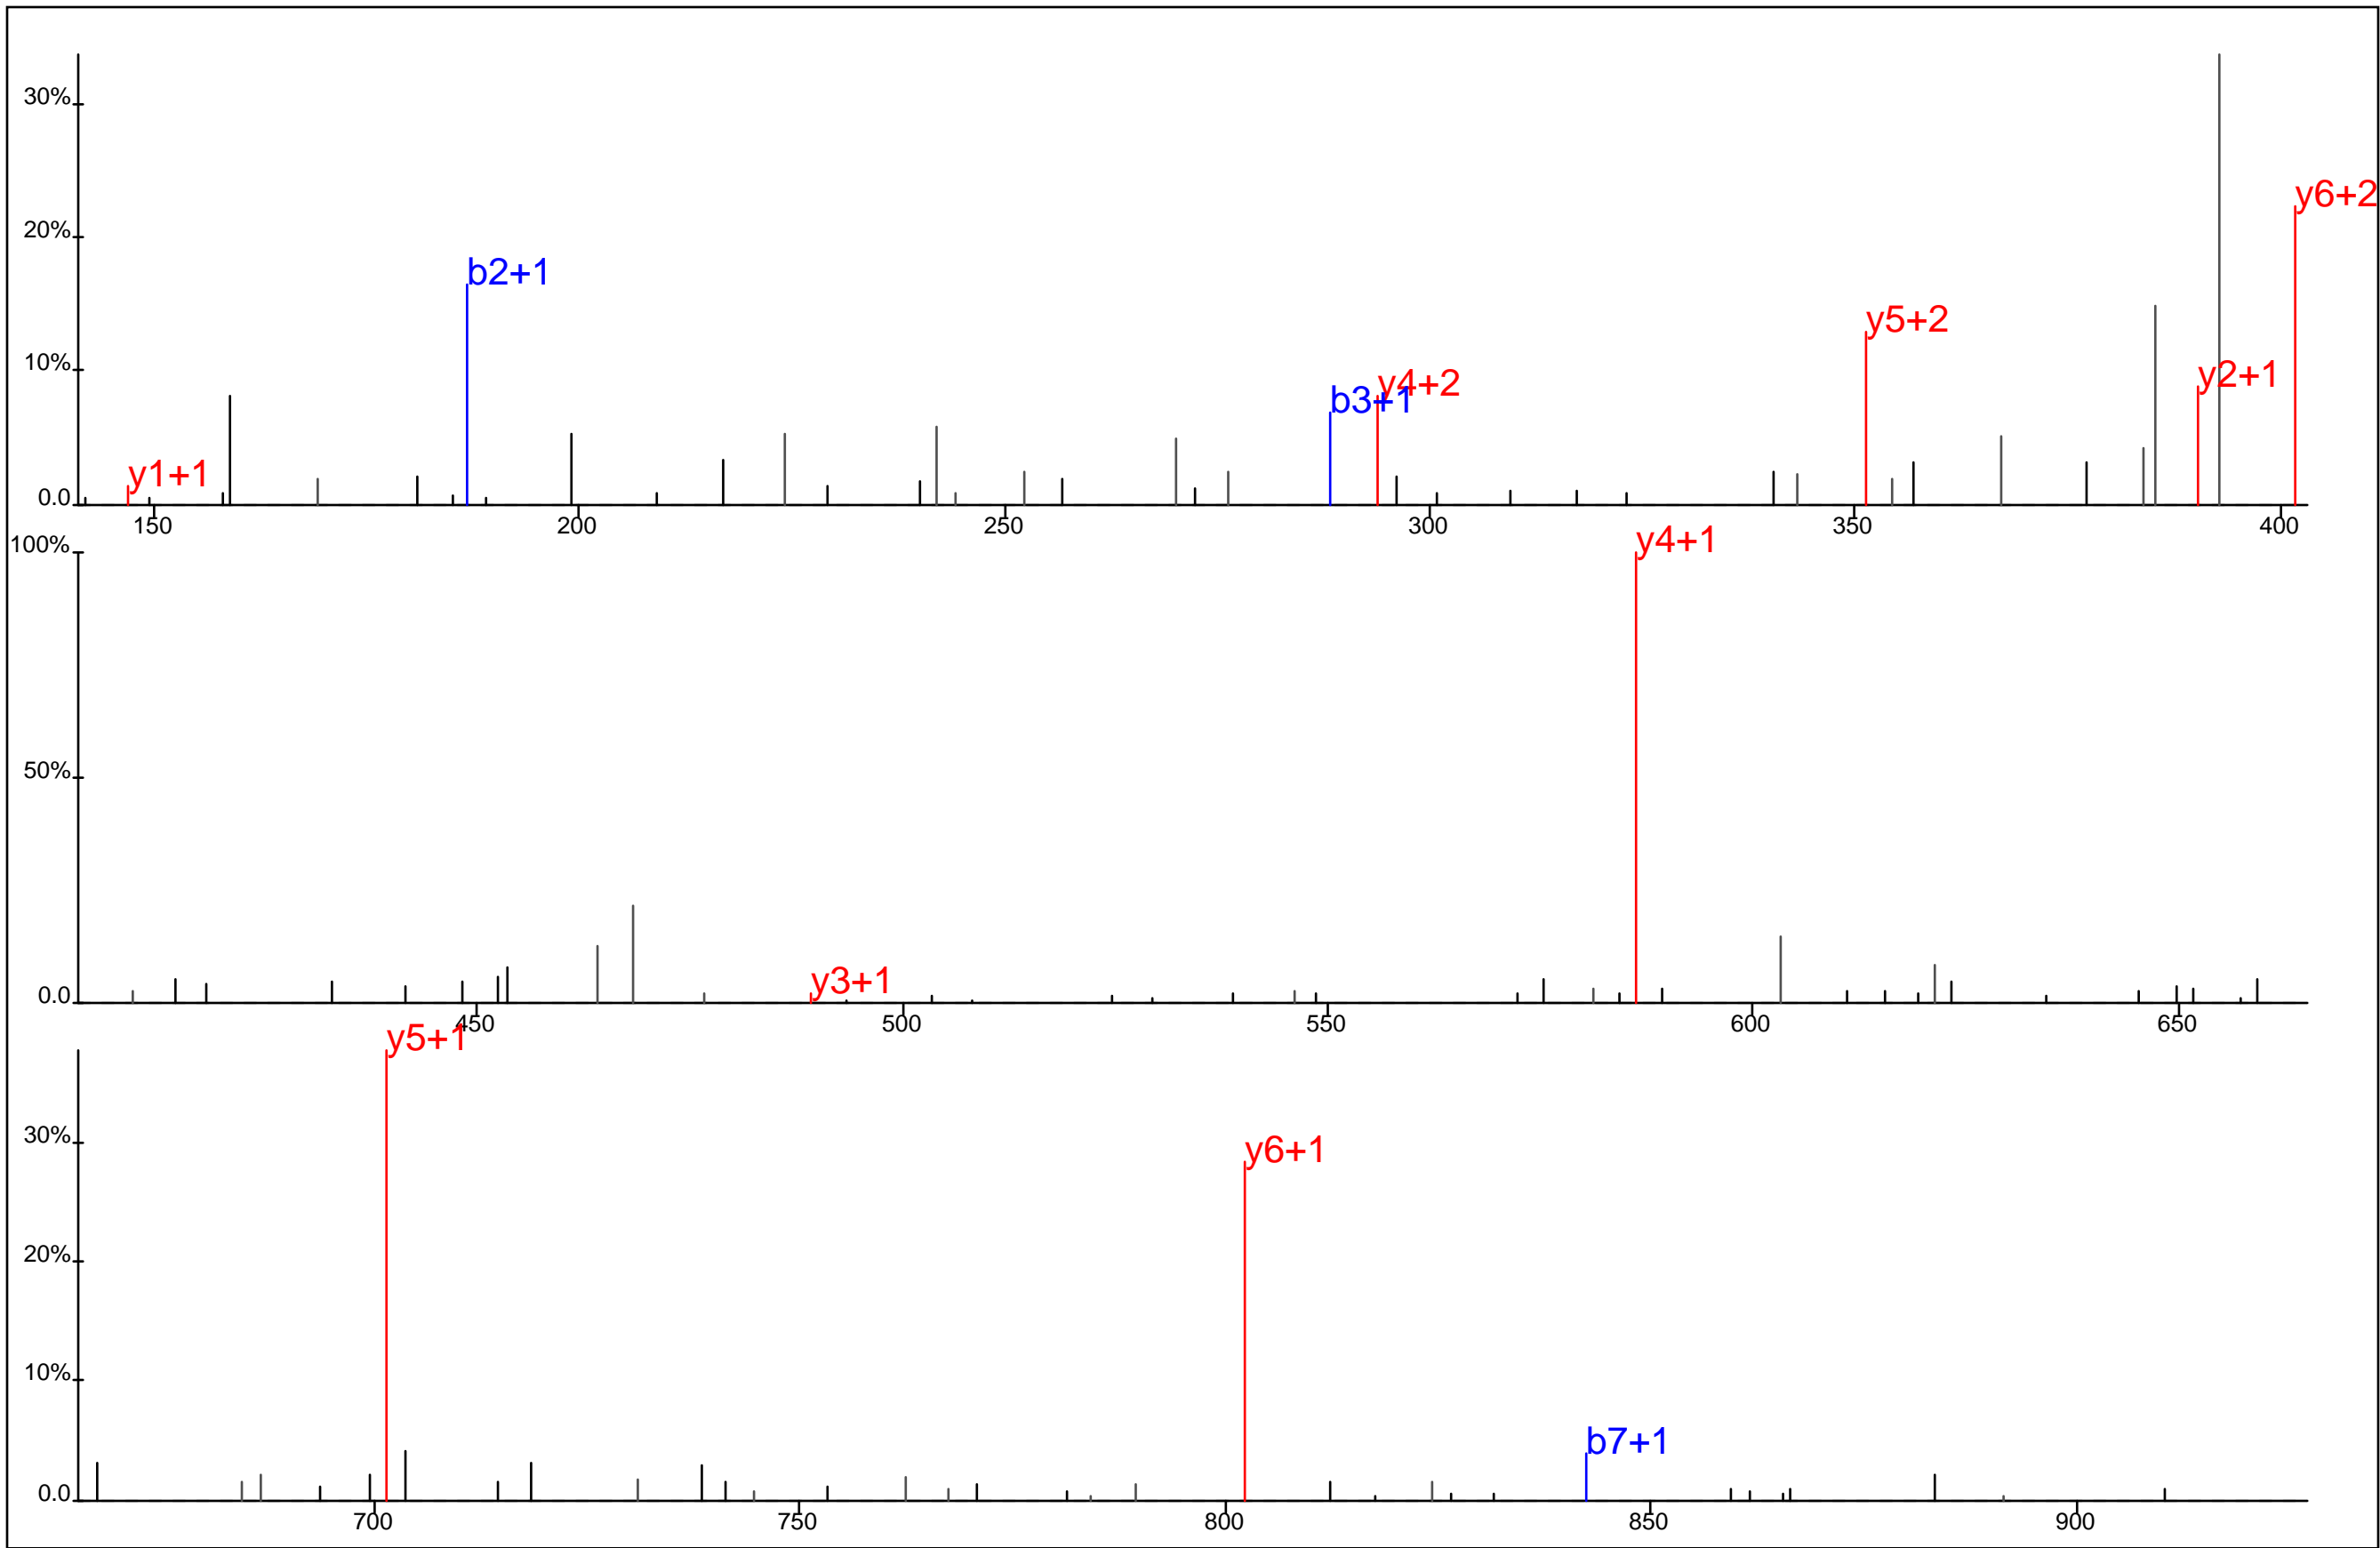

■ ■ ■ ■ ■ ■ ■ ■  
 D A T D P V Y\* K  
□ □ □ □ □ □ □ □

Protein Name: Rap guanine nucleotide exchange factor GEF 6  
 gi Accession: 0  
 Precursor Mass: 494.7049+2  
 Delta Mass: 0.144 ppm  
 XCorr: 21.46

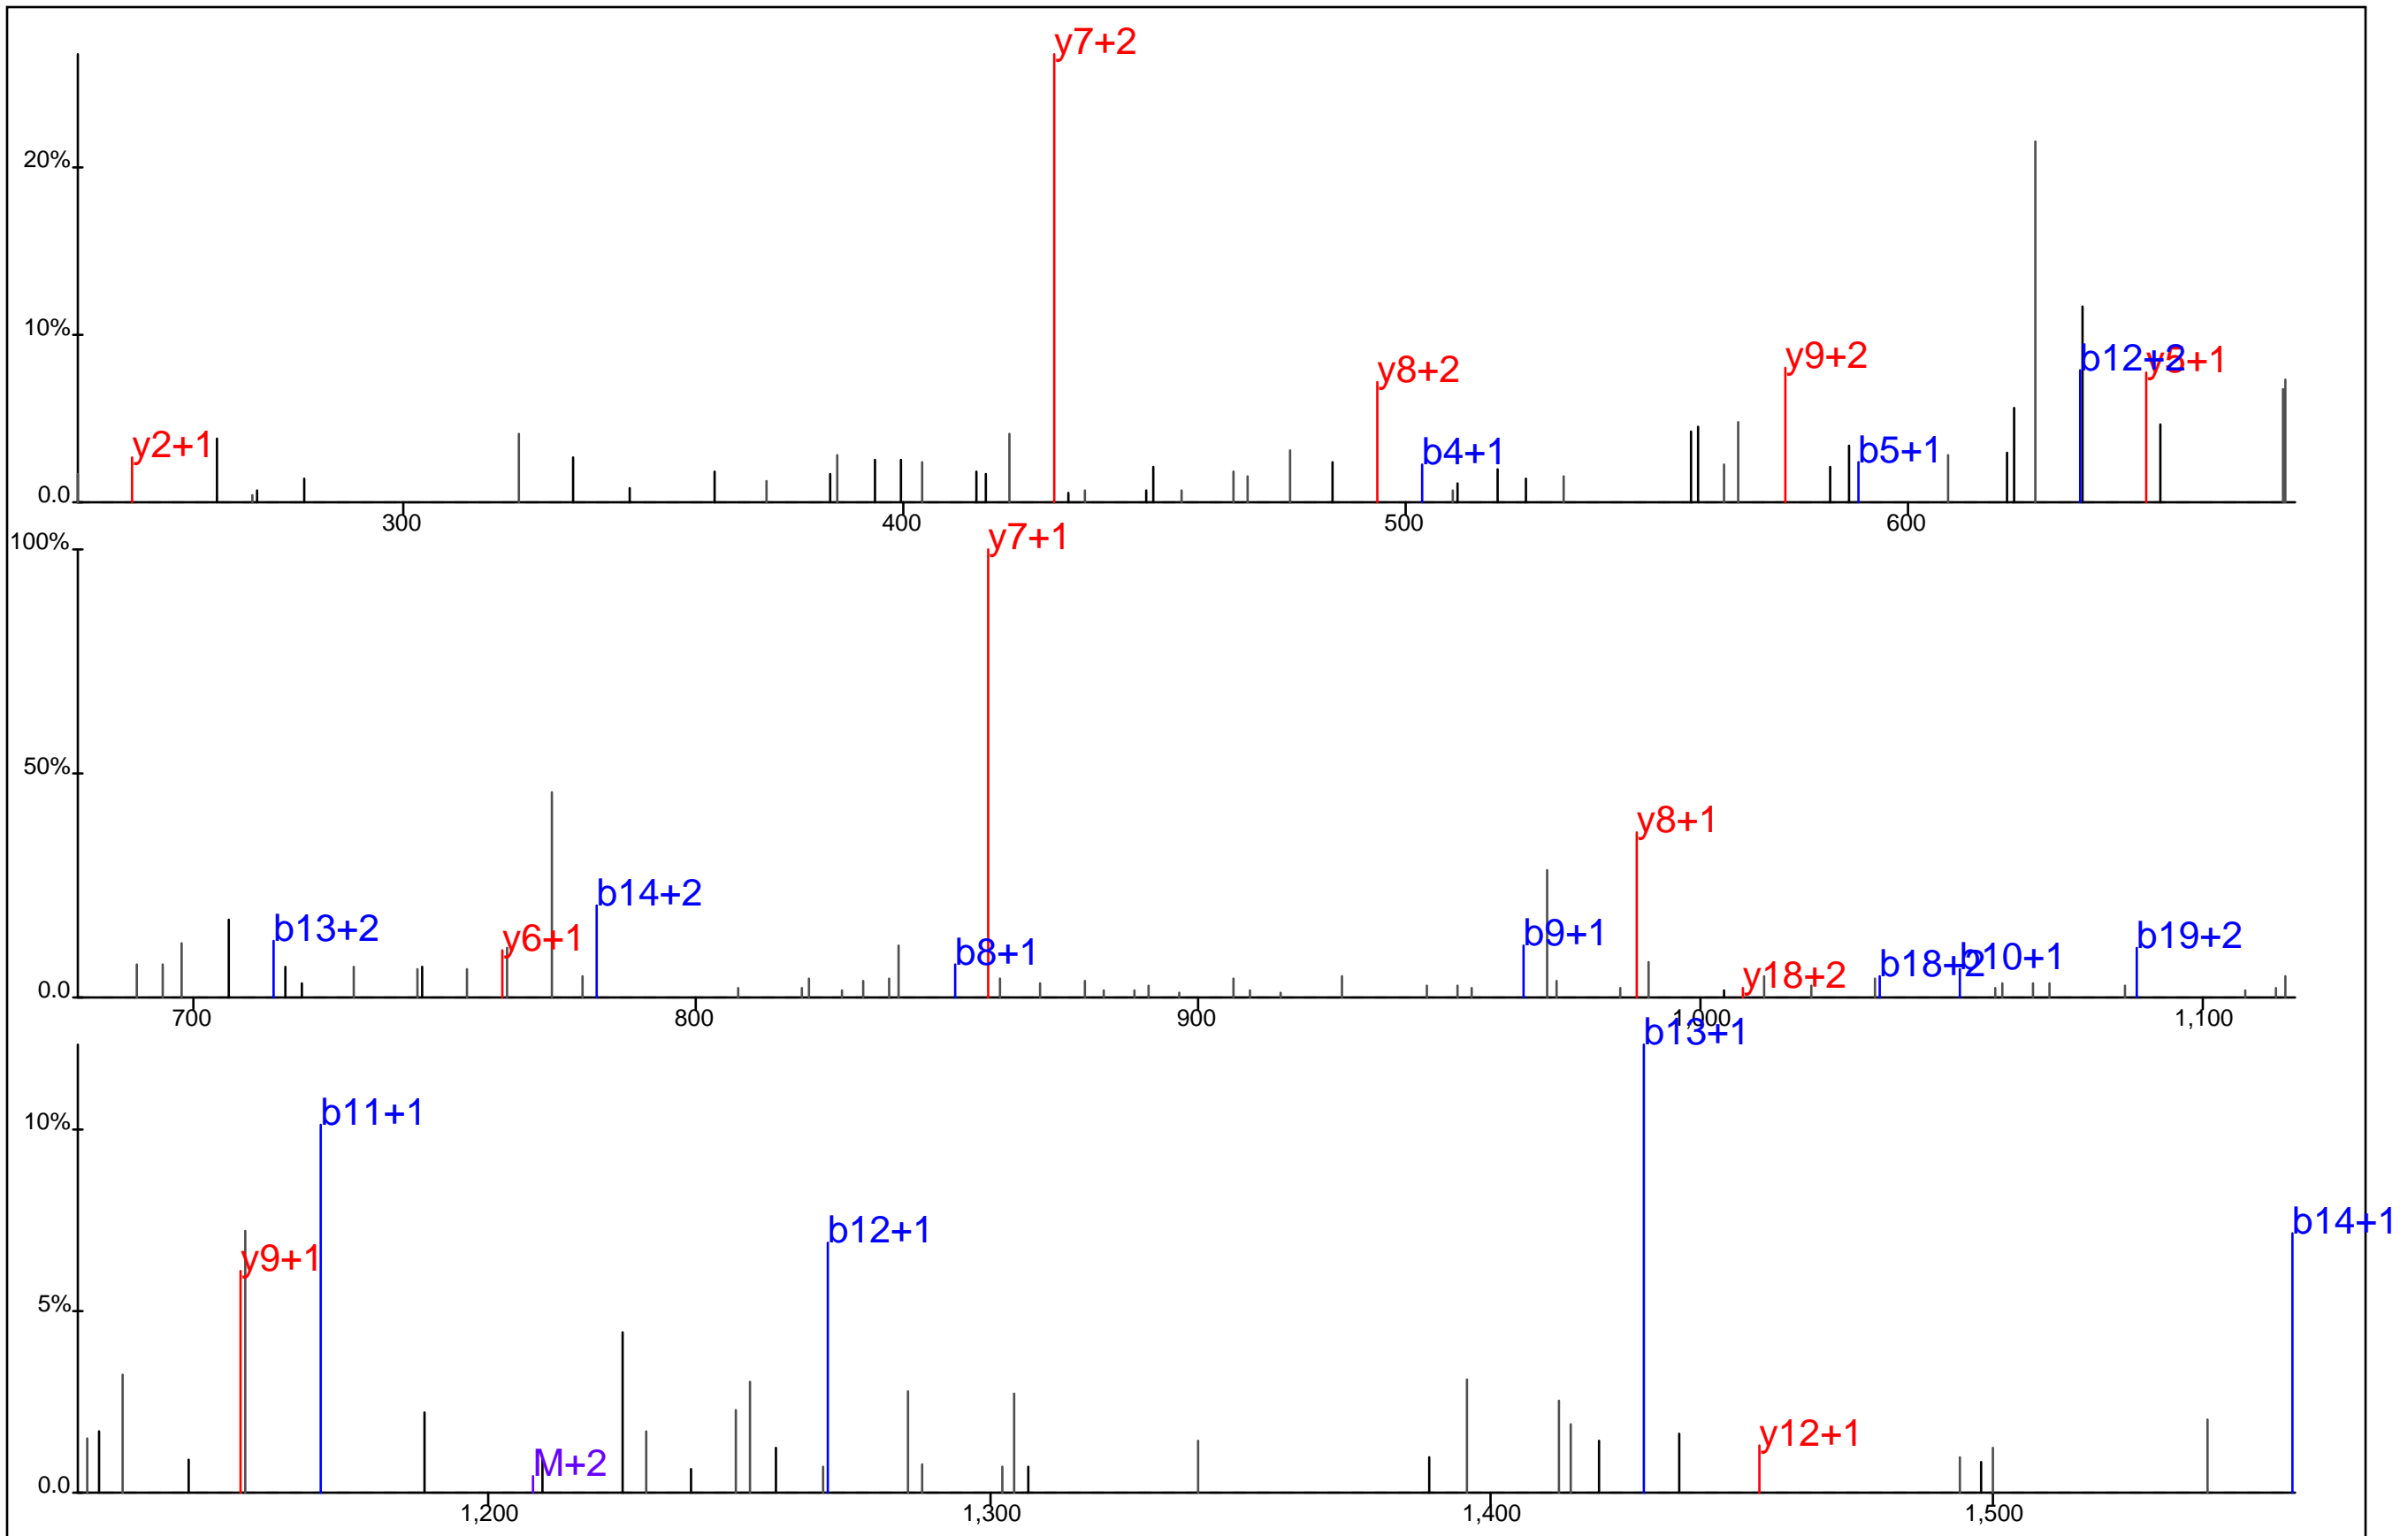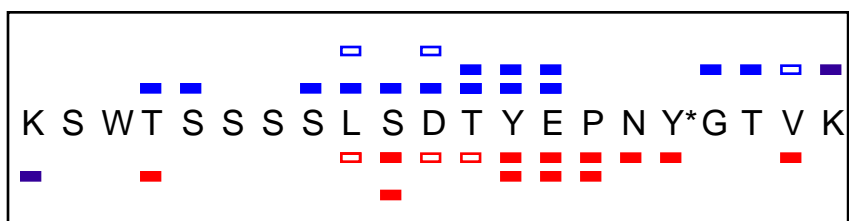

Protein Name: Rap guanine nucleotide exchange factor GEF 6  
 gi Accession: 0  
 Precursor Mass: 806.3552+3  
 Delta Mass: 1.441 ppm  
 XCorr: 45.15

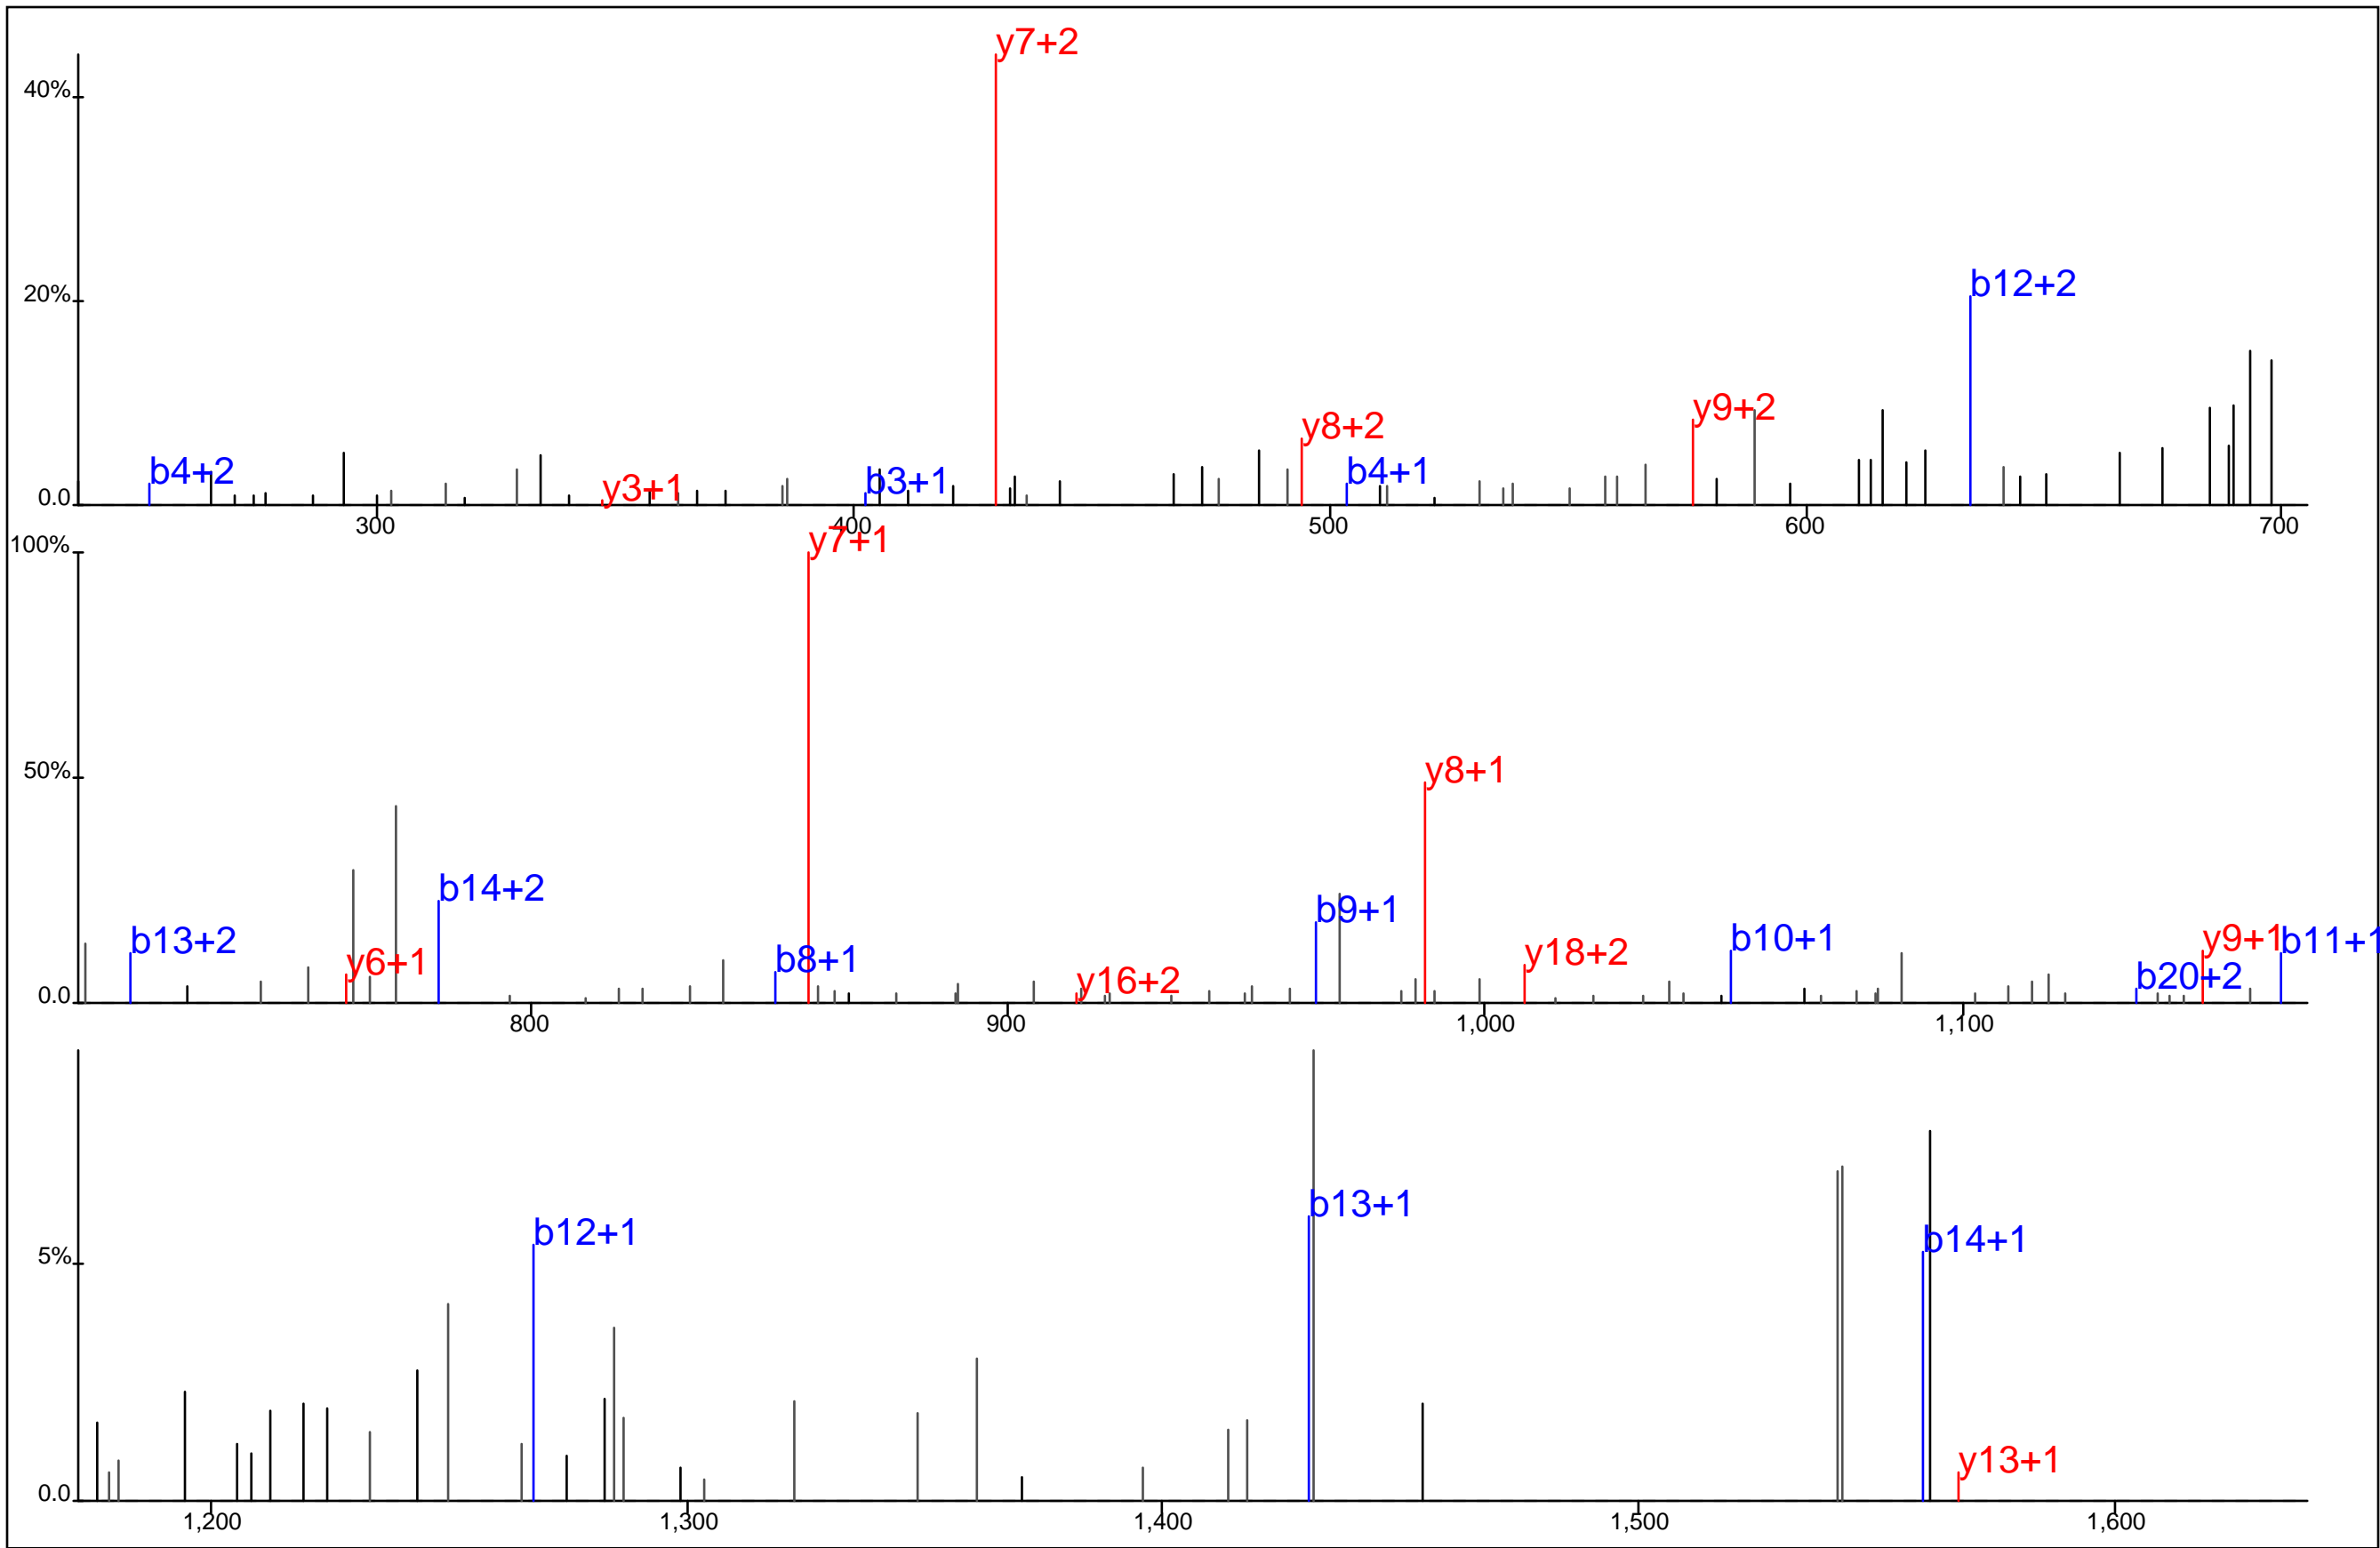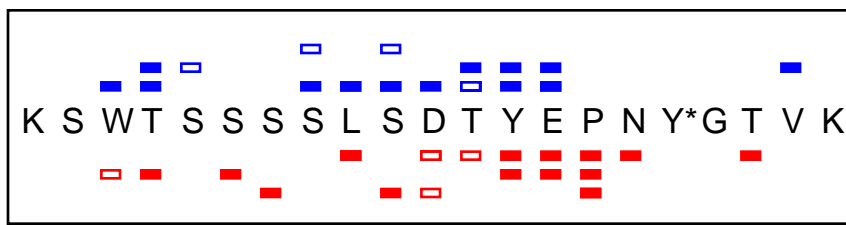

Protein Name: Rap guanine nucleotide exchange factor GEF 6  
 gi Accession: 0  
 Precursor Mass: 806.3558+3  
 Delta Mass: 0.608 ppm  
 XCorr: 28.56

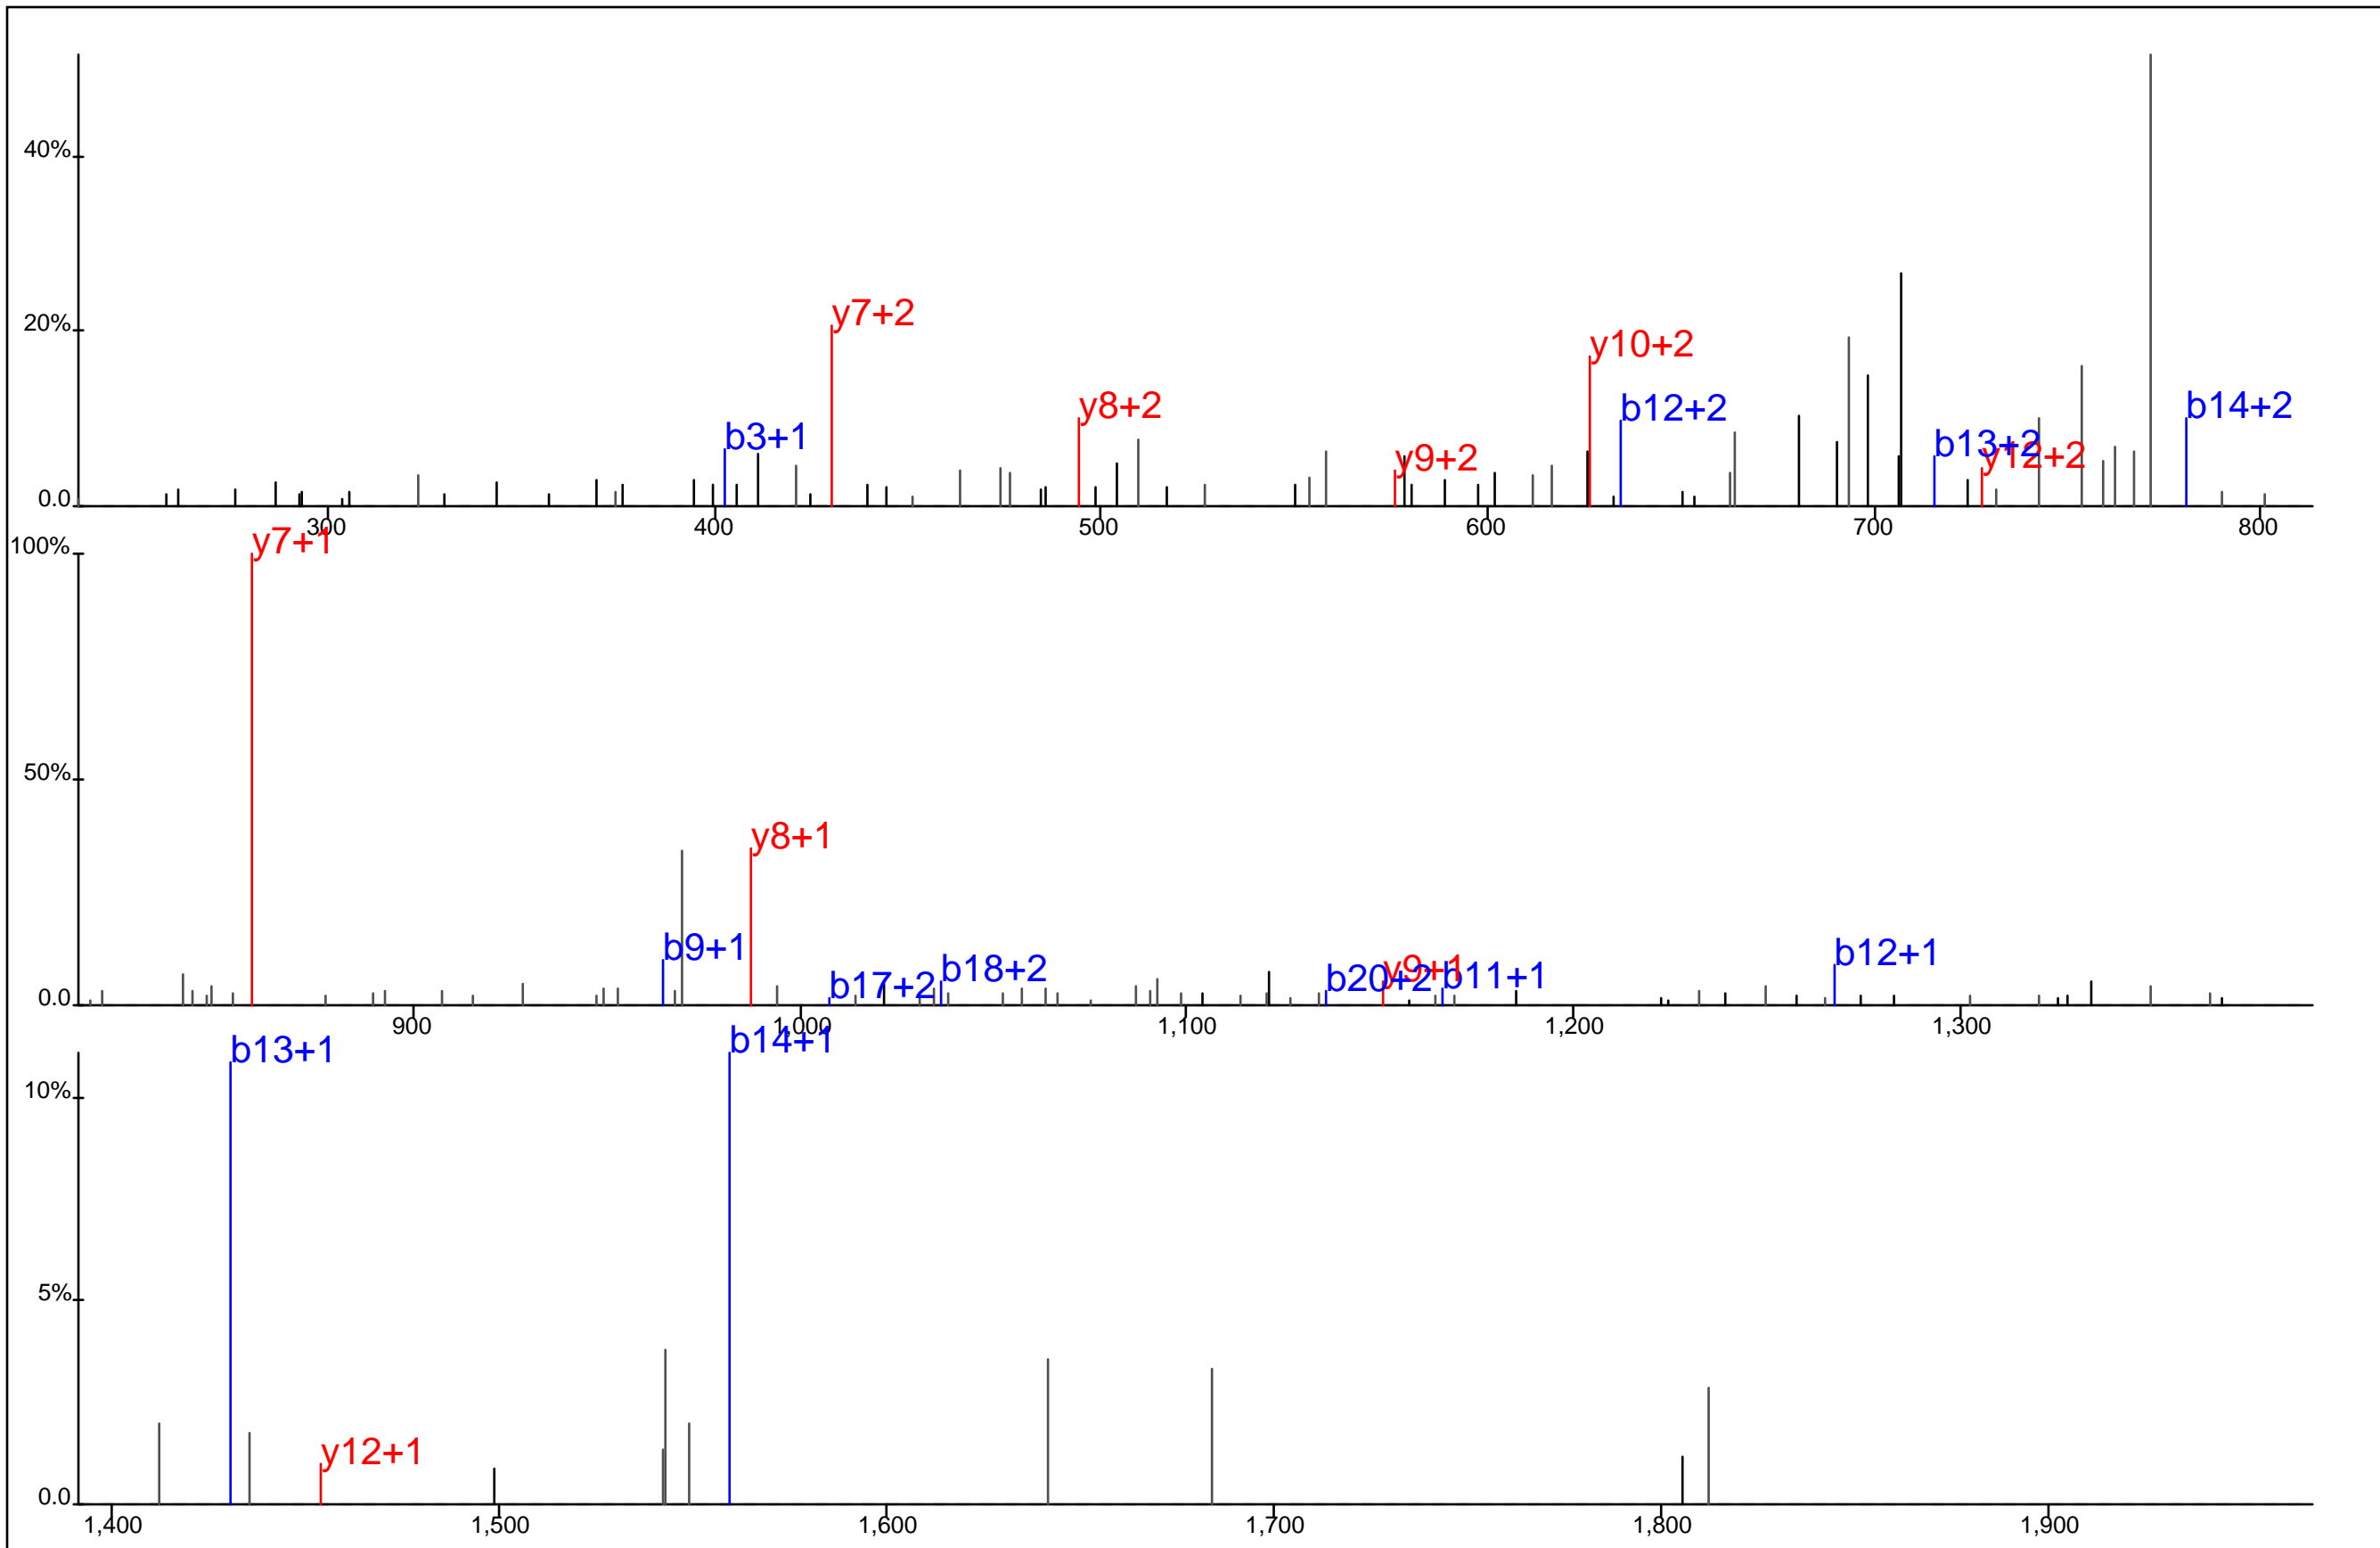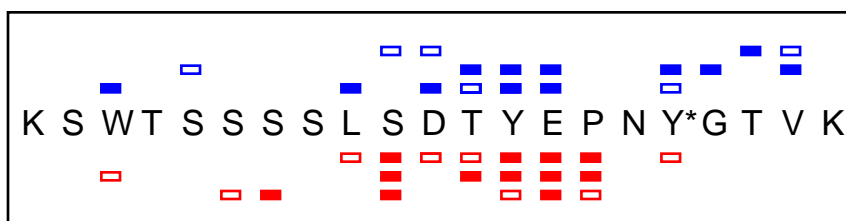

Protein Name: Rap guanine nucleotide exchange factor GEF 6  
 gi Accession: 0  
 Precursor Mass: 806.3572+3  
 Delta Mass: 1.059 ppm  
 XCorr: 22.7

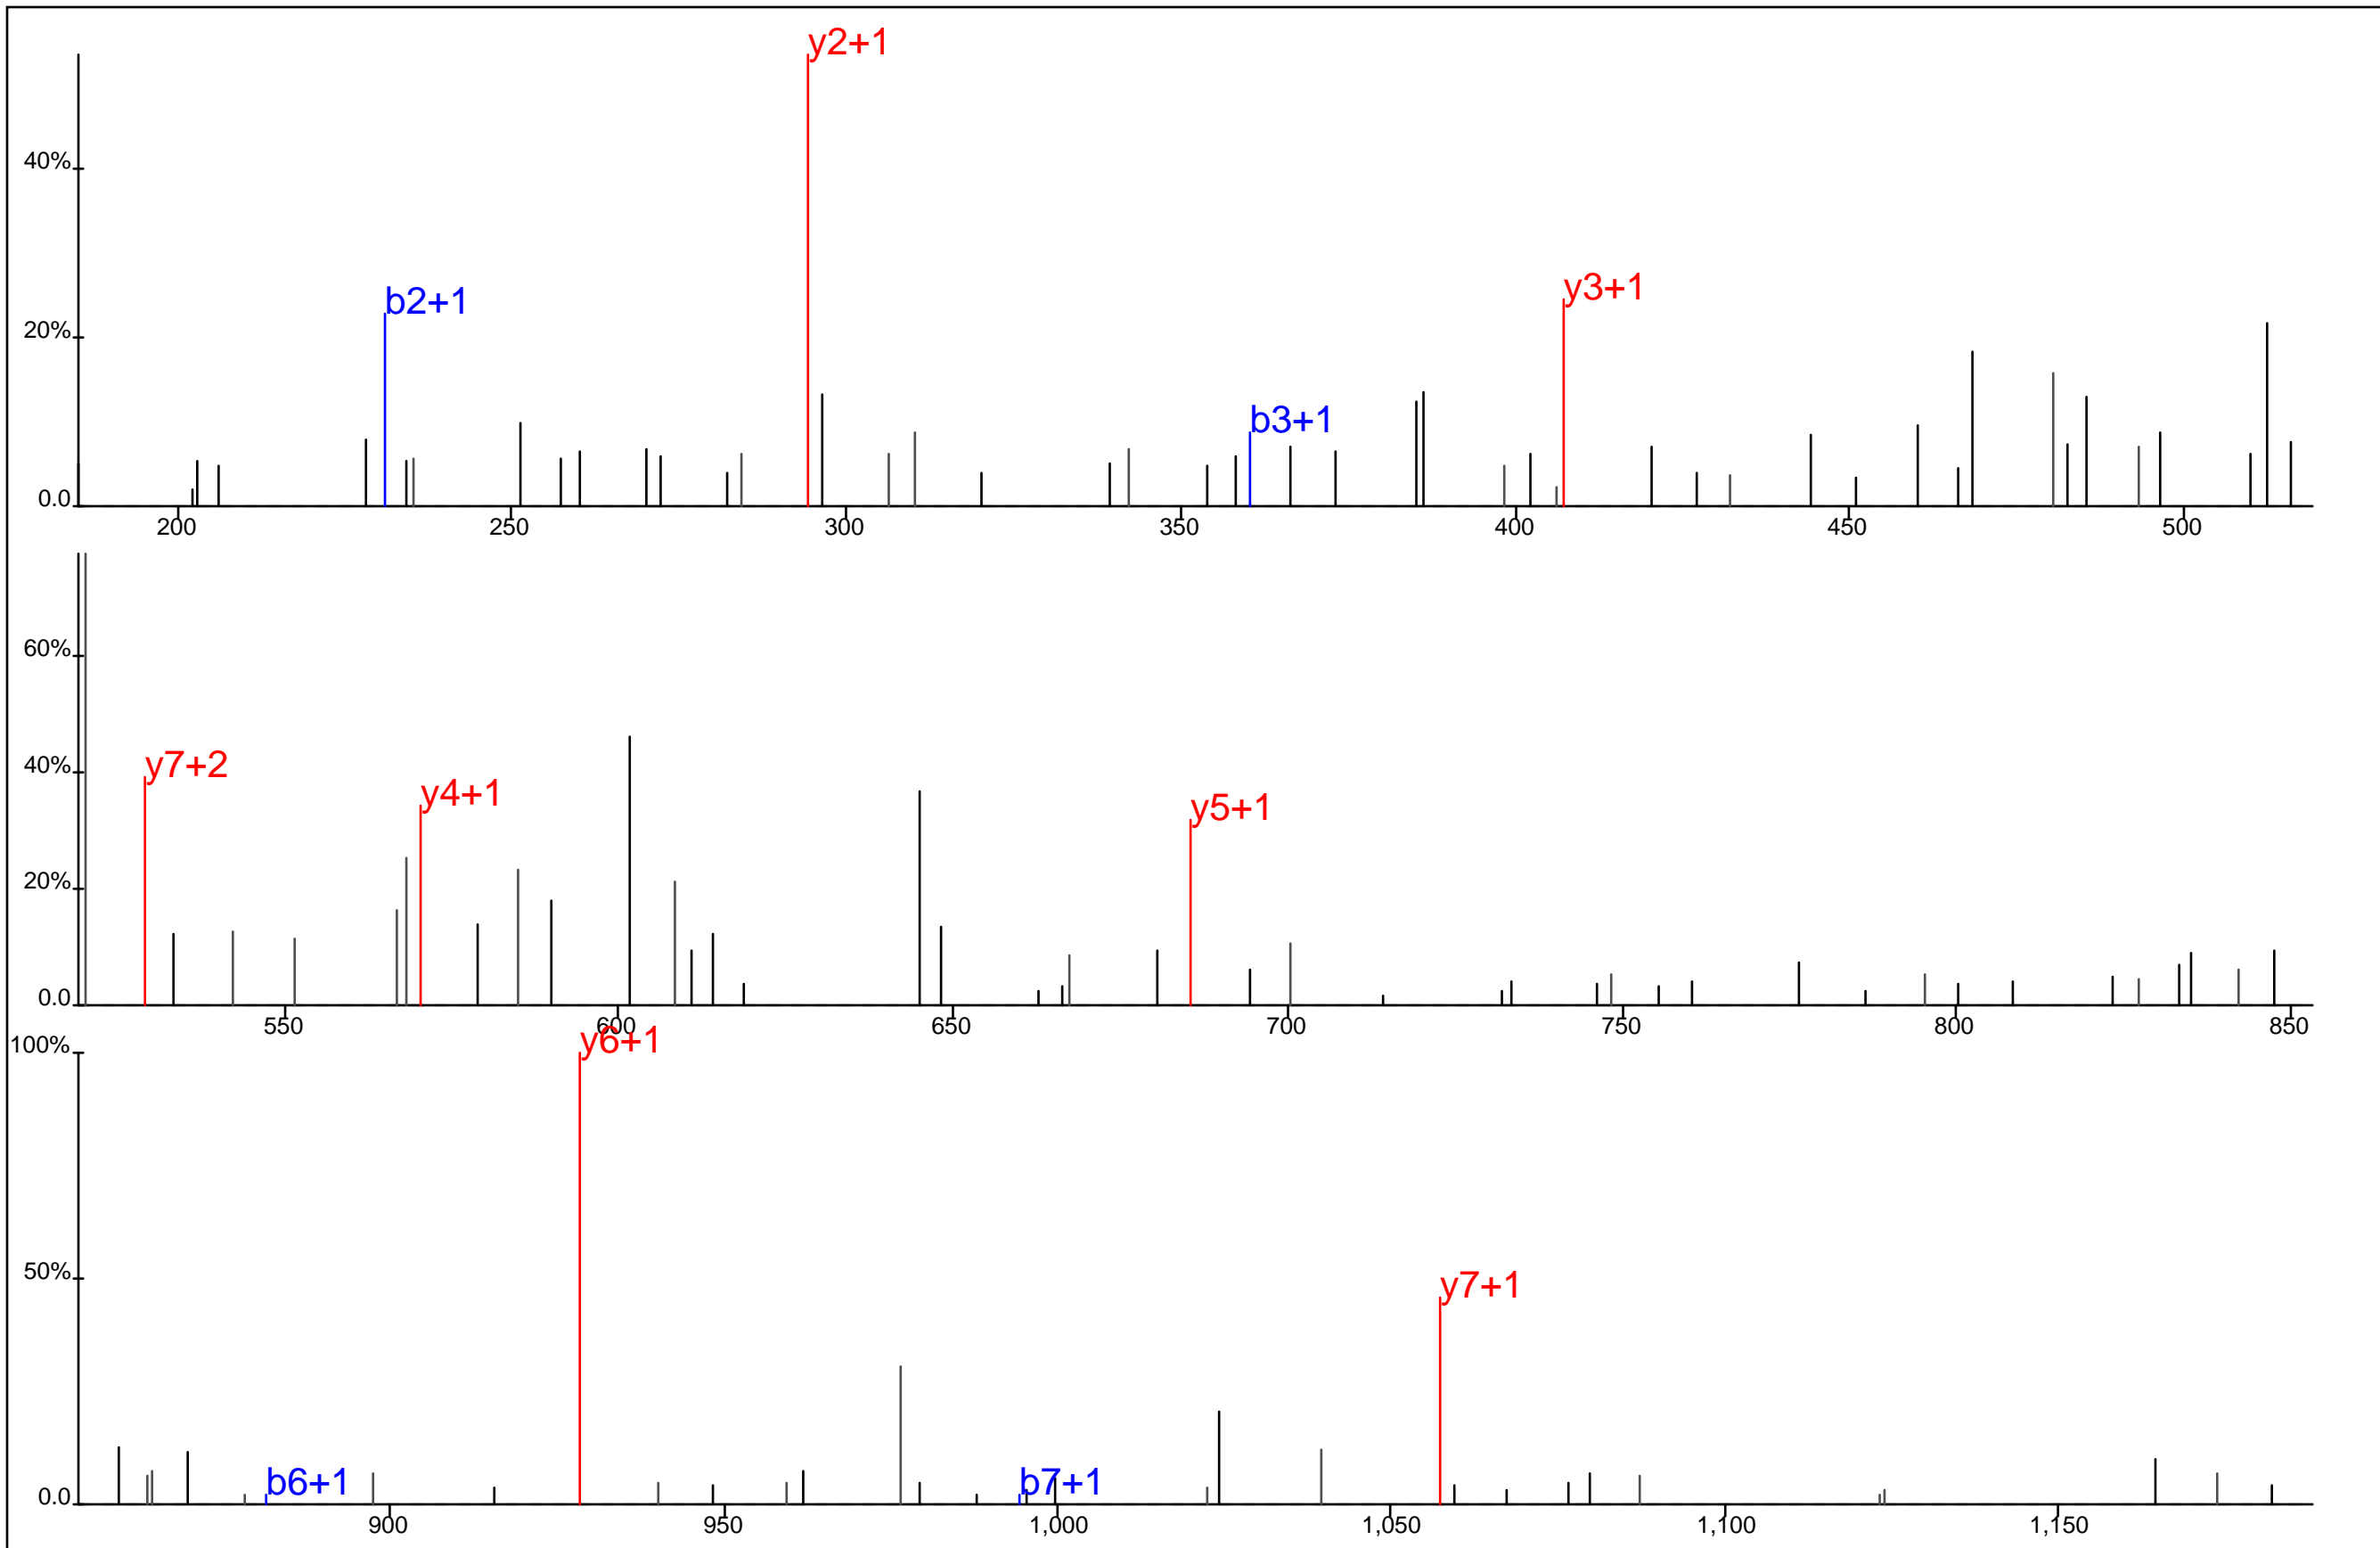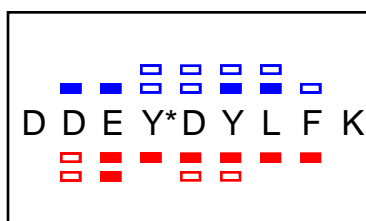

Protein Name: RAS family, member RAB11B  
 gi Accession: 0  
 Precursor Mass: 644.2474+2  
 Delta Mass: 4.506 ppm  
 XCorr: 28.38



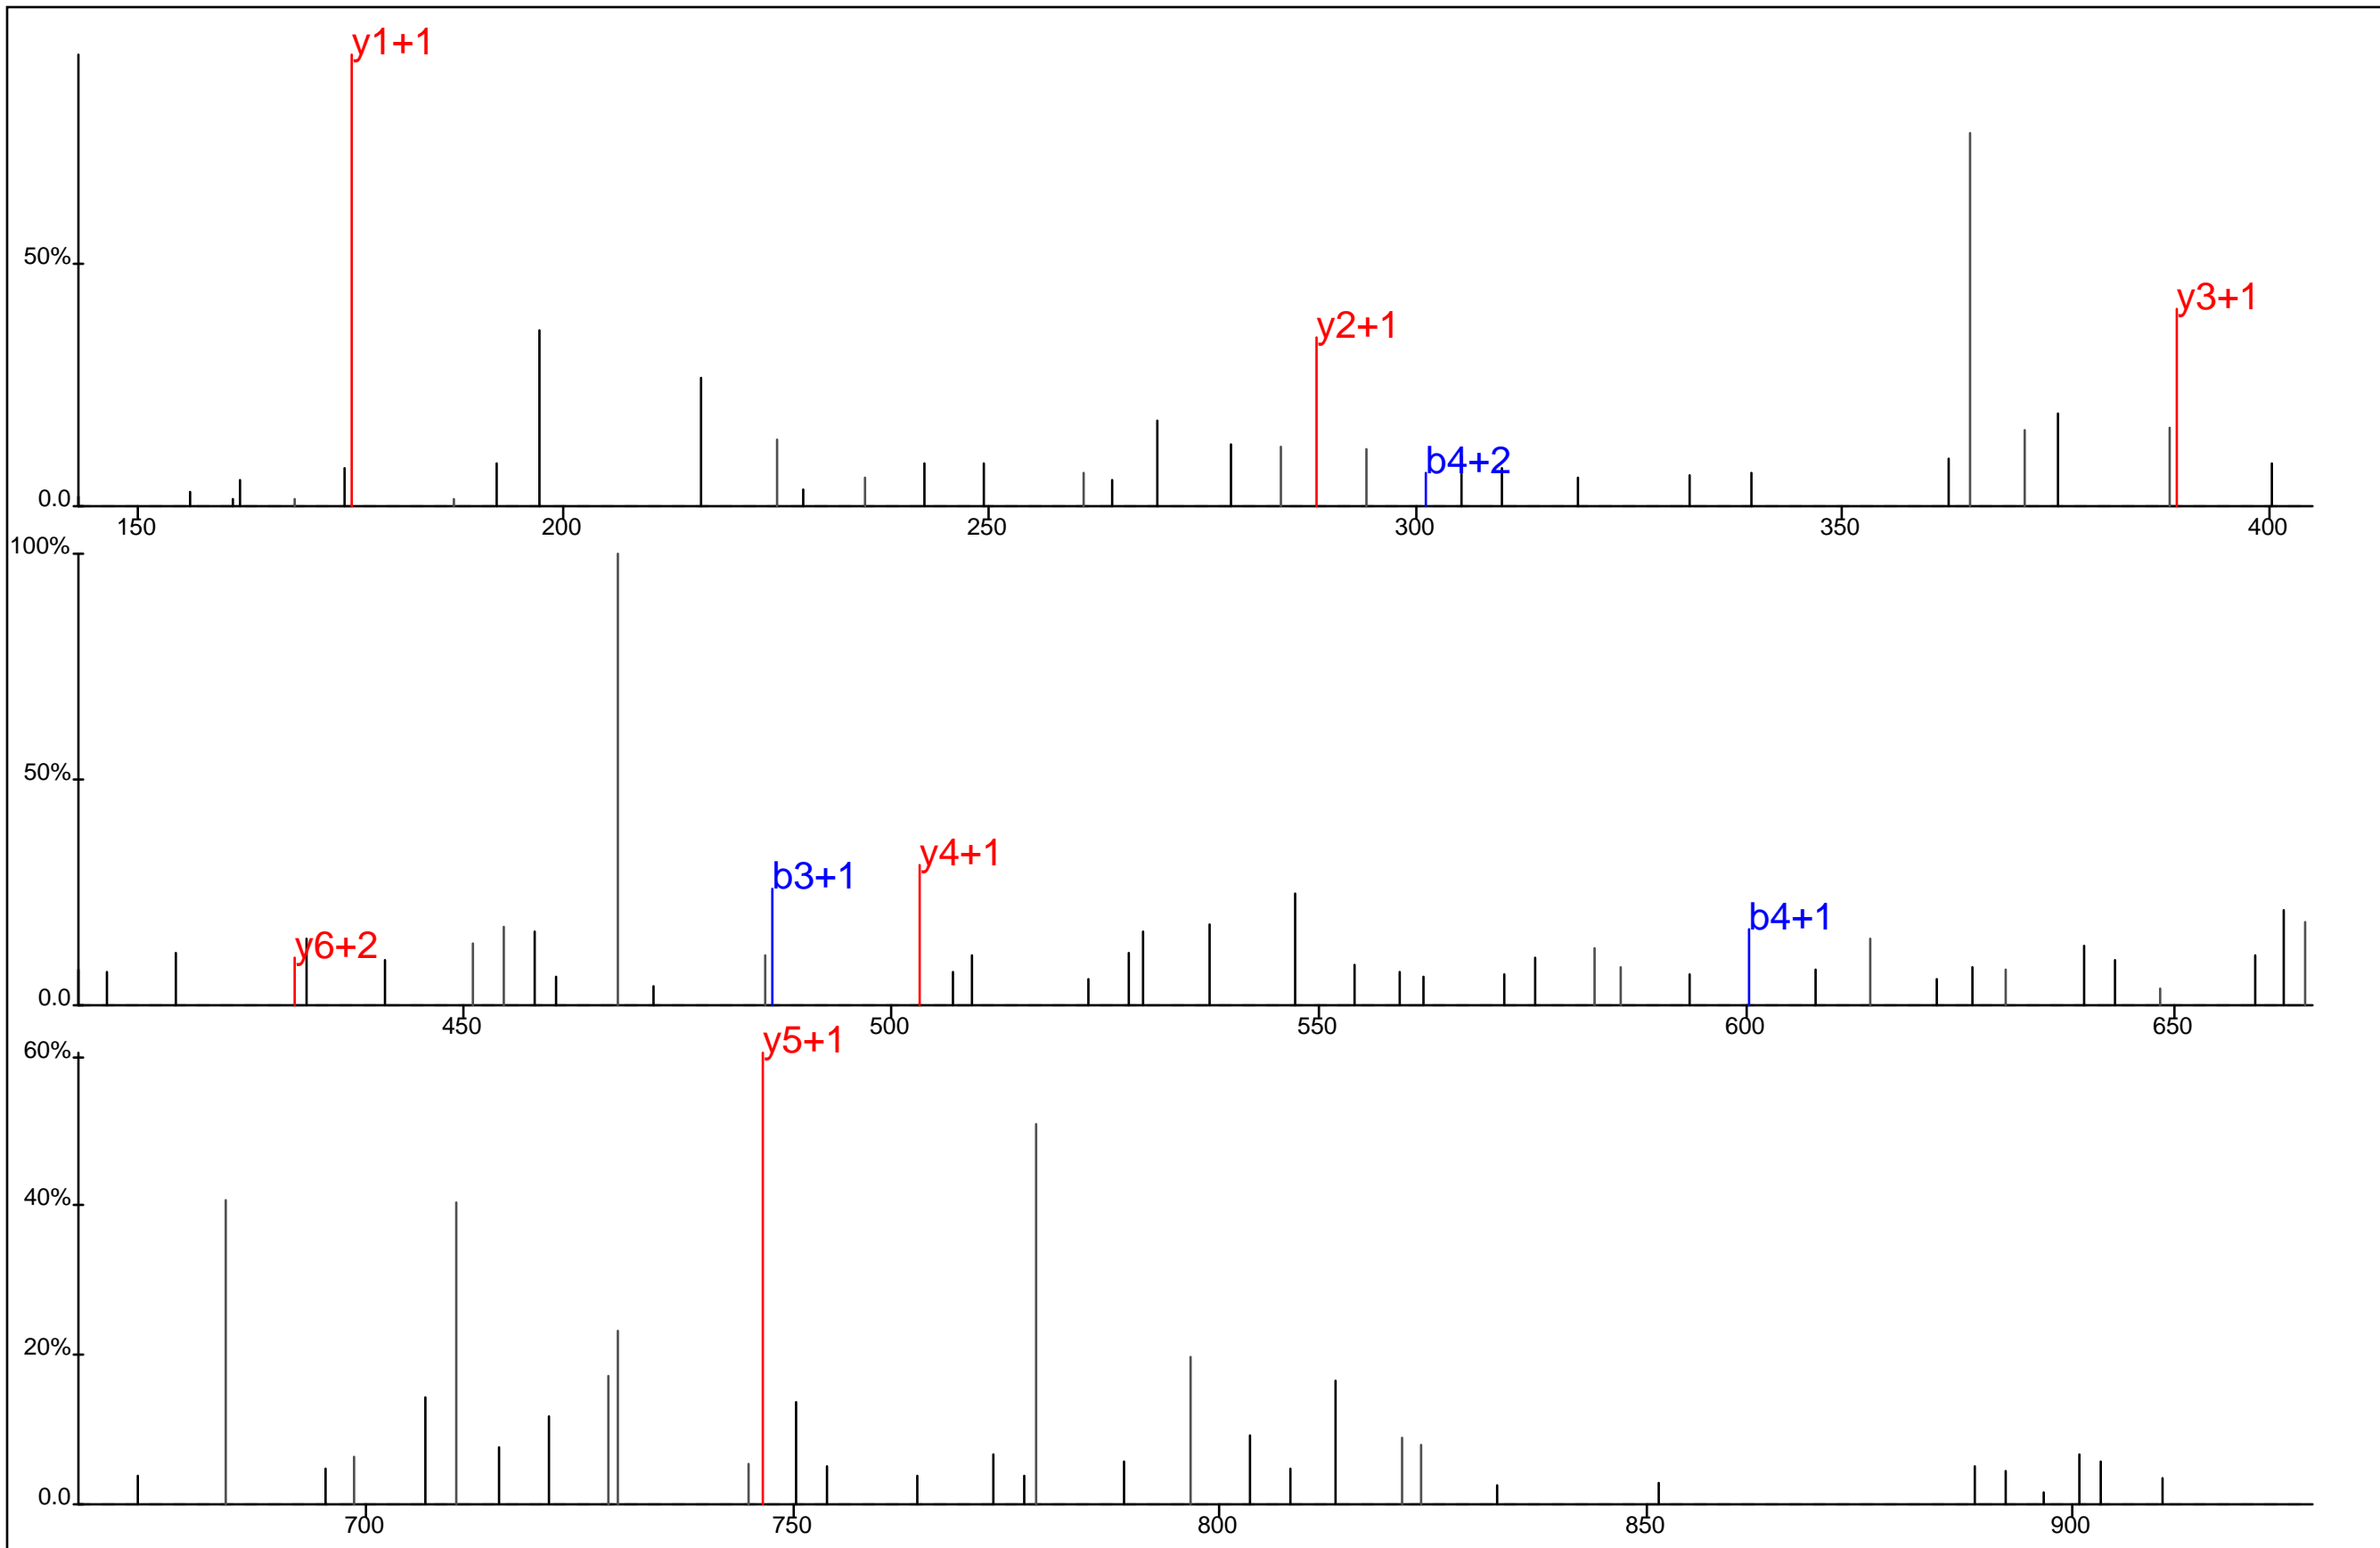

E I Y\* N T I R

Protein Name: RasGAP  
 gi Accession: 0  
 Precursor Mass: 494.7279+2  
 Delta Mass: 1.384 ppm  
 XCorr: 26.12

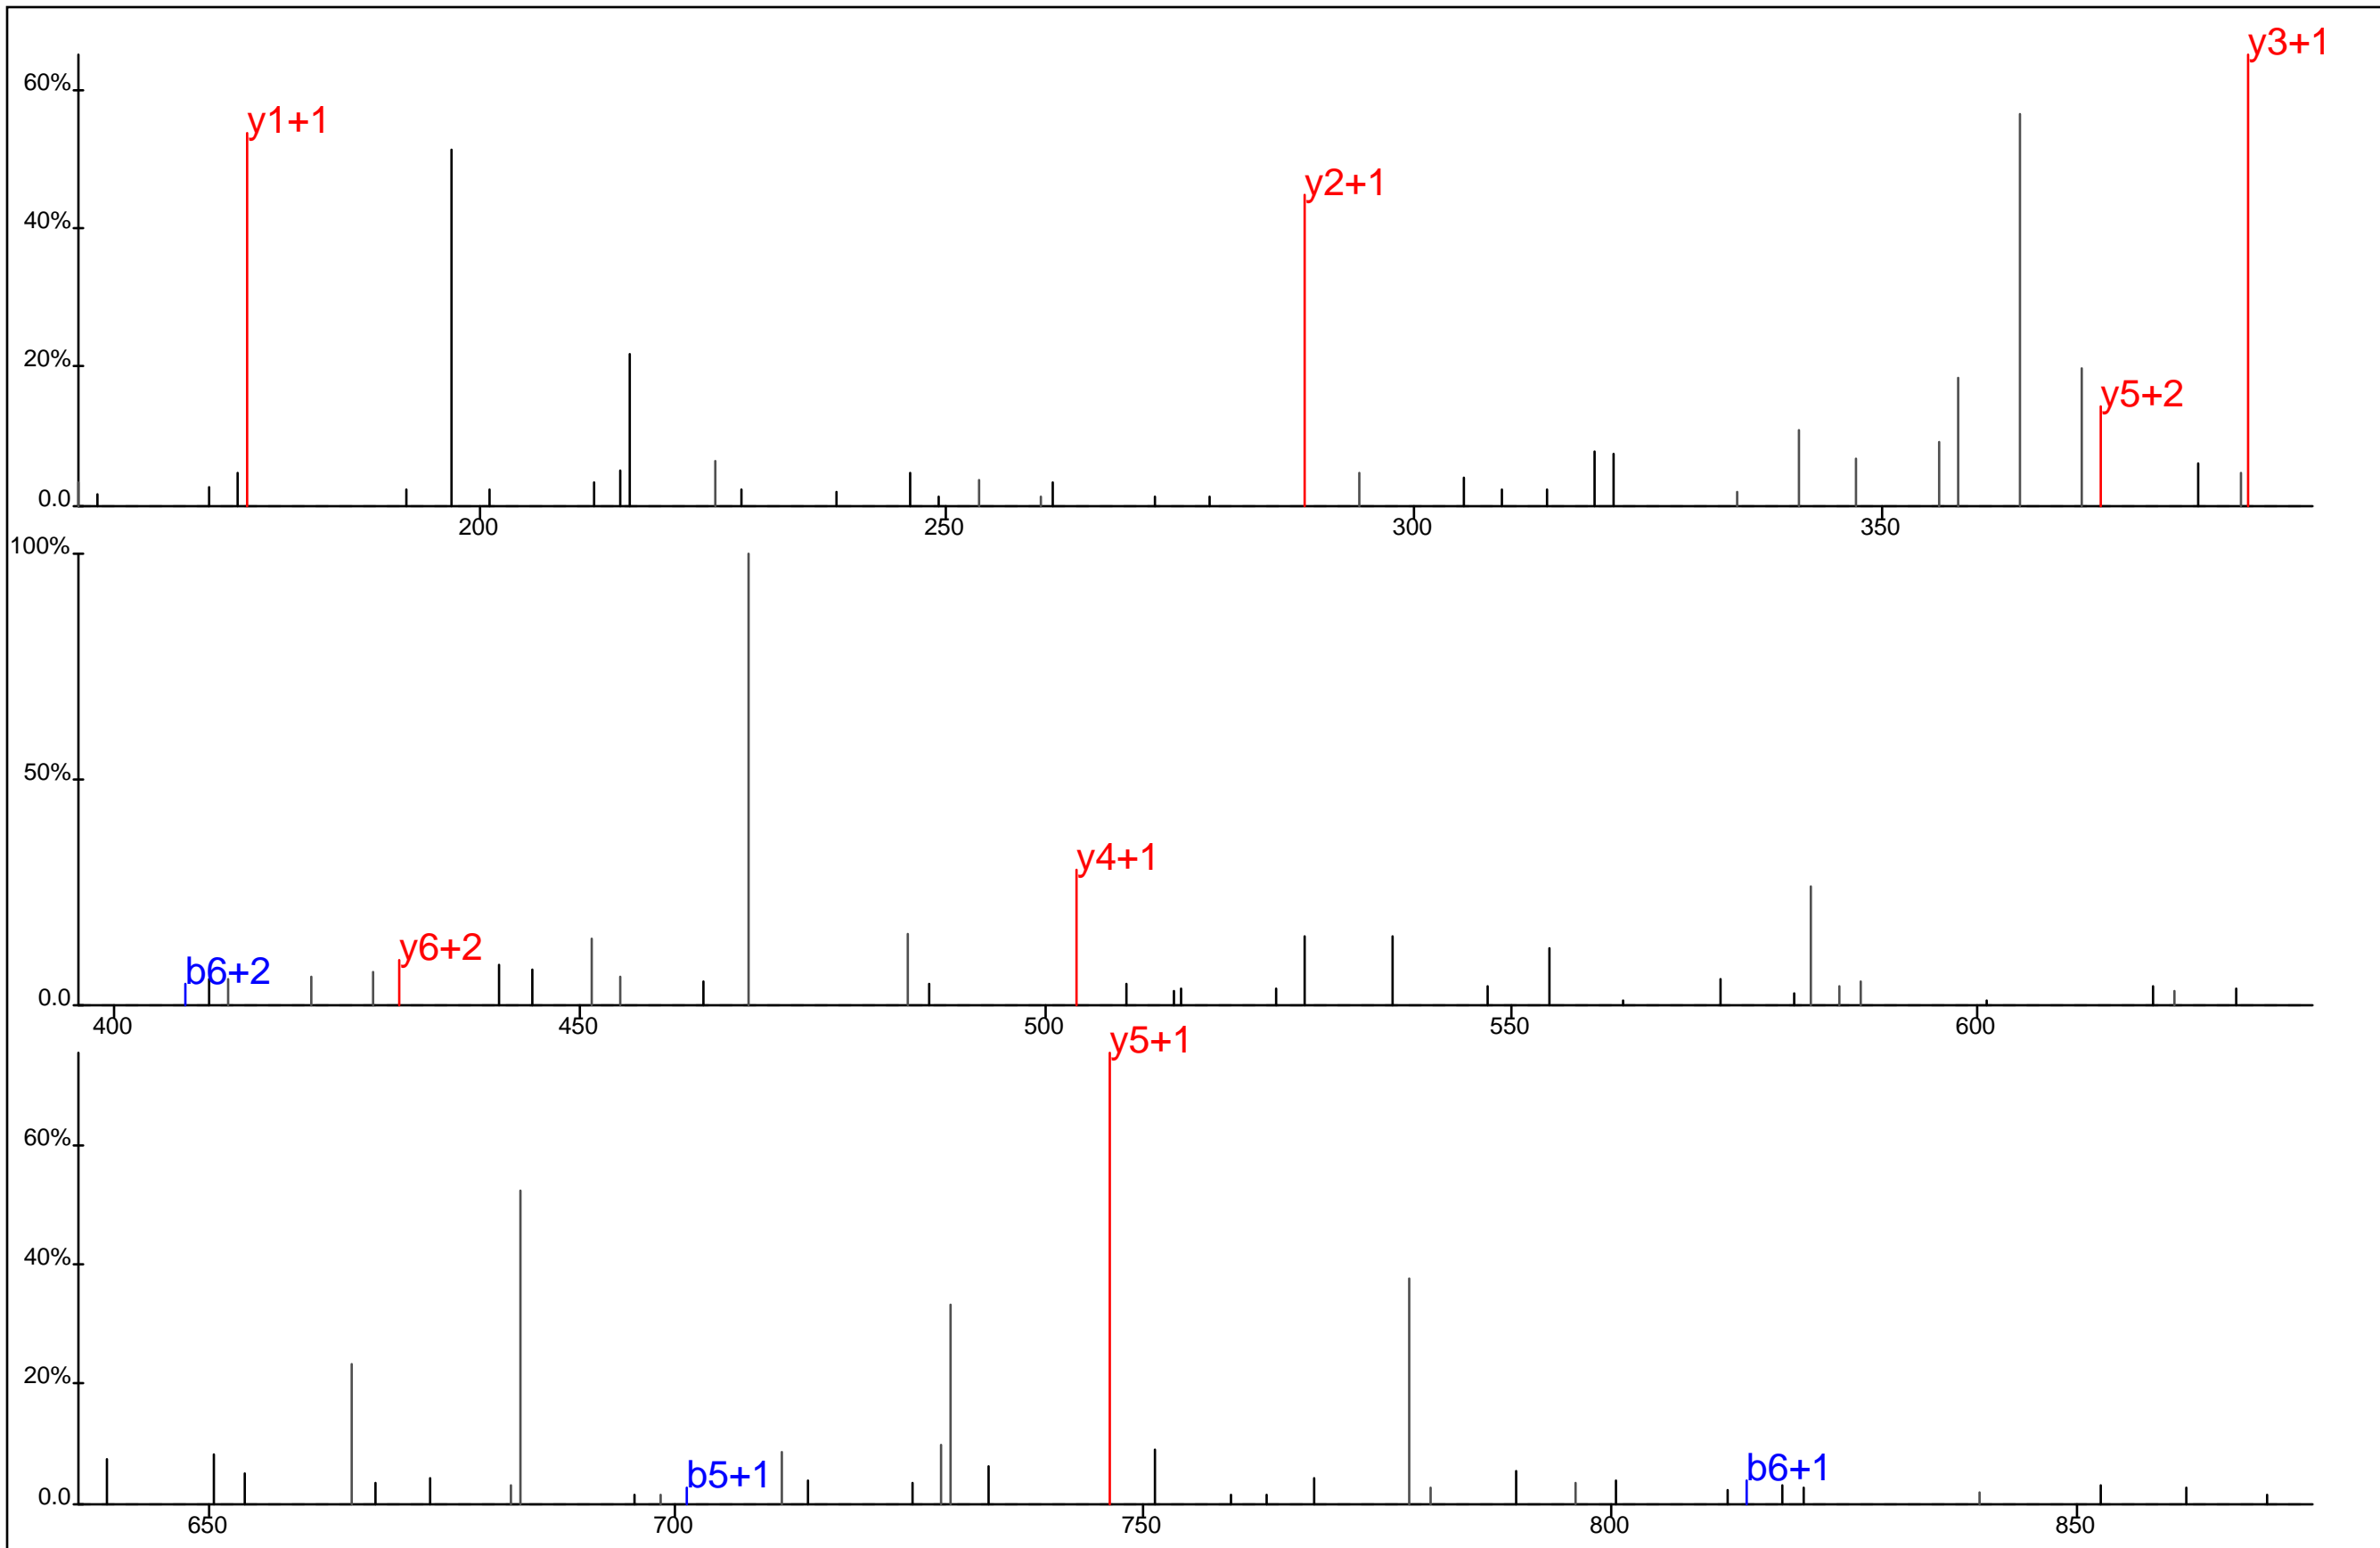

E I Y\* N T I R

Protein Name: RasGAP  
 gi Accession: 0  
 Precursor Mass: 494.7283+2  
 Delta Mass: 0.518 ppm  
 XCorr: 23.44



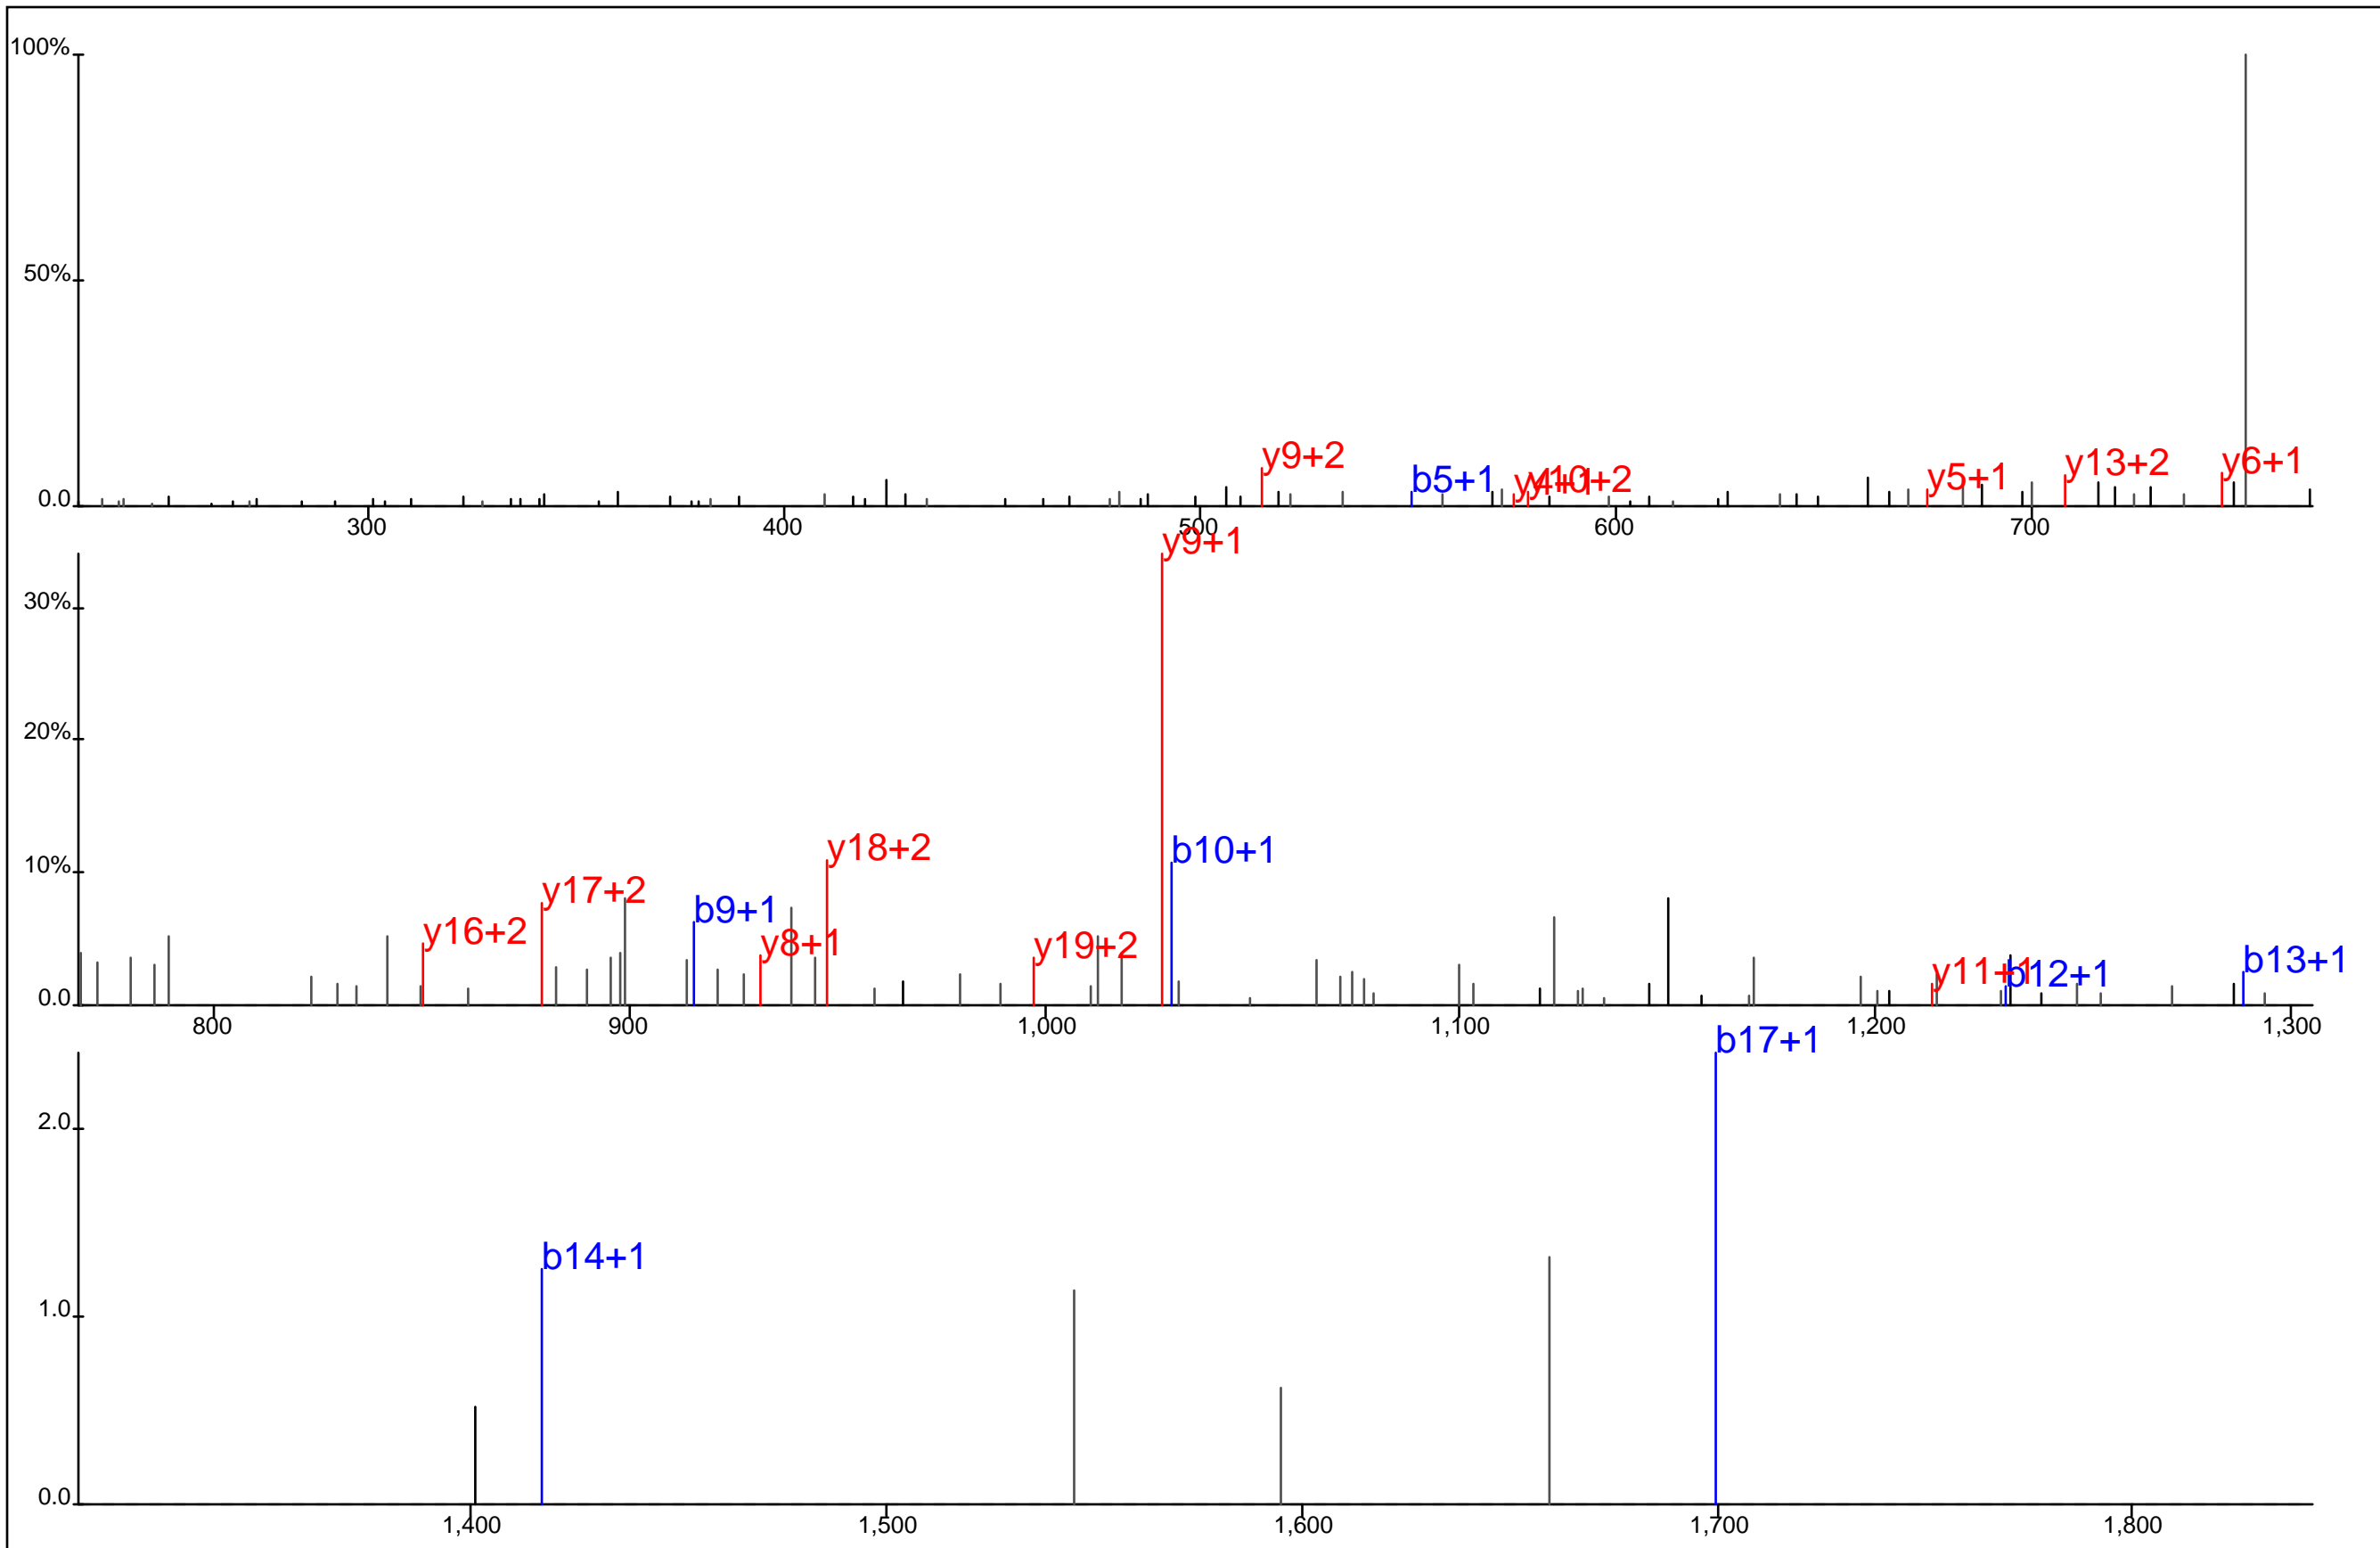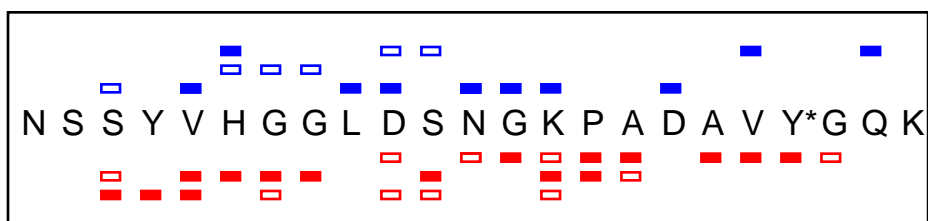

Protein Name: Ras-GTPase-activating protein SH3-domain-binding protein  
 gi Accession: 0  
 Precursor Mass: 815.3638+3  
 Delta Mass: 4.519 ppm  
 XCorr: 23.07

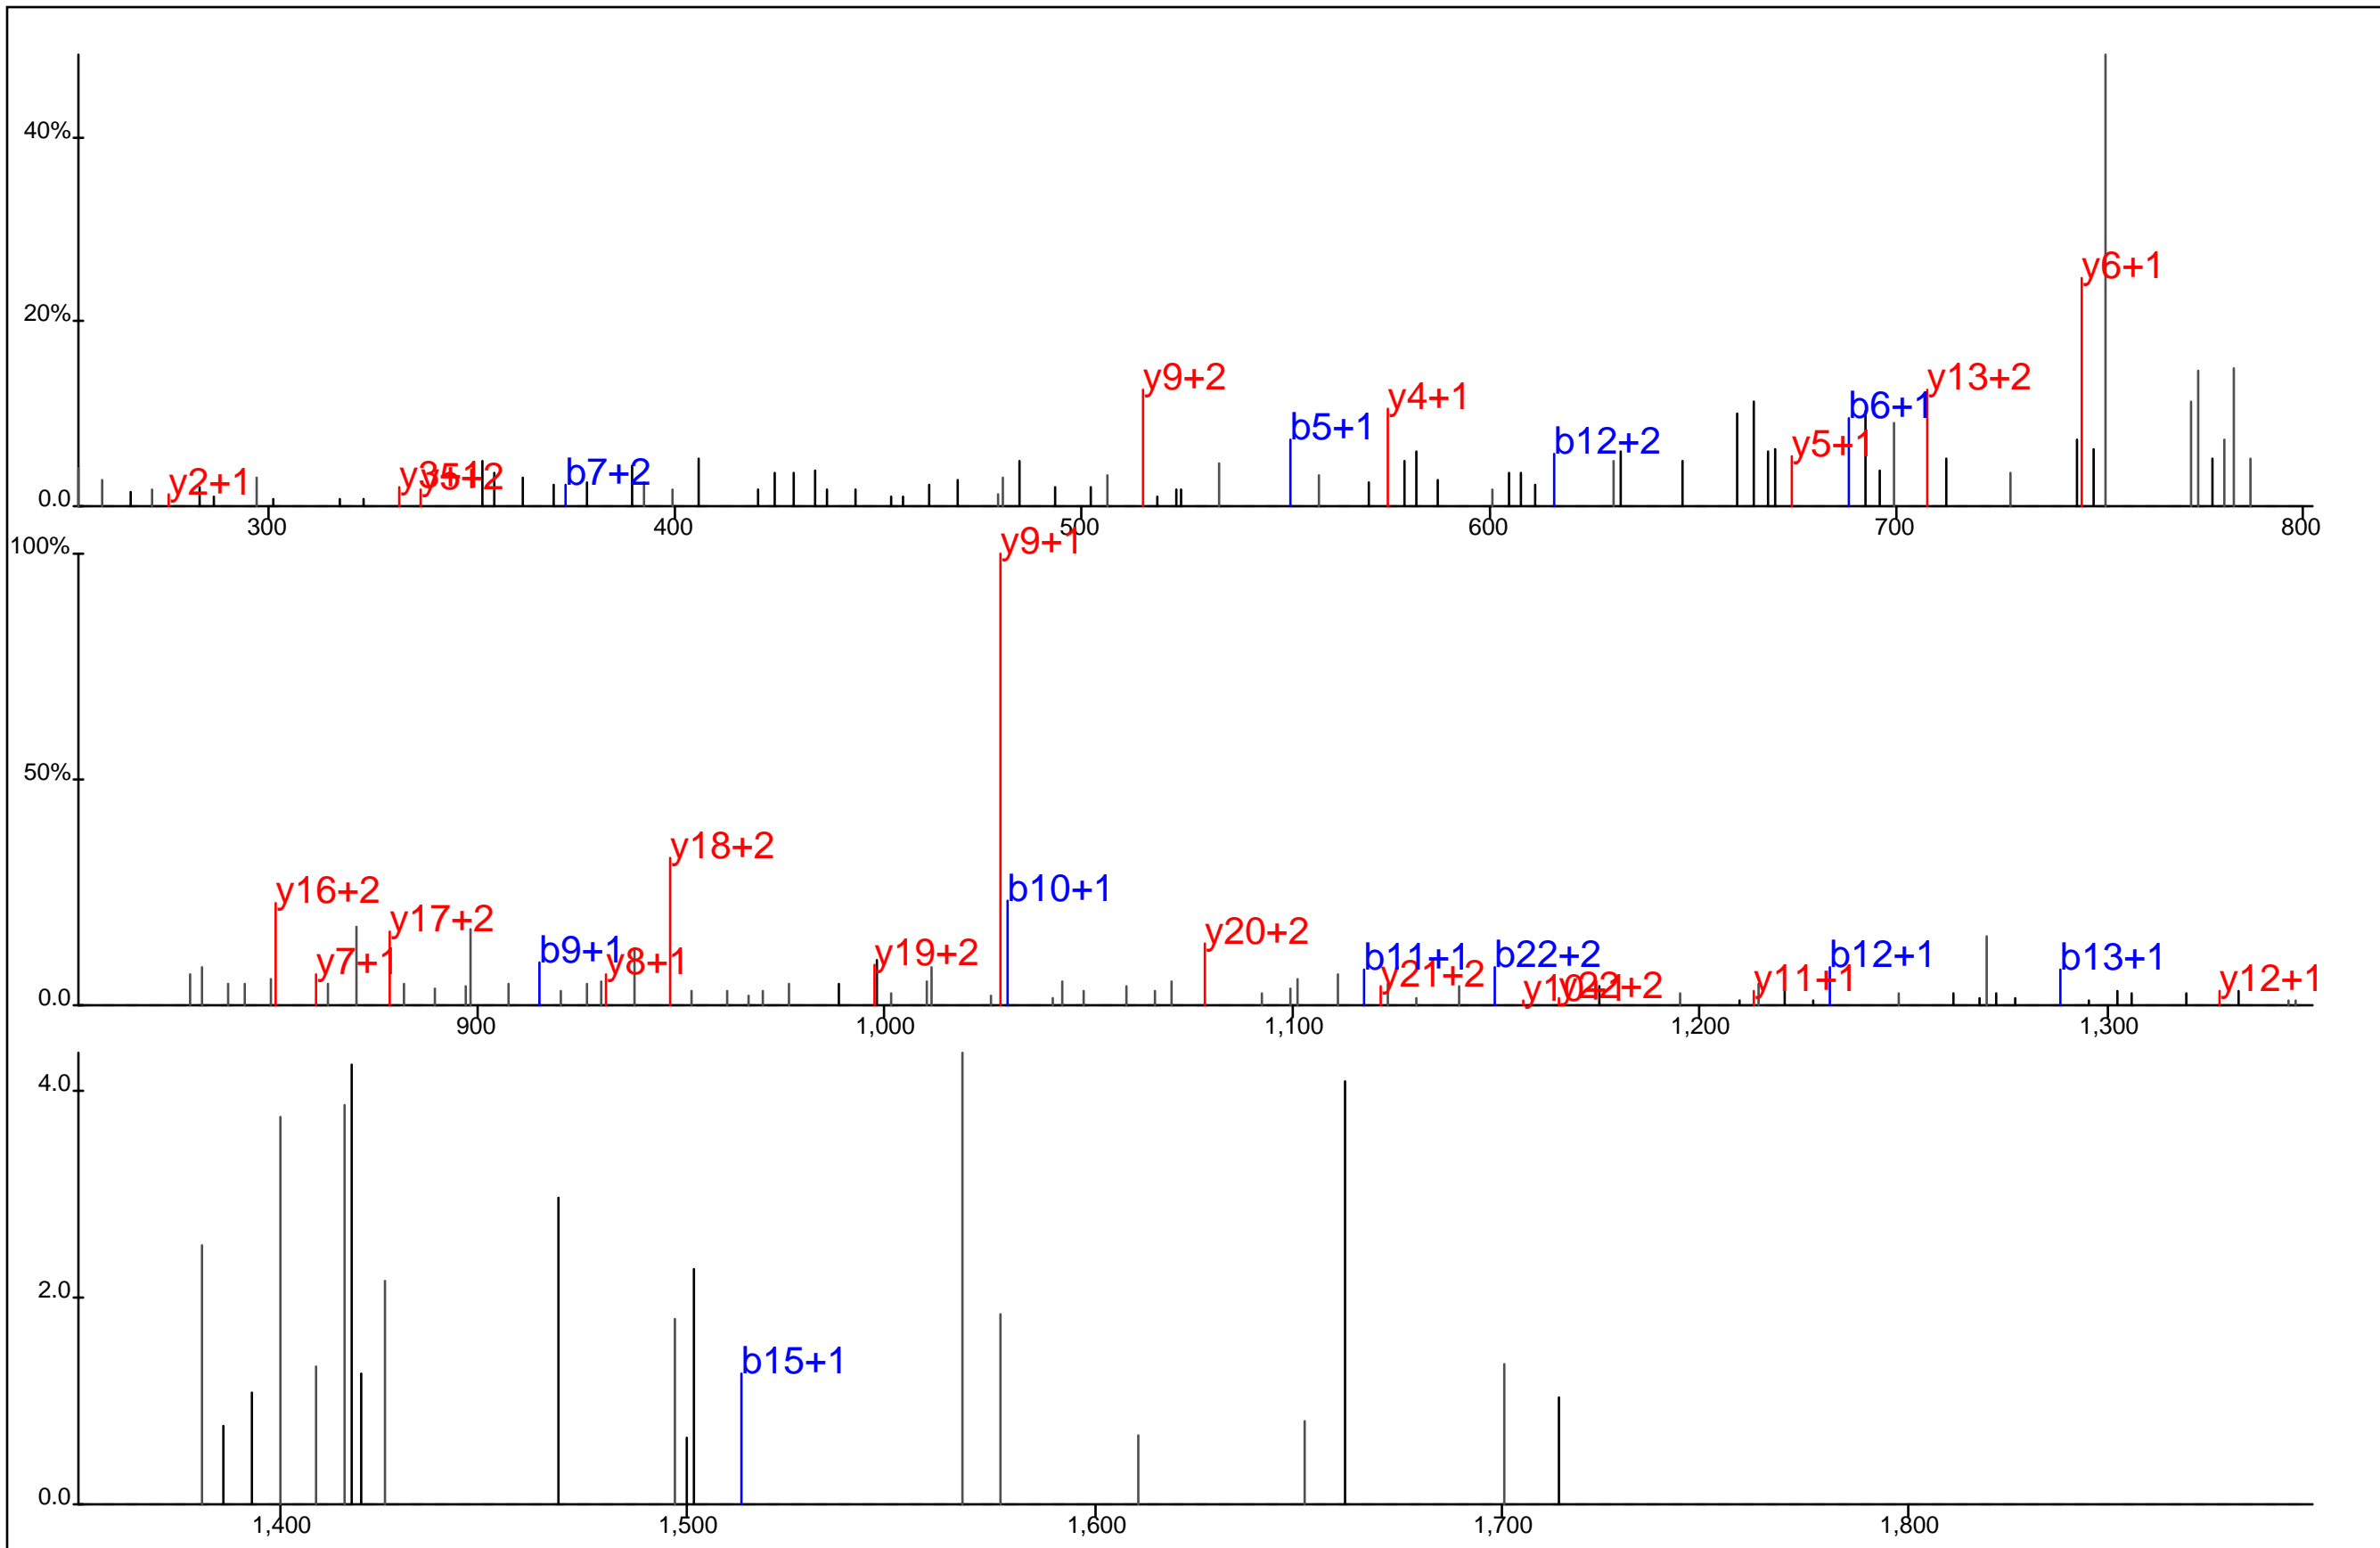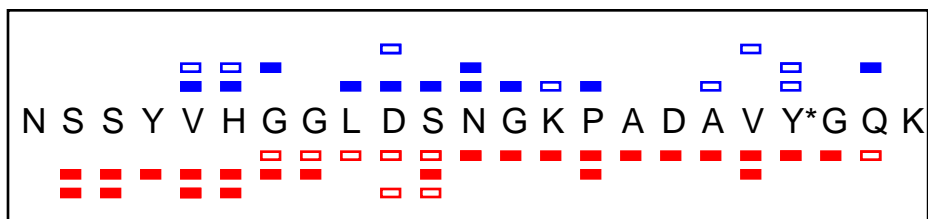

Protein Name: Ras-GTPase-activating protein SH3-domain-binding protein  
 gi Accession: 0  
 Precursor Mass: 815.3643+3  
 Delta Mass: 3.920 ppm  
 XCorr: 46.88

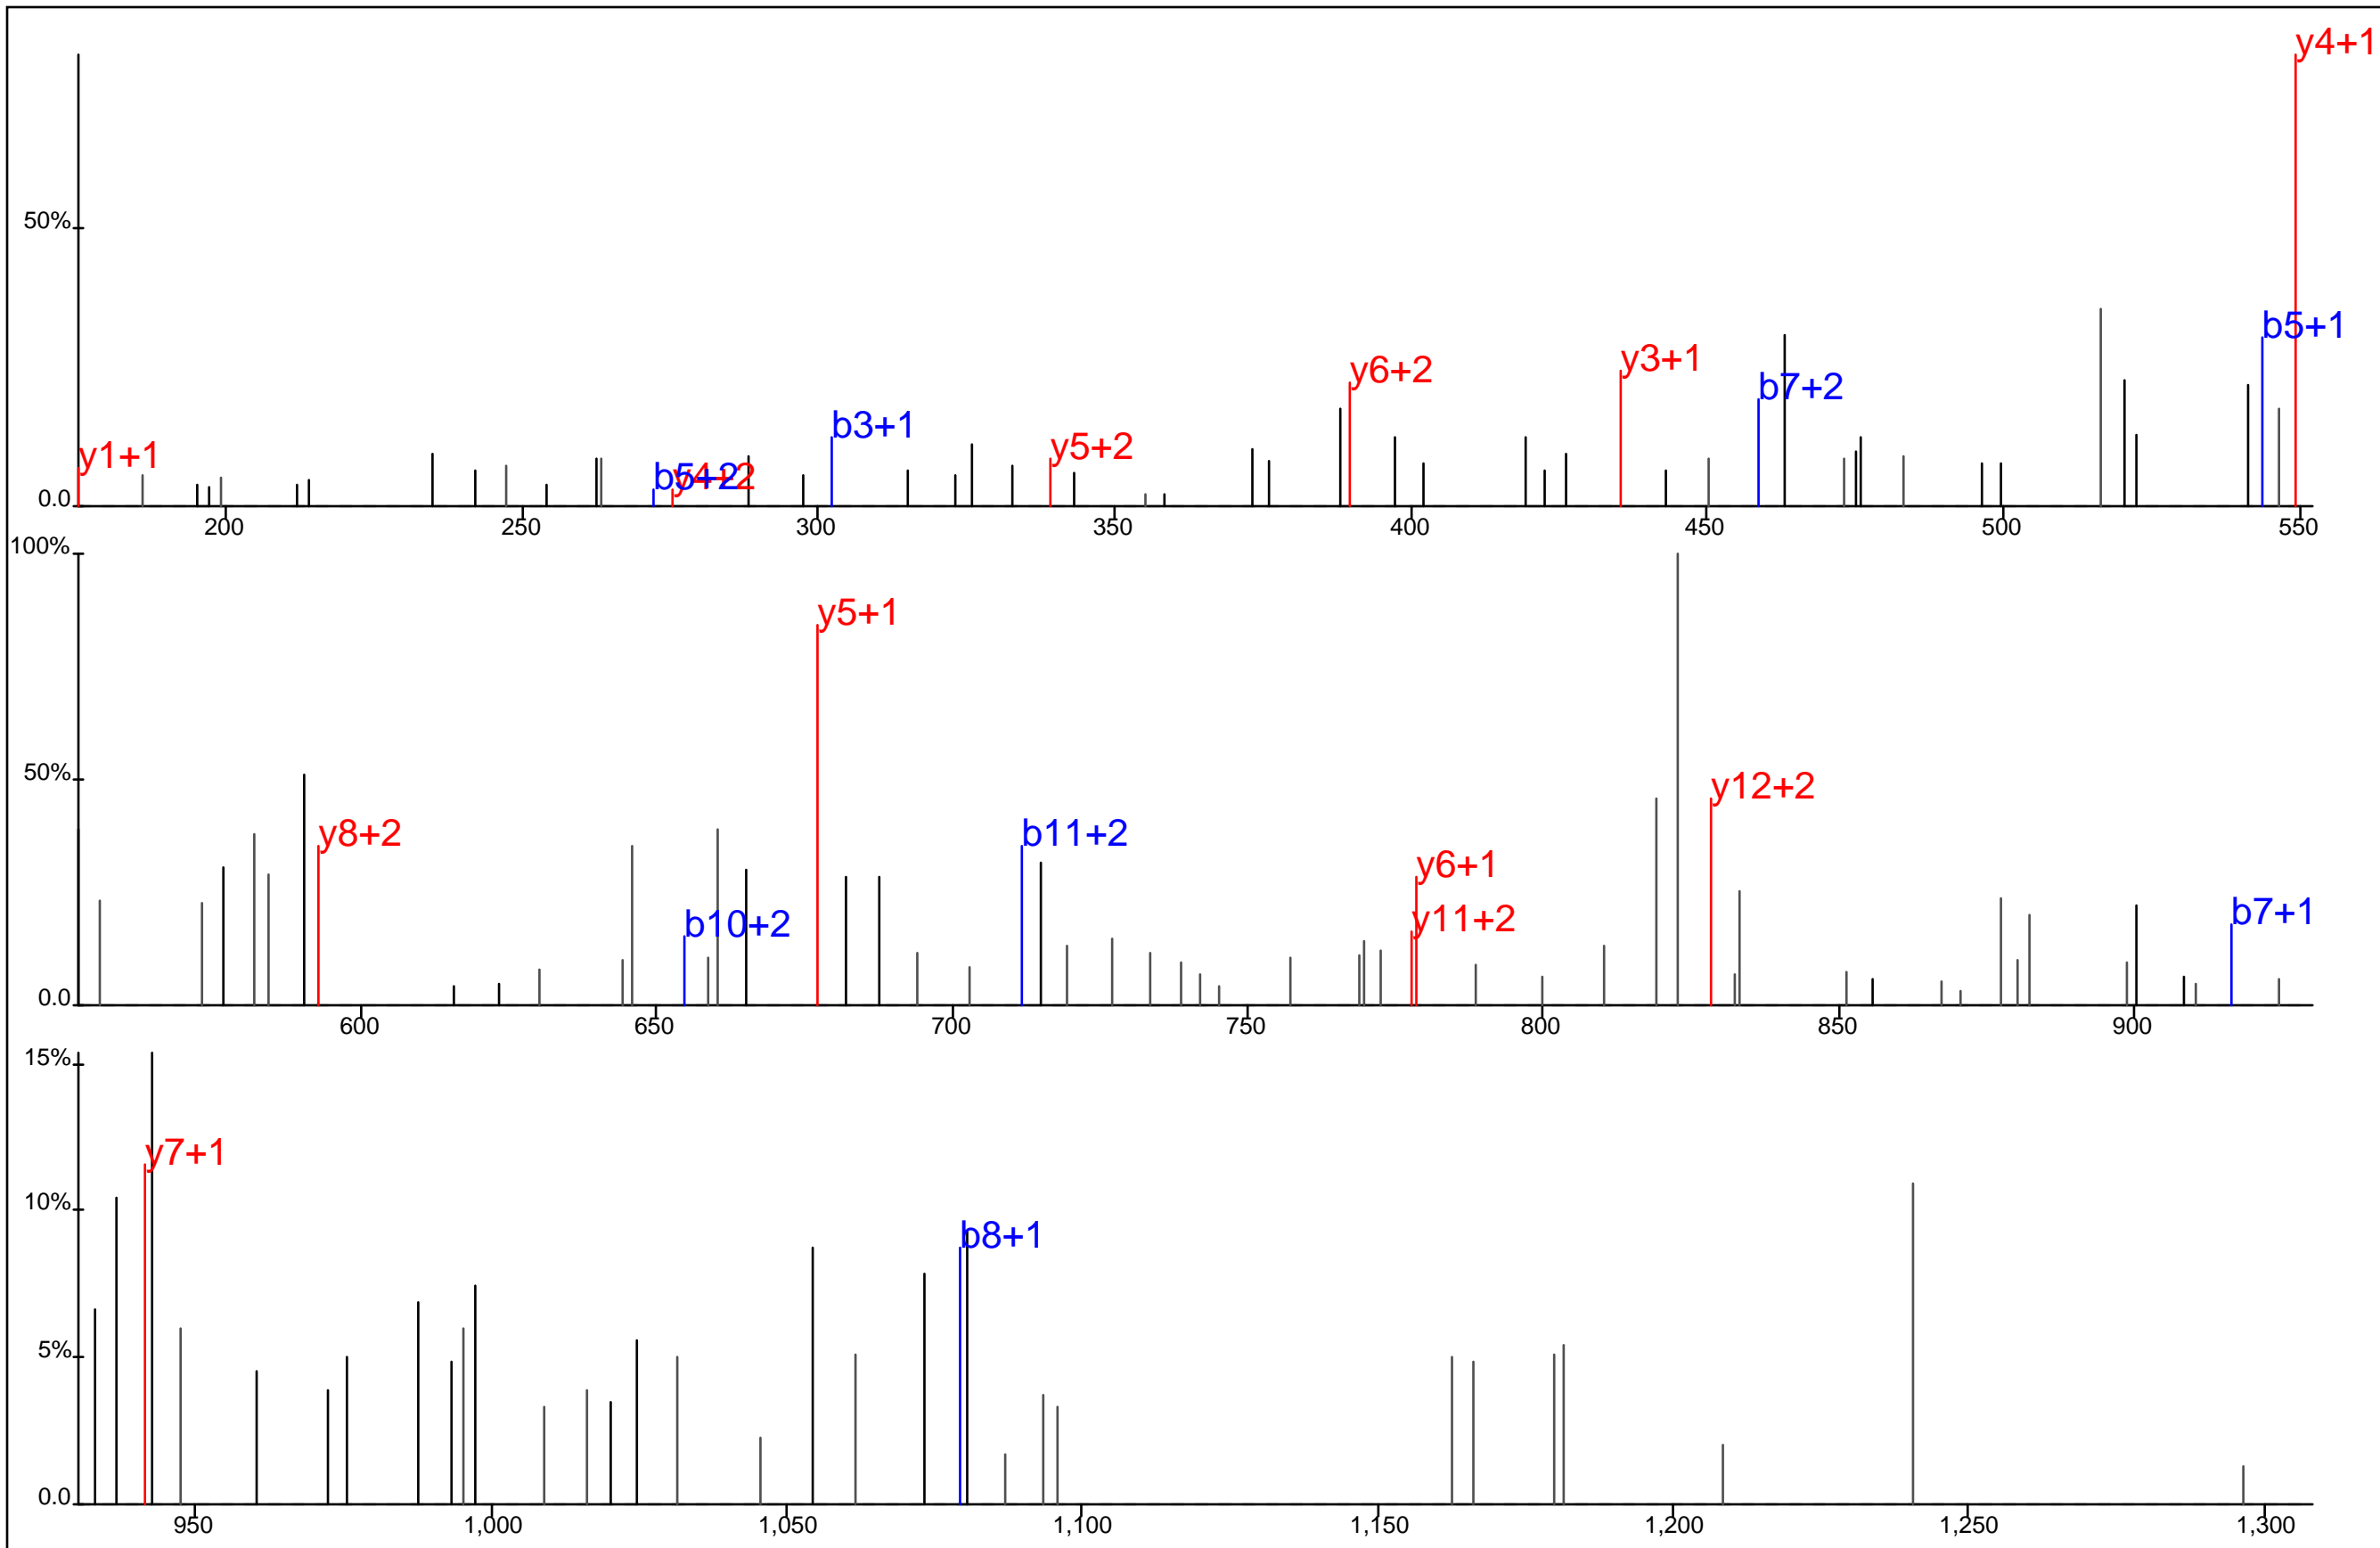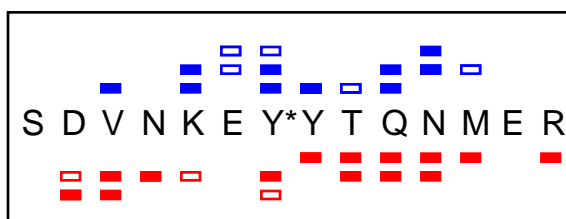

Protein Name: RBM22  
 gi Accession: 0  
 Precursor Mass: 619.5865+3  
 Delta Mass: 3.831 ppm  
 XCorr: 23.43

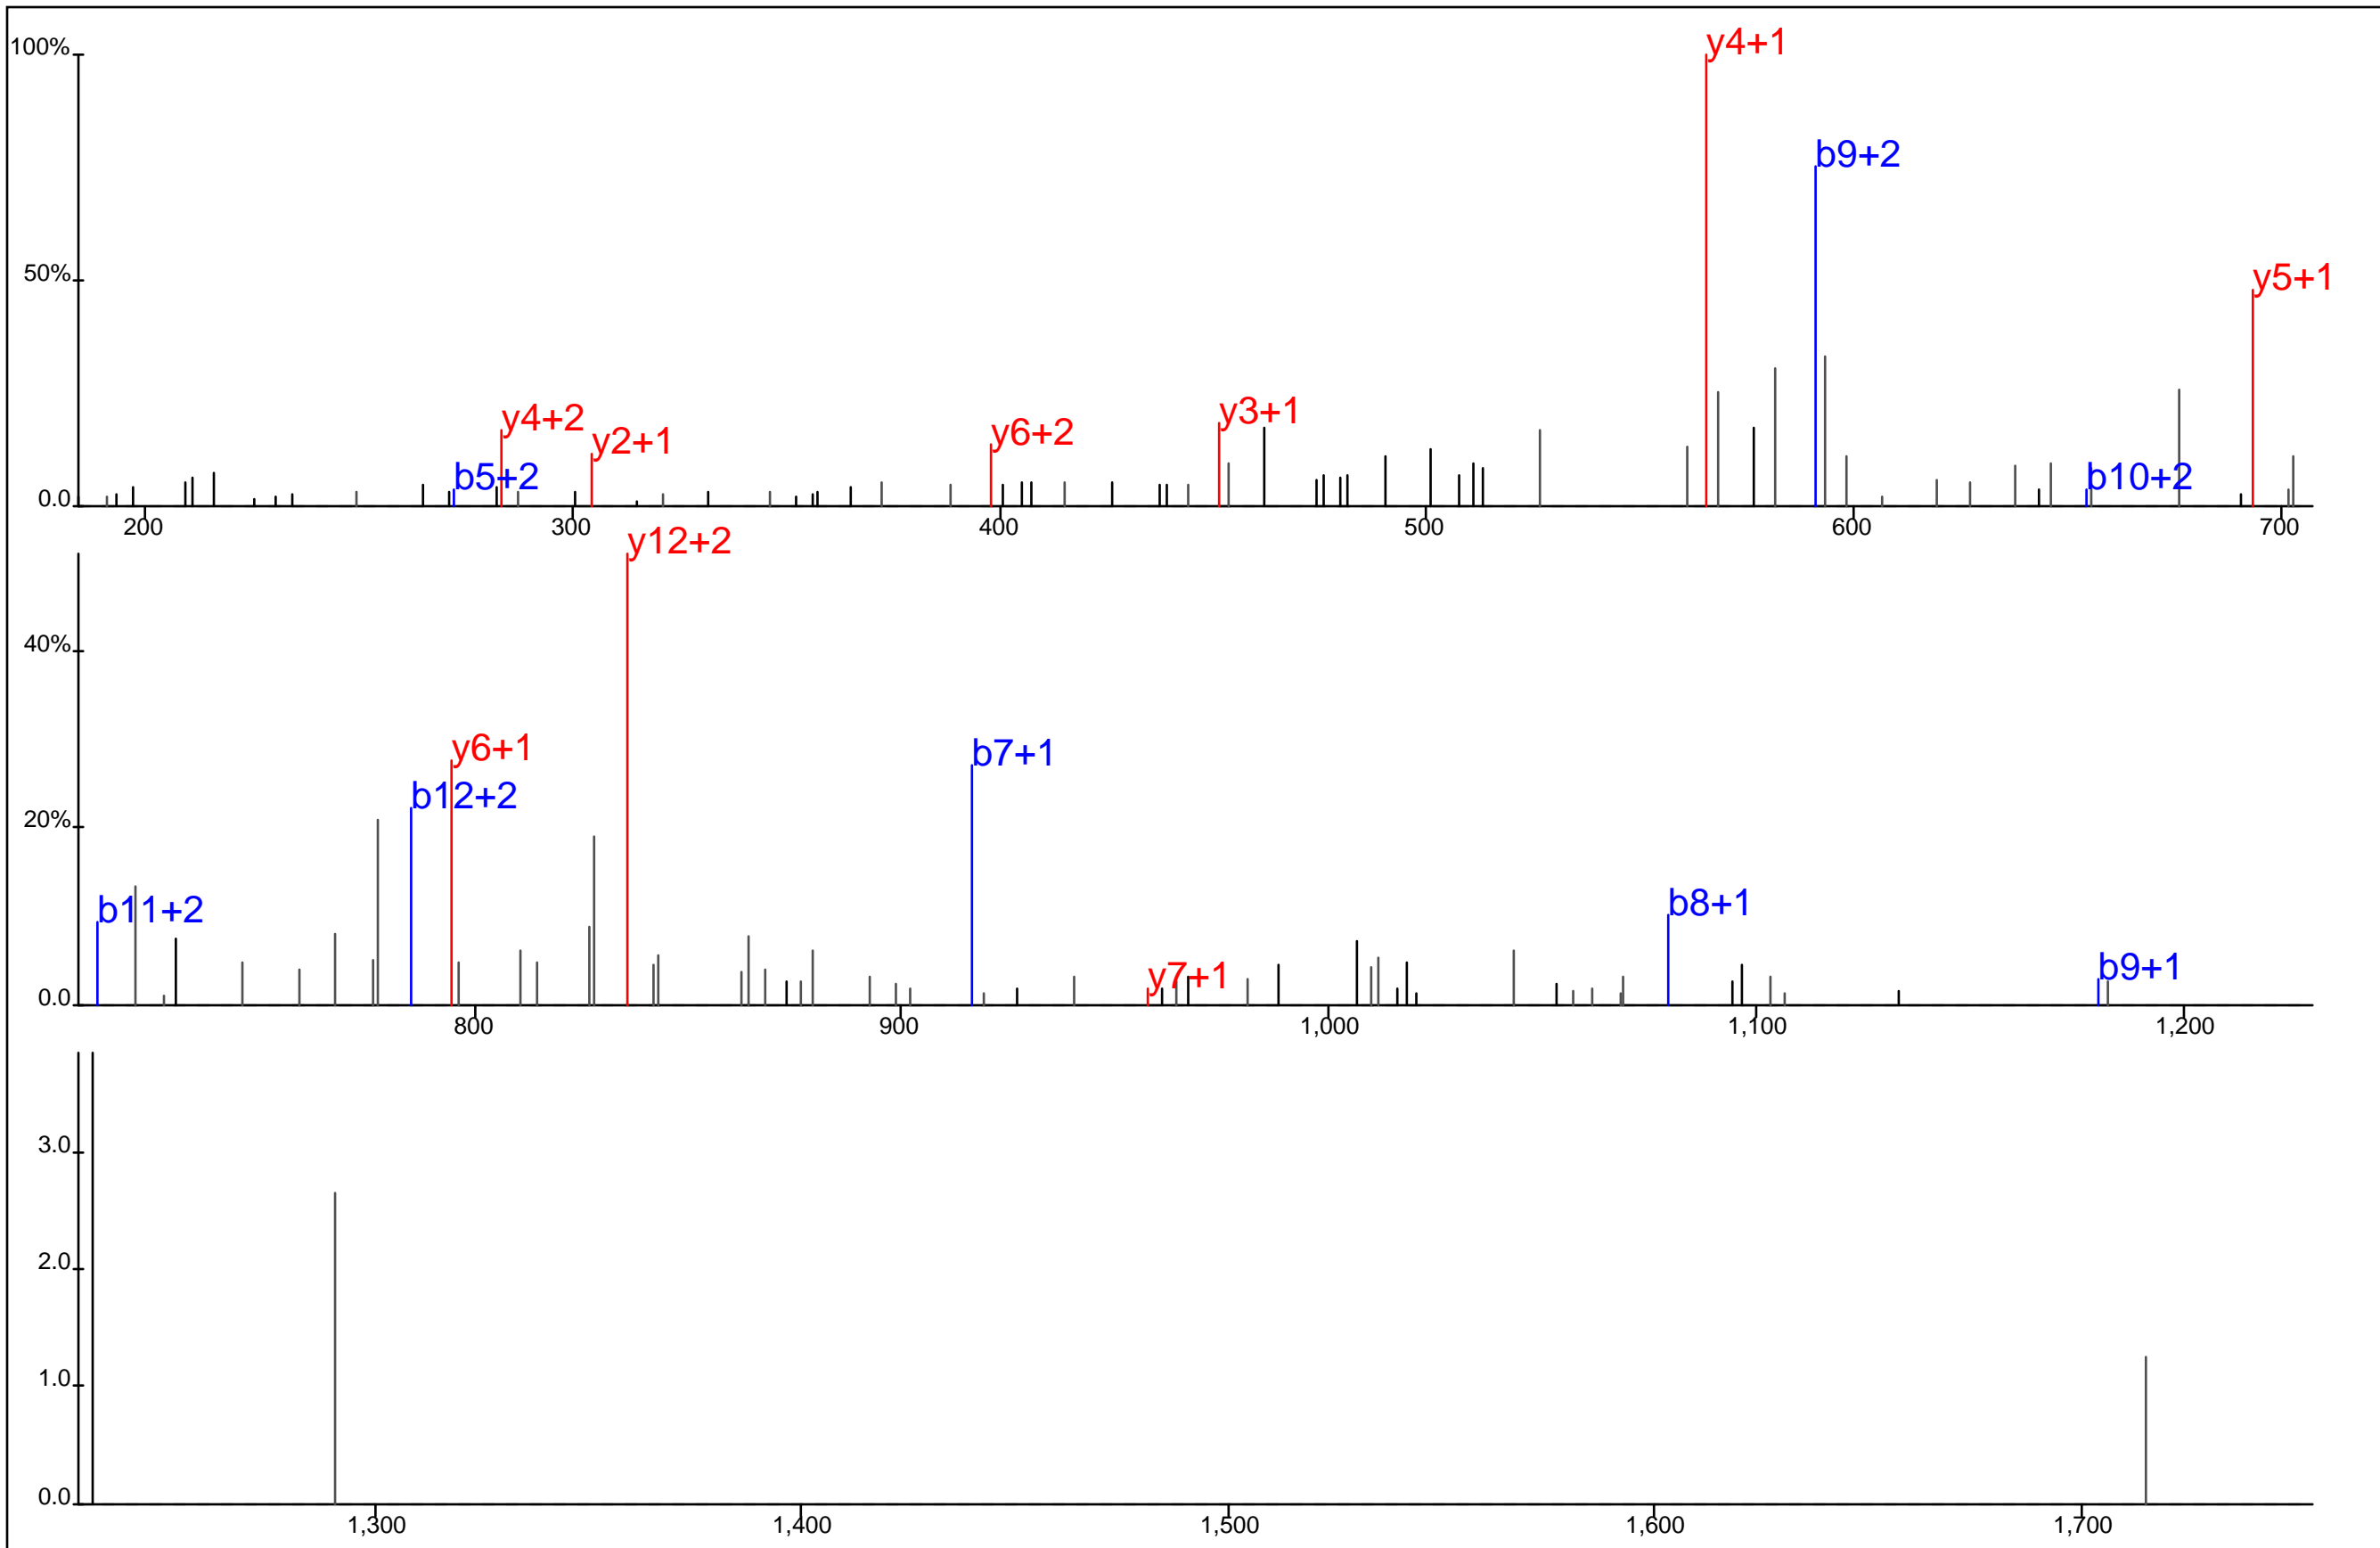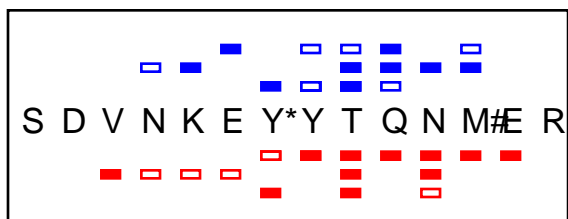

Protein Name: RBM22  
 gi Accession: 0  
 Precursor Mass: 624.9199+3  
 Delta Mass: 1.020 ppm  
 XCorr: 25.11

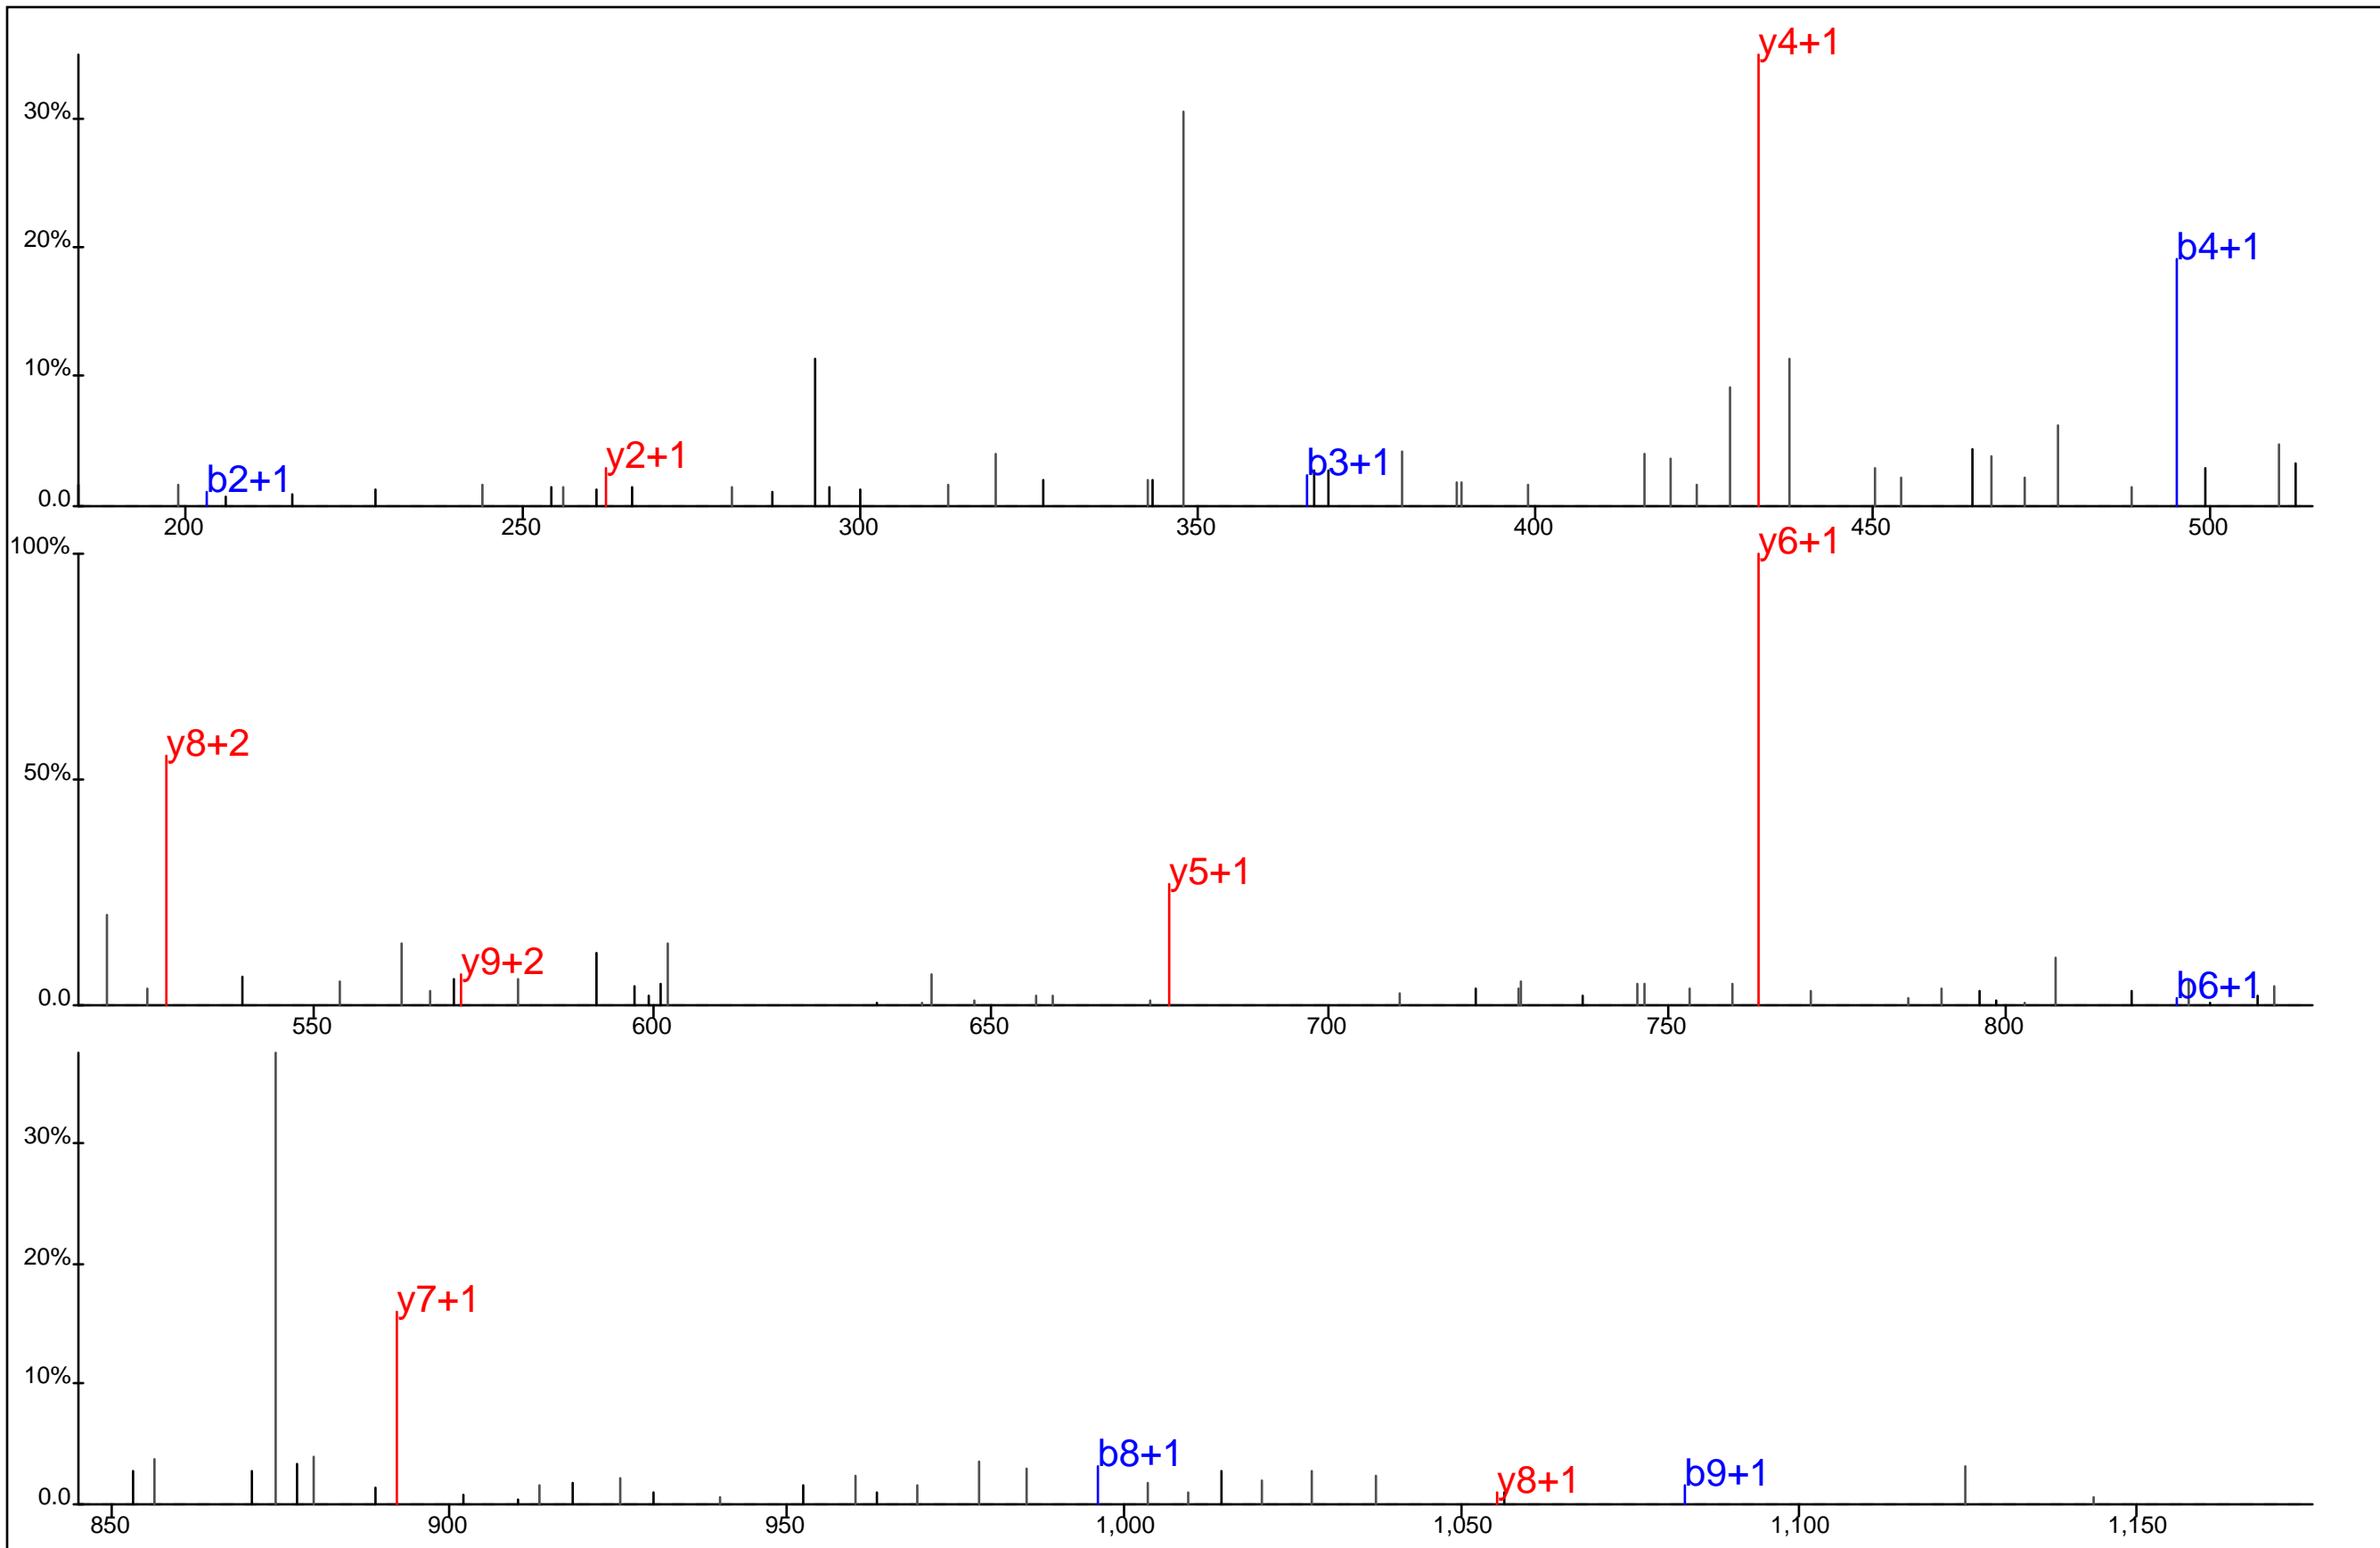

■ ■ ▣ ■ ▣ ■ ■ ▣  
 D S Y E S Y\* G N S R  
■ ■ ▣ ■ ▣ ■ ■ ▣

Protein Name: RBMX  
 gi Accession: 0  
 Precursor Mass: 629.2241+2  
 Delta Mass: 0.857 ppm  
 XCorr: 35.9

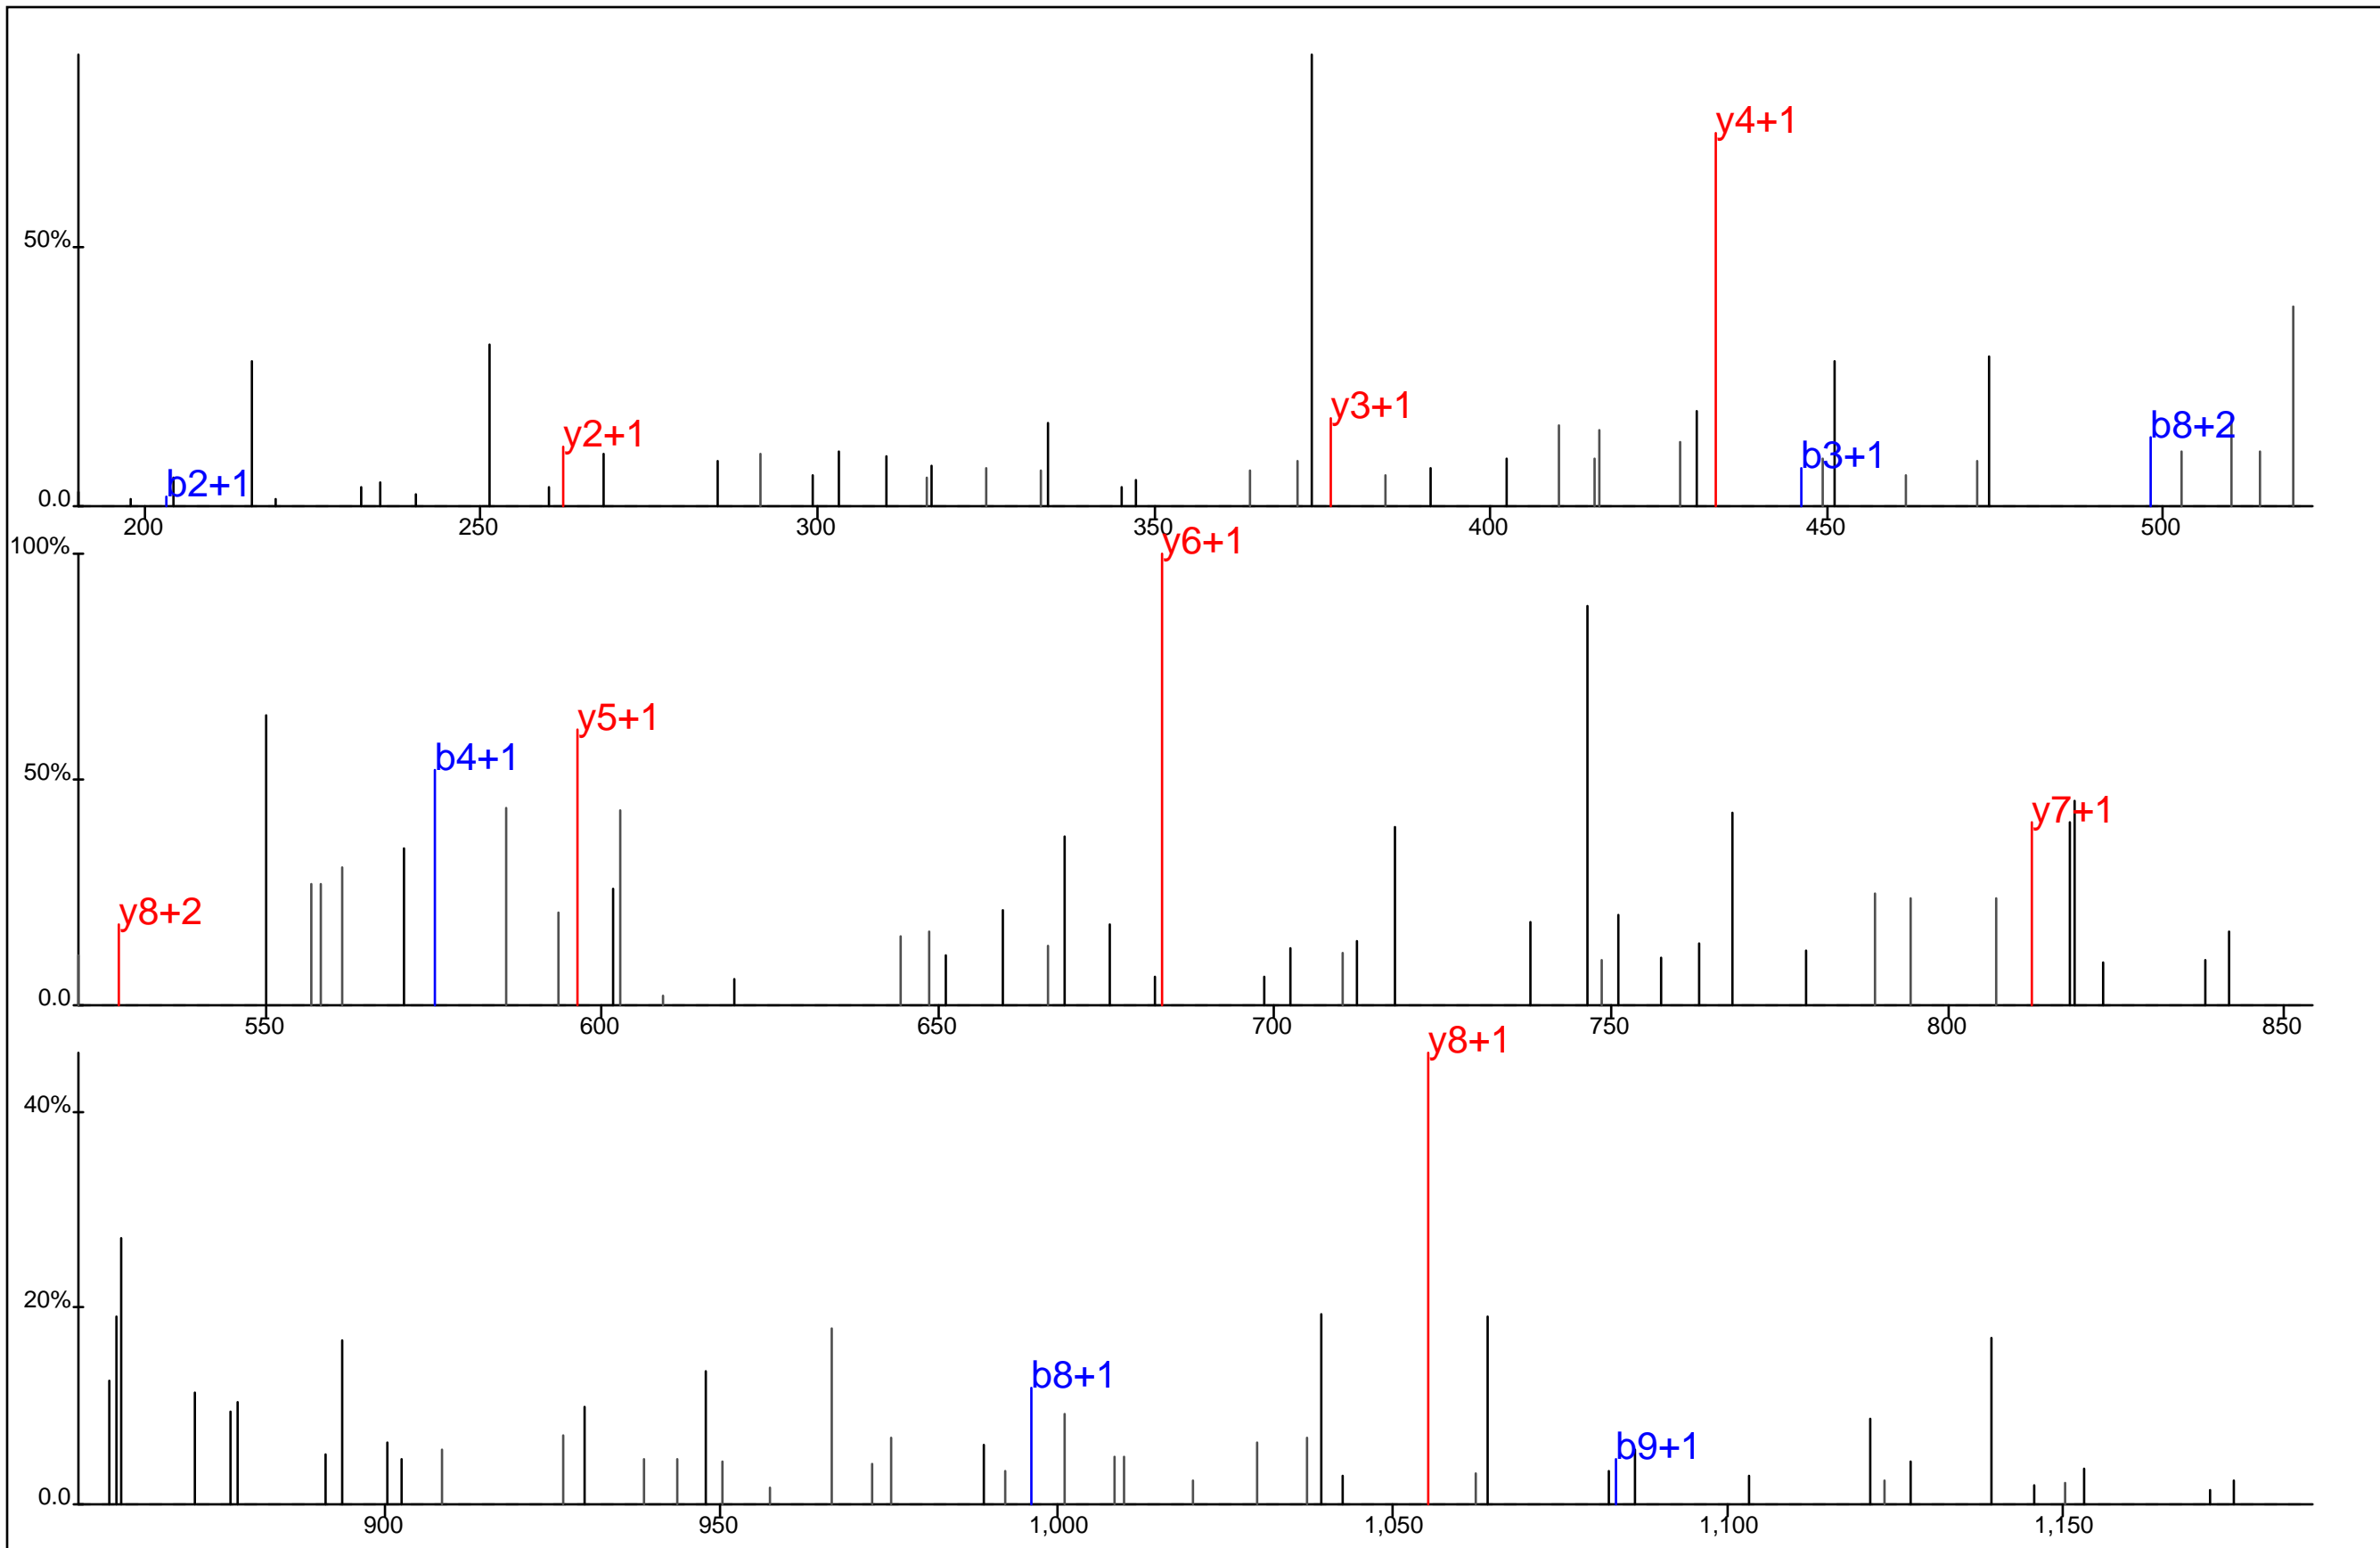

■ ■ ■ ■ ■ ■ ■ ■  
 D S Y\* E S Y G N S R  
■ ■ ■ ■ ■ ■ ■ ■

Protein Name: RBMX  
 gi Accession: 0  
 Precursor Mass: 629.2288+2  
 Delta Mass: 6.715 ppm  
 XCorr: 21.01

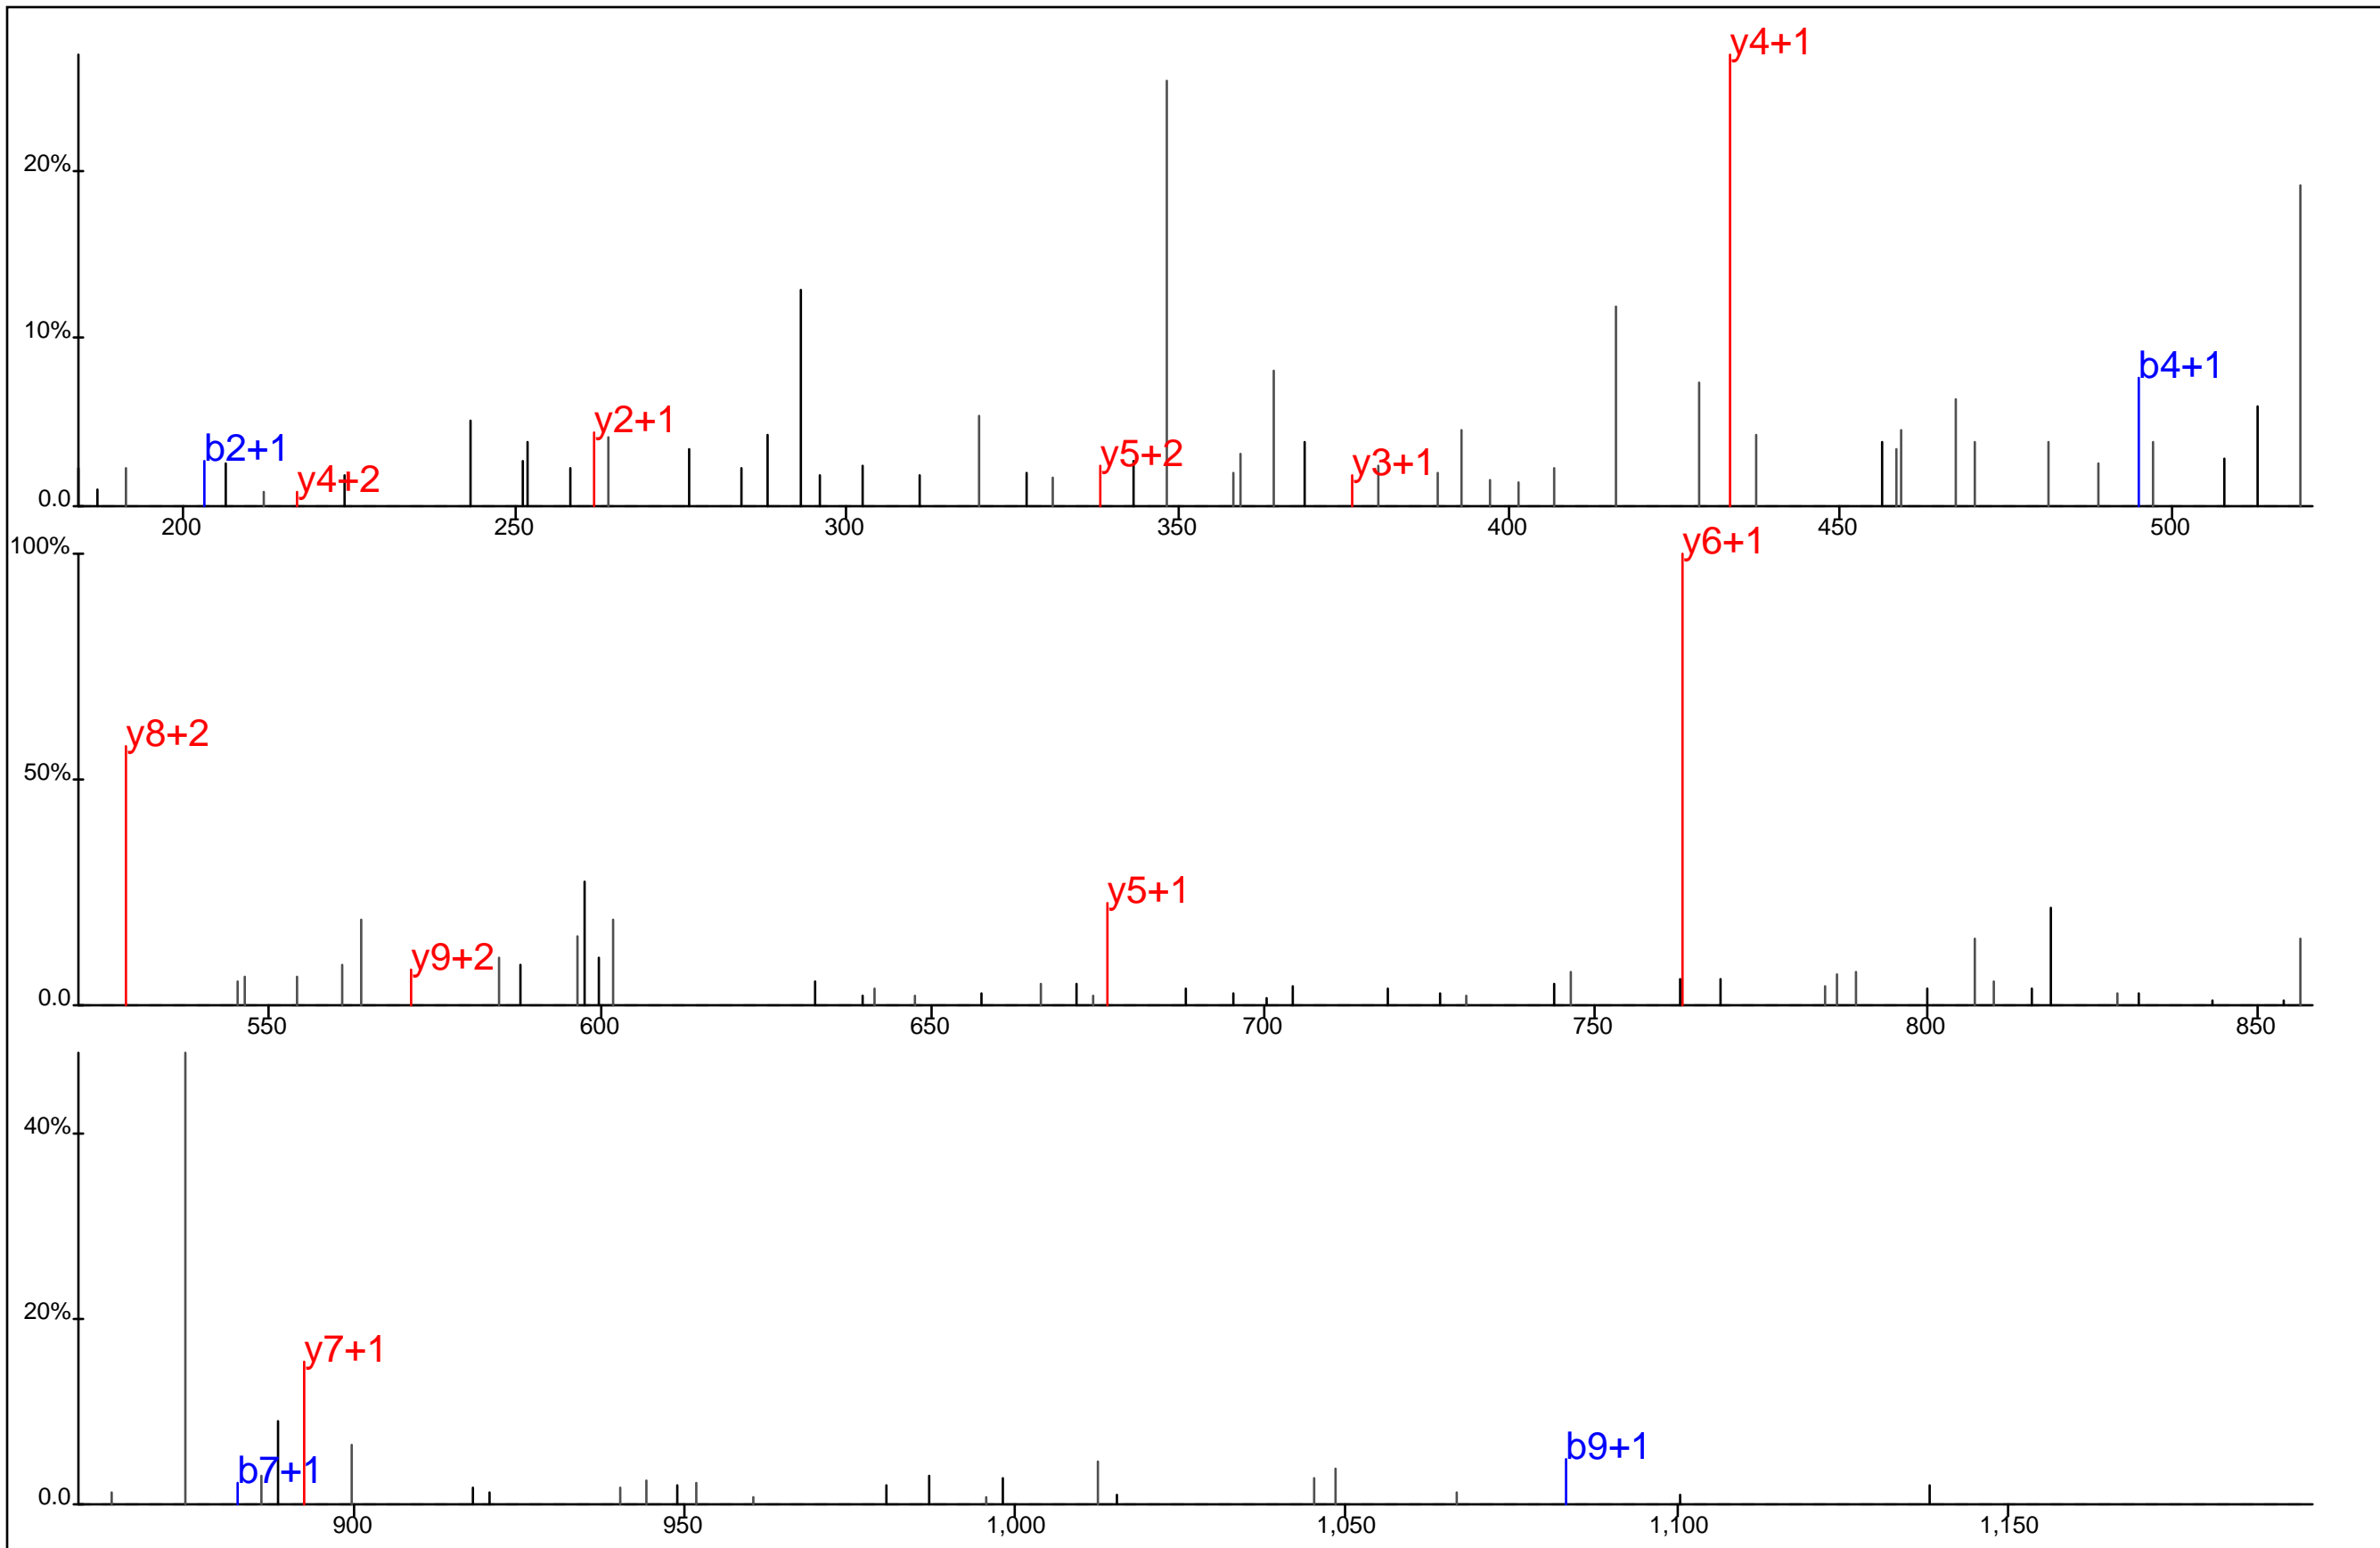

■ □ ■ □ ■ □ ■ □ ■ □  
 D S Y E S Y\* G N S R  
■ □ ■ □ ■ □ ■ □ ■ □

Protein Name: RBMX  
 gi Accession: 0  
 Precursor Mass: 629.2242+2  
 Delta Mass: 0.663 ppm  
 XCorr: 21.73

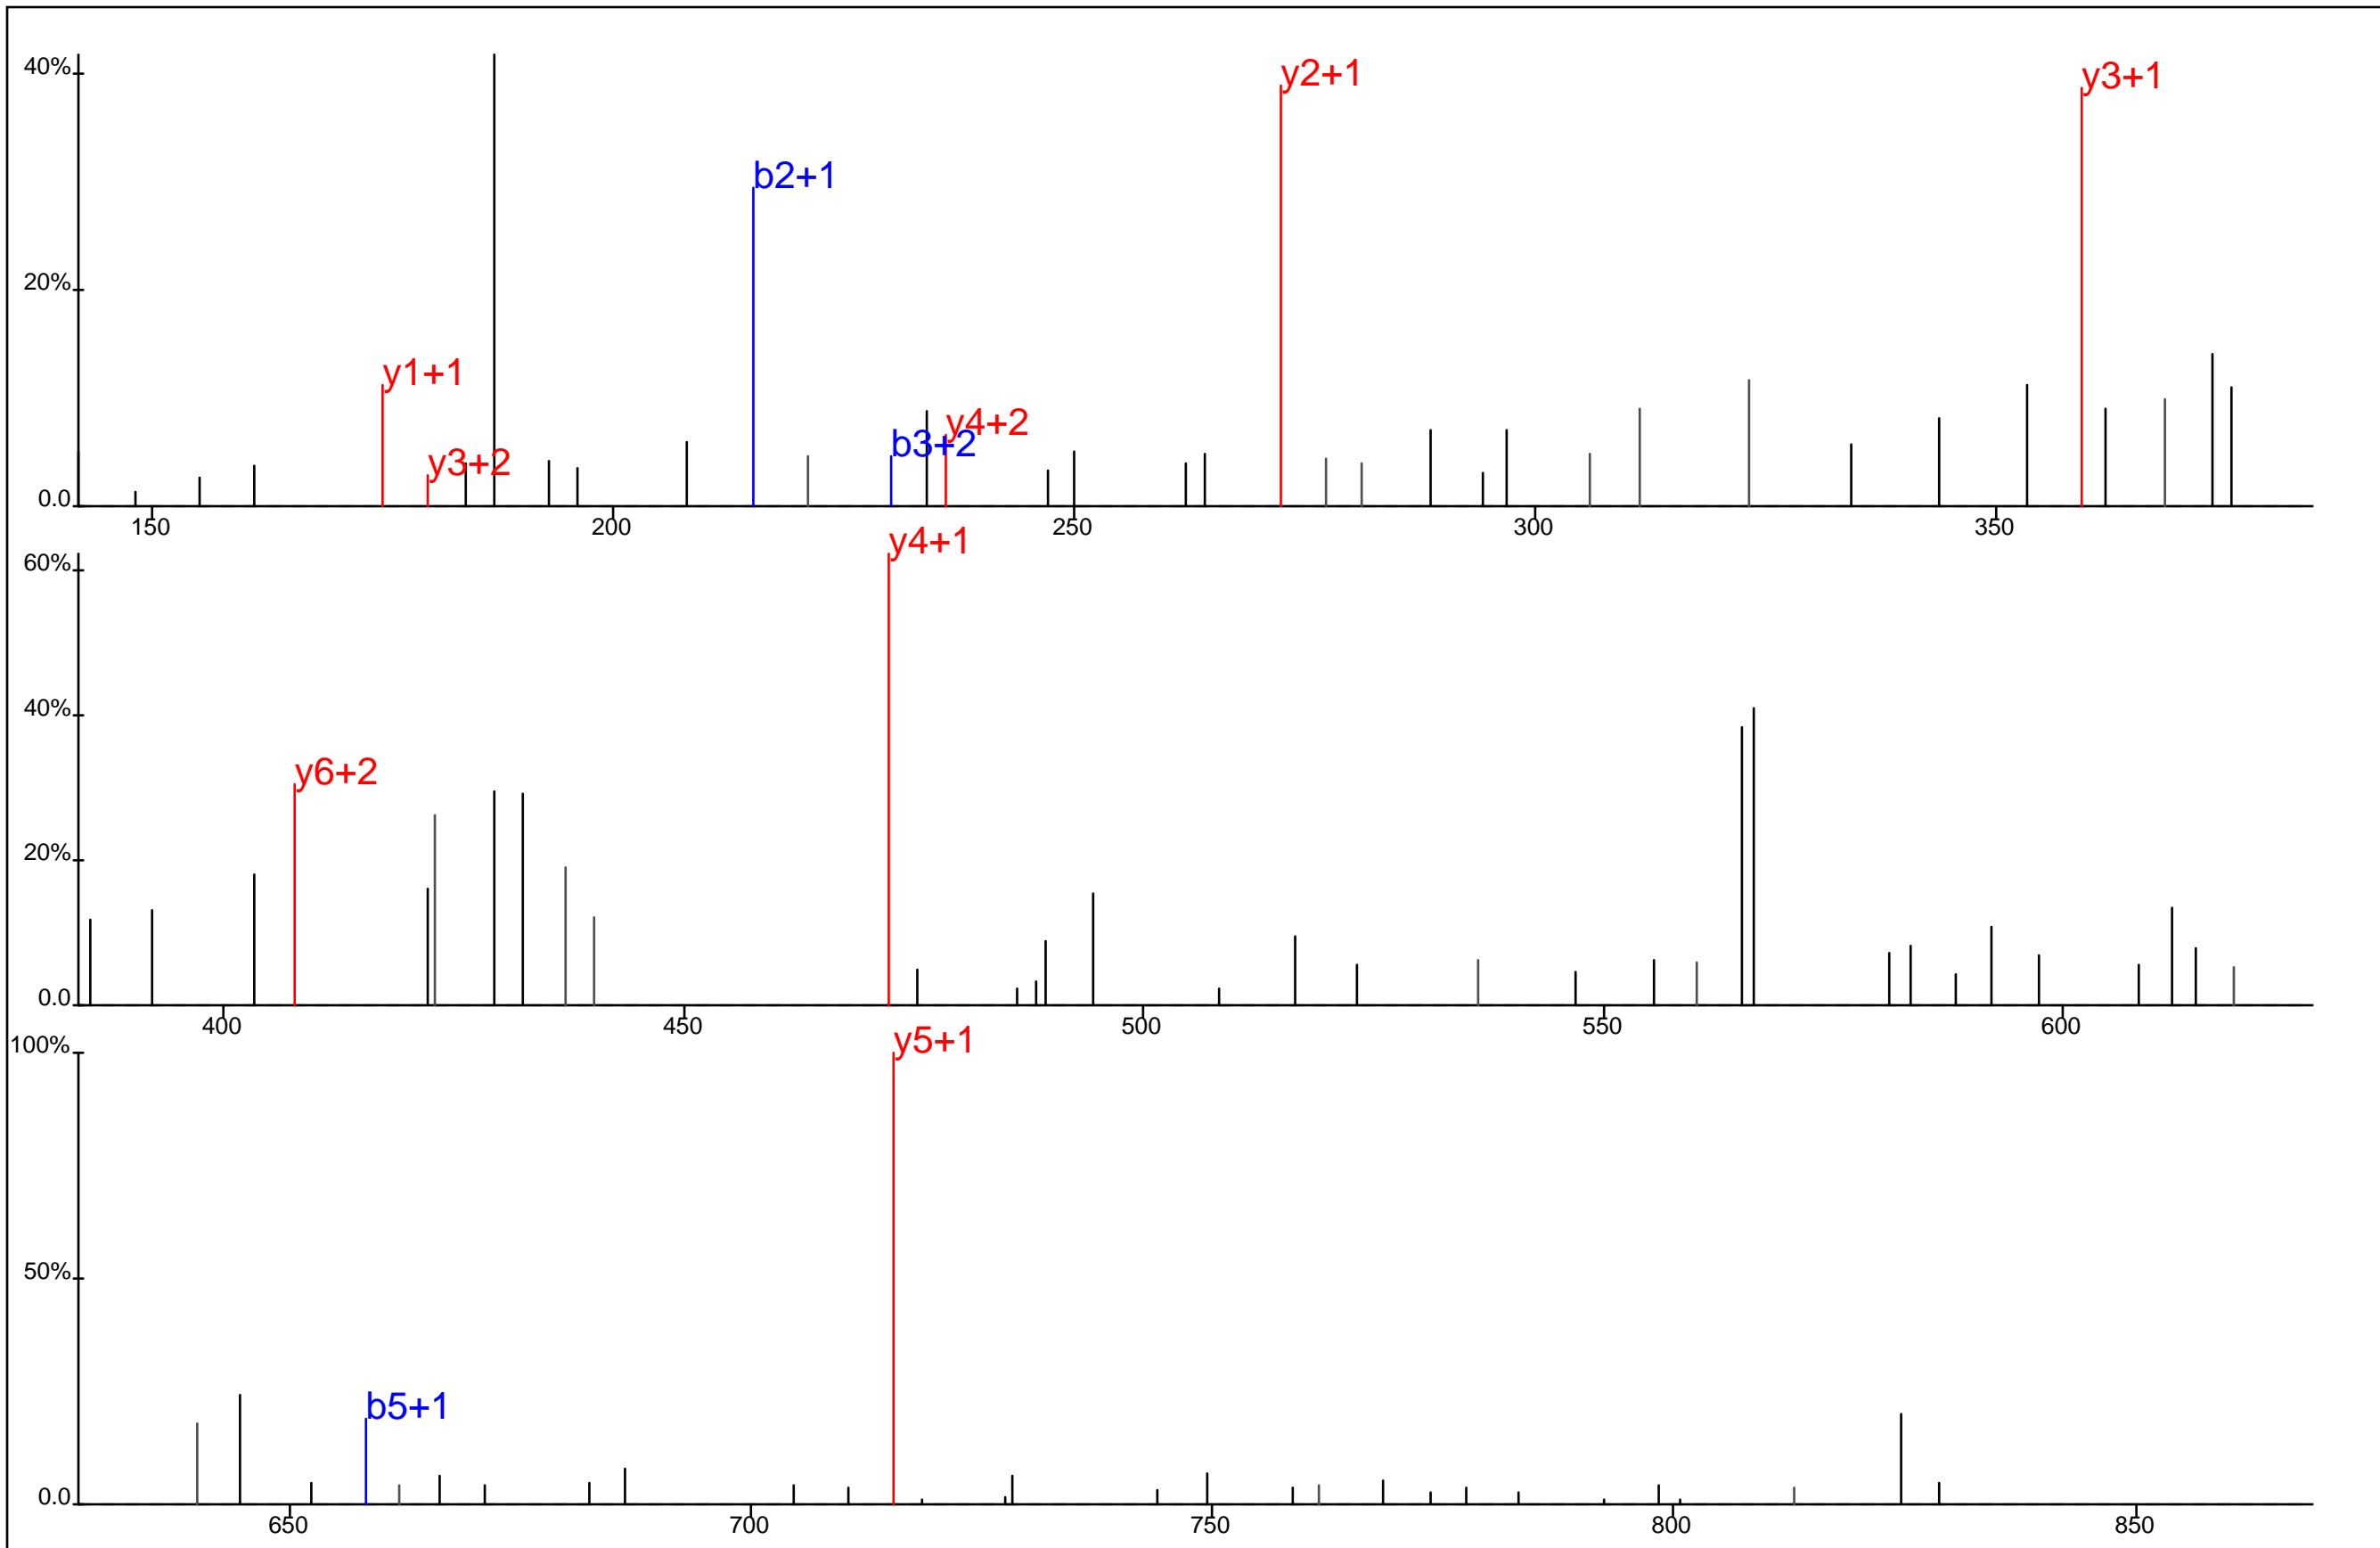

**D V Y\* L S P R**

Protein Name: RBMX  
 gi Accession: 0  
 Precursor Mass: 465.2107+2  
 Delta Mass: 1.332 ppm  
 XCorr: 21.58



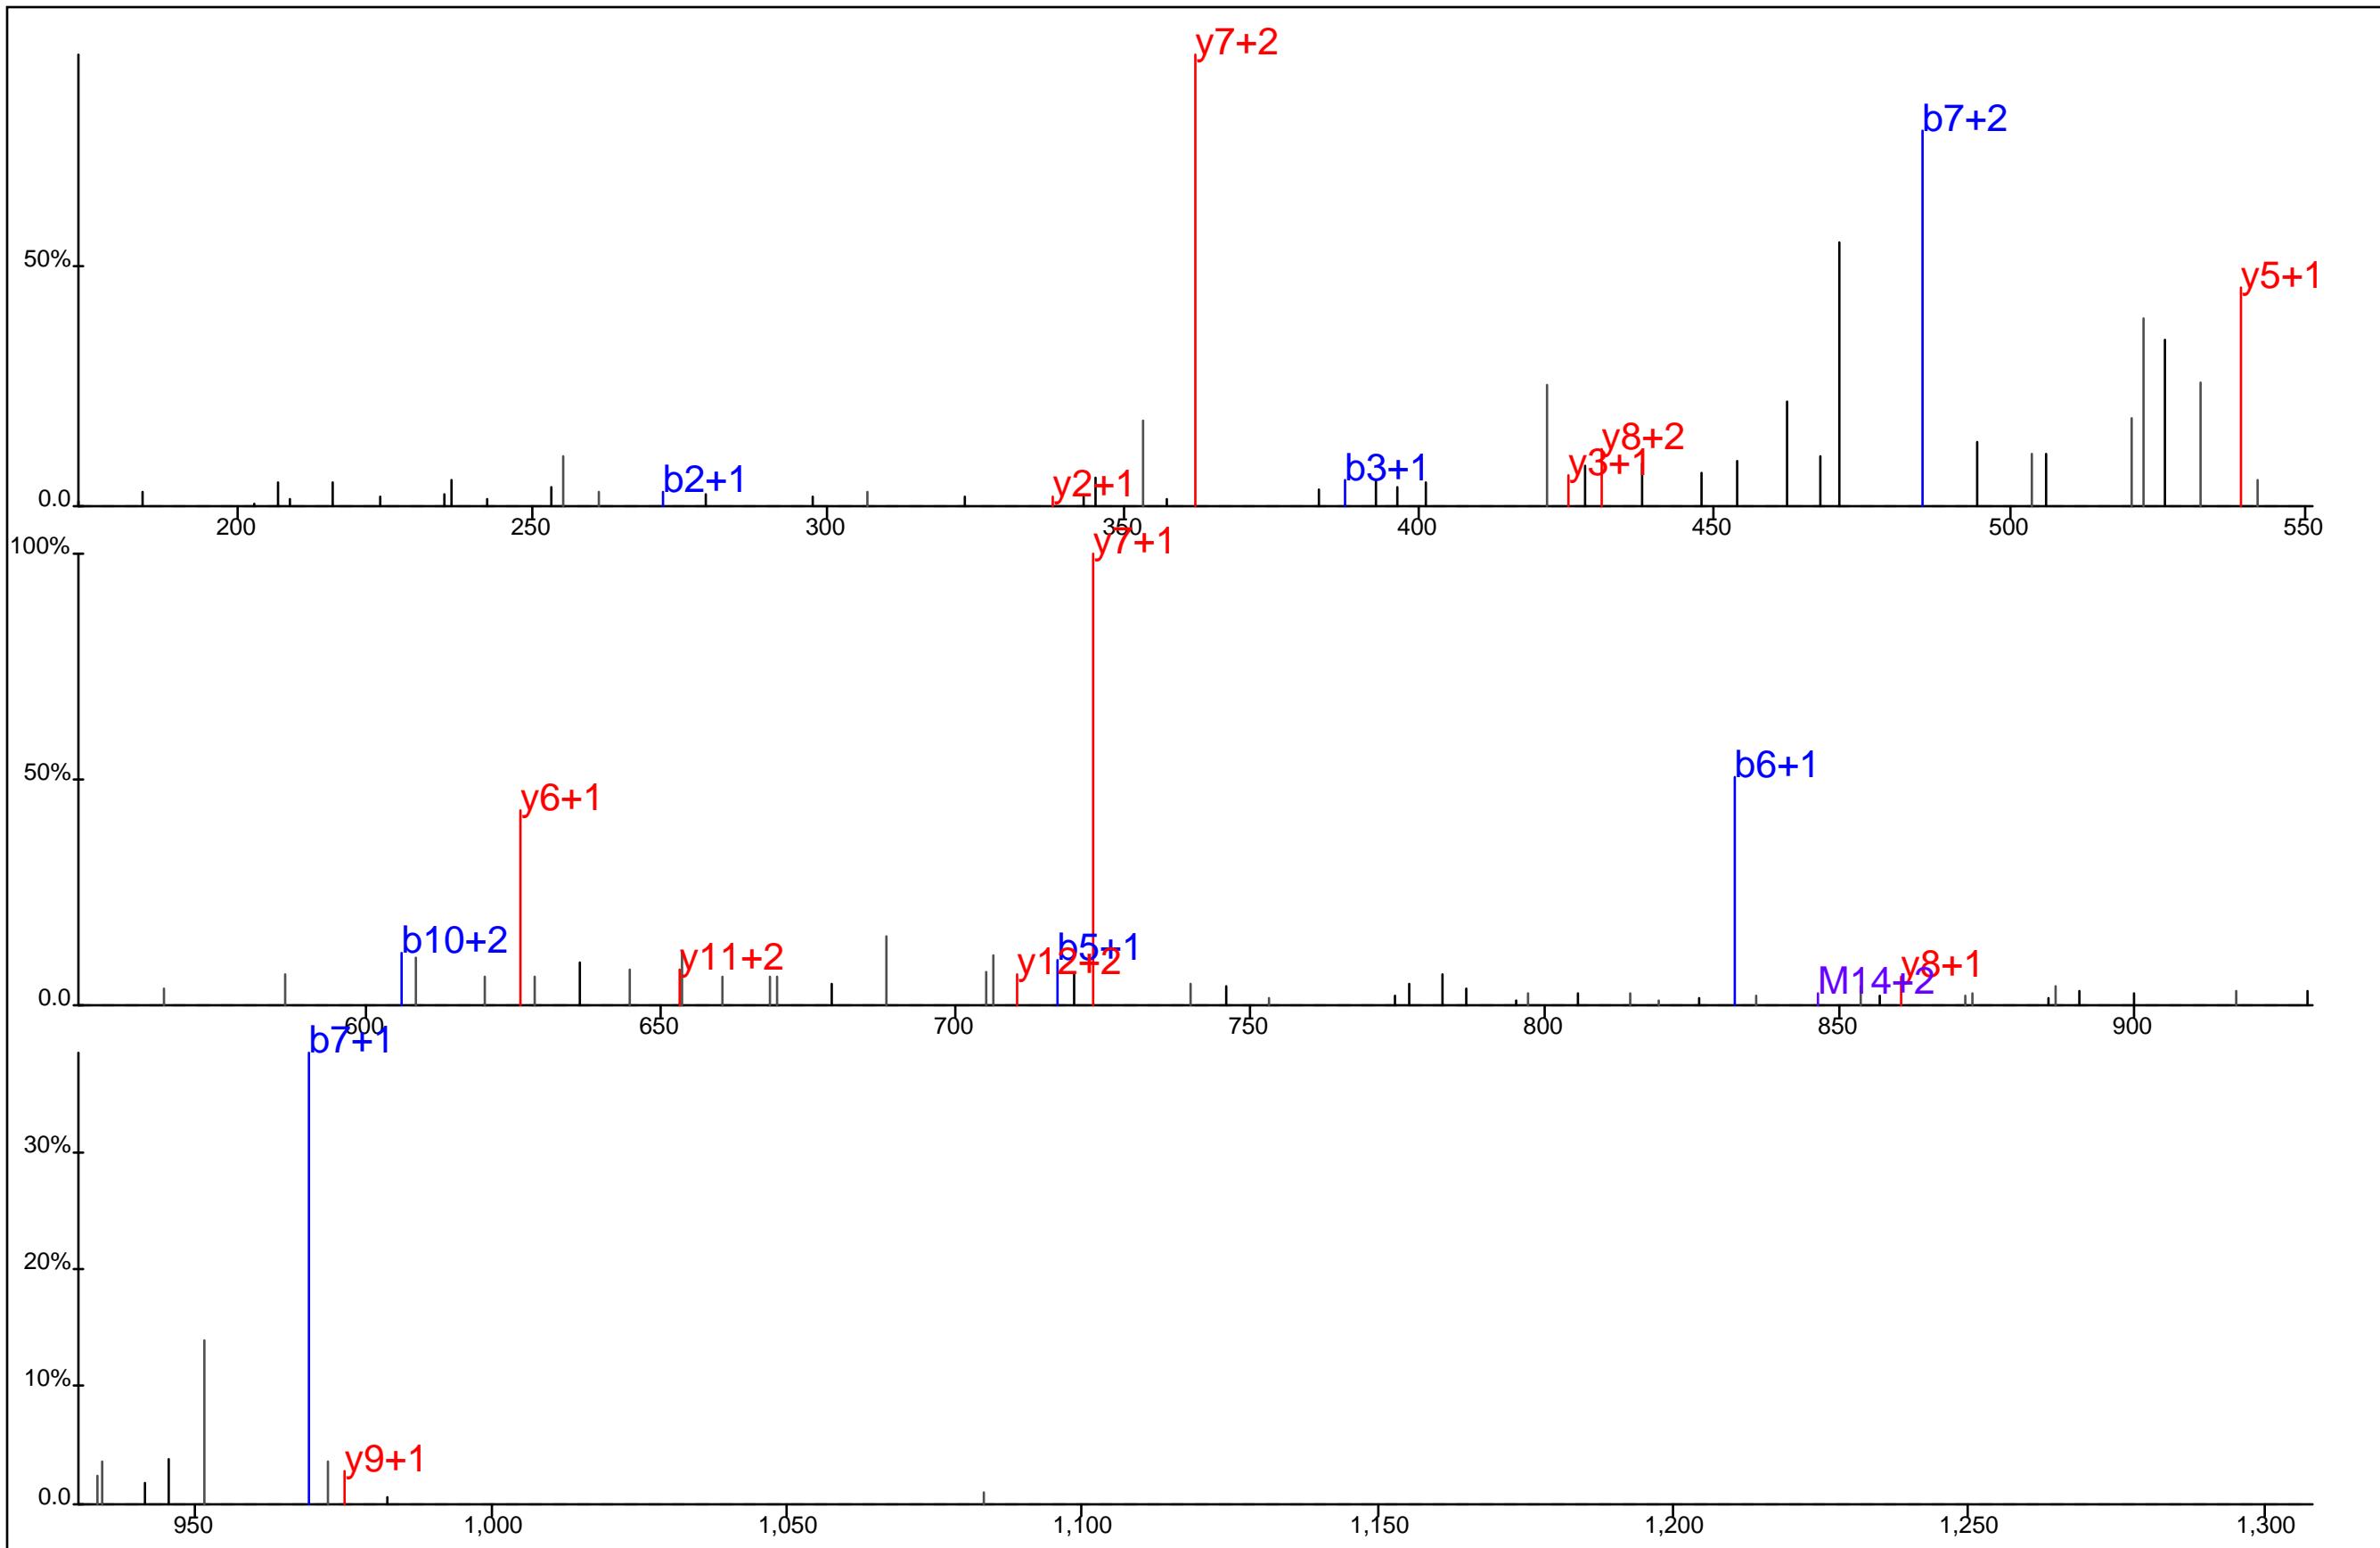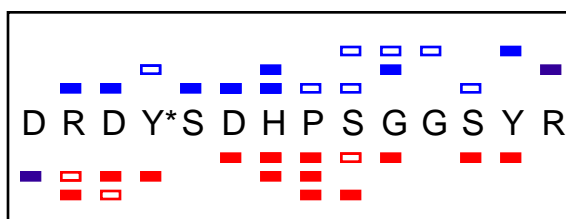

Protein Name: RBMX  
 gi Accession: 0  
 Precursor Mass: 564.5520+3  
 Delta Mass: 1.837 ppm  
 XCorr: 21.29

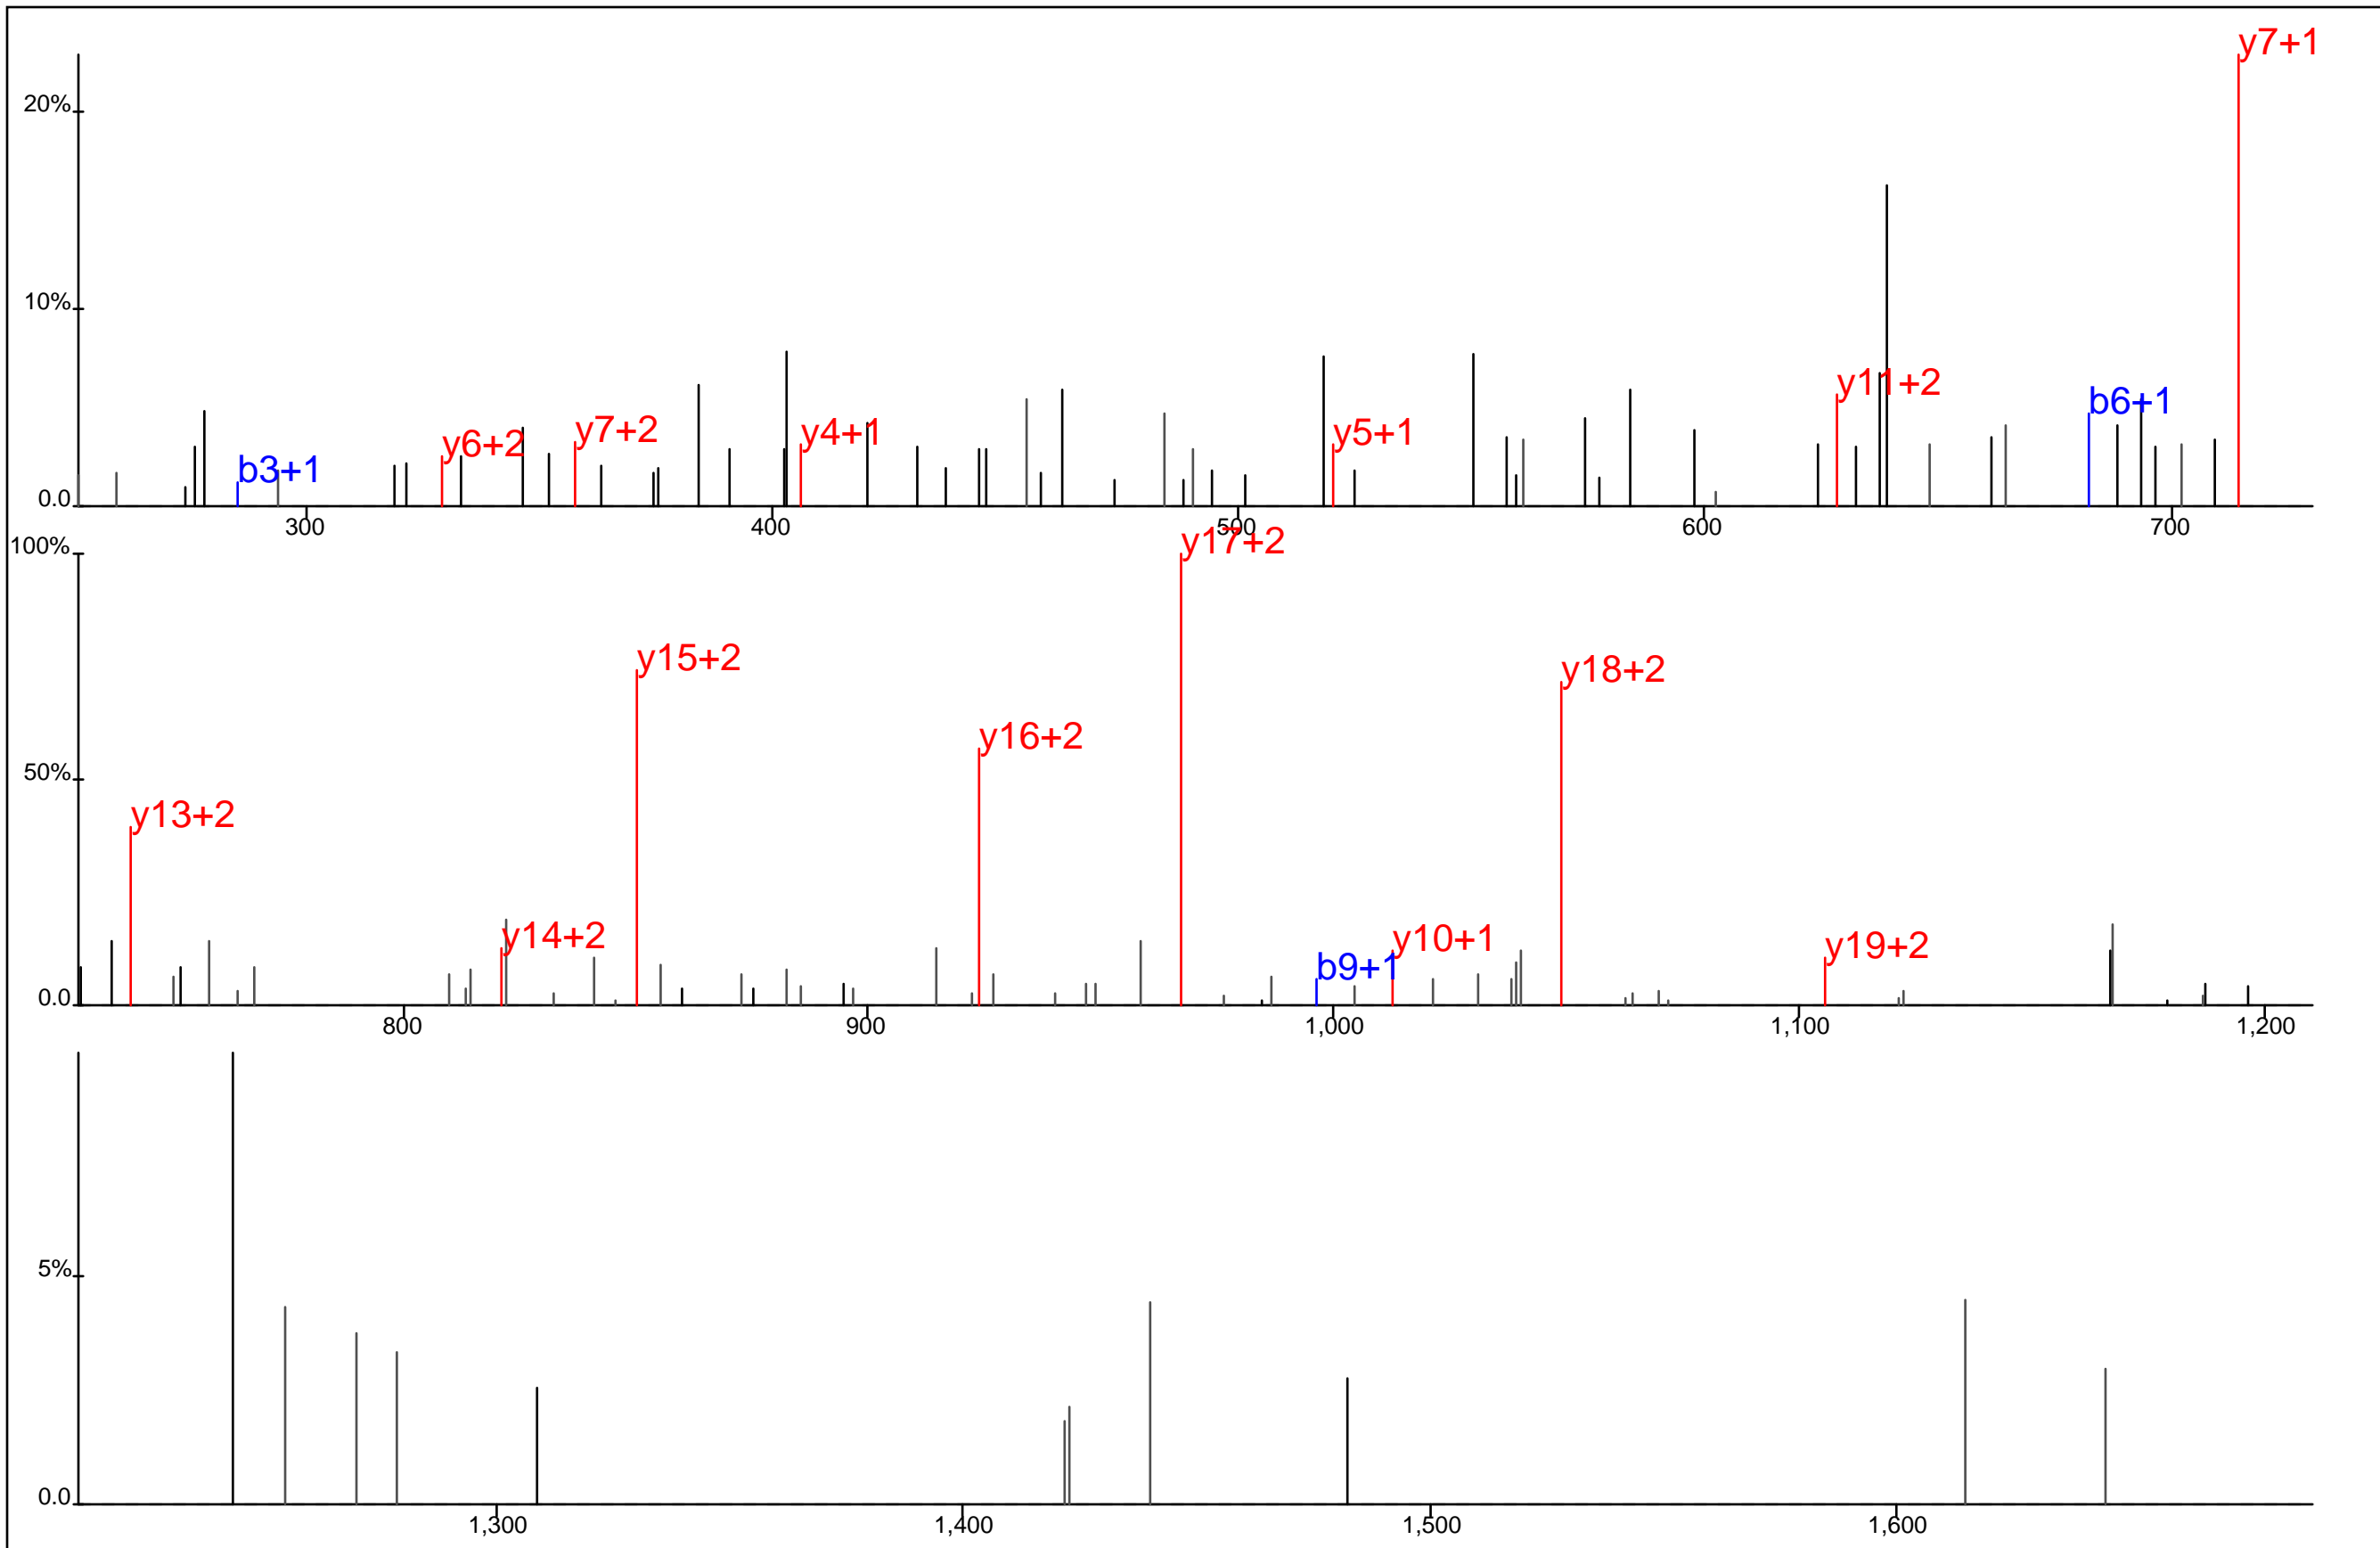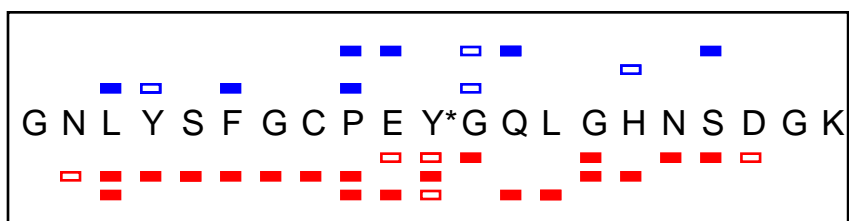

Protein Name: RCC1 like  
 gi Accession: 0  
 Precursor Mass: 793.9961+3  
 Delta Mass: 1.566 ppm  
 XCorr: 29.43

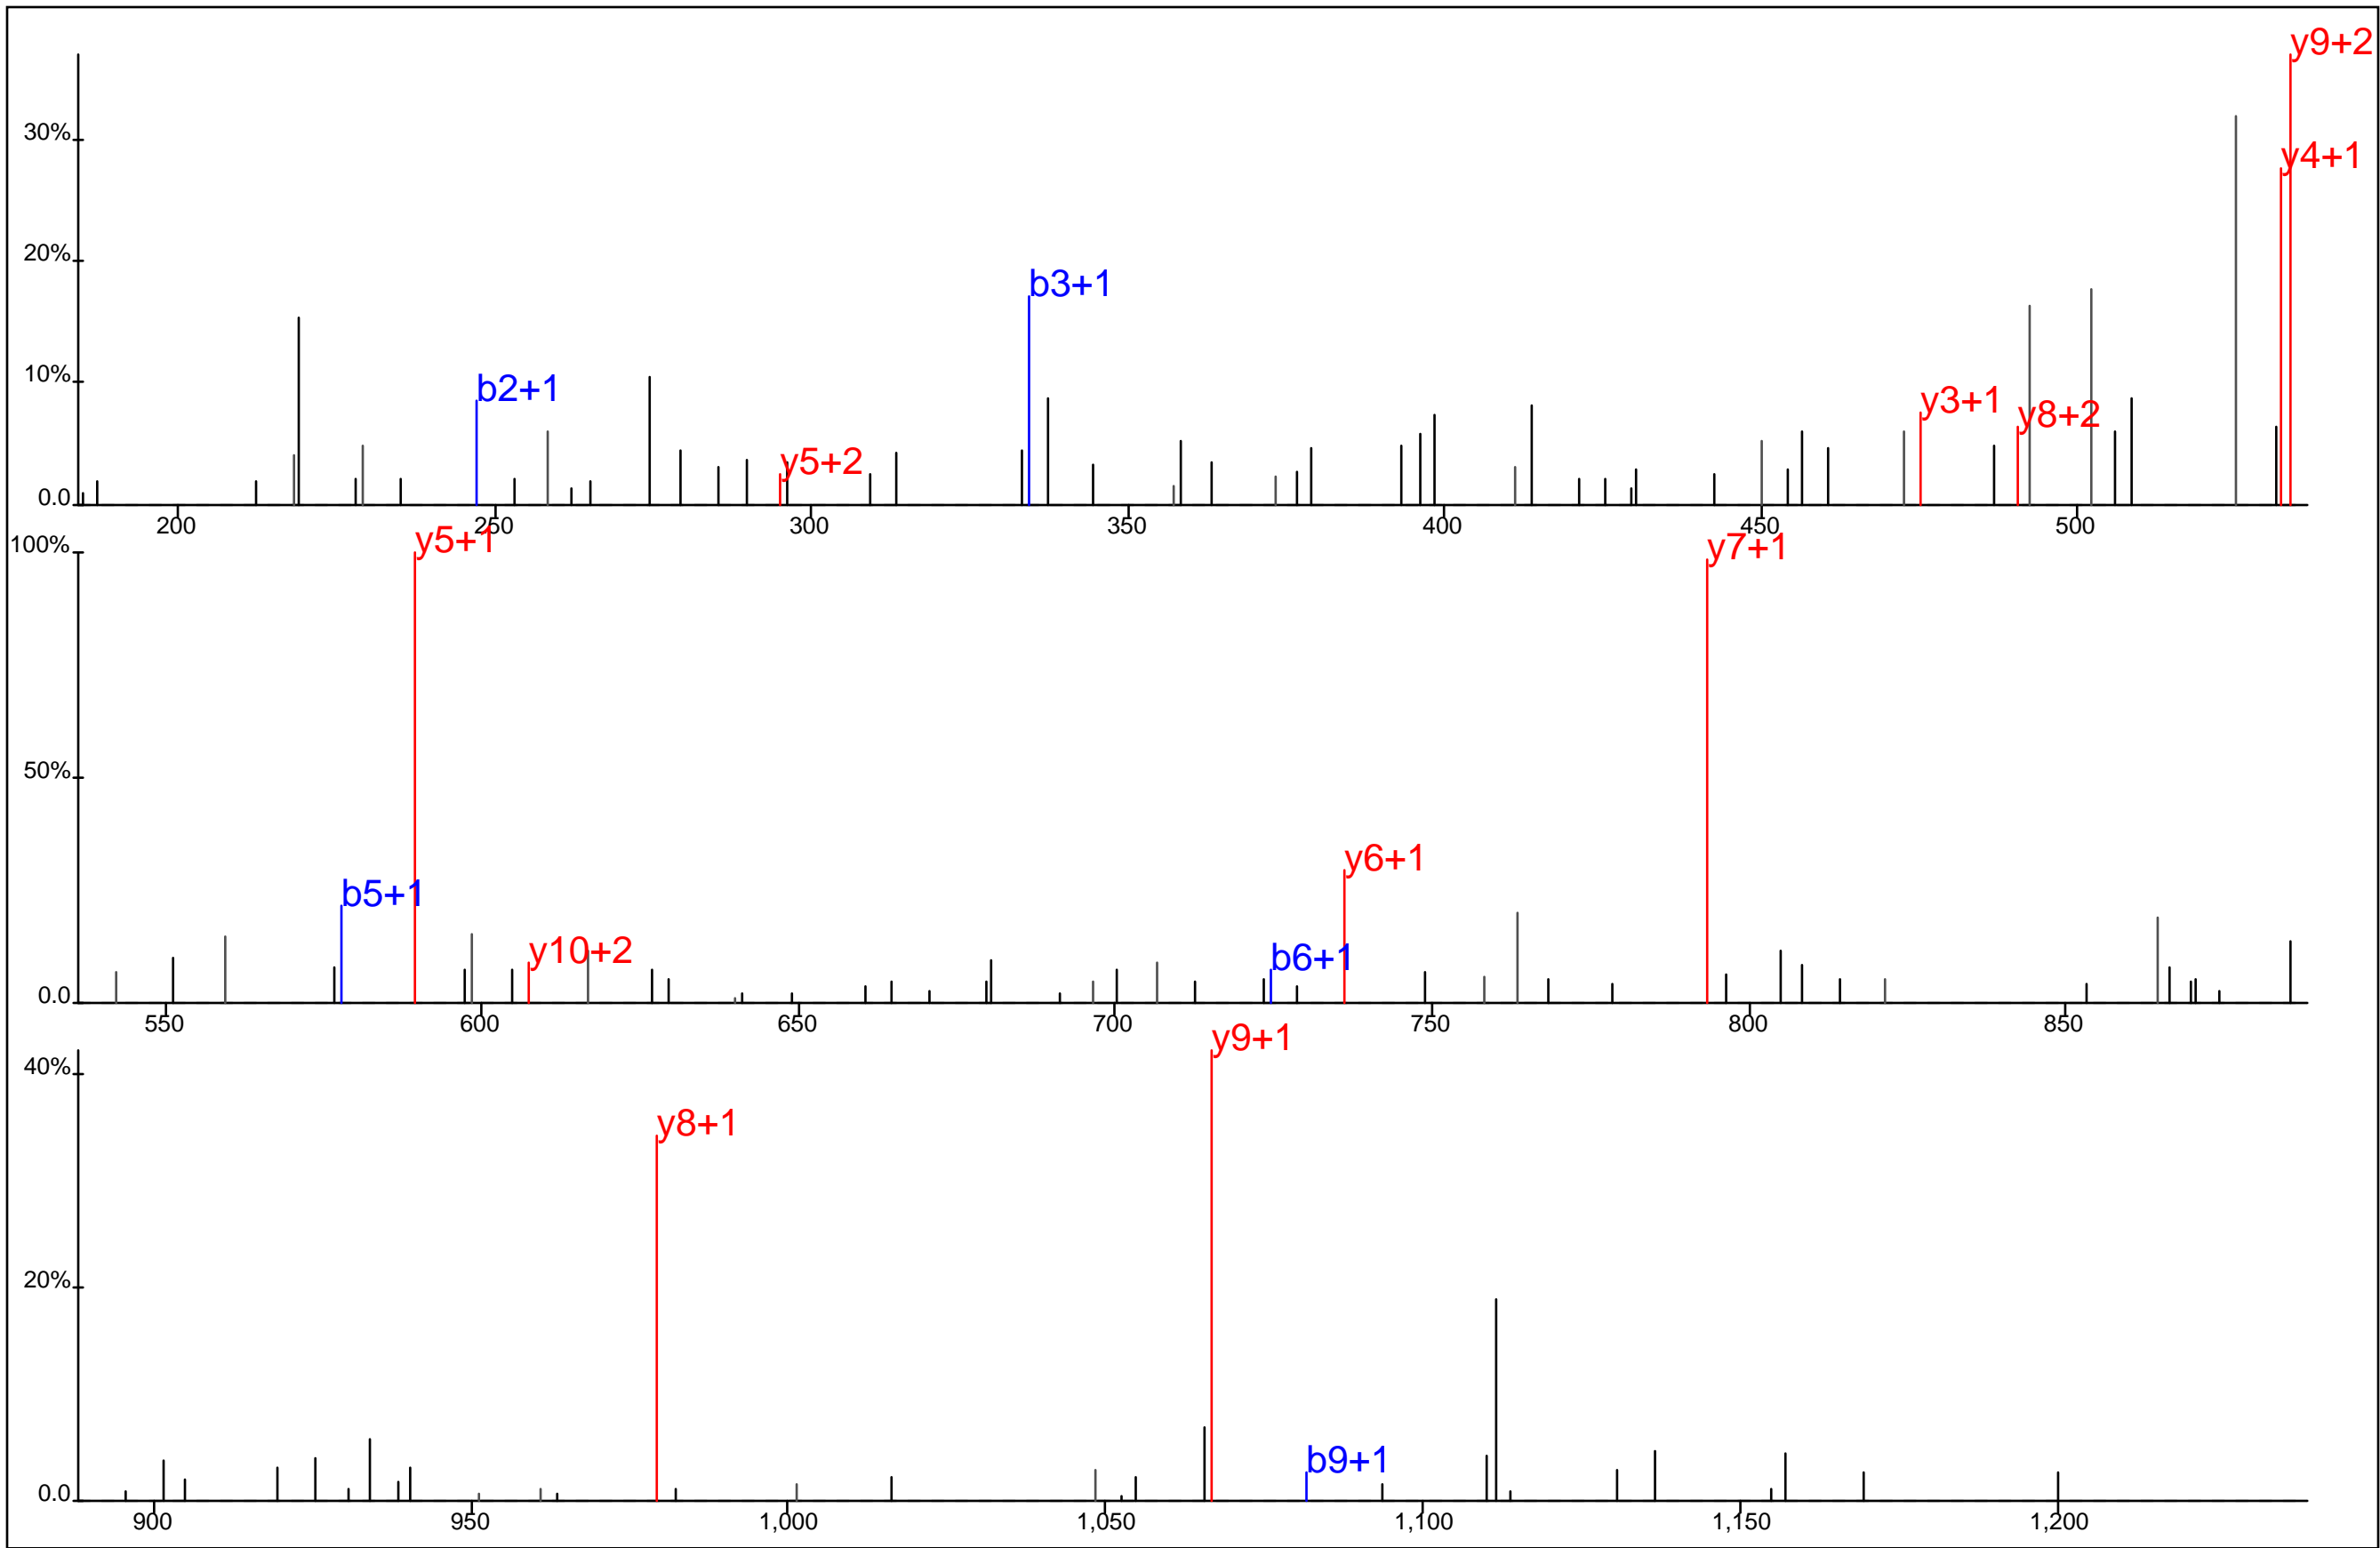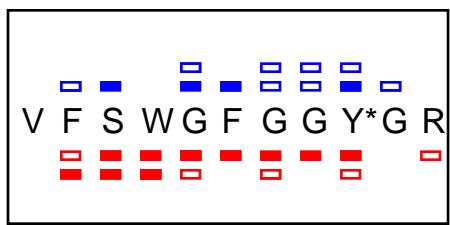

Protein Name: RCC1 like  
 gi Accession: 0  
 Precursor Mass: 656.7809+2  
 Delta Mass: 2.699 ppm  
 XCorr: 35.36

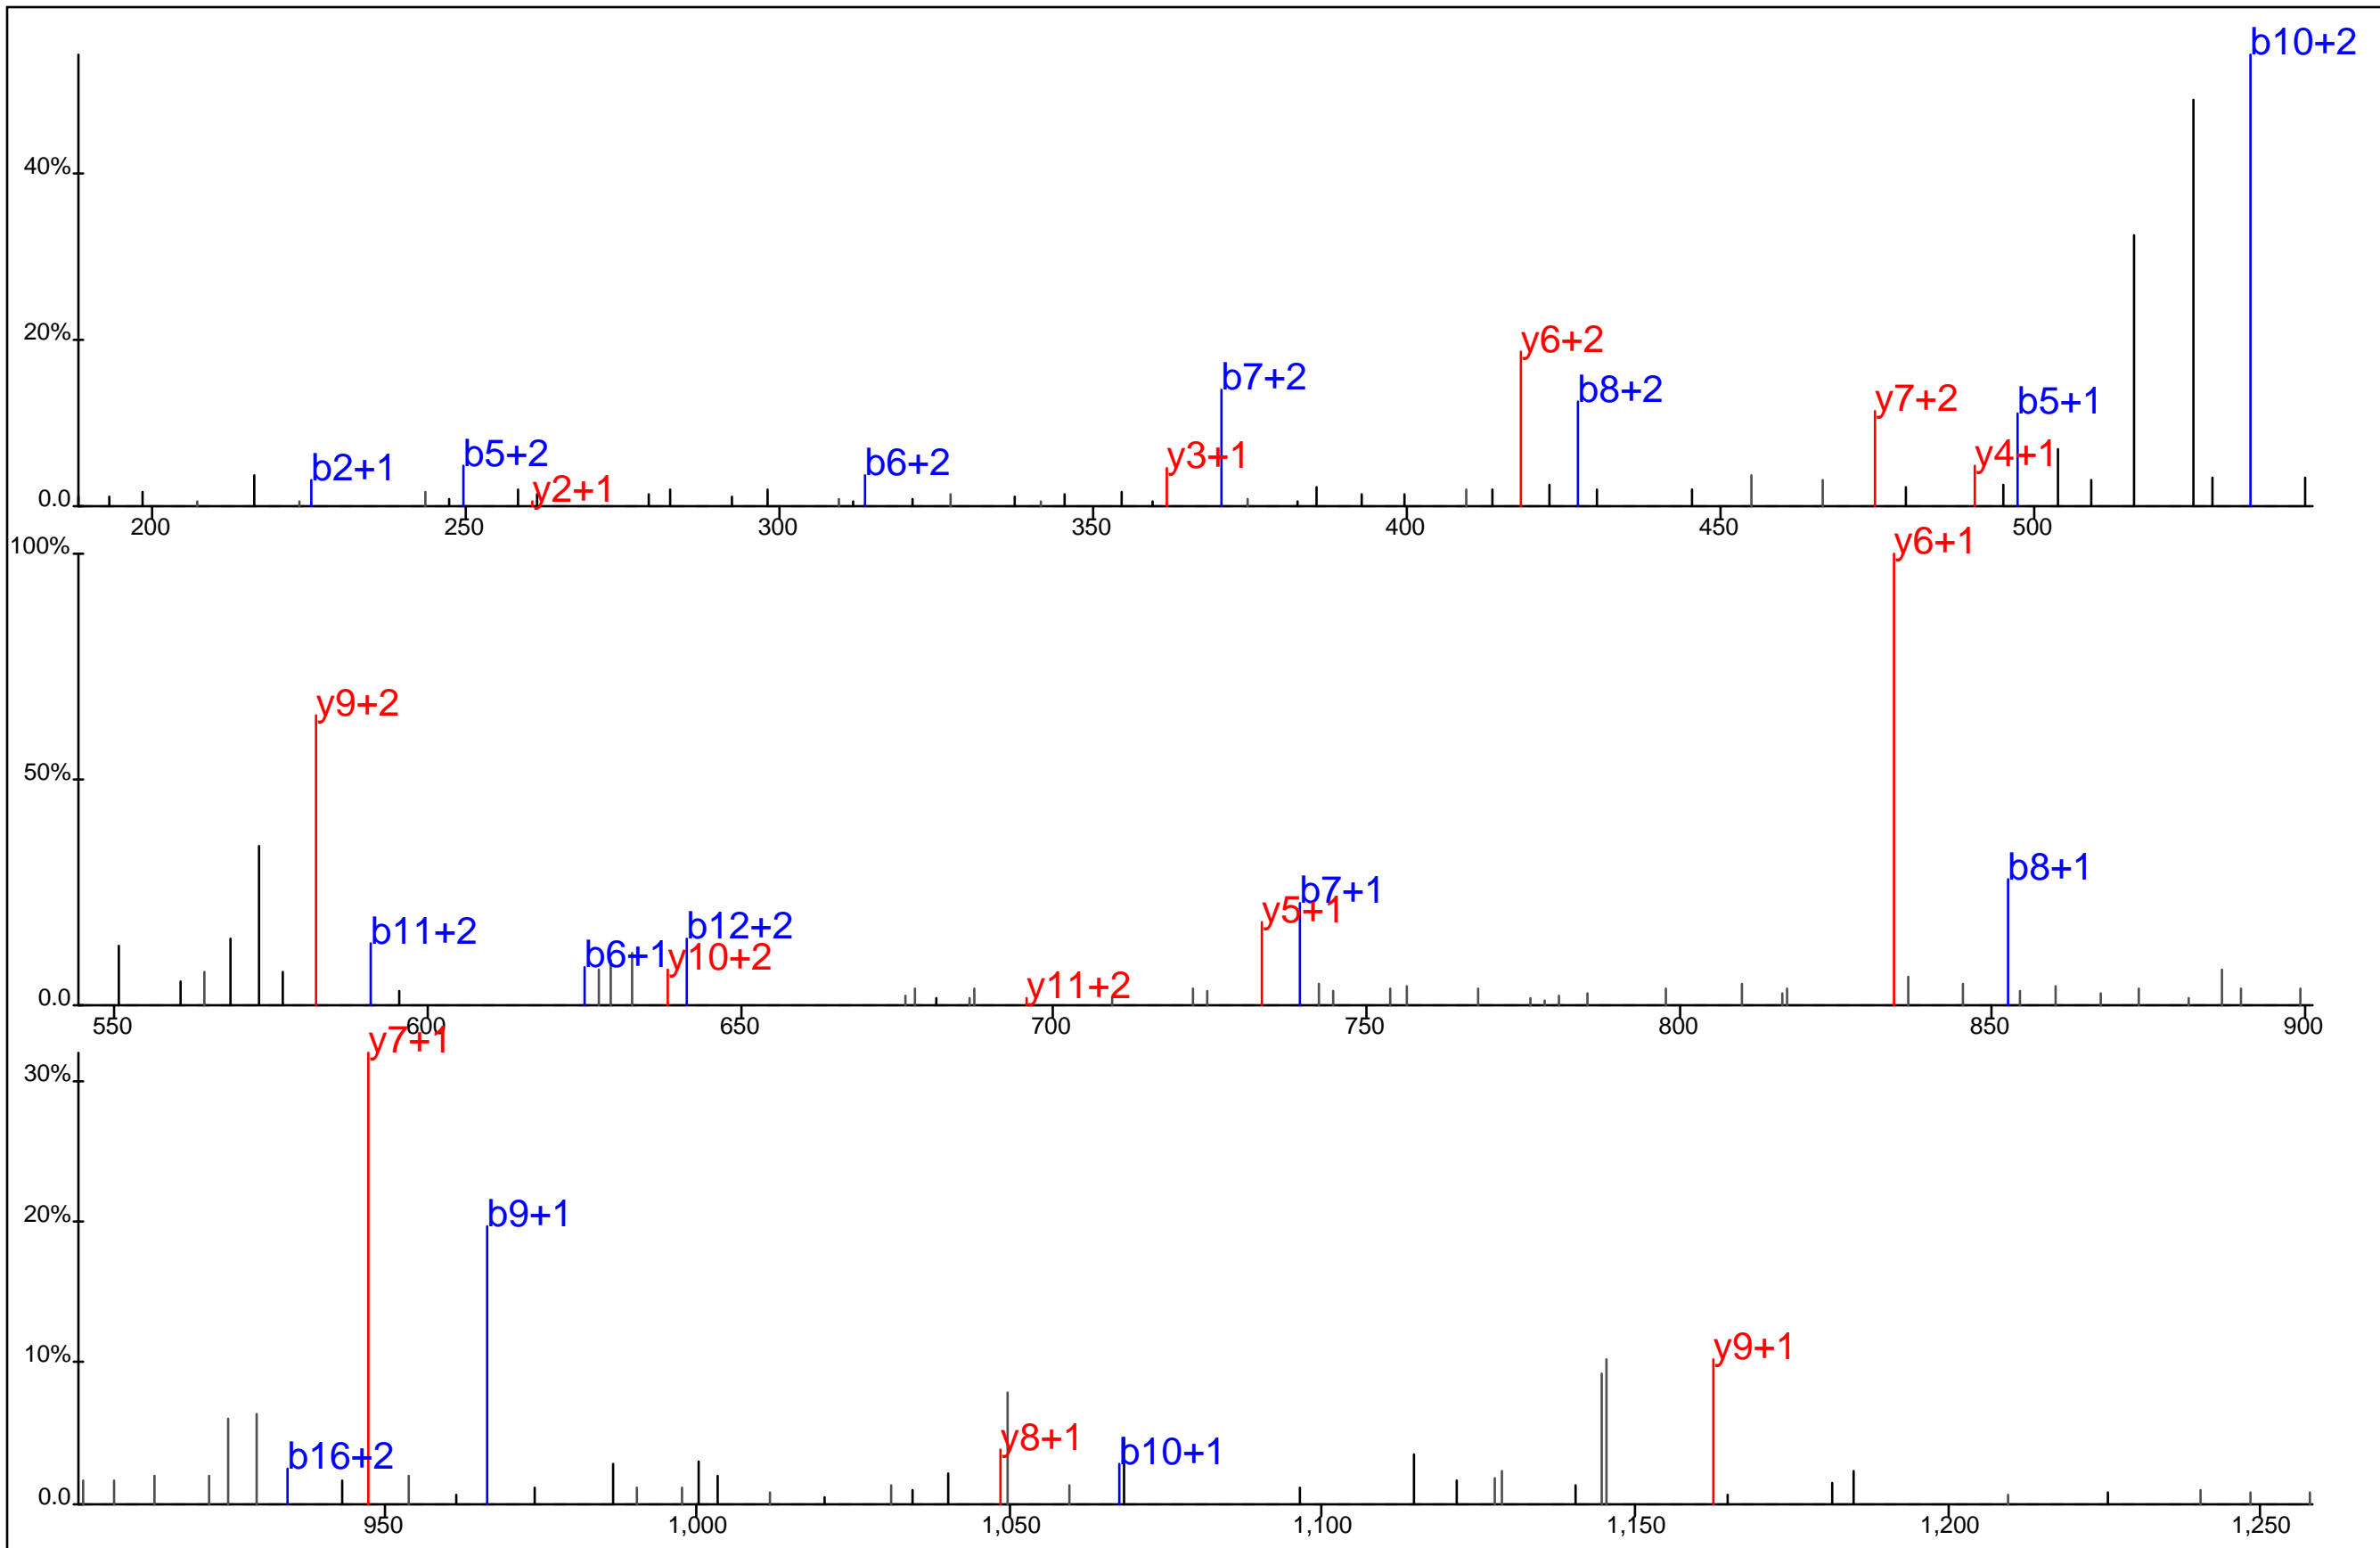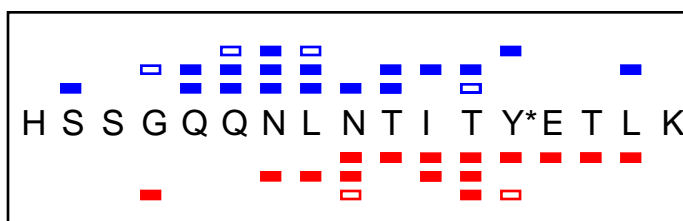

Protein Name: RCP9  
 gi Accession: 0  
 Precursor Mass: 671.9808+3  
 Delta Mass: 0.125 ppm  
 XCorr: 57.35

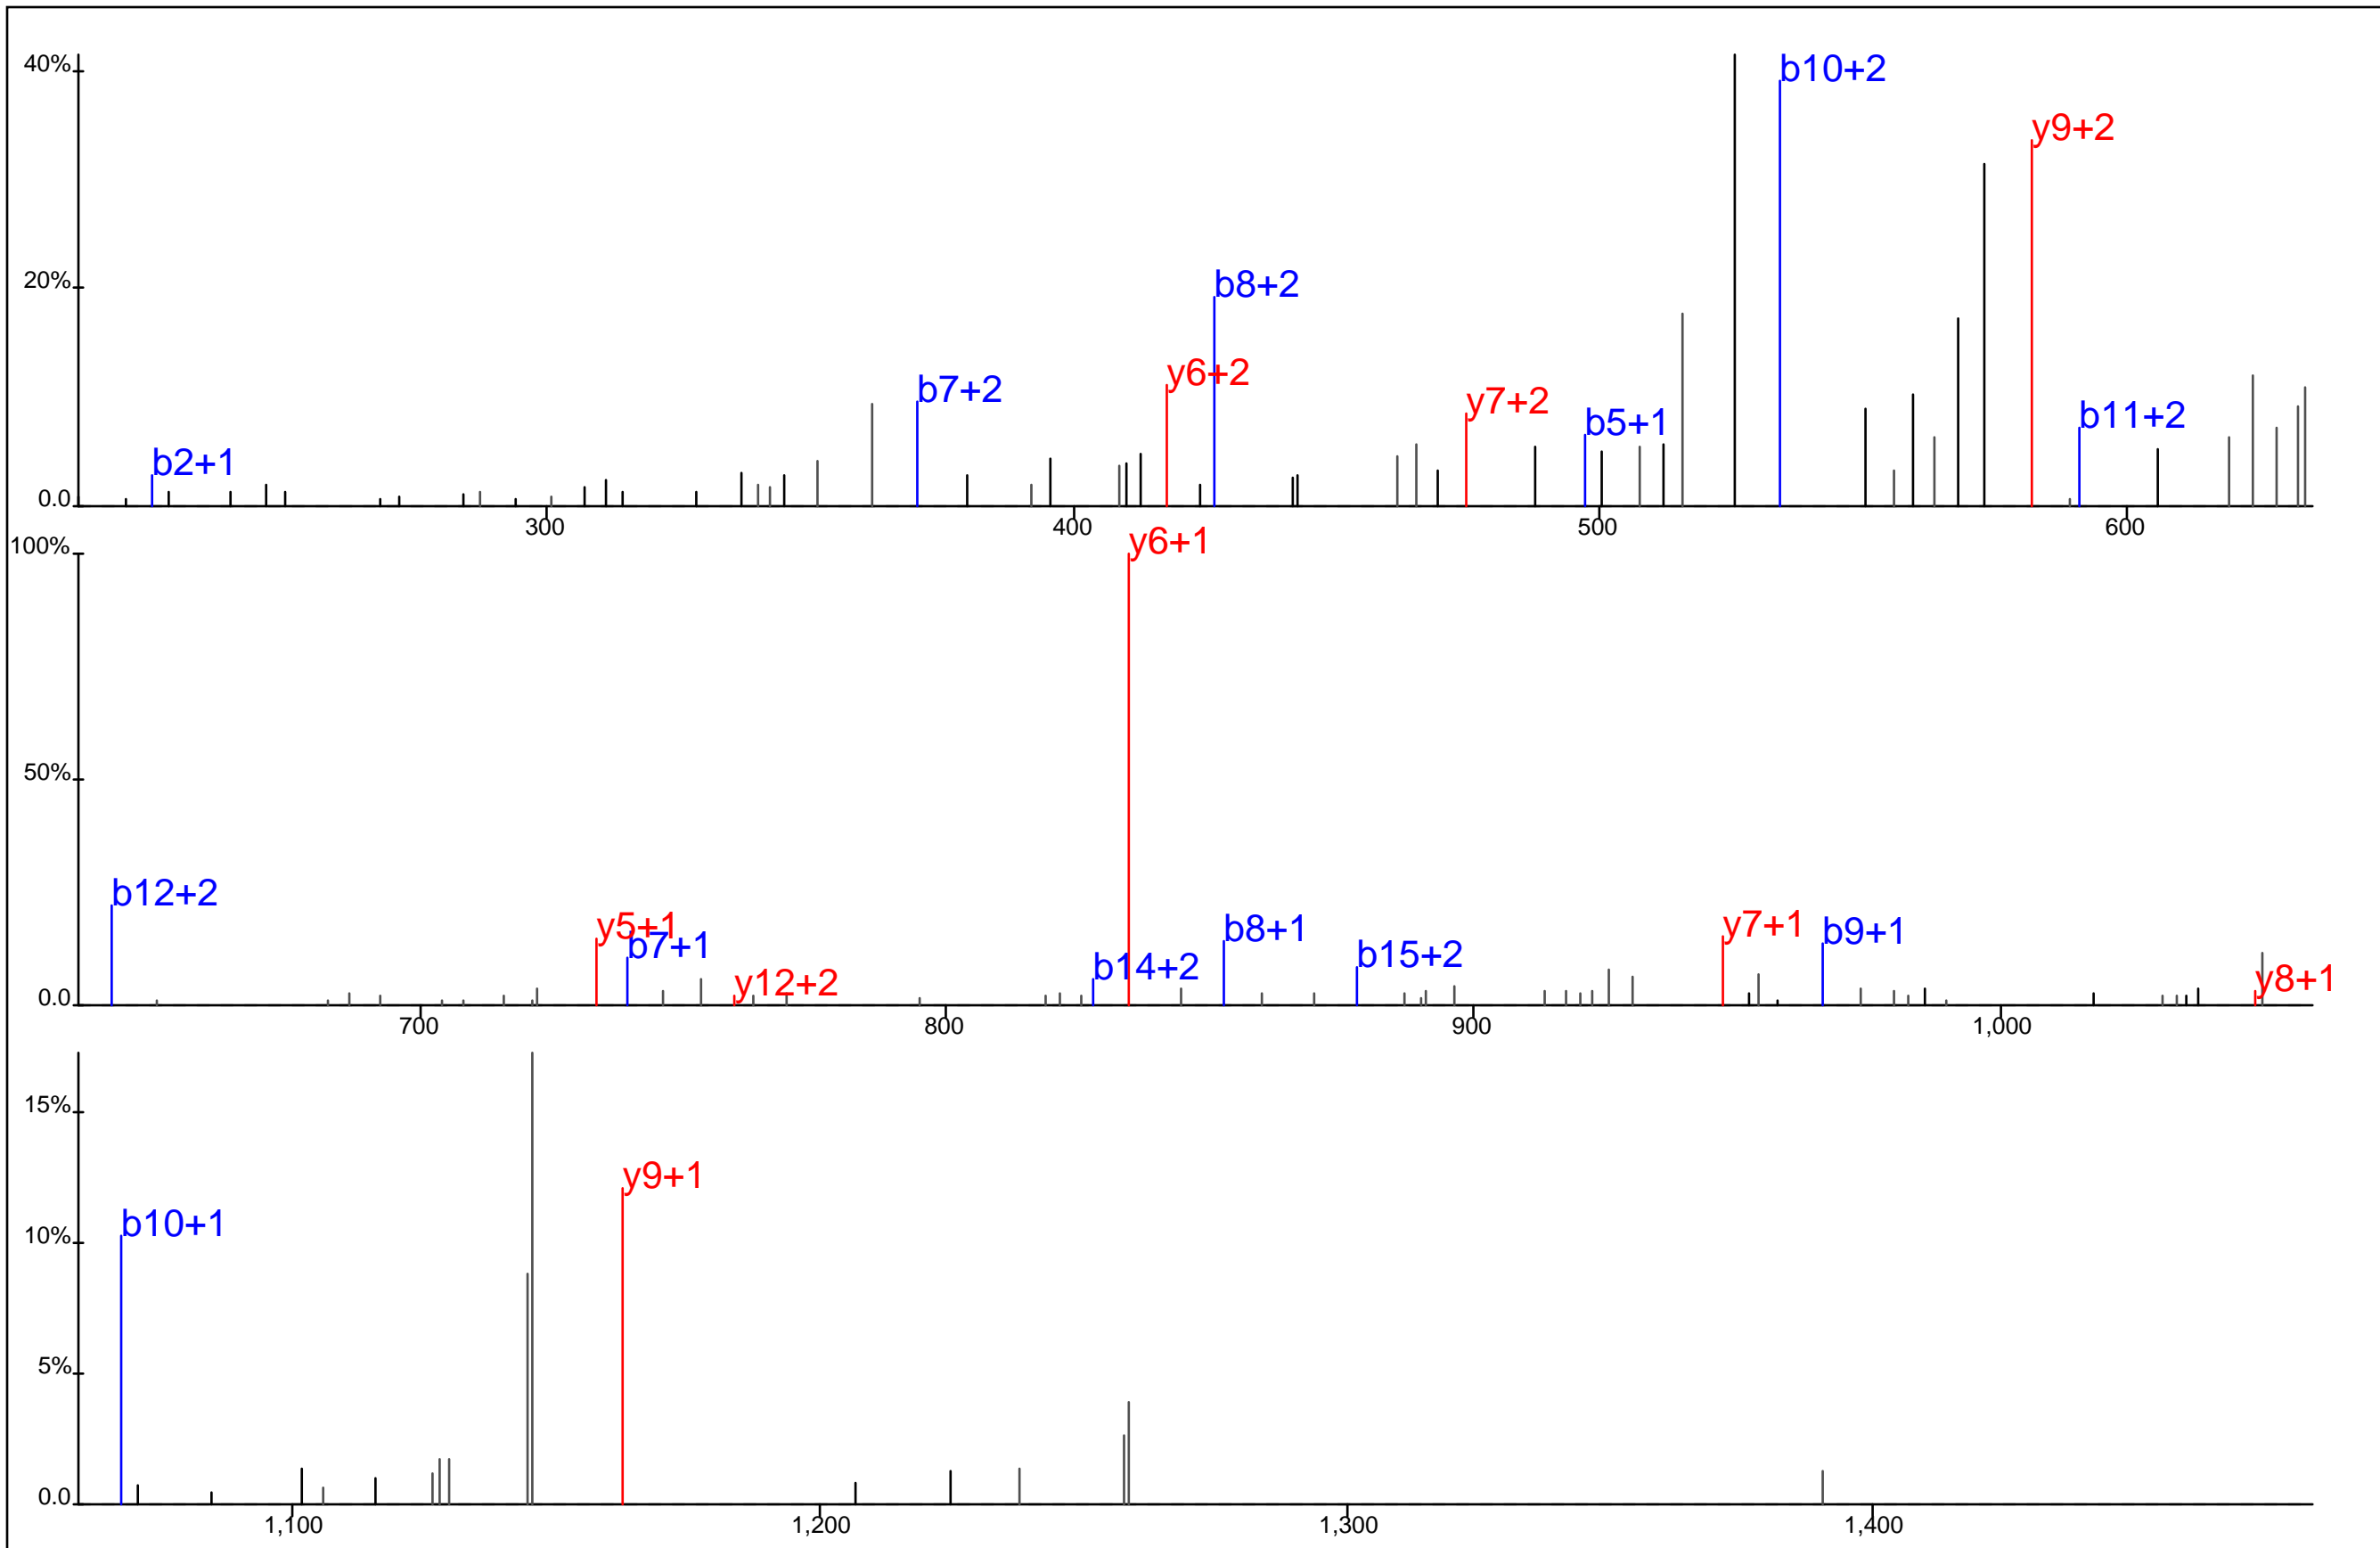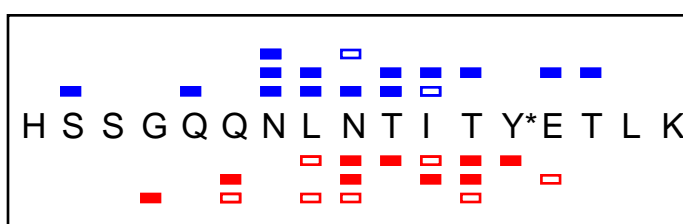

Protein Name: RCP9  
 gi Accession: 0  
 Precursor Mass: 671.9806+3  
 Delta Mass: 0.239 ppm  
 XCorr: 41.41

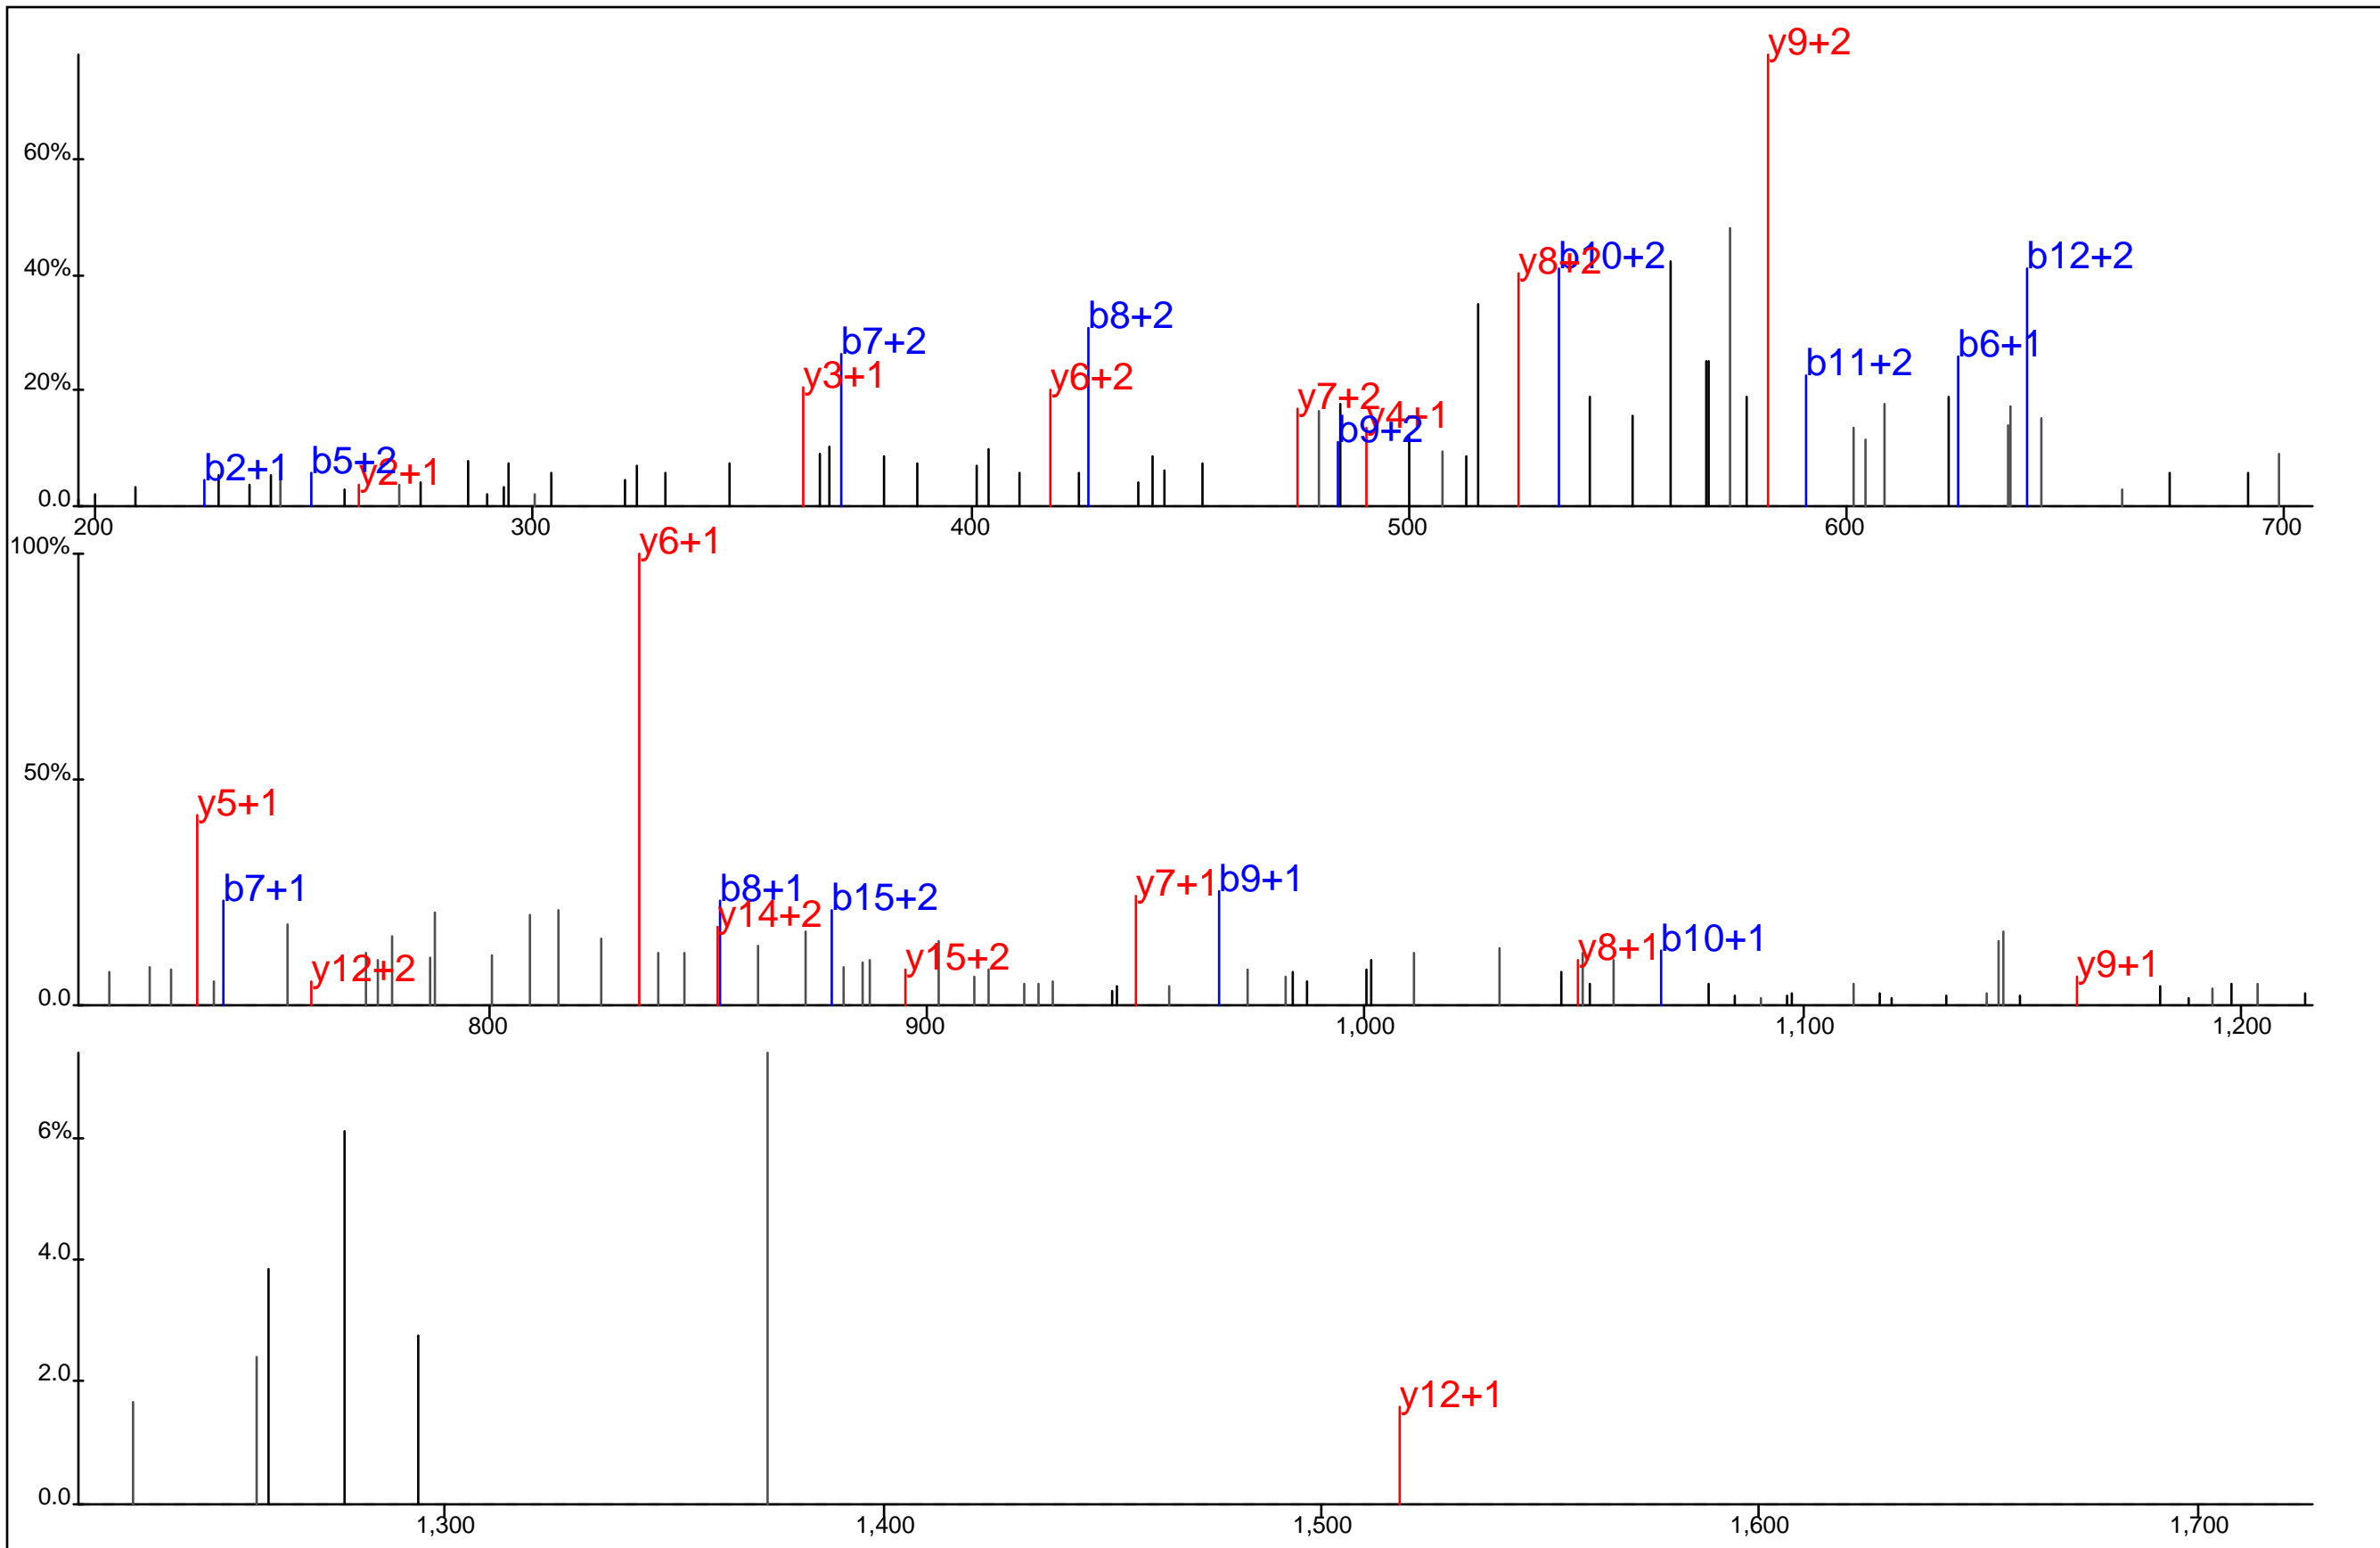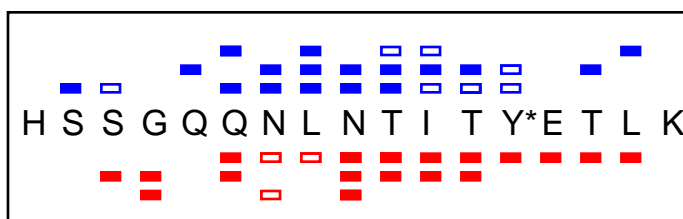

Protein Name: RCP9  
 gi Accession: 0  
 Precursor Mass: 671.9814+3  
 Delta Mass: 0.942 ppm  
 XCorr: 43.9

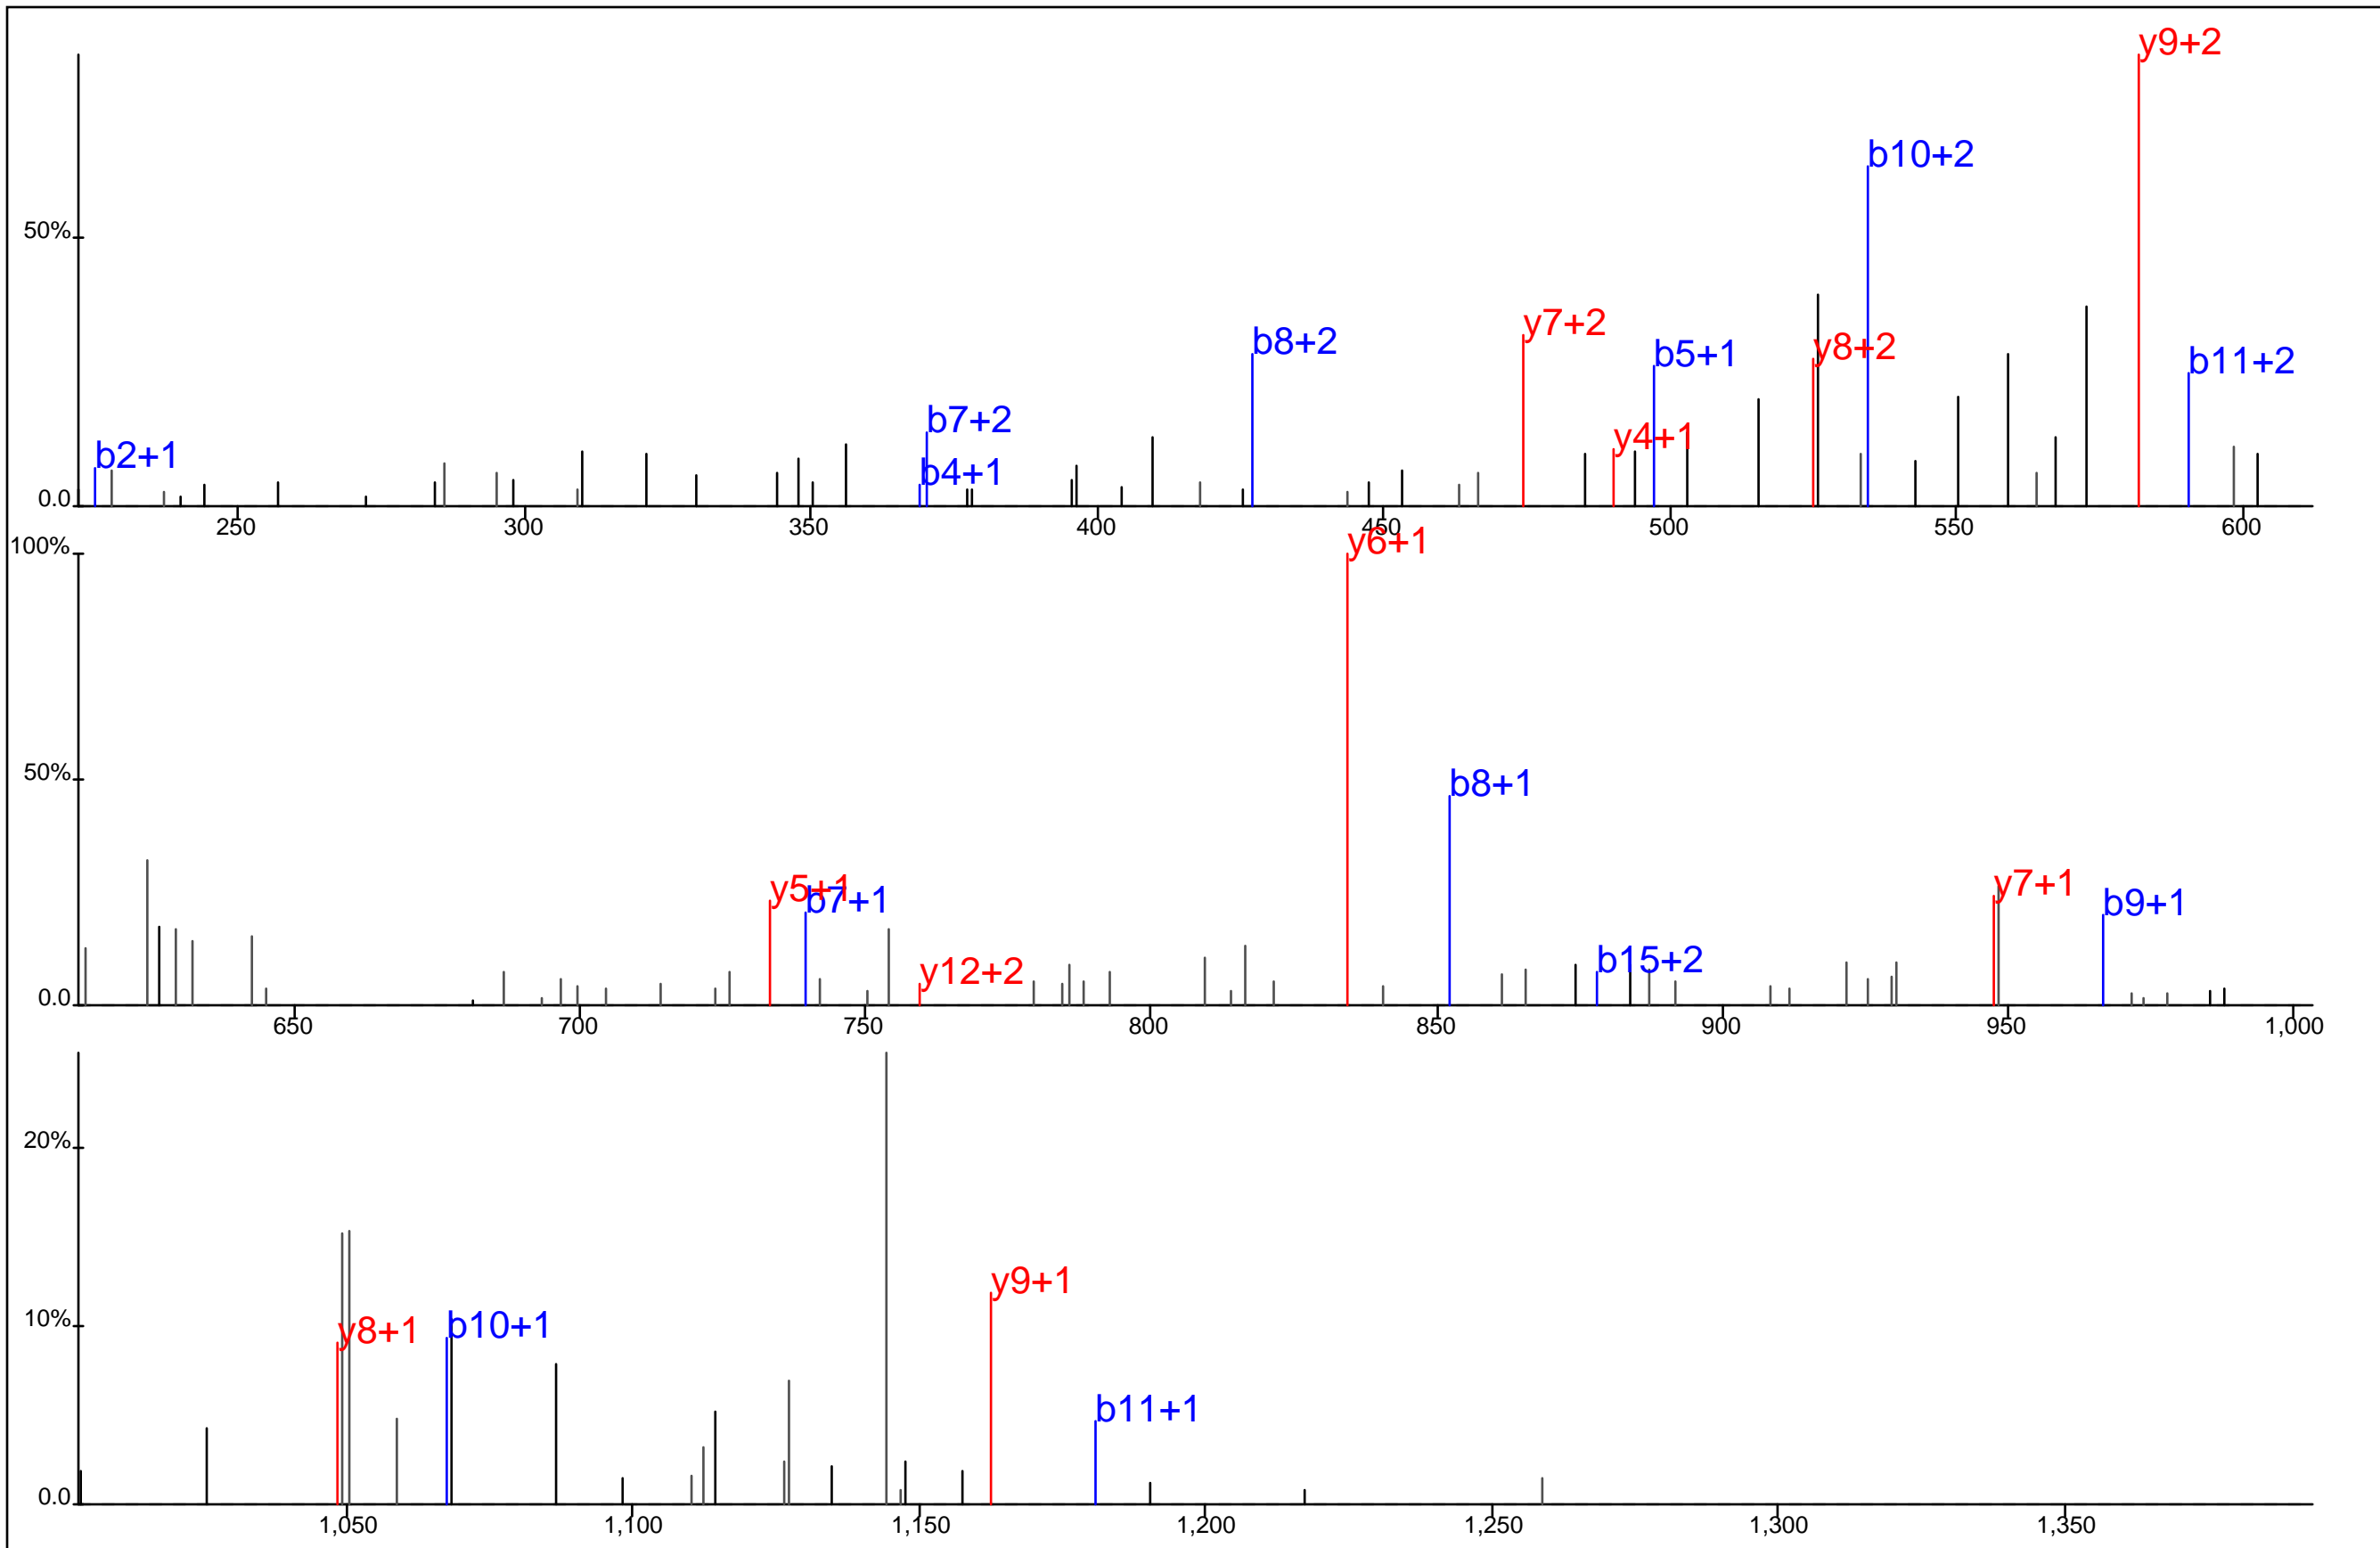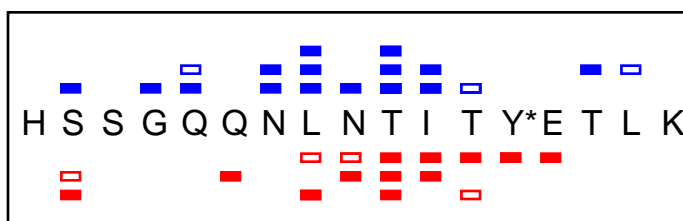

Protein Name: RCP9  
 gi Accession: 0  
 Precursor Mass: 671.9810+3  
 Delta Mass: 0.306 ppm  
 XCorr: 36.7

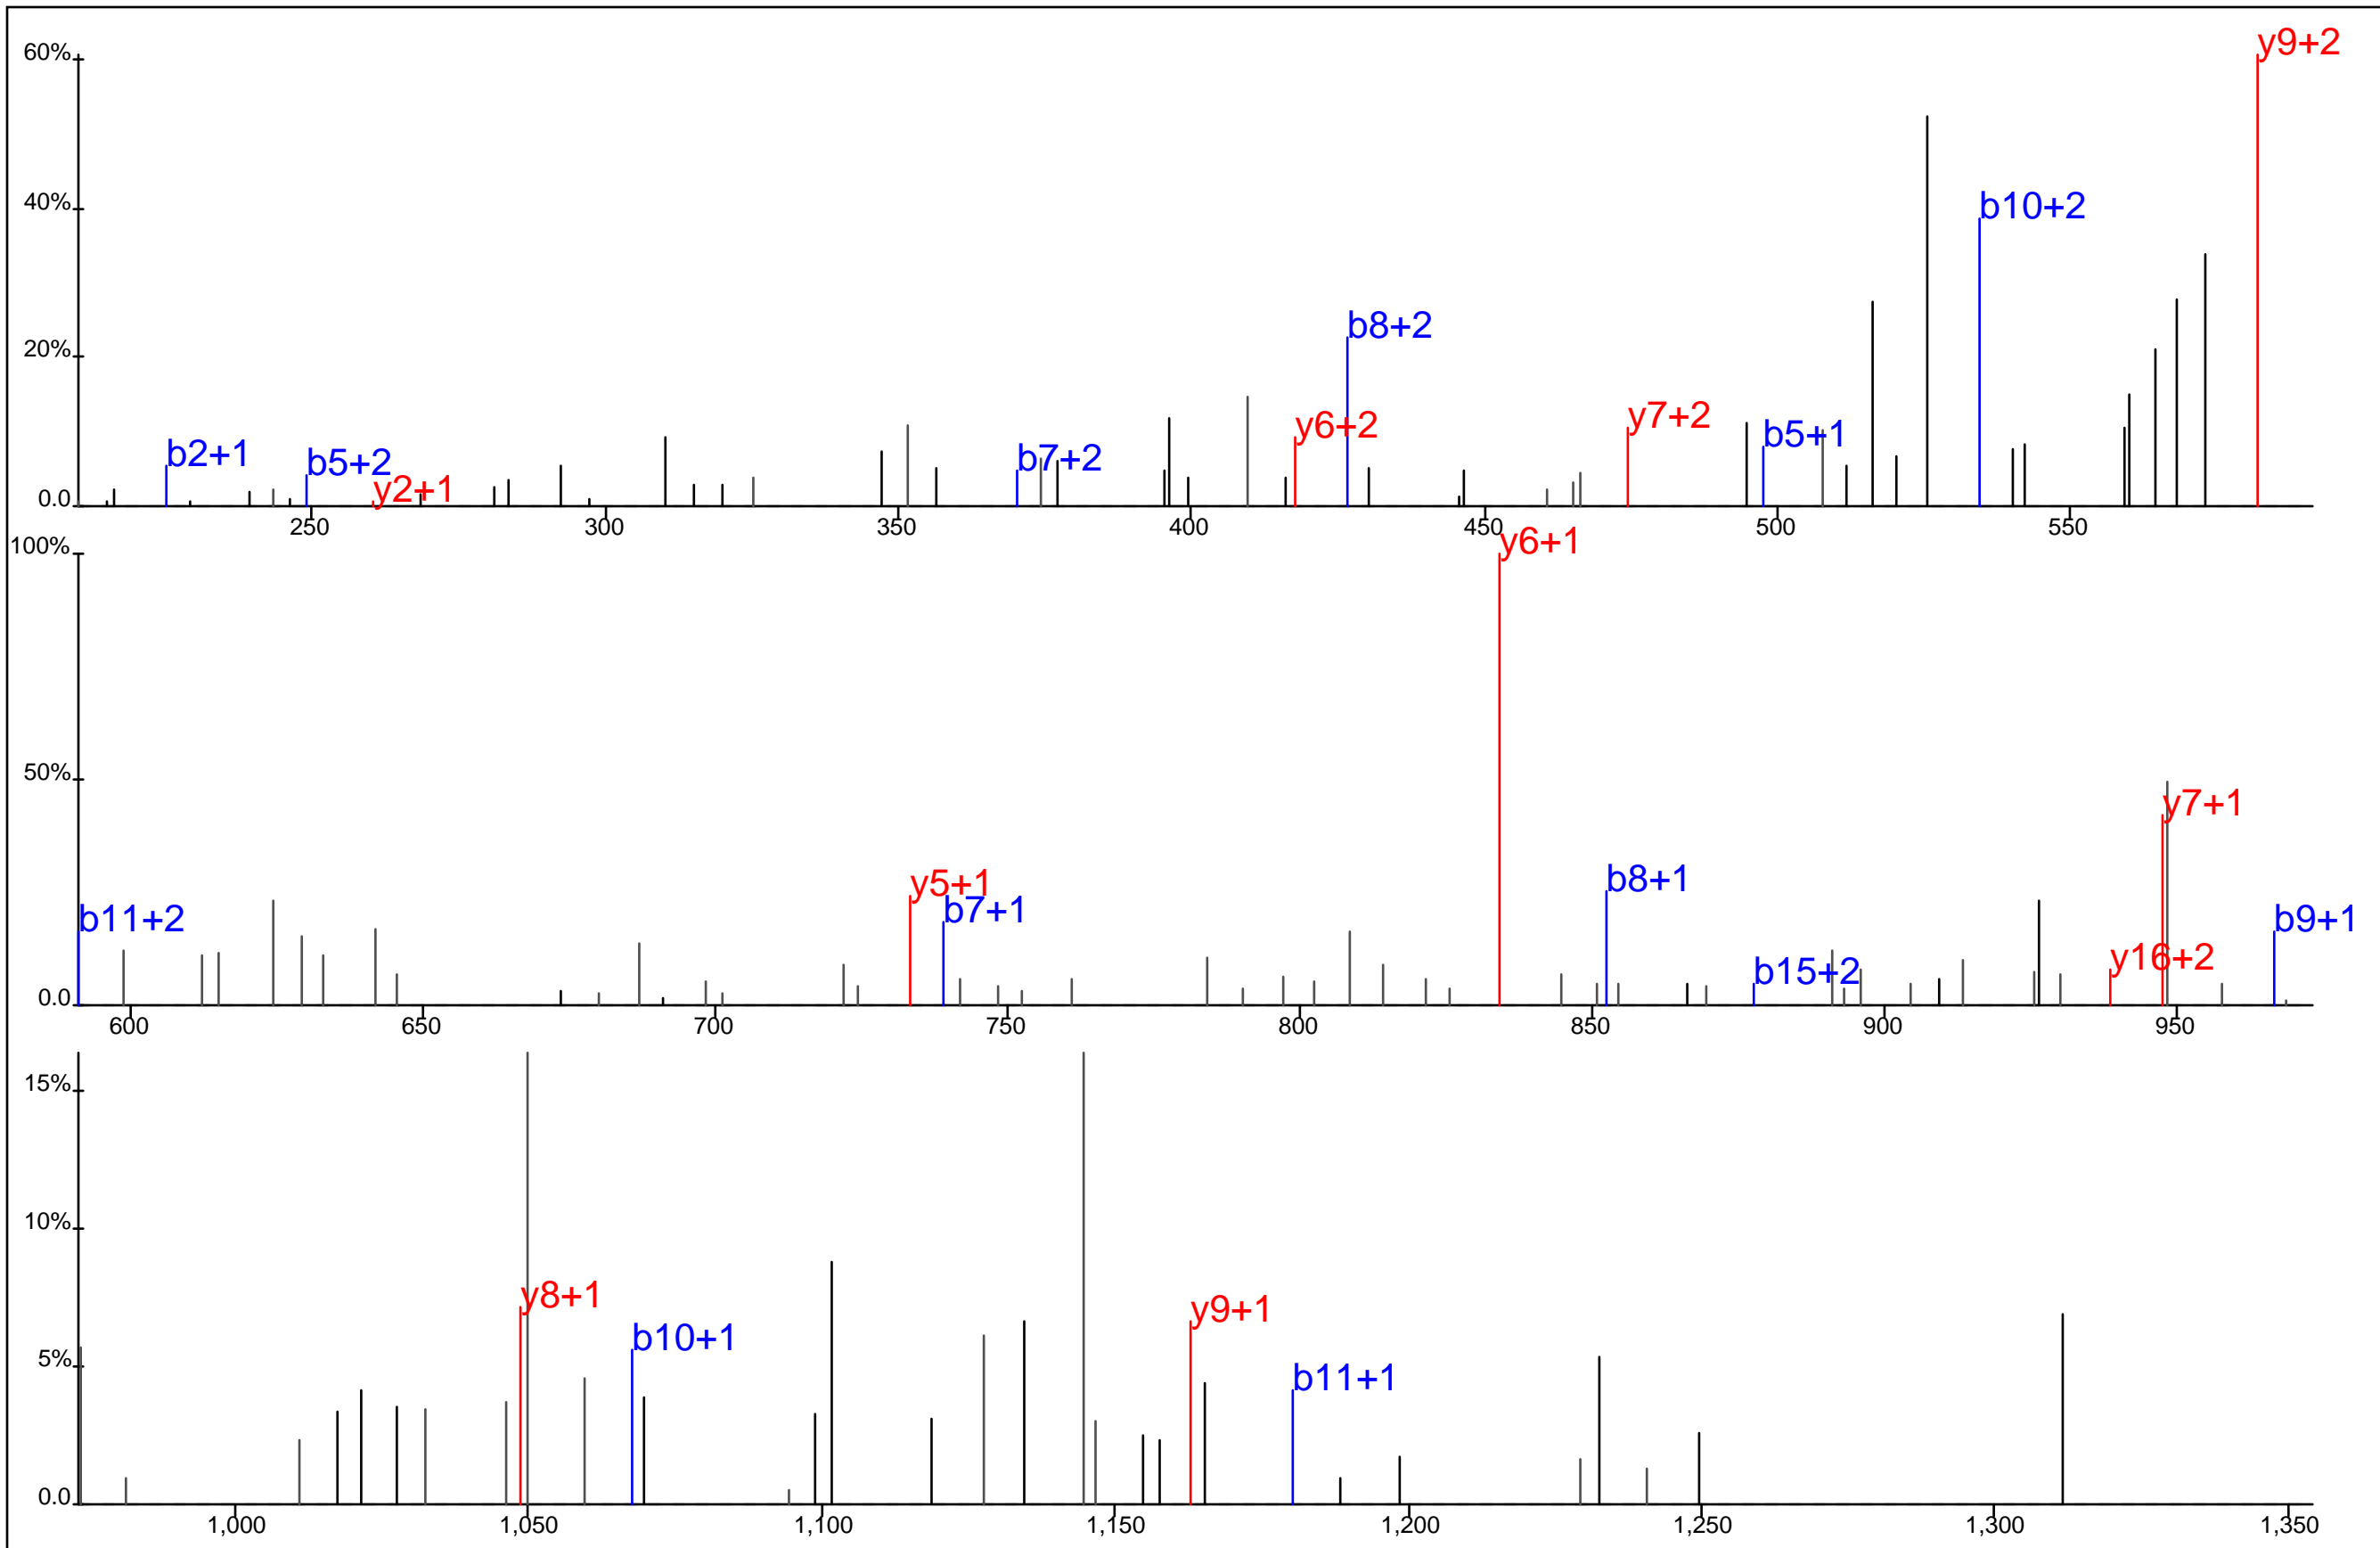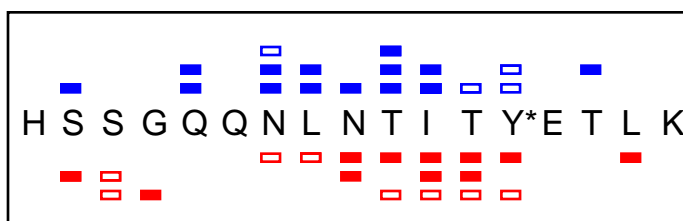

Protein Name: RCP9  
 gi Accession: 0  
 Precursor Mass: 671.9805+3  
 Delta Mass: 0.421 ppm  
 XCorr: 25.9



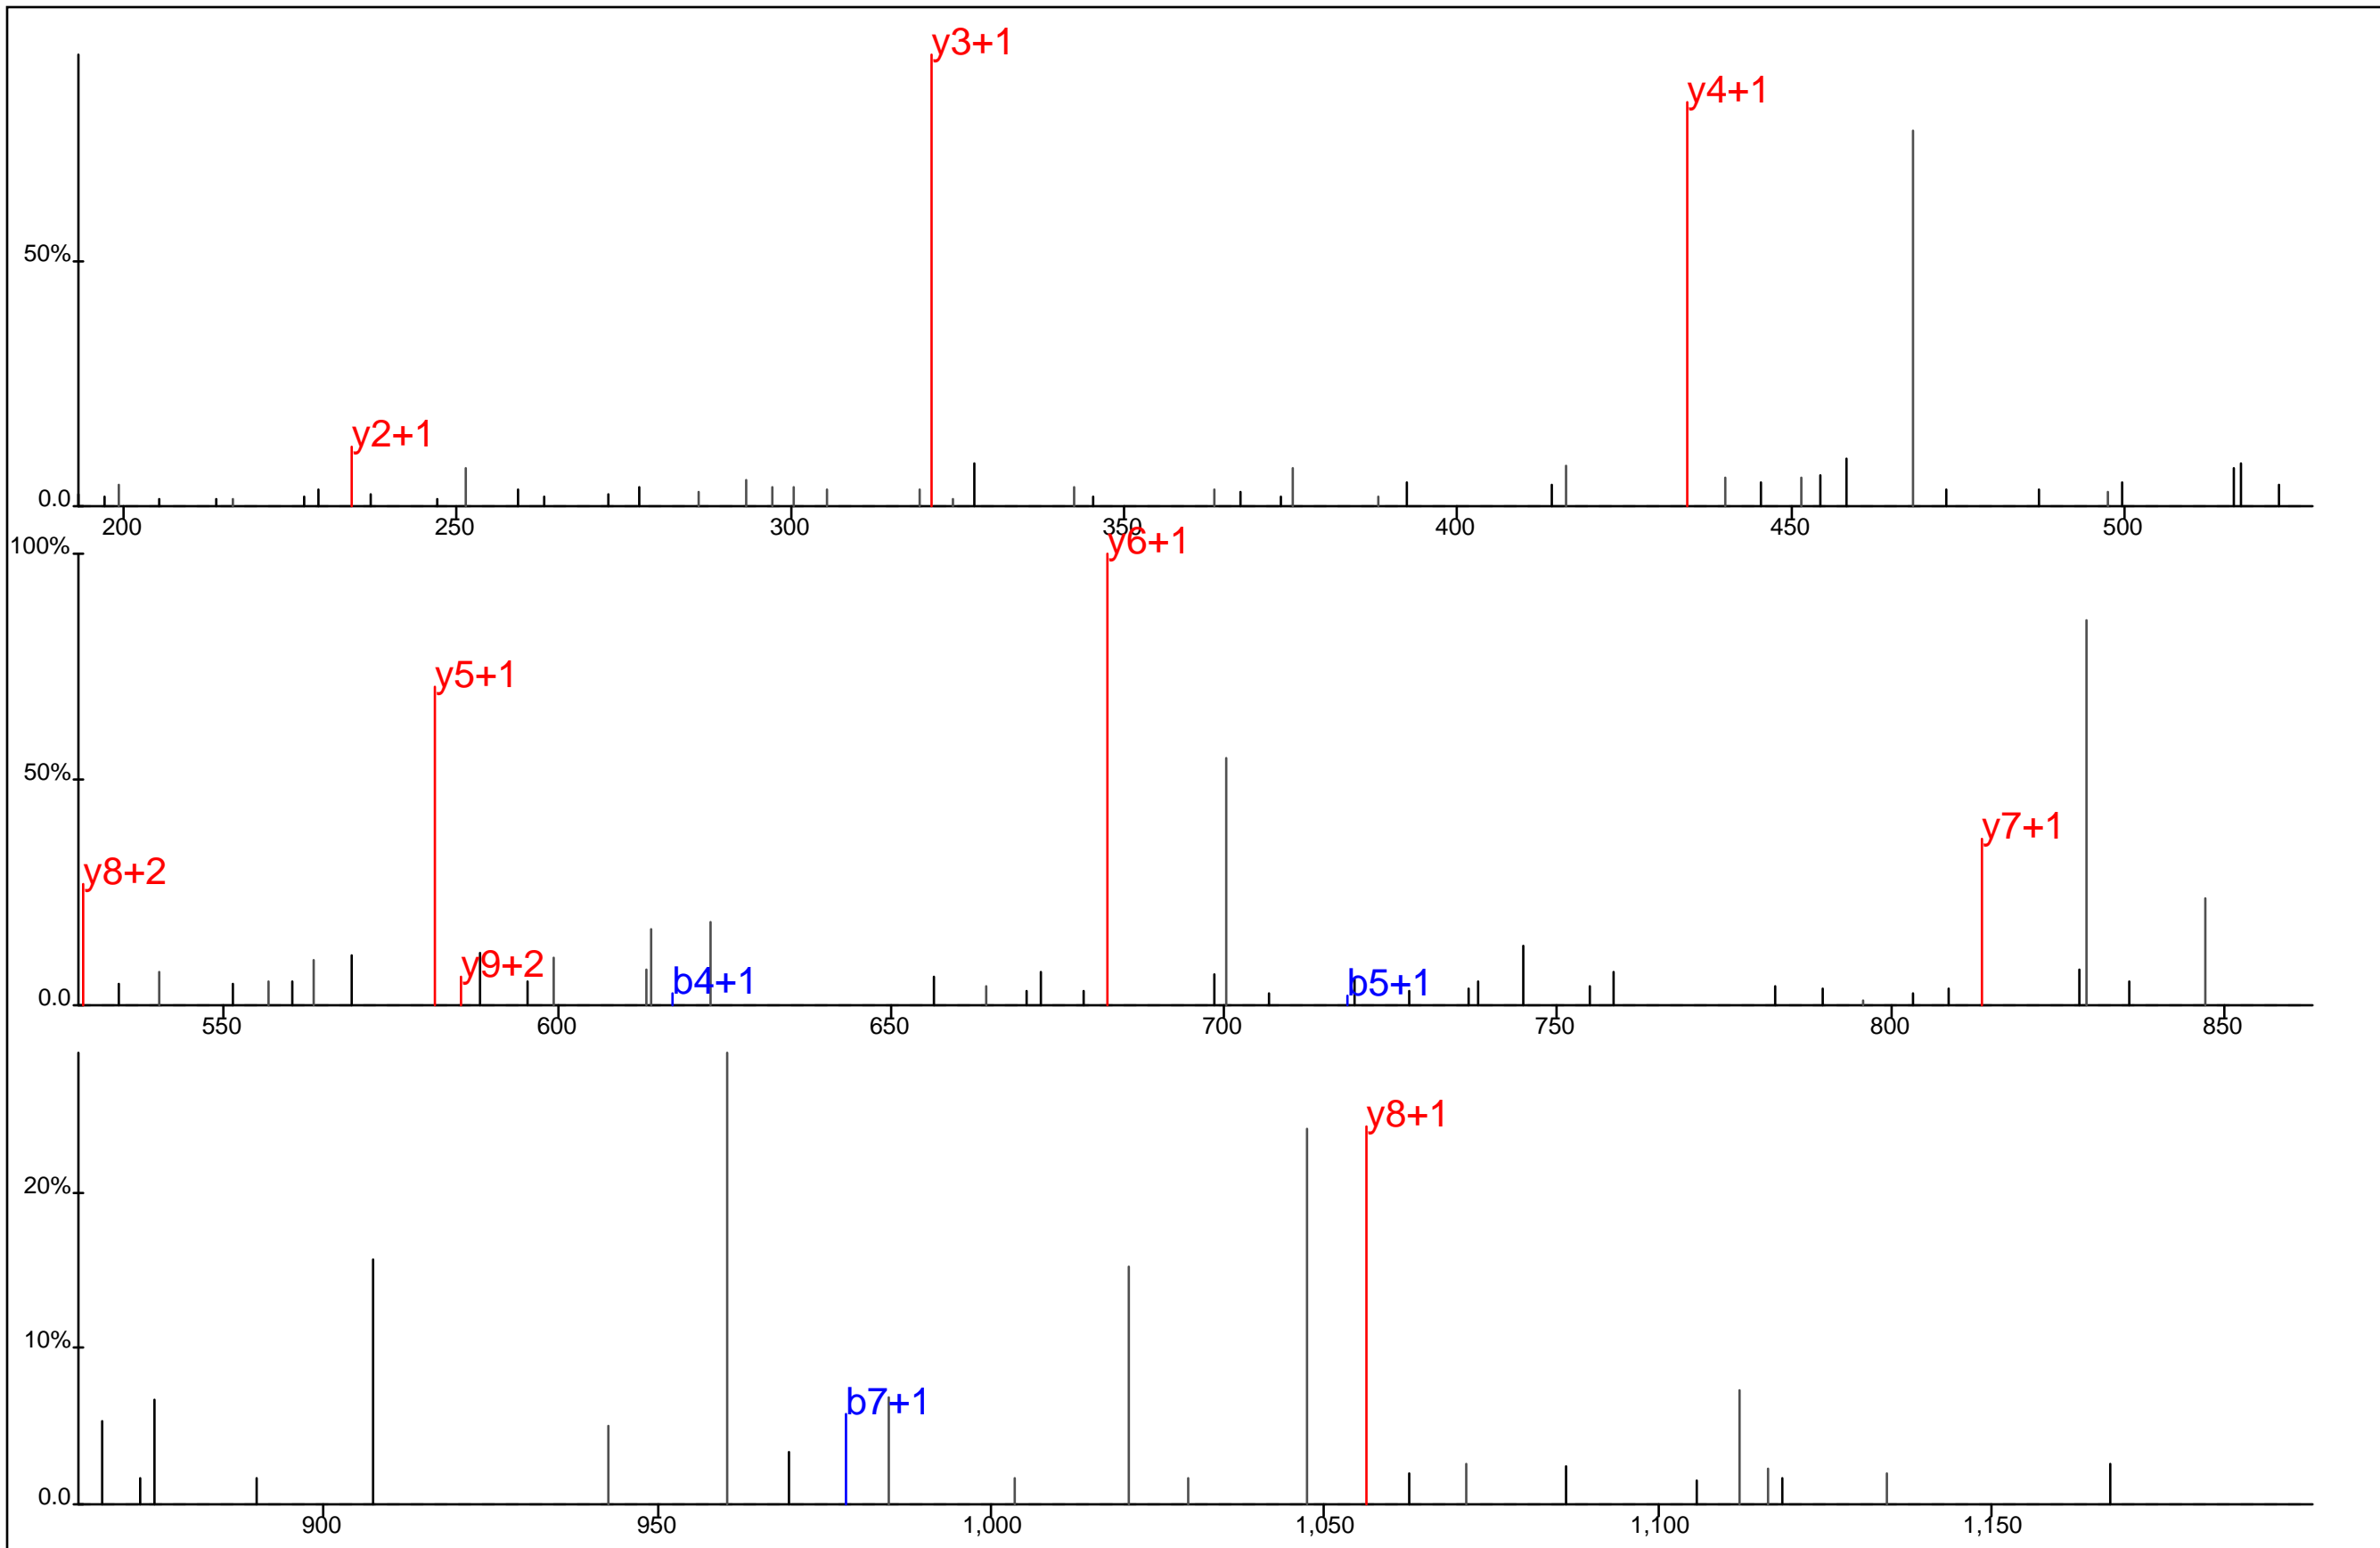

E I Y\* M T F L S S K

Protein Name: Regulator of G protein signaling 10  
 gi Accession: 0  
 Precursor Mass: 649.7927+2  
 Delta Mass: 3.374 ppm  
 XCorr: 38.59

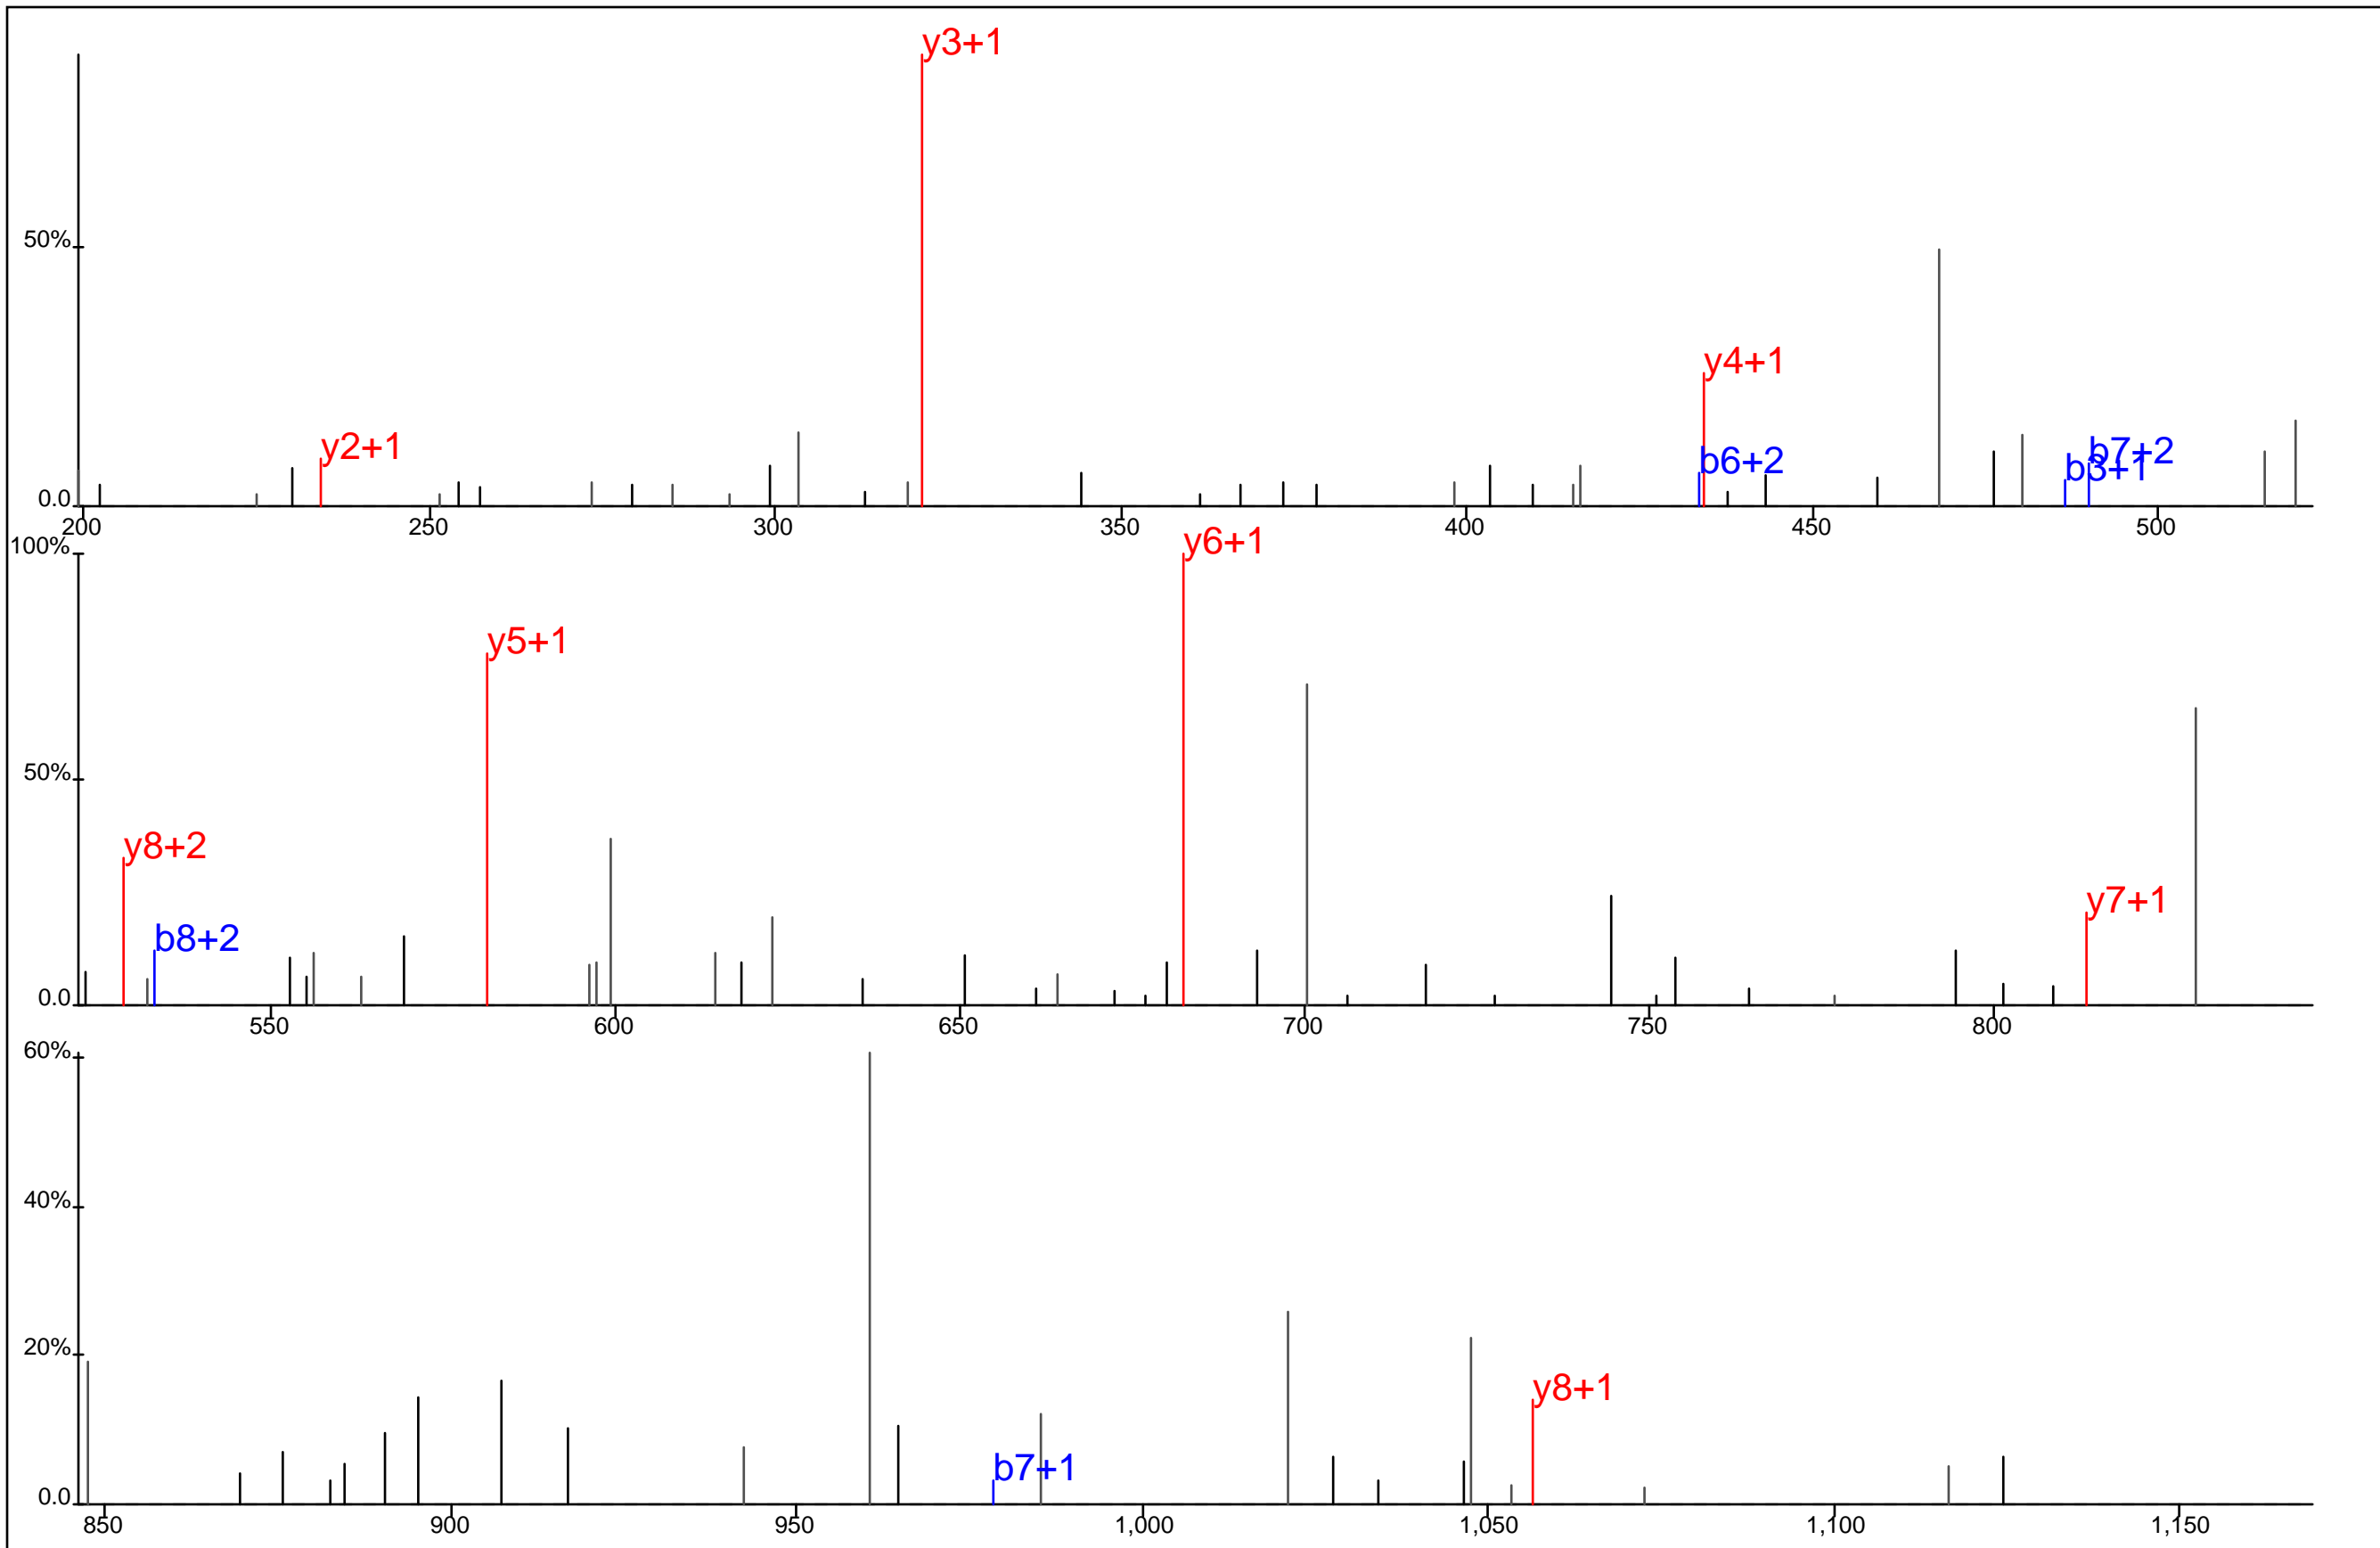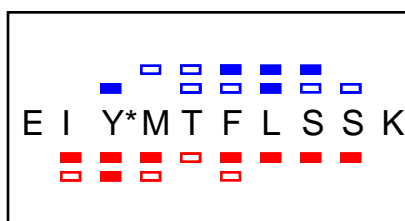

Protein Name: Regulator of G protein signaling 10  
 gi Accession: 0  
 Precursor Mass: 649.7902+2  
 Delta Mass: 0.481 ppm  
 XCorr: 37.34

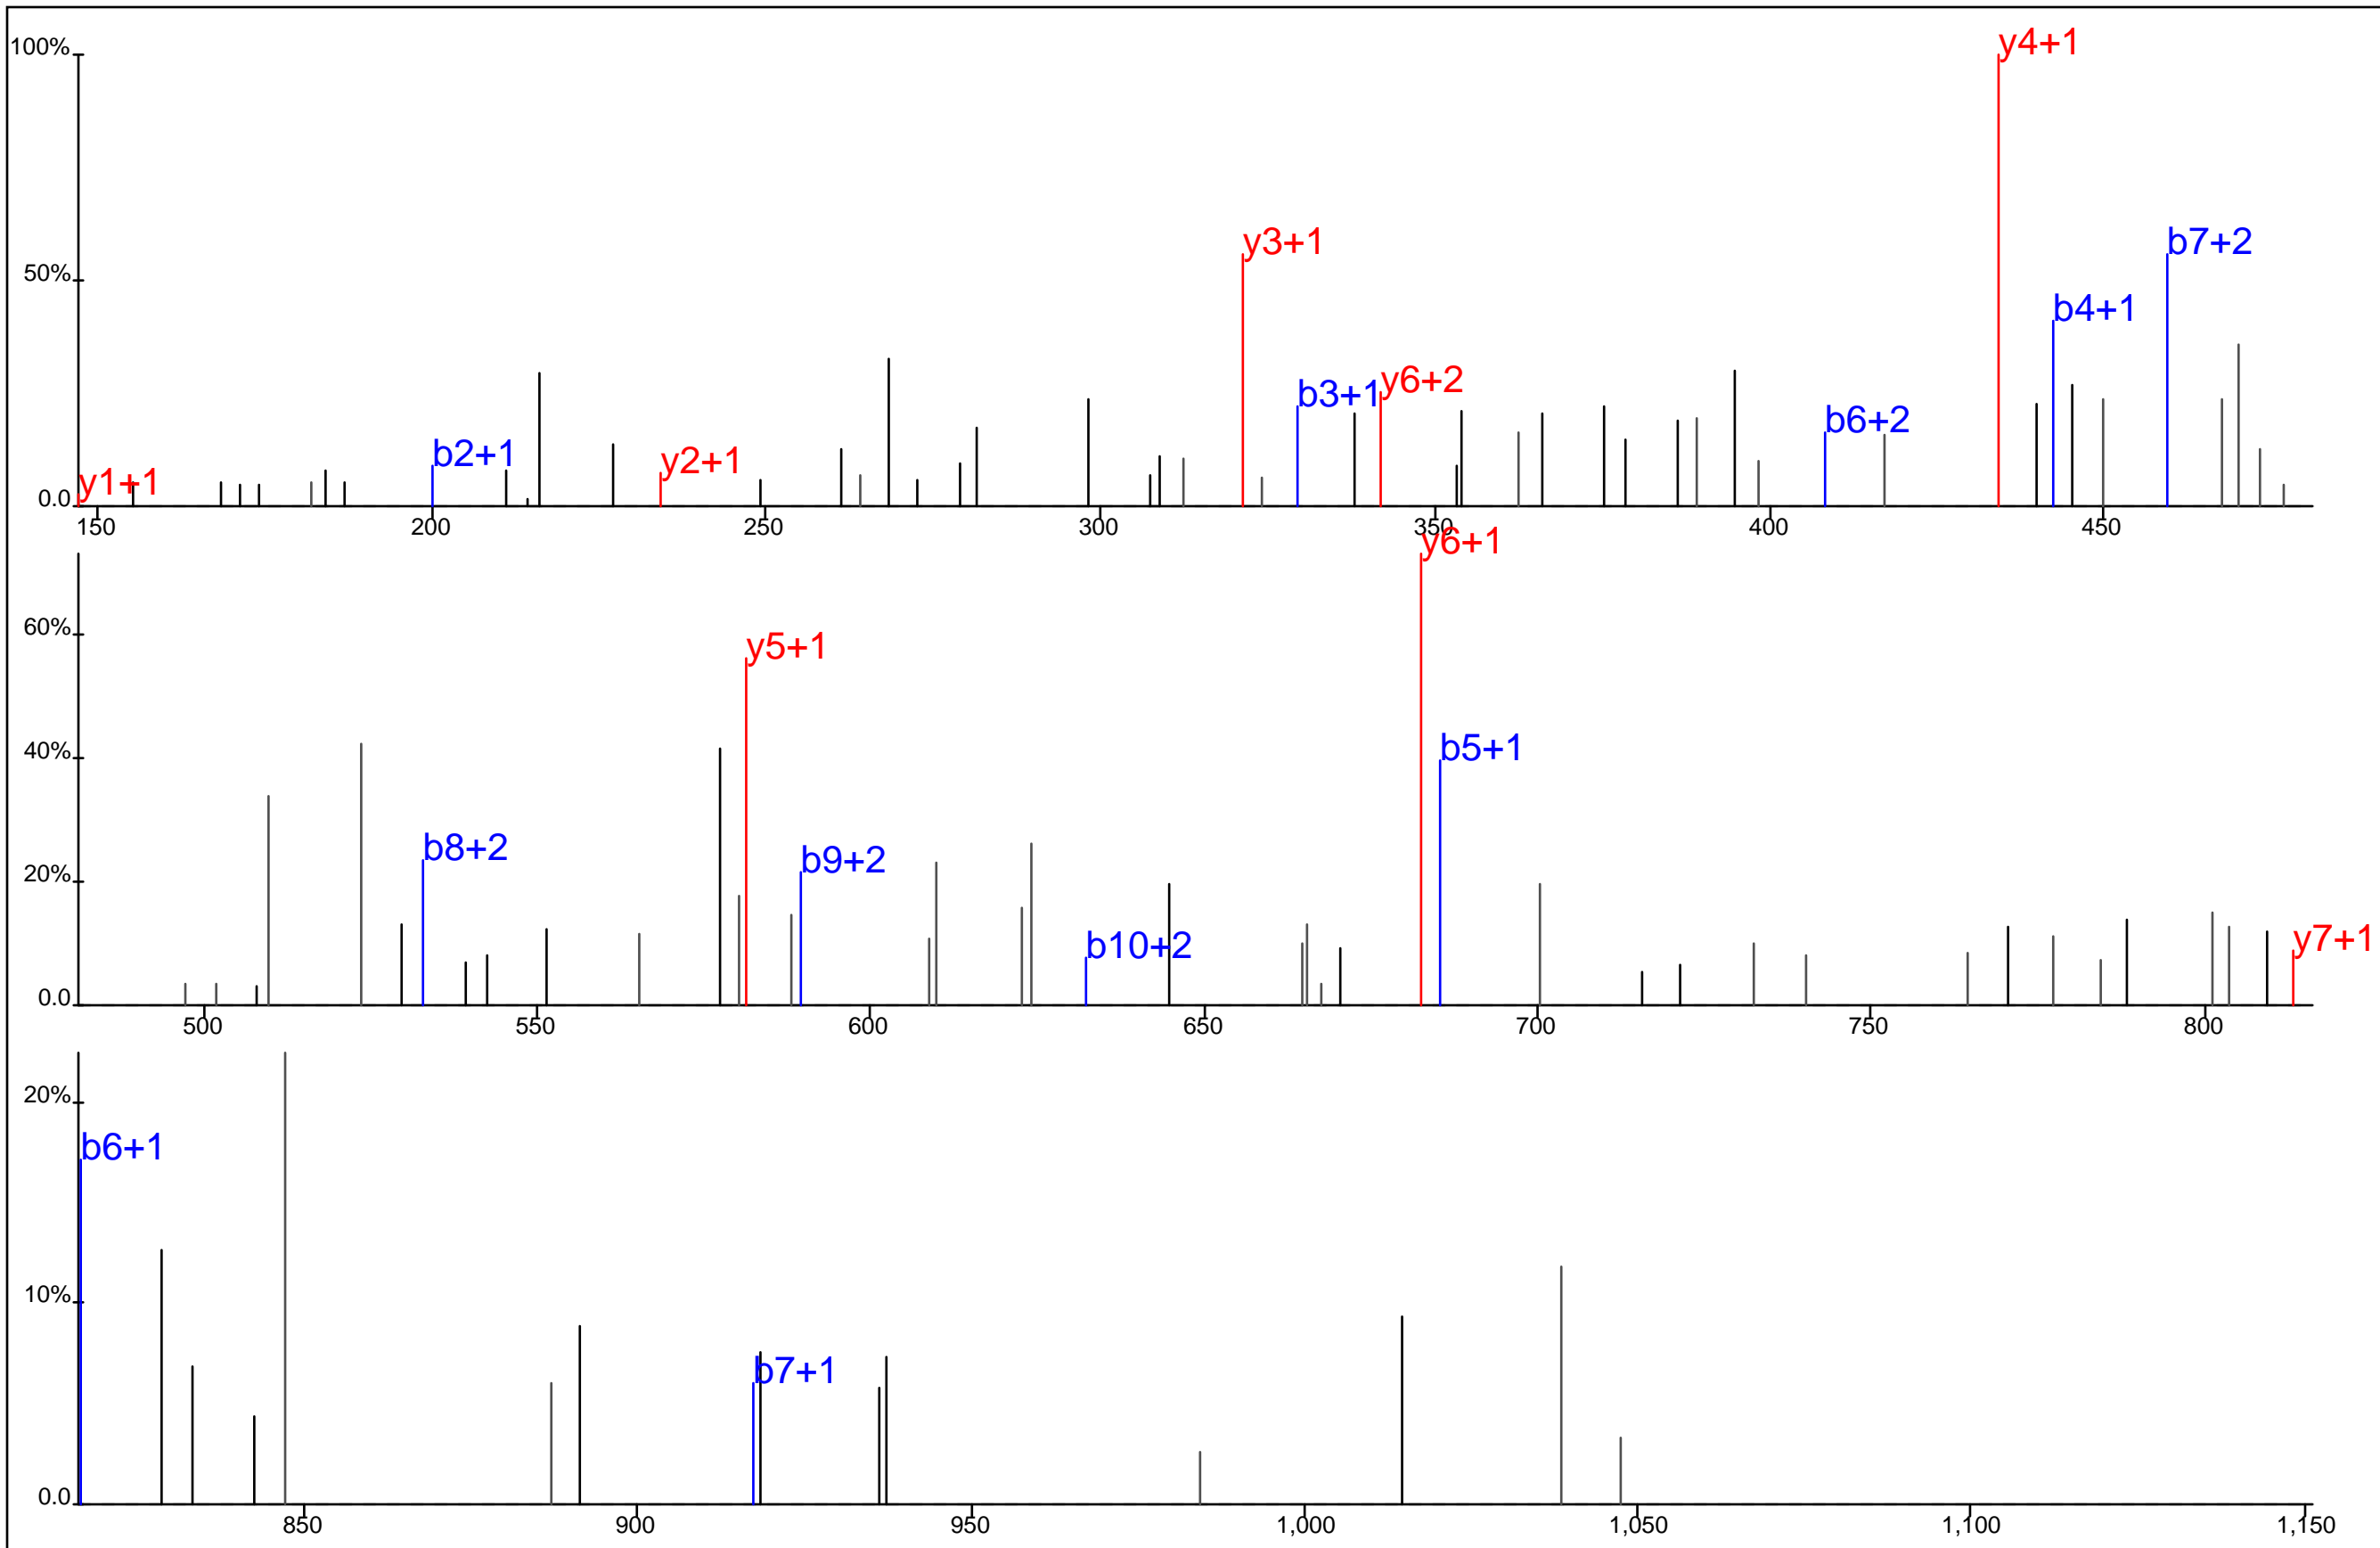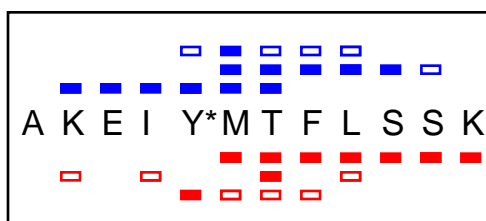

Protein Name: Regulator of G protein signaling 10  
 gi Accession: 0  
 Precursor Mass: 499.9068+3  
 Delta Mass: 0.005 ppm  
 XCorr: 24.32

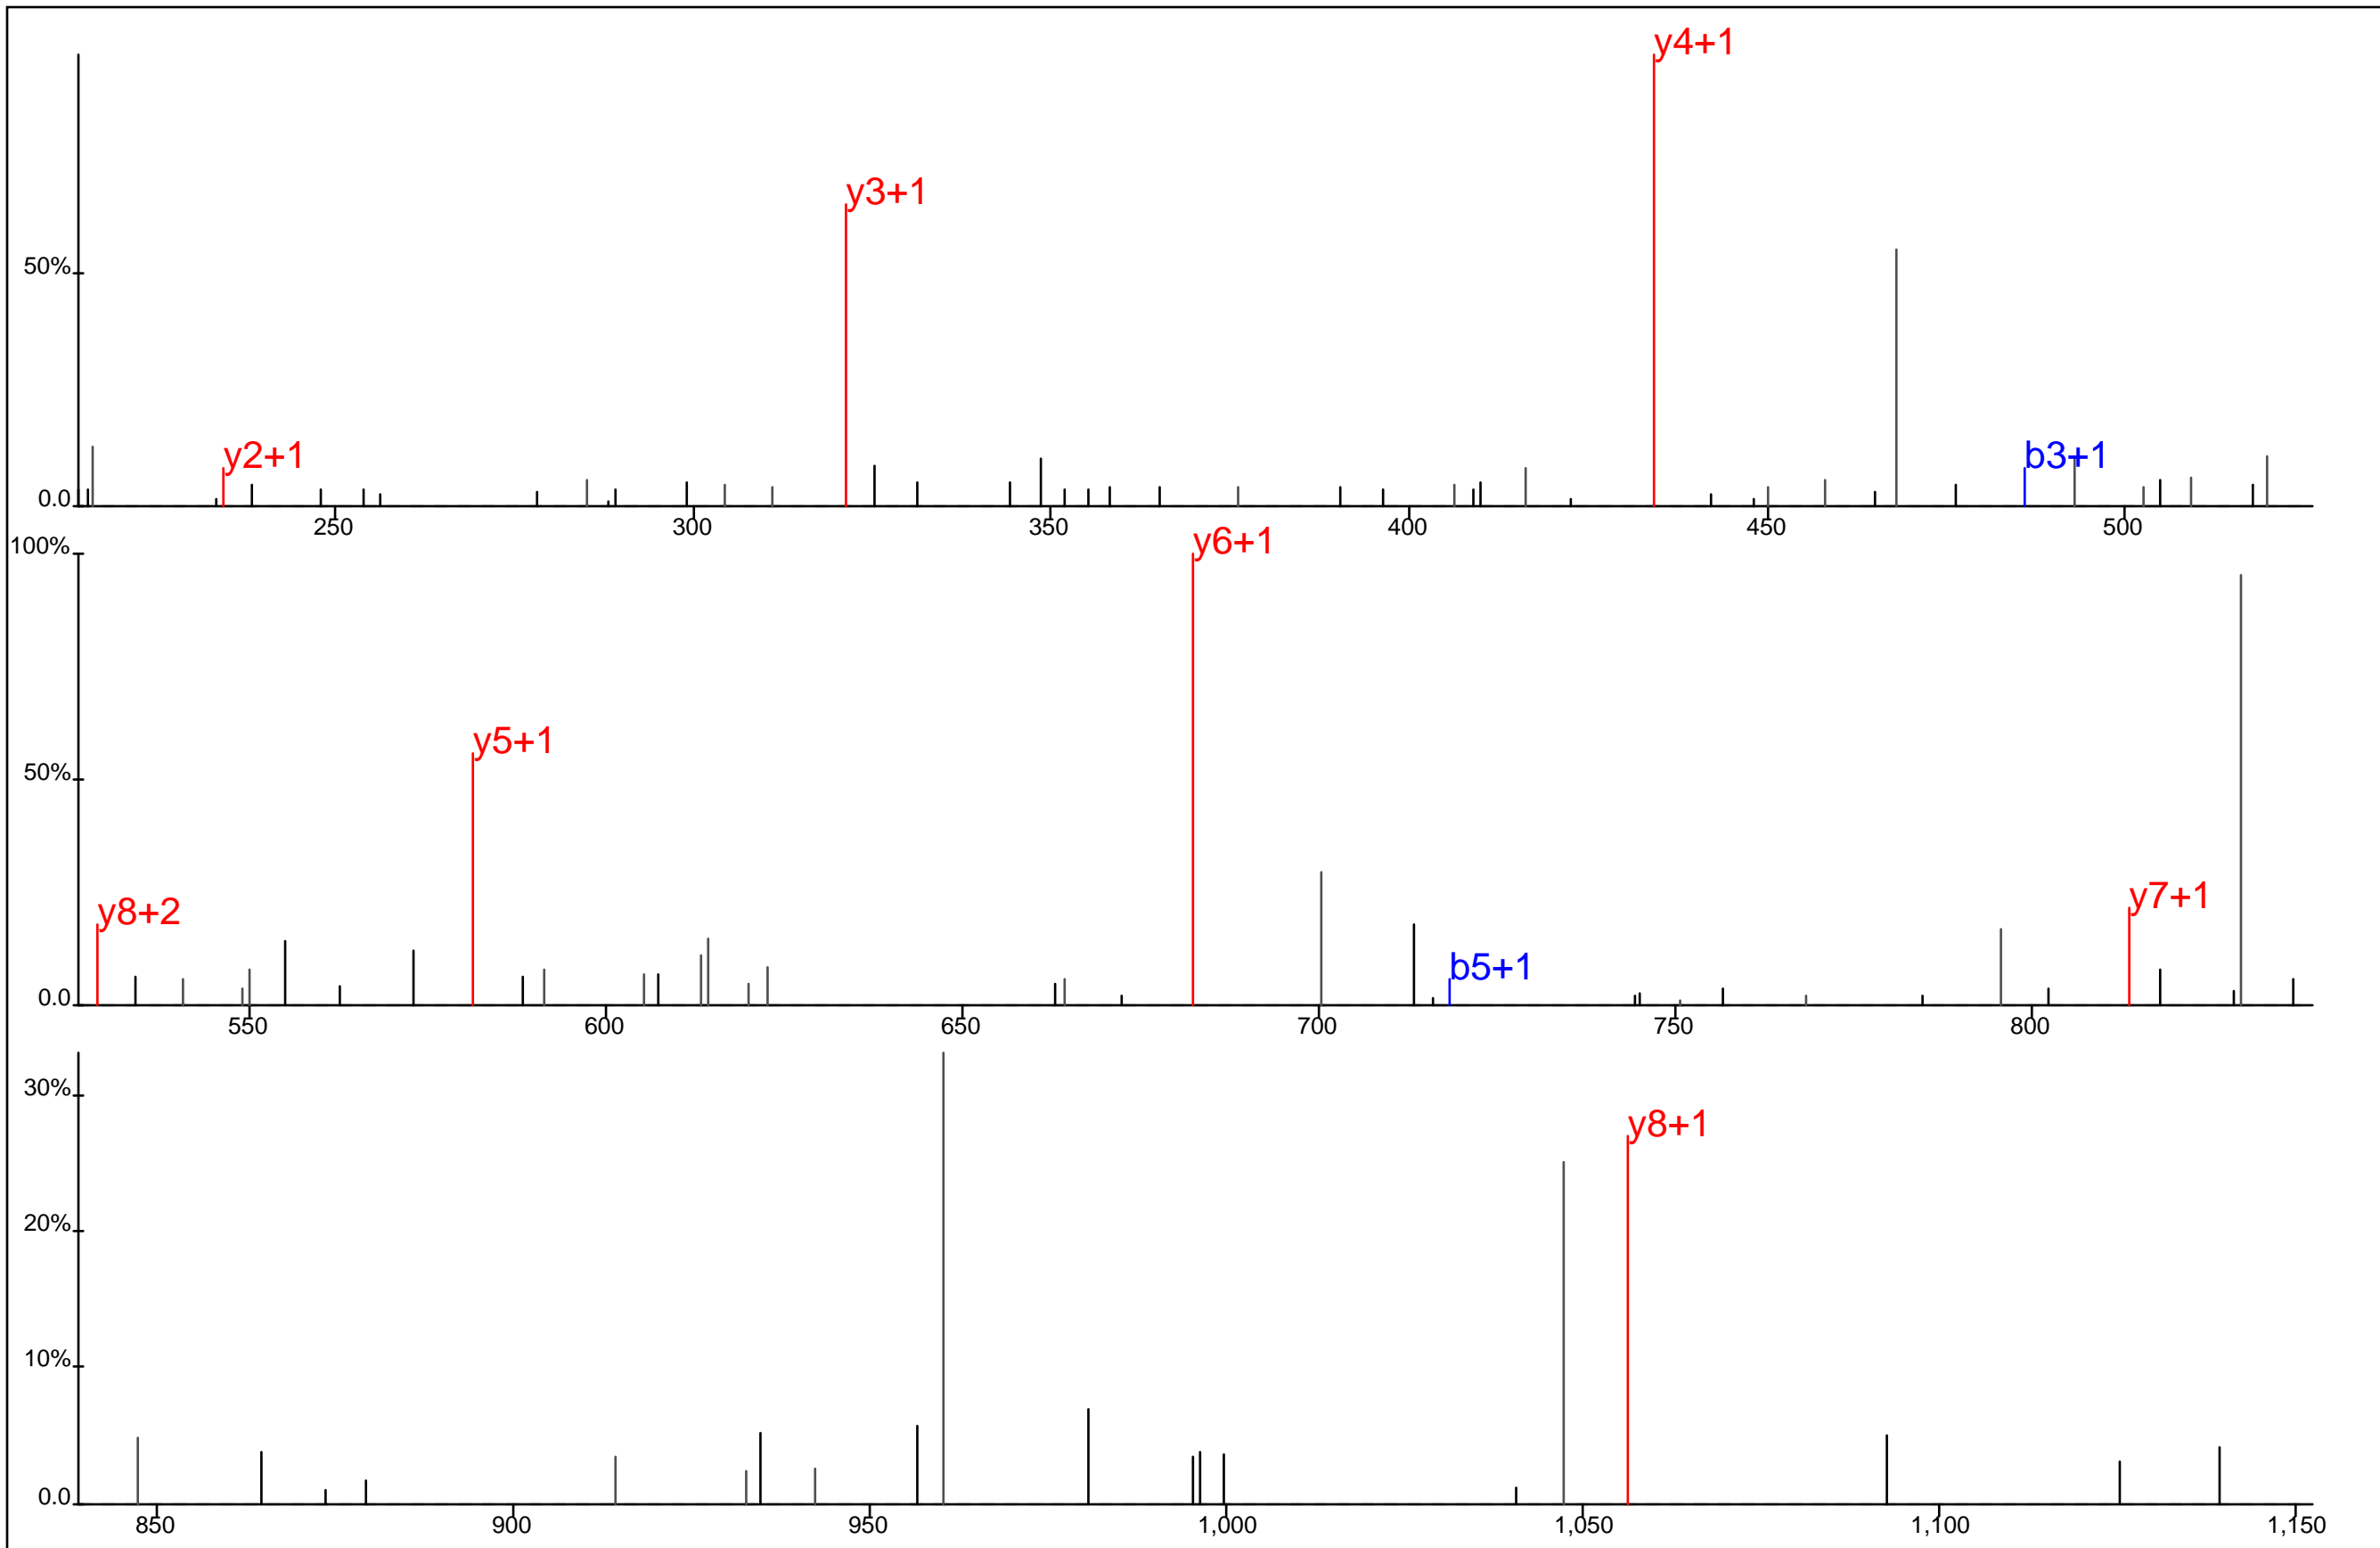

|   |   |    |   |   |   |   |   |   |   |
|---|---|----|---|---|---|---|---|---|---|
| E | I | Y* | M | T | F | L | S | S | K |
|   |   |    |   |   |   |   |   |   |   |
|   |   |    |   |   |   |   |   |   |   |

Protein Name: Regulator of G protein signaling 10  
 gi Accession: 0  
 Precursor Mass: 649.7906+2  
 Delta Mass: 0.177 ppm  
 XCorr: 49.87

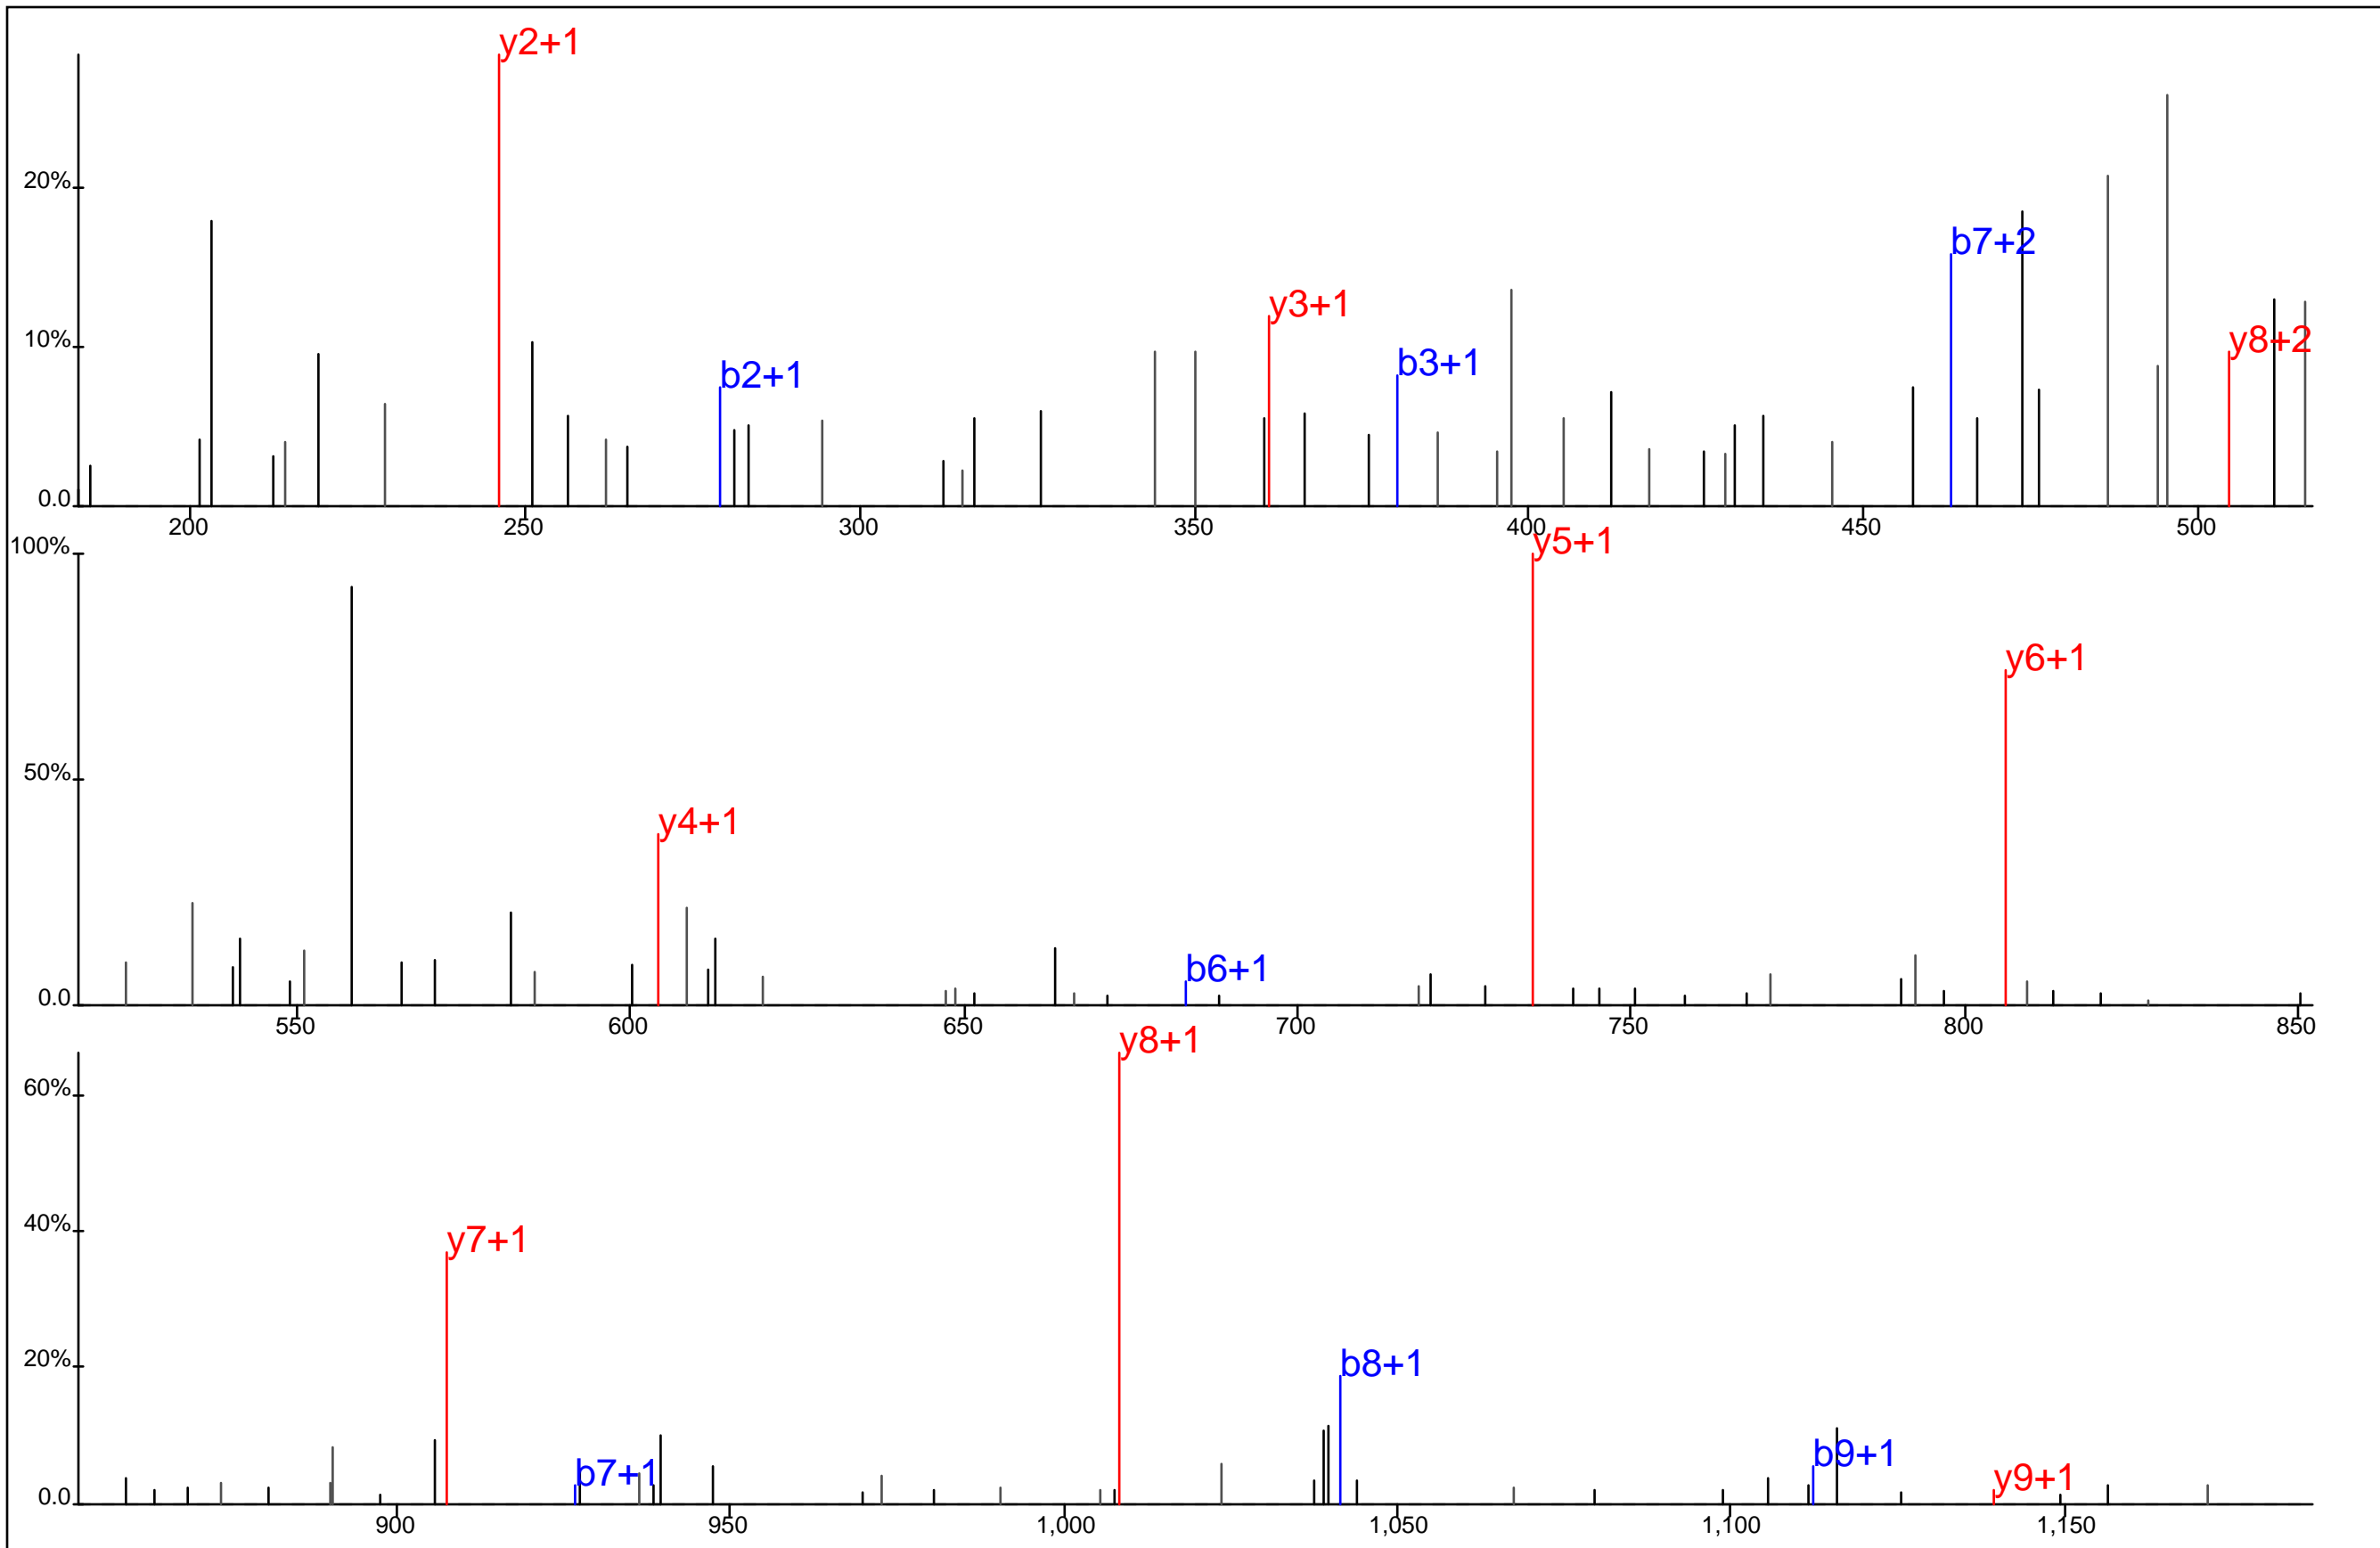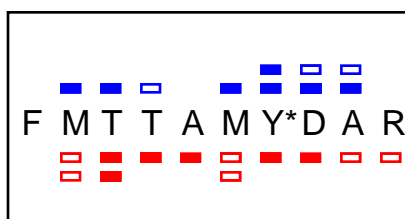

Protein Name: Regulator of nonsense transcripts 1  
 gi Accession: 0  
 Precursor Mass: 643.7524+2  
 Delta Mass: 2.318 ppm  
 XCorr: 52.96

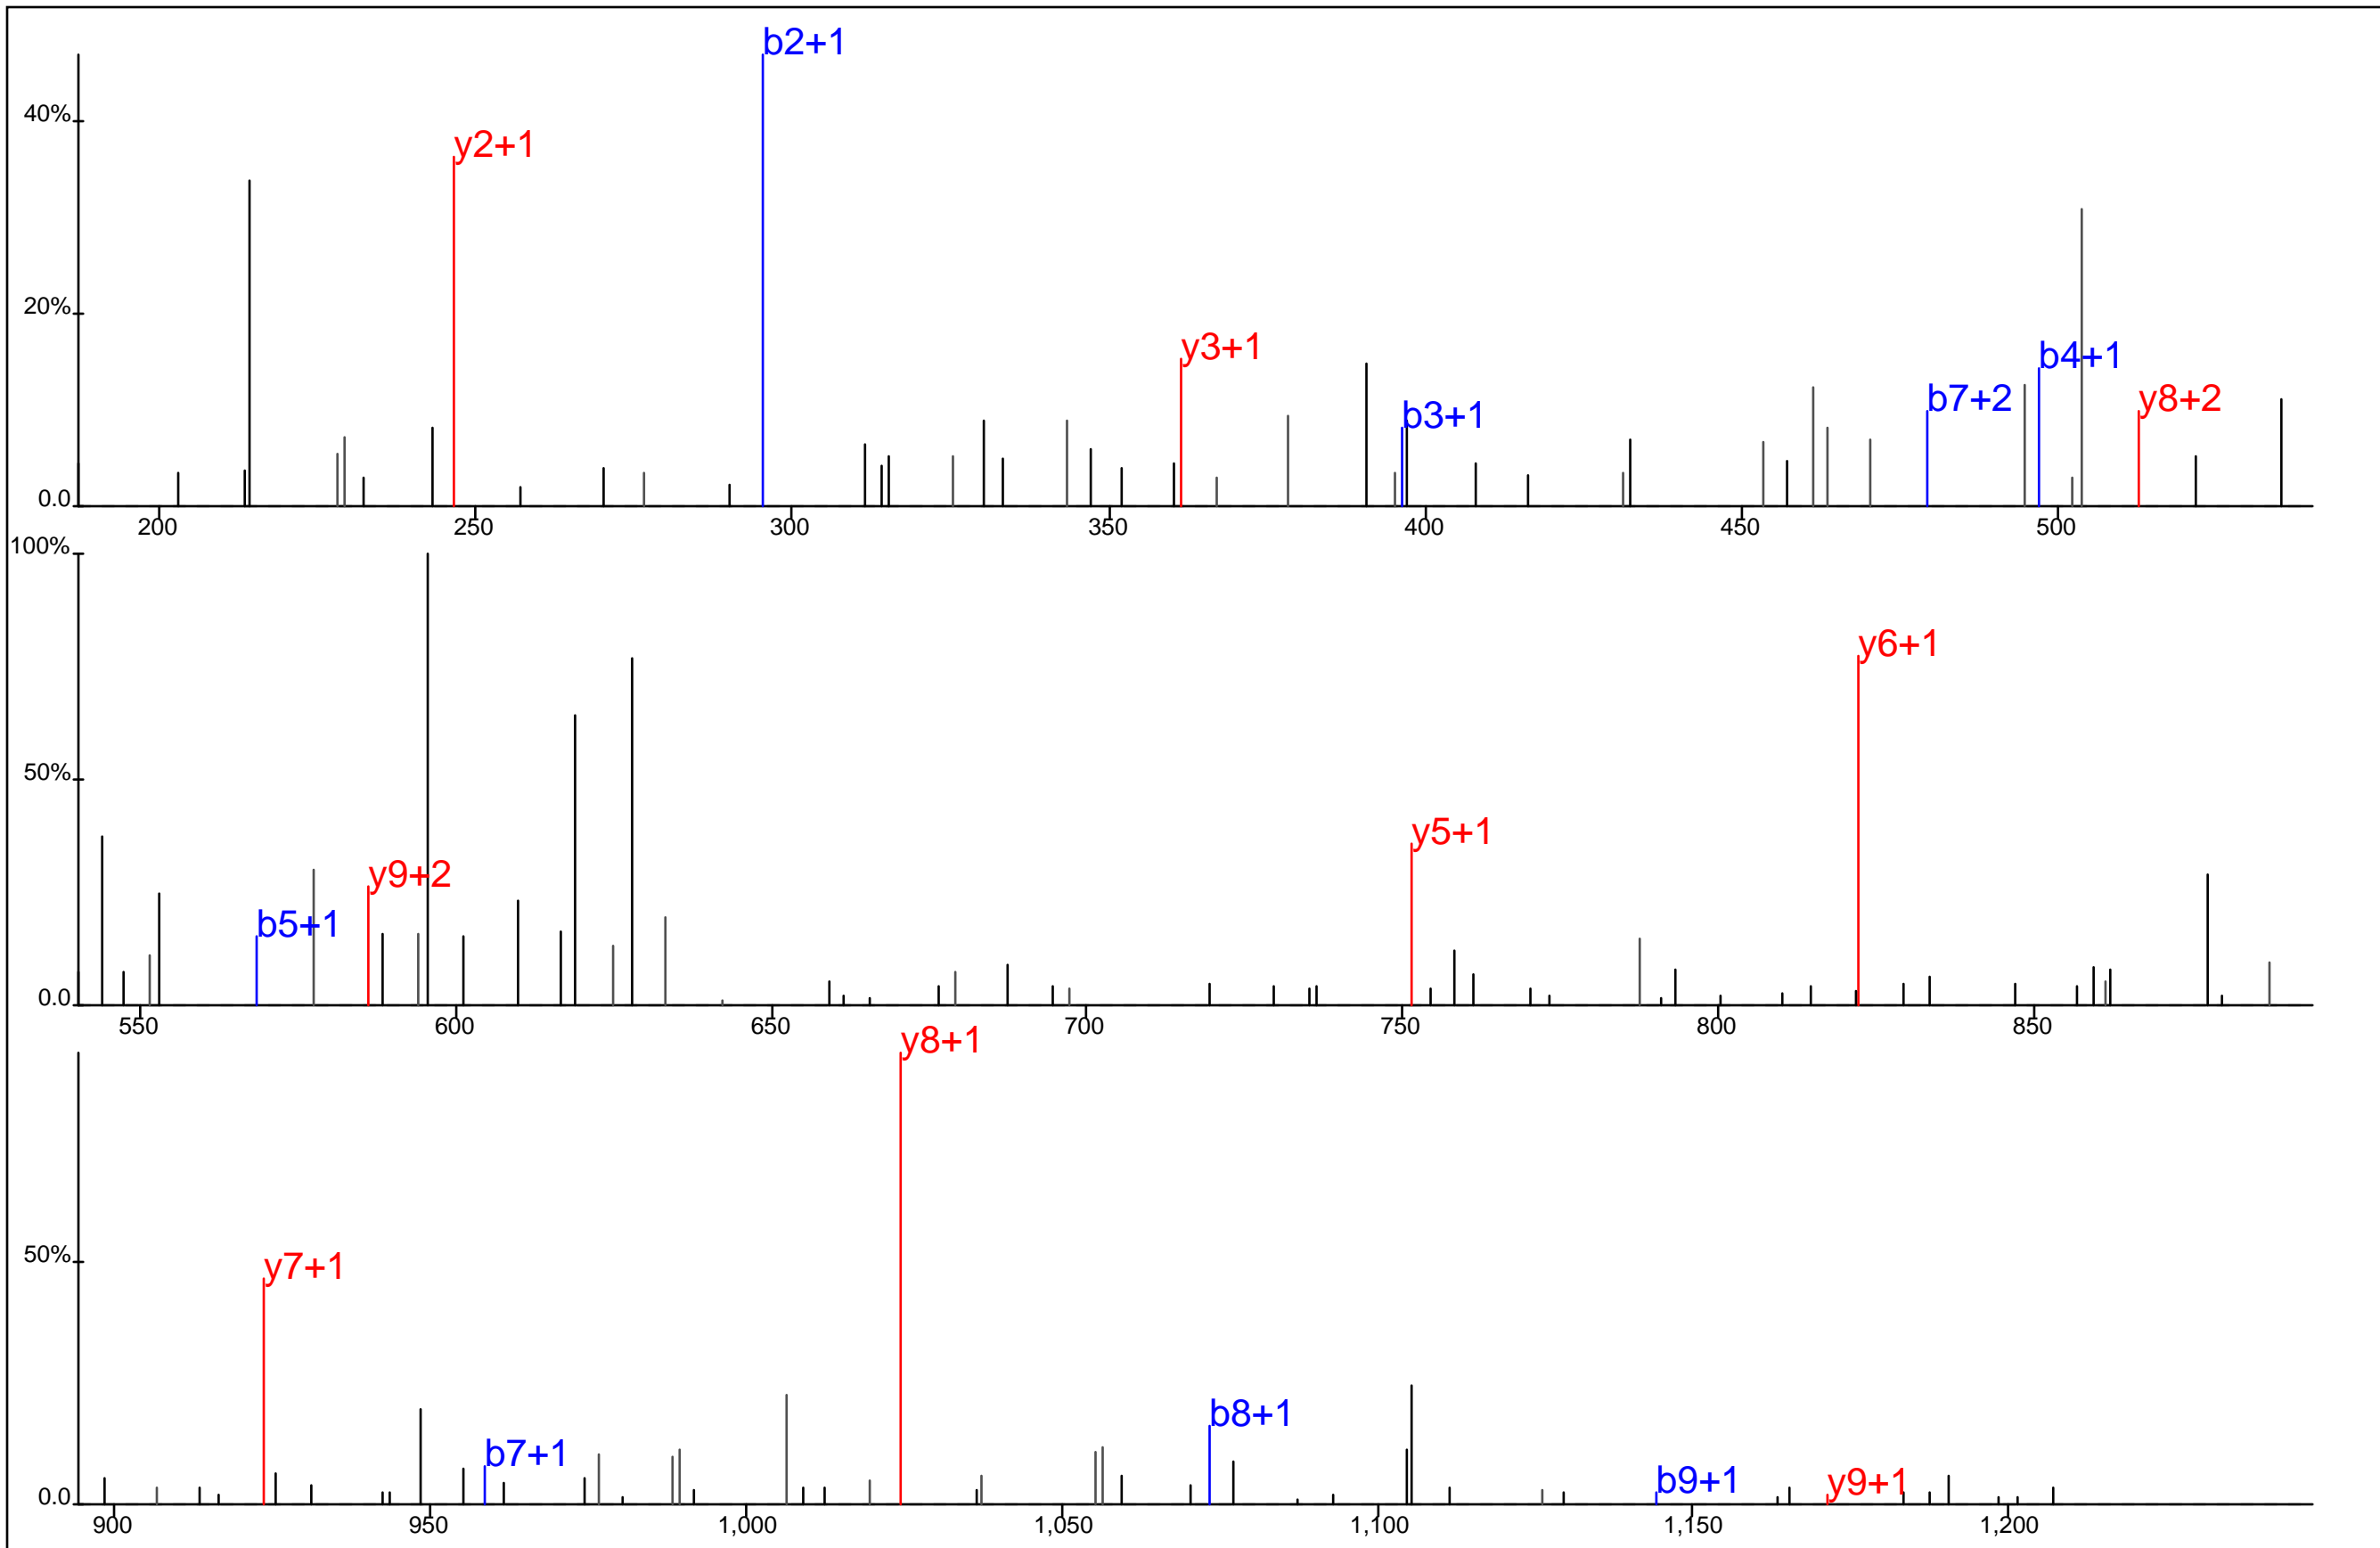

■ ■ ■ ■ ■ ■ ■ ■ ■ ■  
 F M#T T A M#Y\*D A R  
■ ■ ■ ■ ■ ■ ■ ■ ■ ■

Protein Name: Regulator of nonsense transcripts 1  
 gi Accession: 0  
 Precursor Mass: 659.7484+2  
 Delta Mass: 3.857 ppm  
 XCorr: 31.33

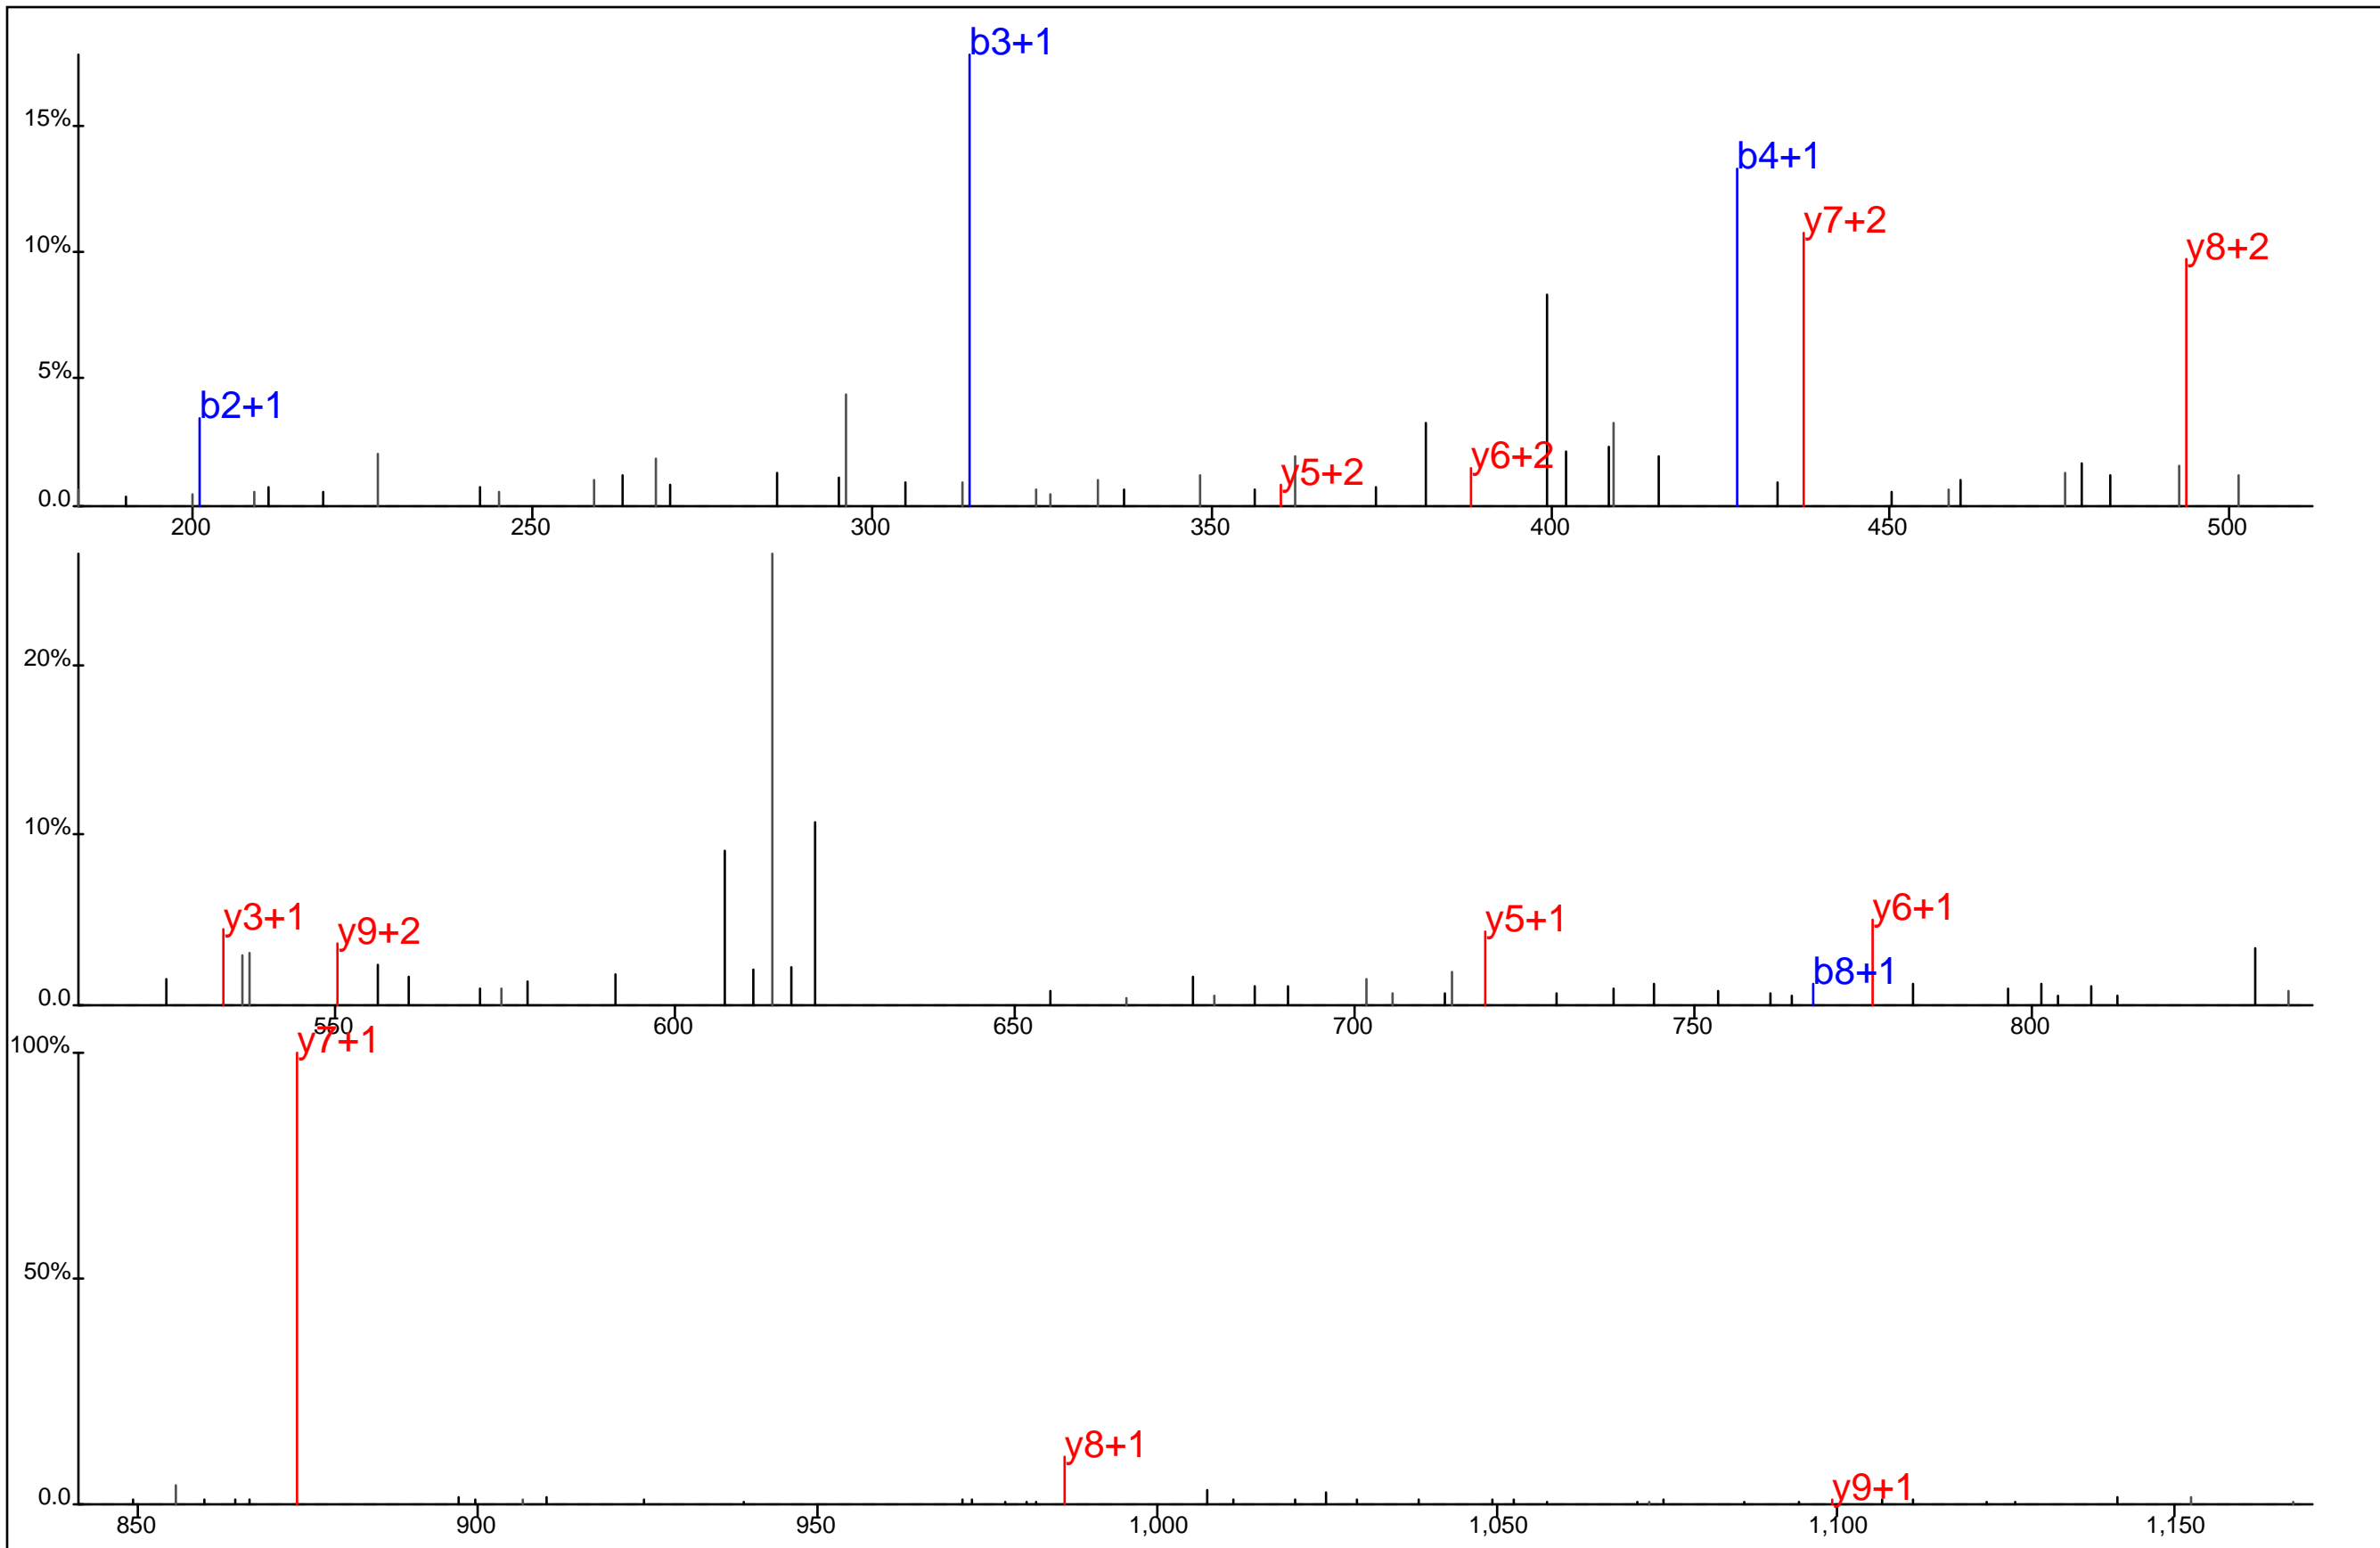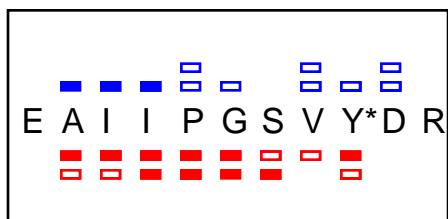

Protein Name: Regulator of nonsense transcripts 1  
 gi Accession: 0  
 Precursor Mass: 650.2996+2  
 Delta Mass: 4.666 ppm  
 XCorr: 32.75

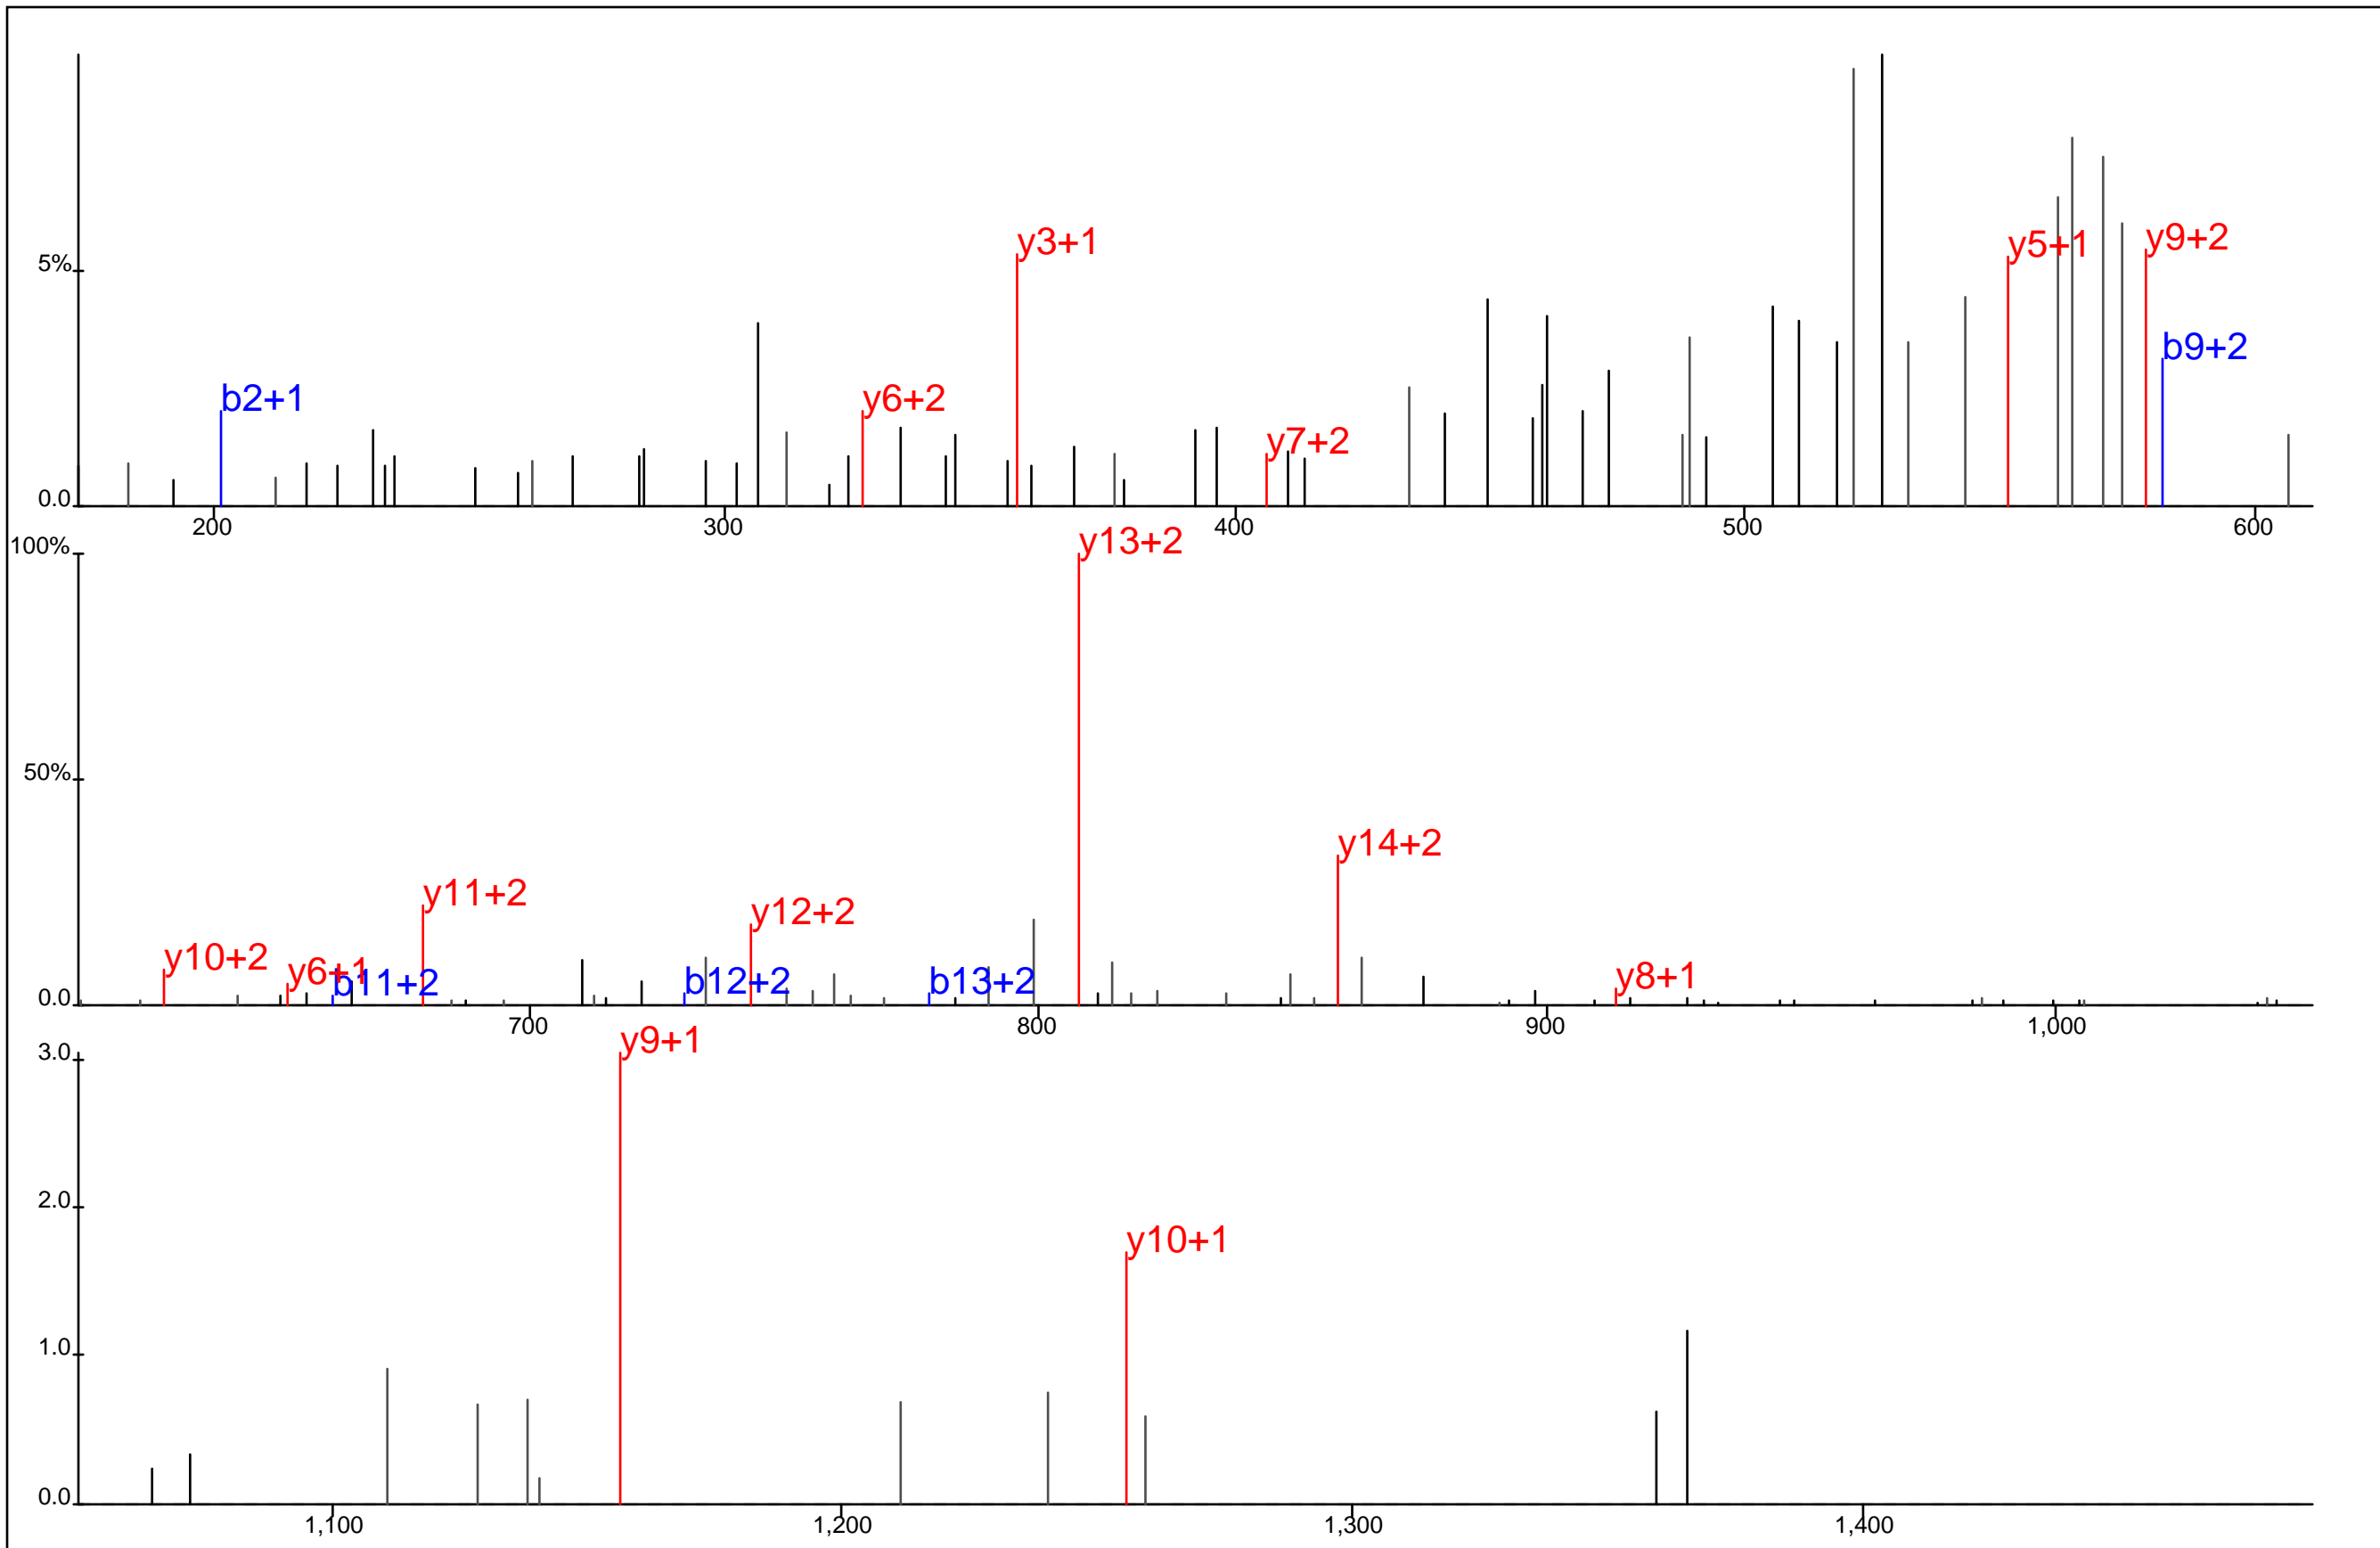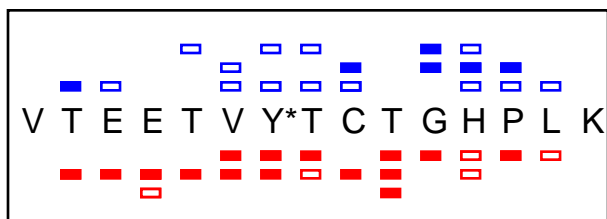

Protein Name: Replication factor C (activator 1) 5, 36.5kDa  
 gi Accession: 0  
 Precursor Mass: 605.6064+3  
 Delta Mass: 0.954 ppm  
 XCorr: 26.66



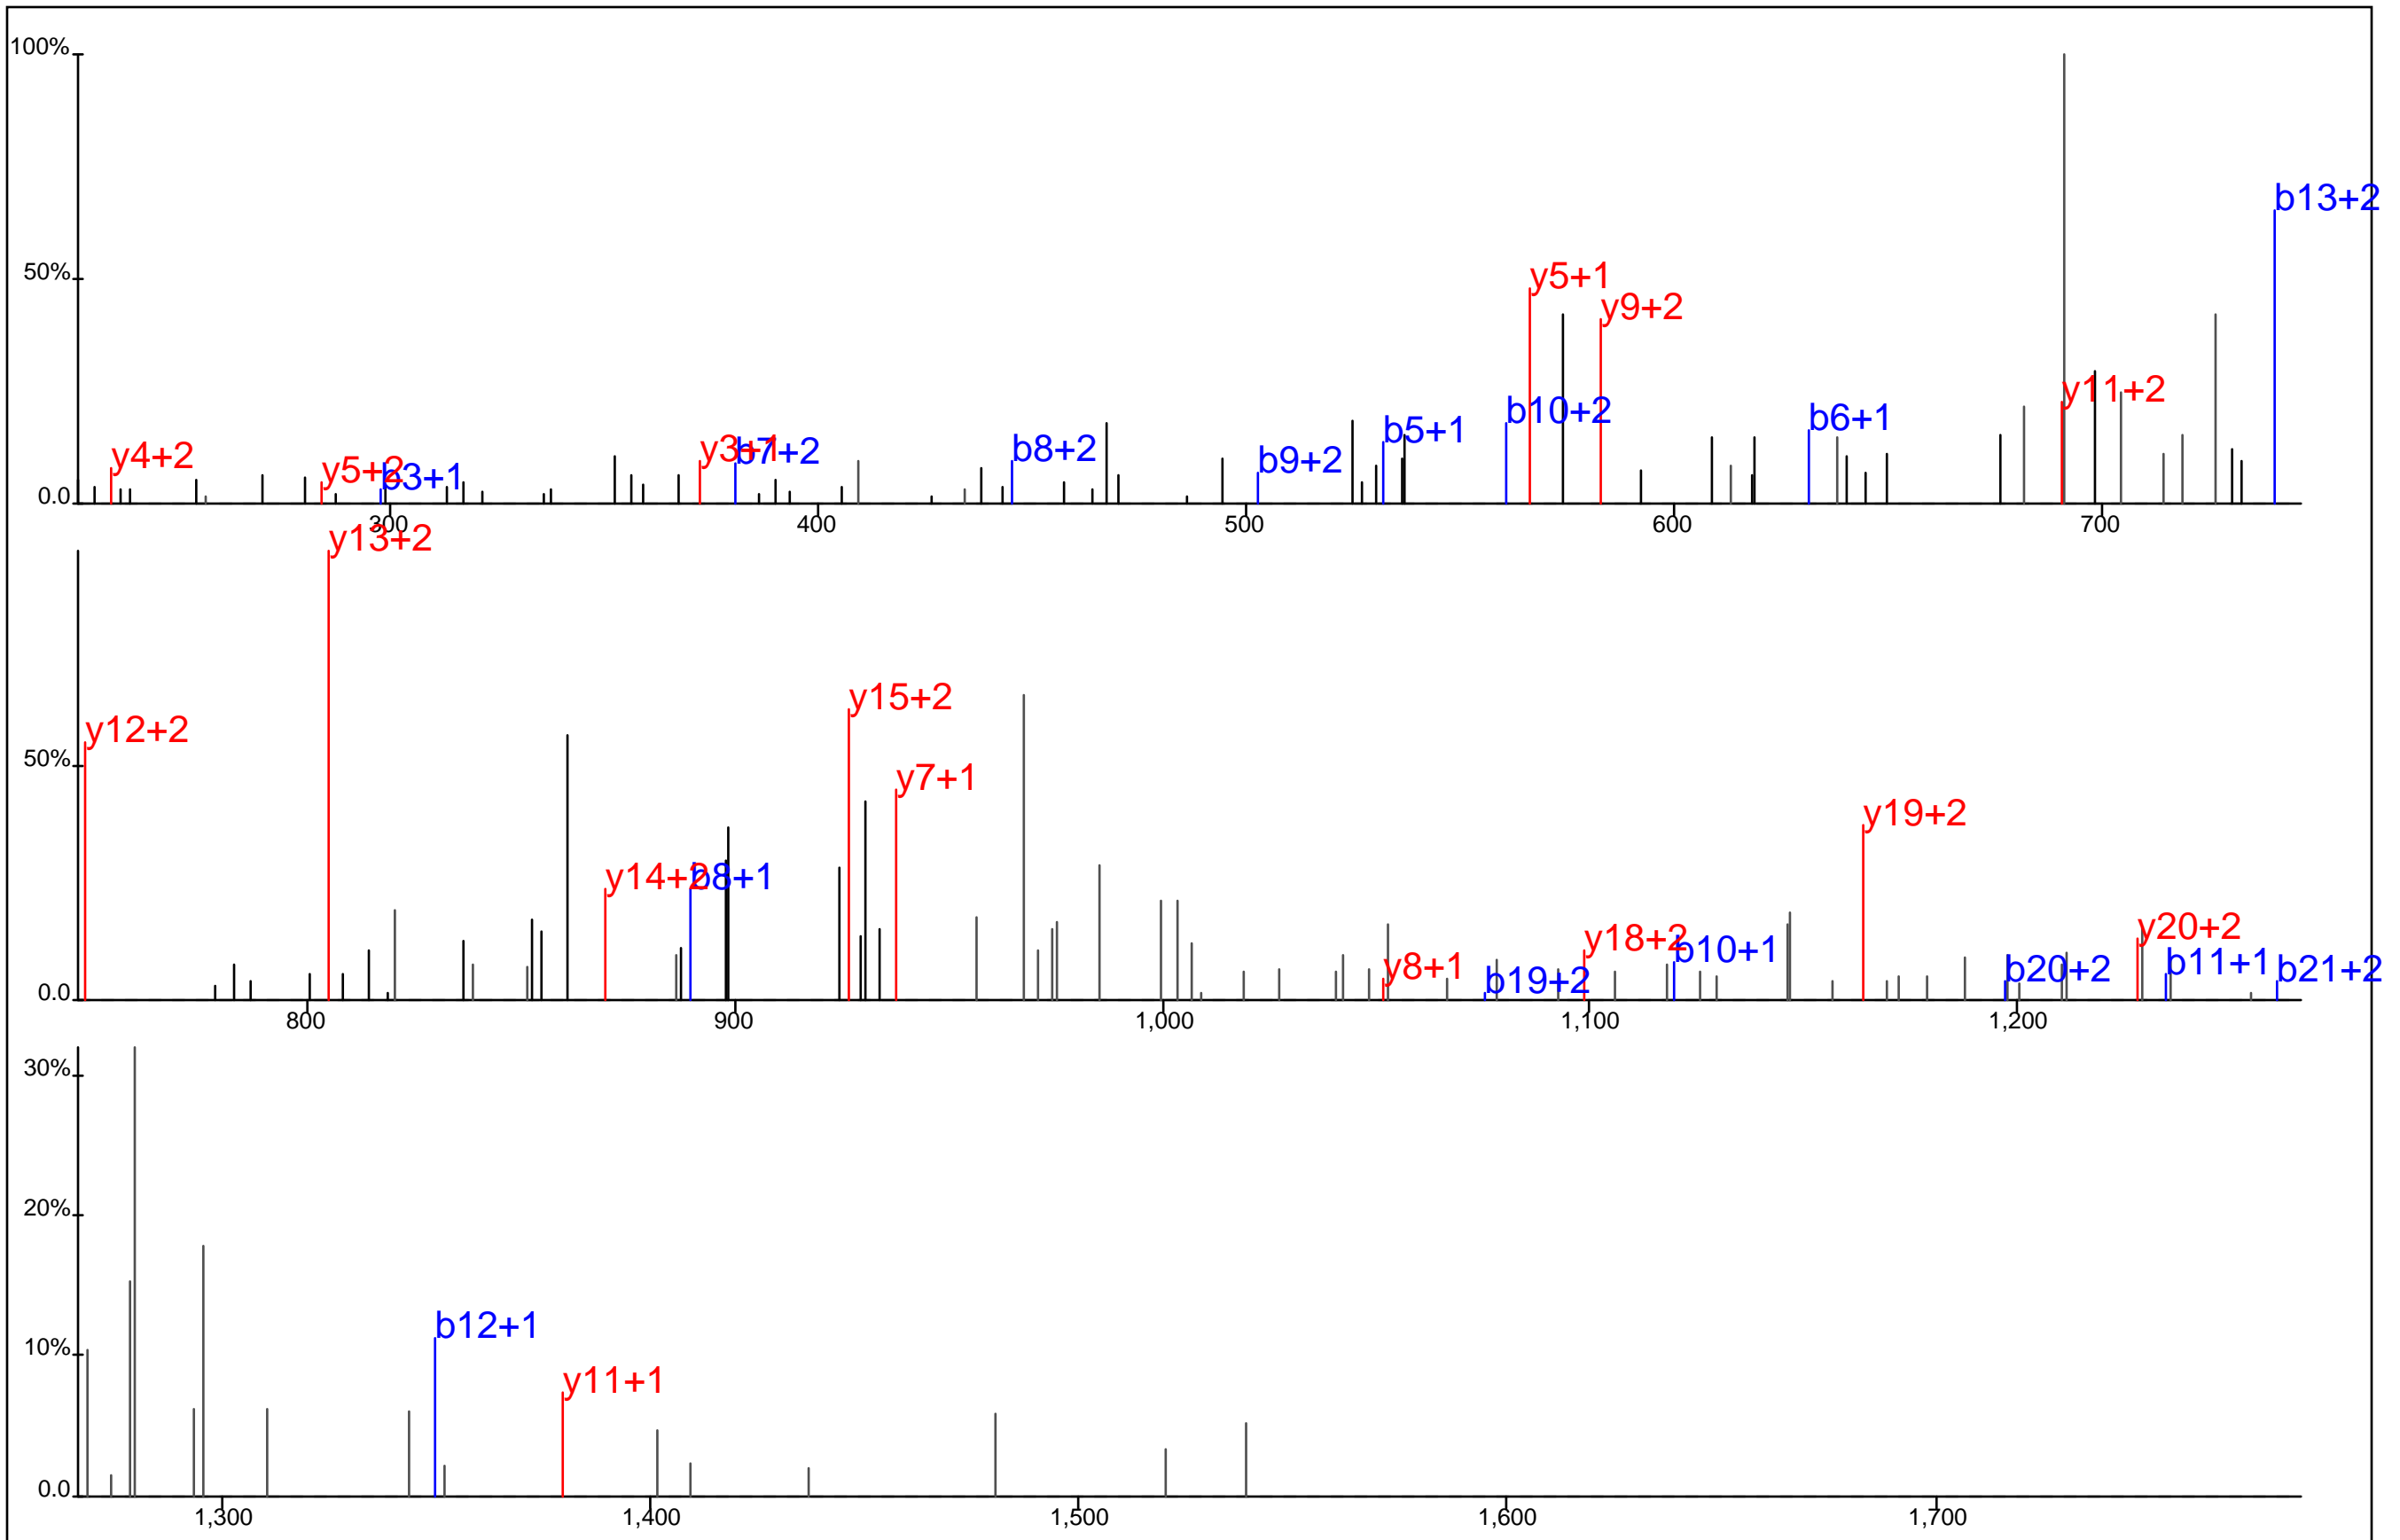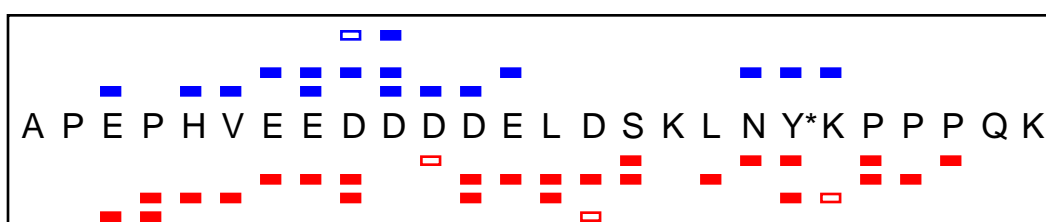

Protein Name: RHO GDP dissociation inhibitor beta  
 gi Accession: 0  
 Precursor Mass: 772.0986+4  
 Delta Mass: 1.656 ppm  
 XCorr: 28.12

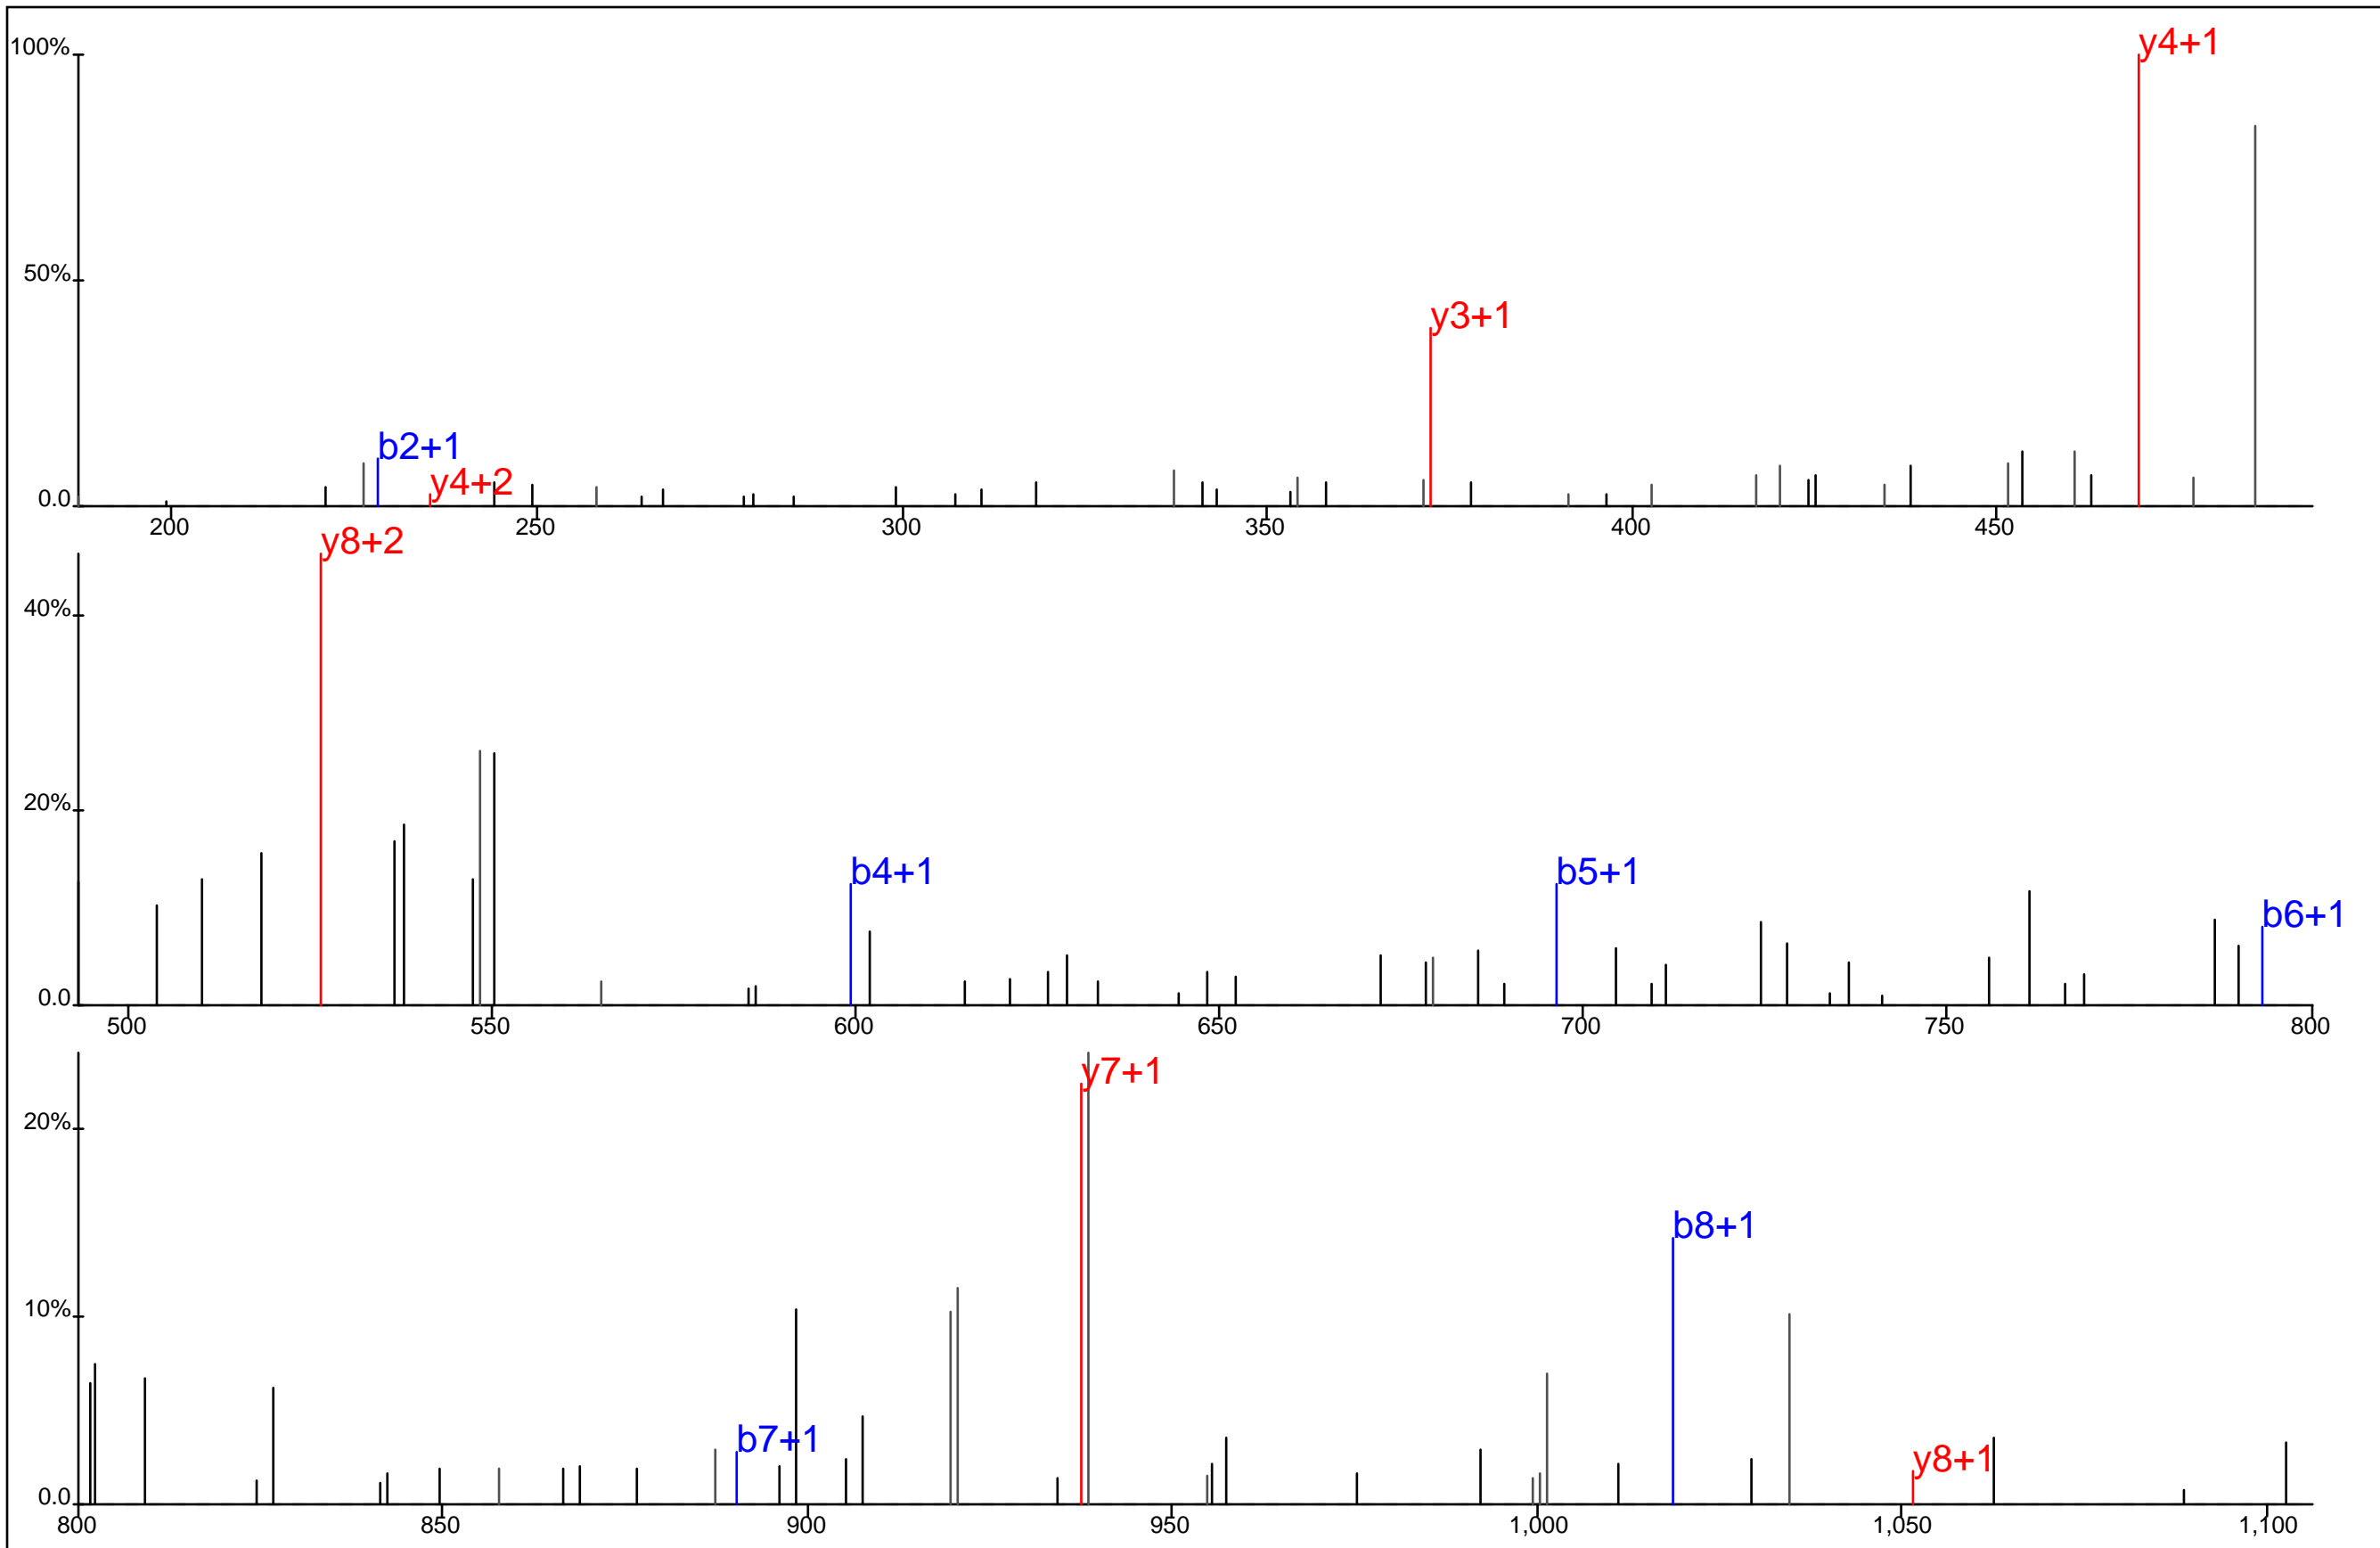


  
 L N Y\* K P P P Q K

Protein Name: RHO GDP dissociation inhibitor beta  
 gi Accession: 0  
 Precursor Mass: 582.7928+2  
 Delta Mass: 2.433 ppm  
 XCorr: 37.73

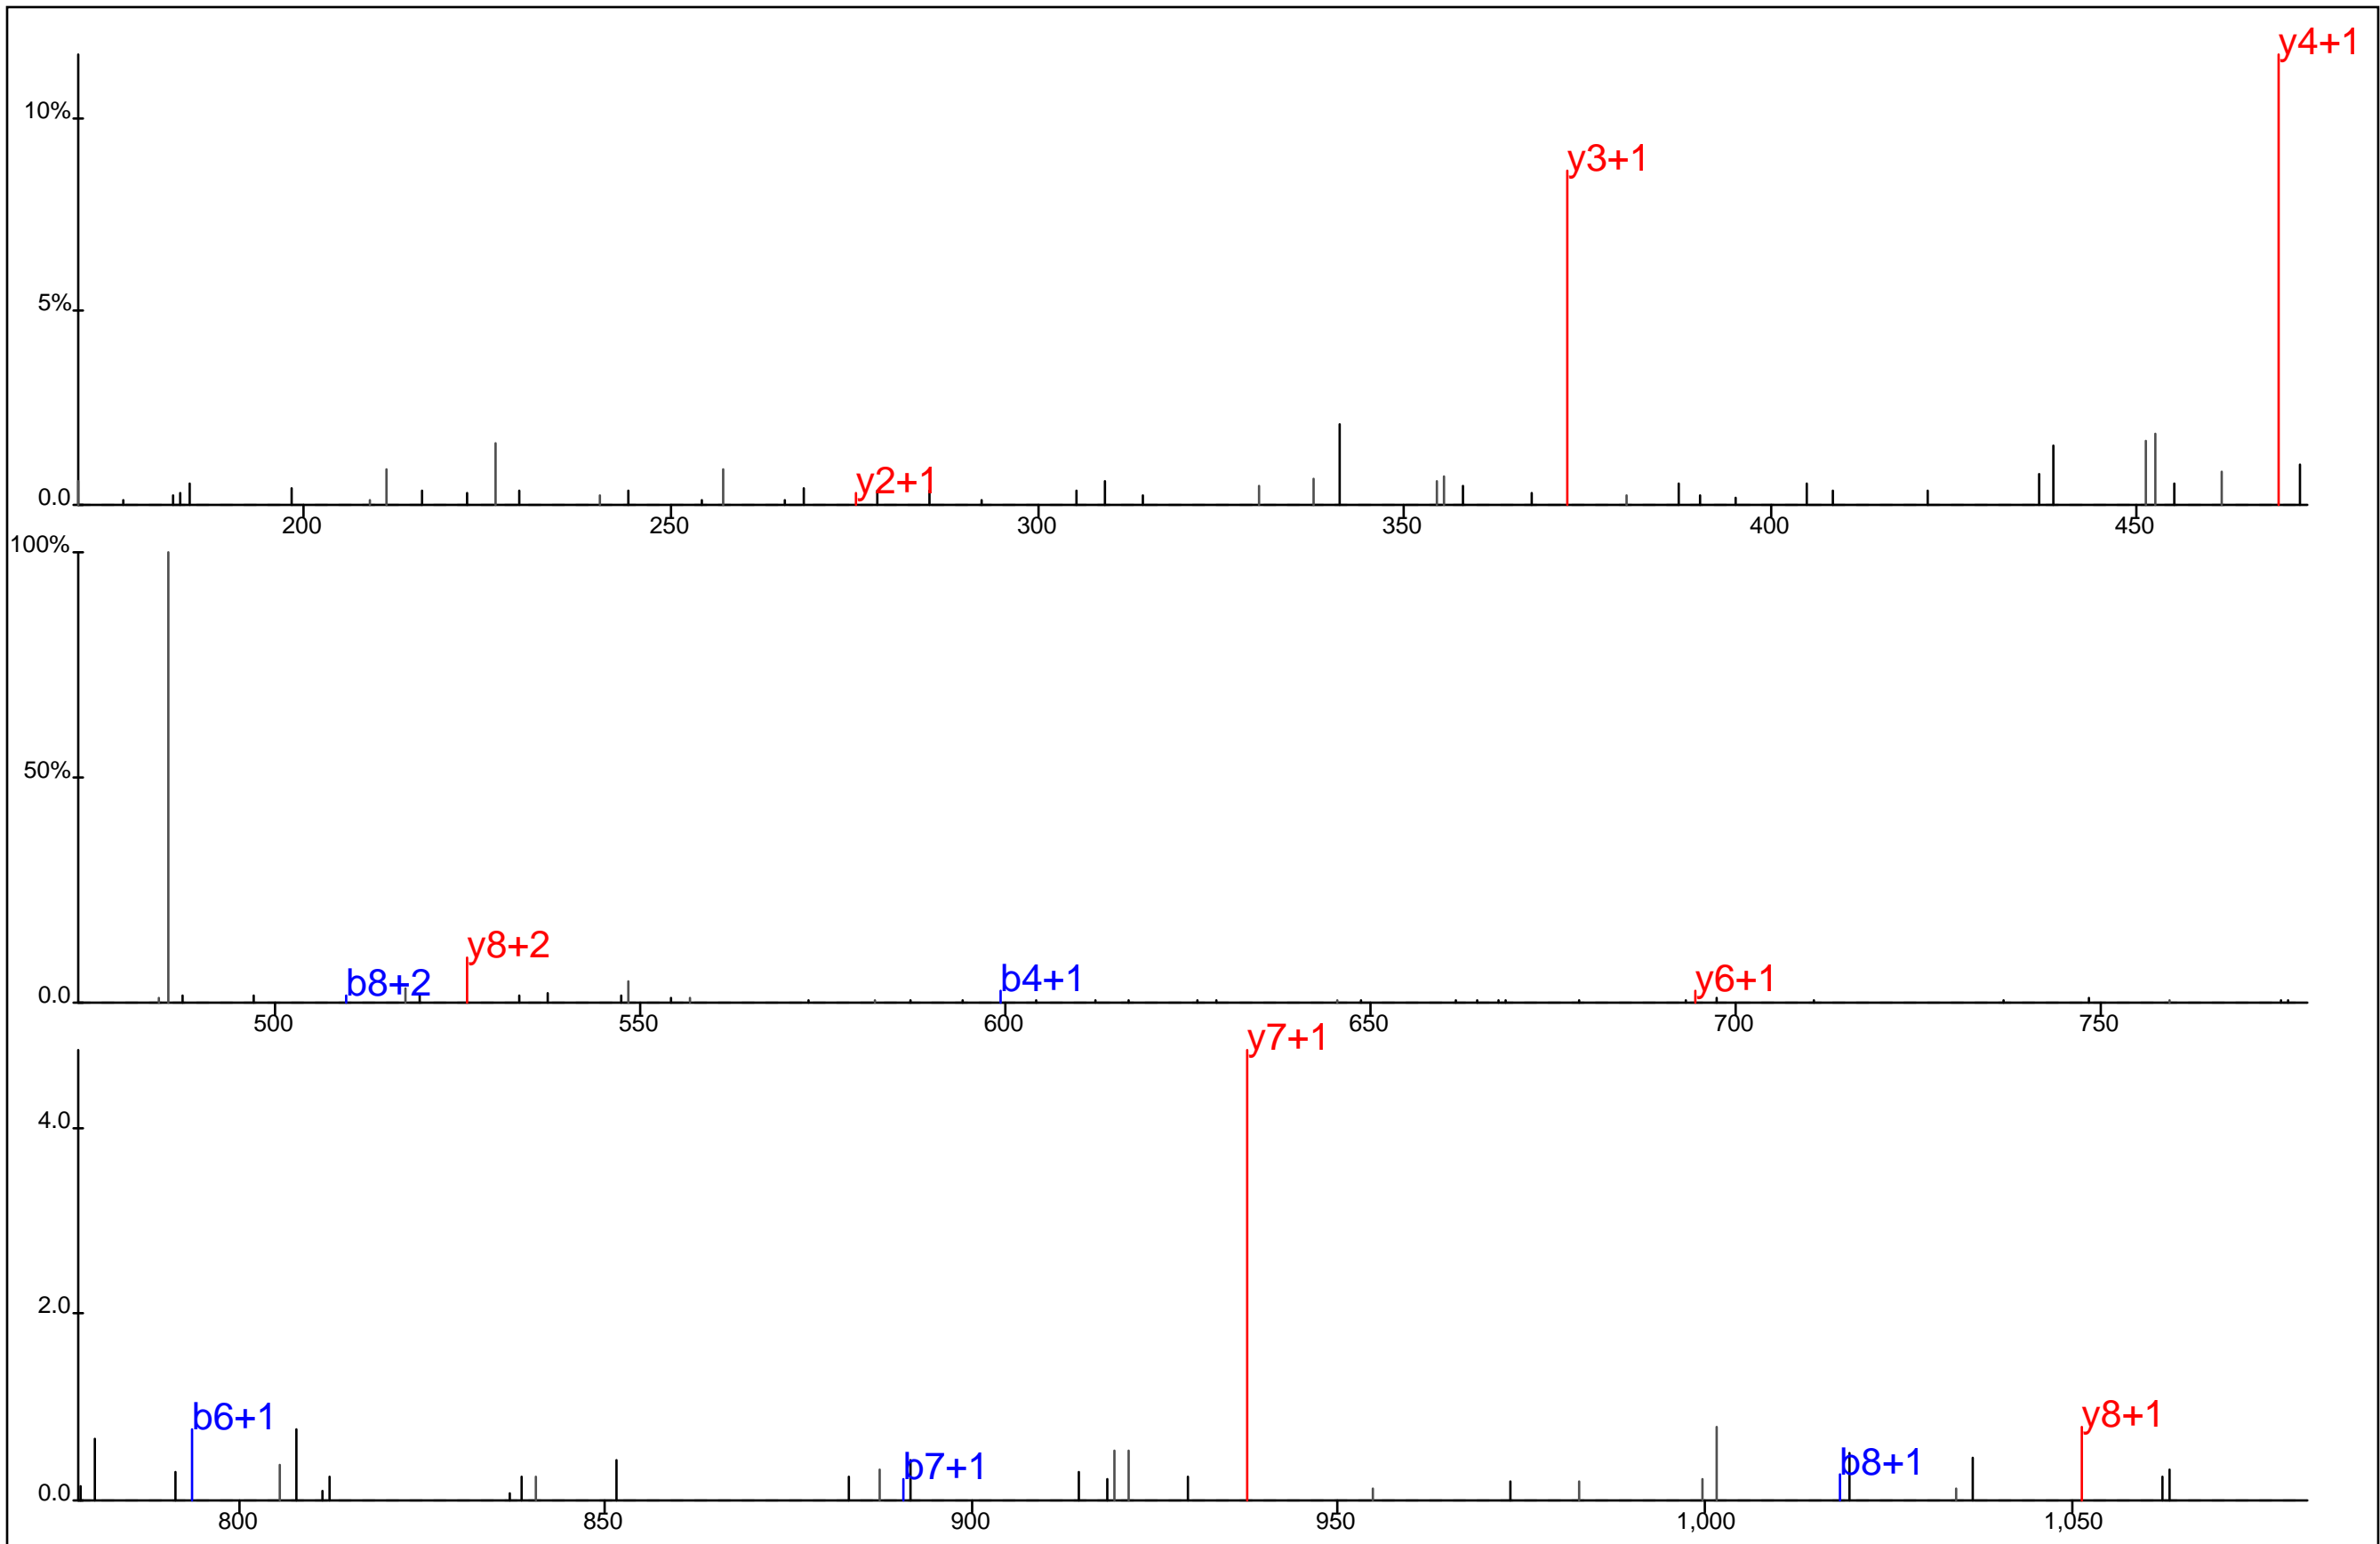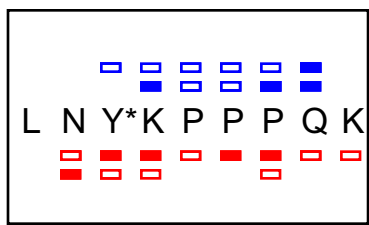

Protein Name: RHO GDP dissociation inhibitor beta  
 gi Accession: 0  
 Precursor Mass: 582.7946+2  
 Delta Mass: 0.606 ppm  
 XCorr: 26.68

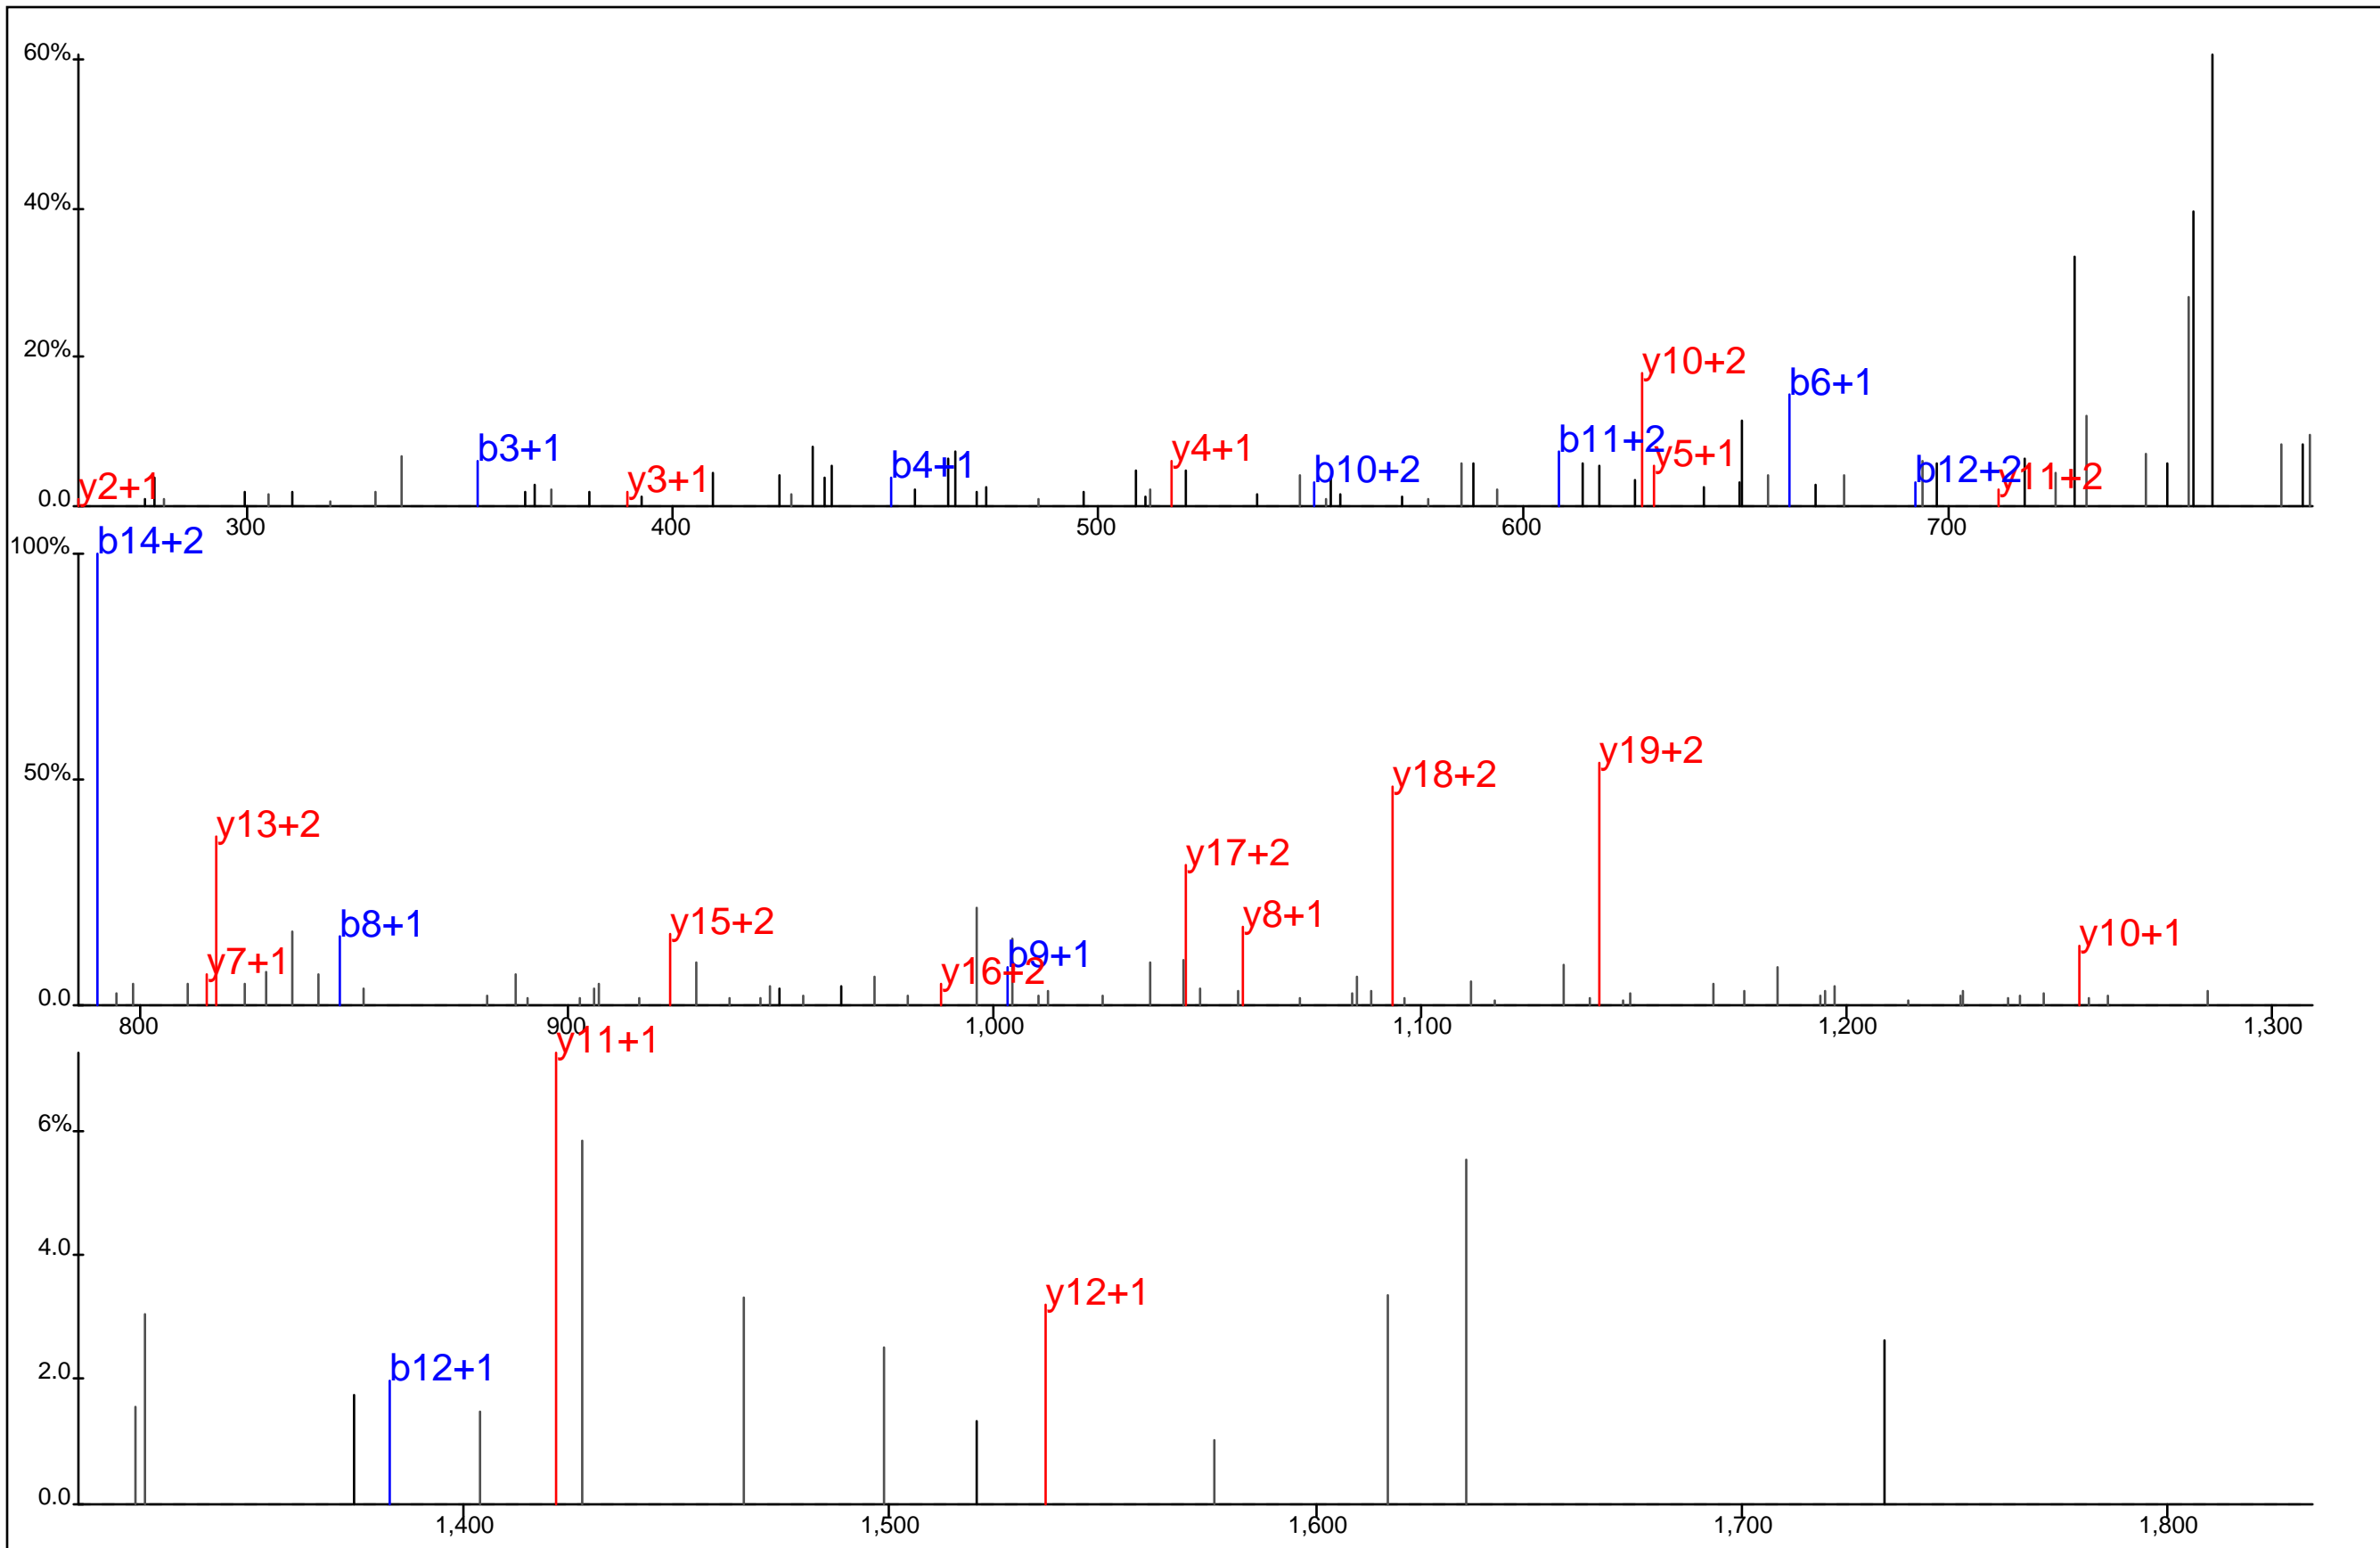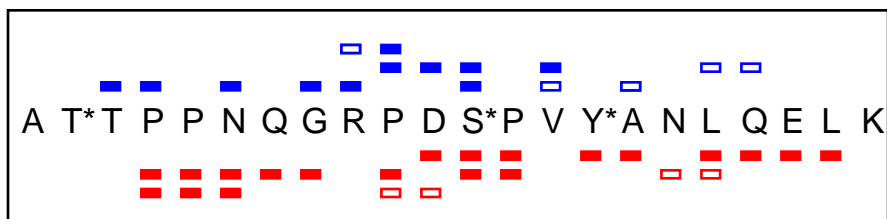

Protein Name: Rho GTPase activating protein 12  
 gi Accession: 0  
 Precursor Mass: 879.3801+3  
 Delta Mass: 2.365 ppm  
 XCorr: 32.06

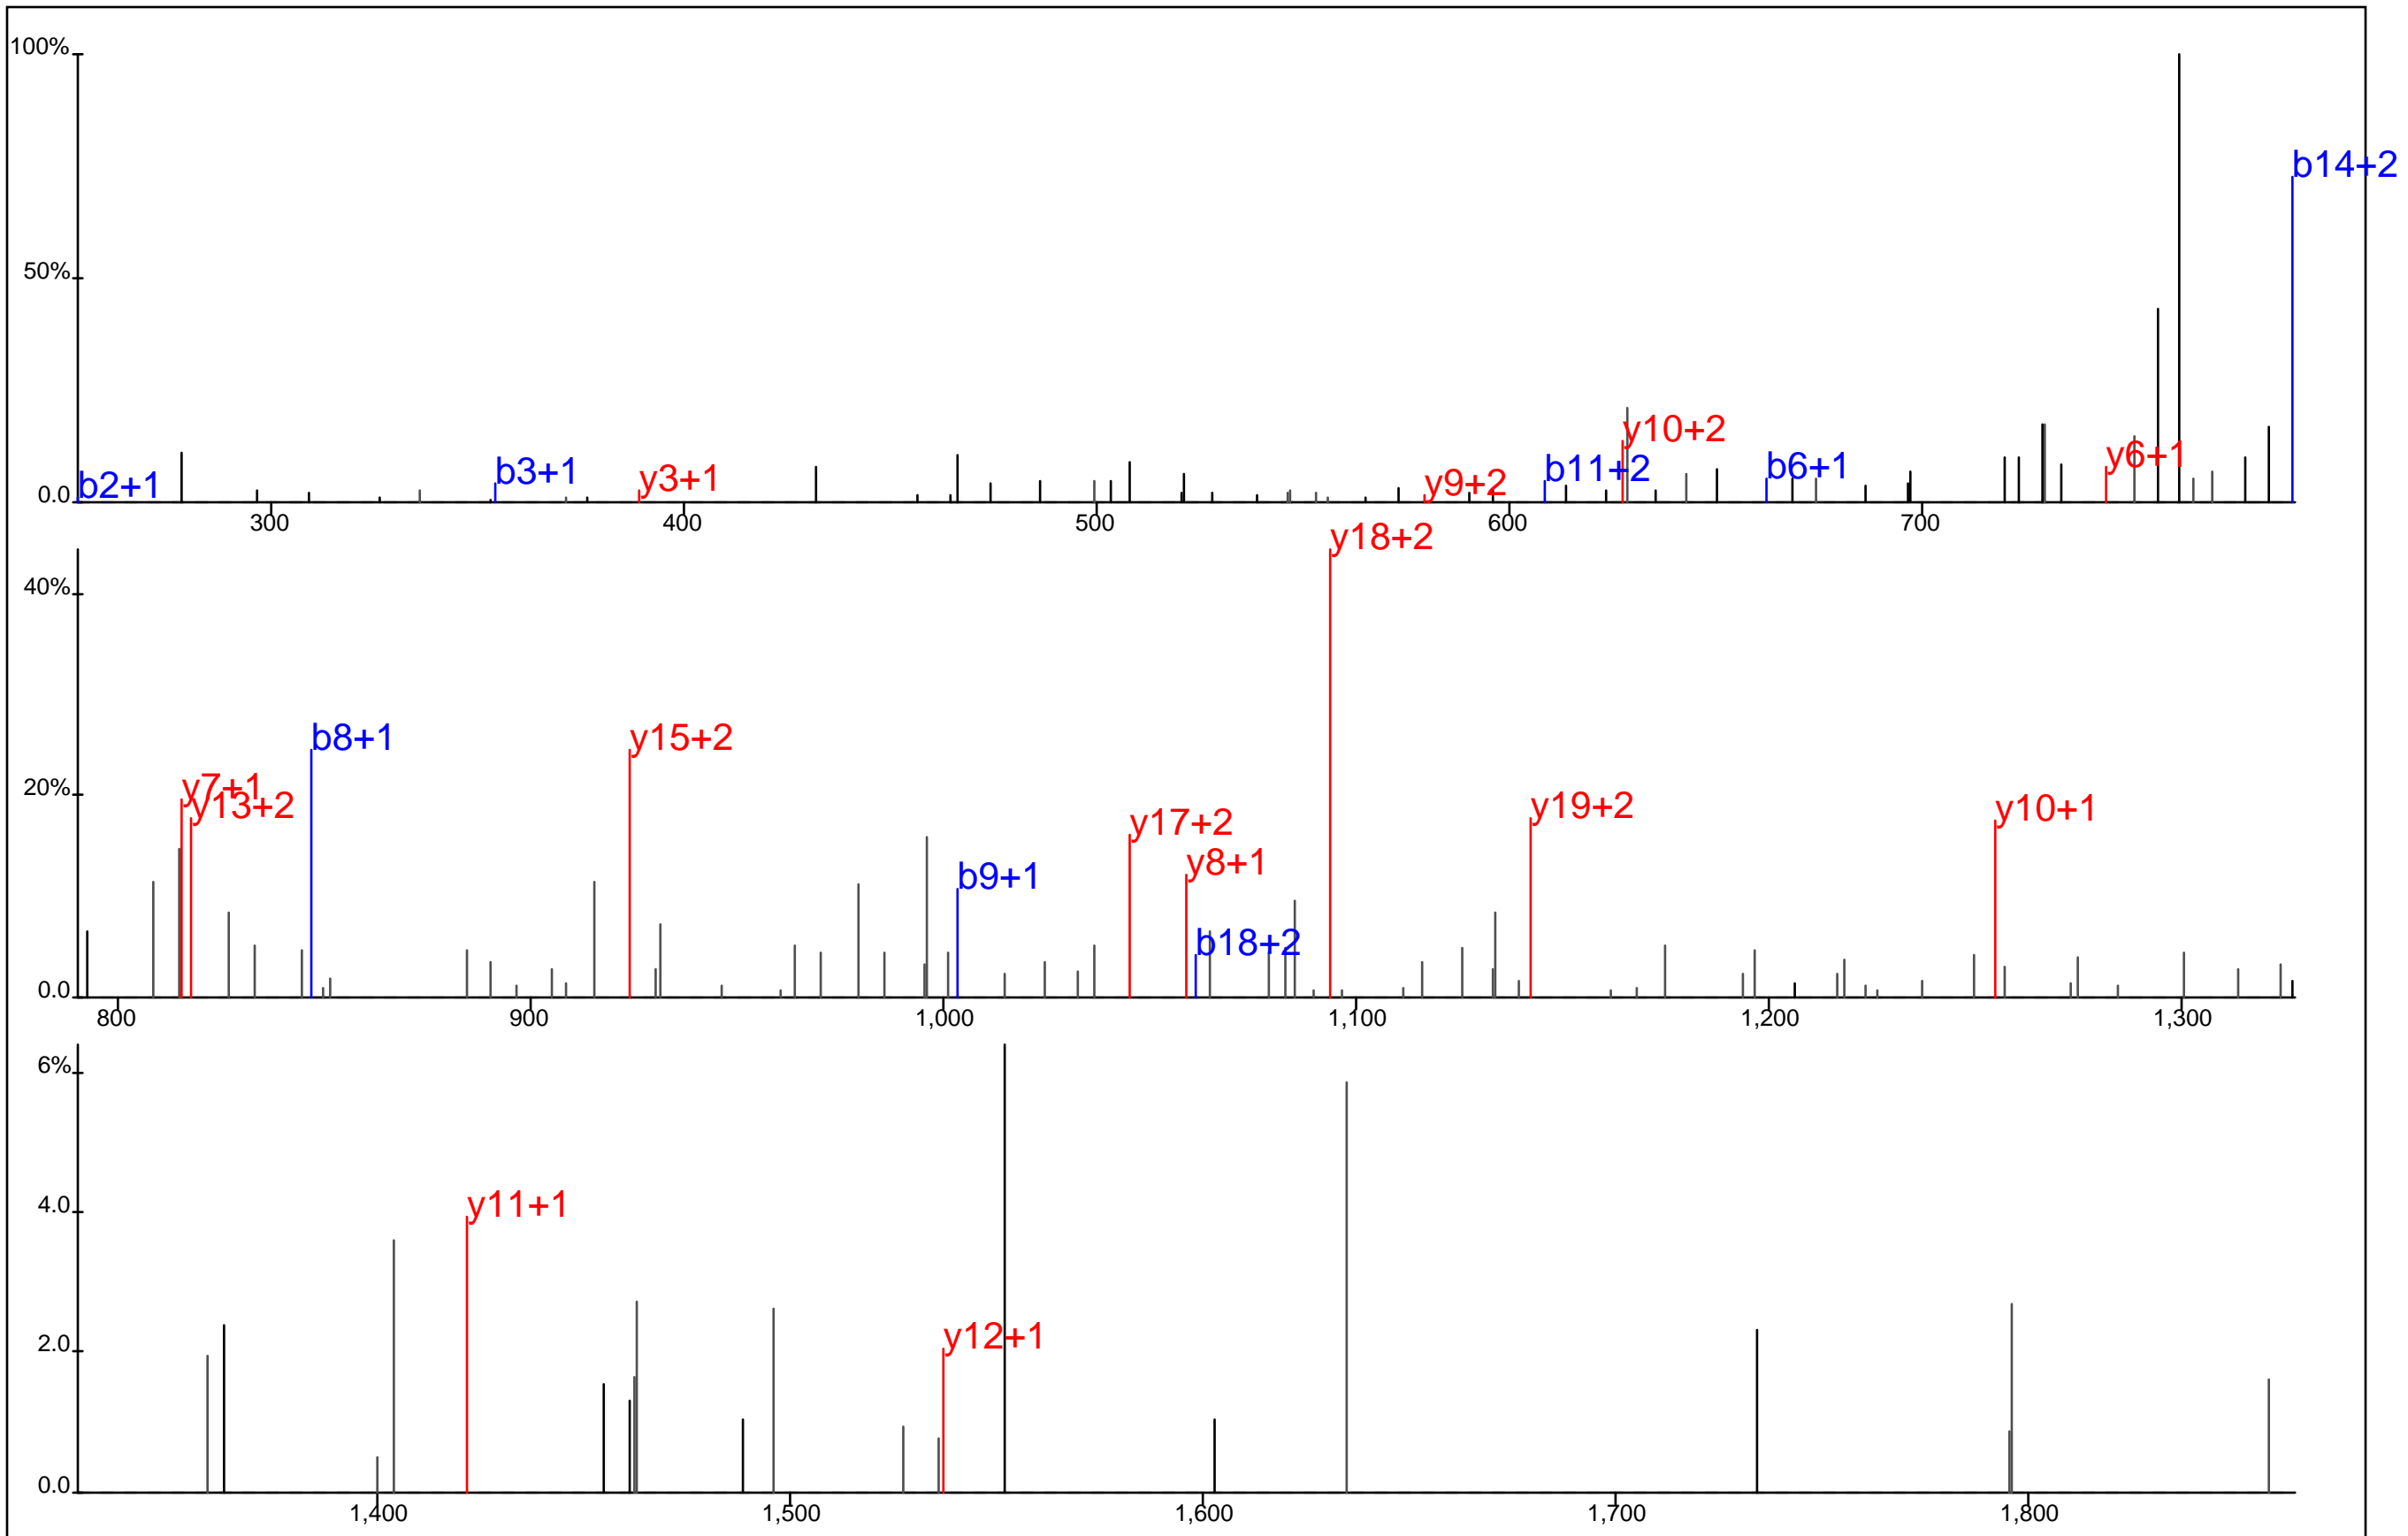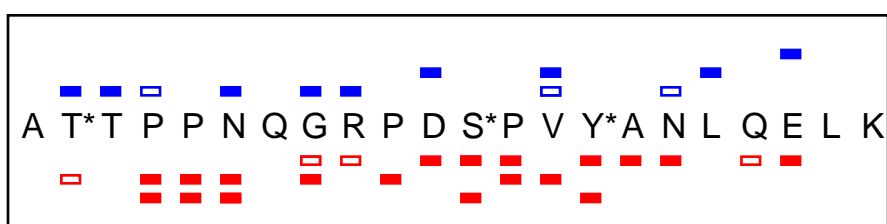

Protein Name: Rho GTPase activating protein 12  
 gi Accession: 0  
 Precursor Mass: 879.3807+3  
 Delta Mass: 3.059 ppm  
 XCorr: 24.57

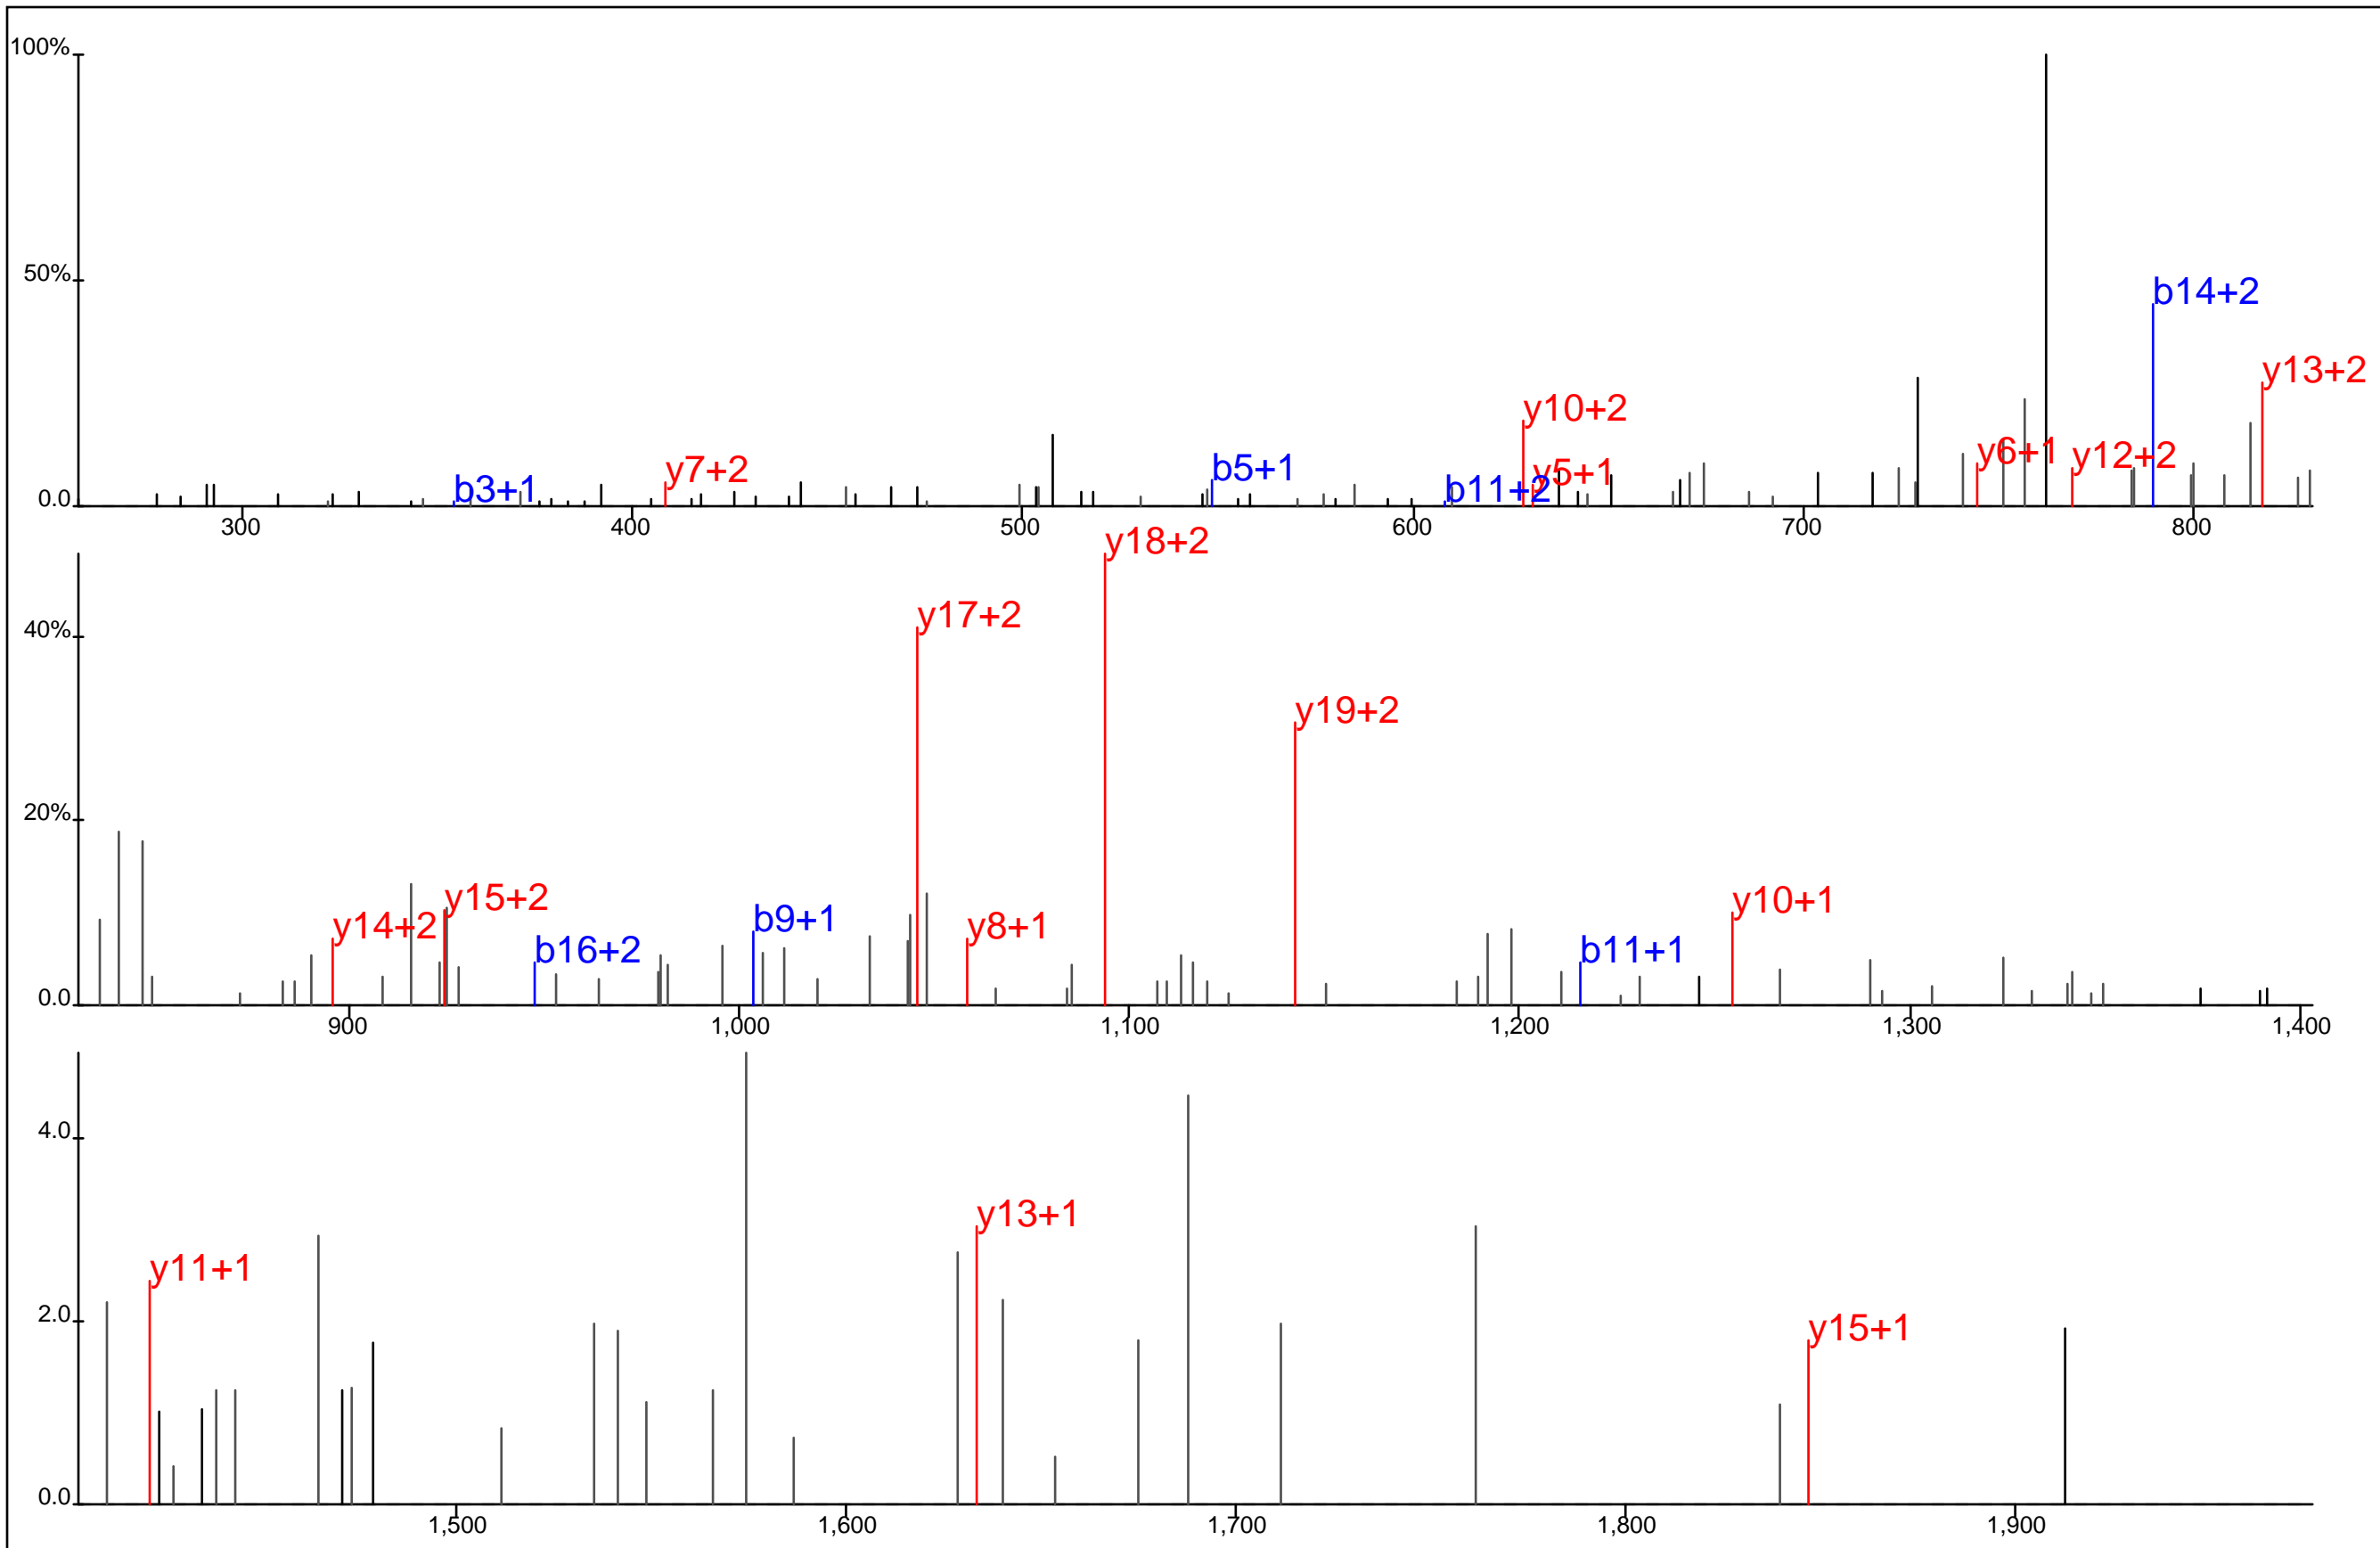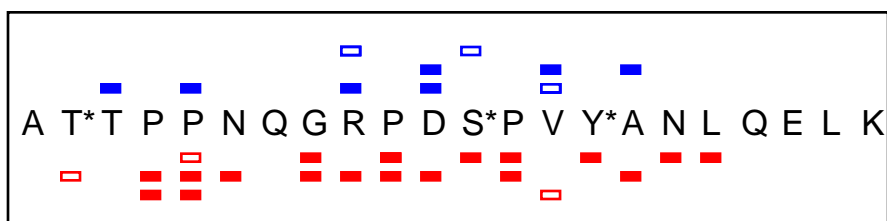

Protein Name: Rho GTPase activating protein 12  
 gi Accession: 0  
 Precursor Mass: 879.3795+3  
 Delta Mass: 1.740 ppm  
 XCorr: 21.21

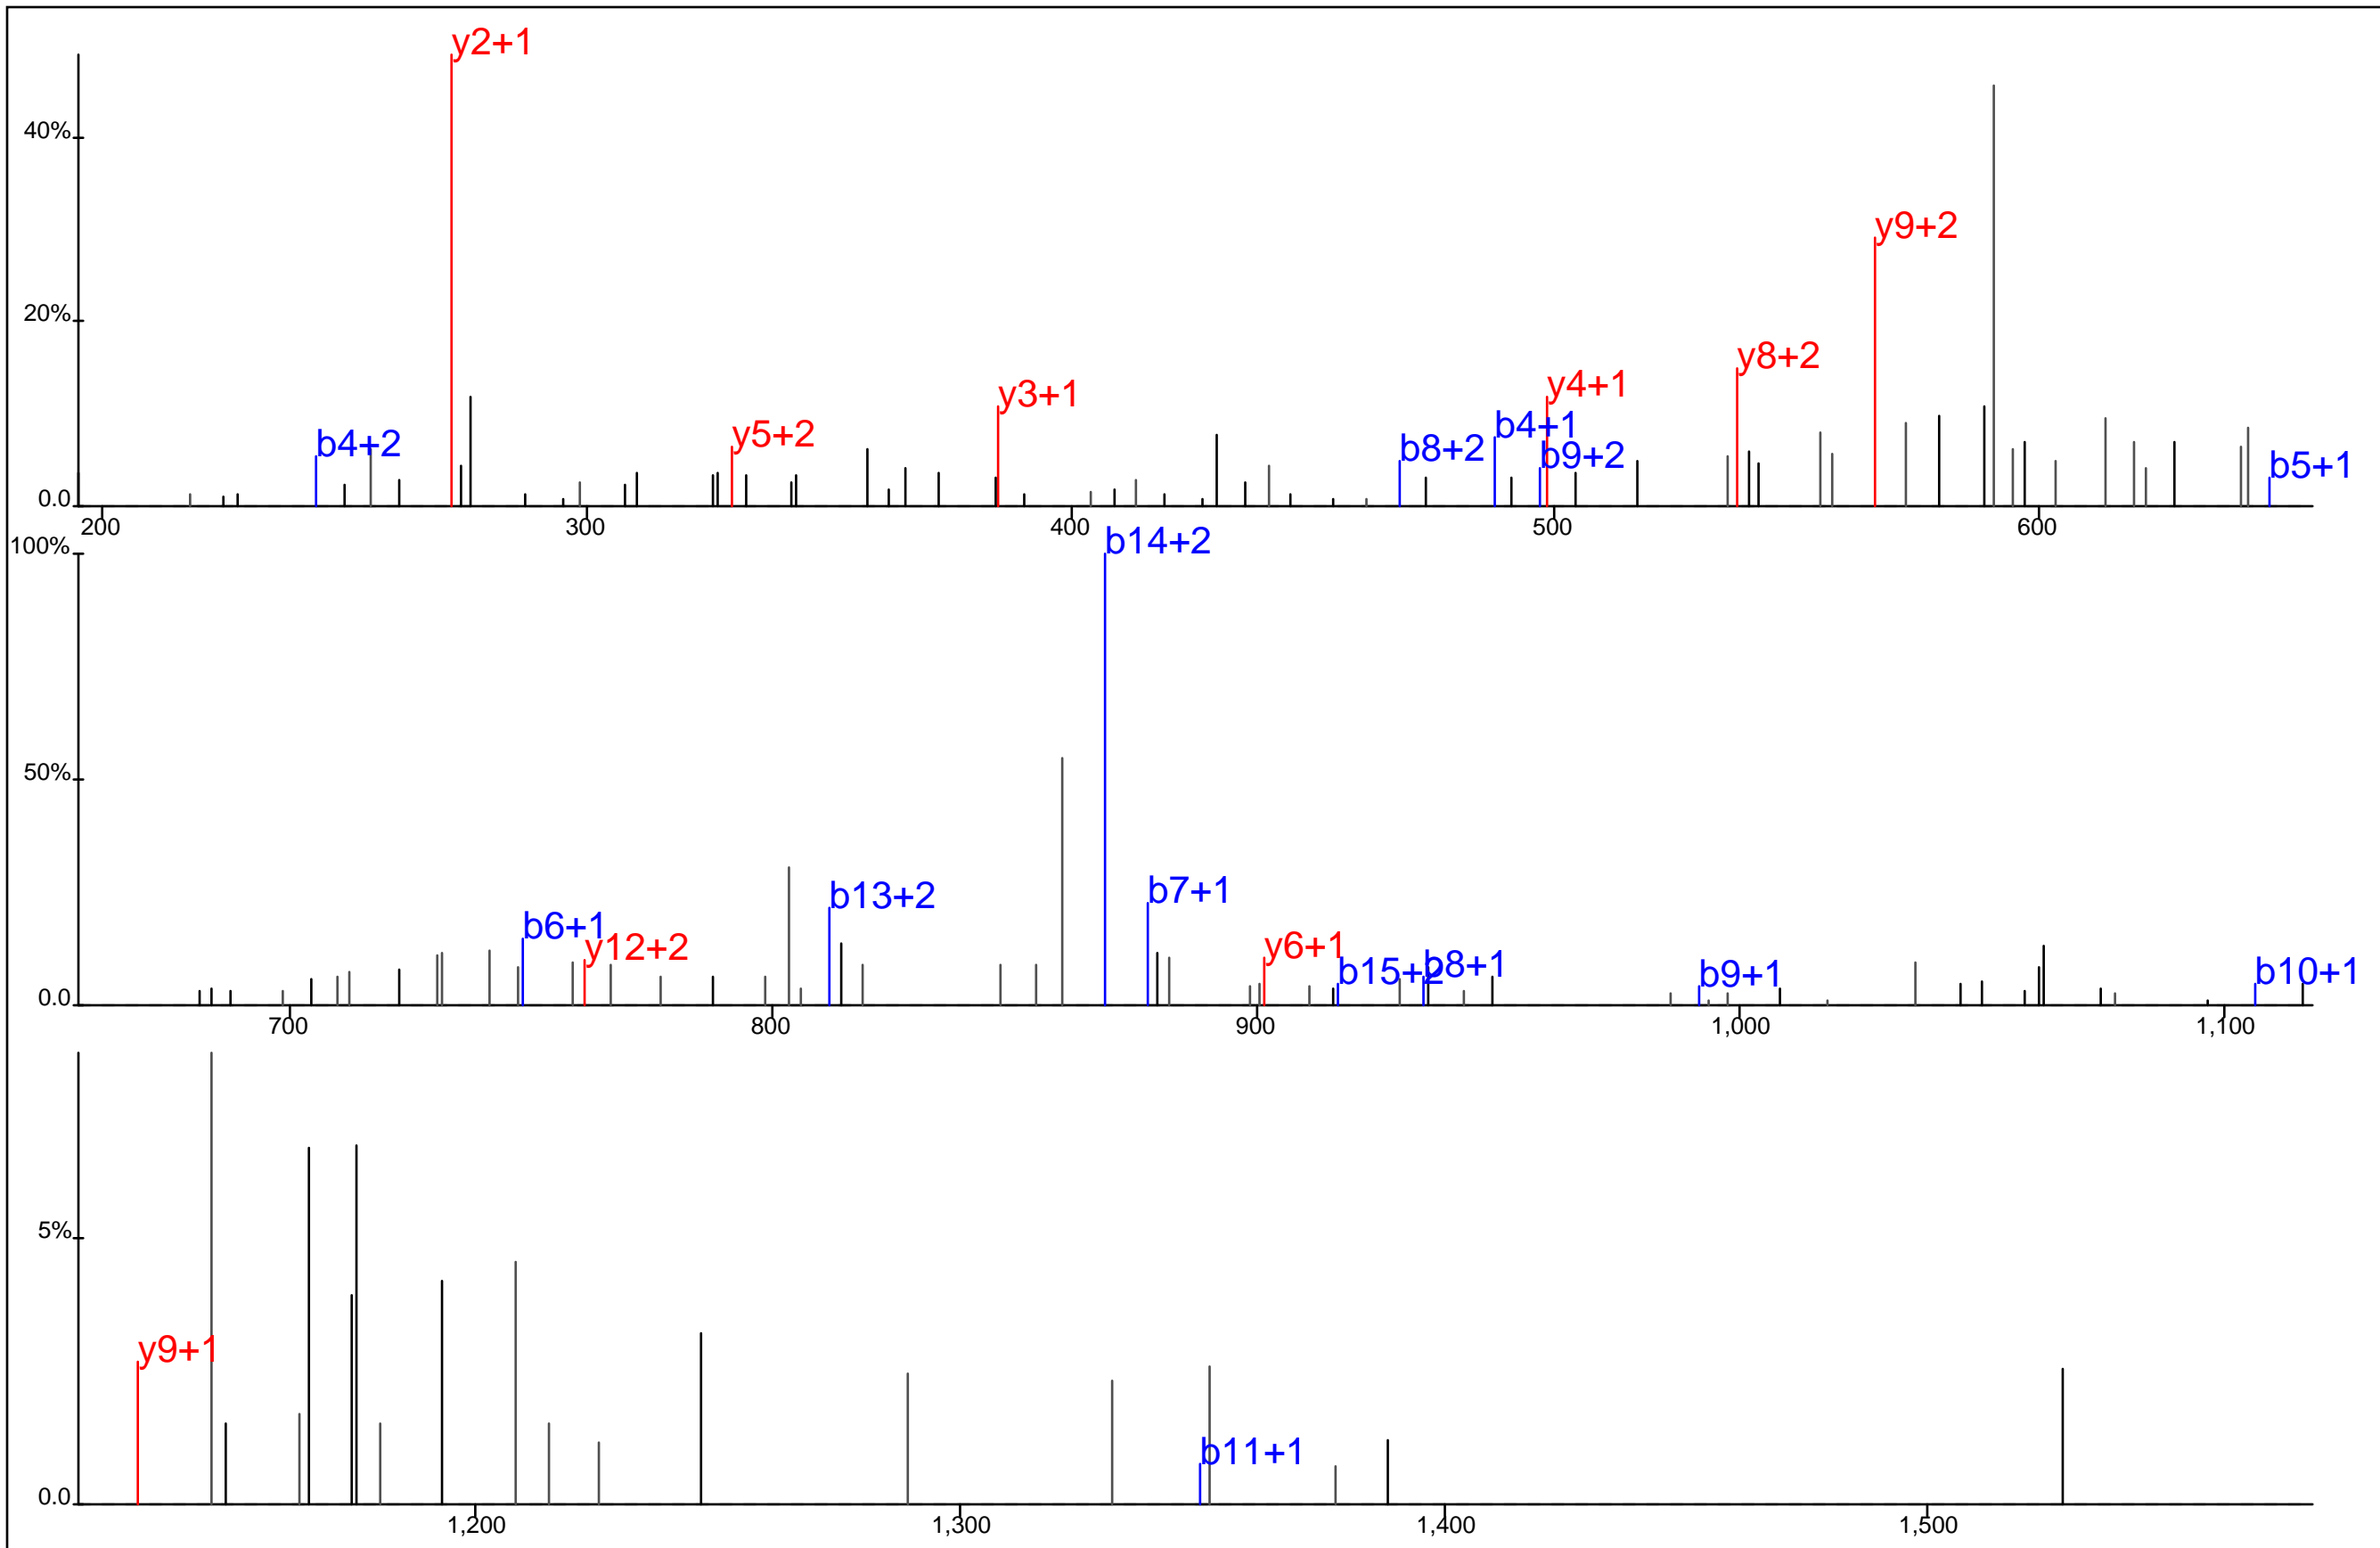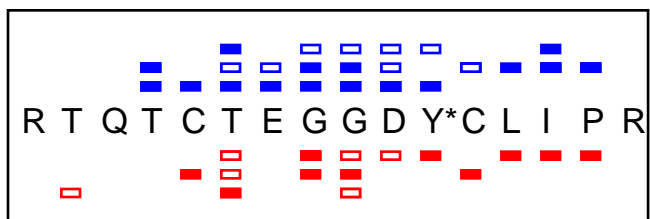

Protein Name: Rho GTPase activating protein 30  
 gi Accession: 0  
 Precursor Mass: 669.6200+3  
 Delta Mass: 0.279 ppm  
 XCorr: 20.55

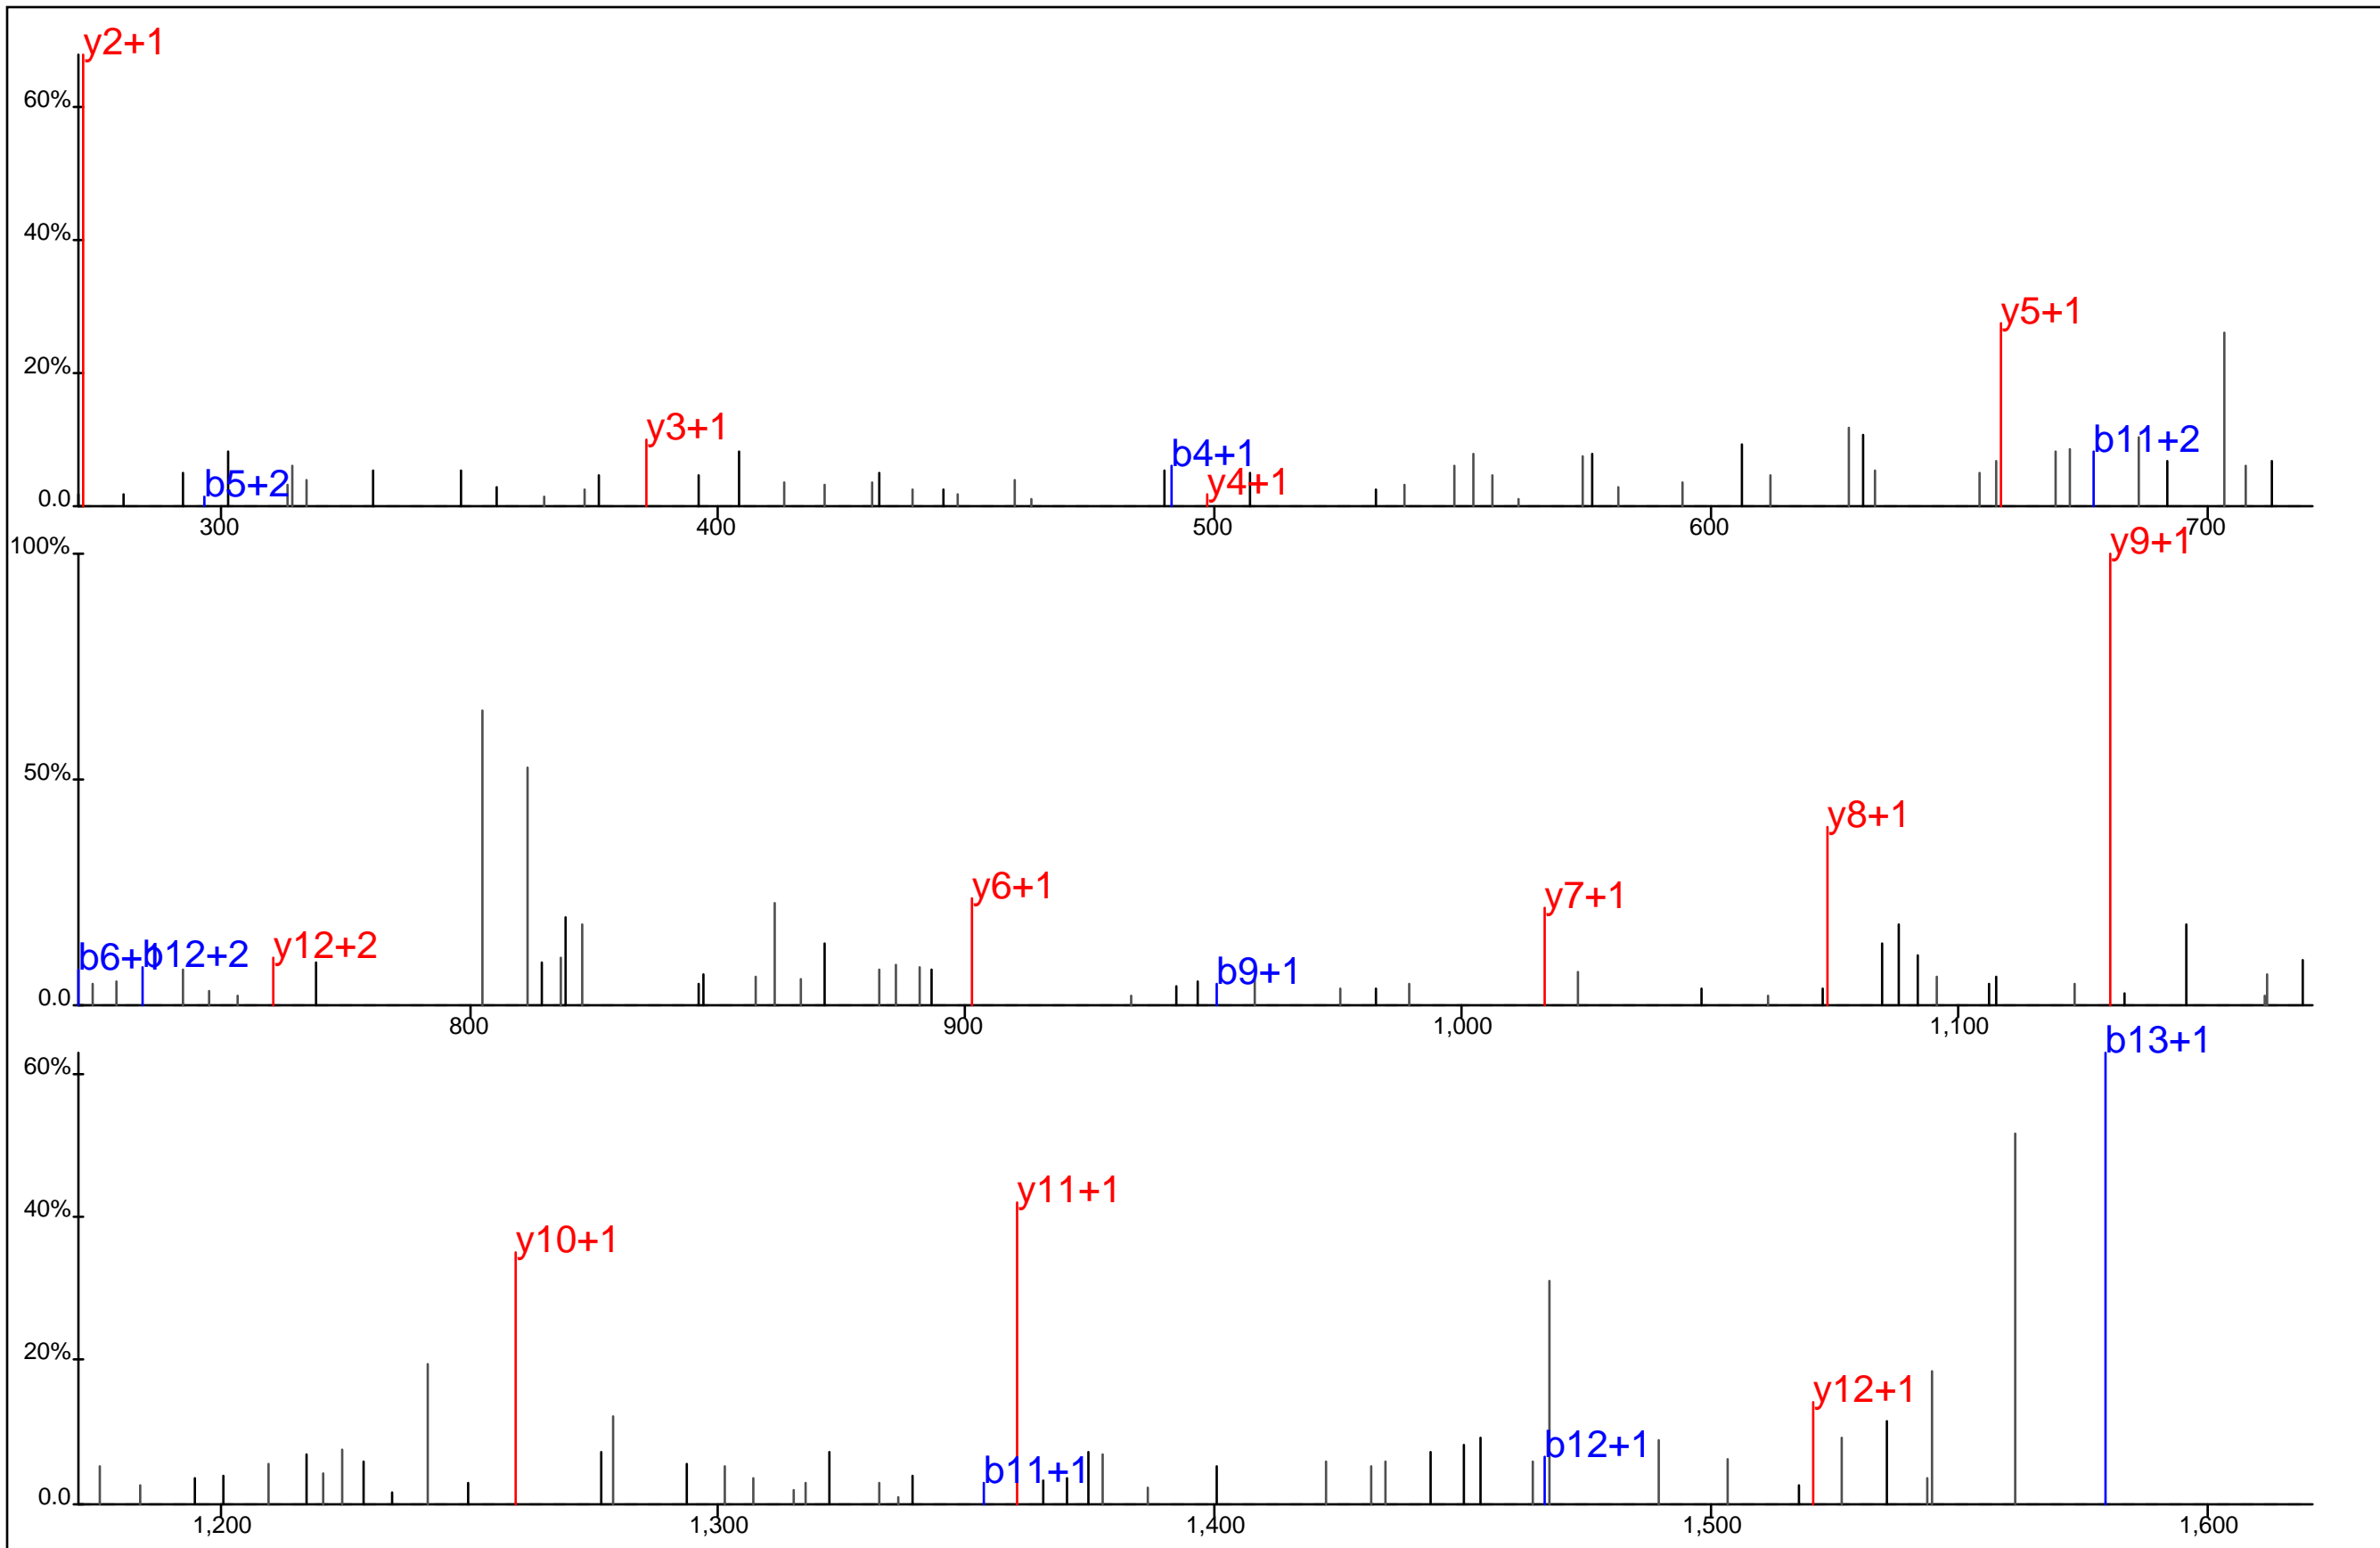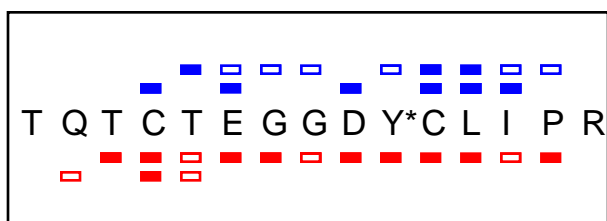

Protein Name: Rho GTPase activating protein 30  
 gi Accession: 0  
 Precursor Mass: 925.8747+2  
 Delta Mass: 1.496 ppm  
 XCorr: 62.55



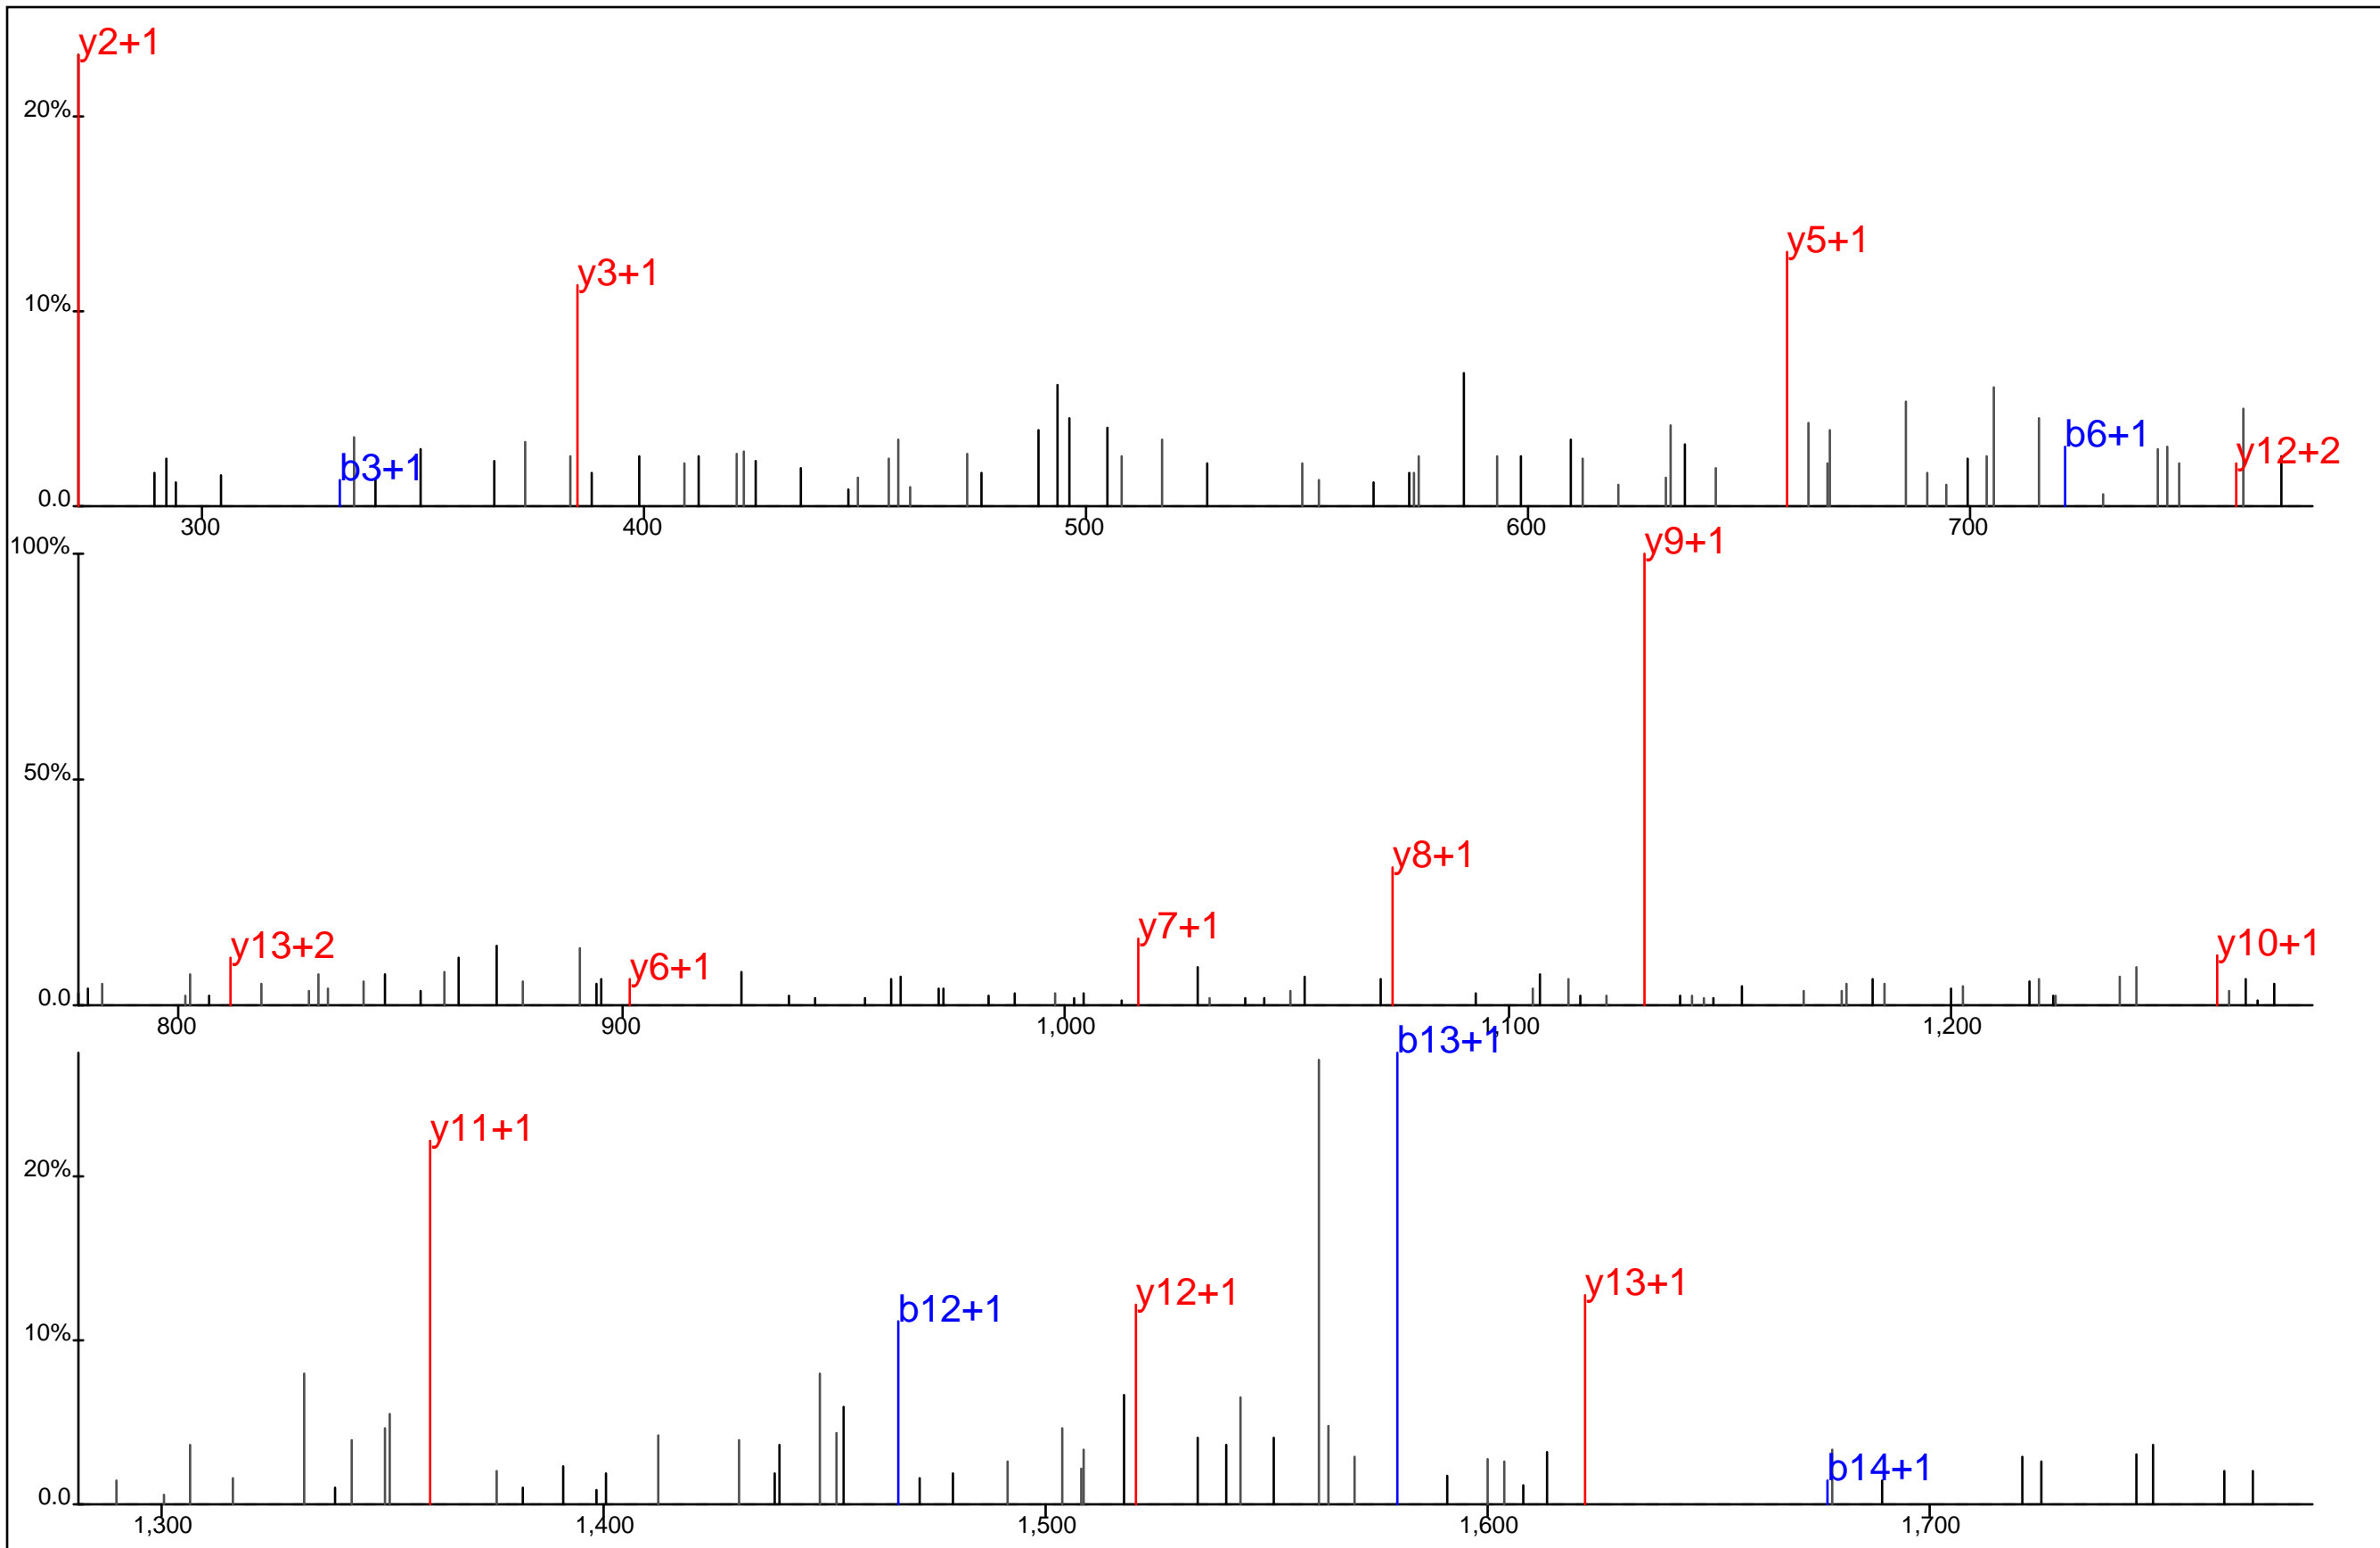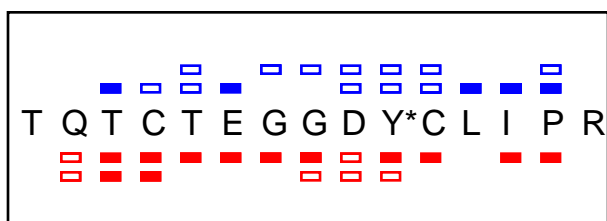

Protein Name: Rho GTPase activating protein 30  
 gi Accession: 0  
 Precursor Mass: 925.8760+2  
 Delta Mass: 0.044 ppm  
 XCorr: 56.5

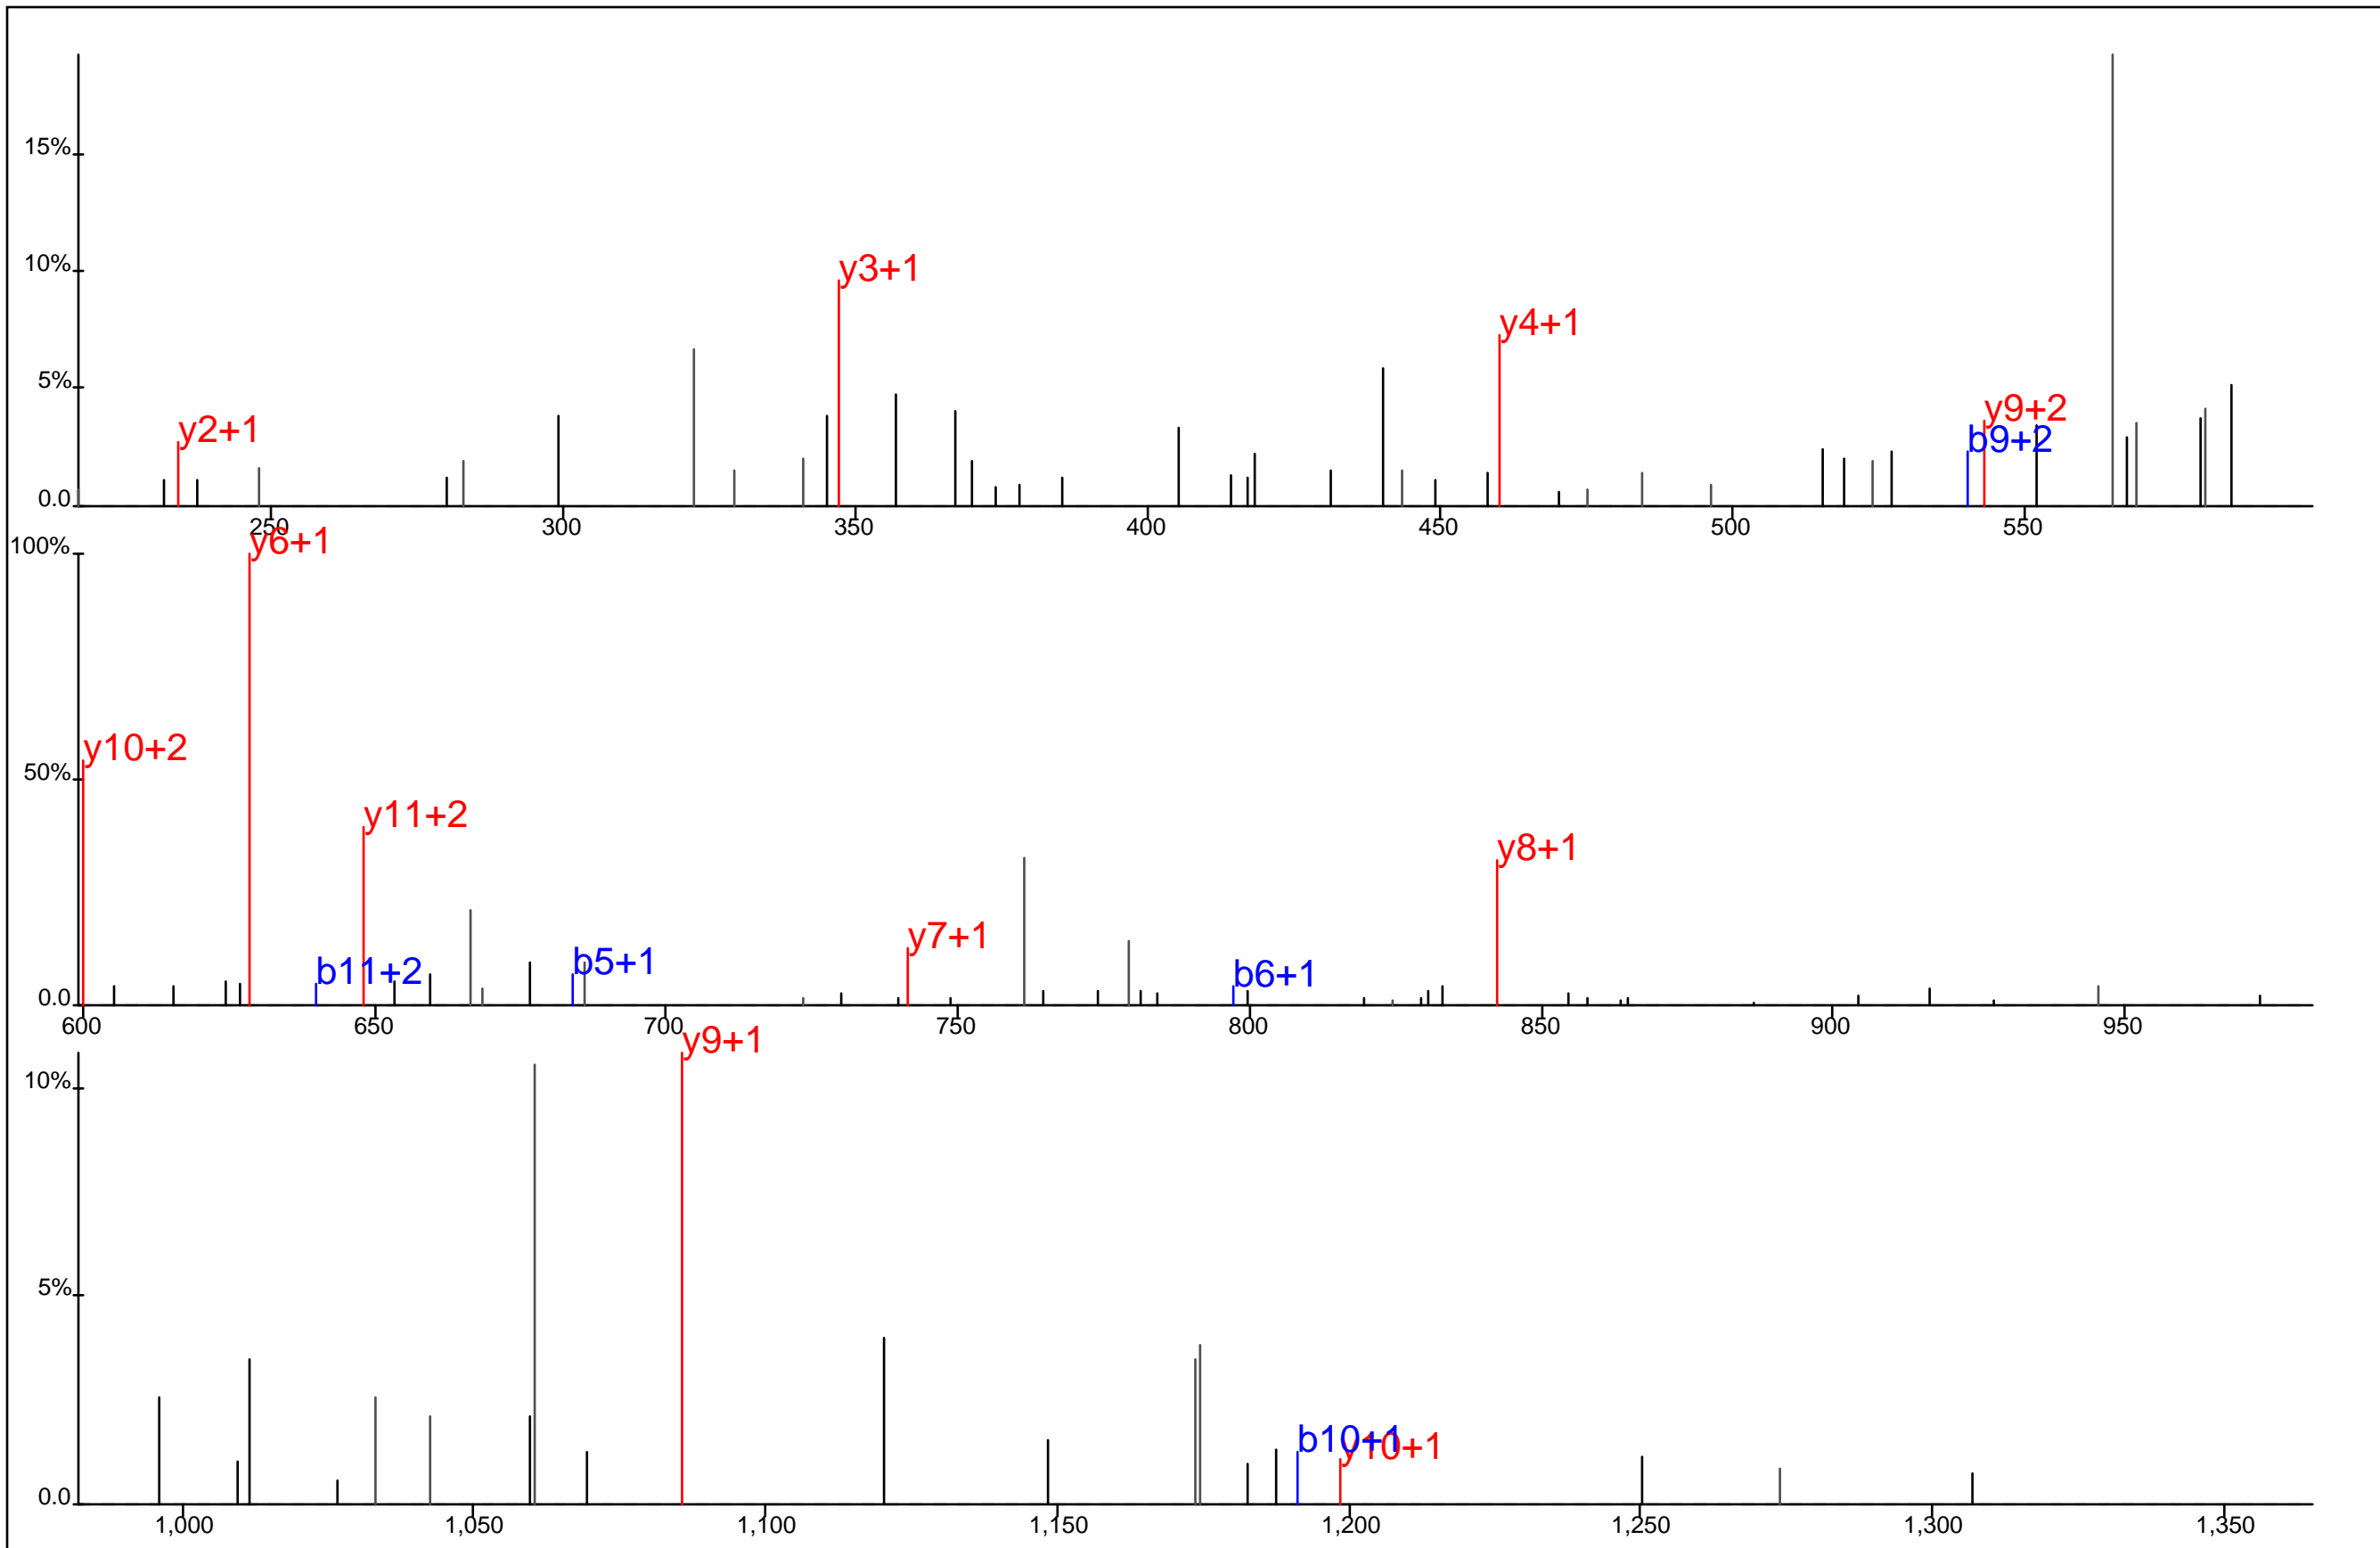

▢ ▢ ▢ ▢ ▢ ▢ ▢  
 E P I Y\* T L P A I I S K  
▢ ▢ ▢ ▢ ▢ ▢ ▢ ▢ ▢

Protein Name: Rho GTPase-activating protein 42  
 gi Accession: 0  
 Precursor Mass: 712.8749+2  
 Delta Mass: 0.716 ppm  
 XCorr: 25.33

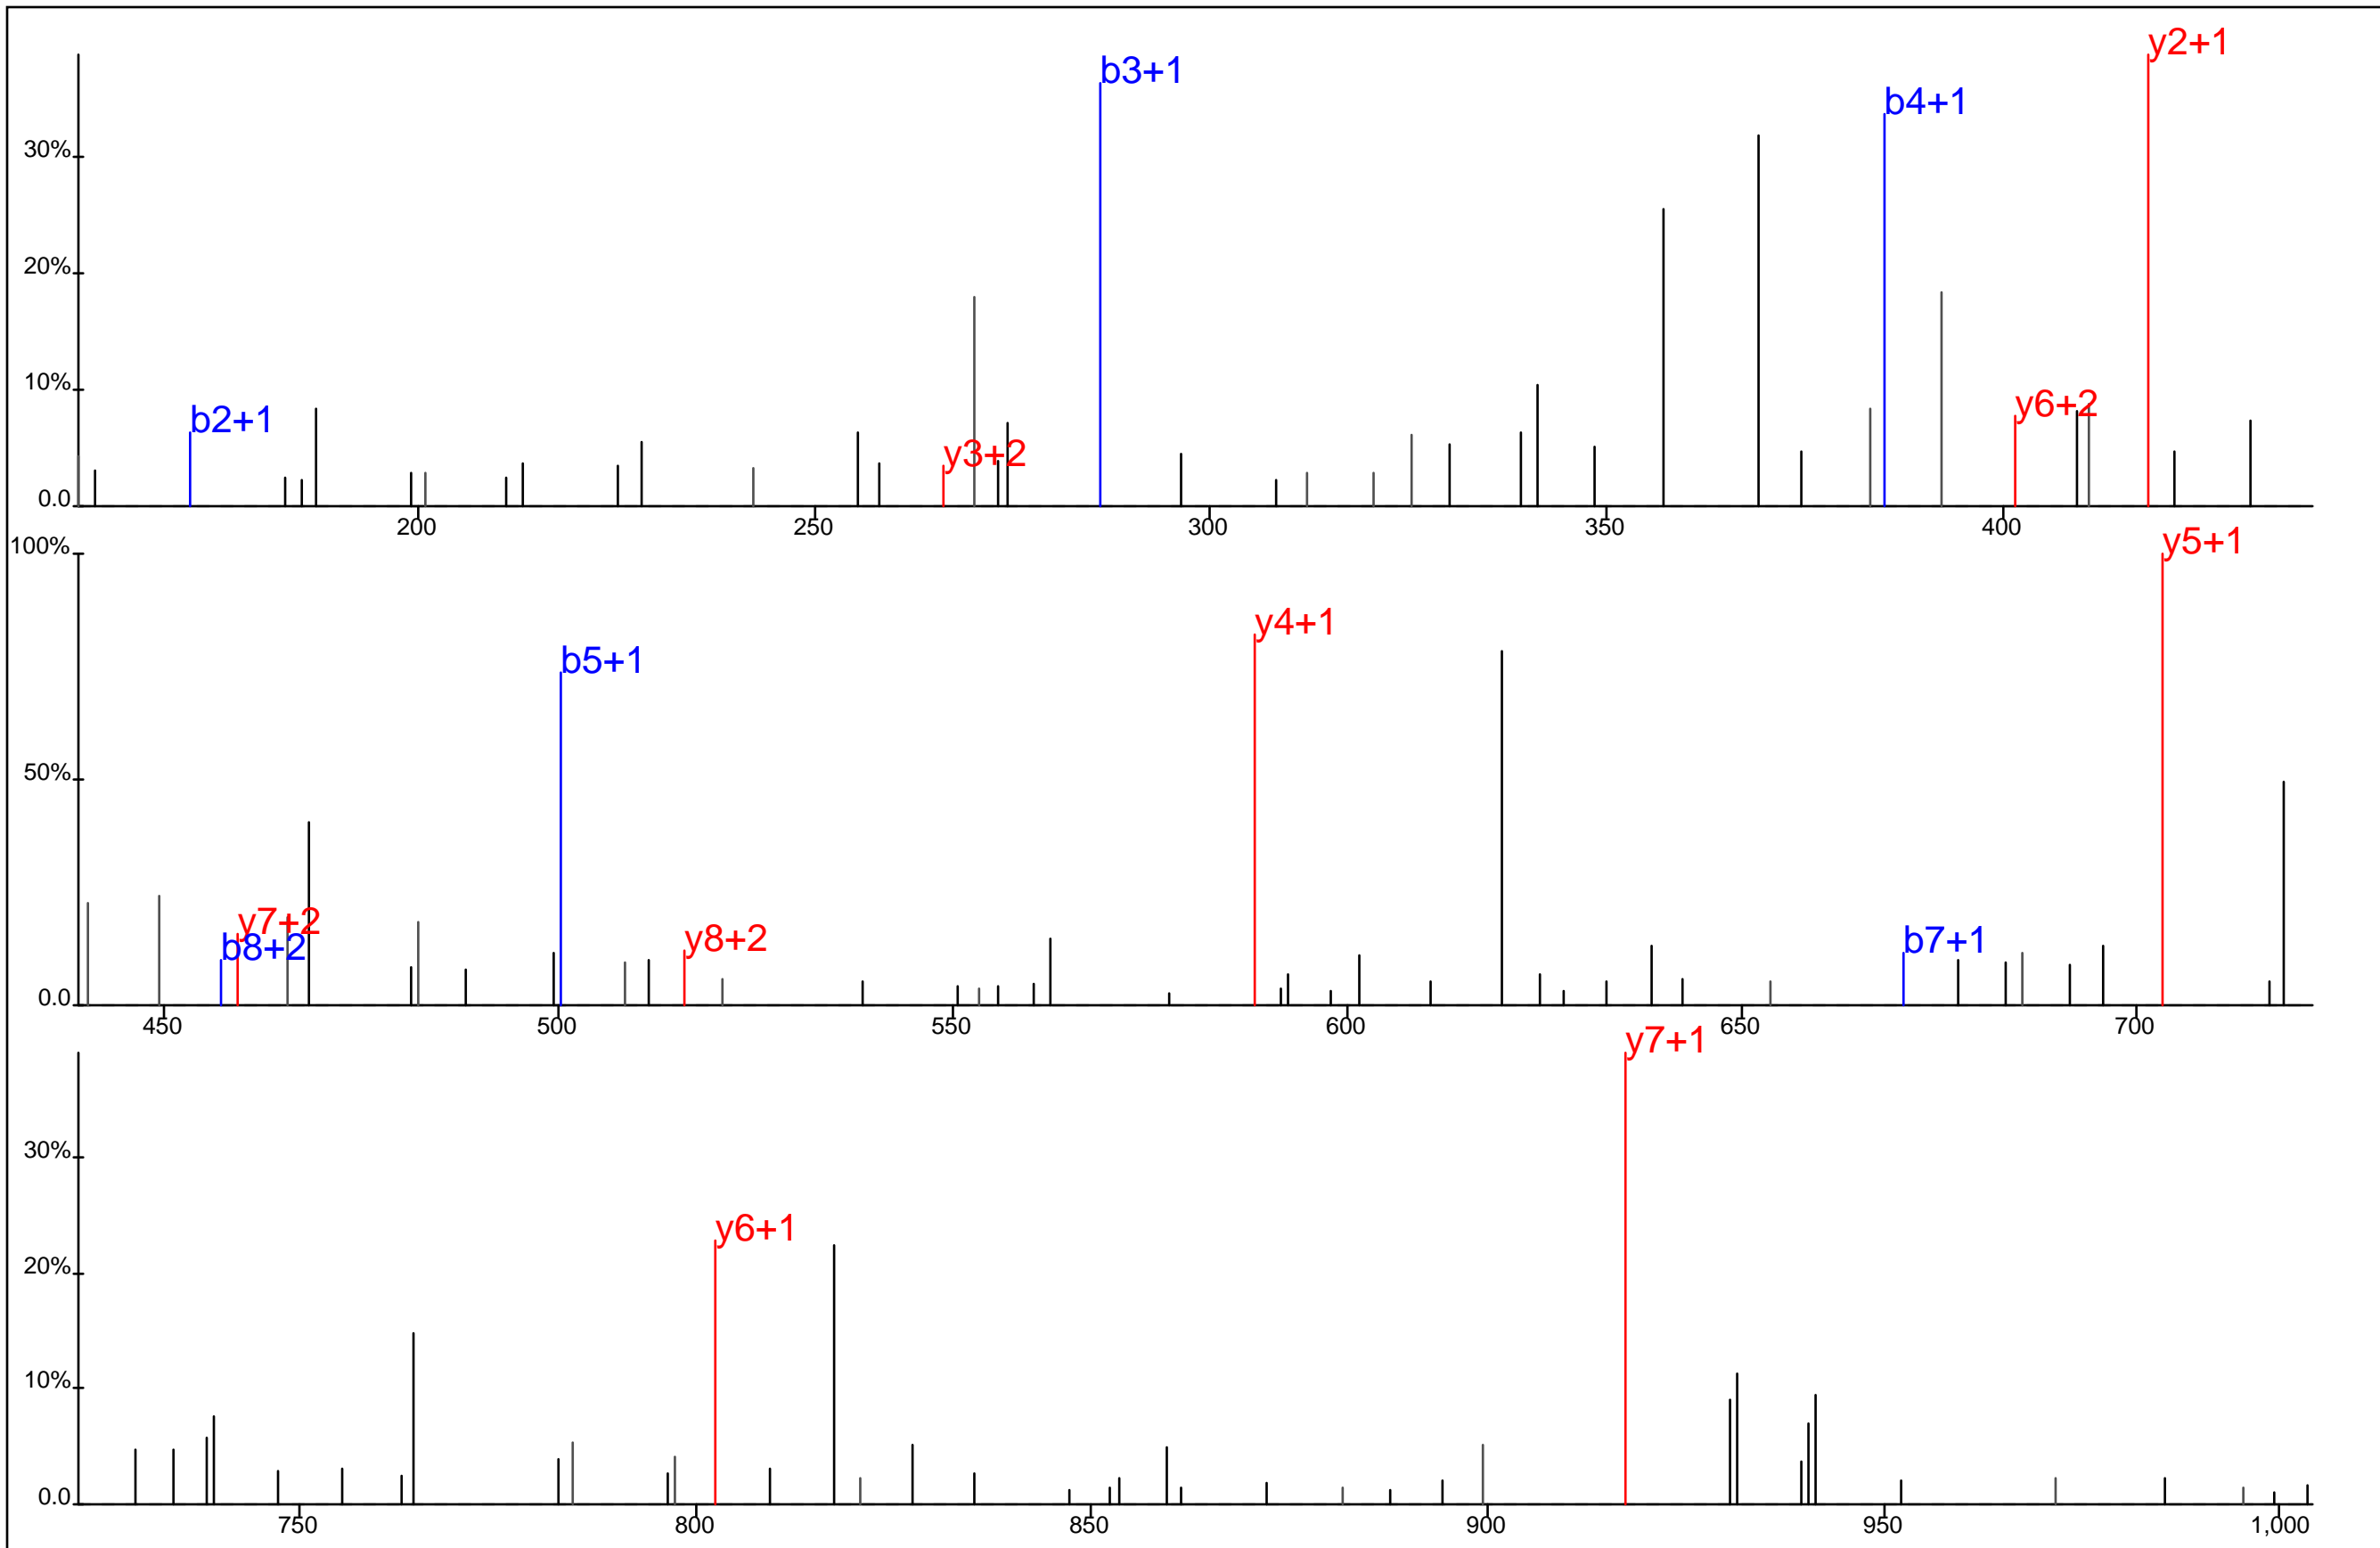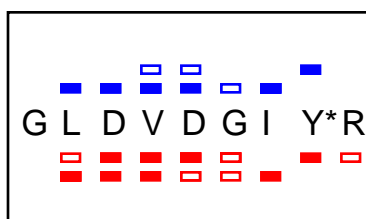

Protein Name: Rho GTPase activating protein 9  
 gi Accession: 0  
 Precursor Mass: 544.2427+2  
 Delta Mass: 3.461 ppm  
 XCorr: 39.36

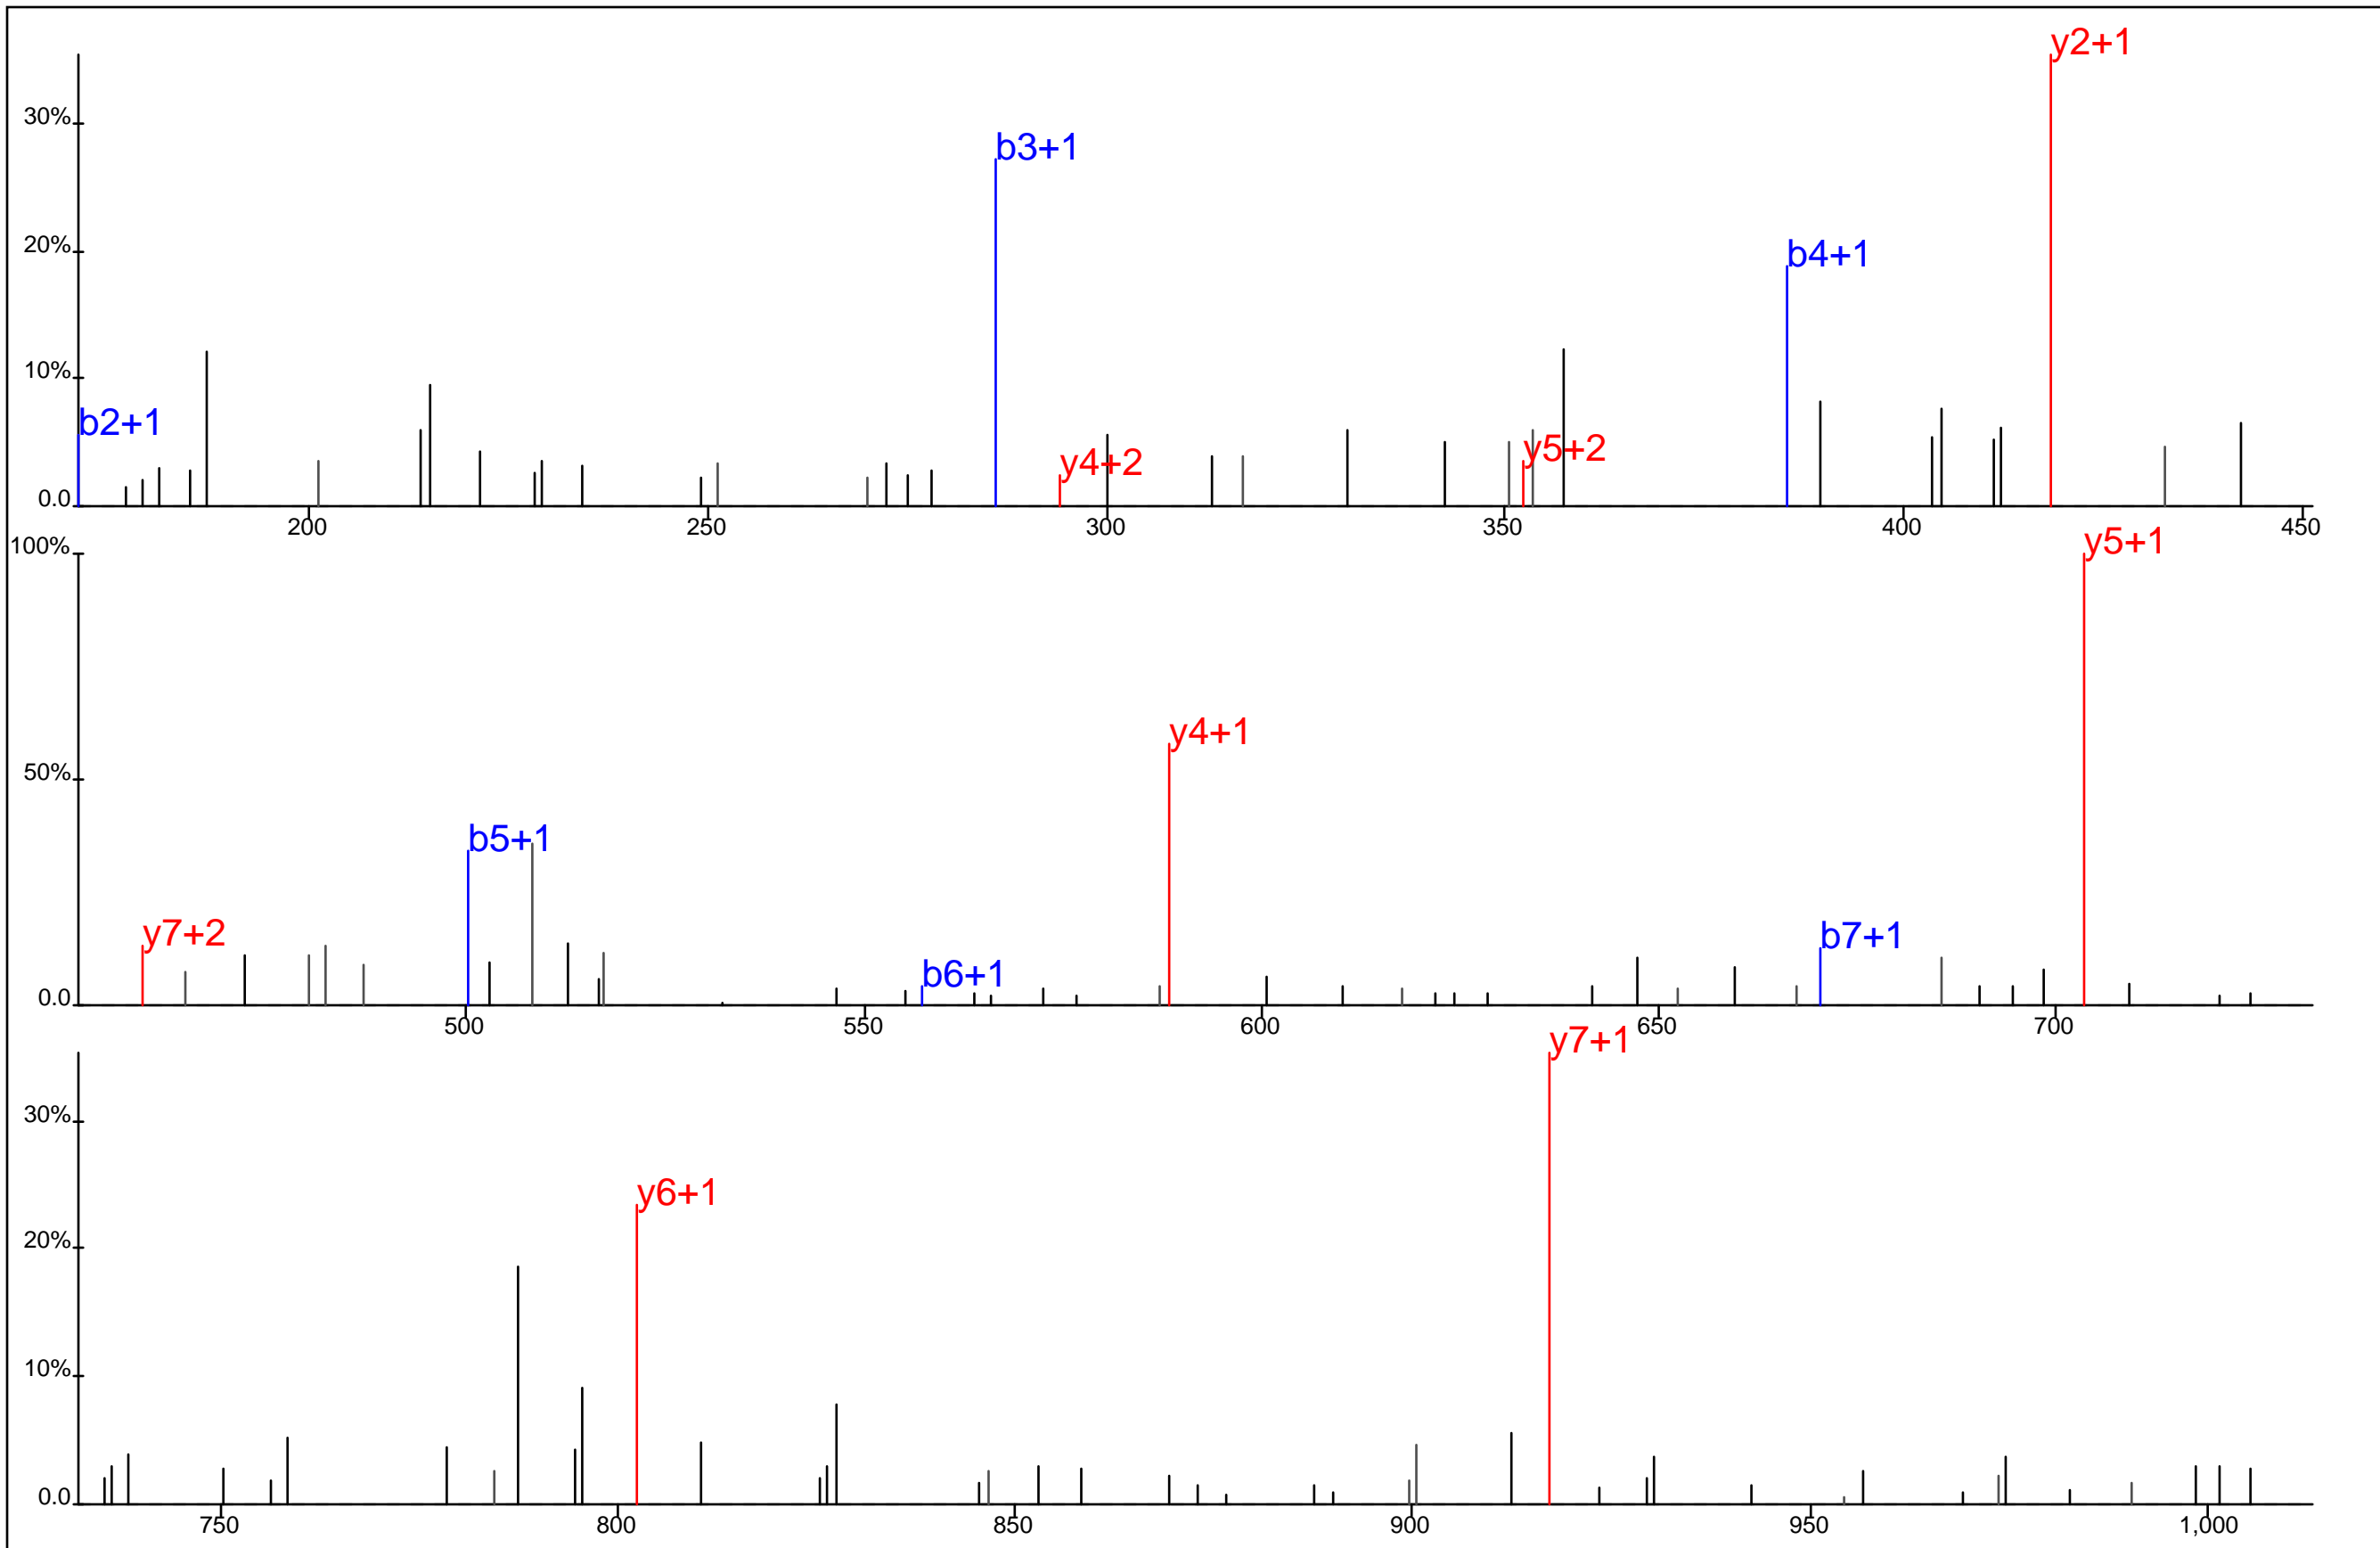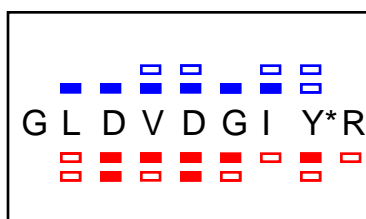

Protein Name: Rho GTPase activating protein 9  
 gi Accession: 0  
 Precursor Mass: 544.2446+2  
 Delta Mass: 0.018 ppm  
 XCorr: 36.12

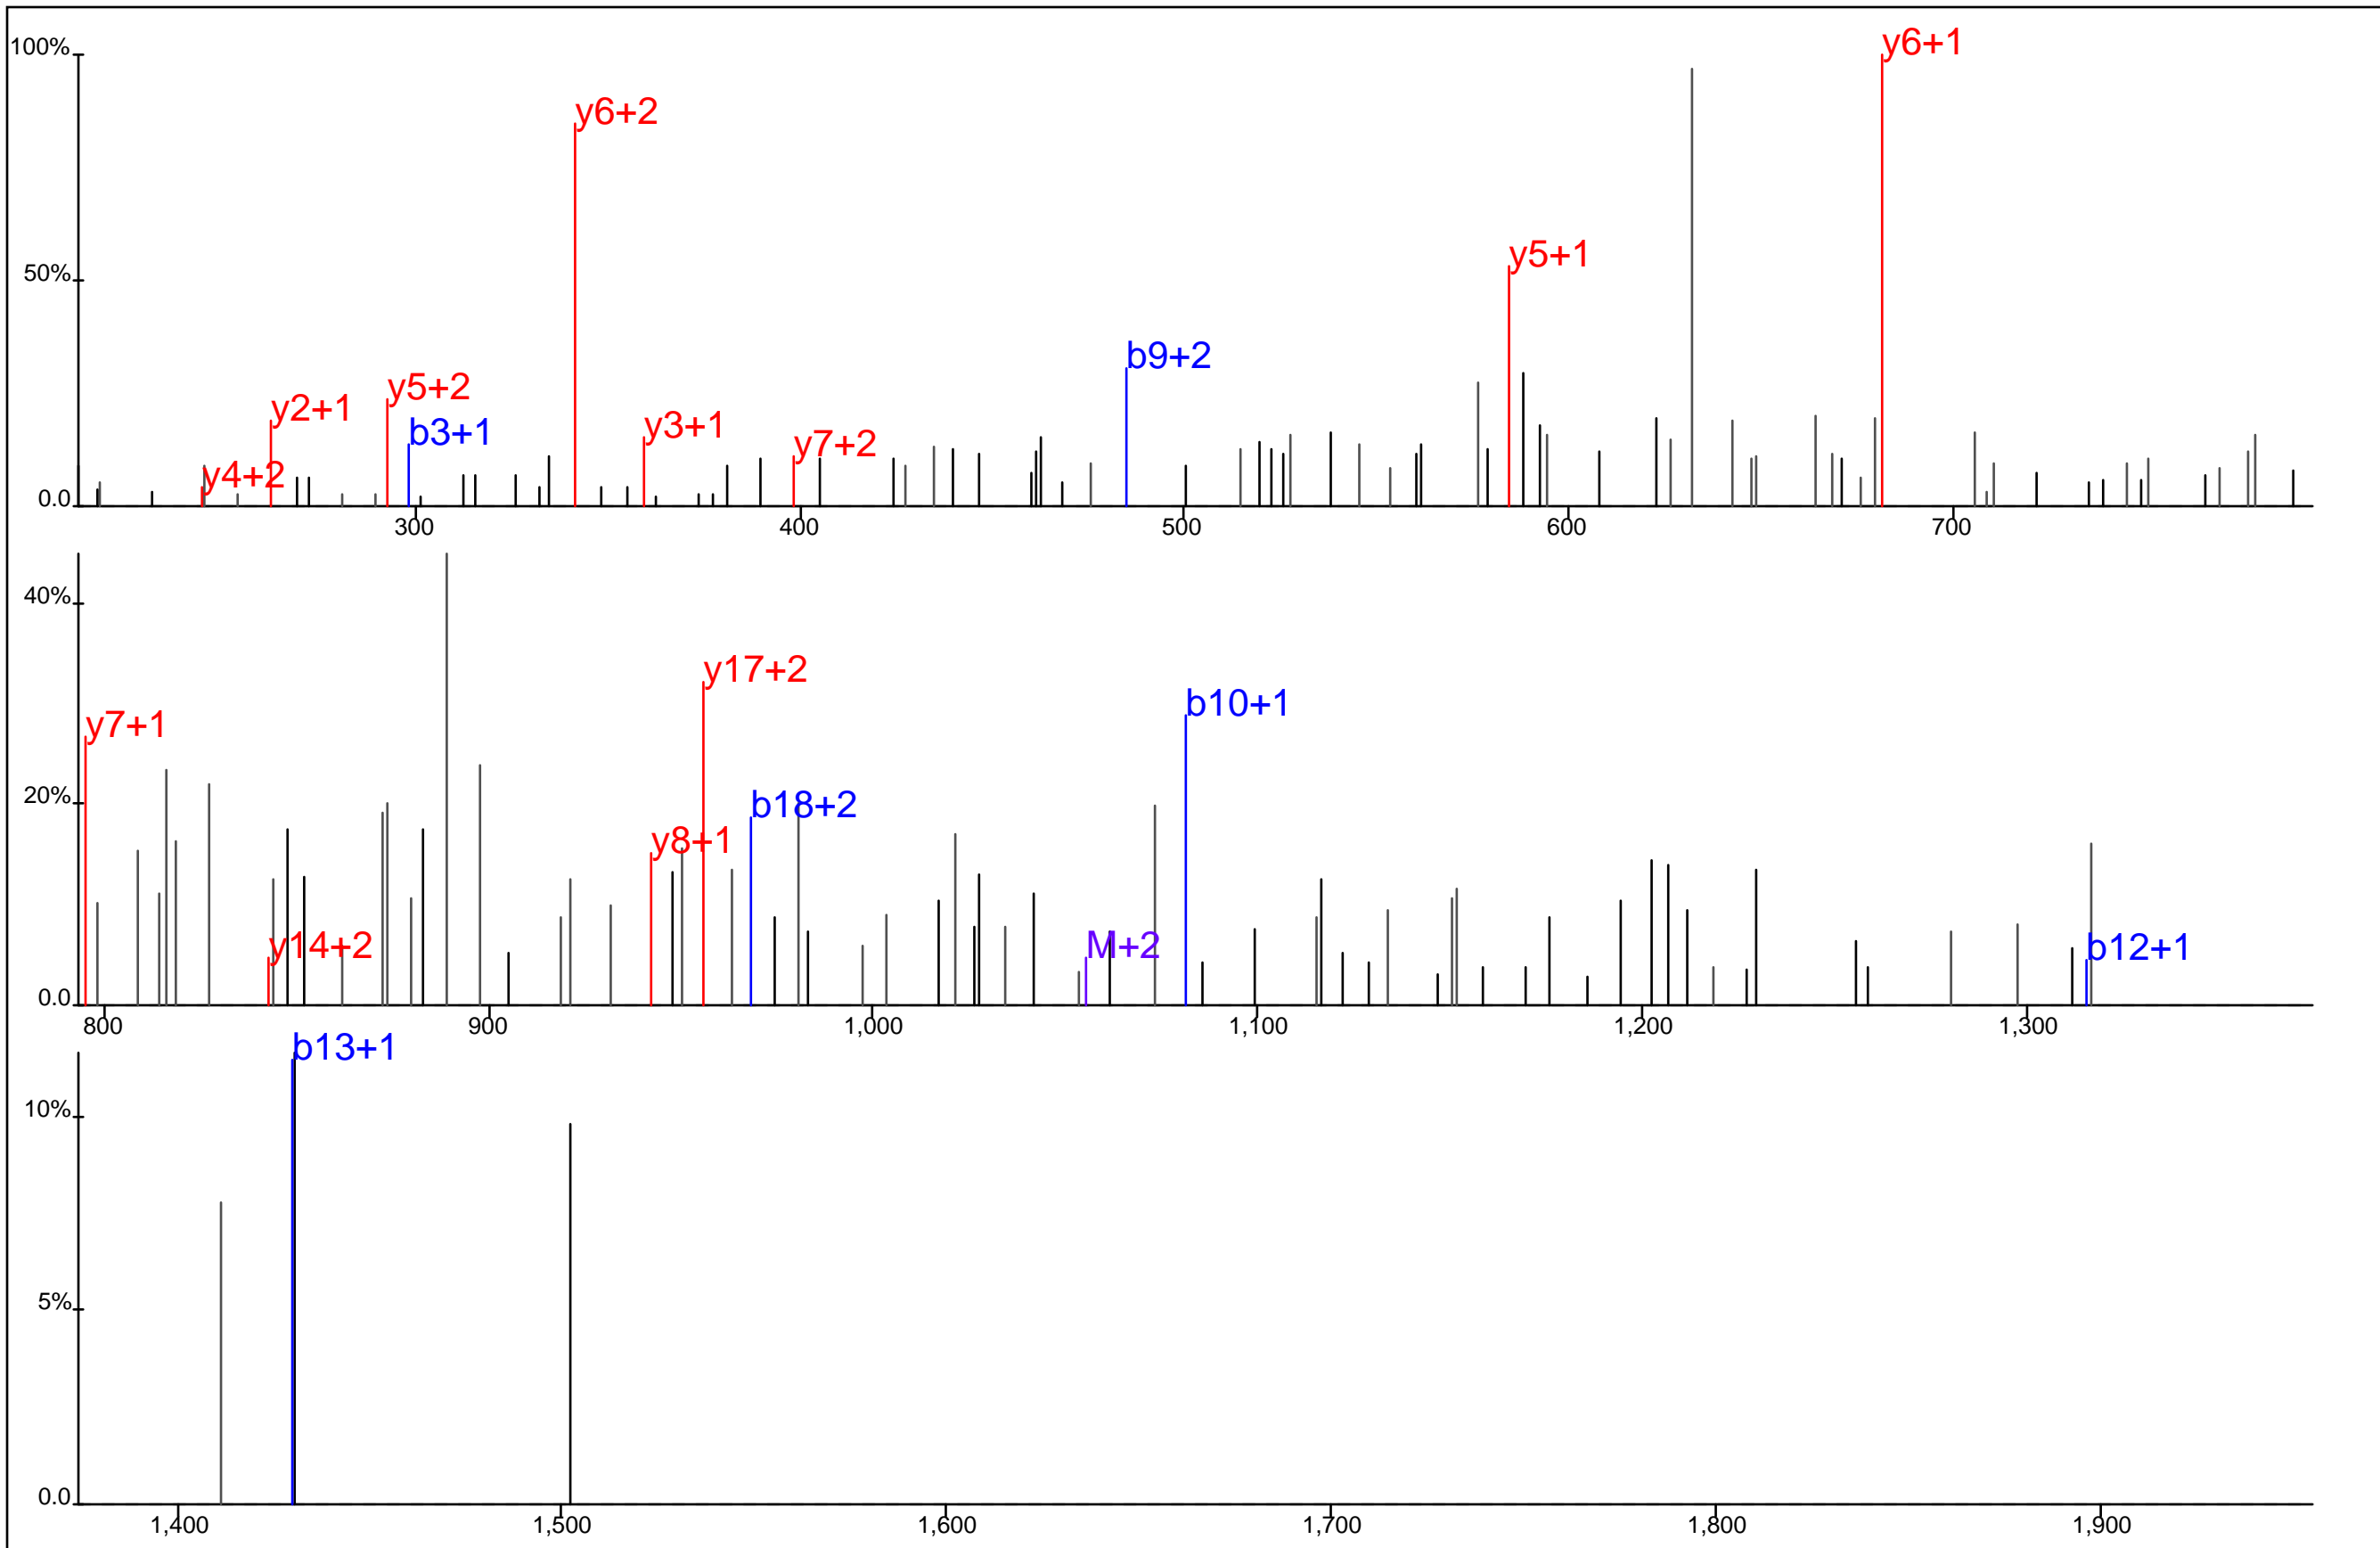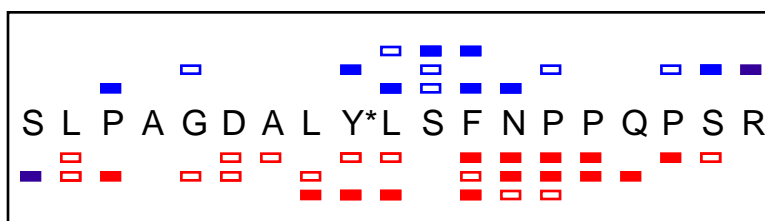

Protein Name: Rho guanine nucleotide exchange factor 2  
 gi Accession: 0  
 Precursor Mass: 704.0042+3  
 Delta Mass: 1.220 ppm  
 XCorr: 22.52

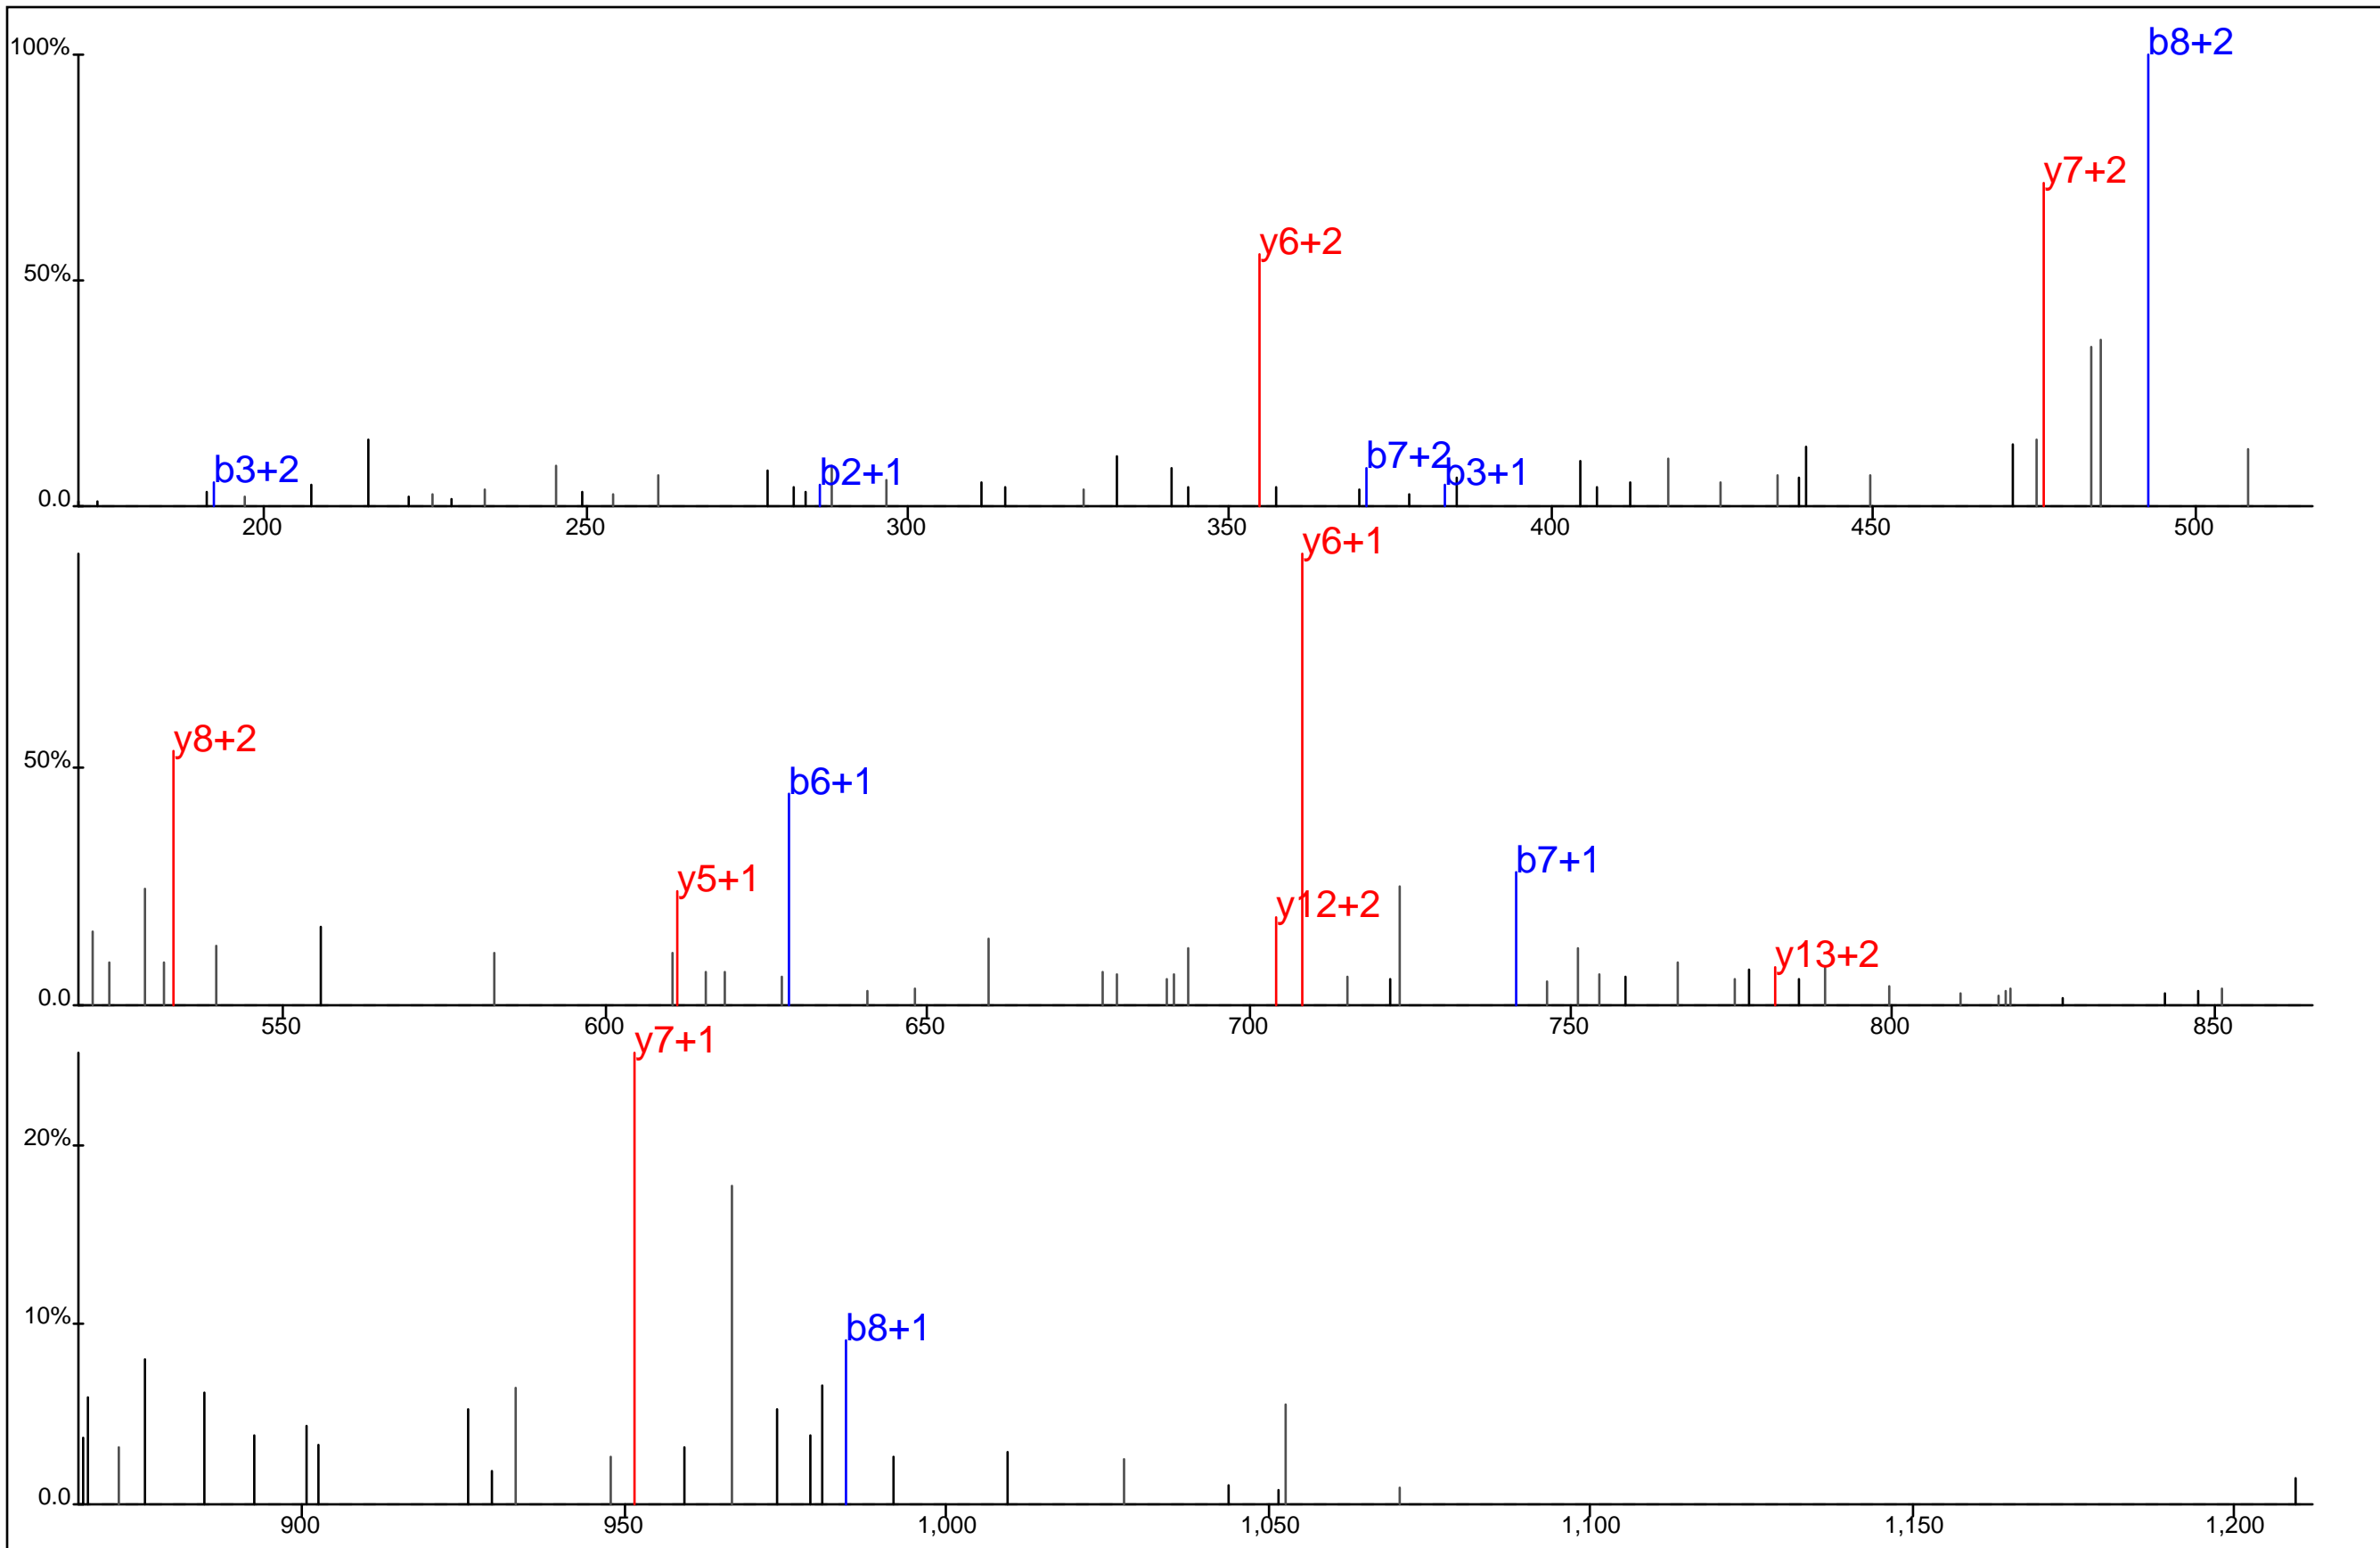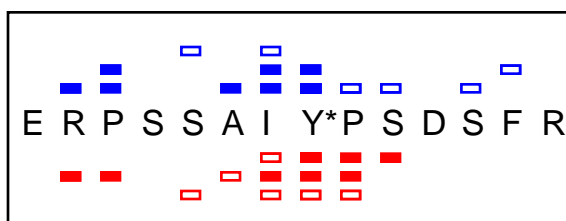

Protein Name: Rho guanine nucleotide exchange factor 2  
 gi Accession: 0  
 Precursor Mass: 564.5860+3  
 Delta Mass: 0.581 ppm  
 XCorr: 23.51

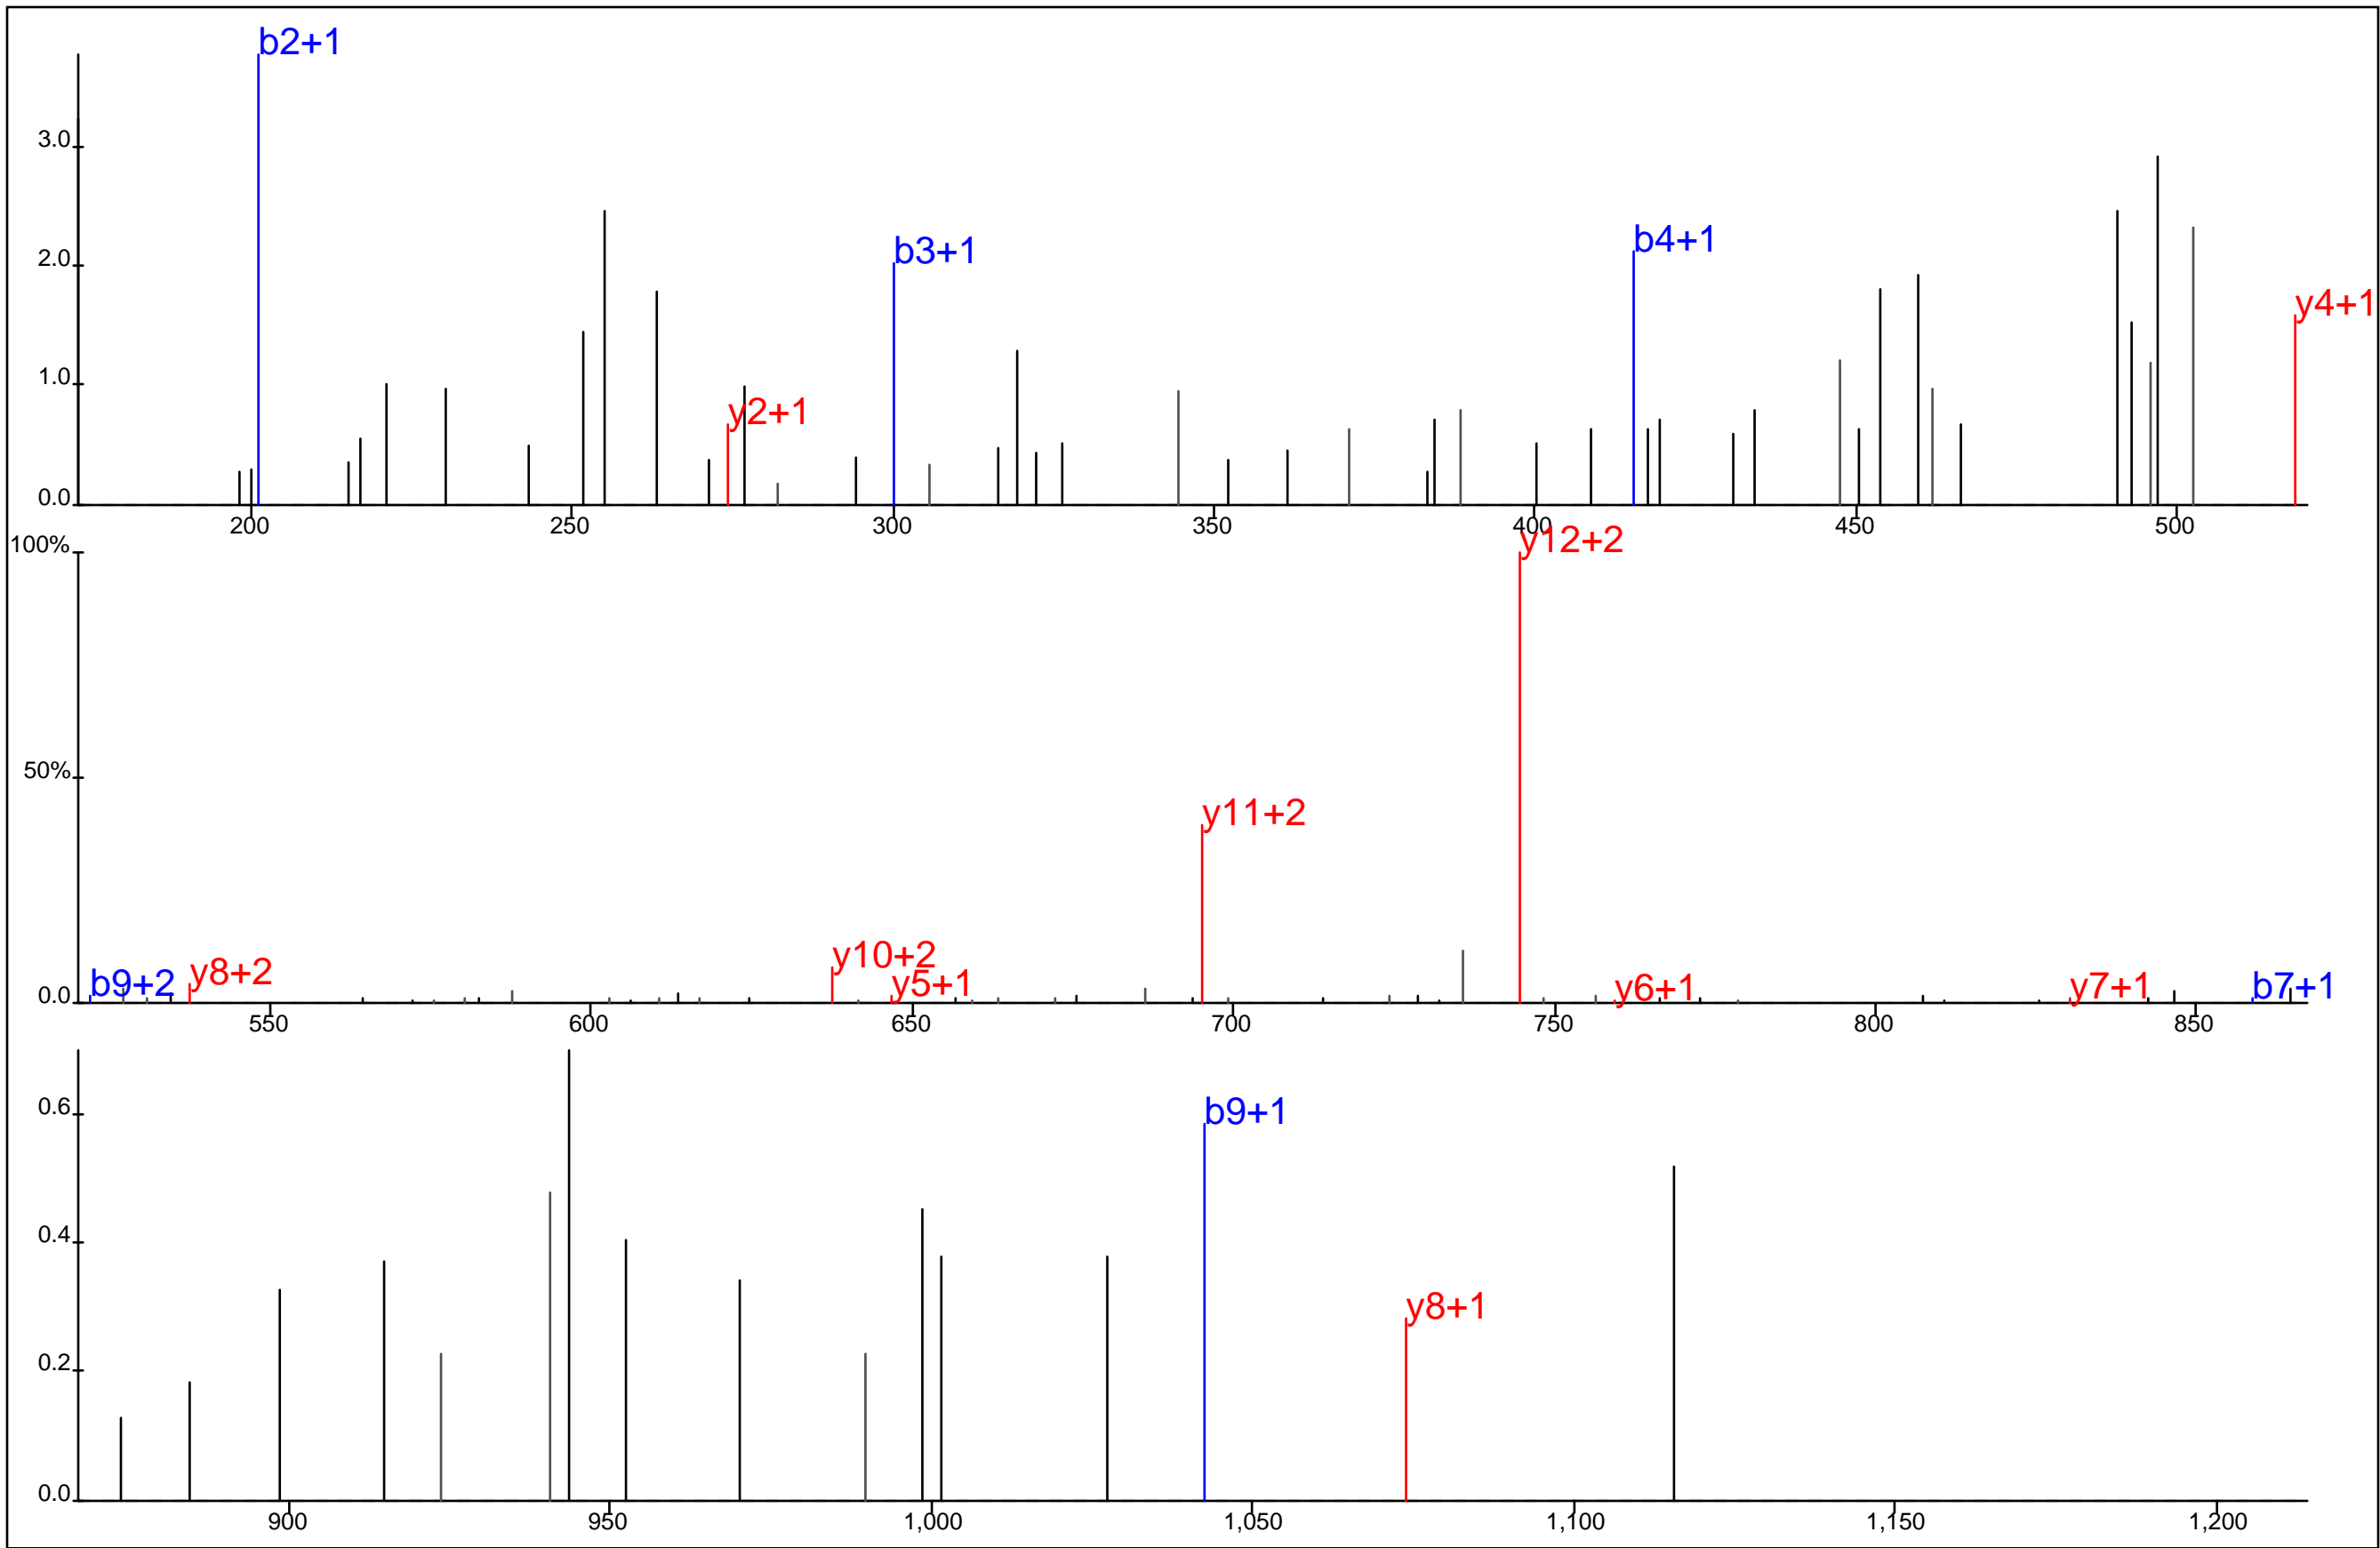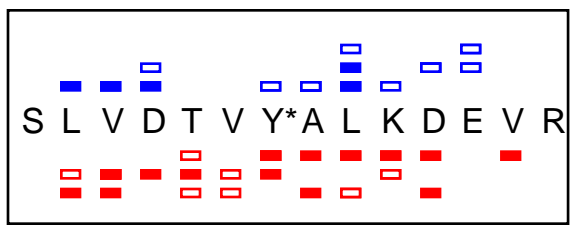

Protein Name: Rho guanine nucleotide exchange factor 6  
 gi Accession: 0  
 Precursor Mass: 563.2825+3  
 Delta Mass: 1.558 ppm  
 XCorr: 27.06

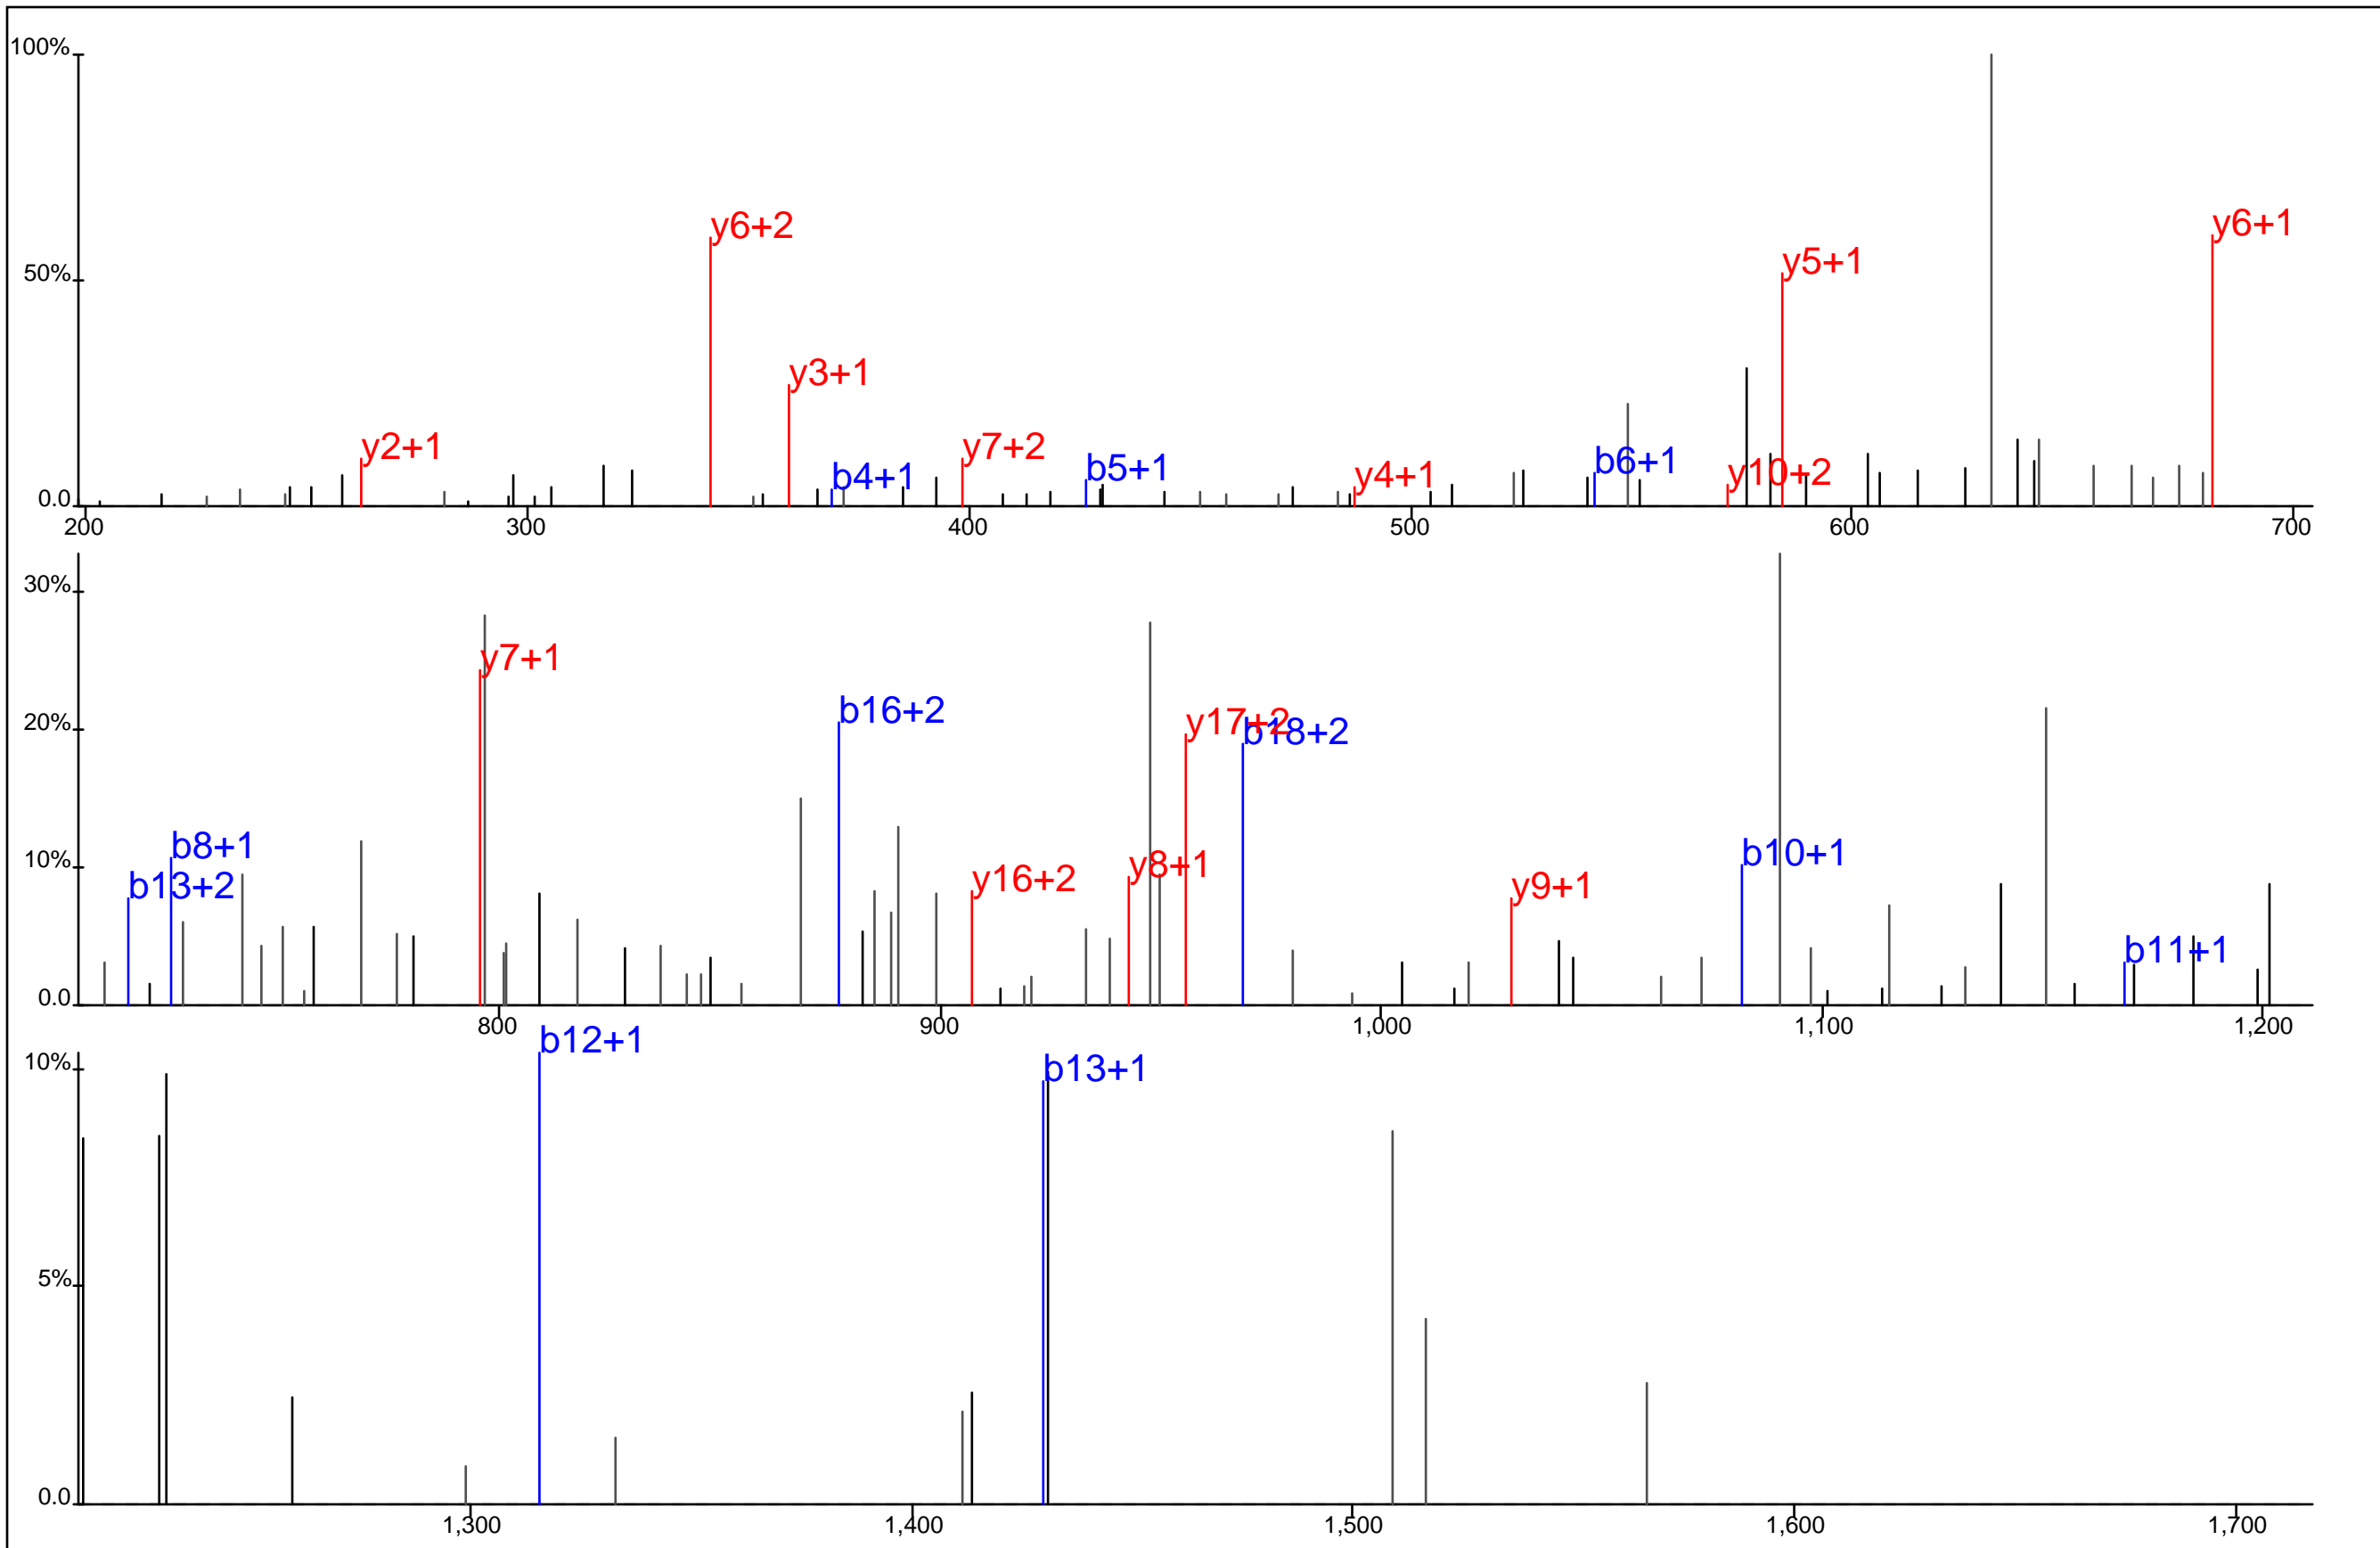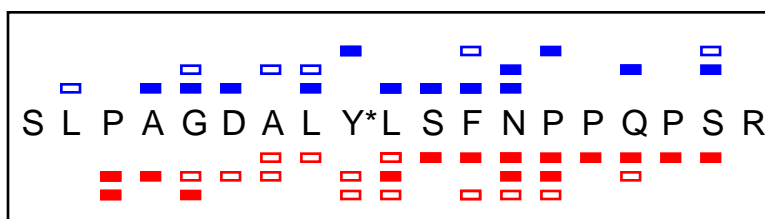

Protein Name: Rho guanine nucleotide exchange factor 2  
 gi Accession: 0  
 Precursor Mass: 704.0044+3  
 Delta Mass: 0.872 ppm  
 XCorr: 31.3



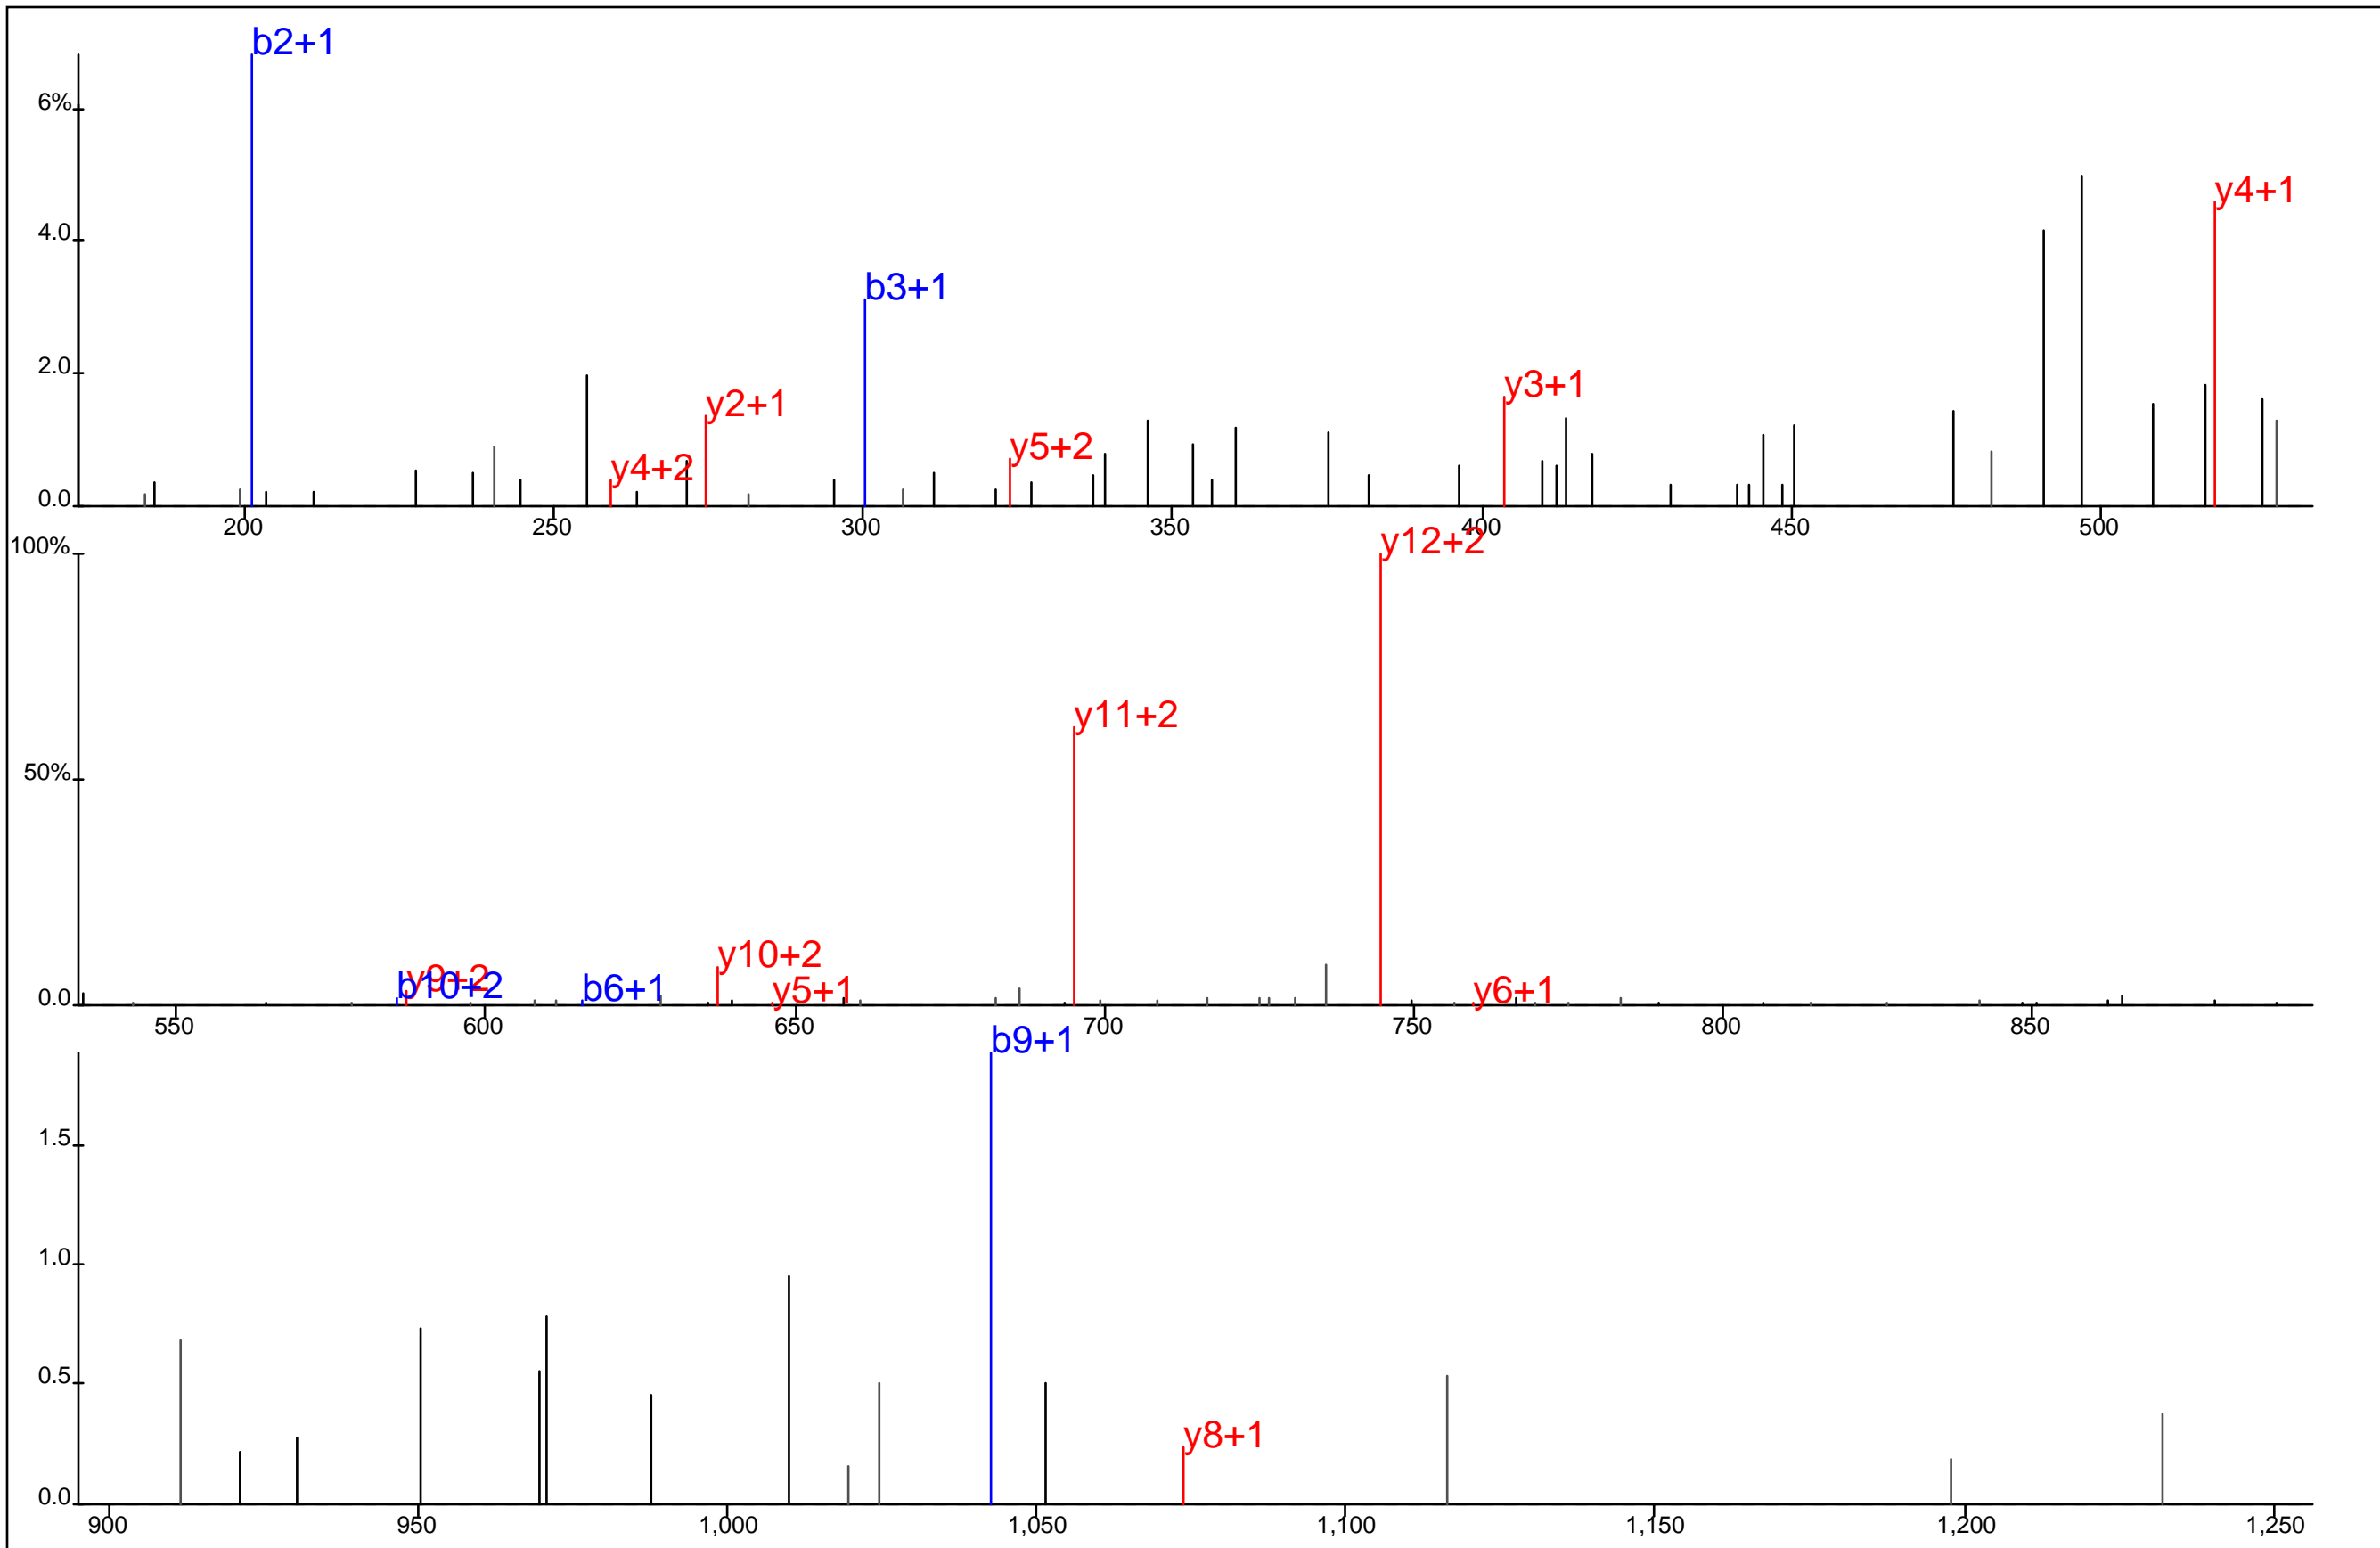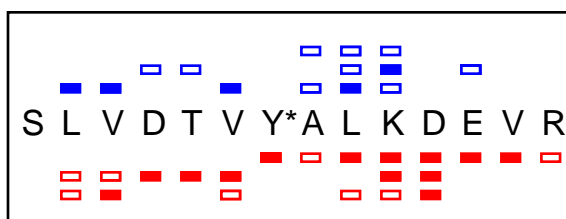

Protein Name: Rho guanine nucleotide exchange factor 6  
 gi Accession: 0  
 Precursor Mass: 563.2825+3  
 Delta Mass: 1.558 ppm  
 XCorr: 29.3



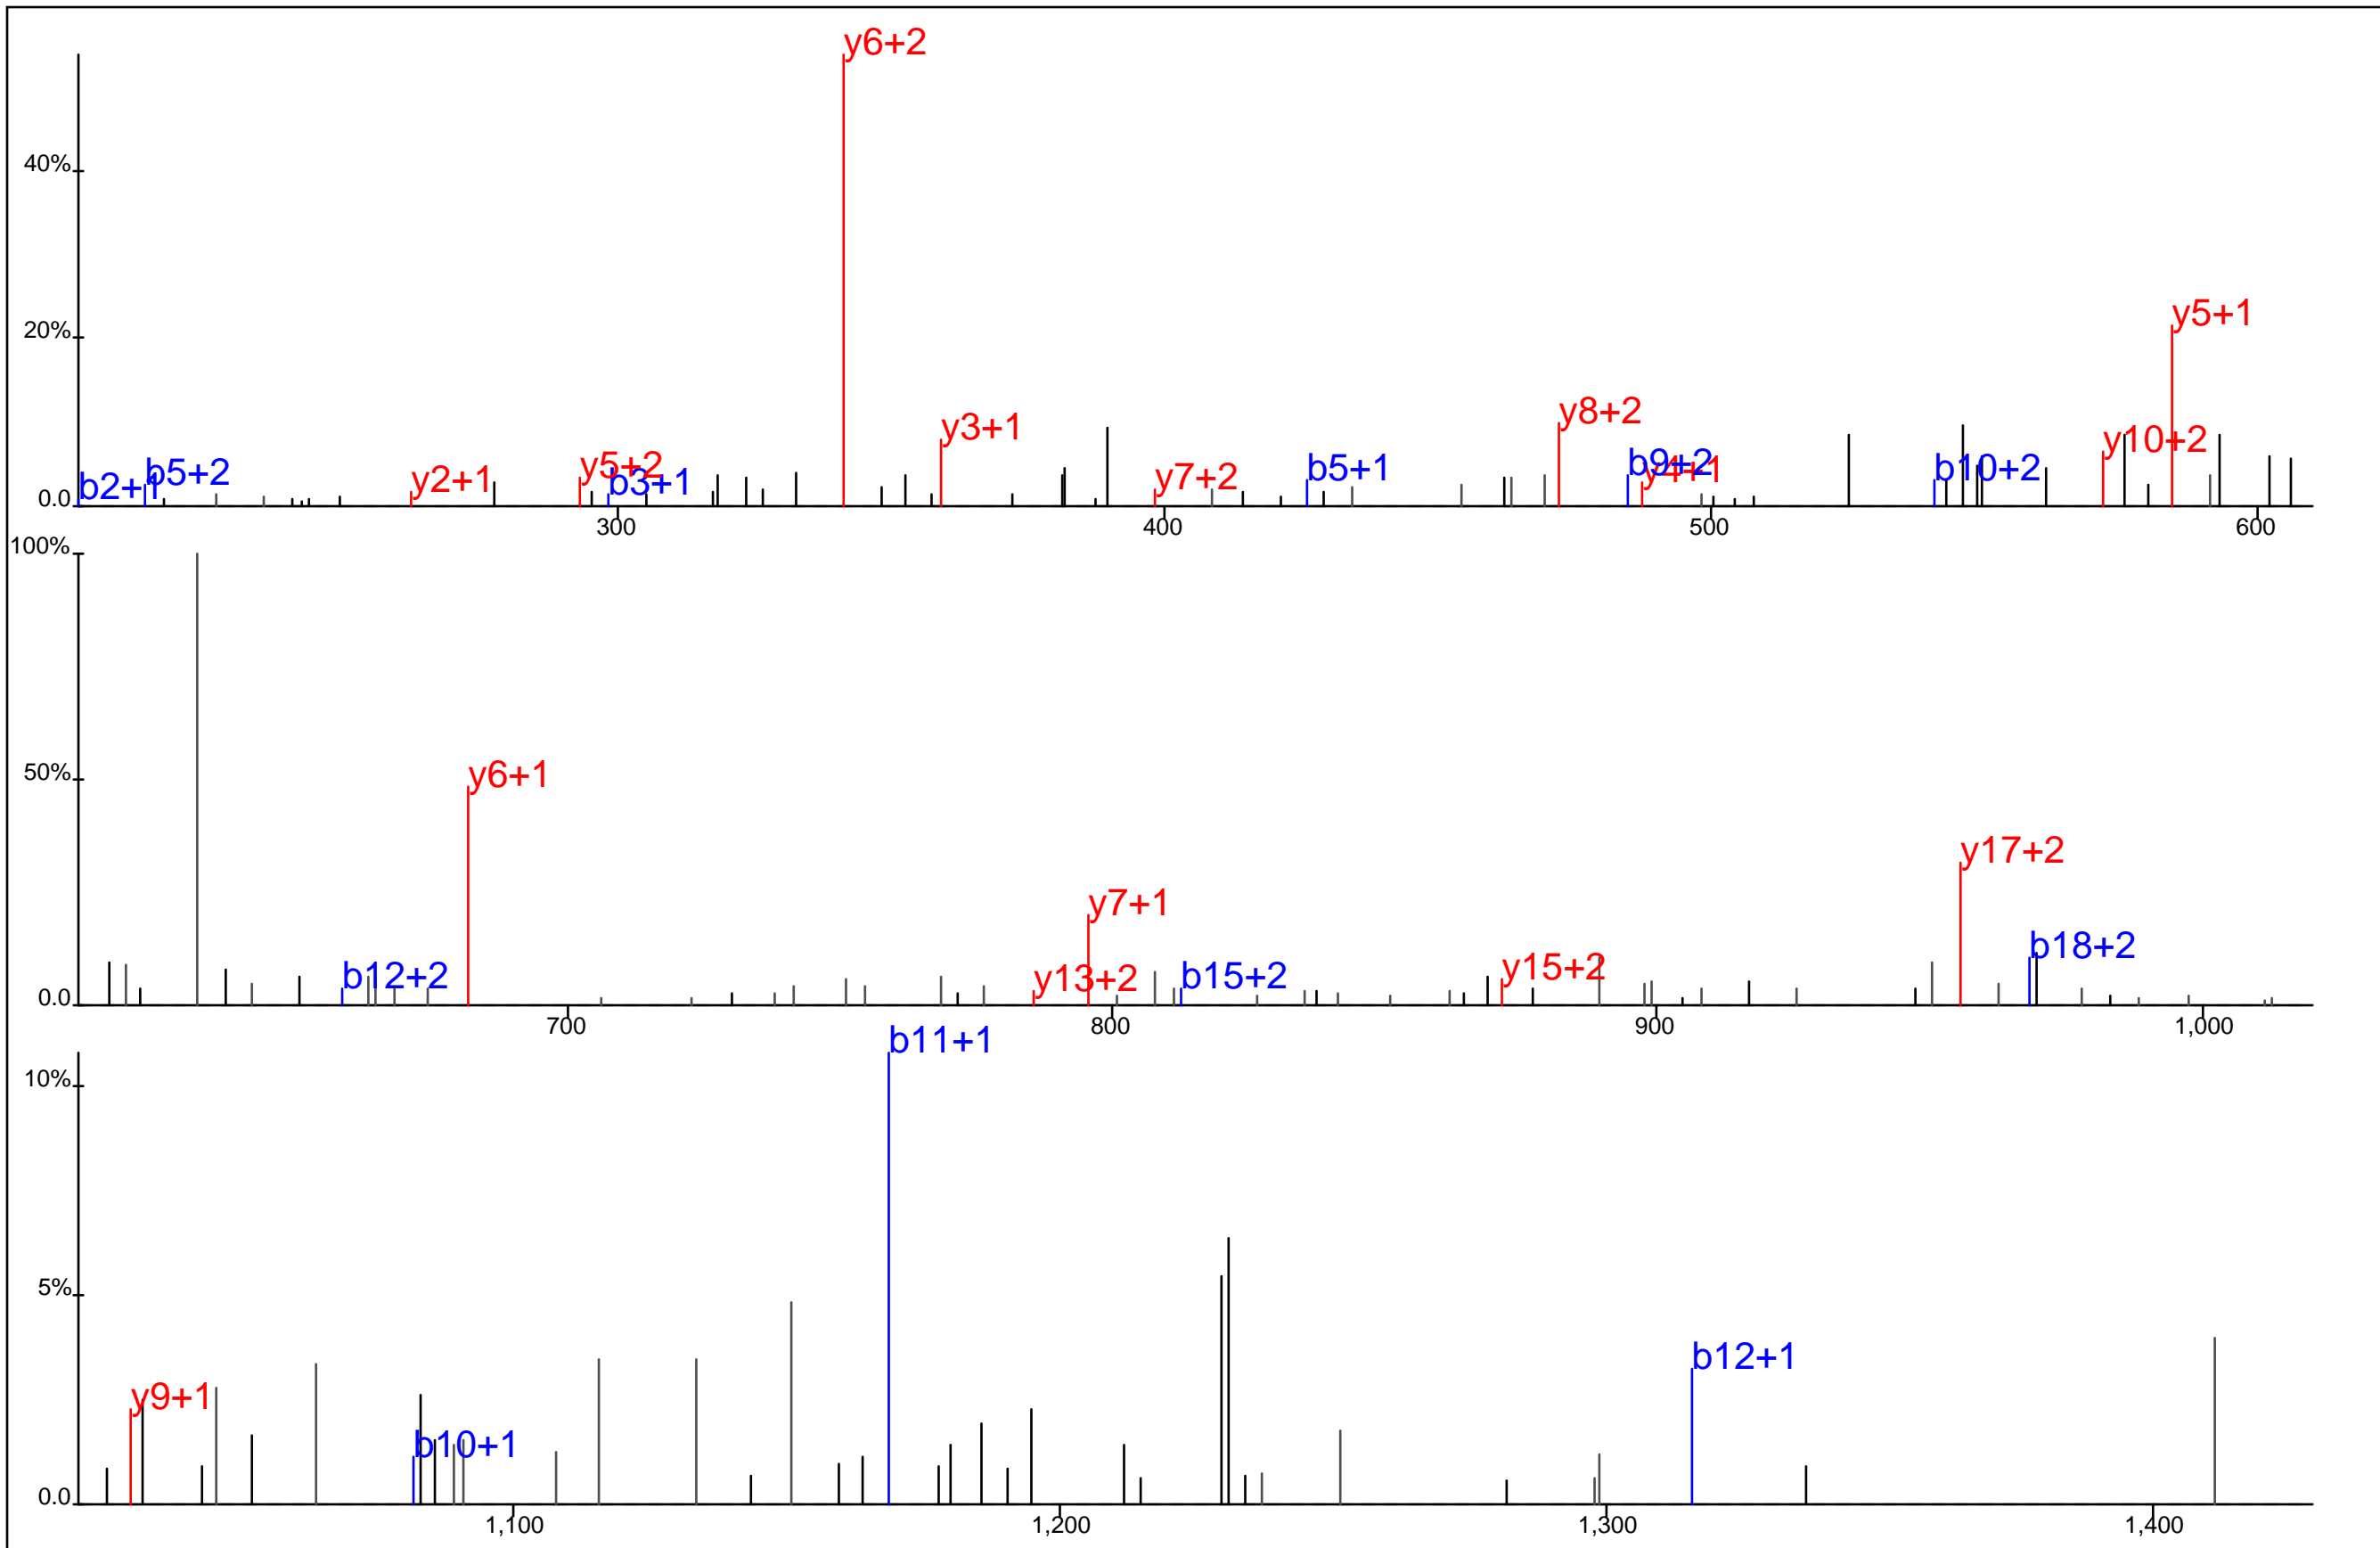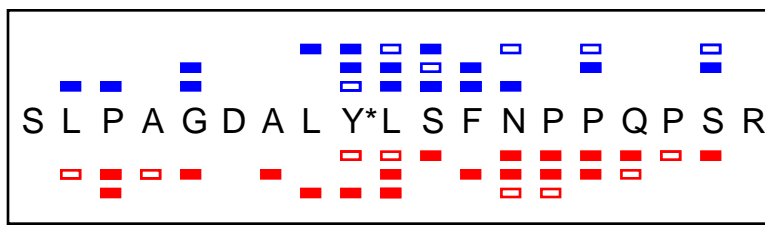

Protein Name: Rho guanine nucleotide exchange factor 2  
 gi Accession: 0  
 Precursor Mass: 704.0051+3  
 Delta Mass: 0.169 ppm  
 XCorr: 36.75





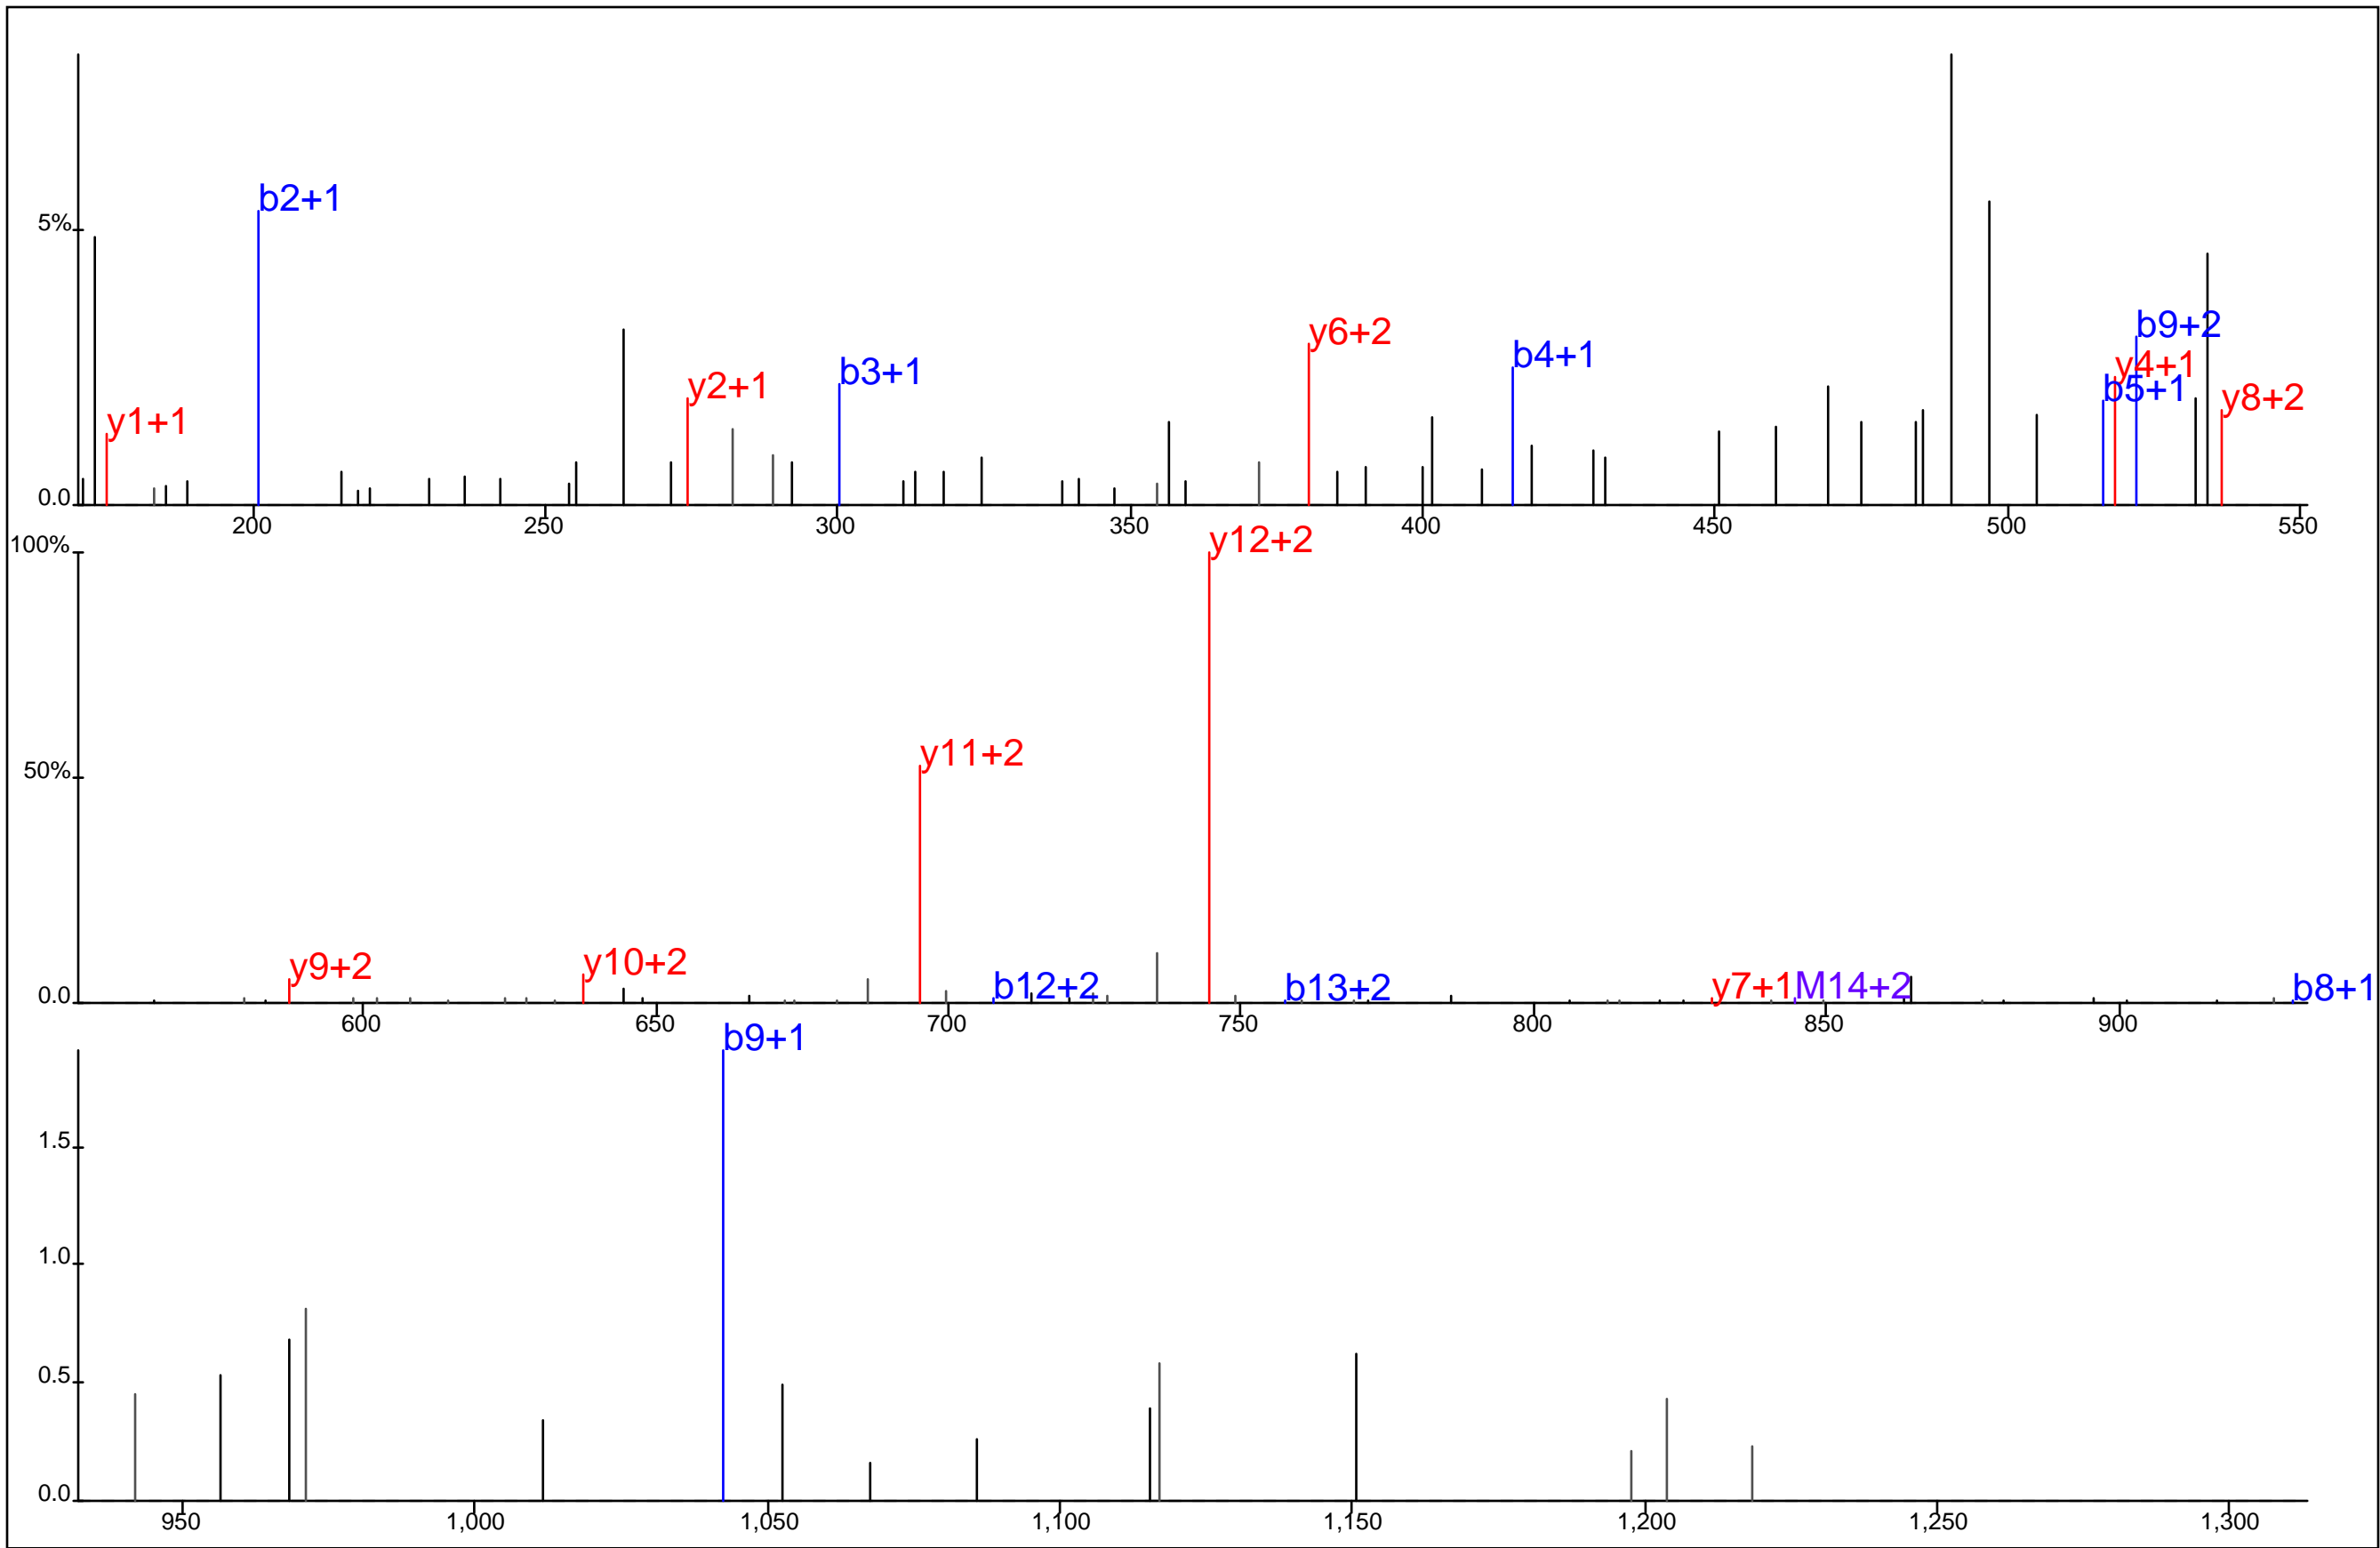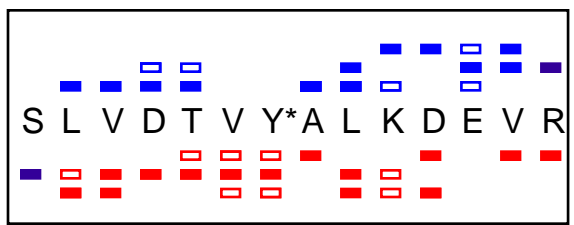

Protein Name: Rho guanine nucleotide exchange factor 6  
 gi Accession: 0  
 Precursor Mass: 563.2816+3  
 Delta Mass: 0.038 ppm  
 XCorr: 25.39

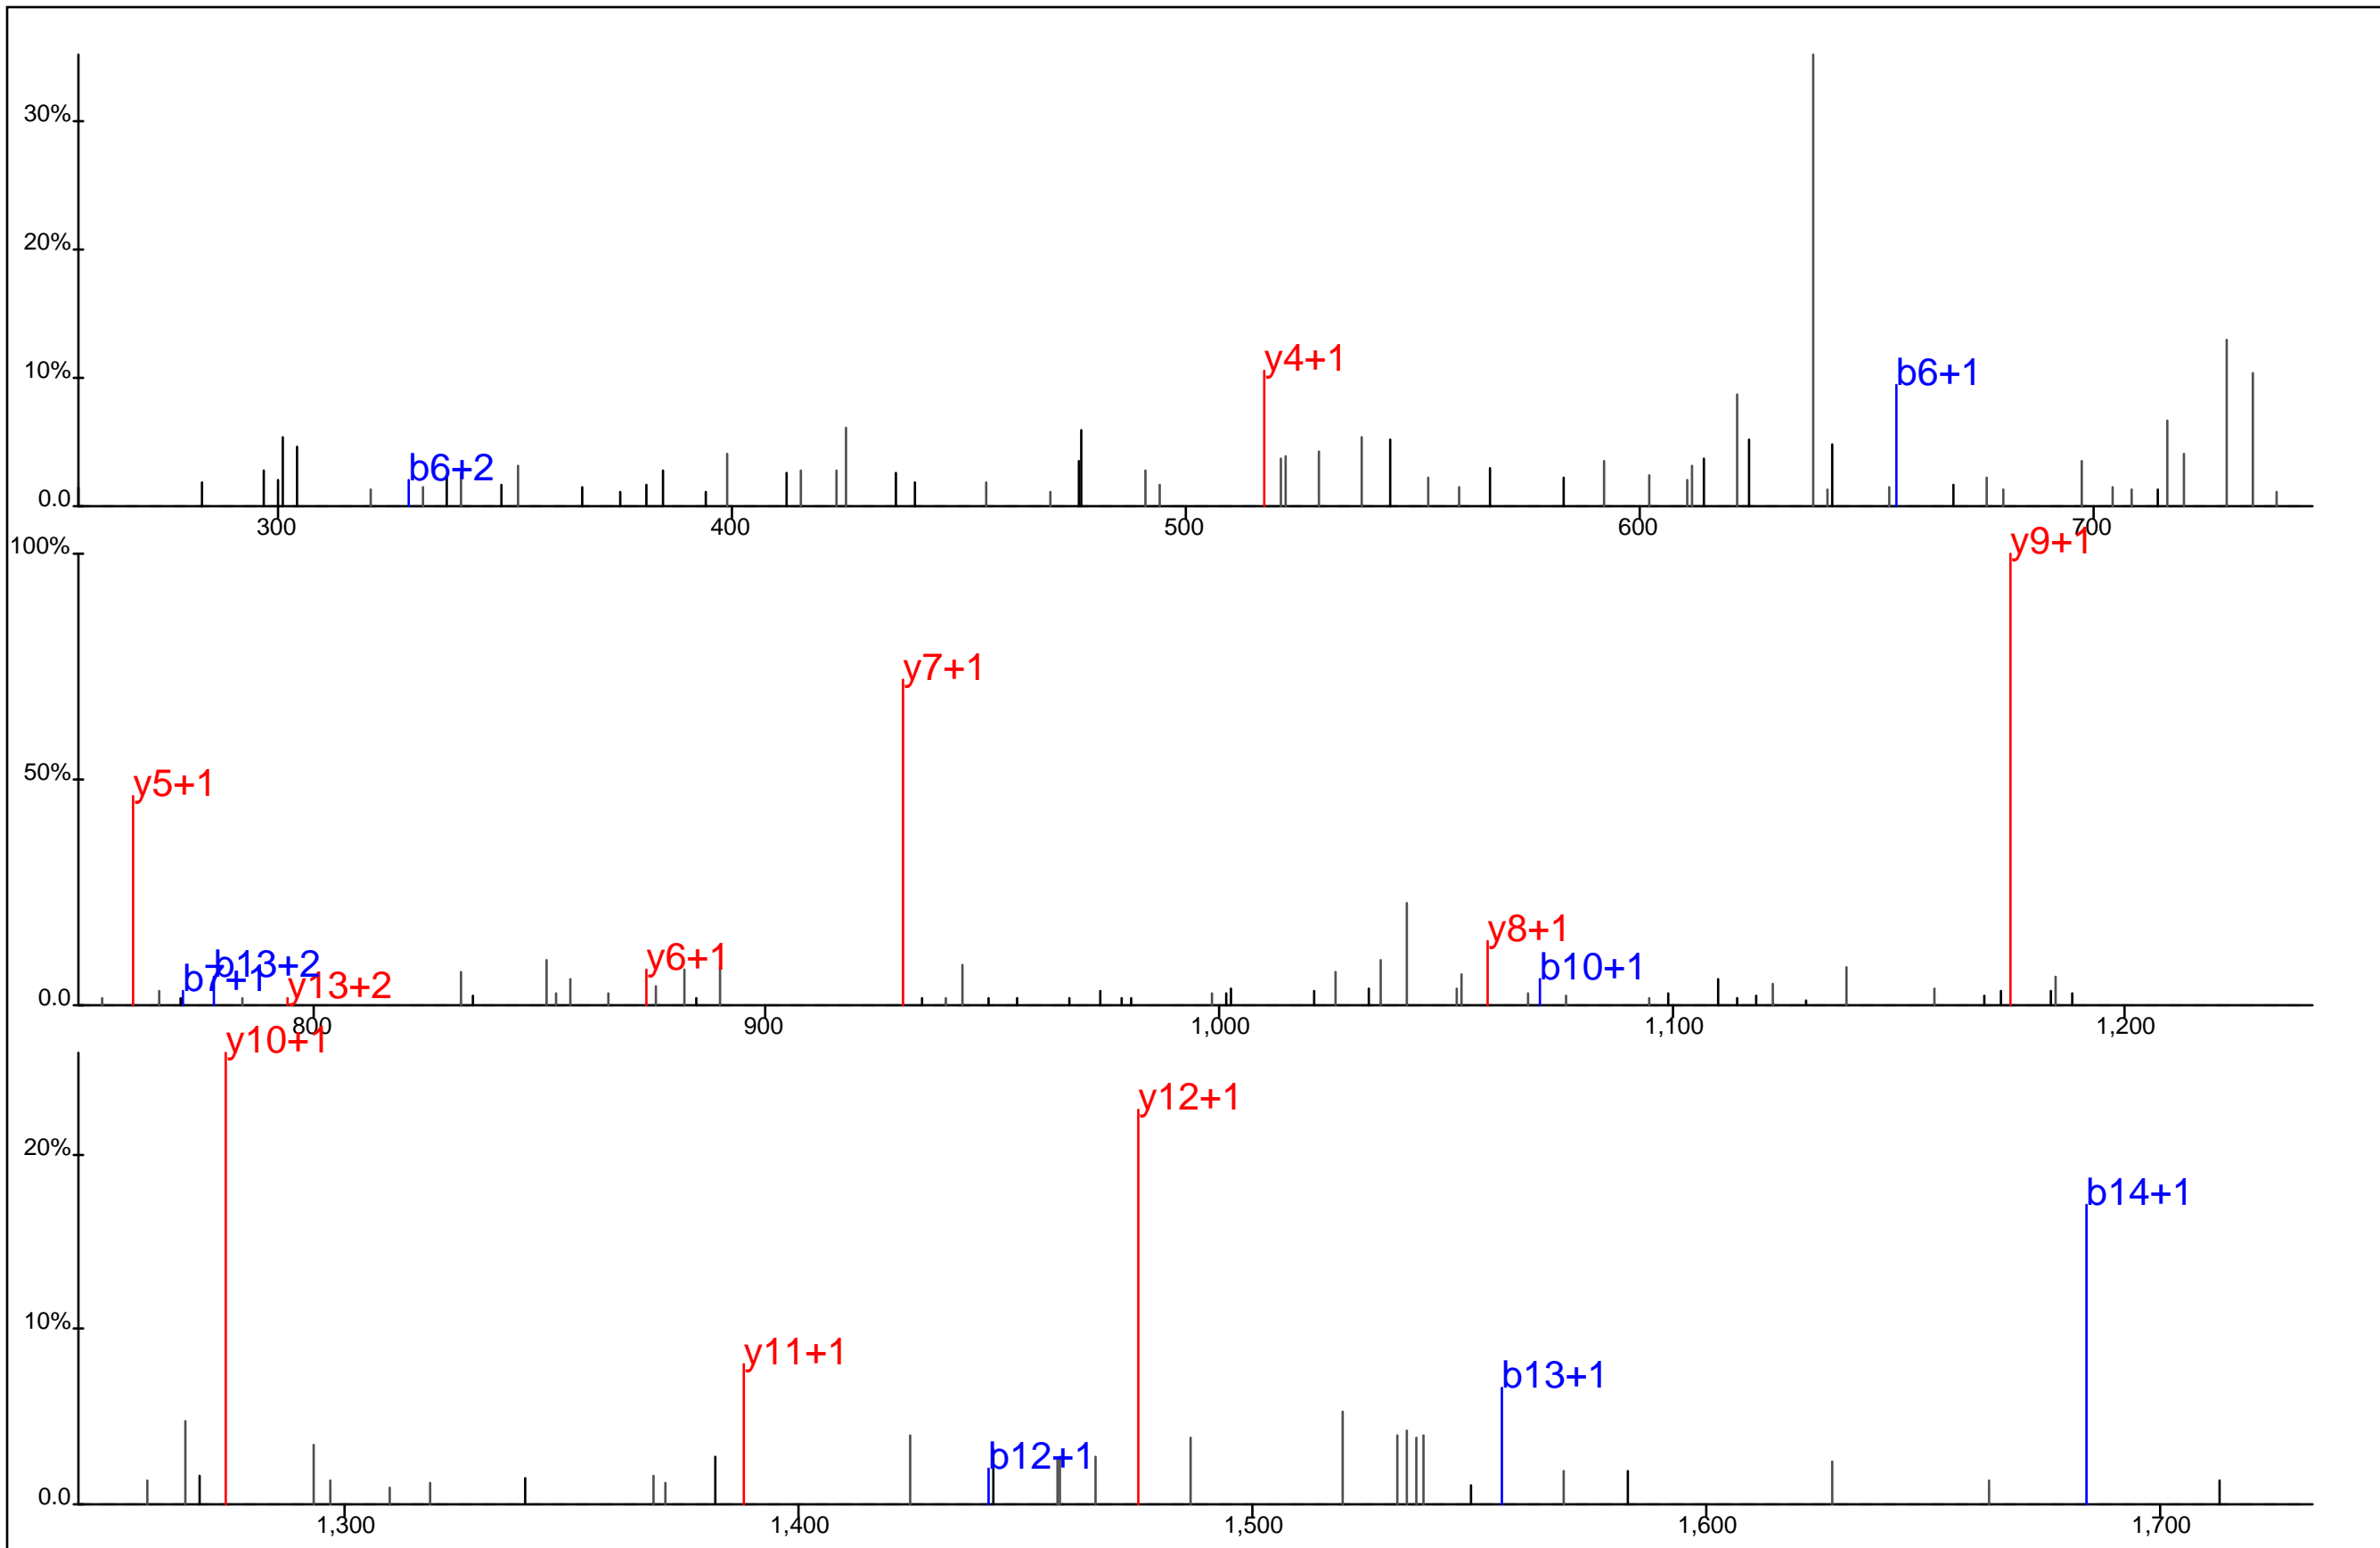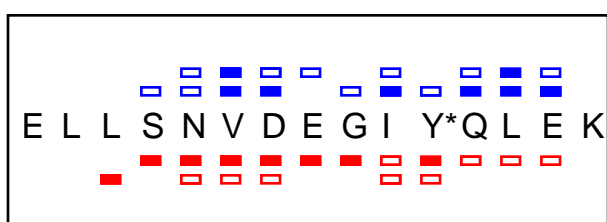

Protein Name: Rho guanine nucleotide exchange factor 2  
 gi Accession: 0  
 Precursor Mass: 915.4327+2  
 Delta Mass: 0.693 ppm  
 XCorr: 61.45







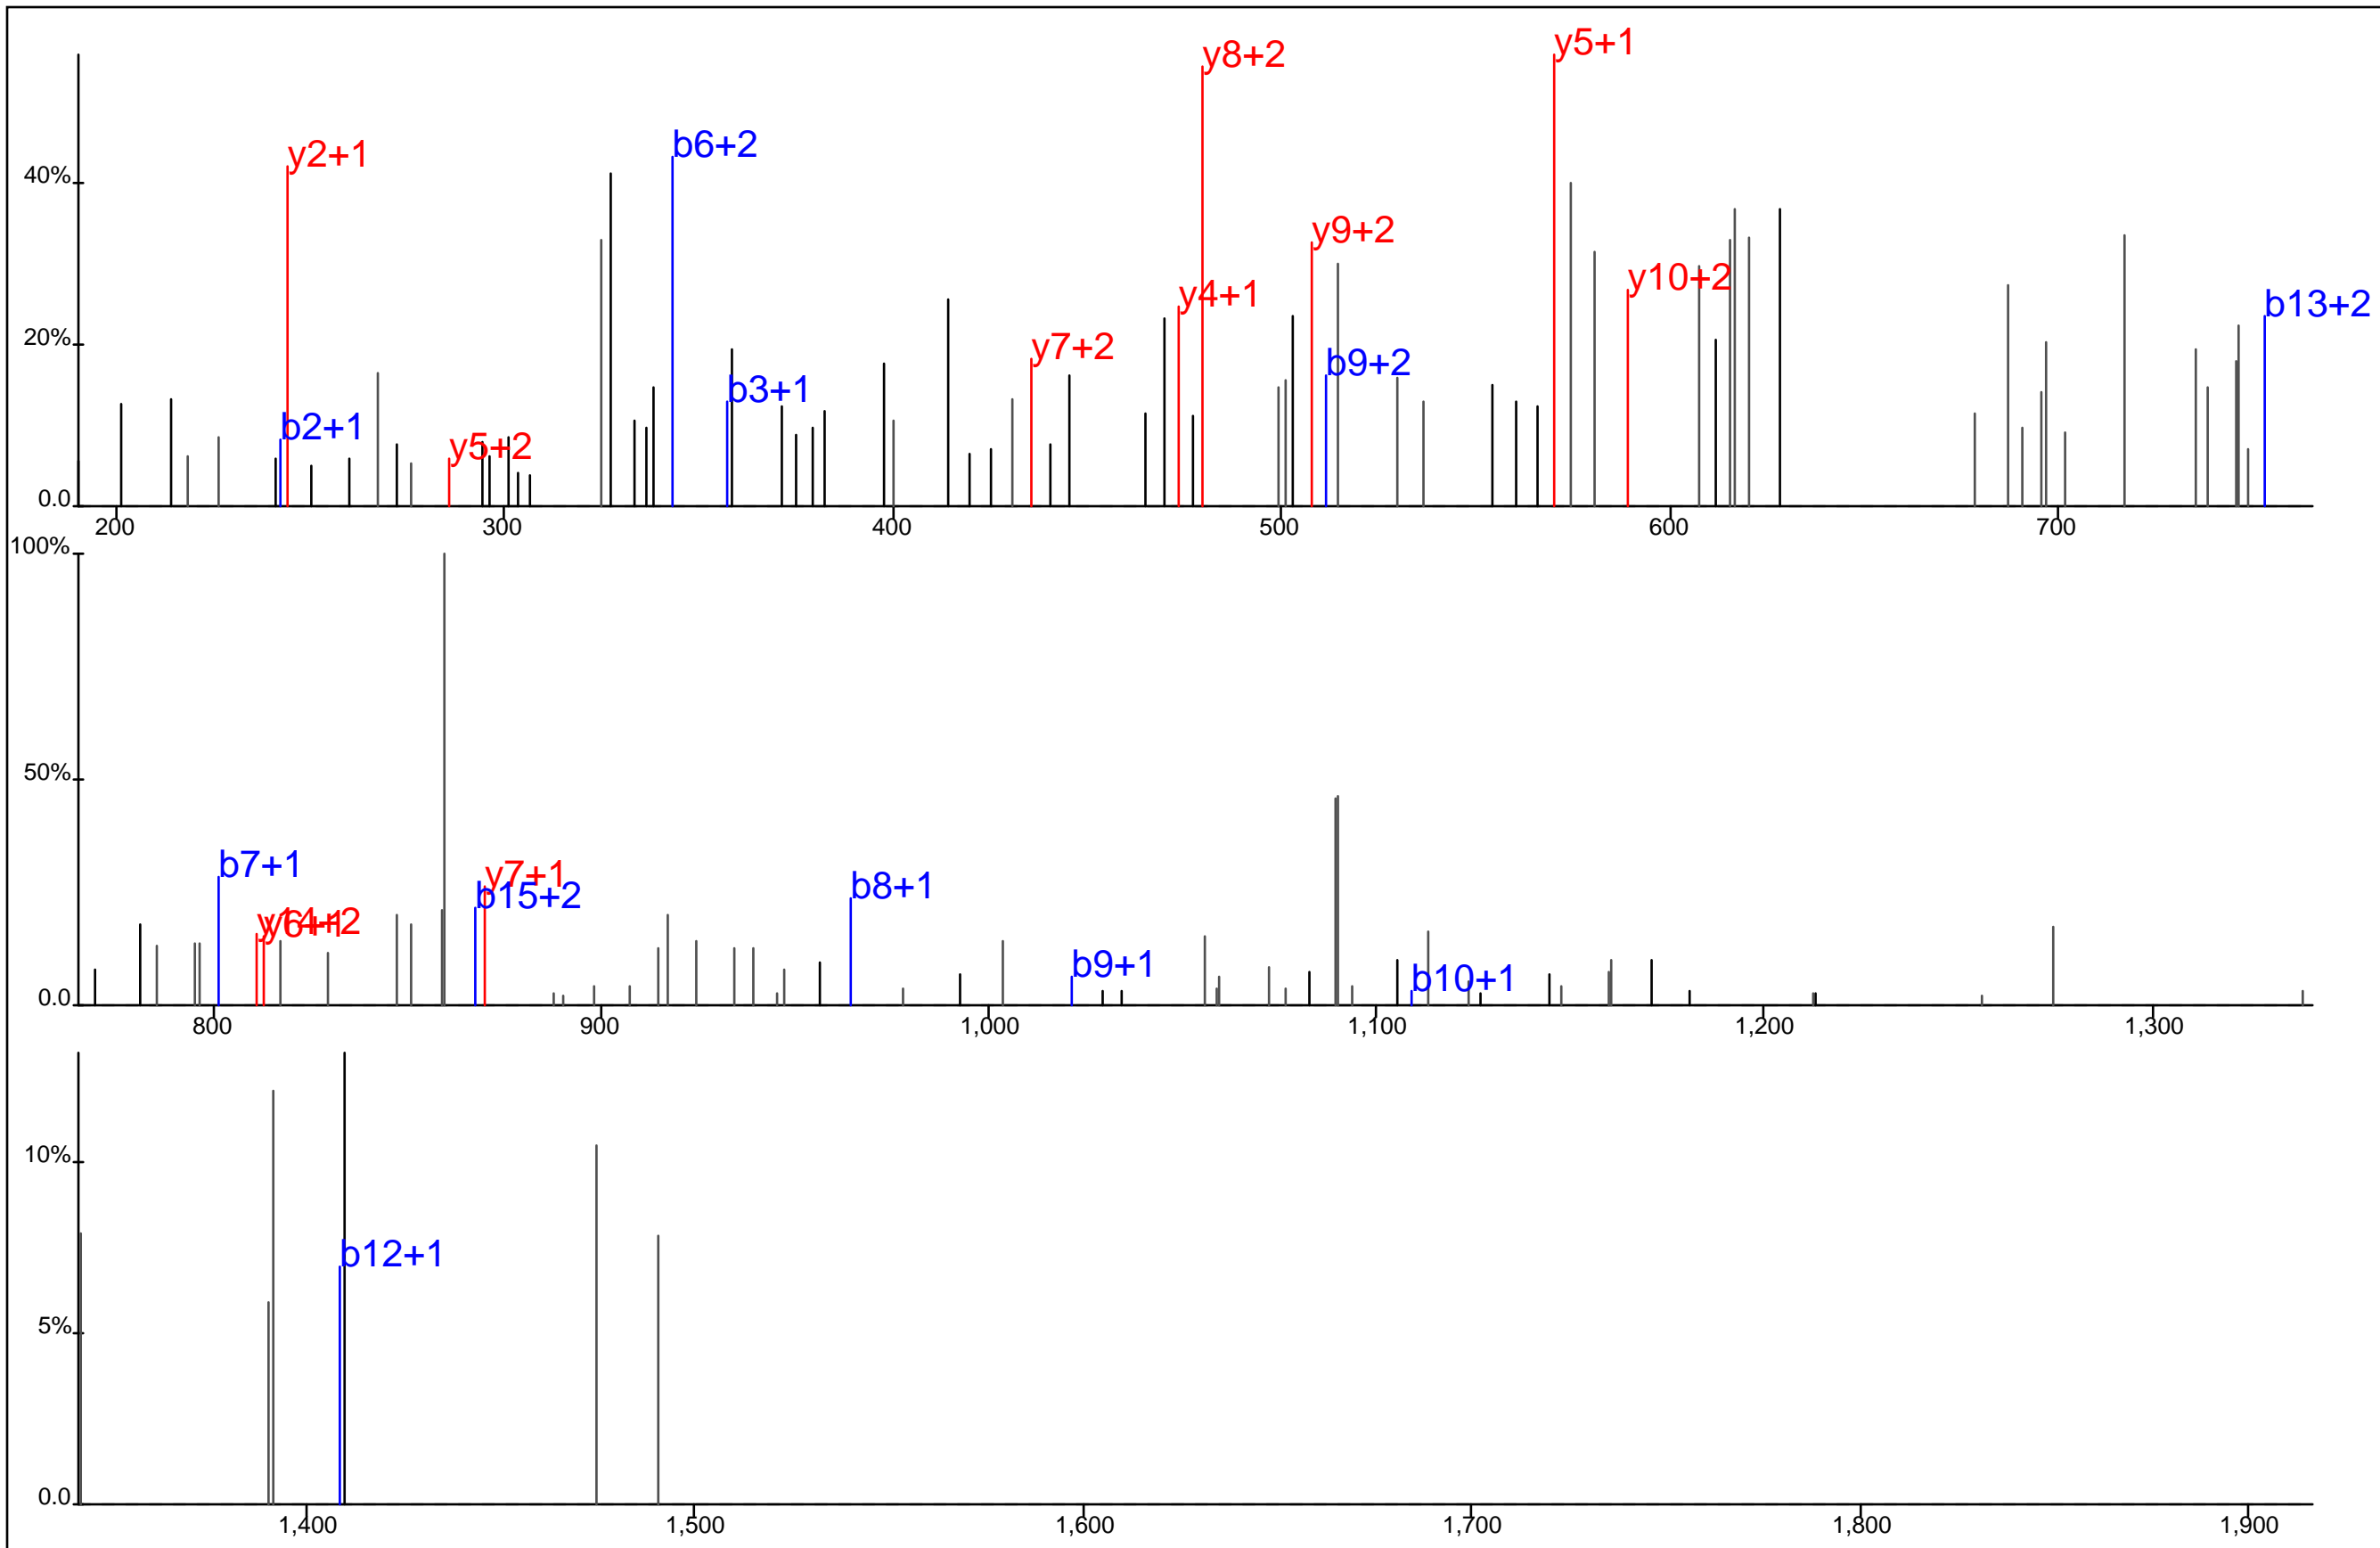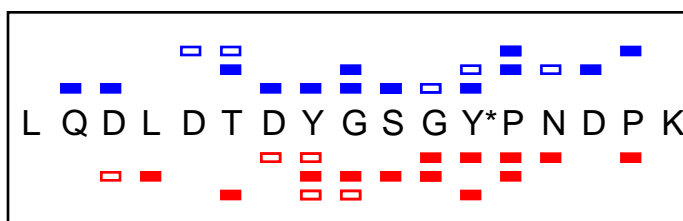

Protein Name: Ribonuclease H2, large subunit  
 gi Accession: 0  
 Precursor Mass: 659.9423+3  
 Delta Mass: 0.537 ppm  
 XCorr: 20.52

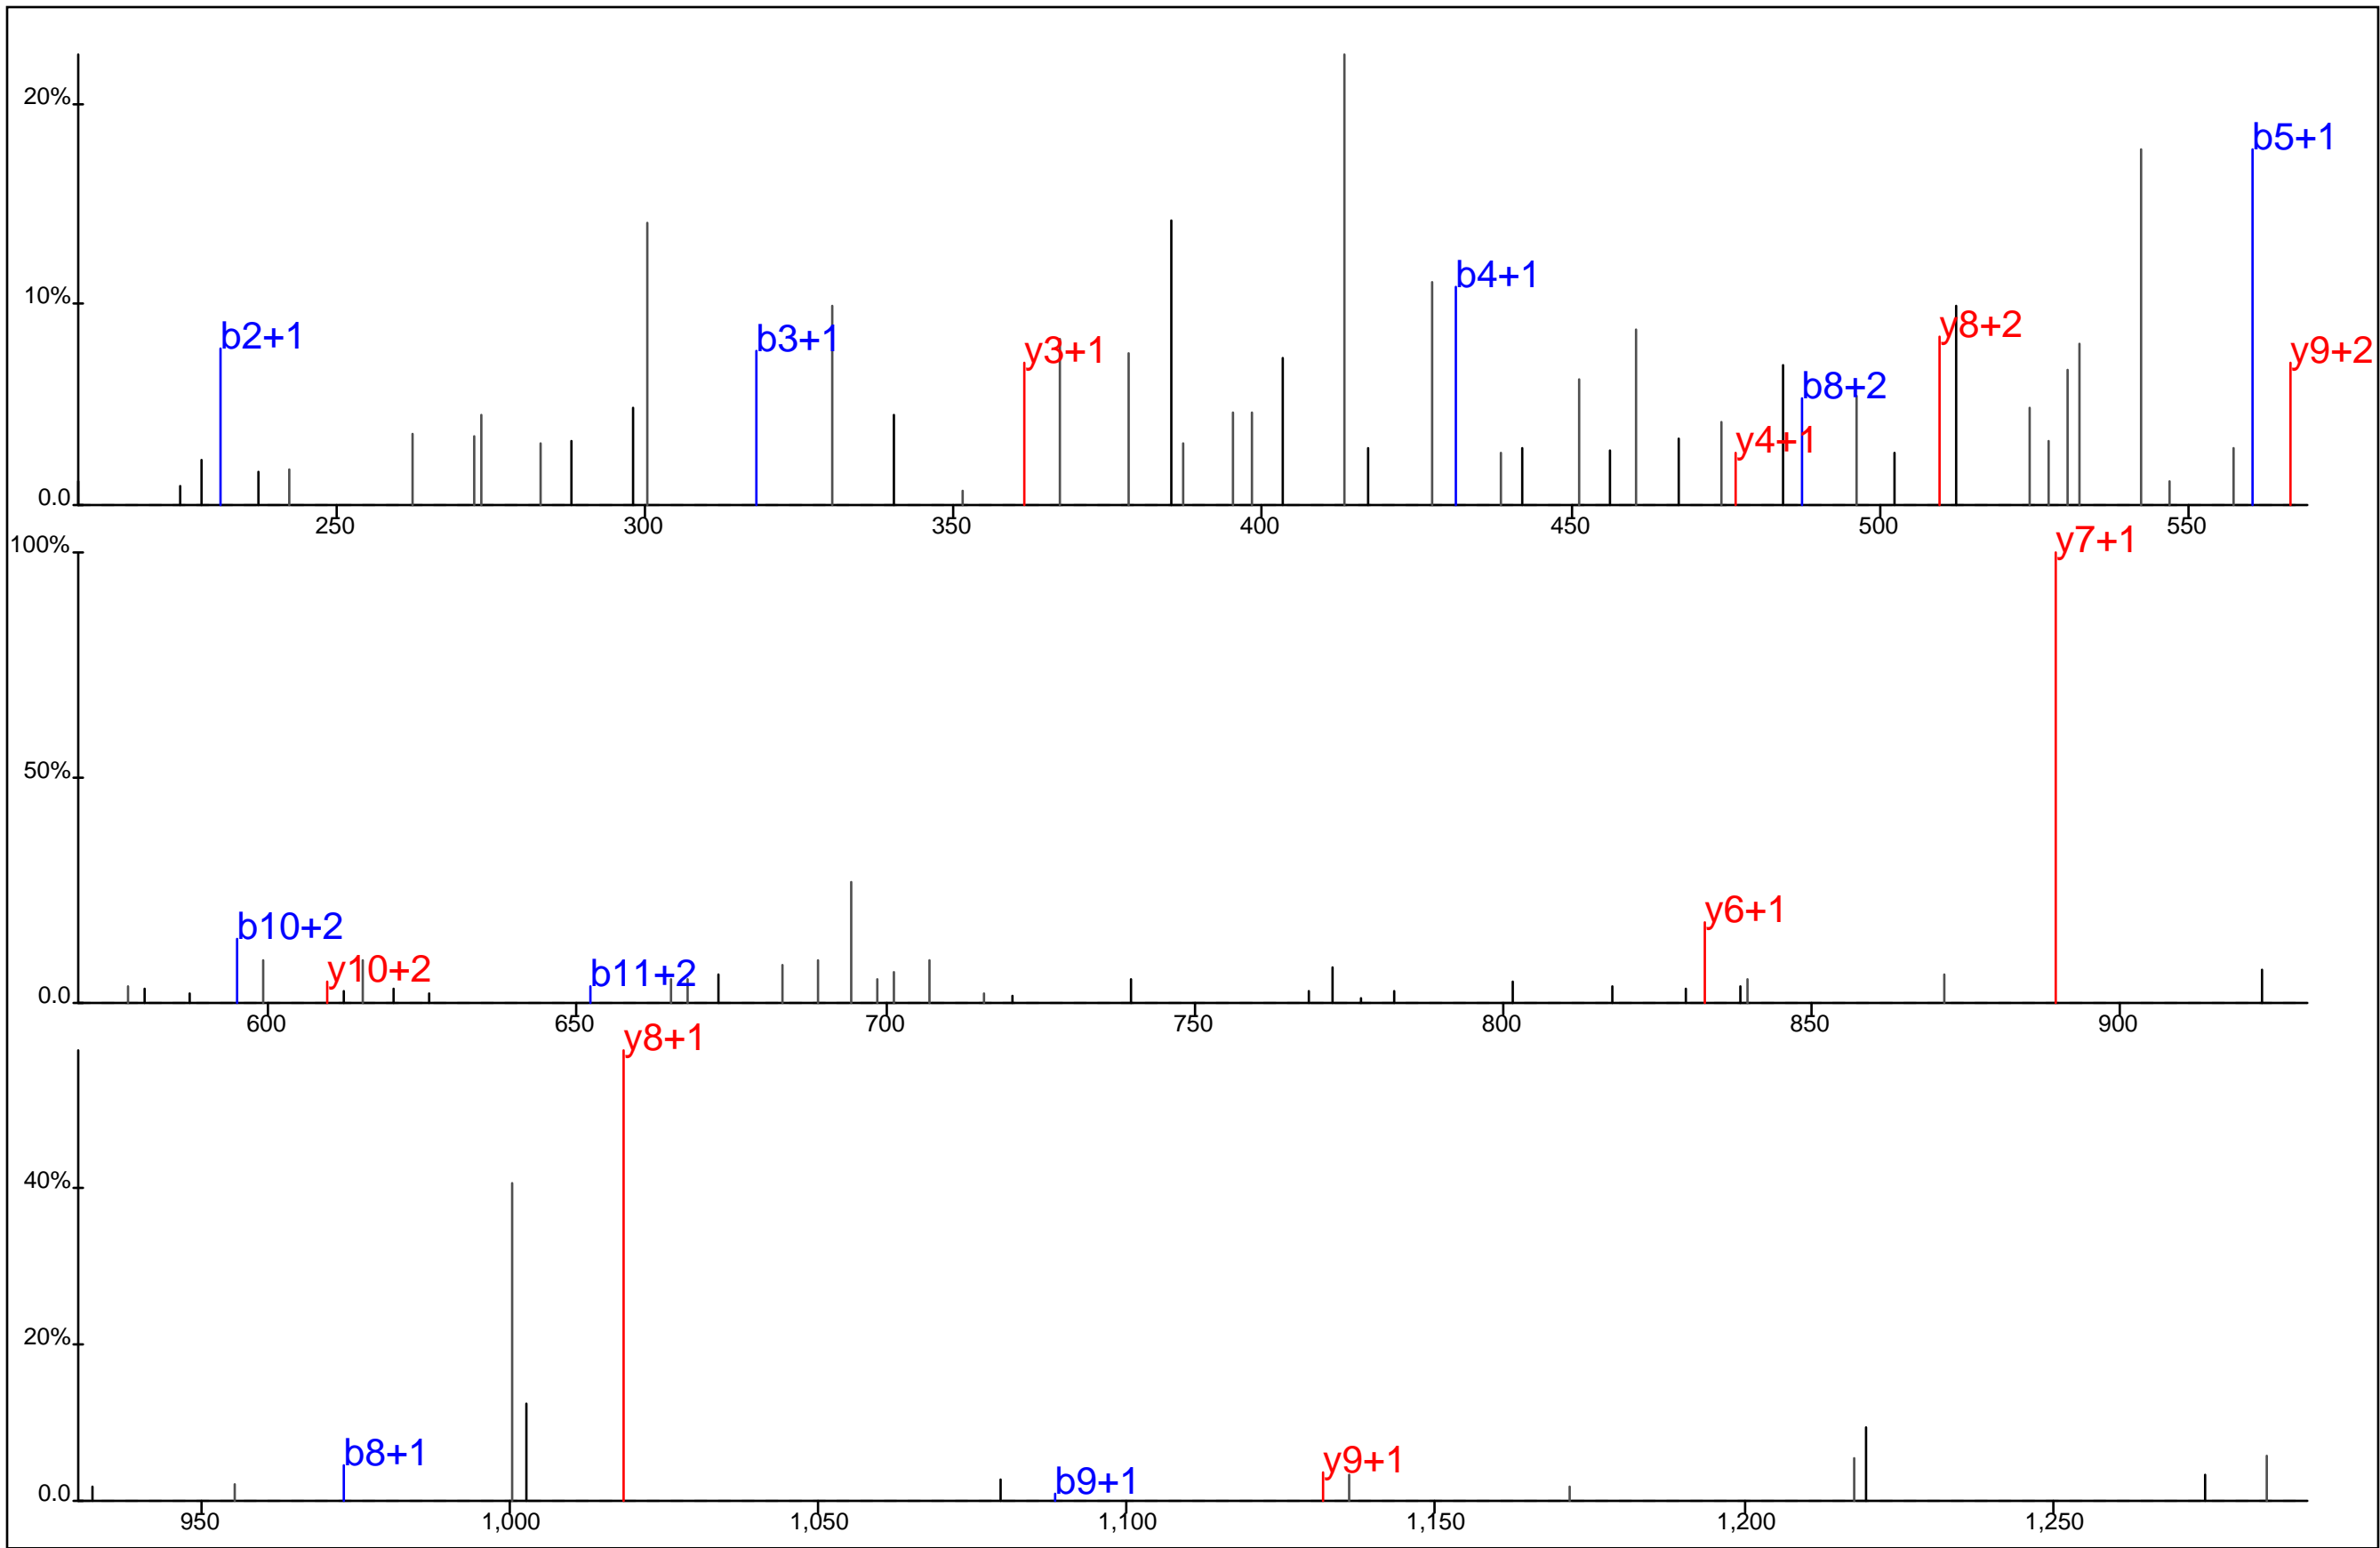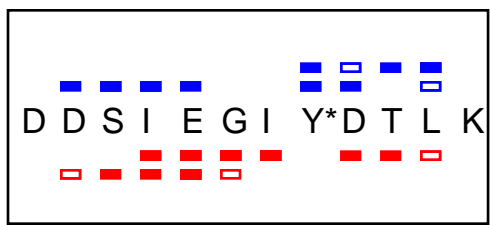

Protein Name: Ribonucleotide reductase M1 subunit  
 gi Accession: 0  
 Precursor Mass: 724.8153+2  
 Delta Mass: 2.836 ppm  
 XCorr: 22.18

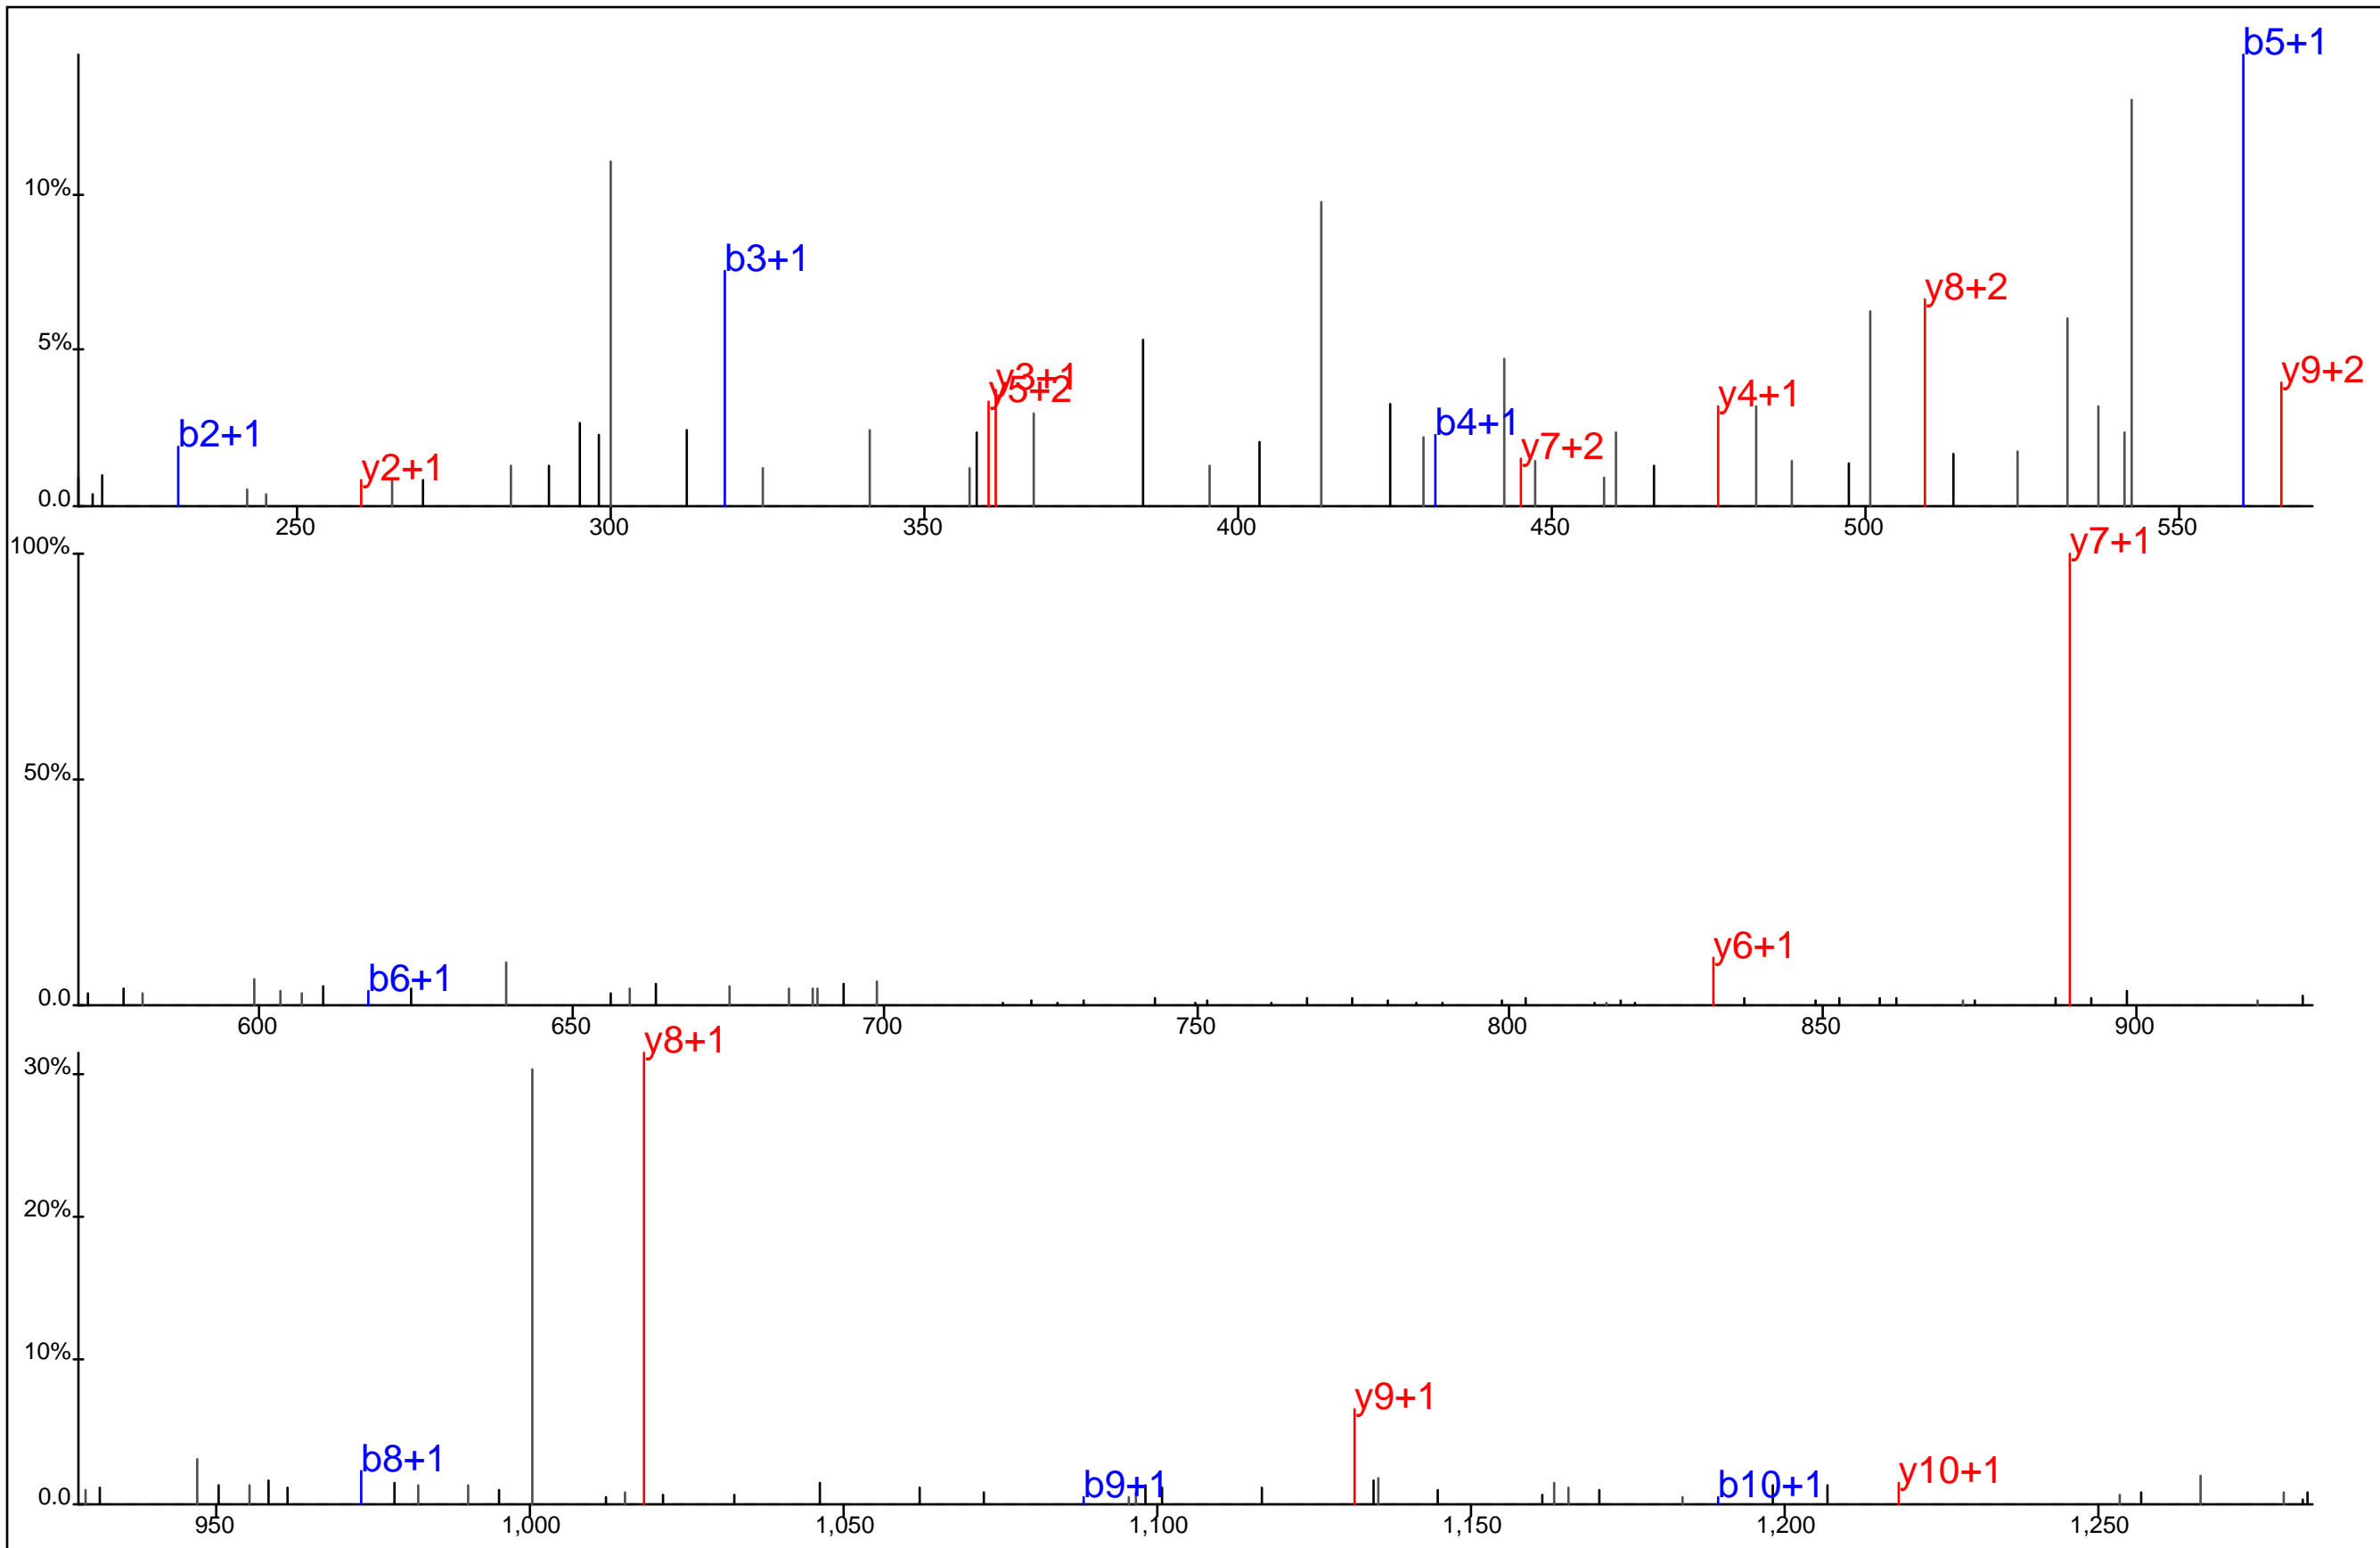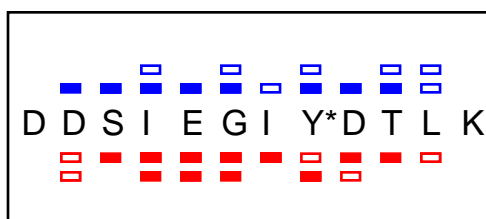

Protein Name: Ribonucleotide reductase M1 subunit  
 gi Accession: 0  
 Precursor Mass: 724.8121+2  
 Delta Mass: 1.546 ppm  
 XCorr: 22.59

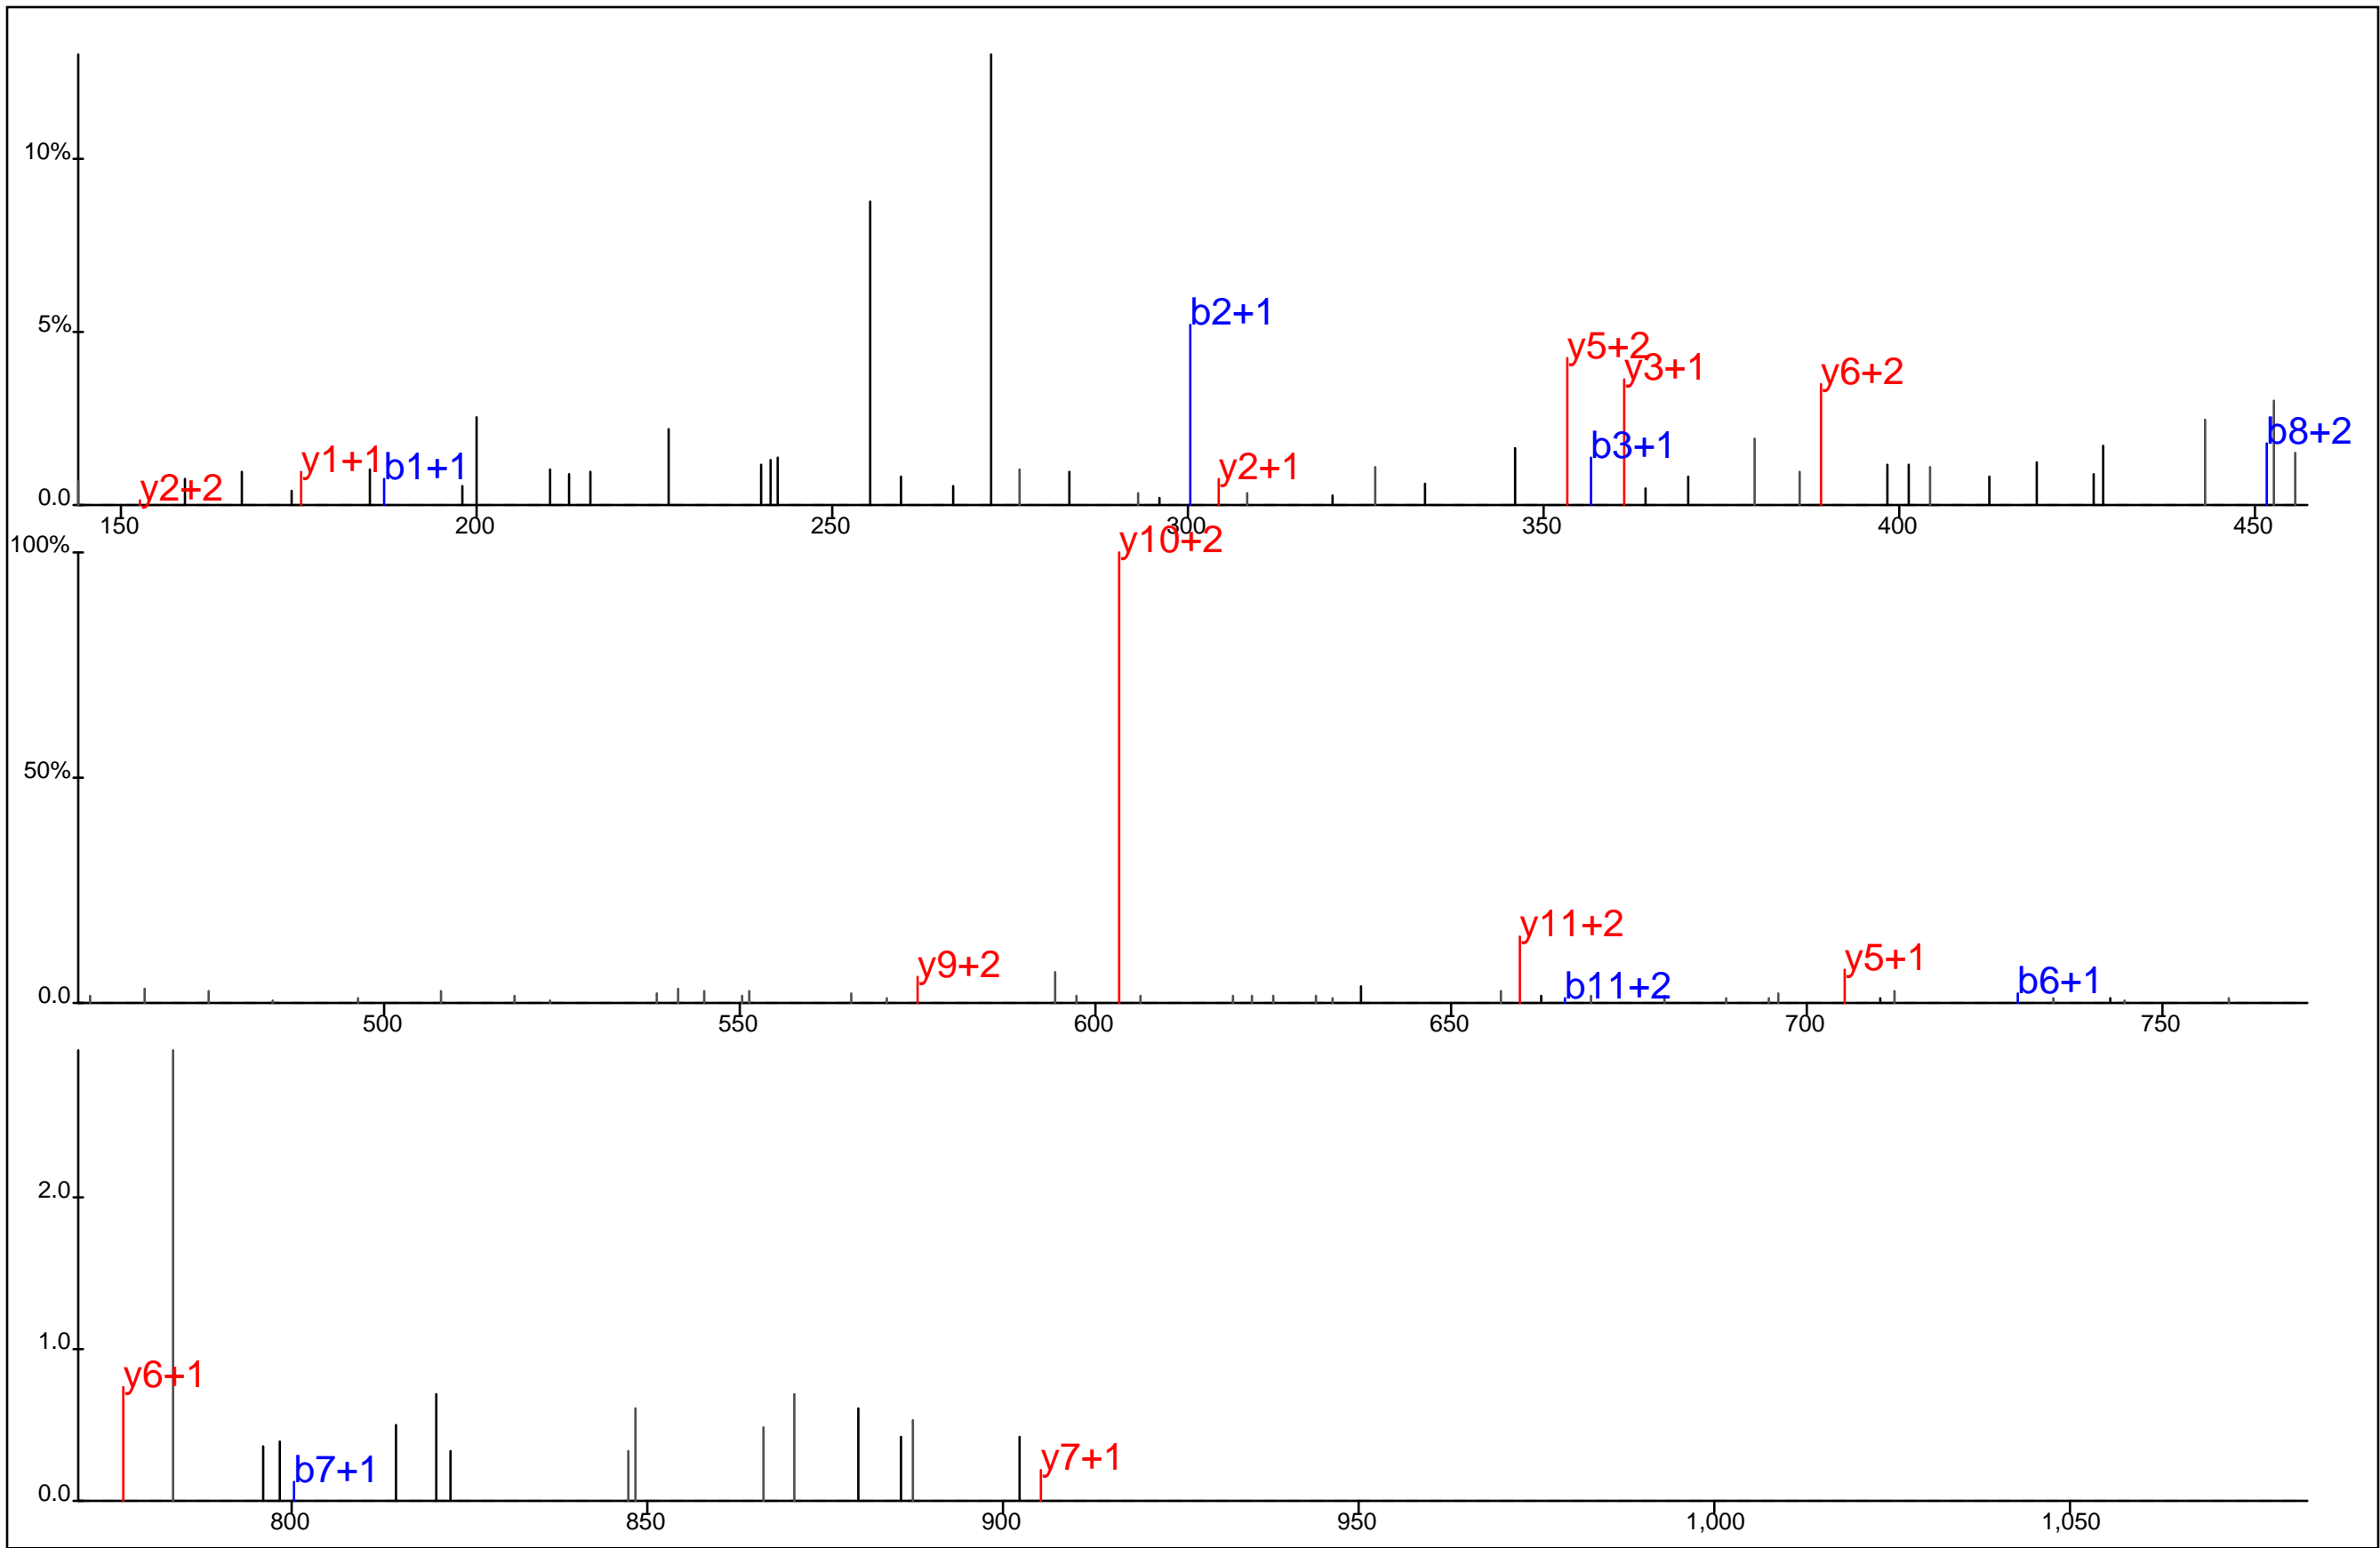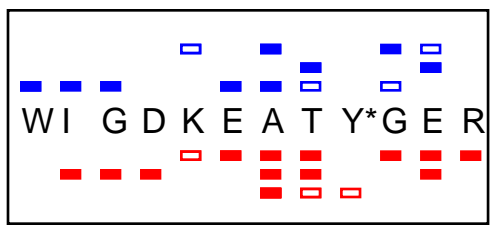

Protein Name: Ribonucleotide reductase M2 subunit  
 gi Accession: 0  
 Precursor Mass: 502.2225+3  
 Delta Mass: 4.051 ppm  
 XCorr: 22.42

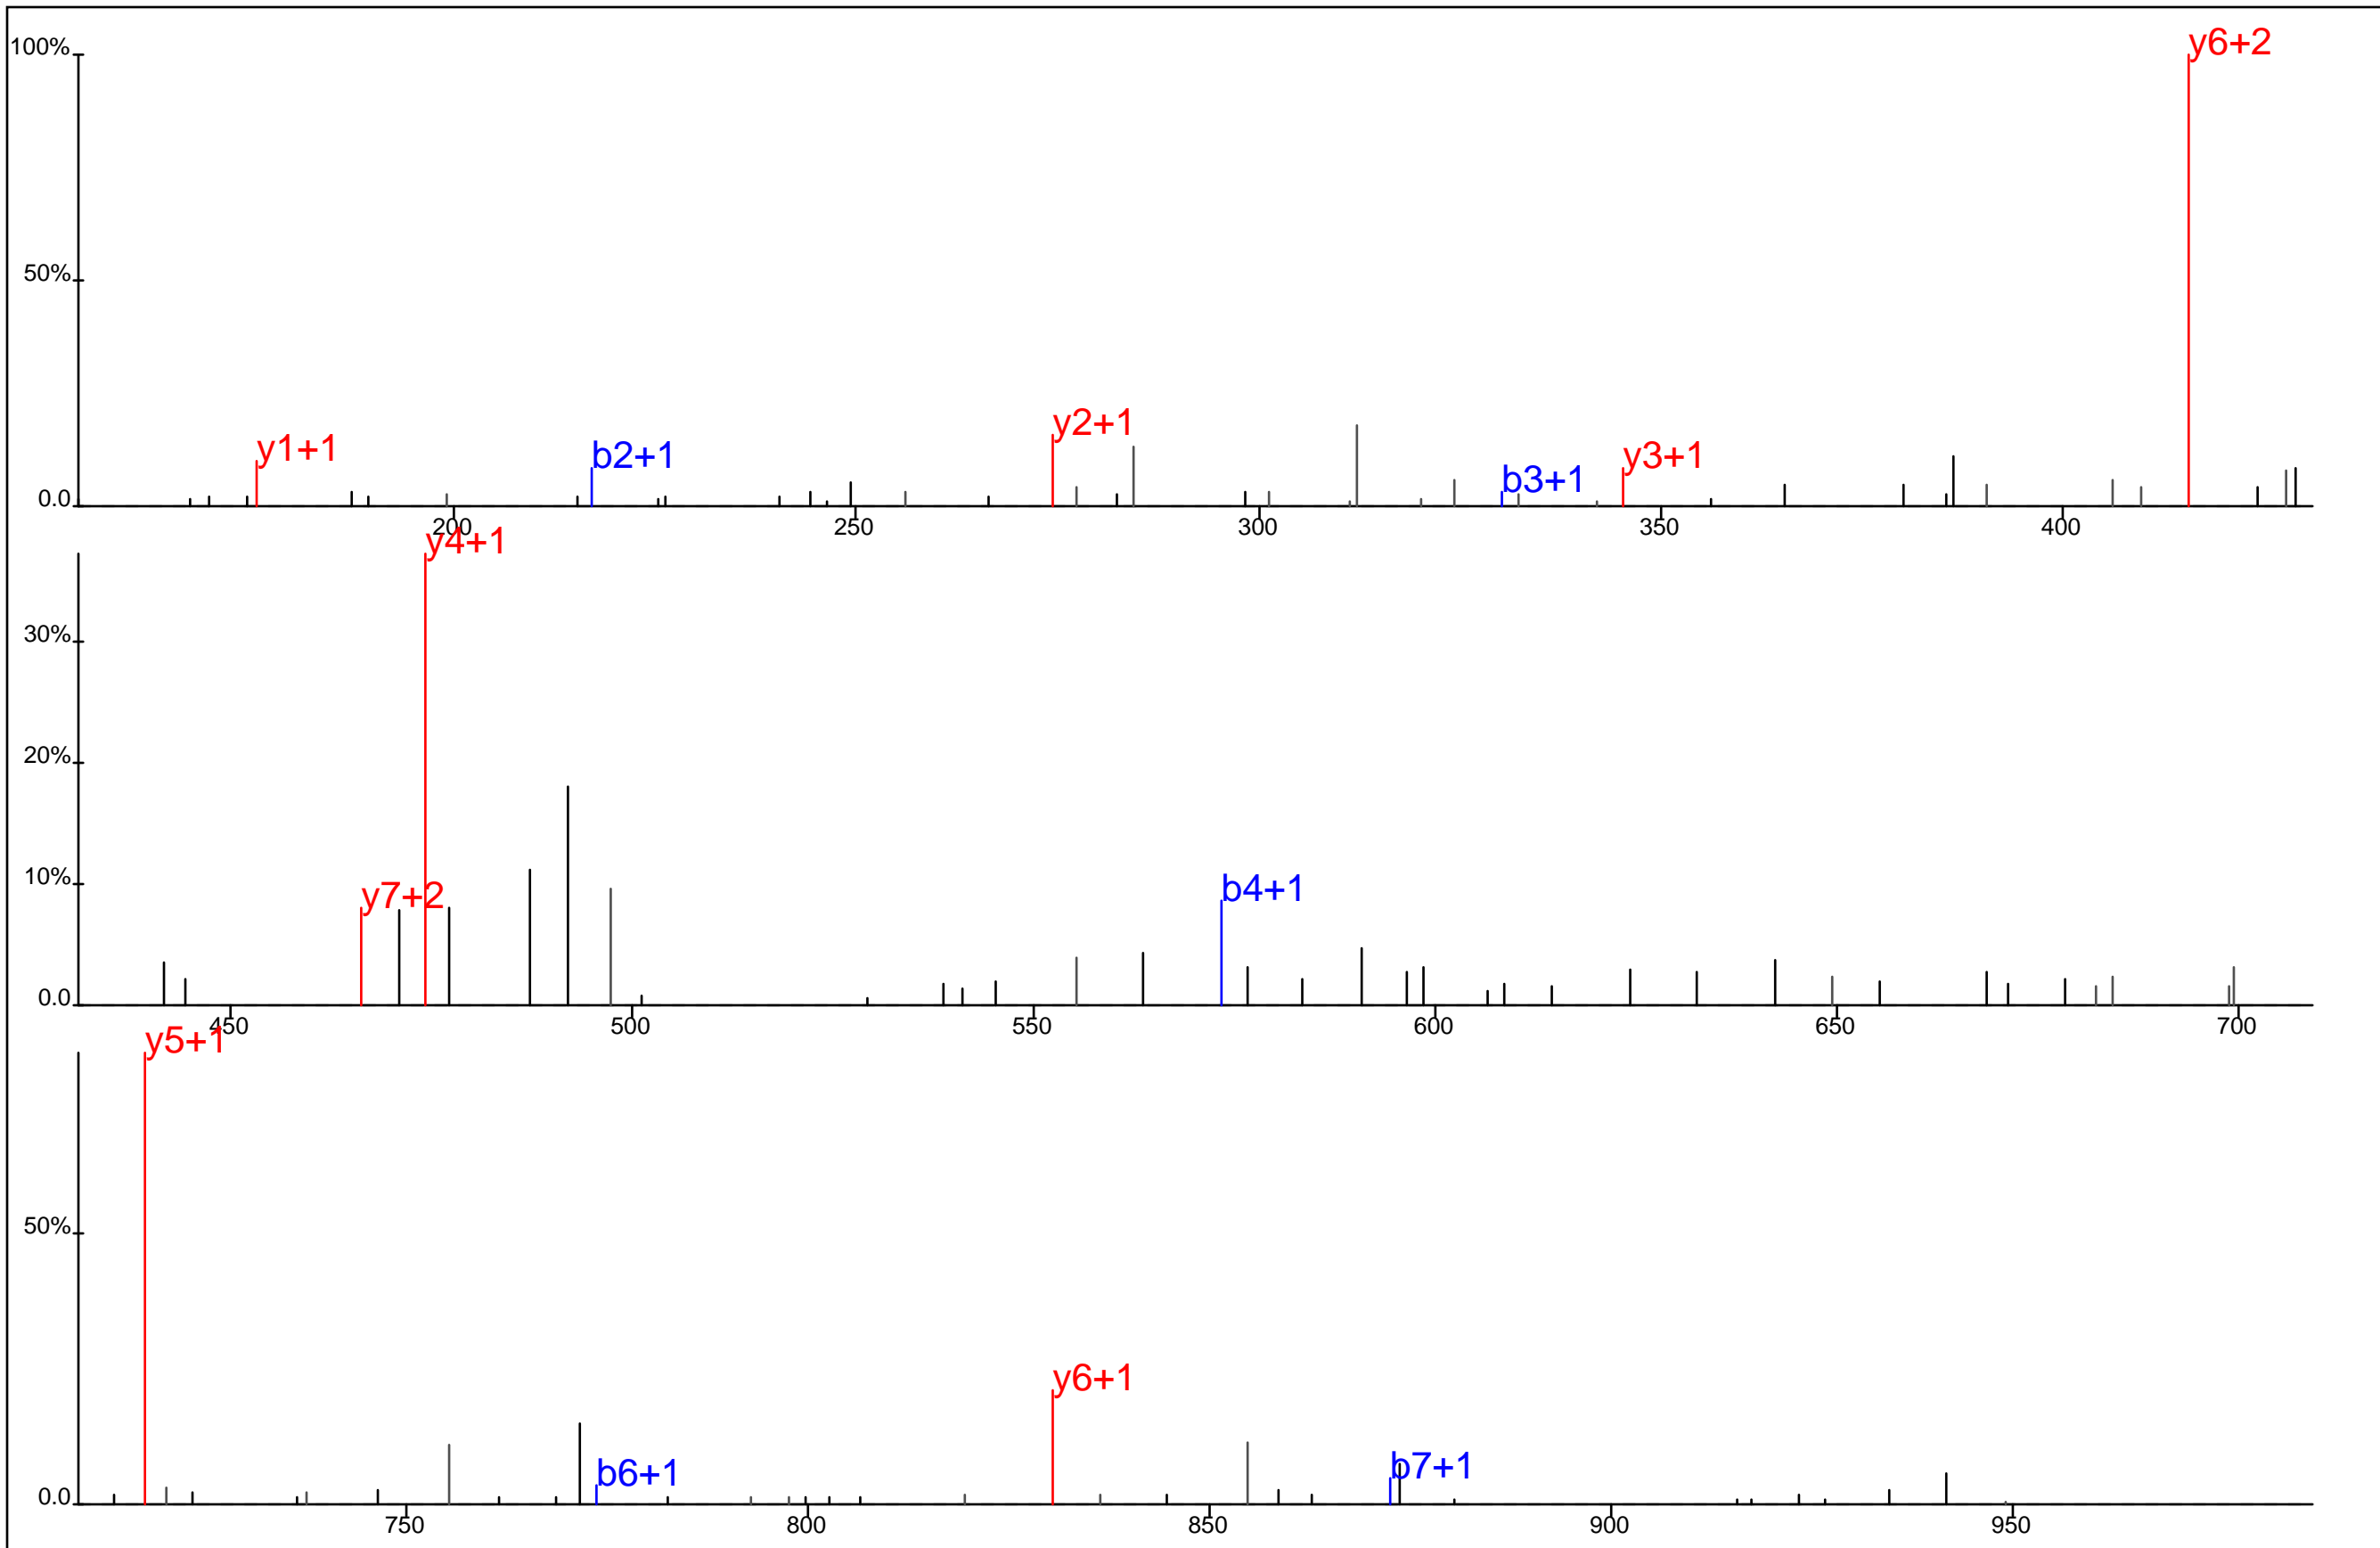

D T L Y\* E A V R

Protein Name: Ribosomal protein L10a  
 gi Accession: 0  
 Precursor Mass: 523.7310+2  
 Delta Mass: 0.604 ppm  
 XCorr: 32.09

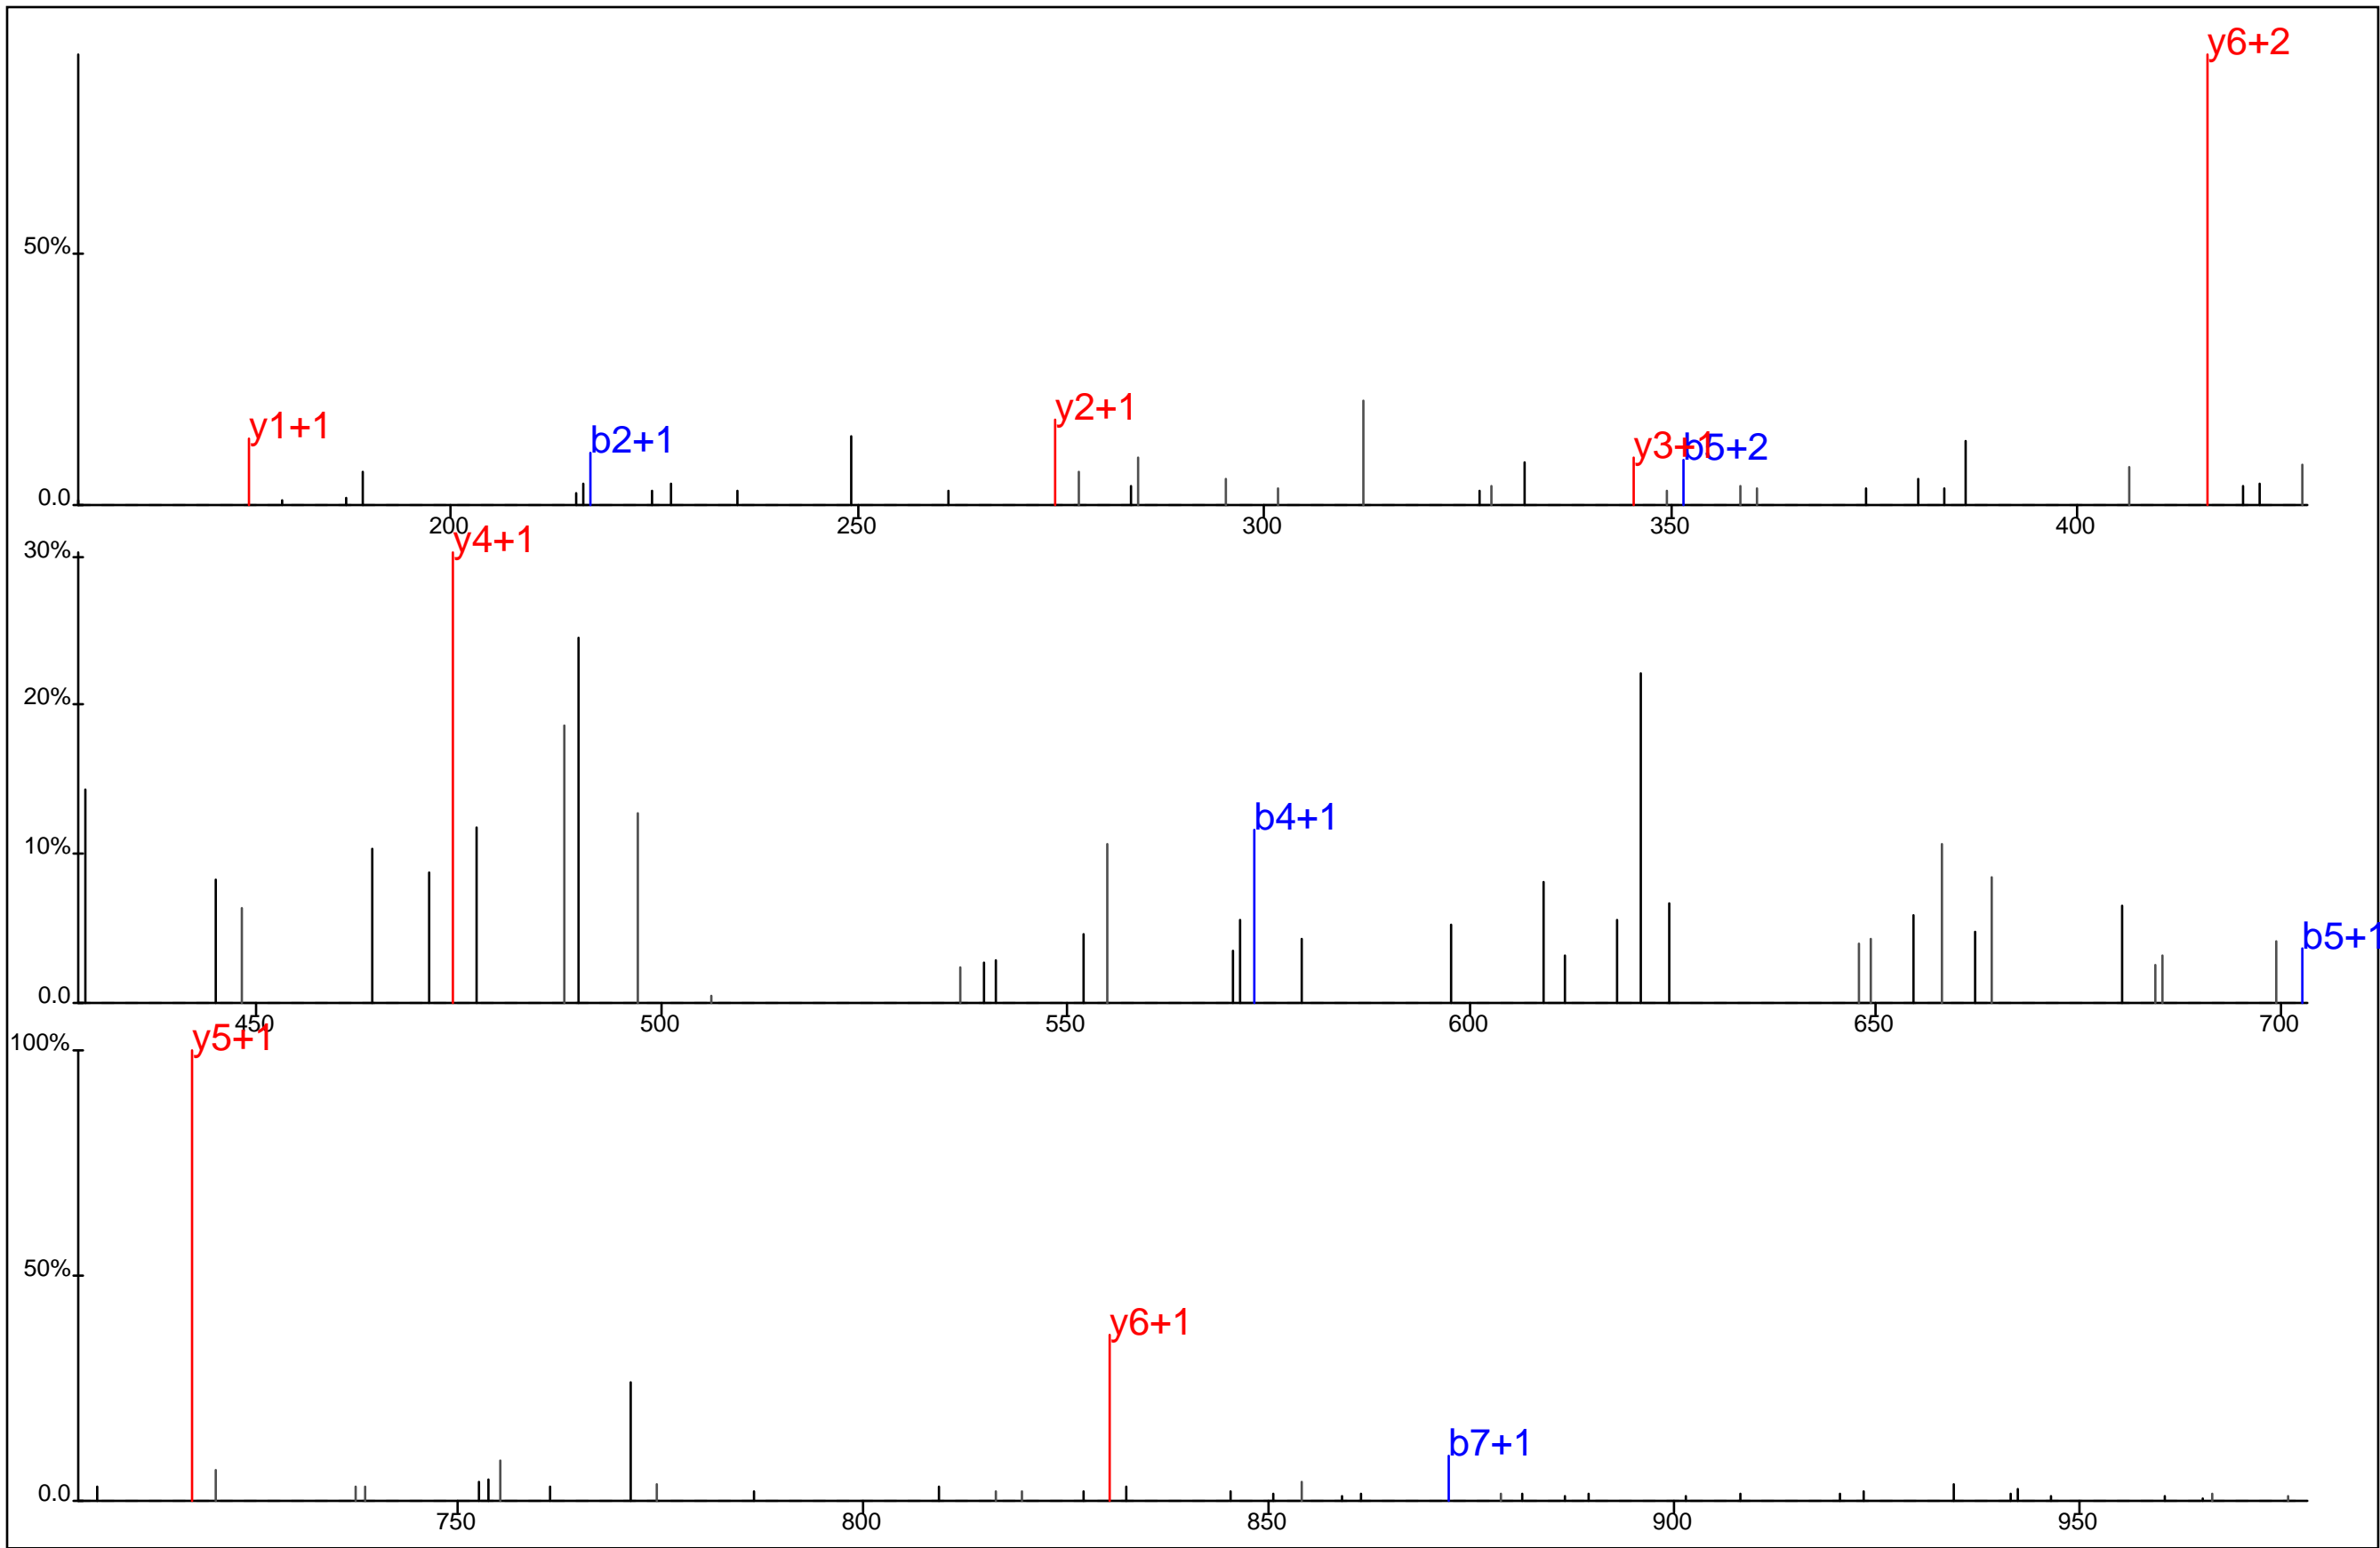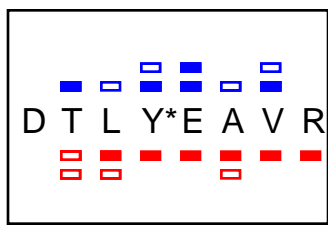

Protein Name: Ribosomal protein L10a  
 gi Accession: 0  
 Precursor Mass: 523.7309+2  
 Delta Mass: 0.837 ppm  
 XCorr: 32.8

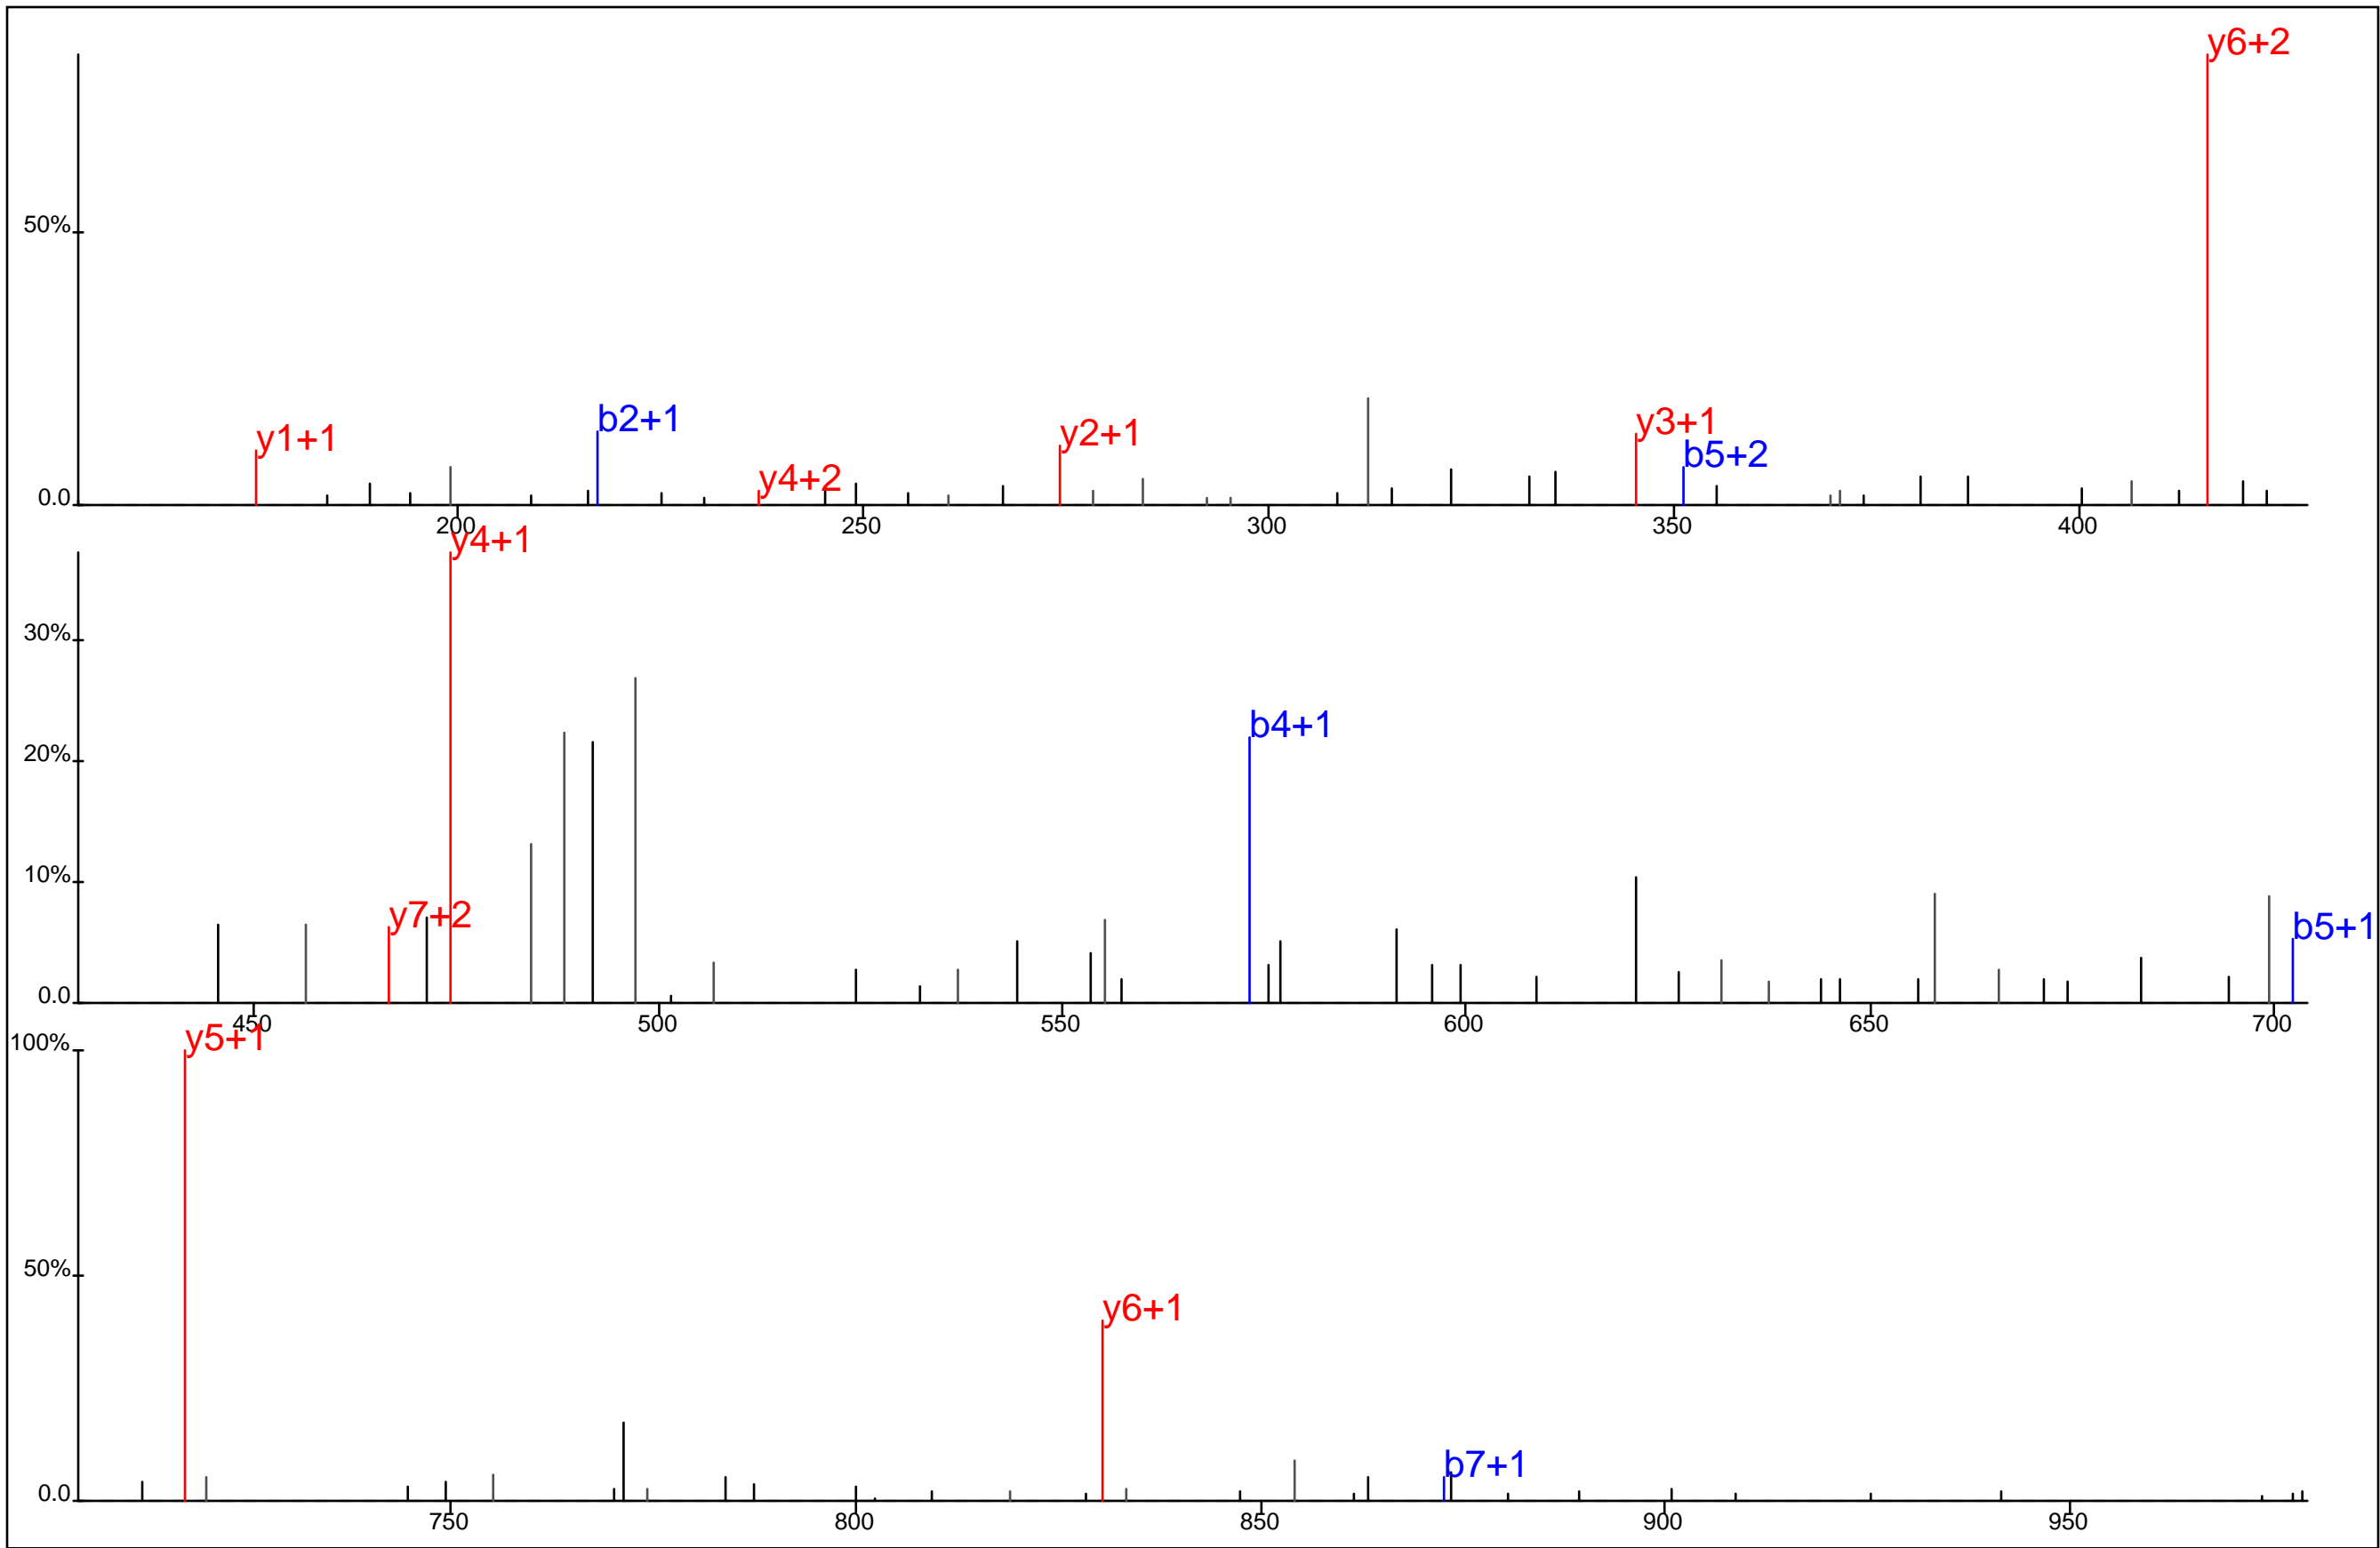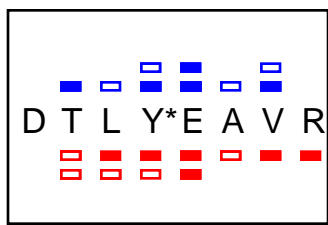

Protein Name: Ribosomal protein L10a  
 gi Accession: 0  
 Precursor Mass: 523.7314+2  
 Delta Mass: 0.212 ppm  
 XCorr: 36.5



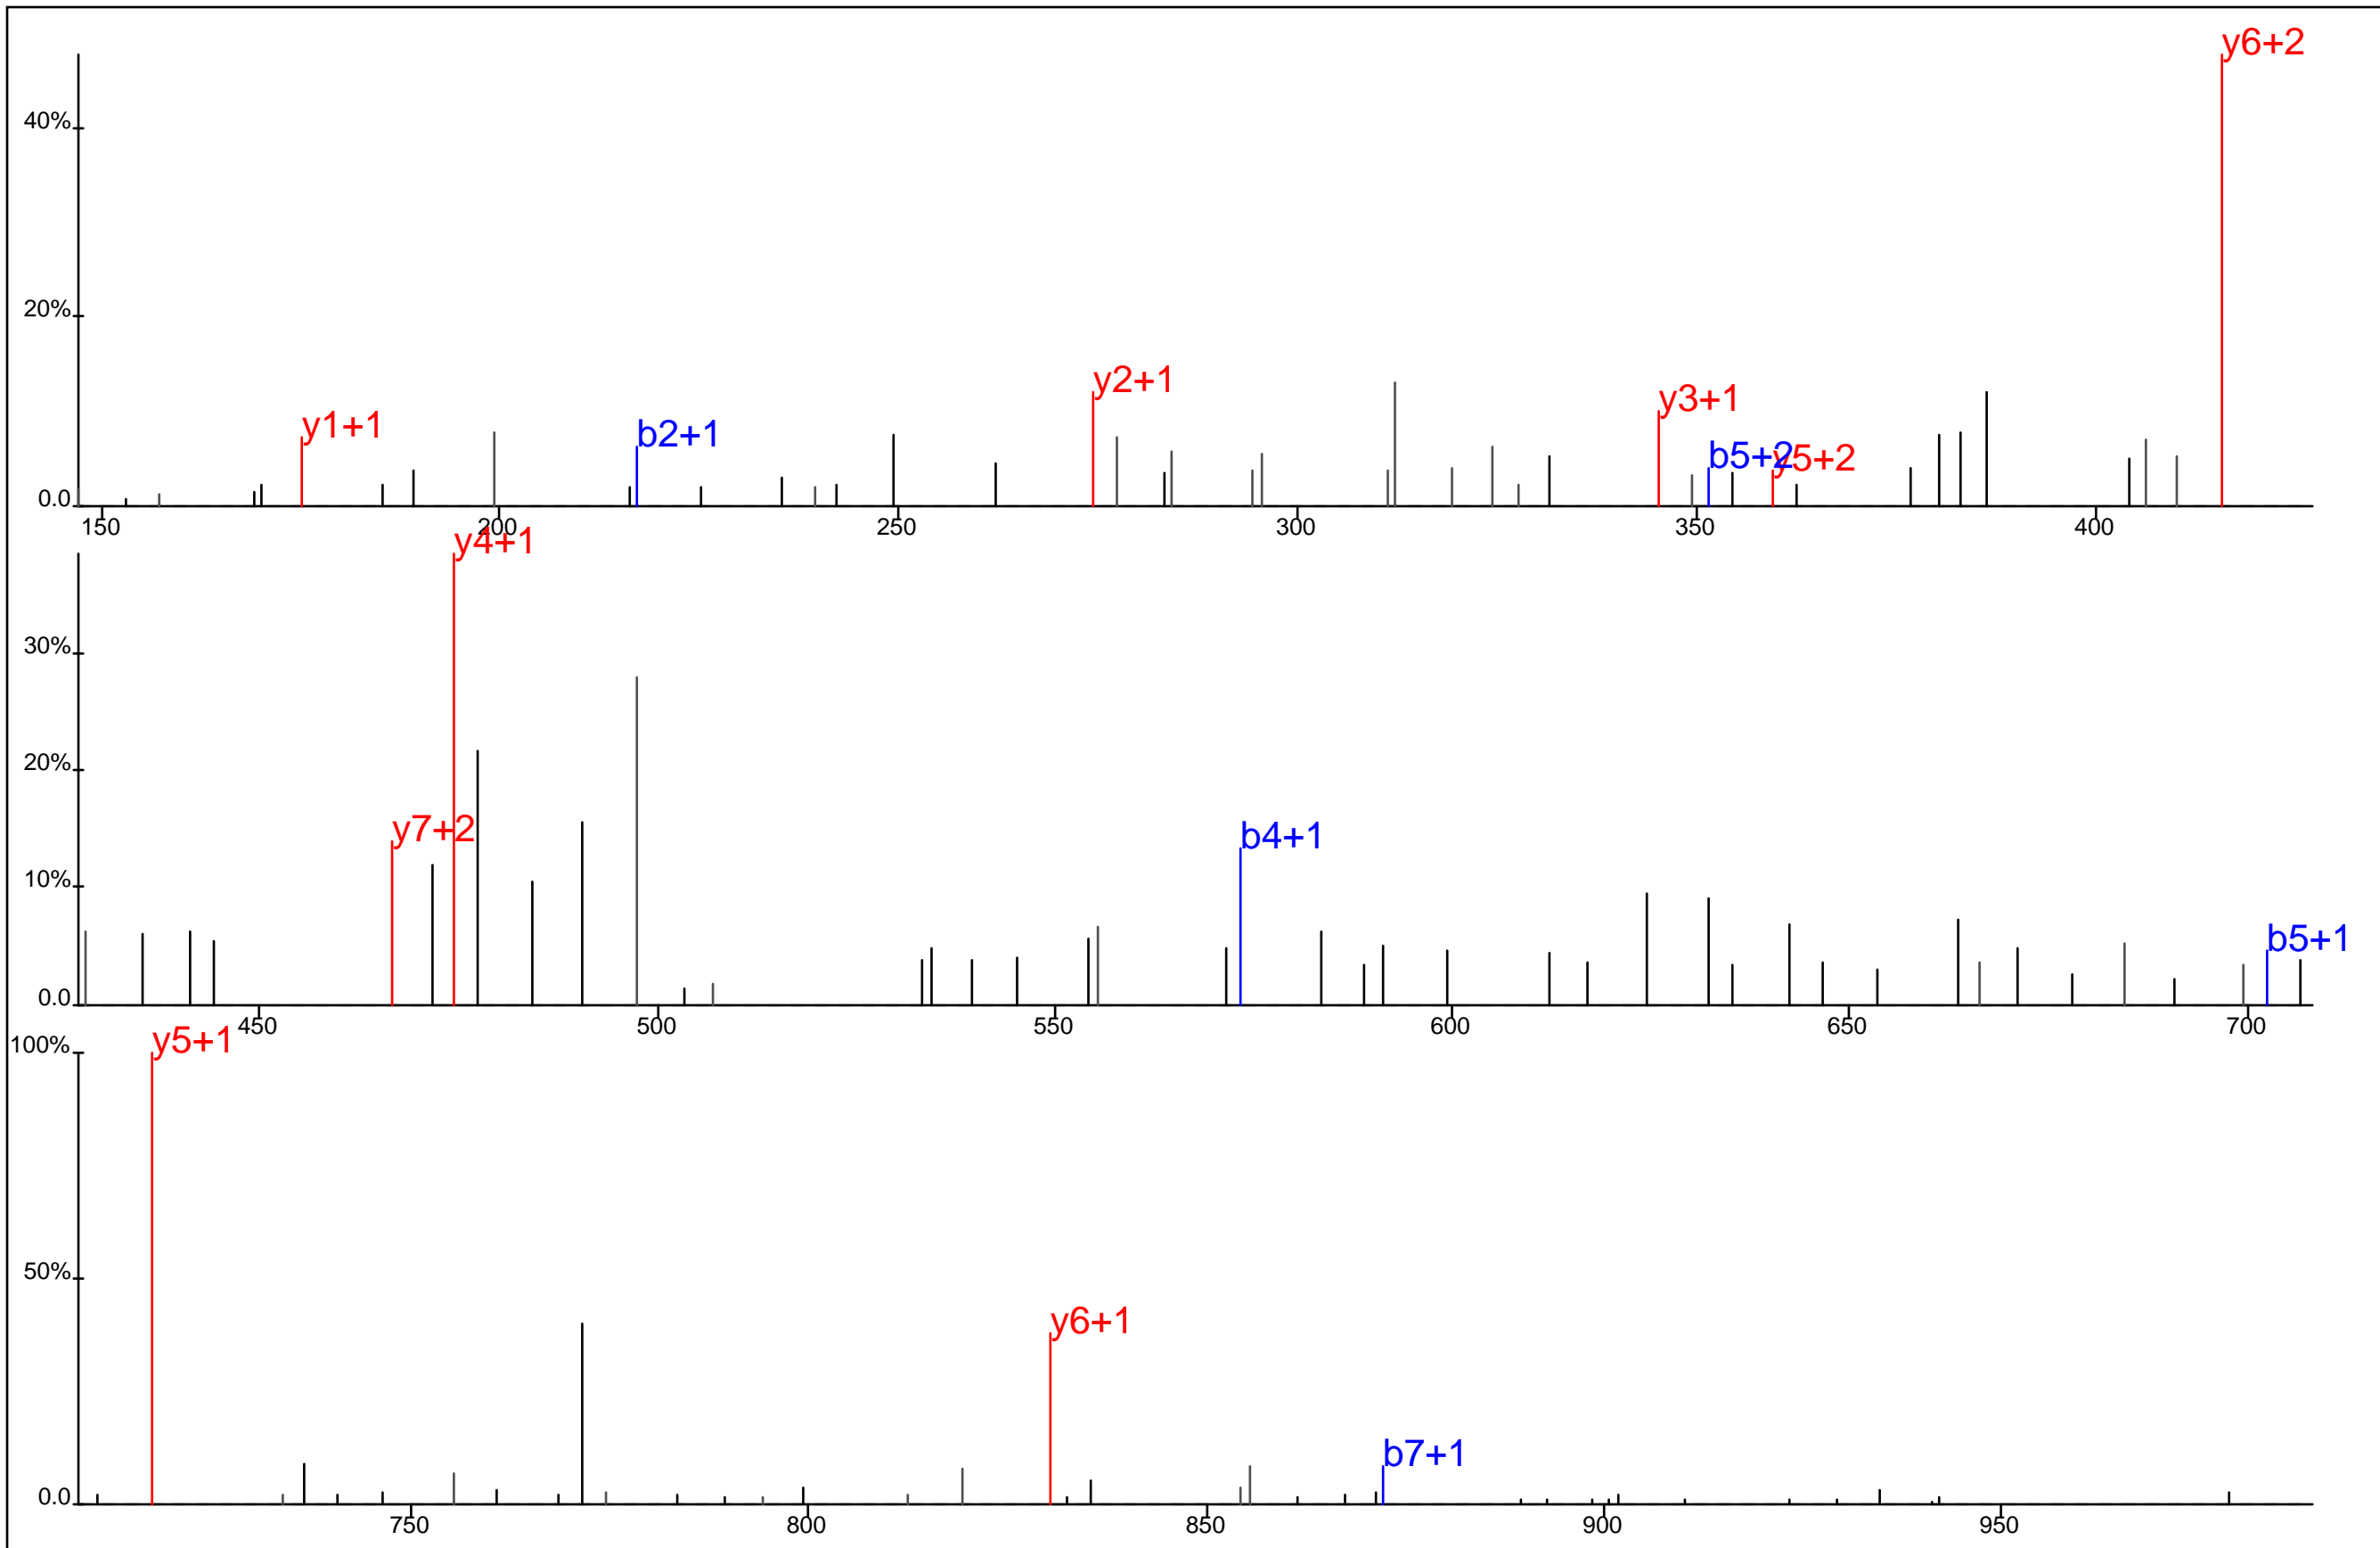

■ □ ■ ■ □ □  
 D T L Y\* E A V R  
□ ■ ■ □ ■ □

Protein Name: Ribosomal protein L10a  
 gi Accession: 0  
 Precursor Mass: 523.7305+2  
 Delta Mass: 1.653 ppm  
 XCorr: 31.79

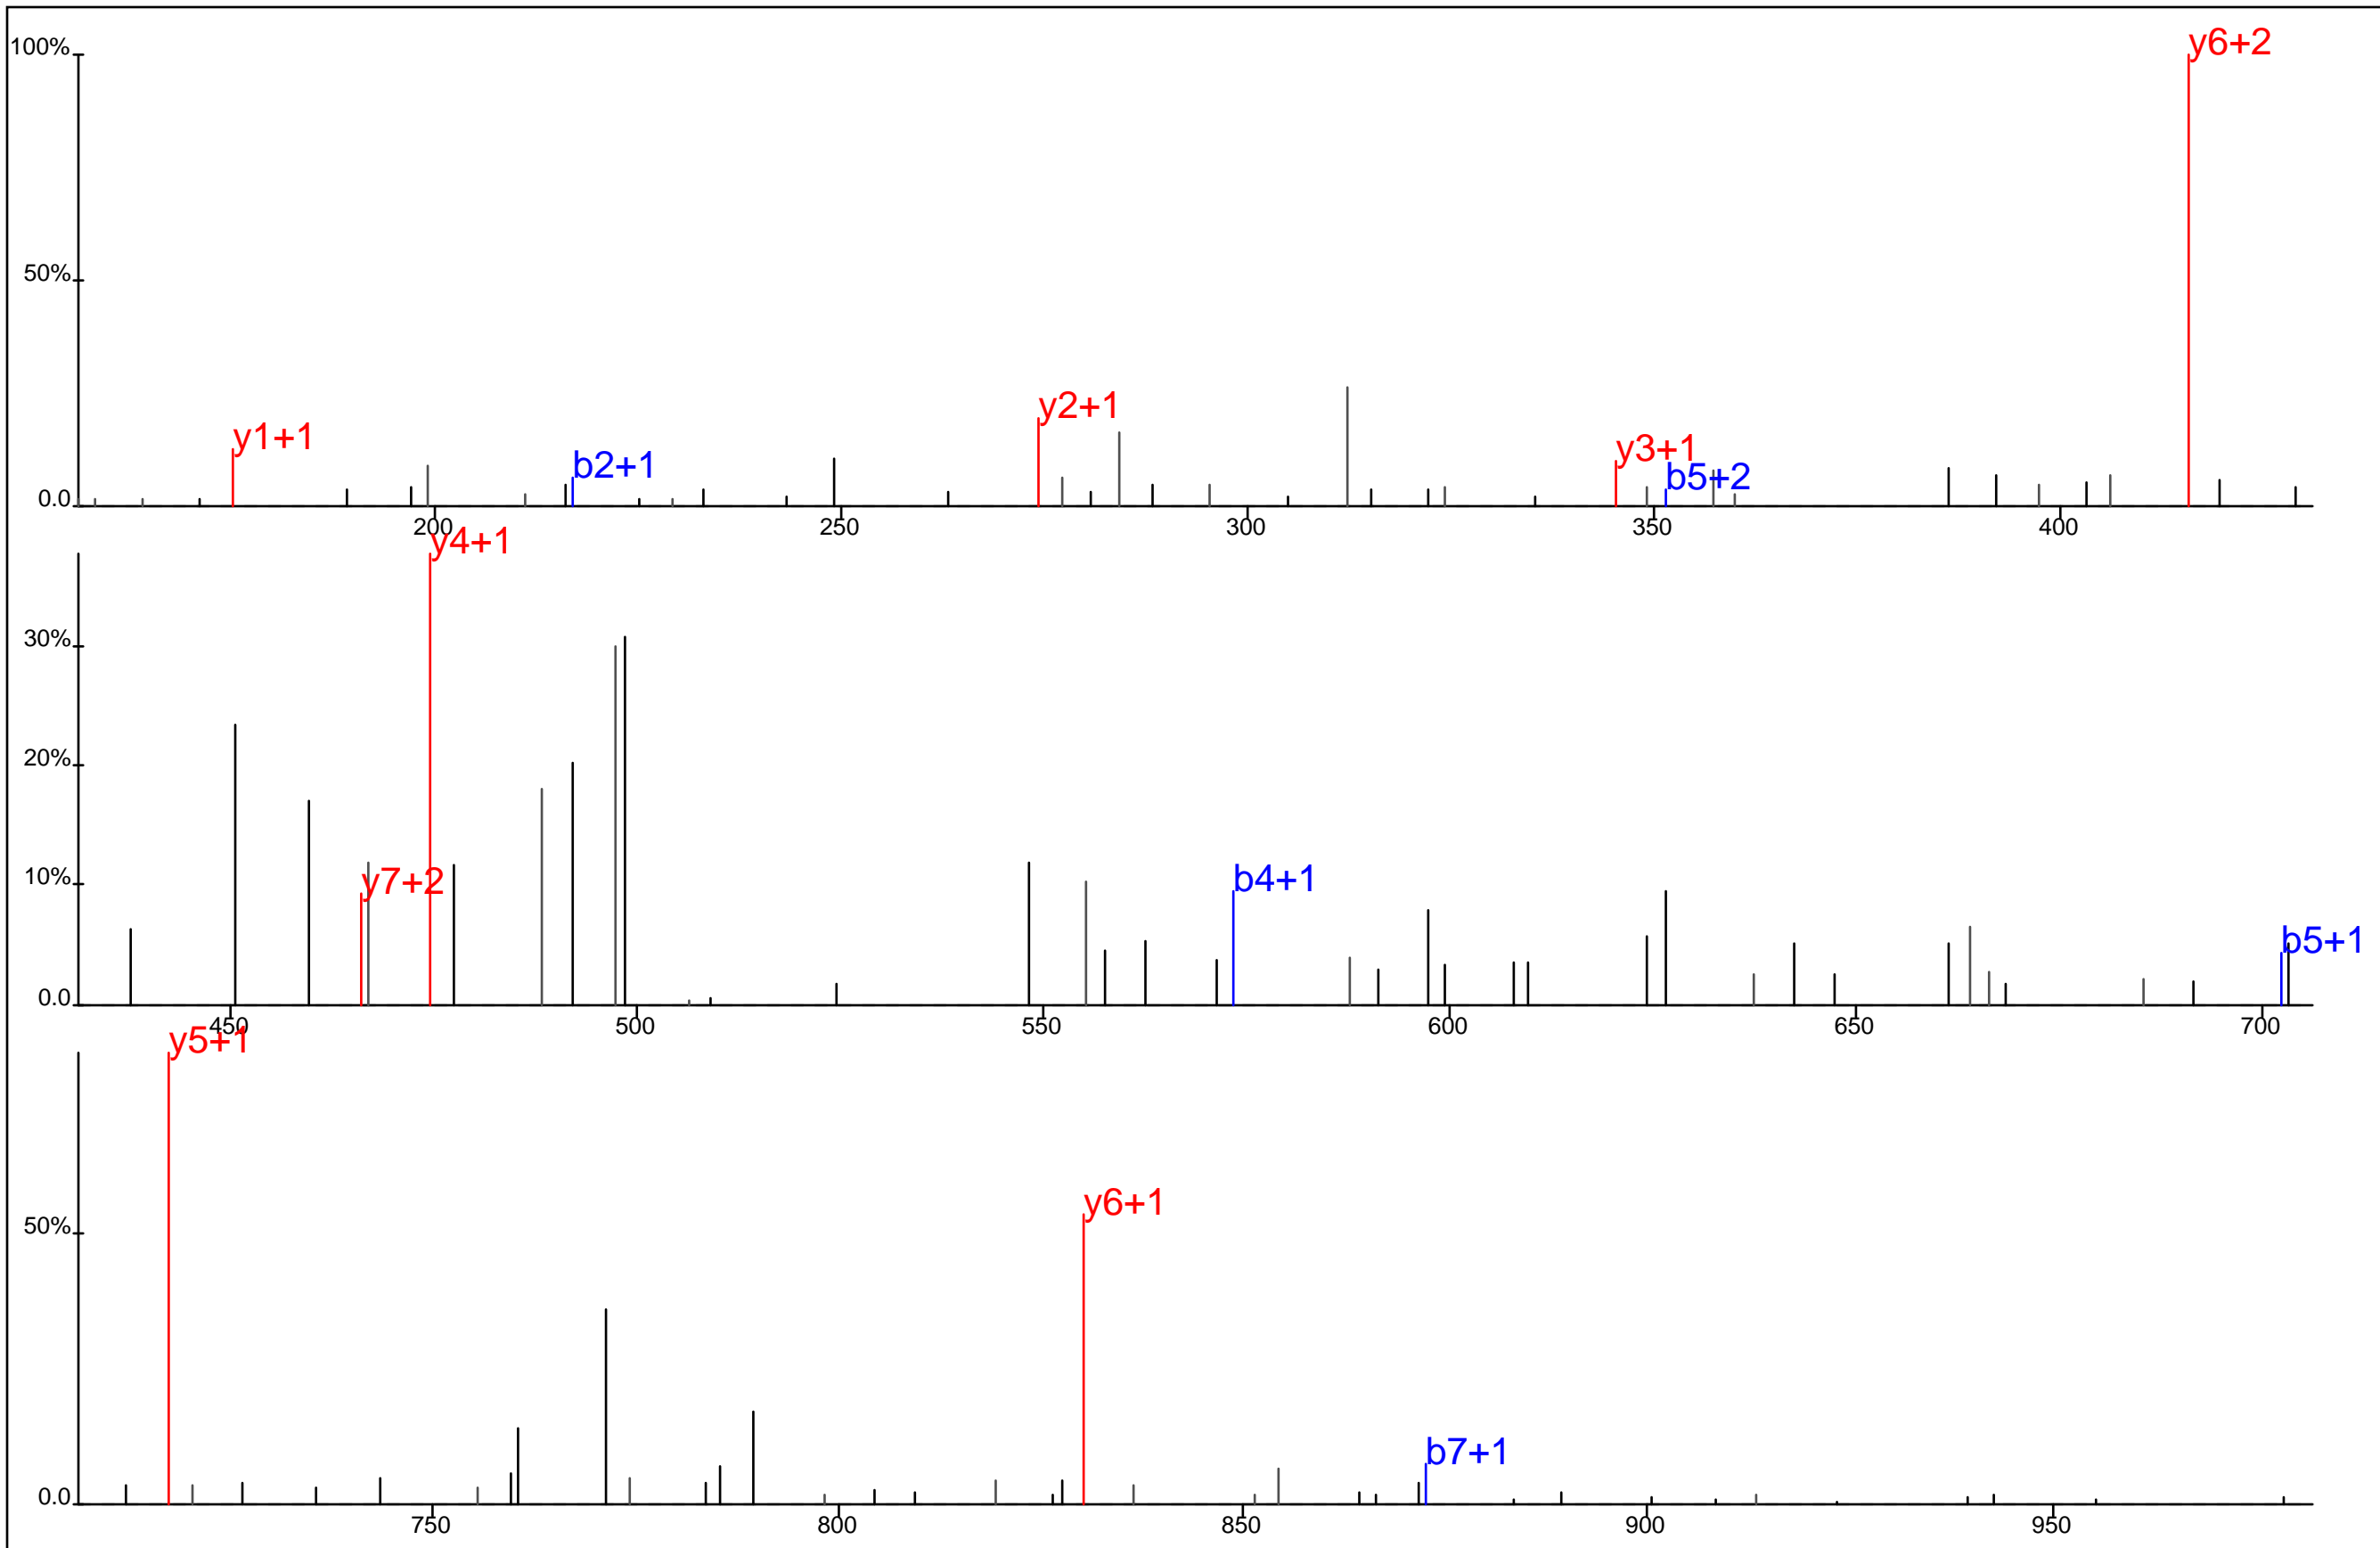

D T L Y\* E A V R

Protein Name: Ribosomal protein L10a  
 gi Accession: 0  
 Precursor Mass: 523.7311+2  
 Delta Mass: 0.371 ppm  
 XCorr: 24.93

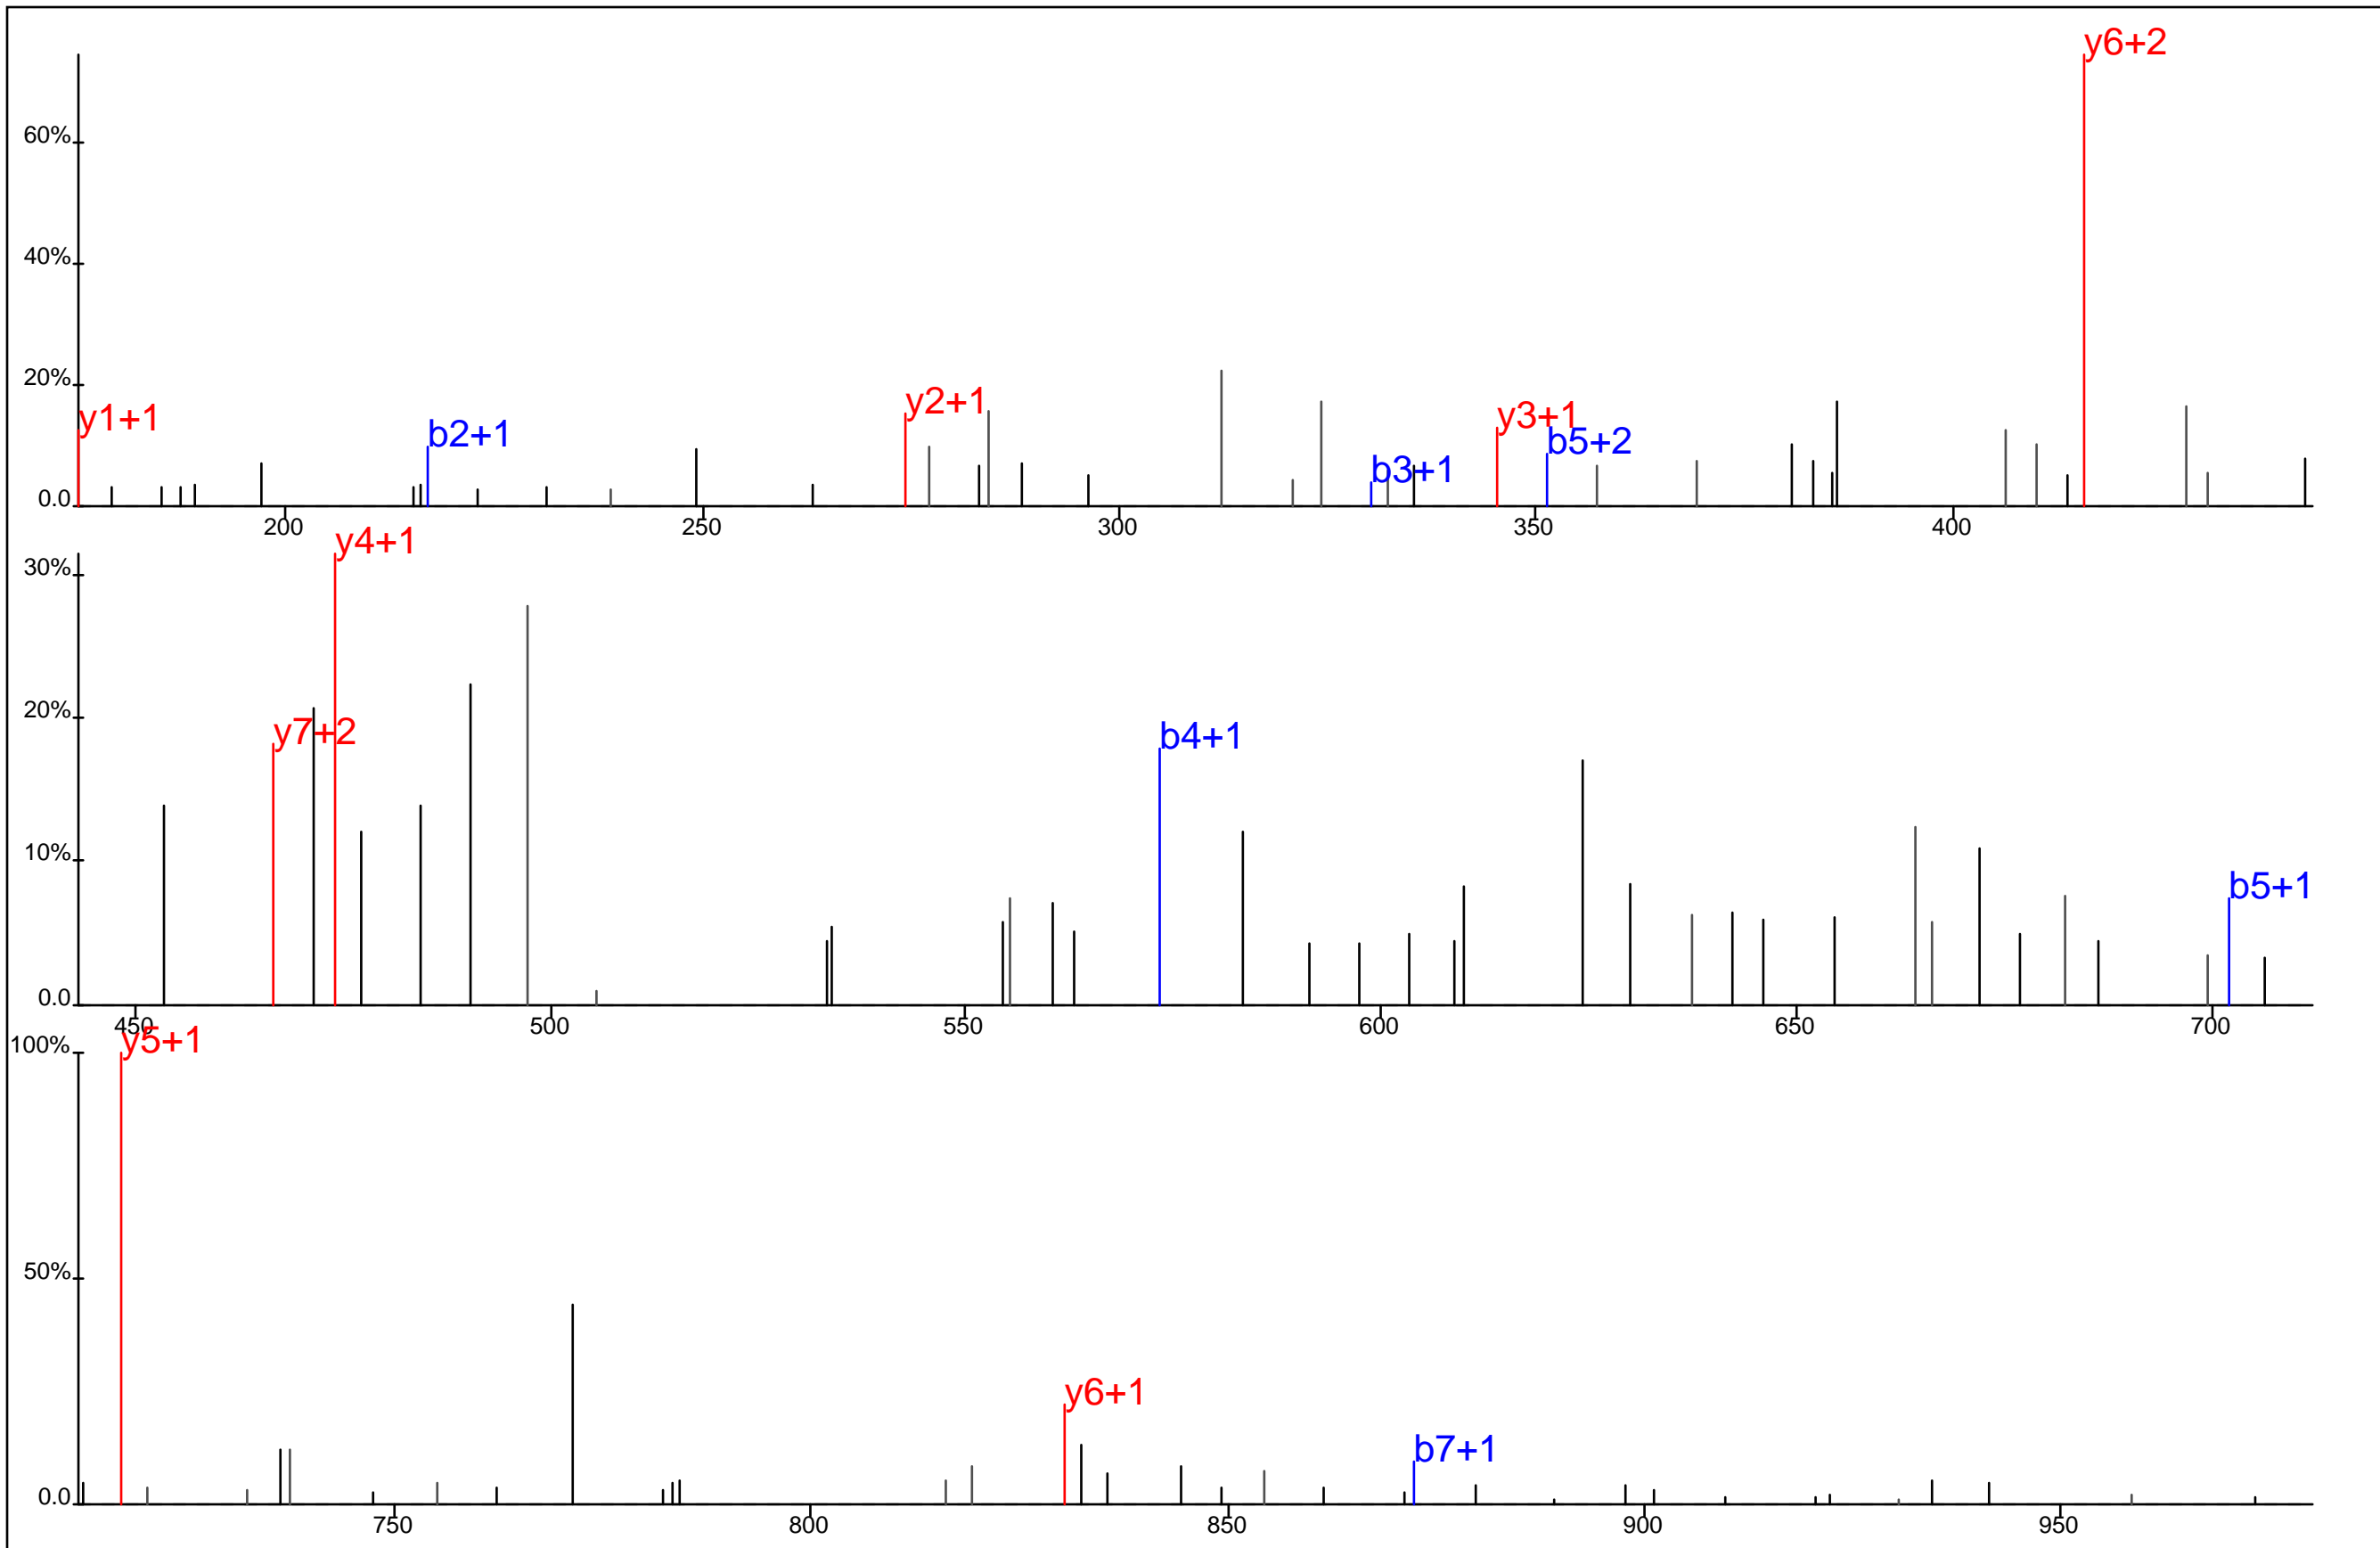

D T L Y\* E A V R

Protein Name: Ribosomal protein L10a  
 gi Accession: 0  
 Precursor Mass: 523.7310+2  
 Delta Mass: 0.721 ppm  
 XCorr: 24.81

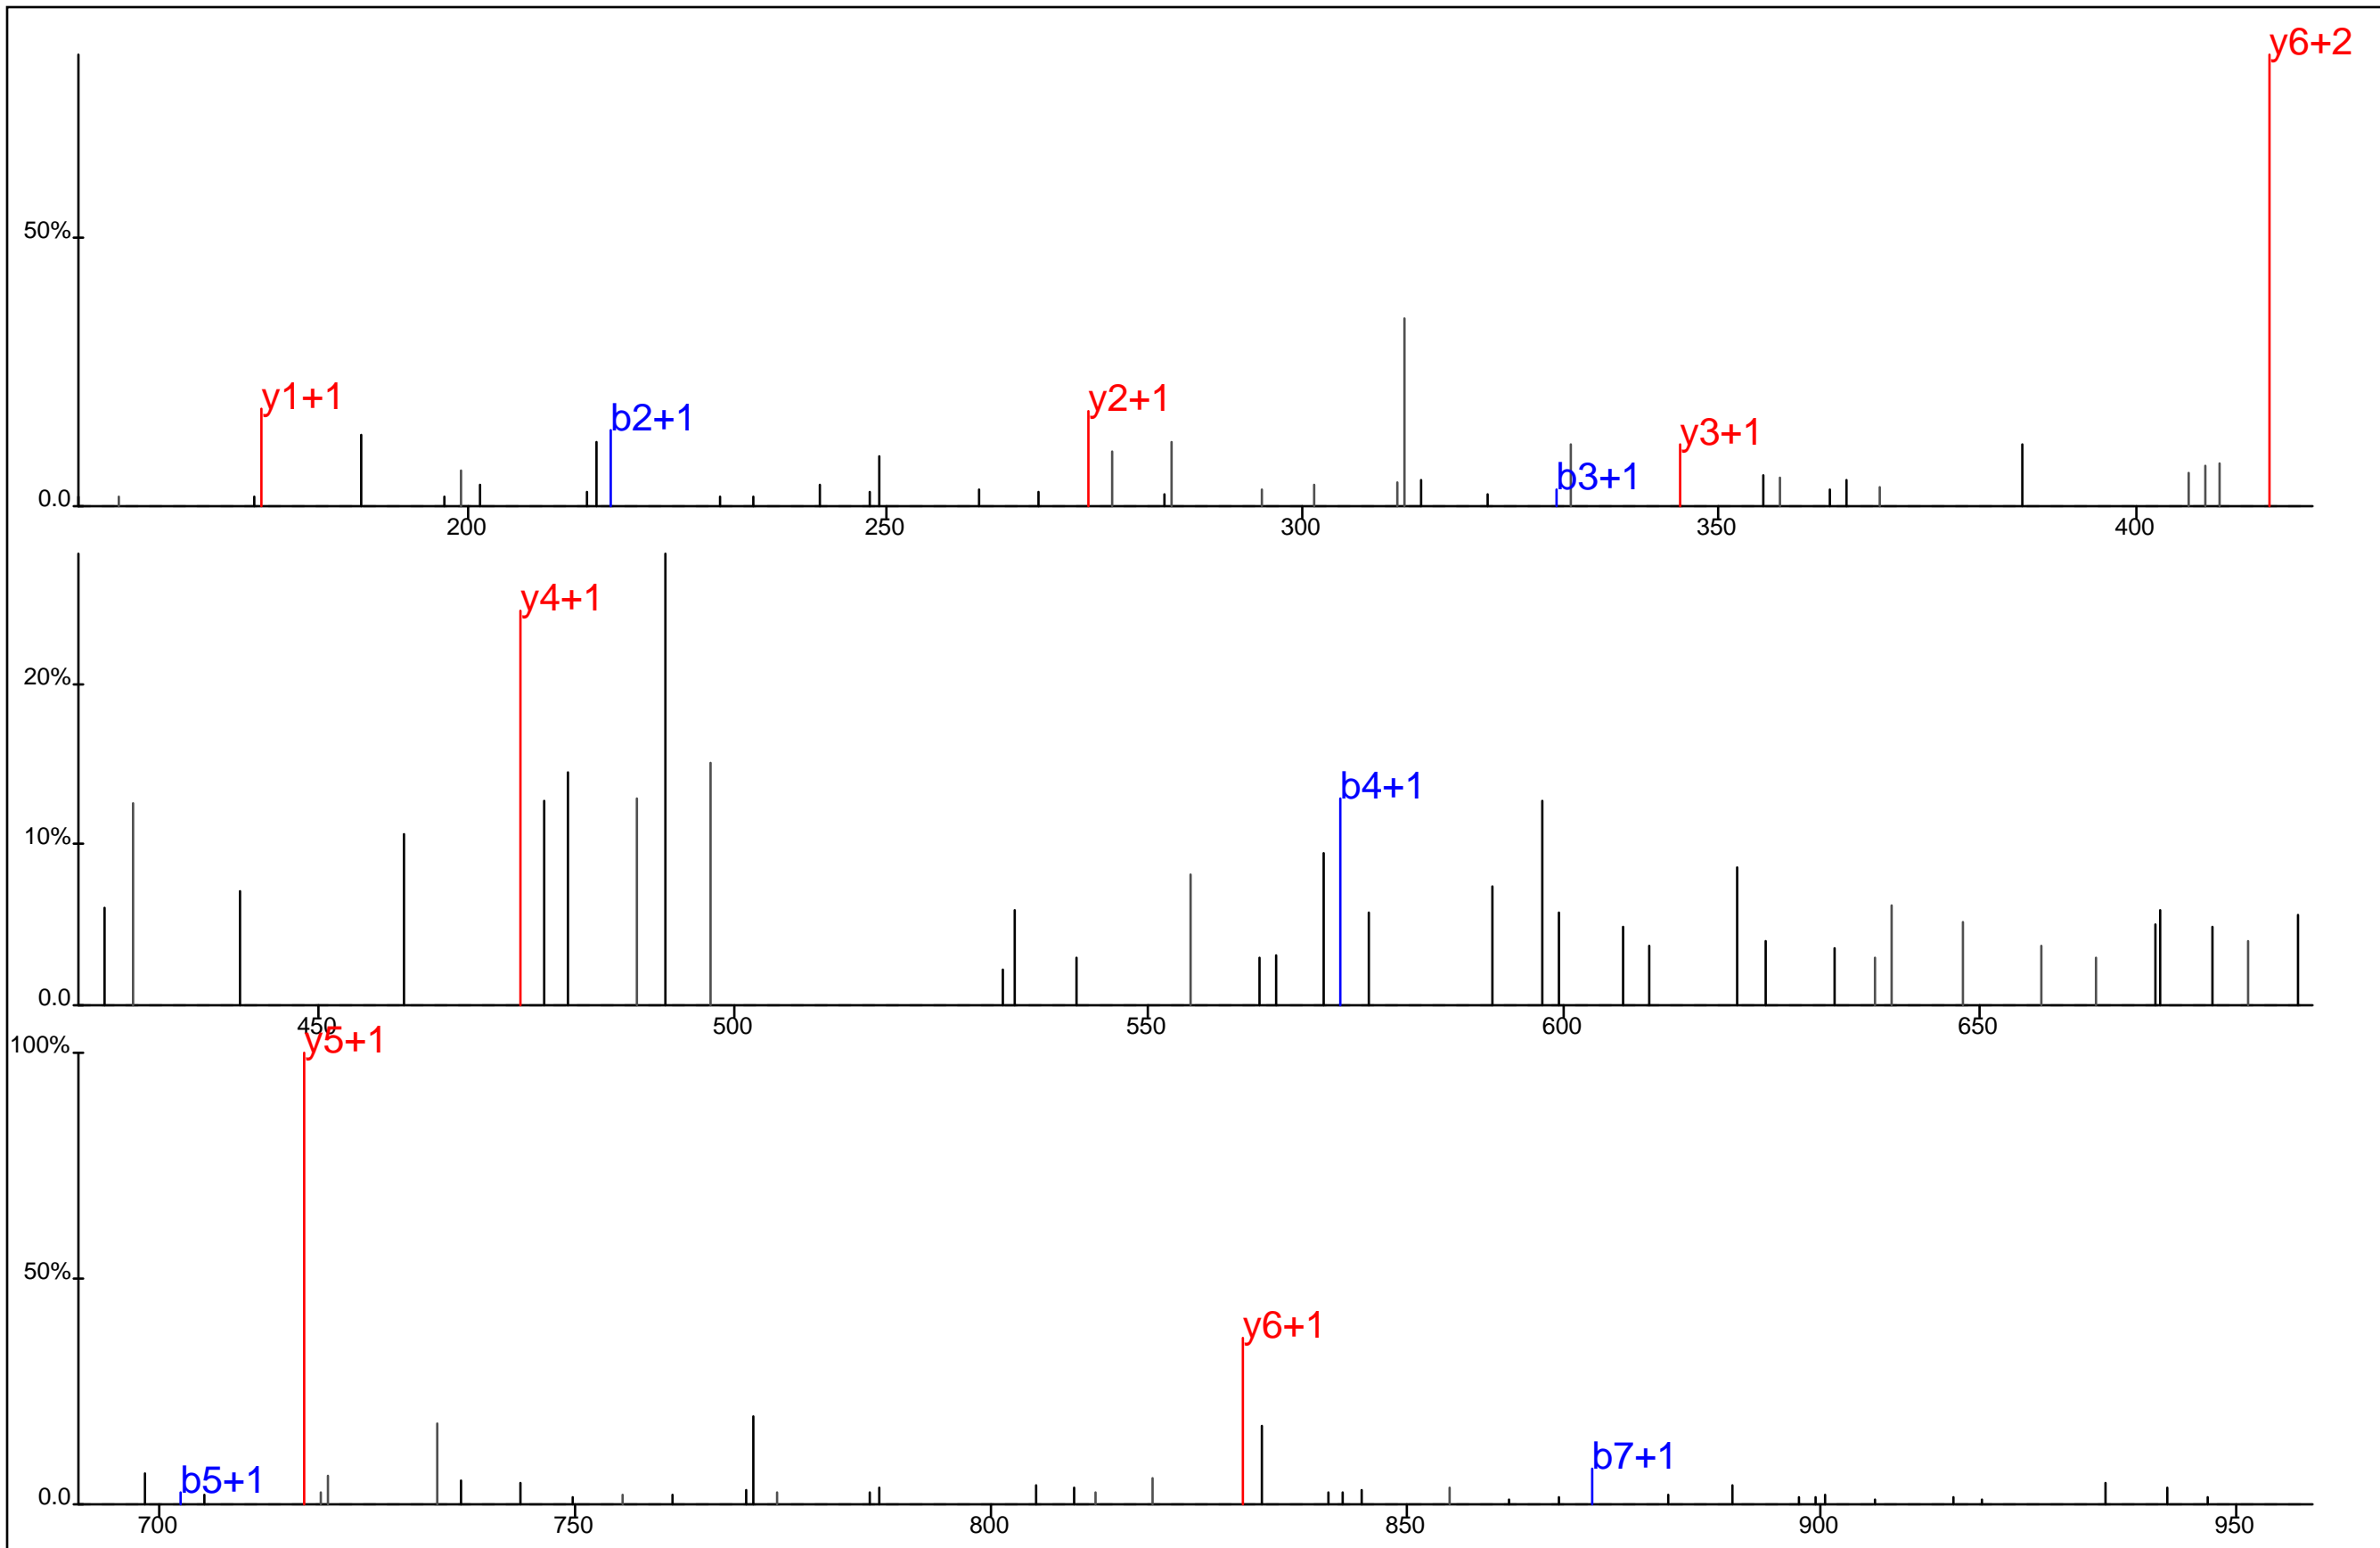

■ ■ ■ ■ ■ ■  
 D T L Y\* E A V R  
■ ■ ■ ■ ■ ■

Protein Name: Ribosomal protein L10a  
 gi Accession: 0  
 Precursor Mass: 523.7310+2  
 Delta Mass: 0.721 ppm  
 XCorr: 30.51



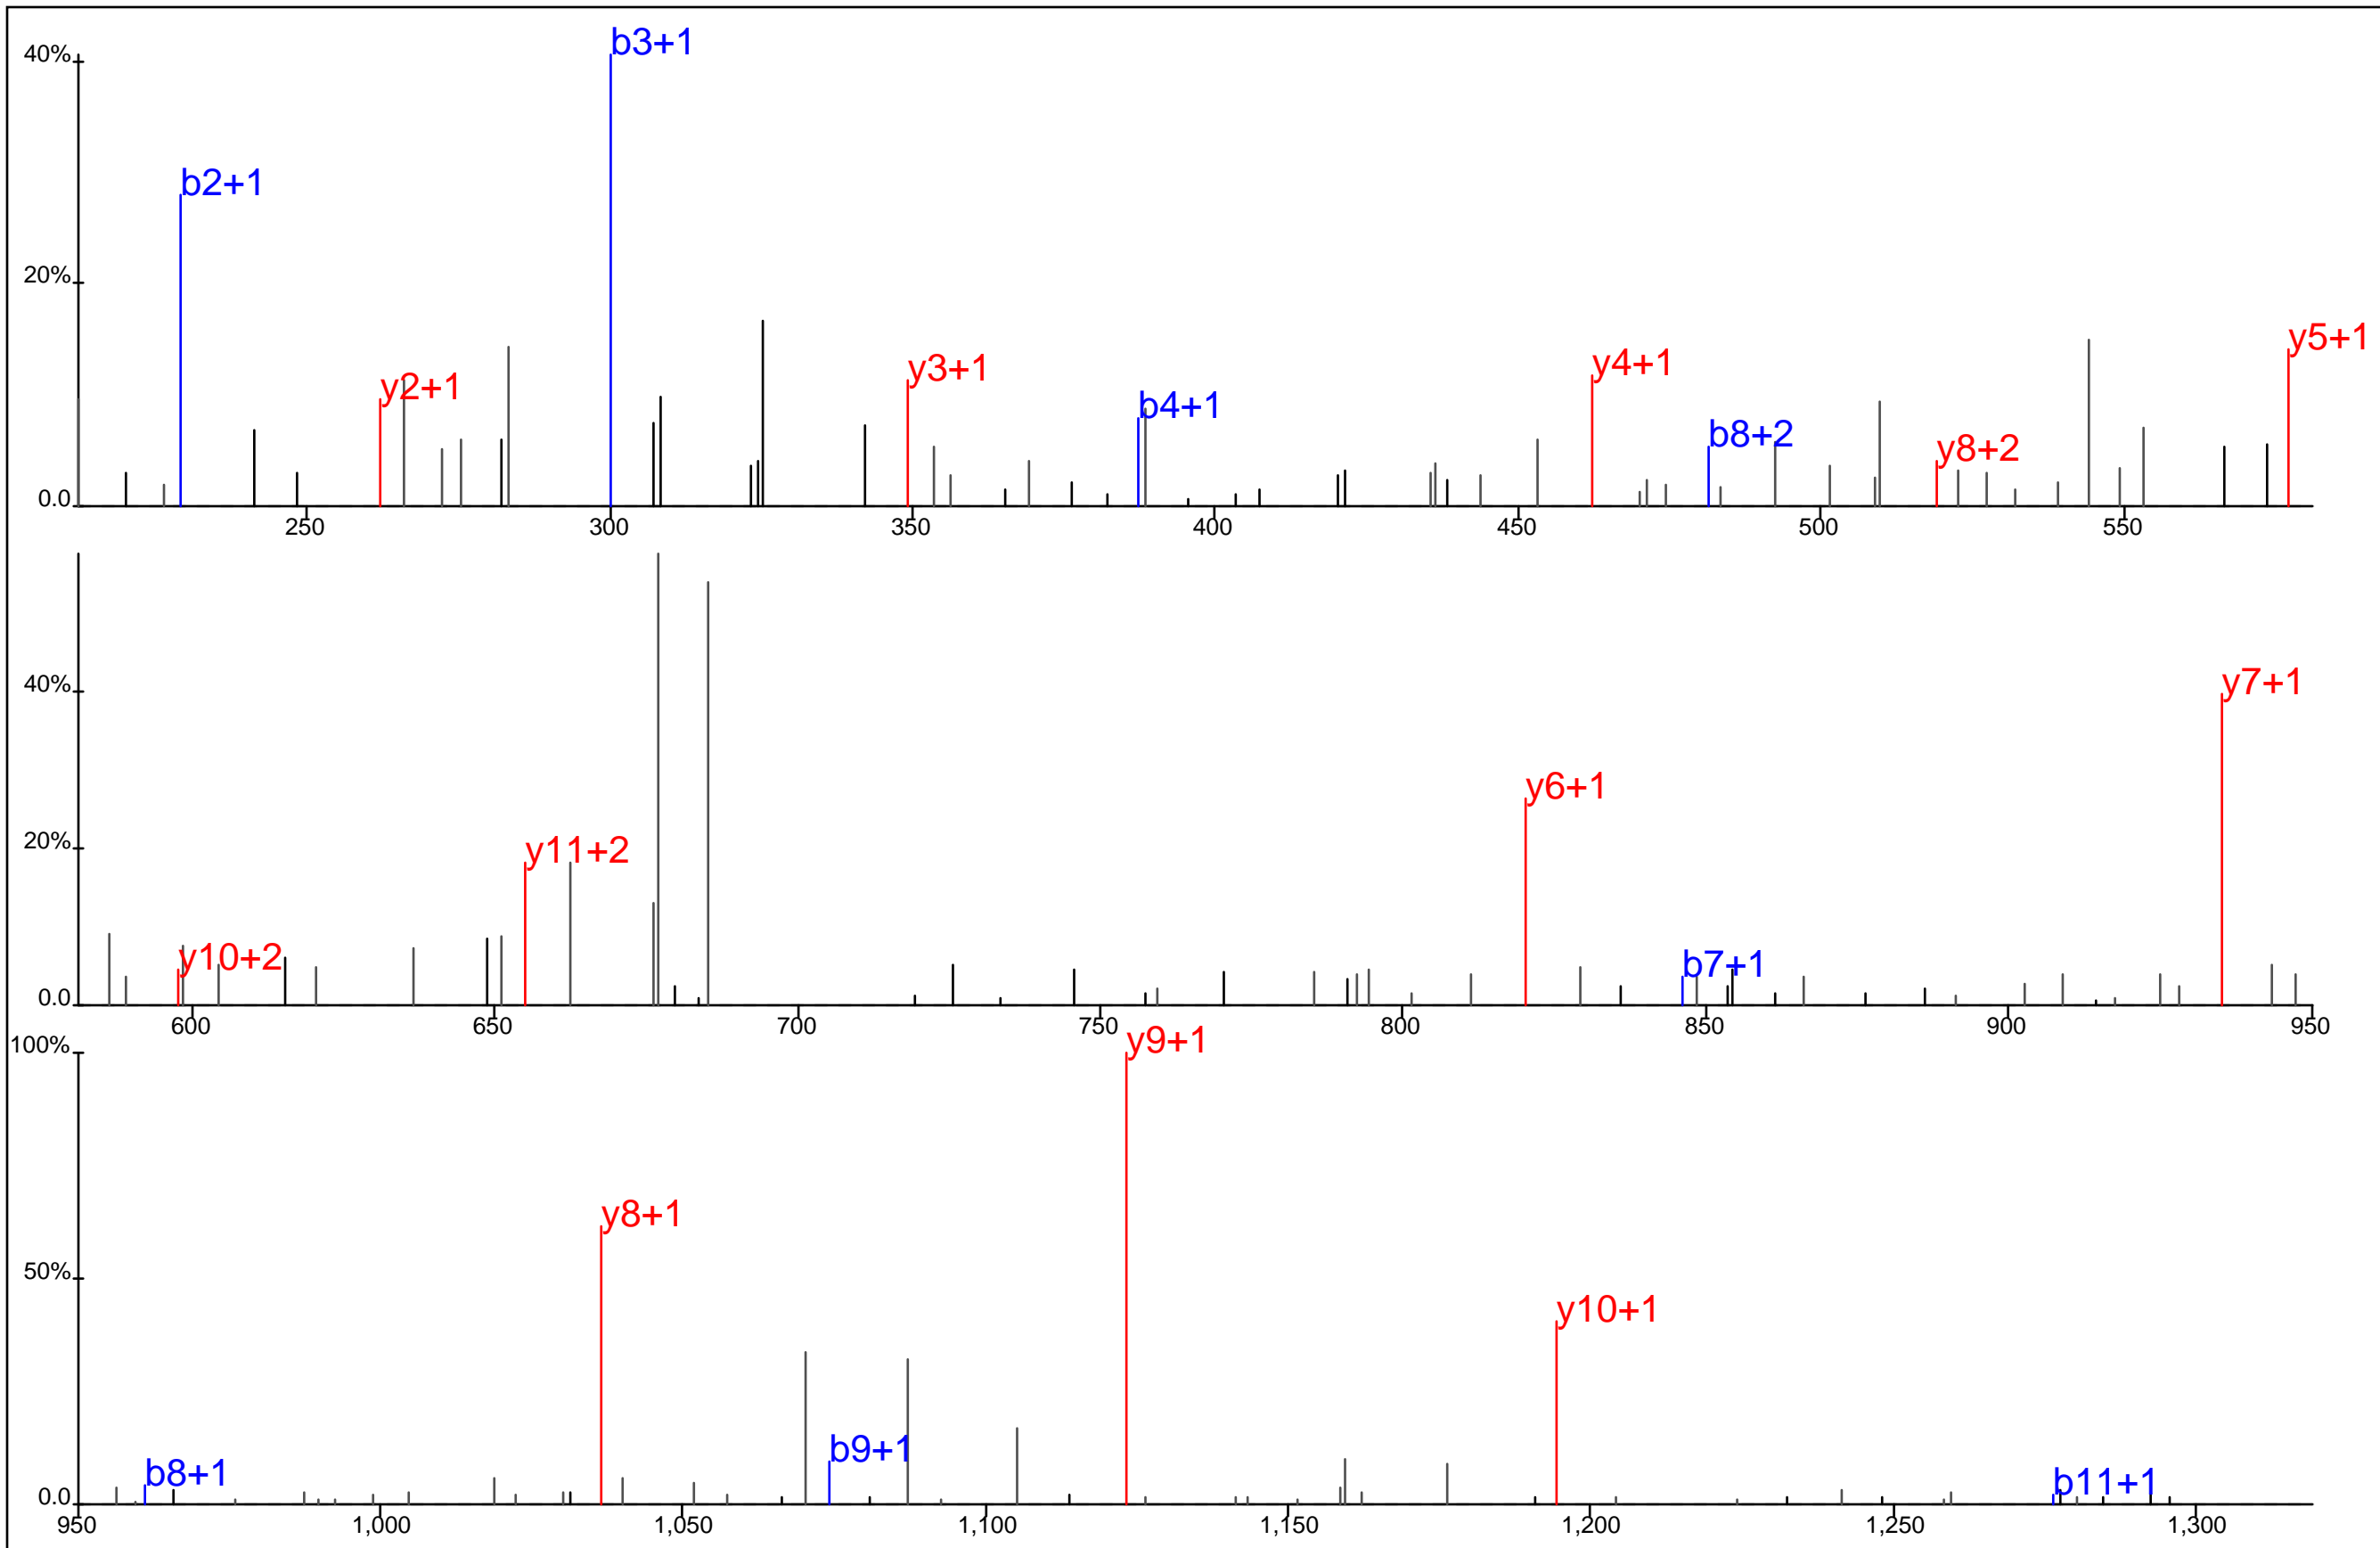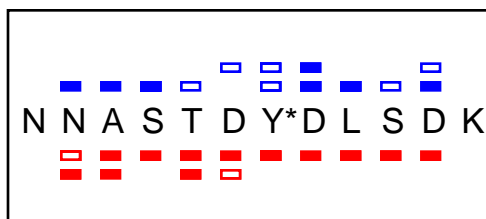

Protein Name: Ribosomal protein L3  
 gi Accession: 0  
 Precursor Mass: 711.7734+2  
 Delta Mass: 1.710 ppm  
 XCorr: 52.66

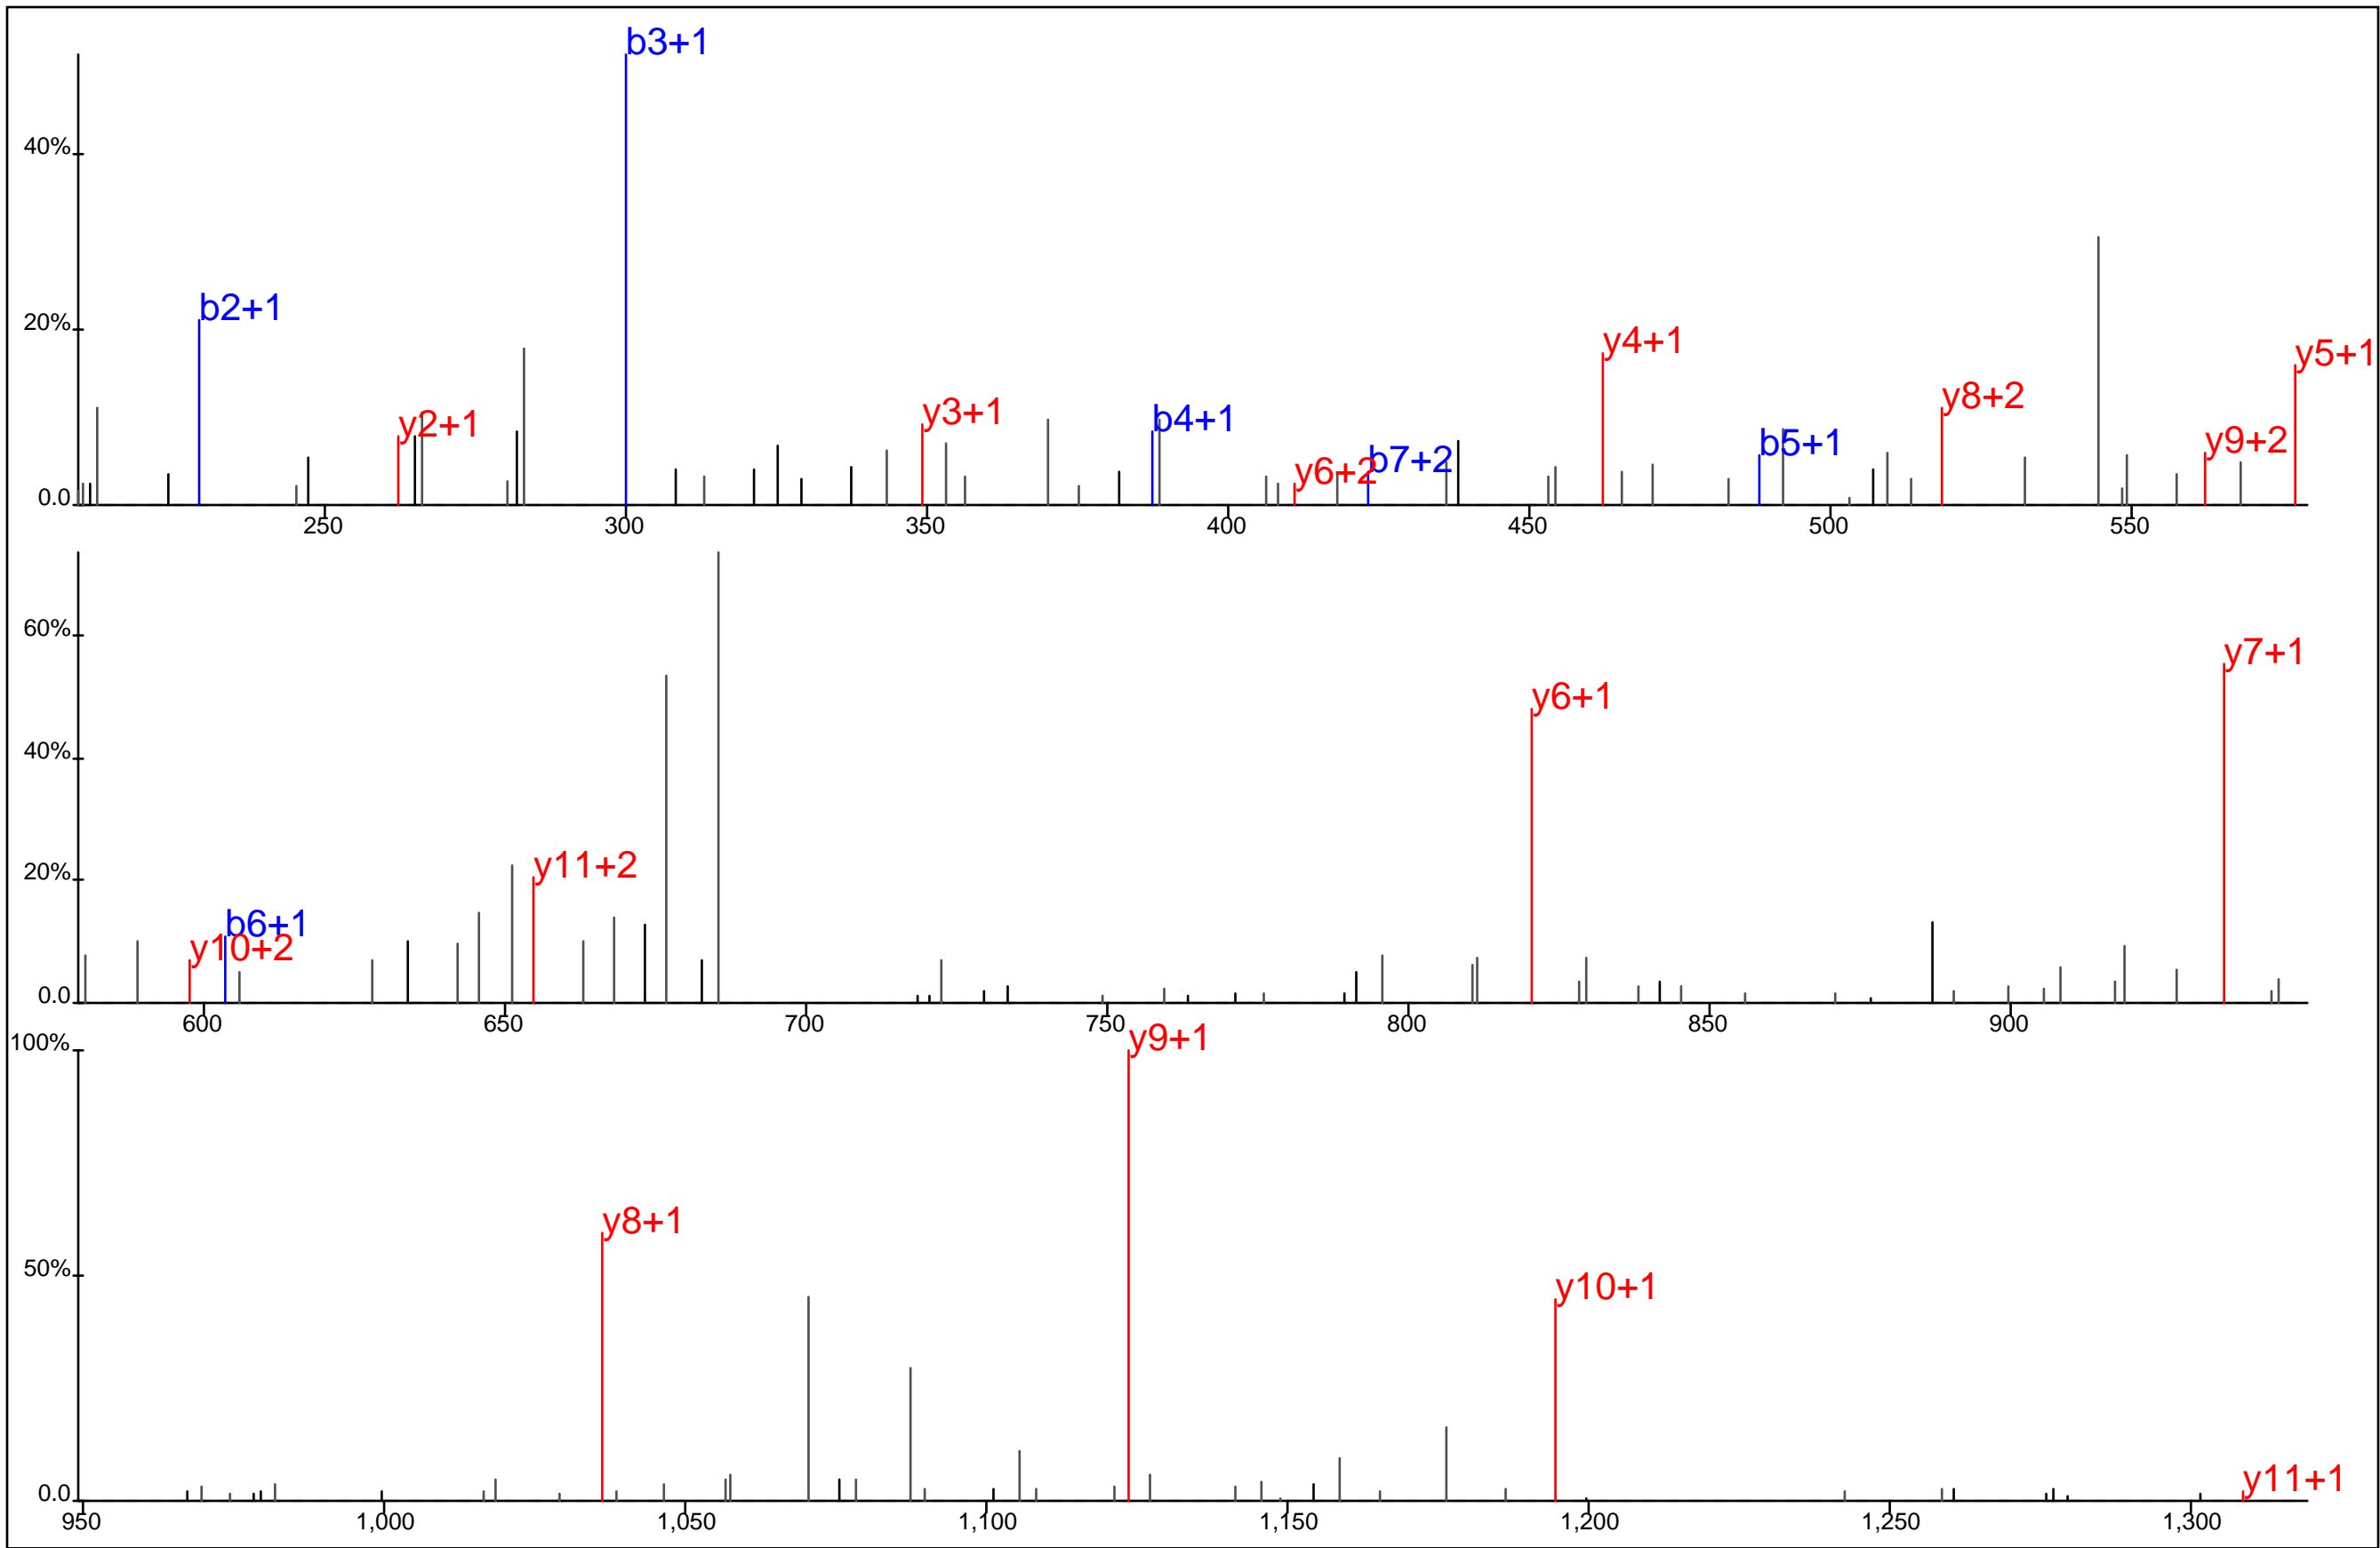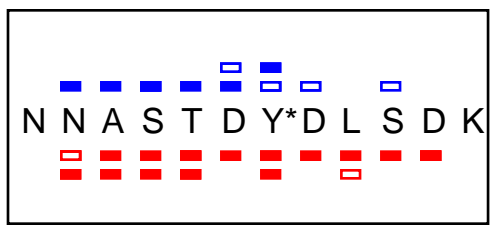

Protein Name: Ribosomal protein L3  
 gi Accession: 0  
 Precursor Mass: 711.7758+2  
 Delta Mass: 1.637 ppm  
 XCorr: 50.07

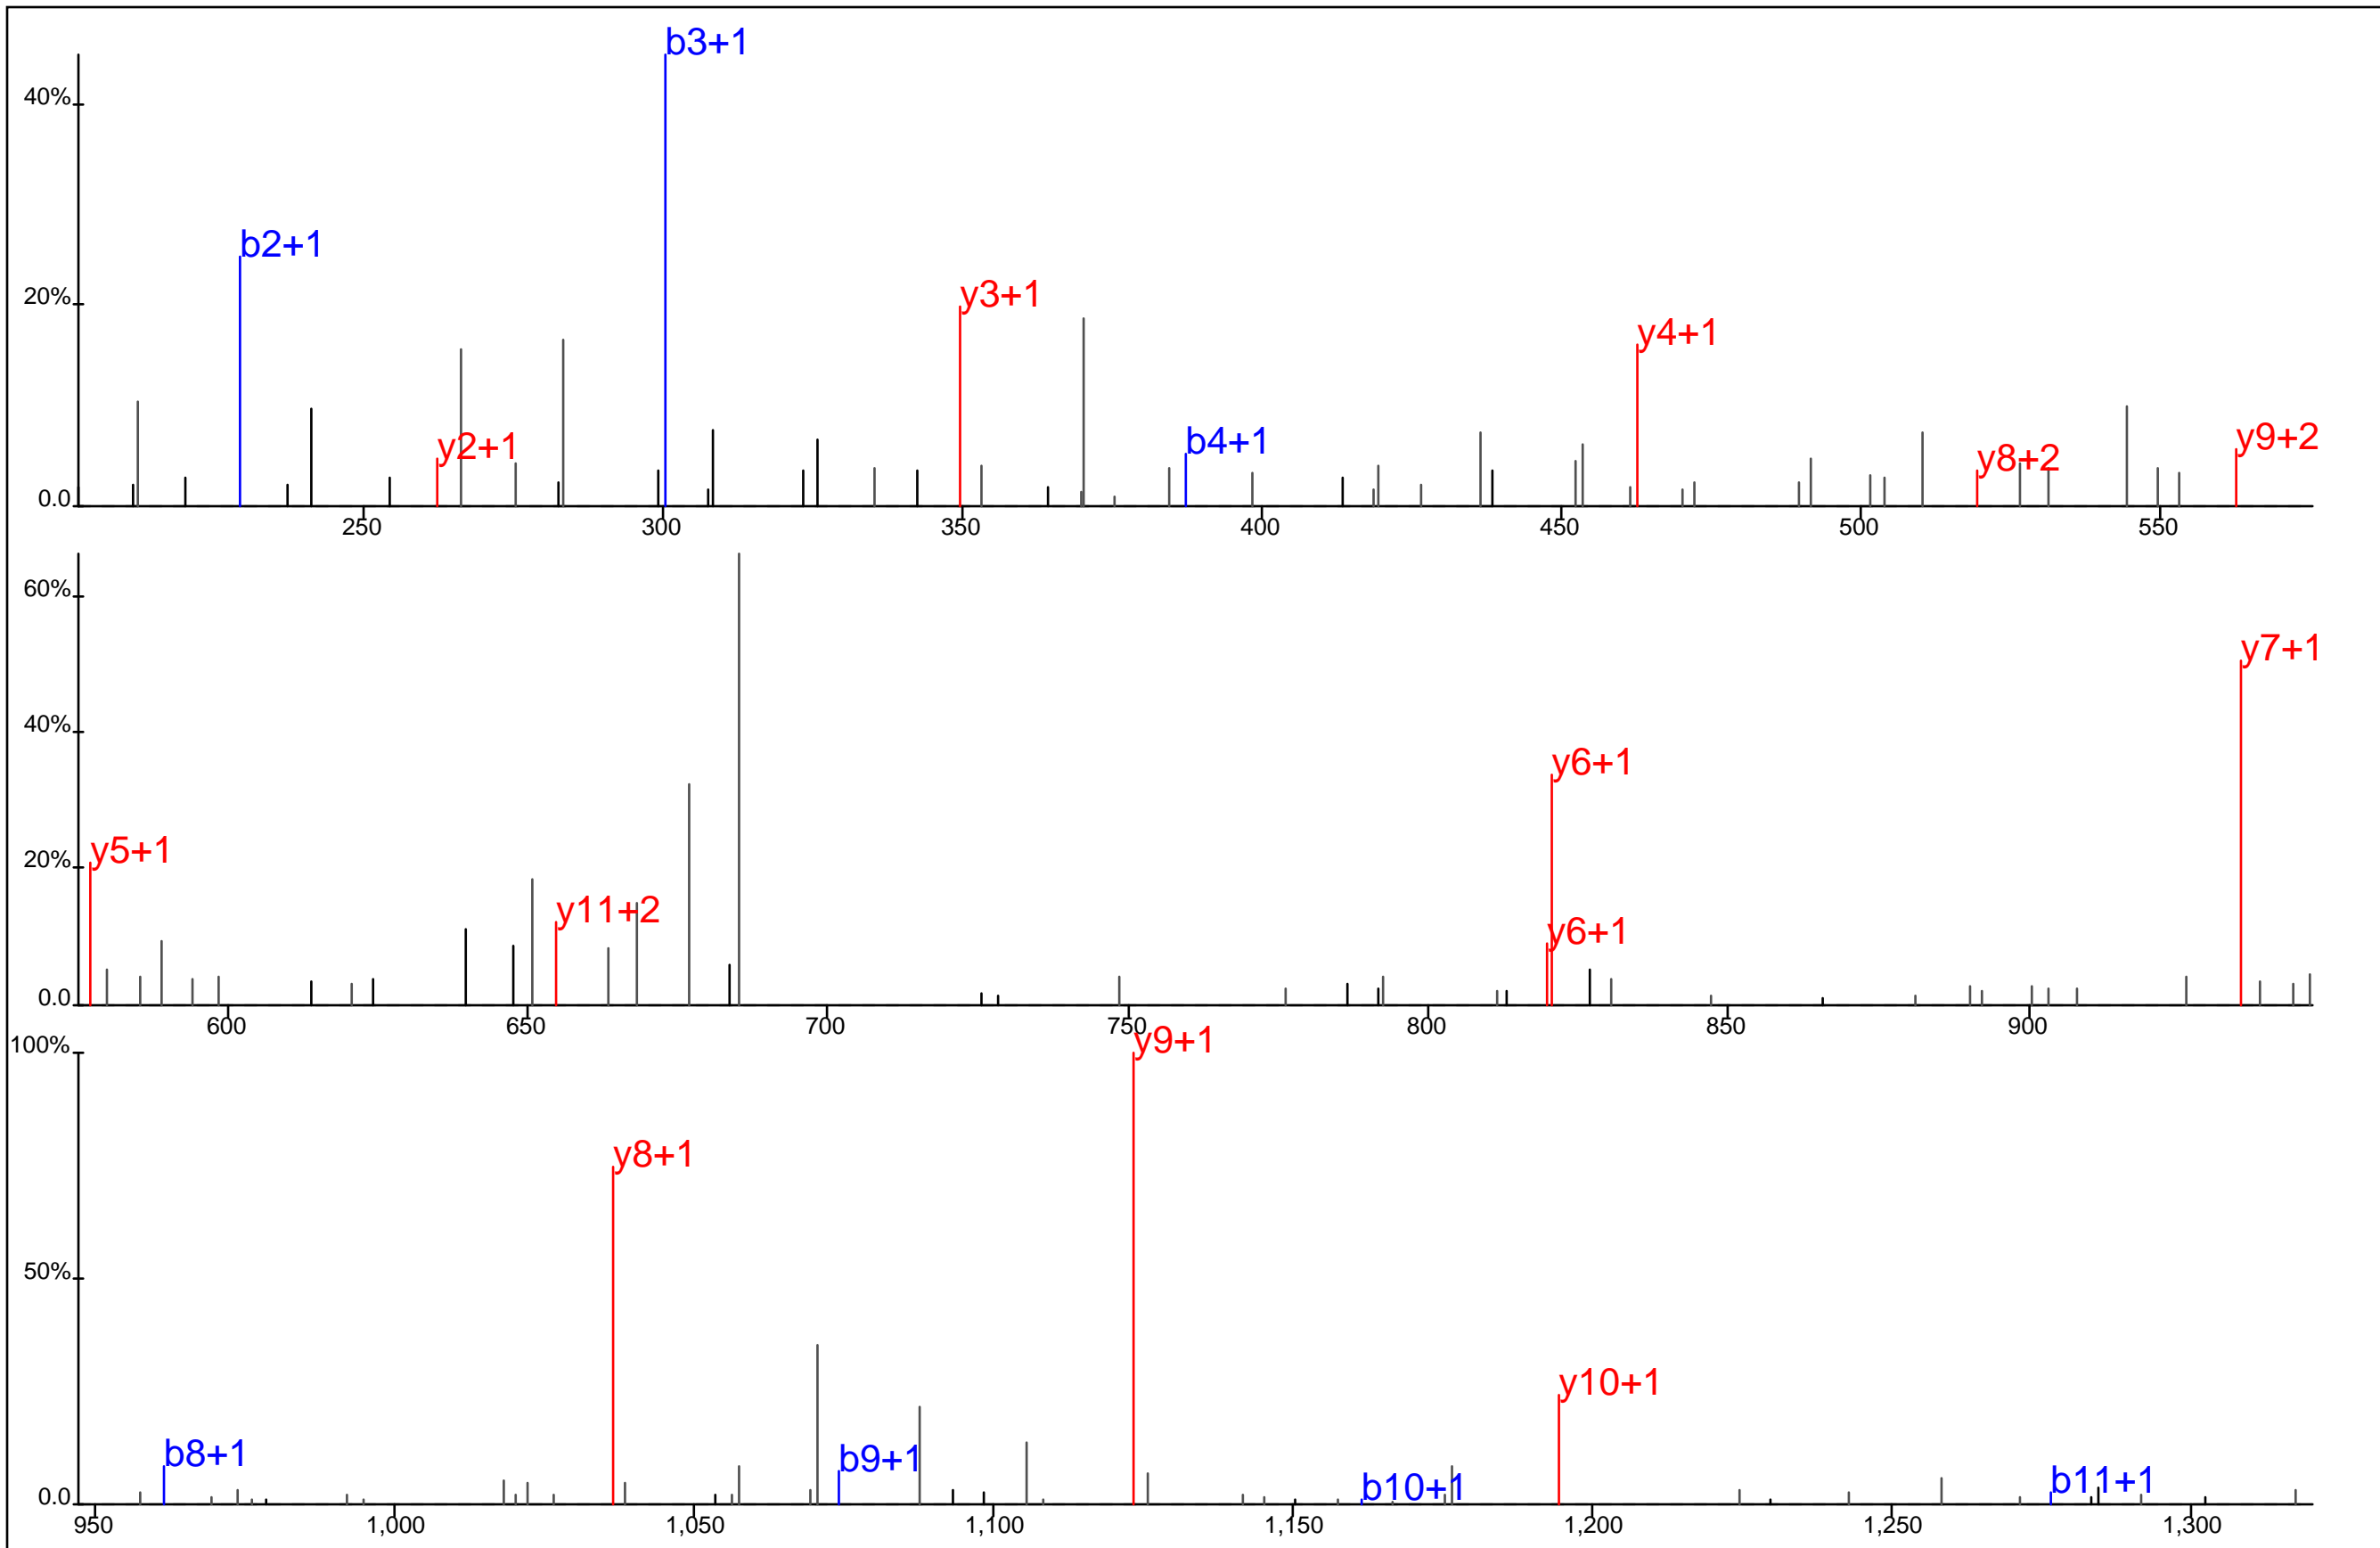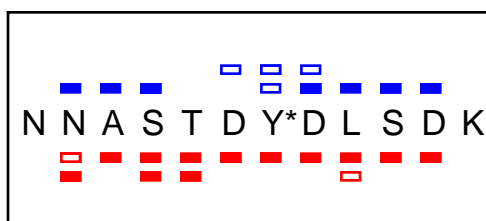

Protein Name: Ribosomal protein L3  
 gi Accession: 0  
 Precursor Mass: 711.7740+2  
 Delta Mass: 0.852 ppm  
 XCorr: 53.91









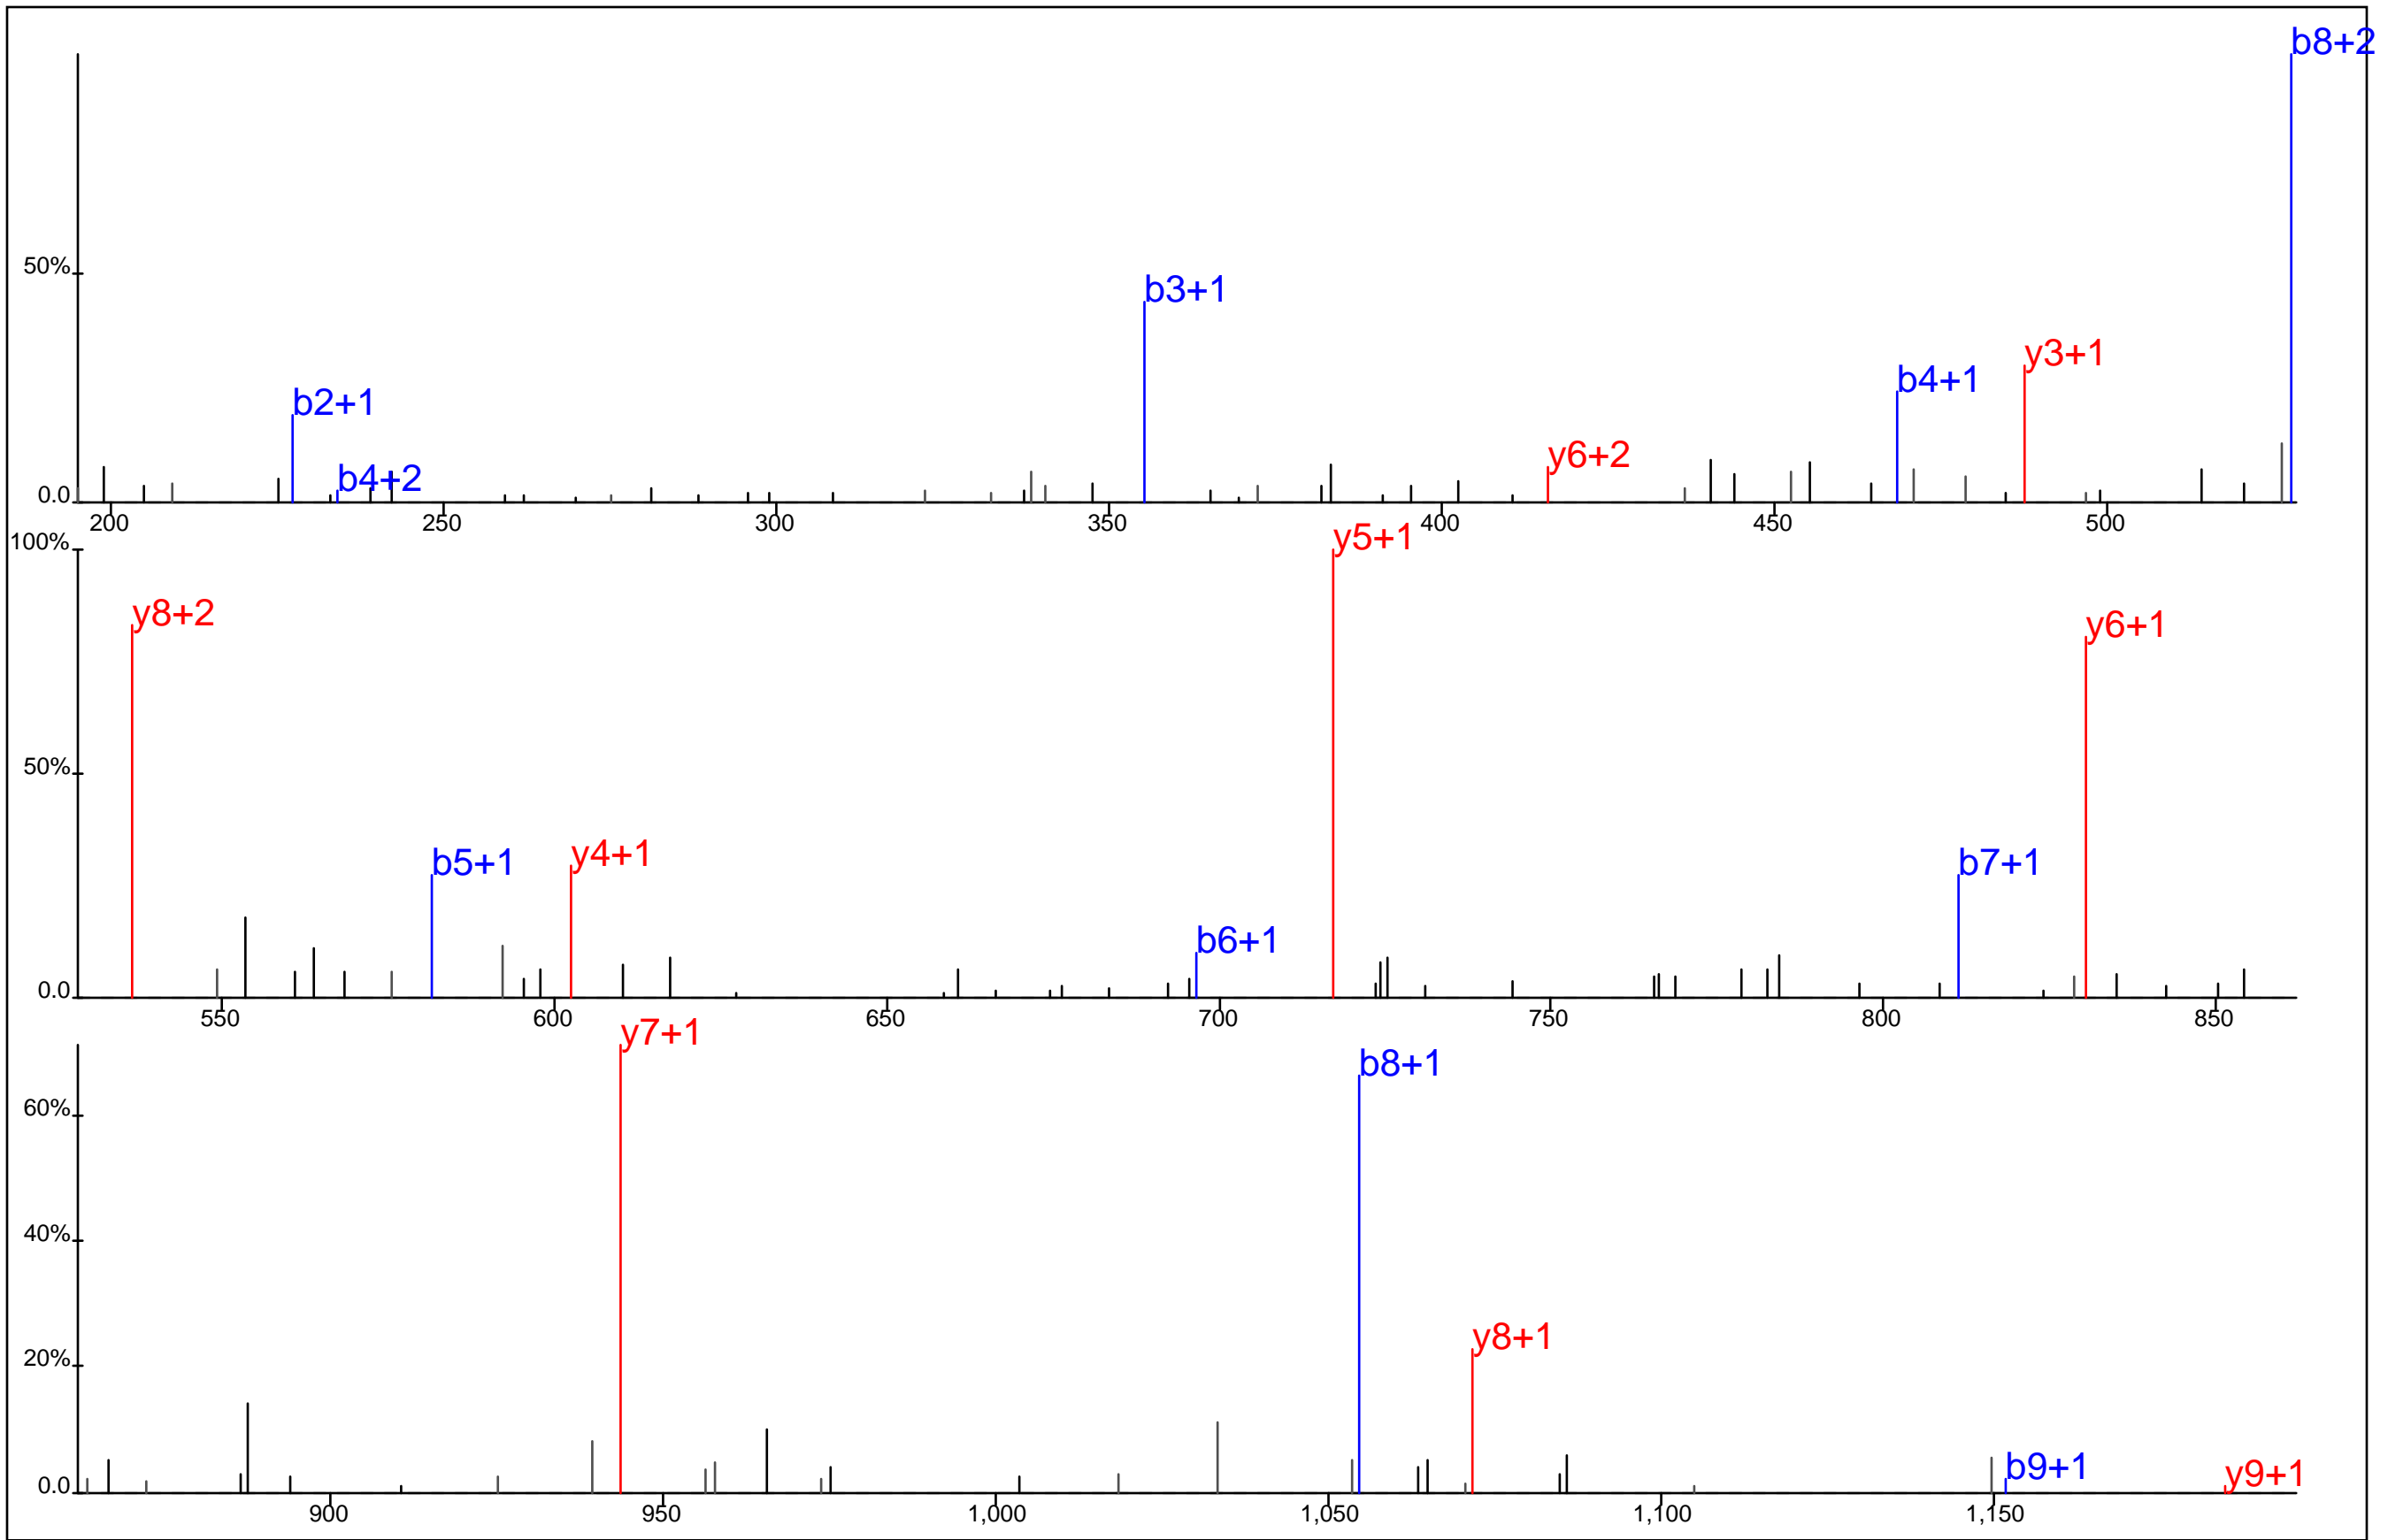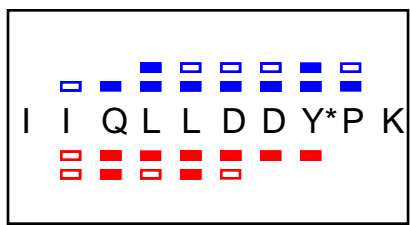

Protein Name: Ribosomal protein, large, P0  
 gi Accession: 0  
 Precursor Mass: 649.3251+2  
 Delta Mass: 0.811 ppm  
 XCorr: 53.73

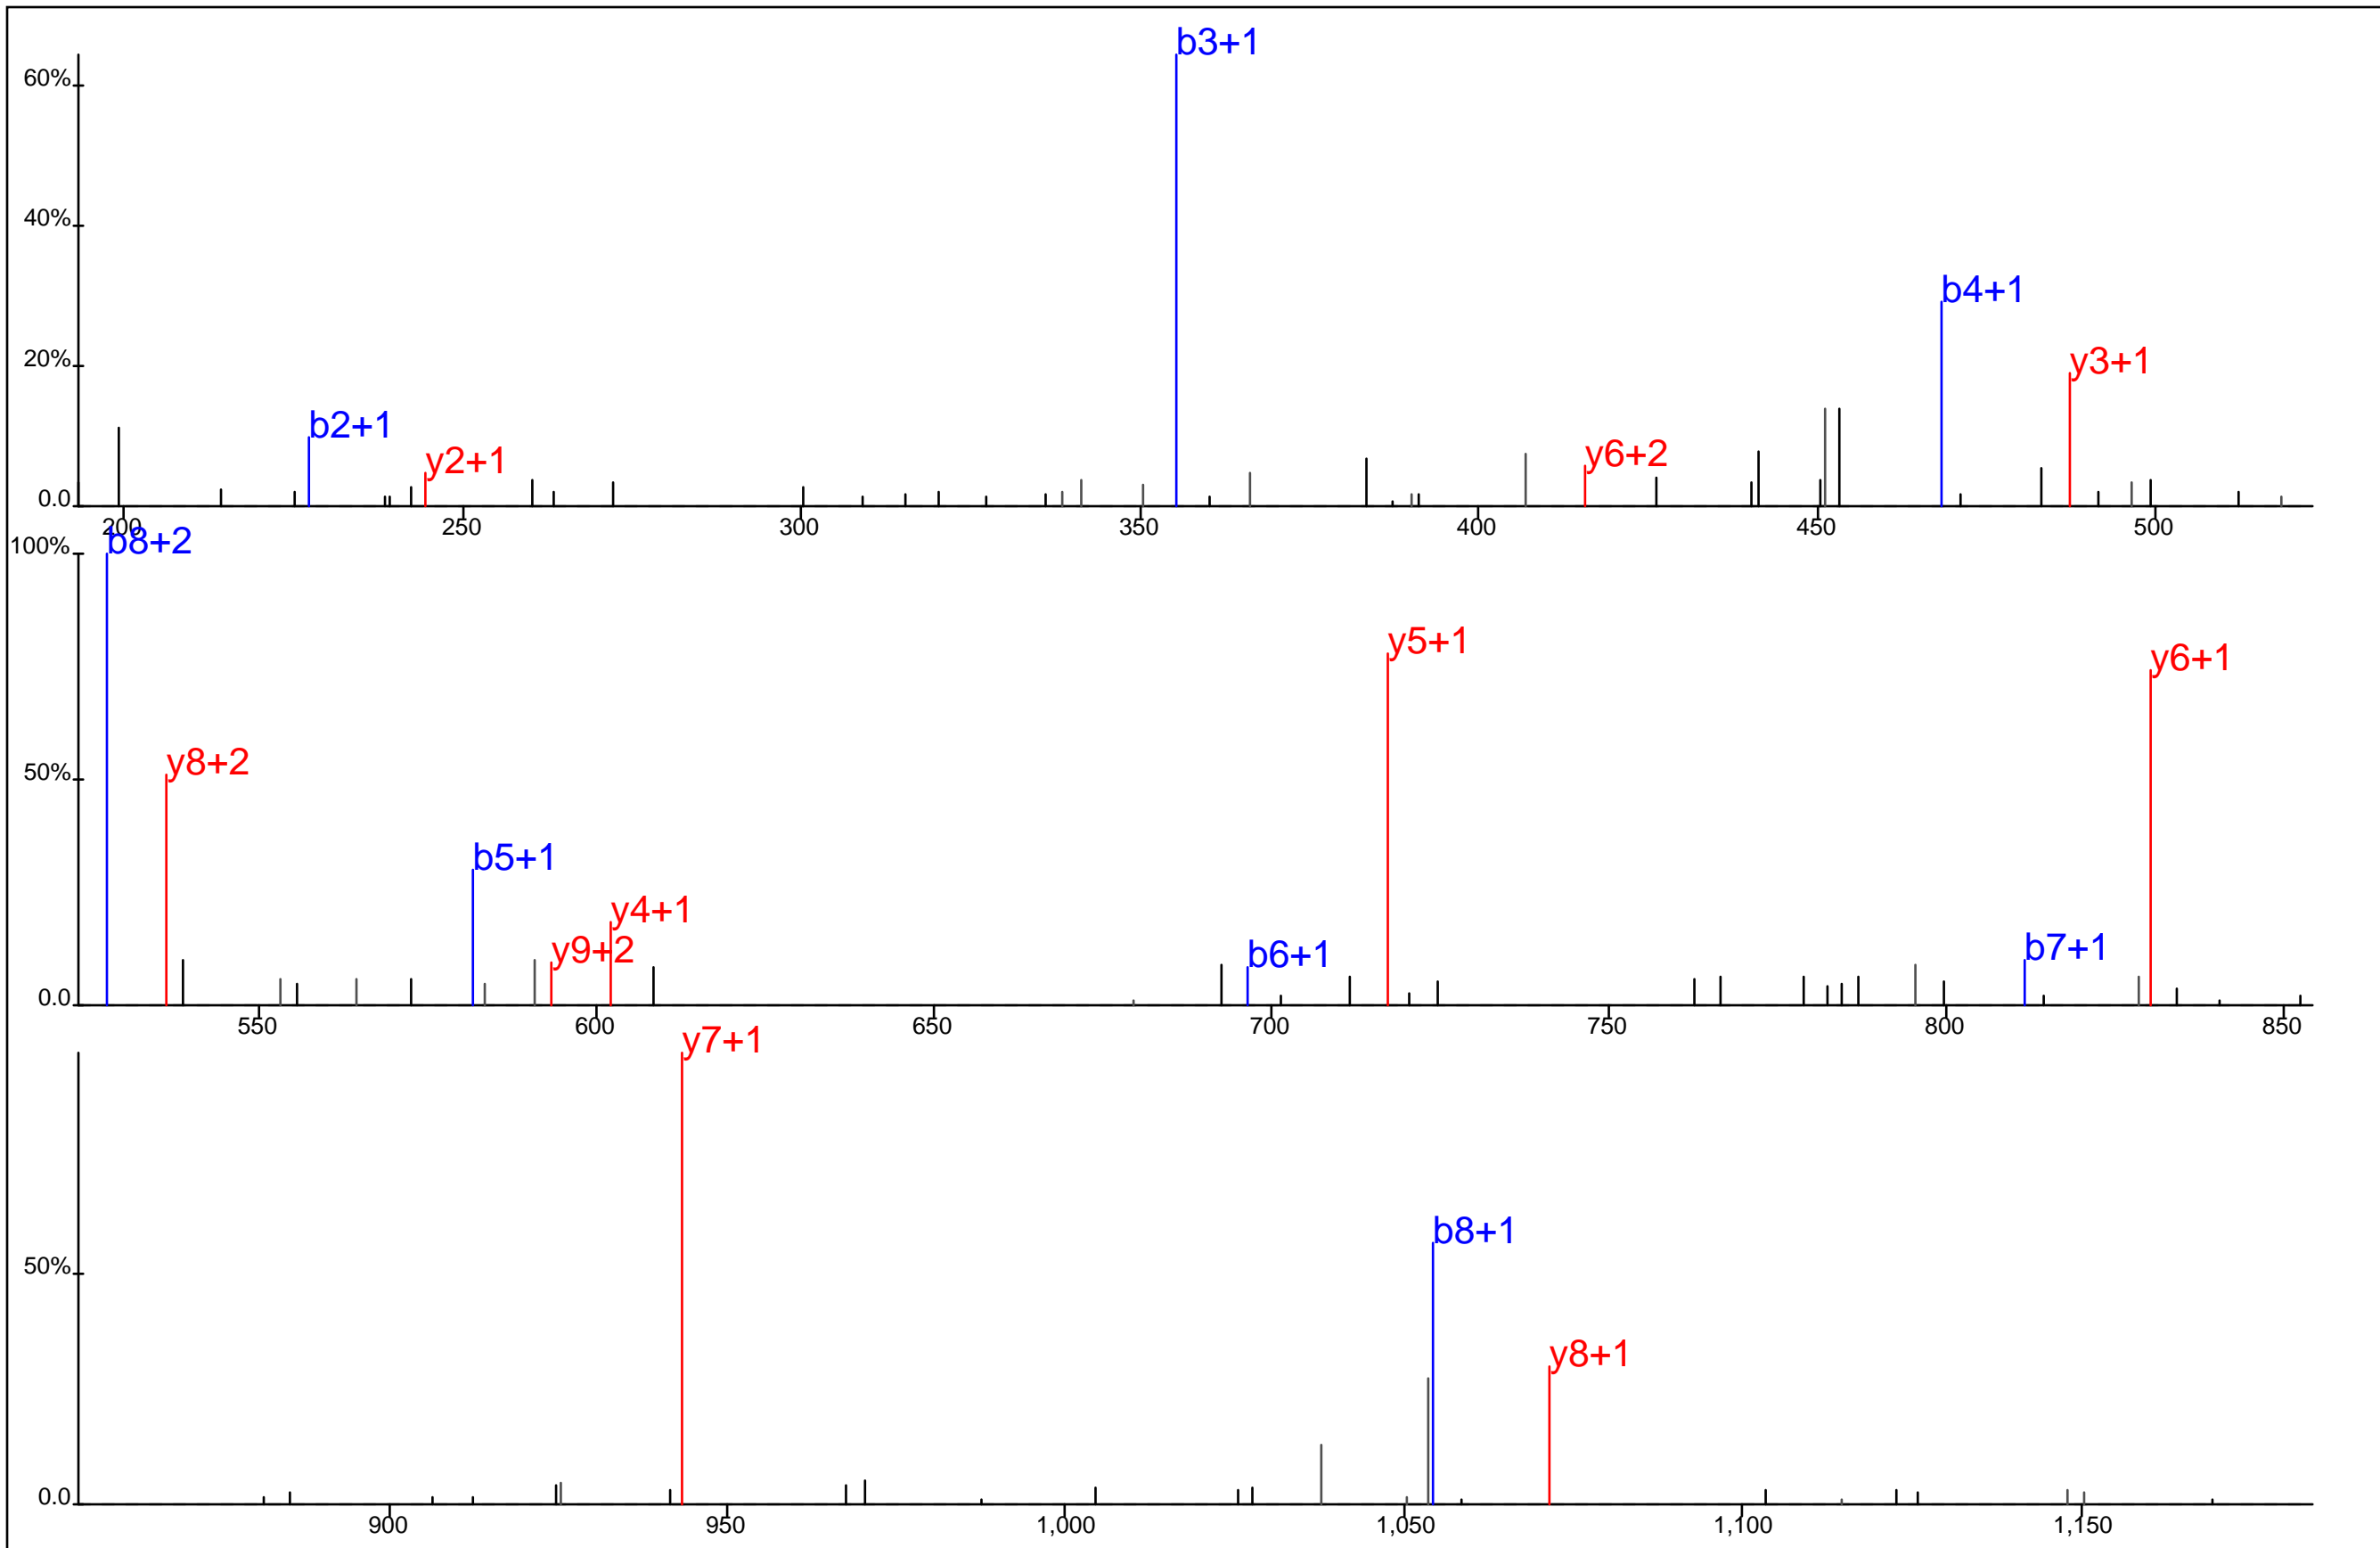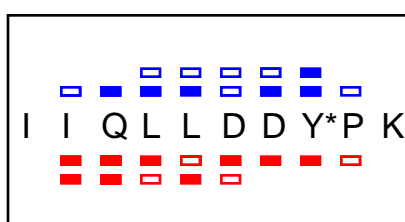

Protein Name: Ribosomal protein, large, P0  
 gi Accession: 0  
 Precursor Mass: 649.3256+2  
 Delta Mass: 0.057 ppm  
 XCorr: 60.13

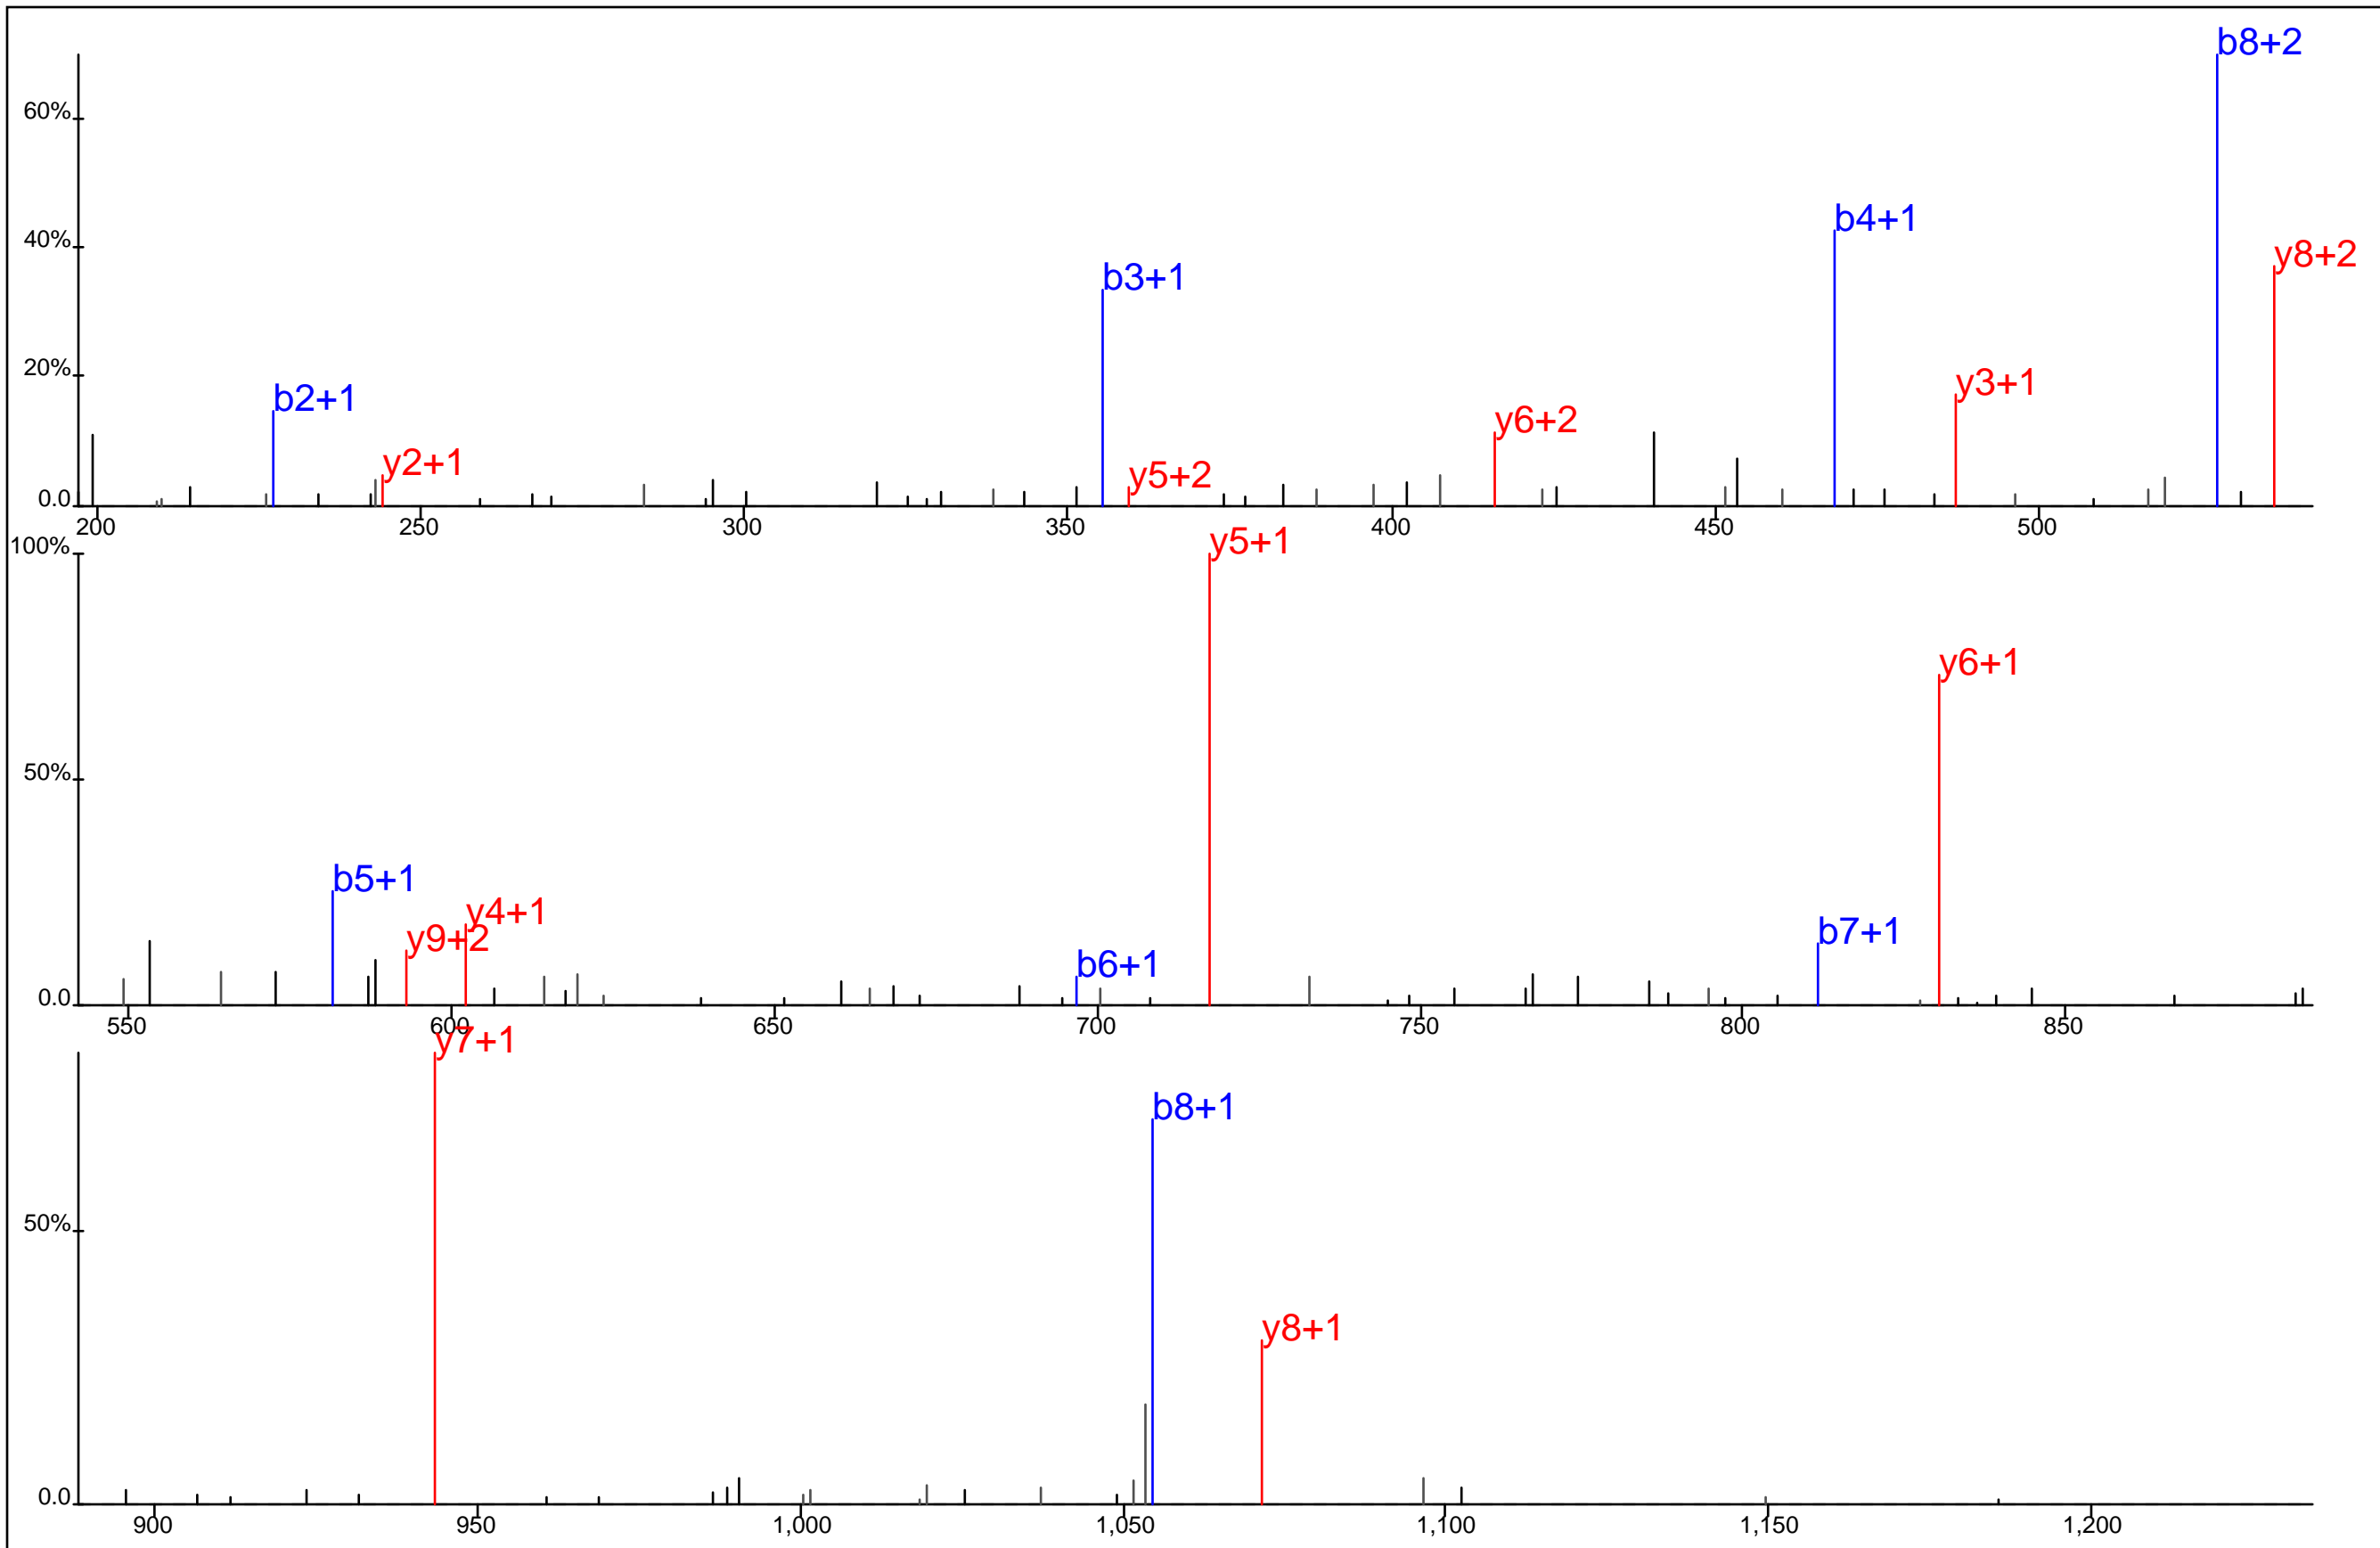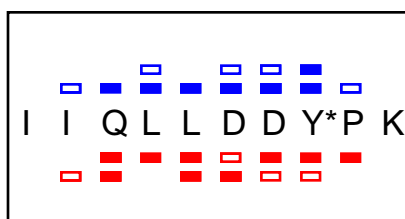

Protein Name: Ribosomal protein, large, P0  
 gi Accession: 0  
 Precursor Mass: 649.3239+2  
 Delta Mass: 2.597 ppm  
 XCorr: 41.03

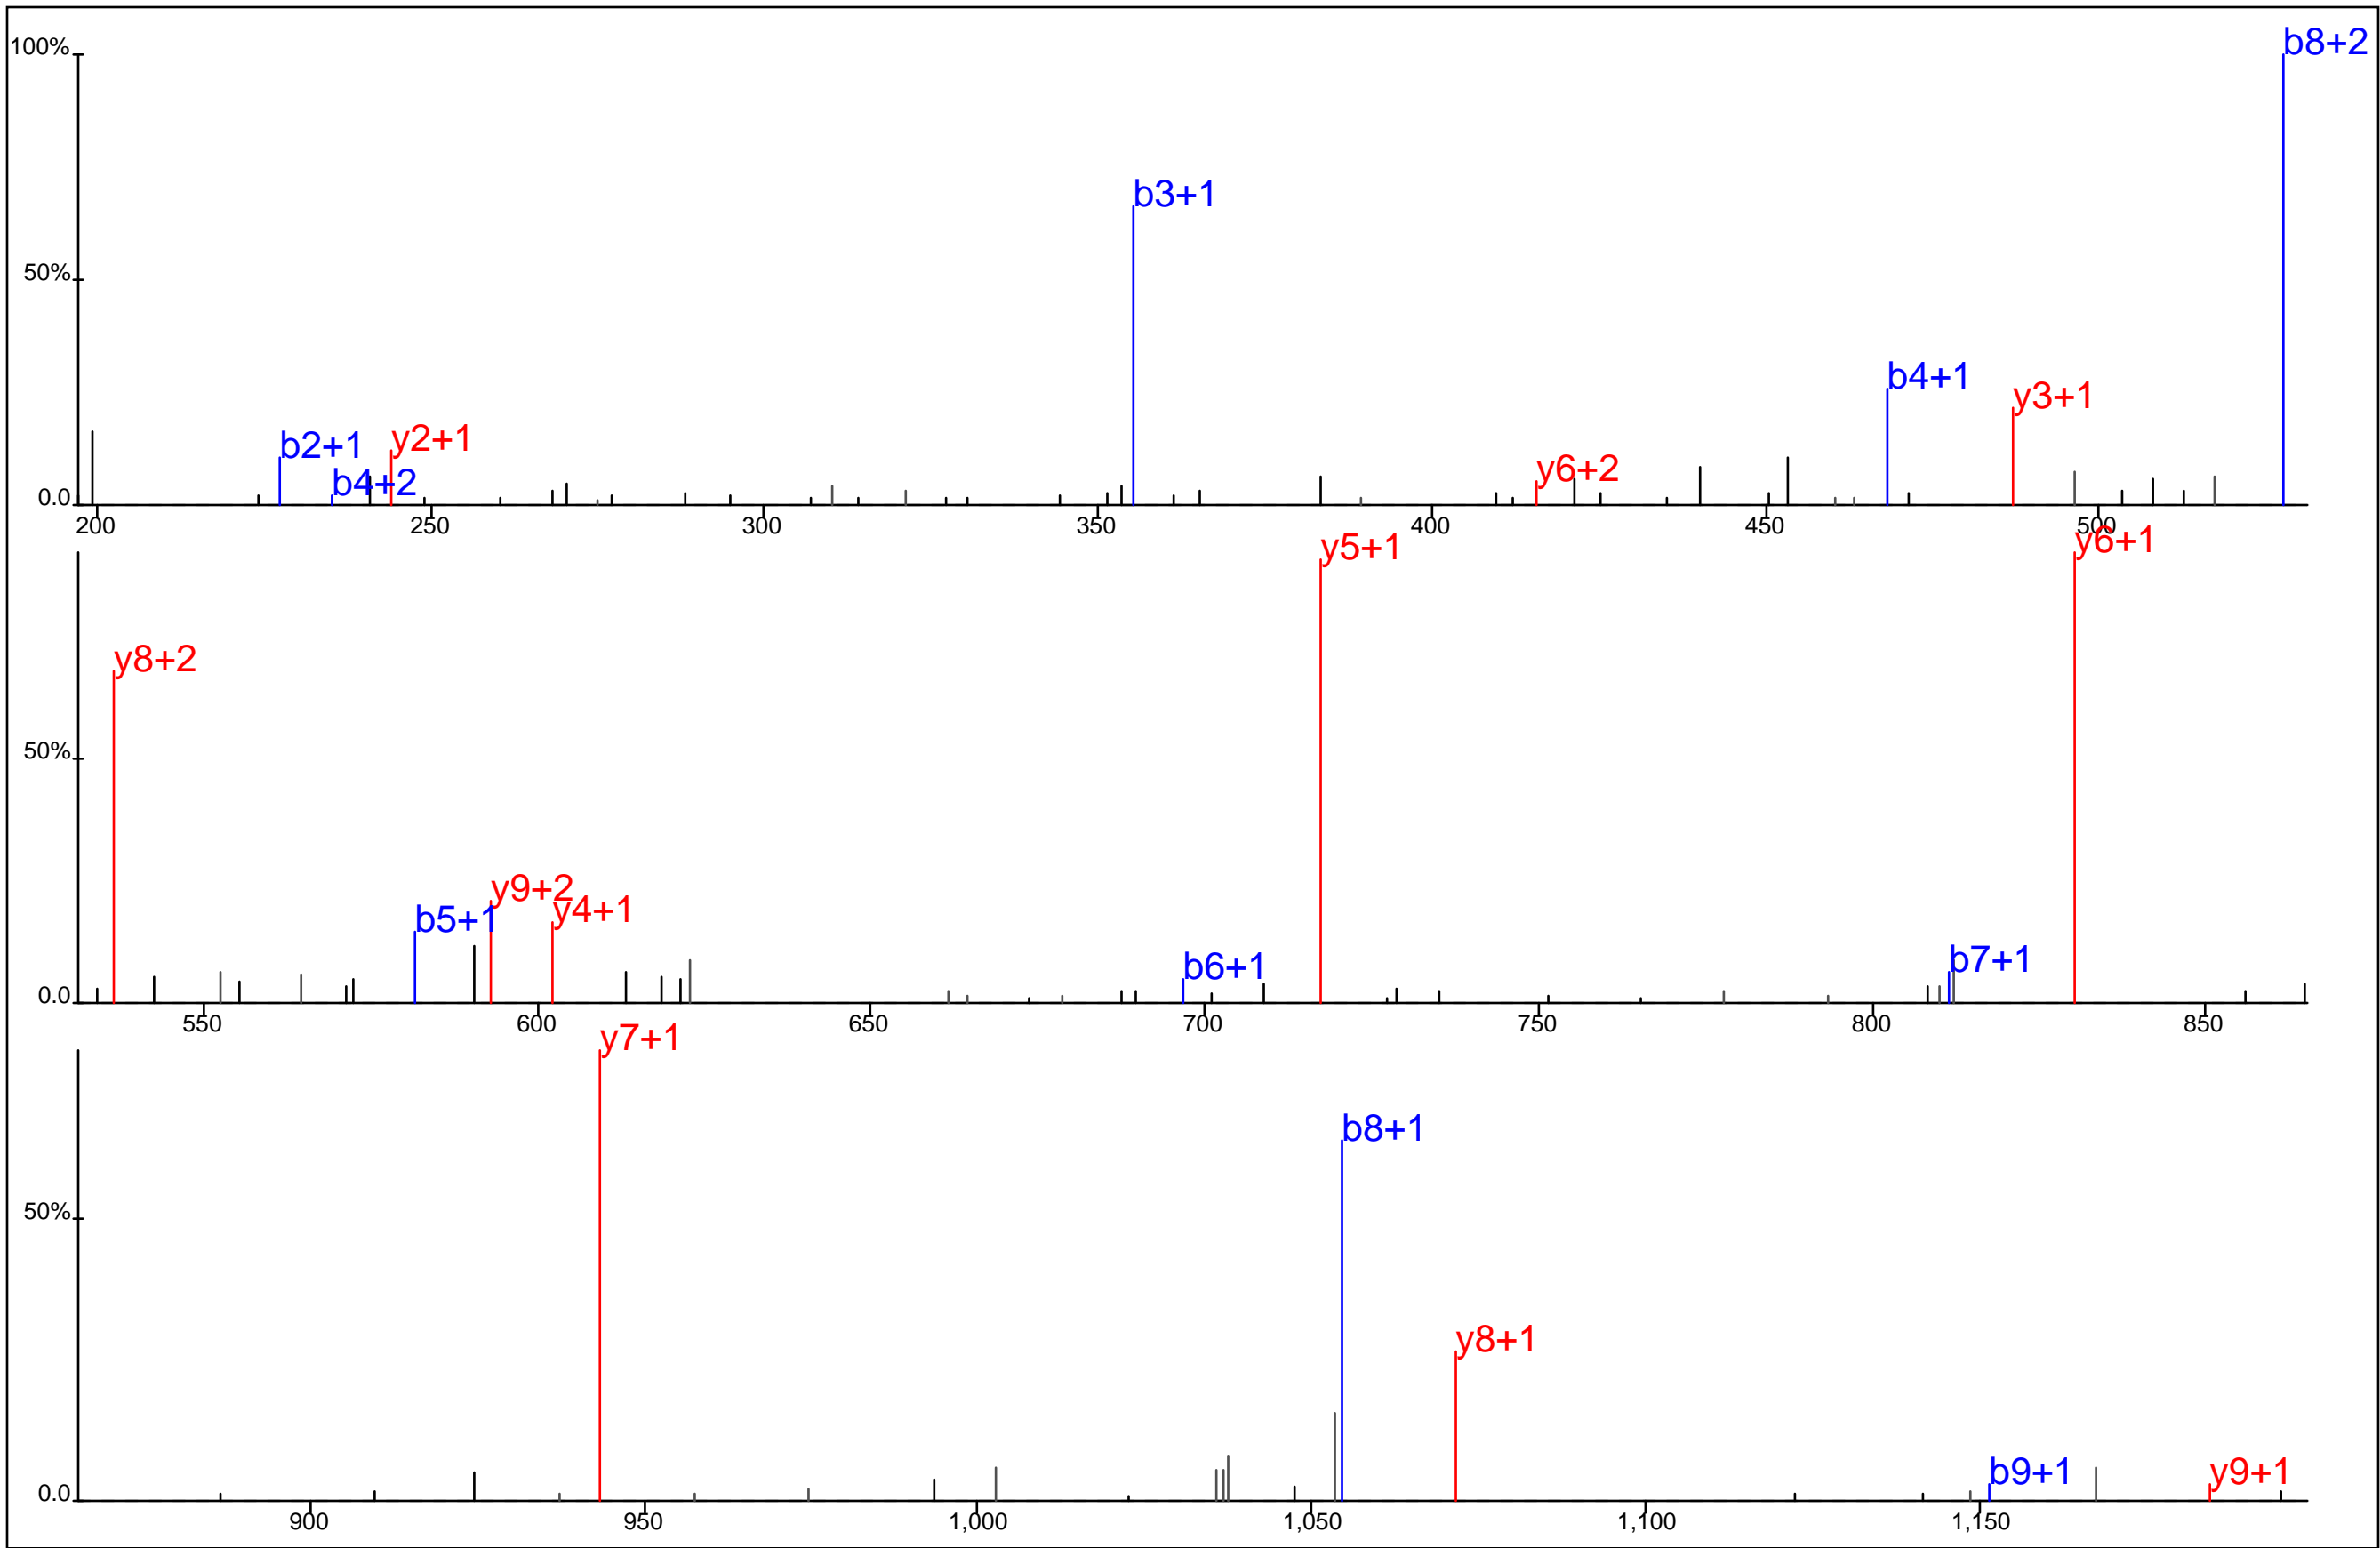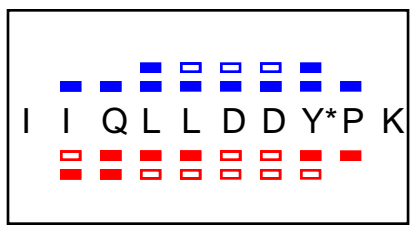

Protein Name: Ribosomal protein, large, P0  
 gi Accession: 0  
 Precursor Mass: 649.3266+2  
 Delta Mass: 1.541 ppm  
 XCorr: 58.61

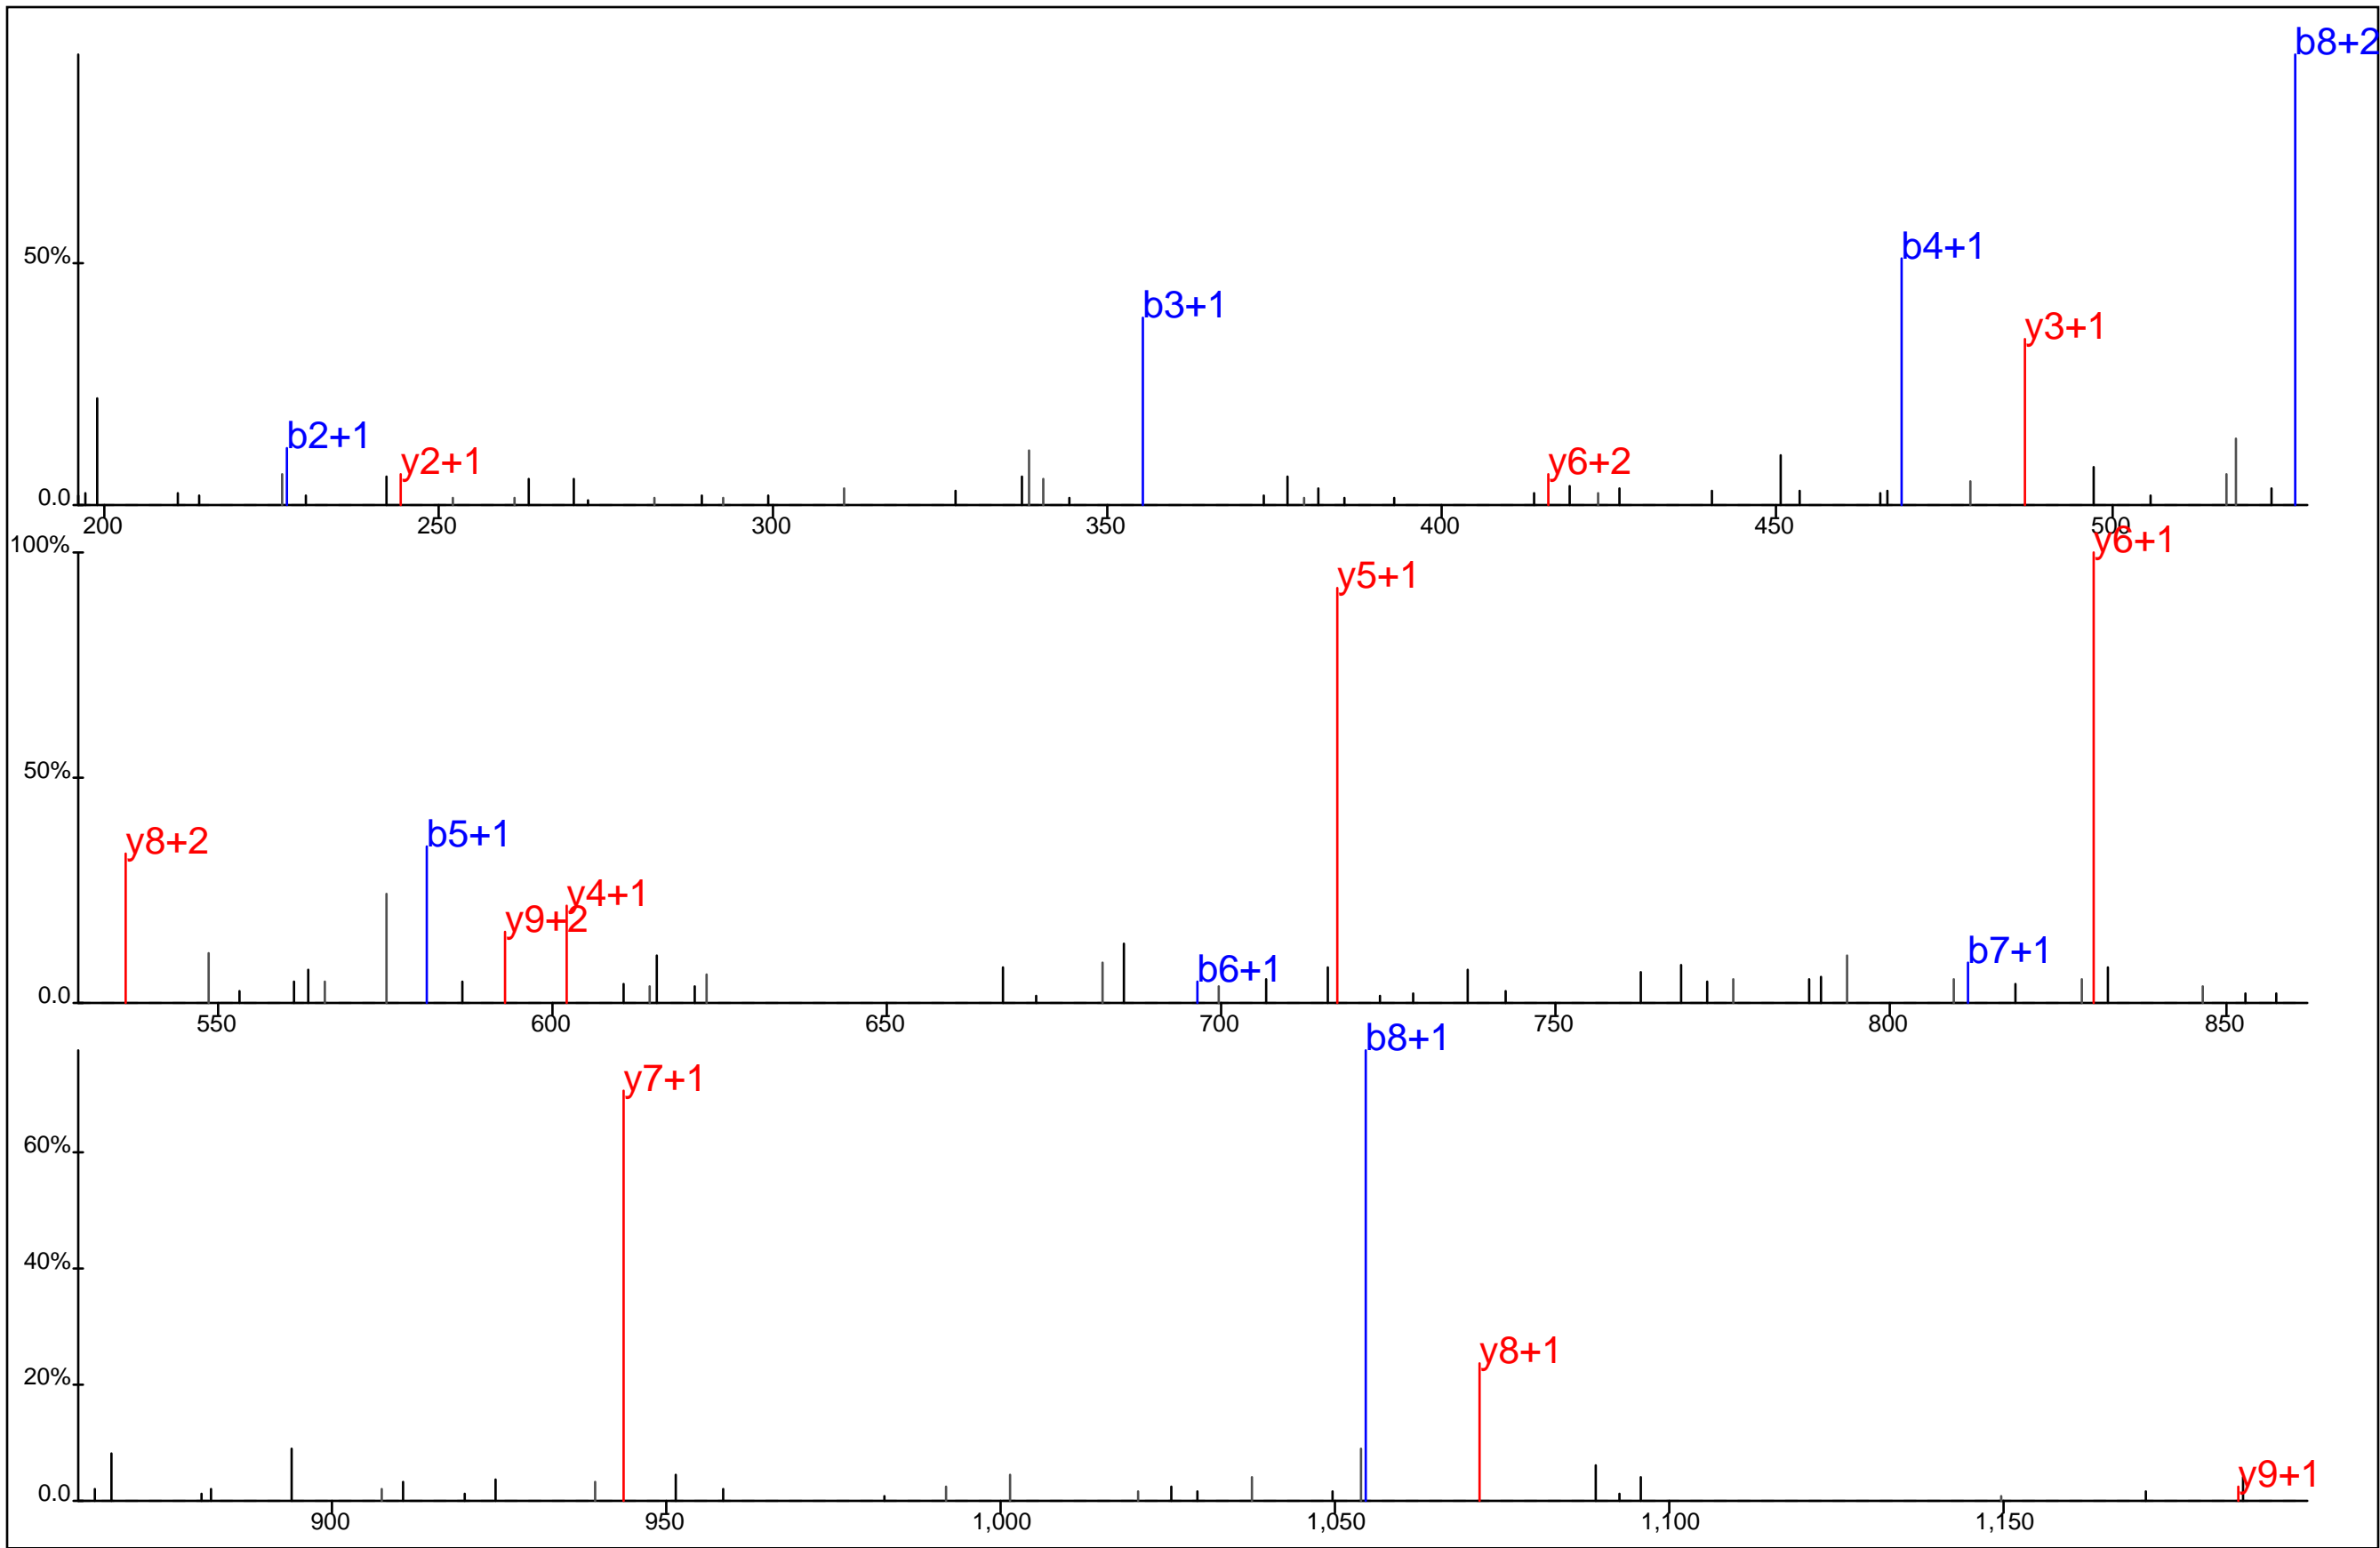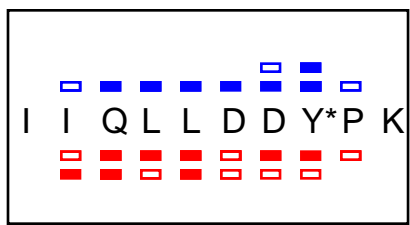

Protein Name: Ribosomal protein, large, P0  
 gi Accession: 0  
 Precursor Mass: 649.3250+2  
 Delta Mass: 0.999 ppm  
 XCorr: 61.66



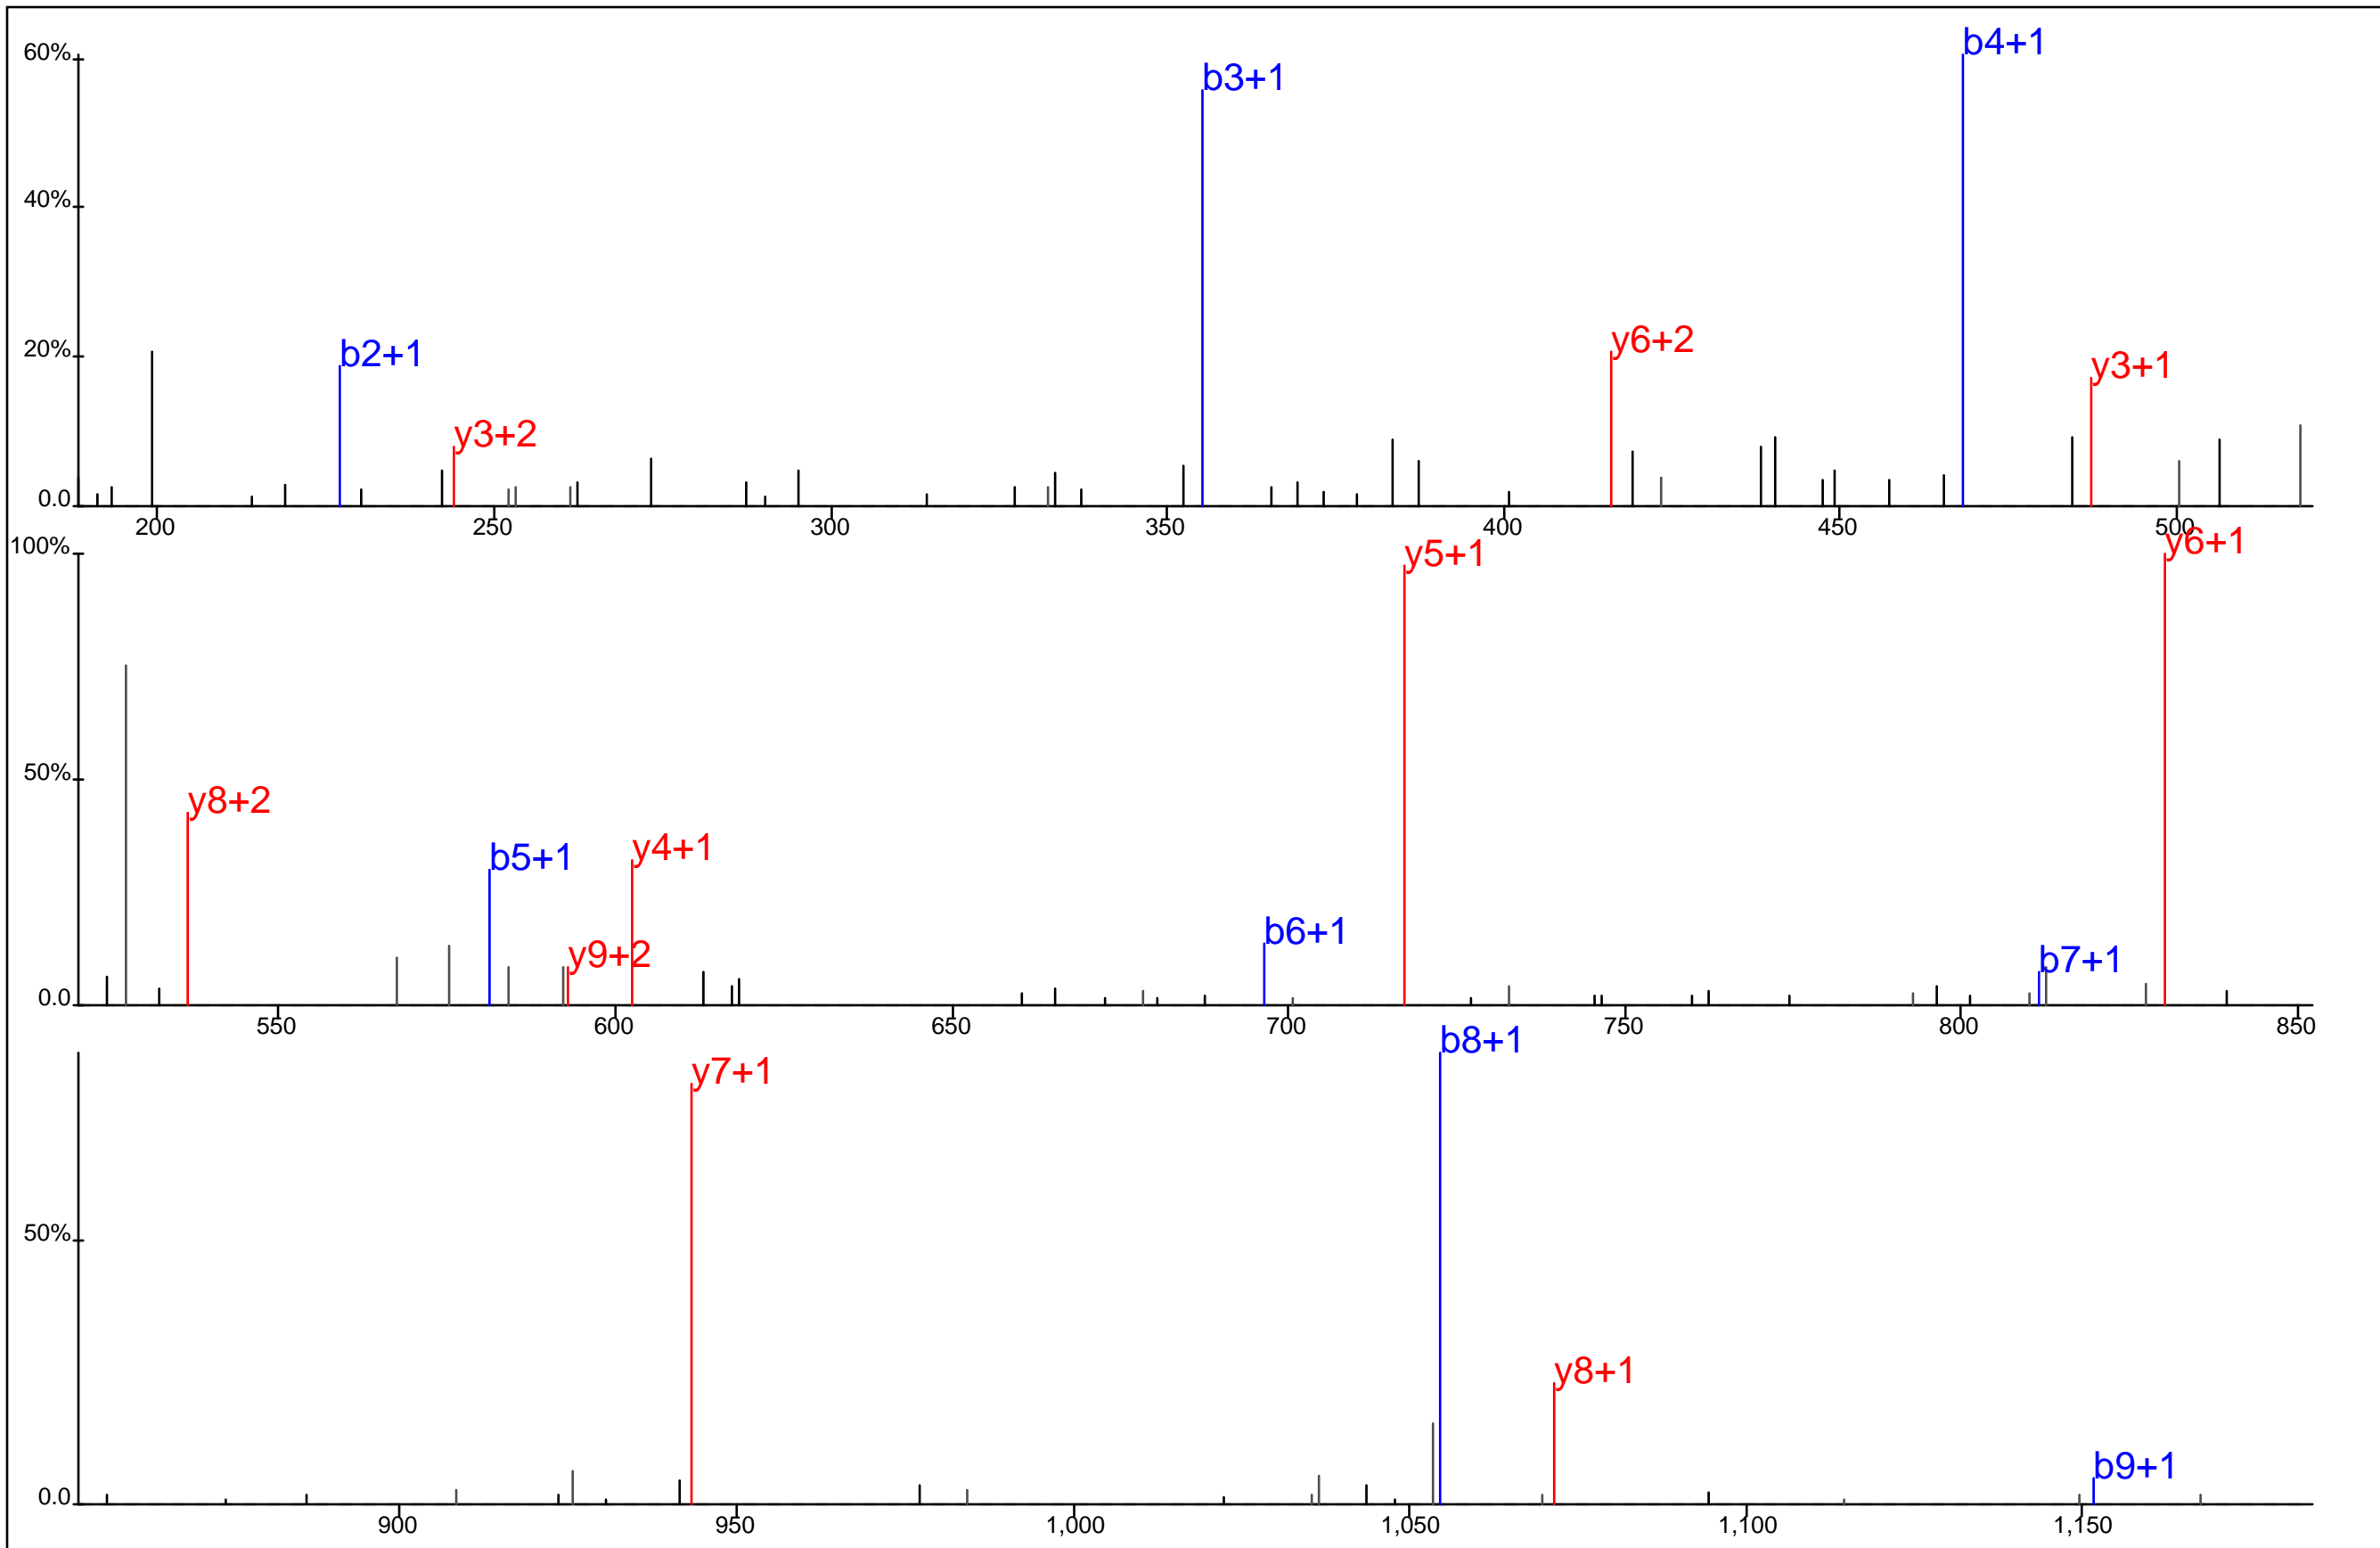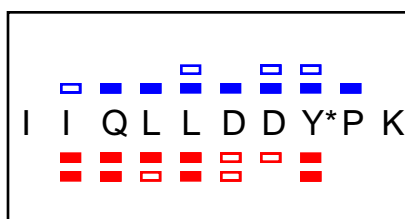

Protein Name: Ribosomal protein, large, P0  
 gi Accession: 0  
 Precursor Mass: 649.3253+2  
 Delta Mass: 0.529 ppm  
 XCorr: 71.18

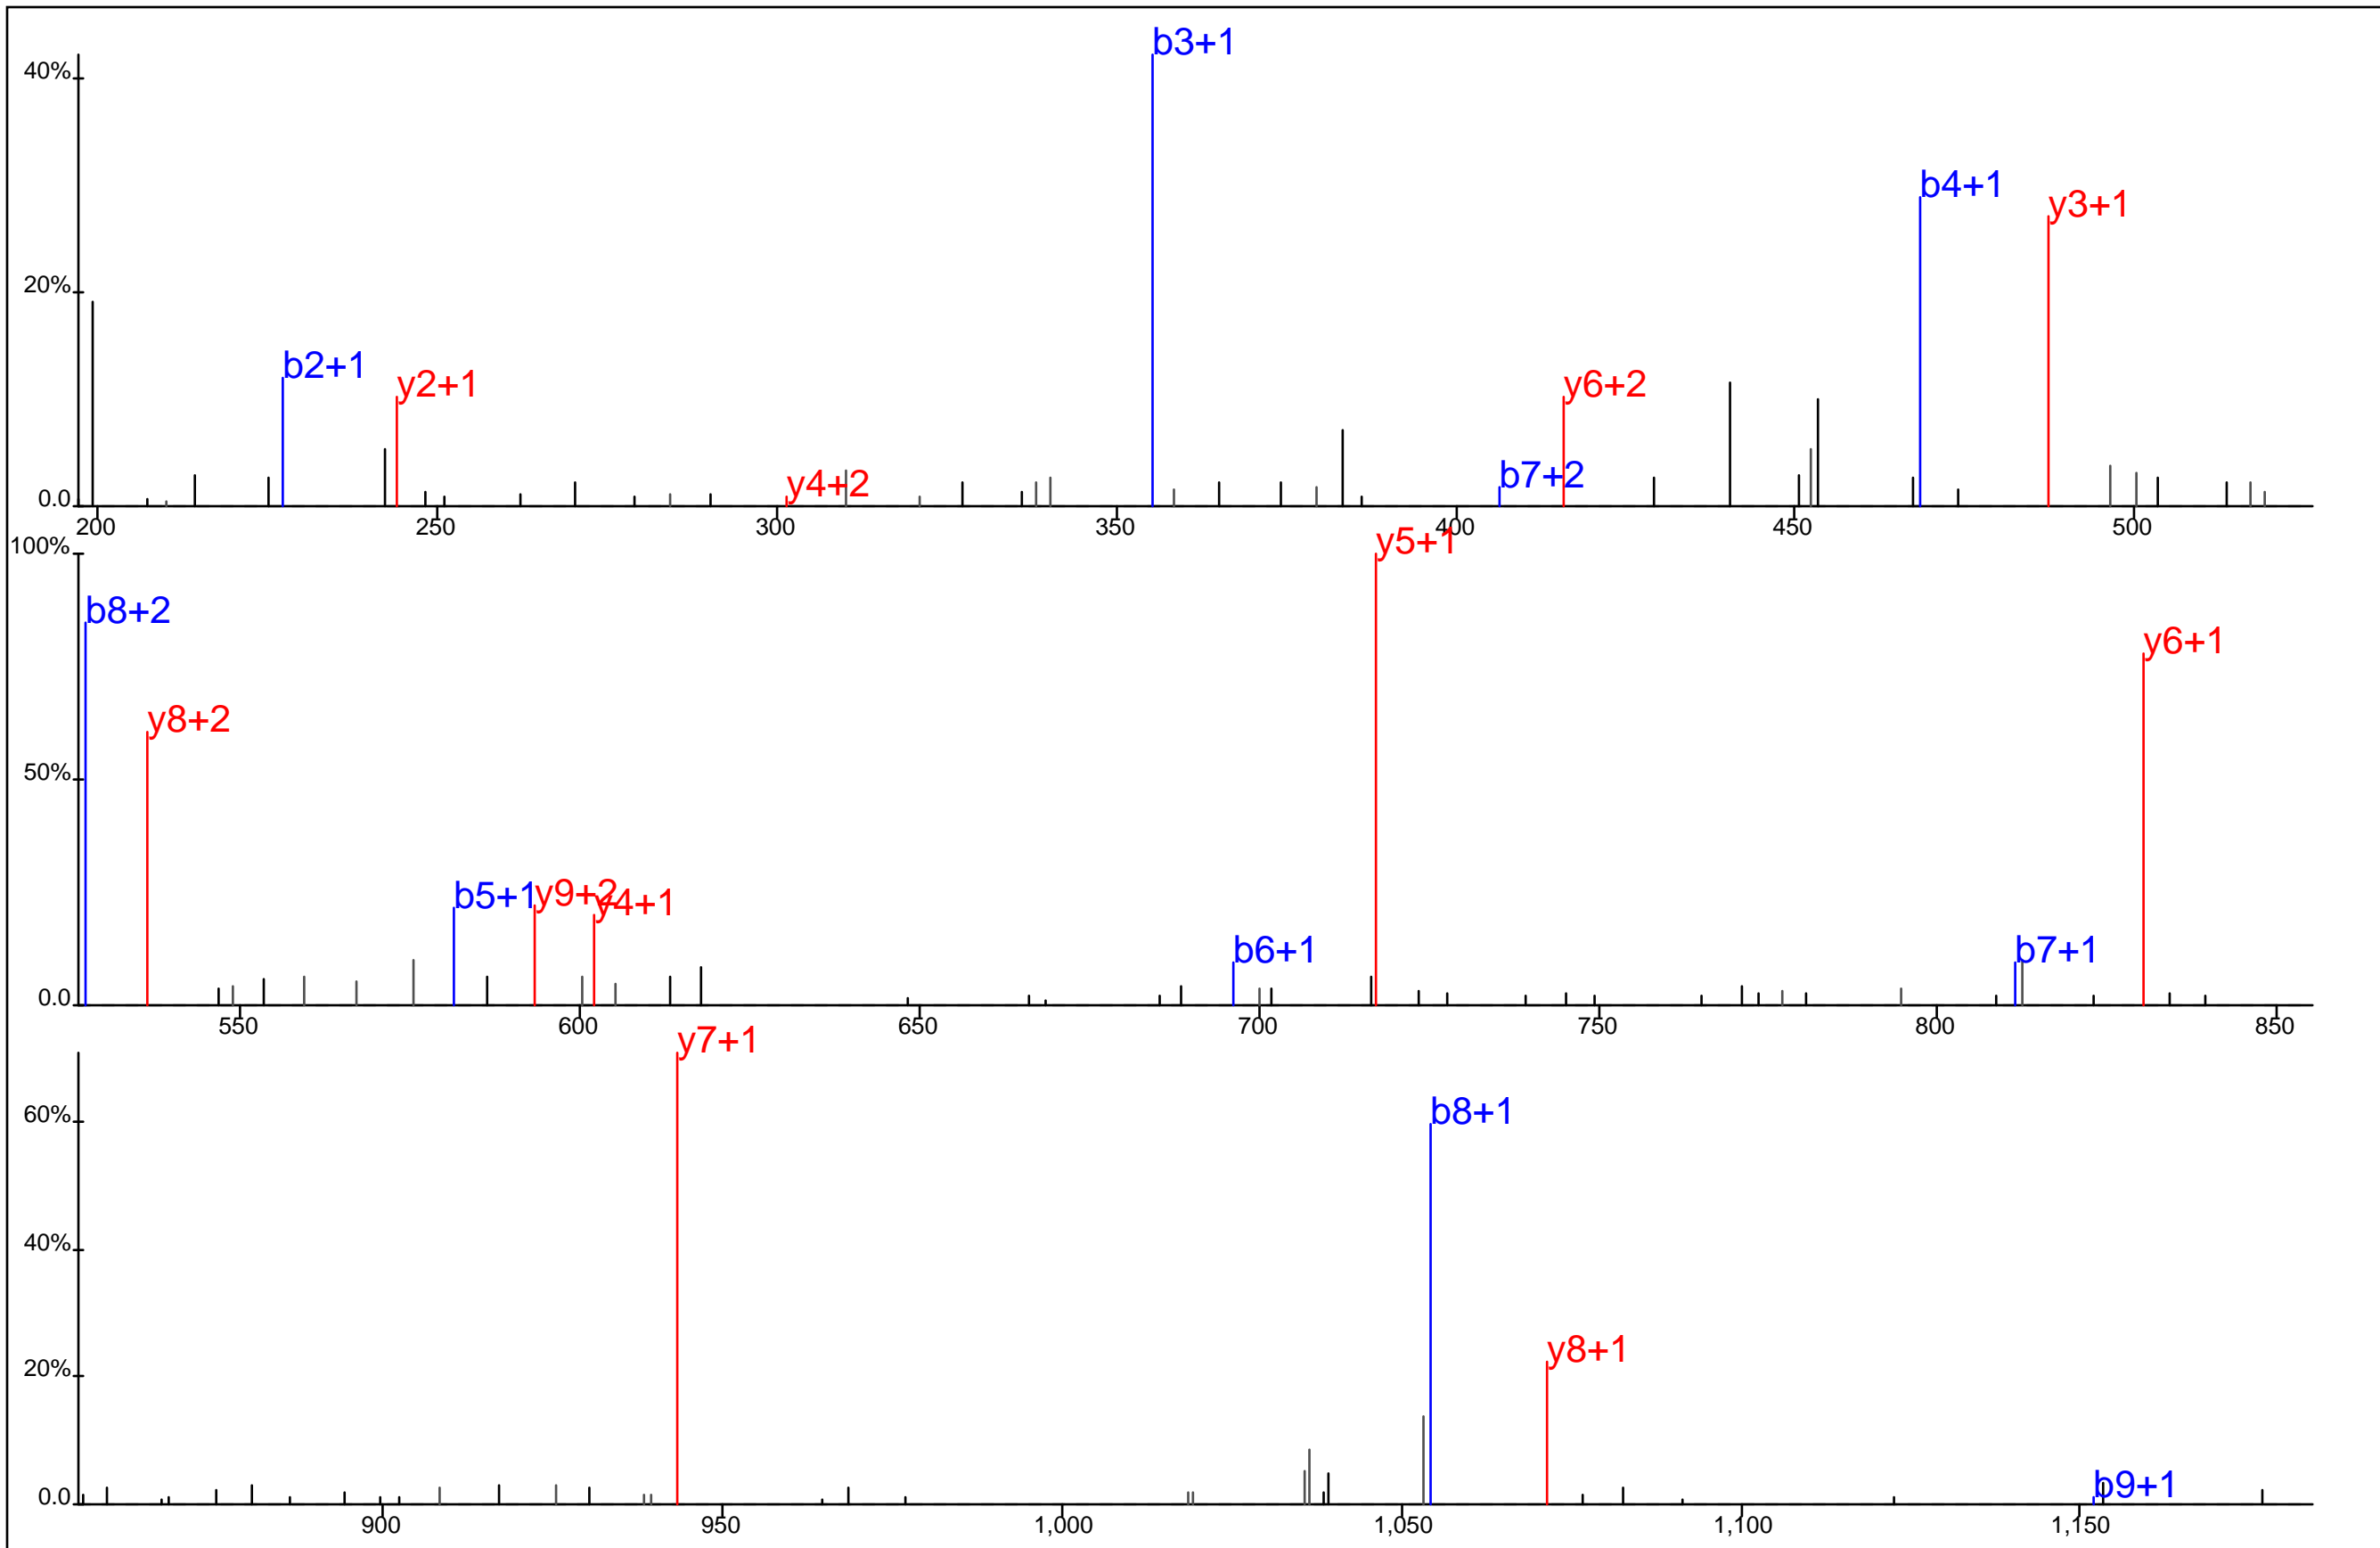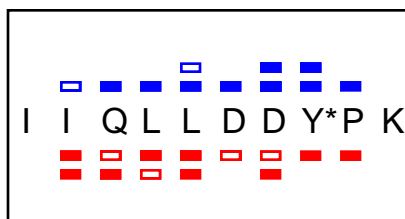

Protein Name: Ribosomal protein, large, P0  
 gi Accession: 0  
 Precursor Mass: 649.3243+2  
 Delta Mass: 2.033 ppm  
 XCorr: 60.08

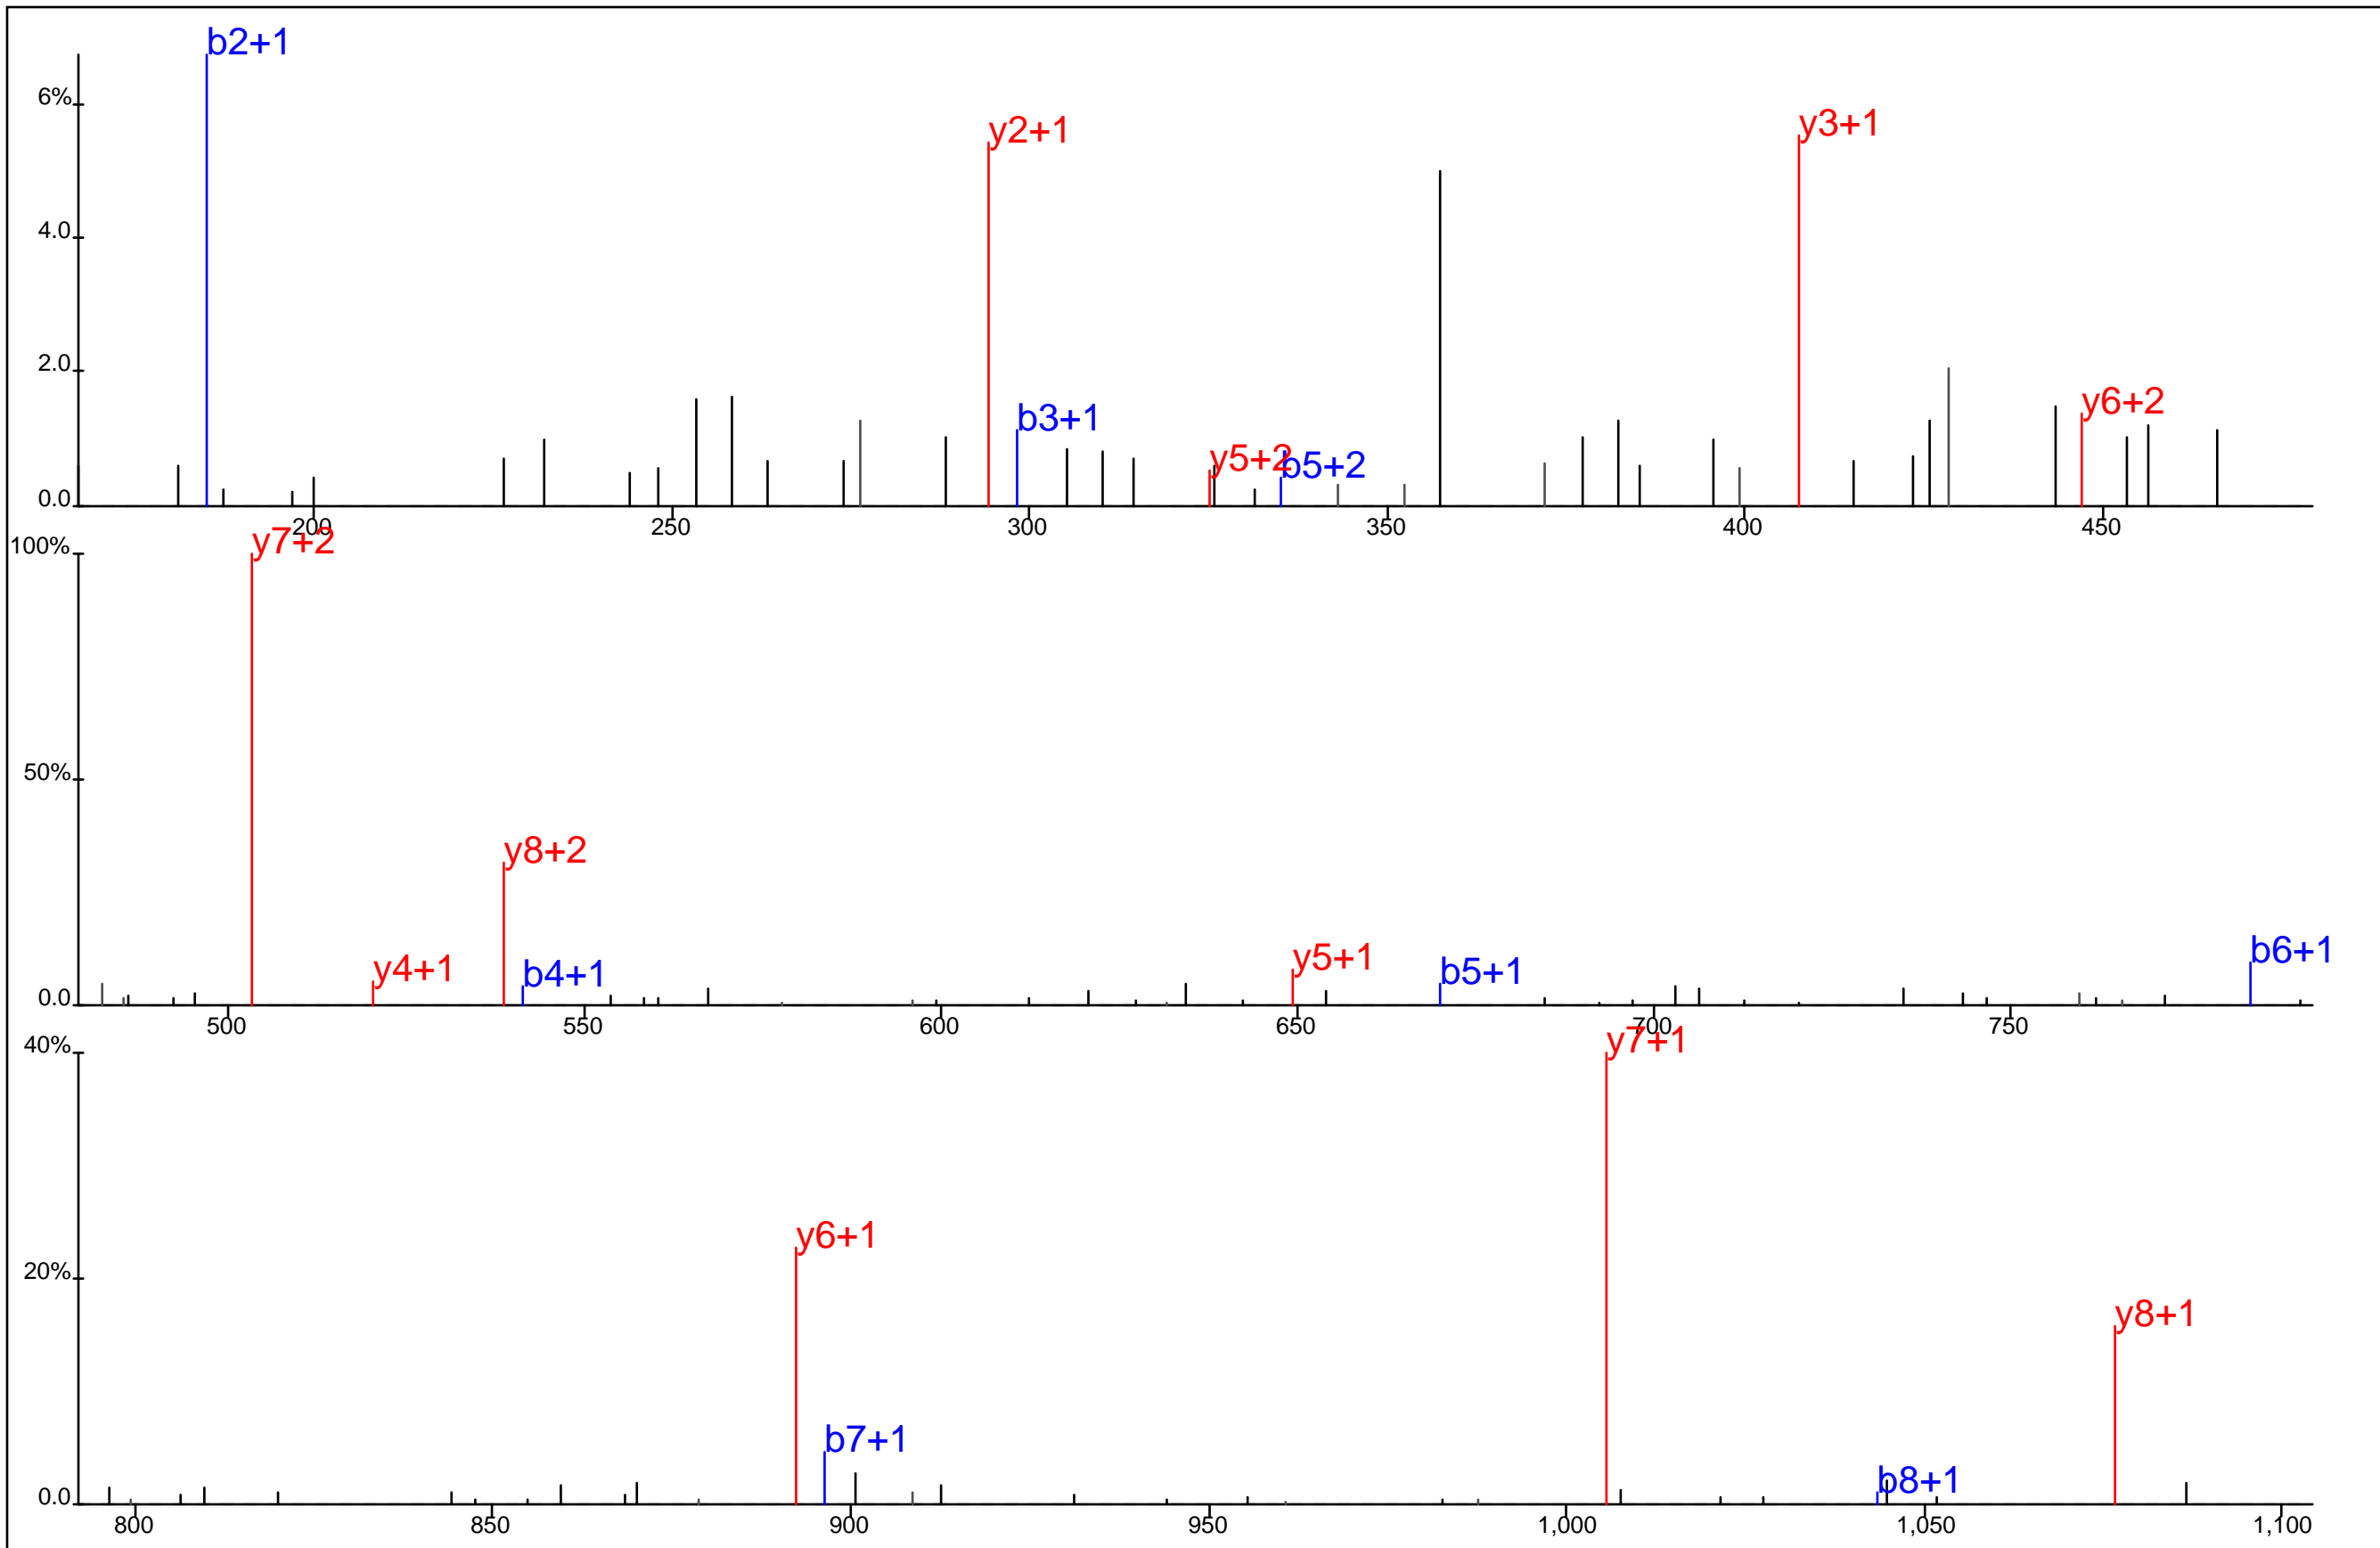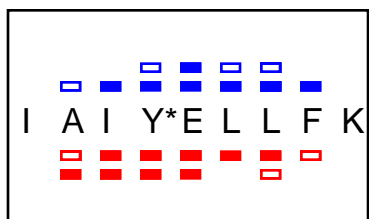

Protein Name: Ribosomal protein S10  
 gi Accession: 0  
 Precursor Mass: 595.3185+2  
 Delta Mass: 2.527 ppm  
 XCorr: 62.52

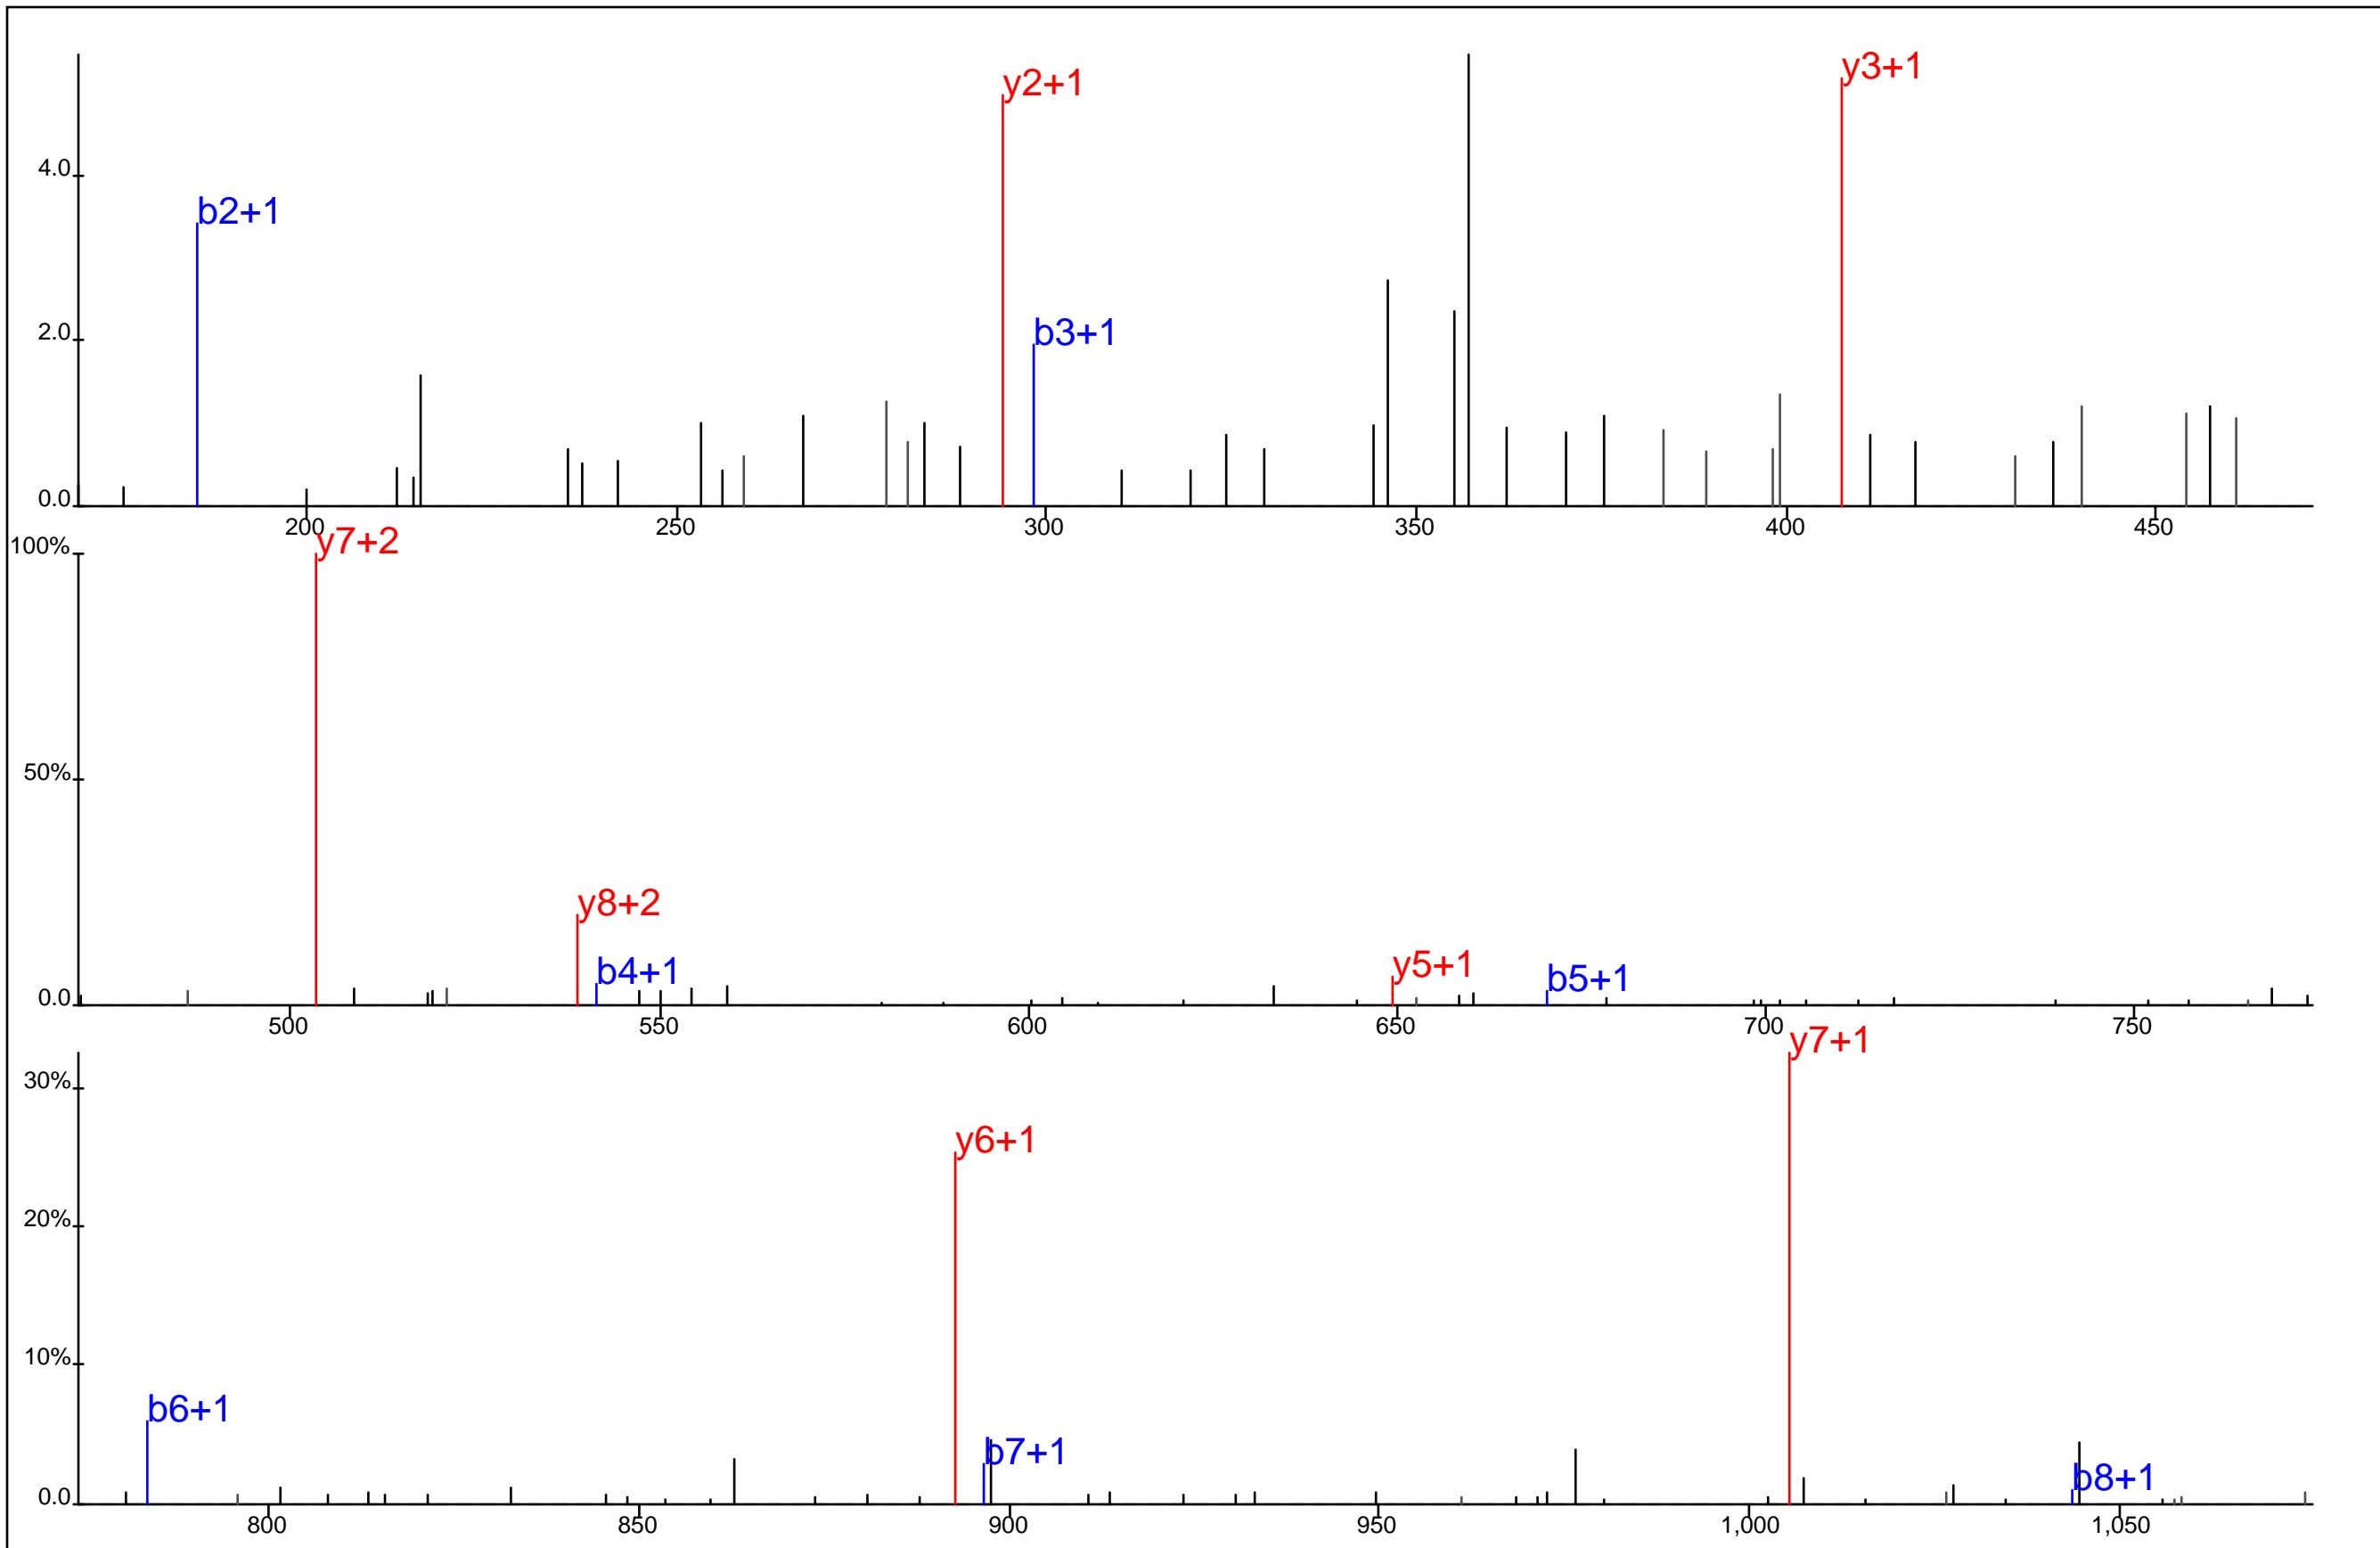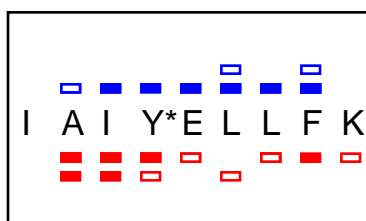

Protein Name: Ribosomal protein S10  
 gi Accession: 0  
 Precursor Mass: 595.3173+2  
 Delta Mass: 0.476 ppm  
 XCorr: 40.83

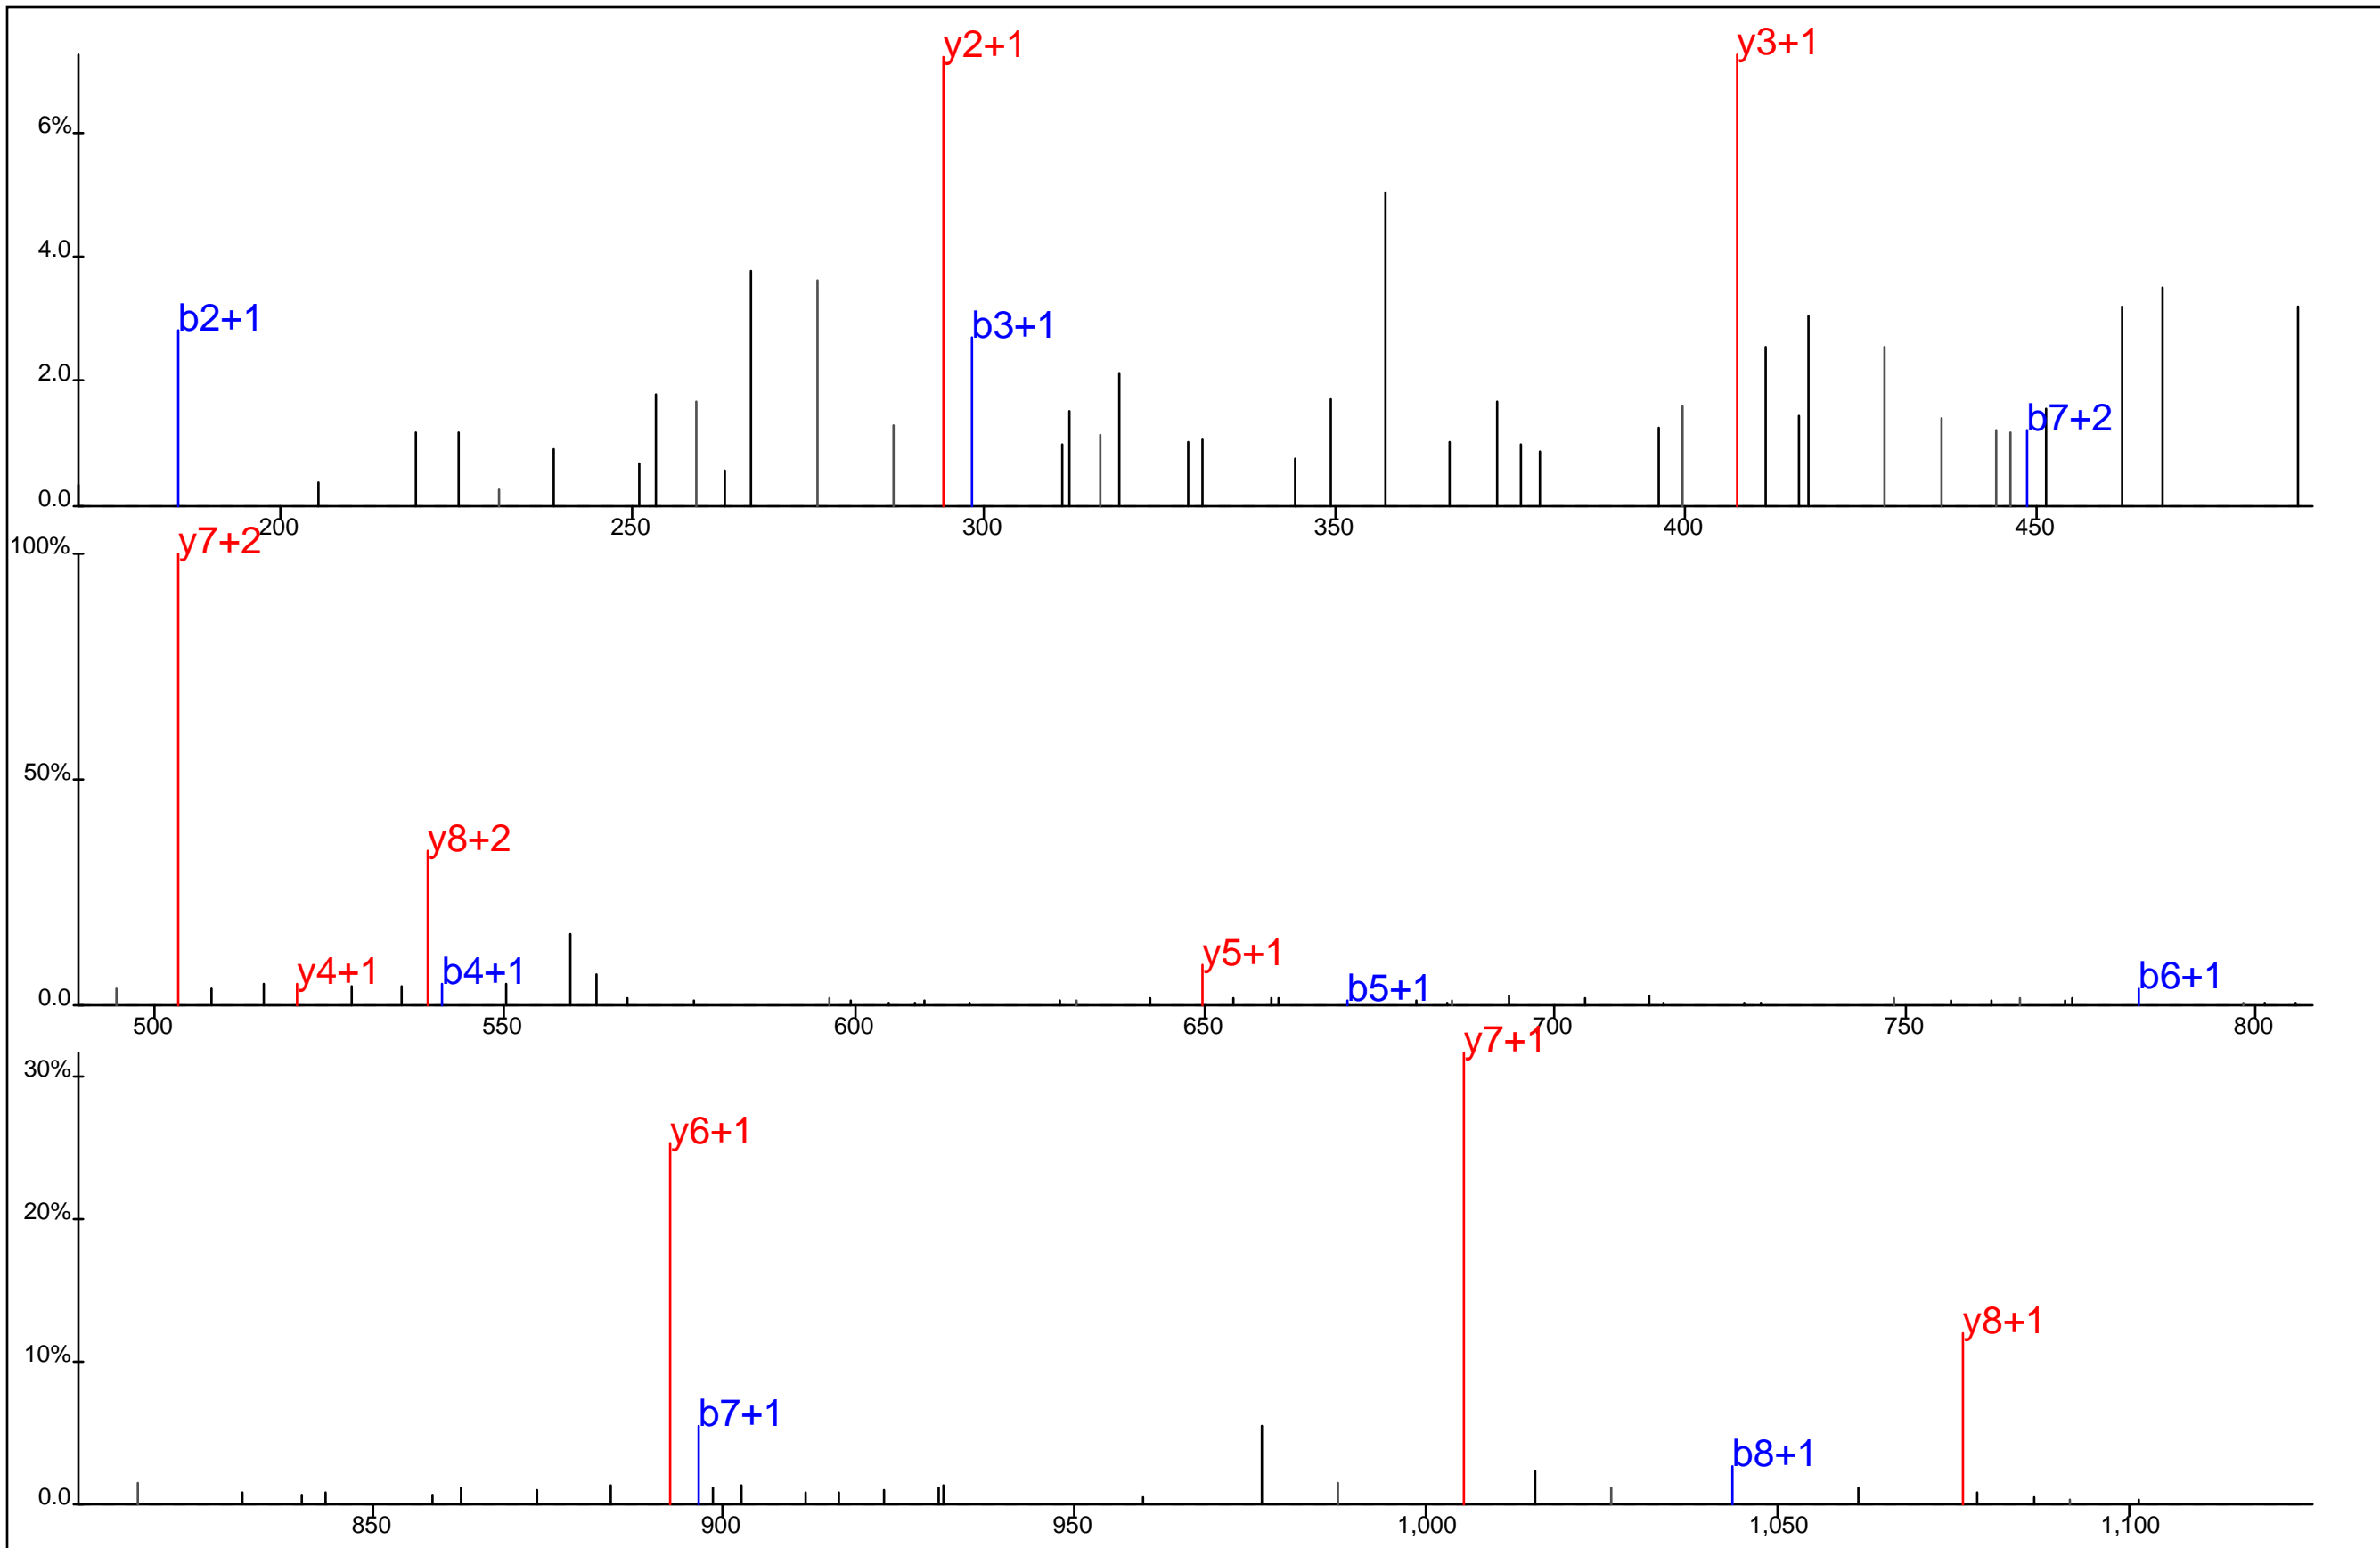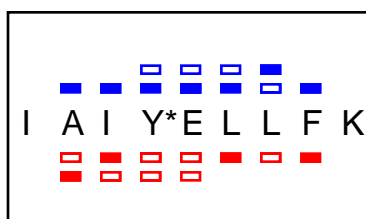

Protein Name: Ribosomal protein S10  
 gi Accession: 0  
 Precursor Mass: 595.3161+2  
 Delta Mass: 1.577 ppm  
 XCorr: 48.19

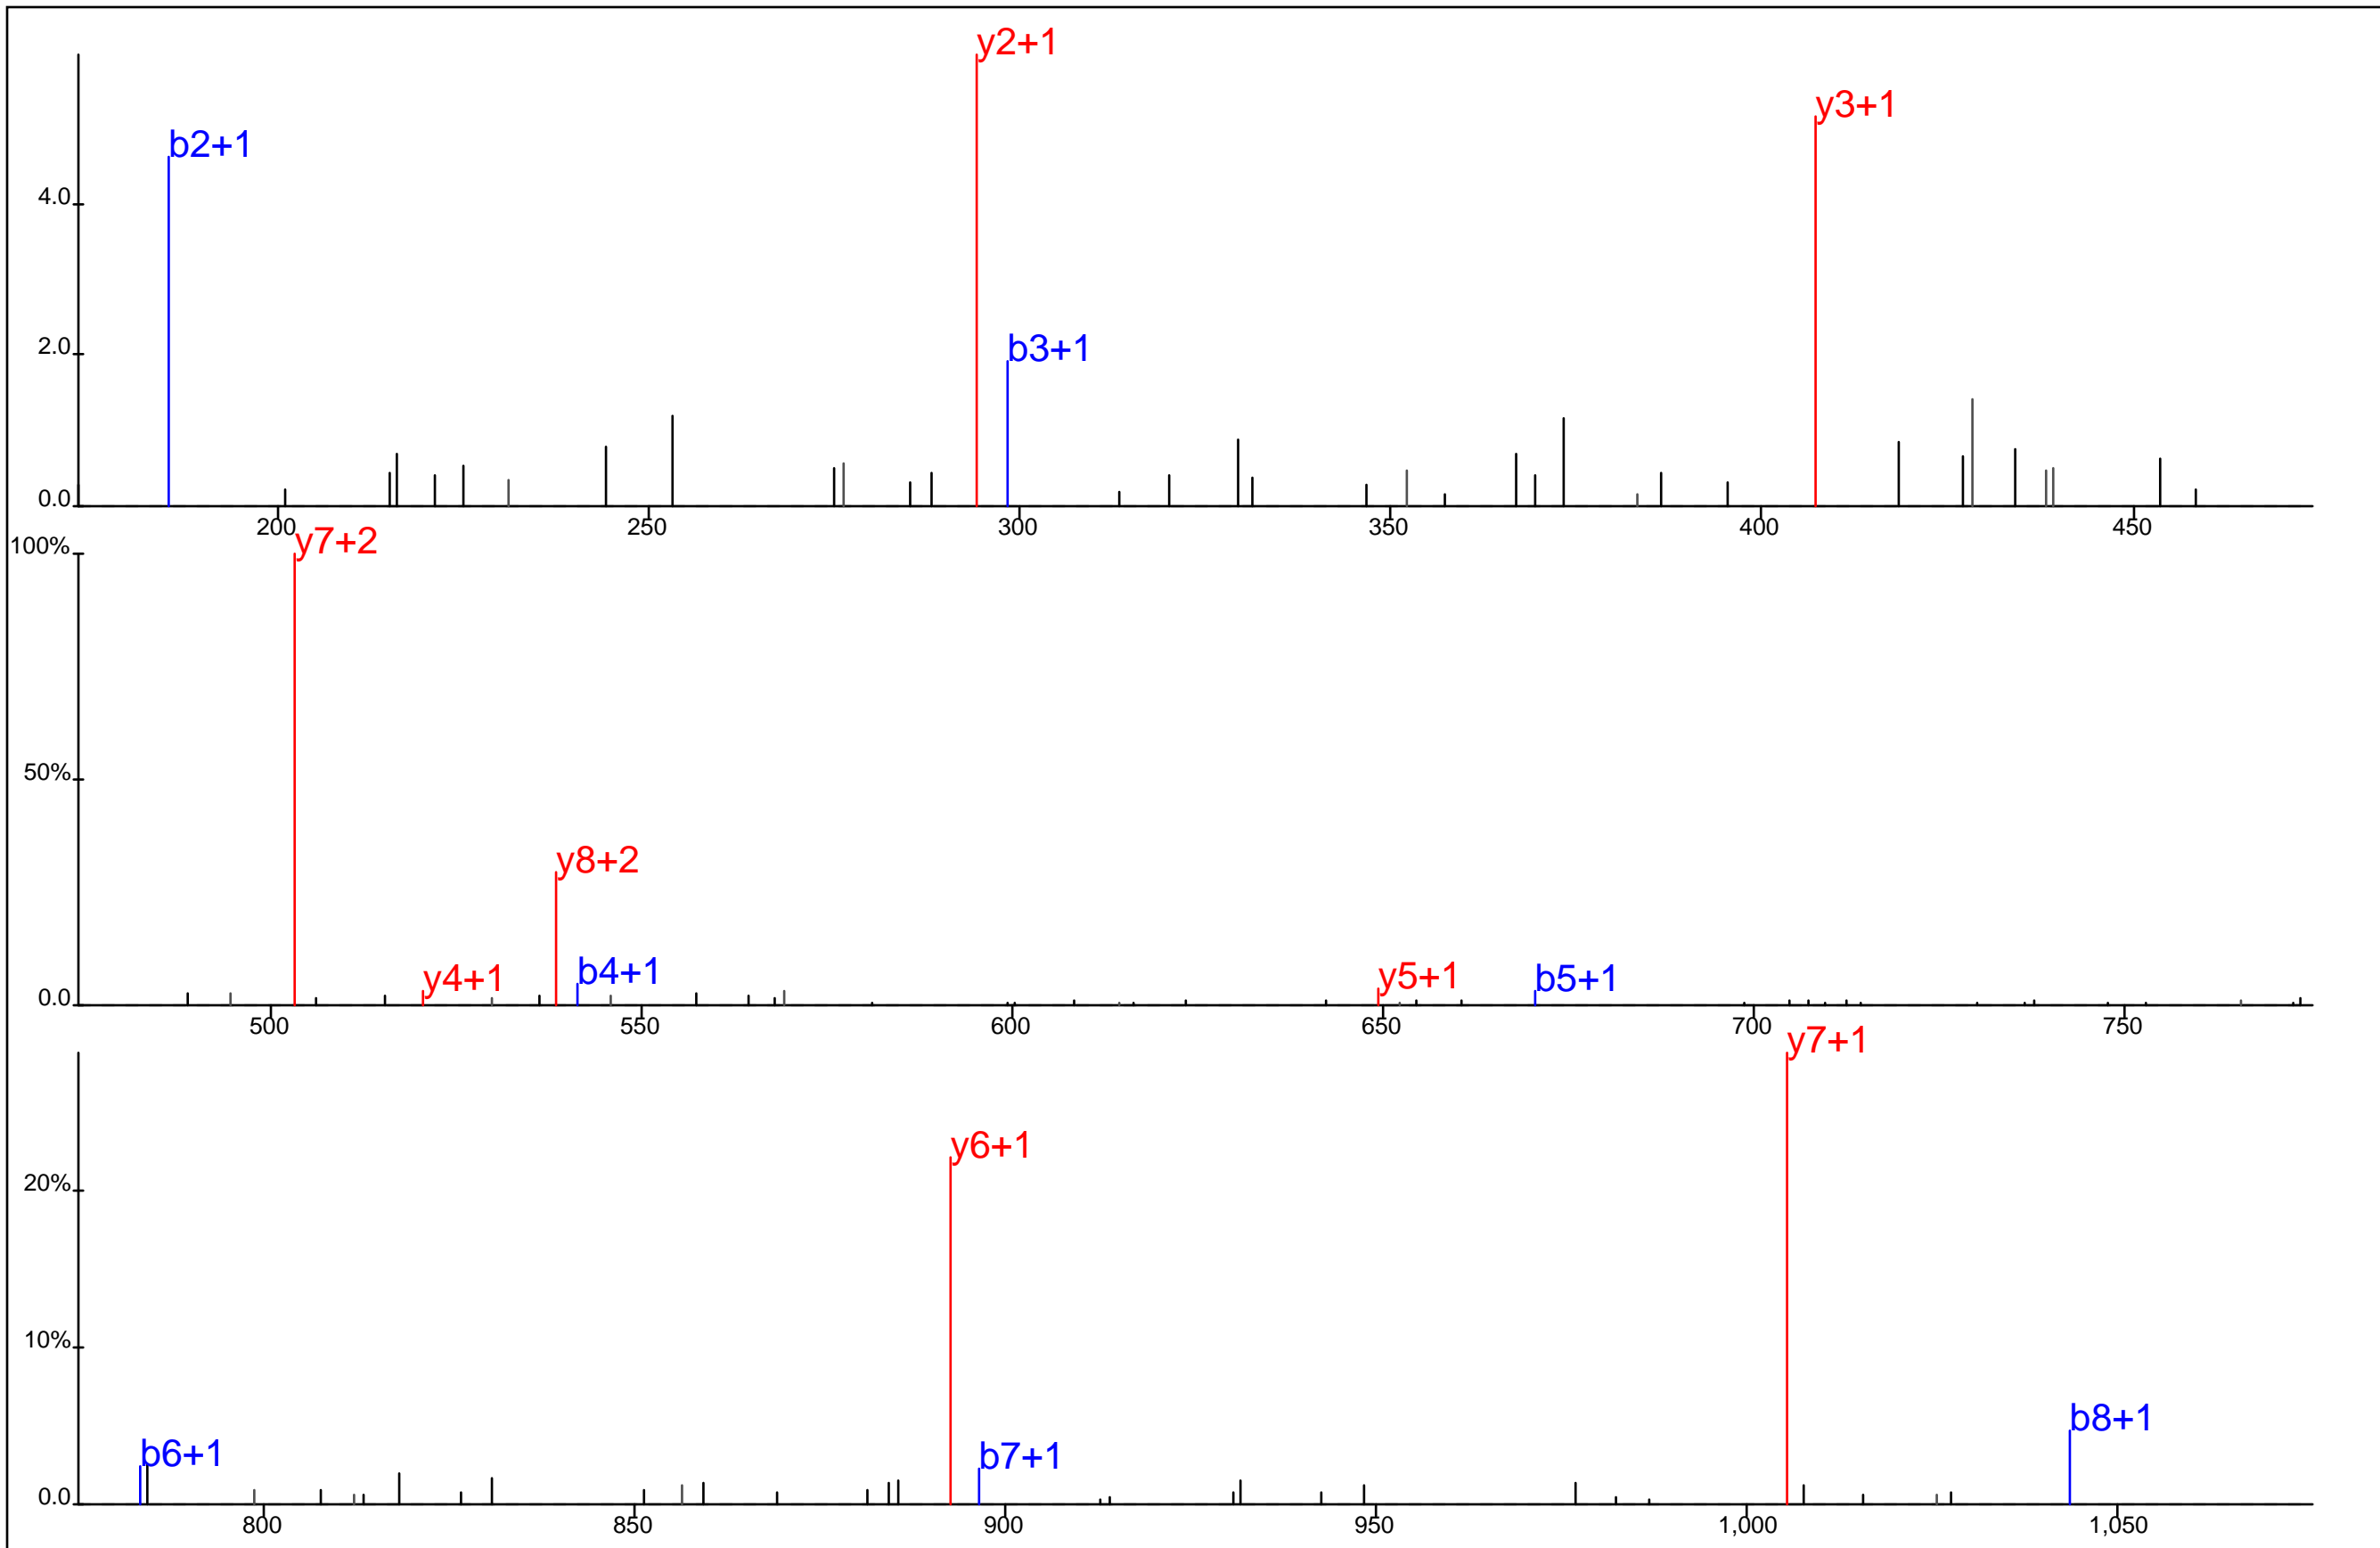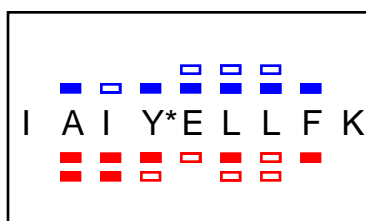

Protein Name: Ribosomal protein S10  
 gi Accession: 0  
 Precursor Mass: 595.3161+2  
 Delta Mass: 1.577 ppm  
 XCorr: 57.4

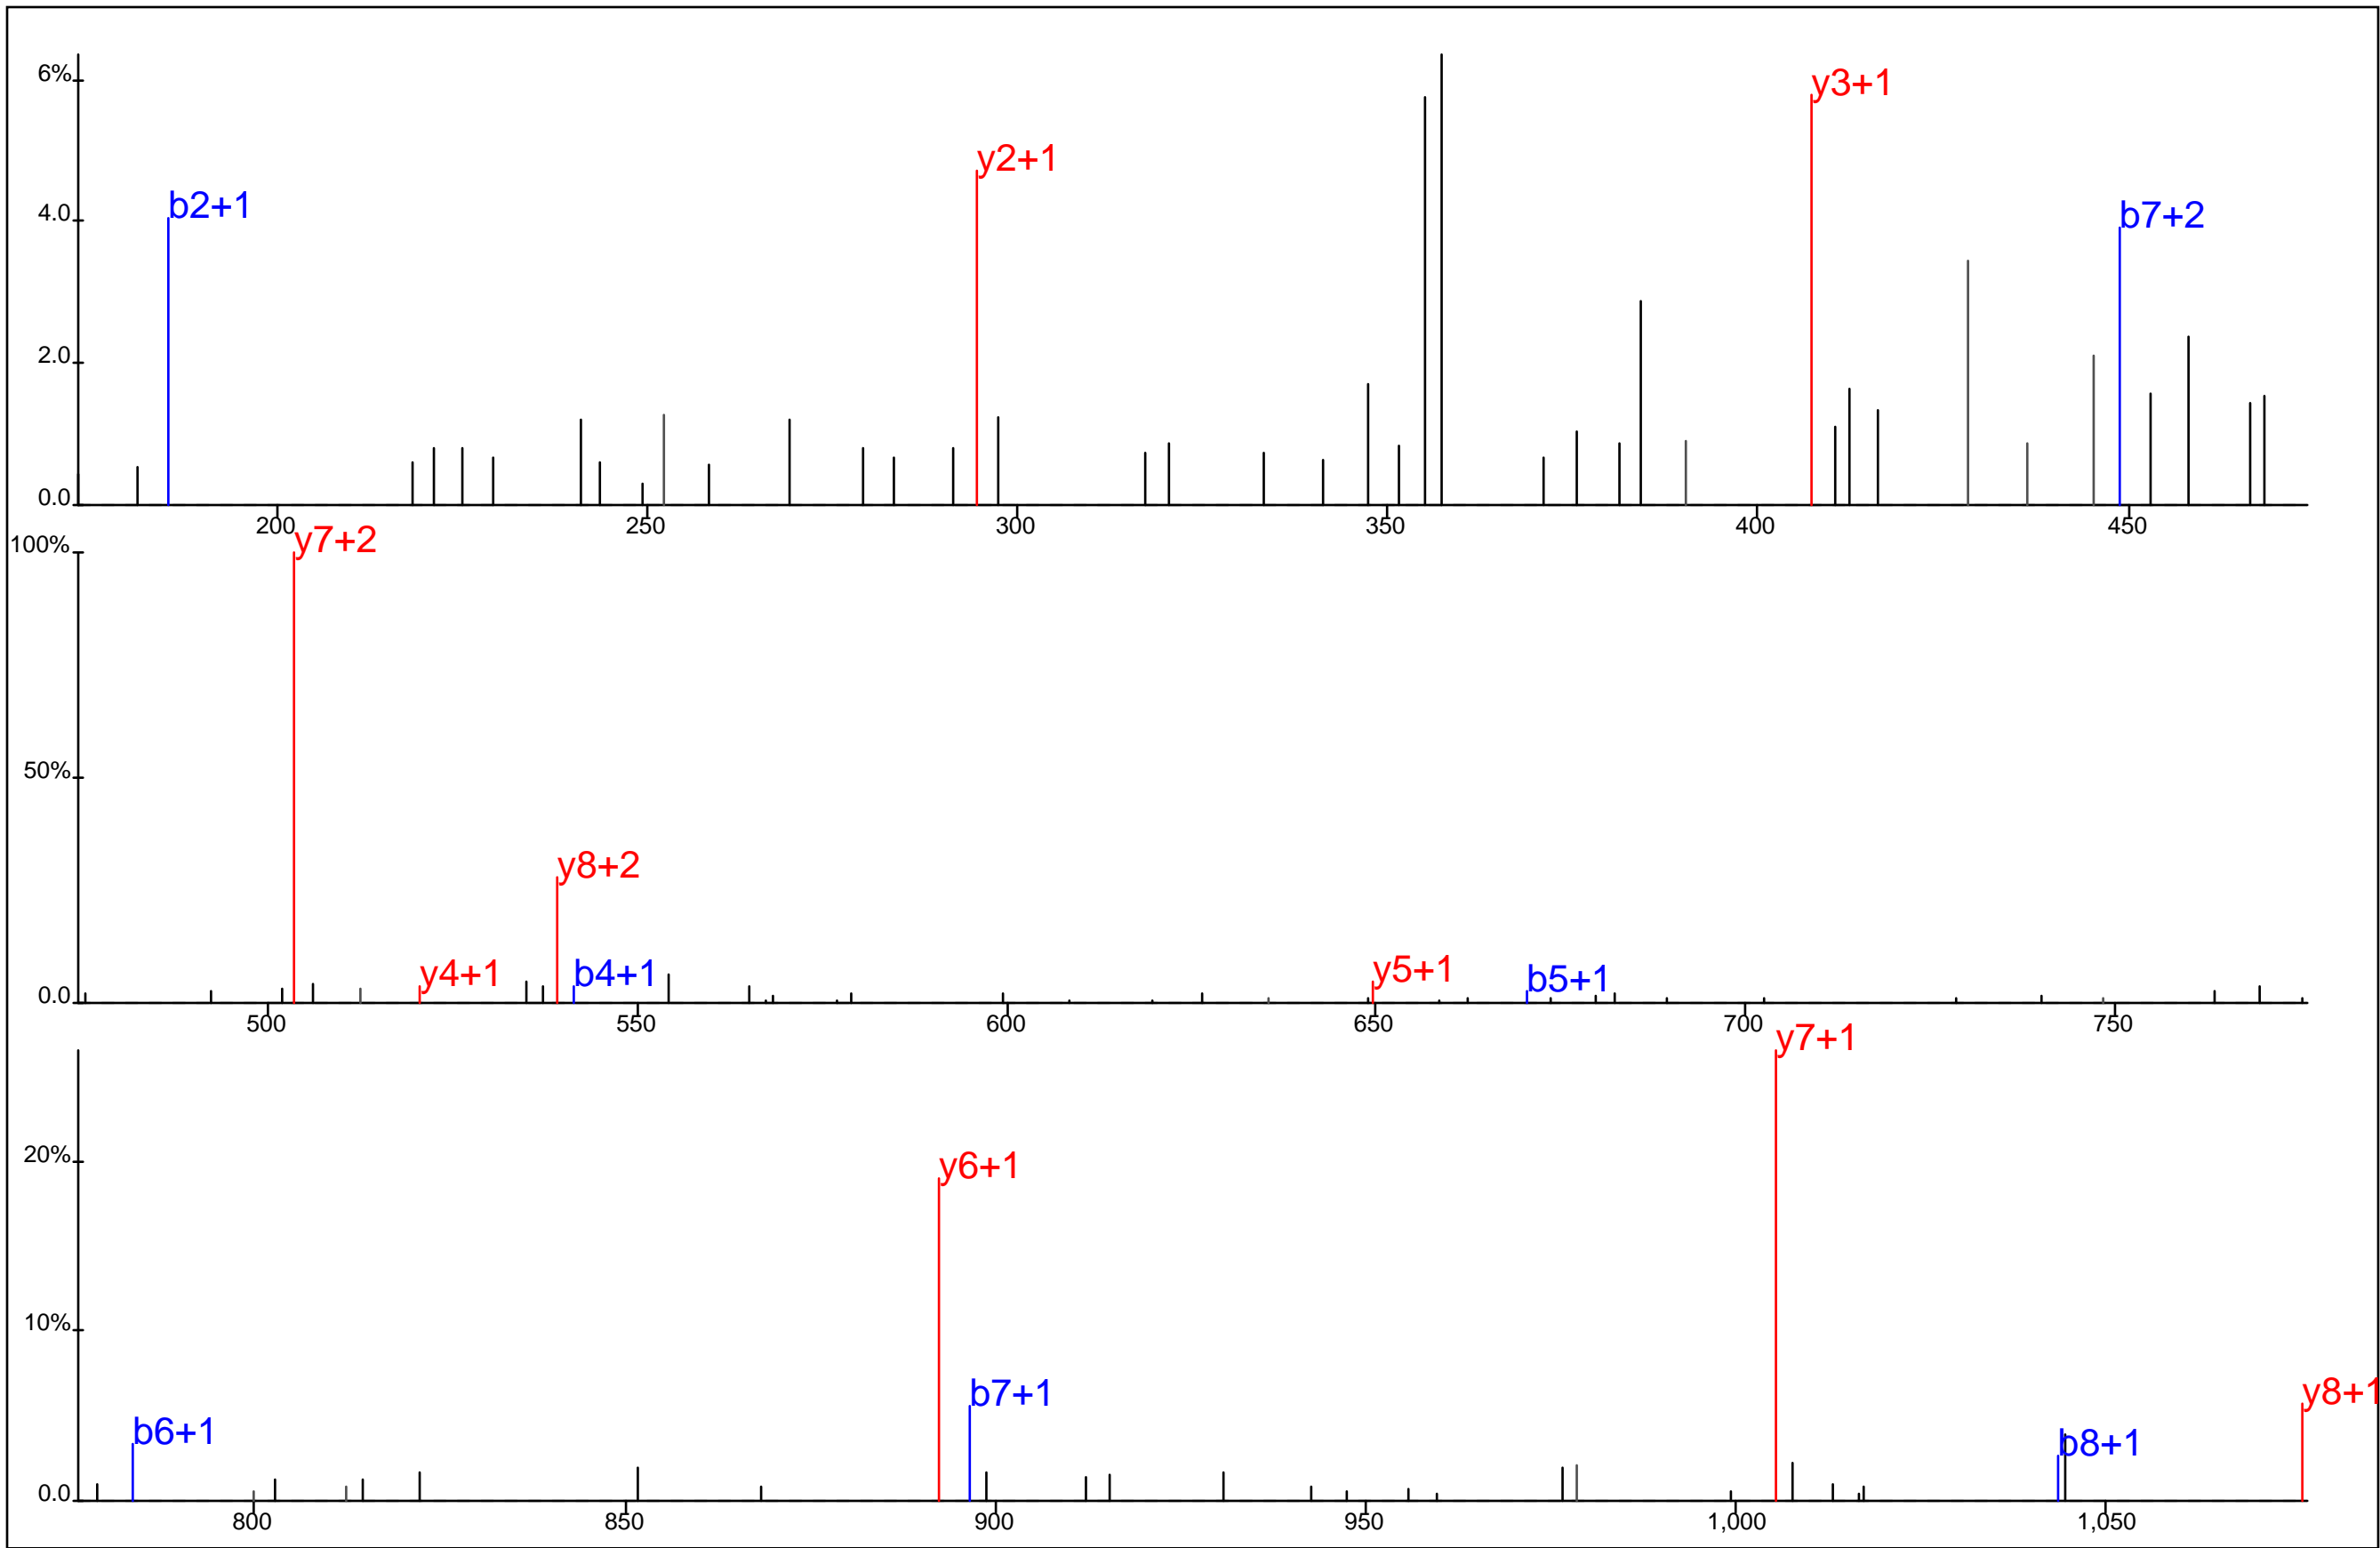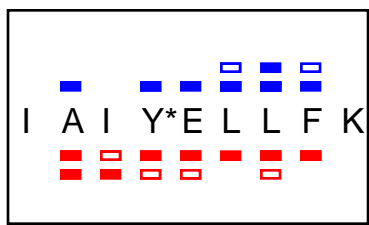

Protein Name: Ribosomal protein S10  
 gi Accession: 0  
 Precursor Mass: 595.3168+2  
 Delta Mass: 0.449 ppm  
 XCorr: 37.02

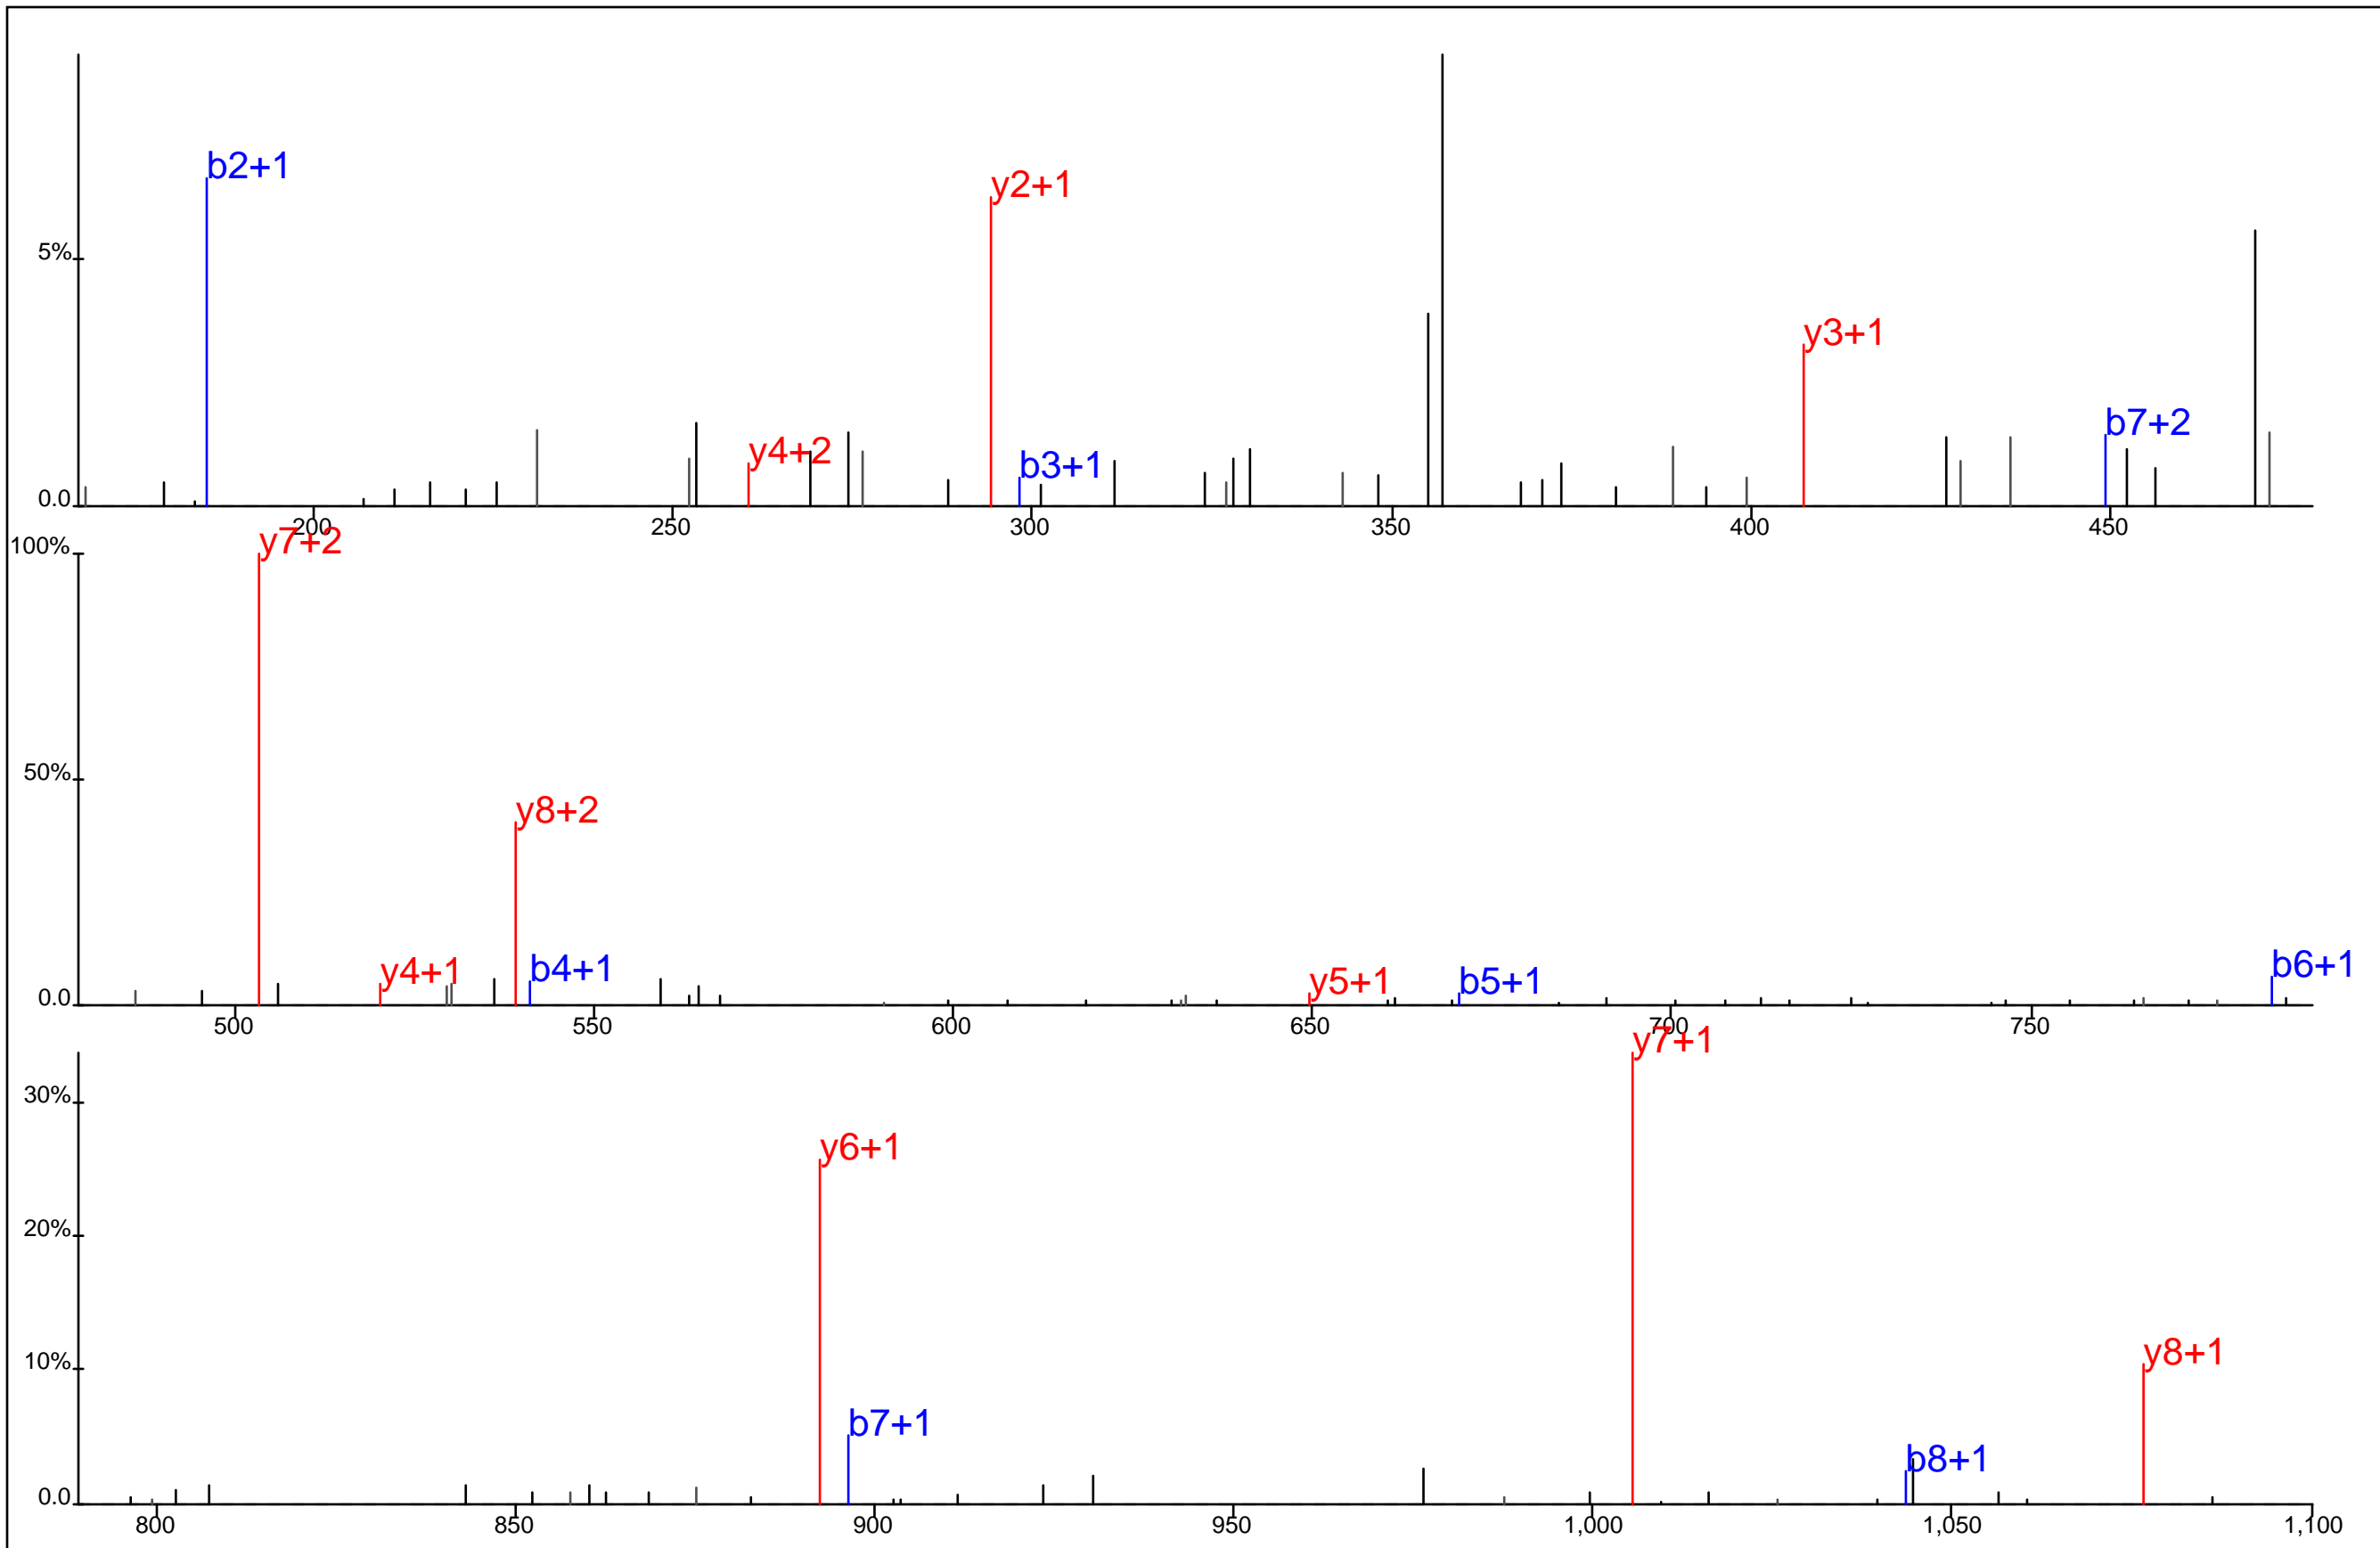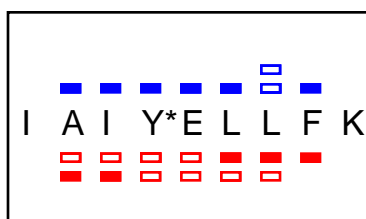

Protein Name: Ribosomal protein S10  
 gi Accession: 0  
 Precursor Mass: 595.3164+2  
 Delta Mass: 1.064 ppm  
 XCorr: 44.39



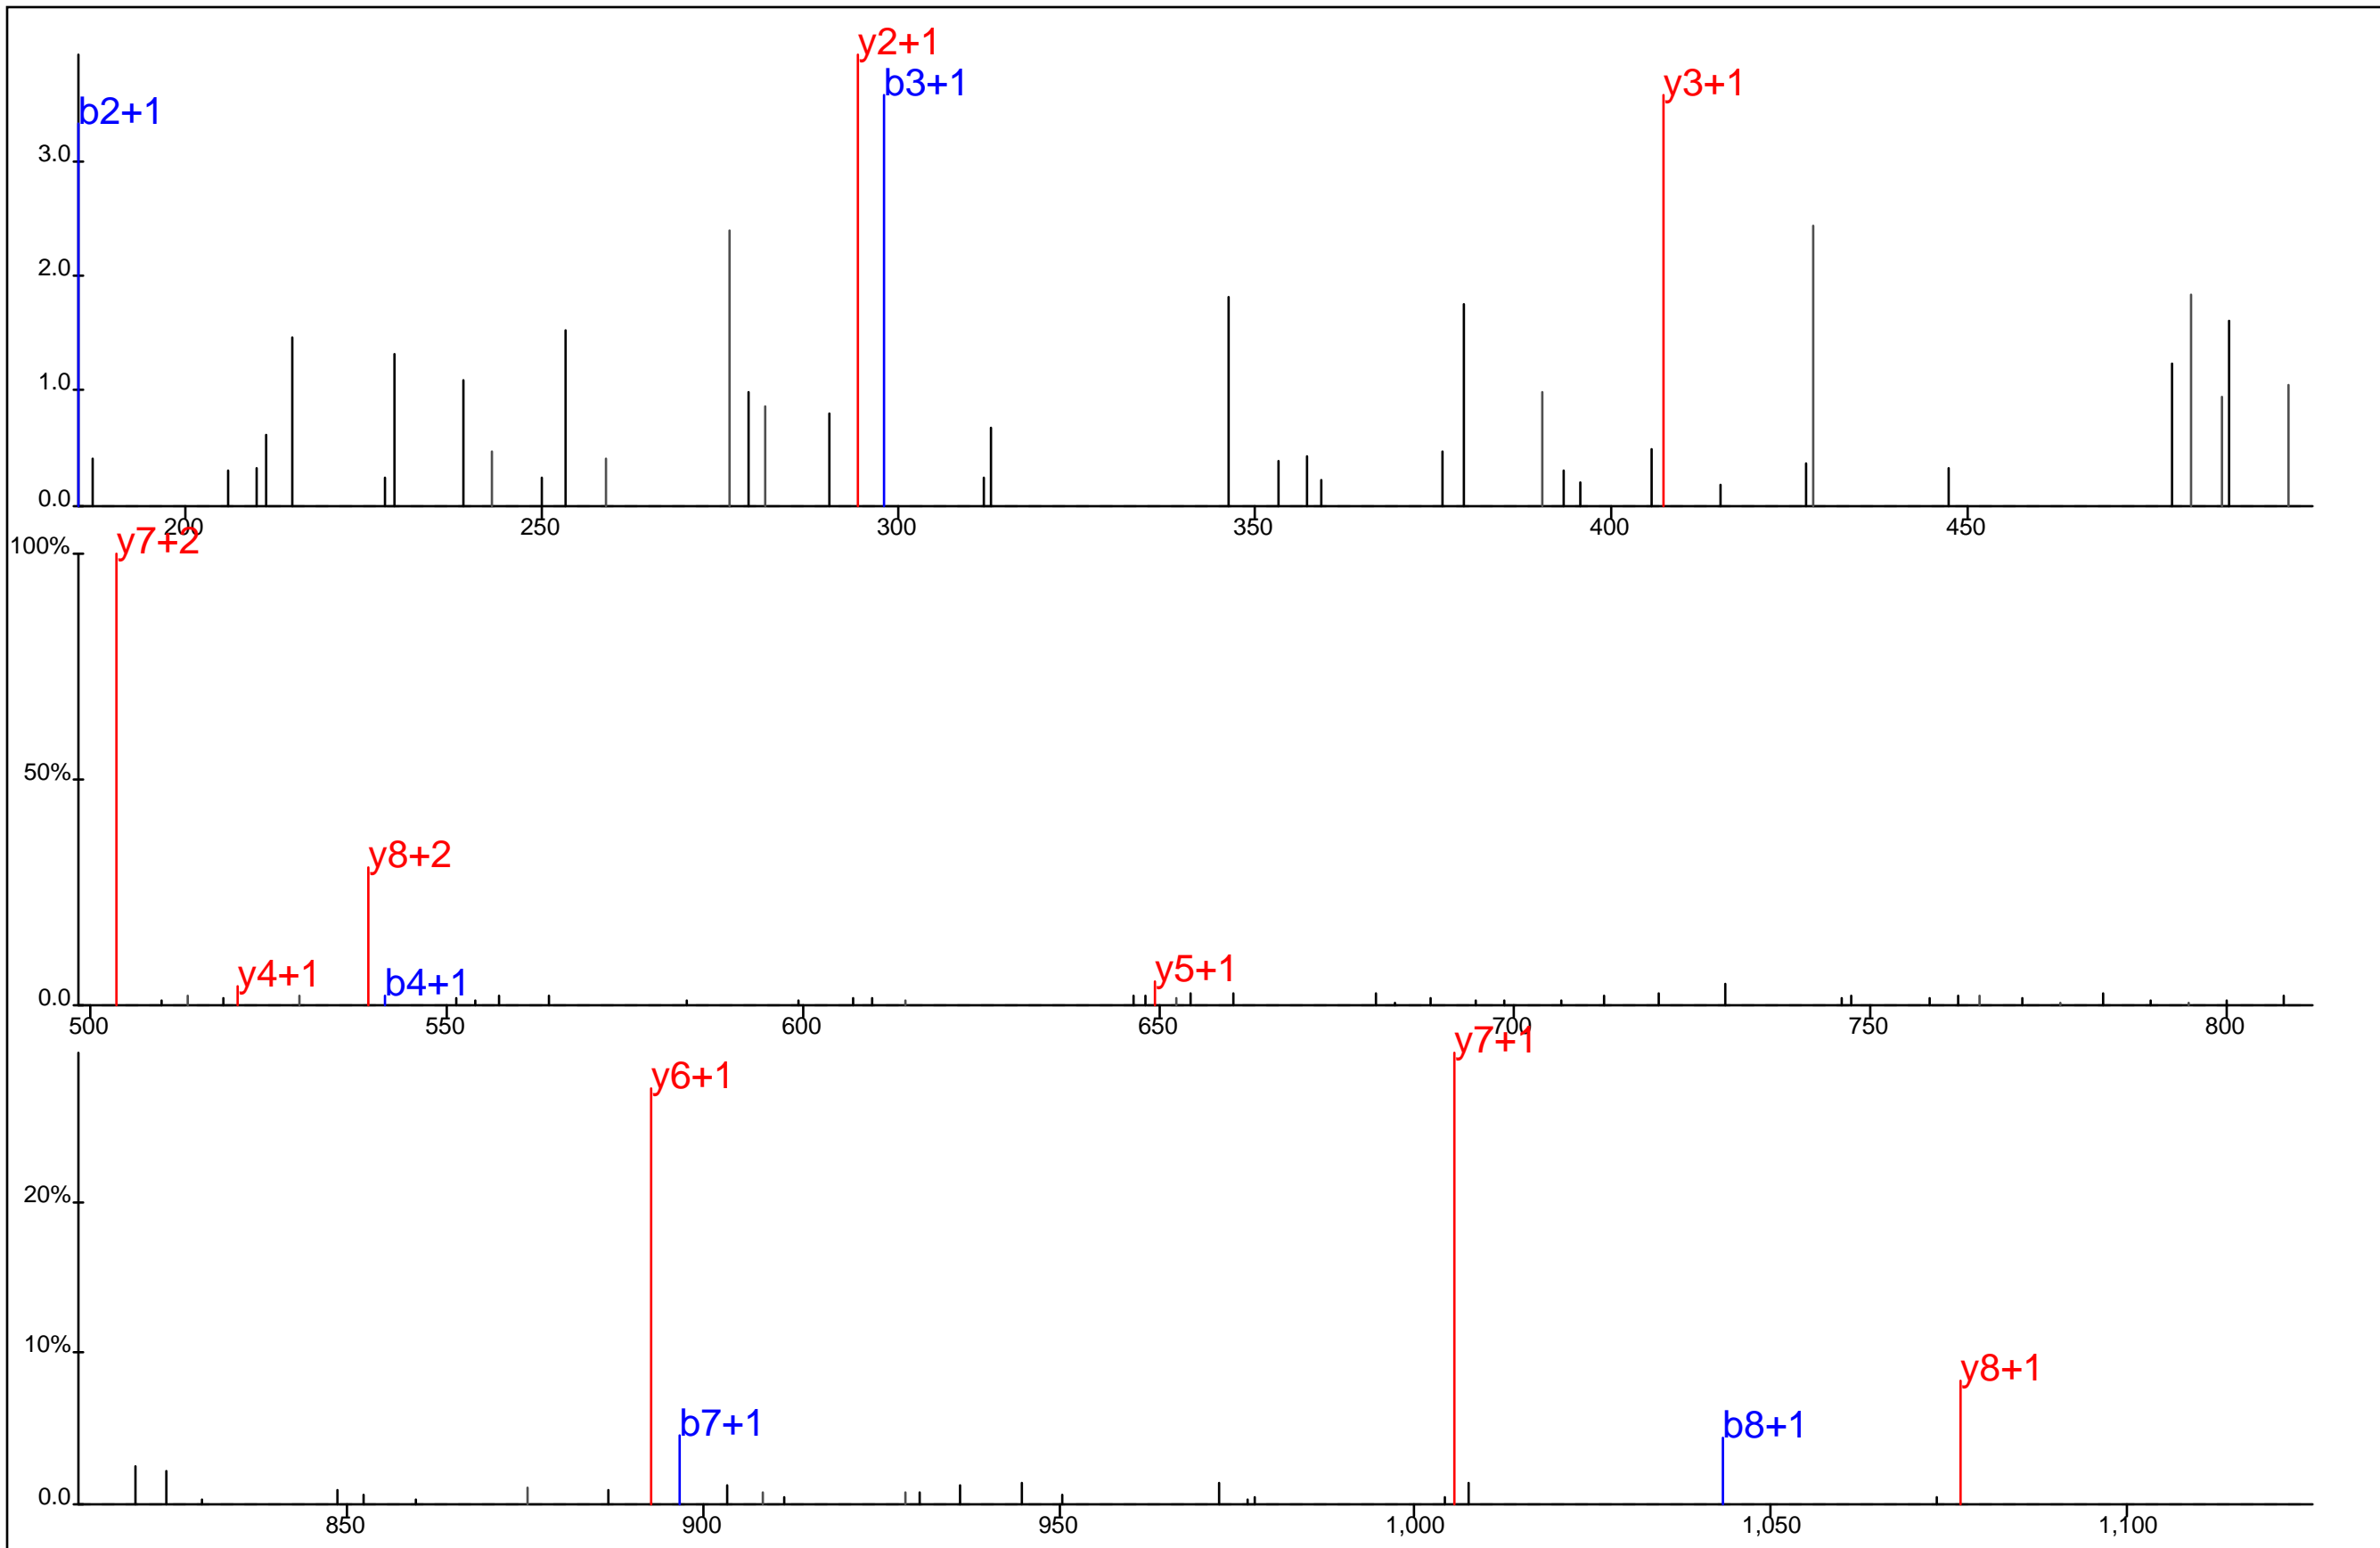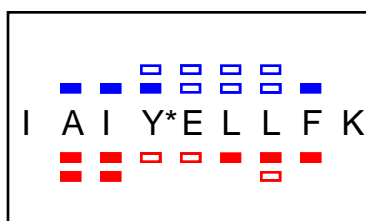

Protein Name: Ribosomal protein S10  
 gi Accession: 0  
 Precursor Mass: 595.3177+2  
 Delta Mass: 1.091 ppm  
 XCorr: 41.36

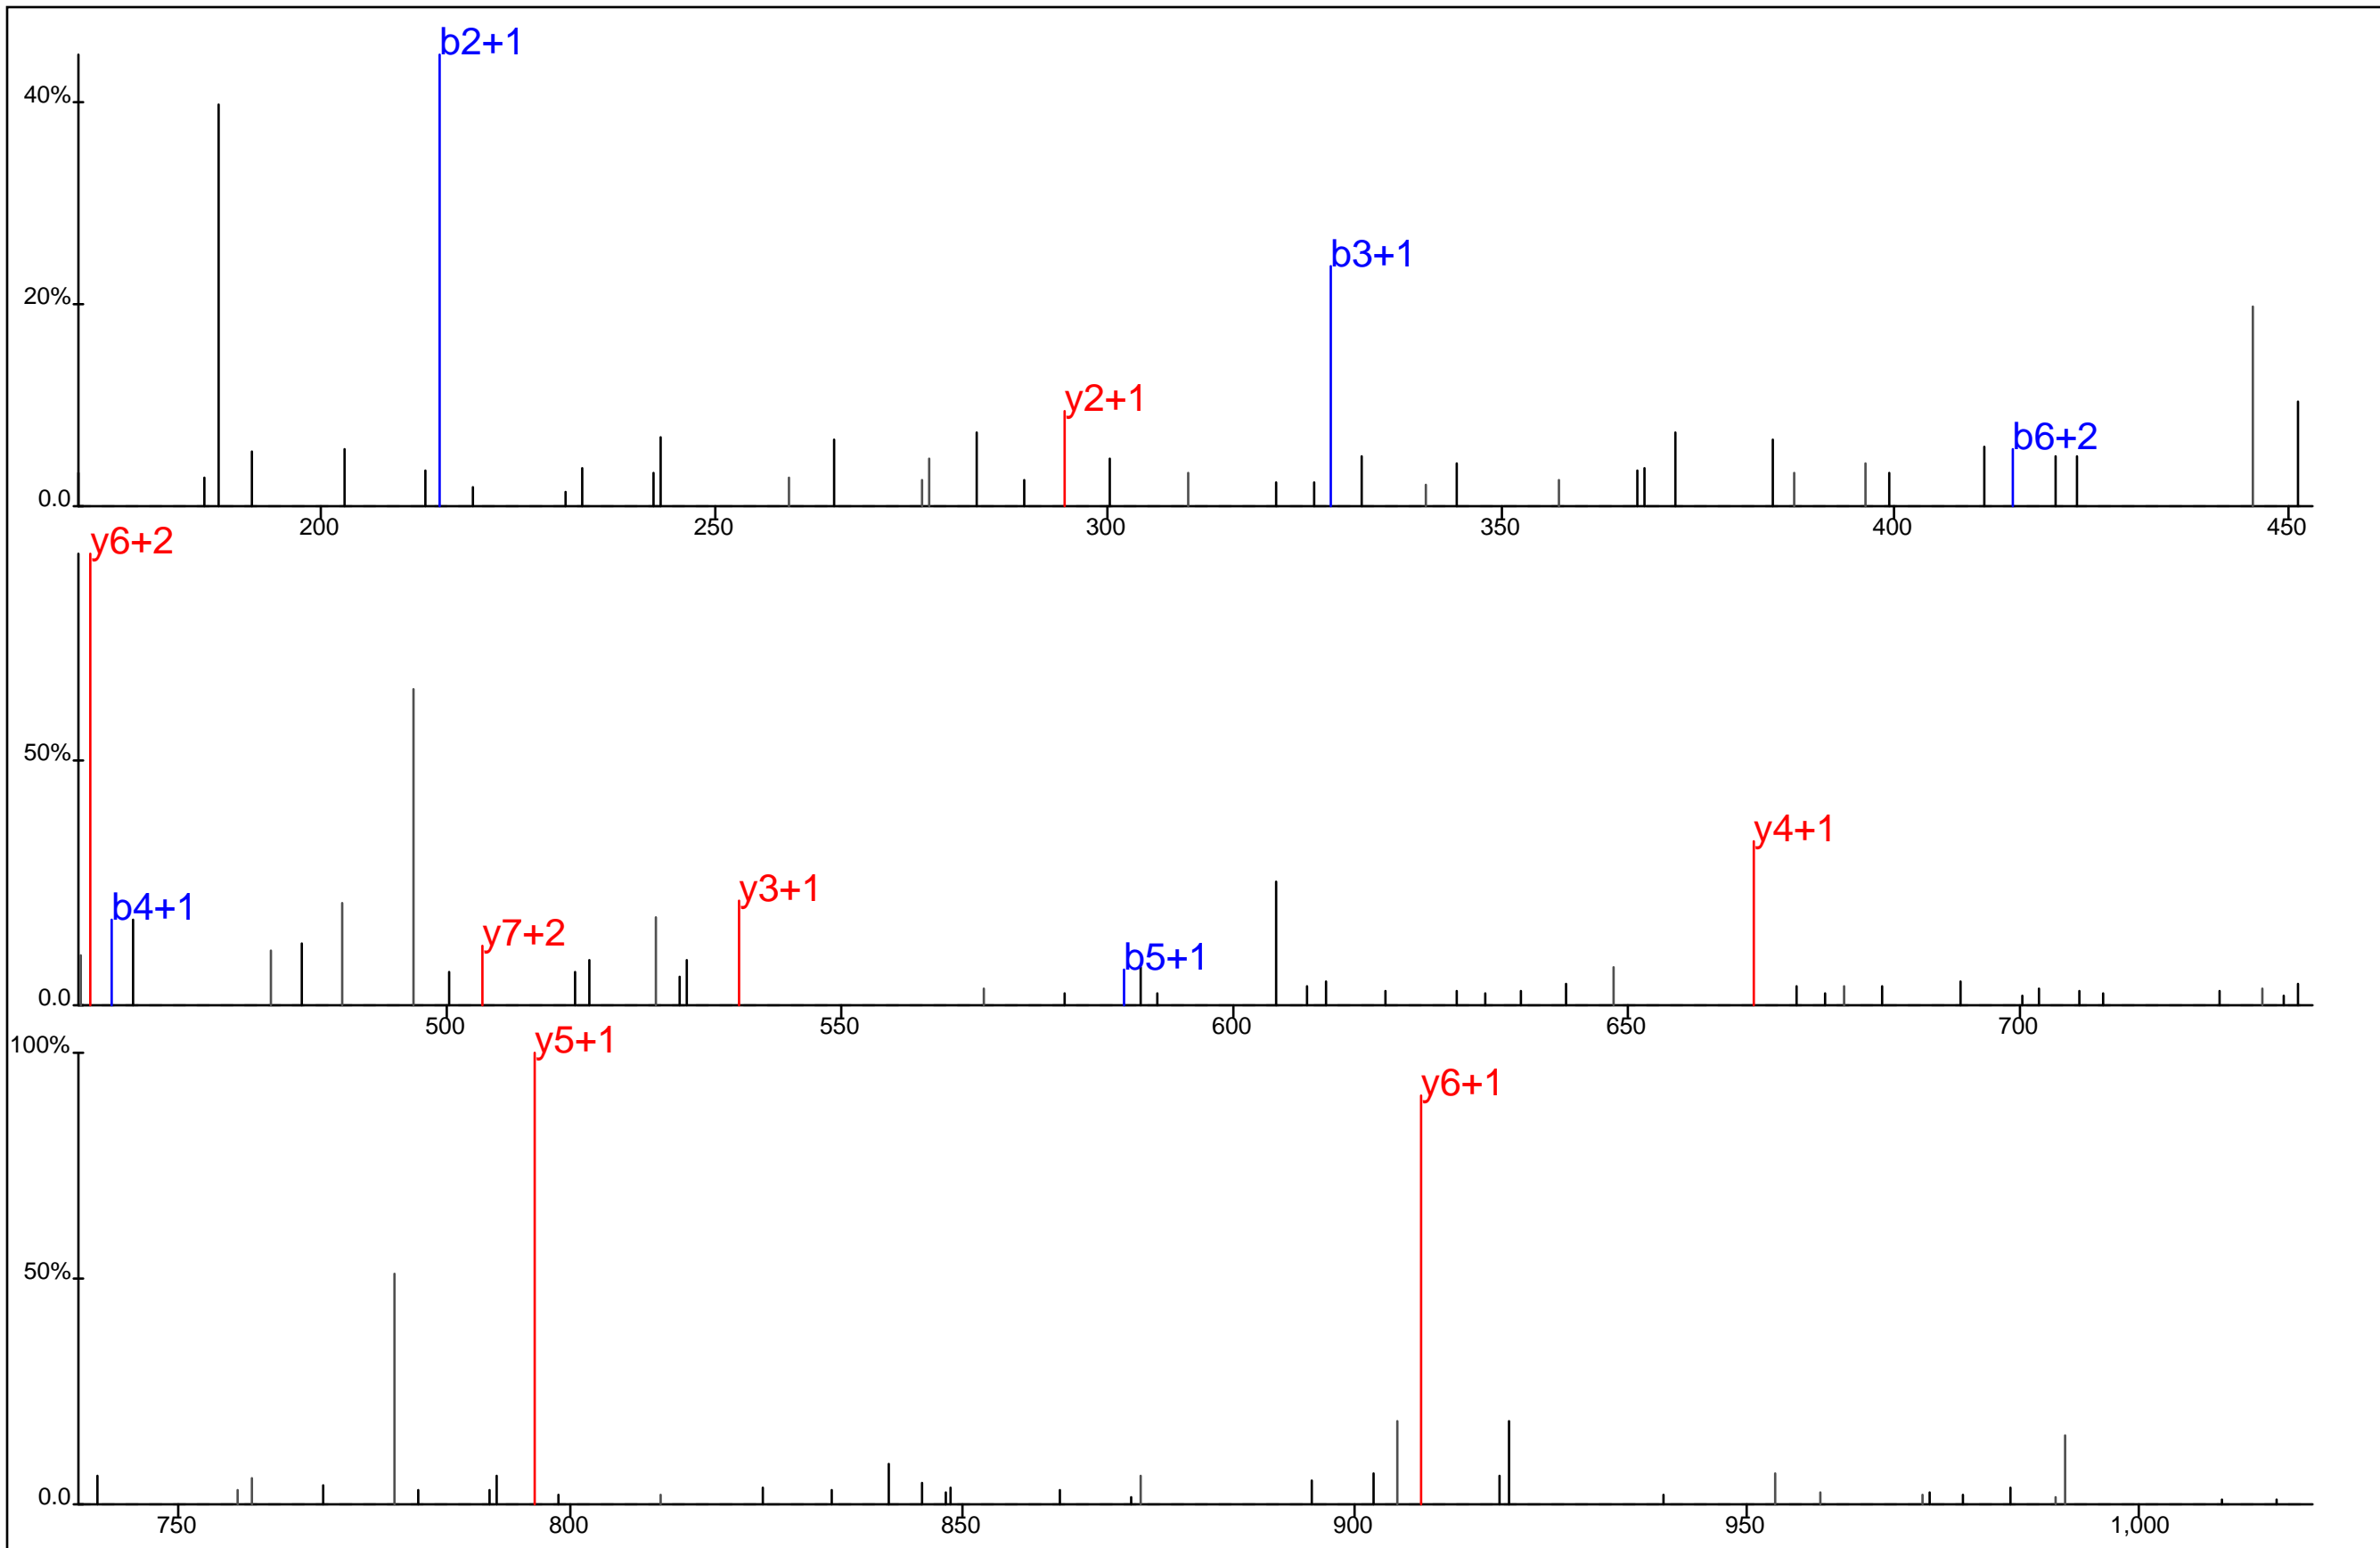

D V I E E Y\*F K

Protein Name: Ribosomal protein S12  
 gi Accession: 0  
 Precursor Mass: 561.7418+2  
 Delta Mass: 0.805 ppm  
 XCorr: 30.65

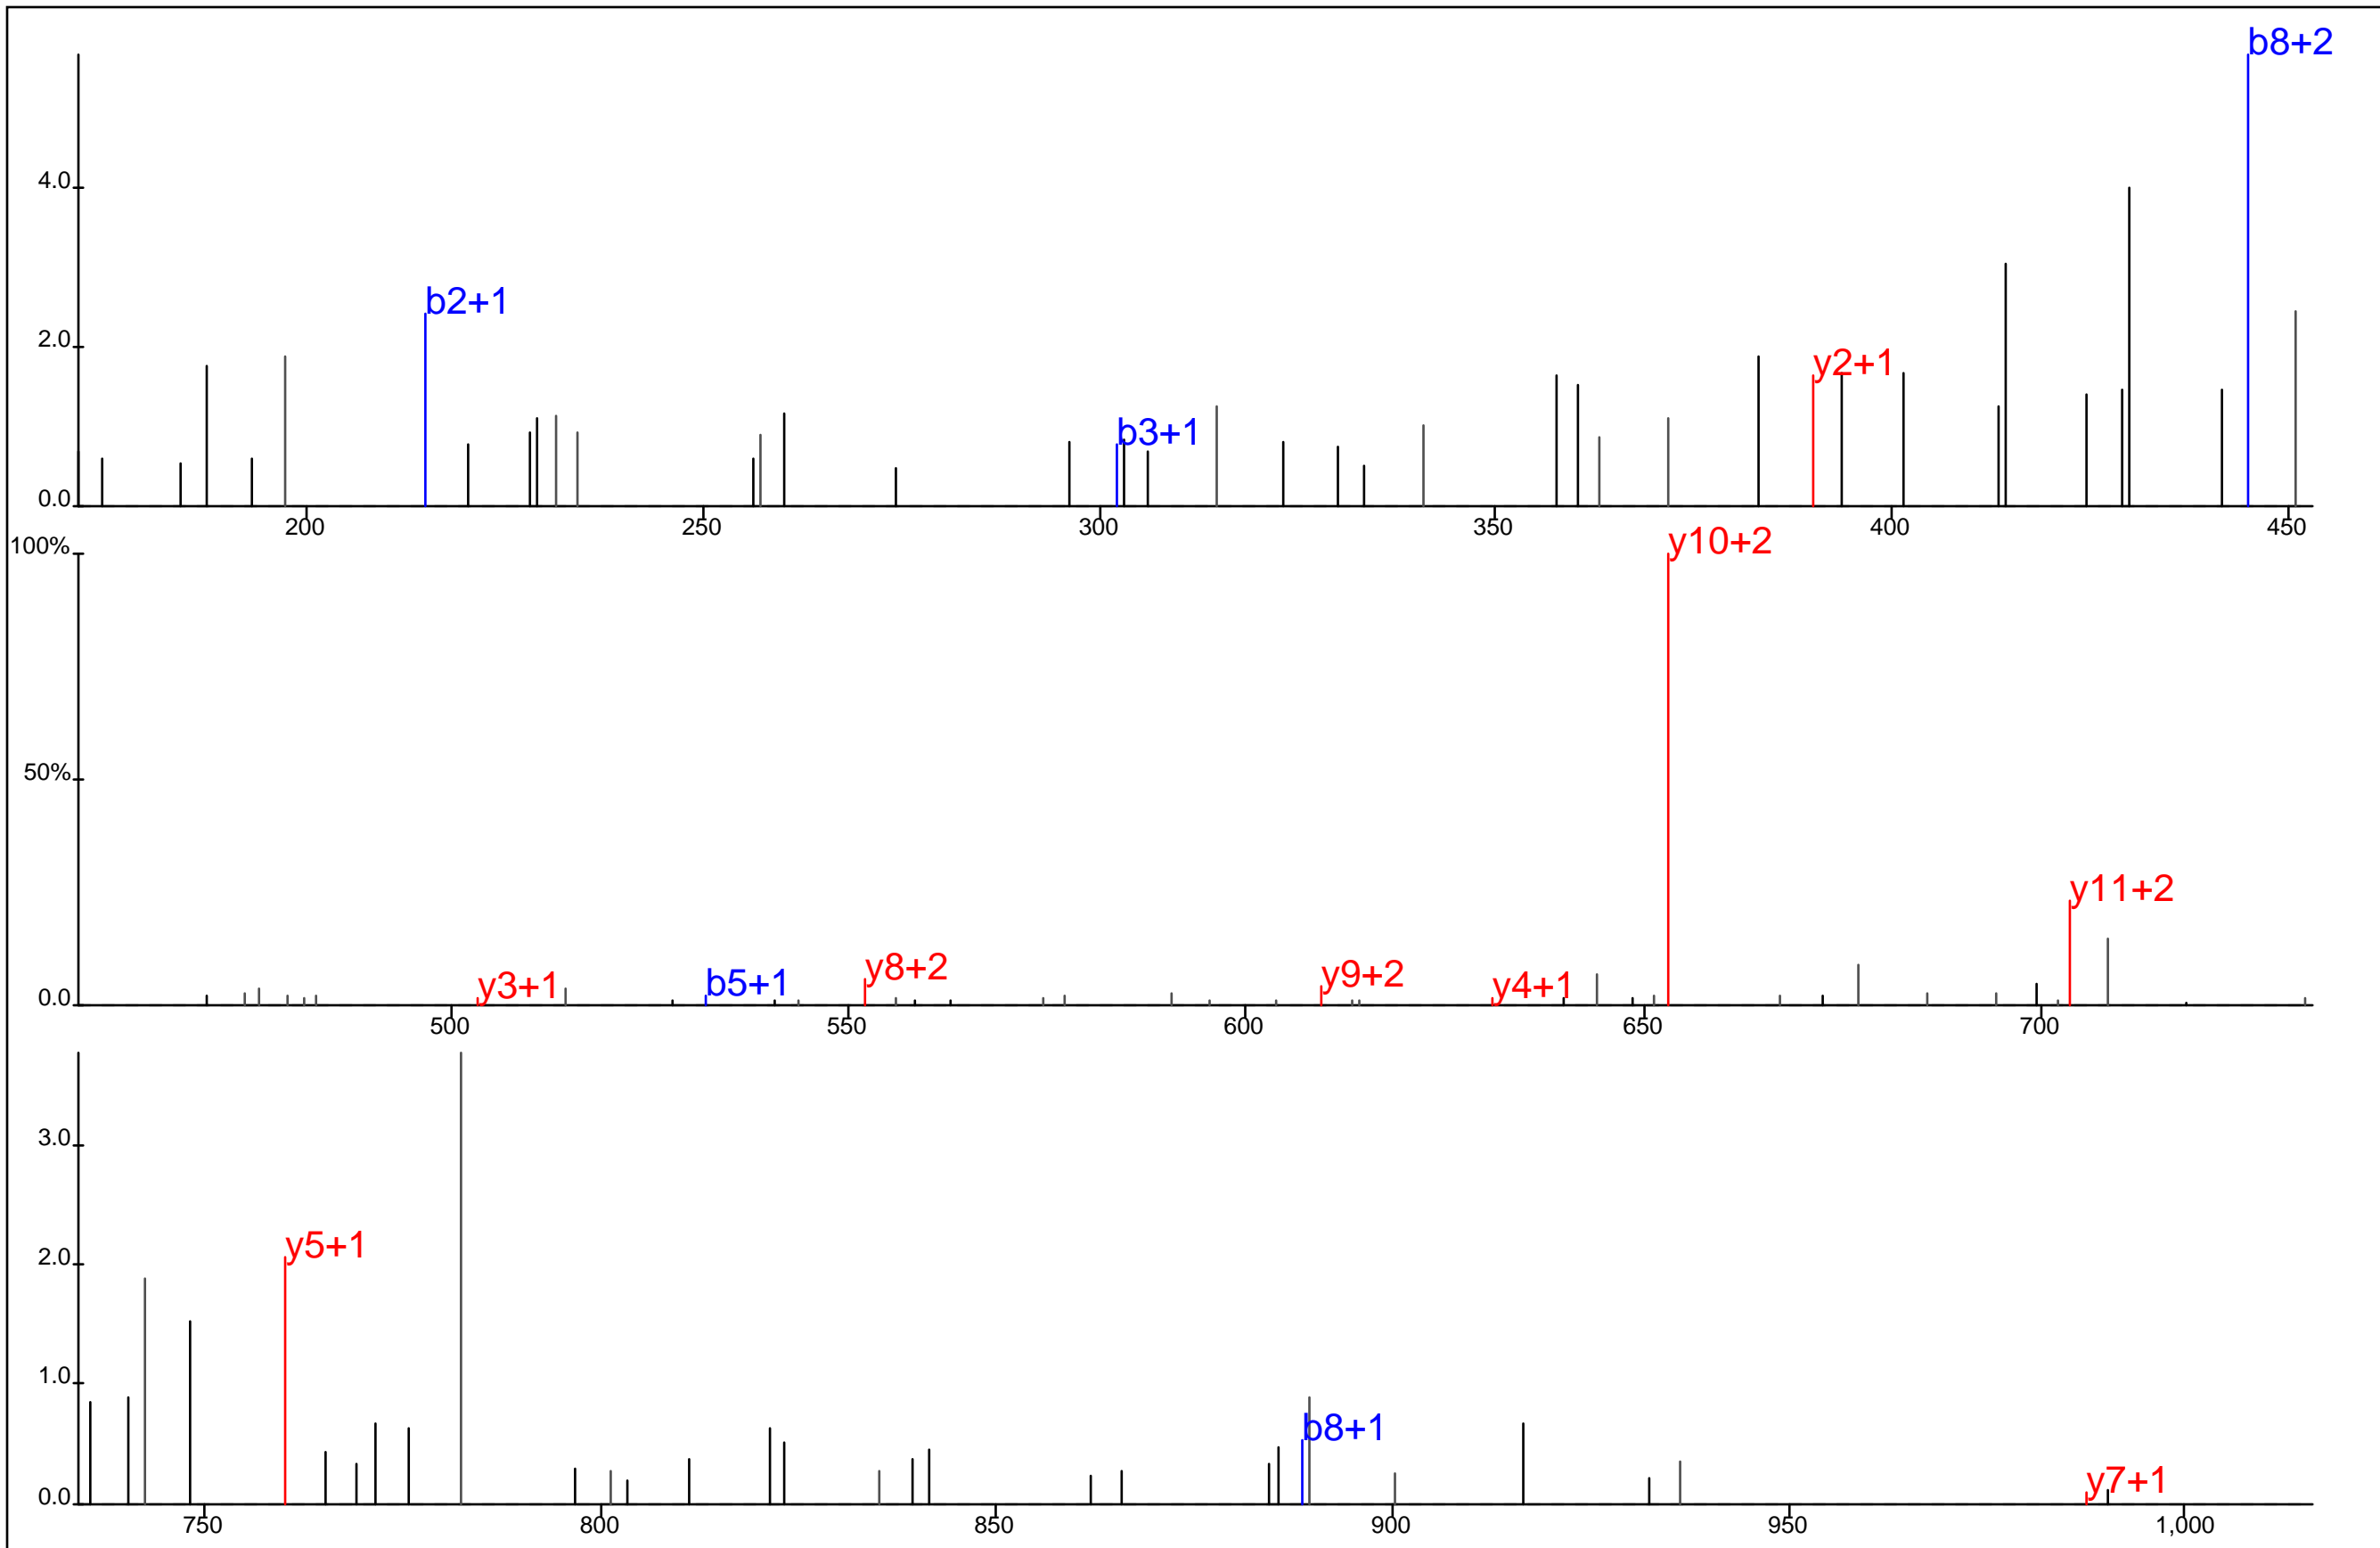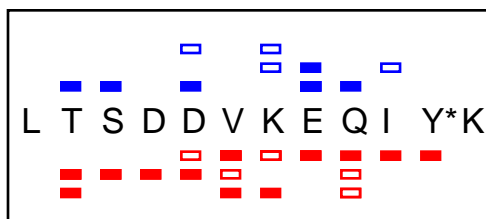

Protein Name: Ribosomal protein S13  
 gi Accession: 0  
 Precursor Mass: 506.9090+3  
 Delta Mass: 2.461 ppm  
 XCorr: 24.64



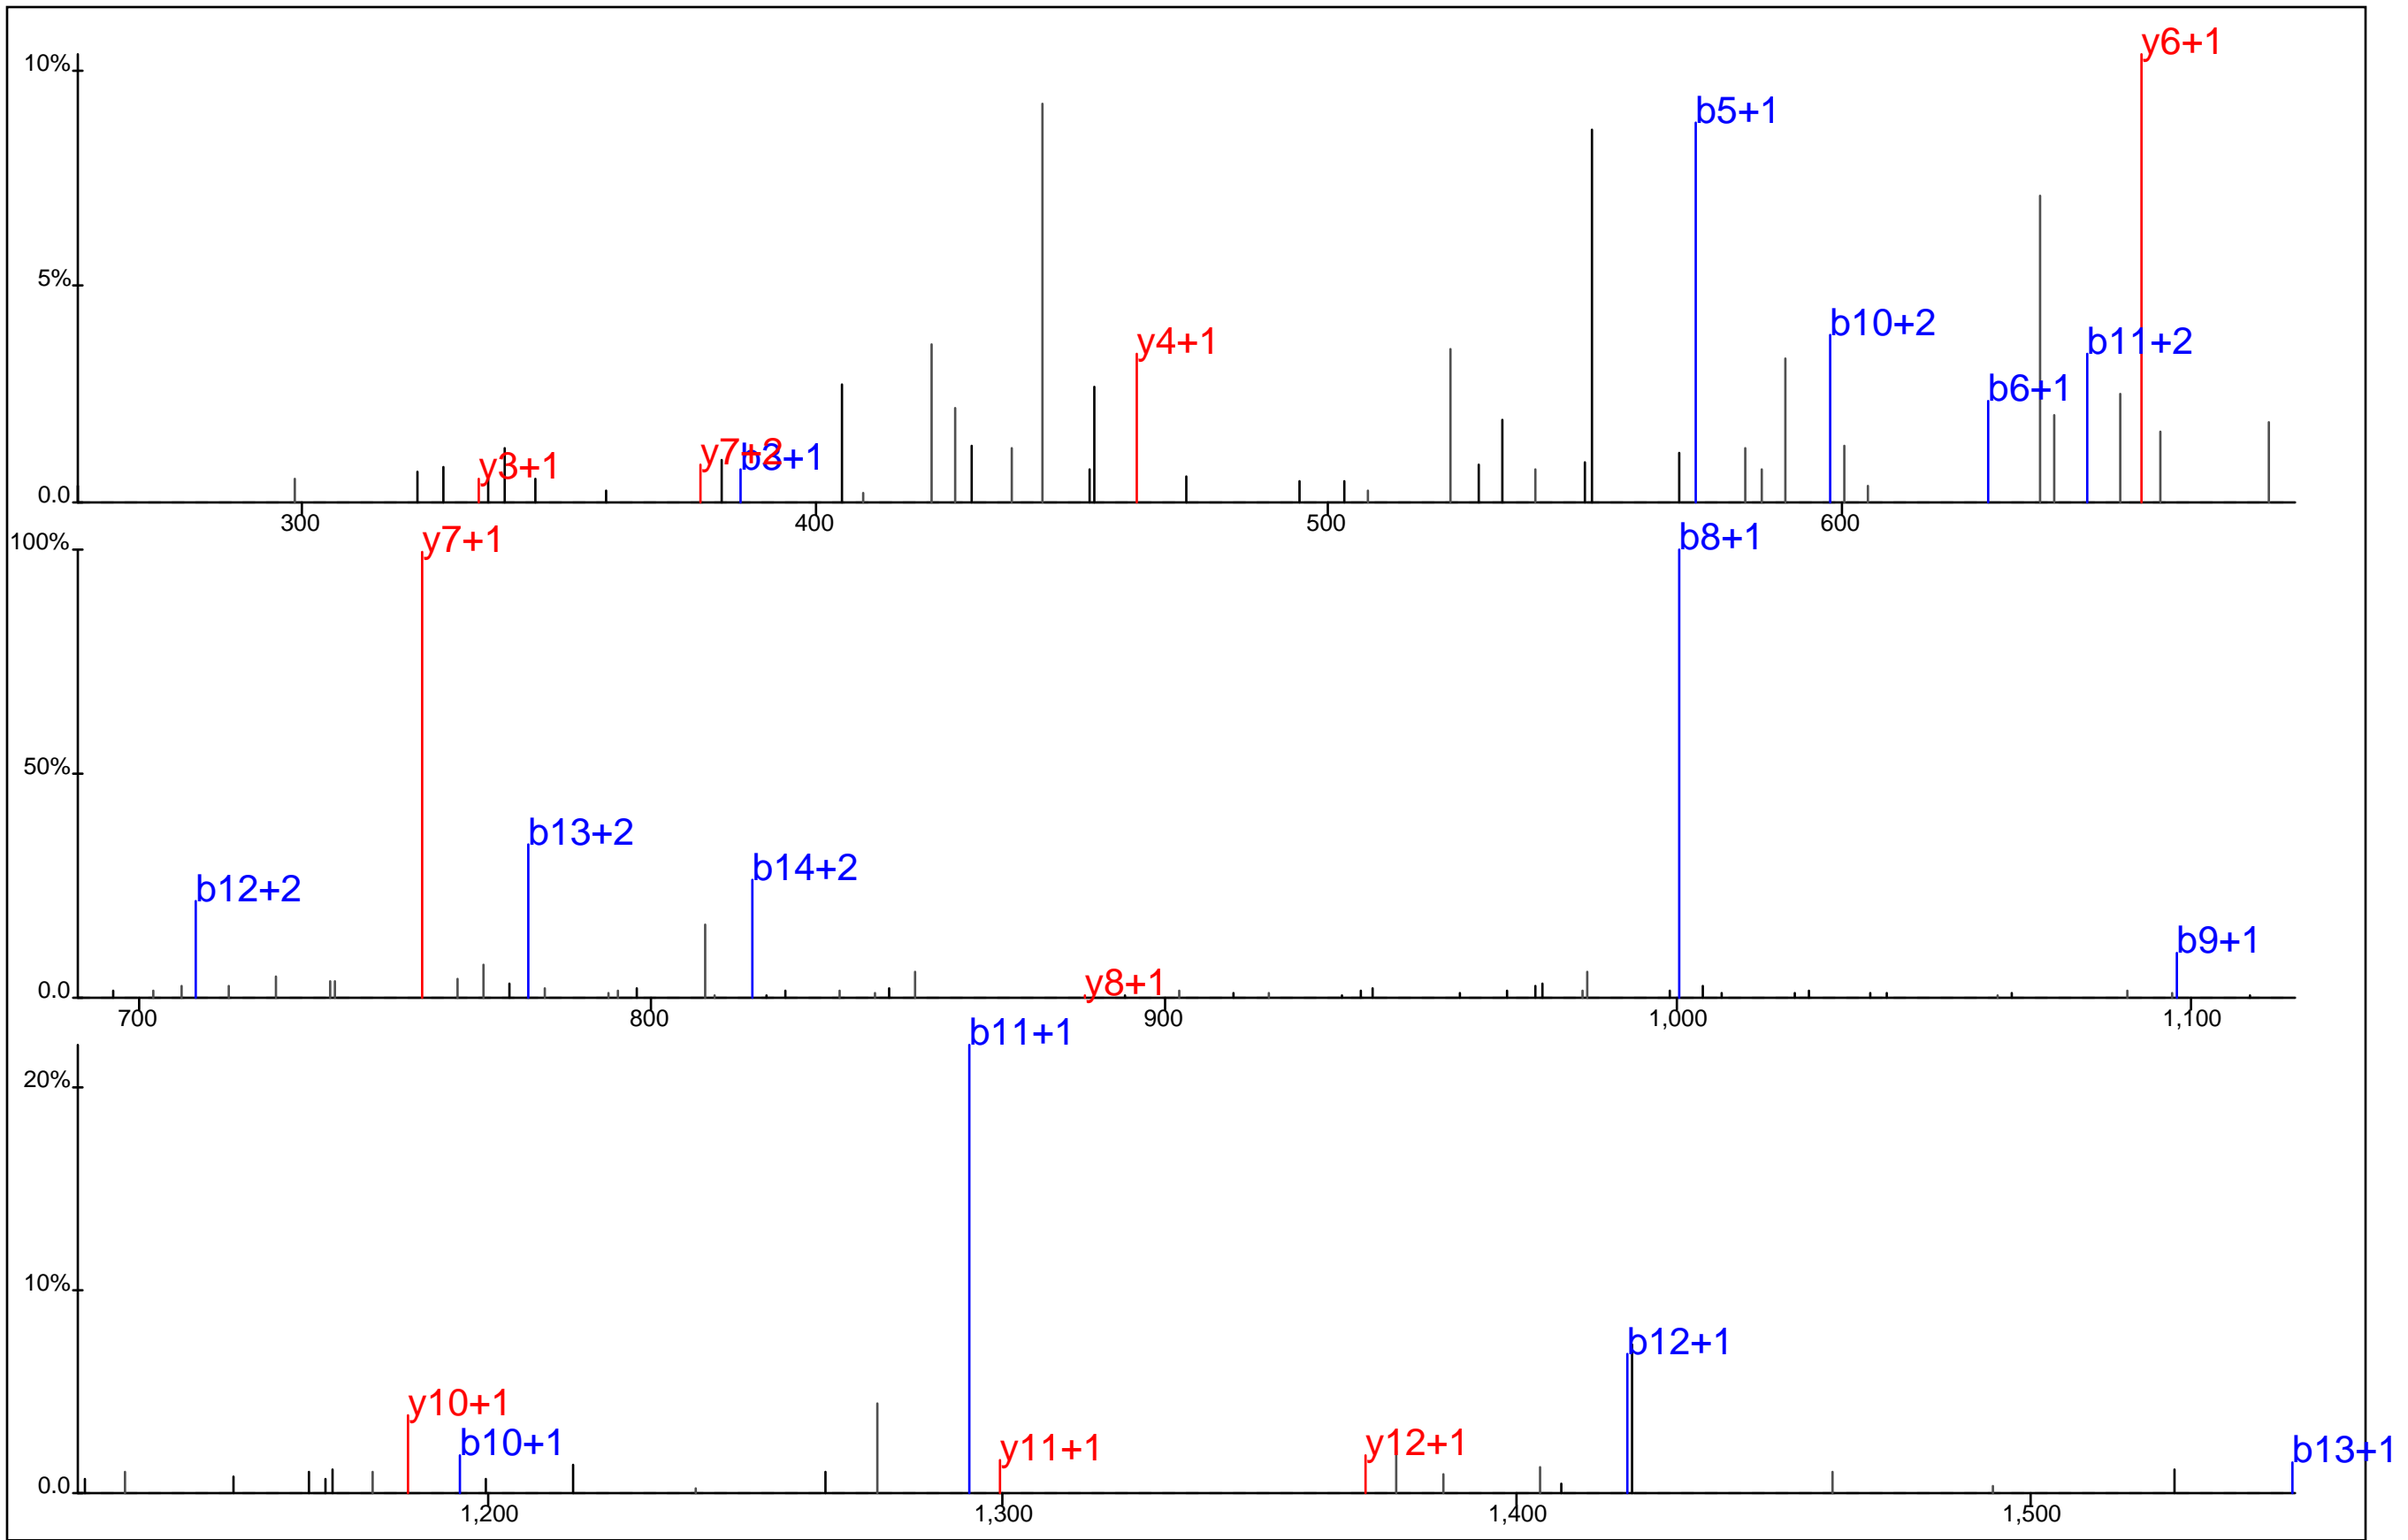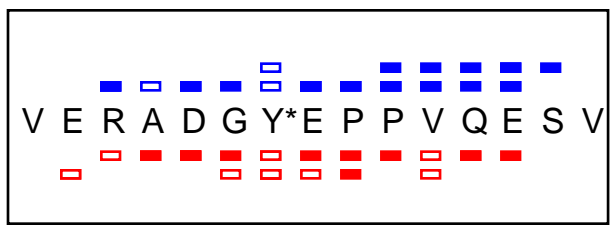

Protein Name: Ribosomal protein S3a  
 gi Accession: 0  
 Precursor Mass: 877.8867+2  
 Delta Mass: 1.647 ppm  
 XCorr: 42.46



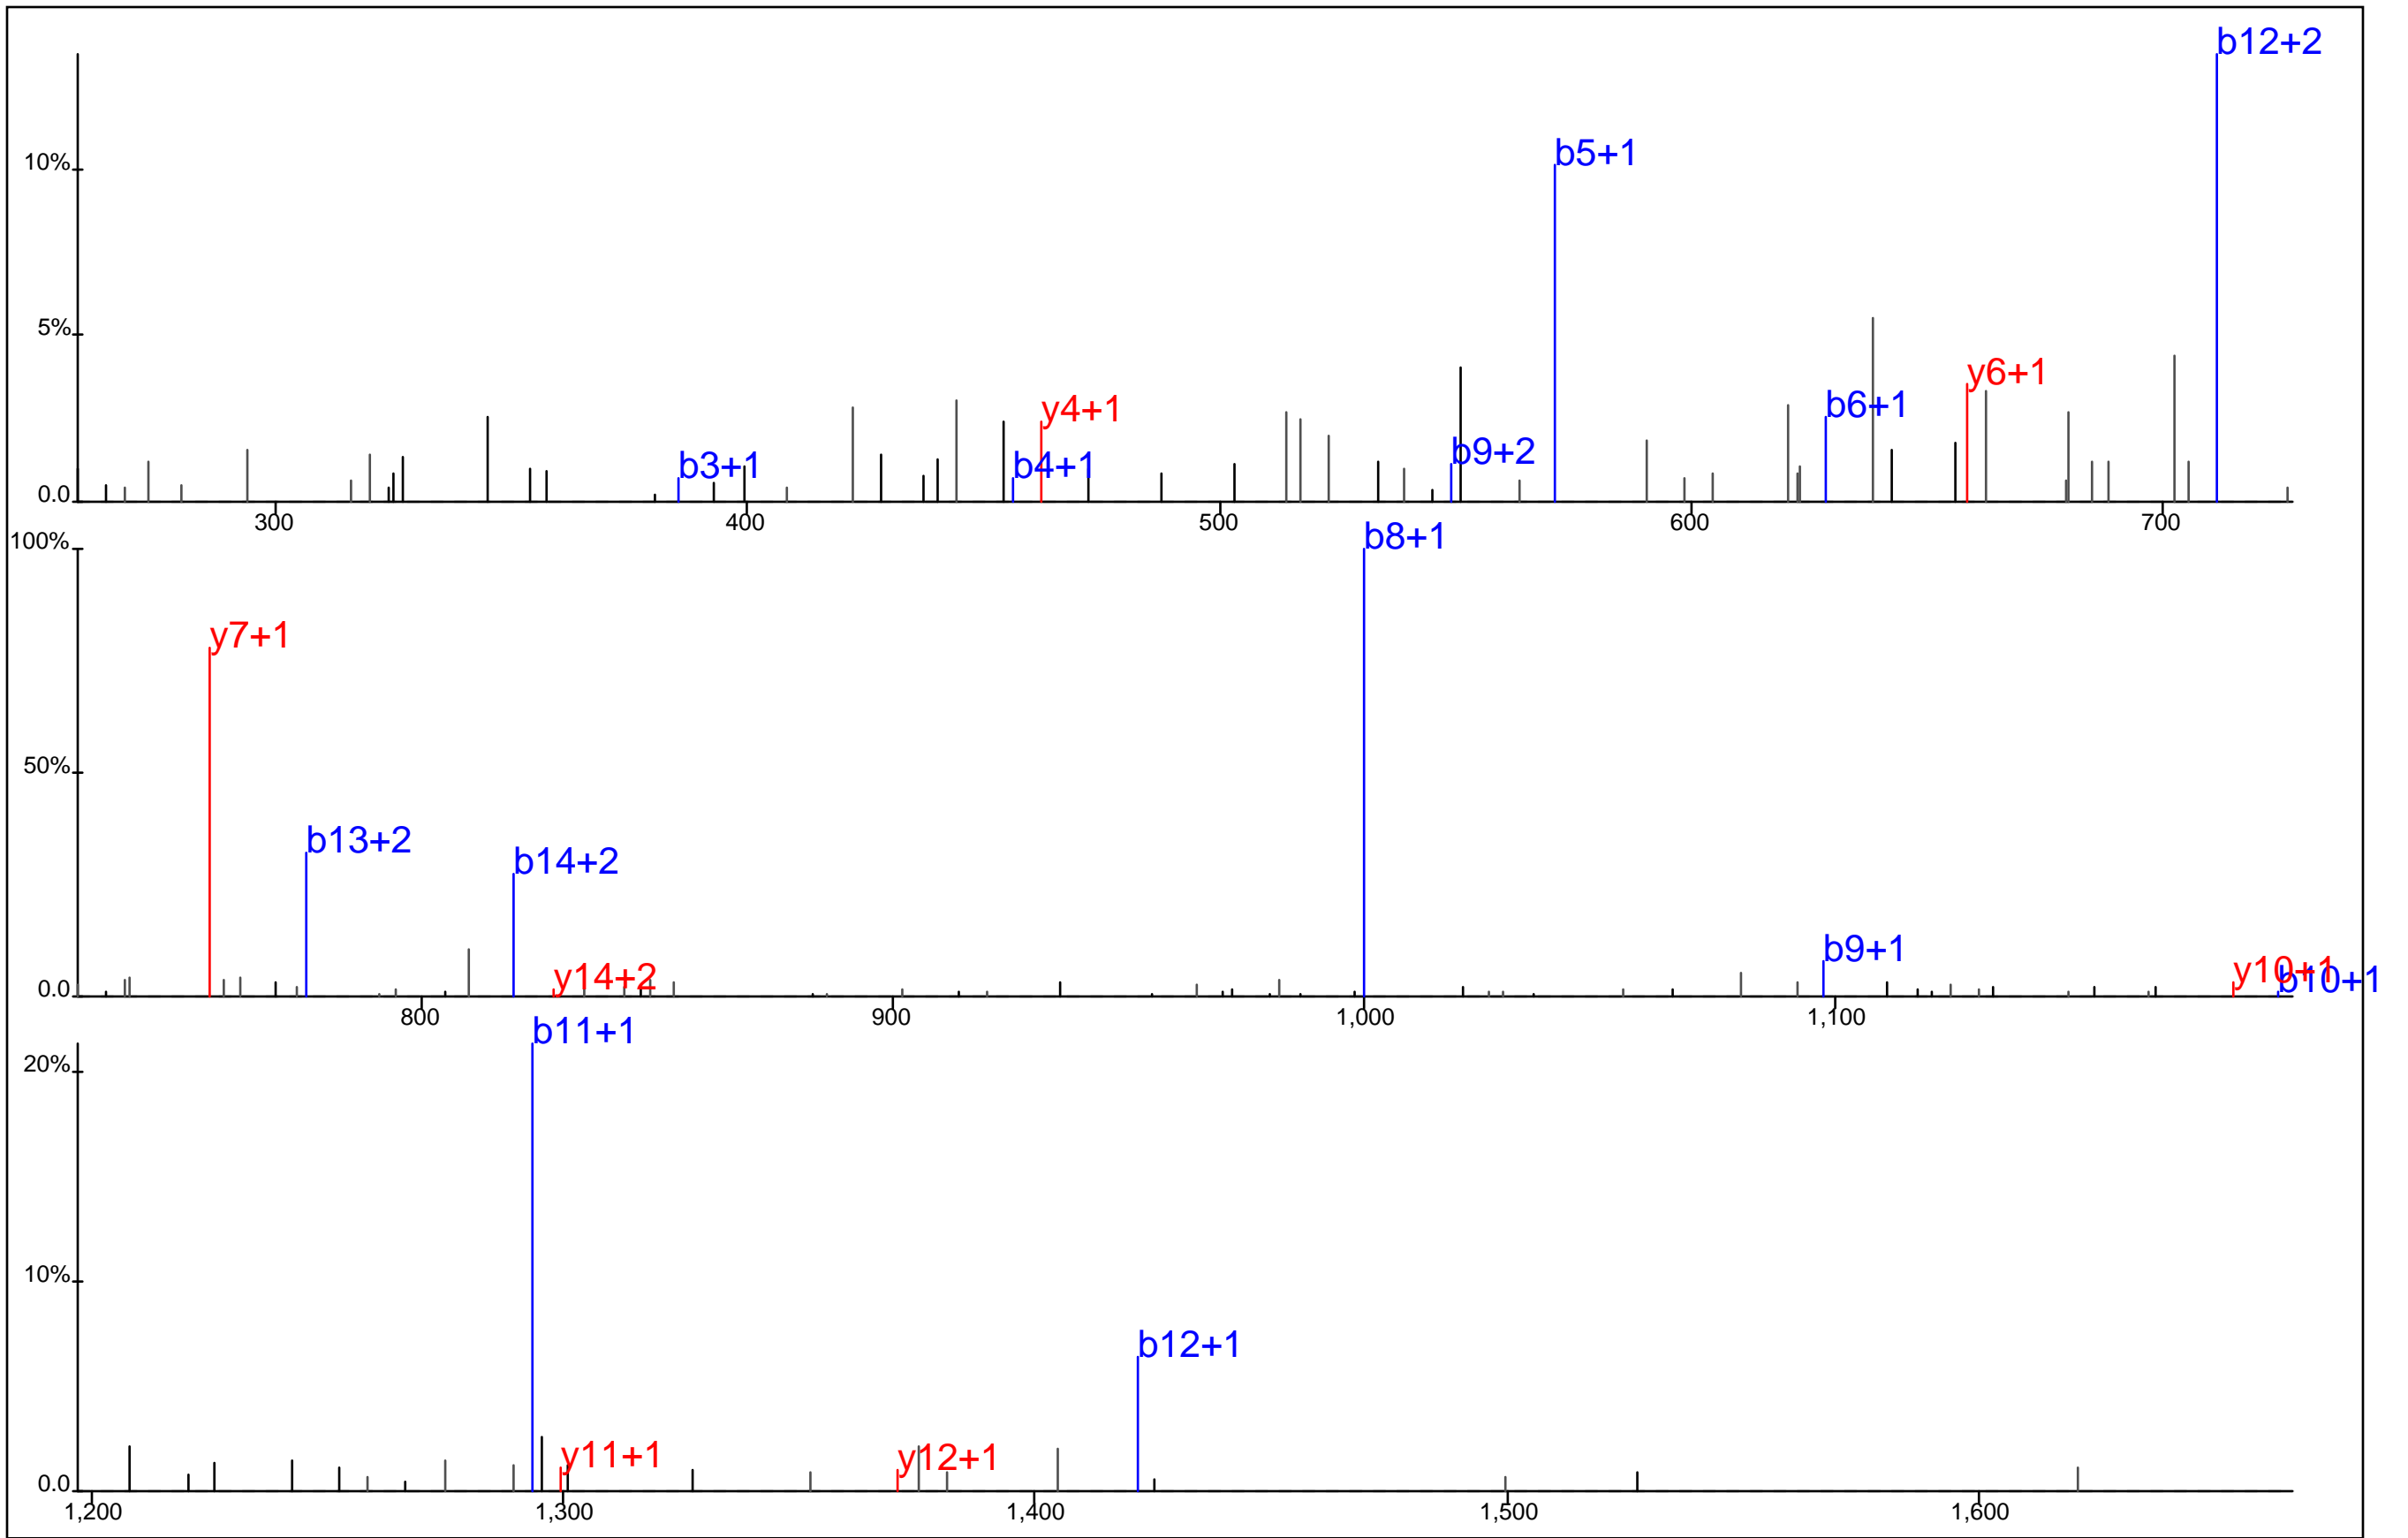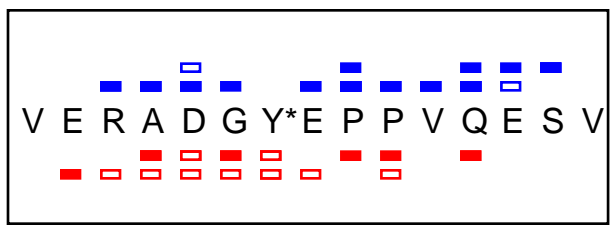

Protein Name: Ribosomal protein S3a  
 gi Accession: 0  
 Precursor Mass: 877.8859+2  
 Delta Mass: 0.742 ppm  
 XCorr: 27.73

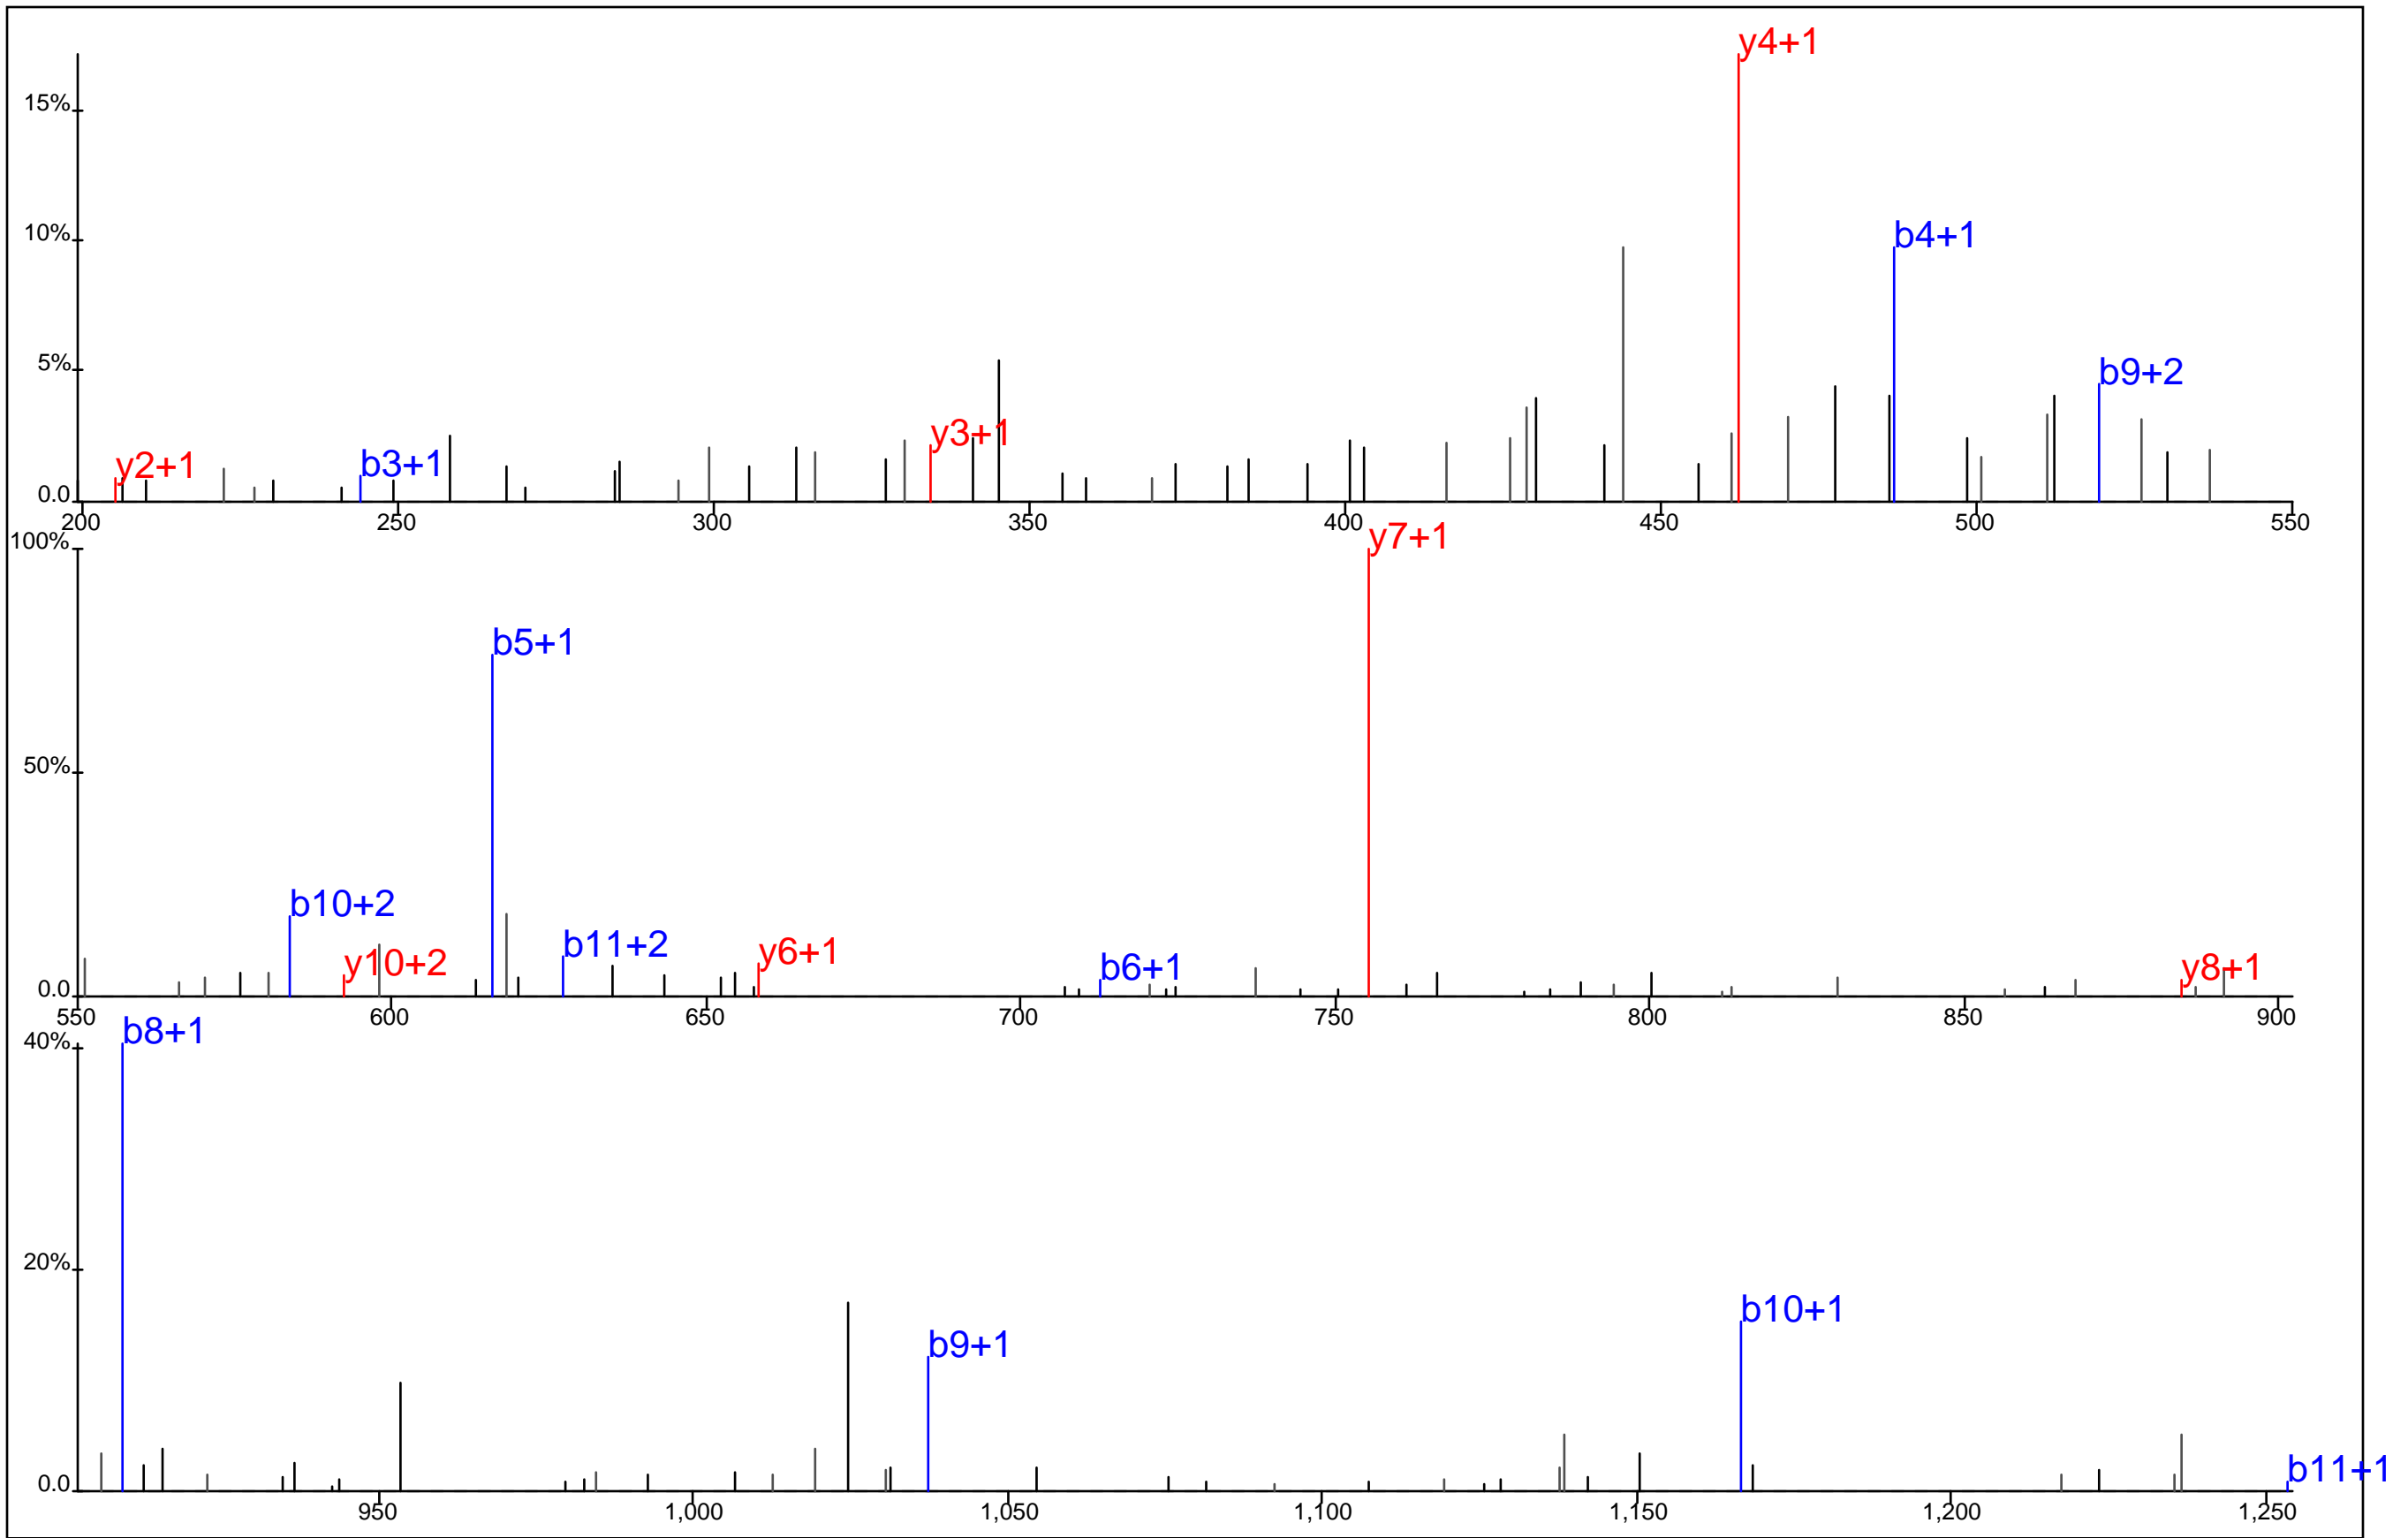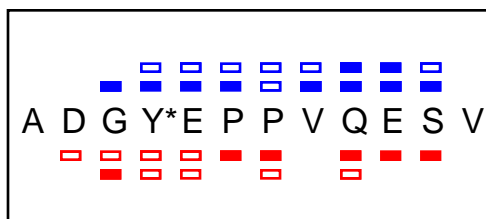

Protein Name: Ribosomal protein S3a  
 gi Accession: 0  
 Precursor Mass: 685.7810+2  
 Delta Mass: 2.608 ppm  
 XCorr: 33.8



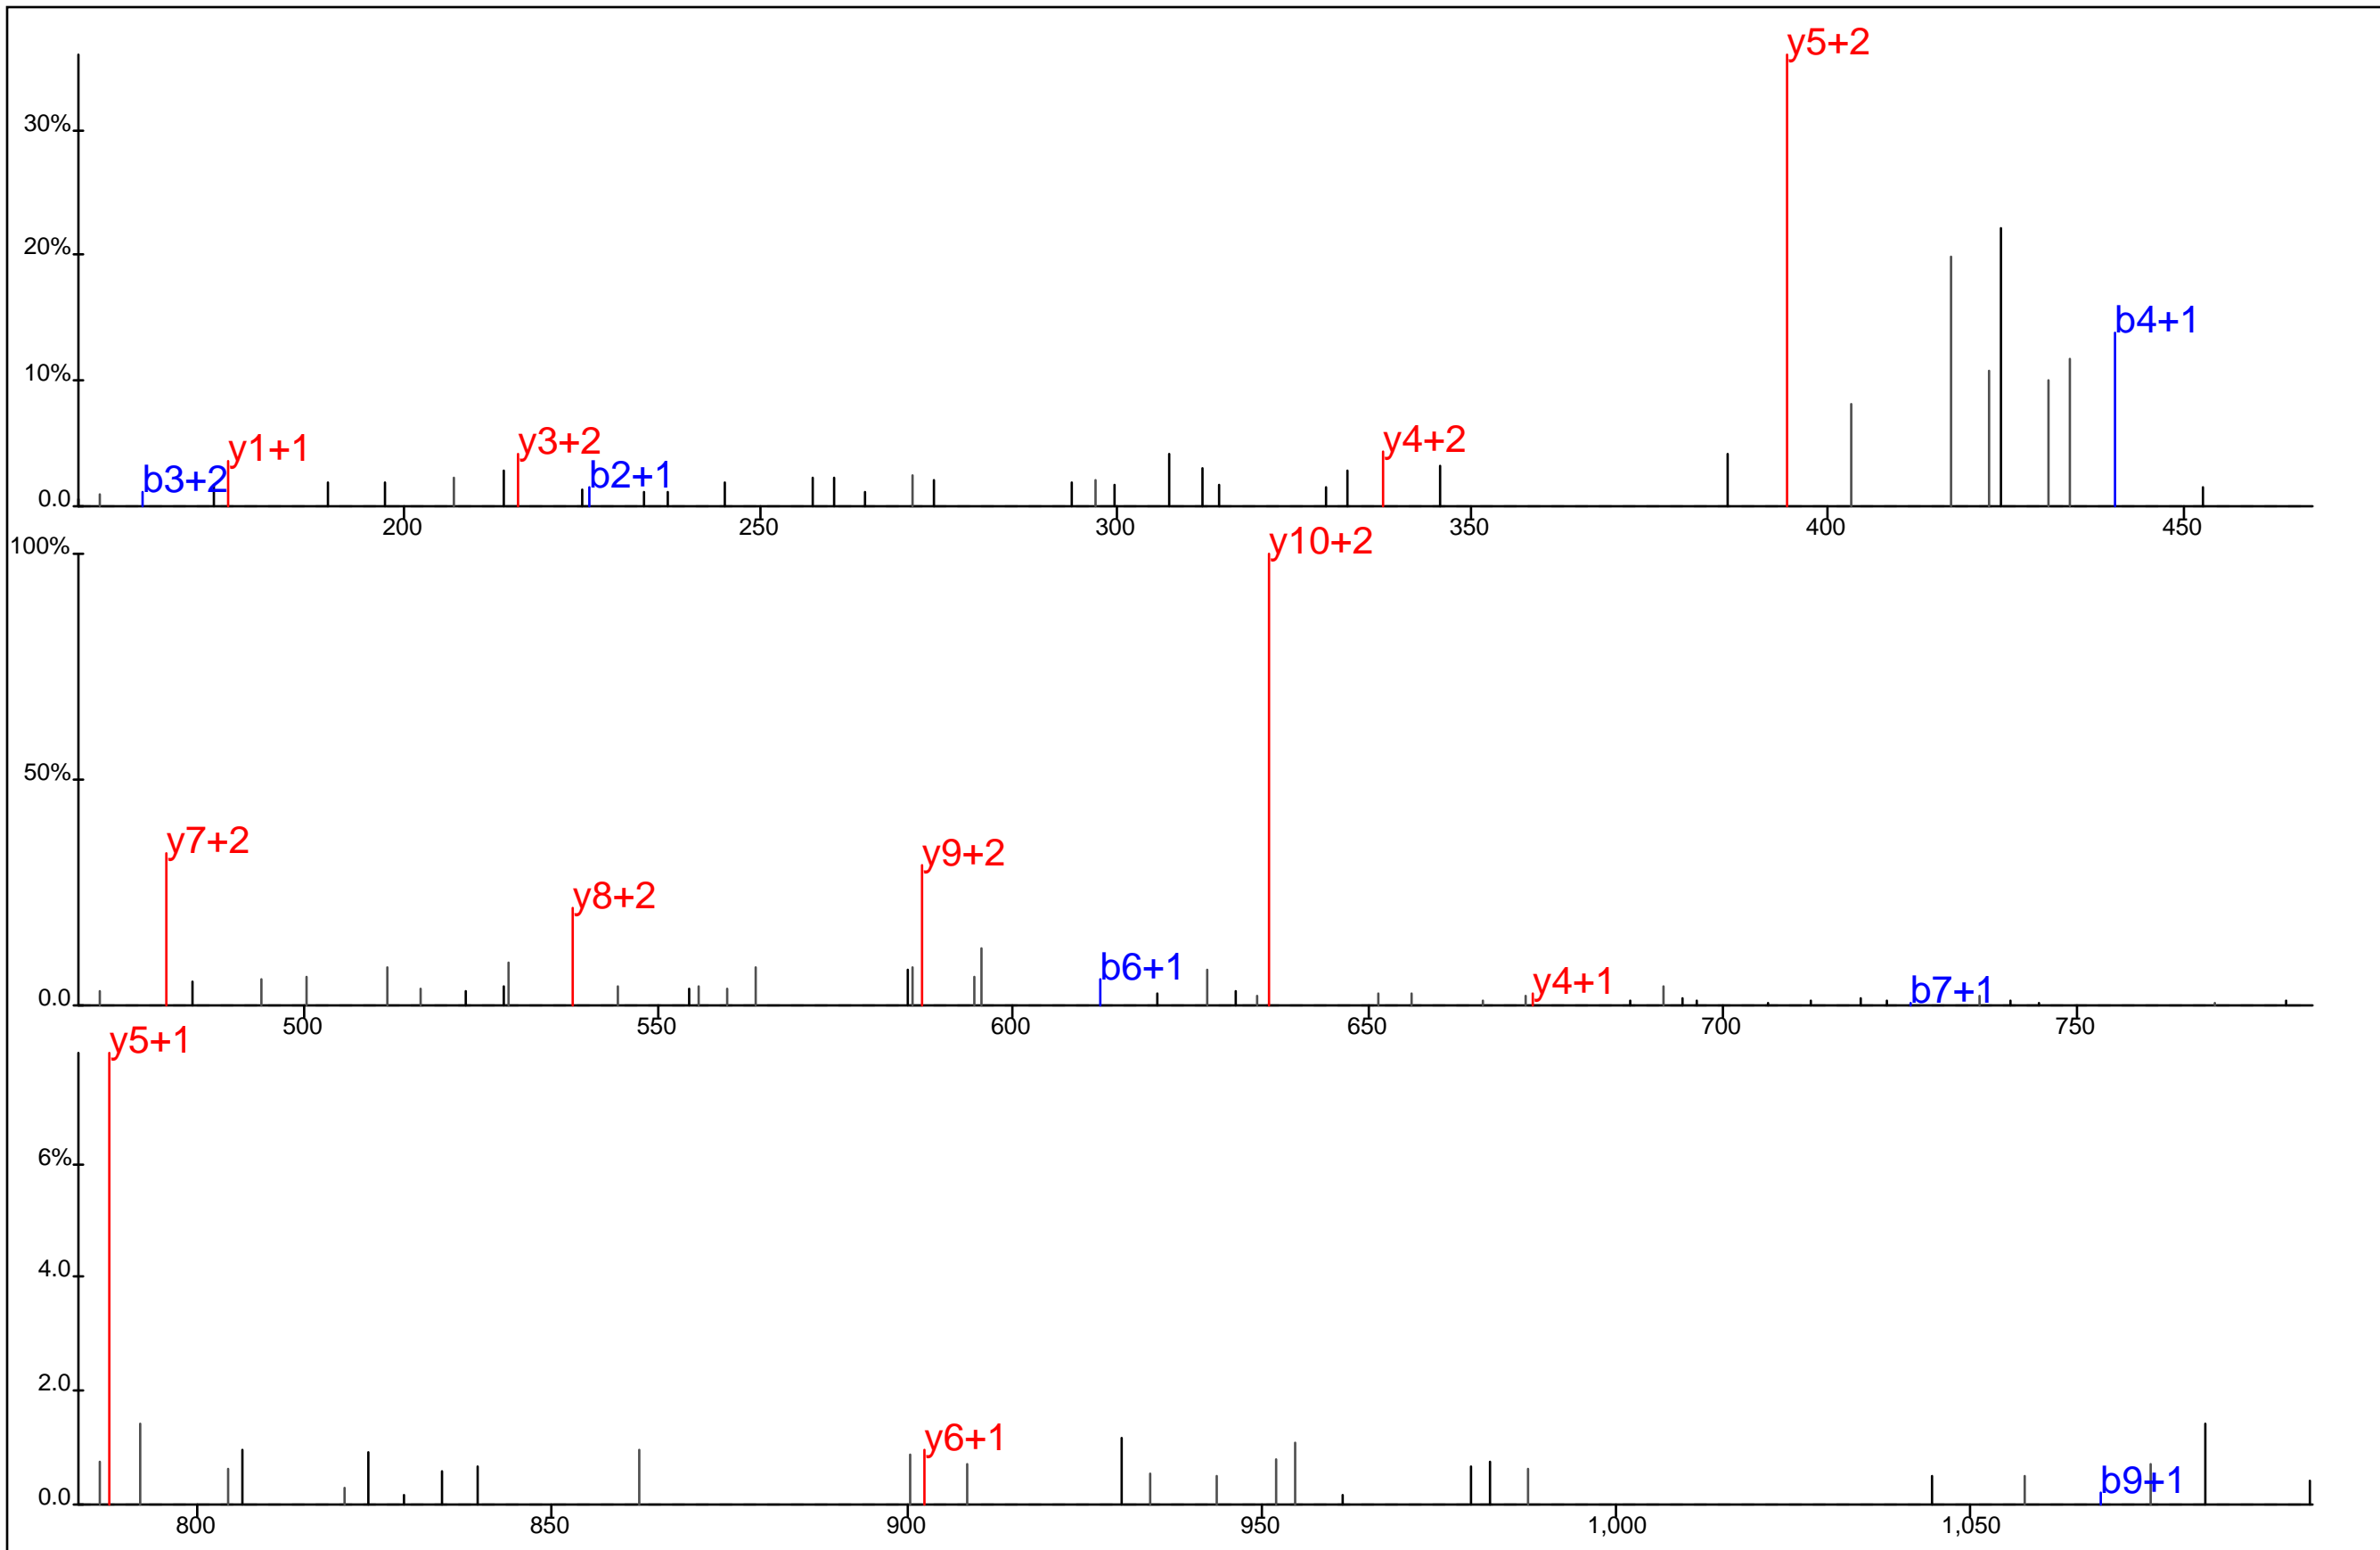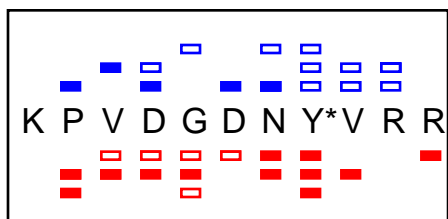

Protein Name: Rictor  
 gi Accession: 0  
 Precursor Mass: 466.8885+3  
 Delta Mass: 1.163 ppm  
 XCorr: 46.42

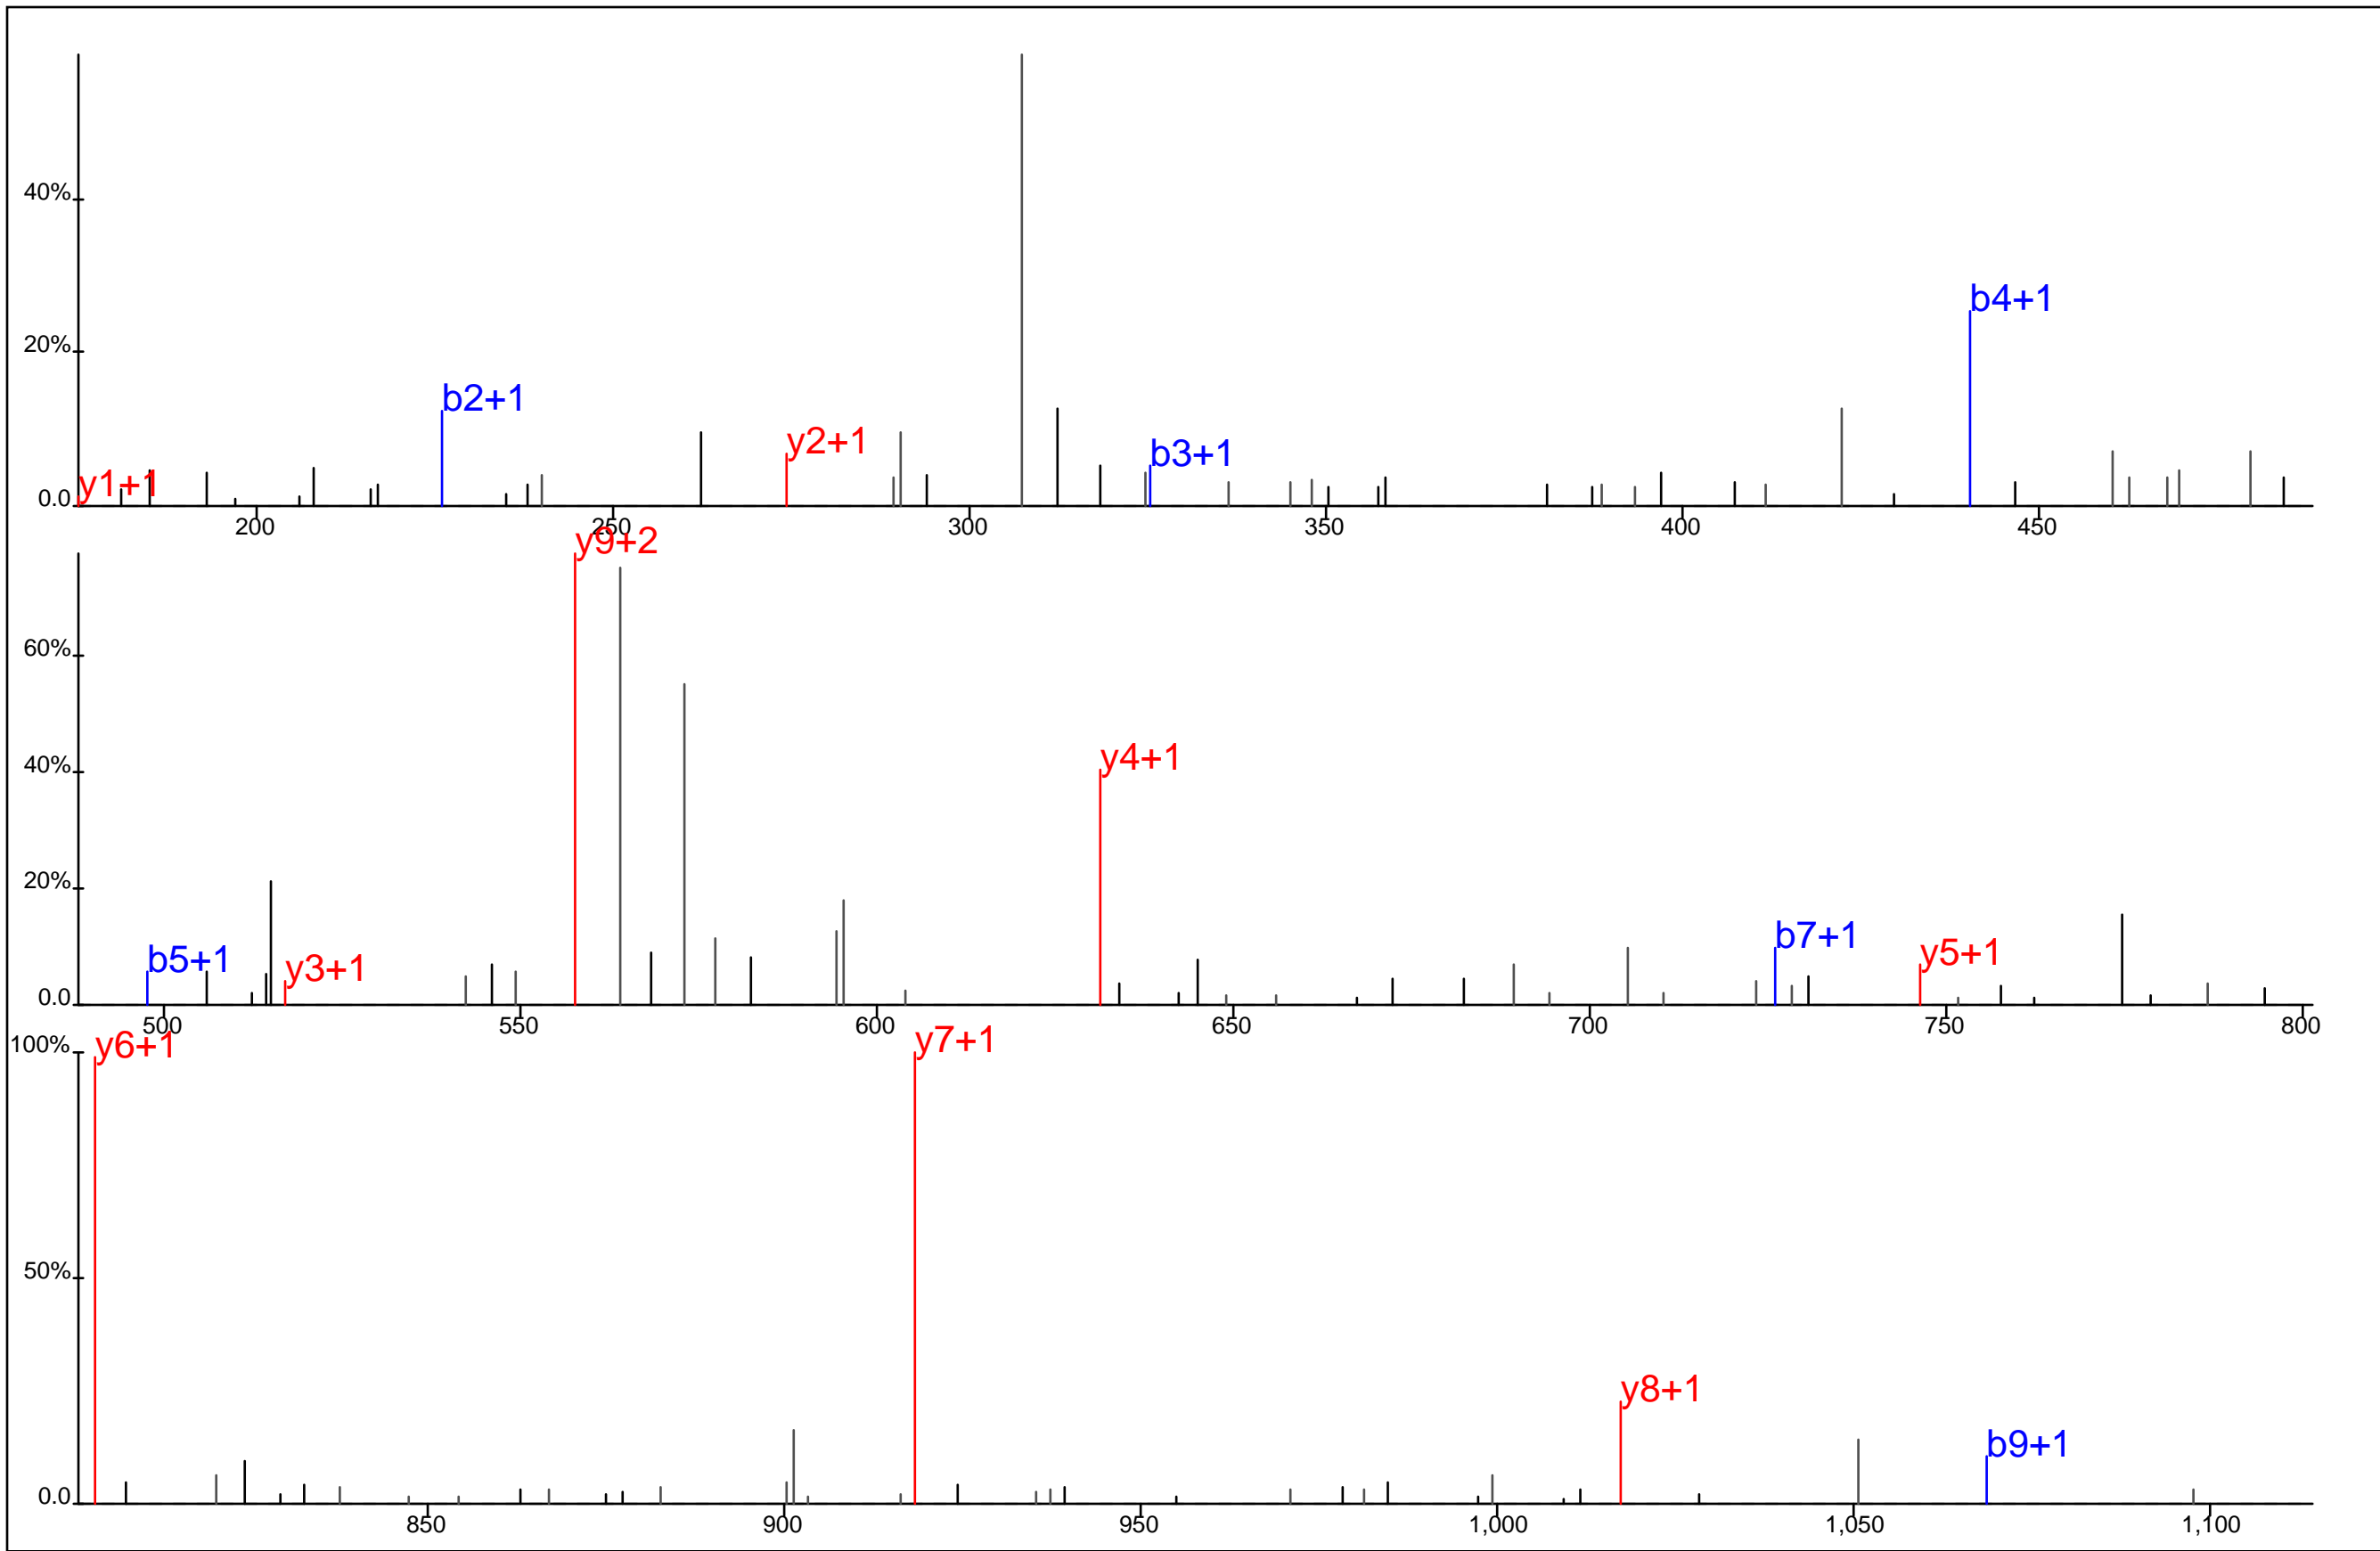

■ ■ ■ ■ ■ ■ ■ ■  
 K P V D G D N Y\* V R  
■ ■ ■ ■ ■ ■ ■ ■

Protein Name: Rictor  
 gi Accession: 0  
 Precursor Mass: 621.7787+2  
 Delta Mass: 0.975 ppm  
 XCorr: 38.96

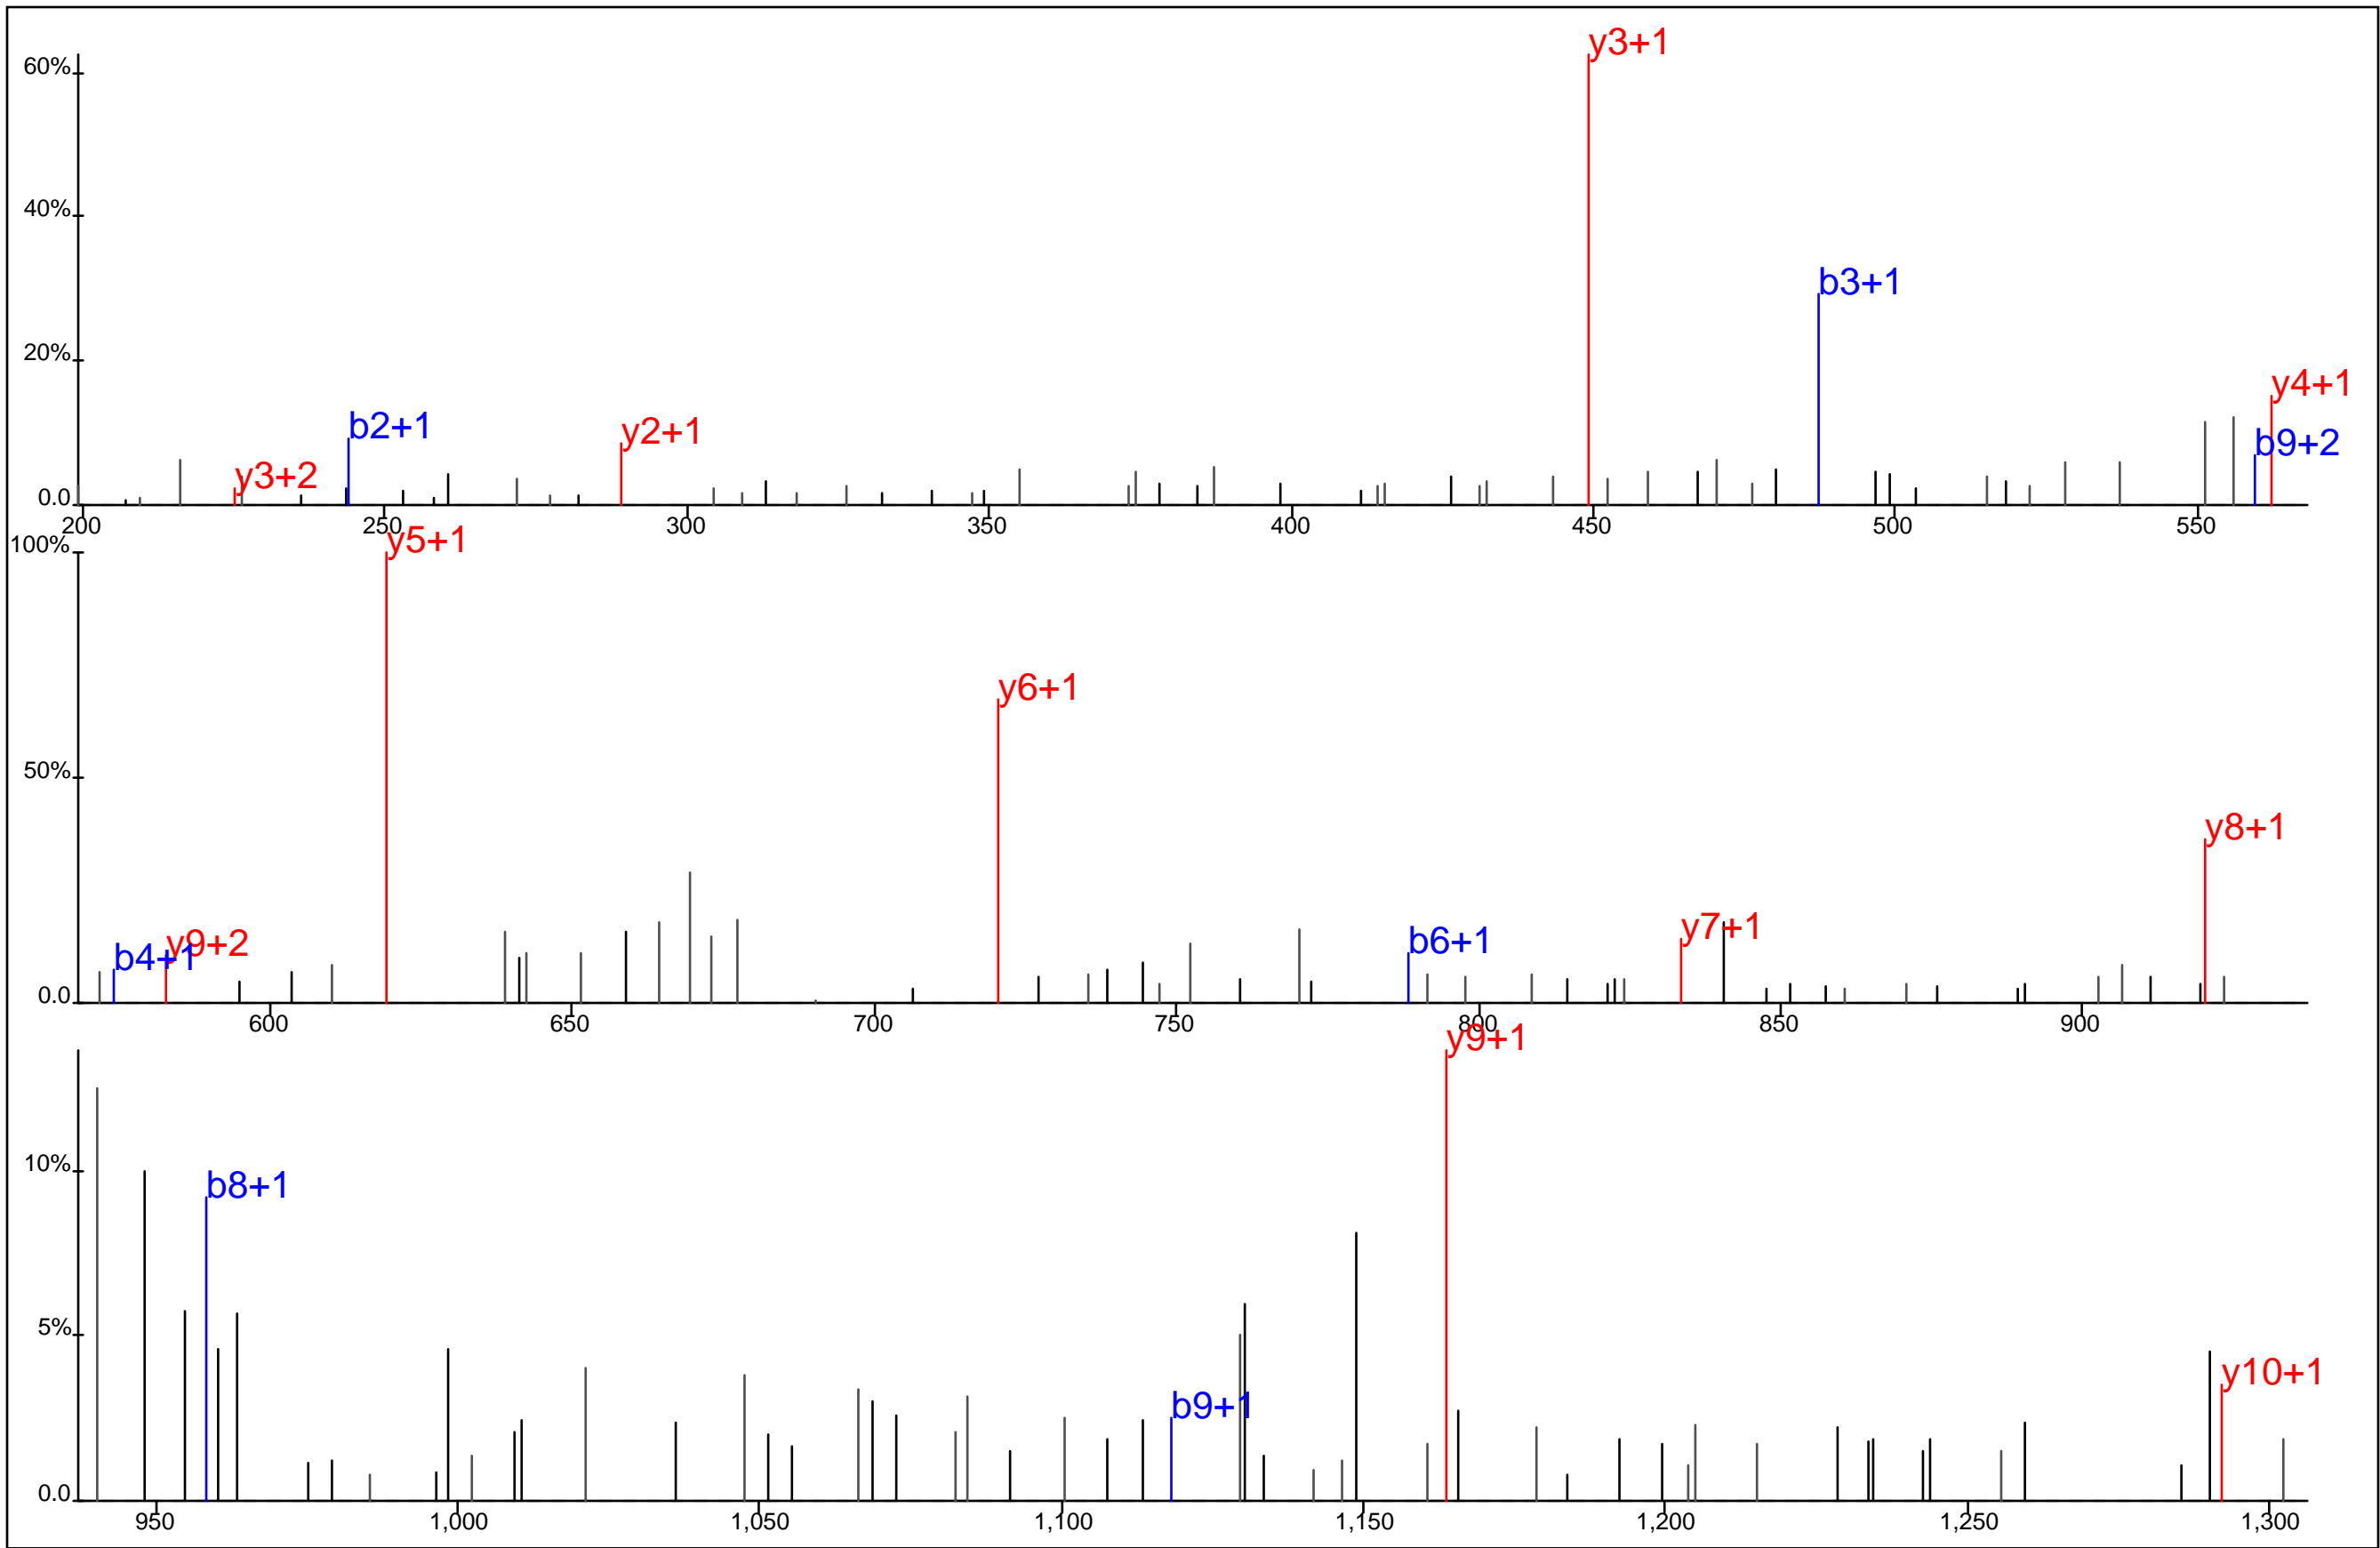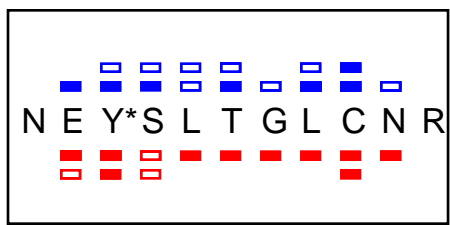

Protein Name: RNA binding motif protein 13  
 gi Accession: 0  
 Precursor Mass: 703.7902+2  
 Delta Mass: 2.798 ppm  
 XCorr: 67.87

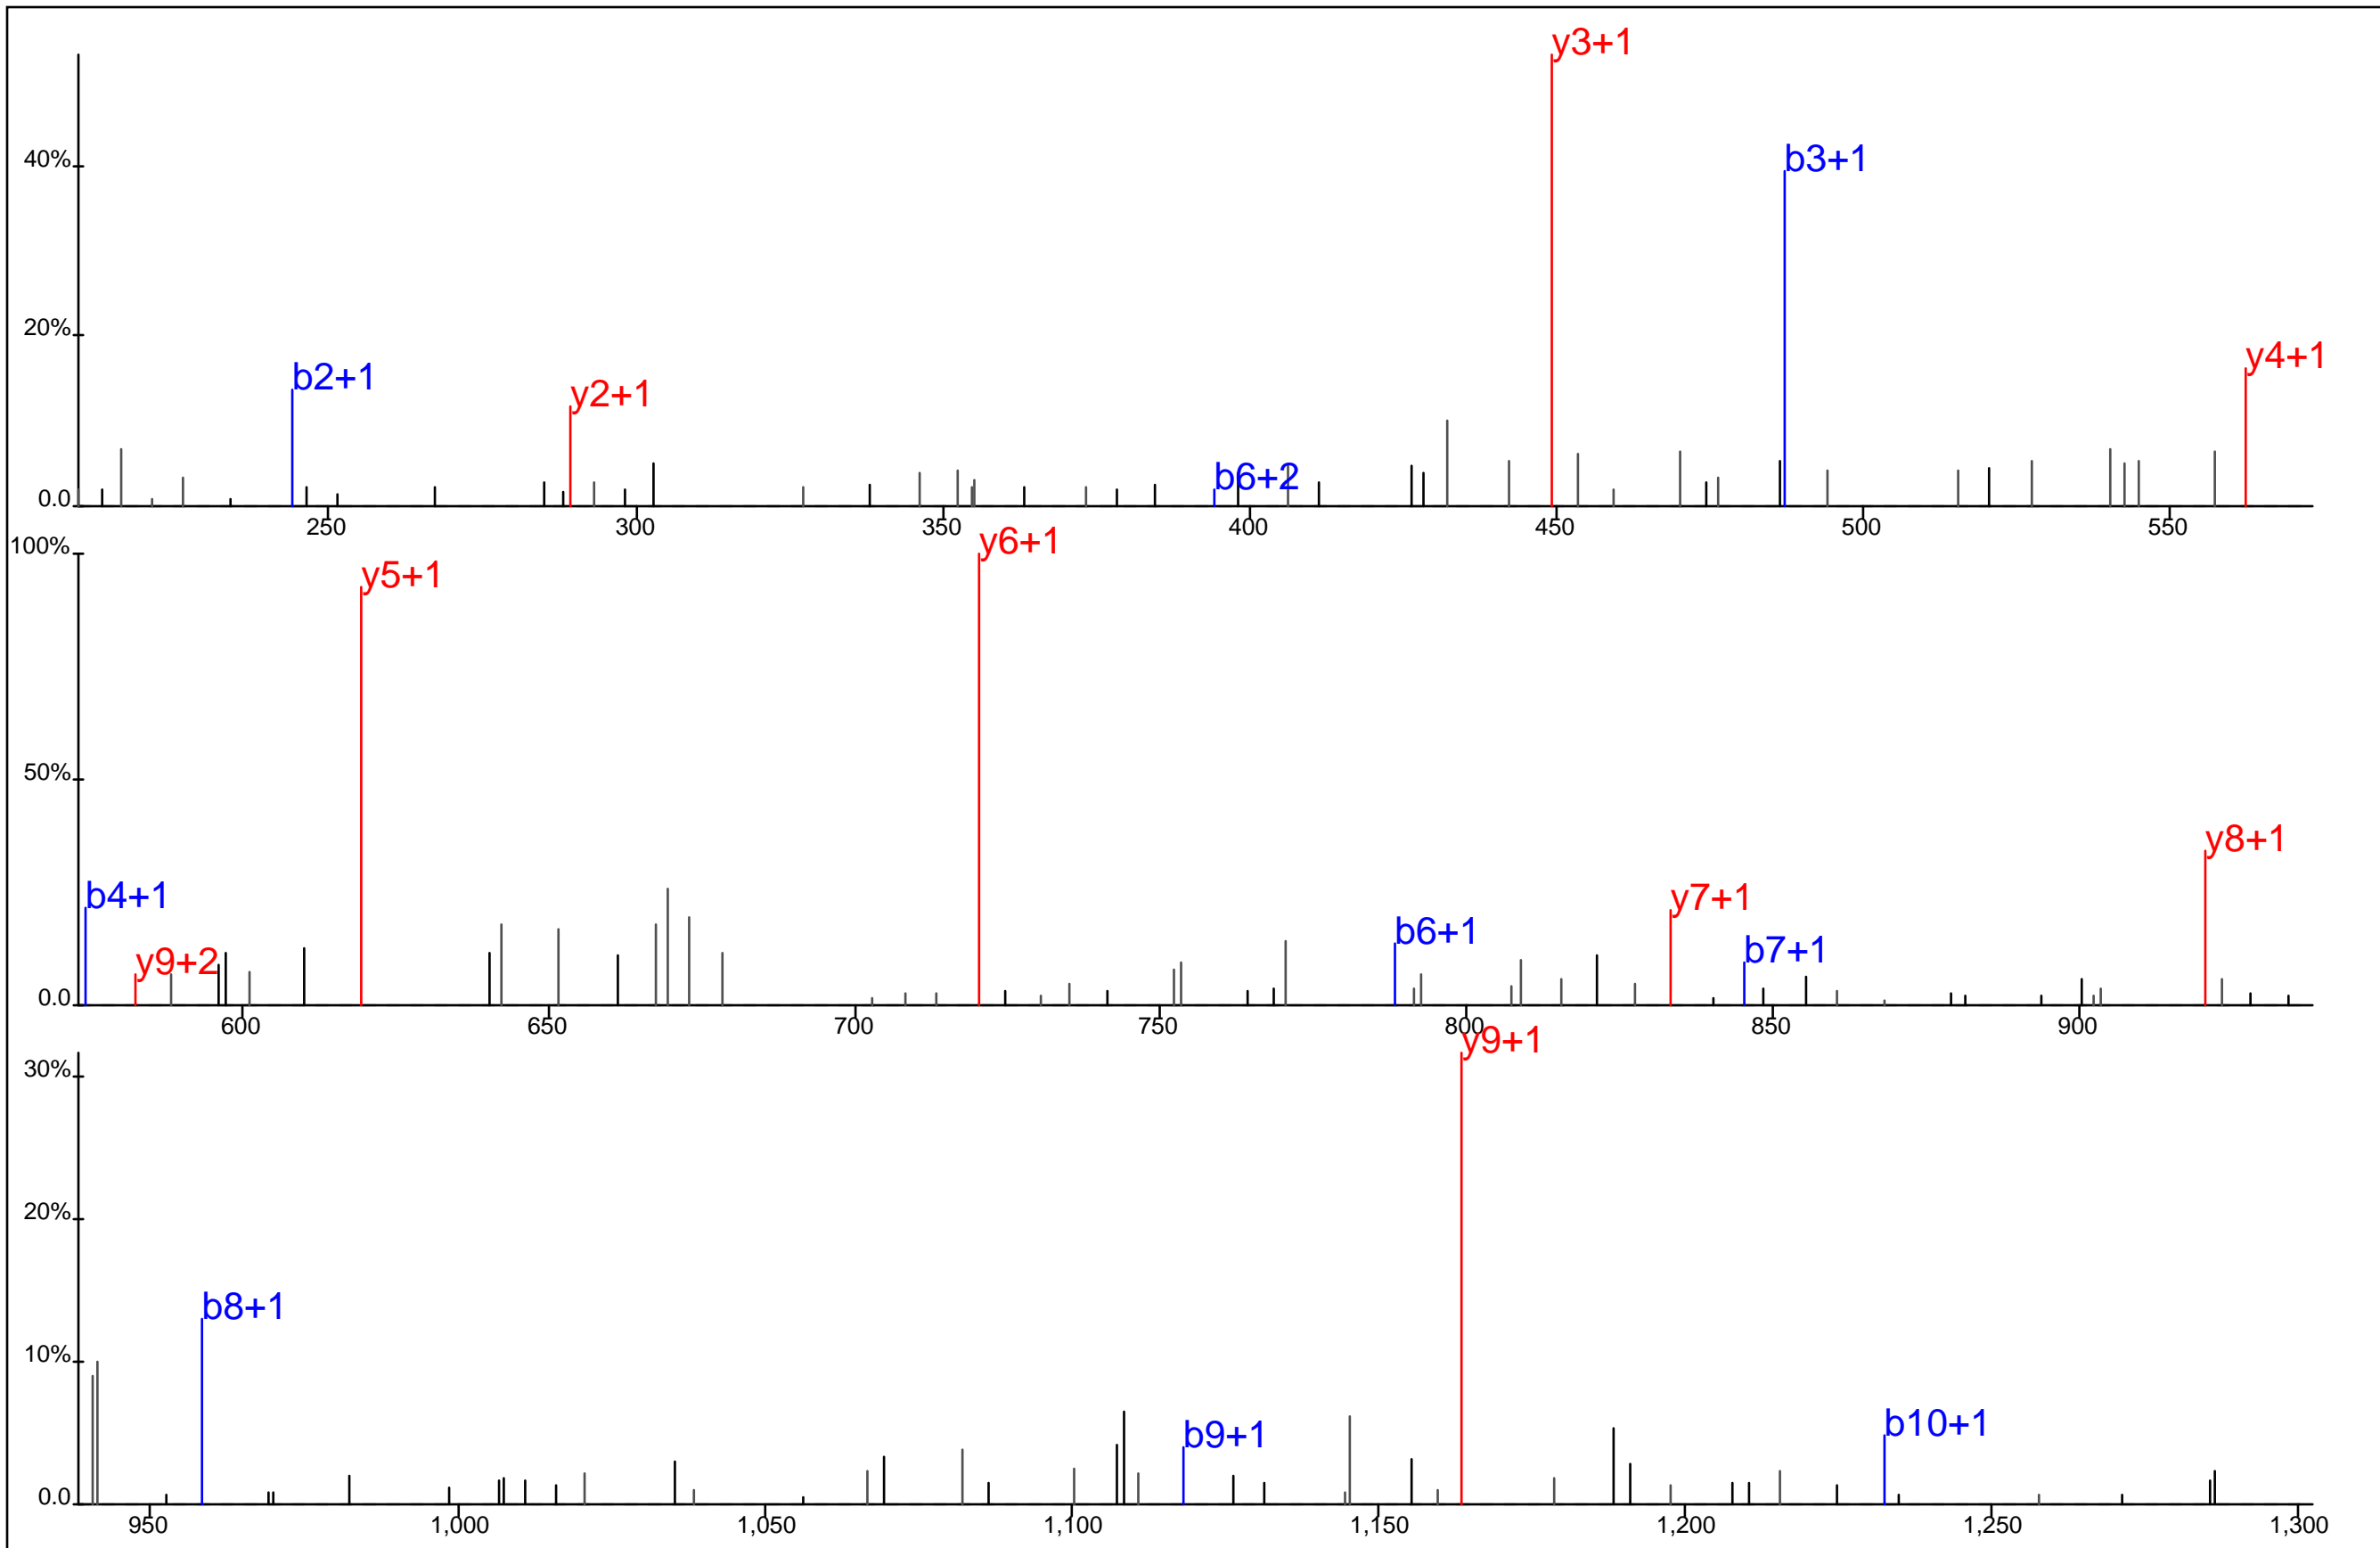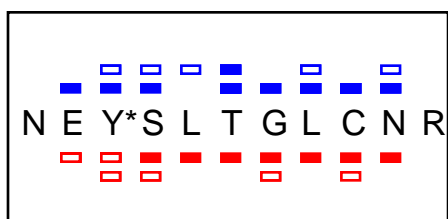

Protein Name: RNA binding motif protein 13  
 gi Accession: 0  
 Precursor Mass: 703.7930+2  
 Delta Mass: 1.281 ppm  
 XCorr: 66.34

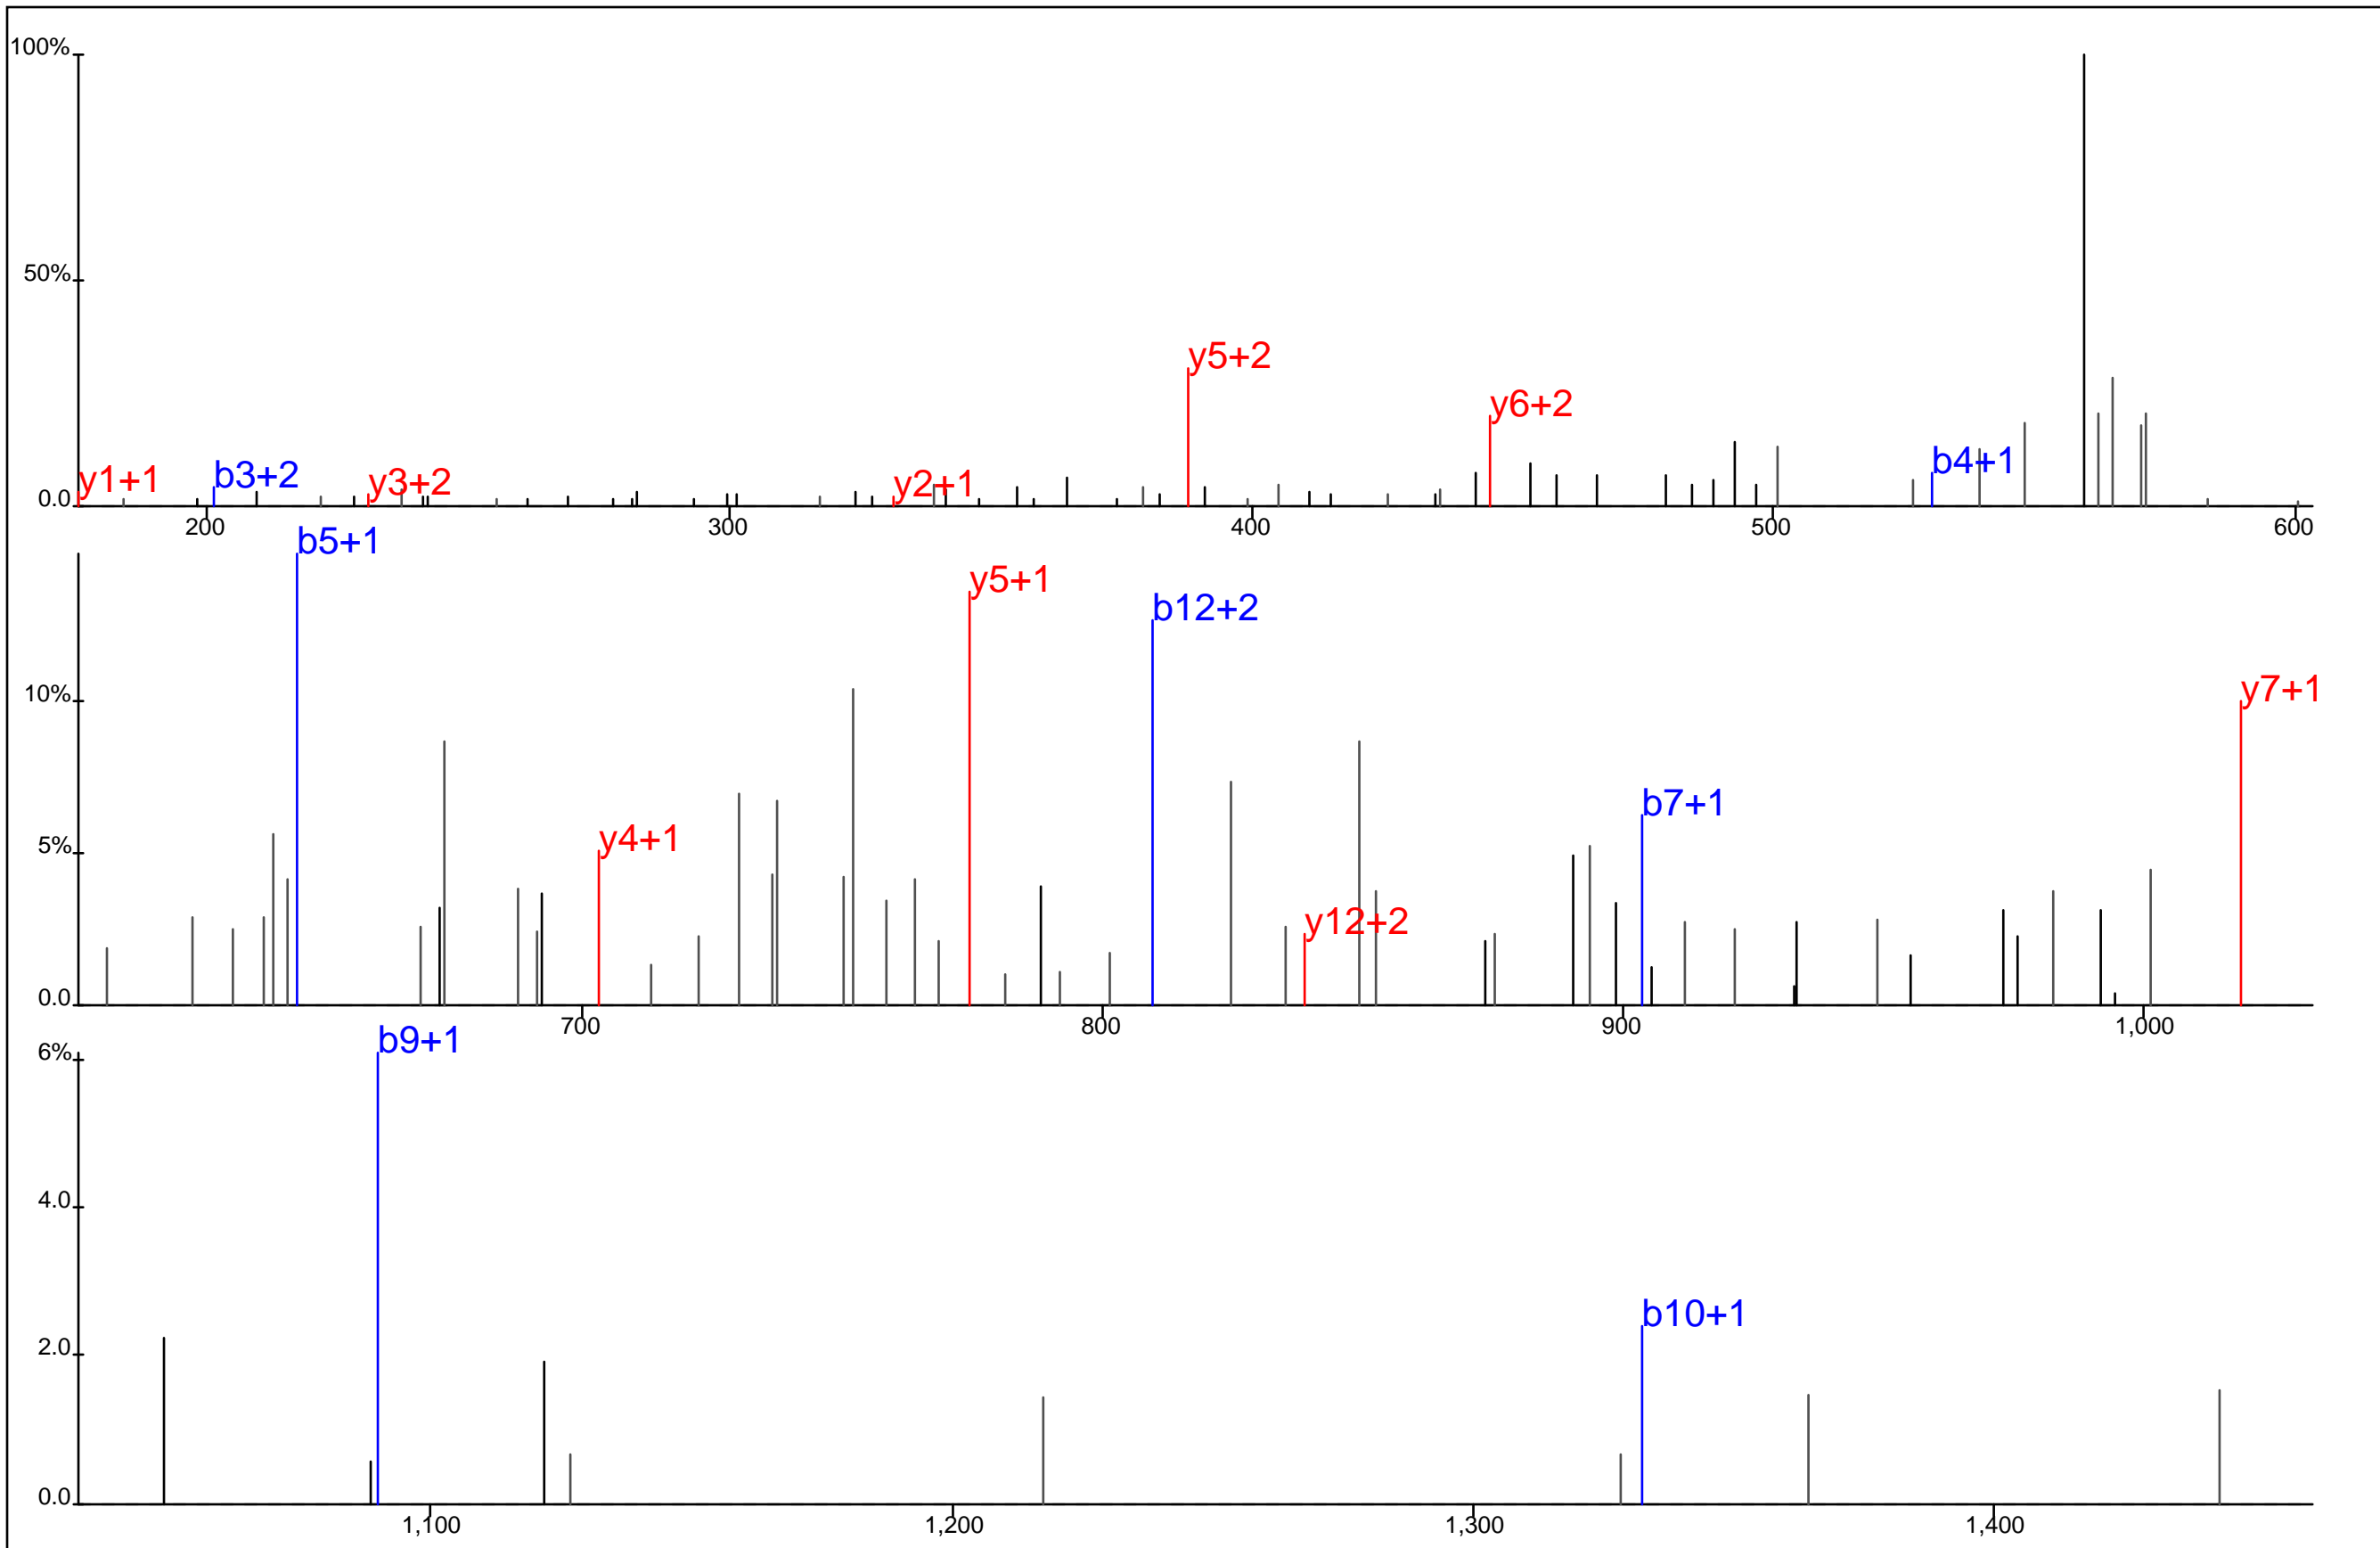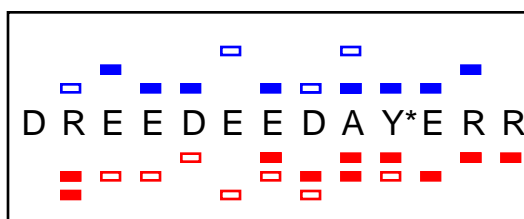

Protein Name: RNA binding motif protein 25  
 gi Accession: 0  
 Precursor Mass: 597.8973+3  
 Delta Mass: 2.354 ppm  
 XCorr: 38.26

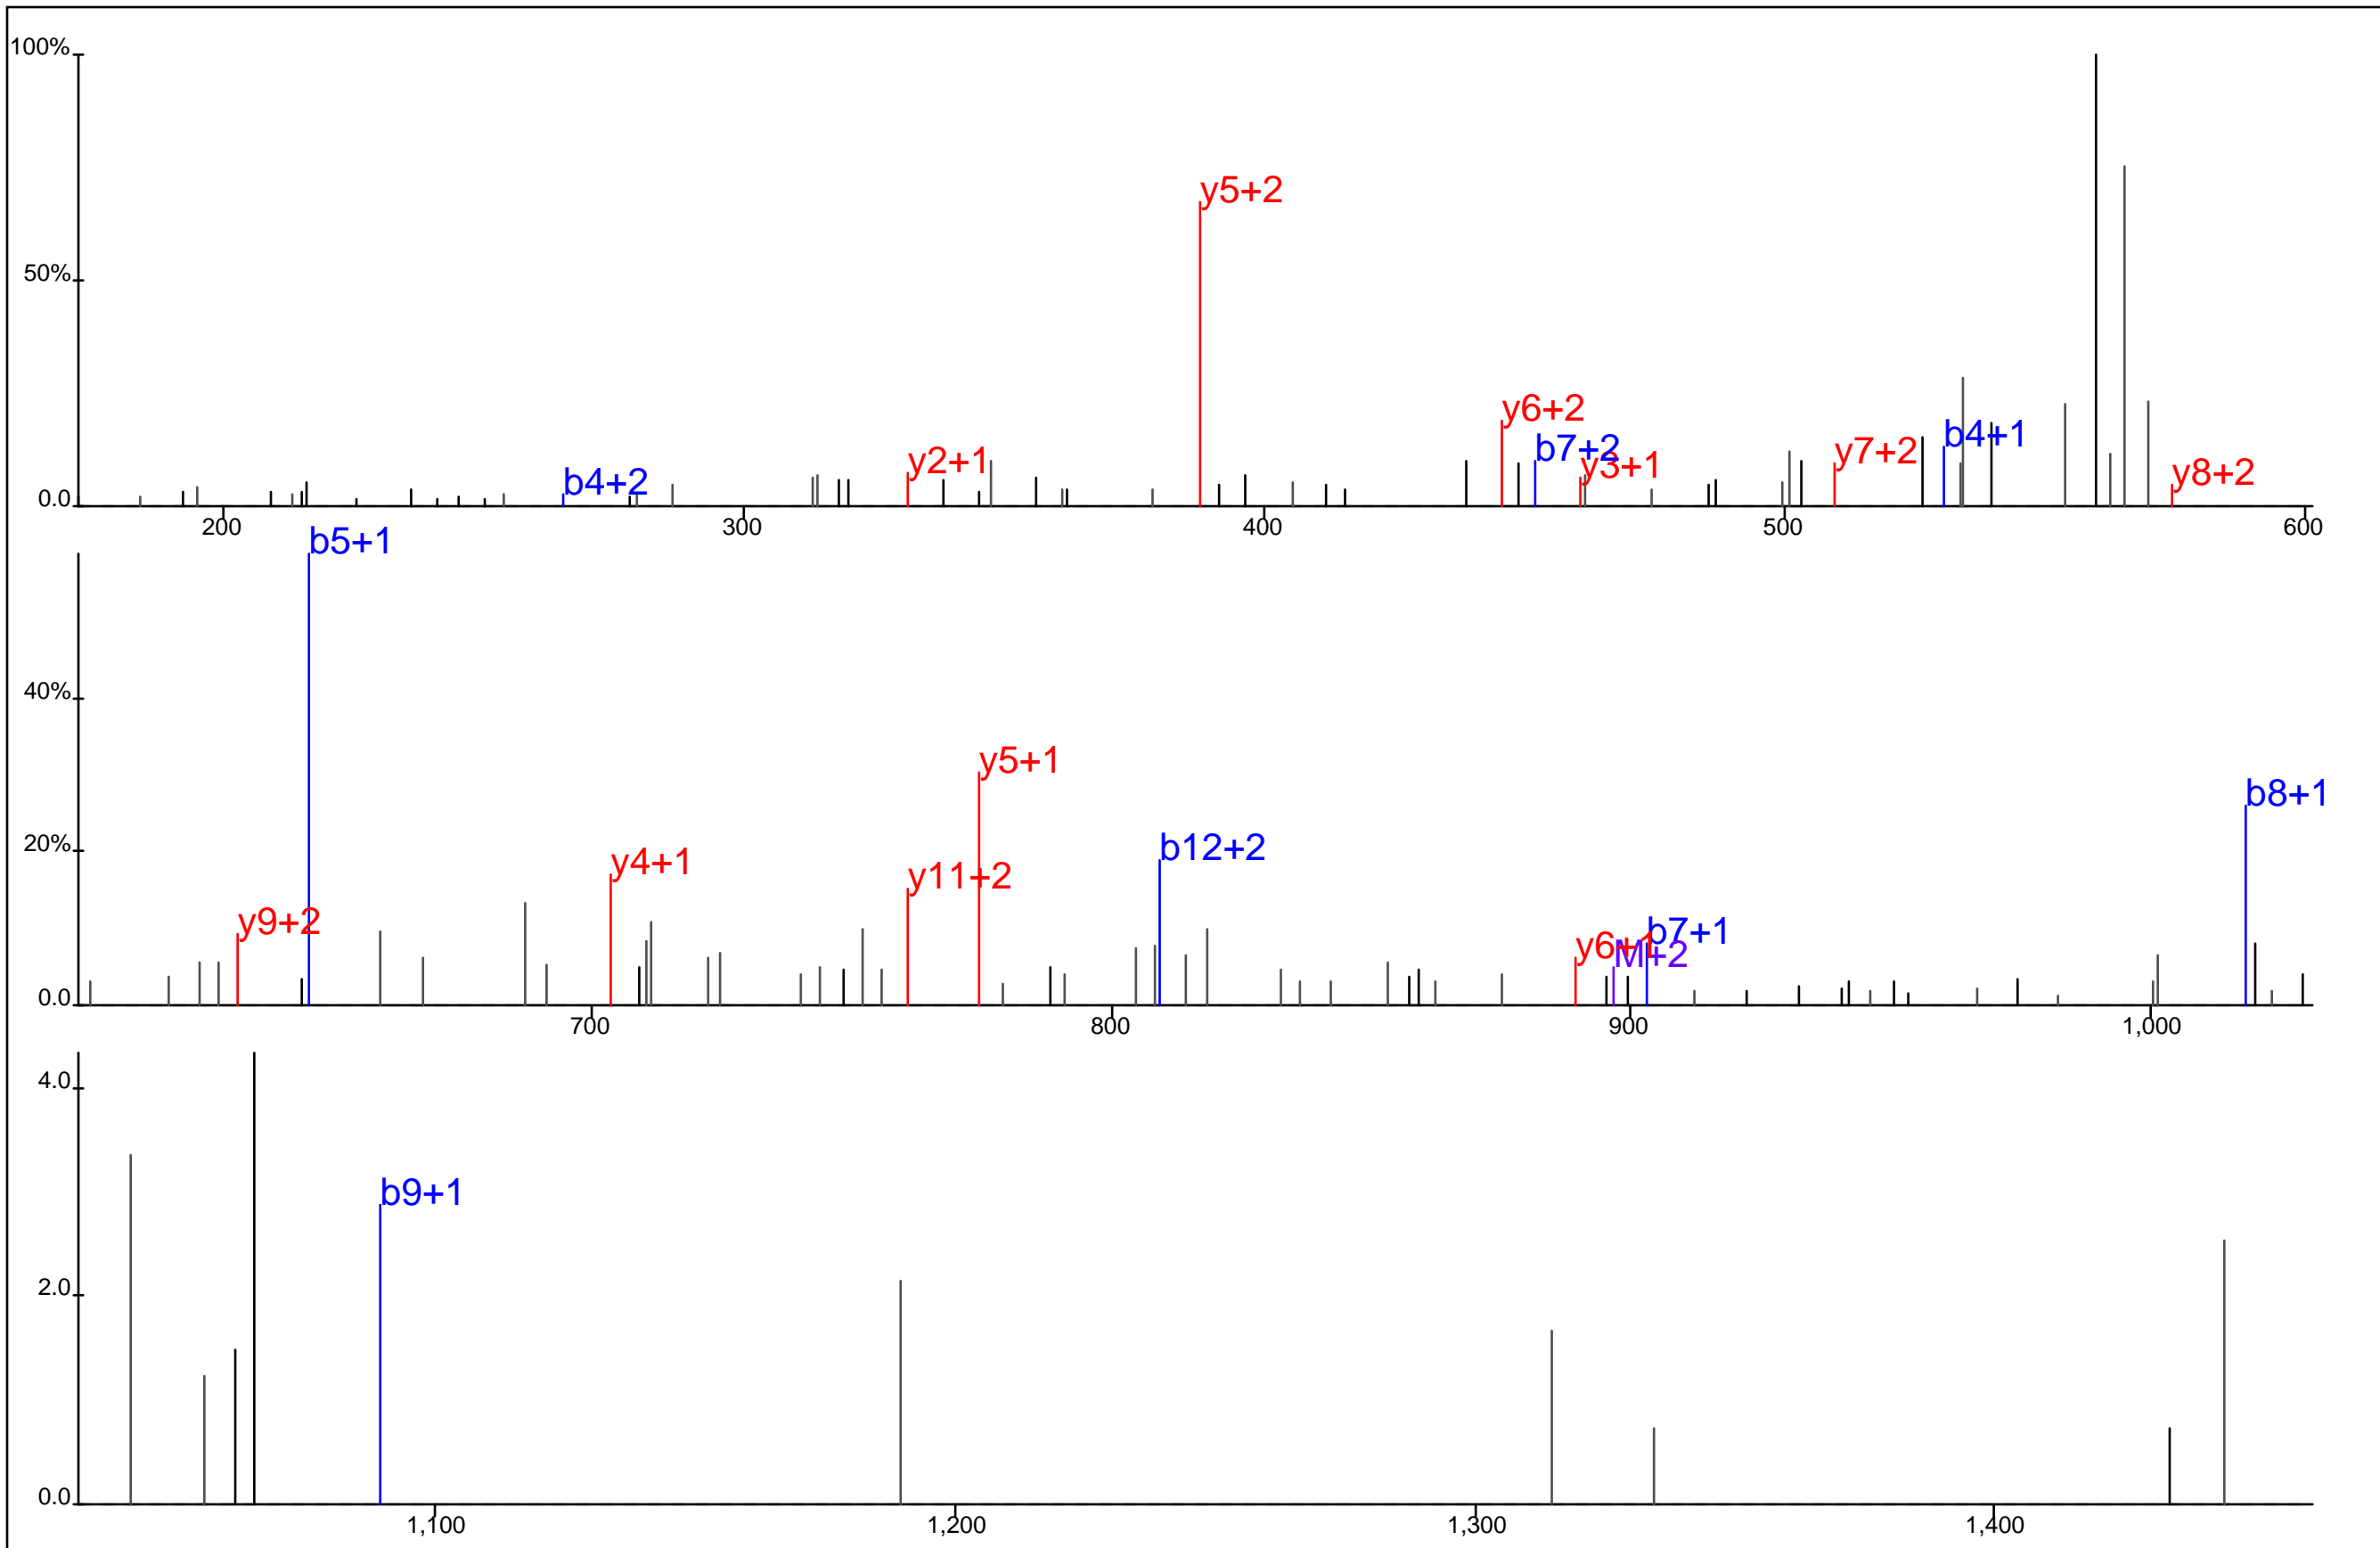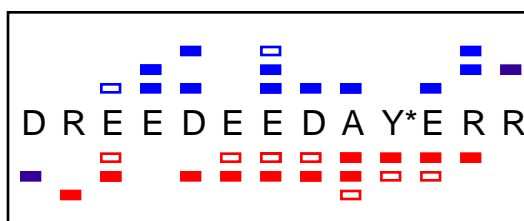

Protein Name: RNA binding motif protein 25  
 gi Accession: 0  
 Precursor Mass: 597.8989+3  
 Delta Mass: 0.304 ppm  
 XCorr: 33.67

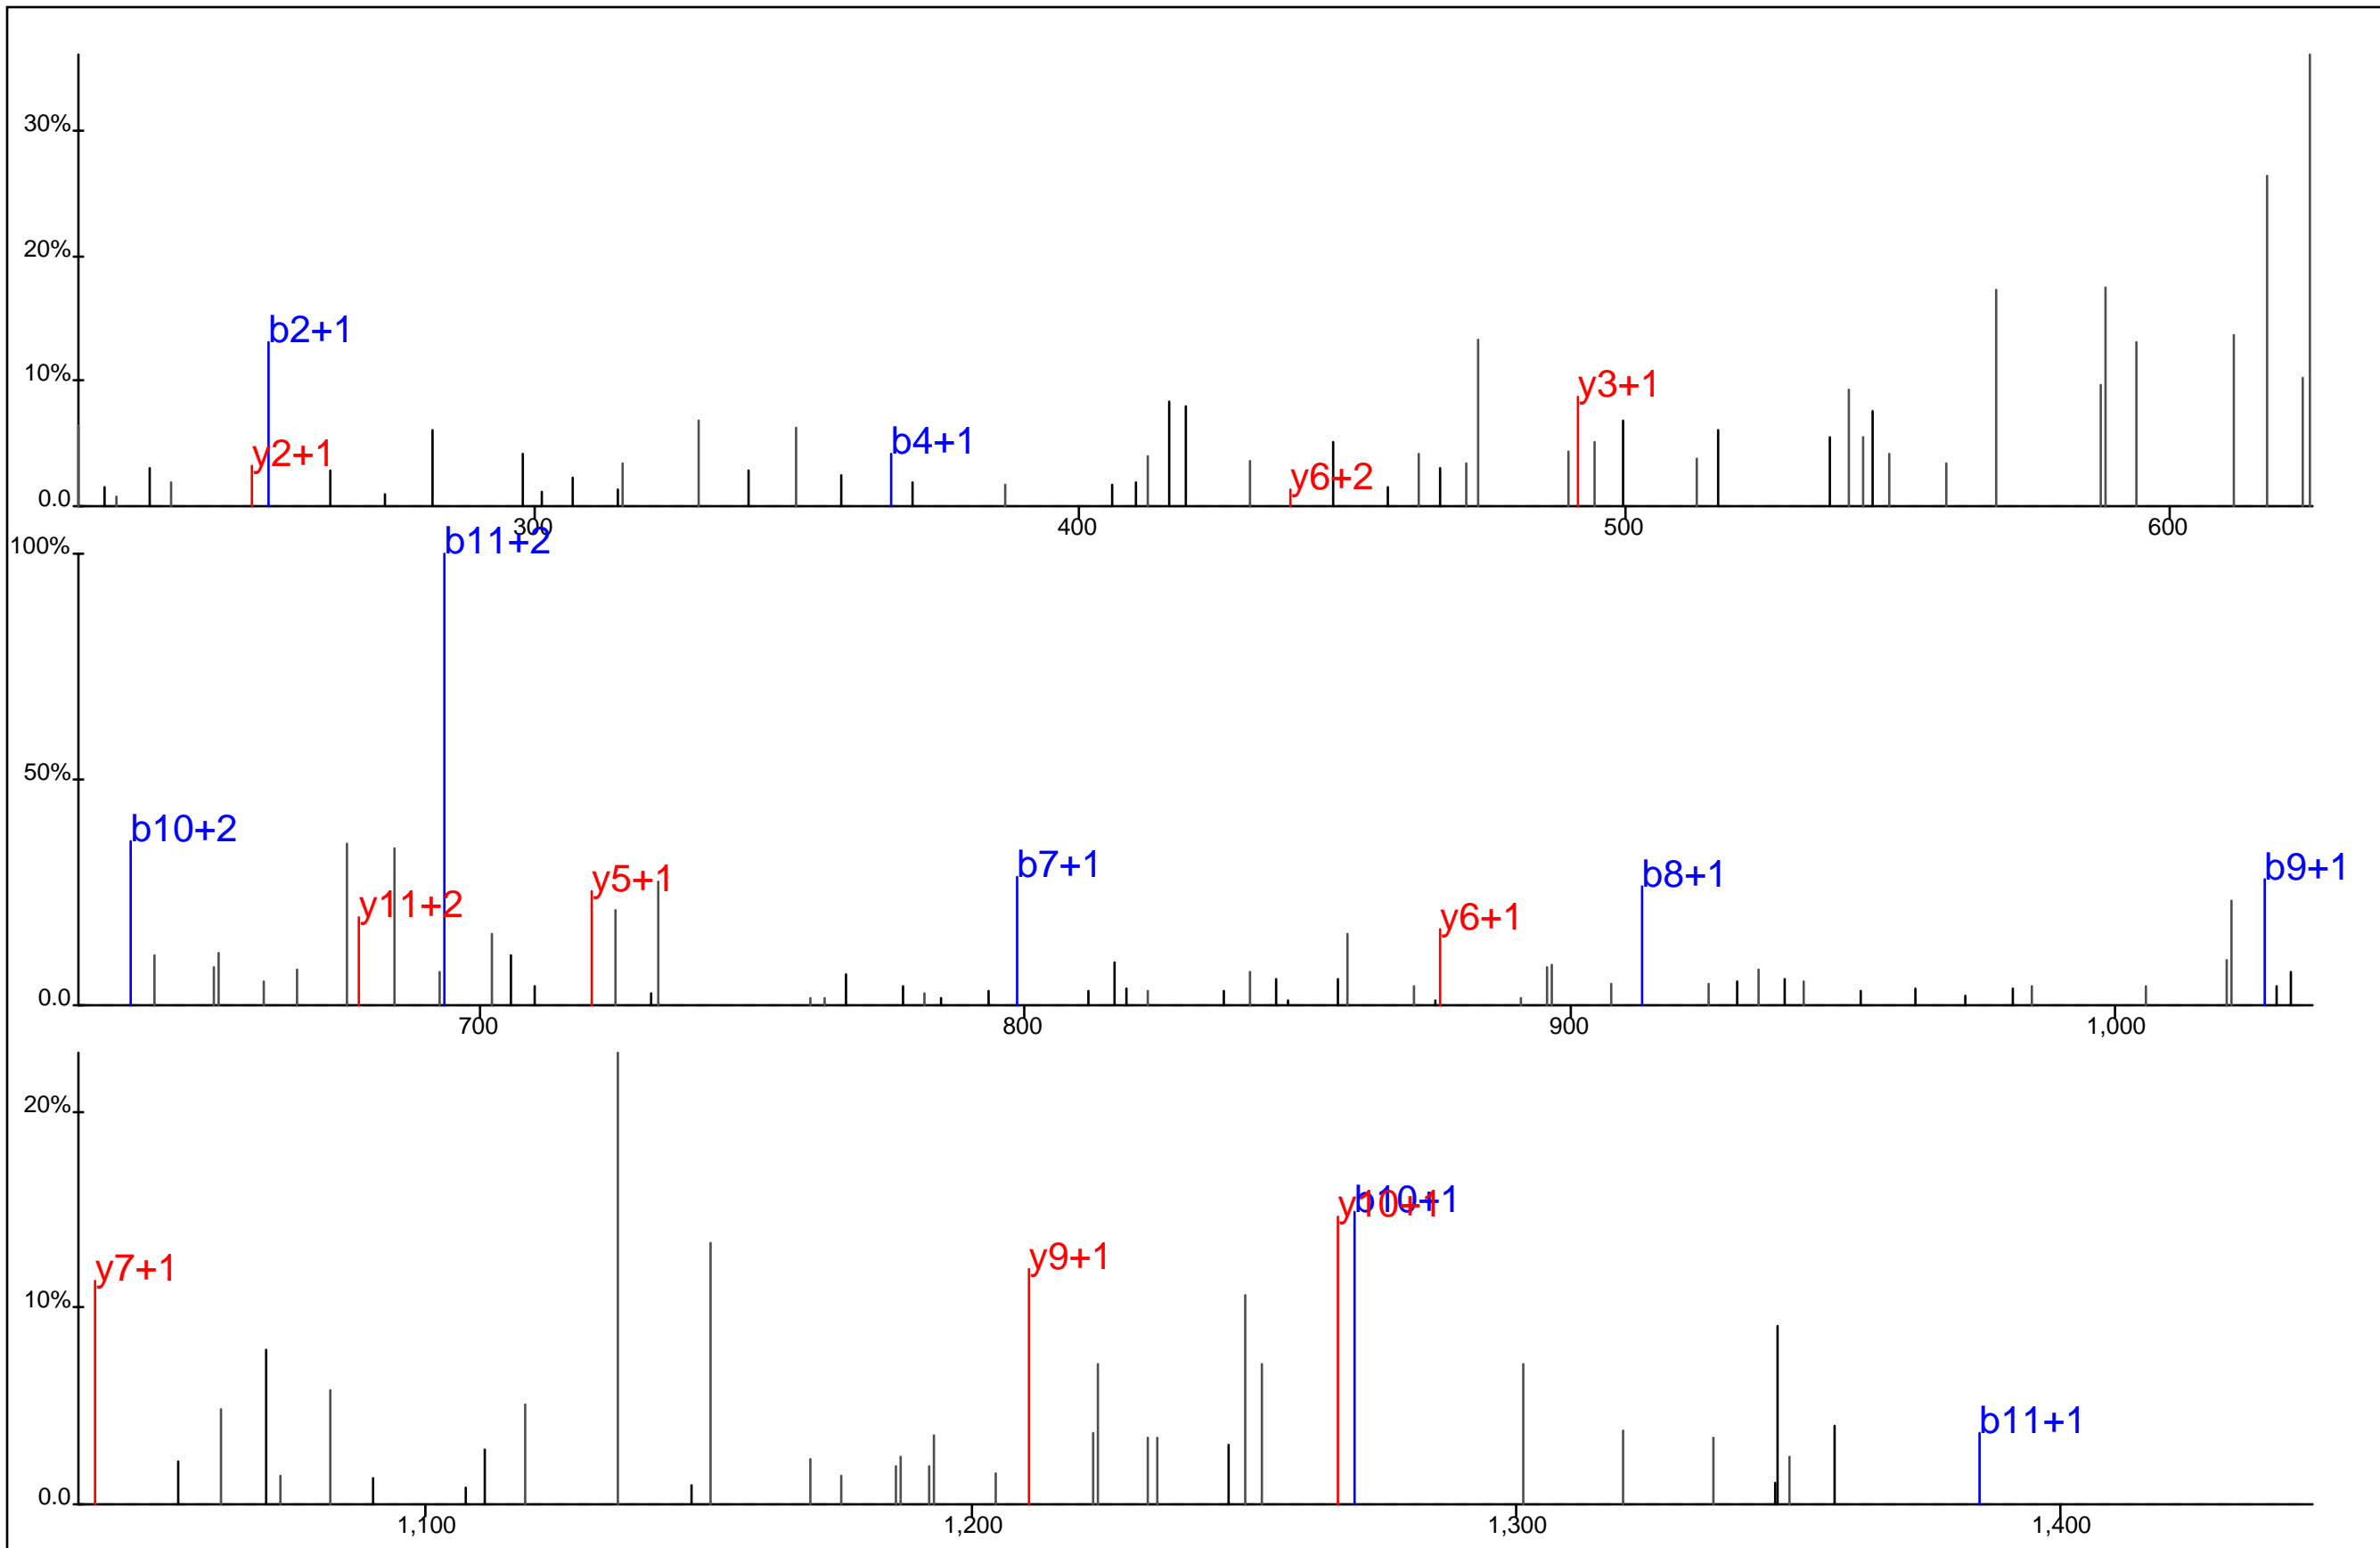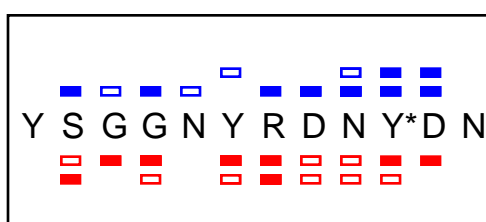

Protein Name: RNA binding motif protein 3  
 gi Accession: 0  
 Precursor Mass: 759.2718+2  
 Delta Mass: 2.268 ppm  
 XCorr: 40.58

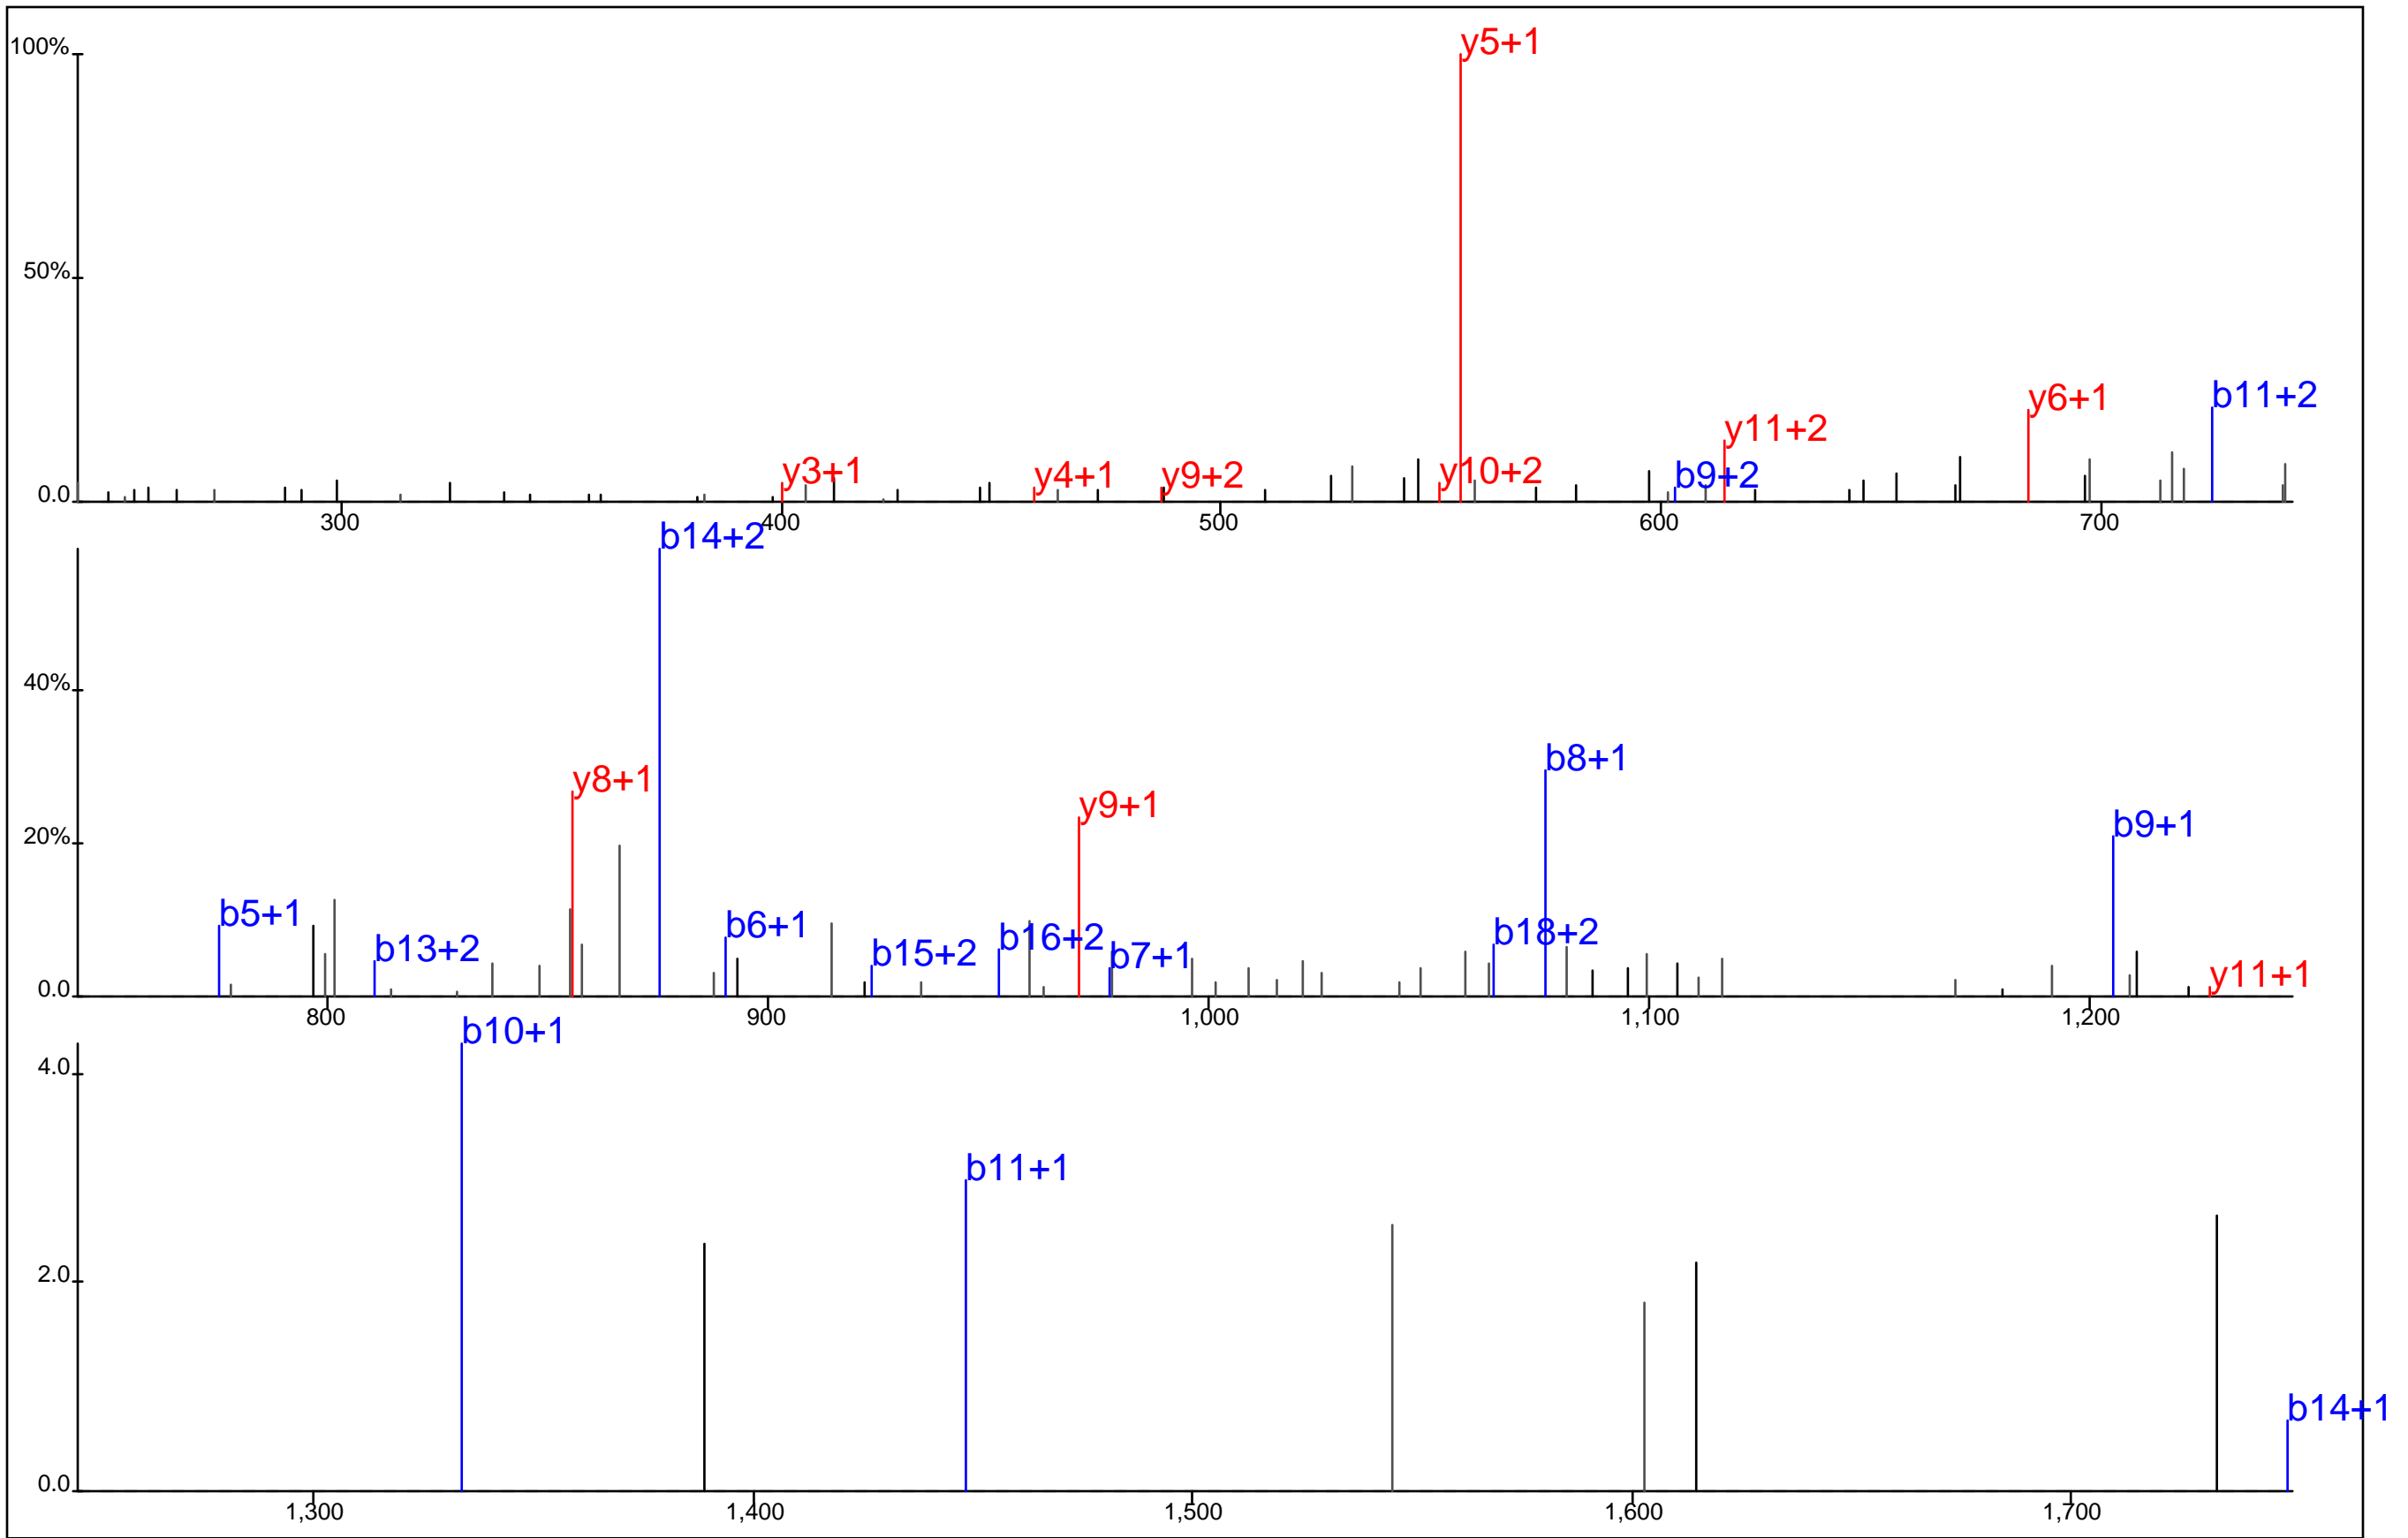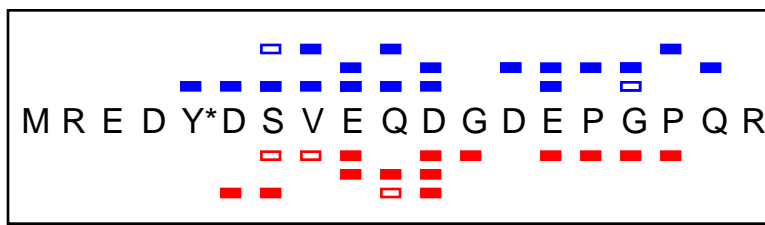

Protein Name: RNA binding motif protein 8A  
 gi Accession: 0  
 Precursor Mass: 768.3025+3  
 Delta Mass: 0.485 ppm  
 XCorr: 30.43



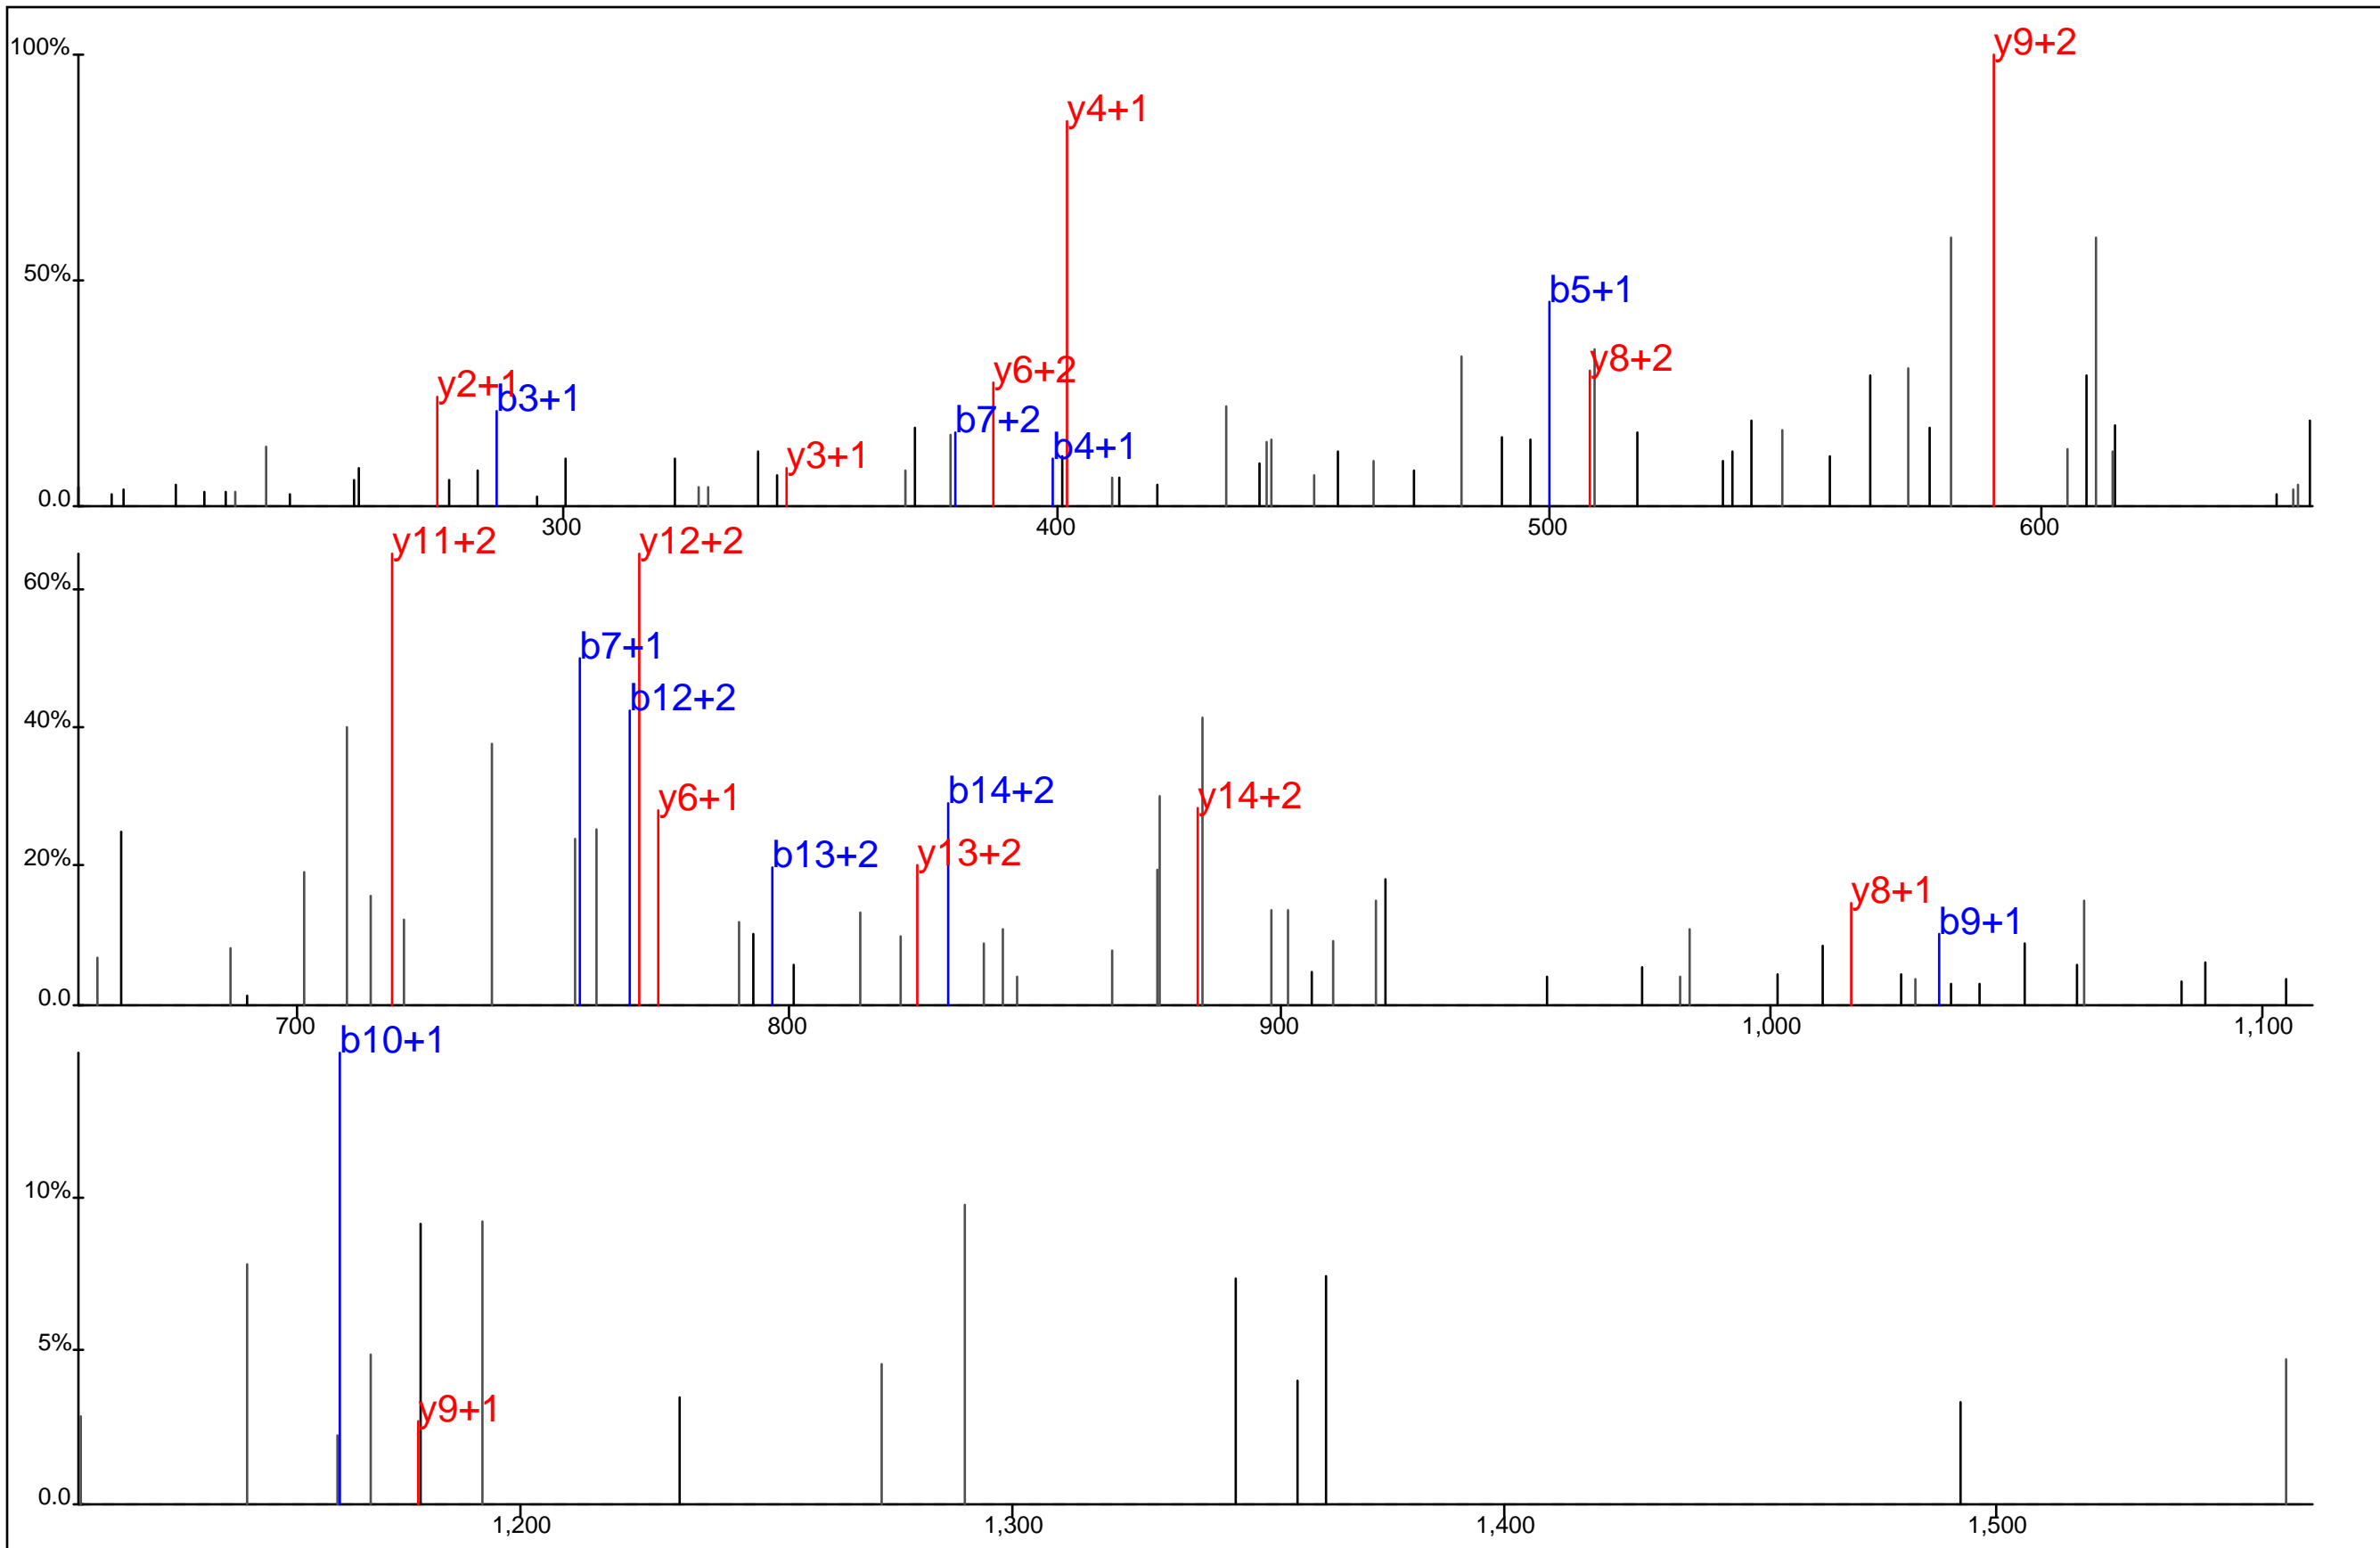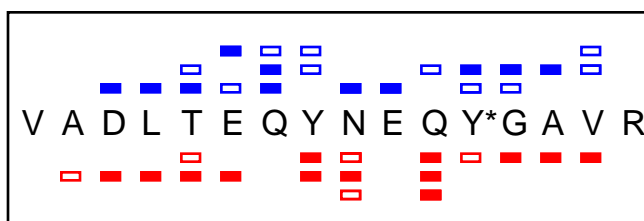

Protein Name: RNA binding protein 4  
 gi Accession: 0  
 Precursor Mass: 645.9545+3  
 Delta Mass: 0.337 ppm  
 XCorr: 25.5

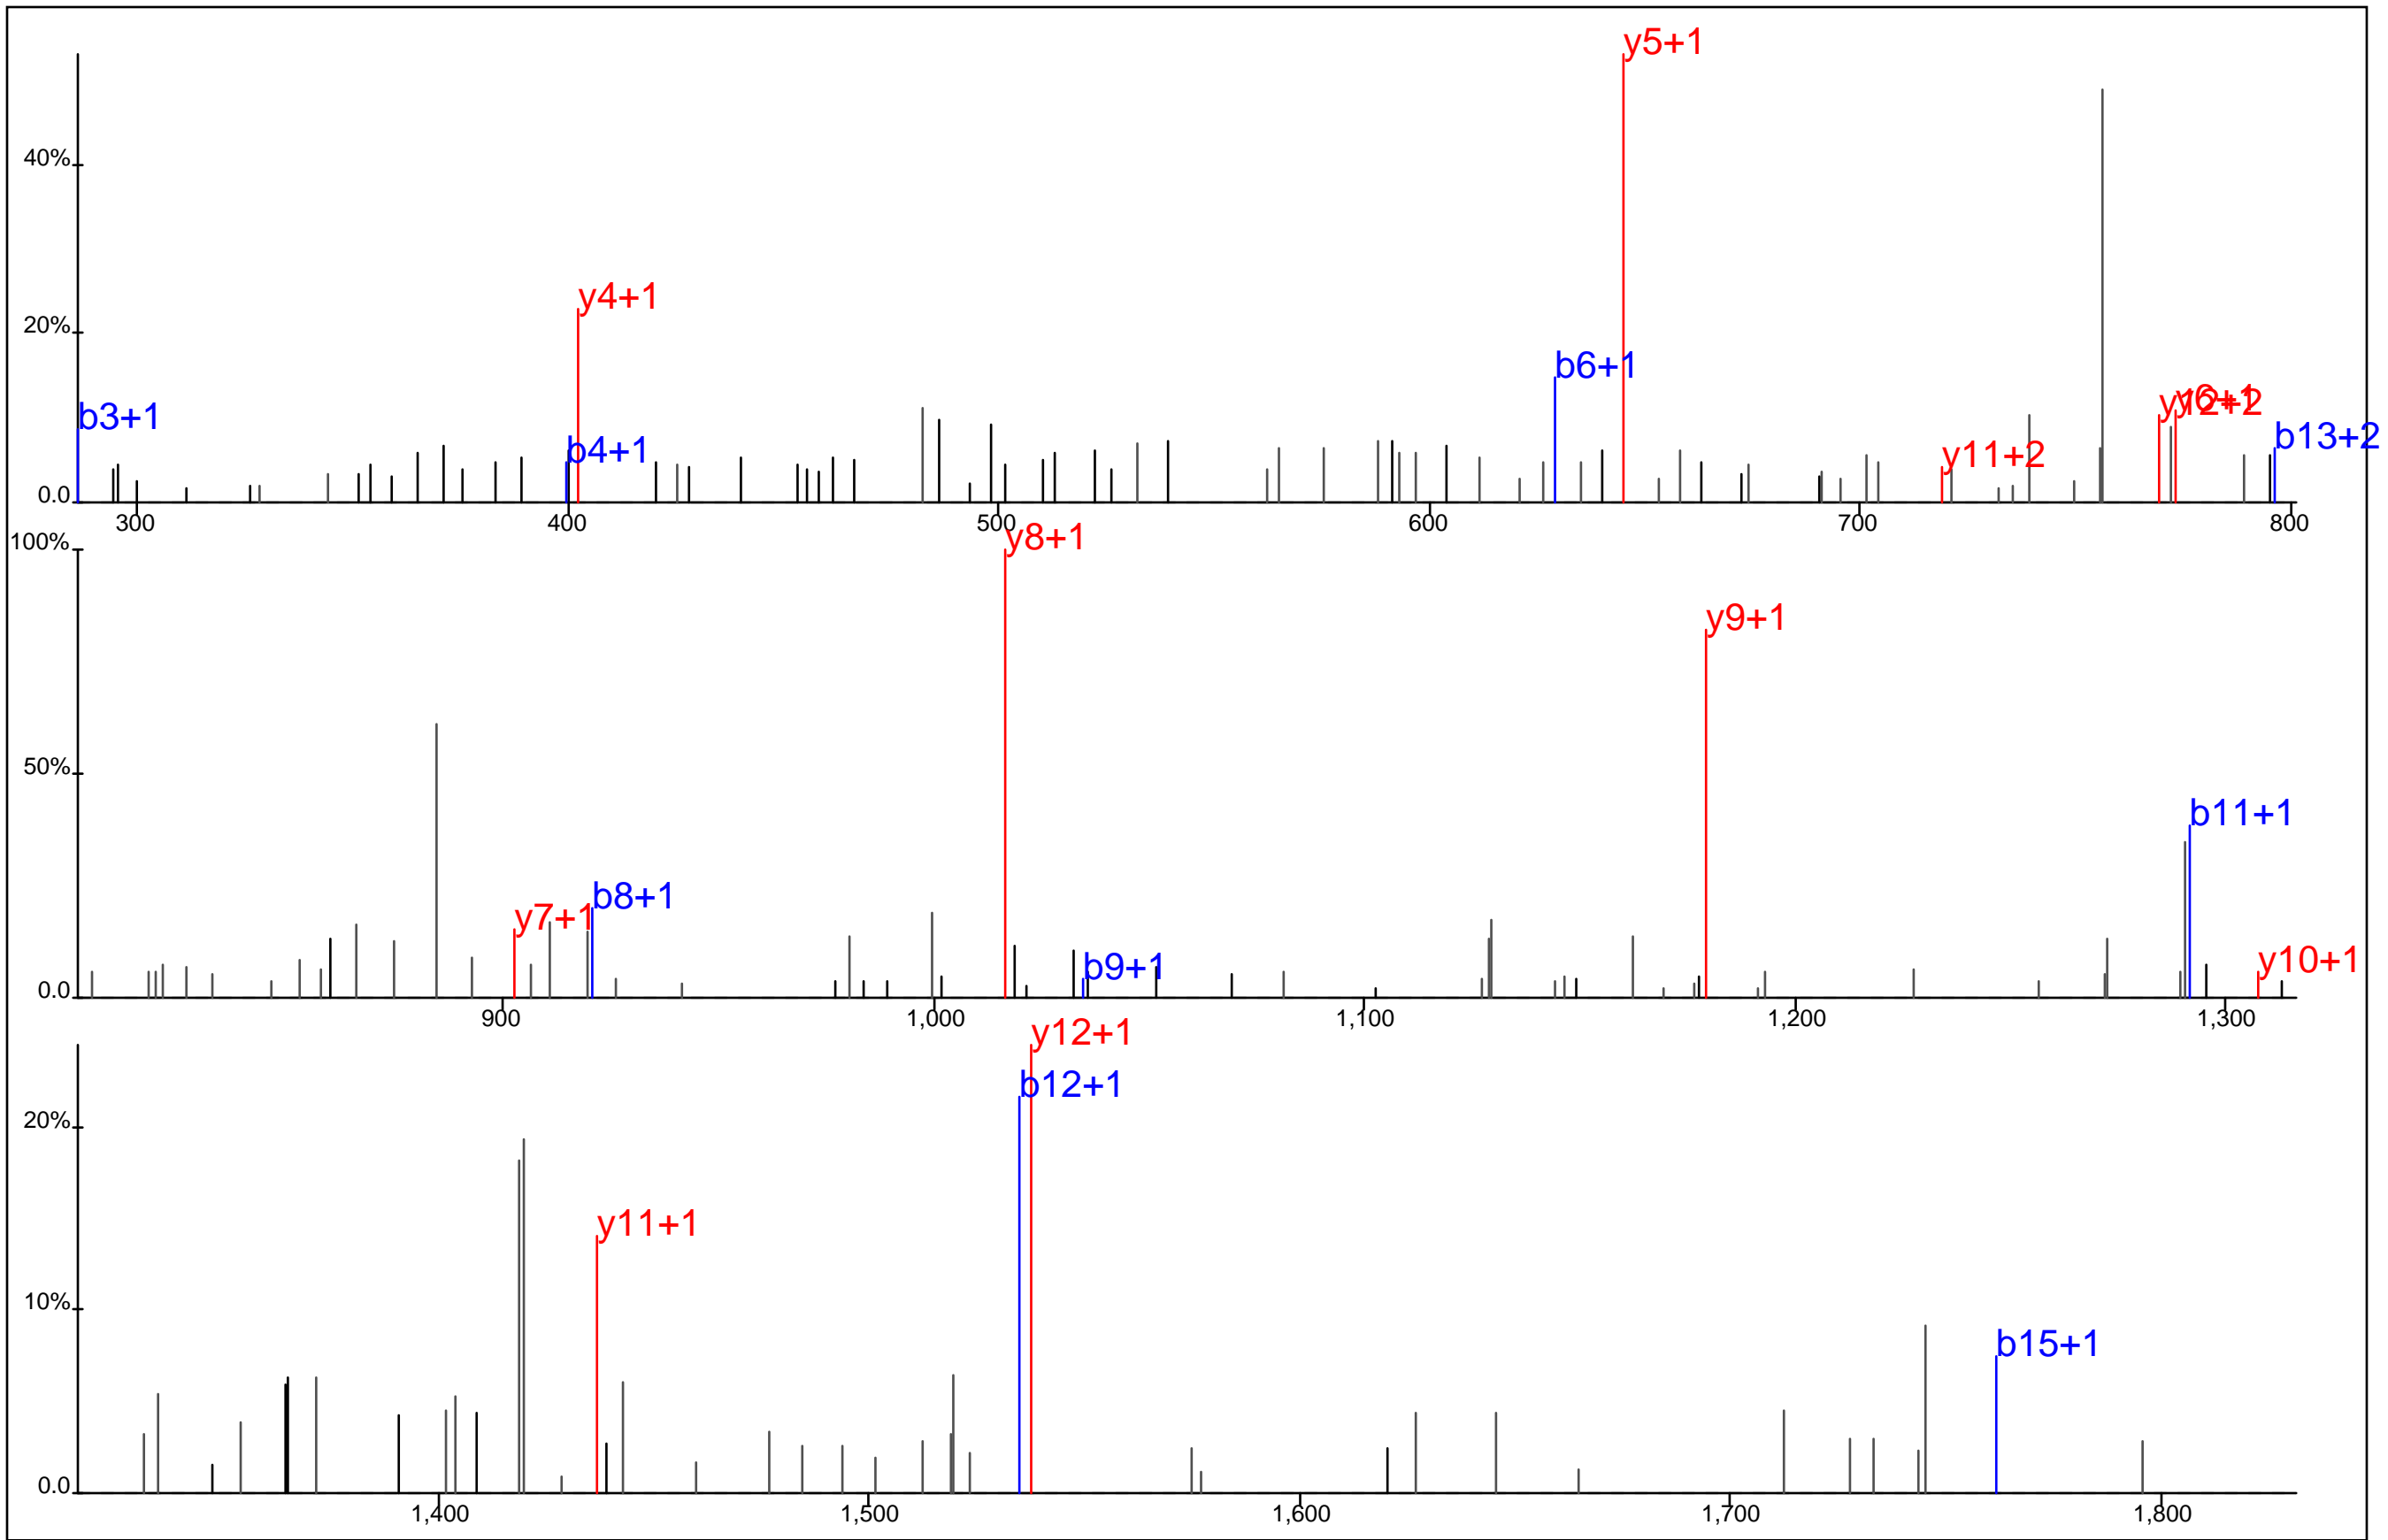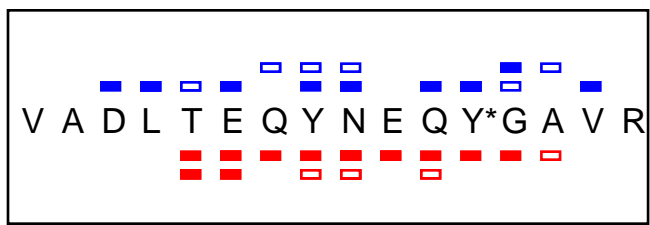

Protein Name: RNA binding protein 4  
 gi Accession: 0  
 Precursor Mass: 968.4279+2  
 Delta Mass: 0.091 ppm  
 XCorr: 44.32

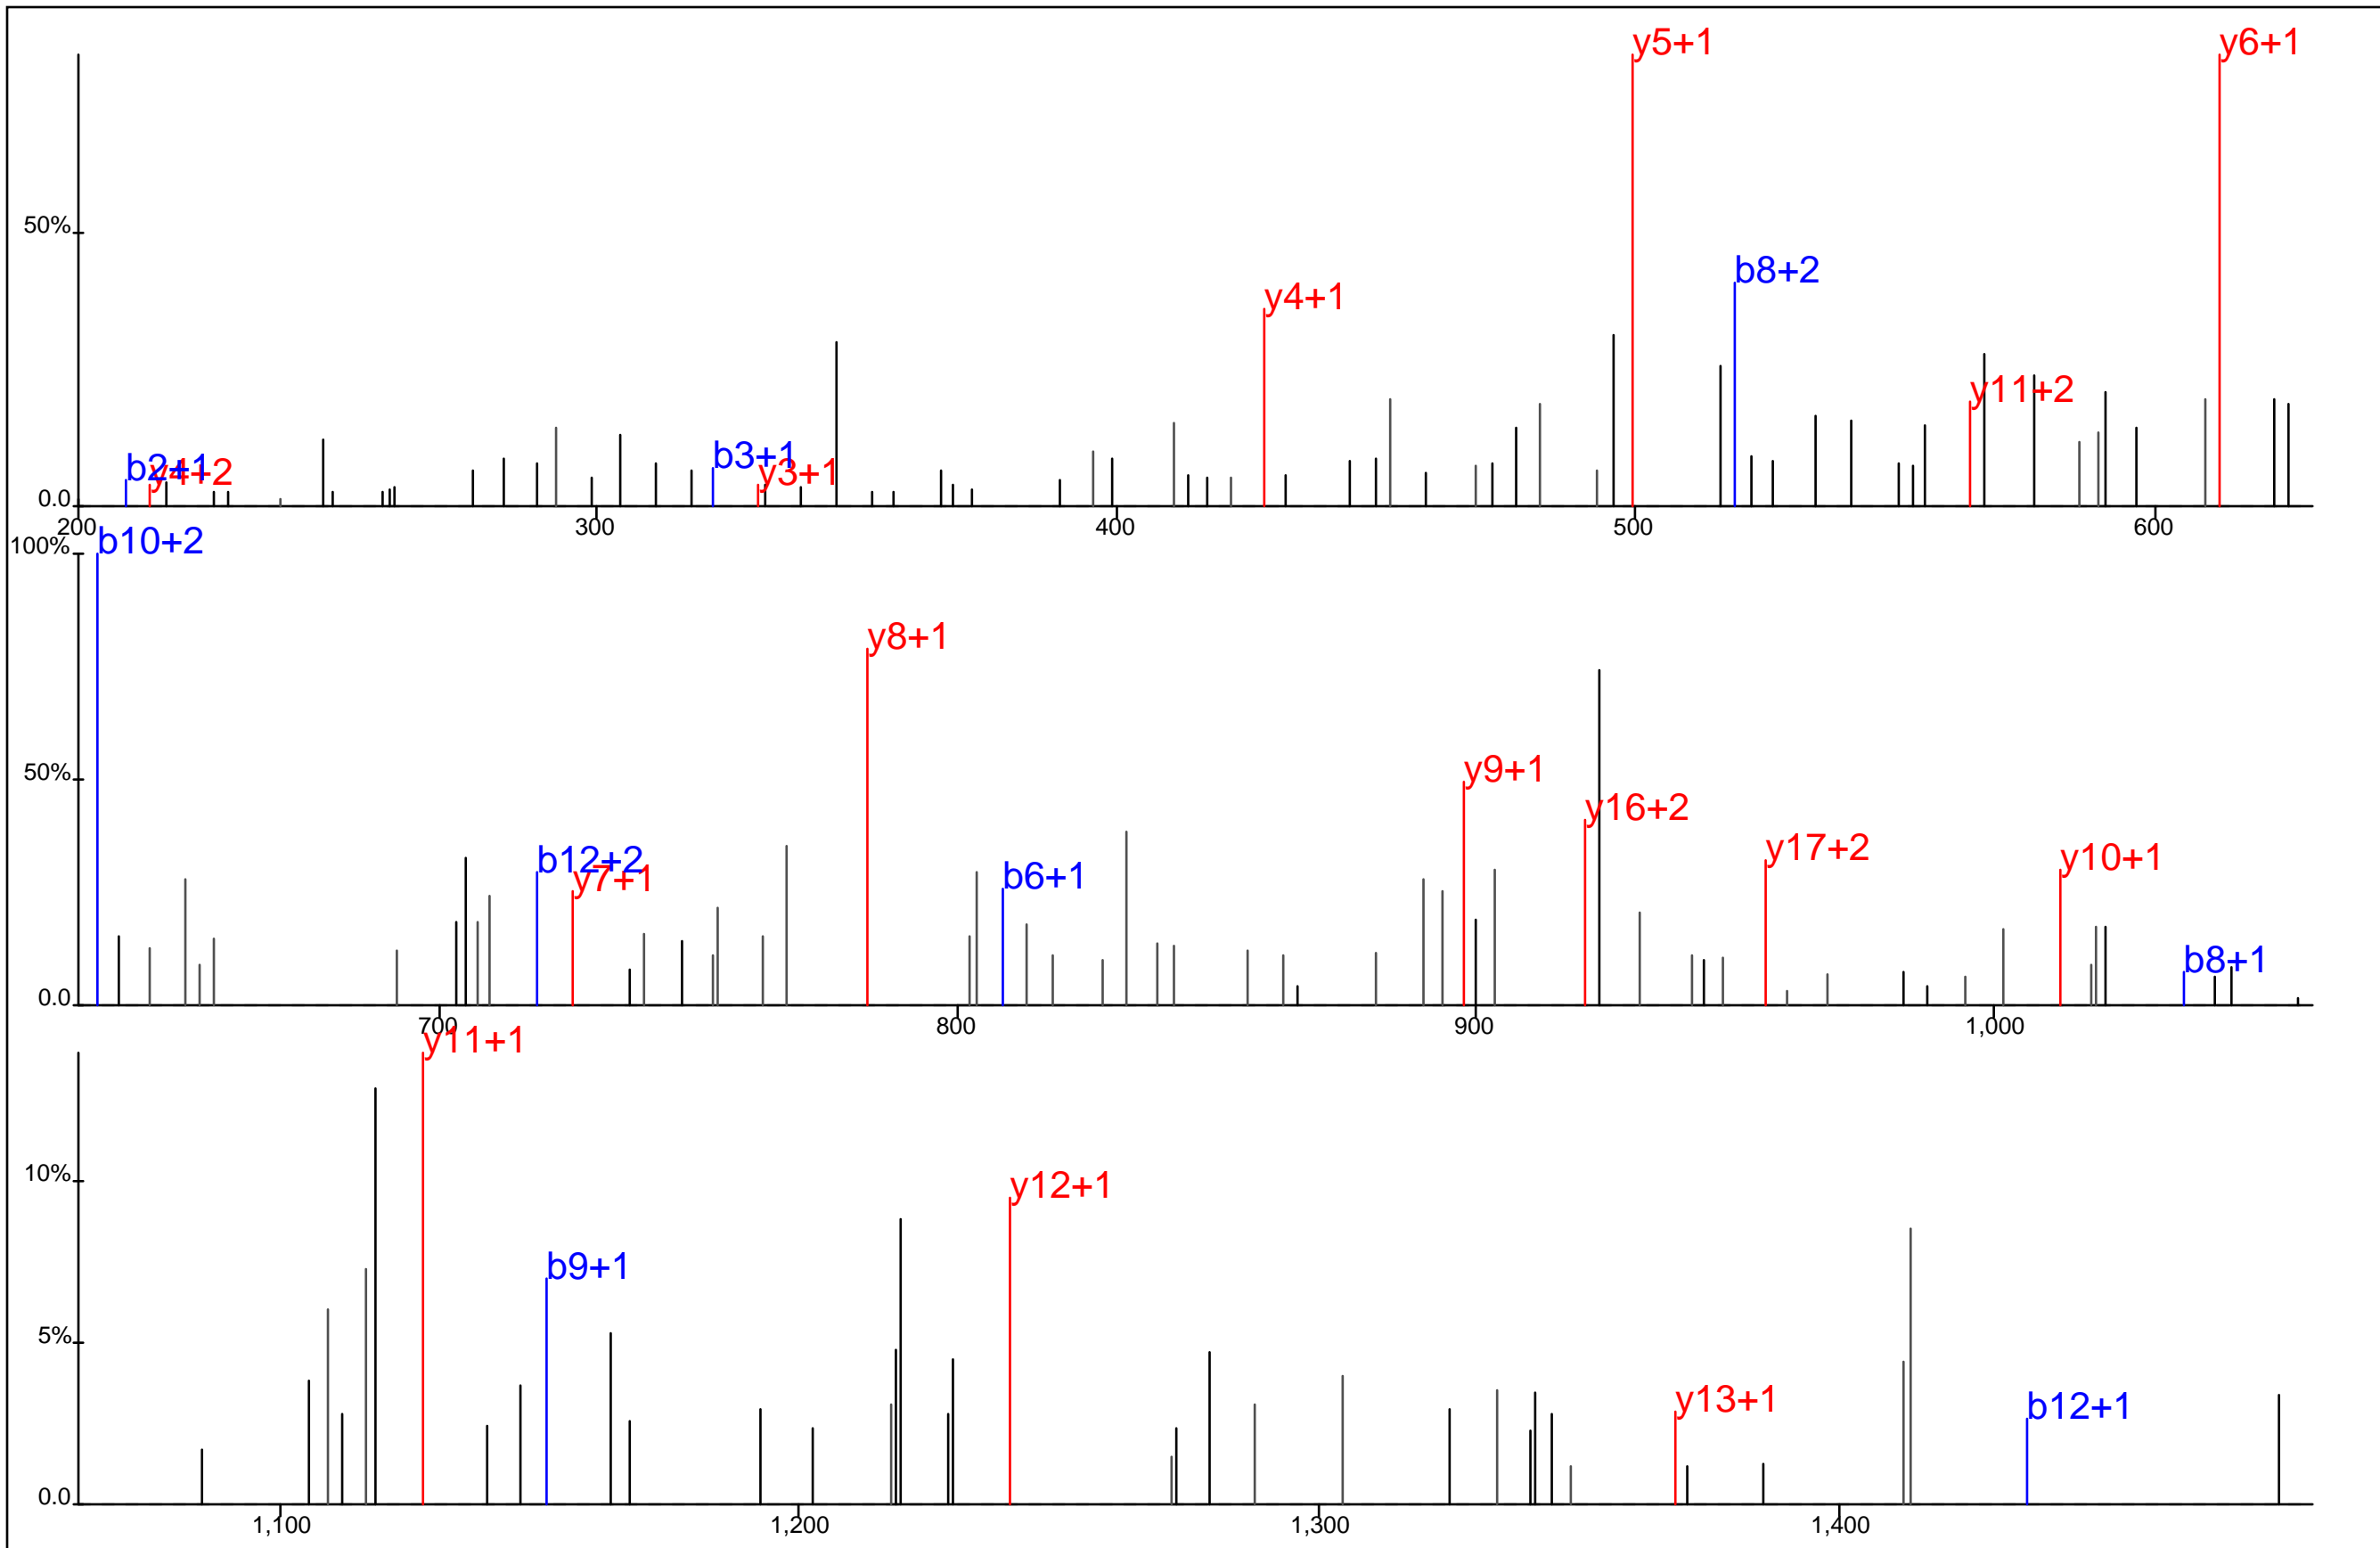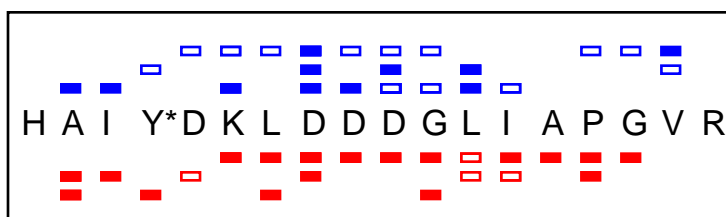

Protein Name: RNA polymerase II subunit 2  
 gi Accession: 0  
 Precursor Mass: 683.3354+3  
 Delta Mass: 3.311 ppm  
 XCorr: 37.55



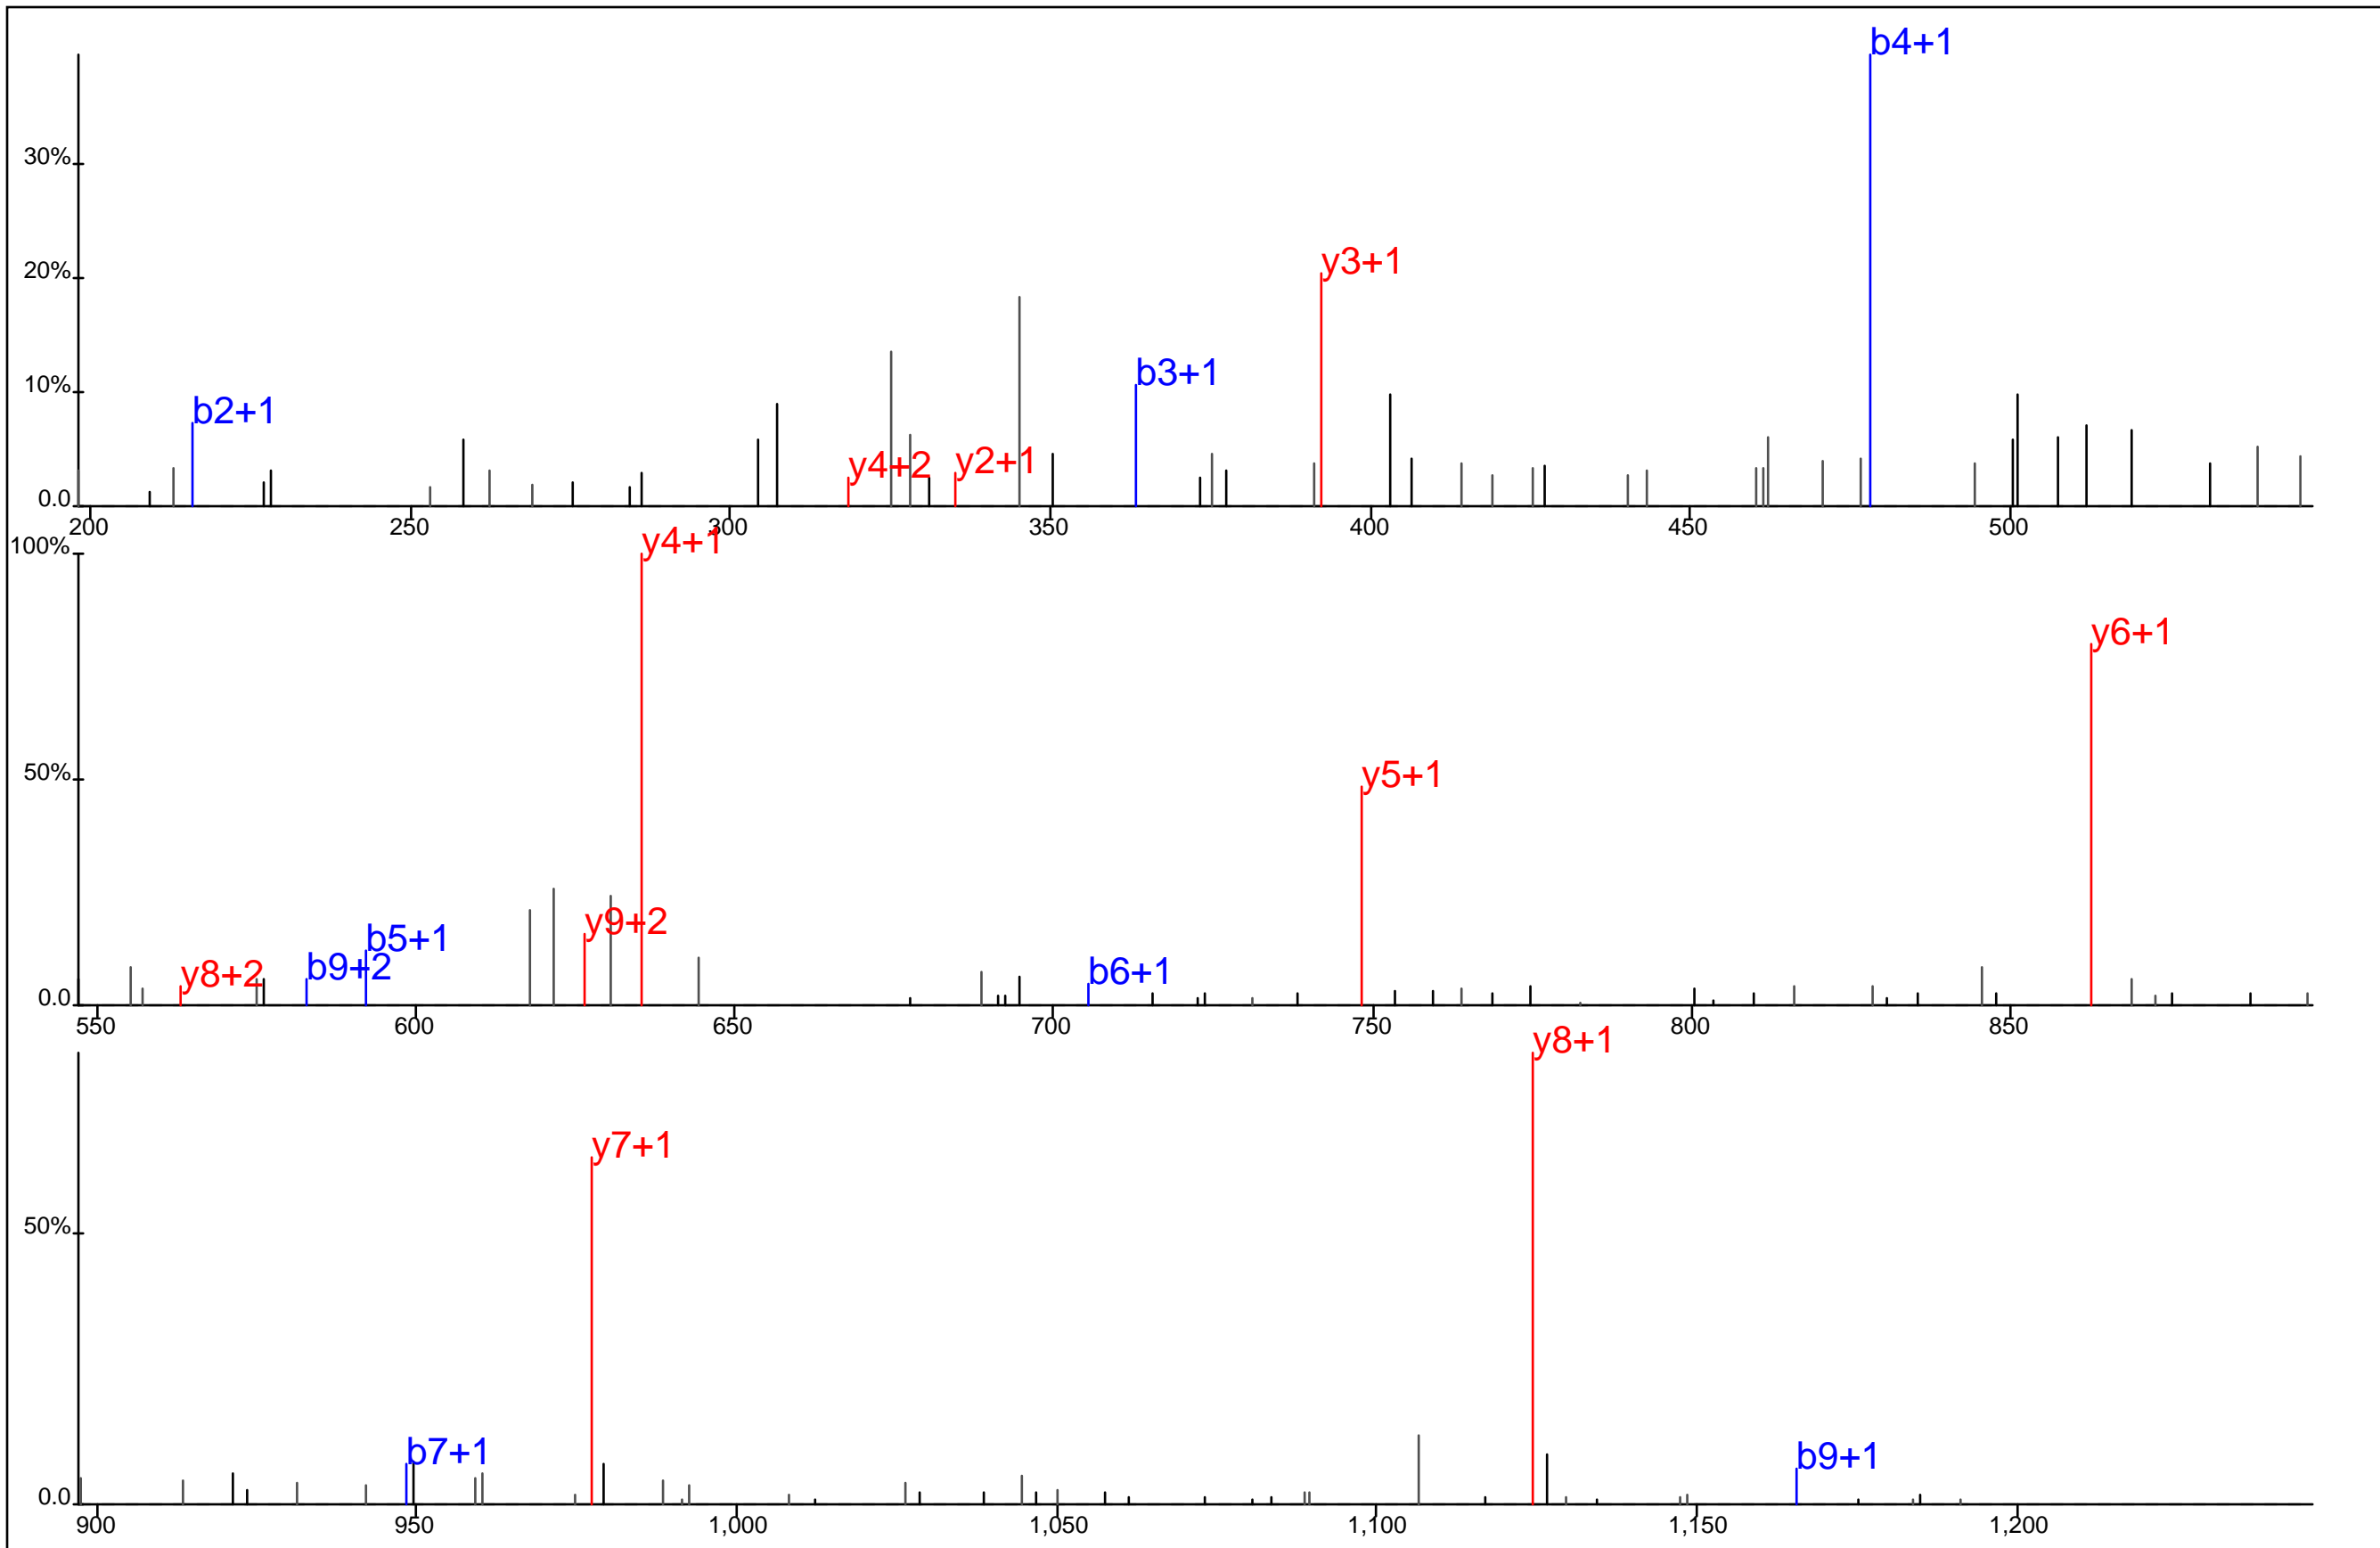

■ ■ ■ ■ ■ ■ ■ ■  
 S K F D N L Y\*G C R  
■ ■ ■ ■ ■ ■ ■ ■

Protein Name: S adenosylhomocysteine hydrolase  
 gi Accession: 0  
 Precursor Mass: 670.2795+2  
 Delta Mass: 1.317 ppm  
 XCorr: 49.64

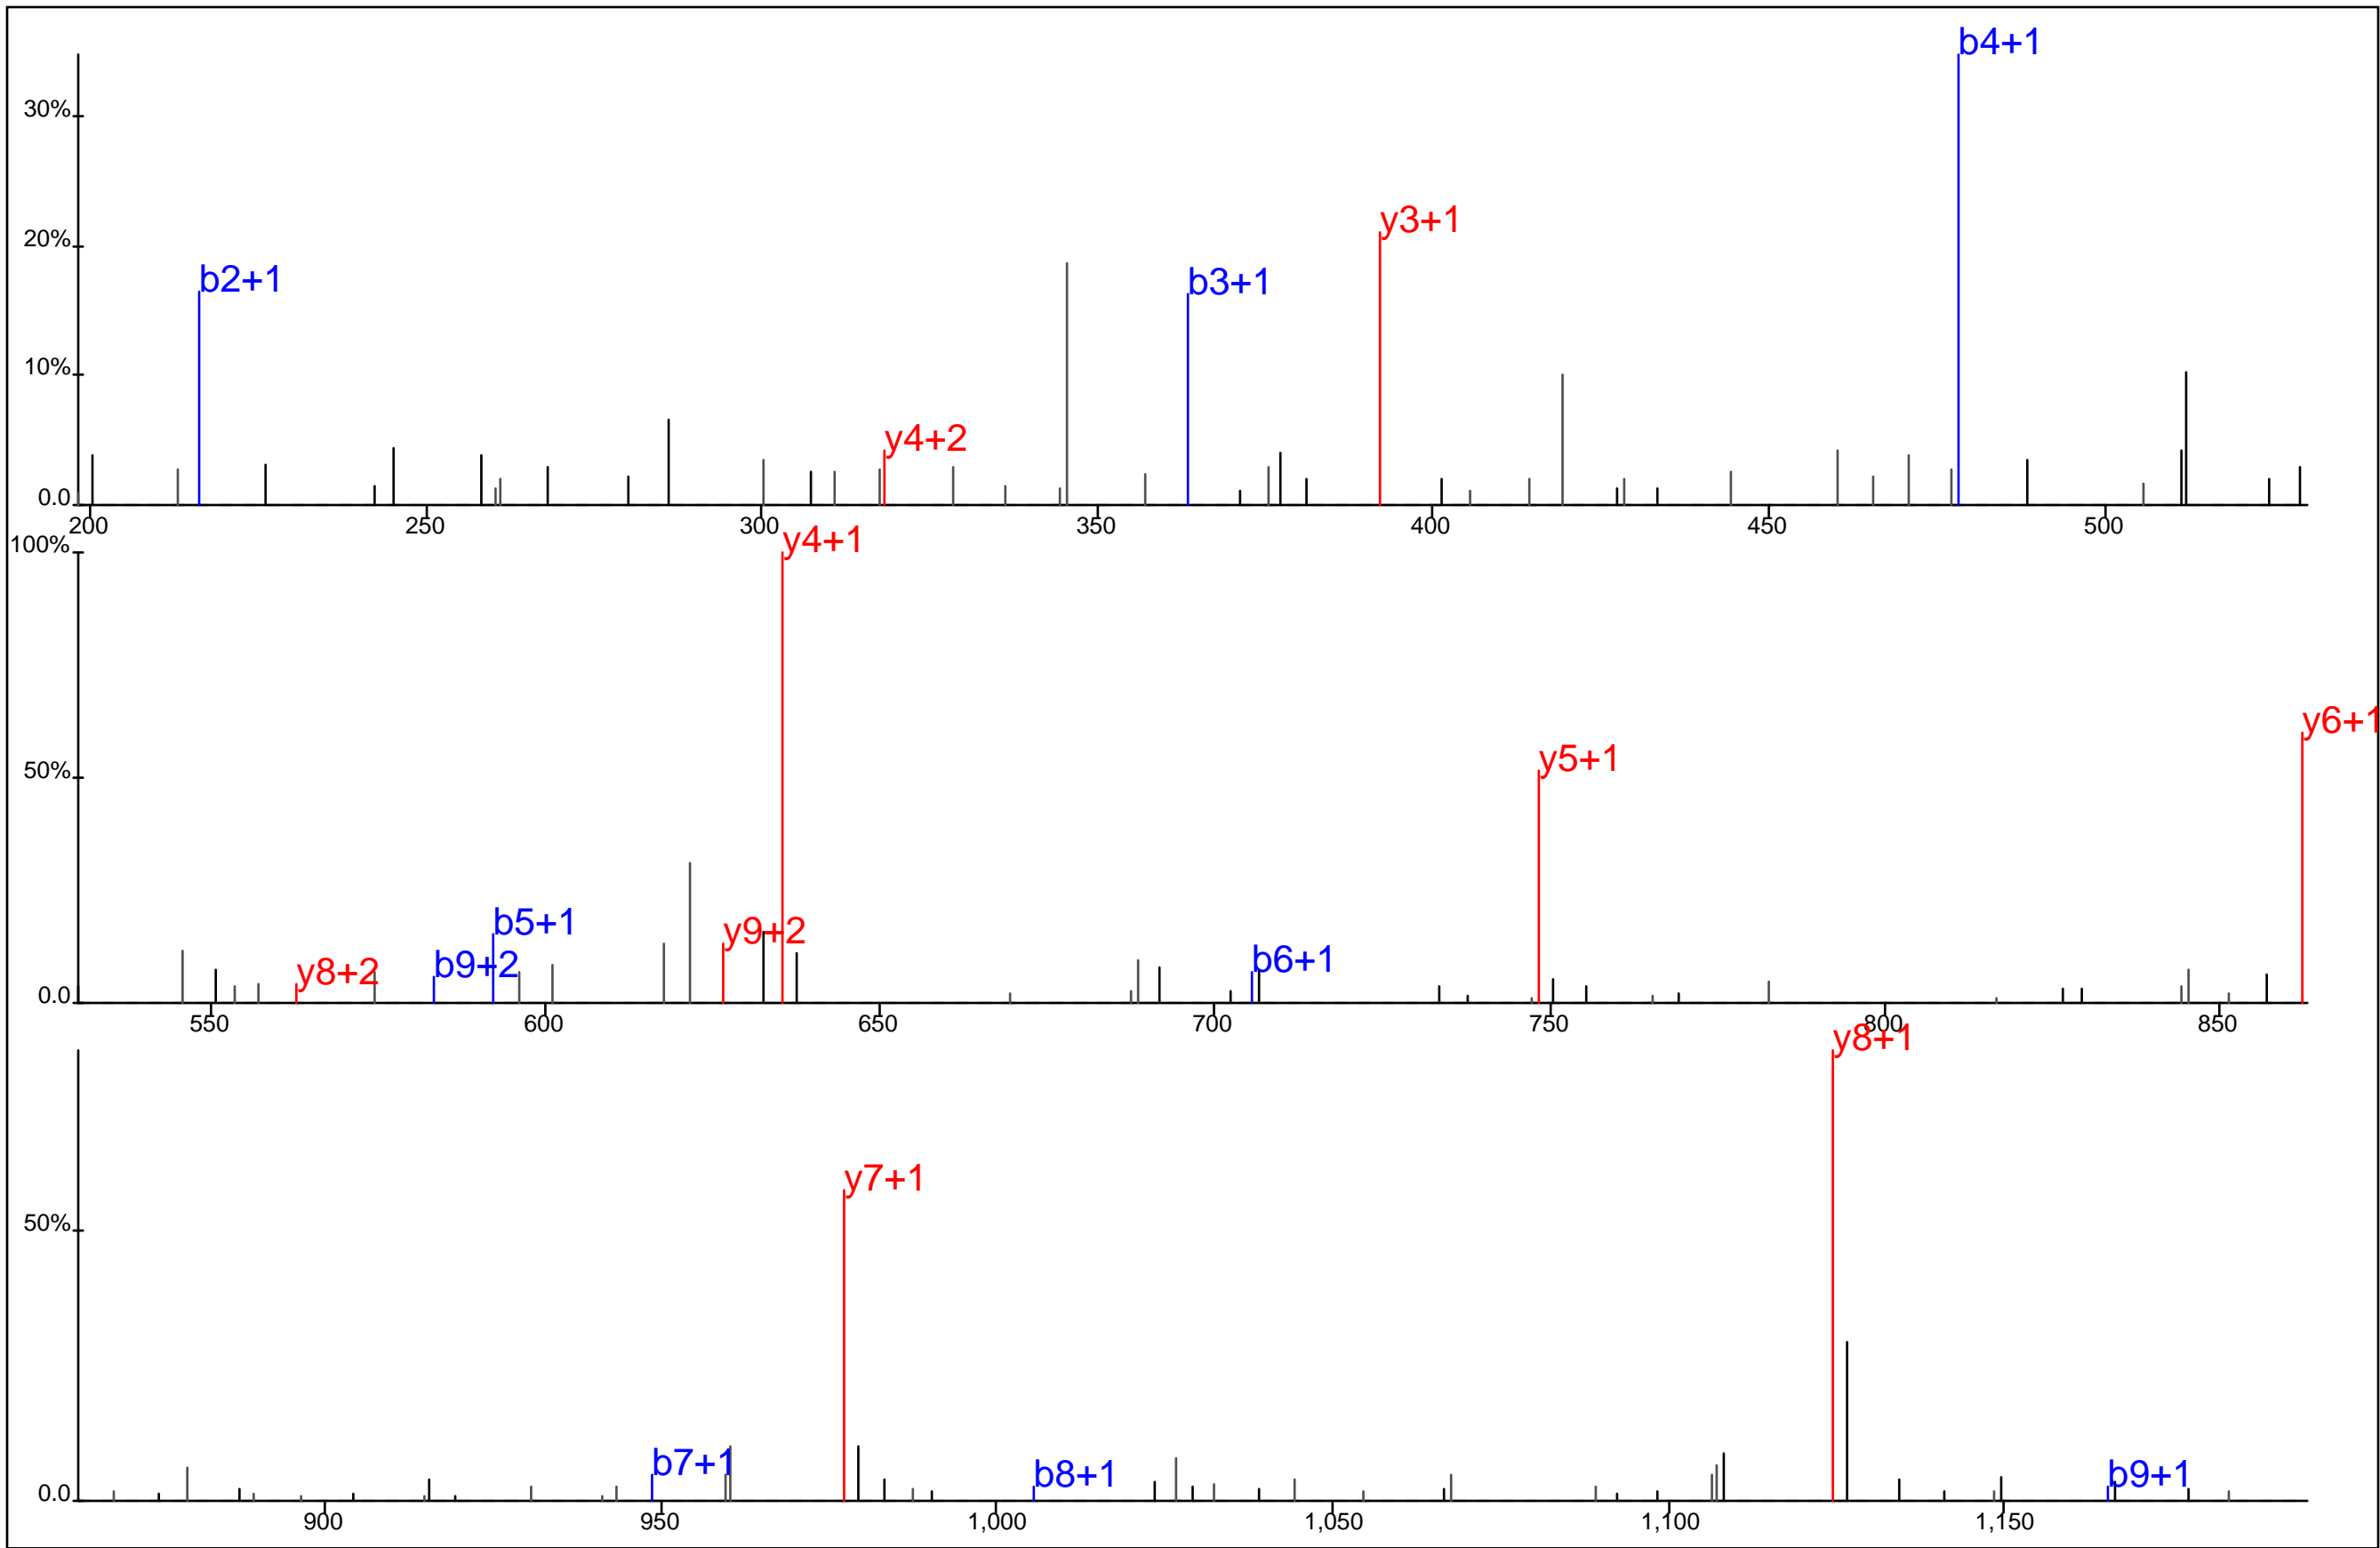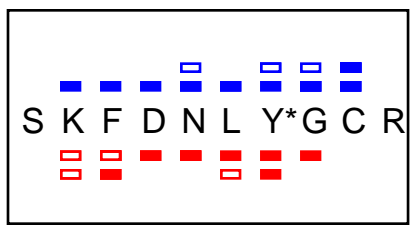

Protein Name: S adenosylhomocysteine hydrolase  
 gi Accession: 0  
 Precursor Mass: 670.2790+2  
 Delta Mass: 0.497 ppm  
 XCorr: 53.56

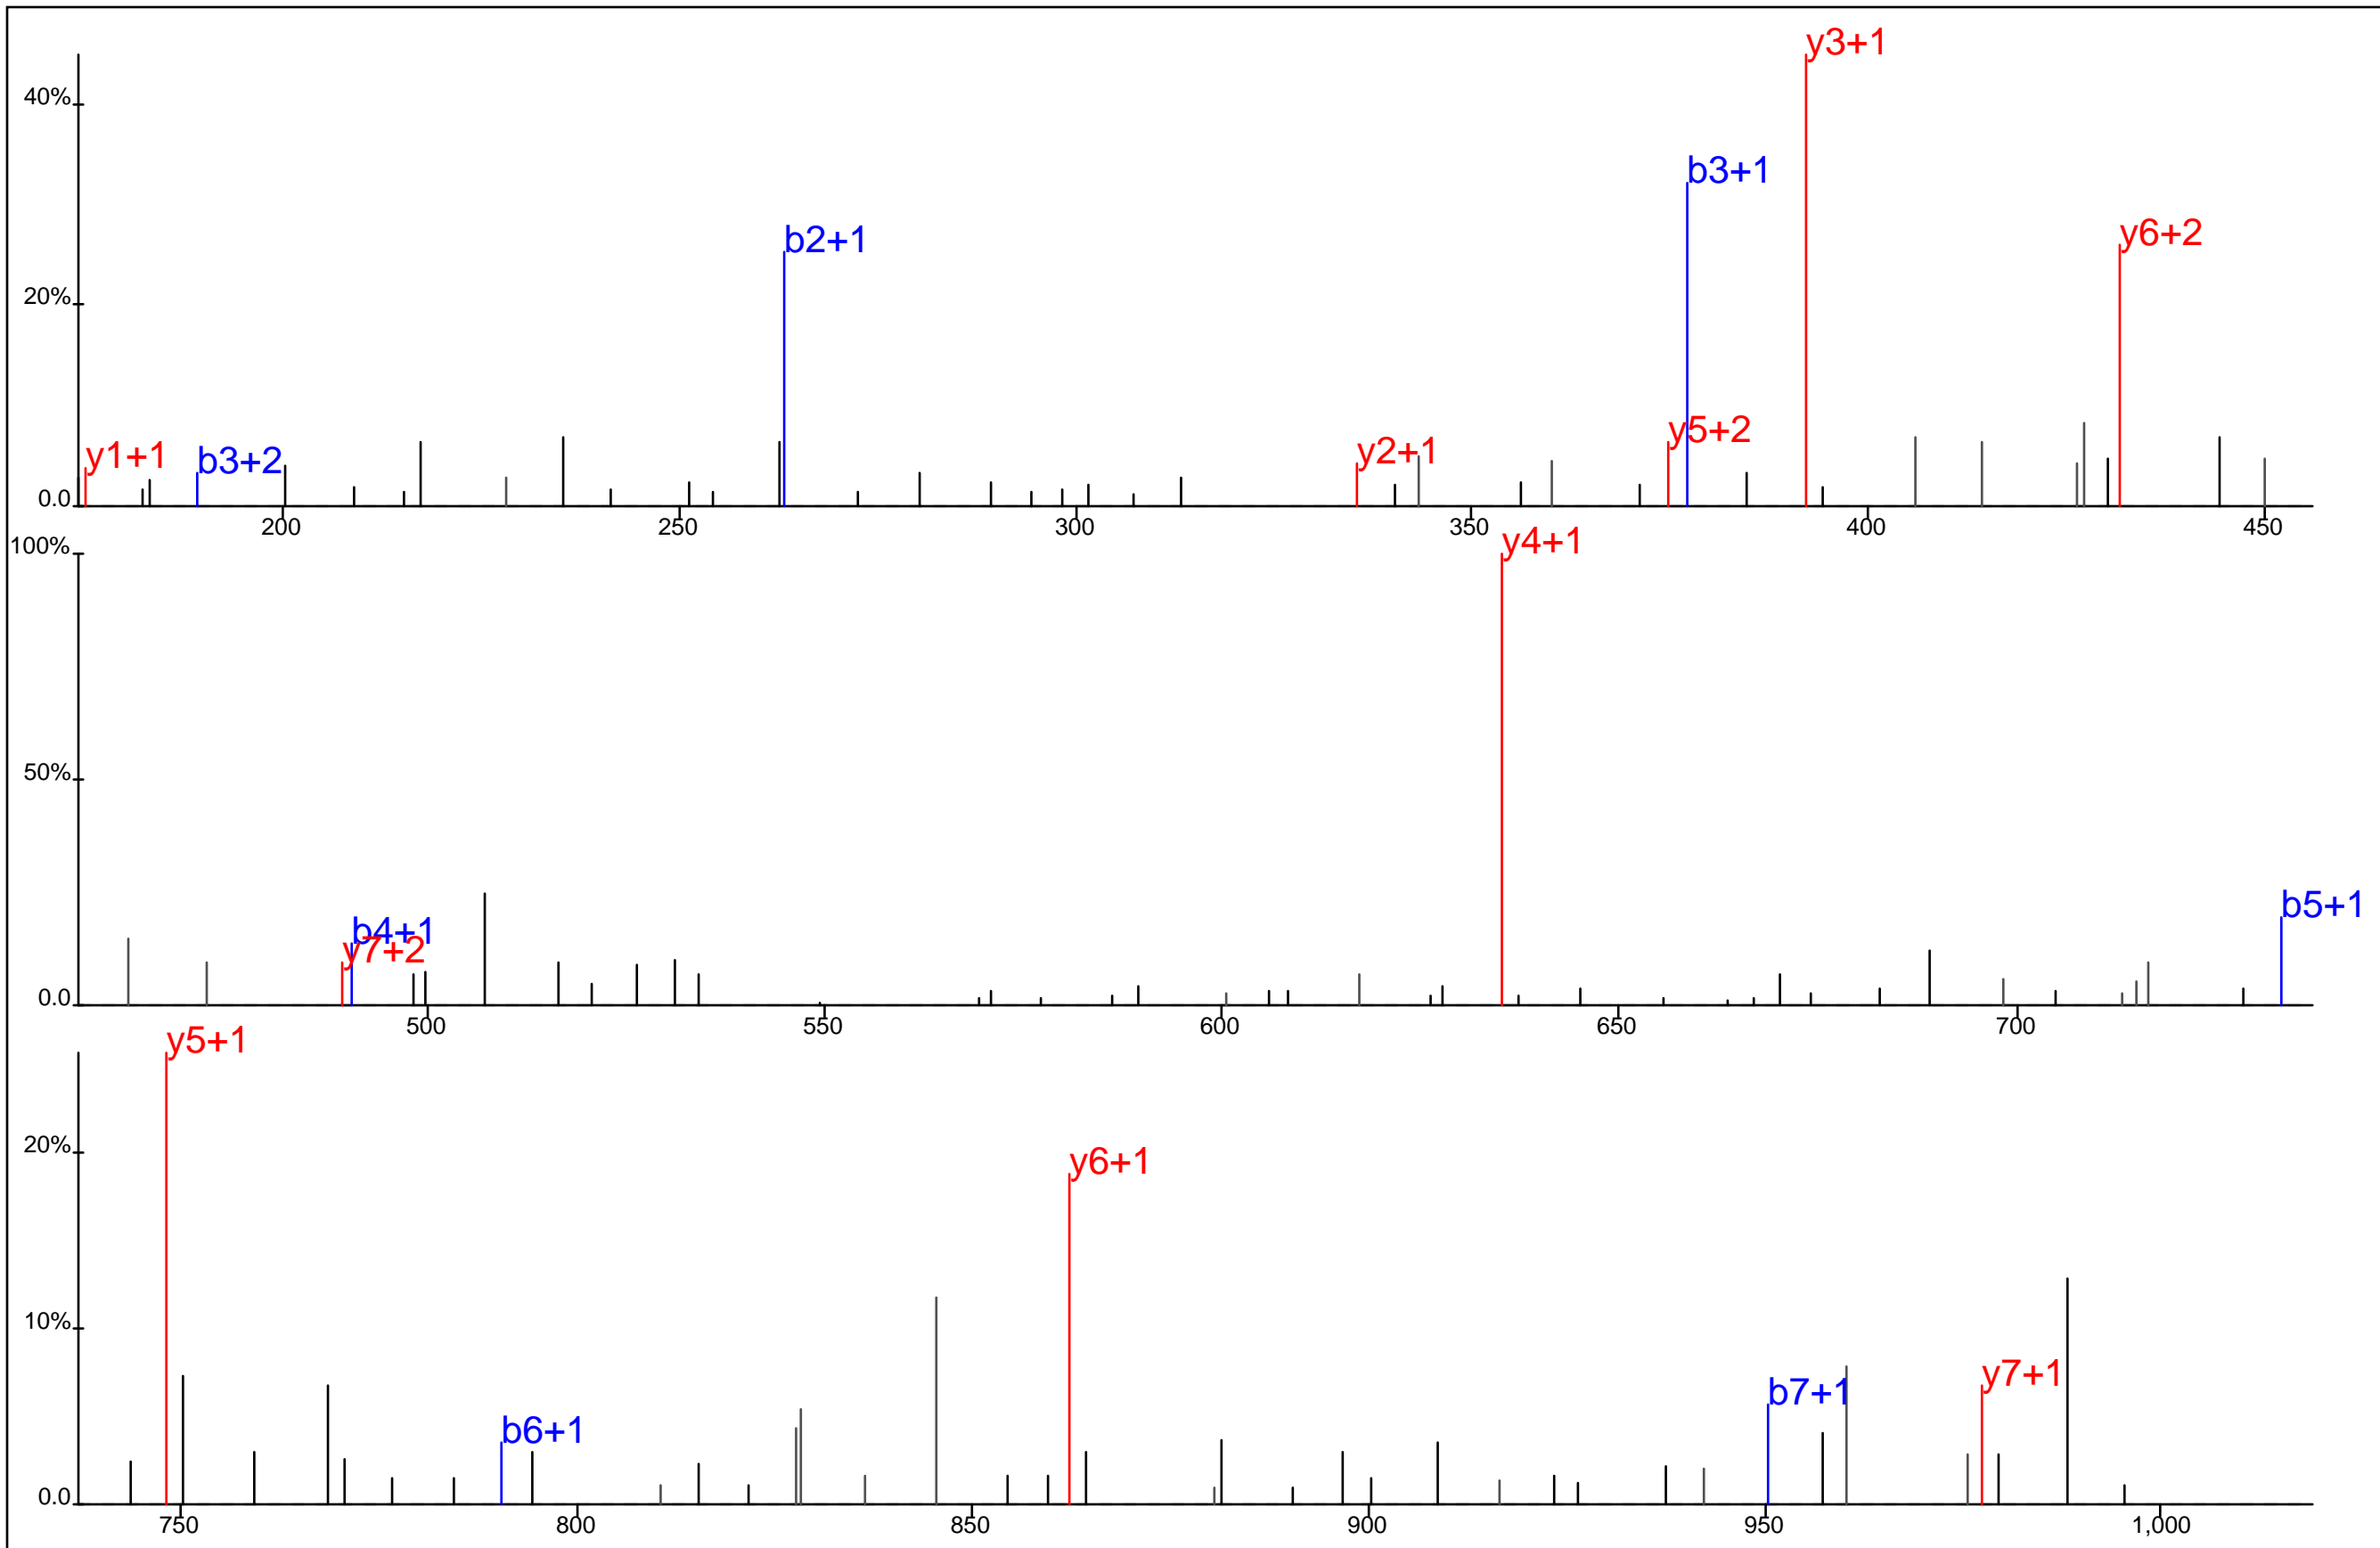

F D N L Y\* G C R

Protein Name: S adenosylhomocysteine hydrolase  
 gi Accession: 0  
 Precursor Mass: 562.7156+2  
 Delta Mass: 0.724 ppm  
 XCorr: 39.13

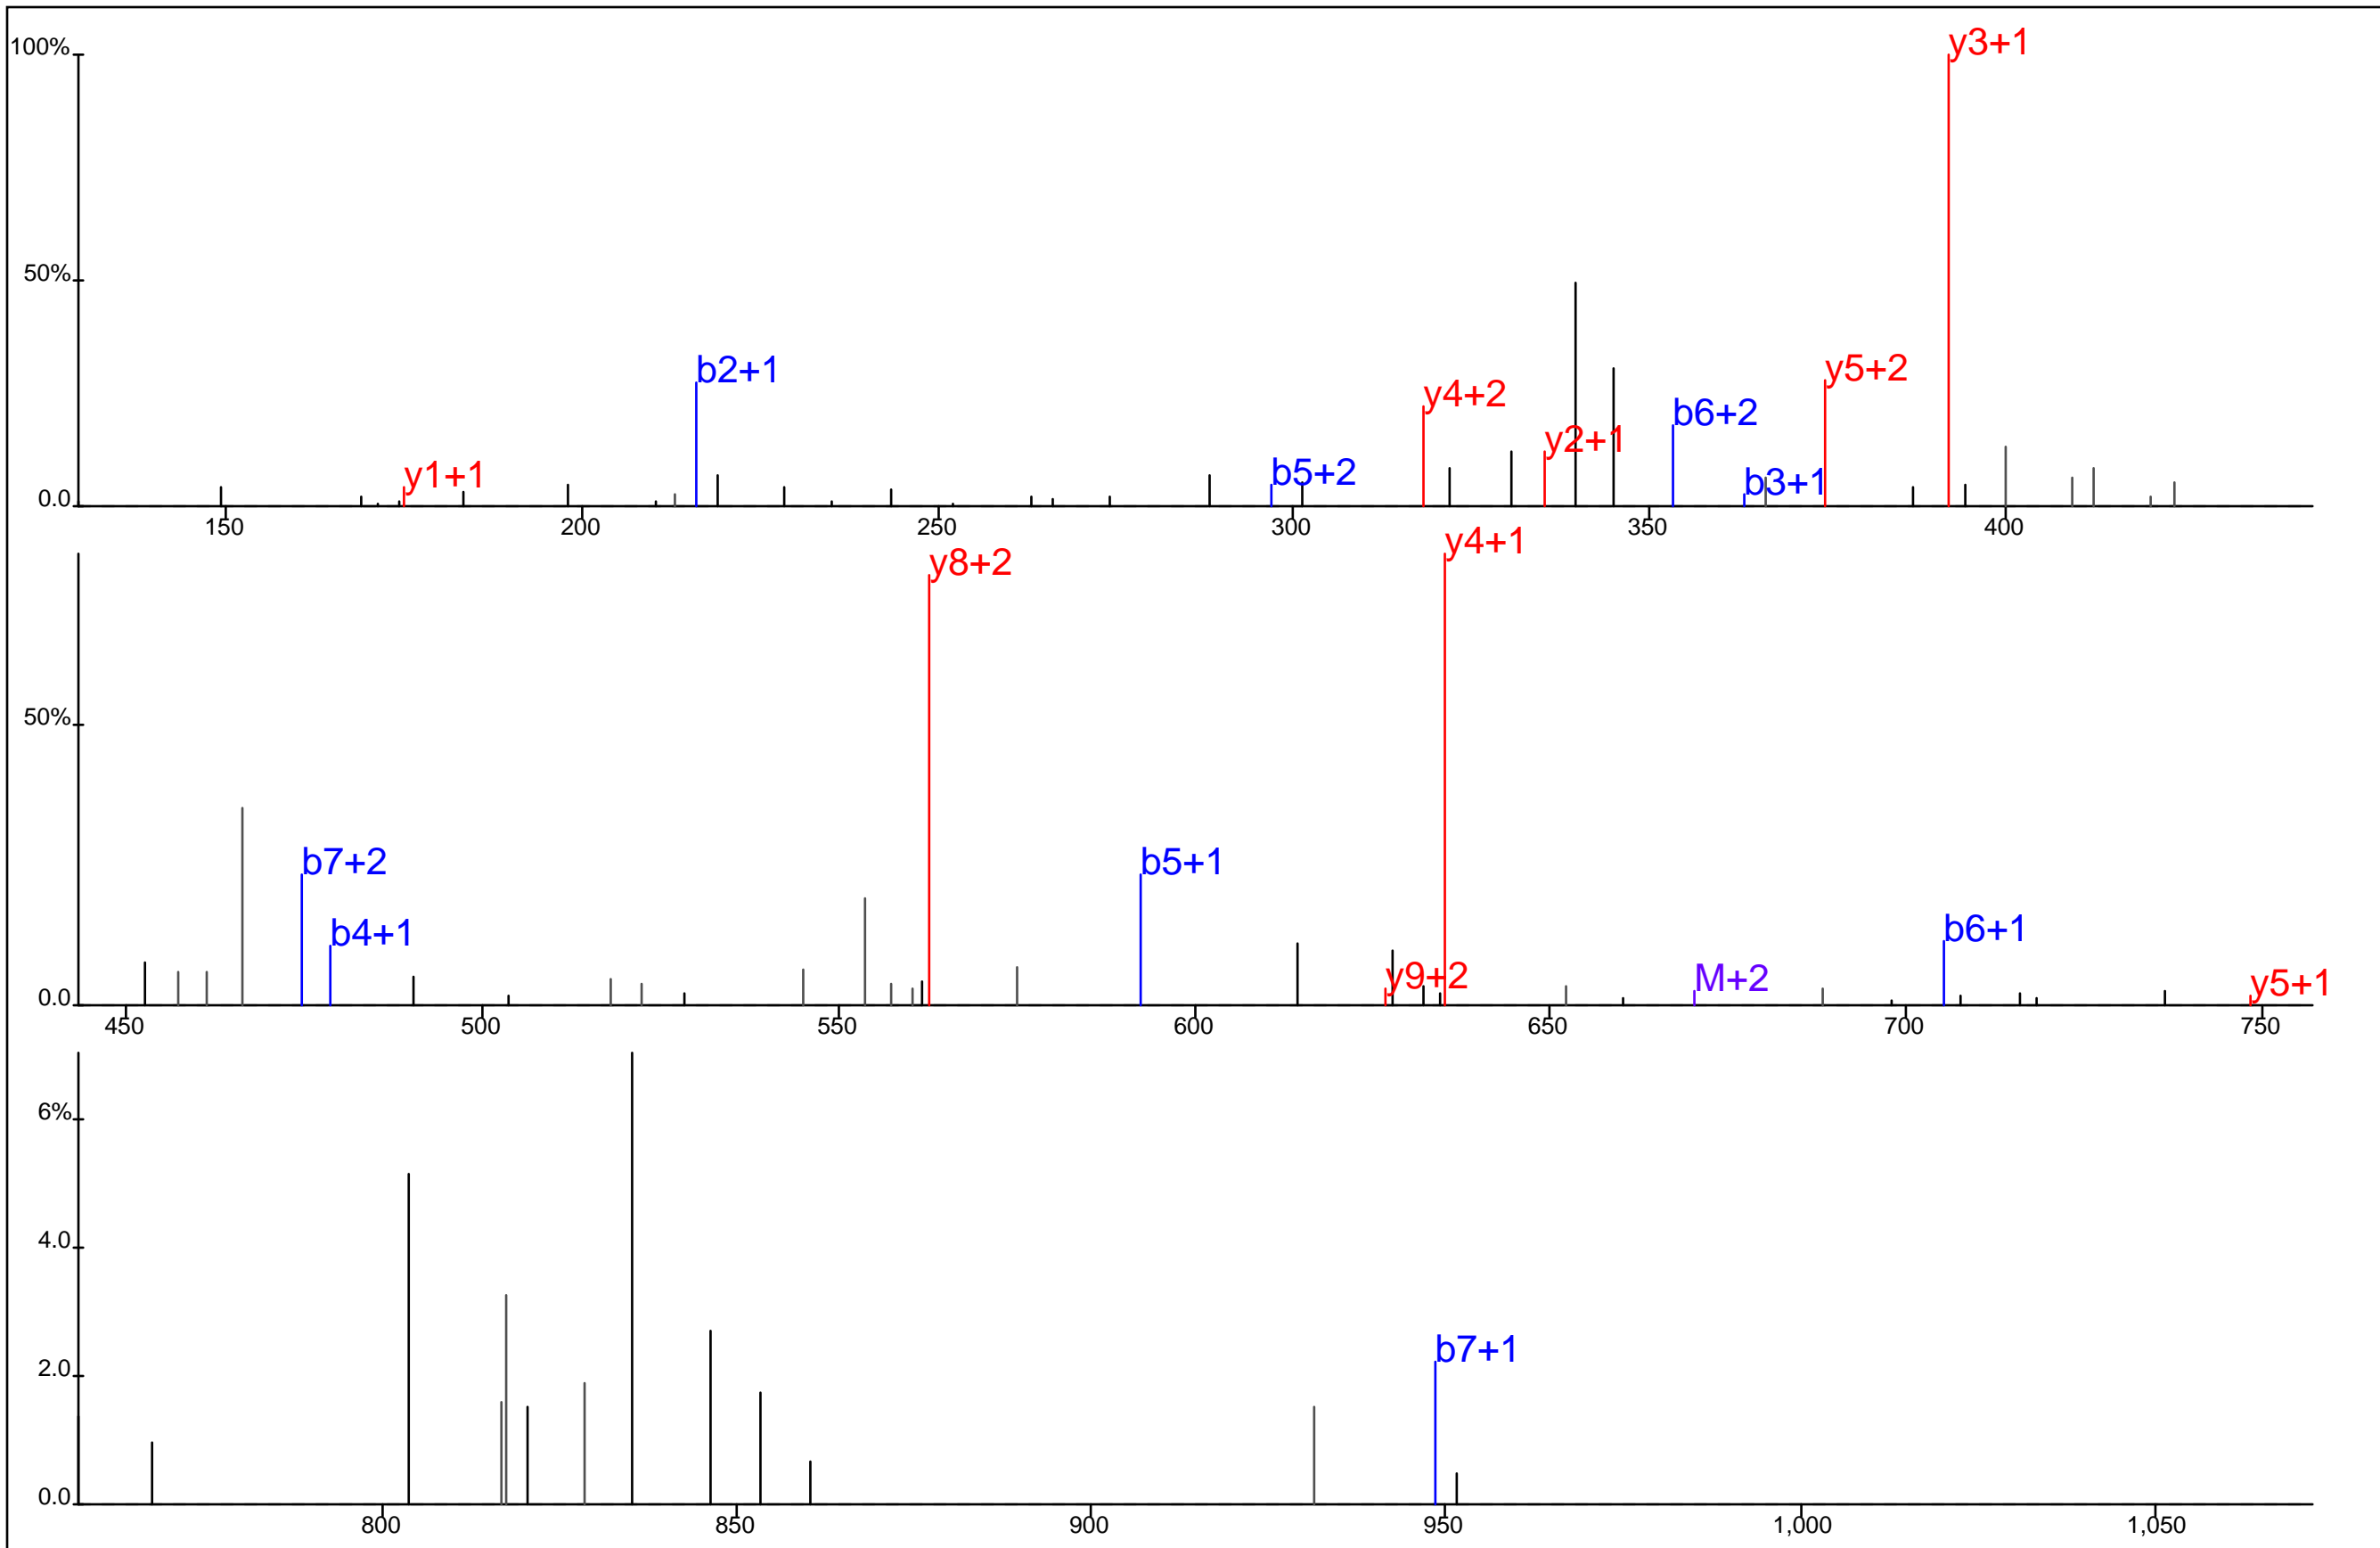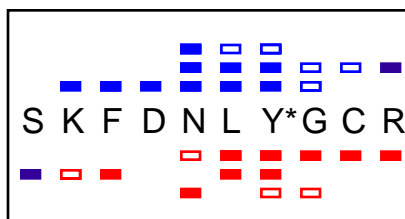

Protein Name: S adenosylhomocysteine hydrolase  
 gi Accession: 0  
 Precursor Mass: 447.1883+3  
 Delta Mass: 0.213 ppm  
 XCorr: 24.85



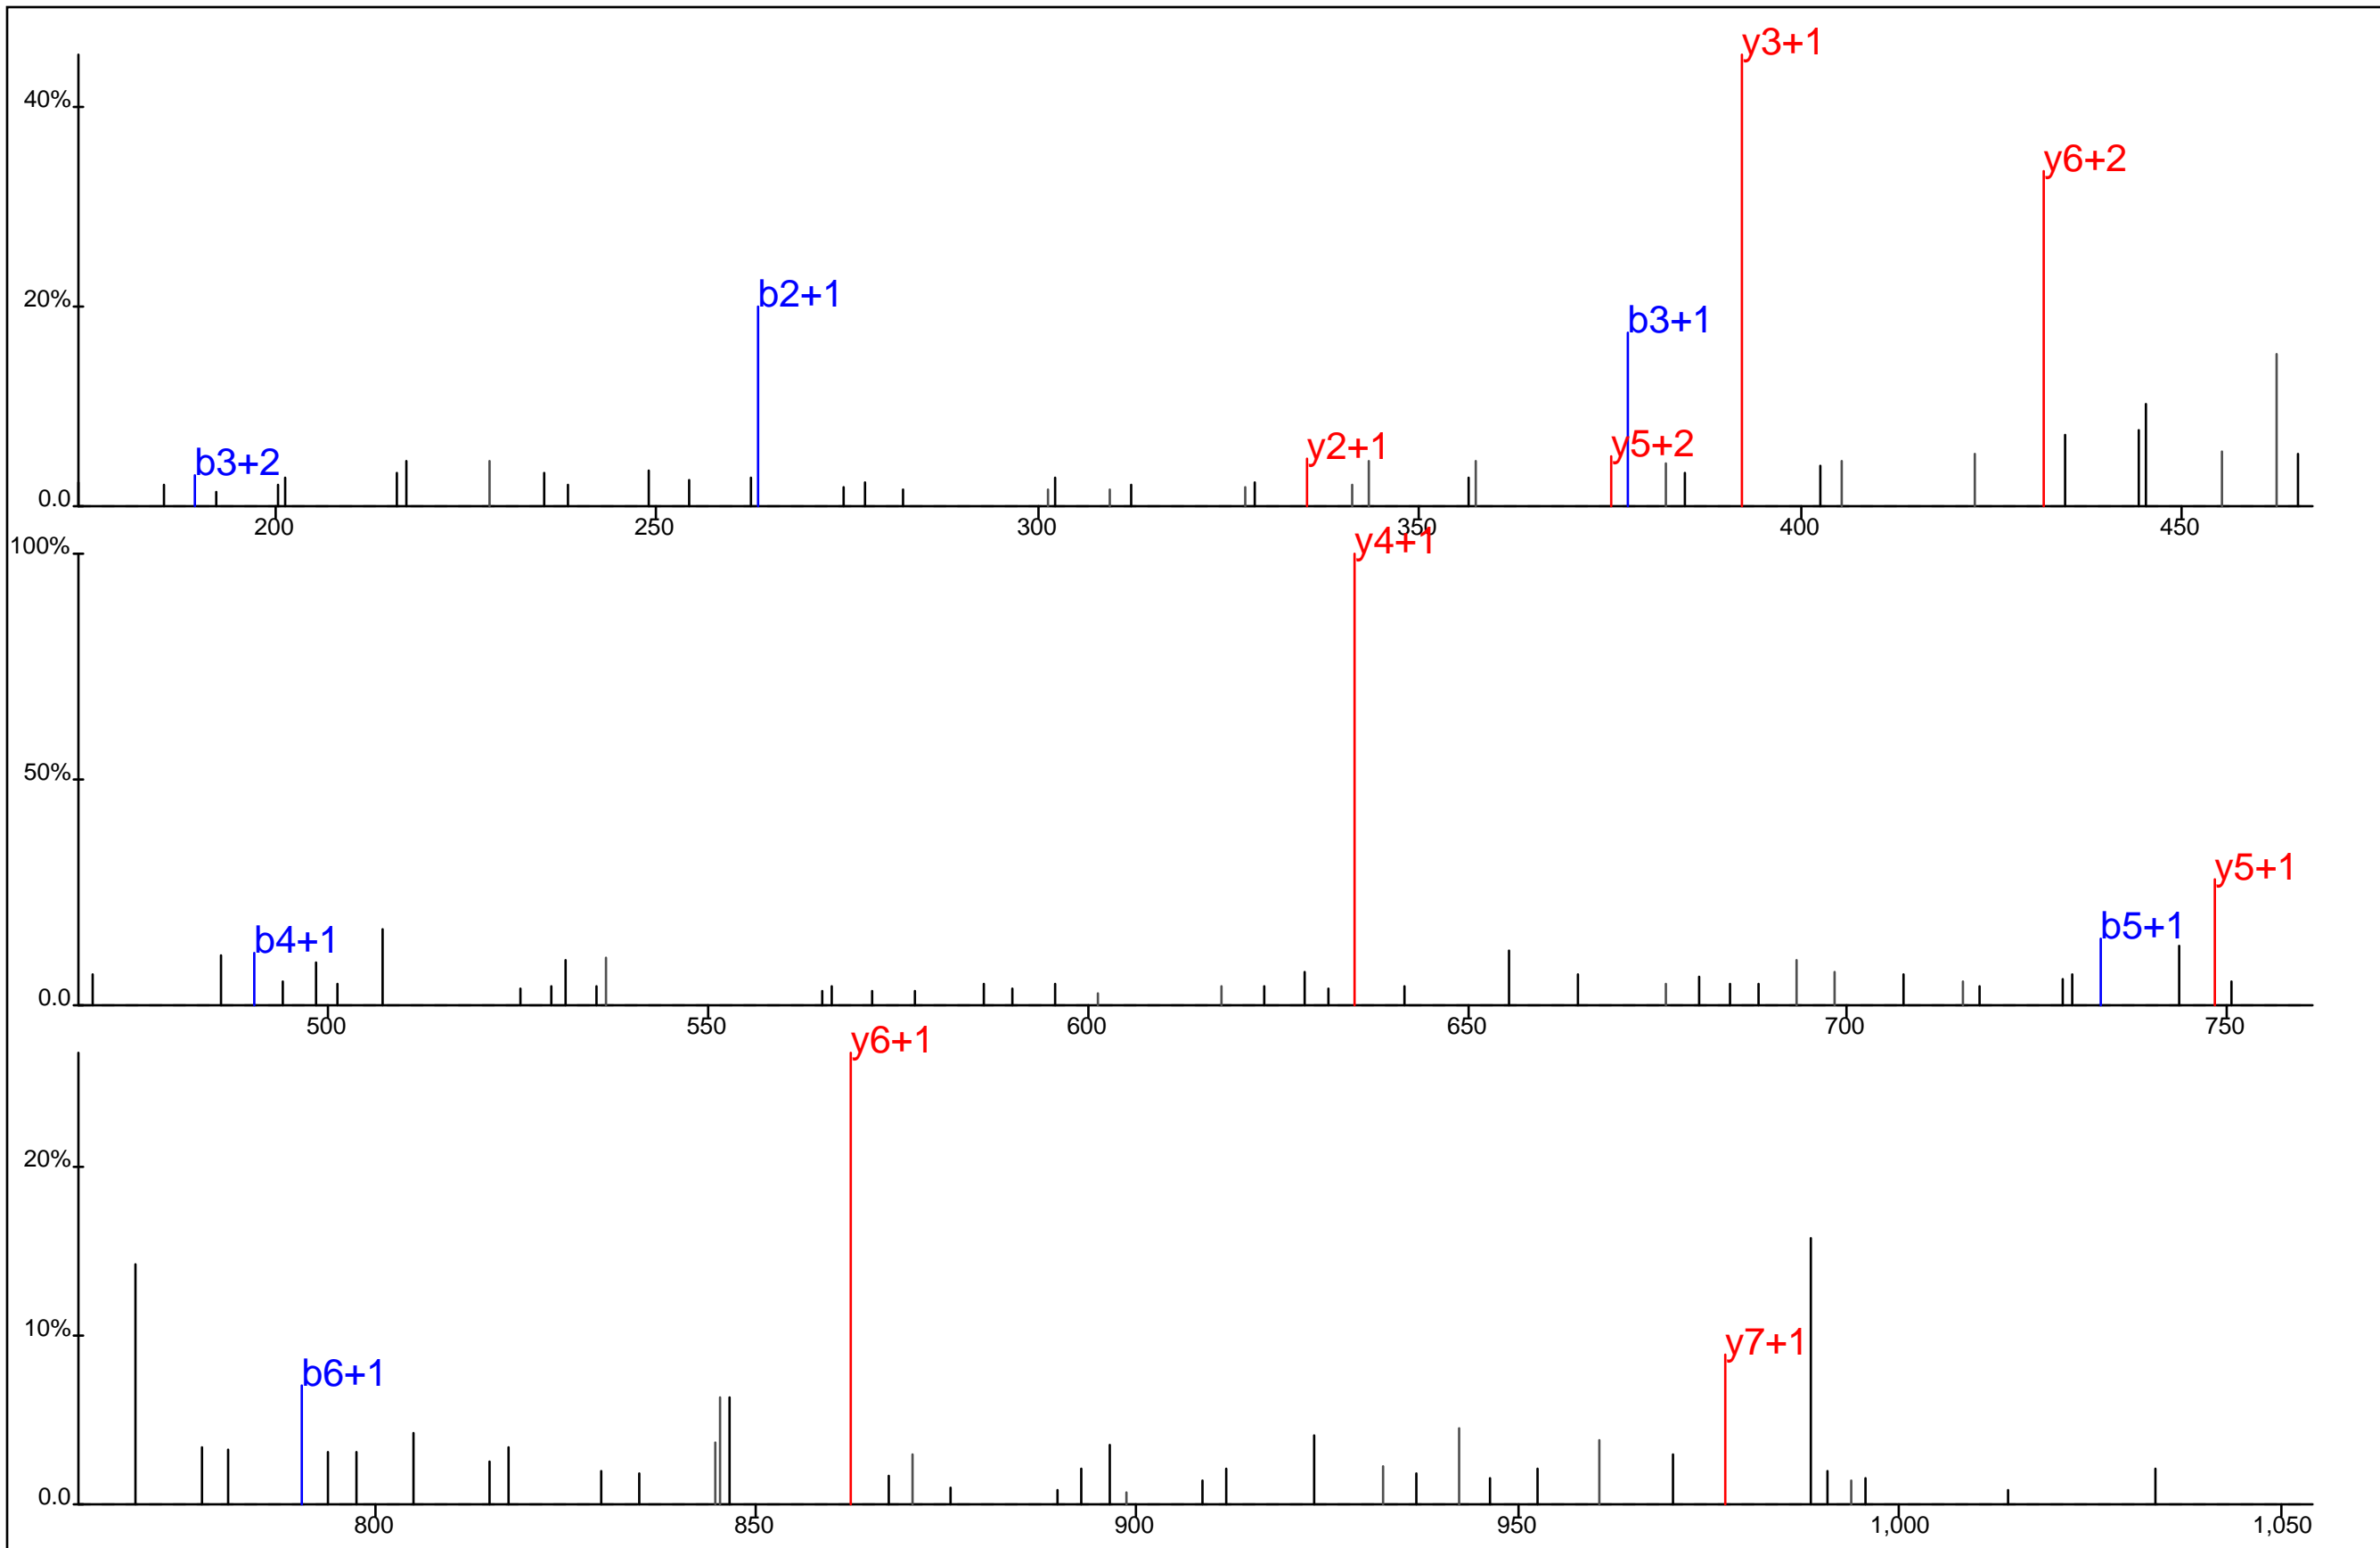

■ ■ ■ ■ ■ ■  
**F D N L Y\* G C R**  
□ □ □ □ □ □

Protein Name: S adenosylhomocysteine hydrolase  
 gi Accession: 0  
 Precursor Mass: 562.7154+2  
 Delta Mass: 0.398 ppm  
 XCorr: 37.48

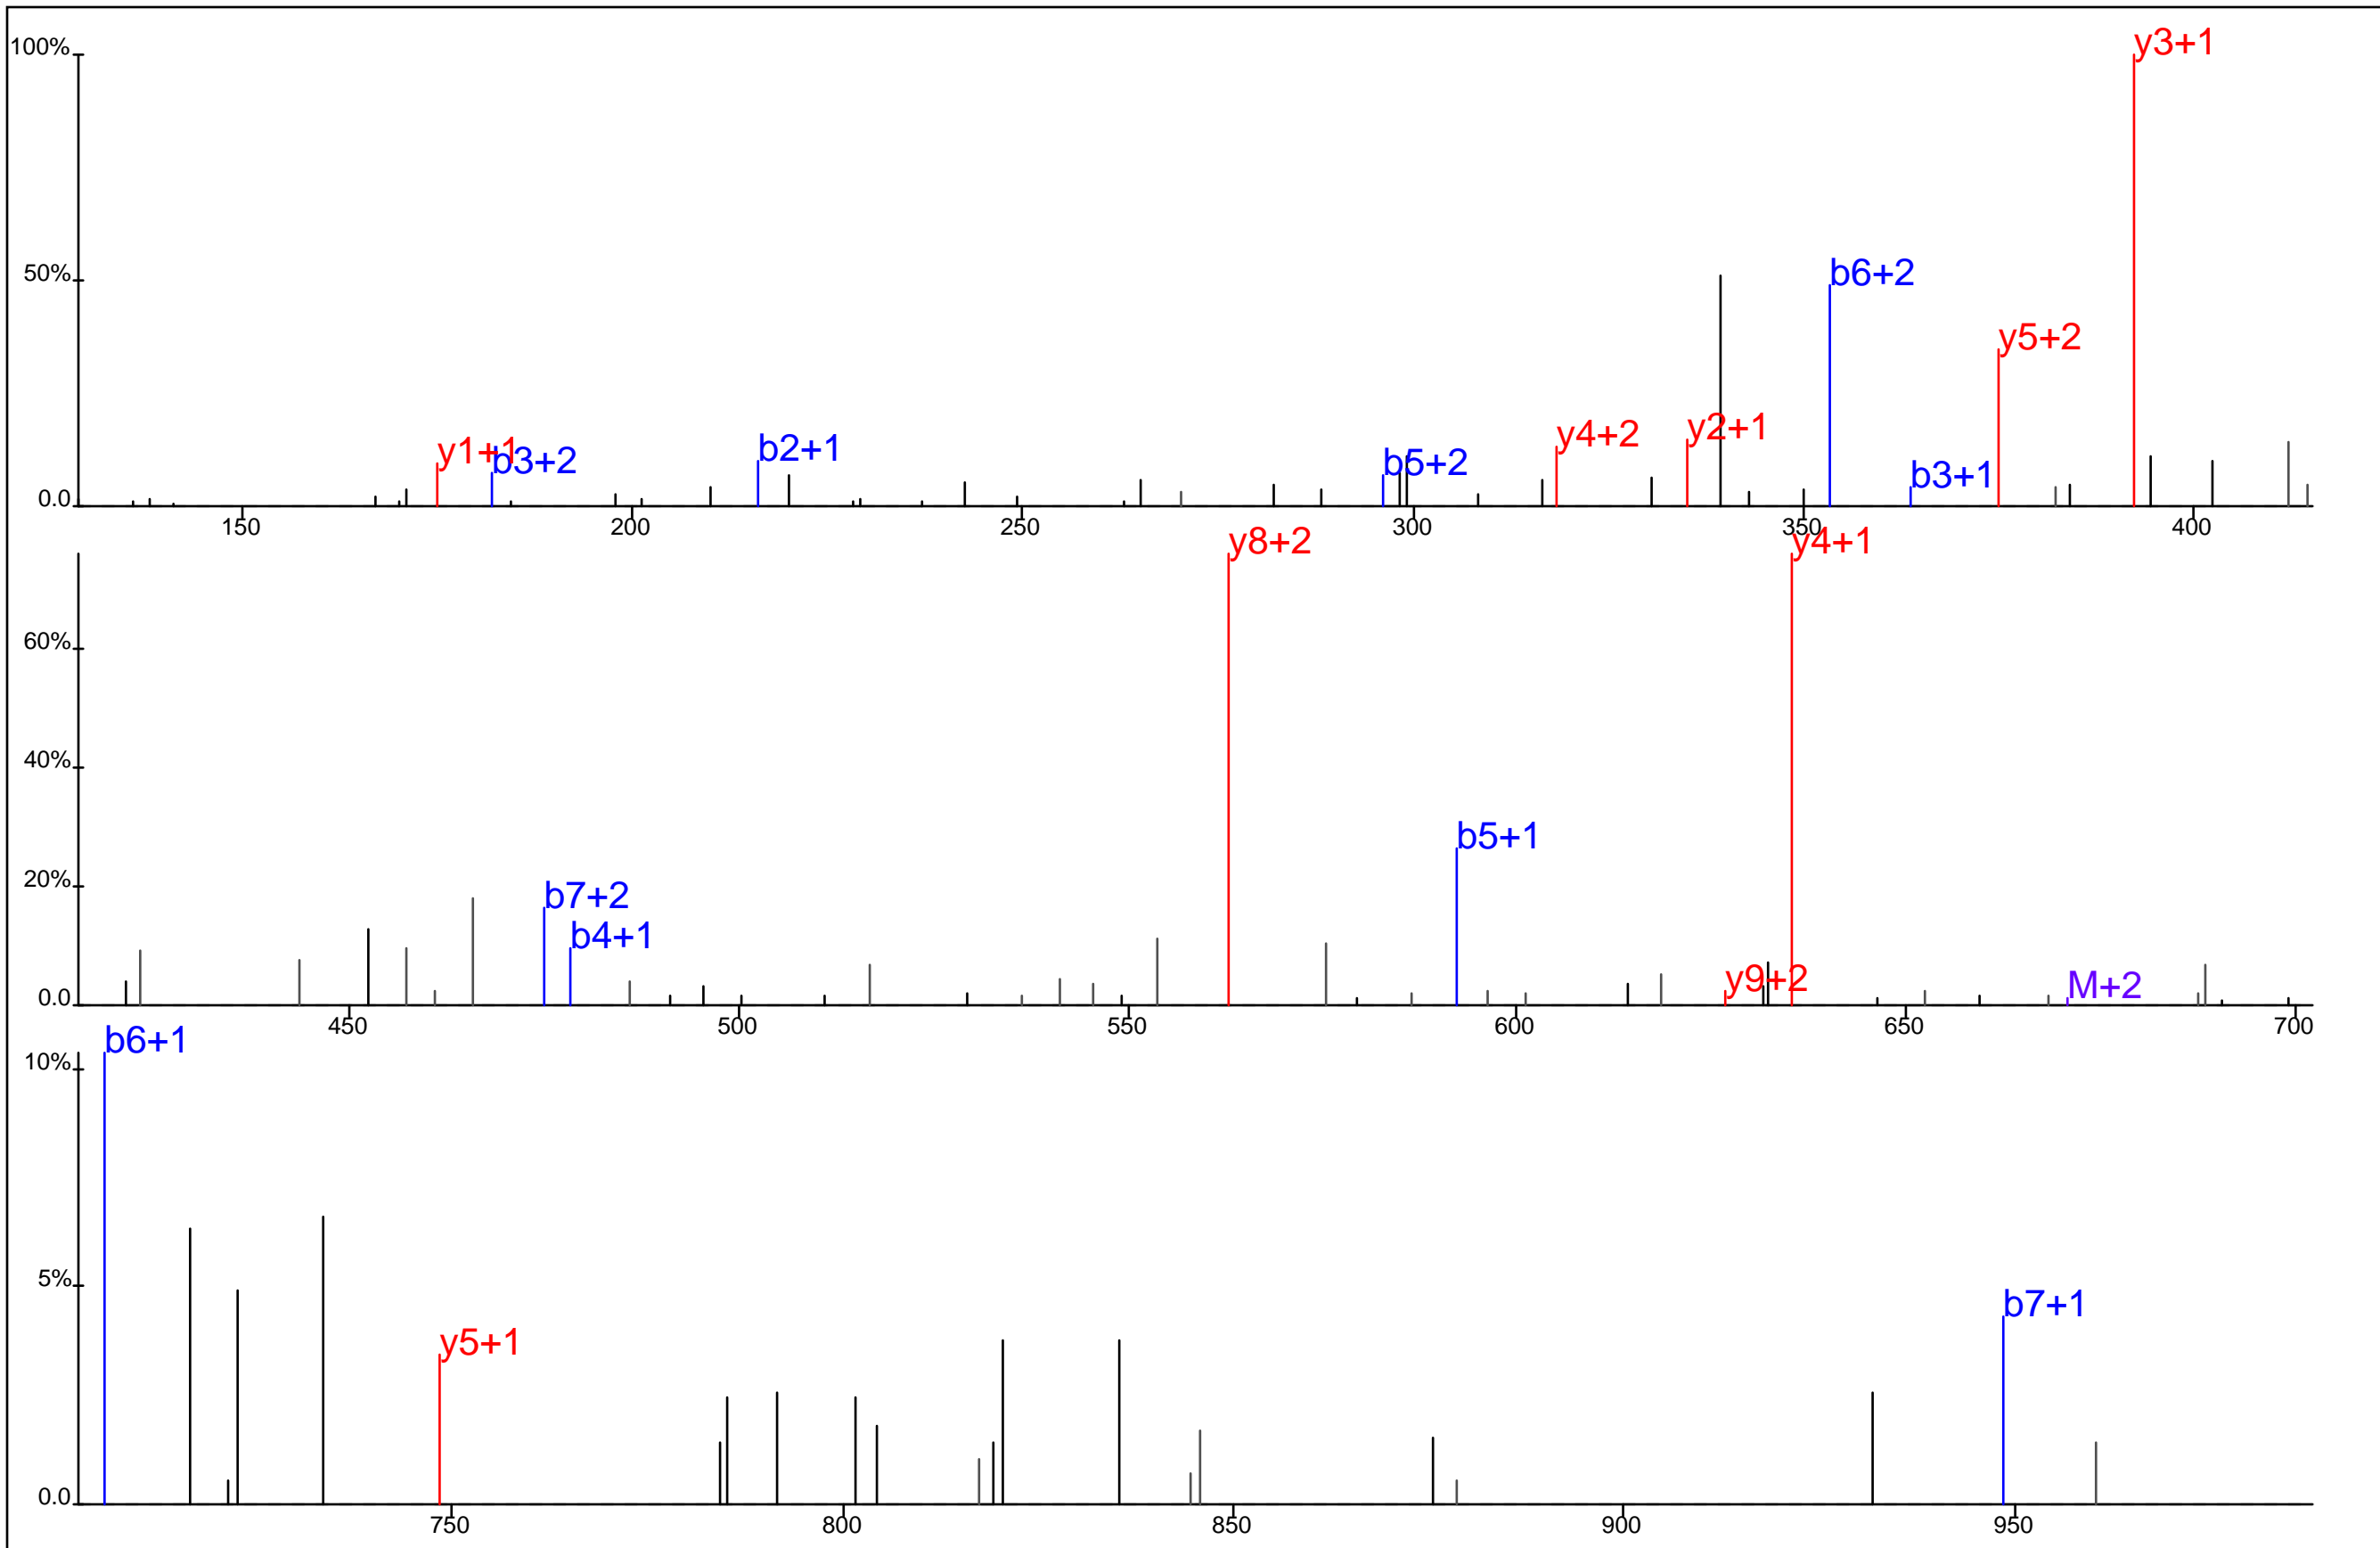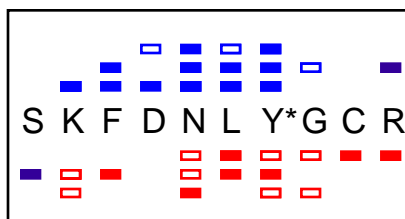

Protein Name: S adenosylhomocysteine hydrolase  
 gi Accession: 0  
 Precursor Mass: 447.1882+3  
 Delta Mass: 0.060 ppm  
 XCorr: 27.75

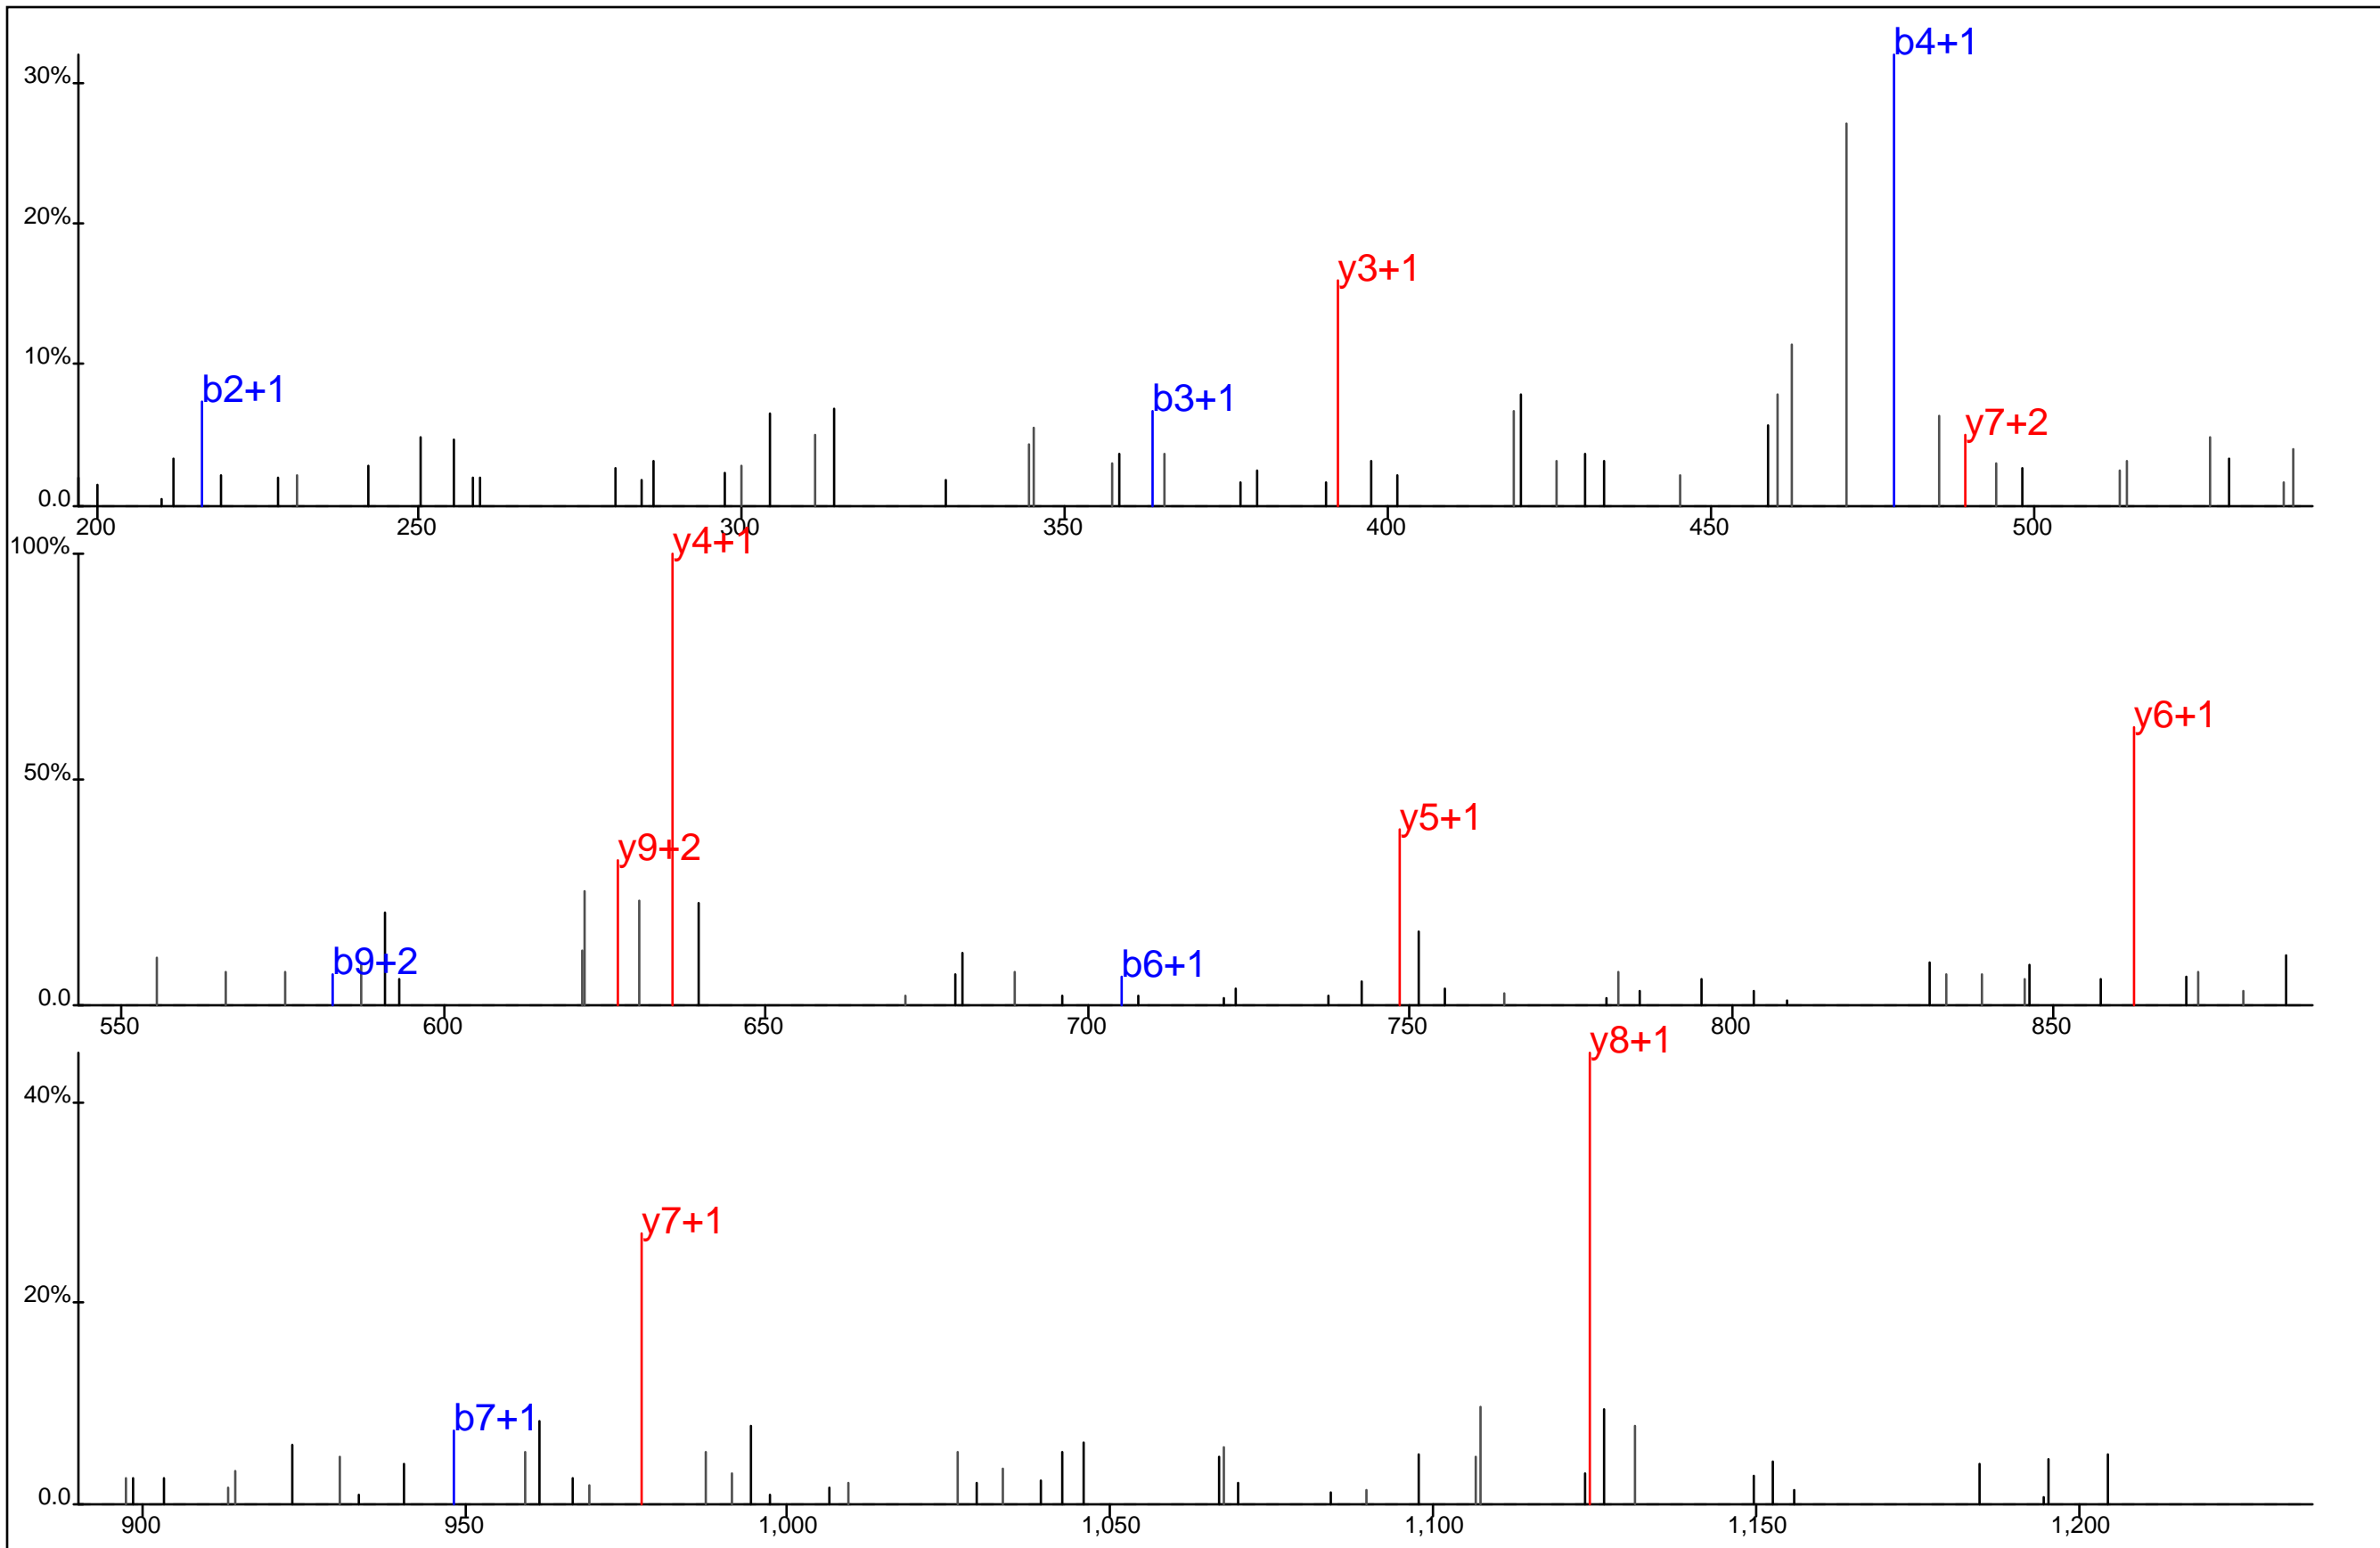

■ ■ ■ ■ ■ ■ ■ ■  
 S K F D N L Y\* G C R  
■ ■ ■ ■ ■ ■ ■

Protein Name: S adenosylhomocysteine hydrolase  
 gi Accession: 0  
 Precursor Mass: 670.2784+2  
 Delta Mass: 0.415 ppm  
 XCorr: 44.46

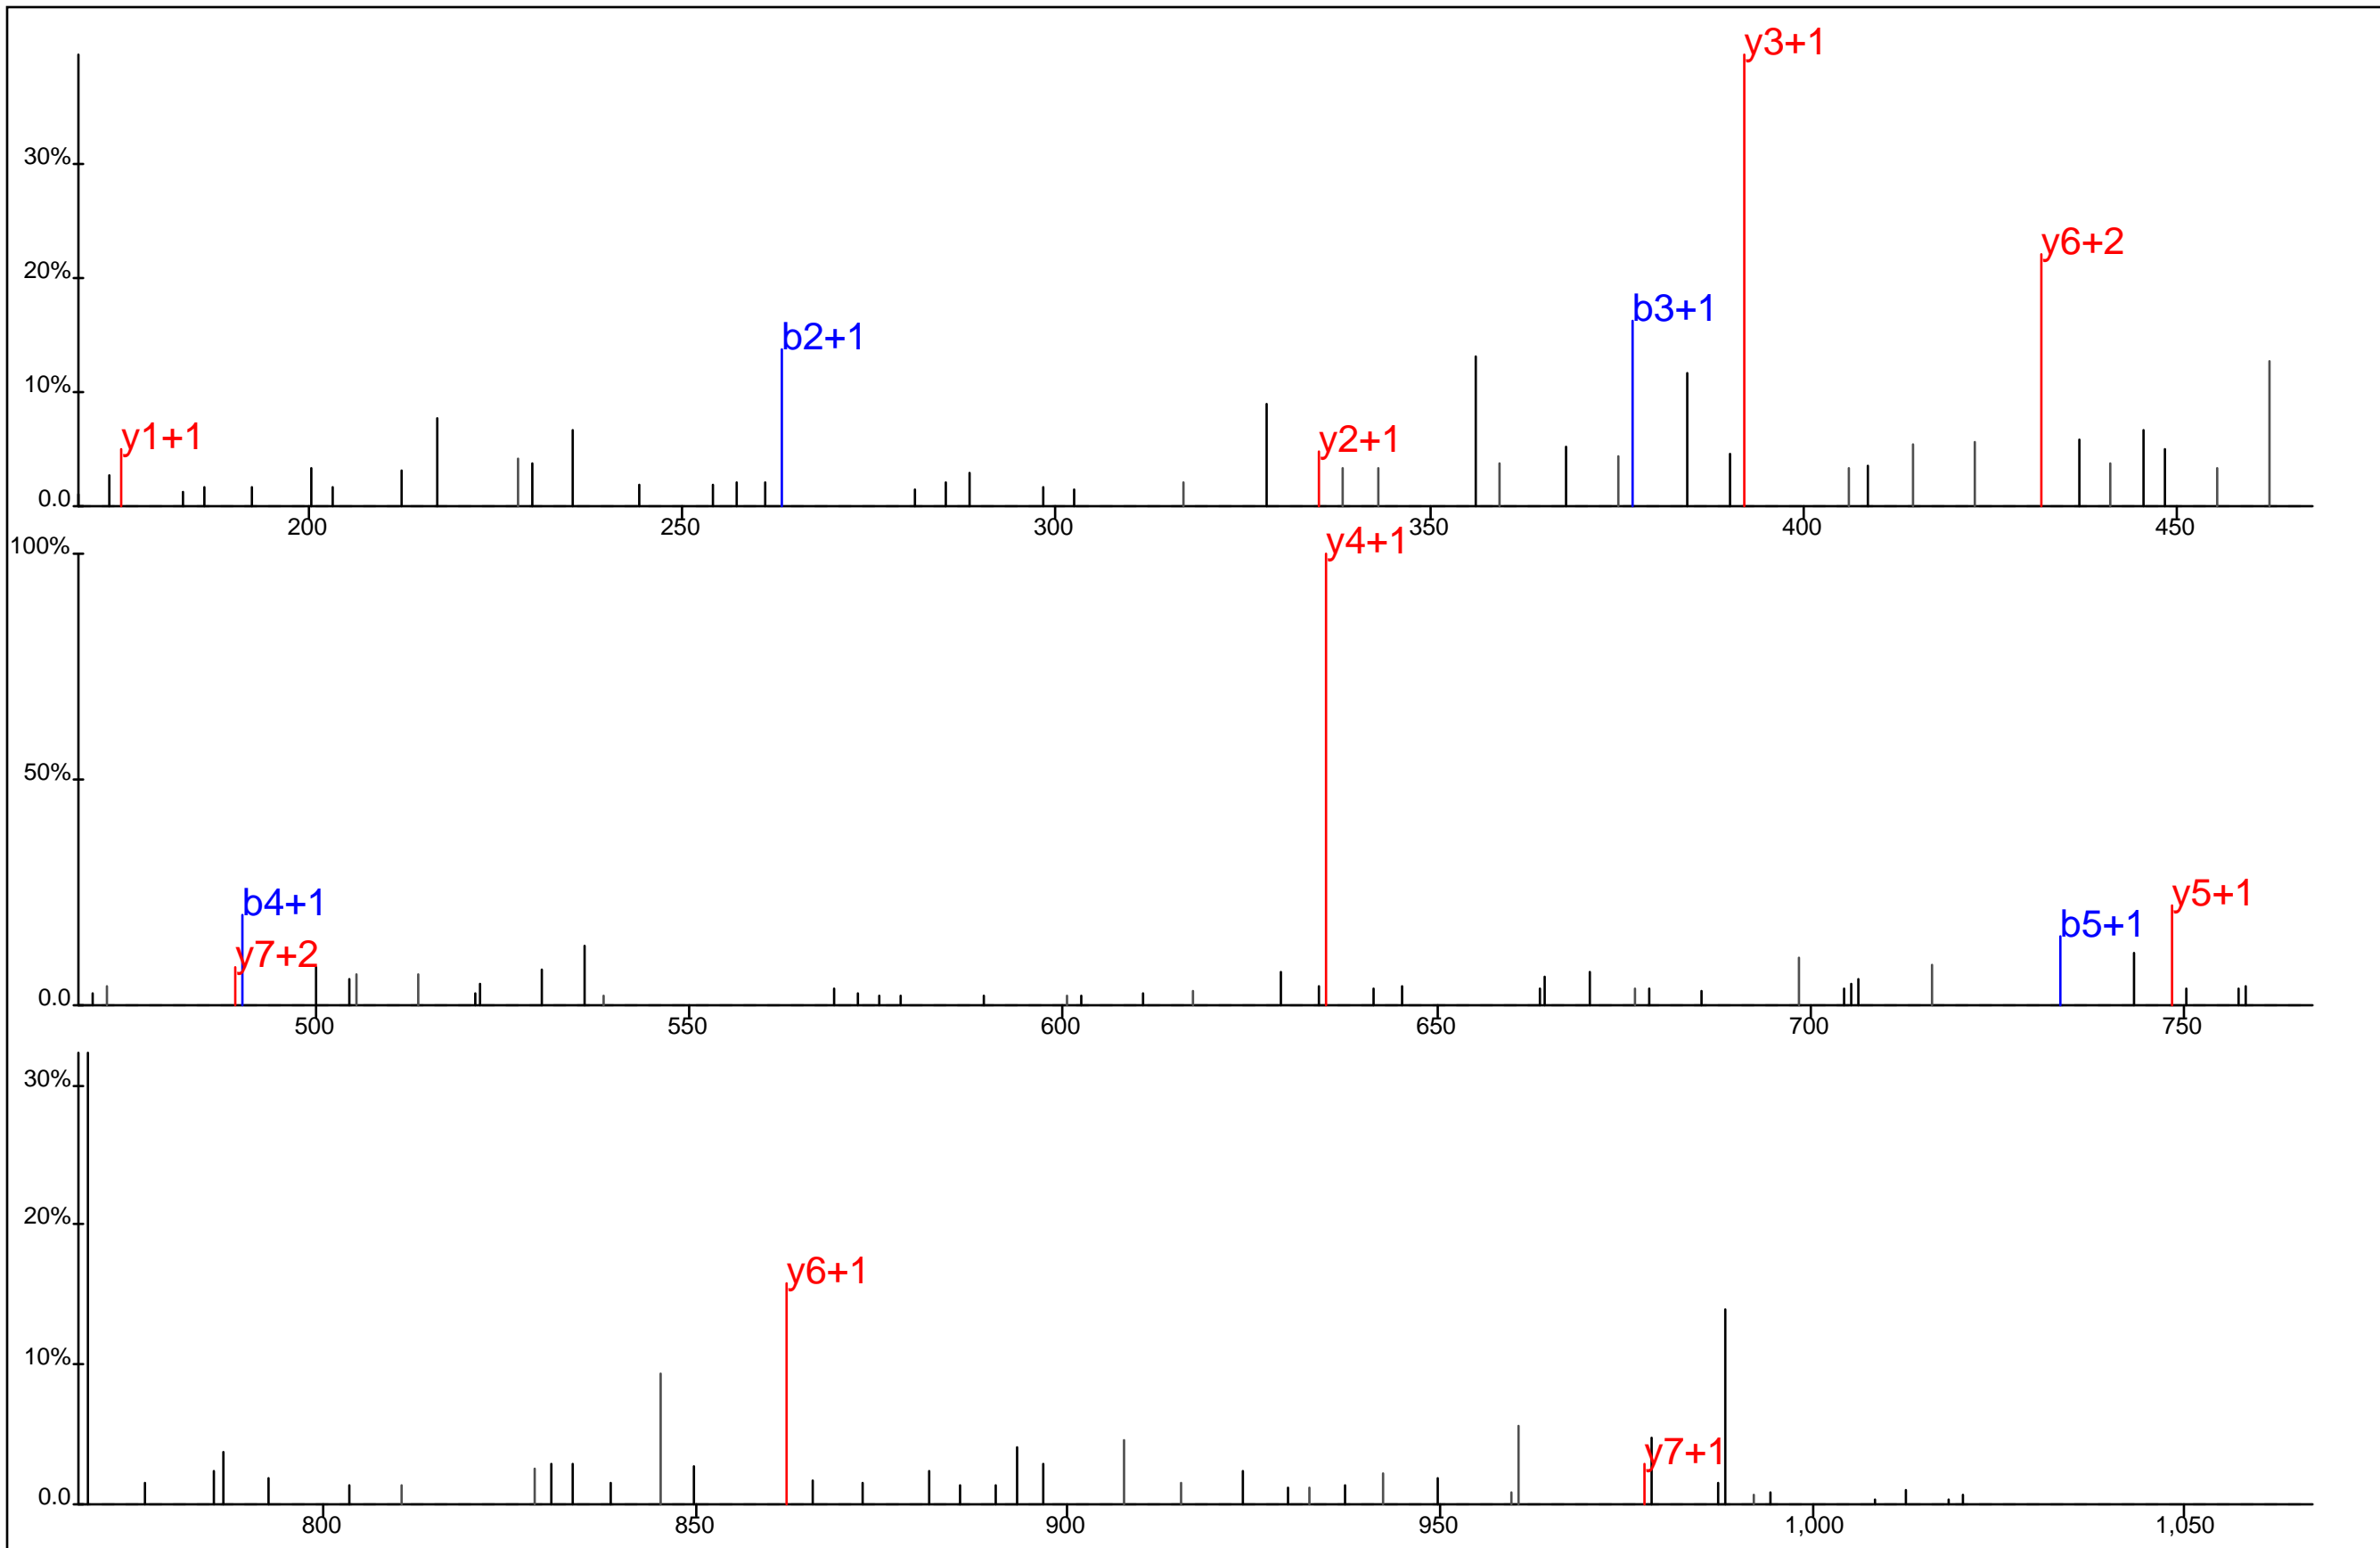

■ ■ ■ ■ ■ ■ ■  
**F D N L Y\* G C R**  
□ □ □ □ □ □ □

Protein Name: S adenosylhomocysteine hydrolase  
 gi Accession: 0  
 Precursor Mass: 562.7132+2  
 Delta Mass: 3.509 ppm  
 XCorr: 34.31

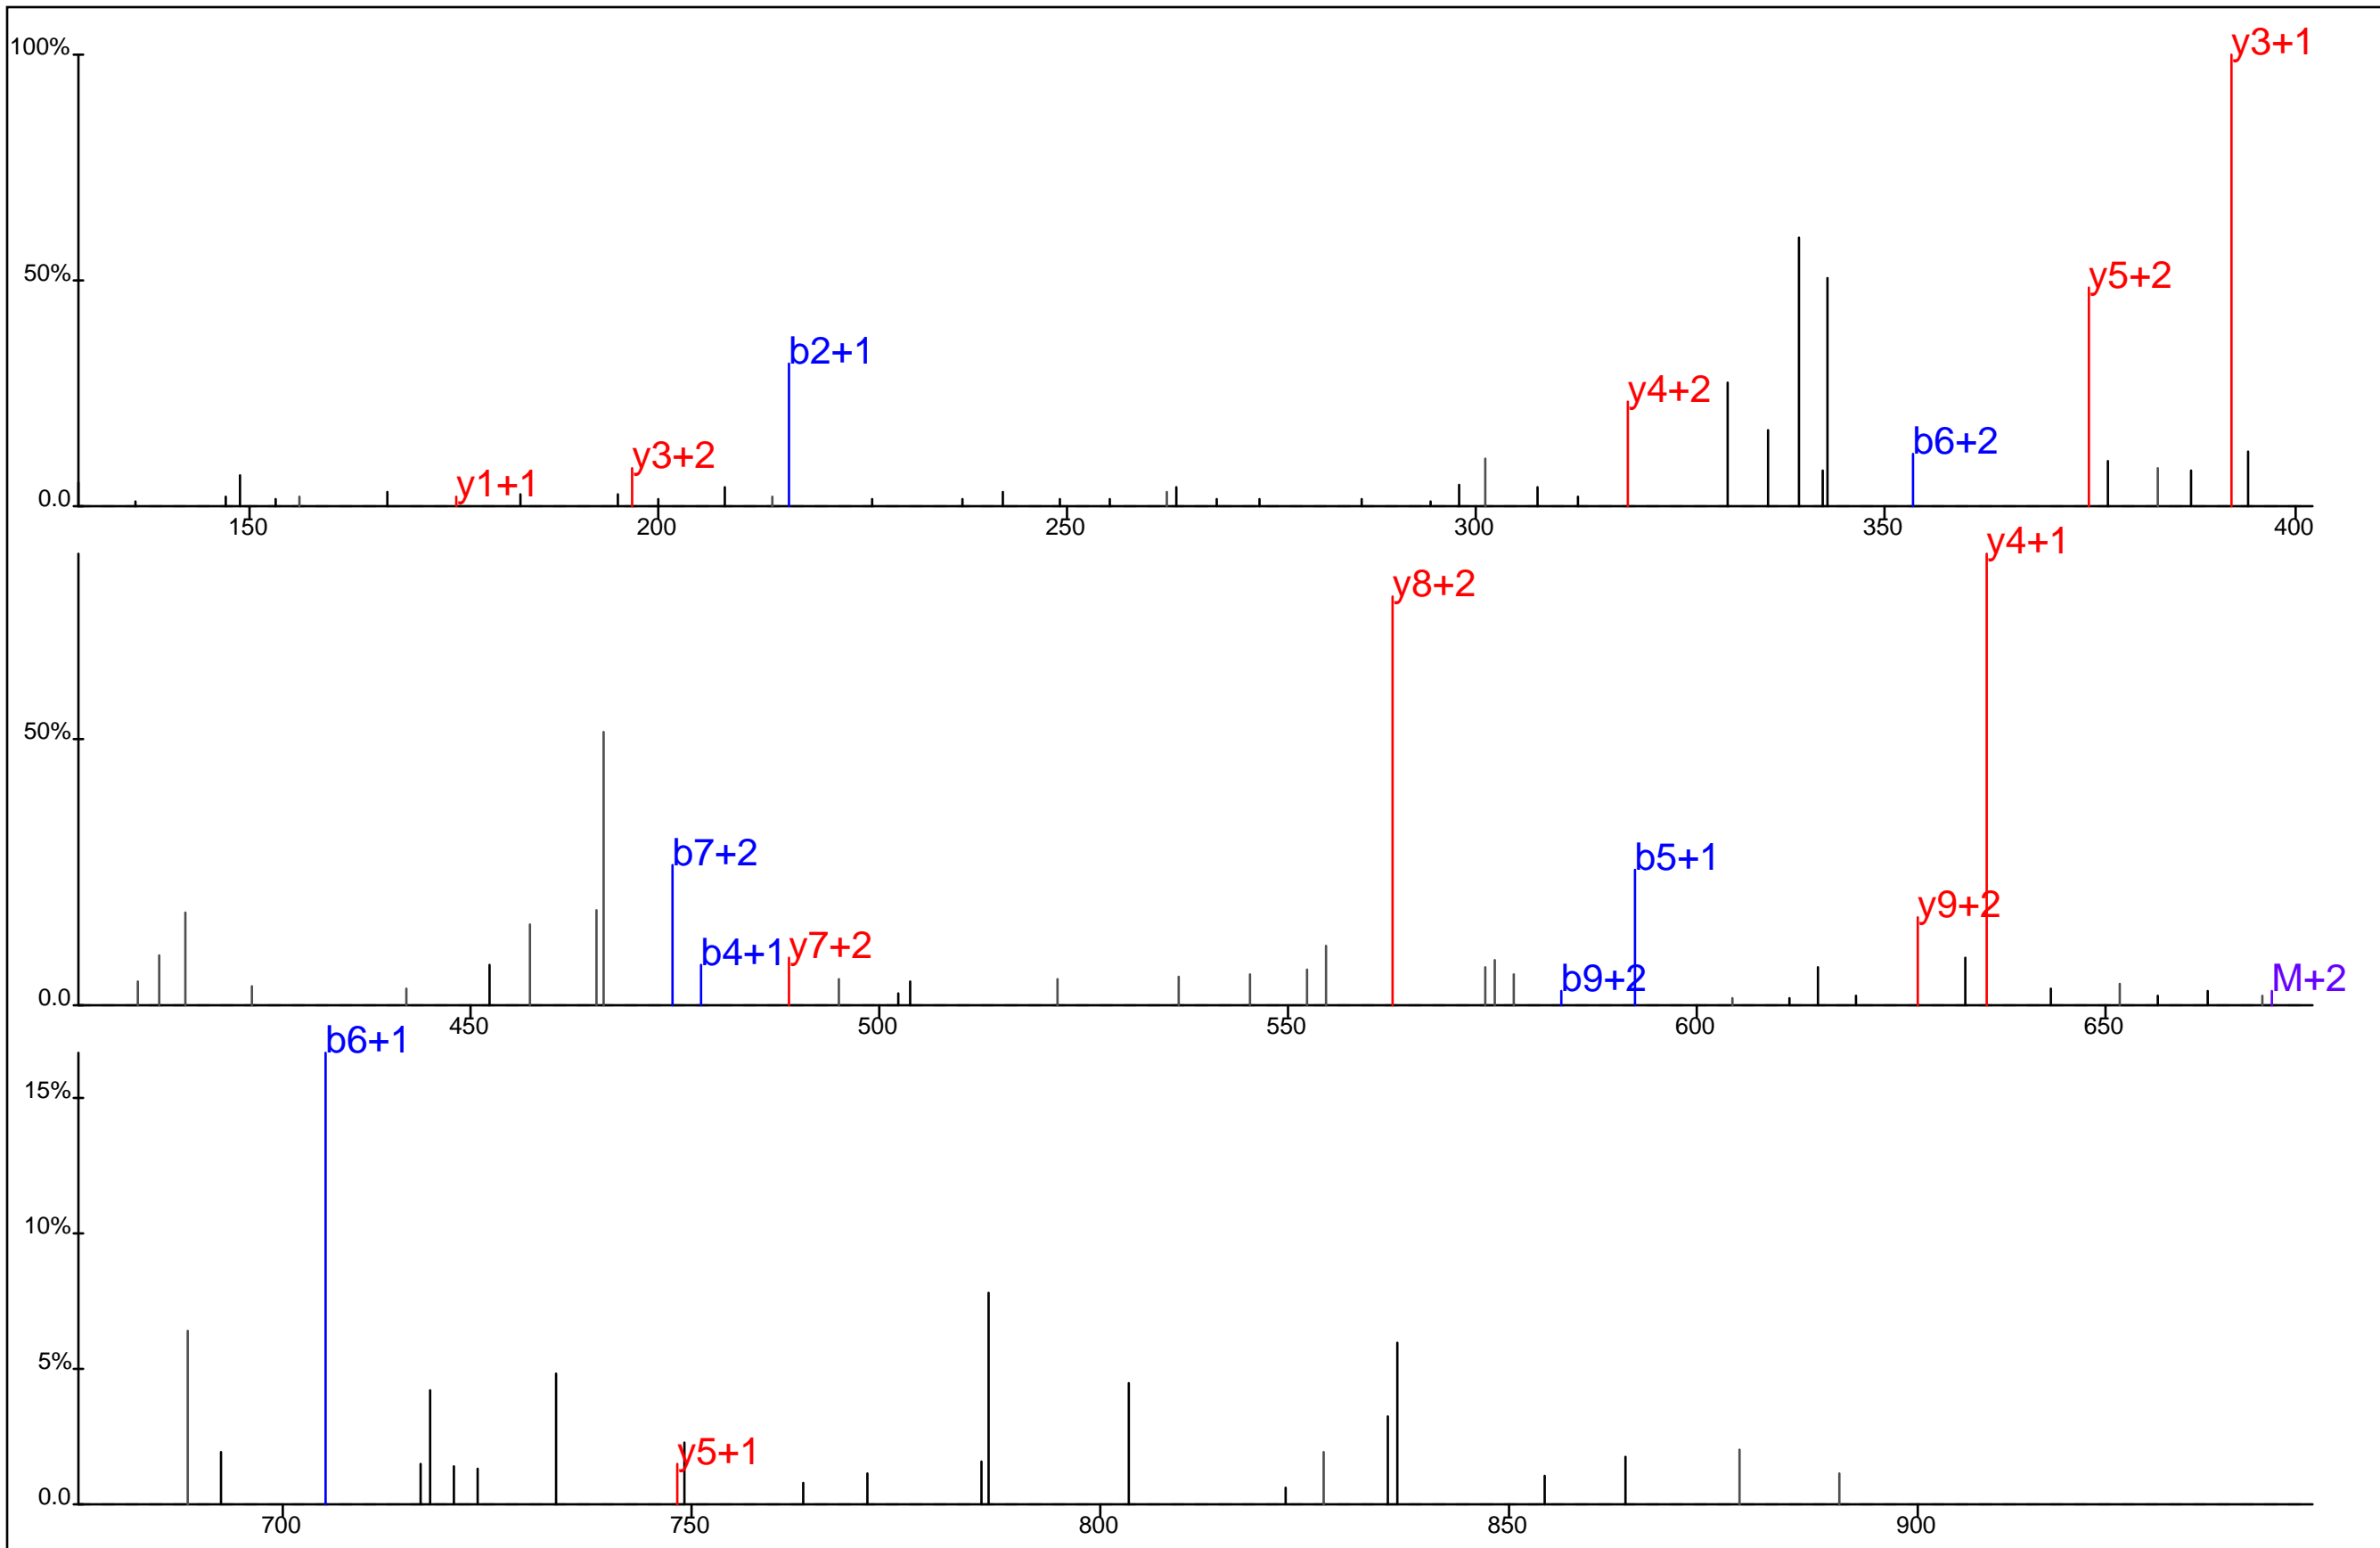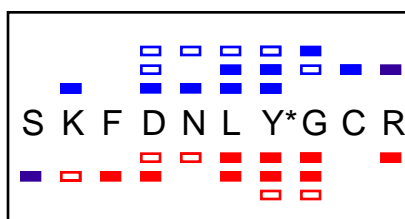

Protein Name: S adenosylhomocysteine hydrolase  
 gi Accession: 0  
 Precursor Mass: 447.1890+3  
 Delta Mass: 1.718 ppm  
 XCorr: 23.48

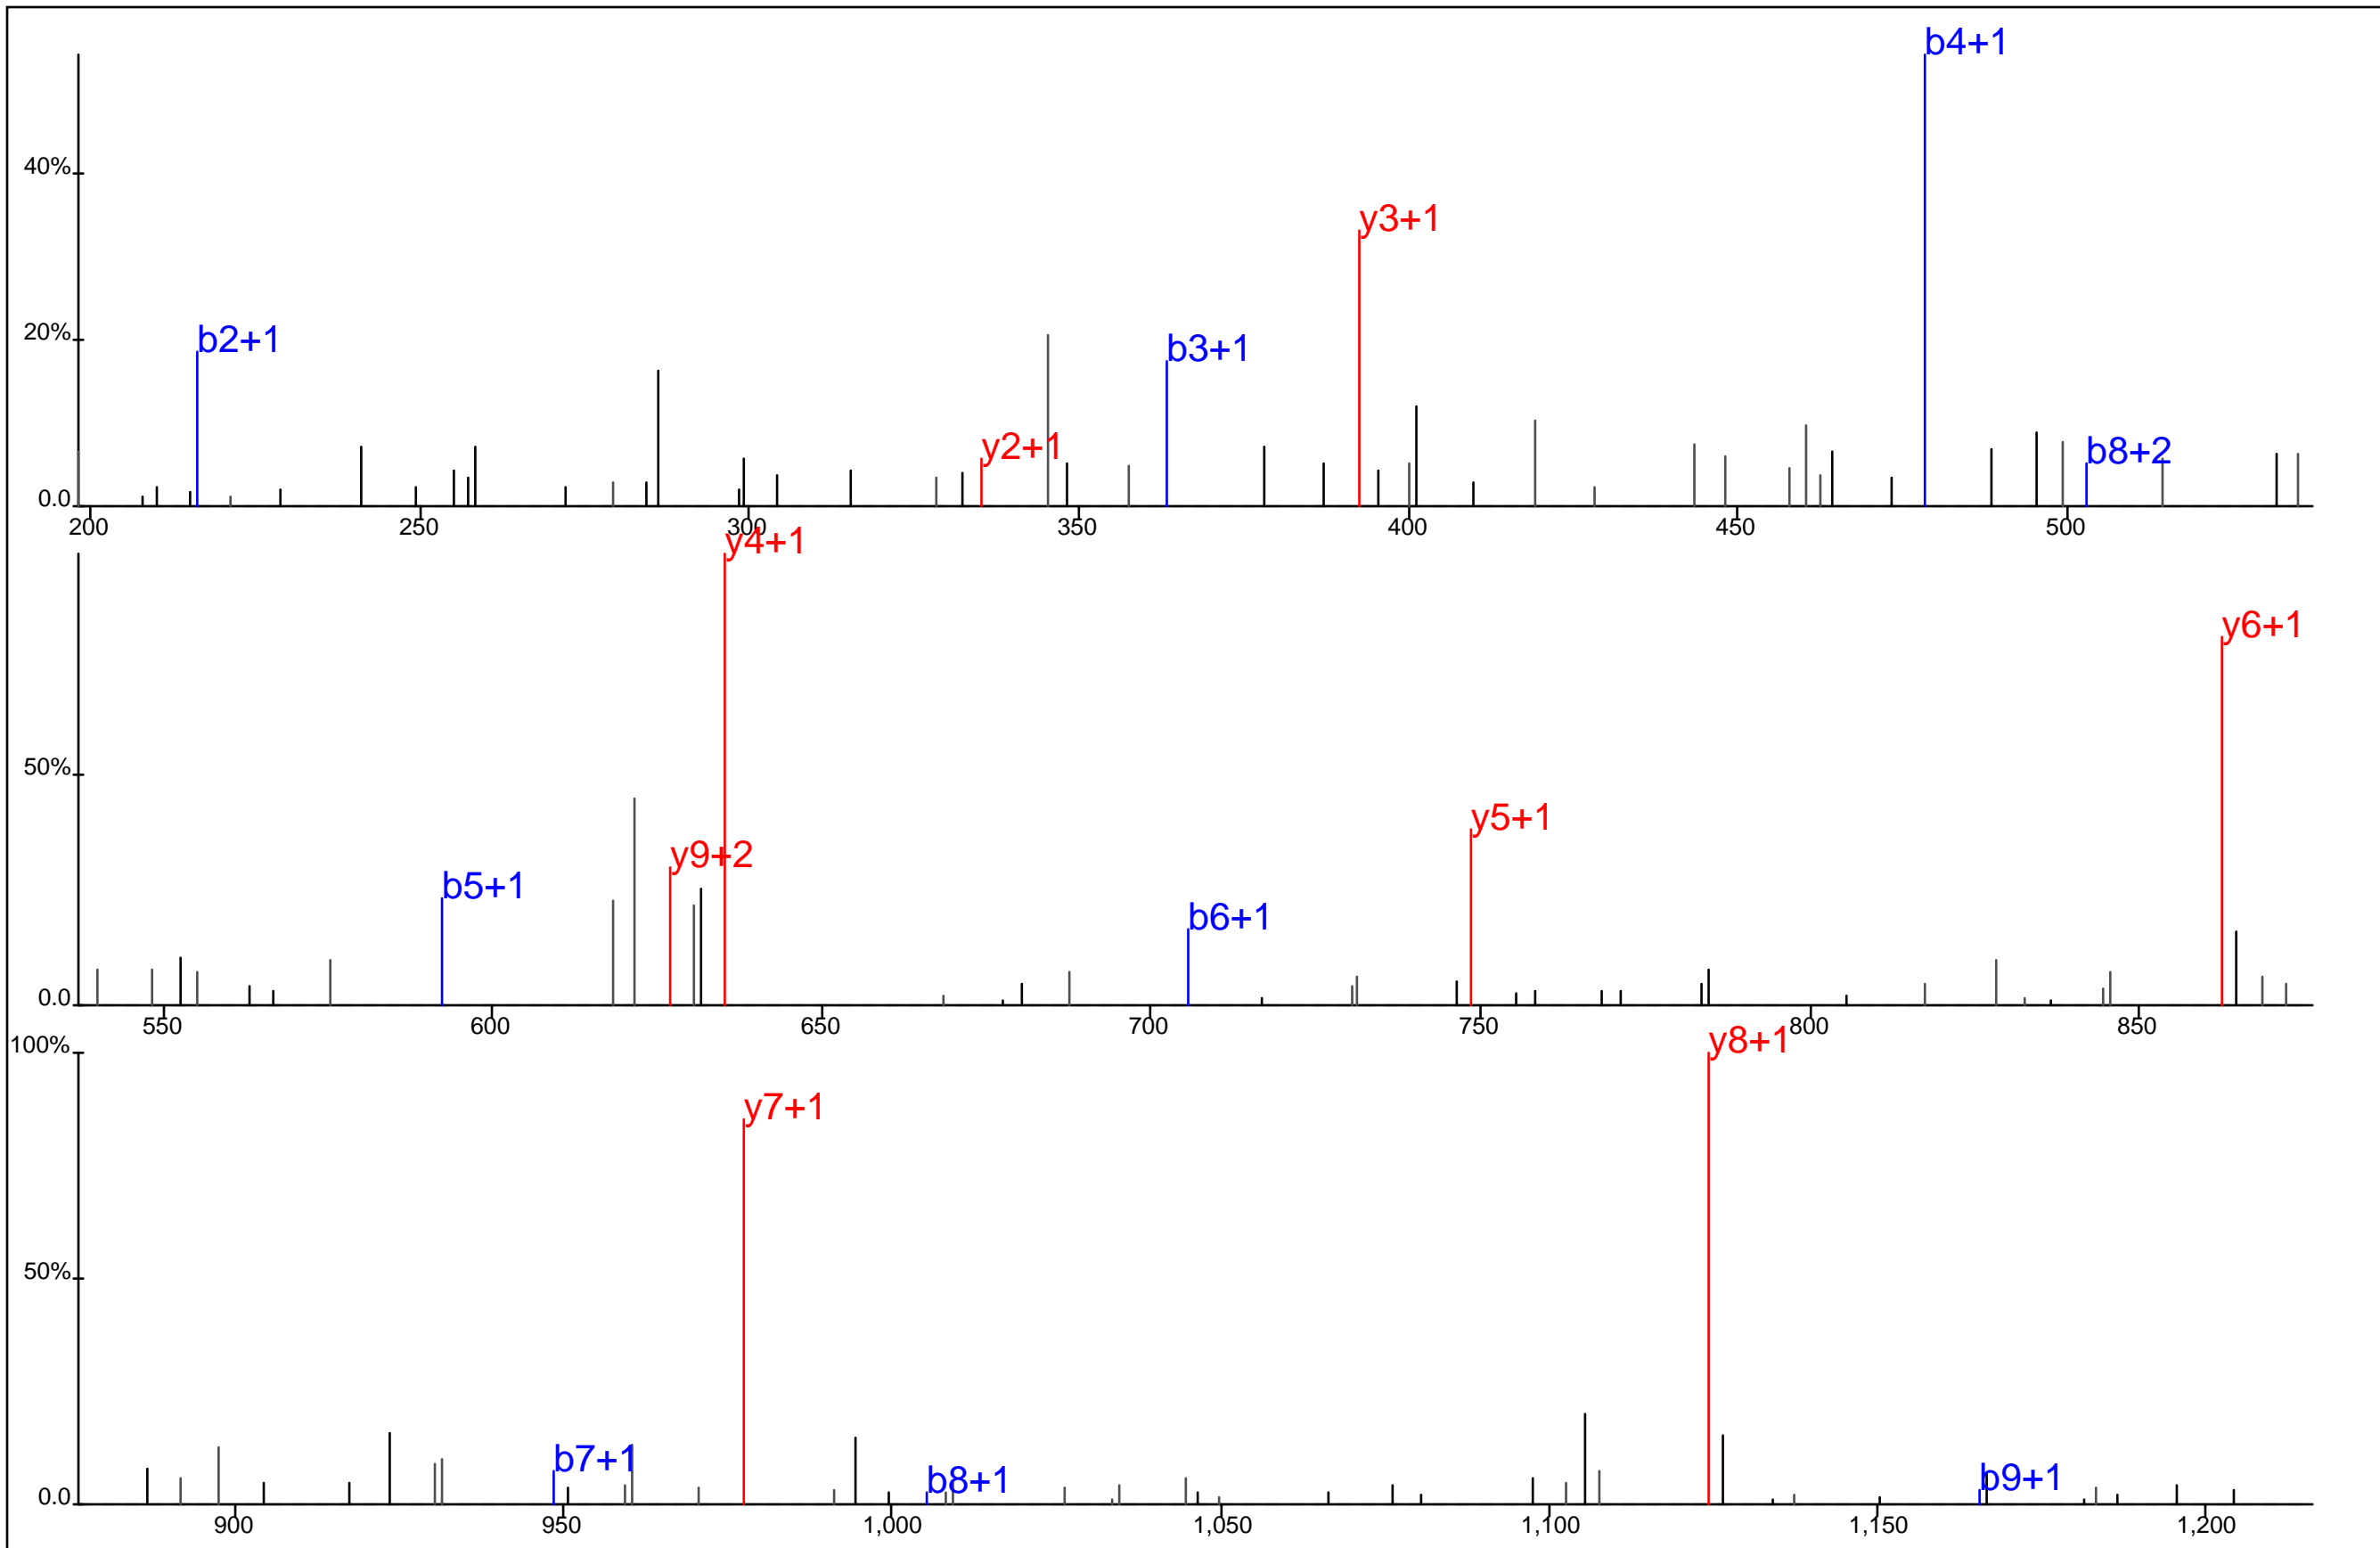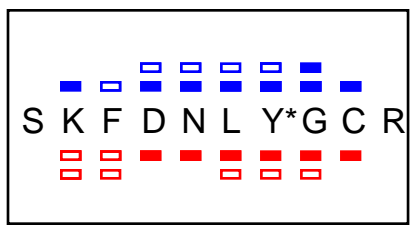

Protein Name: S adenosylhomocysteine hydrolase  
 gi Accession: 0  
 Precursor Mass: 670.2801+2  
 Delta Mass: 2.137 ppm  
 XCorr: 49.01

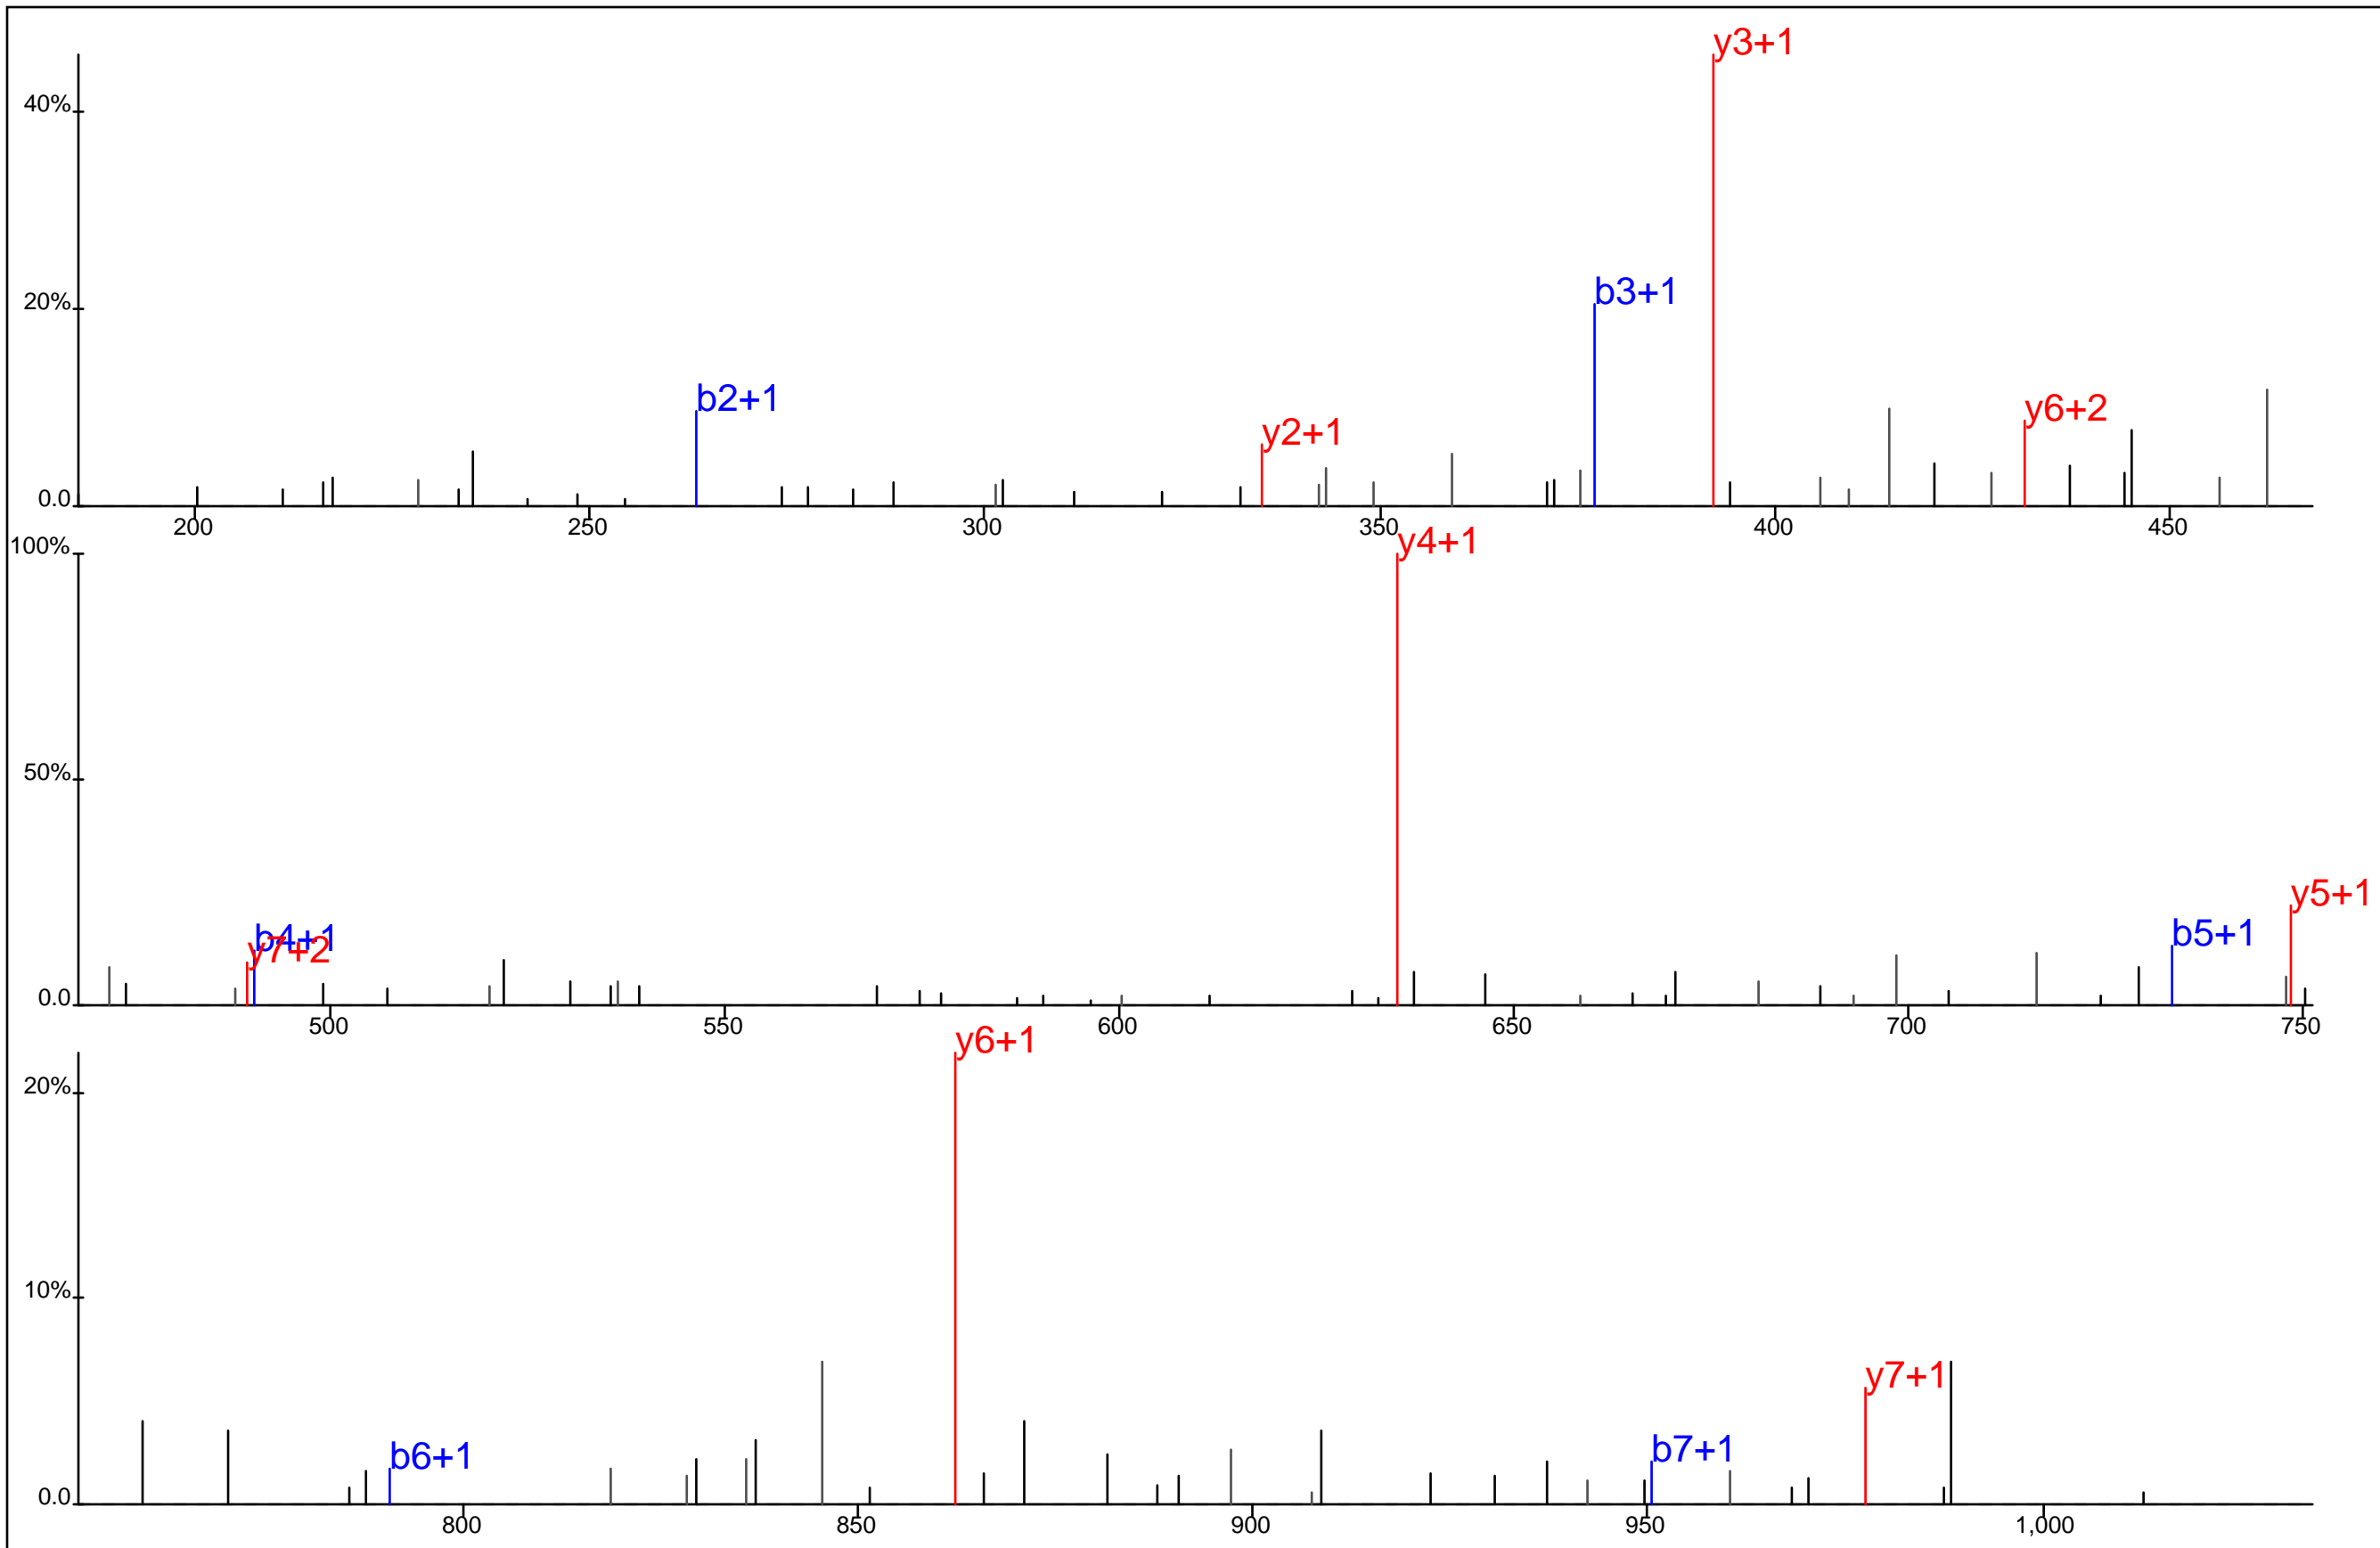

■ ■ ■ ■ ■ ■  
■ ■ ■ ■ ■ ■  
**F D N L Y\* G C R**

Protein Name: S adenosylhomocysteine hydrolase  
 gi Accession: 0  
 Precursor Mass: 562.7159+2  
 Delta Mass: 1.375 ppm  
 XCorr: 43.4

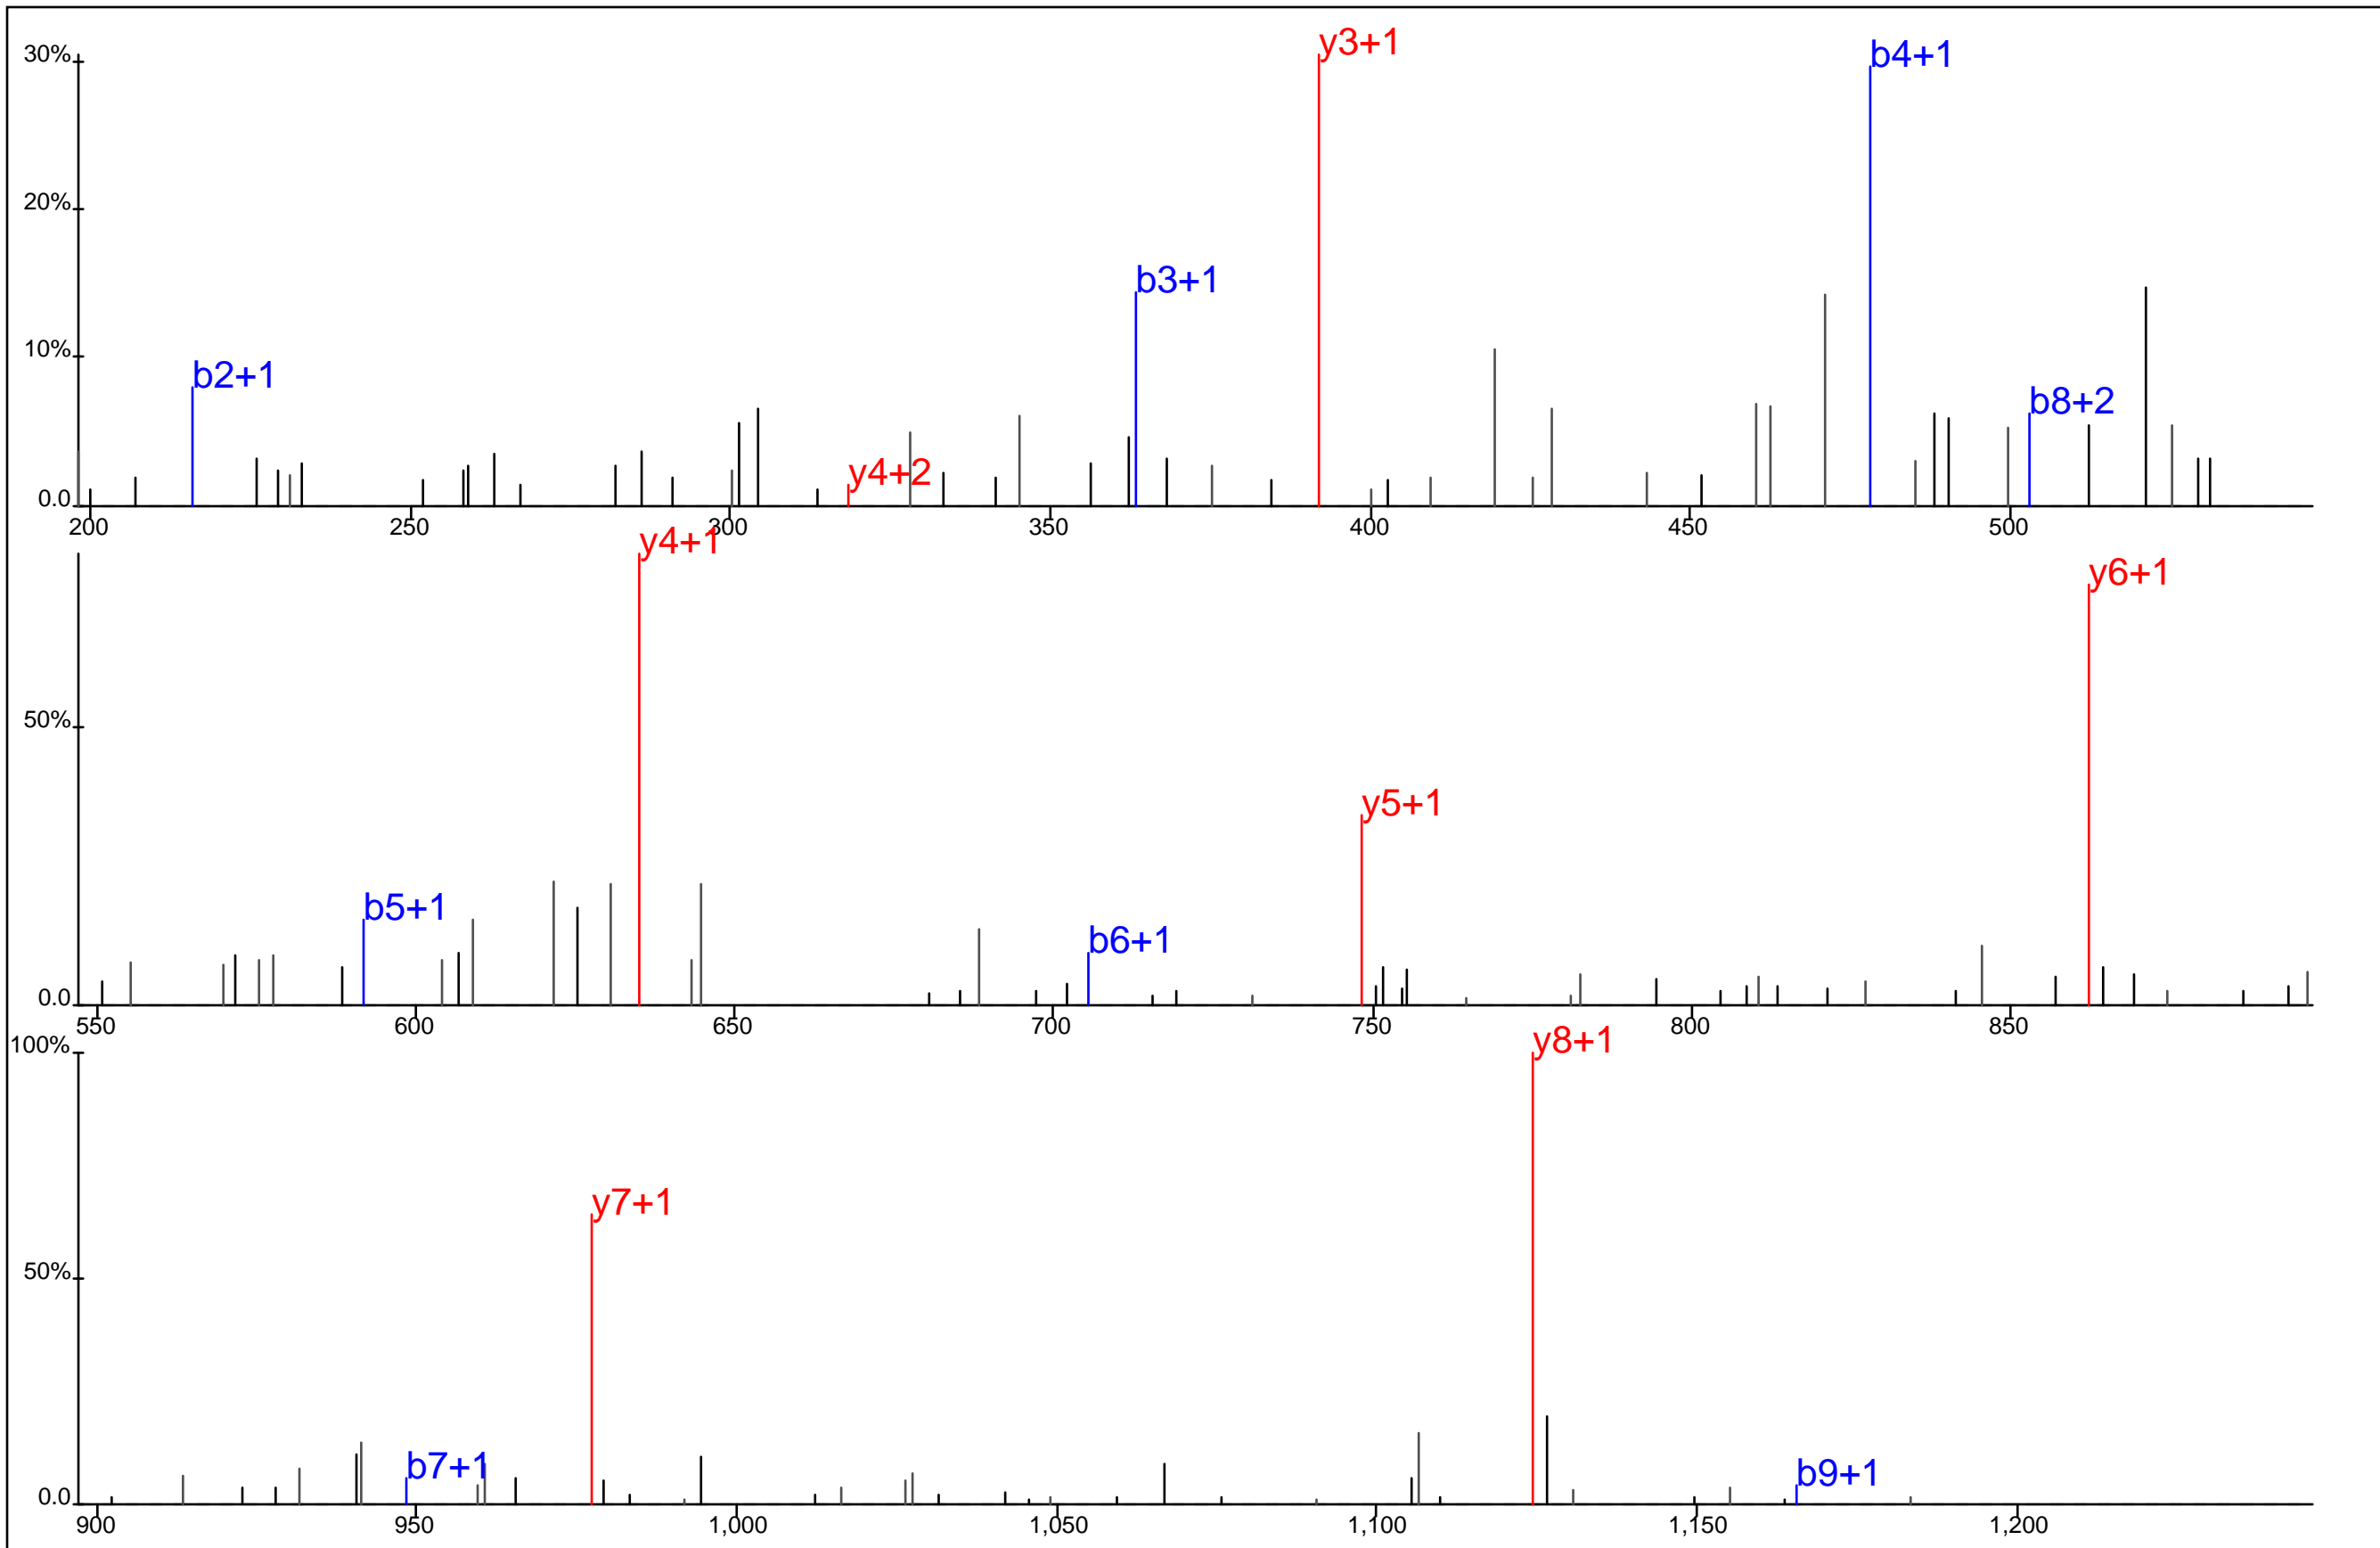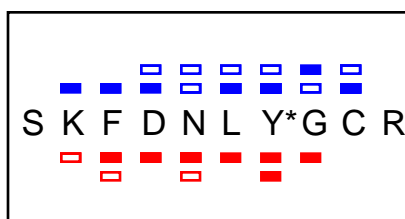

Protein Name: S adenosylhomocysteine hydrolase  
 gi Accession: 0  
 Precursor Mass: 670.2794+2  
 Delta Mass: 1.135 ppm  
 XCorr: 49.07



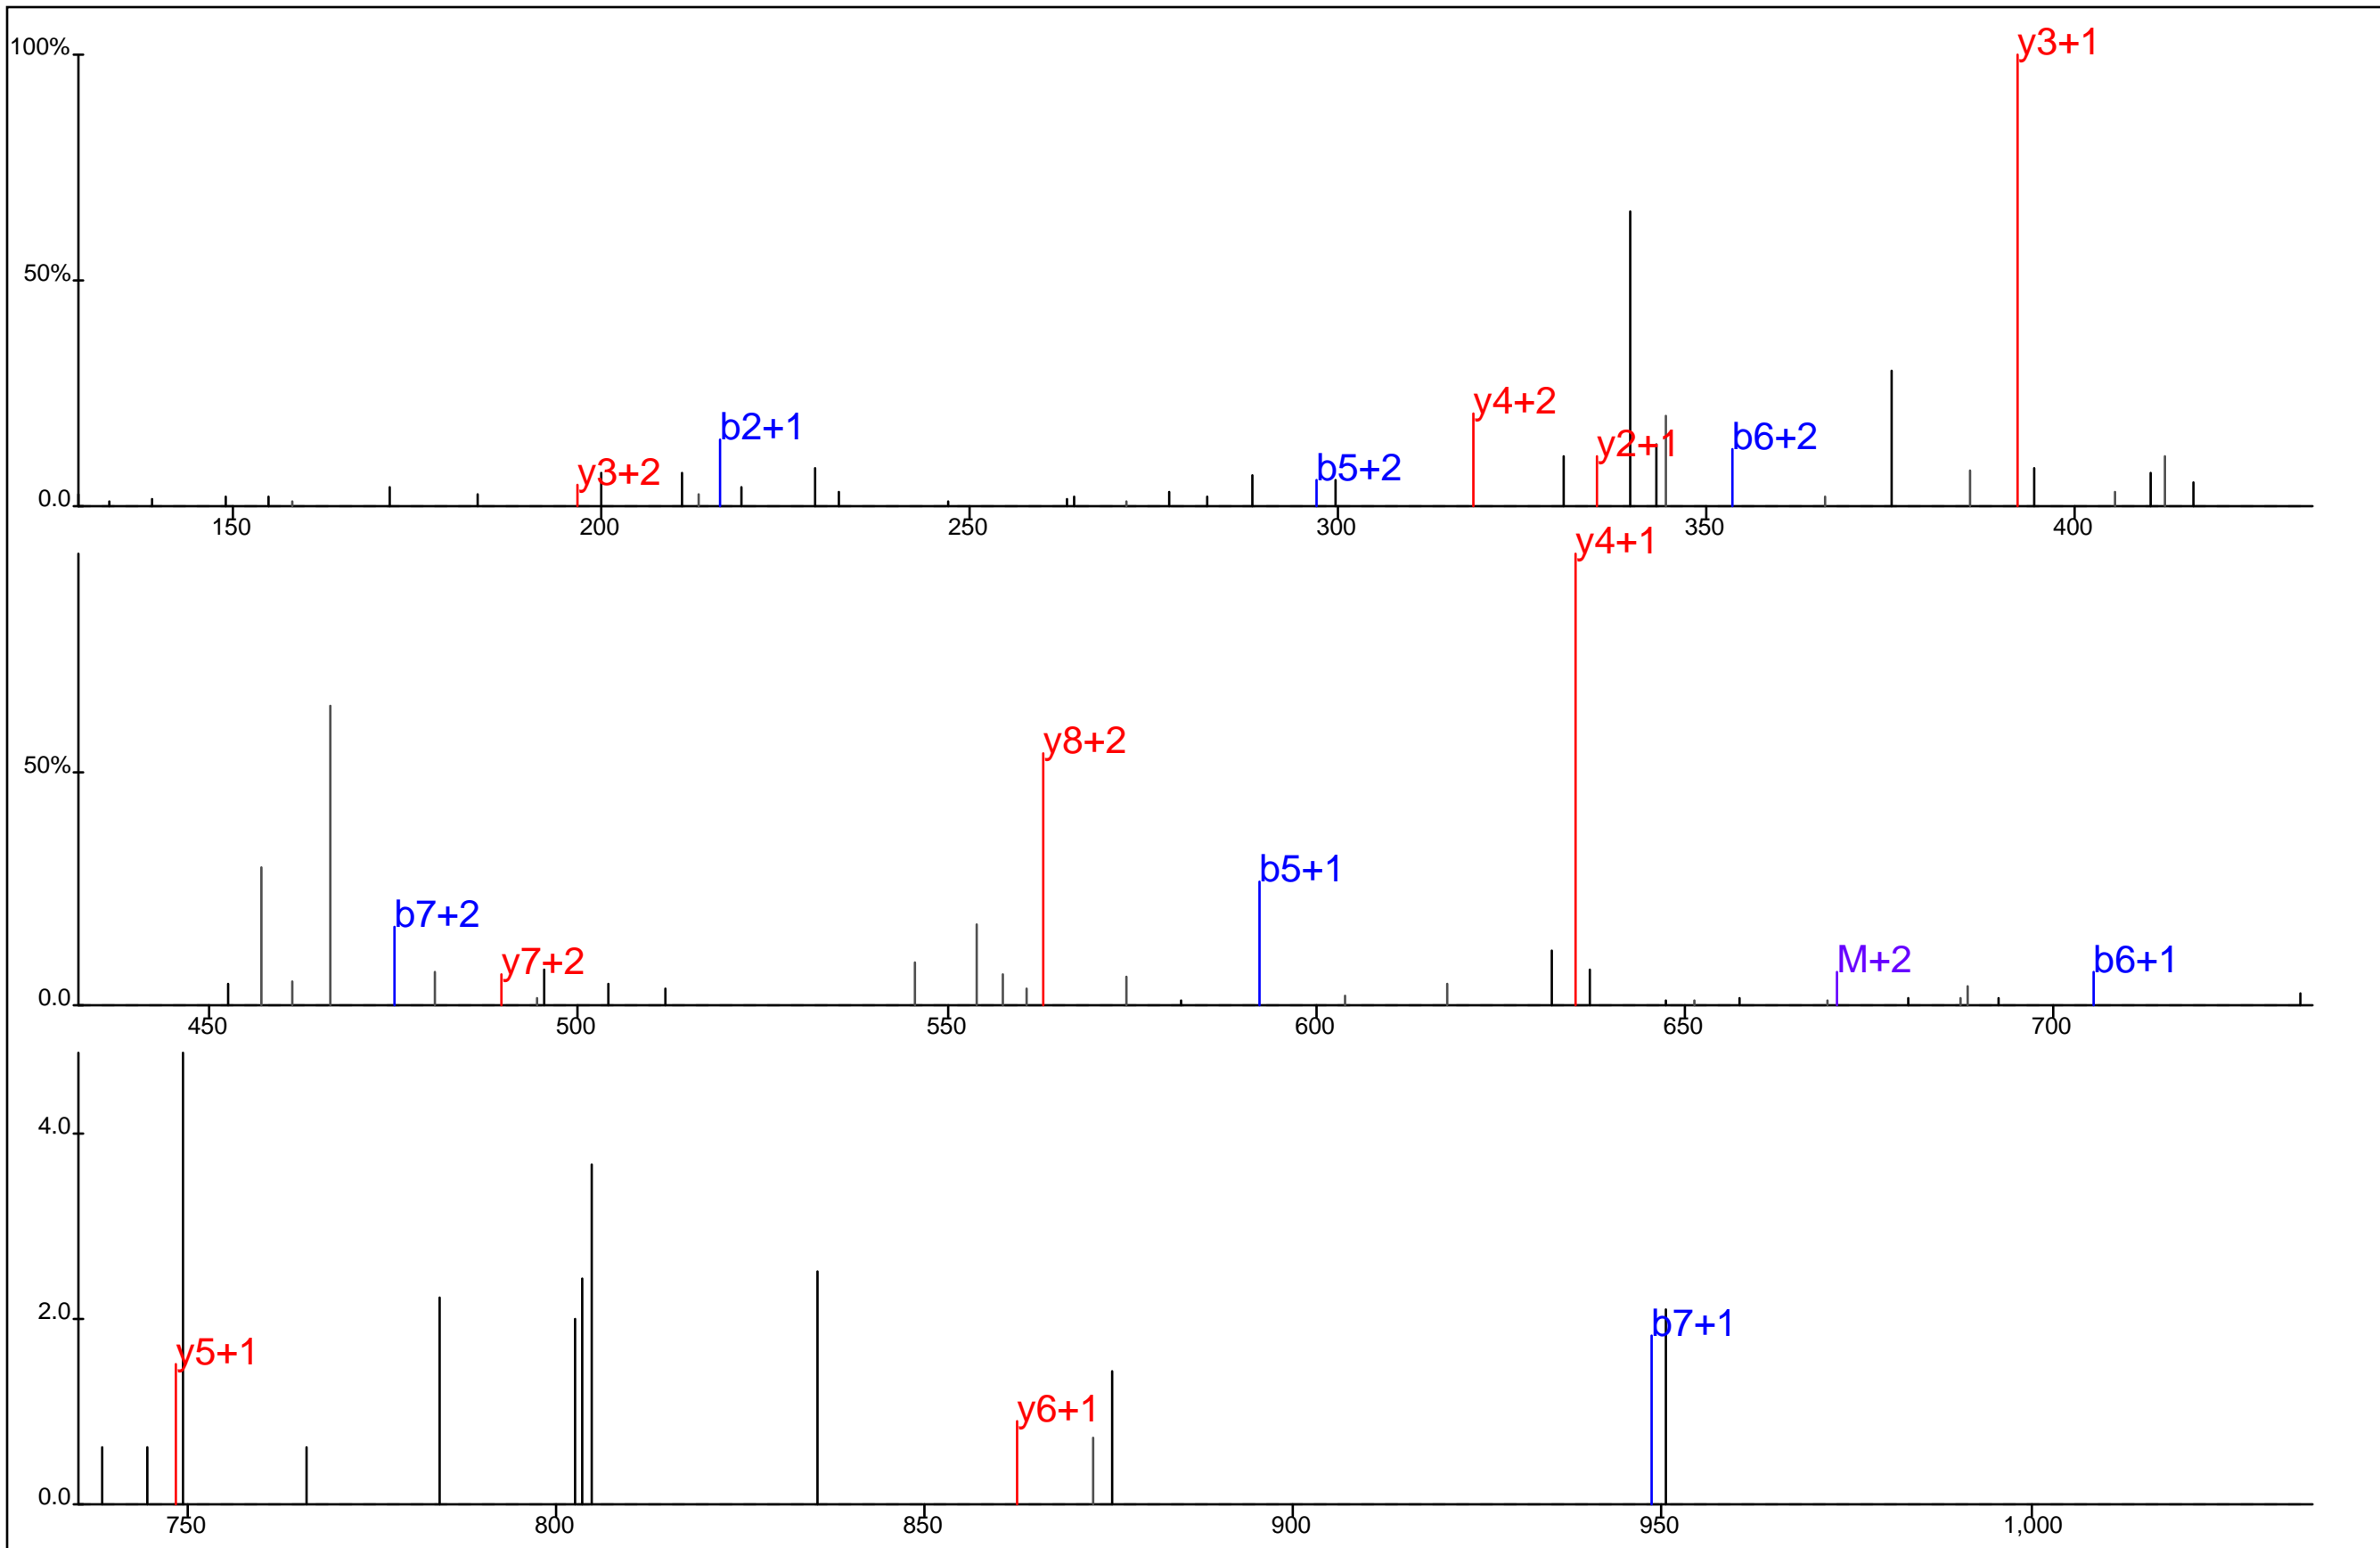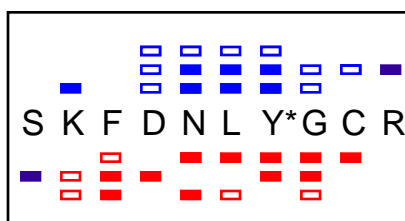

Protein Name: S adenosylhomocysteine hydrolase  
 gi Accession: 0  
 Precursor Mass: 447.1887+3  
 Delta Mass: 1.171 ppm  
 XCorr: 22.4

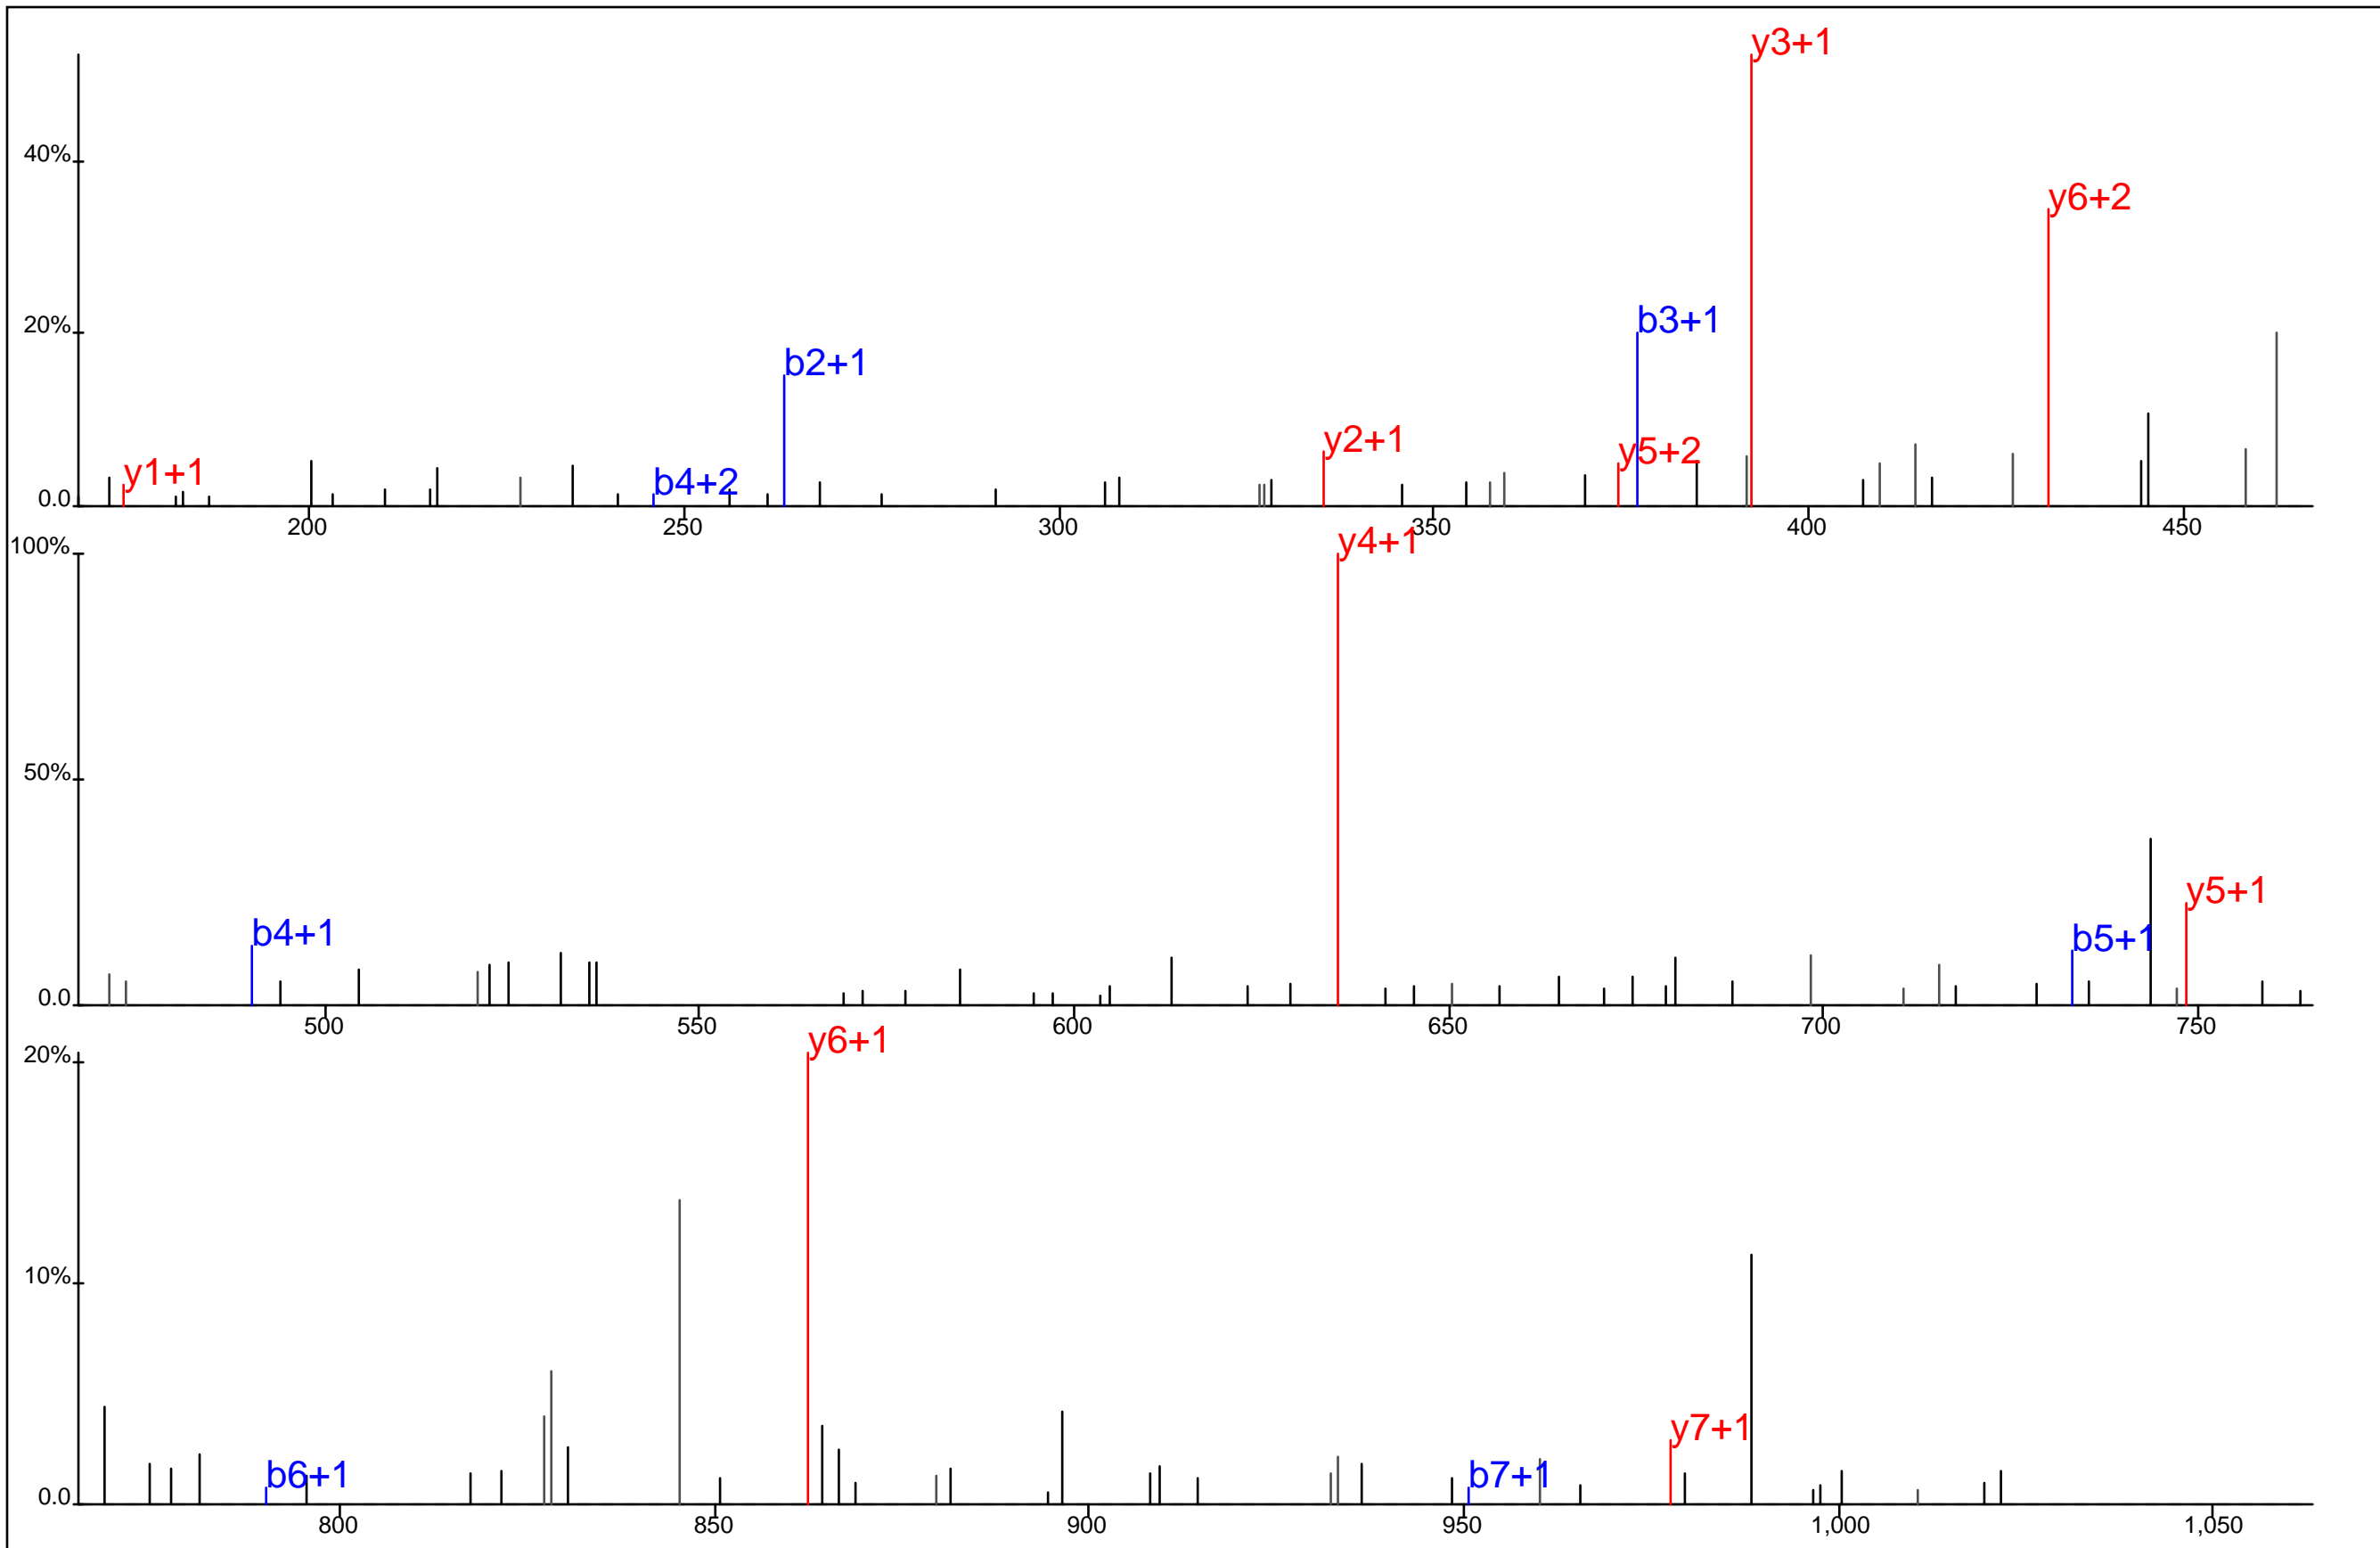

■ ■ ■ ■ ■ ■ ■ ■  
□ □ □ □ □ □ □ □  
**F D N L Y\* G C R**

Protein Name: S adenosylhomocysteine hydrolase  
 gi Accession: 0  
 Precursor Mass: 562.7166+2  
 Delta Mass: 2.570 ppm  
 XCorr: 39.59

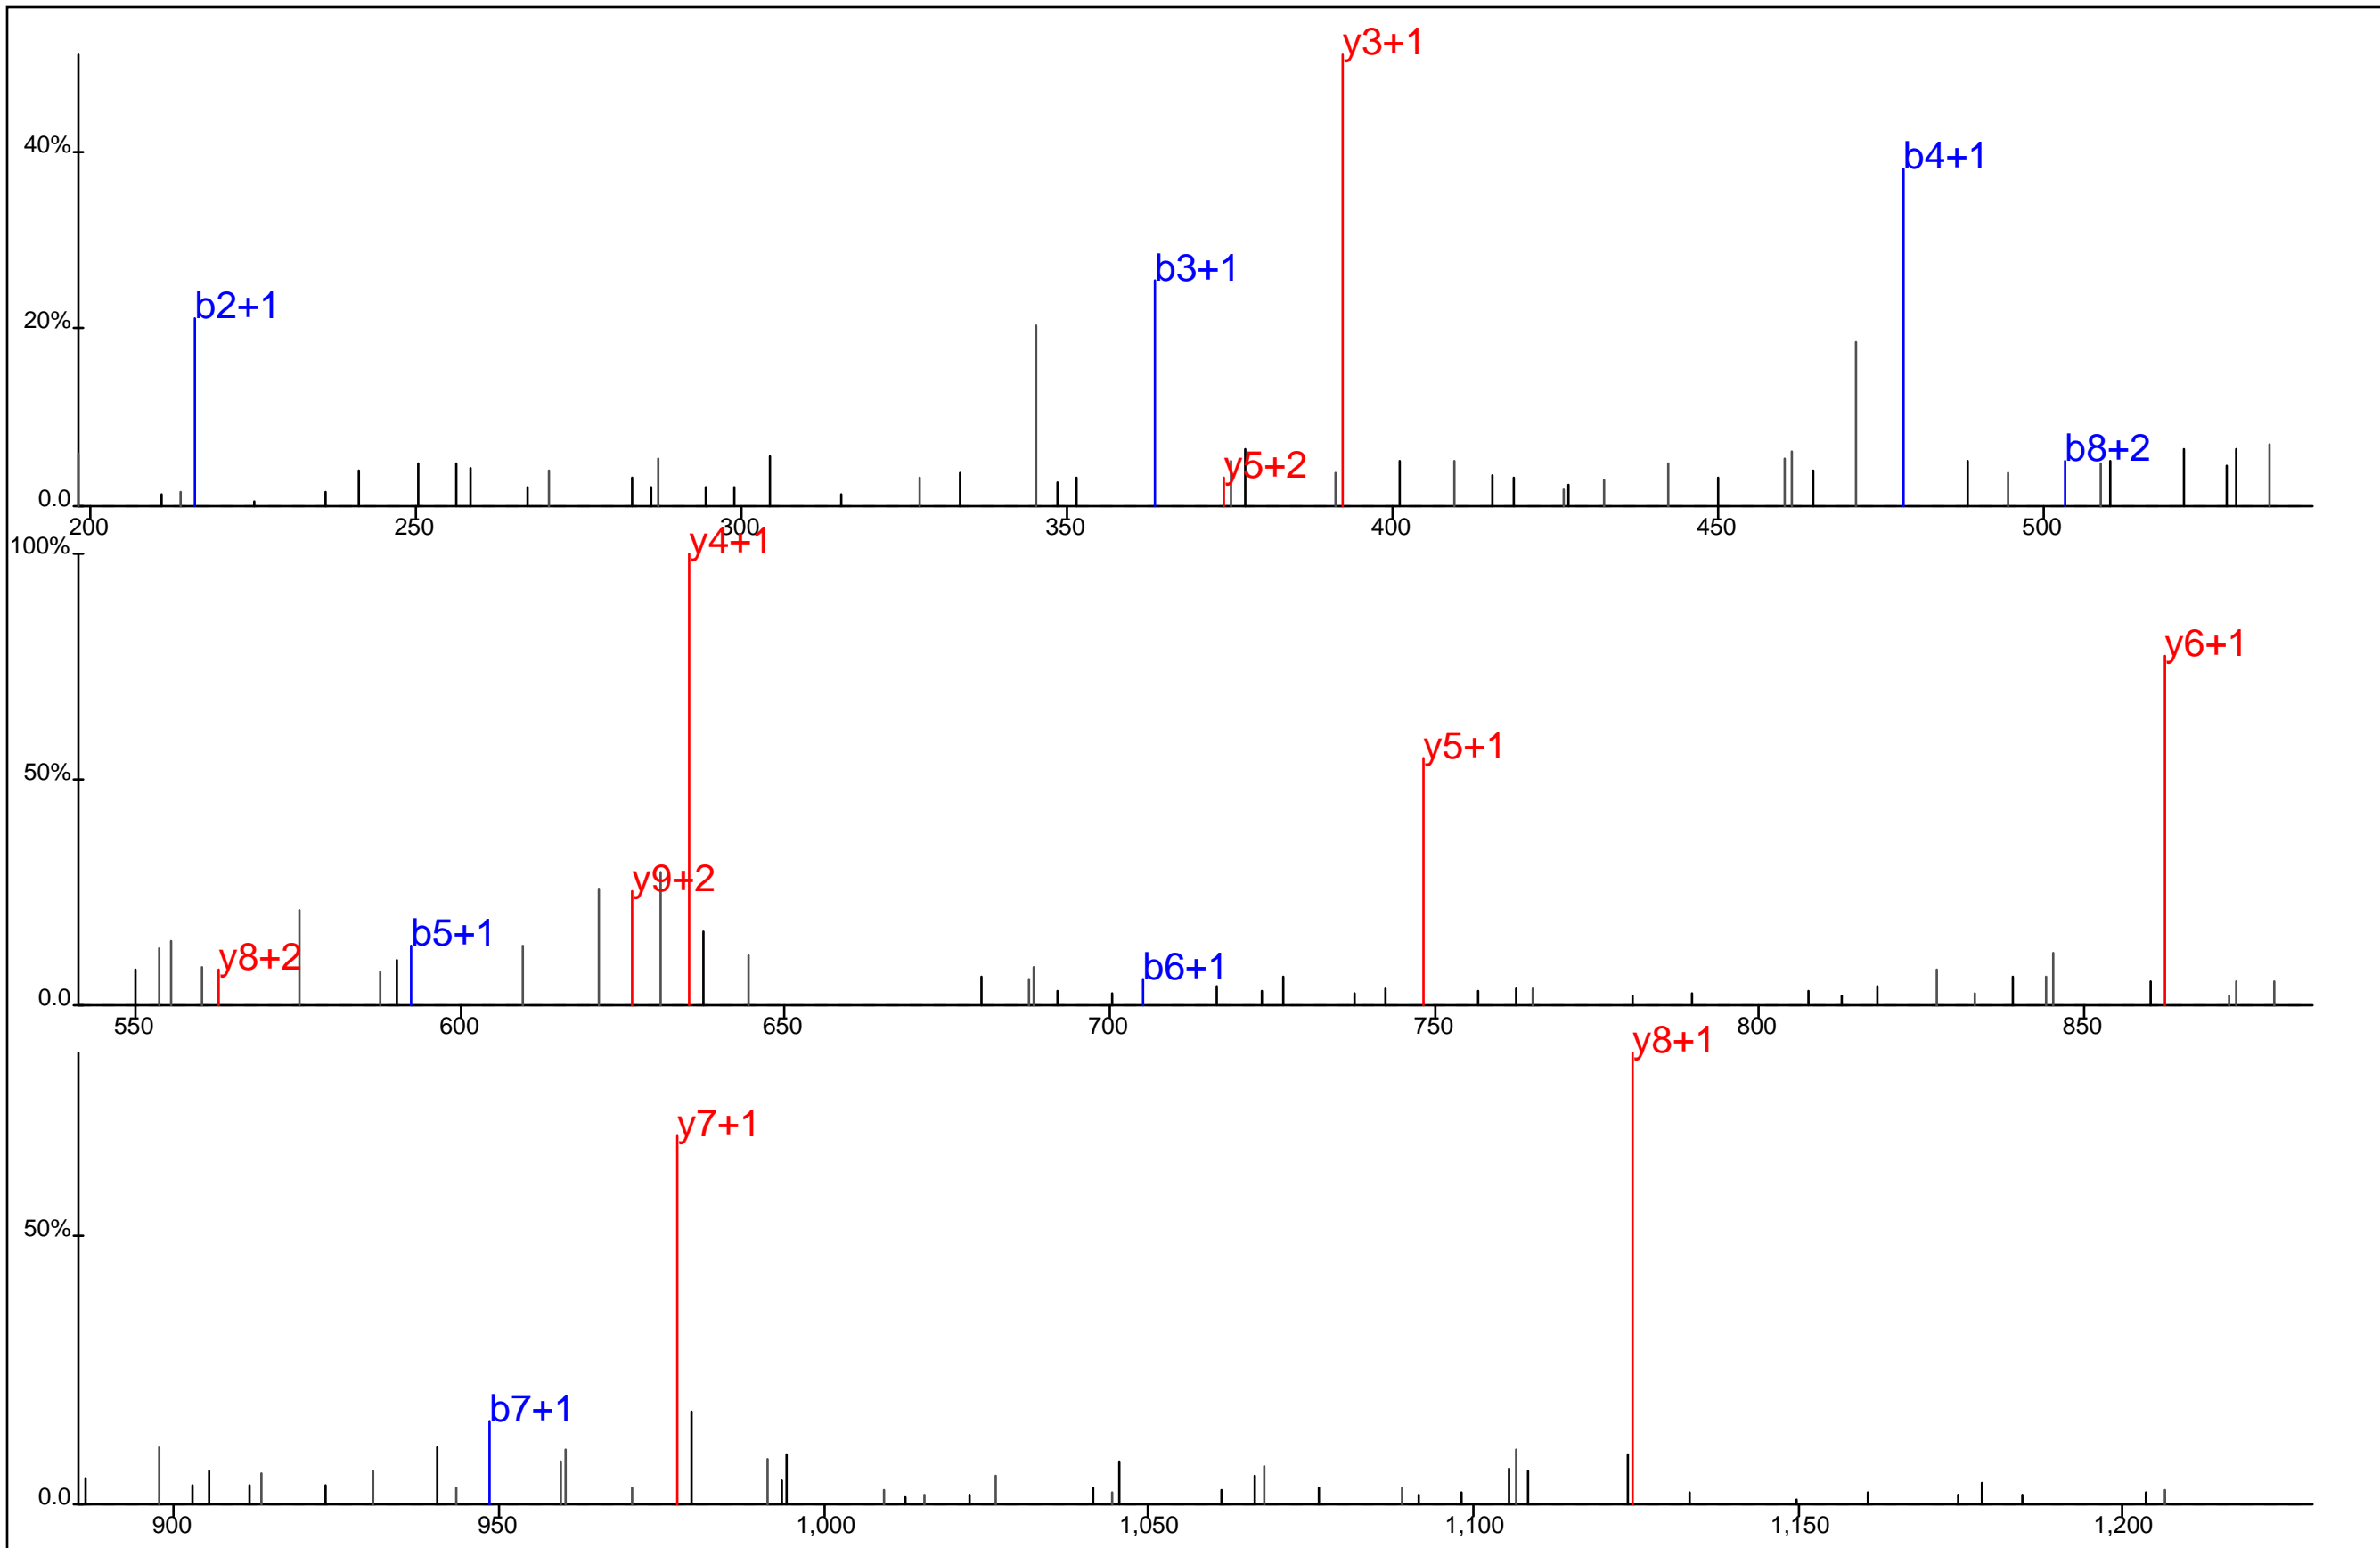

S K F D N L Y\*G C R

Protein Name: S adenosylhomocysteine hydrolase  
 gi Accession: 0  
 Precursor Mass: 670.2806+2  
 Delta Mass: 2.958 ppm  
 XCorr: 49.21

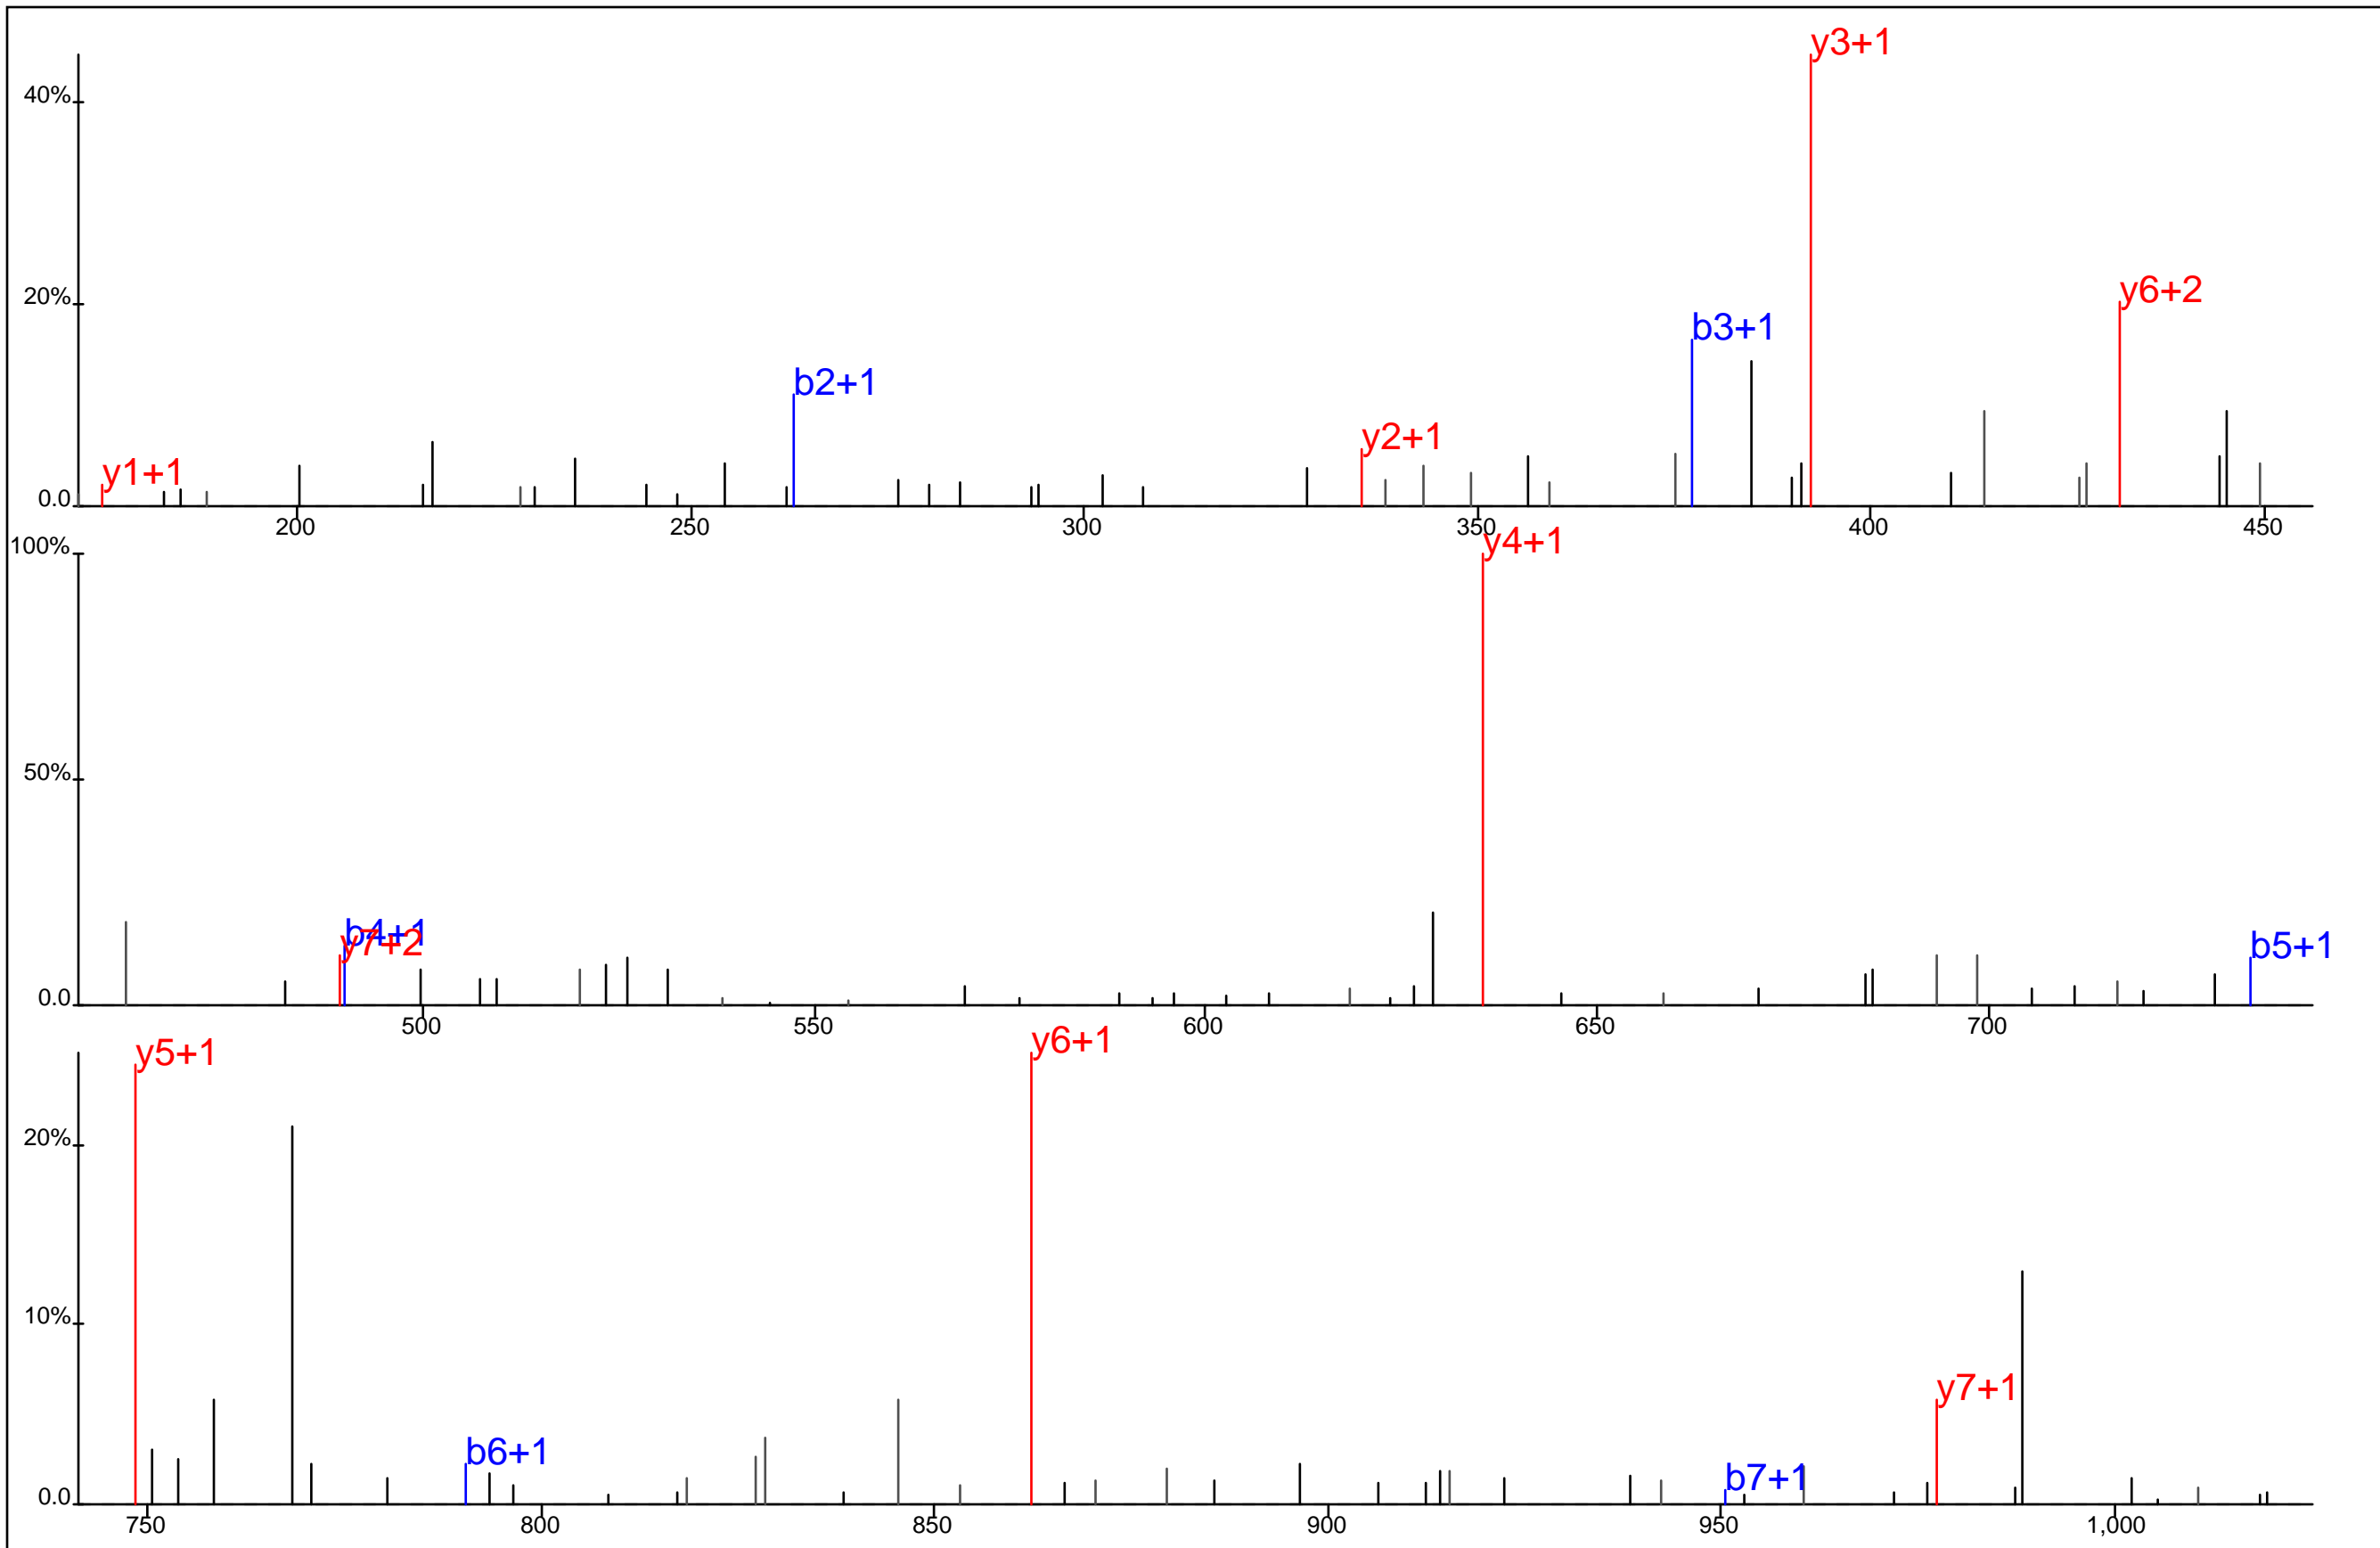

■ ■ ■ ■ ■ ■ ■ ■  
 F D N L Y\*G C R  
■ ■ ■ ■ ■ ■ ■ ■

Protein Name: S adenosylhomocysteine hydrolase  
 gi Accession: 0  
 Precursor Mass: 562.7150+2  
 Delta Mass: 0.361 ppm  
 XCorr: 41.98

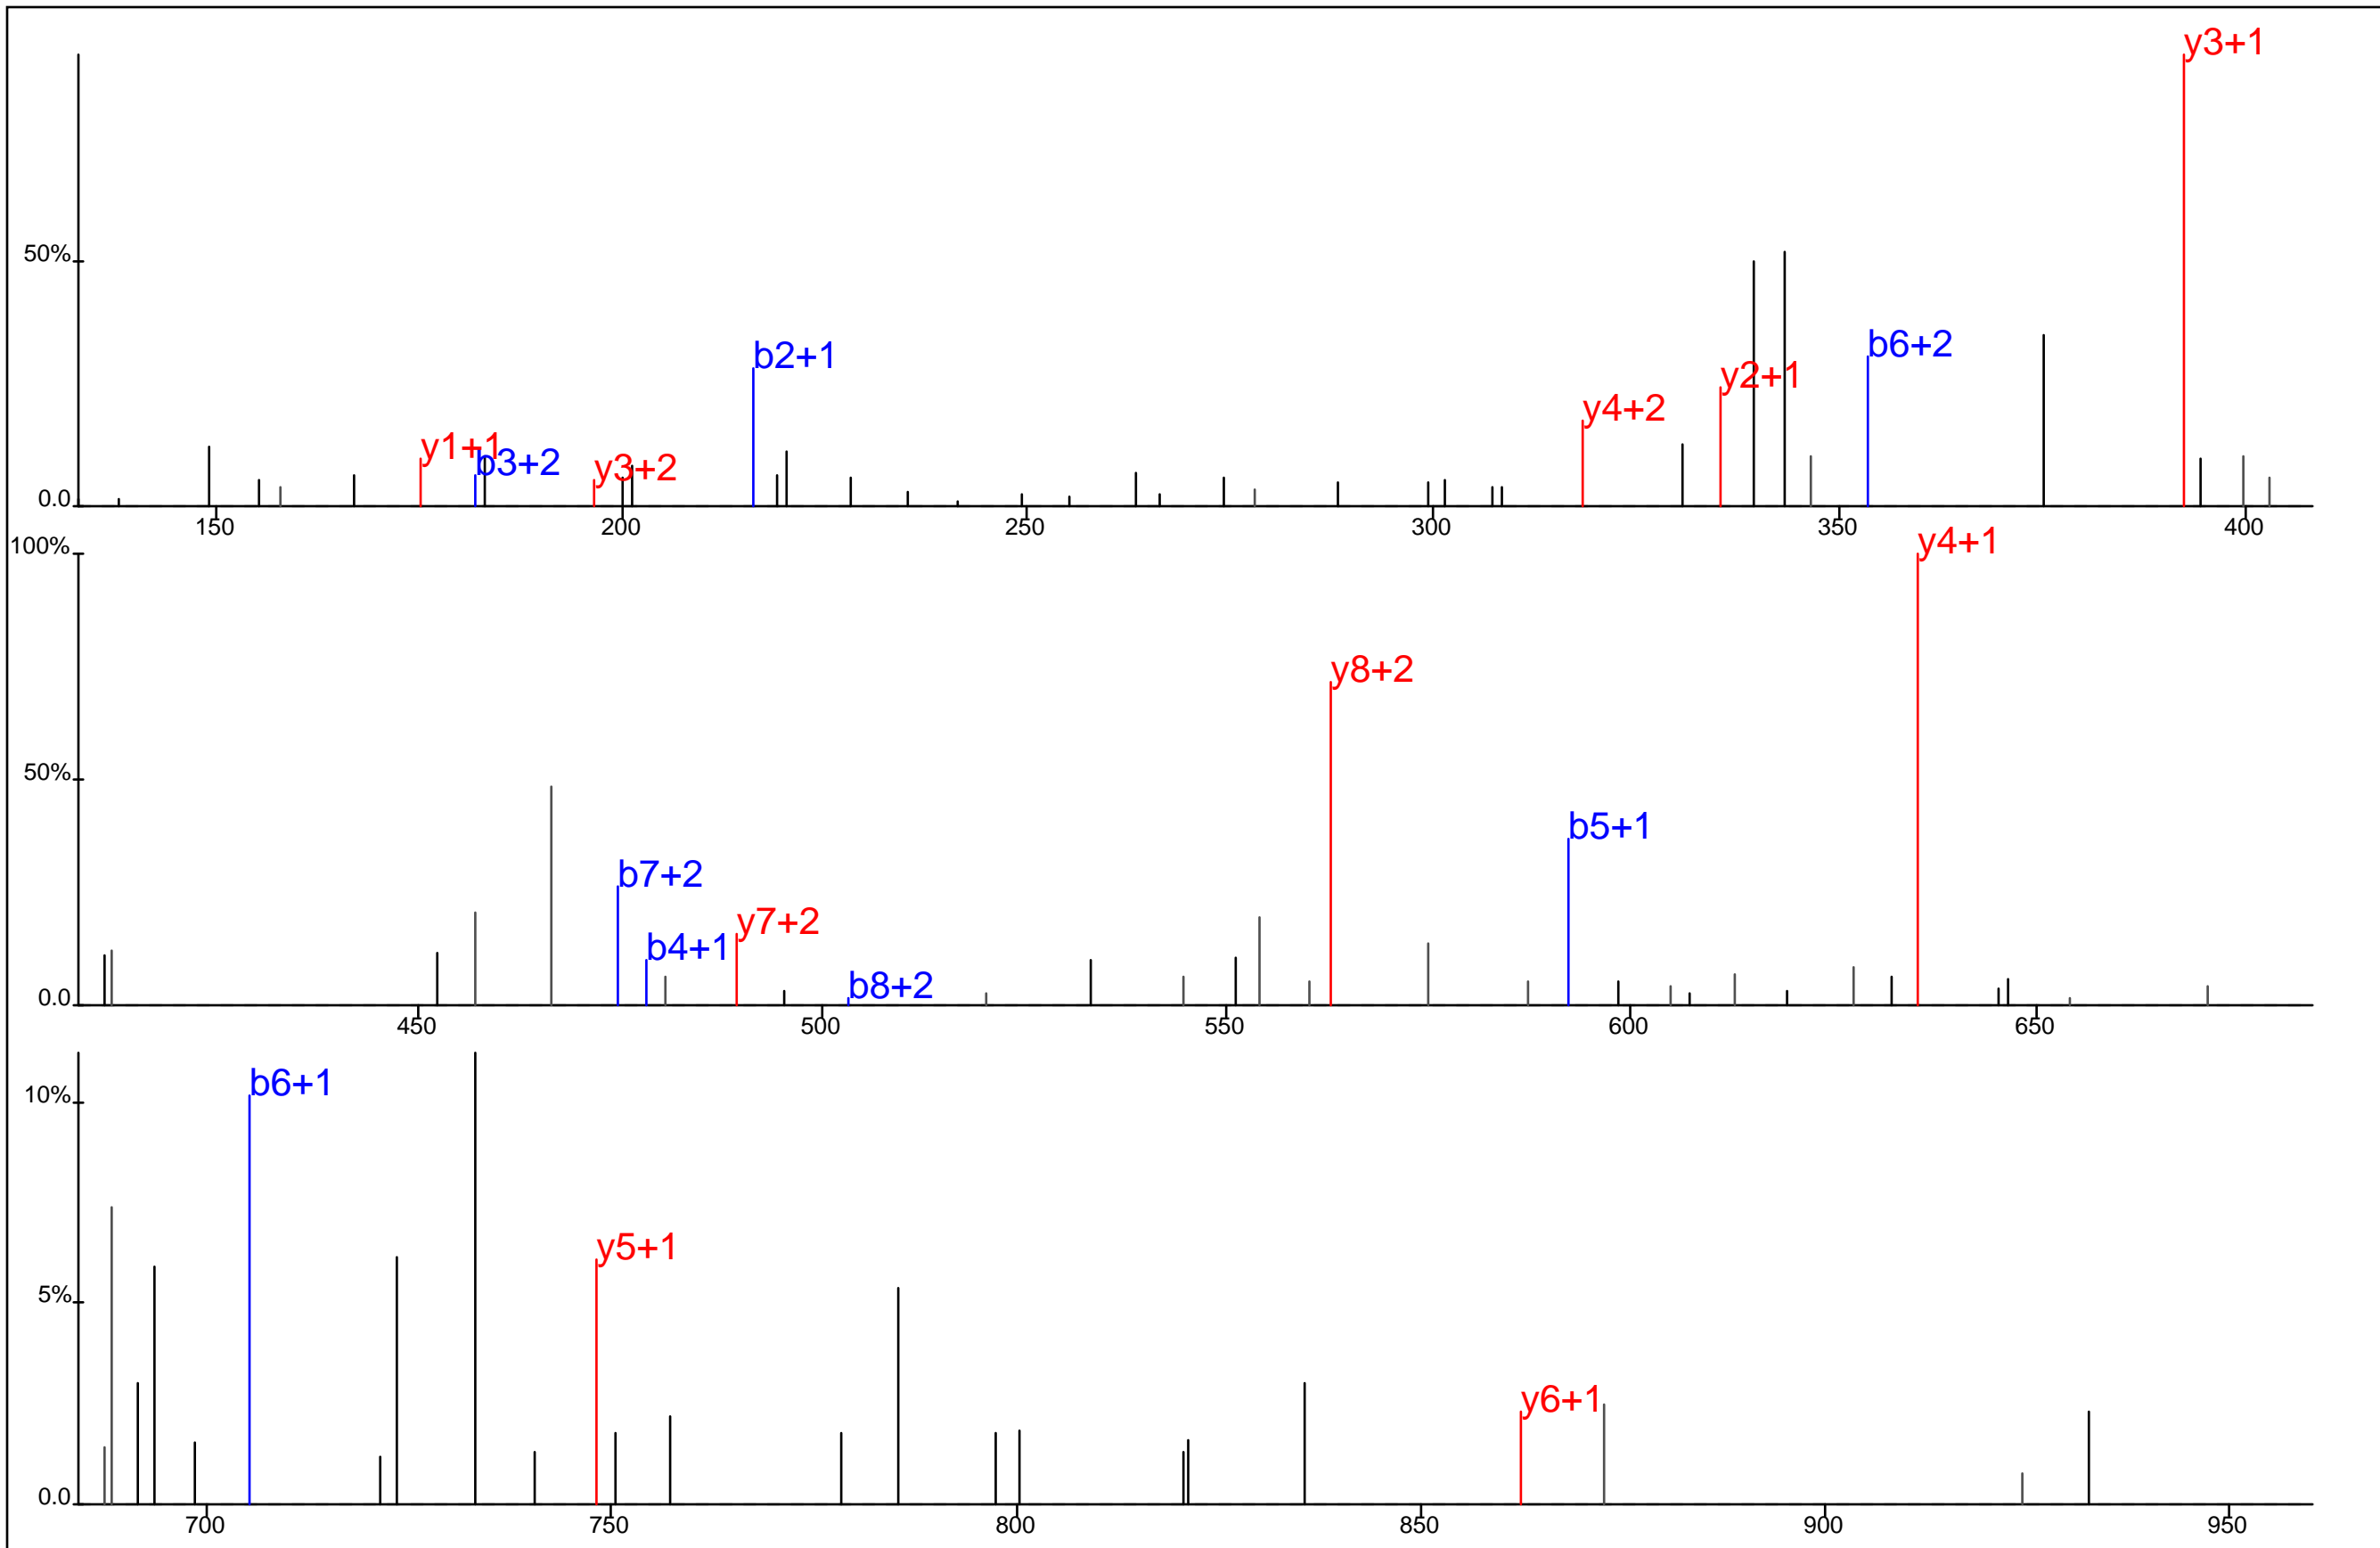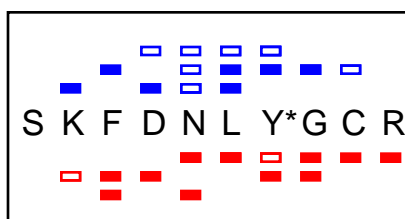

Protein Name: S adenosylhomocysteine hydrolase  
 gi Accession: 0  
 Precursor Mass: 447.1882+3  
 Delta Mass: 0.060 ppm  
 XCorr: 23.56

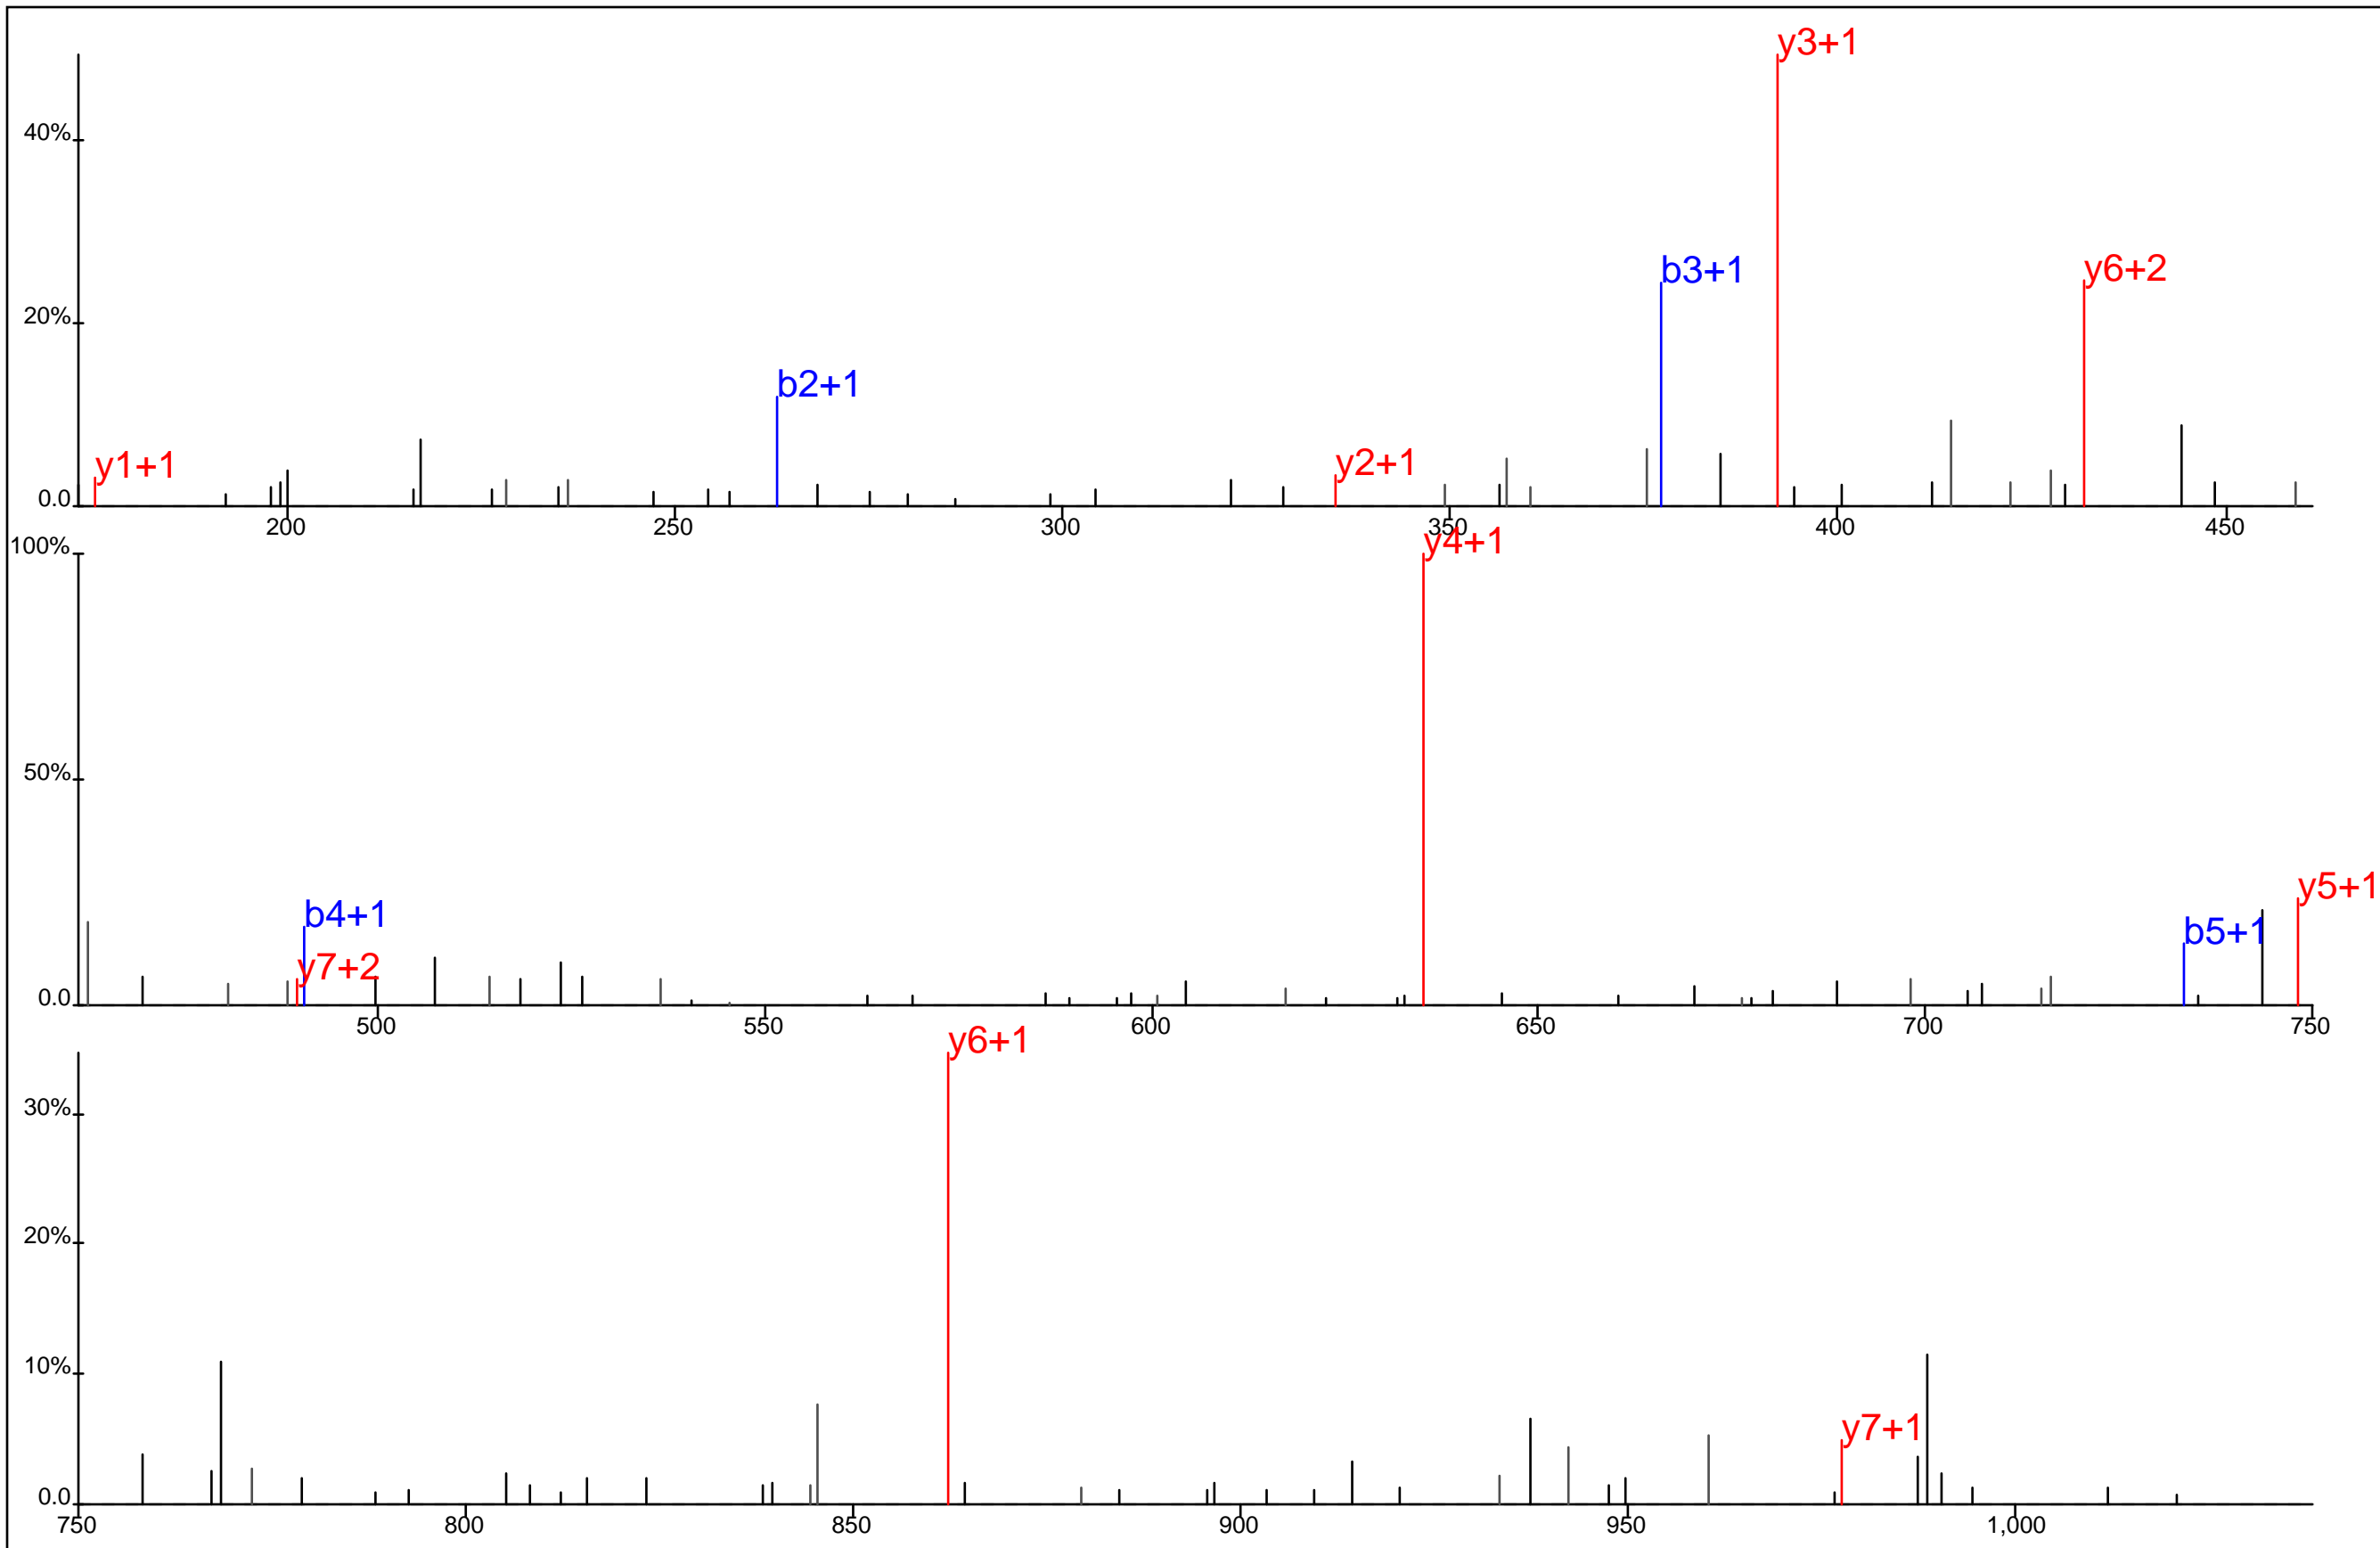

■ ■ ■ ■ ■ ■ ■ ■  
 F D N L Y\* G C R  
■ ■ ■ ■ ■ ■ ■ ■

Protein Name: S adenosylhomocysteine hydrolase  
 gi Accession: 0  
 Precursor Mass: 562.7154+2  
 Delta Mass: 0.398 ppm  
 XCorr: 37.74

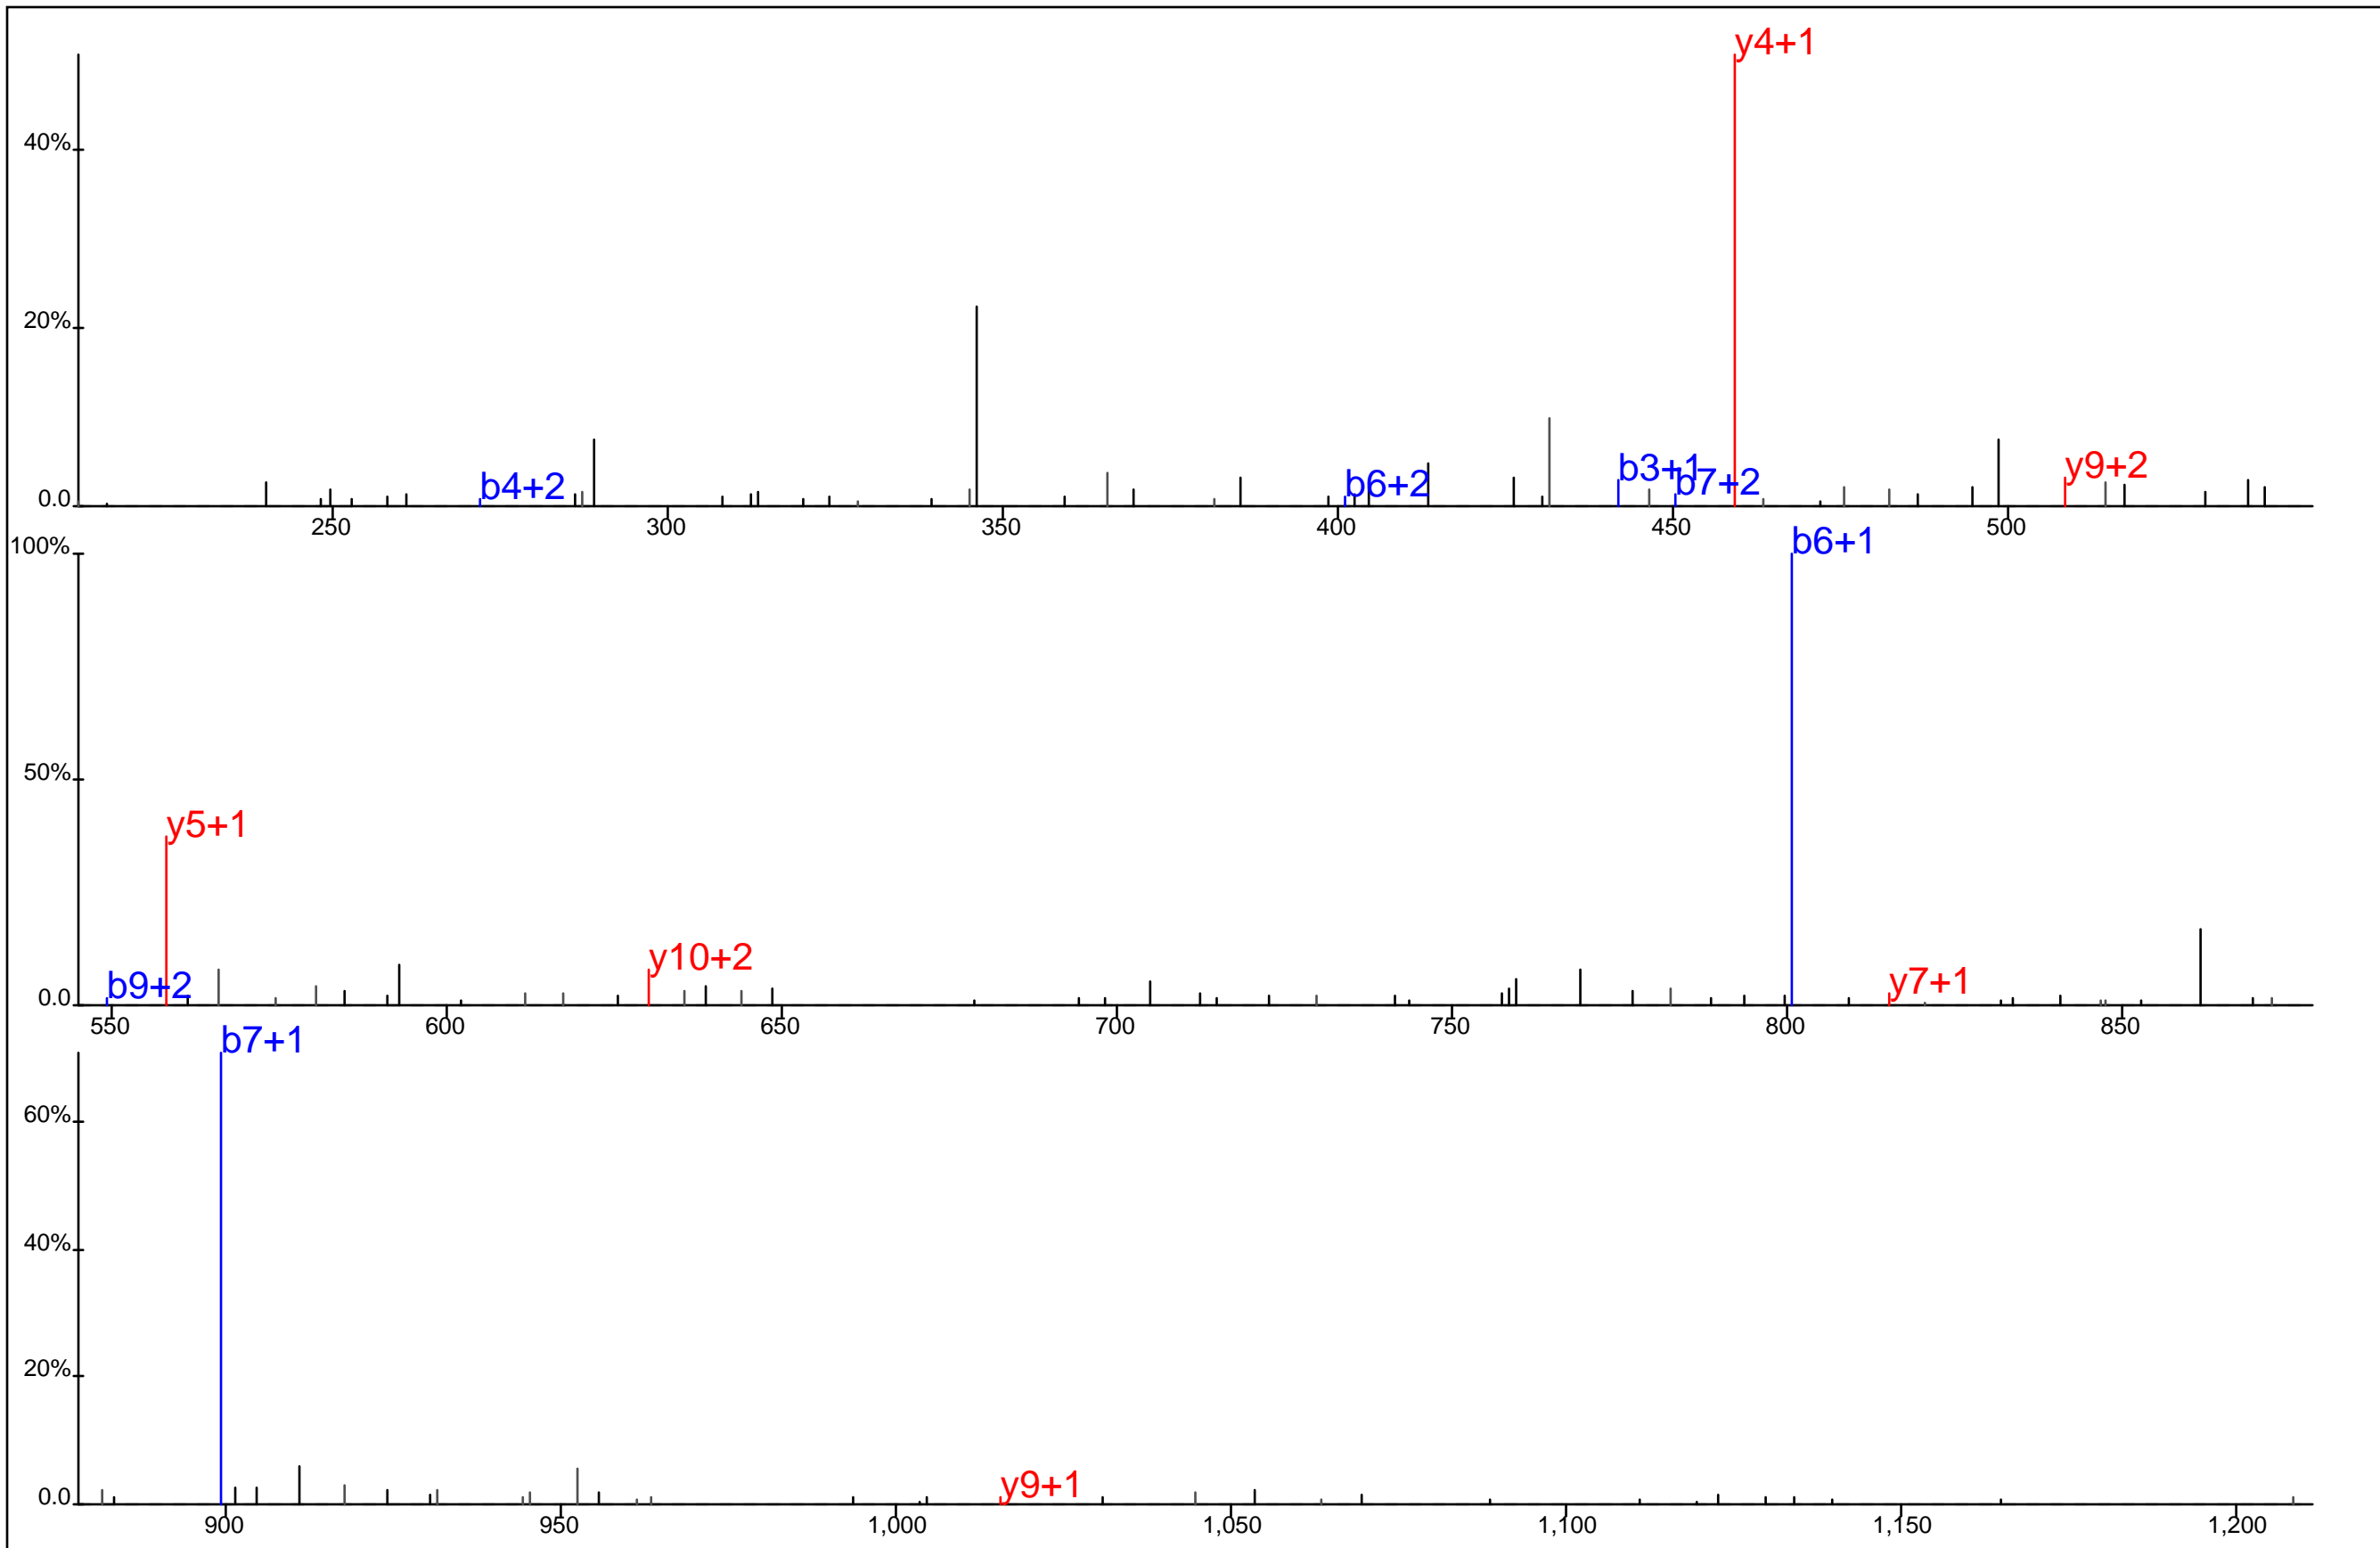

V Y\*V T E K V A Q I K

Protein Name: Scinderin  
 gi Accession: 0  
 Precursor Mass: 679.3555+2  
 Delta Mass: 6.546 ppm  
 XCorr: 21.03

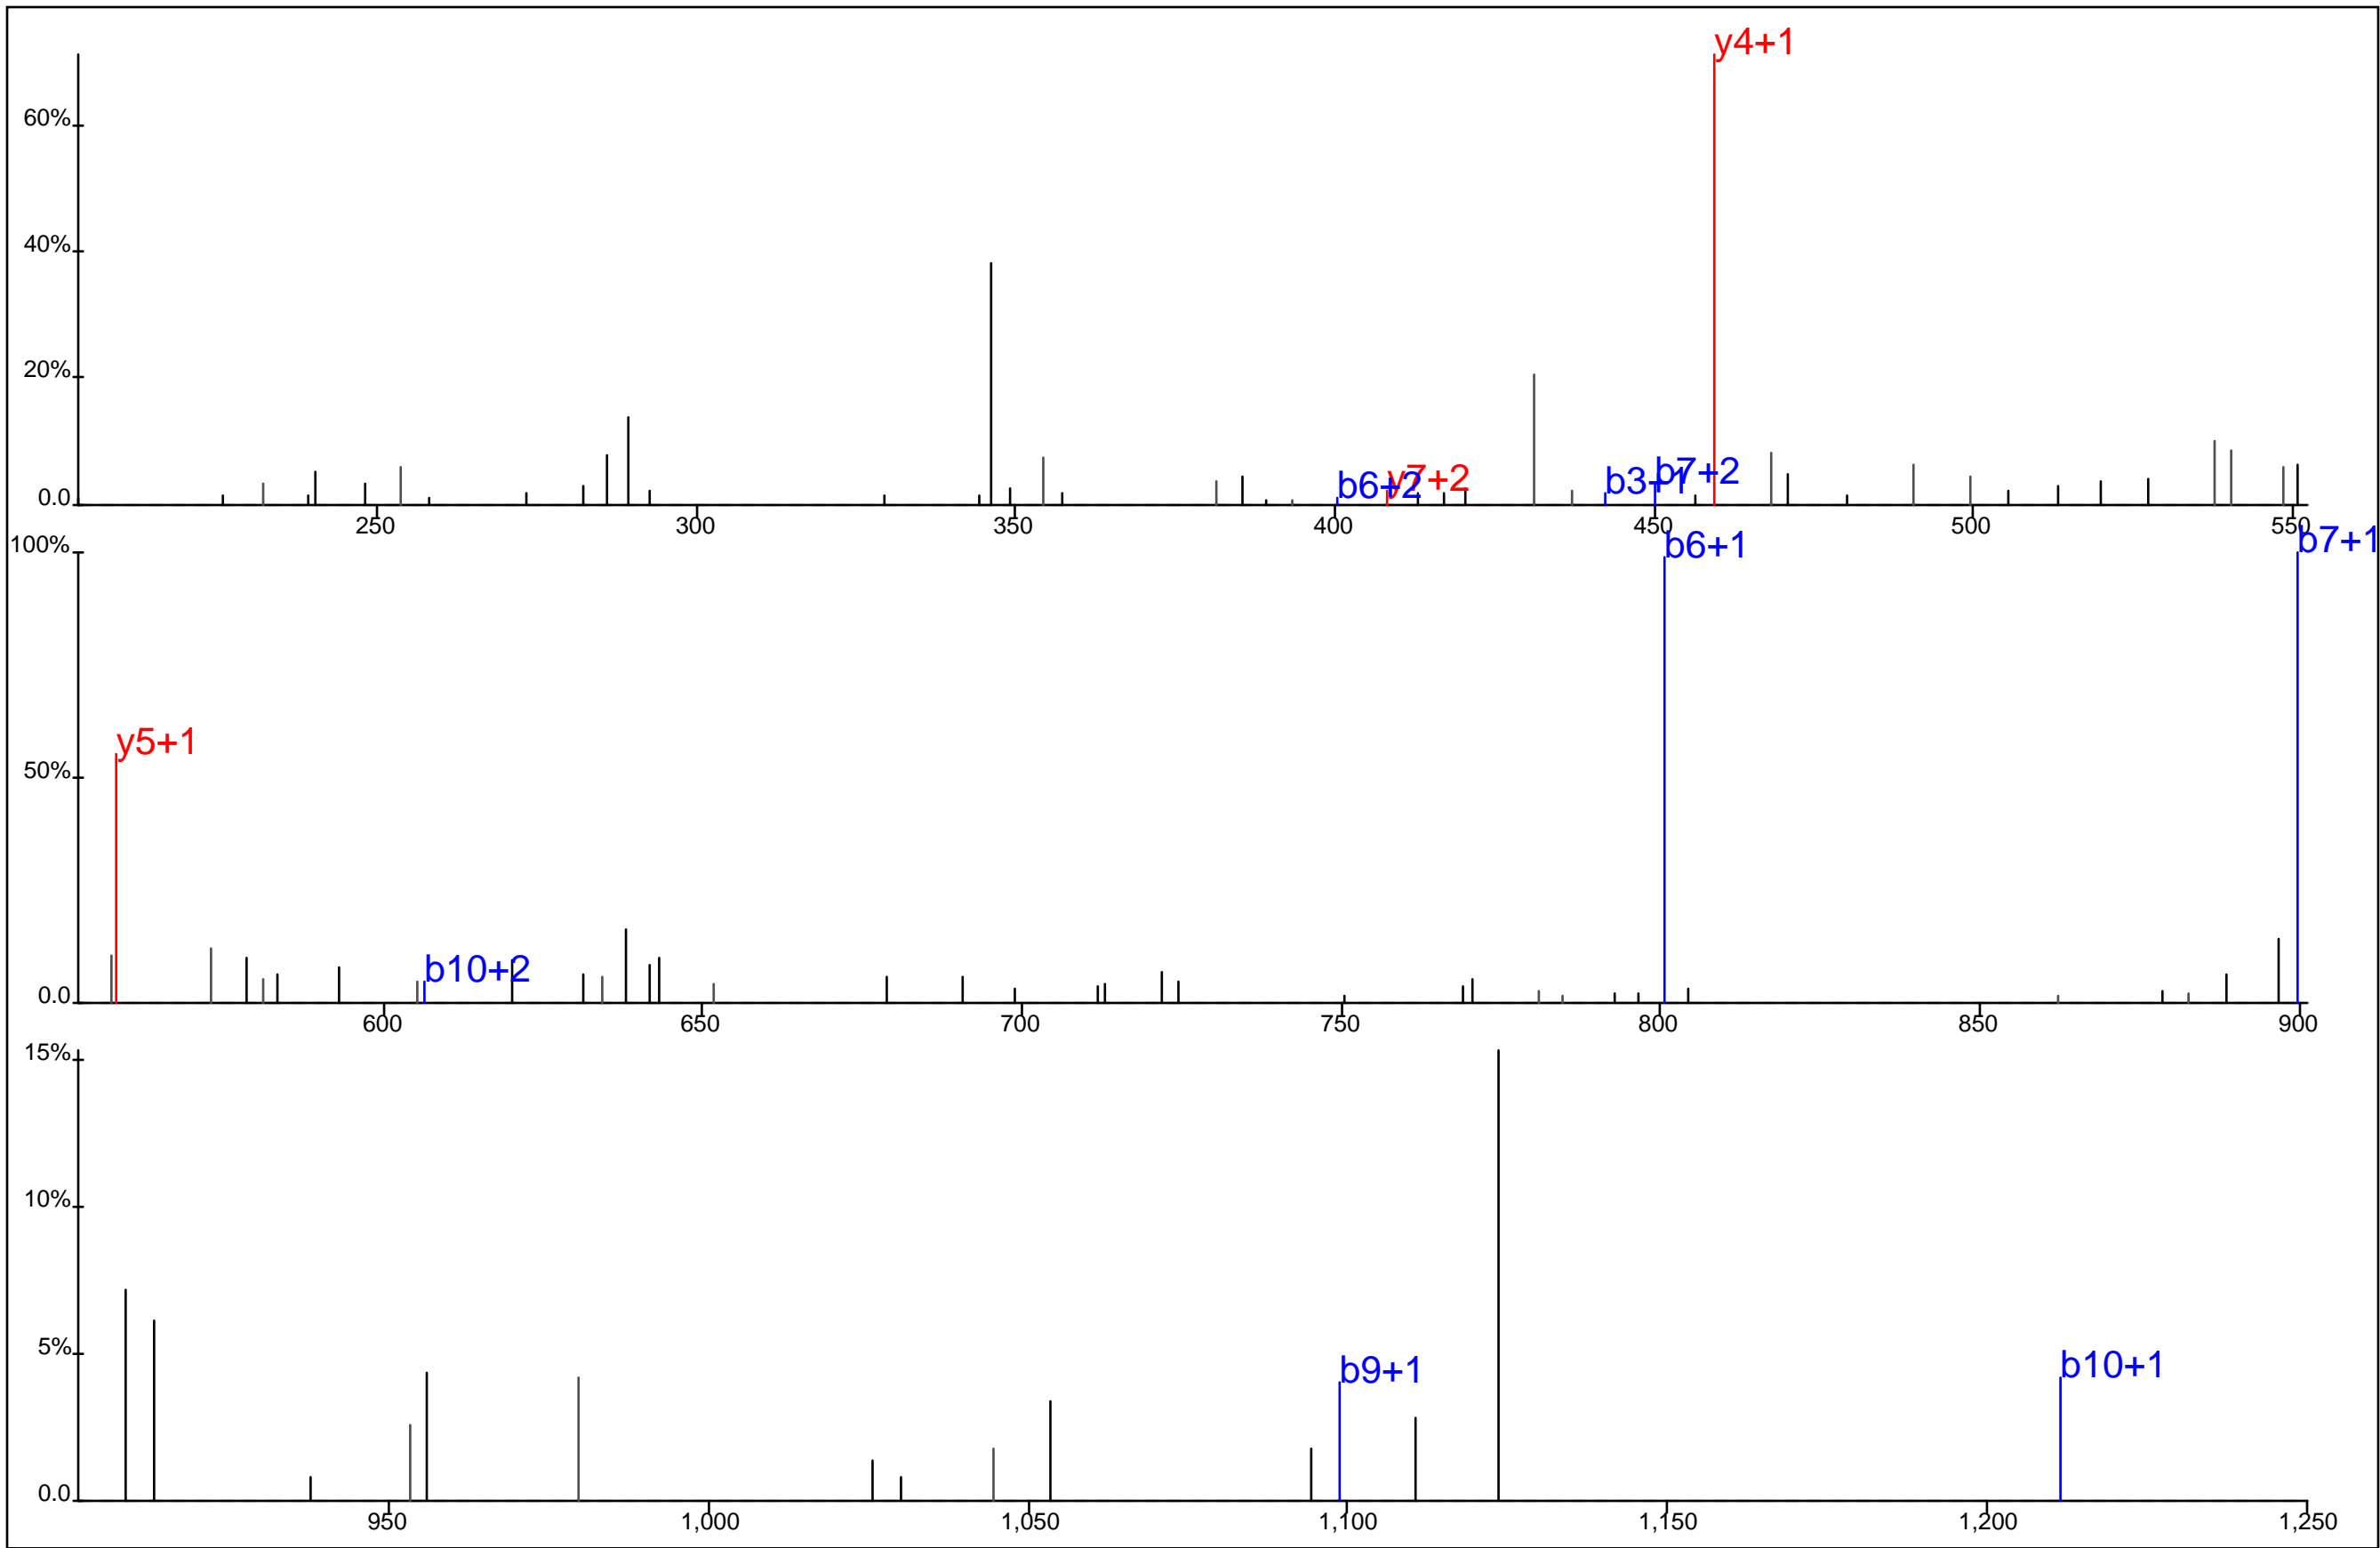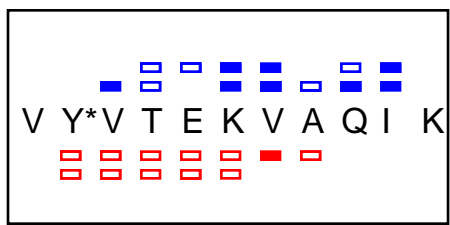

Protein Name: Scinderin  
 gi Accession: 0  
 Precursor Mass: 679.3568+2  
 Delta Mass: 4.749 ppm  
 XCorr: 20.6



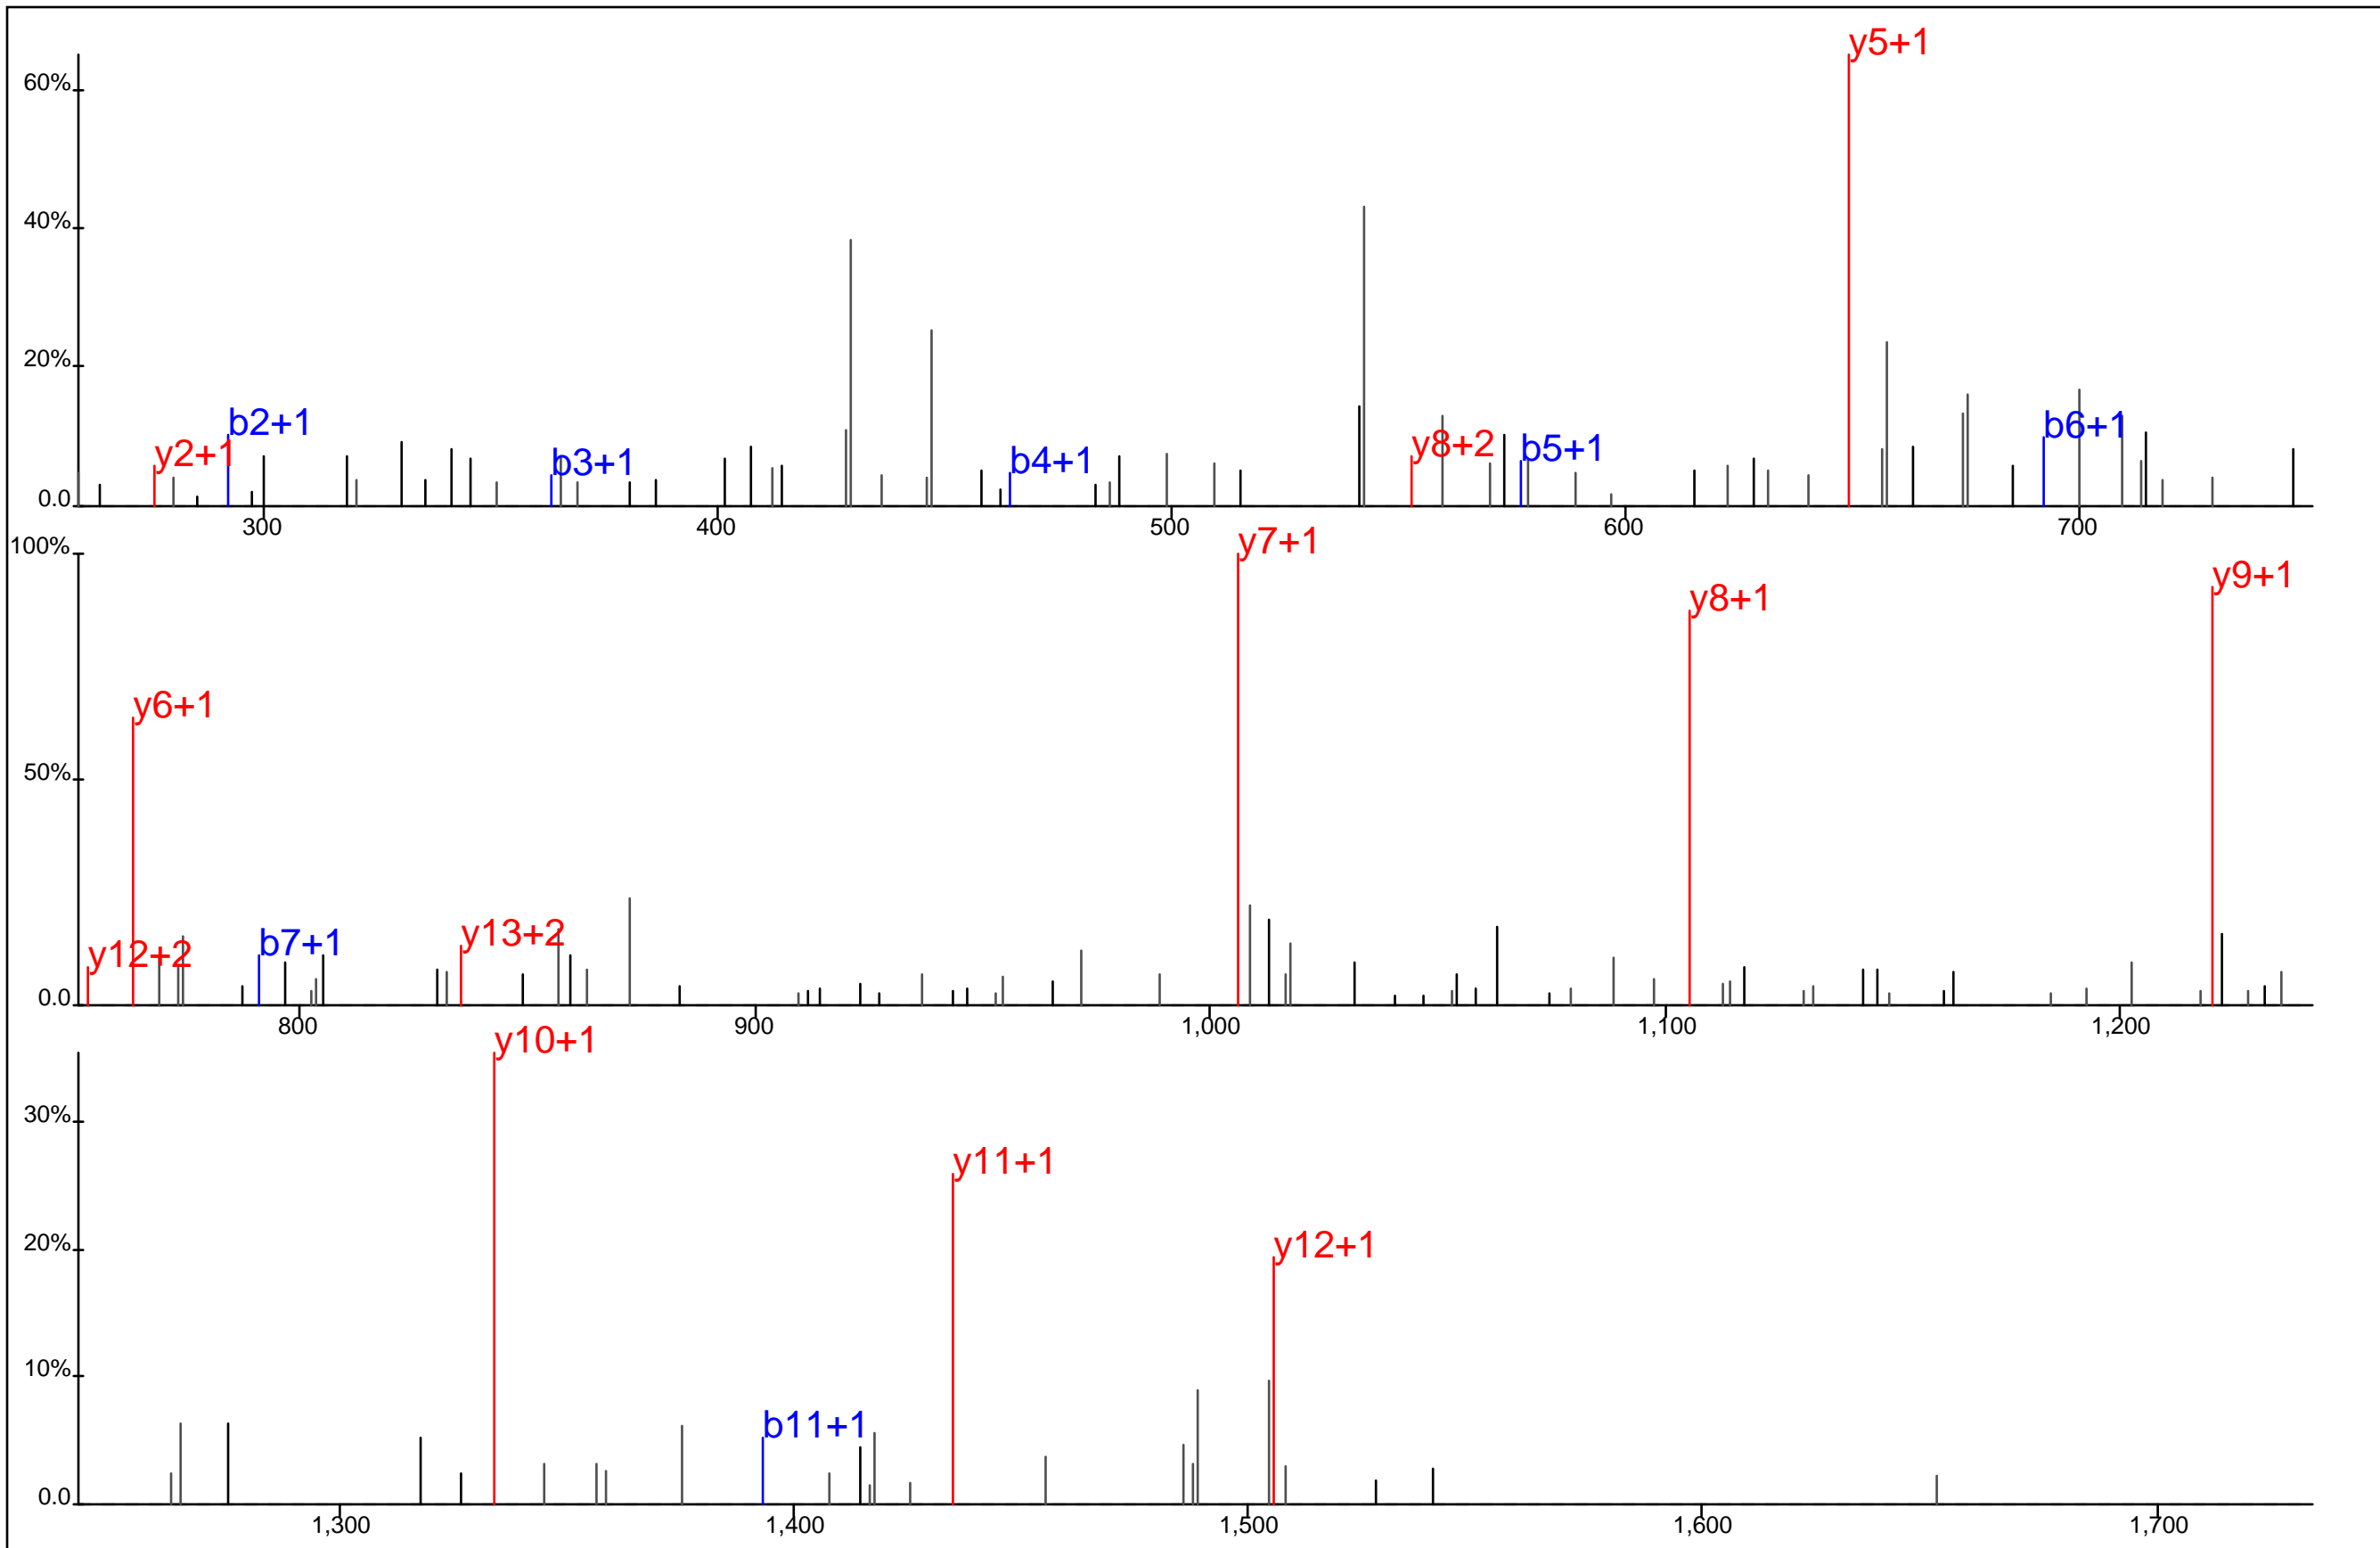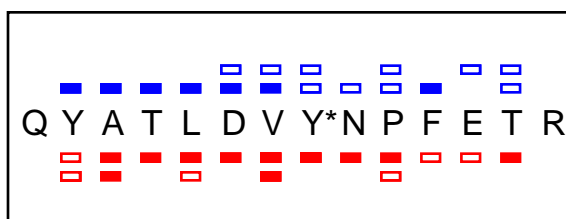

Protein Name: Secretory carrier membrane protein 3  
 gi Accession: 0  
 Precursor Mass: 898.8993+2  
 Delta Mass: 1.233 ppm  
 XCorr: 53.08

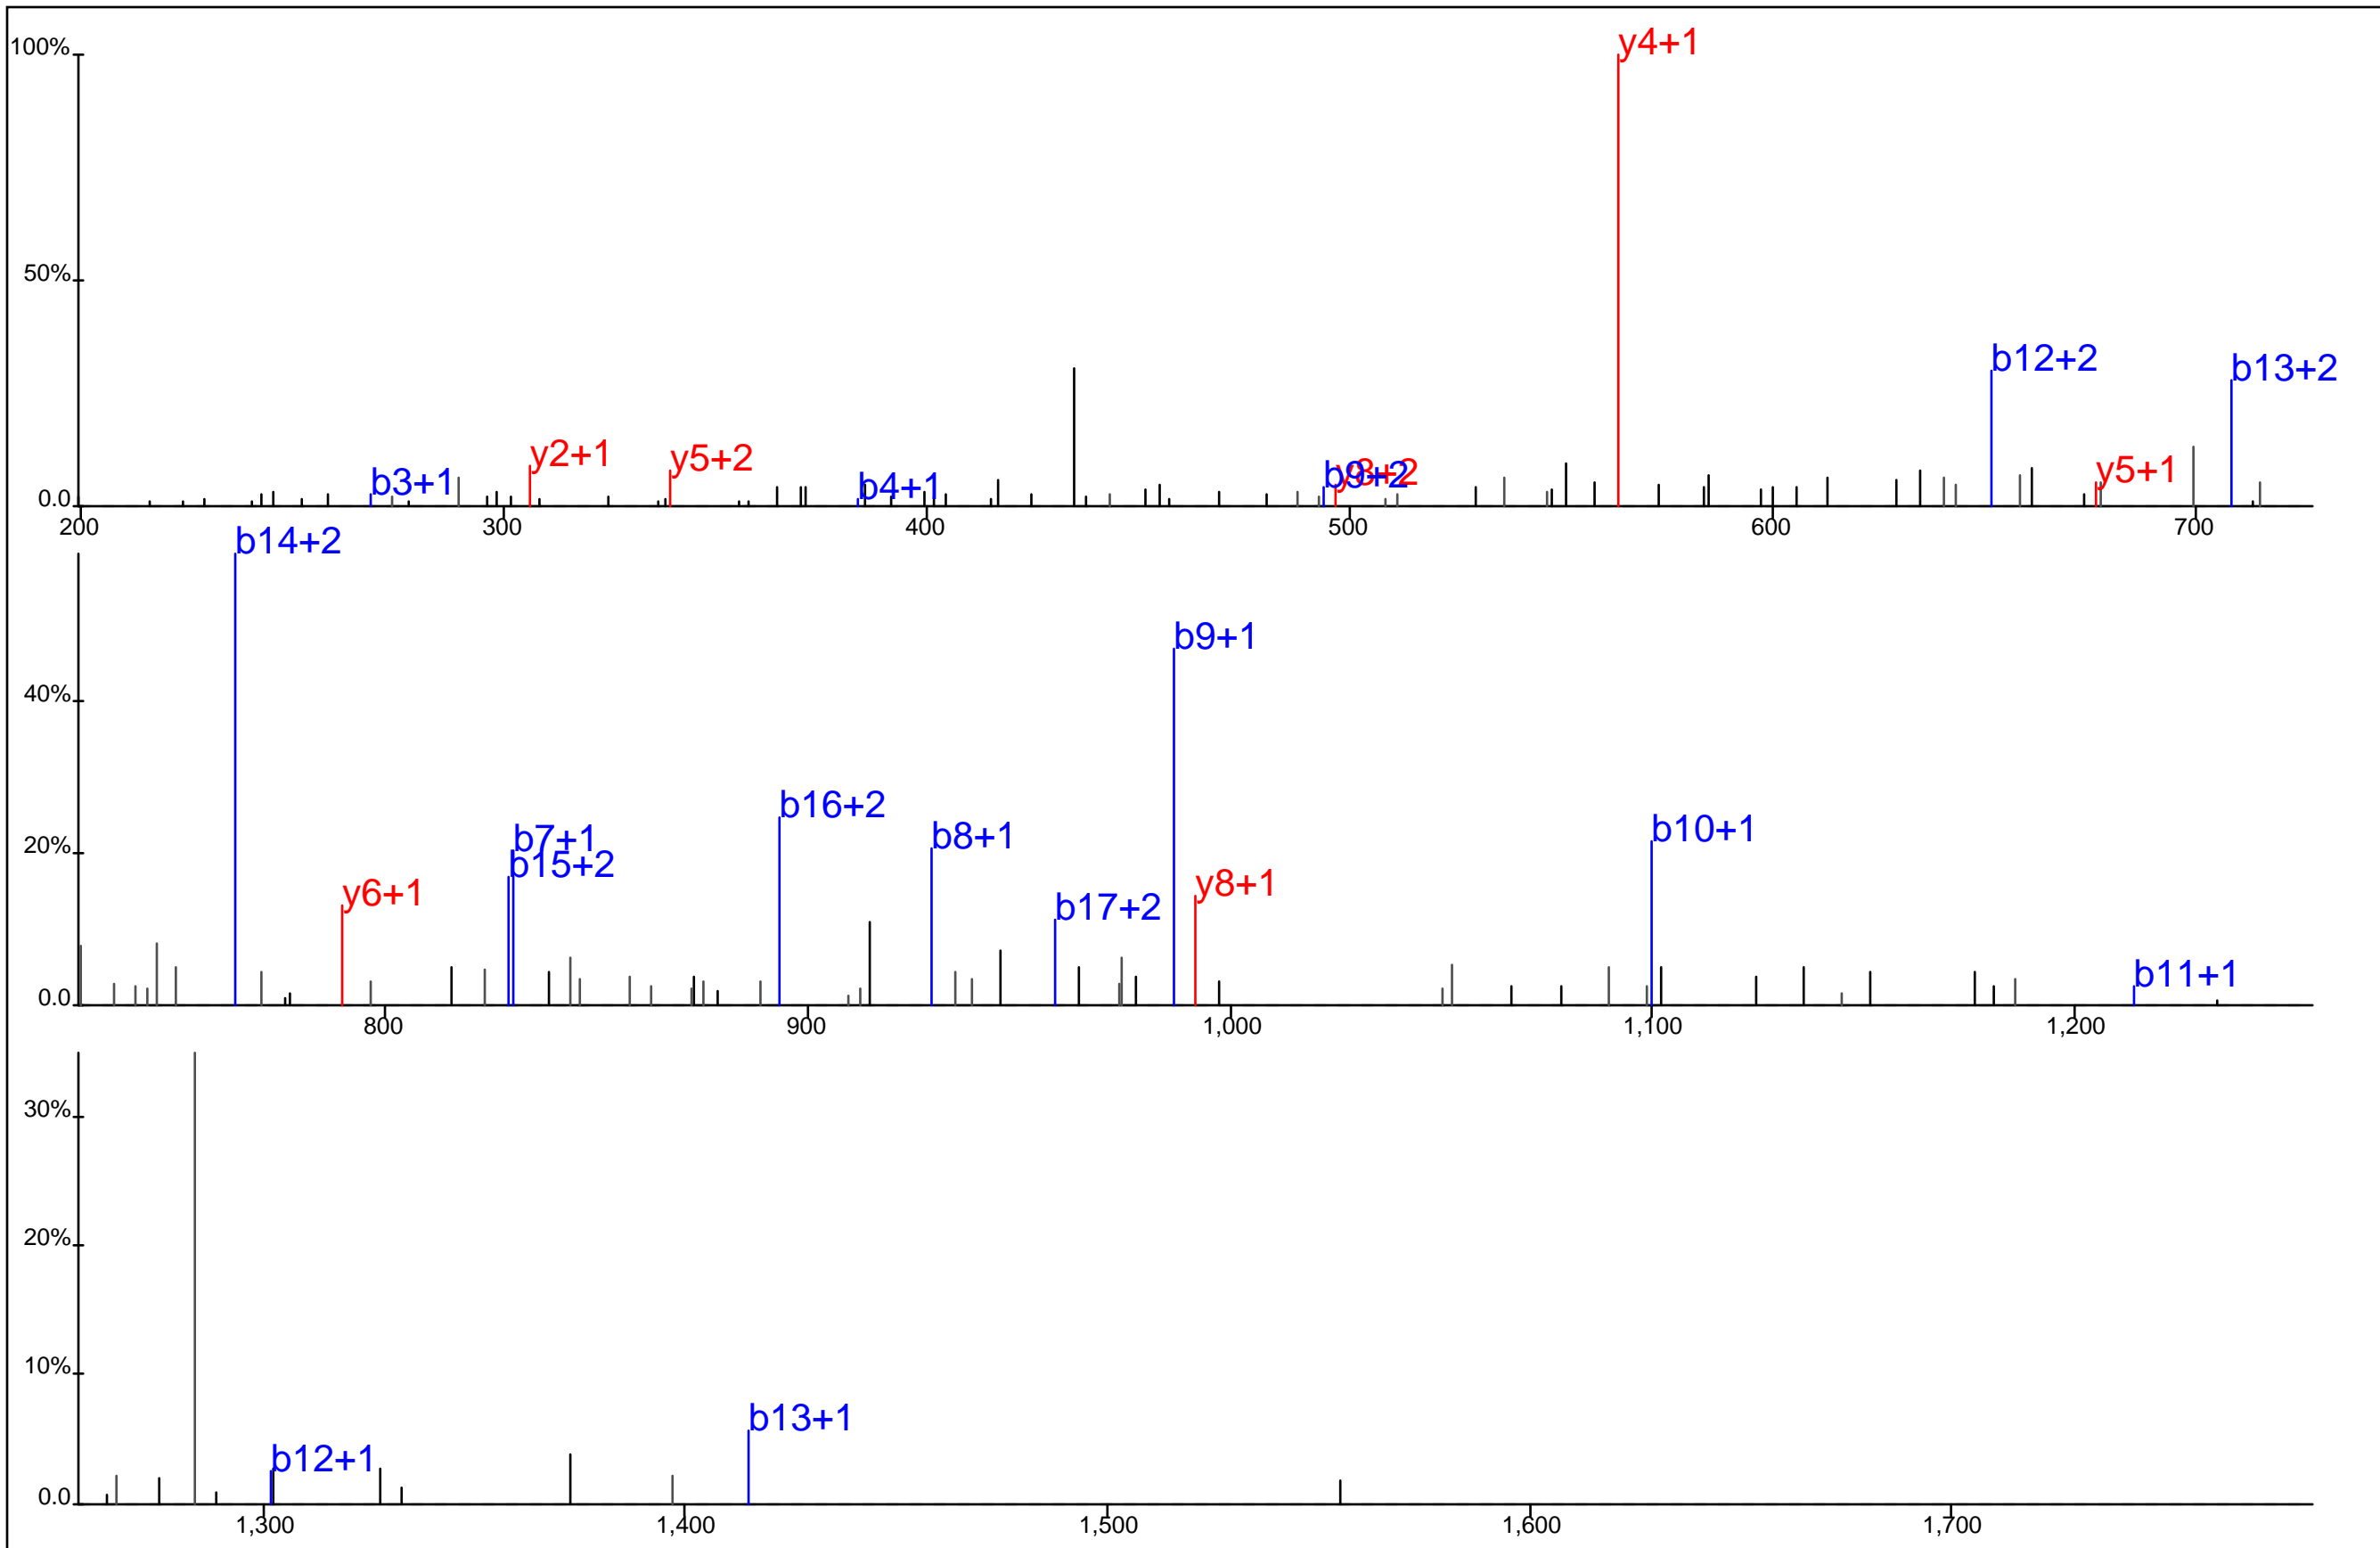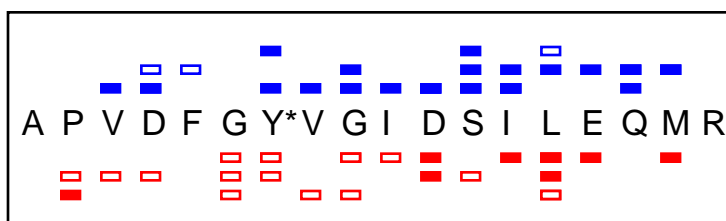

Protein Name: Septin 9  
 gi Accession: 0  
 Precursor Mass: 697.3271+3  
 Delta Mass: 0.142 ppm  
 XCorr: 37.62

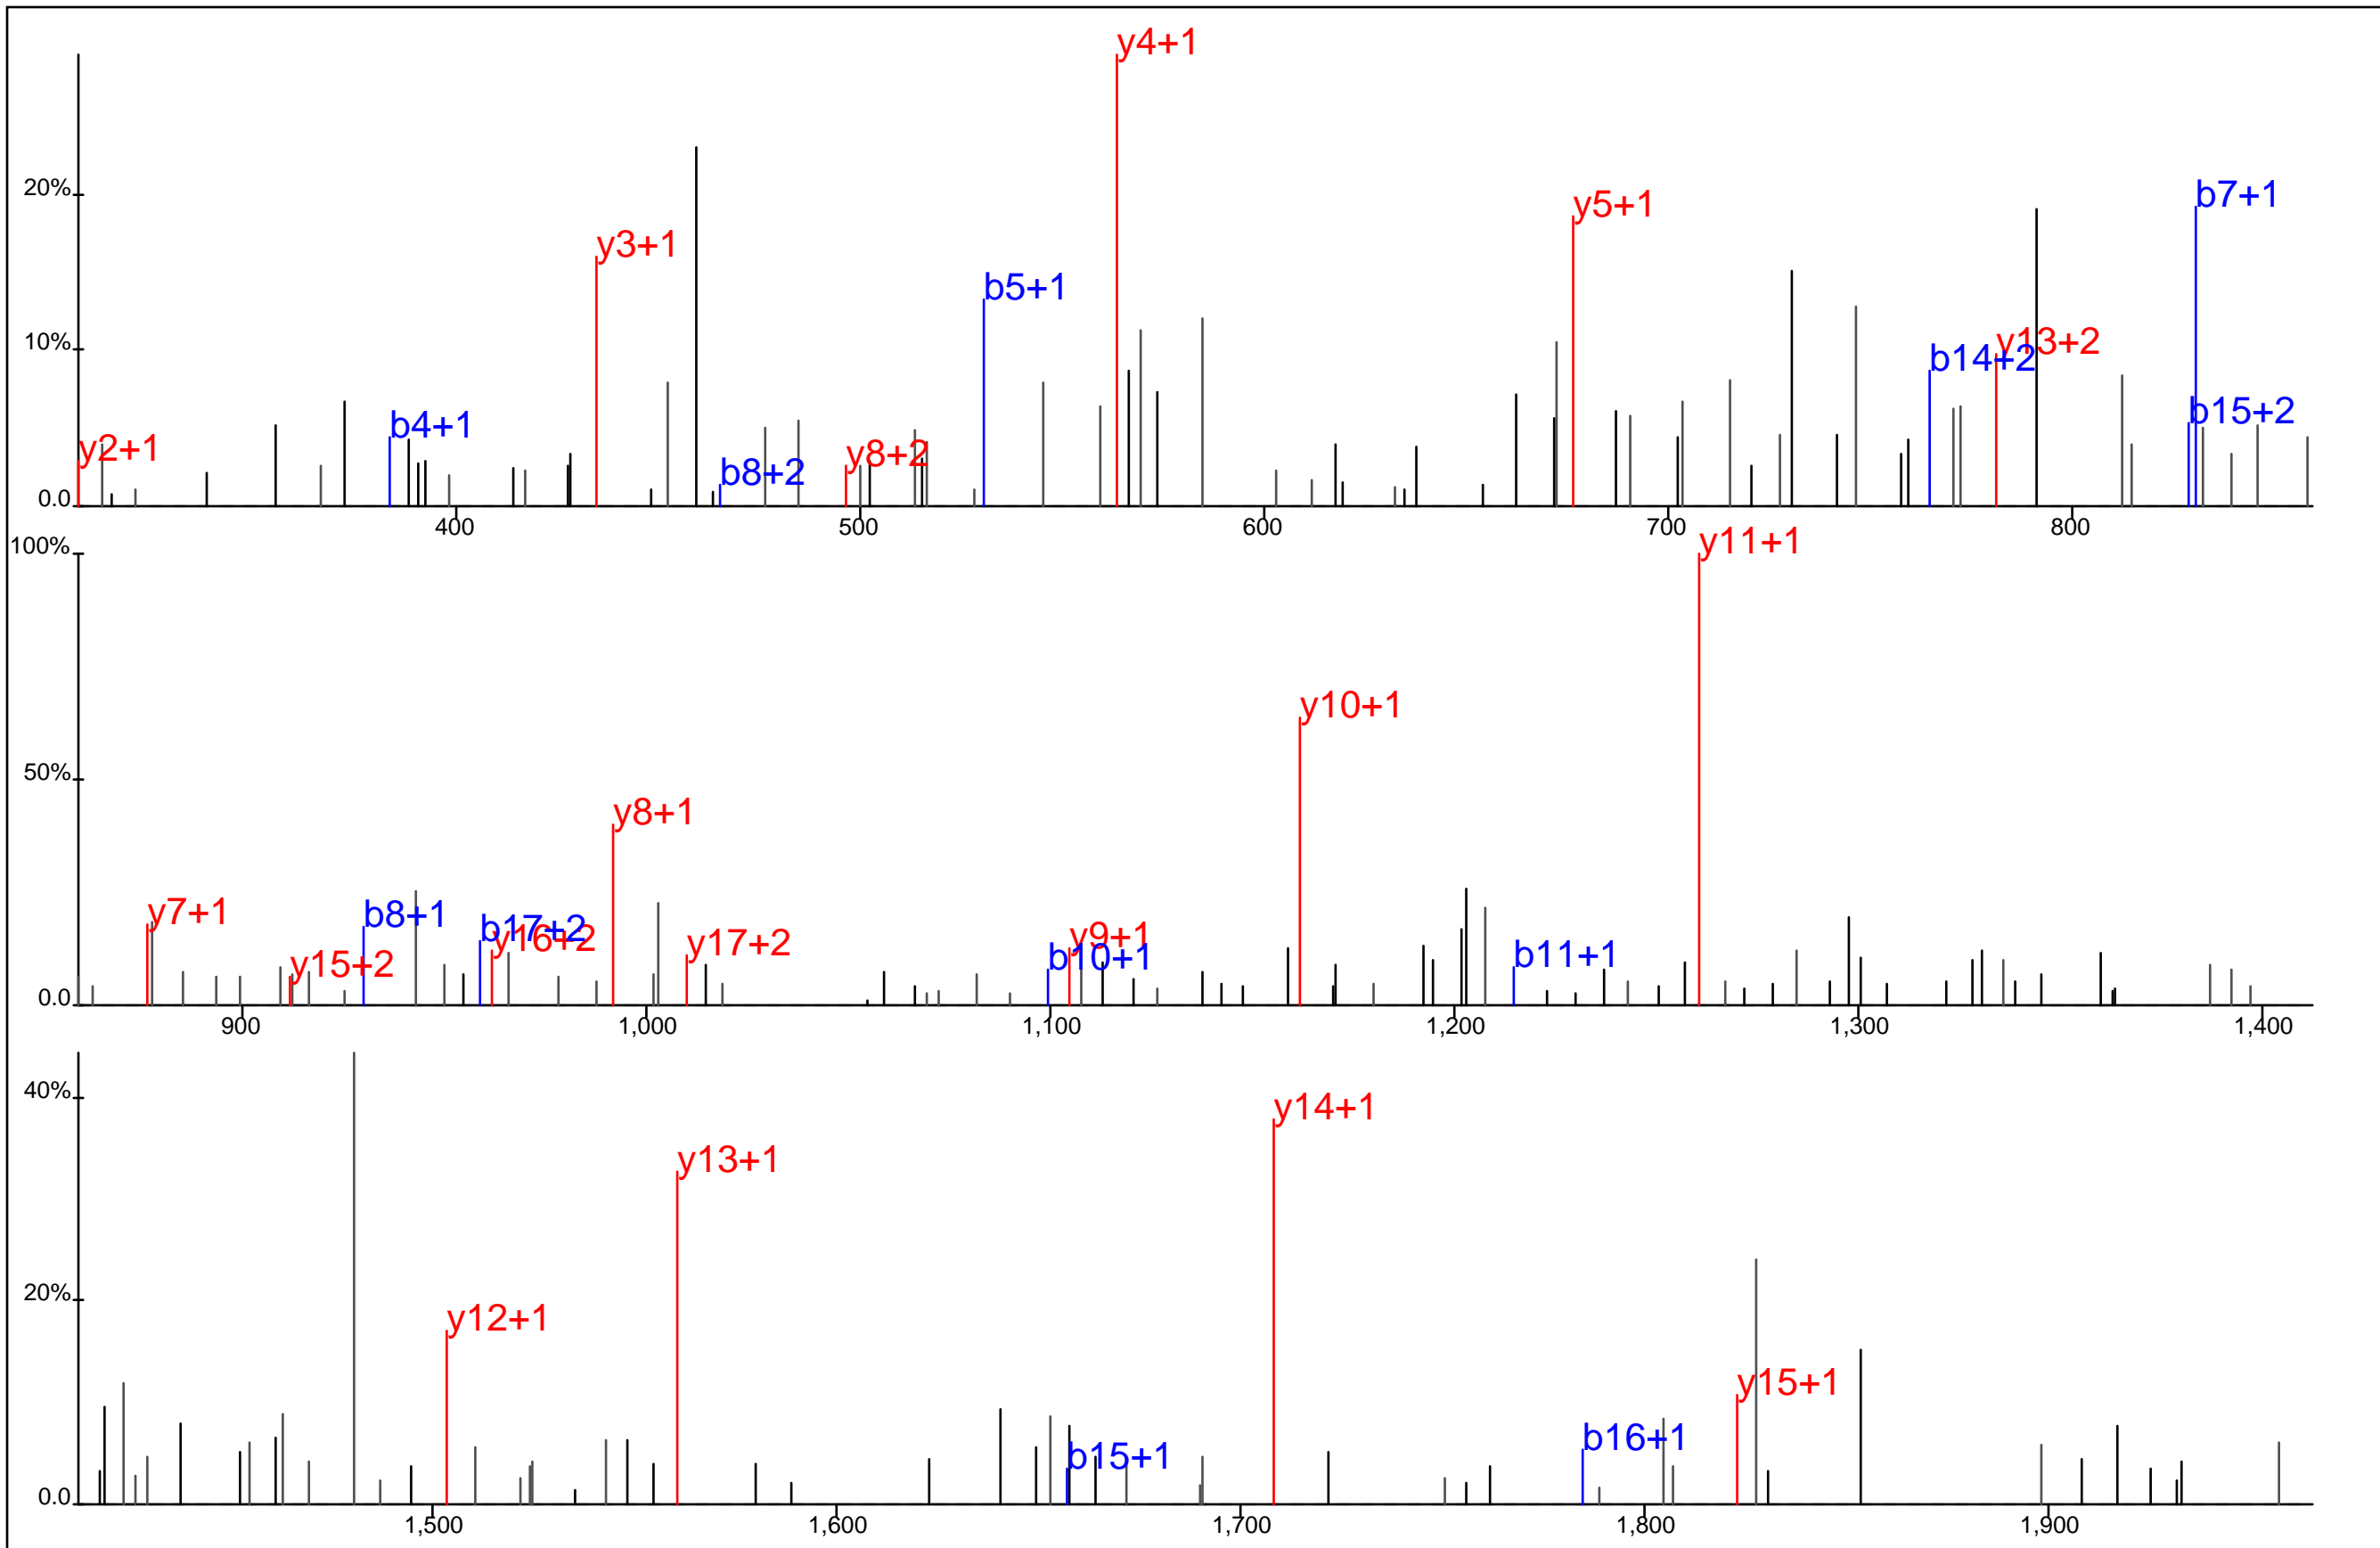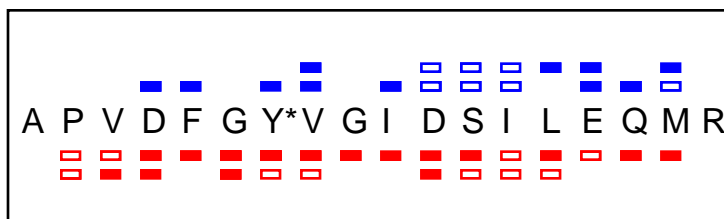

Protein Name: Septin 9  
 gi Accession: 0  
 Precursor Mass: 1,045.4844+2  
 Delta Mass: 2.363 ppm  
 XCorr: 53.14

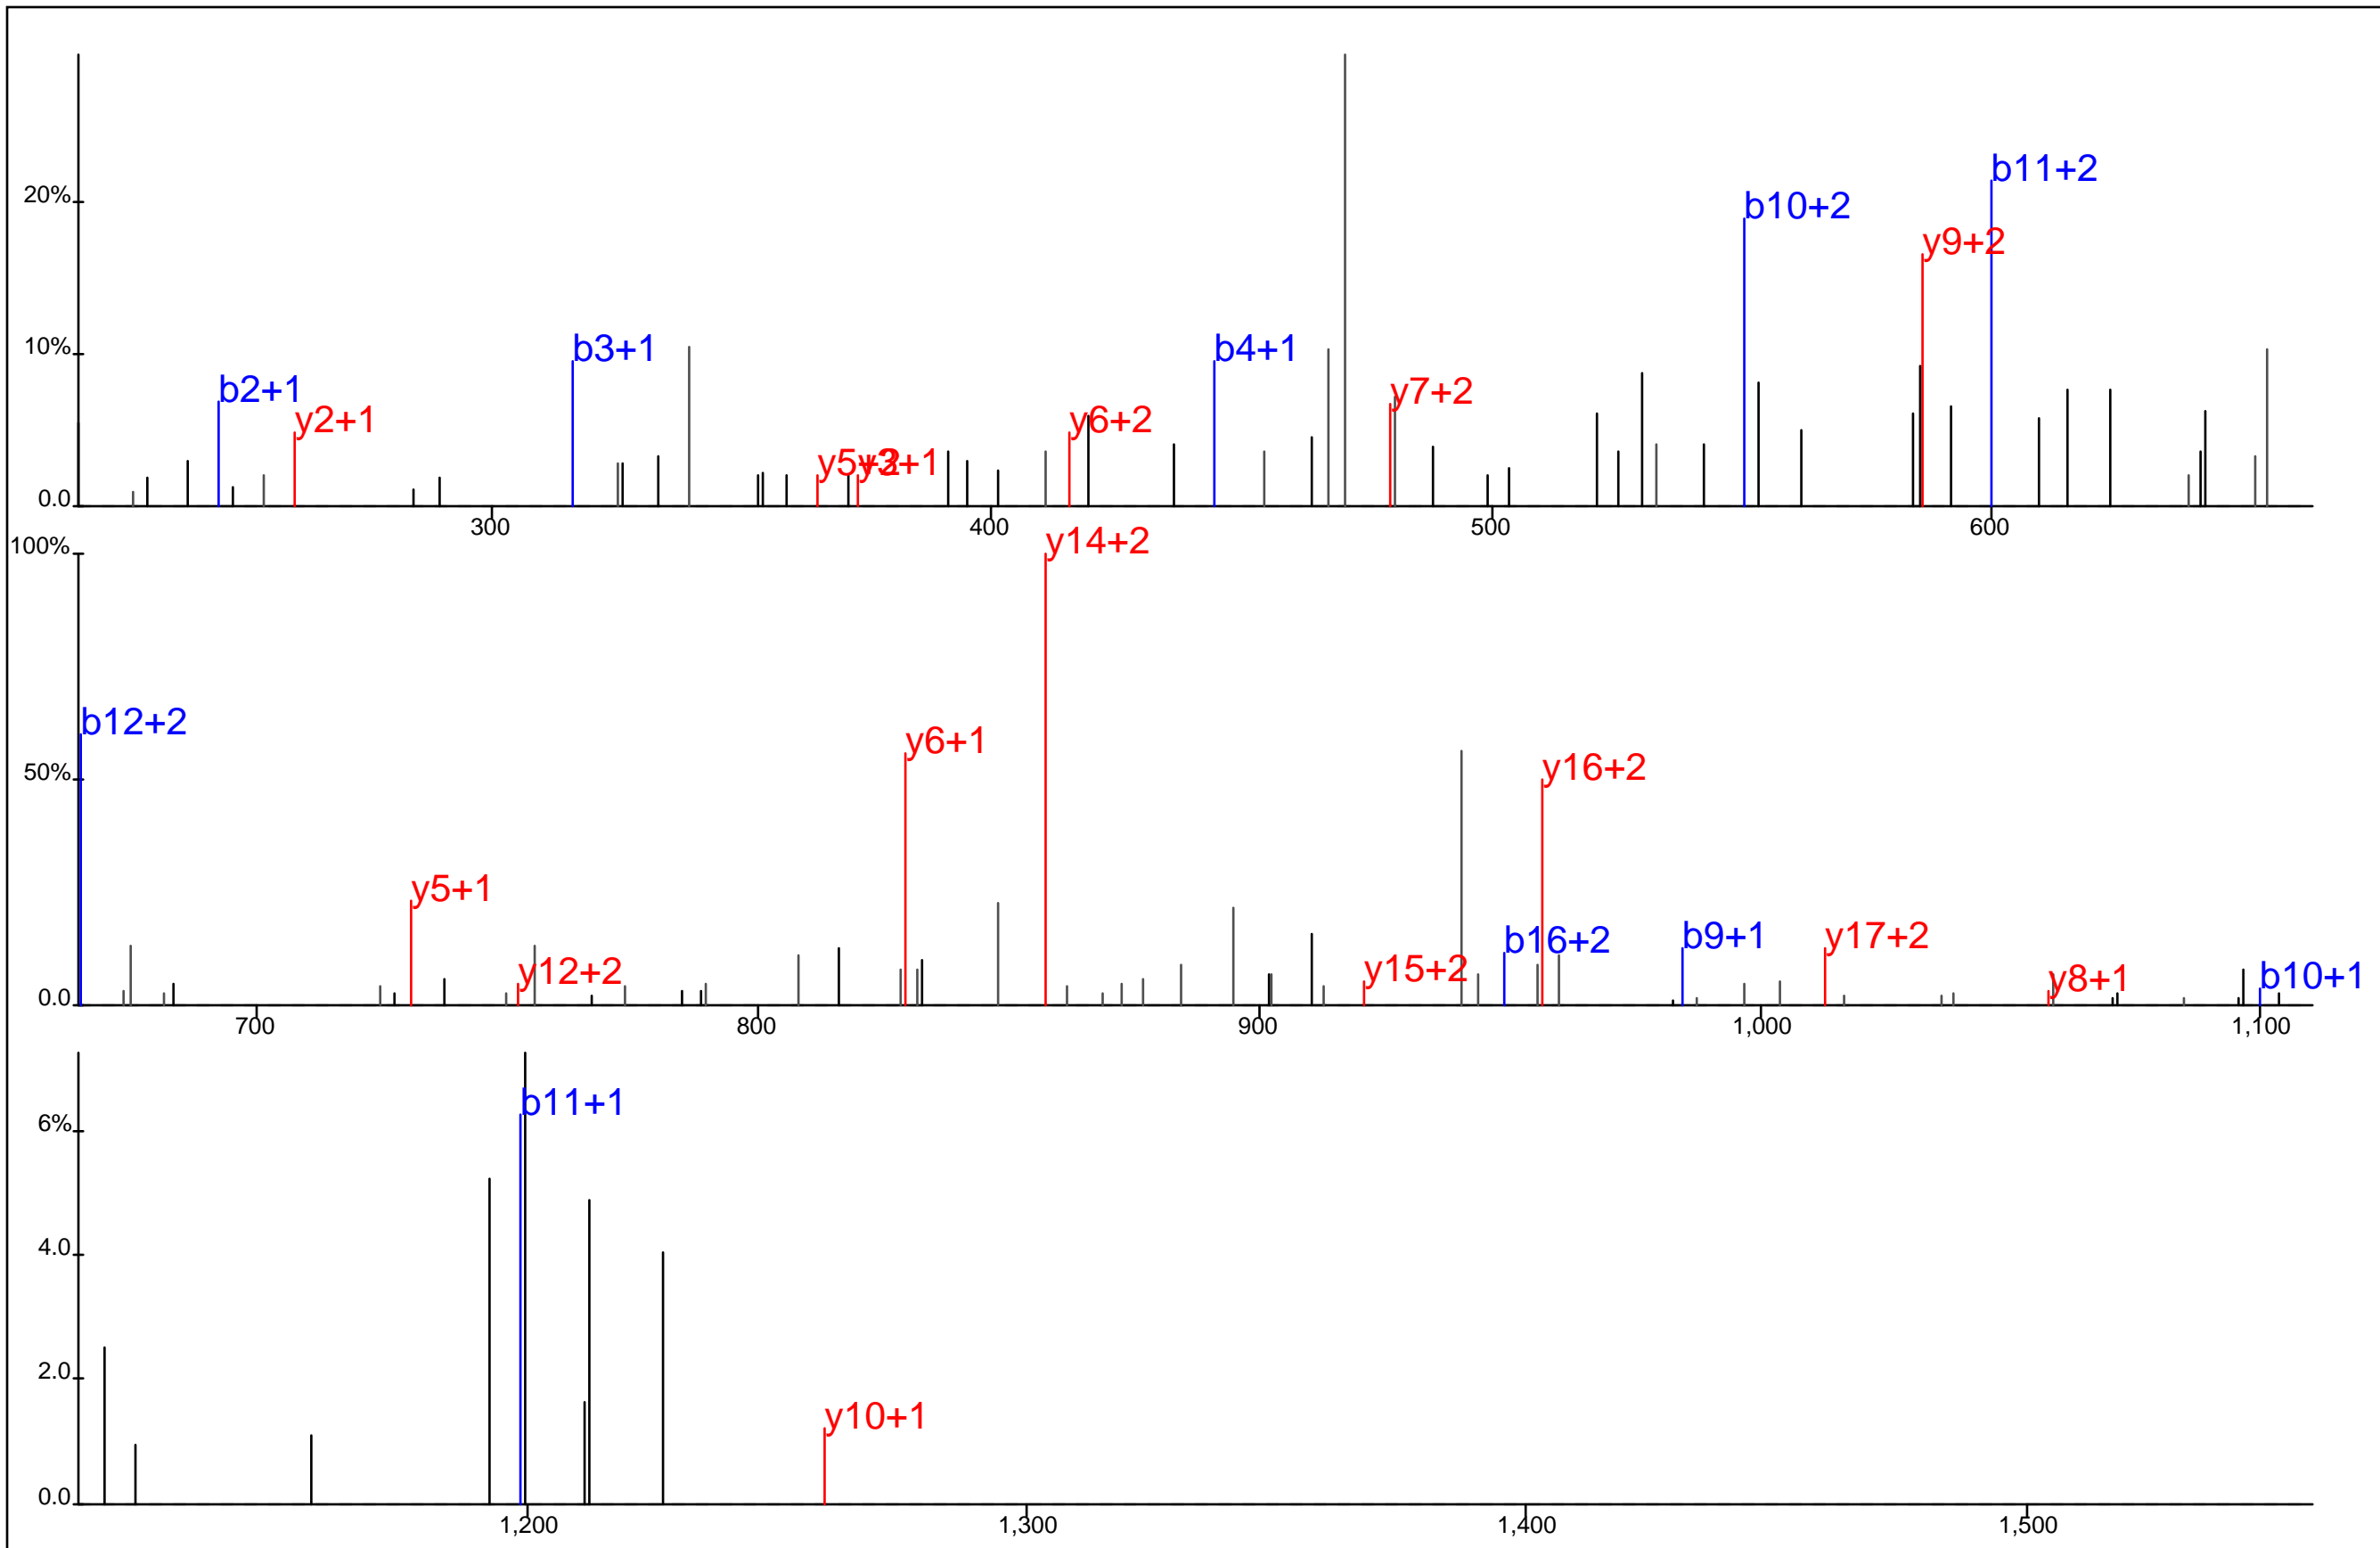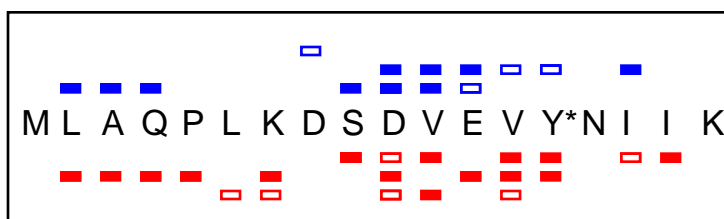

Protein Name: Serine hydroxymethyltransferase, cytosolic  
 gi Accession: 0  
 Precursor Mass: 719.3624+3  
 Delta Mass: 0.875 ppm  
 XCorr: 33.39

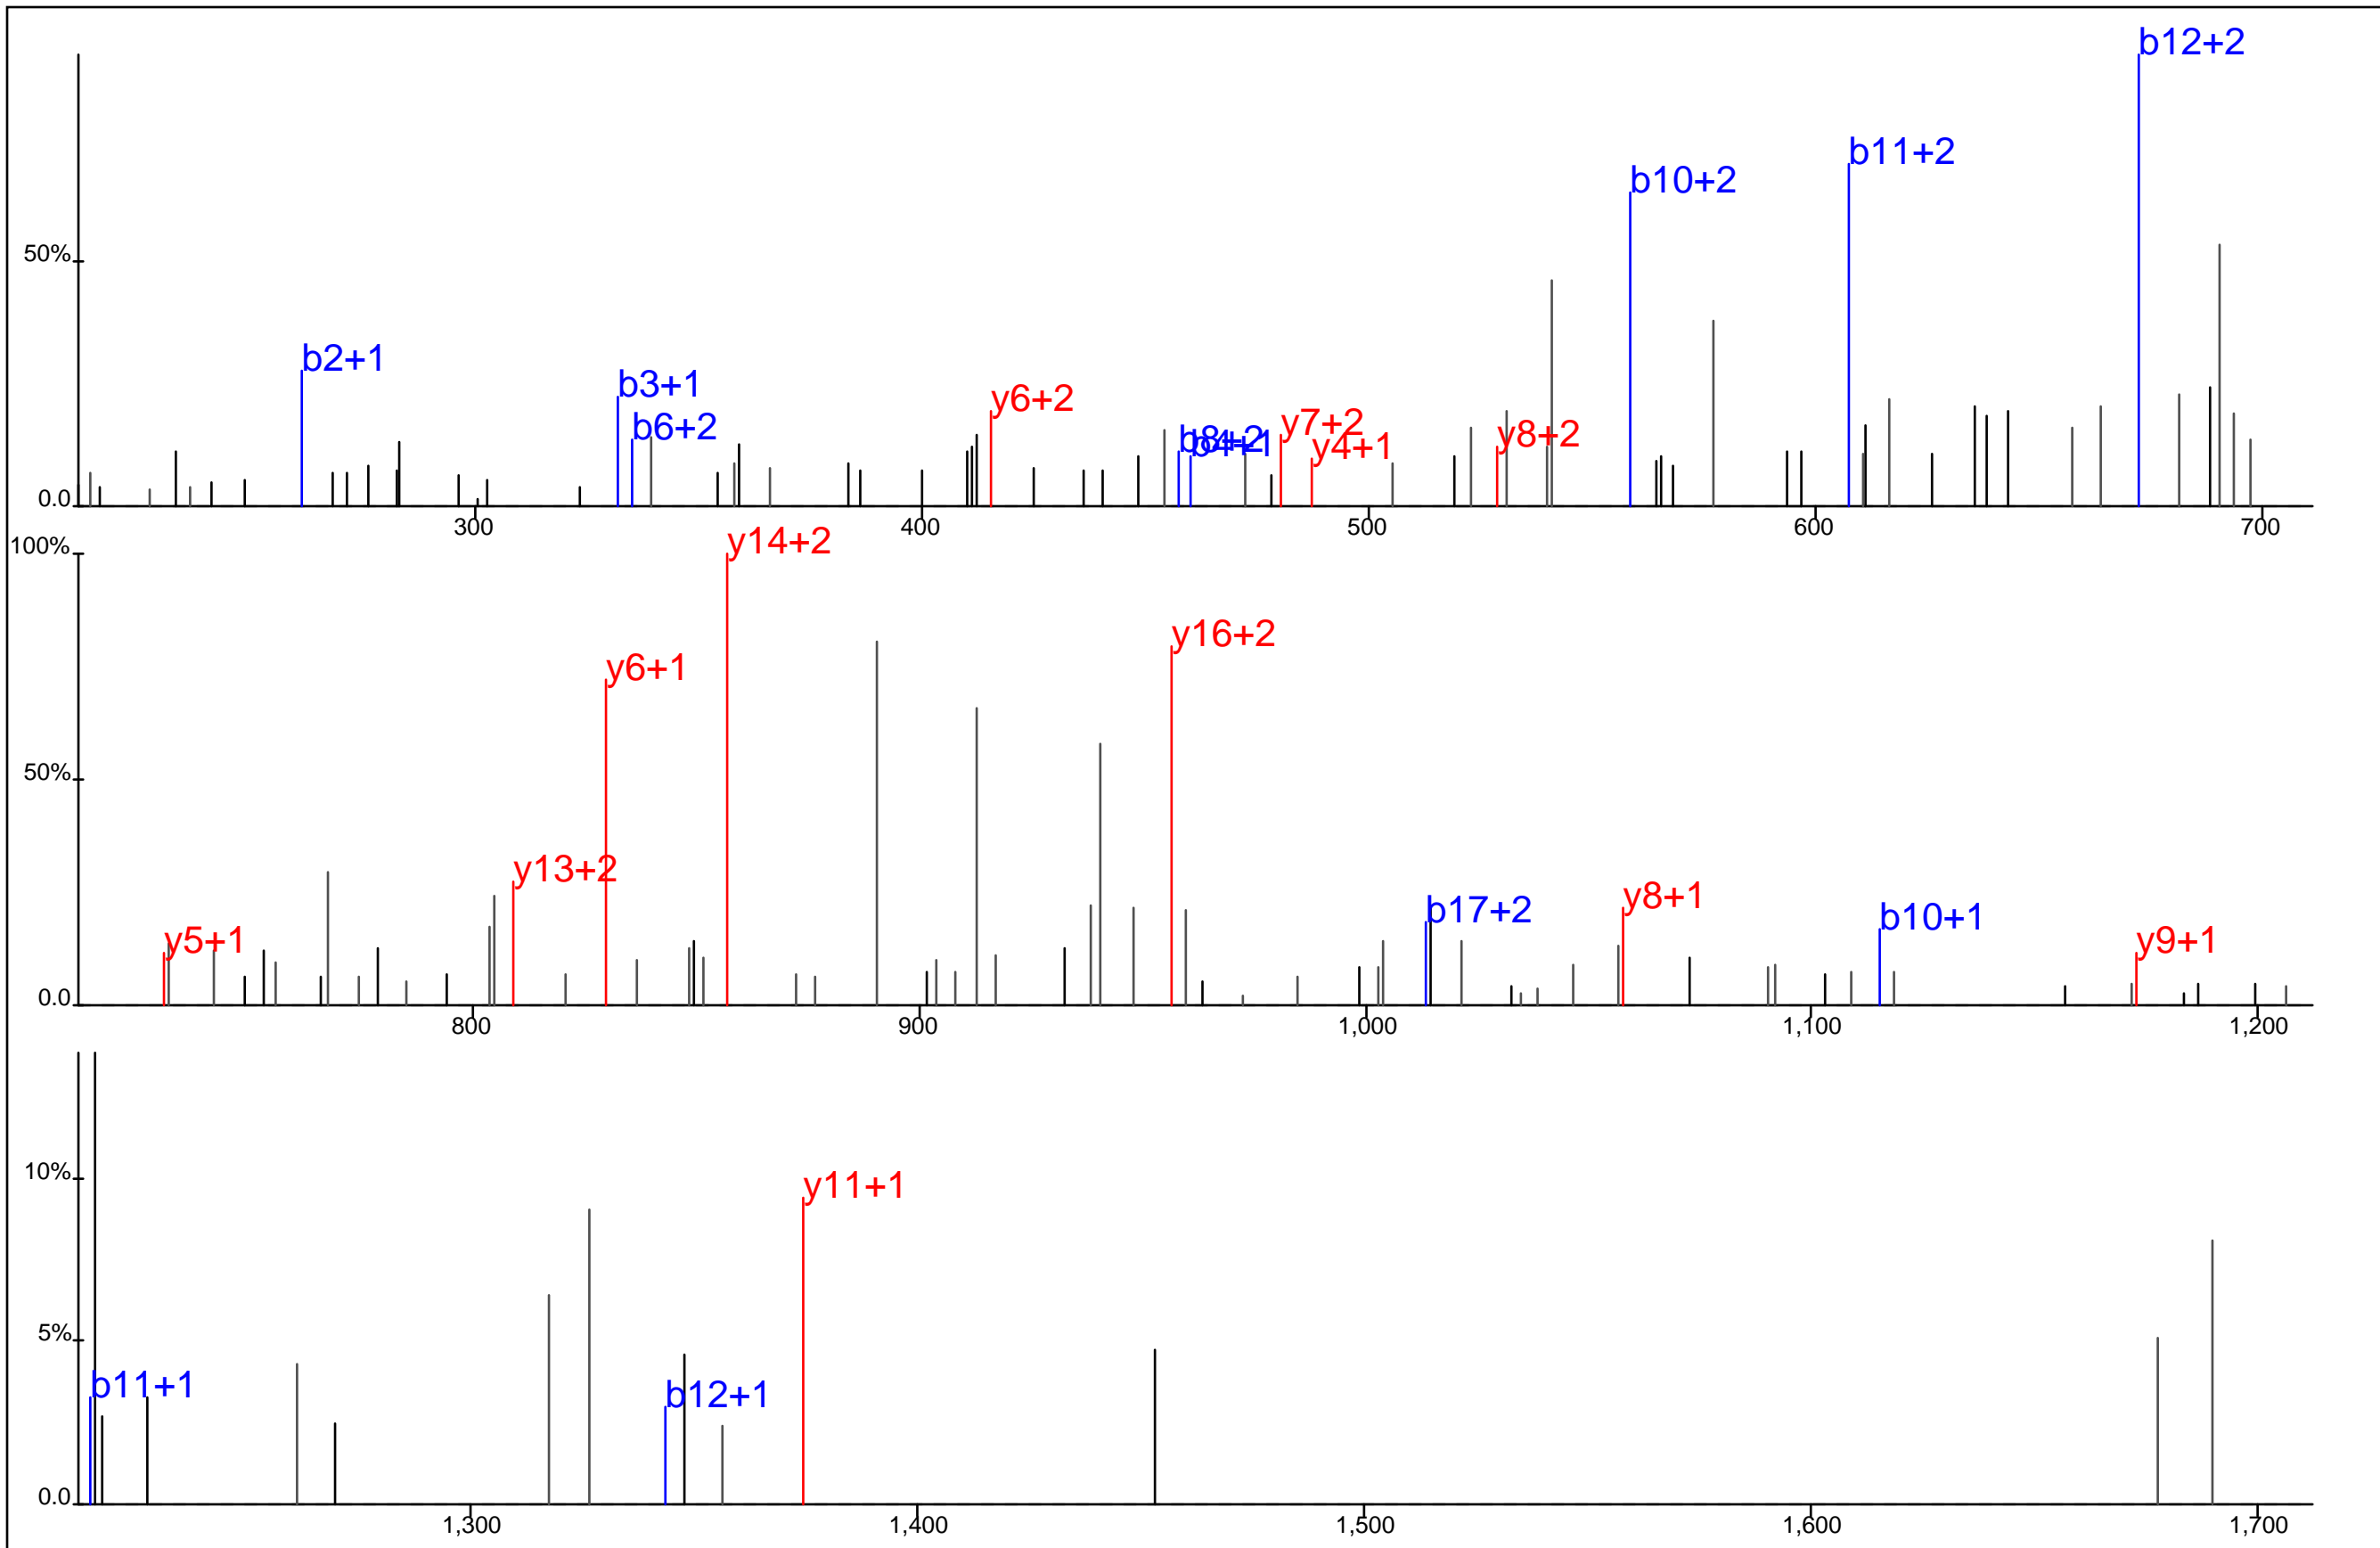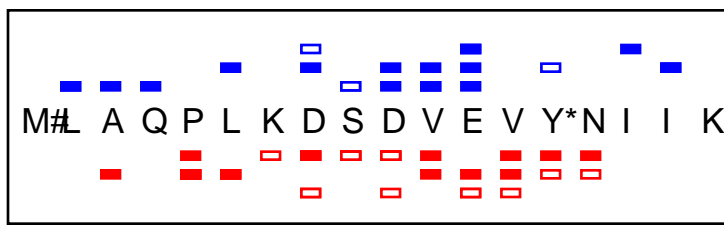

Protein Name: Serine hydroxymethyltransferase, cytosolic  
 gi Accession: 0  
 Precursor Mass: 724.6929+3  
 Delta Mass: 0.783 ppm  
 XCorr: 28.02

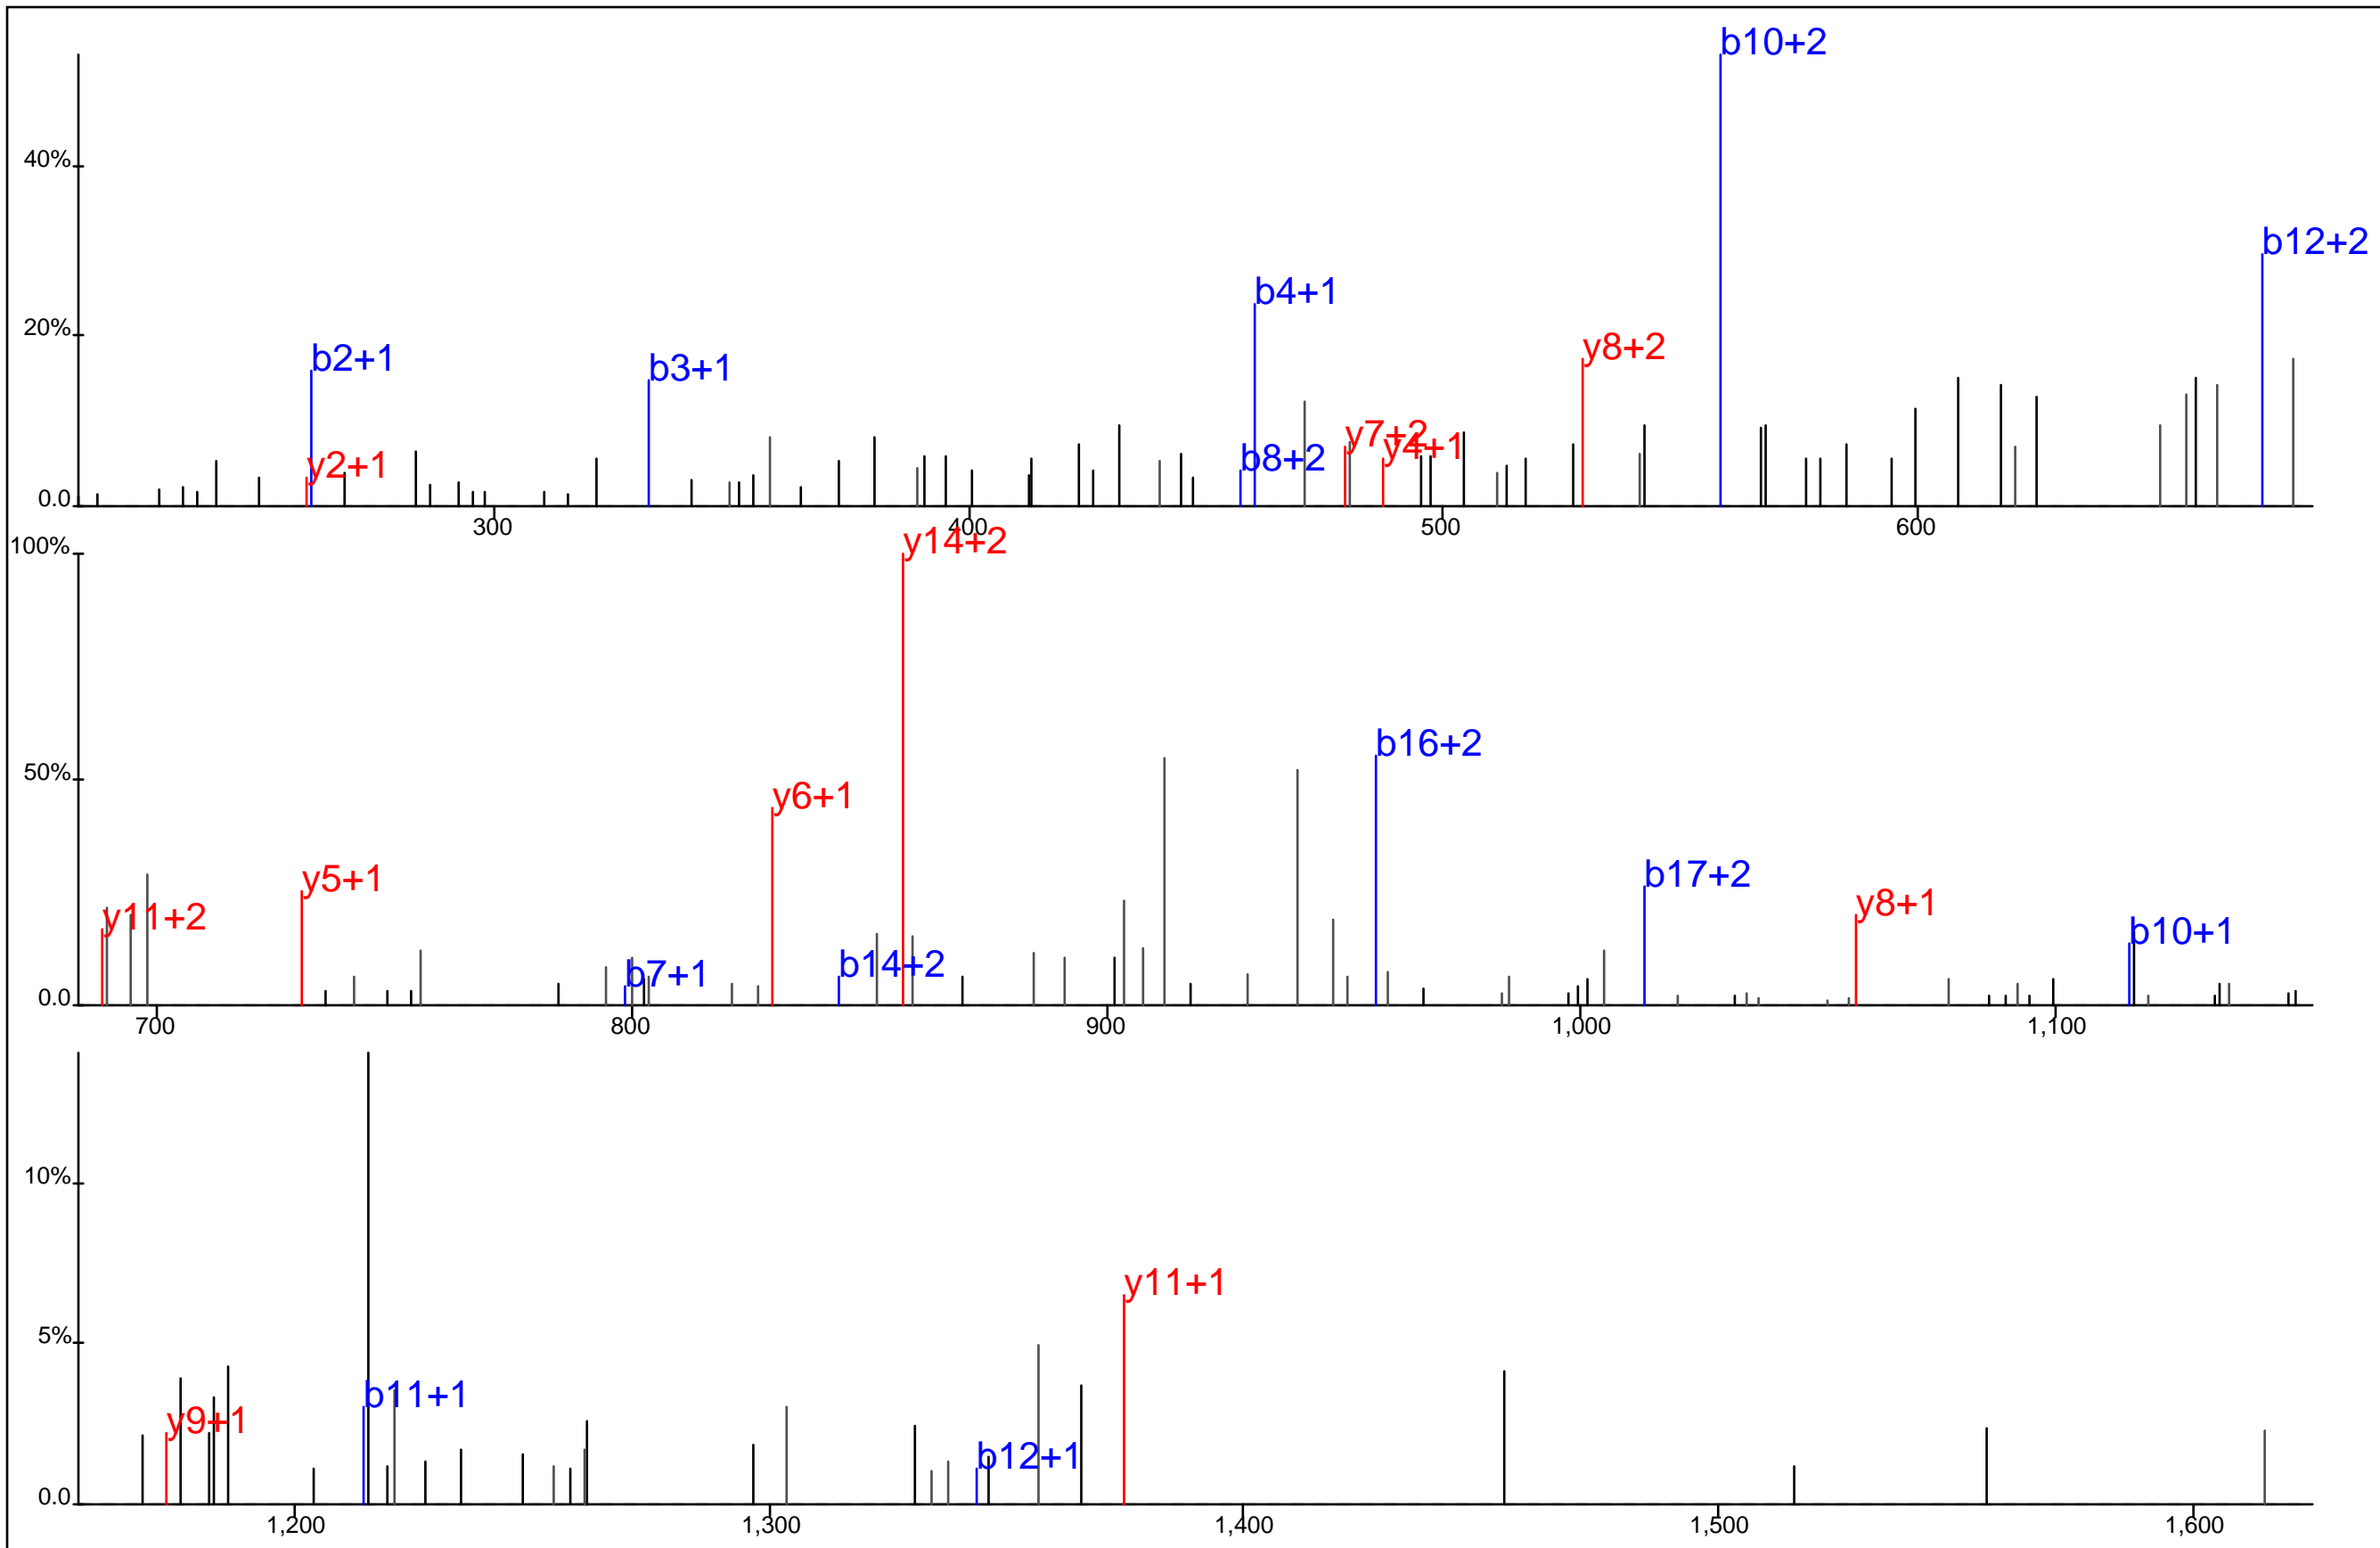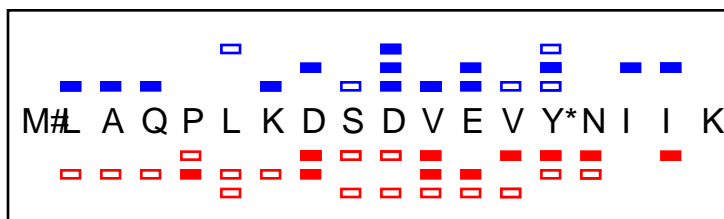

Protein Name: Serine hydroxymethyltransferase, cytosolic  
 gi Accession: 0  
 Precursor Mass: 724.6952+3  
 Delta Mass: 2.420 ppm  
 XCorr: 22.03

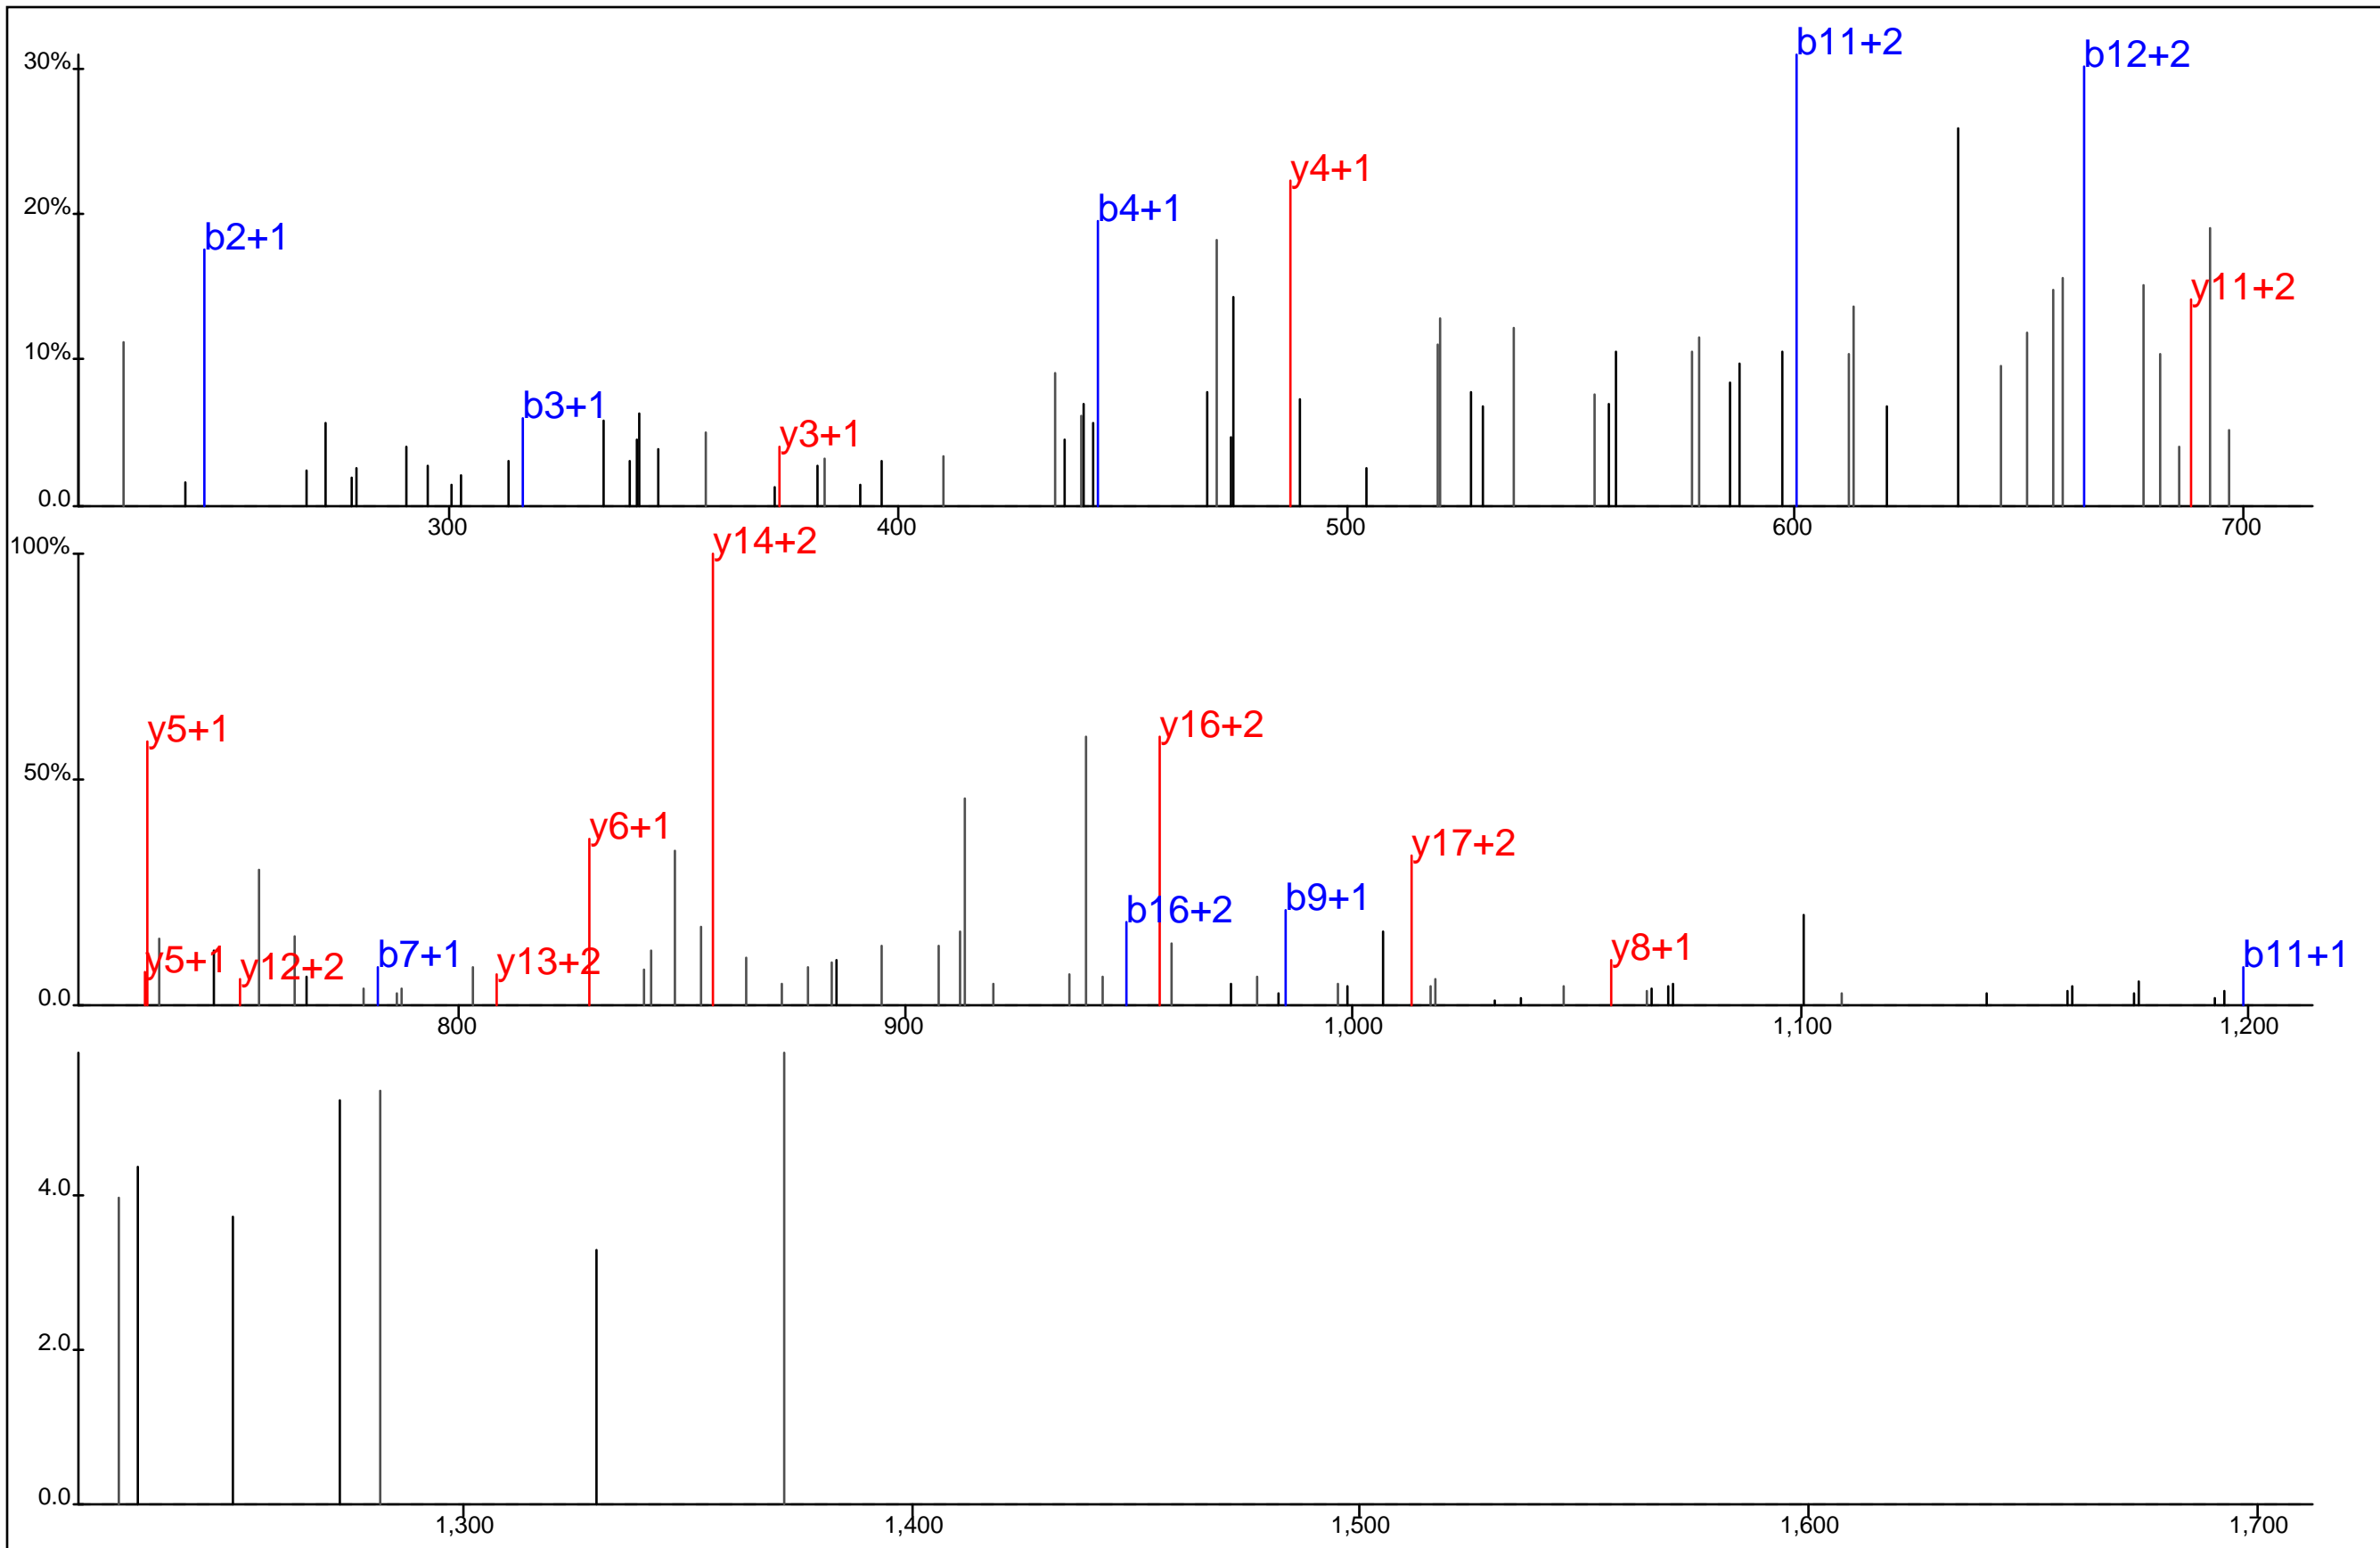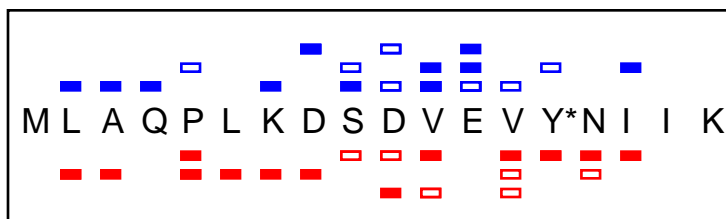

Protein Name: Serine hydroxymethyltransferase, cytosolic  
 gi Accession: 0  
 Precursor Mass: 719.3641+3  
 Delta Mass: 3.253 ppm  
 XCorr: 24.27

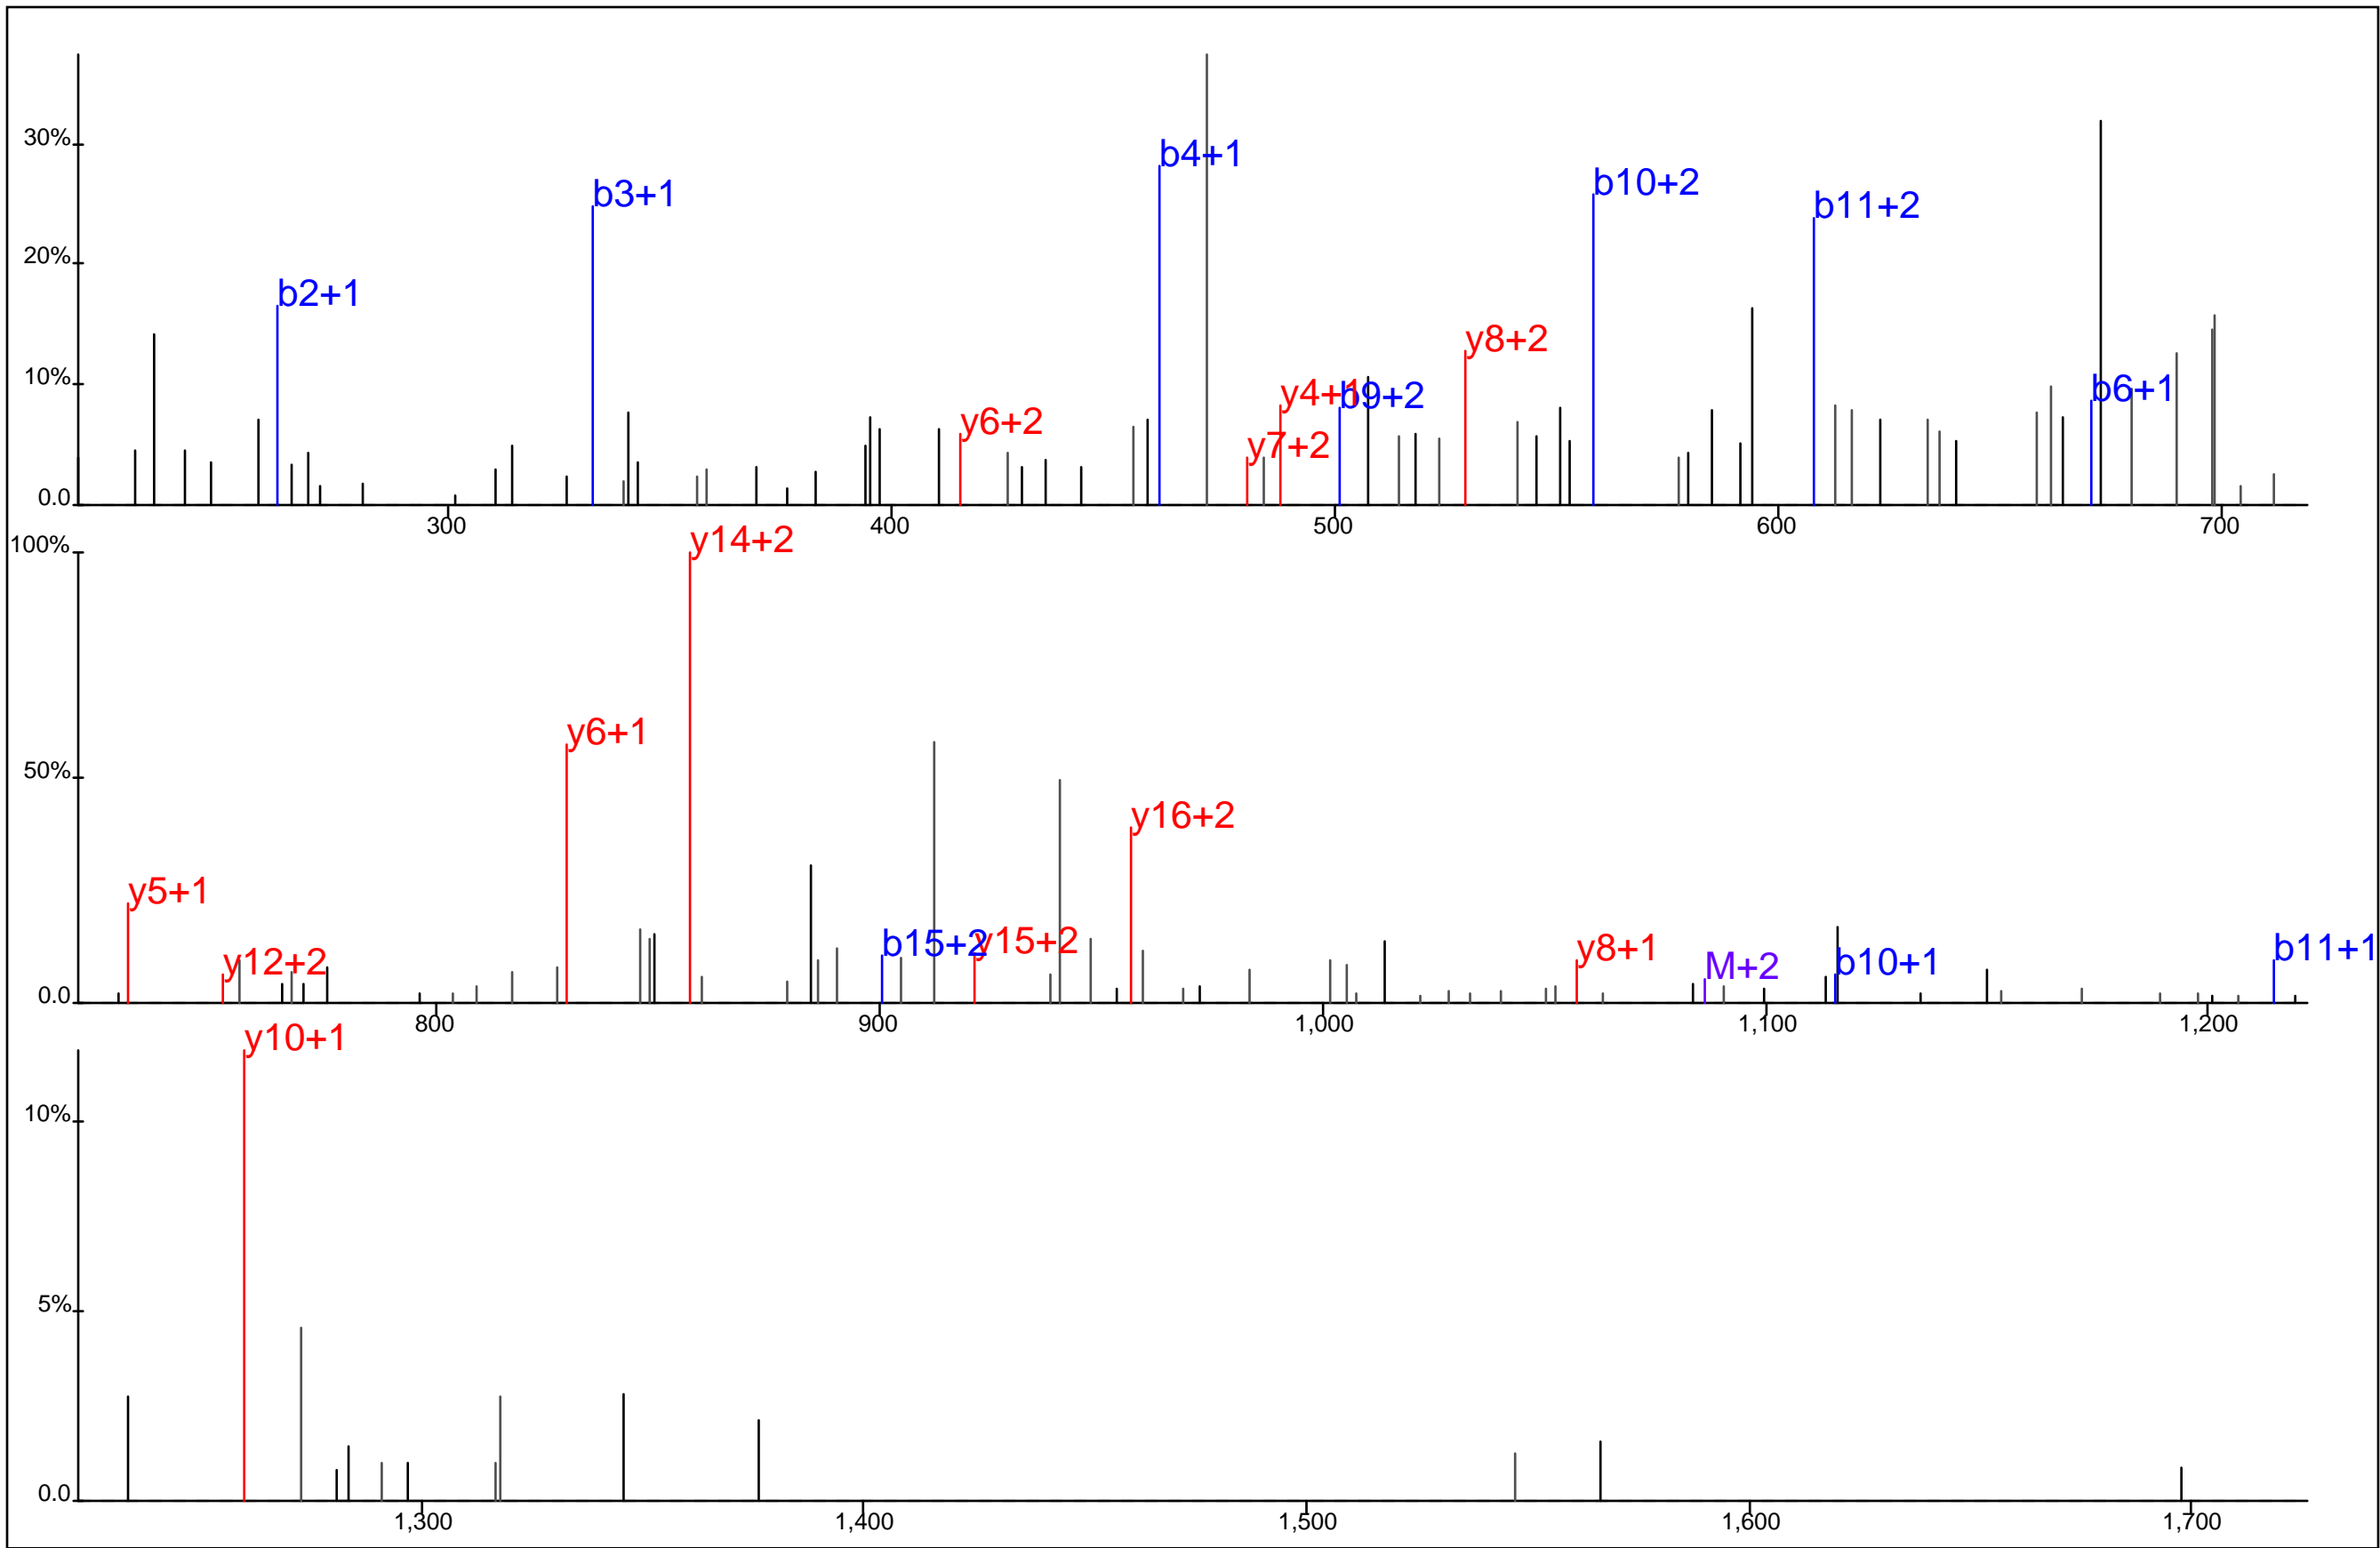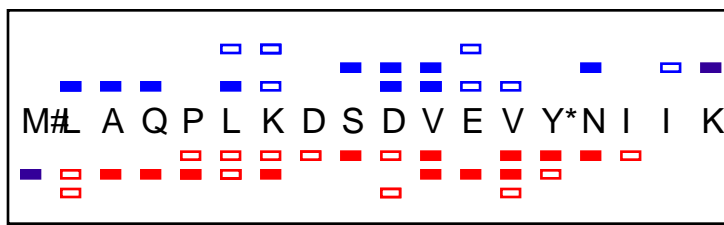

Protein Name: Serine hydroxymethyltransferase, cytosolic  
 gi Accession: 0  
 Precursor Mass: 724.6941+3  
 Delta Mass: 0.903 ppm  
 XCorr: 20.02



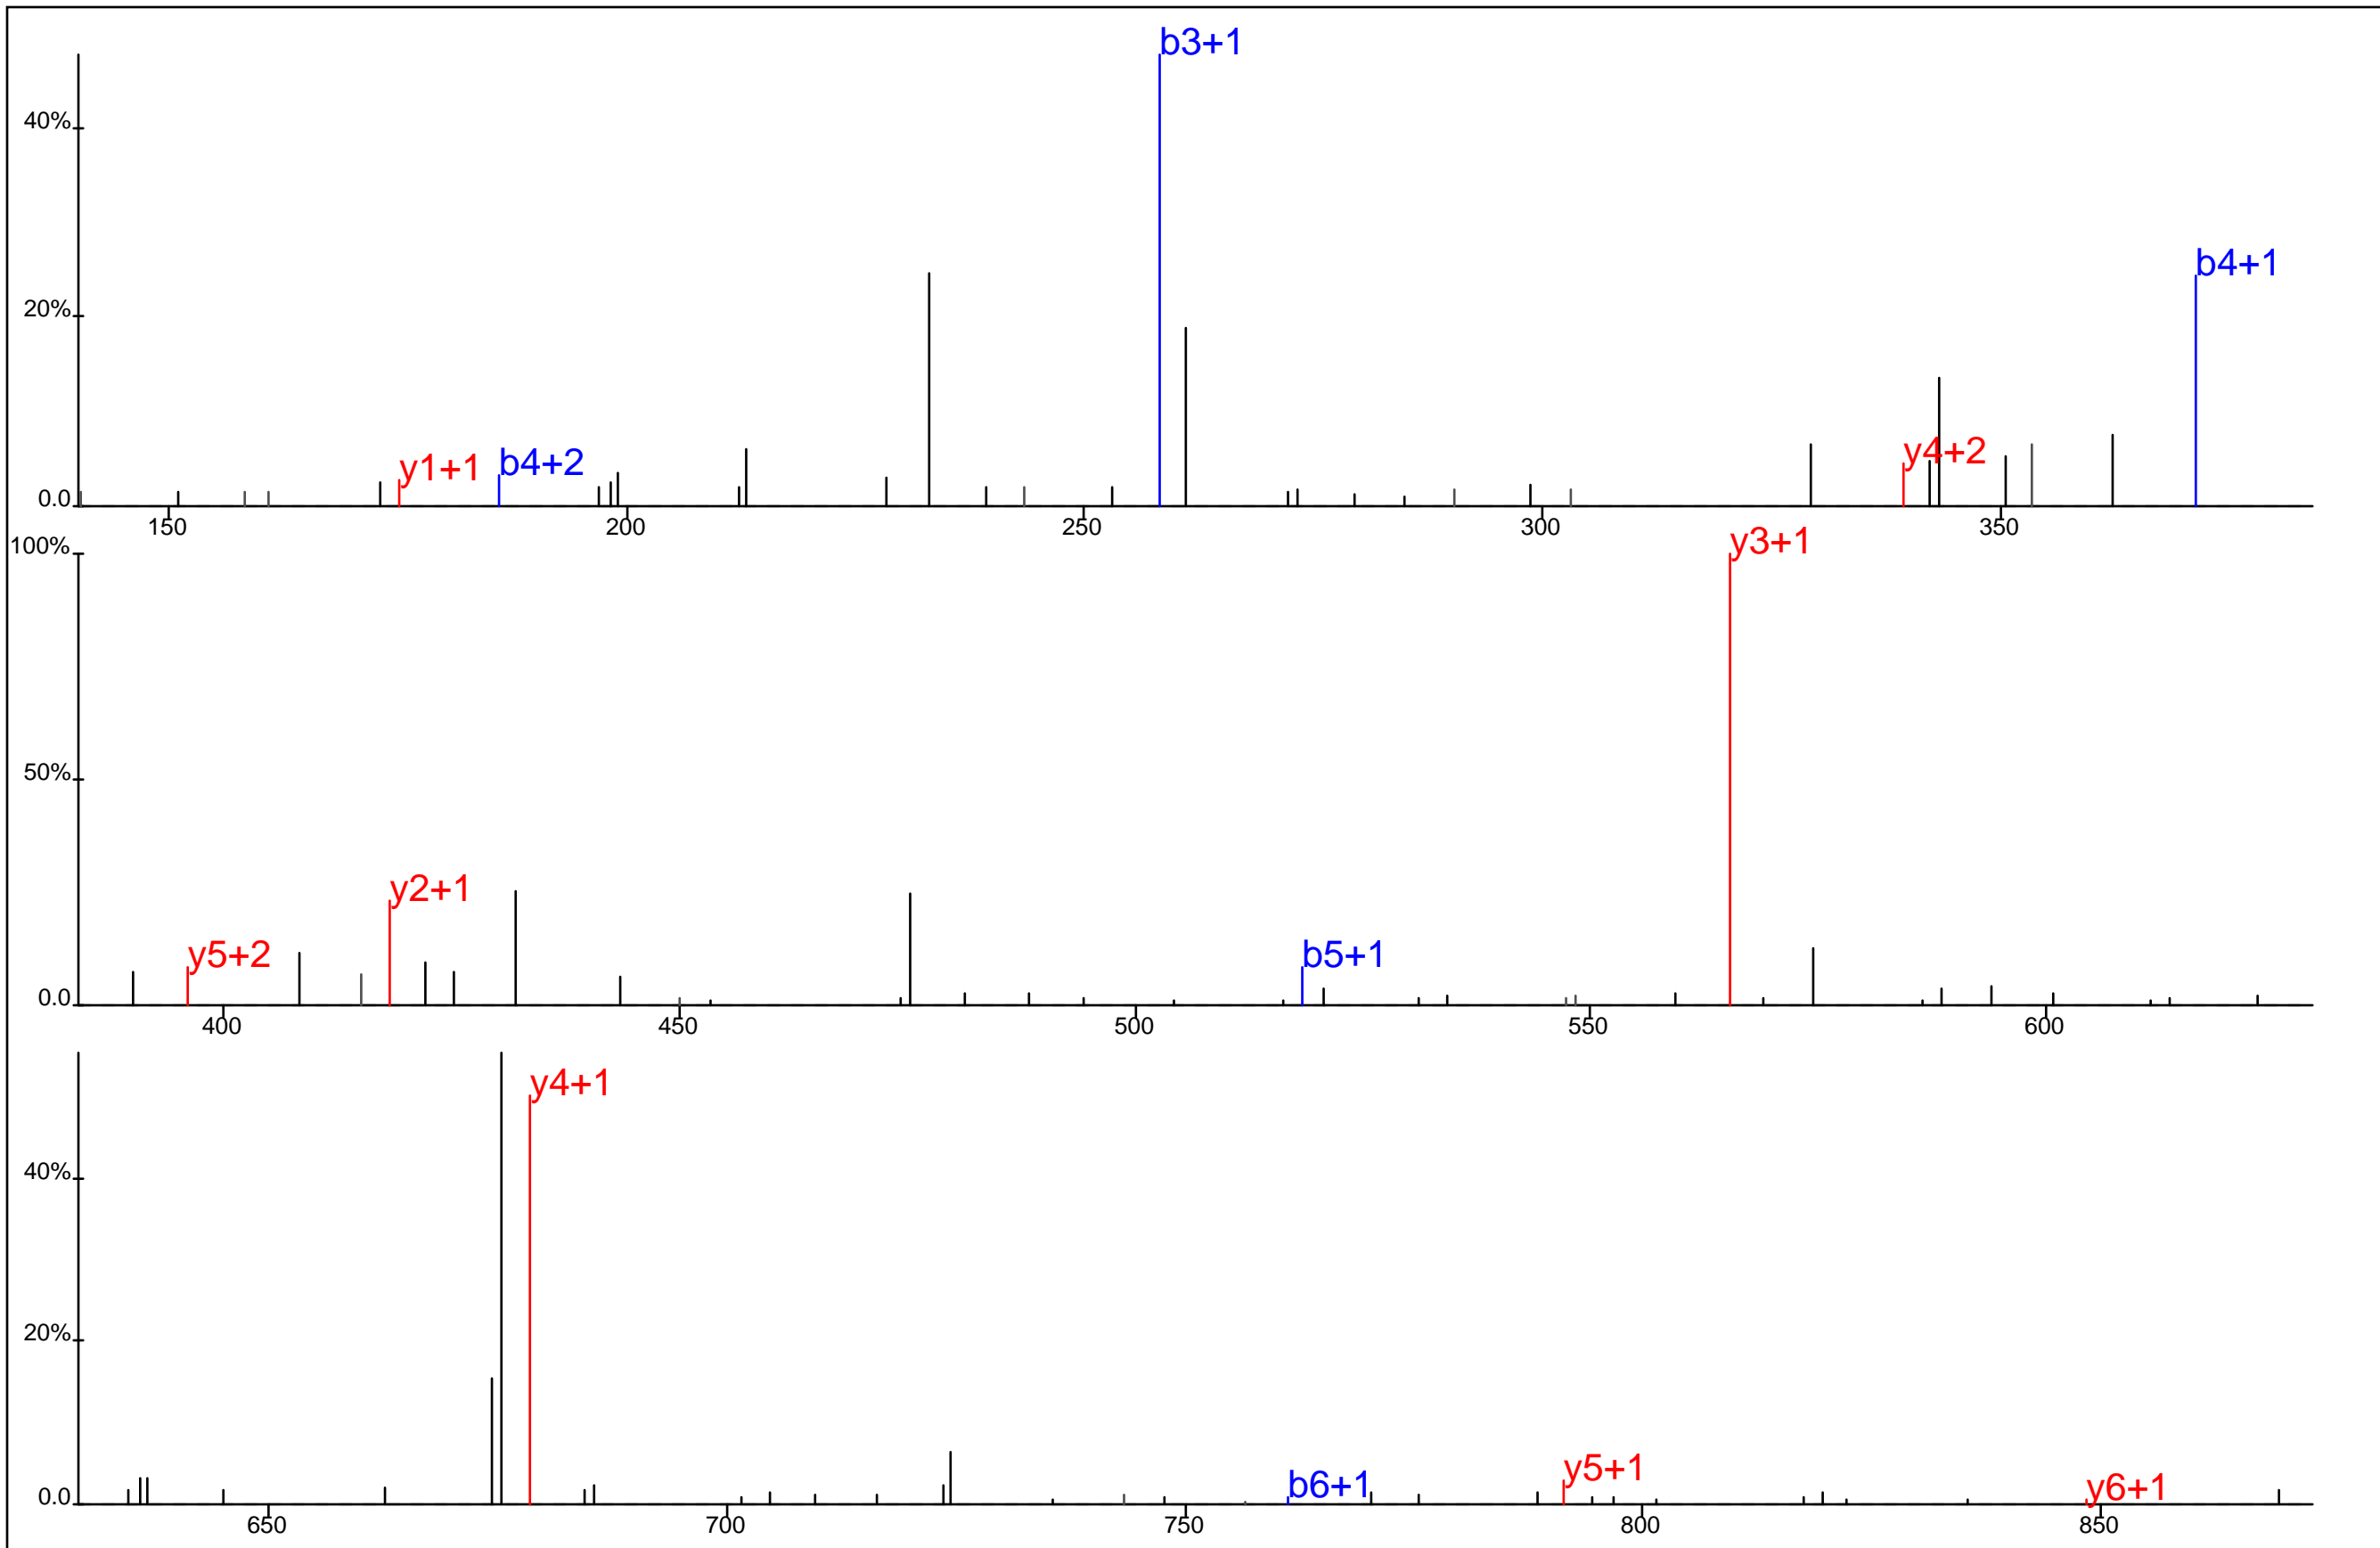

S G L I F Y\* R

Protein Name: Serine hydroxymethyl transferase, mitochondrial  
 gi Accession: 0  
 Precursor Mass: 468.2229+2  
 Delta Mass: 0.169 ppm  
 XCorr: 20.16

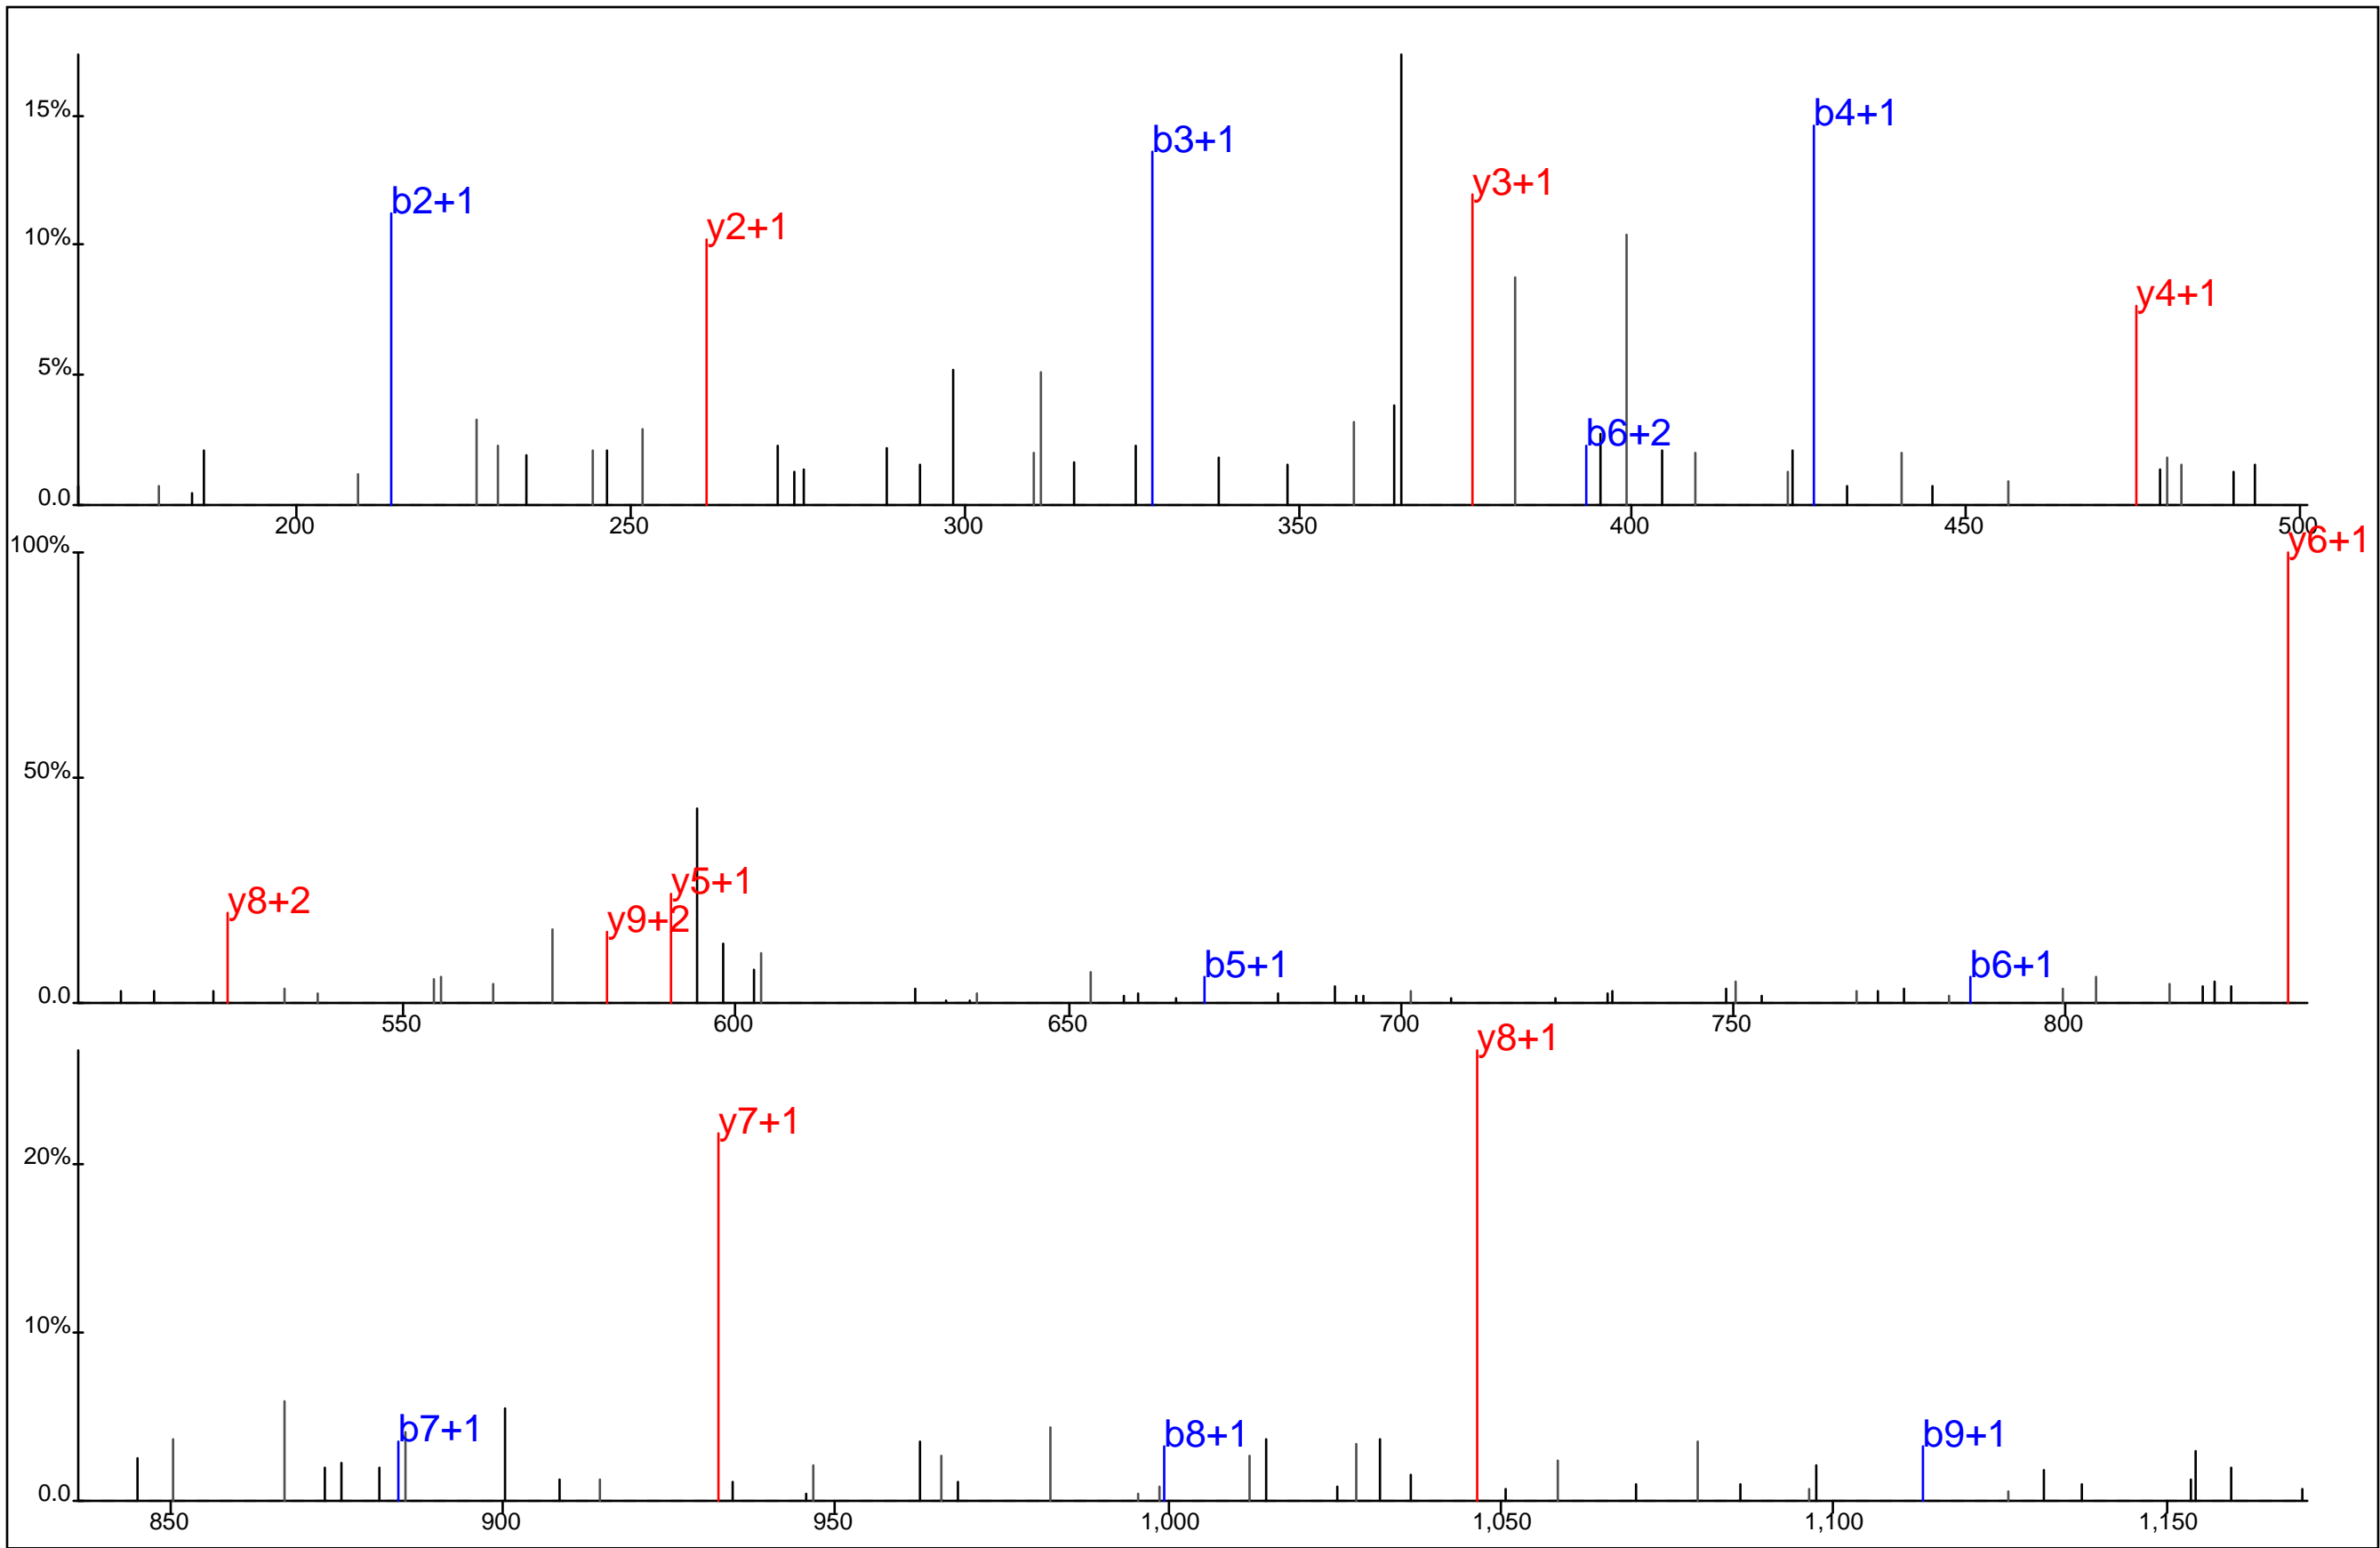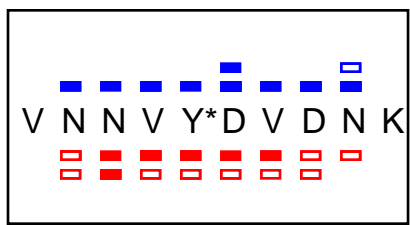

Protein Name: Serologically defined colon cancer antigen 1  
 gi Accession: 0  
 Precursor Mass: 630.2703+2  
 Delta Mass: 2.391 ppm  
 XCorr: 52.6

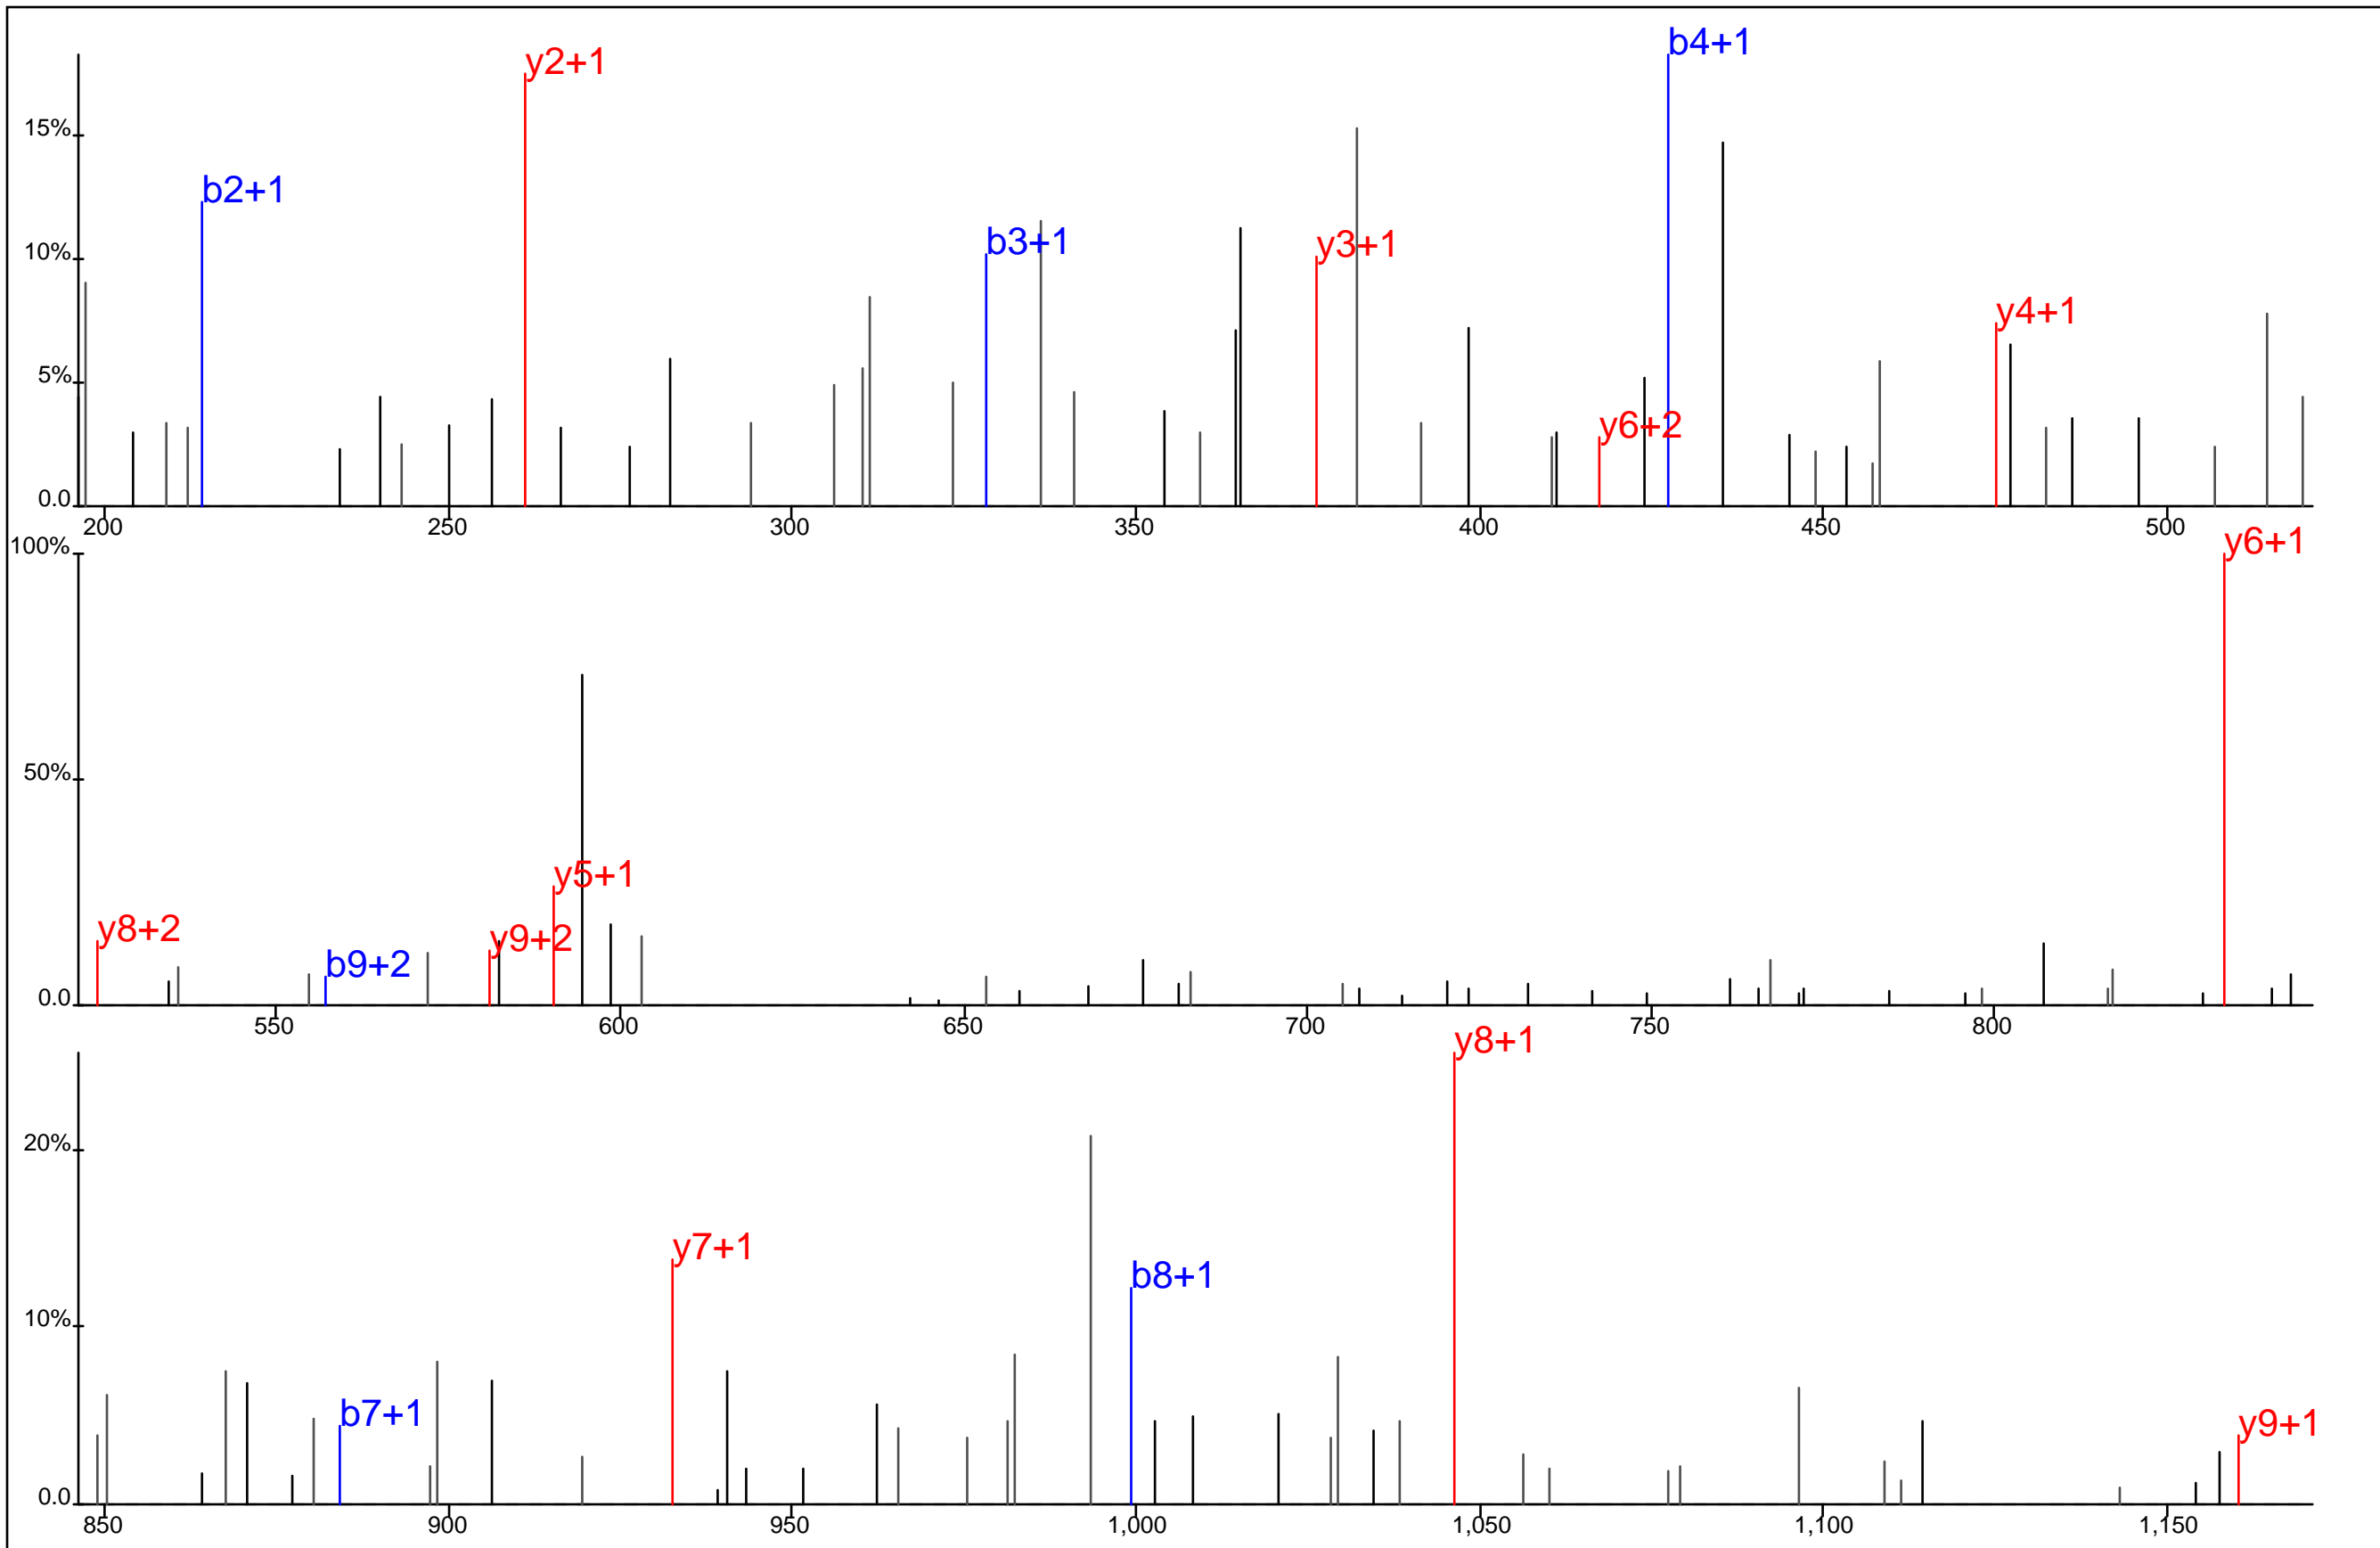

V N N V Y\* D V D N K

Protein Name: Serologically defined colon cancer antigen 1  
 gi Accession: 0  
 Precursor Mass: 630.2672+2  
 Delta Mass: 2.552 ppm  
 XCorr: 34.91



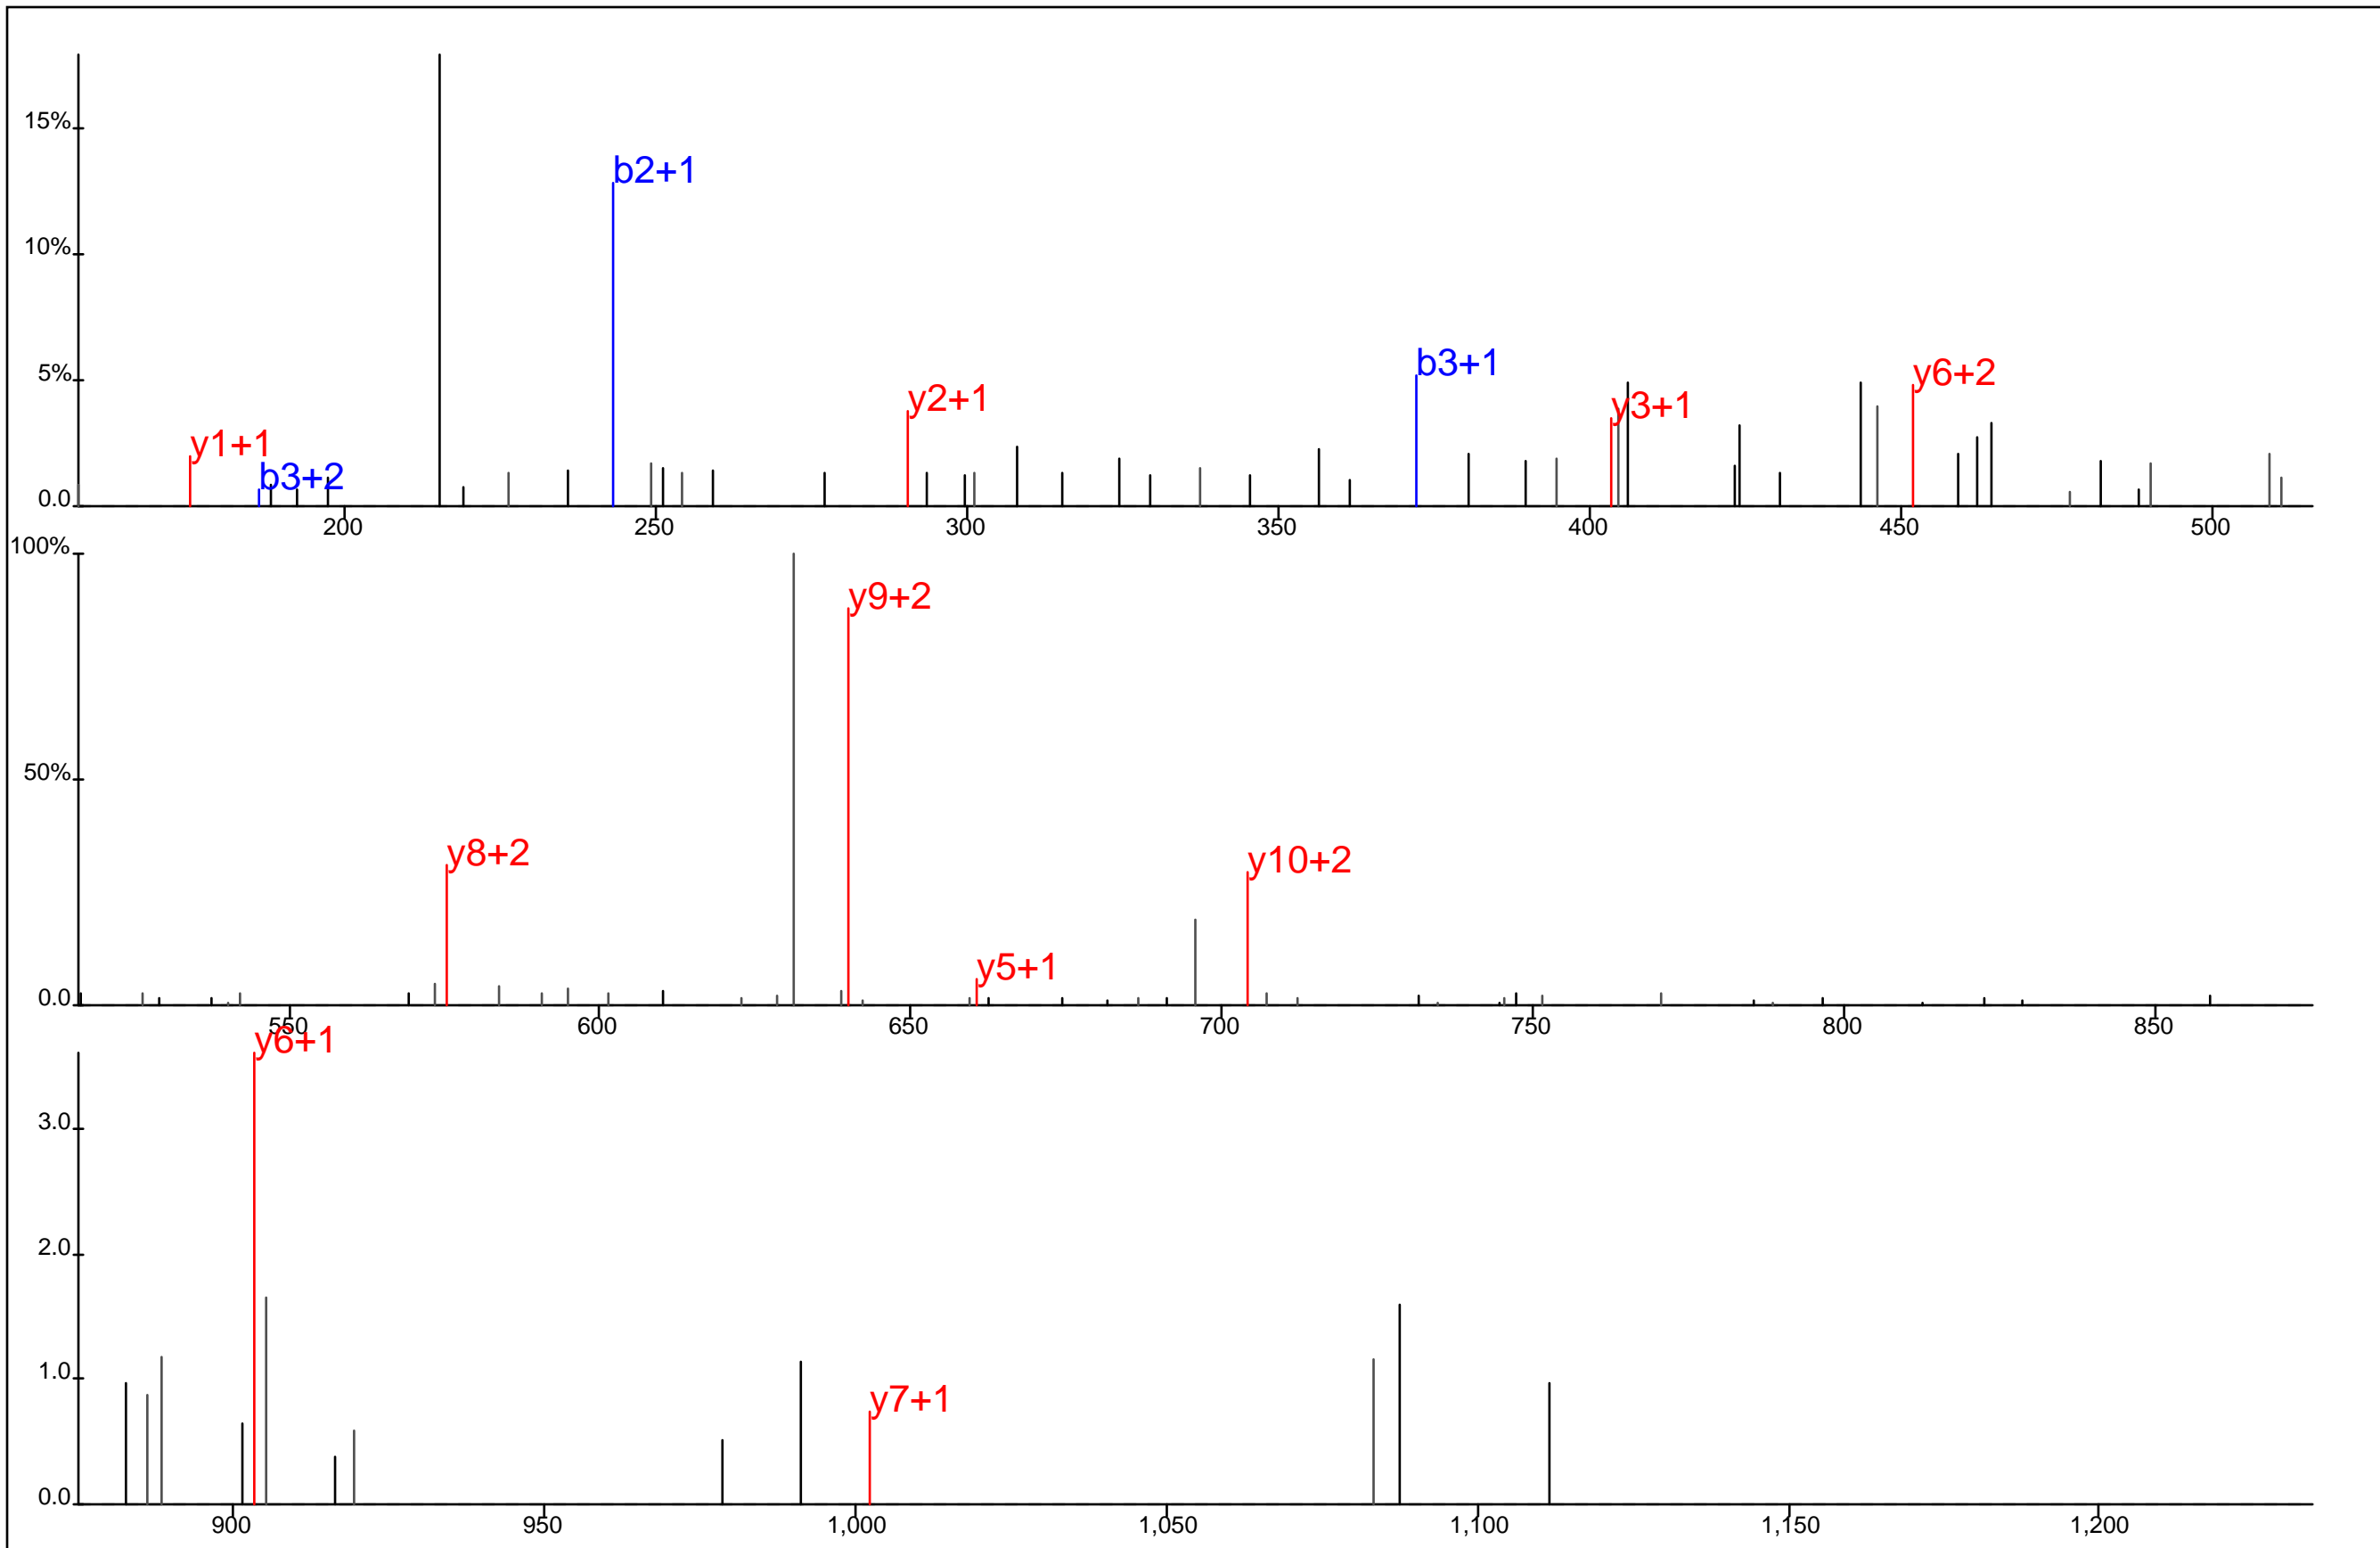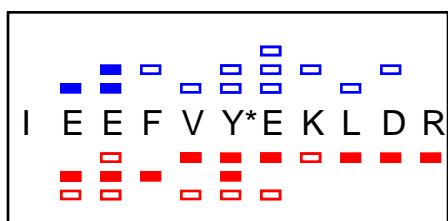

Protein Name: SH3 domain GRB2 like endophilin B1  
 gi Accession: 0  
 Precursor Mass: 507.5715+3  
 Delta Mass: 2.140 ppm  
 XCorr: 23.97



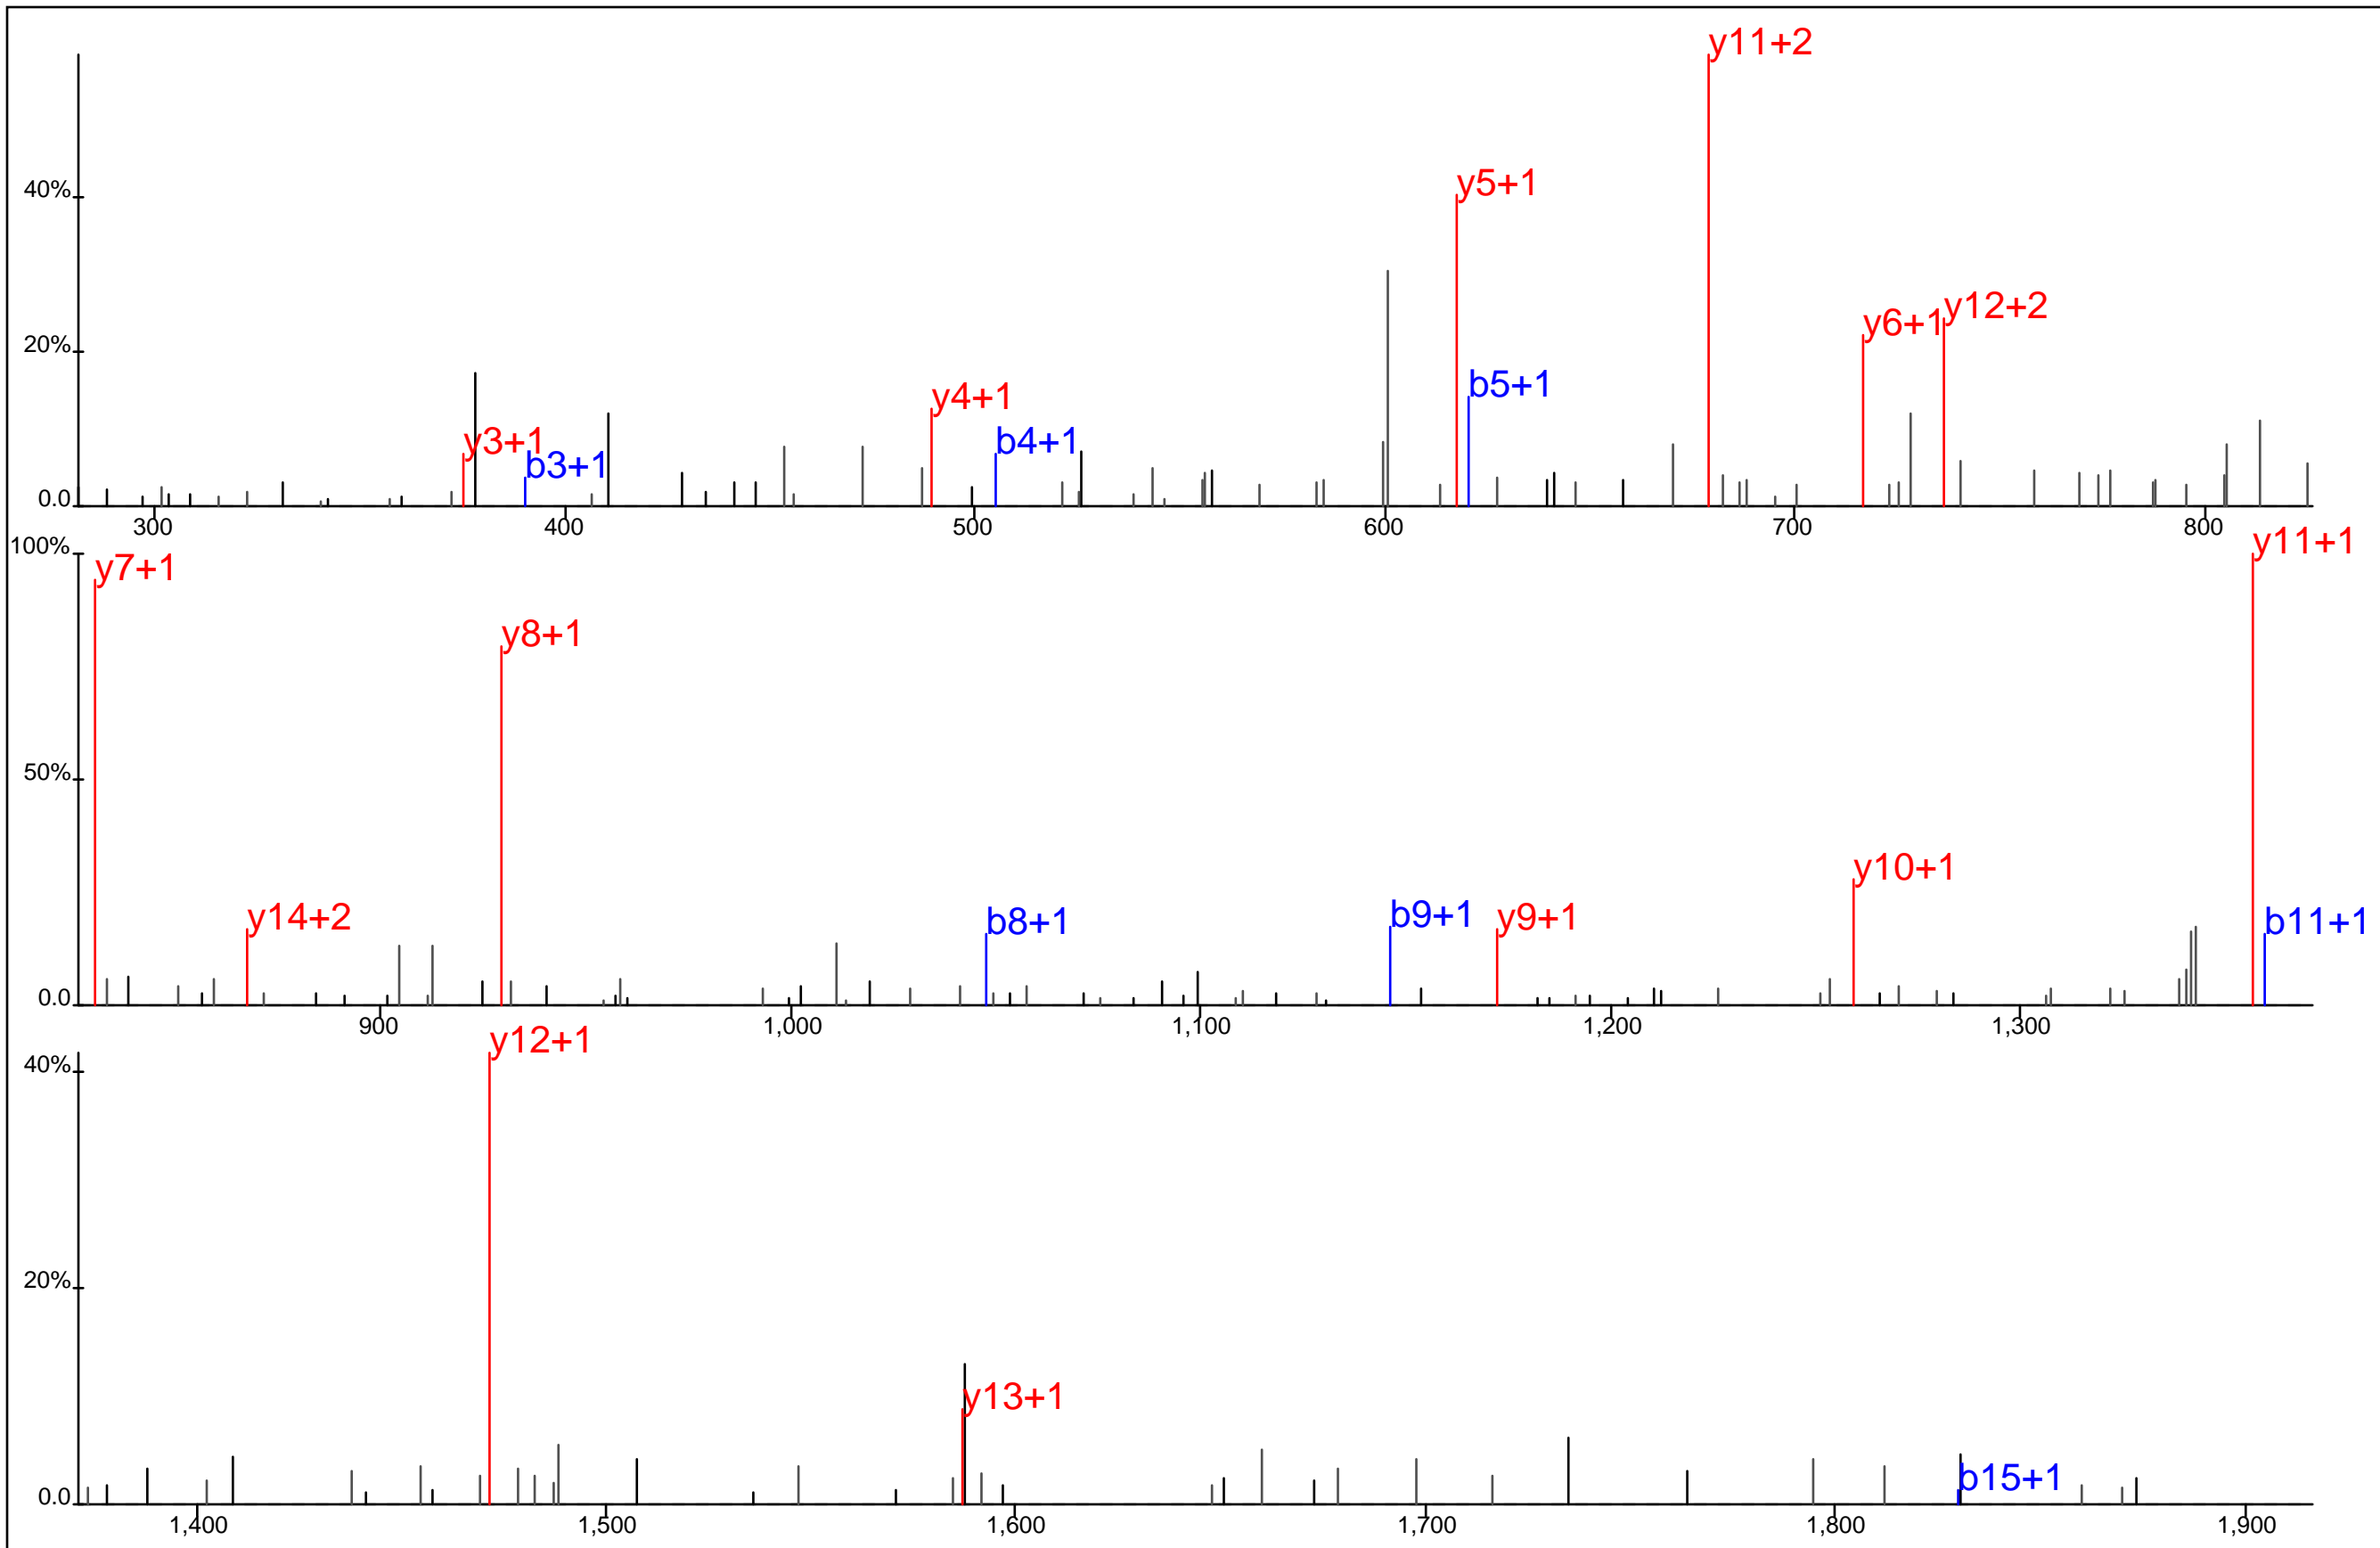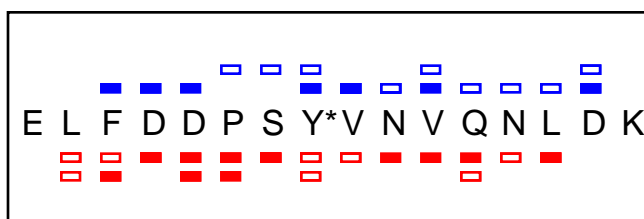

Protein Name: SHC (Src homology 2 domain containing) transforming protein 1  
 gi Accession: 0  
 Precursor Mass: 988.4367+2  
 Delta Mass: 1.176 ppm  
 XCorr: 73.49

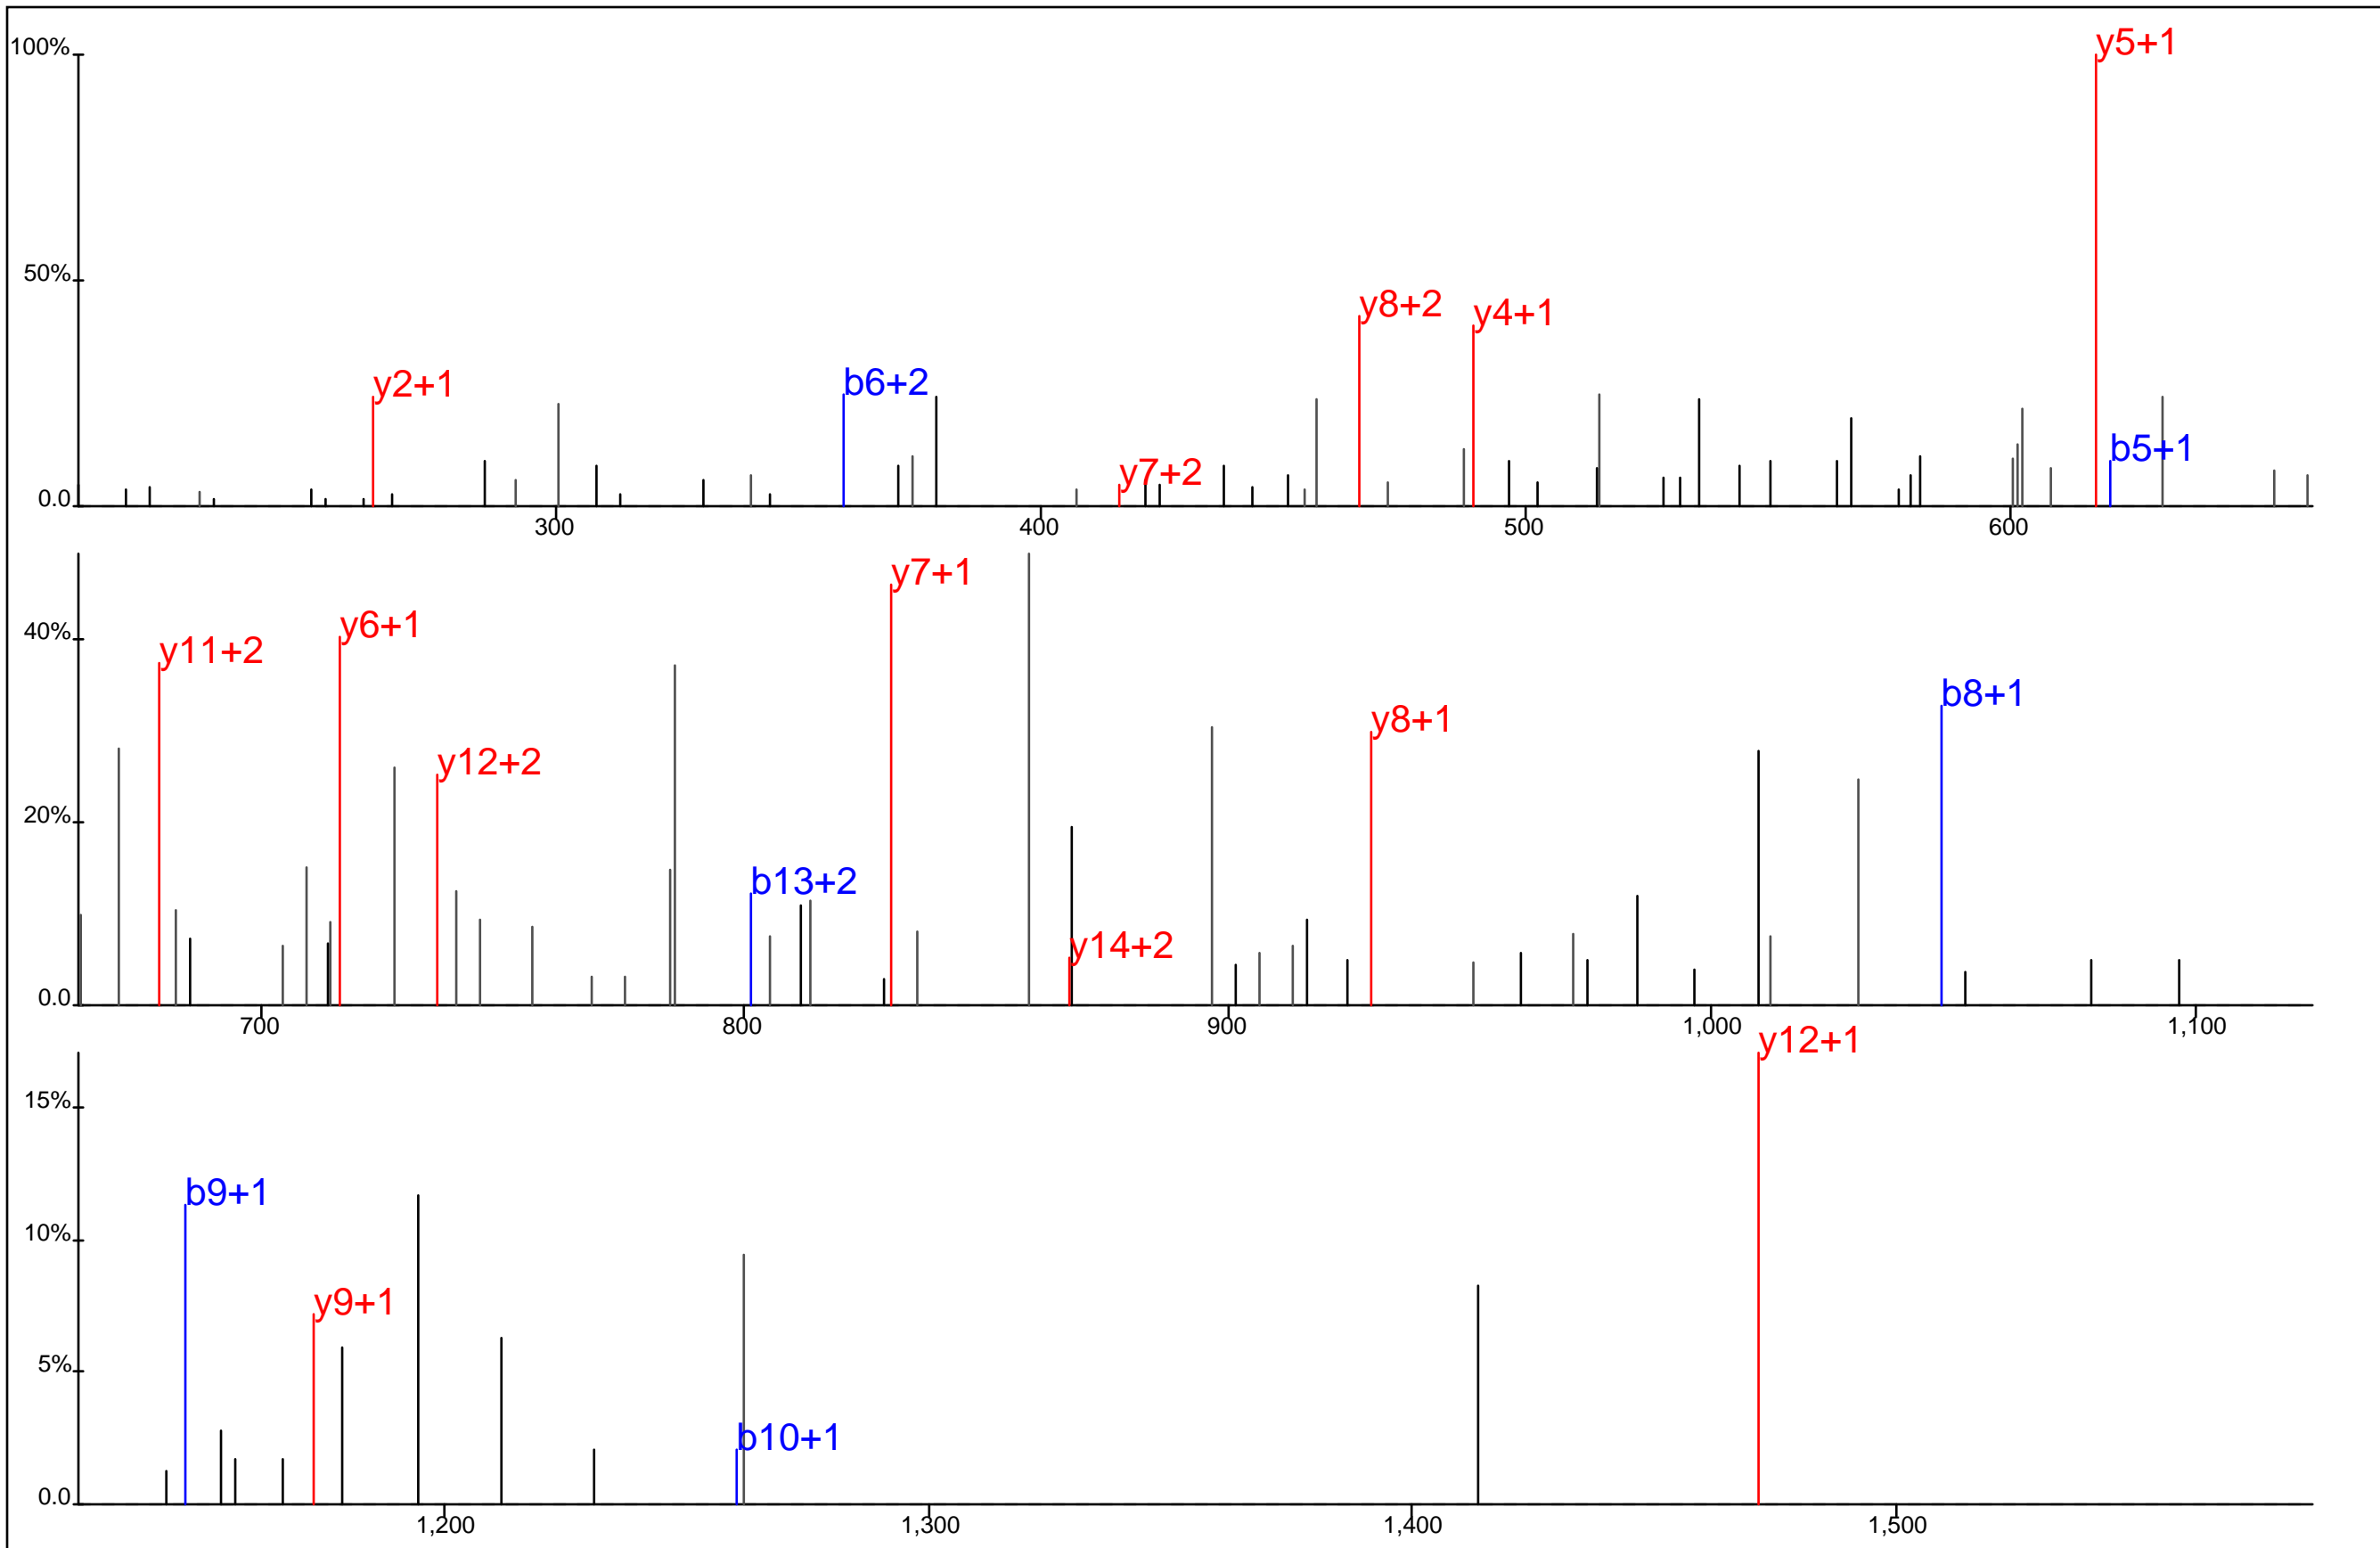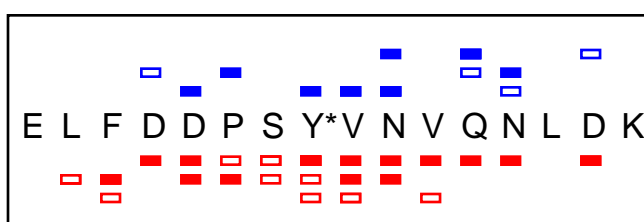

Protein Name: SHC (Src homology 2 domain containing) transforming protein 1  
 gi Accession: 0  
 Precursor Mass: 659.2942+3  
 Delta Mass: 0.226 ppm  
 XCorr: 54.17





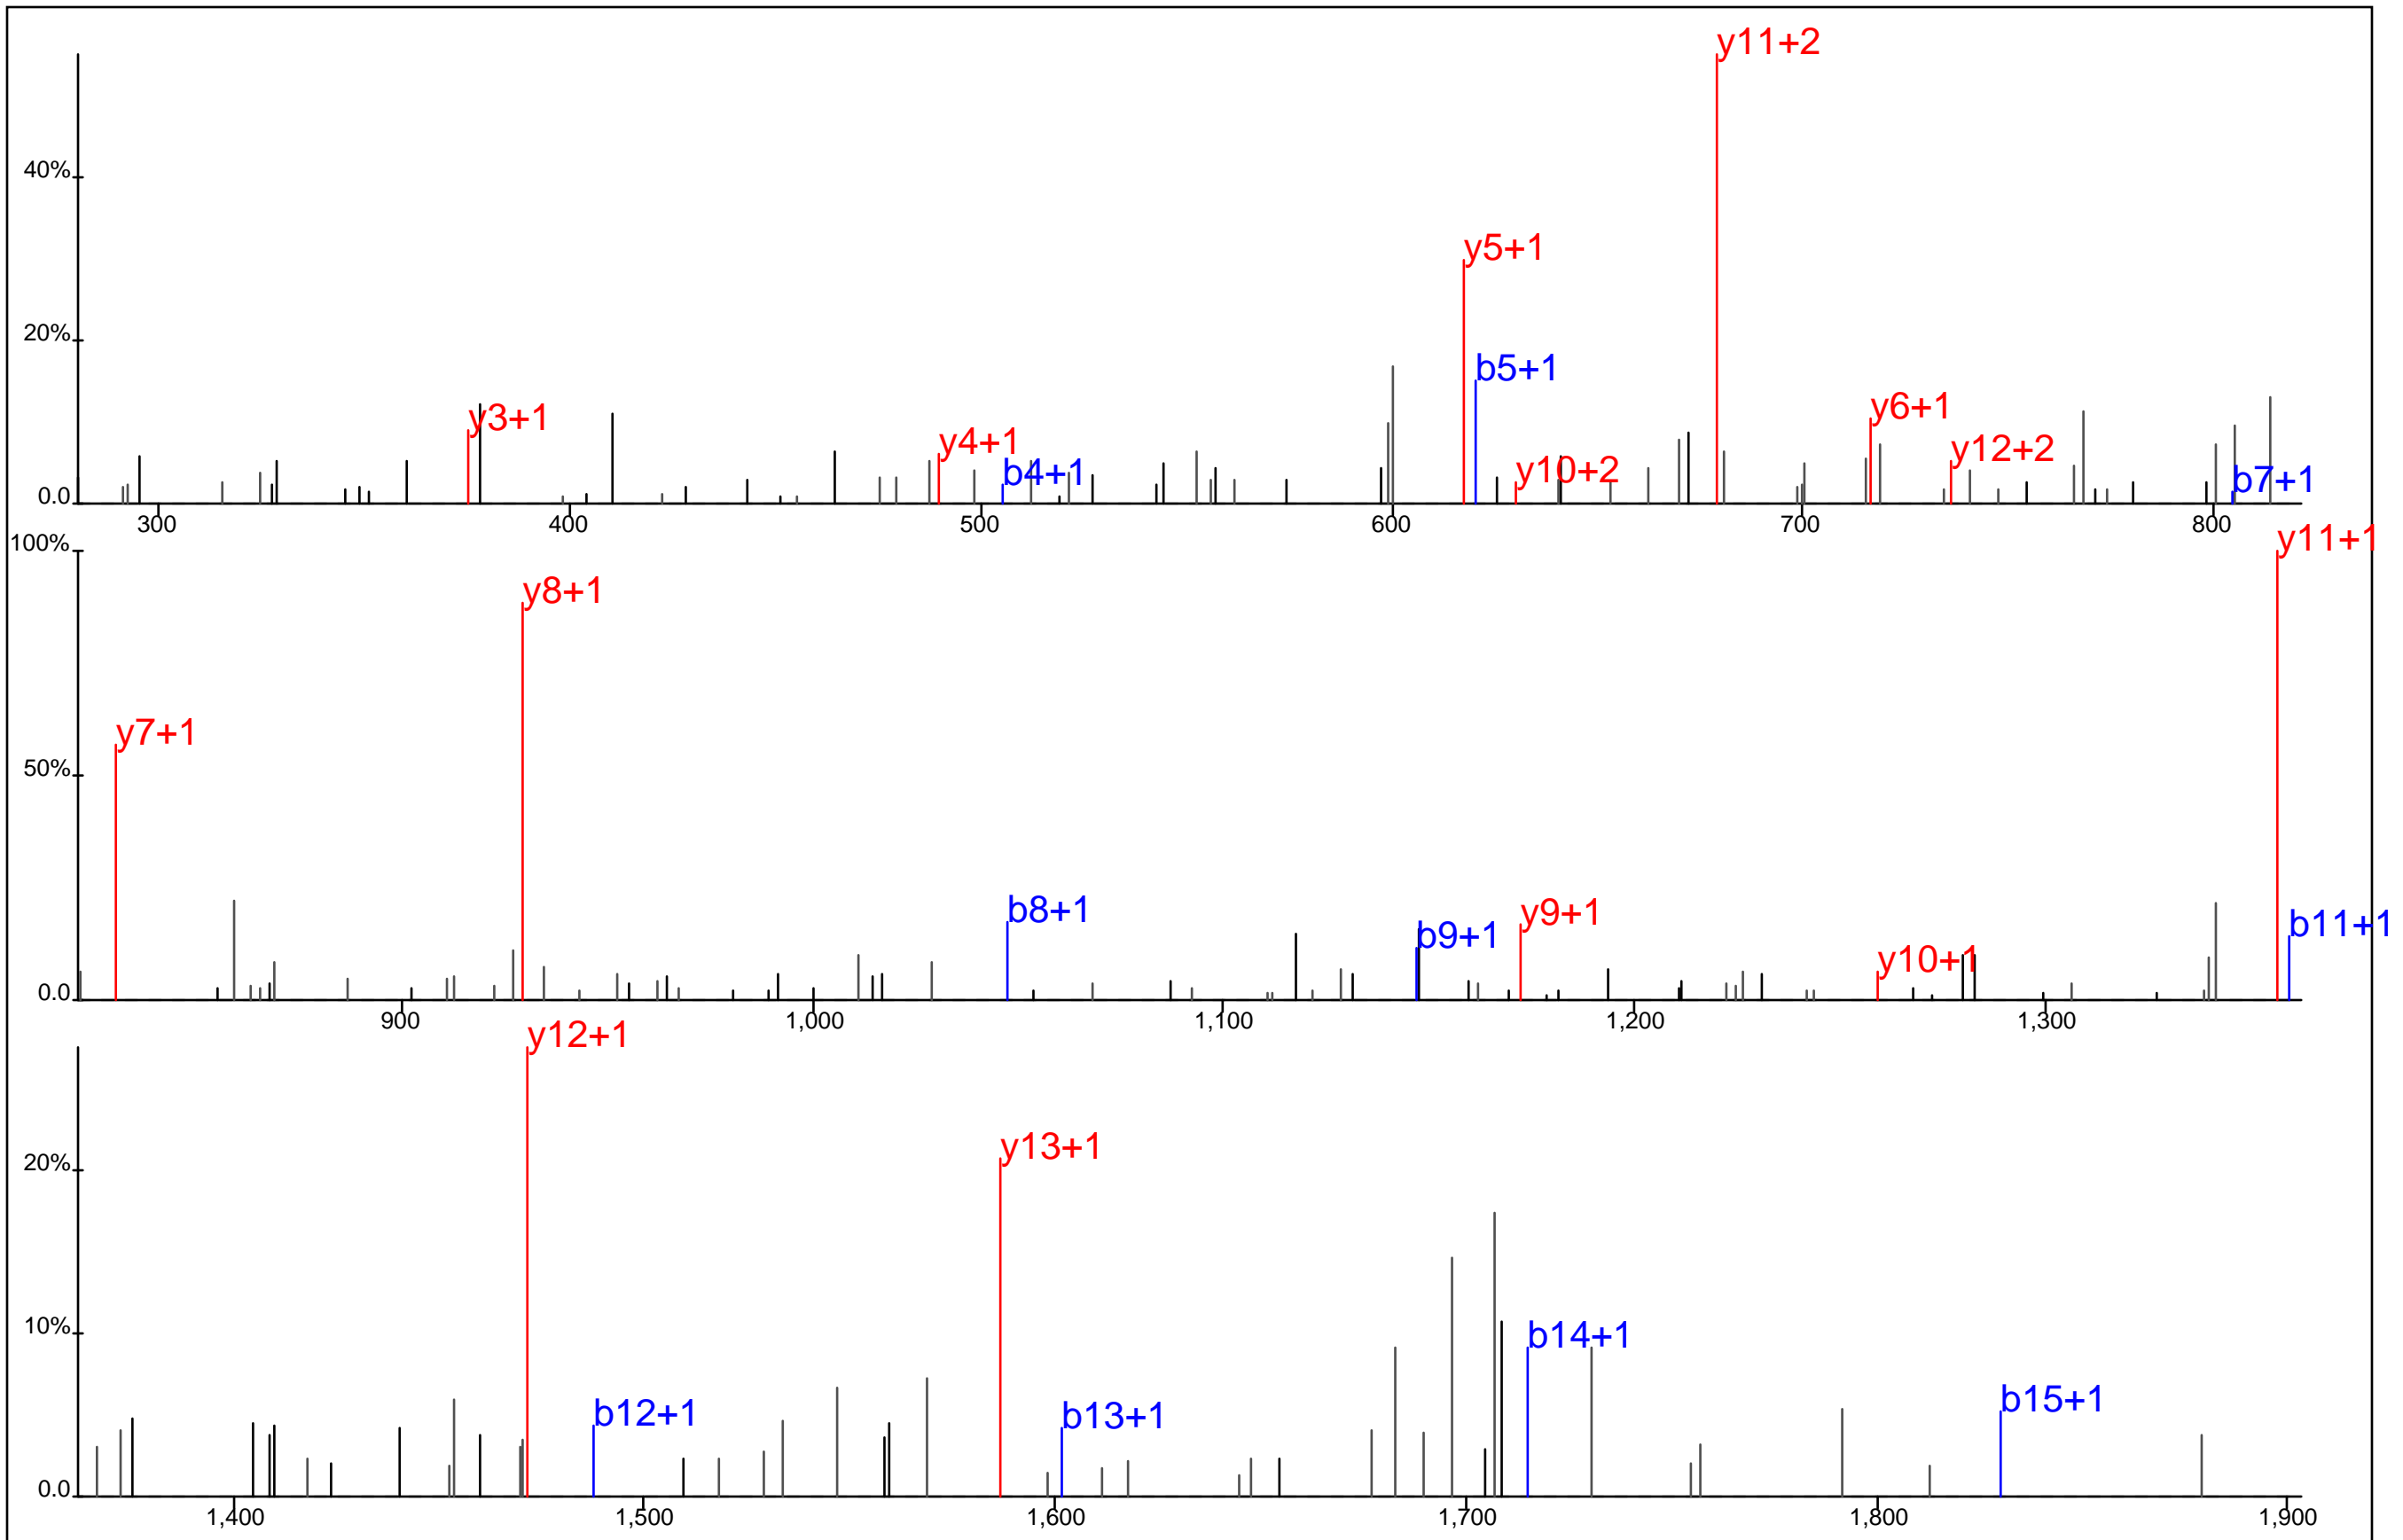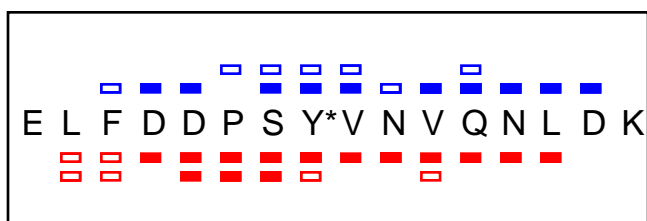

Protein Name: SHC (Src homology 2 domain containing) transforming protein 1  
 gi Accession: 0  
 Precursor Mass: 988.4402+2  
 Delta Mass: 2.407 ppm  
 XCorr: 60.15





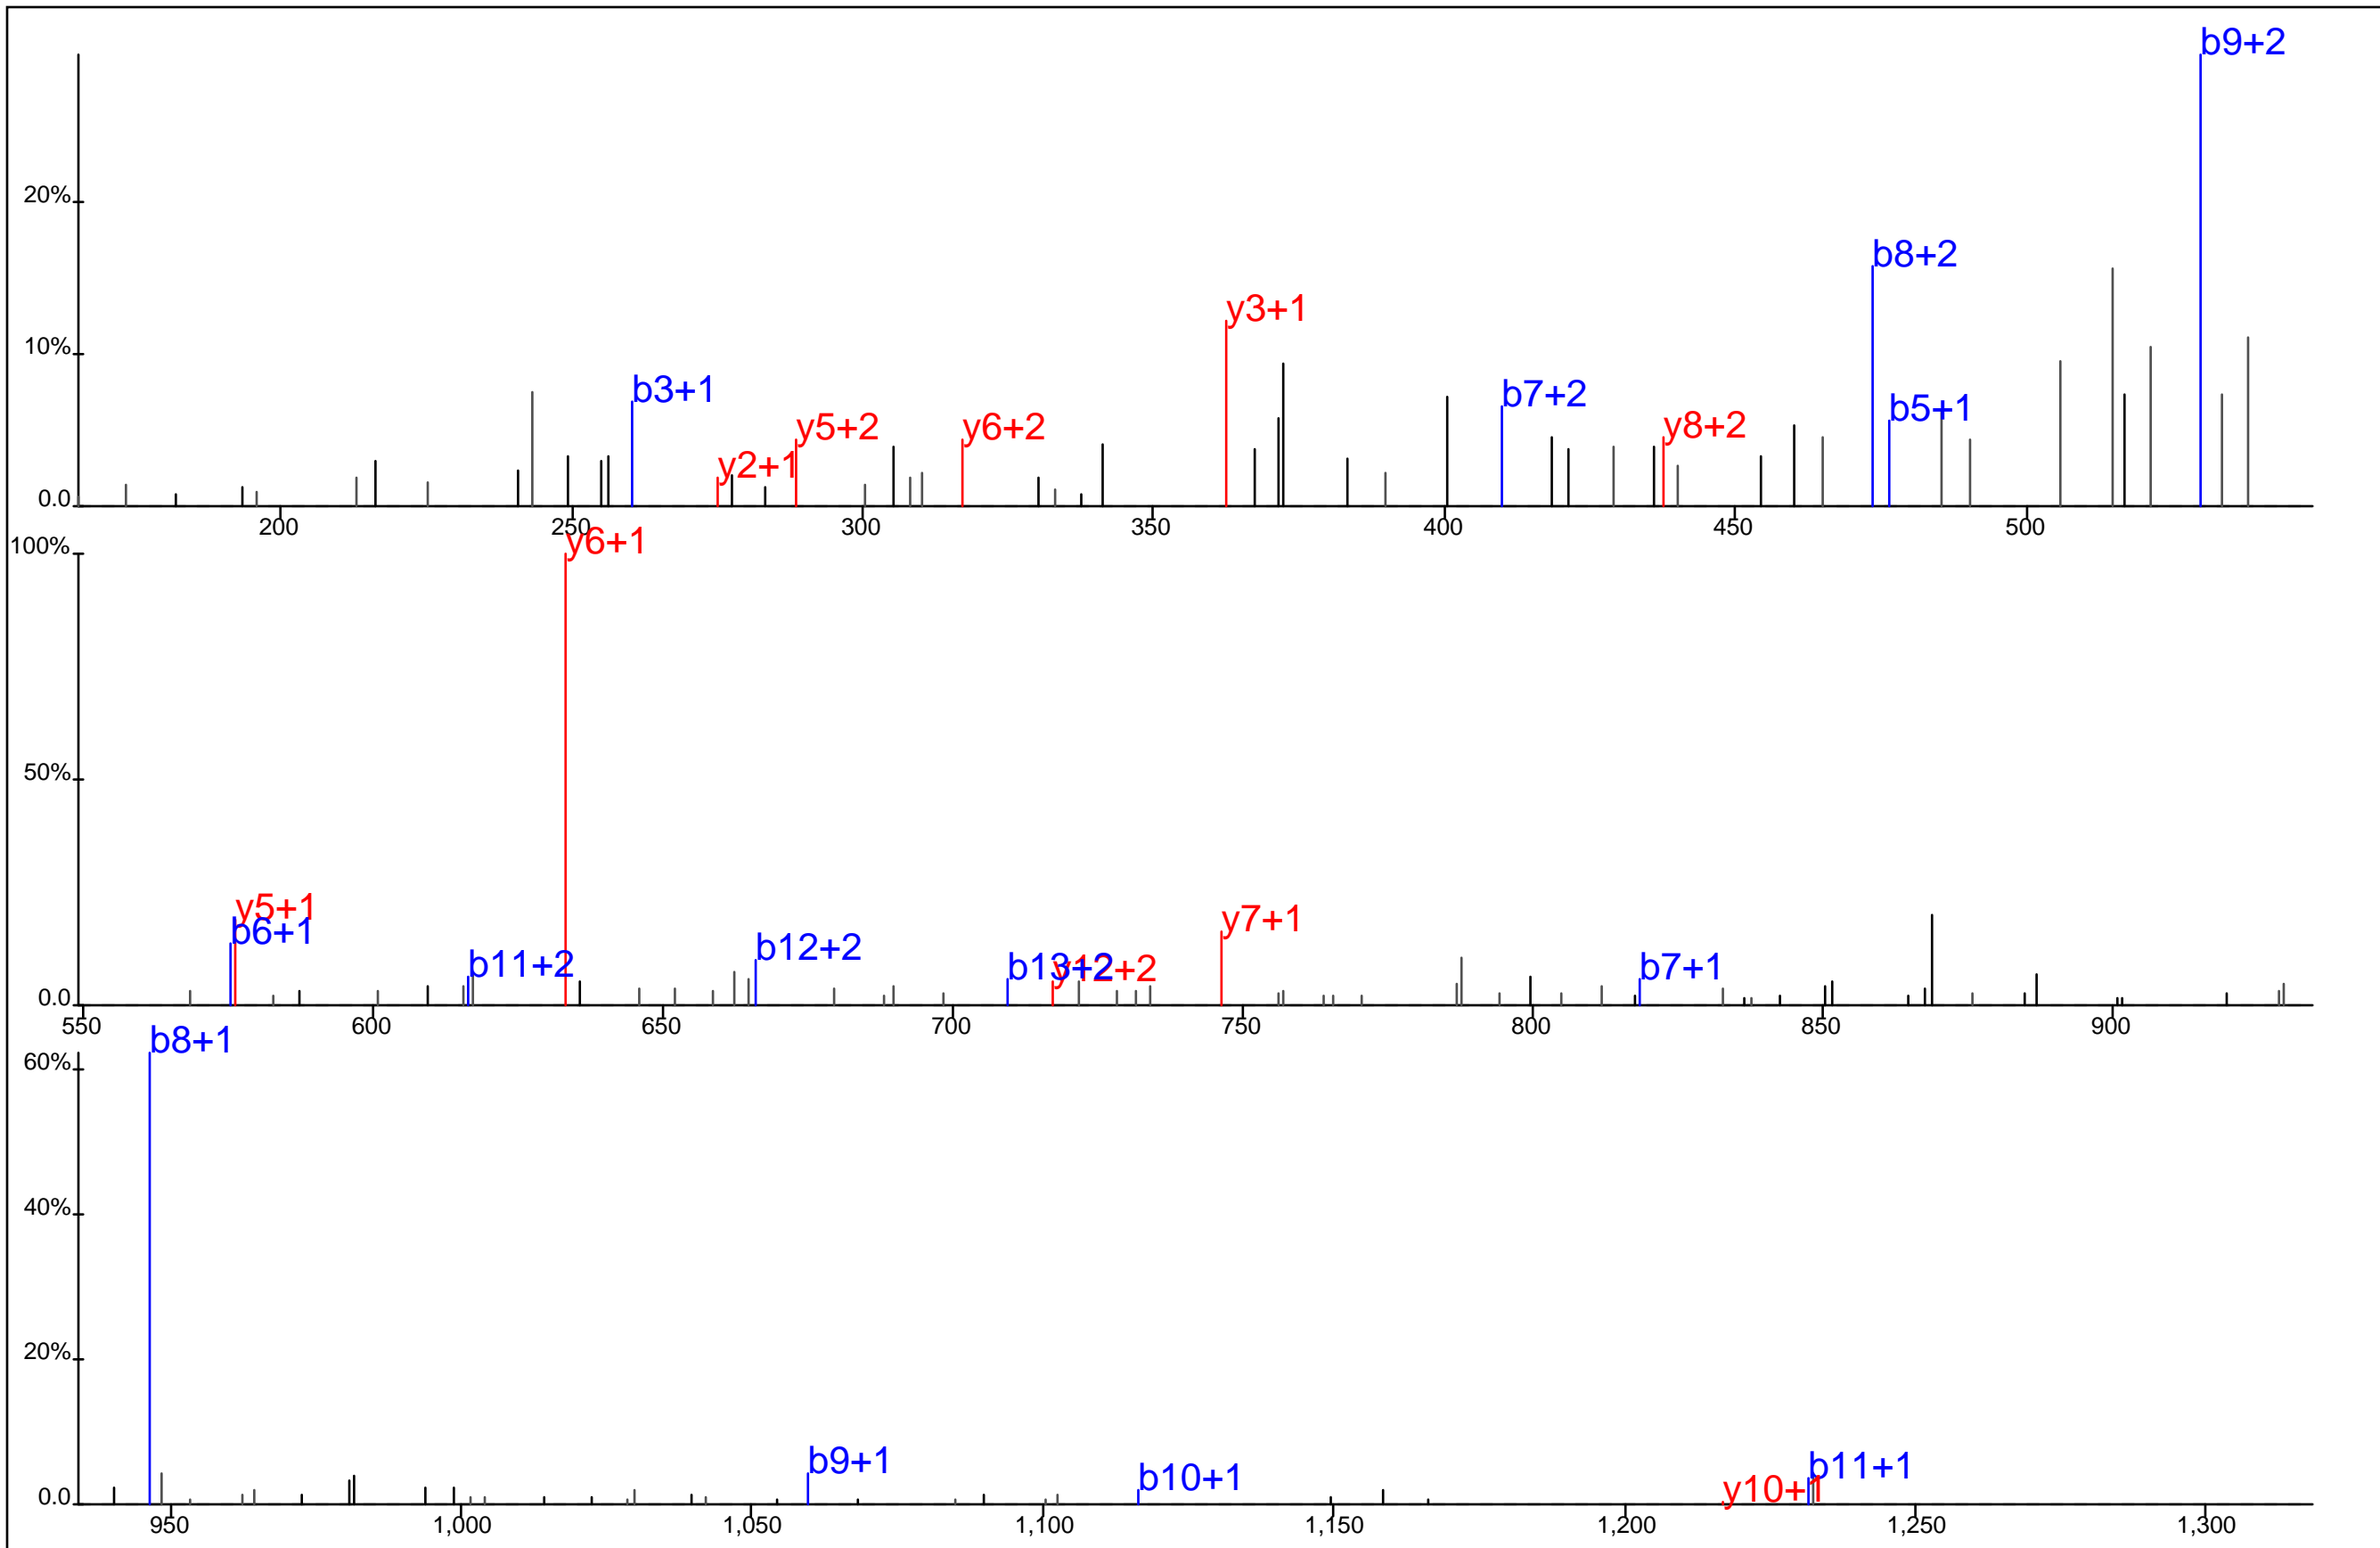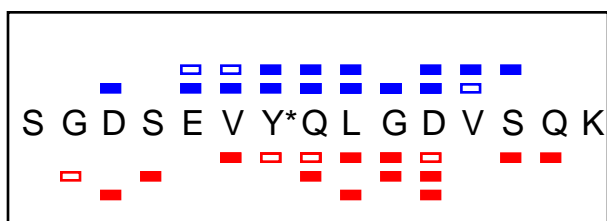

Protein Name: Single stranded DNA binding protein 1  
 gi Accession: 0  
 Precursor Mass: 564.5772+3  
 Delta Mass: 0.634 ppm  
 XCorr: 38.19





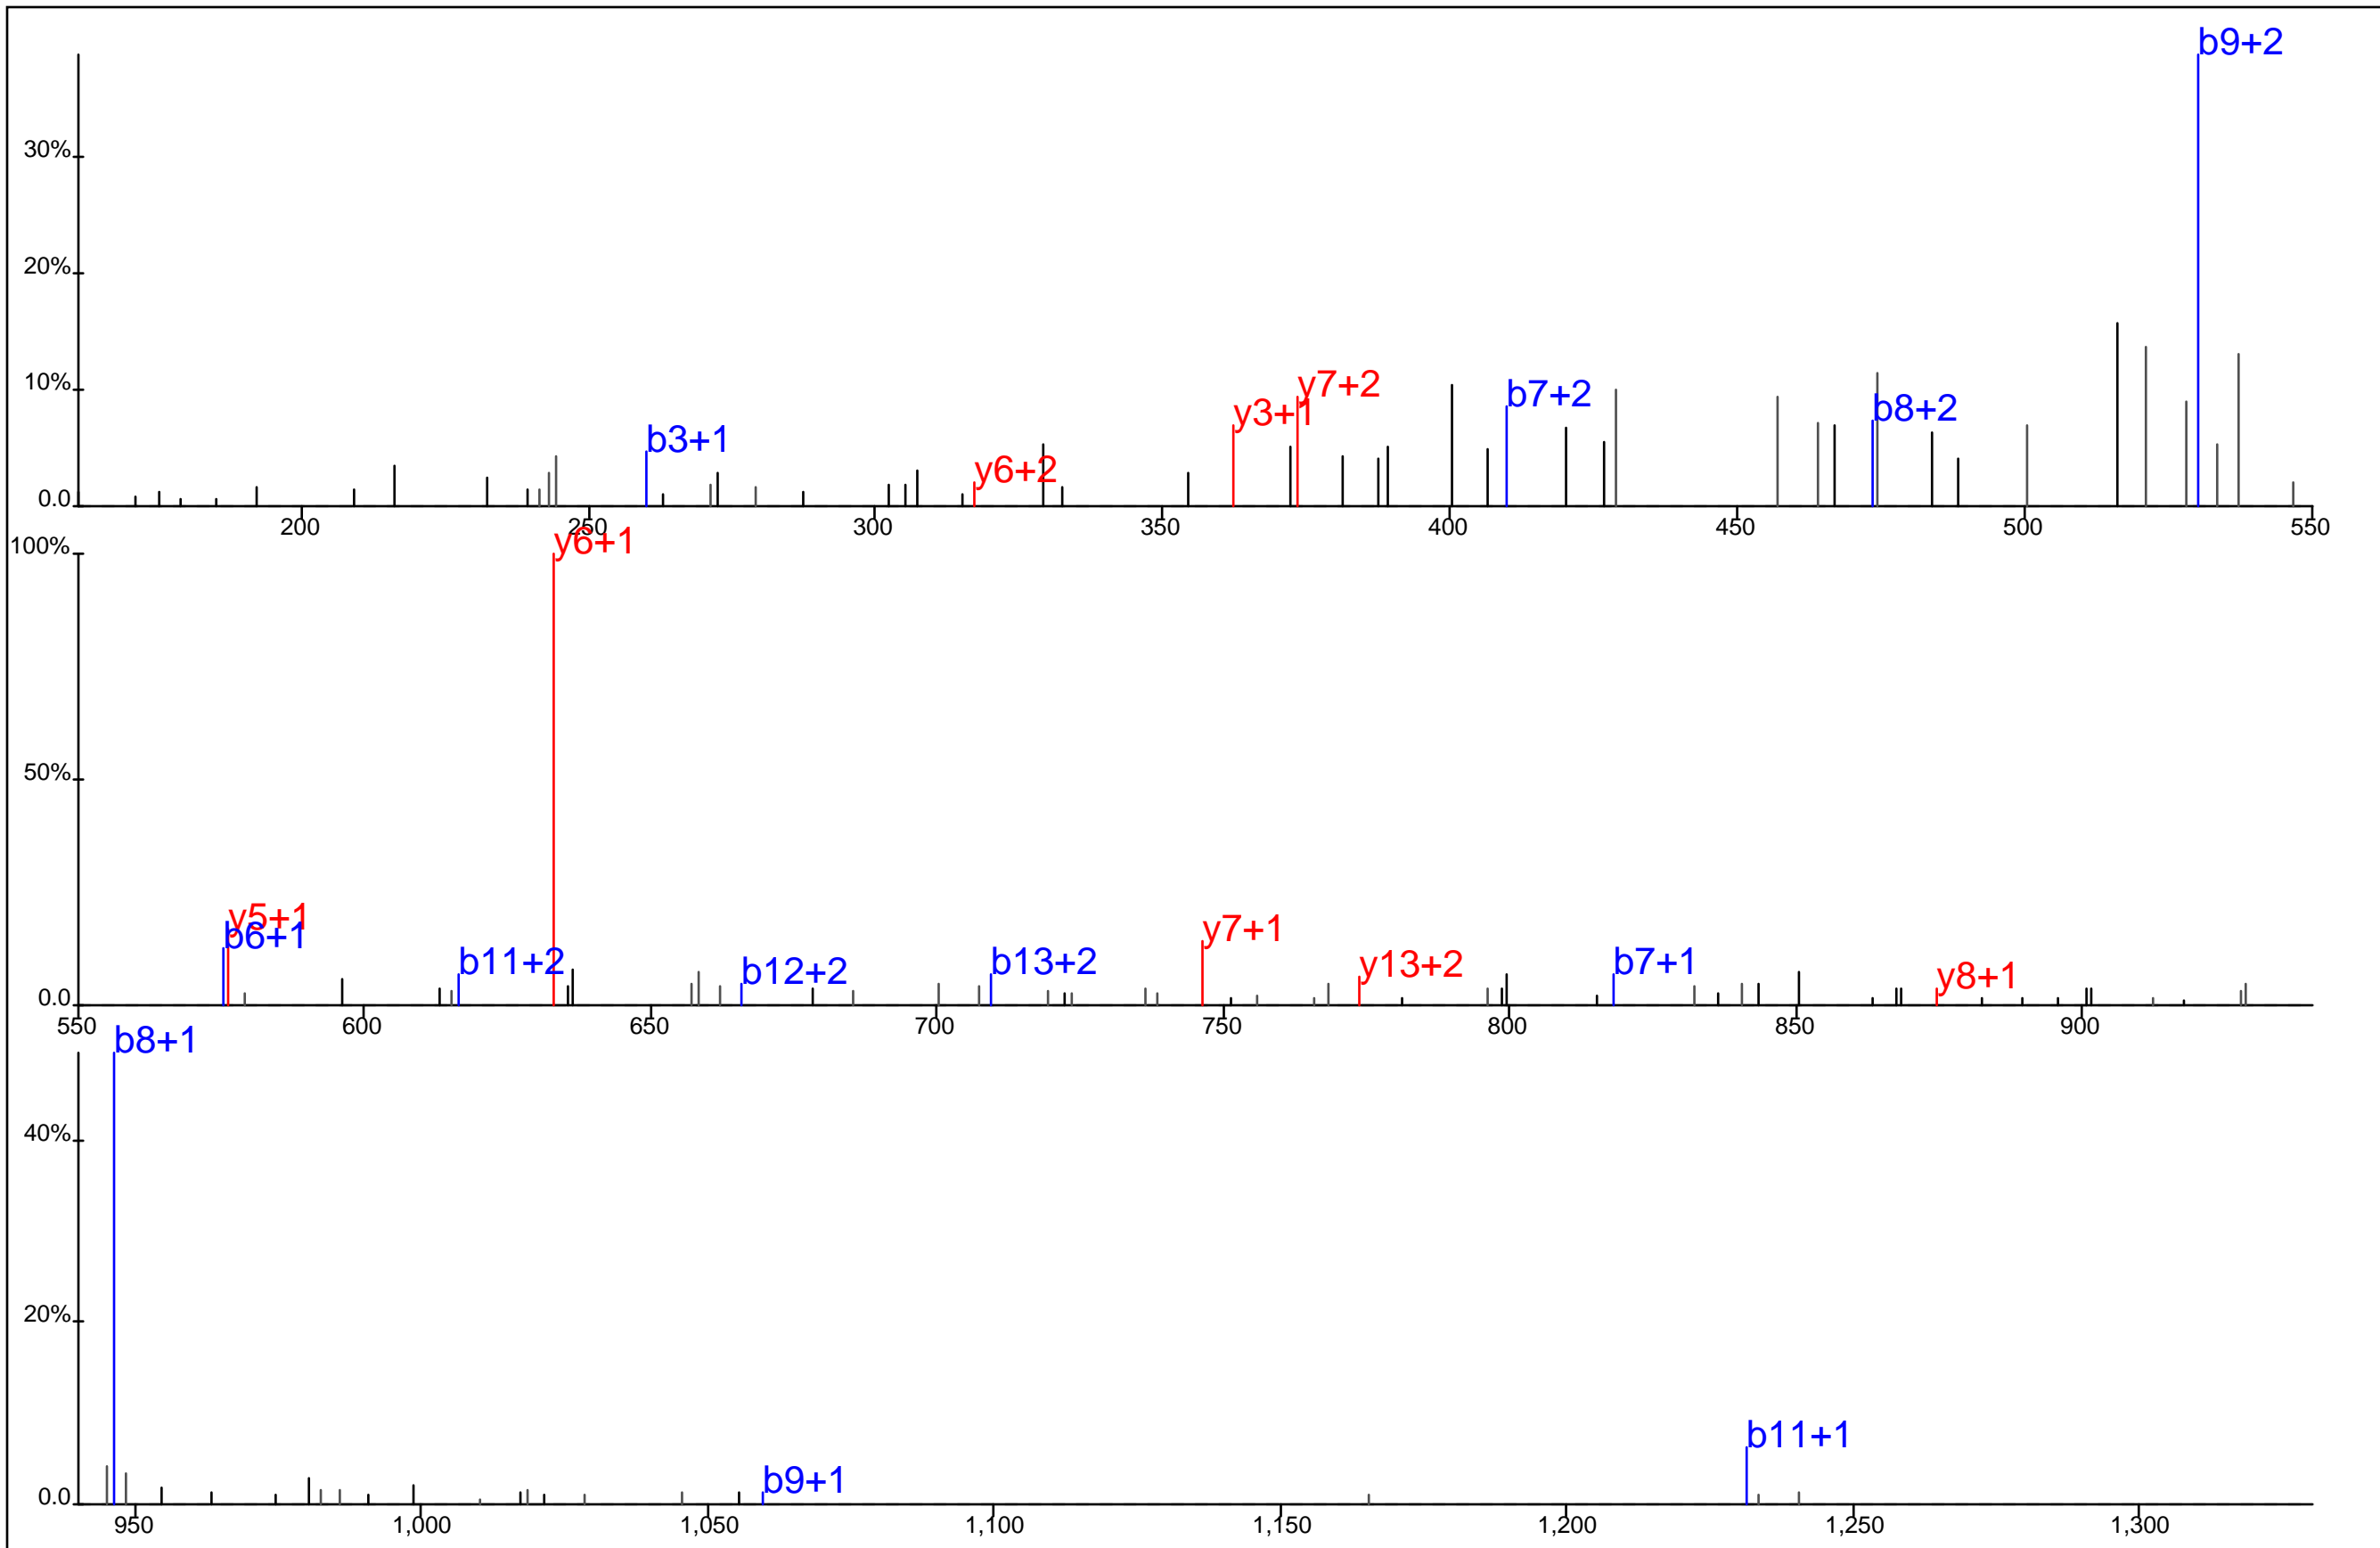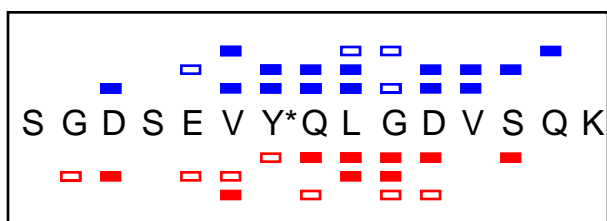

Protein Name: Single stranded DNA binding protein 1  
 gi Accession: 0  
 Precursor Mass: 564.5782+3  
 Delta Mass: 2.475 ppm  
 XCorr: 28.96



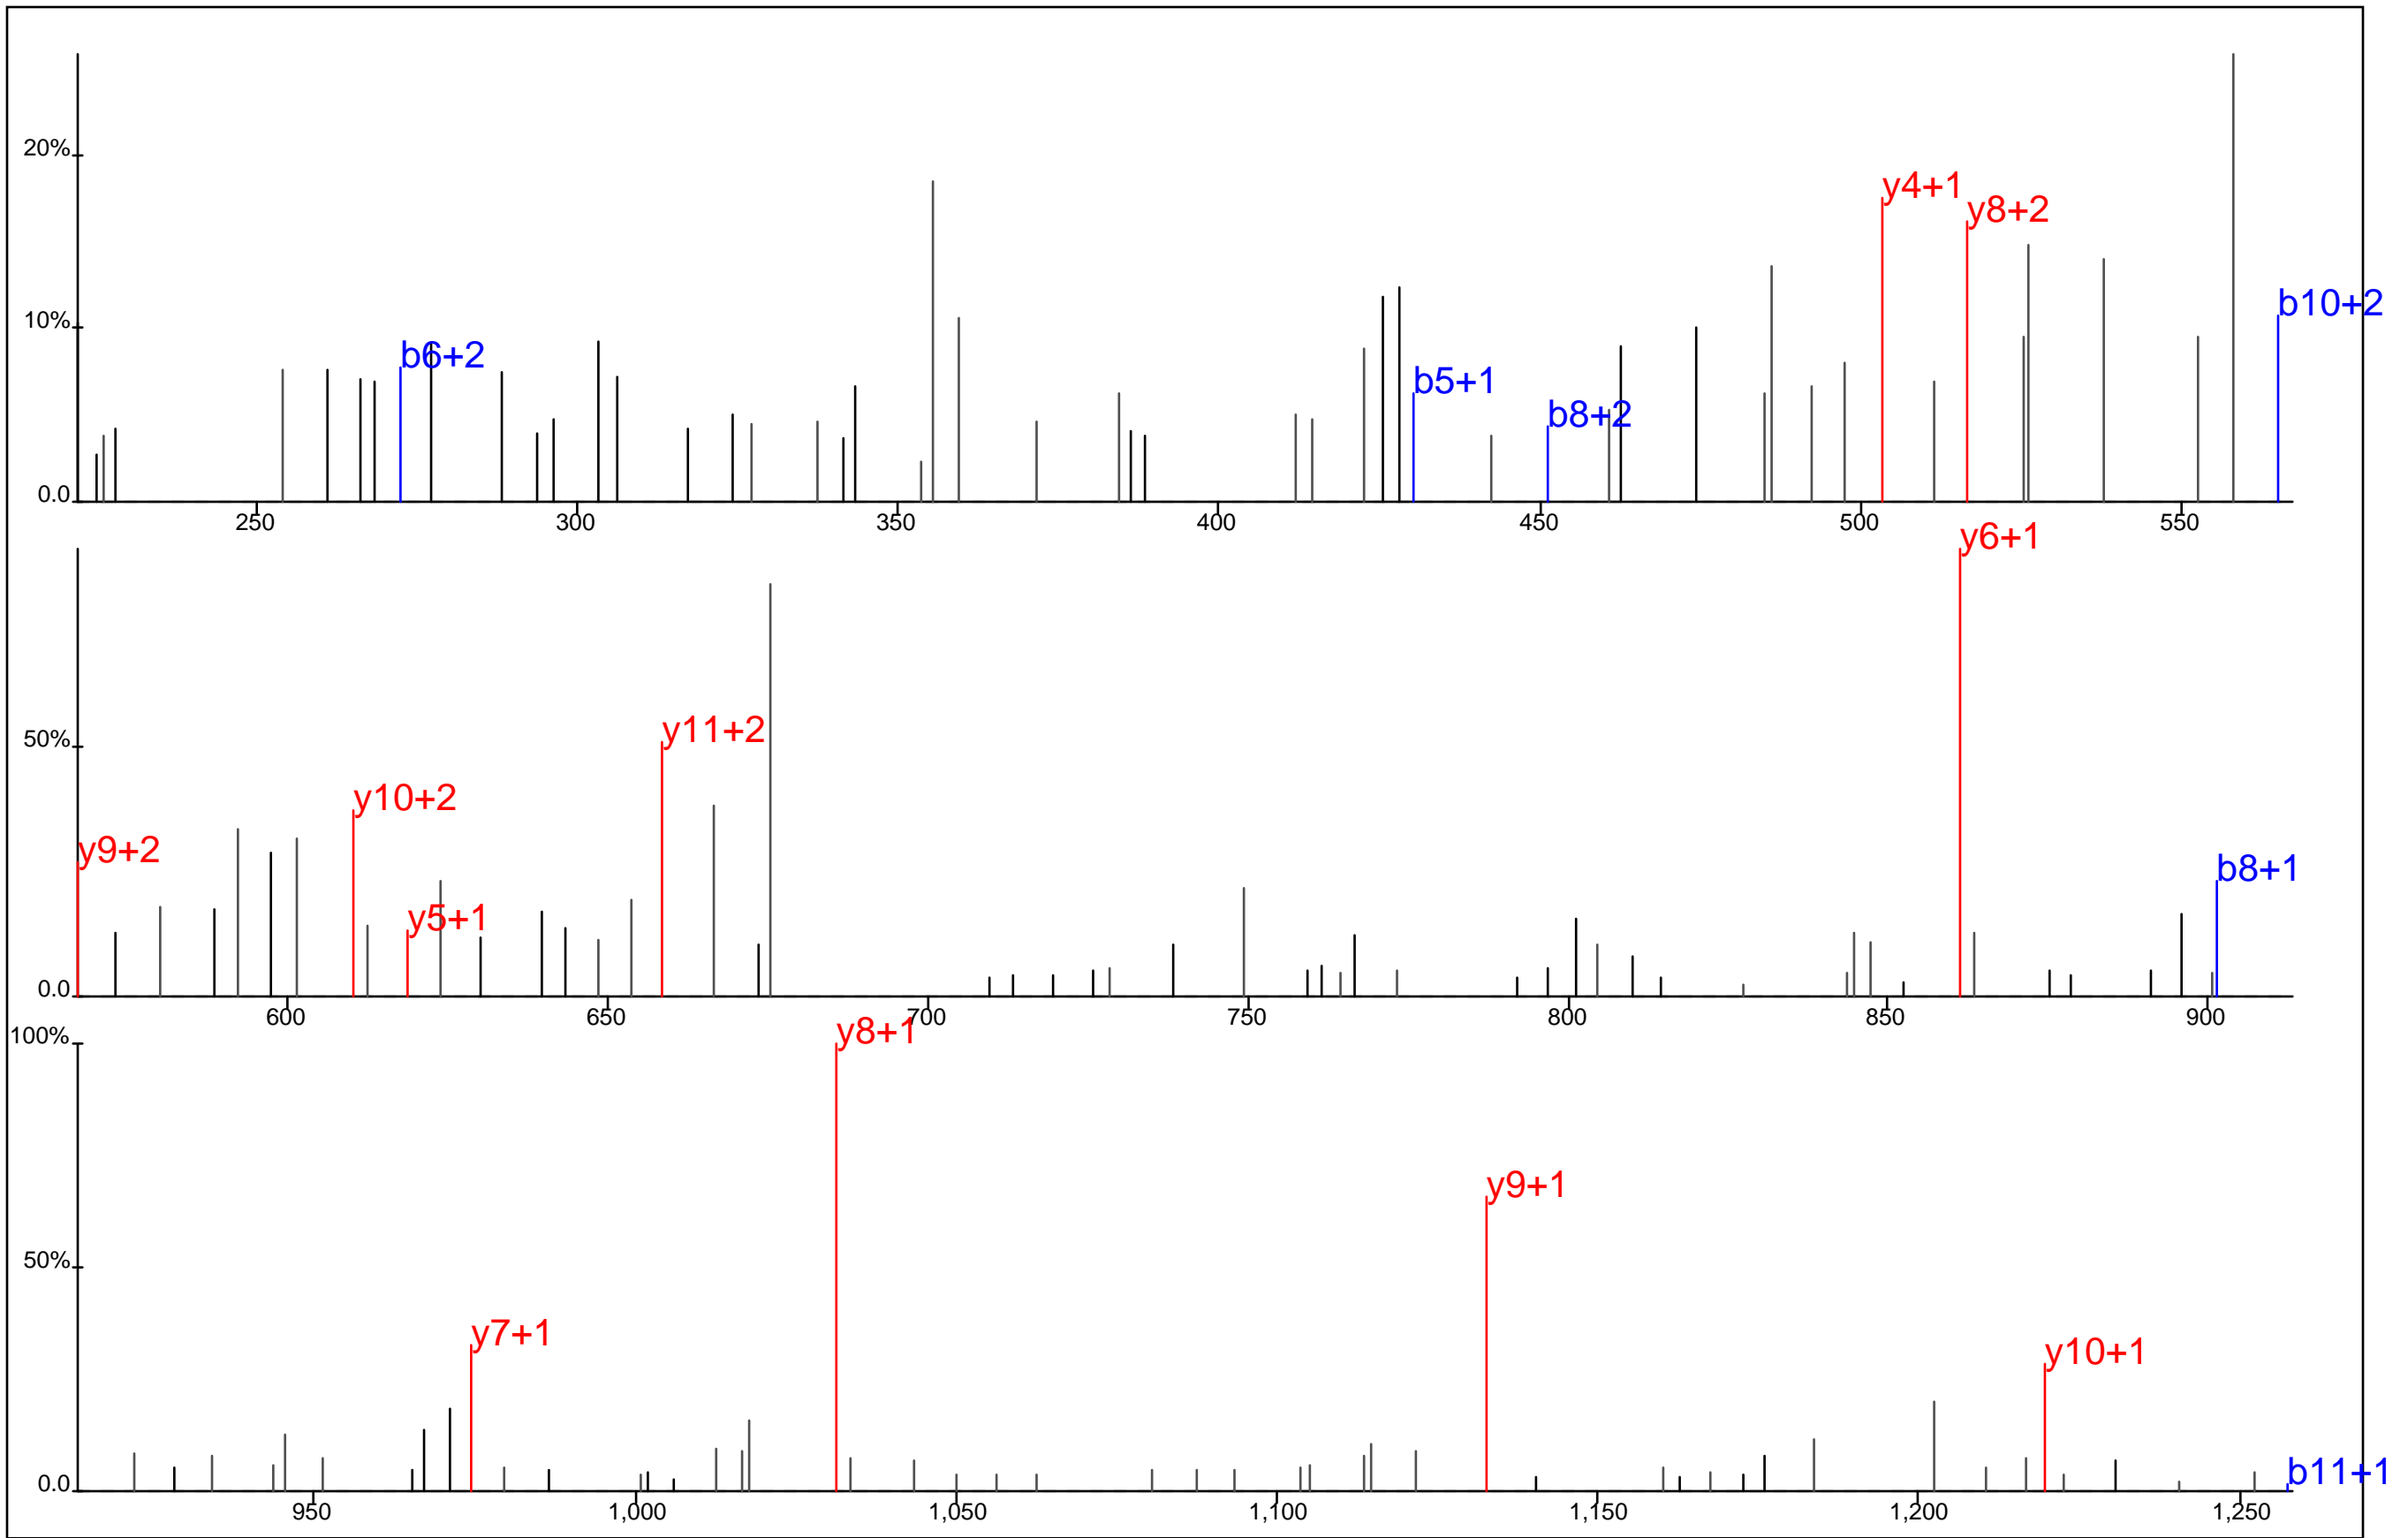

■ ■  
 S P S T G L Y\* D N L E K  
□ □ □ □ □ □ □ □

Protein Name: Sirtuin 2  
 gi Accession: 0  
 Precursor Mass: 702.3085+2  
 Delta Mass: 0.569 ppm  
 XCorr: 28.01

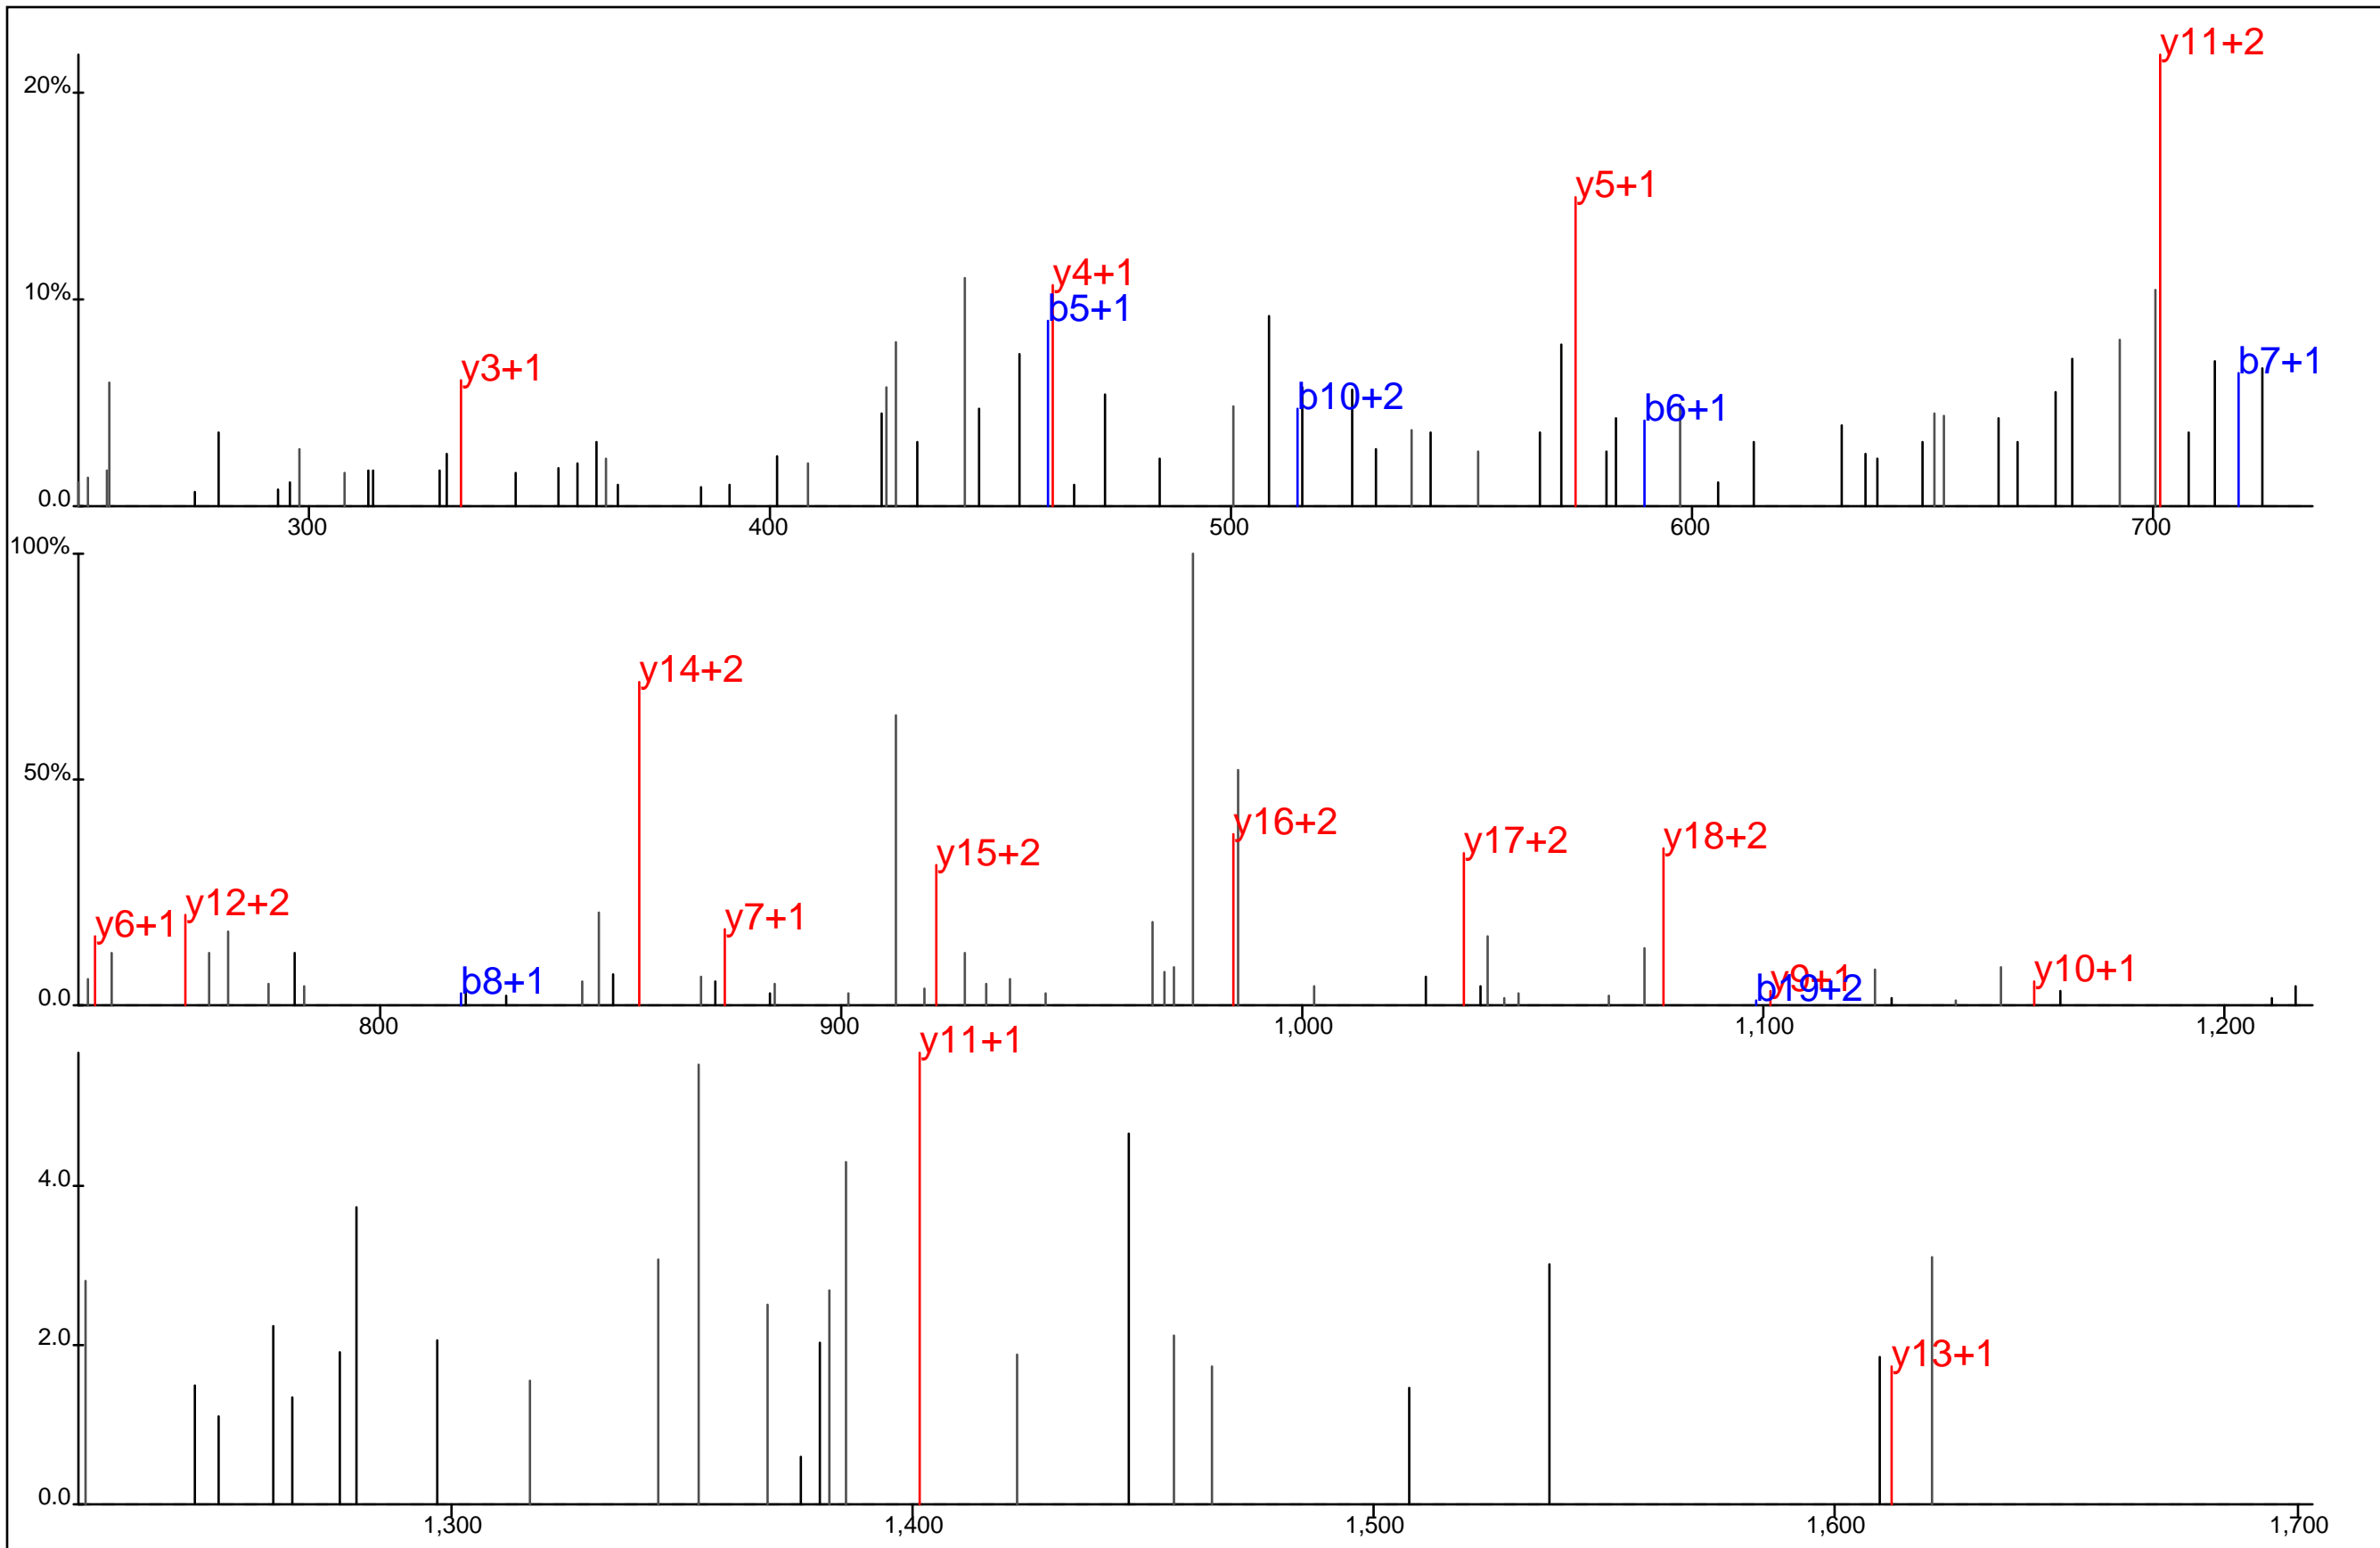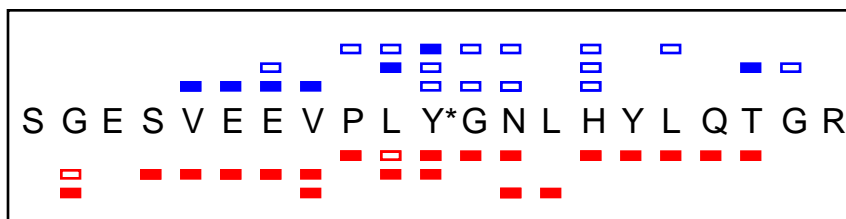

Protein Name: SIT  
 gi Accession: 0  
 Precursor Mass: 810.0452+3  
 Delta Mass: 1.204 ppm  
 XCorr: 43.28

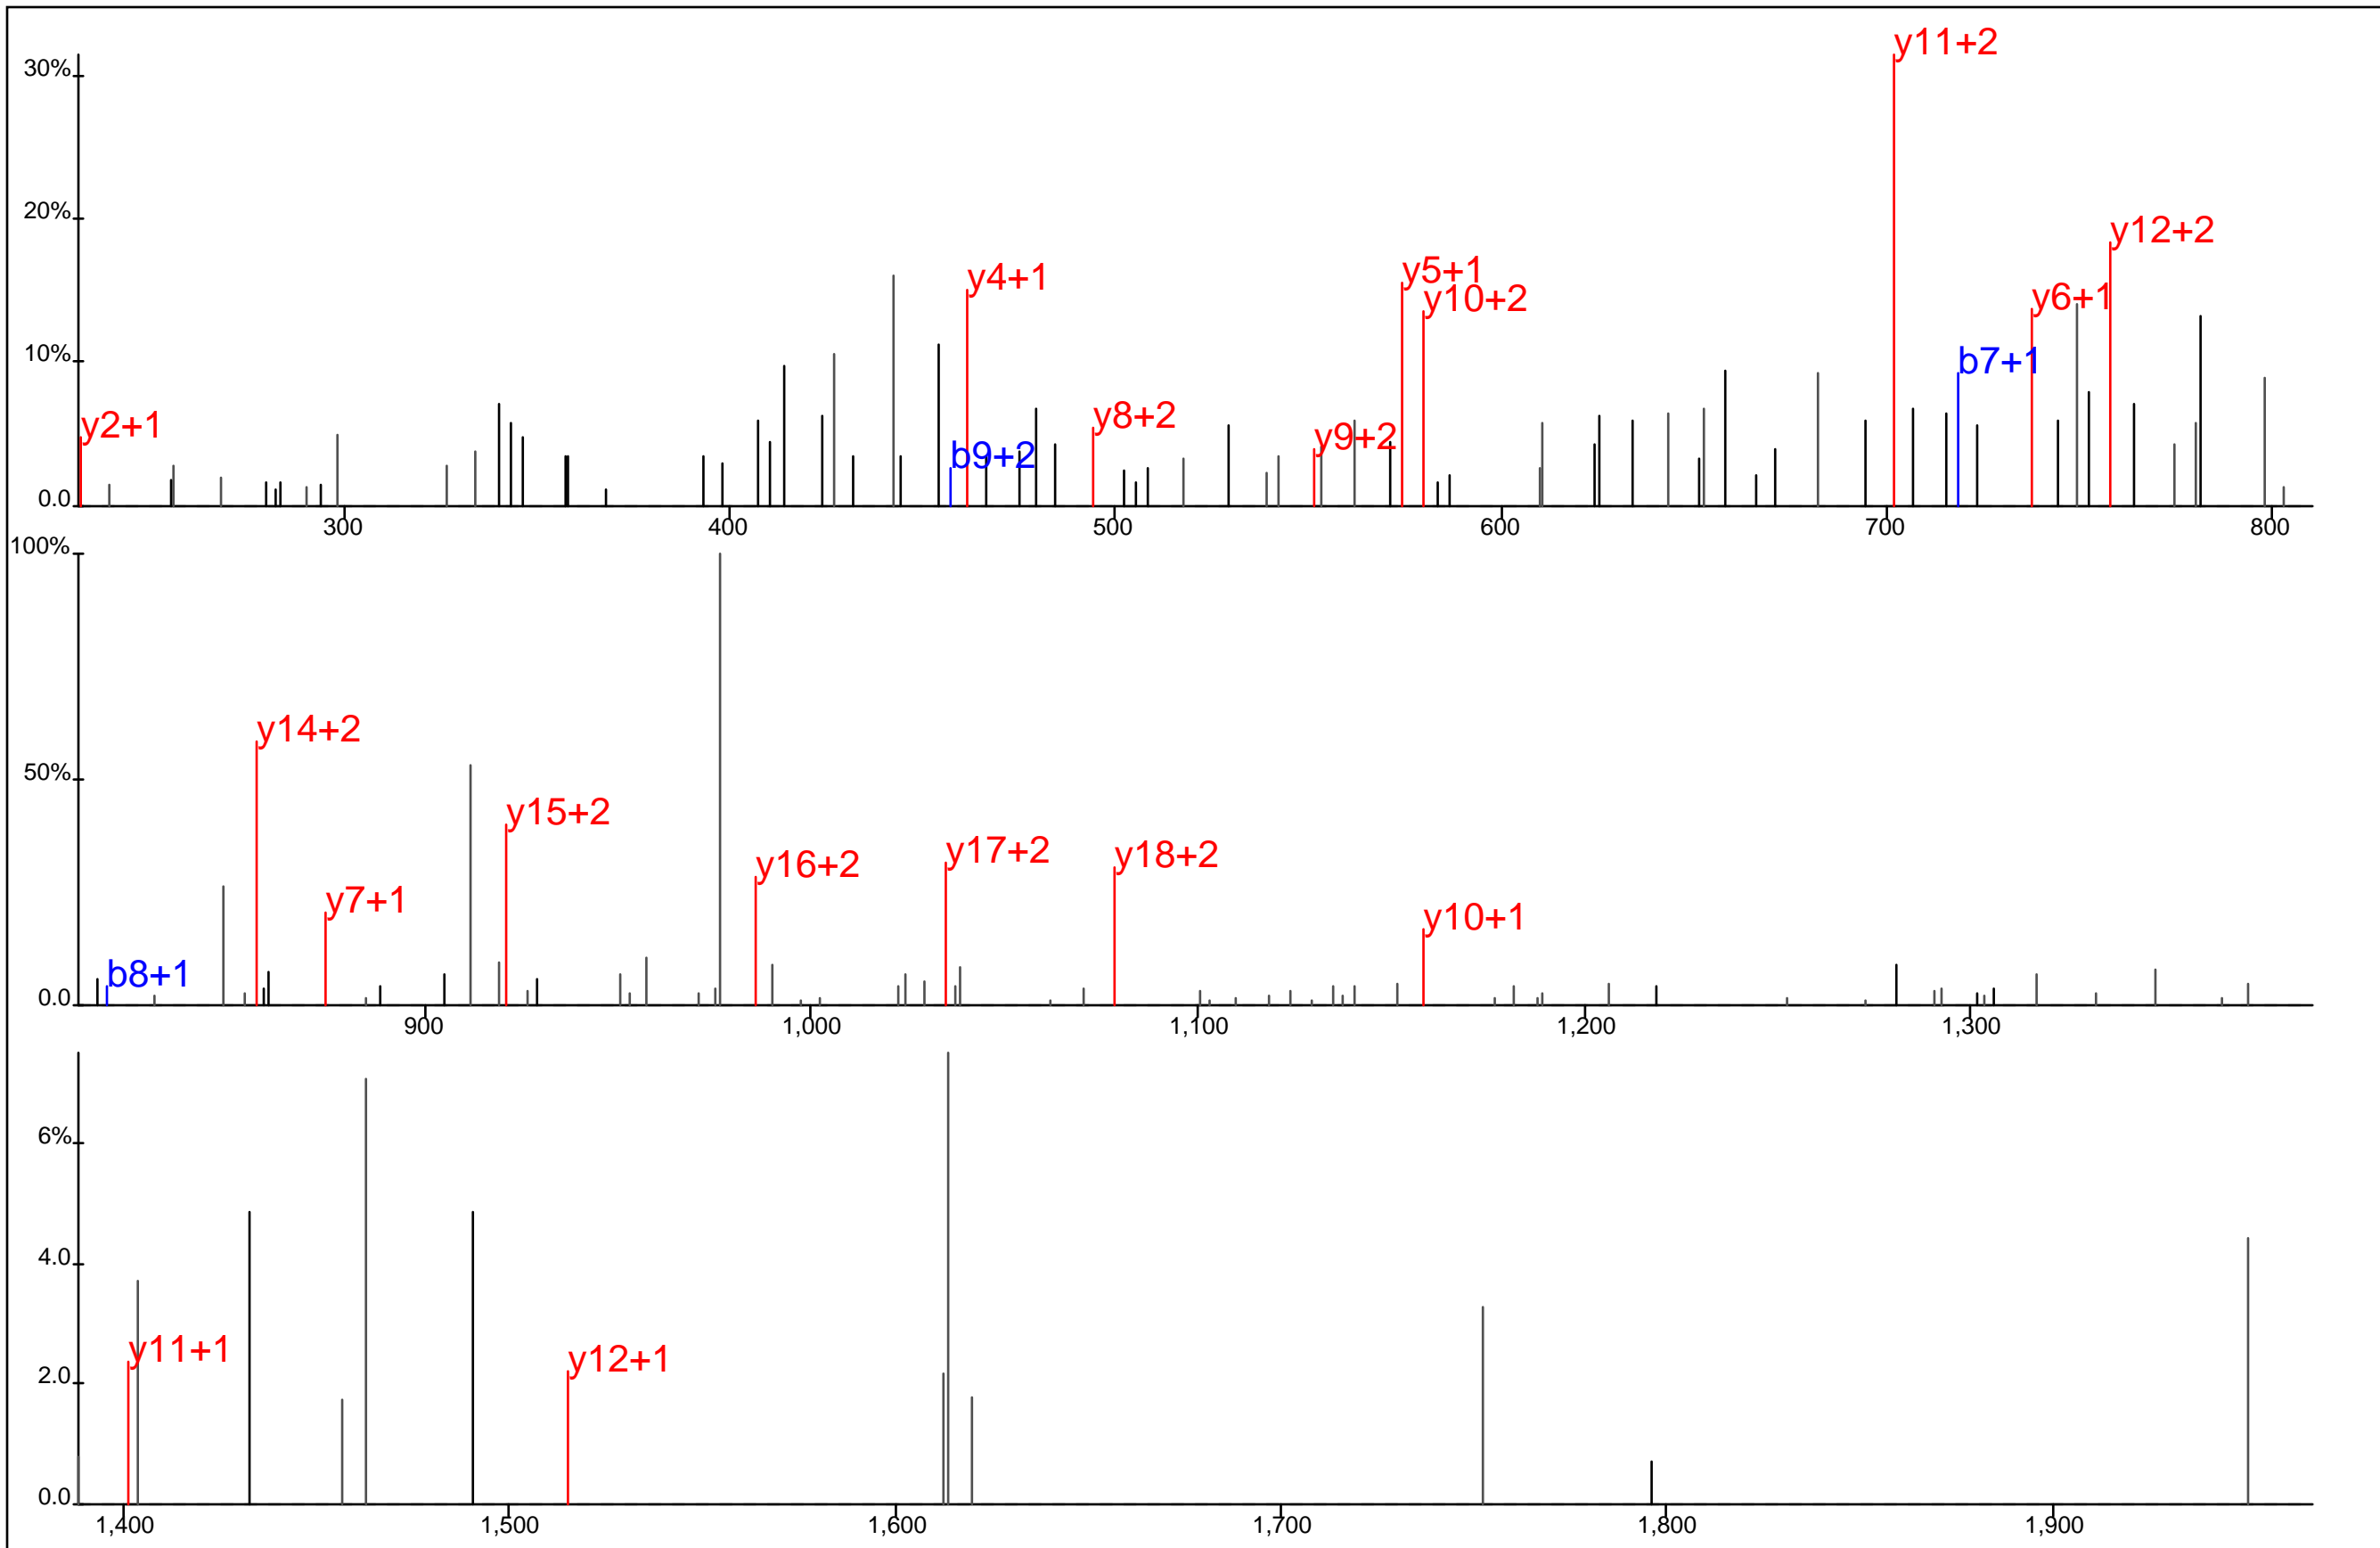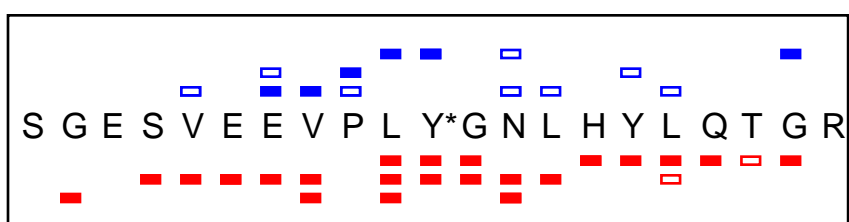

Protein Name: SIT  
 gi Accession: 0  
 Precursor Mass: 810.0449+3  
 Delta Mass: 0.903 ppm  
 XCorr: 32.21

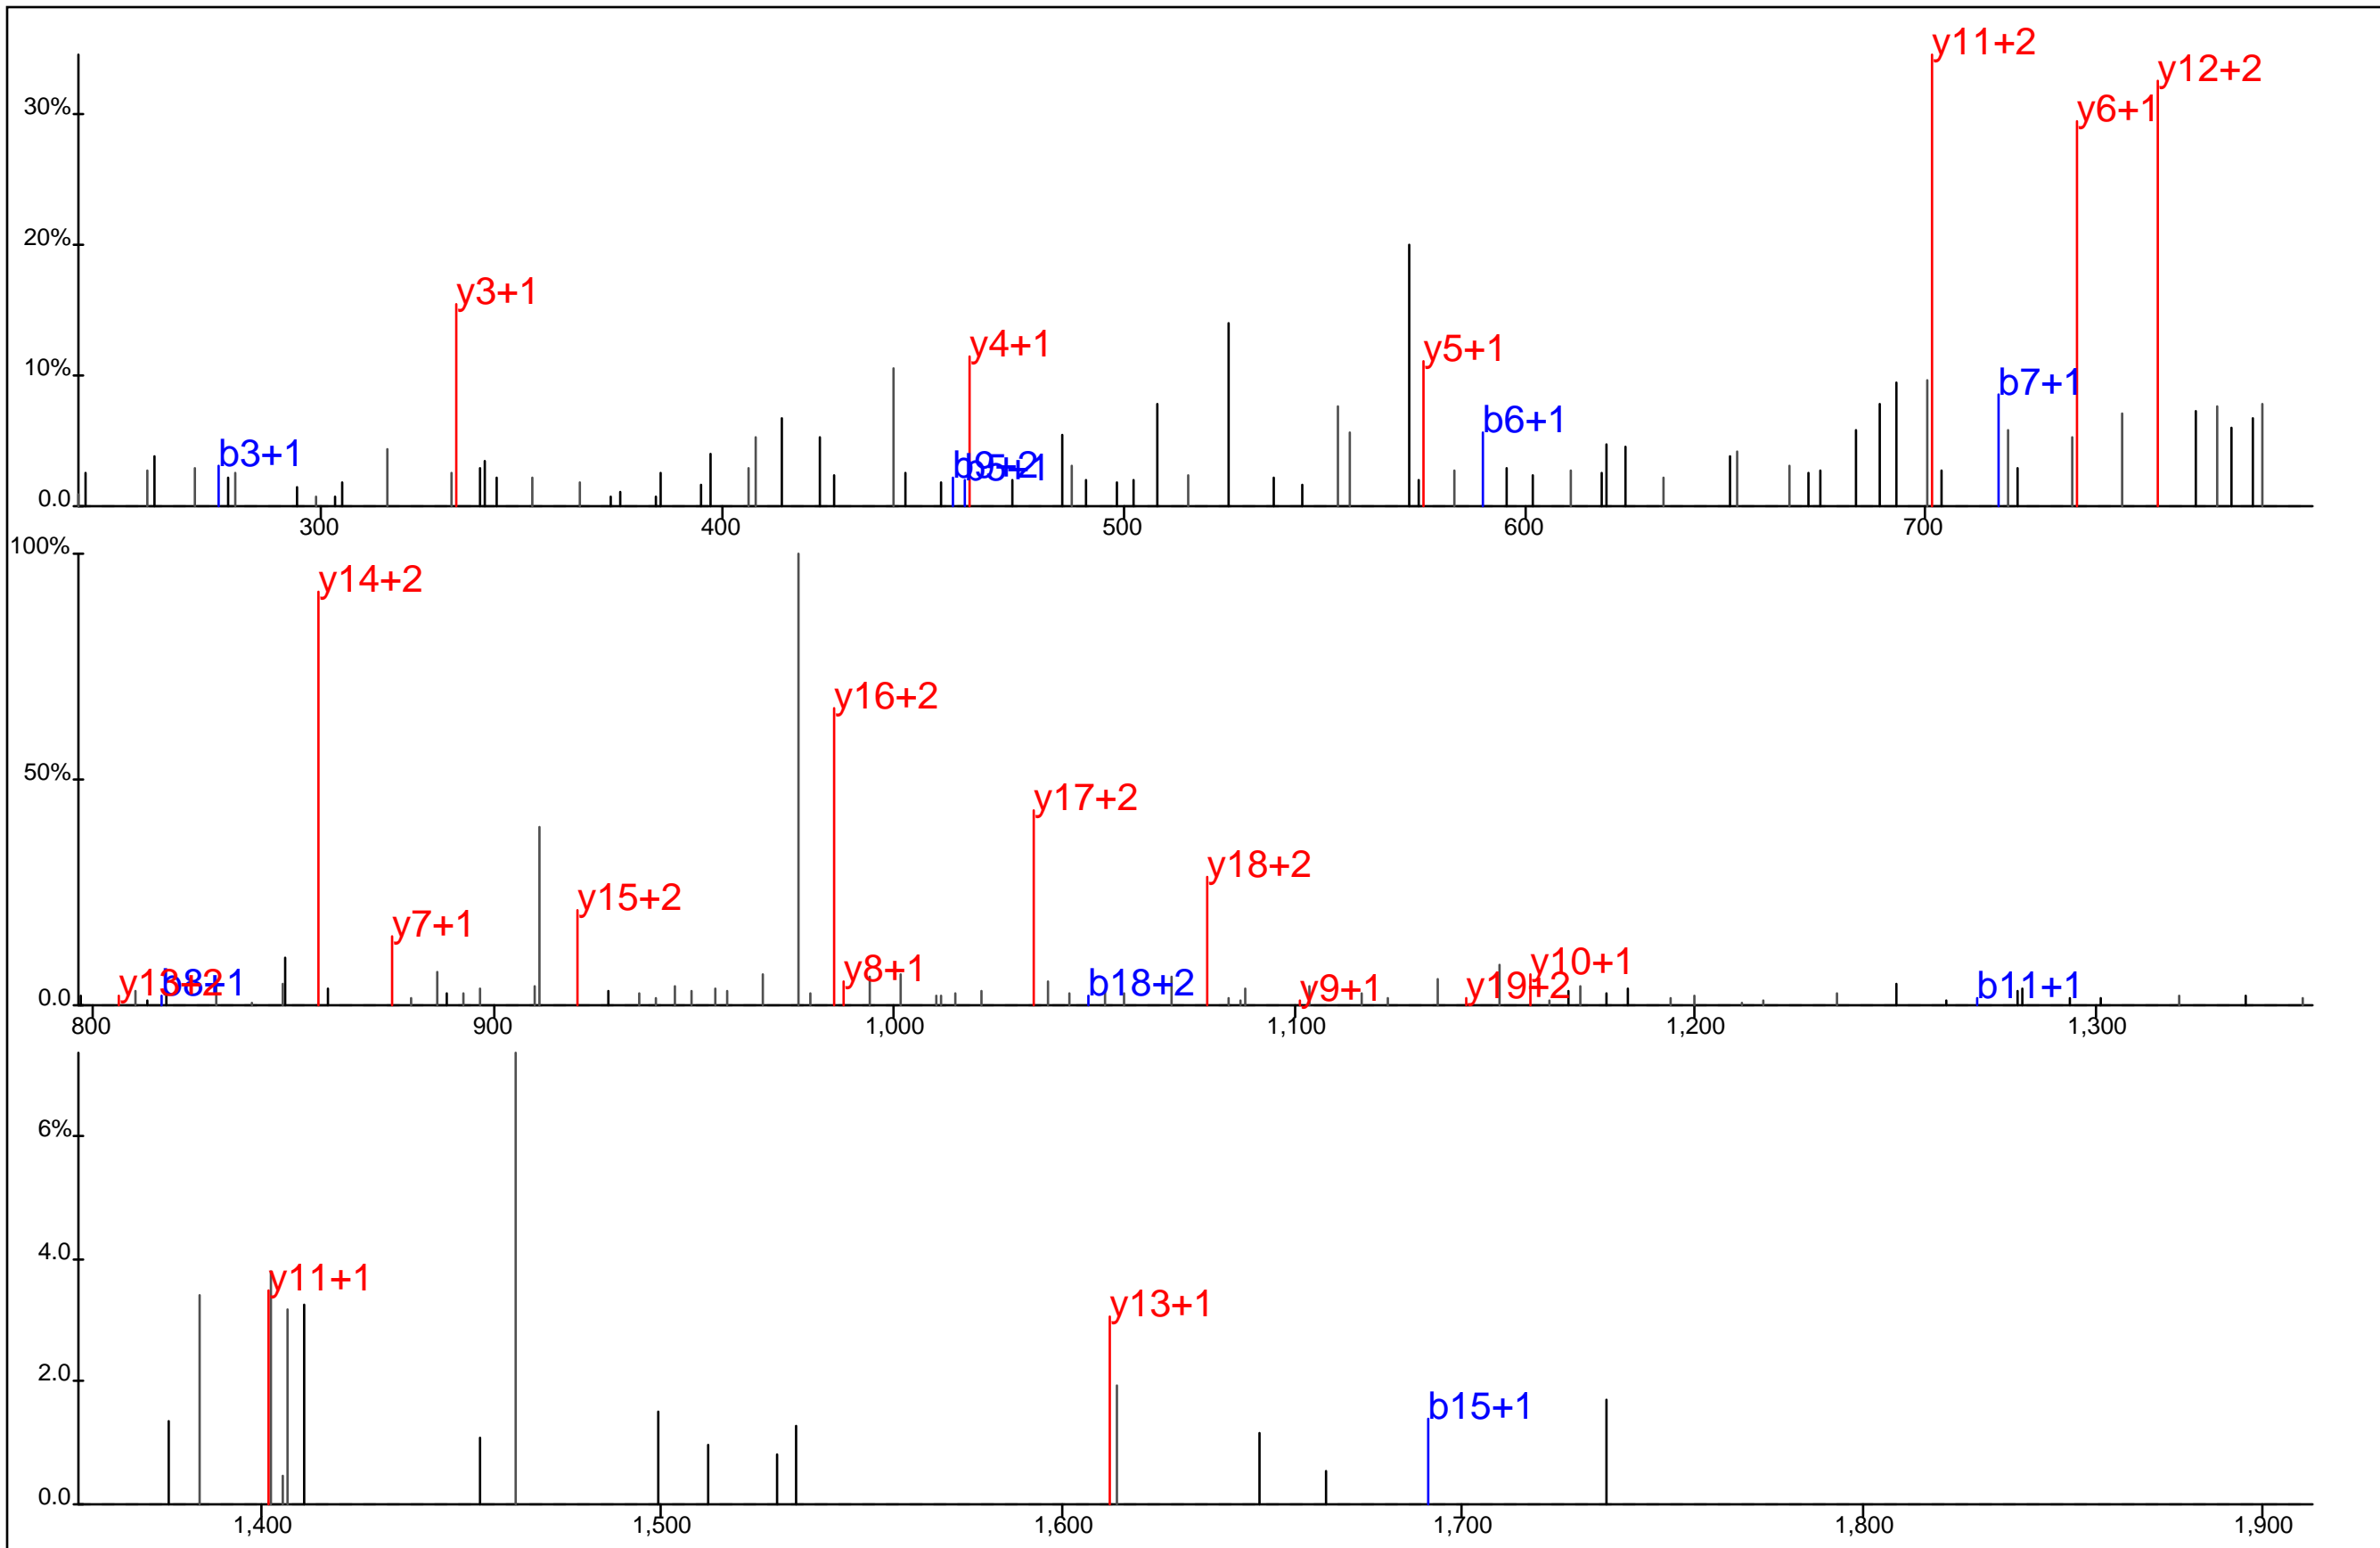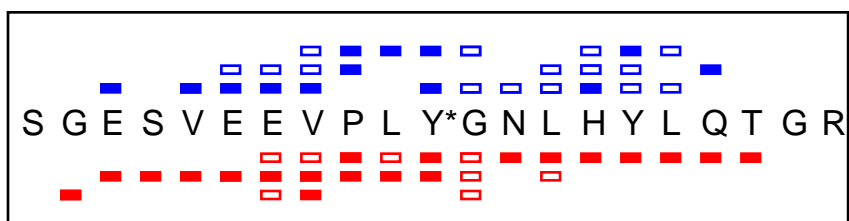

Protein Name: SIT  
 gi Accession: 0  
 Precursor Mass: 810.0452+3  
 Delta Mass: 1.280 ppm  
 XCorr: 41.72

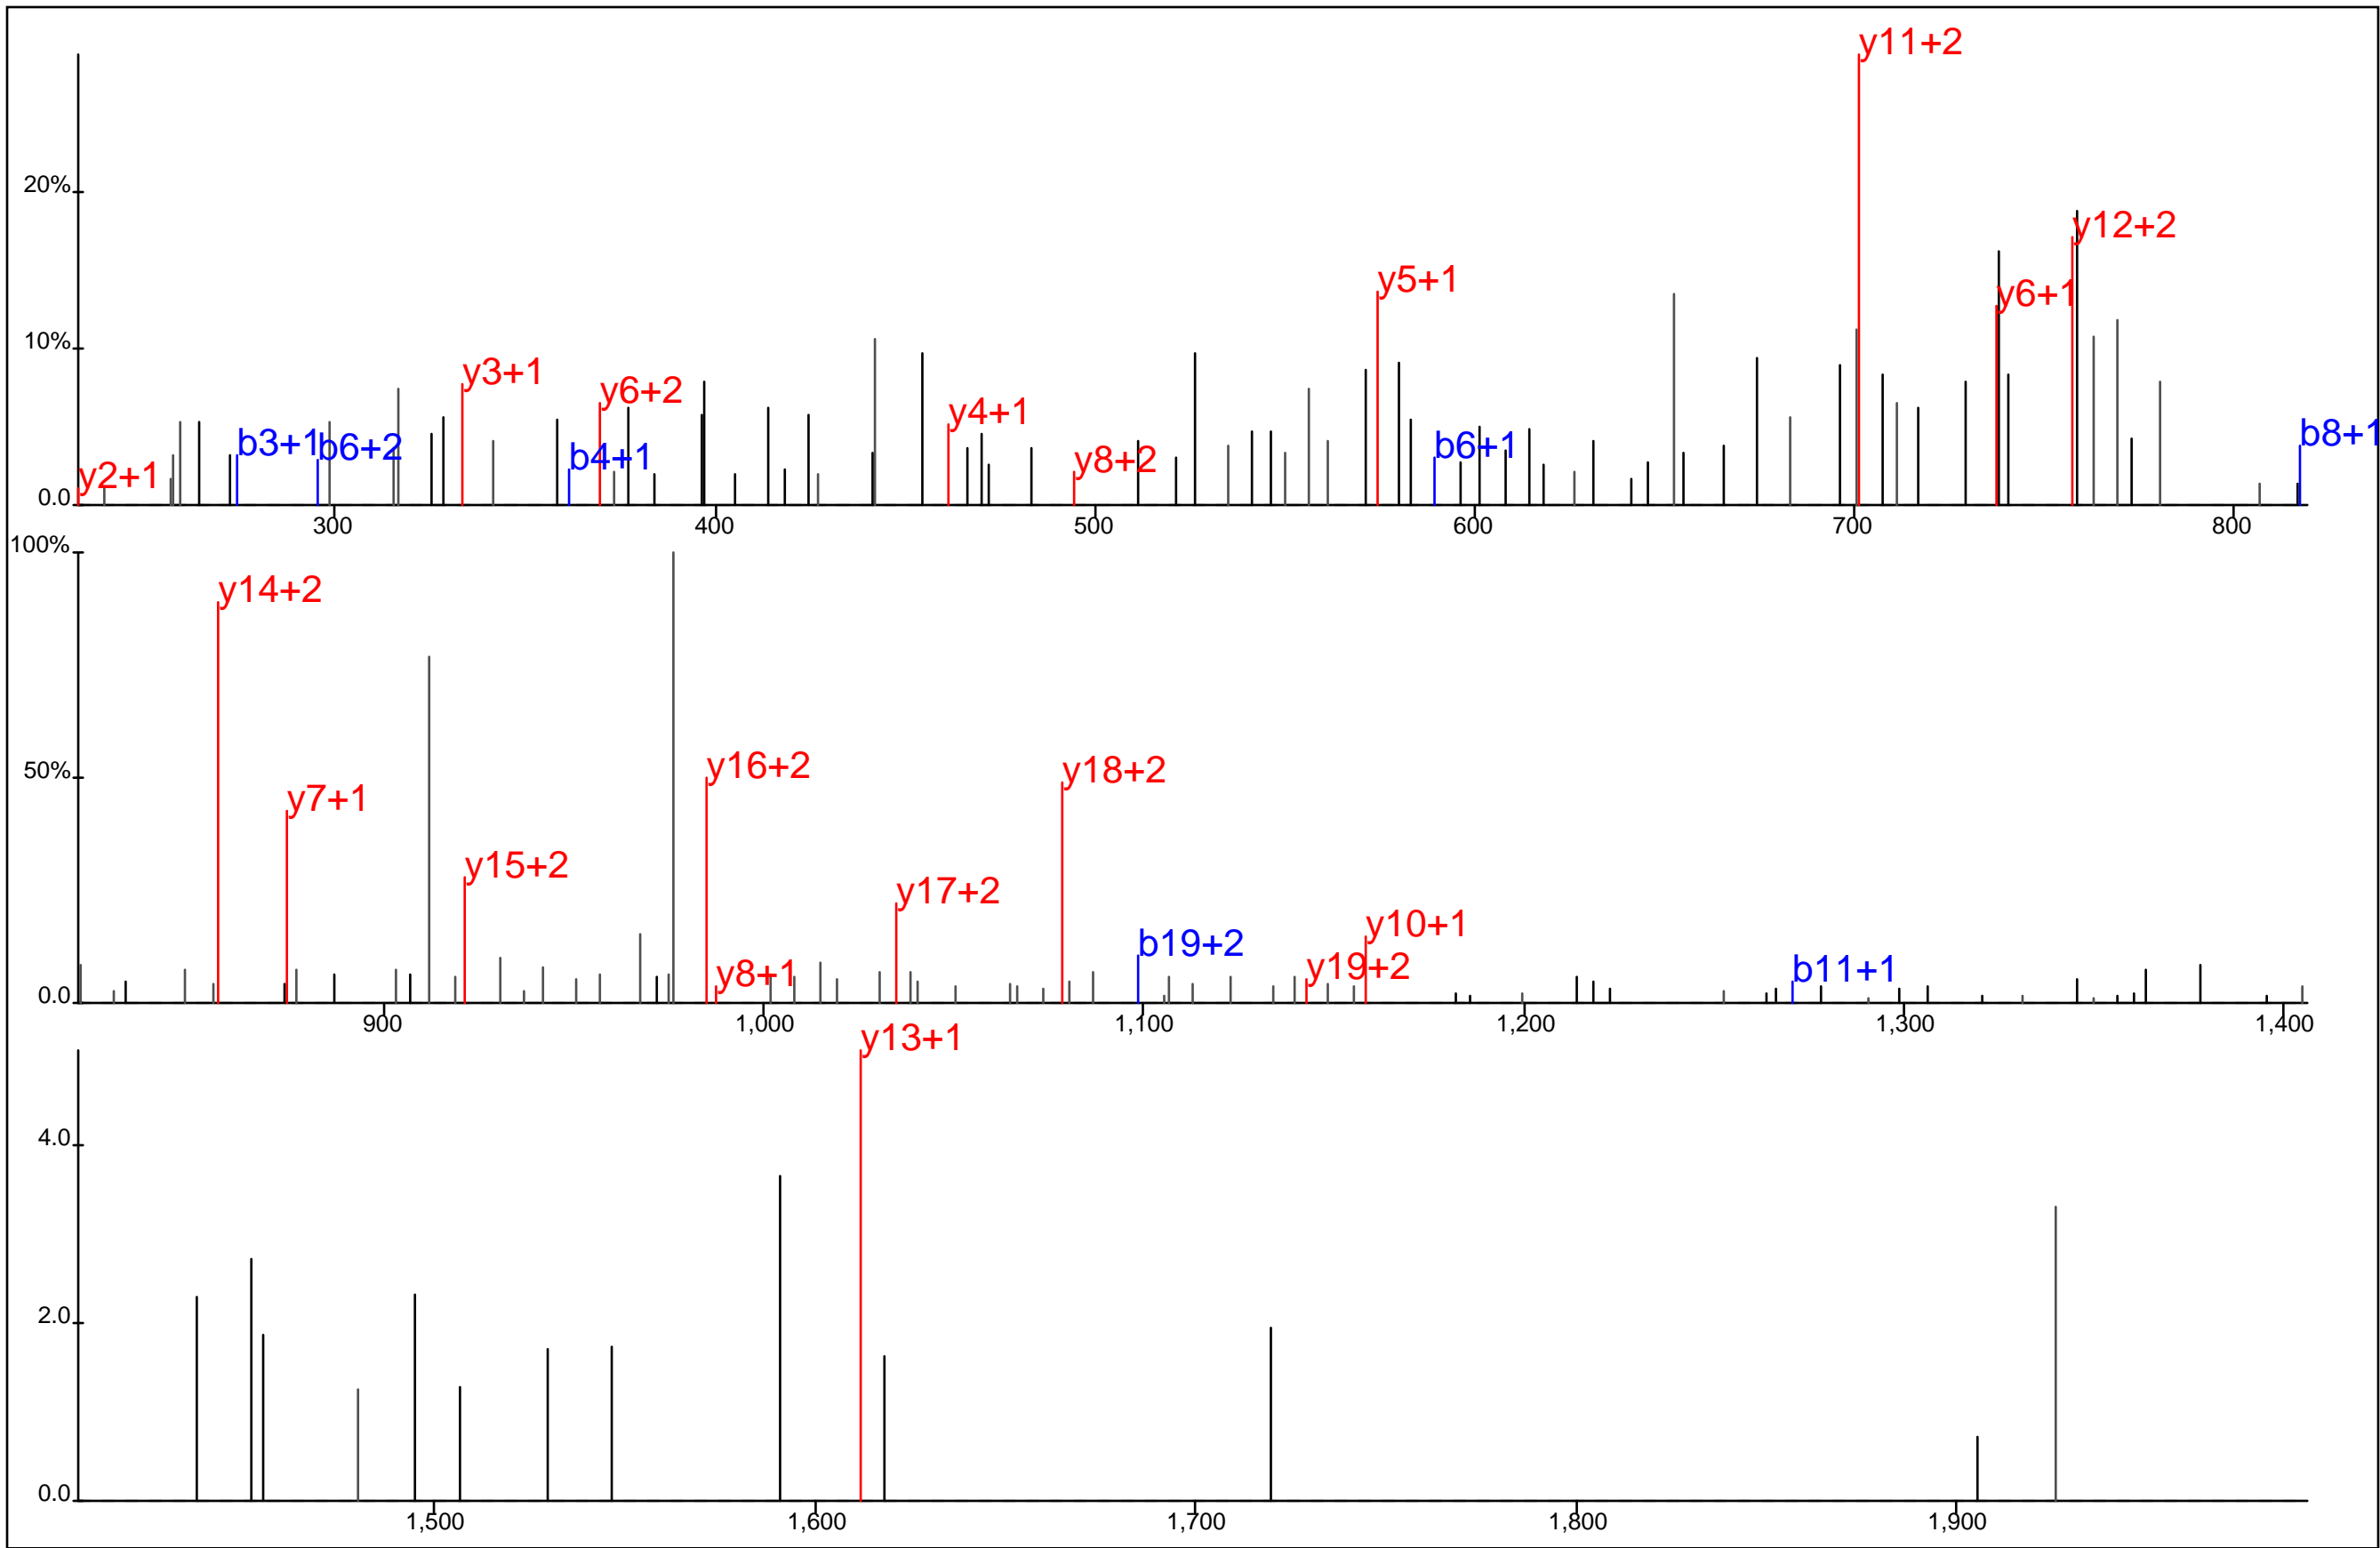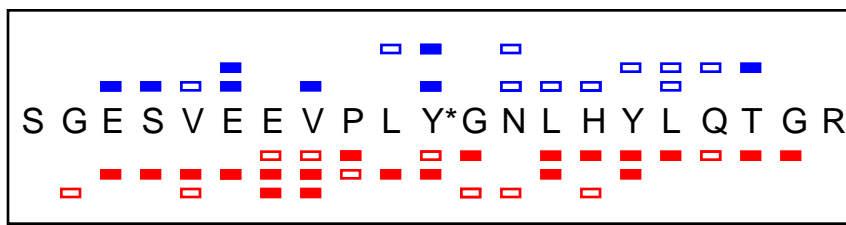

Protein Name: SIT  
 gi Accession: 0  
 Precursor Mass: 810.0437+3  
 Delta Mass: 0.606 ppm  
 XCorr: 38.06

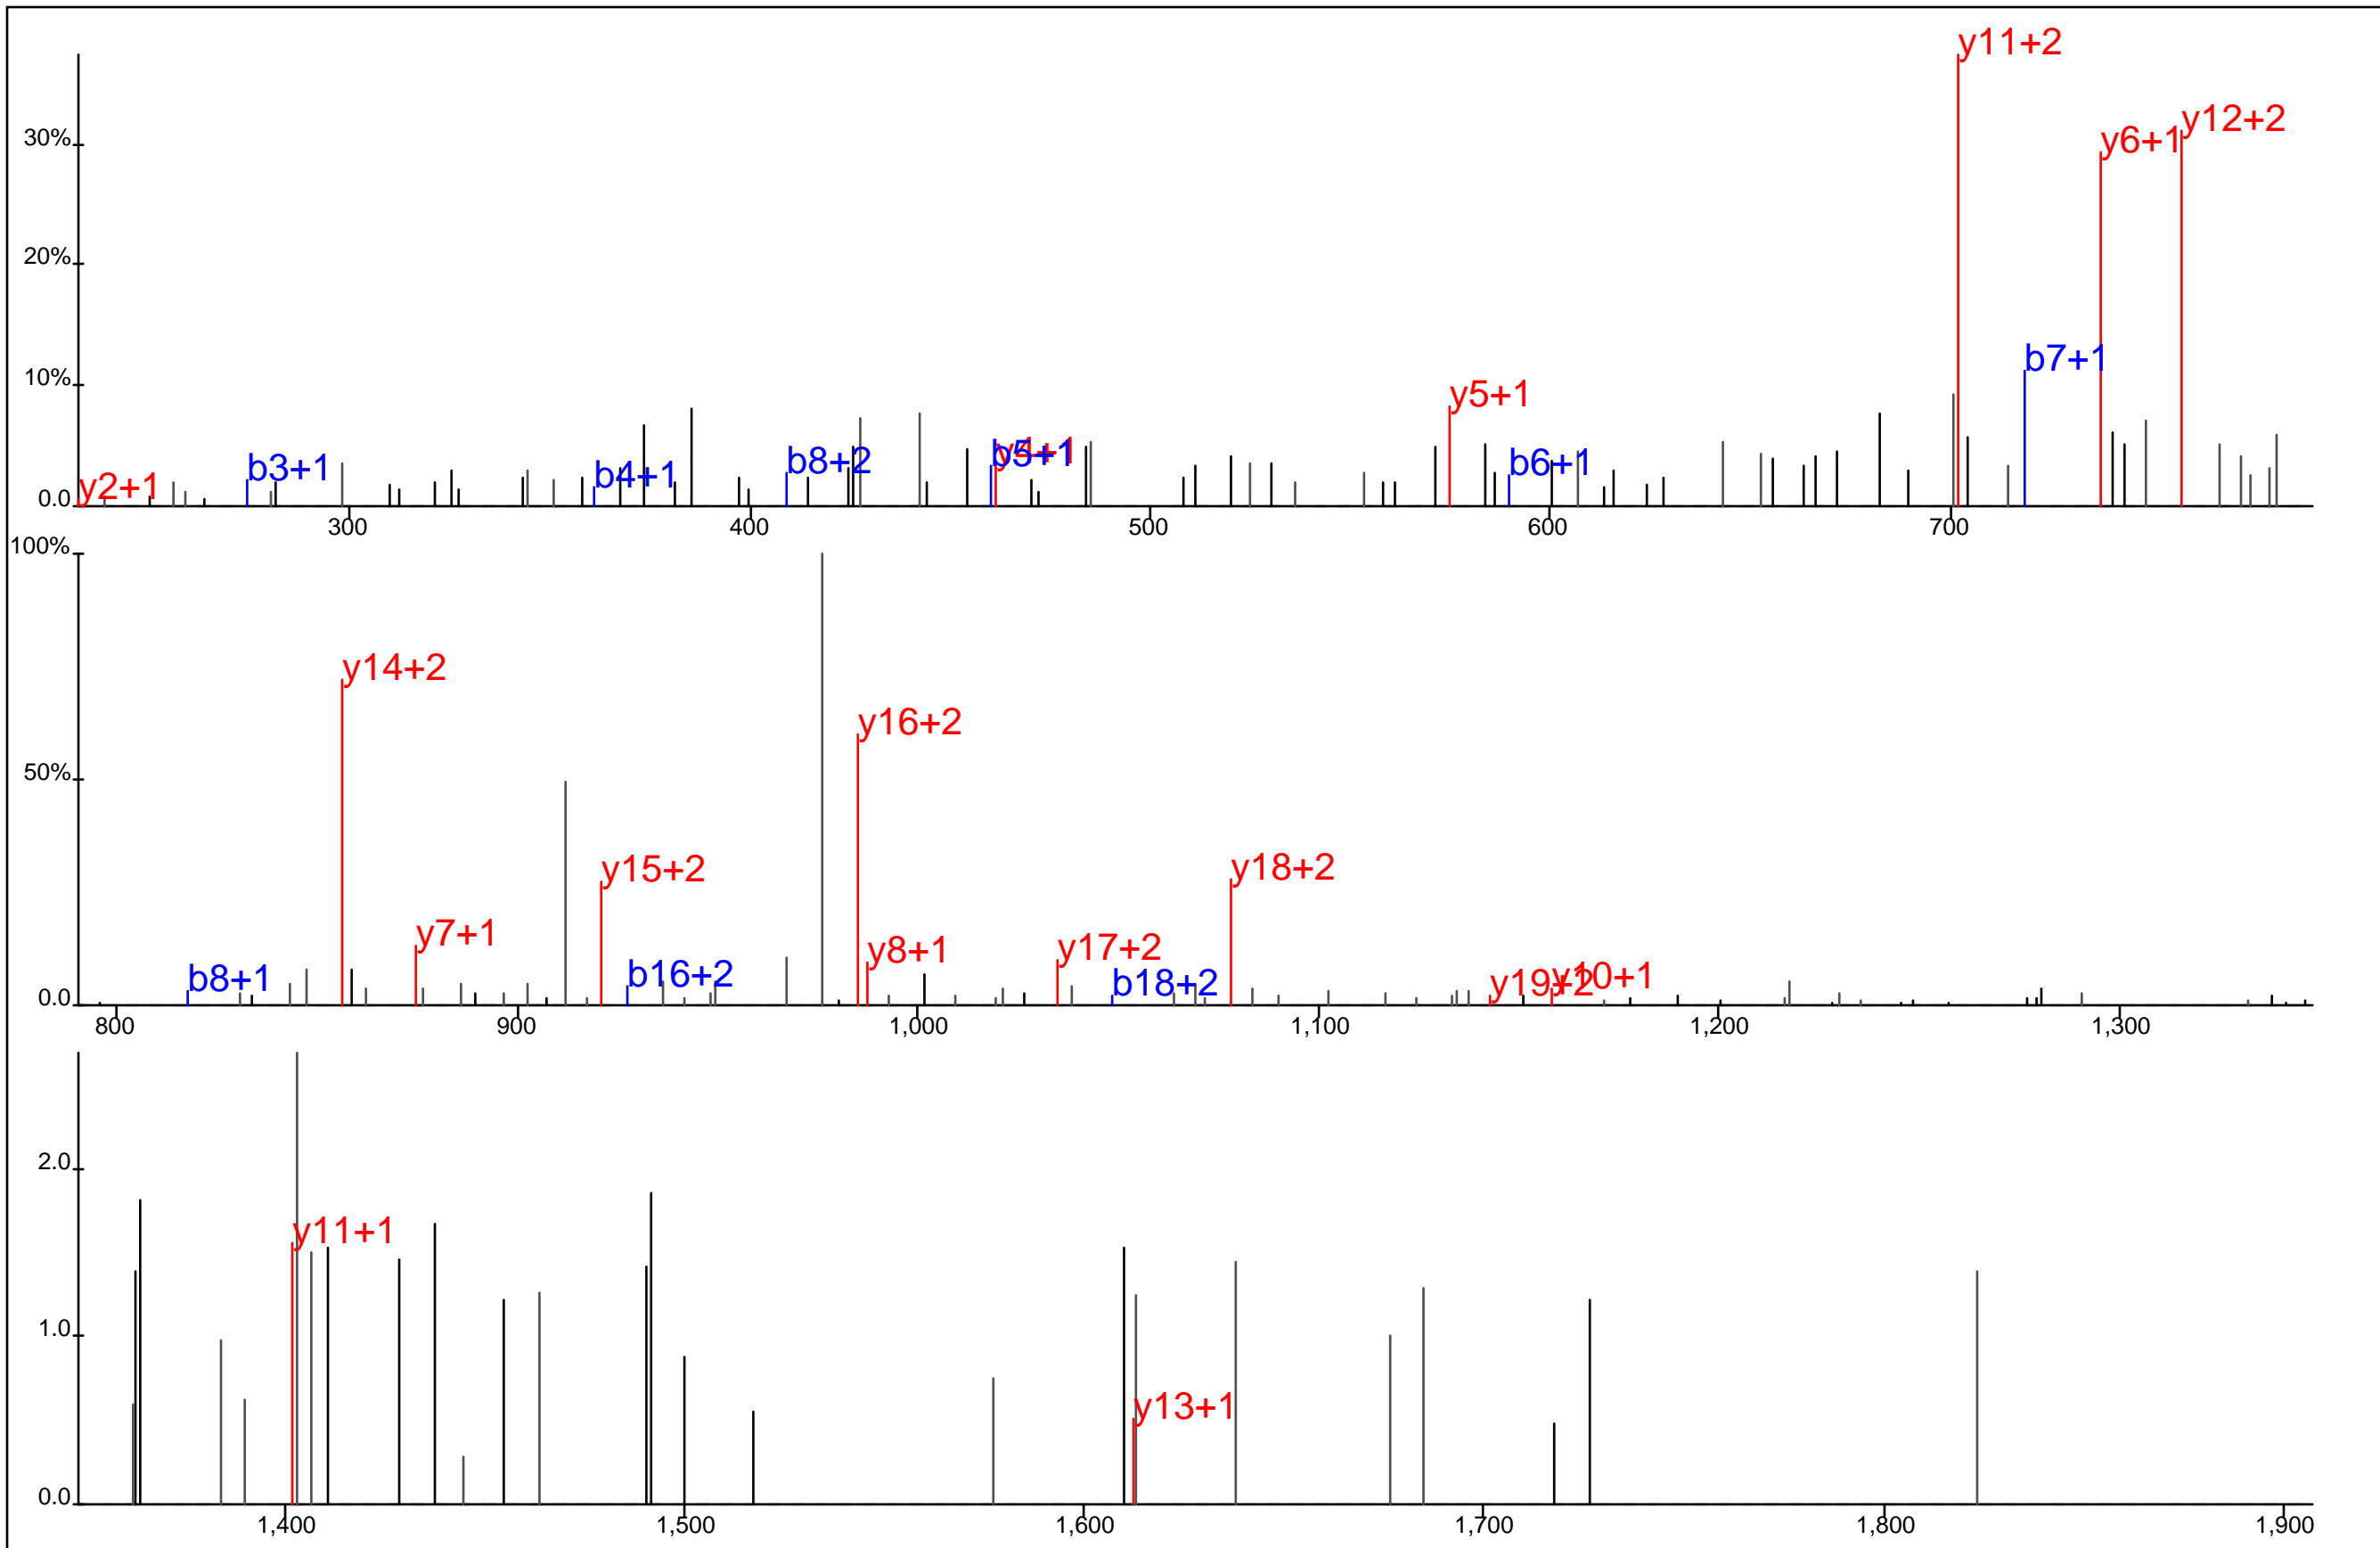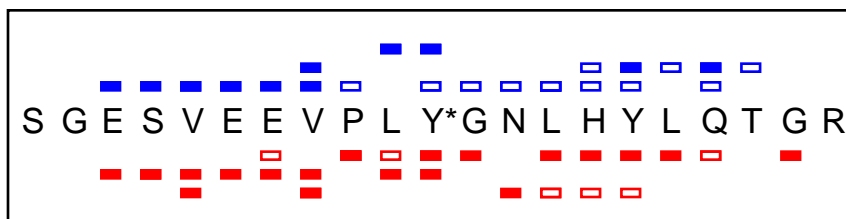

Protein Name: SIT  
 gi Accession: 0  
 Precursor Mass: 810.0450+3  
 Delta Mass: 1.053 ppm  
 XCorr: 31.23

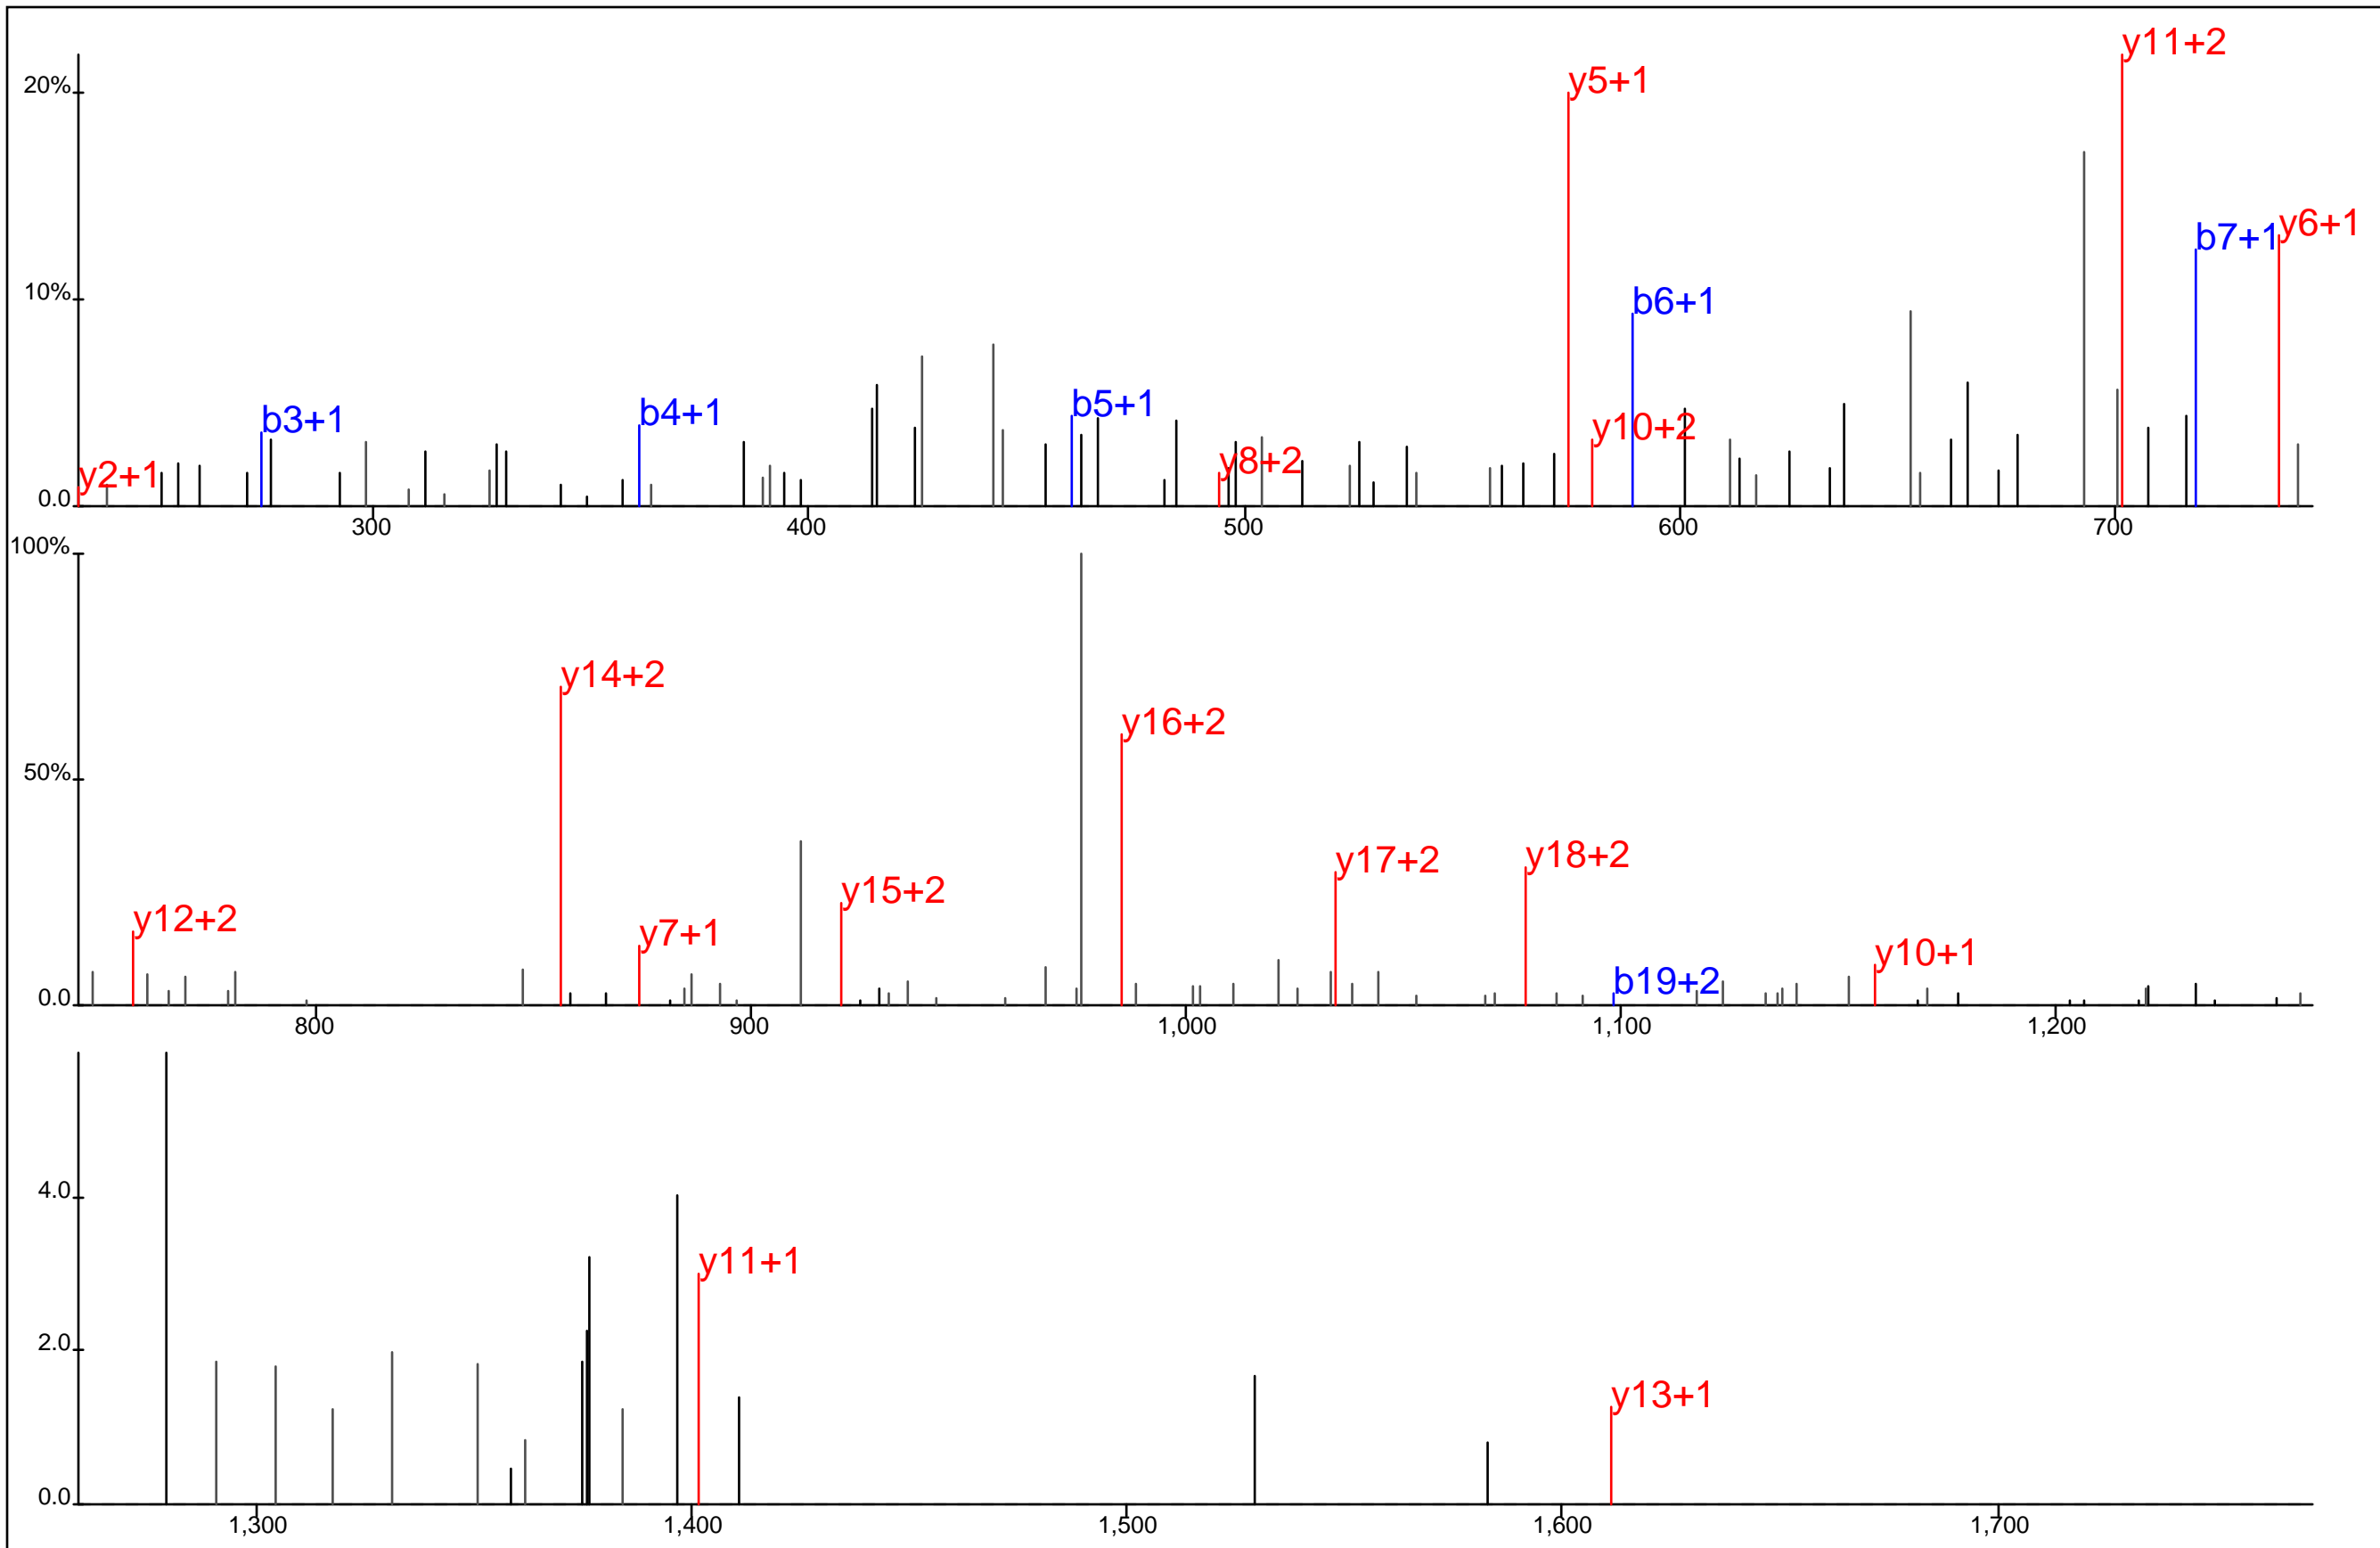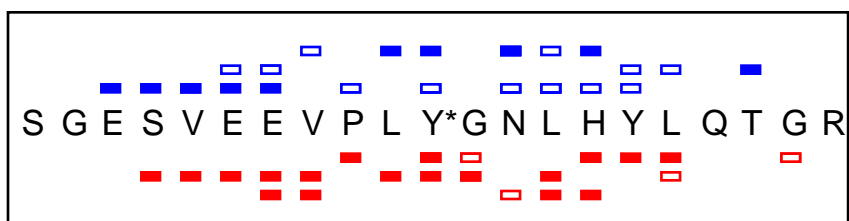

Protein Name: SIT  
 gi Accession: 0  
 Precursor Mass: 810.0449+3  
 Delta Mass: 0.903 ppm  
 XCorr: 38.07





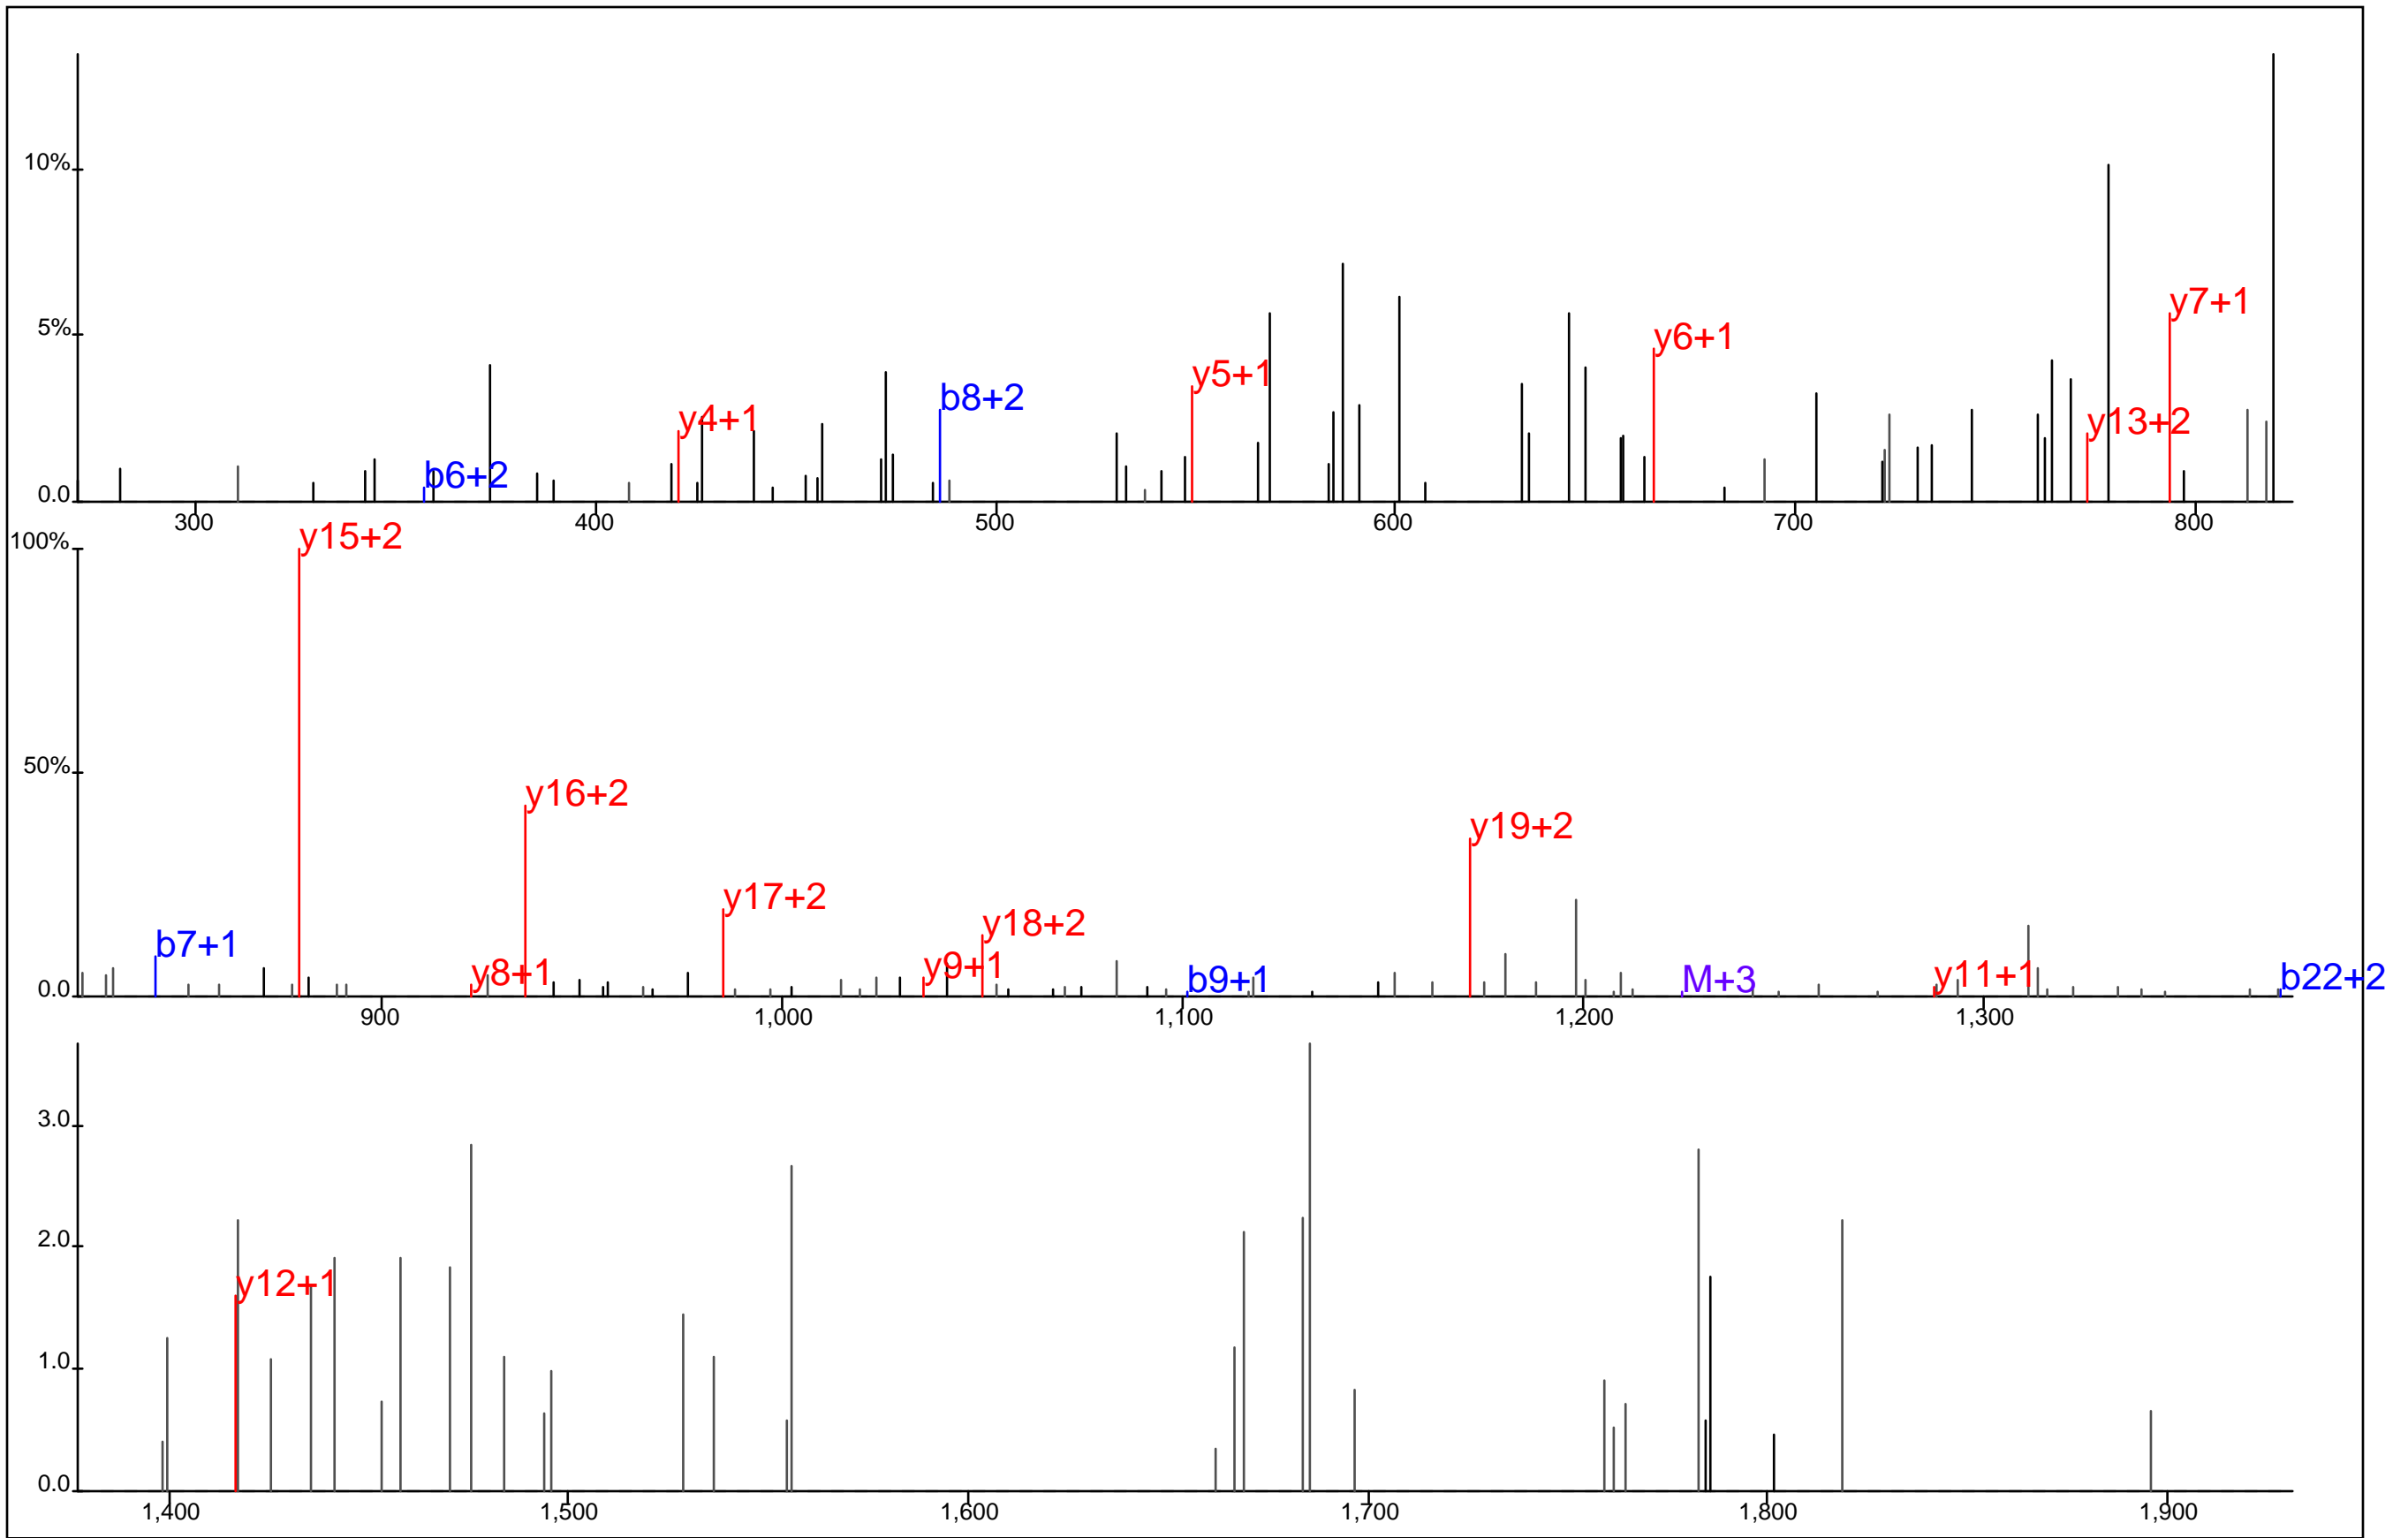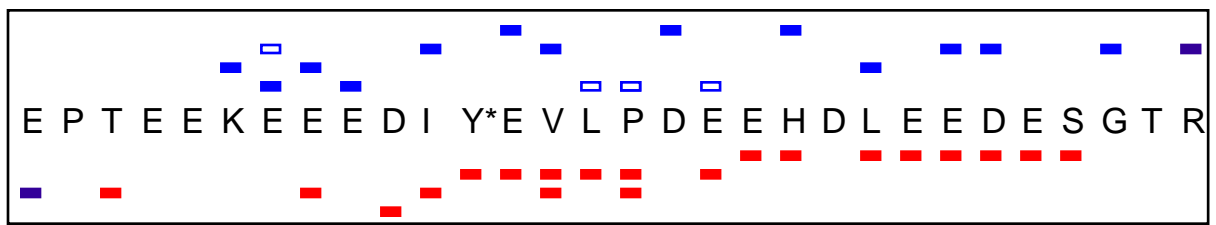

Protein Name: SKAP55  
 gi Accession: 0  
 Precursor Mass: 918.3830+4  
 Delta Mass: 3.777 ppm  
 XCorr: 20.76

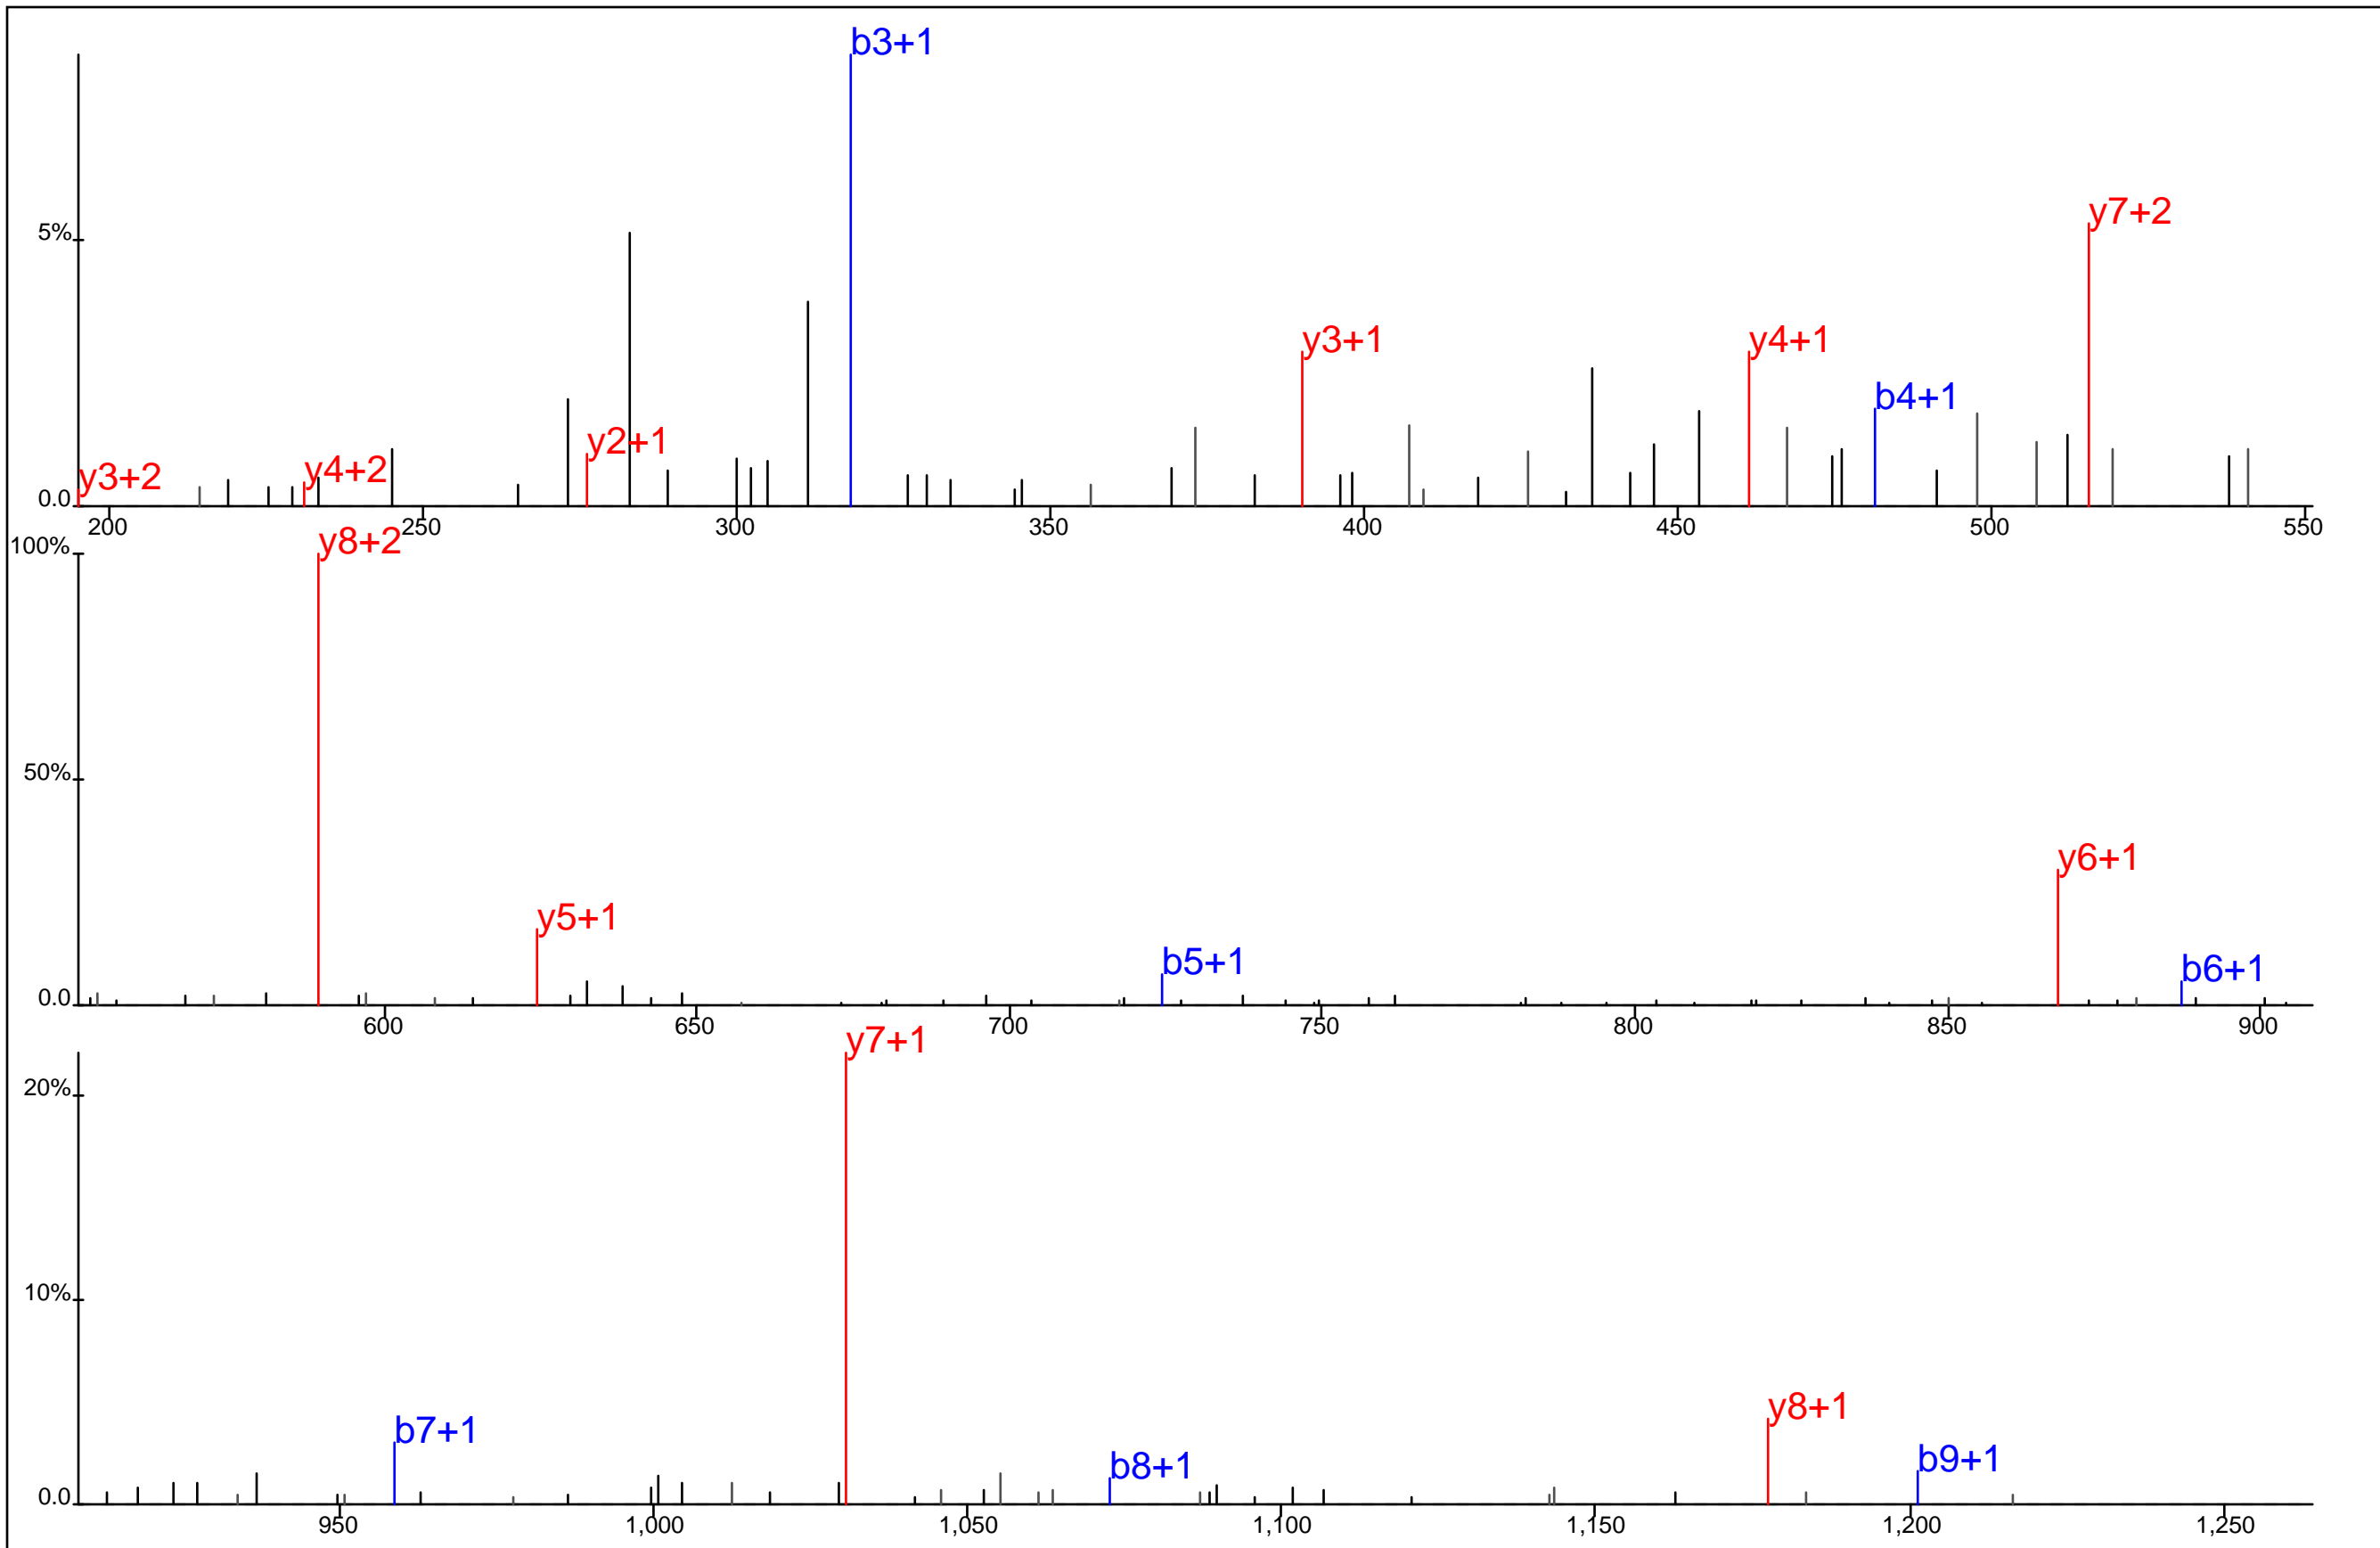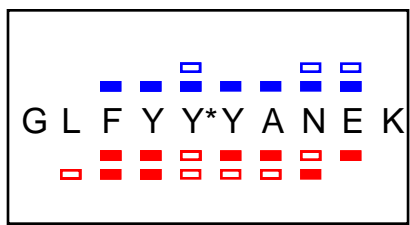

Protein Name: SKAP55  
 gi Accession: 0  
 Precursor Mass: 674.2851+2  
 Delta Mass: 2.032 ppm  
 XCorr: 46.58

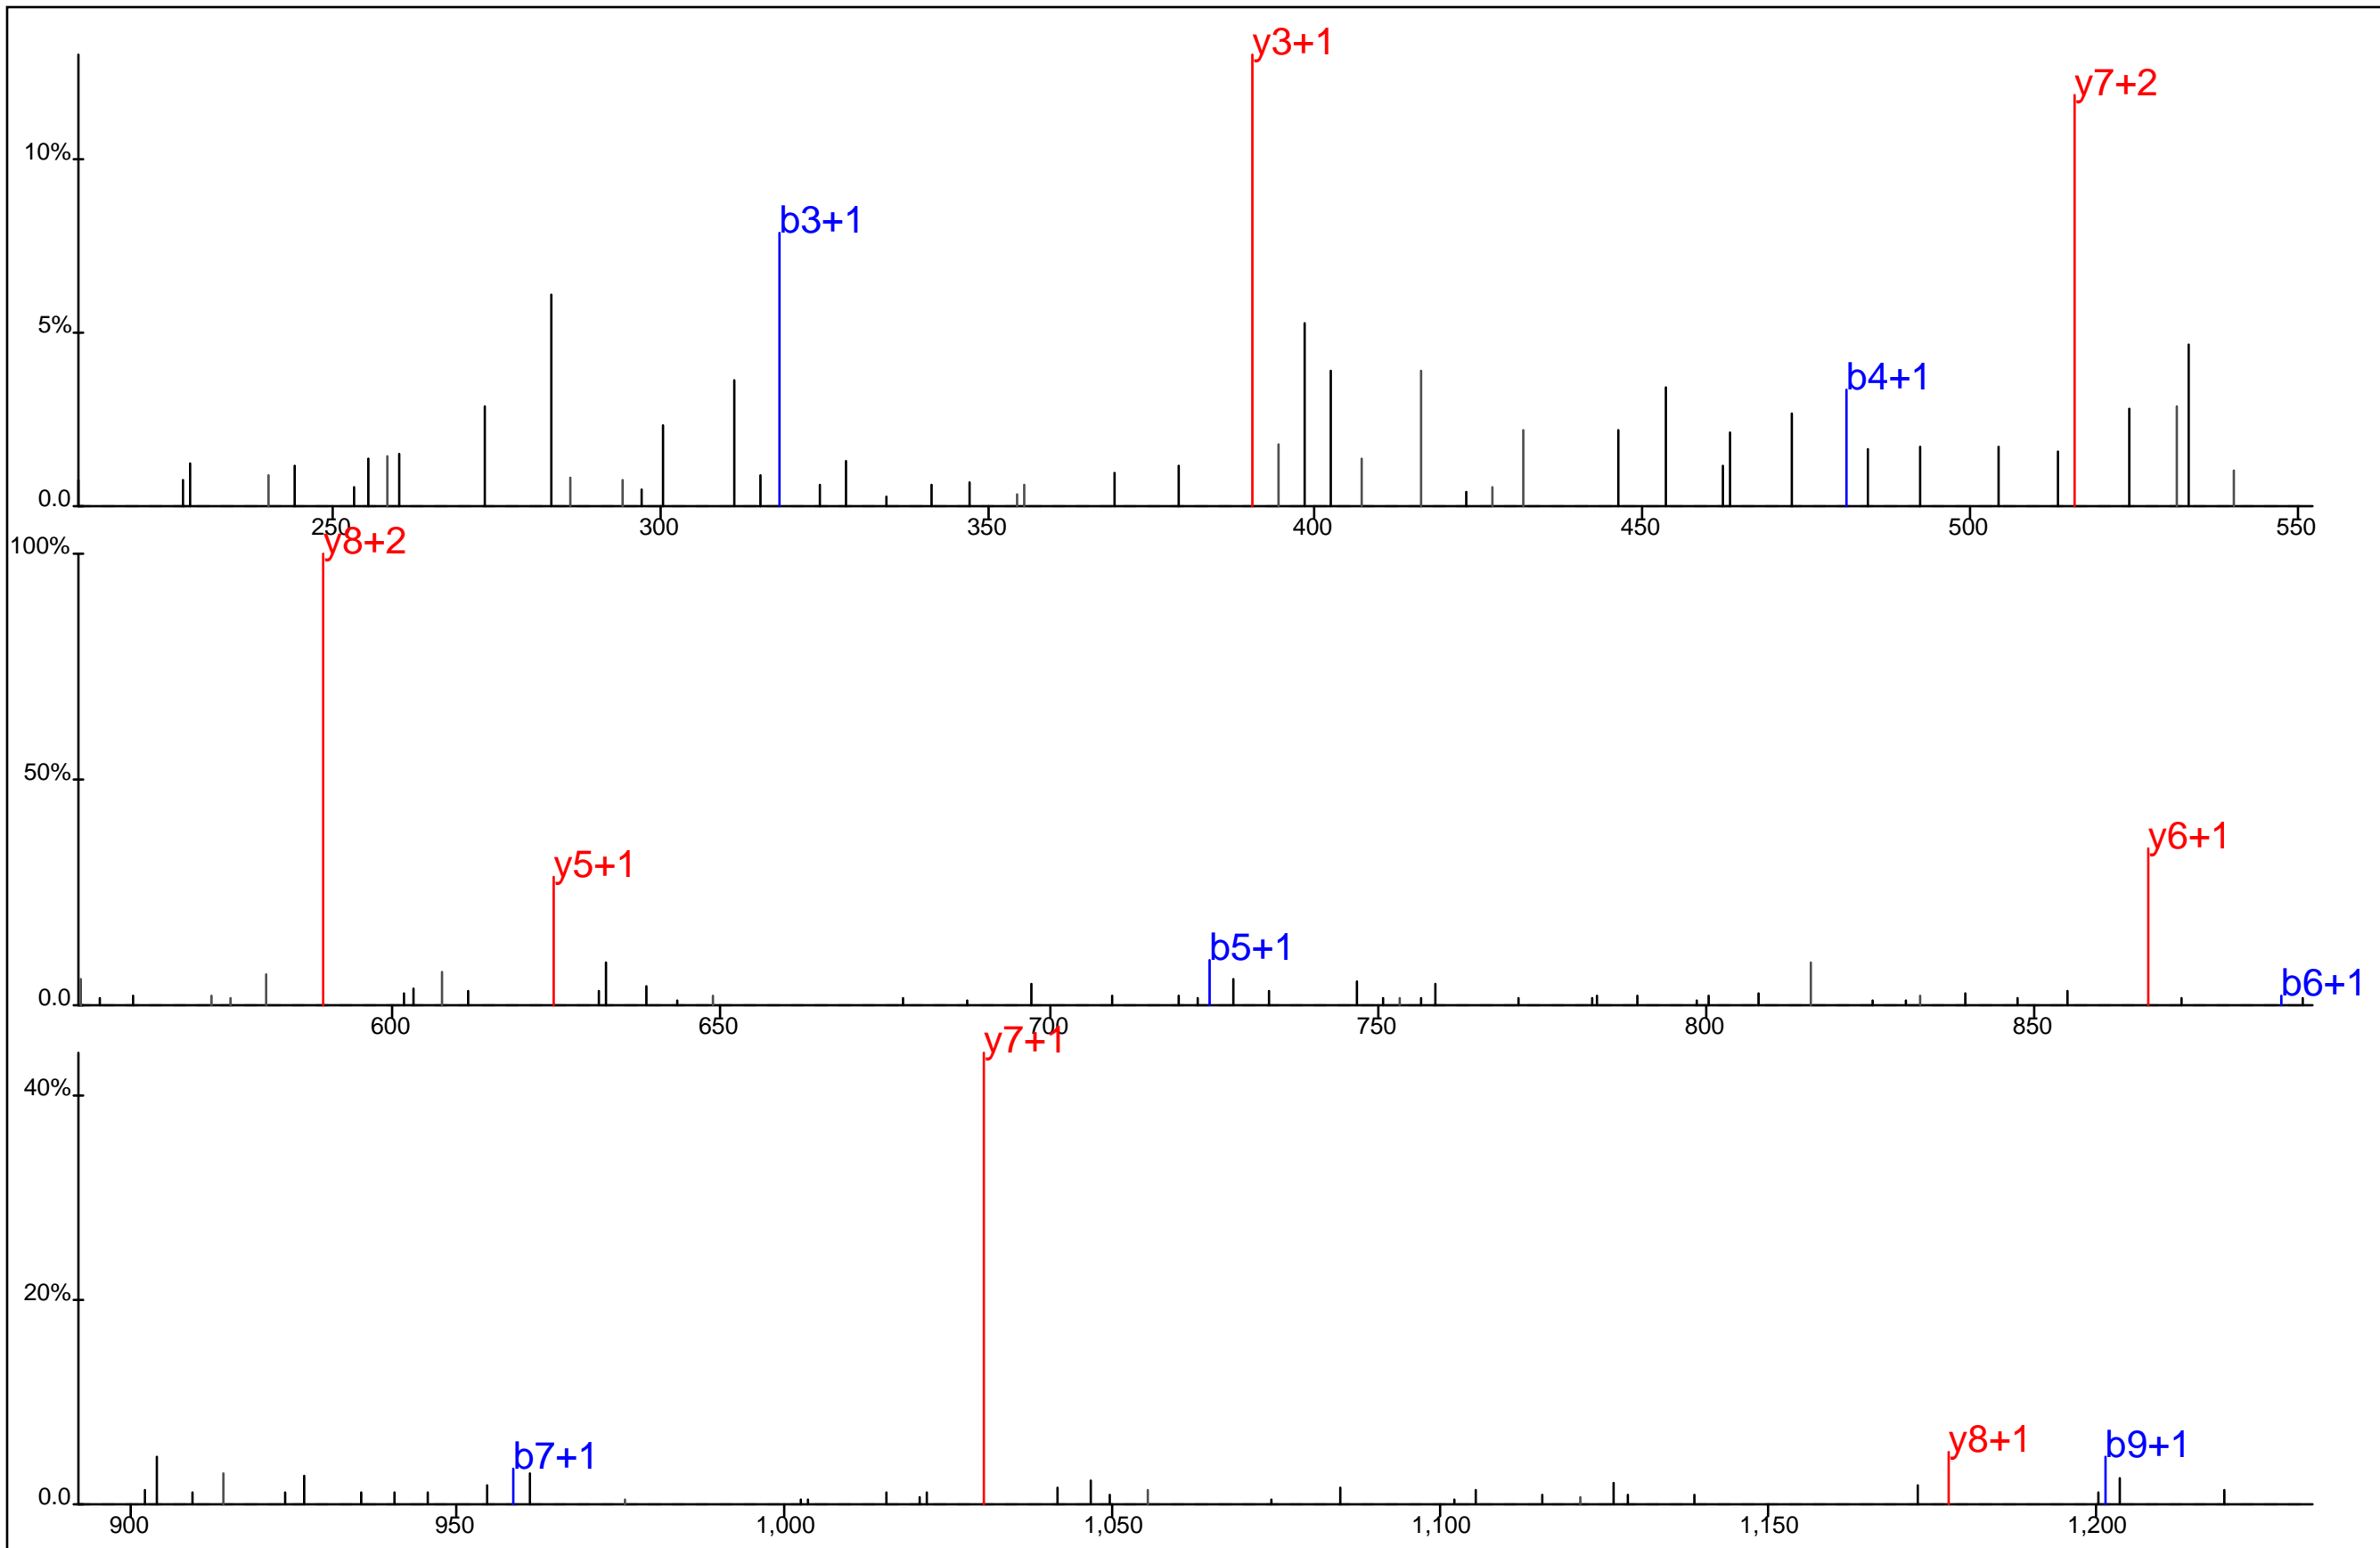

G L F Y Y\*Y A N E K  
 □ □ □ □ □ □ □ □  
 □ □ □ □ □ □ □ □

Protein Name: SKAP55  
 gi Accession: 0  
 Precursor Mass: 674.2870+2  
 Delta Mass: 0.776 ppm  
 XCorr: 32.57

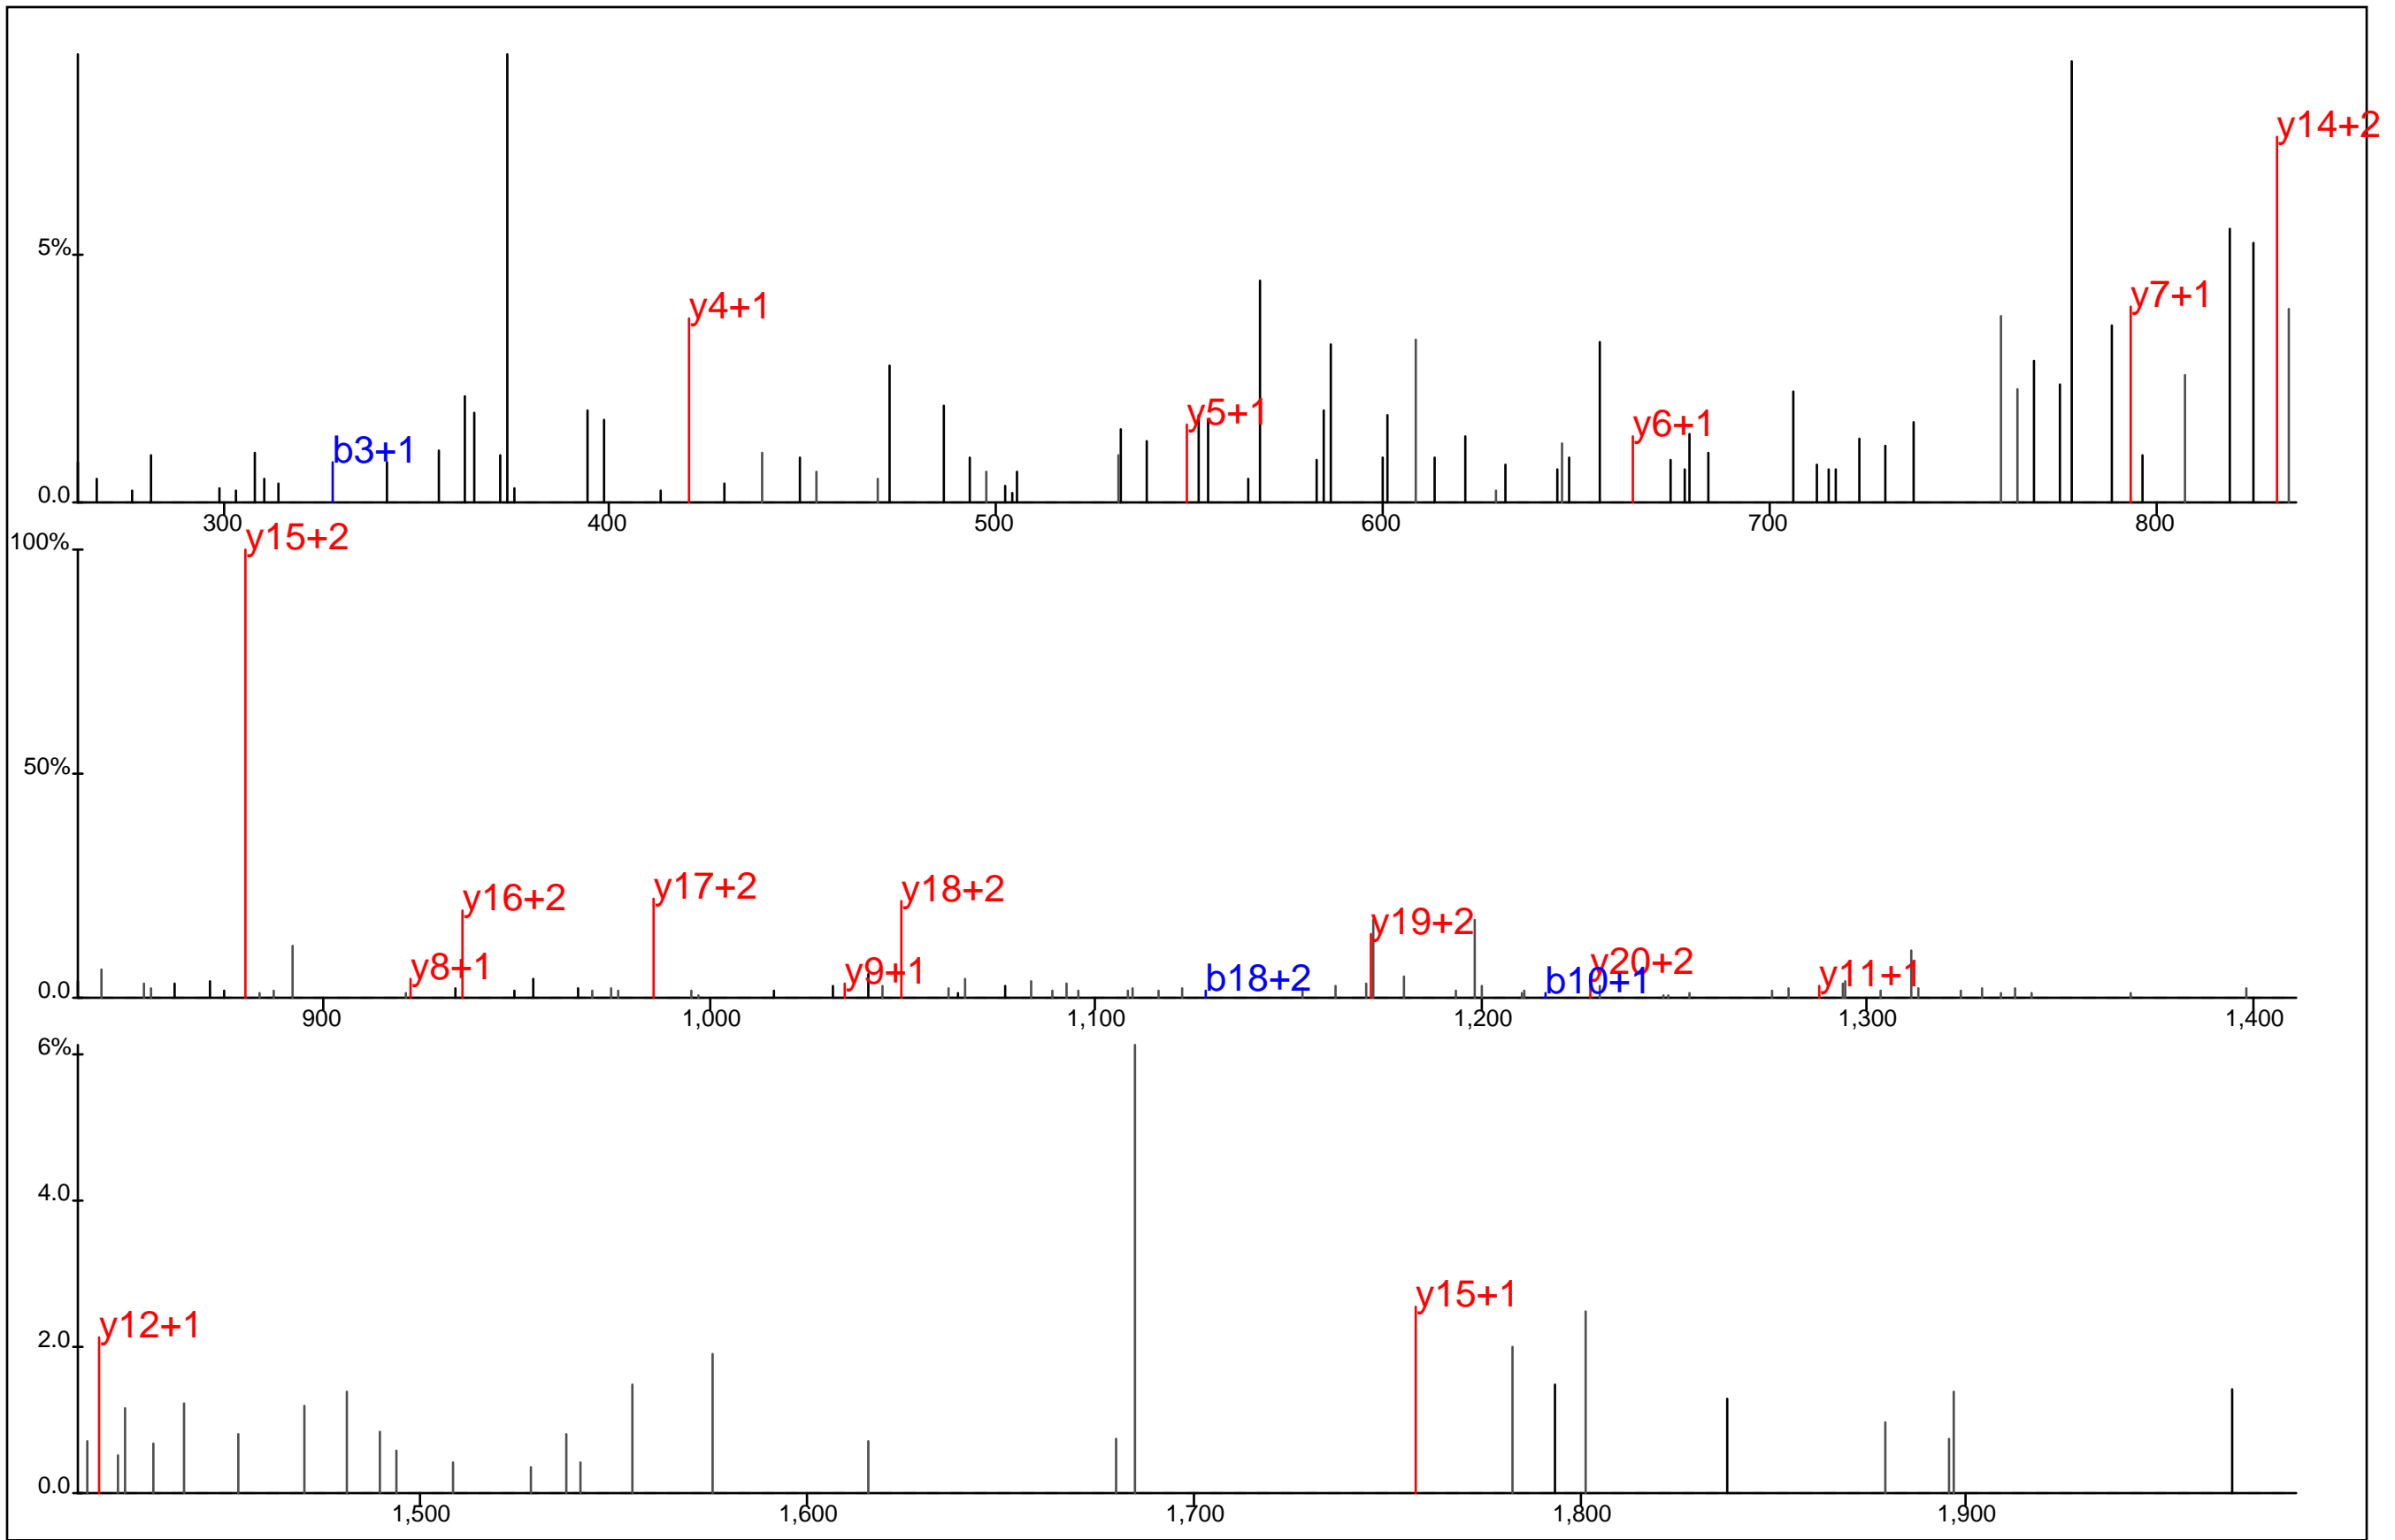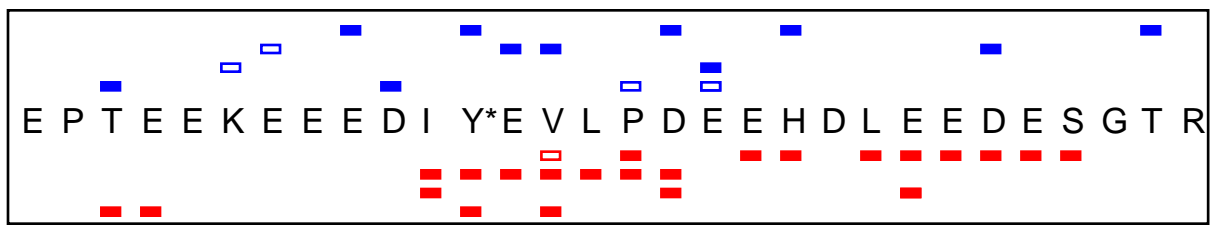

Protein Name: SKAP55  
 gi Accession: 0  
 Precursor Mass: 918.3768+4  
 Delta Mass: 2.941 ppm  
 XCorr: 37.86

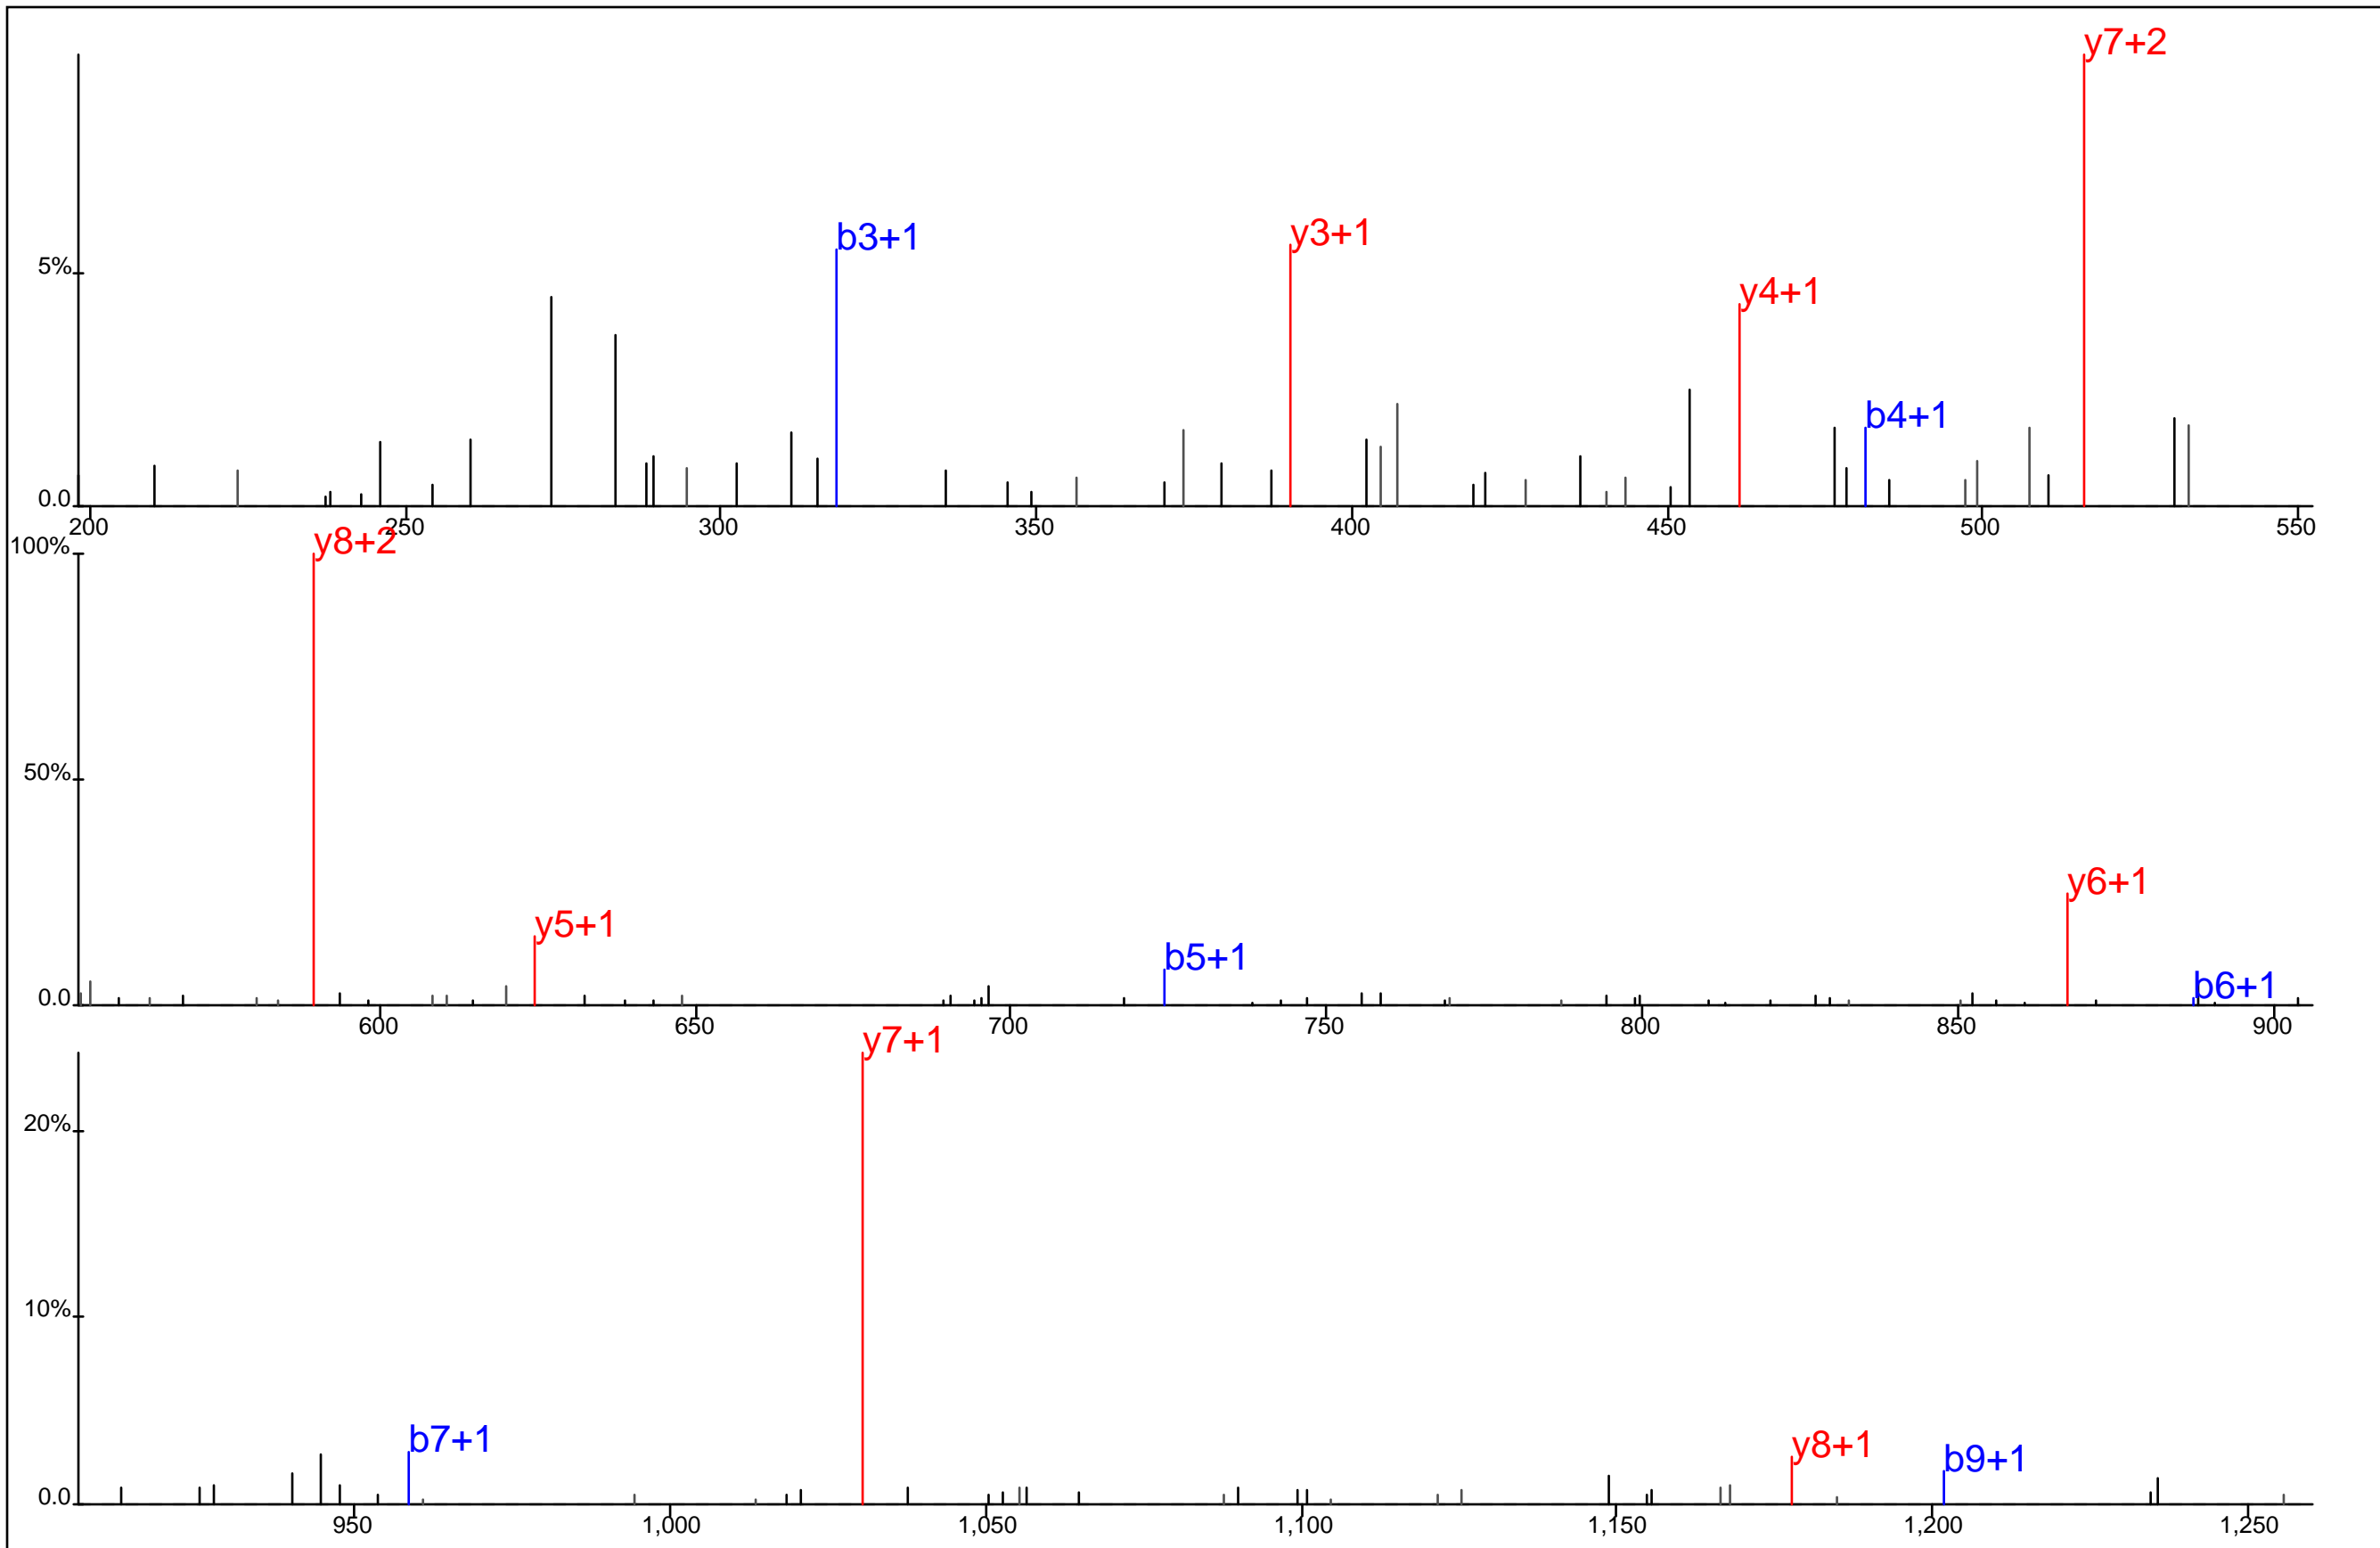

G L F Y Y\*Y A N E K  
 ■ ■ ■ ■ ■ ■ ■ ■  
 □ □ □ □ □ □ □ □

Protein Name: SKAP55  
 gi Accession: 0  
 Precursor Mass: 674.2870+2  
 Delta Mass: 0.867 ppm  
 XCorr: 50.36

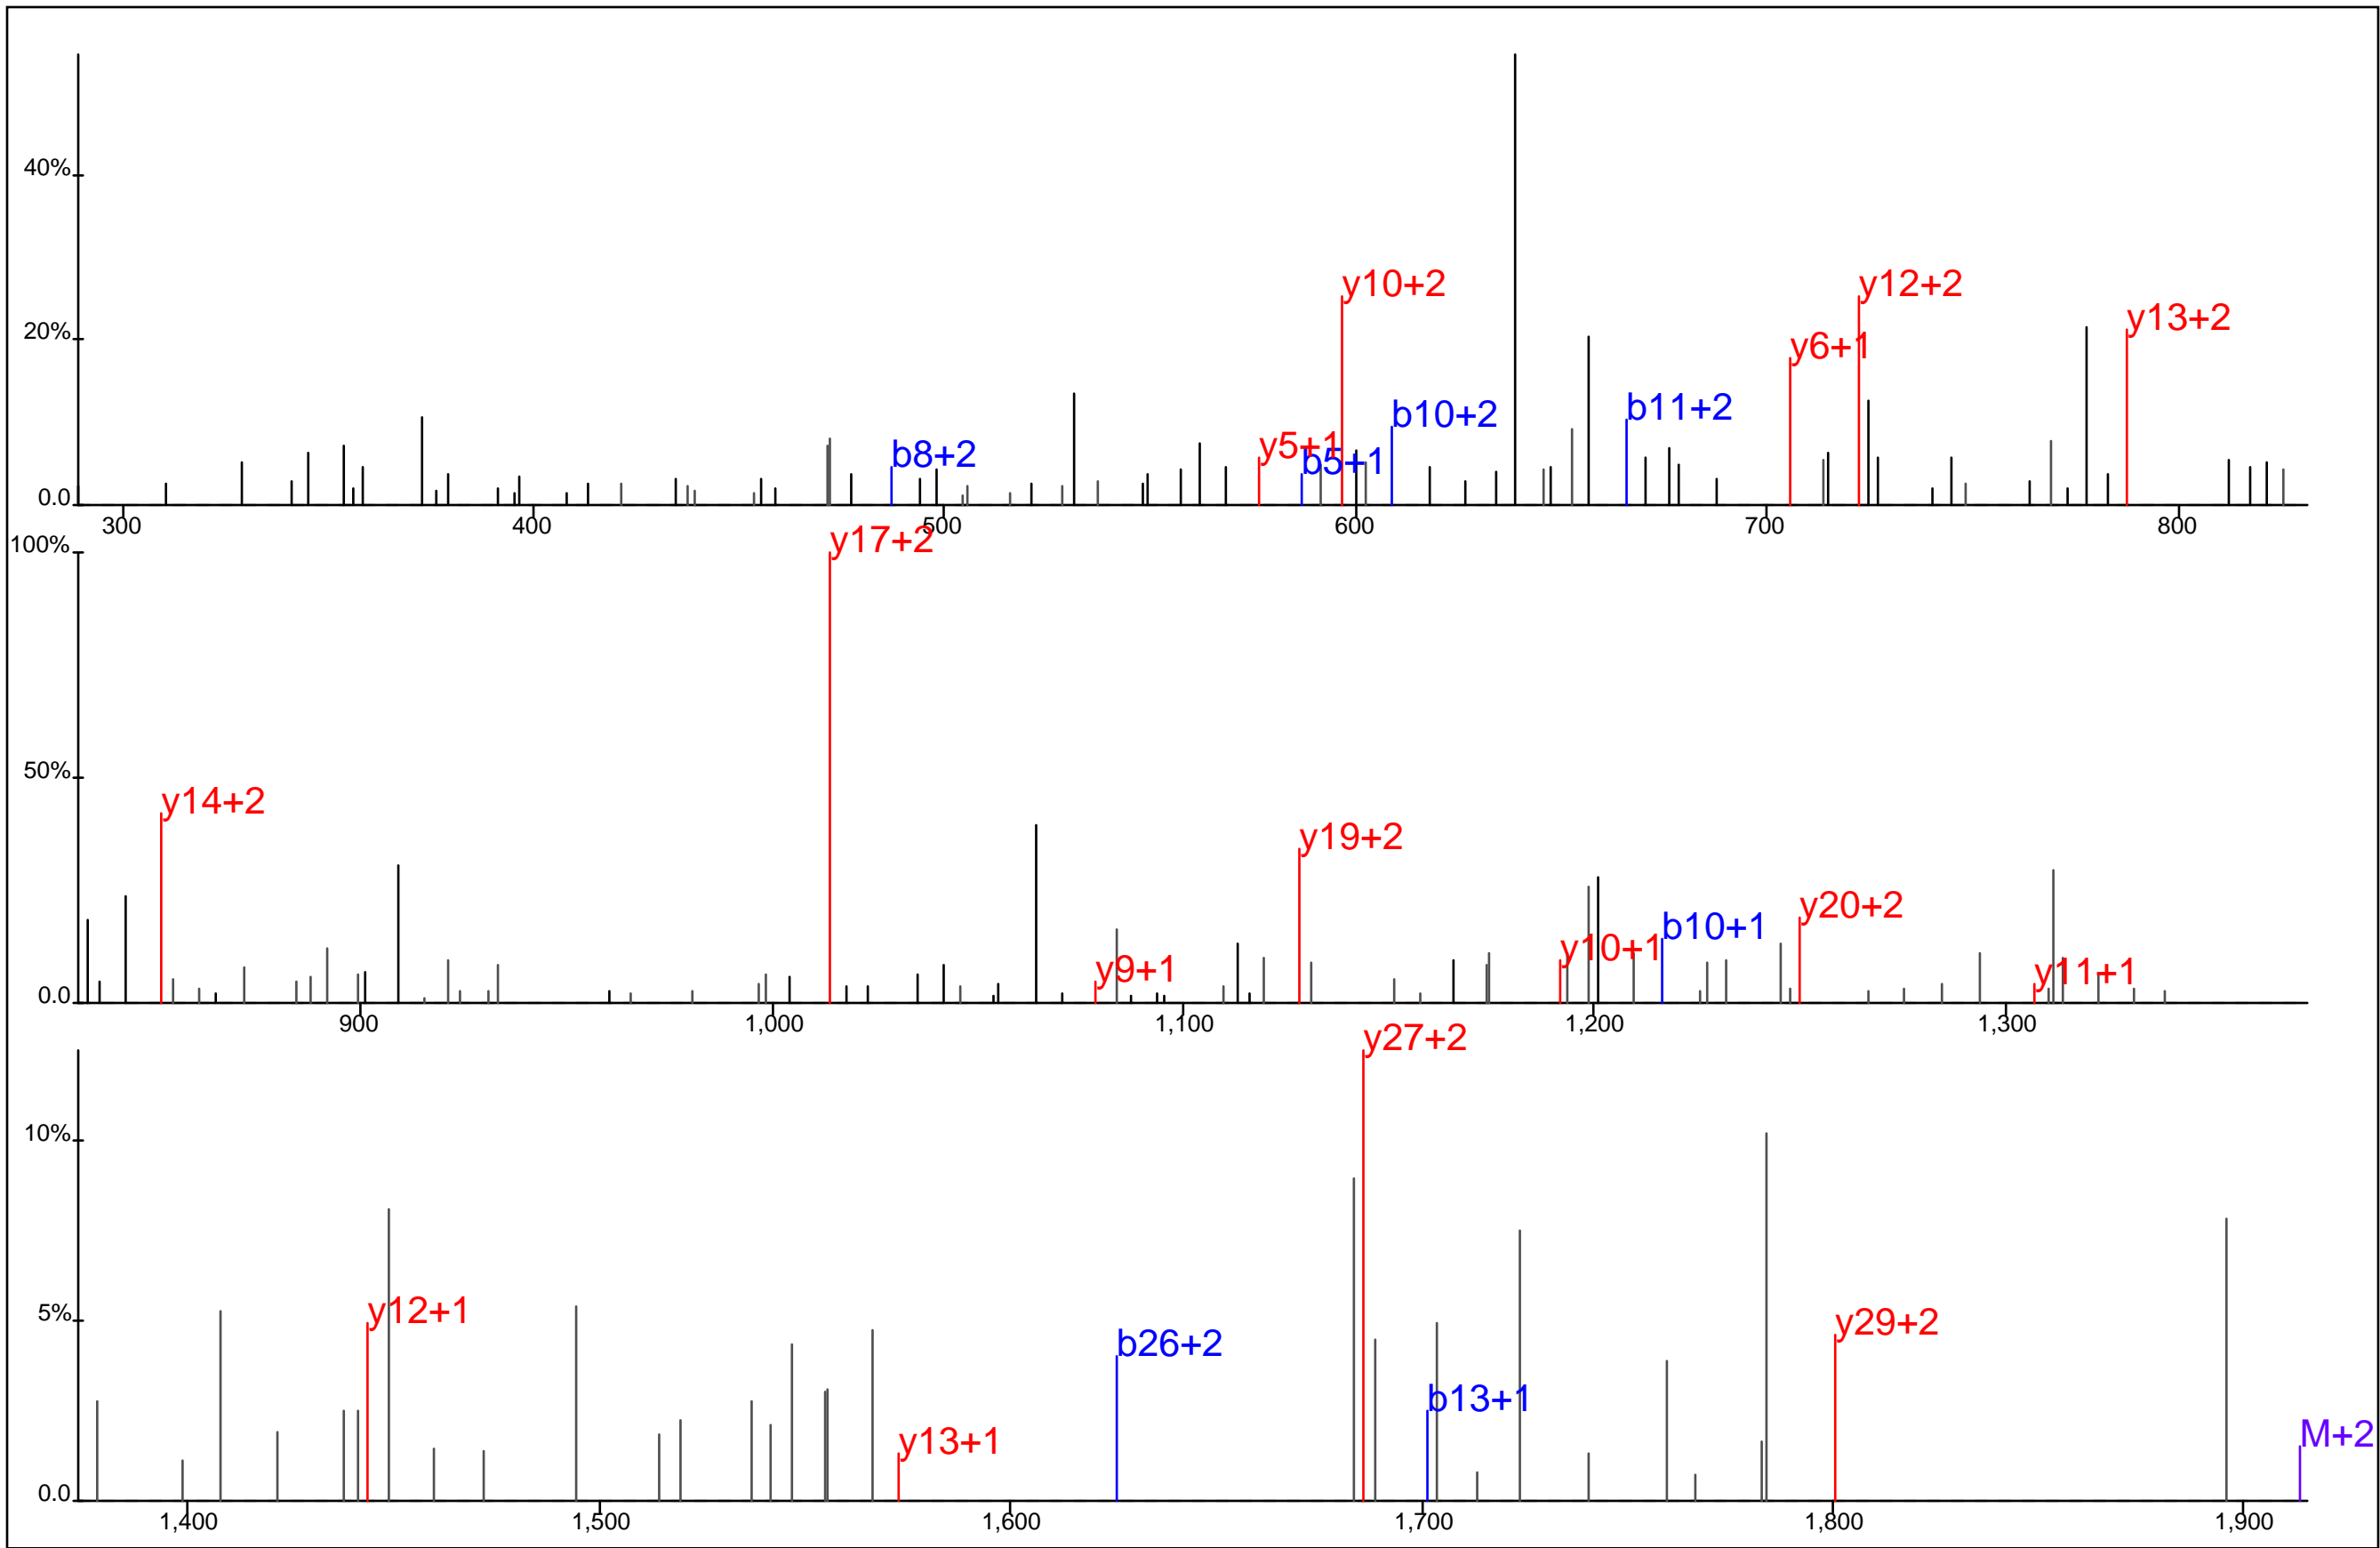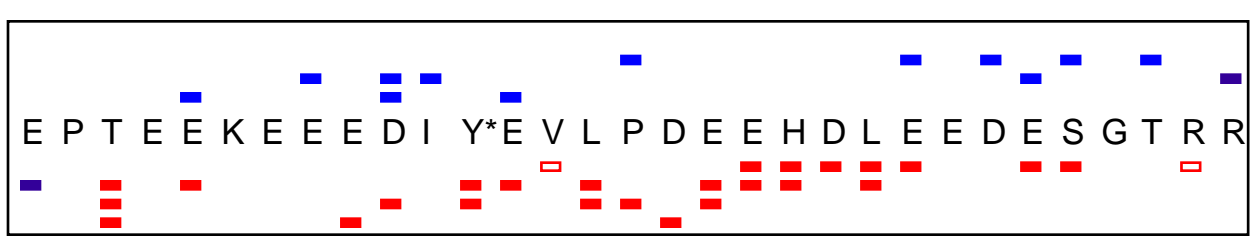

Protein Name: SKAP55  
 gi Accession: 0  
 Precursor Mass: 957.4054+4  
 Delta Mass: 0.618 ppm  
 XCorr: 38.37

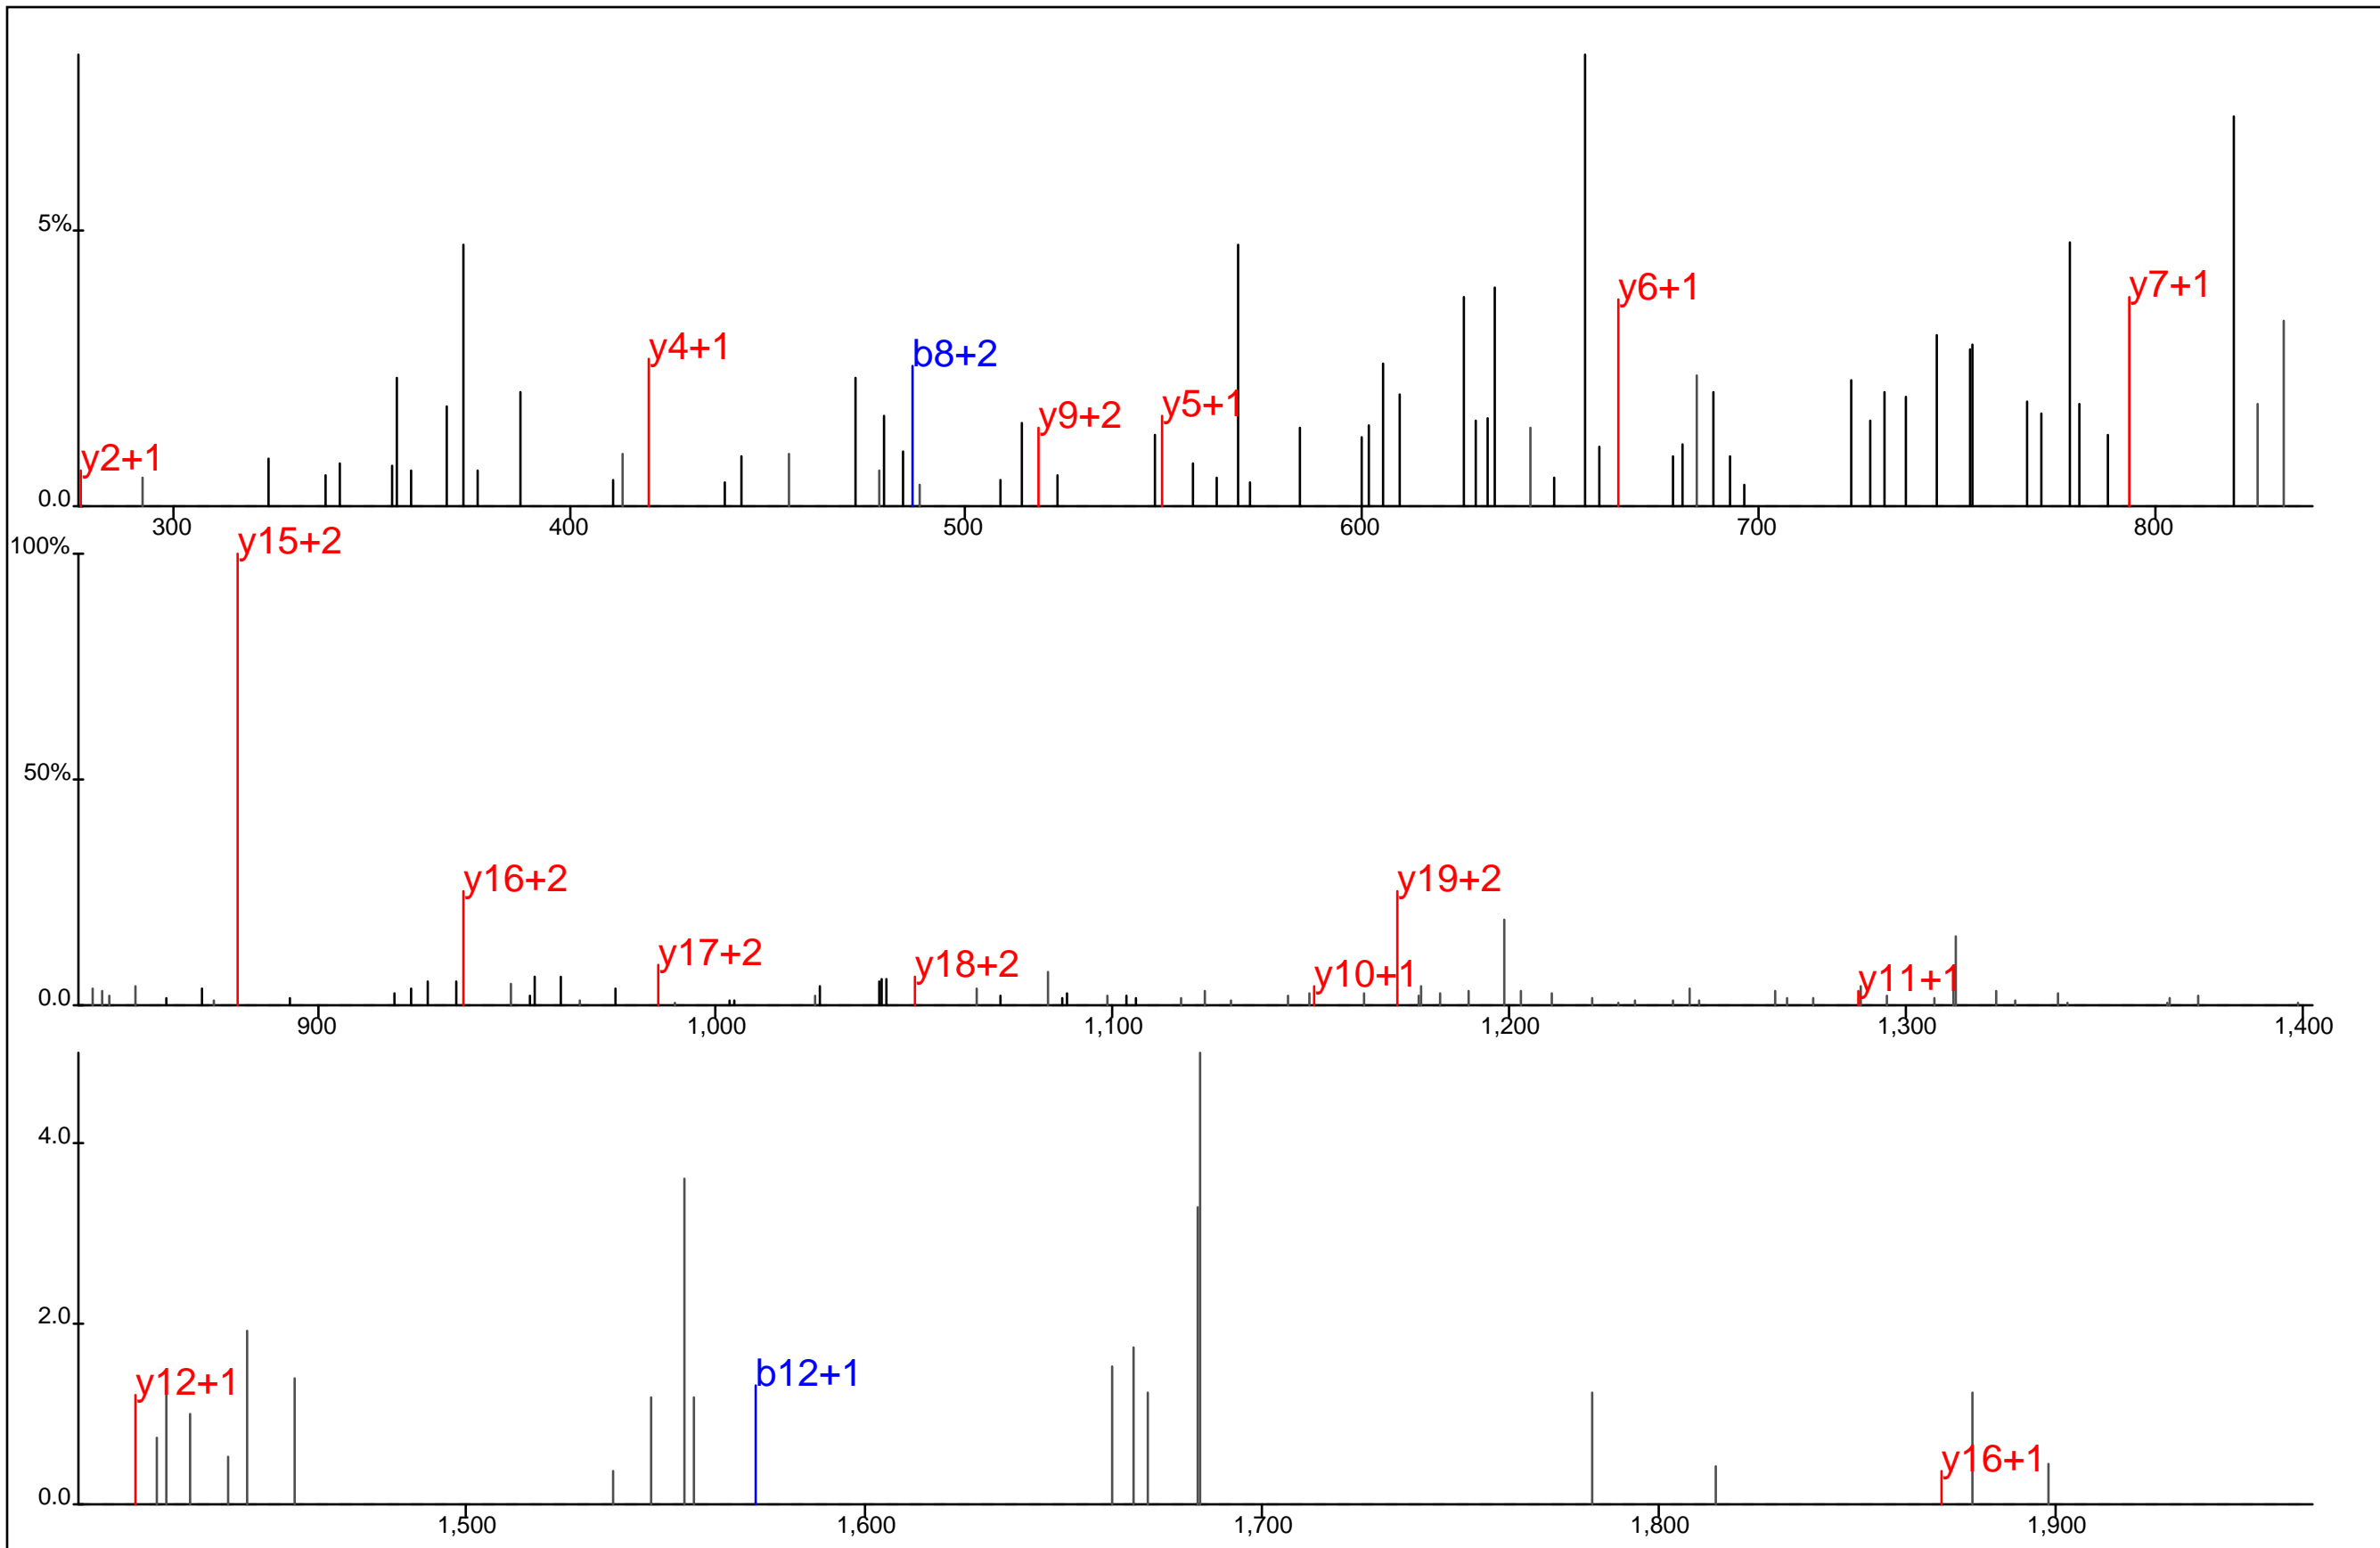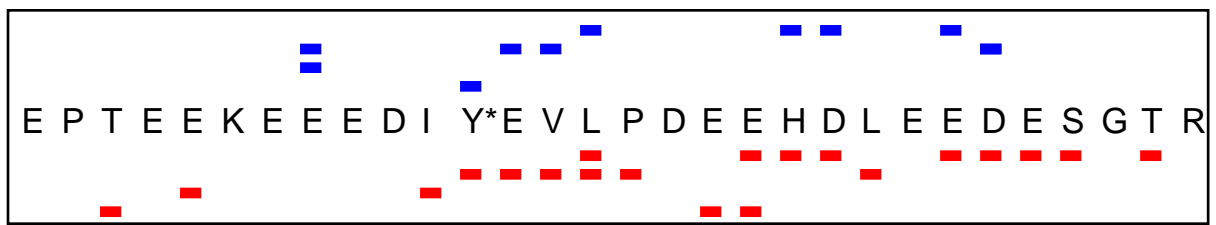

Protein Name: SKAP55  
 gi Accession: 0  
 Precursor Mass: 918.3786+4  
 Delta Mass: 1.012 ppm  
 XCorr: 24.86

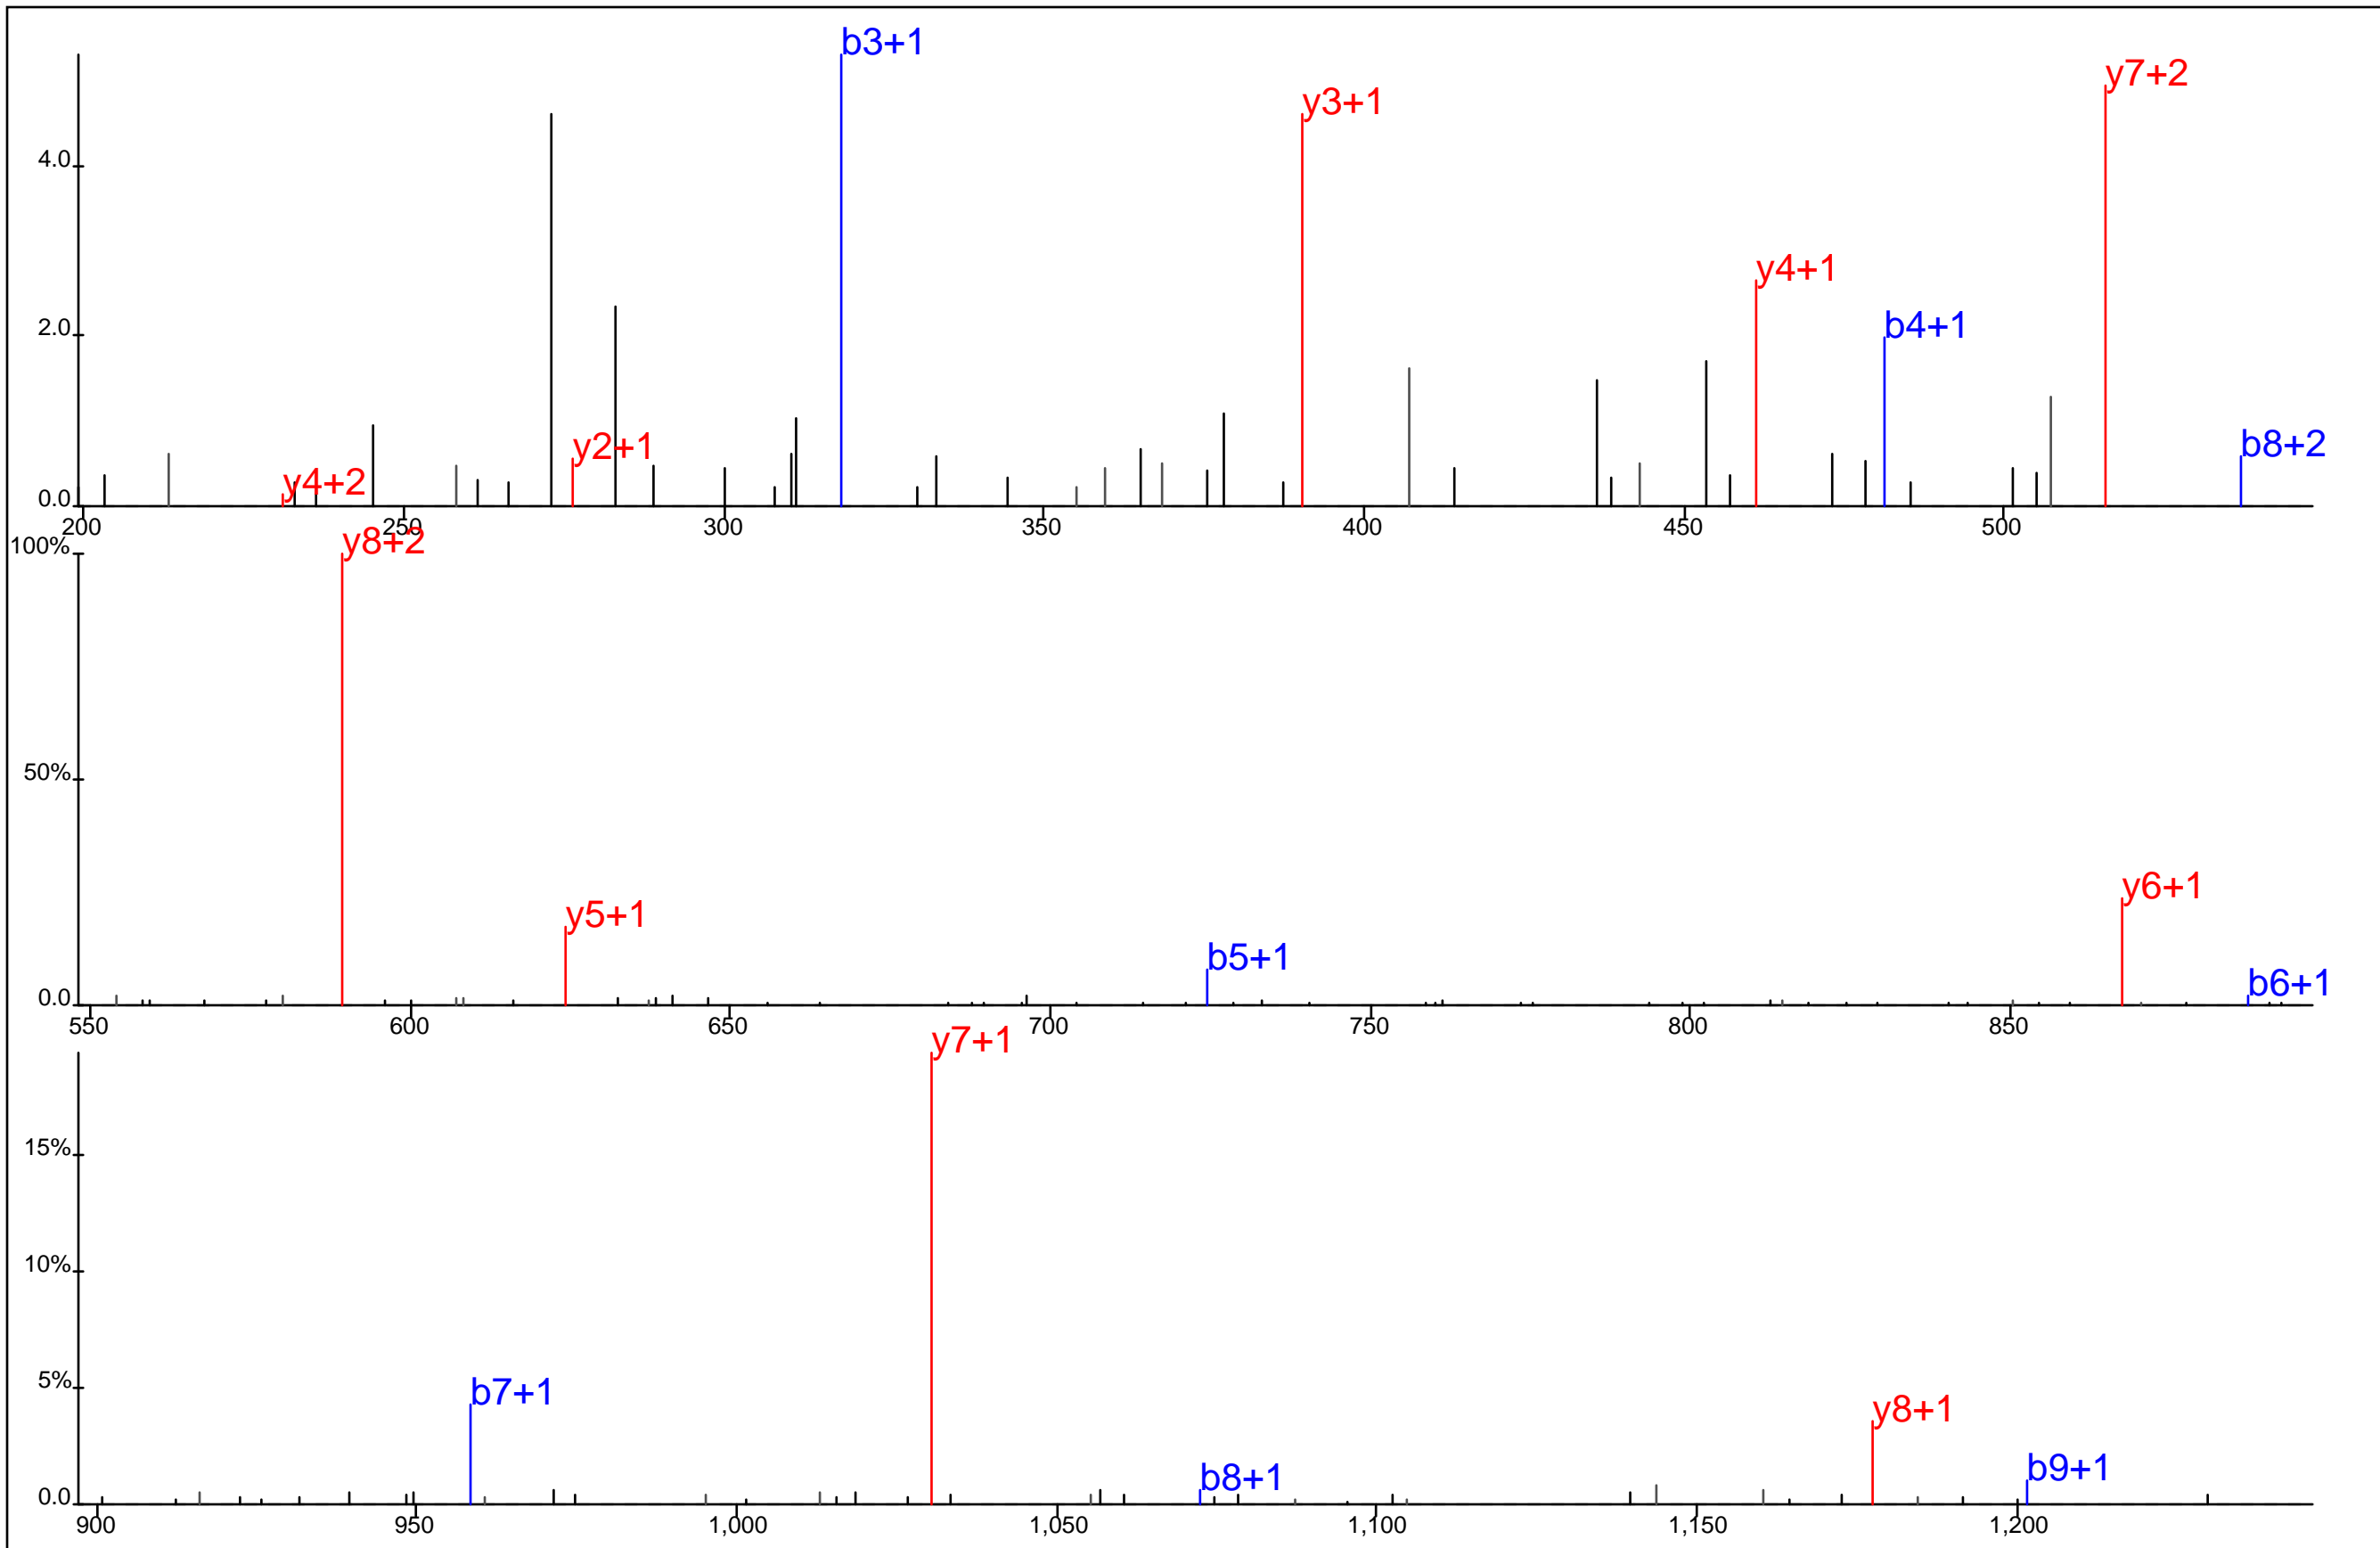

G L F Y Y\*Y A N E K  
 ■ ■ ■ ■ ■ ■ ■ ■  
 ■ ■ ■ ■ ■ ■ ■ ■

Protein Name: SKAP55  
 gi Accession: 0  
 Precursor Mass: 674.2857+2  
 Delta Mass: 1.125 ppm  
 XCorr: 53.63



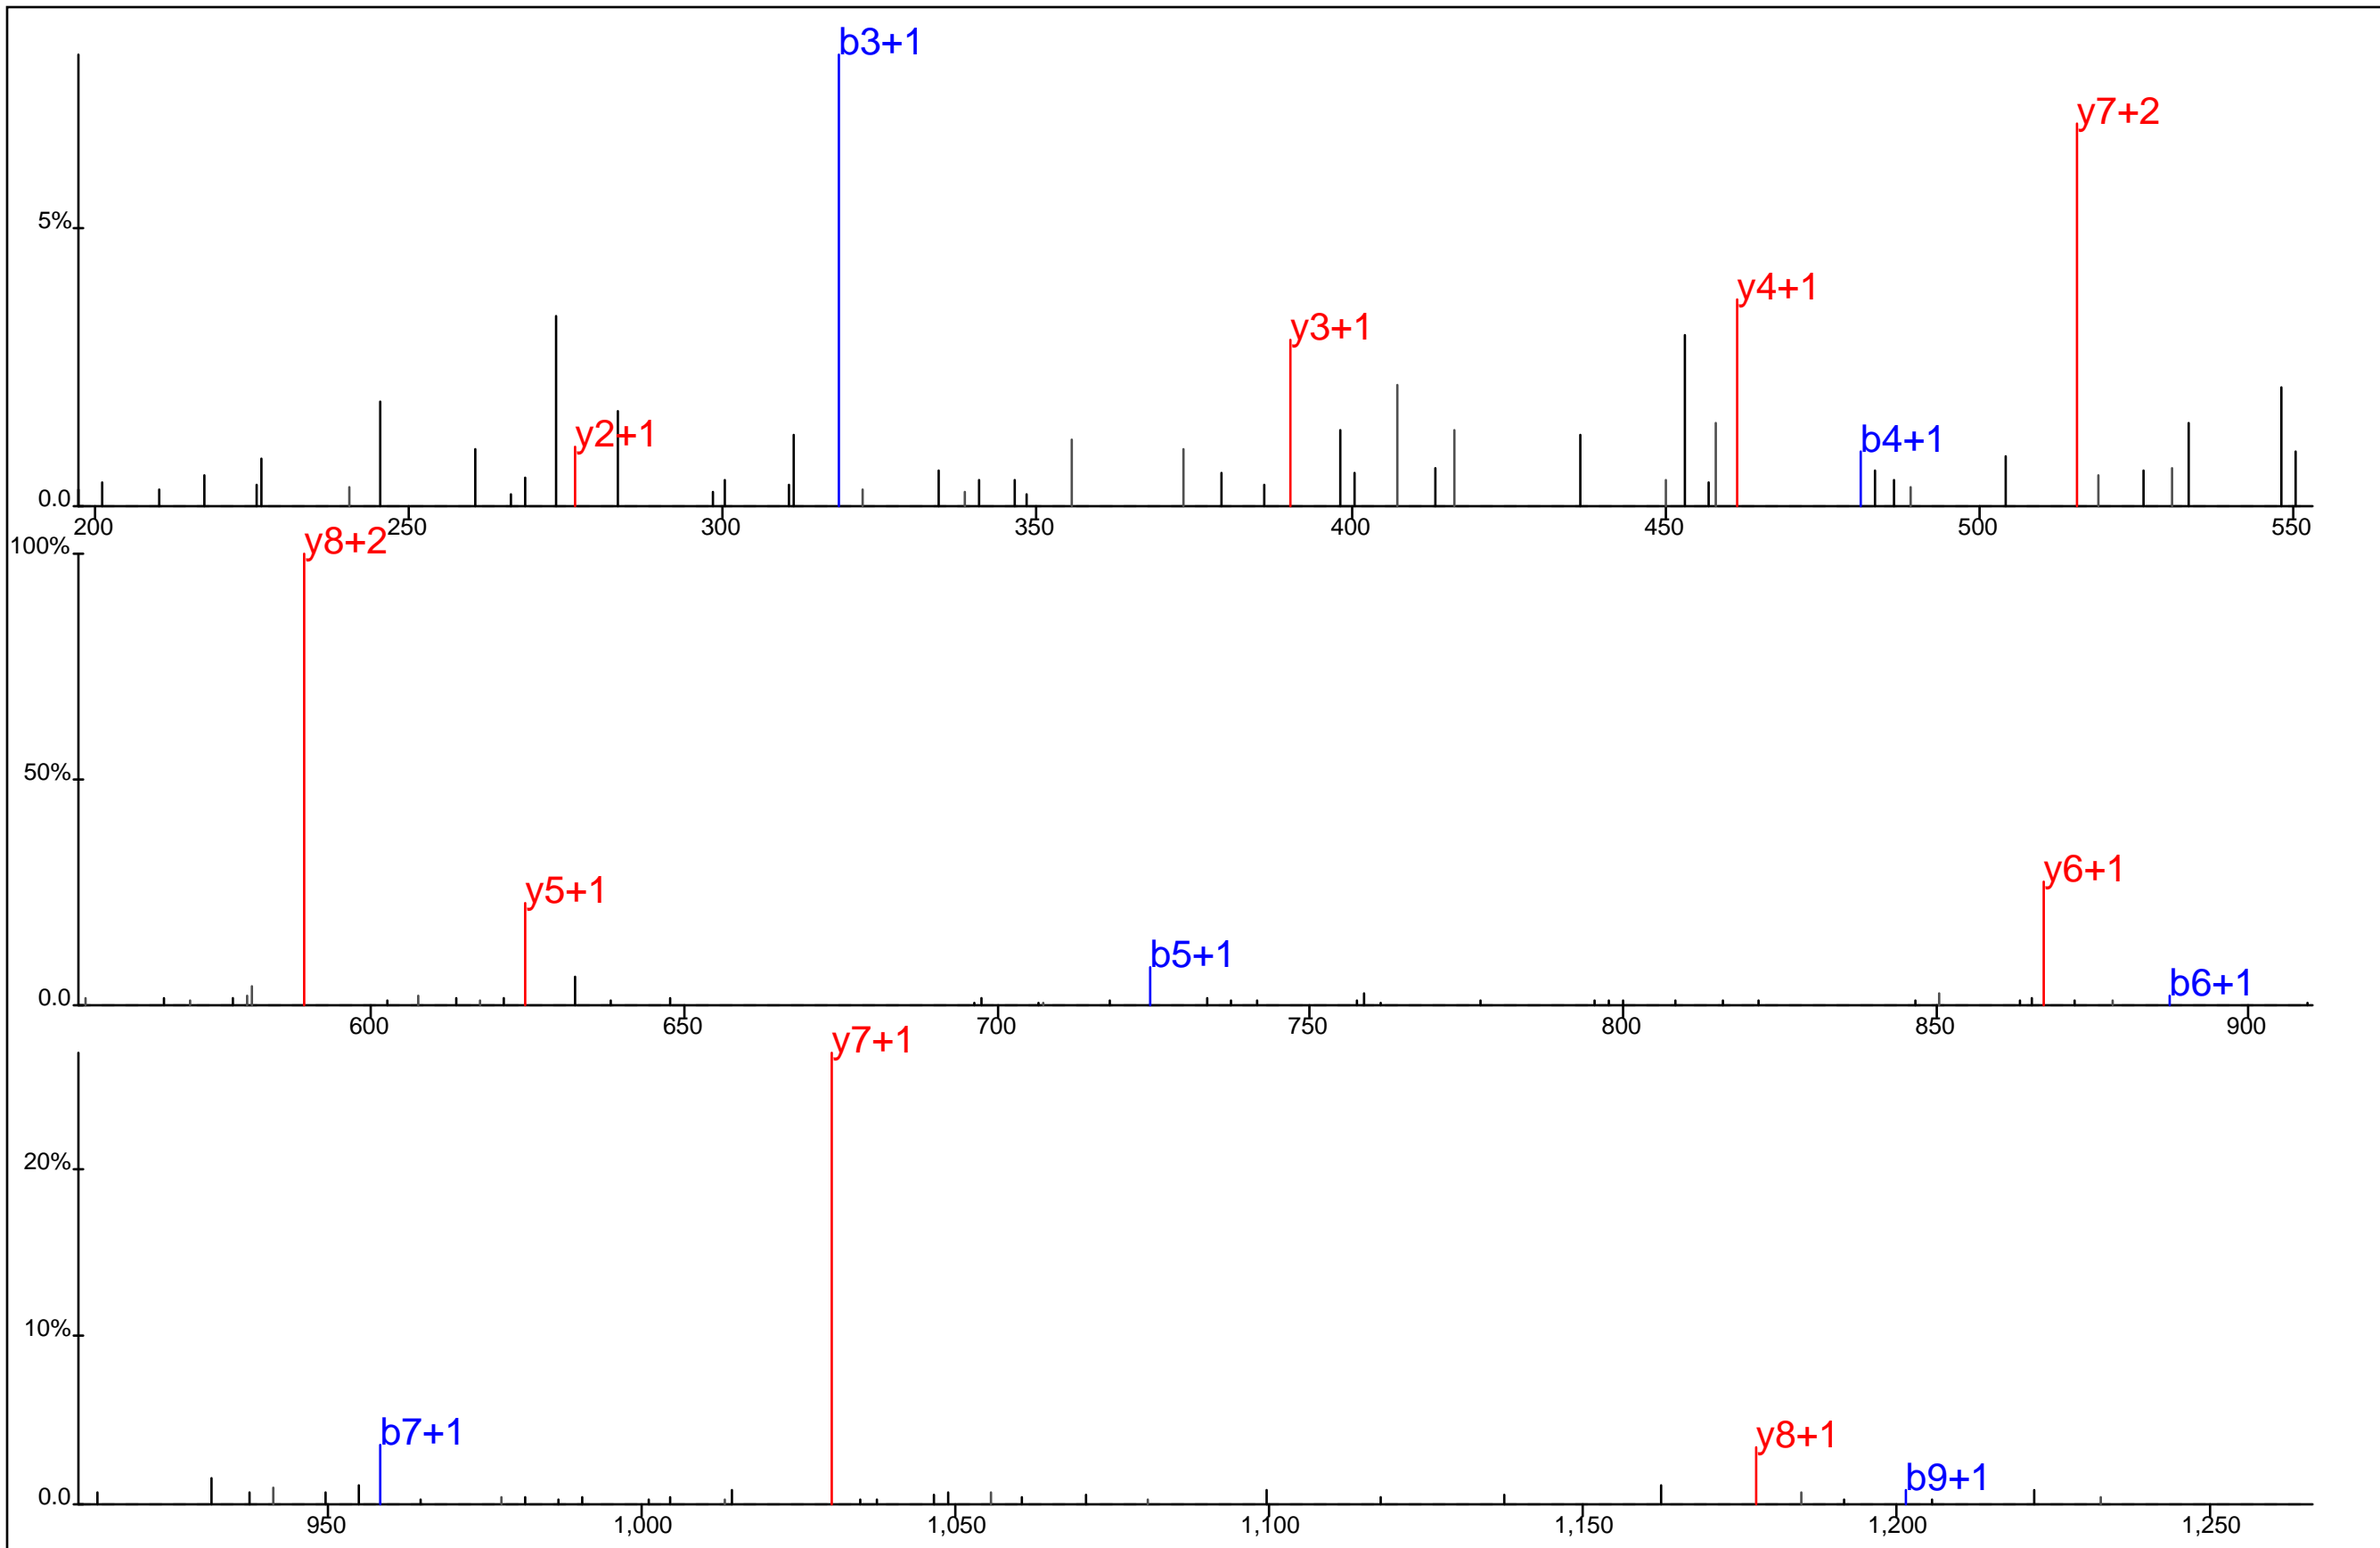

■ ■ ■ ■ ■ ■ ■  
 G L F Y Y\*Y A N E K  
■ ■ ■ ■ ■ ■ ■

Protein Name: SKAP55  
 gi Accession: 0  
 Precursor Mass: 674.2863+2  
 Delta Mass: 0.310 ppm  
 XCorr: 36.95

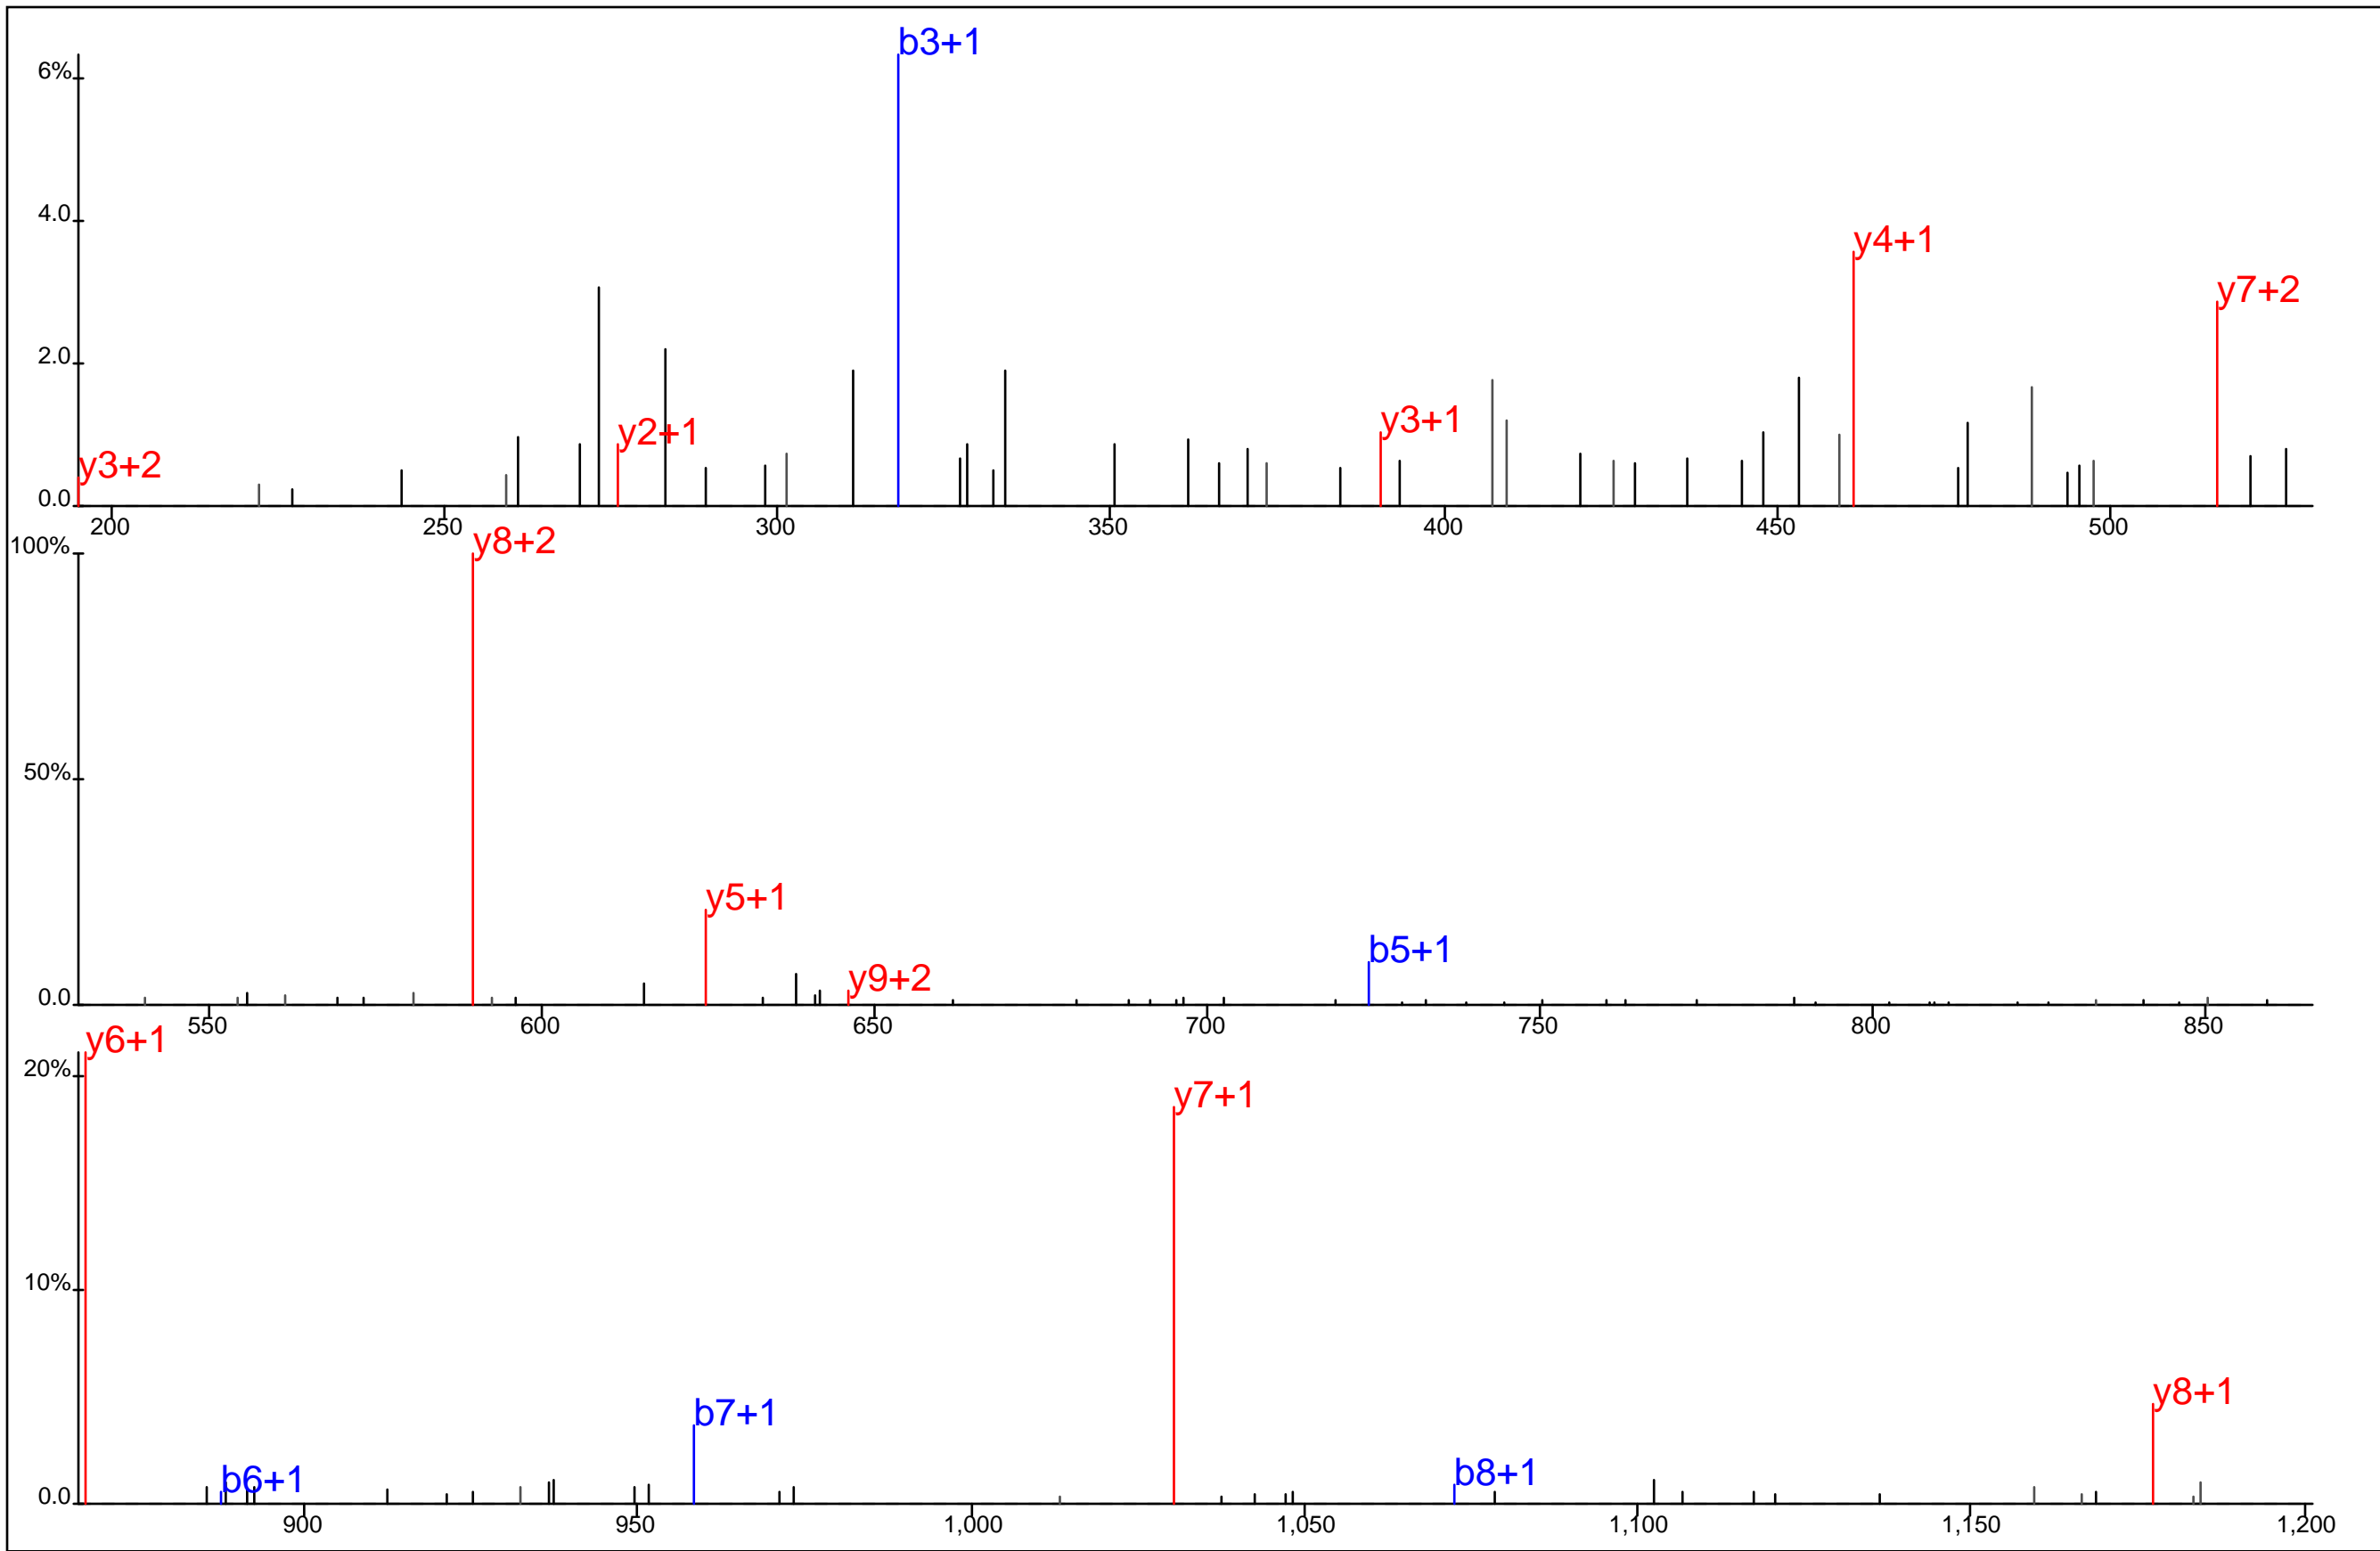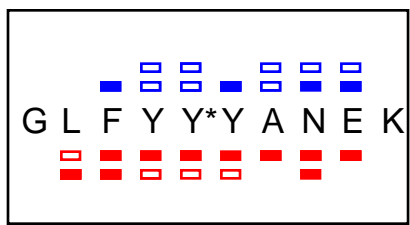

Protein Name: SKAP55  
 gi Accession: 0  
 Precursor Mass: 674.2859+2  
 Delta Mass: 0.763 ppm  
 XCorr: 46.88

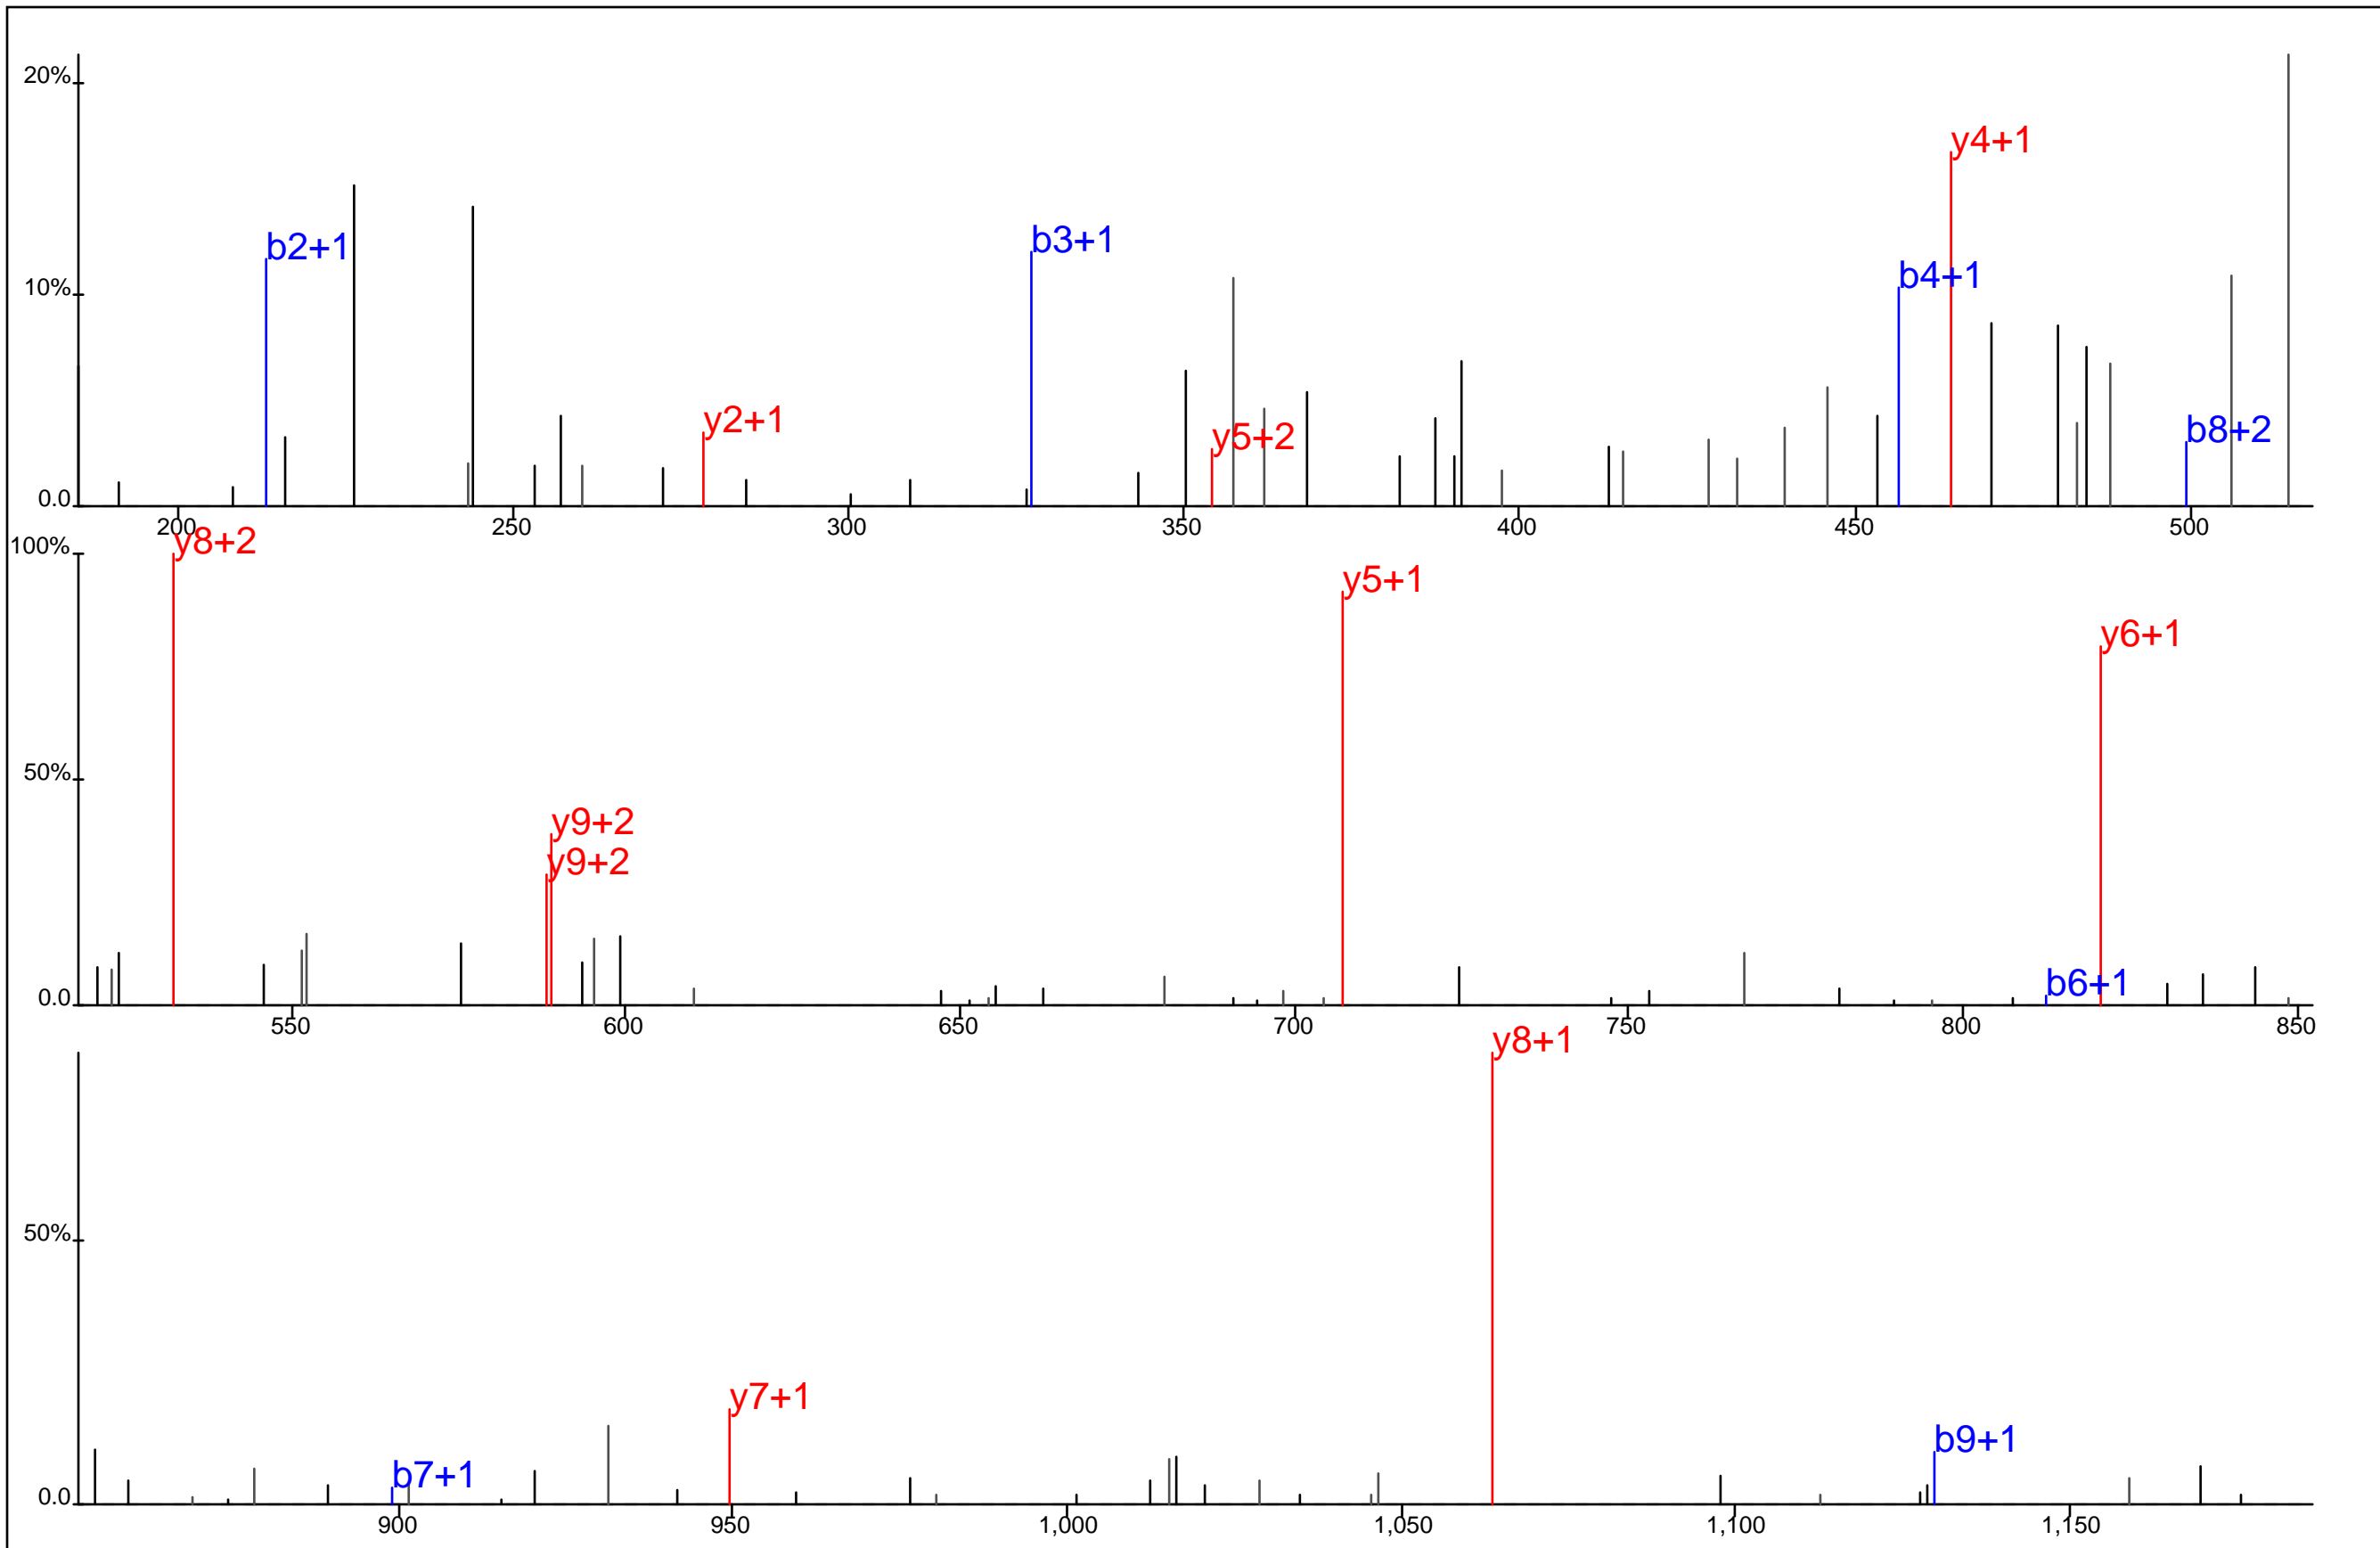

V L N E L Y\* S V M K

Protein Name: SLIT-ROBO Rho GTPase activating protein 2  
 gi Accession: 0  
 Precursor Mass: 638.3071+2  
 Delta Mass: 1.223 ppm  
 XCorr: 39.19

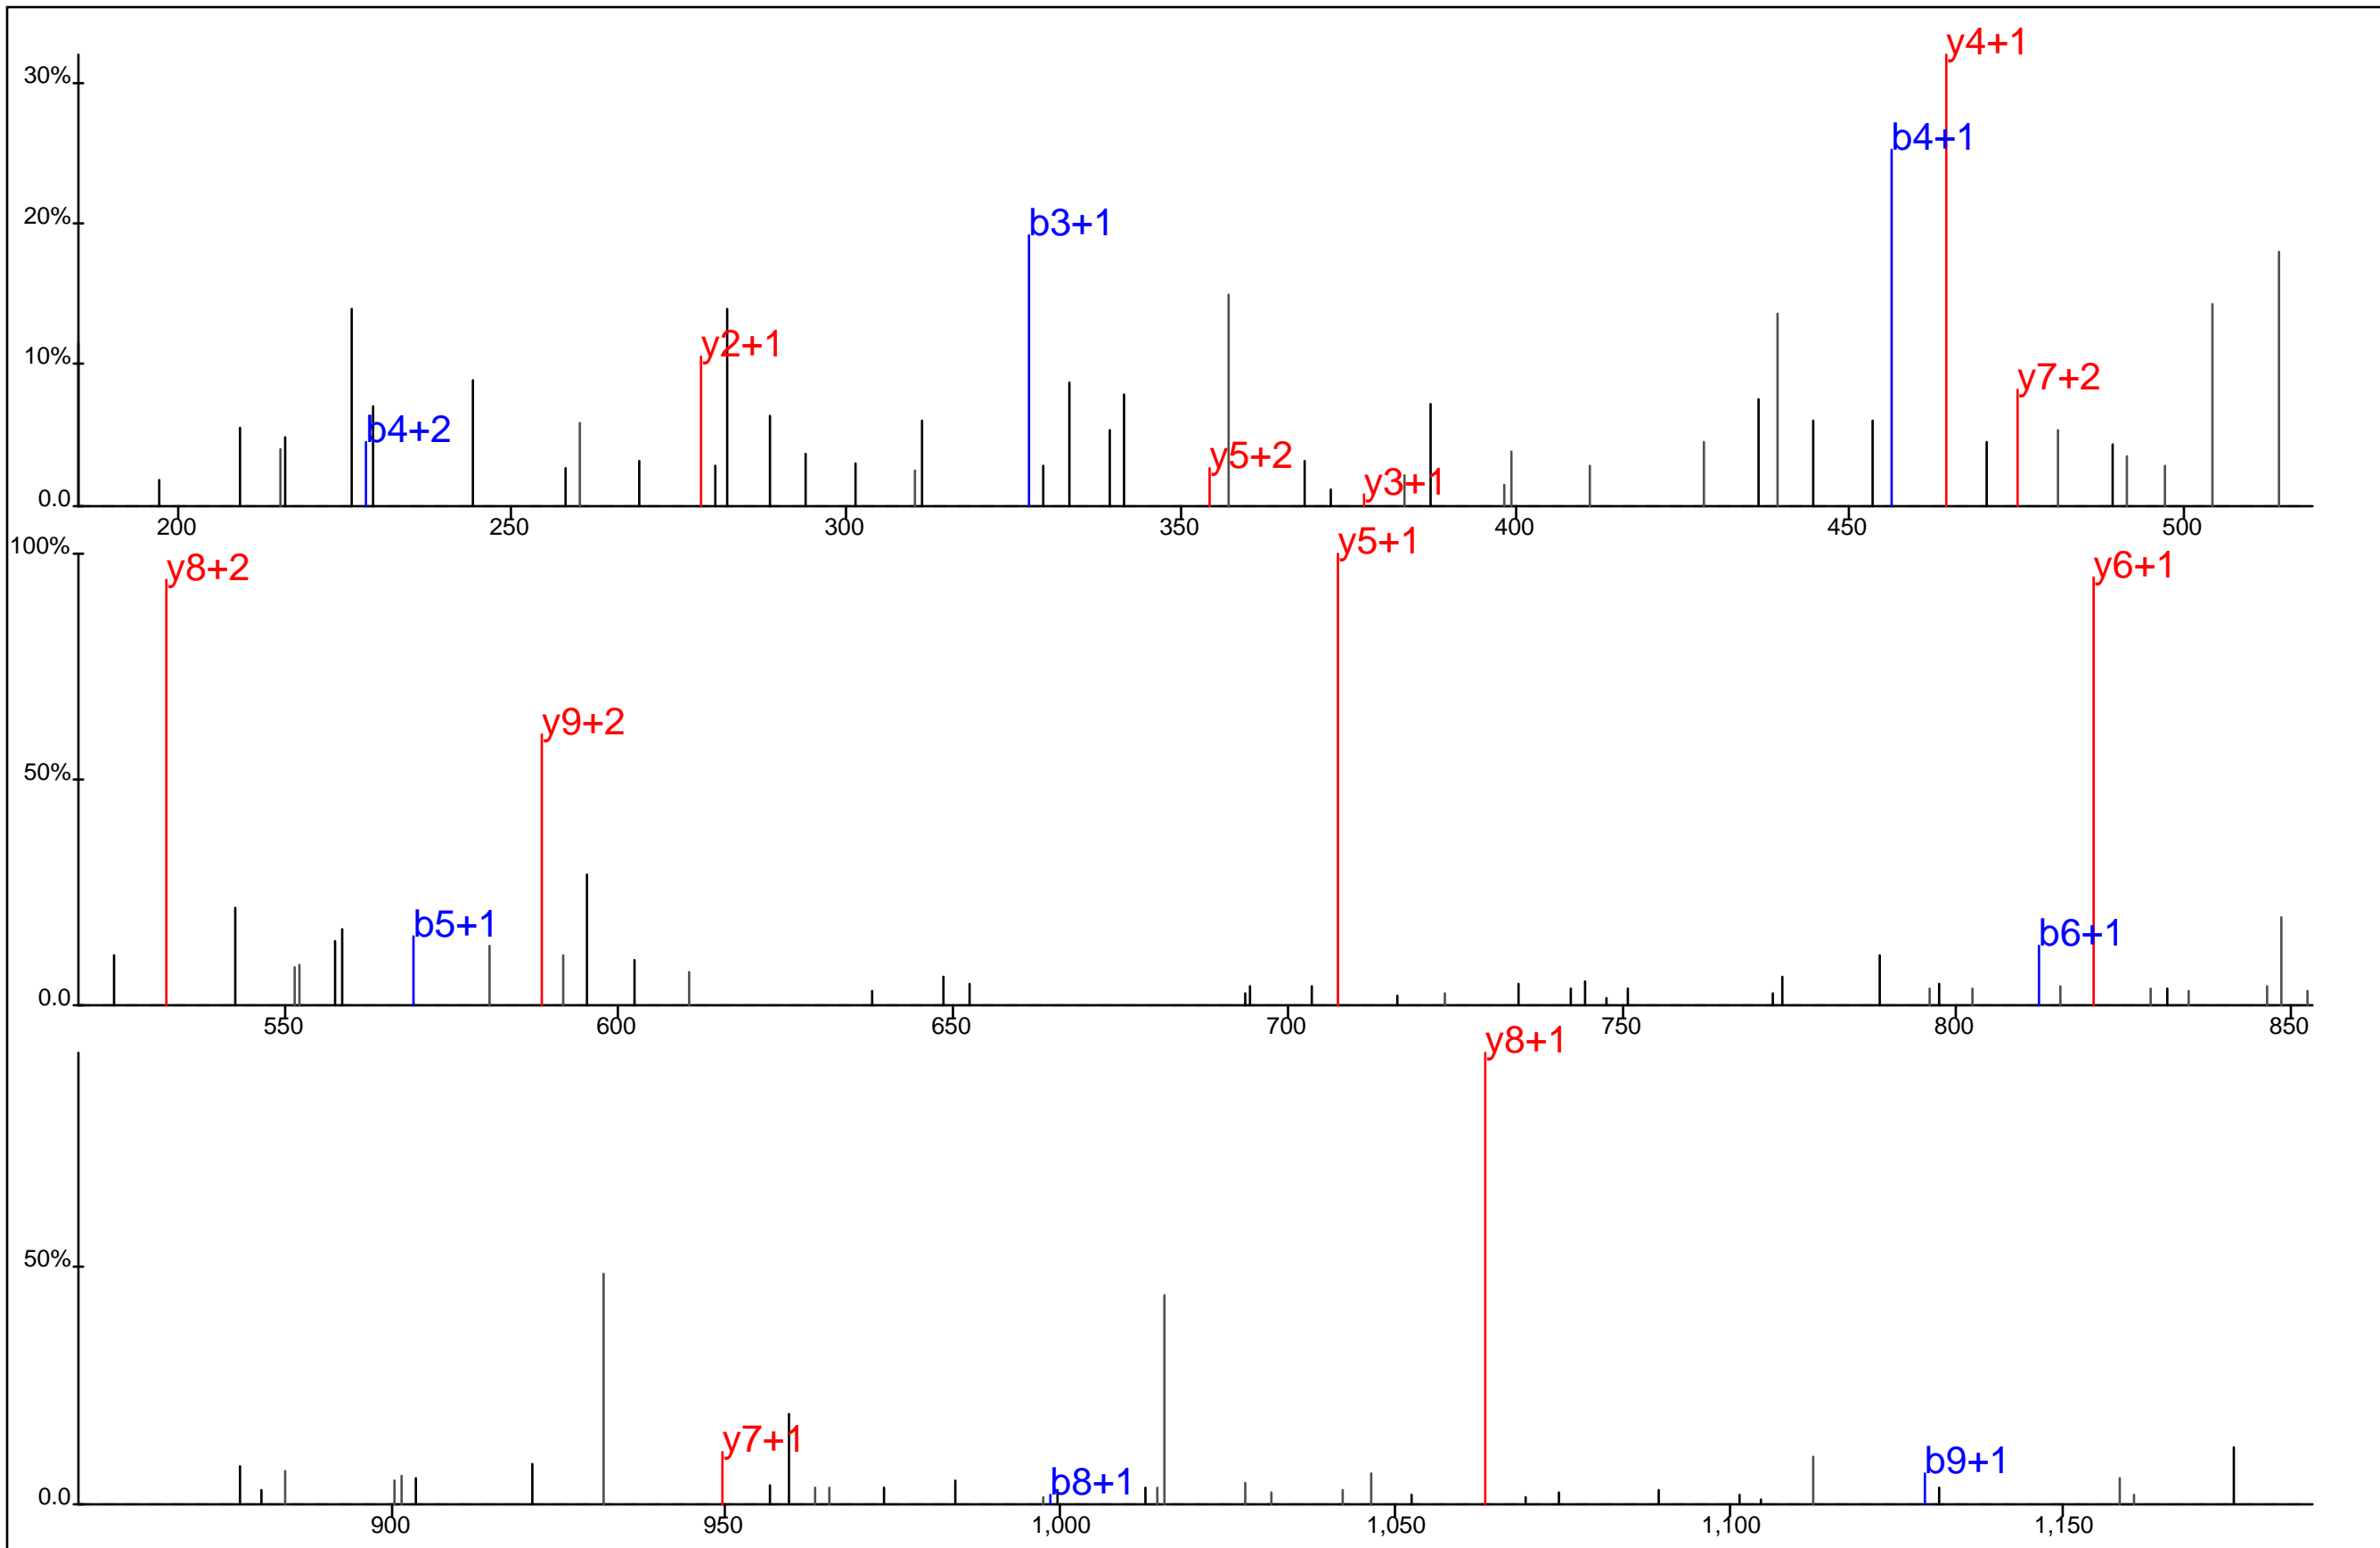

V L N E L Y\* S V M K

Protein Name: SLIT-ROBO Rho GTPase activating protein 2  
 gi Accession: 0  
 Precursor Mass: 638.3076+2  
 Delta Mass: 1.988 ppm  
 XCorr: 25.03

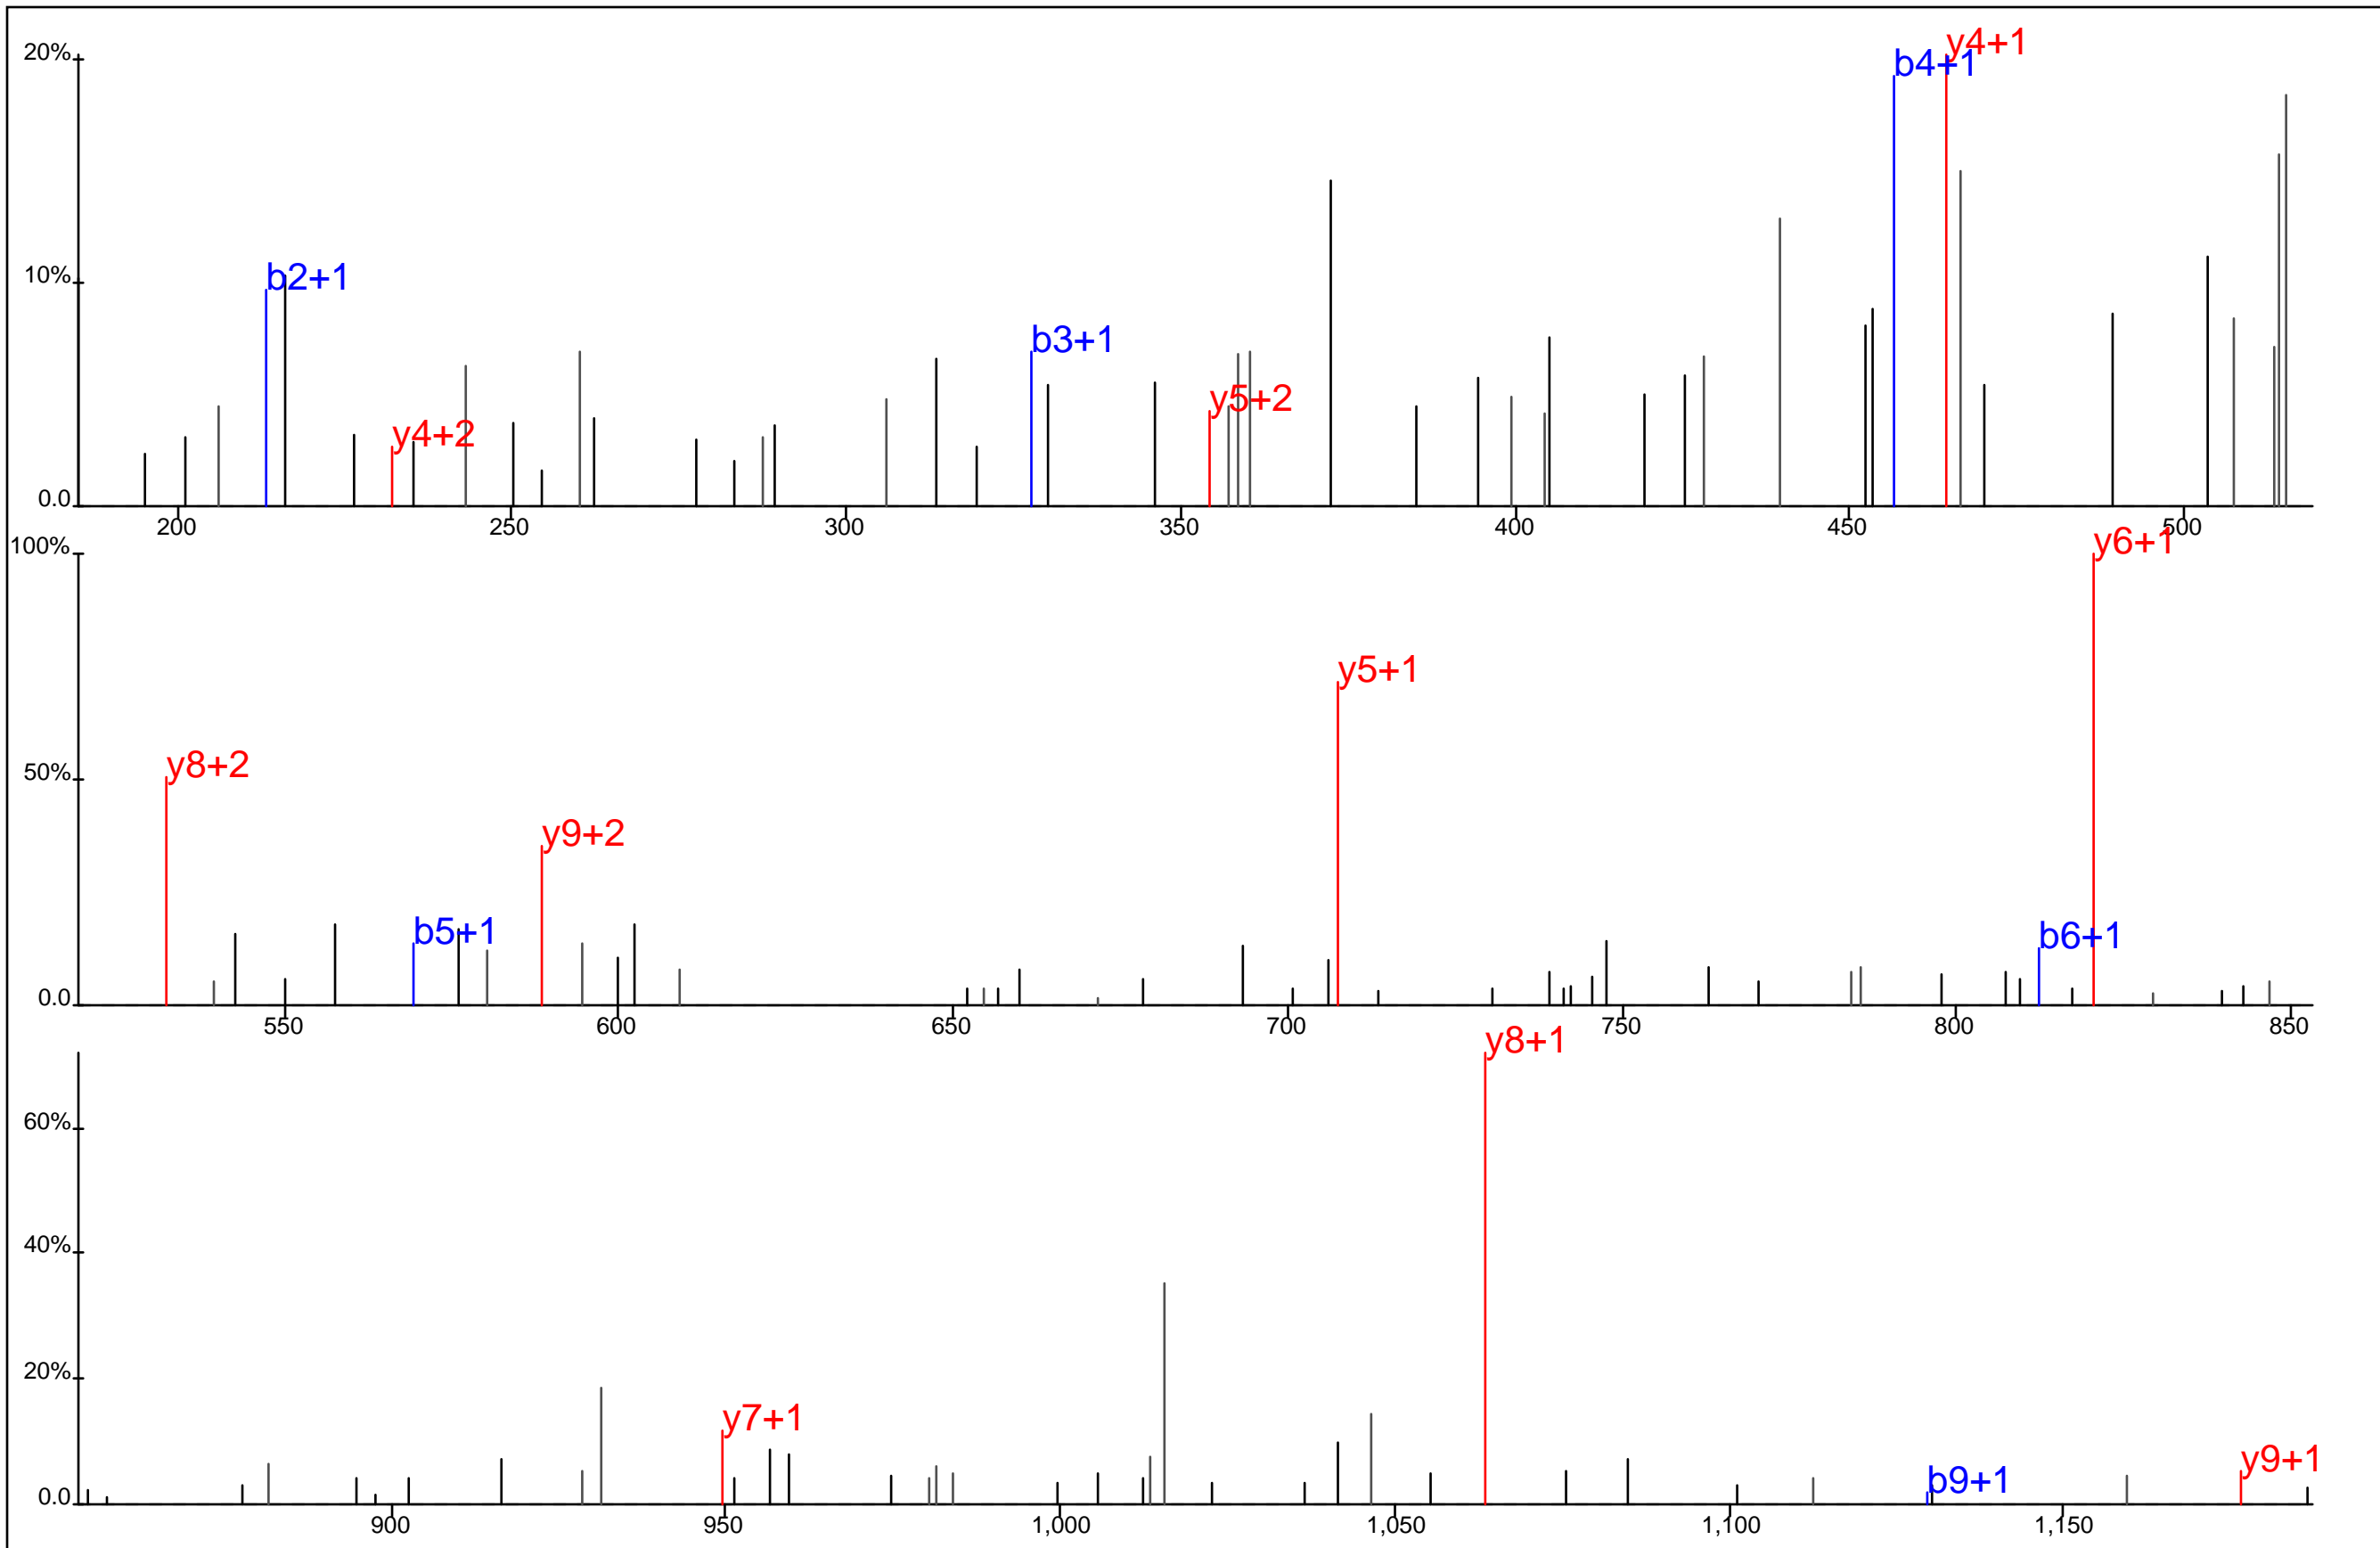

**V L N E L Y\* S V M K**

Protein Name: SLIT-ROBO Rho GTPase activating protein 2  
 gi Accession: 0  
 Precursor Mass: 638.3076+2  
 Delta Mass: 1.988 ppm  
 XCorr: 35.52

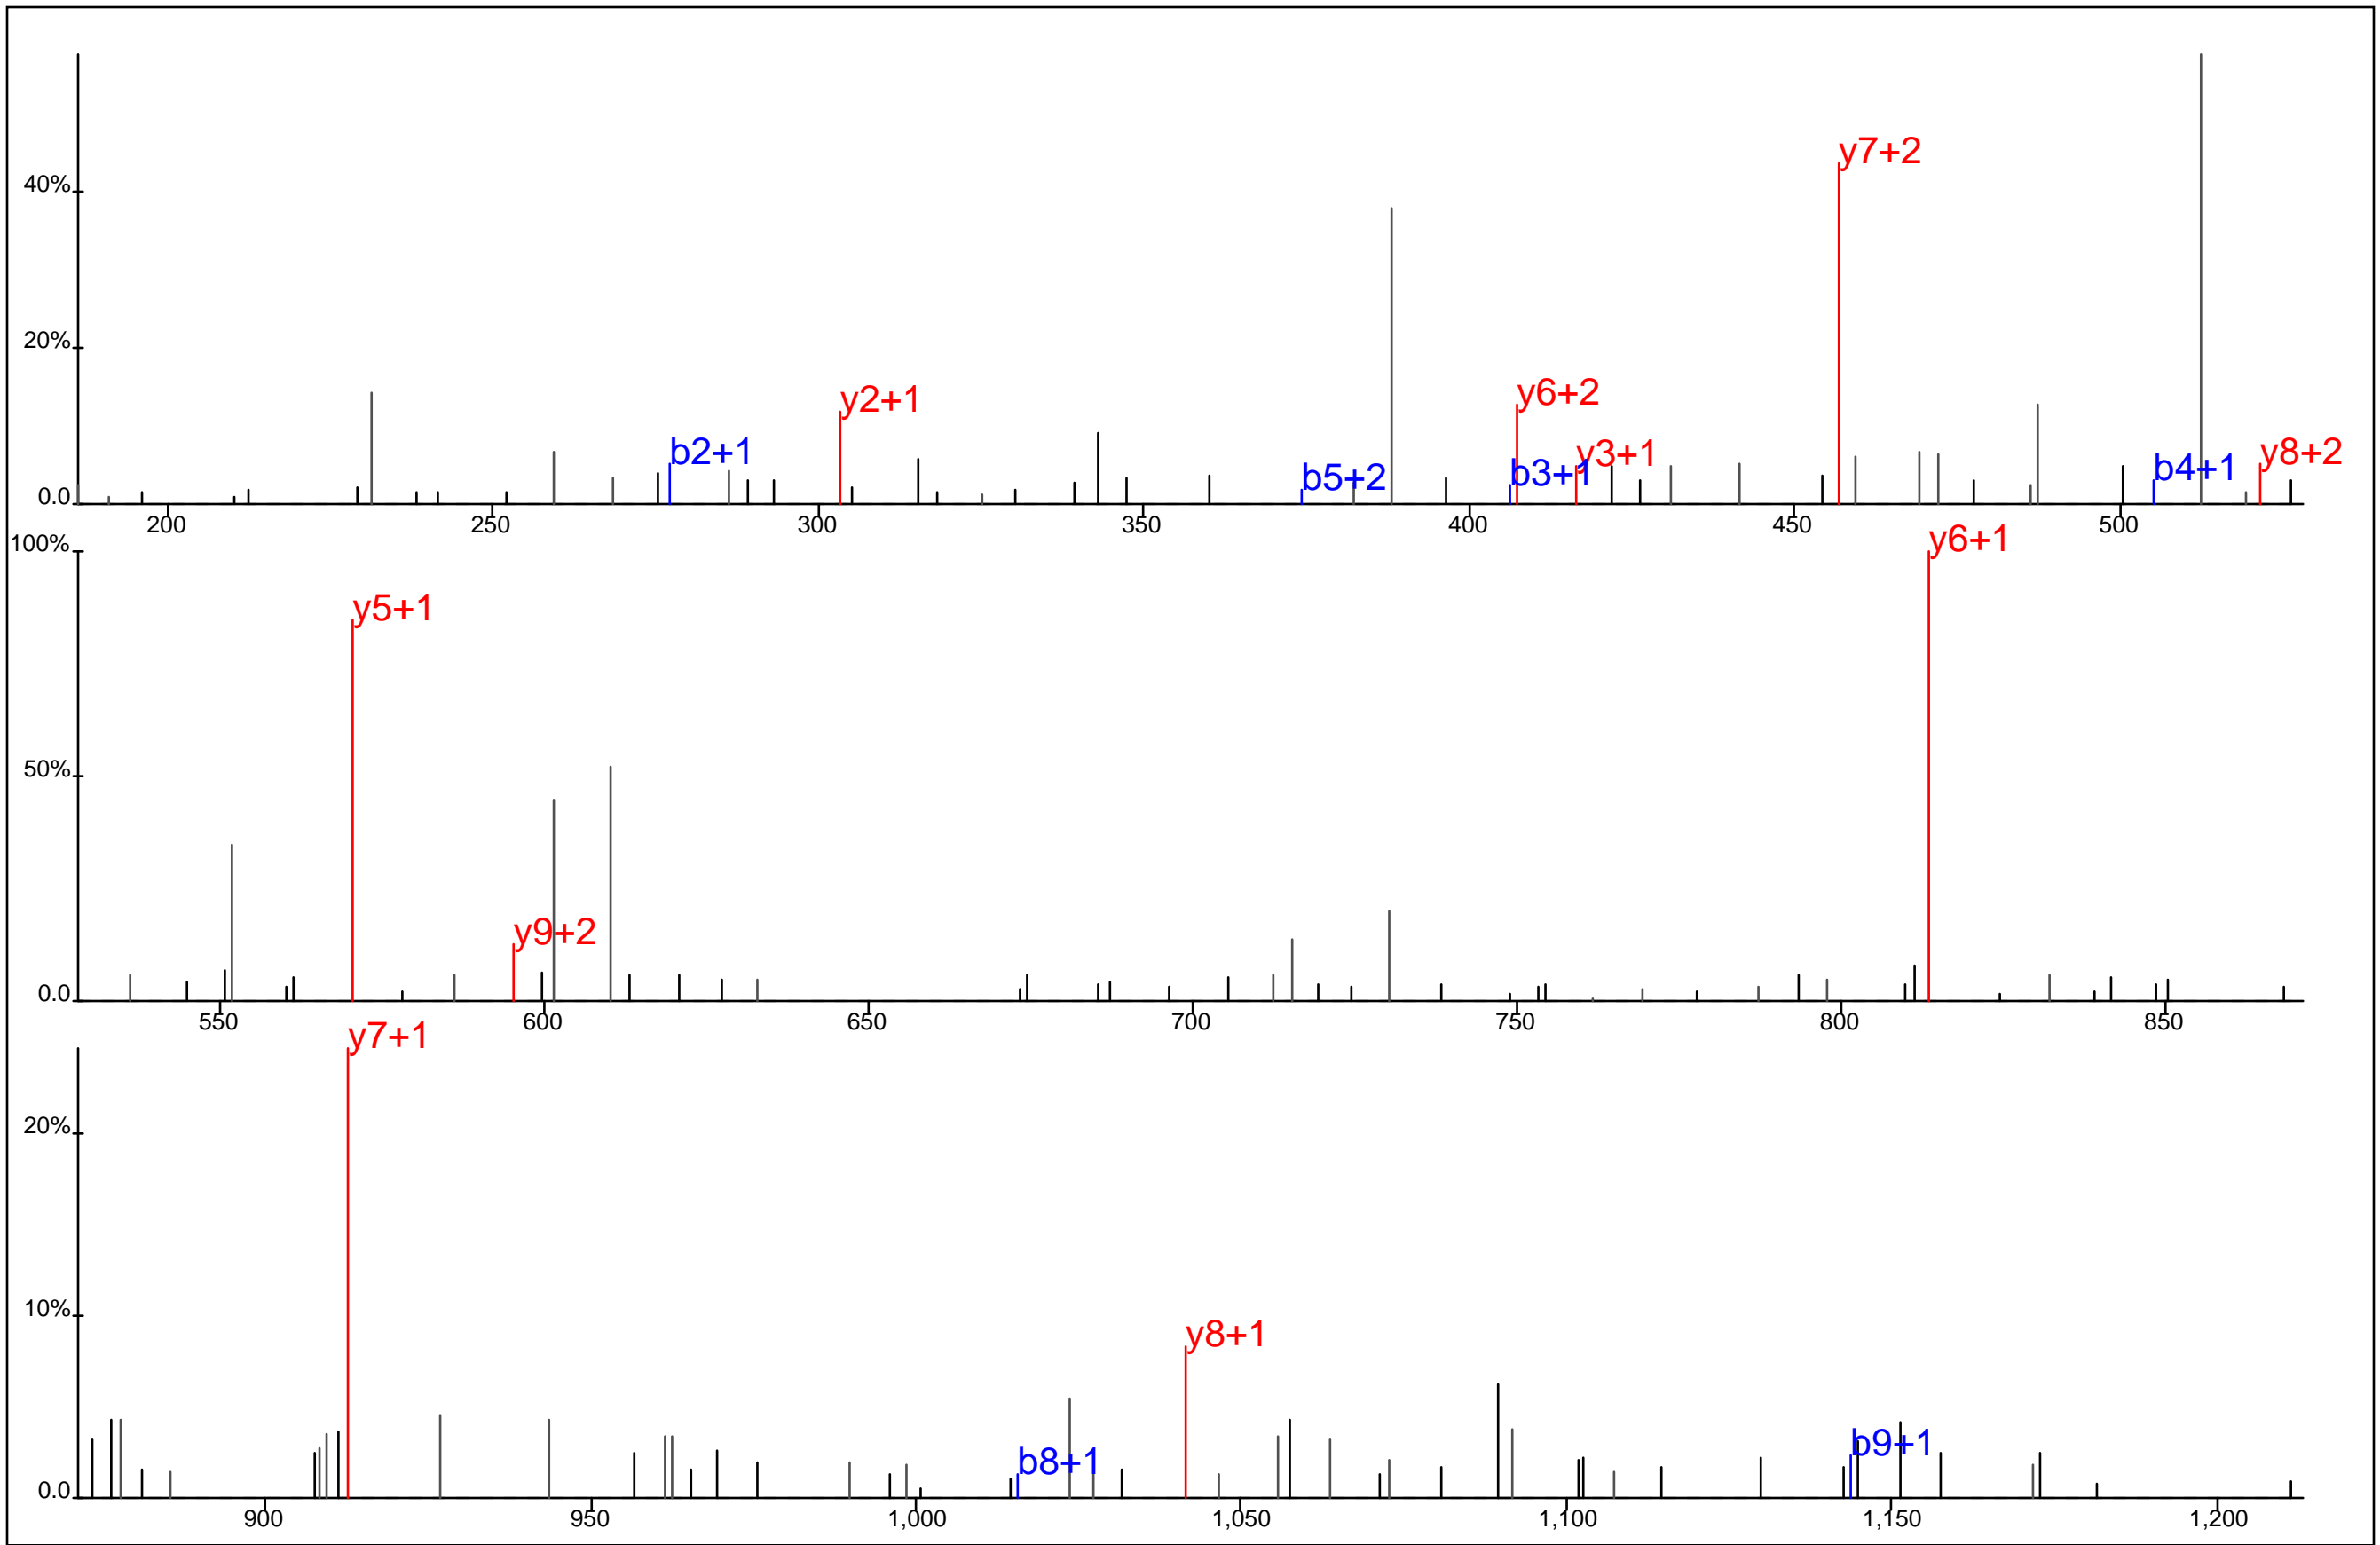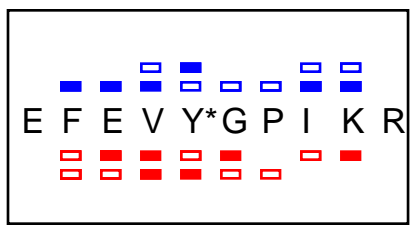

Protein Name: Small nuclear ribonucleoprotein 70 kD  
 gi Accession: 0  
 Precursor Mass: 659.3144+2  
 Delta Mass: 1.779 ppm  
 XCorr: 25.53

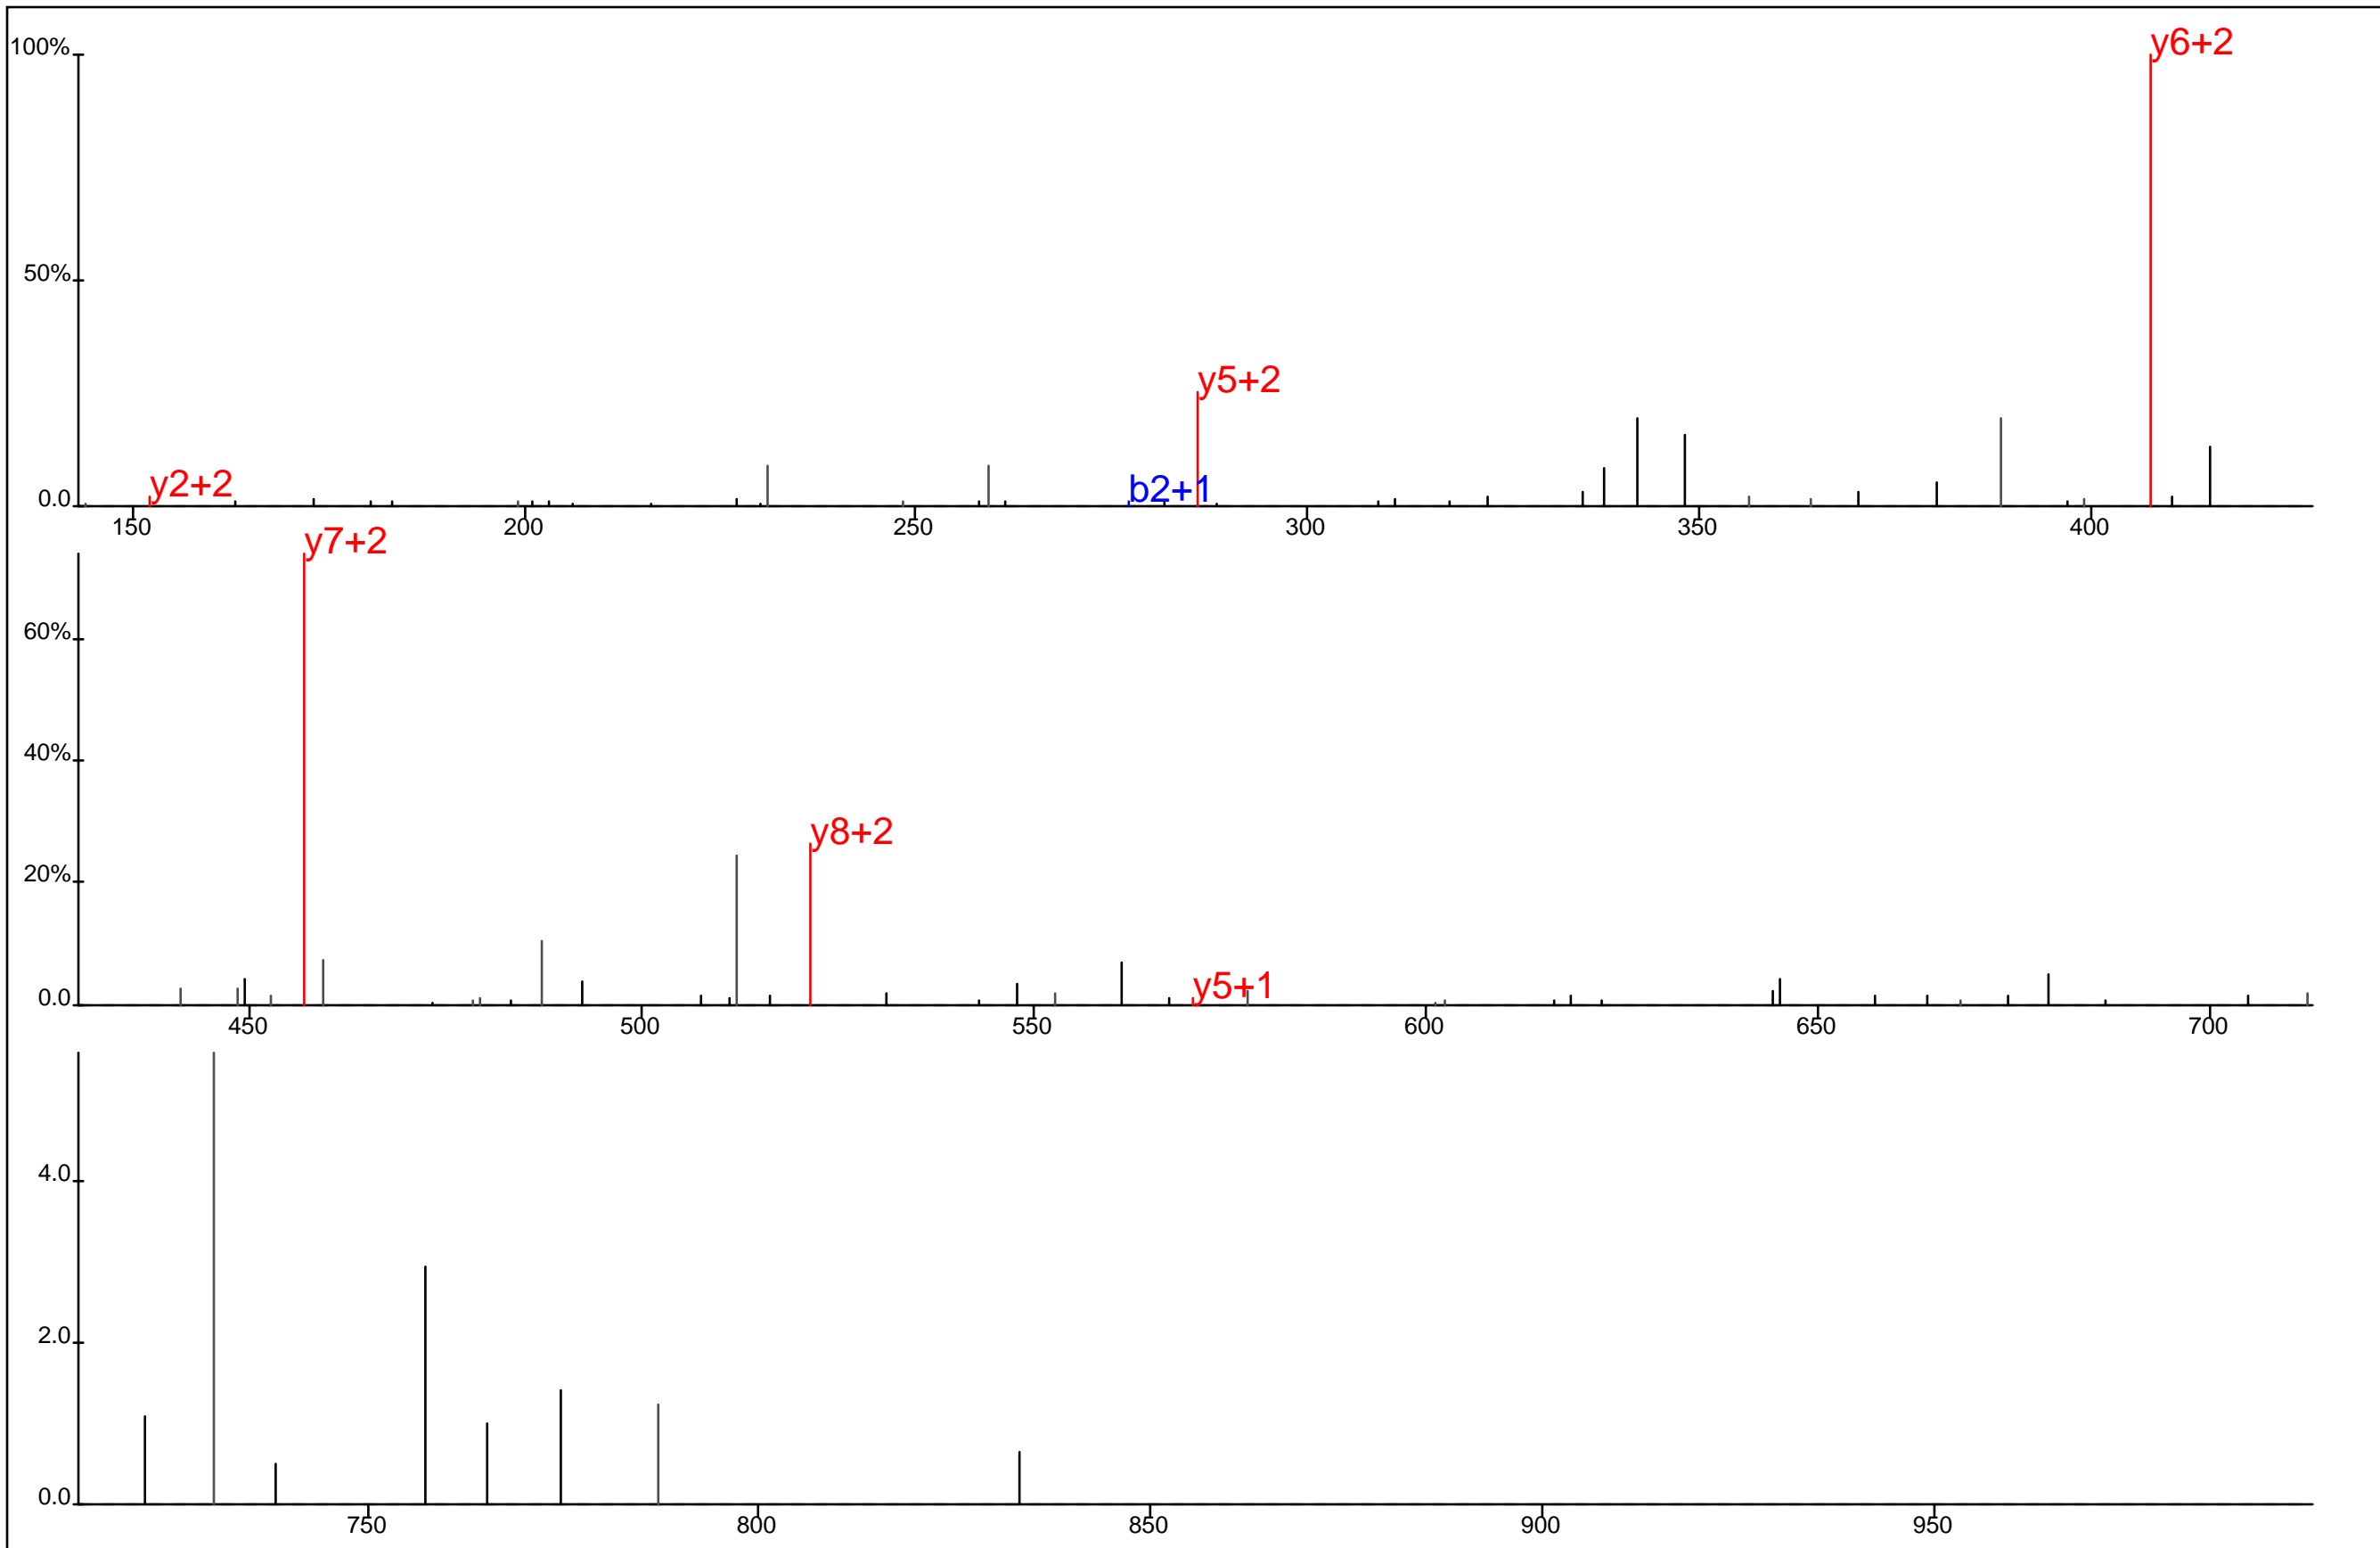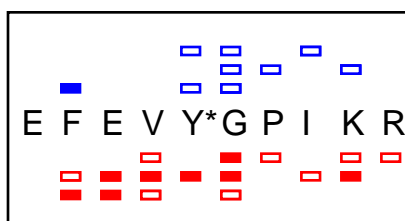

Protein Name: Small nuclear ribonucleoprotein 70 kD  
 gi Accession: 0  
 Precursor Mass: 439.8796+3  
 Delta Mass: 0.250 ppm  
 XCorr: 21.5

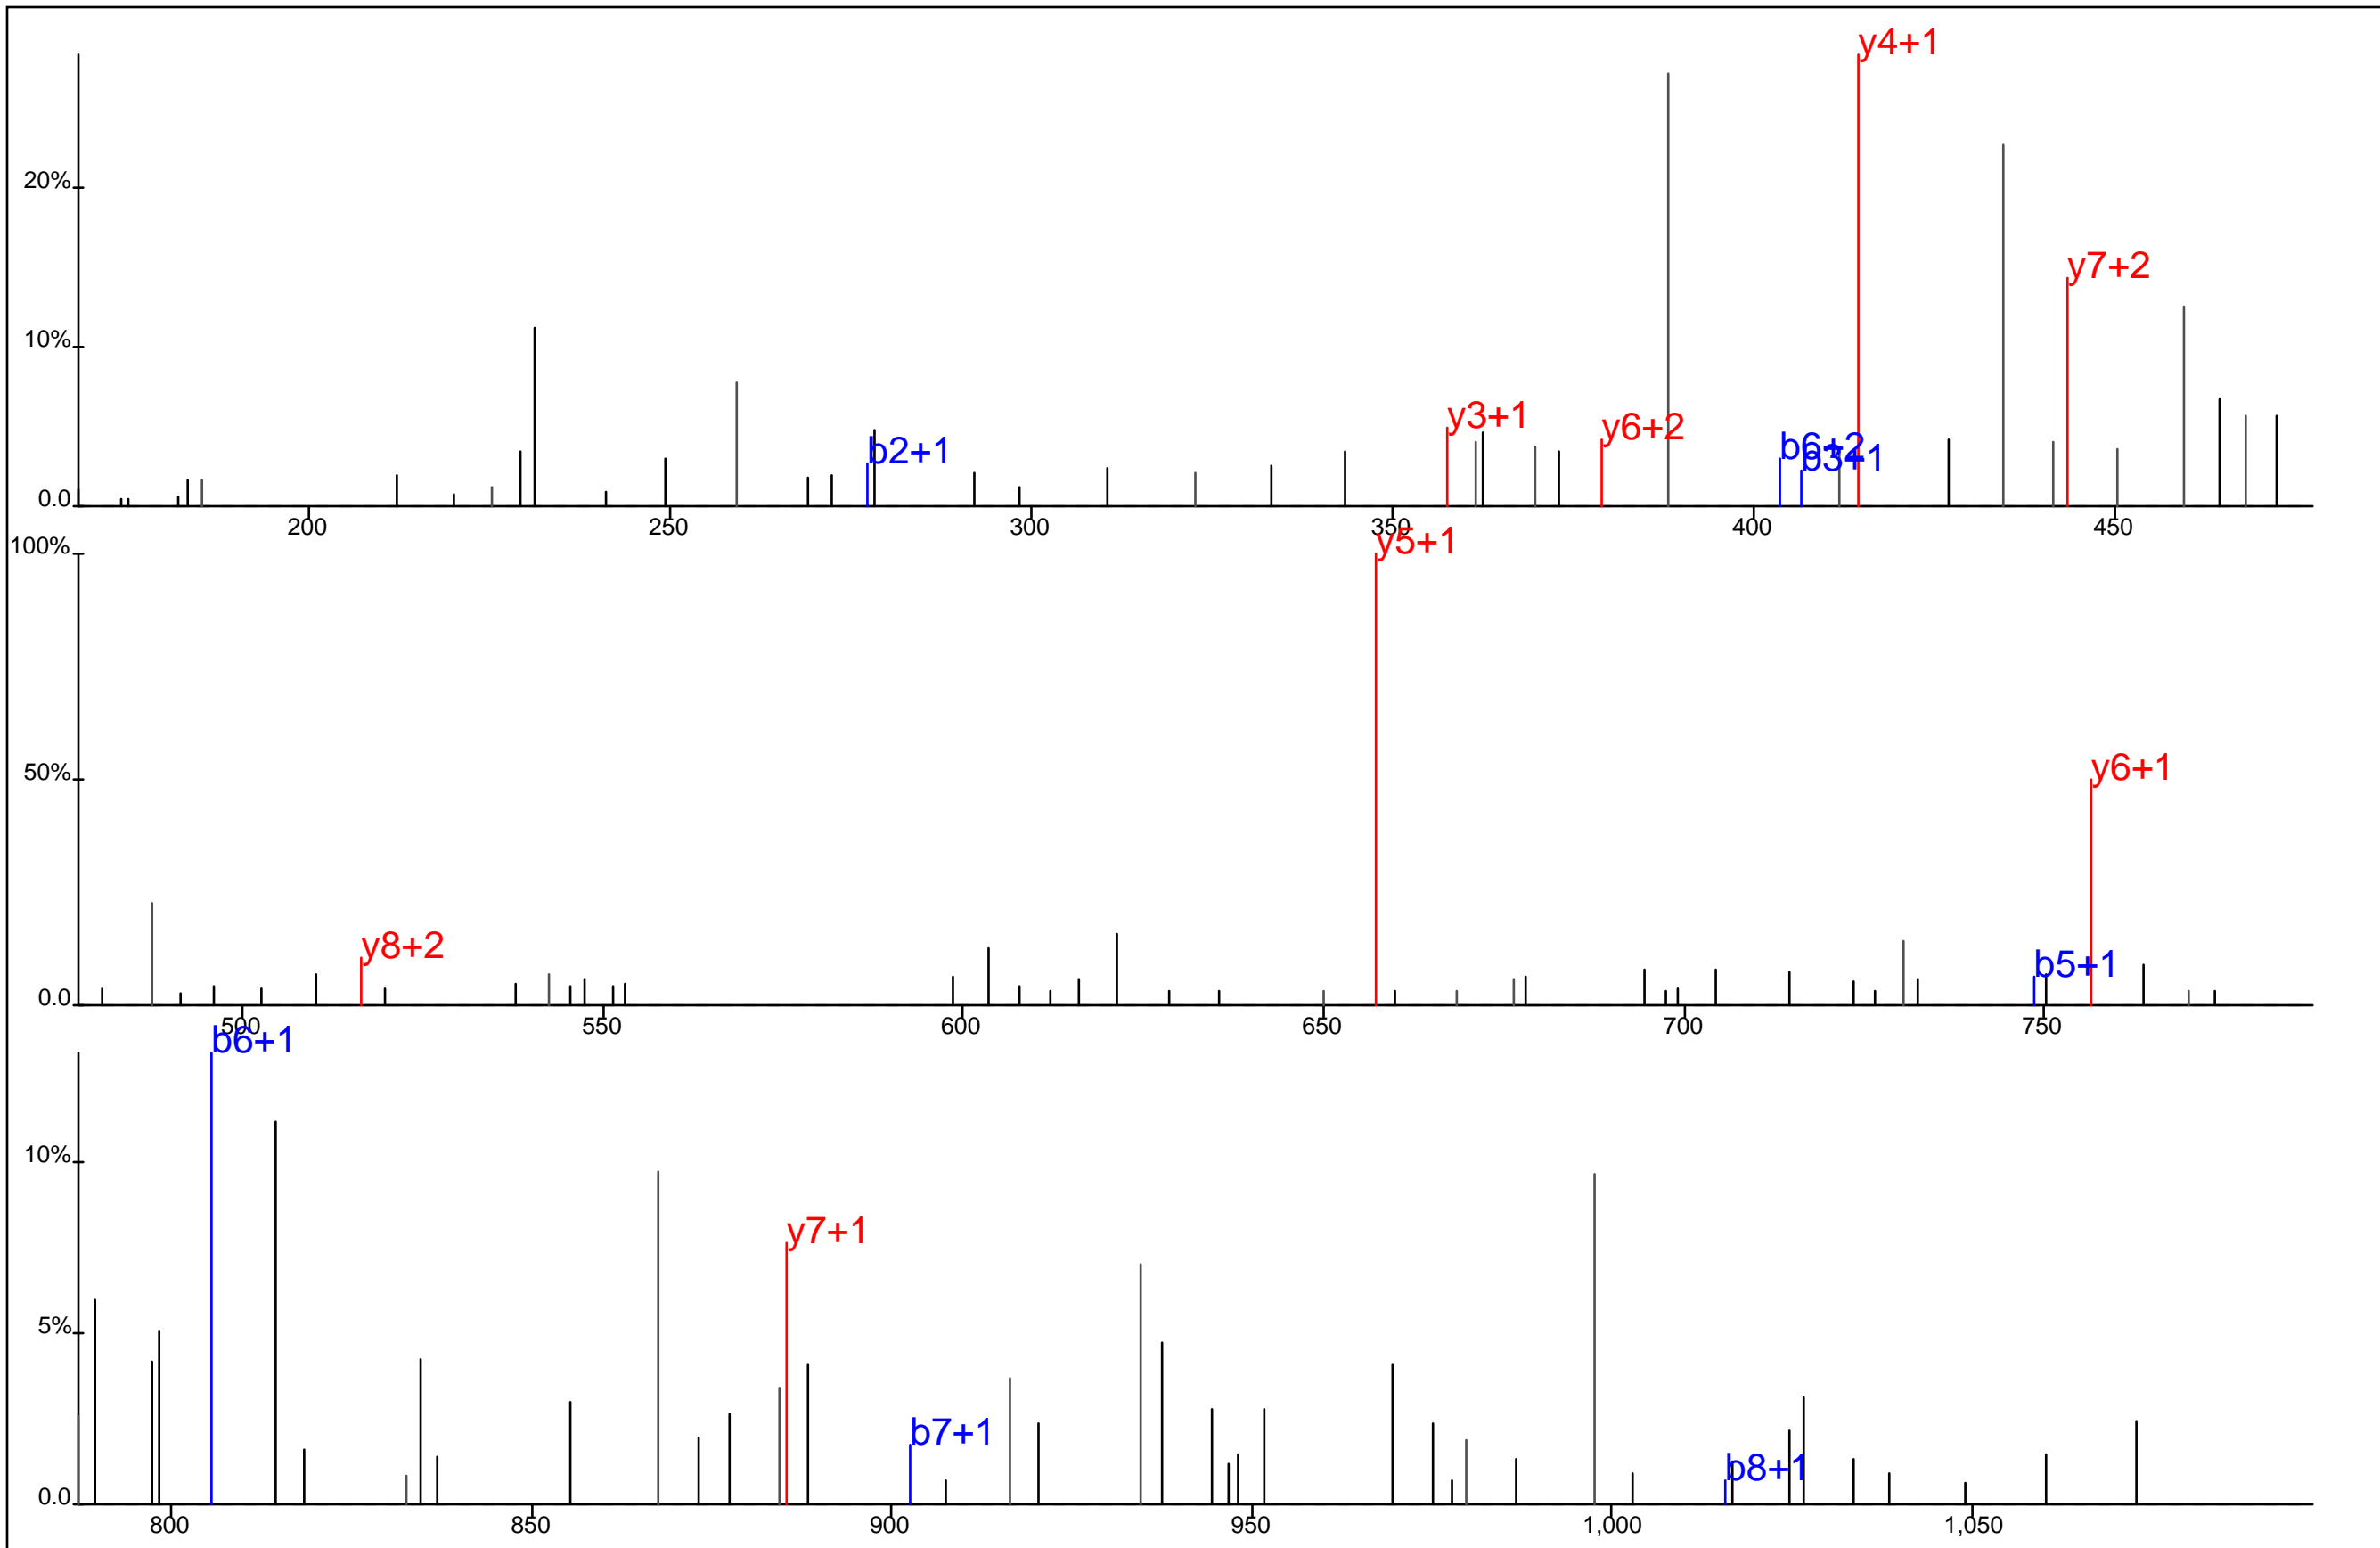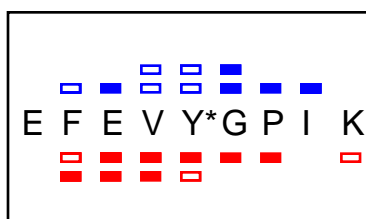

Protein Name: Small nuclear ribonucleoprotein 70 kD  
 gi Accession: 0  
 Precursor Mass: 581.2645+2  
 Delta Mass: 0.945 ppm  
 XCorr: 29.21



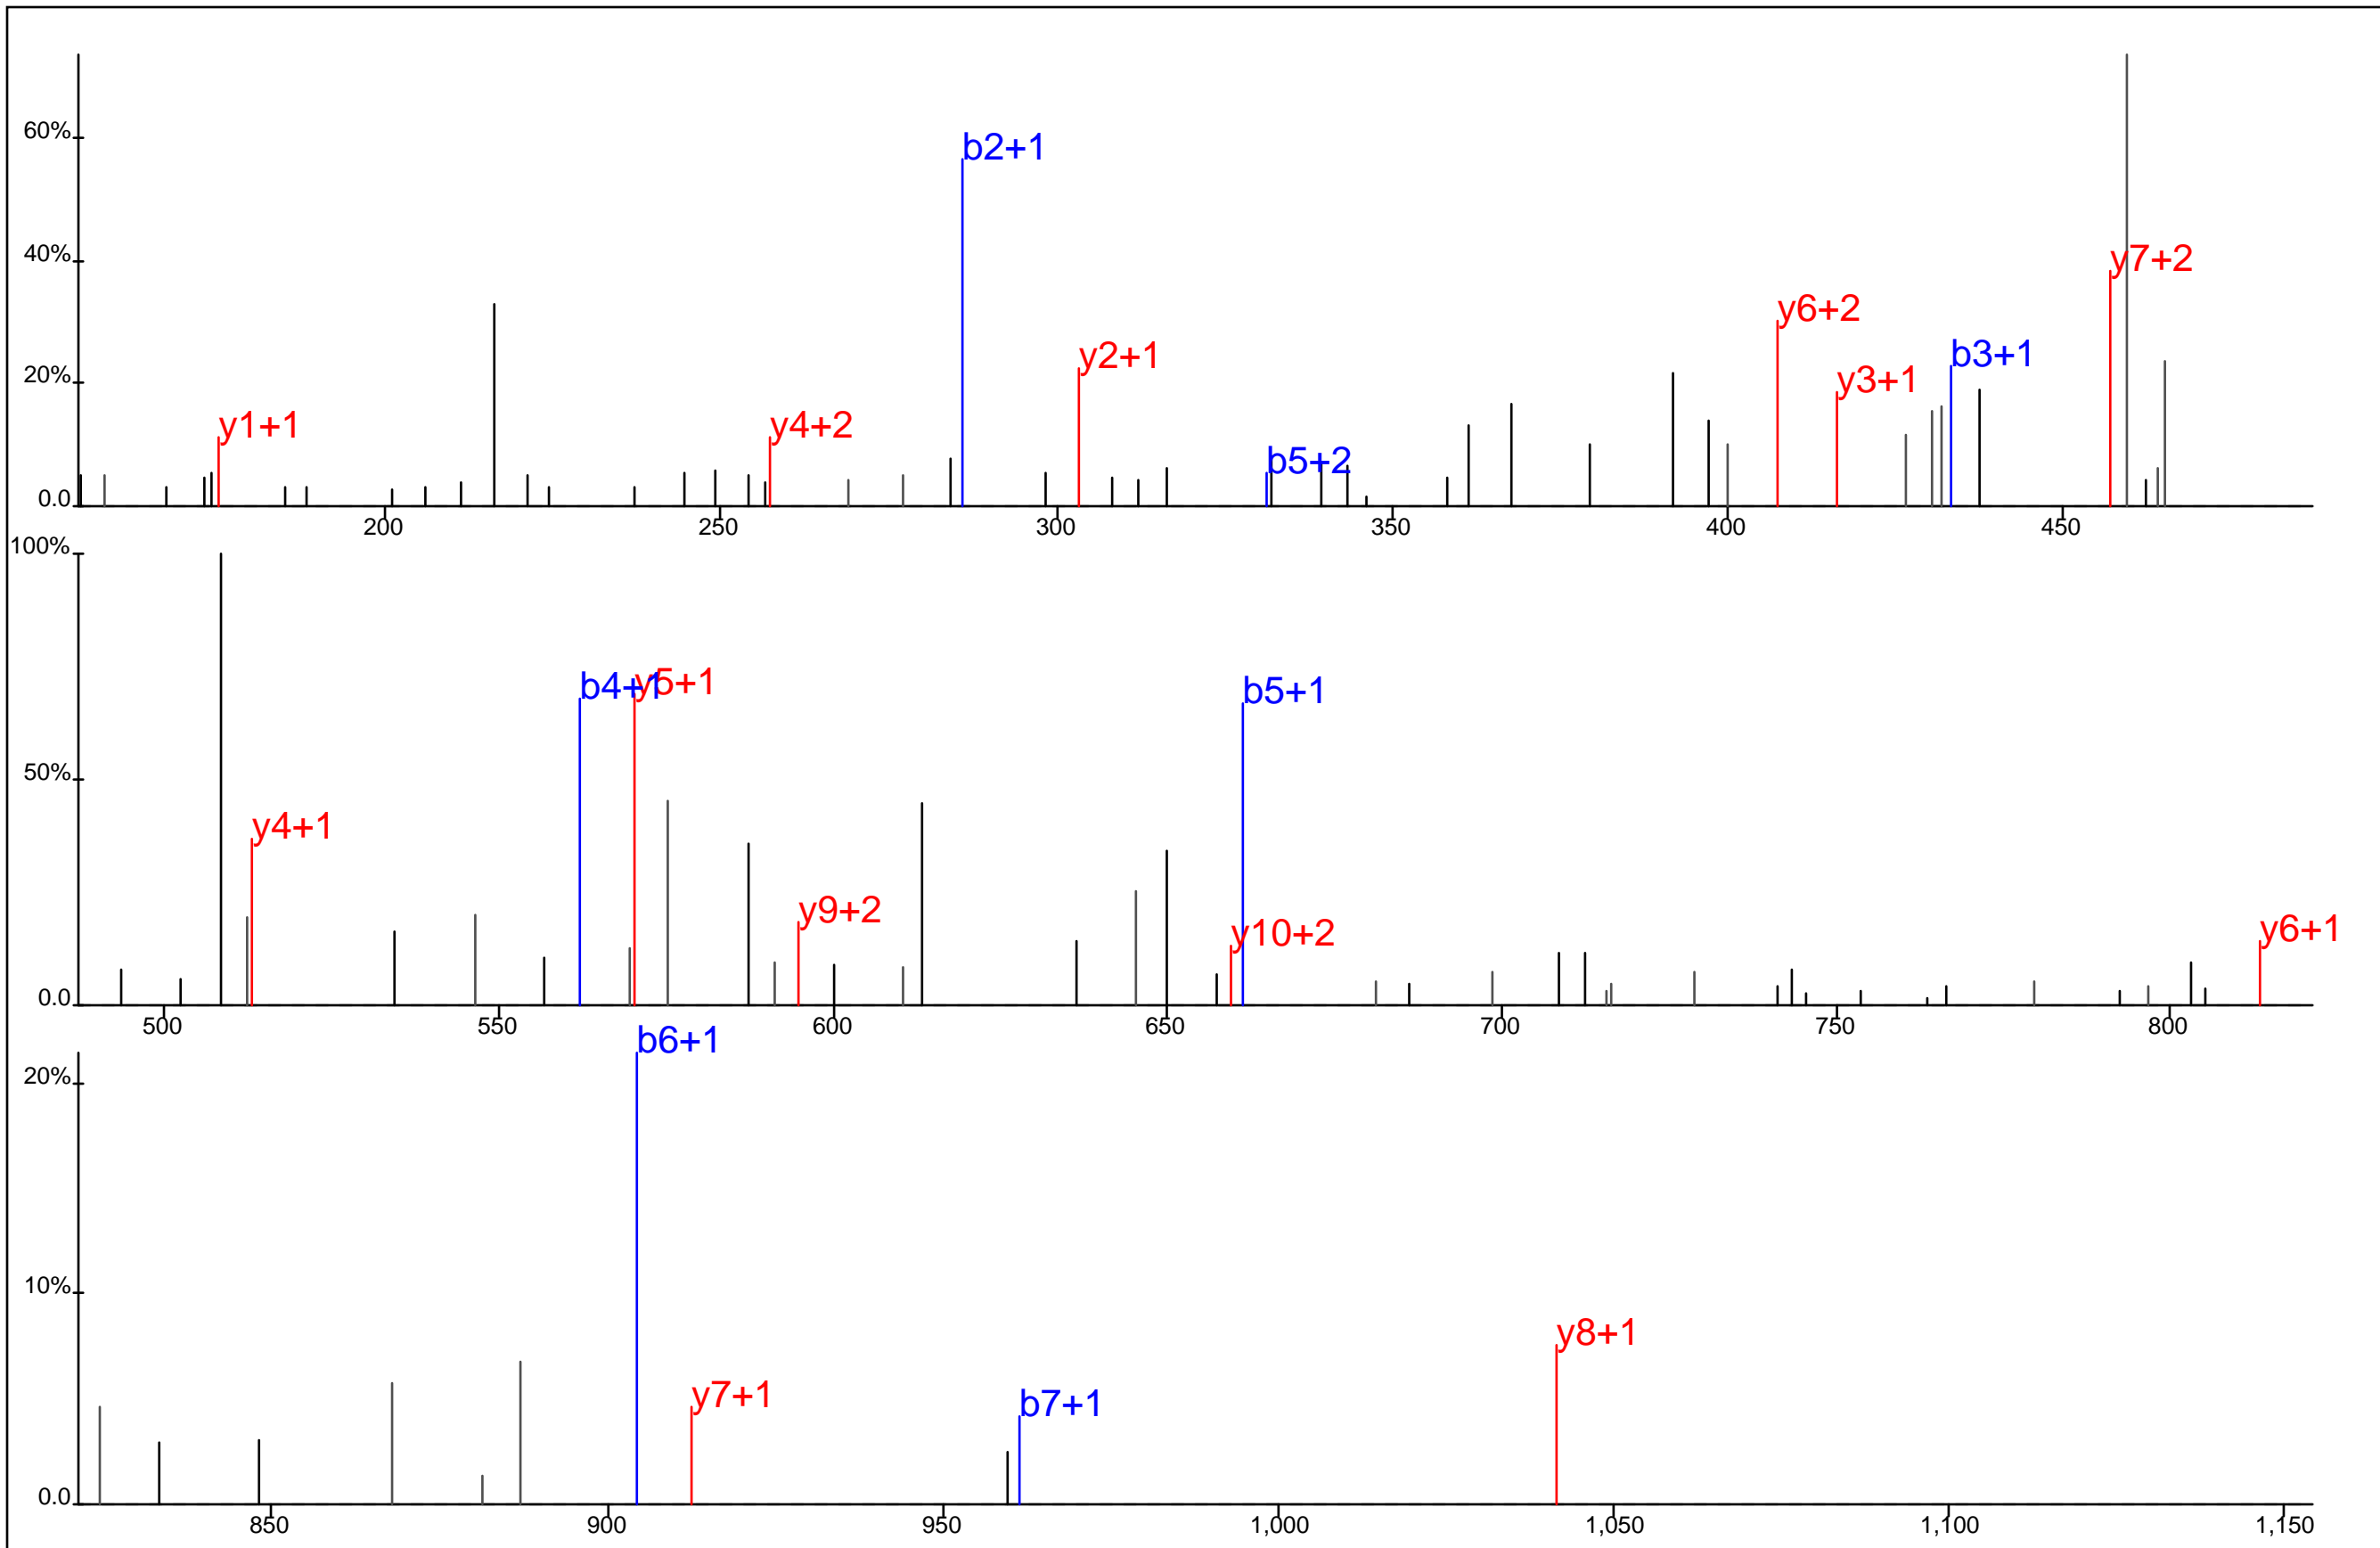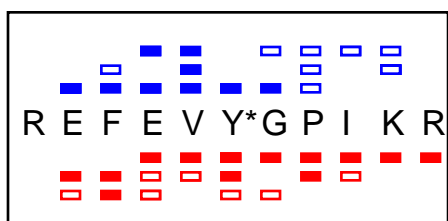

Protein Name: Small nuclear ribonucleoprotein 70 kD  
 gi Accession: 0  
 Precursor Mass: 491.9141+3  
 Delta Mass: 1.939 ppm  
 XCorr: 44.86



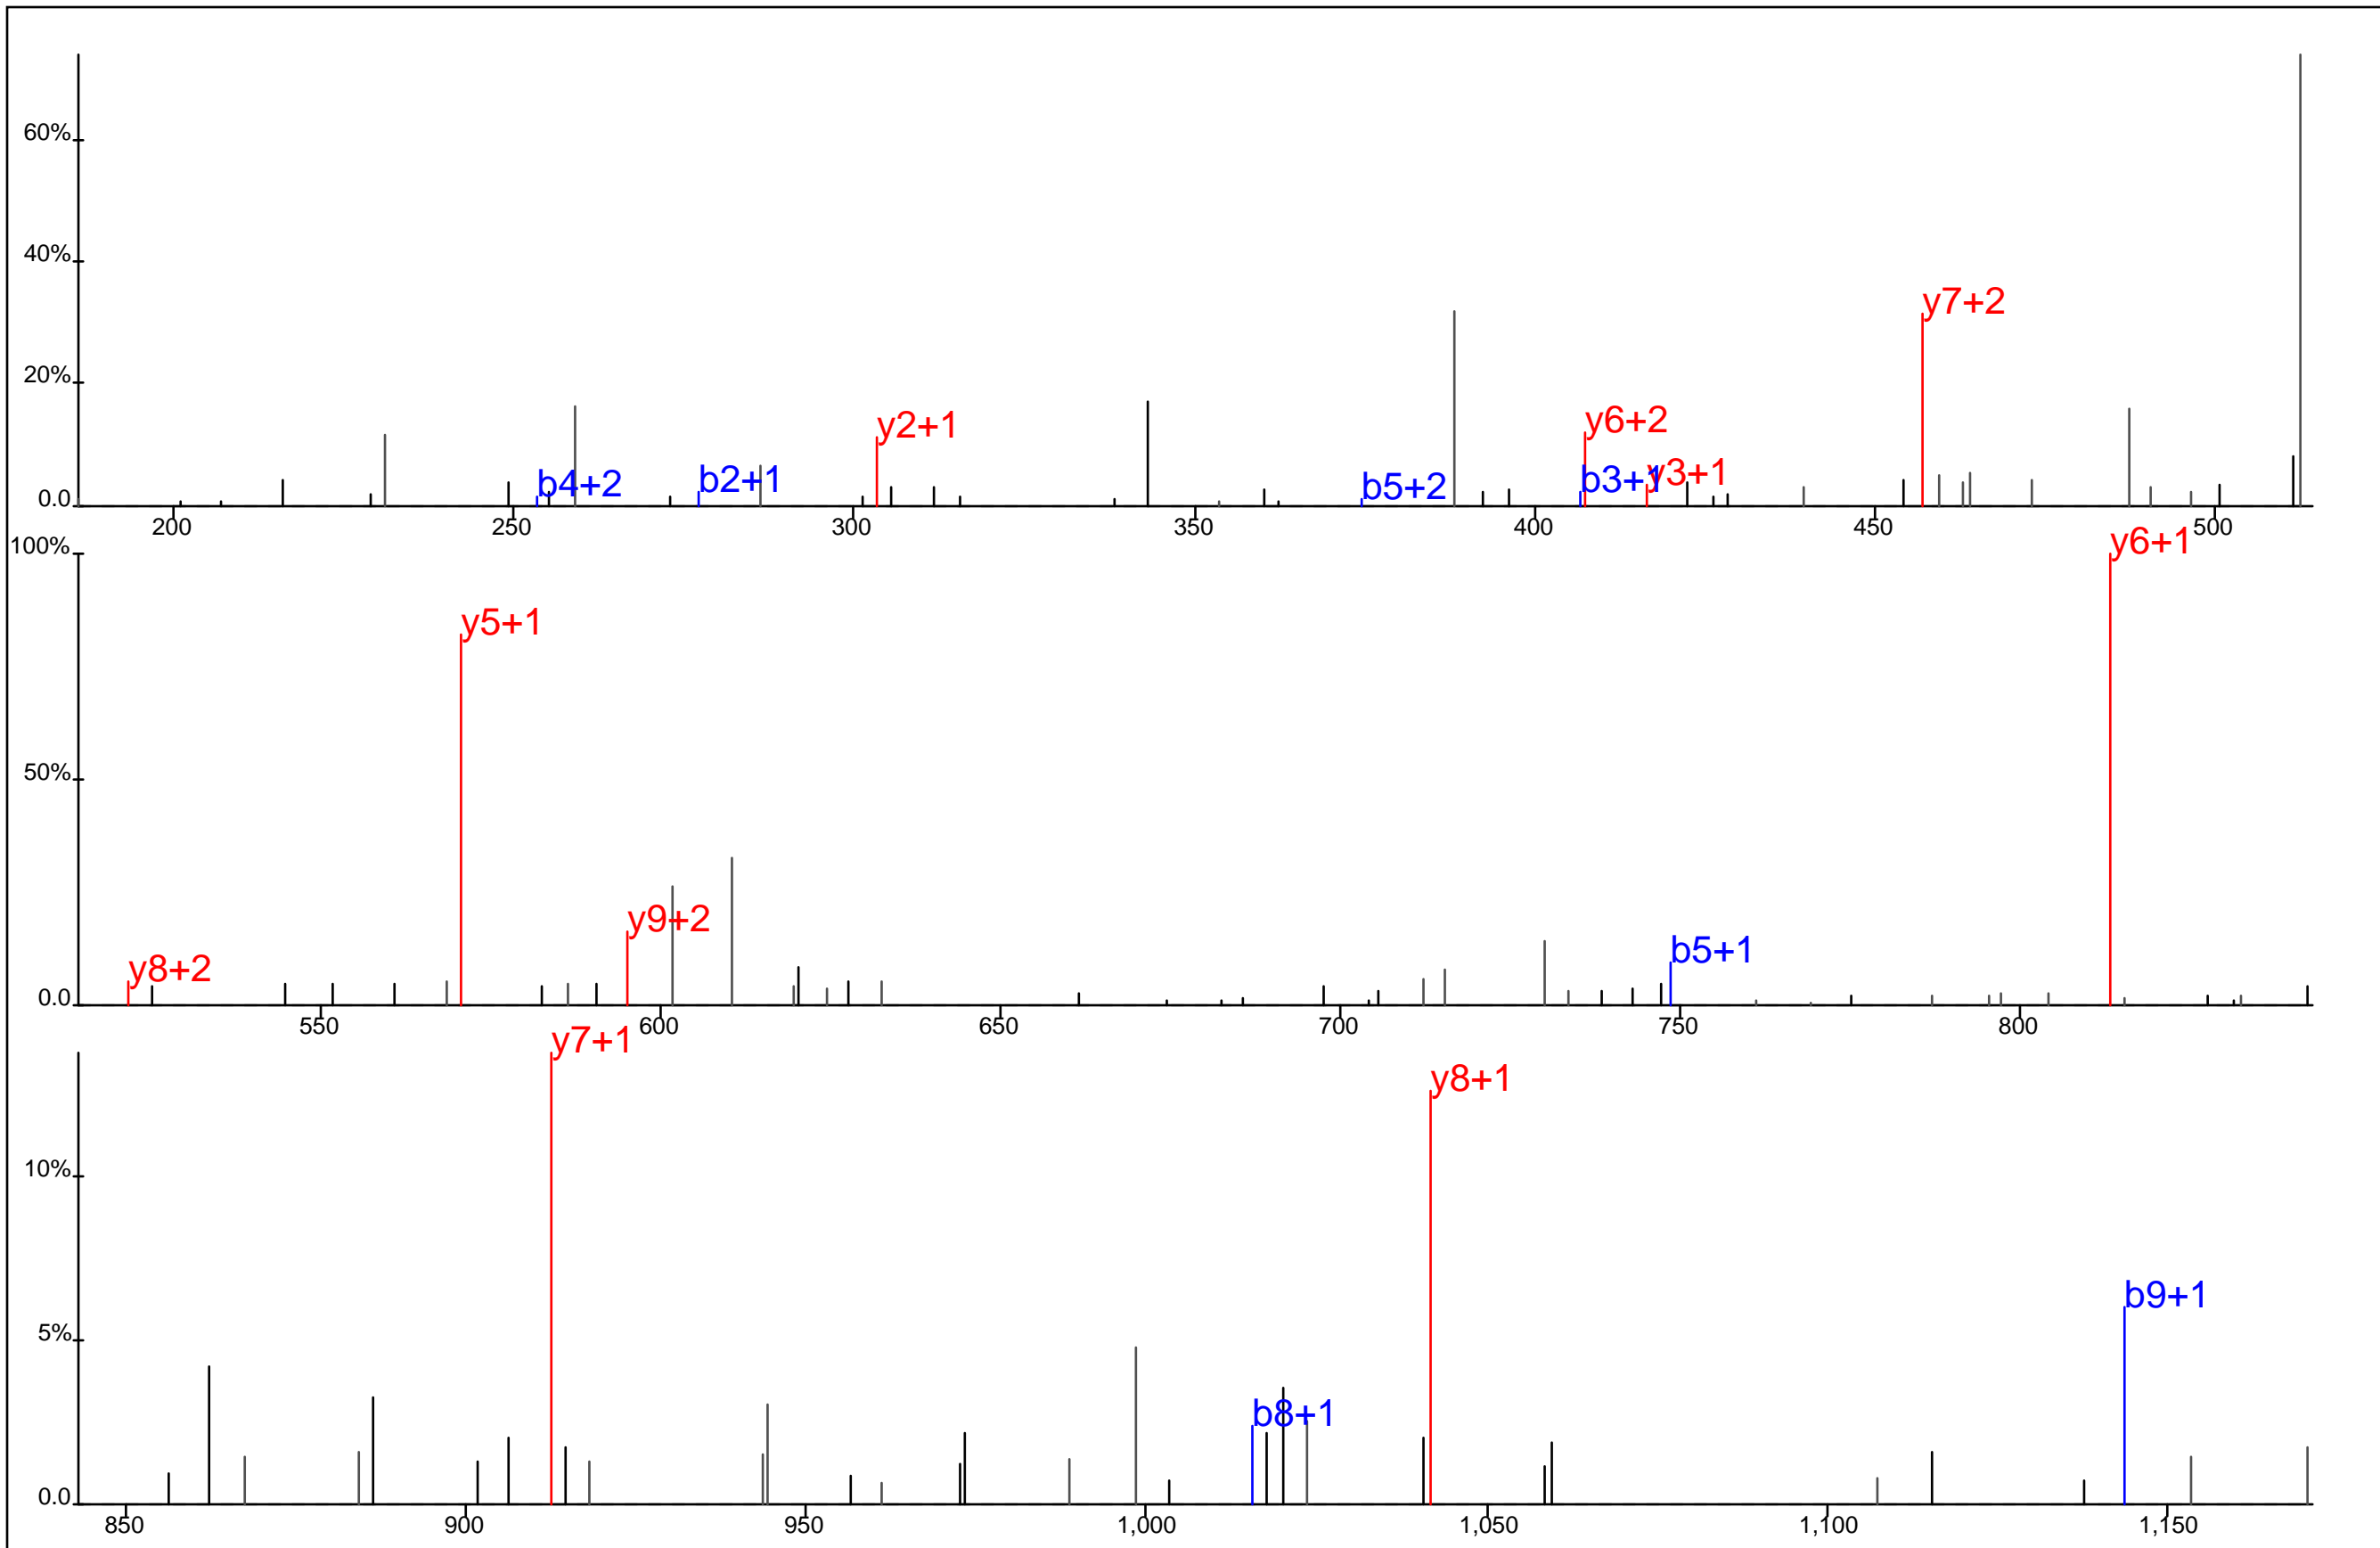

E F E V Y\* G P I K R

Protein Name: Small nuclear ribonucleoprotein 70 kD  
 gi Accession: 0  
 Precursor Mass: 659.3155+2  
 Delta Mass: 0.111 ppm  
 XCorr: 28.57

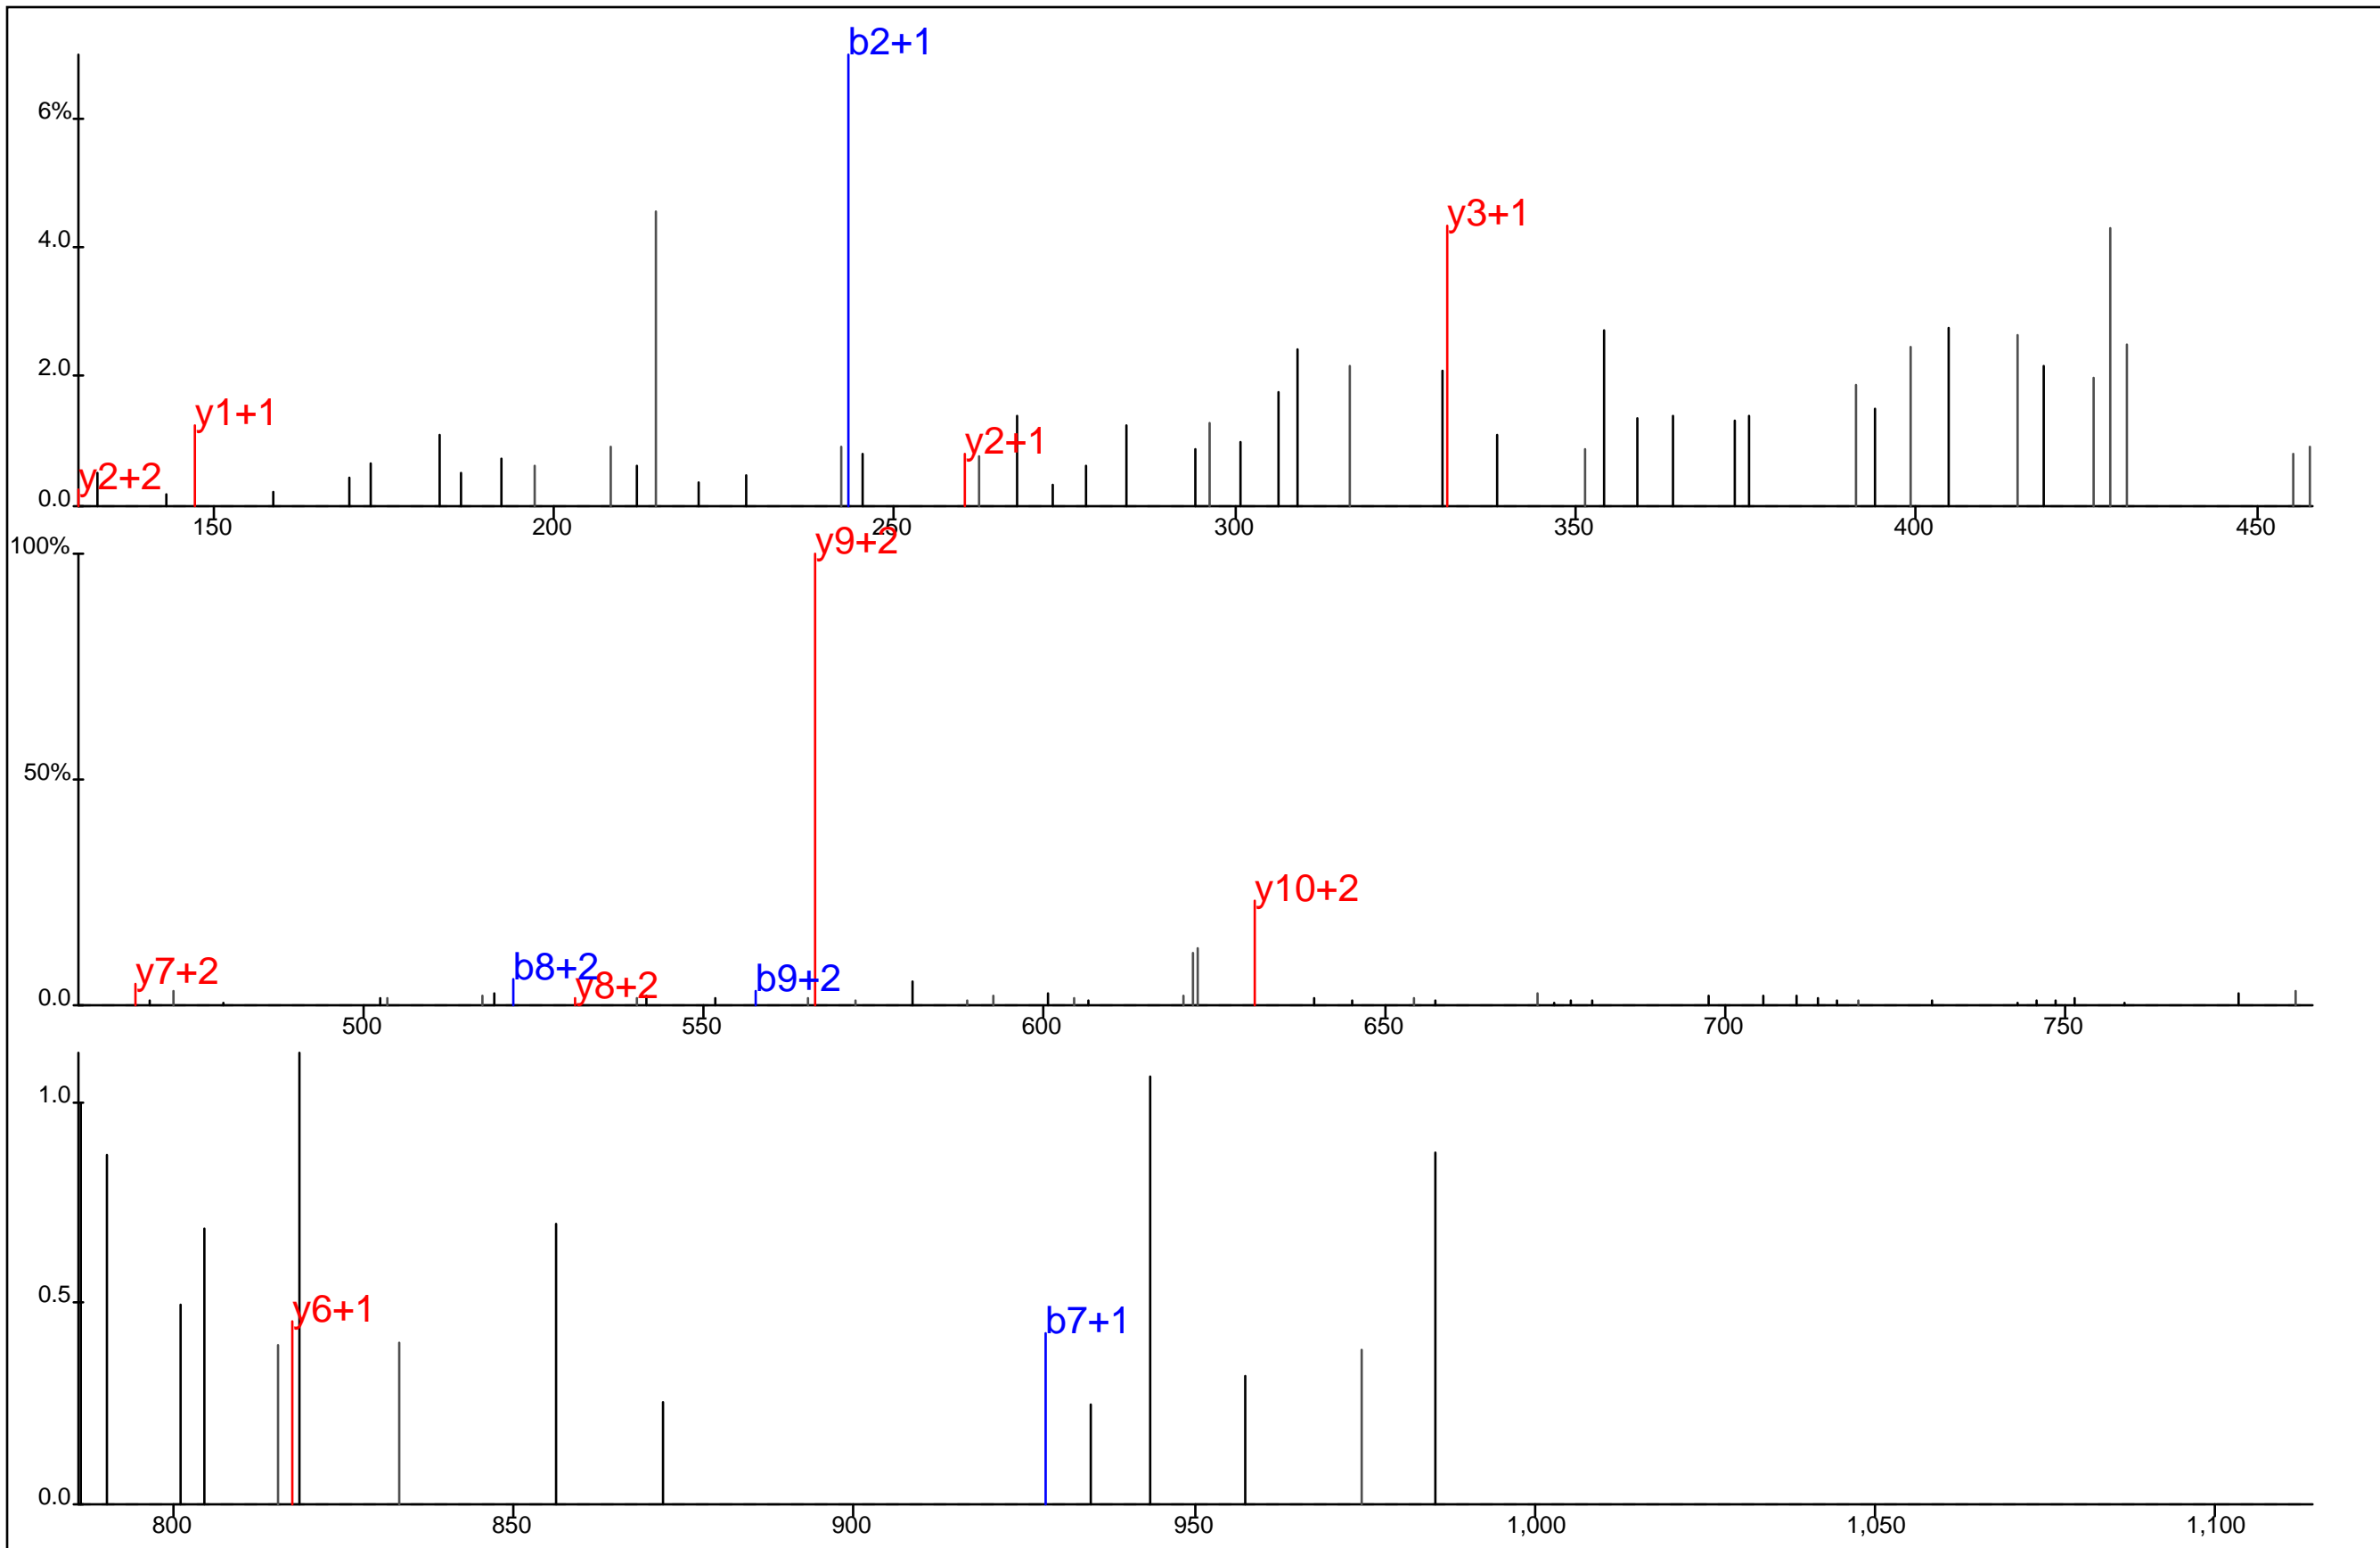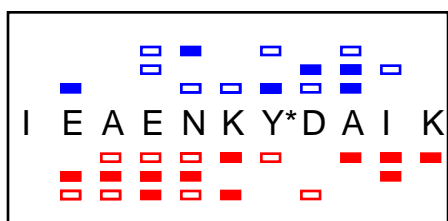

Protein Name: SMC6  
 gi Accession: 0  
 Precursor Mass: 458.5497+3  
 Delta Mass: 0.207 ppm  
 XCorr: 23.73



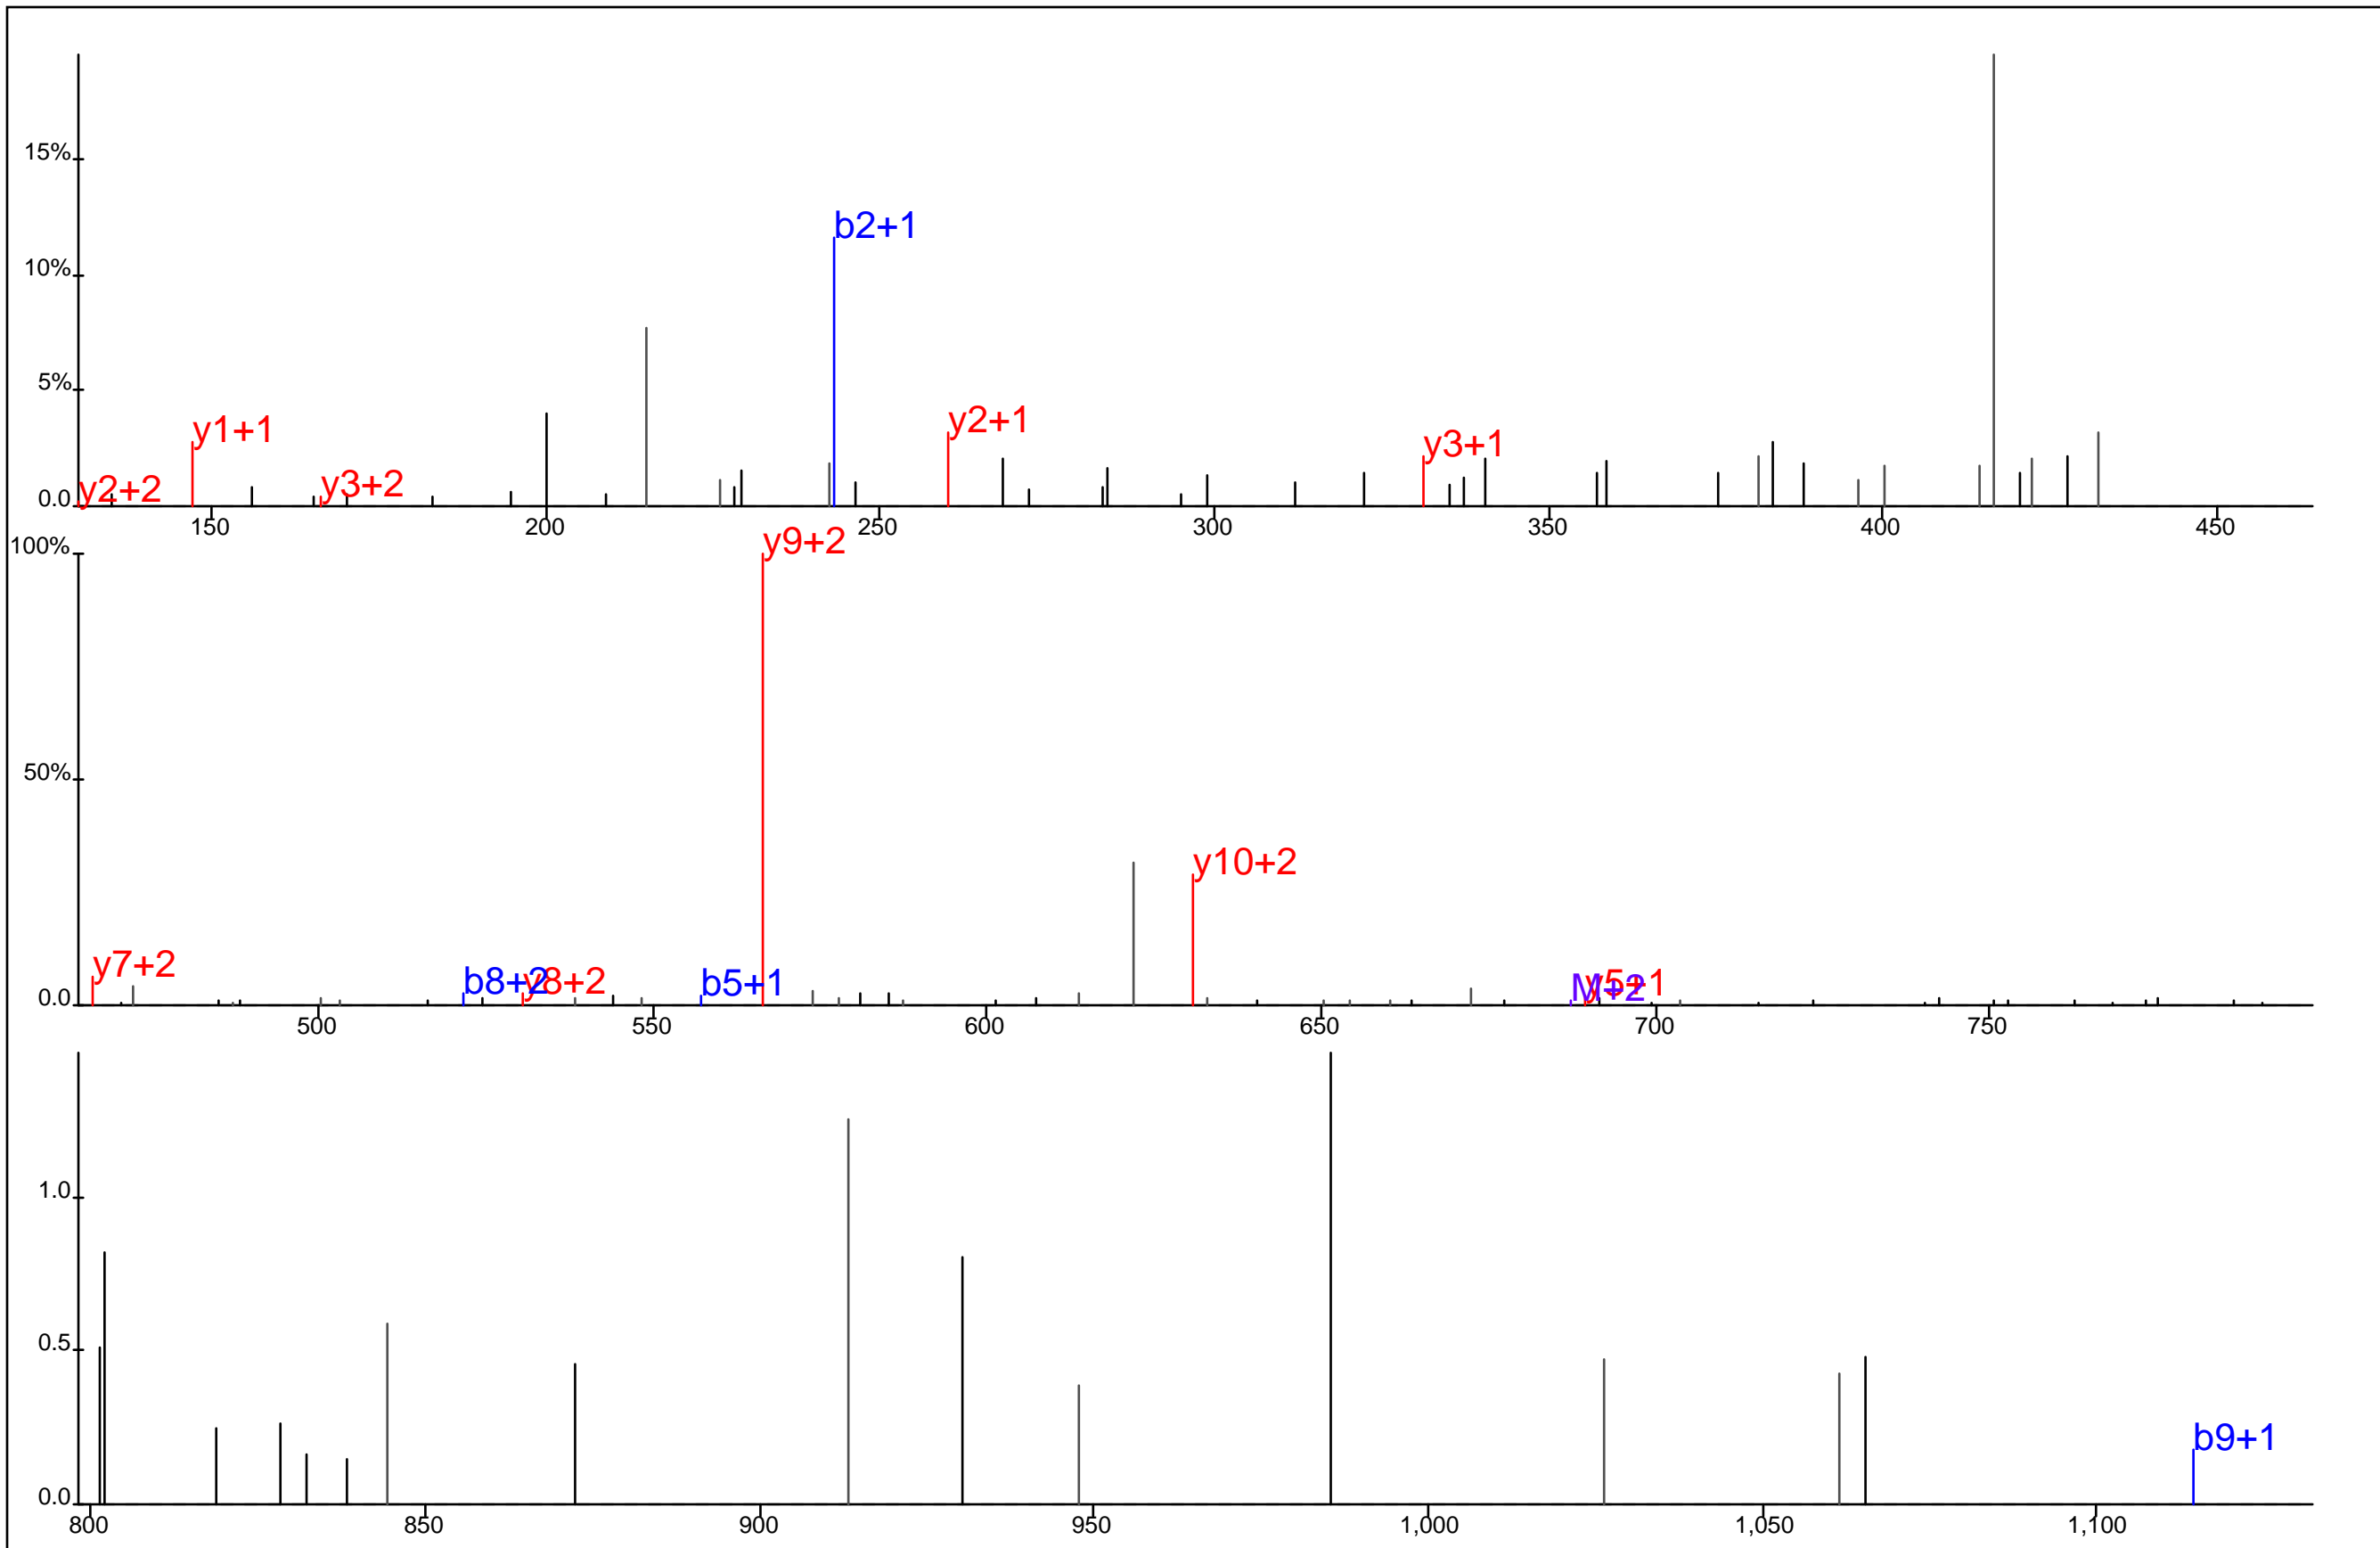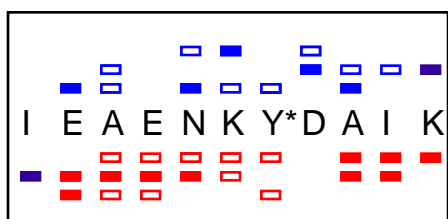

Protein Name: SMC6  
 gi Accession: 0  
 Precursor Mass: 458.5506+3  
 Delta Mass: 1.725 ppm  
 XCorr: 22.13



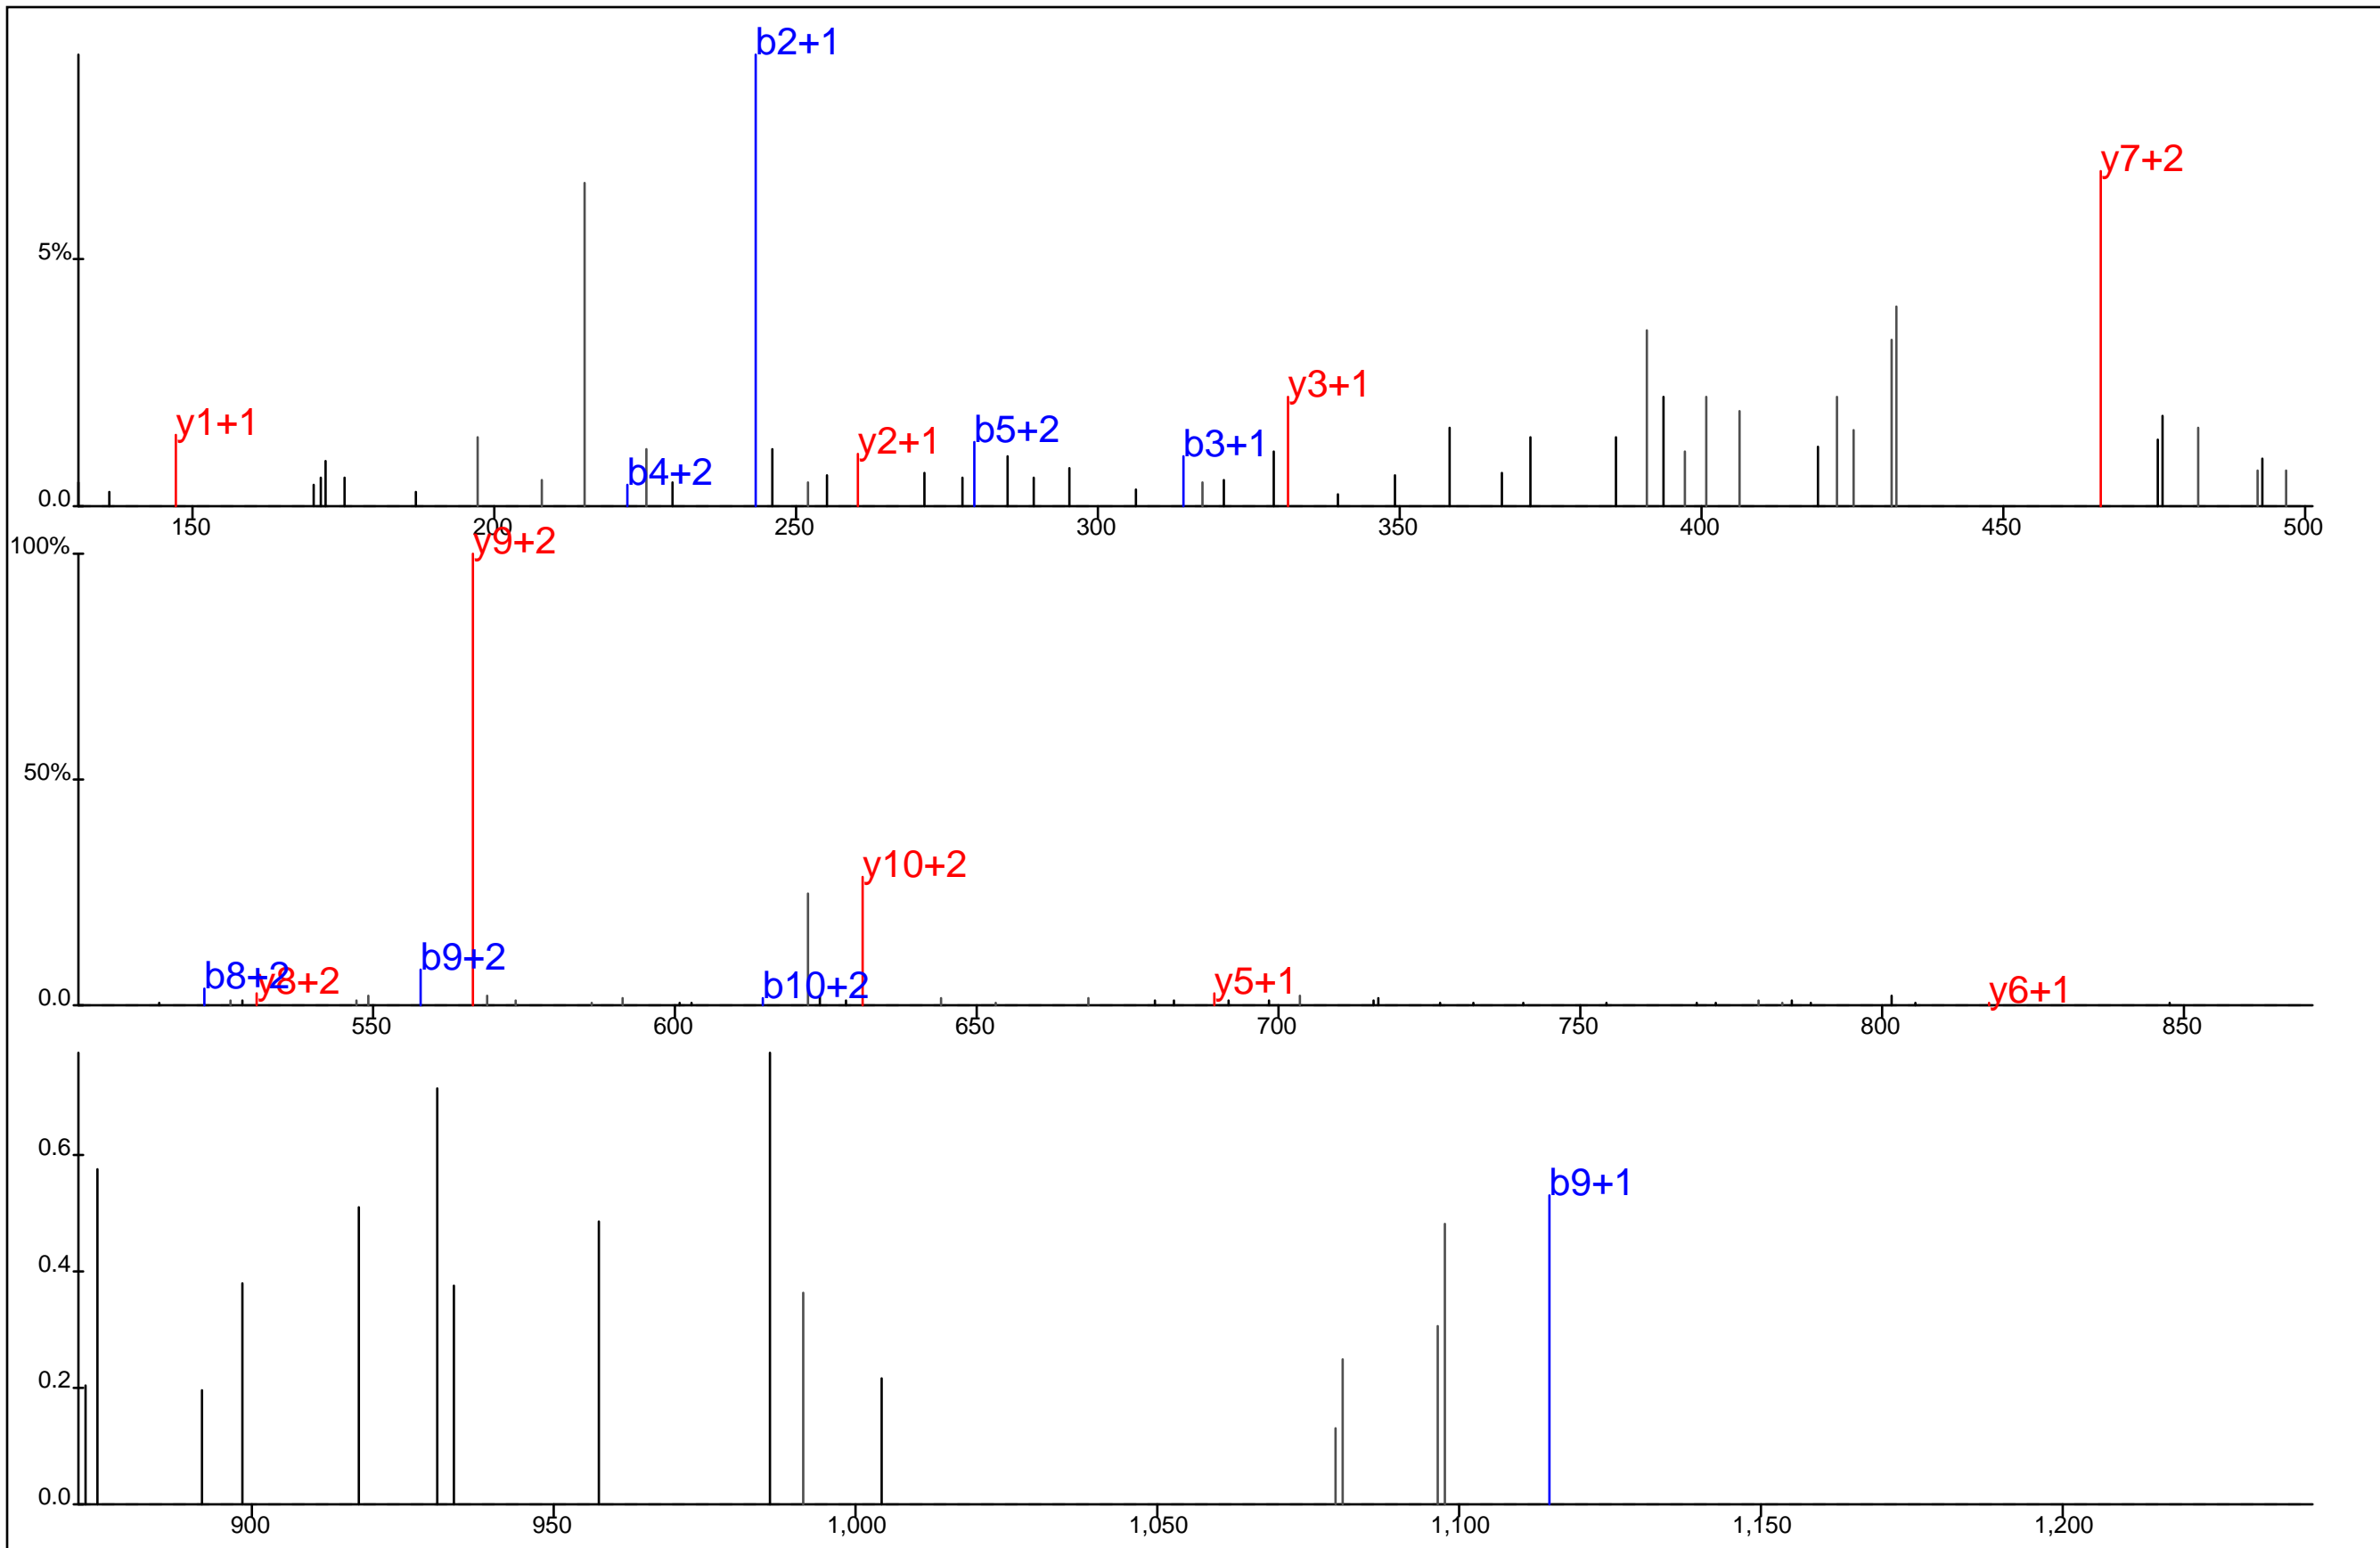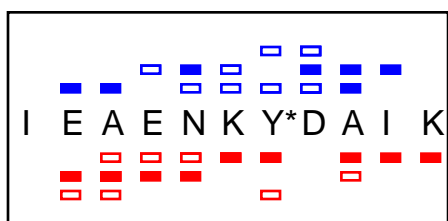

Protein Name: SMC6  
 gi Accession: 0  
 Precursor Mass: 458.5498+3  
 Delta Mass: 0.124 ppm  
 XCorr: 20.76



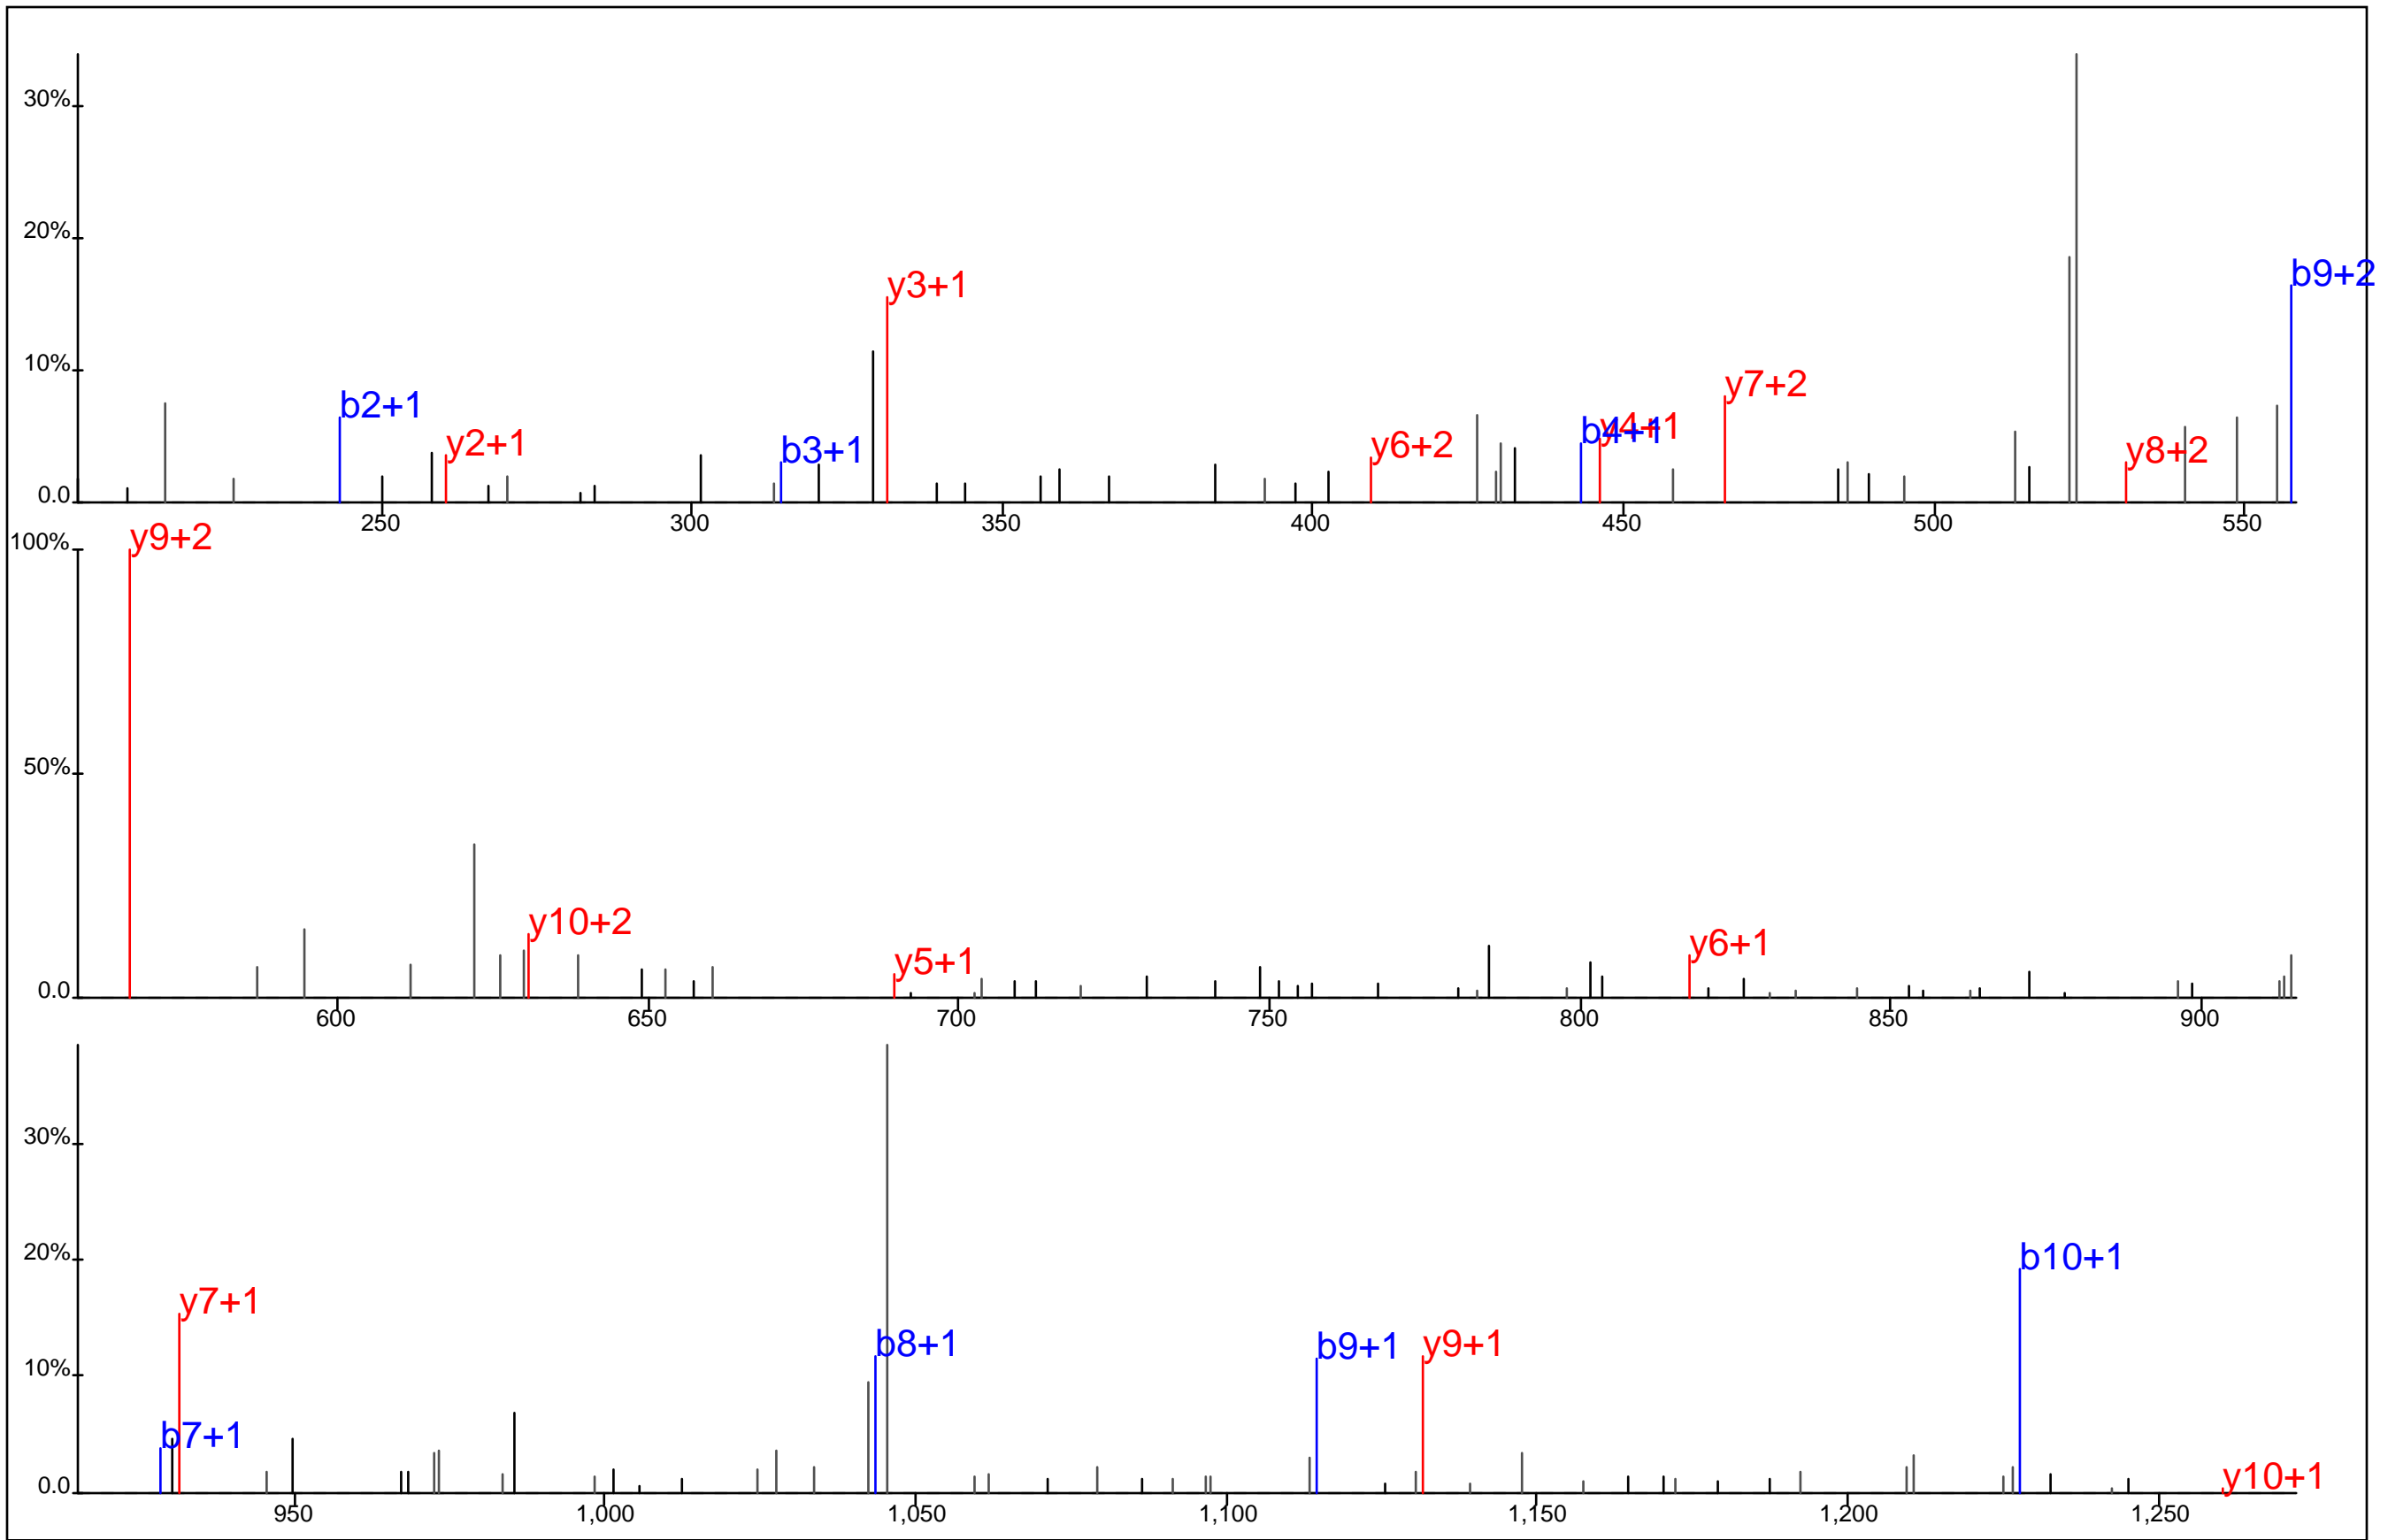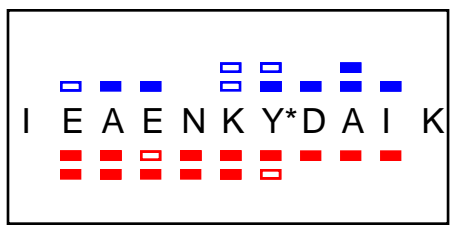

Protein Name: SMC6  
 gi Accession: 0  
 Precursor Mass: 687.3219+2  
 Delta Mass: 1.267 ppm  
 XCorr: 32.44

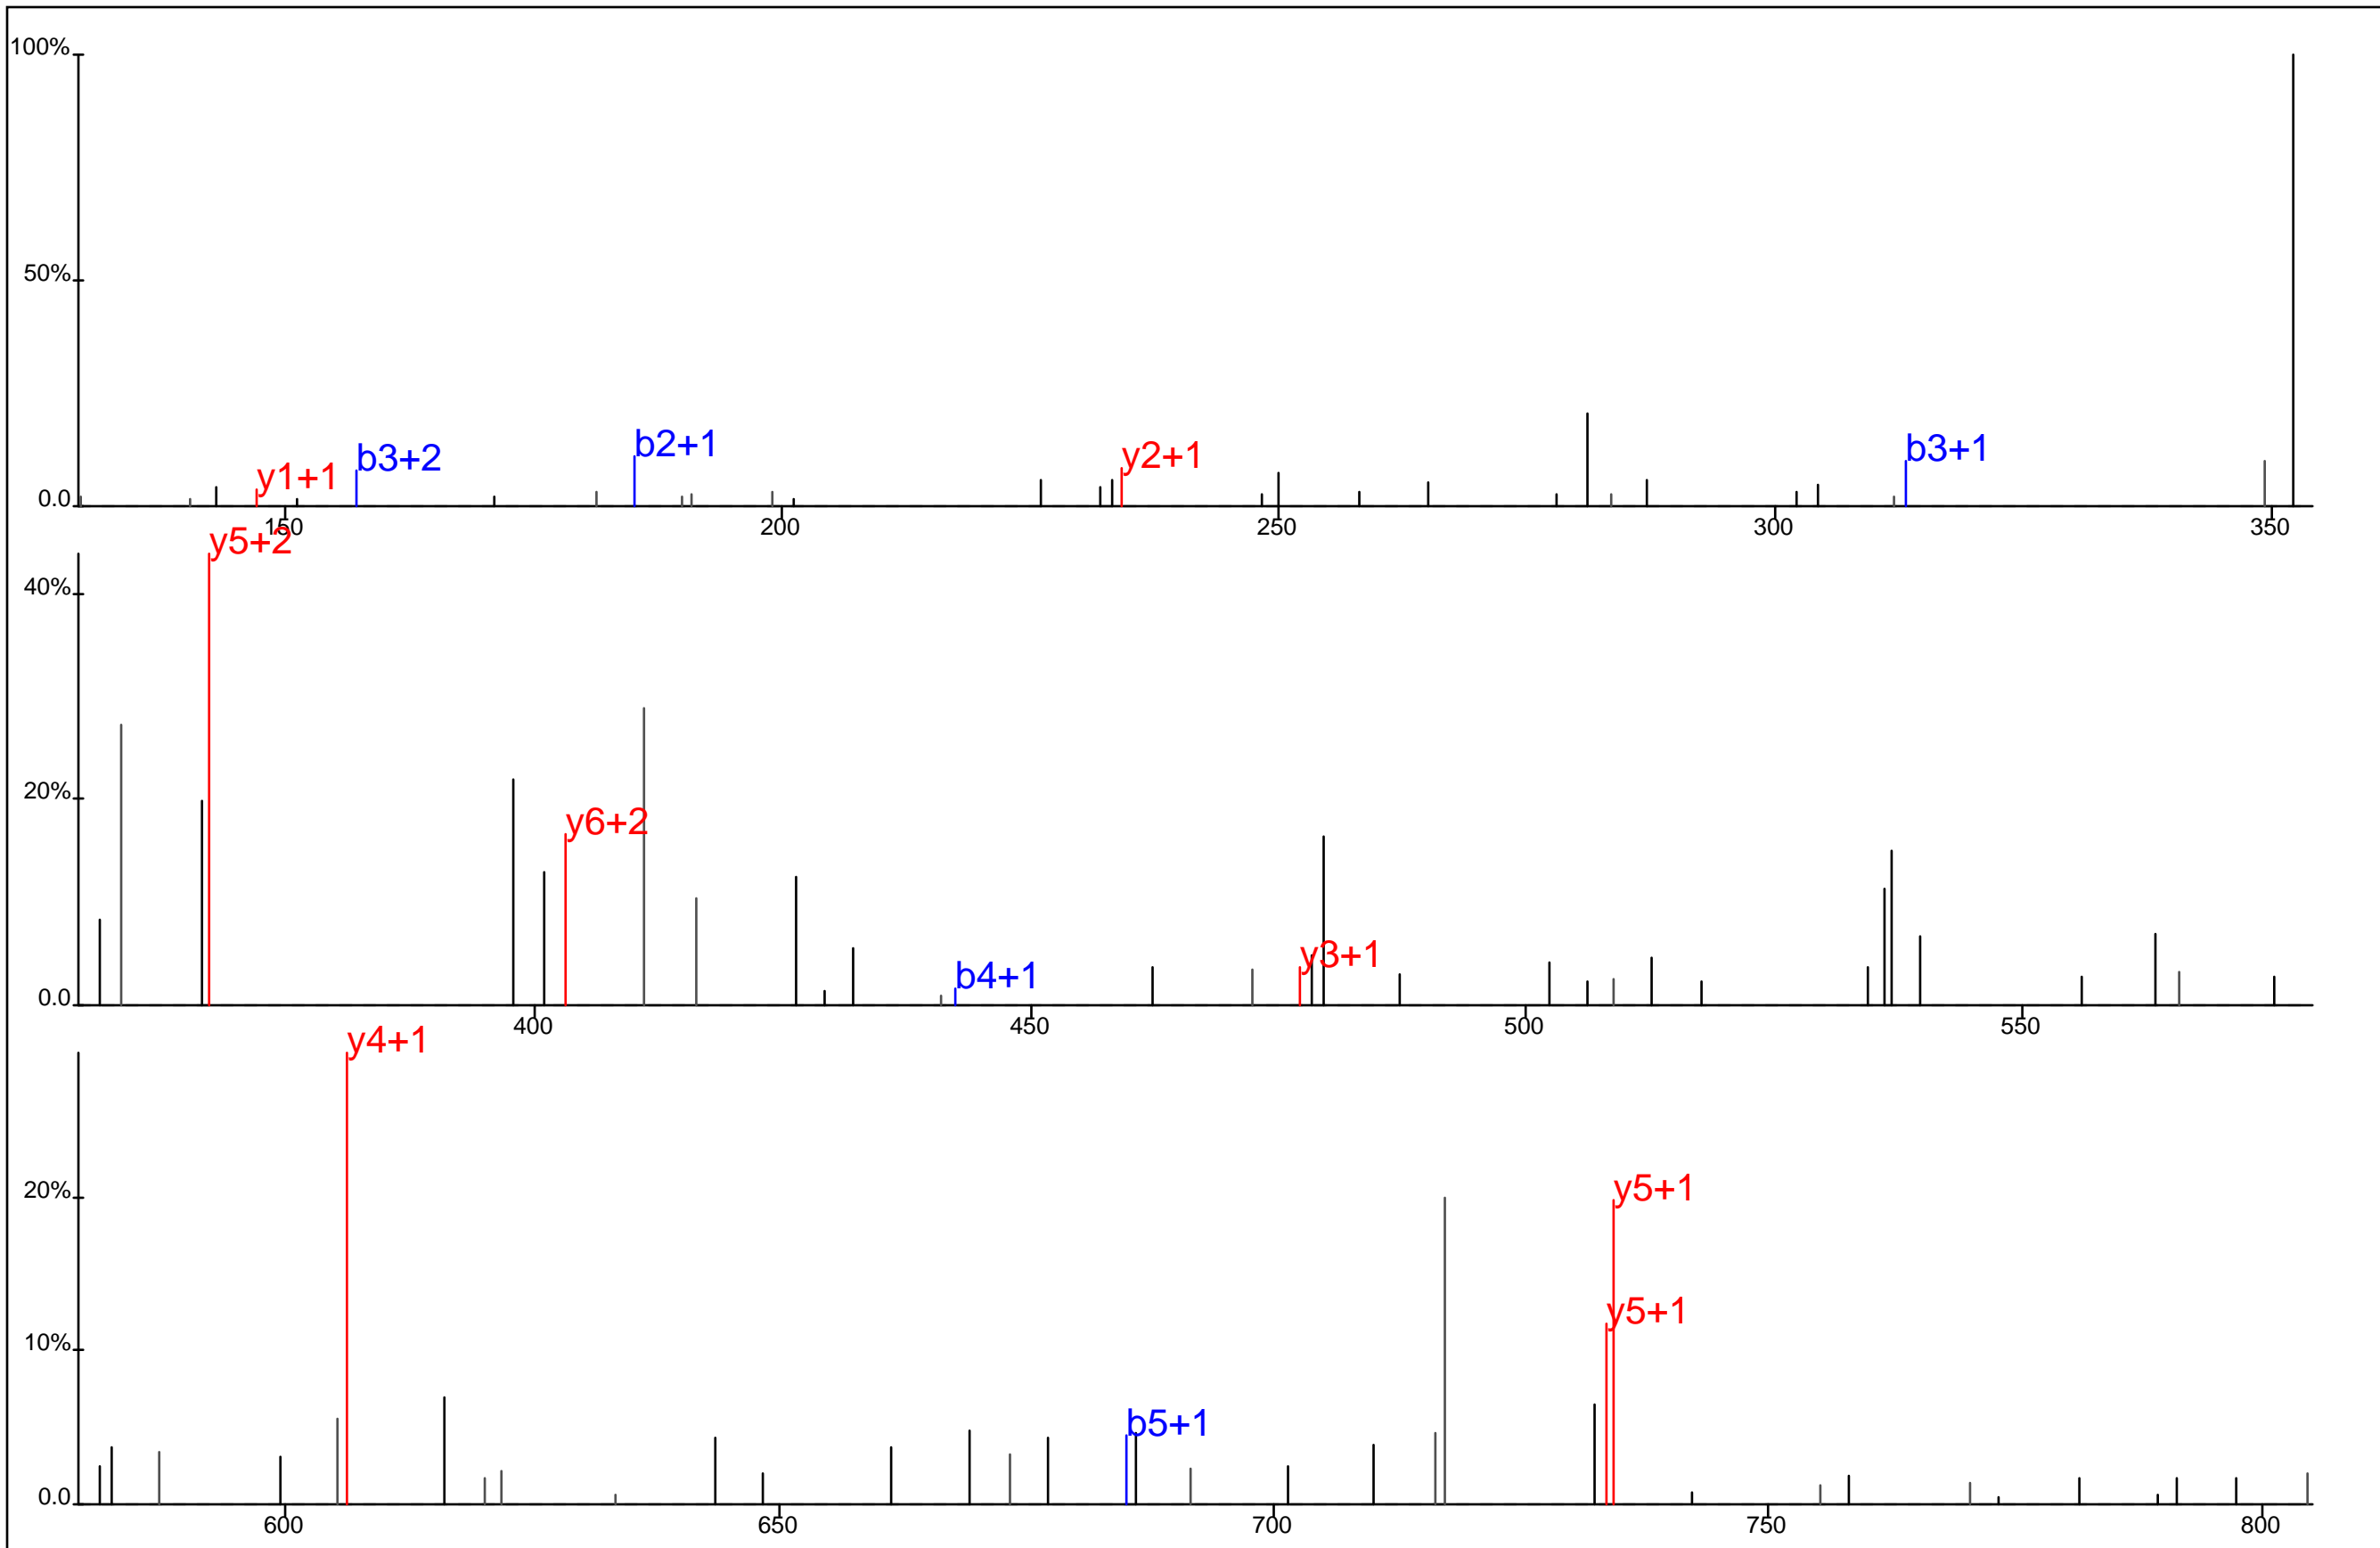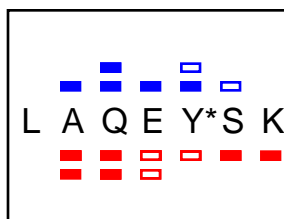

Protein Name: Smooth muscle myosin heavy chain 11 isoform SM1 like  
 gi Accession: 0  
 Precursor Mass: 459.7027+2  
 Delta Mass: 1.500 ppm  
 XCorr: 21.18

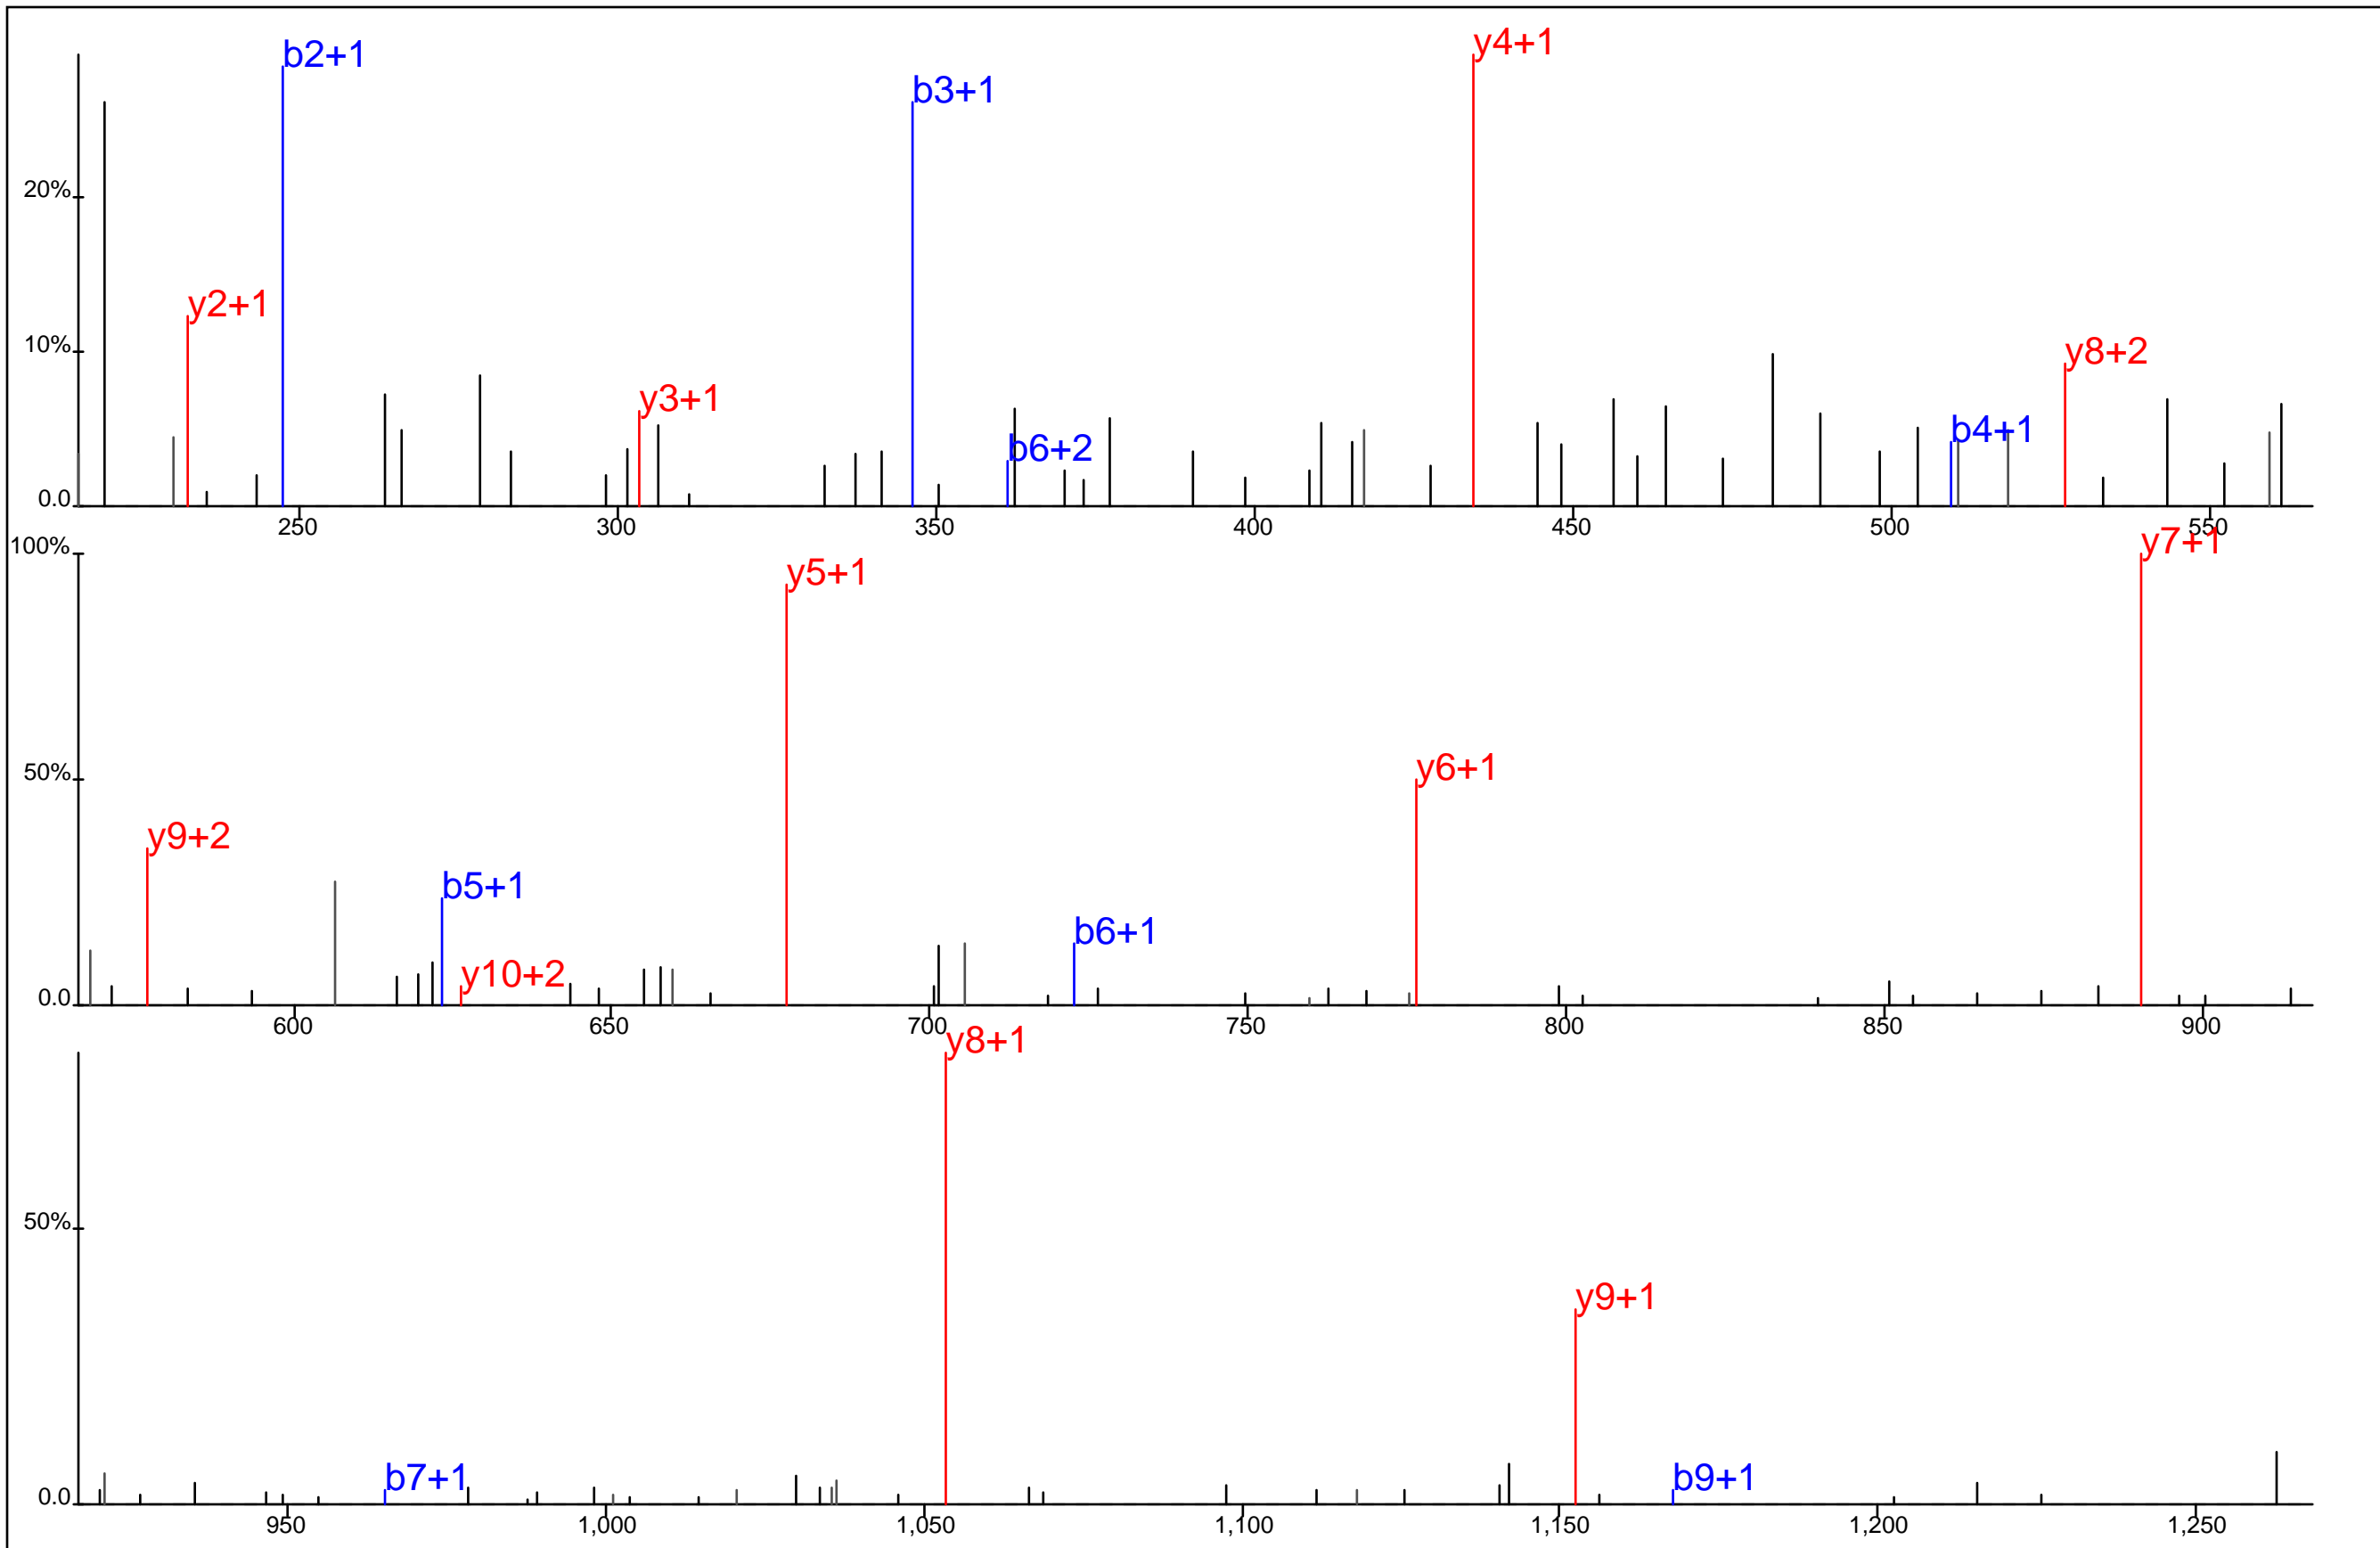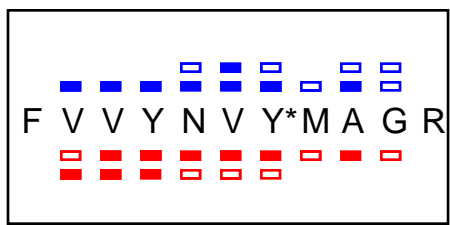

Protein Name: SNX27  
 gi Accession: 0  
 Precursor Mass: 699.8183+2  
 Delta Mass: 1.250 ppm  
 XCorr: 46.12

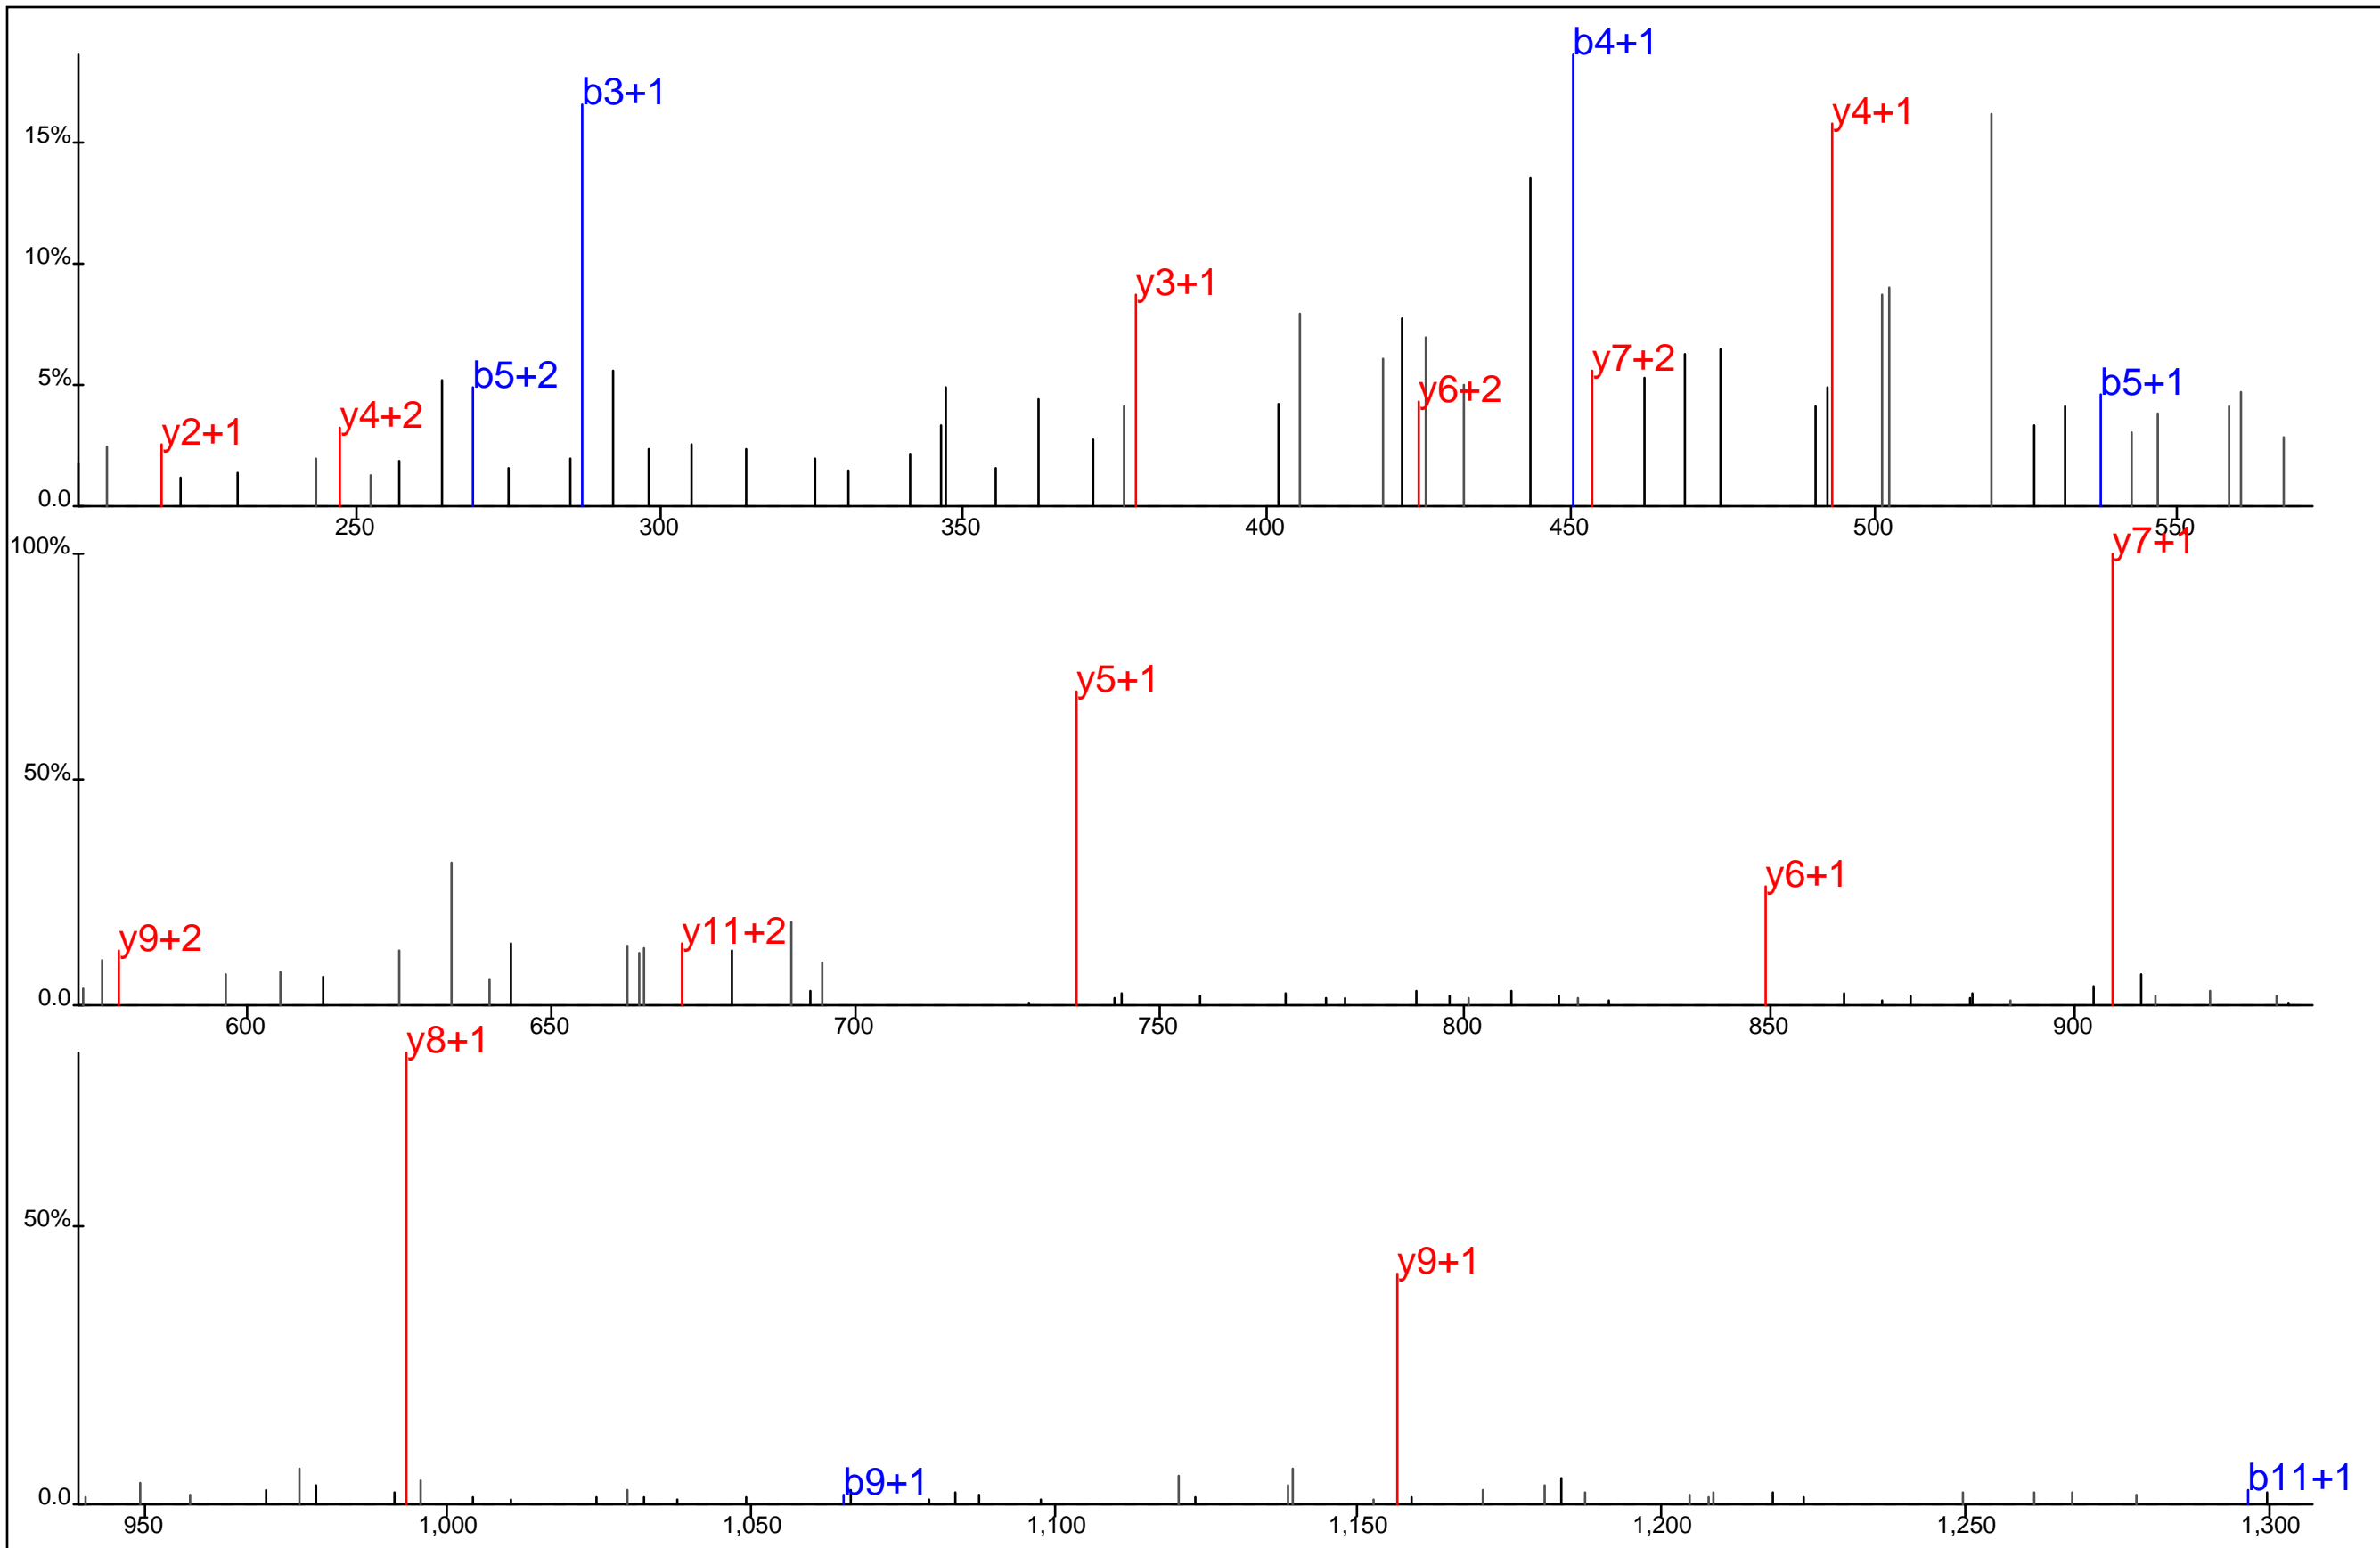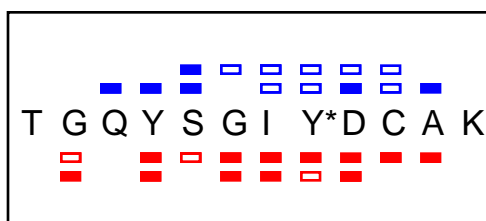

Protein Name: Solute carrier family 25 member 24  
 gi Accession: 0  
 Precursor Mass: 721.7883+2  
 Delta Mass: 2.511 ppm  
 XCorr: 48.23

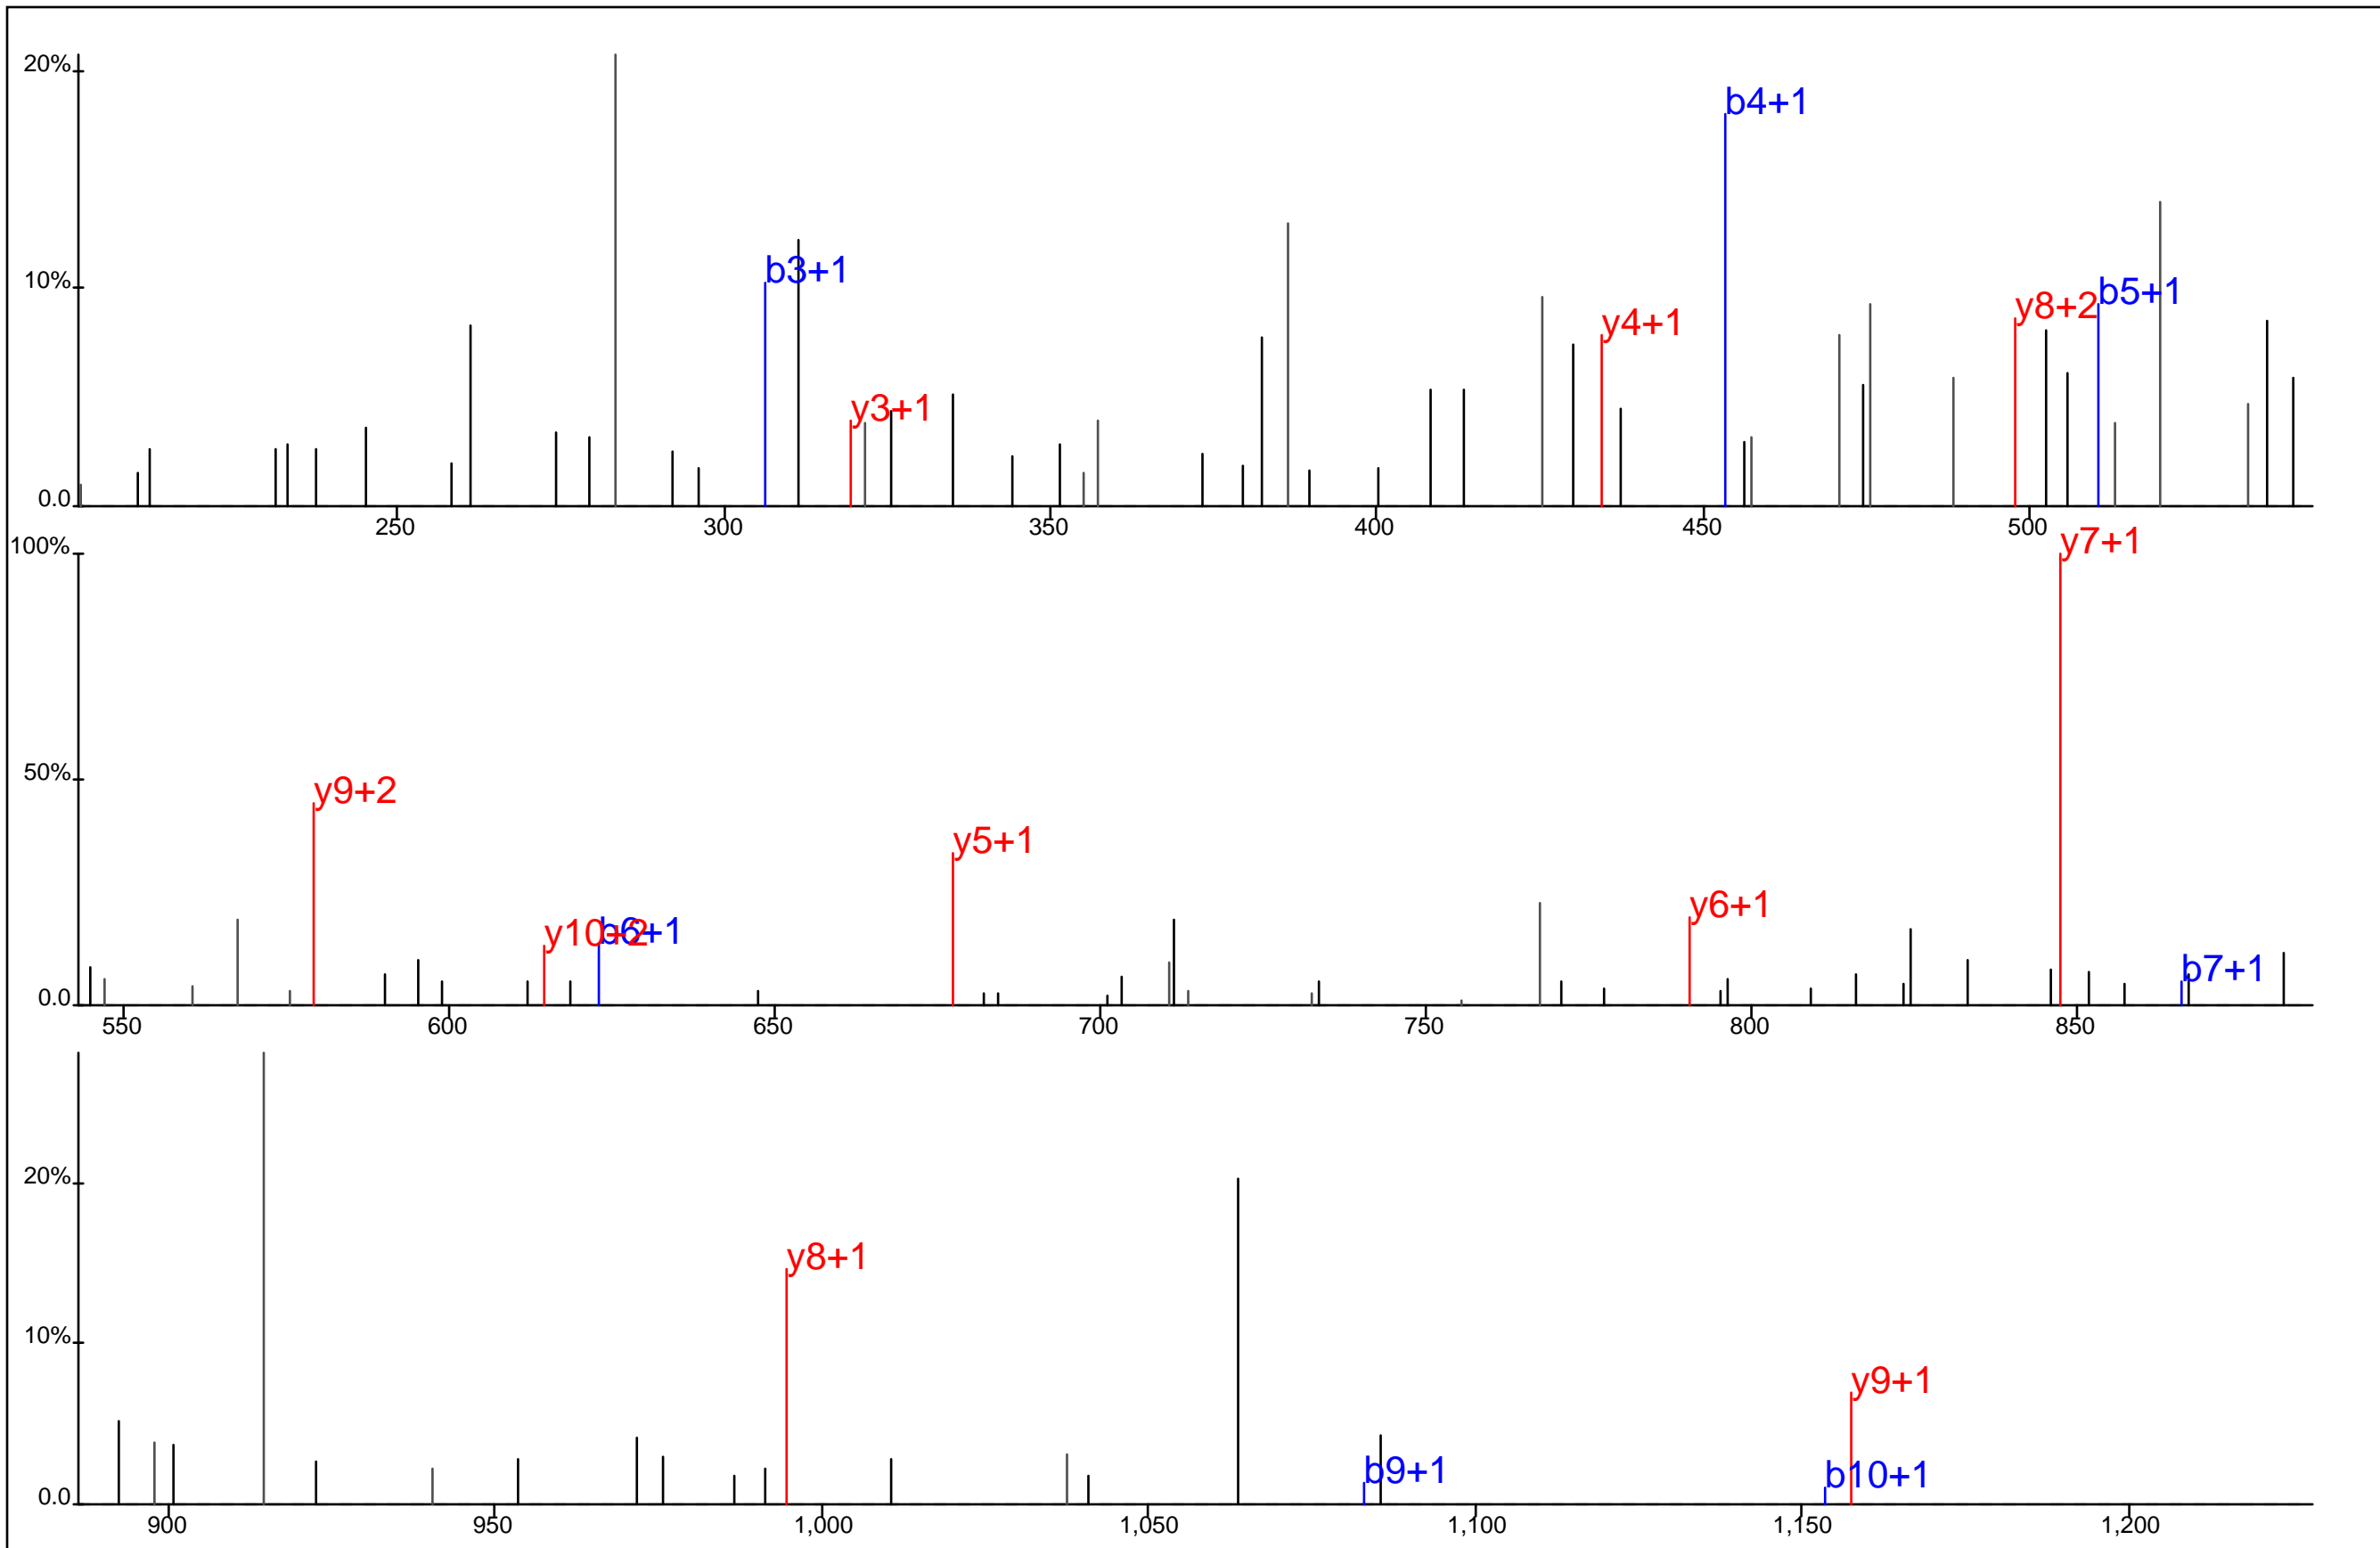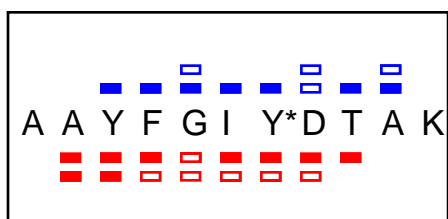

Protein Name: Solute carrier family 25 (mitochondrial carrier; adenine nucleotide translocator), member 5  
 gi Accession: 0  
 Precursor Mass: 650.2891+2  
 Delta Mass: 3.984 ppm  
 XCorr: 34.81

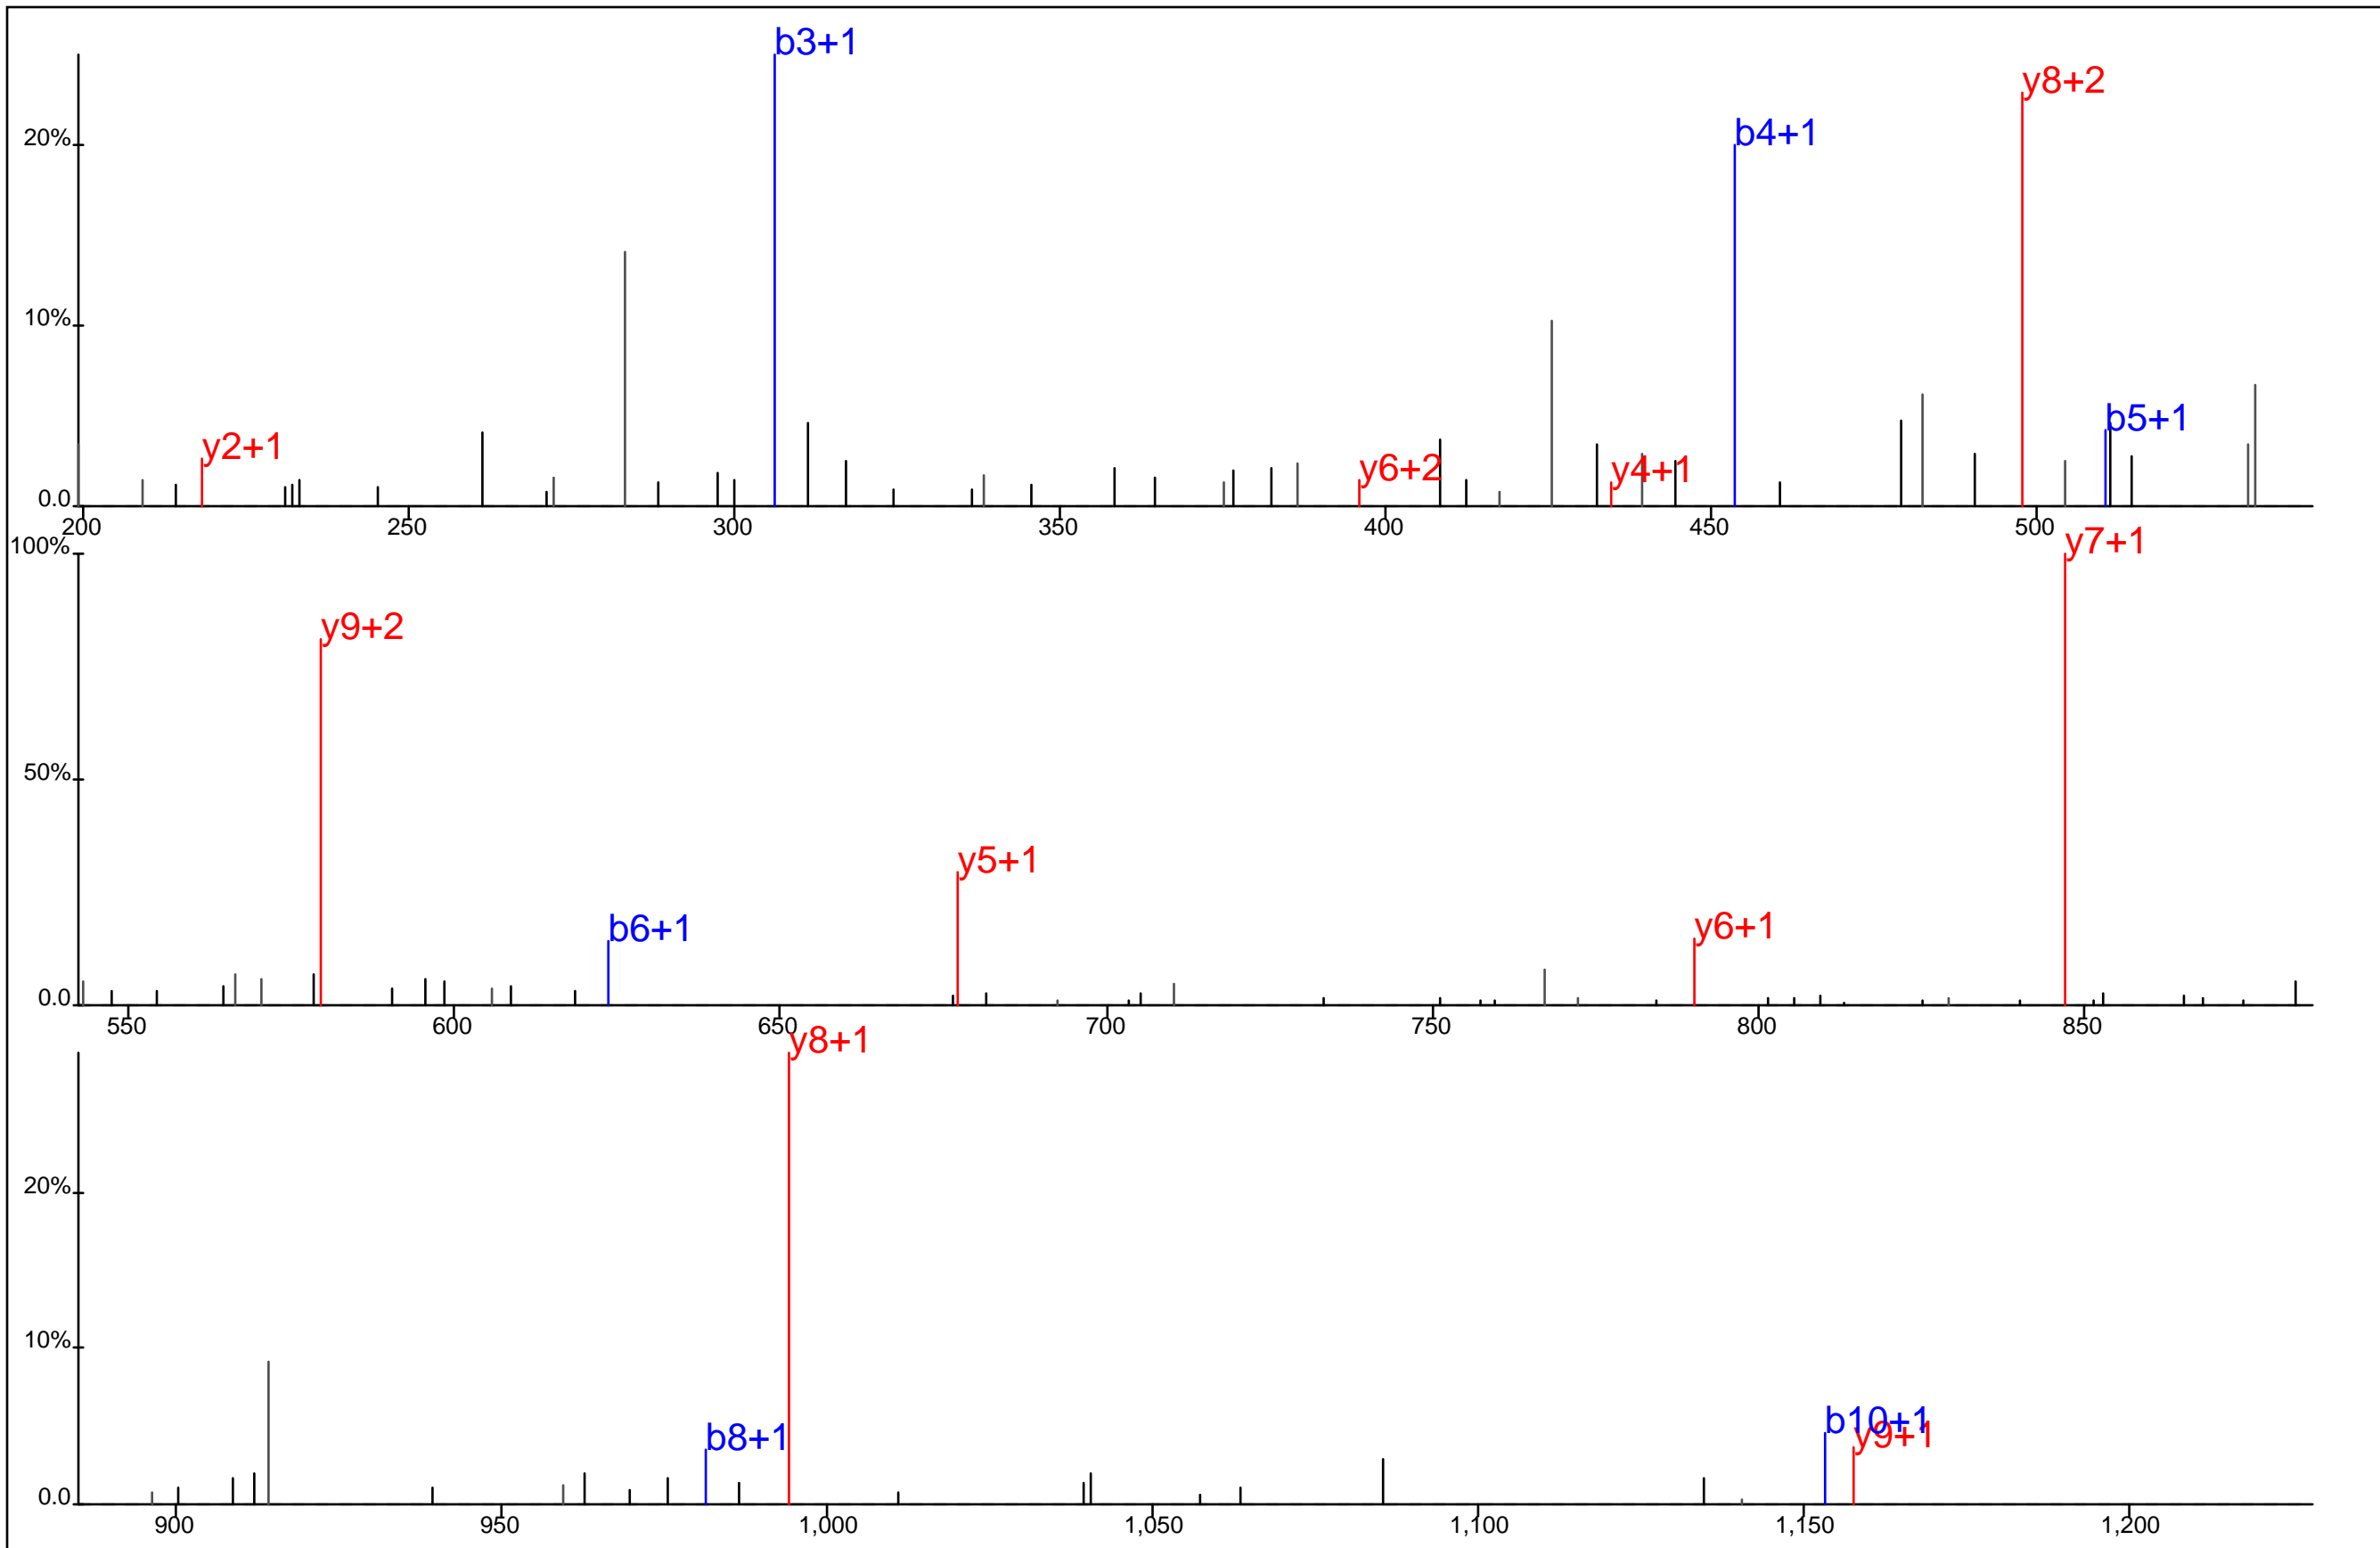

■ ■ □ ■ □ ■ □ ■ □  
 A A Y F G I Y\* D T A K  
■ ■ ■ ■ ■ □ □ ■

Protein Name: Solute carrier family 25 (mitochondrial carrier; adenine nucleotide translocator), member 5  
 gi Accession: 0  
 Precursor Mass: 650.2858+2  
 Delta Mass: 0.994 ppm  
 XCorr: 39.94

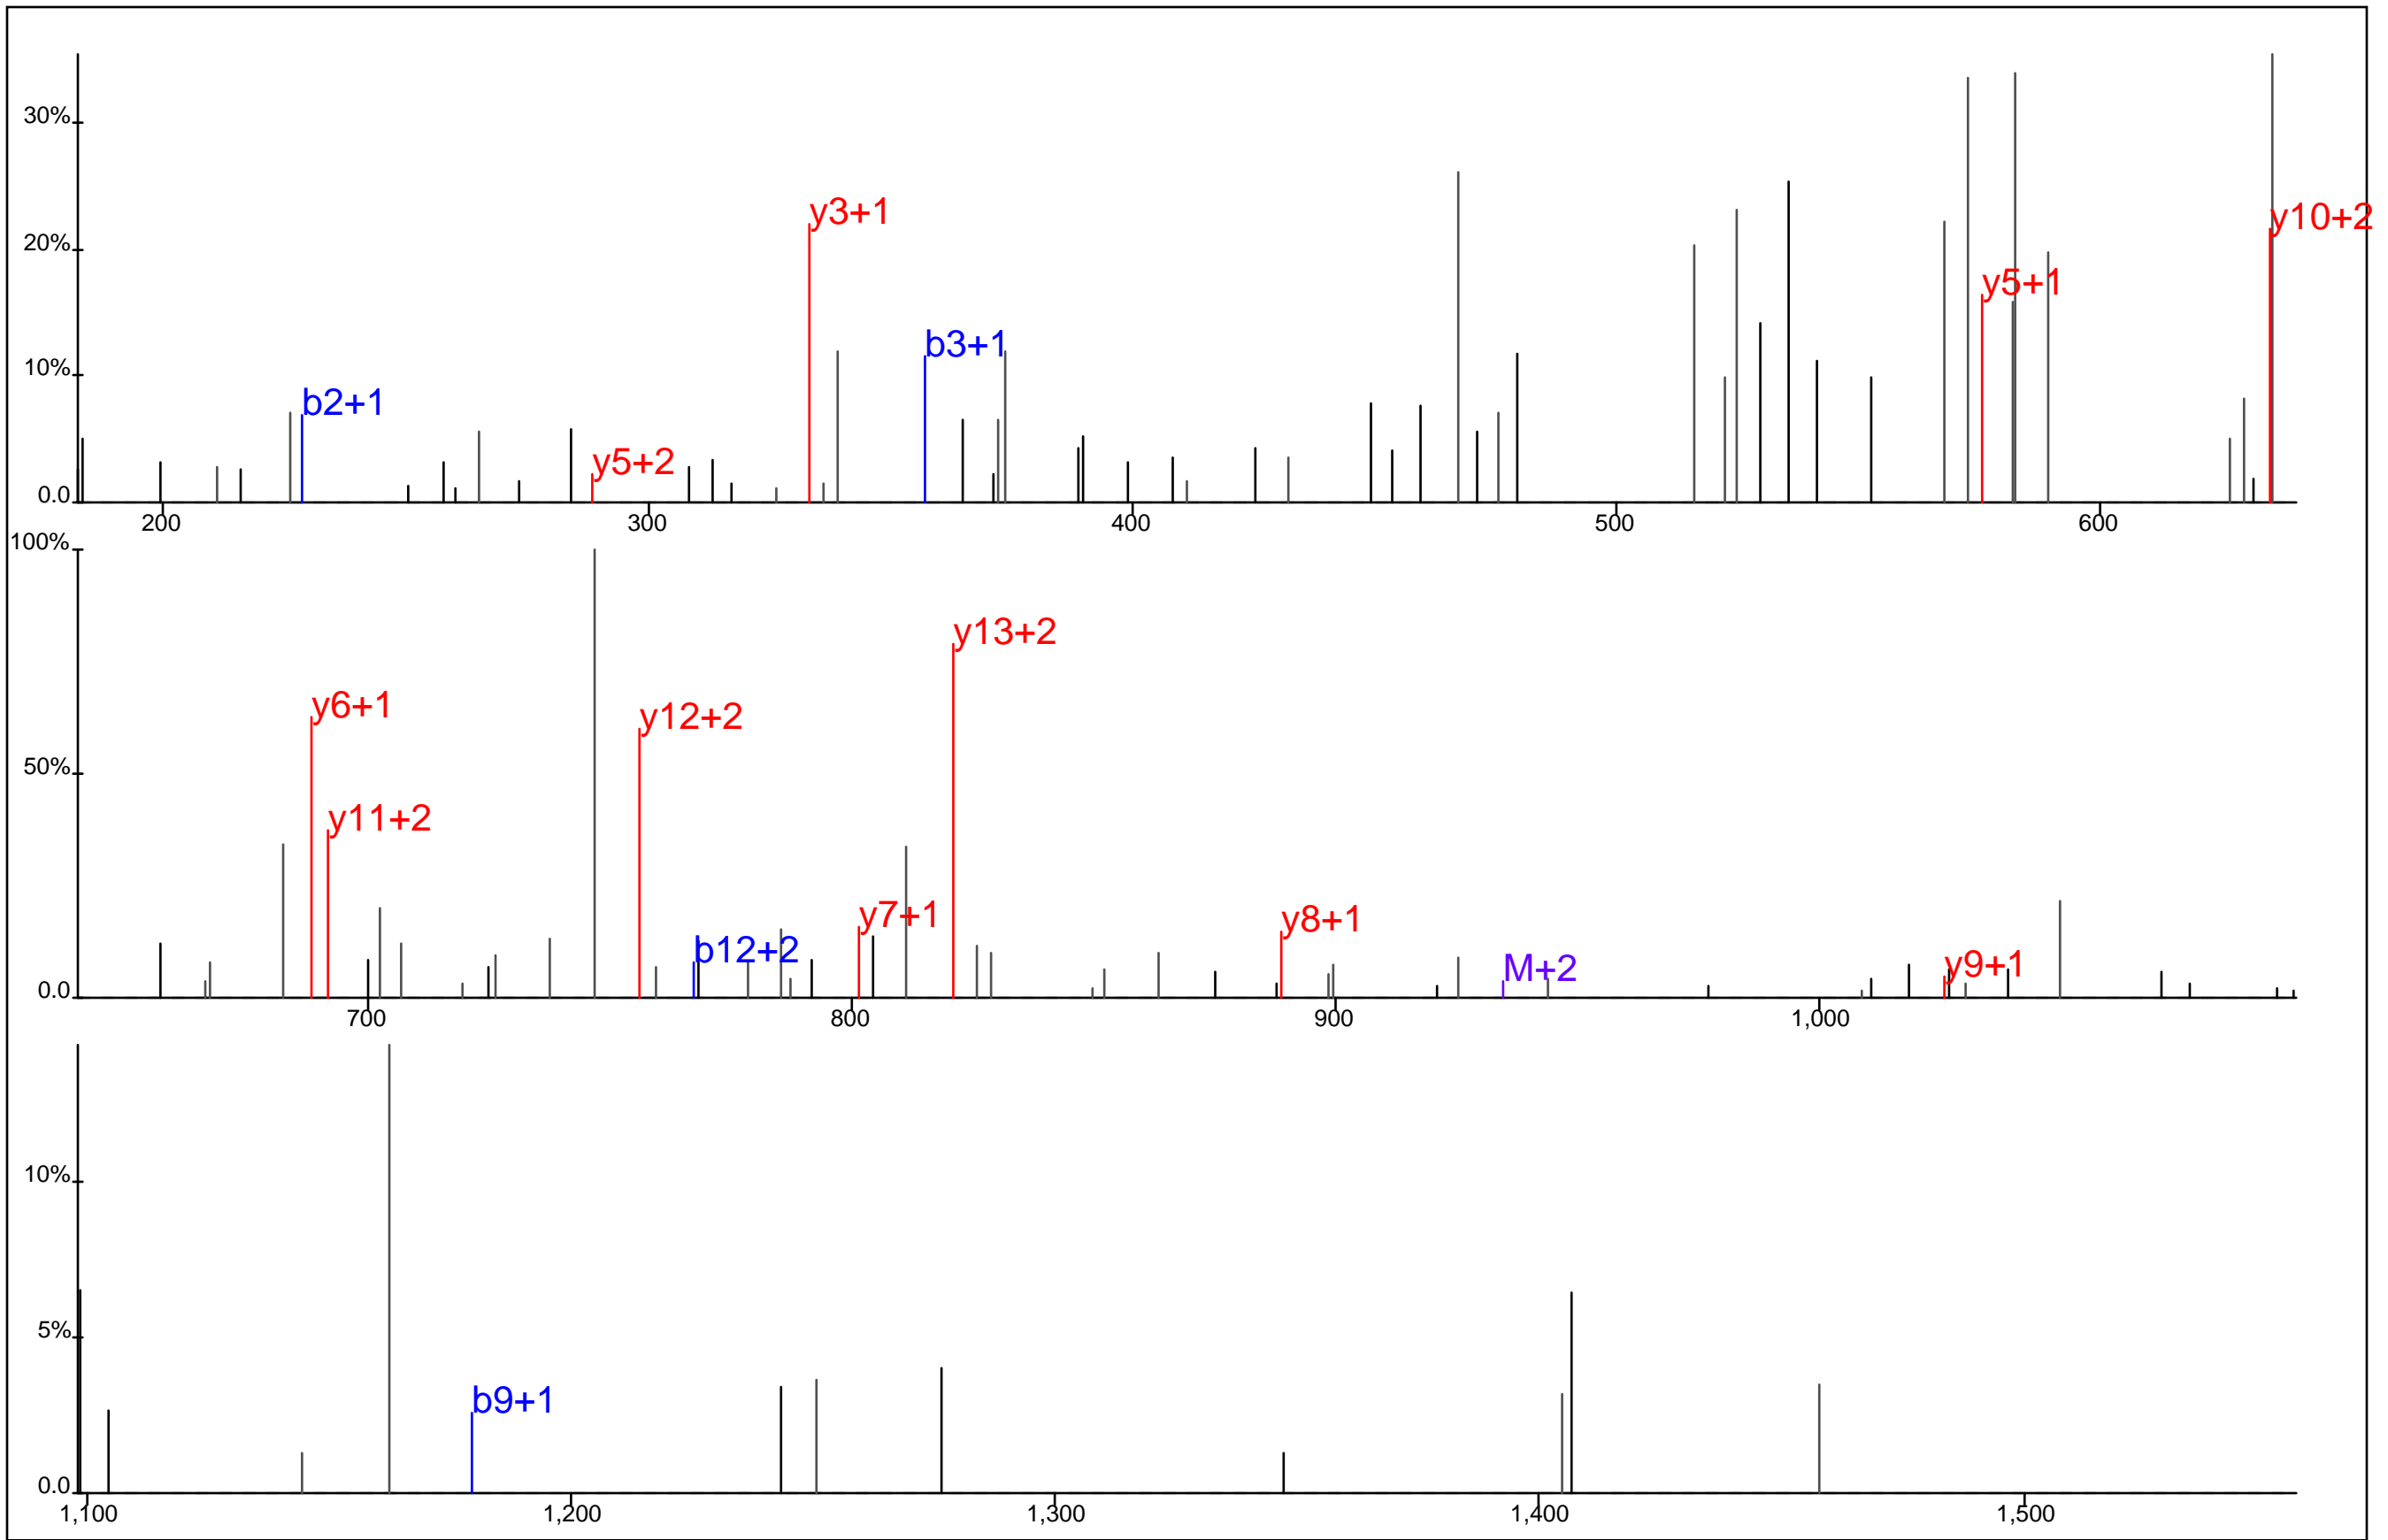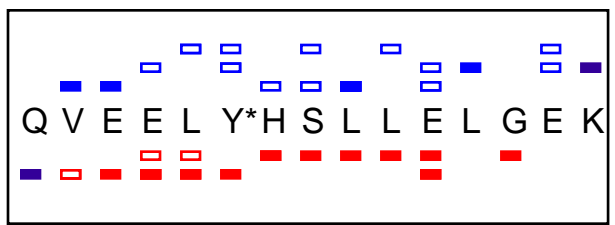

Protein Name: Spectrin, alpha, non-erythrocytic 1 (alpha-fodrin)  
 gi Accession: 0  
 Precursor Mass: 622.9680+3  
 Delta Mass: 0.568 ppm  
 XCorr: 22.68

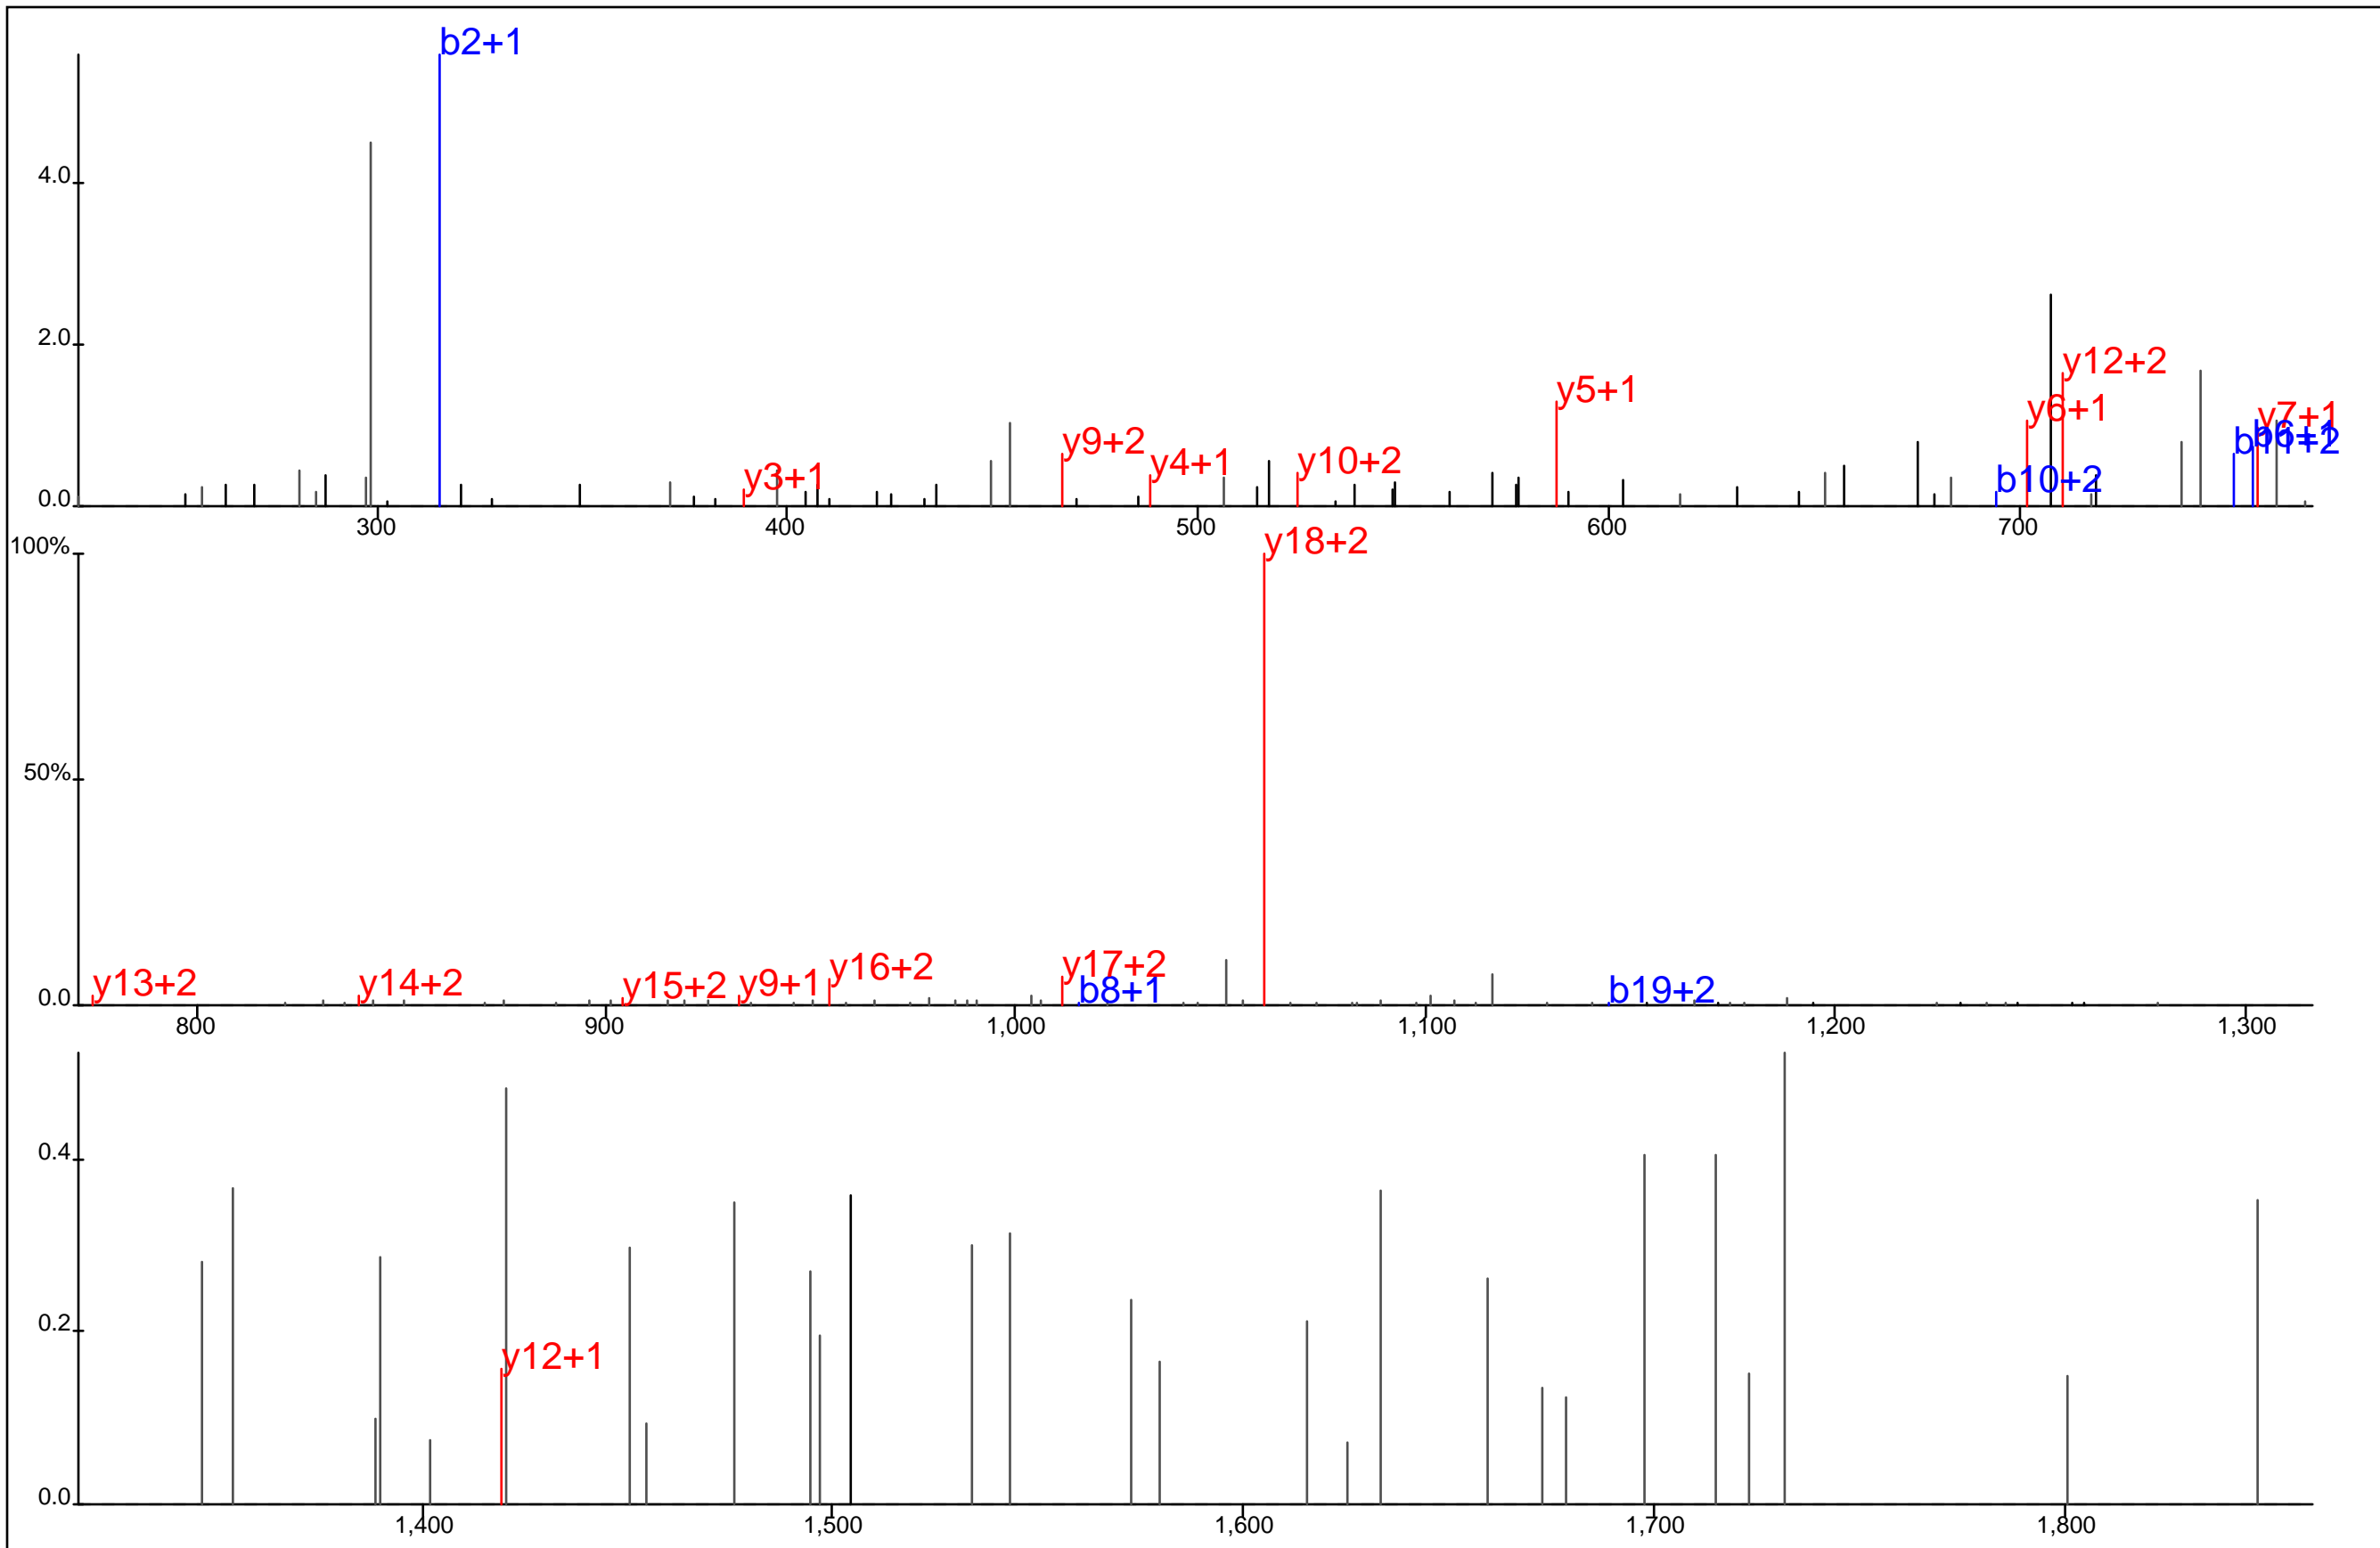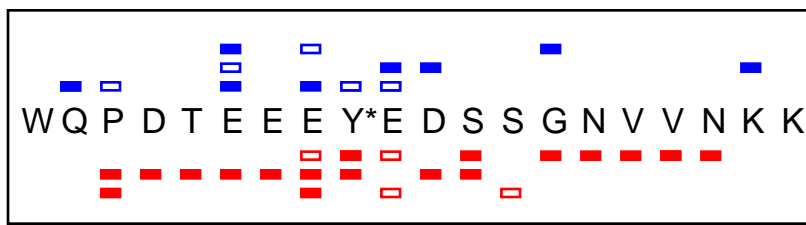

Protein Name: Splicing factor 3A, subunit 3  
 gi Accession: 0  
 Precursor Mass: 812.0090+3  
 Delta Mass: 1.789 ppm  
 XCorr: 25.37



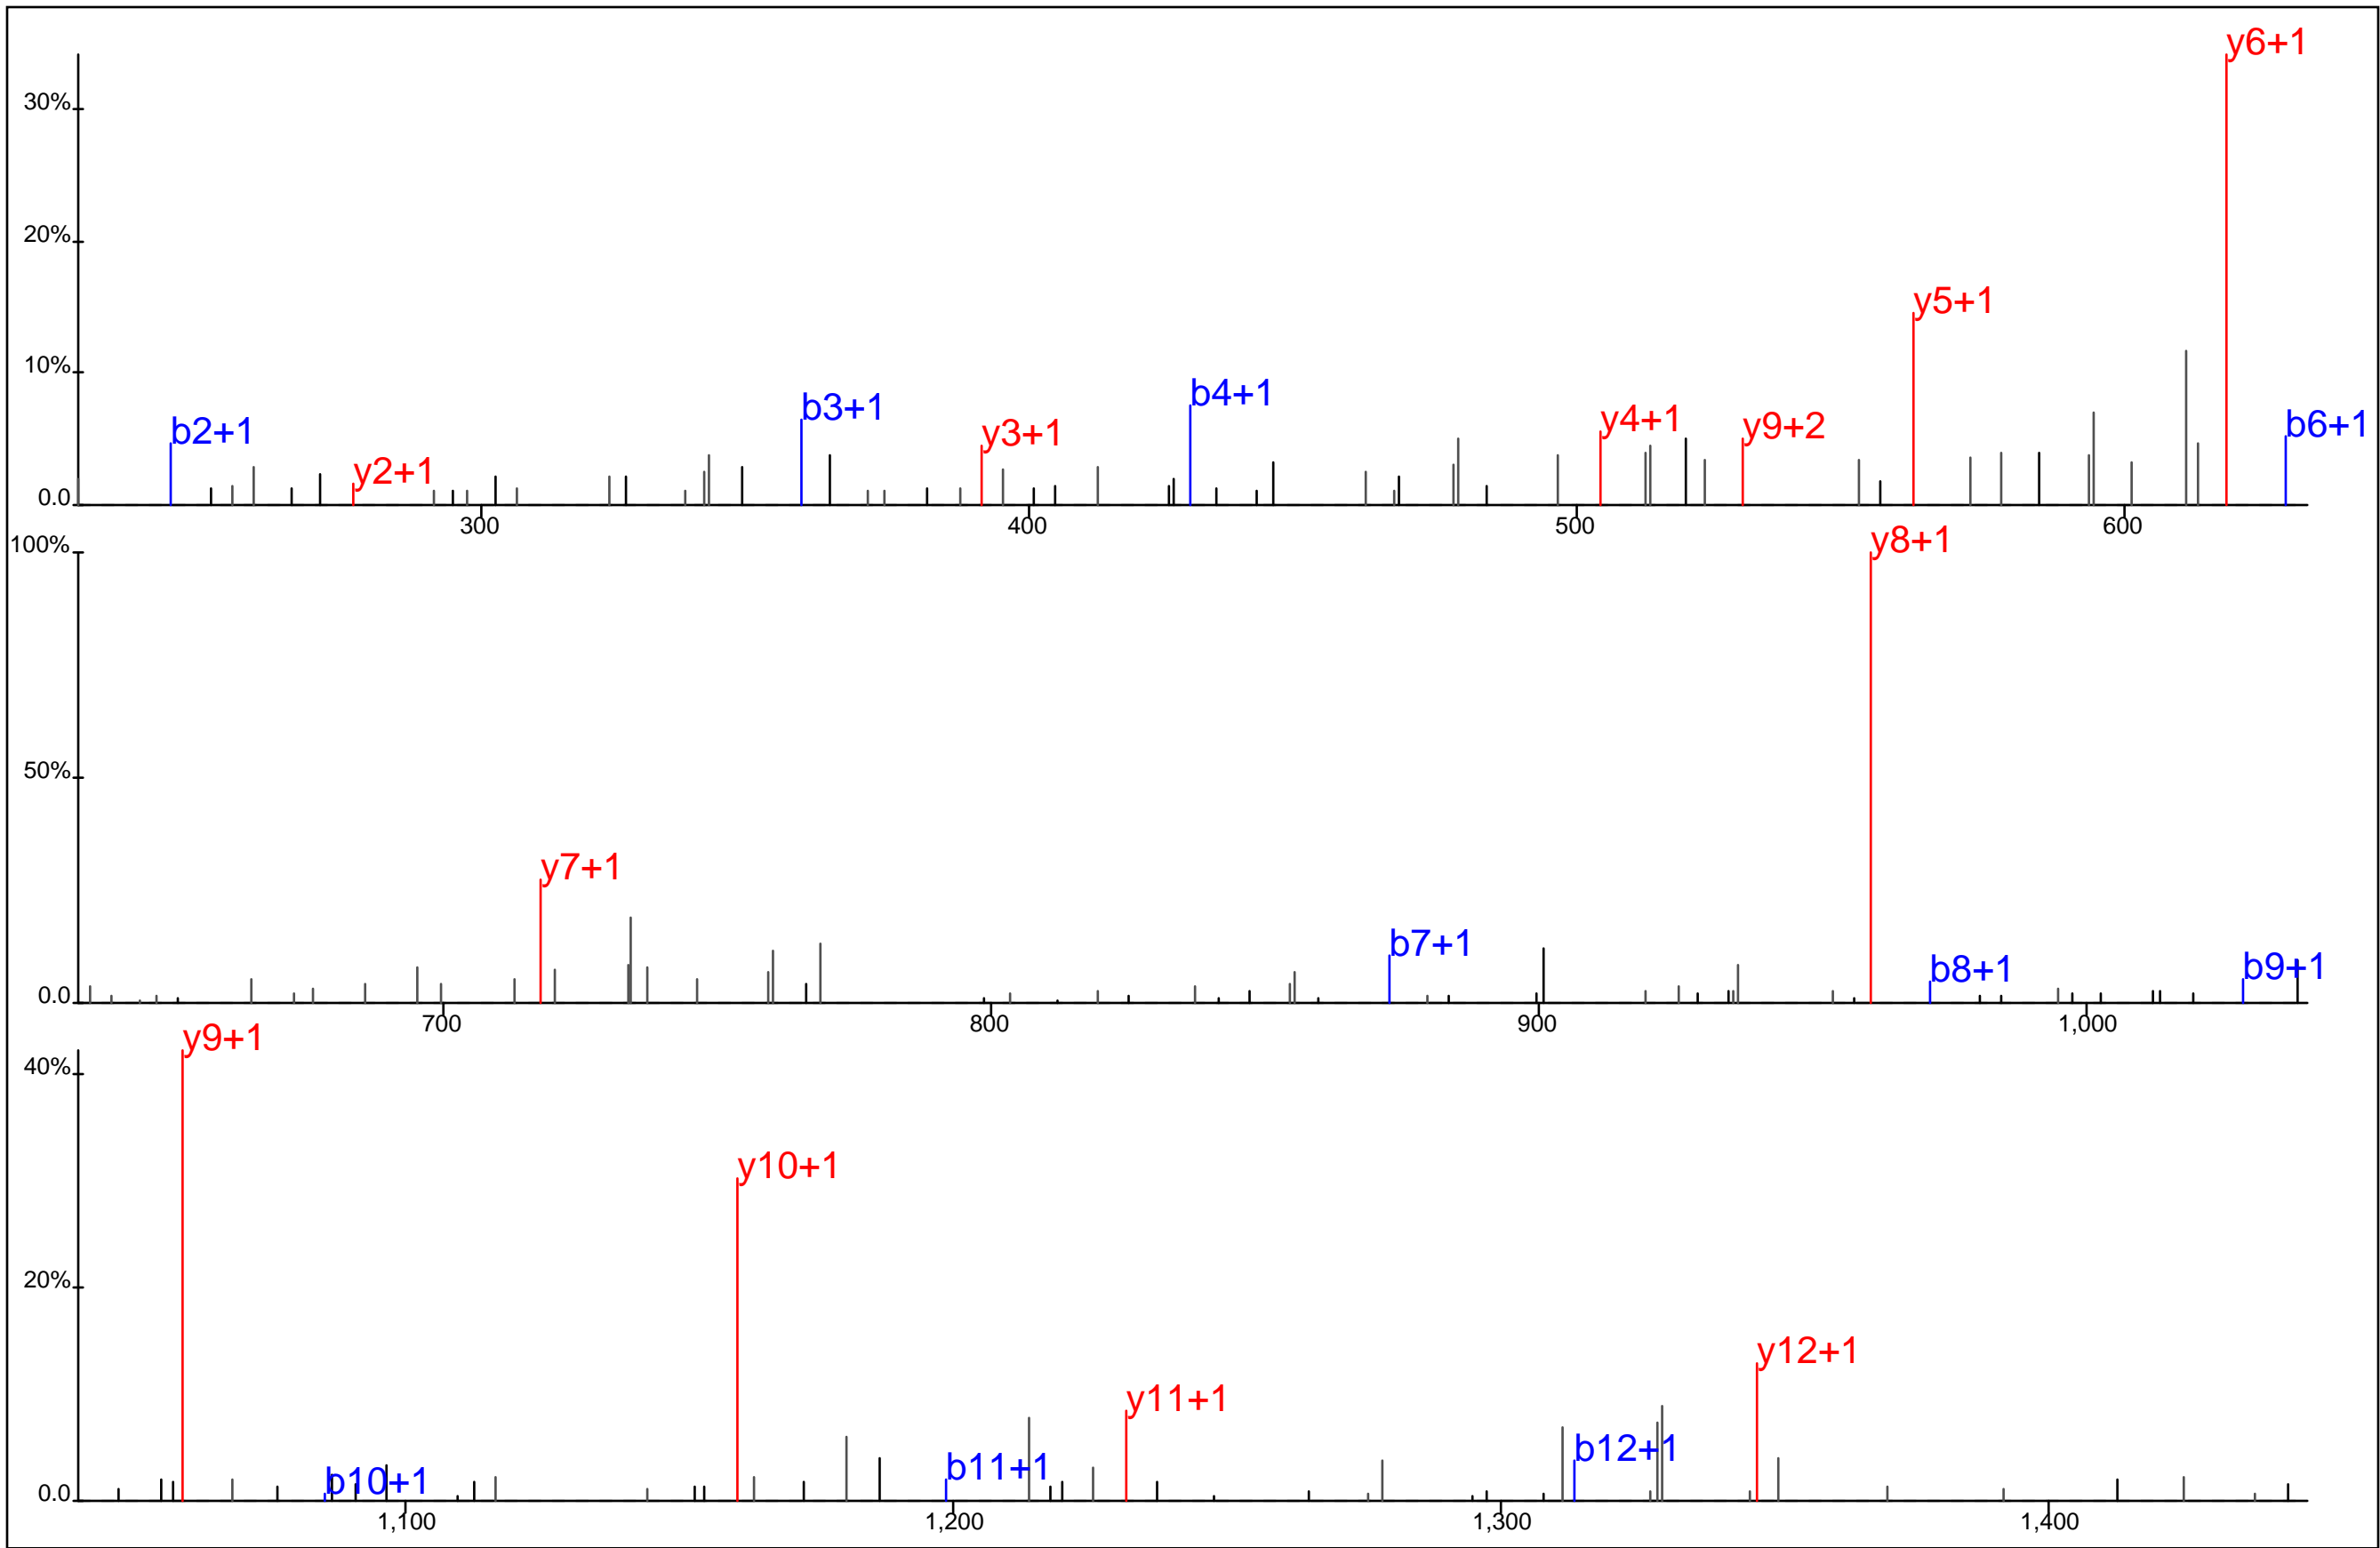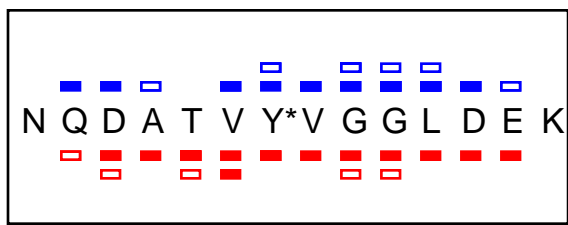

Protein Name: Splicing factor 3B subunit 4  
 gi Accession: 0  
 Precursor Mass: 794.8514+2  
 Delta Mass: 4.124 ppm  
 XCorr: 76.45

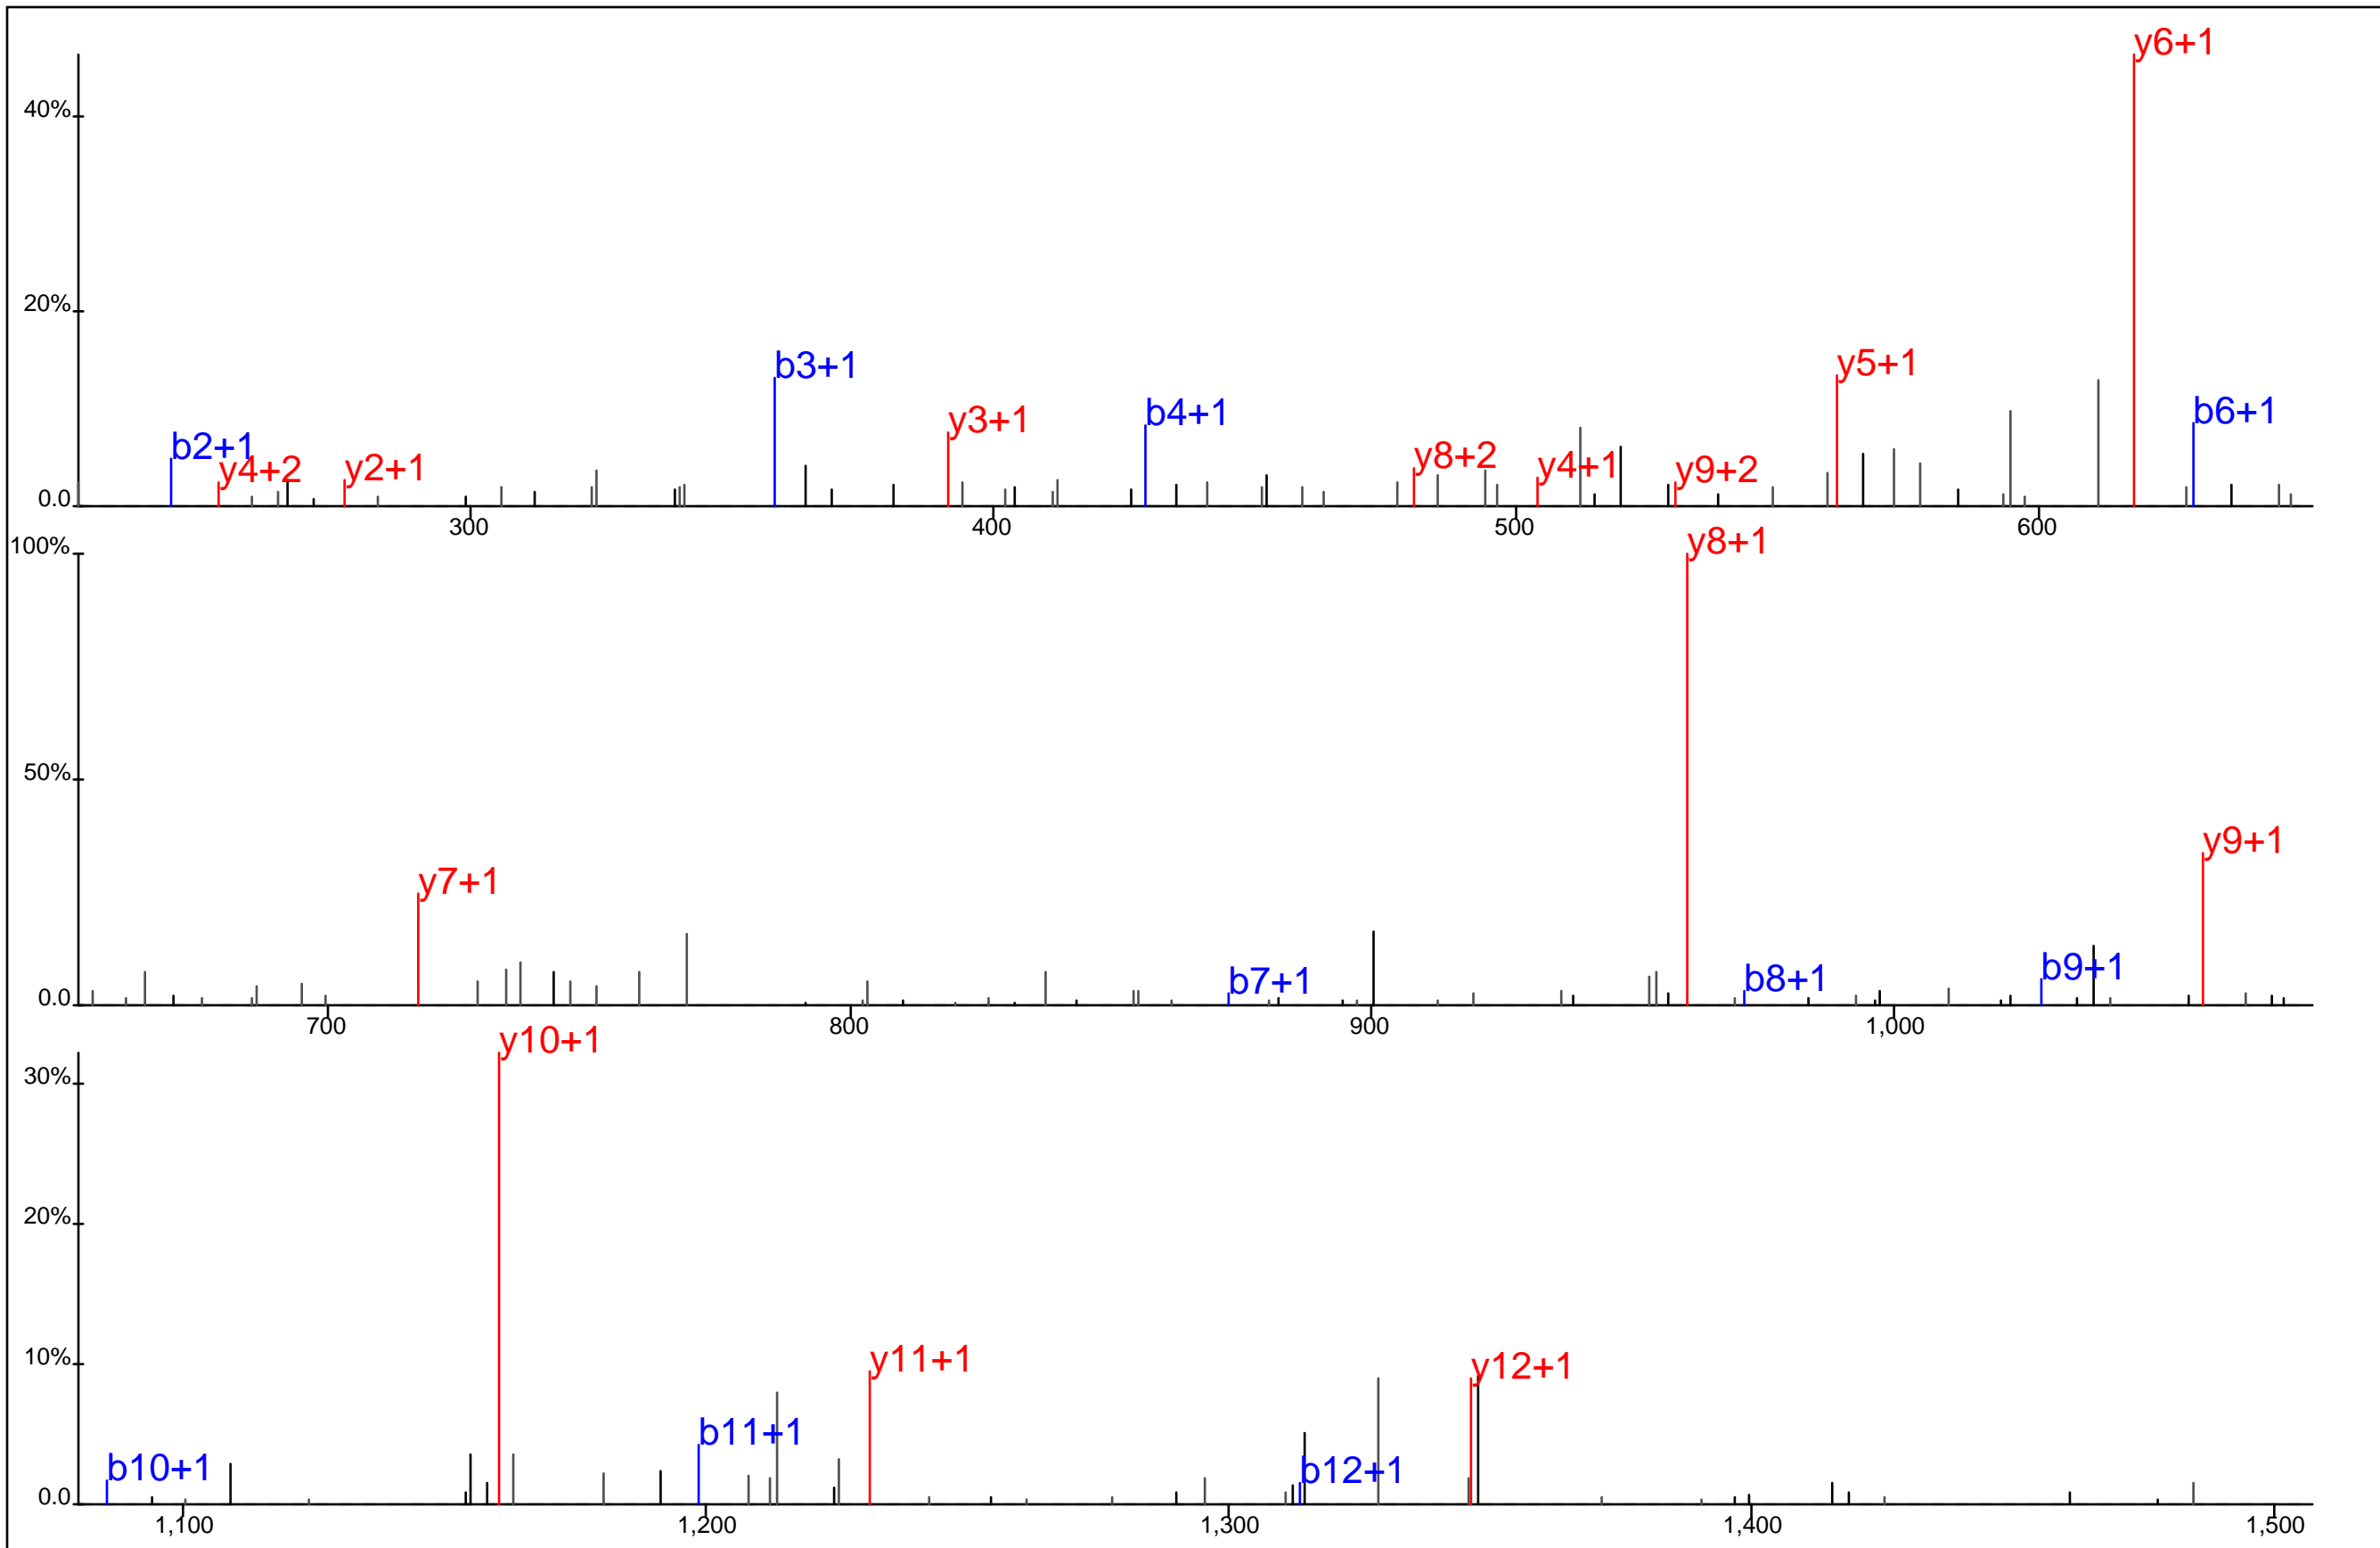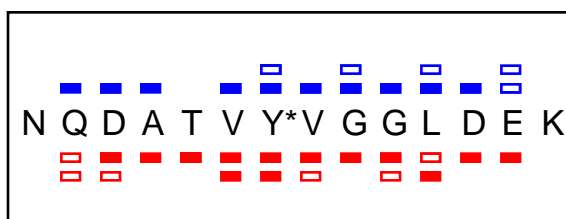

Protein Name: Splicing factor 3B subunit 4  
 gi Accession: 0  
 Precursor Mass: 794.8500+2  
 Delta Mass: 2.358 ppm  
 XCorr: 62.73



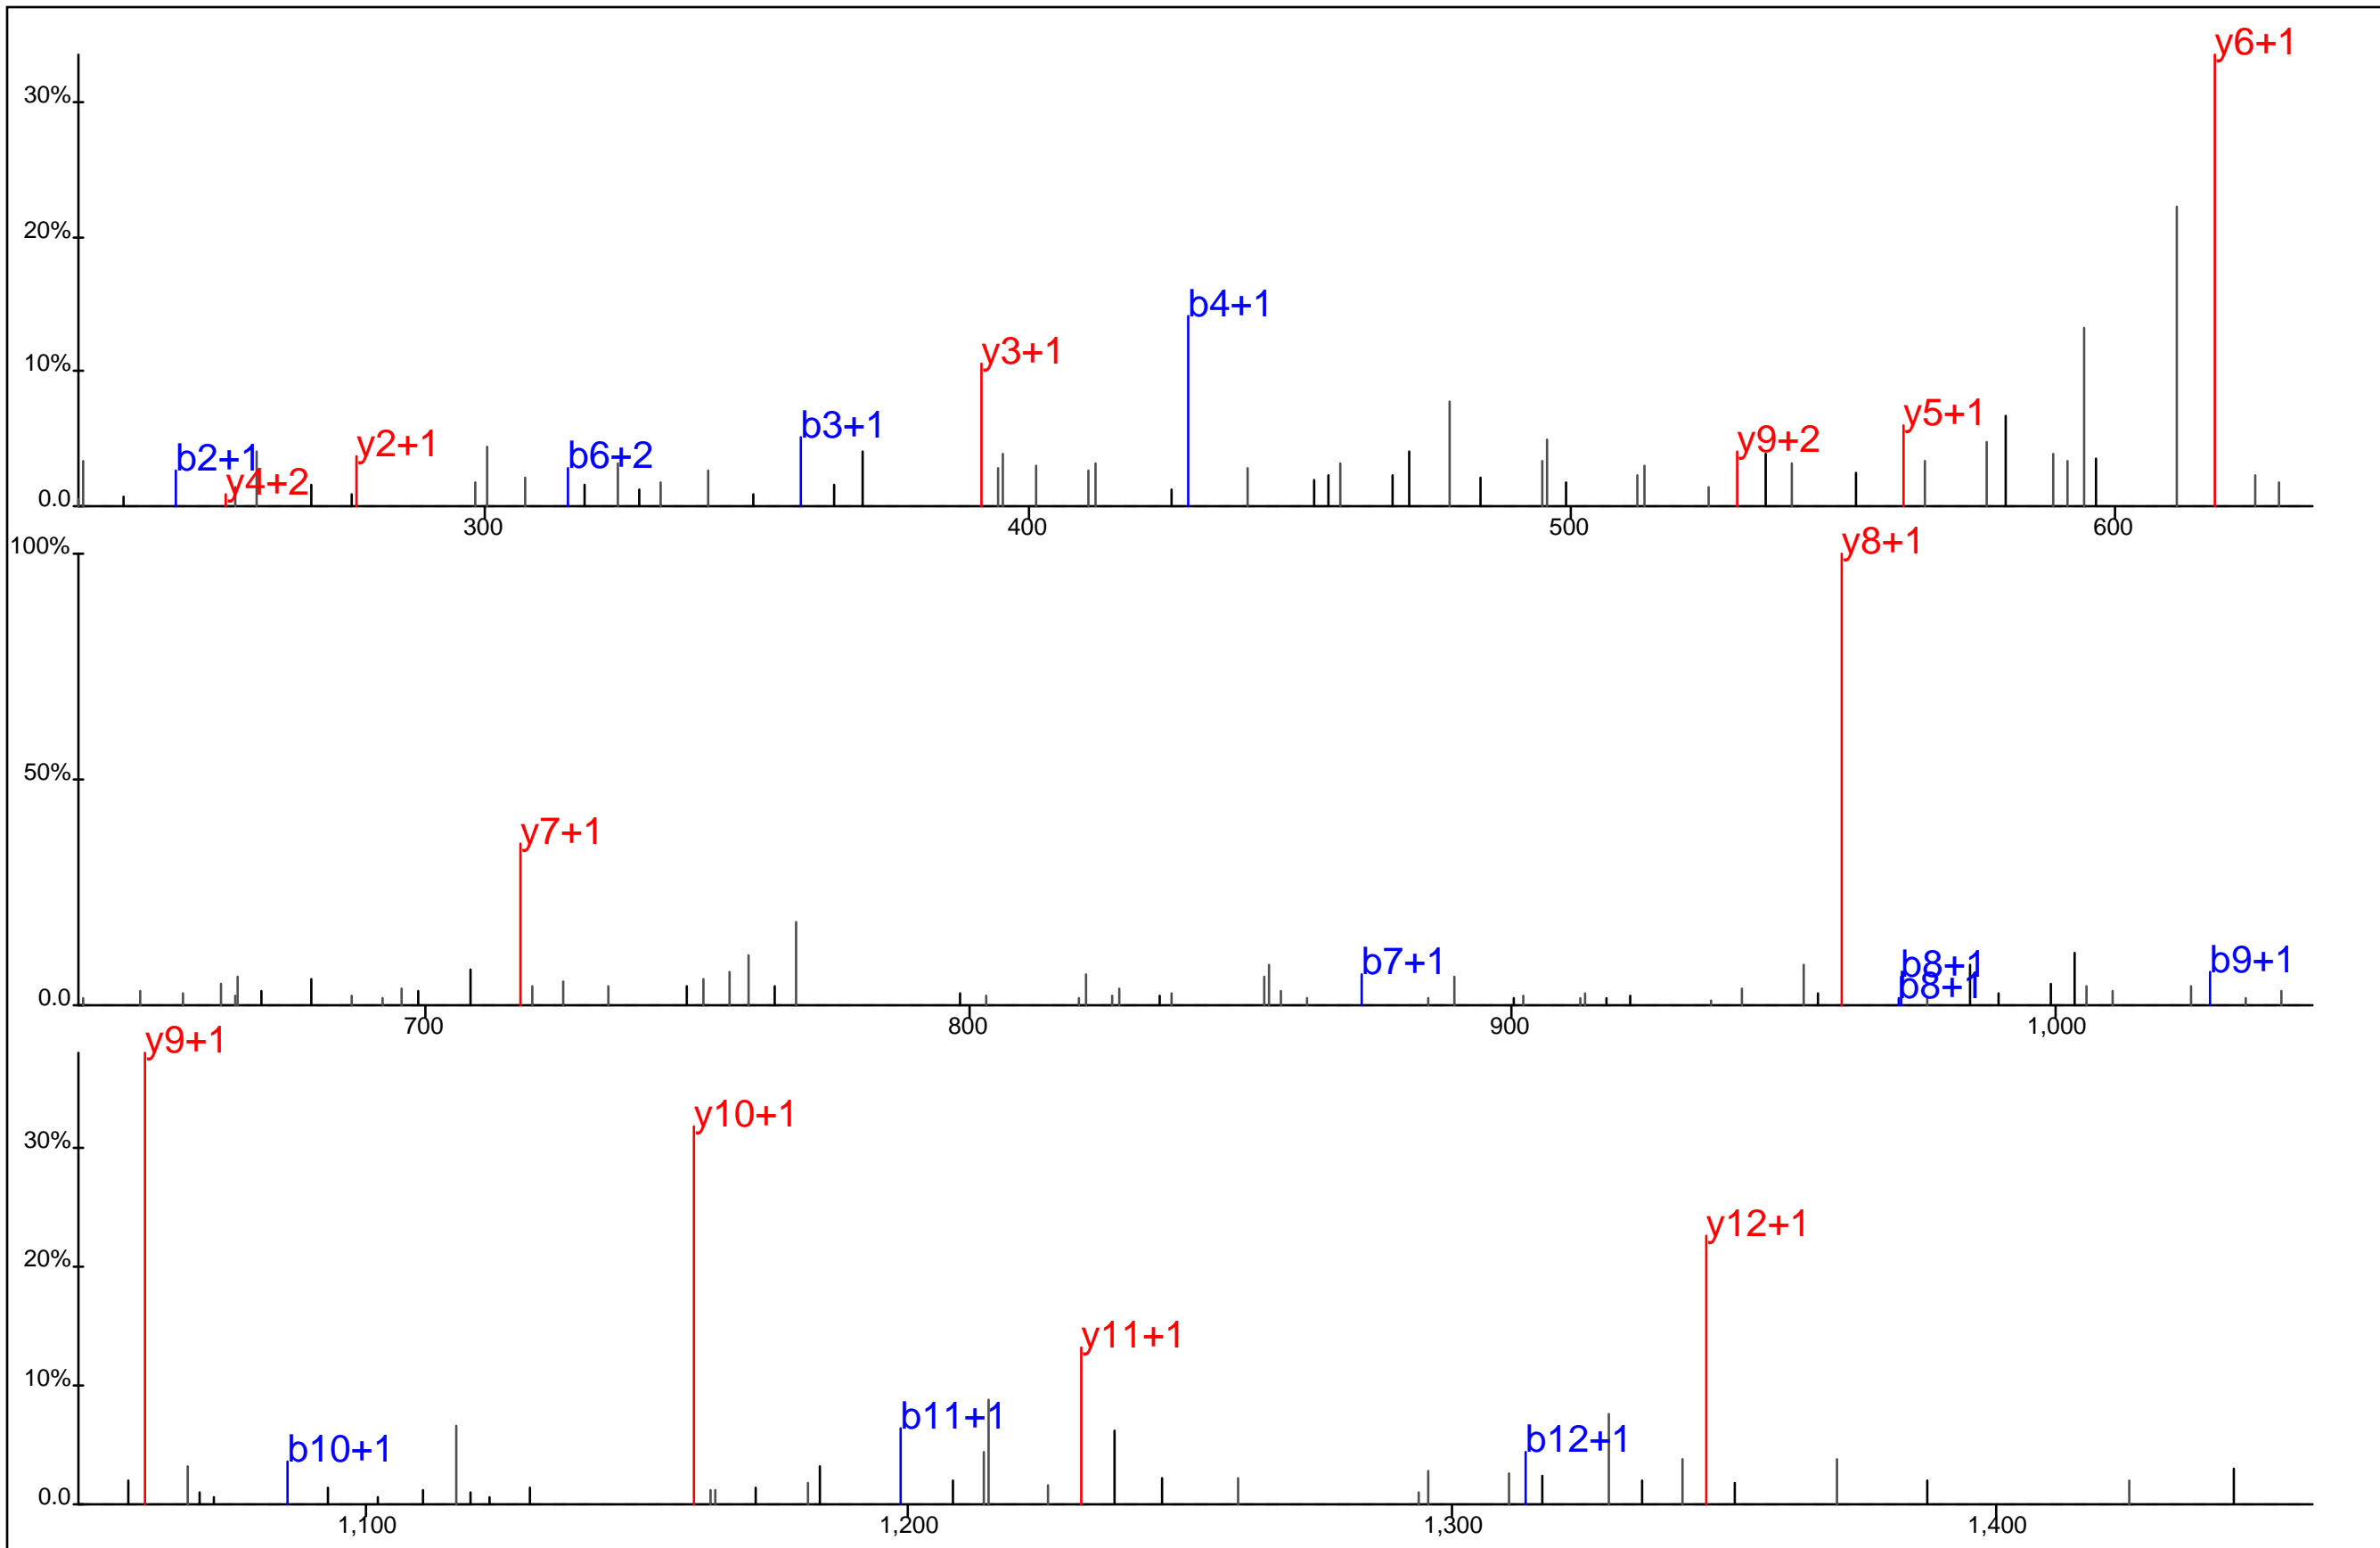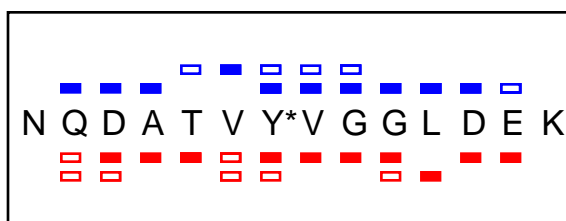

Protein Name: Splicing factor 3B subunit 4  
 gi Accession: 0  
 Precursor Mass: 794.8487+2  
 Delta Mass: 0.667 ppm  
 XCorr: 62.31



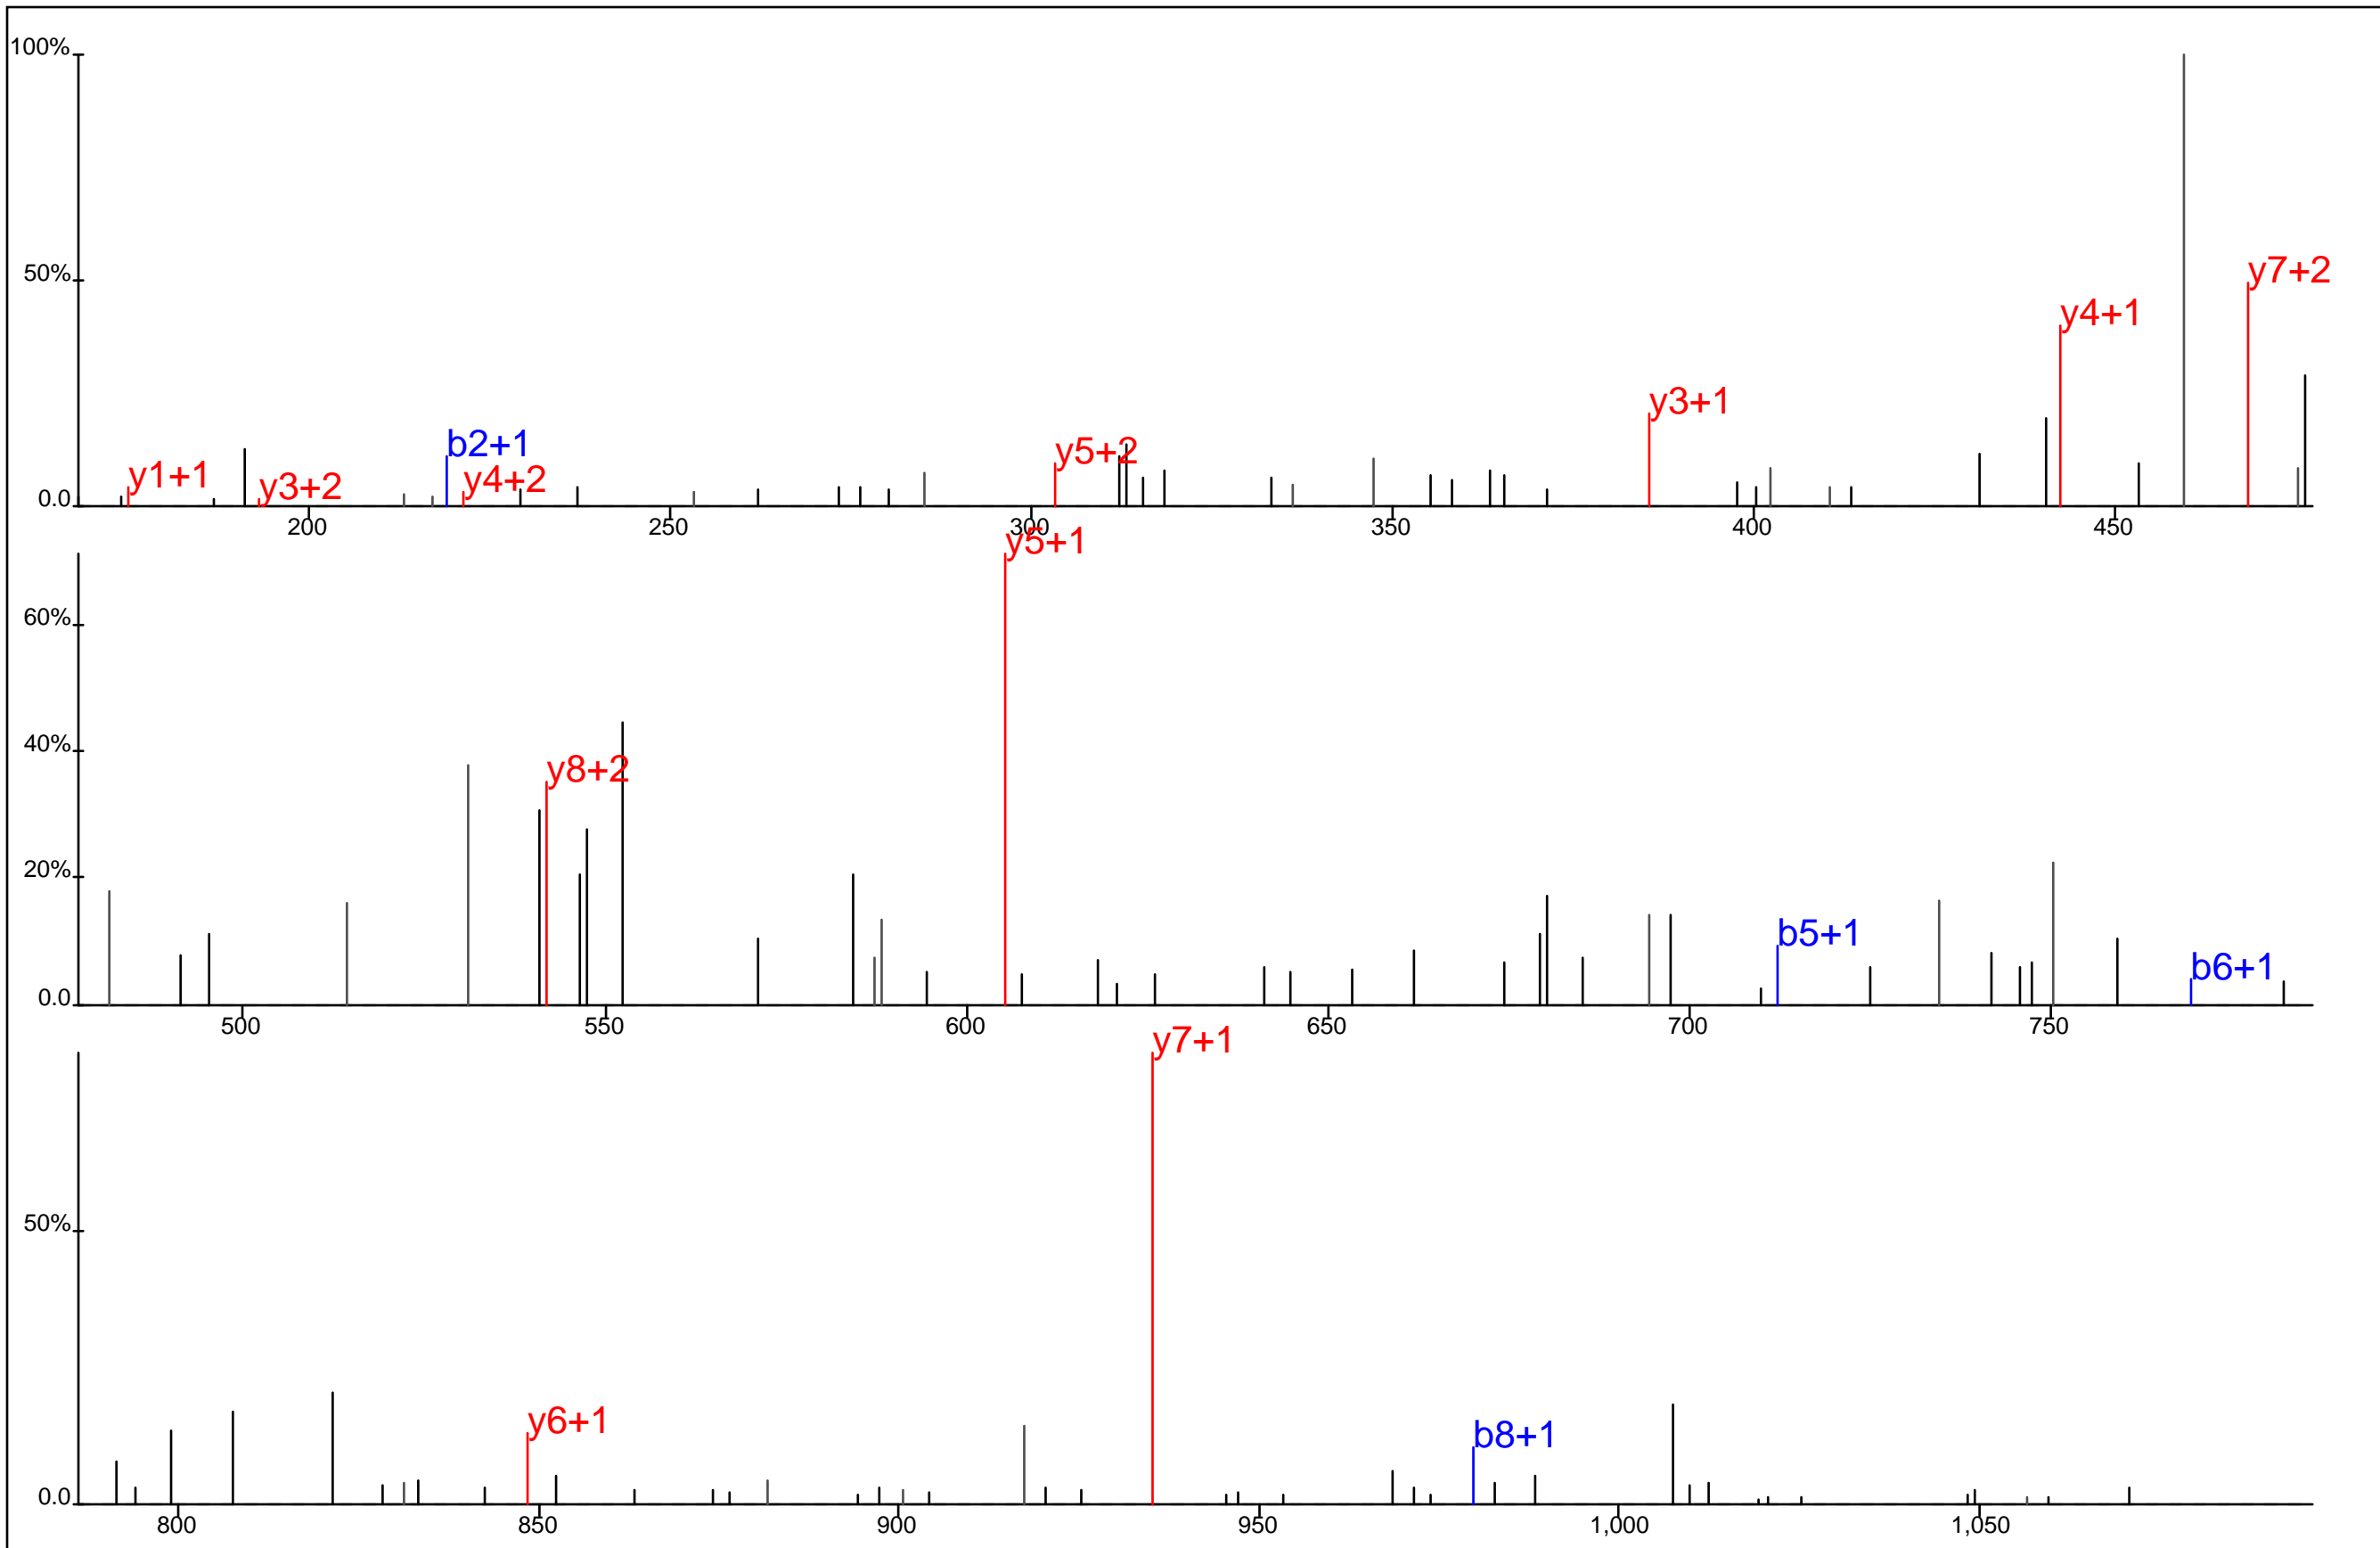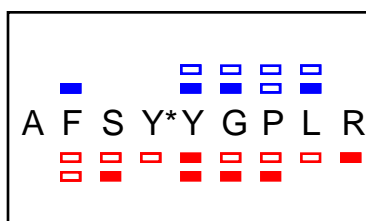

Protein Name: Splicing factor, arginine/serine-rich 7,35kDa  
 gi Accession: 0  
 Precursor Mass: 577.2574+2  
 Delta Mass: 0.127 ppm  
 XCorr: 25.38

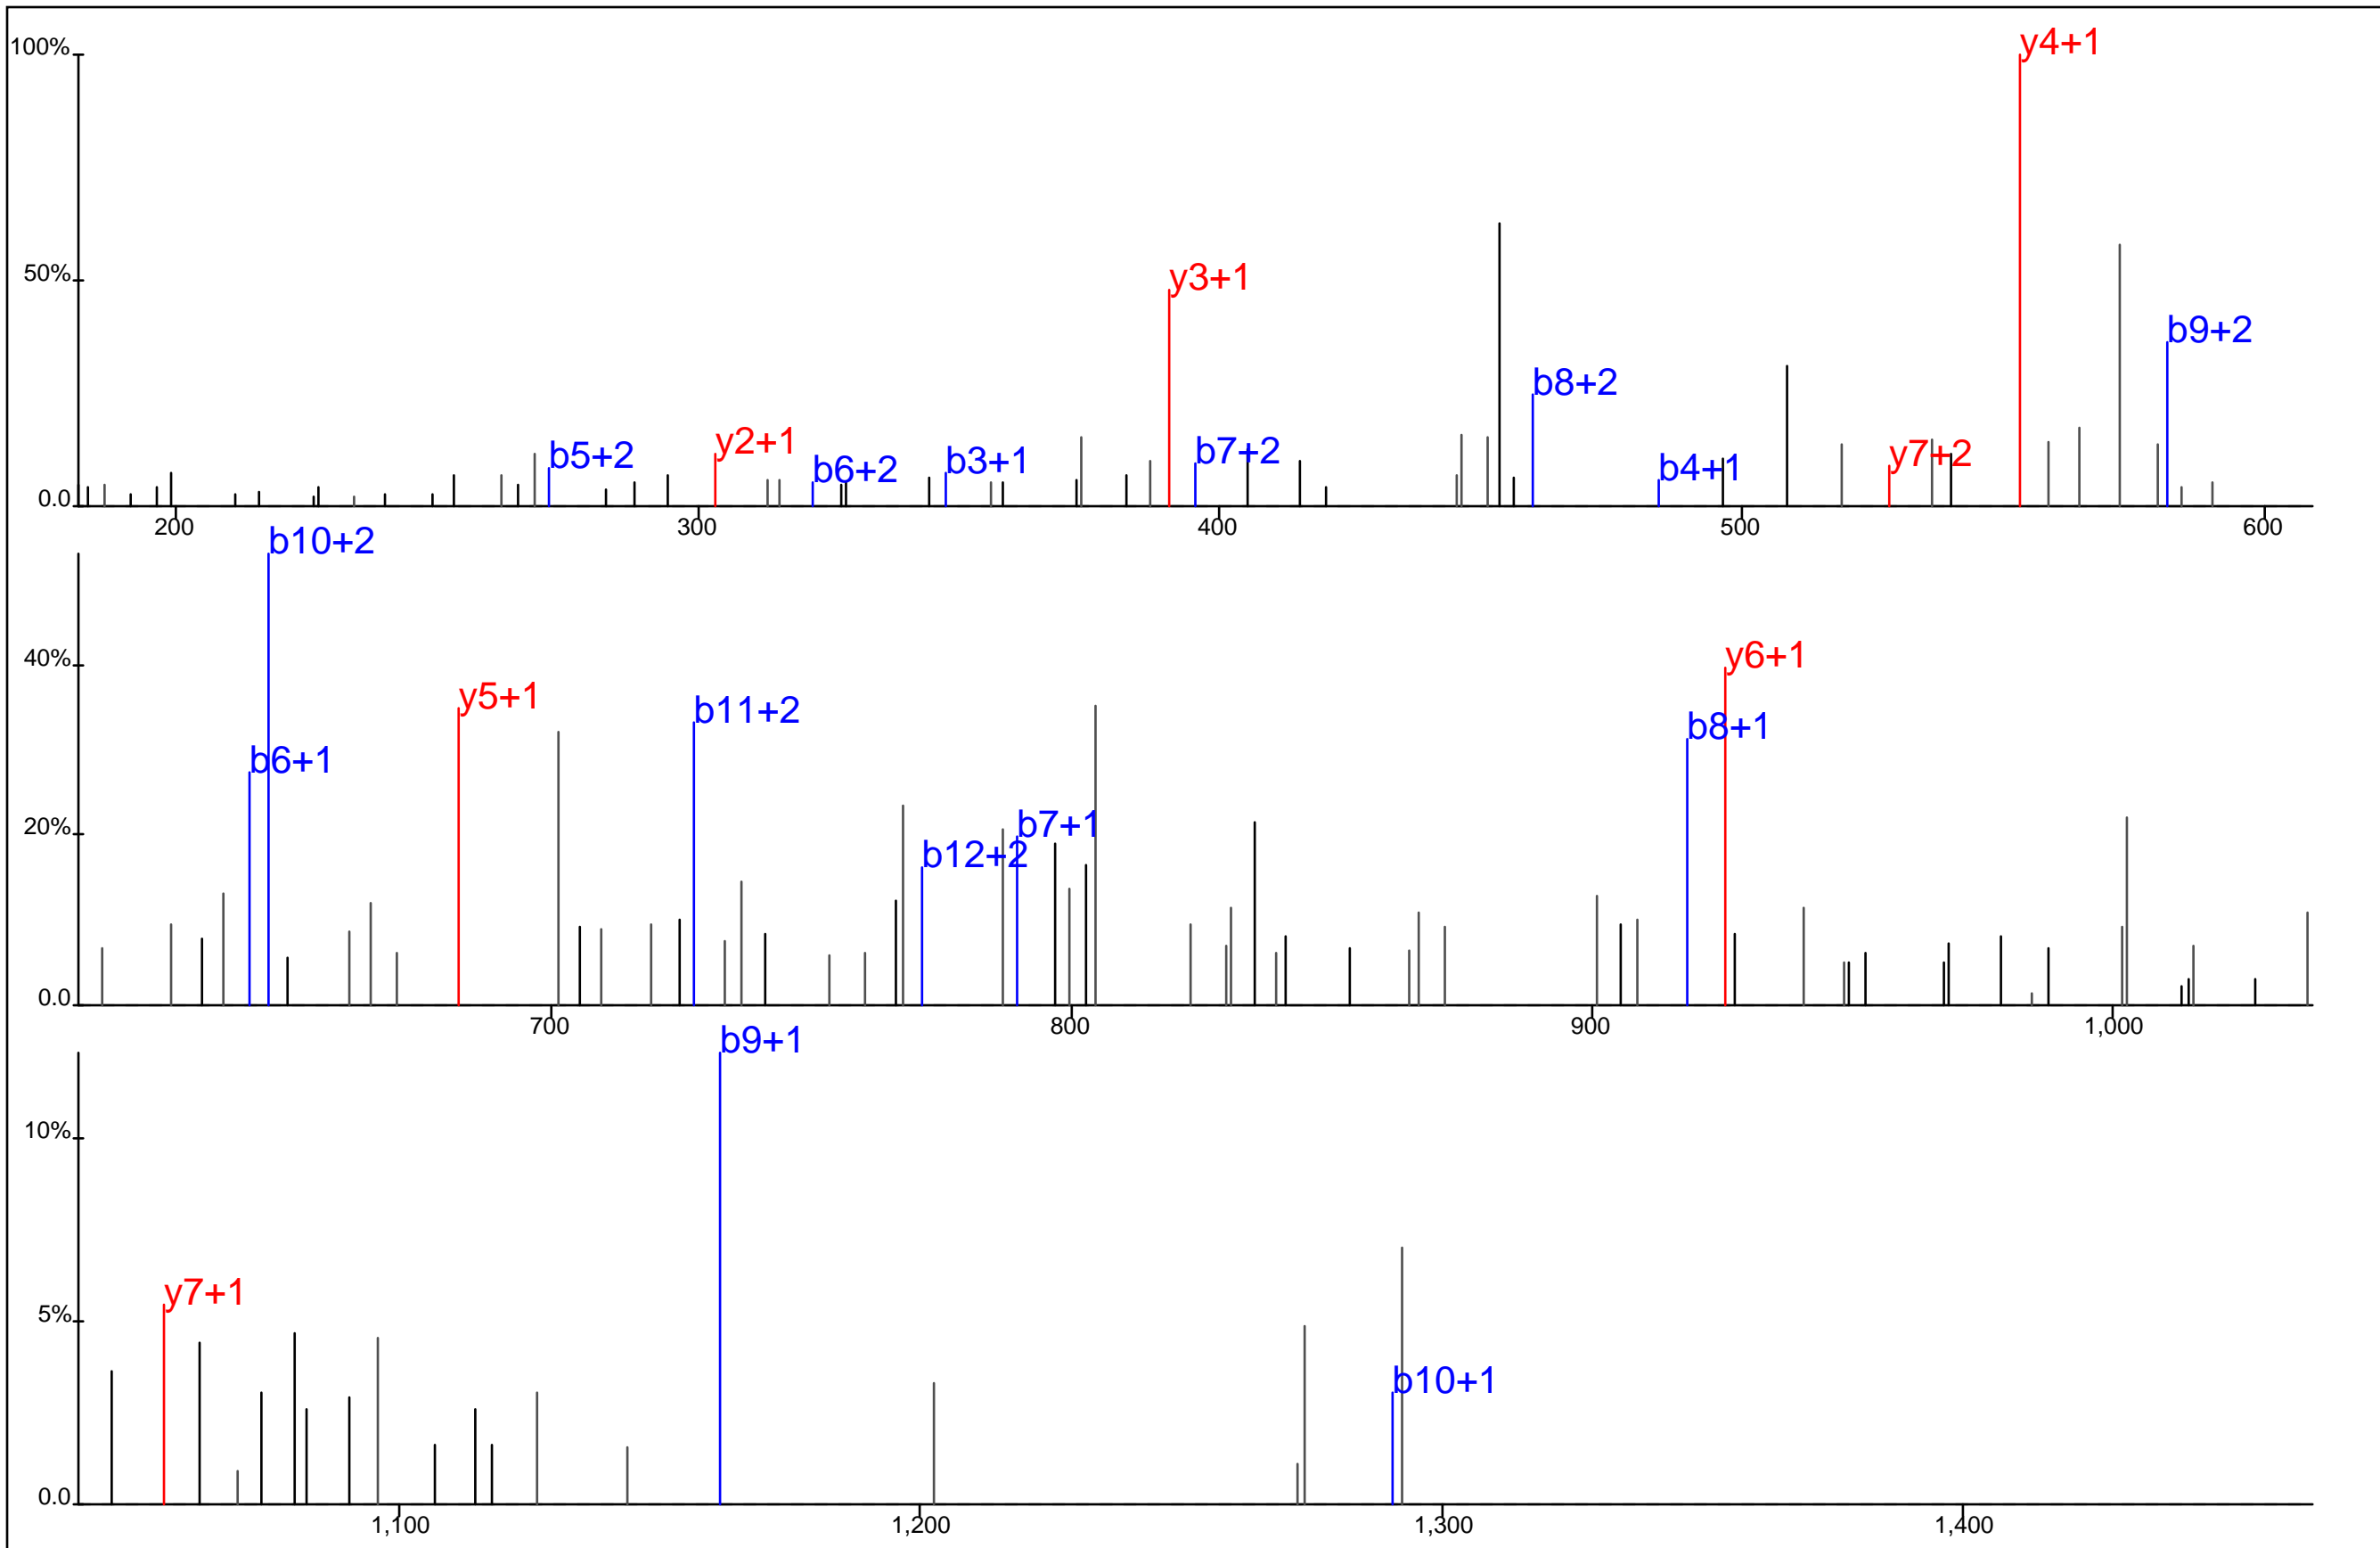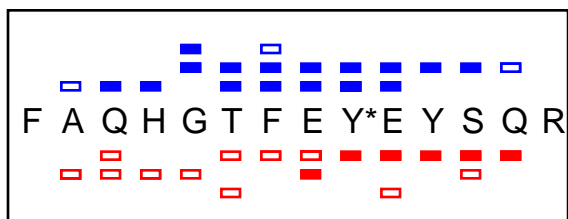

Protein Name: Splicing factor, proline and glutamine rich  
 gi Accession: 0  
 Precursor Mass: 614.9181+3  
 Delta Mass: 4.651 ppm  
 XCorr: 31.01

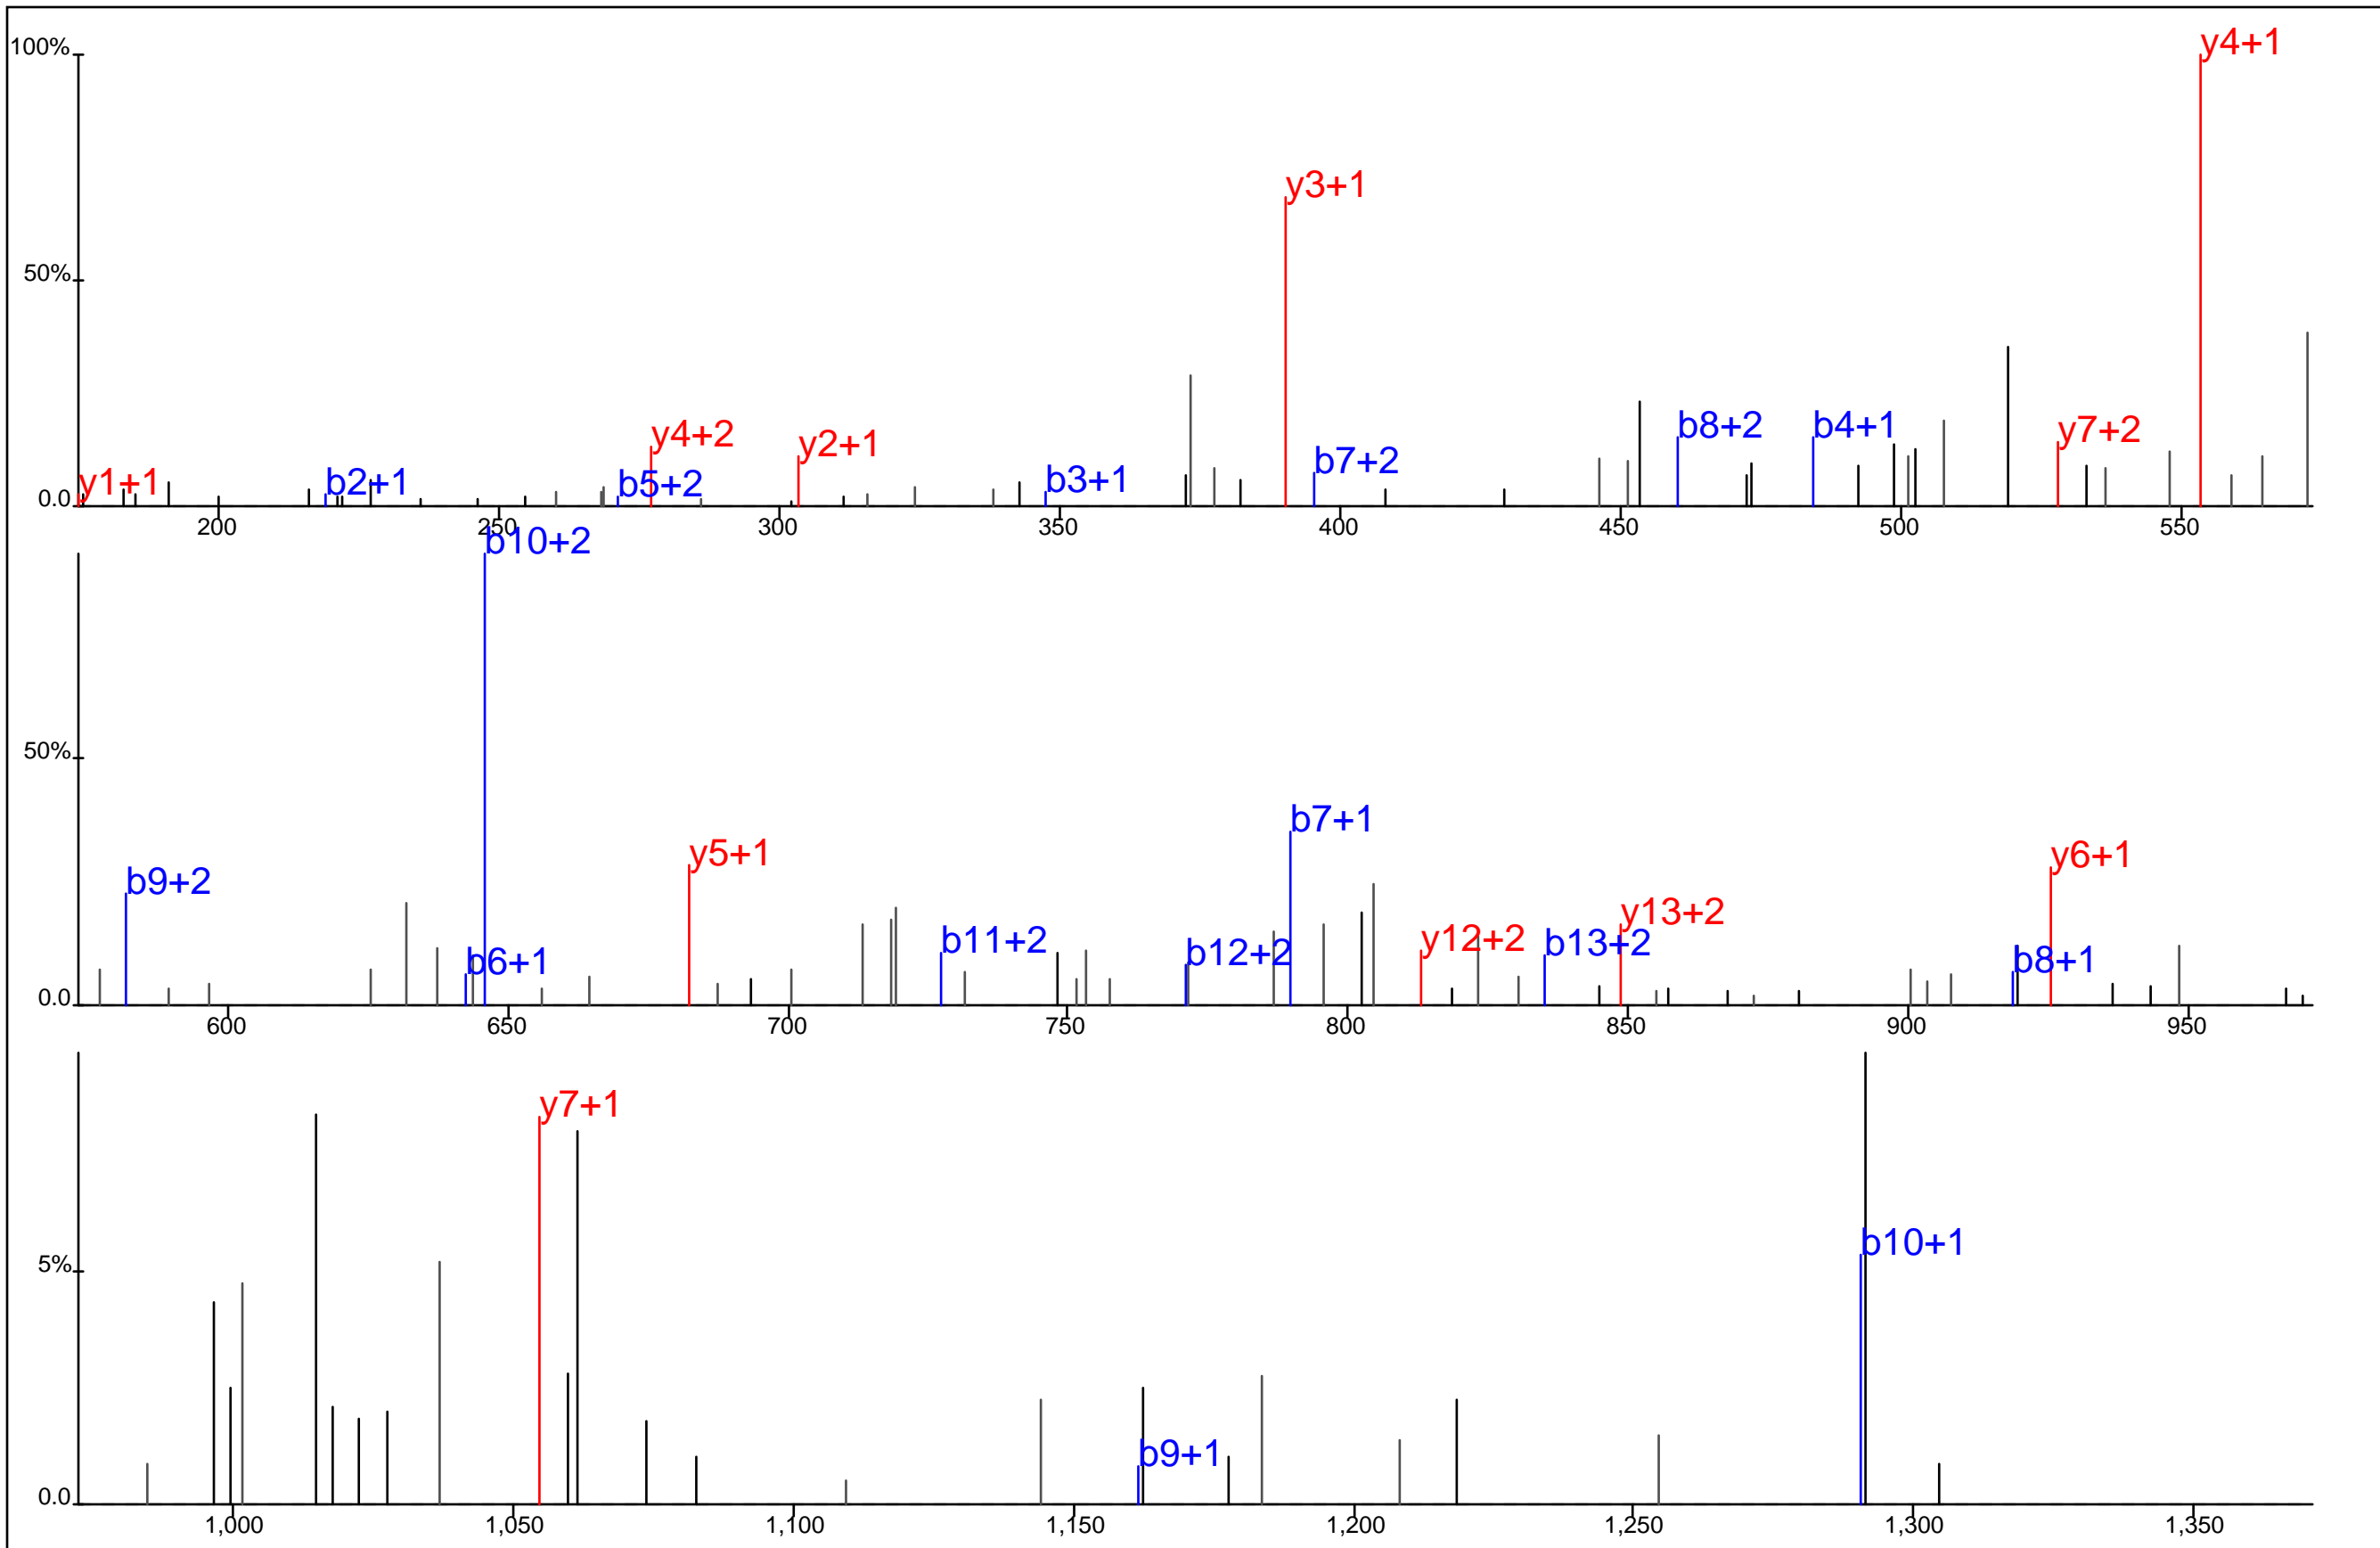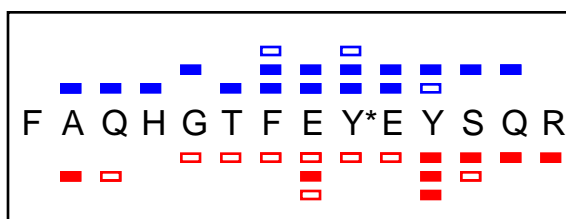

Protein Name: Splicing factor, proline and glutamine rich  
 gi Accession: 0  
 Precursor Mass: 614.9223+3  
 Delta Mass: 2.204 ppm  
 XCorr: 34.21



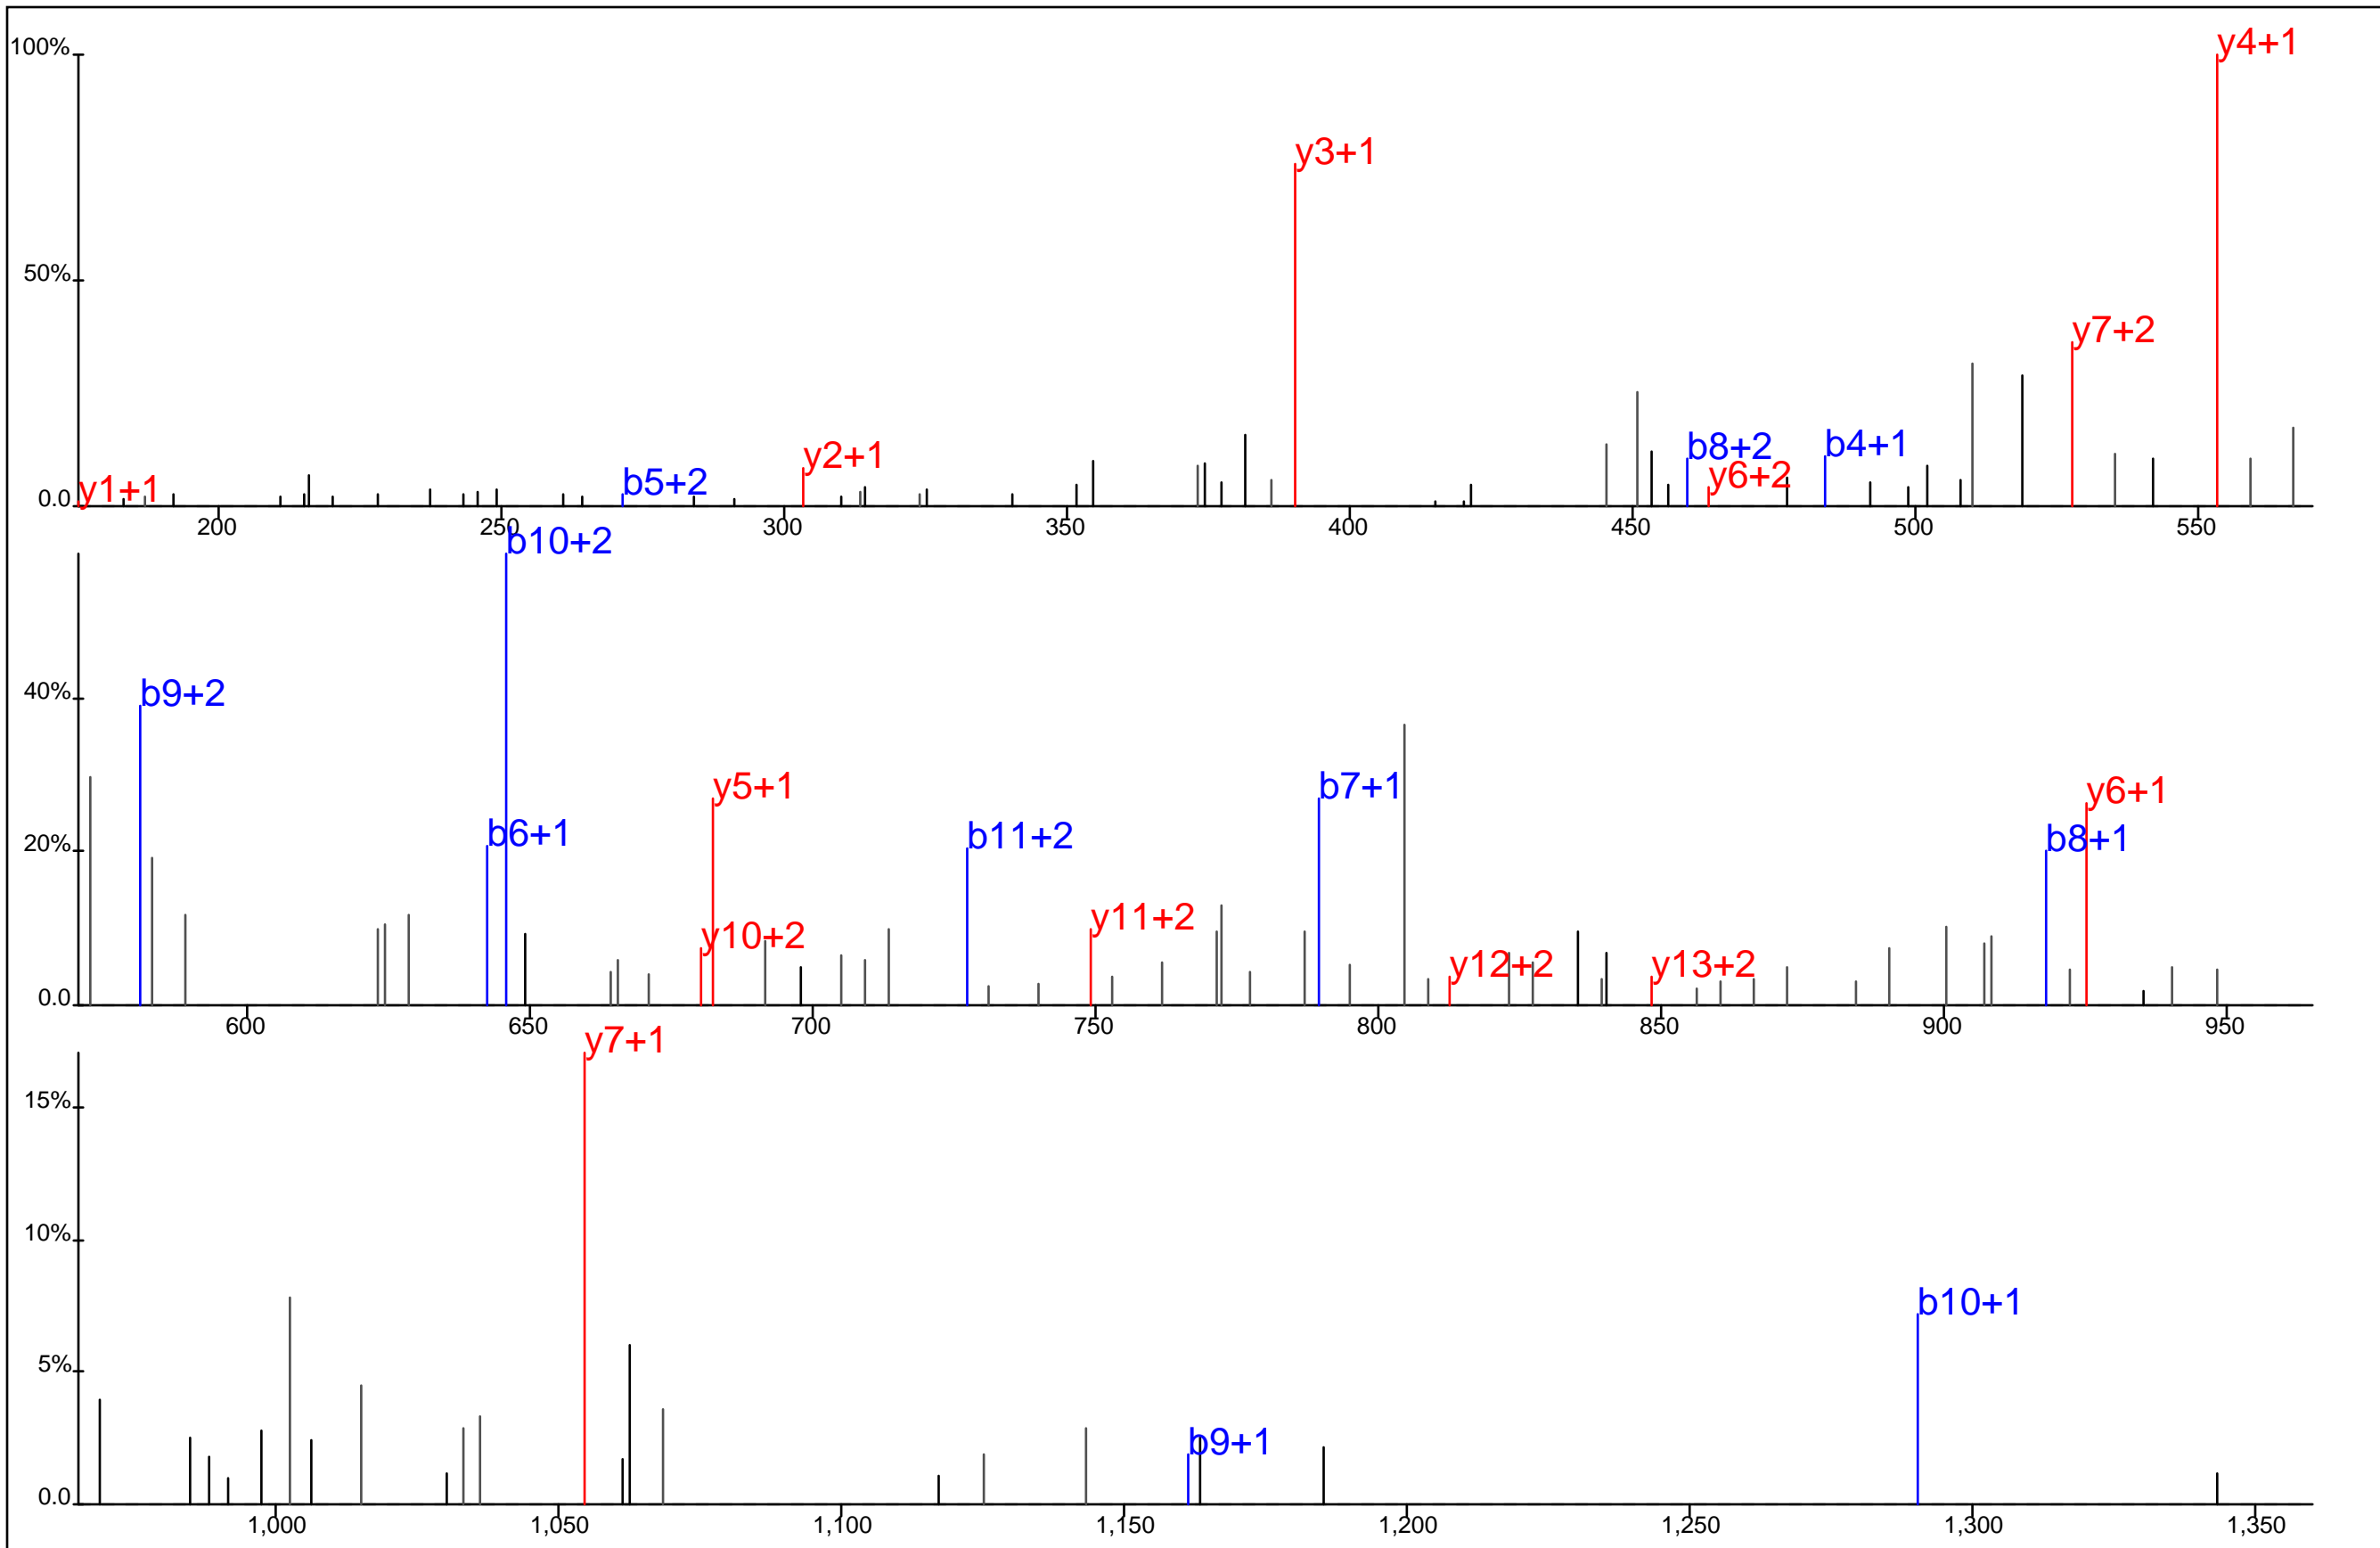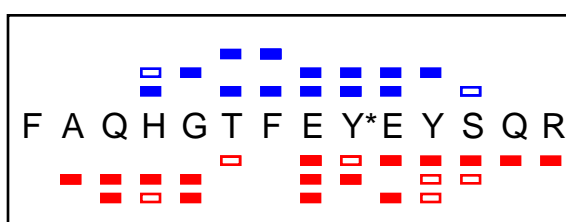

Protein Name: Splicing factor, proline and glutamine rich  
 gi Accession: 0  
 Precursor Mass: 614.9200+3  
 Delta Mass: 1.472 ppm  
 XCorr: 23.69

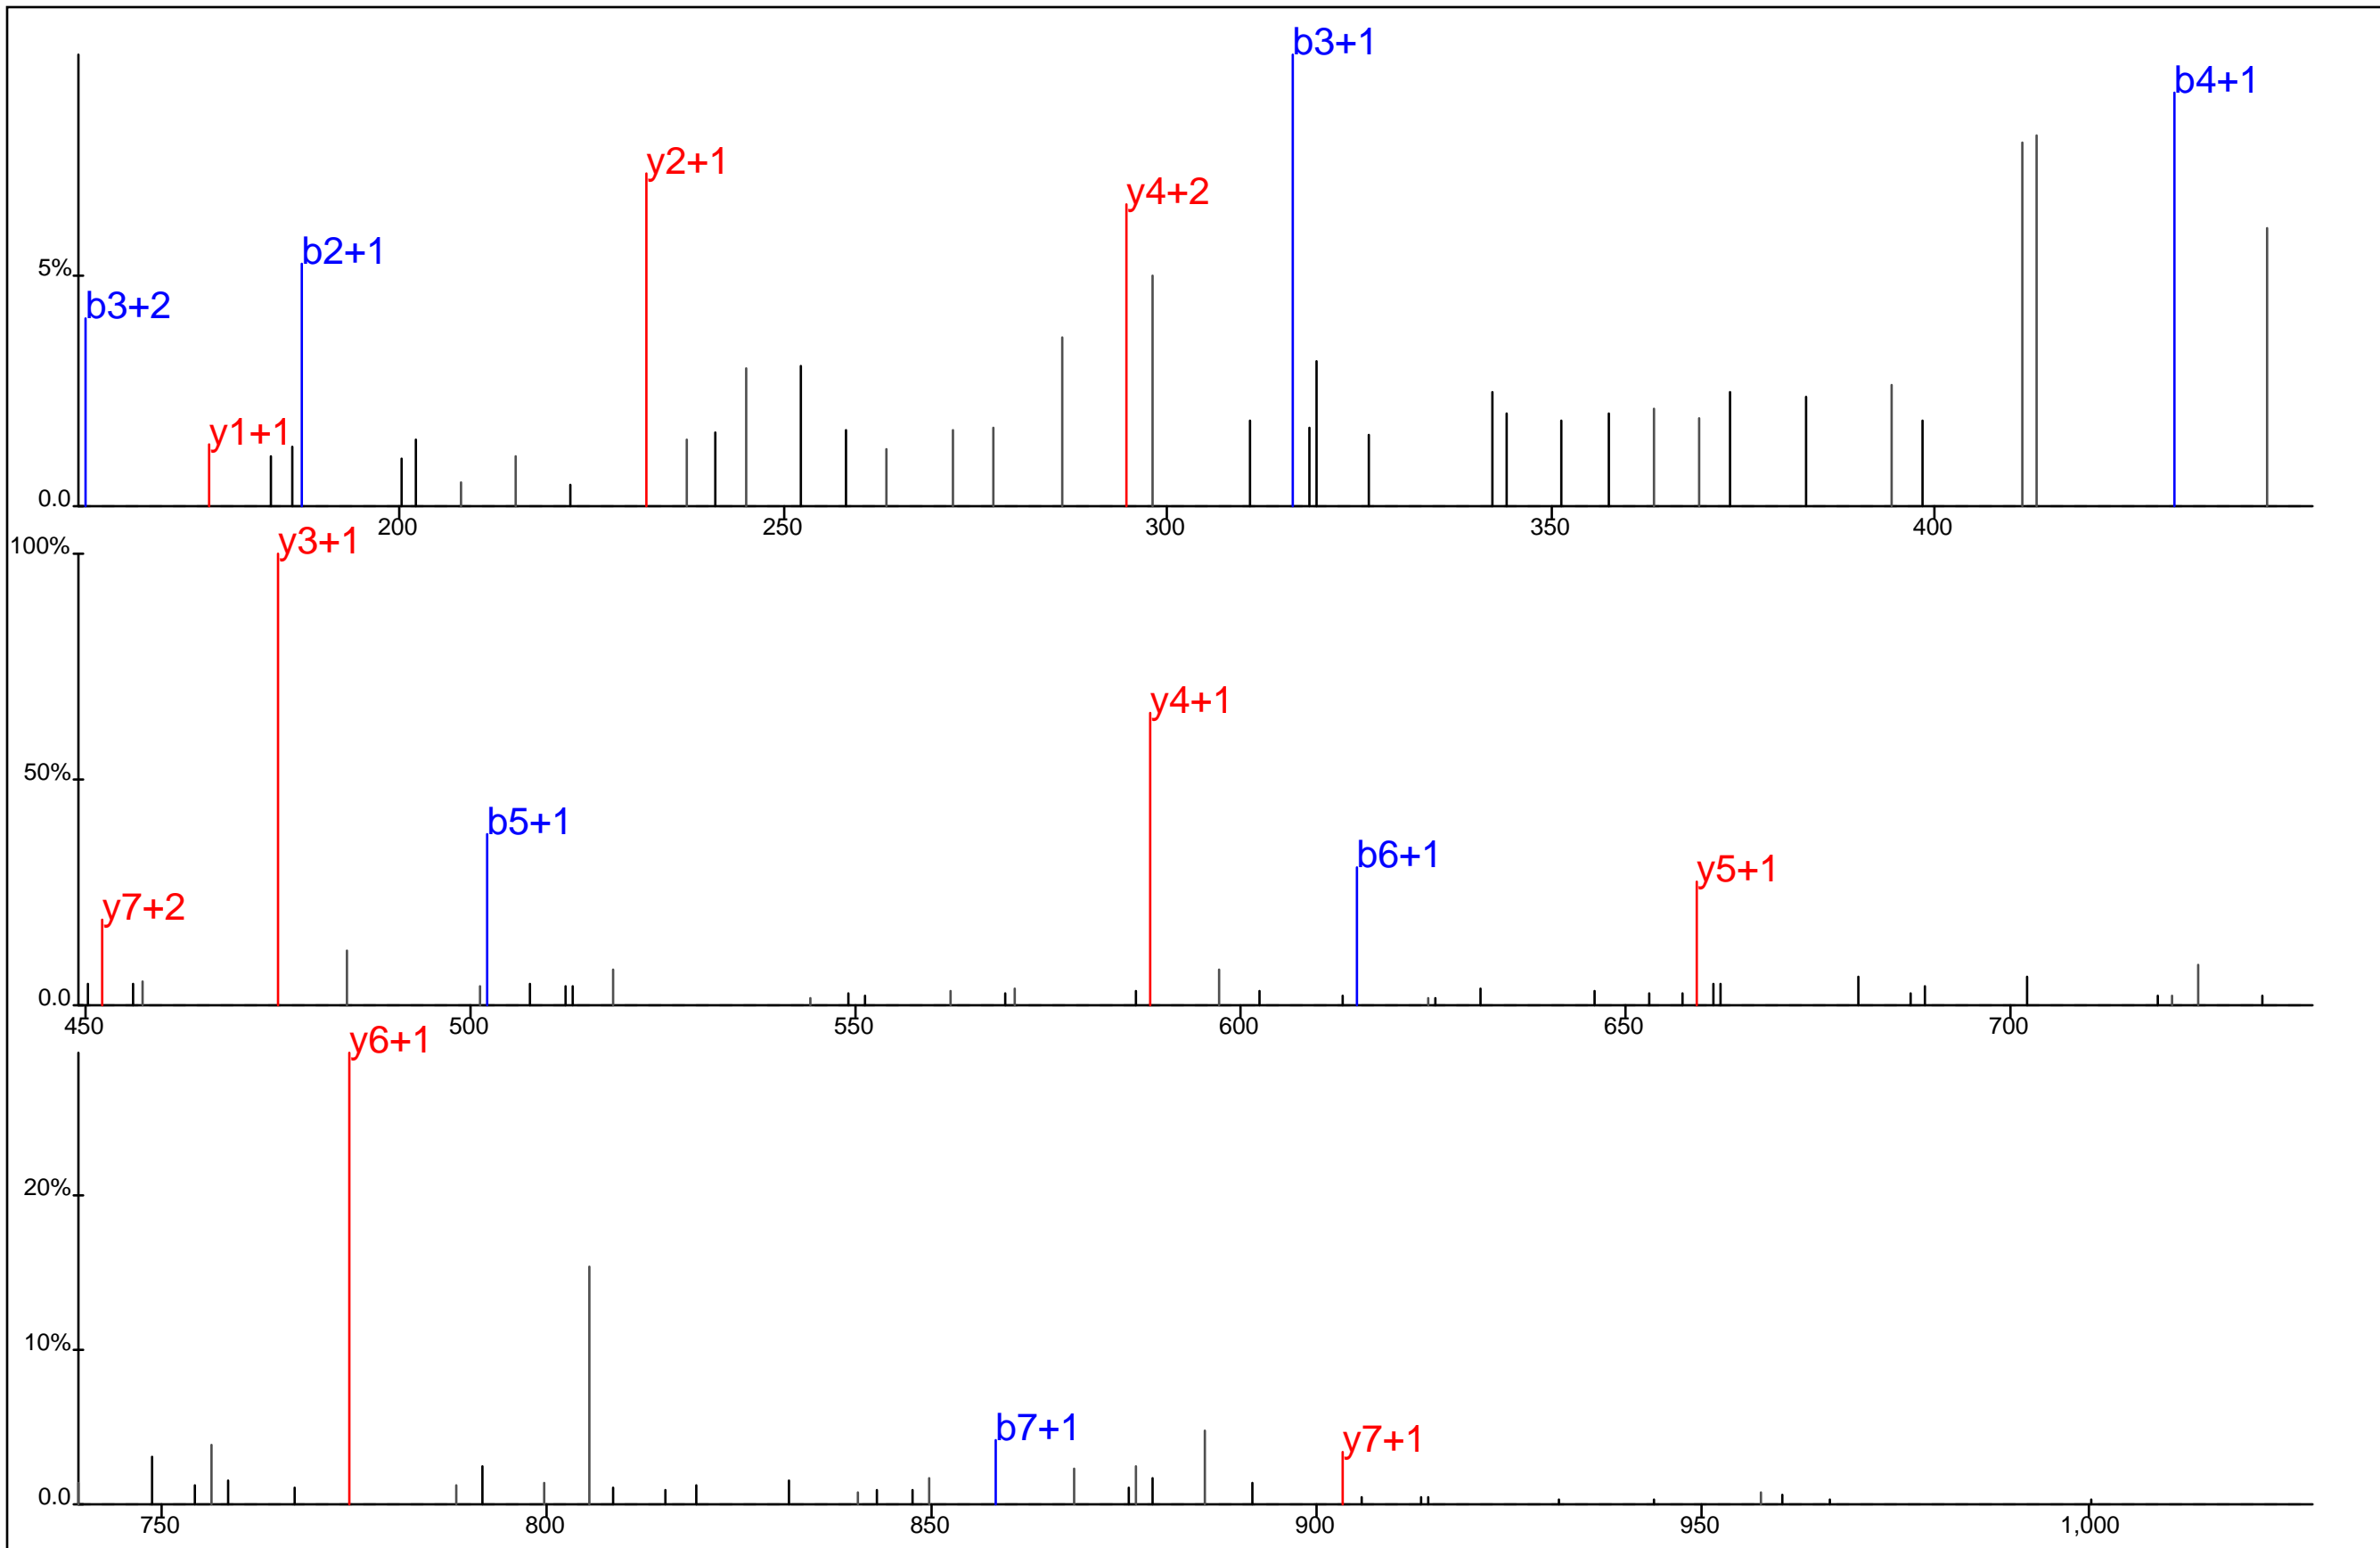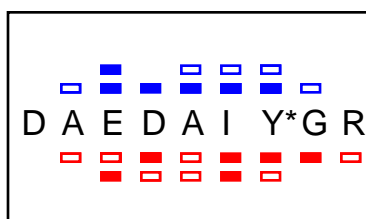

Protein Name: SRp30c  
 gi Accession: 0  
 Precursor Mass: 545.2161+2  
 Delta Mass: 0.028 ppm  
 XCorr: 50.0

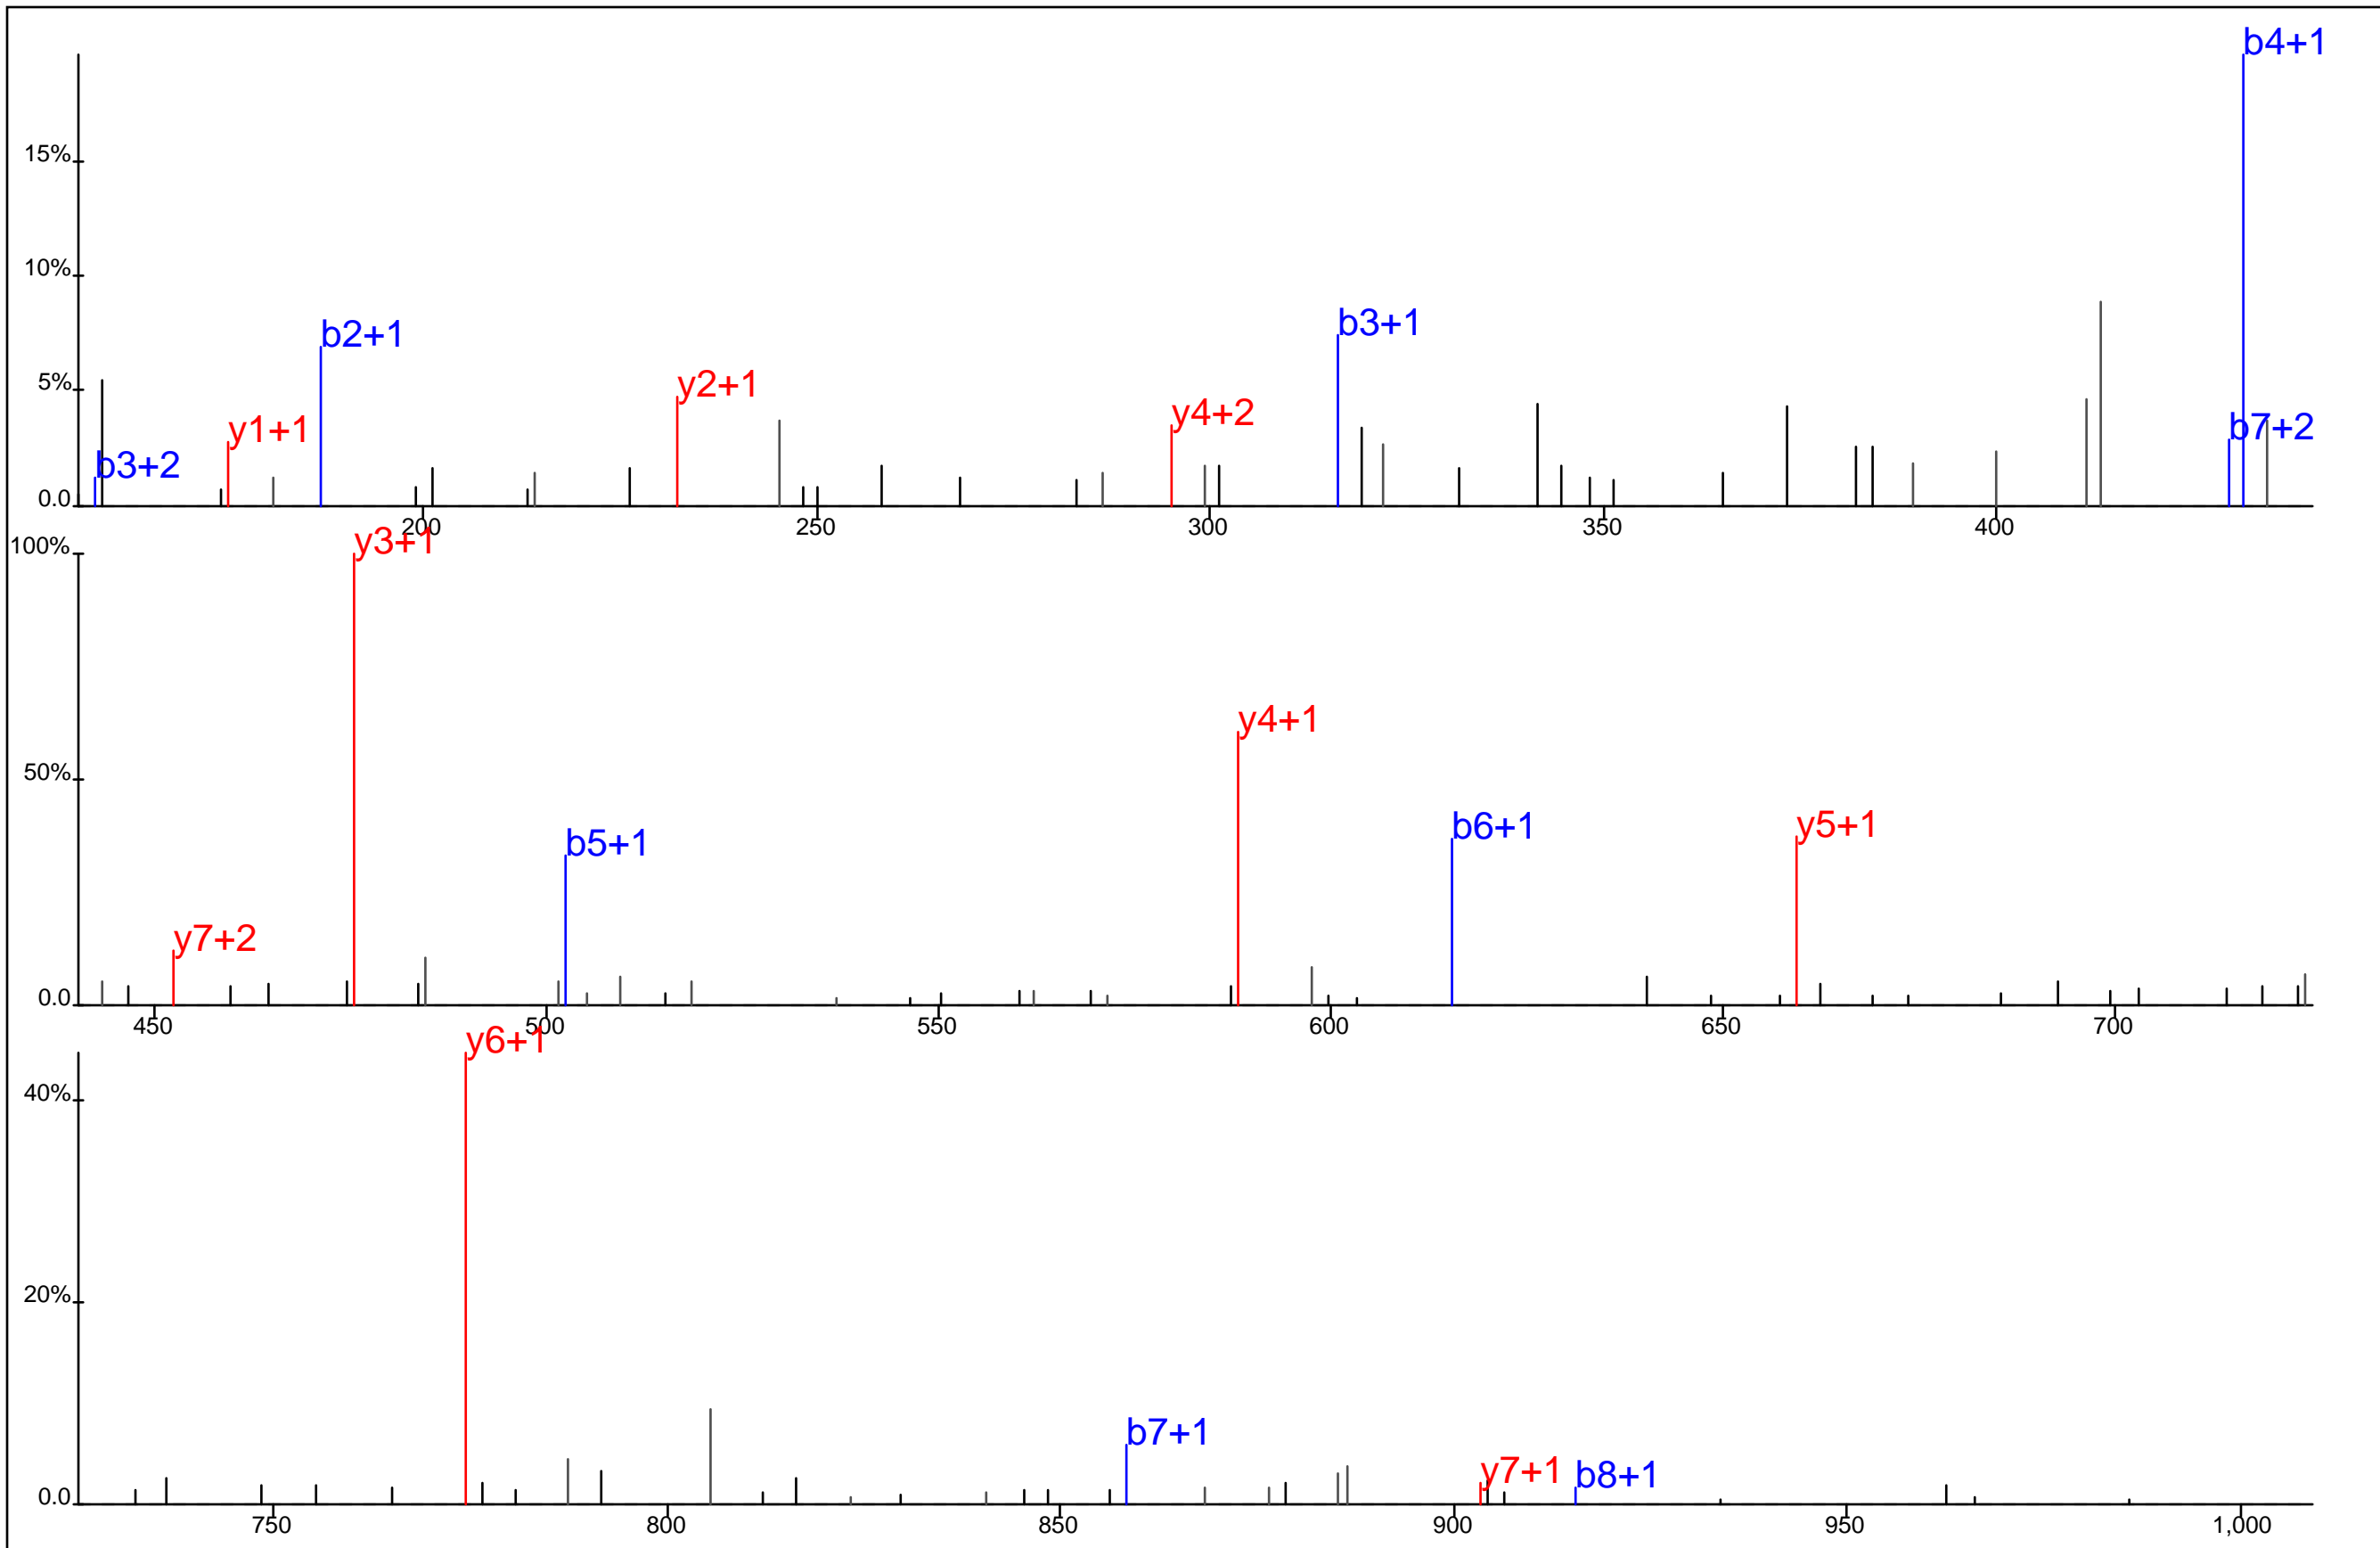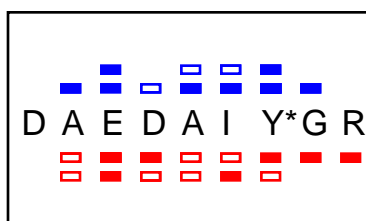

Protein Name: SRp30c  
 gi Accession: 0  
 Precursor Mass: 545.2155+2  
 Delta Mass: 0.980 ppm  
 XCorr: 44.14

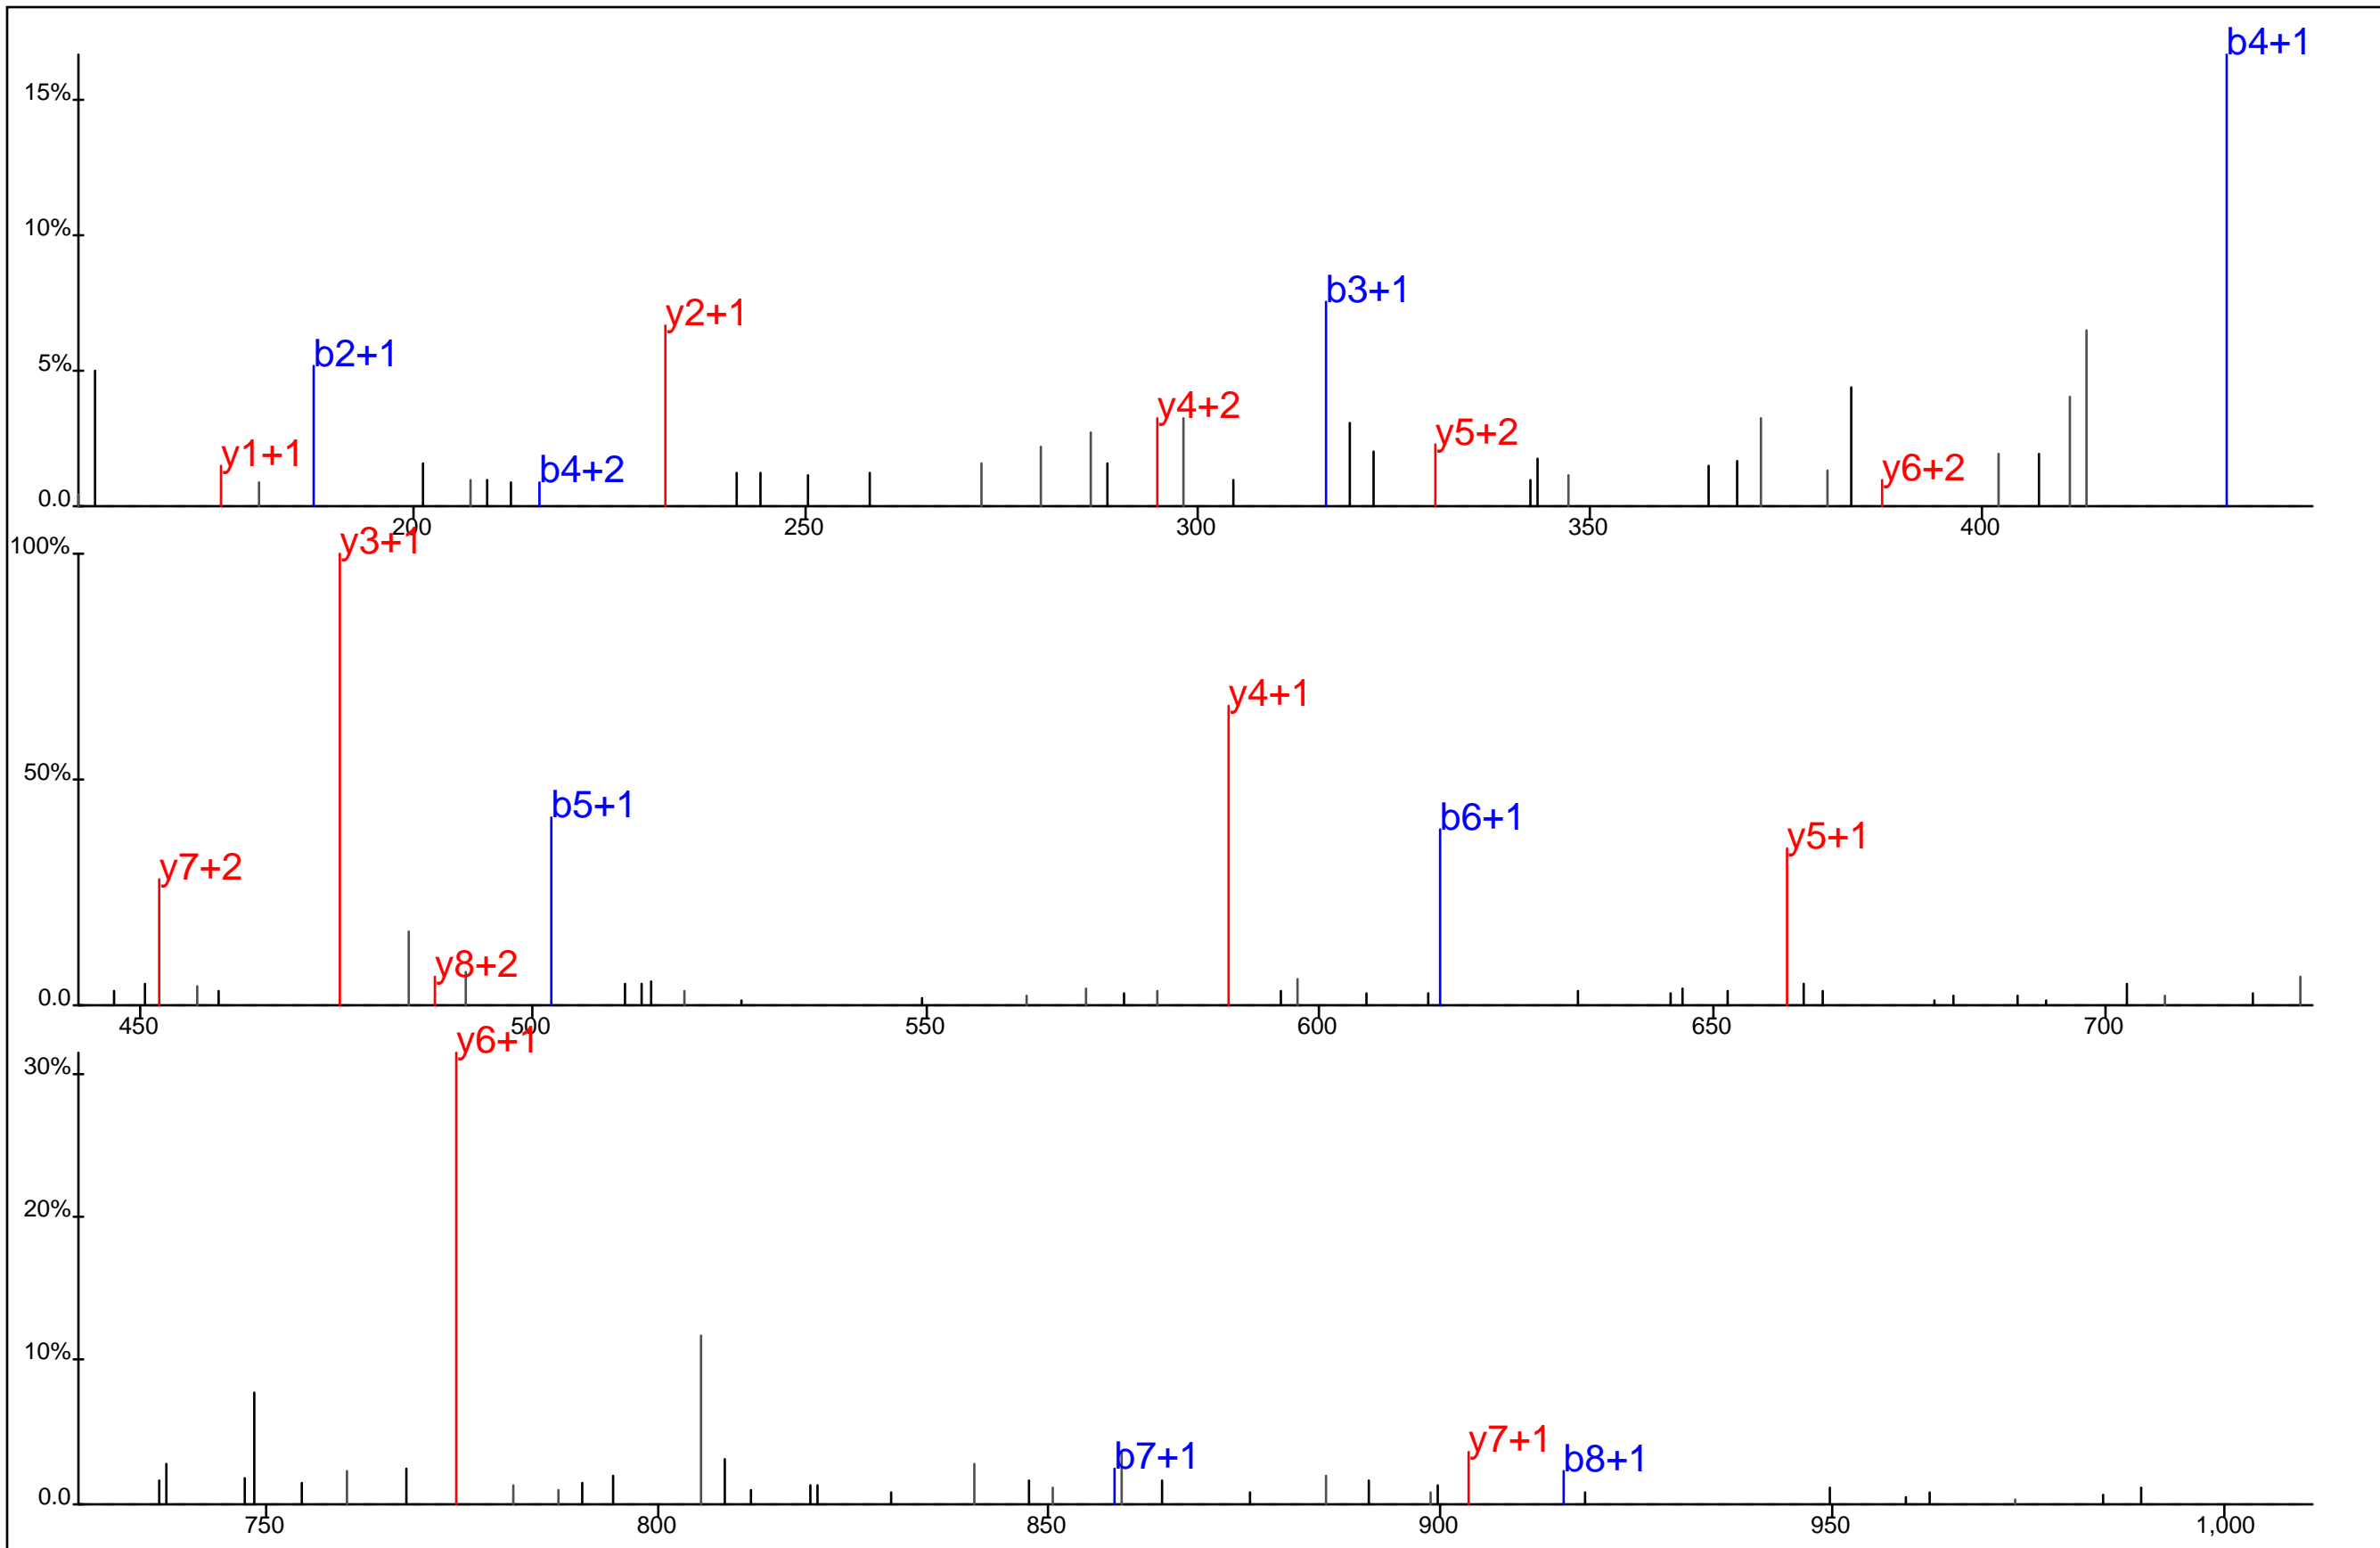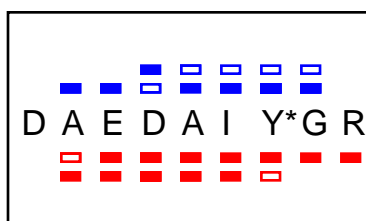

Protein Name: SRp30c  
 gi Accession: 0  
 Precursor Mass: 545.2170+2  
 Delta Mass: 1.709 ppm  
 XCorr: 48.78

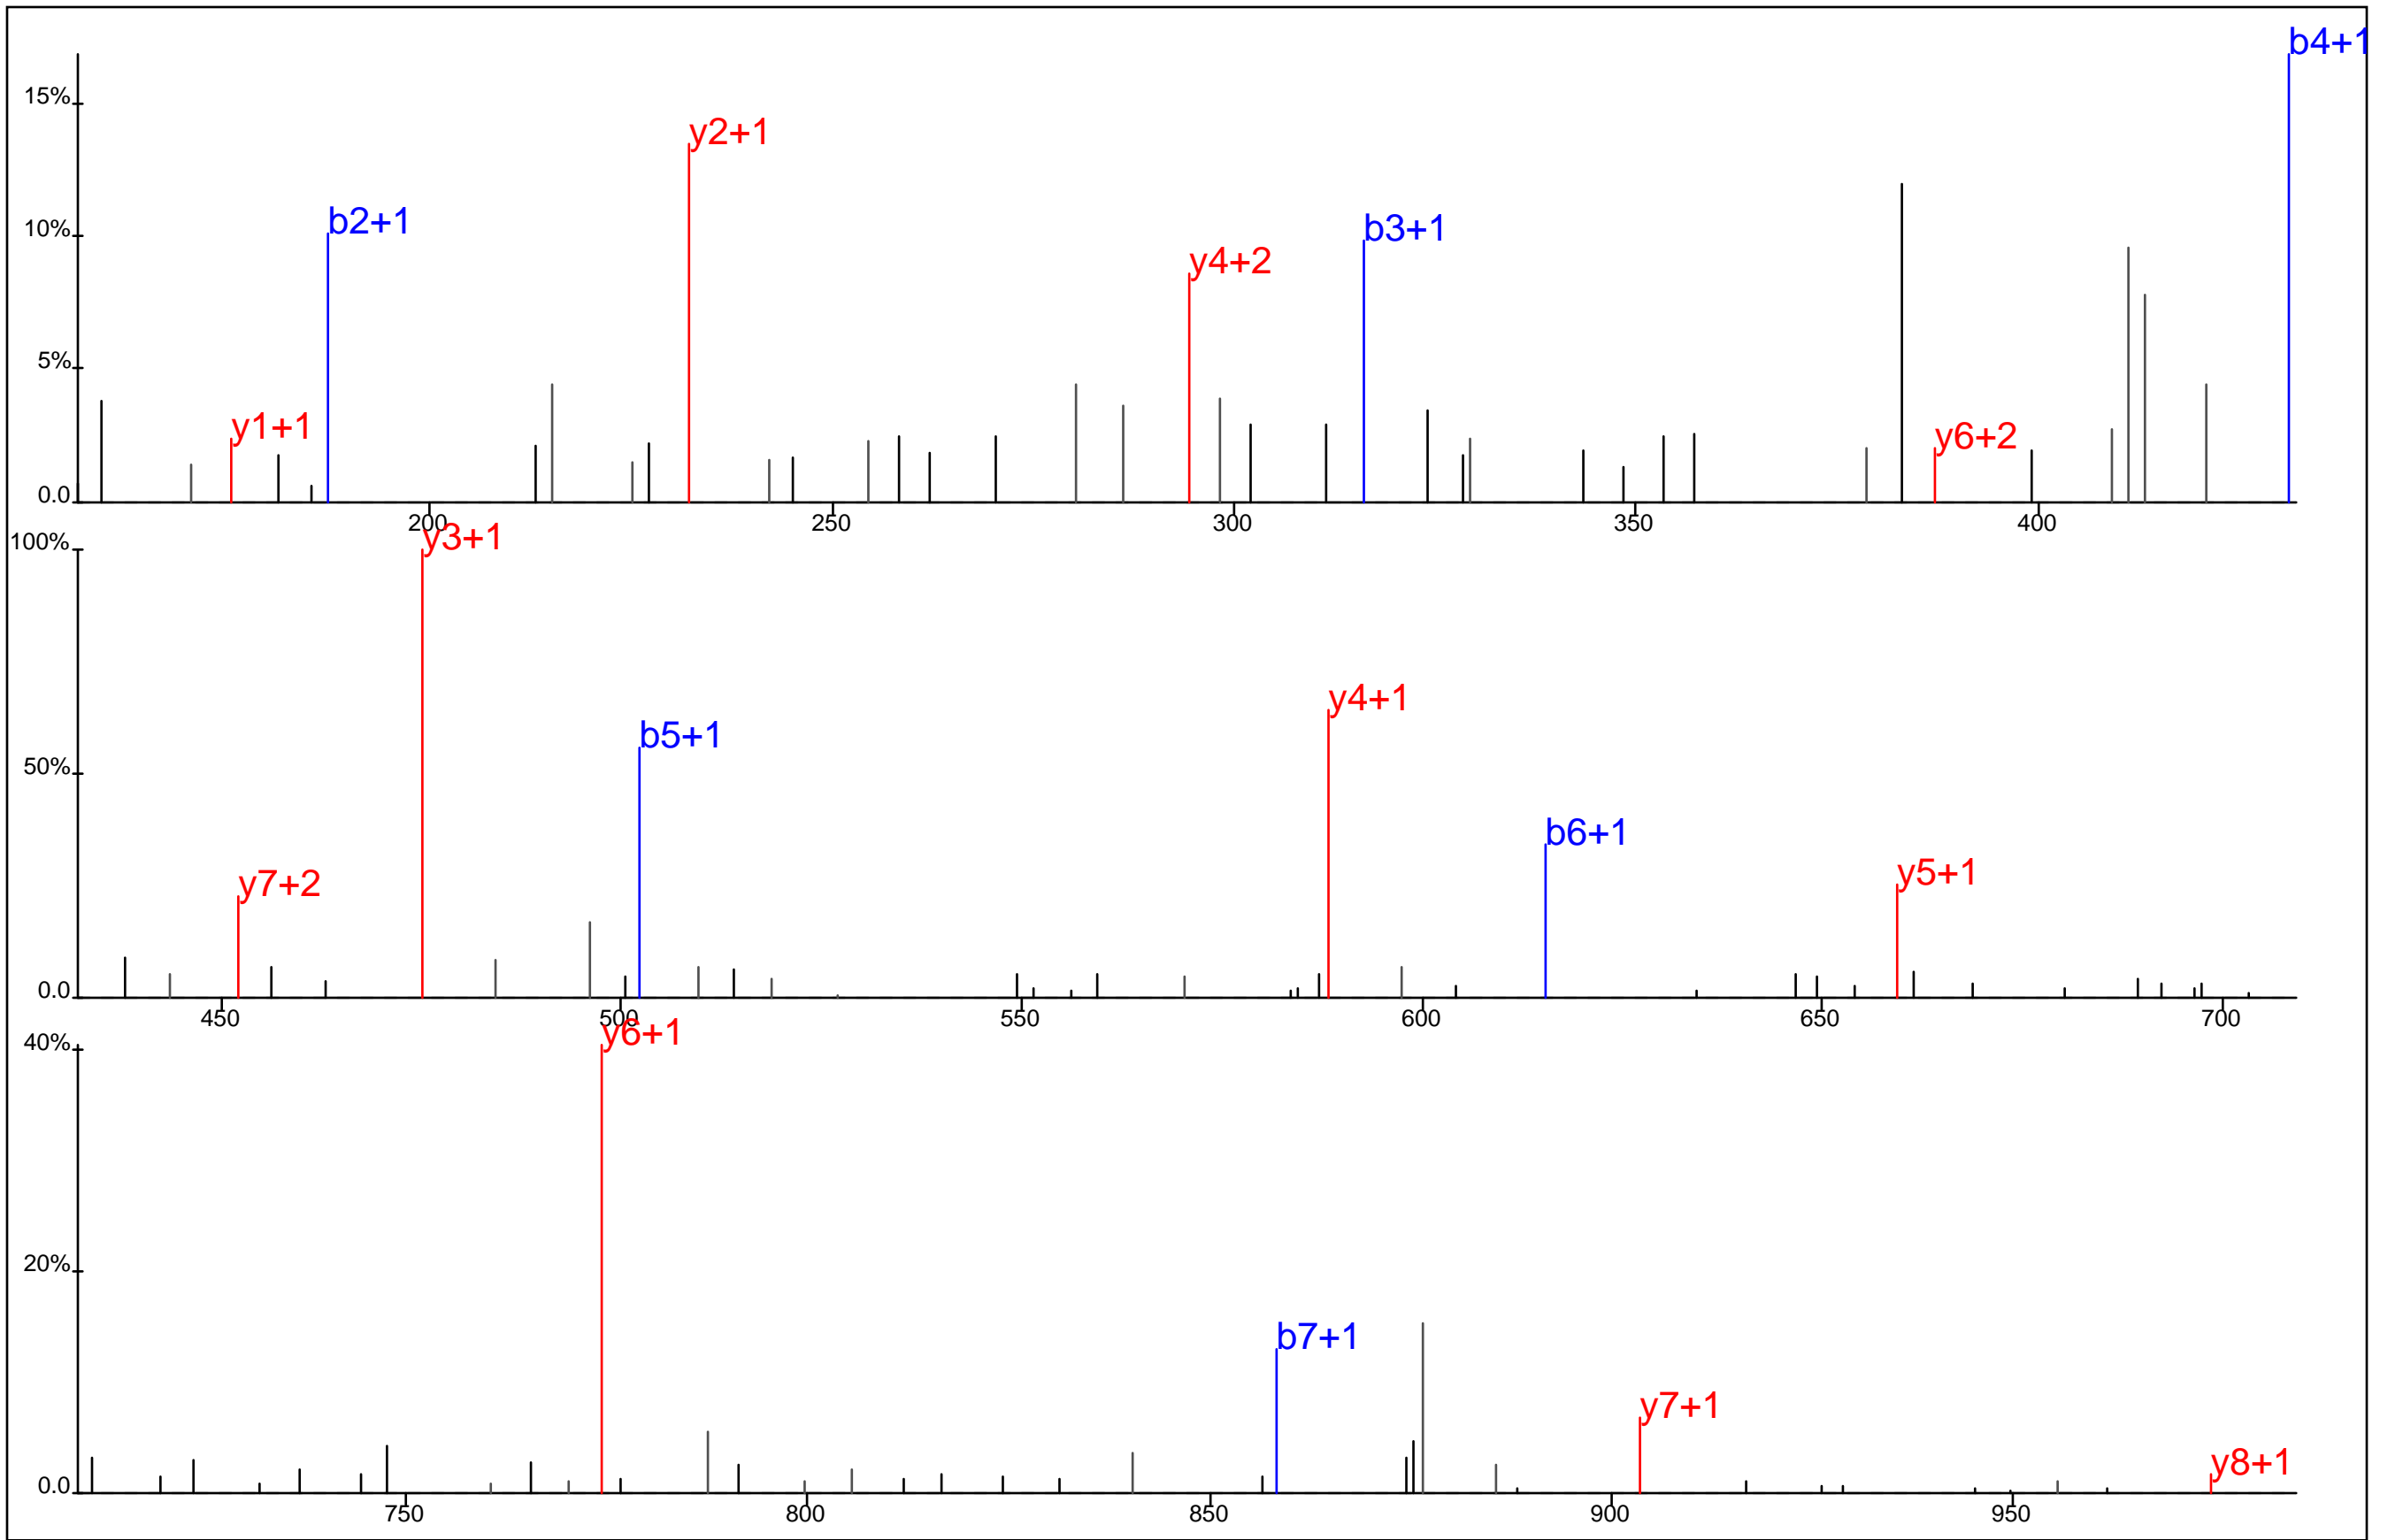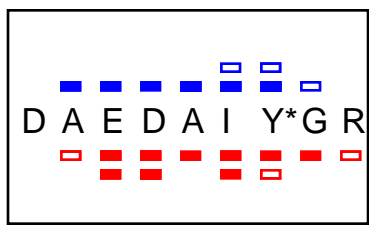

Protein Name: SRp30c  
 gi Accession: 0  
 Precursor Mass: 545.2164+2  
 Delta Mass: 0.589 ppm  
 XCorr: 55.65

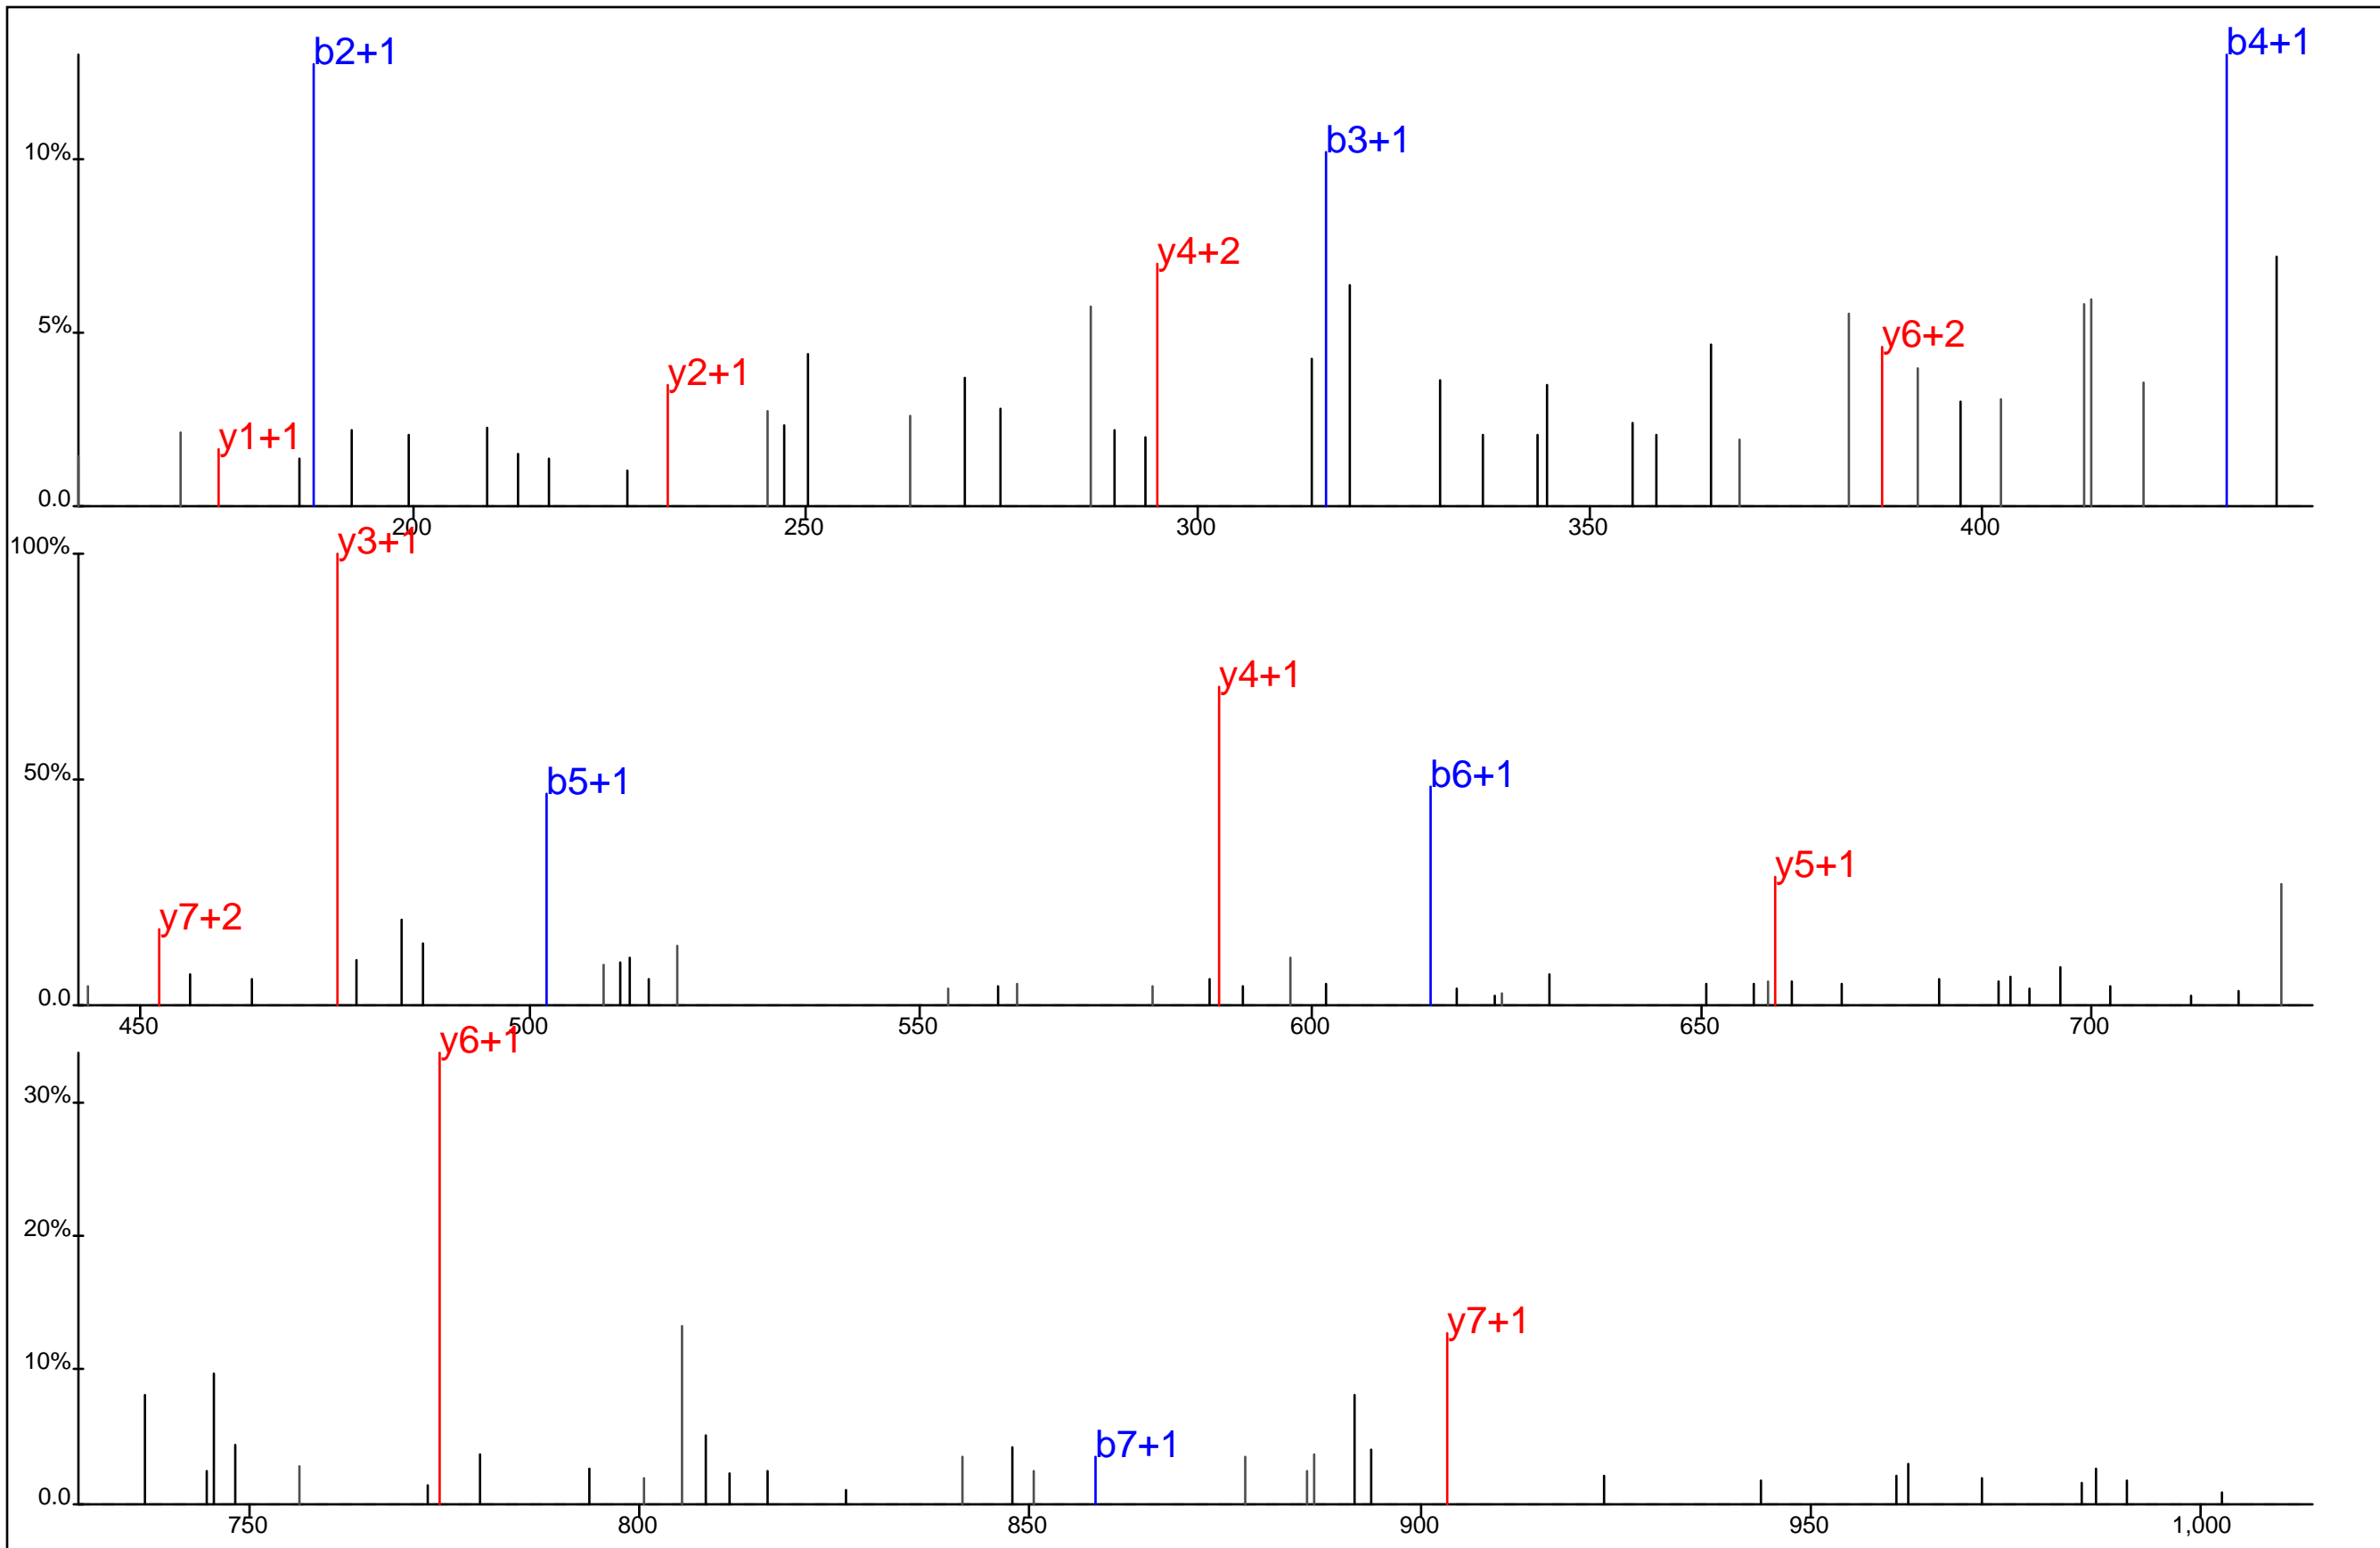

■ □ ■ □ ■ □  
 D A E D A I Y\*G R  
□ ■ ■ □ ■ □ ■ □

Protein Name: SRp30c  
 gi Accession: 0  
 Precursor Mass: 545.2173+2  
 Delta Mass: 2.381 ppm  
 XCorr: 39.86

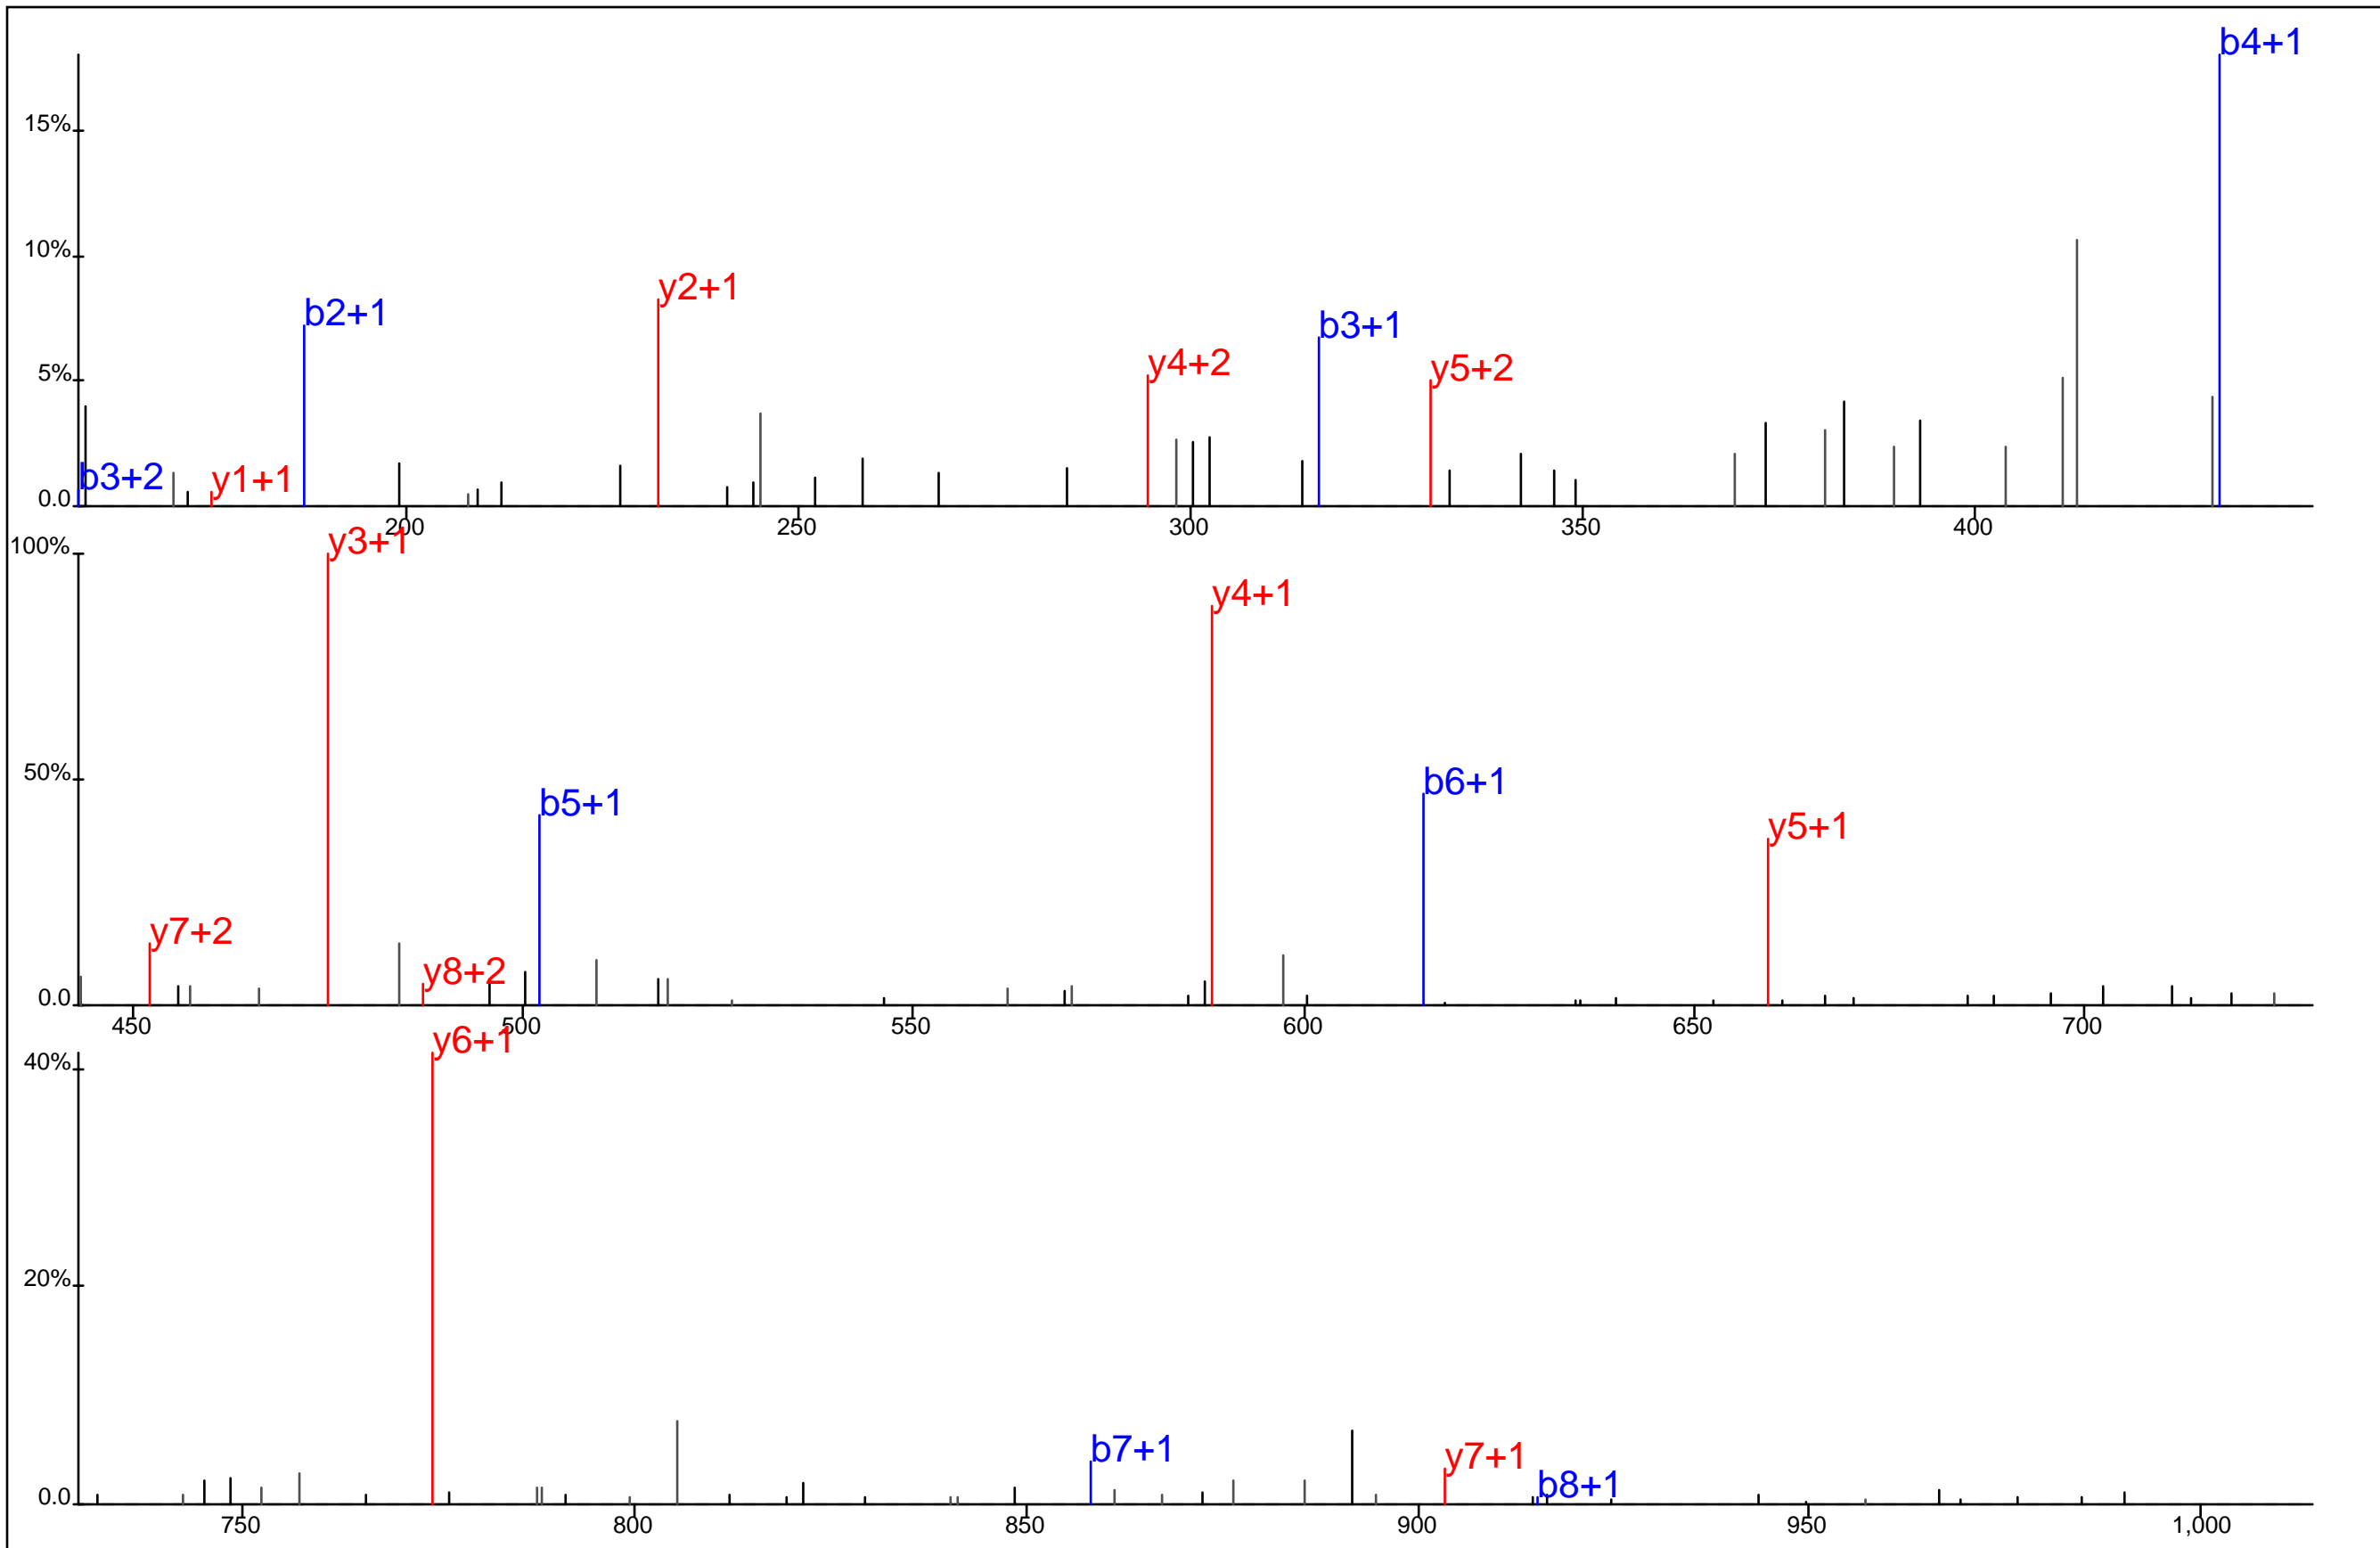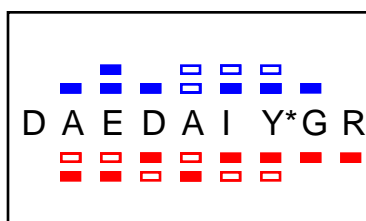

Protein Name: SRp30c  
 gi Accession: 0  
 Precursor Mass: 545.2169+2  
 Delta Mass: 1.597 ppm  
 XCorr: 47.79

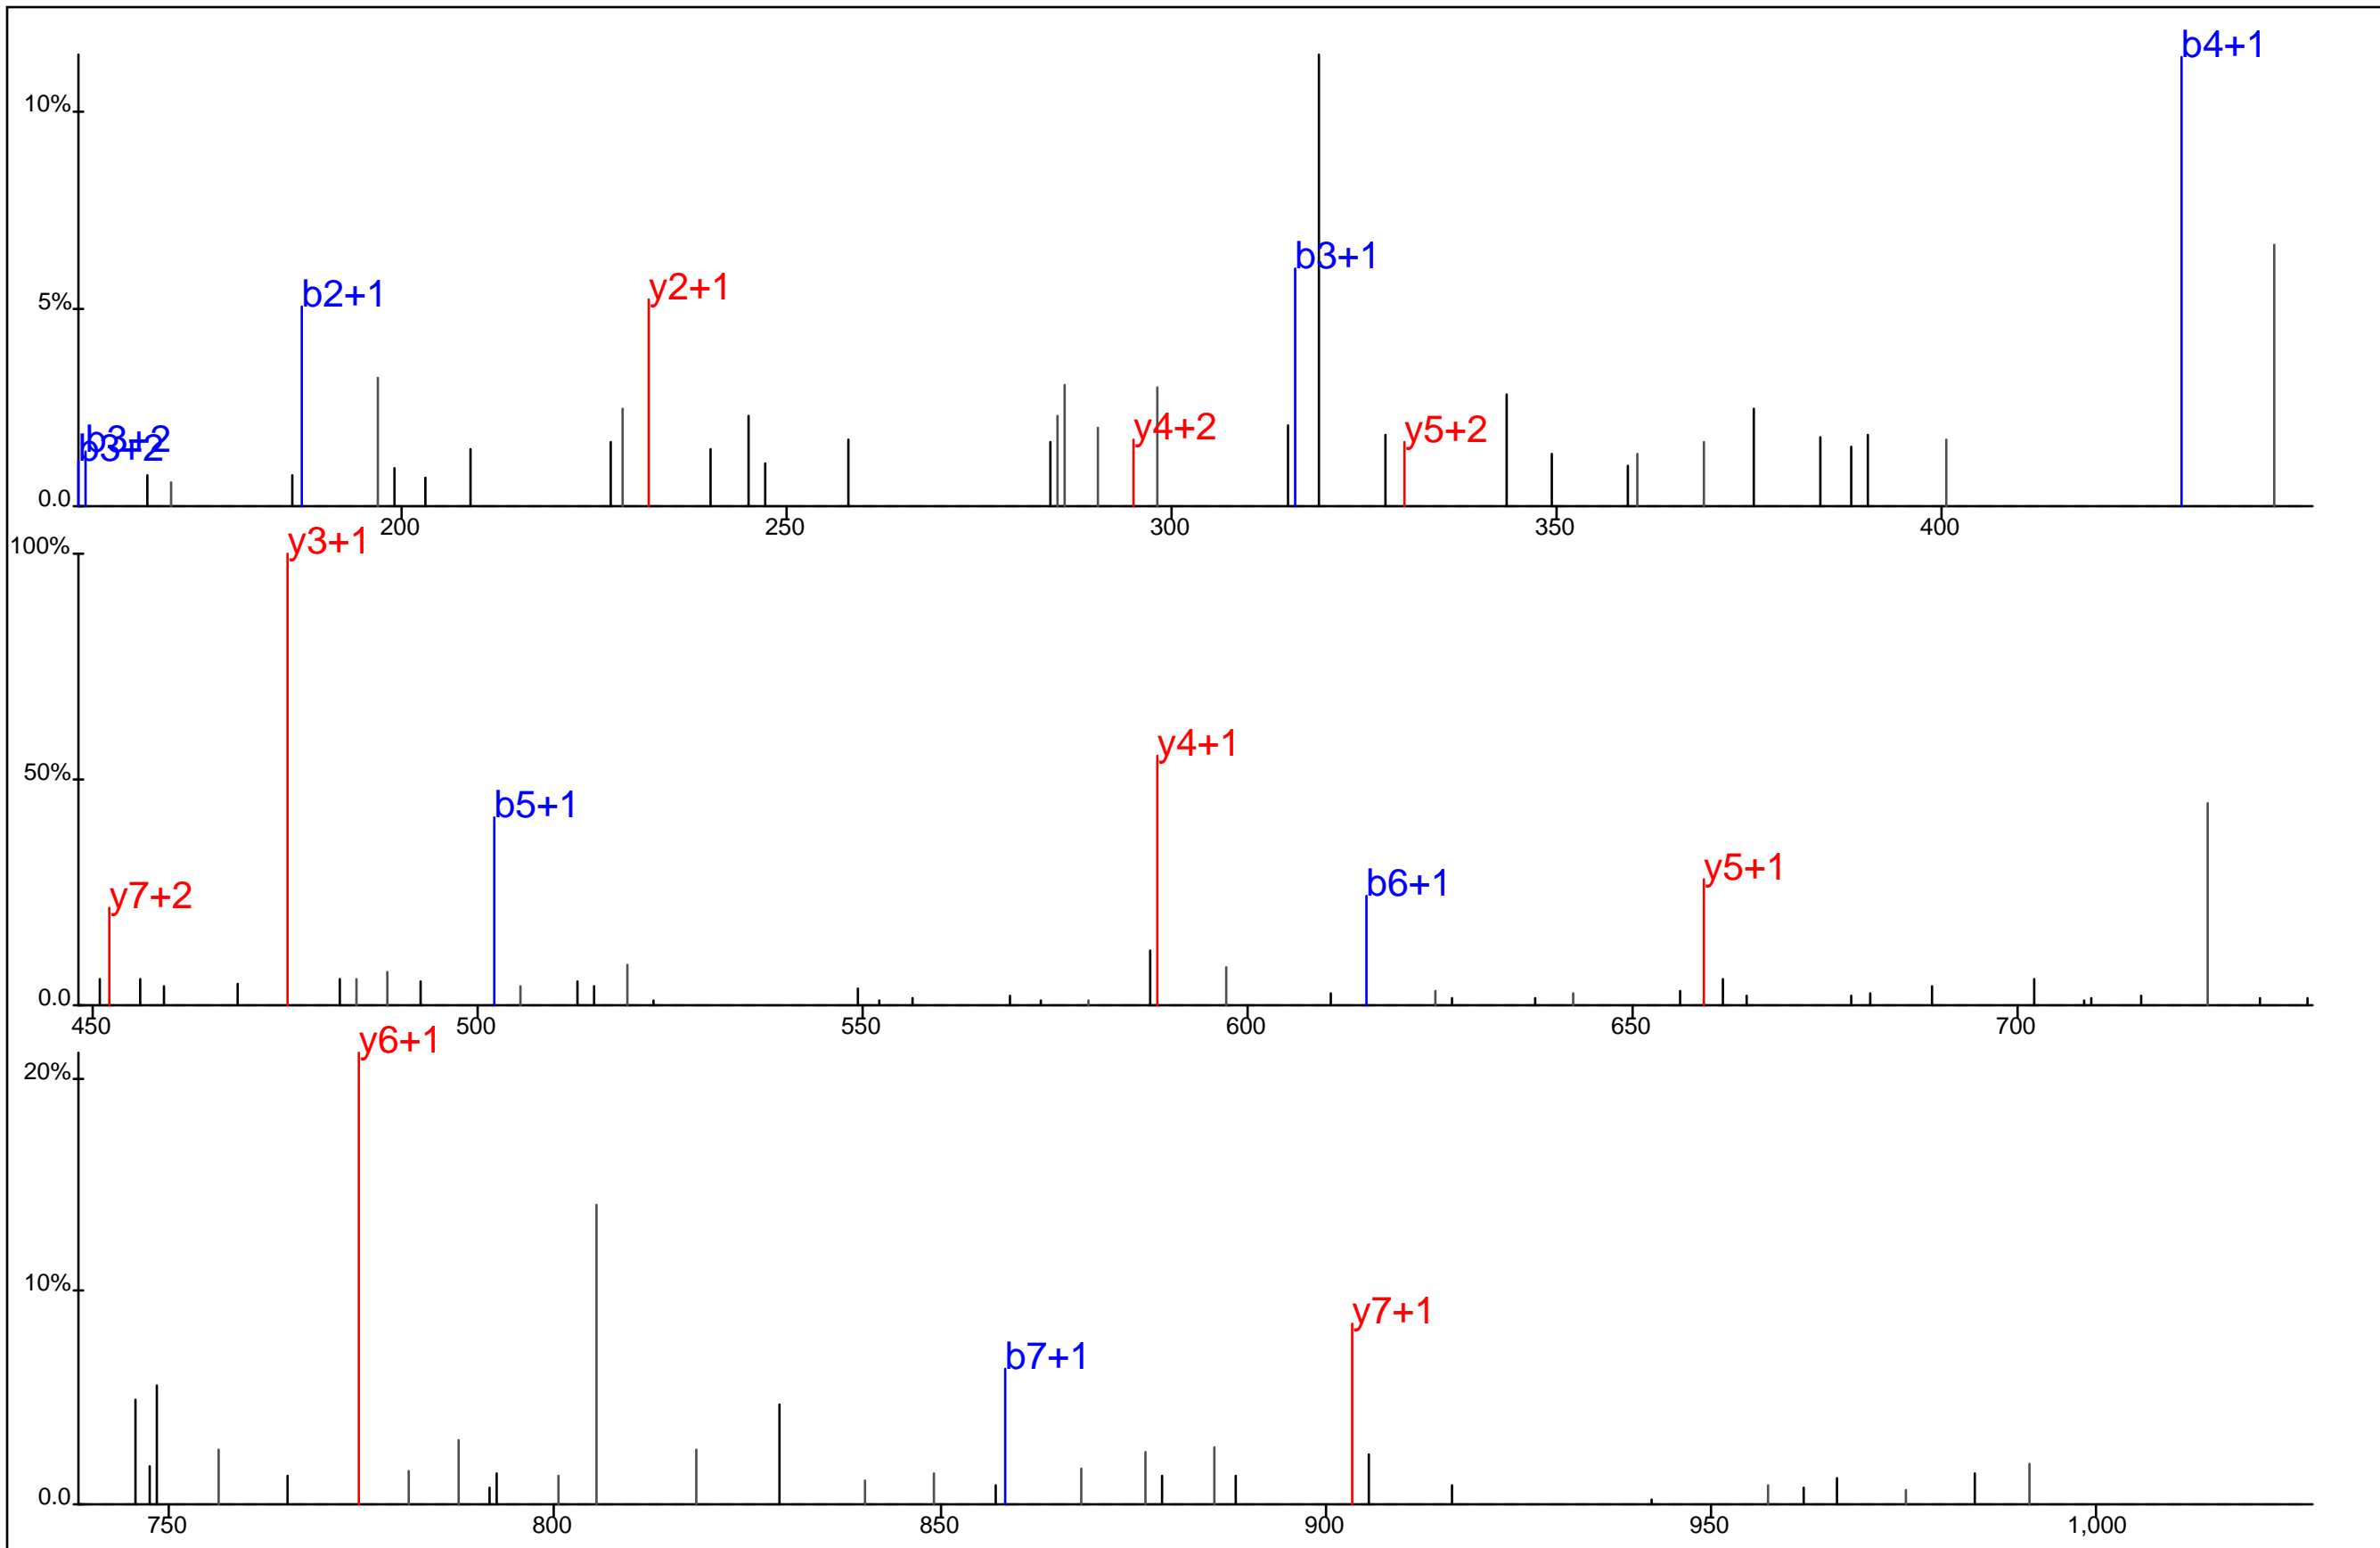

D A E D A I Y\* G R

Protein Name: SRp30c  
 gi Accession: 0  
 Precursor Mass: 545.2164+2  
 Delta Mass: 0.701 ppm  
 XCorr: 45.33



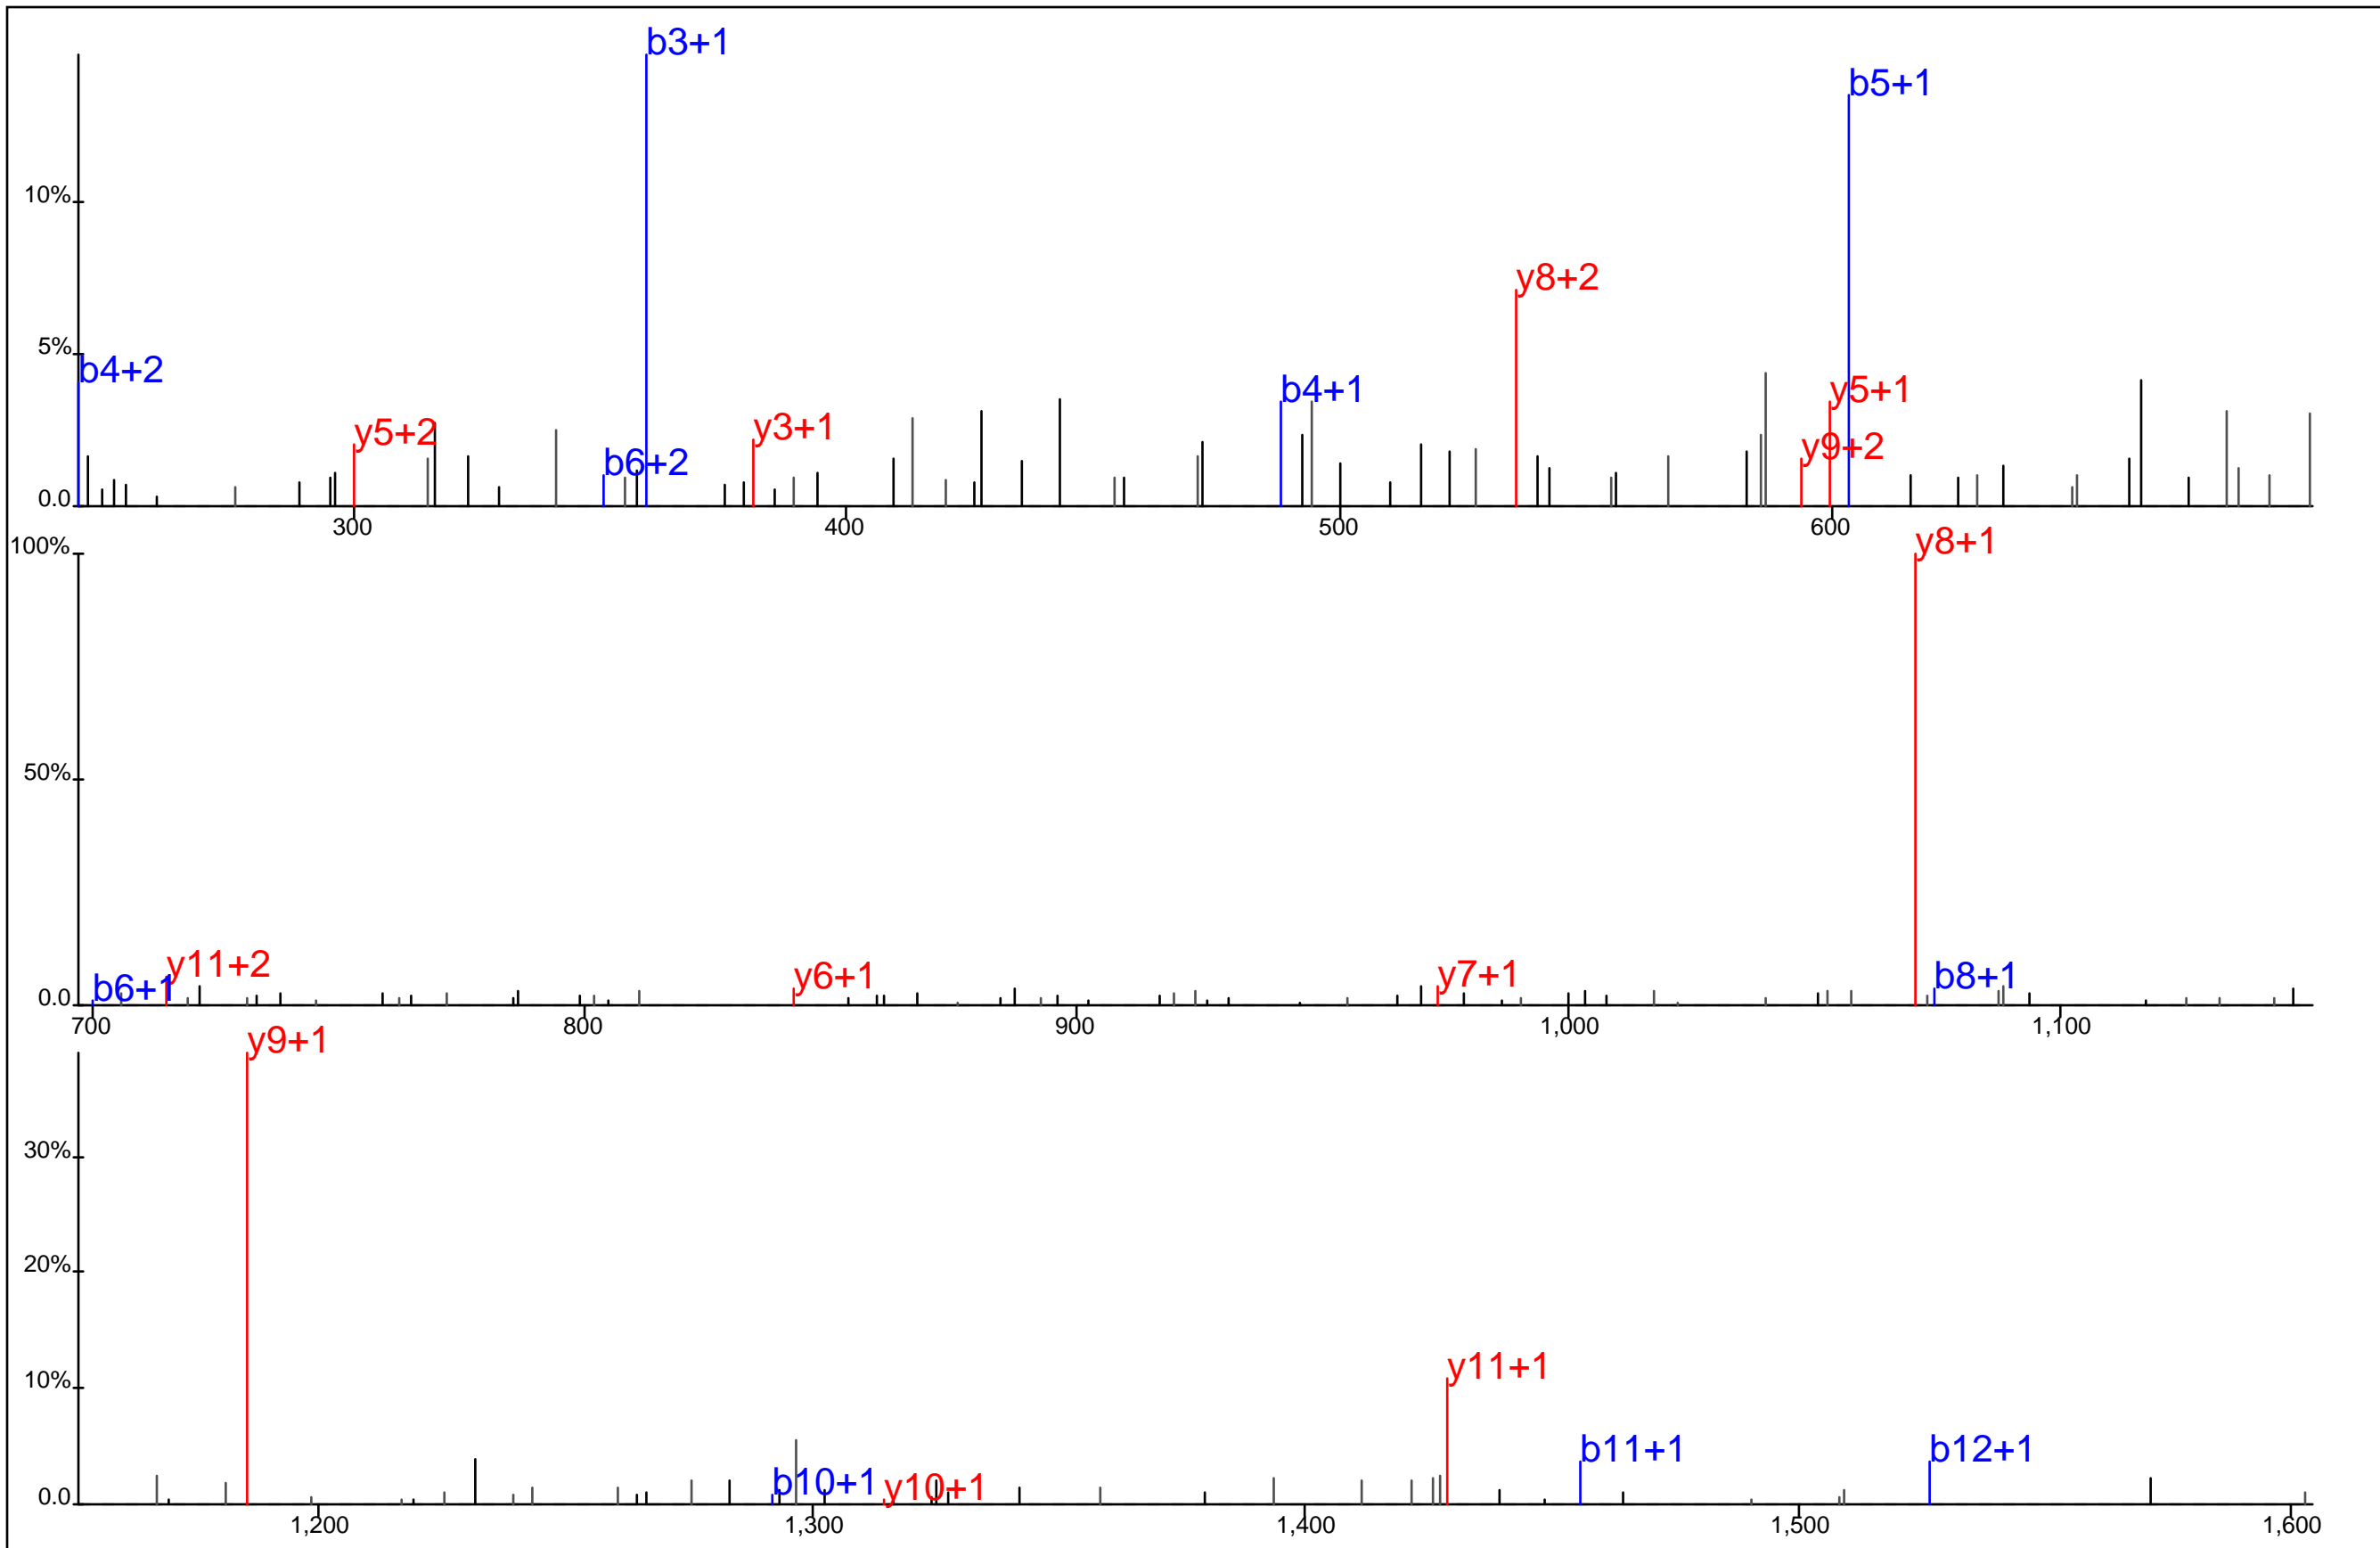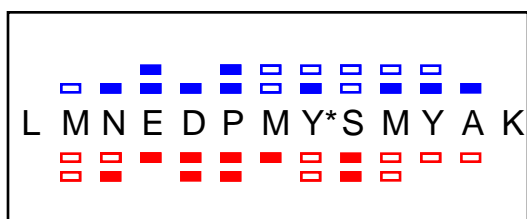

Protein Name: STAM1  
 gi Accession: 0  
 Precursor Mass: 836.8260+2  
 Delta Mass: 0.550 ppm  
 XCorr: 36.7

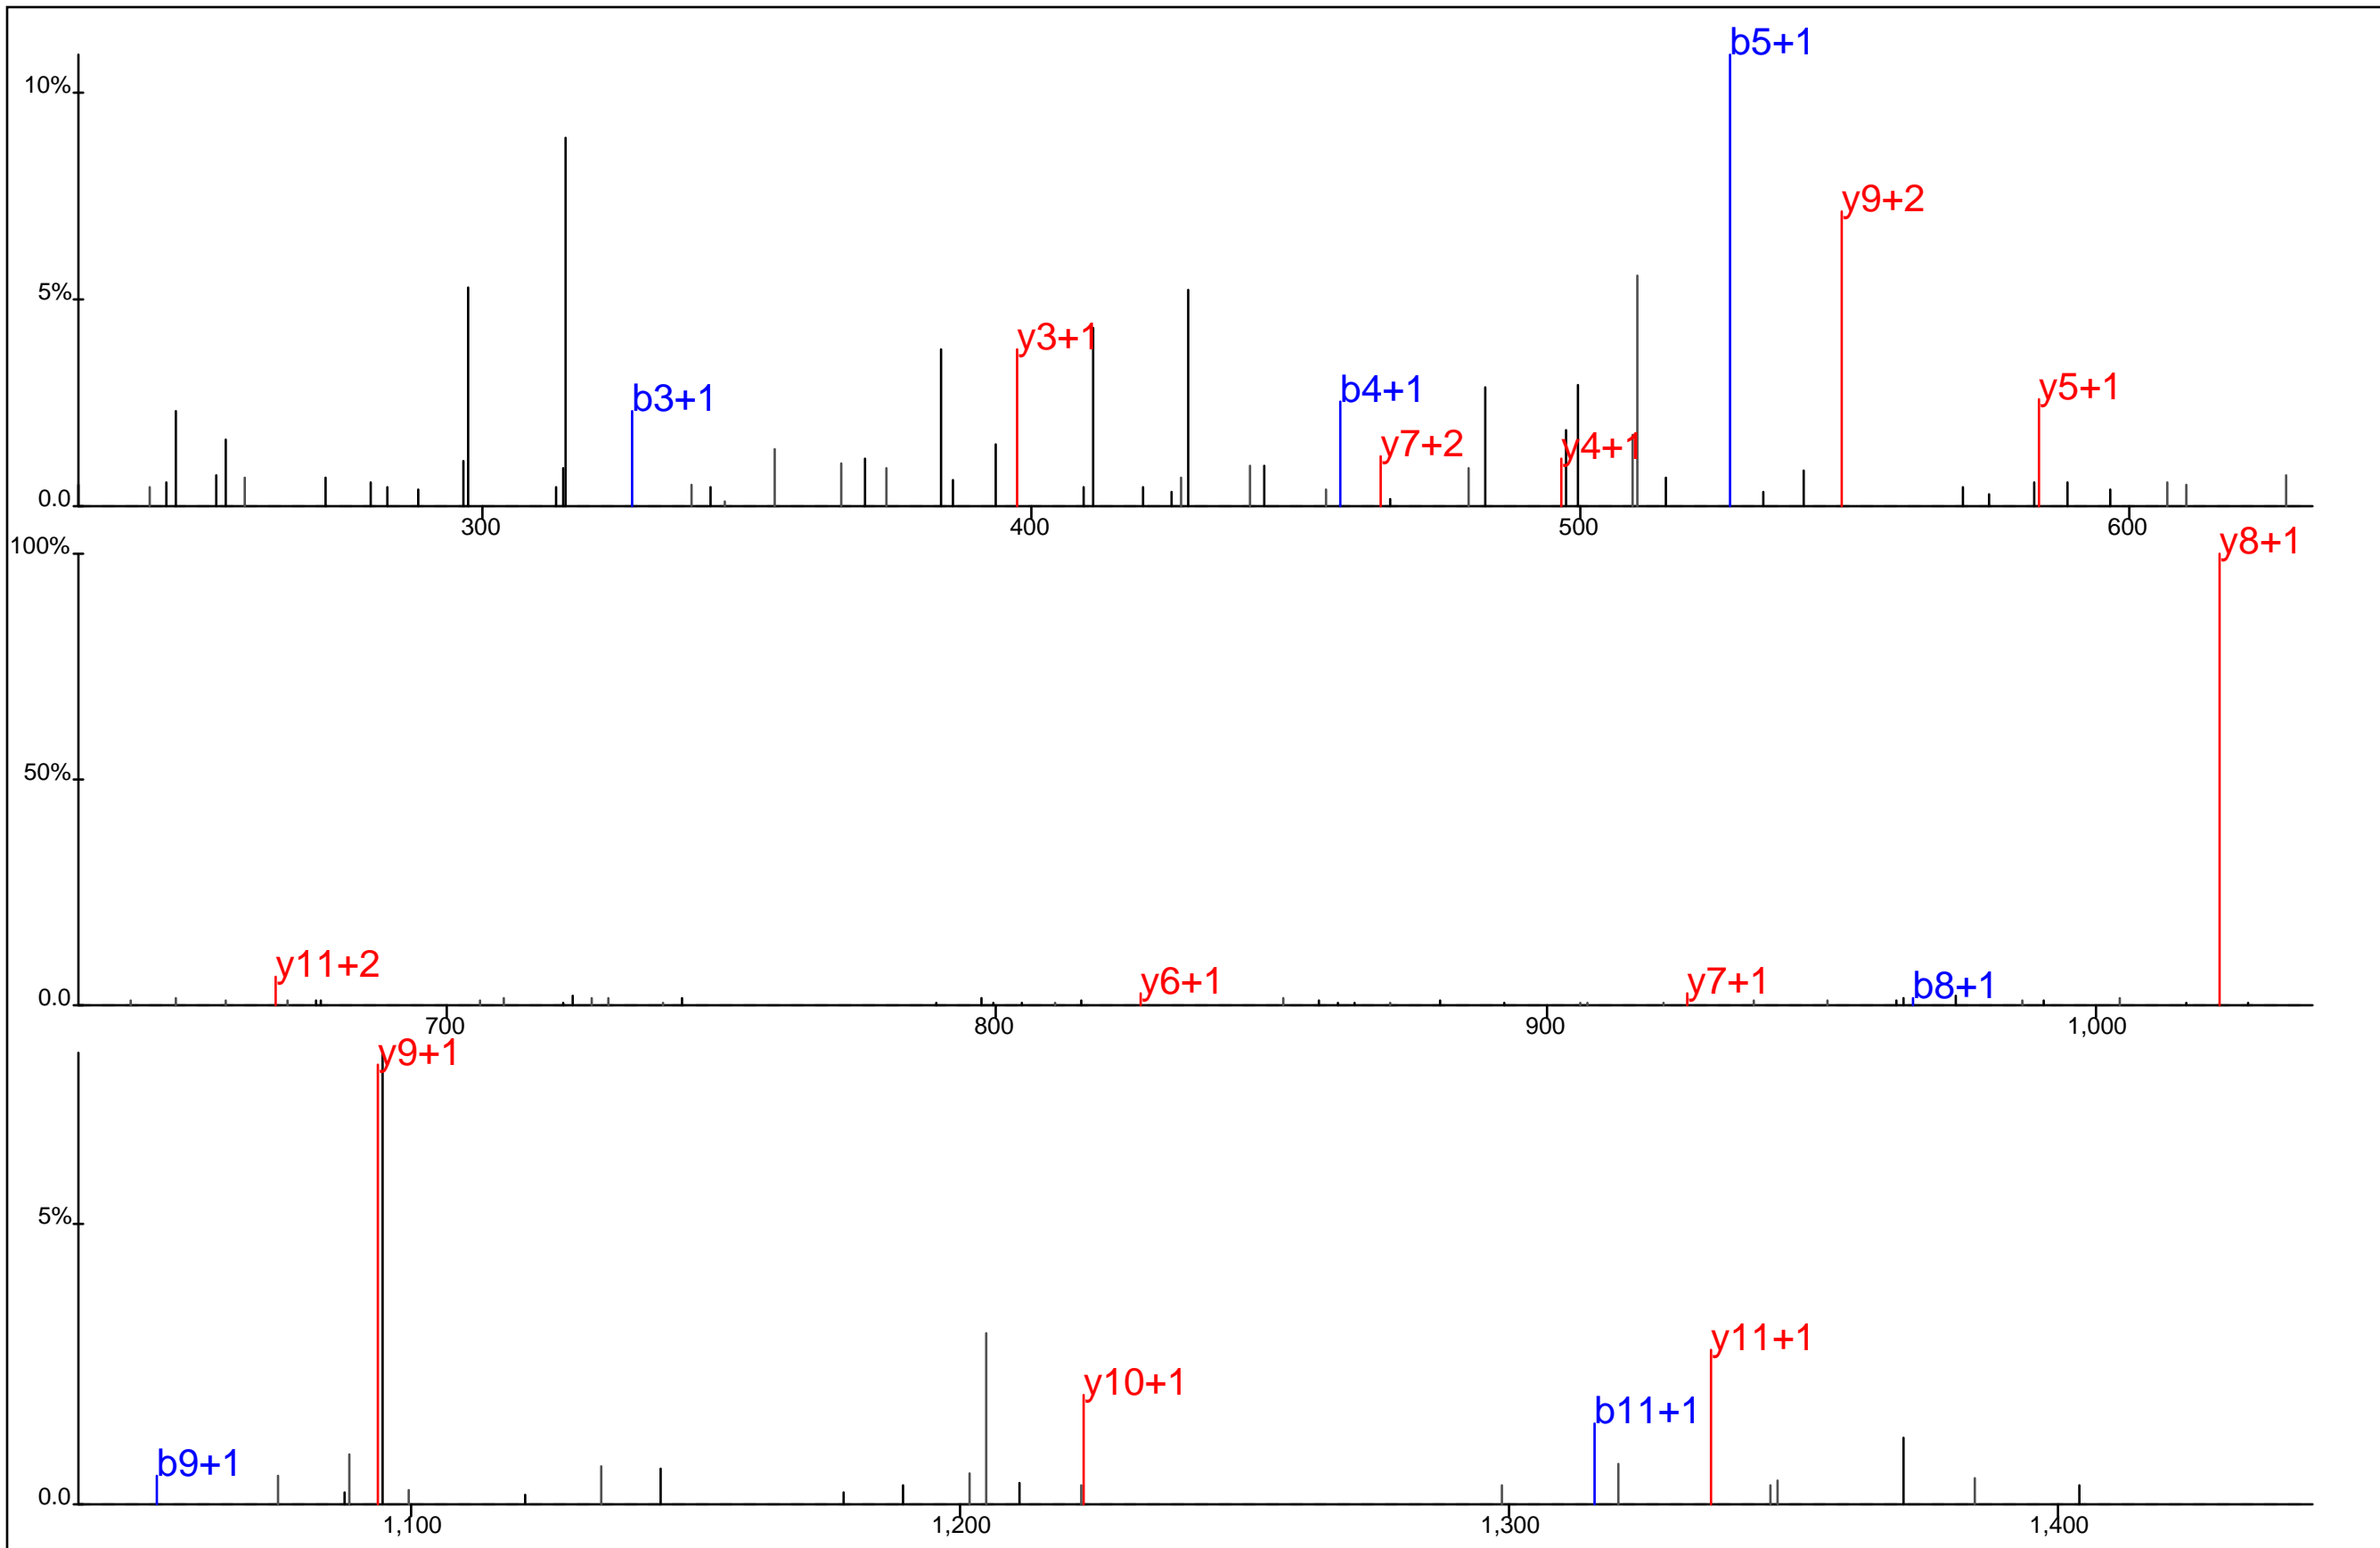

■ ■ ■ ■ ■ ■ ■ ■ ■ ■  
 L V N E A P V Y\* S V Y S K  
□ □ □ □ □ □ □ □ □ □

Protein Name: STAM2  
 gi Accession: 0  
 Precursor Mass: 774.8716+2  
 Delta Mass: 0.882 ppm  
 XCorr: 44.76

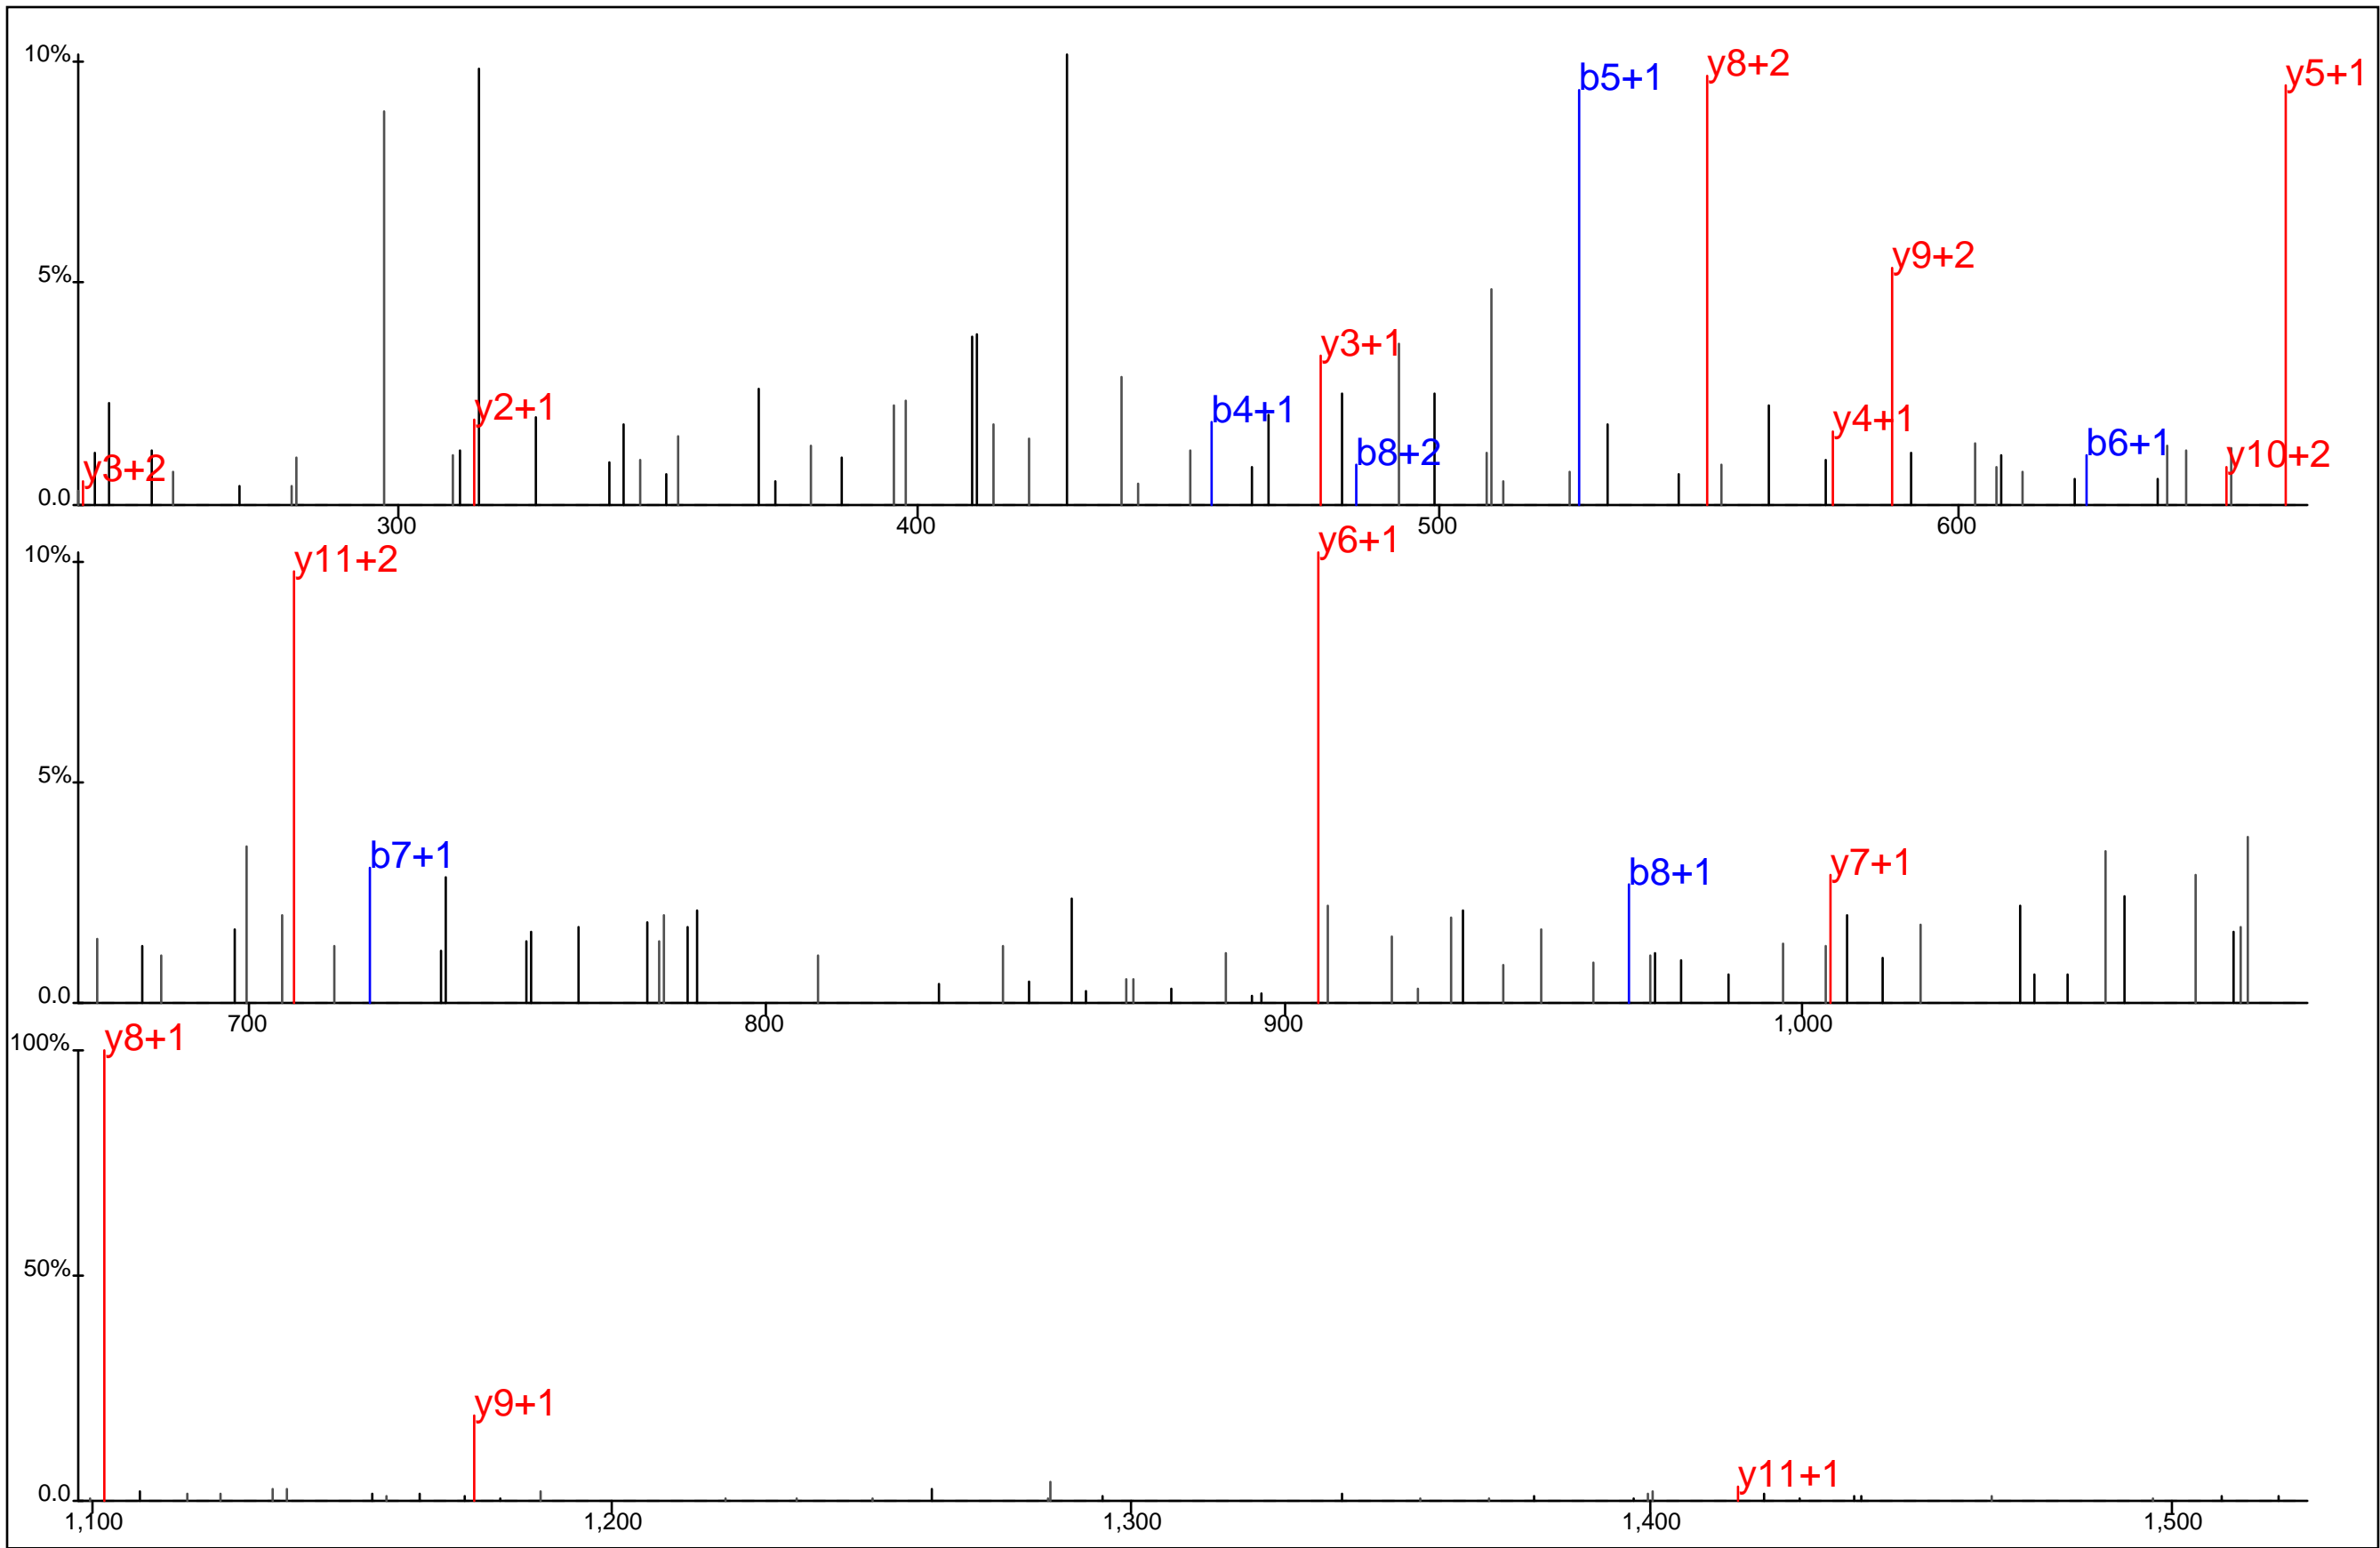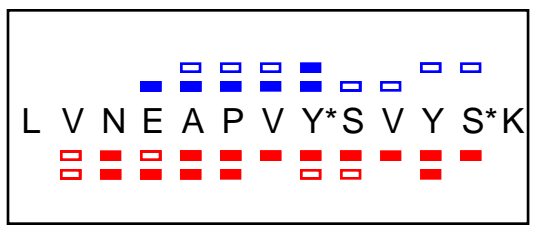

Protein Name: STAM2  
 gi Accession: 0  
 Precursor Mass: 814.8564+2  
 Delta Mass: 2.924 ppm  
 XCorr: 38.82



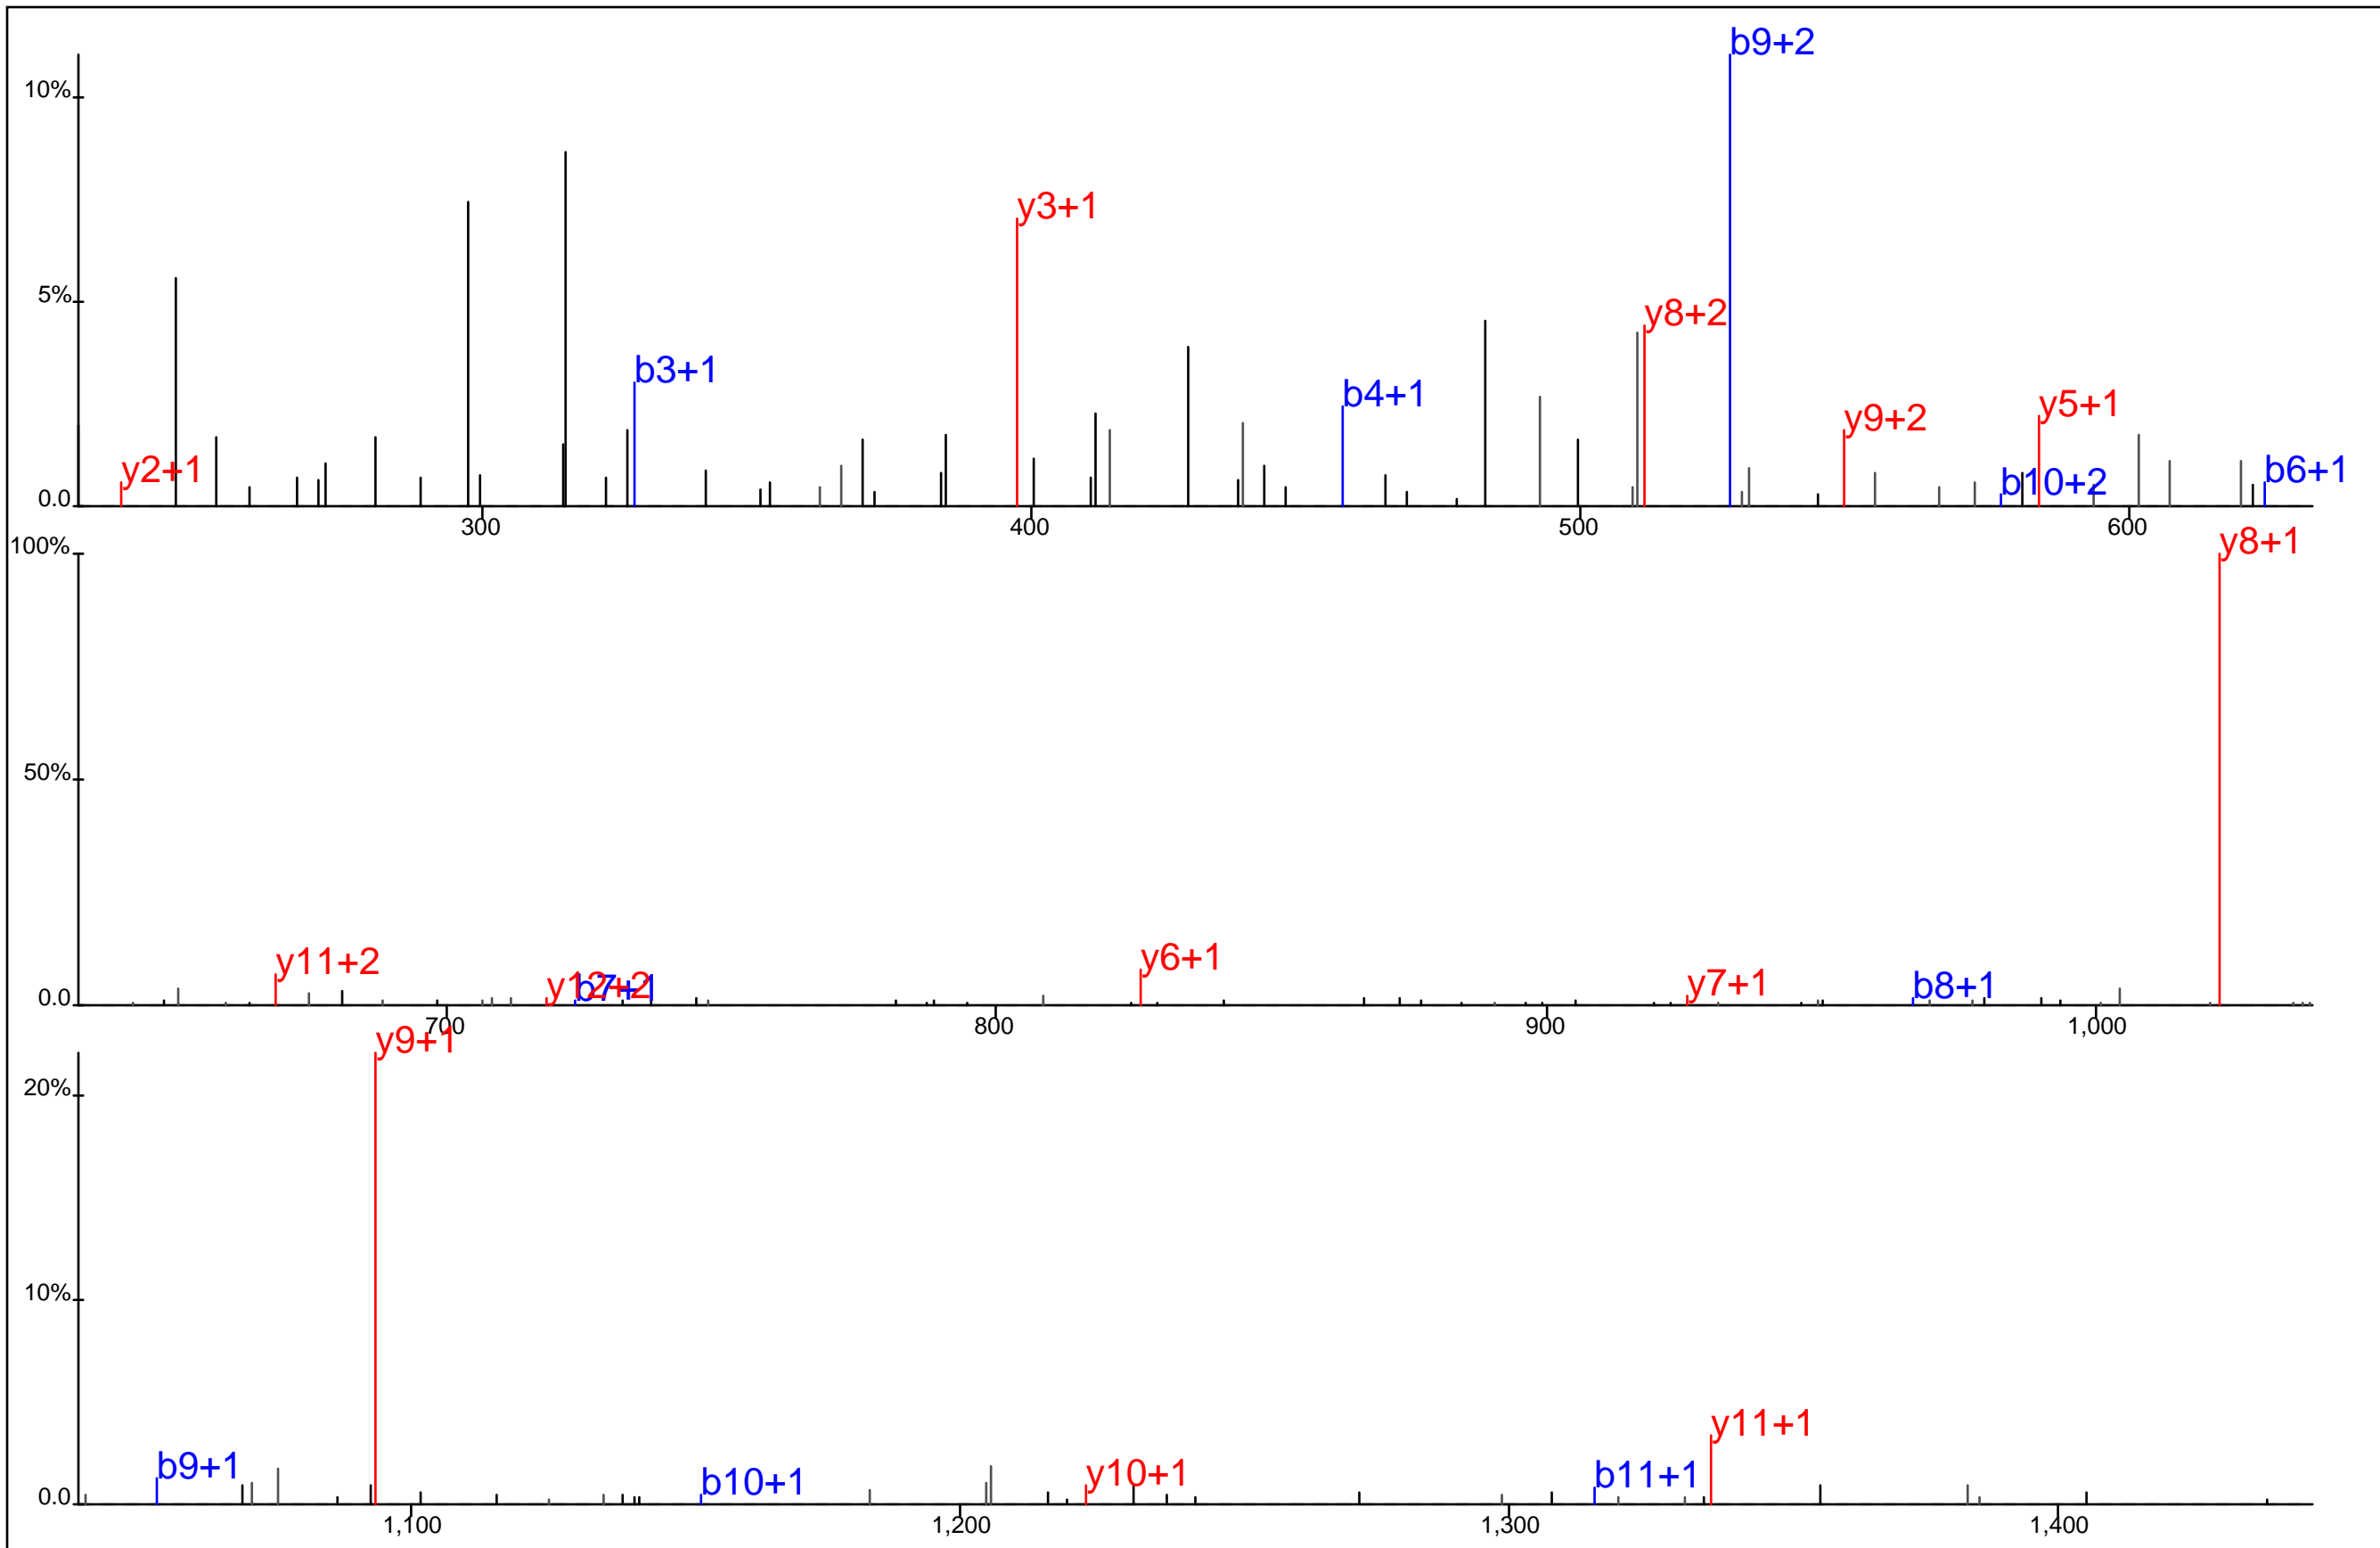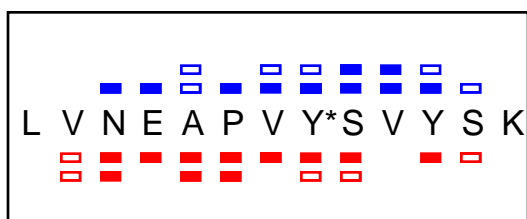

Protein Name: STAM2  
 gi Accession: 0  
 Precursor Mass: 774.8723+2  
 Delta Mass: 1.749 ppm  
 XCorr: 46.72

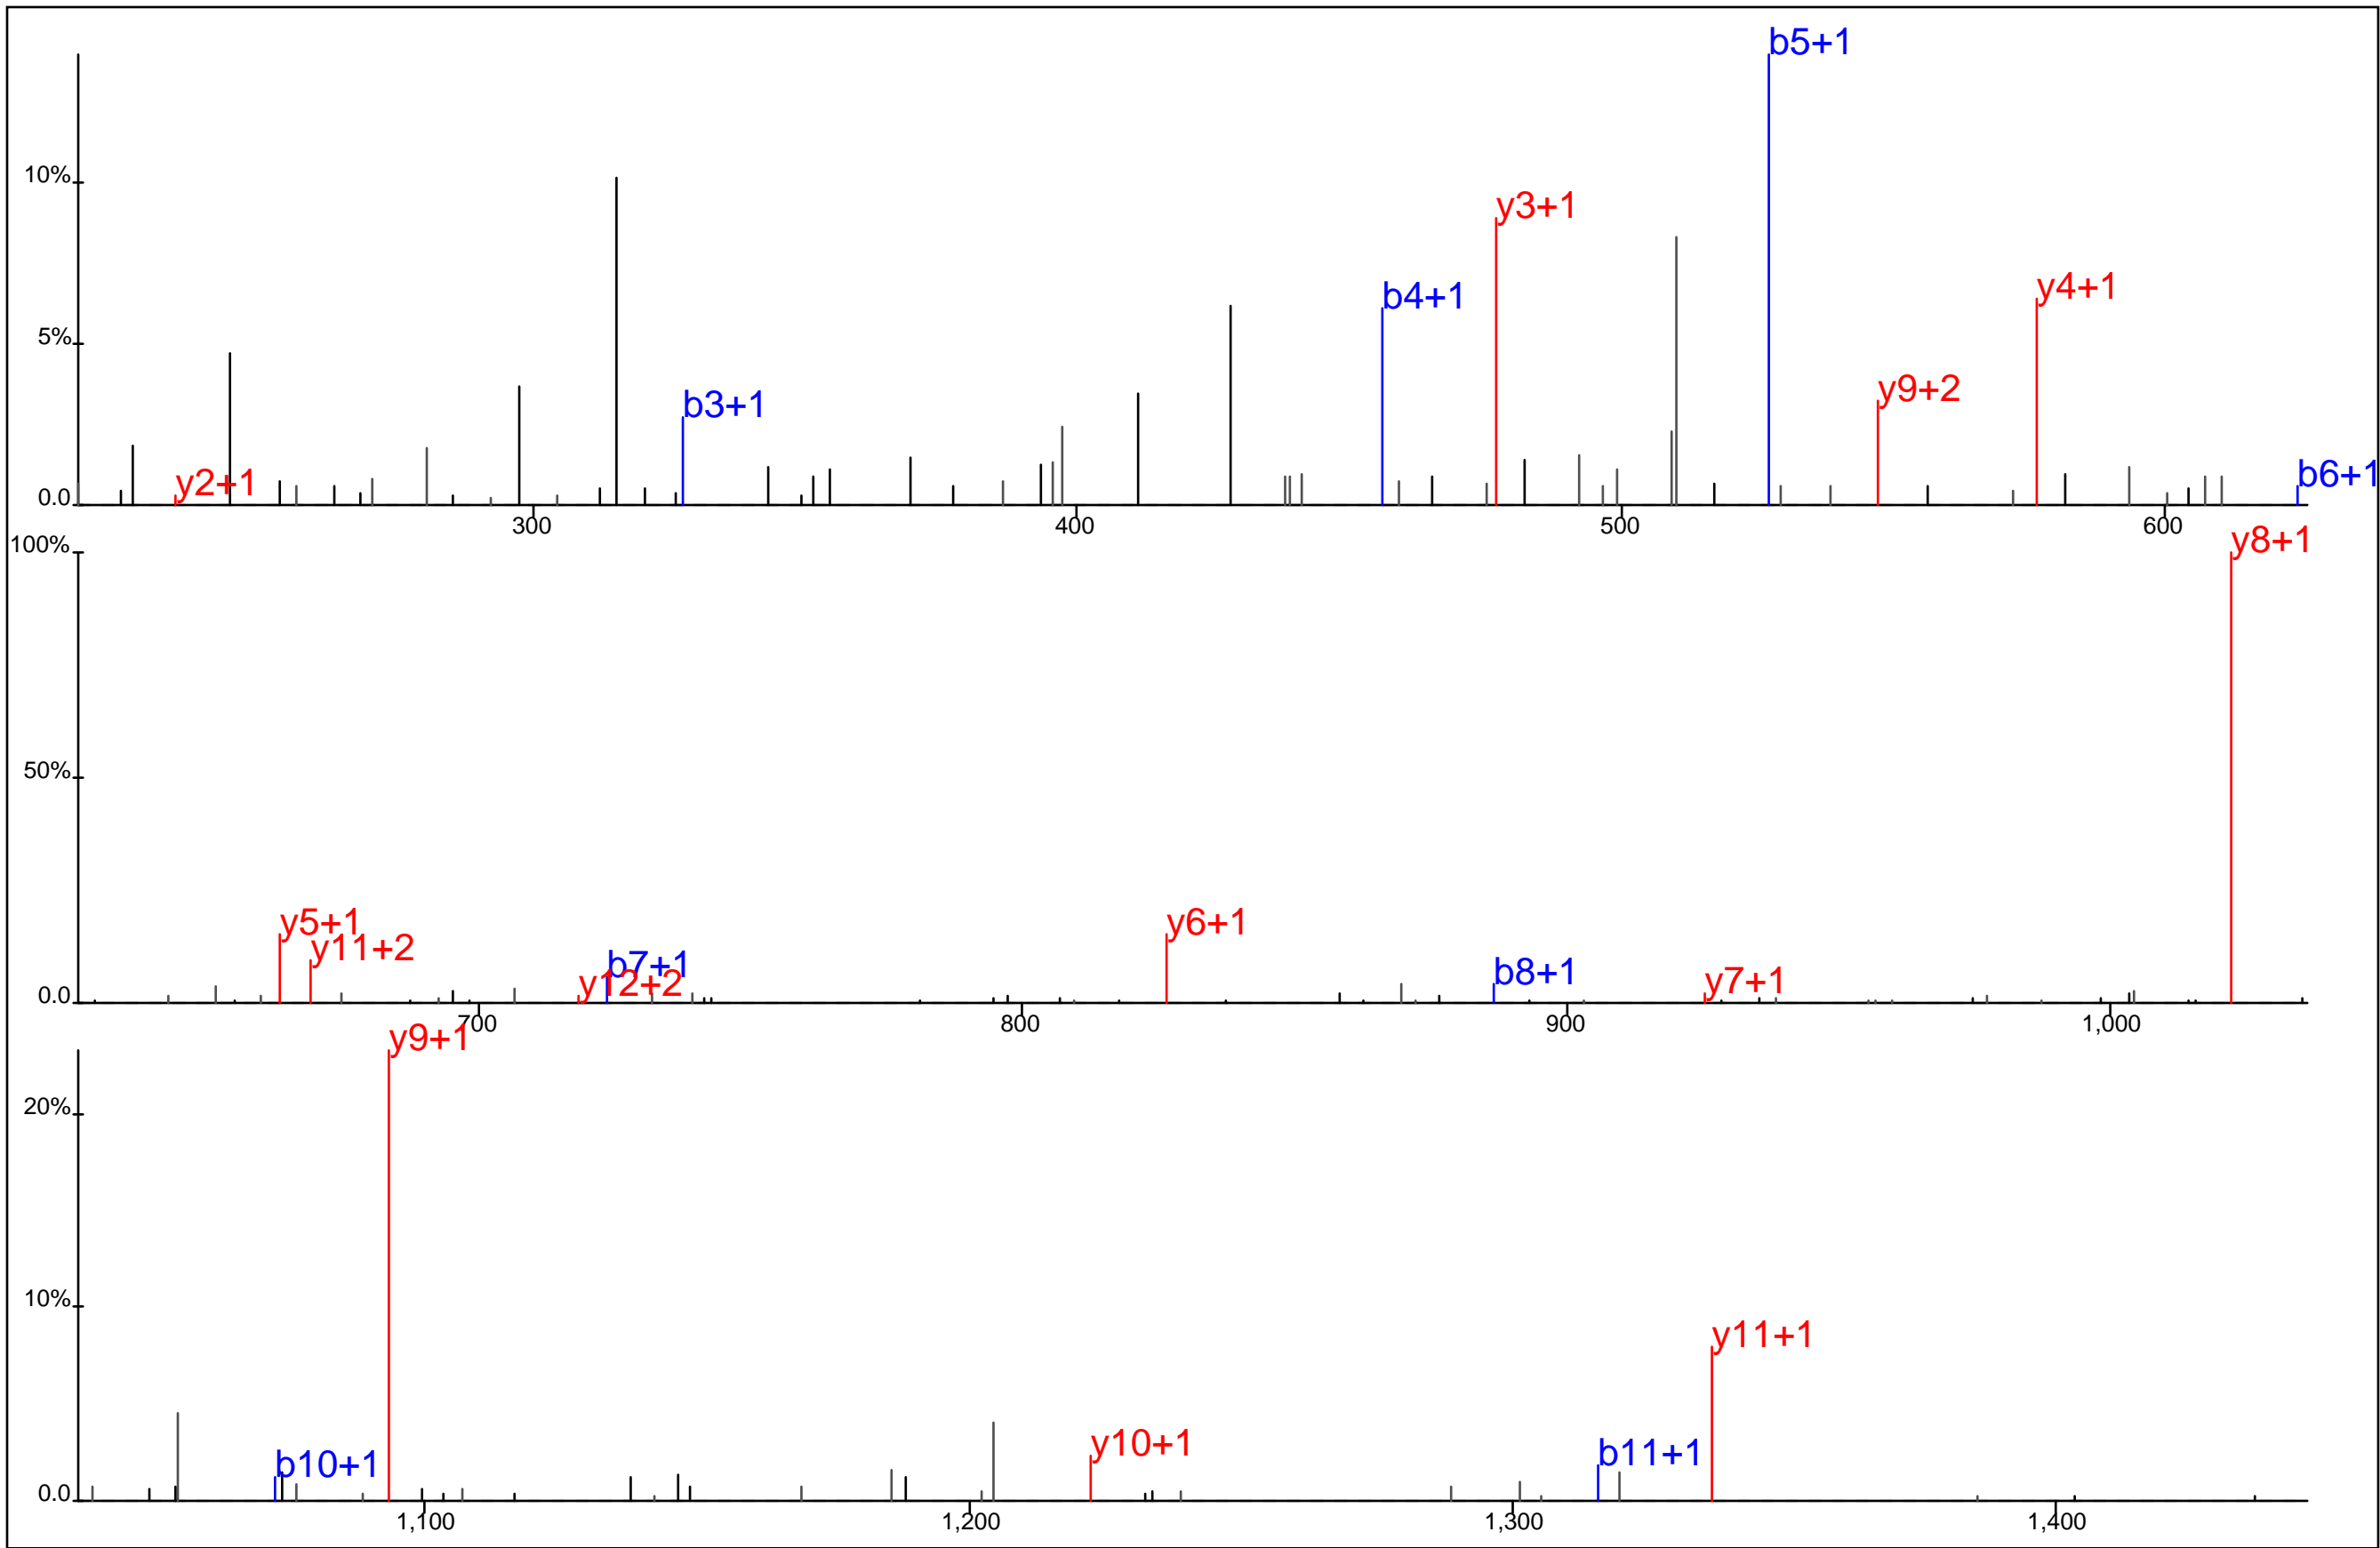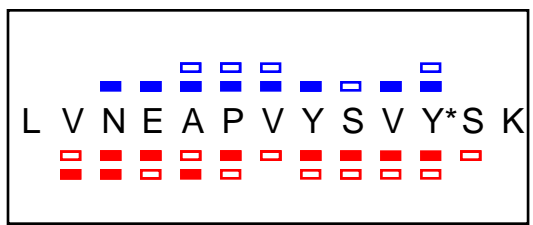

Protein Name: STAM2  
 gi Accession: 0  
 Precursor Mass: 774.8721+2  
 Delta Mass: 1.591 ppm  
 XCorr: 58.81

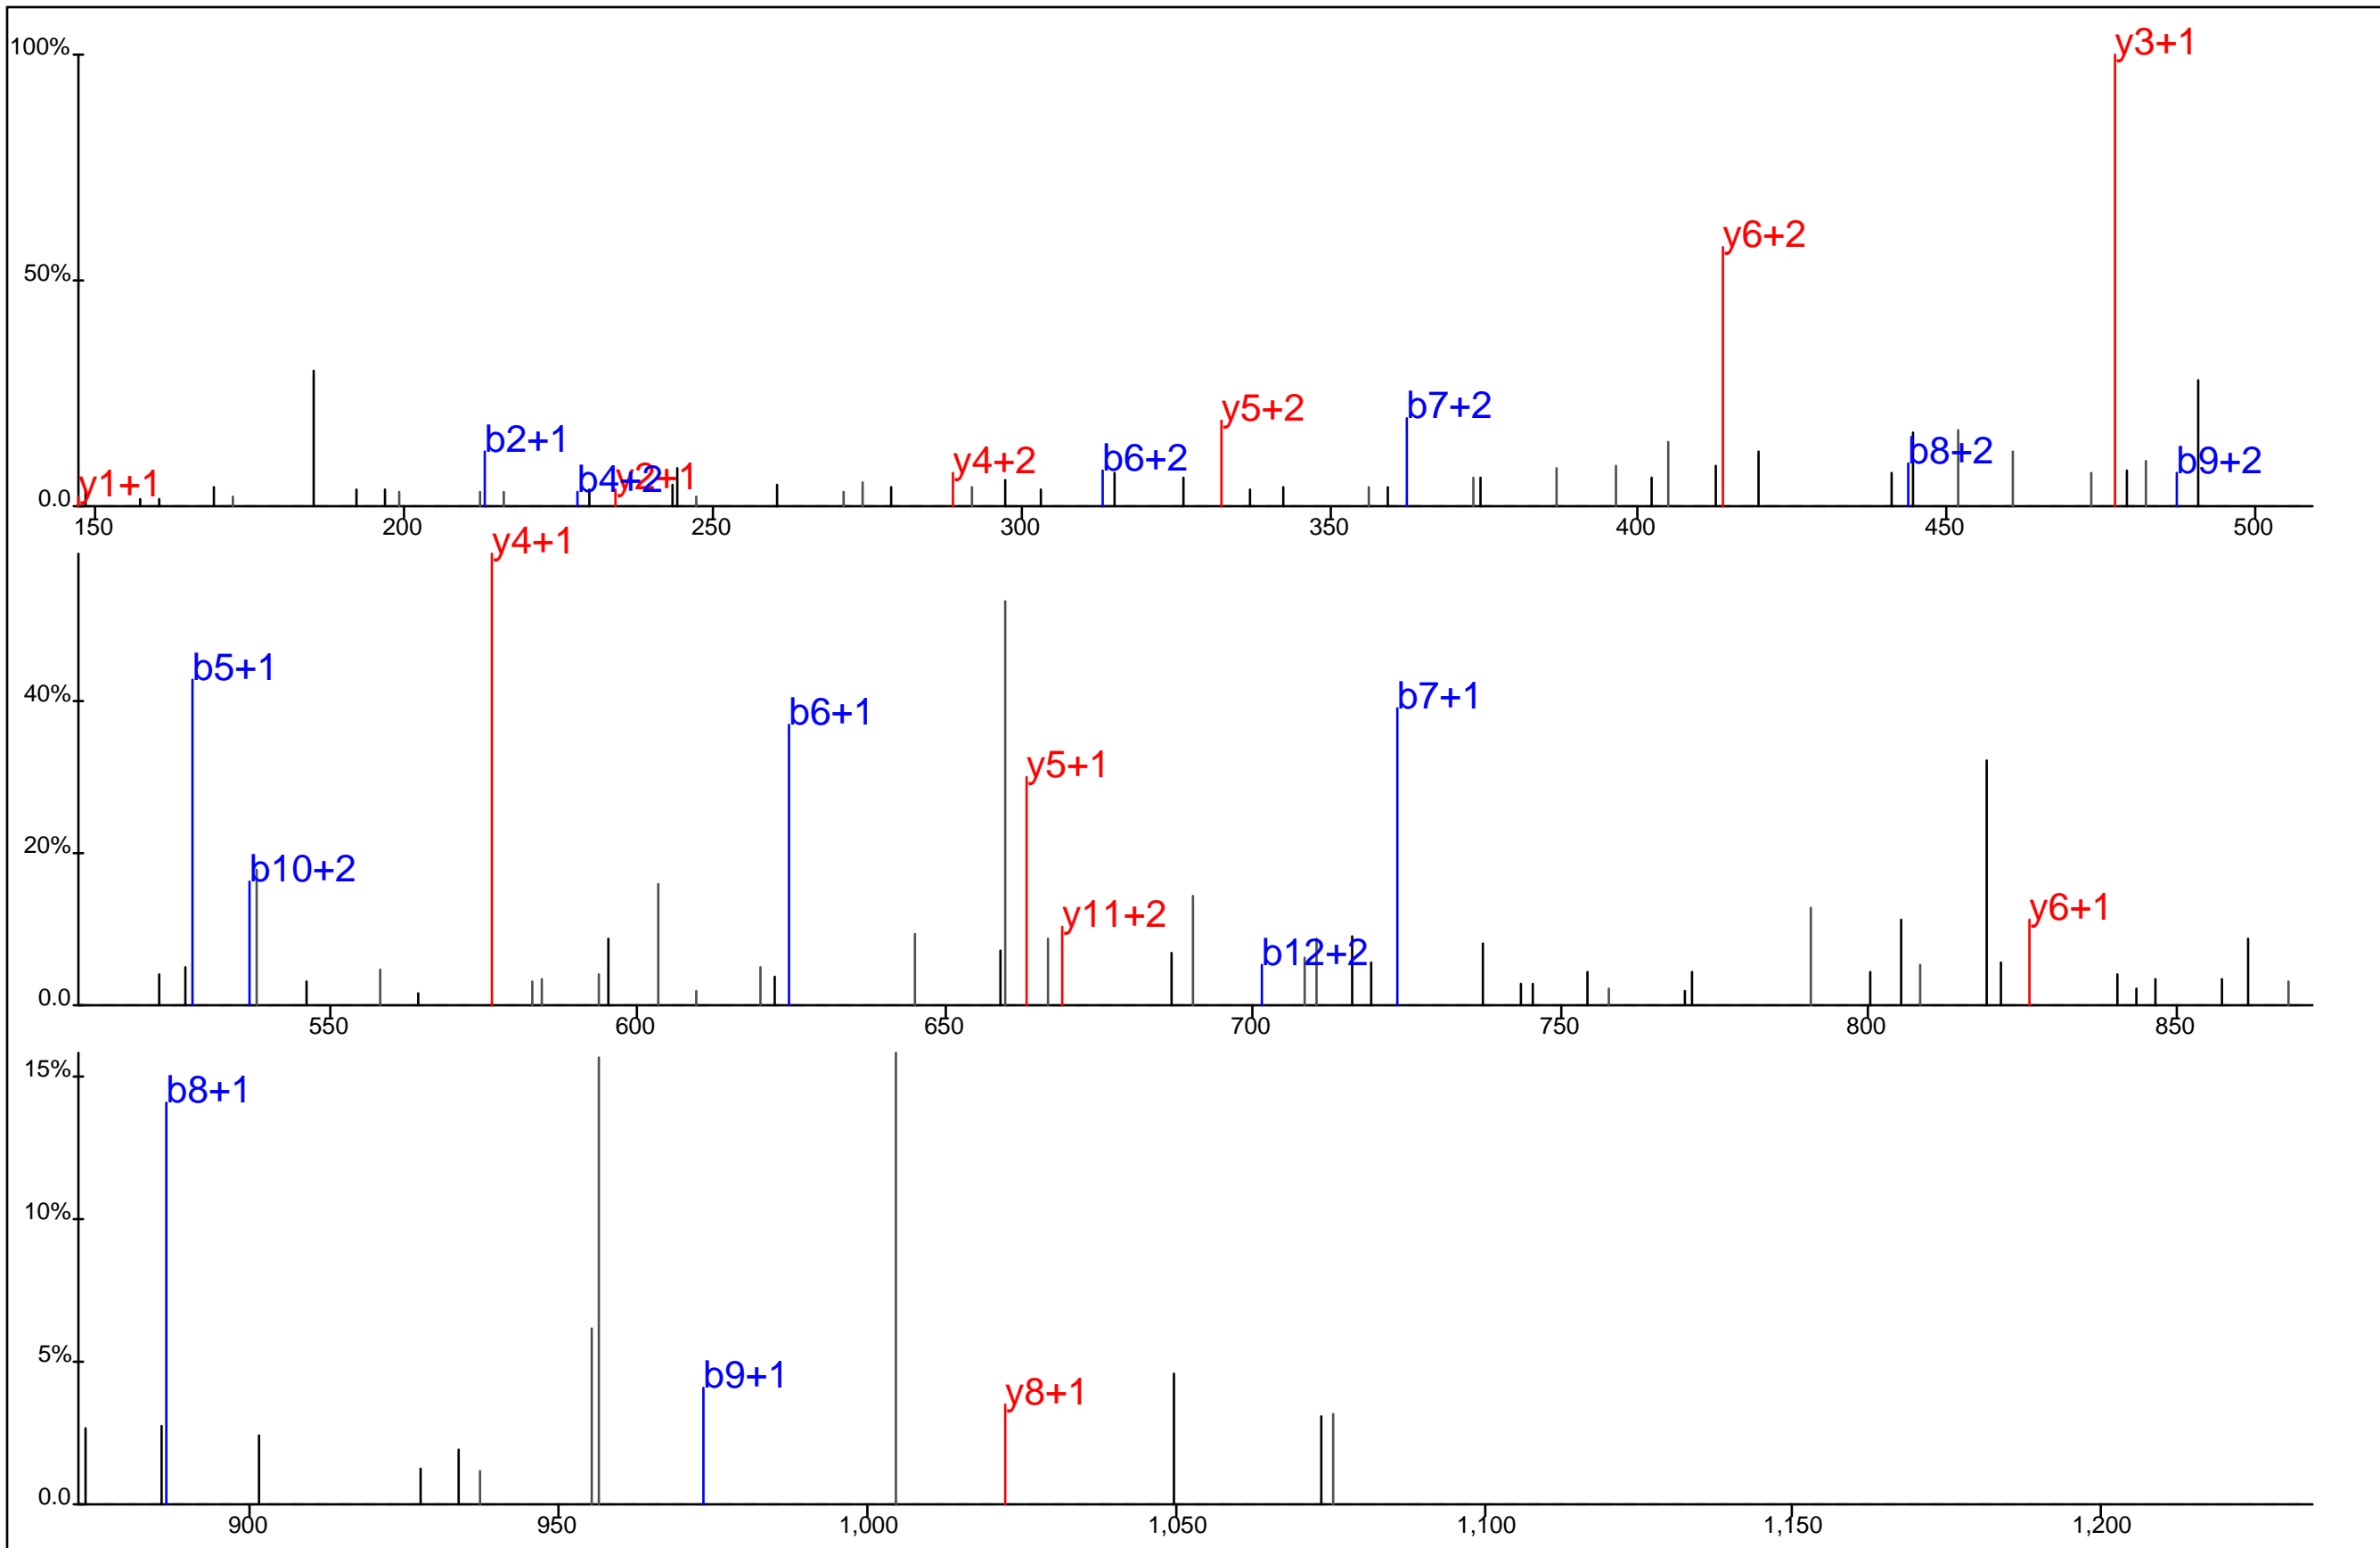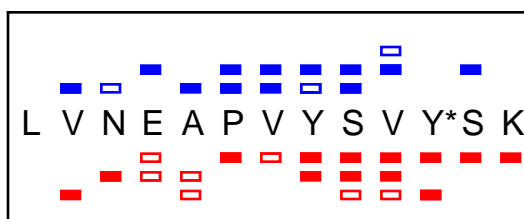

Protein Name: STAM2  
 gi Accession: 0  
 Precursor Mass: 516.9166+3  
 Delta Mass: 0.519 ppm  
 XCorr: 31.12

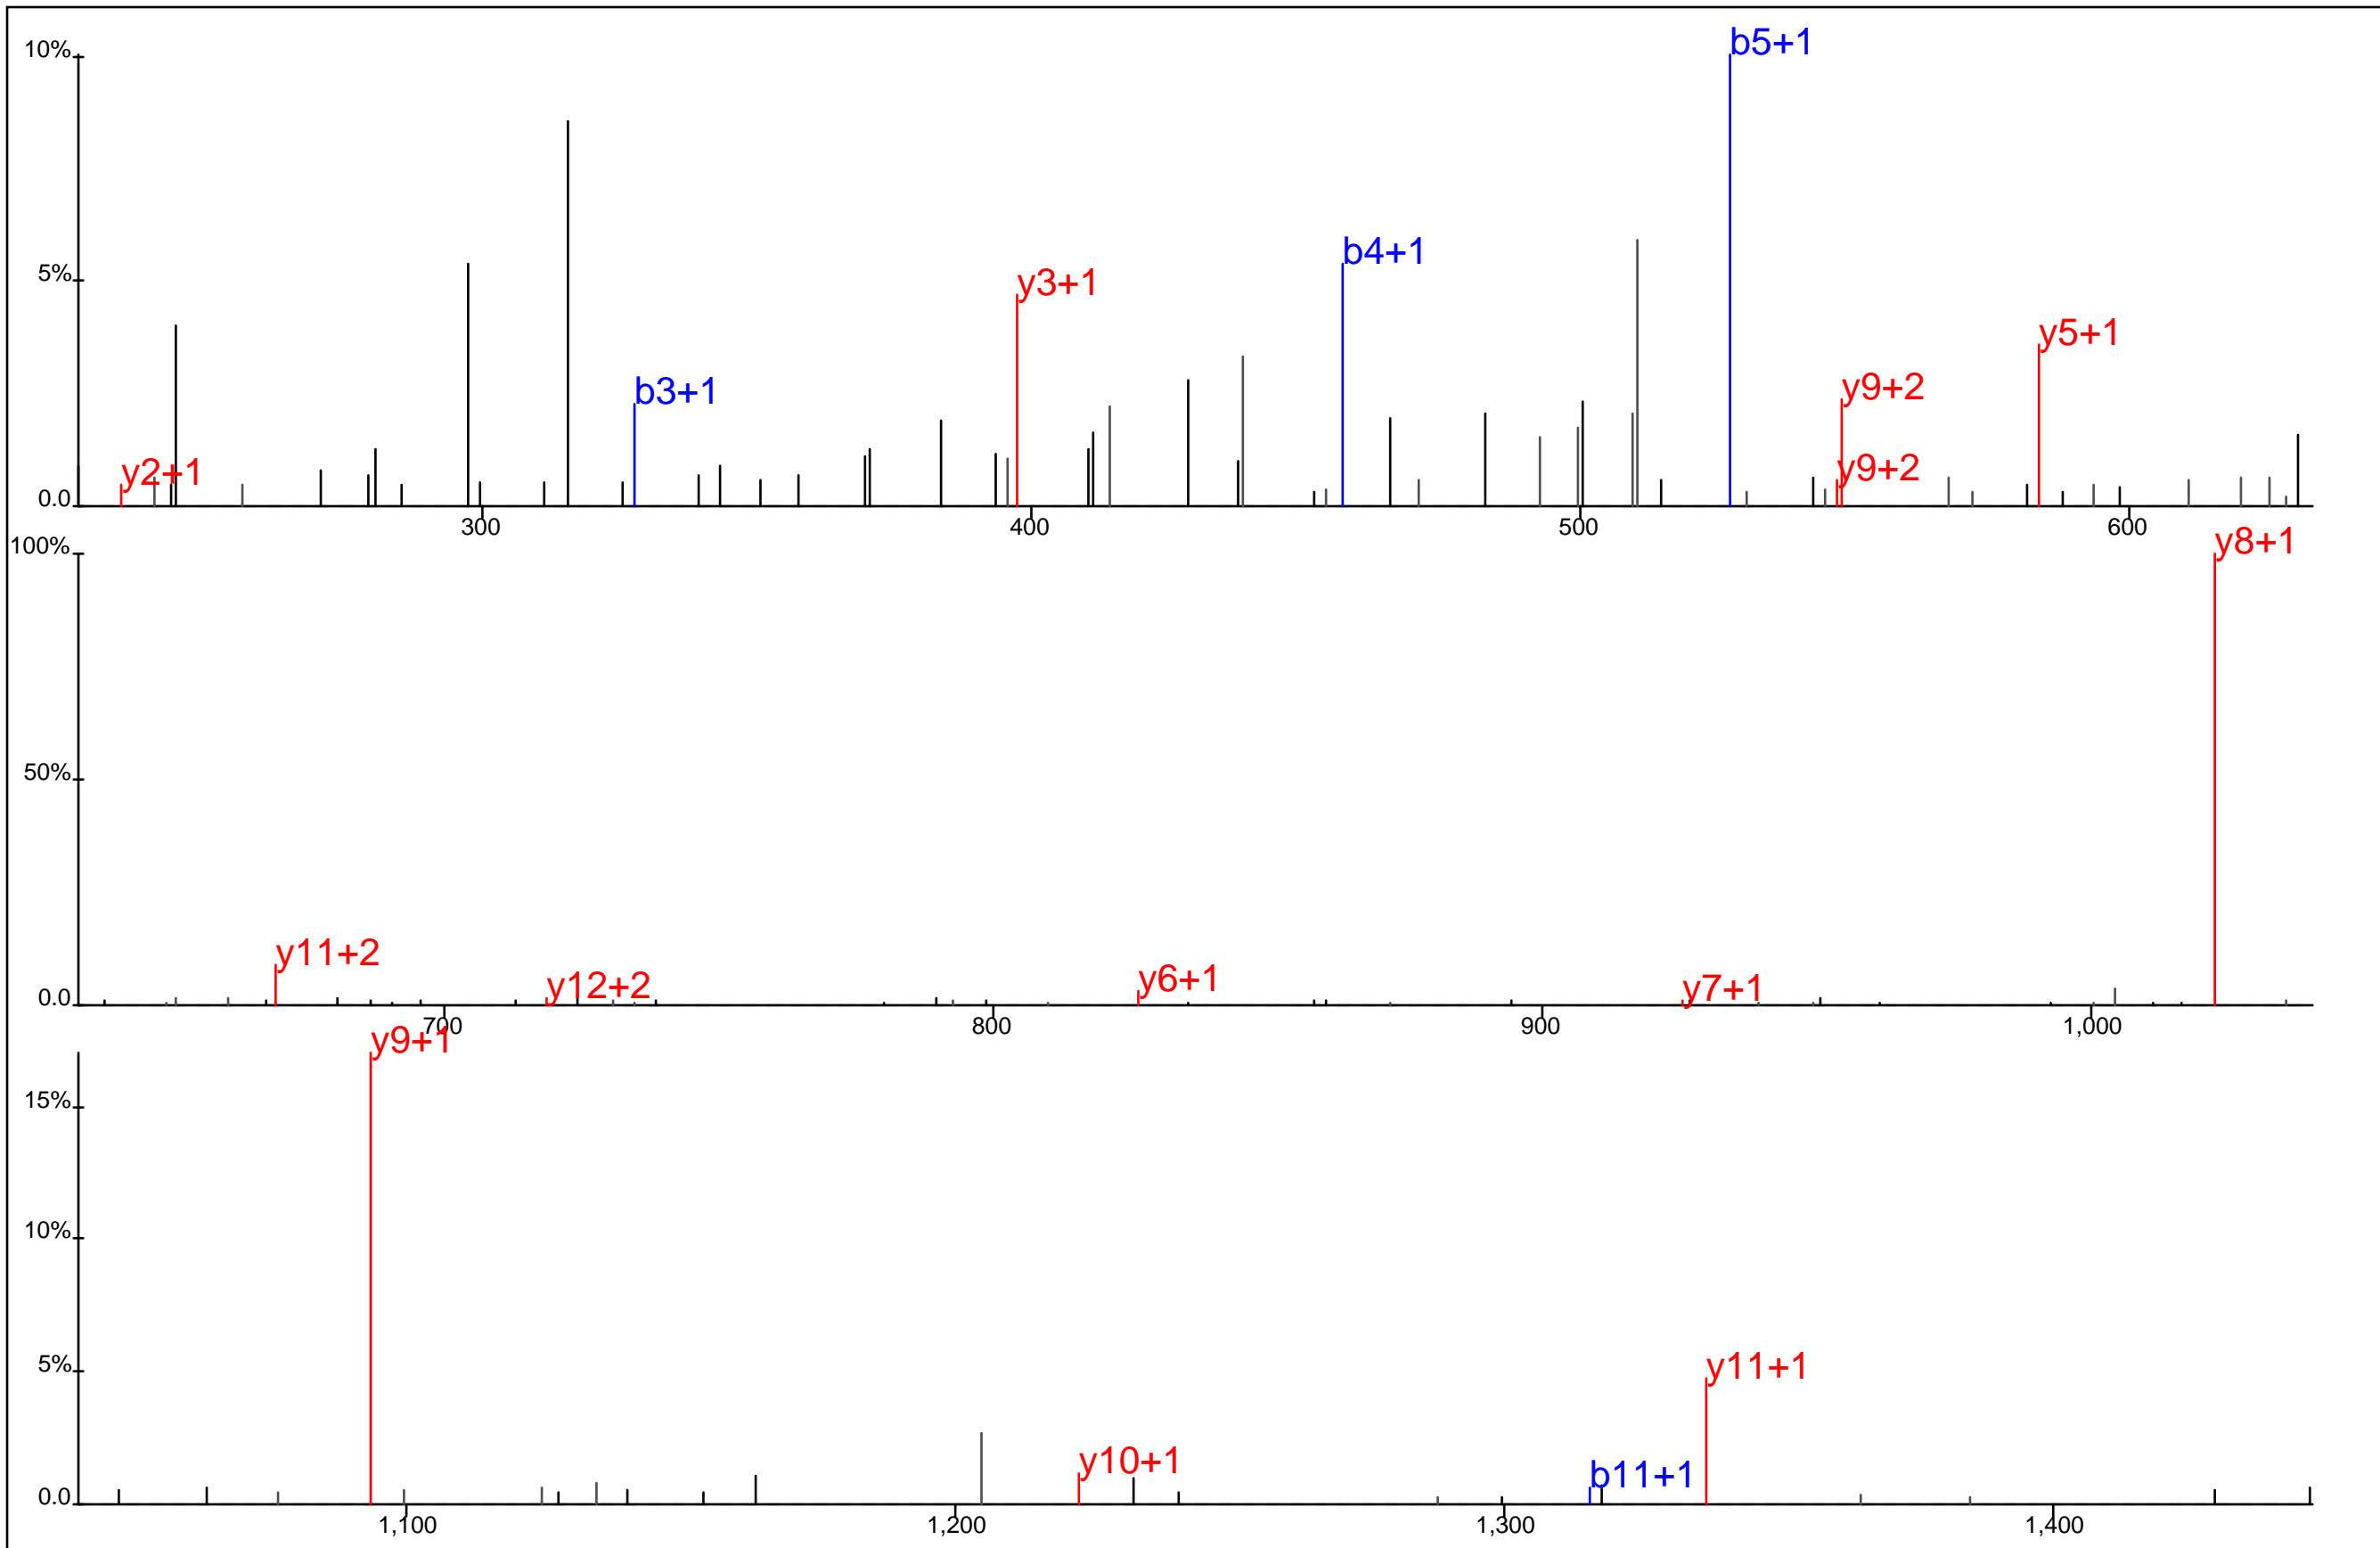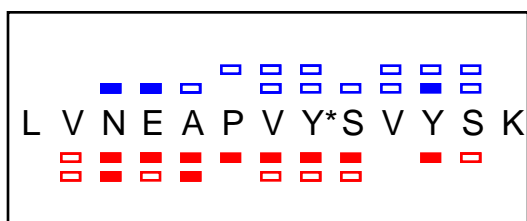

Protein Name: STAM2  
 gi Accession: 0  
 Precursor Mass: 774.8727+2  
 Delta Mass: 2.380 ppm  
 XCorr: 52.79



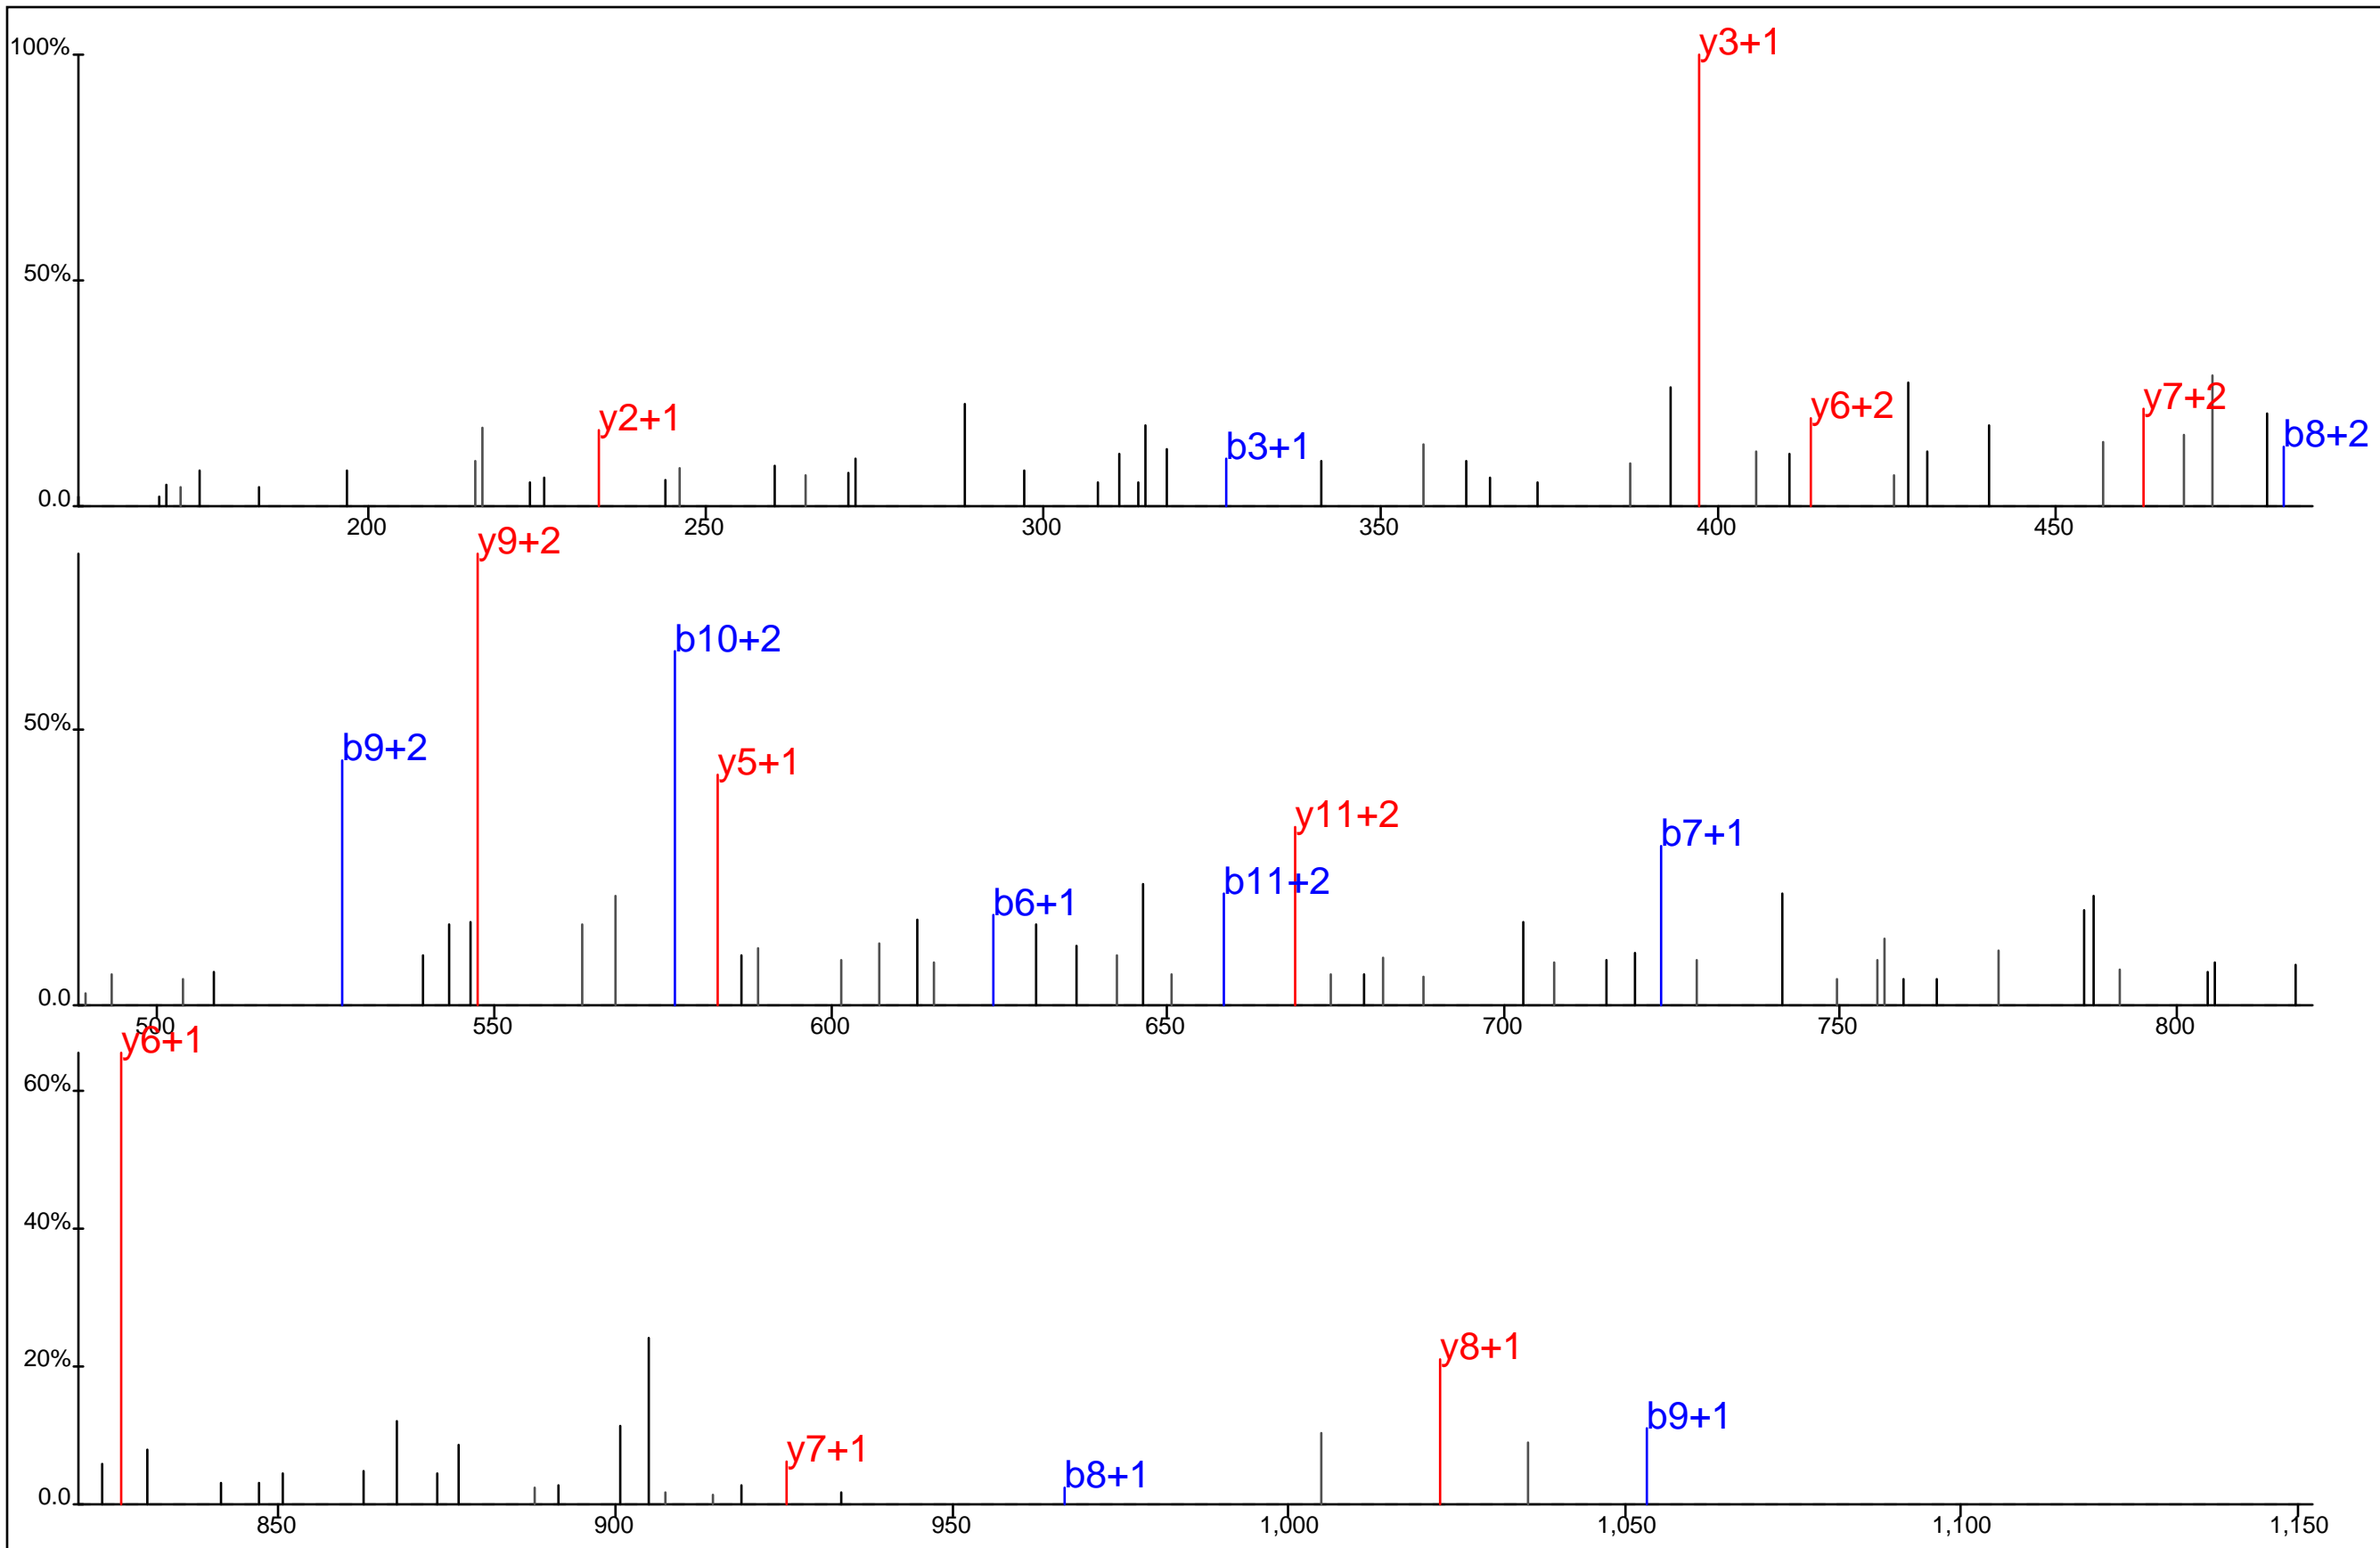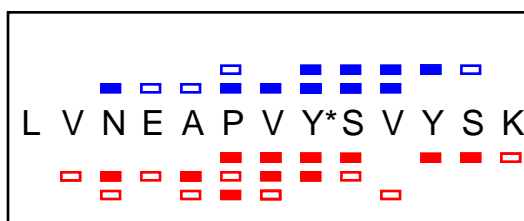

Protein Name: STAM2  
 gi Accession: 0  
 Precursor Mass: 516.9164+3  
 Delta Mass: 0.046 ppm  
 XCorr: 30.74

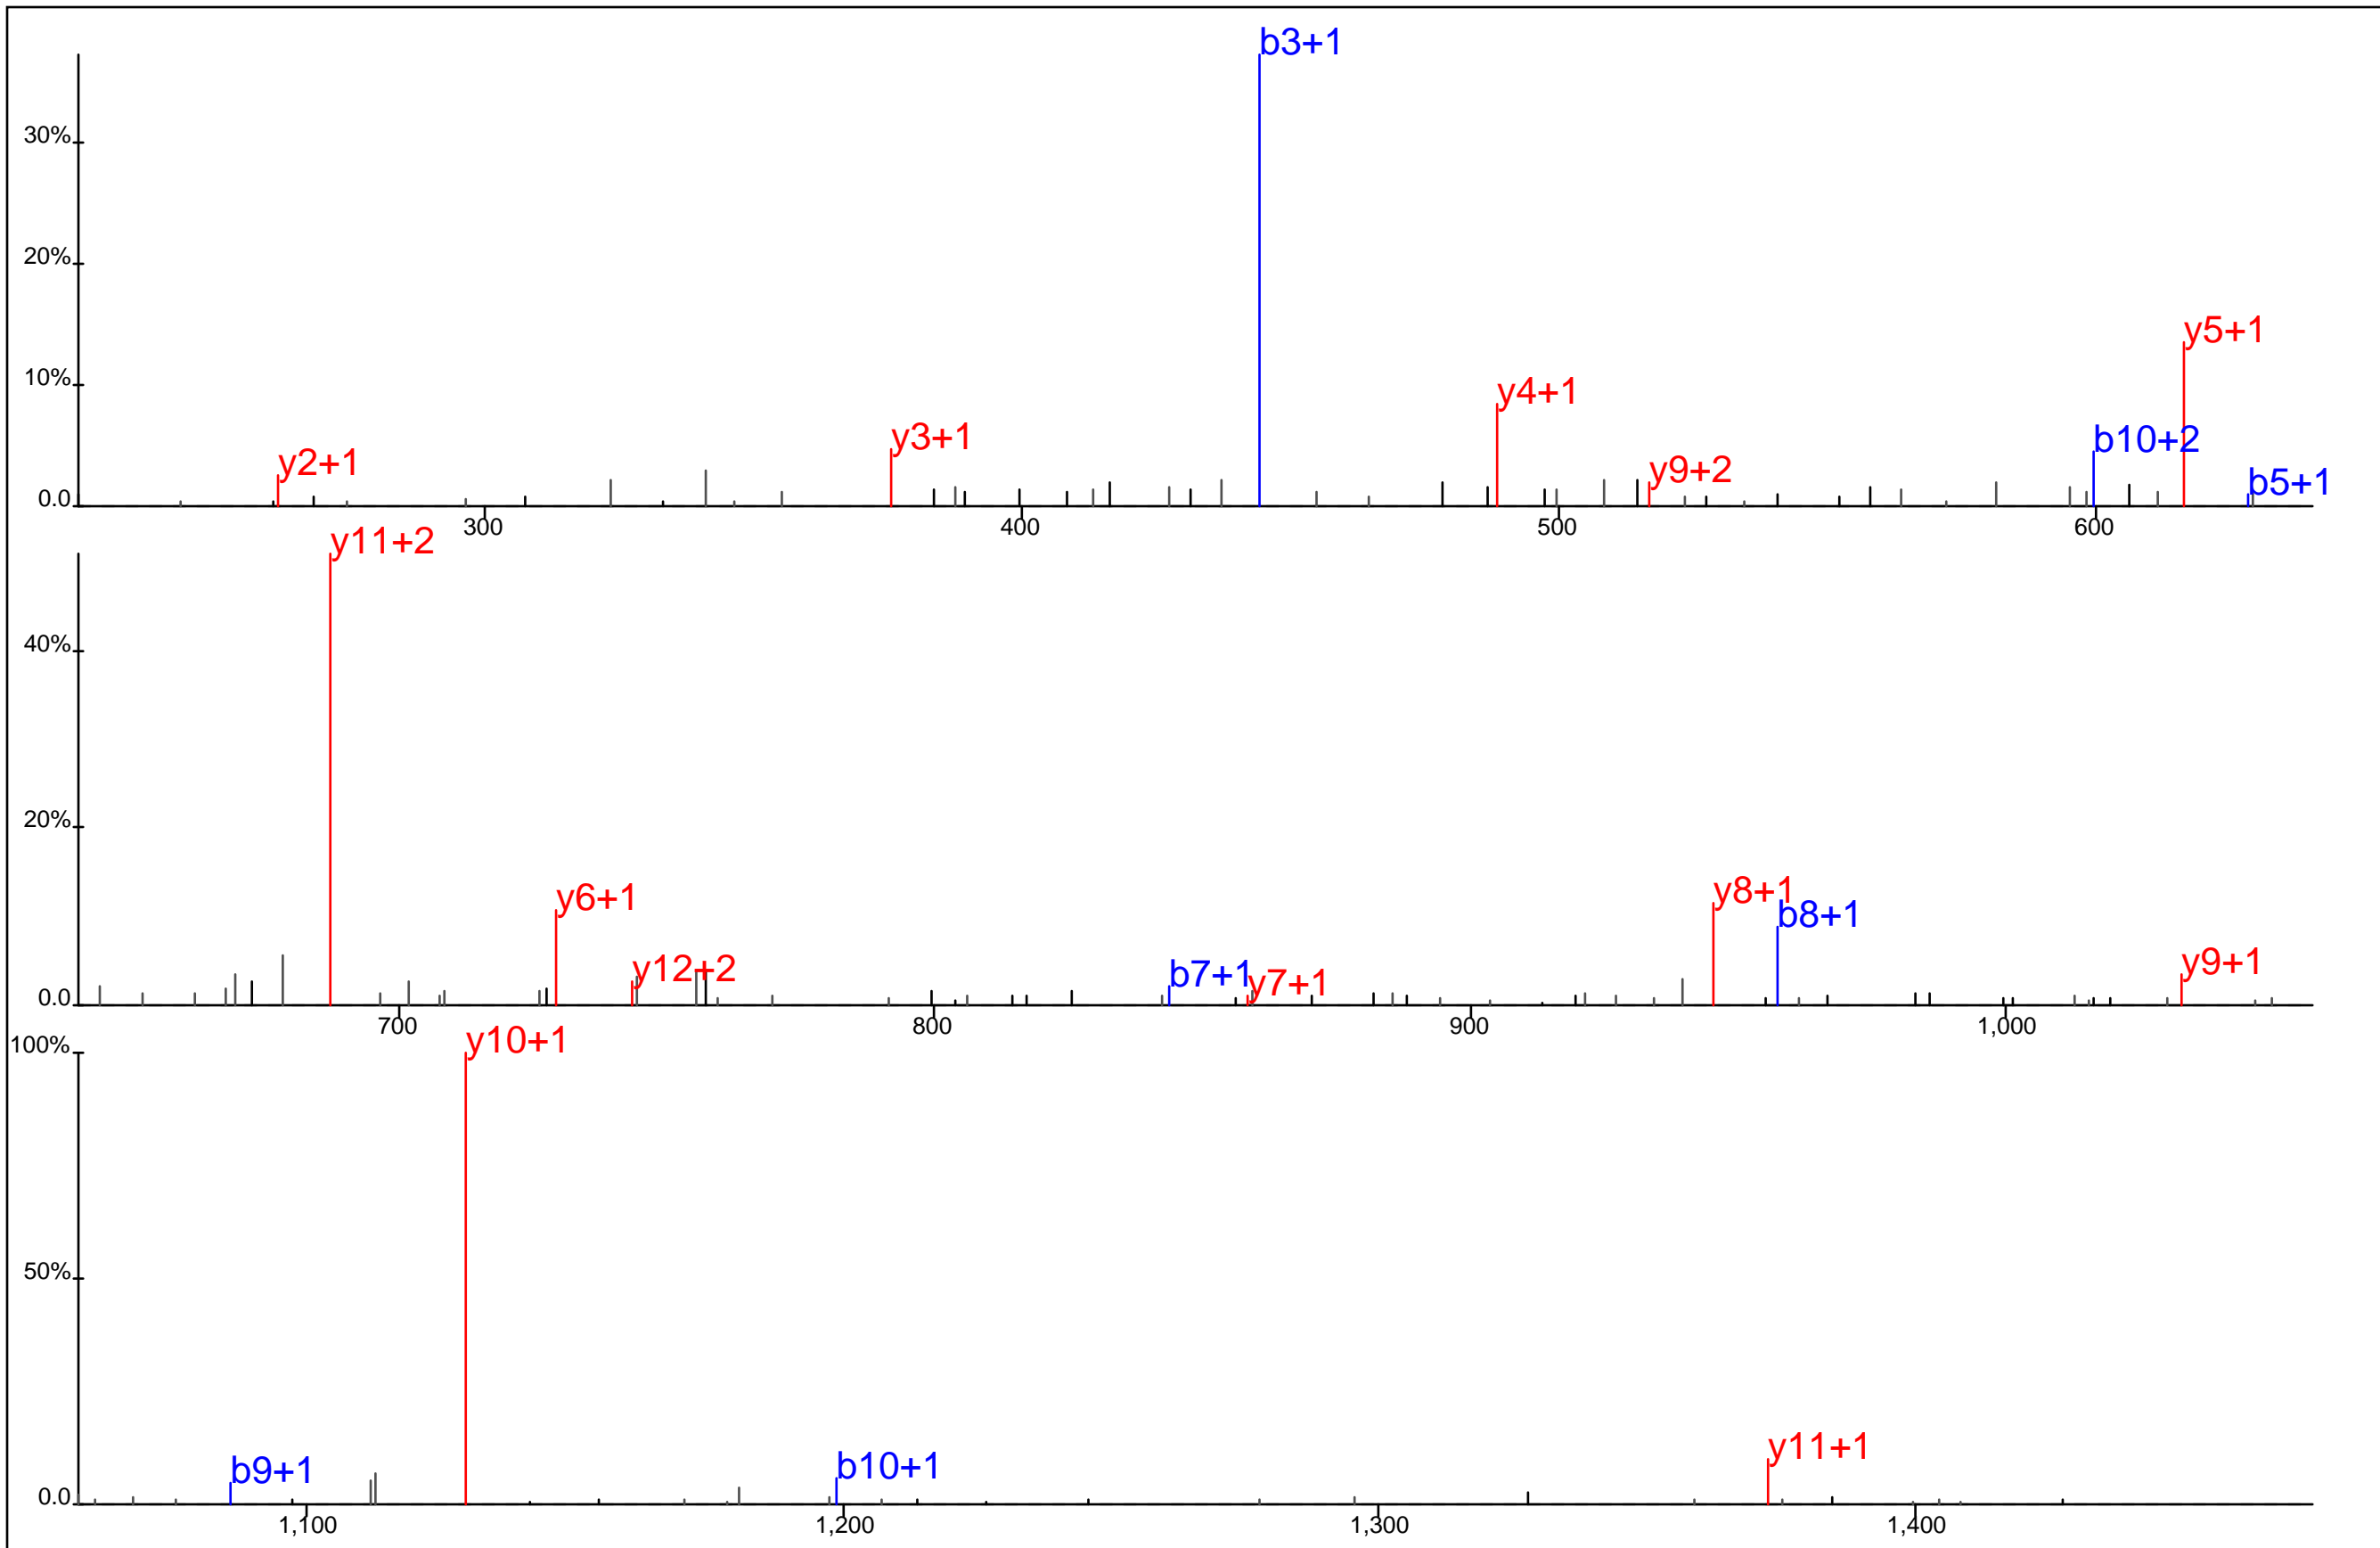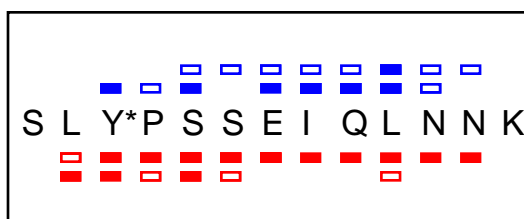

Protein Name: STAM2  
 gi Accession: 0  
 Precursor Mass: 786.8681+2  
 Delta Mass: 0.987 ppm  
 XCorr: 60.27





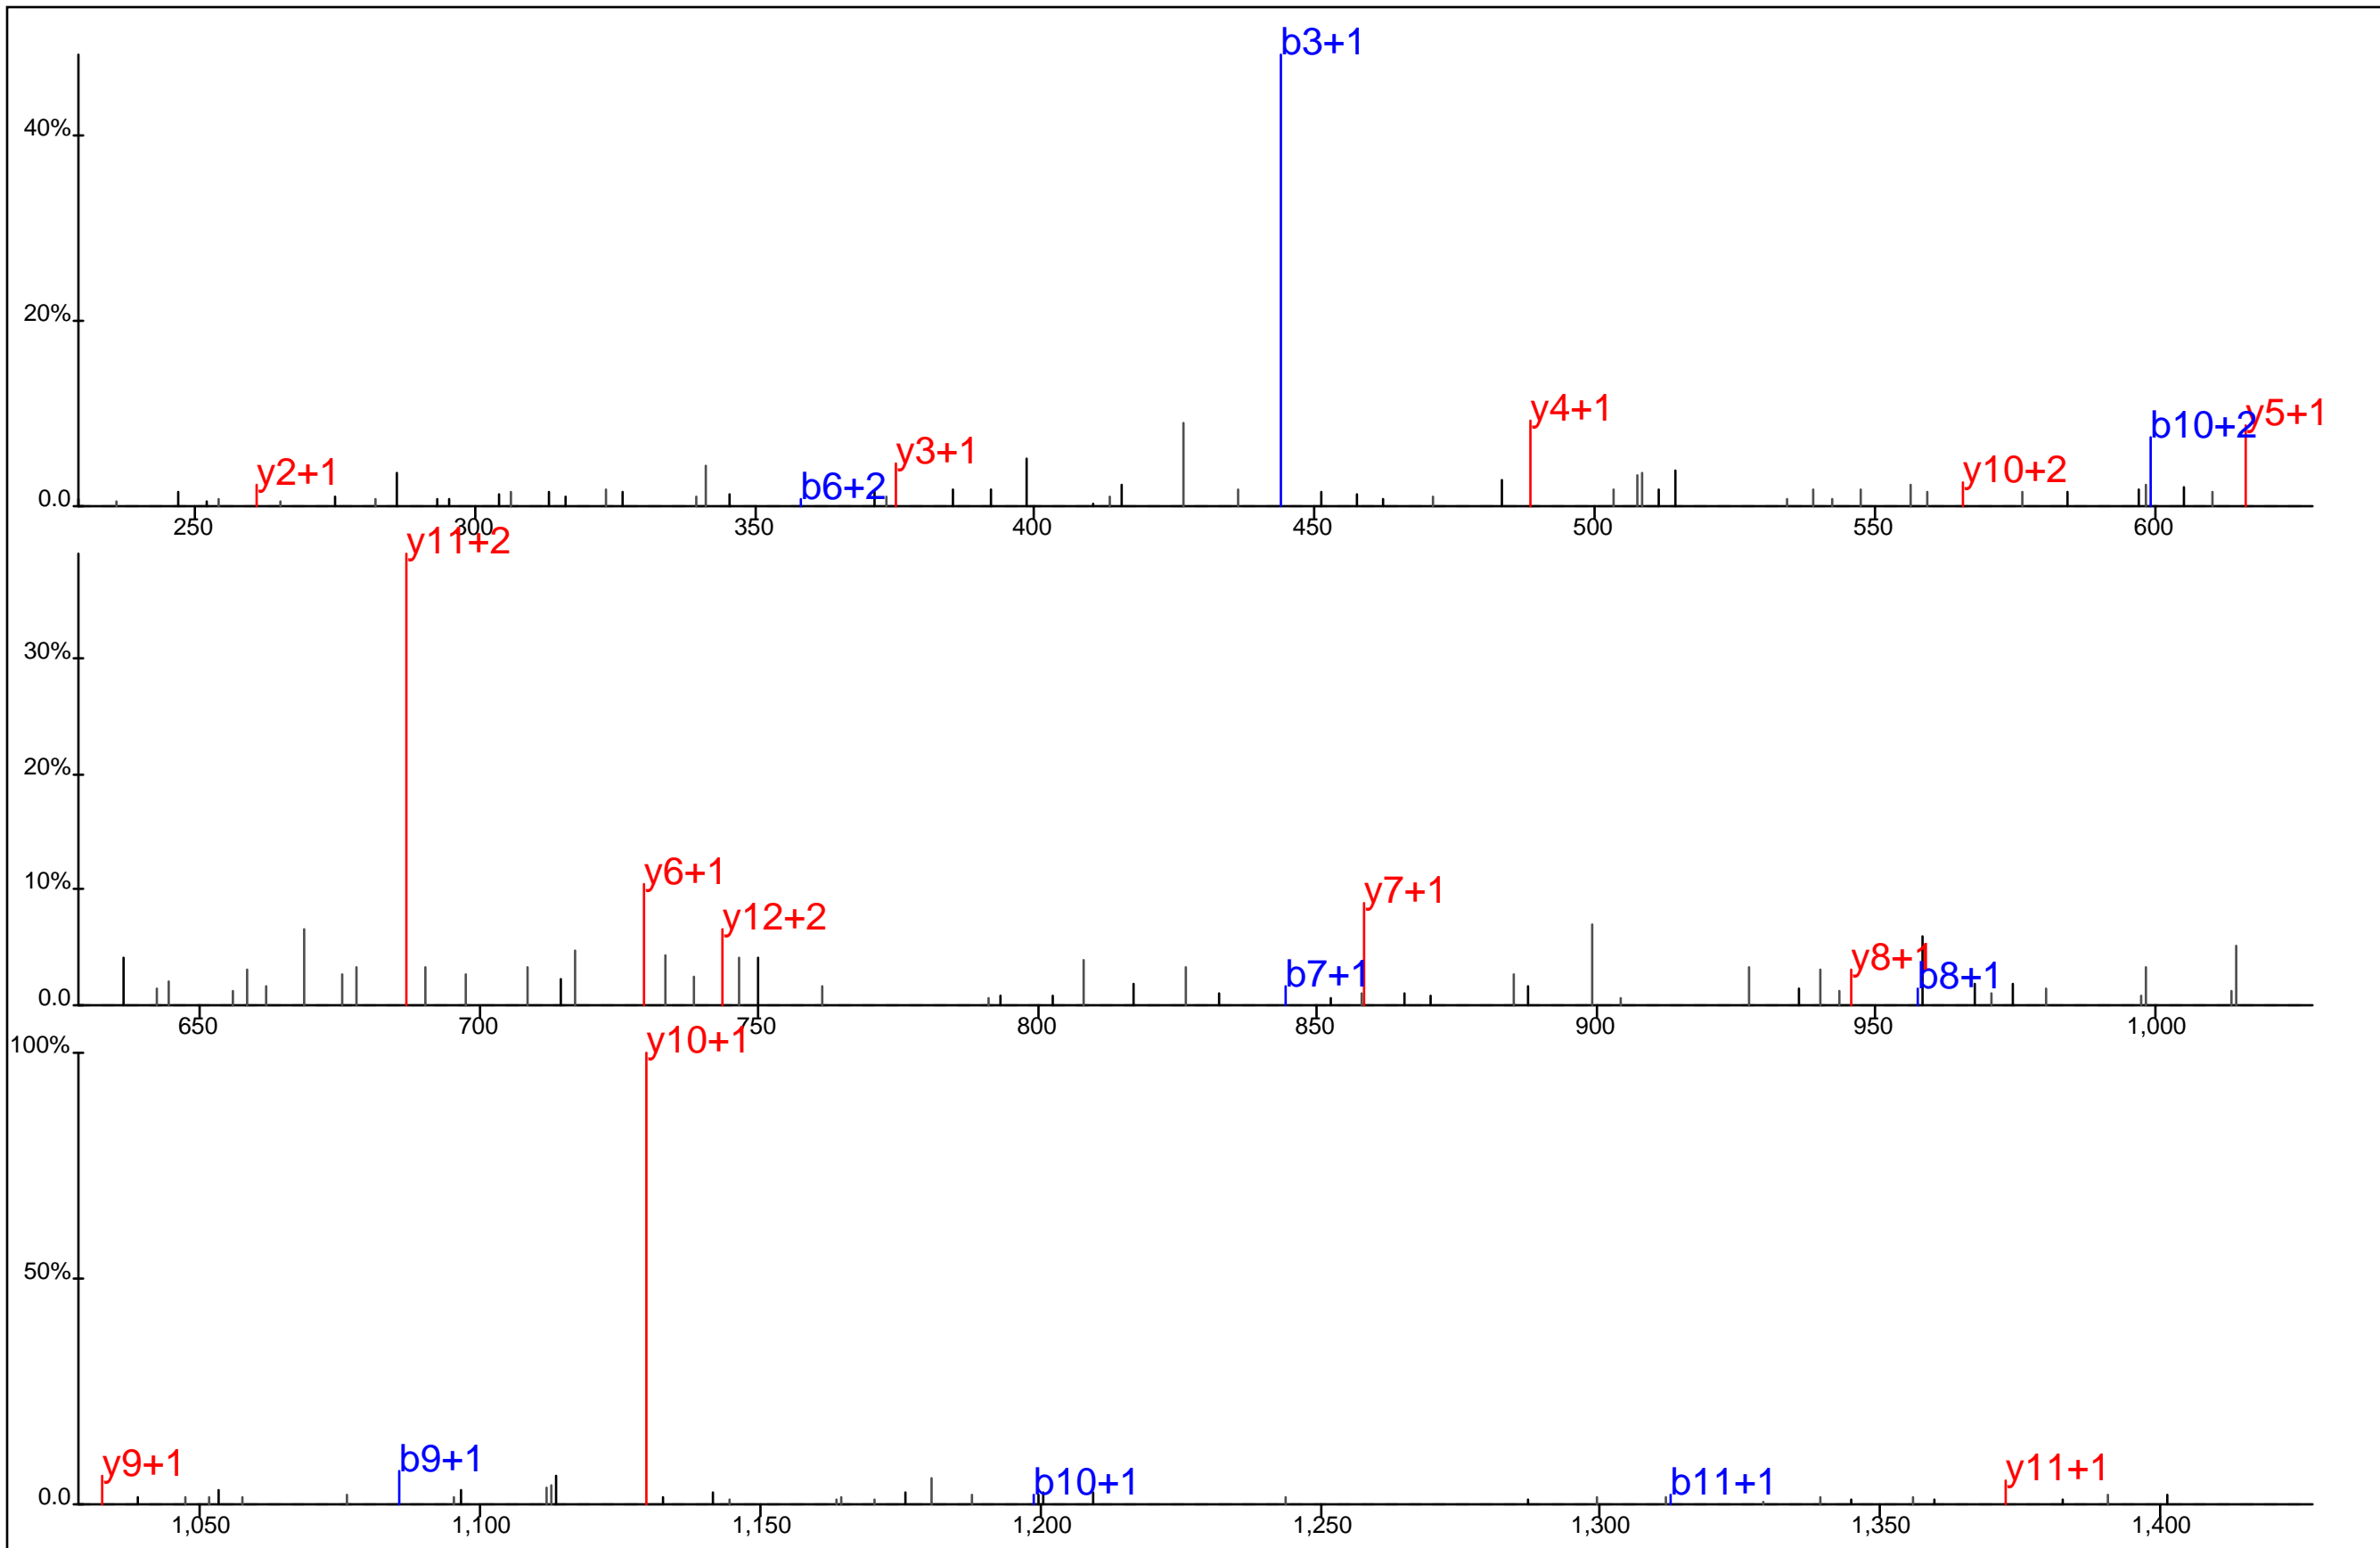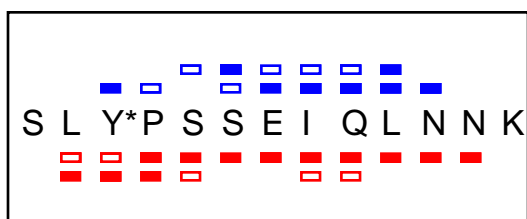

Protein Name: STAM2  
 gi Accession: 0  
 Precursor Mass: 786.8694+2  
 Delta Mass: 0.721 ppm  
 XCorr: 58.8

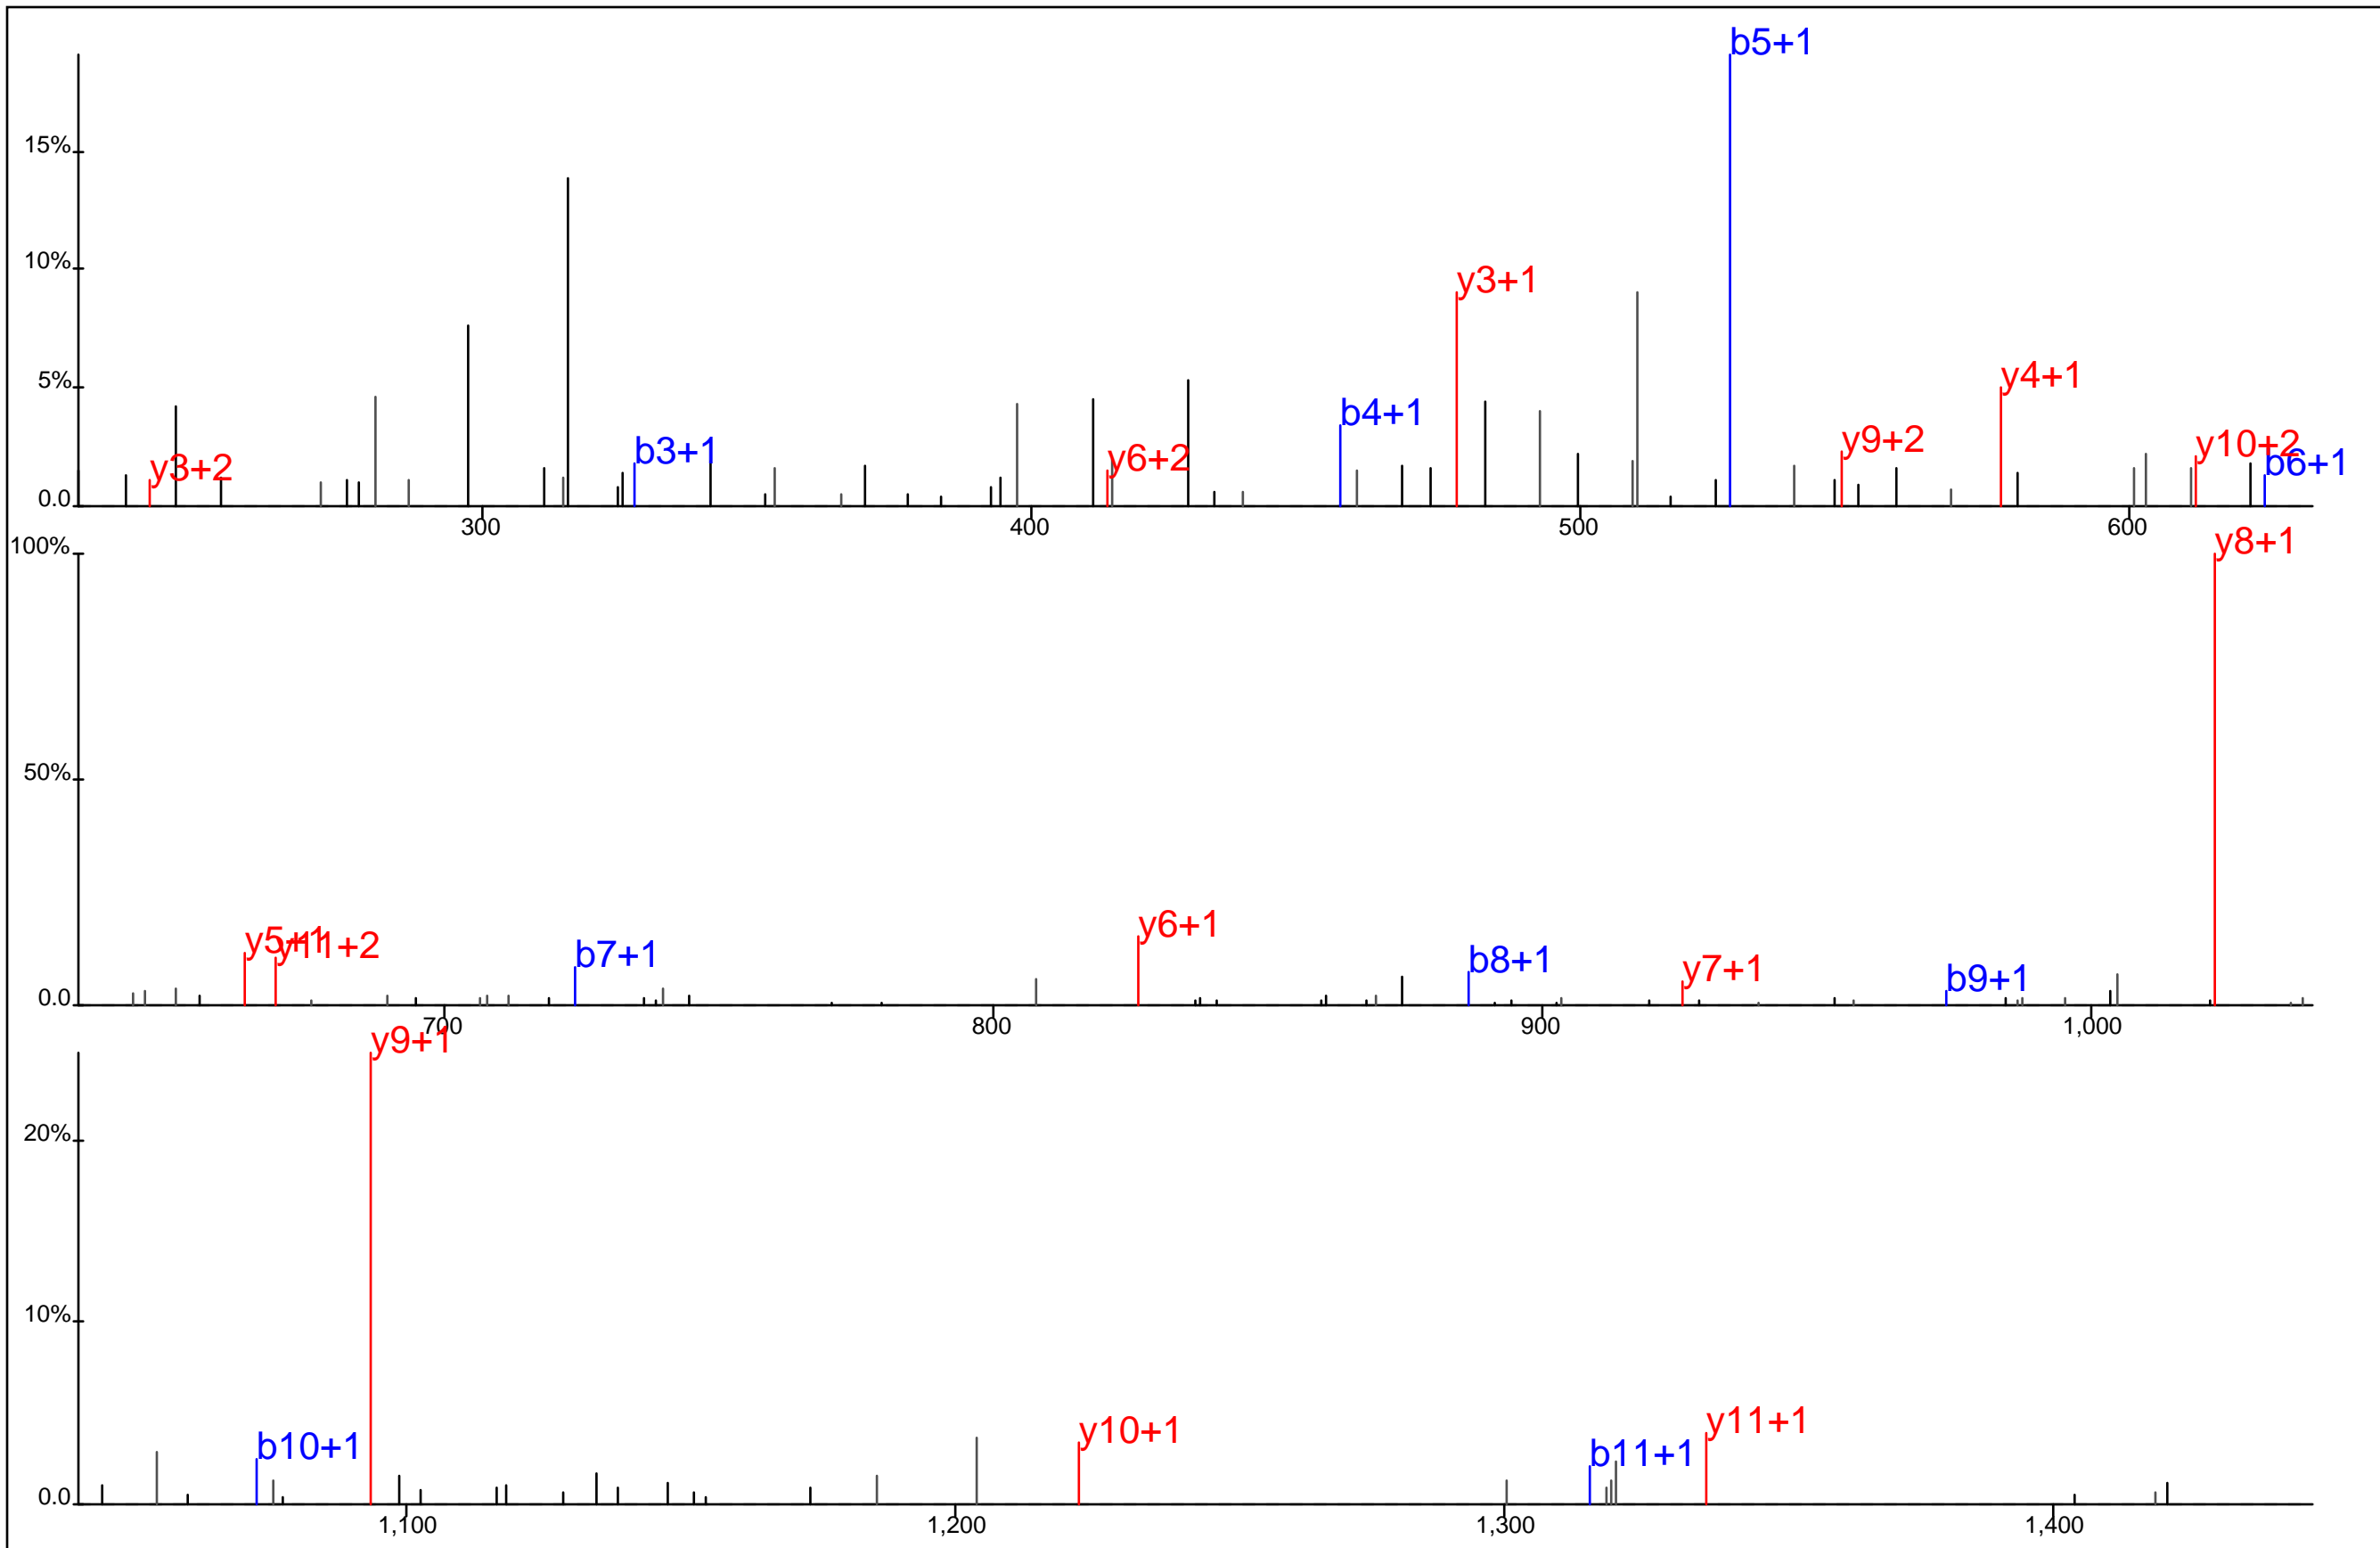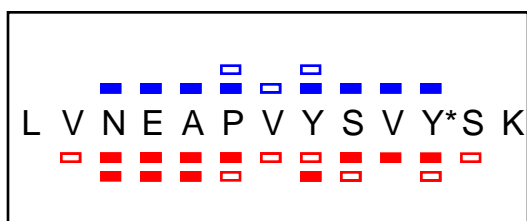

Protein Name: STAM2  
 gi Accession: 0  
 Precursor Mass: 774.8687+2  
 Delta Mass: 2.823 ppm  
 XCorr: 56.06









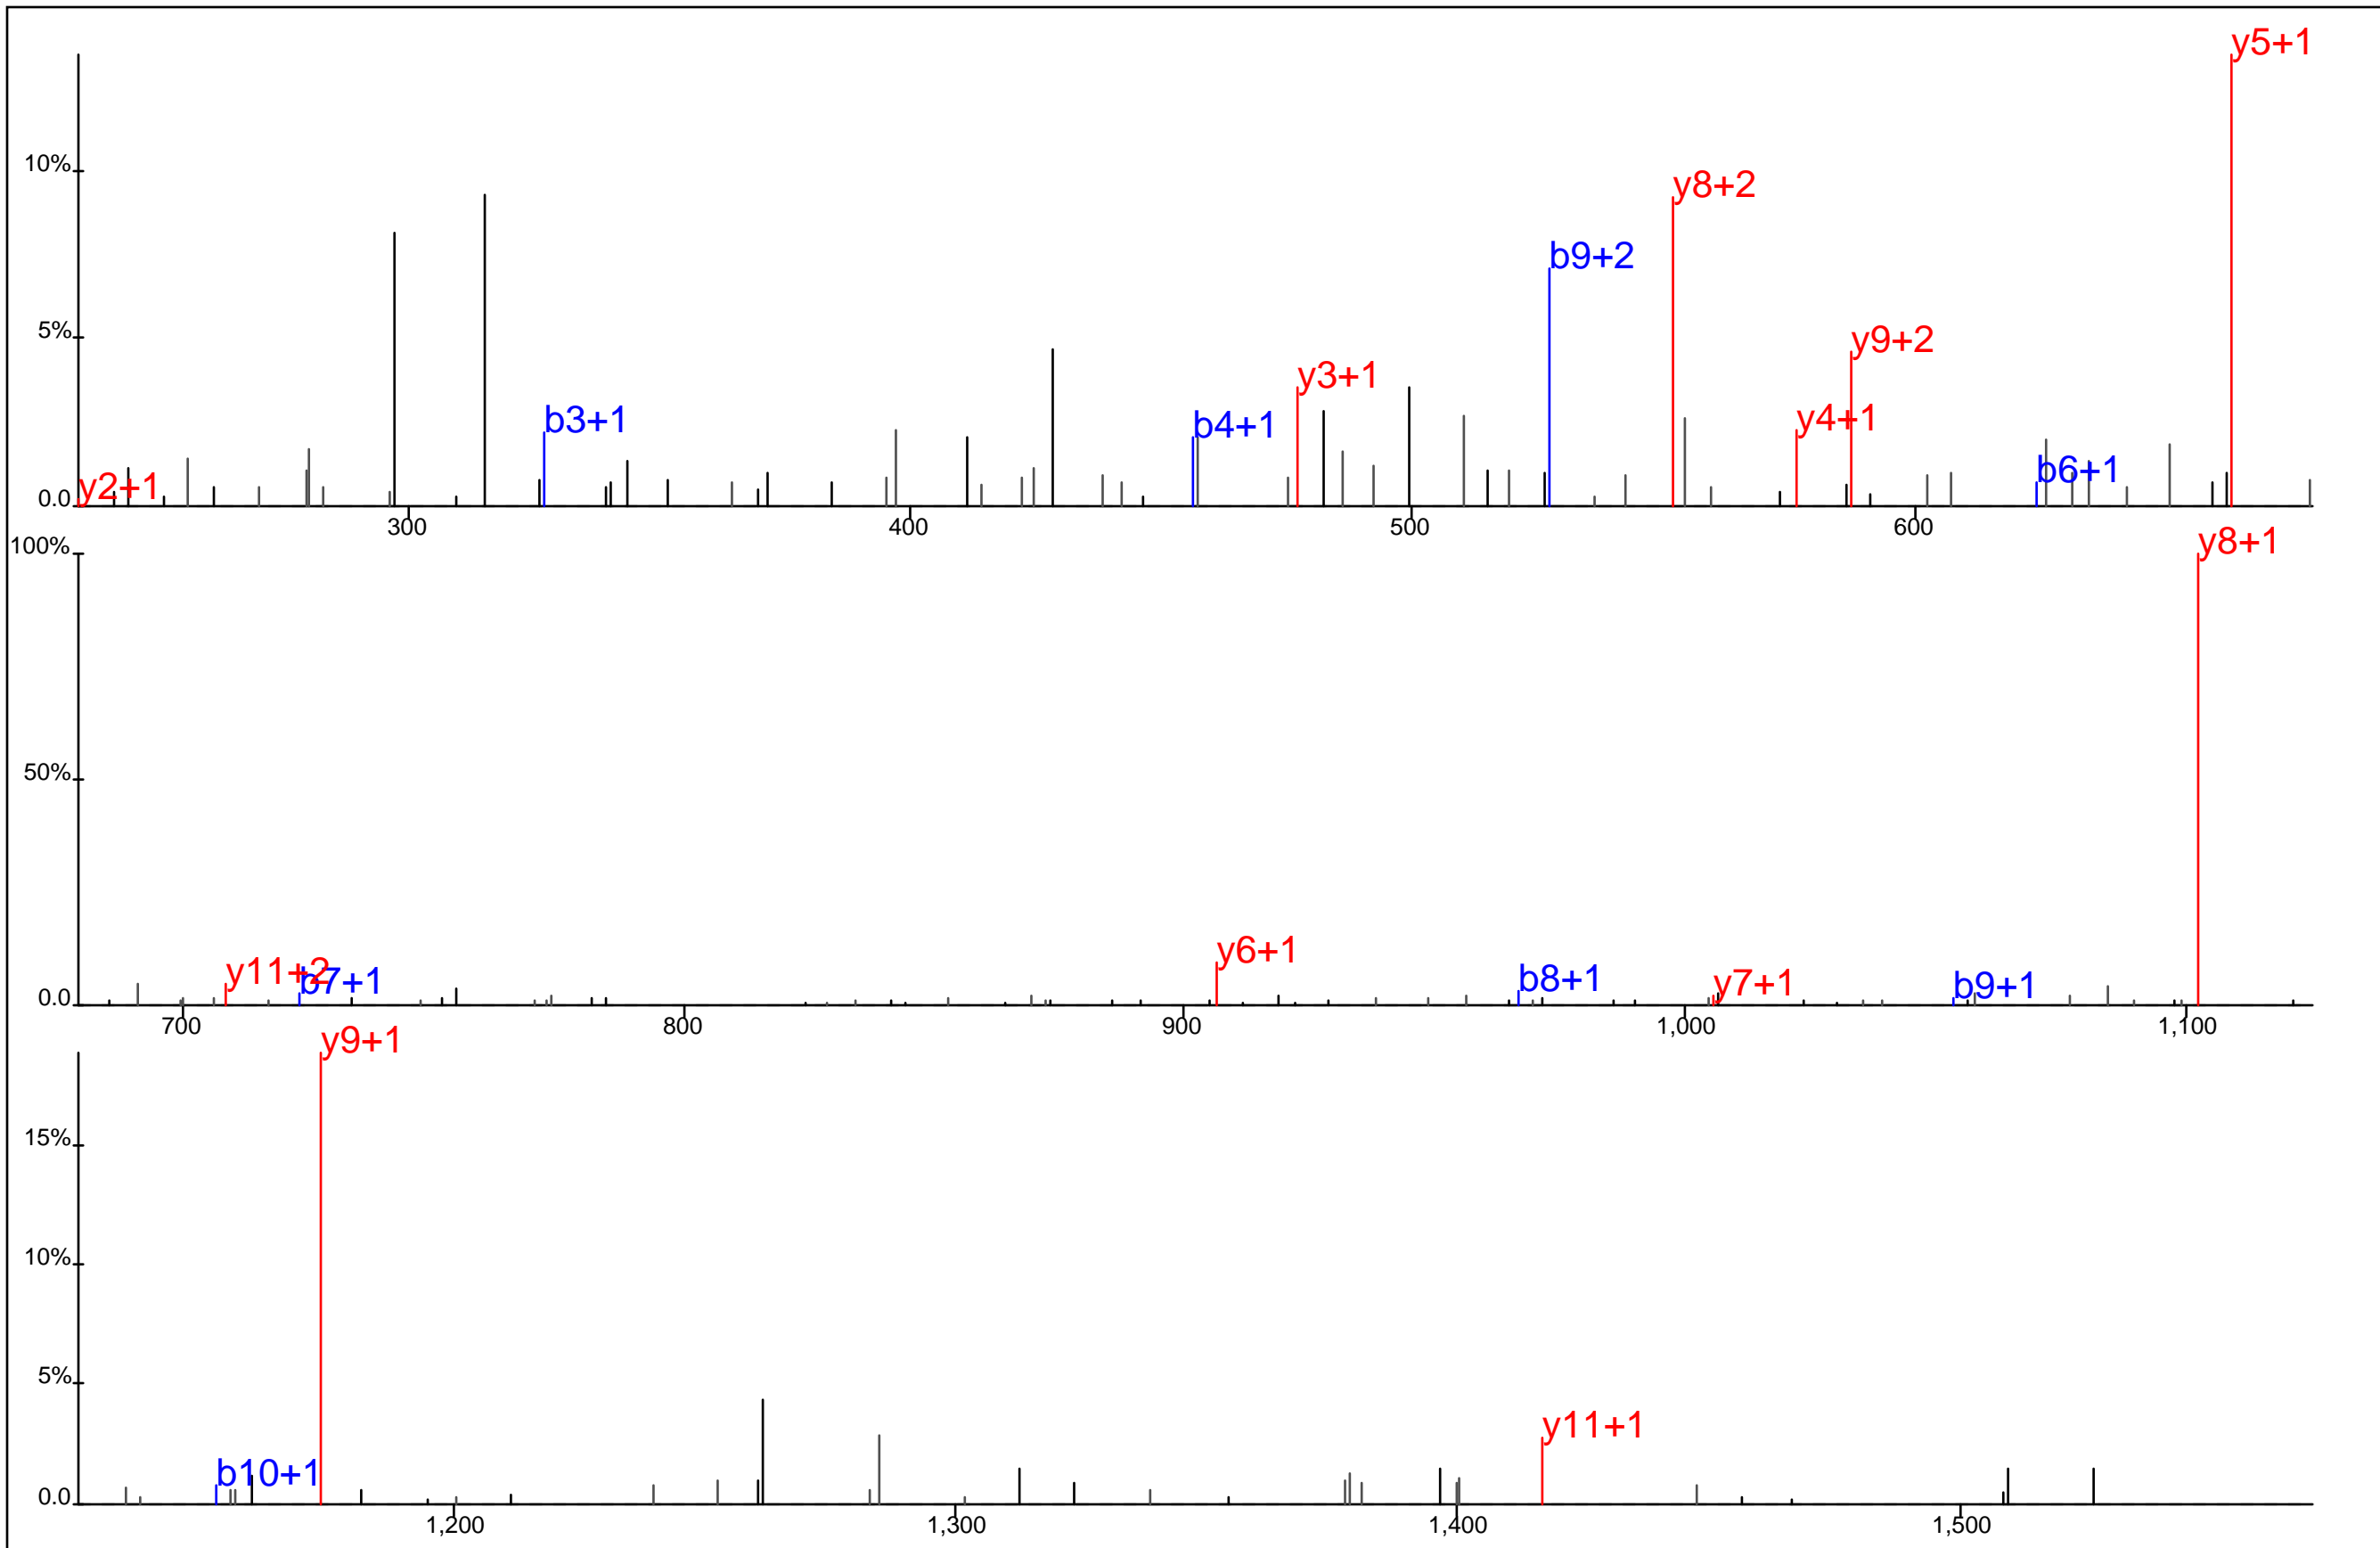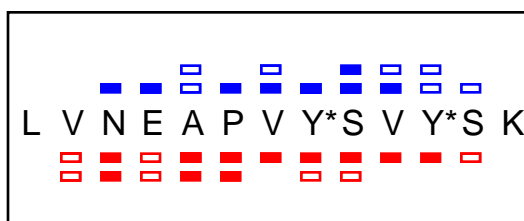

Protein Name: STAM2  
 gi Accession: 0  
 Precursor Mass: 814.8521+2  
 Delta Mass: 2.397 ppm  
 XCorr: 32.46

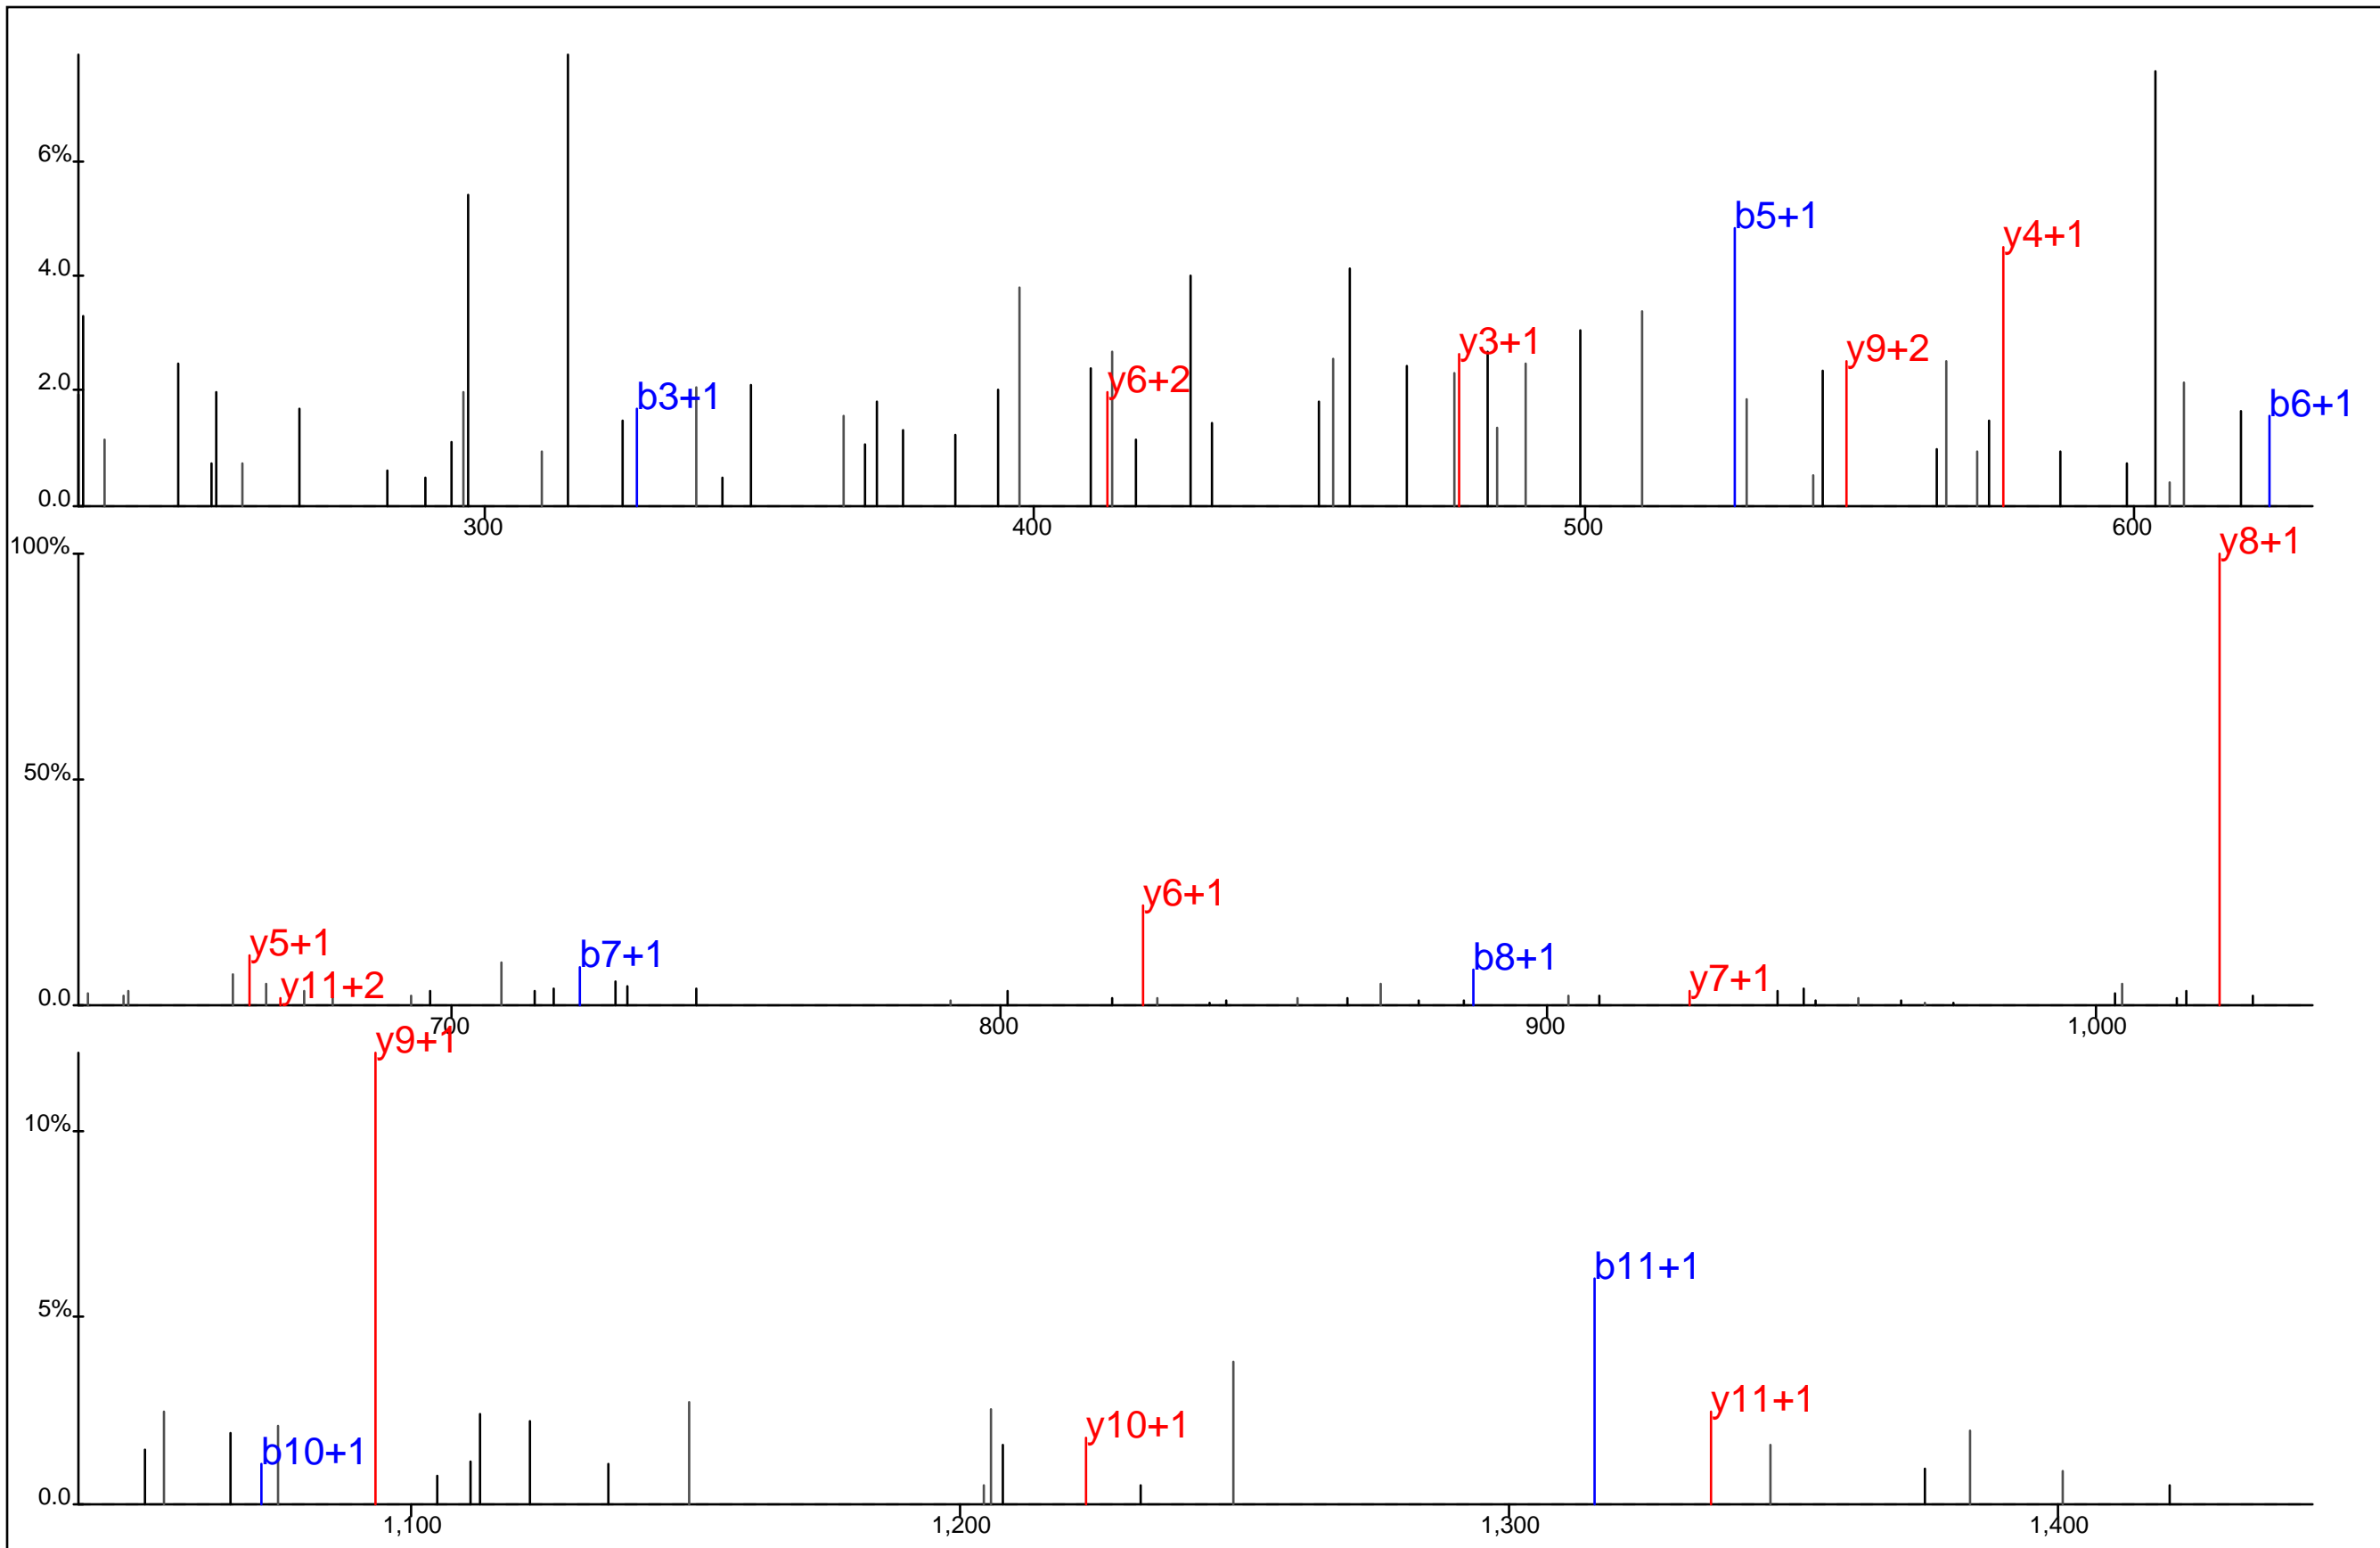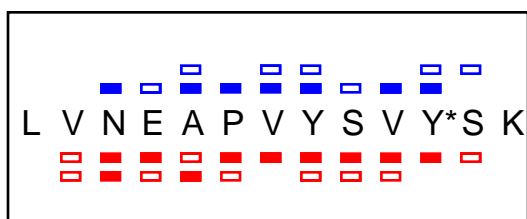

Protein Name: STAM2  
 gi Accession: 0  
 Precursor Mass: 774.8701+2  
 Delta Mass: 1.010 ppm  
 XCorr: 35.71



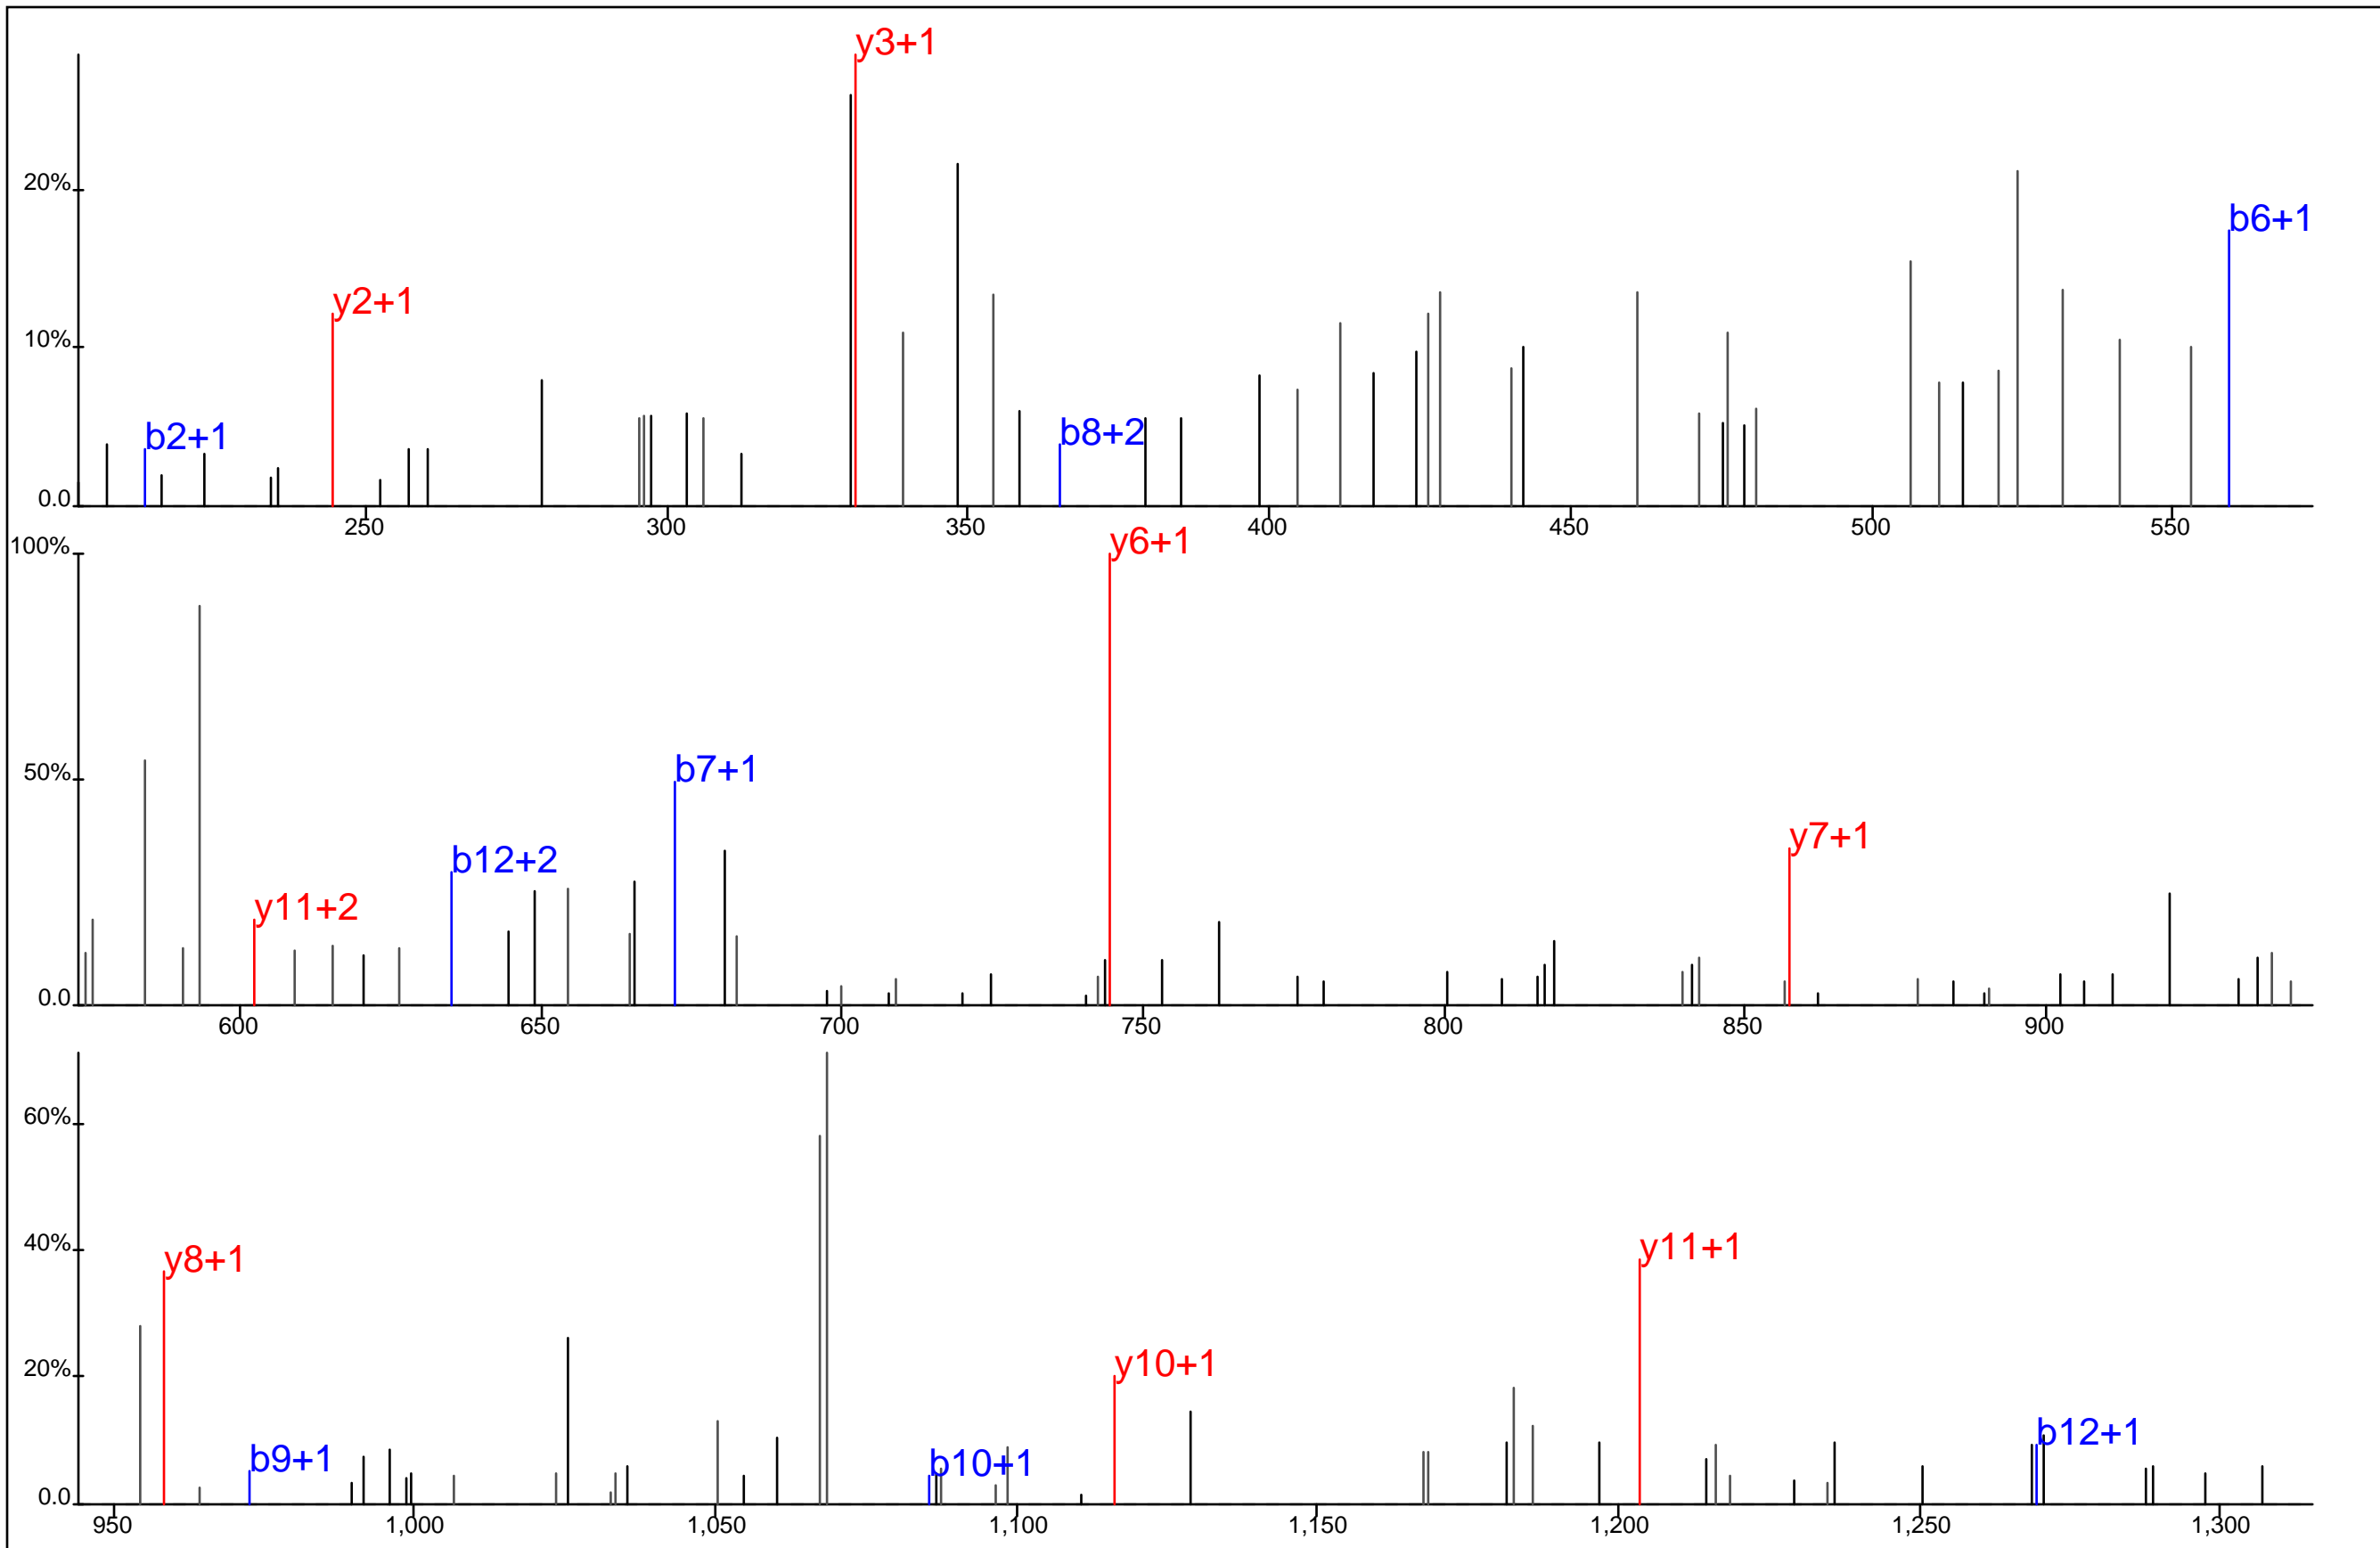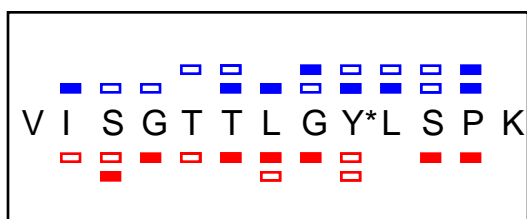

Protein Name: Staufen RNA binding protein homolog 2  
 gi Accession: 0  
 Precursor Mass: 708.3627+2  
 Delta Mass: 0.075 ppm  
 XCorr: 51.04

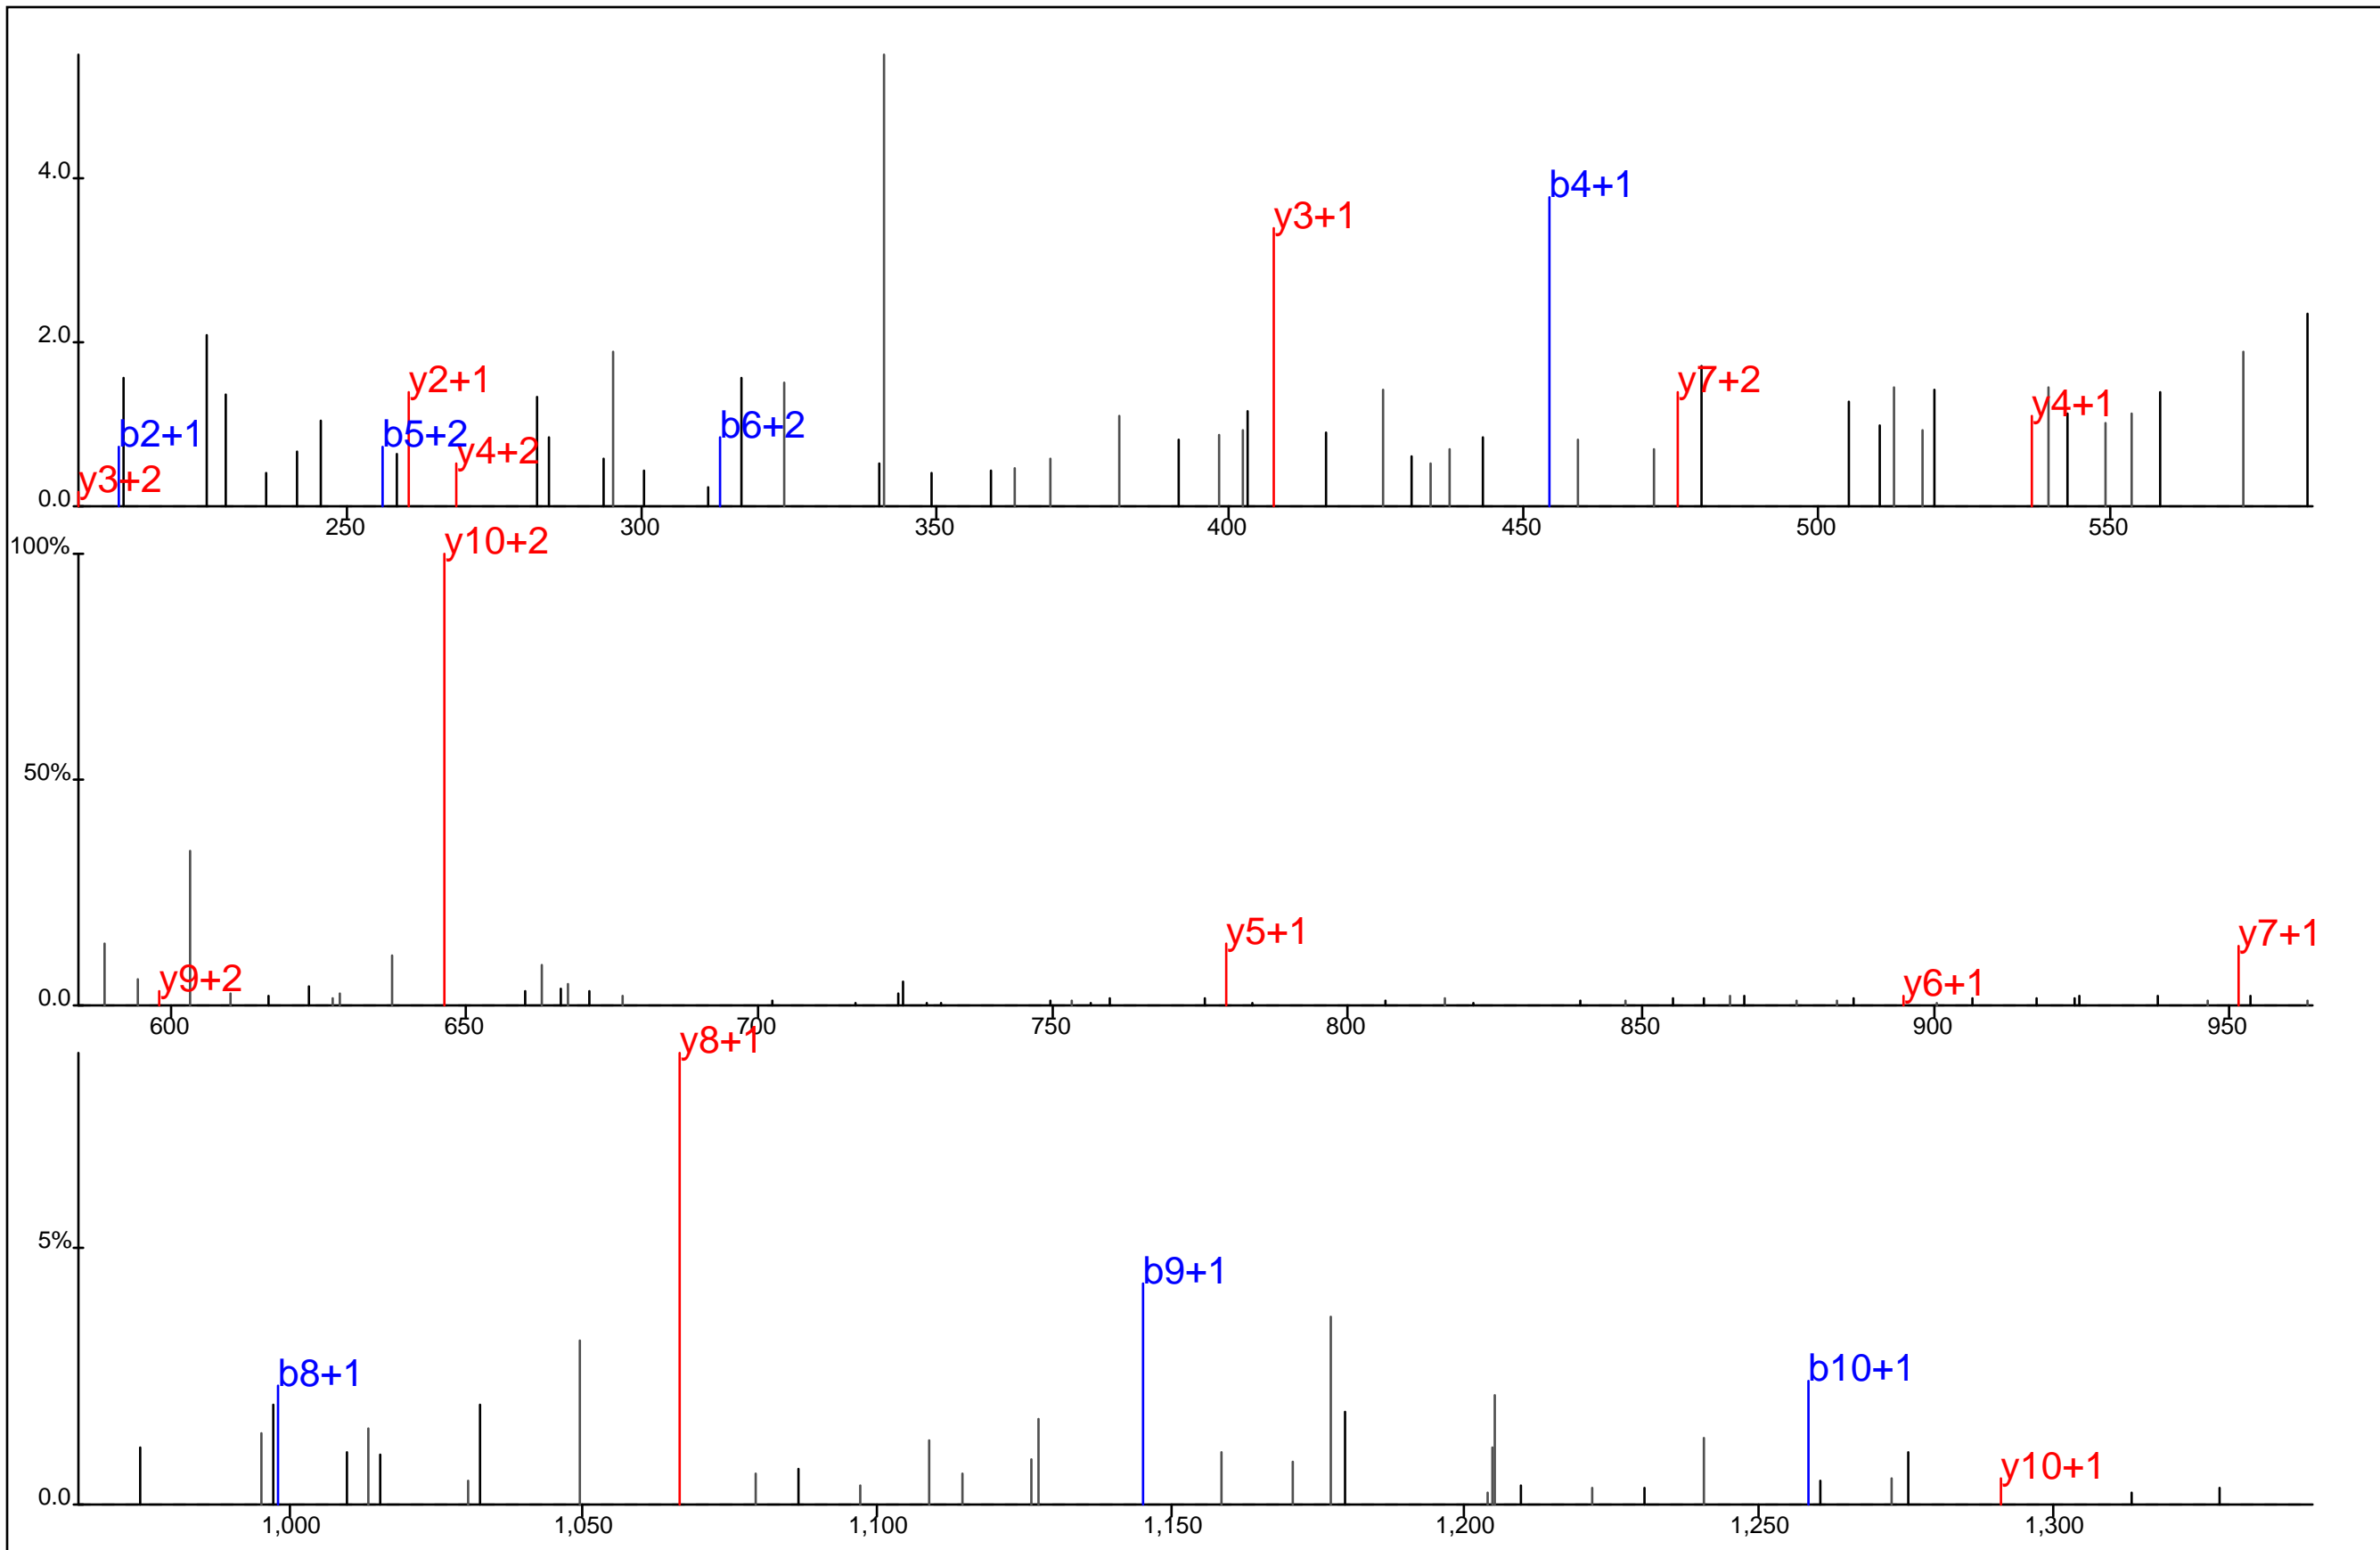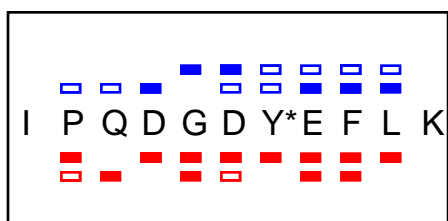

Protein Name: STE20 like kinase MST1  
 gi Accession: 0  
 Precursor Mass: 702.8065+2  
 Delta Mass: 1.787 ppm  
 XCorr: 29.0

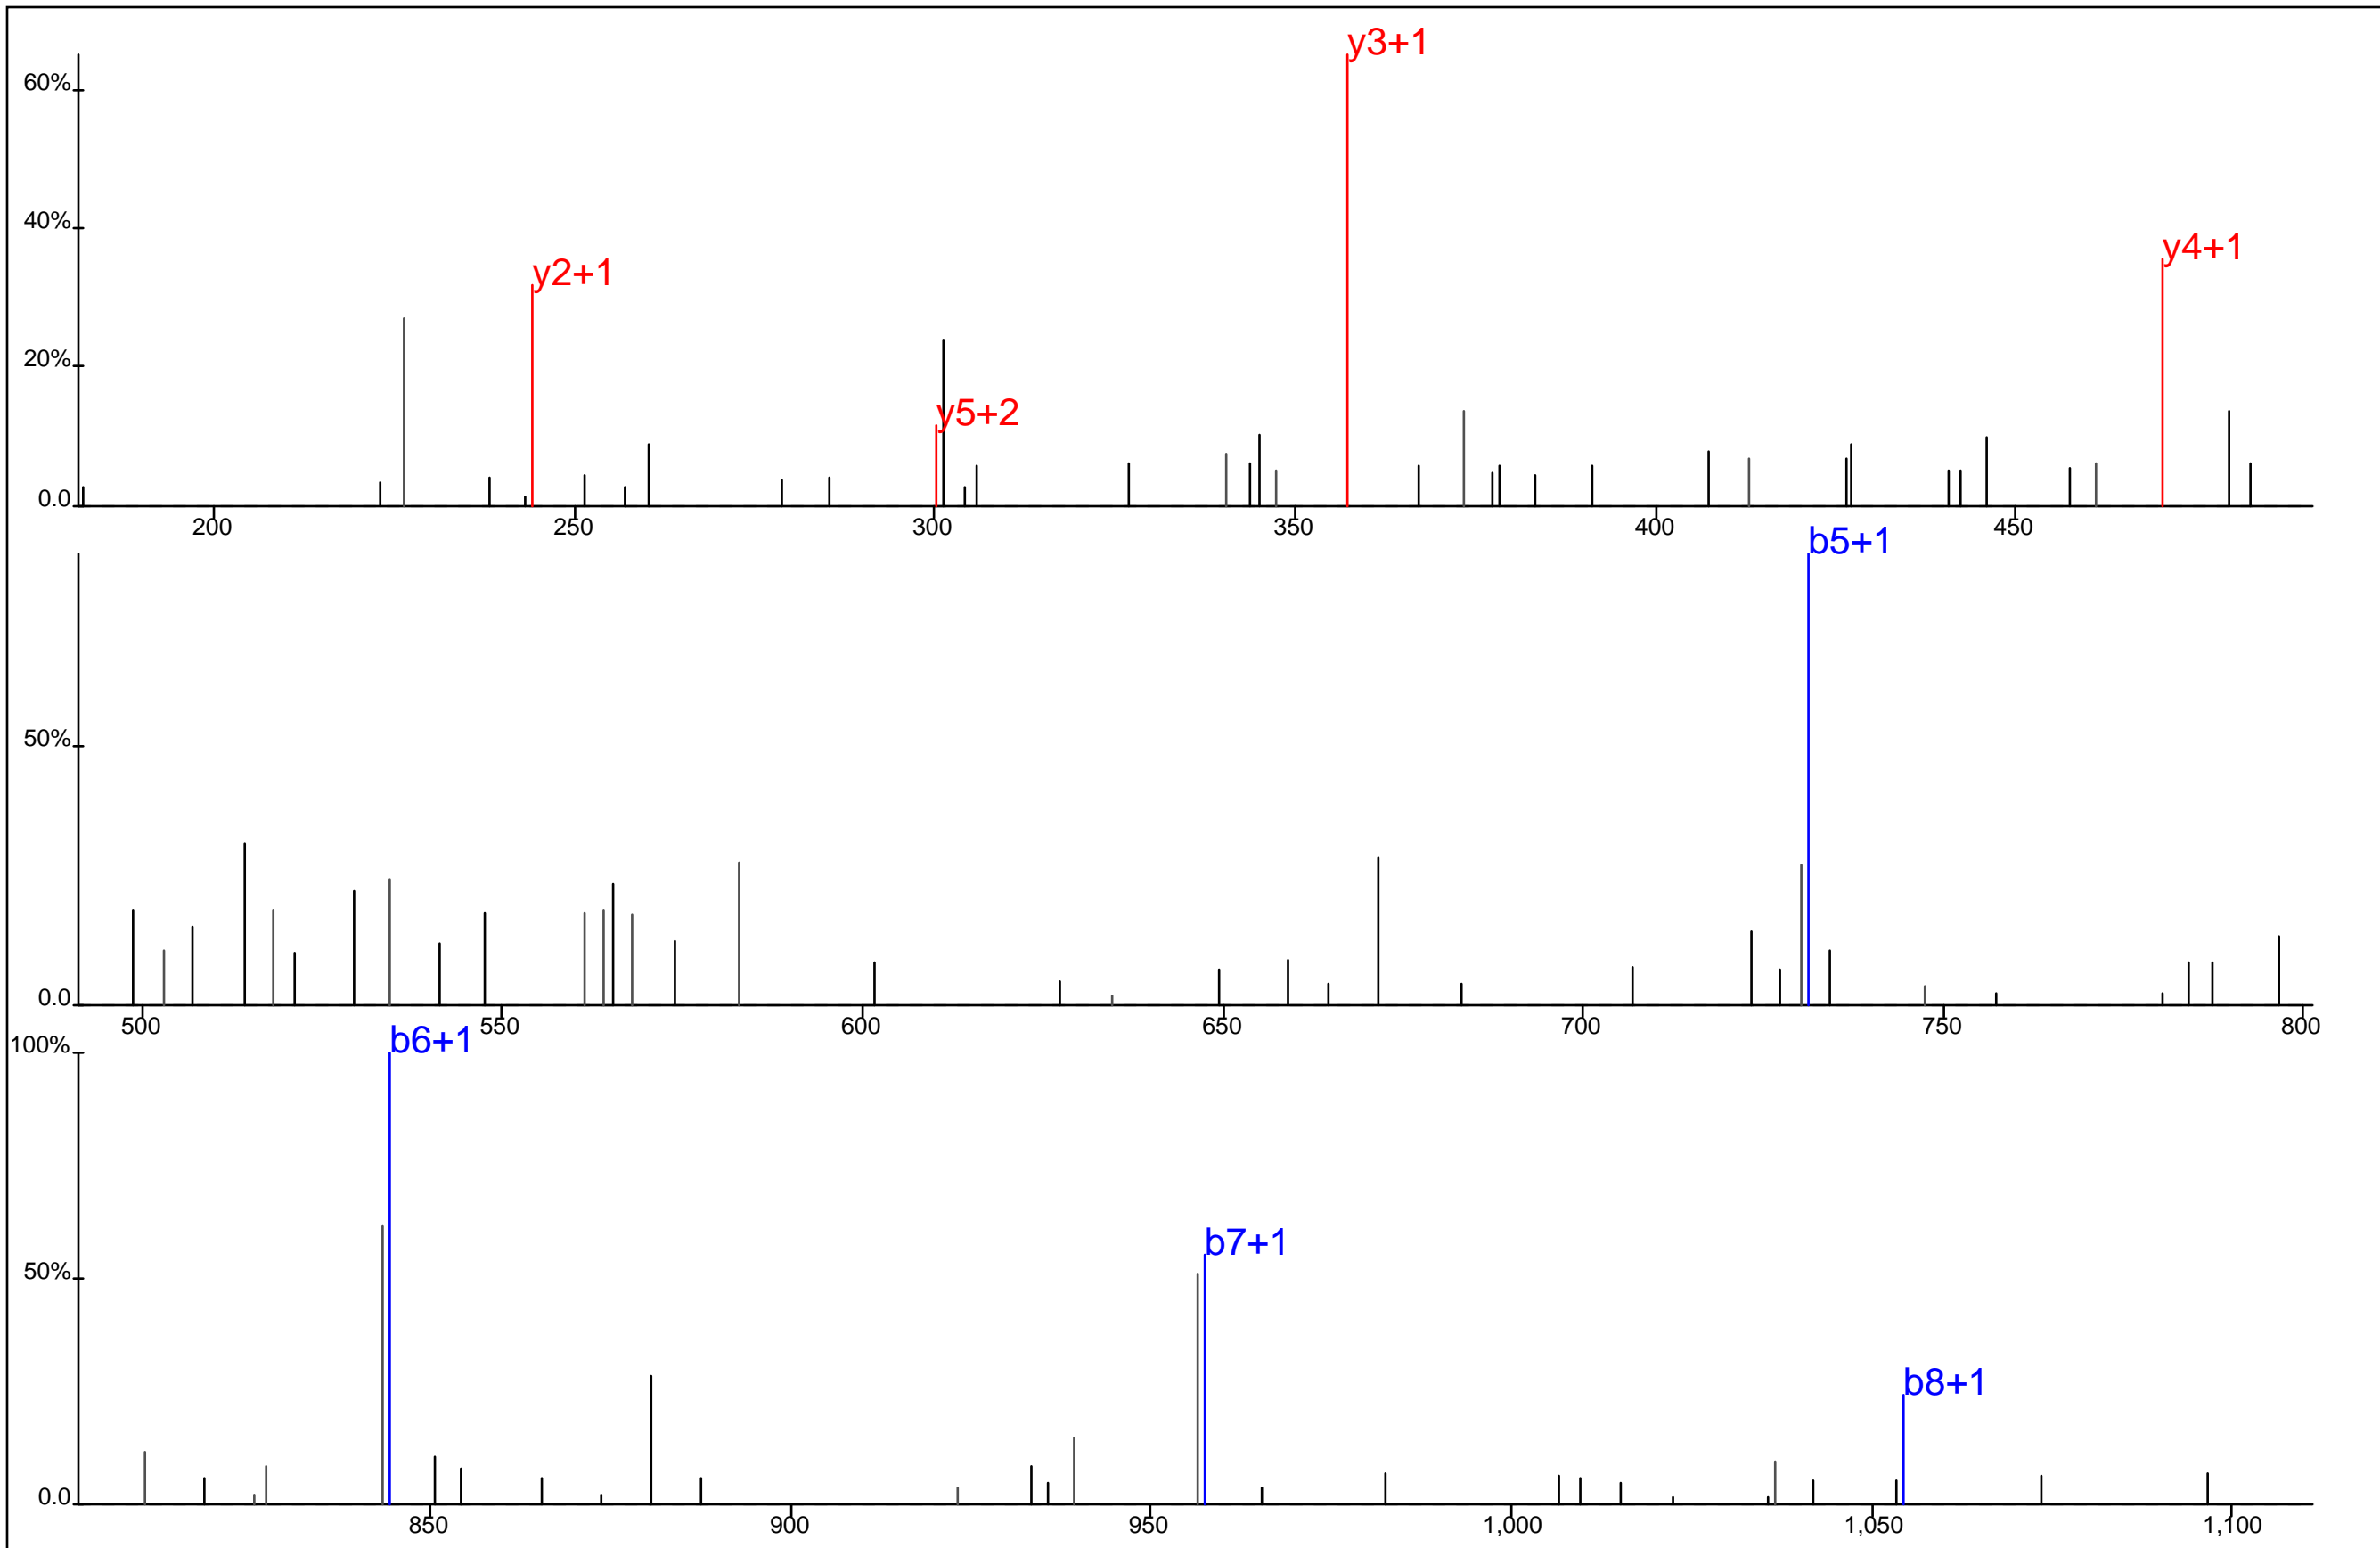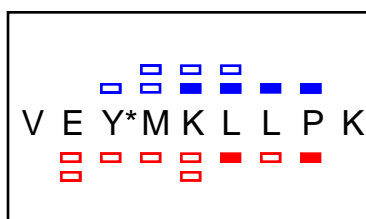

Protein Name: Sterile alpha motif domain containing 4  
 gi Accession: 0  
 Precursor Mass: 600.8049+2  
 Delta Mass: 5.984 ppm  
 XCorr: 24.75

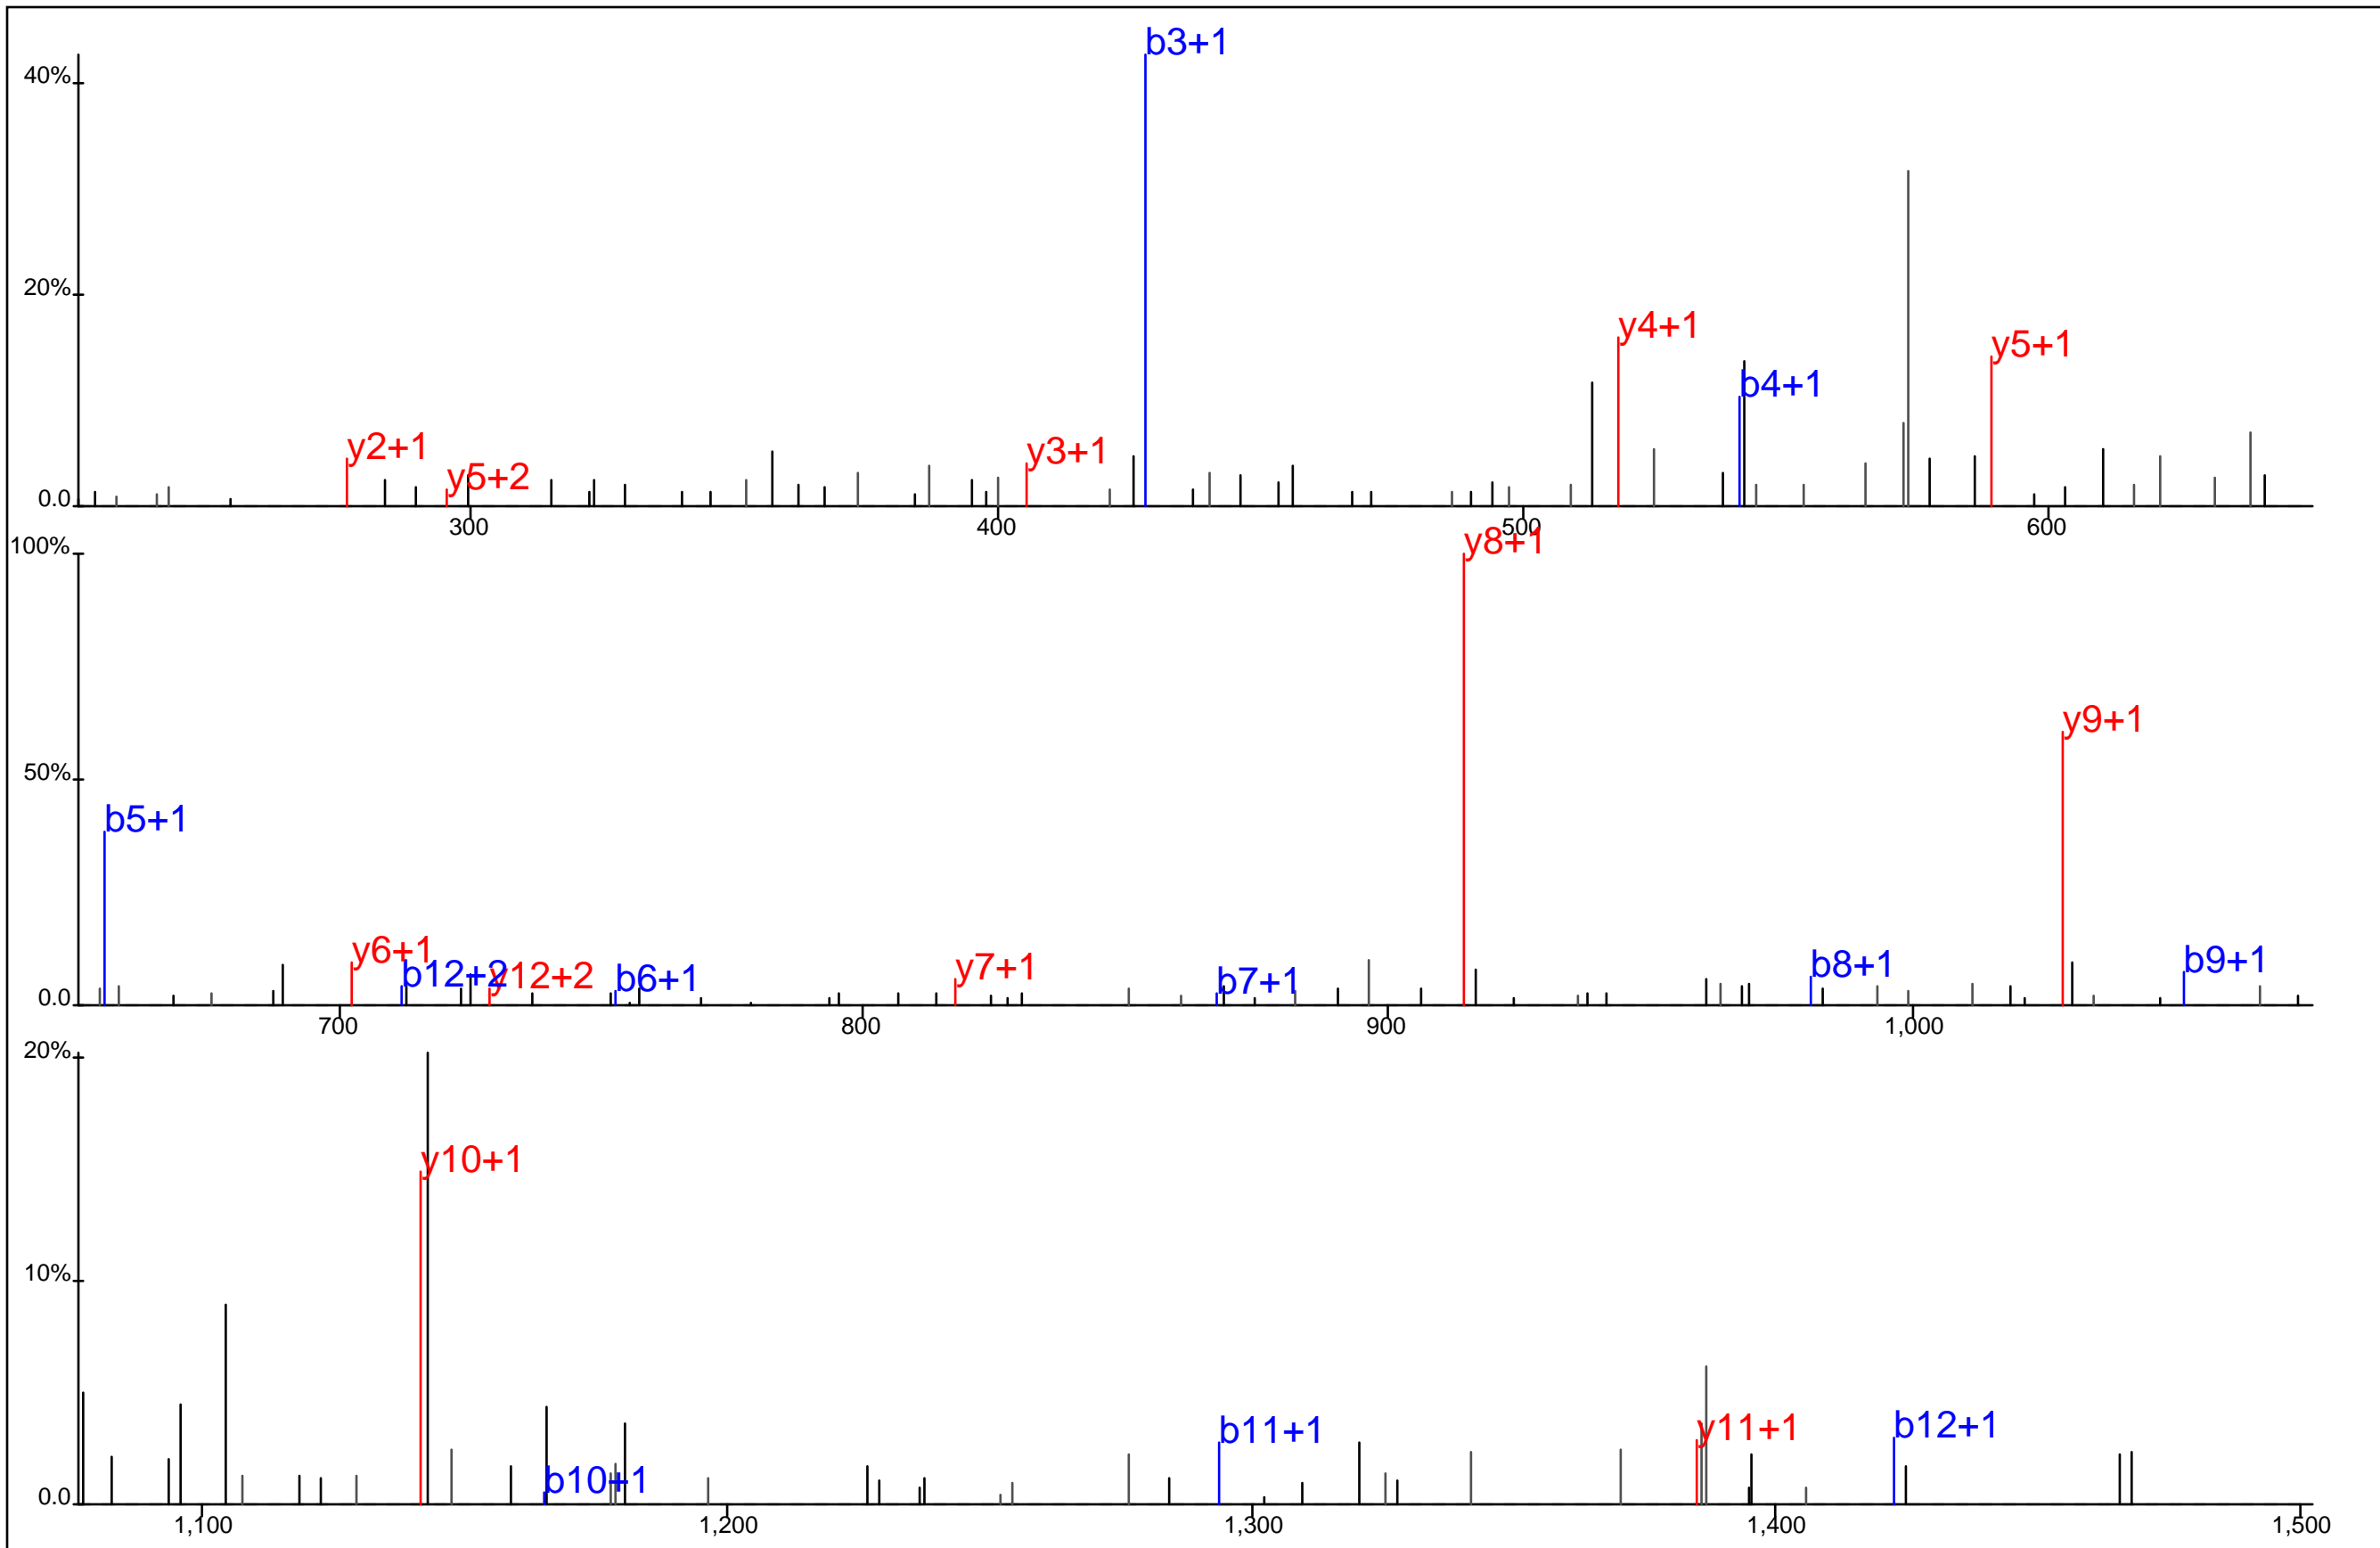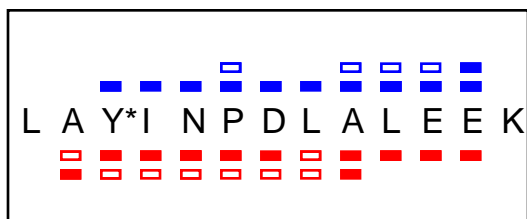

Protein Name: Stress induced phosphoprotein 1  
 gi Accession: 0  
 Precursor Mass: 784.8842+2  
 Delta Mass: 0.205 ppm  
 XCorr: 60.4



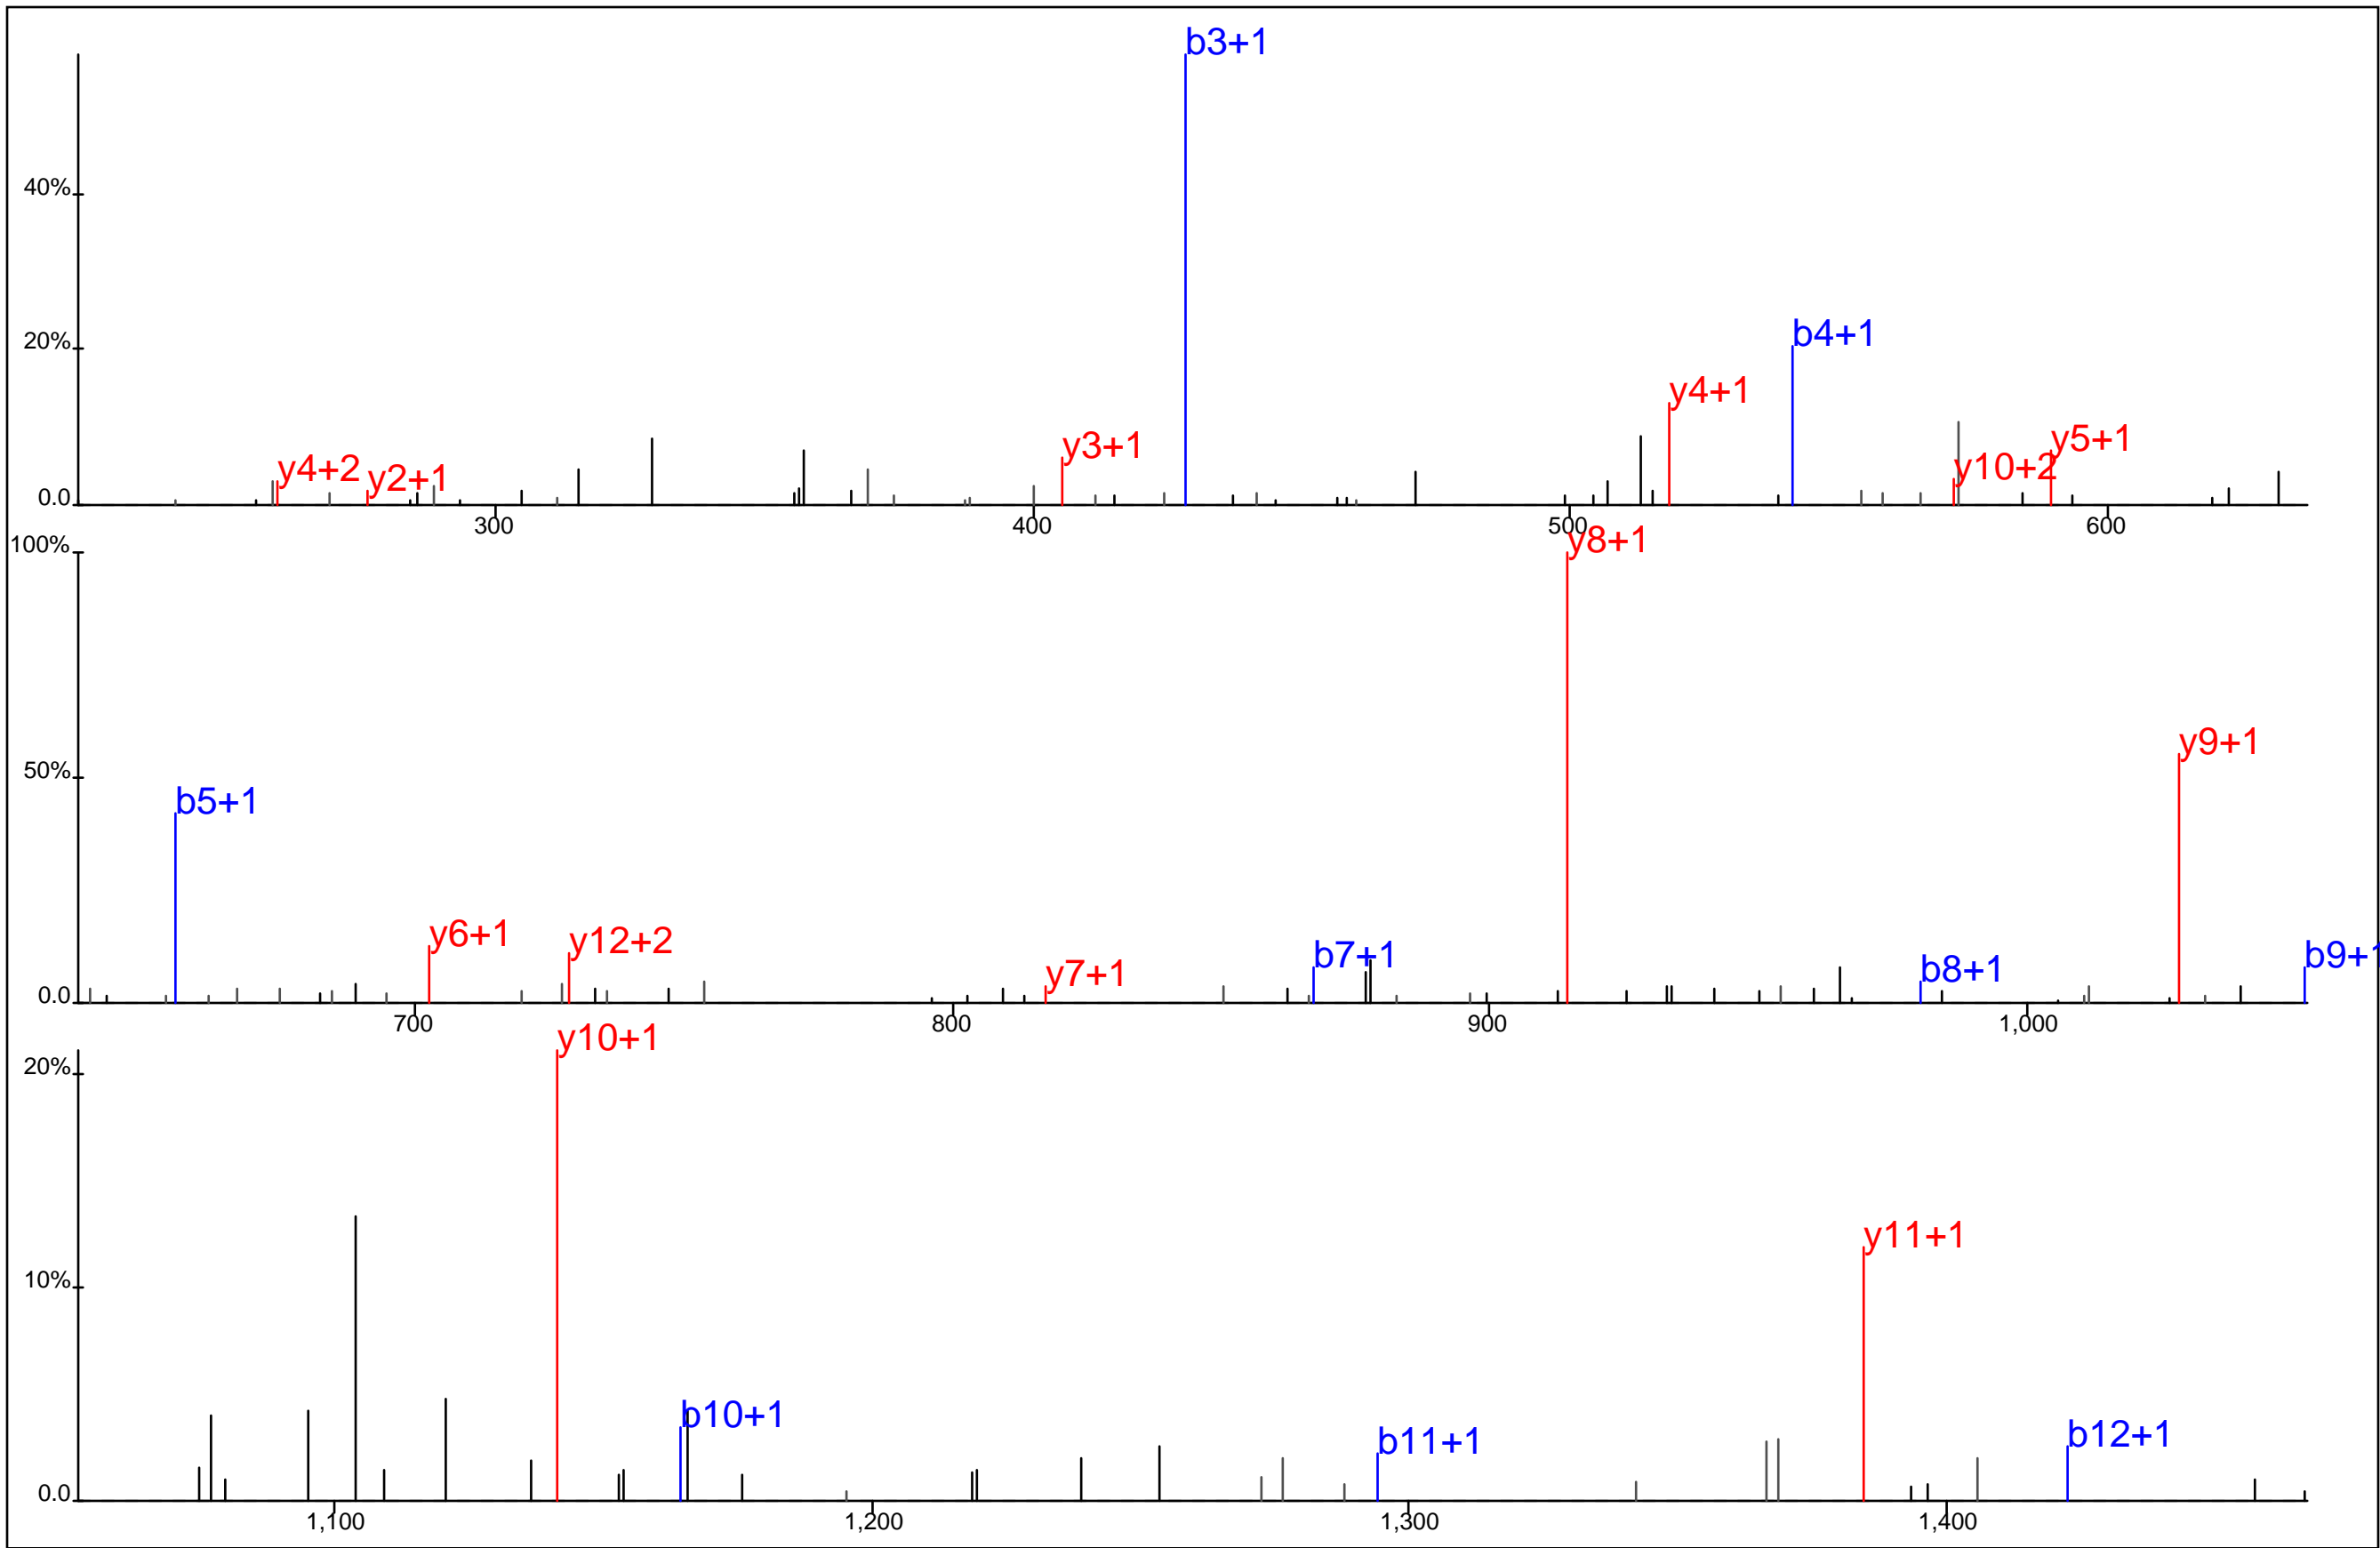

▣ ▣  
▣ ▣ ▣ ▣ ▣ ▣ ▣ ▣ ▣ ▣  
**L A Y\* I N P D L A L E E K**  
▣ ▣ ▣ ▣ ▣ ▣ ▣ ▣ ▣ ▣

Protein Name: Stress induced phosphoprotein 1  
 gi Accession: 0  
 Precursor Mass: 784.8824+2  
 Delta Mass: 1.974 ppm  
 XCorr: 57.63

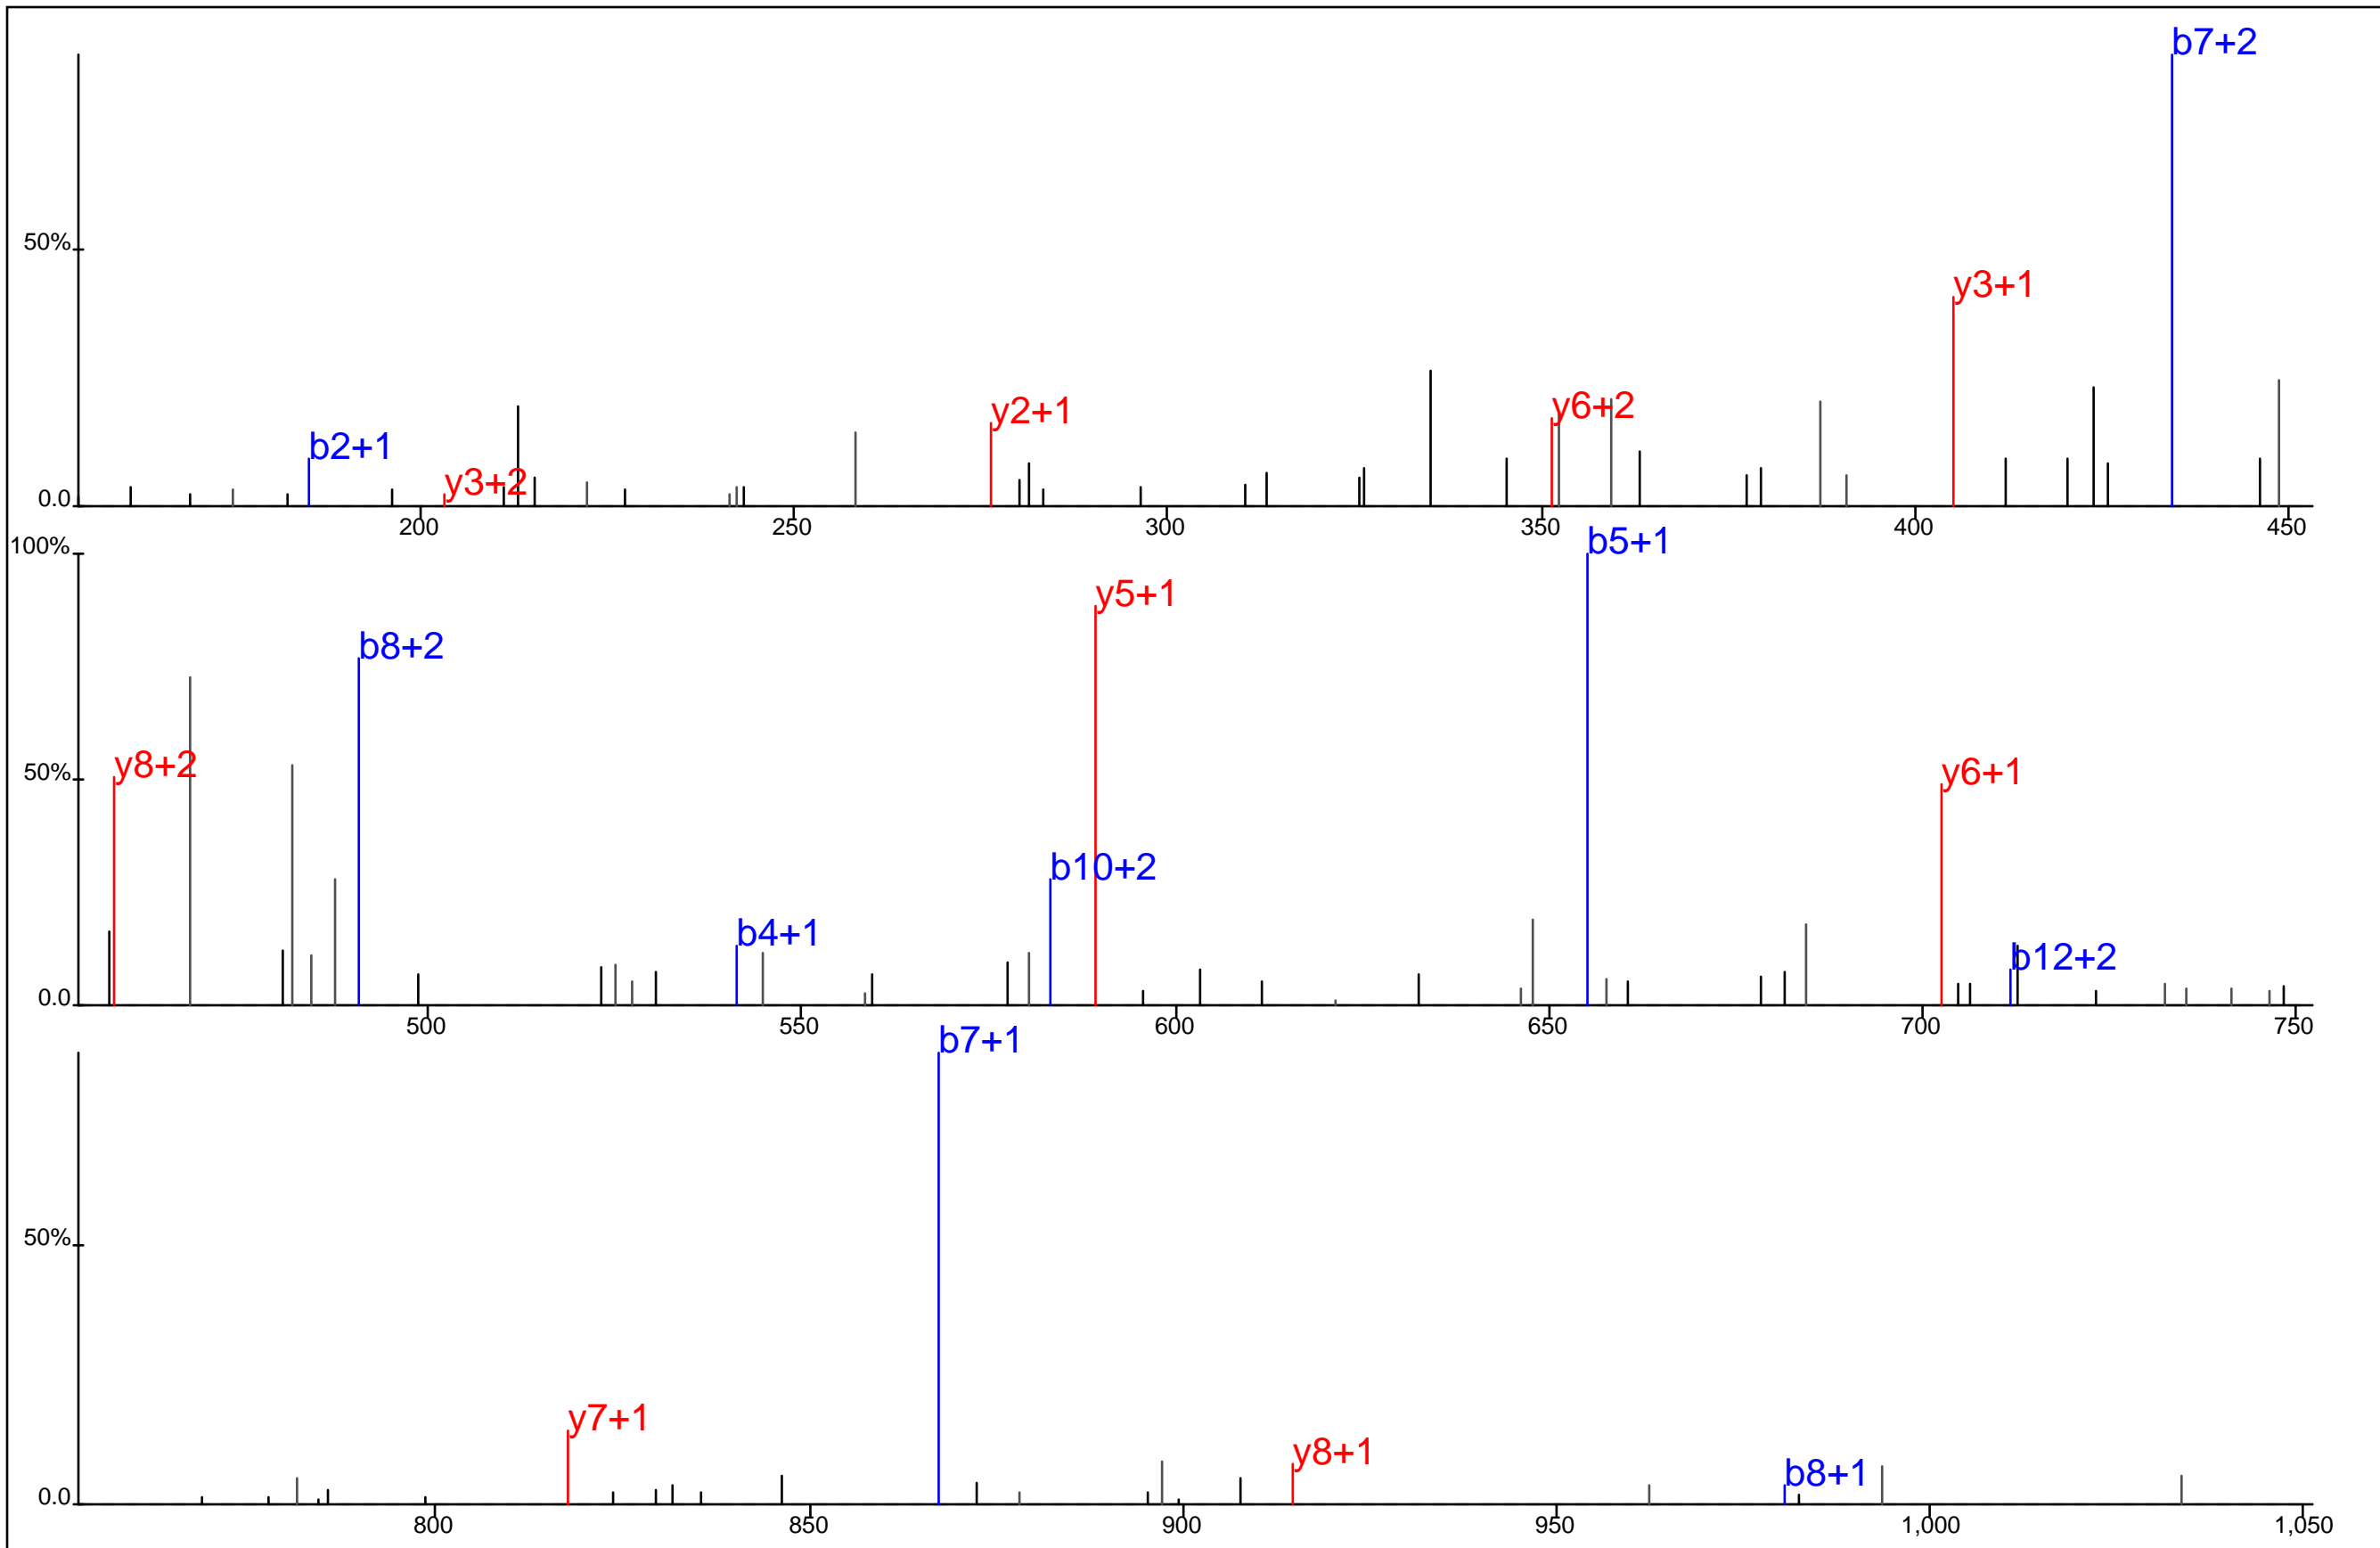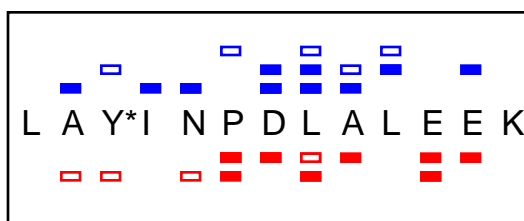

Protein Name: Stress induced phosphoprotein 1  
 gi Accession: 0  
 Precursor Mass: 523.5918+3  
 Delta Mass: 0.081 ppm  
 XCorr: 31.79





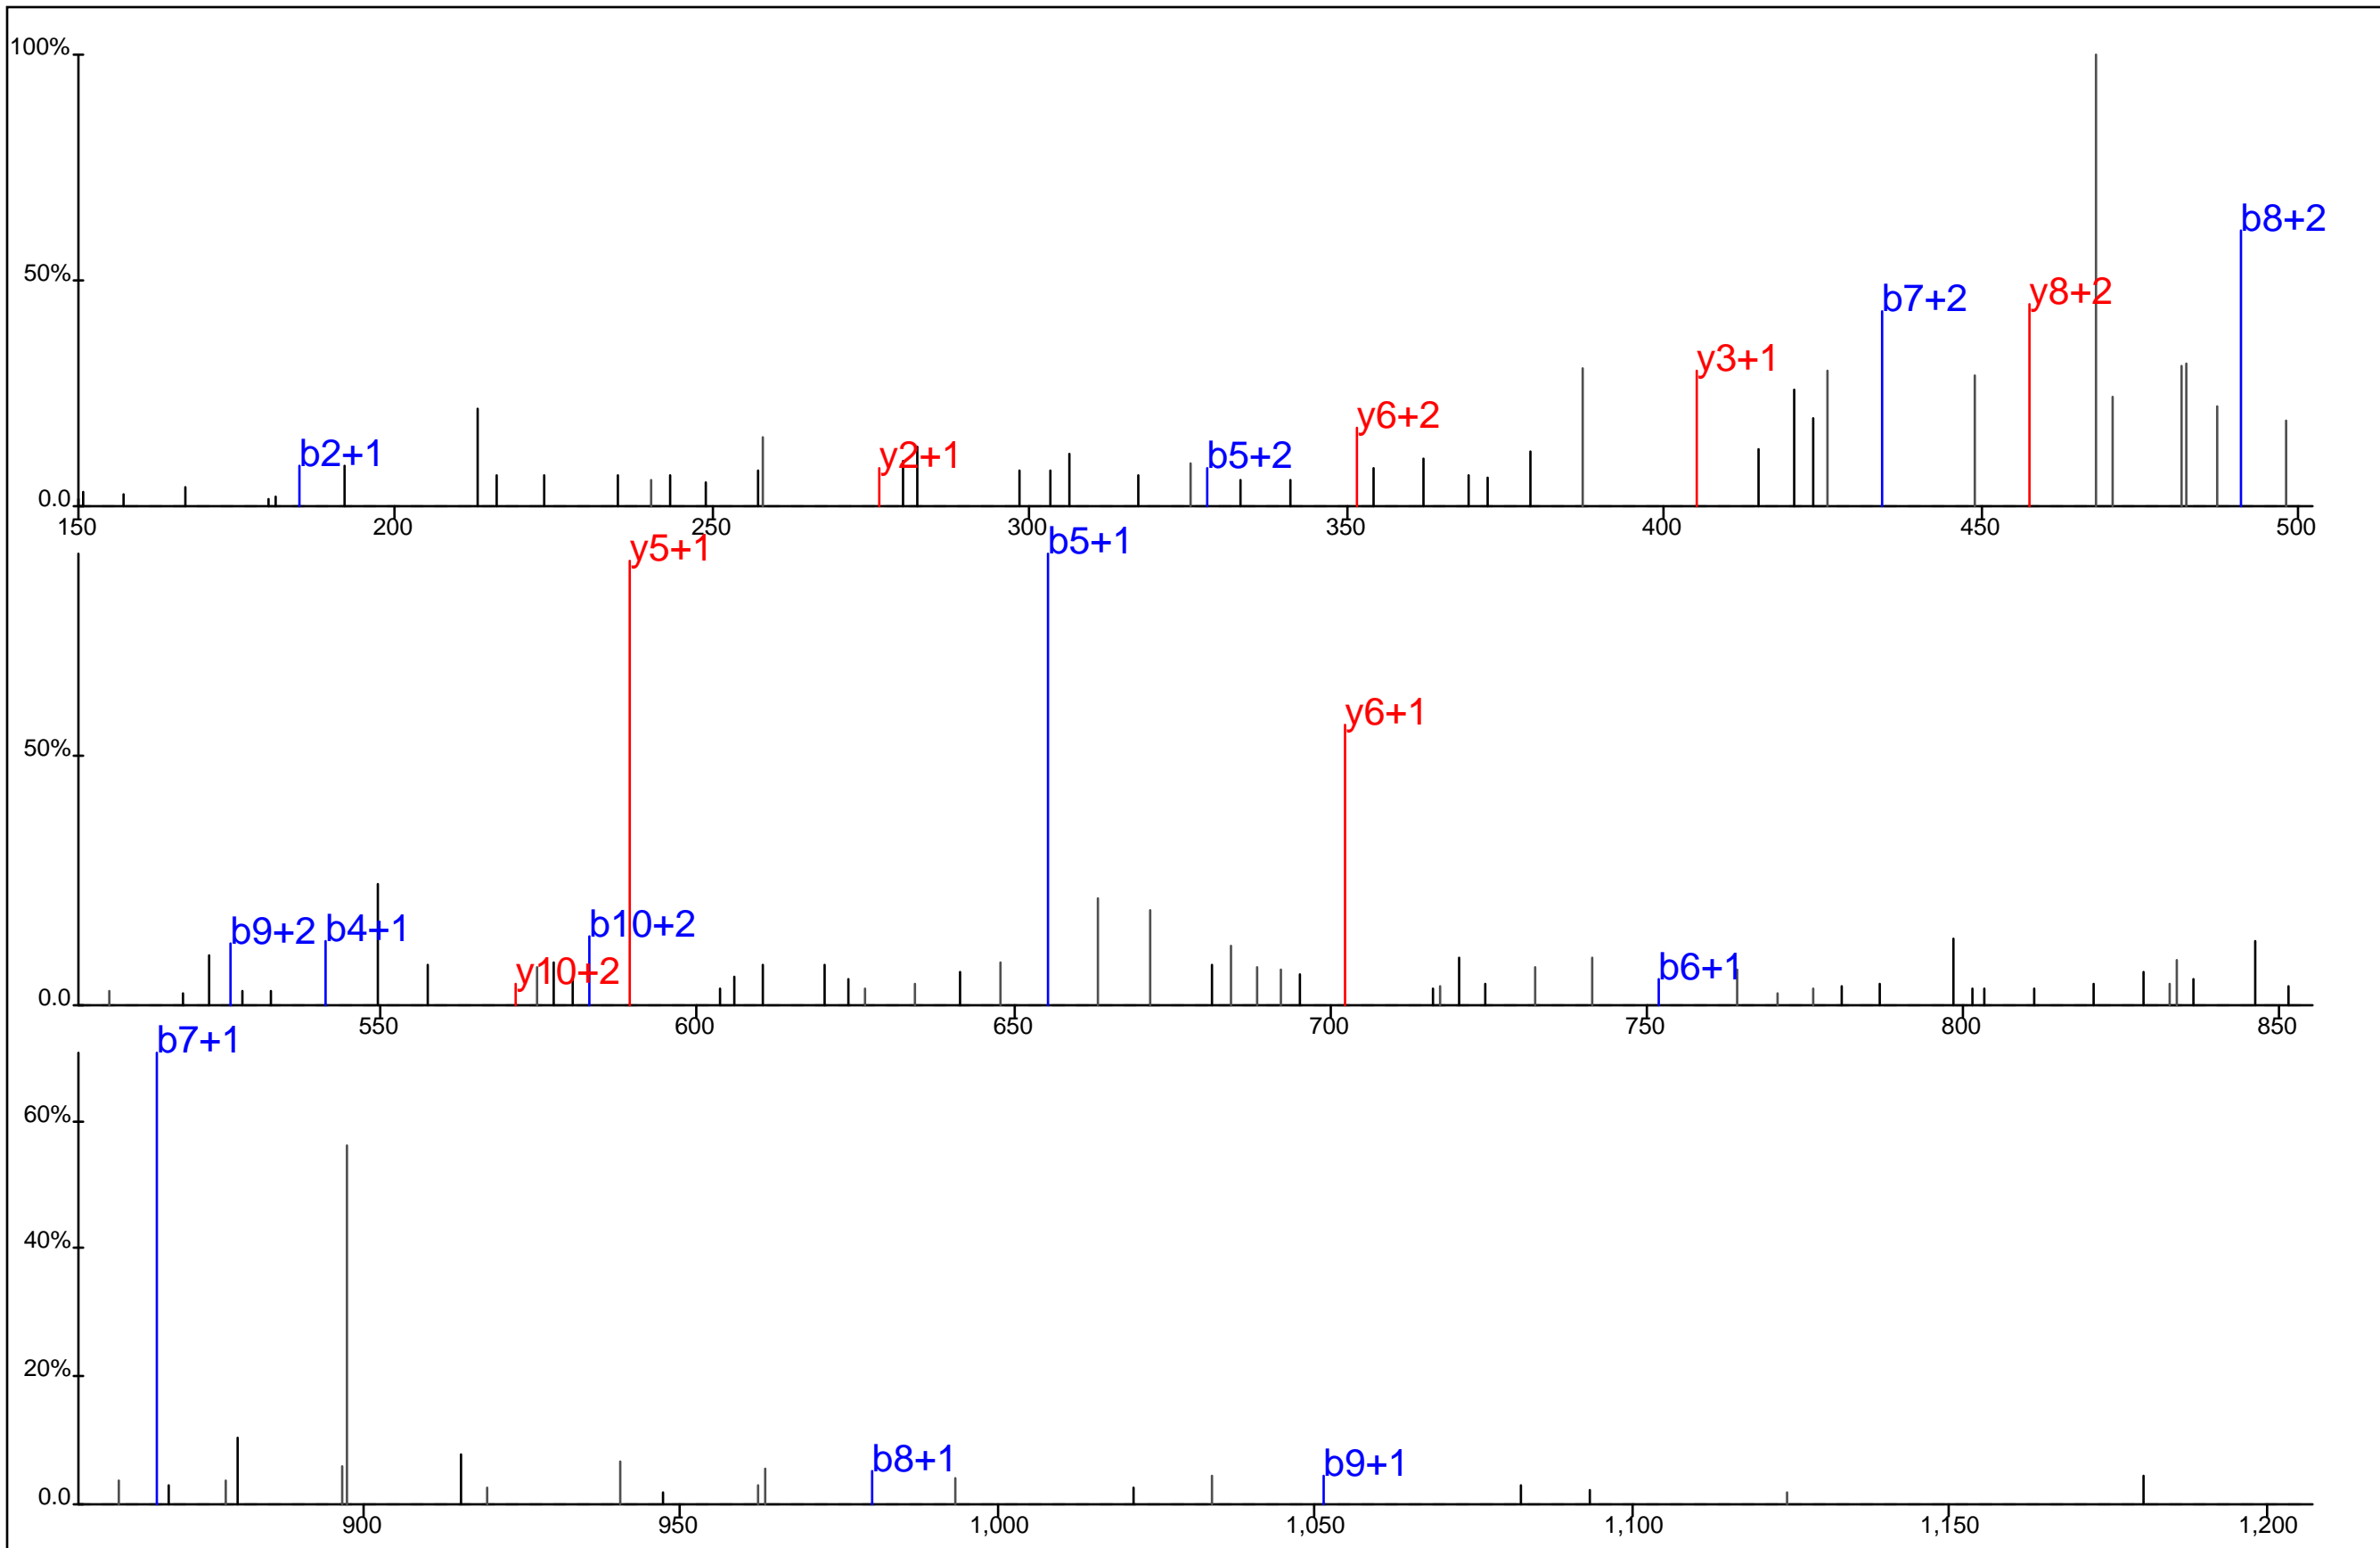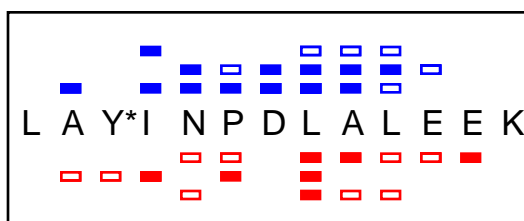

Protein Name: Stress induced phosphoprotein 1  
 gi Accession: 0  
 Precursor Mass: 523.5914+3  
 Delta Mass: 0.619 ppm  
 XCorr: 20.7















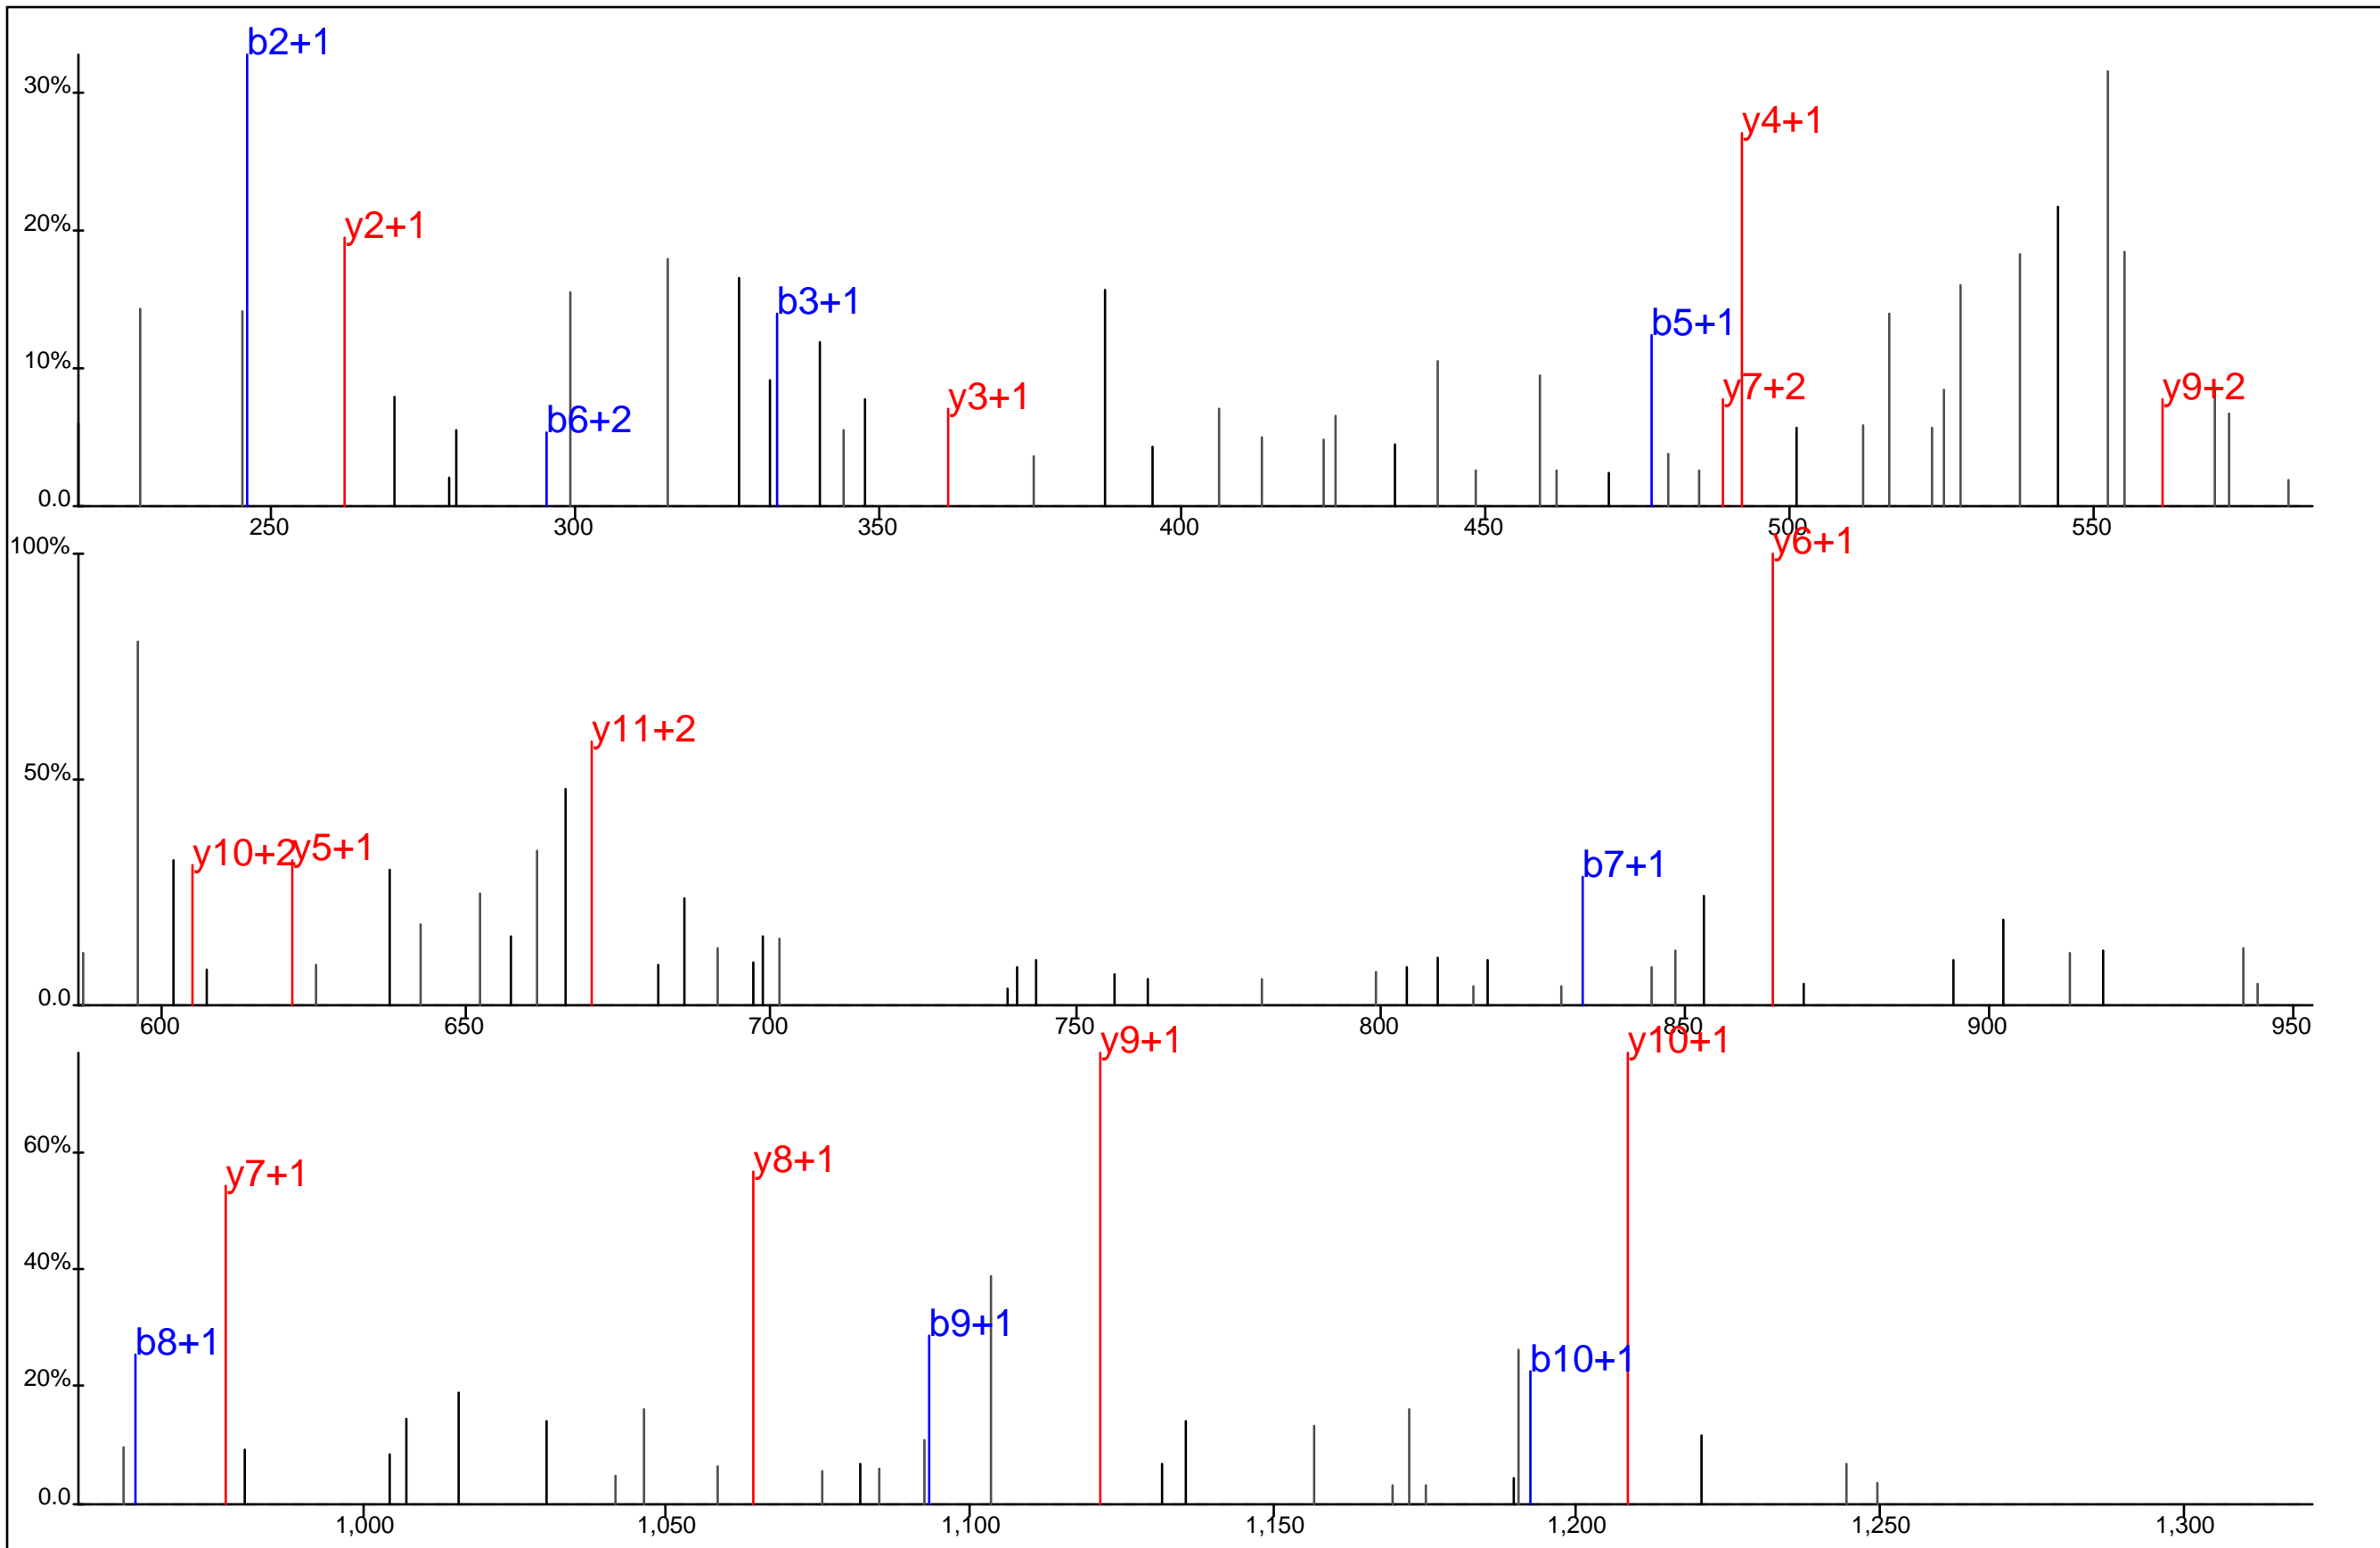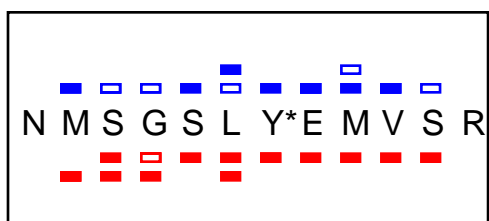

Protein Name: Structure specific recognition protein 1  
 gi Accession: 0  
 Precursor Mass: 727.2939+2  
 Delta Mass: 3.081 ppm  
 XCorr: 44.18

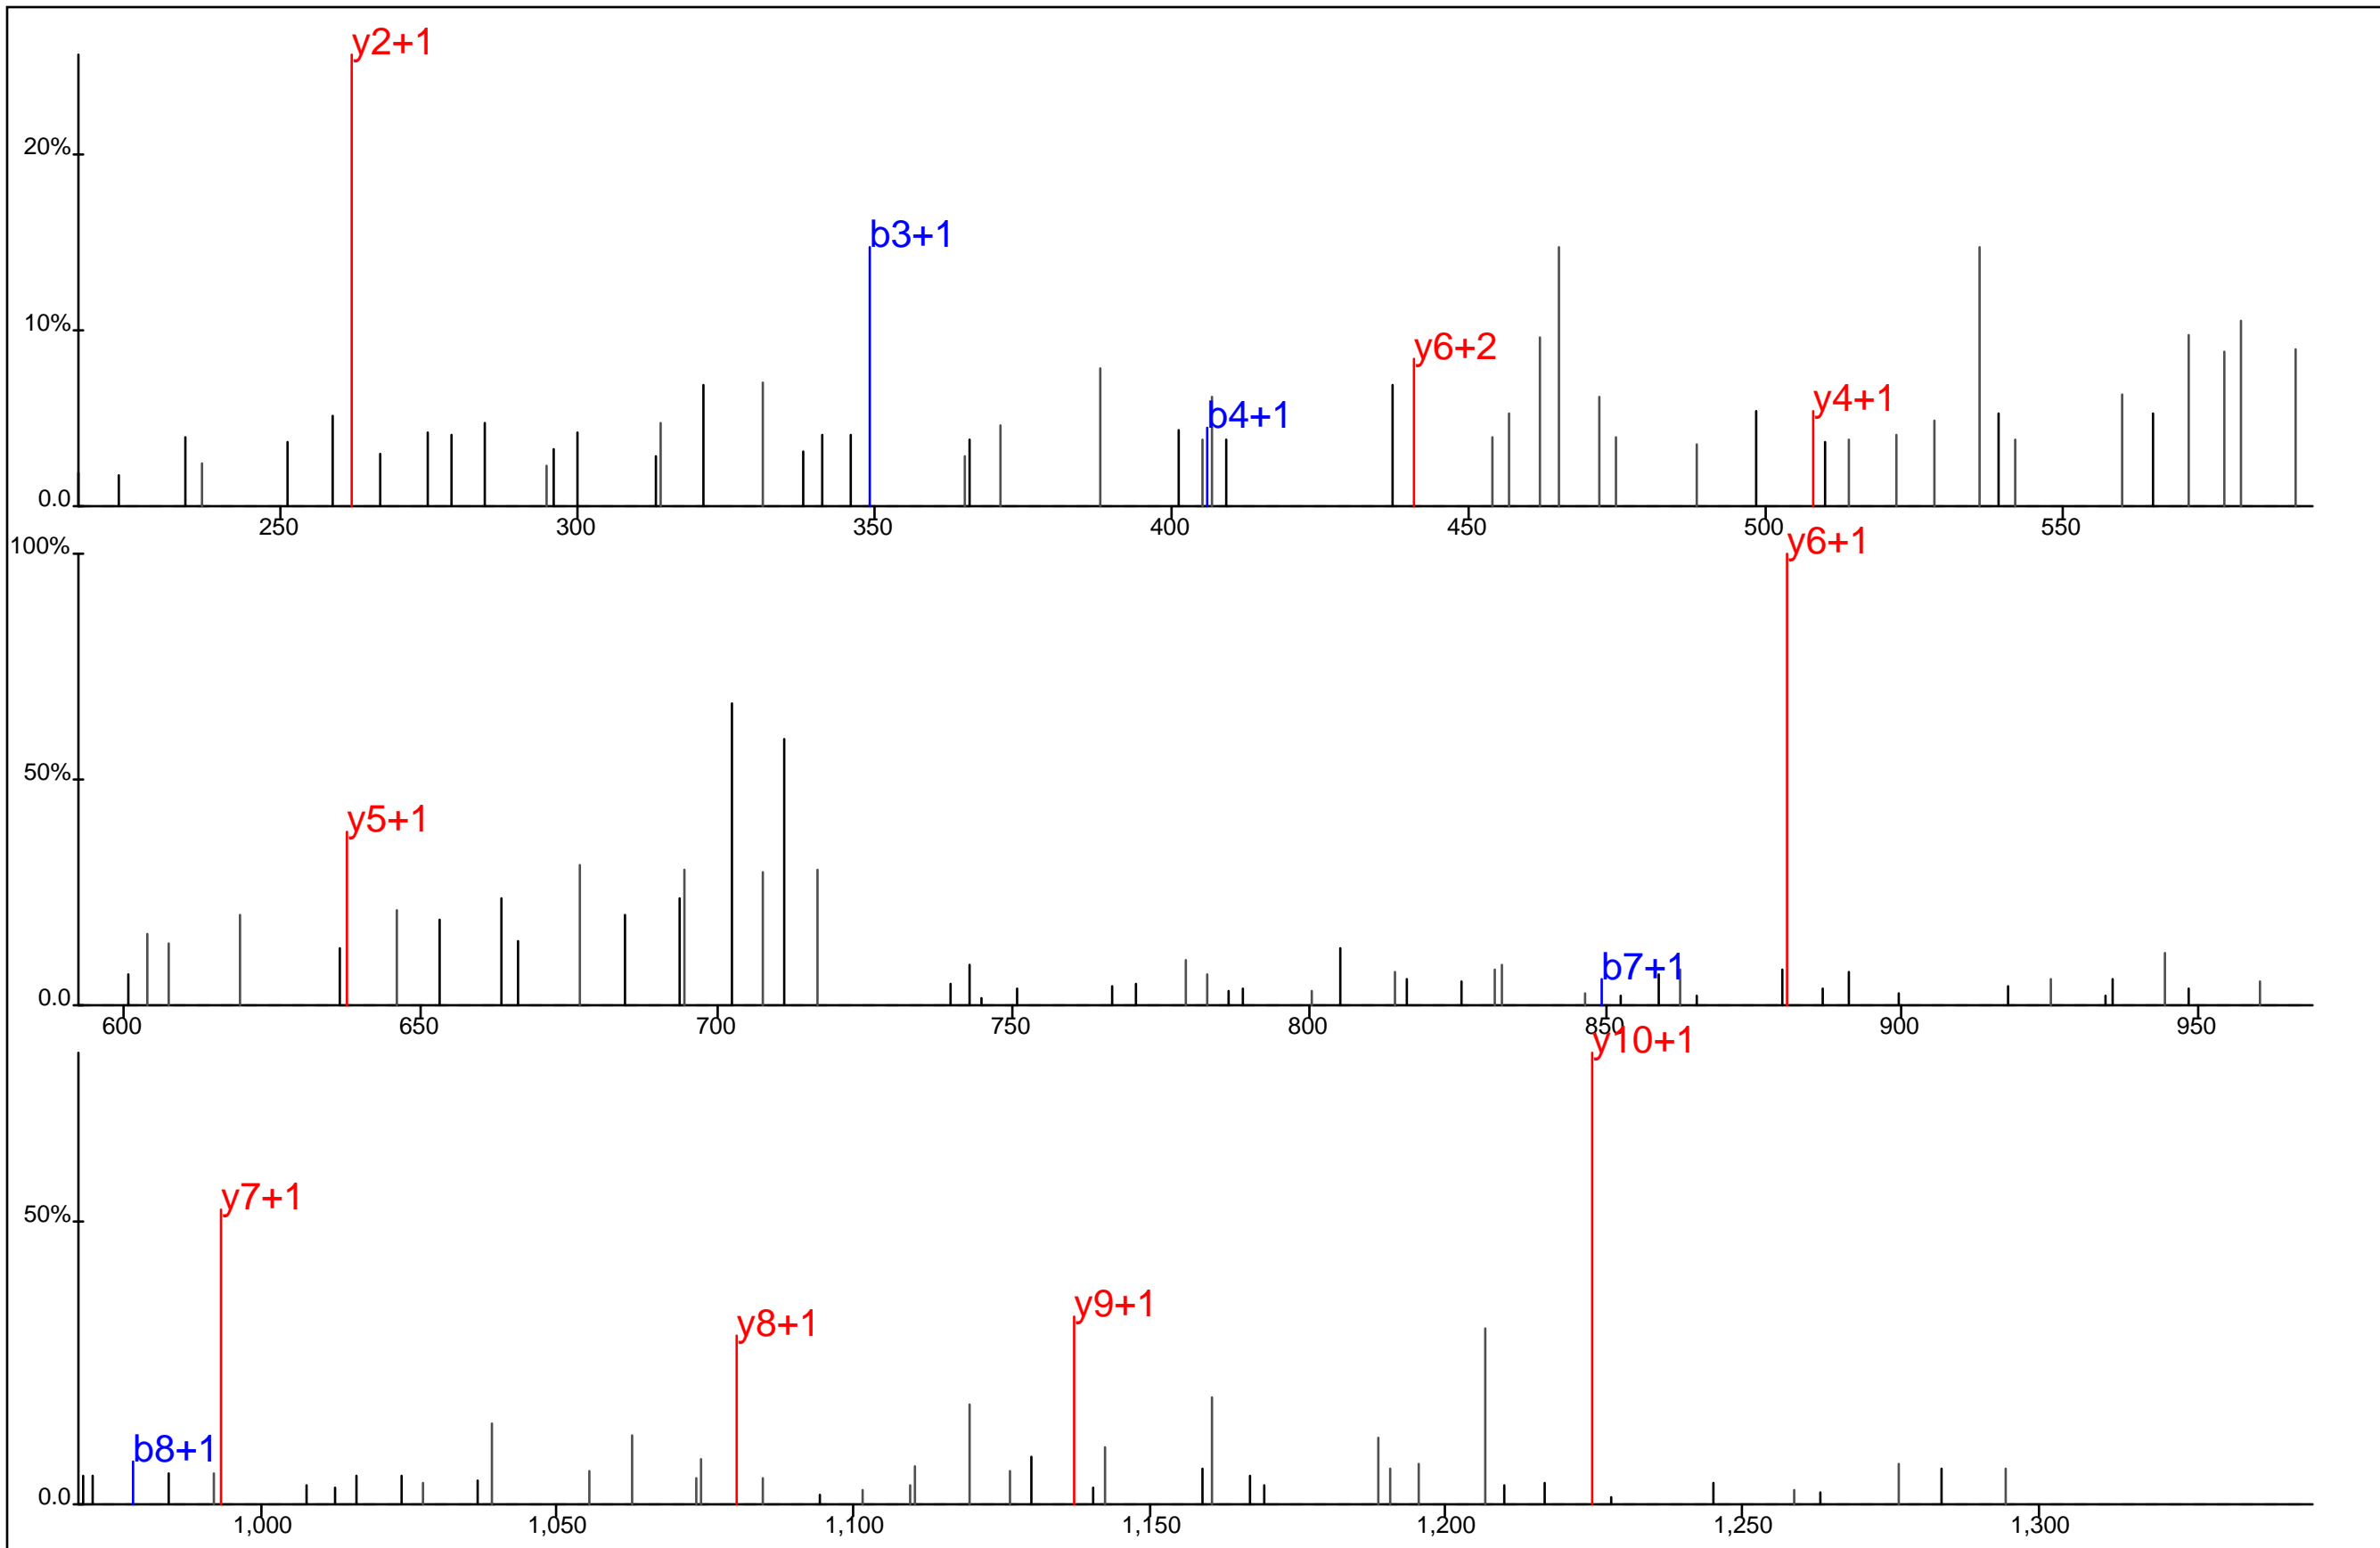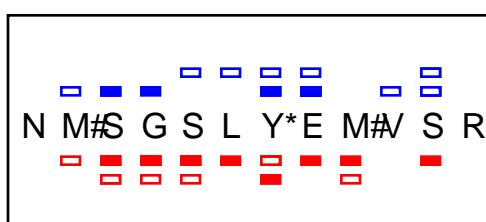

Protein Name: Structure specific recognition protein 1  
 gi Accession: 0  
 Precursor Mass: 743.2893+2  
 Delta Mass: 2.419 ppm  
 XCorr: 42.94

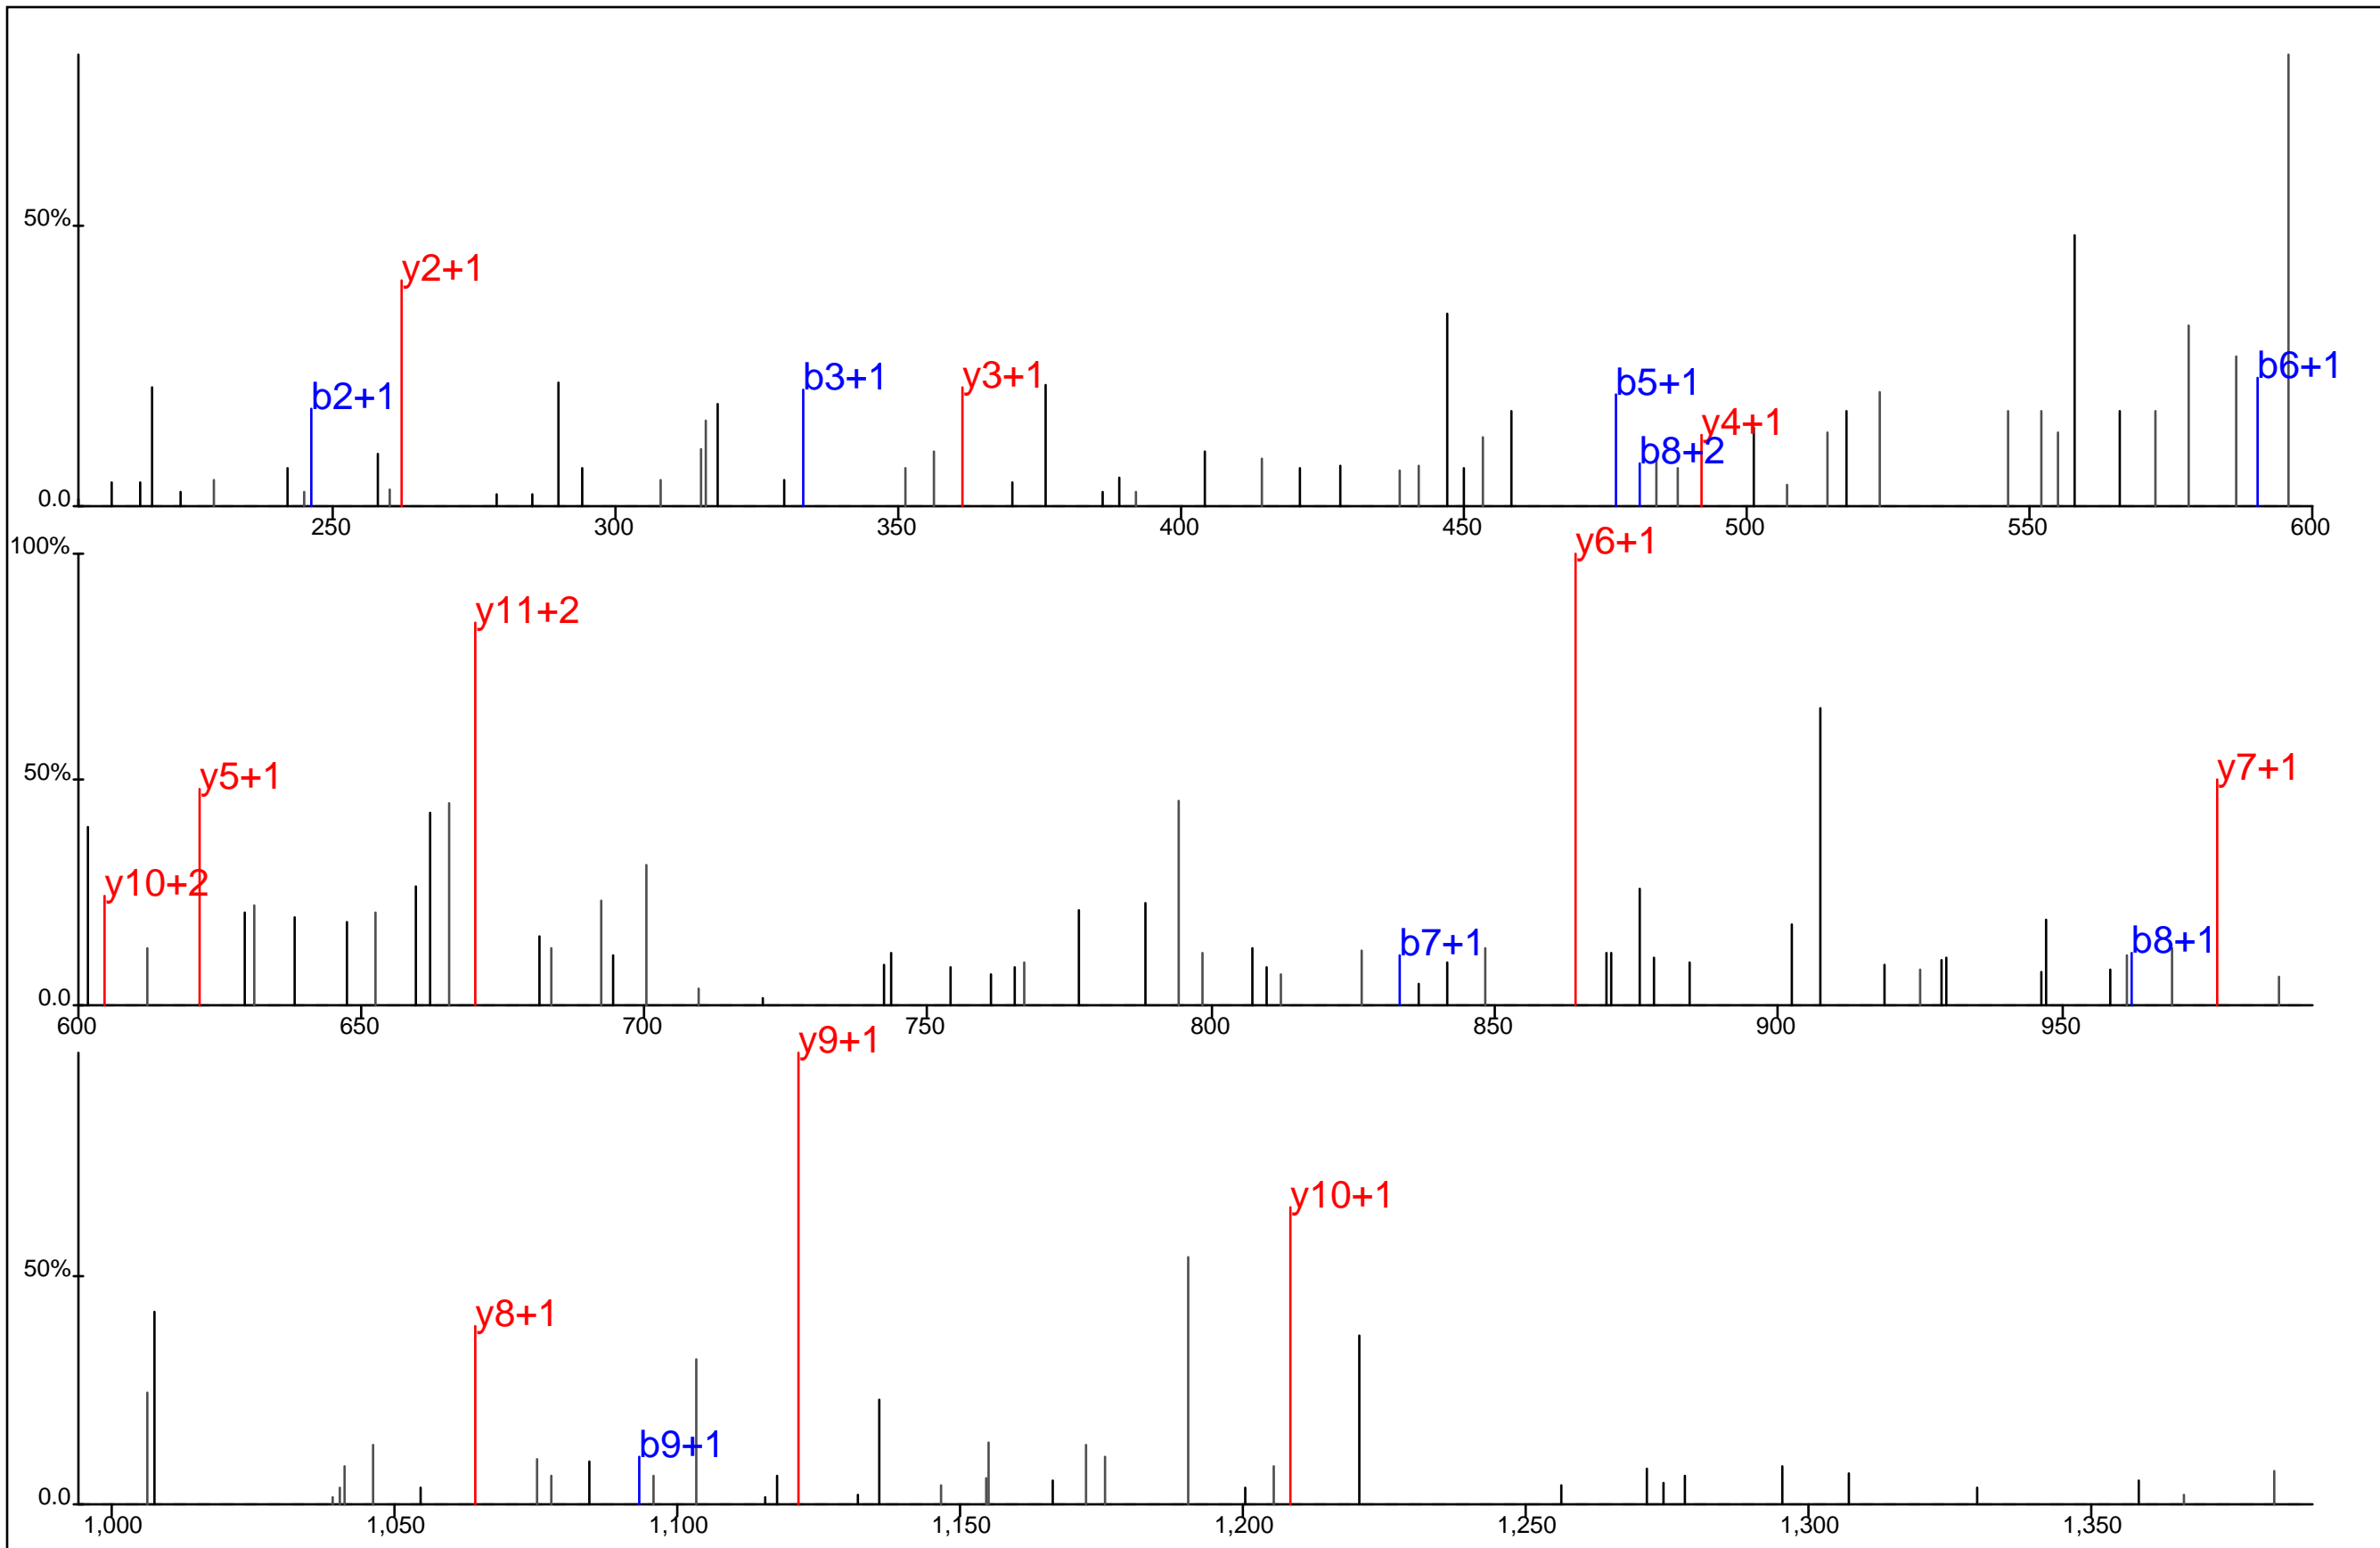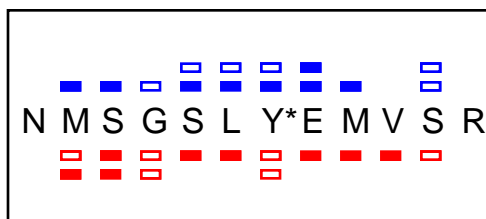

Protein Name: Structure specific recognition protein 1  
 gi Accession: 0  
 Precursor Mass: 727.2961+2  
 Delta Mass: 0.056 ppm  
 XCorr: 41.58

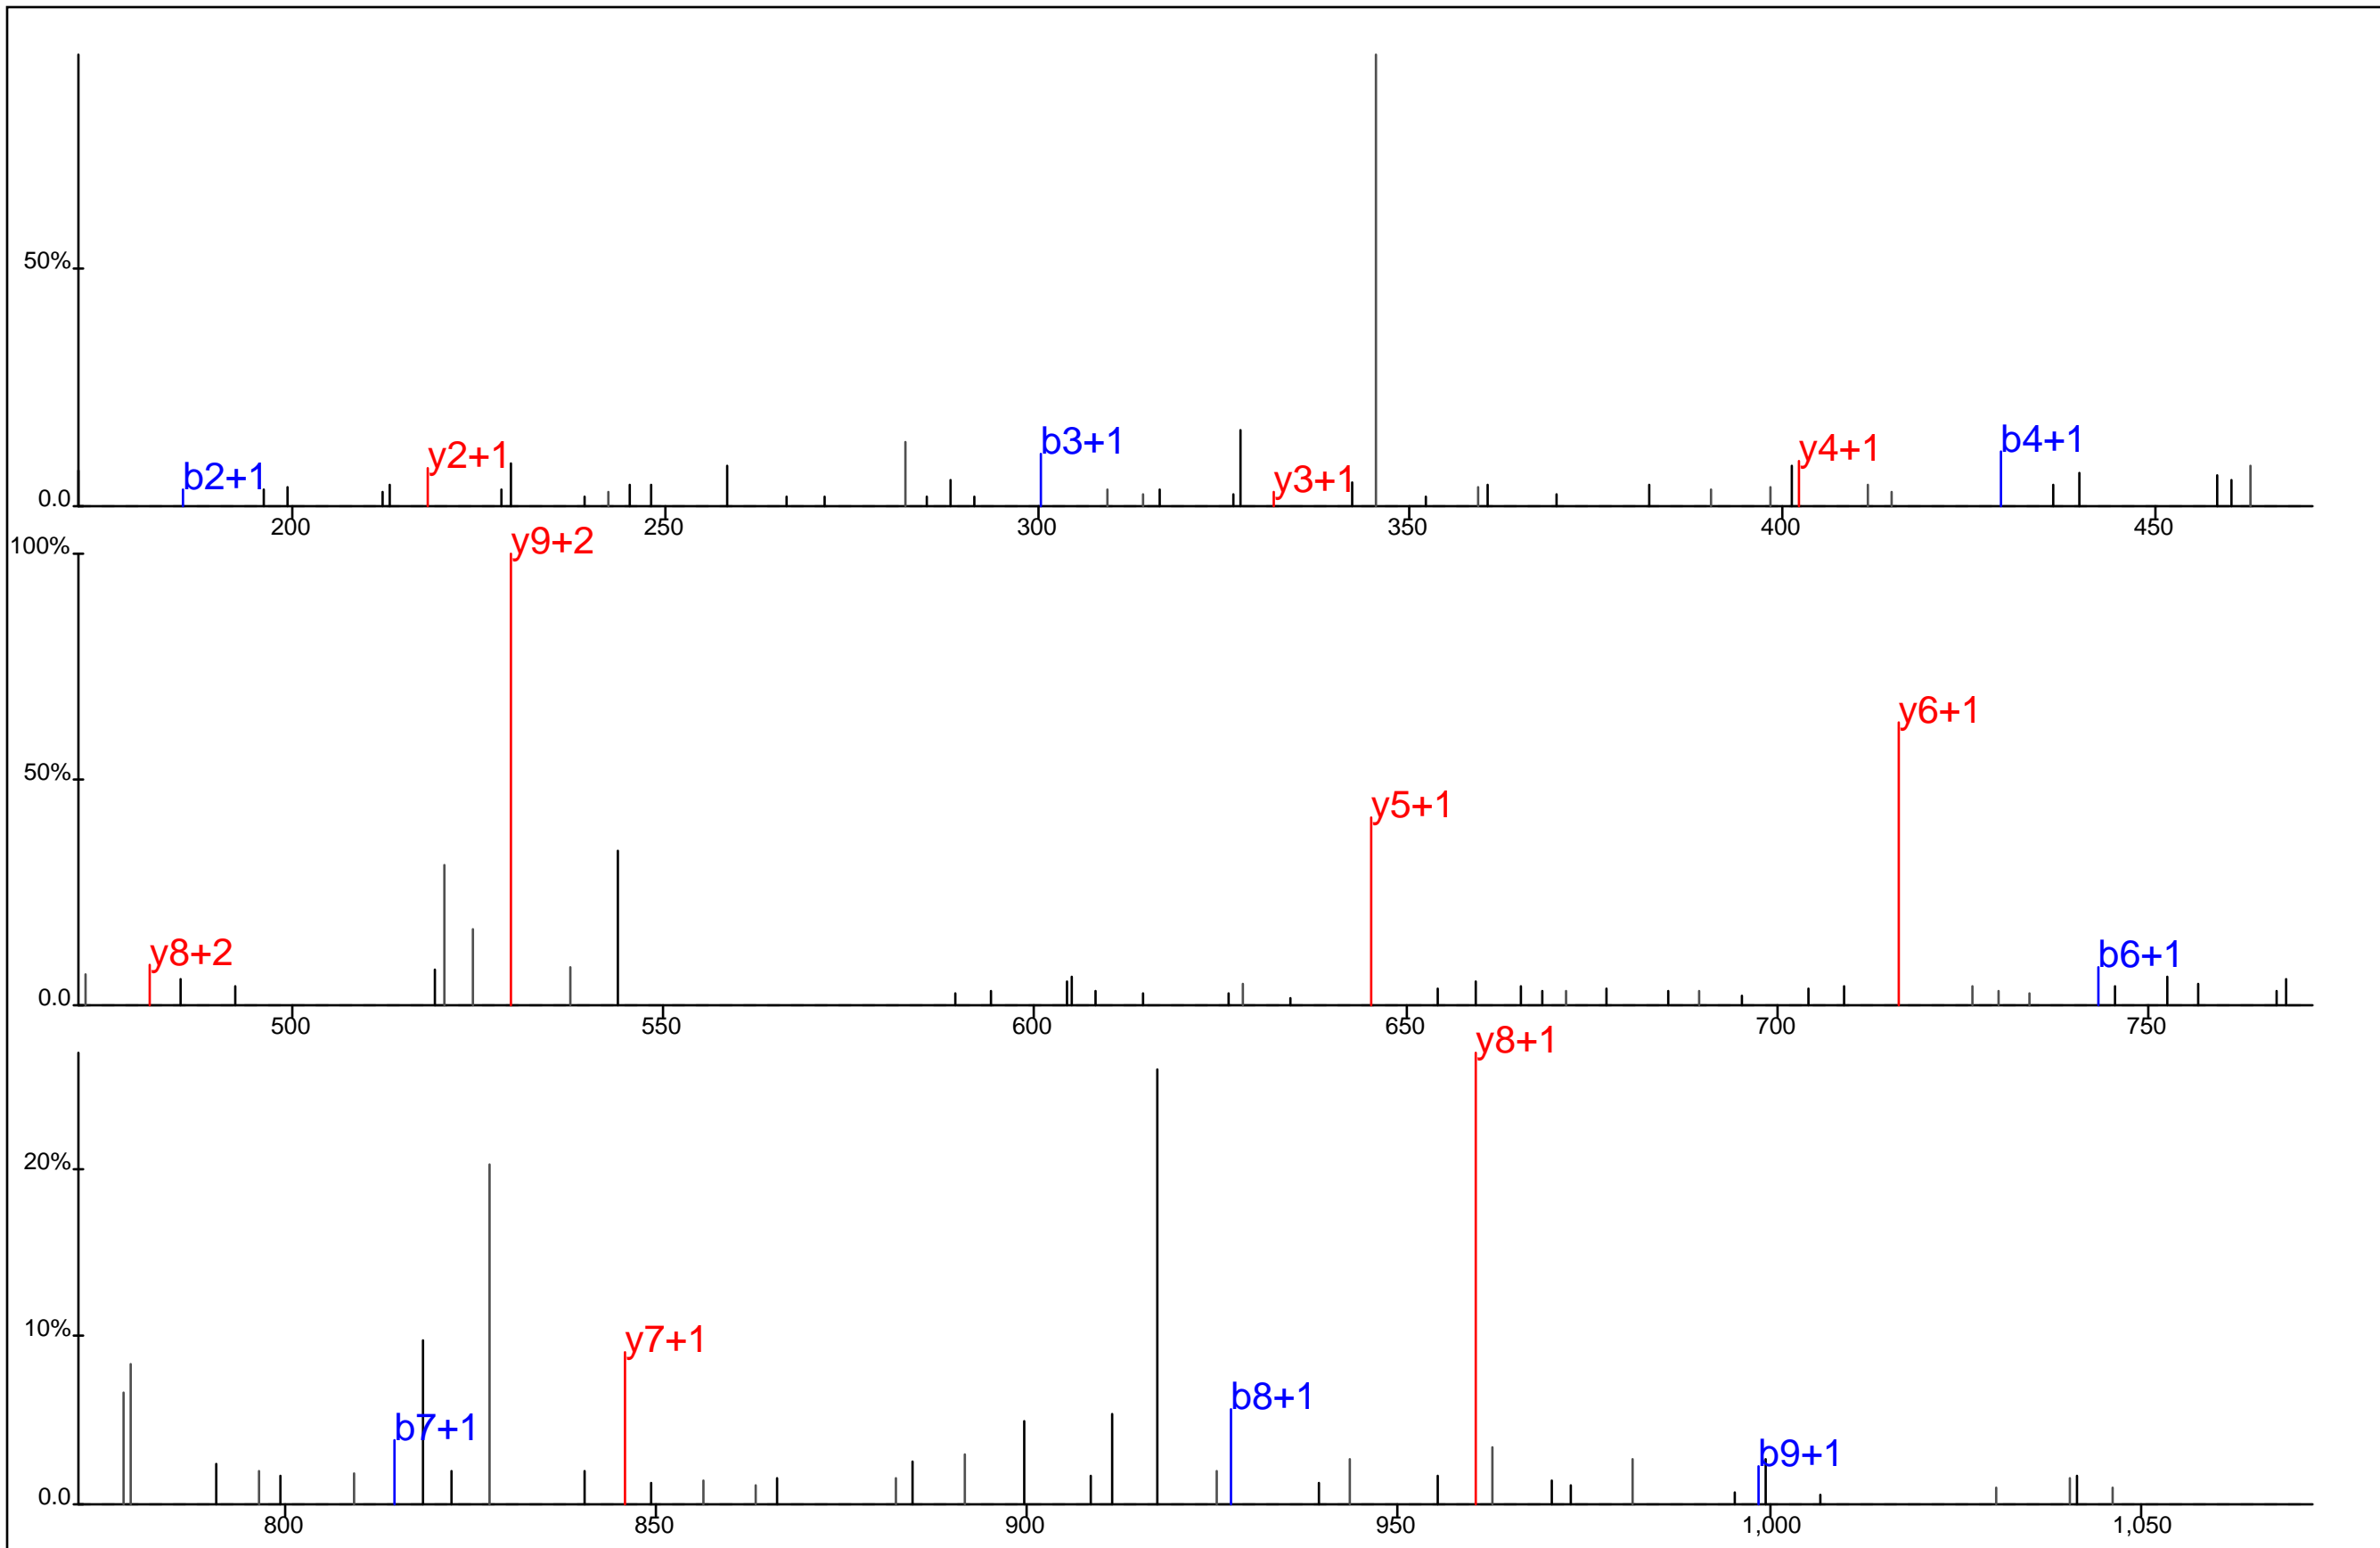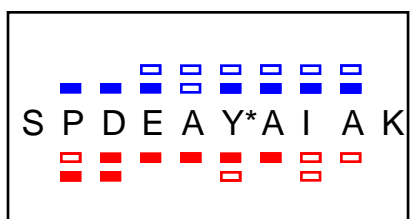

Protein Name: Succinyl CoA synthetase, beta A chain  
 gi Accession: 0  
 Precursor Mass: 572.7498+2  
 Delta Mass: 0.180 ppm  
 XCorr: 29.71

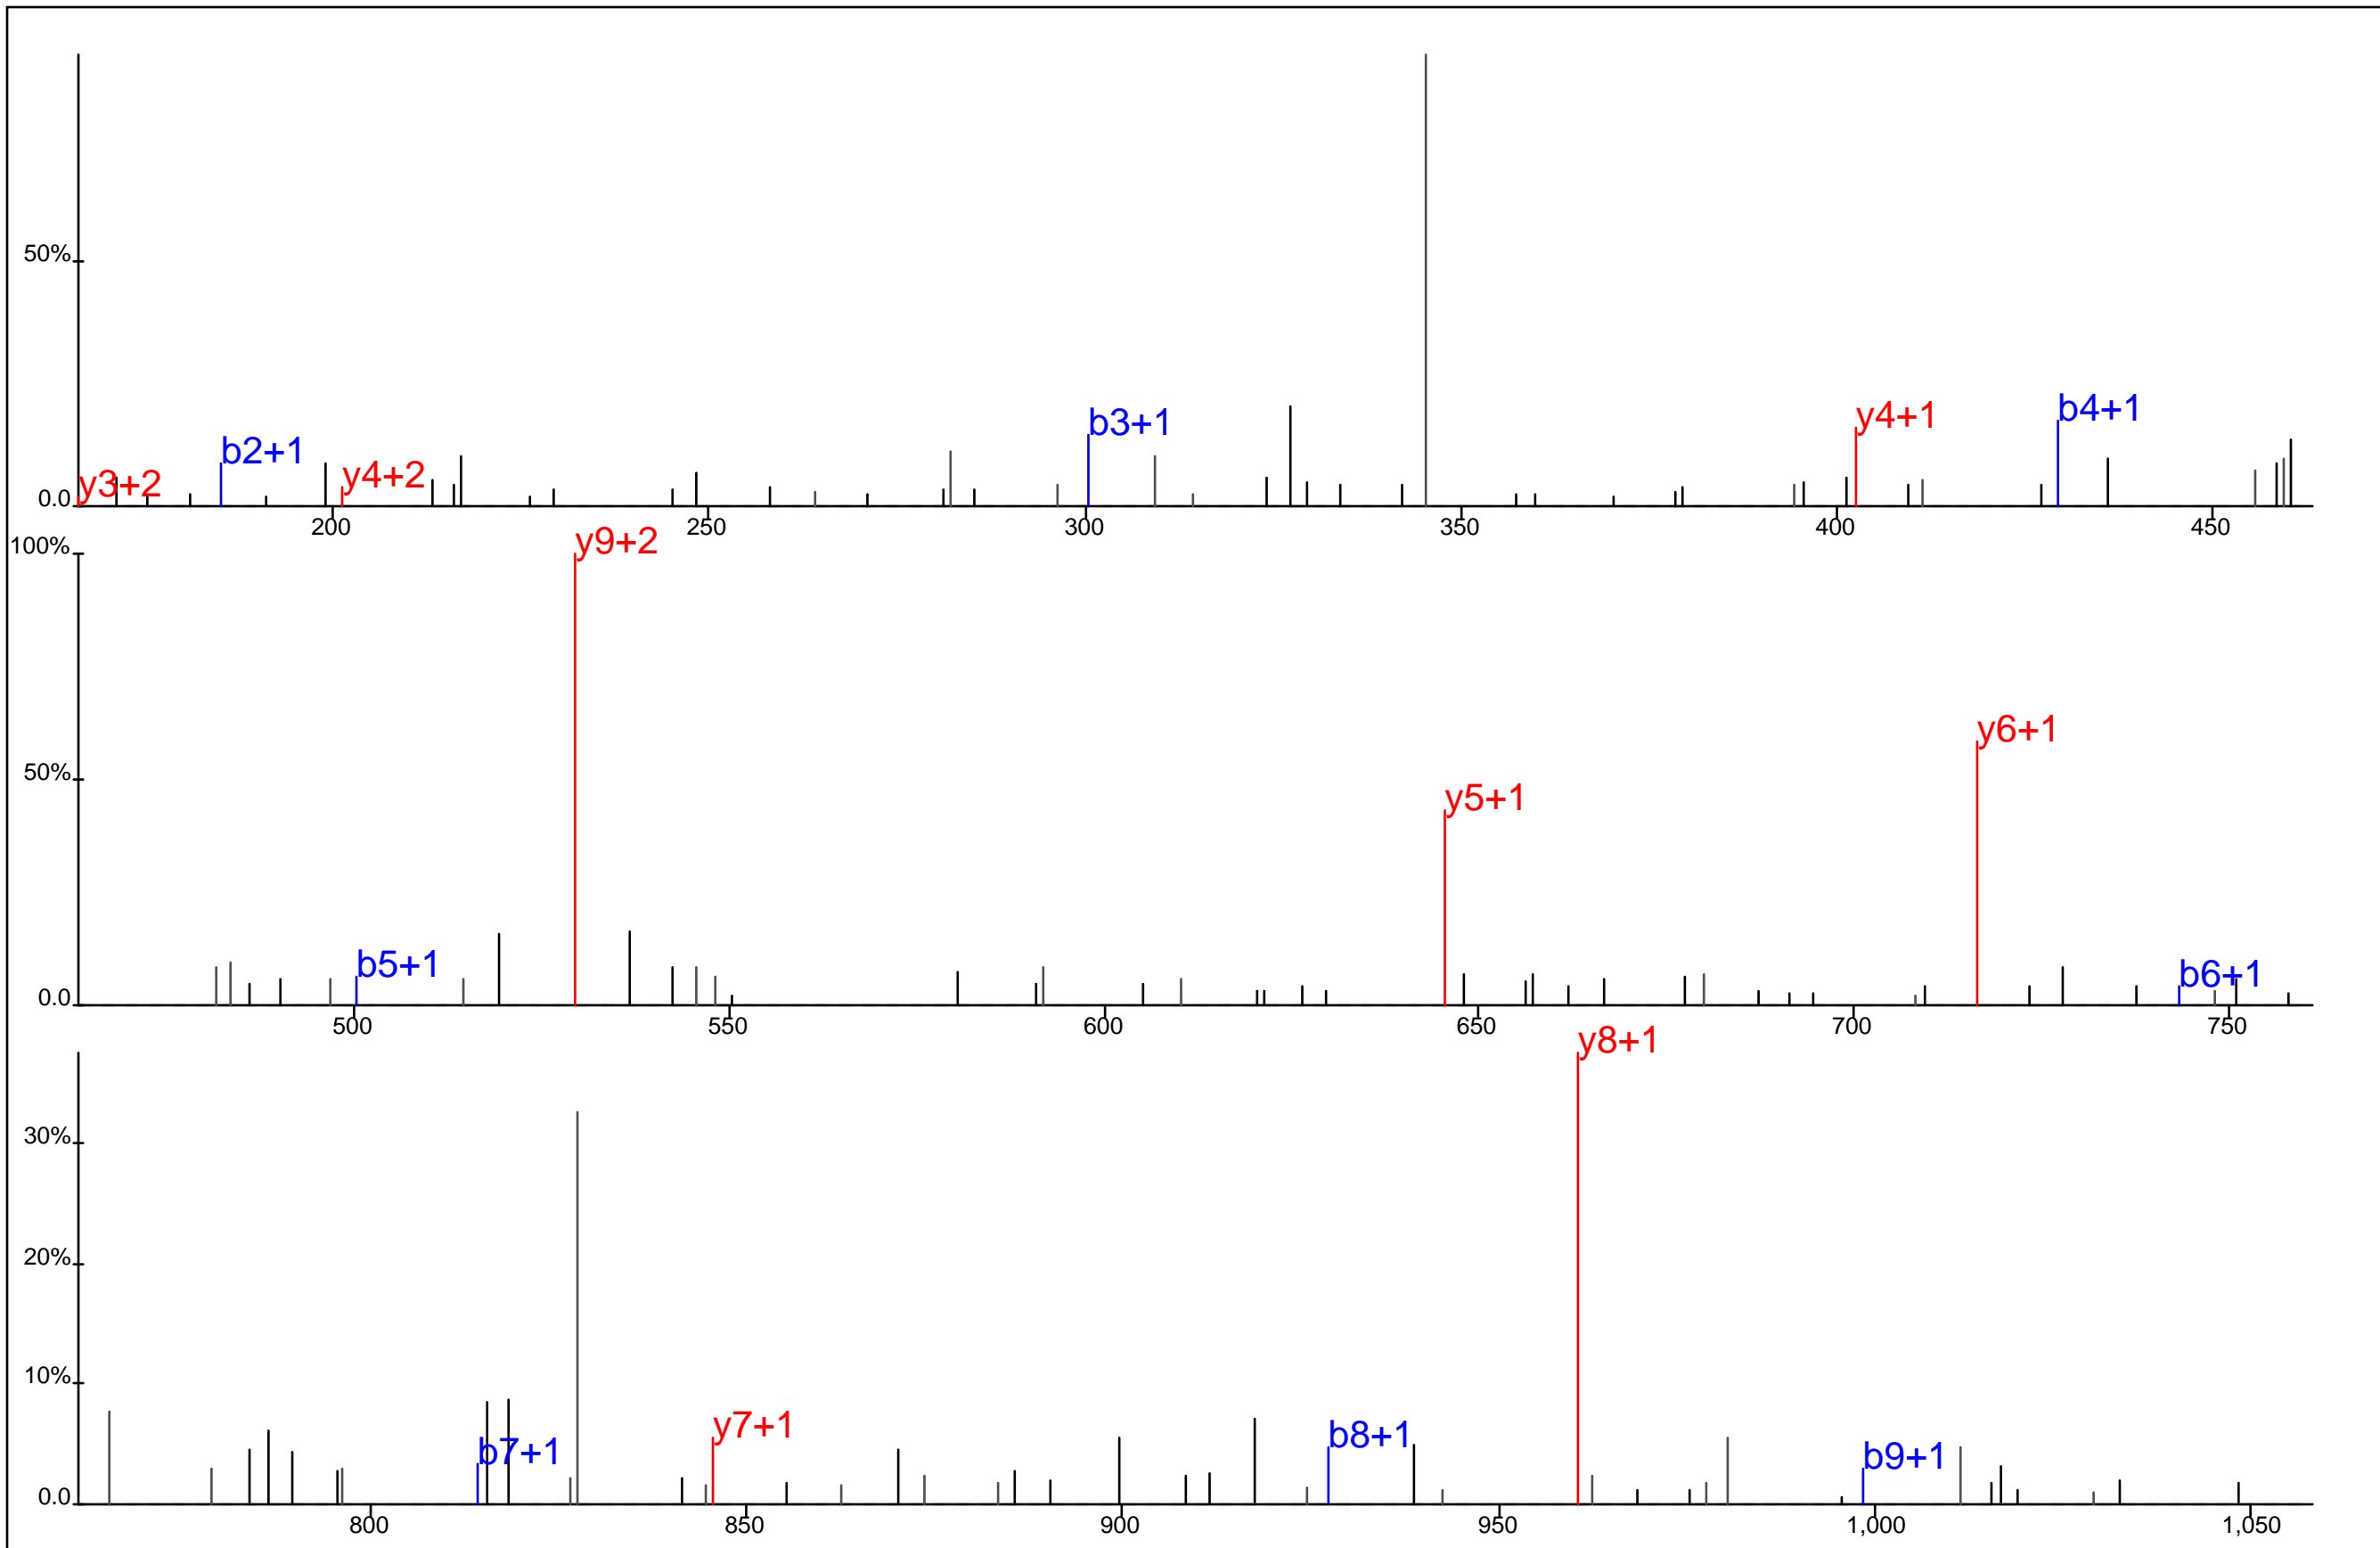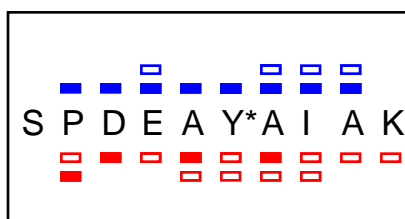

Protein Name: Succinyl CoA synthetase, beta A chain  
 gi Accession: 0  
 Precursor Mass: 572.7488+2  
 Delta Mass: 1.527 ppm  
 XCorr: 23.34



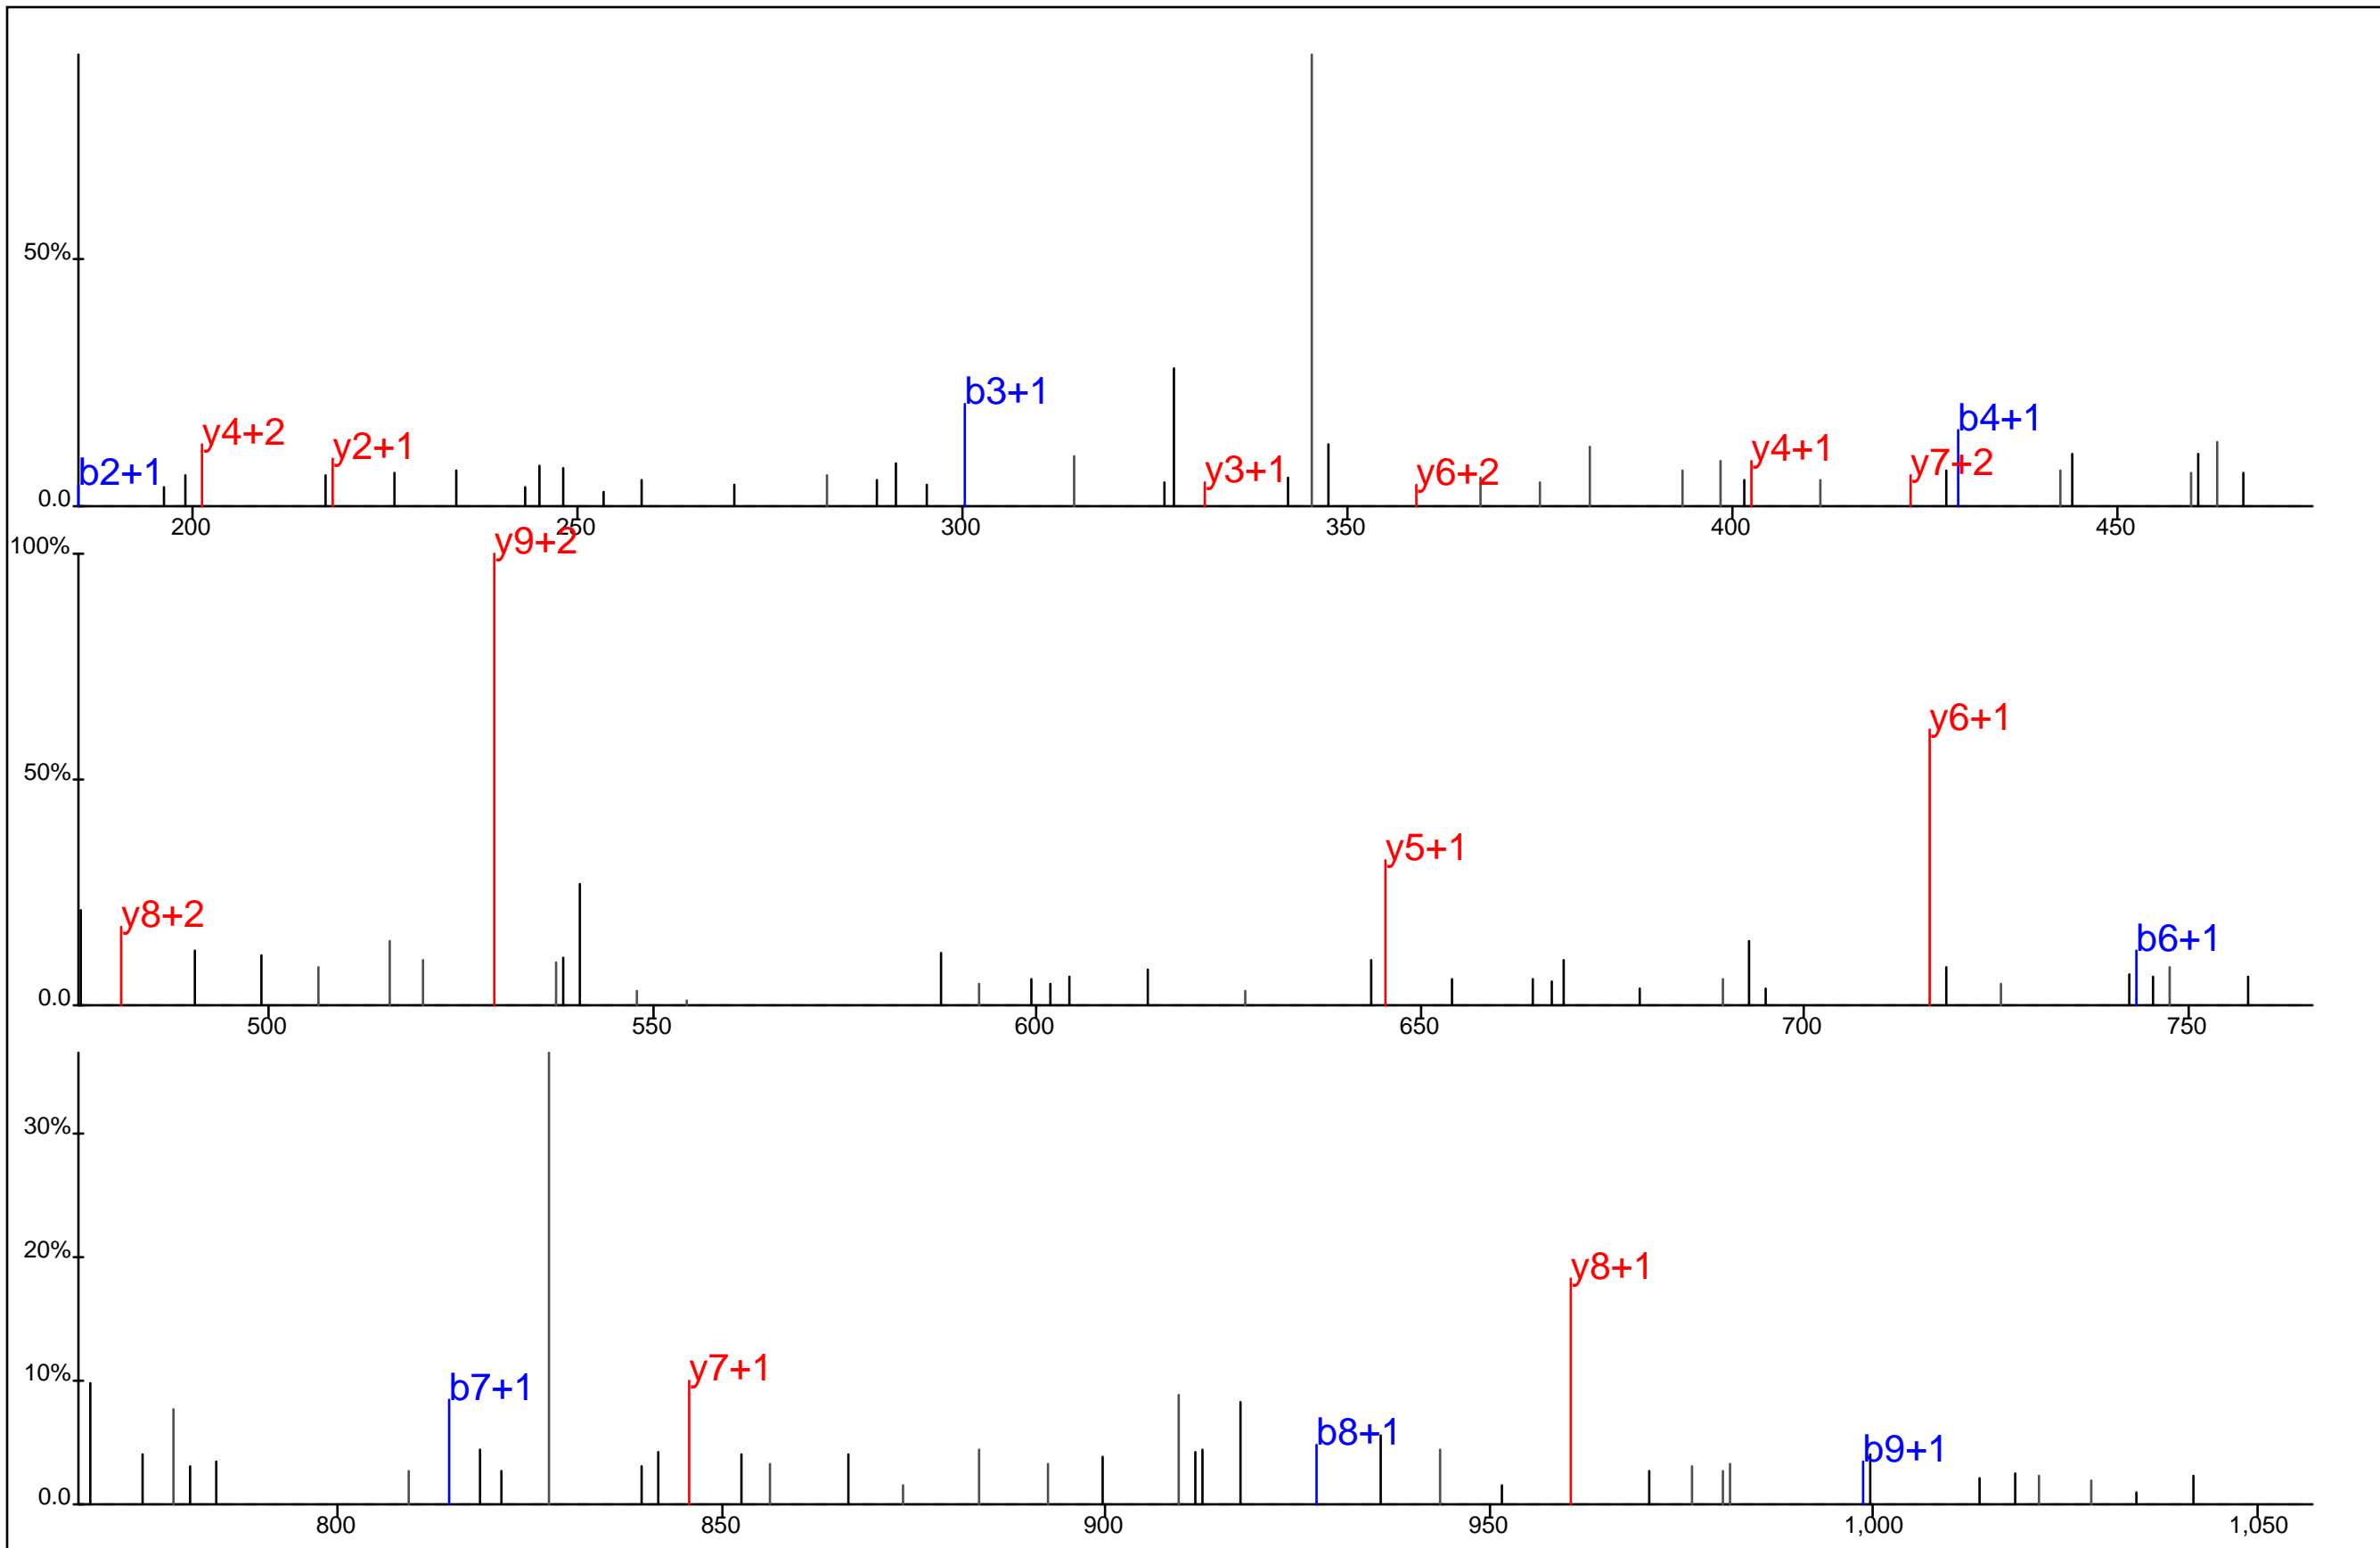

■ ■ ■ ■ ■ ■ ■ ■  
 S P D E A Y\* A I A K  
■ ■ ■ ■ ■ ■ ■ ■

Protein Name: Succinyl CoA synthetase, beta A chain  
 gi Accession: 0  
 Precursor Mass: 572.7495+2  
 Delta Mass: 0.353 ppm  
 XCorr: 36.02

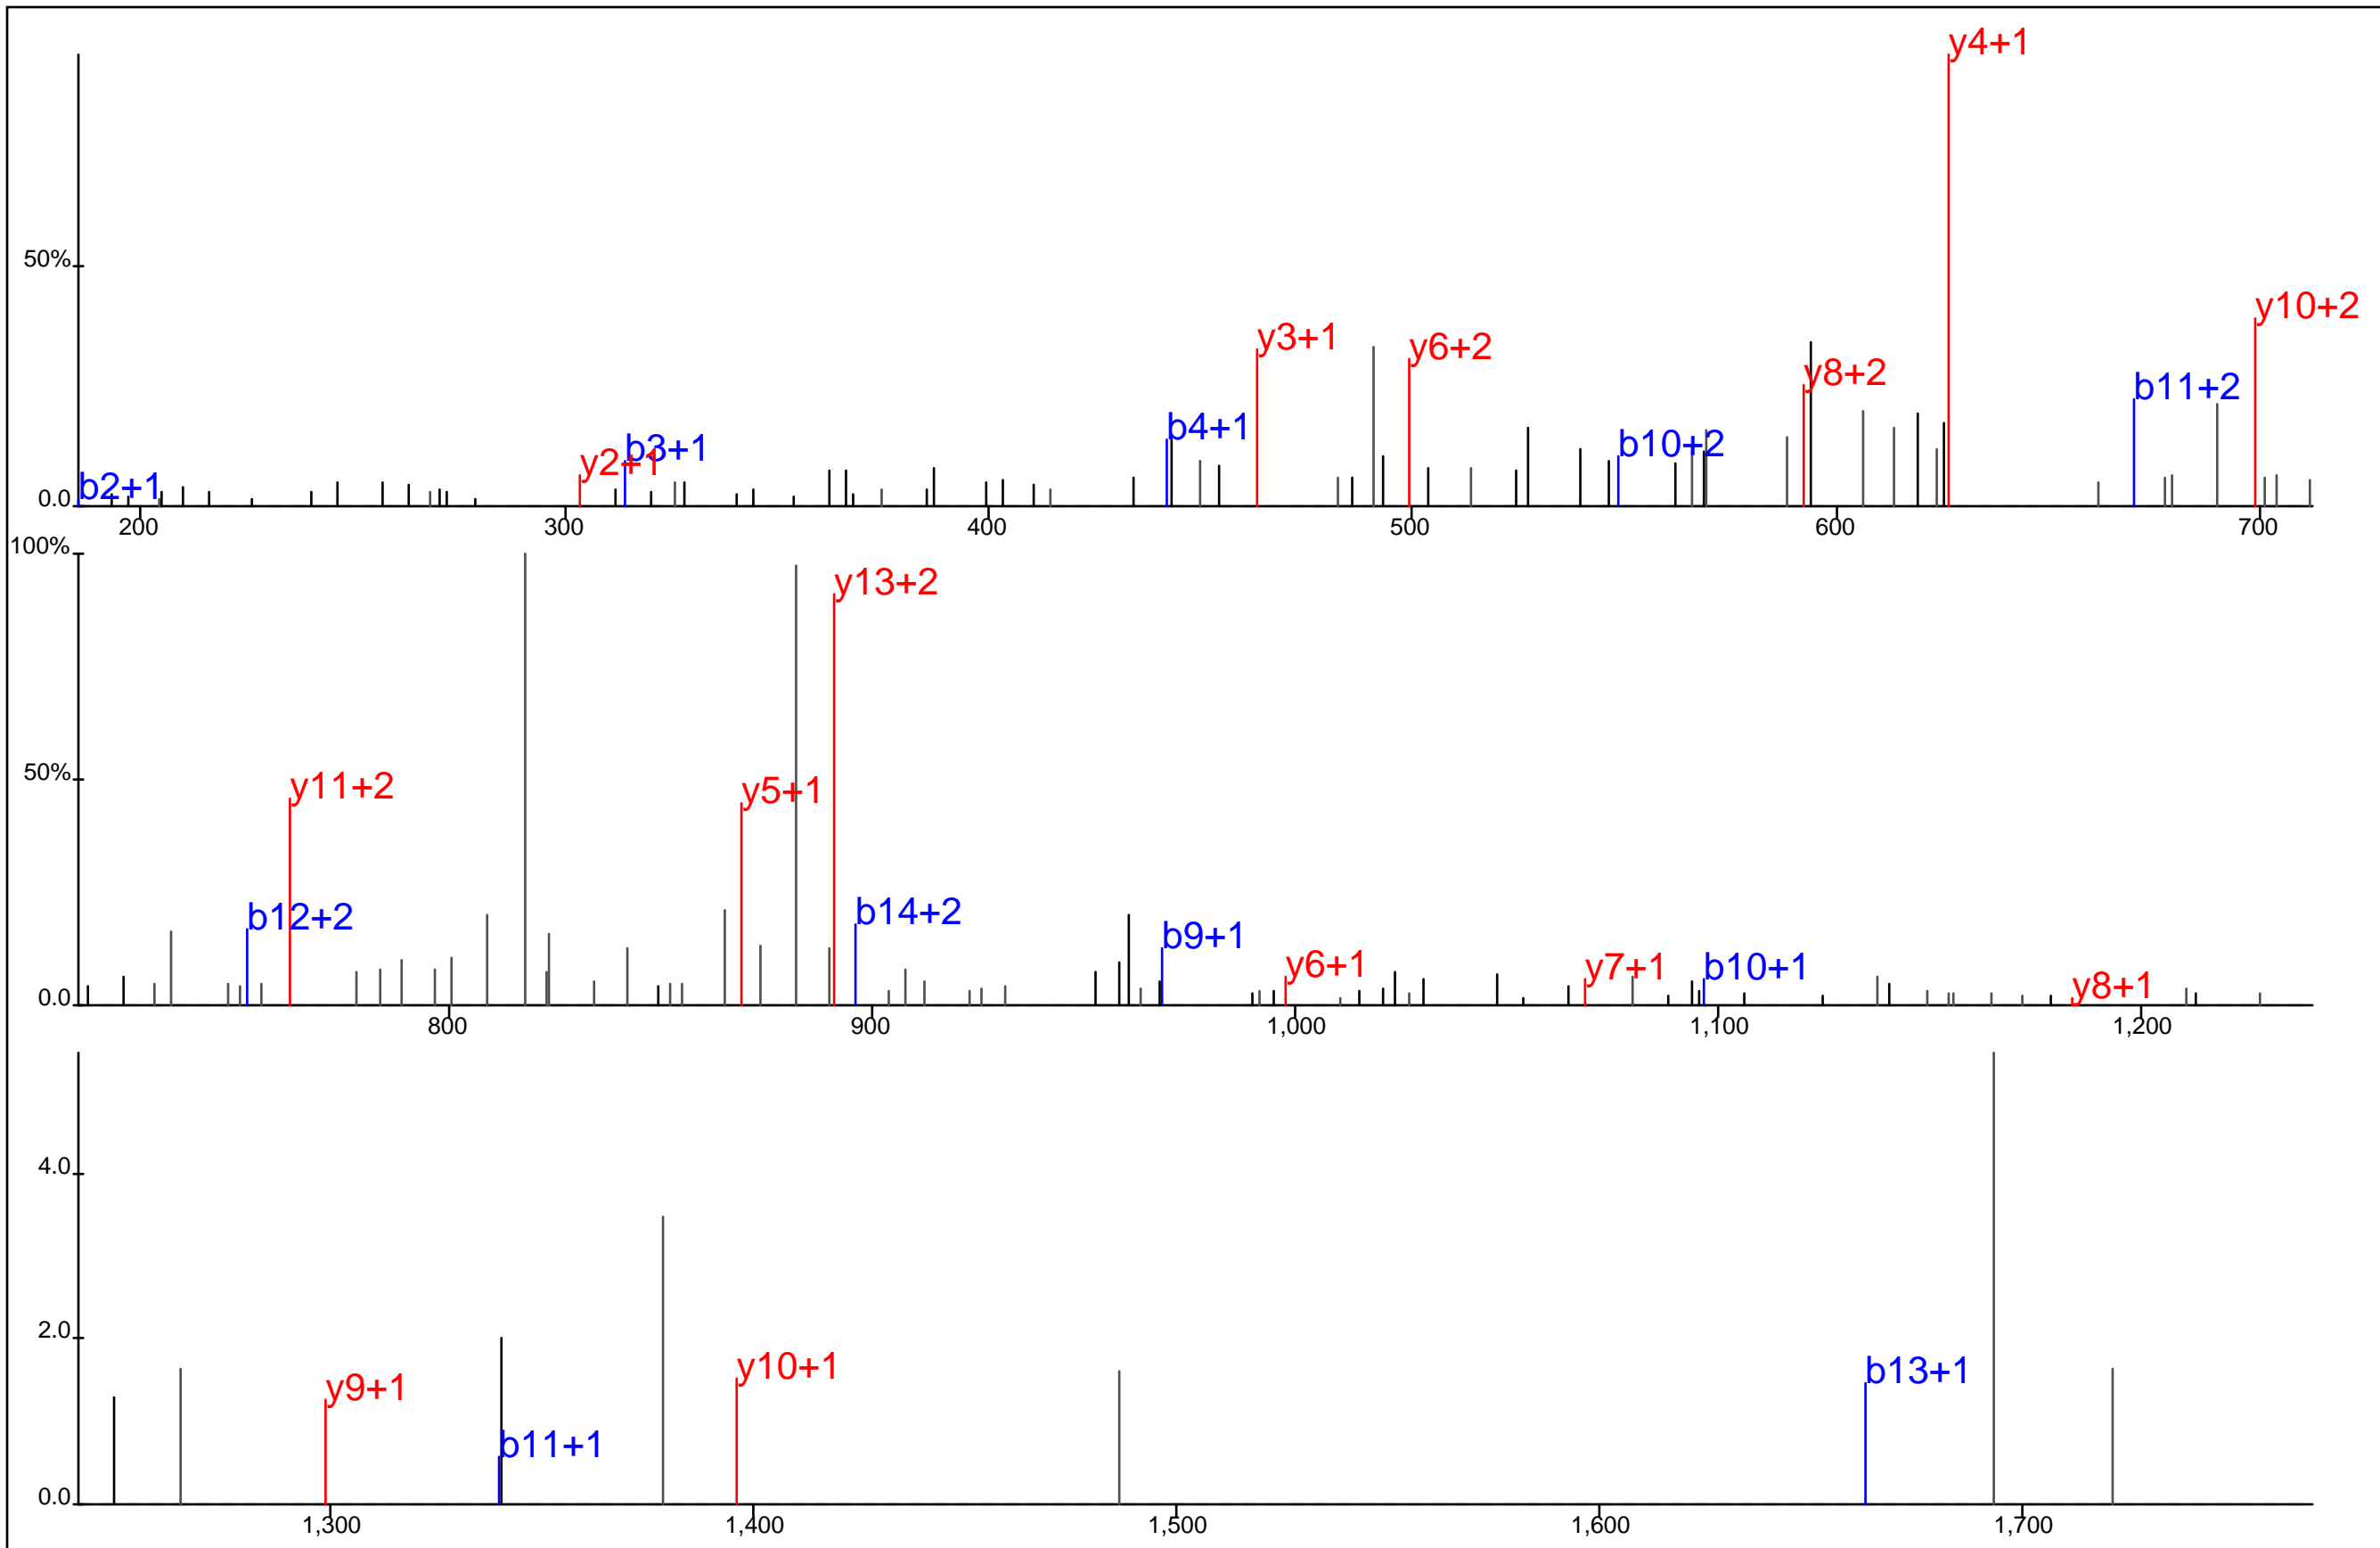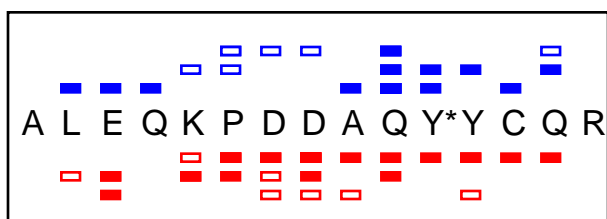

Protein Name: SUGT1  
 gi Accession: 0  
 Precursor Mass: 655.6121+3  
 Delta Mass: 0.432 ppm  
 XCorr: 30.92

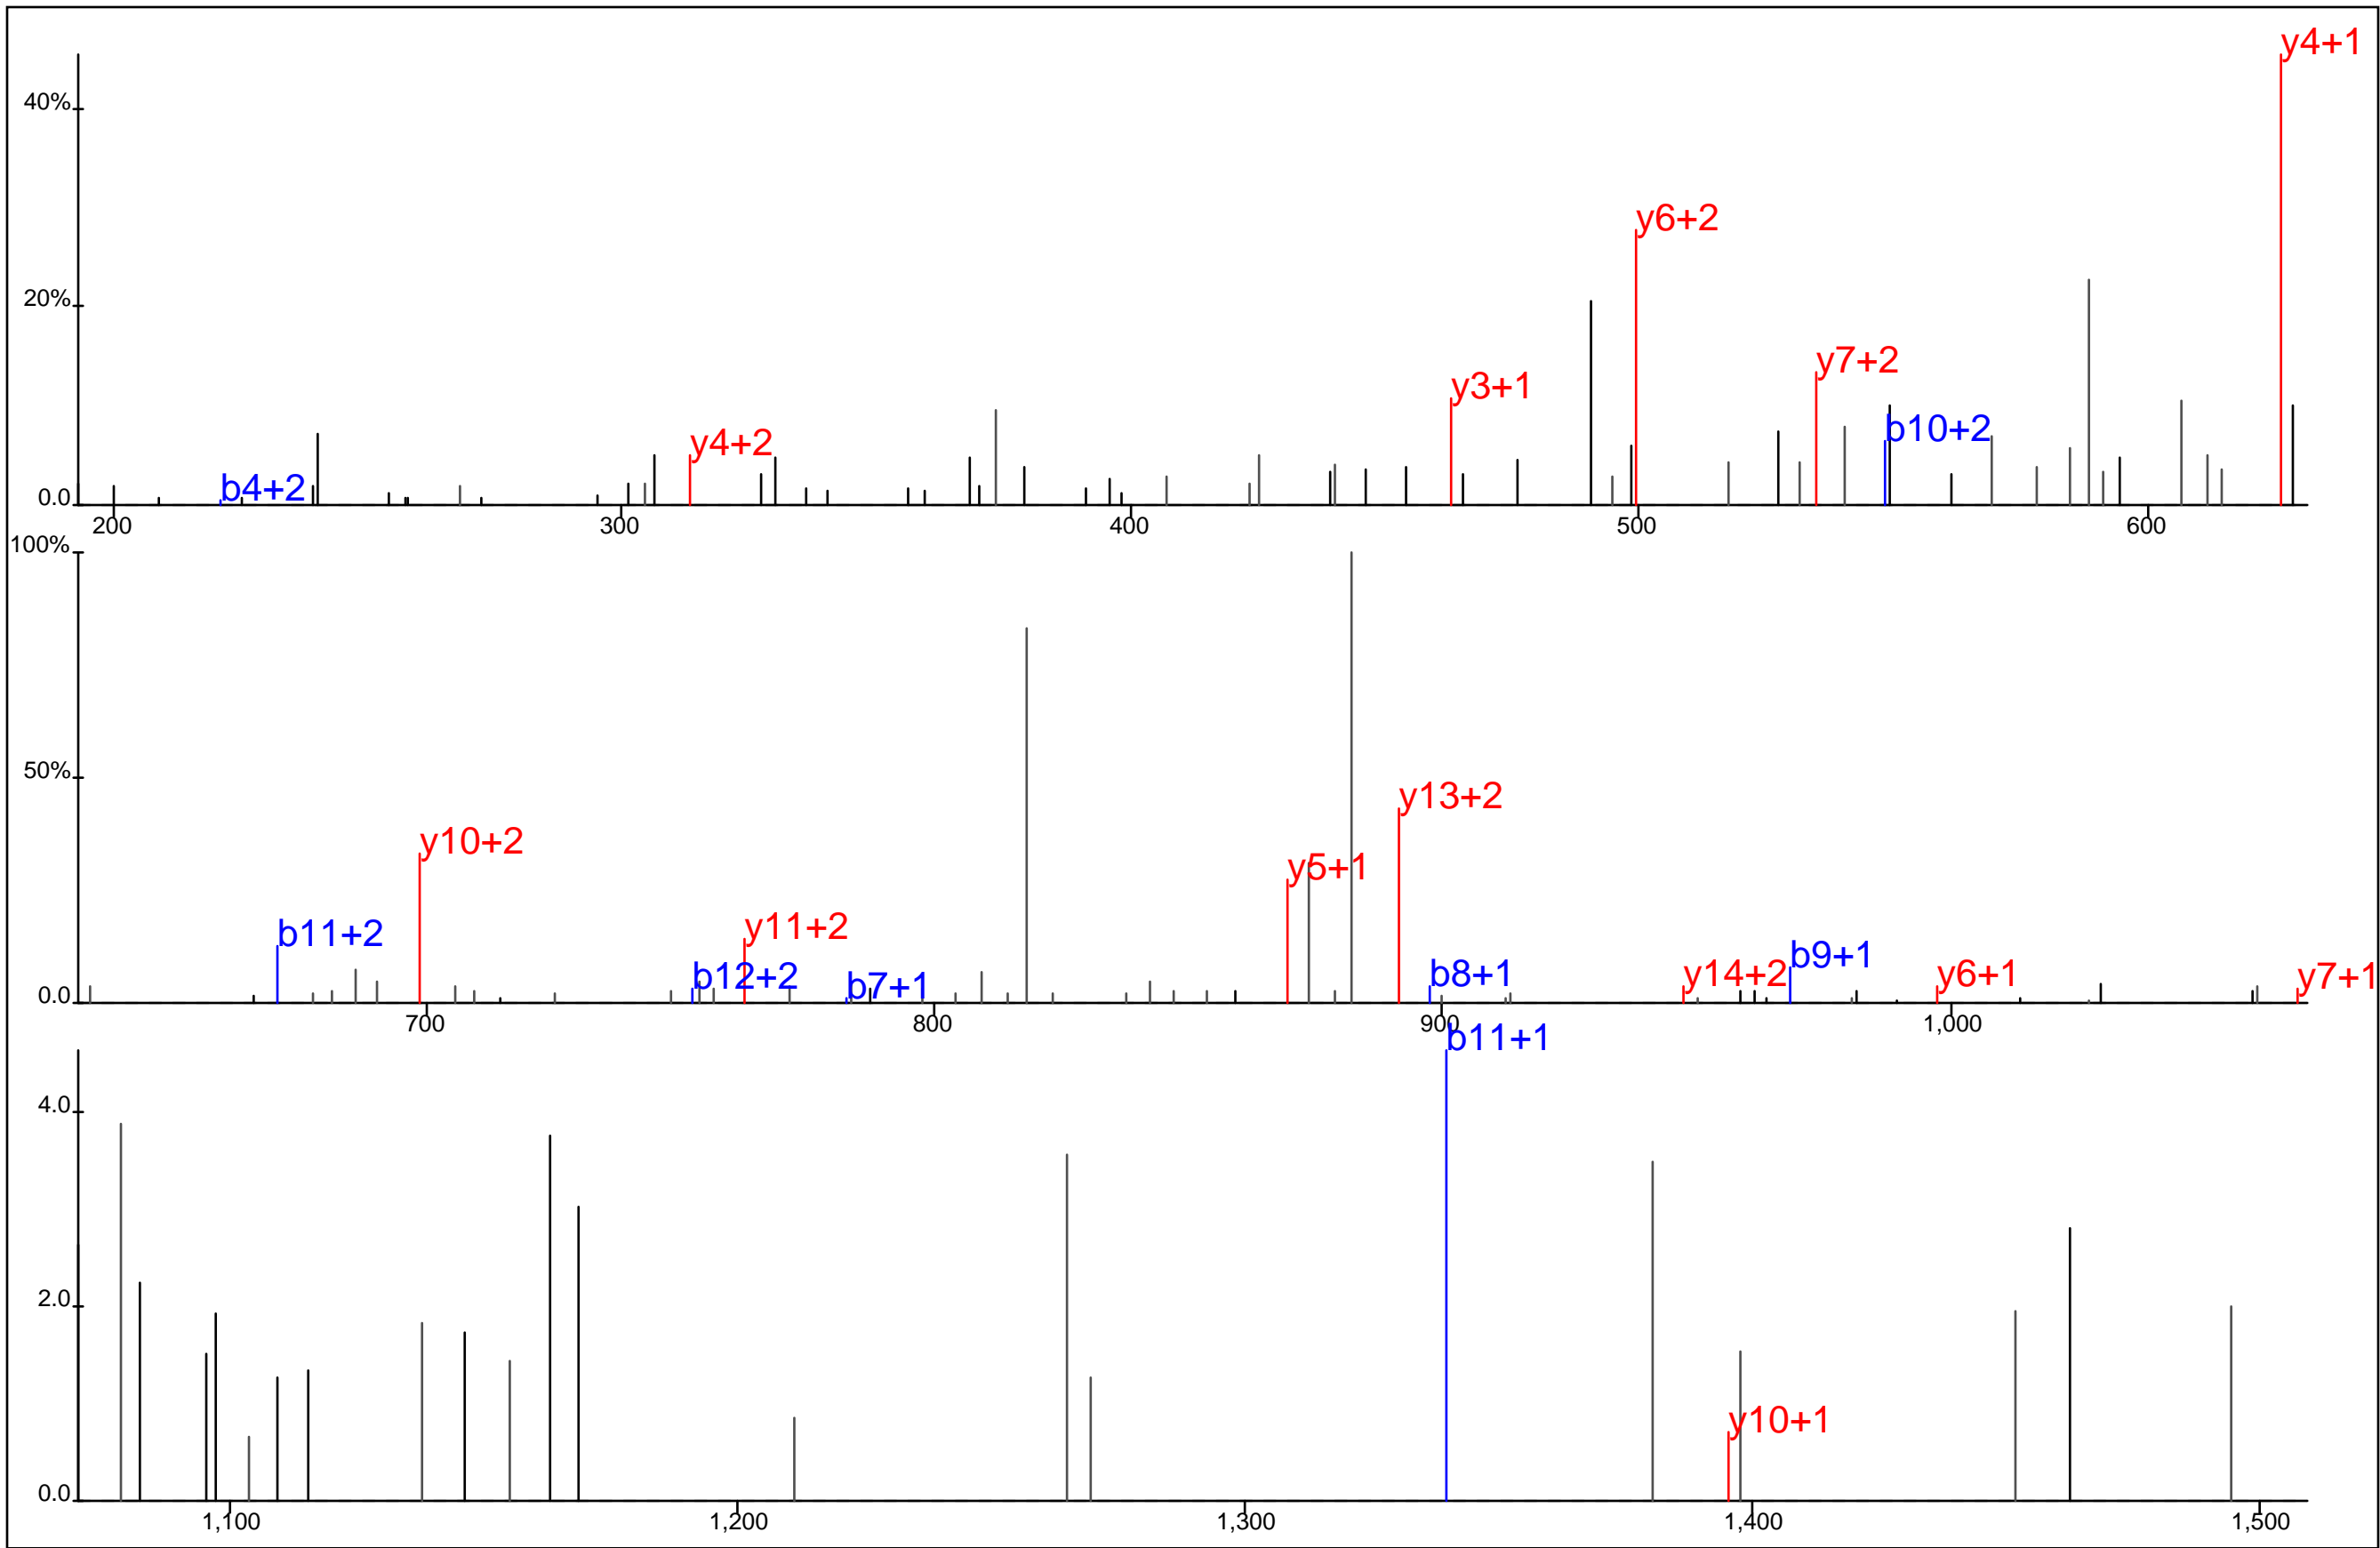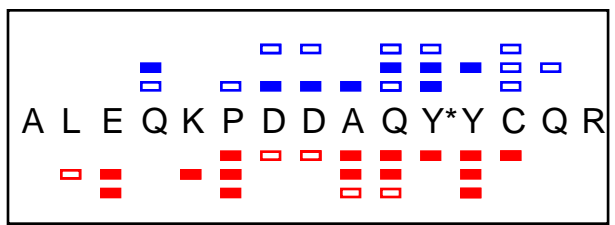

Protein Name: SUGT1  
 gi Accession: 0  
 Precursor Mass: 655.6113+3  
 Delta Mass: 0.687 ppm  
 XCorr: 27.67

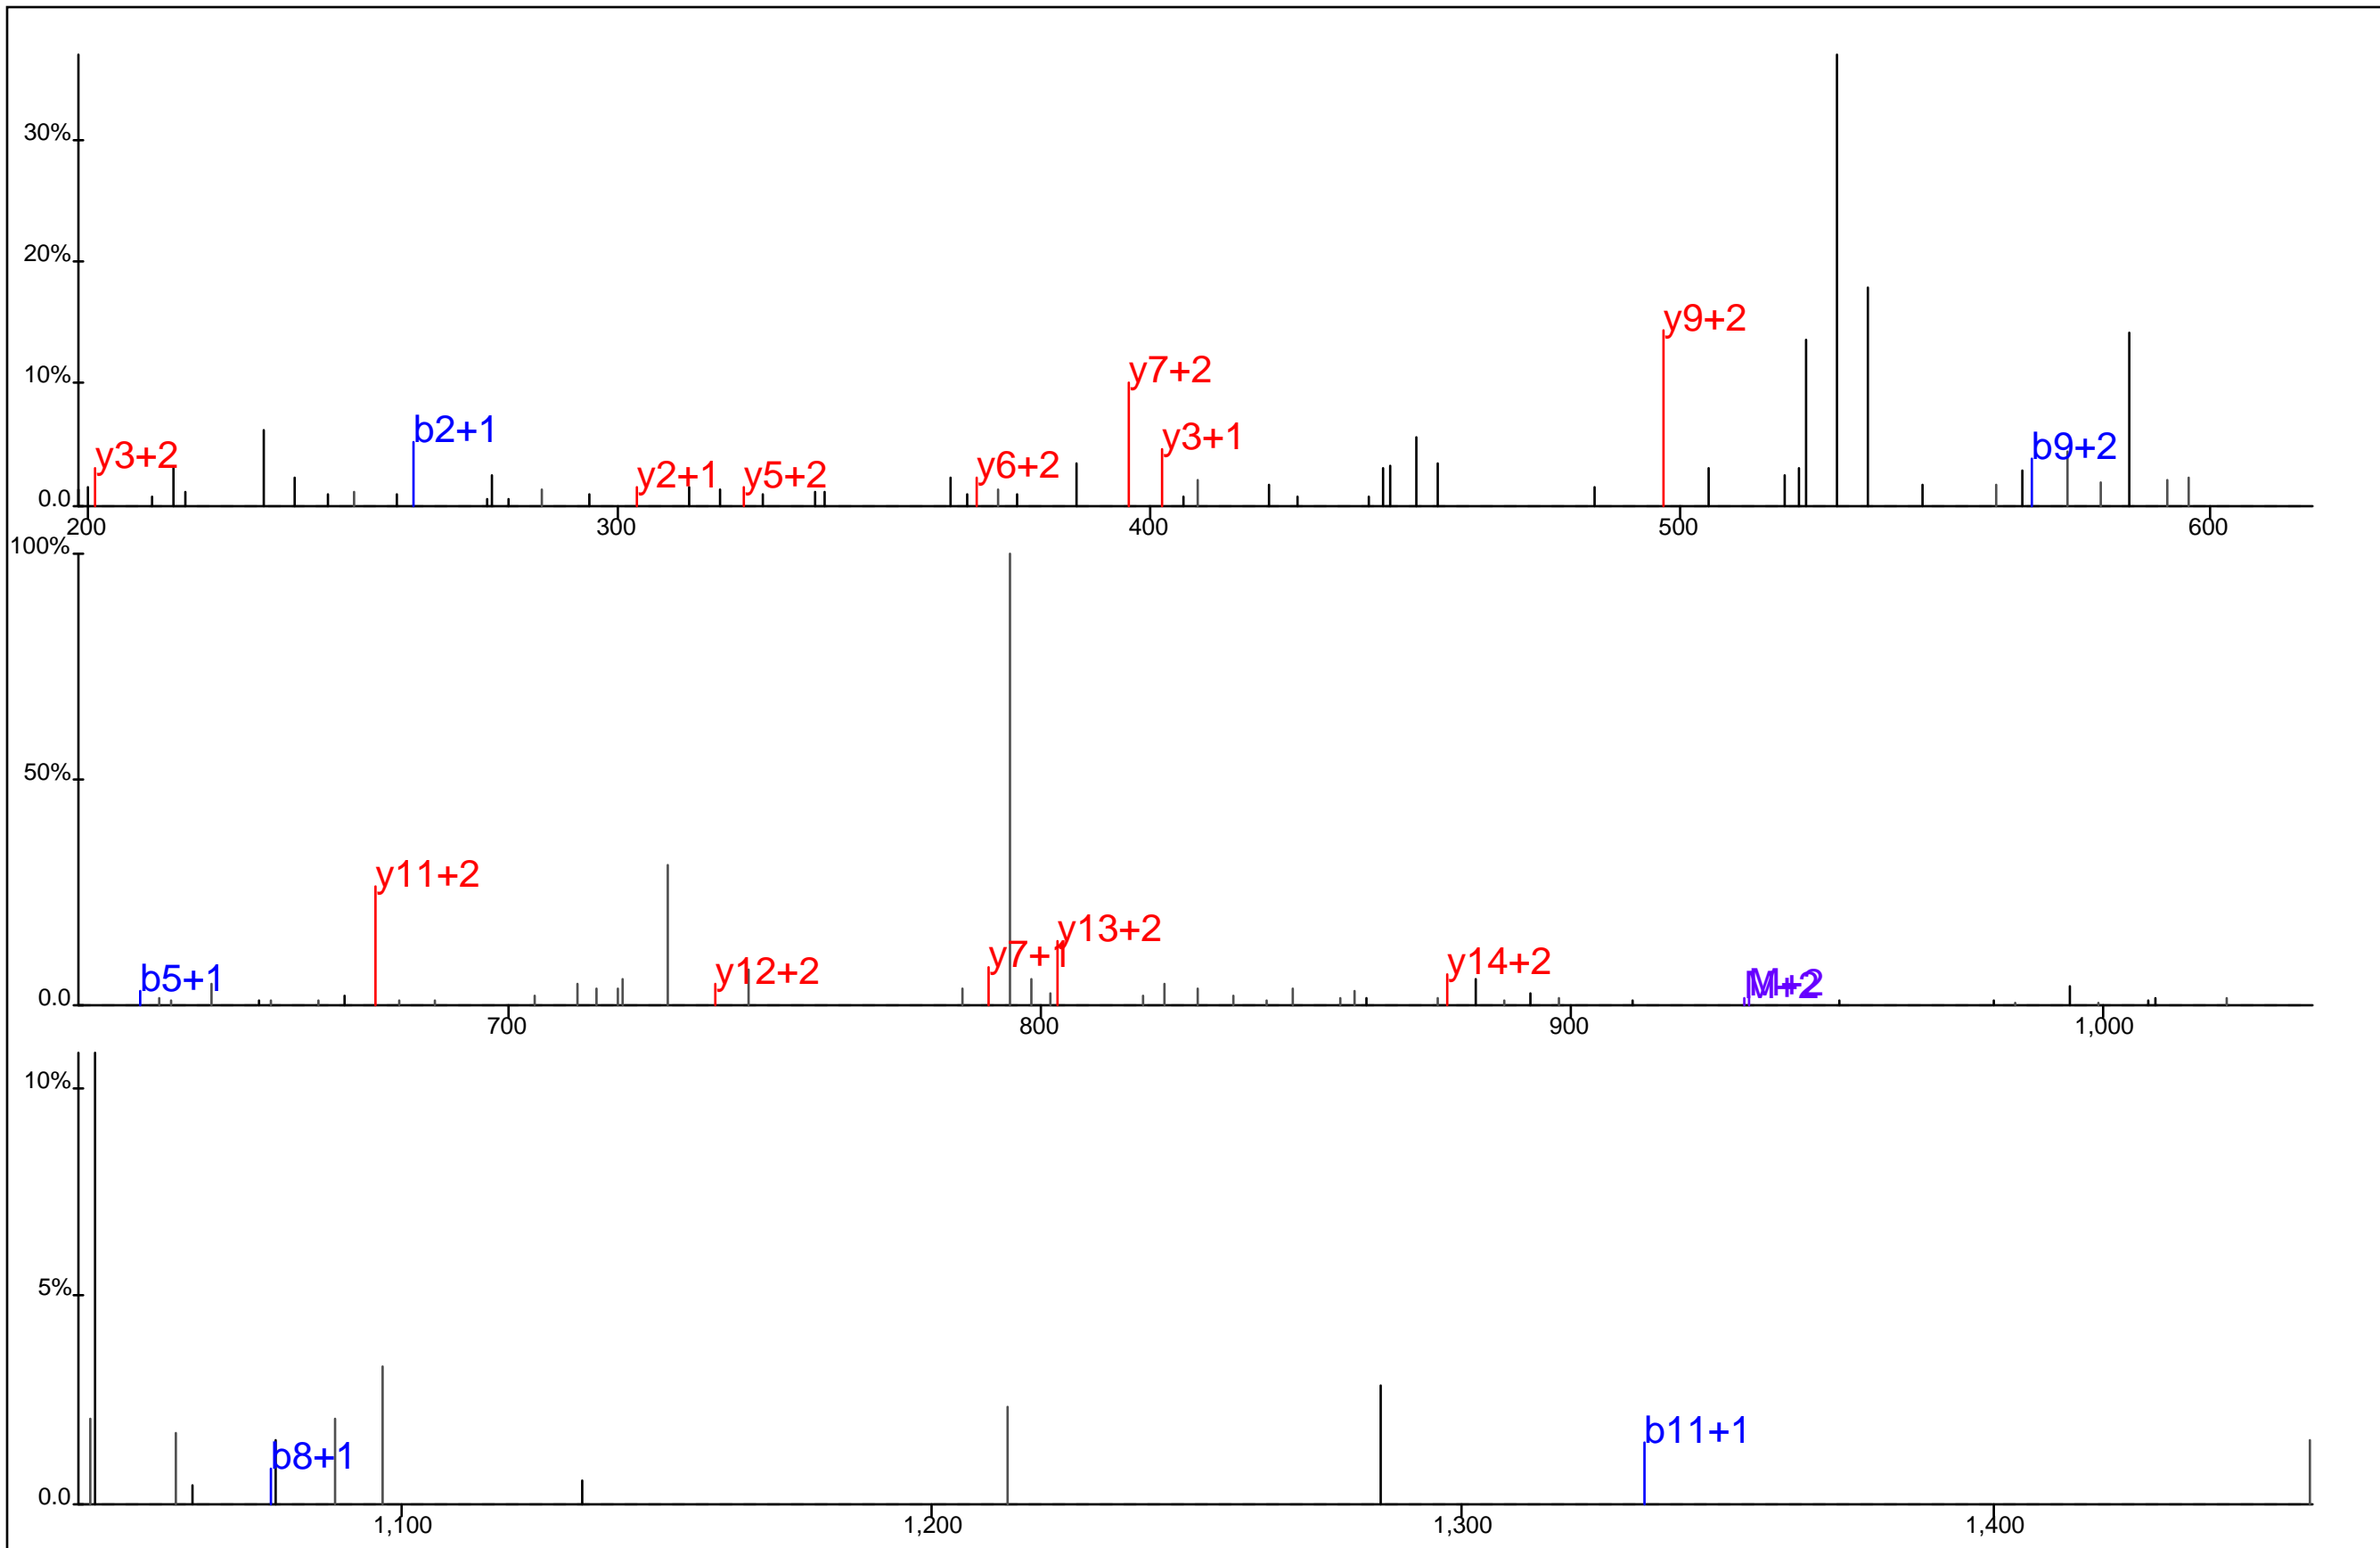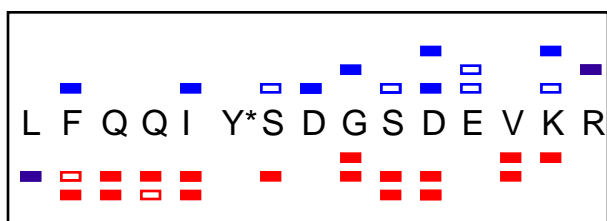

Protein Name: SUGT1  
 gi Accession: 0  
 Precursor Mass: 622.2870+3  
 Delta Mass: 0.579 ppm  
 XCorr: 30.7

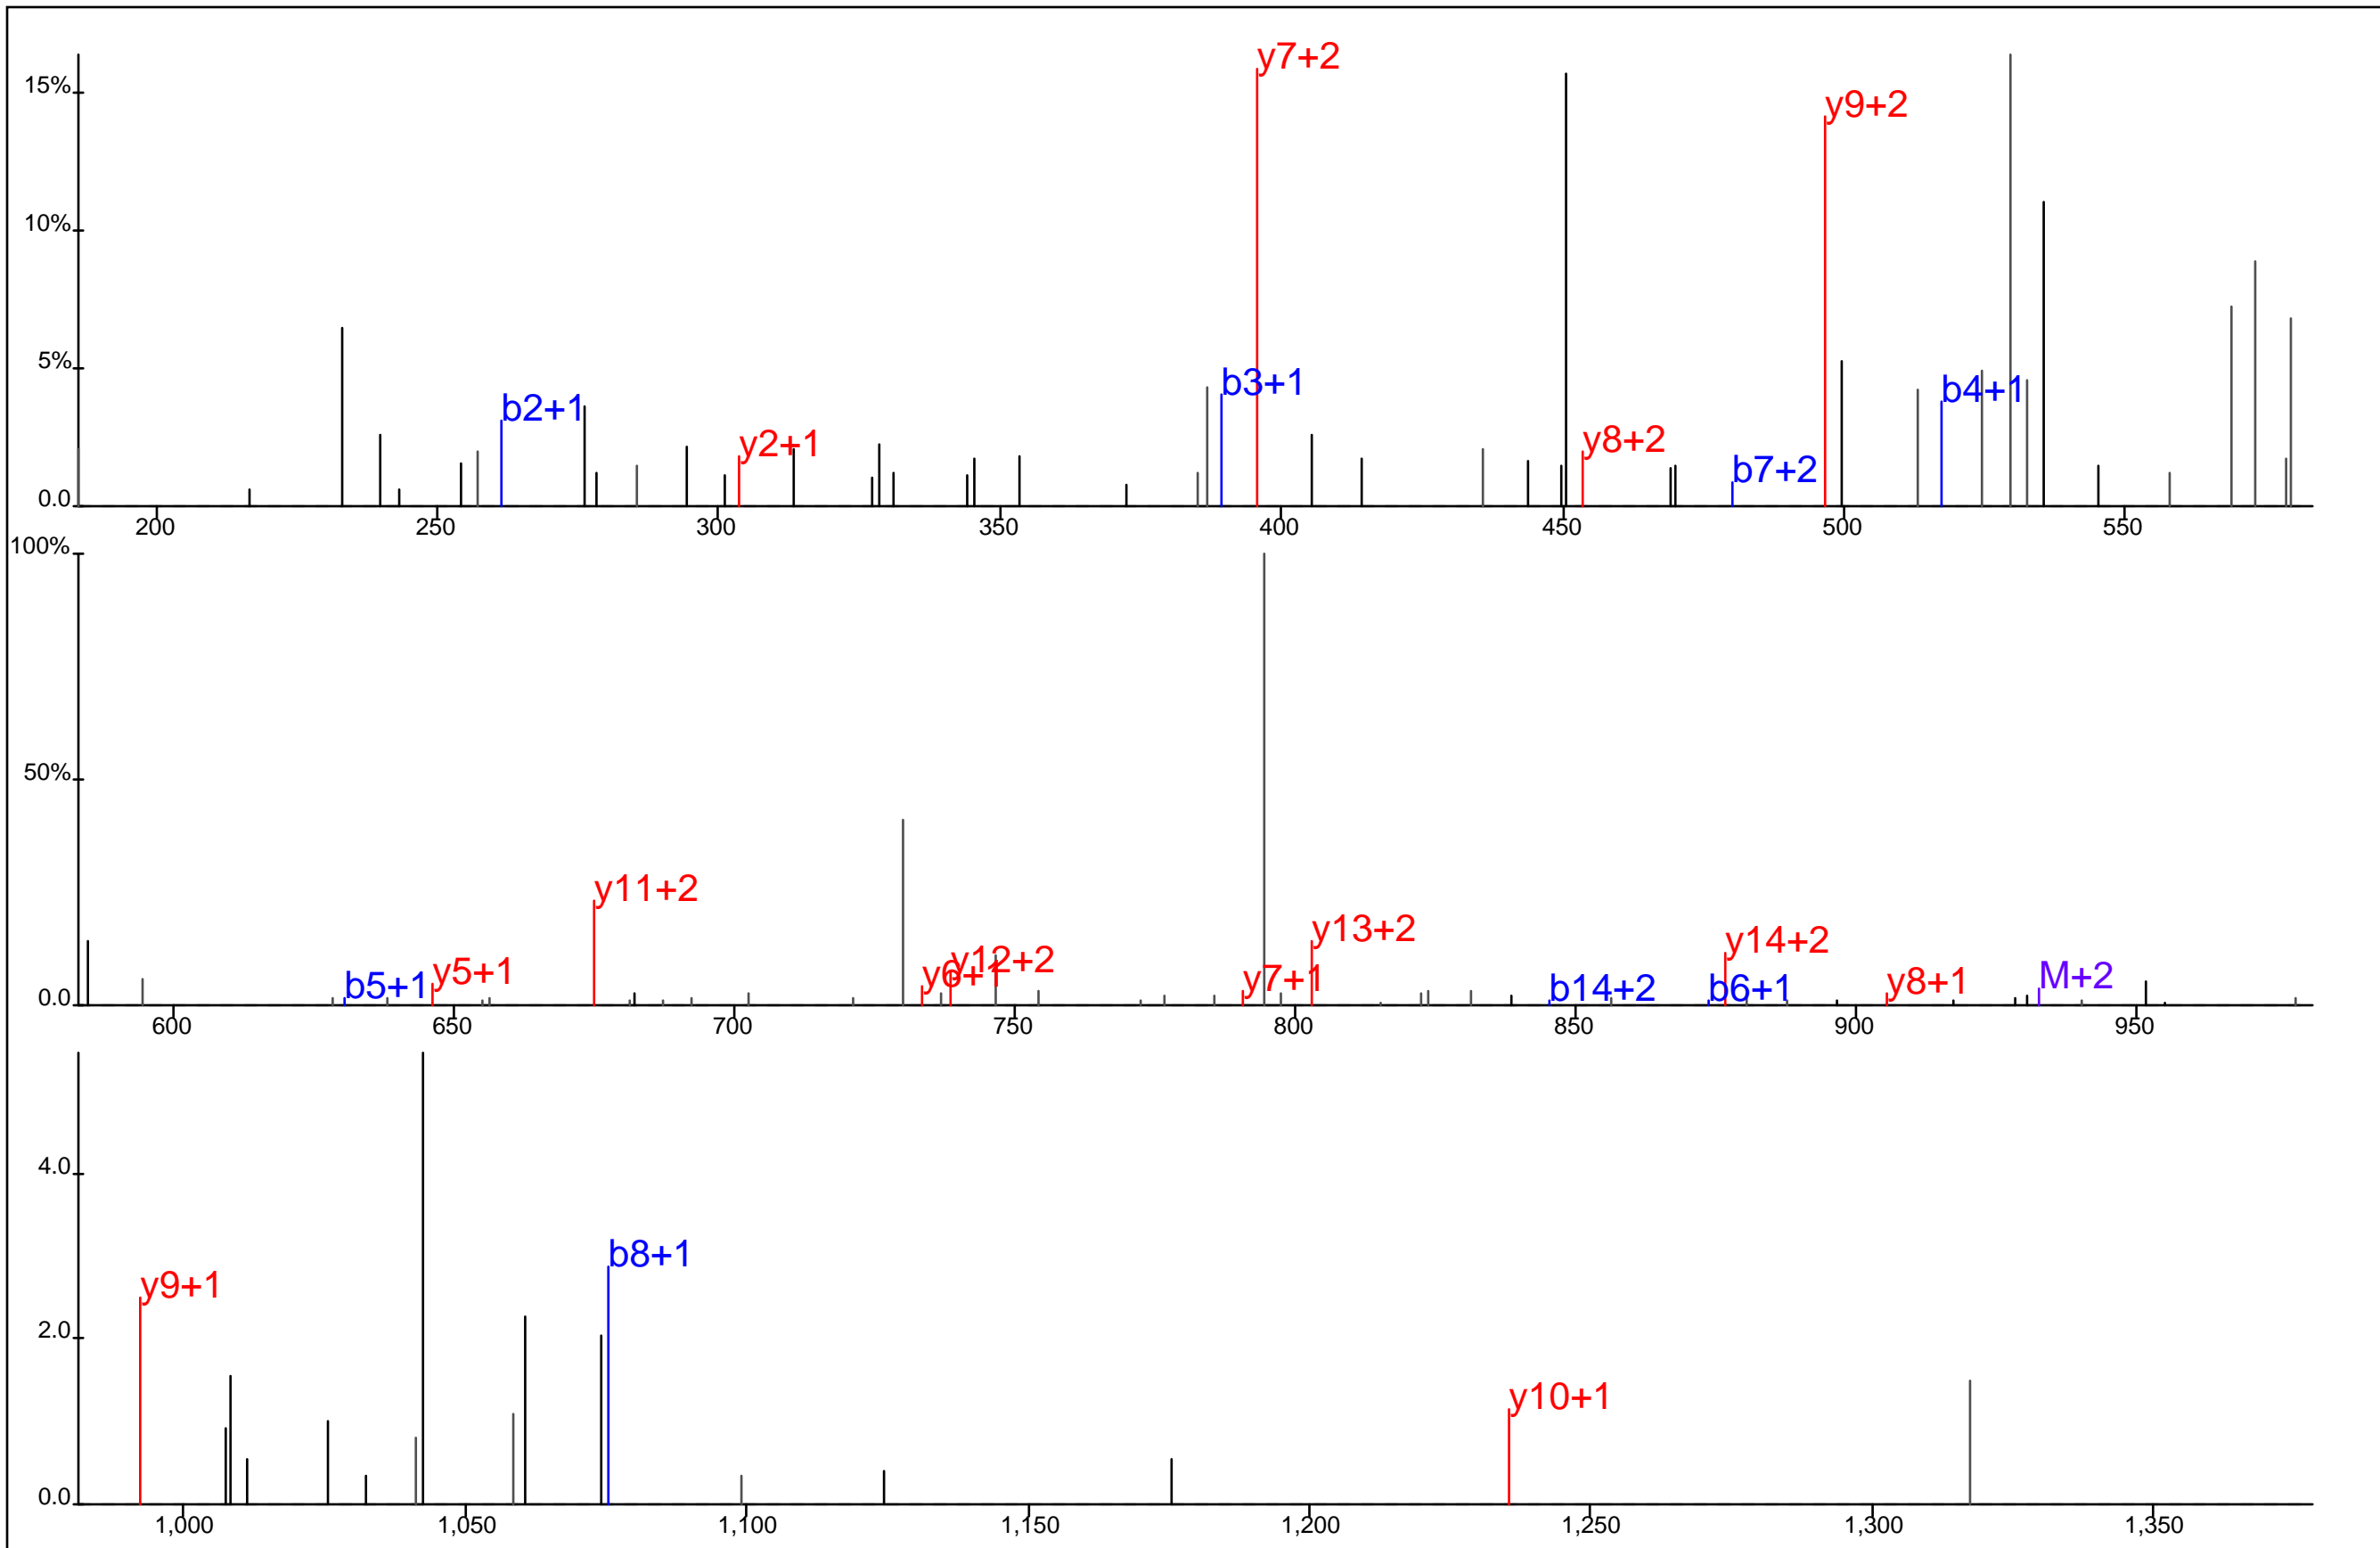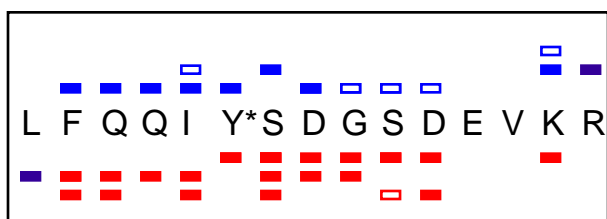

Protein Name: SUGT1  
 gi Accession: 0  
 Precursor Mass: 622.2877+3  
 Delta Mass: 0.404 ppm  
 XCorr: 33.83

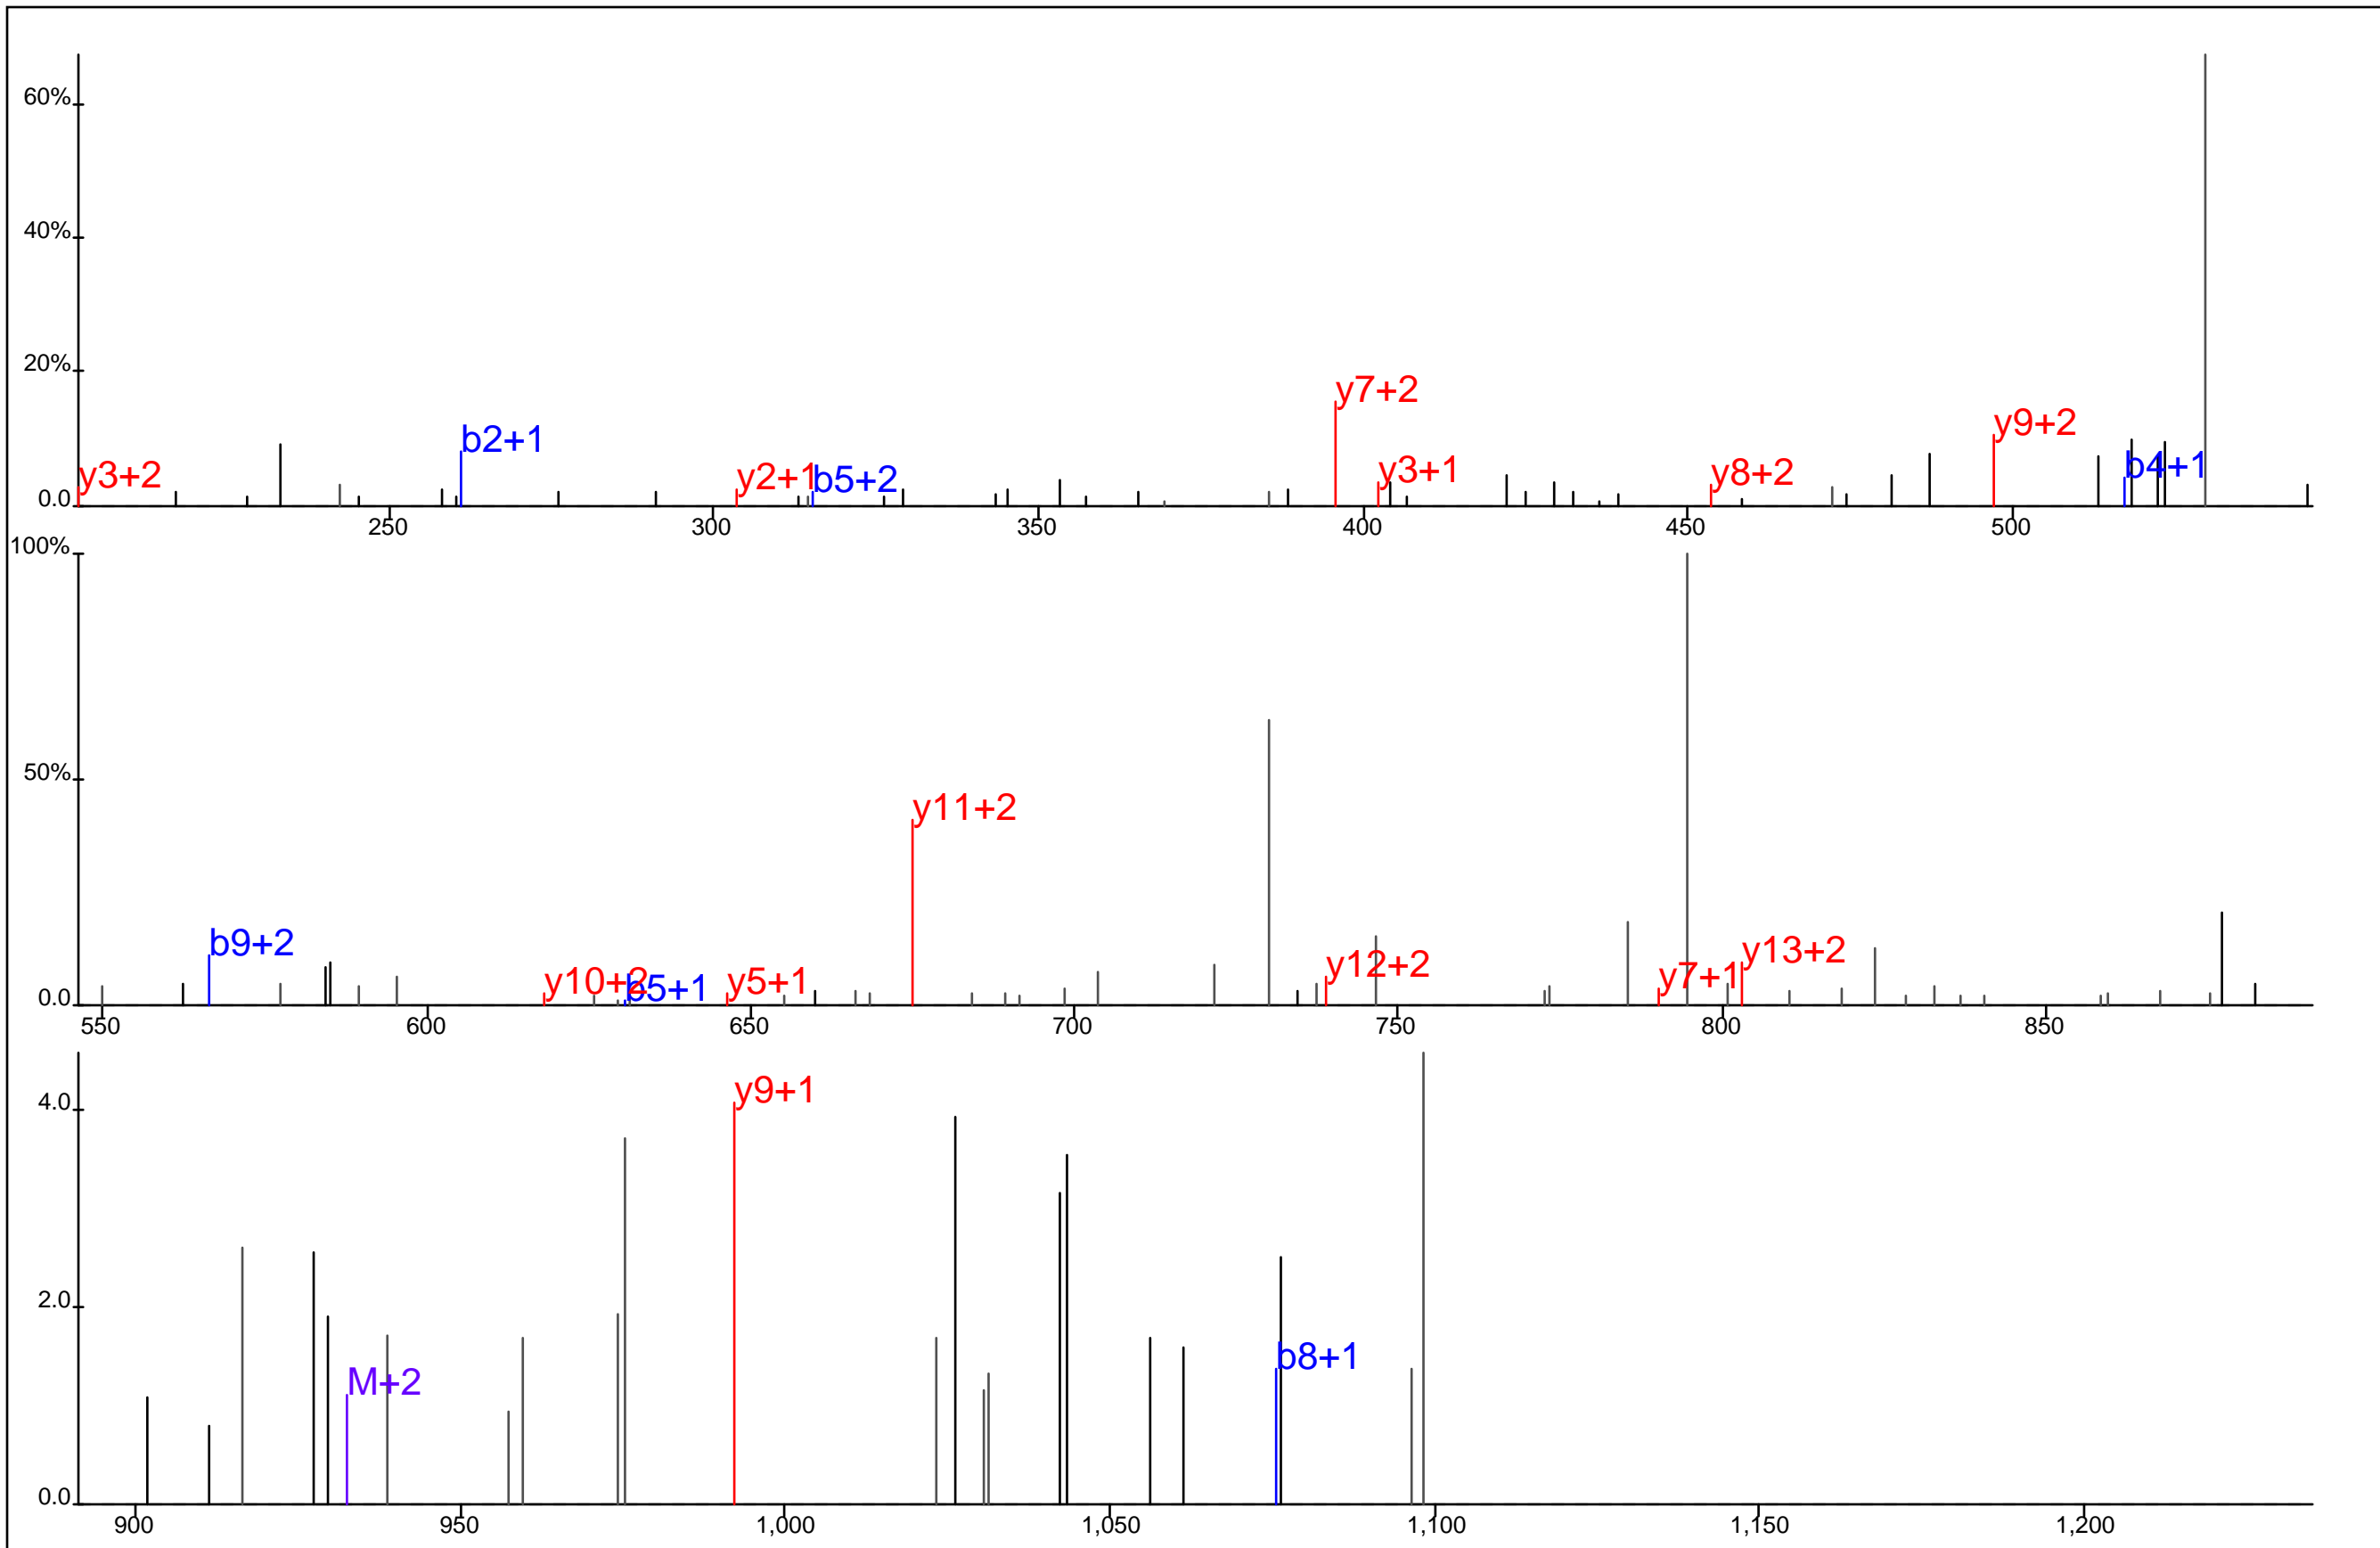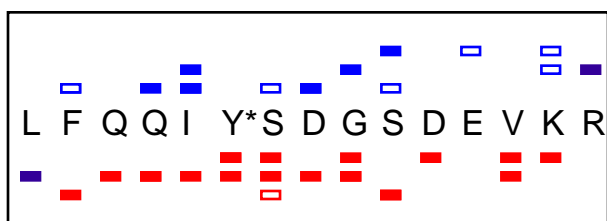

Protein Name: SUGT1  
 gi Accession: 0  
 Precursor Mass: 622.2883+3  
 Delta Mass: 1.385 ppm  
 XCorr: 21.57

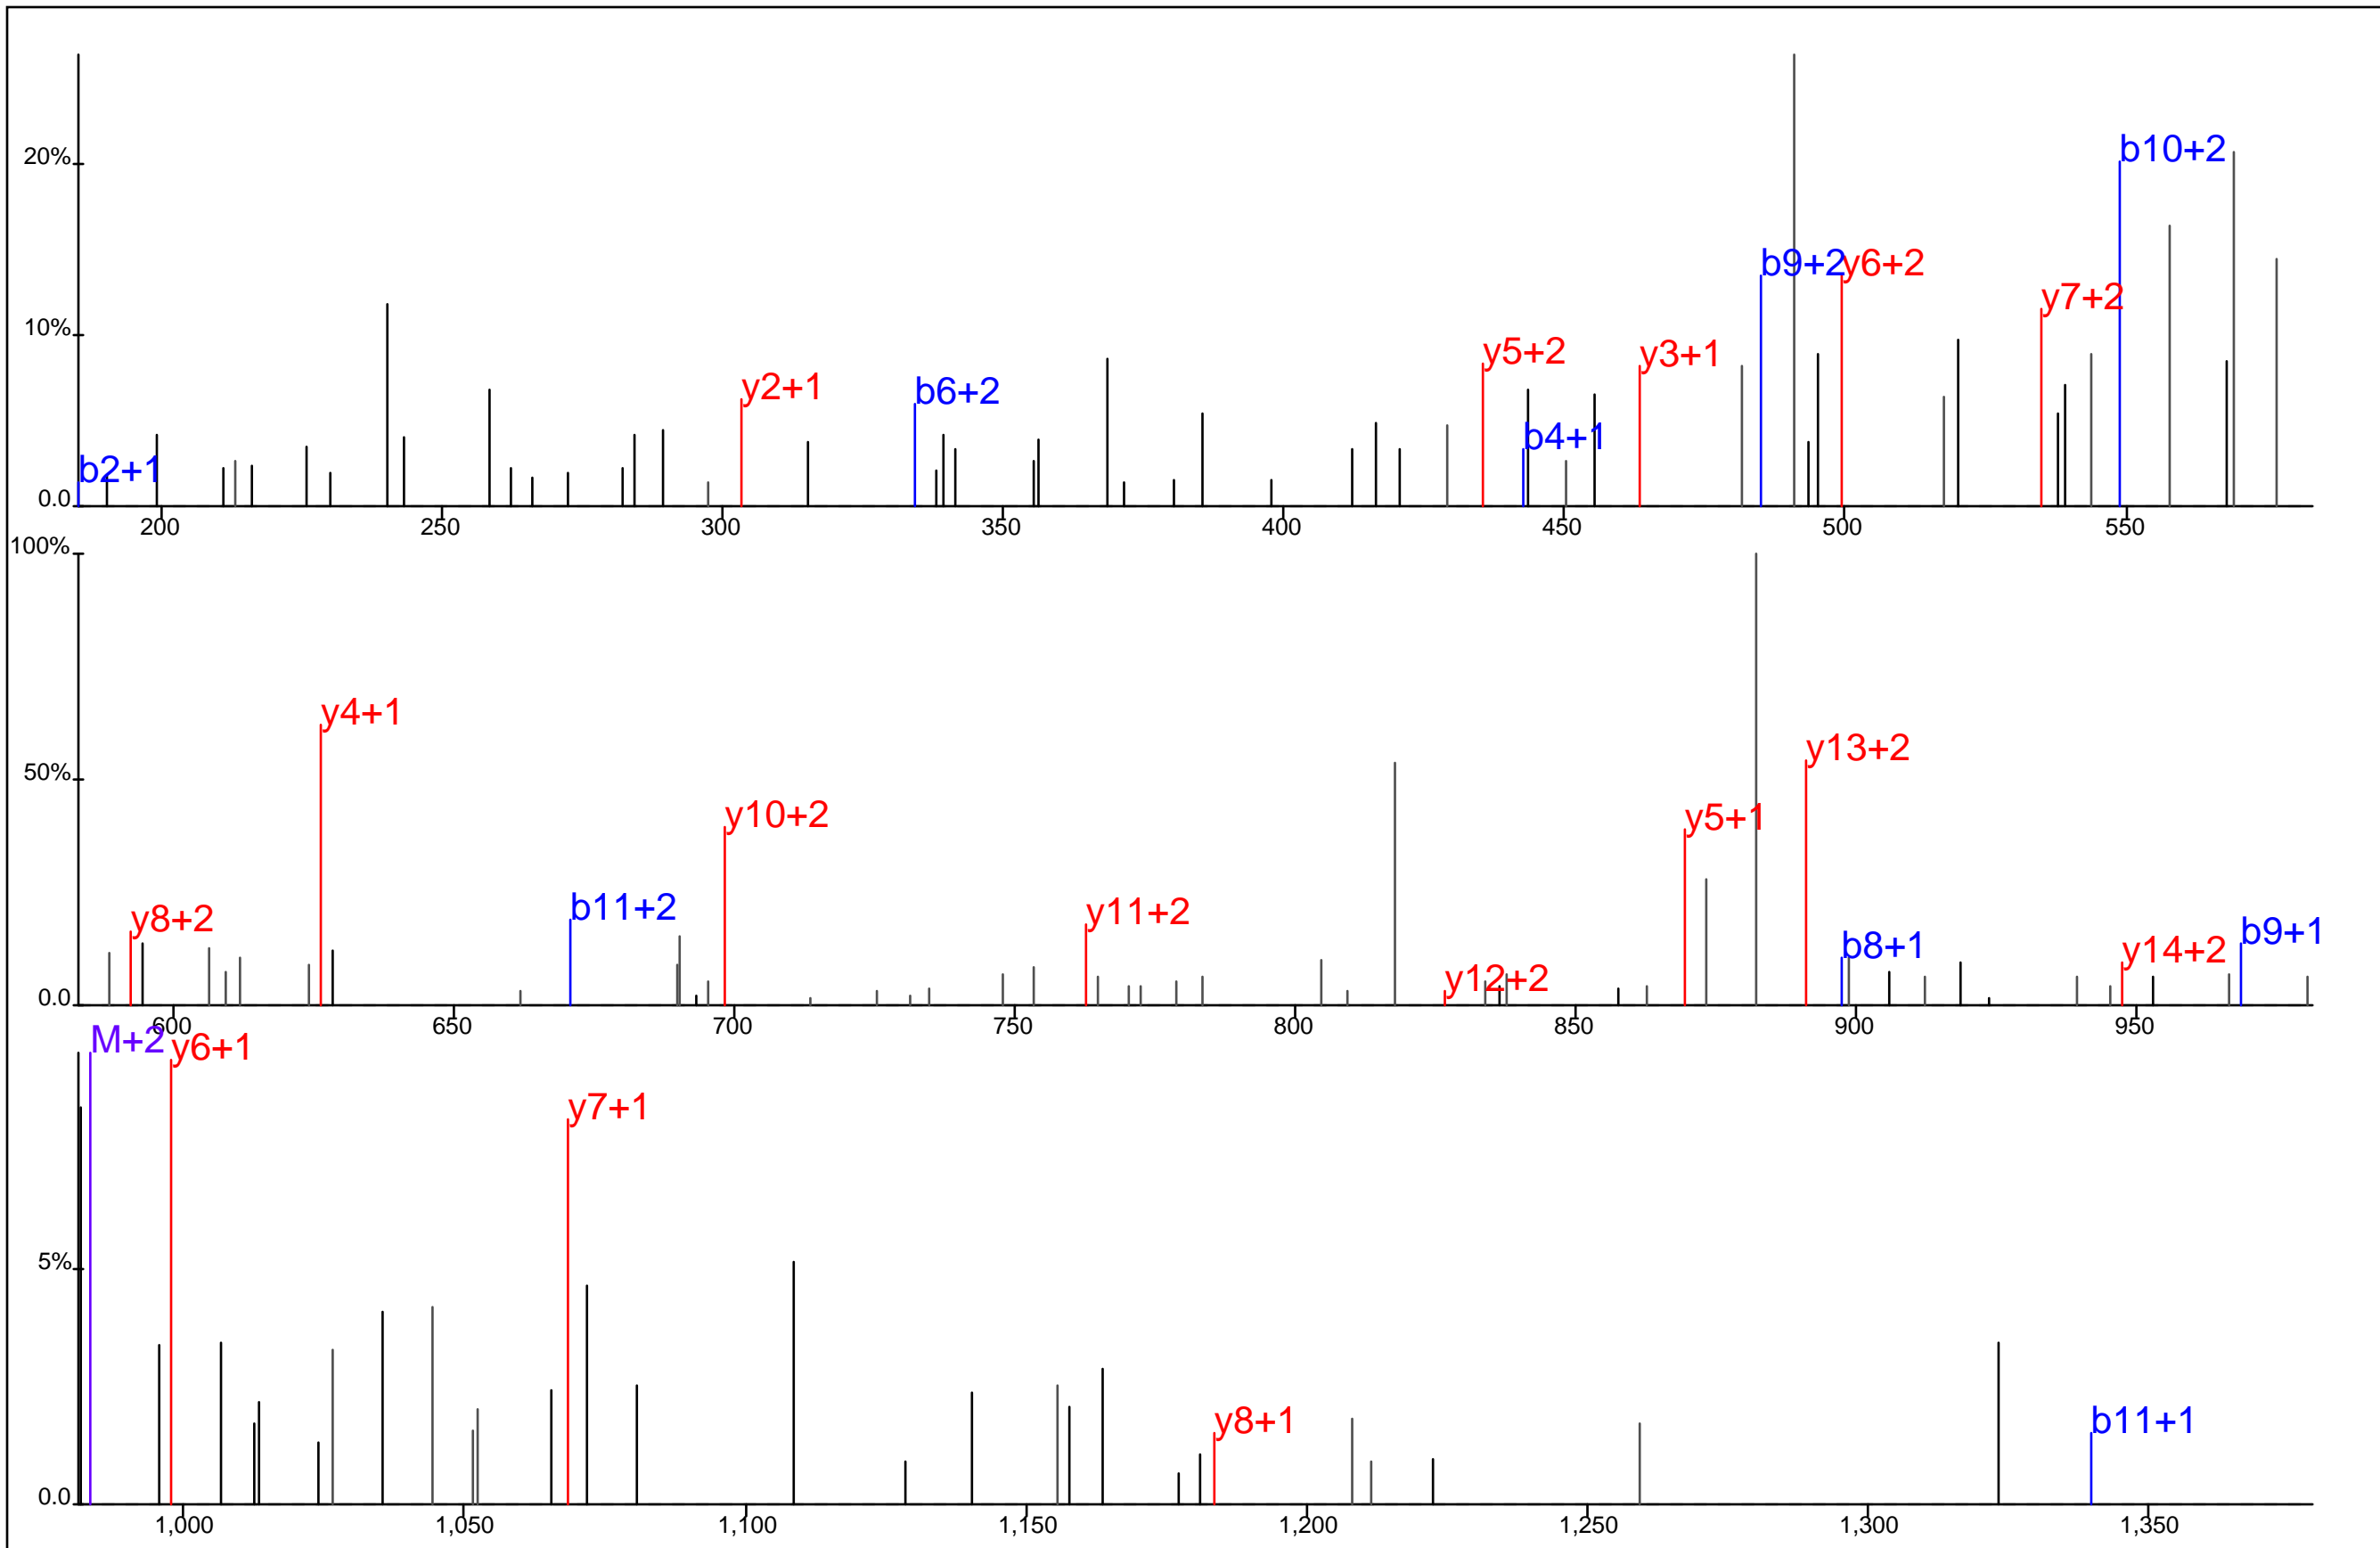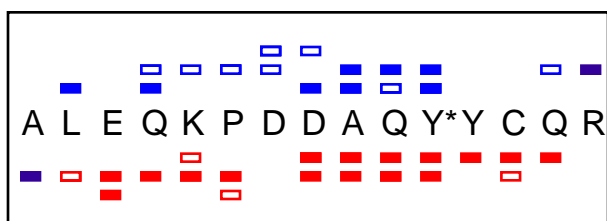

Protein Name: SUGT1  
 gi Accession: 0  
 Precursor Mass: 655.6121+3  
 Delta Mass: 0.525 ppm  
 XCorr: 30.39

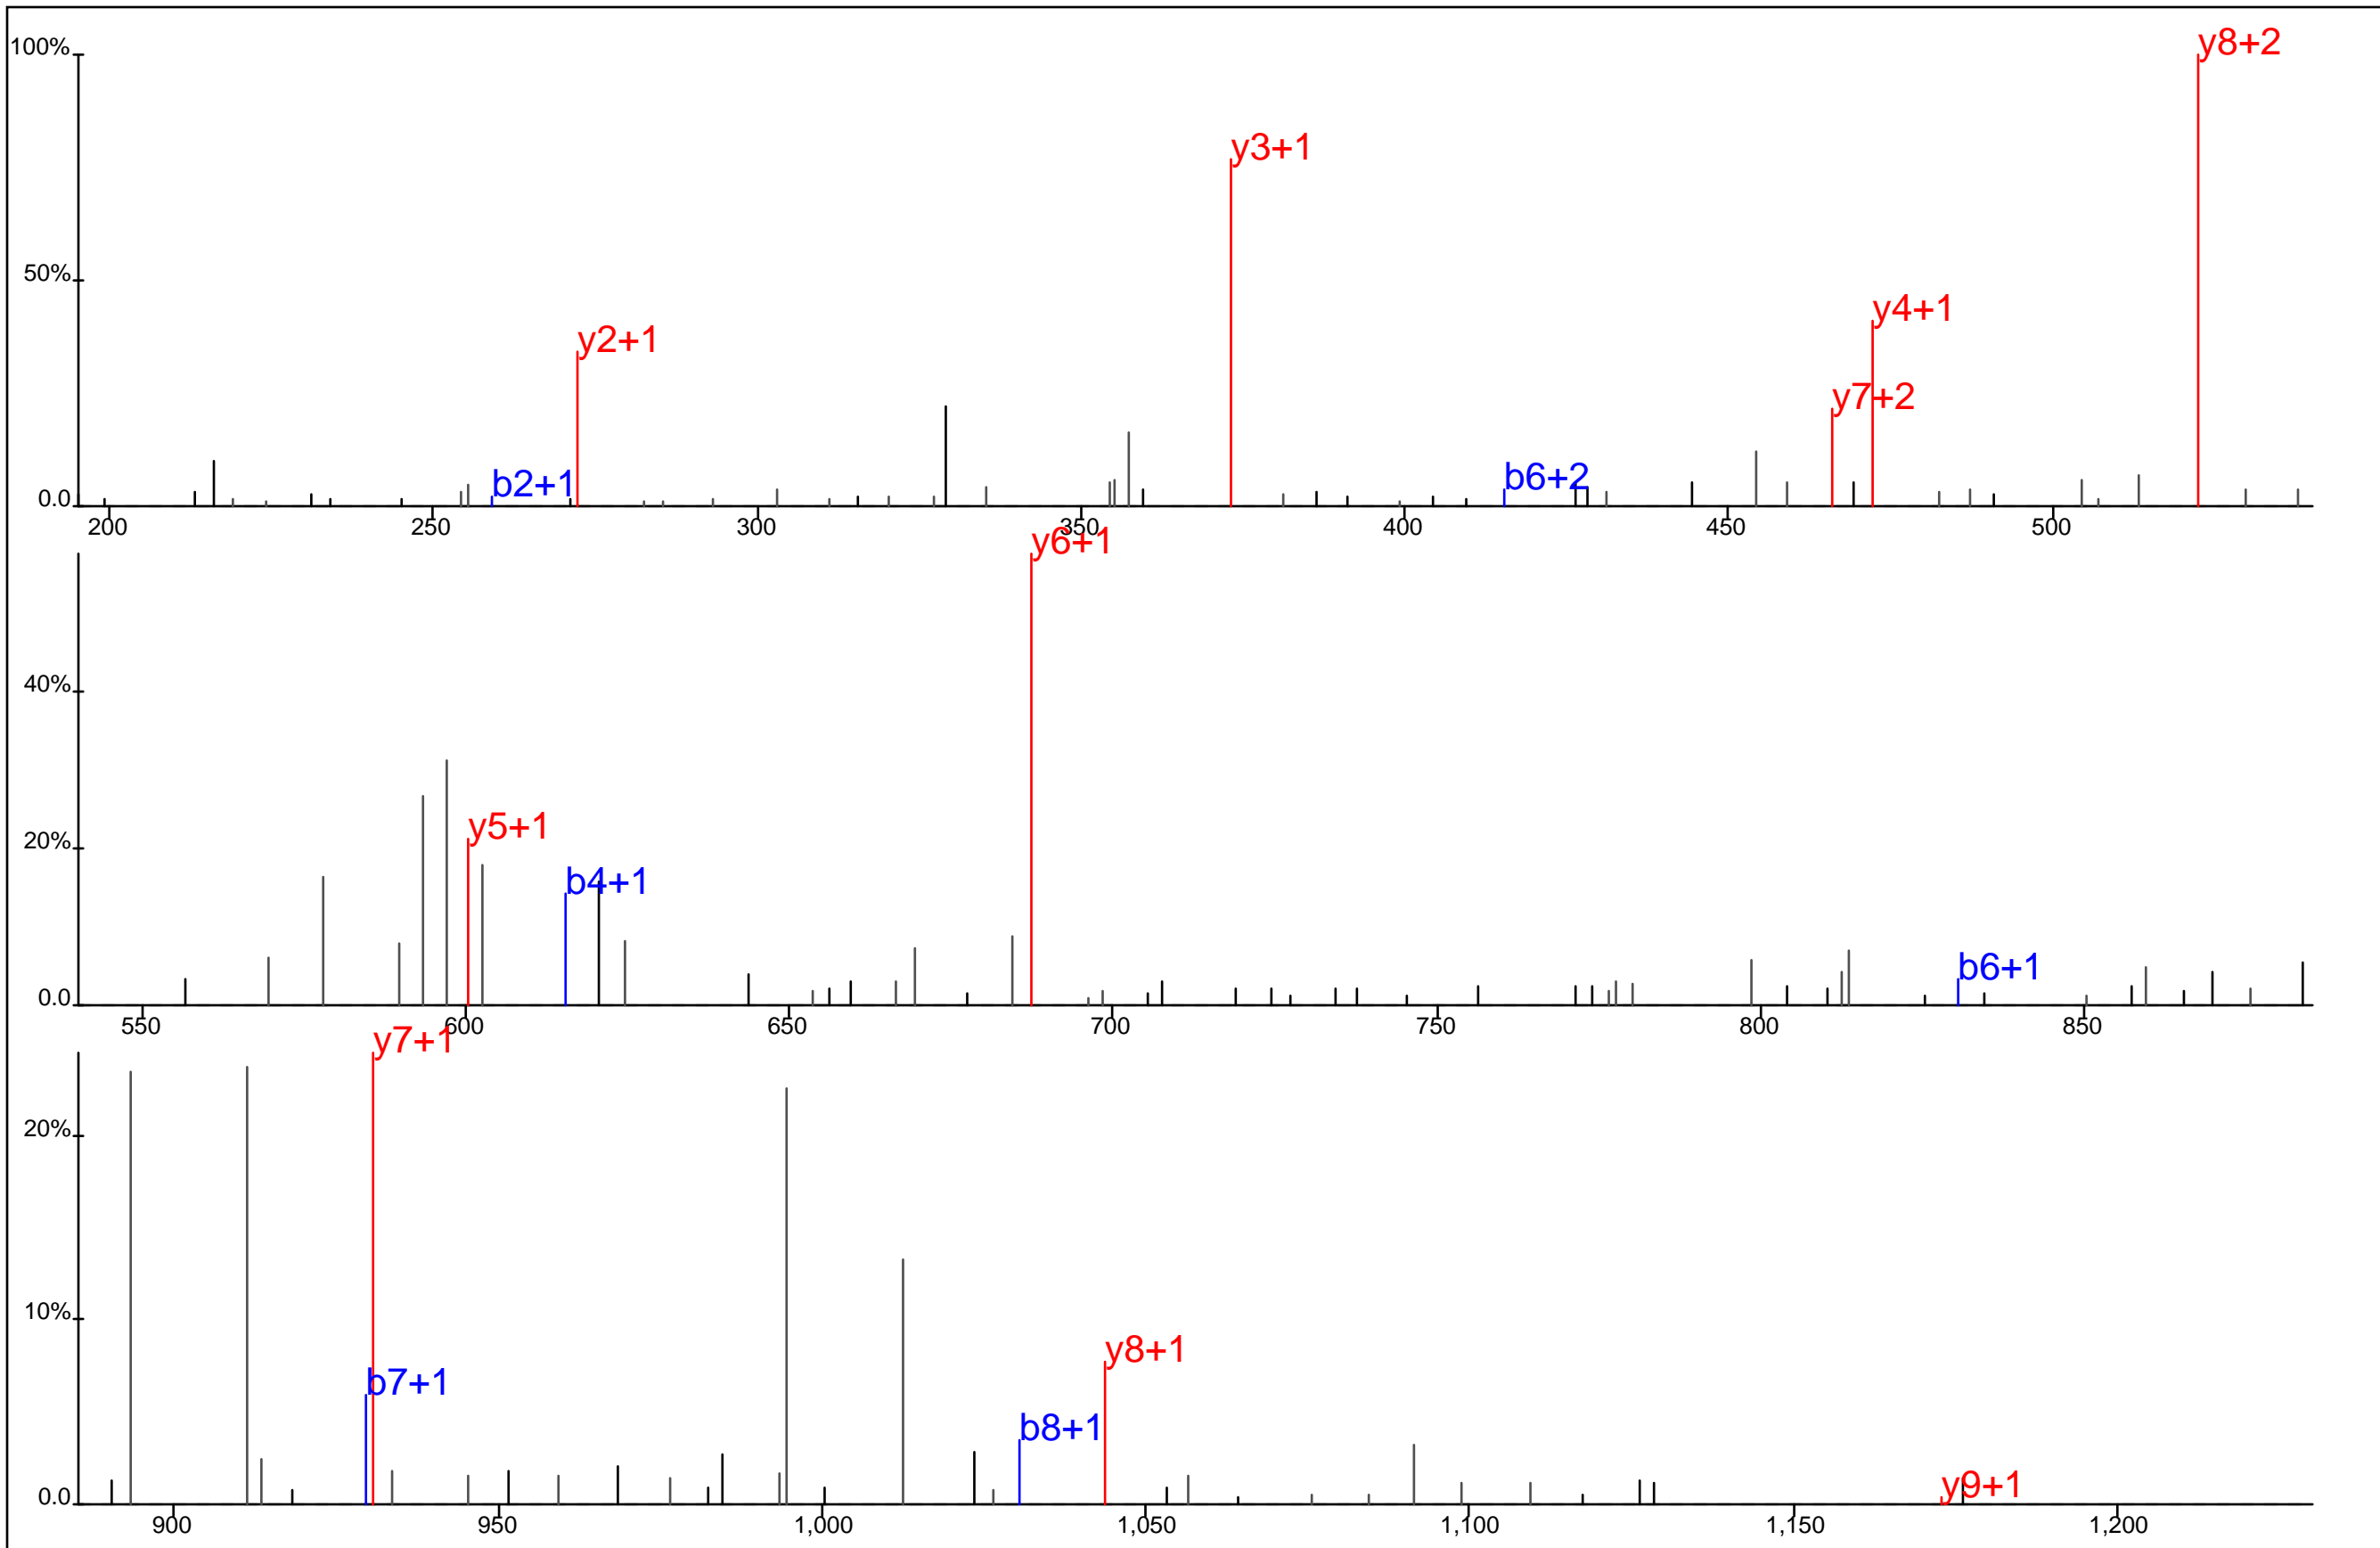

■ ▢ ▣ ▤ ▥ ▦  
 E E L Y\* S K V T P R  
▨ ▩ ▪ ▫ ▬ ▭

Protein Name: Suppressor of T-cell receptor signaling 1  
 gi Accession: 0  
 Precursor Mass: 651.3075+2  
 Delta Mass: 4.577 ppm  
 XCorr: 35.96



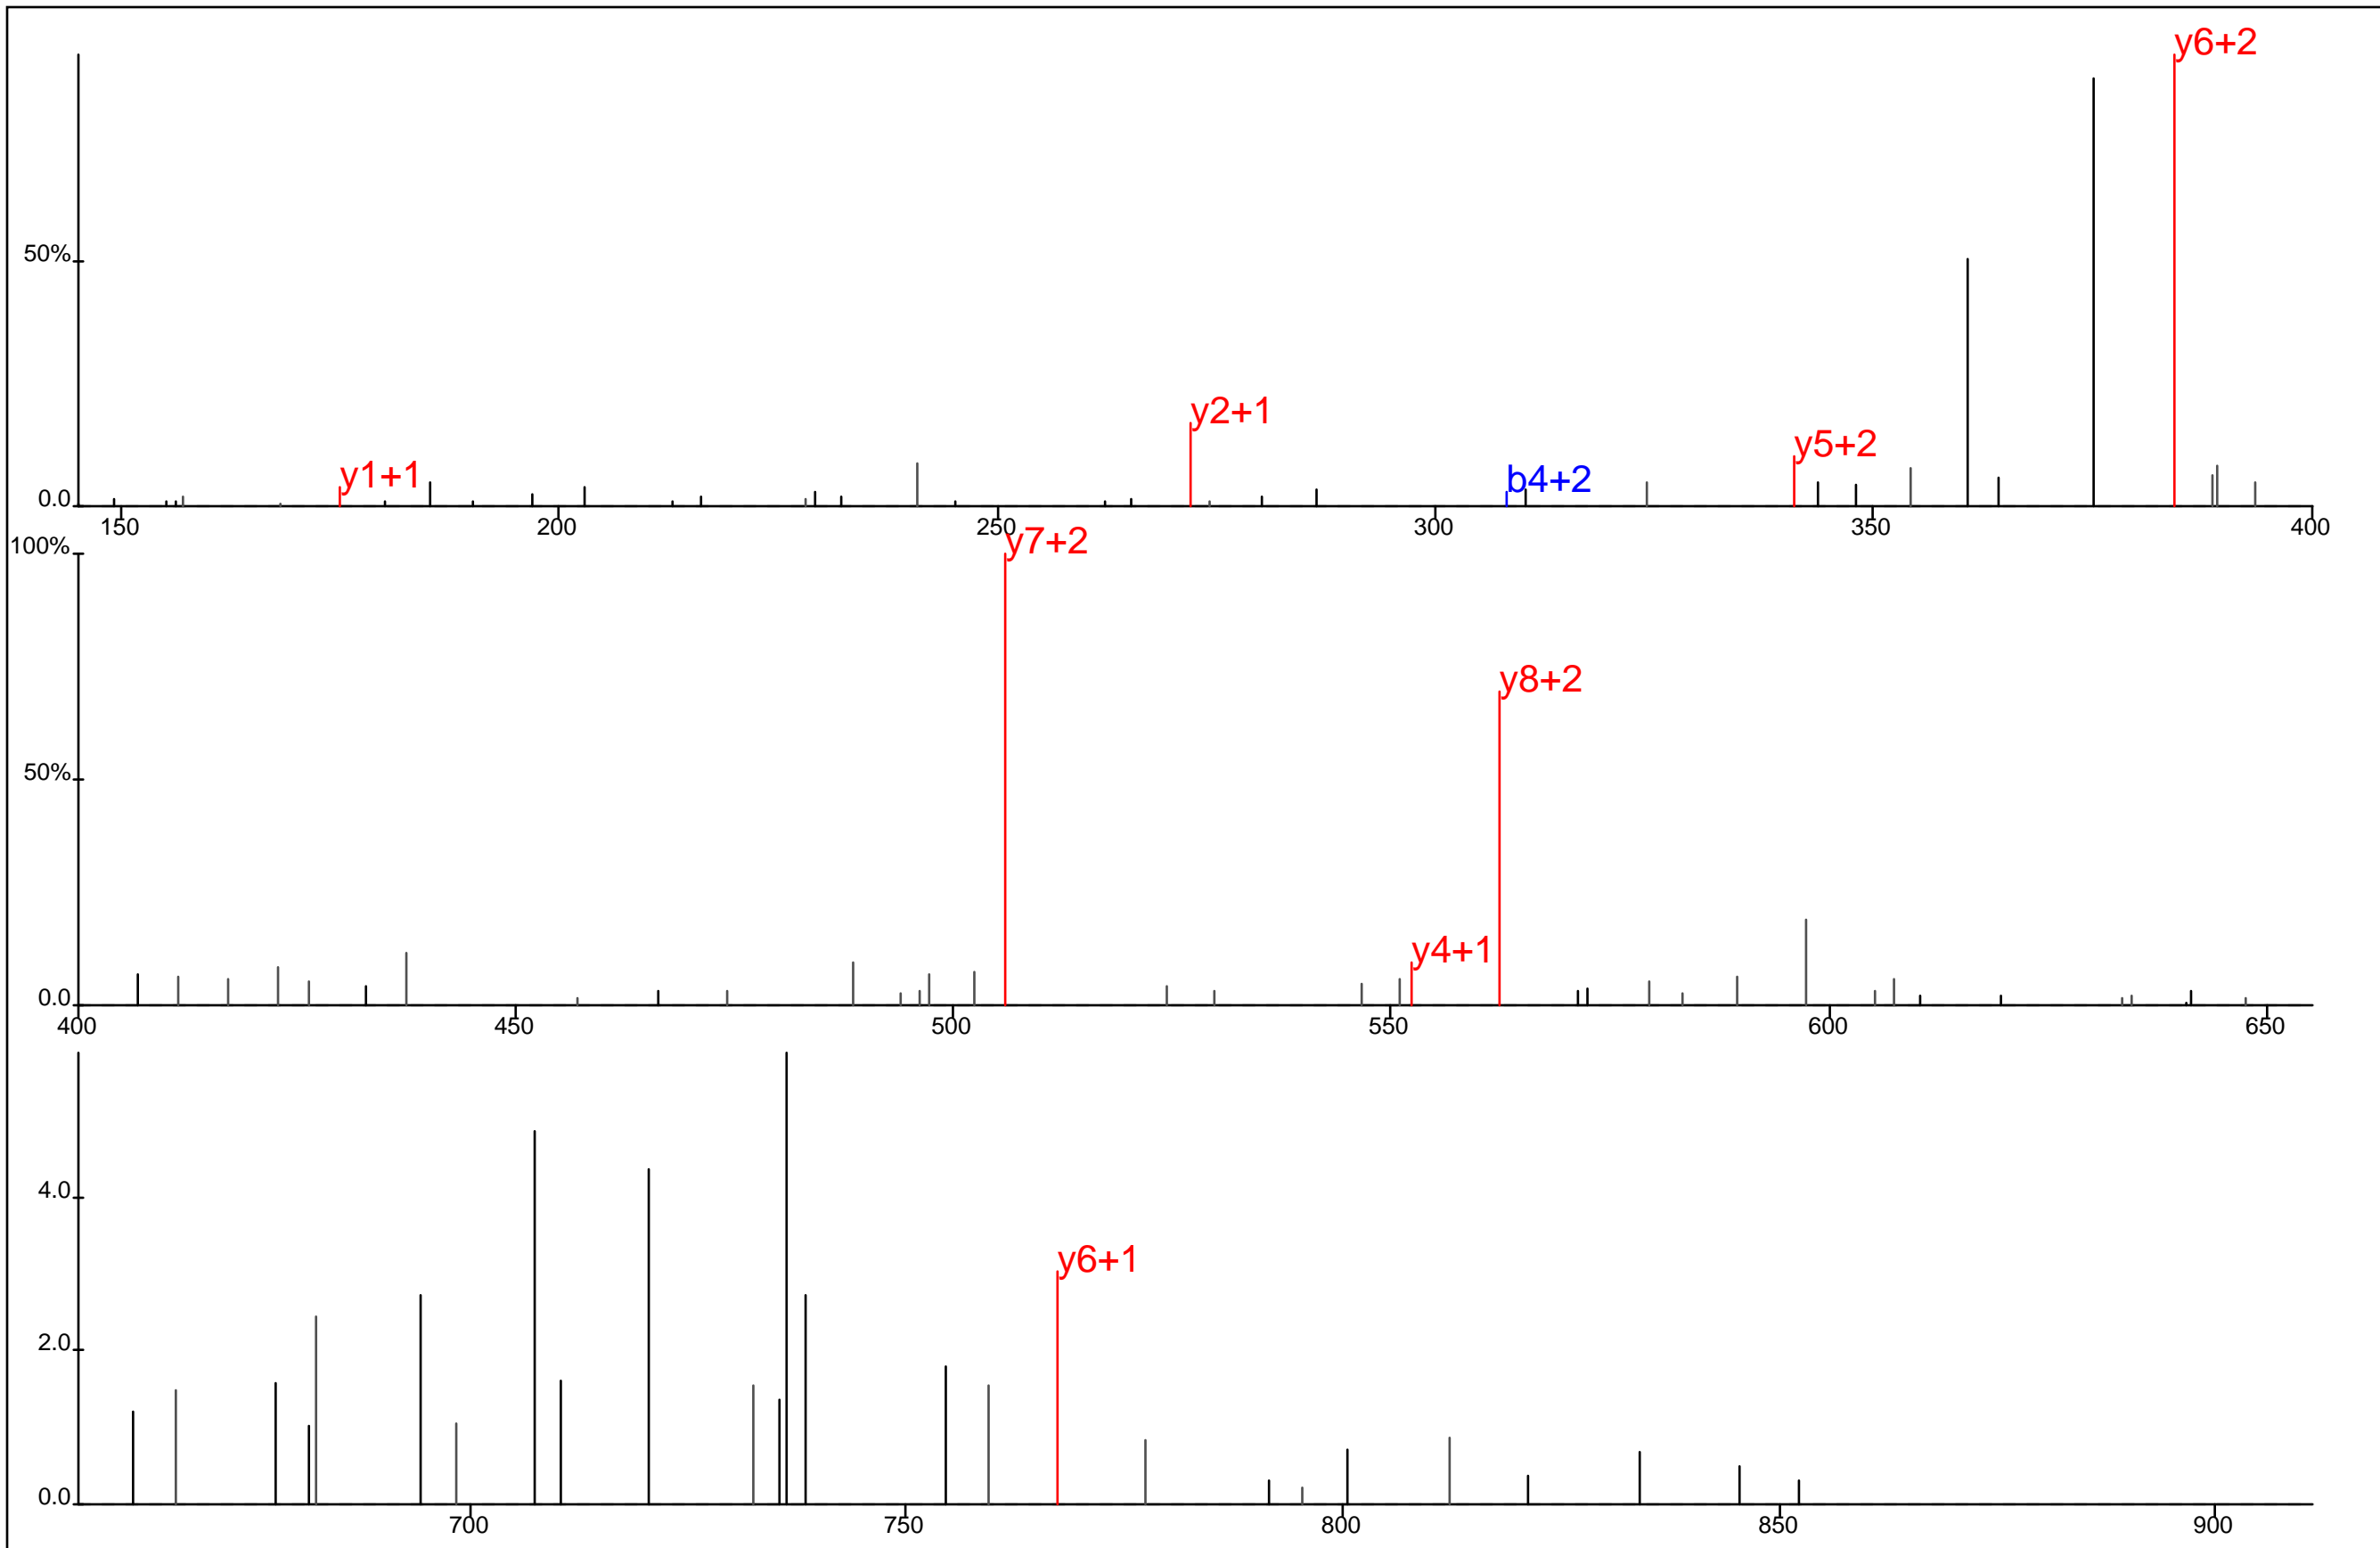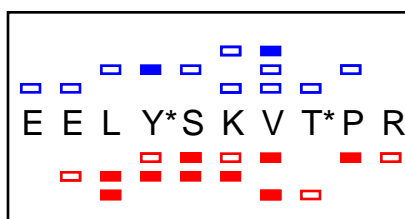

Protein Name: Suppressor of T-cell receptor signaling 1  
 gi Accession: 0  
 Precursor Mass: 461.1979+3  
 Delta Mass: 0.605 ppm  
 XCorr: 21.22

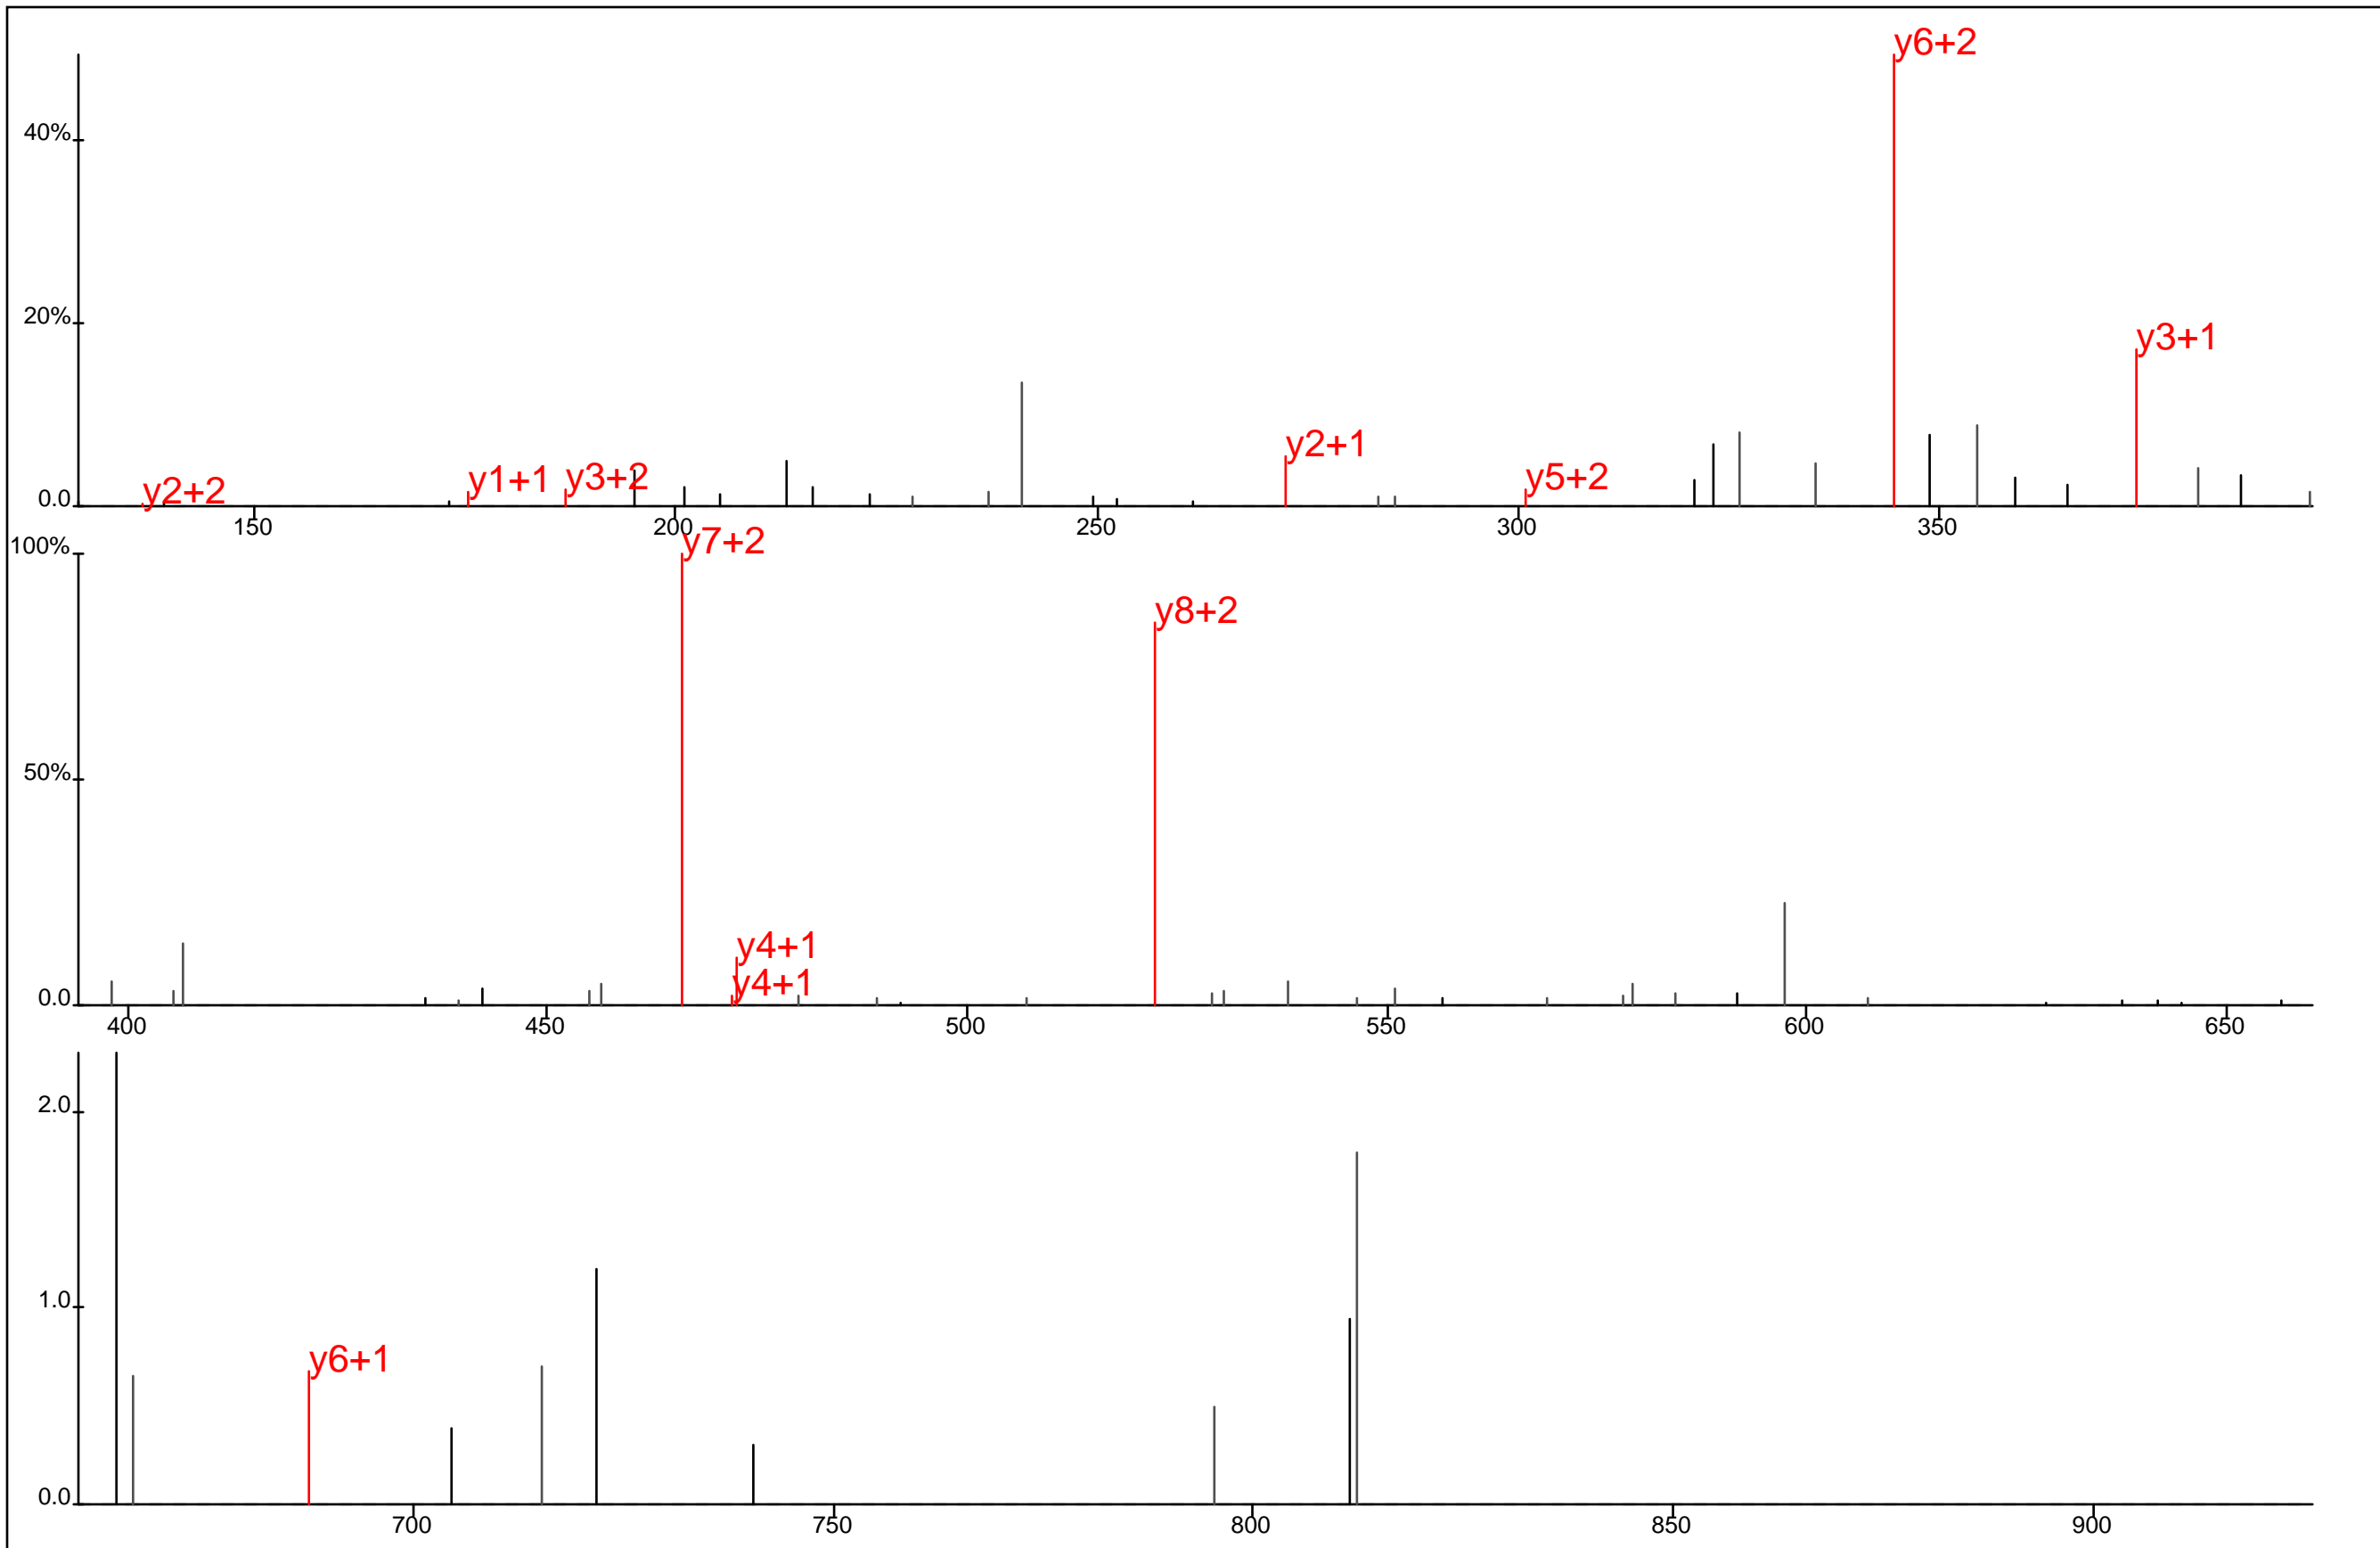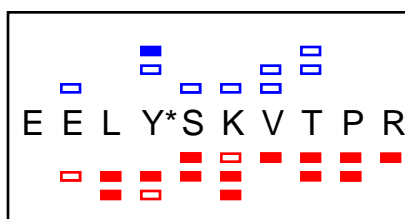

Protein Name: Suppressor of T-cell receptor signaling 1  
 gi Accession: 0  
 Precursor Mass: 434.5424+3  
 Delta Mass: 0.884 ppm  
 XCorr: 21.56

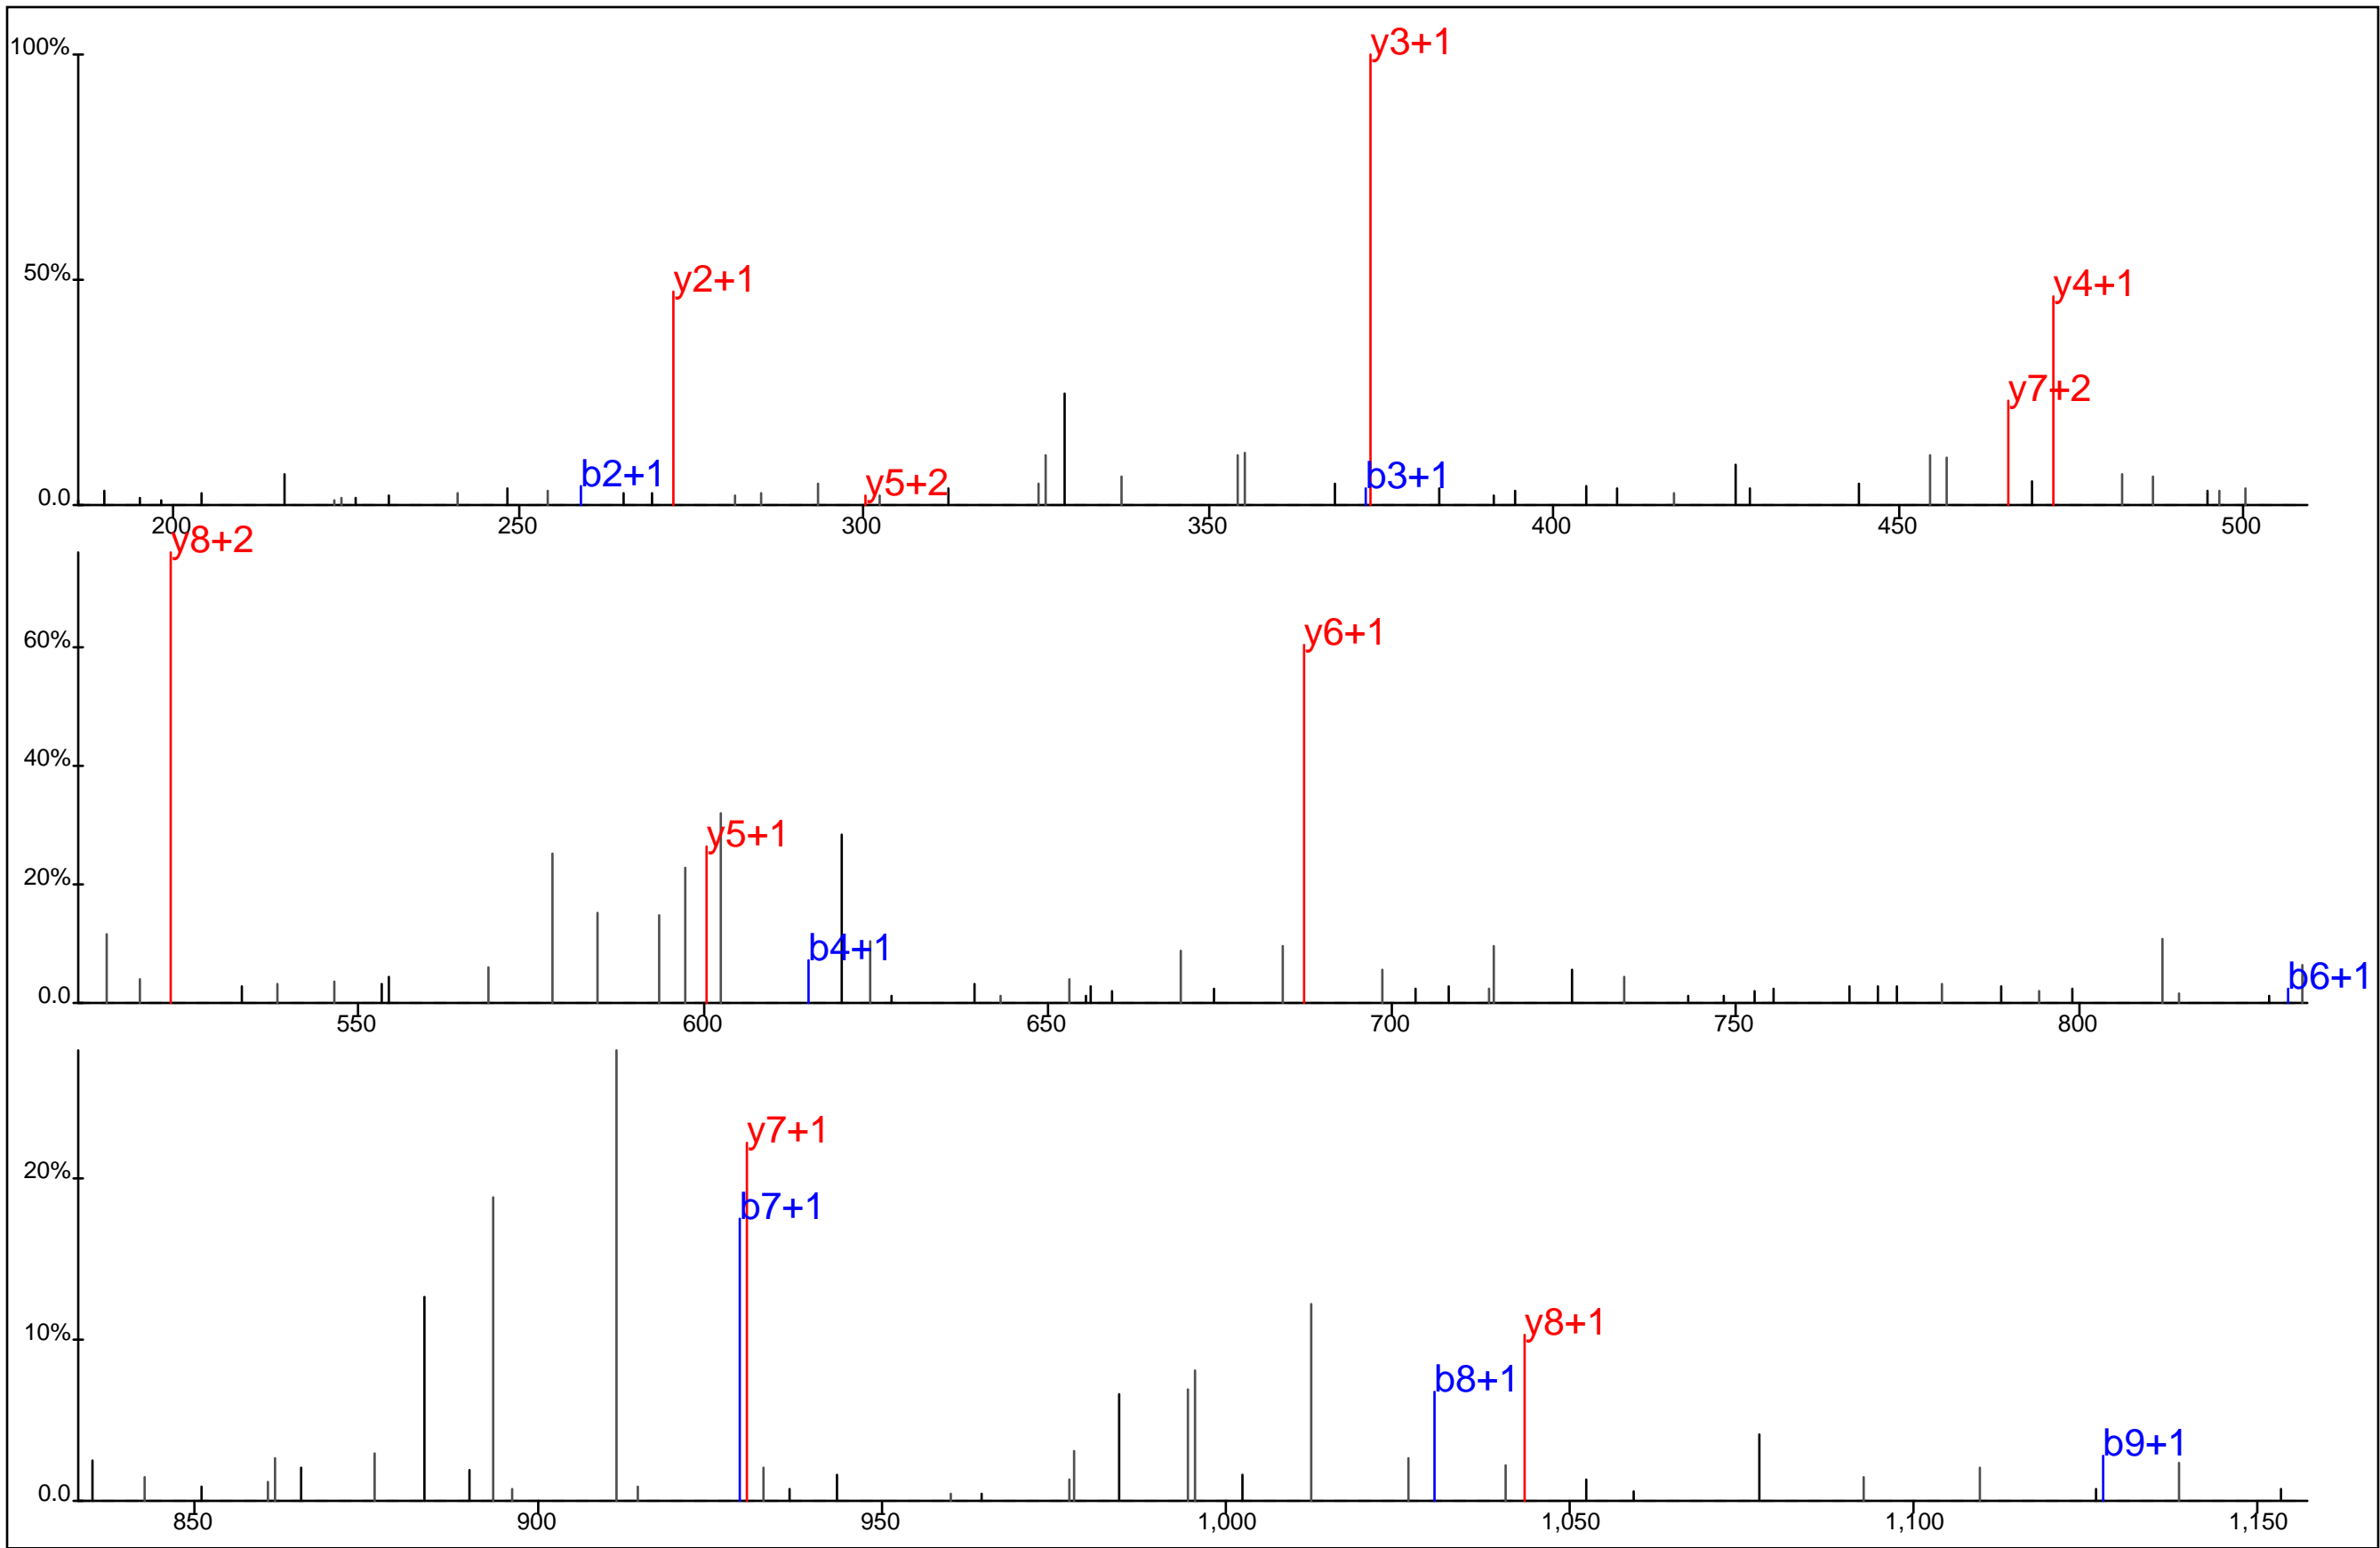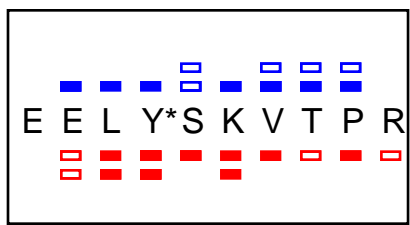

Protein Name: Suppressor of T-cell receptor signaling 1  
 gi Accession: 0  
 Precursor Mass: 651.3090+2  
 Delta Mass: 2.326 ppm  
 XCorr: 44.24

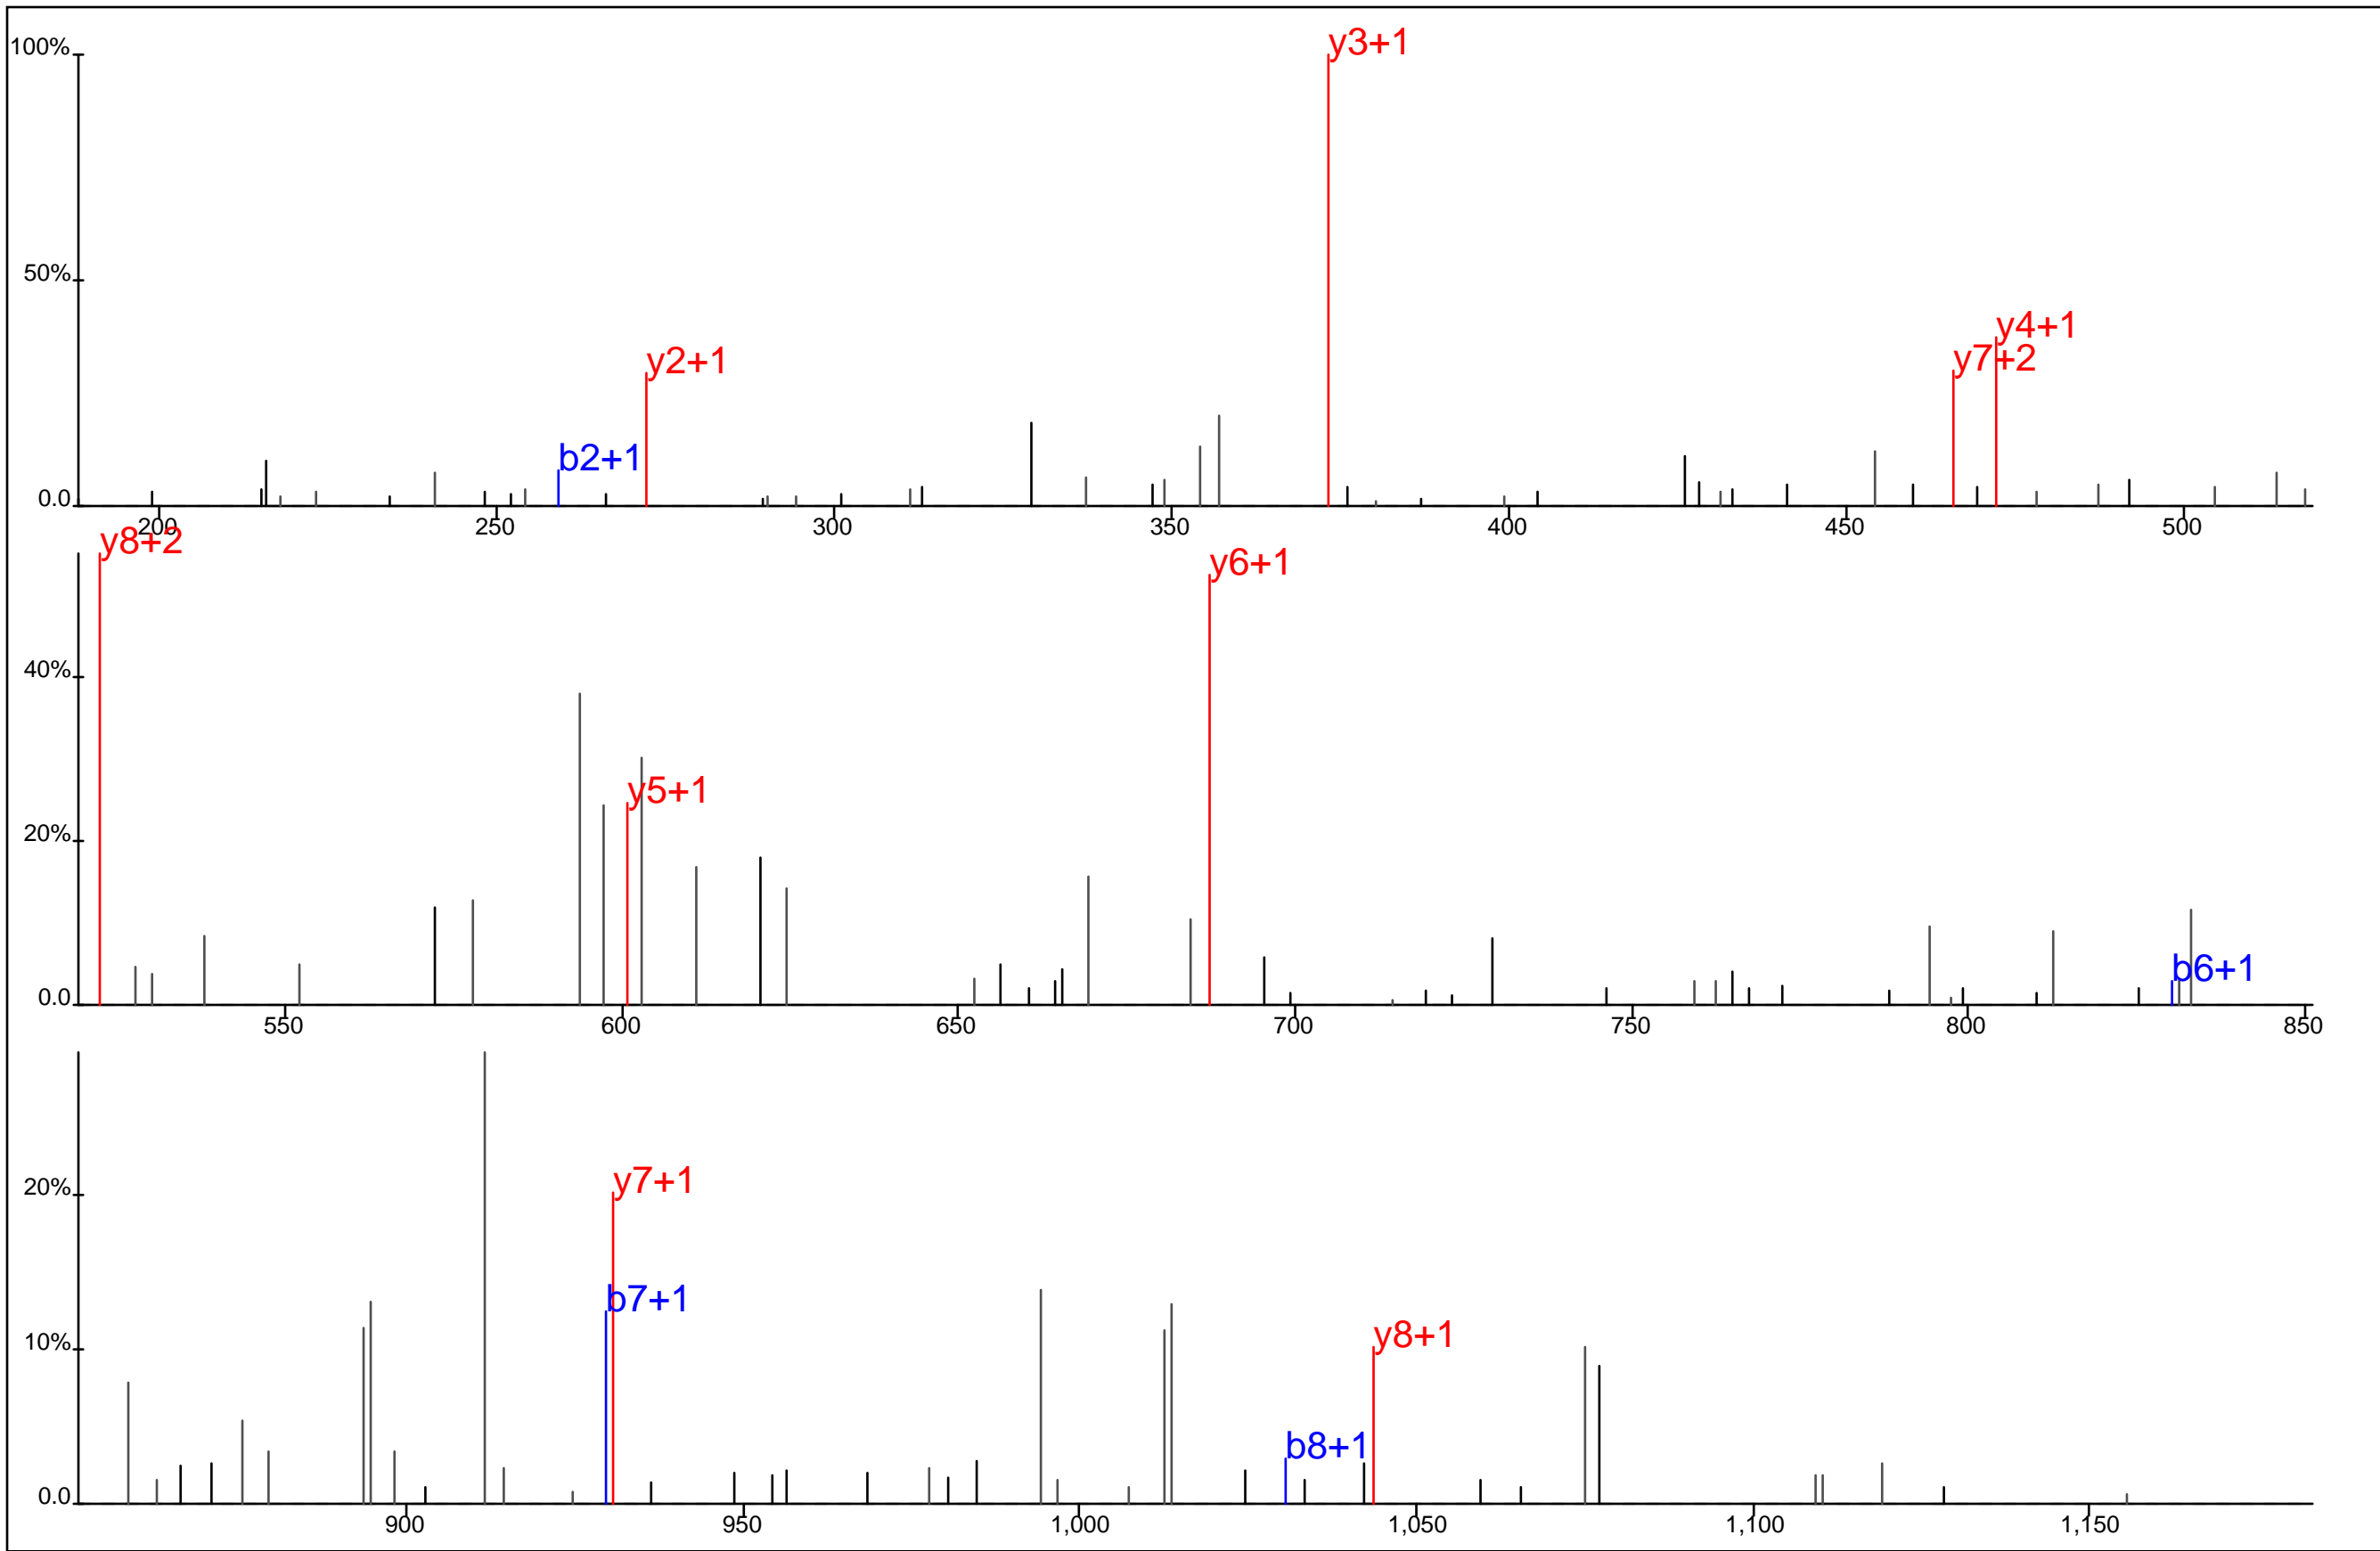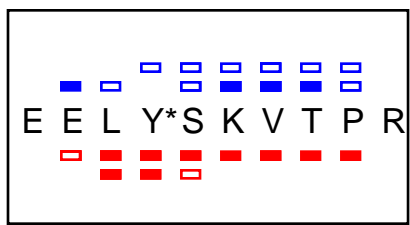

Protein Name: Suppressor of T-cell receptor signaling 1  
 gi Accession: 0  
 Precursor Mass: 651.3085+2  
 Delta Mass: 3.076 ppm  
 XCorr: 37.37

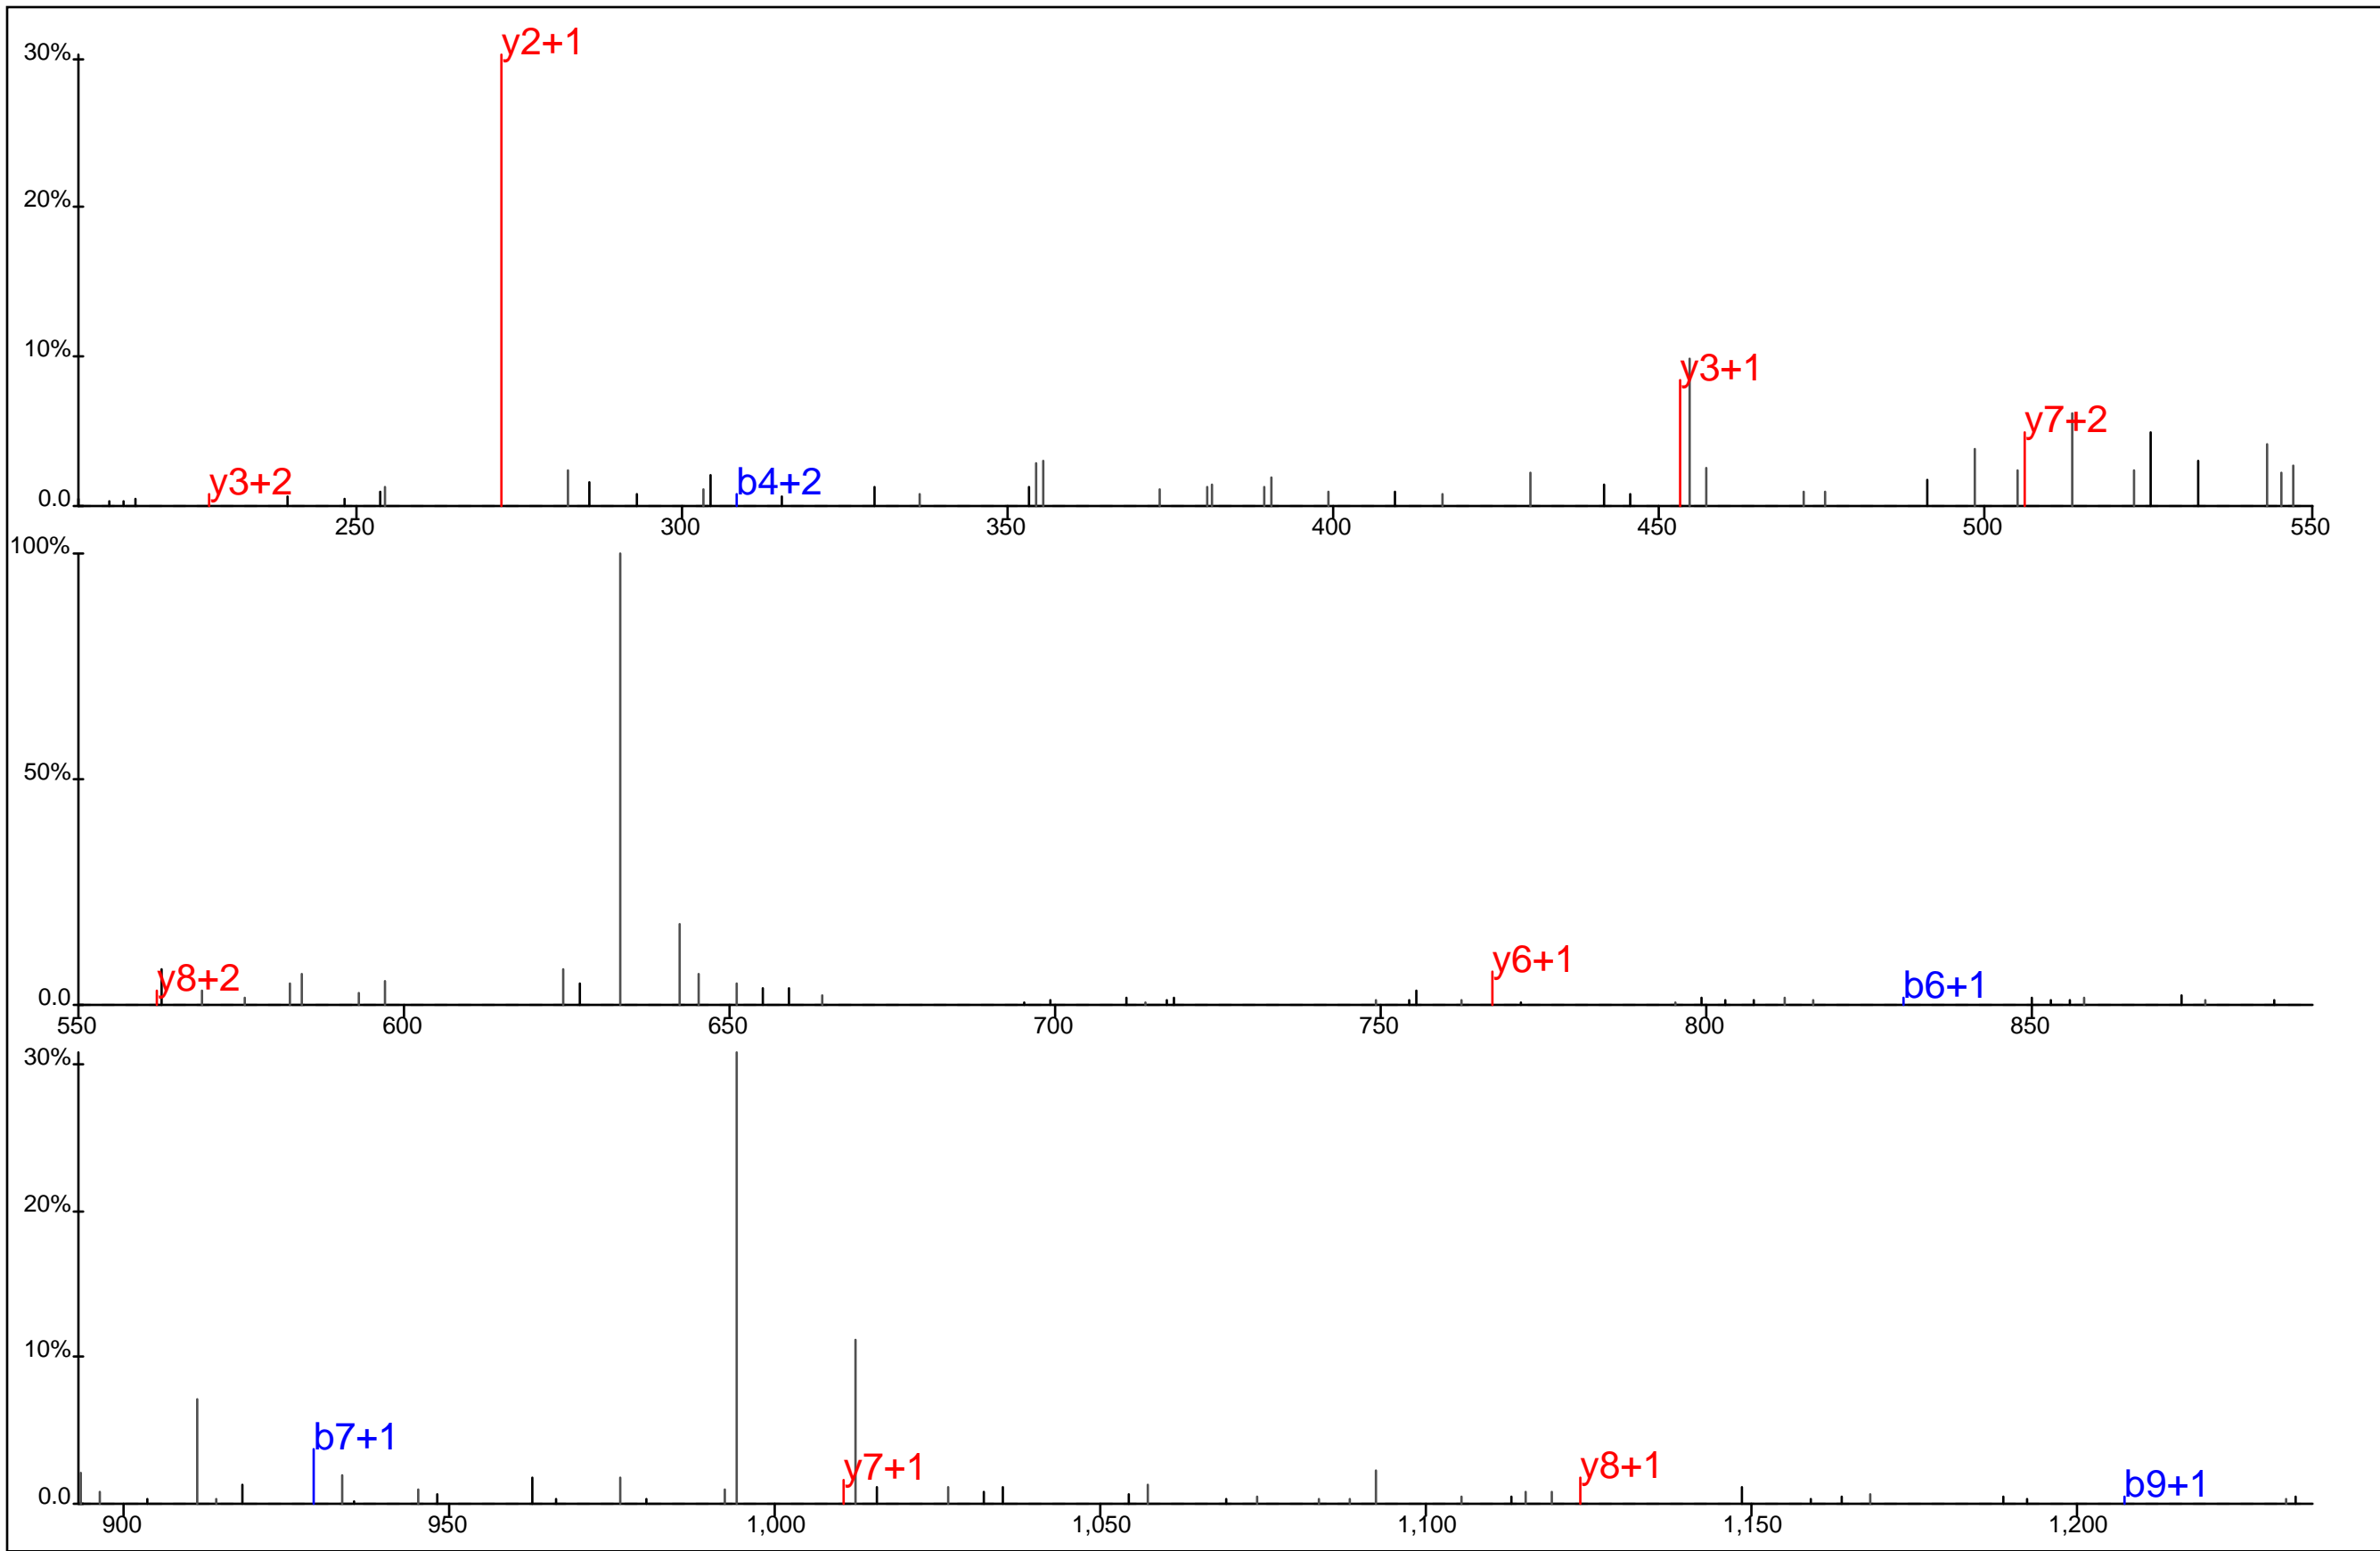

□ □ □ □ □ □  
 E E L Y\* S K V T\* P R  
□ □ □ □ □ □

Protein Name: Suppressor of T-cell receptor signaling 1  
 gi Accession: 0  
 Precursor Mass: 691.2939+2  
 Delta Mass: 0.443 ppm  
 XCorr: 21.41

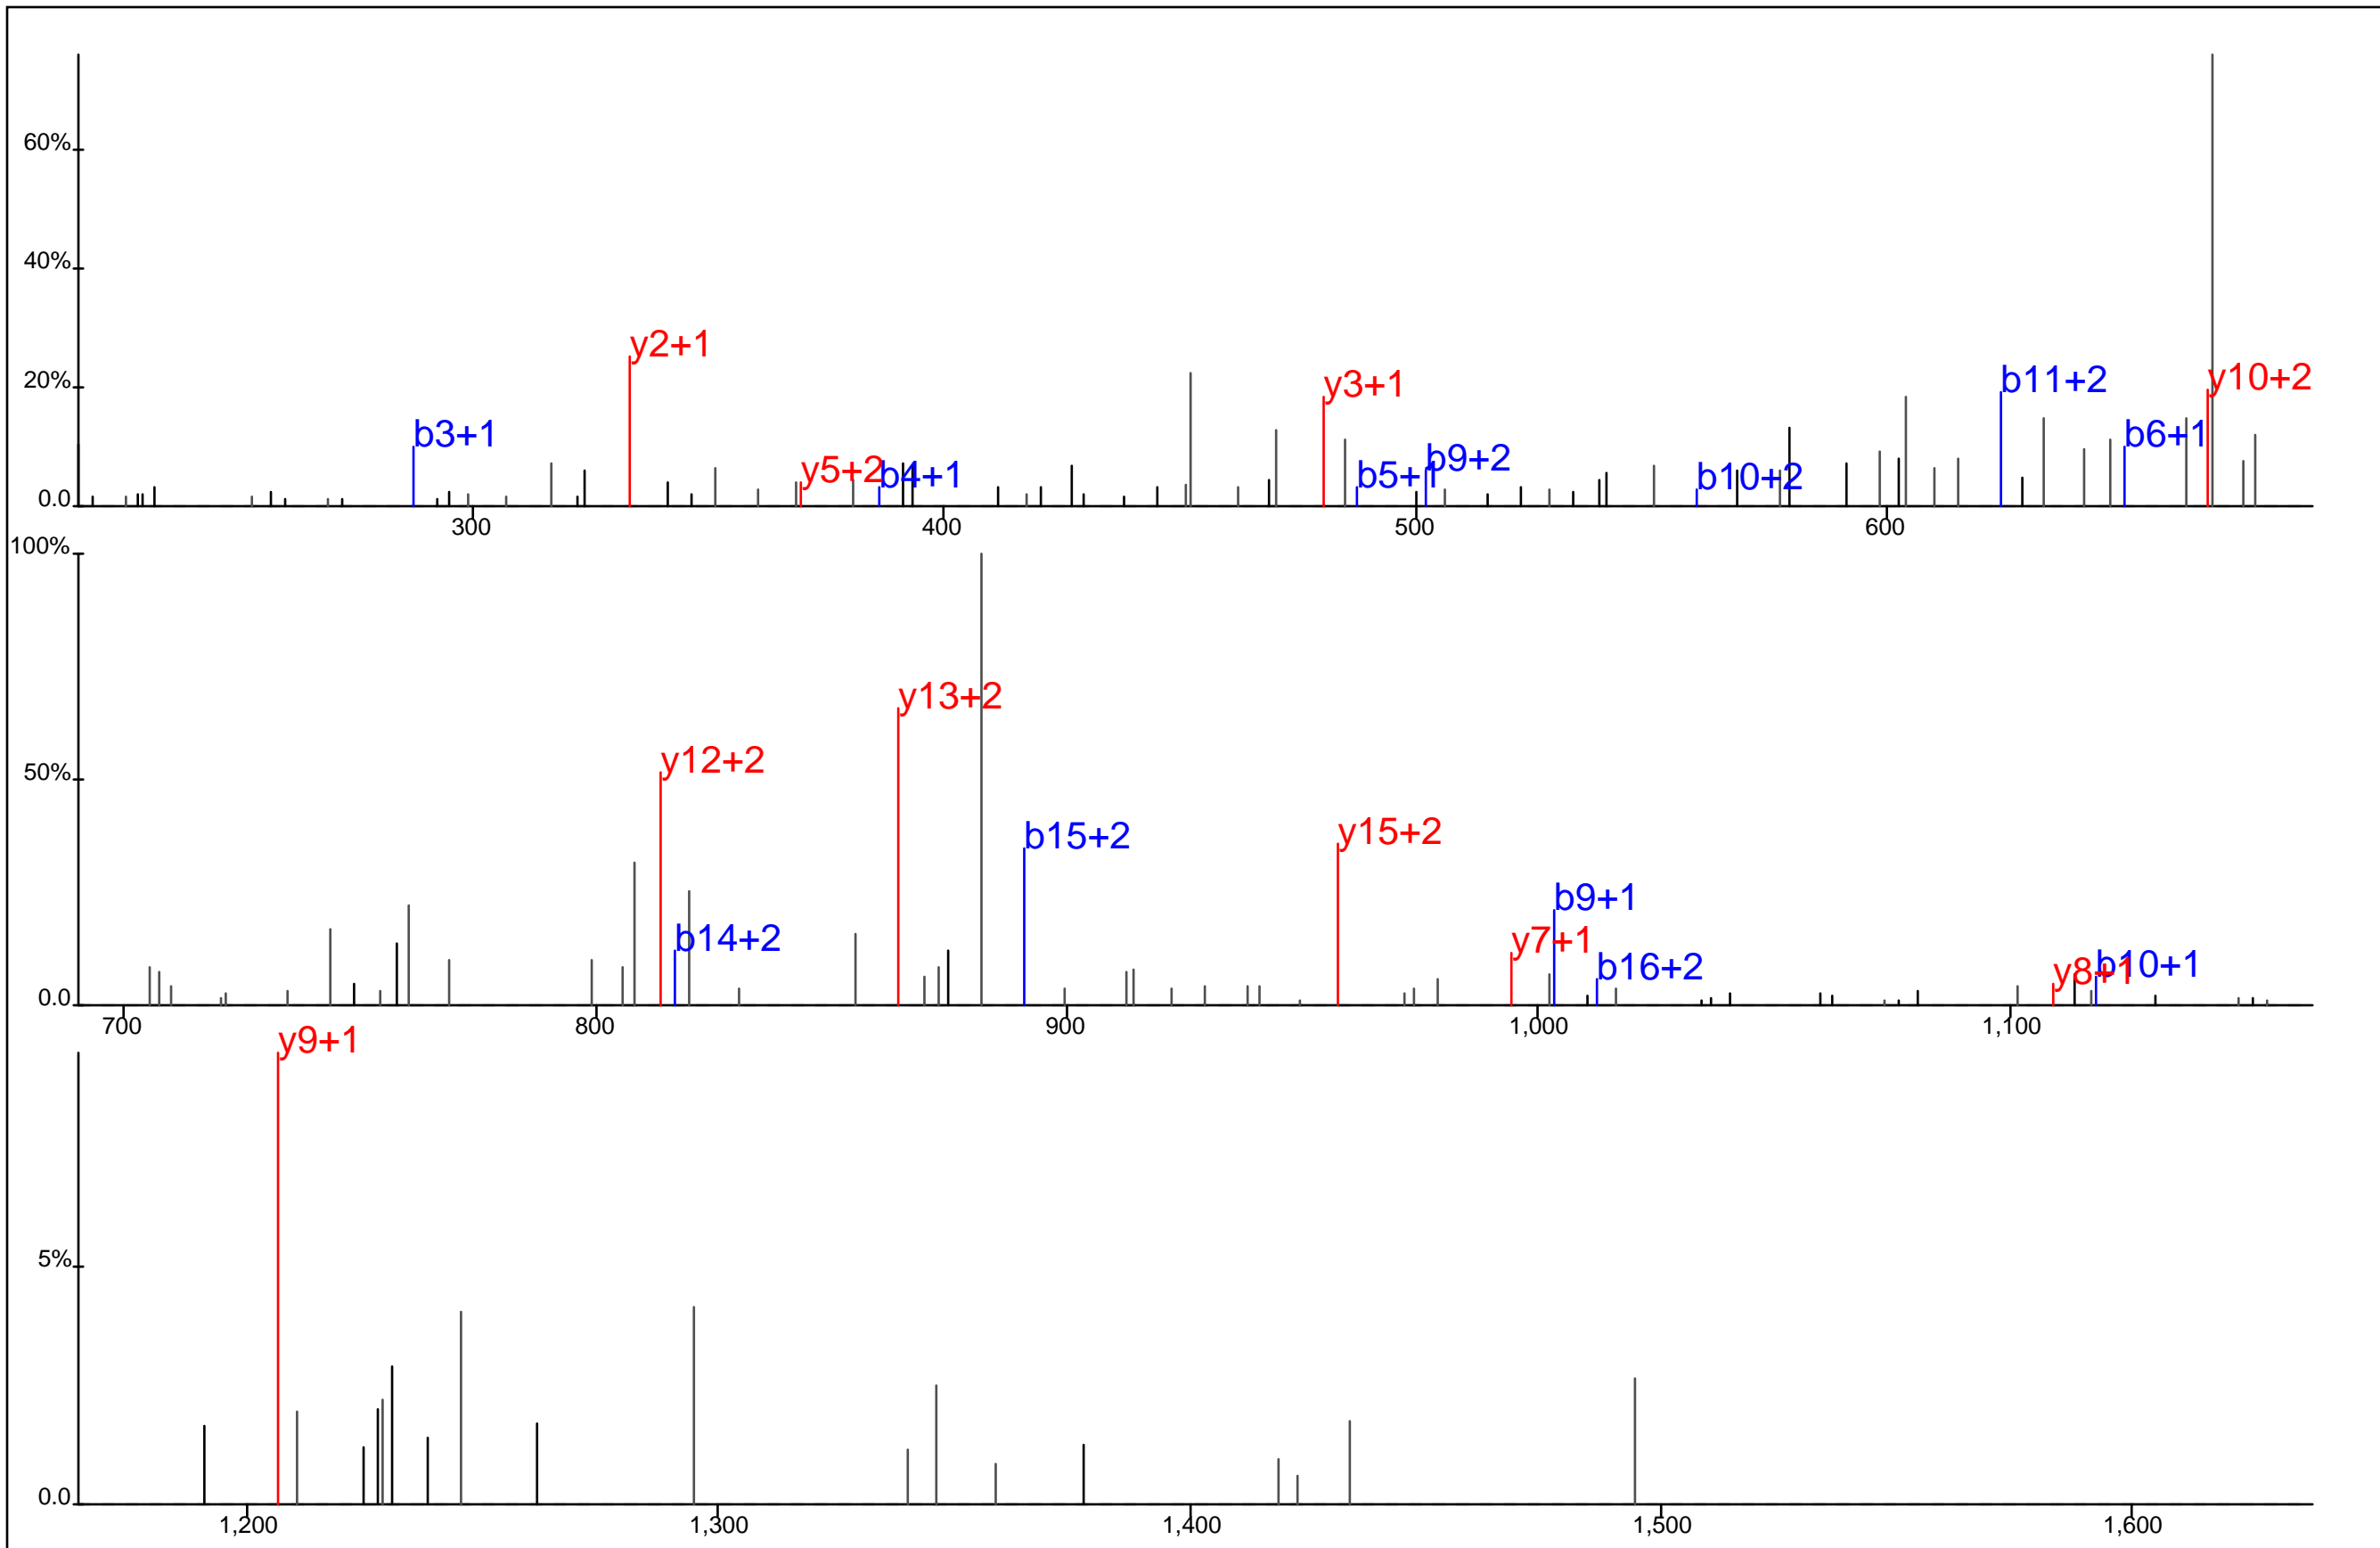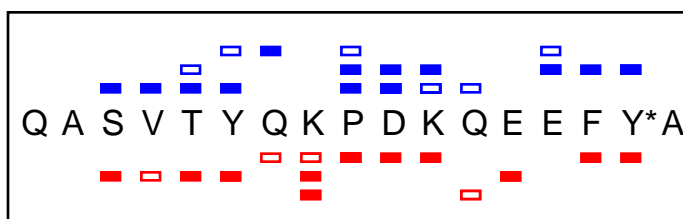

Protein Name: Syndecan 3  
 gi Accession: 0  
 Precursor Mass: 704.6492+3  
 Delta Mass: 0.401 ppm  
 XCorr: 23.28

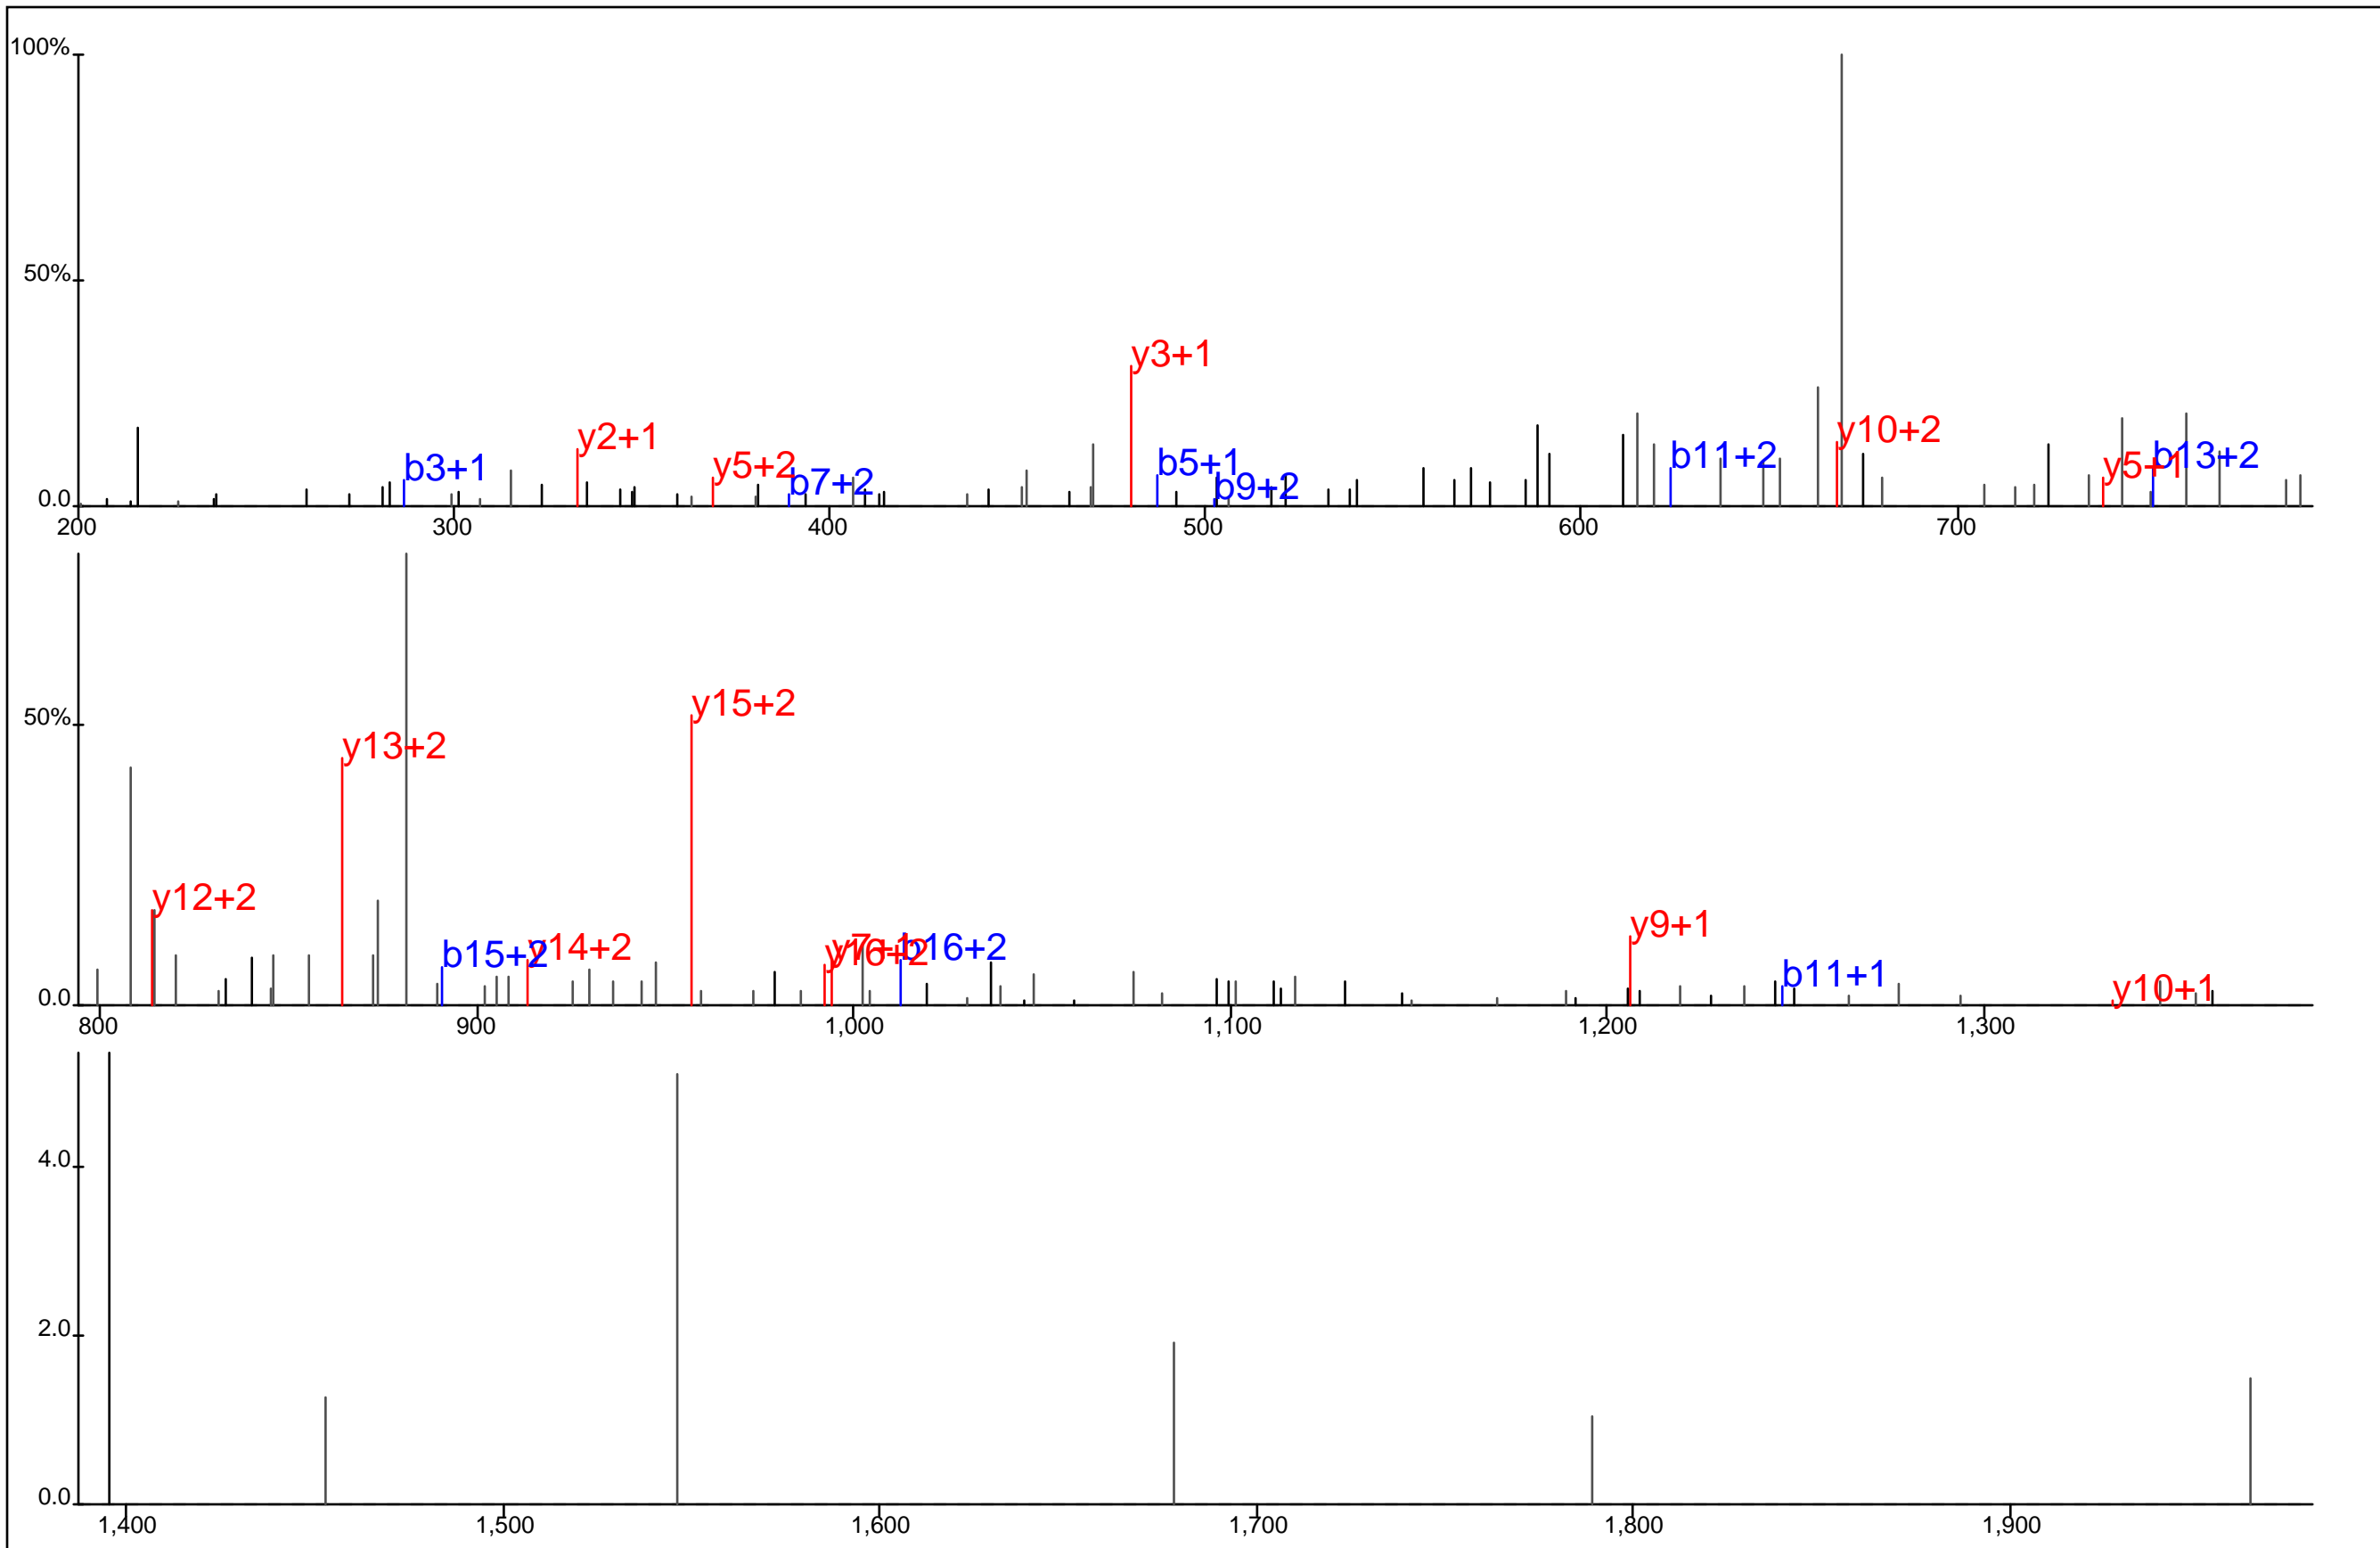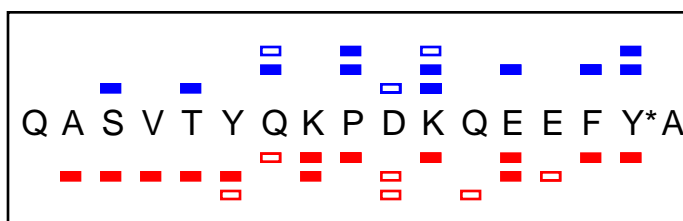

Protein Name: Syndecan 3  
 gi Accession: 0  
 Precursor Mass: 704.6479+3  
 Delta Mass: 1.334 ppm  
 XCorr: 22.61

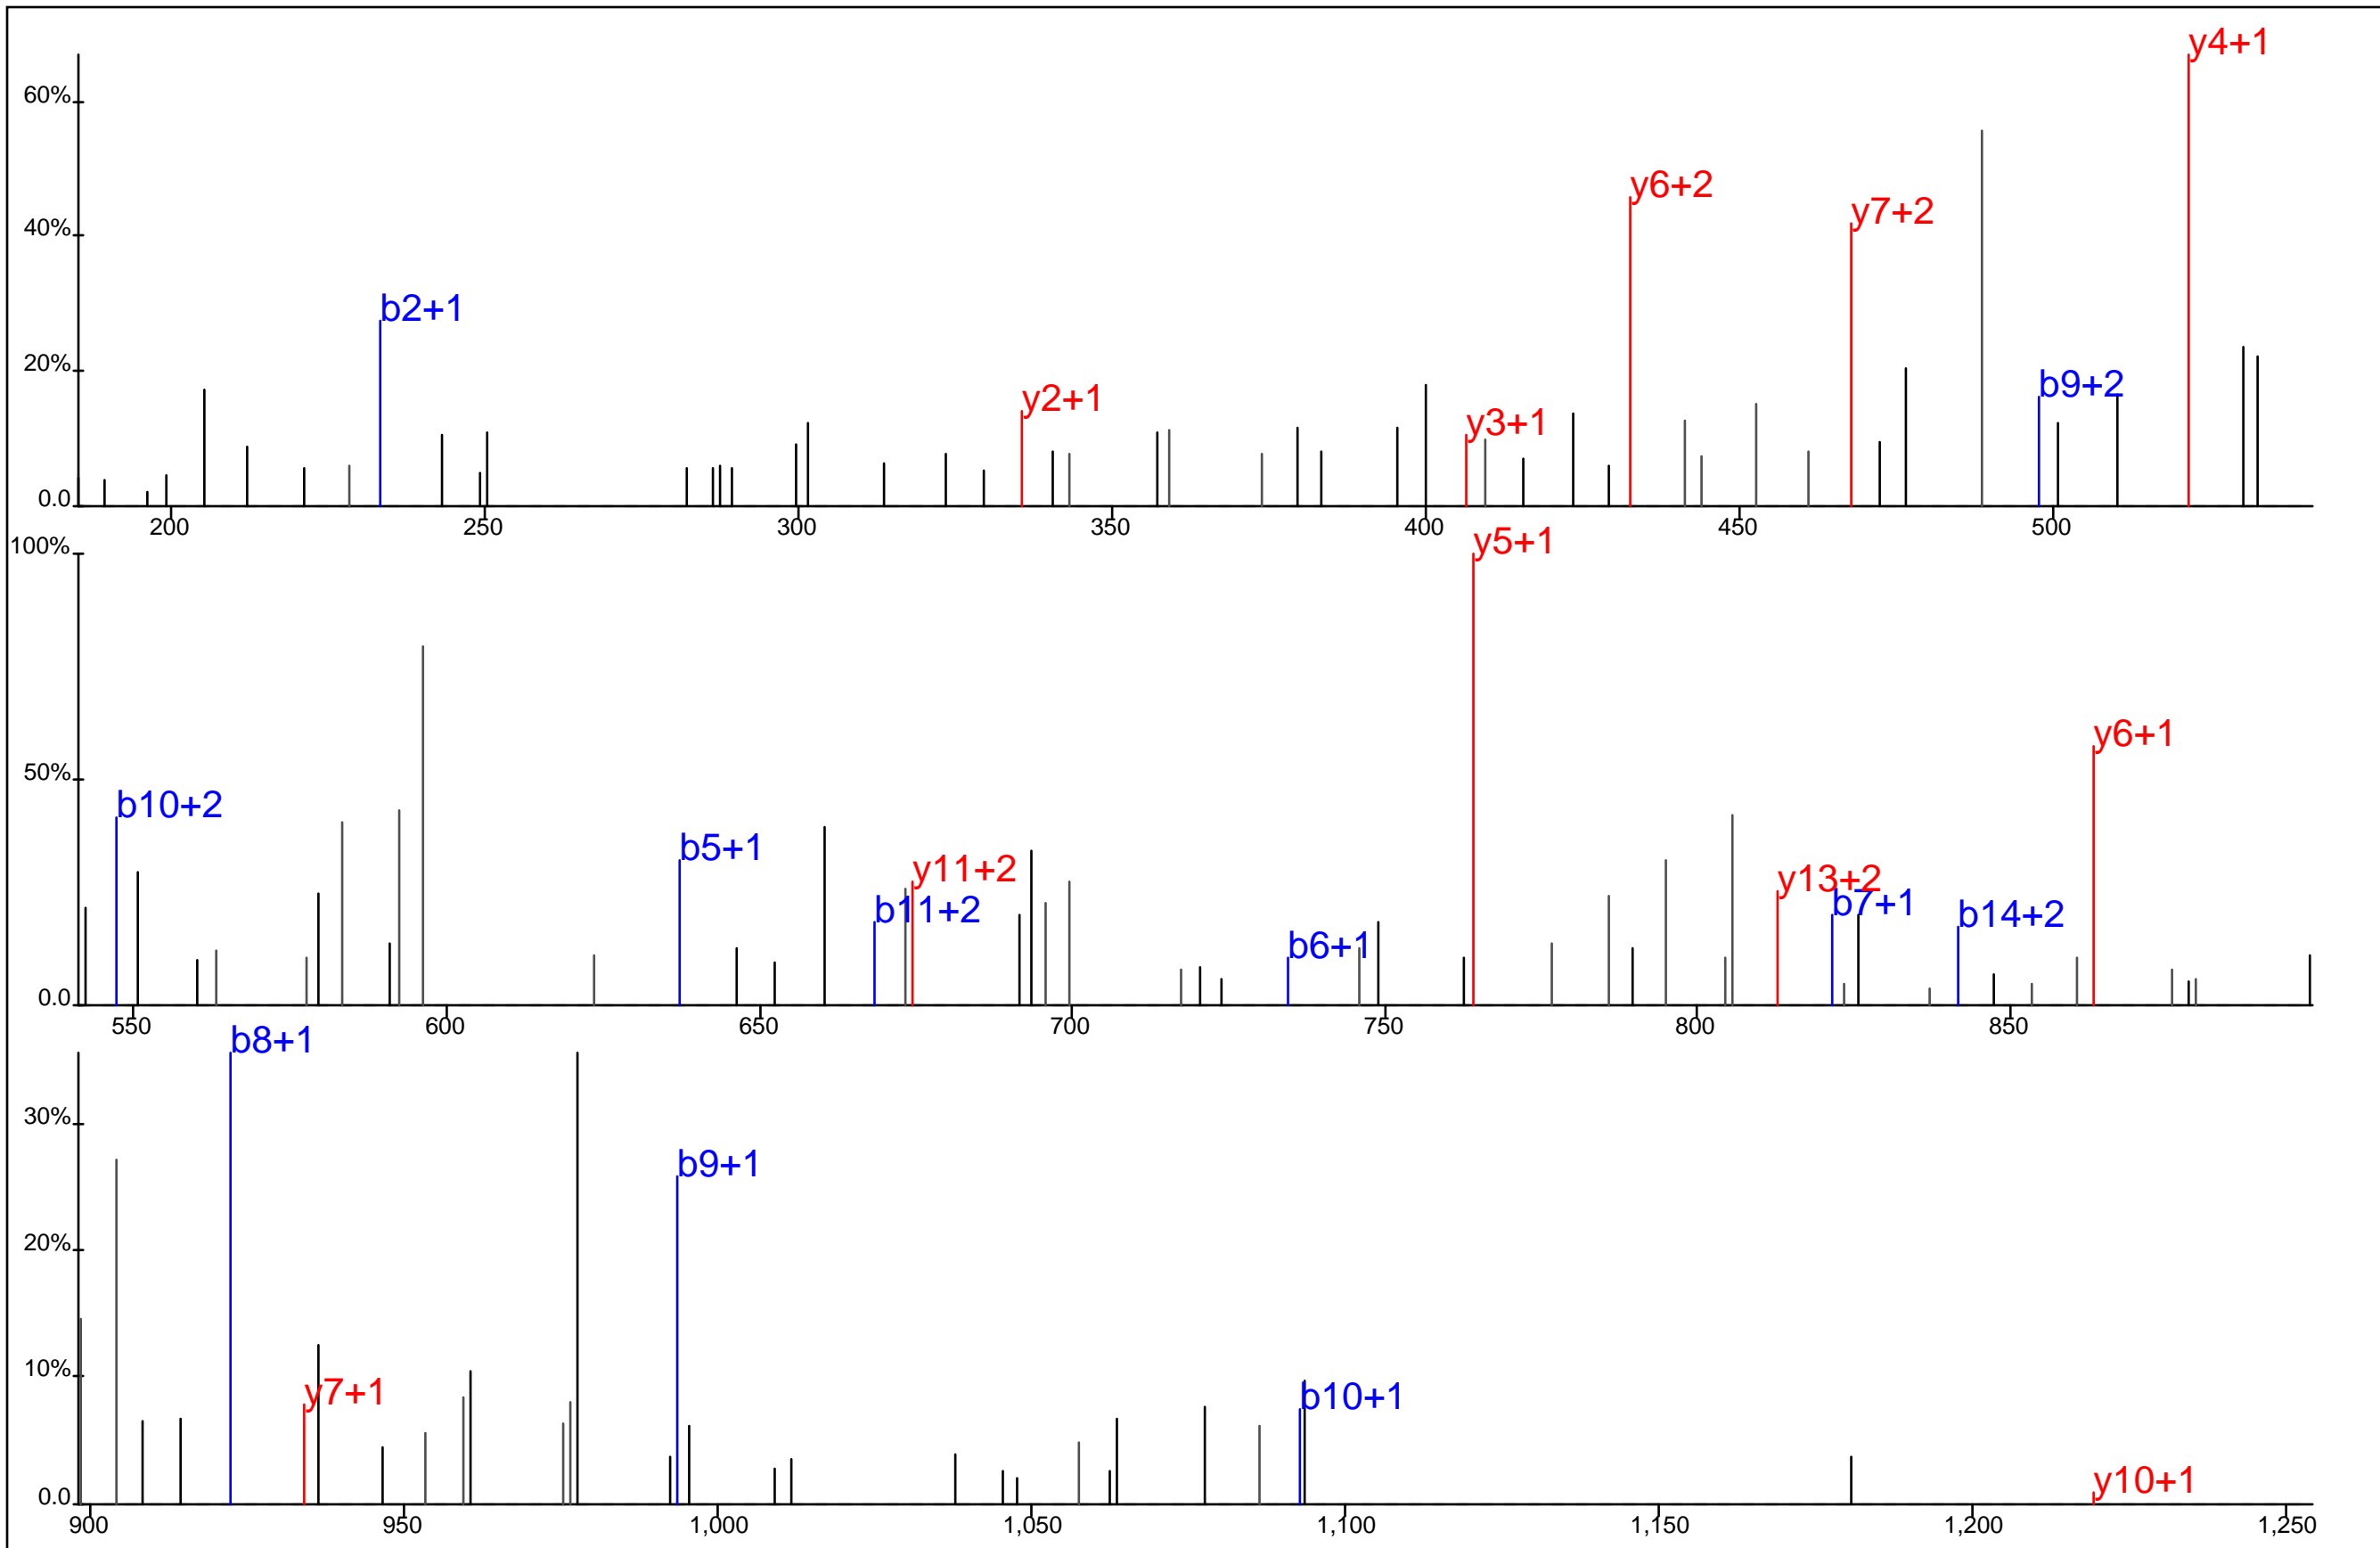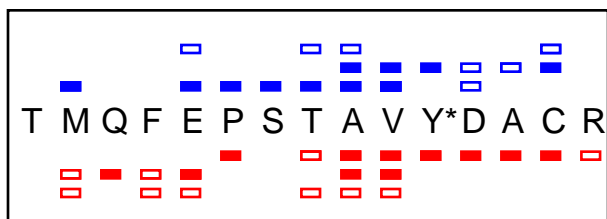

Protein Name: Talin 2  
 gi Accession: 0  
 Precursor Mass: 619.2501+3  
 Delta Mass: 1.849 ppm  
 XCorr: 24.08





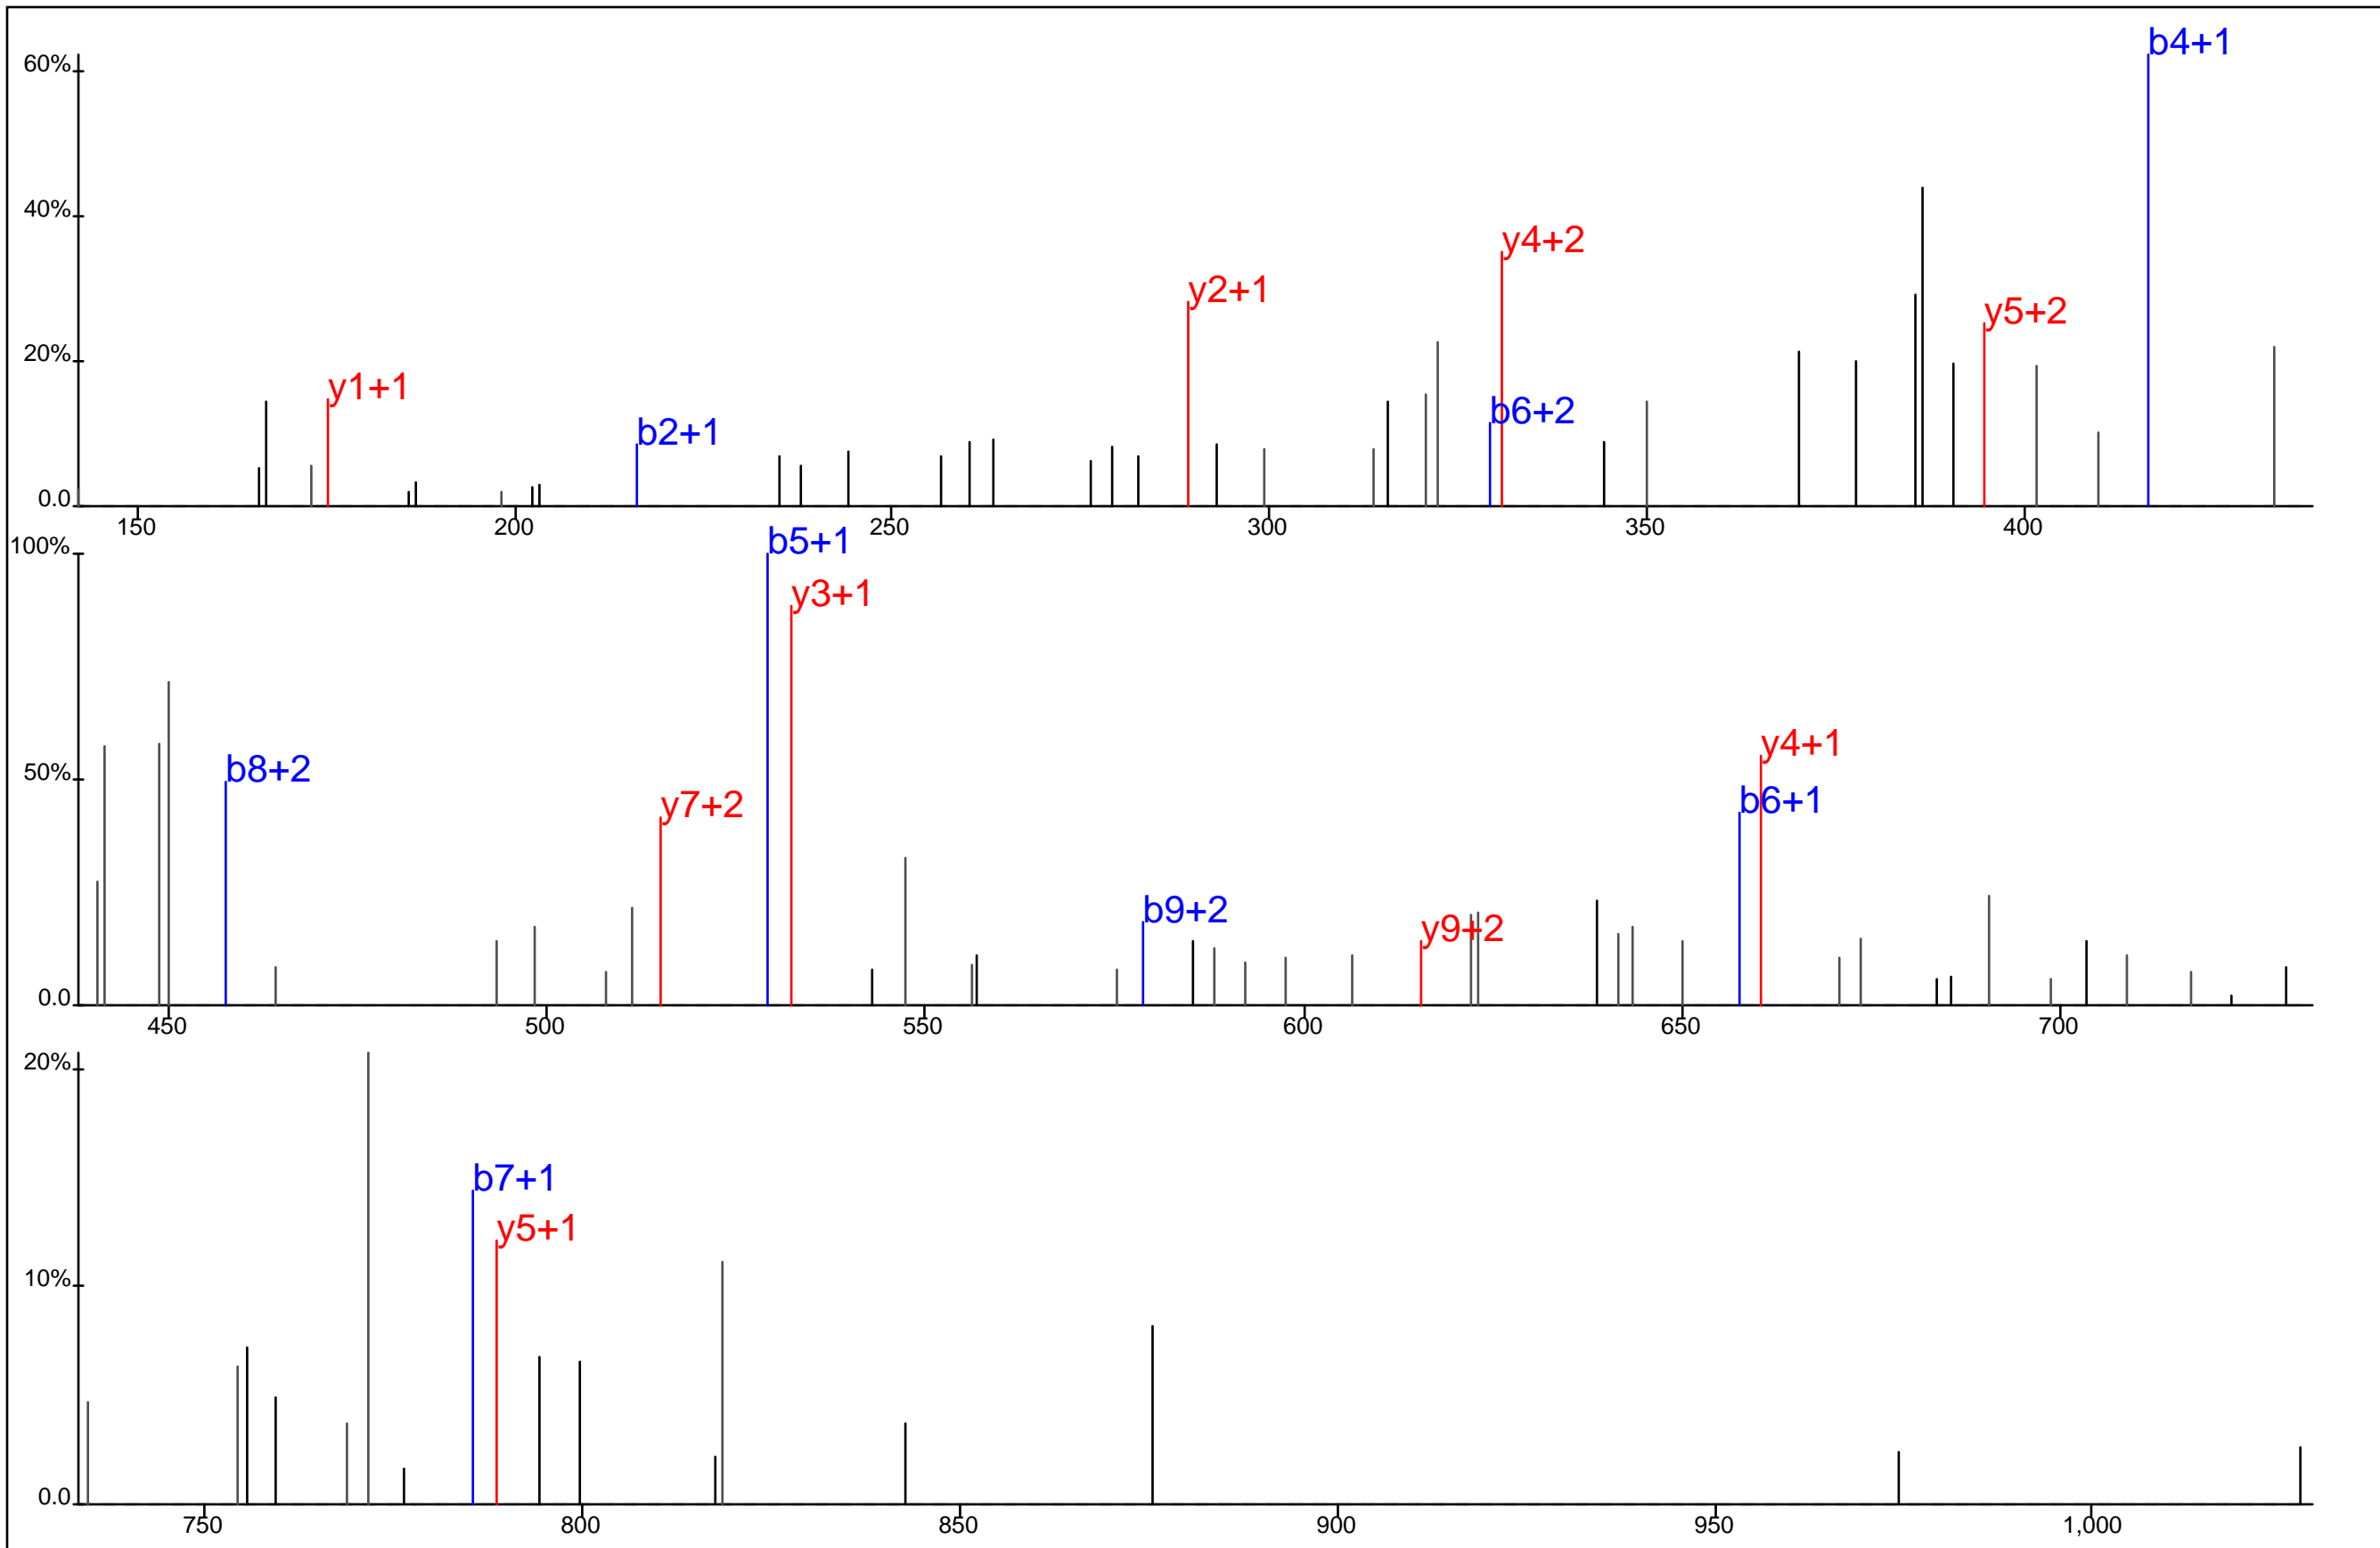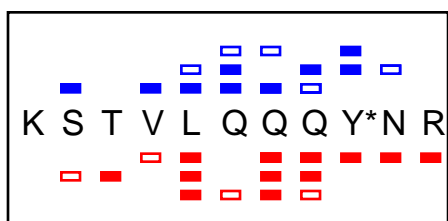

Protein Name: Talin  
 gi Accession: 0  
 Precursor Mass: 482.2370+3  
 Delta Mass: 1.485 ppm  
 XCorr: 36.78

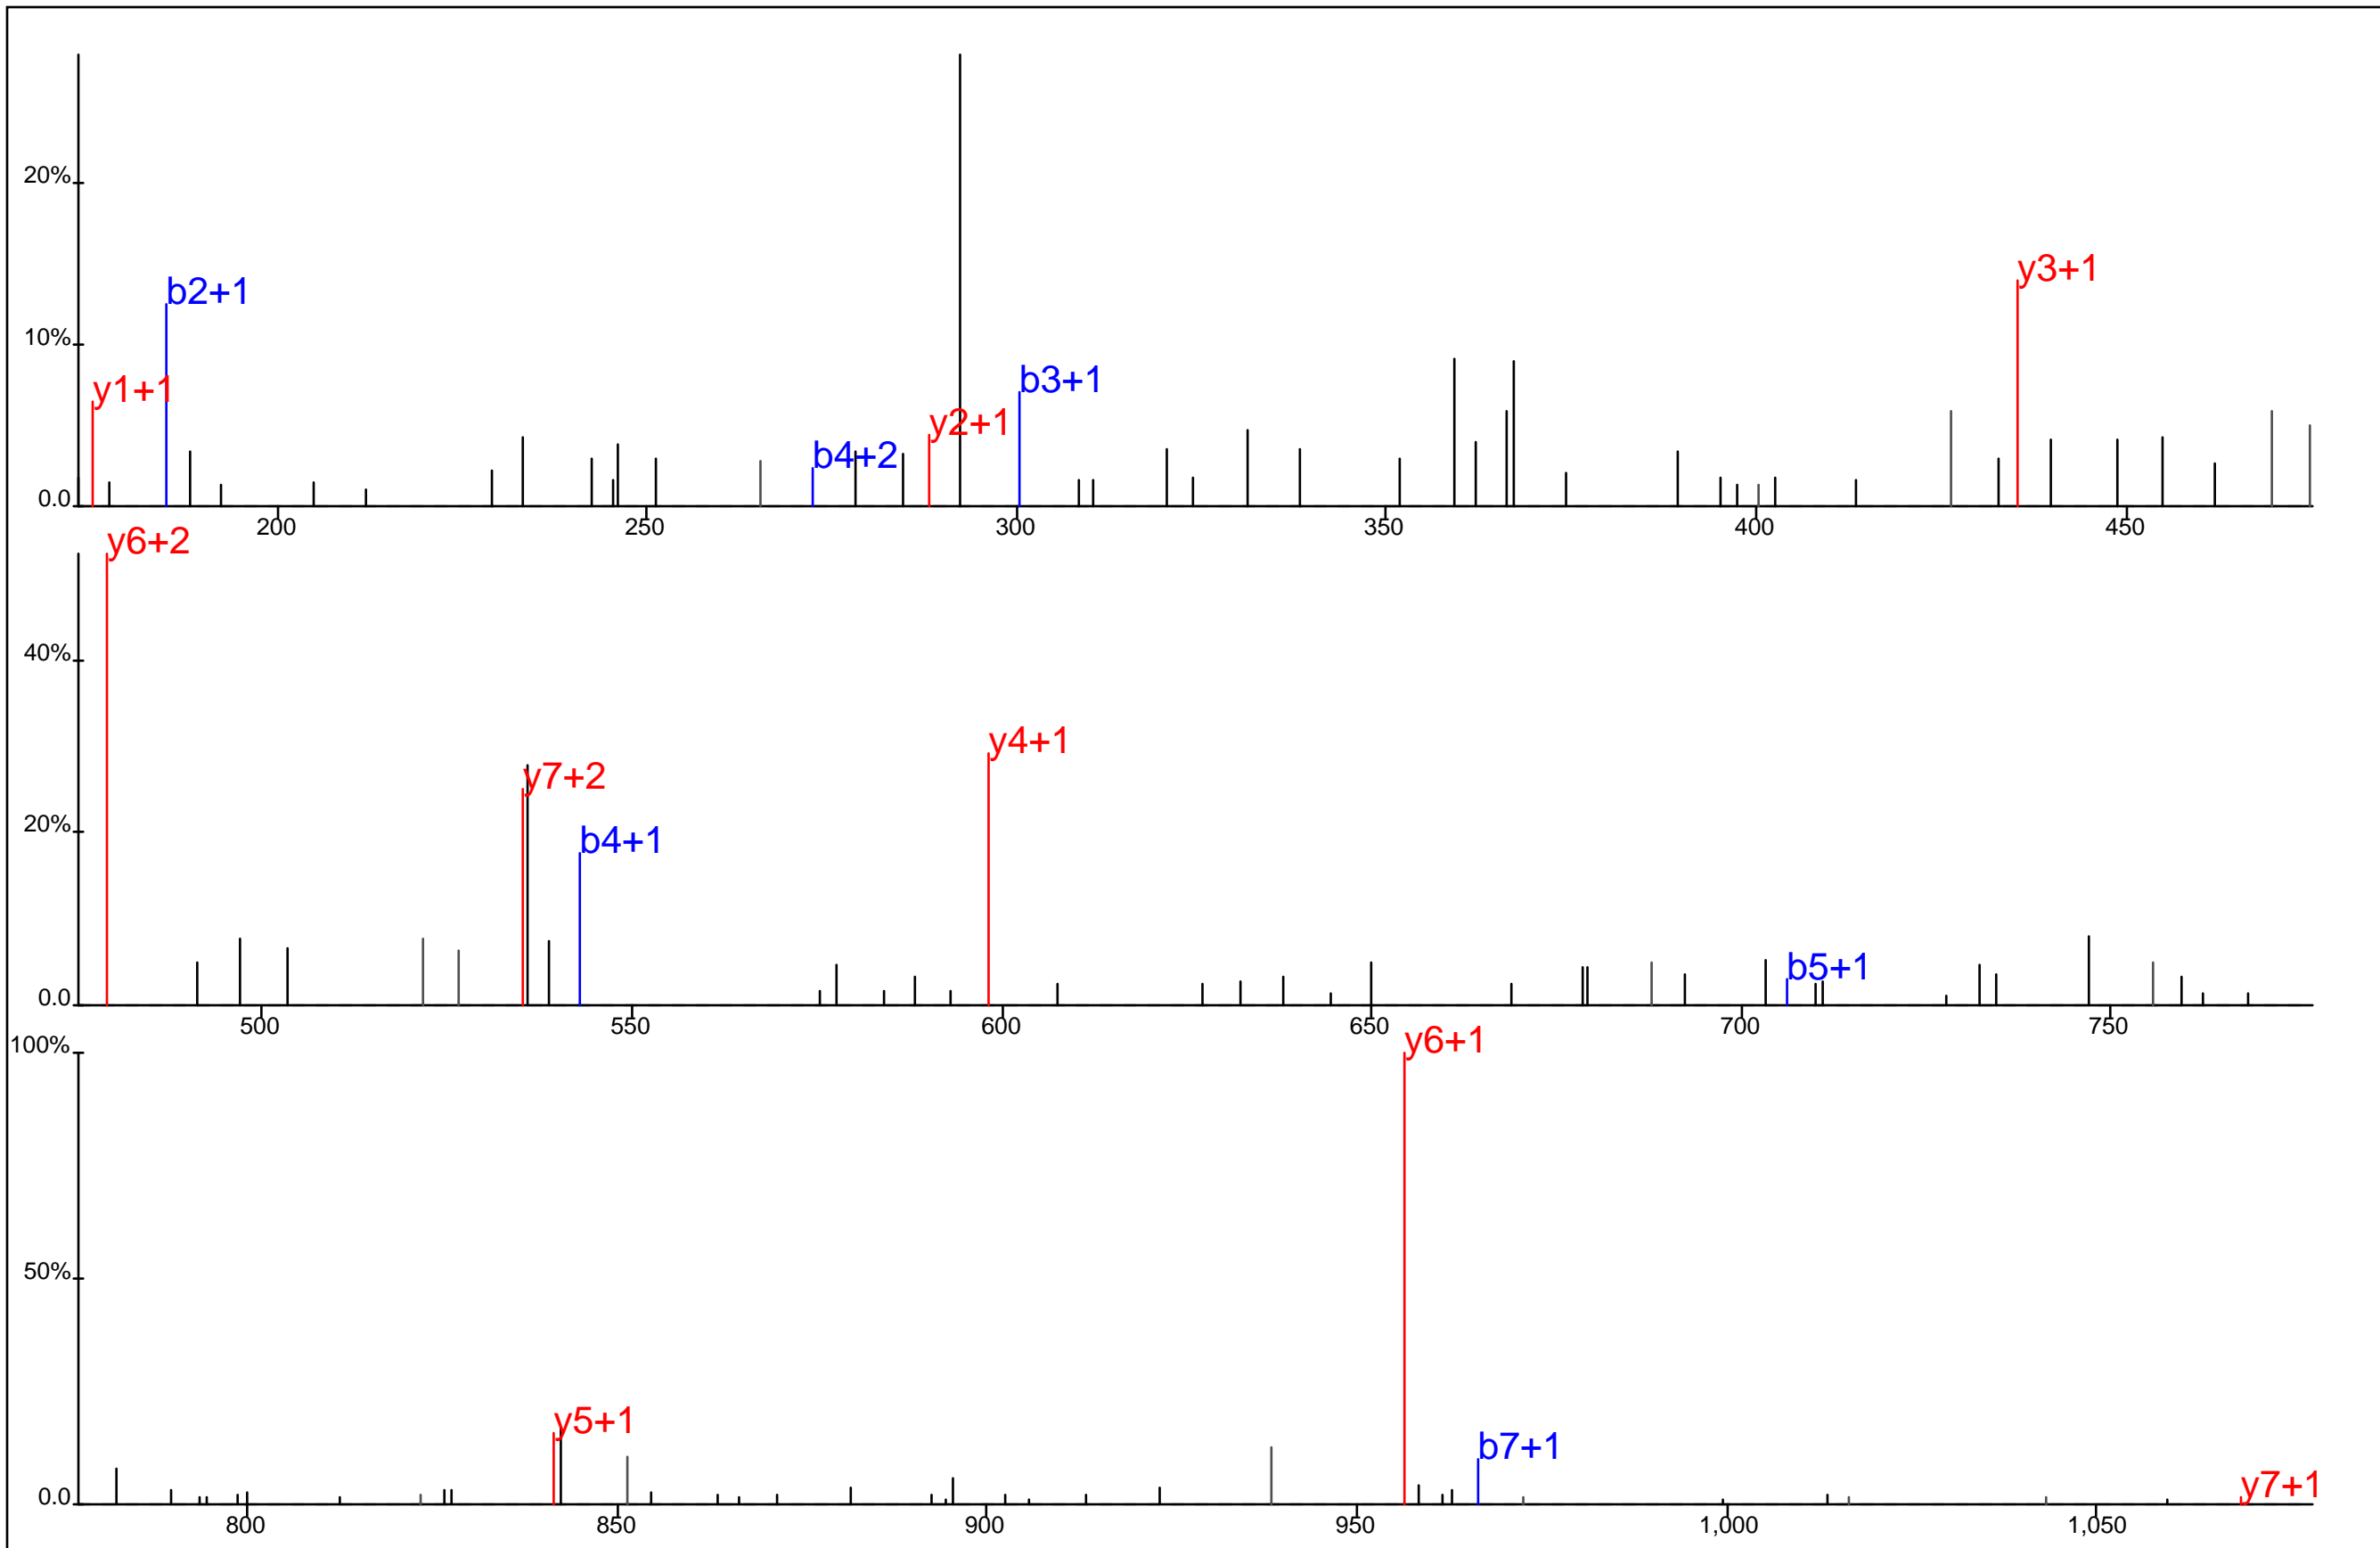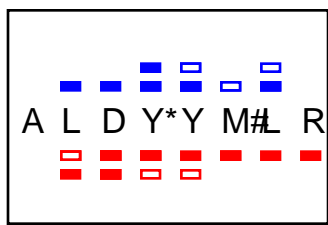

Protein Name: Talin  
 gi Accession: 0  
 Precursor Mass: 570.7448+2  
 Delta Mass: 2.504 ppm  
 XCorr: 25.41

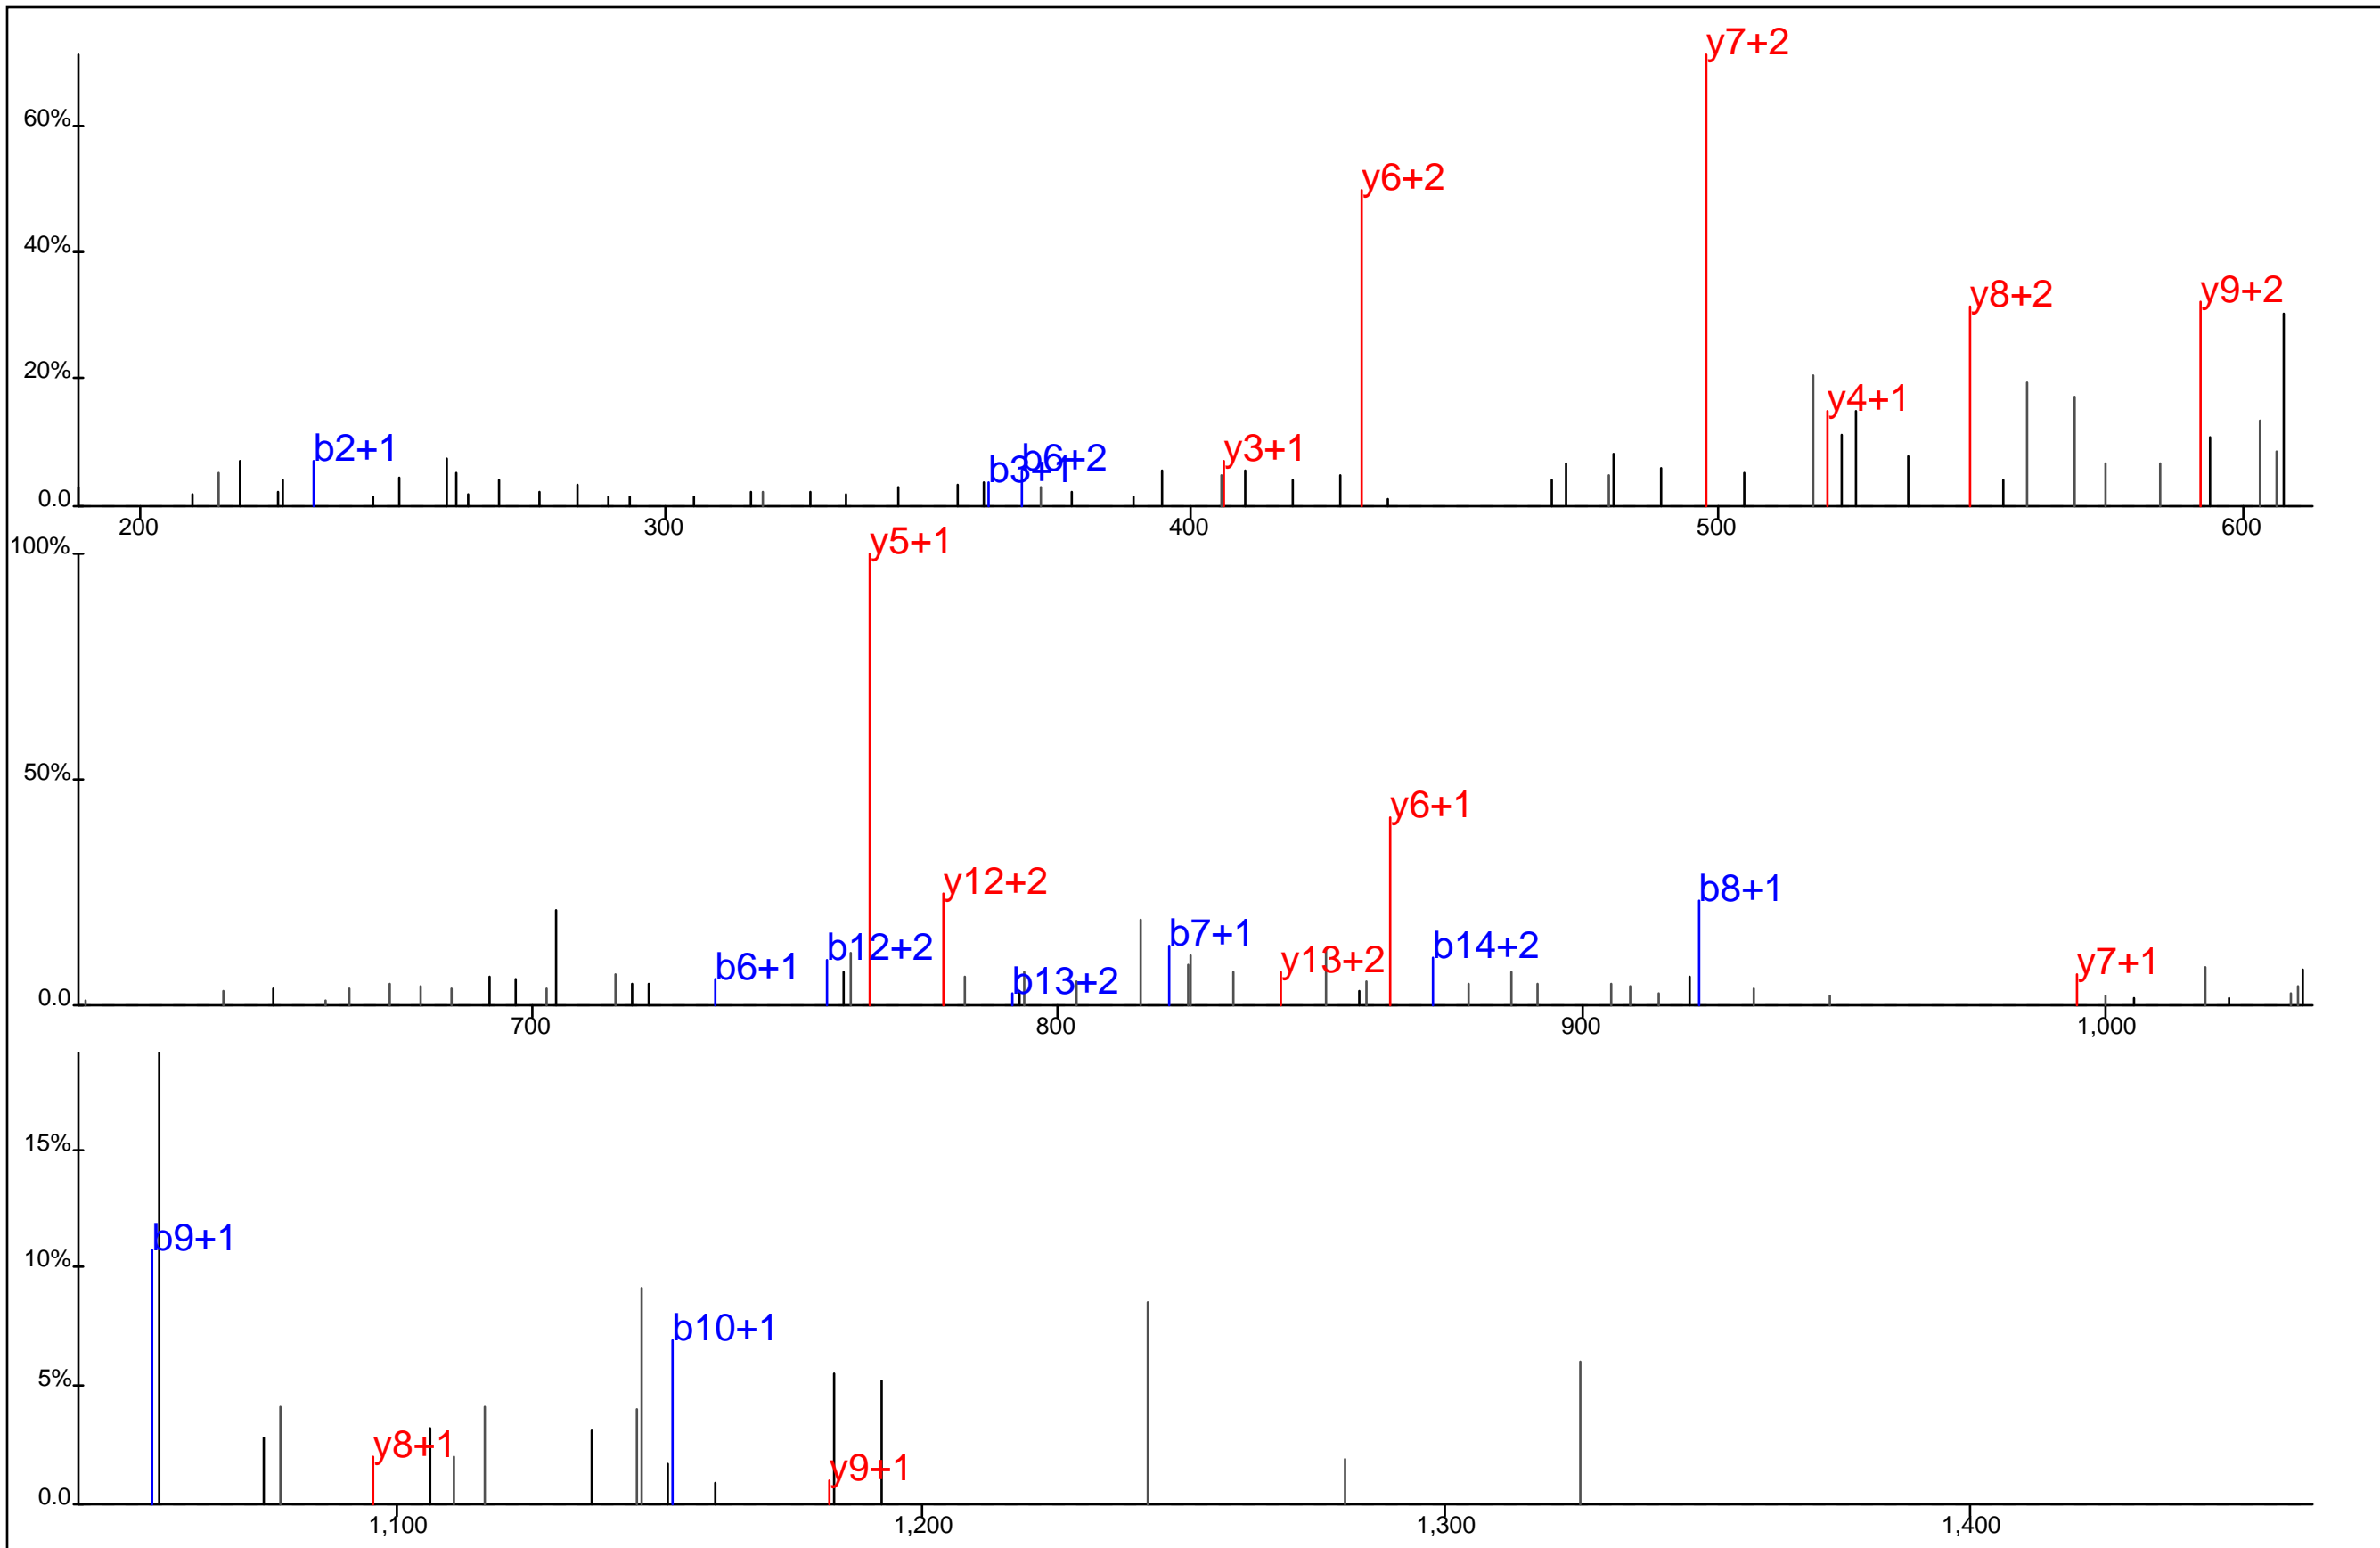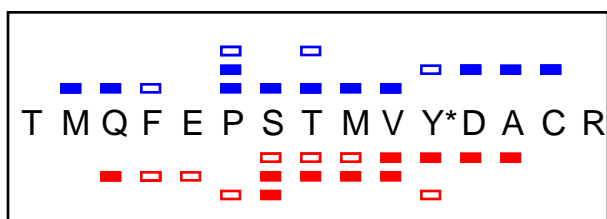

Protein Name: Talin  
 gi Accession: 0  
 Precursor Mass: 639.2532+3  
 Delta Mass: 1.325 ppm  
 XCorr: 25.53

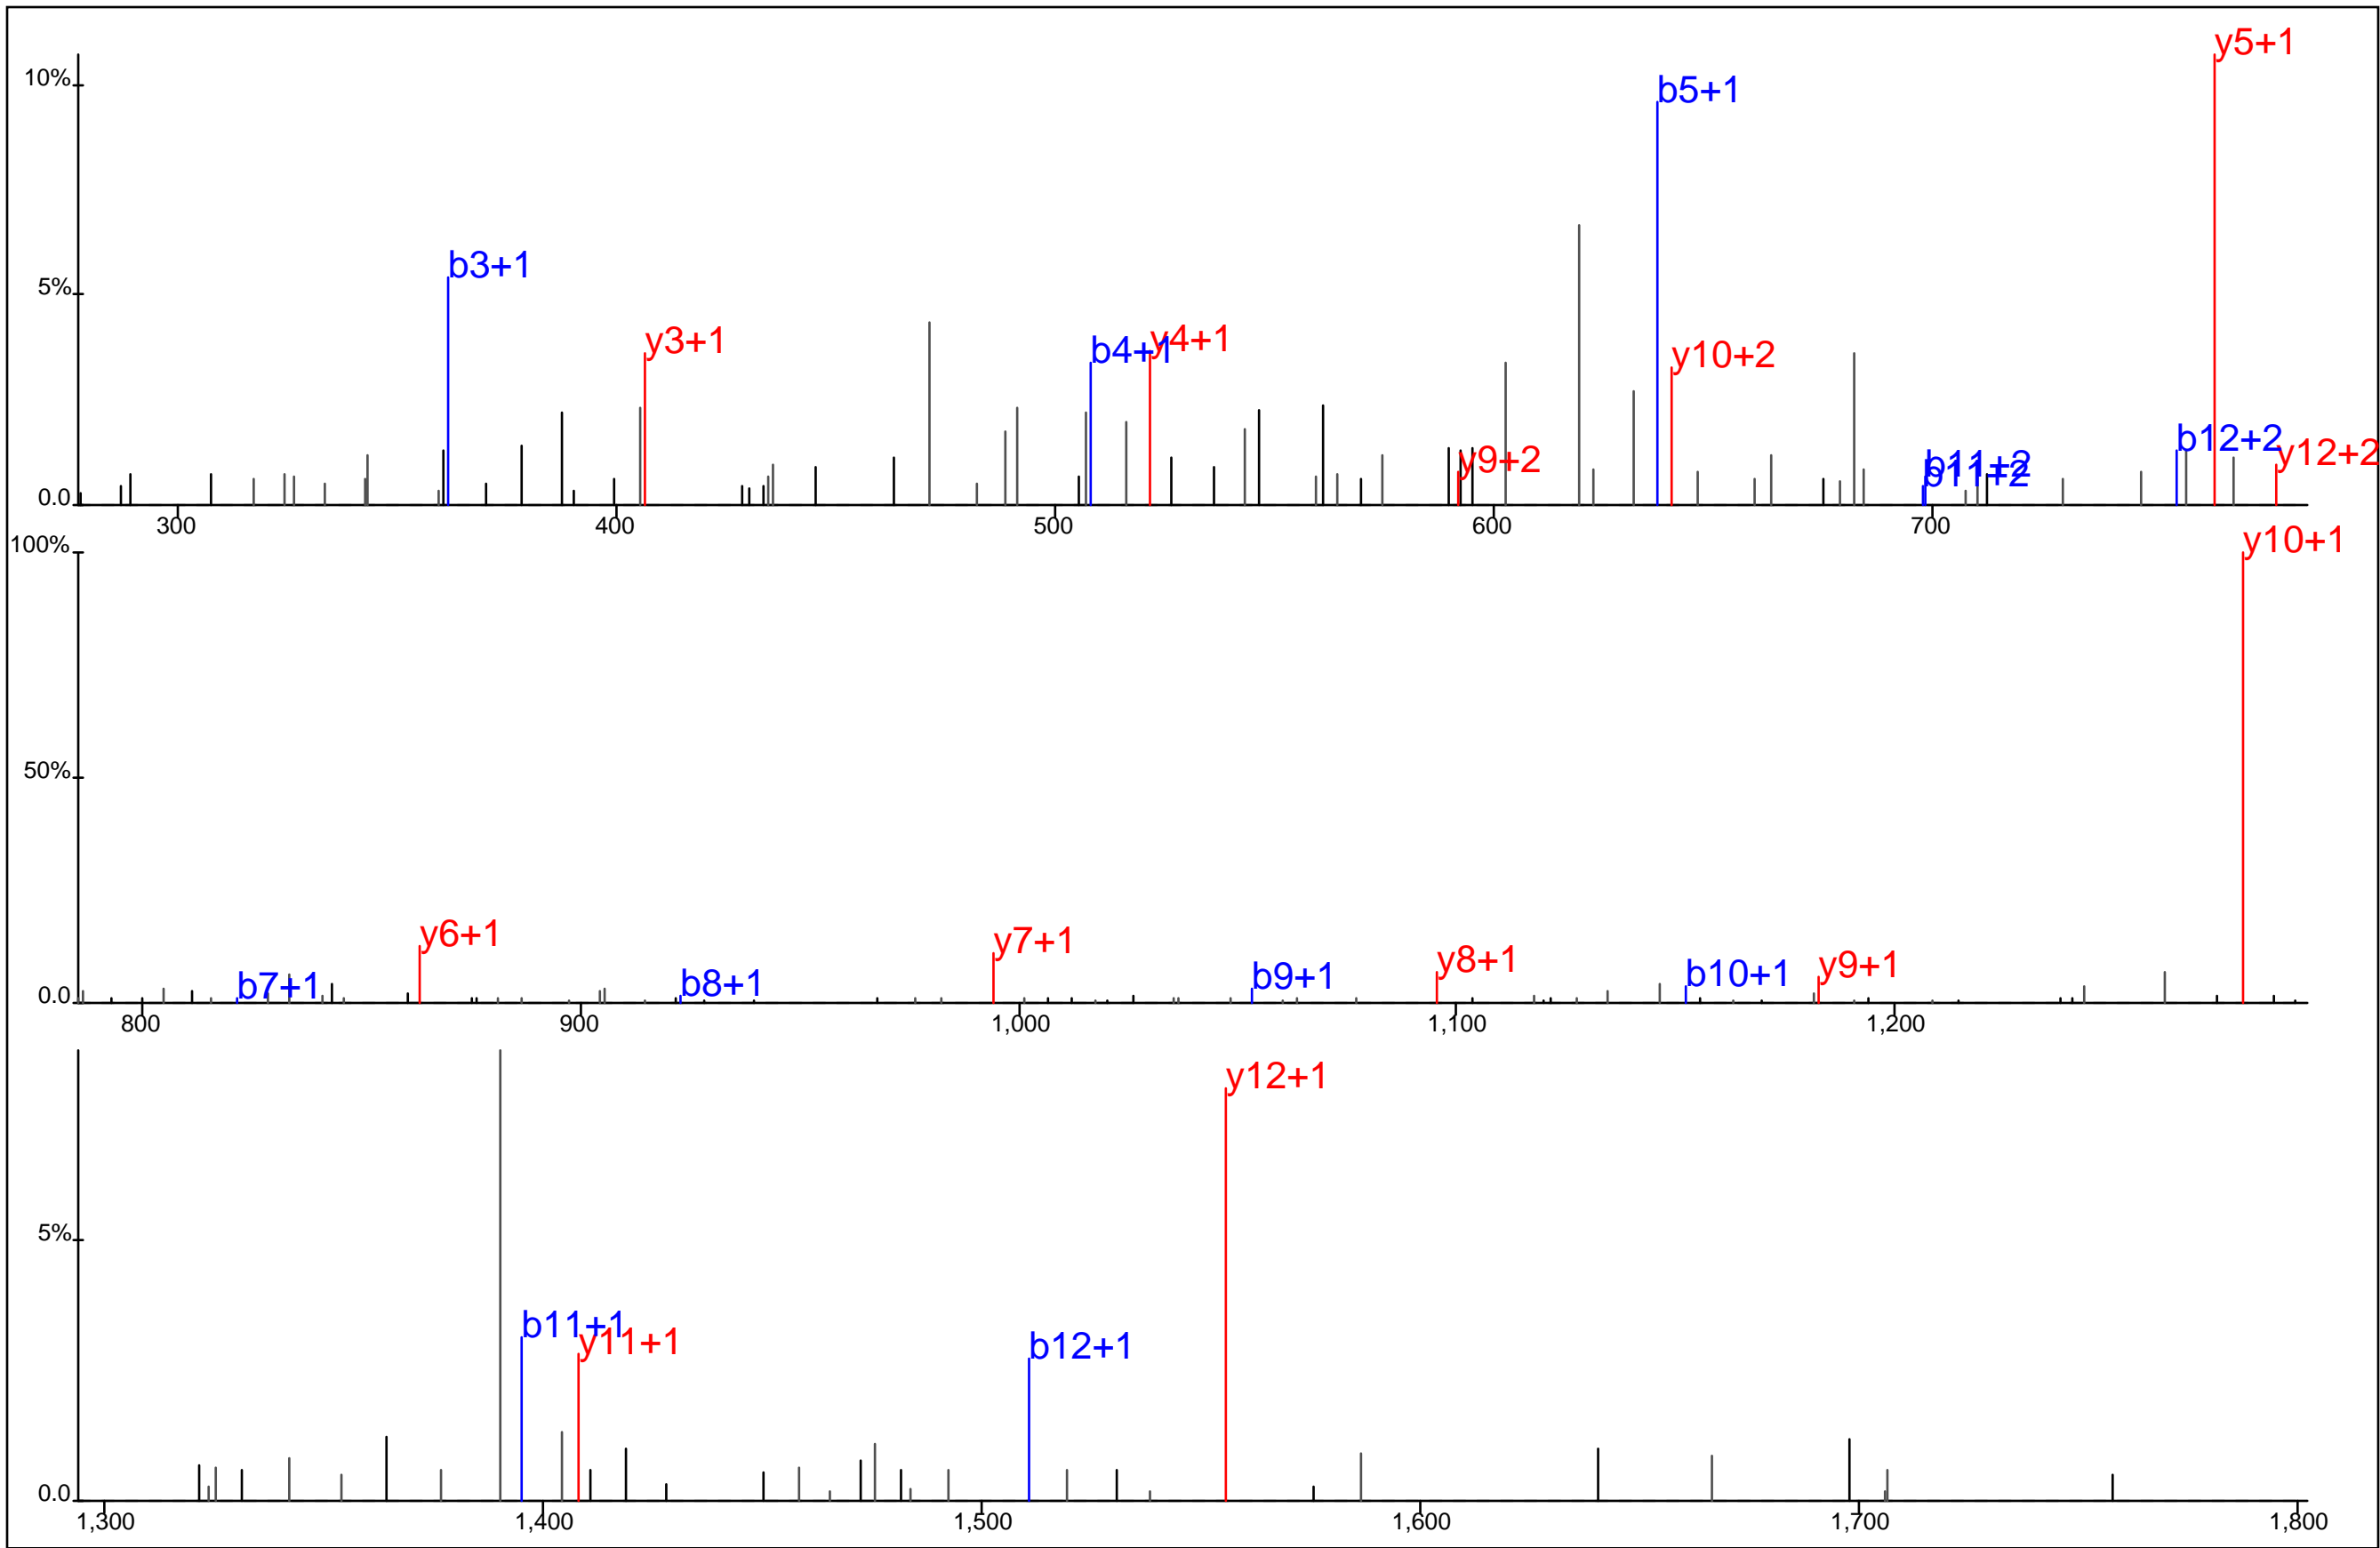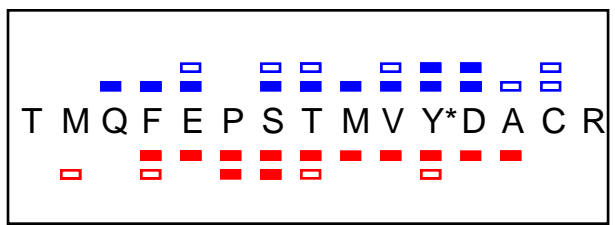

Protein Name: Talin  
 gi Accession: 0  
 Precursor Mass: 958.3723+2  
 Delta Mass: 2.715 ppm  
 XCorr: 61.12

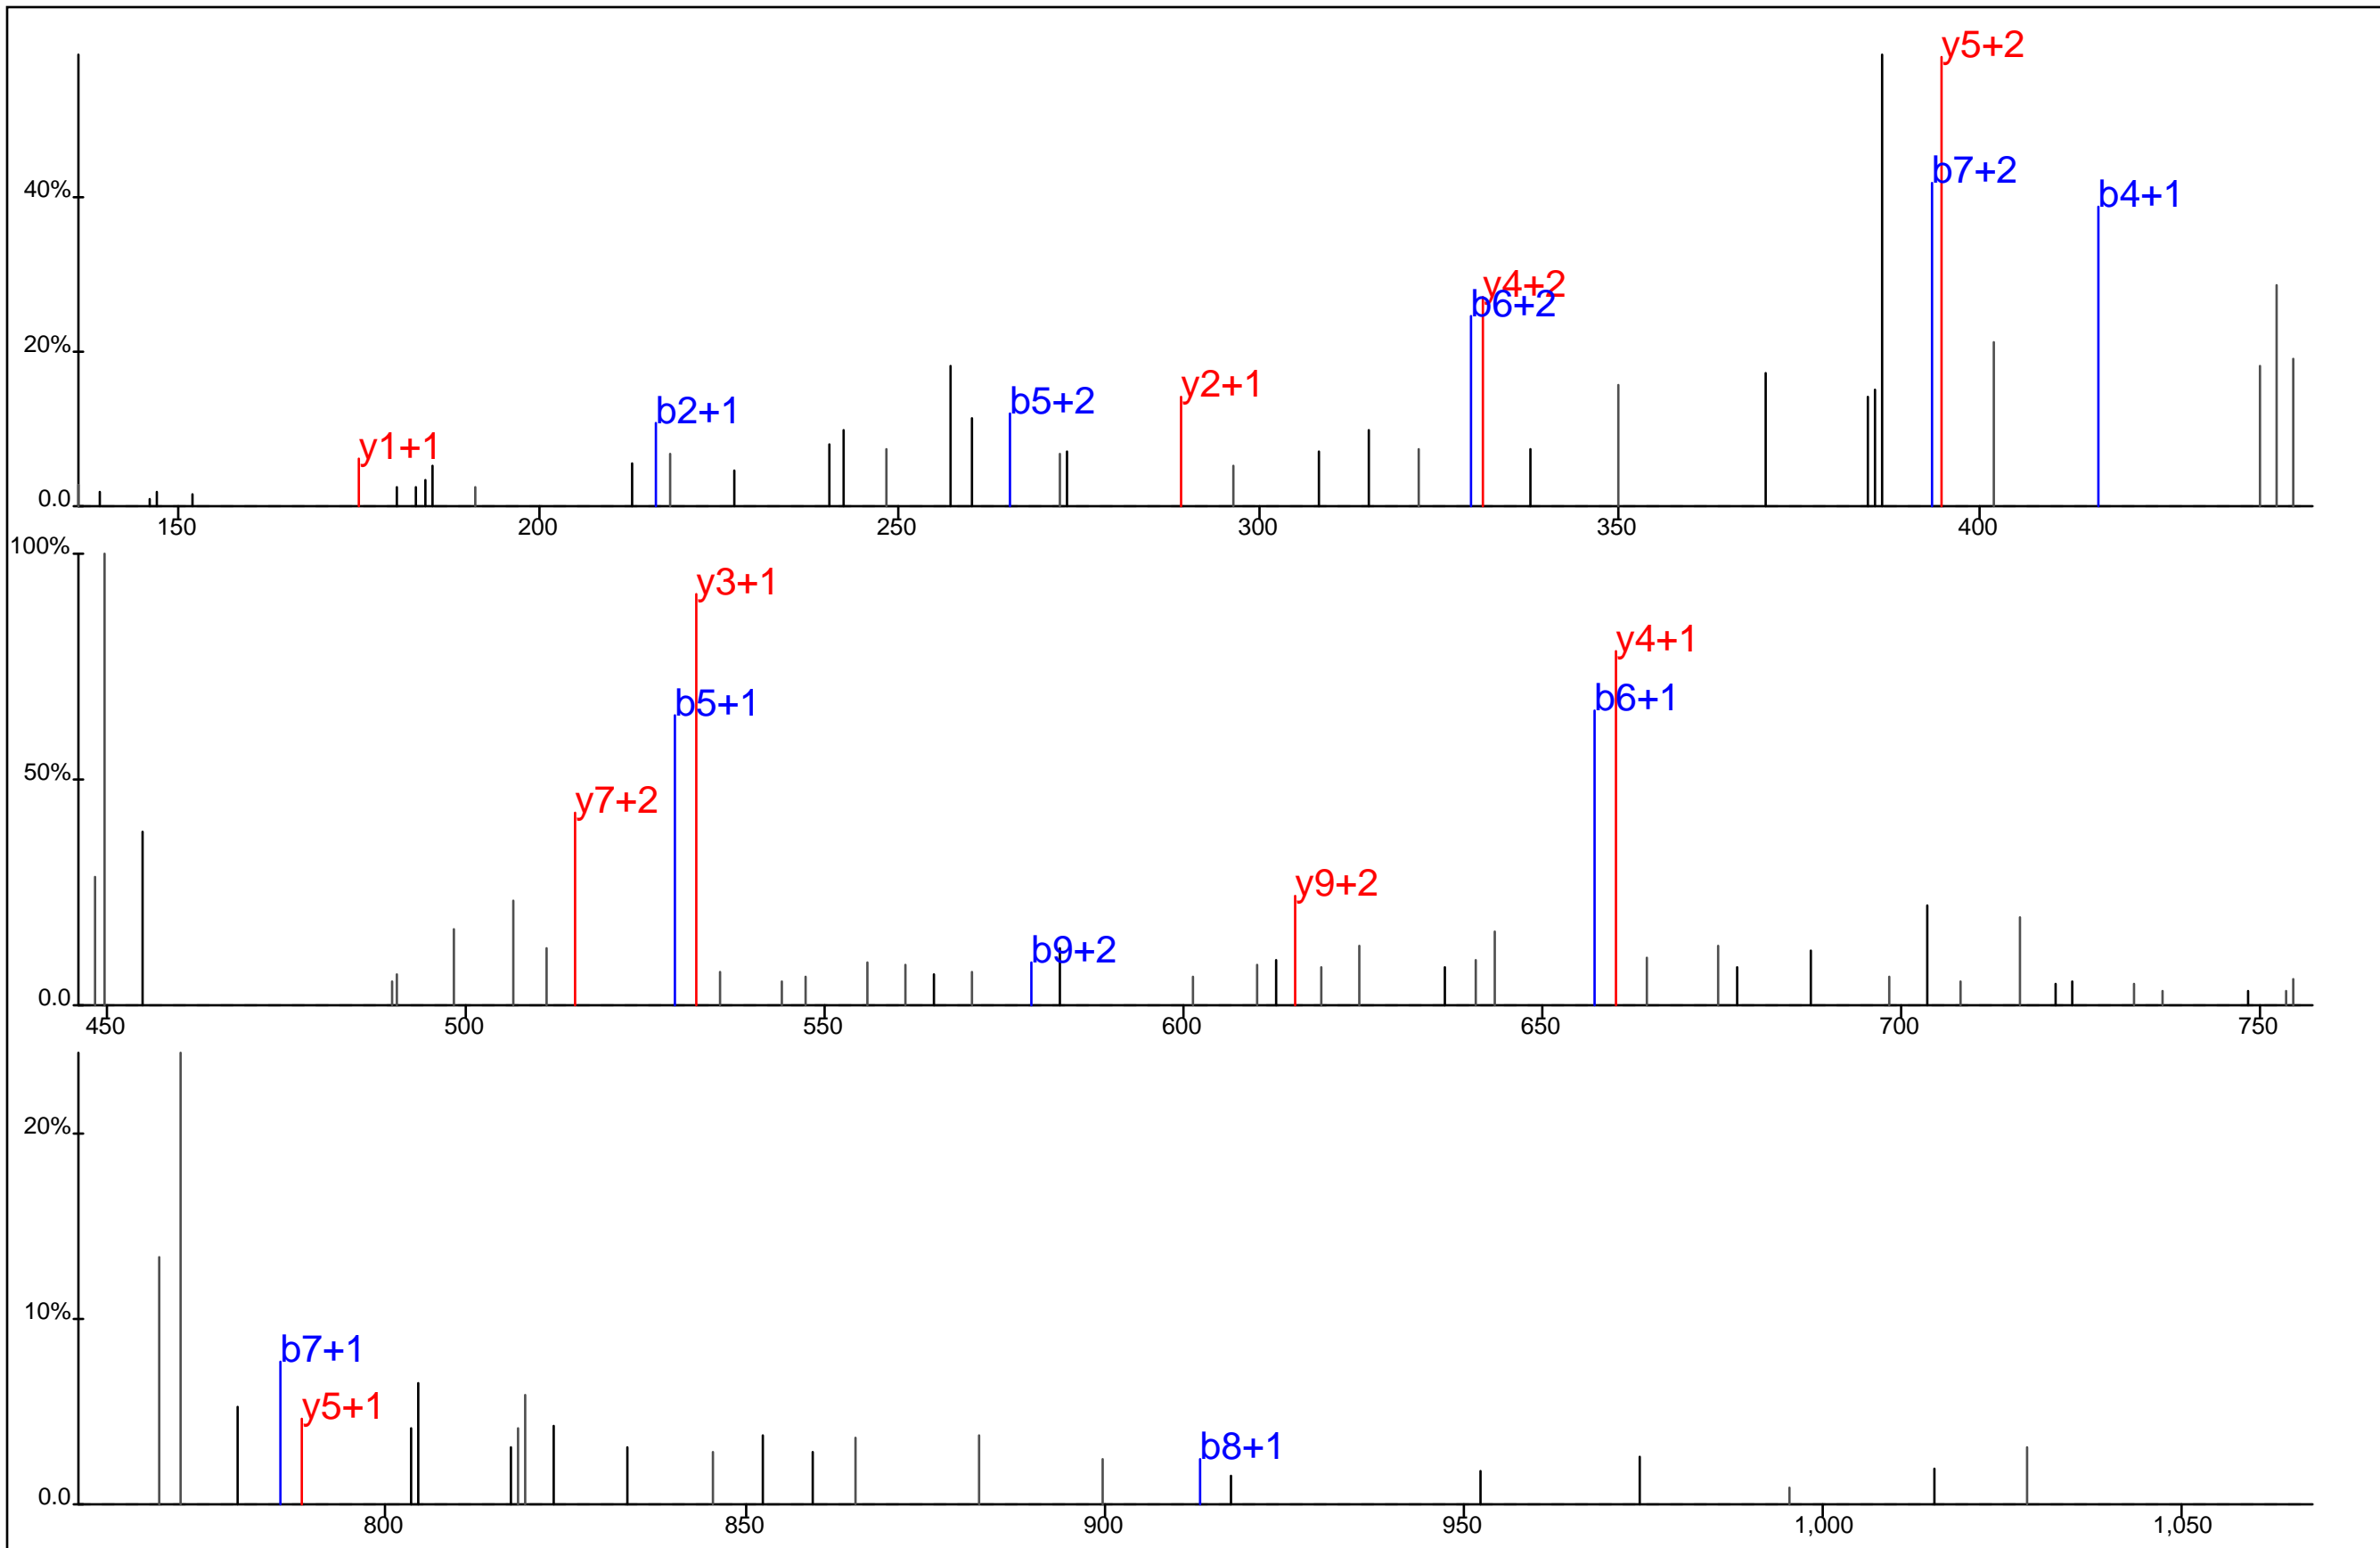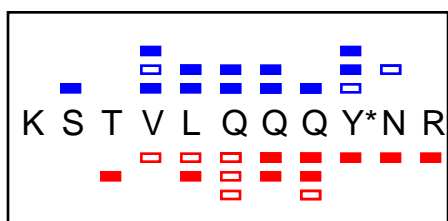

Protein Name: Talin  
 gi Accession: 0  
 Precursor Mass: 482.2336+3  
 Delta Mass: 5.612 ppm  
 XCorr: 27.16

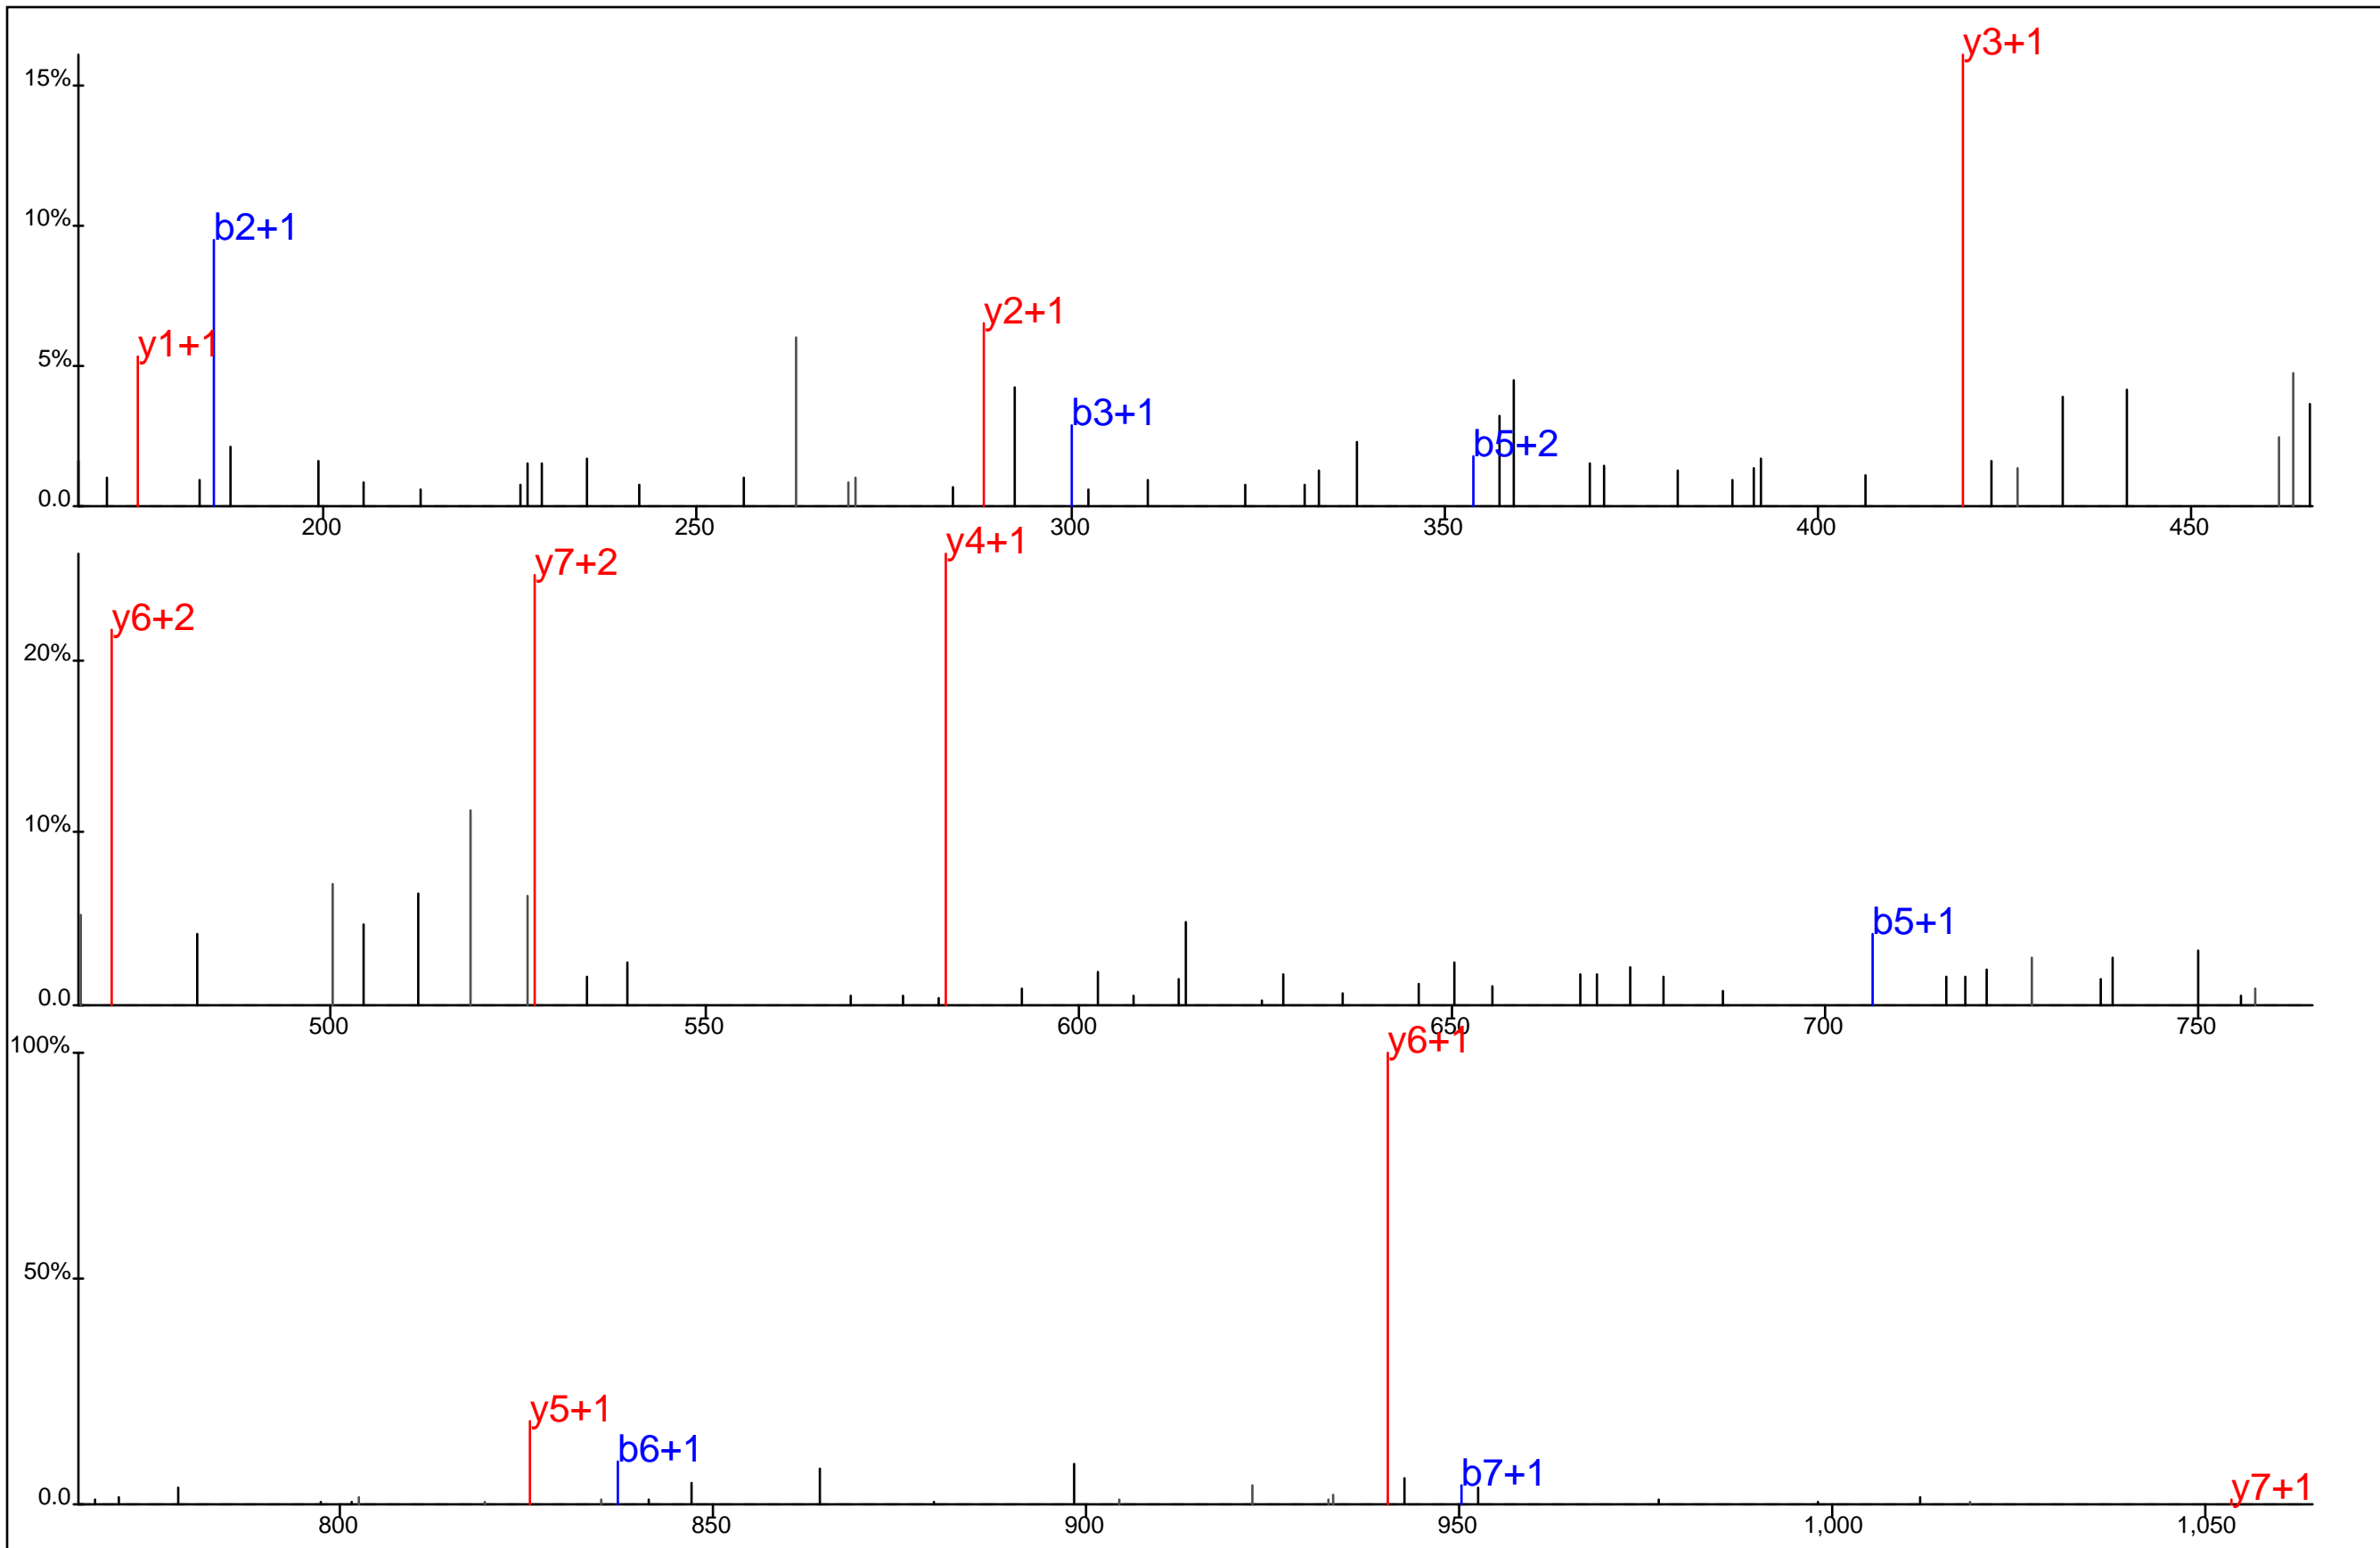

**A L D Y\*Y M L R**

Protein Name: Talin  
 gi Accession: 0  
 Precursor Mass: 562.7458+2  
 Delta Mass: 0.132 ppm  
 XCorr: 45.61

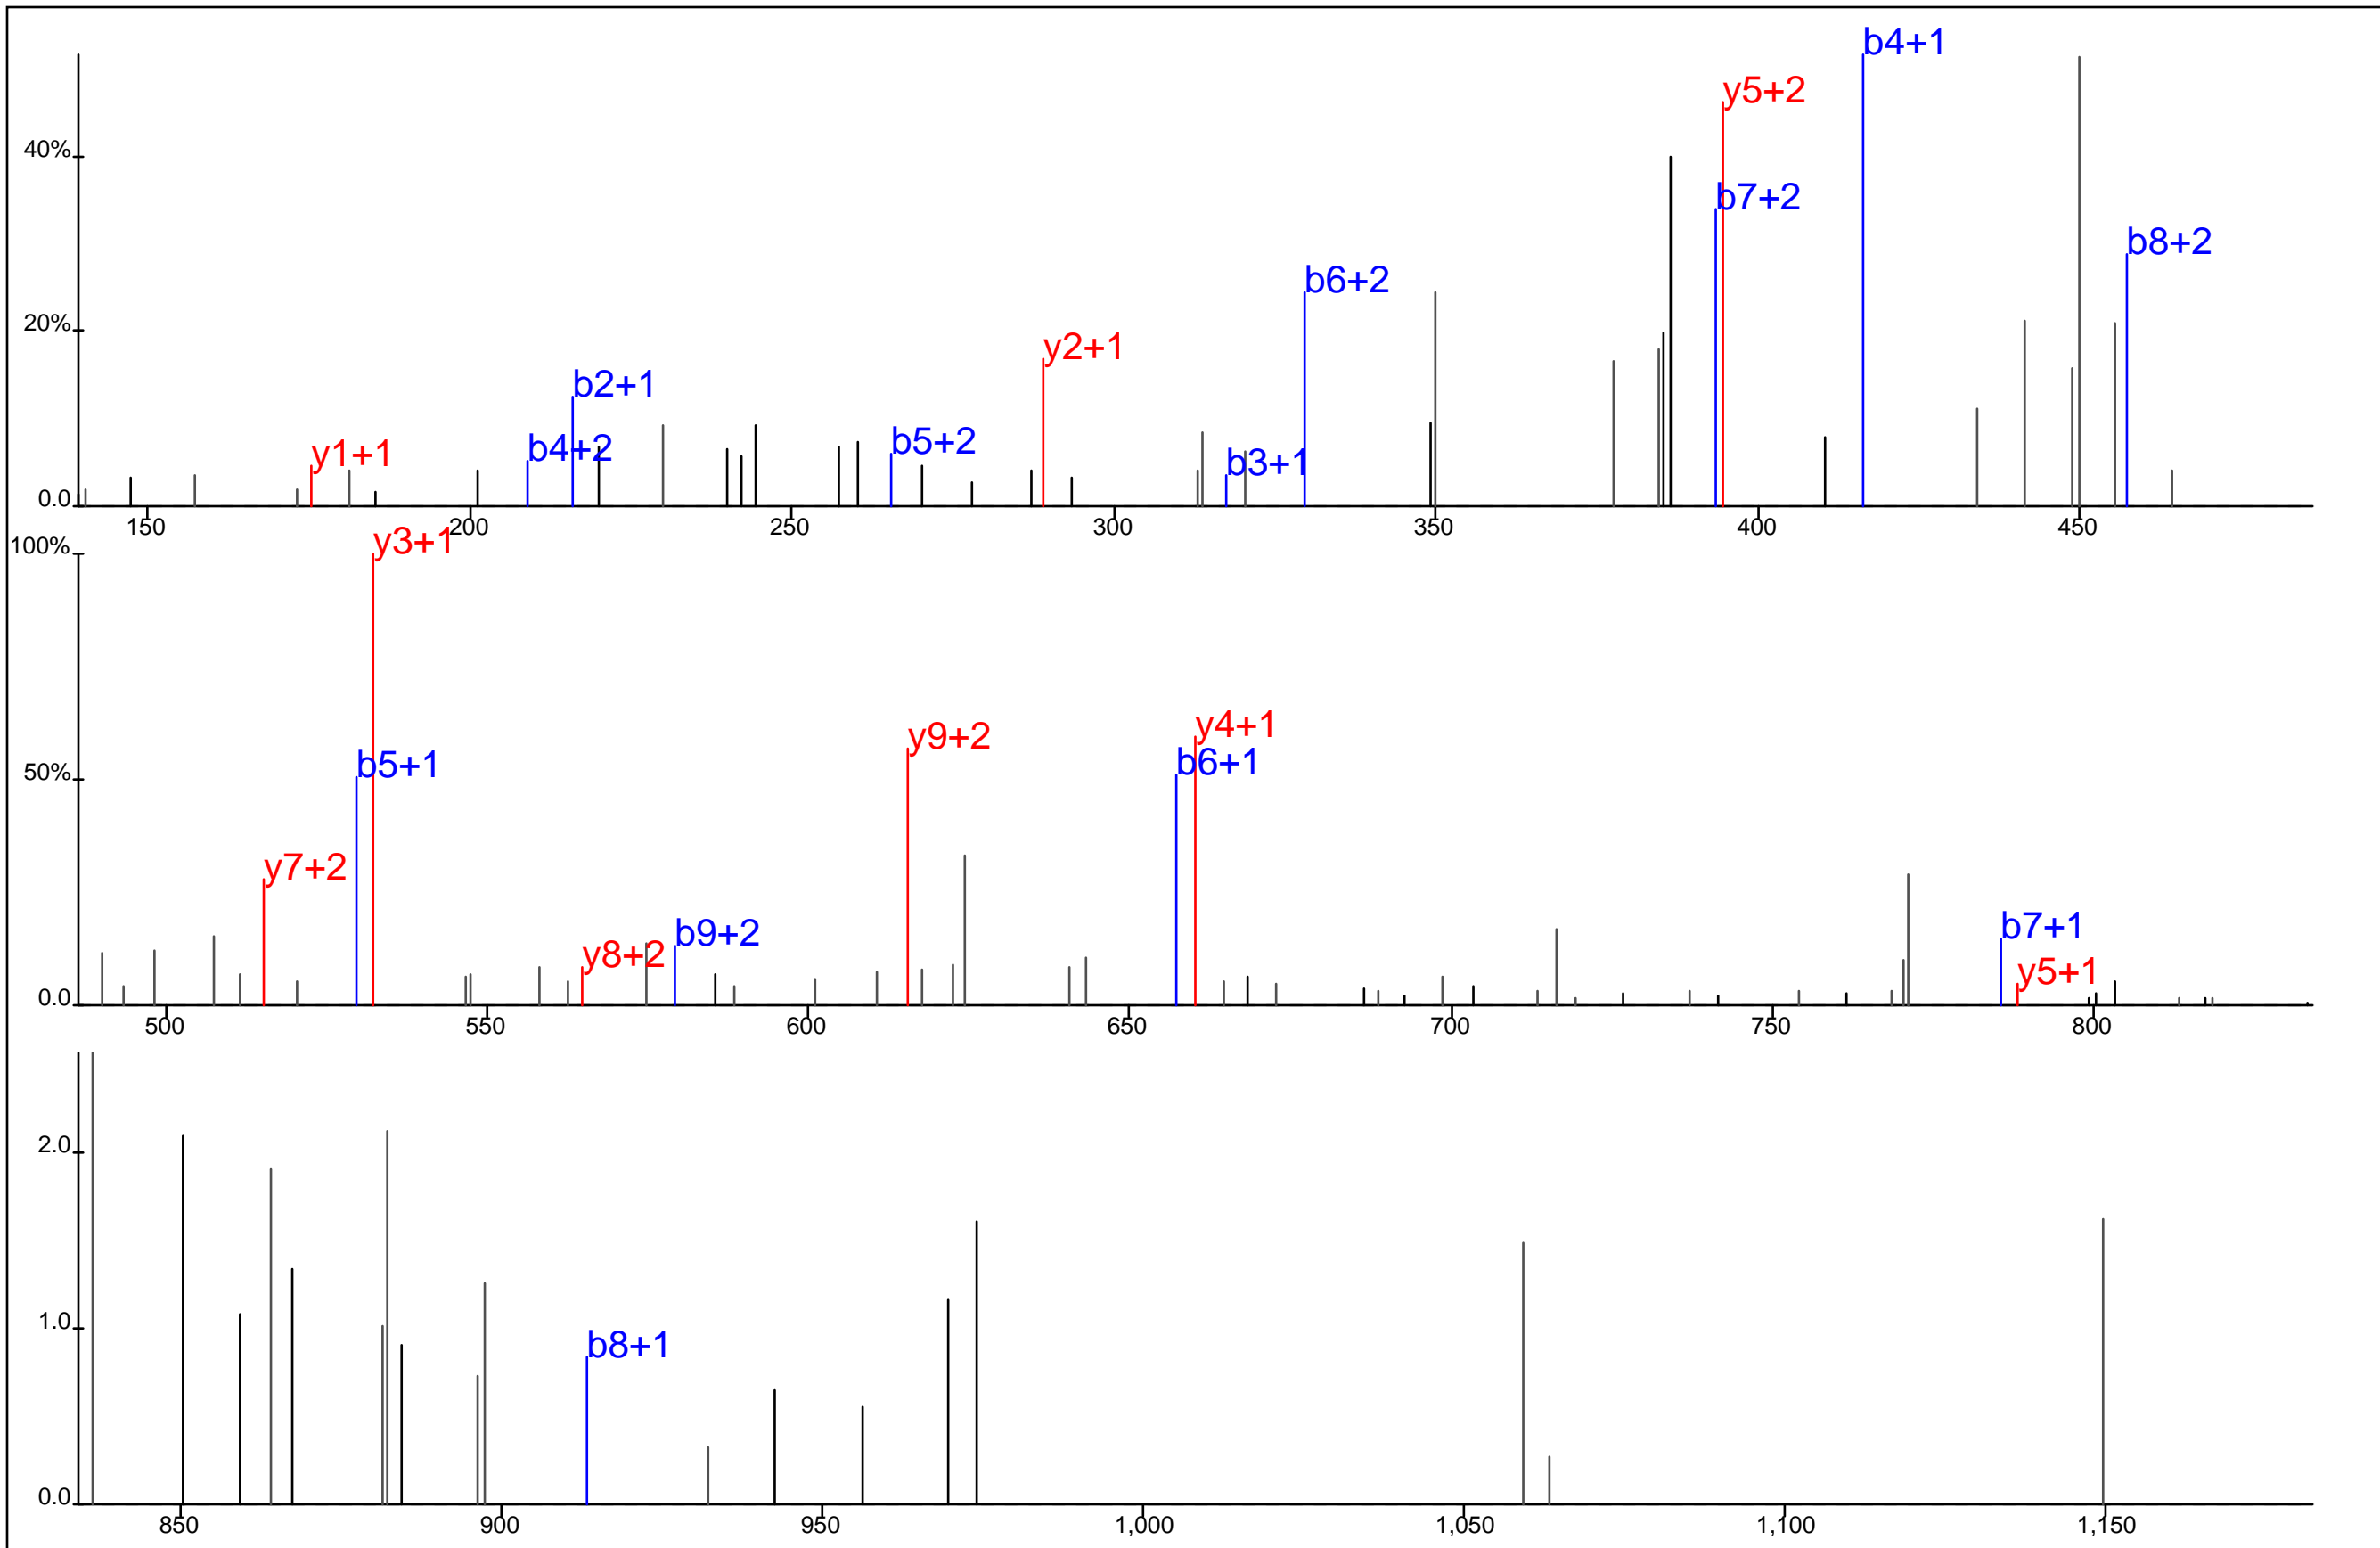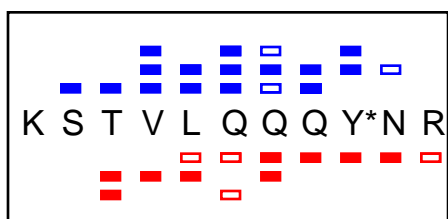

Protein Name: Talin  
 gi Accession: 0  
 Precursor Mass: 482.2358+3  
 Delta Mass: 1.112 ppm  
 XCorr: 25.84





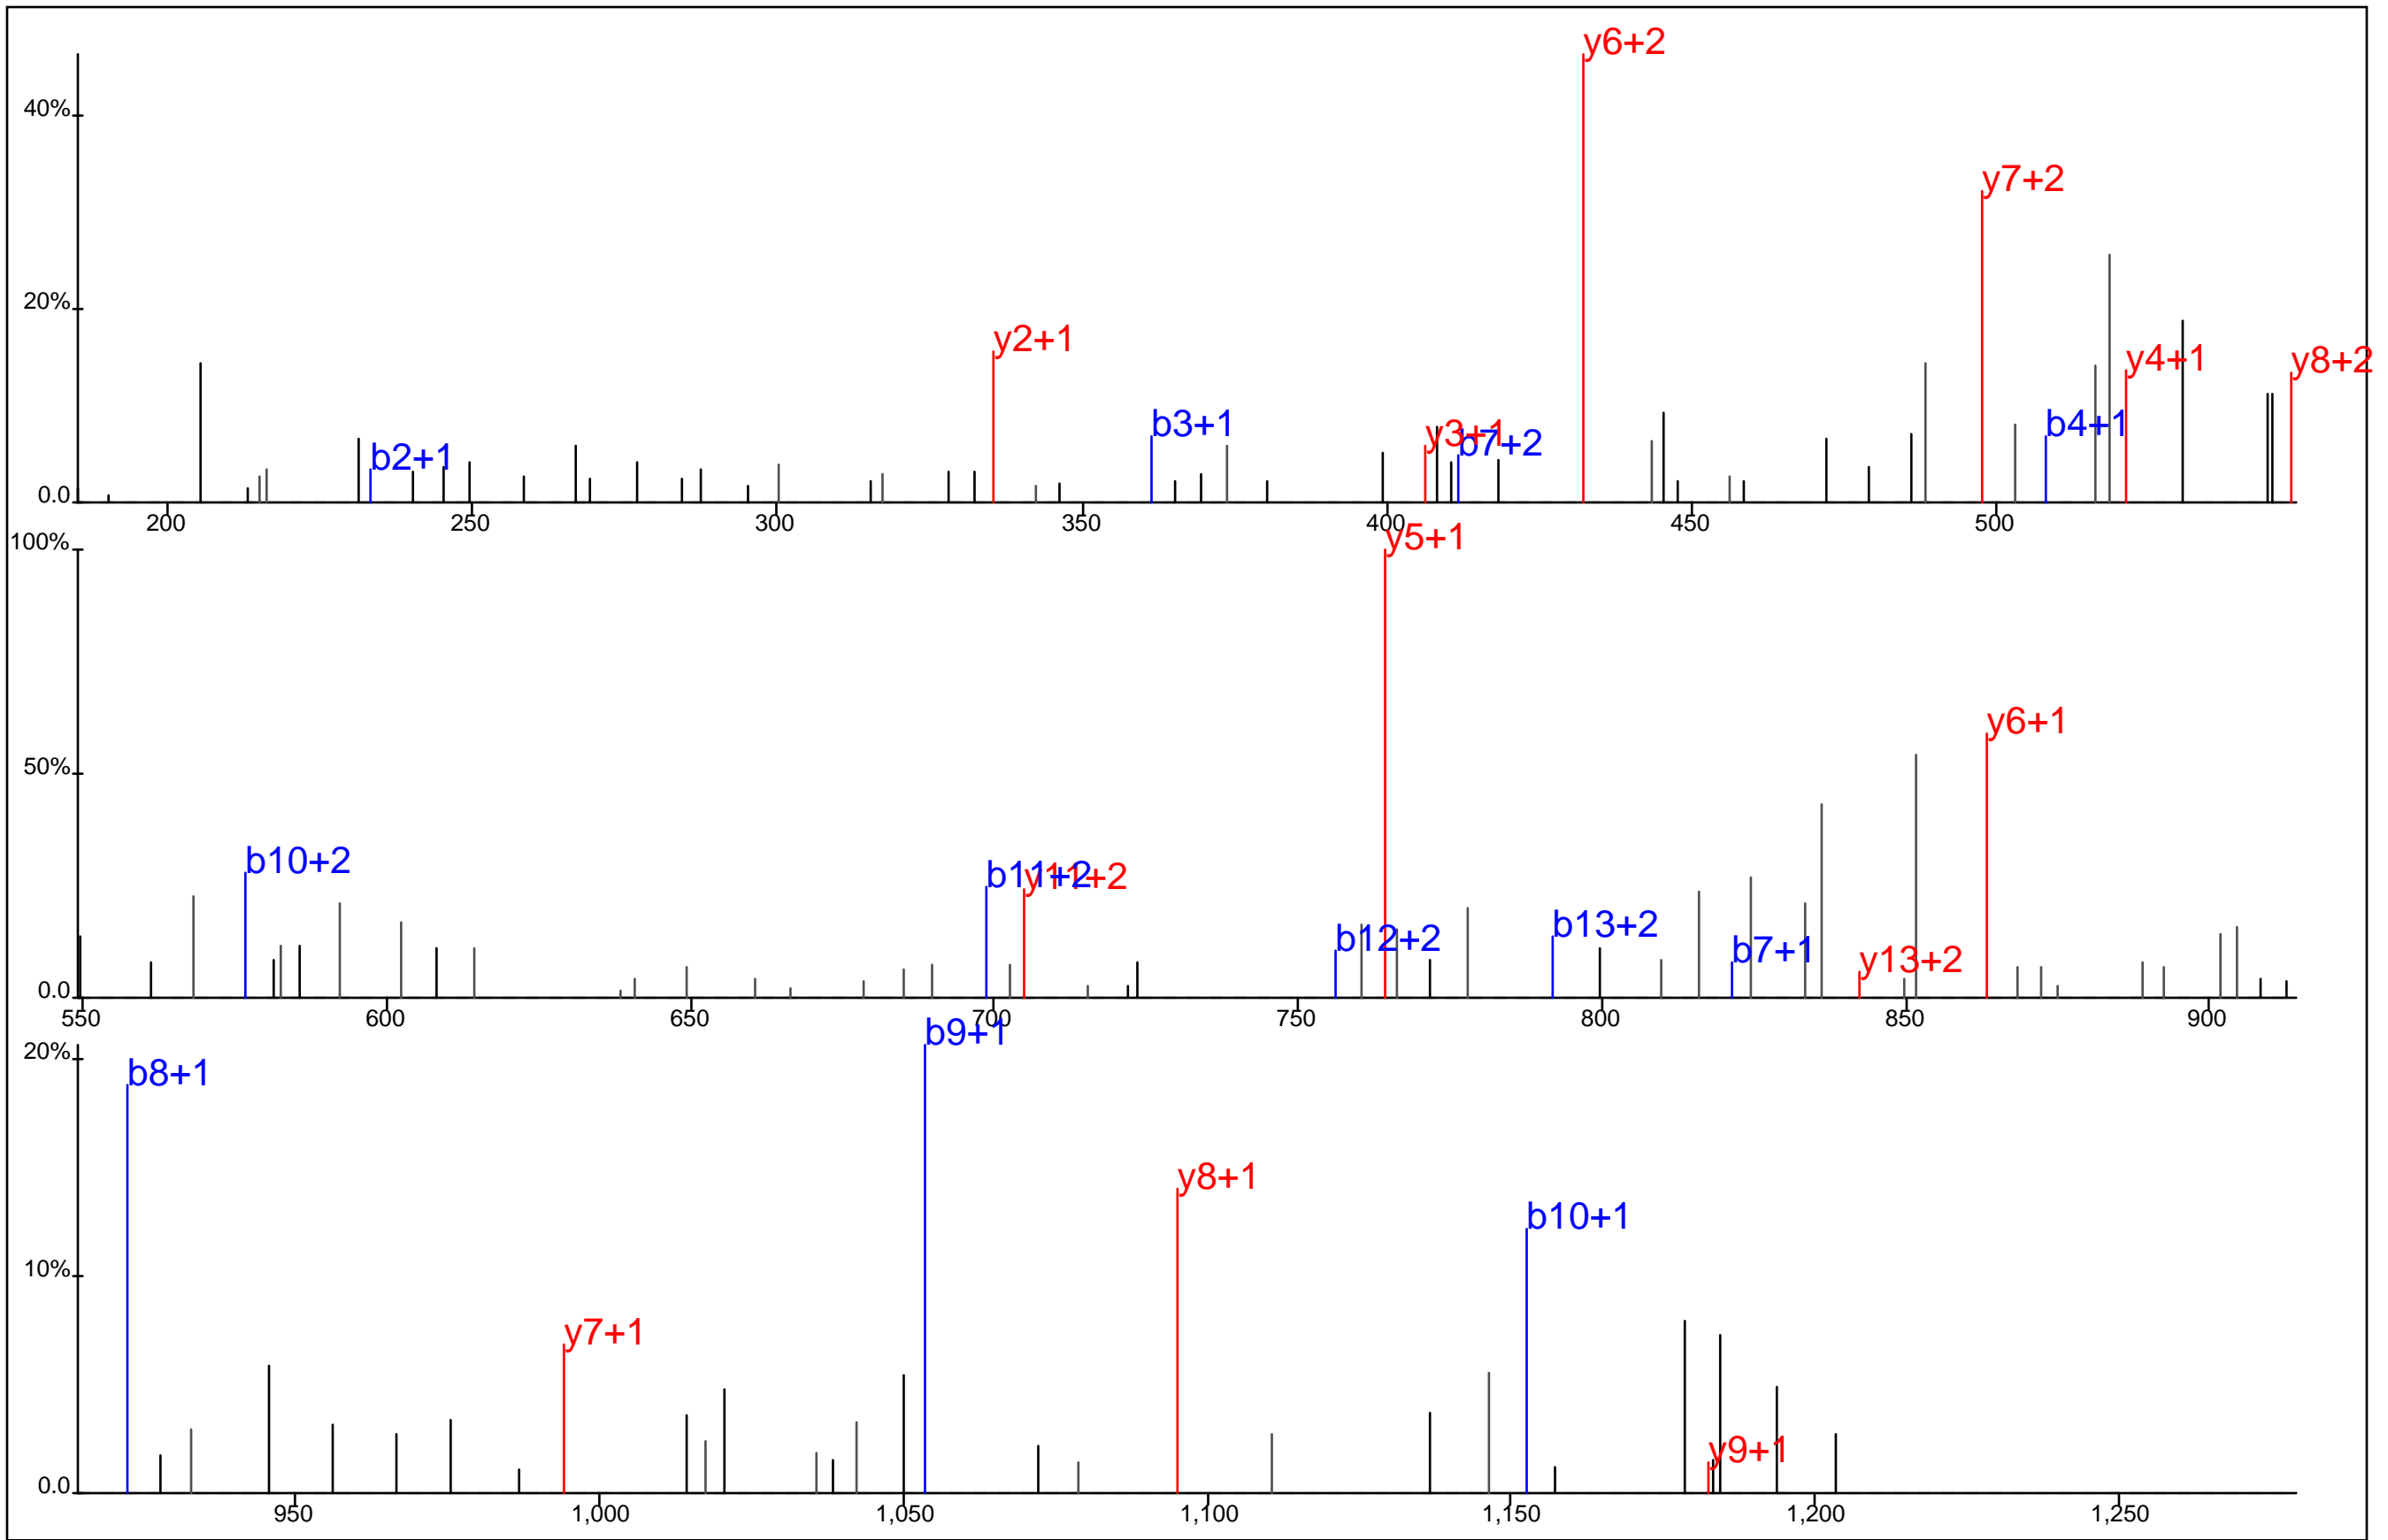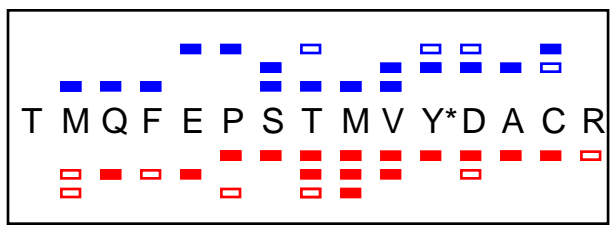

Protein Name: Talin  
 gi Accession: 0  
 Precursor Mass: 639.2567+3  
 Delta Mass: 6.868 ppm  
 XCorr: 33.27



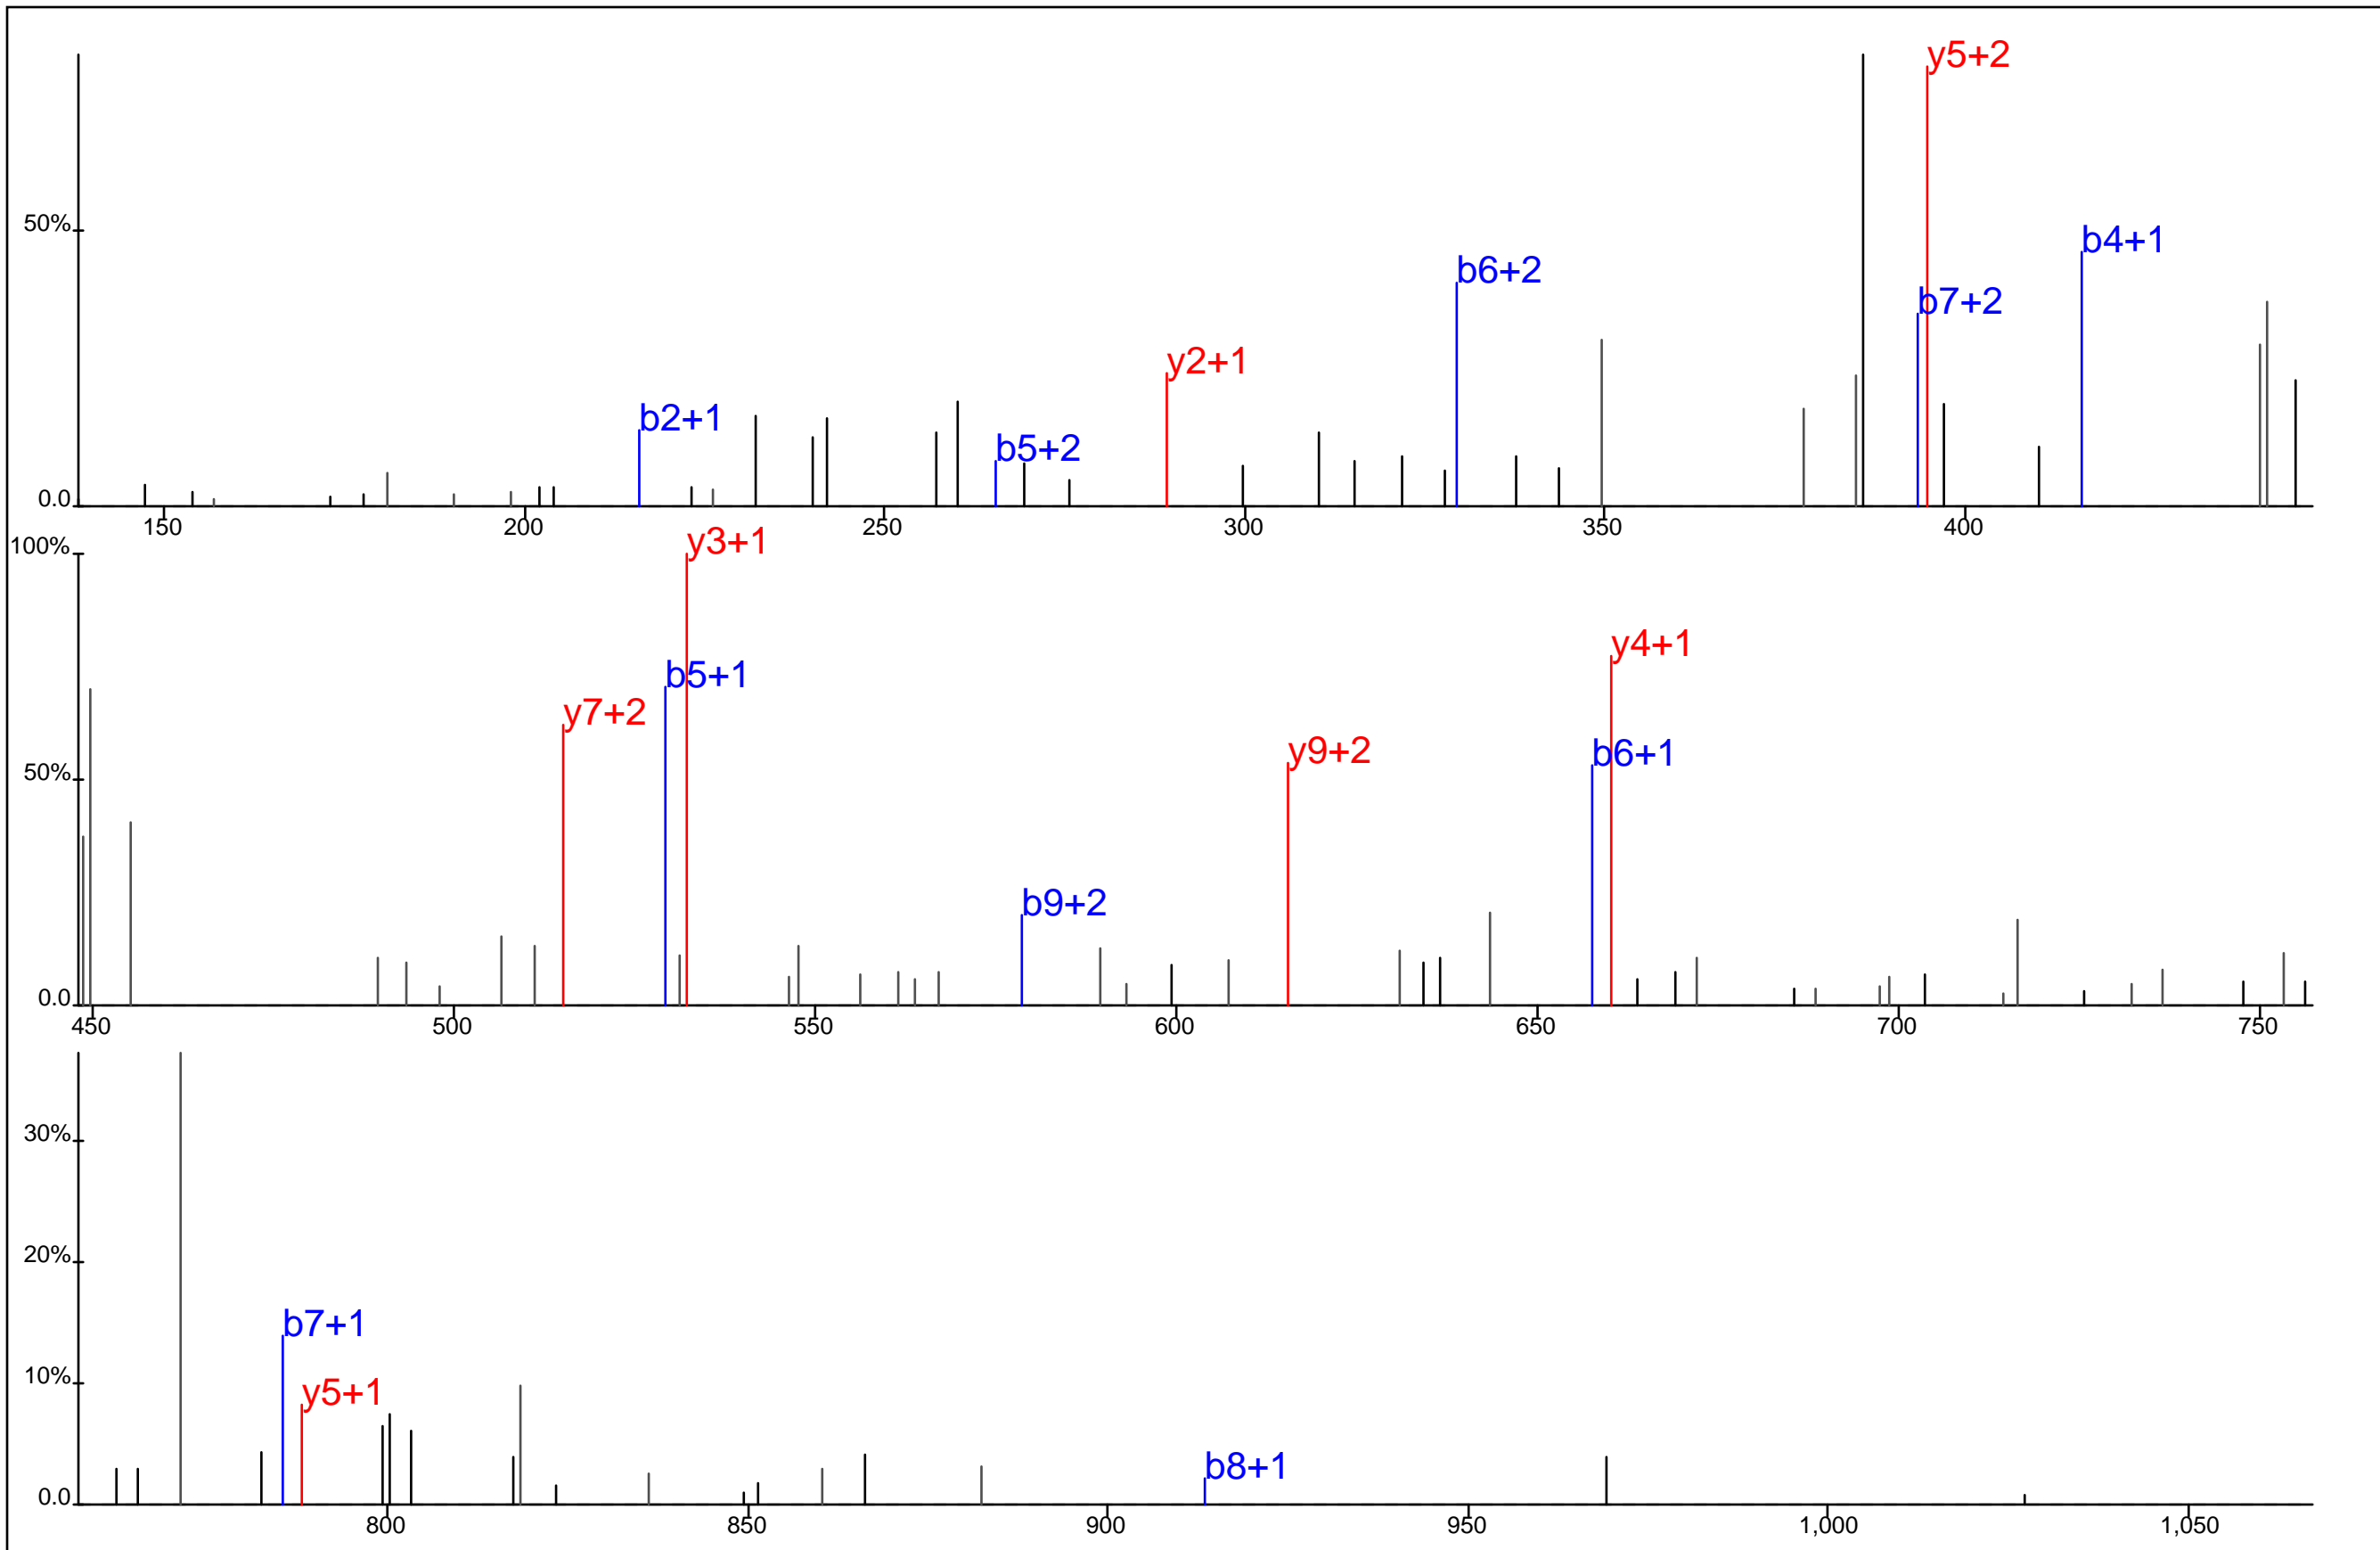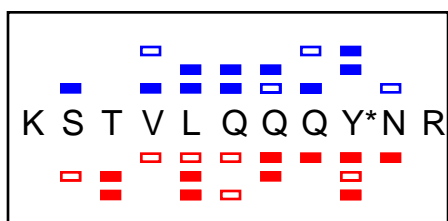

Protein Name: Talin  
 gi Accession: 0  
 Precursor Mass: 482.2364+3  
 Delta Mass: 0.154 ppm  
 XCorr: 29.09

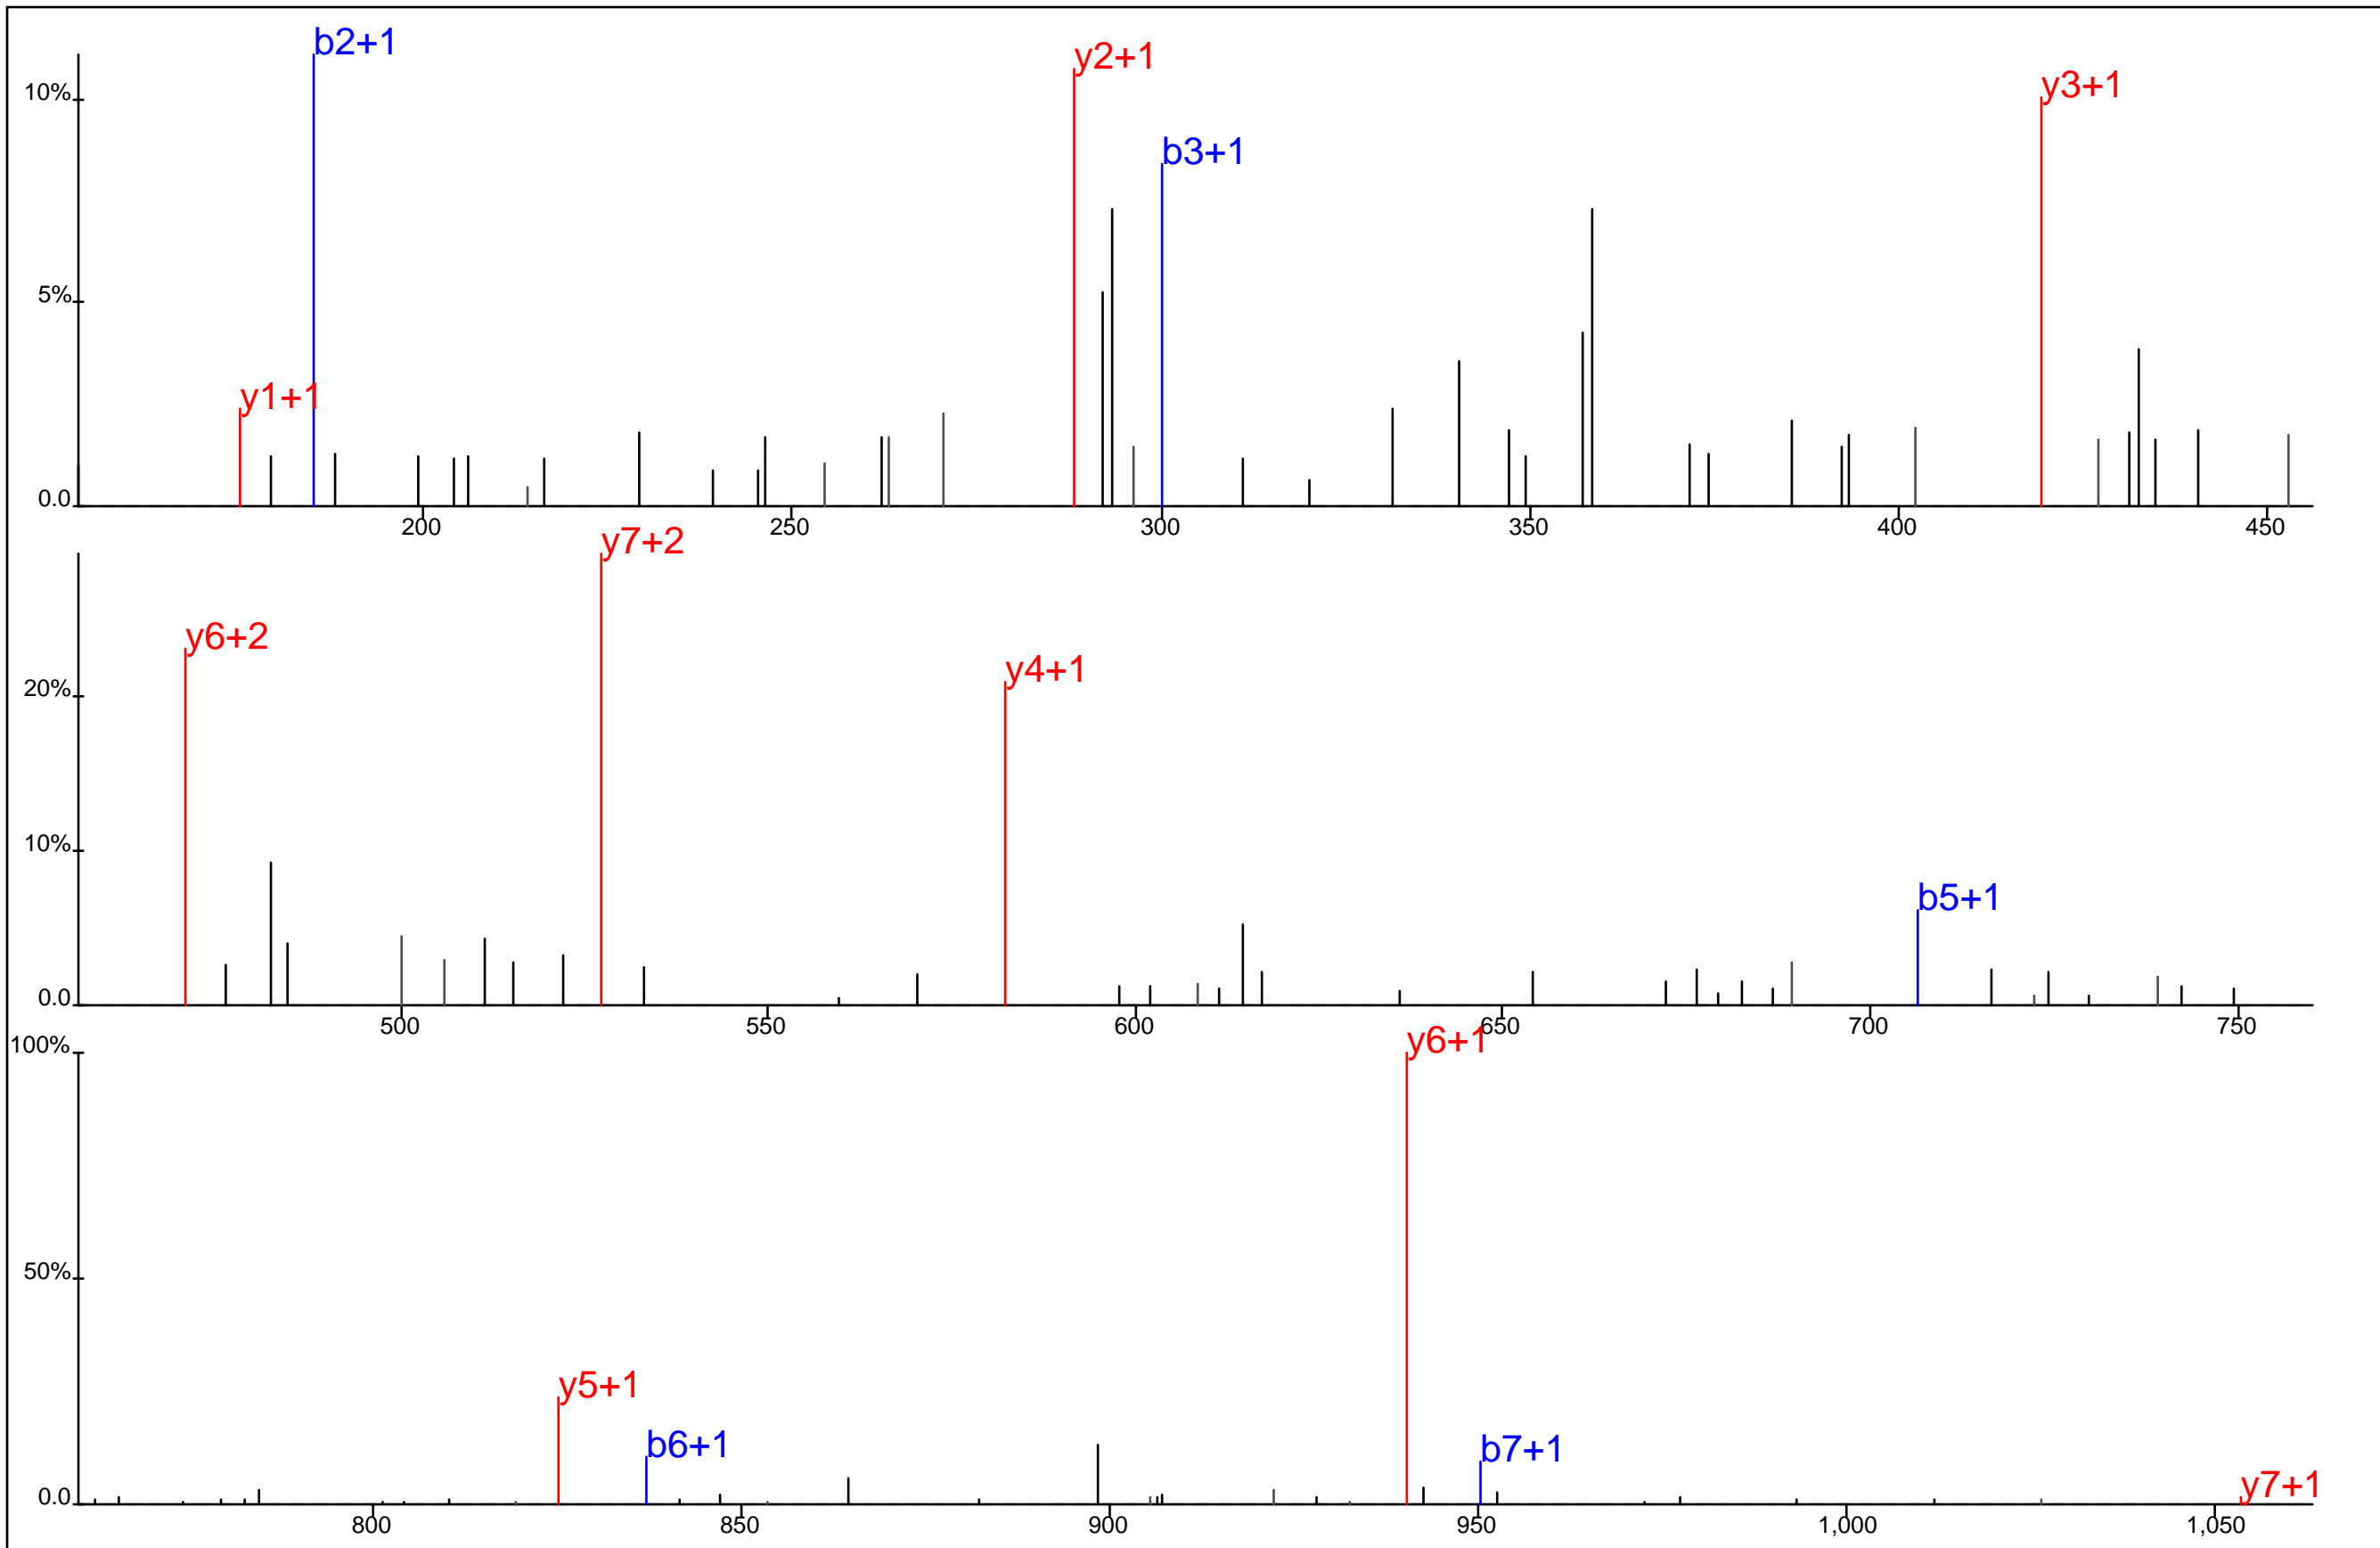

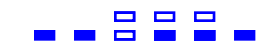
  
**A L D Y\*Y M L R**
  


Protein Name: Talin  
 gi Accession: 0  
 Precursor Mass: 562.7454+2  
 Delta Mass: 0.893 ppm  
 XCorr: 52.92

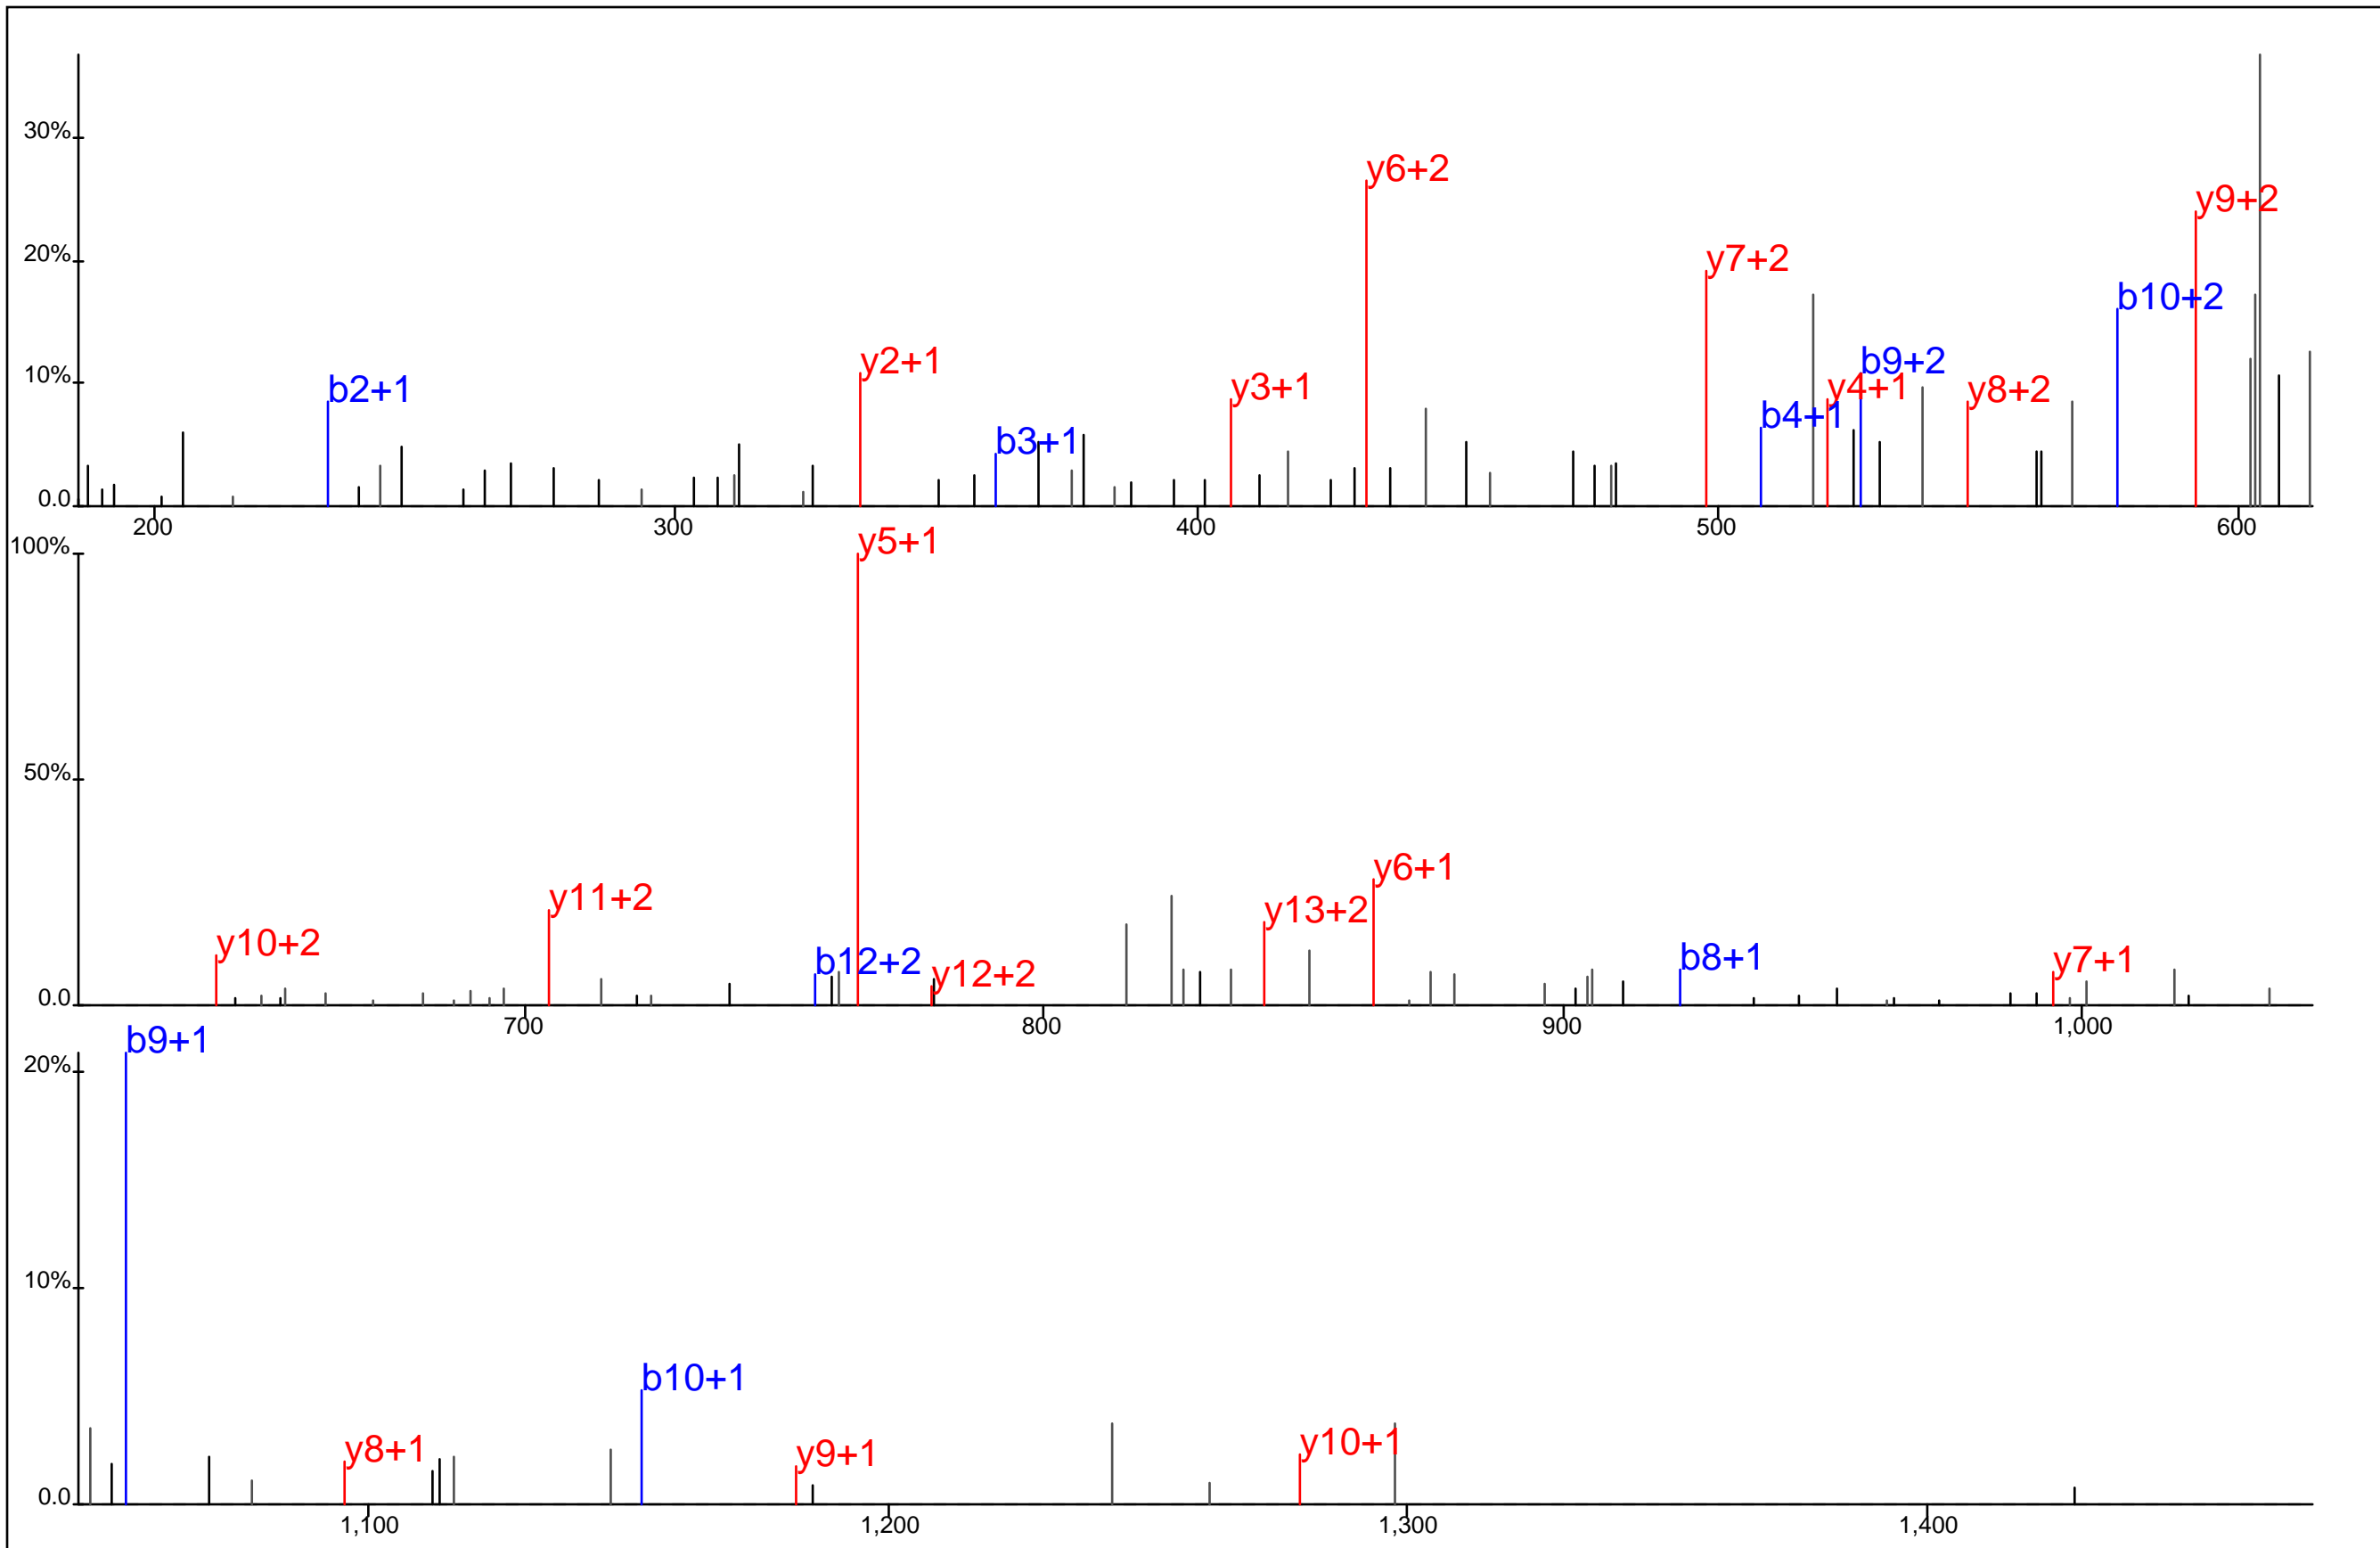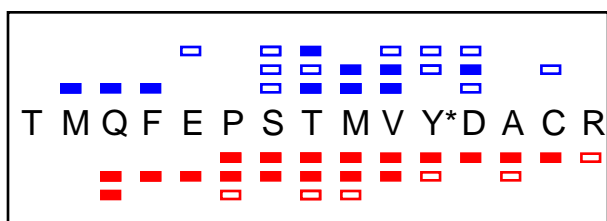

Protein Name: Talin  
 gi Accession: 0  
 Precursor Mass: 639.2532+3  
 Delta Mass: 1.325 ppm  
 XCorr: 33.75

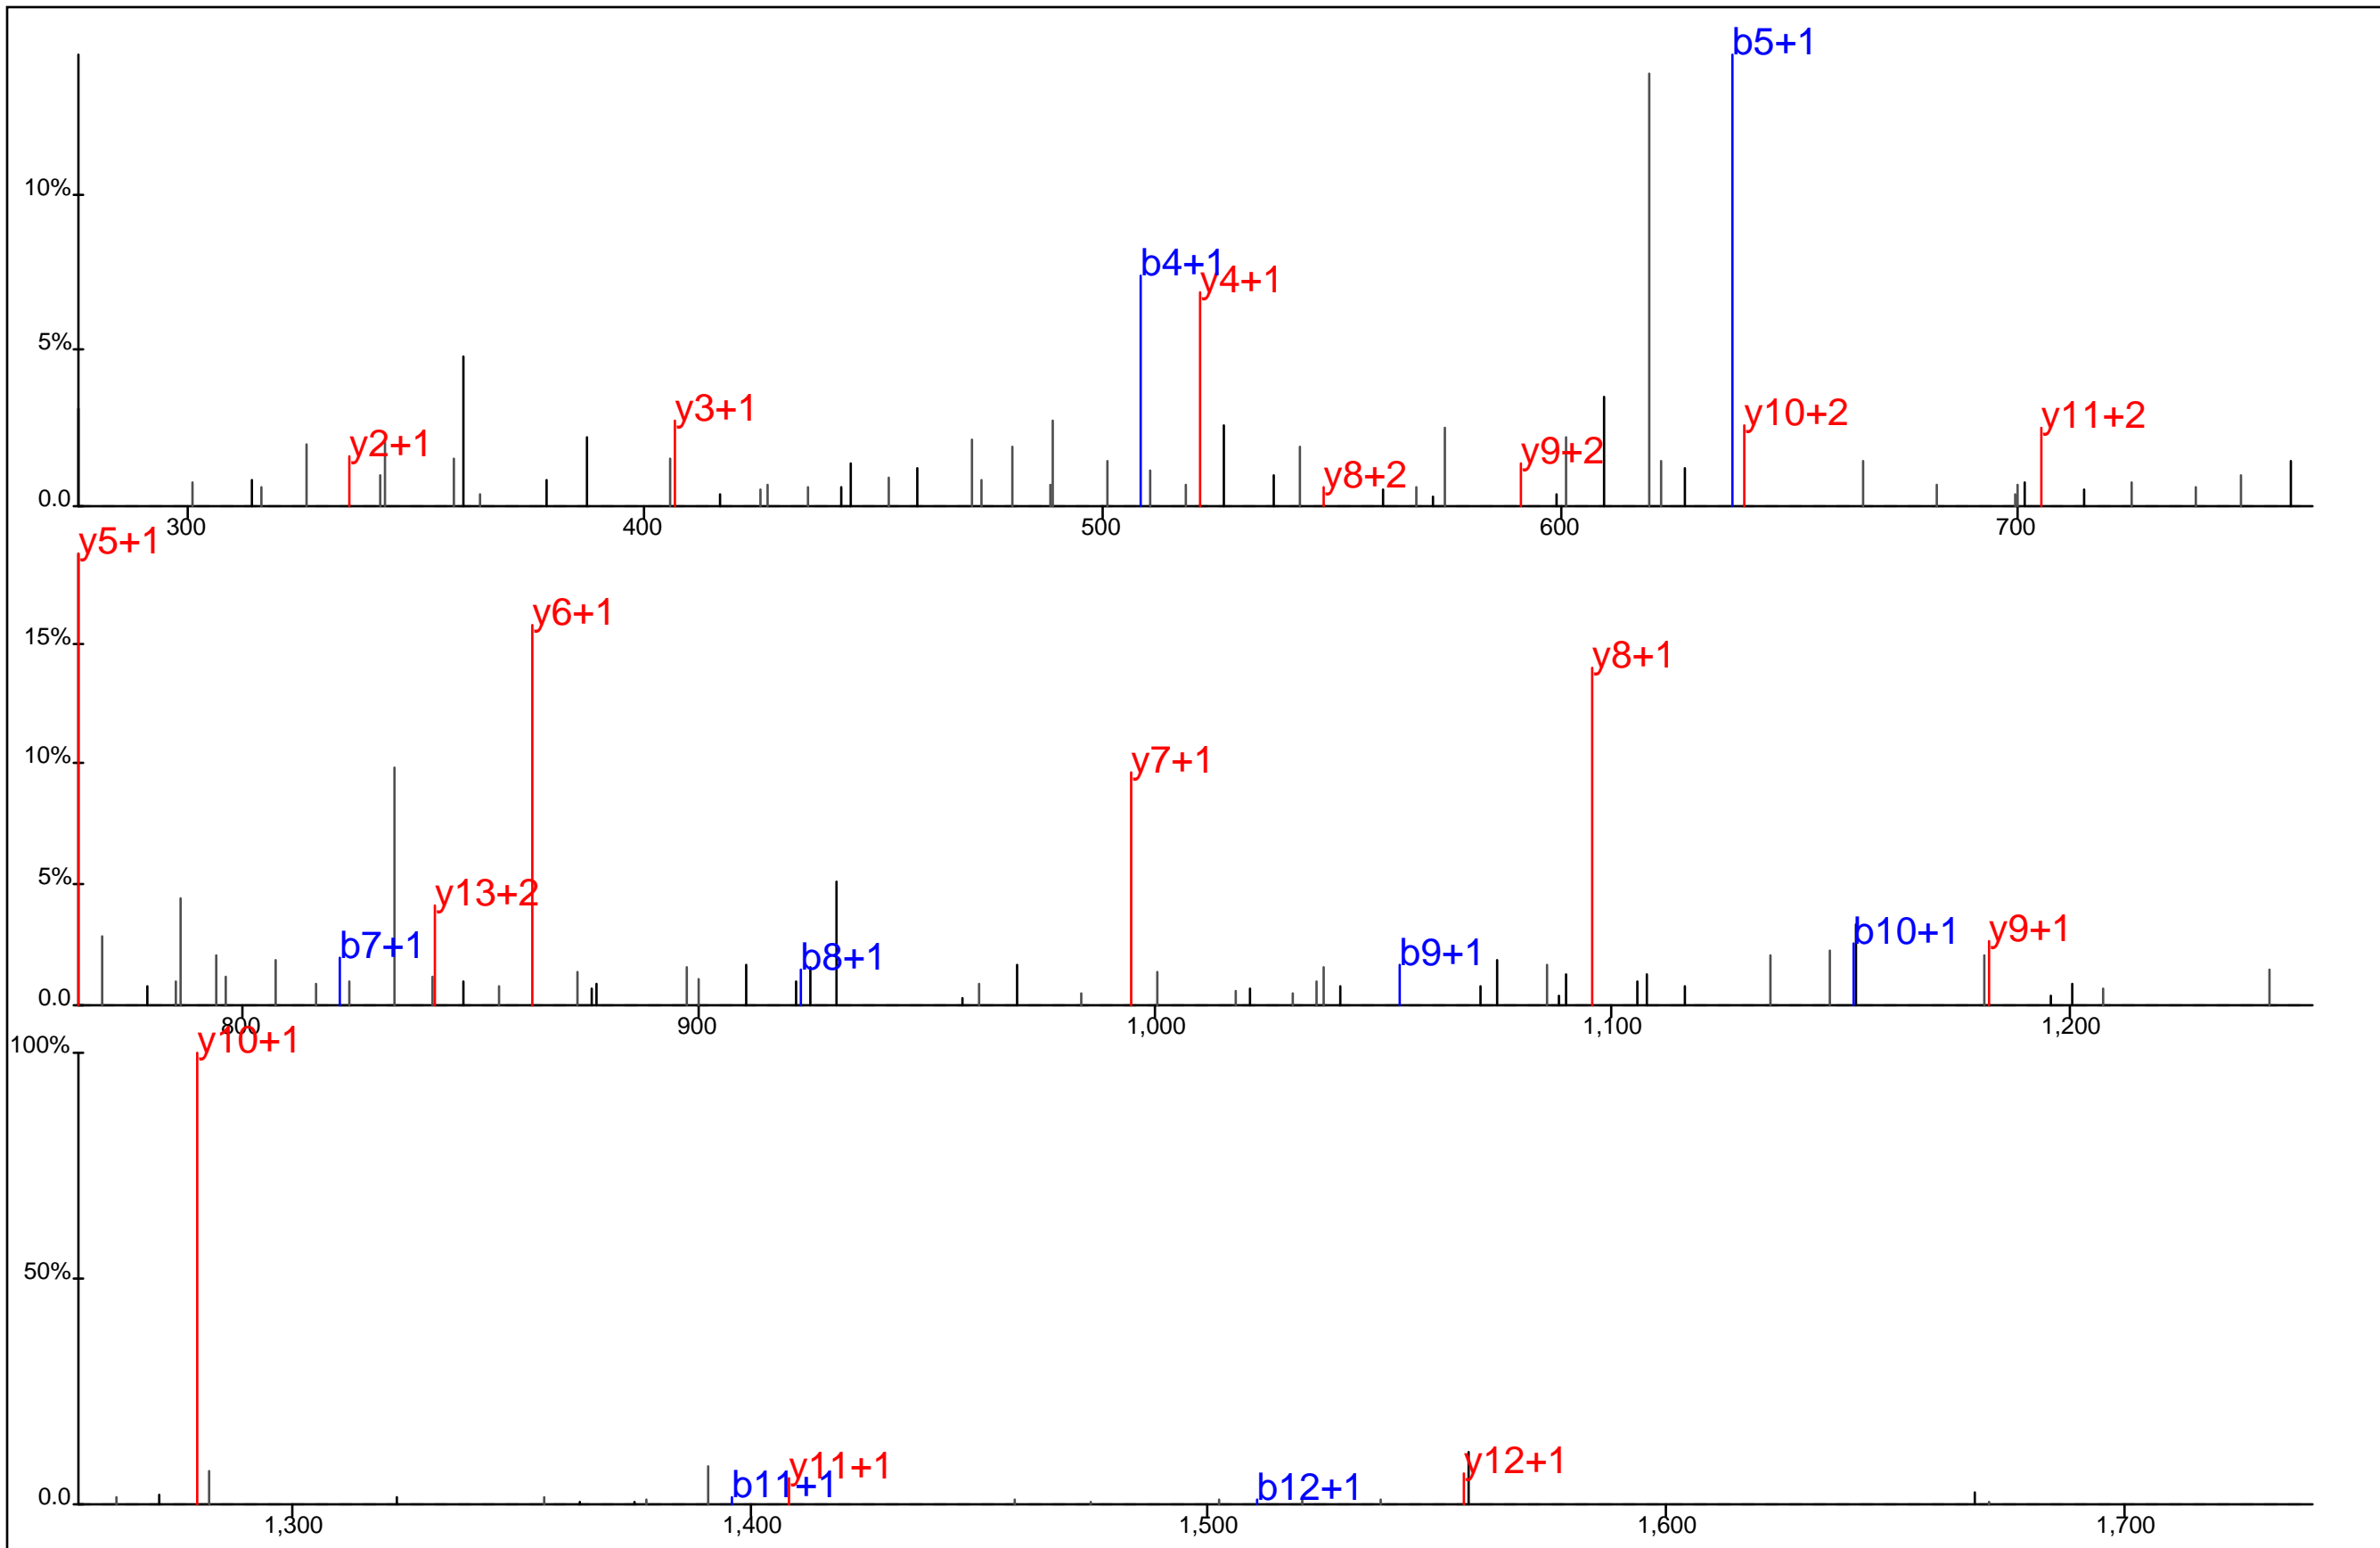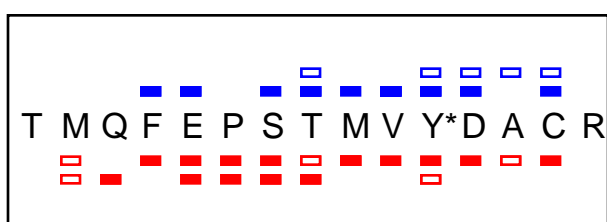

Protein Name: Talin  
 gi Accession: 0  
 Precursor Mass: 958.3745+2  
 Delta Mass: 0.357 ppm  
 XCorr: 66.19

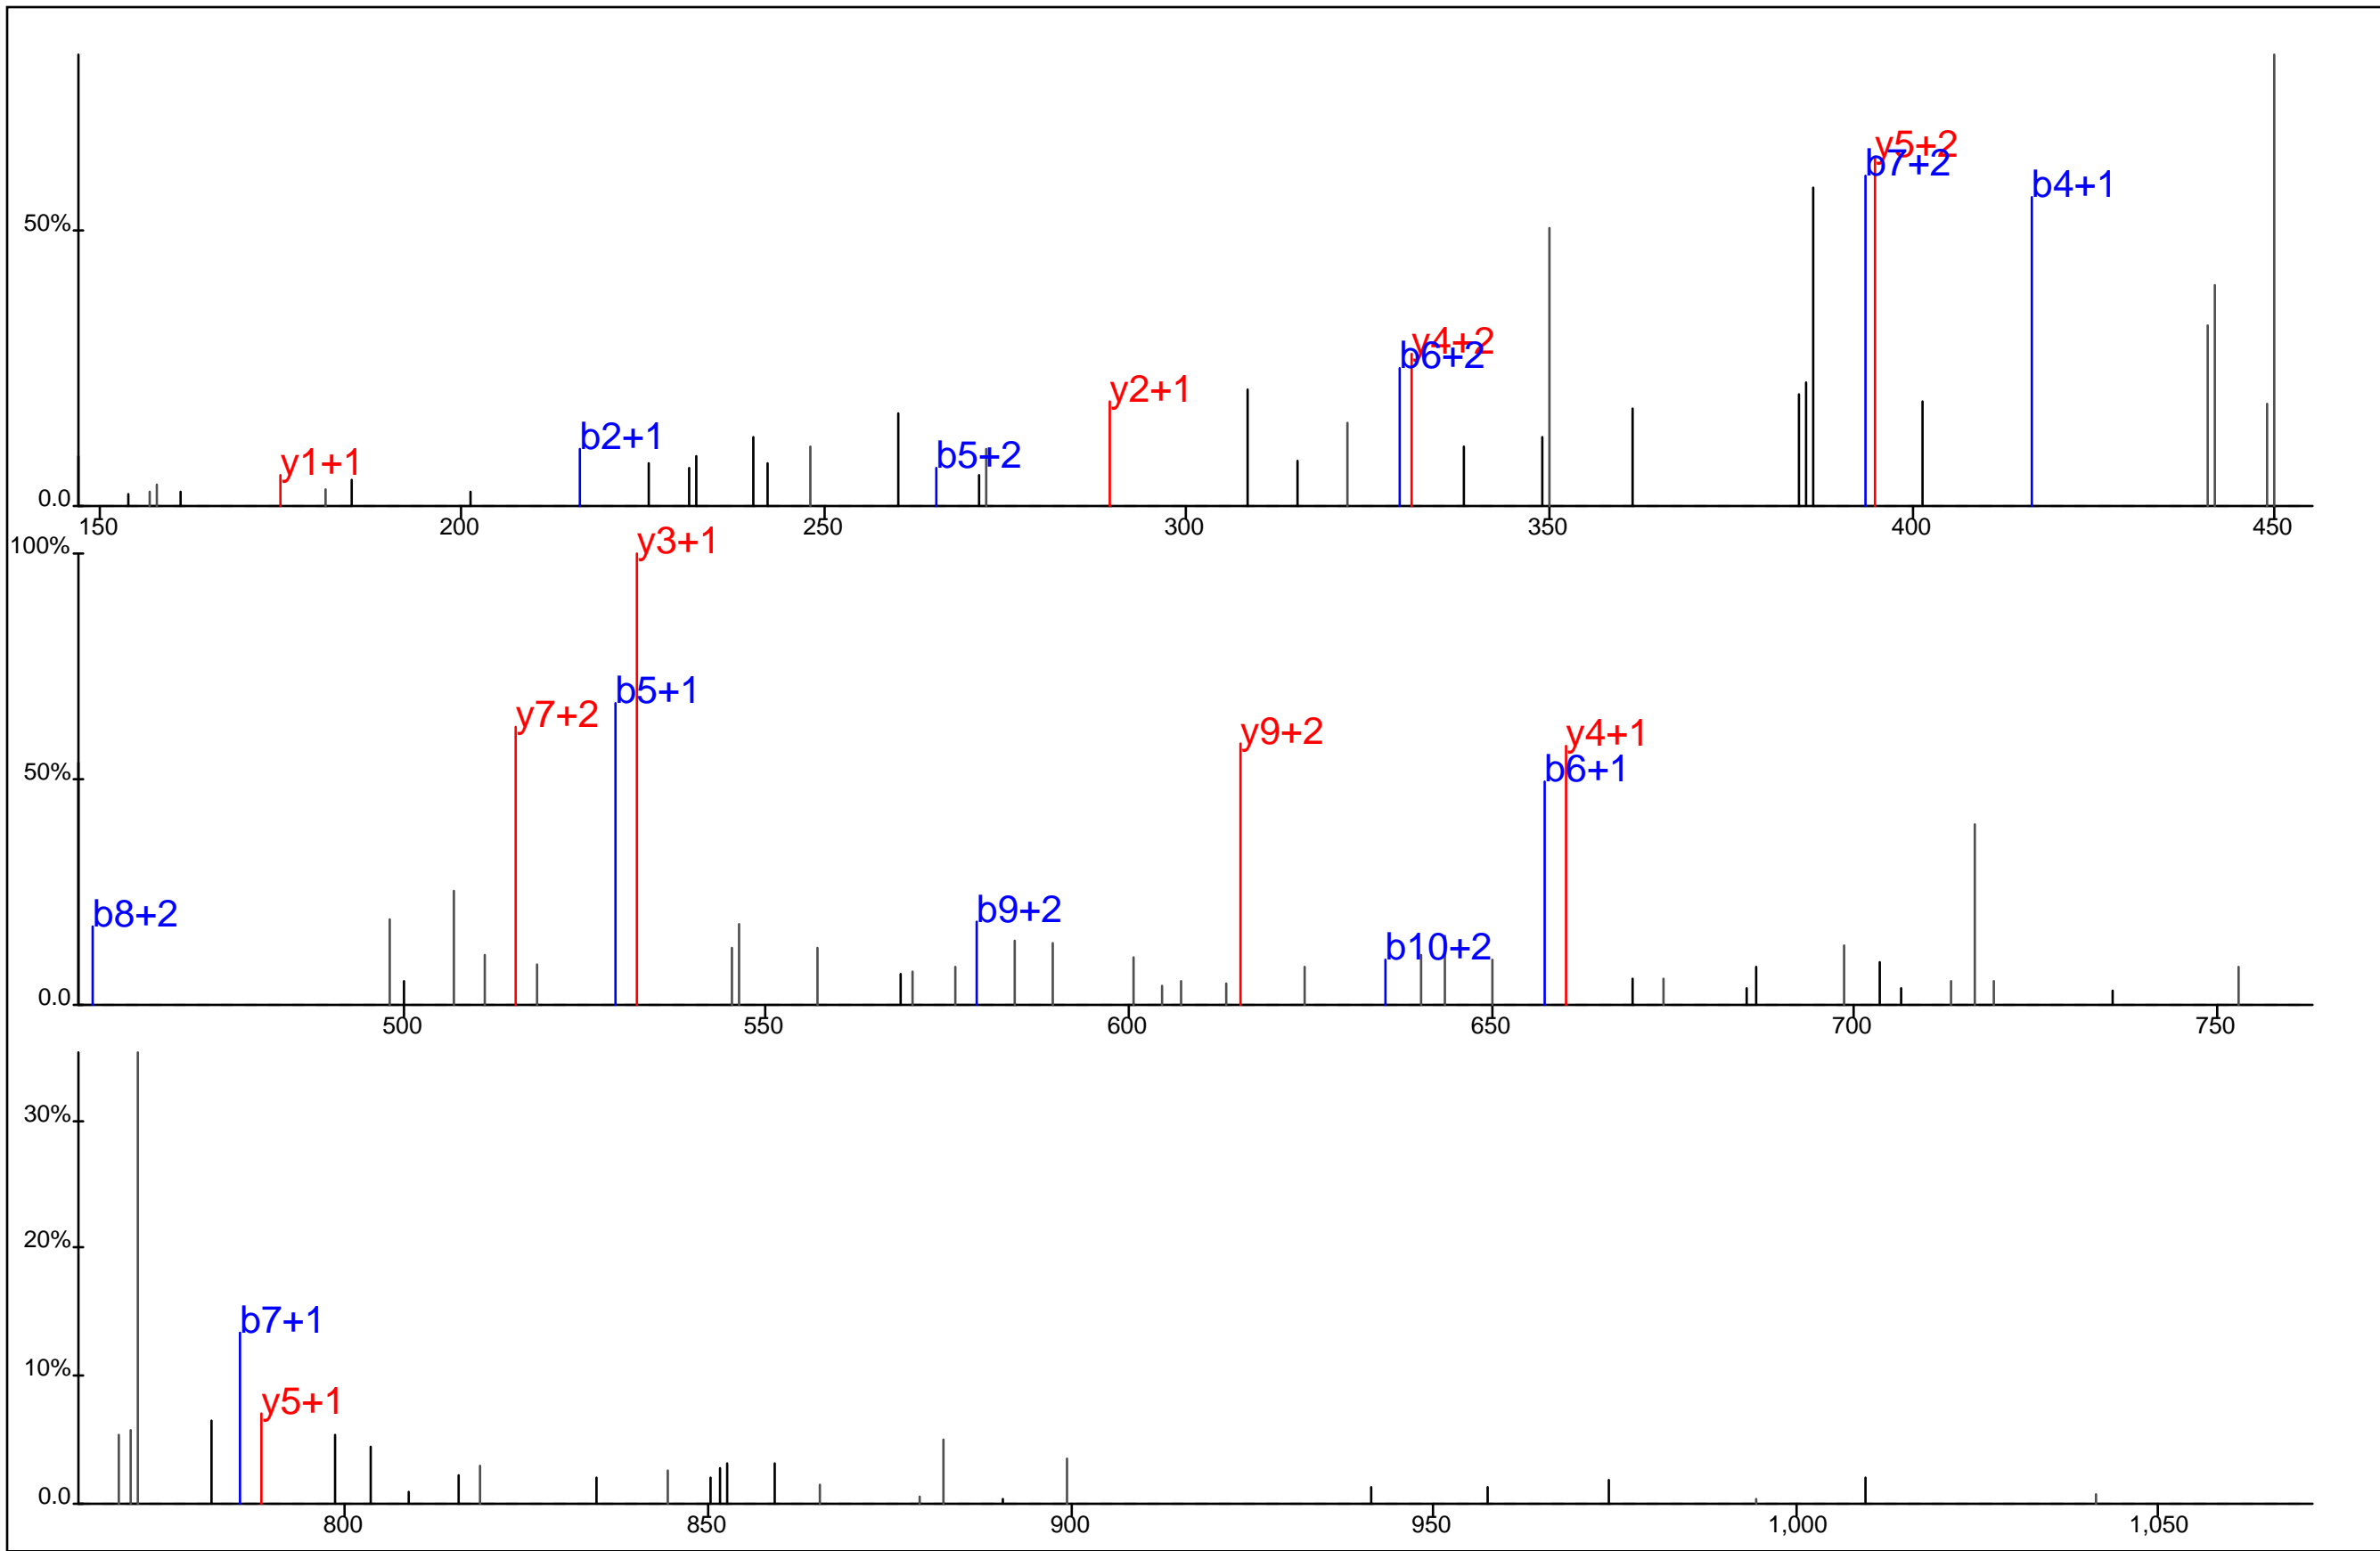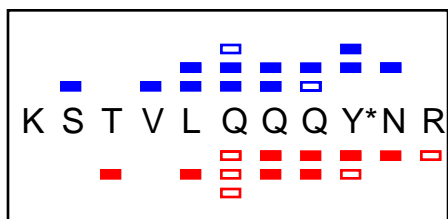

Protein Name: Talin  
 gi Accession: 0  
 Precursor Mass: 482.2371+3  
 Delta Mass: 1.612 ppm  
 XCorr: 25.6



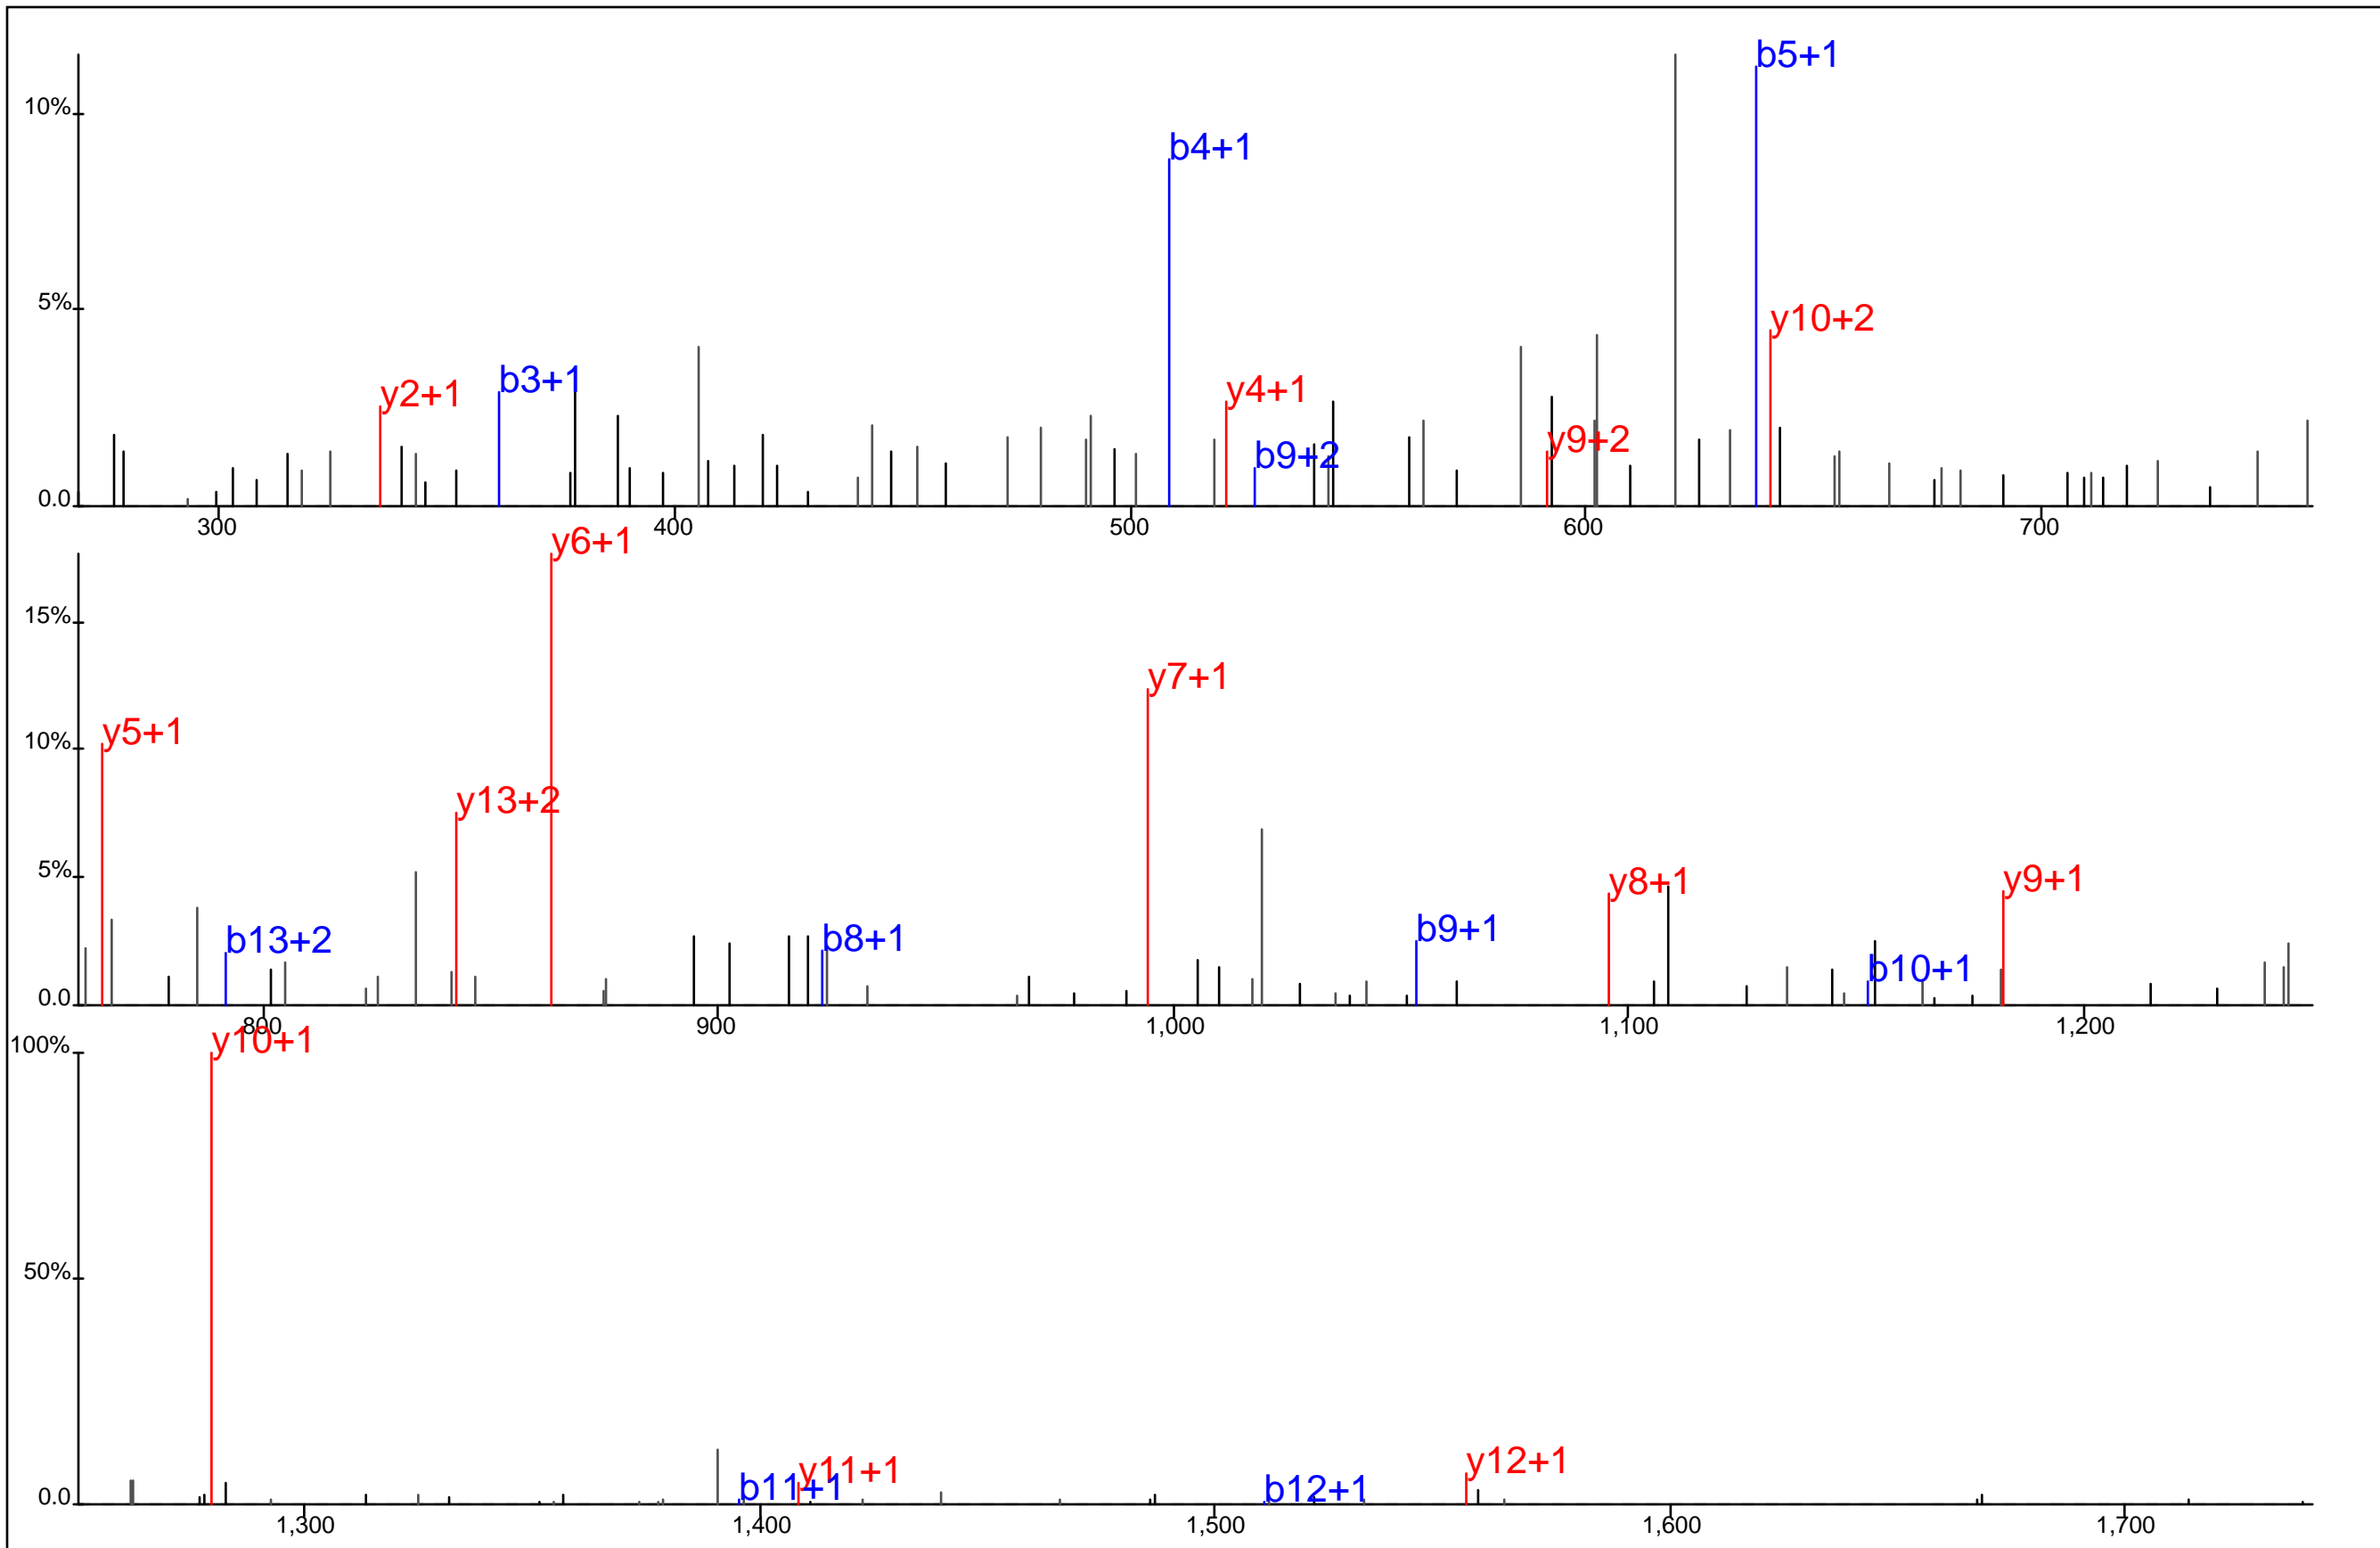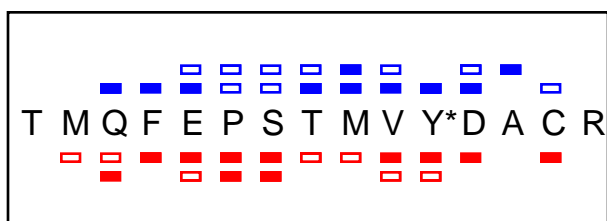

Protein Name: Talin  
 gi Accession: 0  
 Precursor Mass: 958.3723+2  
 Delta Mass: 2.652 ppm  
 XCorr: 51.97

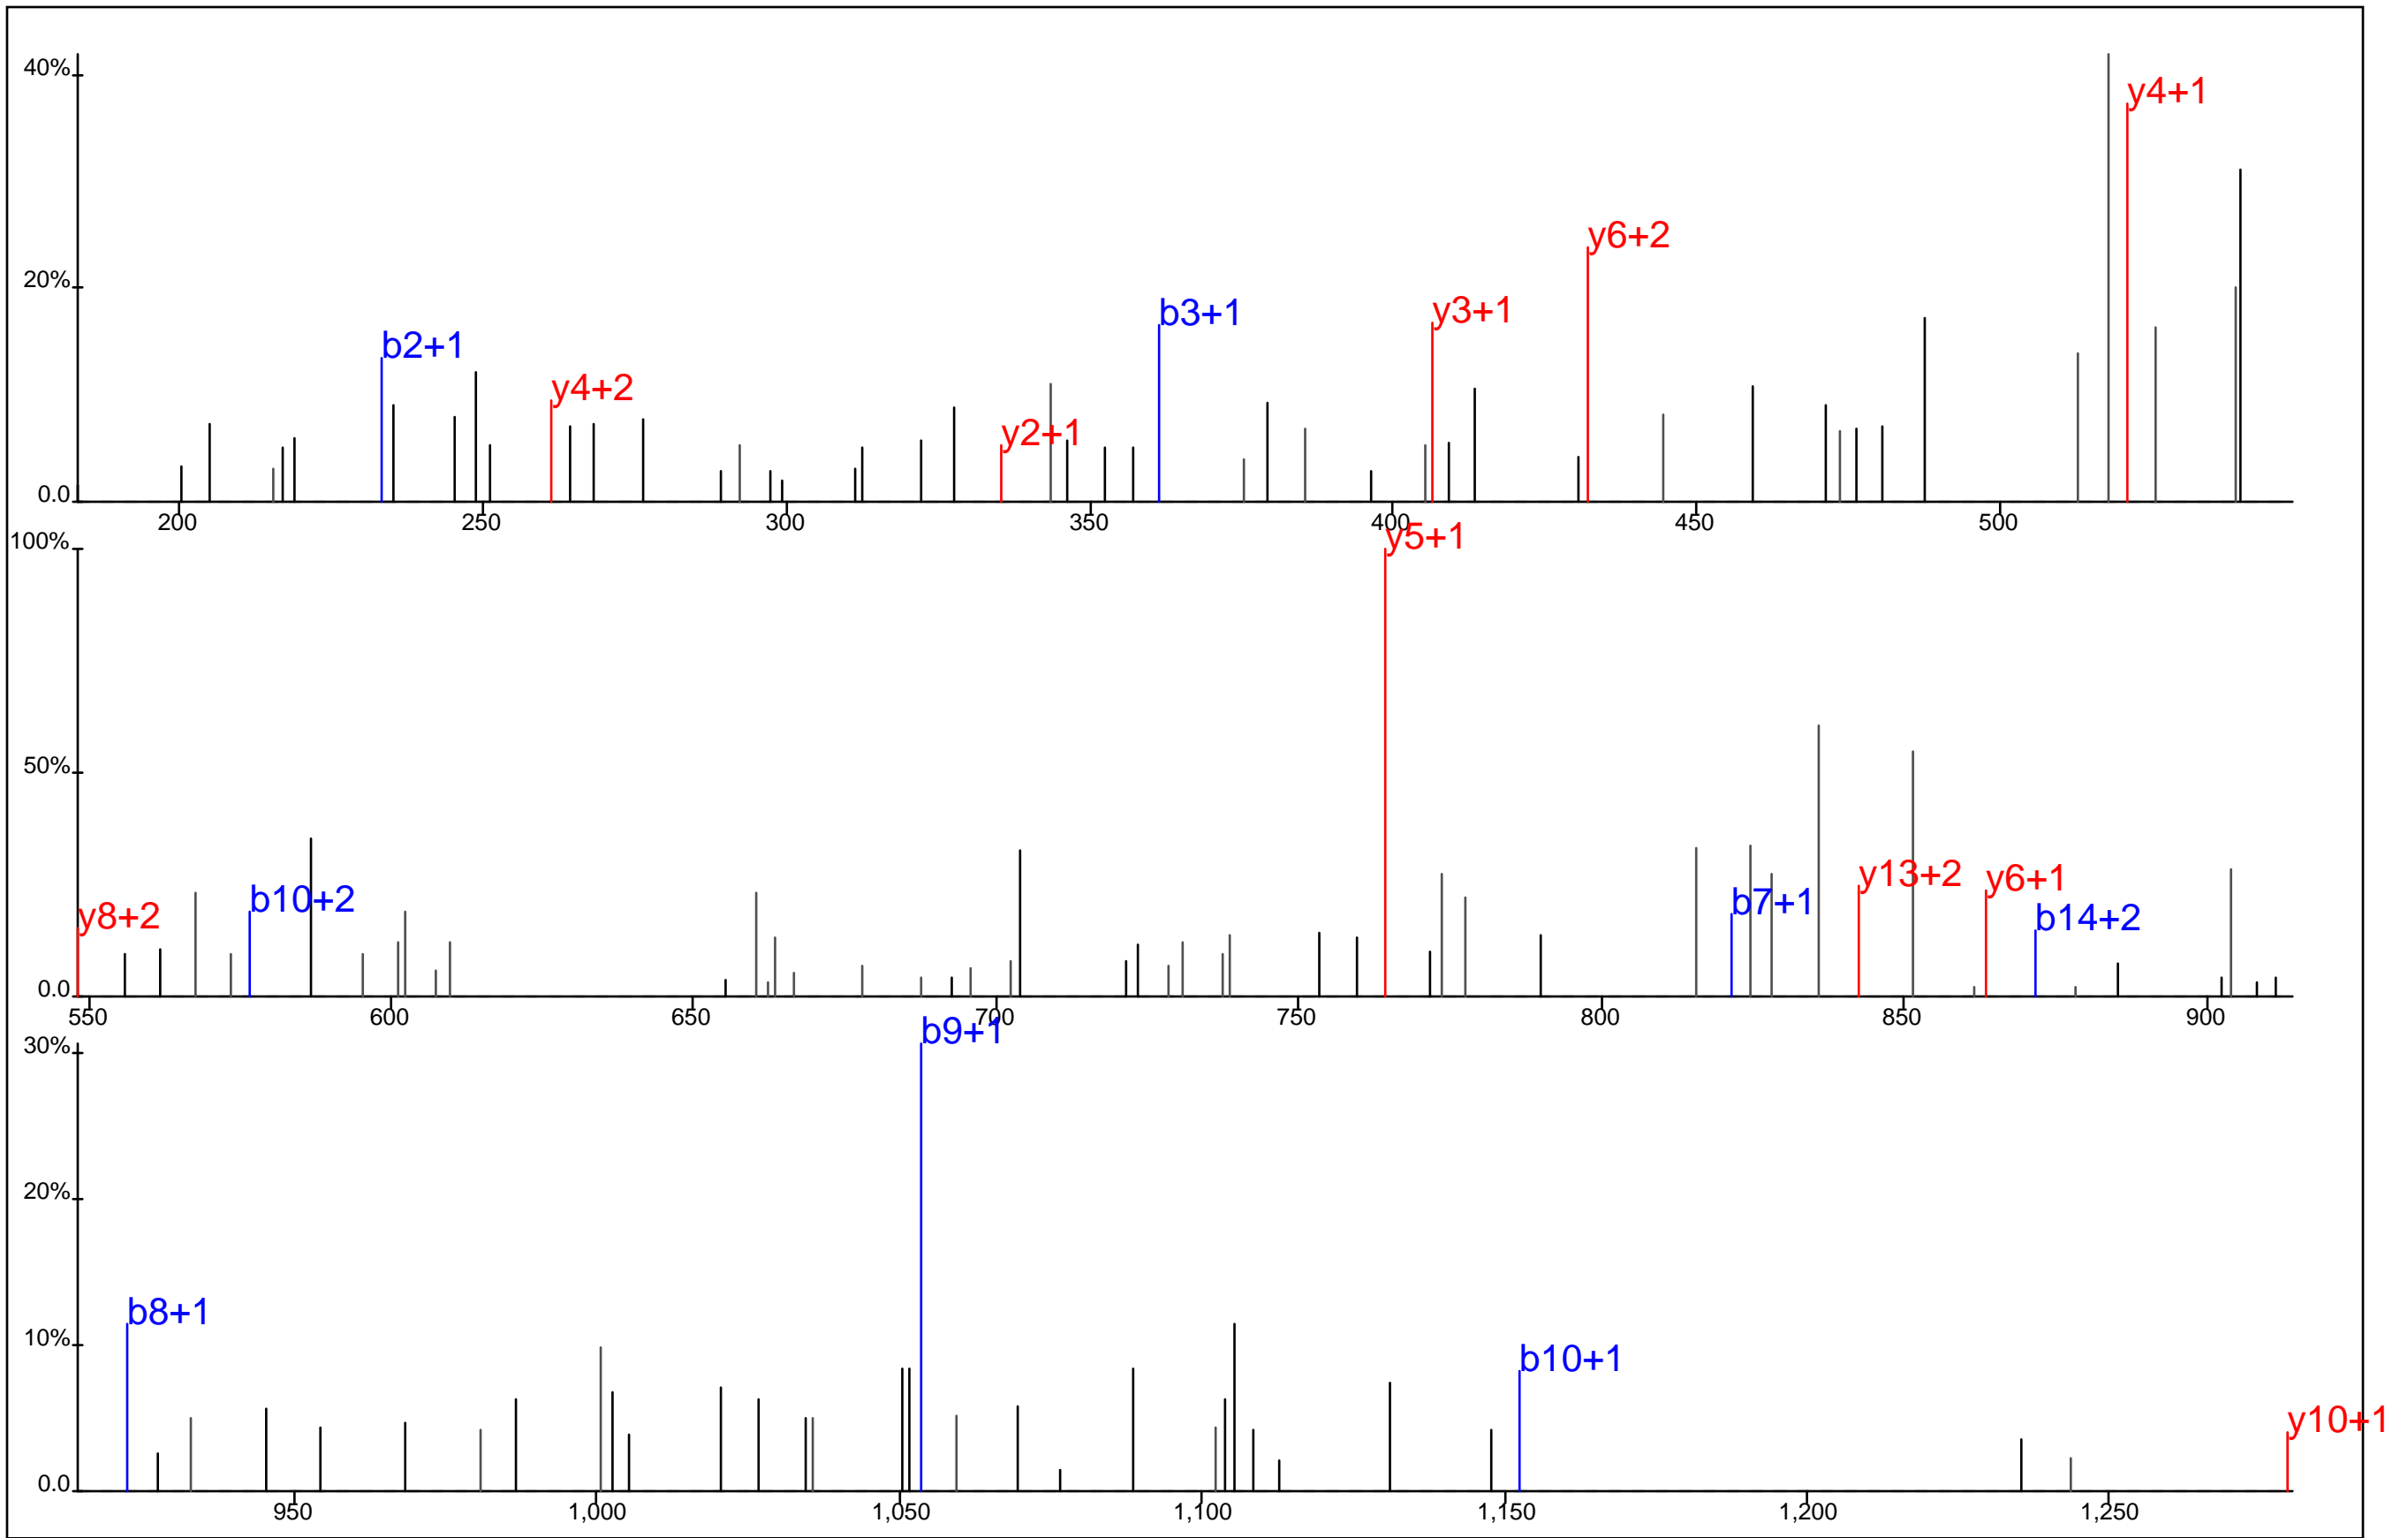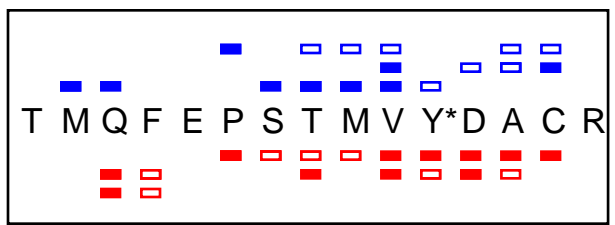

Protein Name: Talin  
 gi Accession: 0  
 Precursor Mass: 639.2534+3  
 Delta Mass: 1.611 ppm  
 XCorr: 21.5

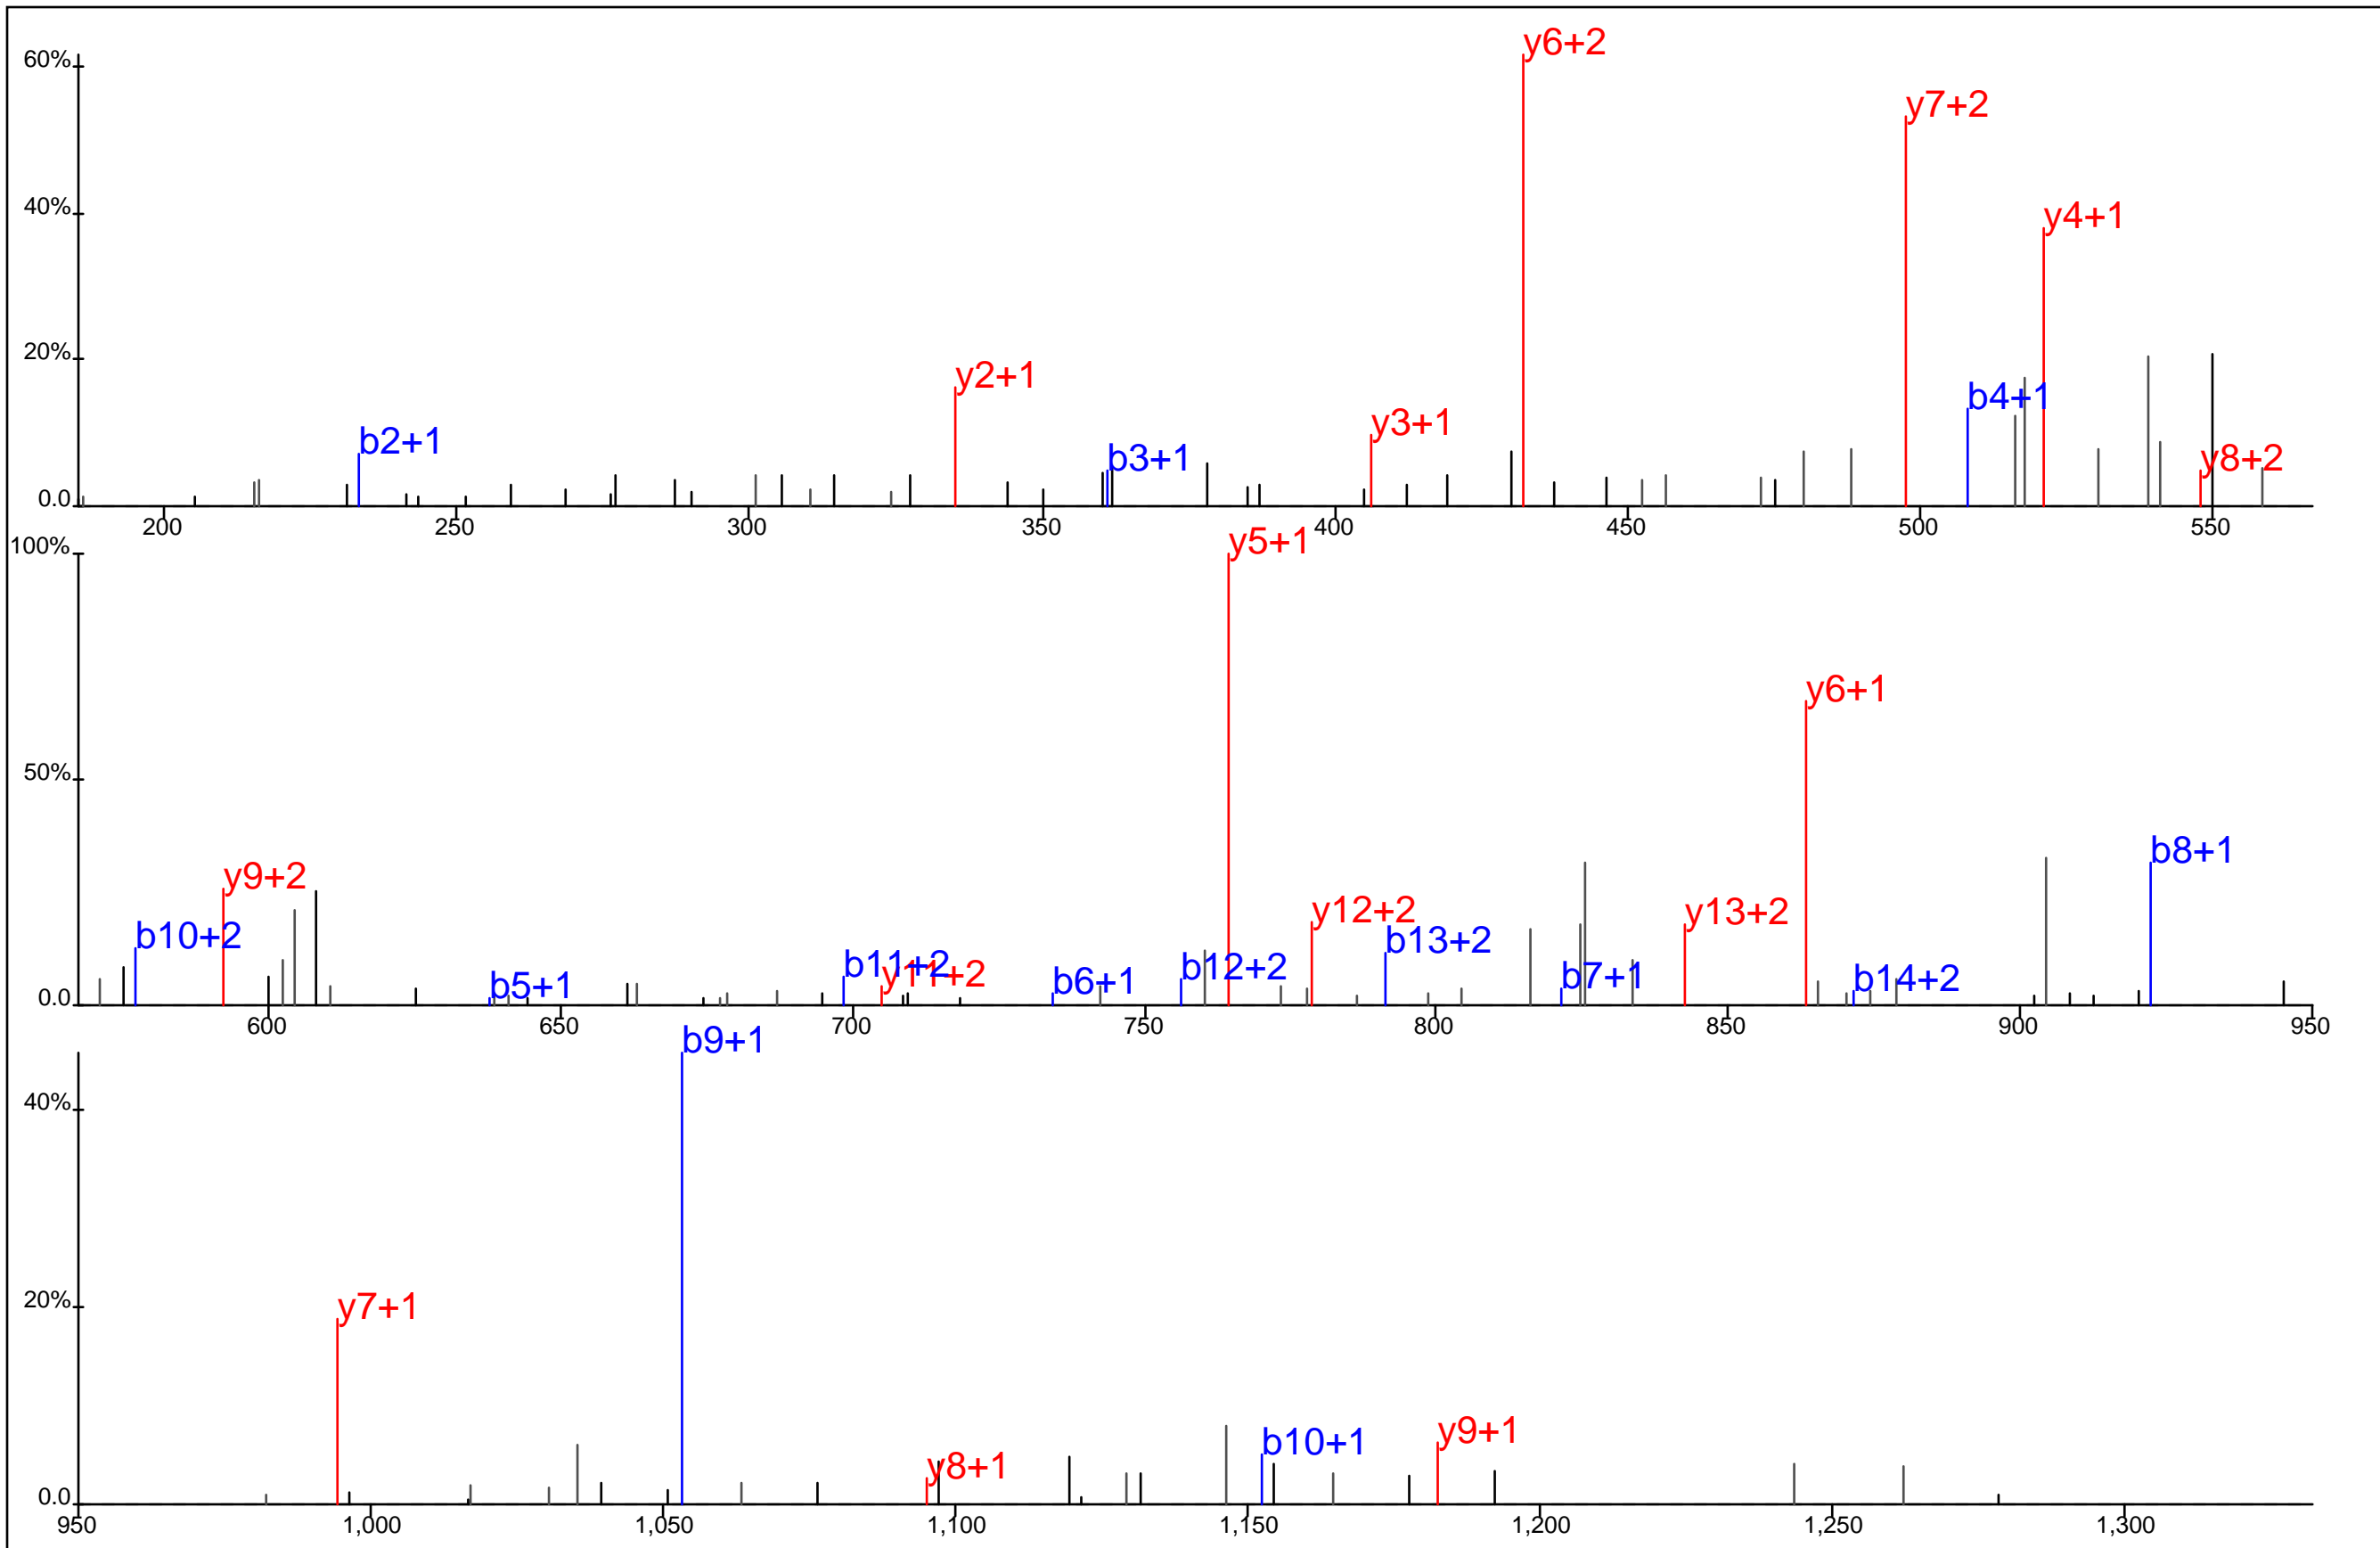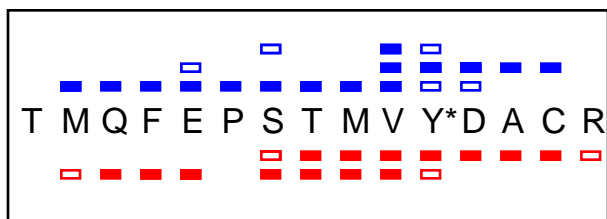

Protein Name: Talin  
 gi Accession: 0  
 Precursor Mass: 639.2512+3  
 Delta Mass: 1.734 ppm  
 XCorr: 44.48

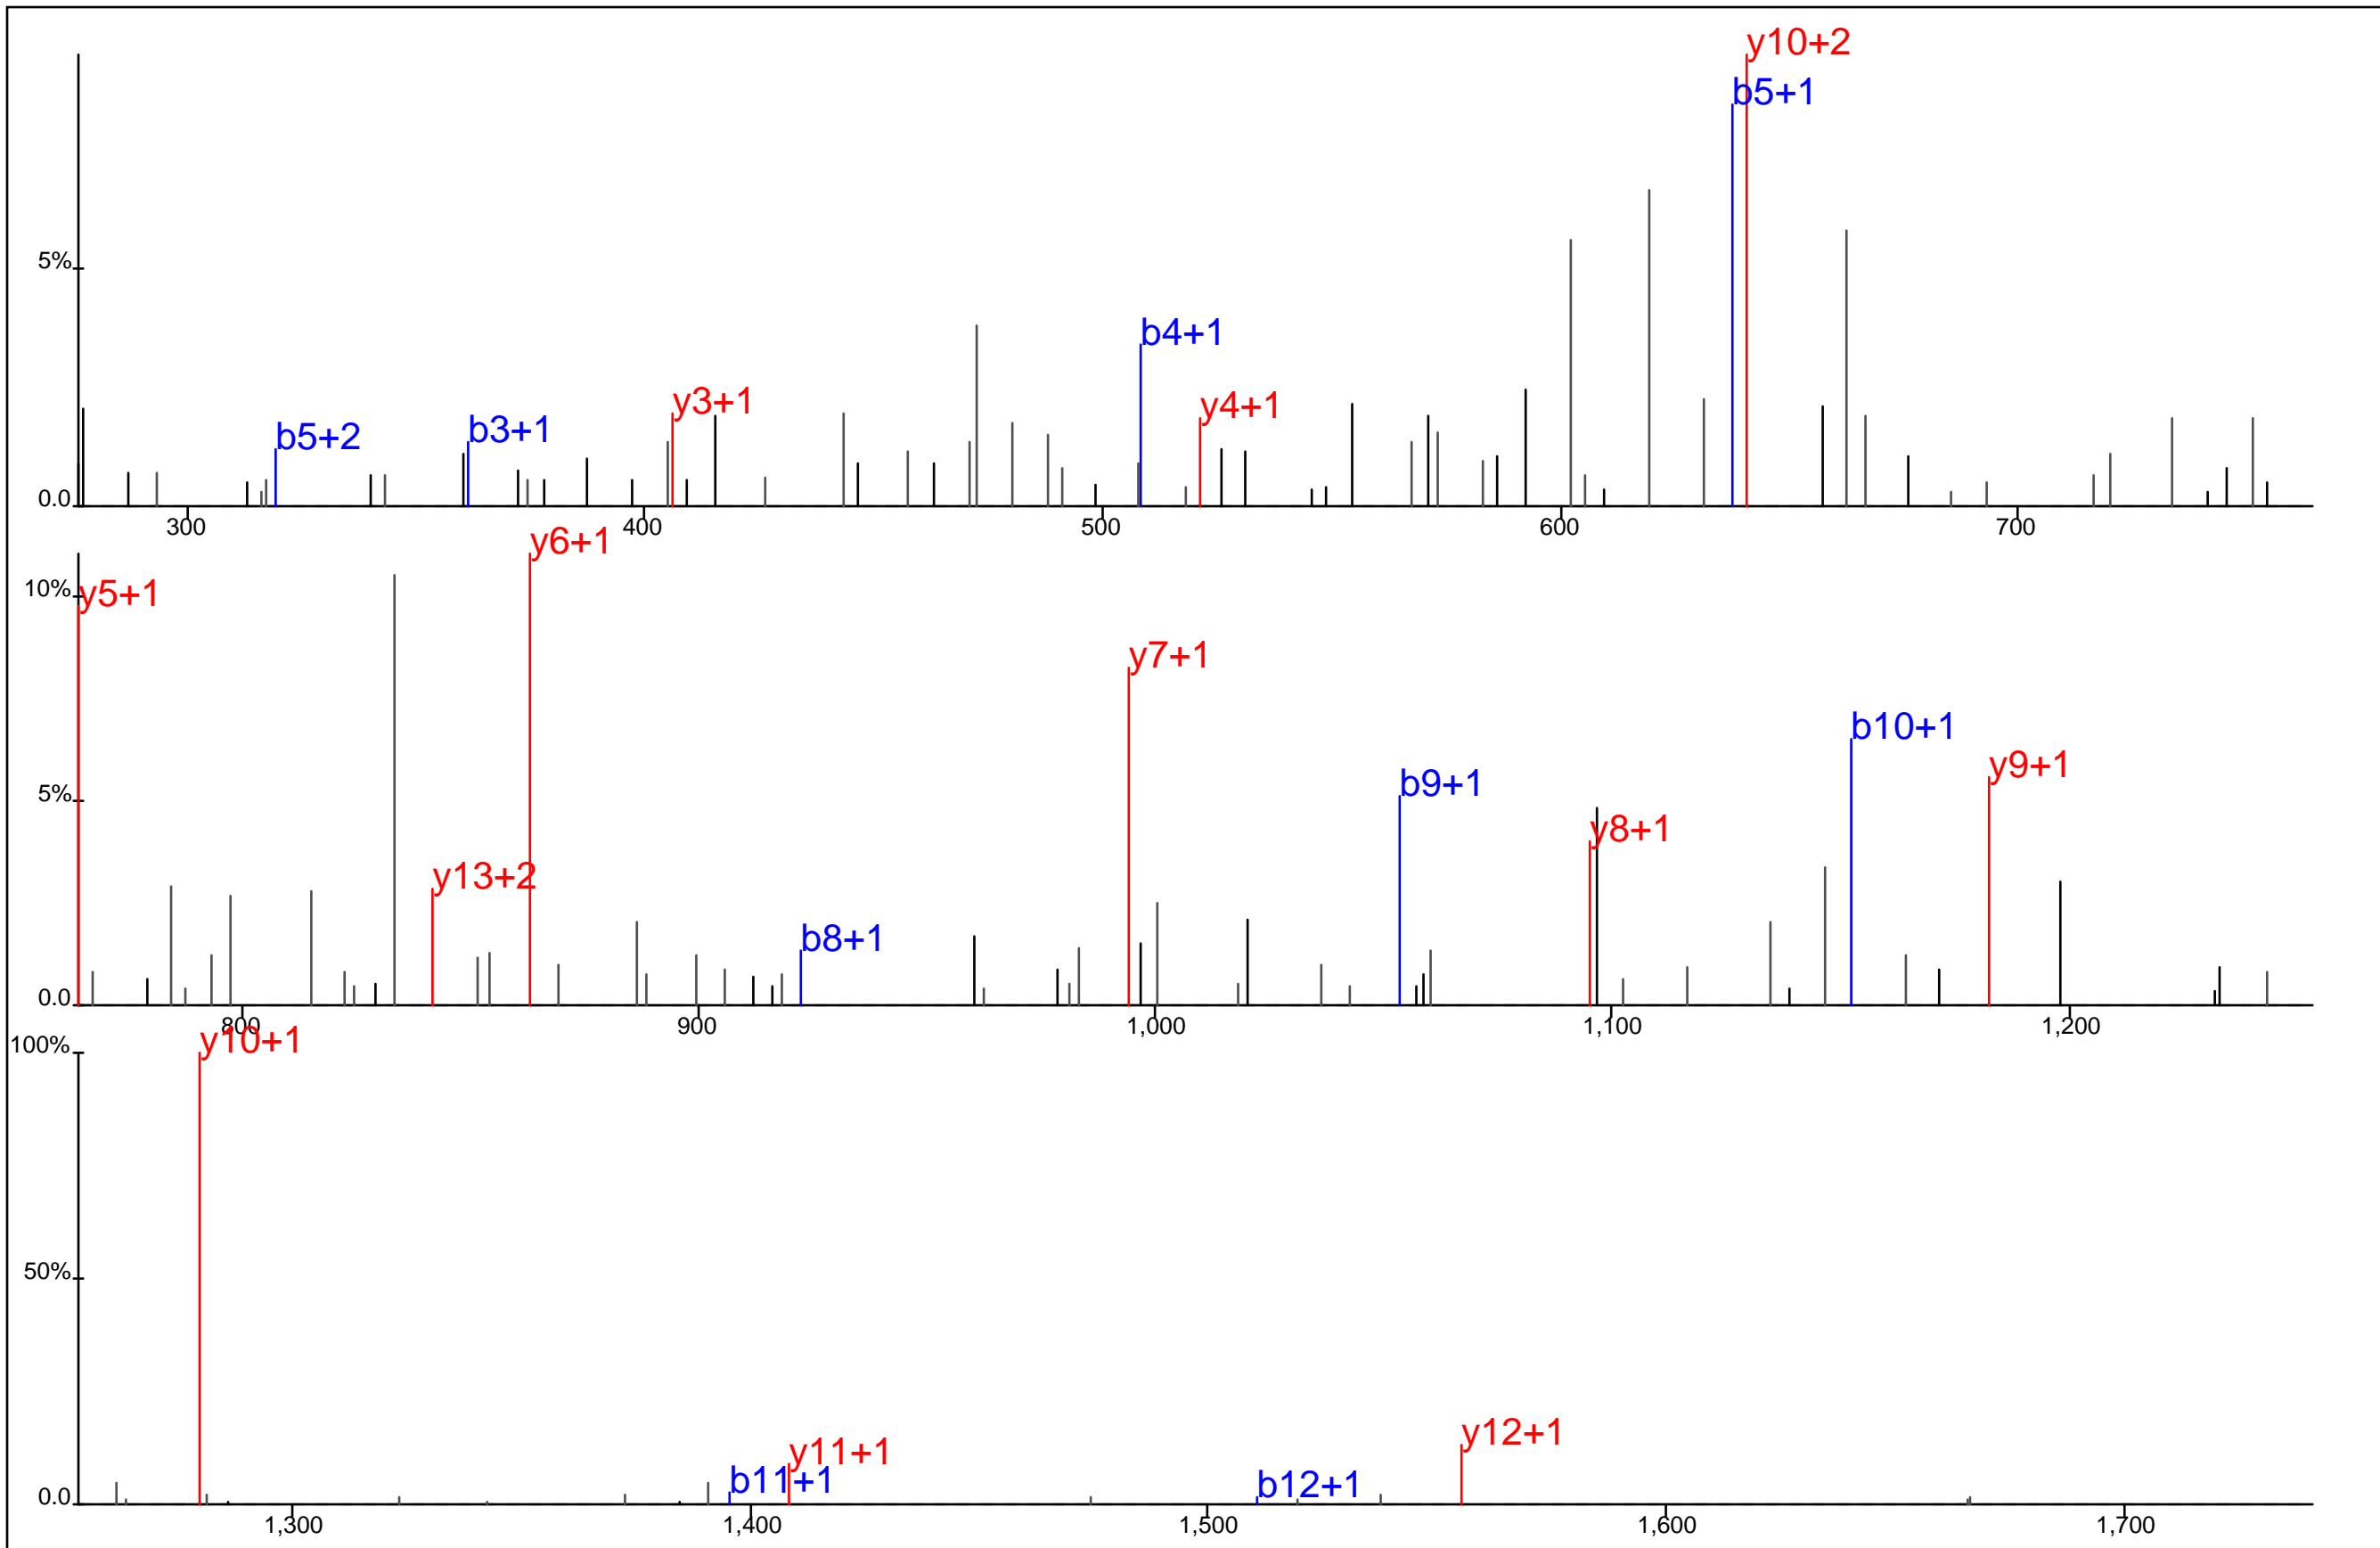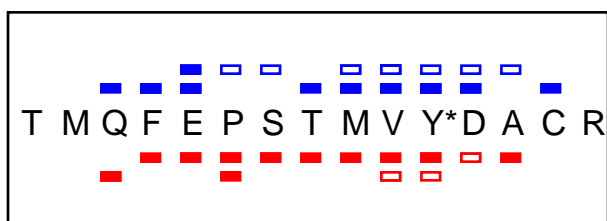

Protein Name: Talin  
 gi Accession: 0  
 Precursor Mass: 958.3748+2  
 Delta Mass: 0.039 ppm  
 XCorr: 61.8

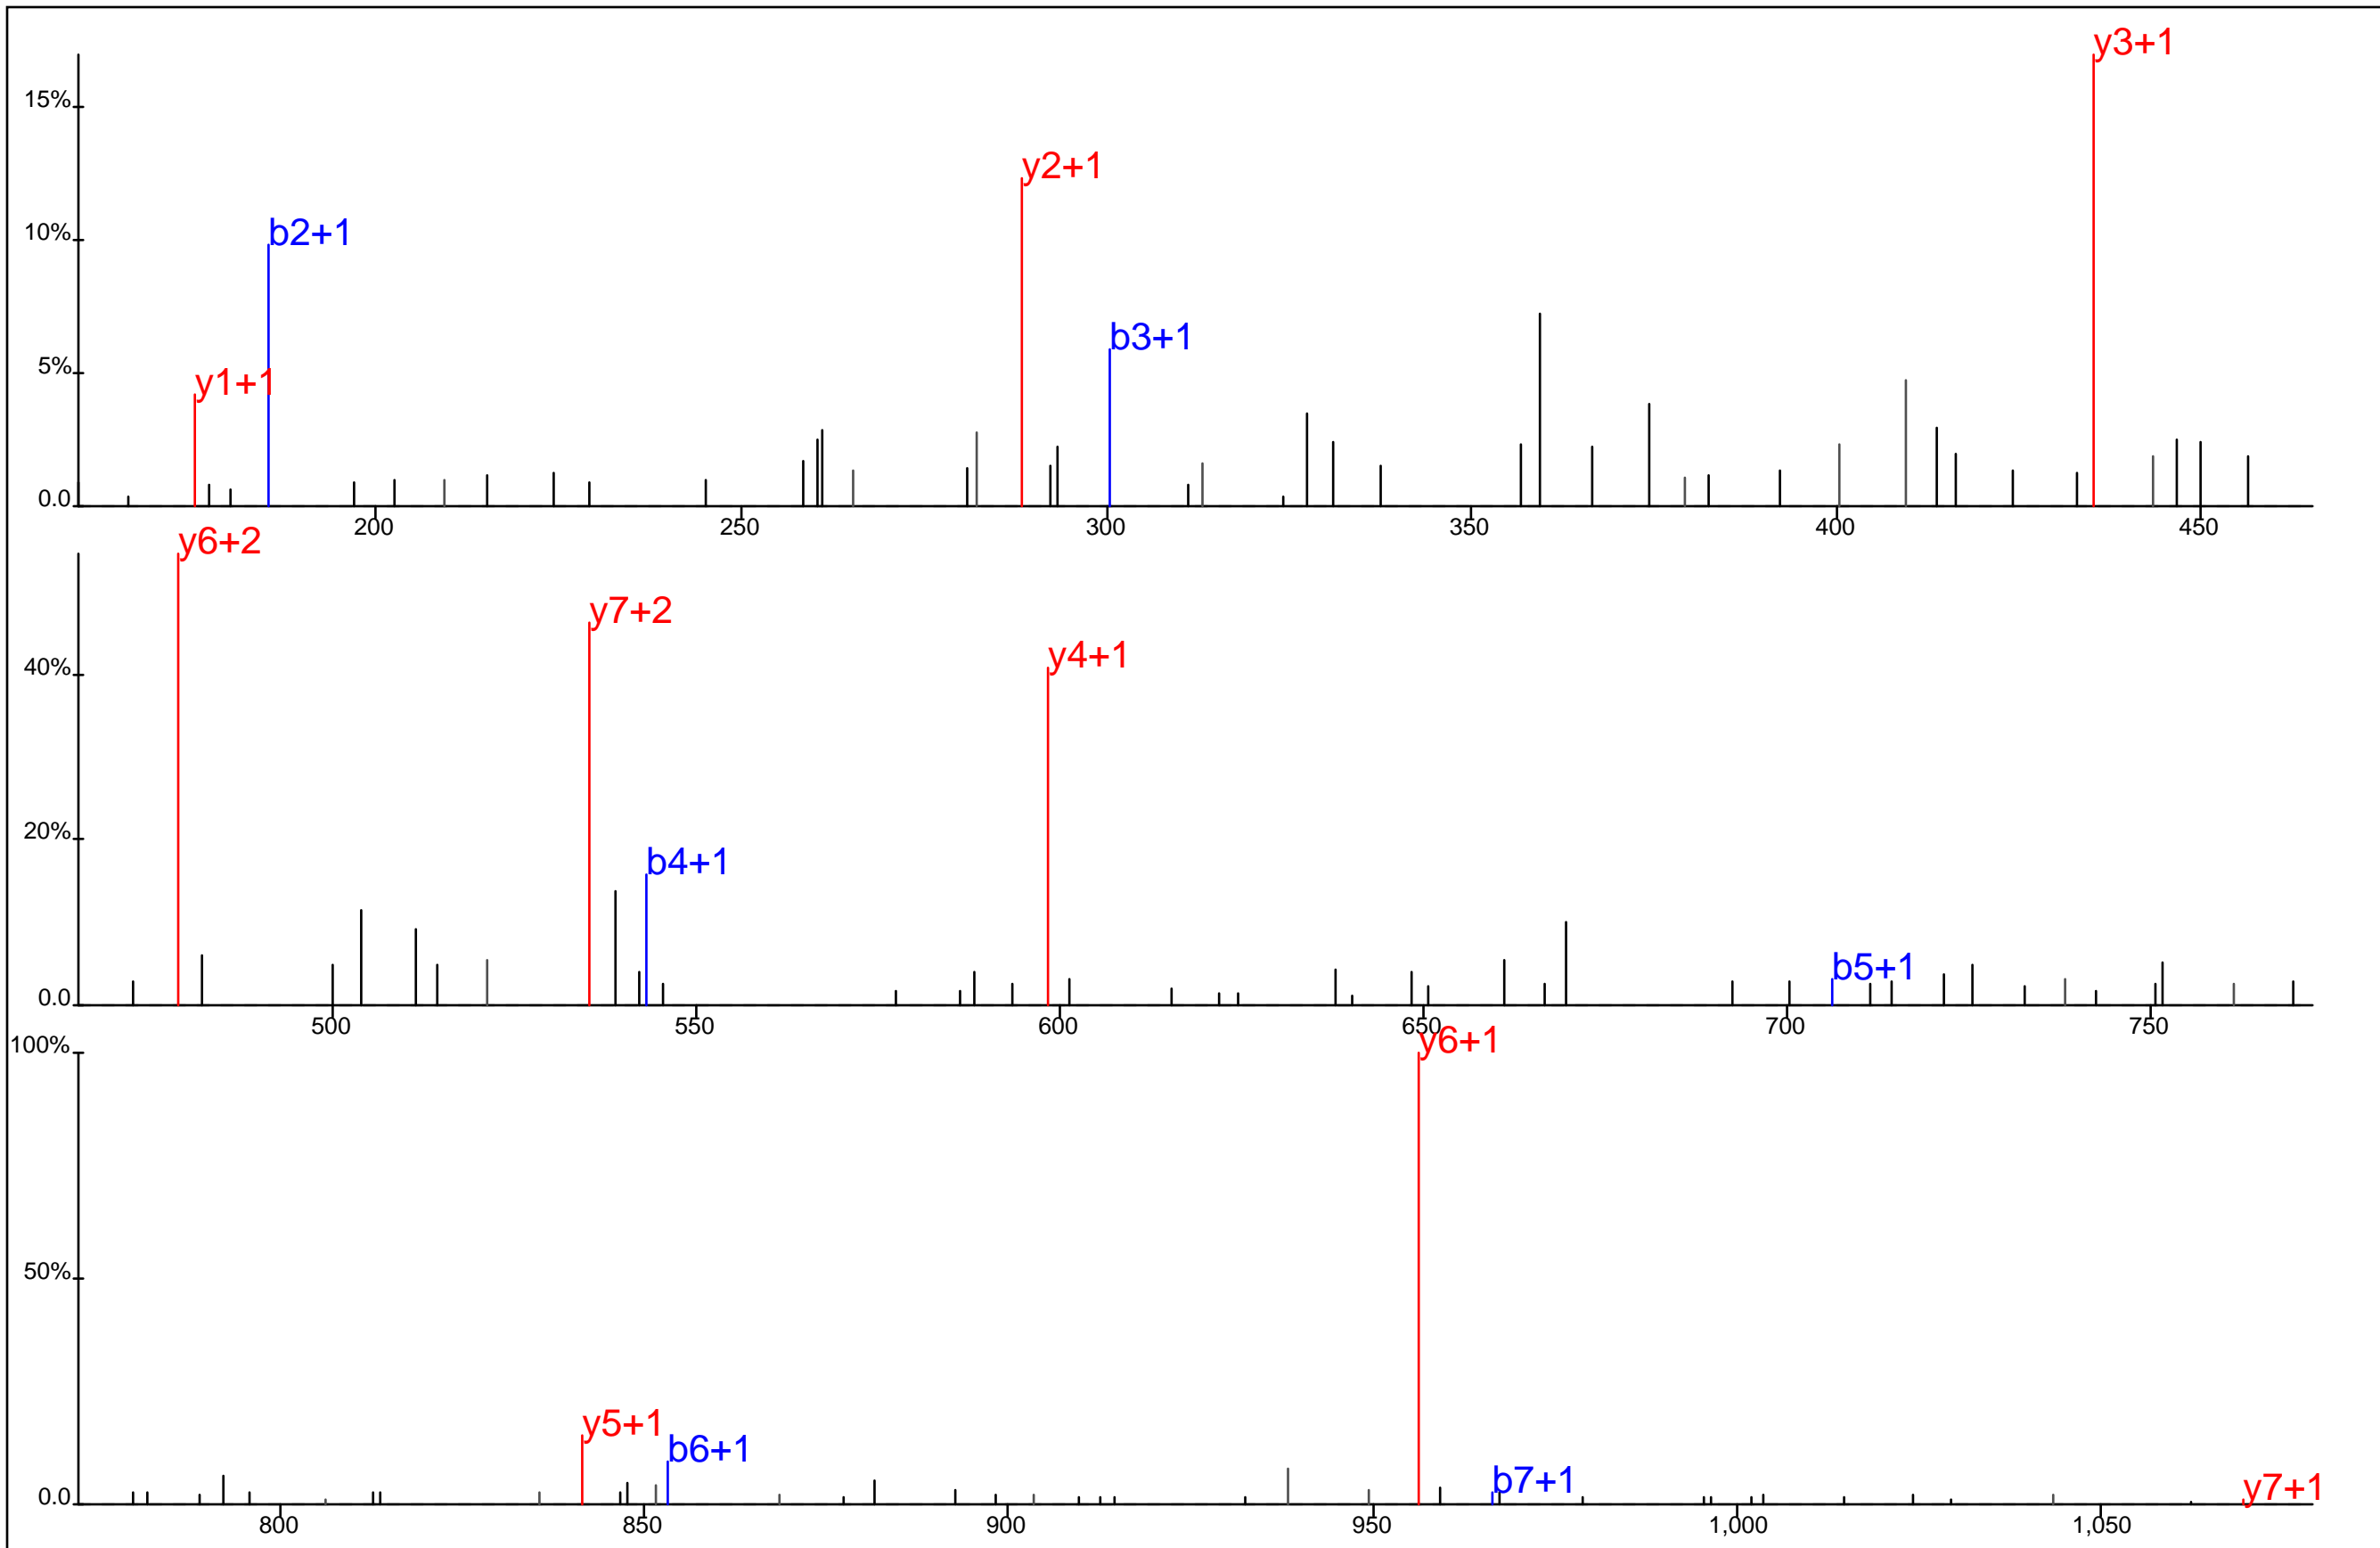

**A L D Y\*Y M#L R**

Protein Name: Talin  
 gi Accession: 0  
 Precursor Mass: 570.7430+2  
 Delta Mass: 0.600 ppm  
 XCorr: 52.64

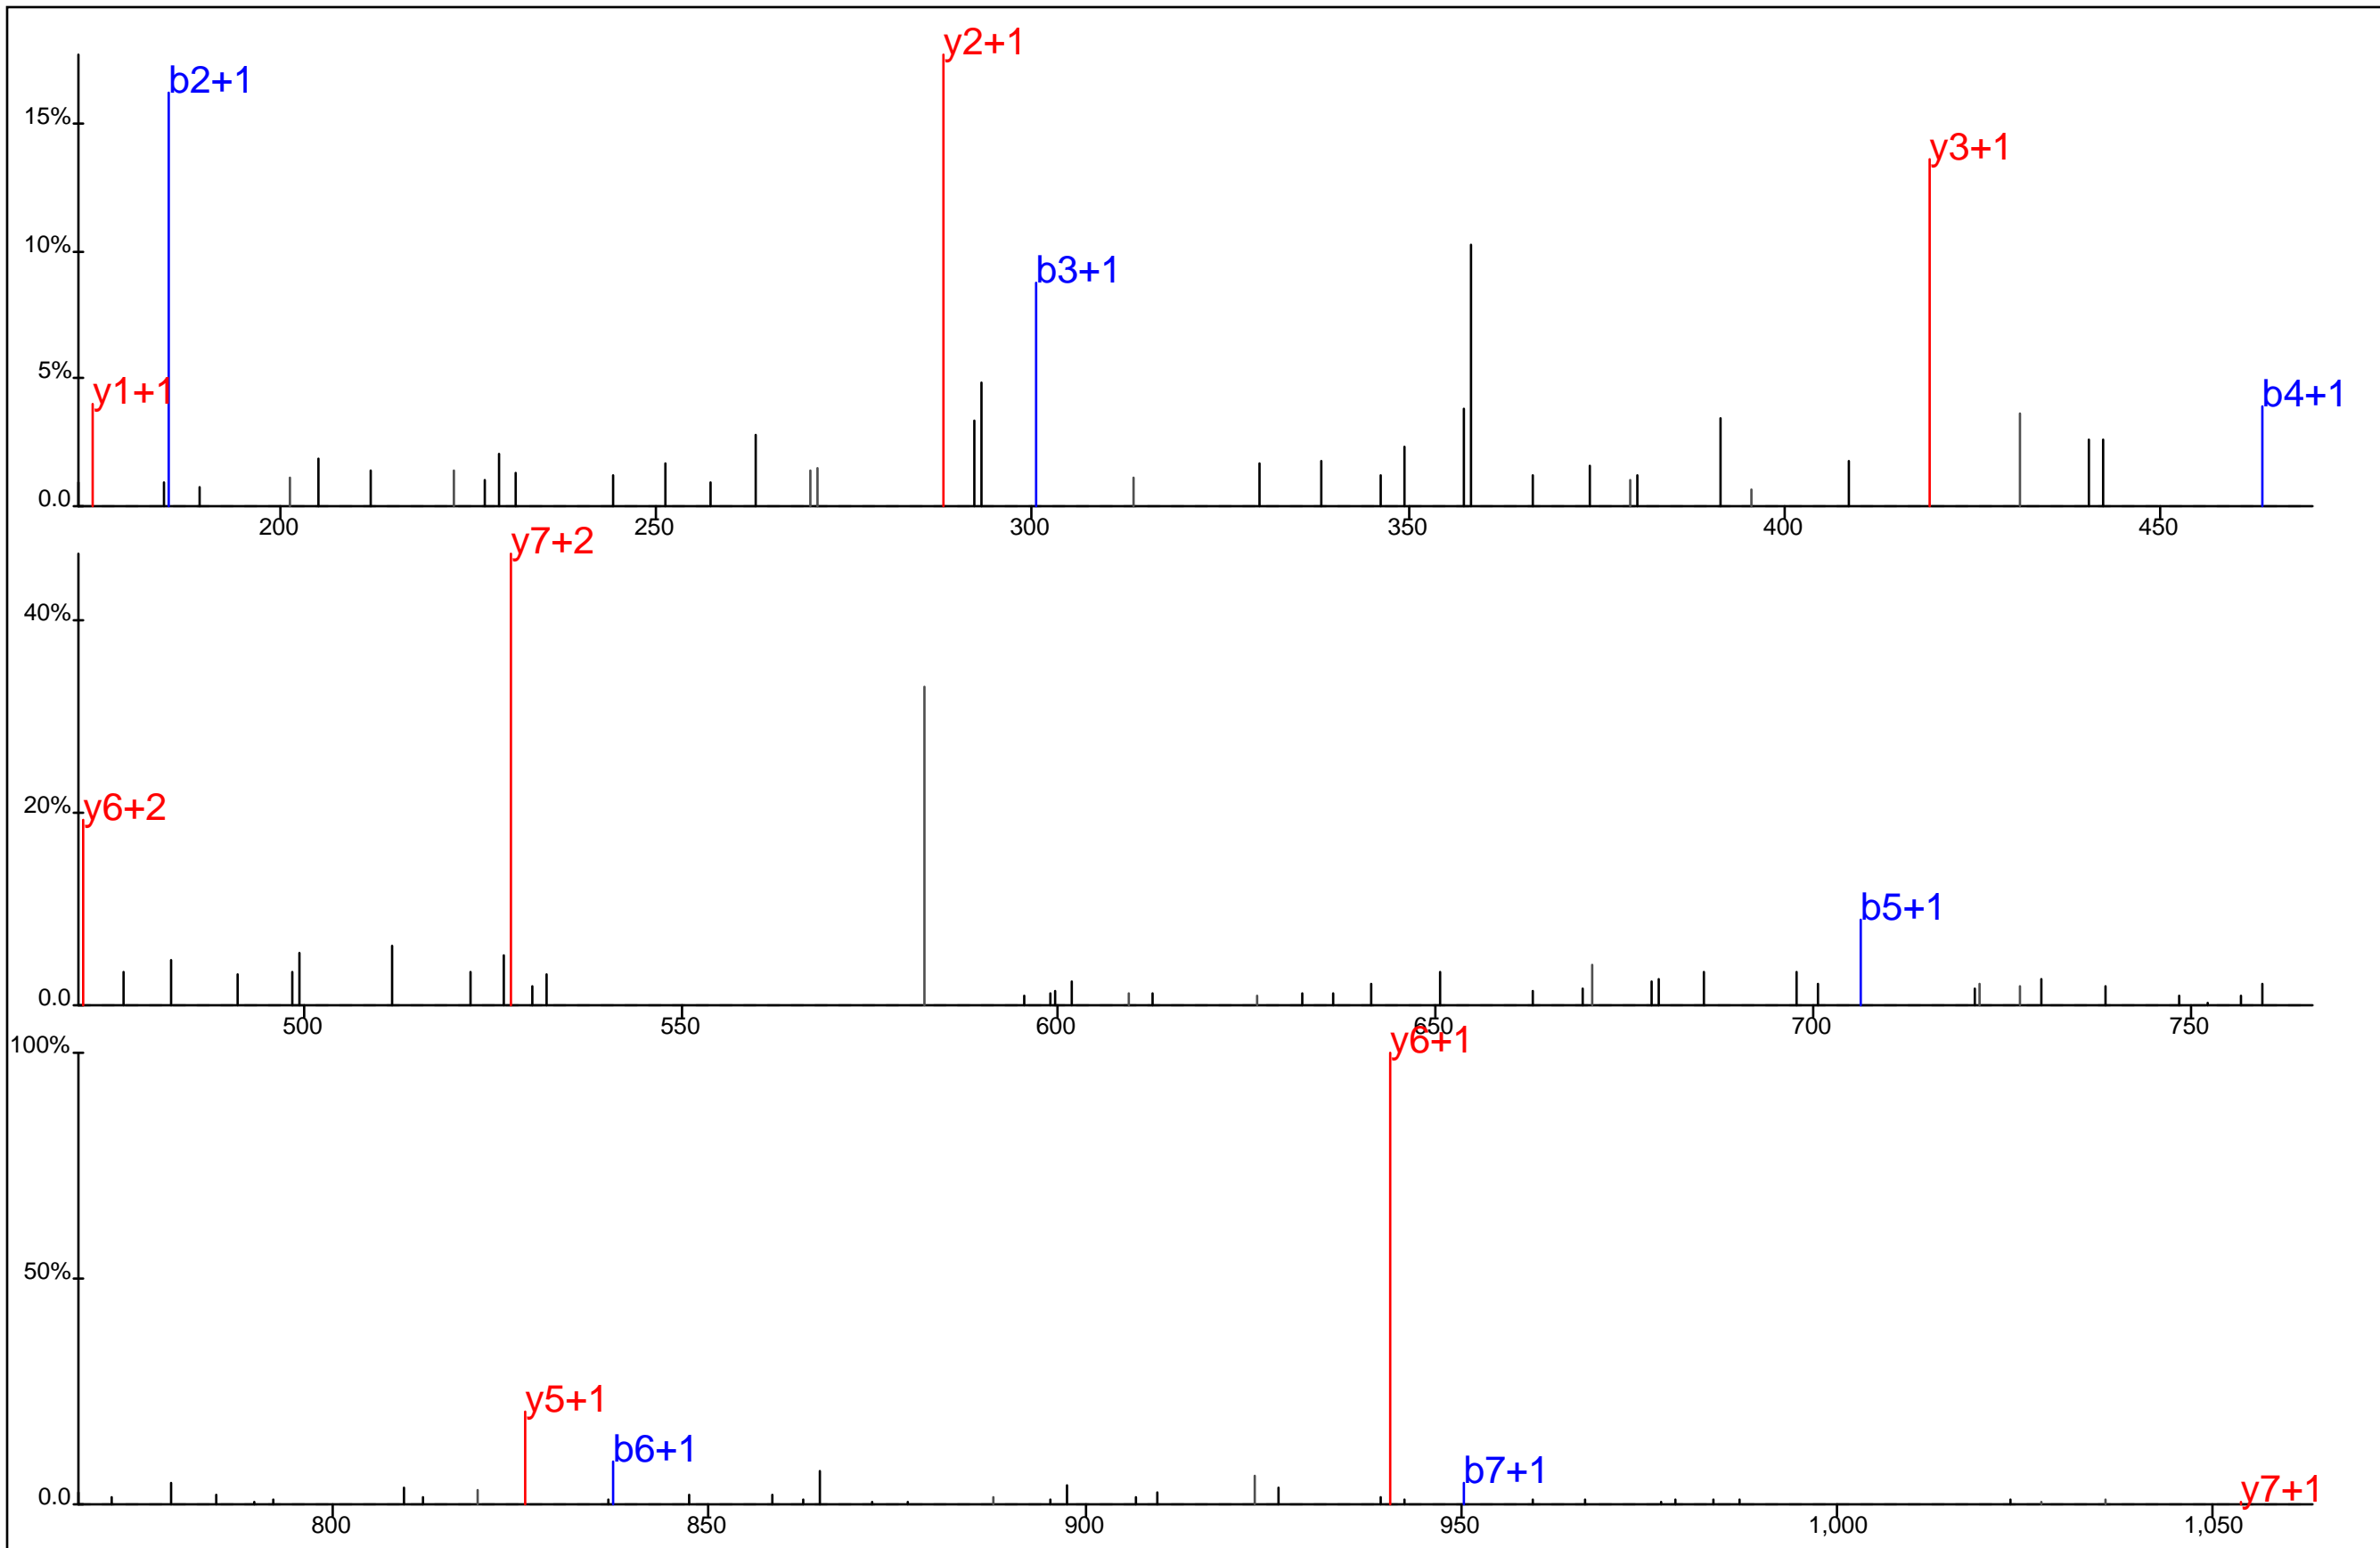

■ ■ ■ ■ ■ ■ ■  
 A L D Y Y\* M L R  
□ □ □ □ □ □ □

Protein Name: Talin  
 gi Accession: 0  
 Precursor Mass: 562.7459+2  
 Delta Mass: 0.023 ppm  
 XCorr: 43.51

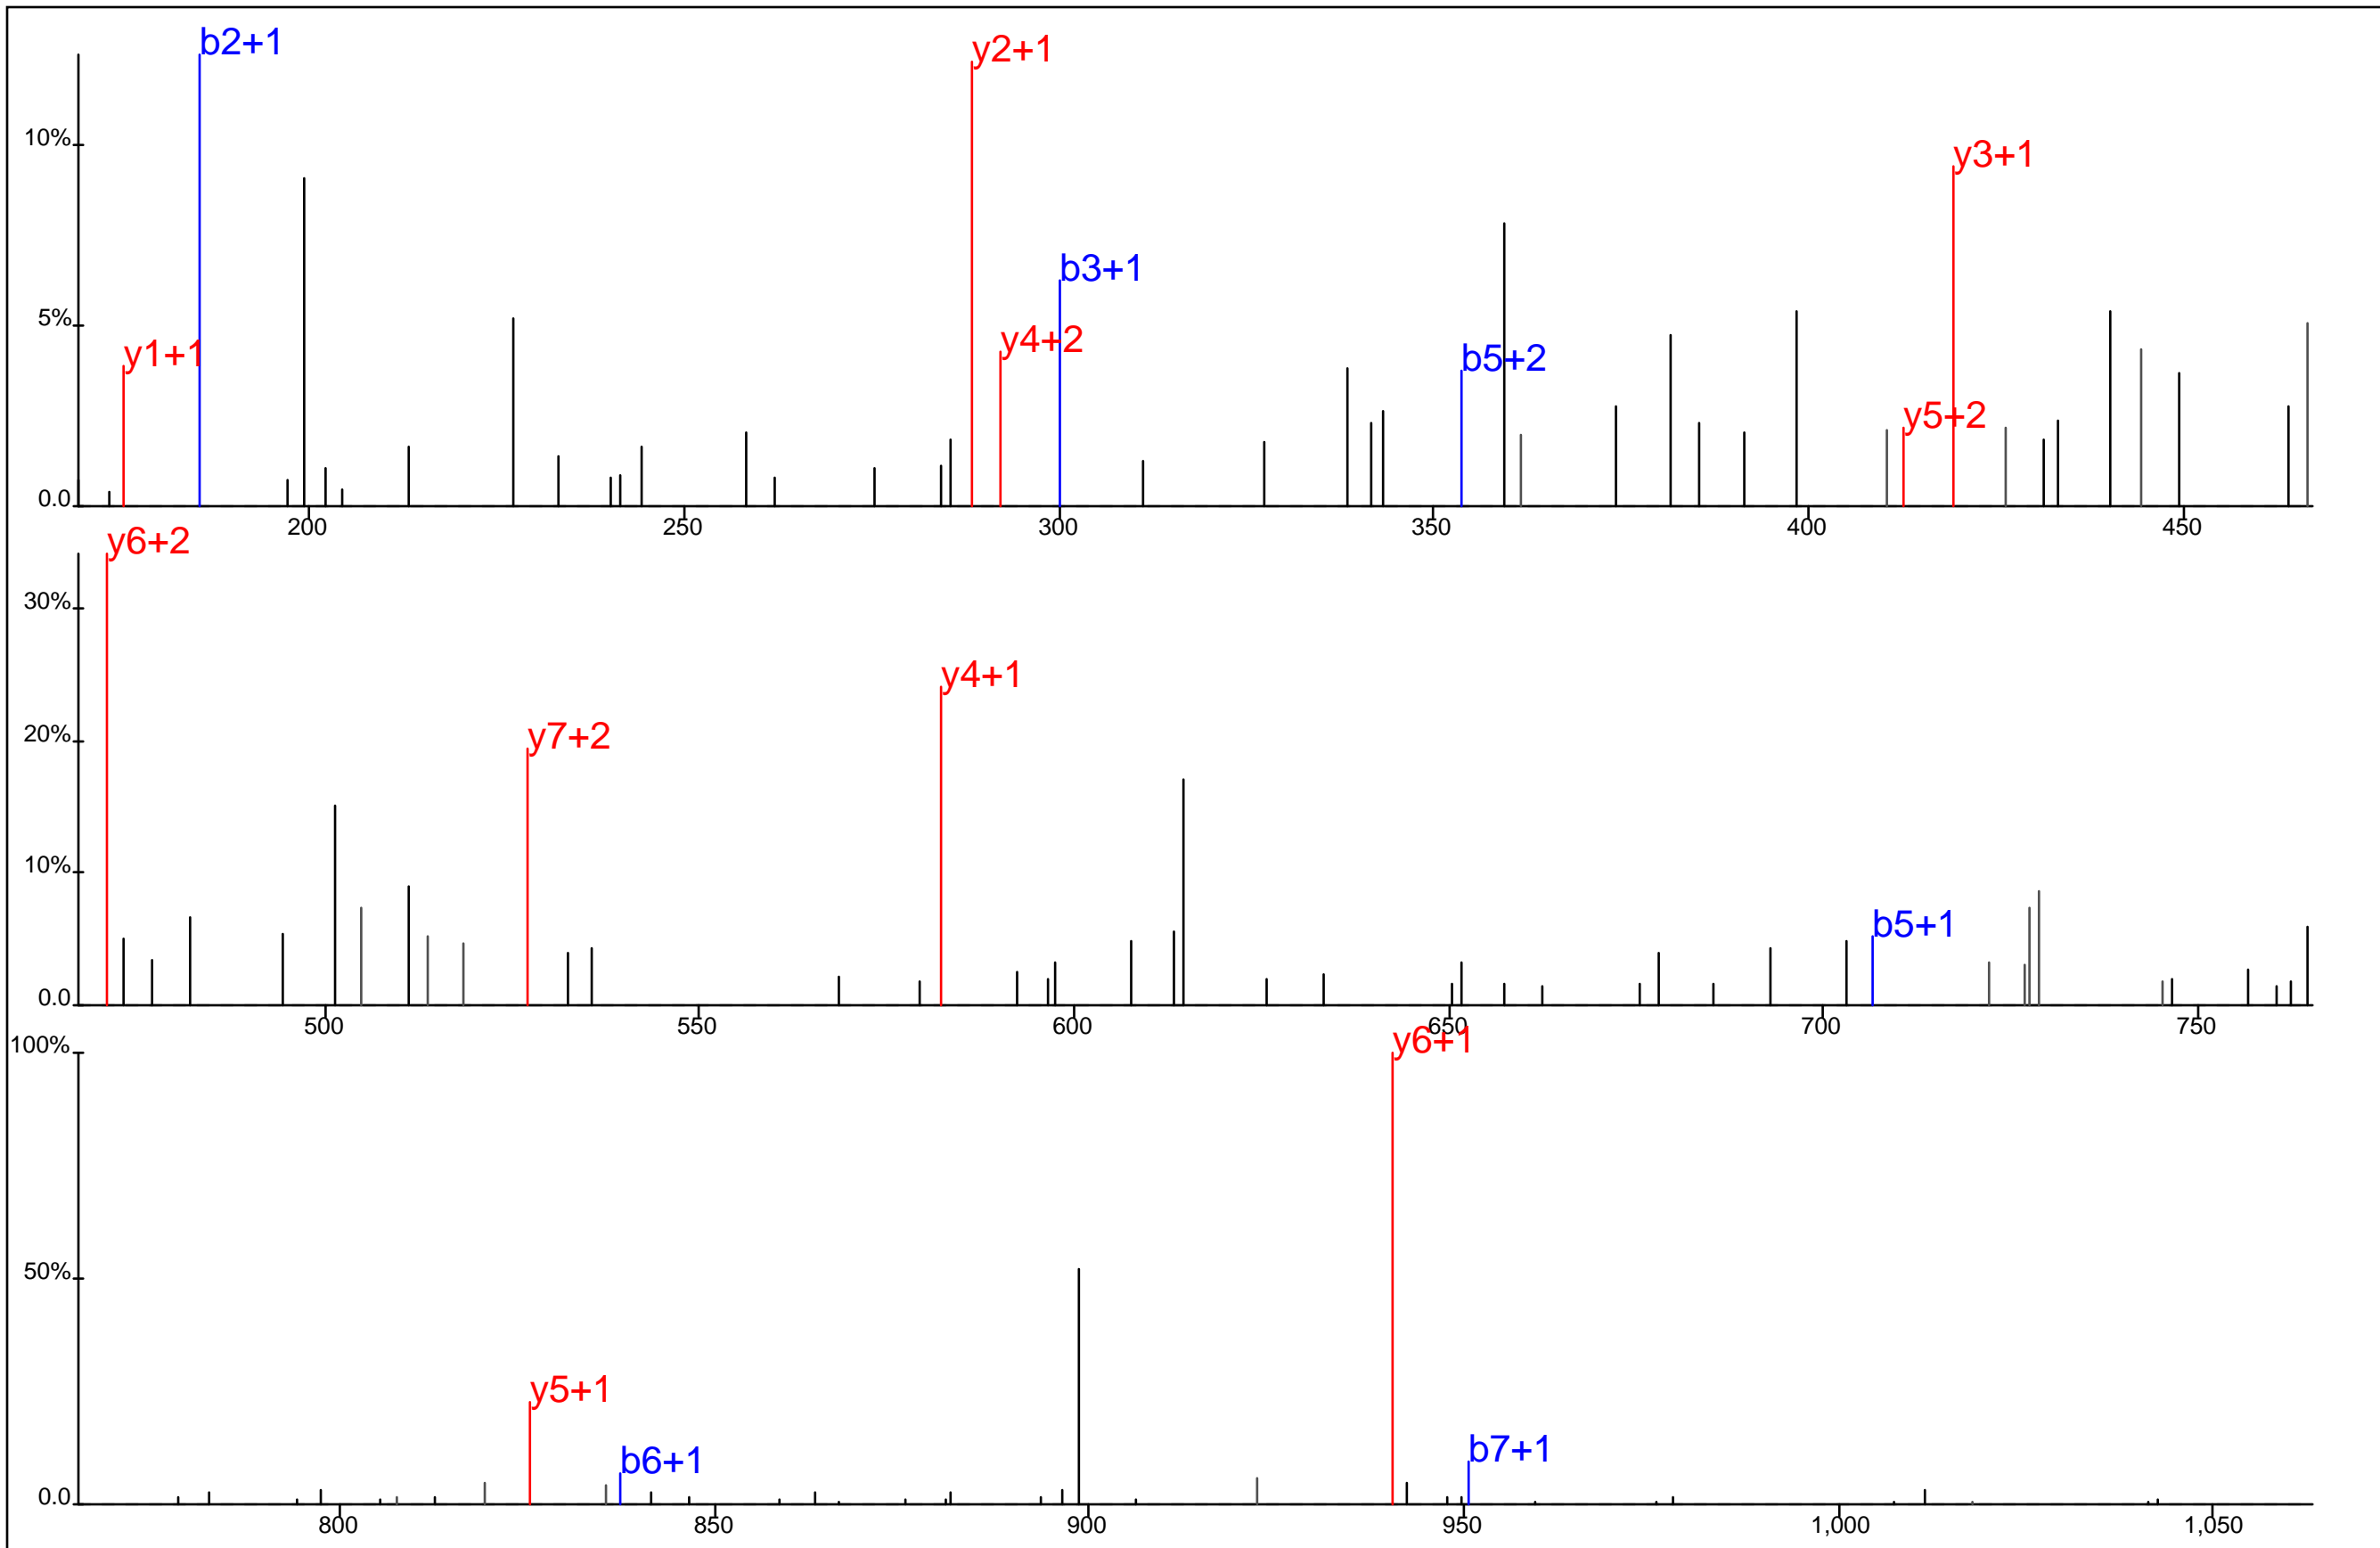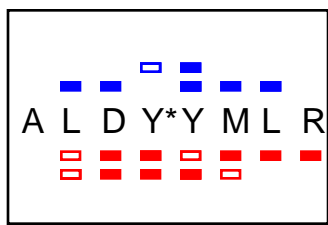

Protein Name: Talin  
 gi Accession: 0  
 Precursor Mass: 562.7462+2  
 Delta Mass: 0.519 ppm  
 XCorr: 31.78

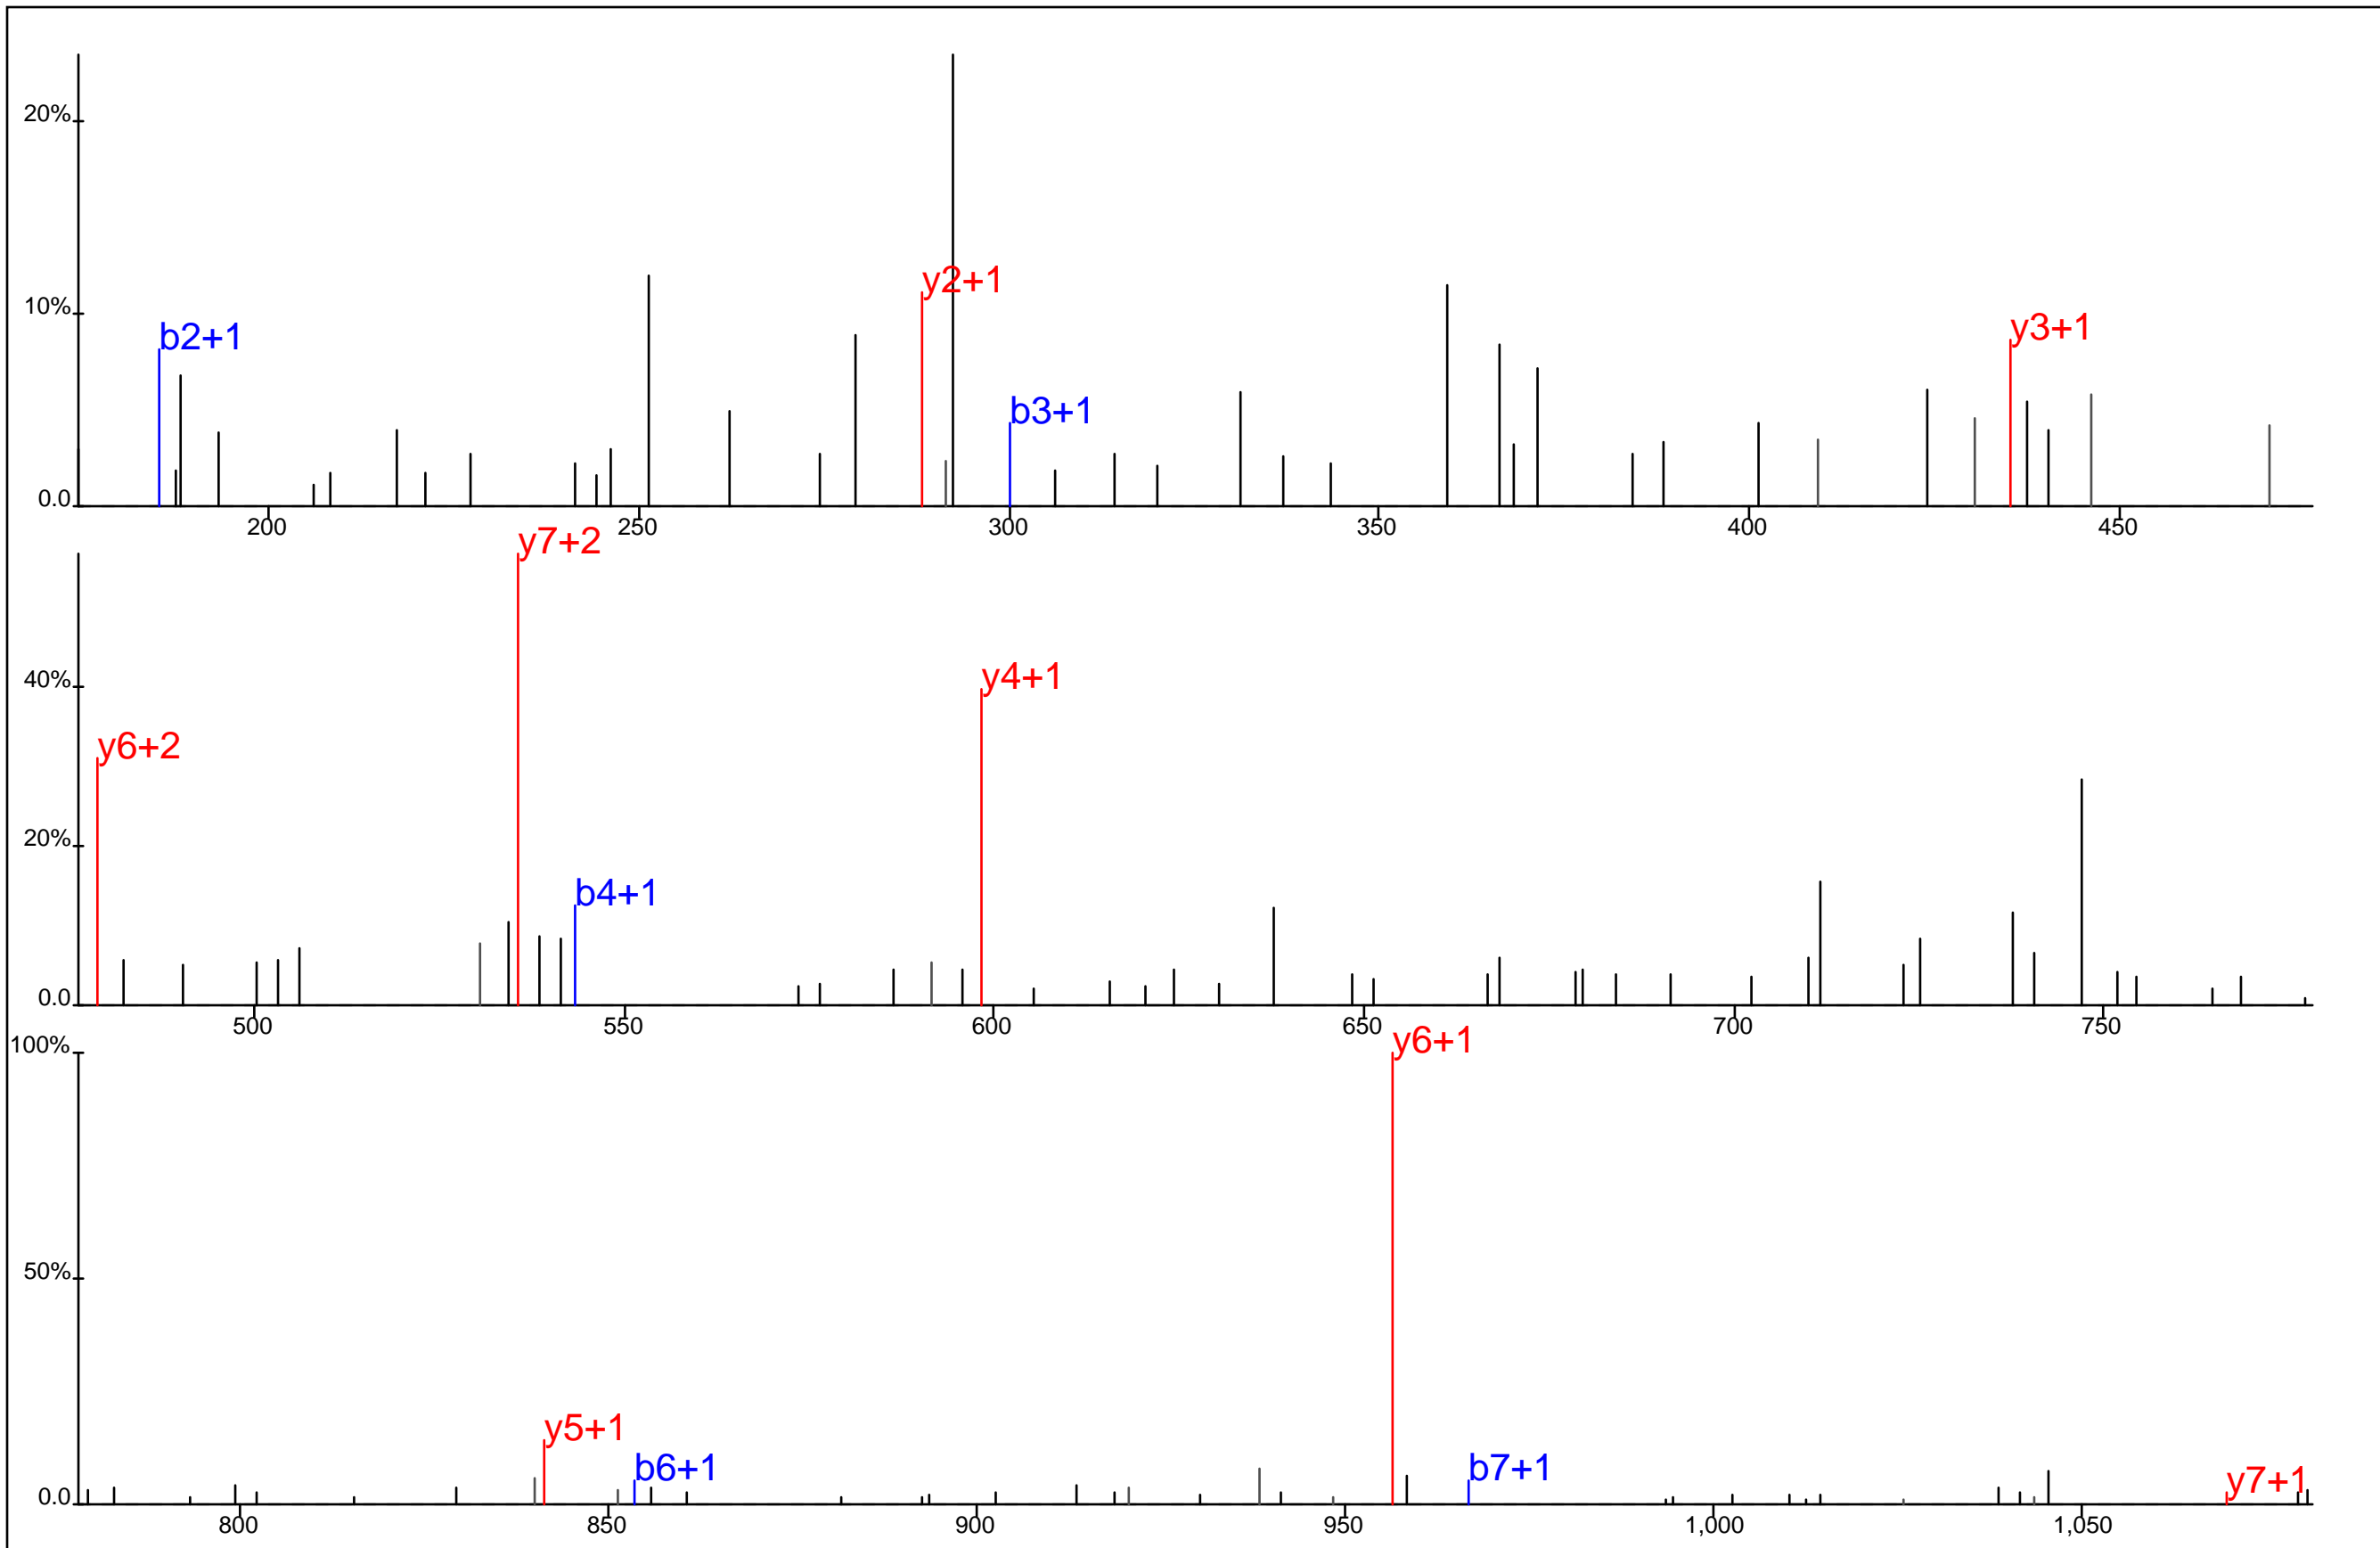

■ ■ ▢ ▢ ■ ▢  
 A L D Y\*Y M#L R  
▢ ▢ ▢ ▢ ▢

Protein Name: Talin  
 gi Accession: 0  
 Precursor Mass: 570.7444+2  
 Delta Mass: 1.755 ppm  
 XCorr: 26.33



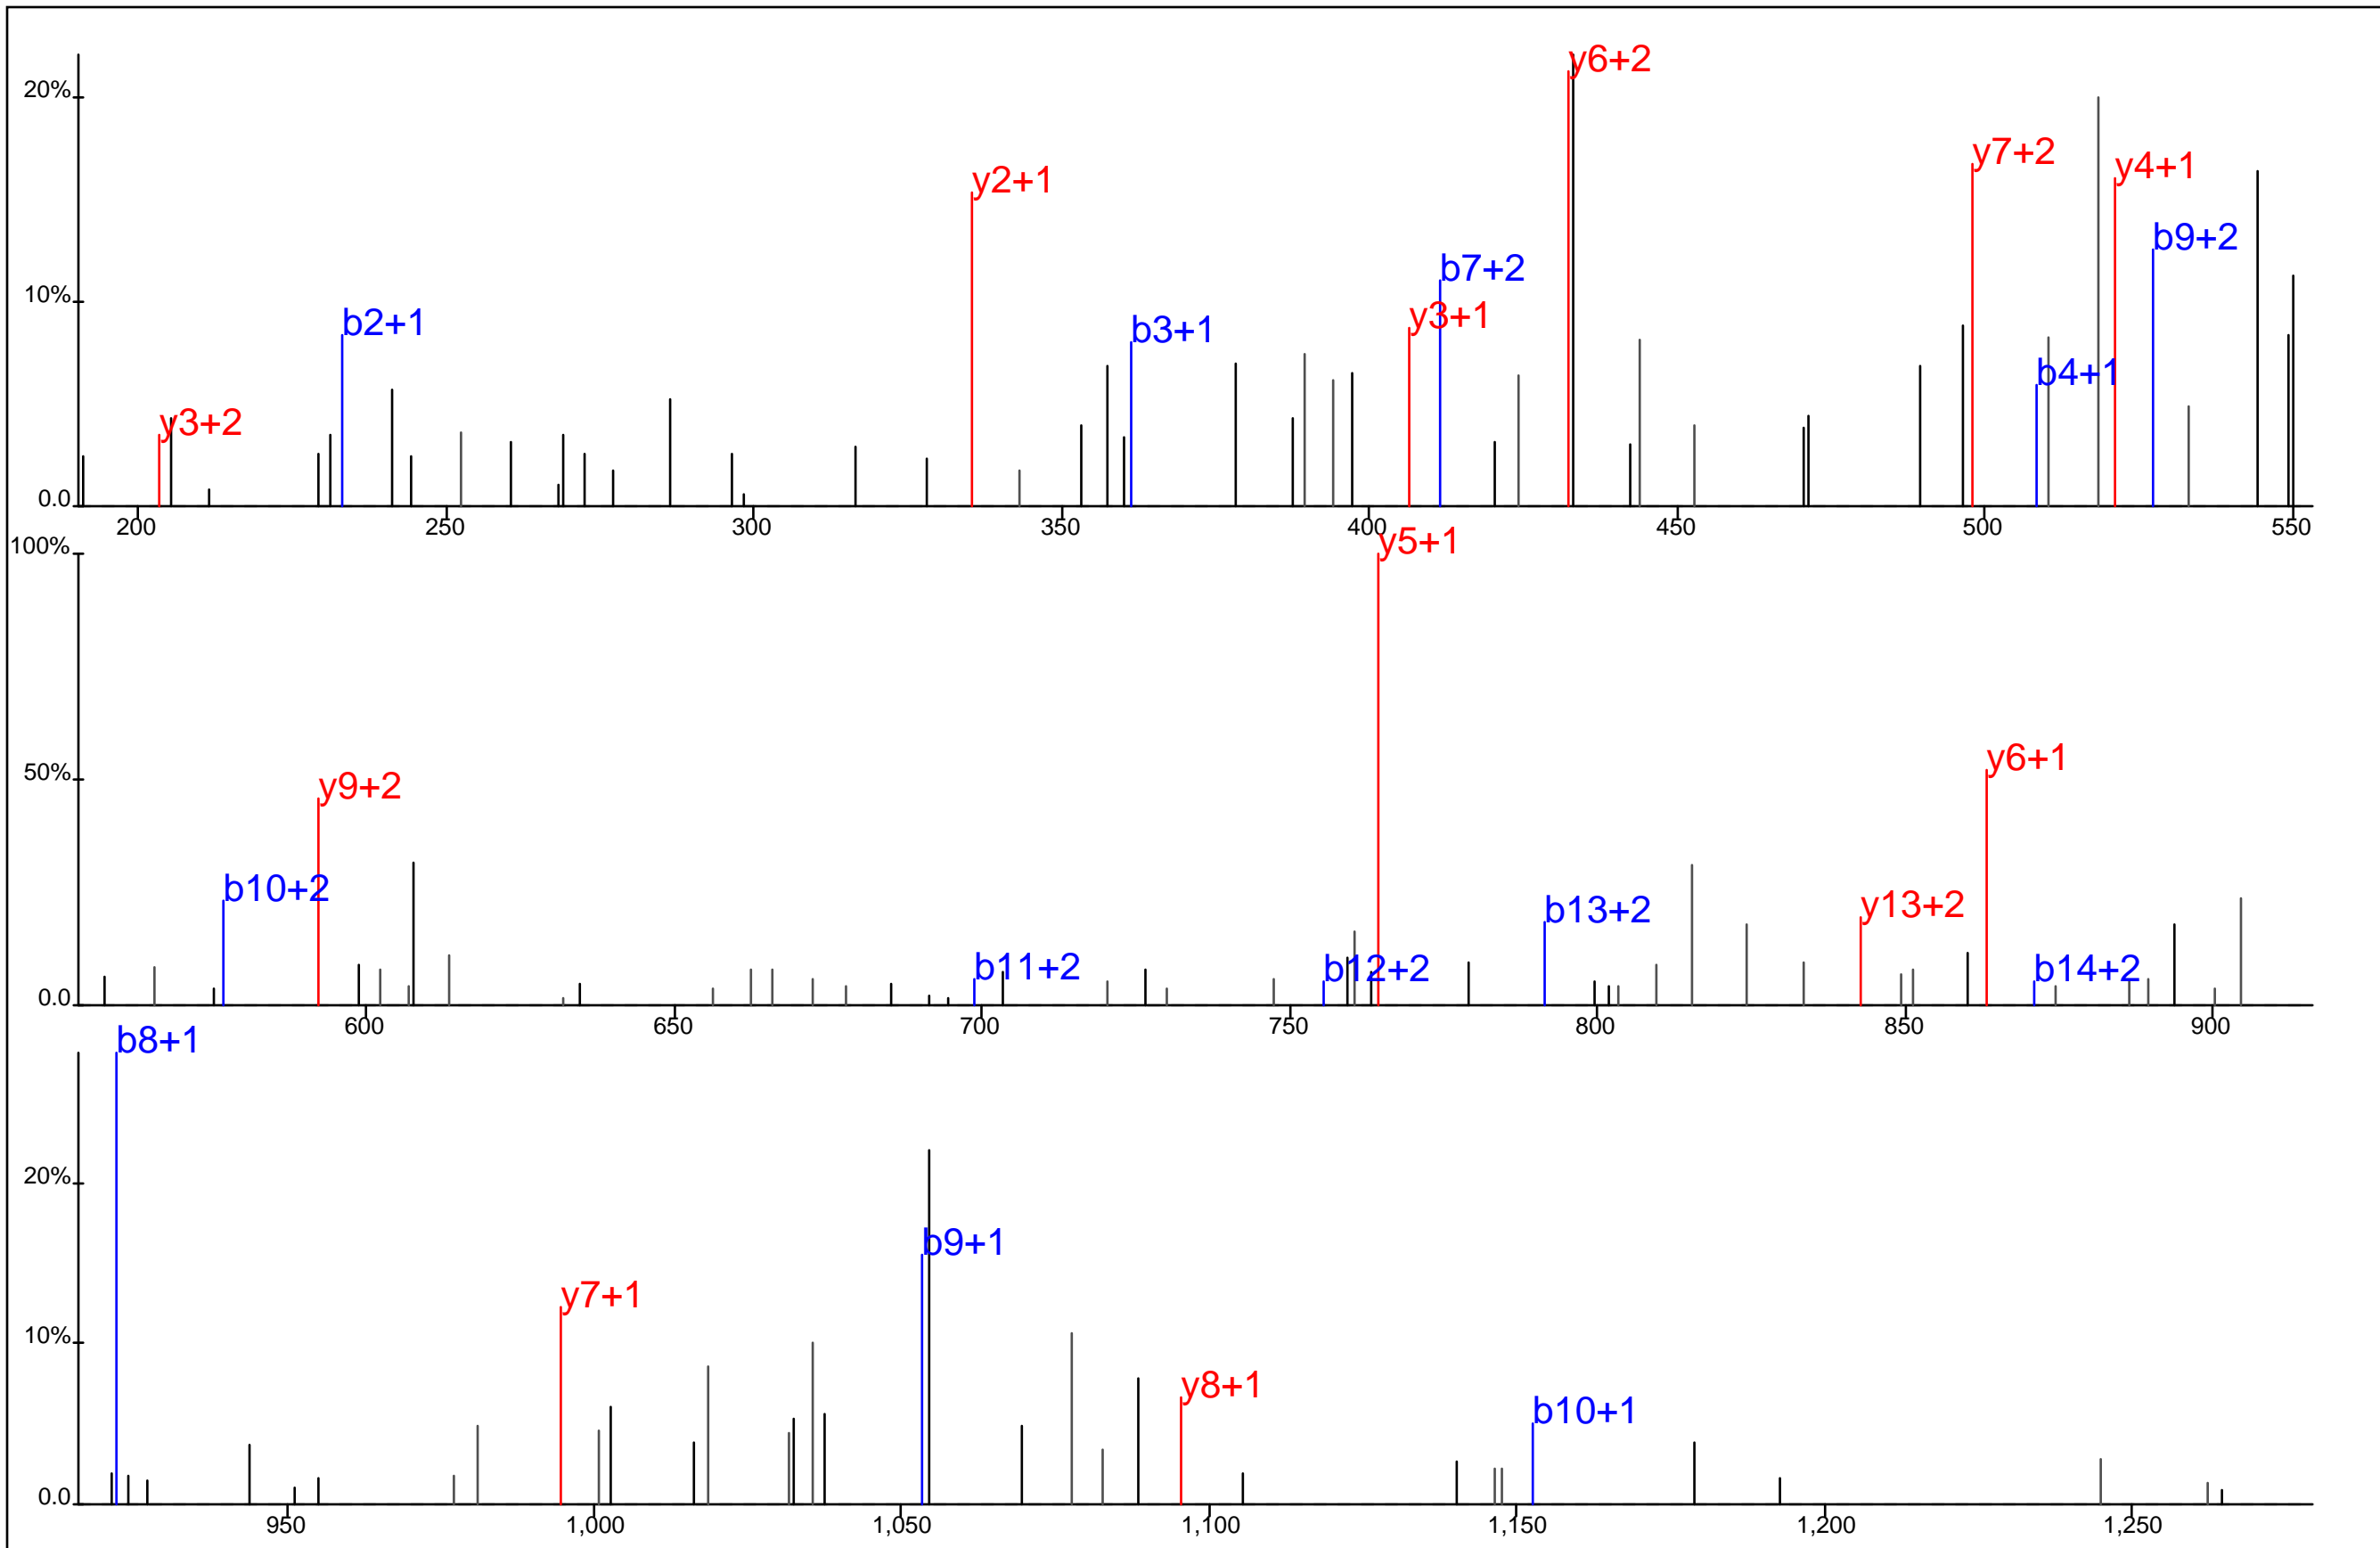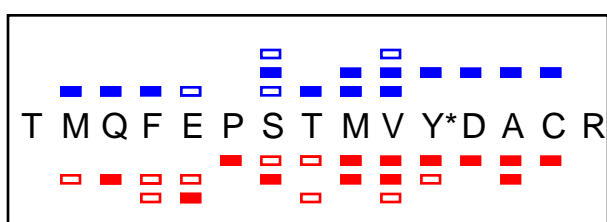

Protein Name: Talin  
 gi Accession: 0  
 Precursor Mass: 639.2560+3  
 Delta Mass: 5.816 ppm  
 XCorr: 34.1

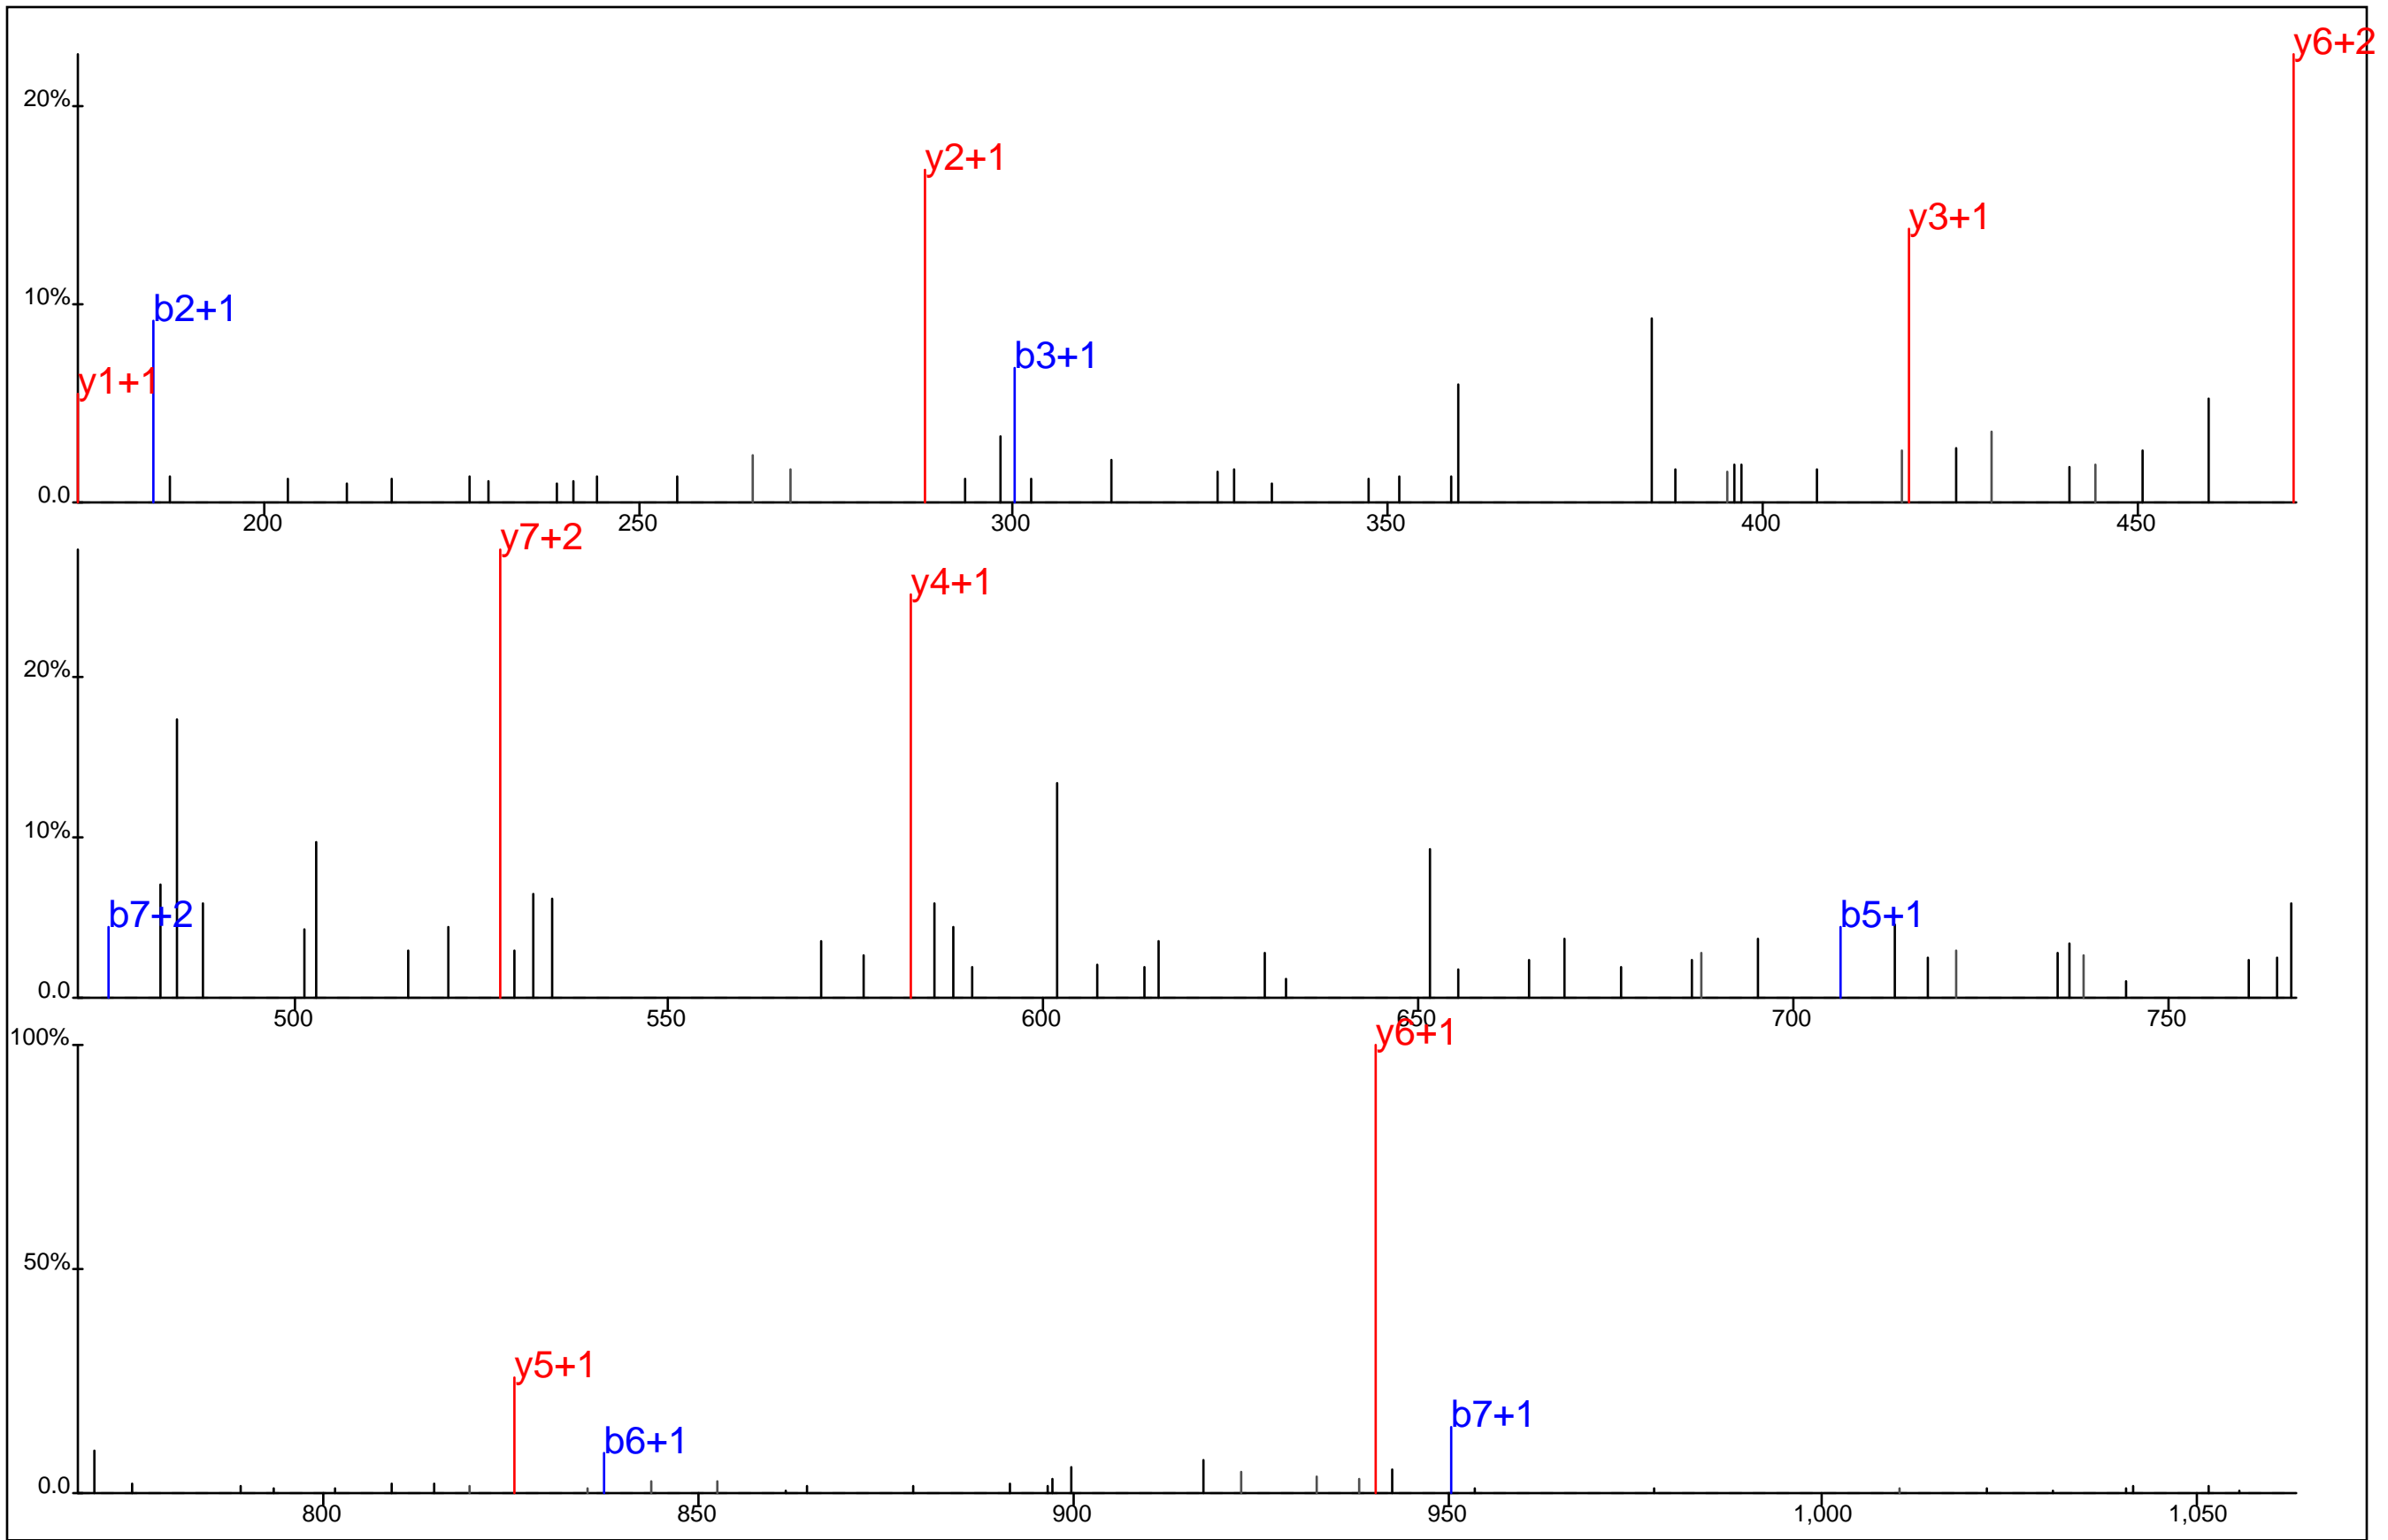

■ ■ ■ ■ ■ ■  
 A L D Y\*Y M L R  
□ □ □ □ □ □

Protein Name: Talin  
 gi Accession: 0  
 Precursor Mass: 562.7455+2  
 Delta Mass: 0.784 ppm  
 XCorr: 42.81

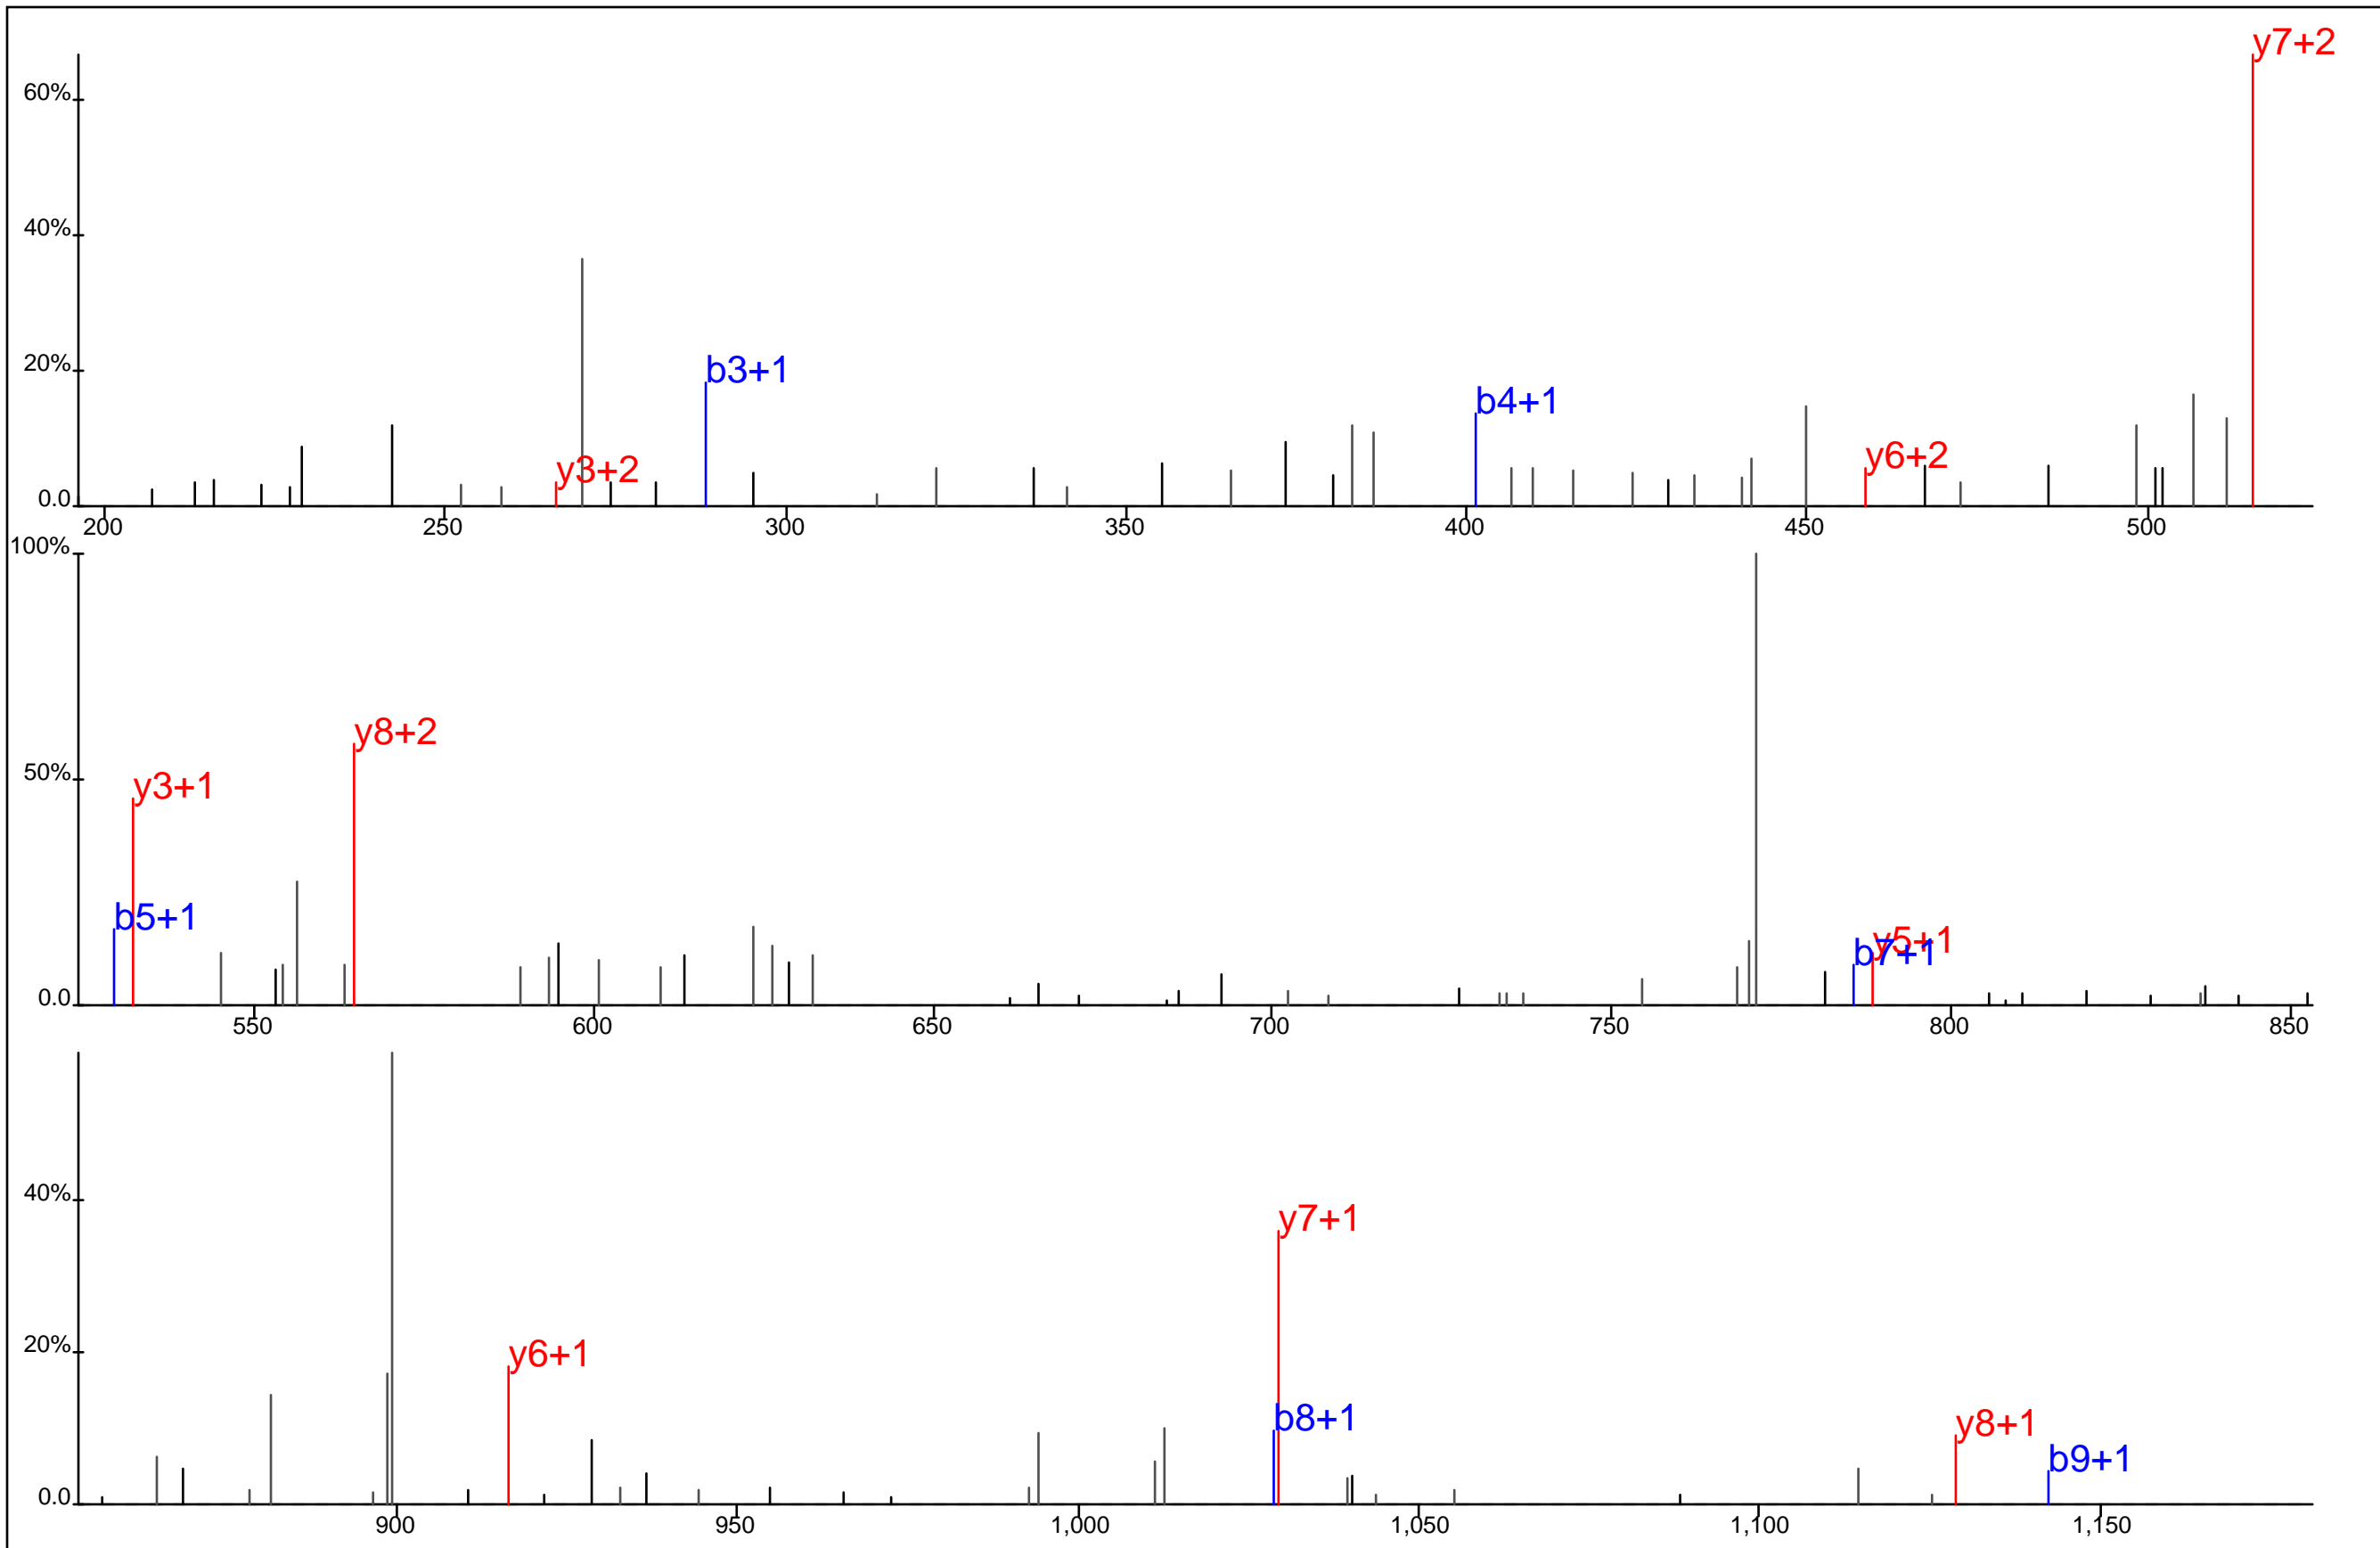

S T V L Q Q Q Y\* N R  
 □ □ □ □ □ □ □ □

Protein Name: Talin  
 gi Accession: 0  
 Precursor Mass: 658.8020+2  
 Delta Mass: 2.061 ppm  
 XCorr: 30.28

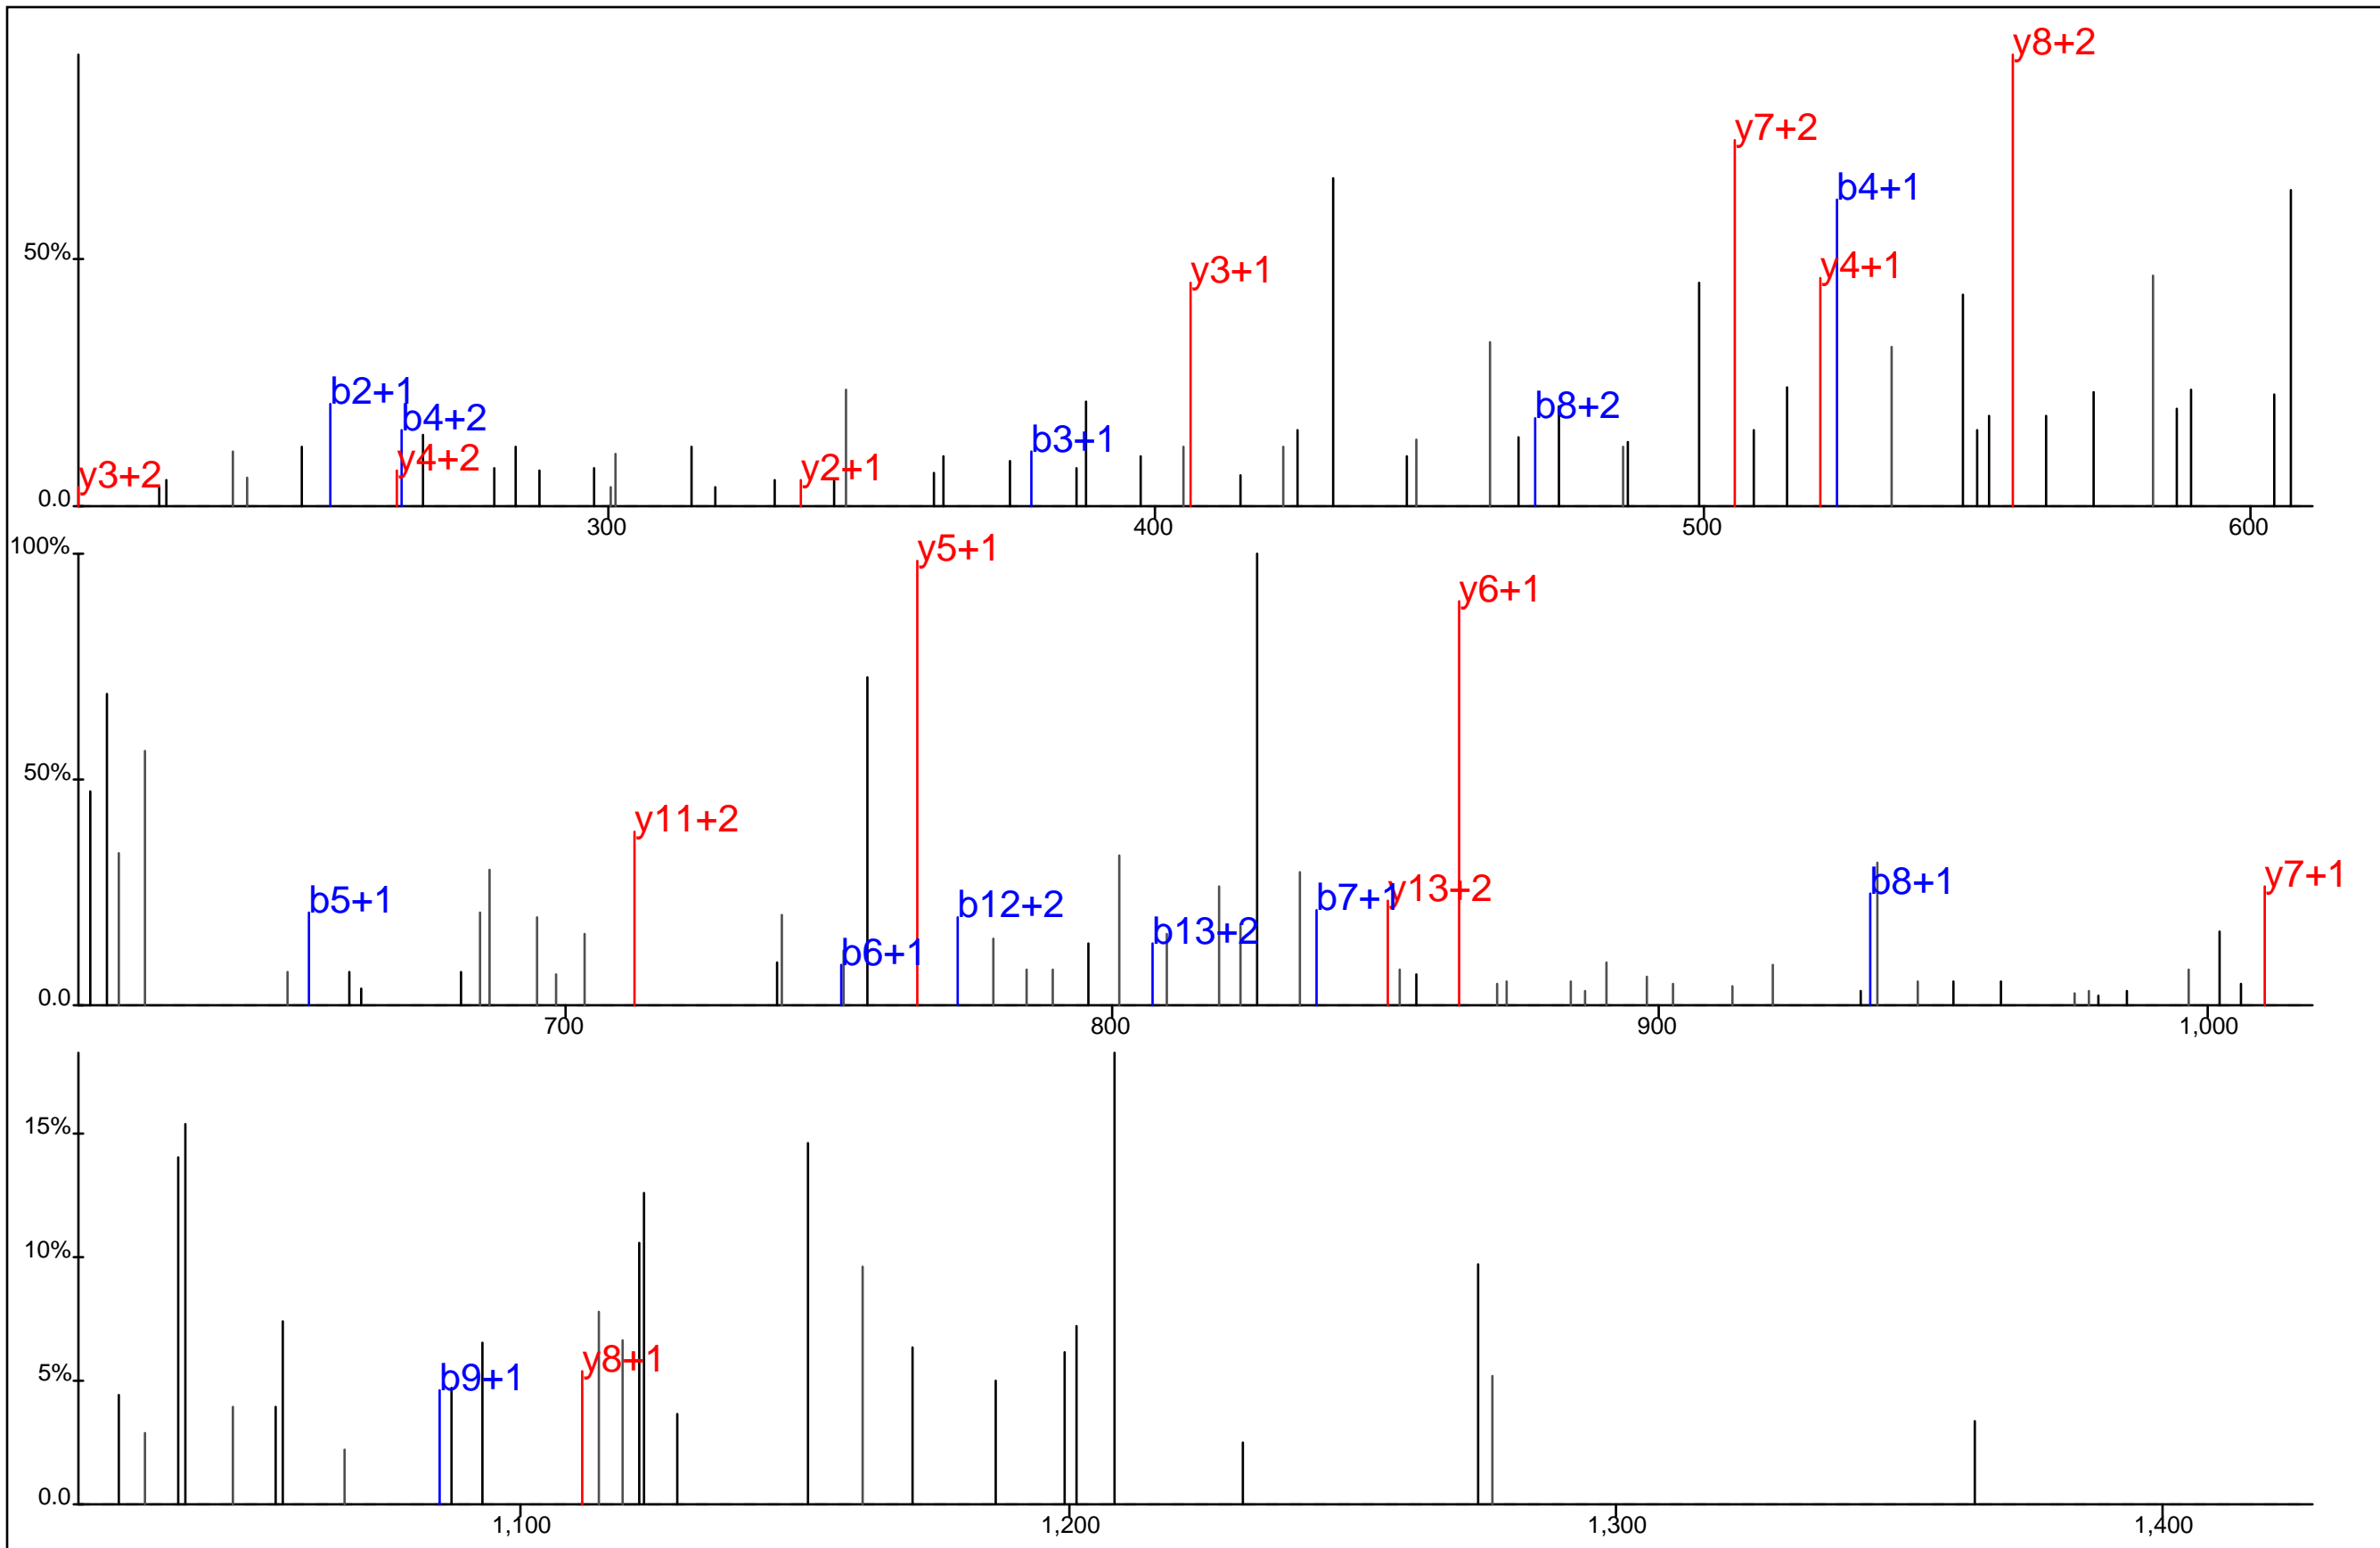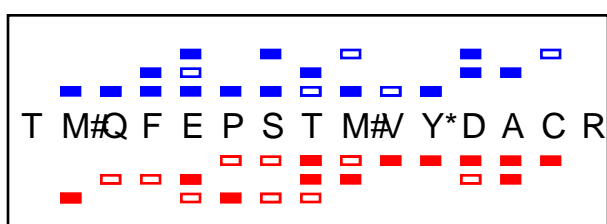

Protein Name: Talin  
 gi Accession: 0  
 Precursor Mass: 649.9162+3  
 Delta Mass: 0.915 ppm  
 XCorr: 26.16

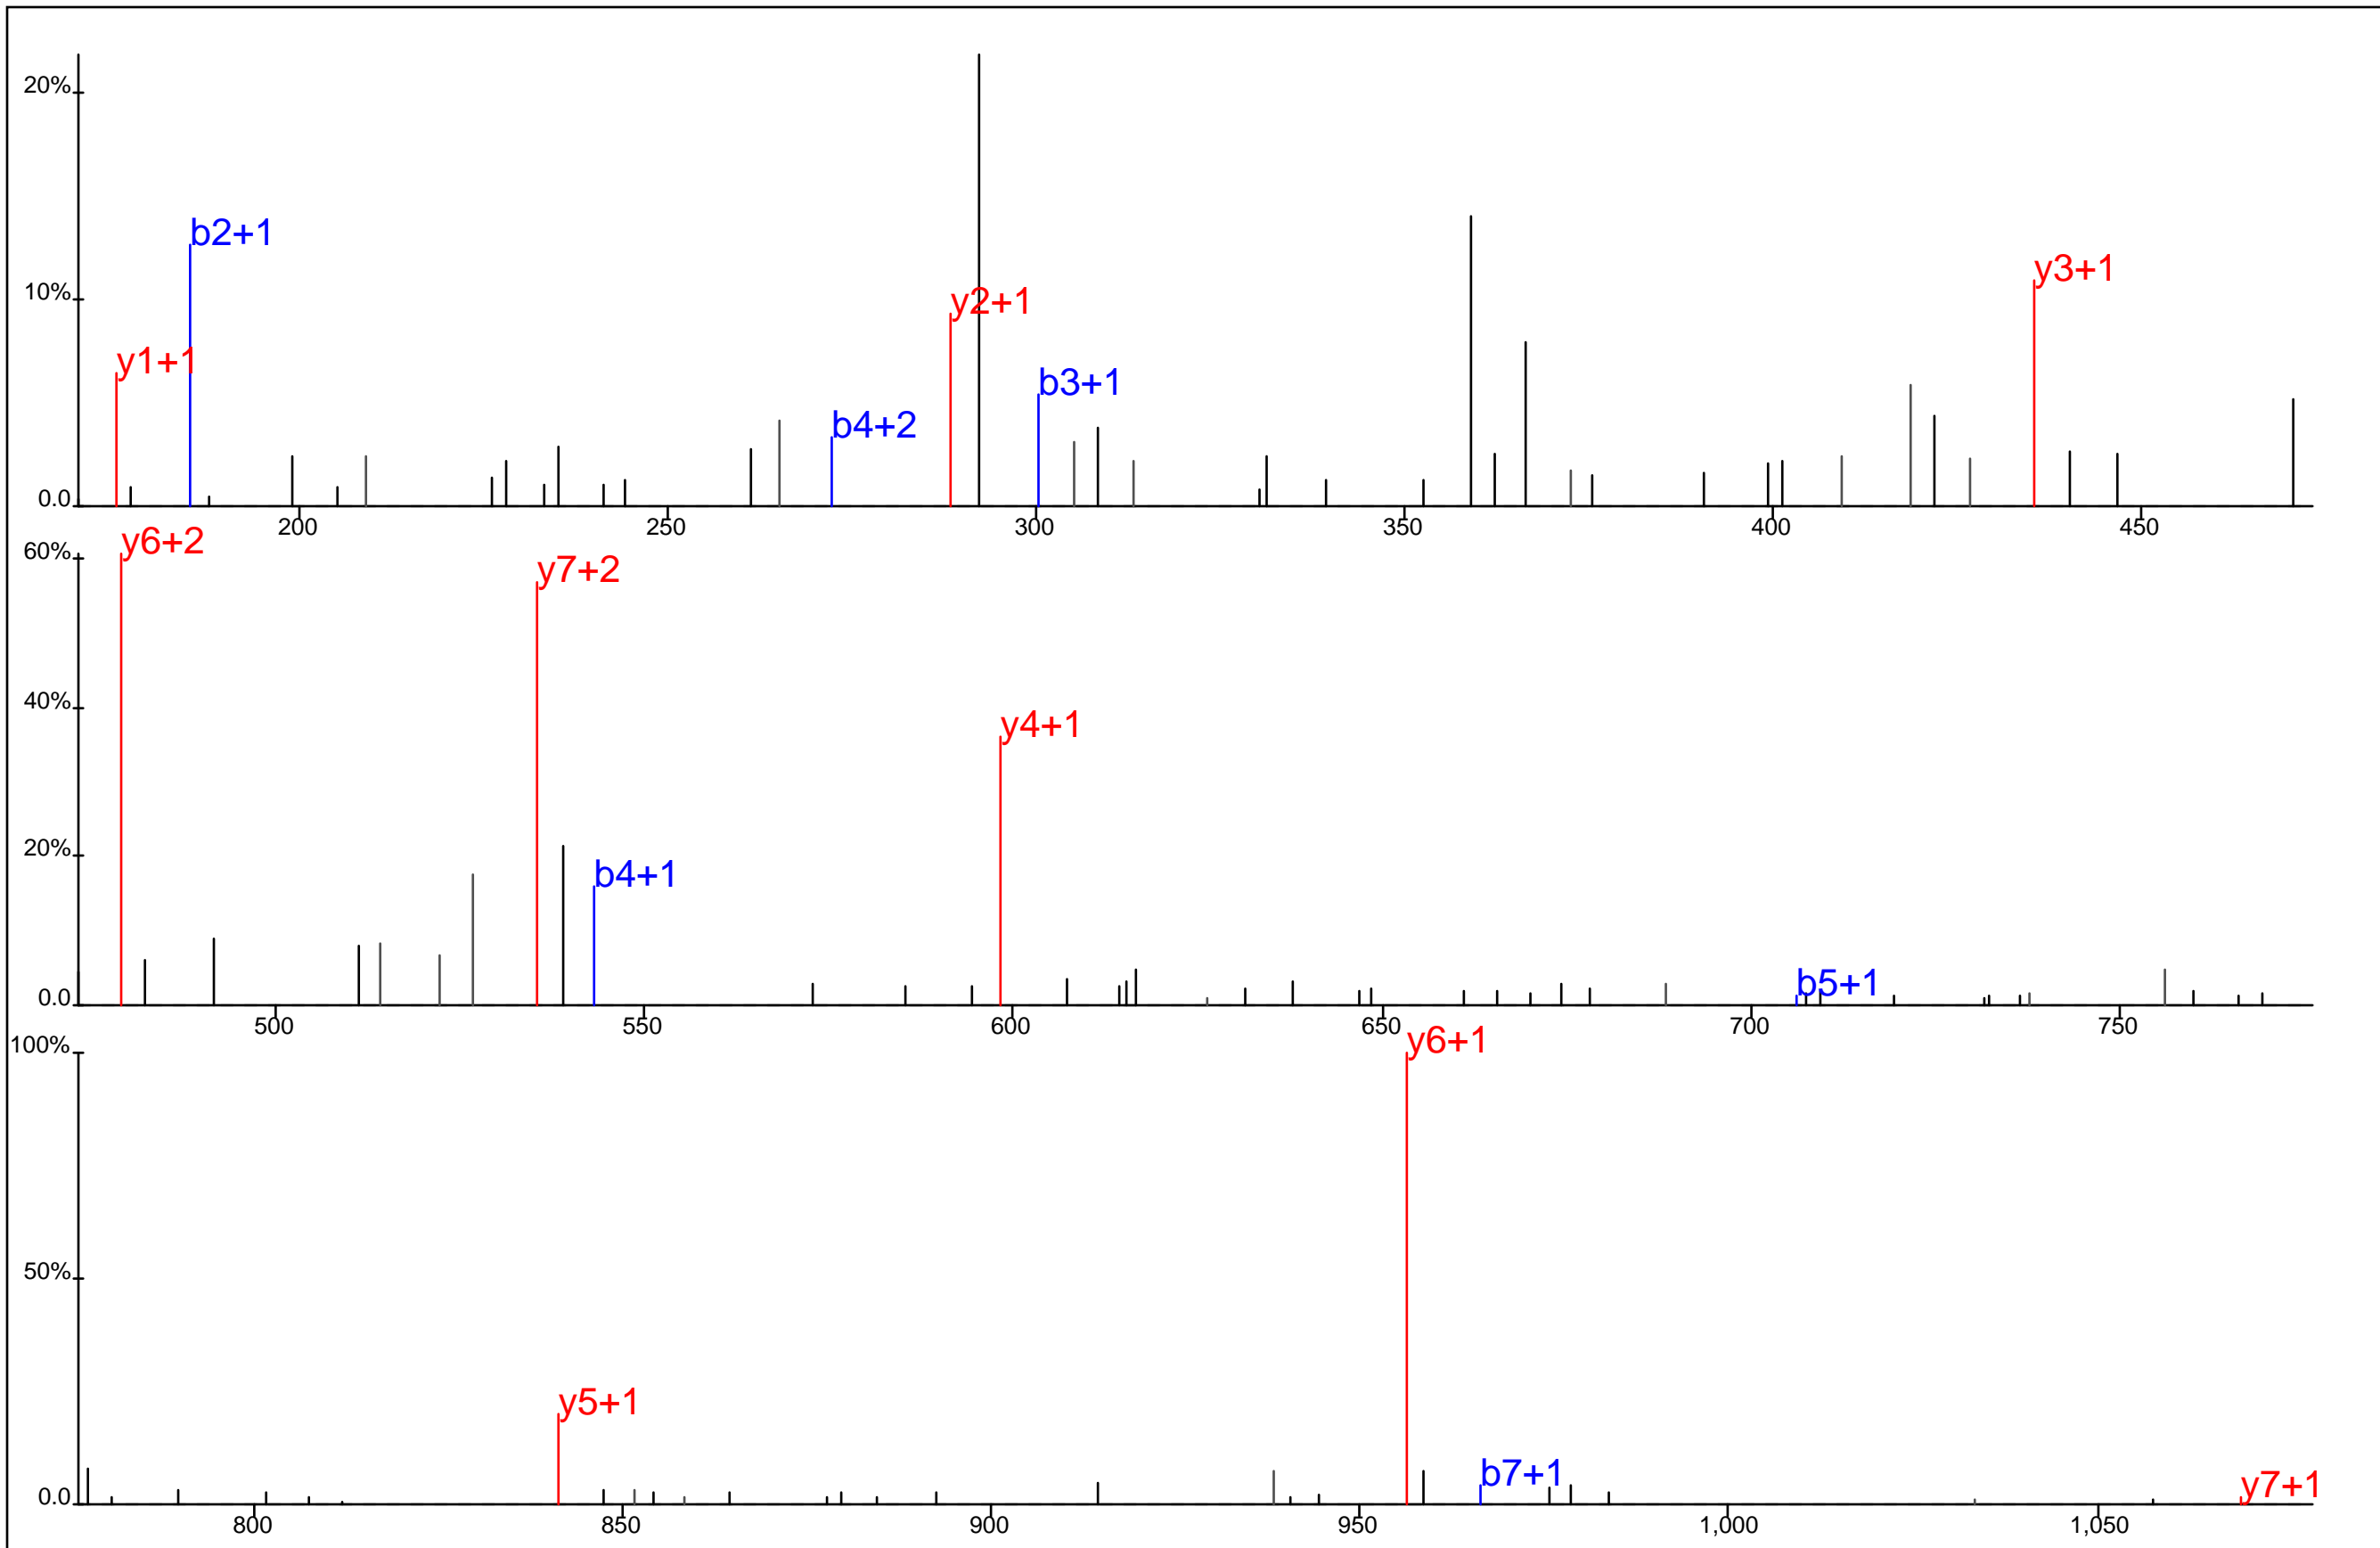

**b-ions (blue):** A L D Y\*Y M#L R
   
**y-ions (red):**

Protein Name: Talin  
 gi Accession: 0  
 Precursor Mass: 570.7440+2  
 Delta Mass: 1.007 ppm  
 XCorr: 31.99

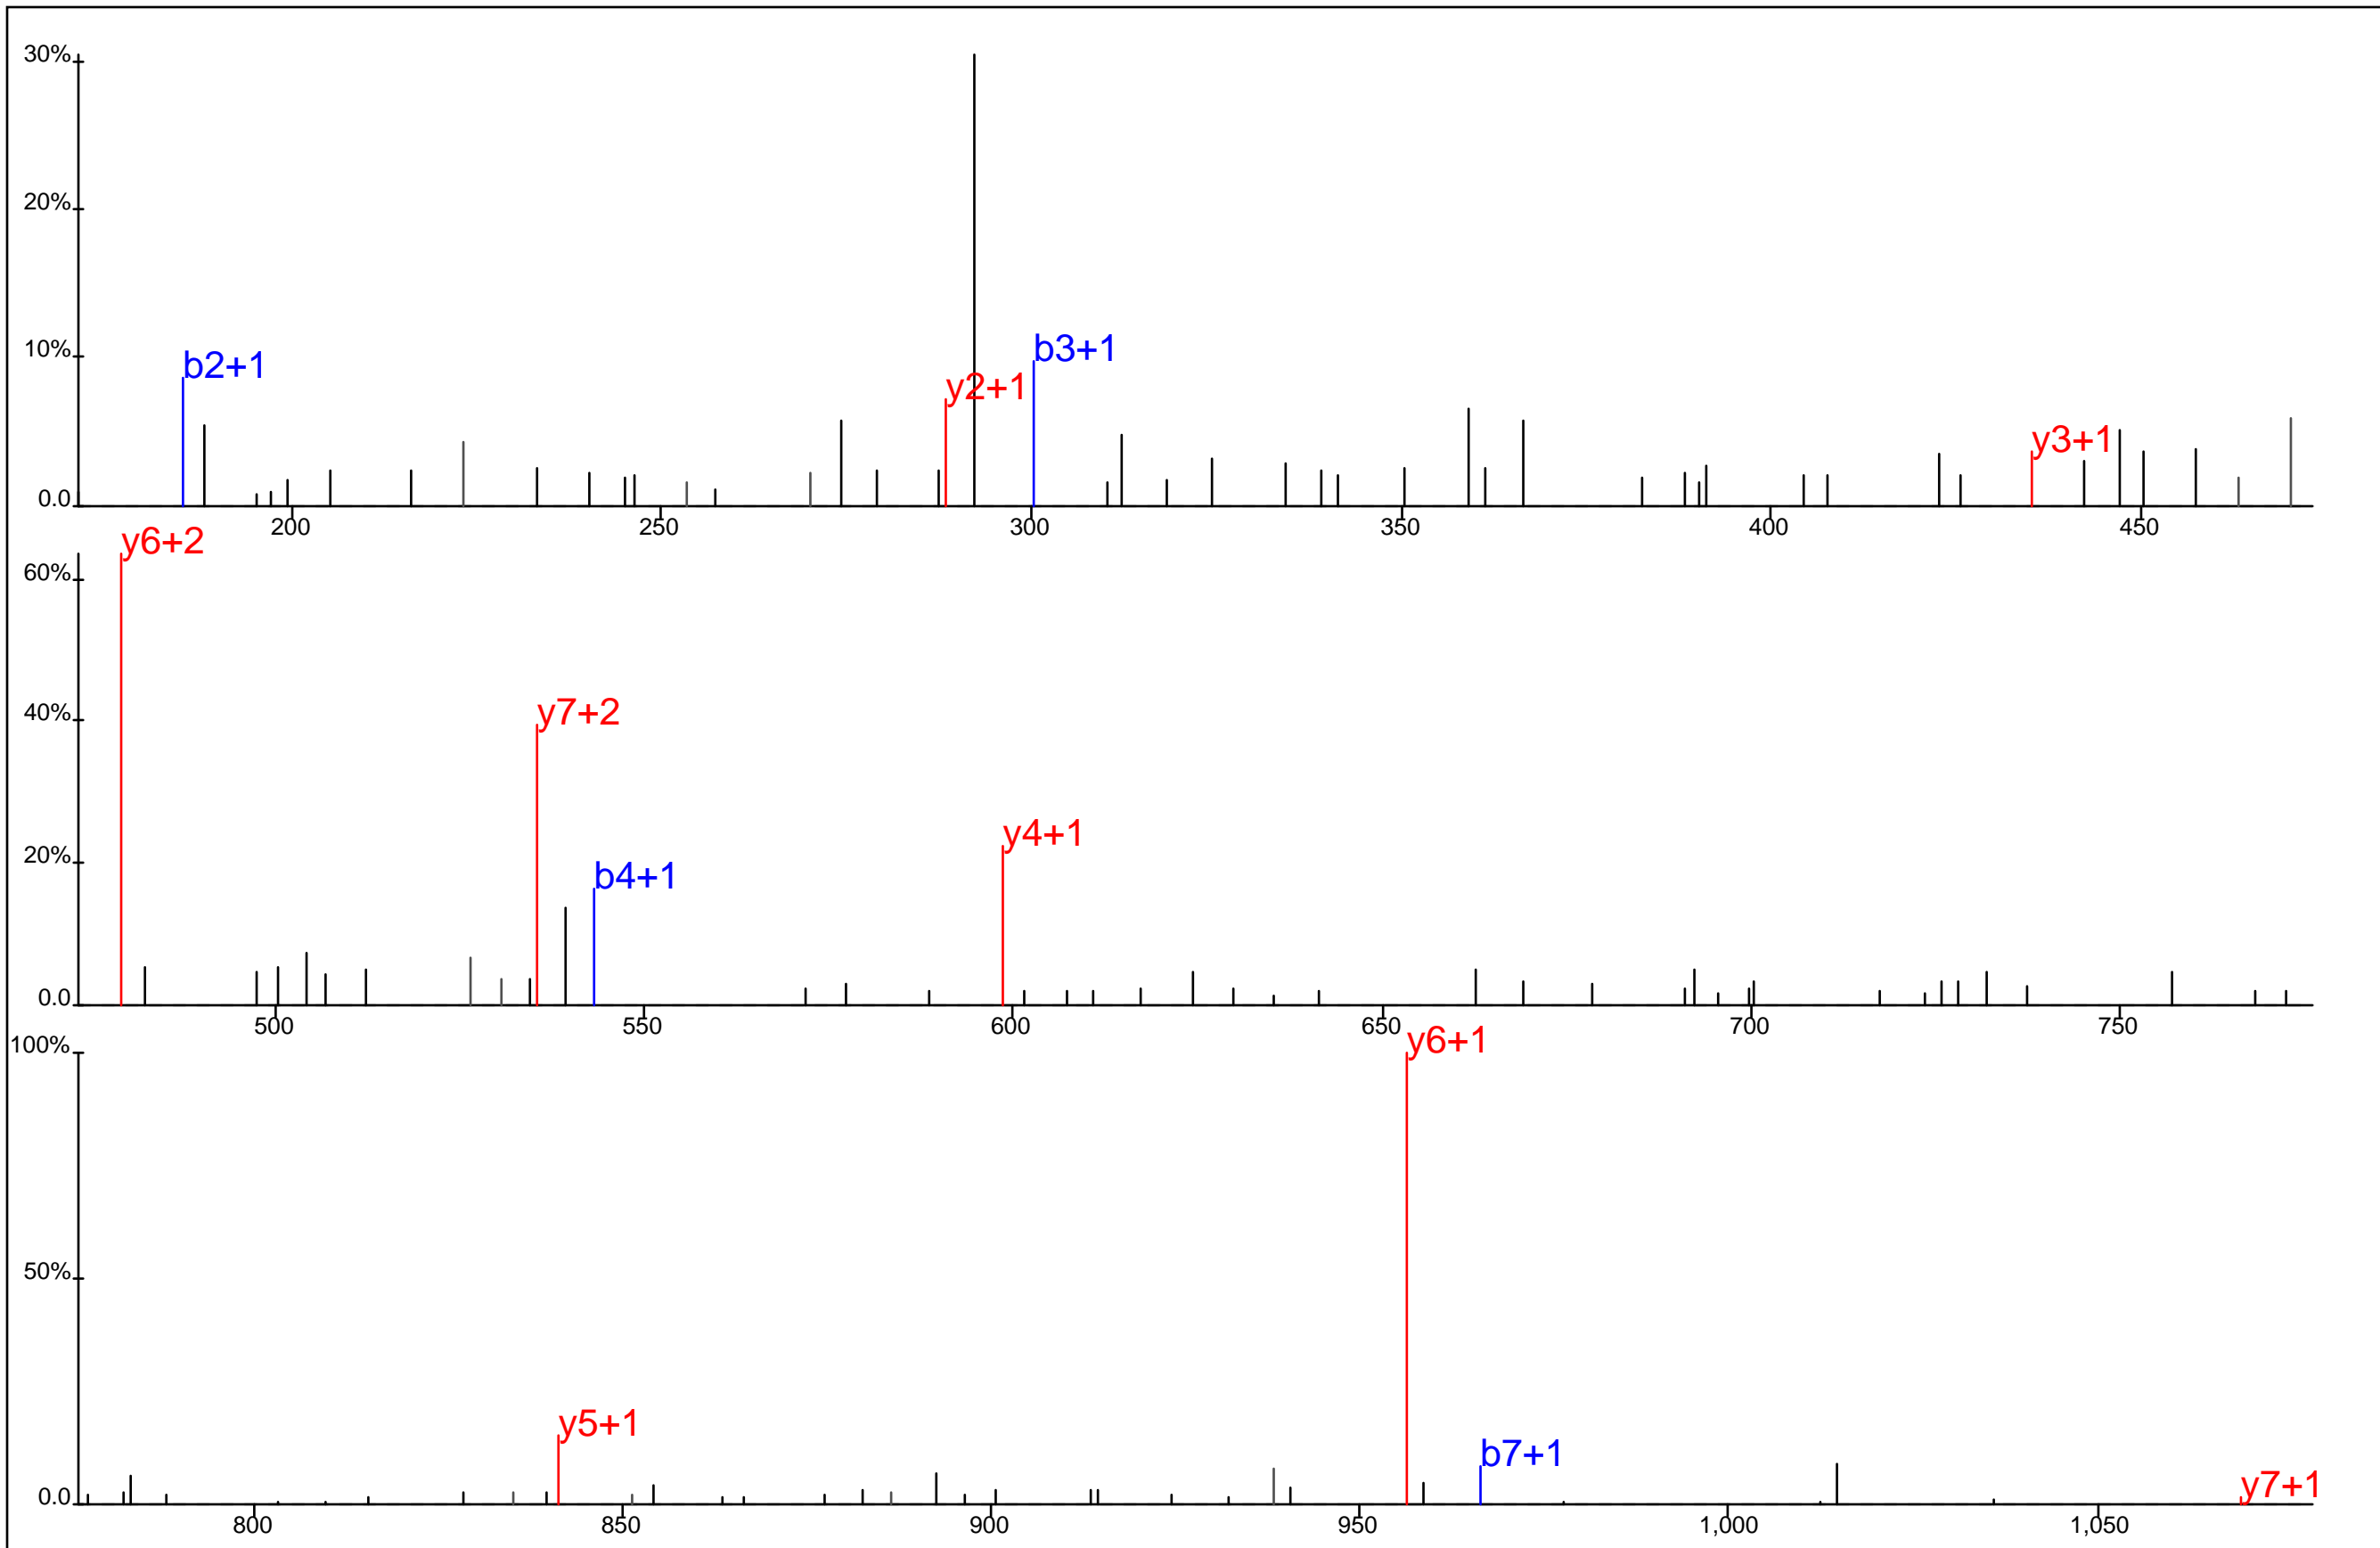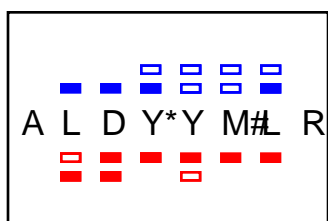

Protein Name: Talin  
 gi Accession: 0  
 Precursor Mass: 570.7442+2  
 Delta Mass: 1.434 ppm  
 XCorr: 28.45

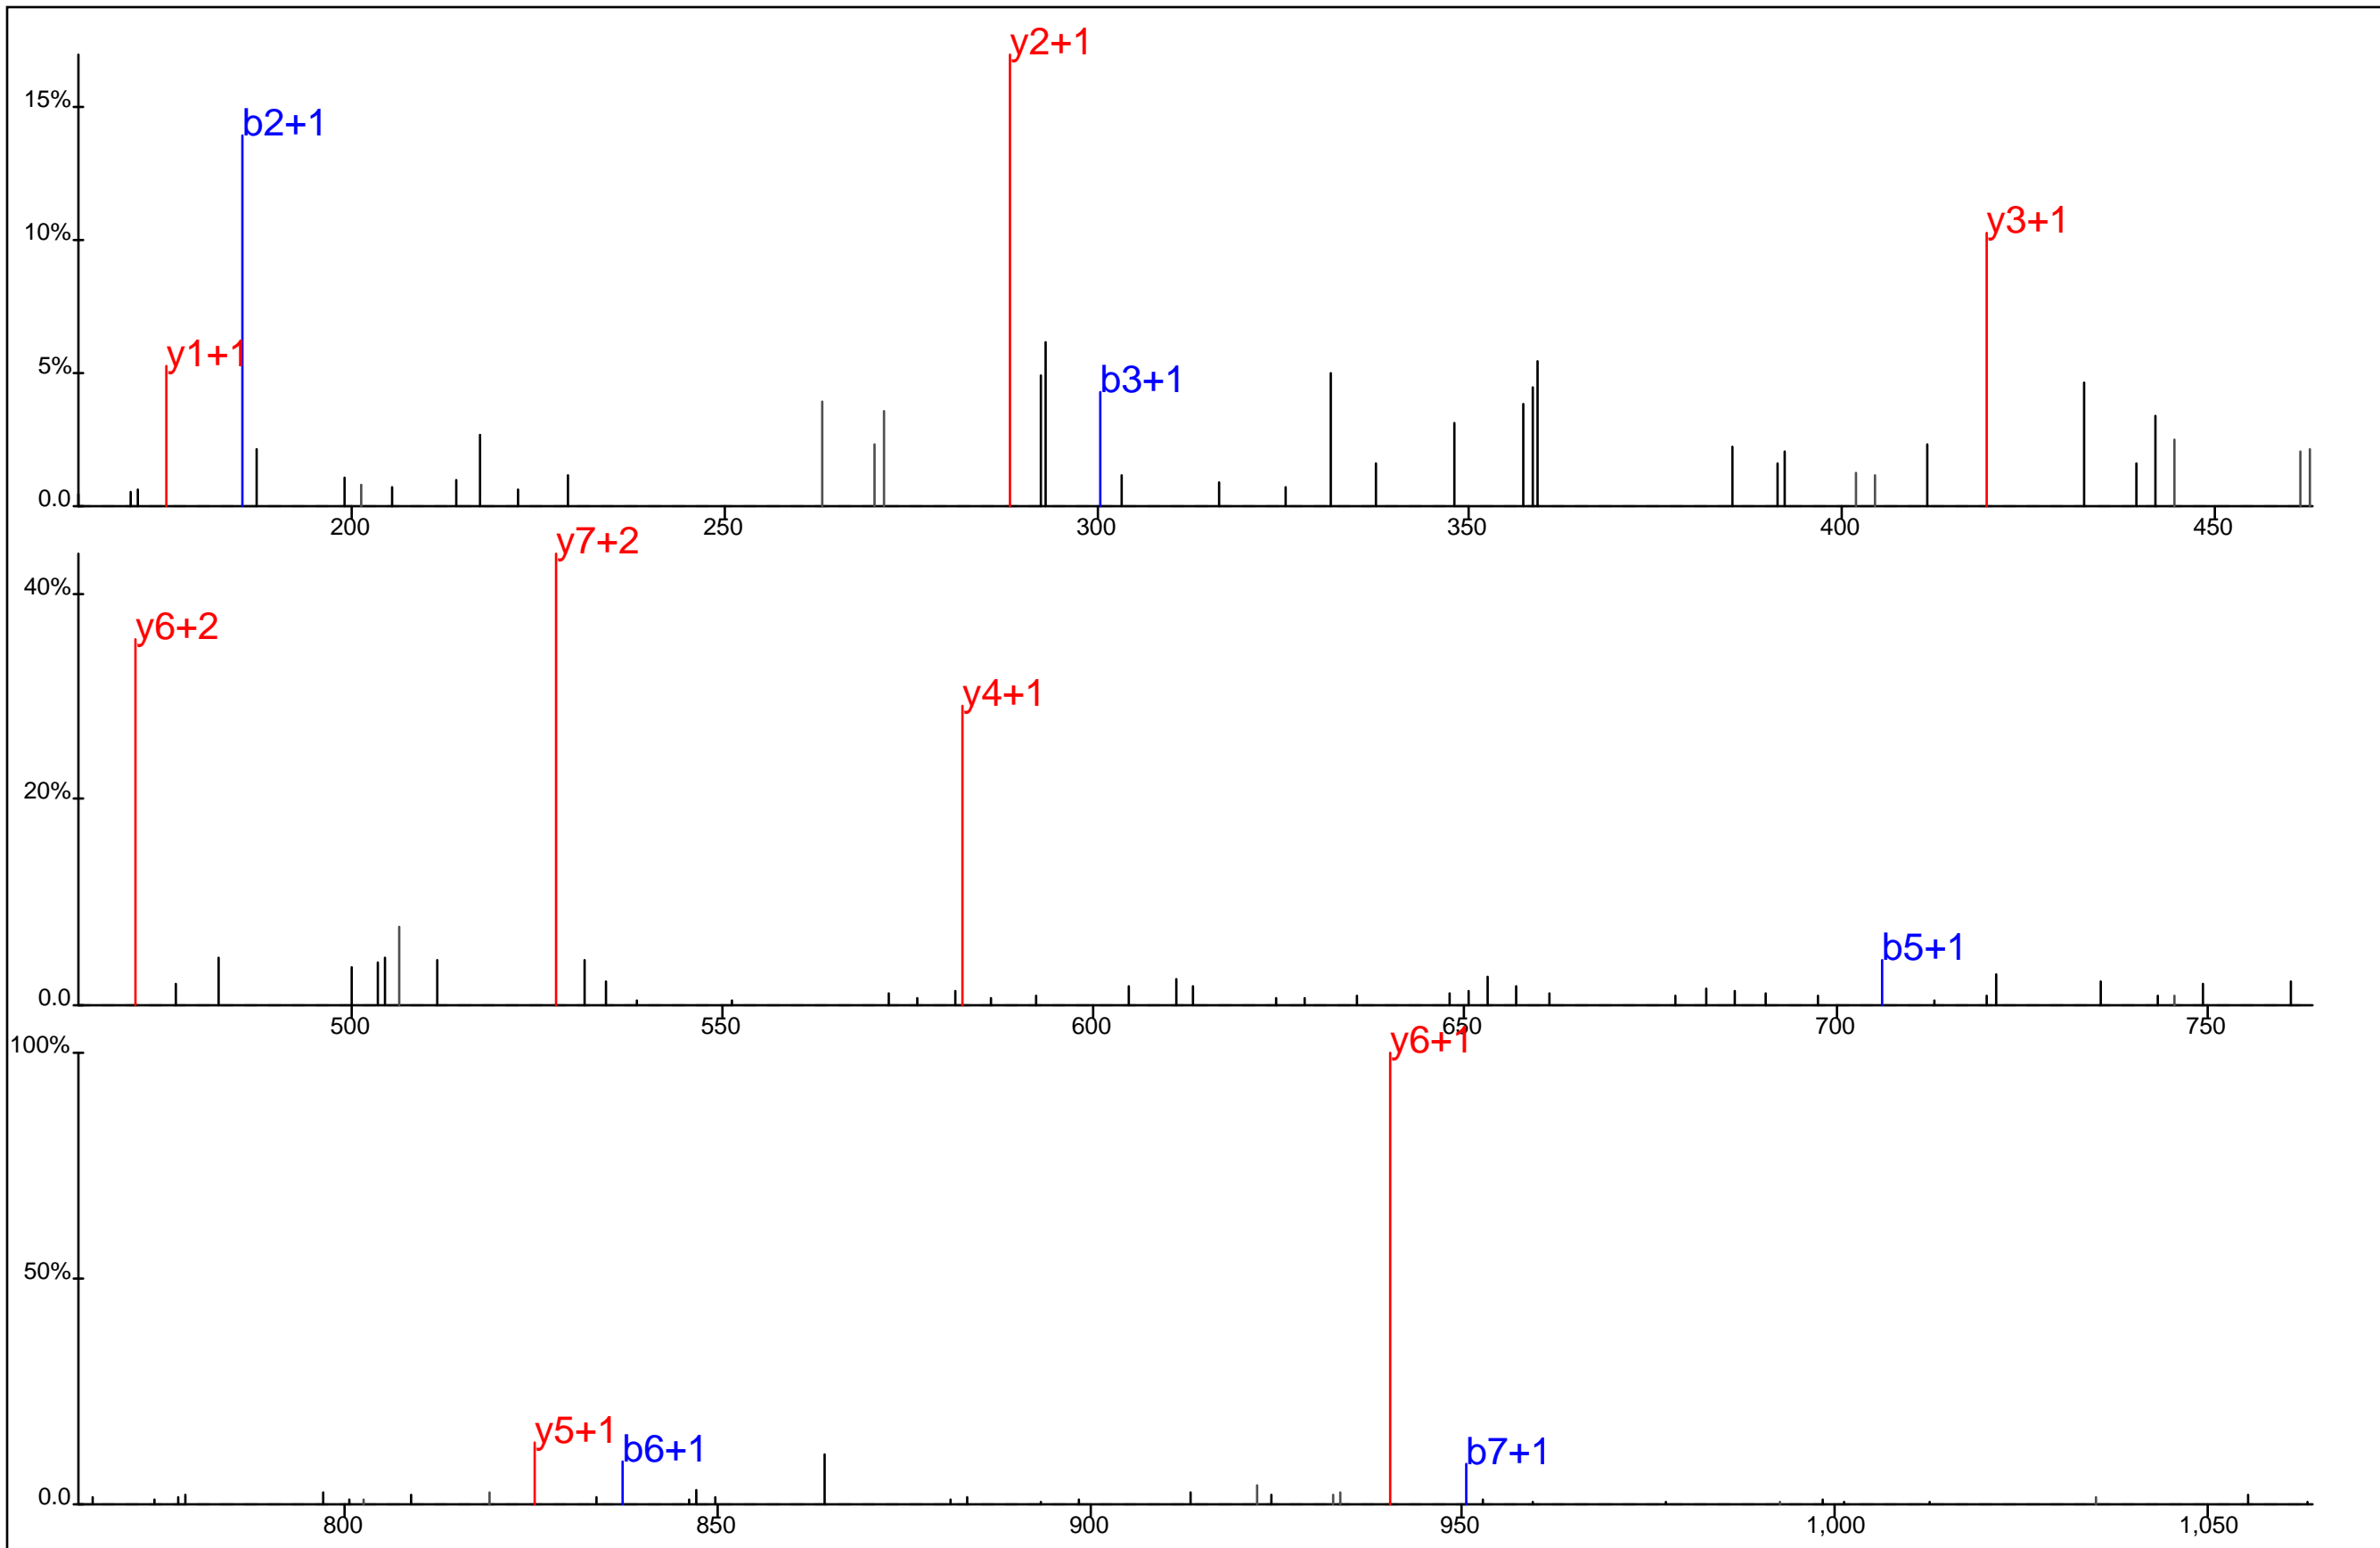

**A L D Y\*Y M L R**

Protein Name: Talin  
 gi Accession: 0  
 Precursor Mass: 562.7458+2  
 Delta Mass: 0.132 ppm  
 XCorr: 39.89





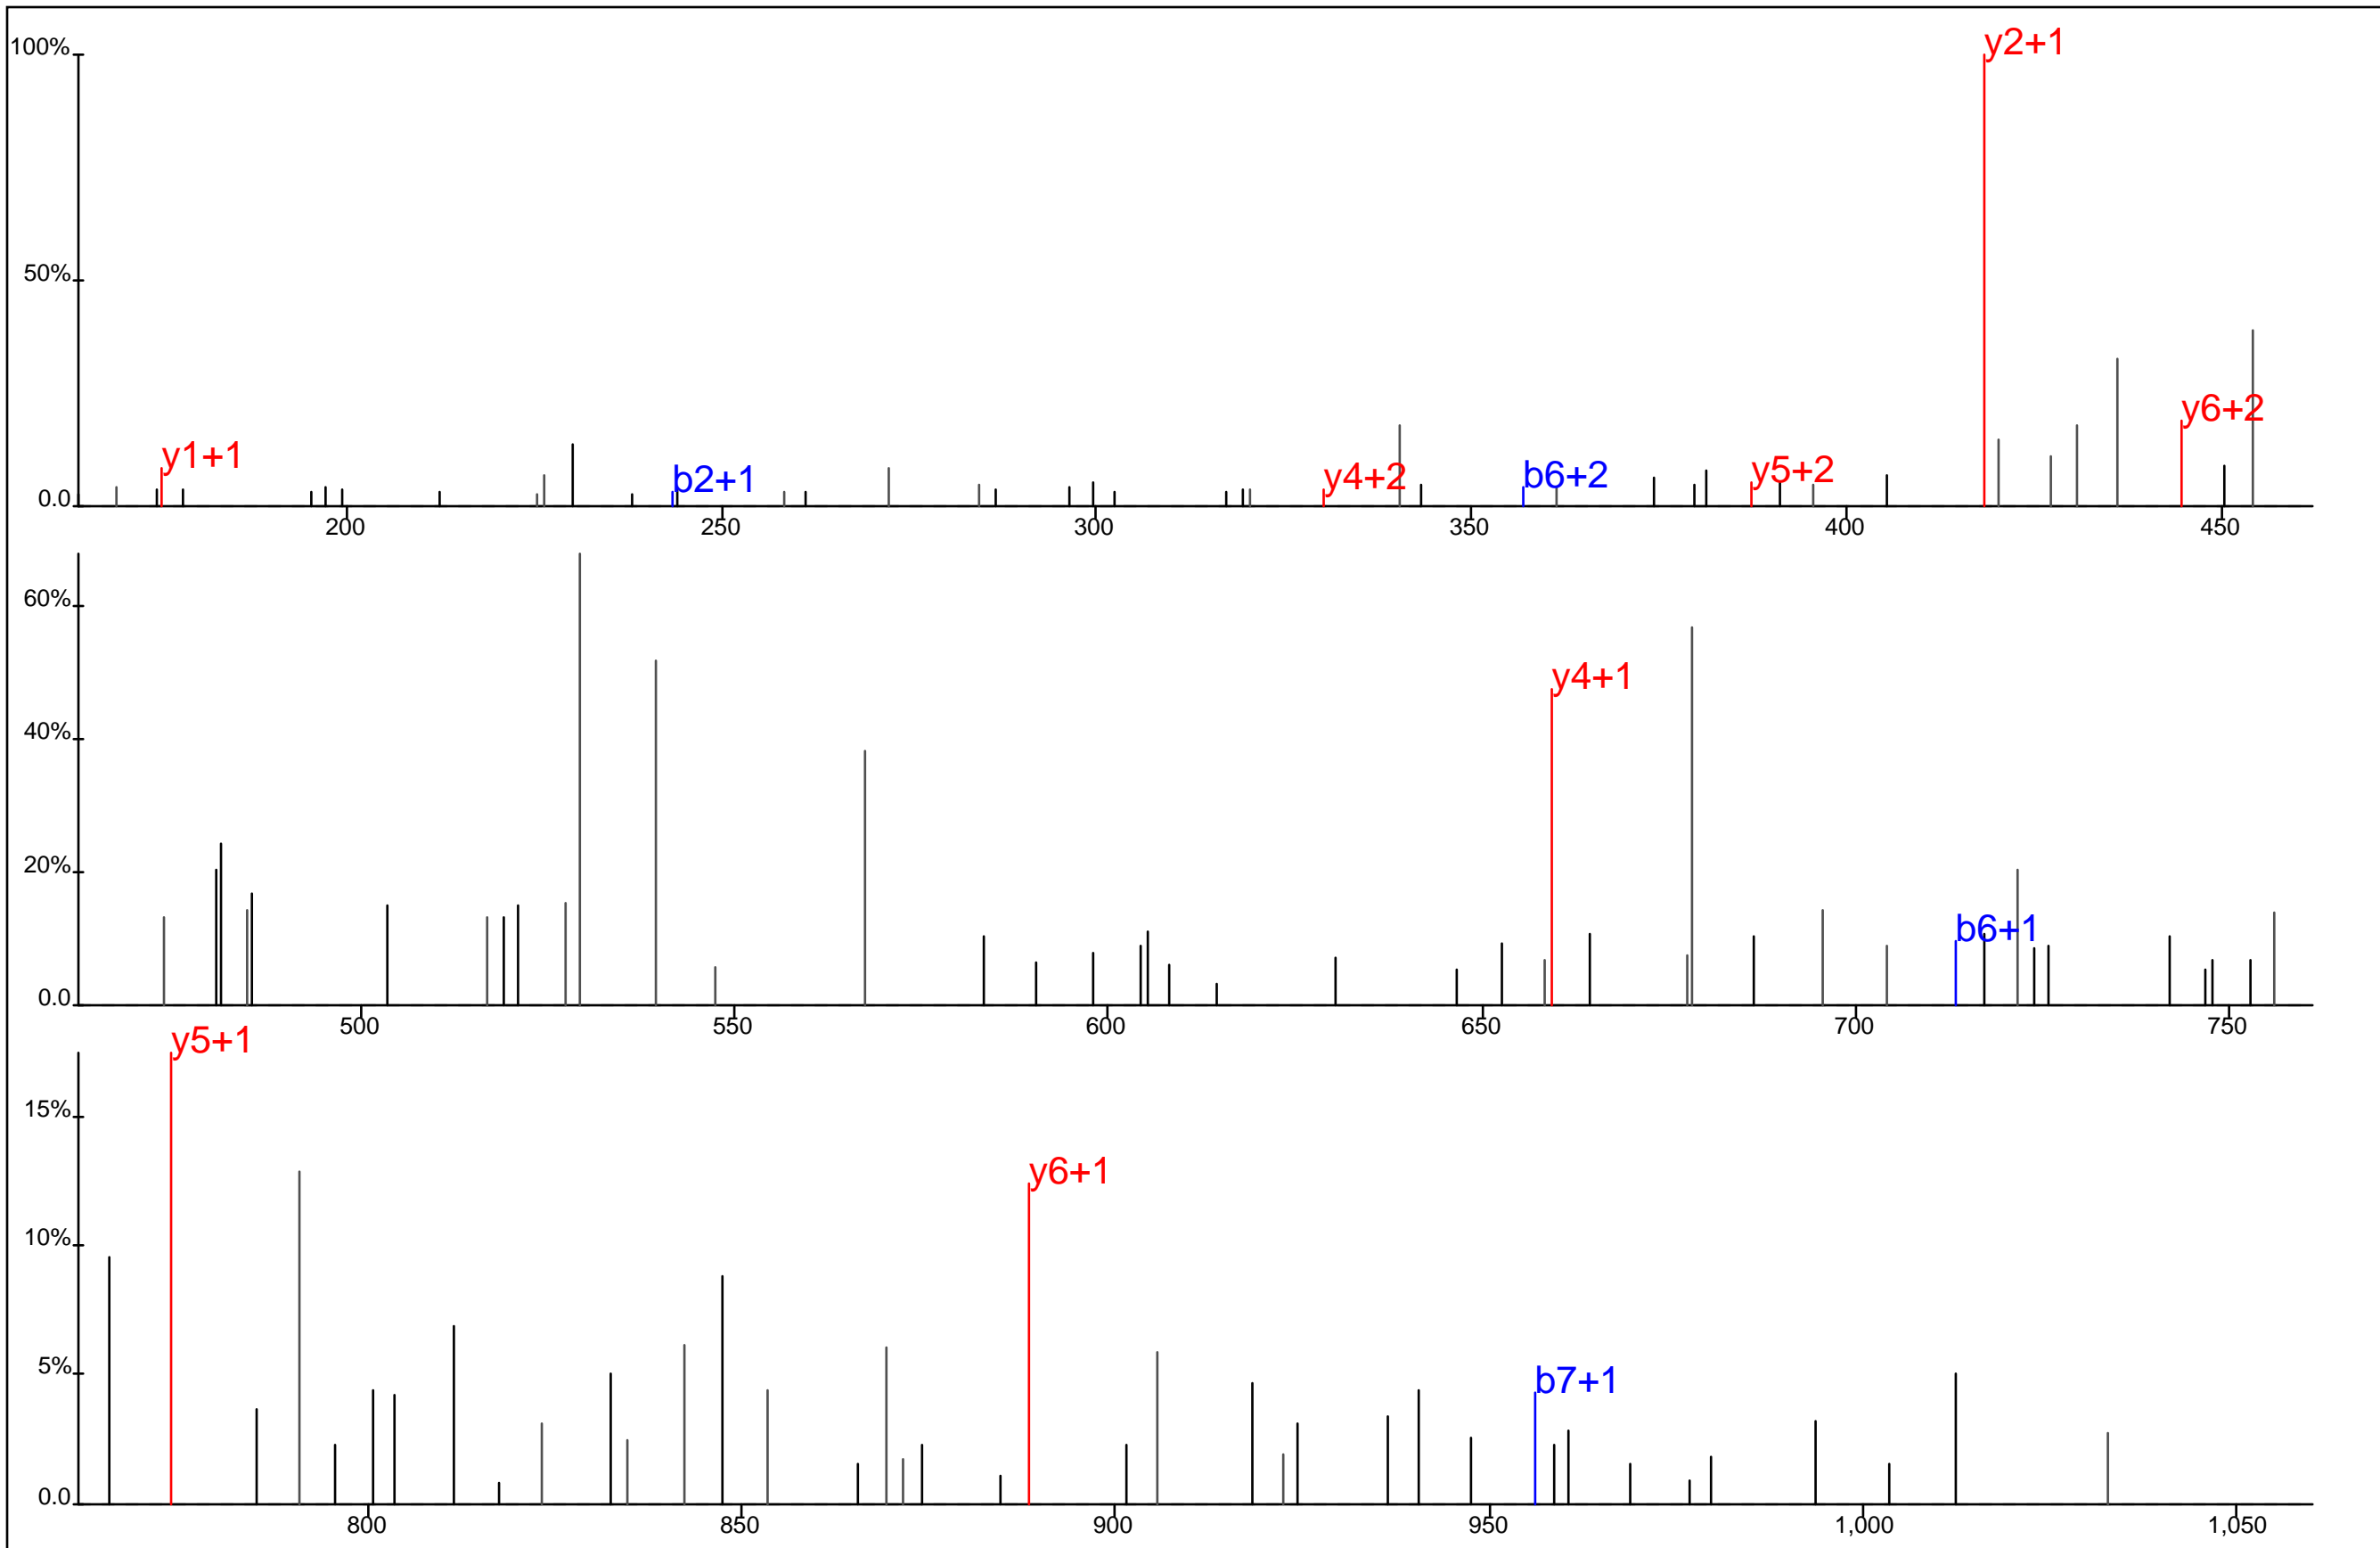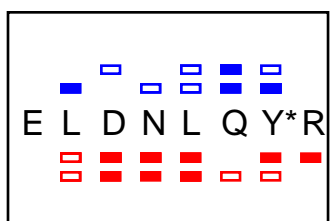

Protein Name: TAO kinase 3  
 gi Accession: 0  
 Precursor Mass: 565.7462+2  
 Delta Mass: 2.288 ppm  
 XCorr: 20.43

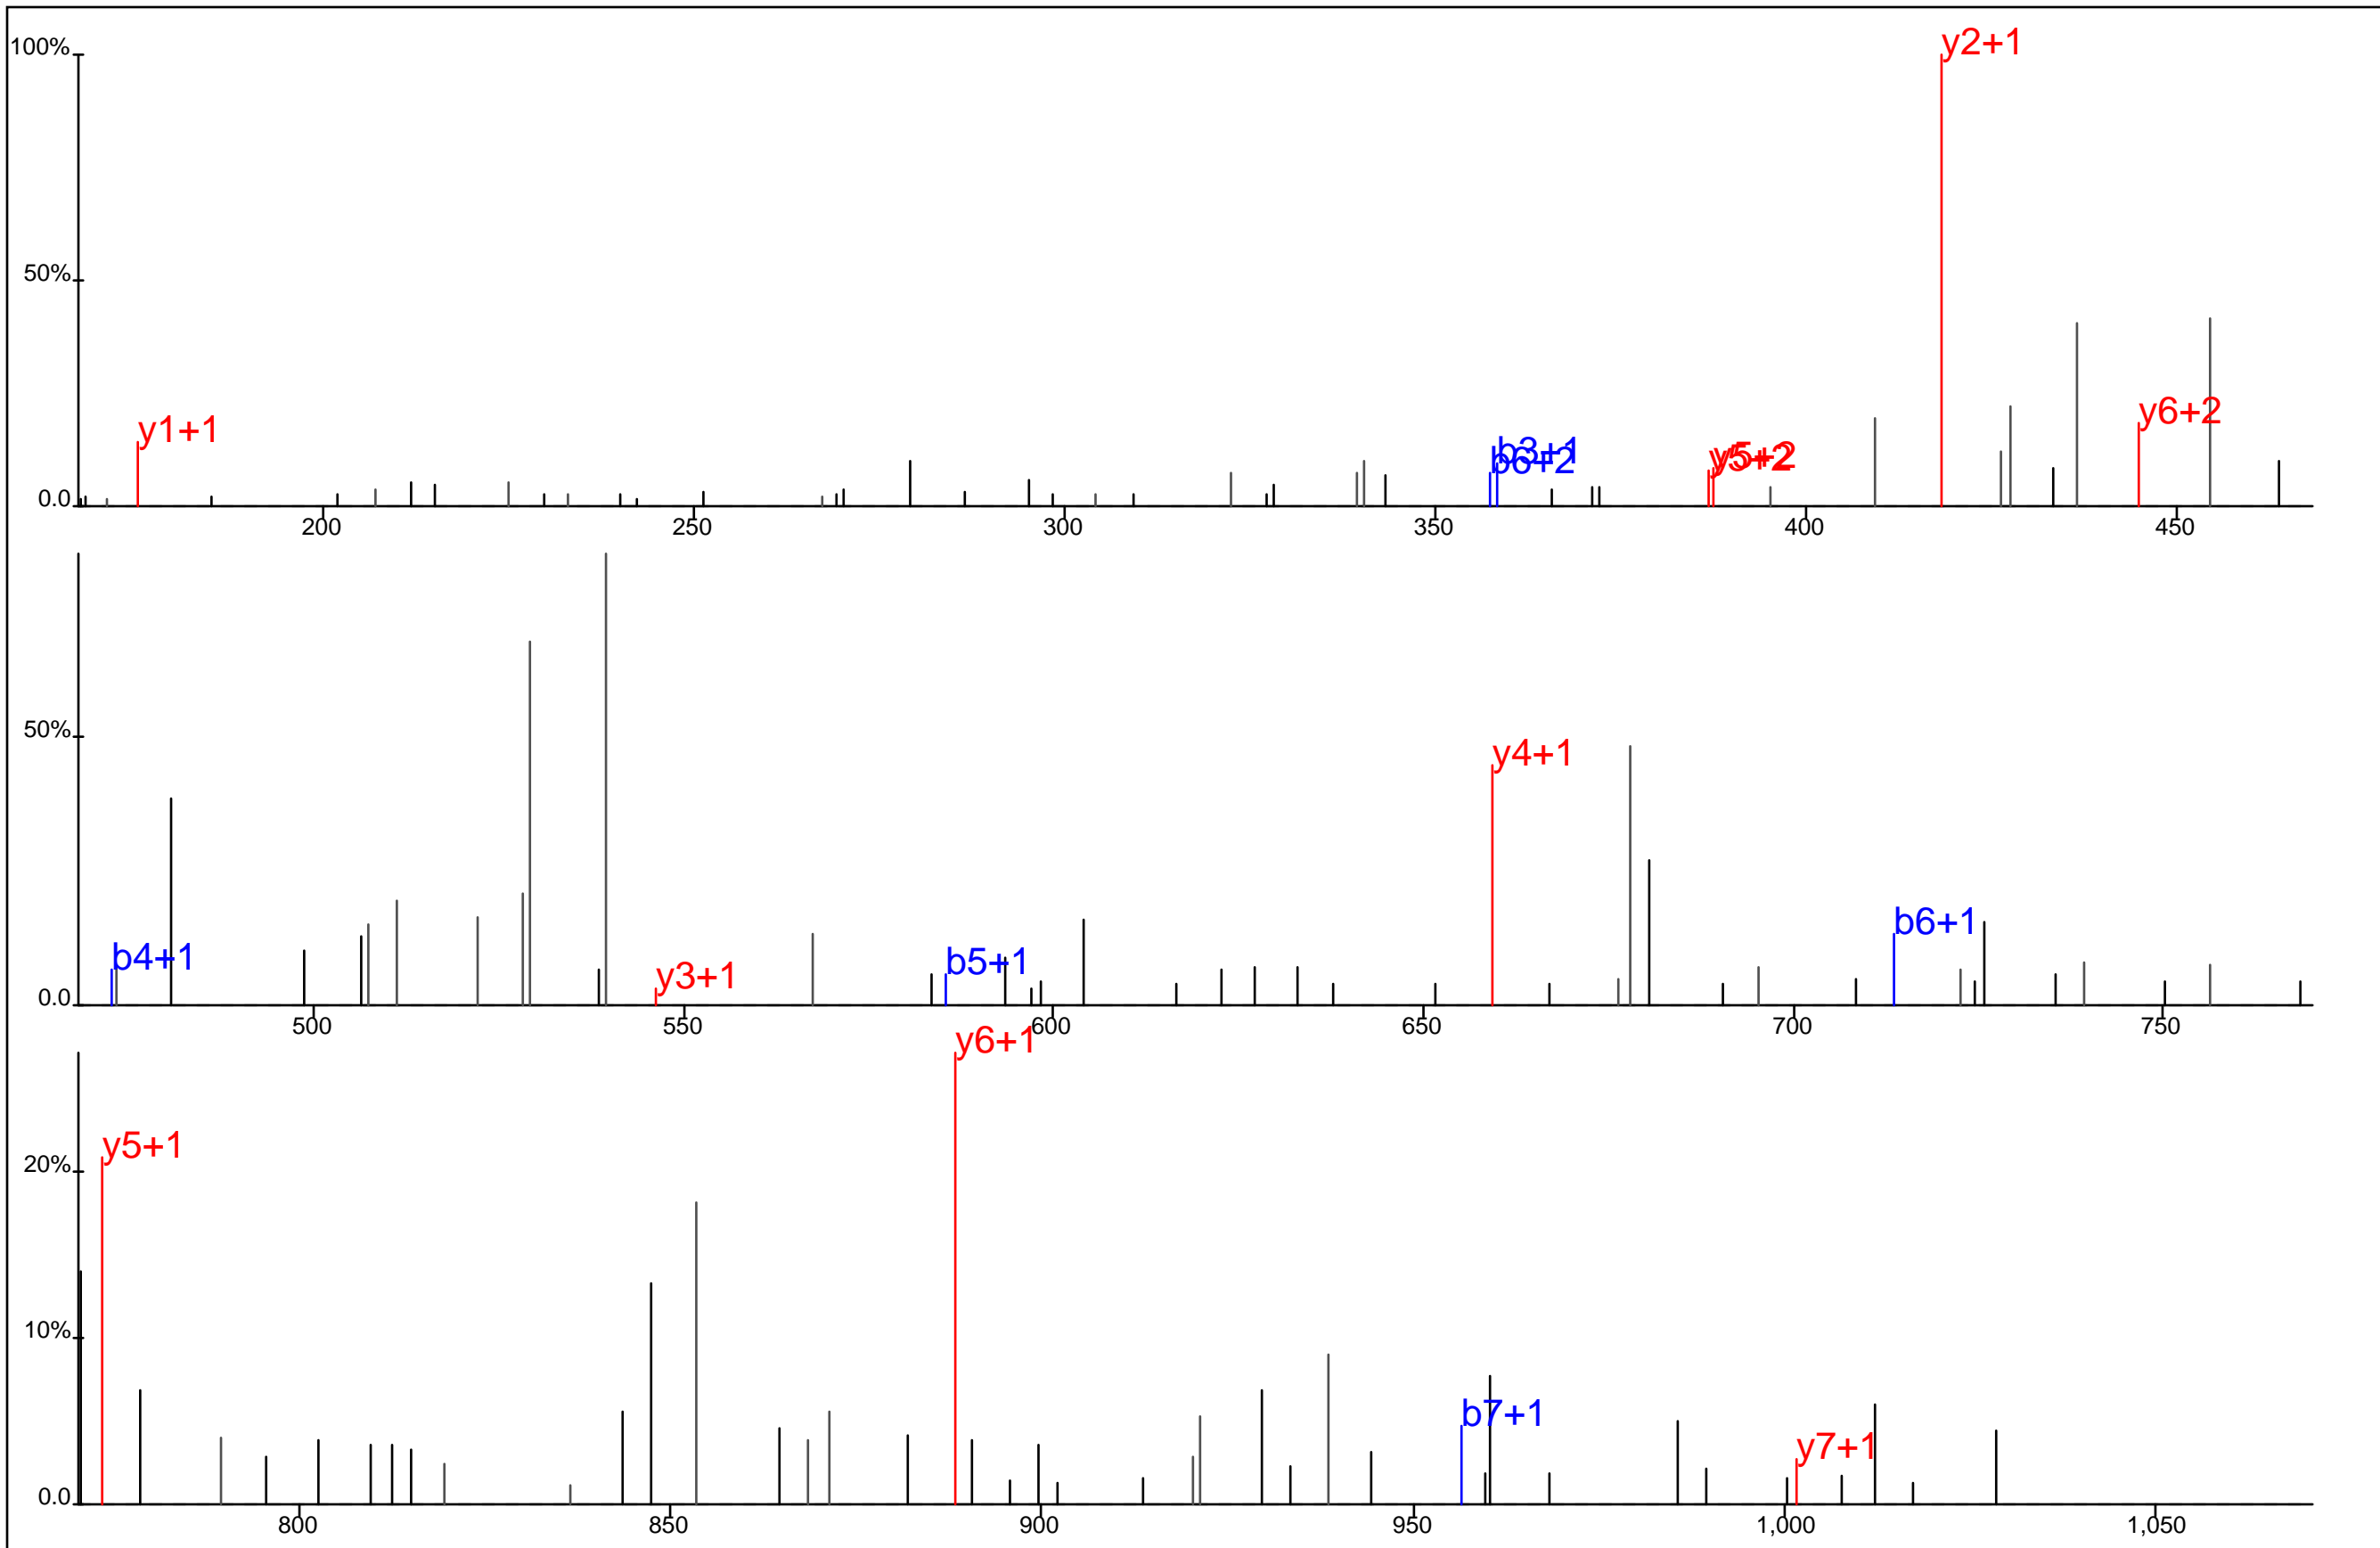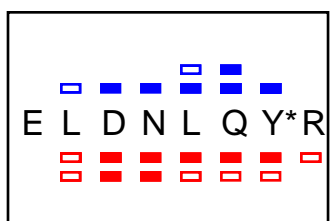

Protein Name: TAO kinase 3  
 gi Accession: 0  
 Precursor Mass: 565.7500+2  
 Delta Mass: 4.407 ppm  
 XCorr: 26.42

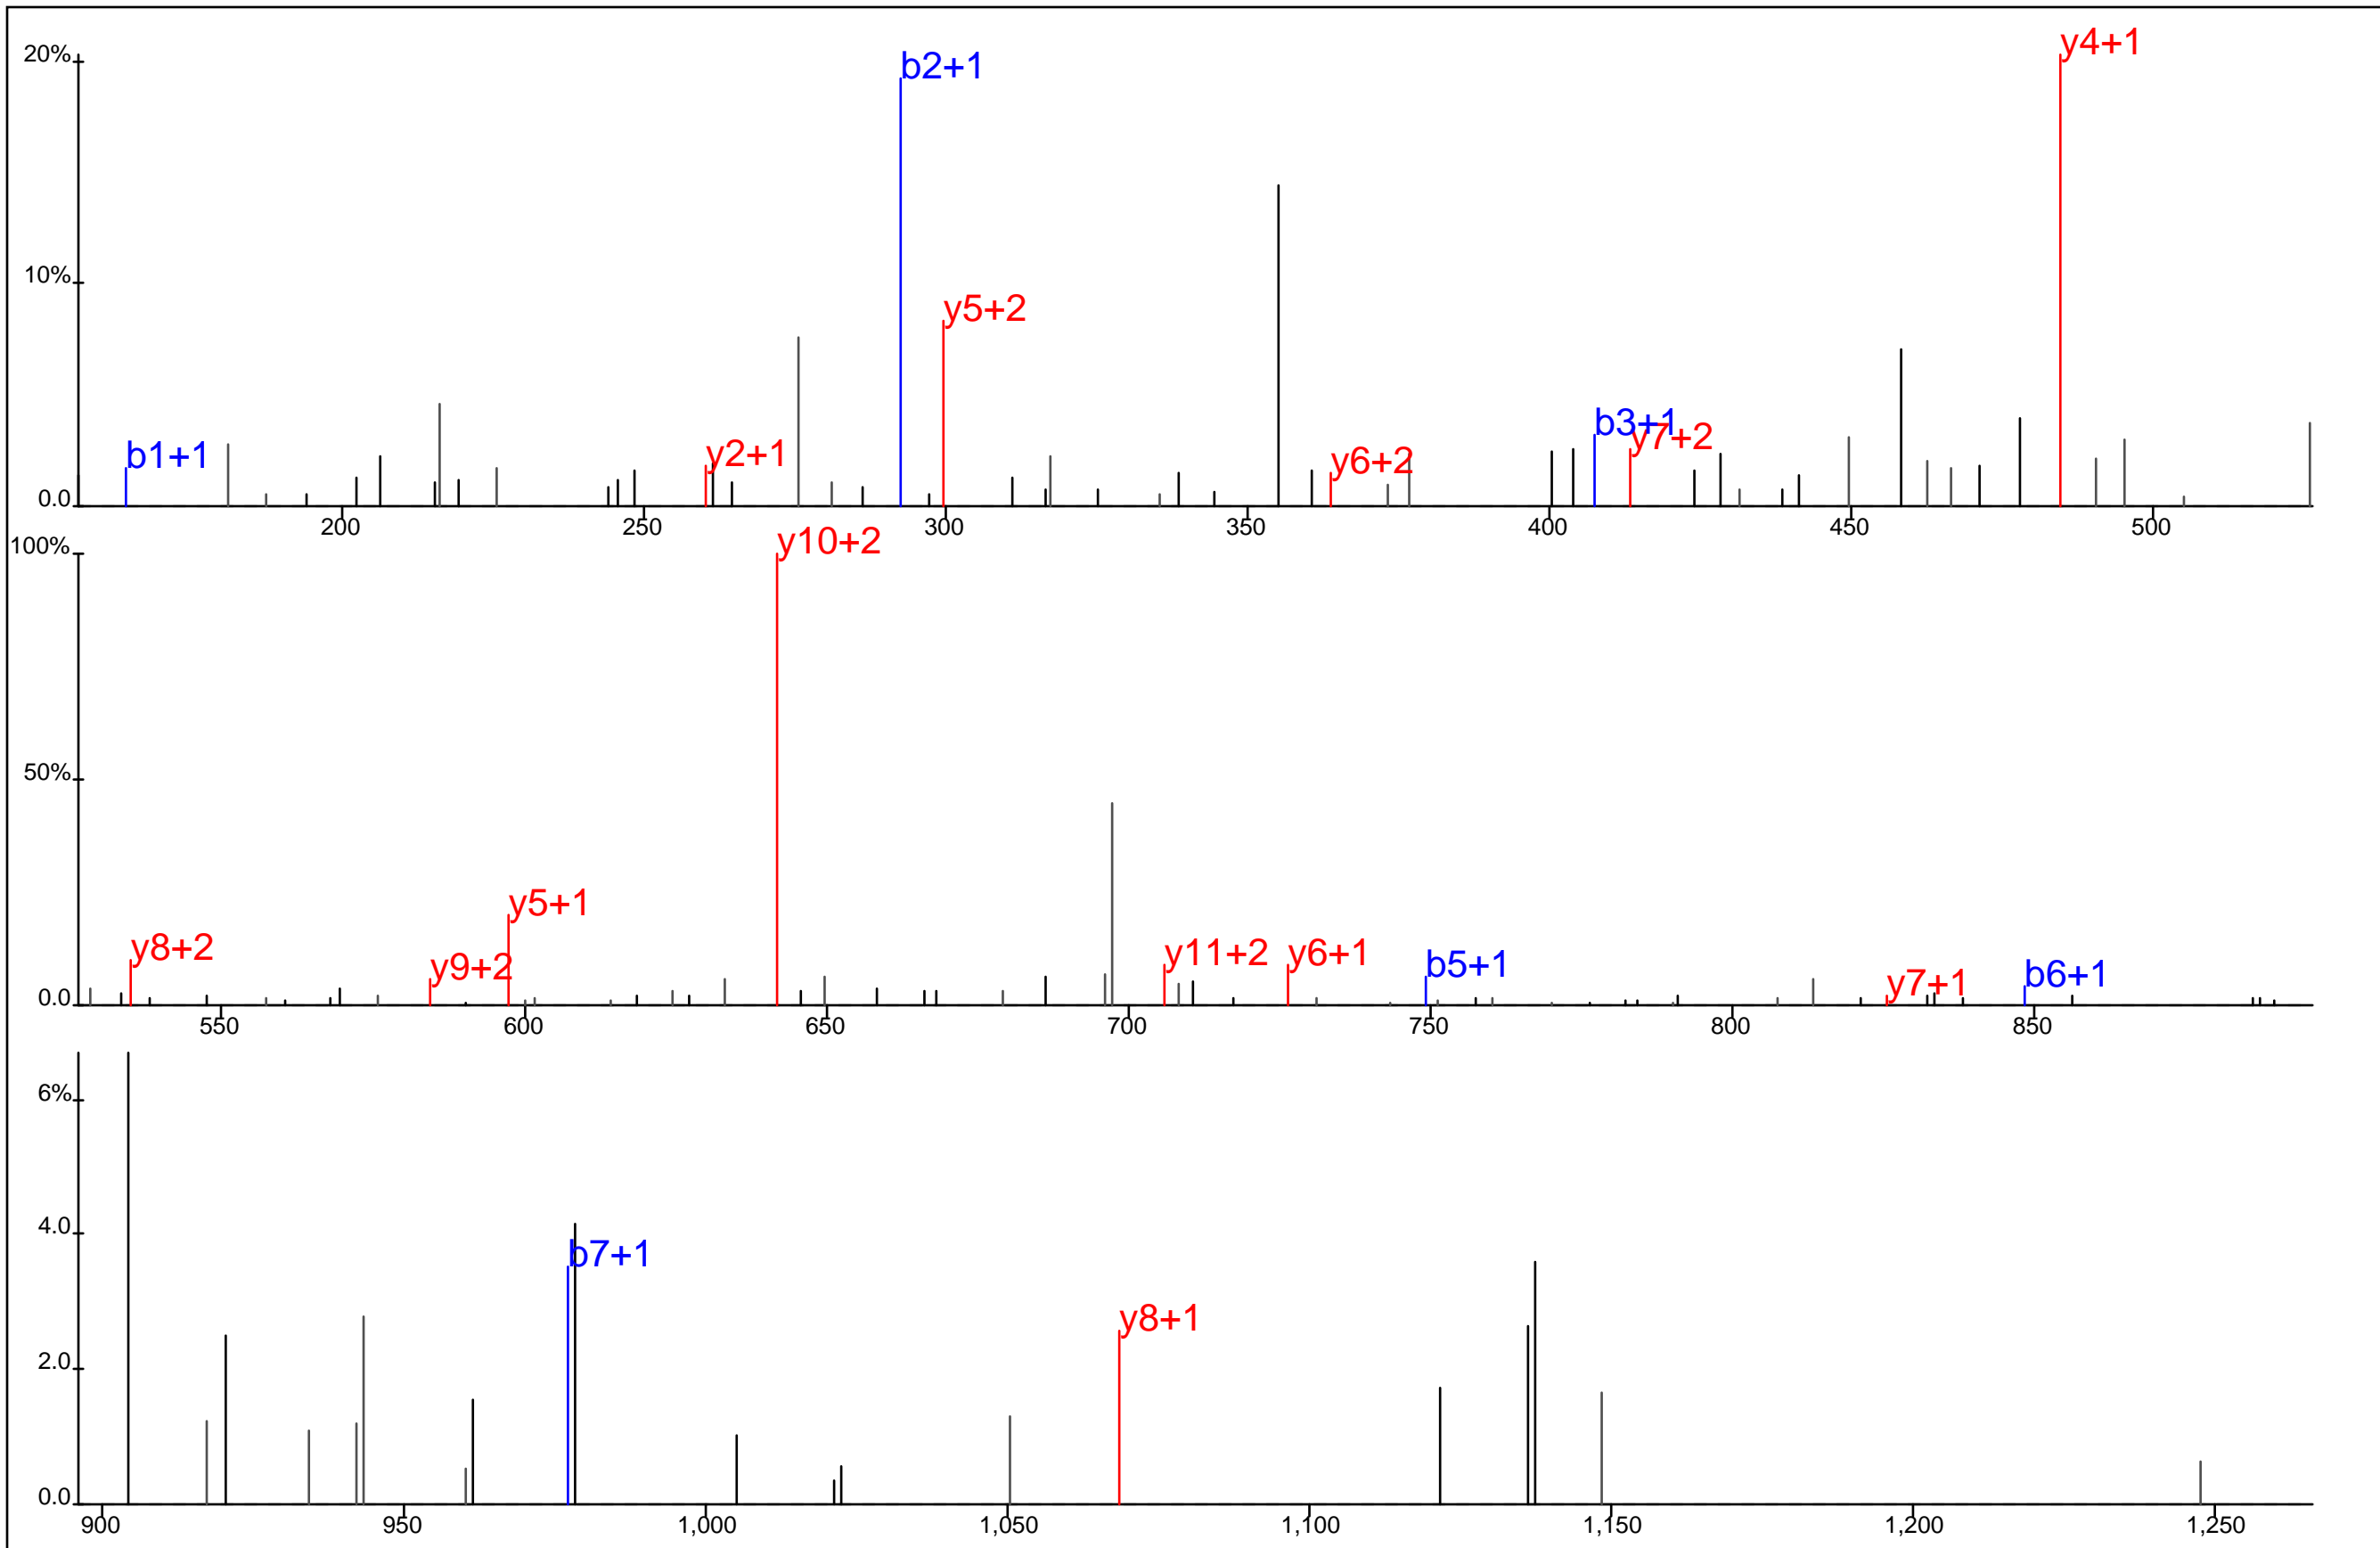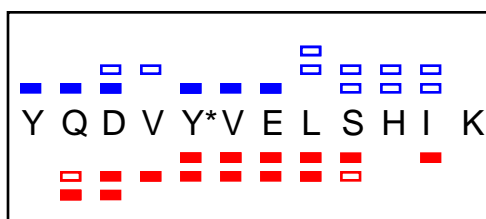

Protein Name: Tara like protein  
 gi Accession: 0  
 Precursor Mass: 525.2479+3  
 Delta Mass: 0.355 ppm  
 XCorr: 28.03

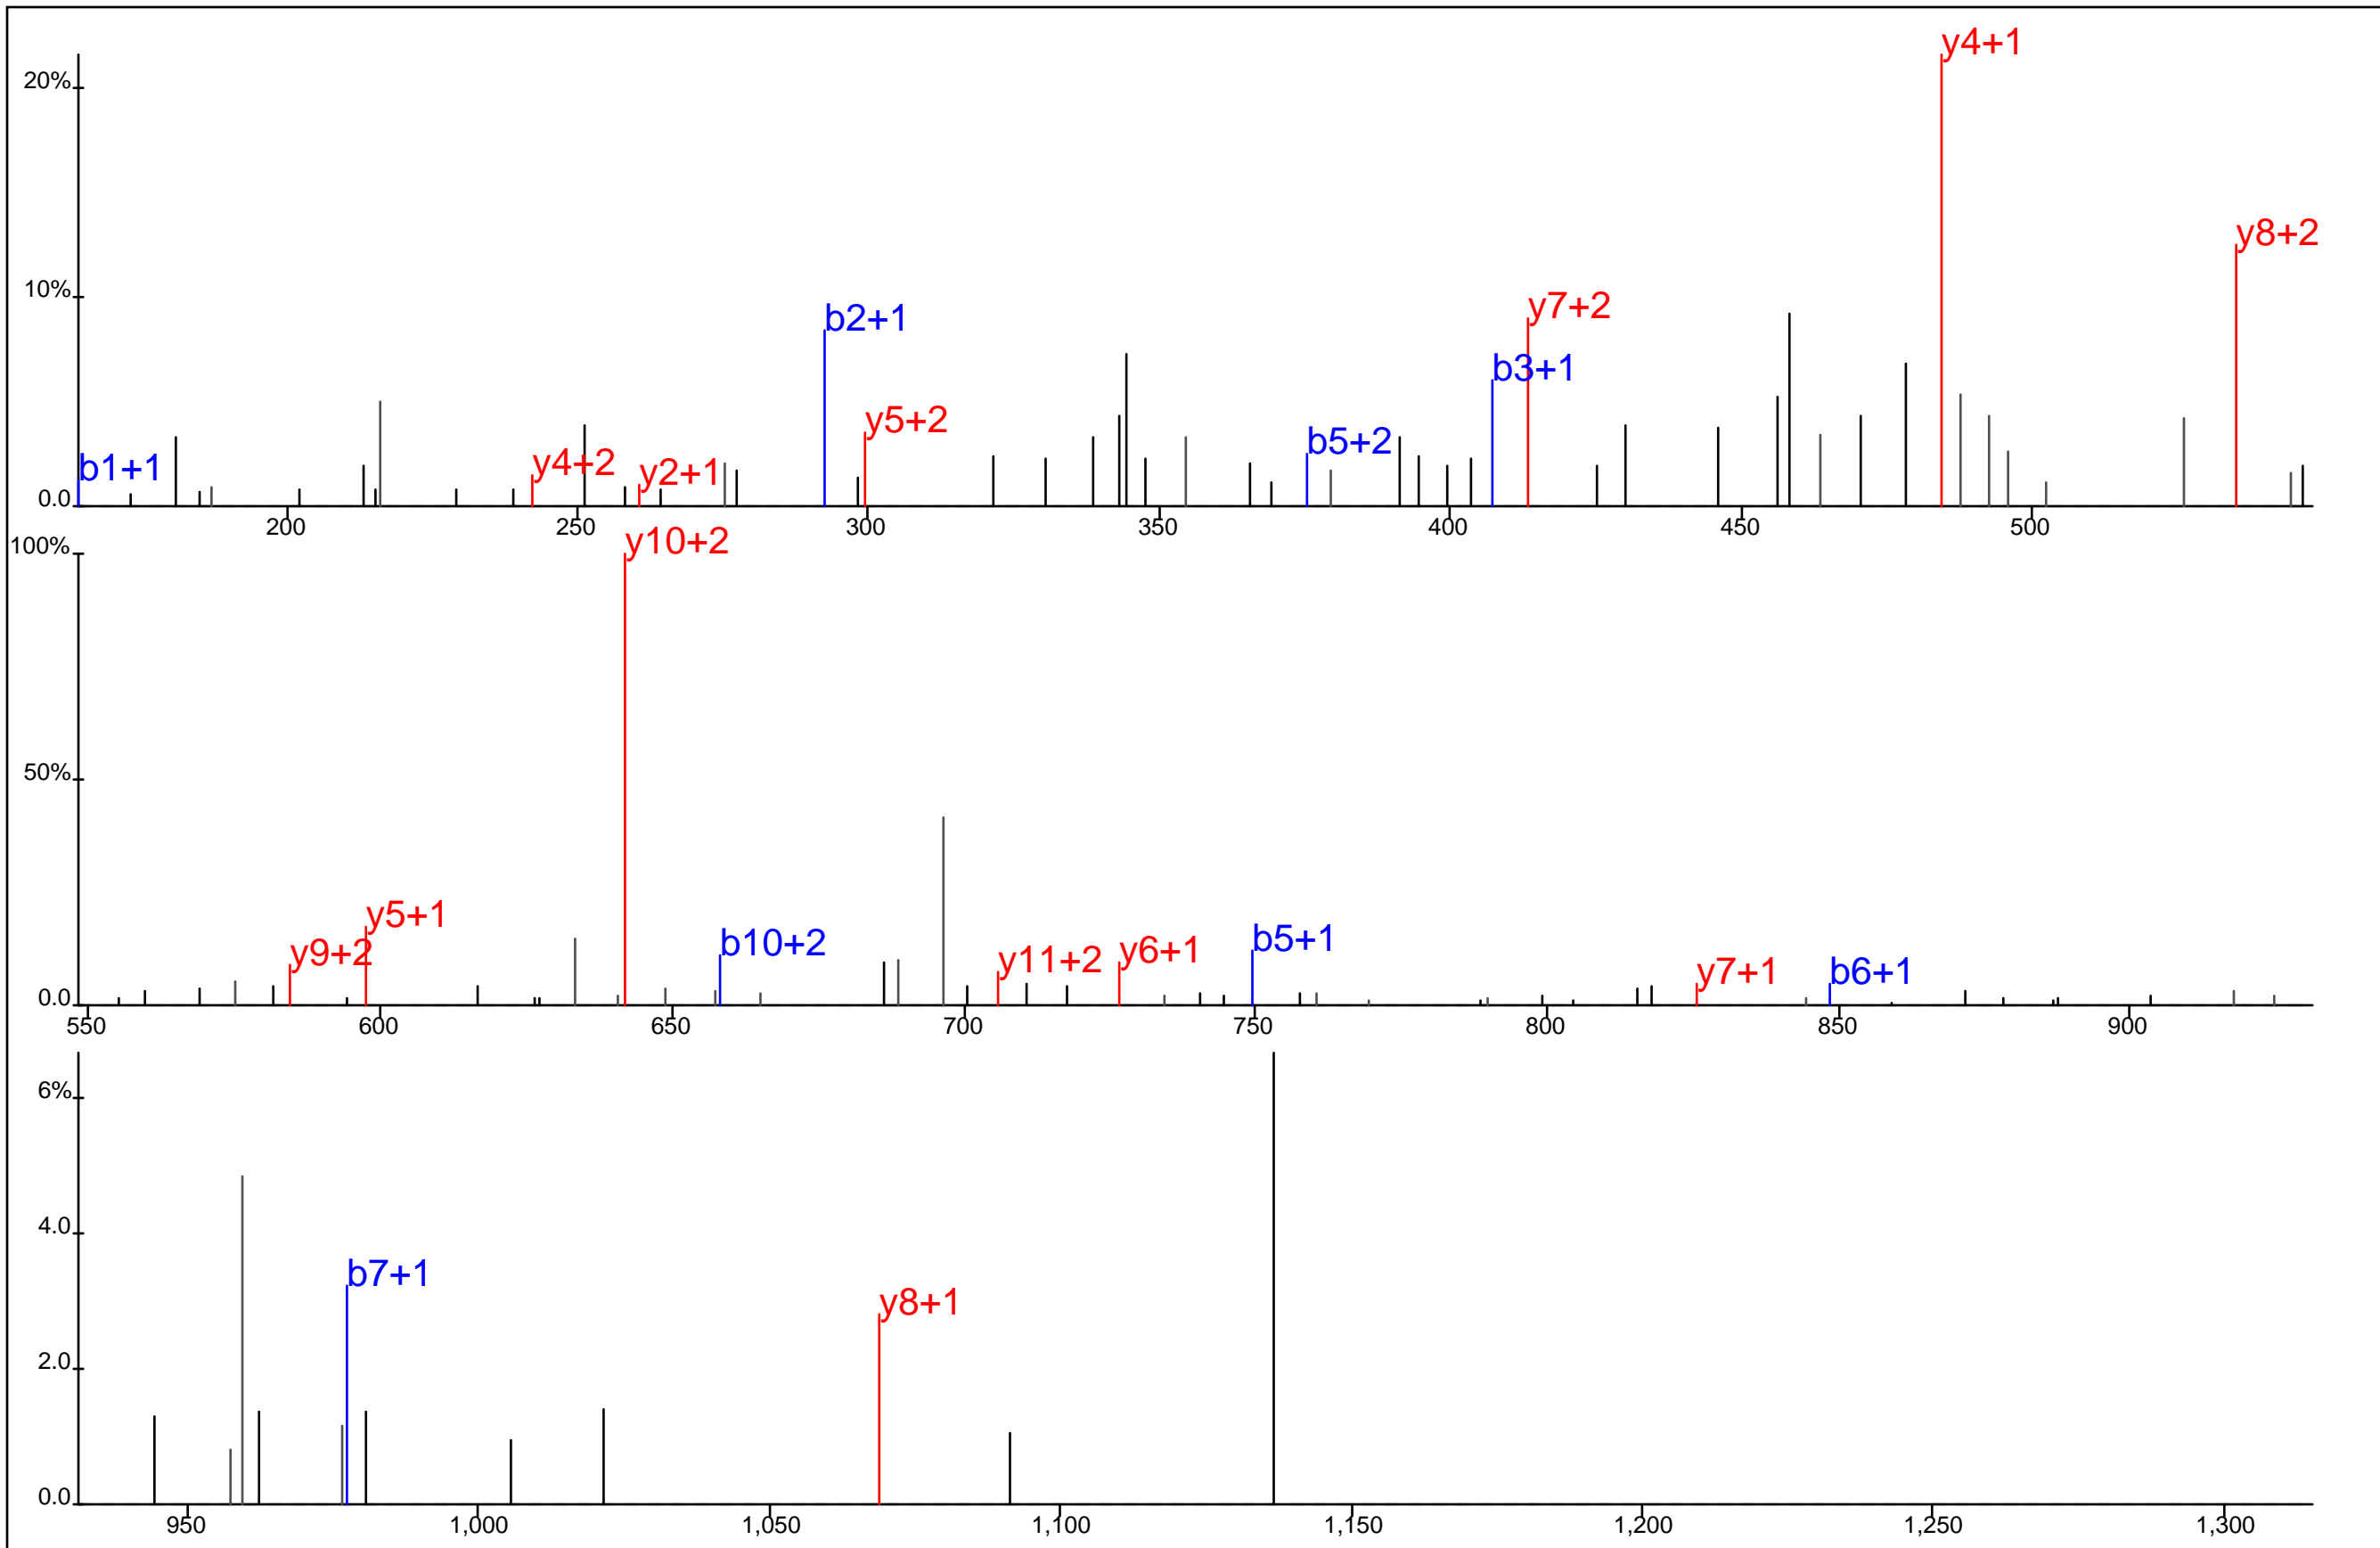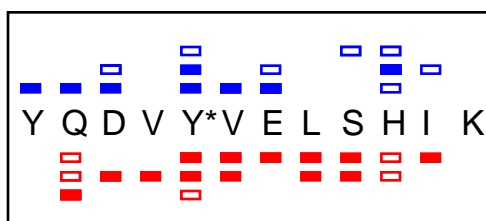

Protein Name: Tara like protein  
 gi Accession: 0  
 Precursor Mass: 525.2481+3  
 Delta Mass: 0.006 ppm  
 XCorr: 25.3

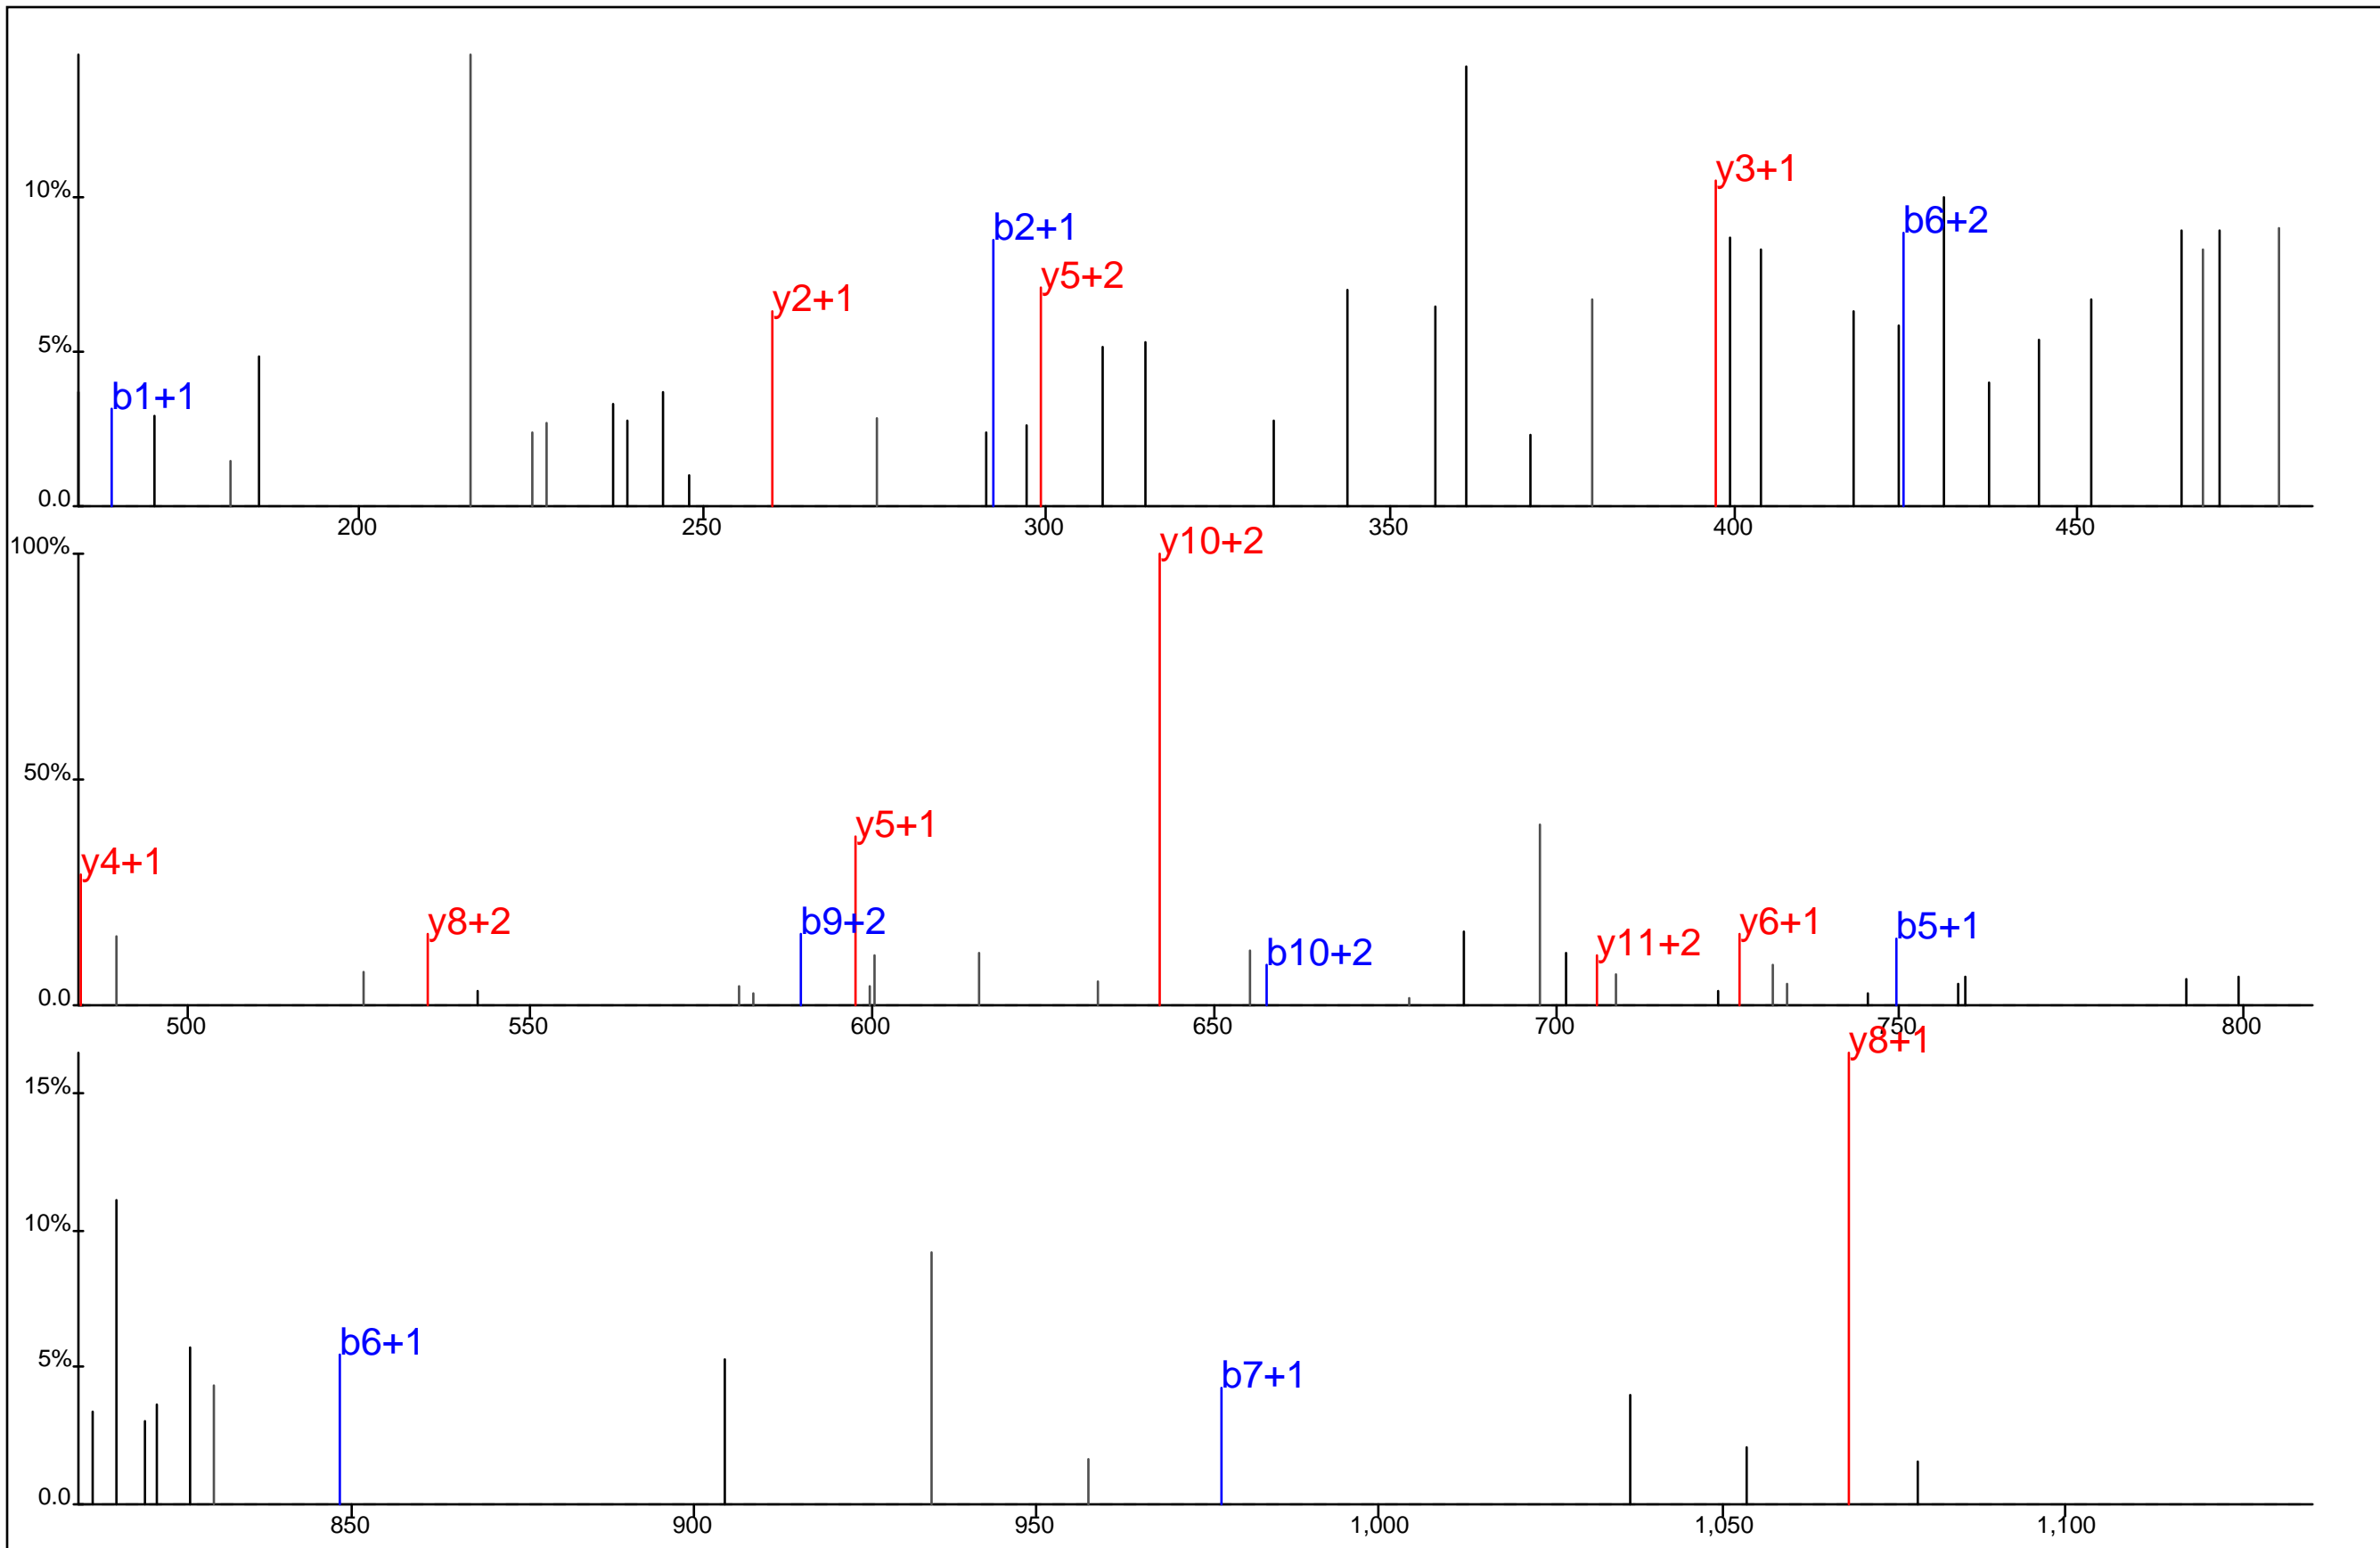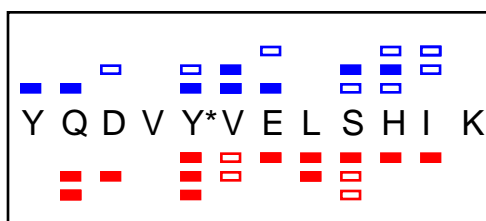

Protein Name: Tara like protein  
 gi Accession: 0  
 Precursor Mass: 525.2481+3  
 Delta Mass: 0.006 ppm  
 XCorr: 24.03



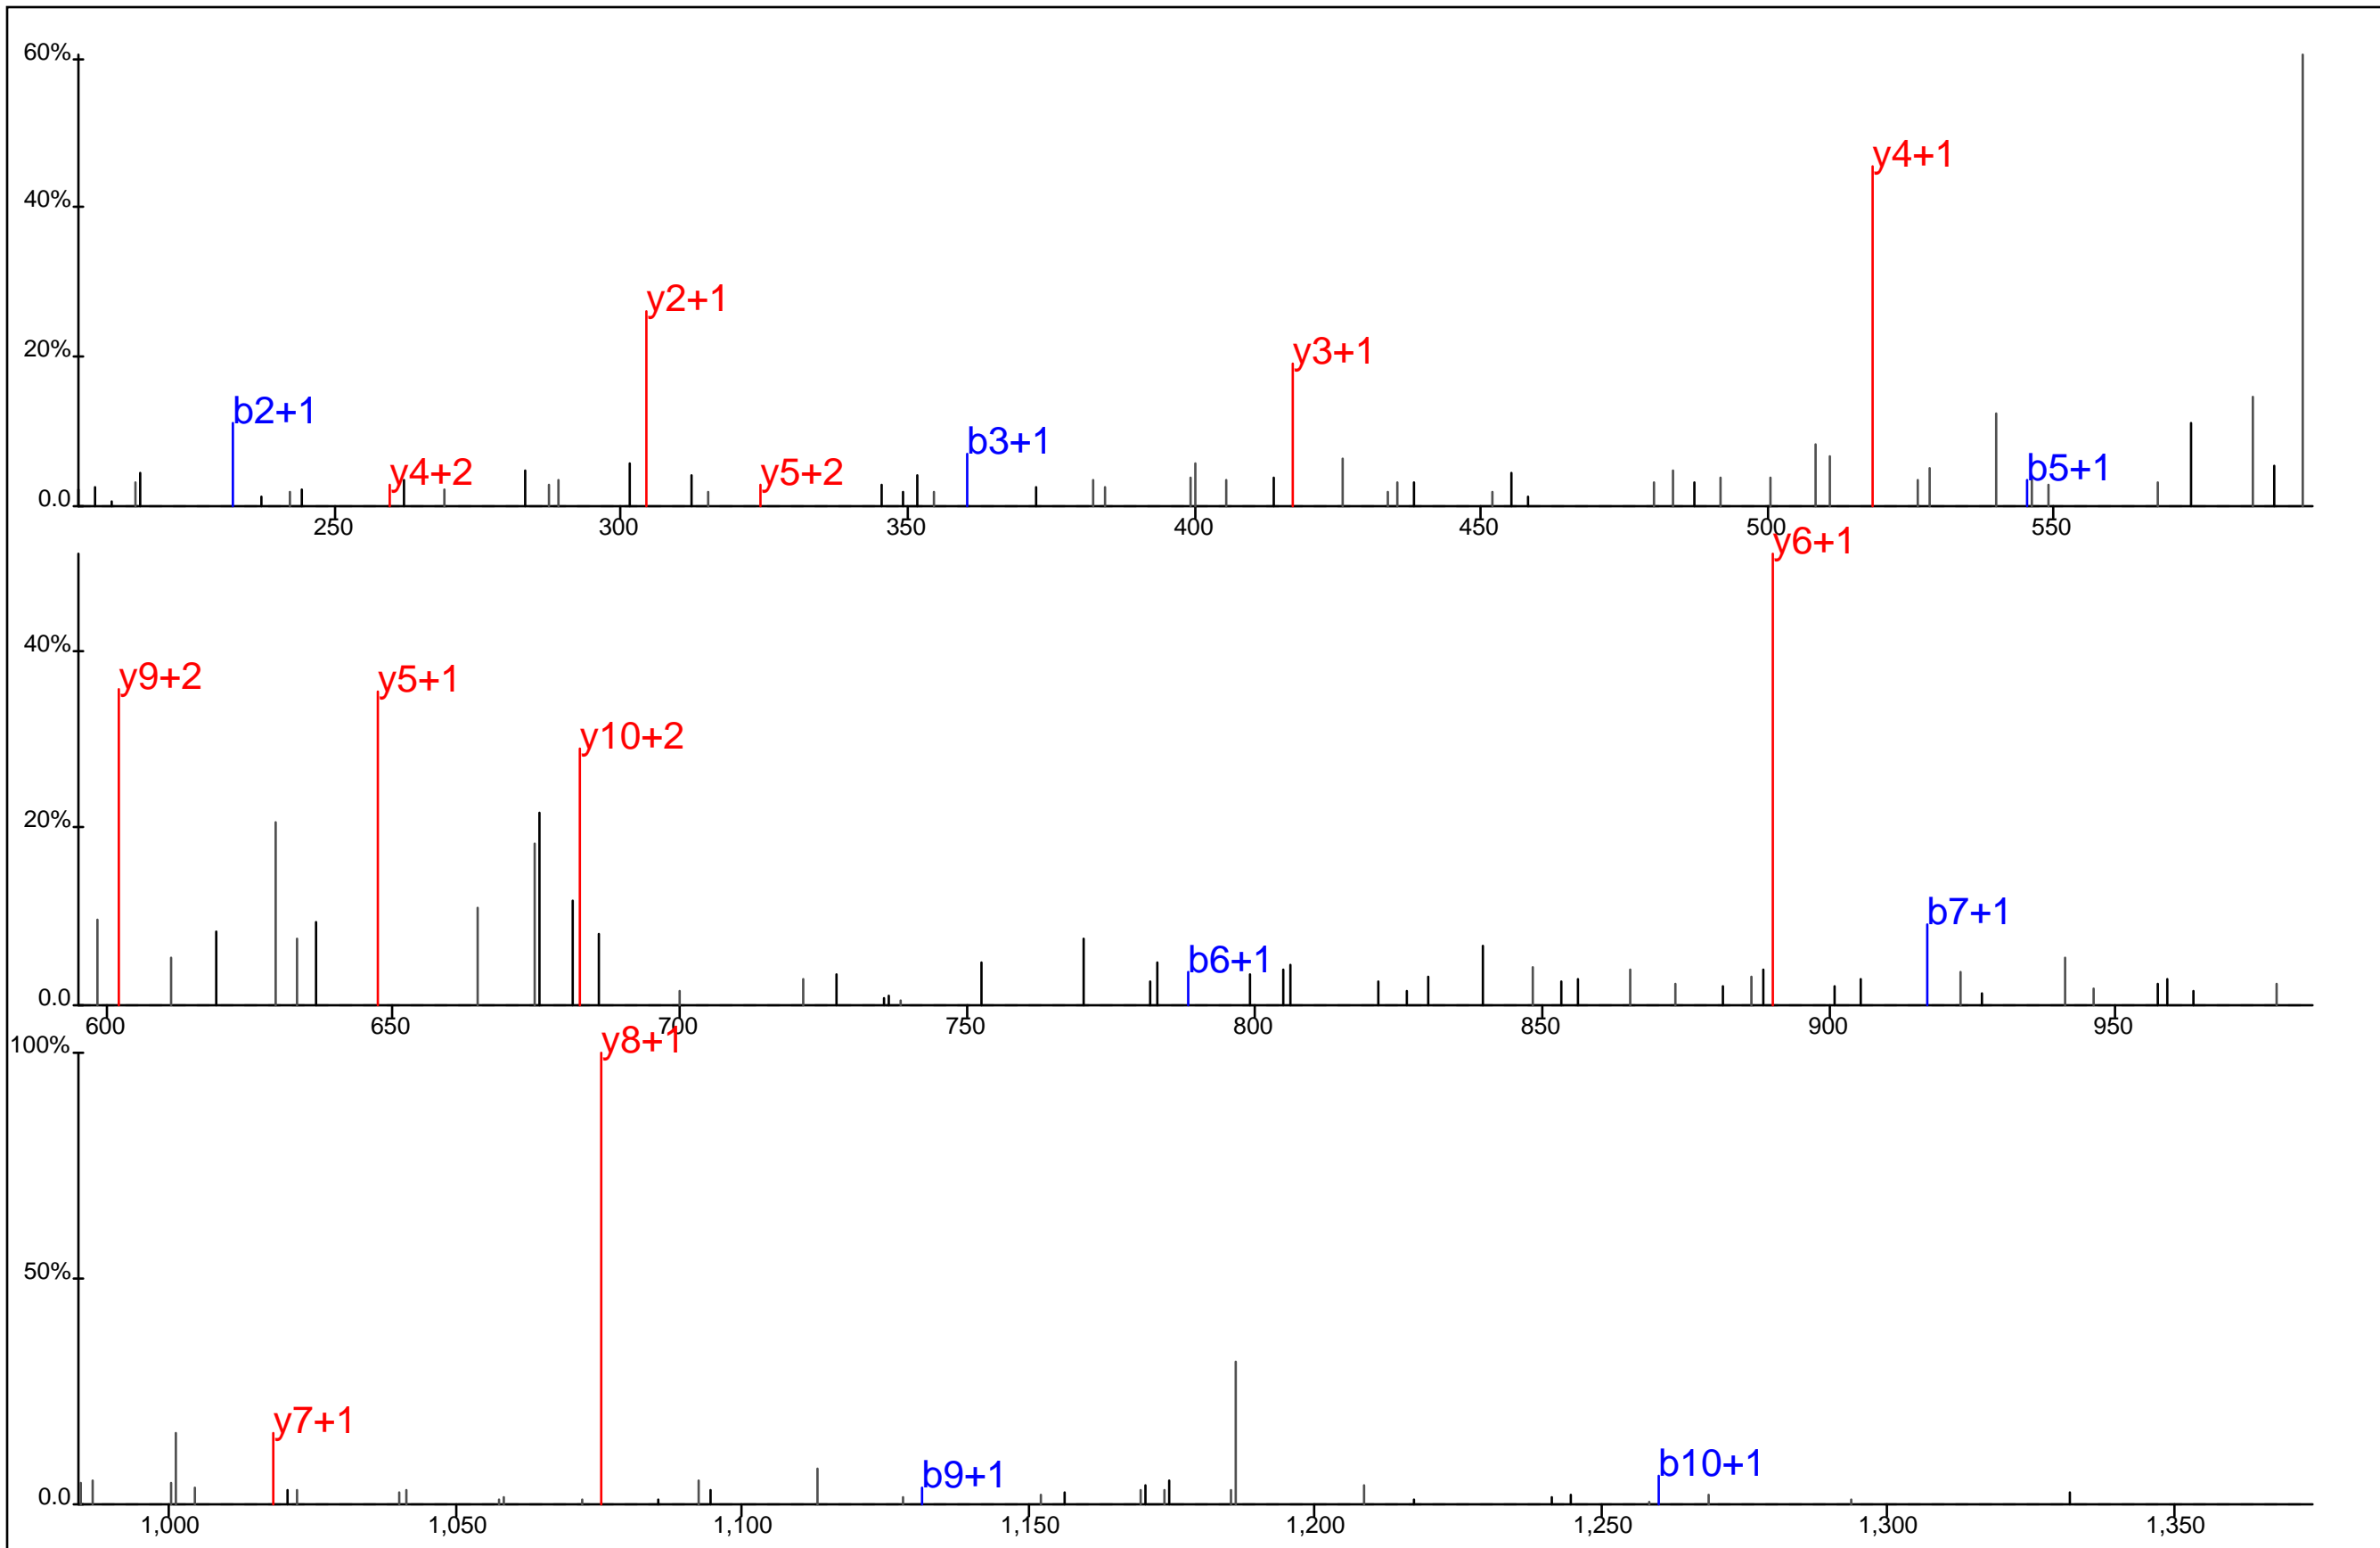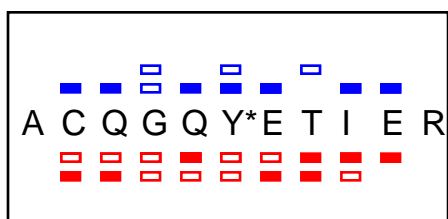

Protein Name: TBC1 domain family member 10A  
 gi Accession: 0  
 Precursor Mass: 717.7886+2  
 Delta Mass: 1.330 ppm  
 XCorr: 54.51

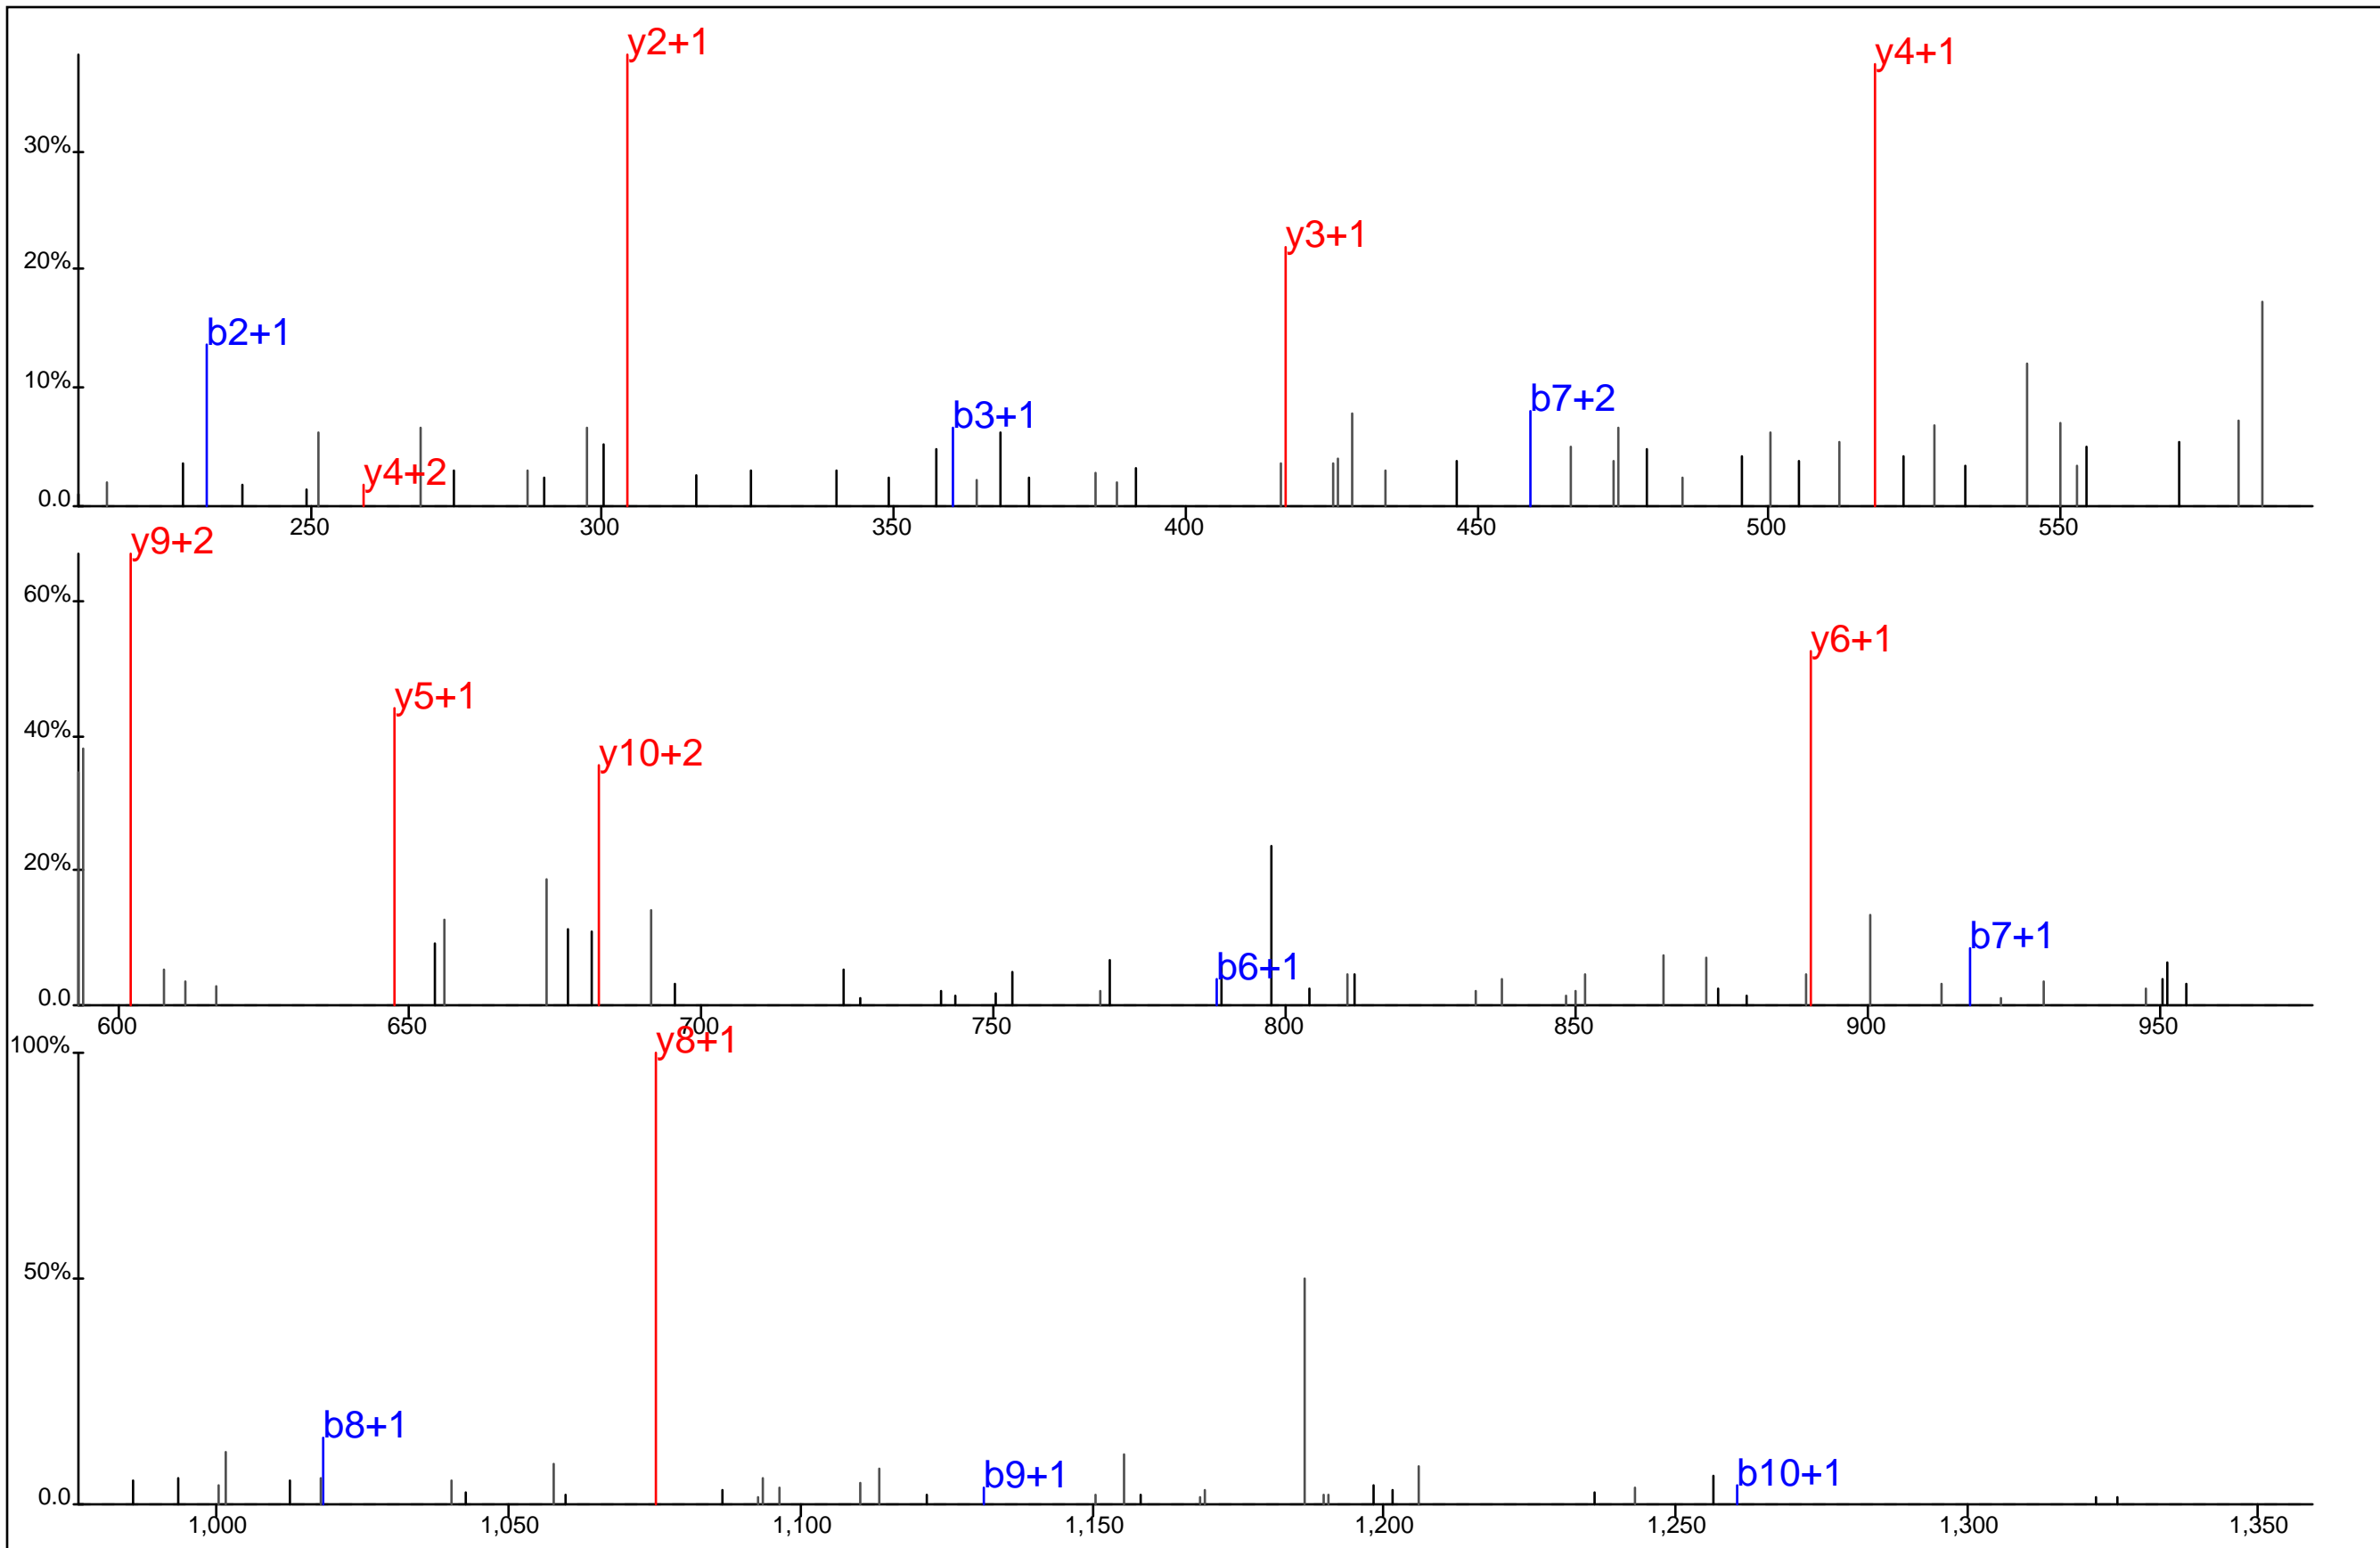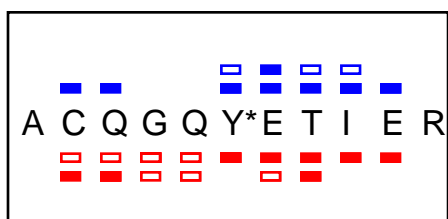

Protein Name: TBC1 domain family member 10A  
 gi Accession: 0  
 Precursor Mass: 717.7899+2  
 Delta Mass: 0.457 ppm  
 XCorr: 51.18



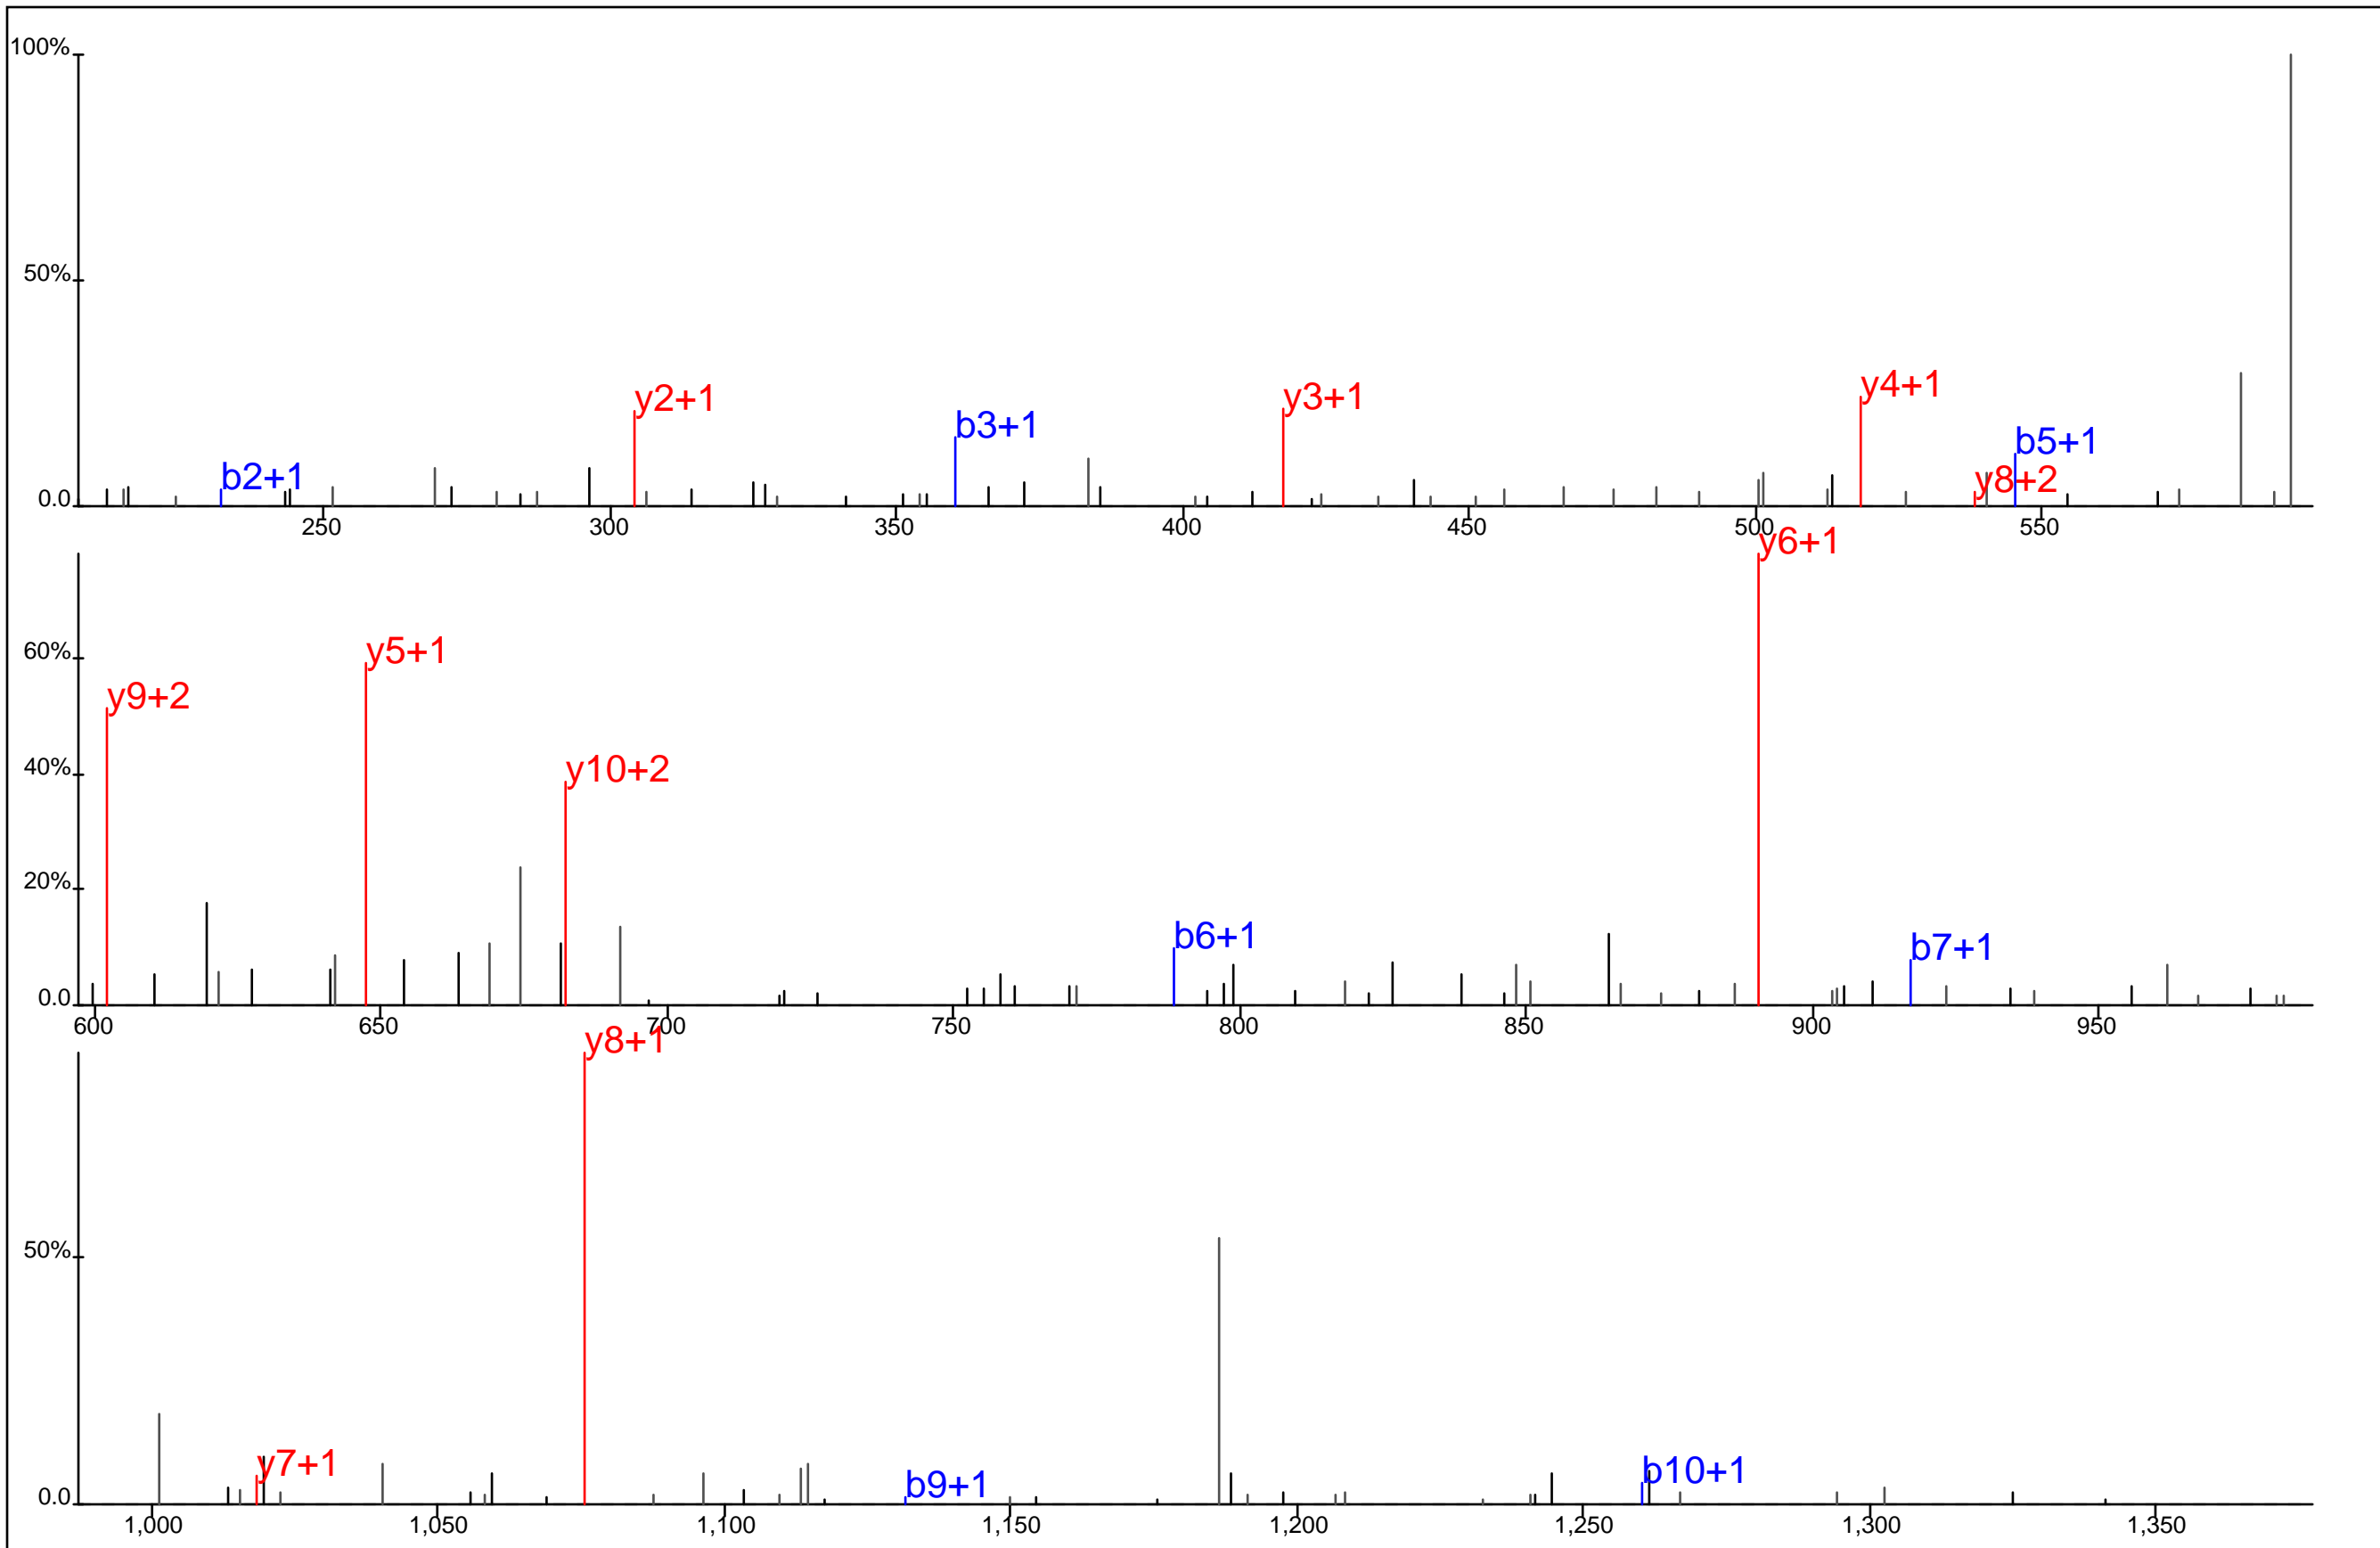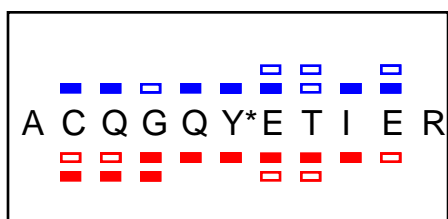

Protein Name: TBC1 domain family member 10A  
 gi Accession: 0  
 Precursor Mass: 717.7879+2  
 Delta Mass: 2.351 ppm  
 XCorr: 38.19

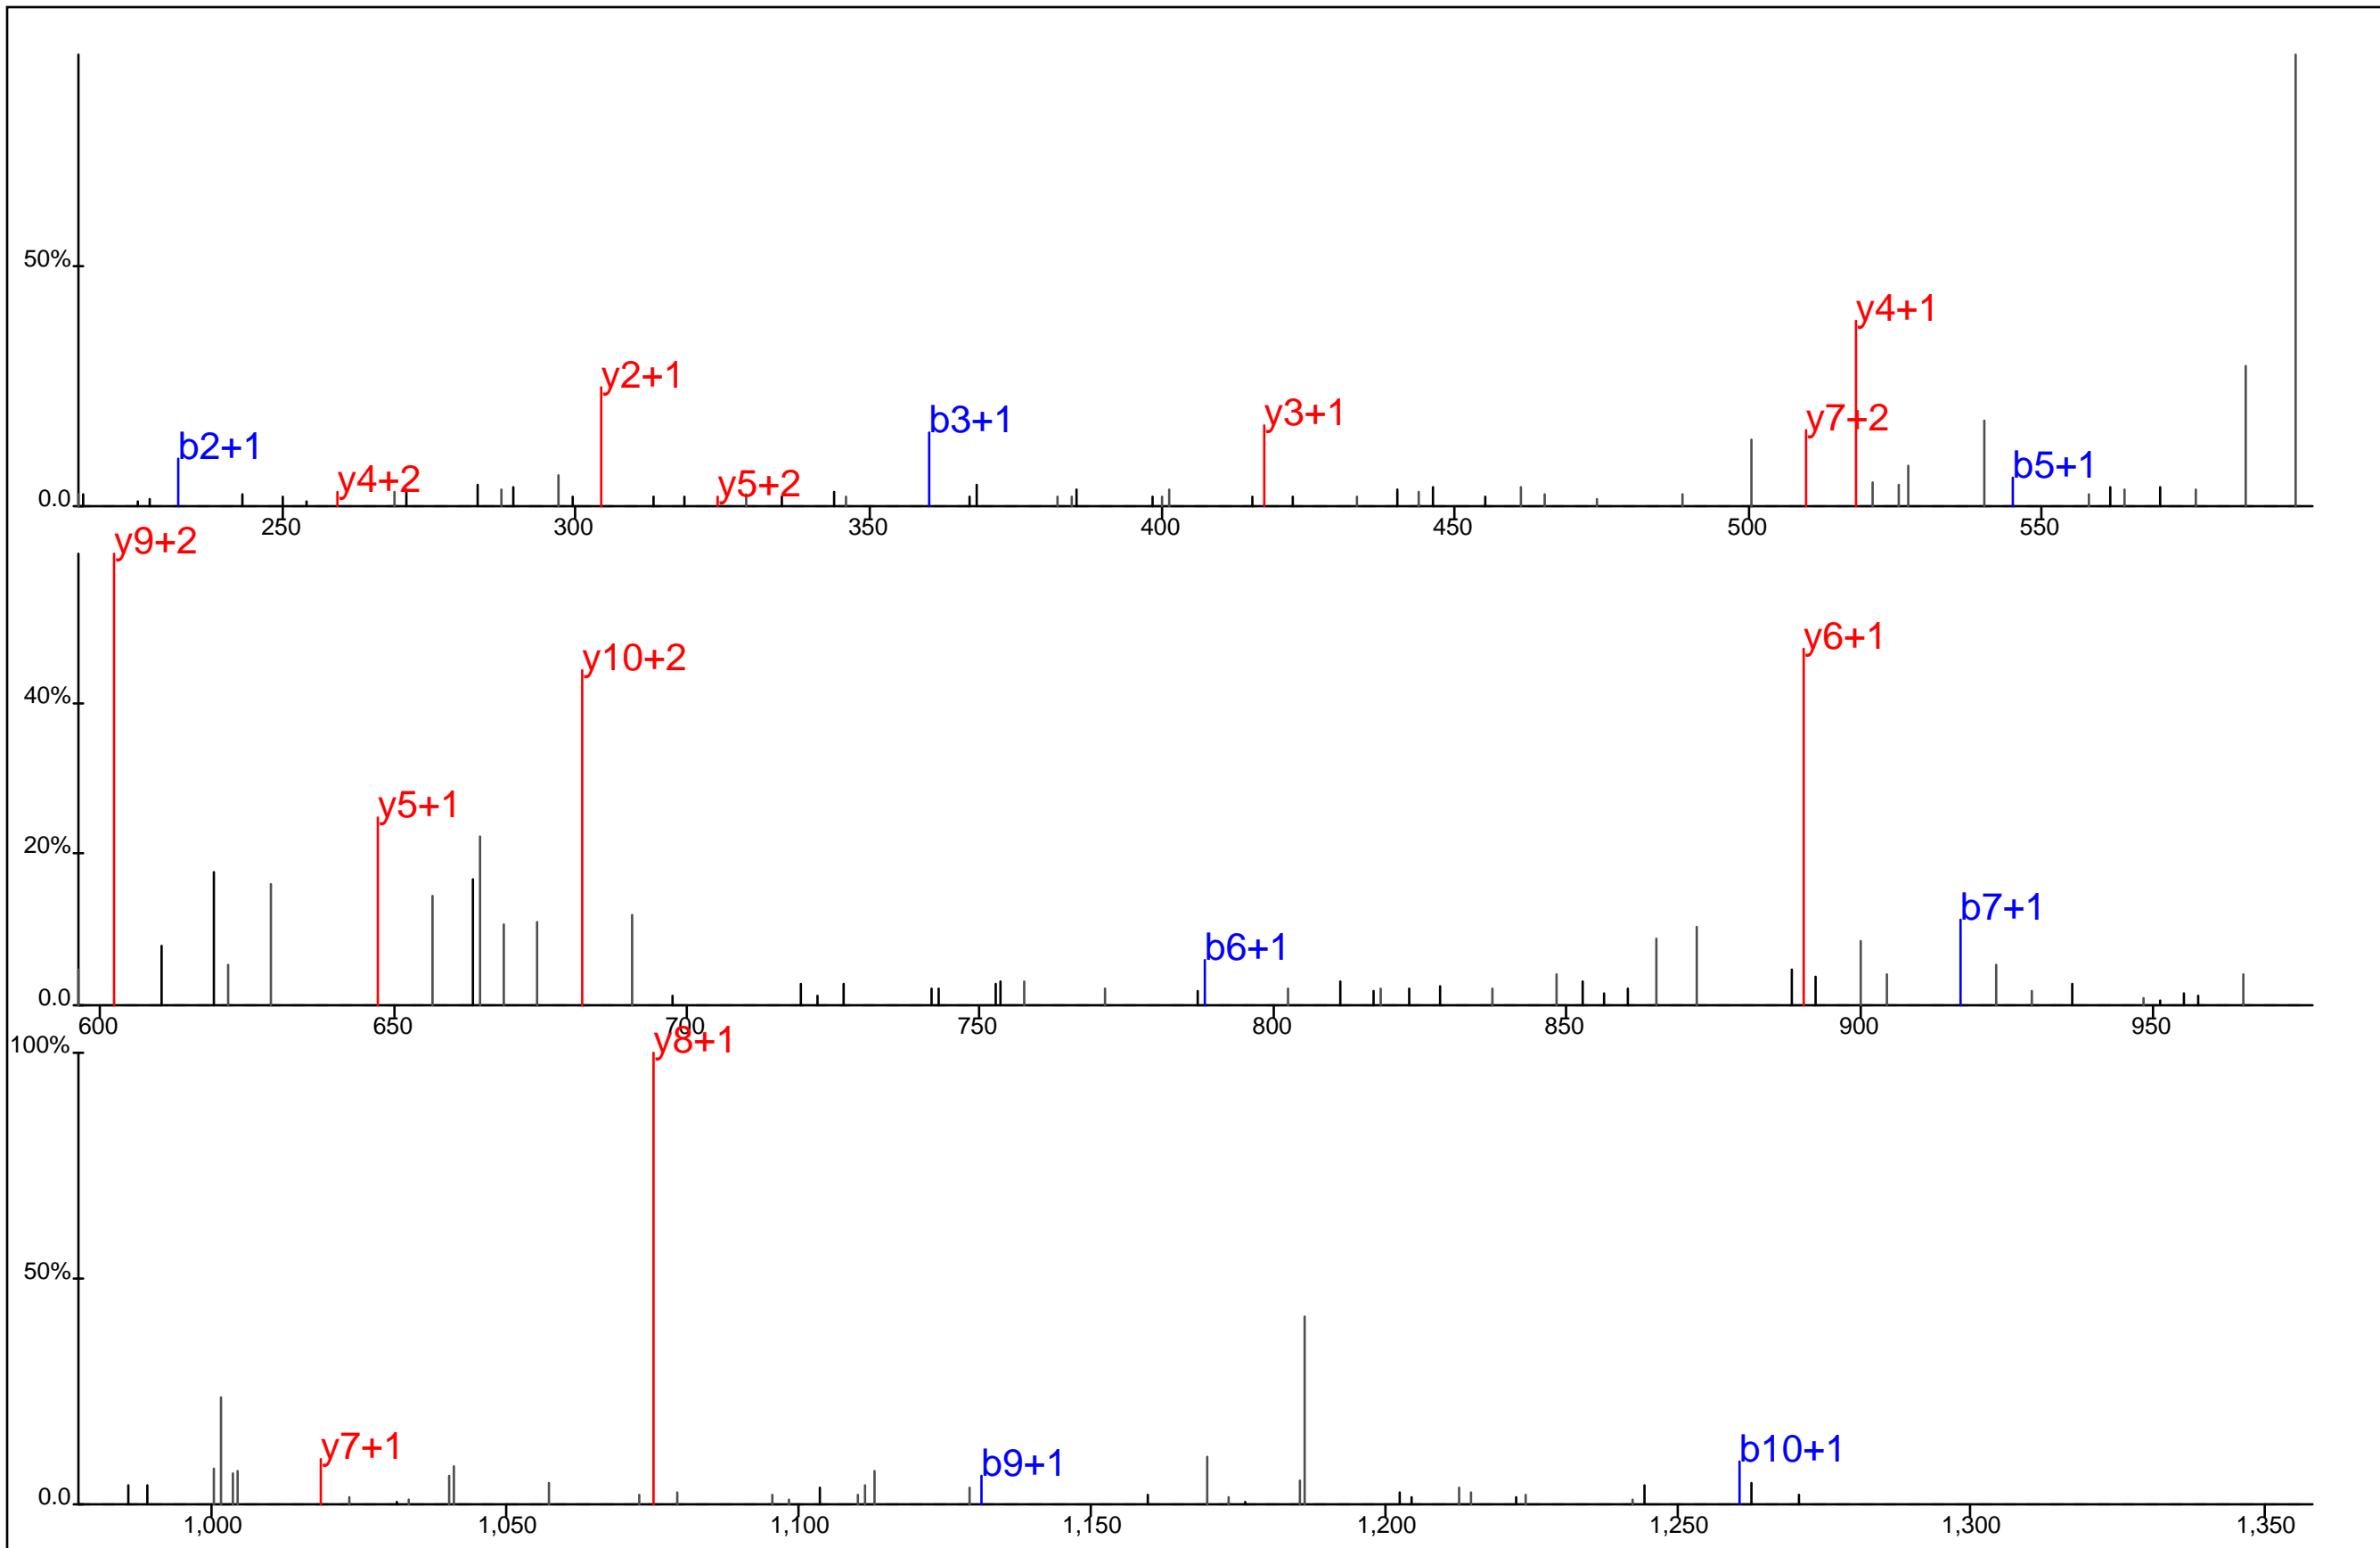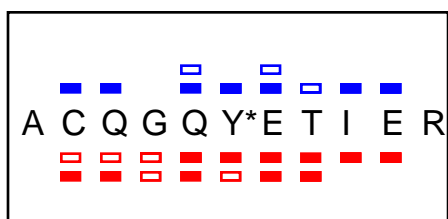

Protein Name: TBC1 domain family member 10A  
 gi Accession: 0  
 Precursor Mass: 717.7878+2  
 Delta Mass: 2.521 ppm  
 XCorr: 61.99

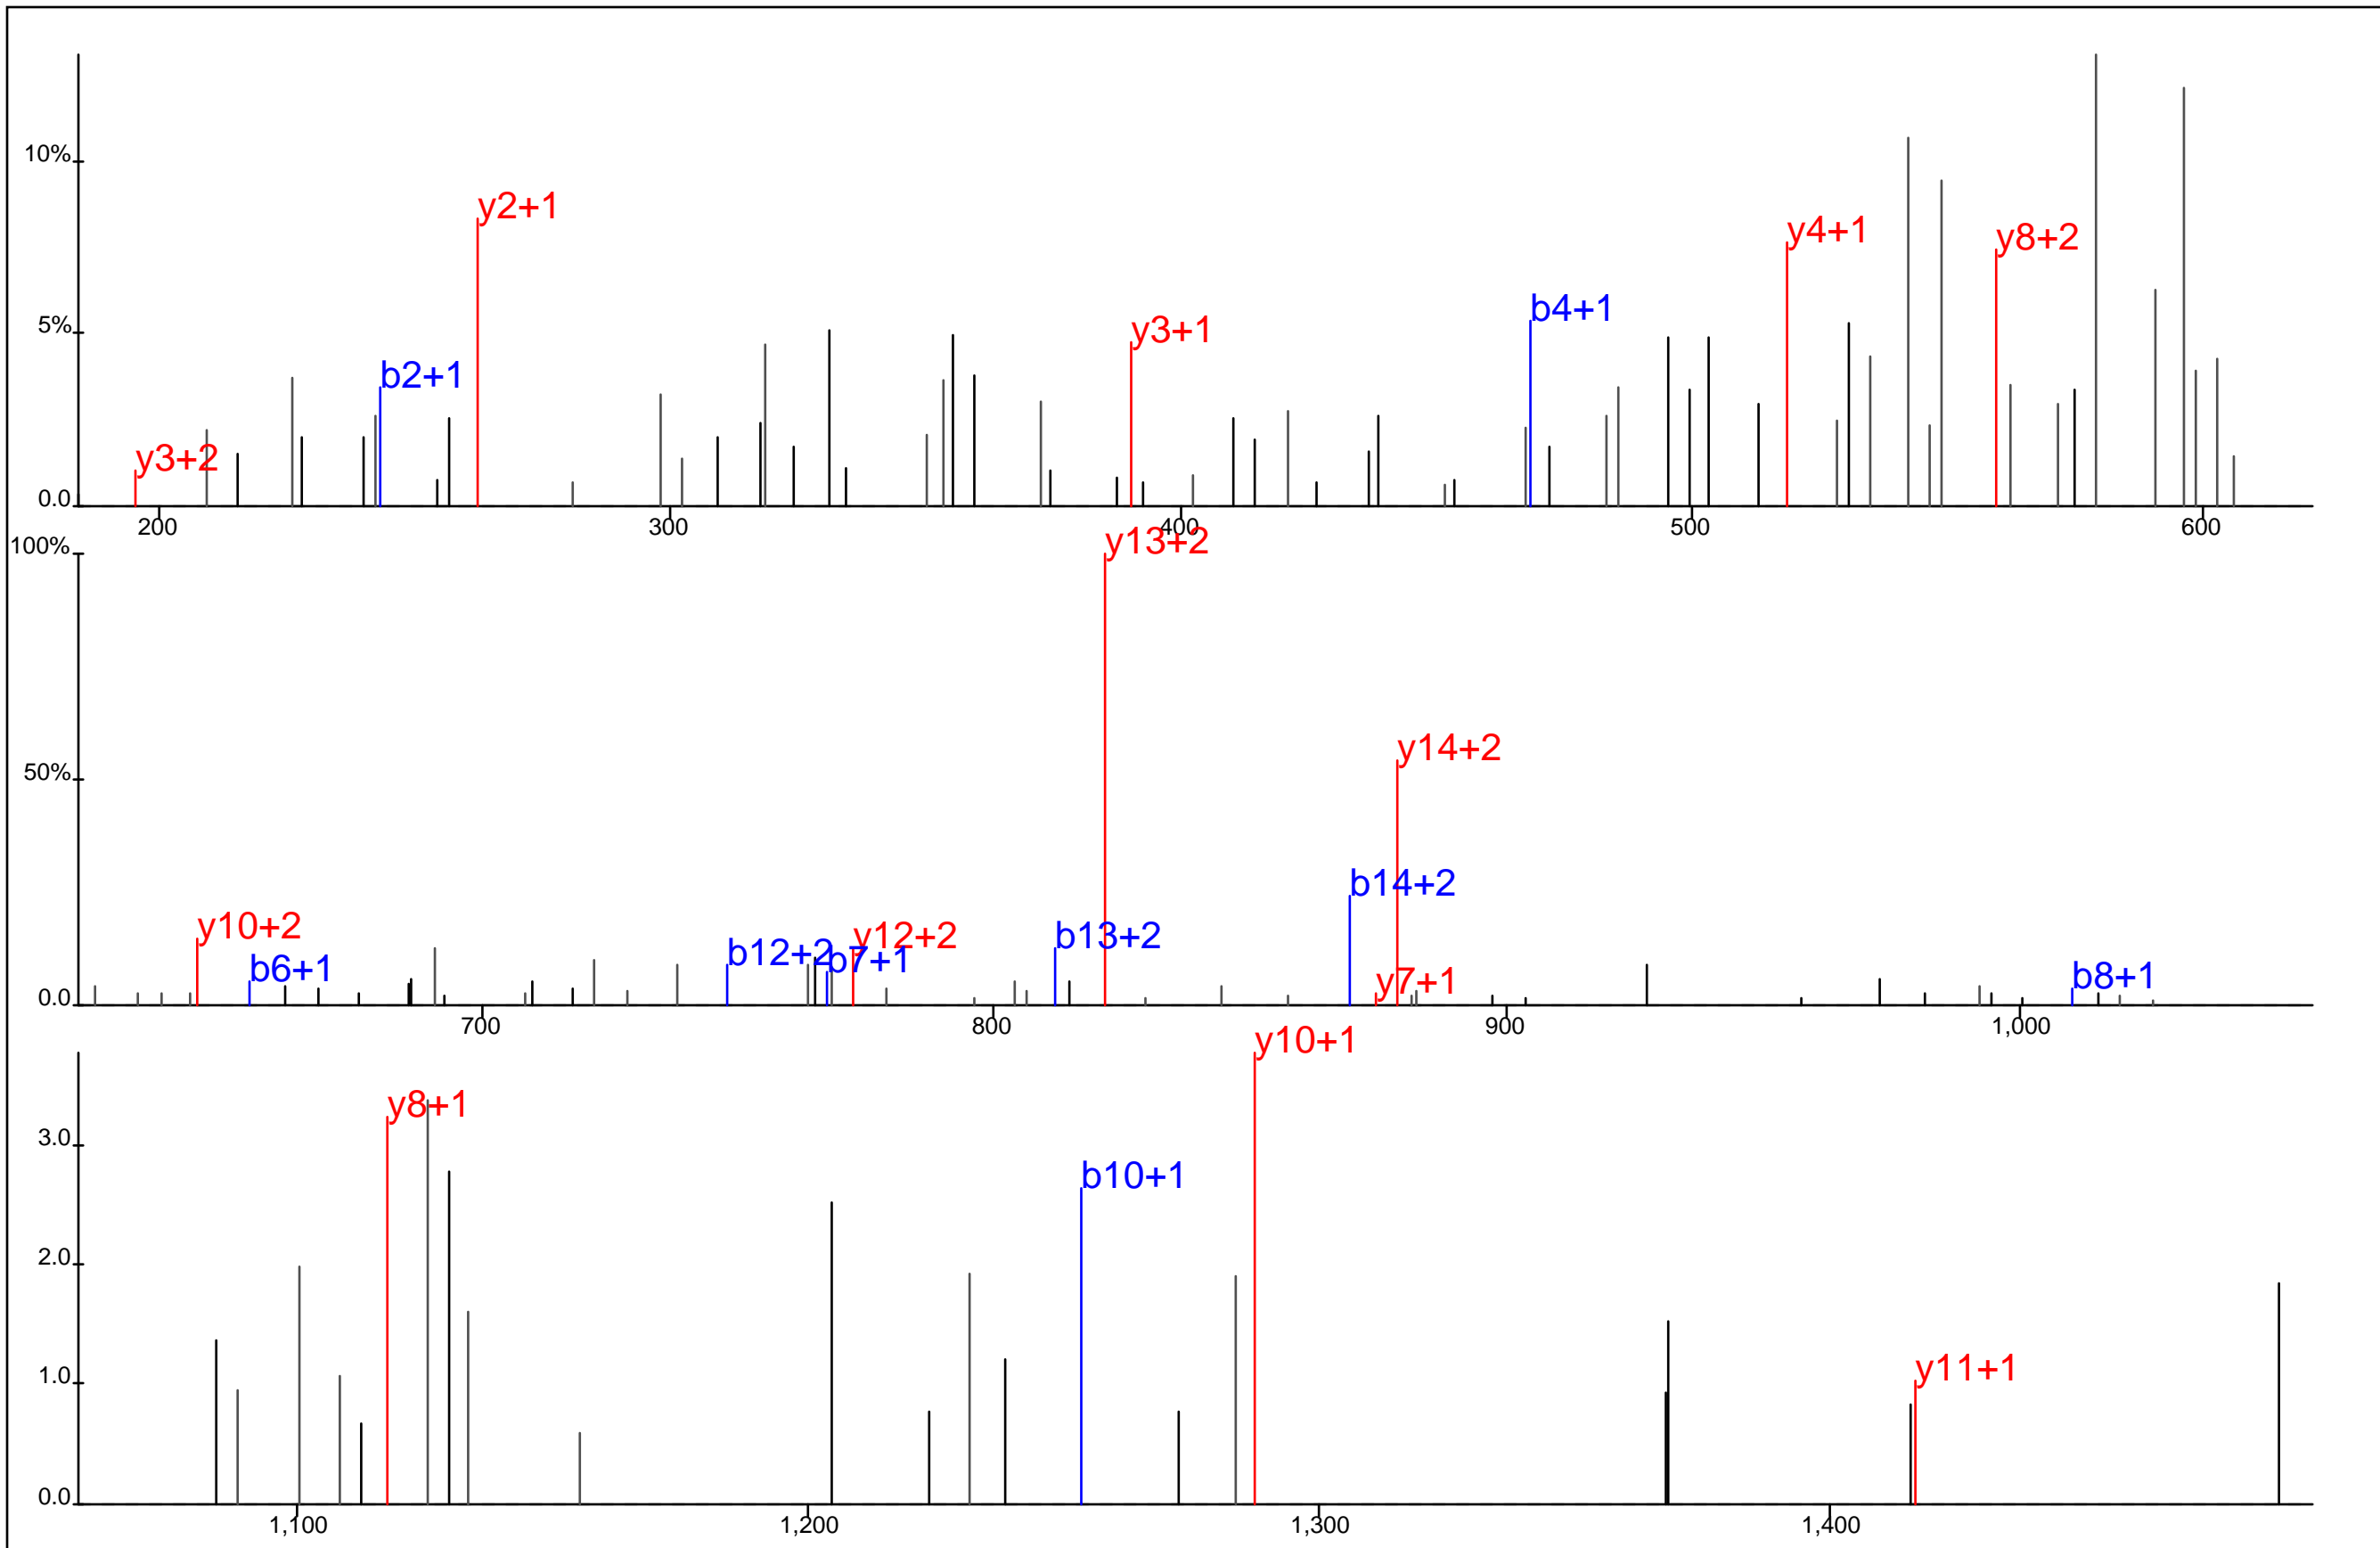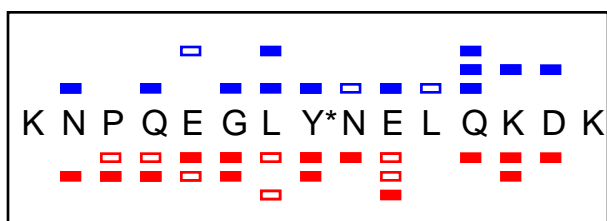

Protein Name: T cell antigen receptor, zeta  
 gi Accession: 0  
 Precursor Mass: 628.6369+3  
 Delta Mass: 3.356 ppm  
 XCorr: 31.01





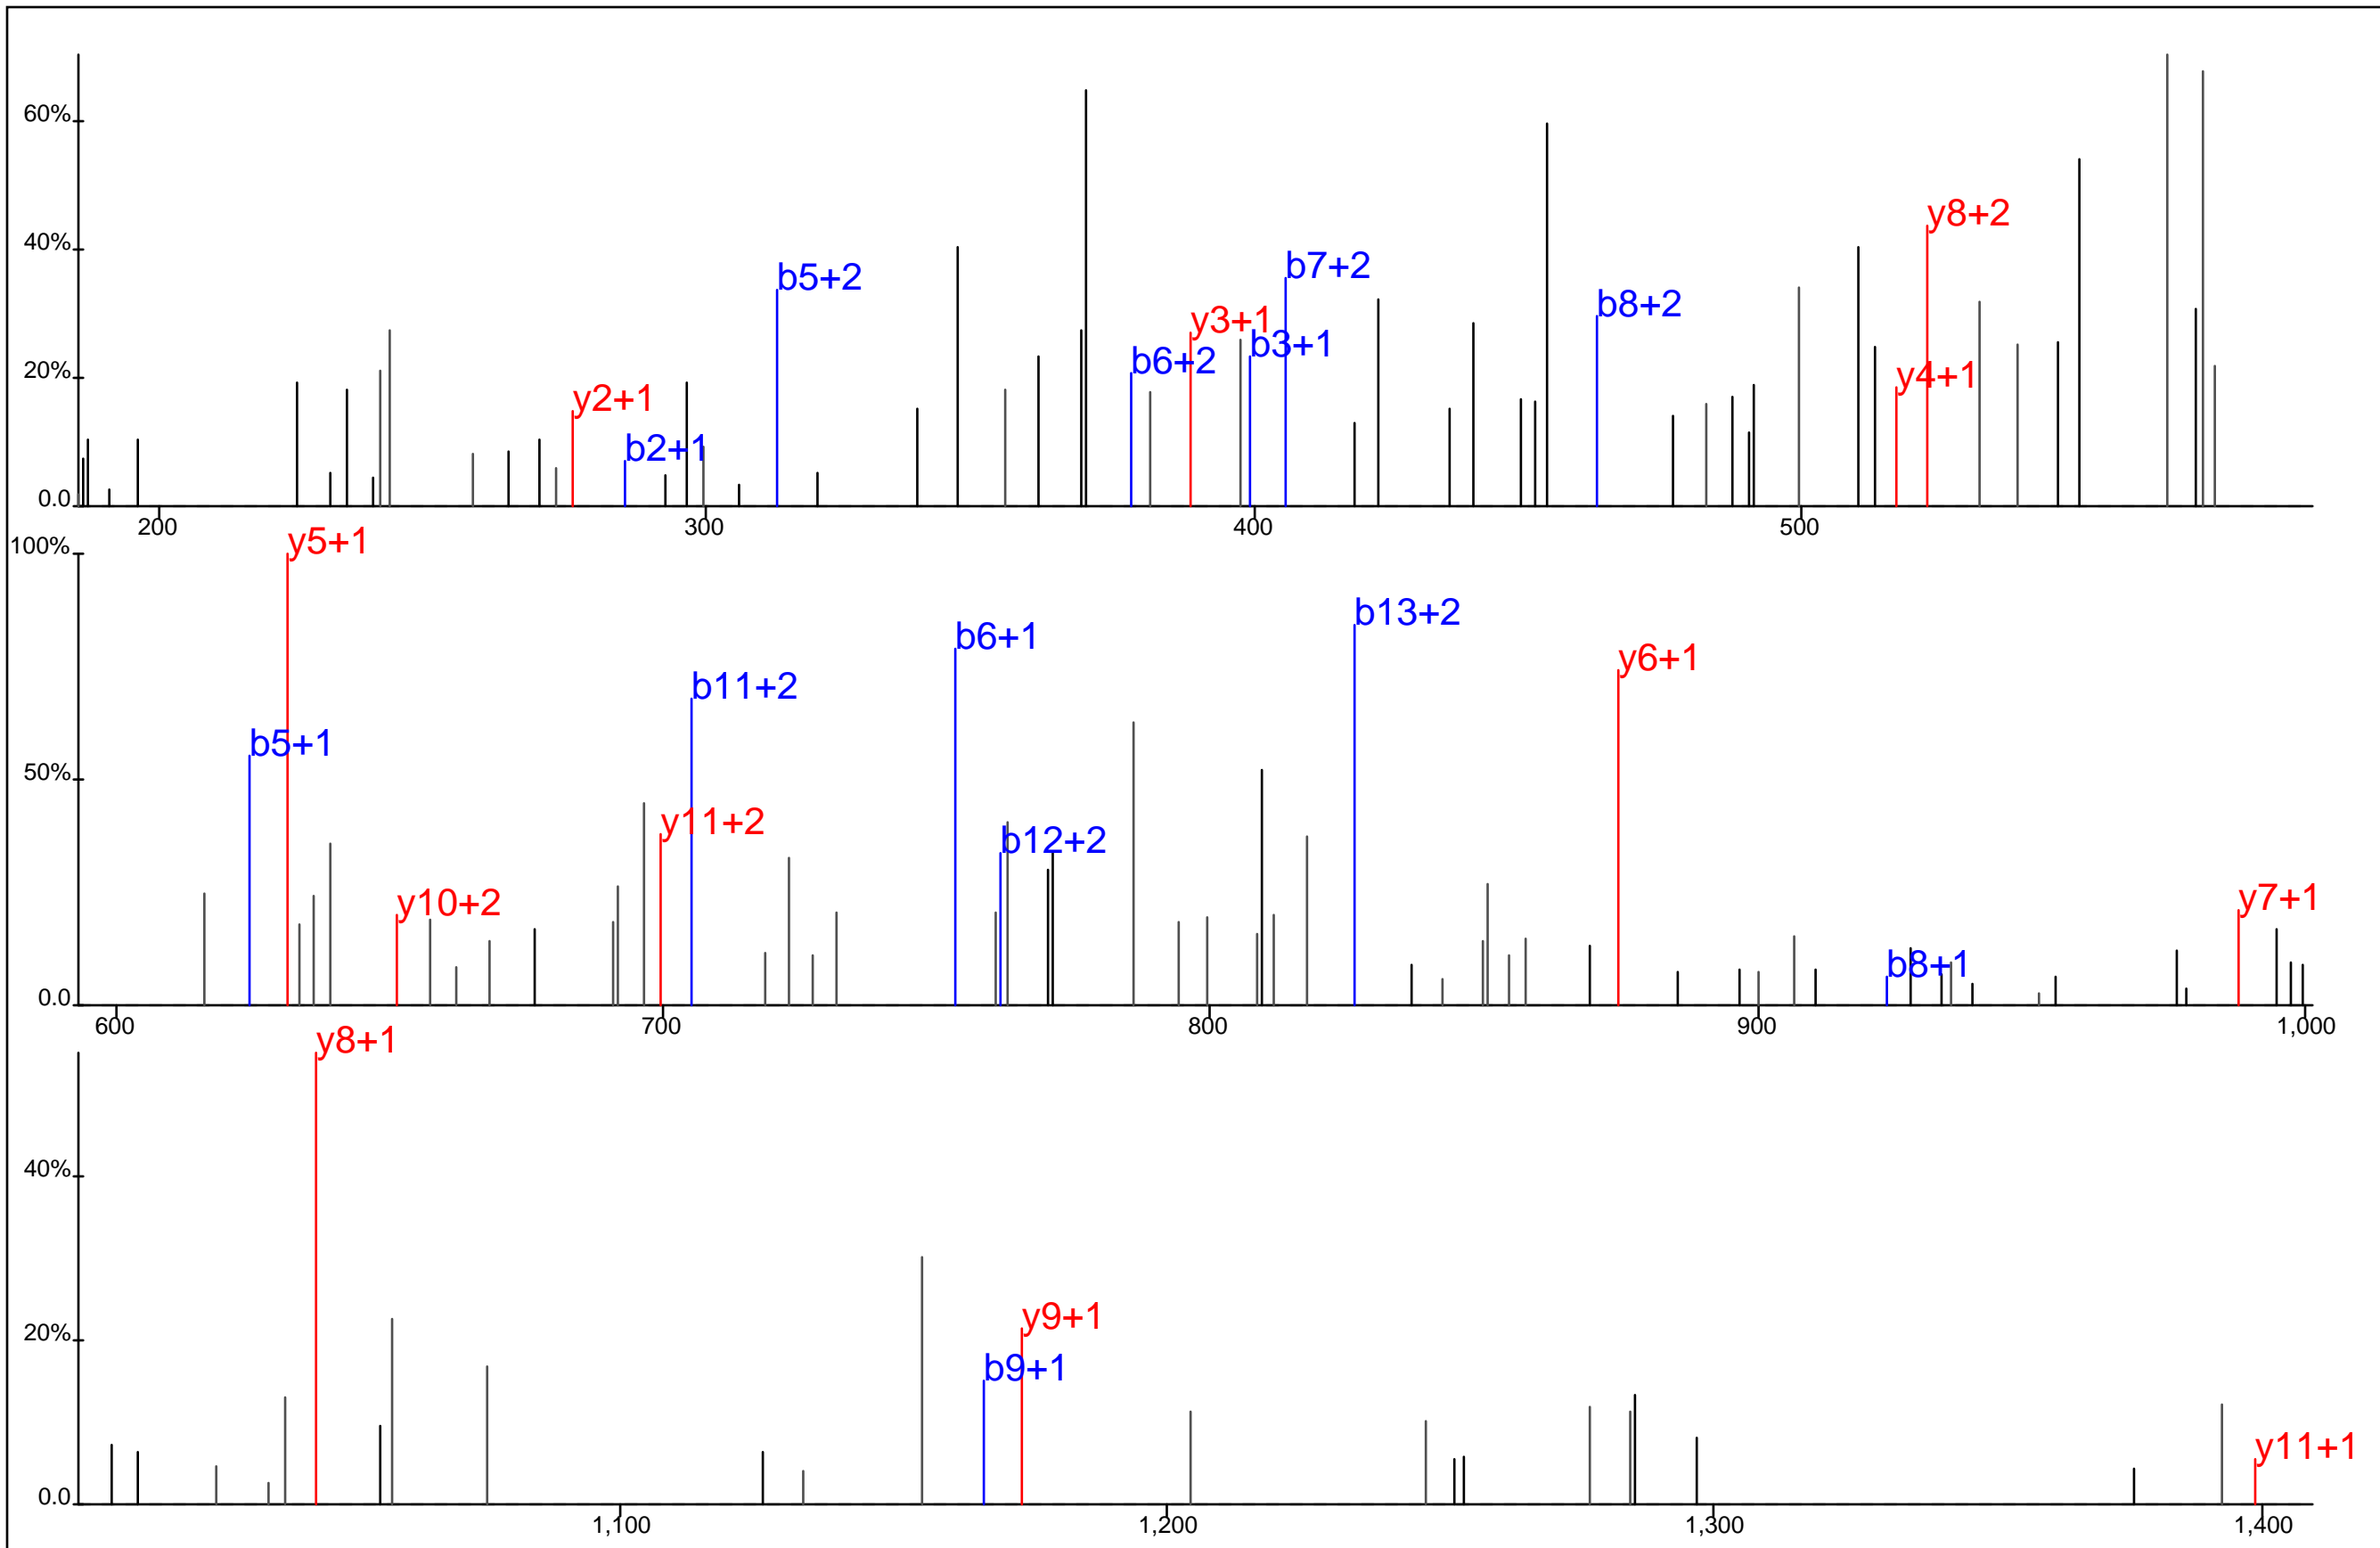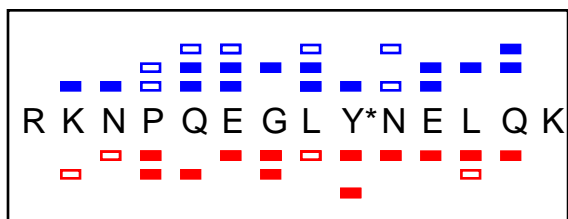

Protein Name: T cell antigen receptor, zeta  
 gi Accession: 0  
 Precursor Mass: 599.6287+3  
 Delta Mass: 1.439 ppm  
 XCorr: 27.43



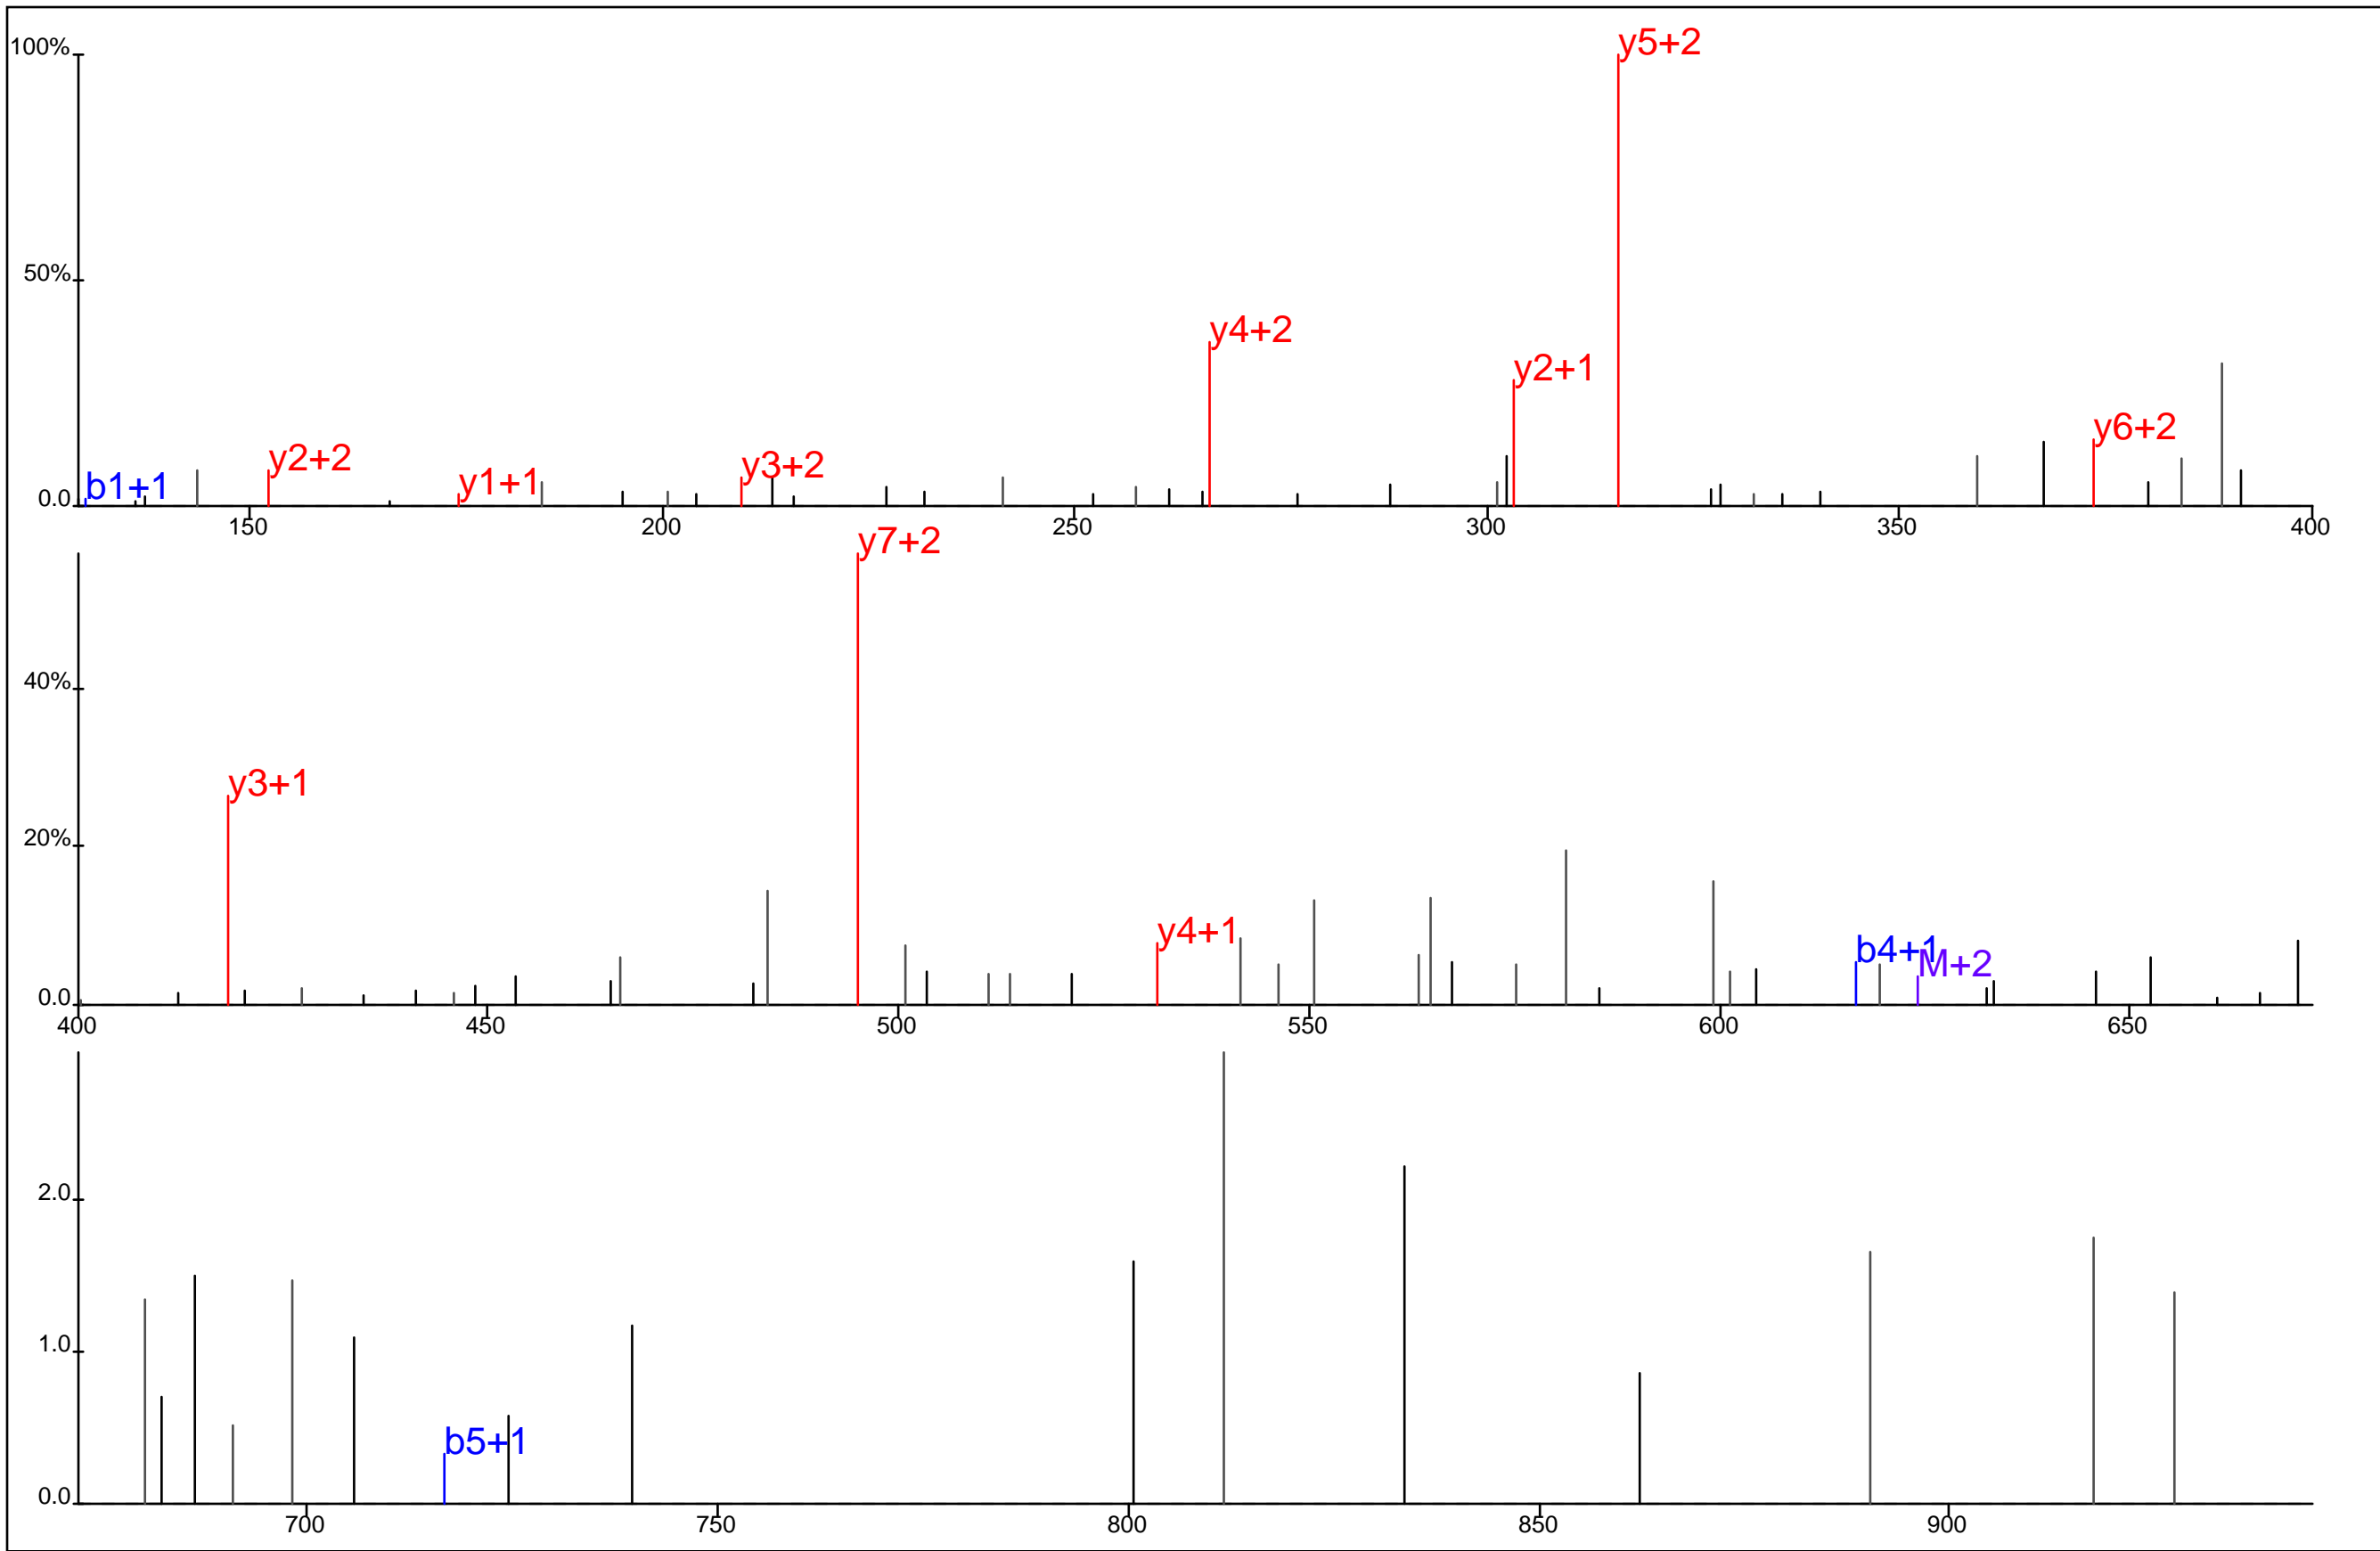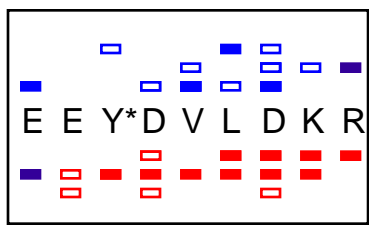

Protein Name: T cell antigen receptor, zeta  
 gi Accession: 0  
 Precursor Mass: 416.1837+3  
 Delta Mass: 1.279 ppm  
 XCorr: 25.53



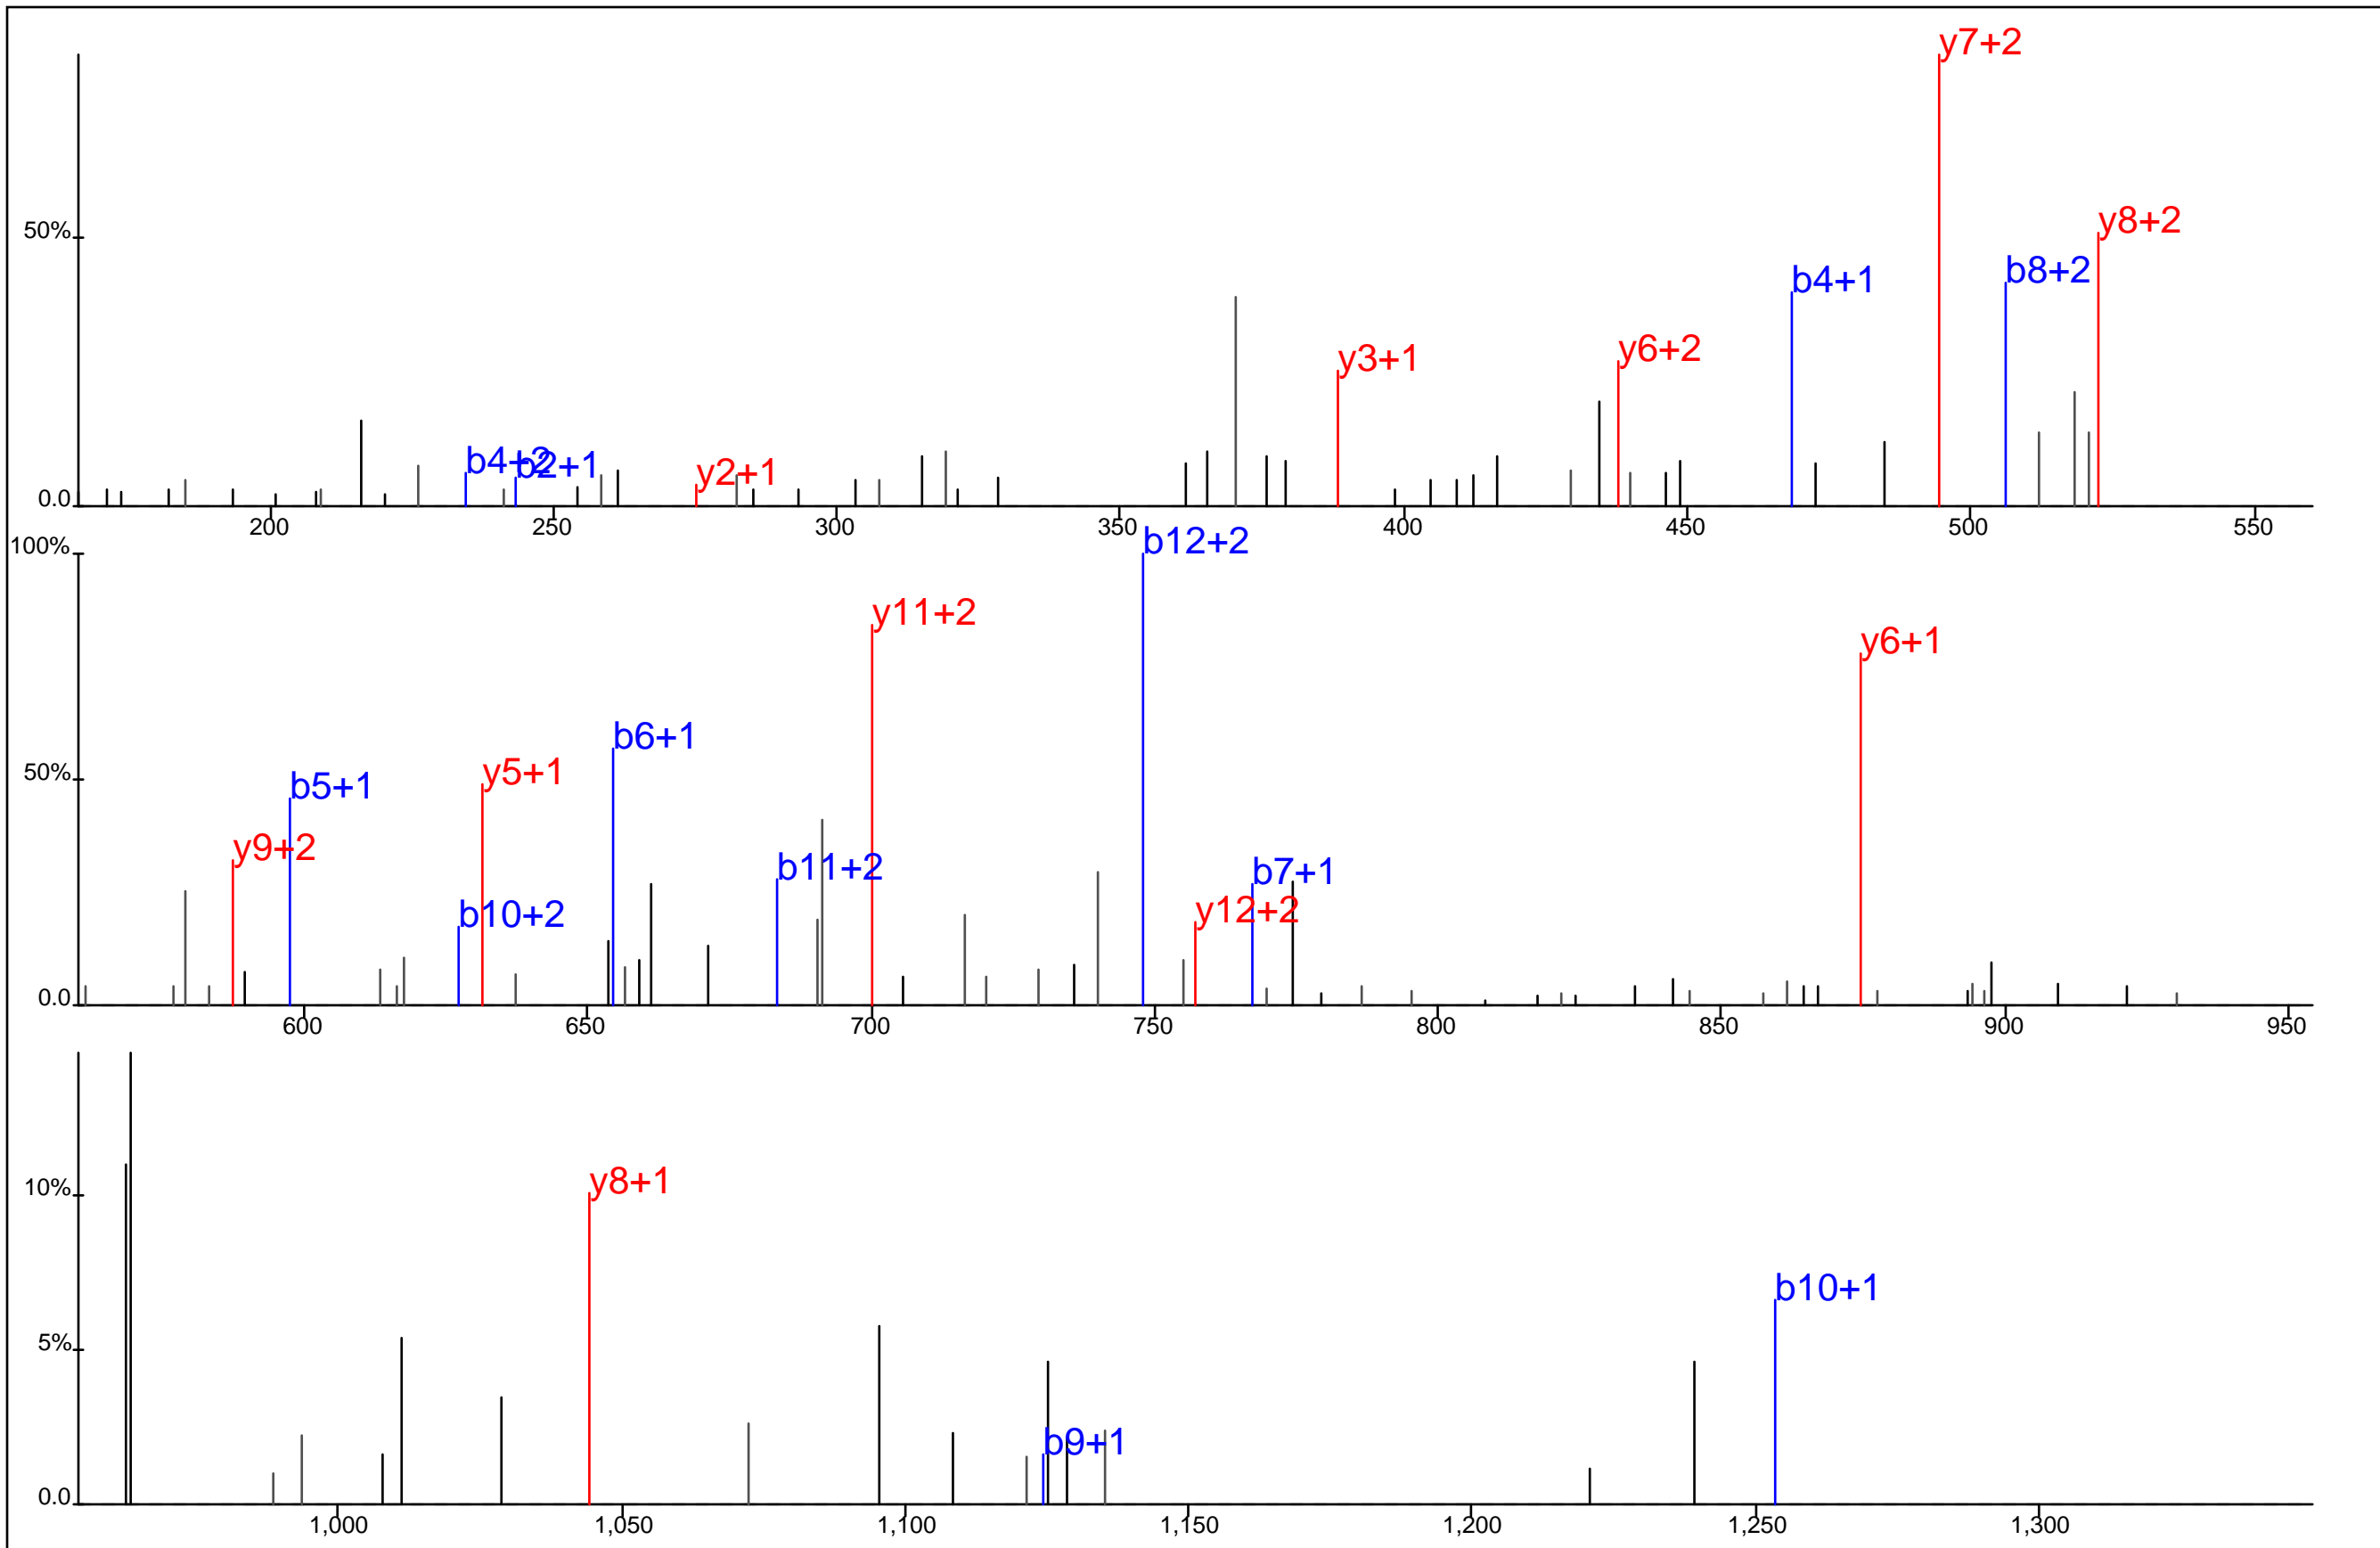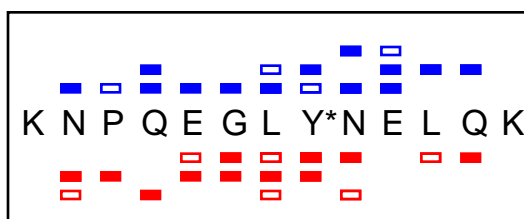

Protein Name: T cell antigen receptor, zeta  
 gi Accession: 0  
 Precursor Mass: 547.5950+3  
 Delta Mass: 1.486 ppm  
 XCorr: 28.39

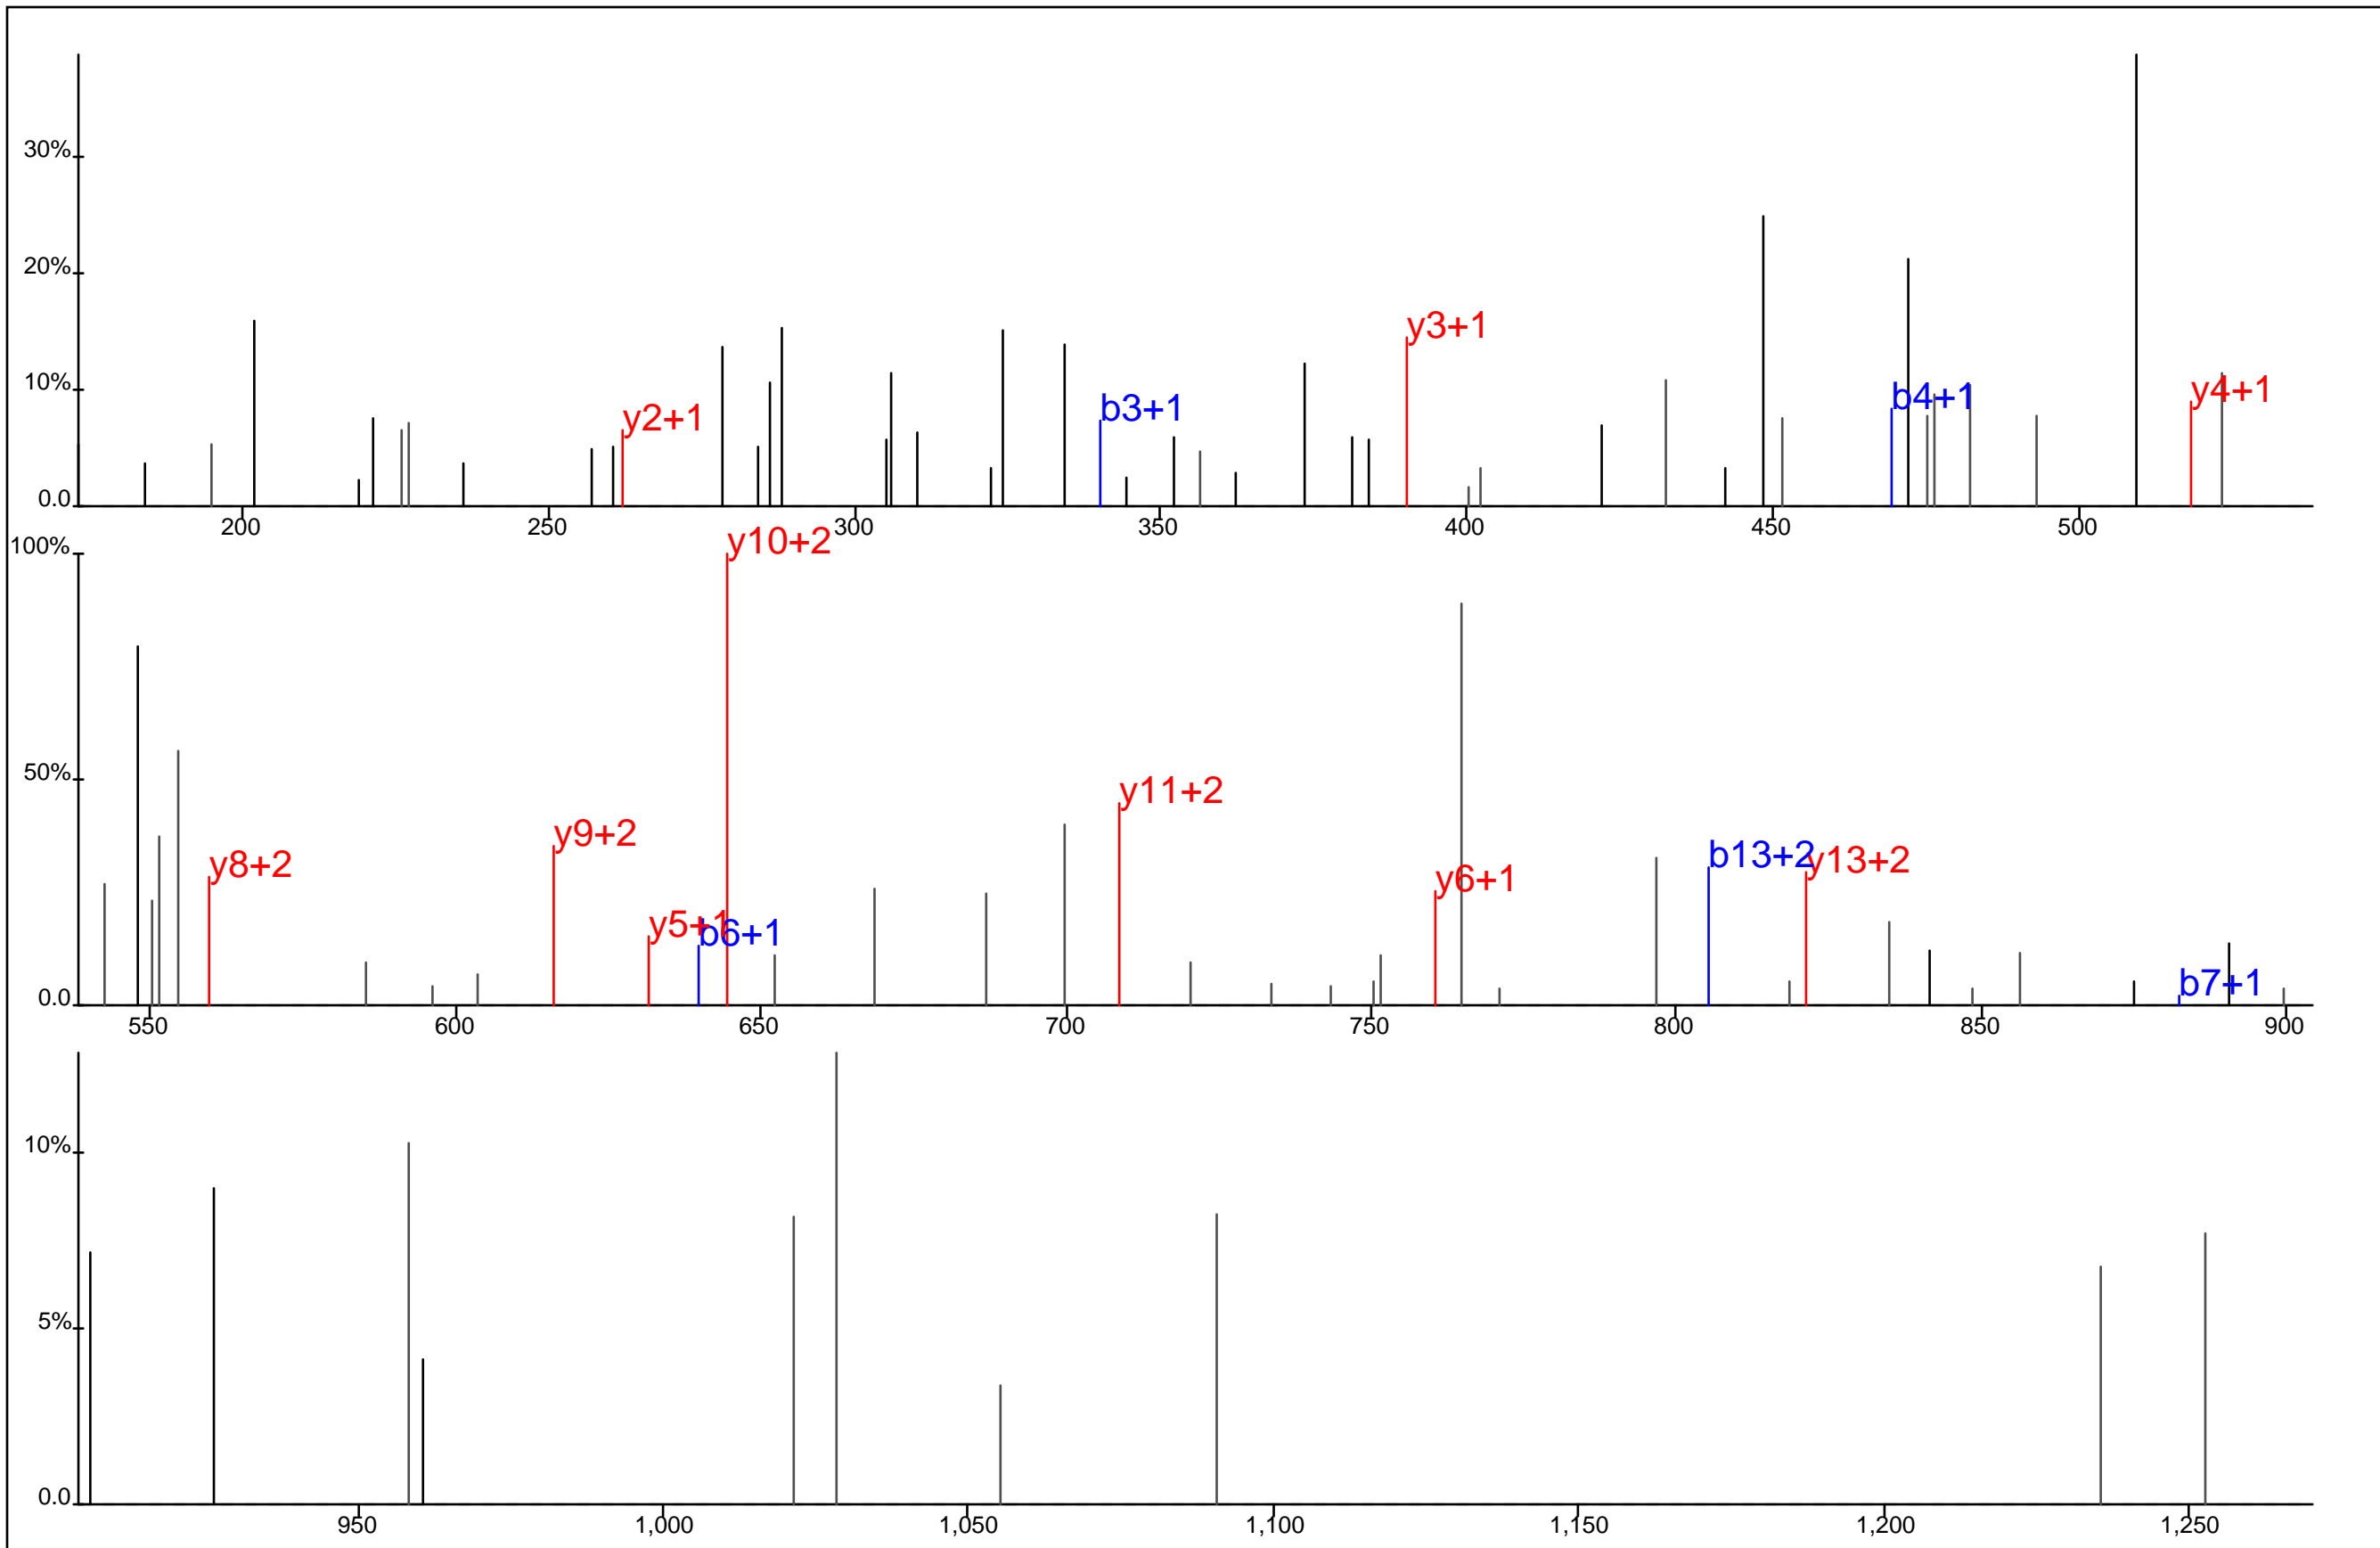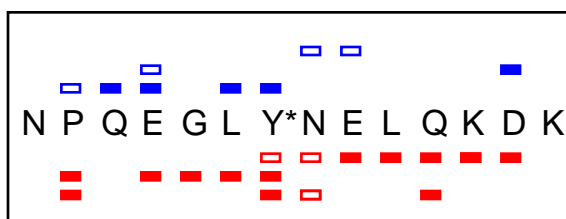

Protein Name: T cell antigen receptor, zeta  
 gi Accession: 0  
 Precursor Mass: 585.9372+3  
 Delta Mass: 1.231 ppm  
 XCorr: 20.25

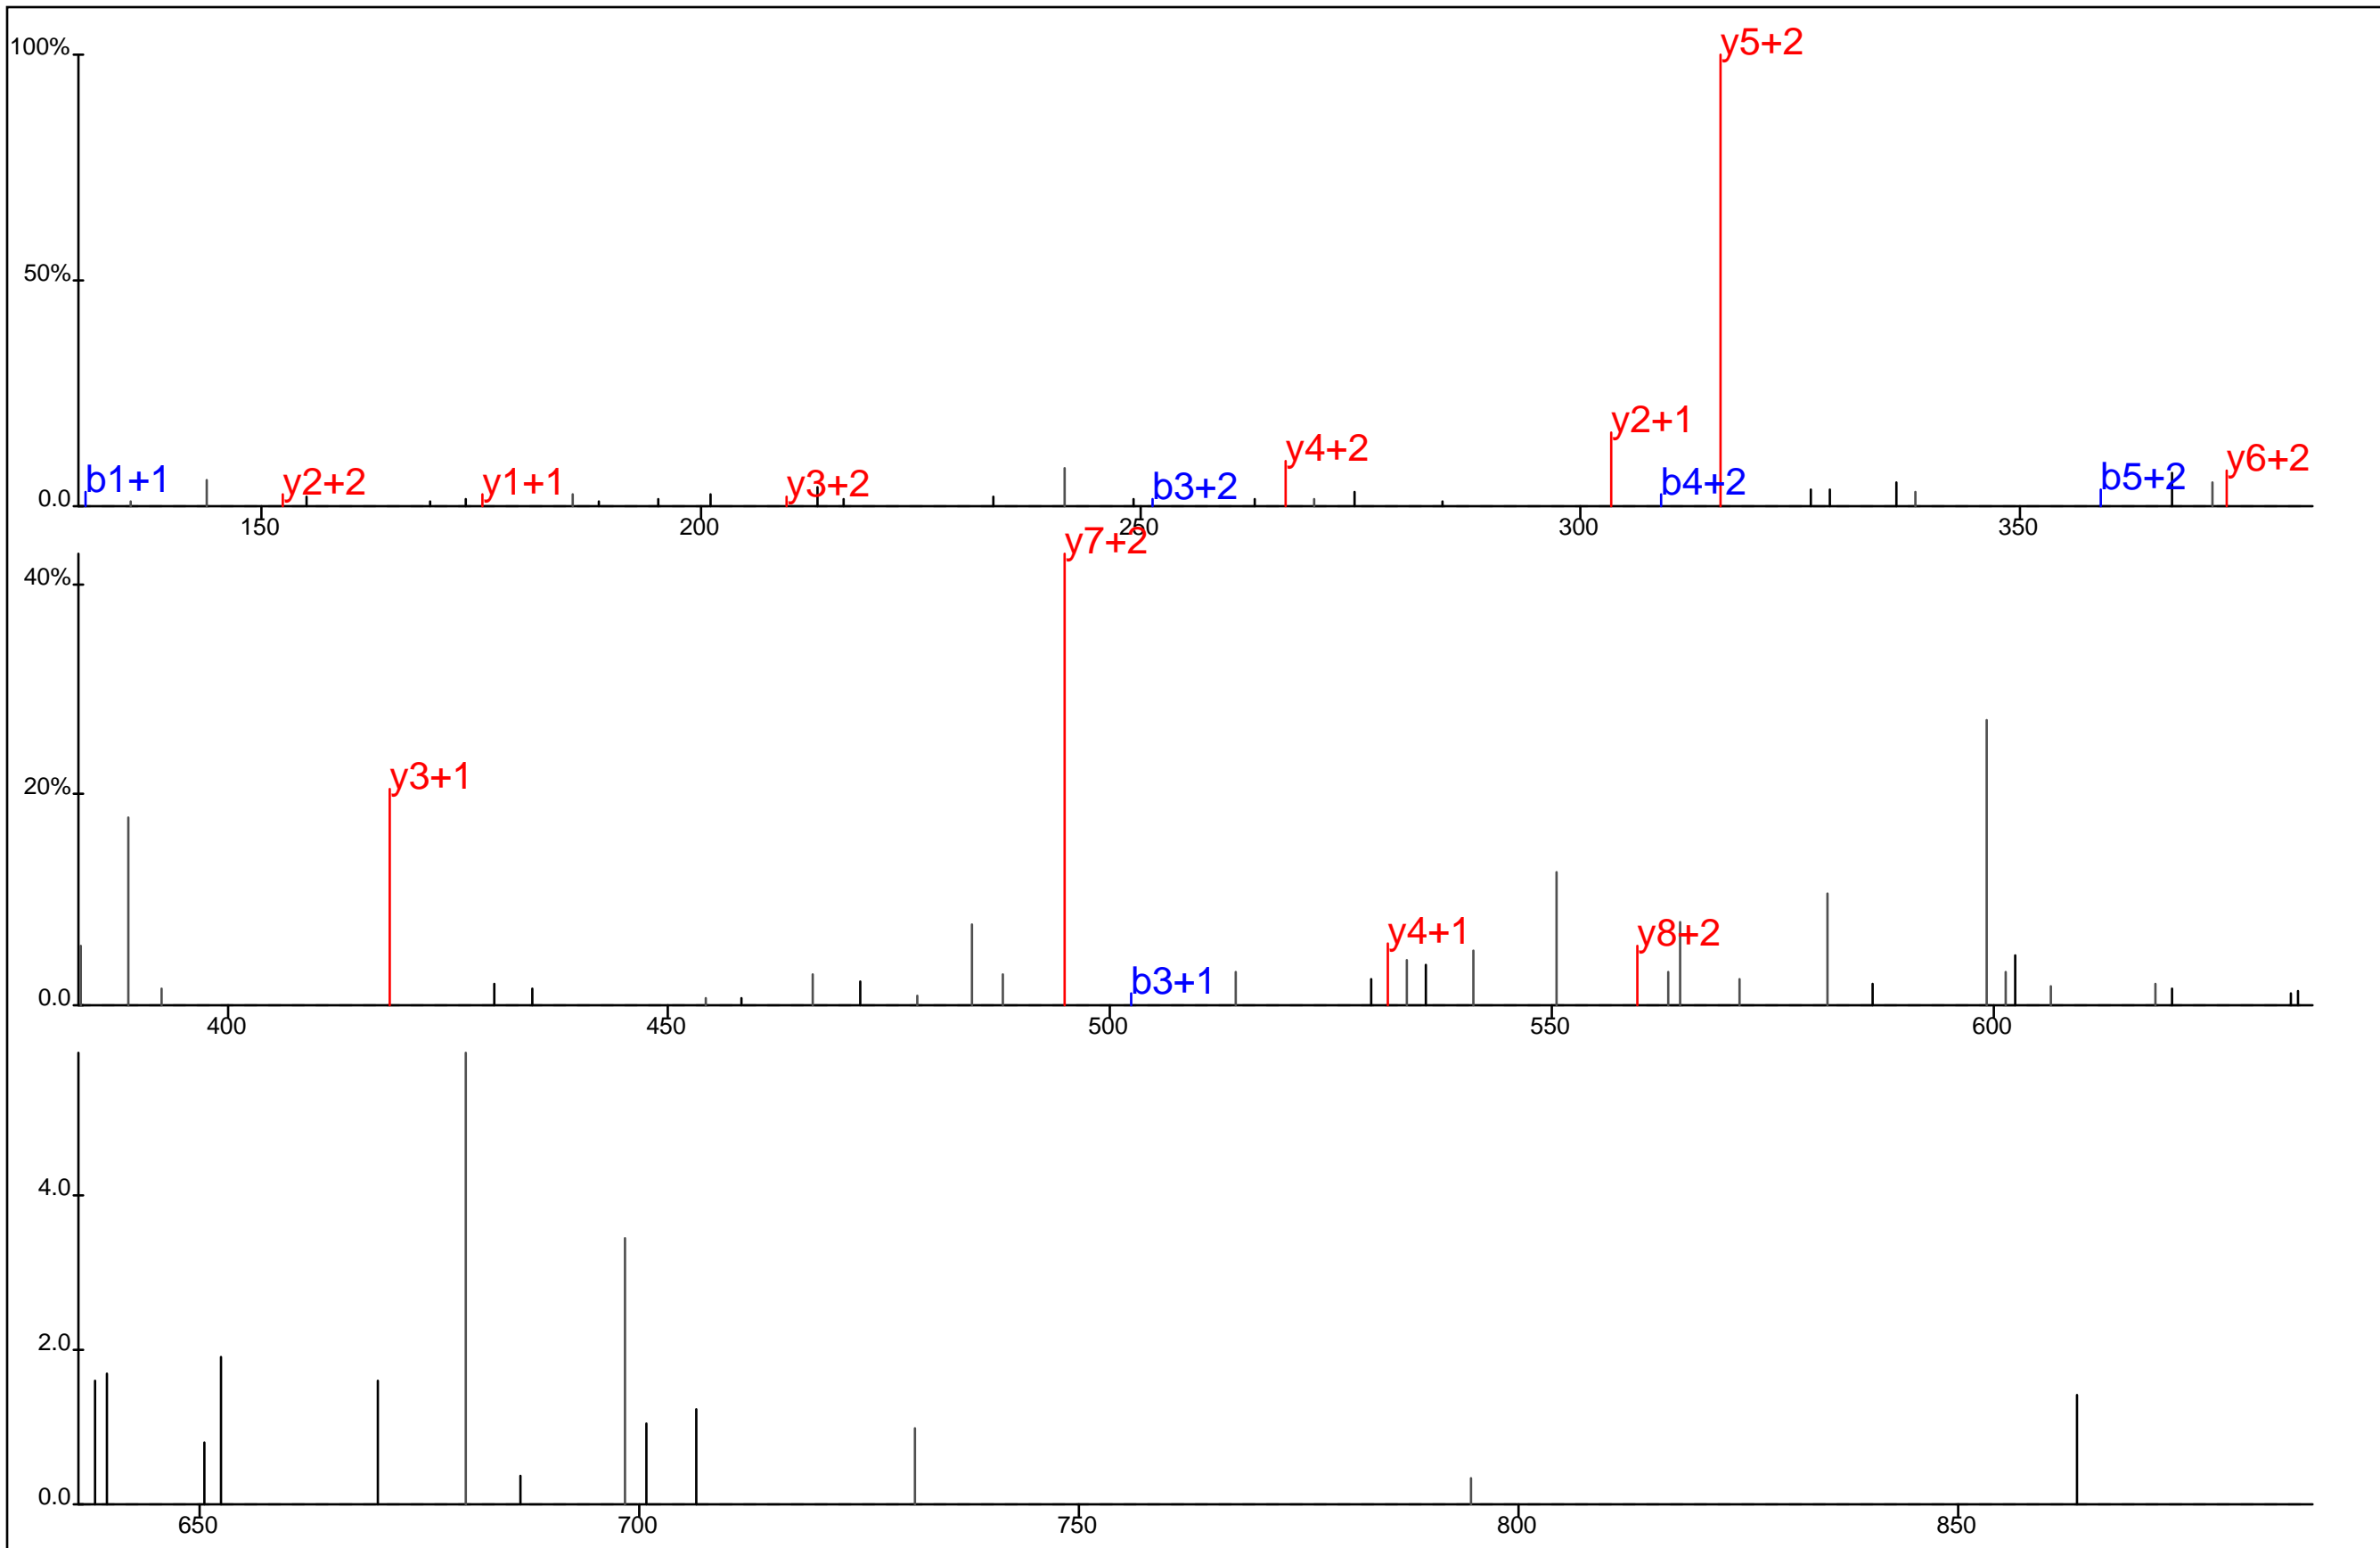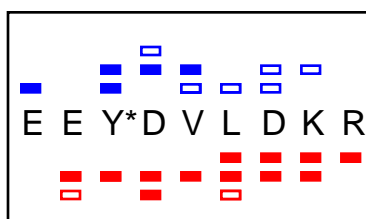

Protein Name: T cell antigen receptor, zeta  
 gi Accession: 0  
 Precursor Mass: 416.1832+3  
 Delta Mass: 0.115 ppm  
 XCorr: 24.13

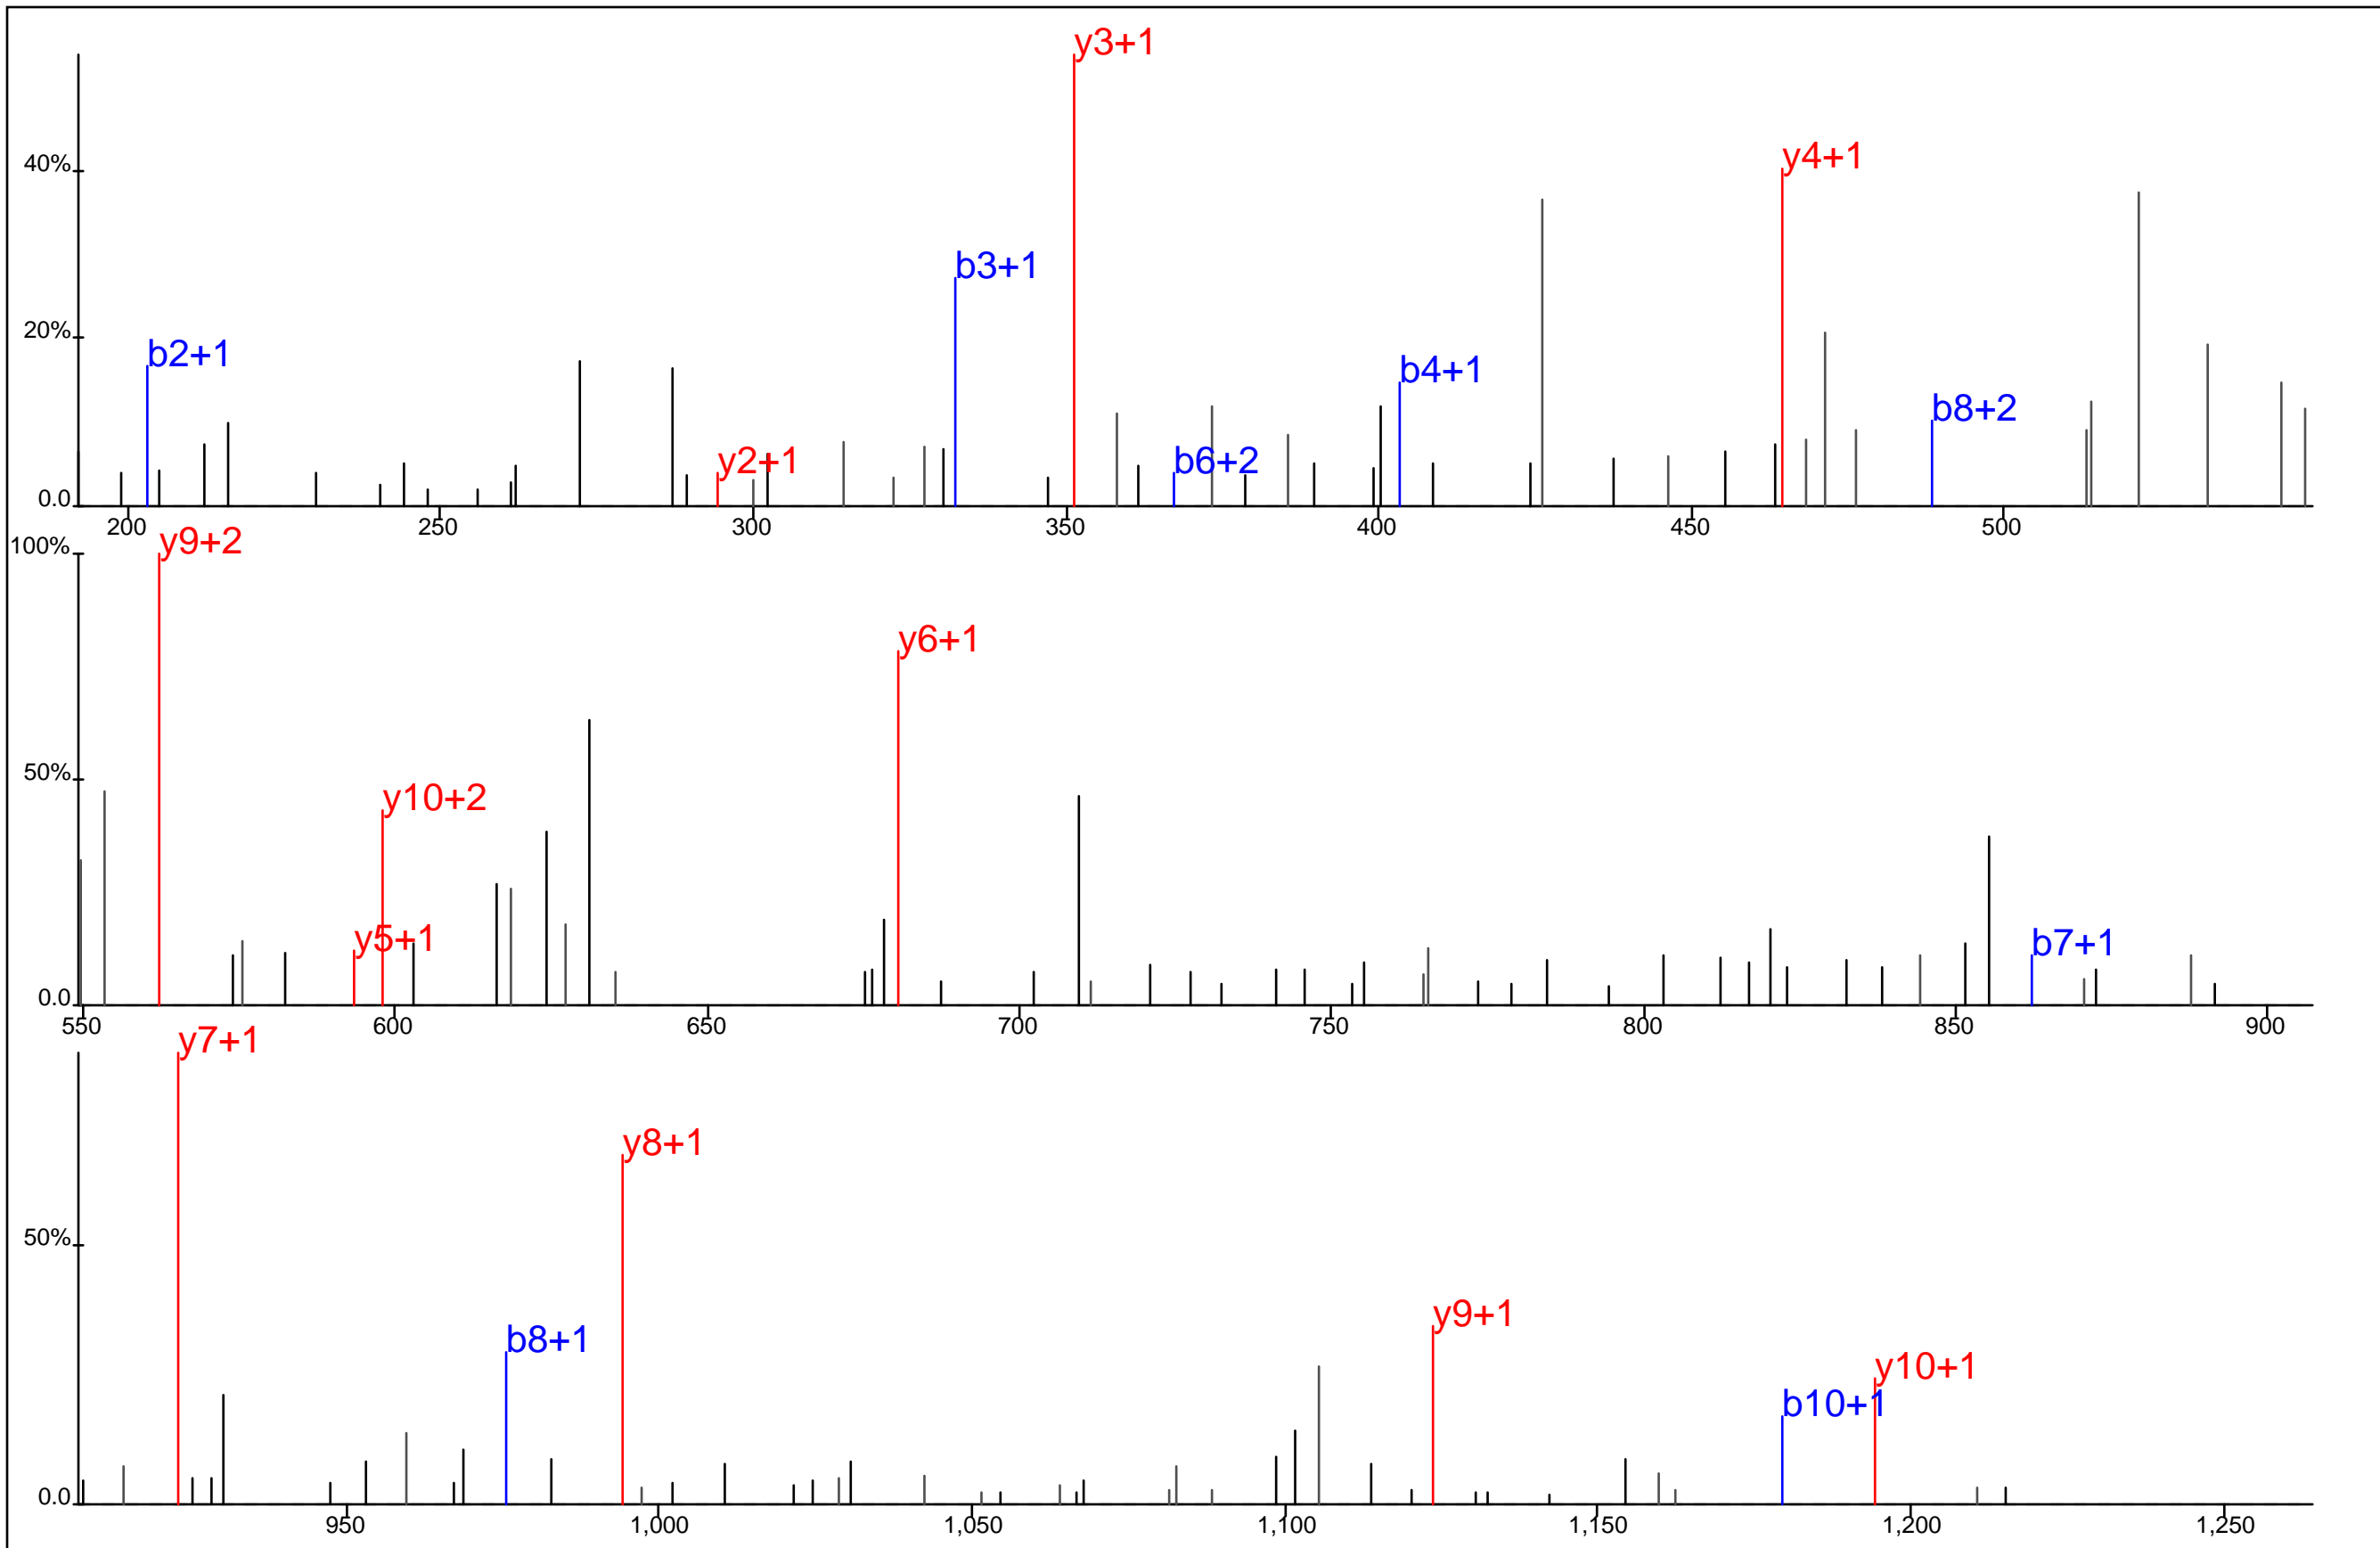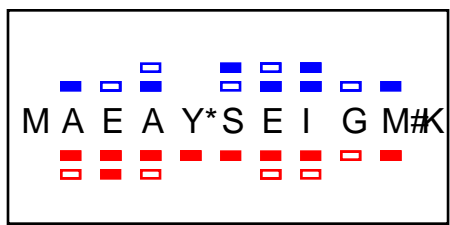

Protein Name: T cell antigen receptor, zeta  
 gi Accession: 0  
 Precursor Mass: 663.2653+2  
 Delta Mass: 6.013 ppm  
 XCorr: 52.37



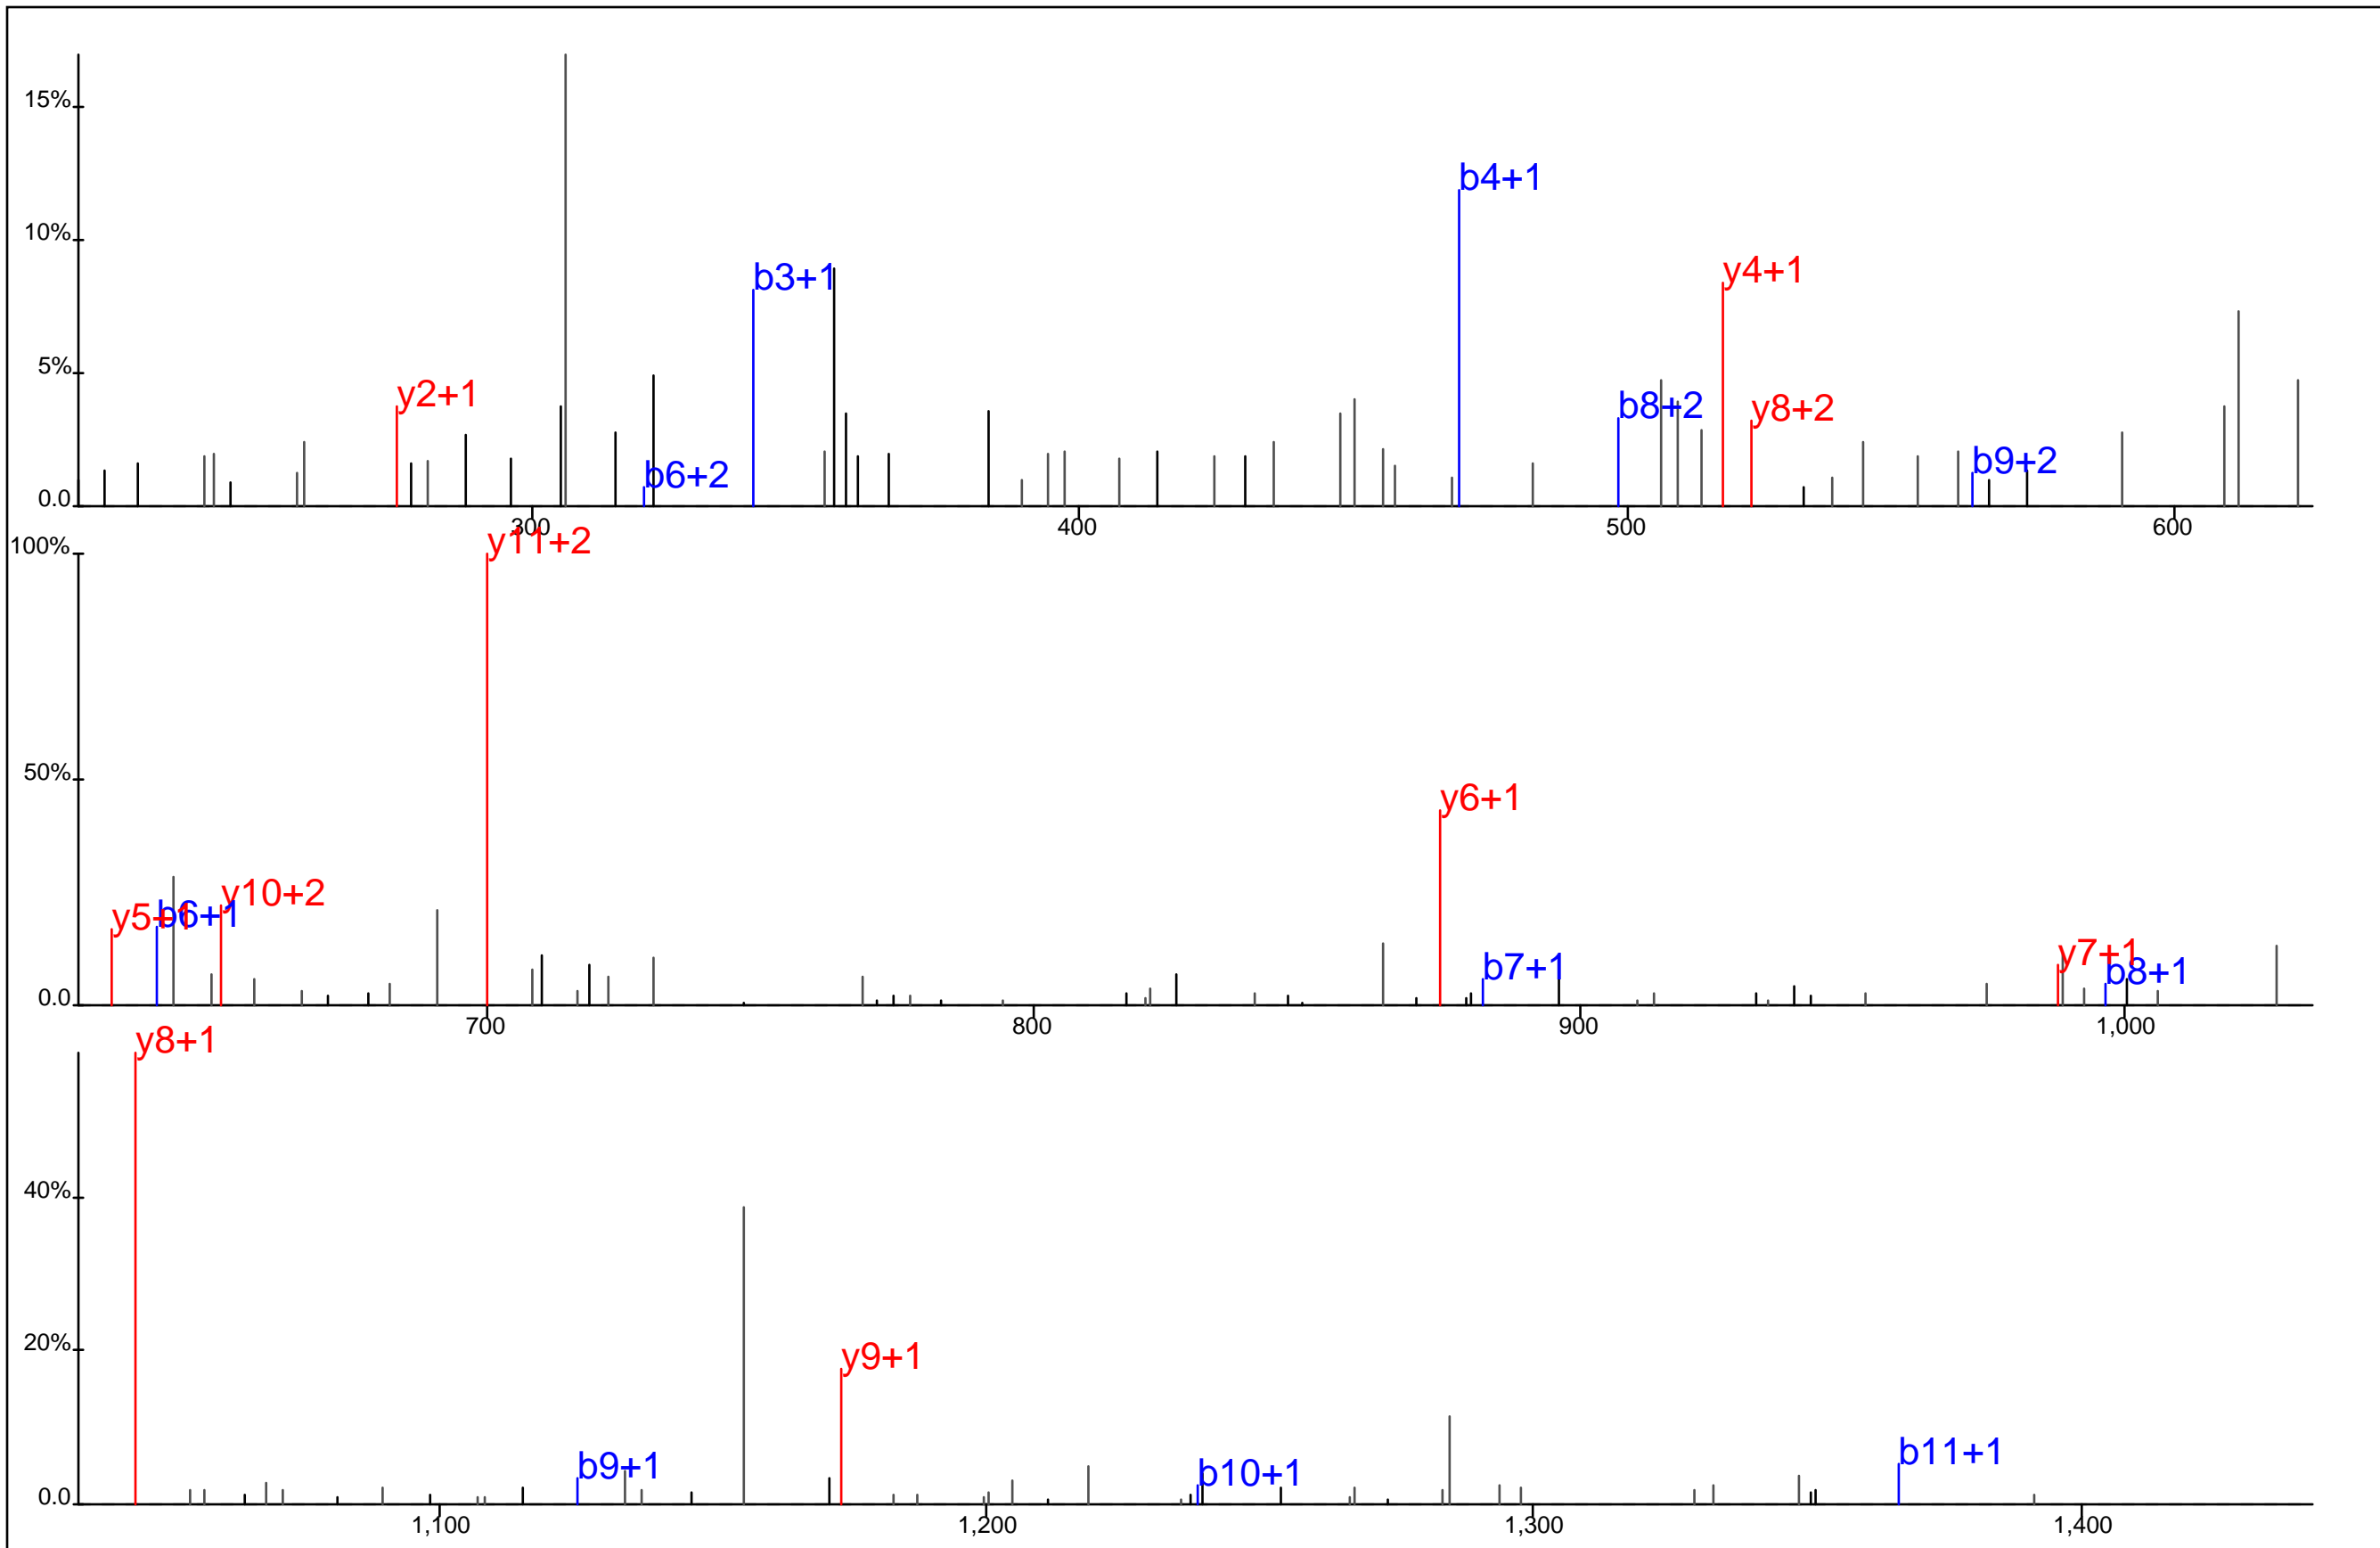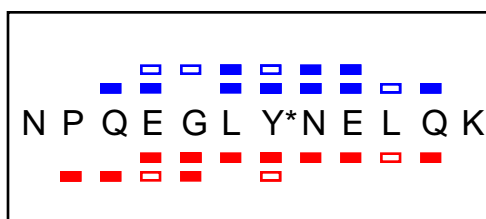

Protein Name: T cell antigen receptor, zeta  
 gi Accession: 0  
 Precursor Mass: 756.8384+2  
 Delta Mass: 2.307 ppm  
 XCorr: 35.3

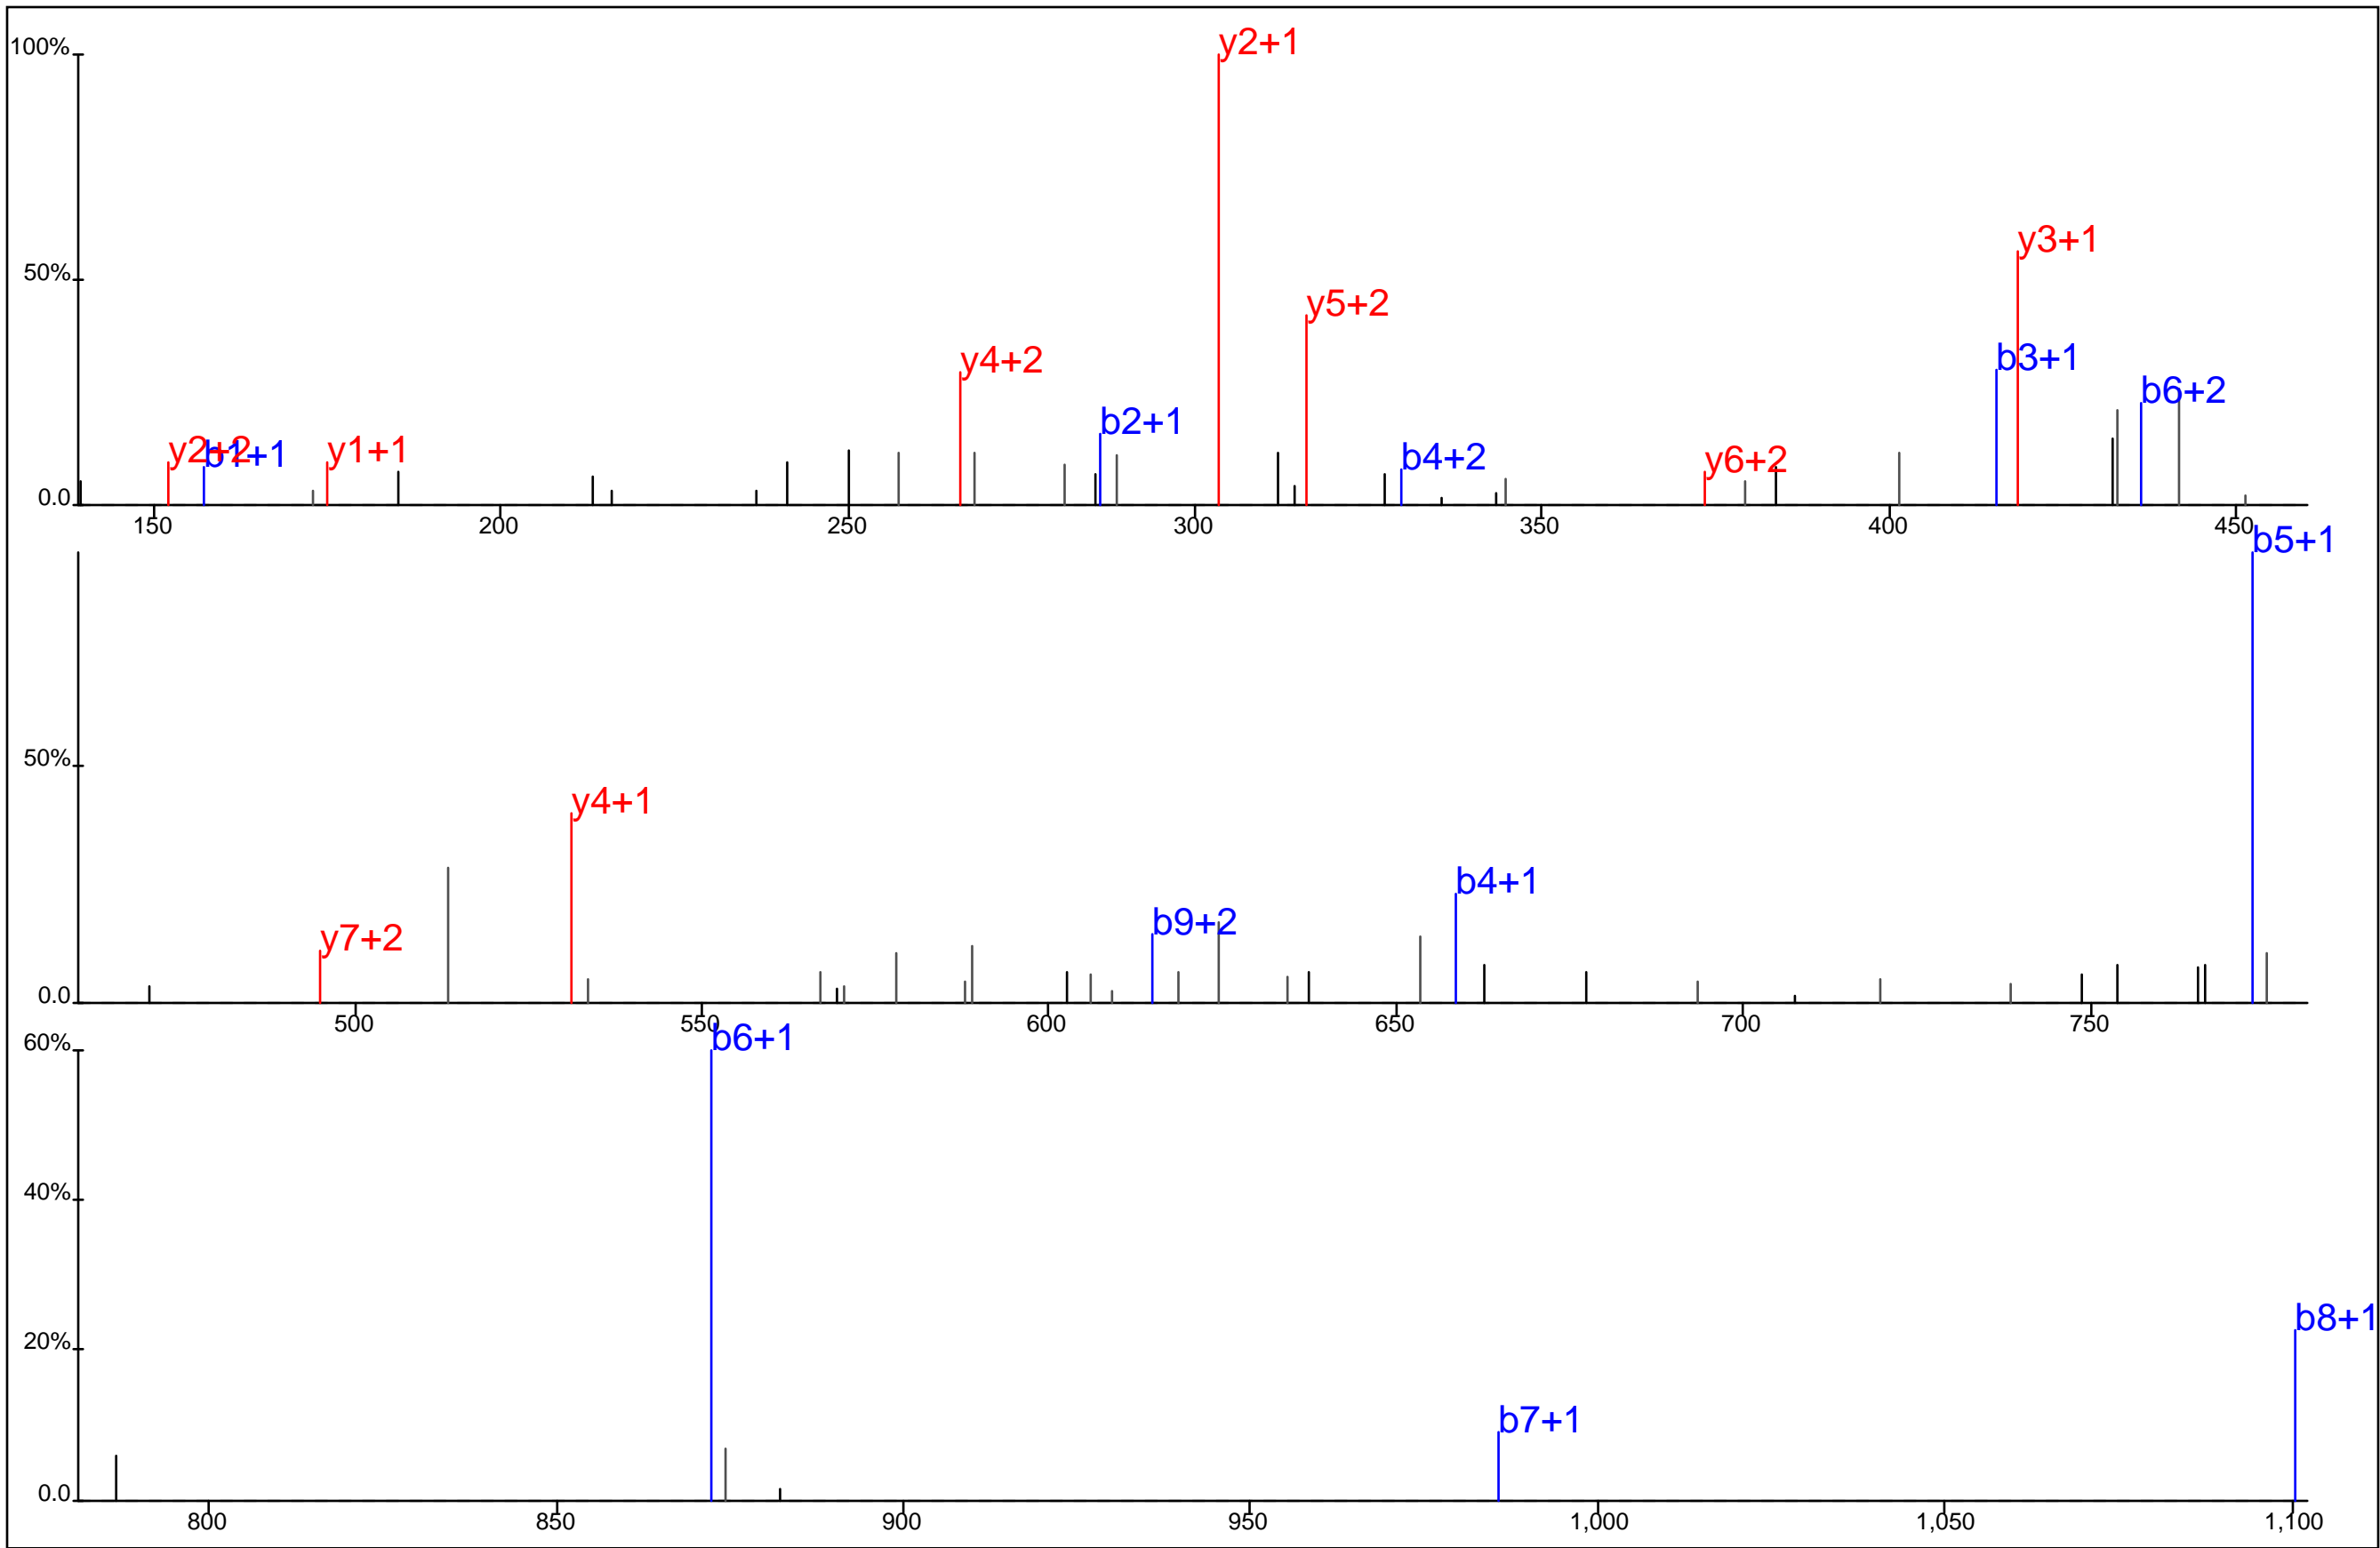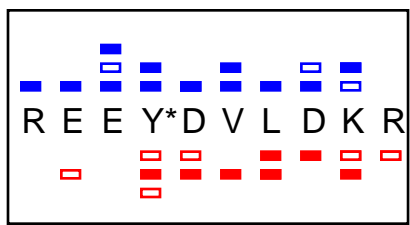

Protein Name: T cell antigen receptor, zeta  
 gi Accession: 0  
 Precursor Mass: 468.2169+3  
 Delta Mass: 0.128 ppm  
 XCorr: 50.08

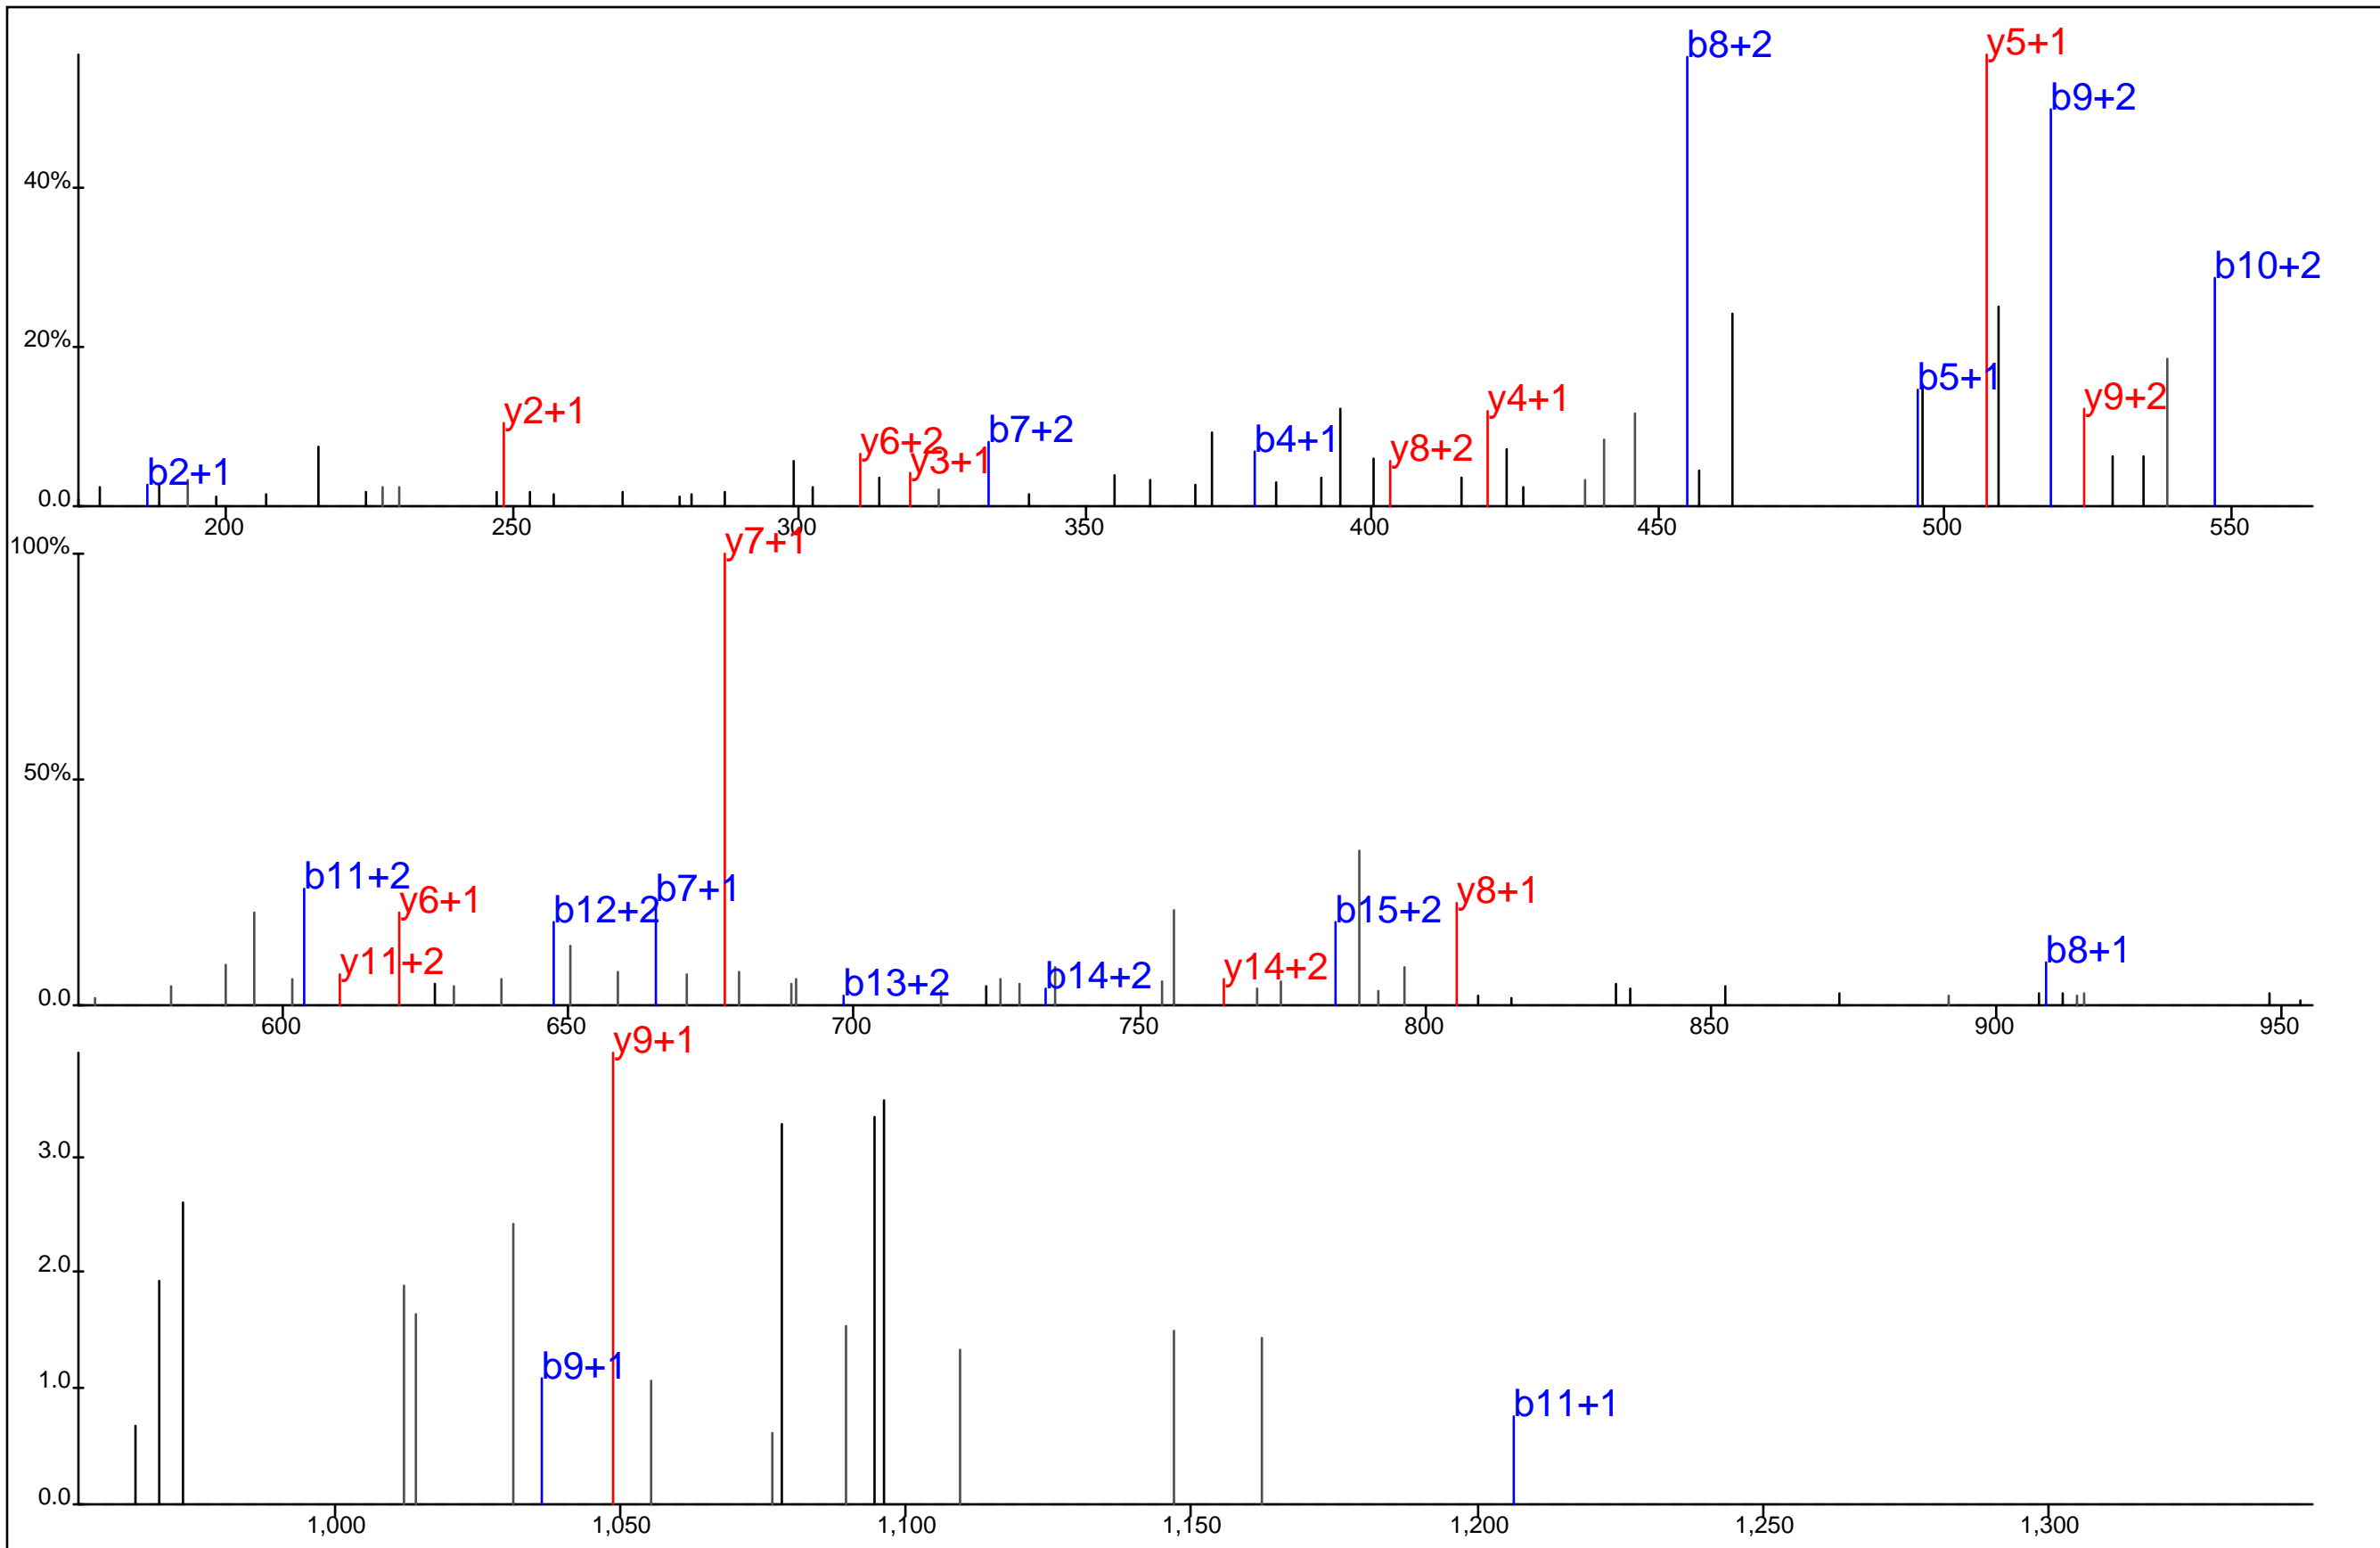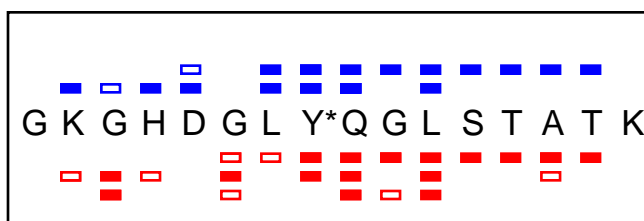

Protein Name: T cell antigen receptor, zeta  
 gi Accession: 0  
 Precursor Mass: 571.6046+3  
 Delta Mass: 0.608 ppm  
 XCorr: 43.41



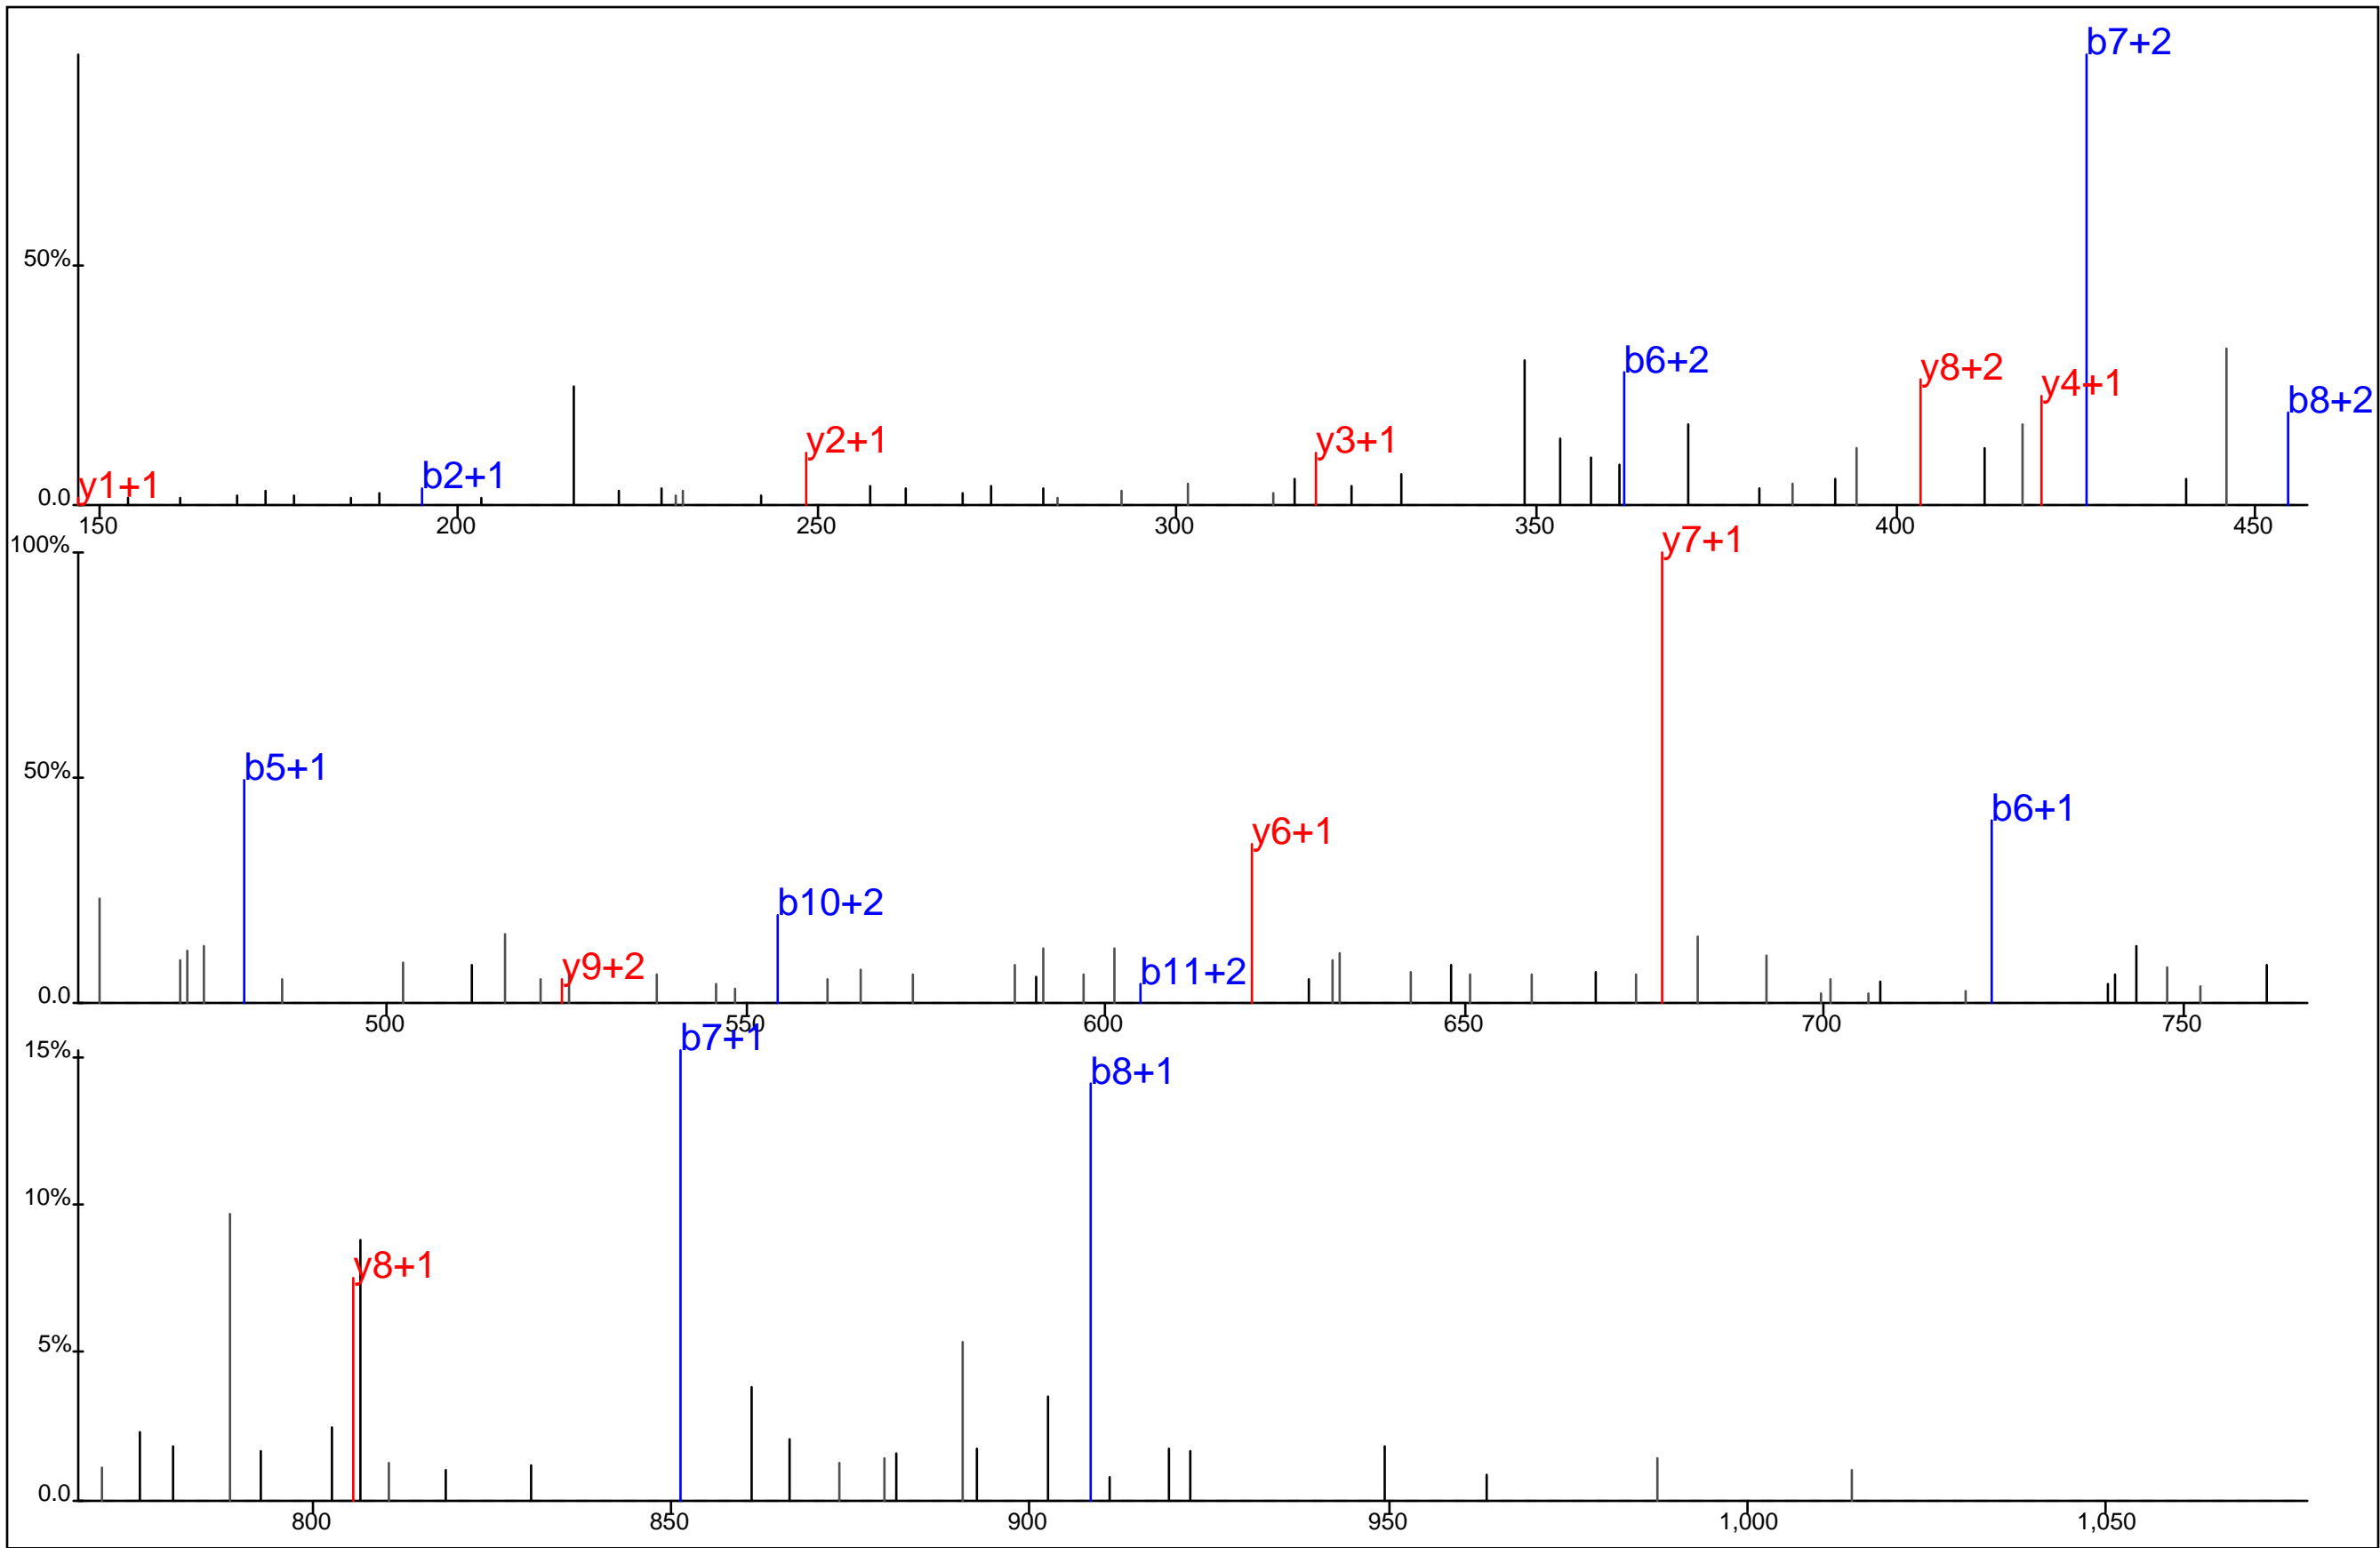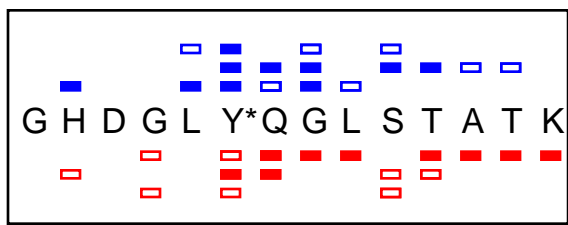

Protein Name: T cell antigen receptor, zeta  
 gi Accession: 0  
 Precursor Mass: 509.8997+3  
 Delta Mass: 0.334 ppm  
 XCorr: 30.41

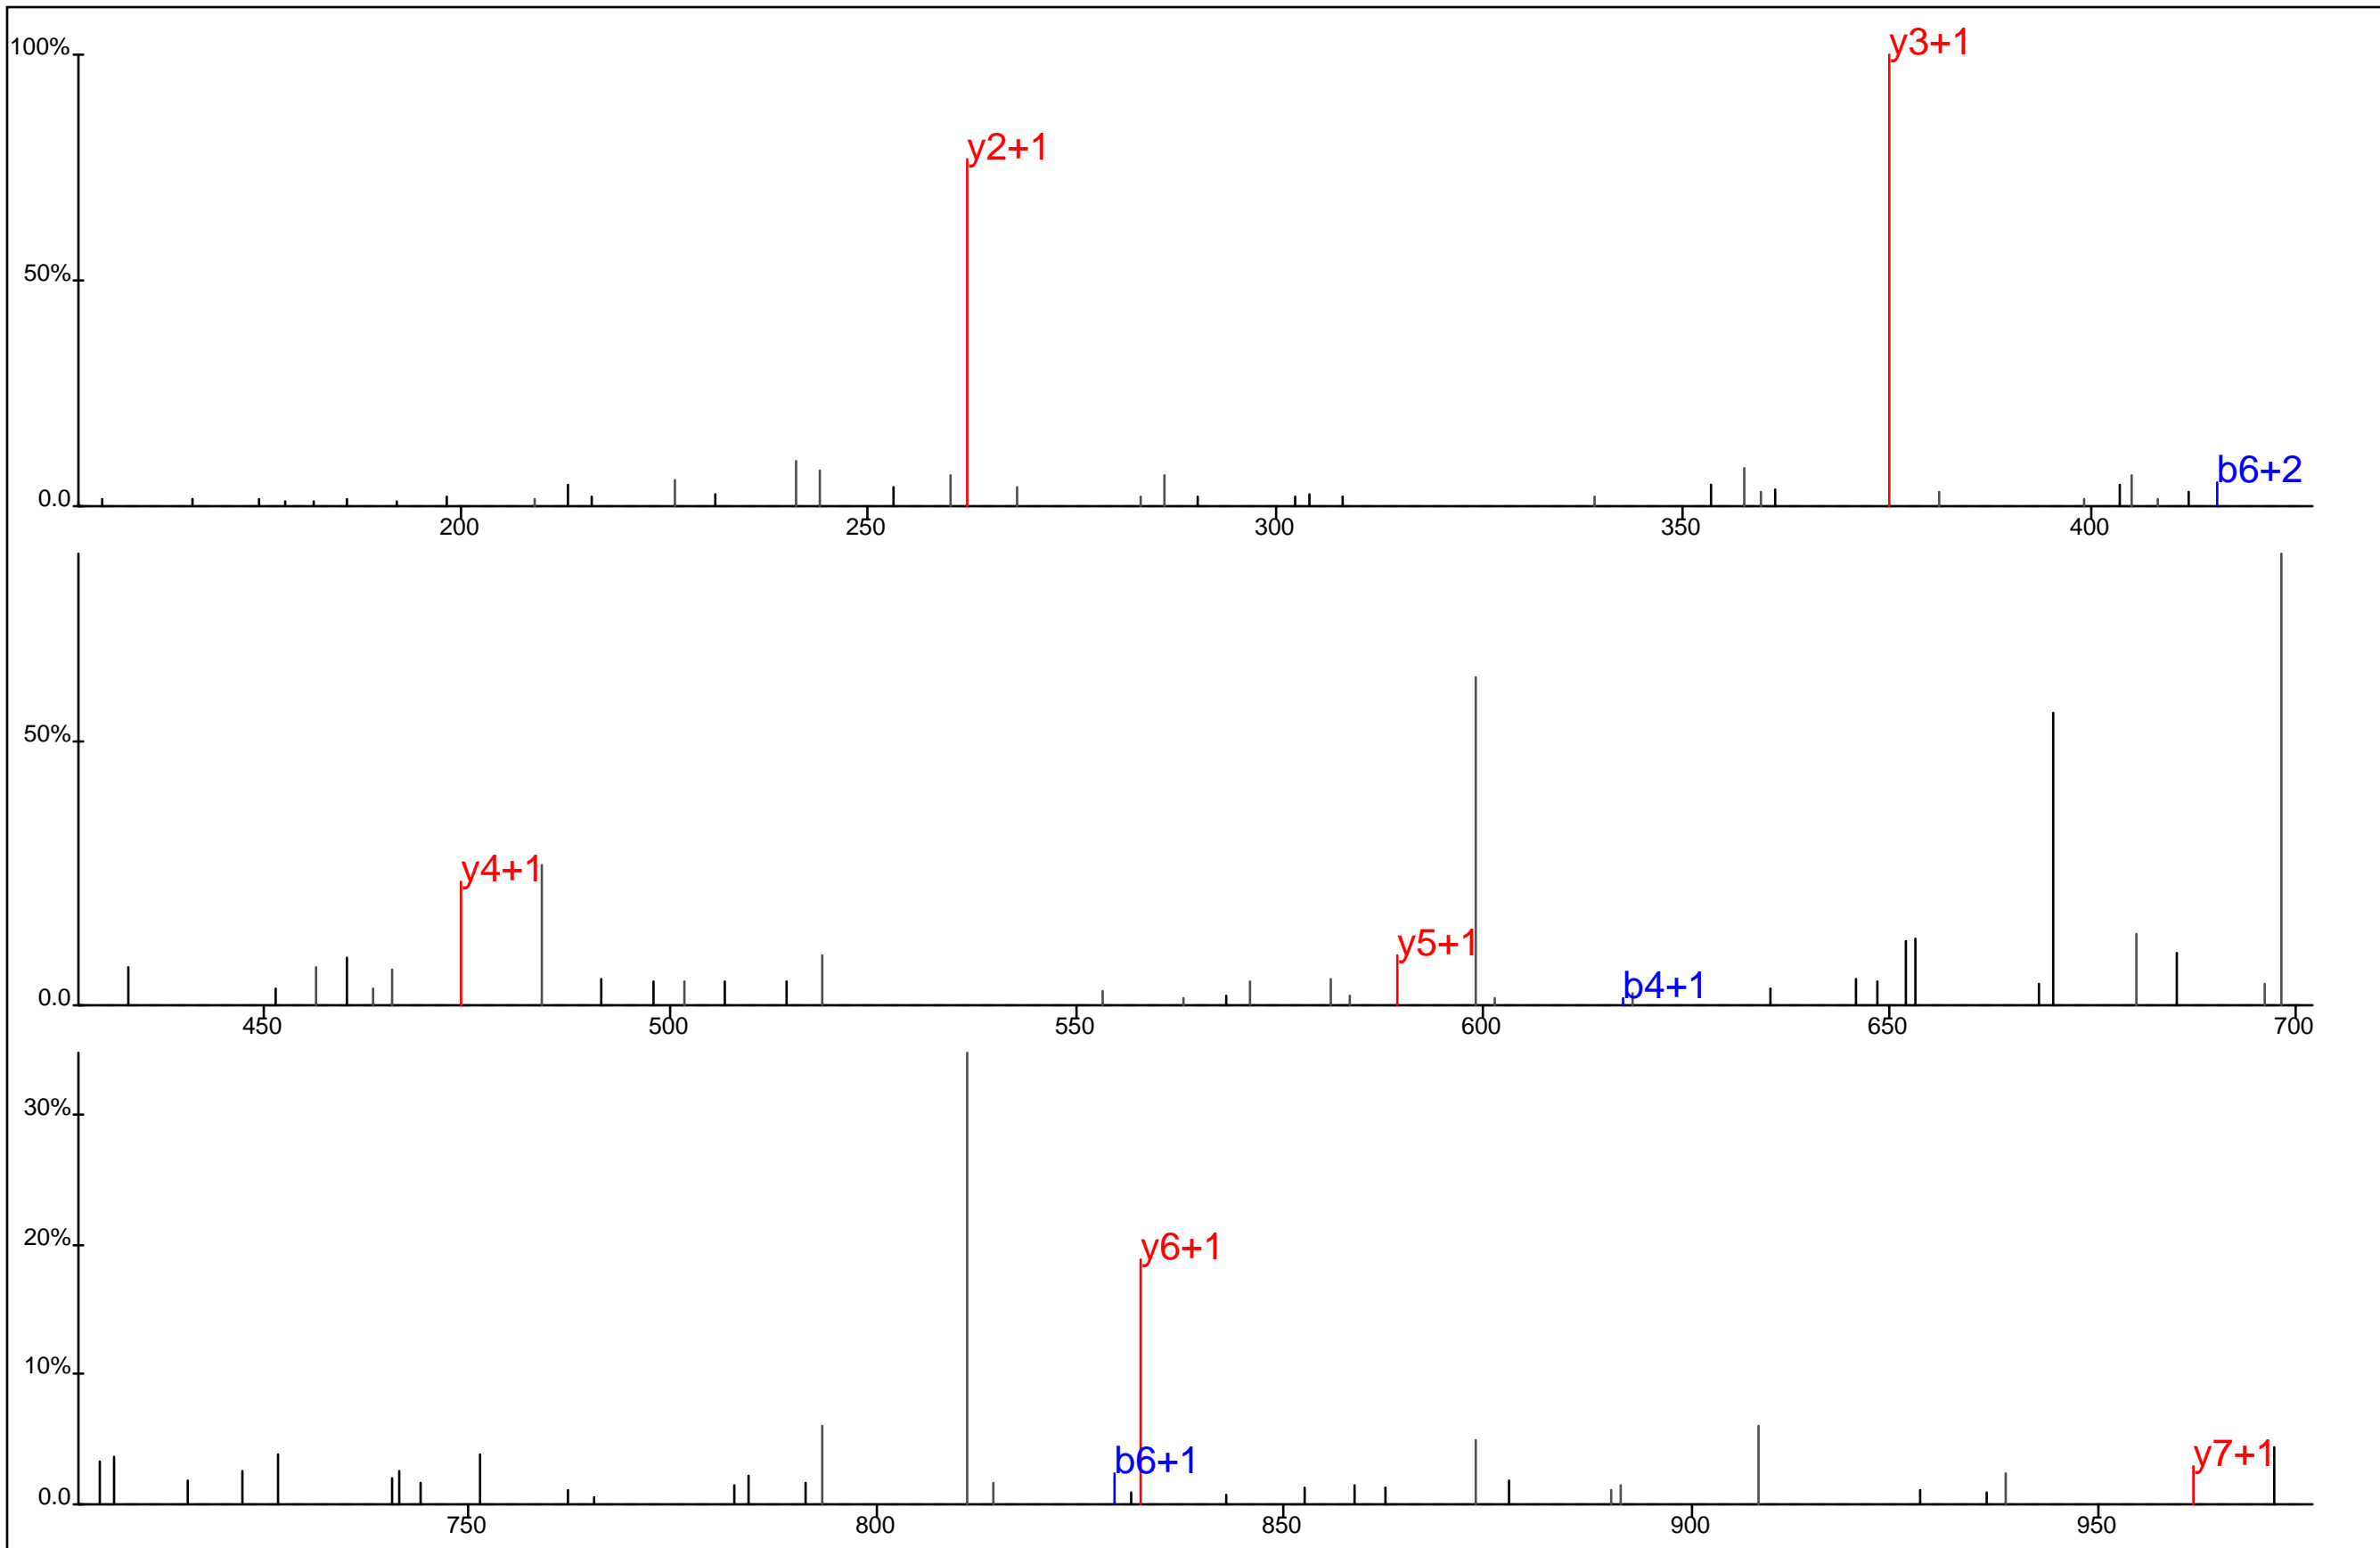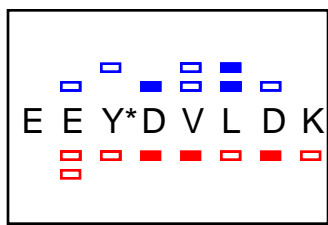

Protein Name: T cell antigen receptor, zeta  
 gi Accession: 0  
 Precursor Mass: 545.7210+2  
 Delta Mass: 0.686 ppm  
 XCorr: 24.57

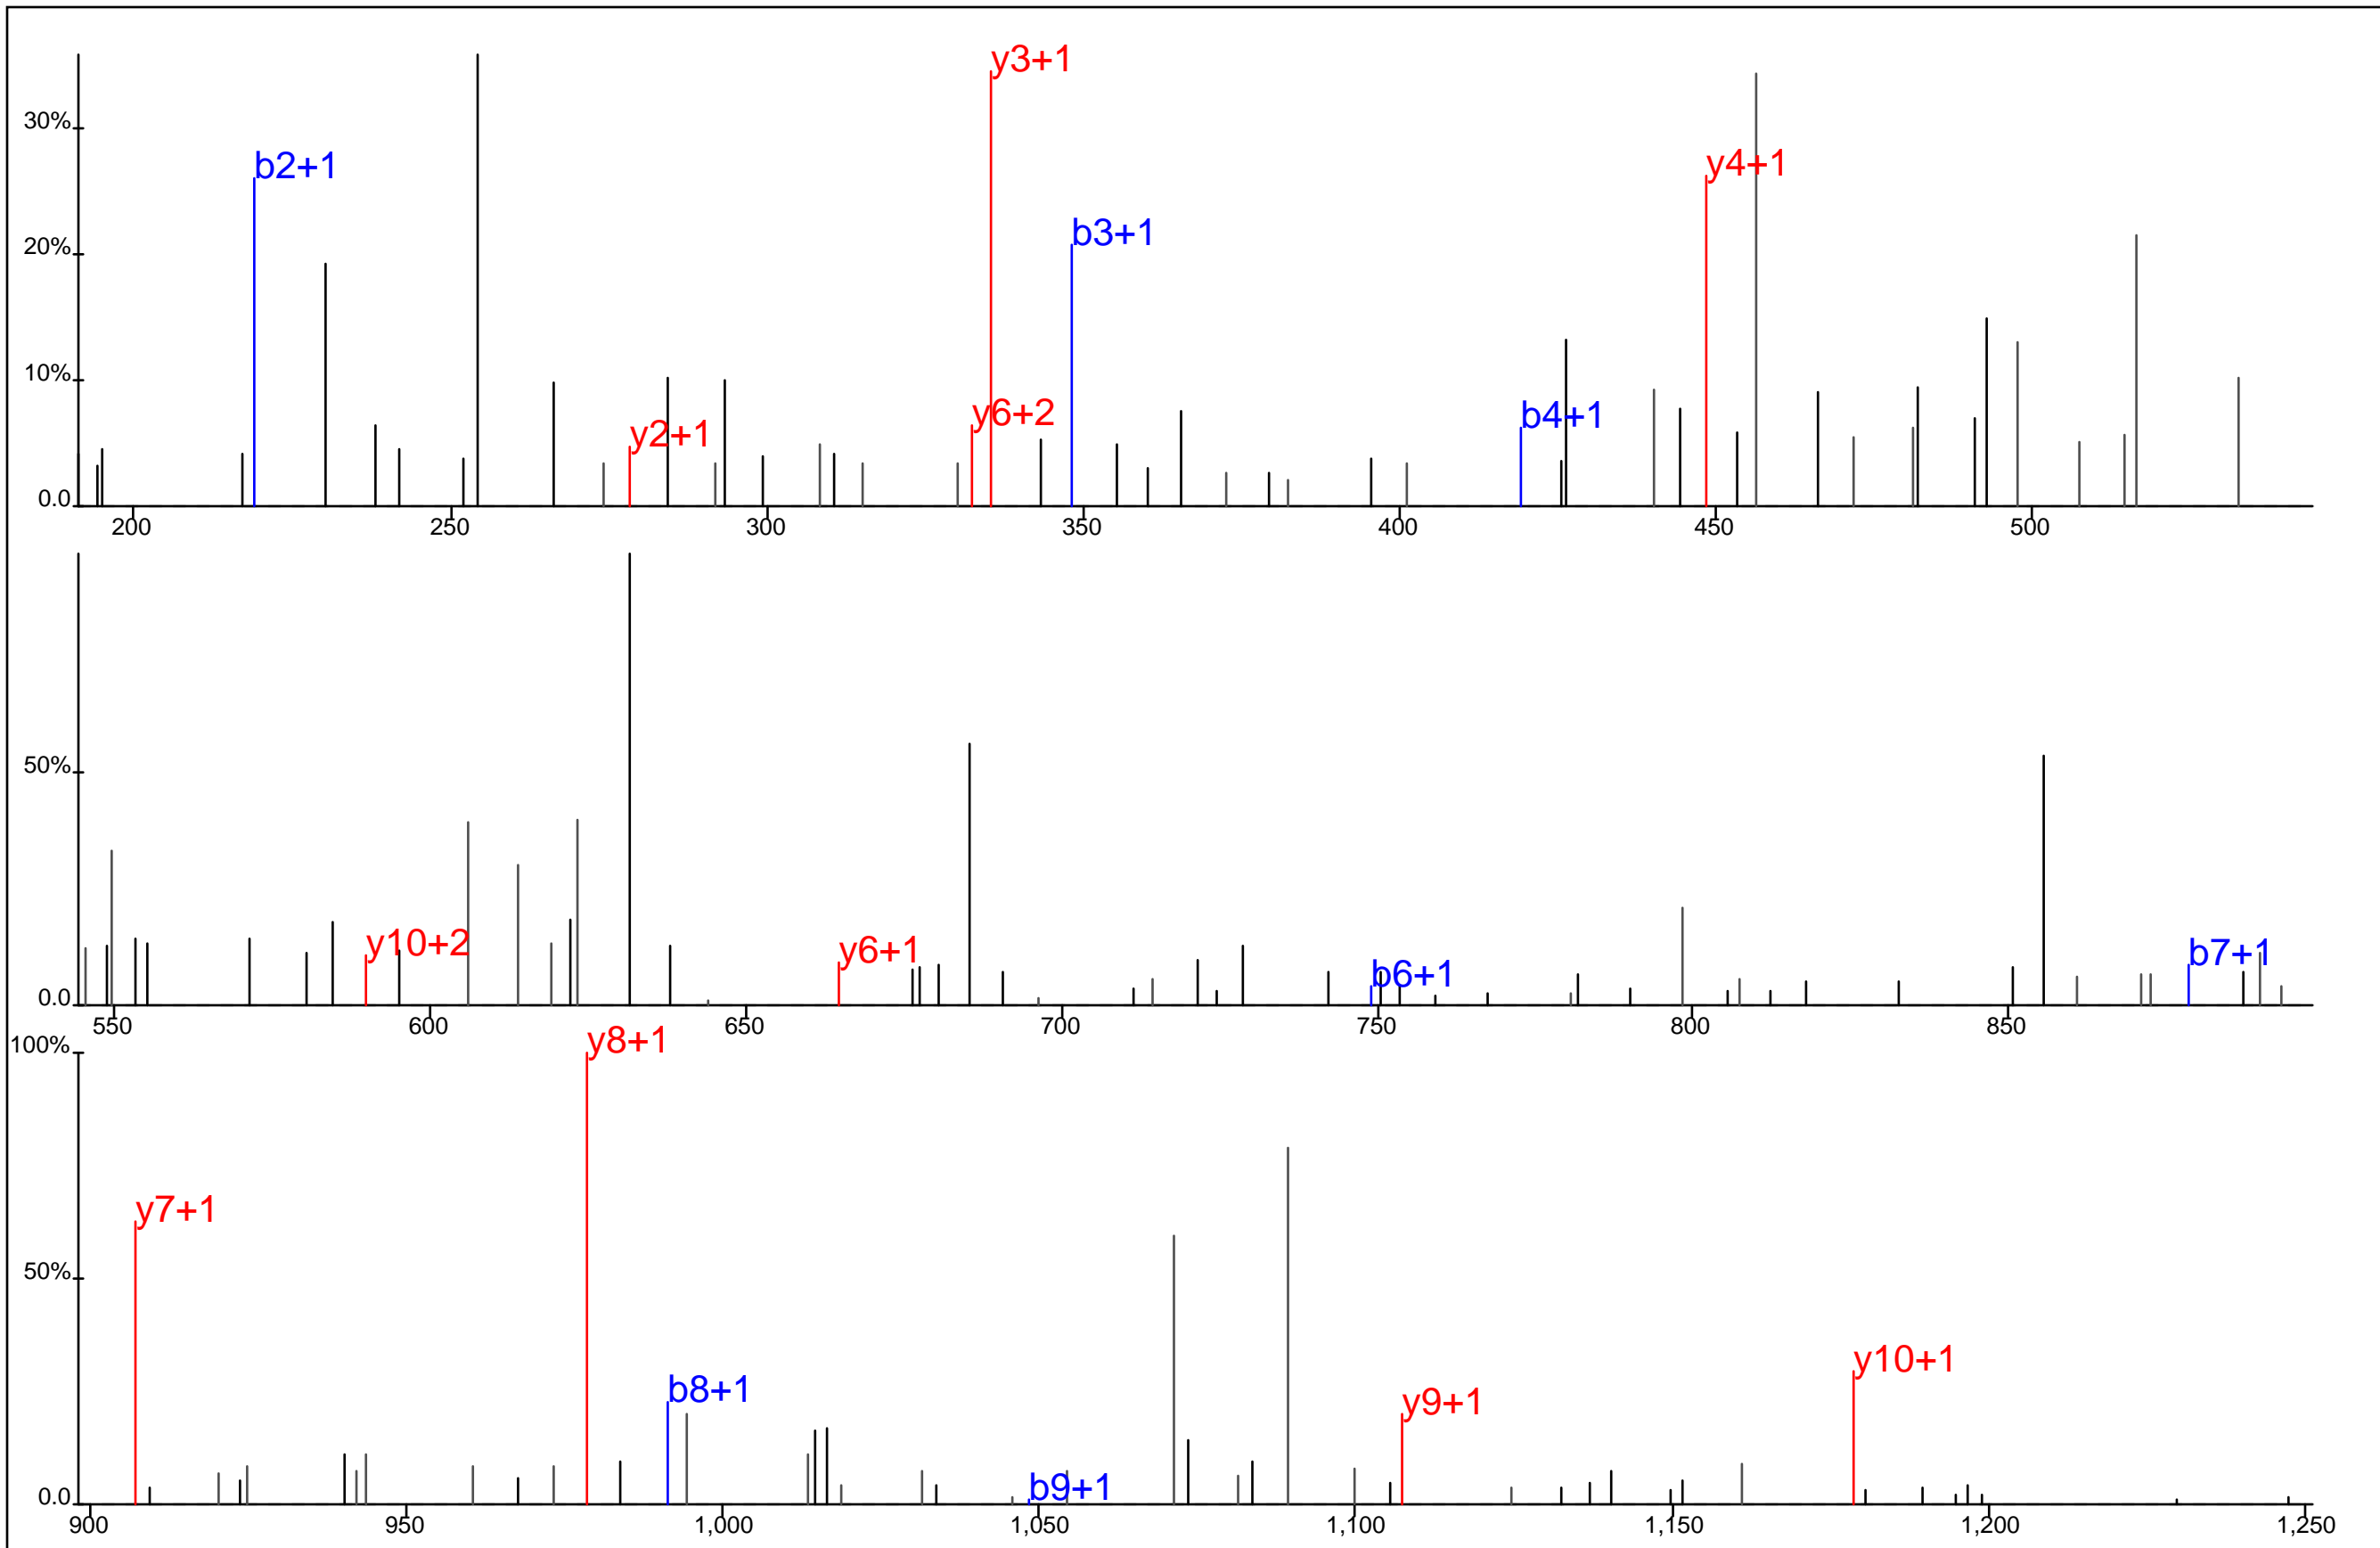

|    |   |   |   |    |   |   |   |       |
|----|---|---|---|----|---|---|---|-------|
|    | ■ | ■ | ■ | ■  | ■ | ■ | ■ | ■     |
| M# | A | E | A | Y* | S | E | I | G M K |
|    | □ | □ | □ | □  | □ | □ | □ | □     |

Protein Name: T cell antigen receptor, zeta  
 gi Accession: 0  
 Precursor Mass: 663.2586+2  
 Delta Mass: 4.026 ppm  
 XCorr: 31.25

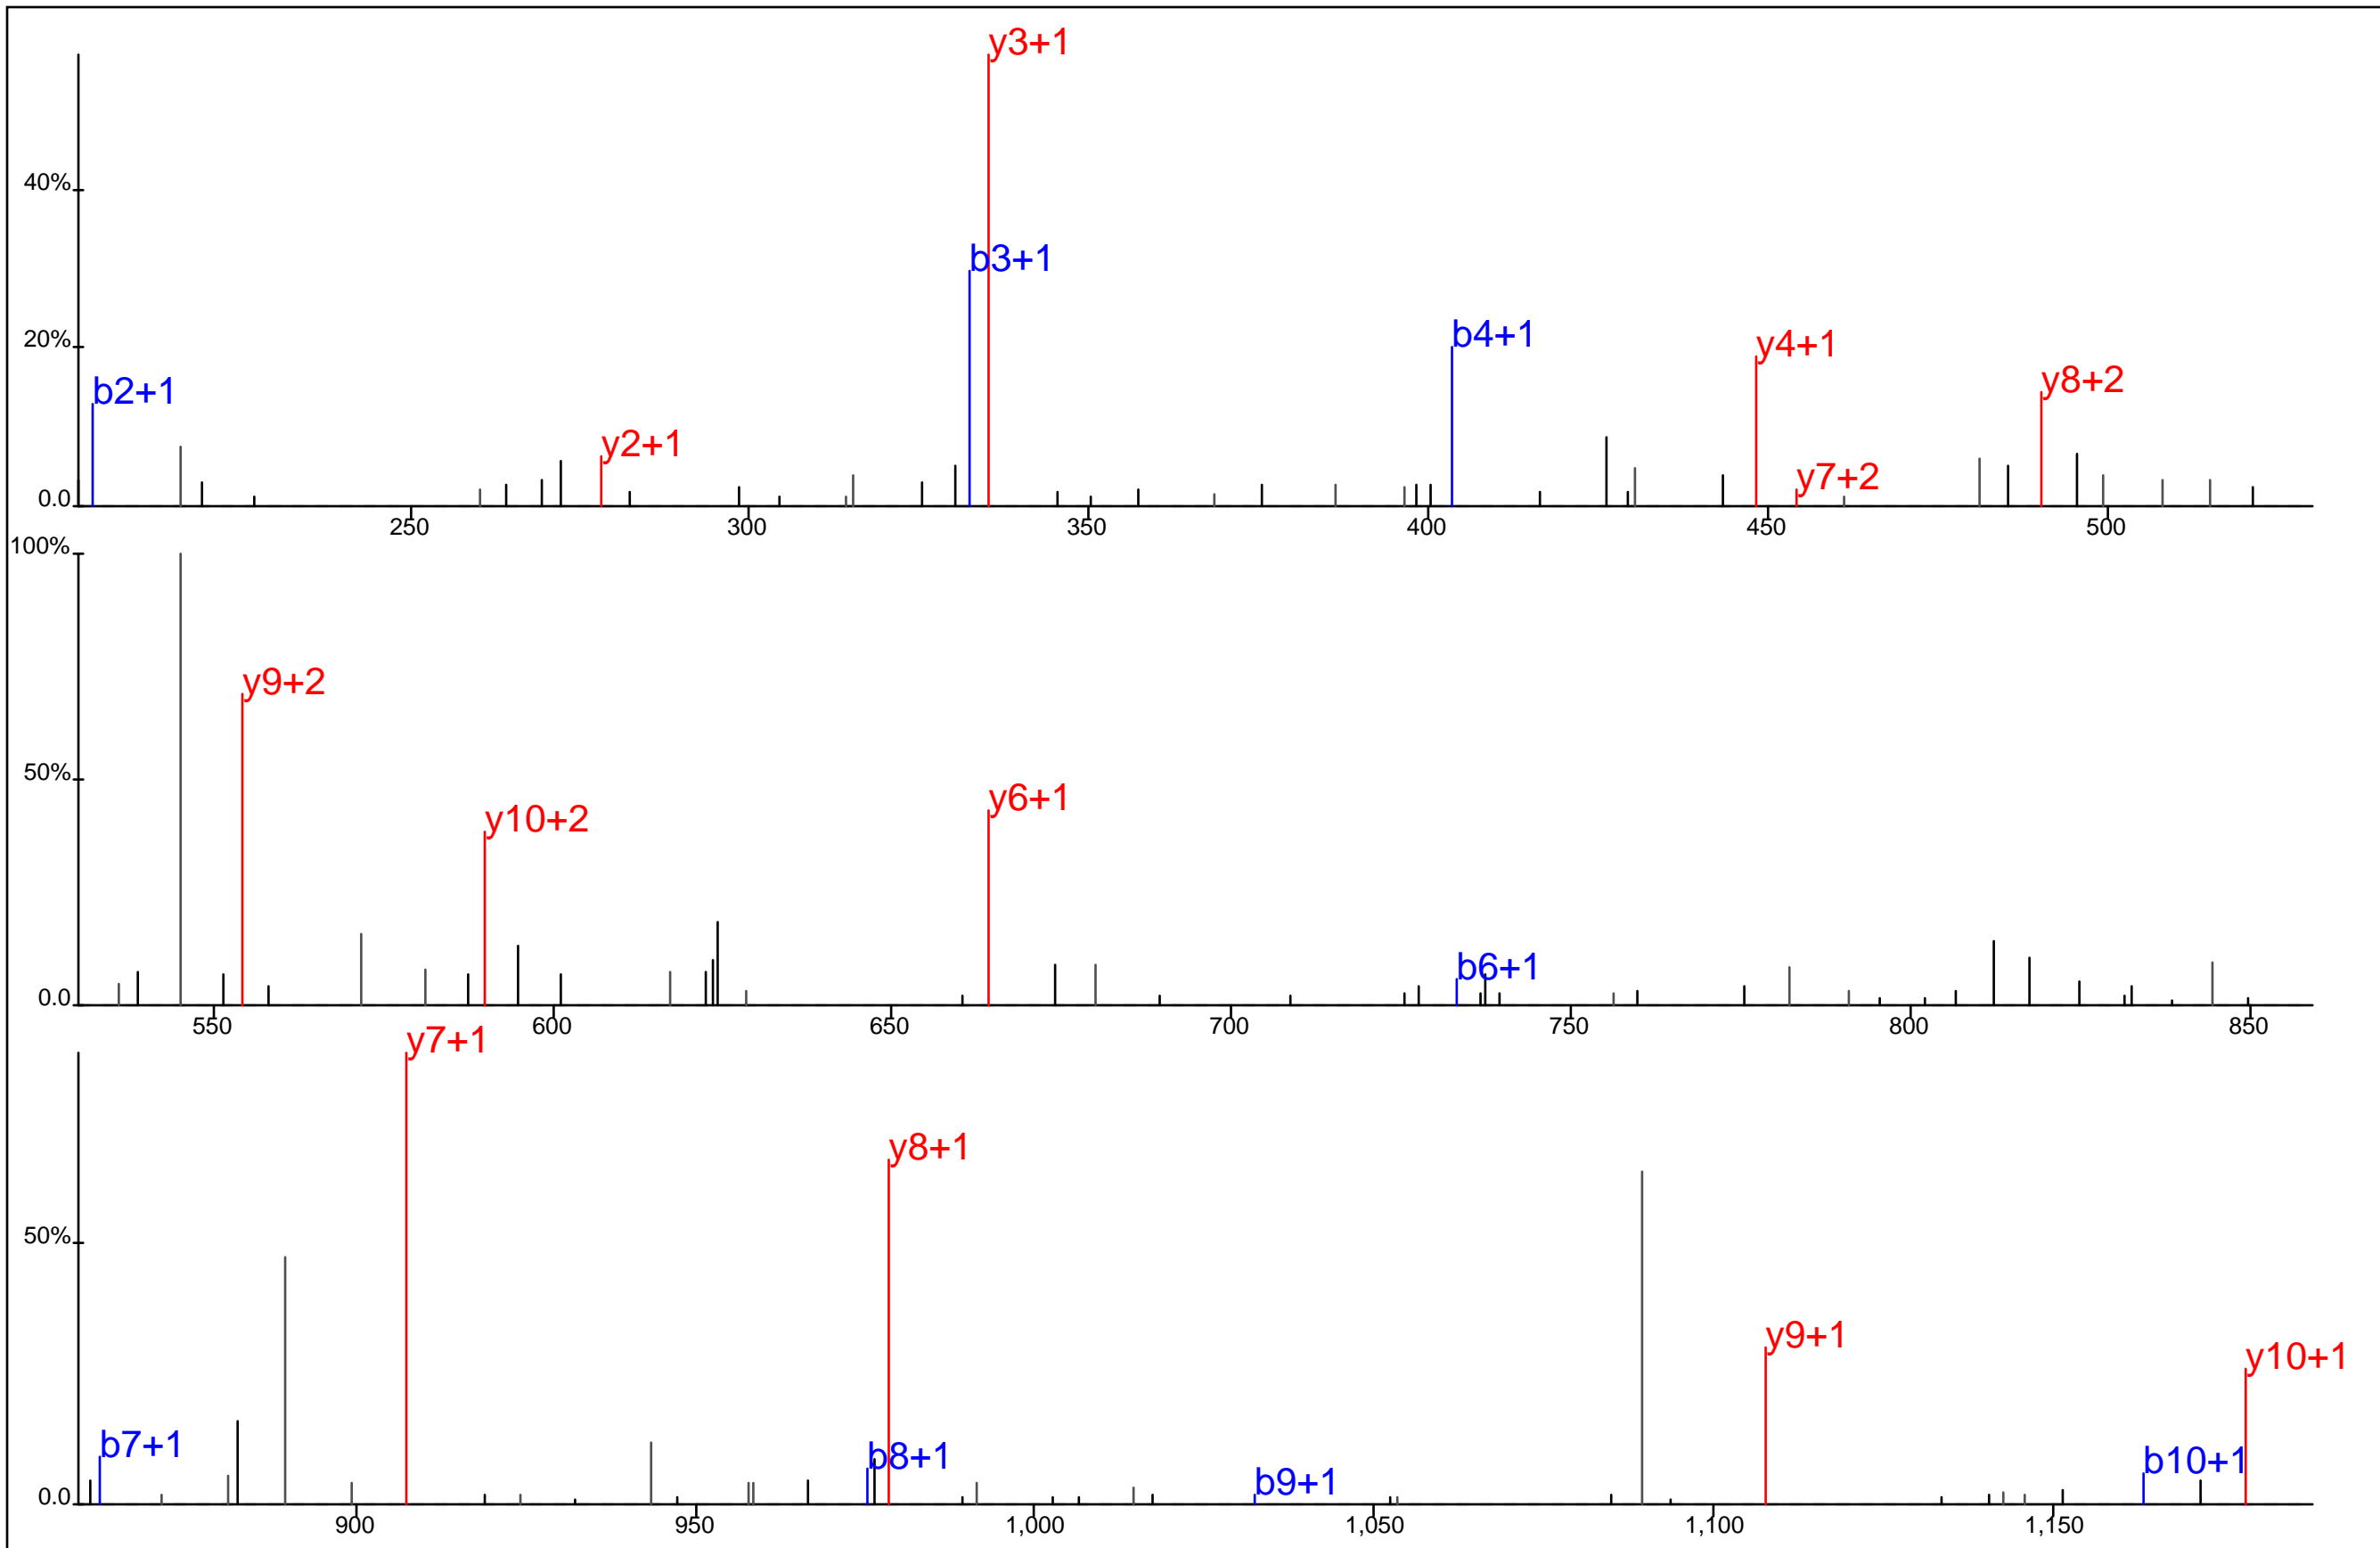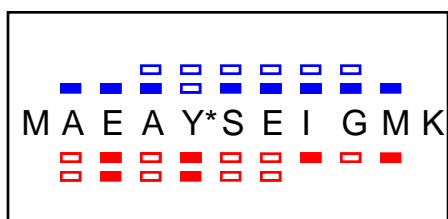

Protein Name: T cell antigen receptor, zeta  
 gi Accession: 0  
 Precursor Mass: 655.2668+2  
 Delta Mass: 4.538 ppm  
 XCorr: 62.09

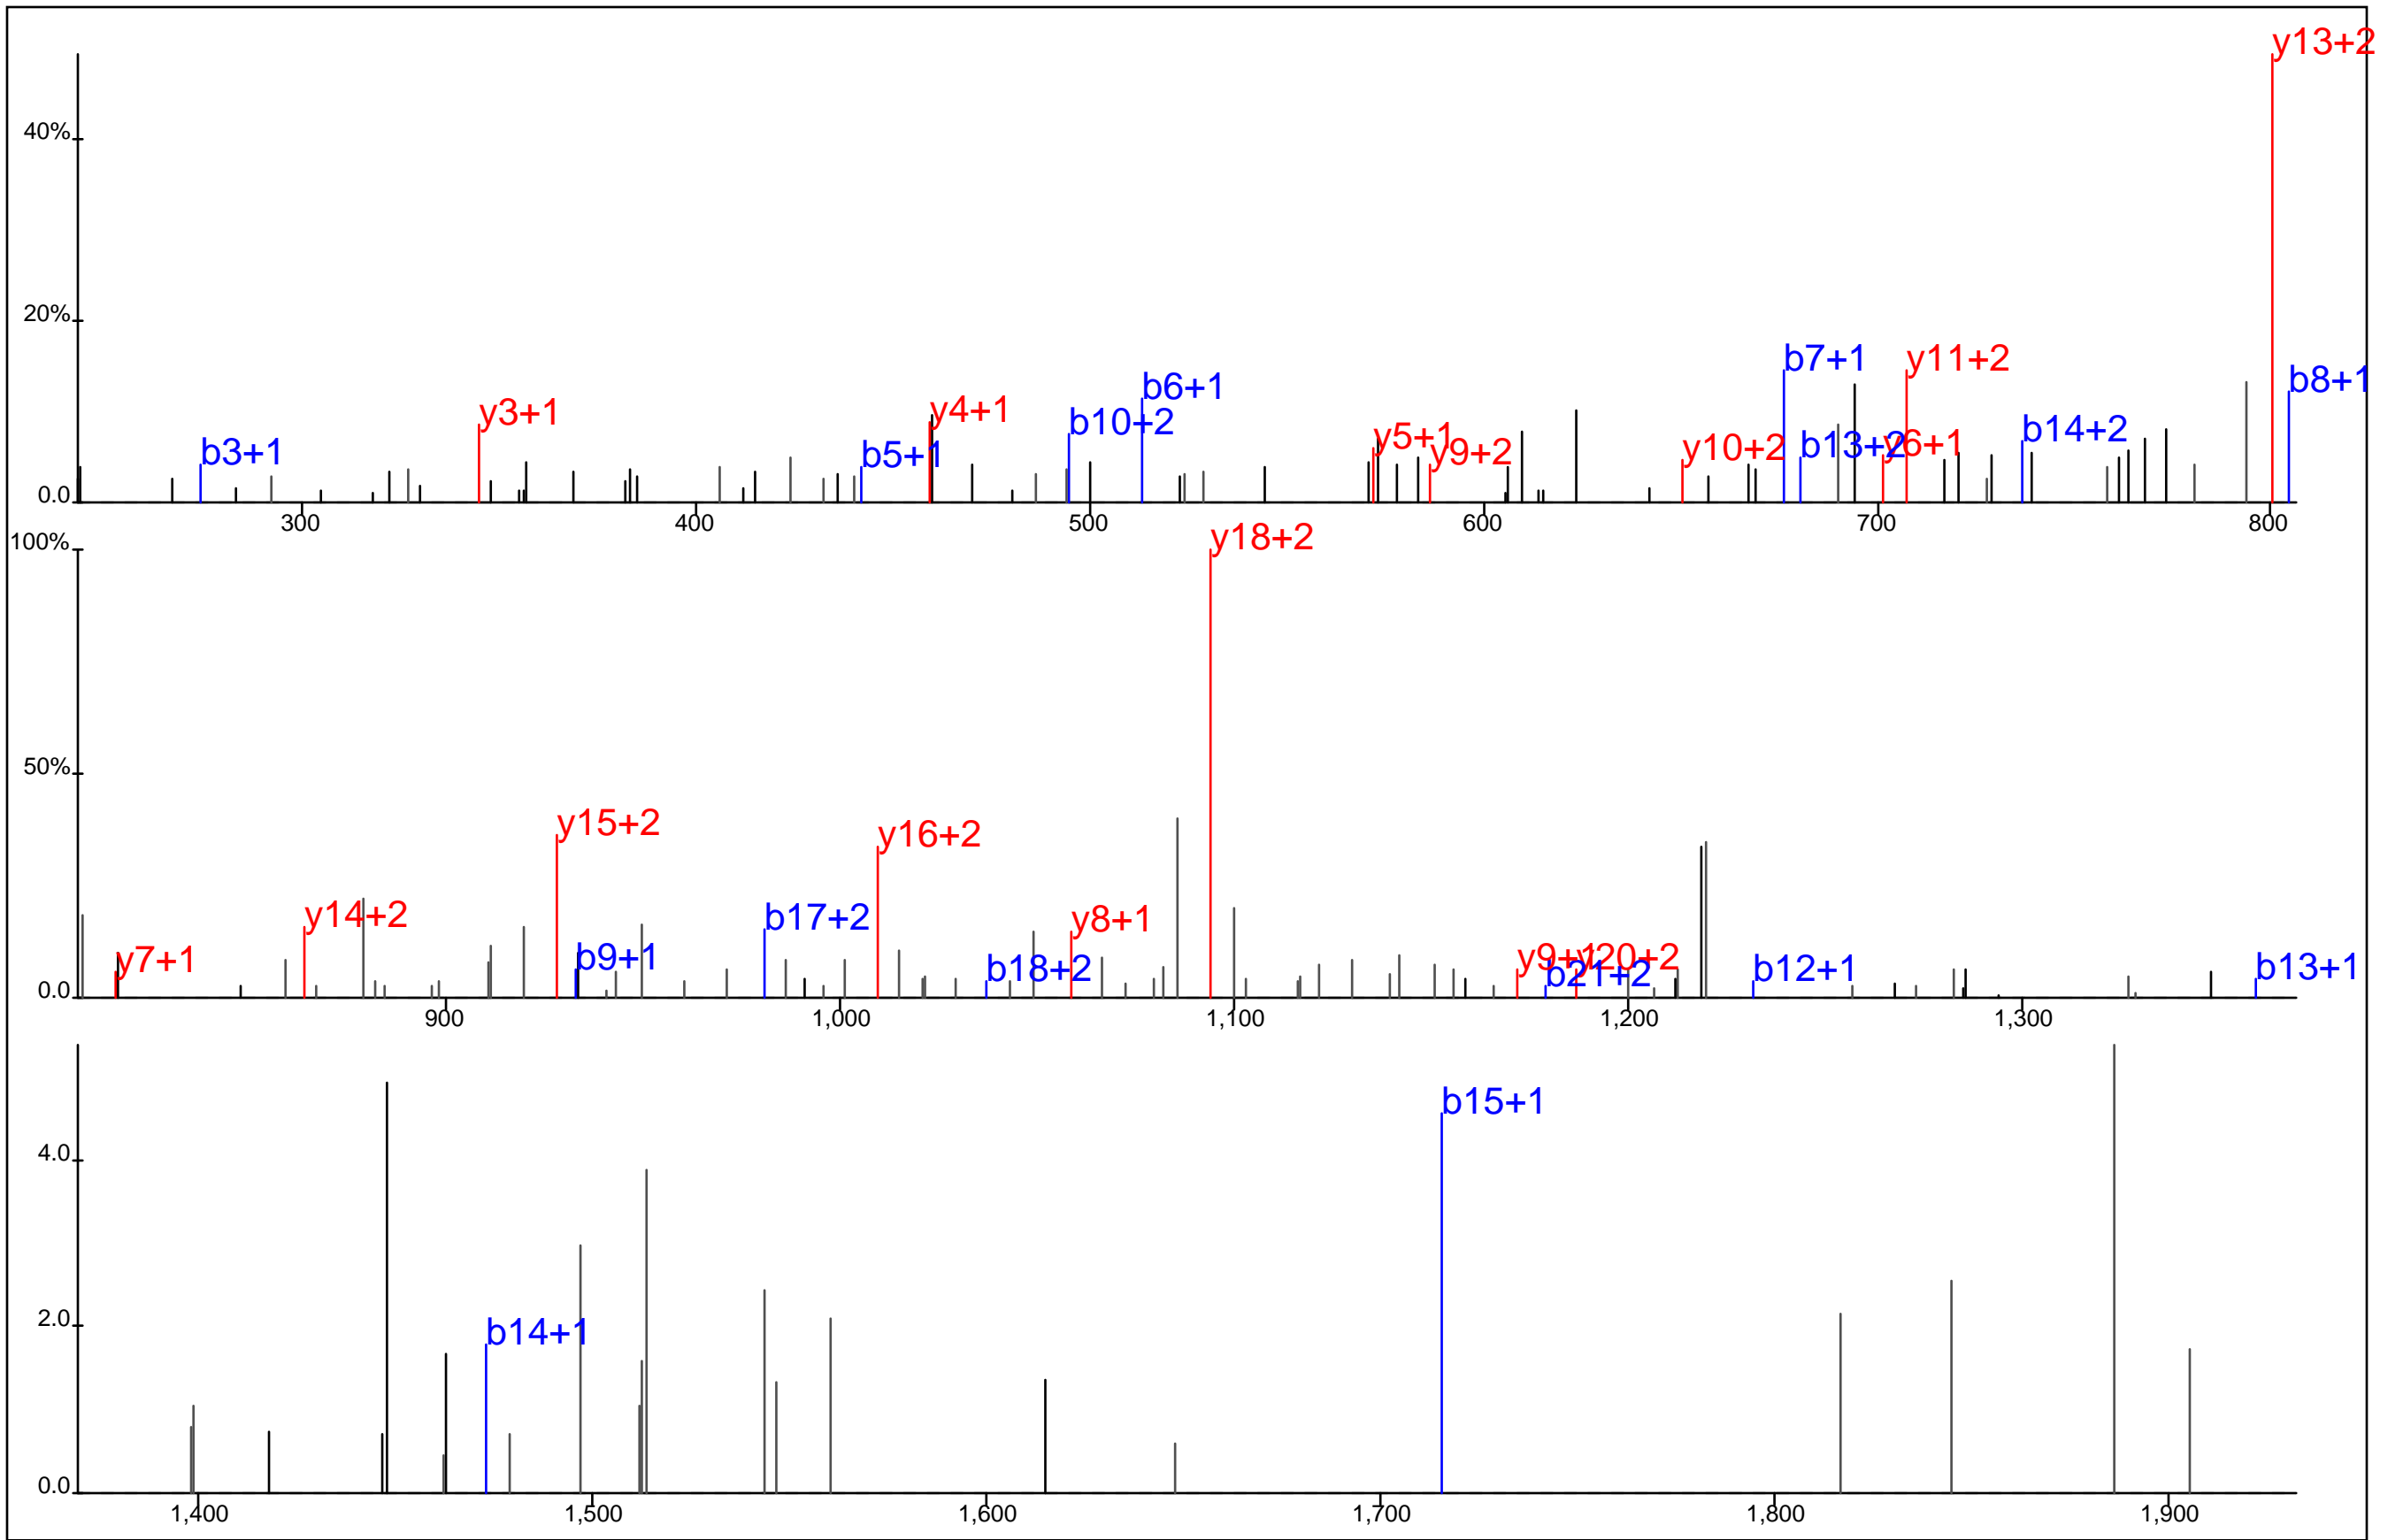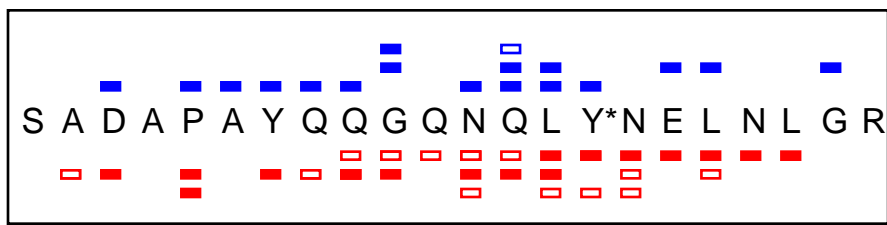

Protein Name: T cell antigen receptor, zeta  
 gi Accession: 0  
 Precursor Mass: 844.0493+3  
 Delta Mass: 1.011 ppm  
 XCorr: 29.86



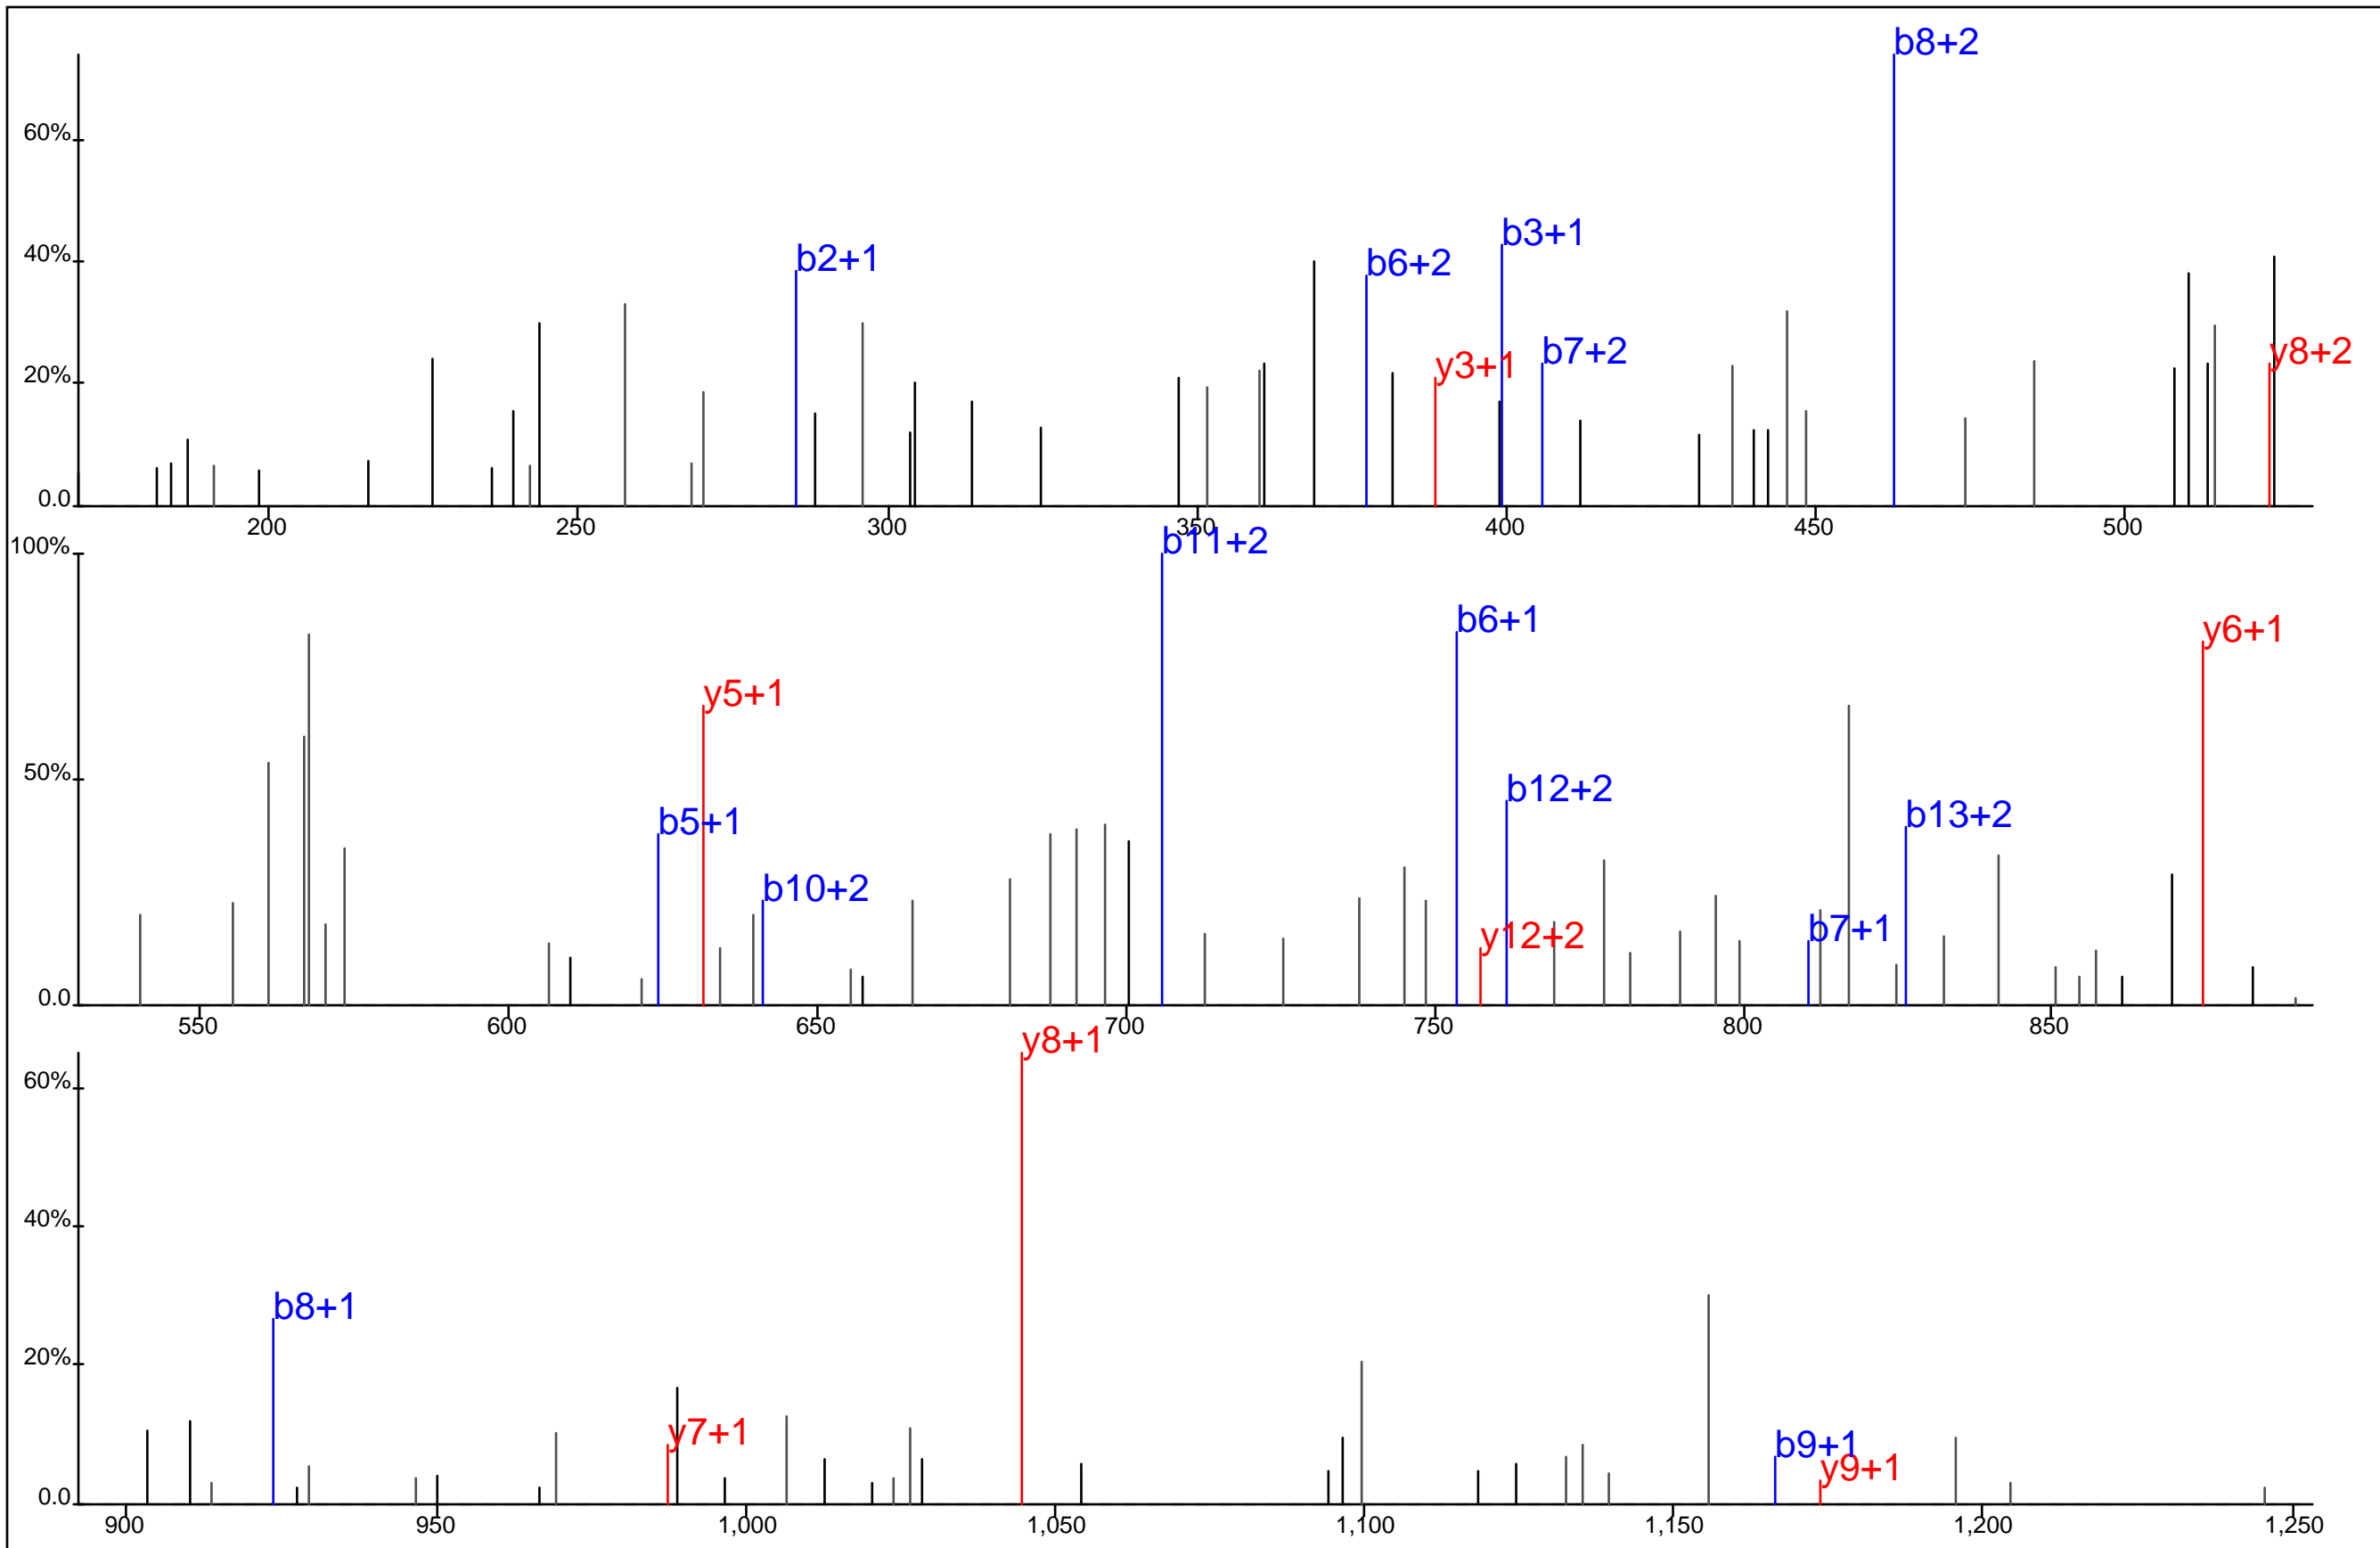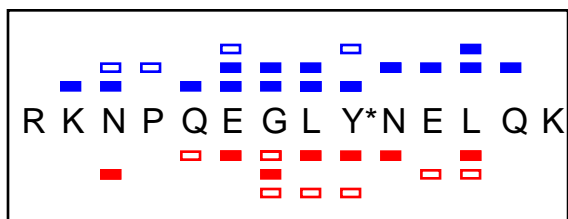

Protein Name: T cell antigen receptor, zeta  
 gi Accession: 0  
 Precursor Mass: 599.6270+3  
 Delta Mass: 1.517 ppm  
 XCorr: 30.71

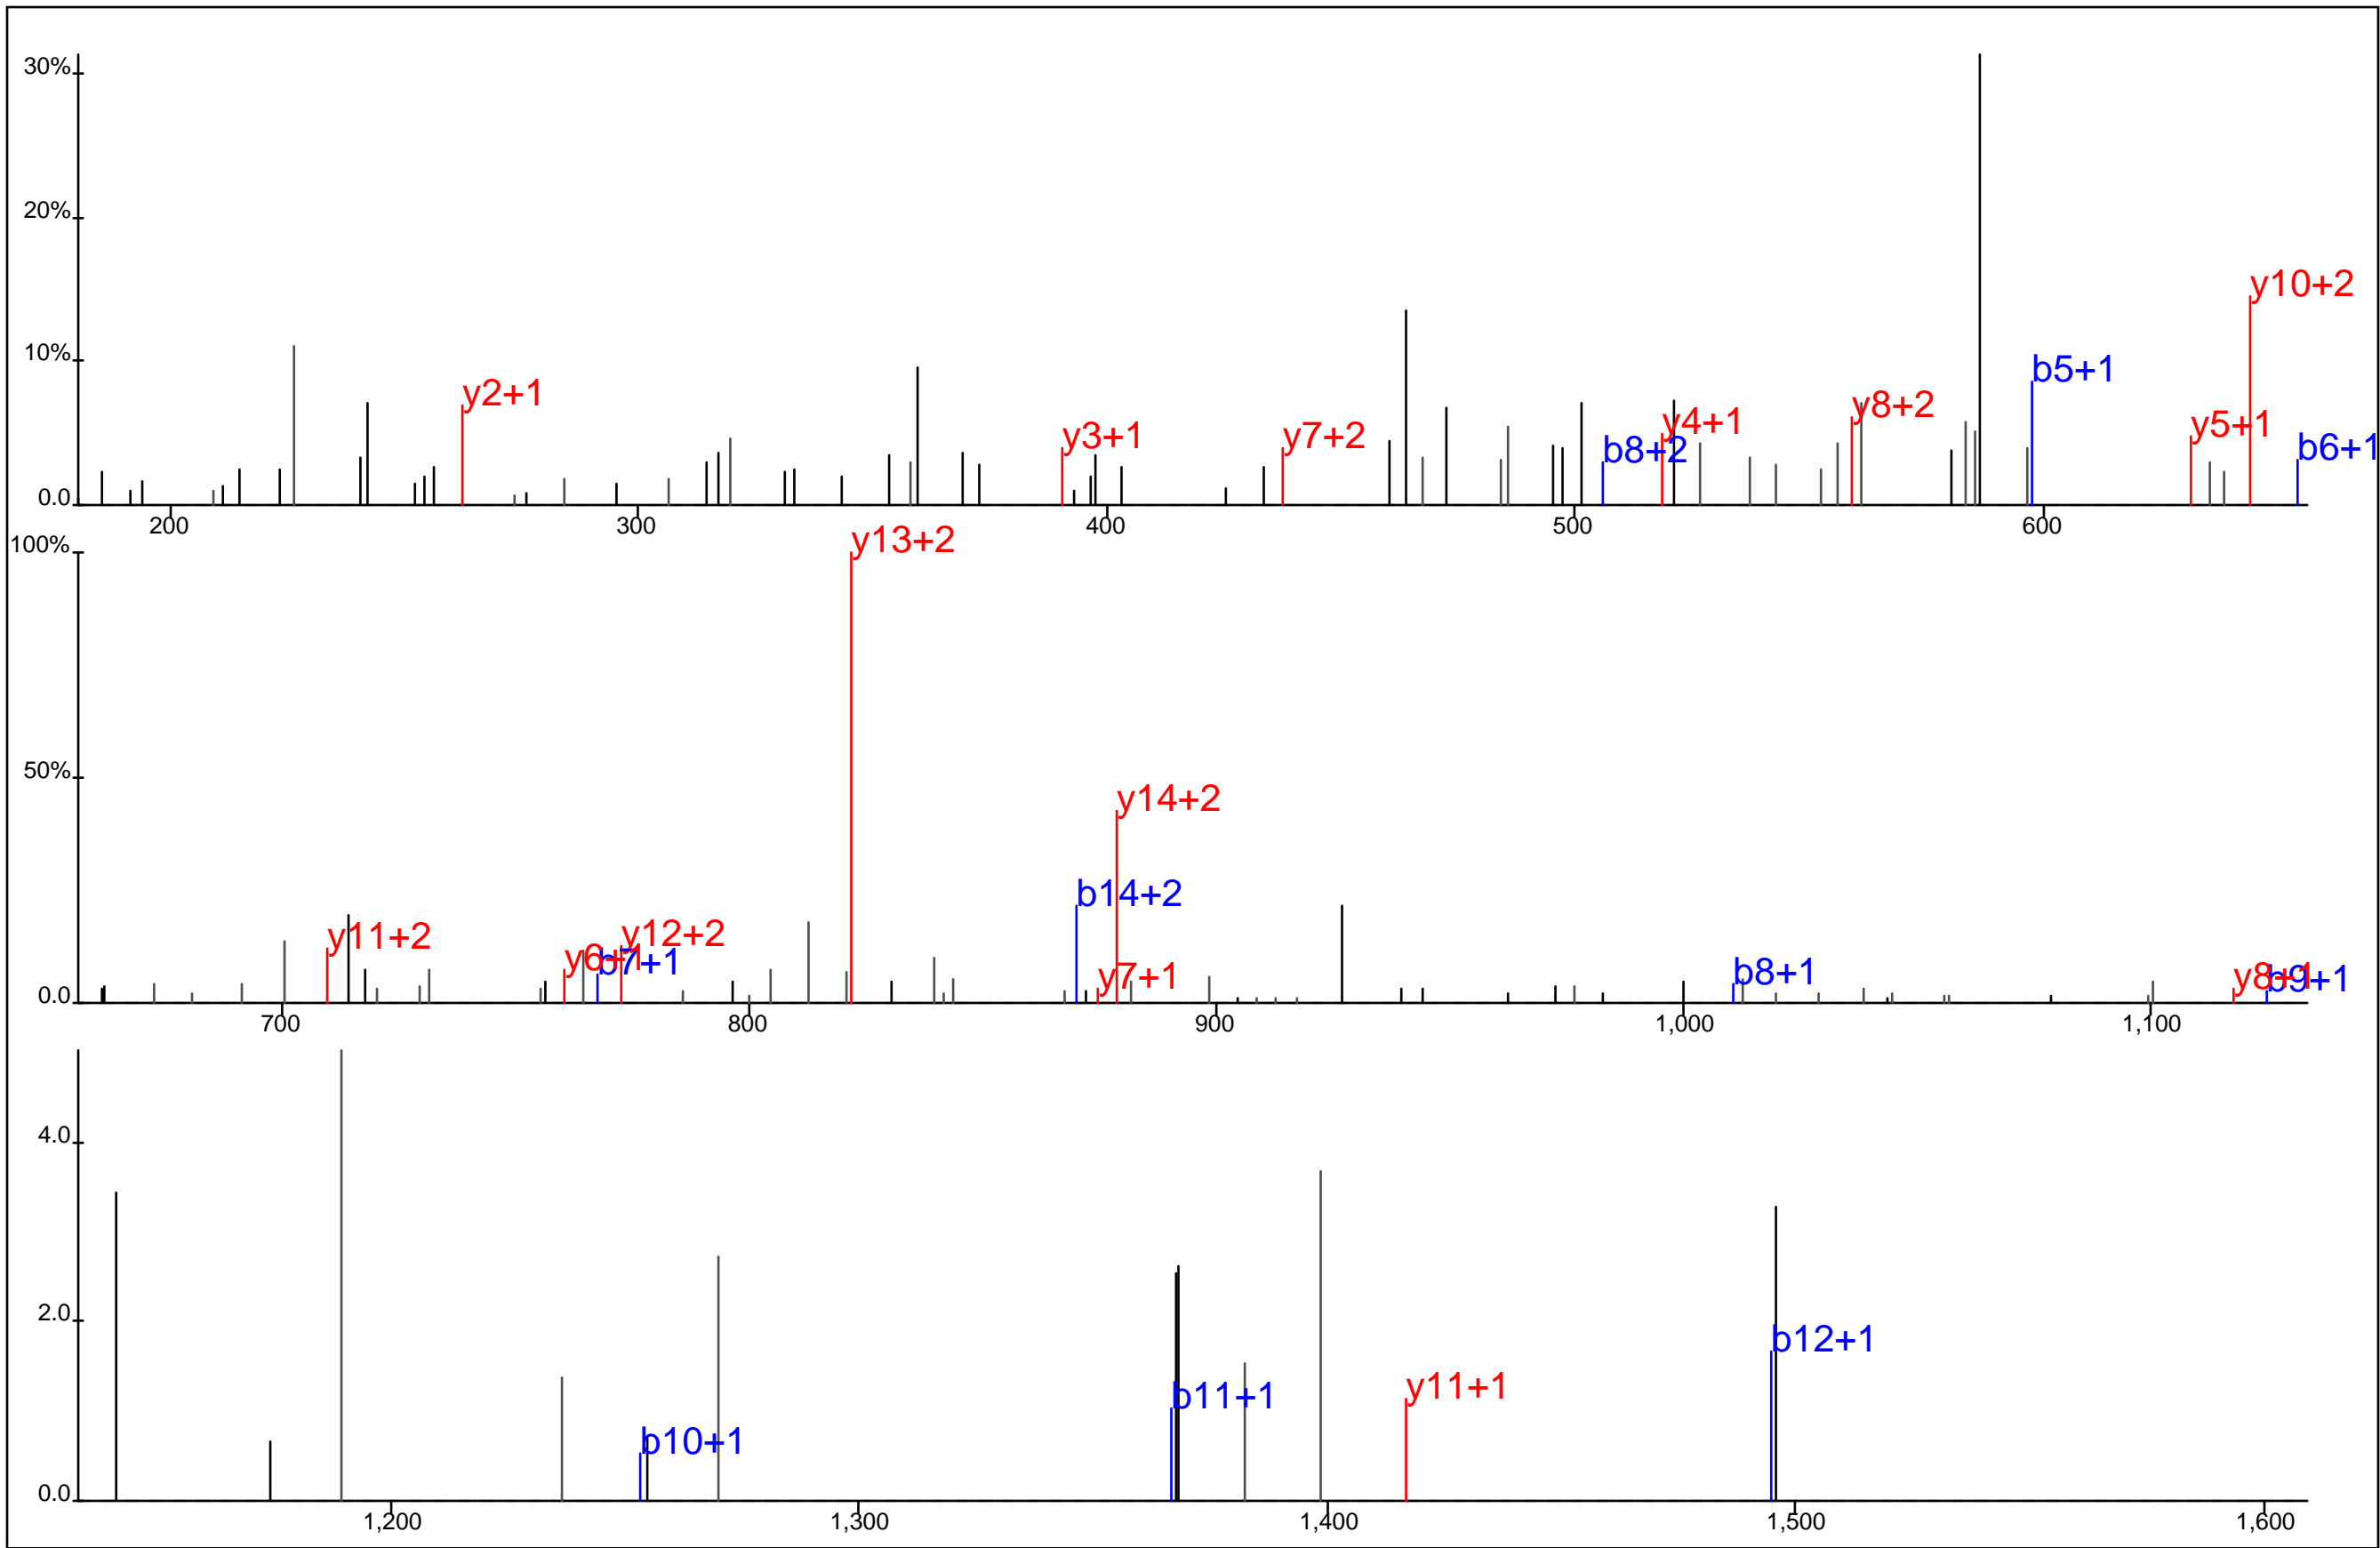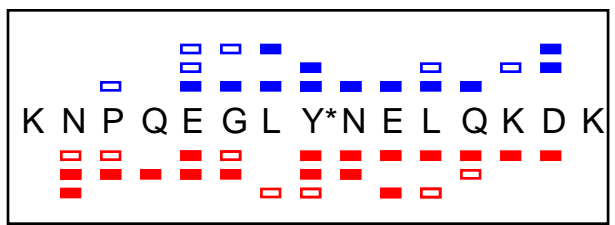

Protein Name: T cell antigen receptor, zeta  
 gi Accession: 0  
 Precursor Mass: 628.6351+3  
 Delta Mass: 0.440 ppm  
 XCorr: 33.29





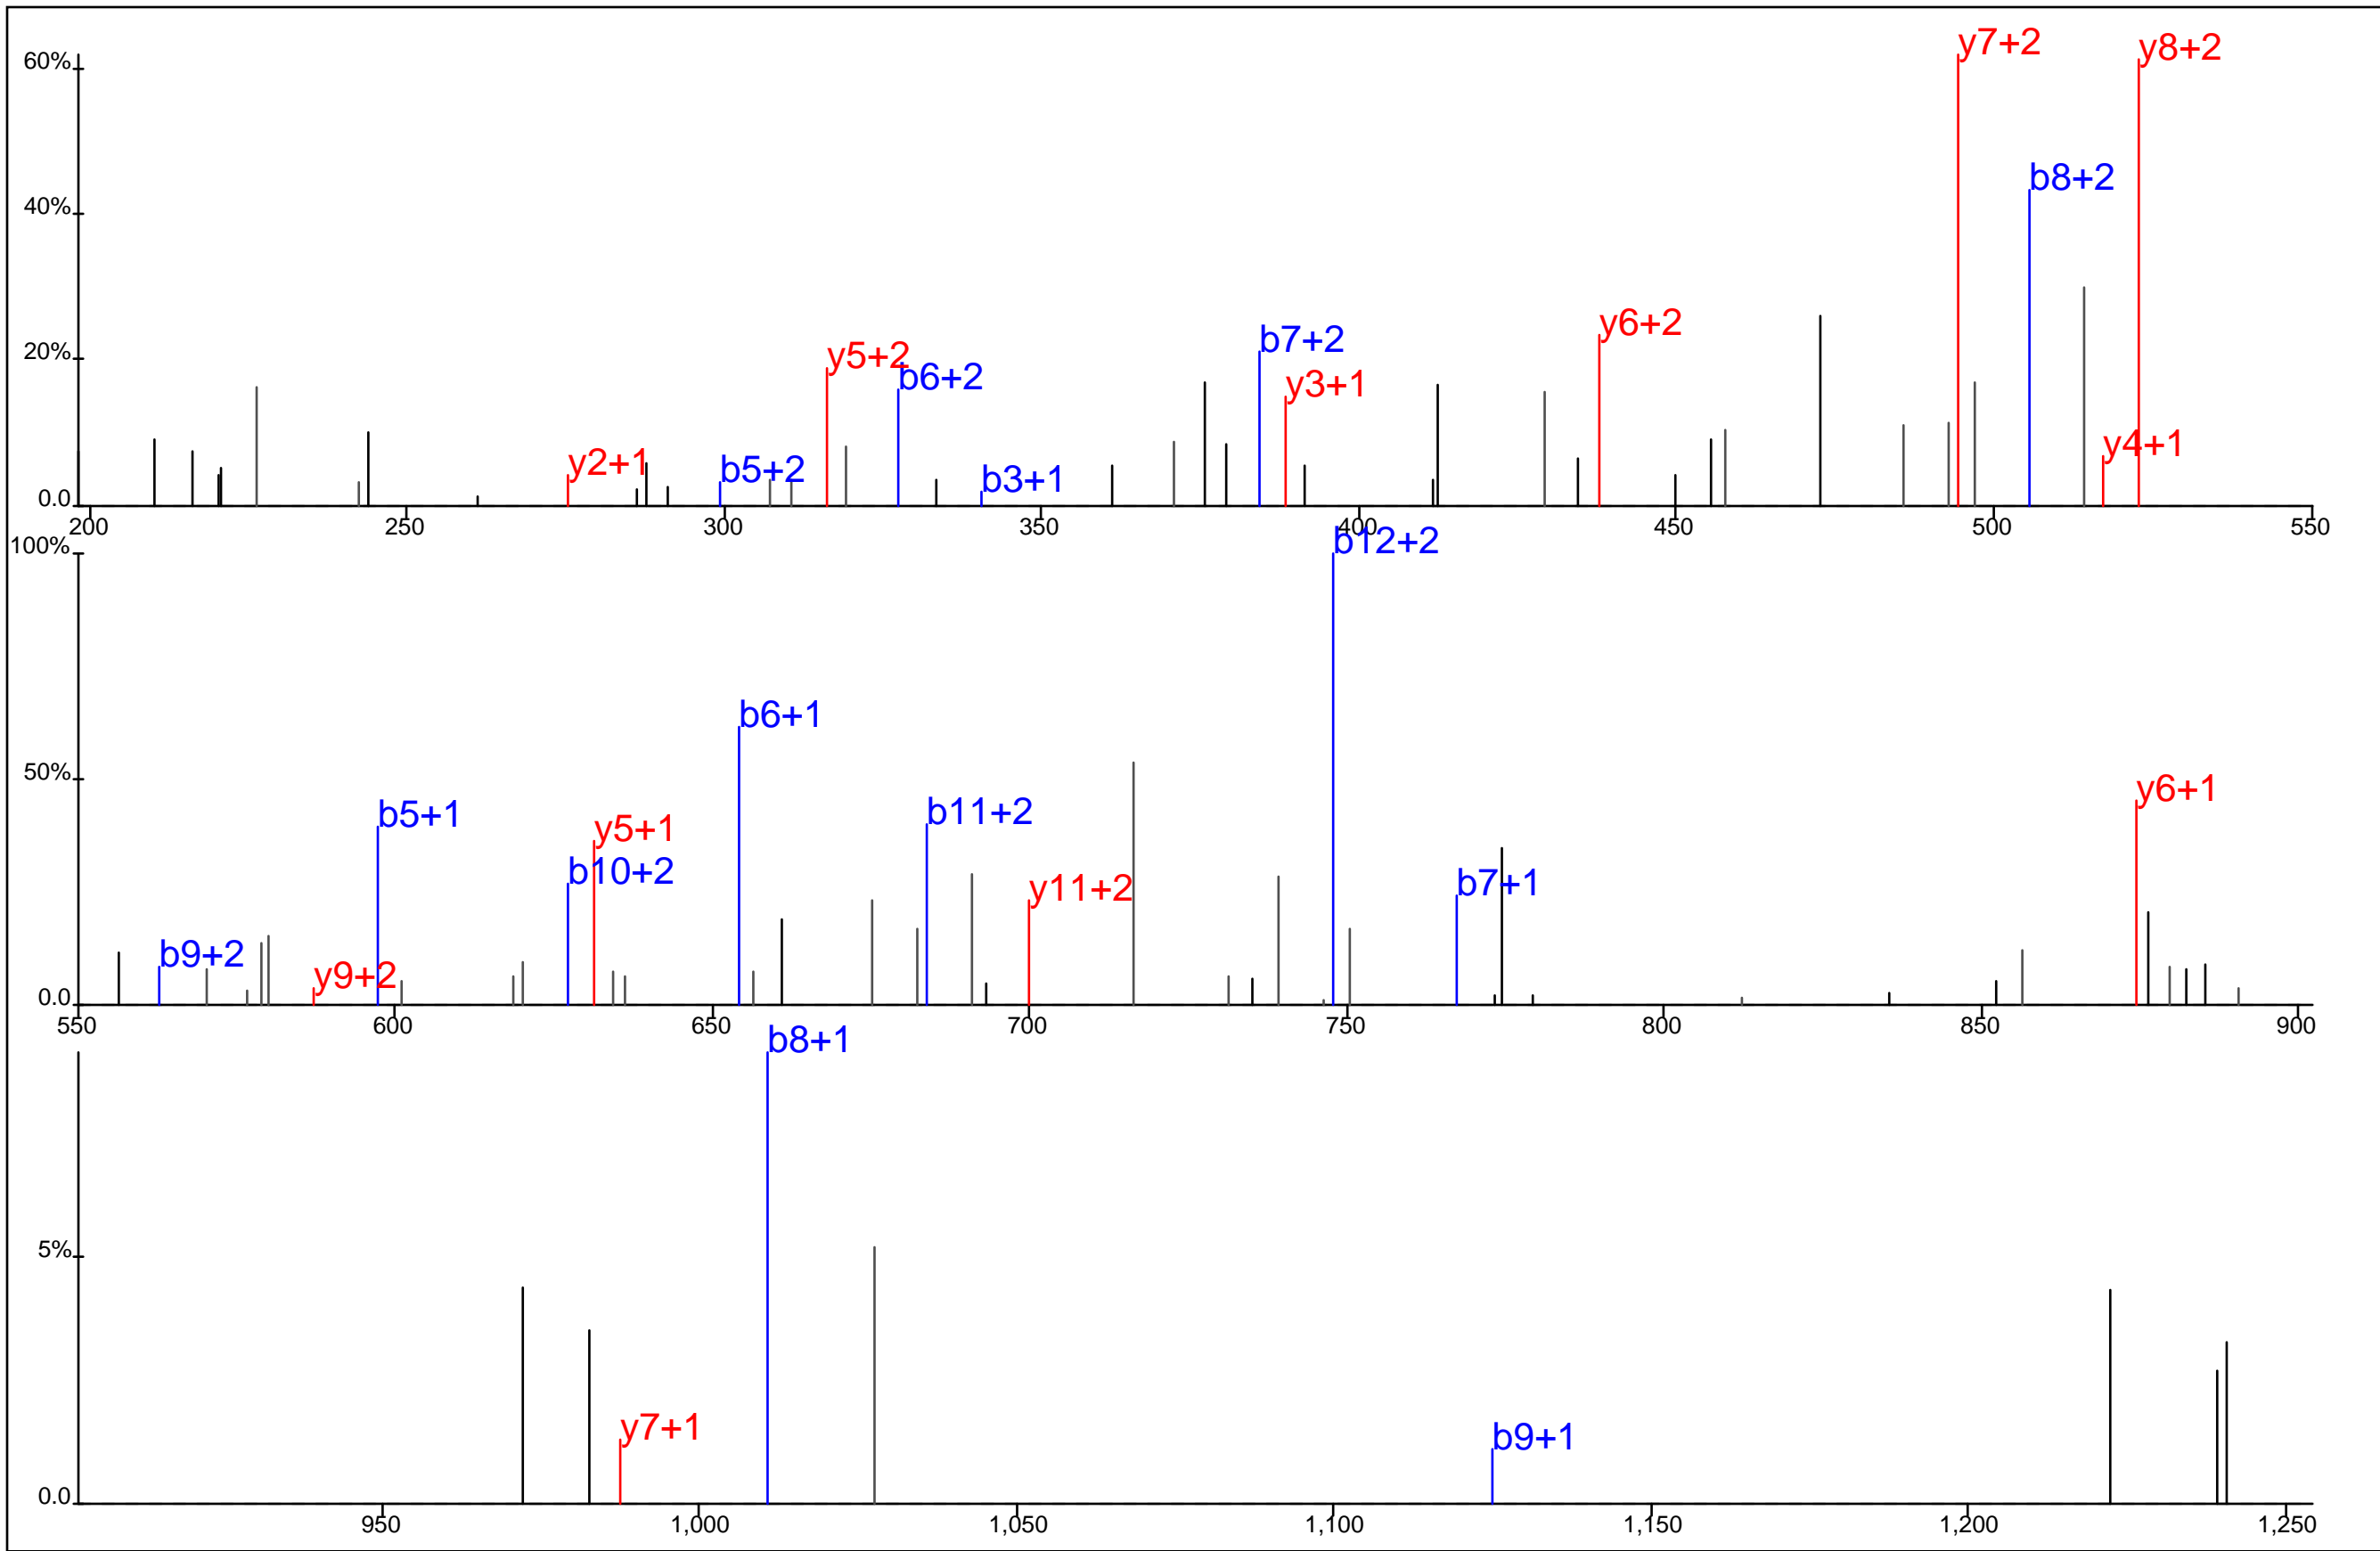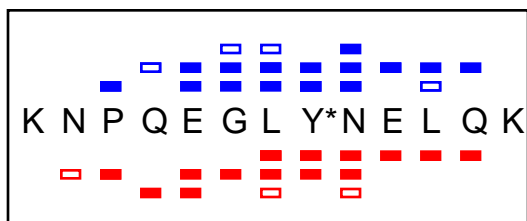

Protein Name: T cell antigen receptor, zeta  
 gi Accession: 0  
 Precursor Mass: 547.5947+3  
 Delta Mass: 1.040 ppm  
 XCorr: 33.6

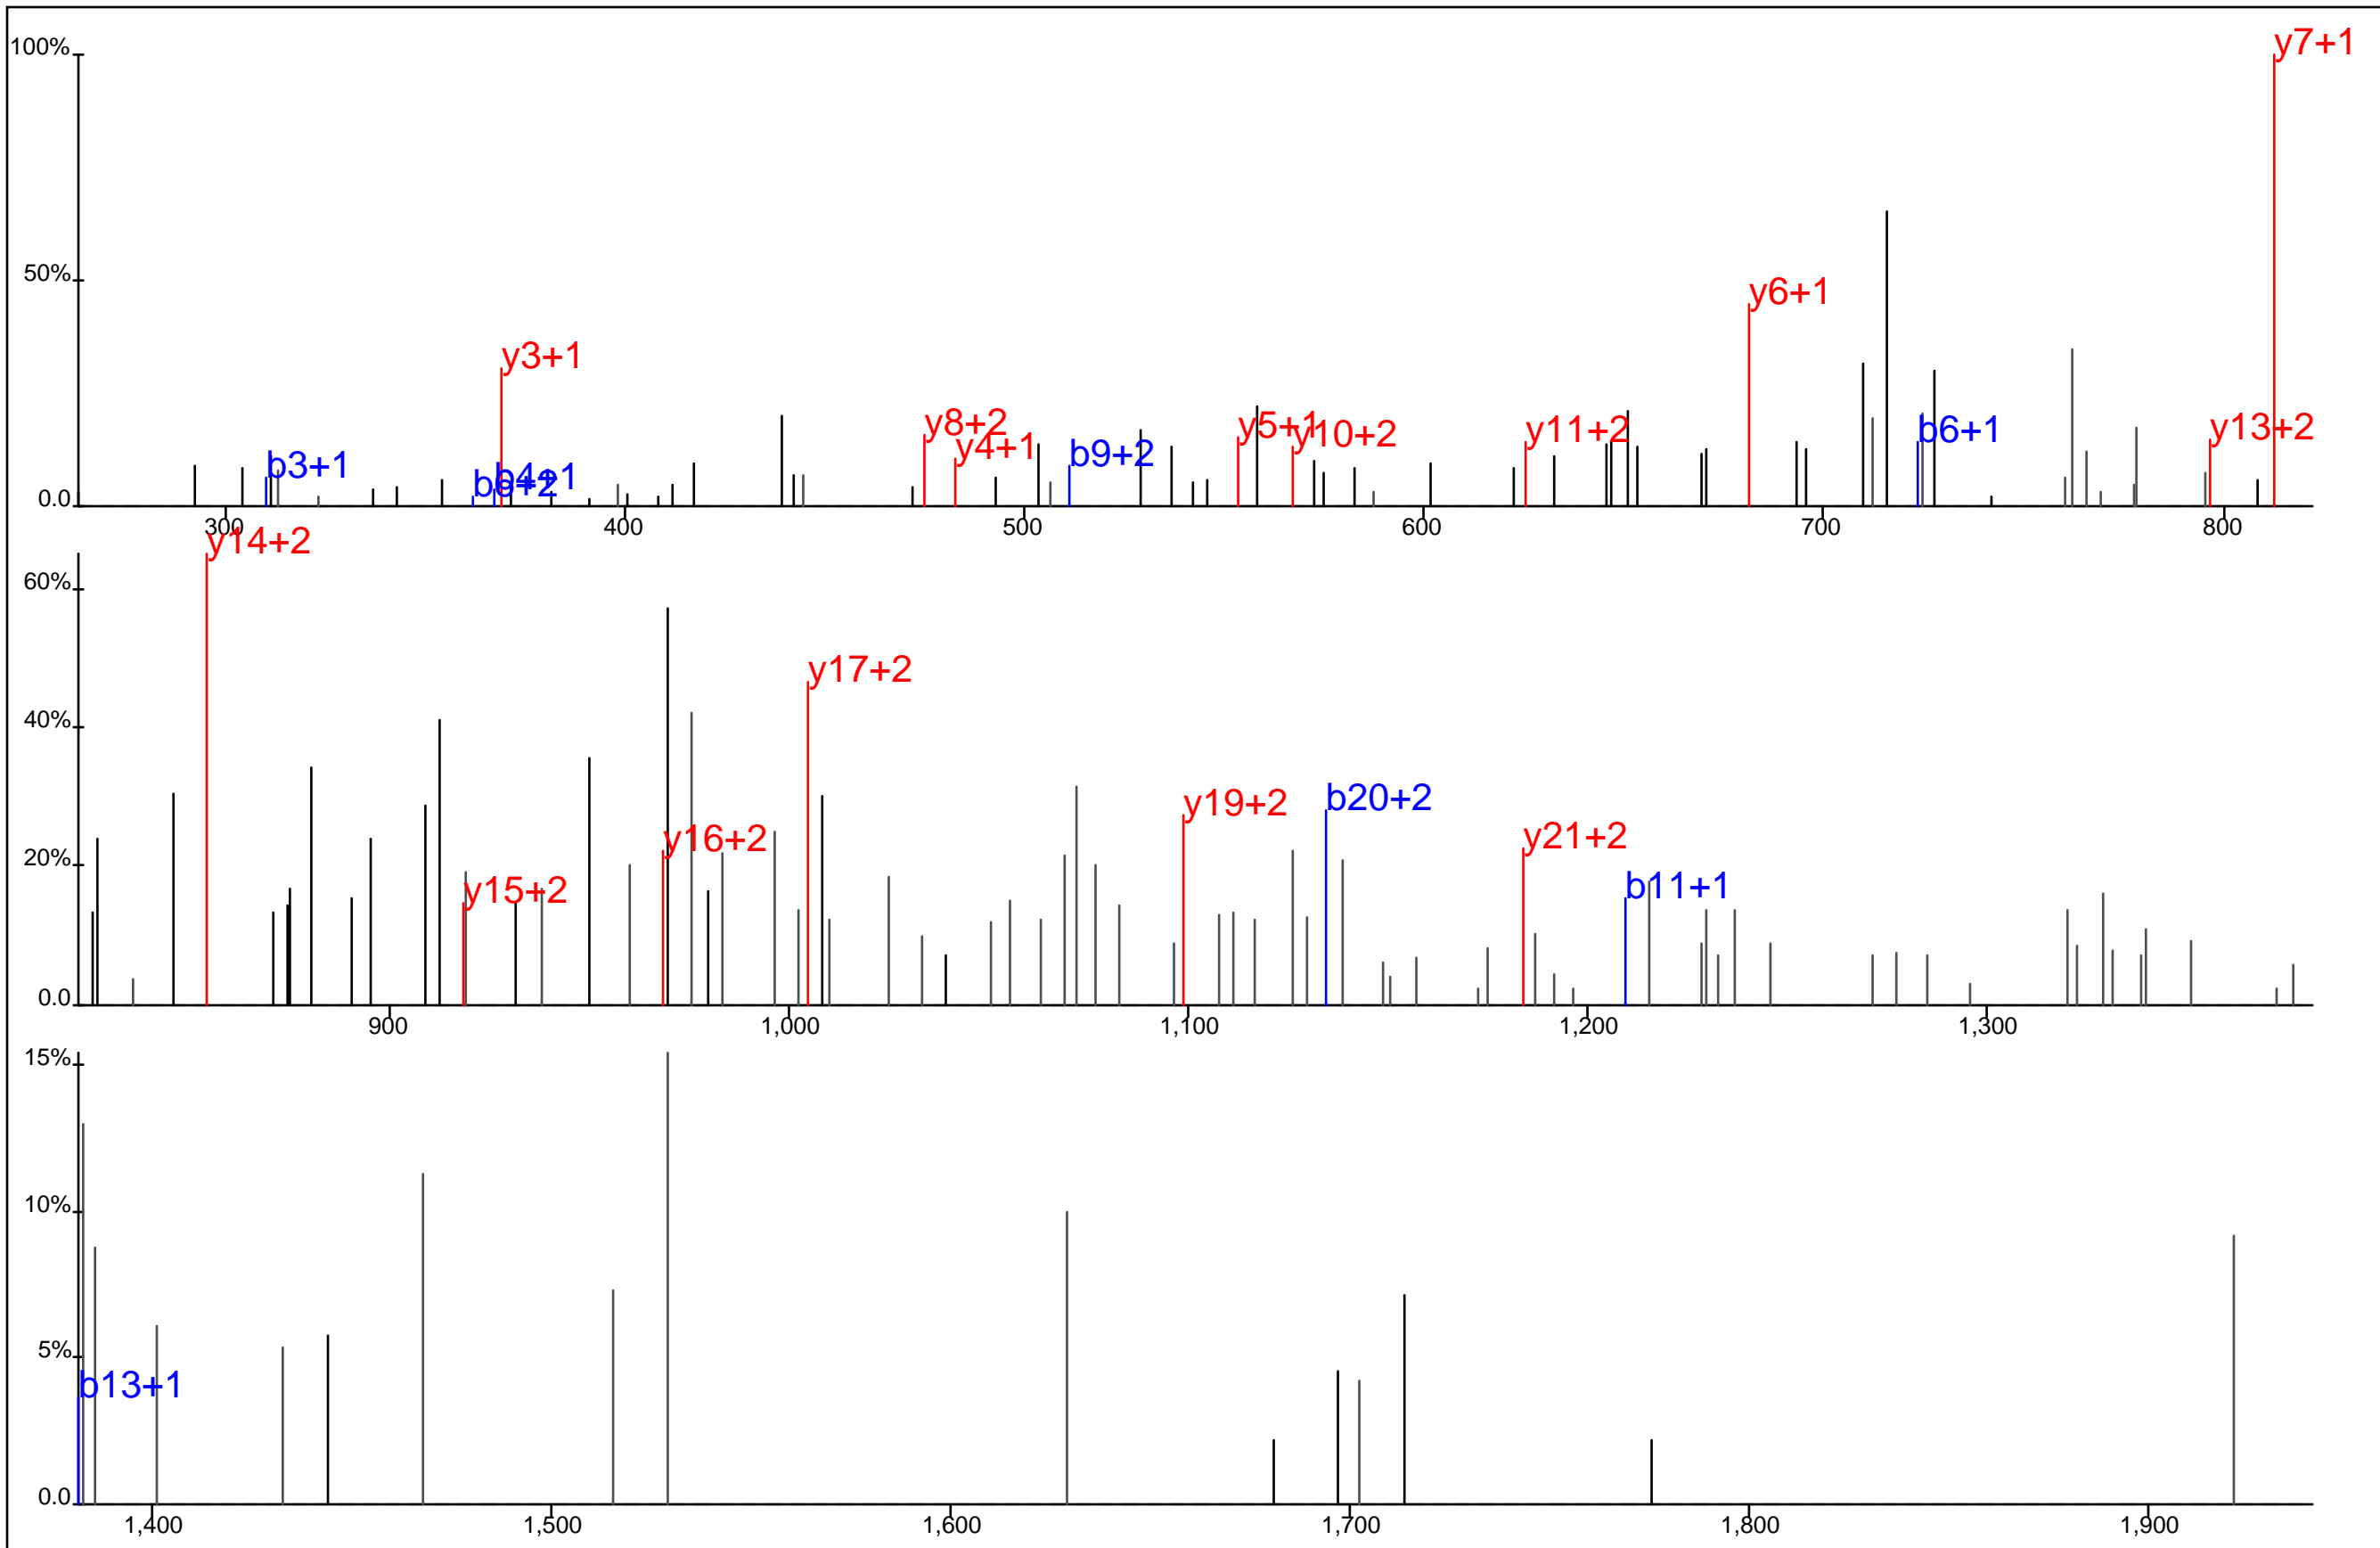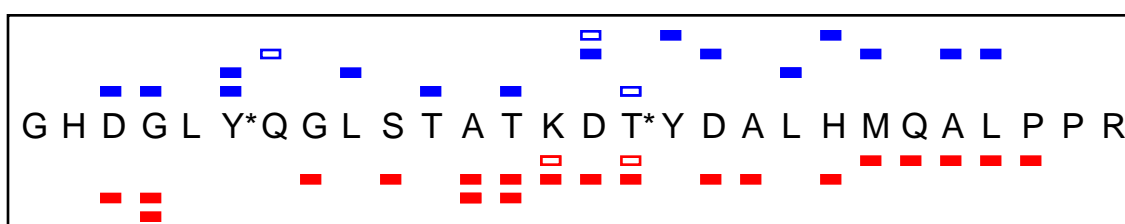

Protein Name: T cell antigen receptor, zeta  
 gi Accession: 0  
 Precursor Mass: 804.8608+4  
 Delta Mass: 0.171 ppm  
 XCorr: 21.24

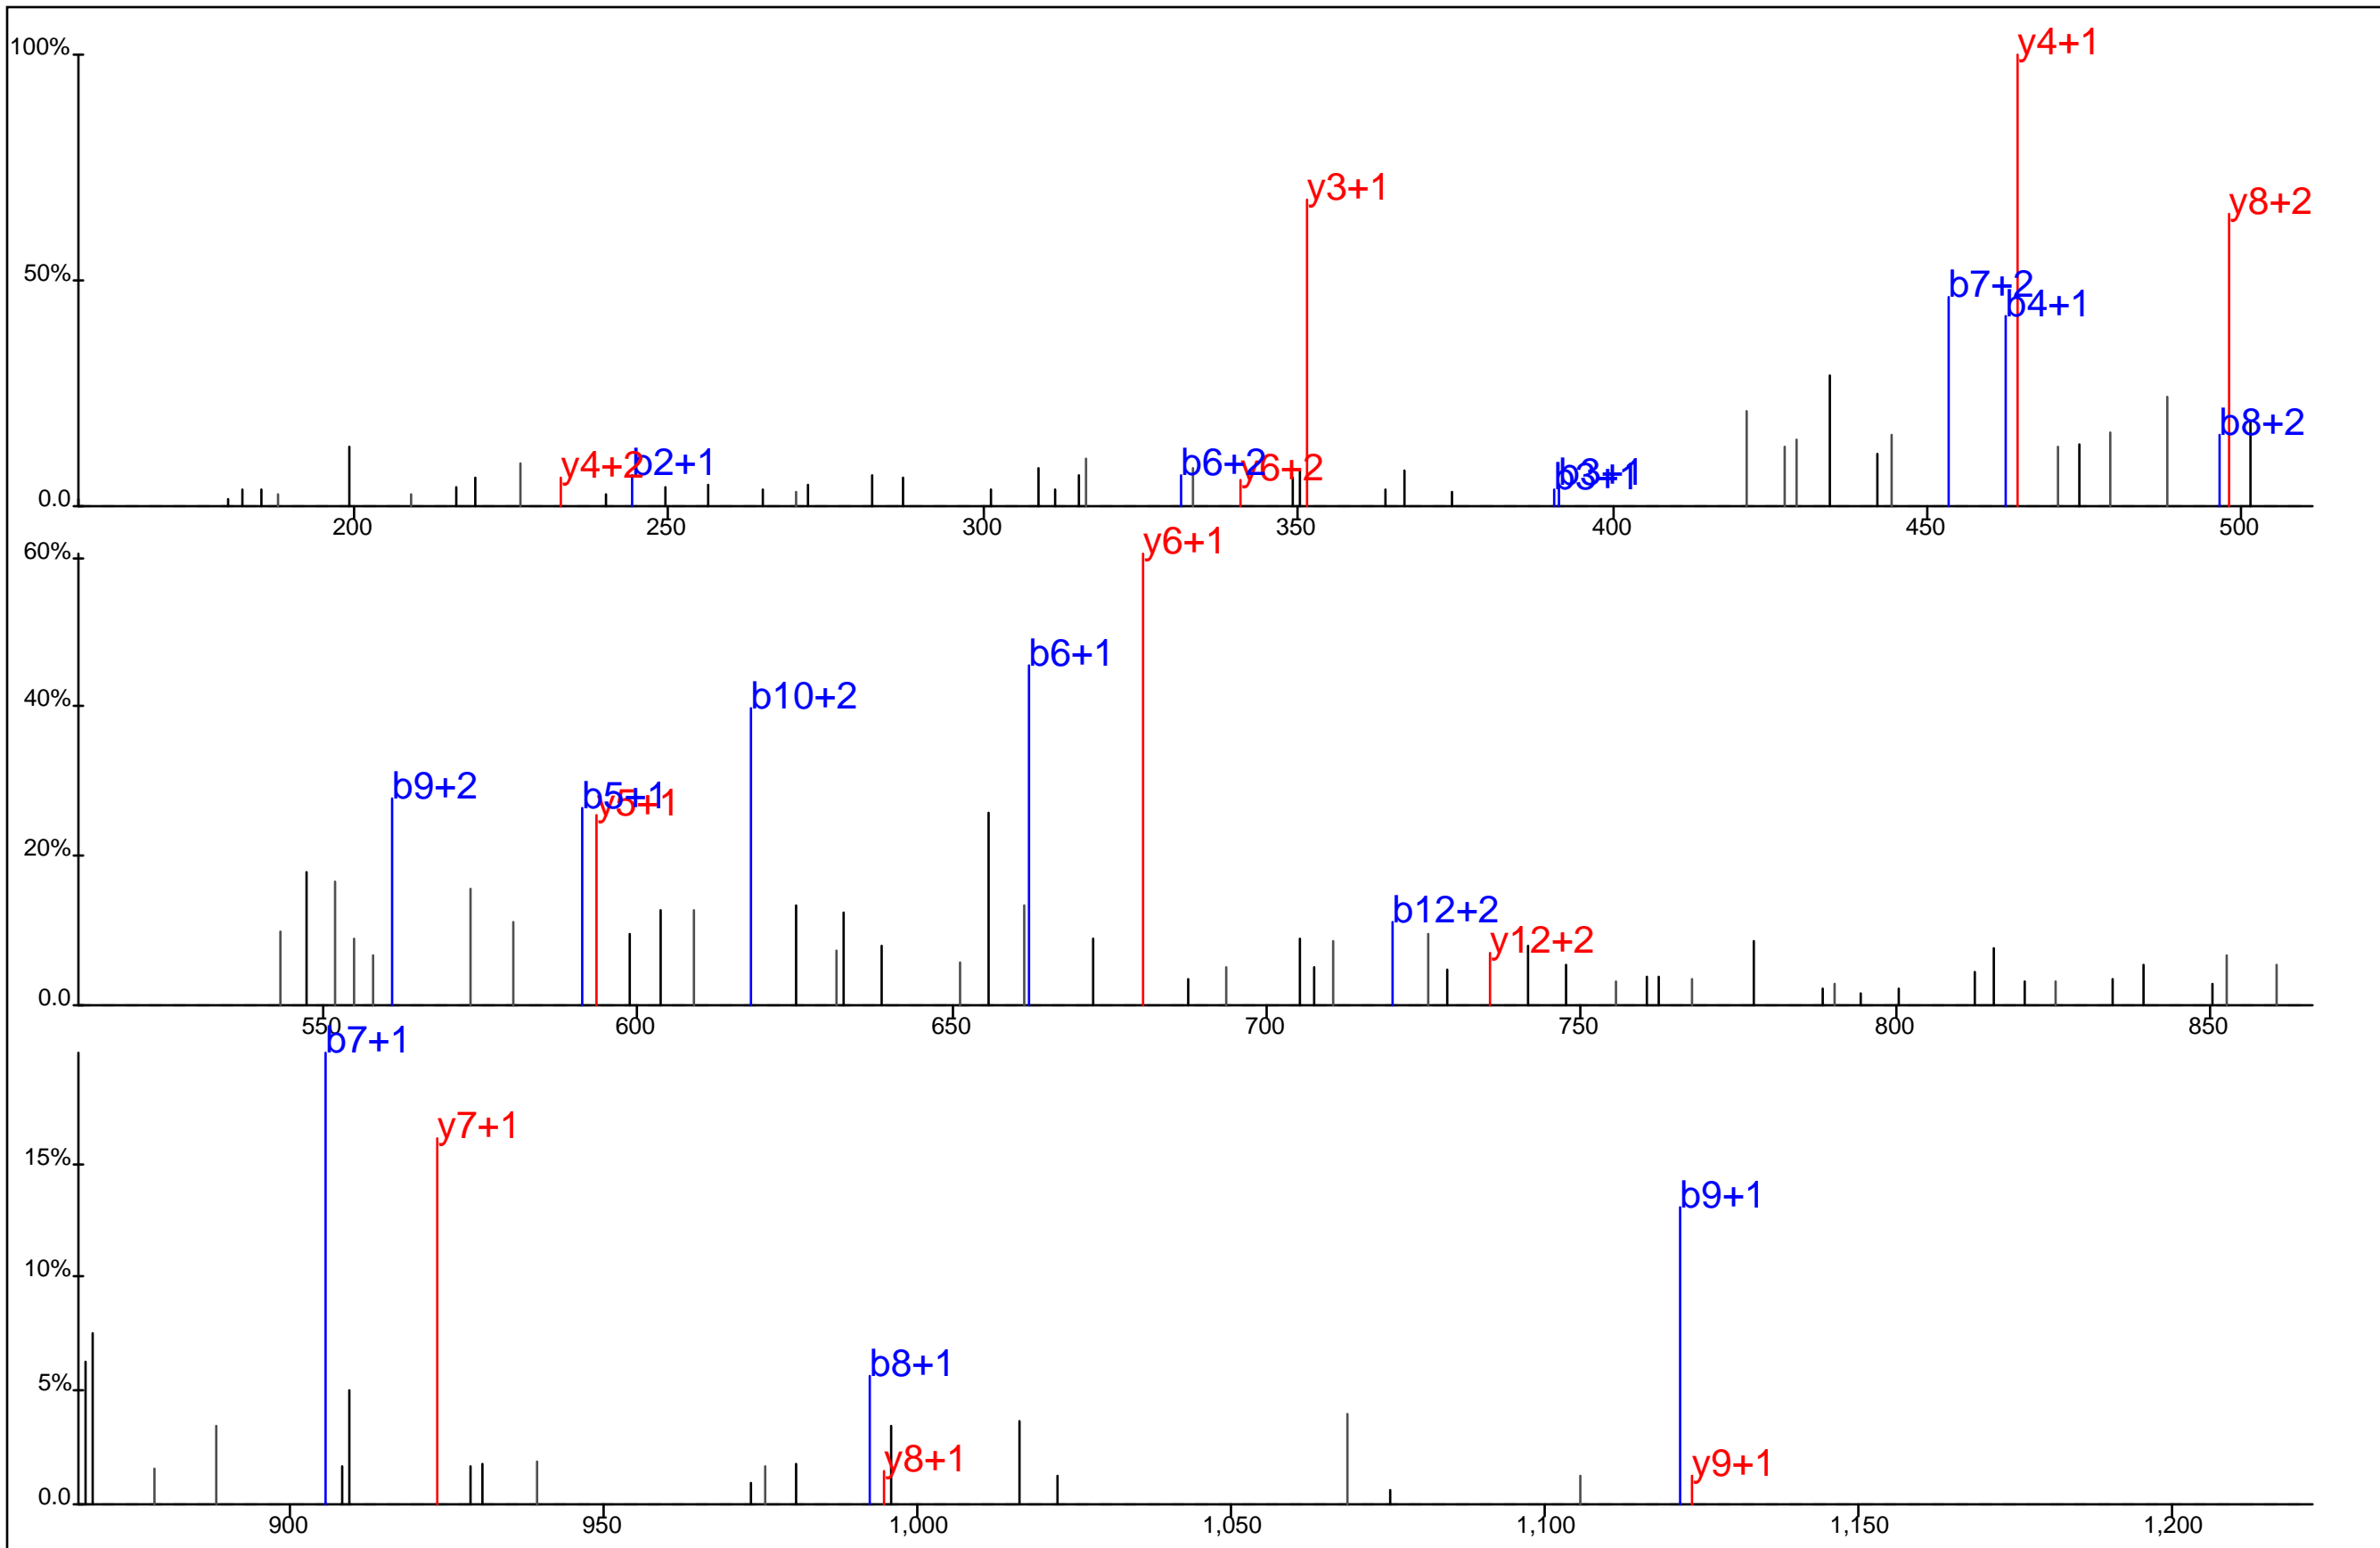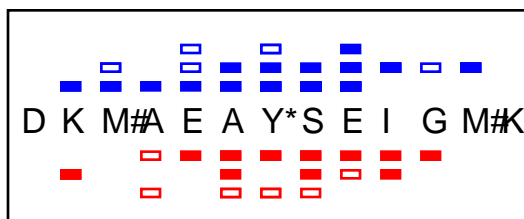

Protein Name: T cell antigen receptor, zeta  
 gi Accession: 0  
 Precursor Mass: 528.8827+3  
 Delta Mass: 0.900 ppm  
 XCorr: 40.45



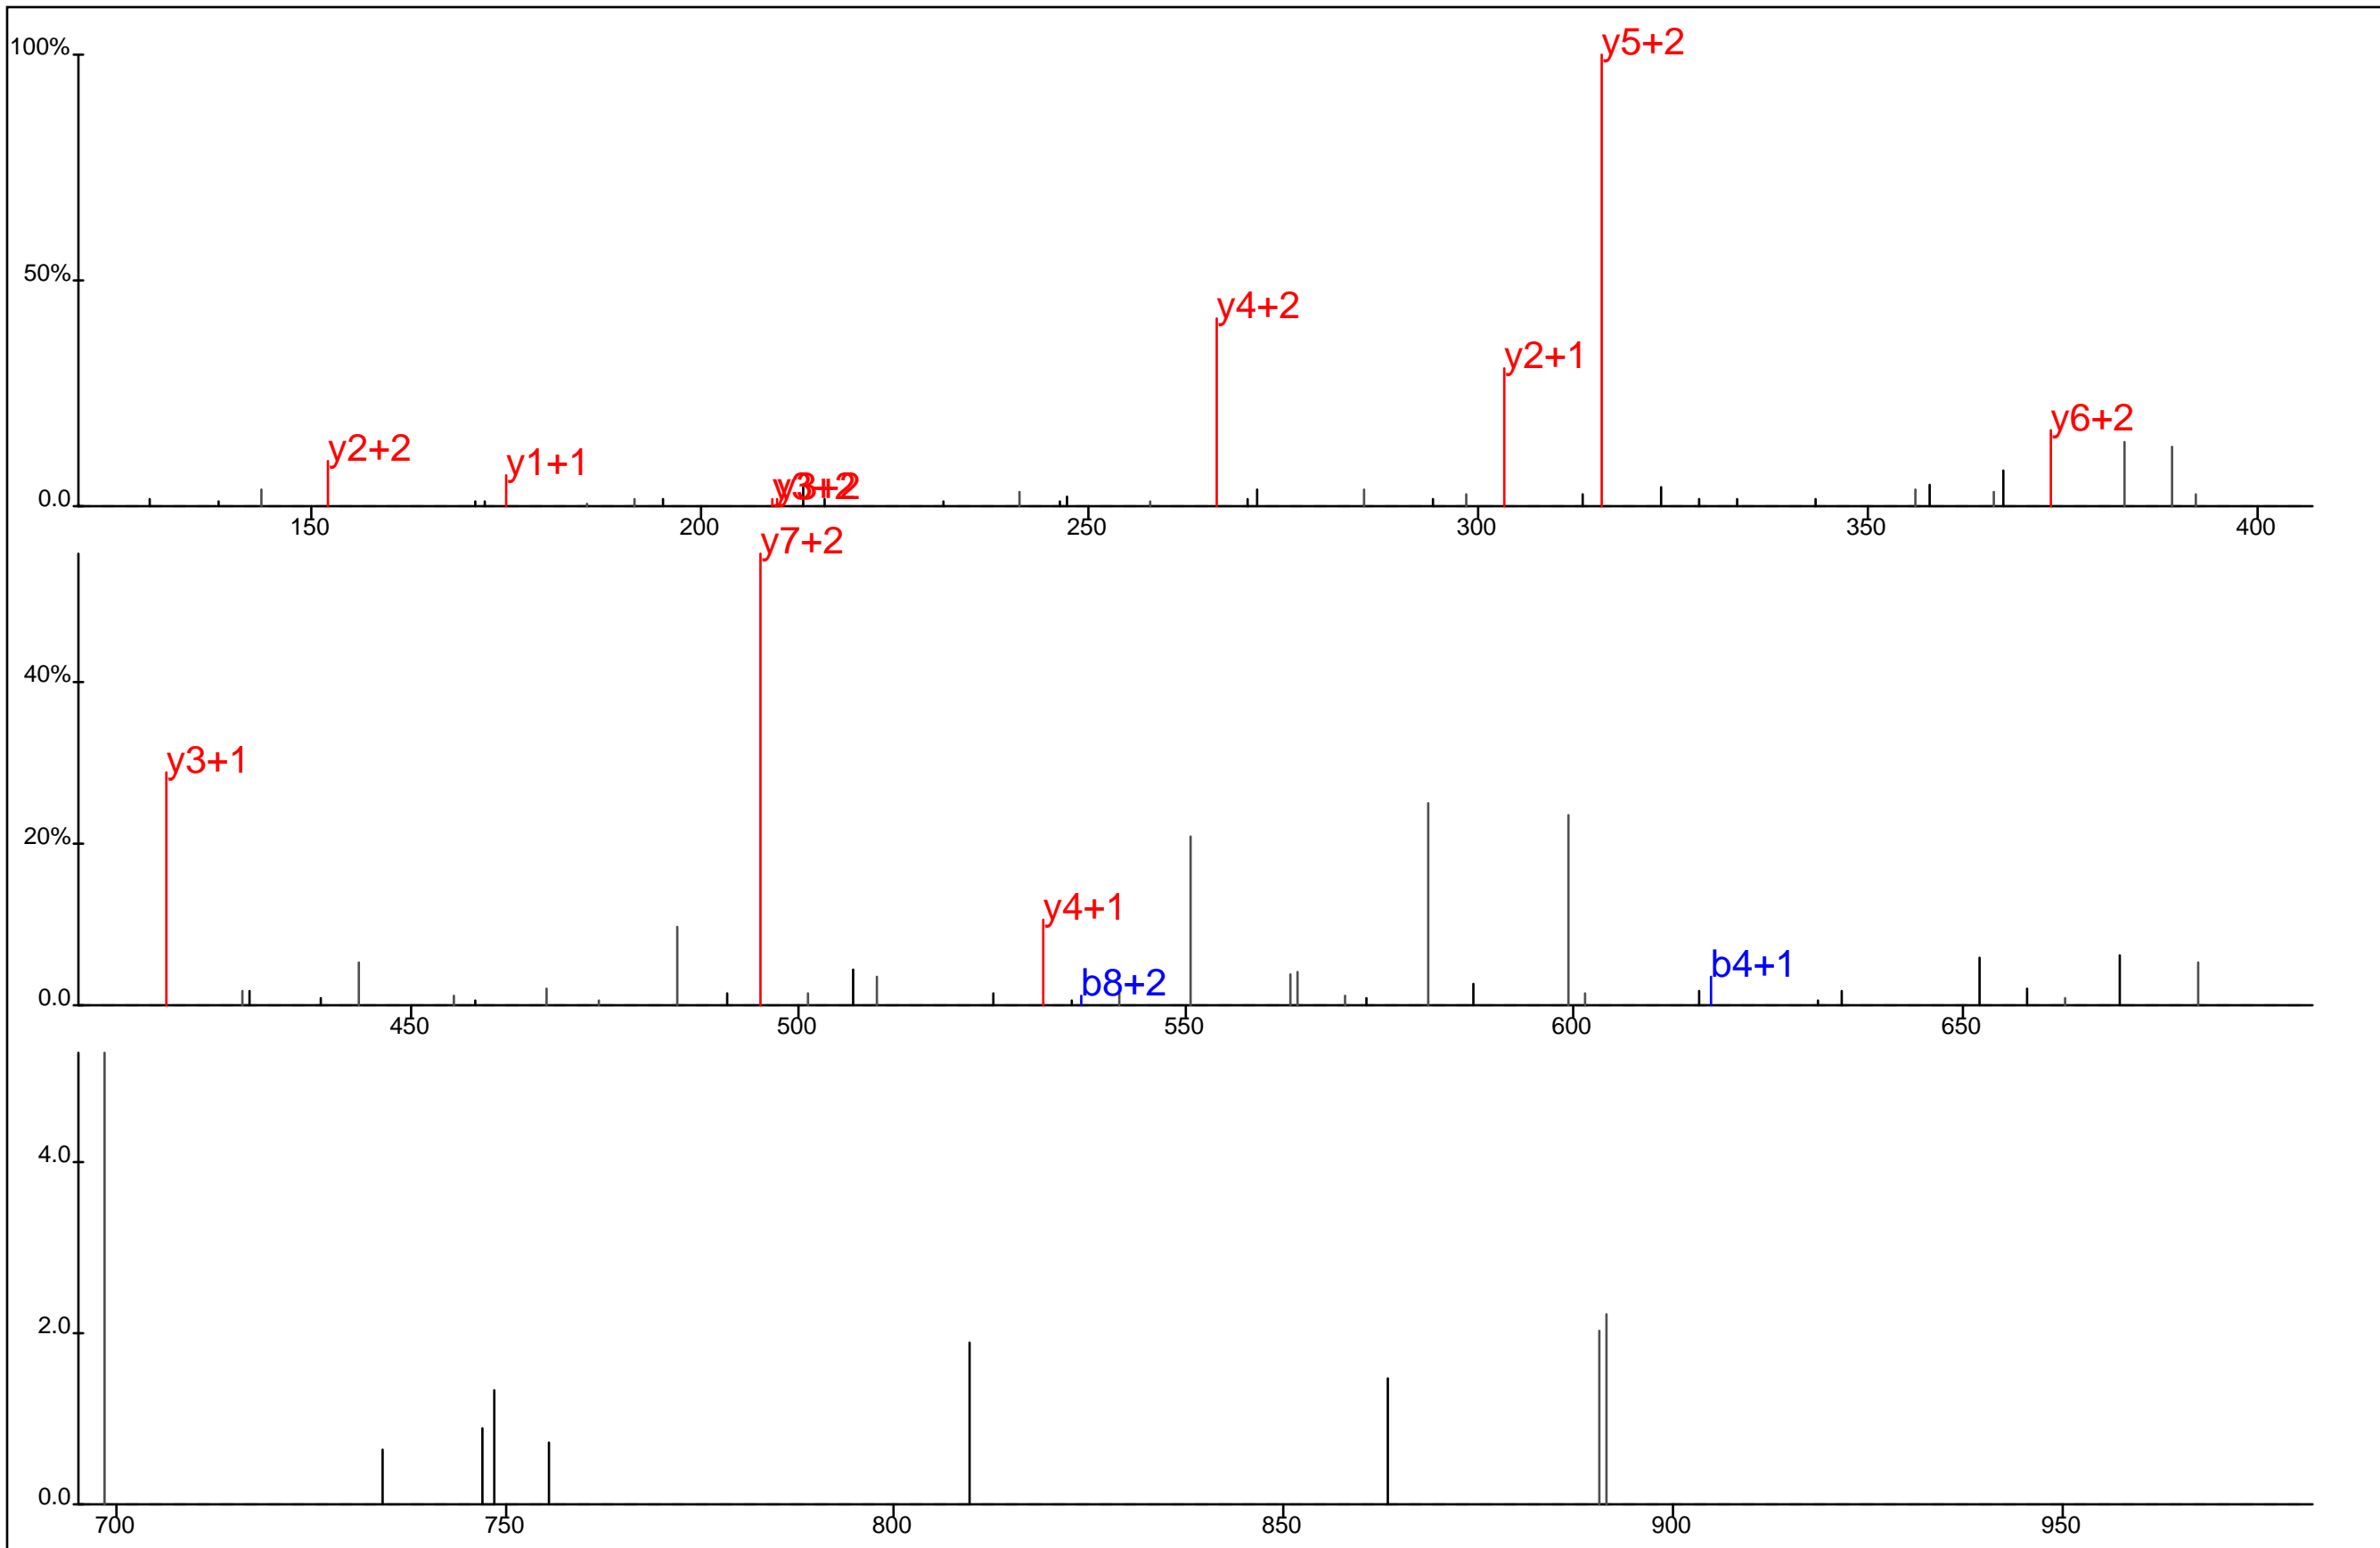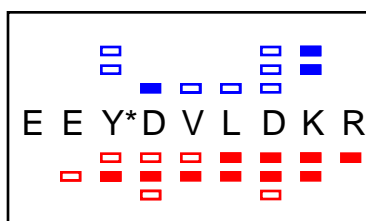

Protein Name: T cell antigen receptor, zeta  
 gi Accession: 0  
 Precursor Mass: 416.1836+3  
 Delta Mass: 0.985 ppm  
 XCorr: 23.36

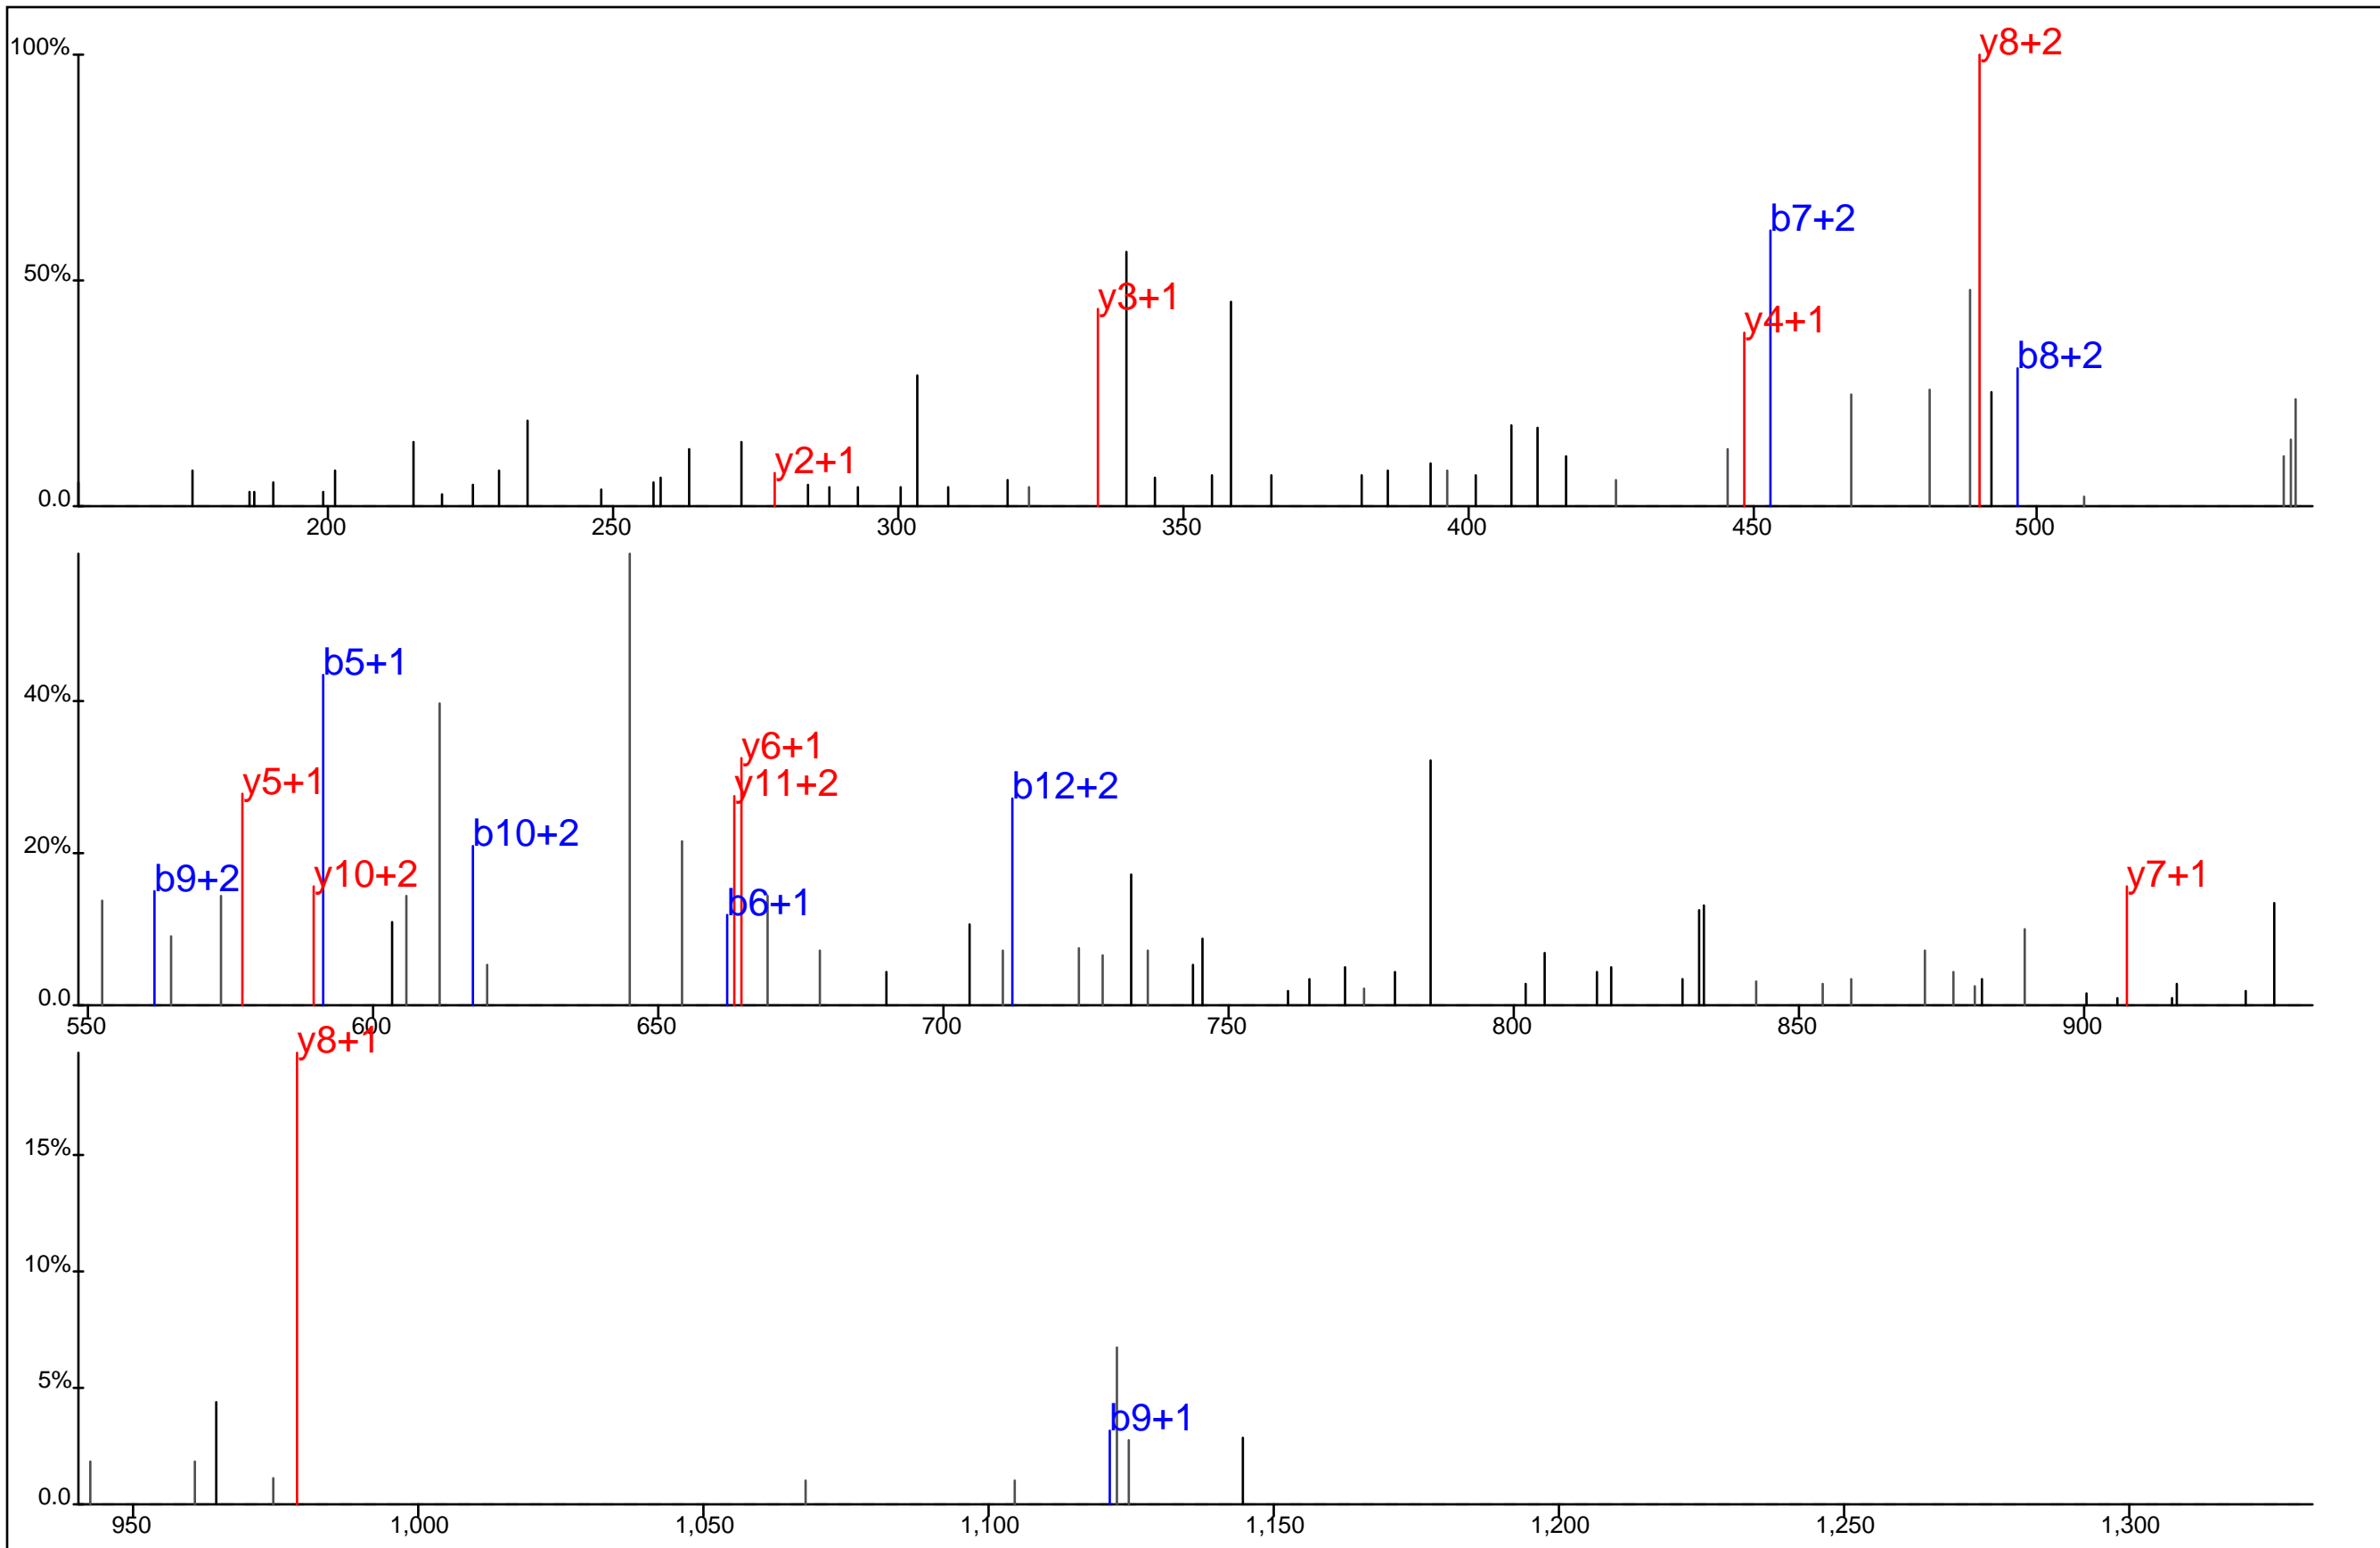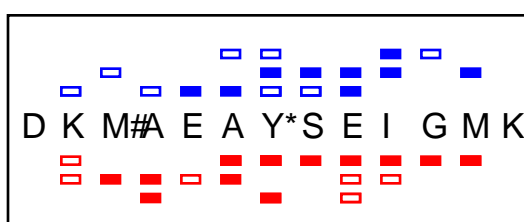

Protein Name: T cell antigen receptor, zeta  
 gi Accession: 0  
 Precursor Mass: 523.5503+3  
 Delta Mass: 0.539 ppm  
 XCorr: 22.99

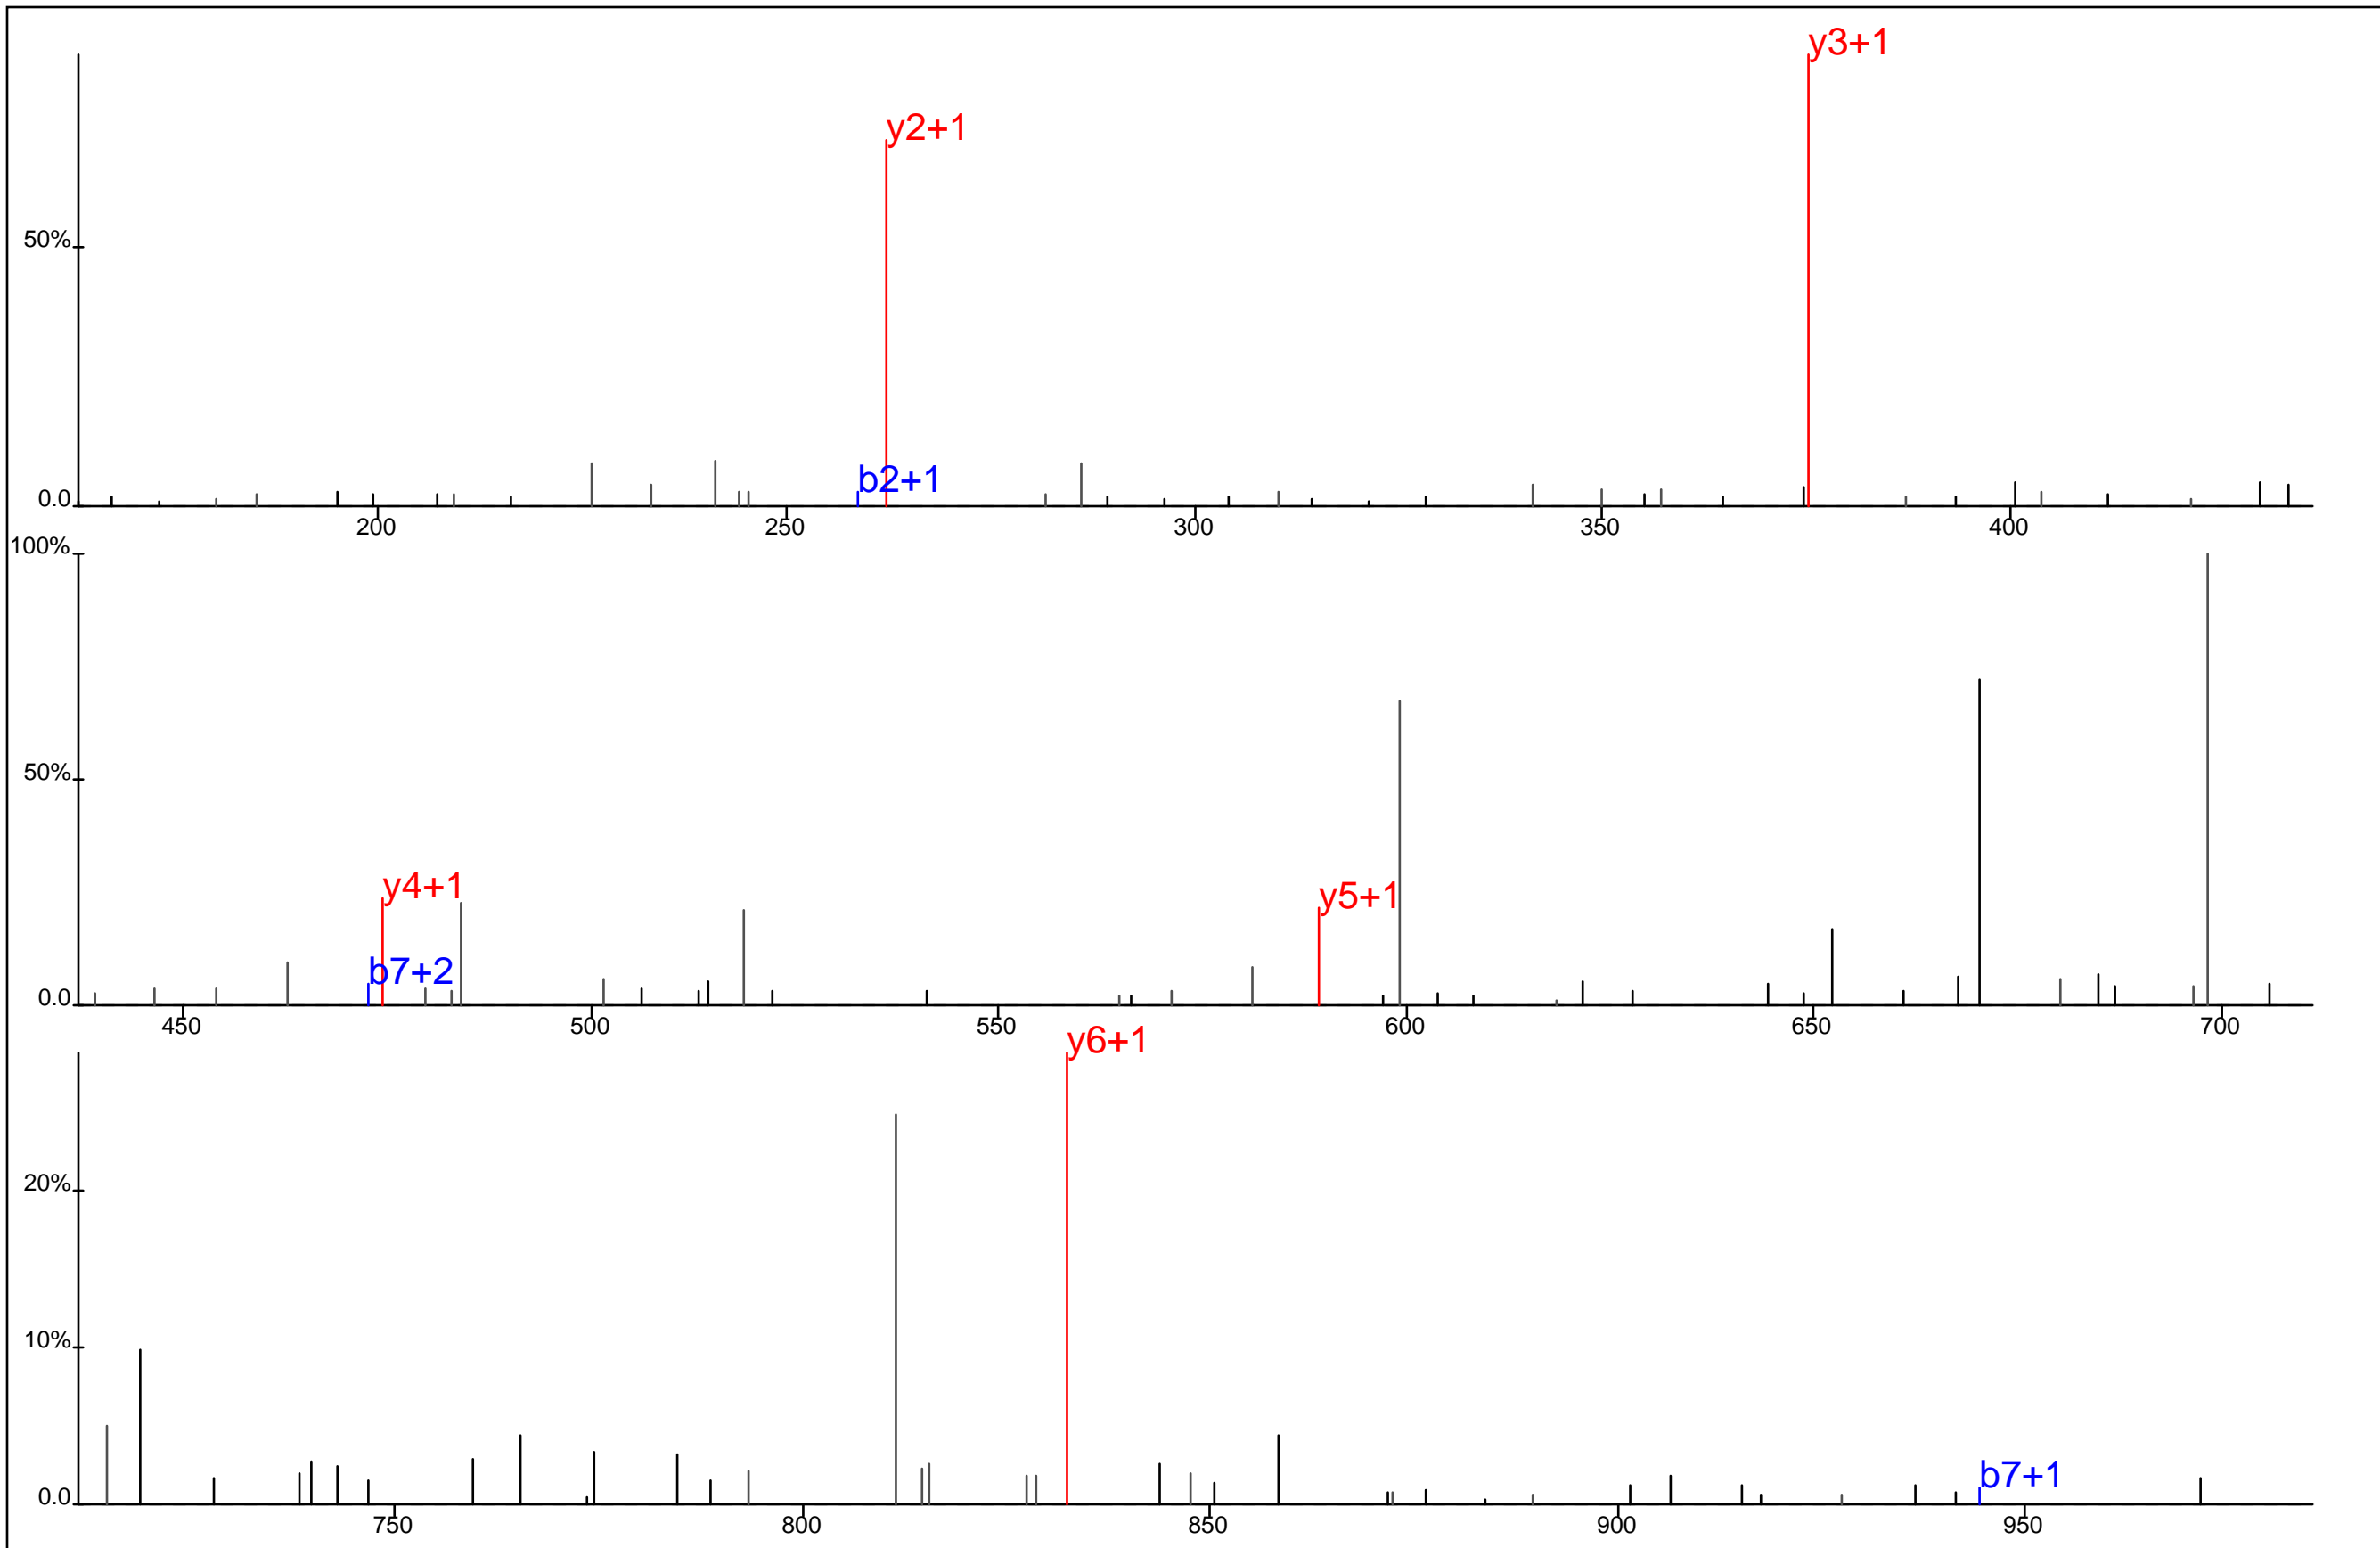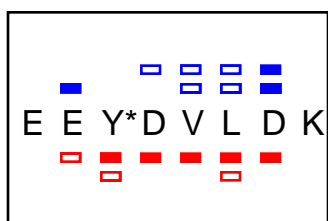

Protein Name: T cell antigen receptor, zeta  
 gi Accession: 0  
 Precursor Mass: 545.7203+2  
 Delta Mass: 0.545 ppm  
 XCorr: 21.93



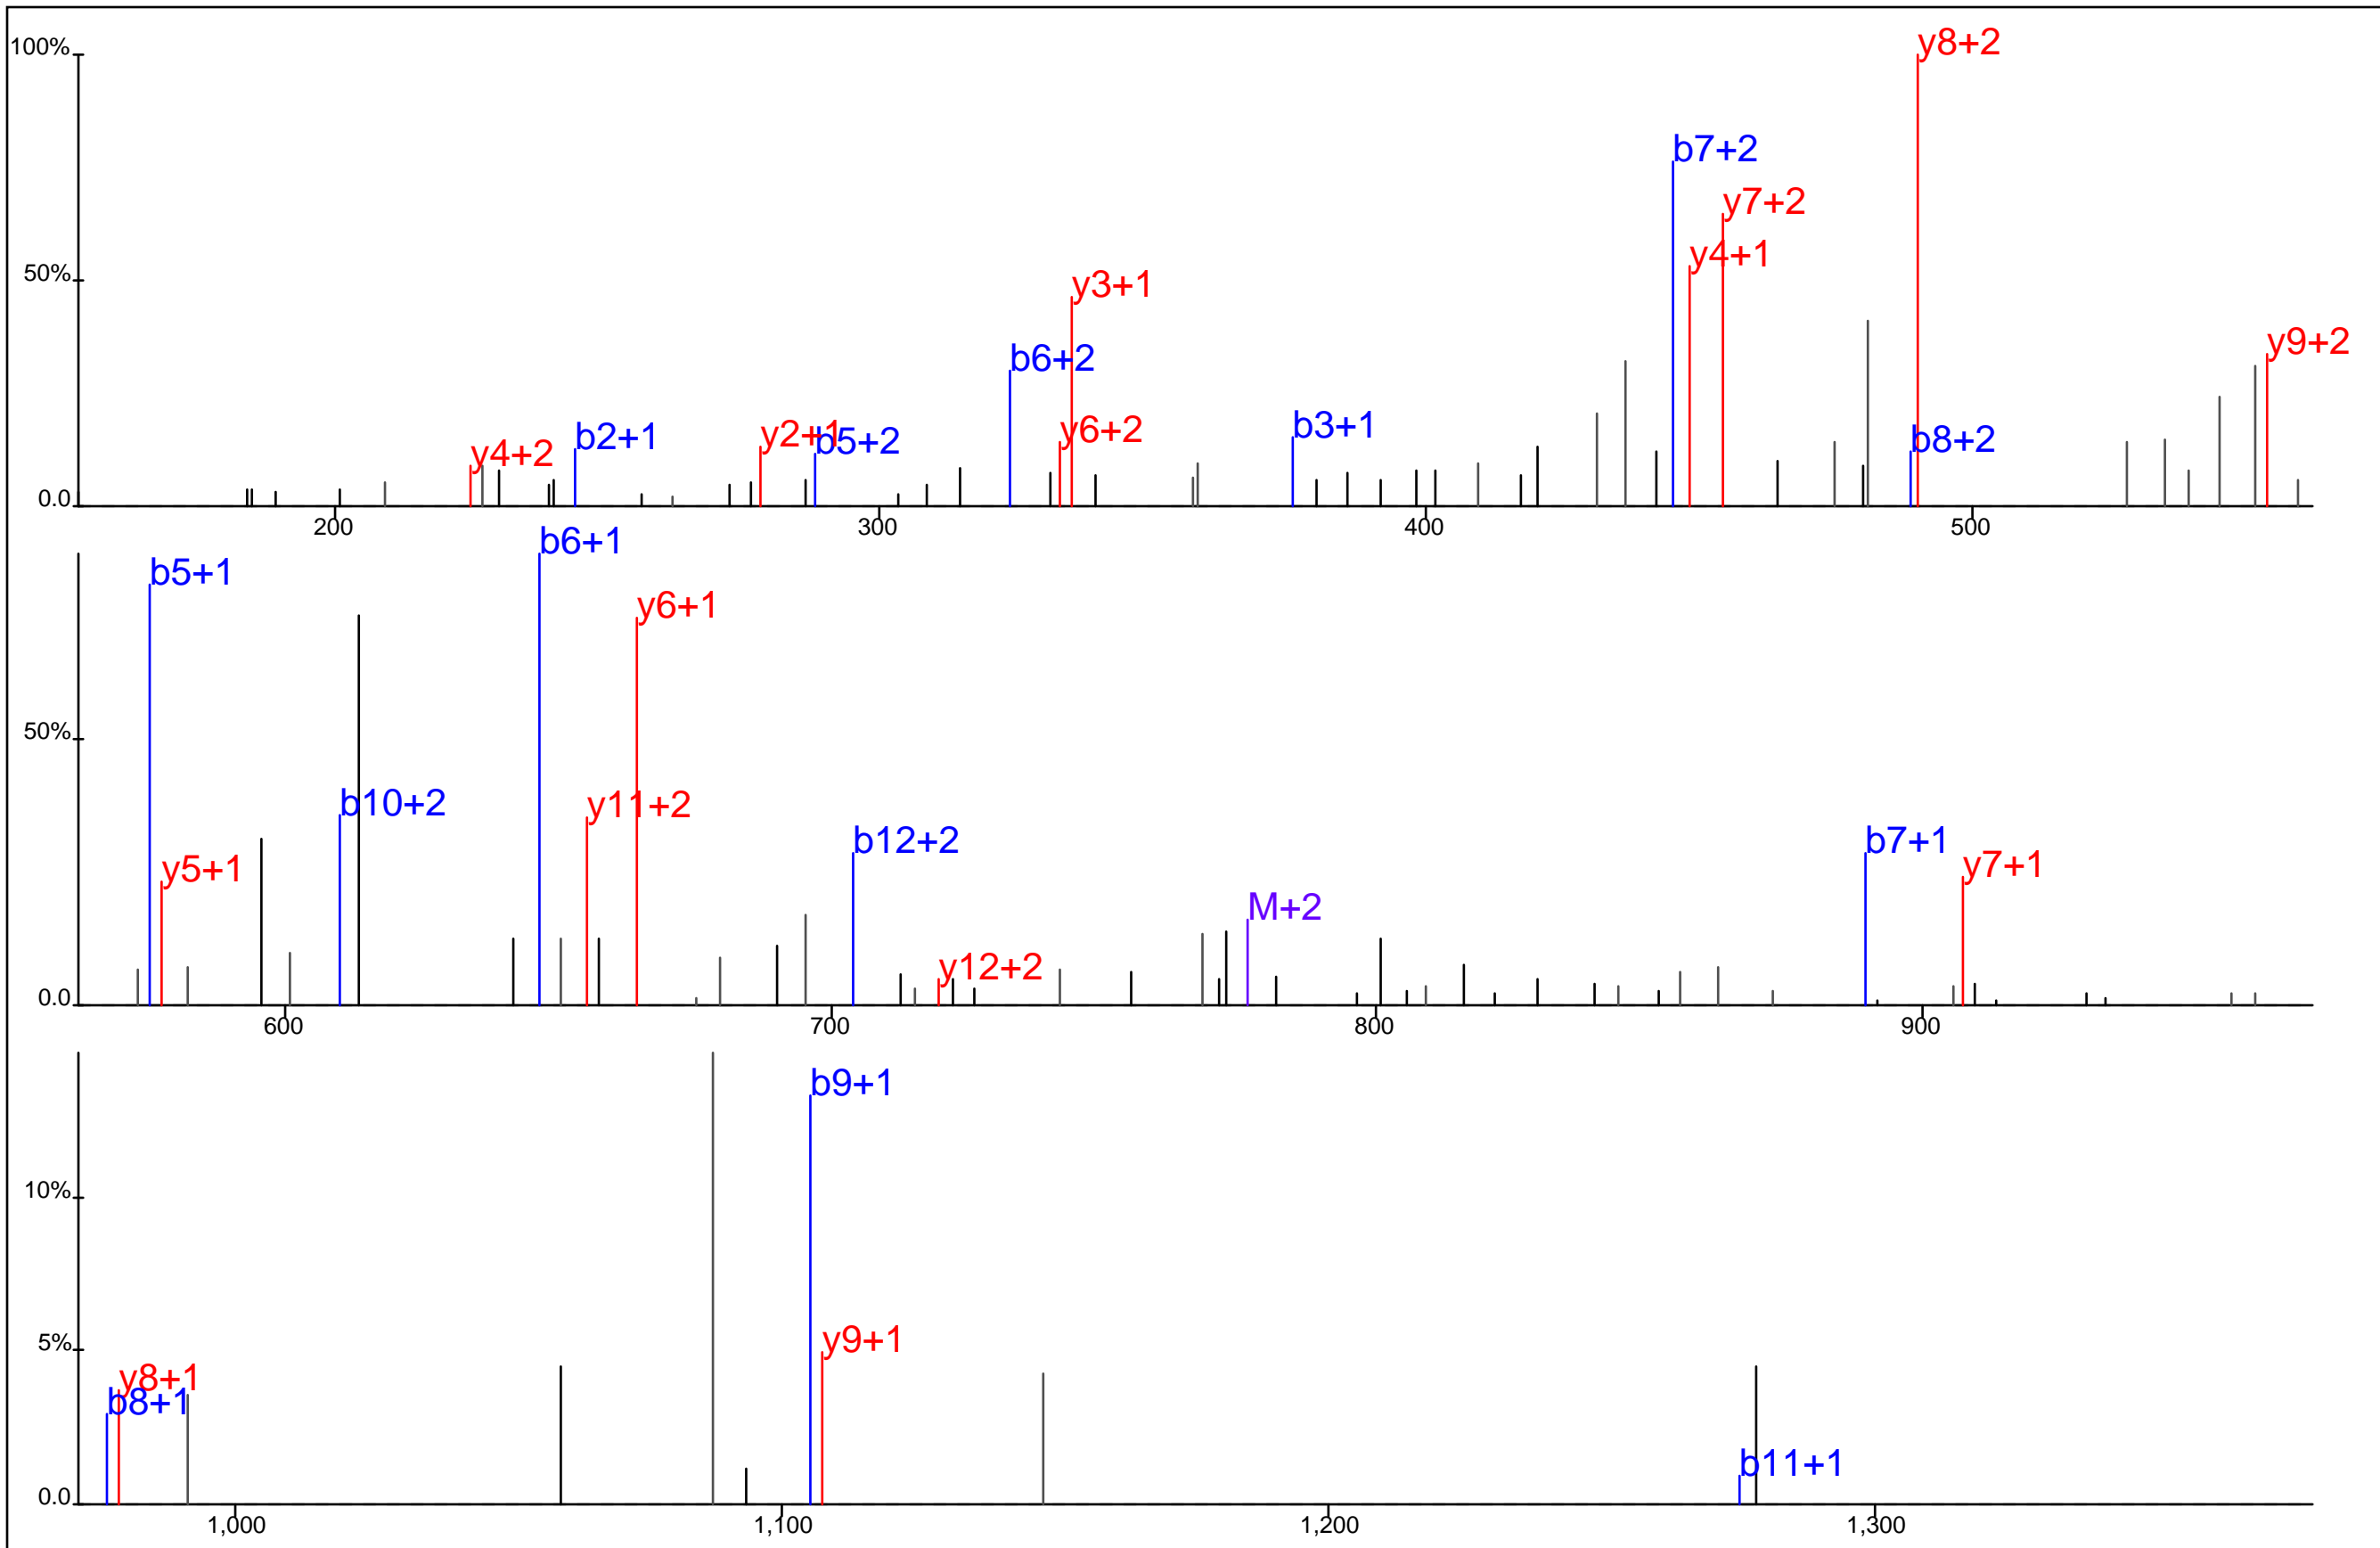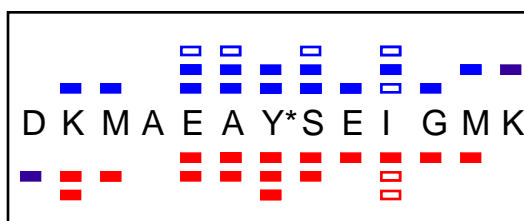

Protein Name: T cell antigen receptor, zeta  
 gi Accession: 0  
 Precursor Mass: 518.2192+3  
 Delta Mass: 0.468 ppm  
 XCorr: 59.5

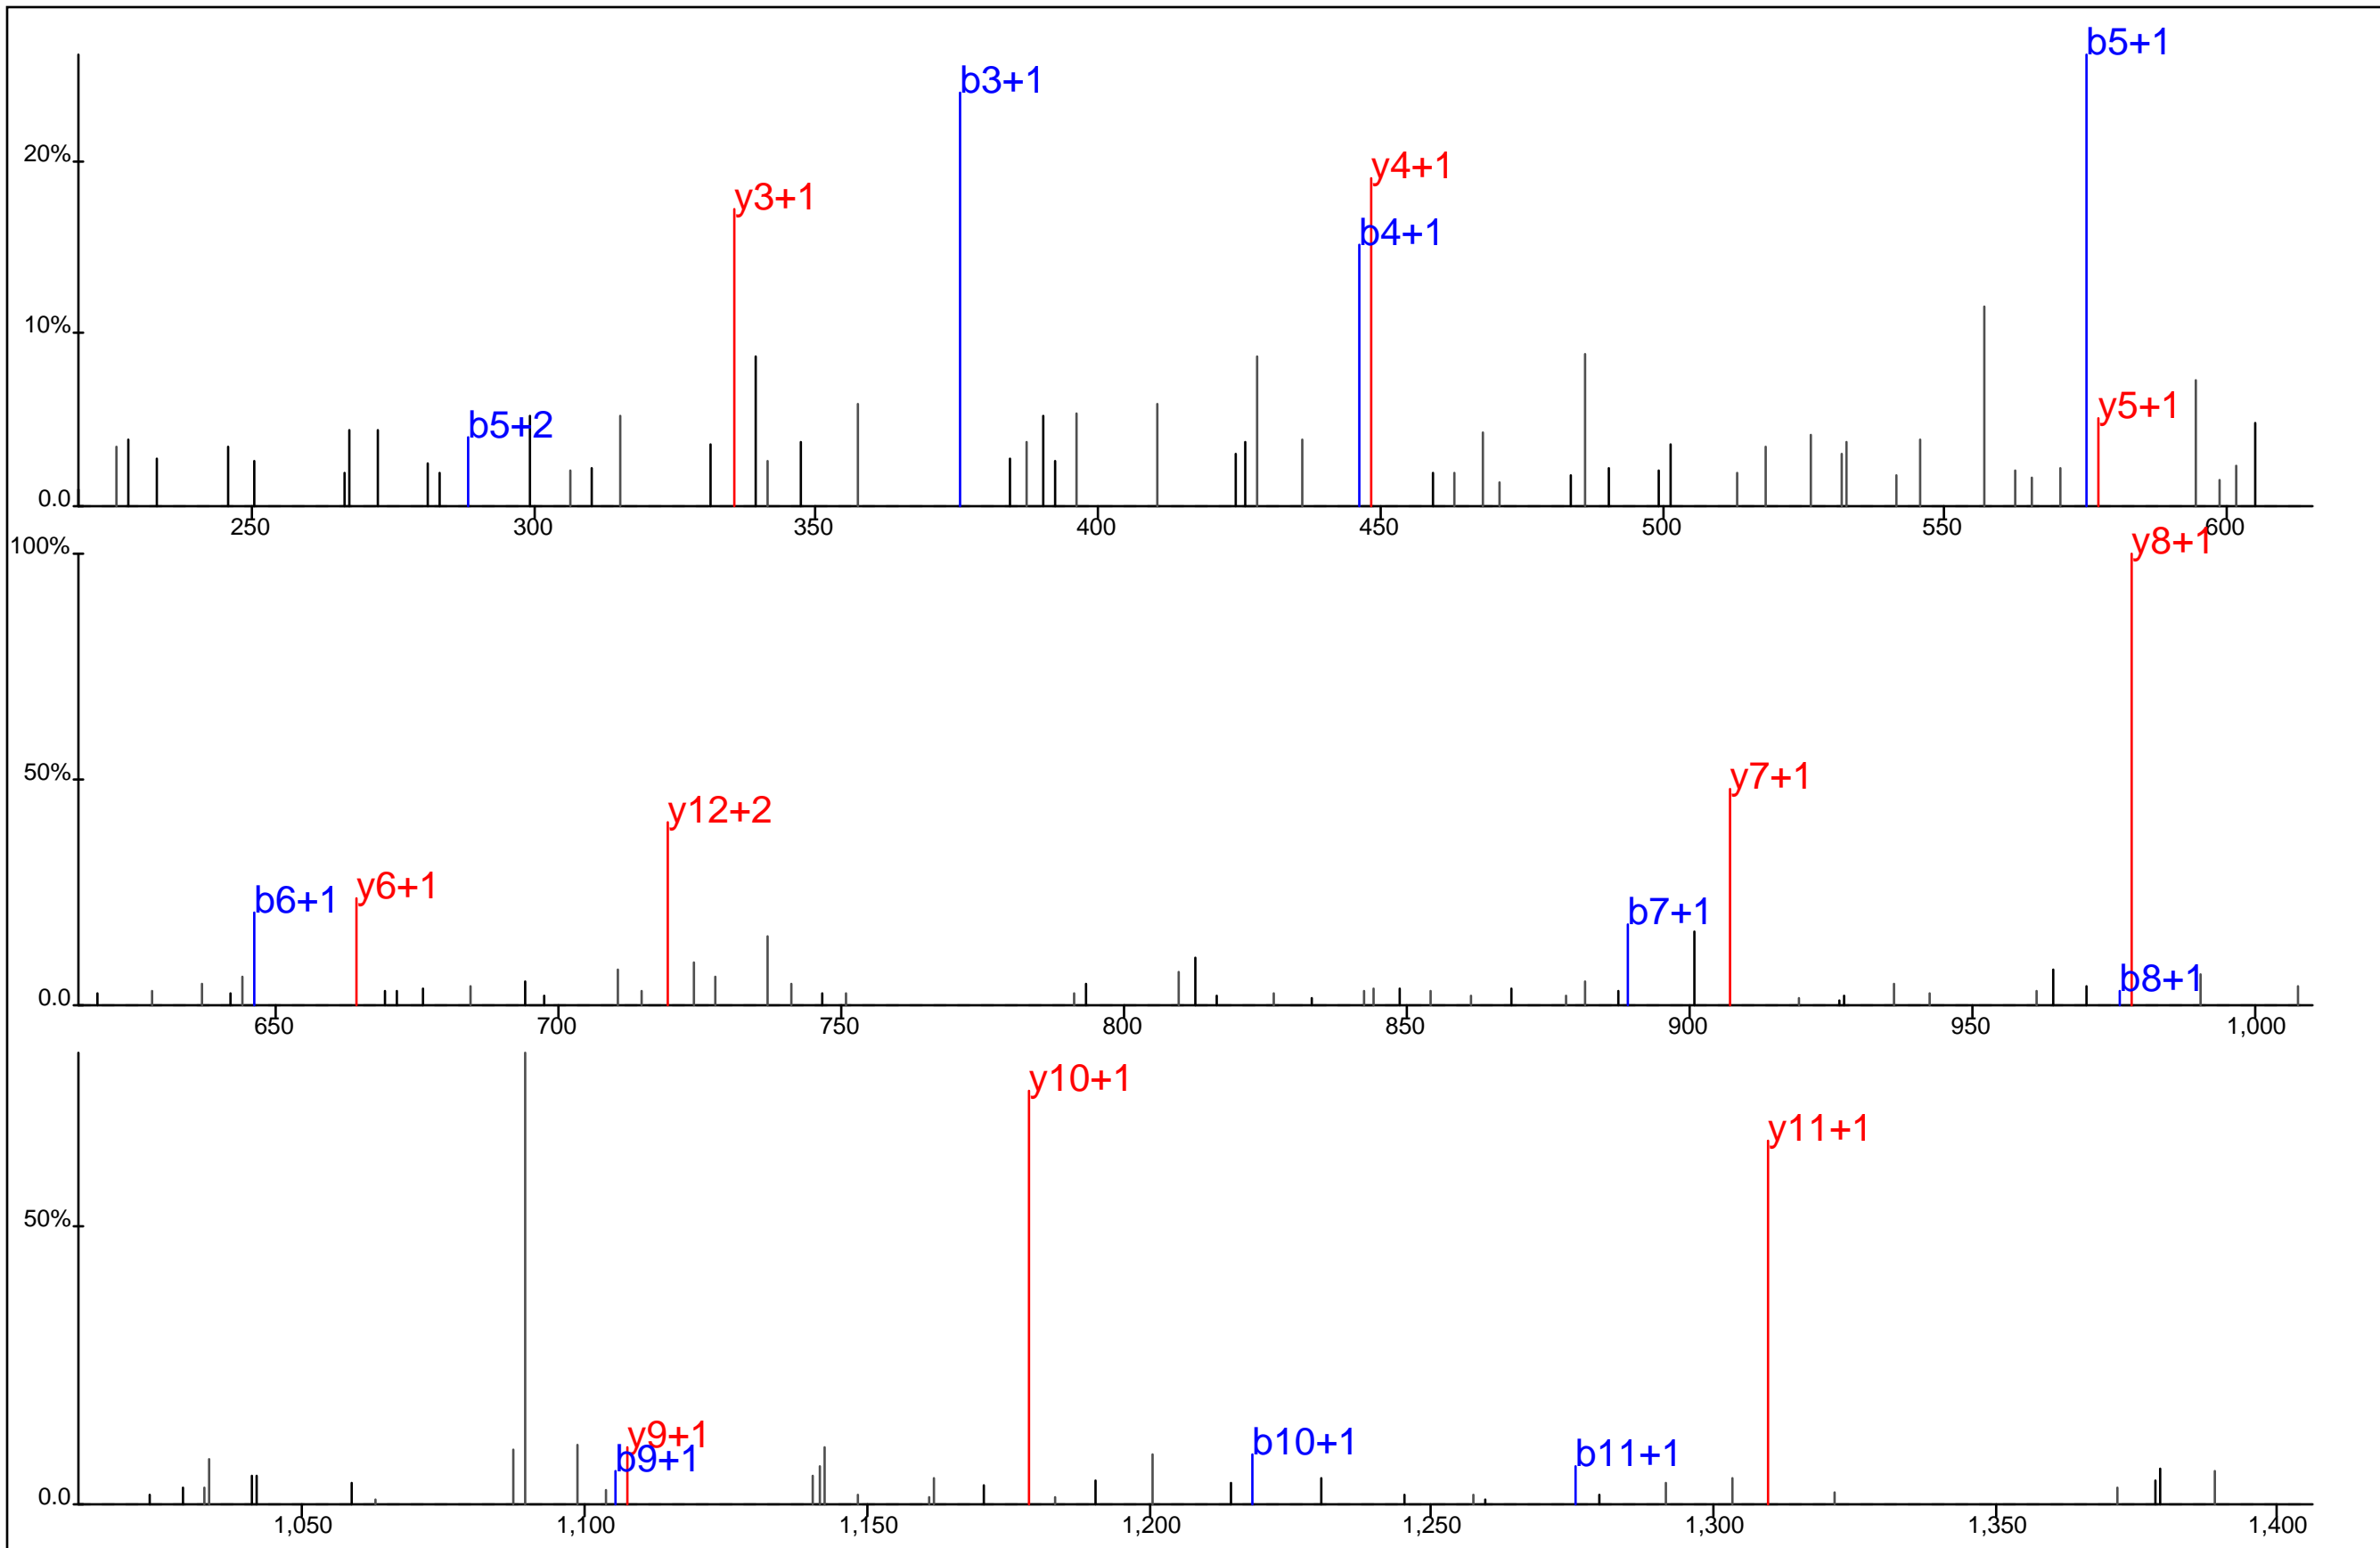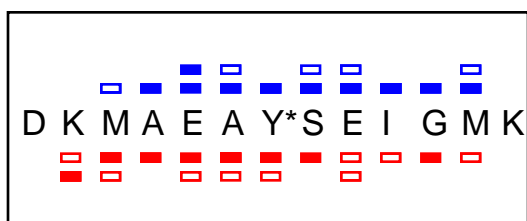

Protein Name: T cell antigen receptor, zeta  
 gi Accession: 0  
 Precursor Mass: 776.8235+2  
 Delta Mass: 1.646 ppm  
 XCorr: 58.05

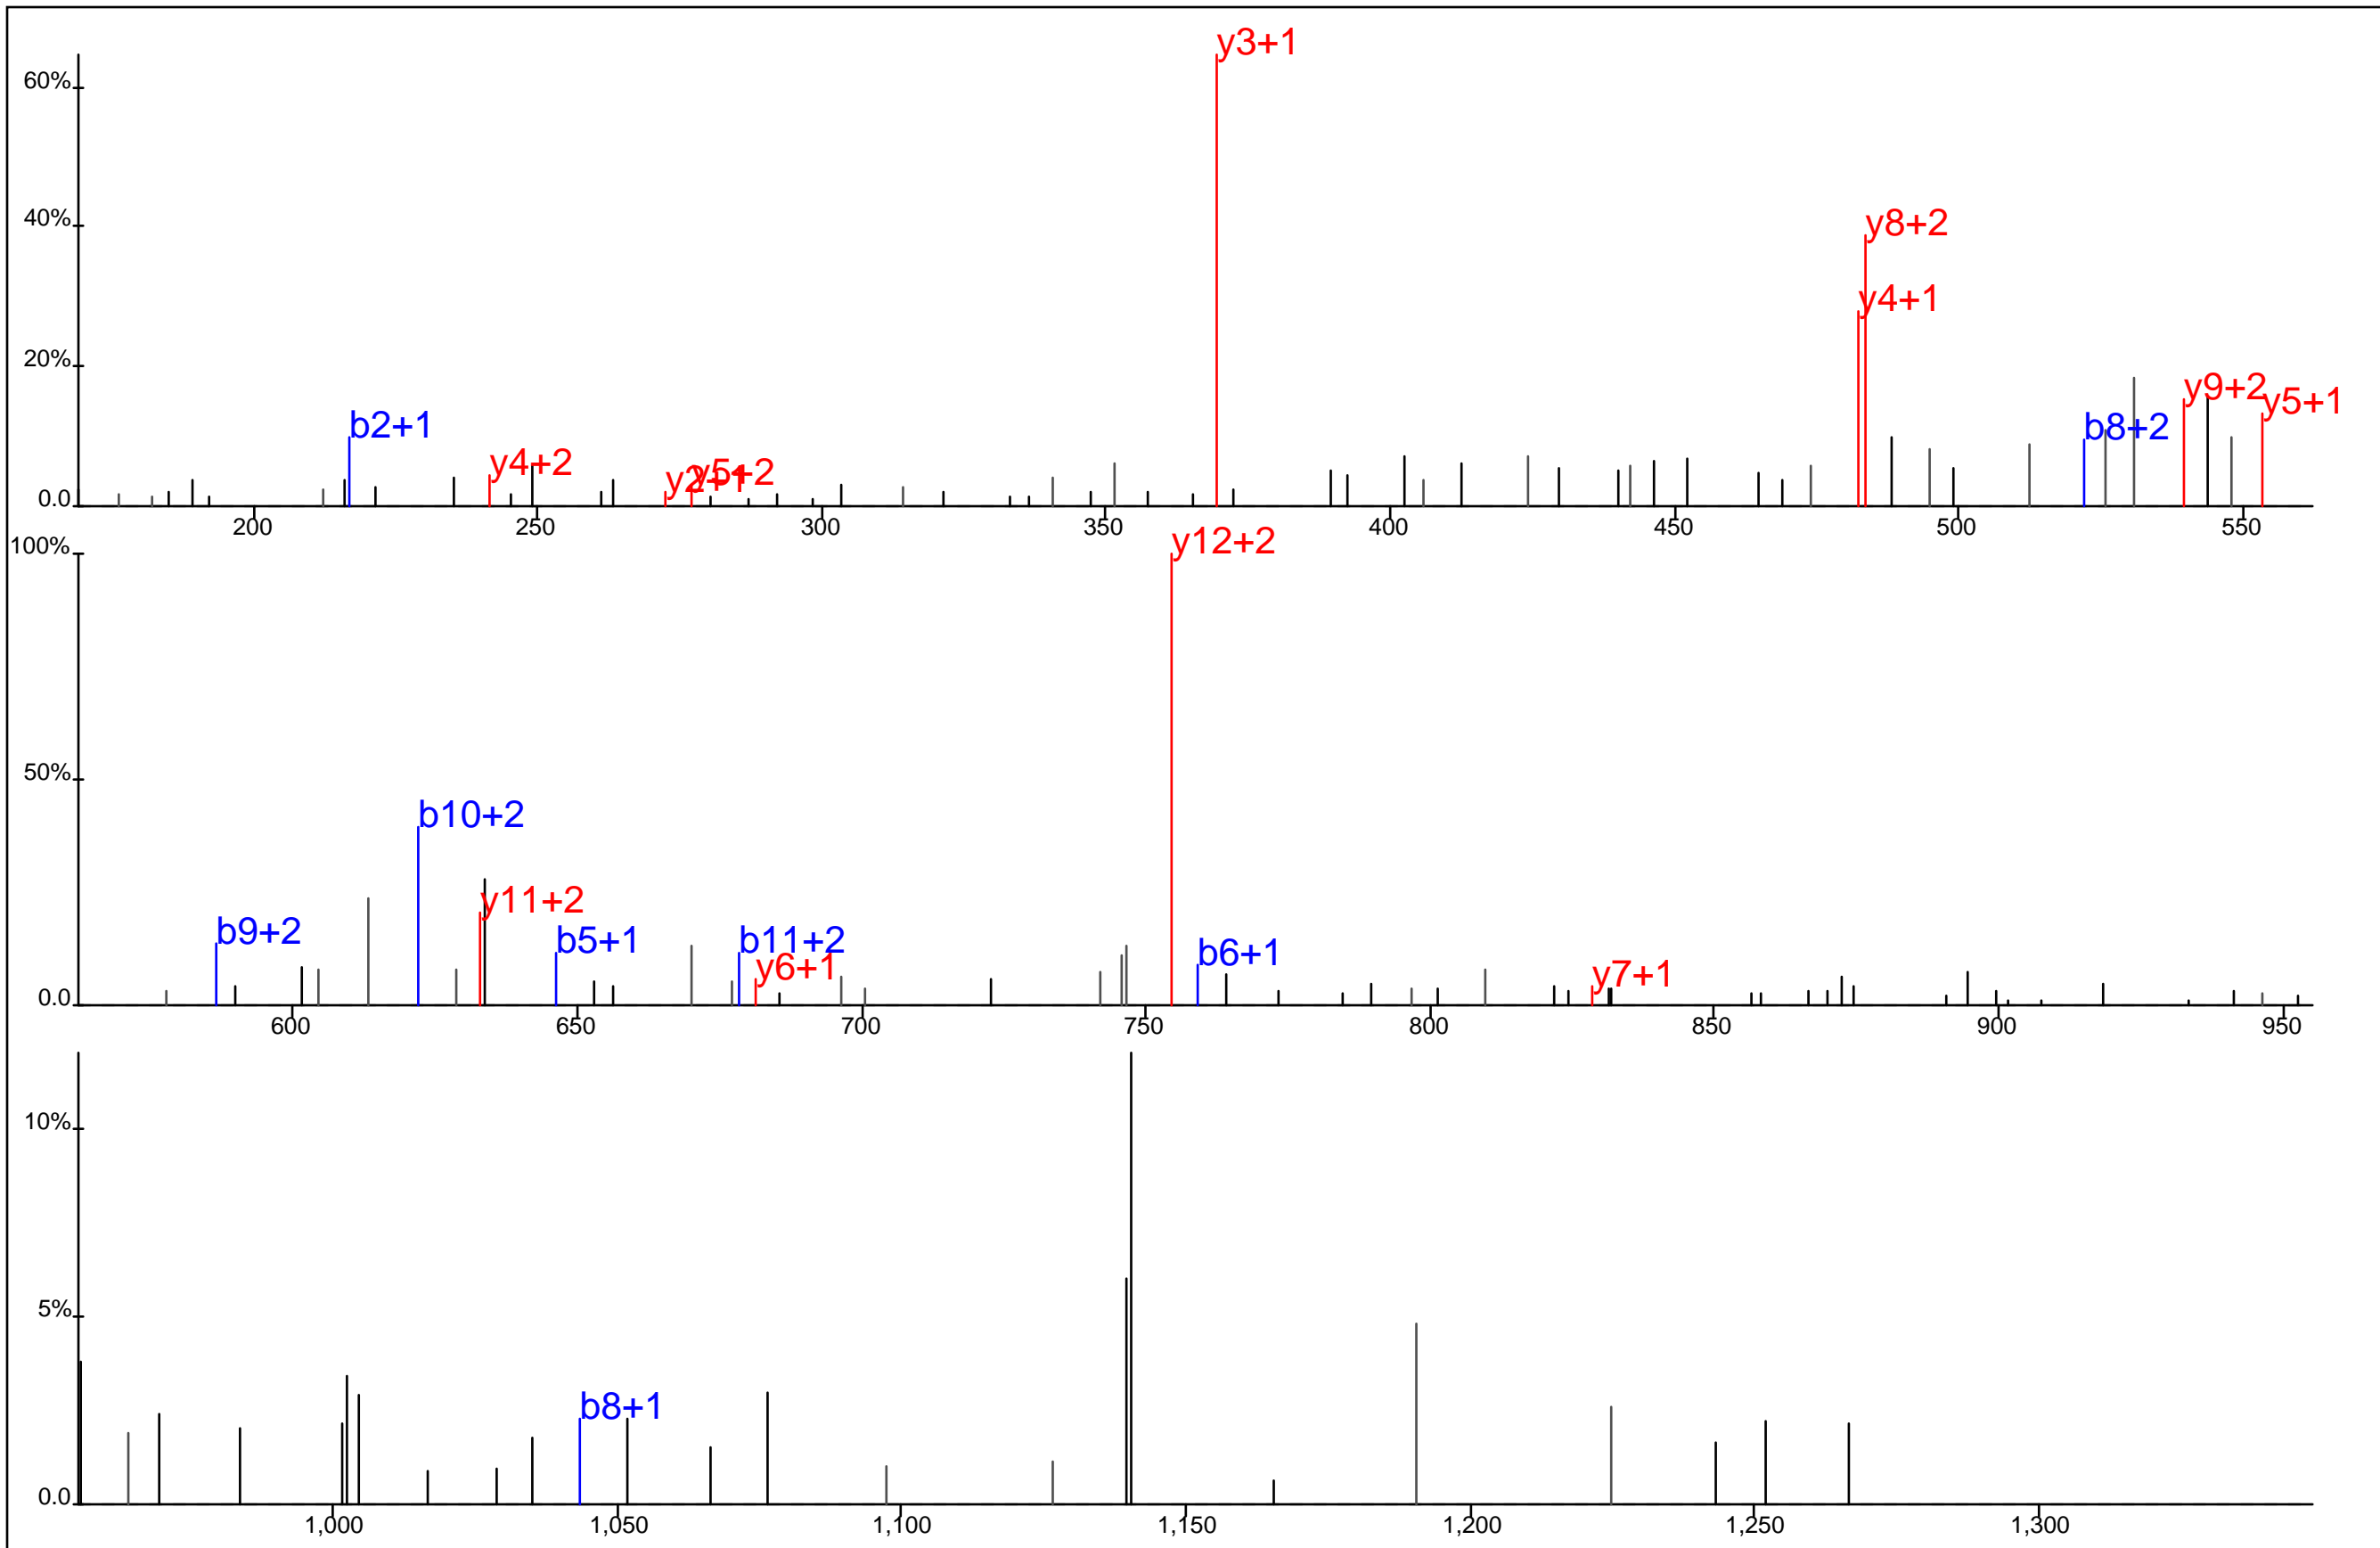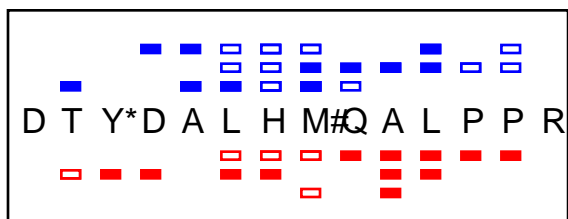

Protein Name: T cell antigen receptor, zeta  
 gi Accession: 0  
 Precursor Mass: 575.2548+3  
 Delta Mass: 0.591 ppm  
 XCorr: 22.08



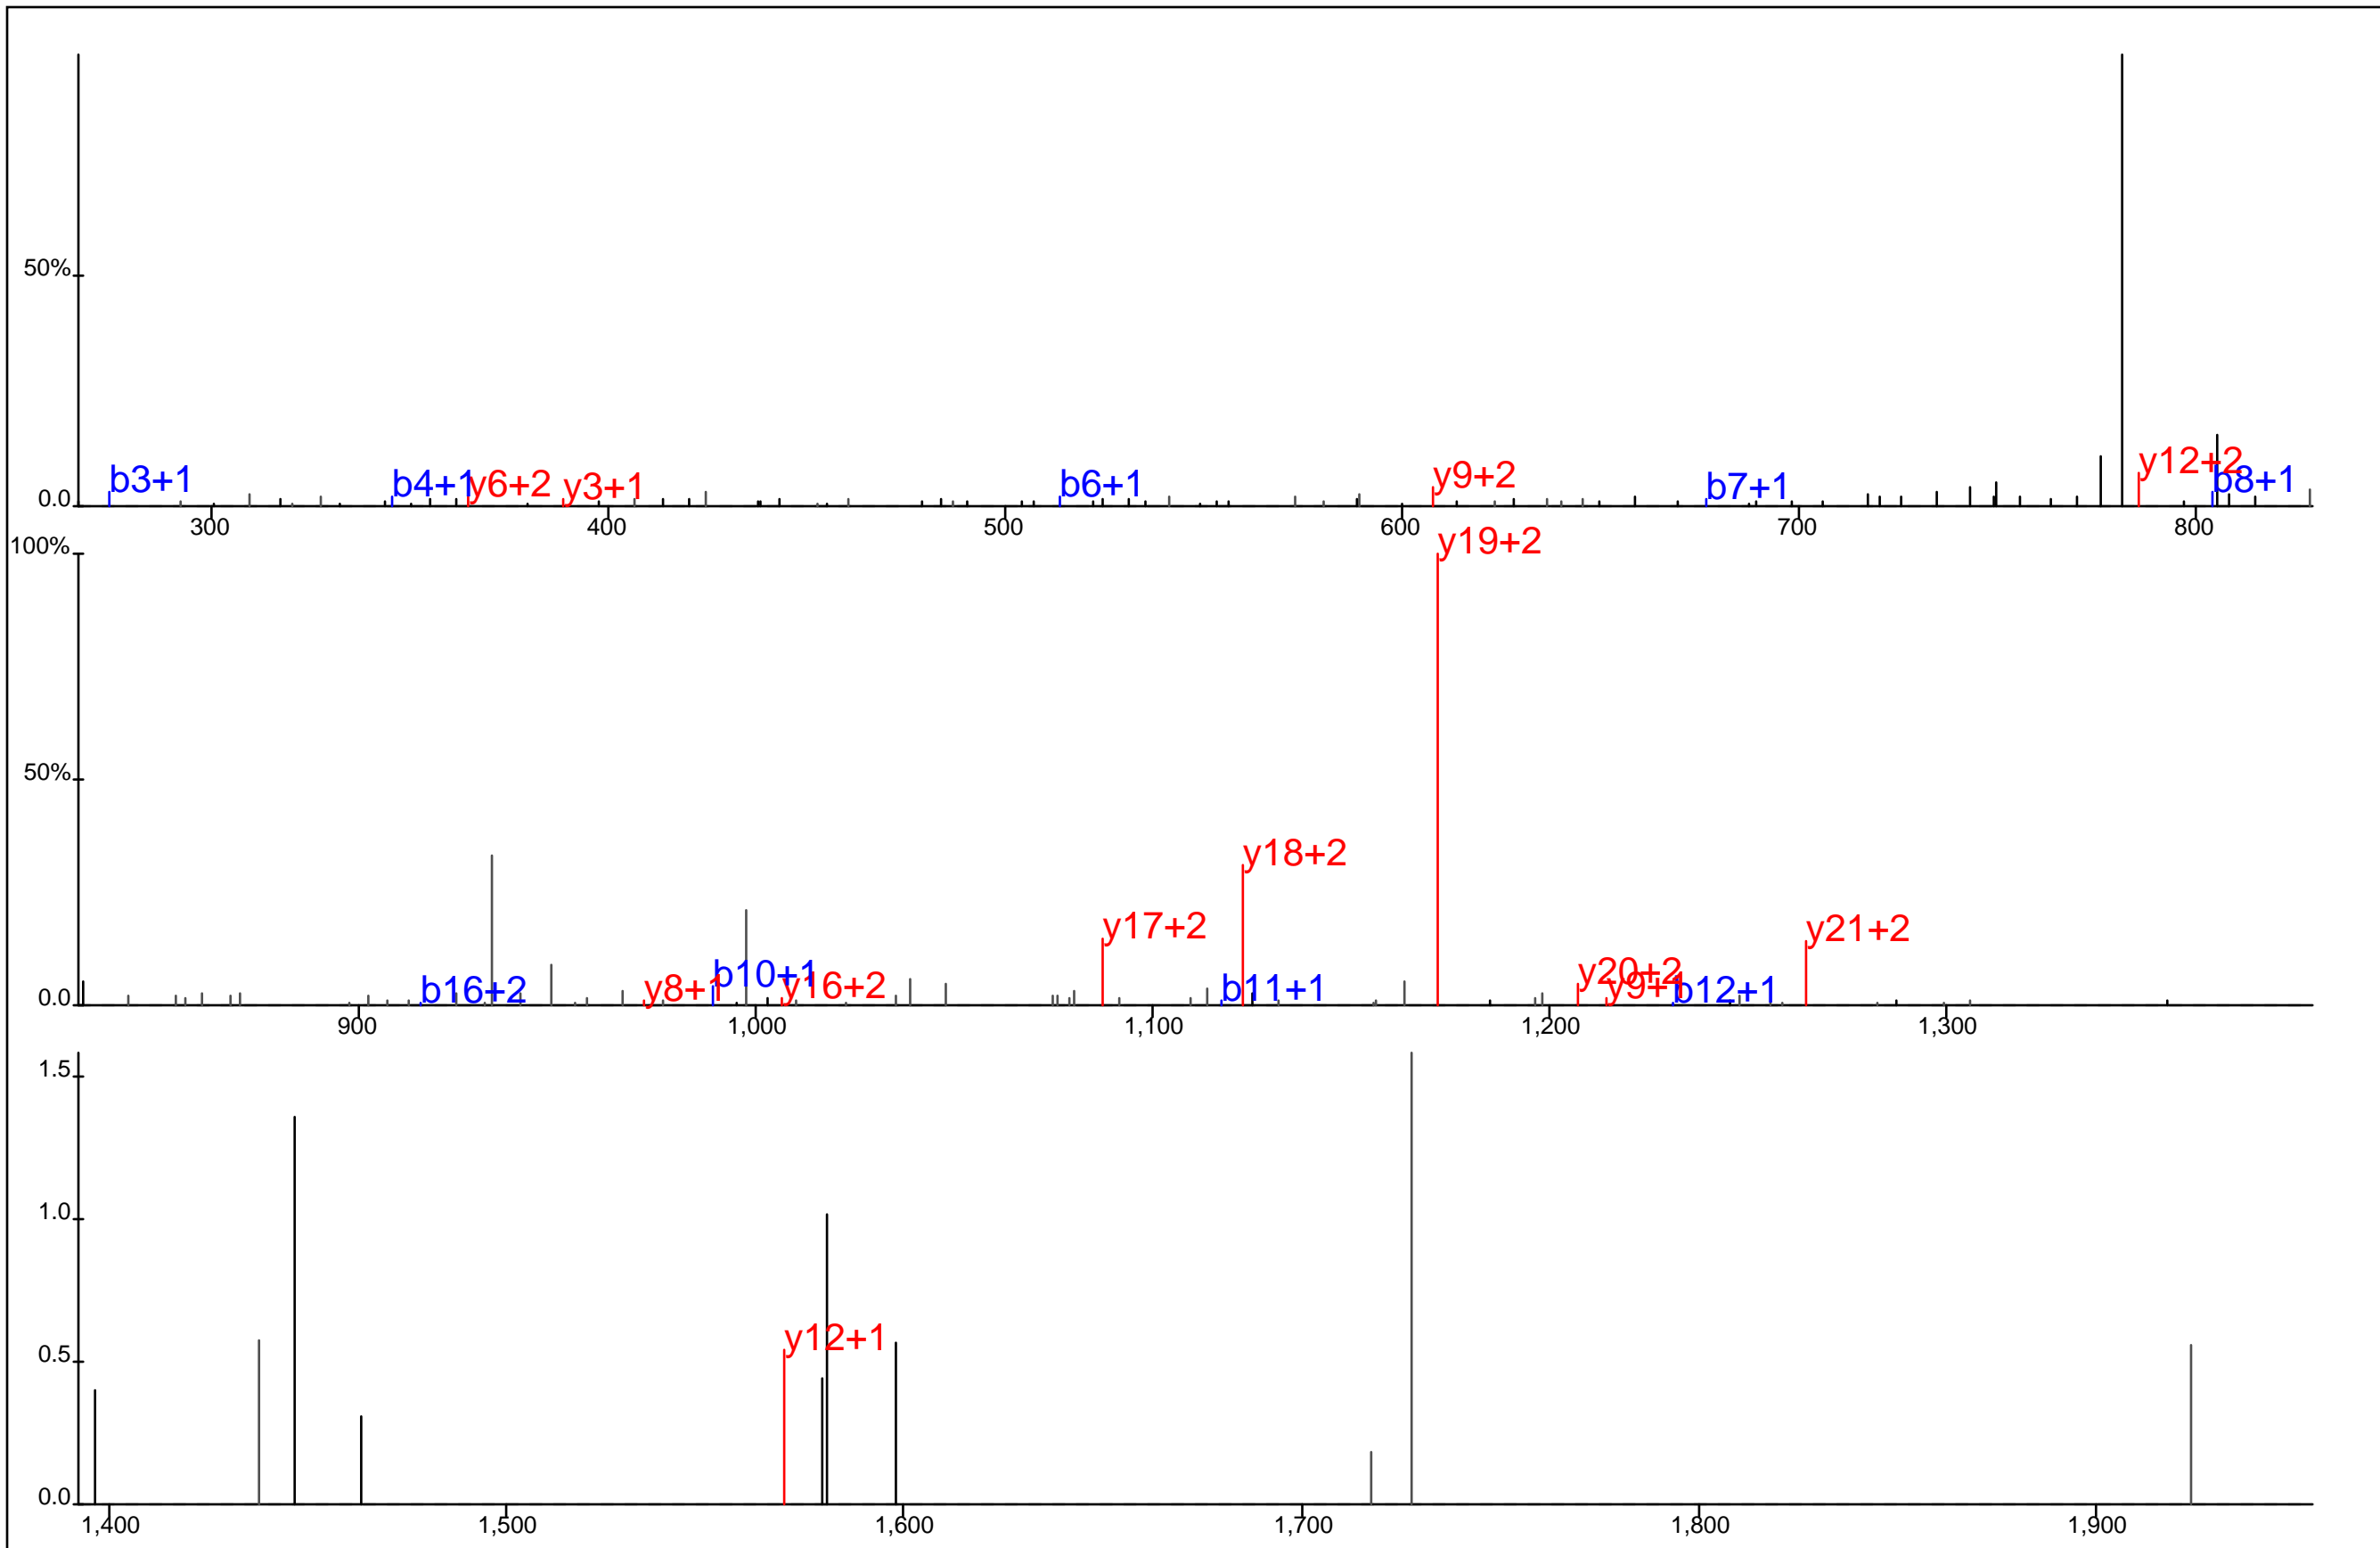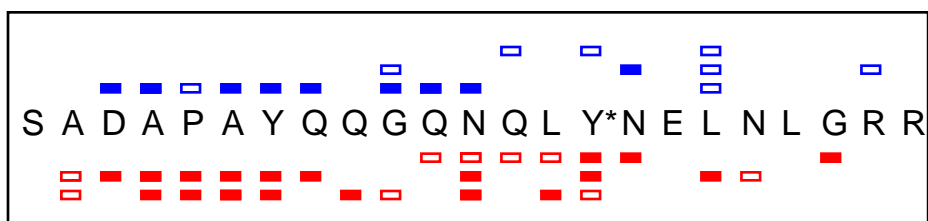

Protein Name: T cell antigen receptor, zeta  
 gi Accession: 0  
 Precursor Mass: 896.0797+3  
 Delta Mass: 4.574 ppm  
 XCorr: 21.85

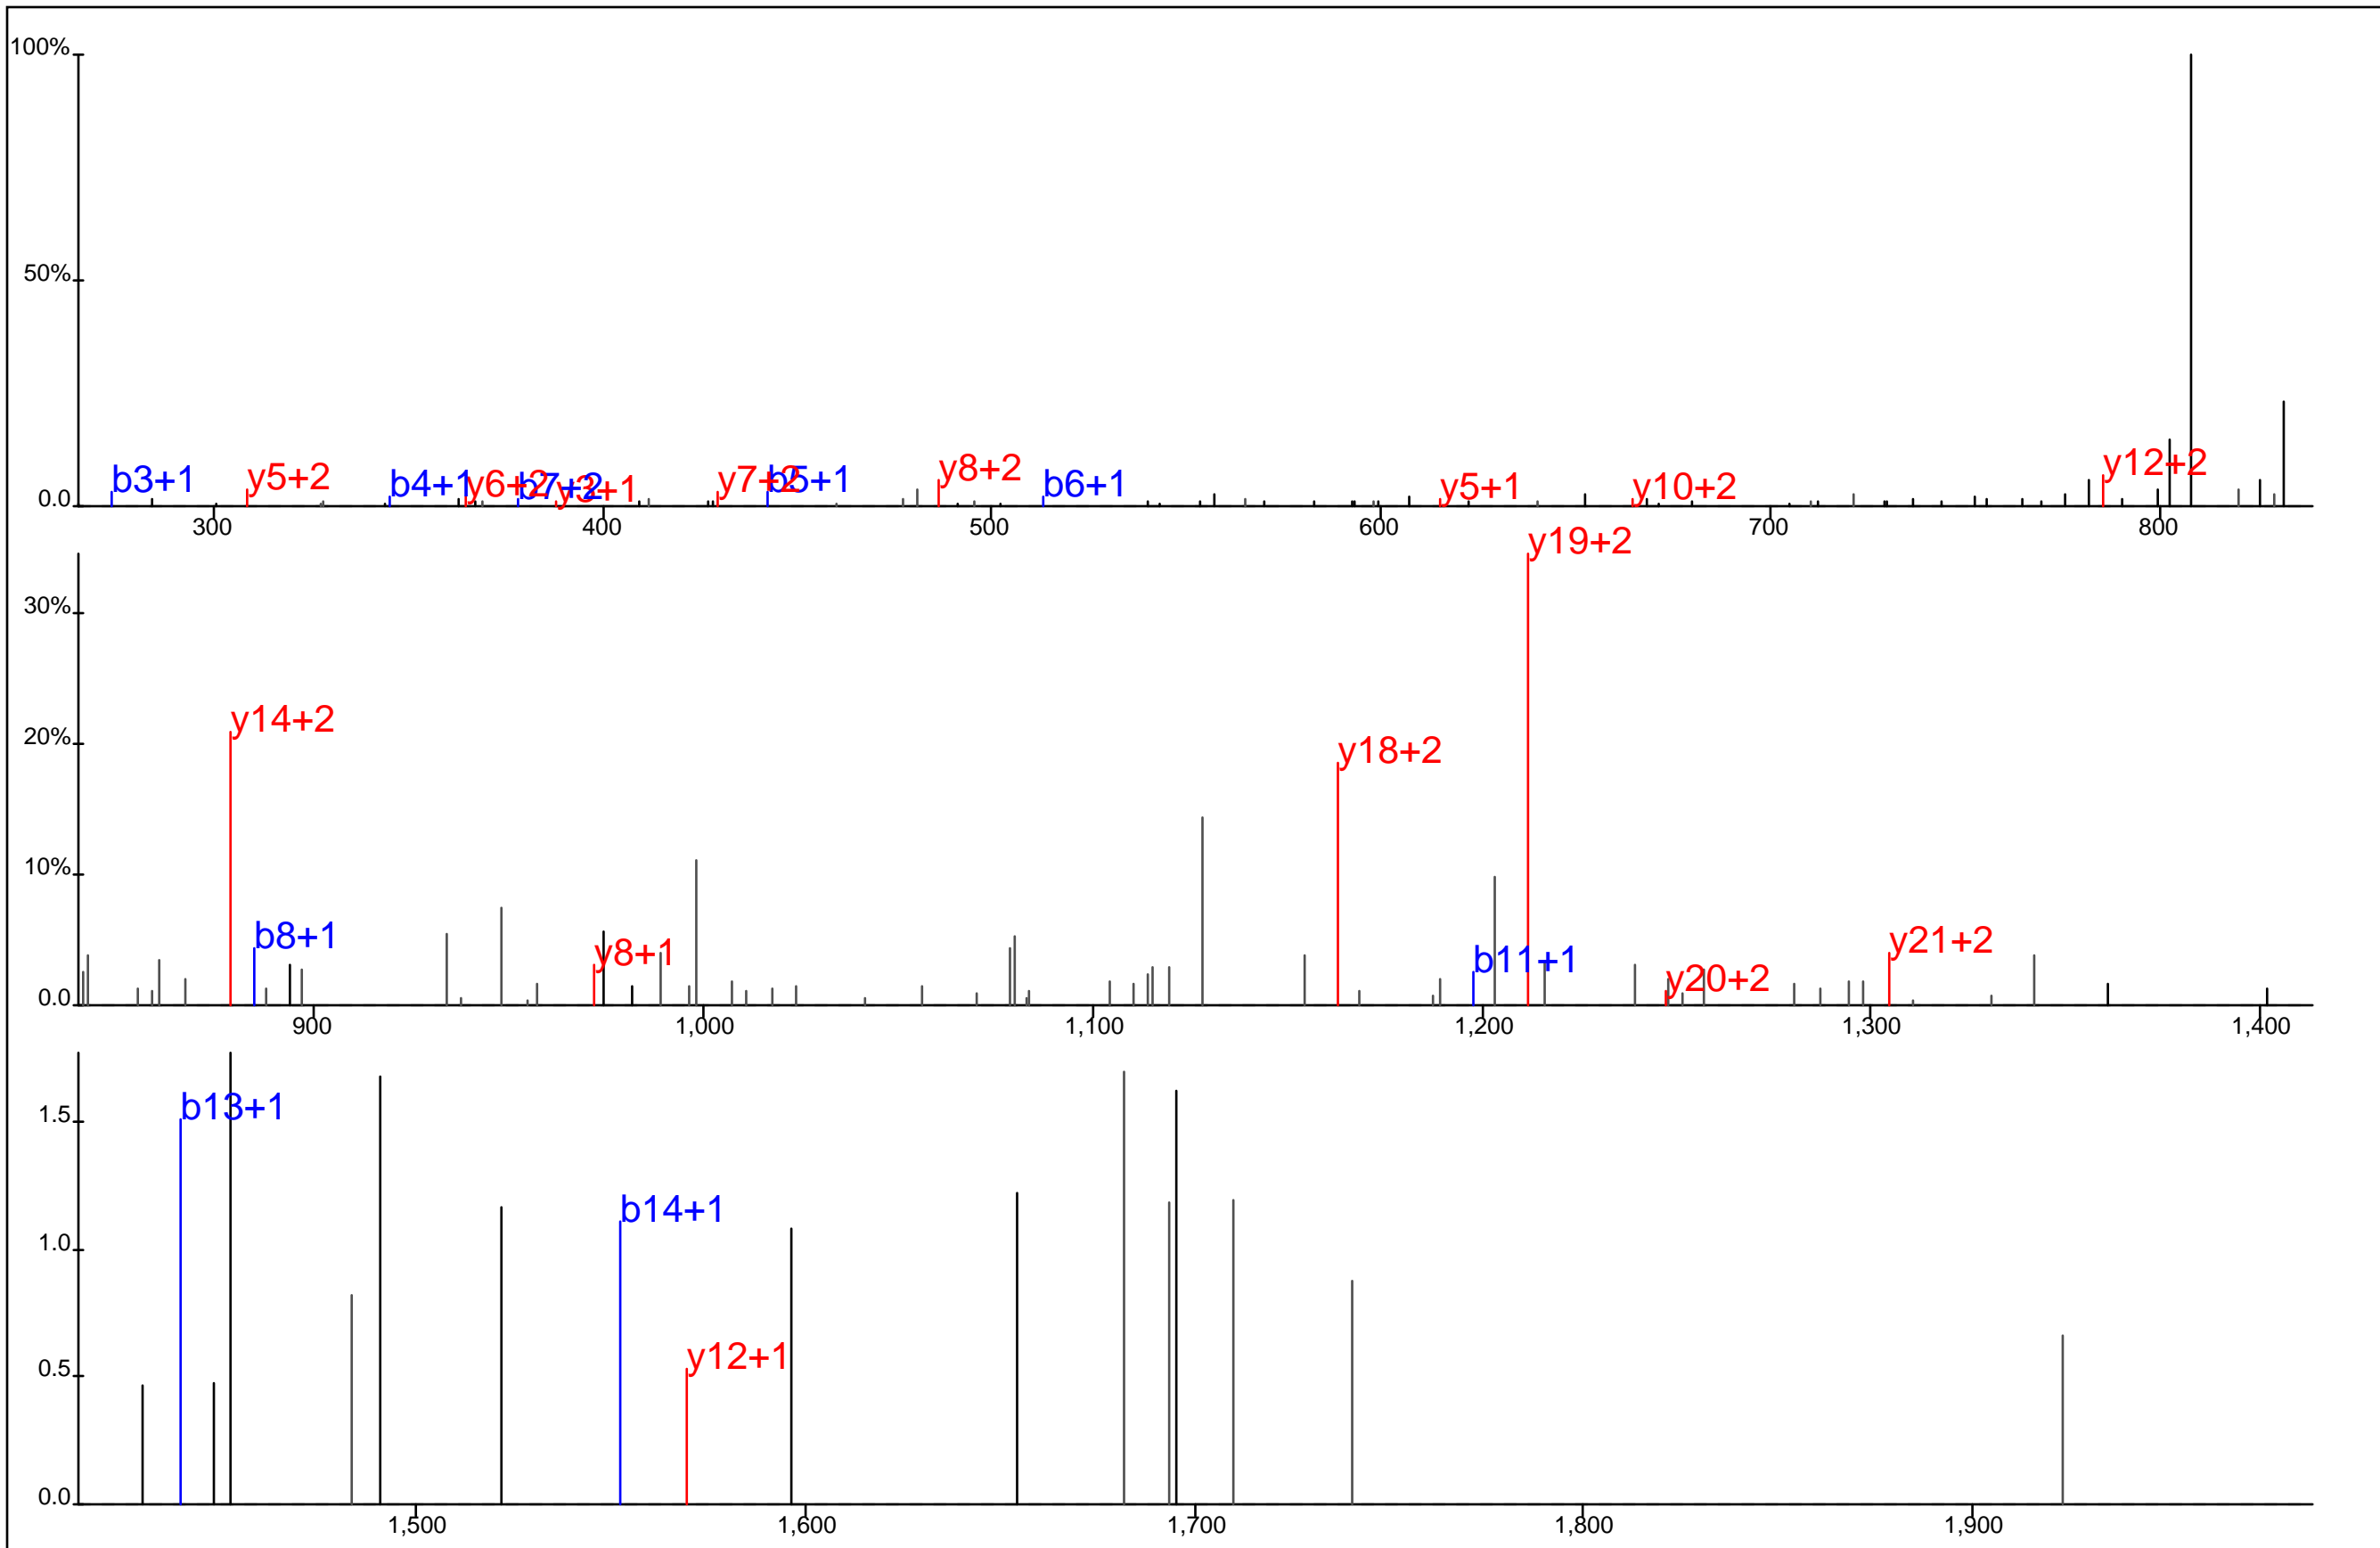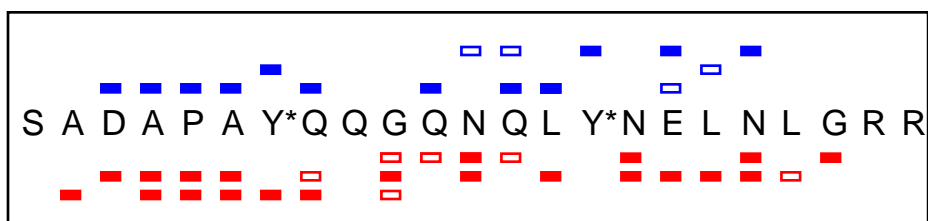

Protein Name: T cell antigen receptor, zeta  
 gi Accession: 0  
 Precursor Mass: 922.7393+3  
 Delta Mass: 0.007 ppm  
 XCorr: 37.75

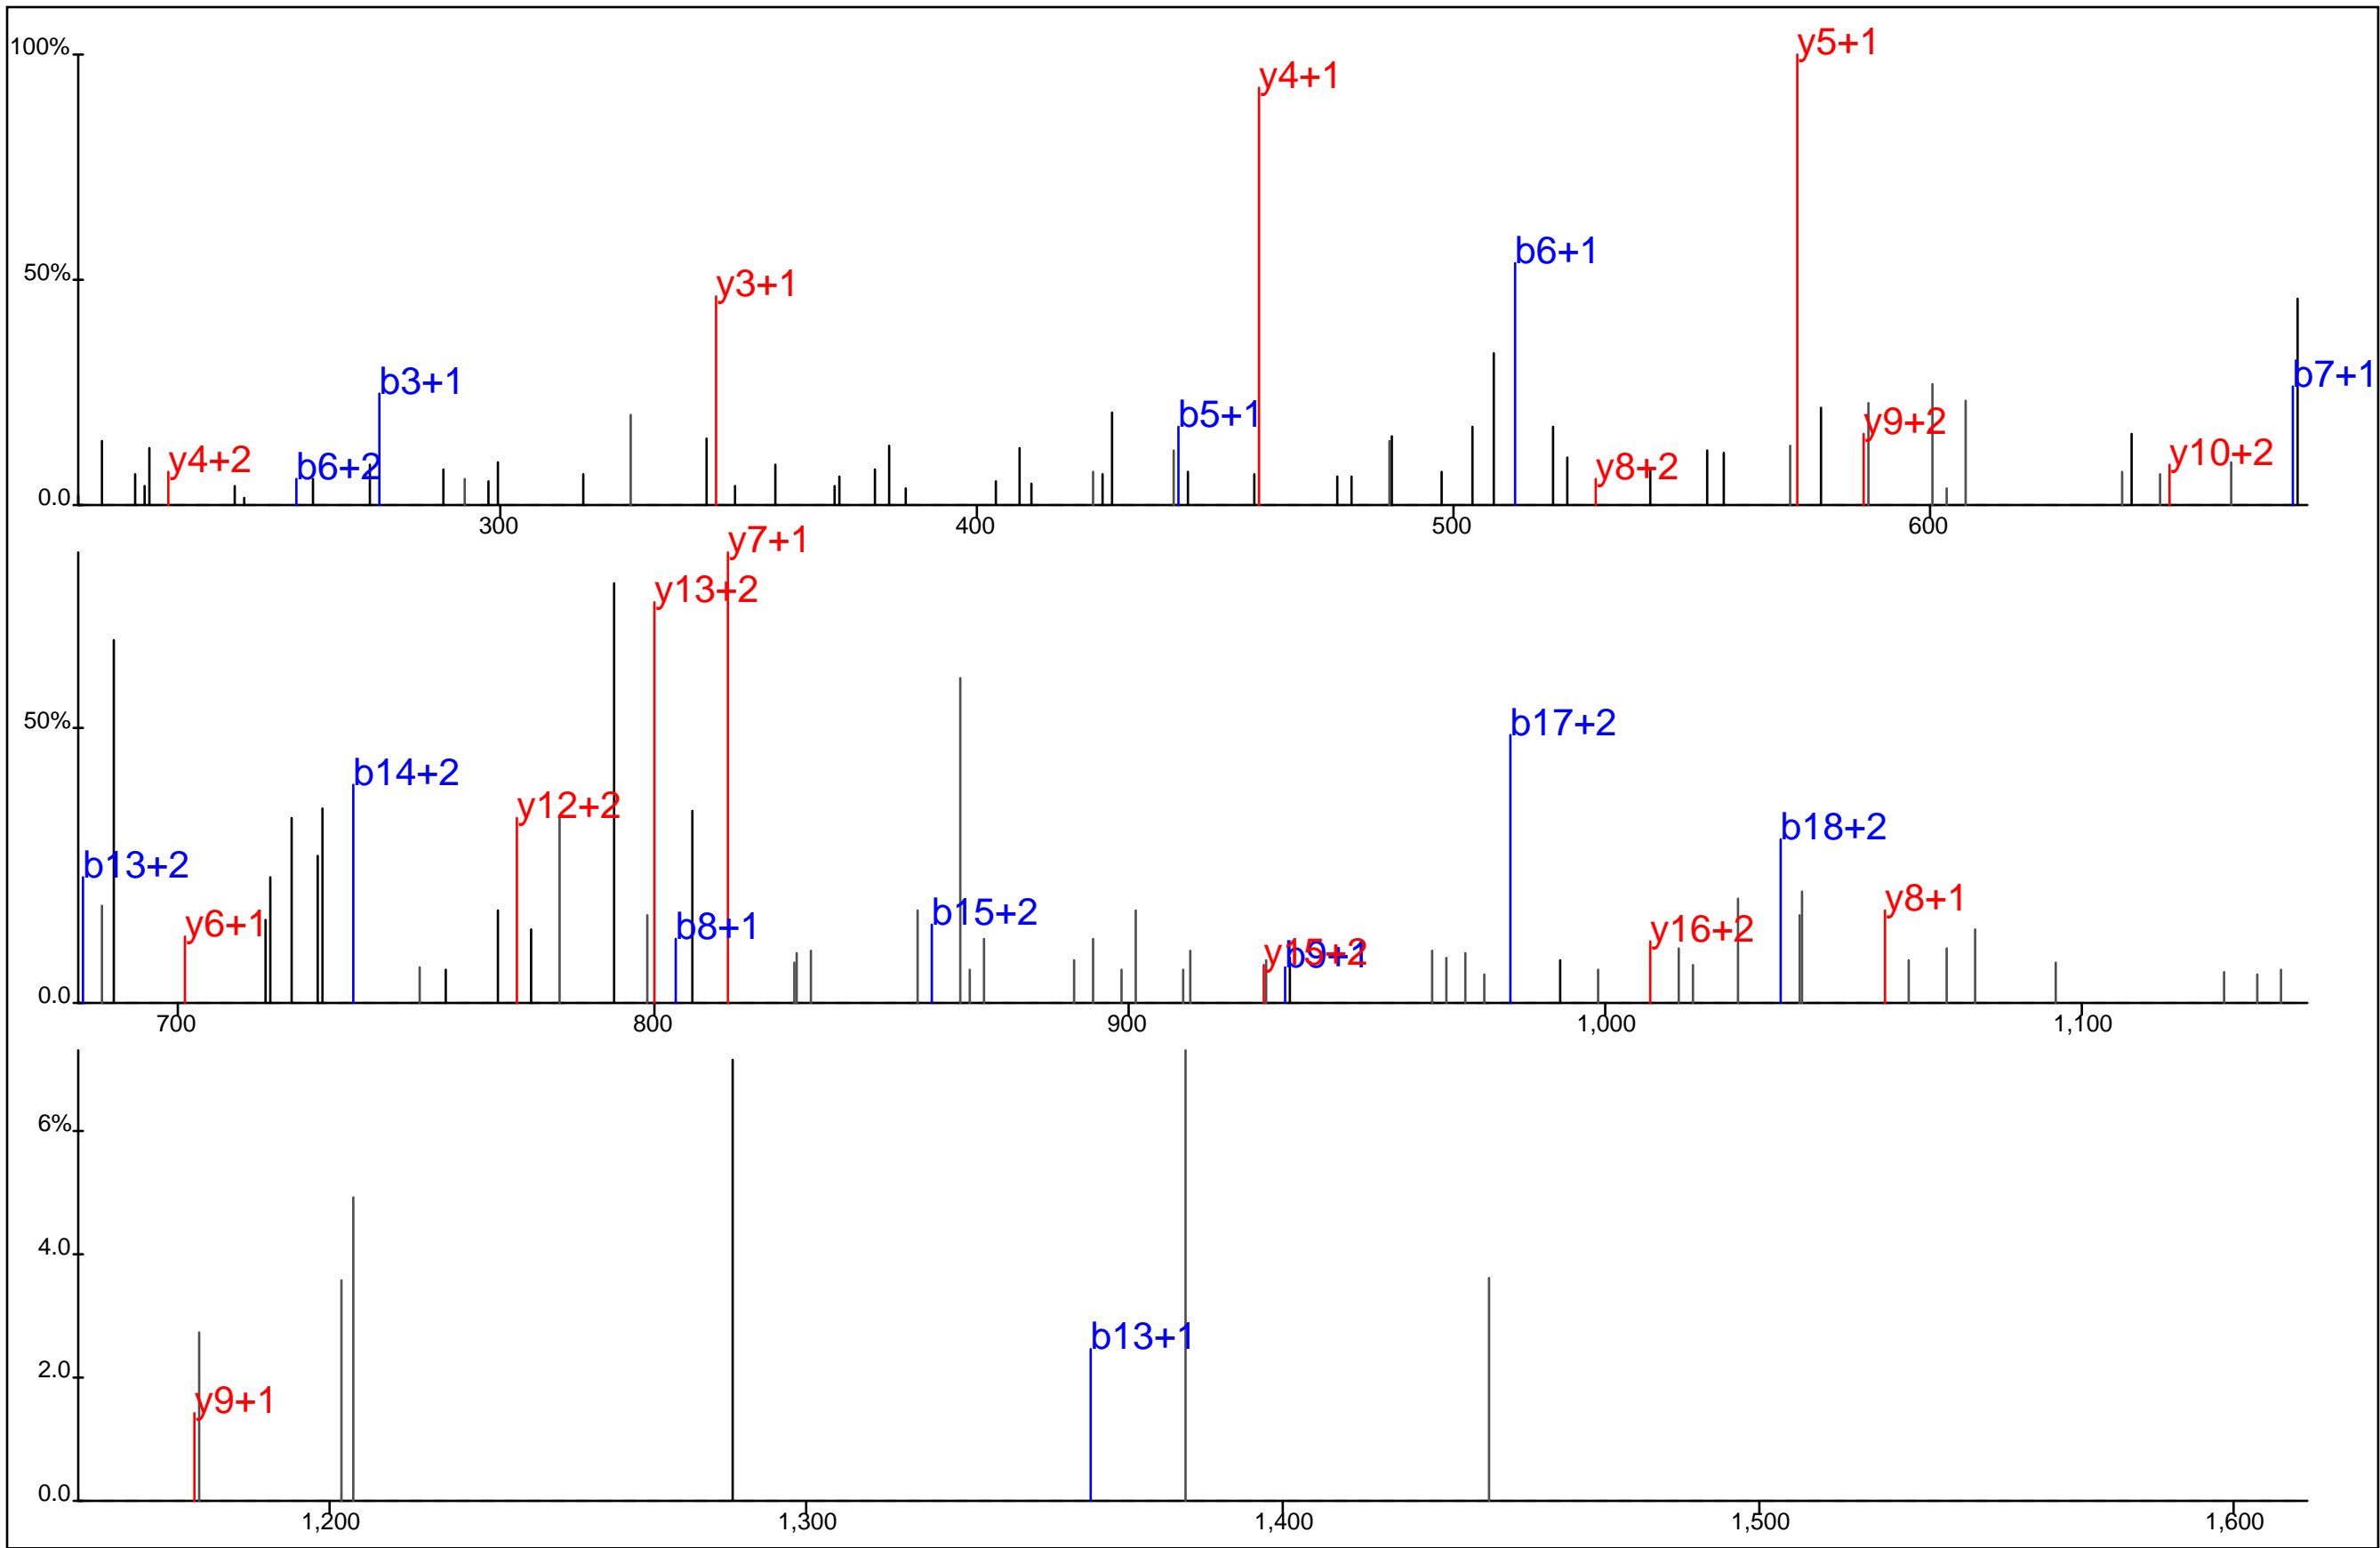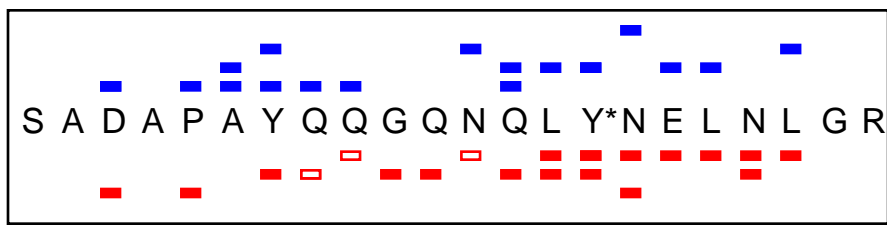

Protein Name: T cell antigen receptor, zeta  
 gi Accession: 0  
 Precursor Mass: 633.2900+4  
 Delta Mass: 0.914 ppm  
 XCorr: 26.16

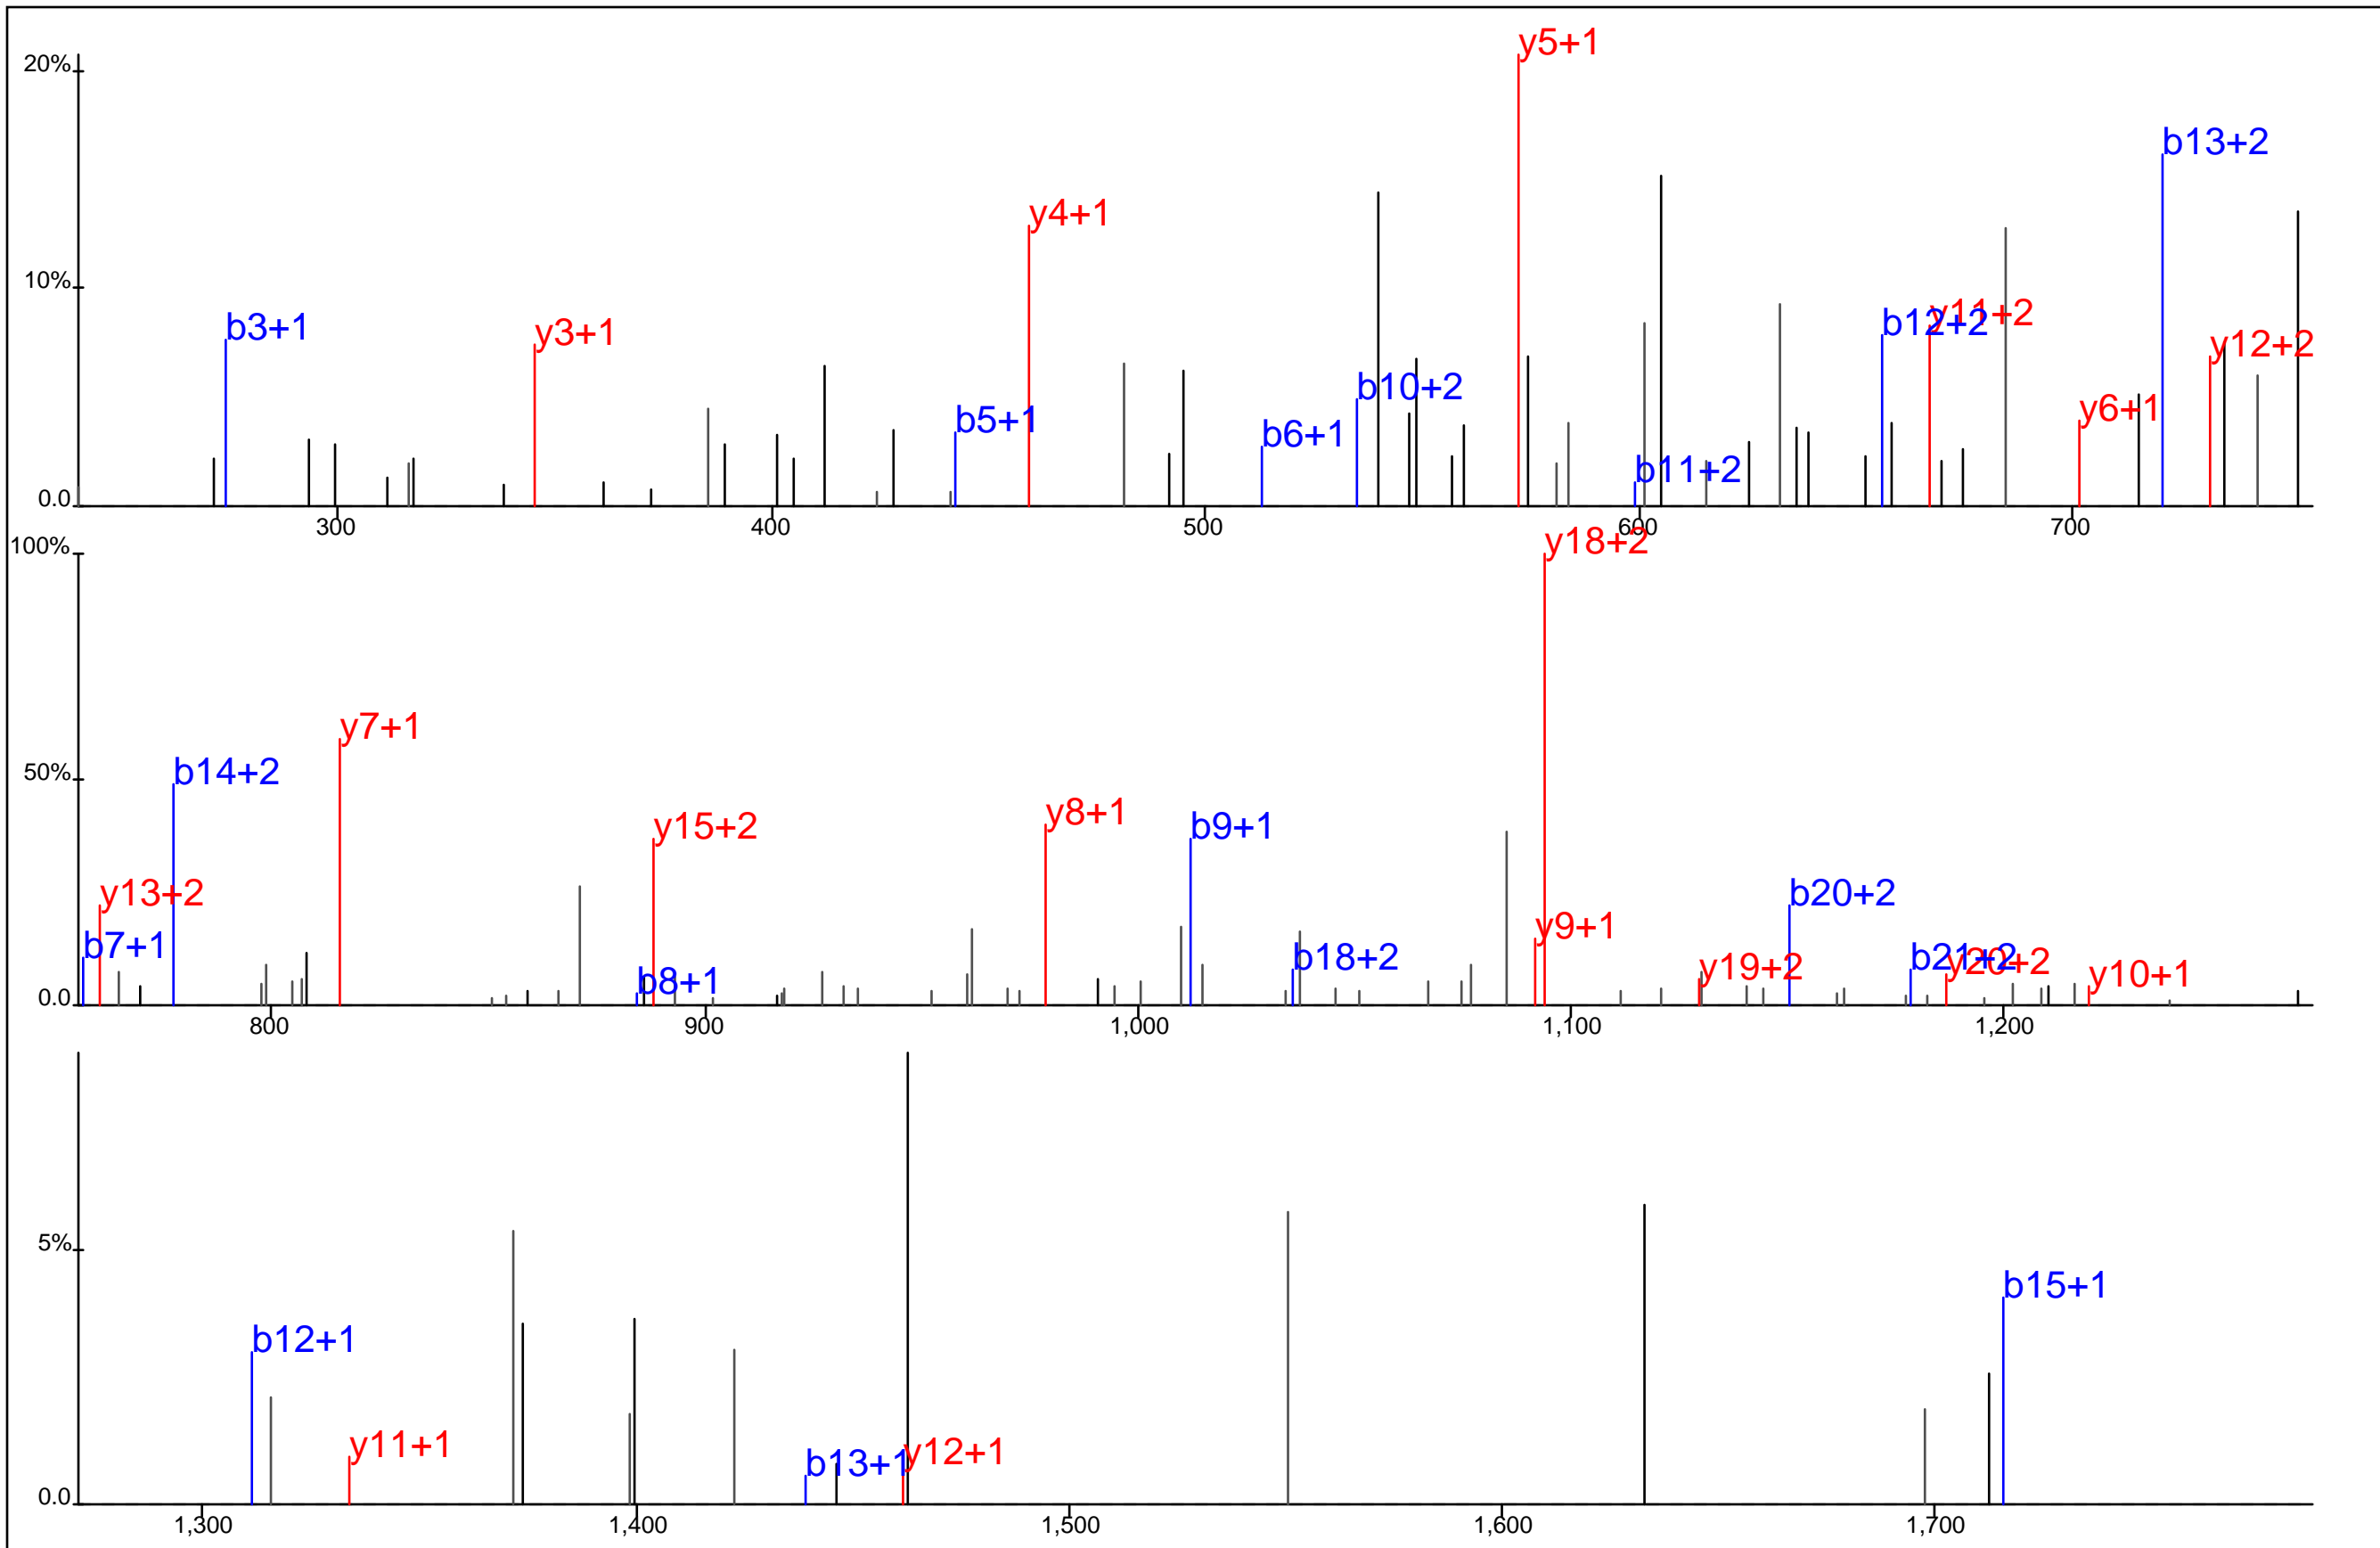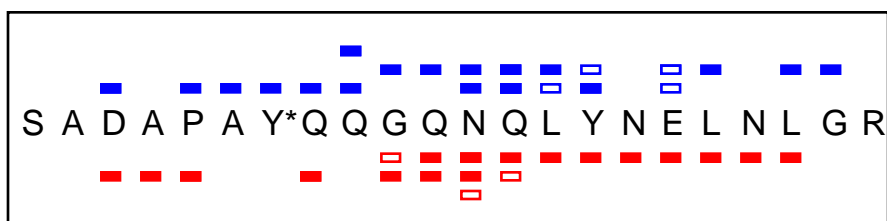

Protein Name: T cell antigen receptor, zeta  
 gi Accession: 0  
 Precursor Mass: 844.0498+3  
 Delta Mass: 0.359 ppm  
 XCorr: 50.91





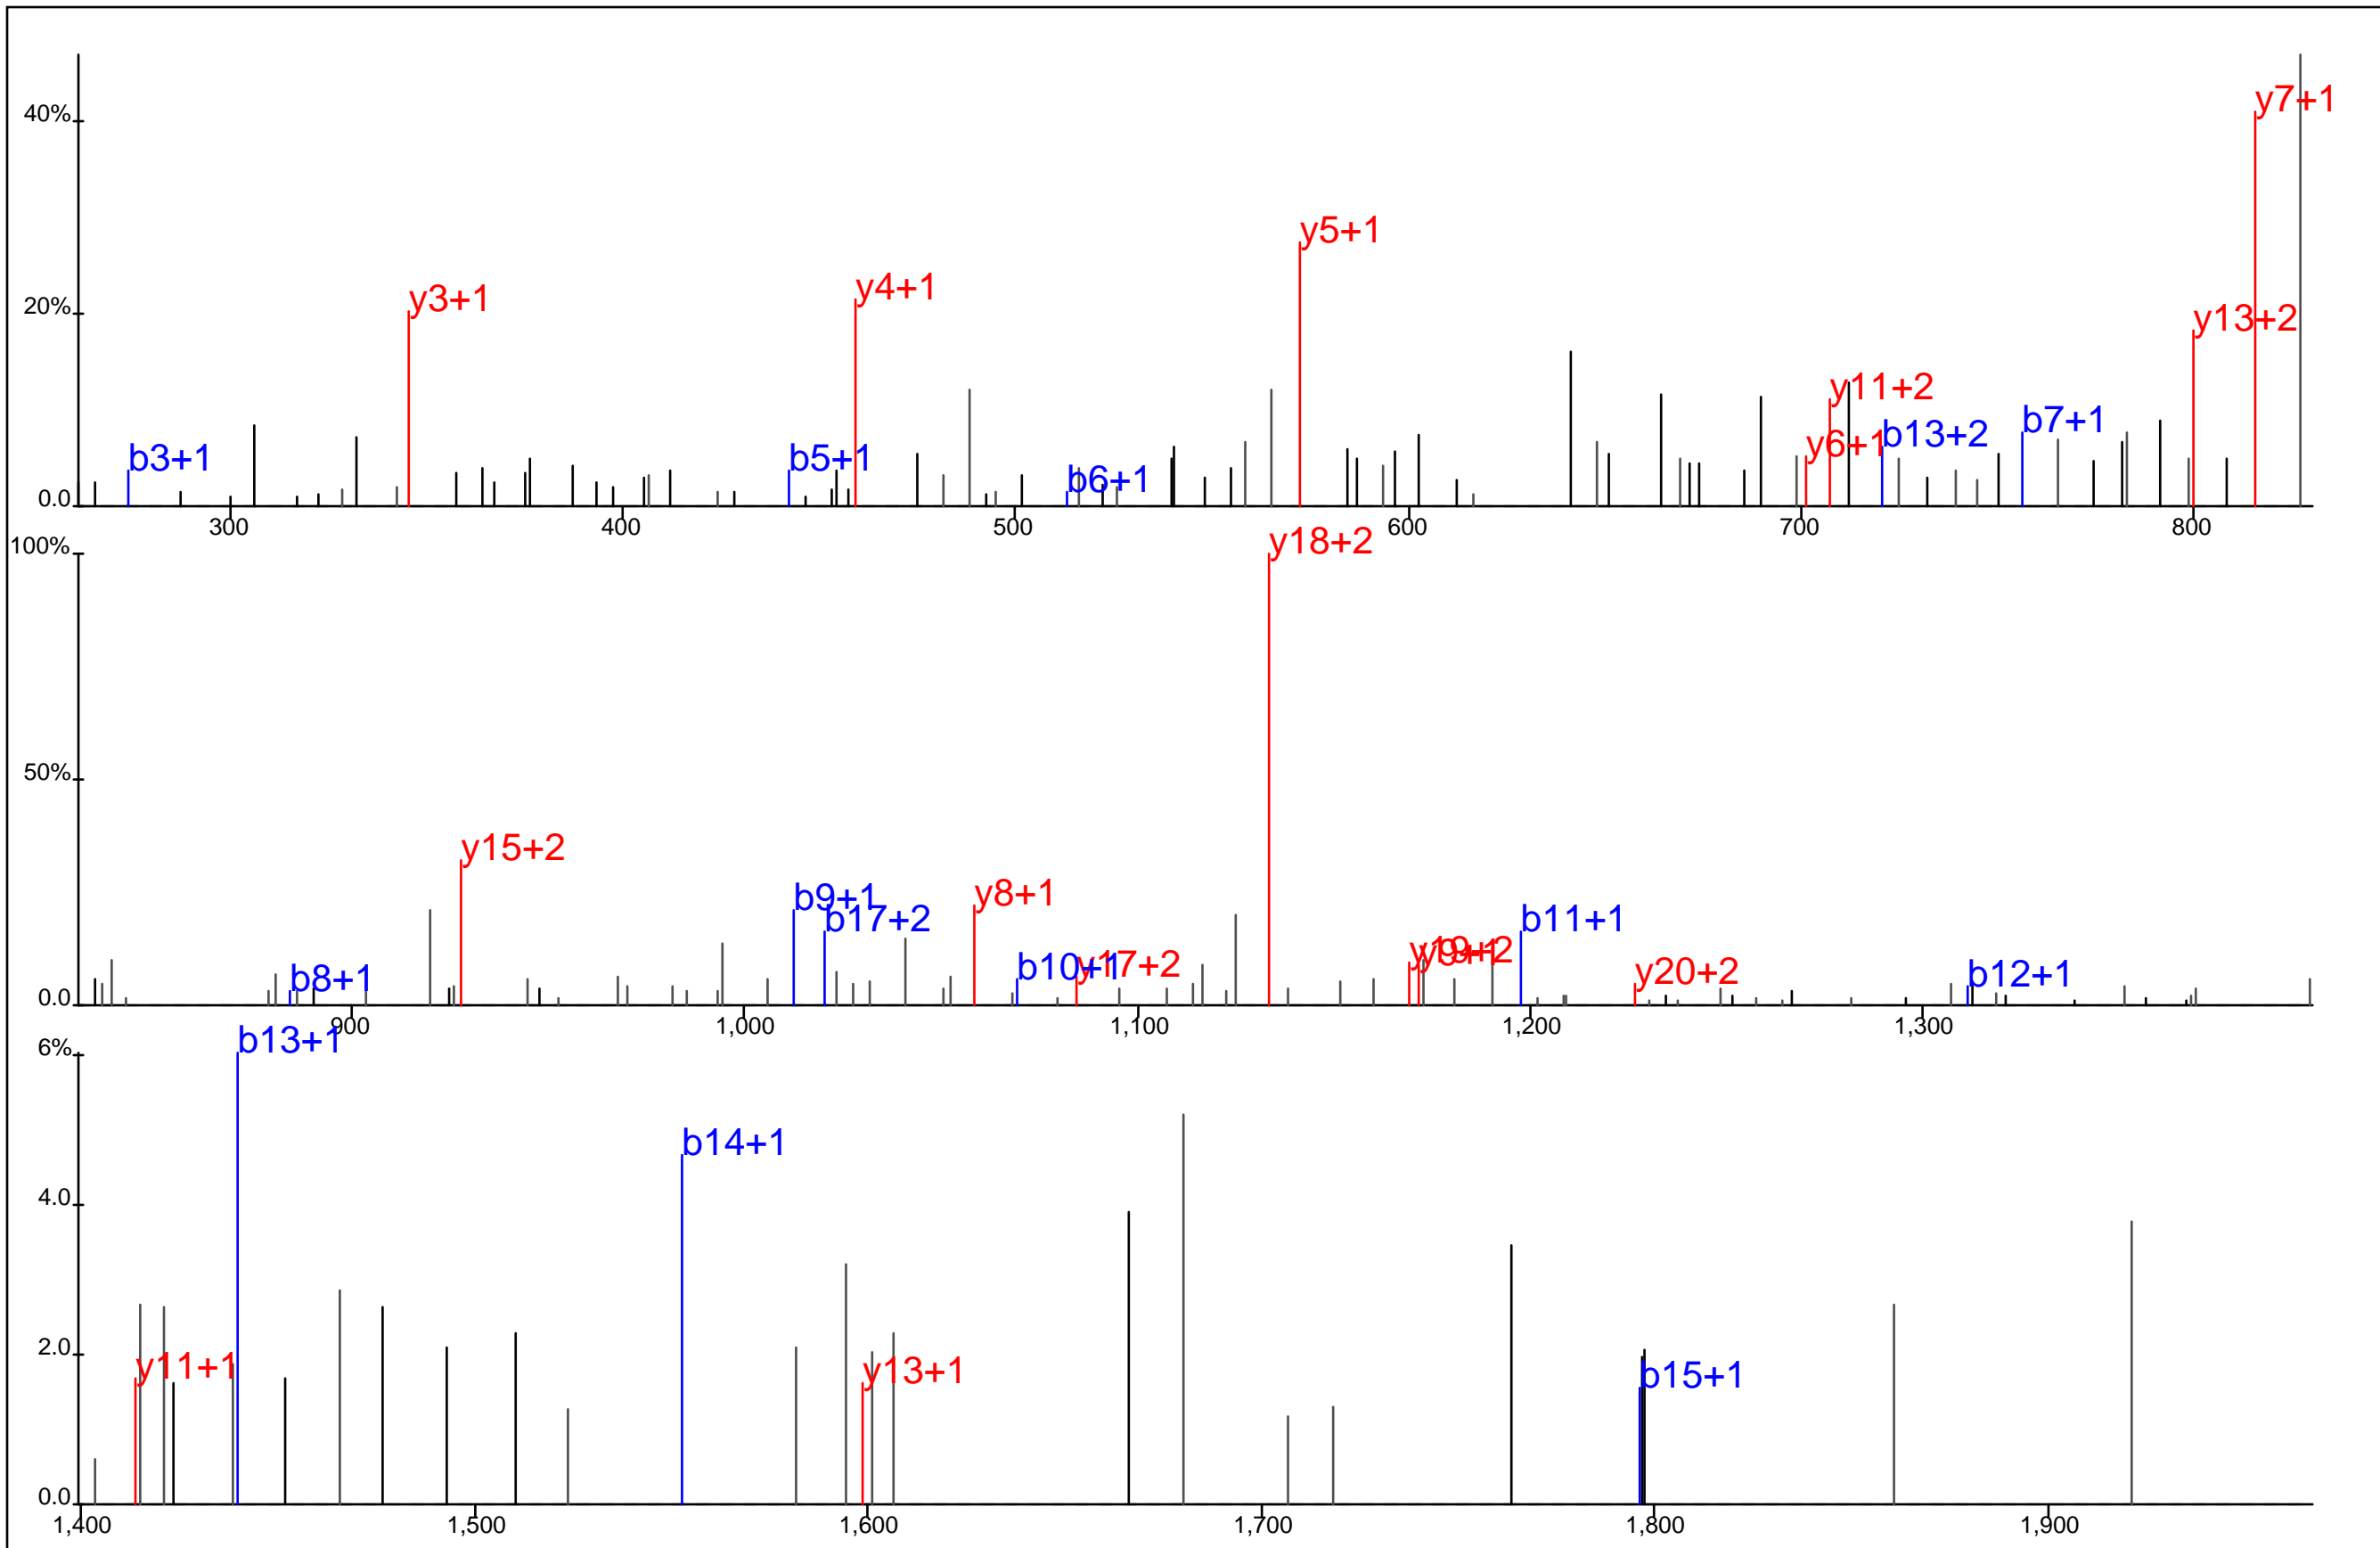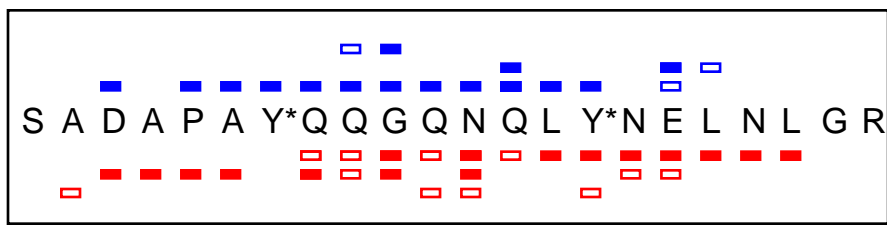

Protein Name: T cell antigen receptor, zeta  
 gi Accession: 0  
 Precursor Mass: 870.7068+3  
 Delta Mass: 1.494 ppm  
 XCorr: 35.46

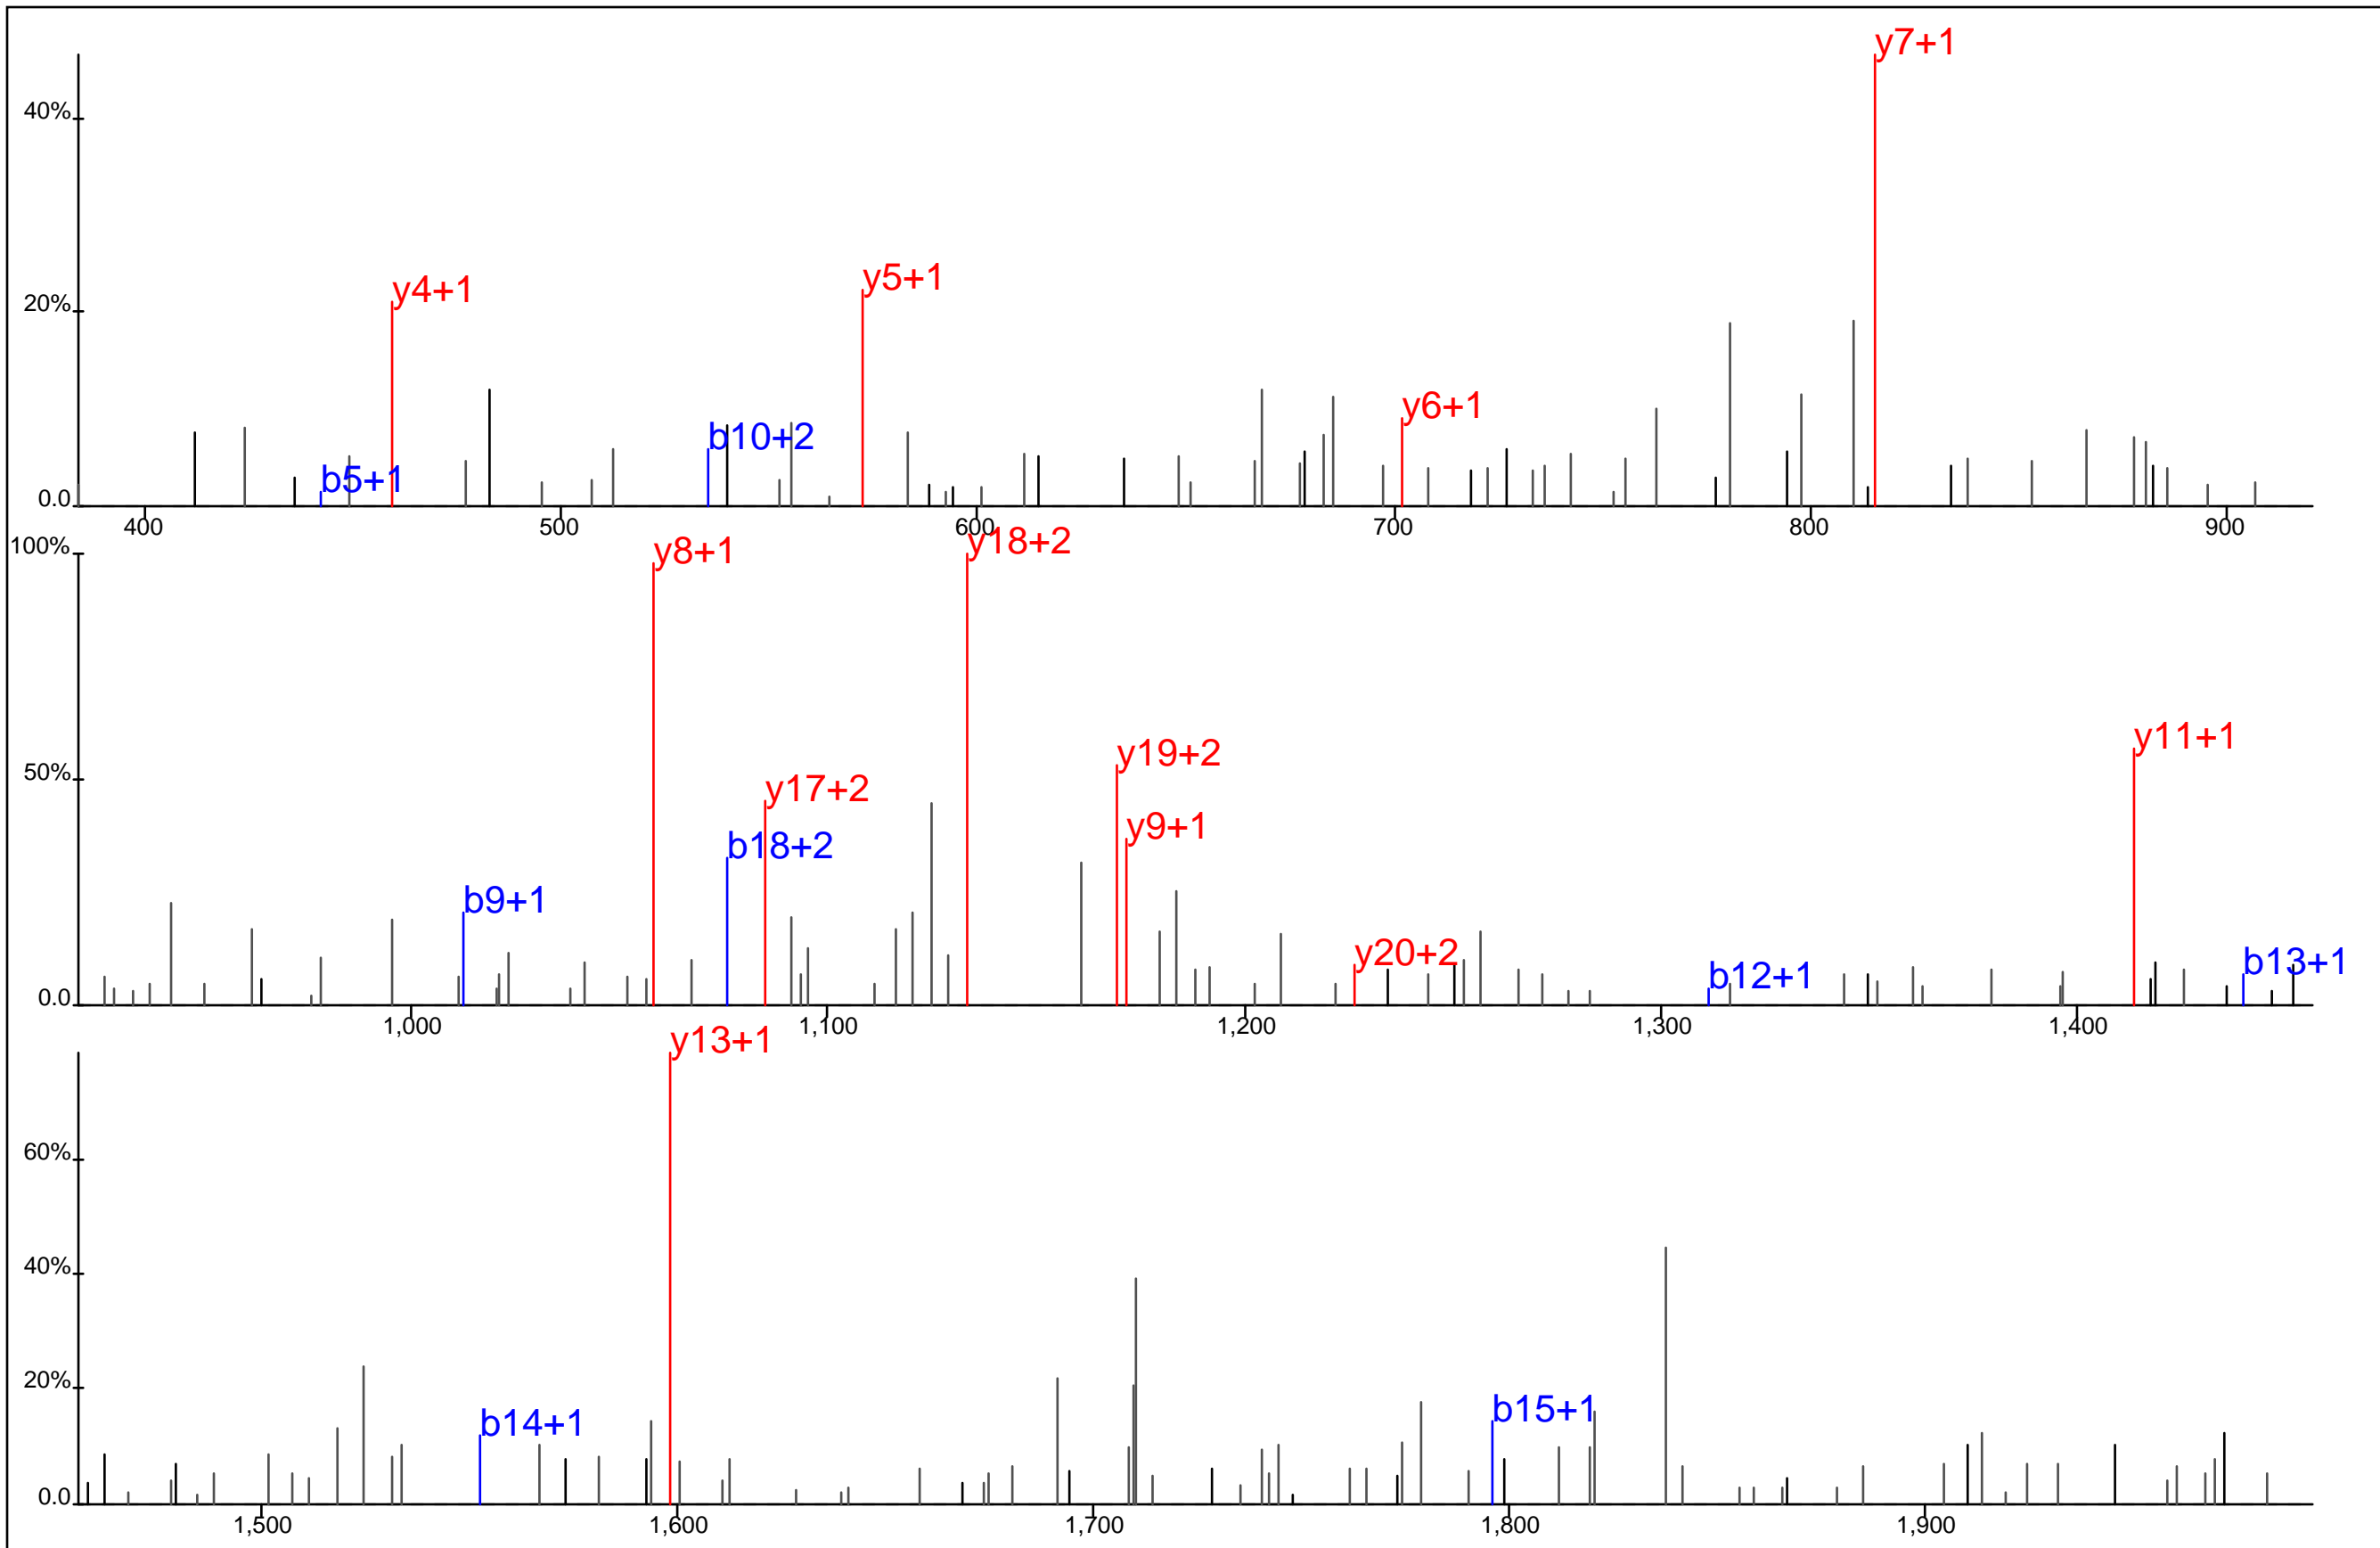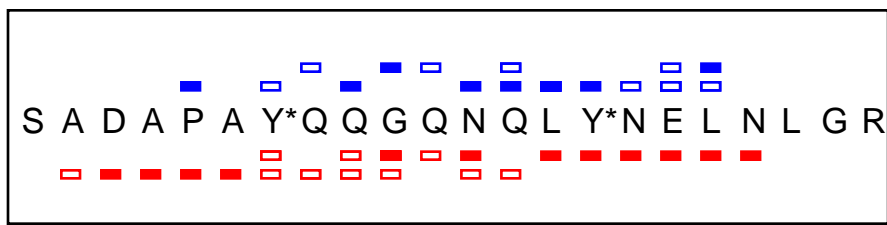

Protein Name: T cell antigen receptor, zeta  
 gi Accession: 0  
 Precursor Mass: 1,305.5536+2  
 Delta Mass: 0.839 ppm  
 XCorr: 25.35

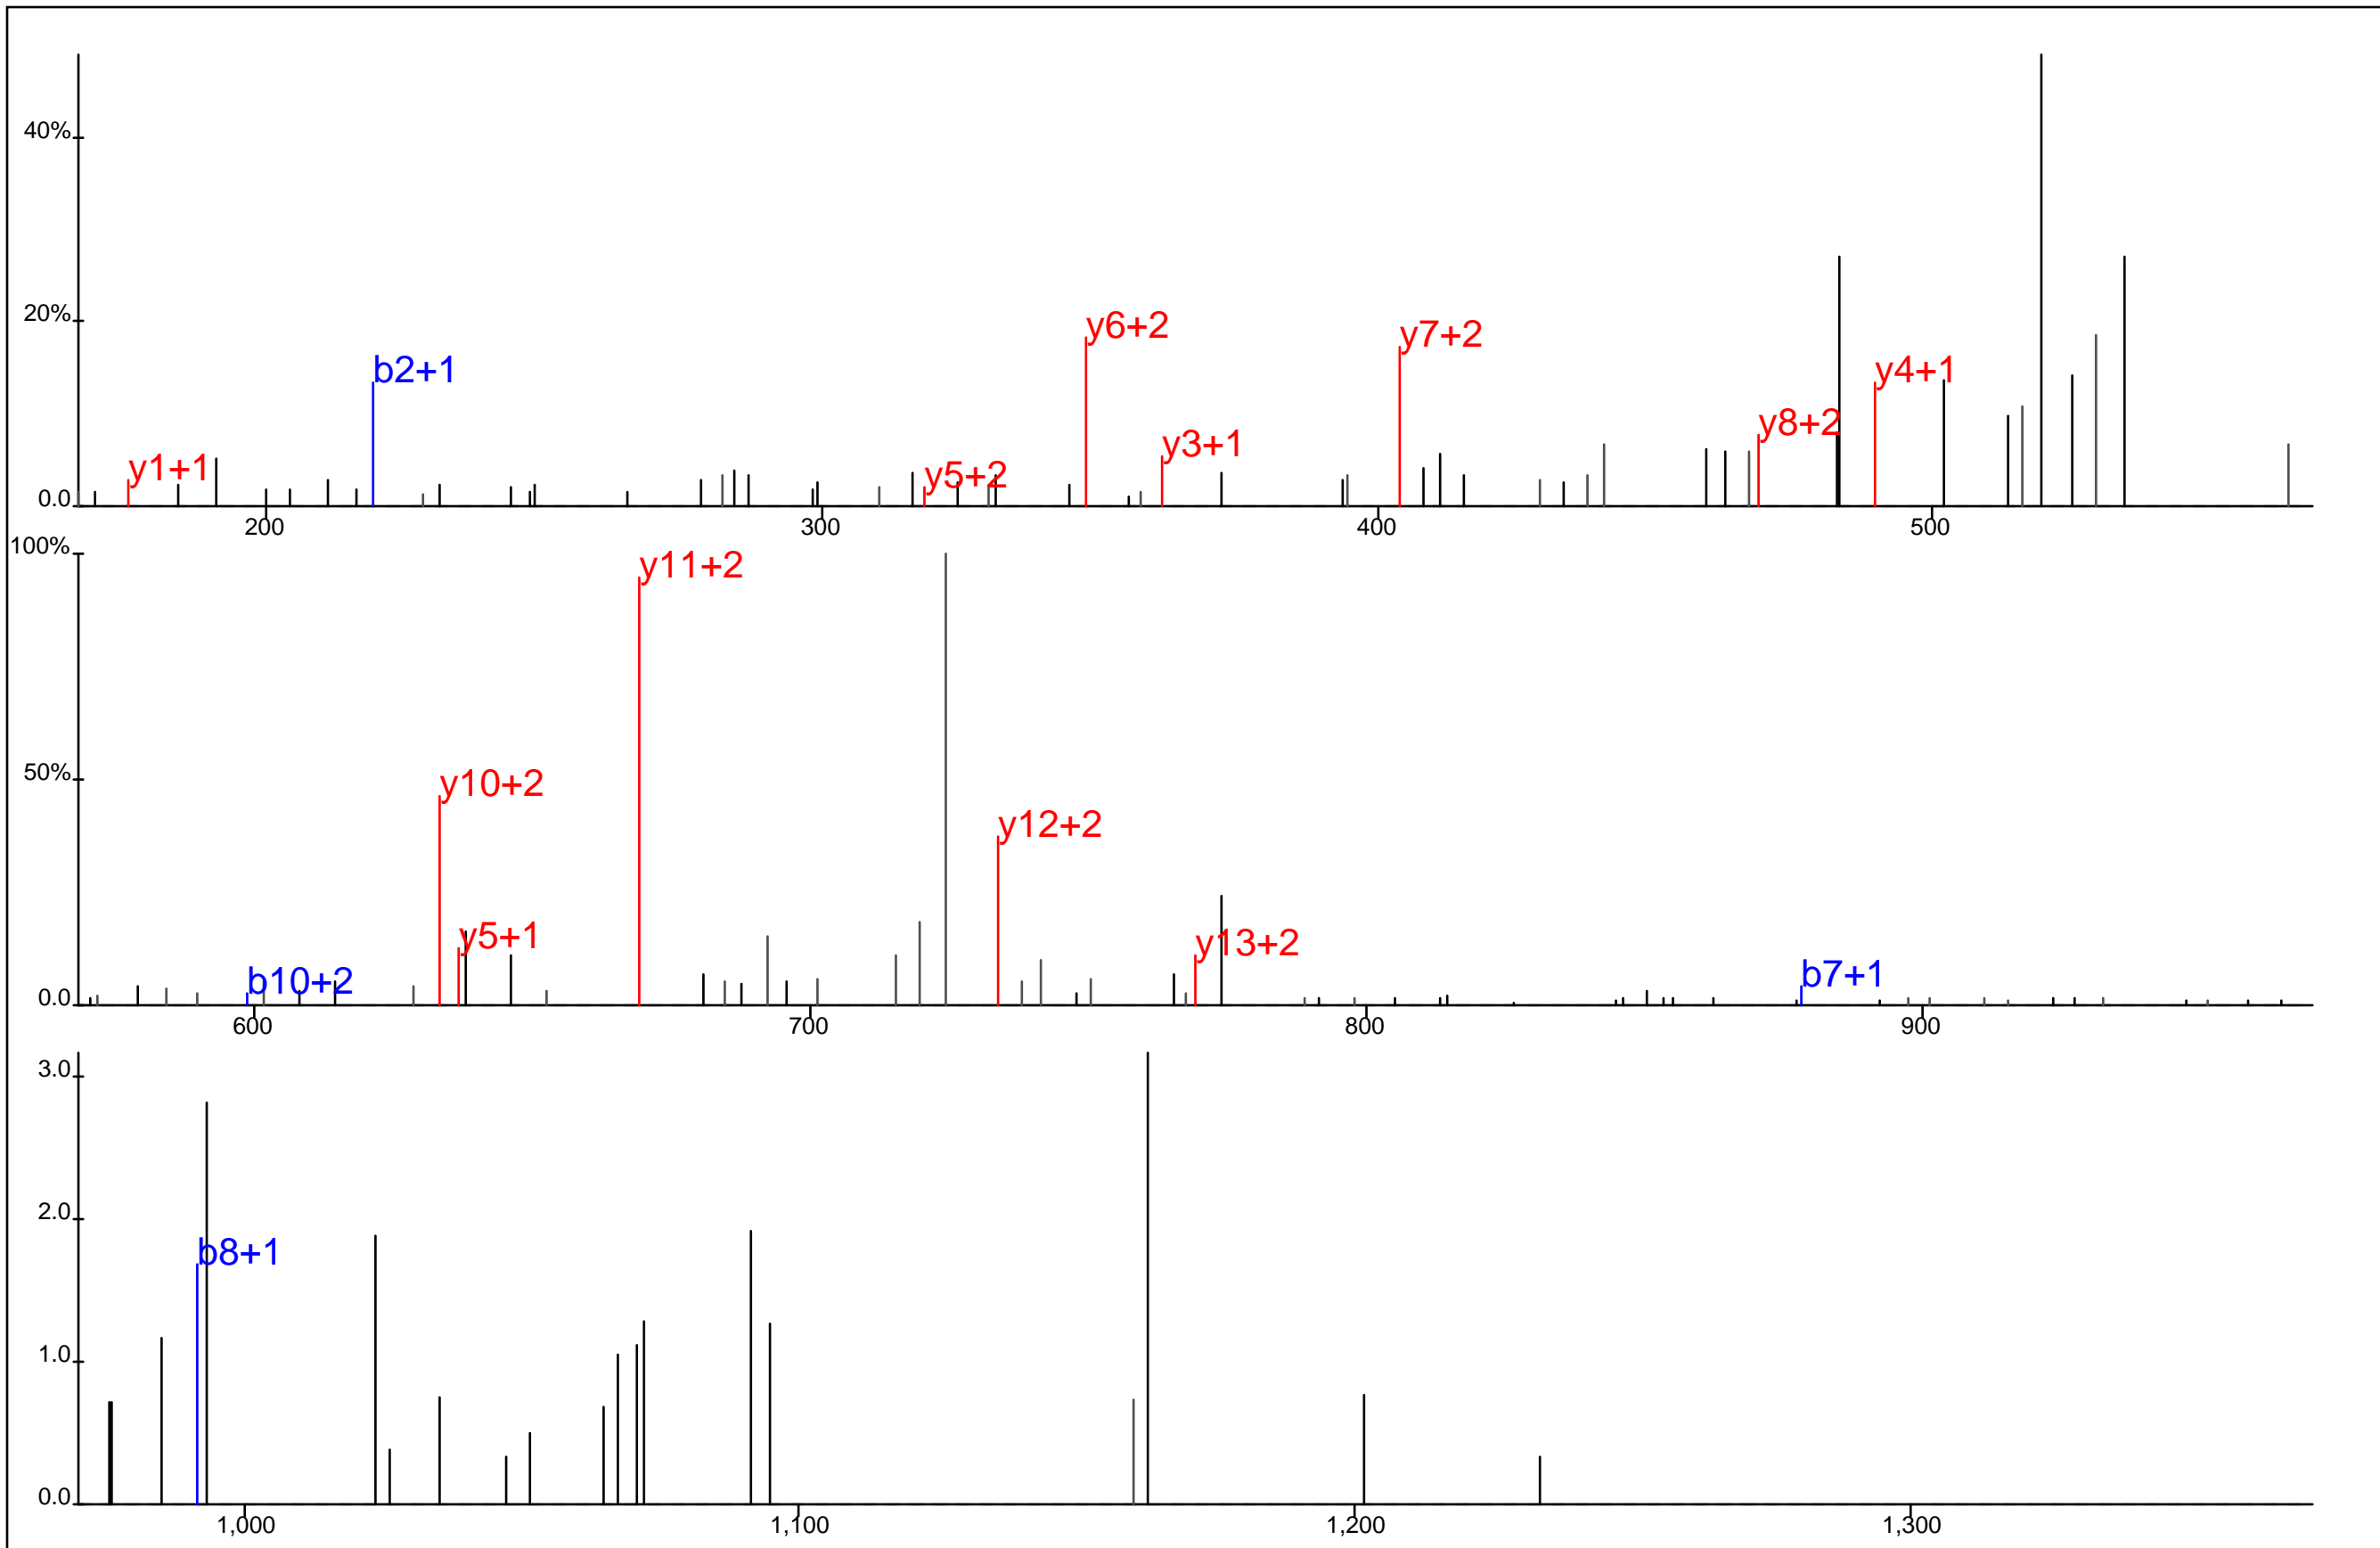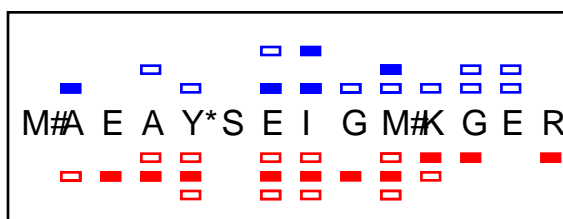

Protein Name: T cell antigen receptor, zeta  
 gi Accession: 0  
 Precursor Mass: 561.8948+3  
 Delta Mass: 3.314 ppm  
 XCorr: 24.8

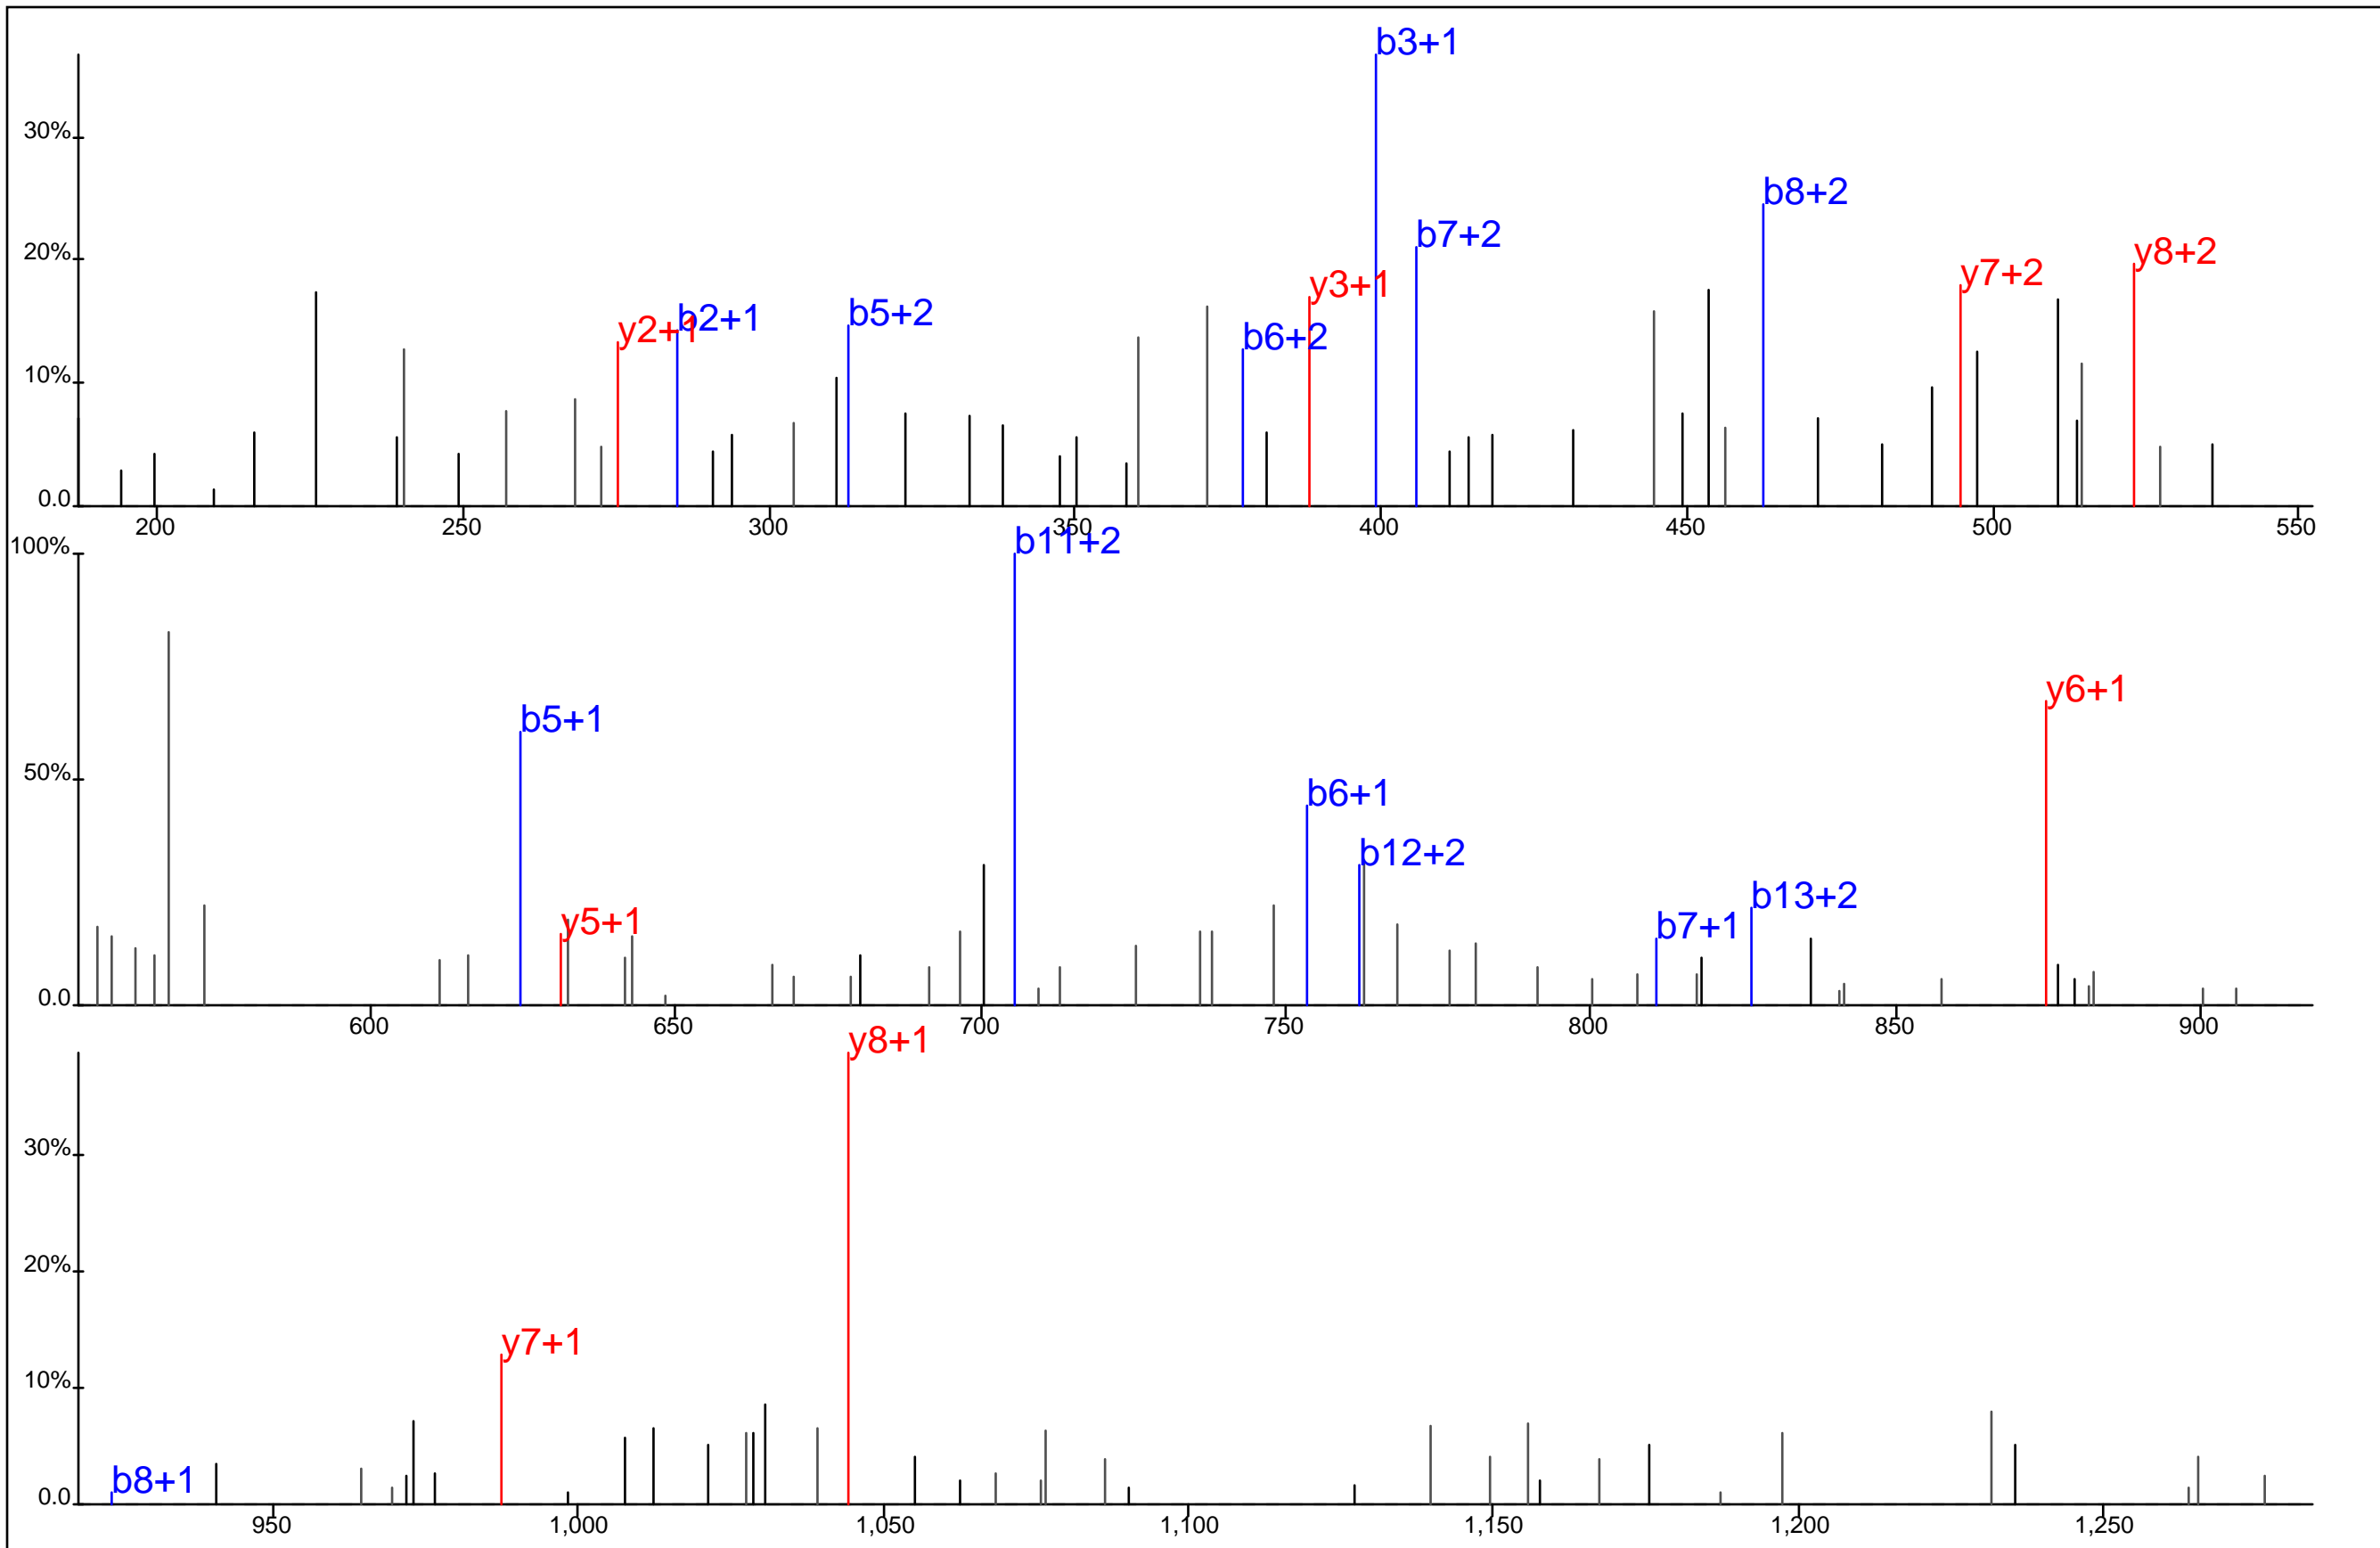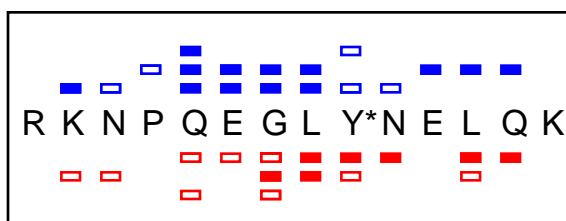

Protein Name: T cell antigen receptor, zeta  
 gi Accession: 0  
 Precursor Mass: 599.6279+3  
 Delta Mass: 0.013 ppm  
 XCorr: 35.6

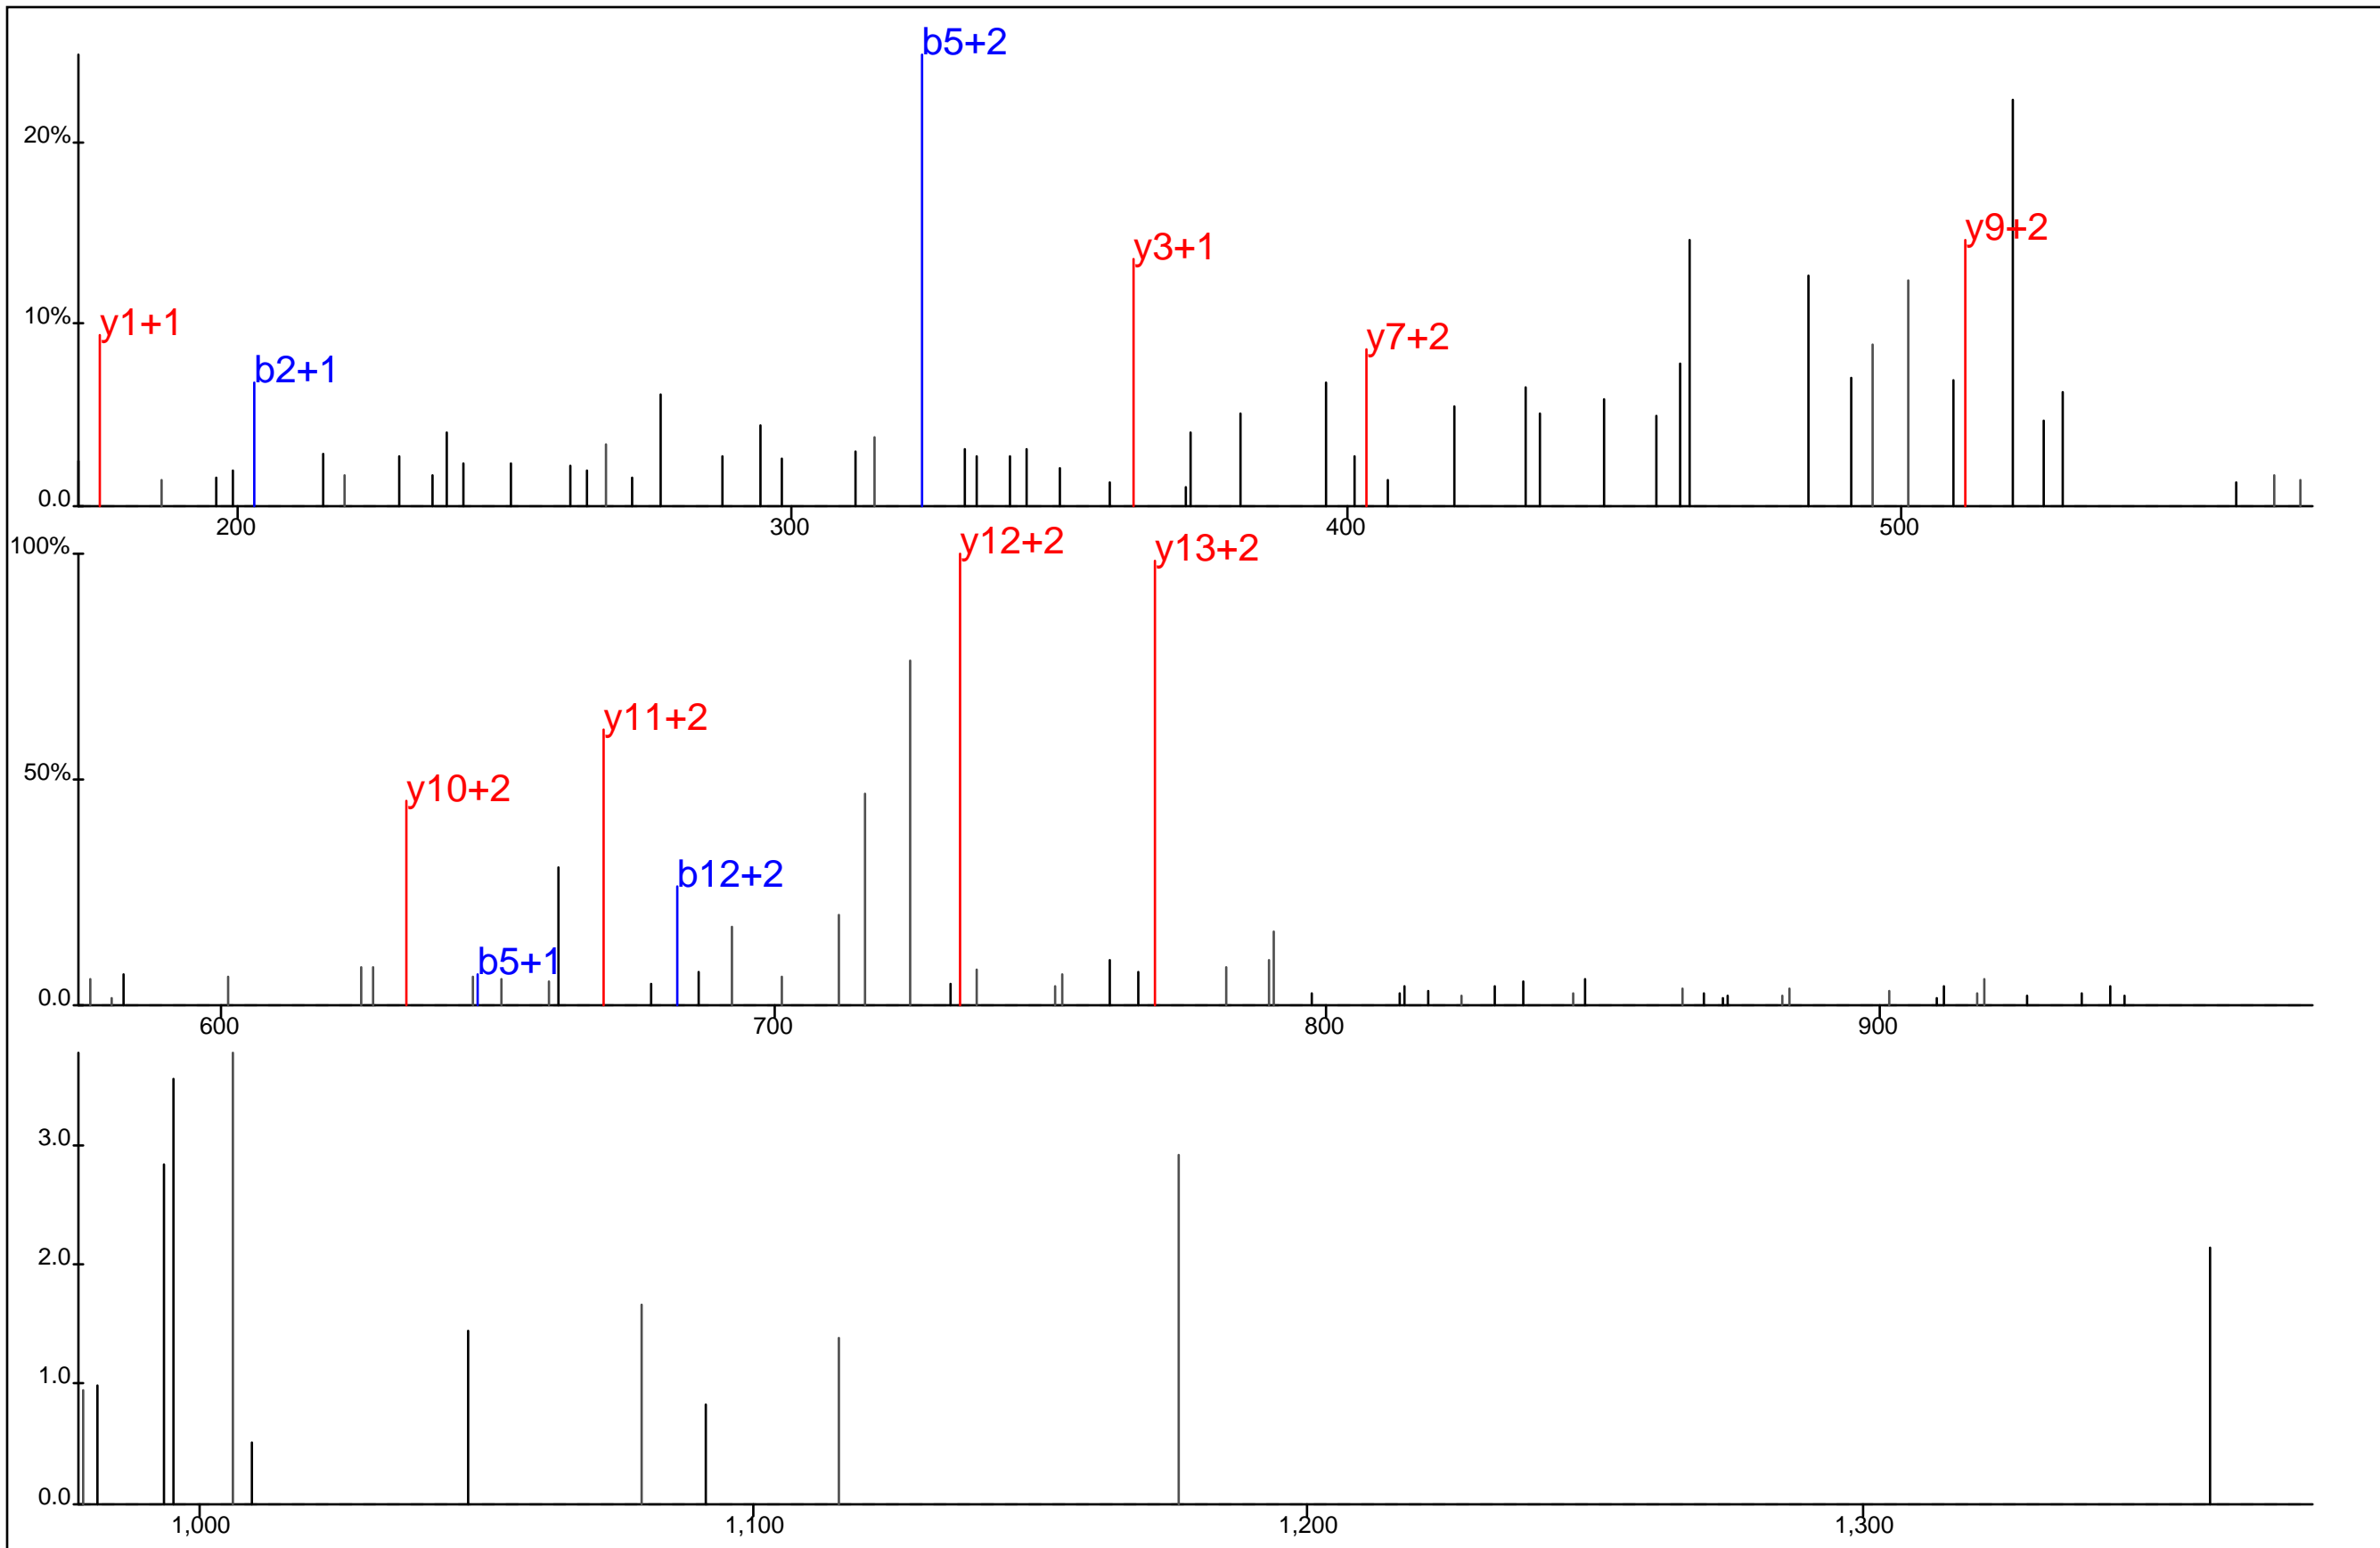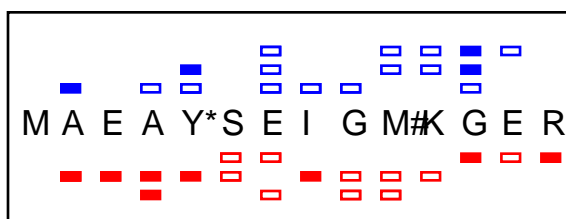

Protein Name: T cell antigen receptor, zeta  
 gi Accession: 0  
 Precursor Mass: 556.5661+3  
 Delta Mass: 1.990 ppm  
 XCorr: 30.47



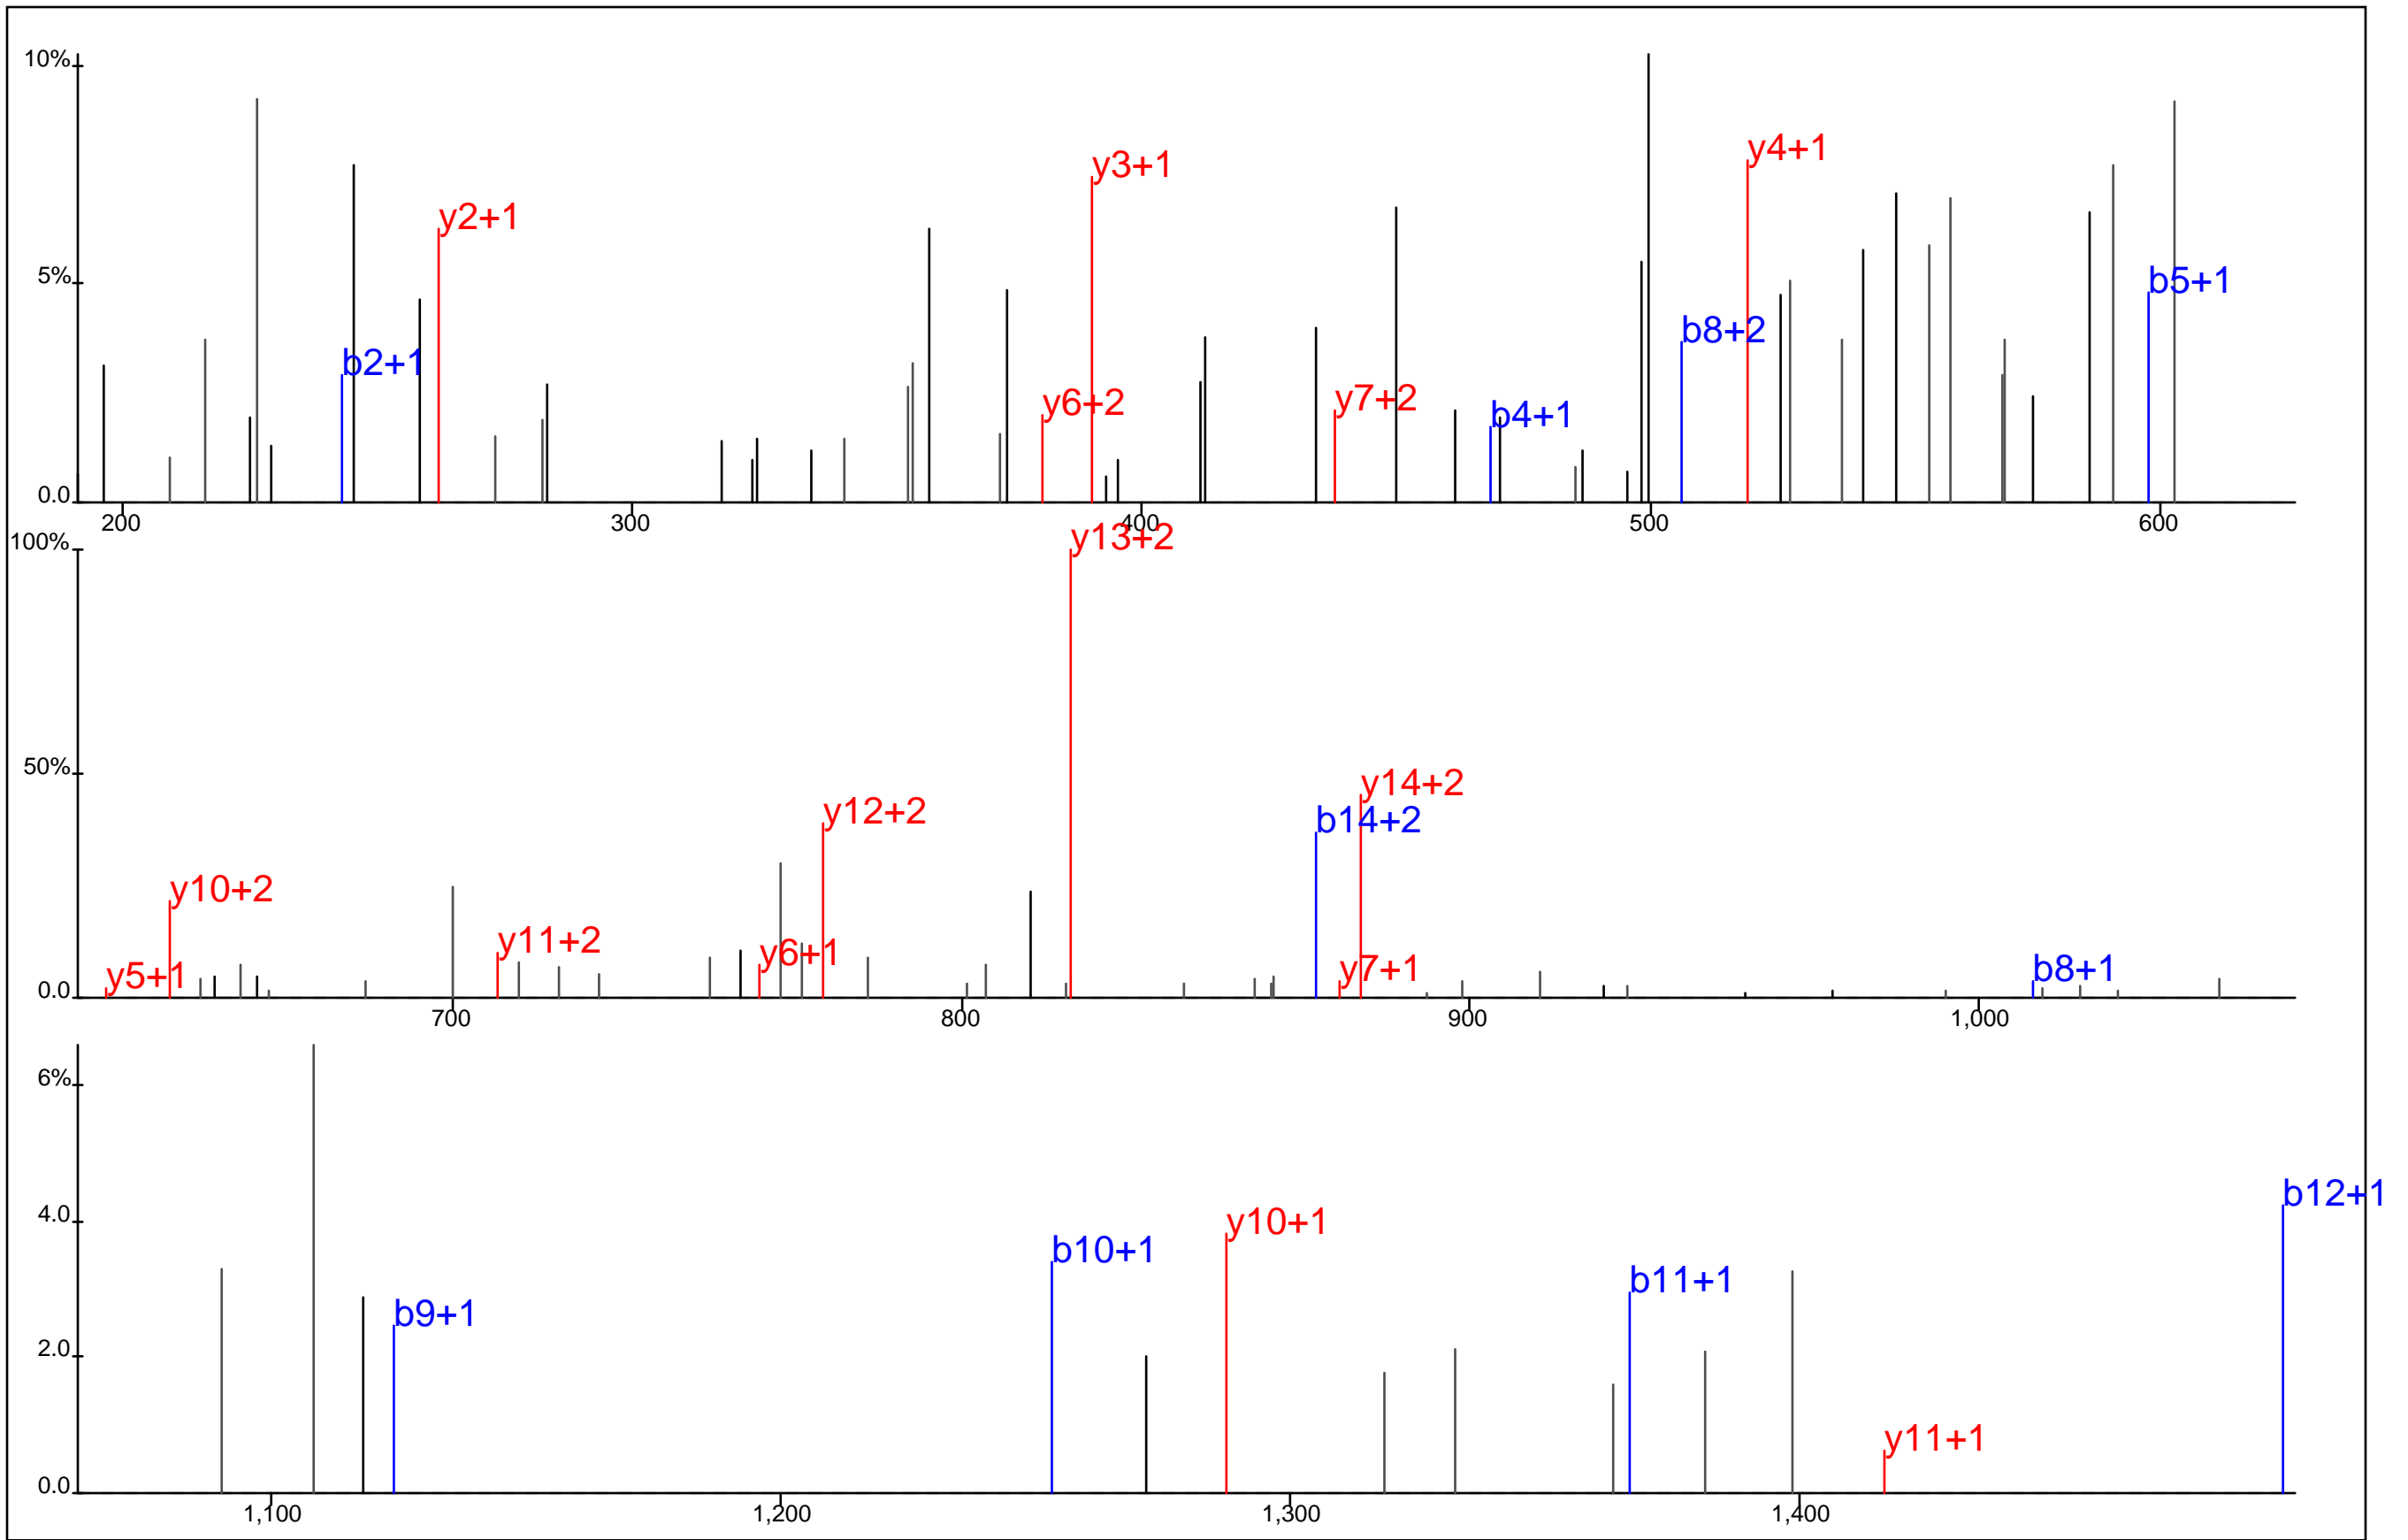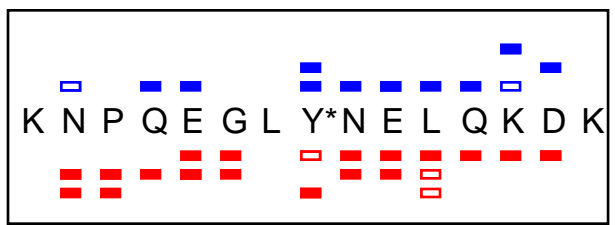

Protein Name: T cell antigen receptor, zeta  
 gi Accession: 0  
 Precursor Mass: 628.6352+3  
 Delta Mass: 0.634 ppm  
 XCorr: 31.01



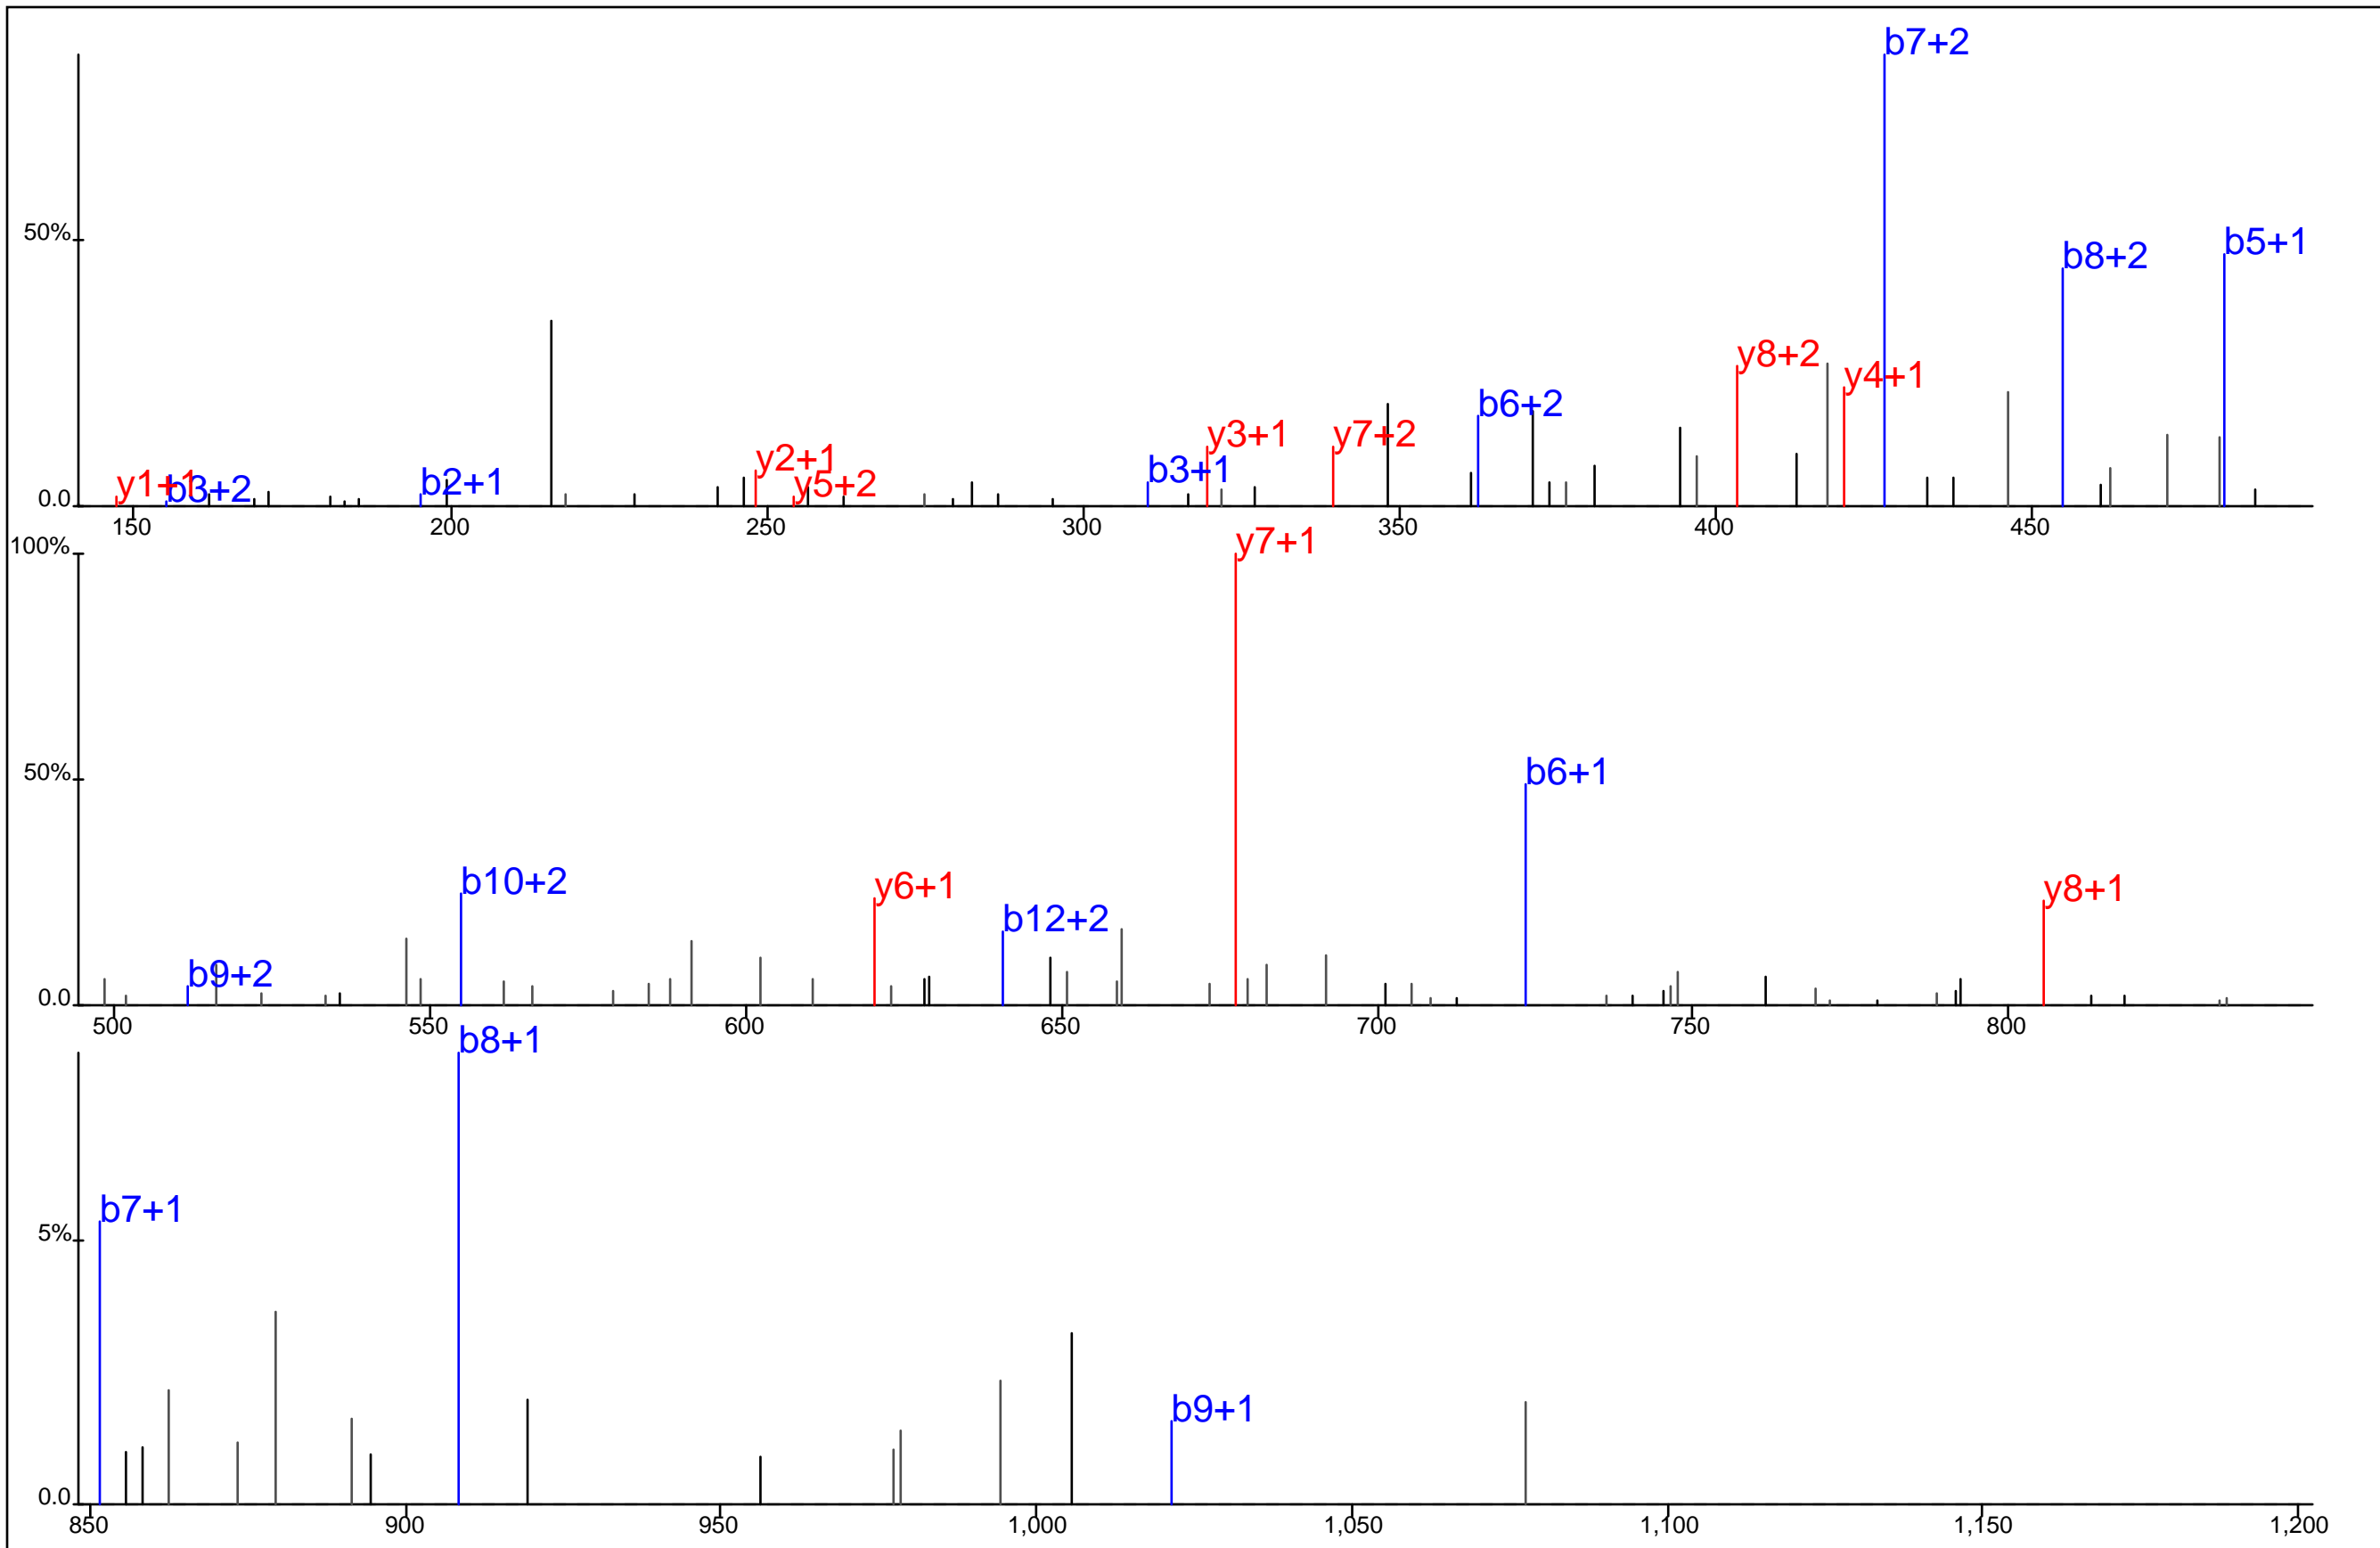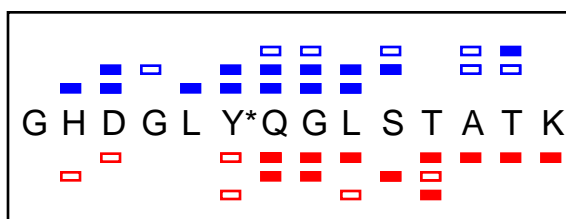

Protein Name: T cell antigen receptor, zeta  
 gi Accession: 0  
 Precursor Mass: 509.8996+3  
 Delta Mass: 0.214 ppm  
 XCorr: 39.33





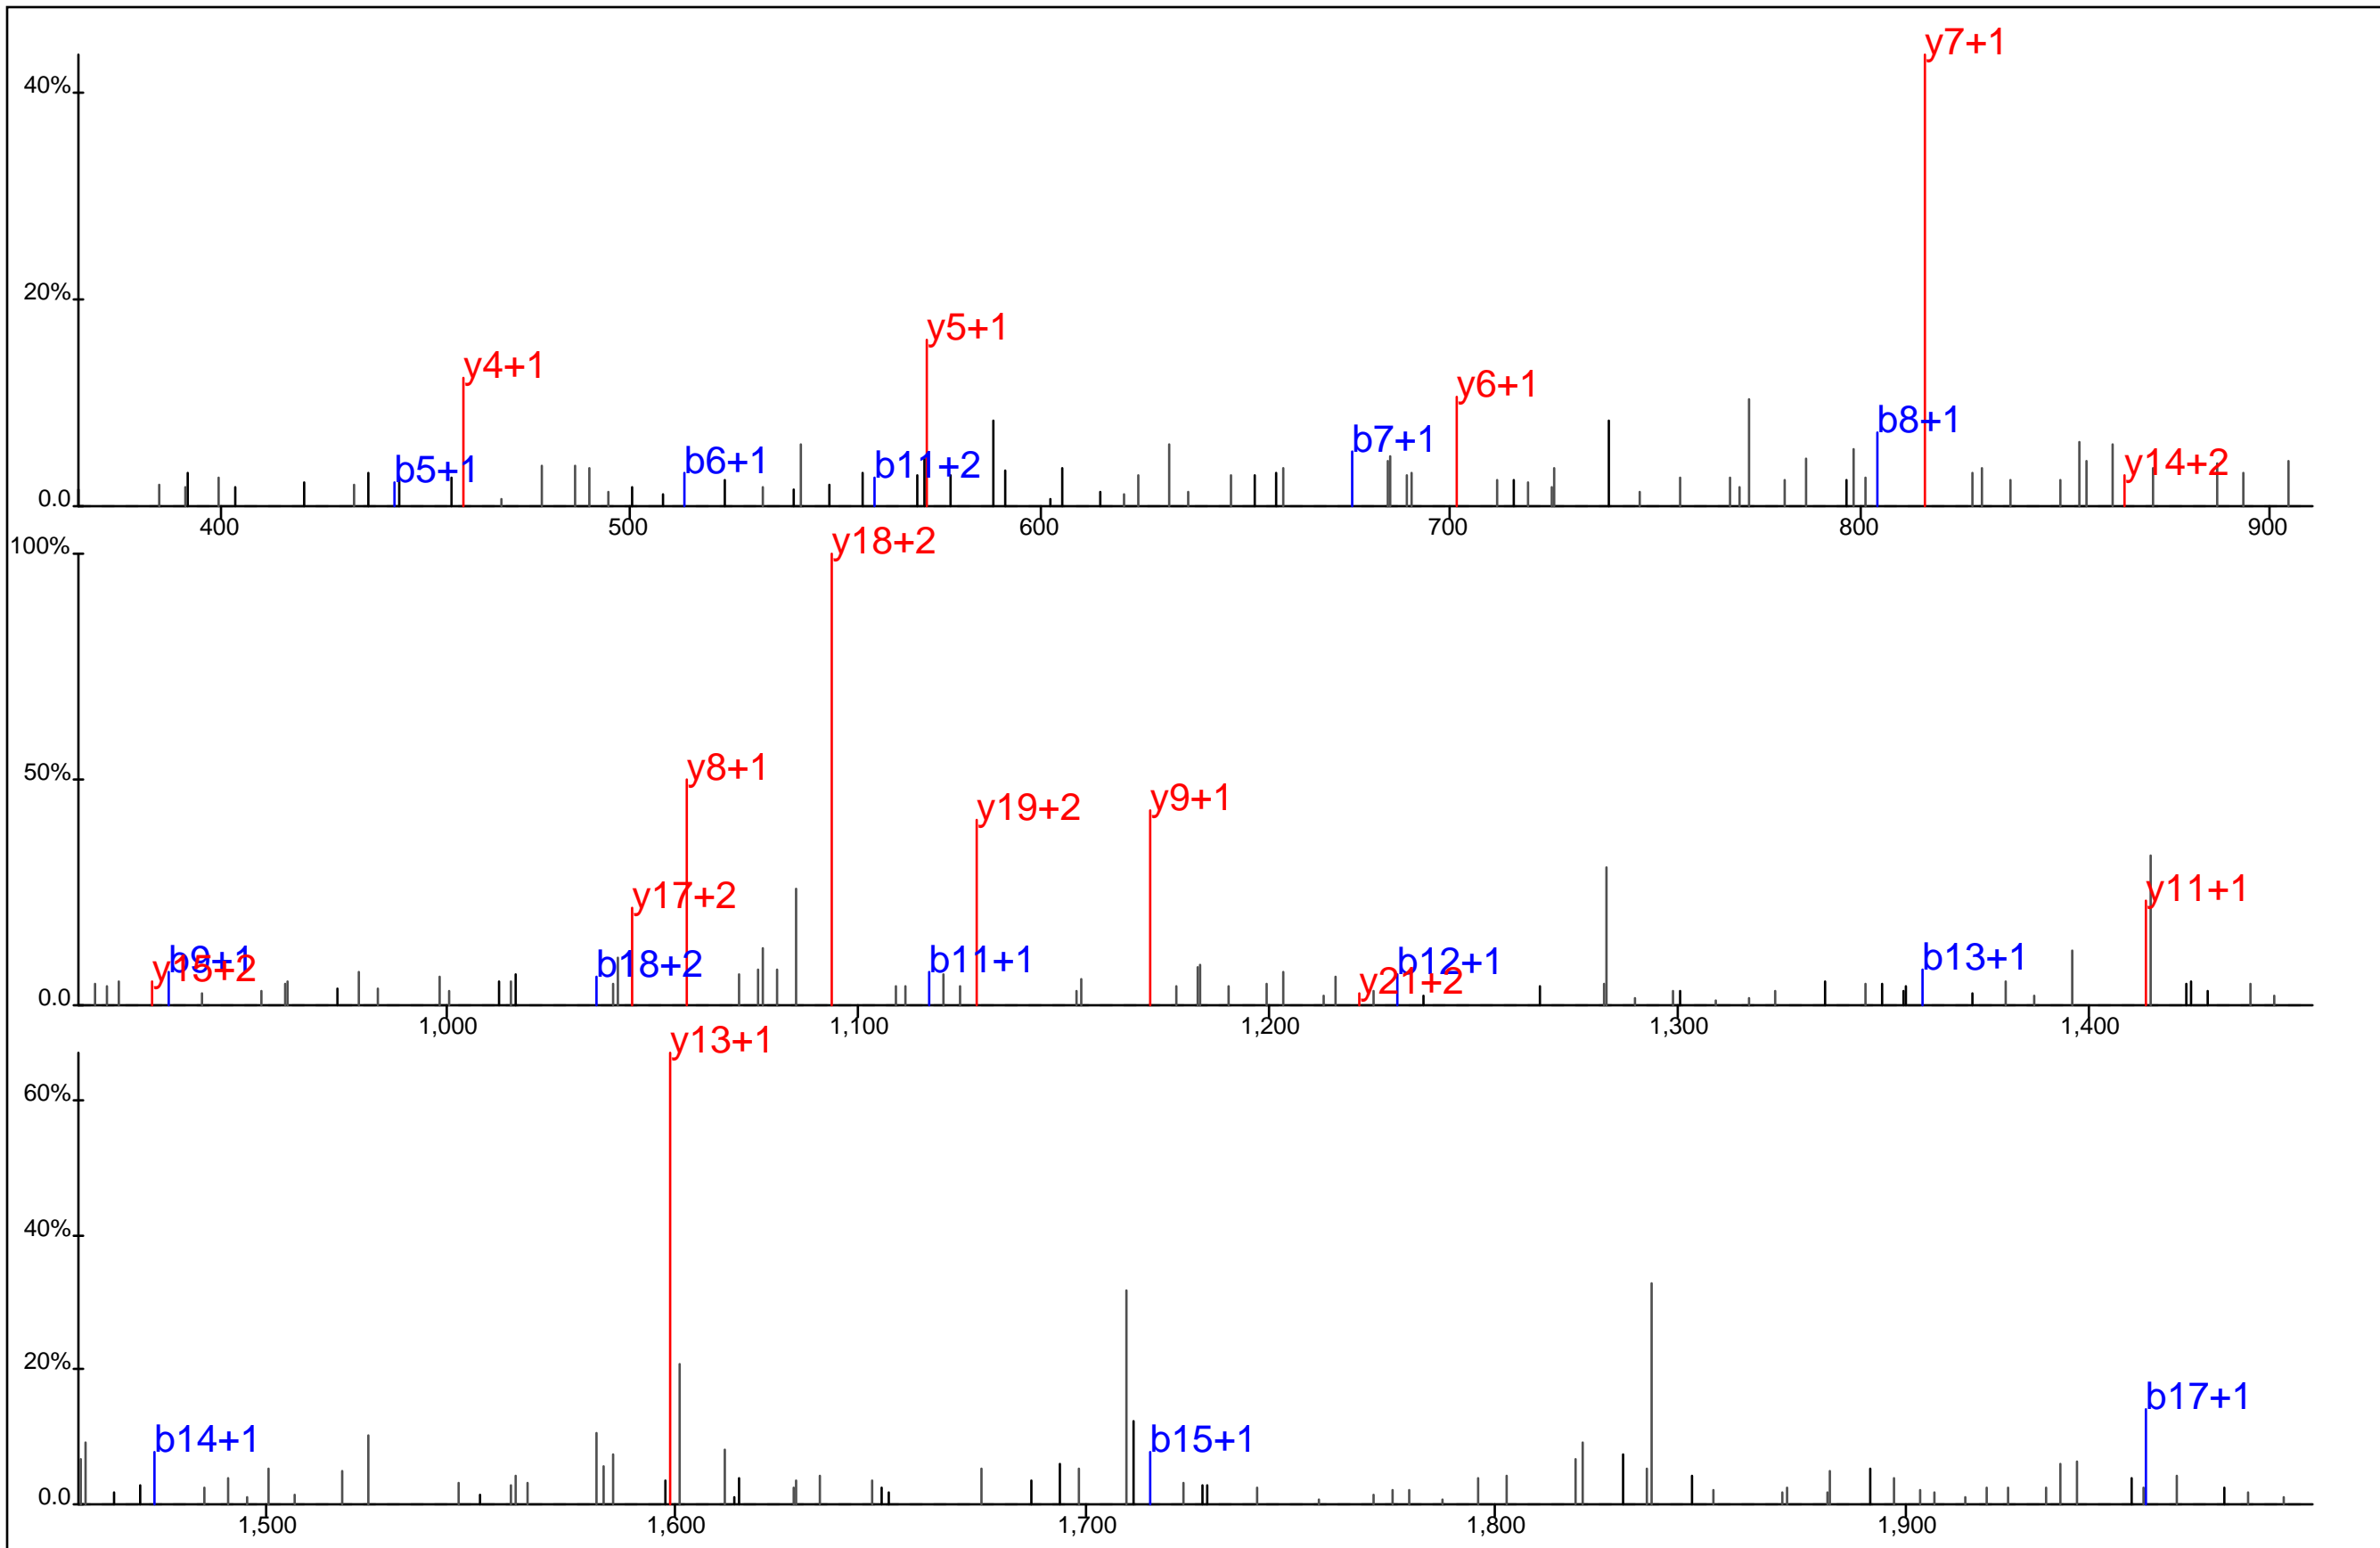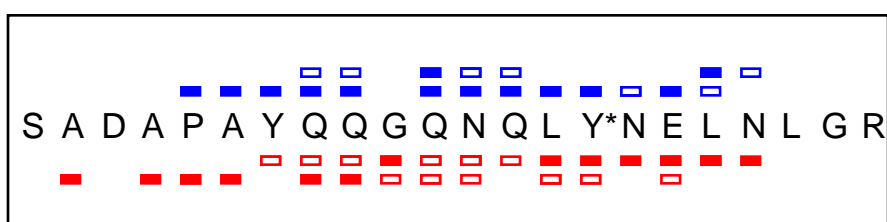

Protein Name: T cell antigen receptor, zeta  
 gi Accession: 0  
 Precursor Mass: 1,265.5757+2  
 Delta Mass: 3.288 ppm  
 XCorr: 45.32

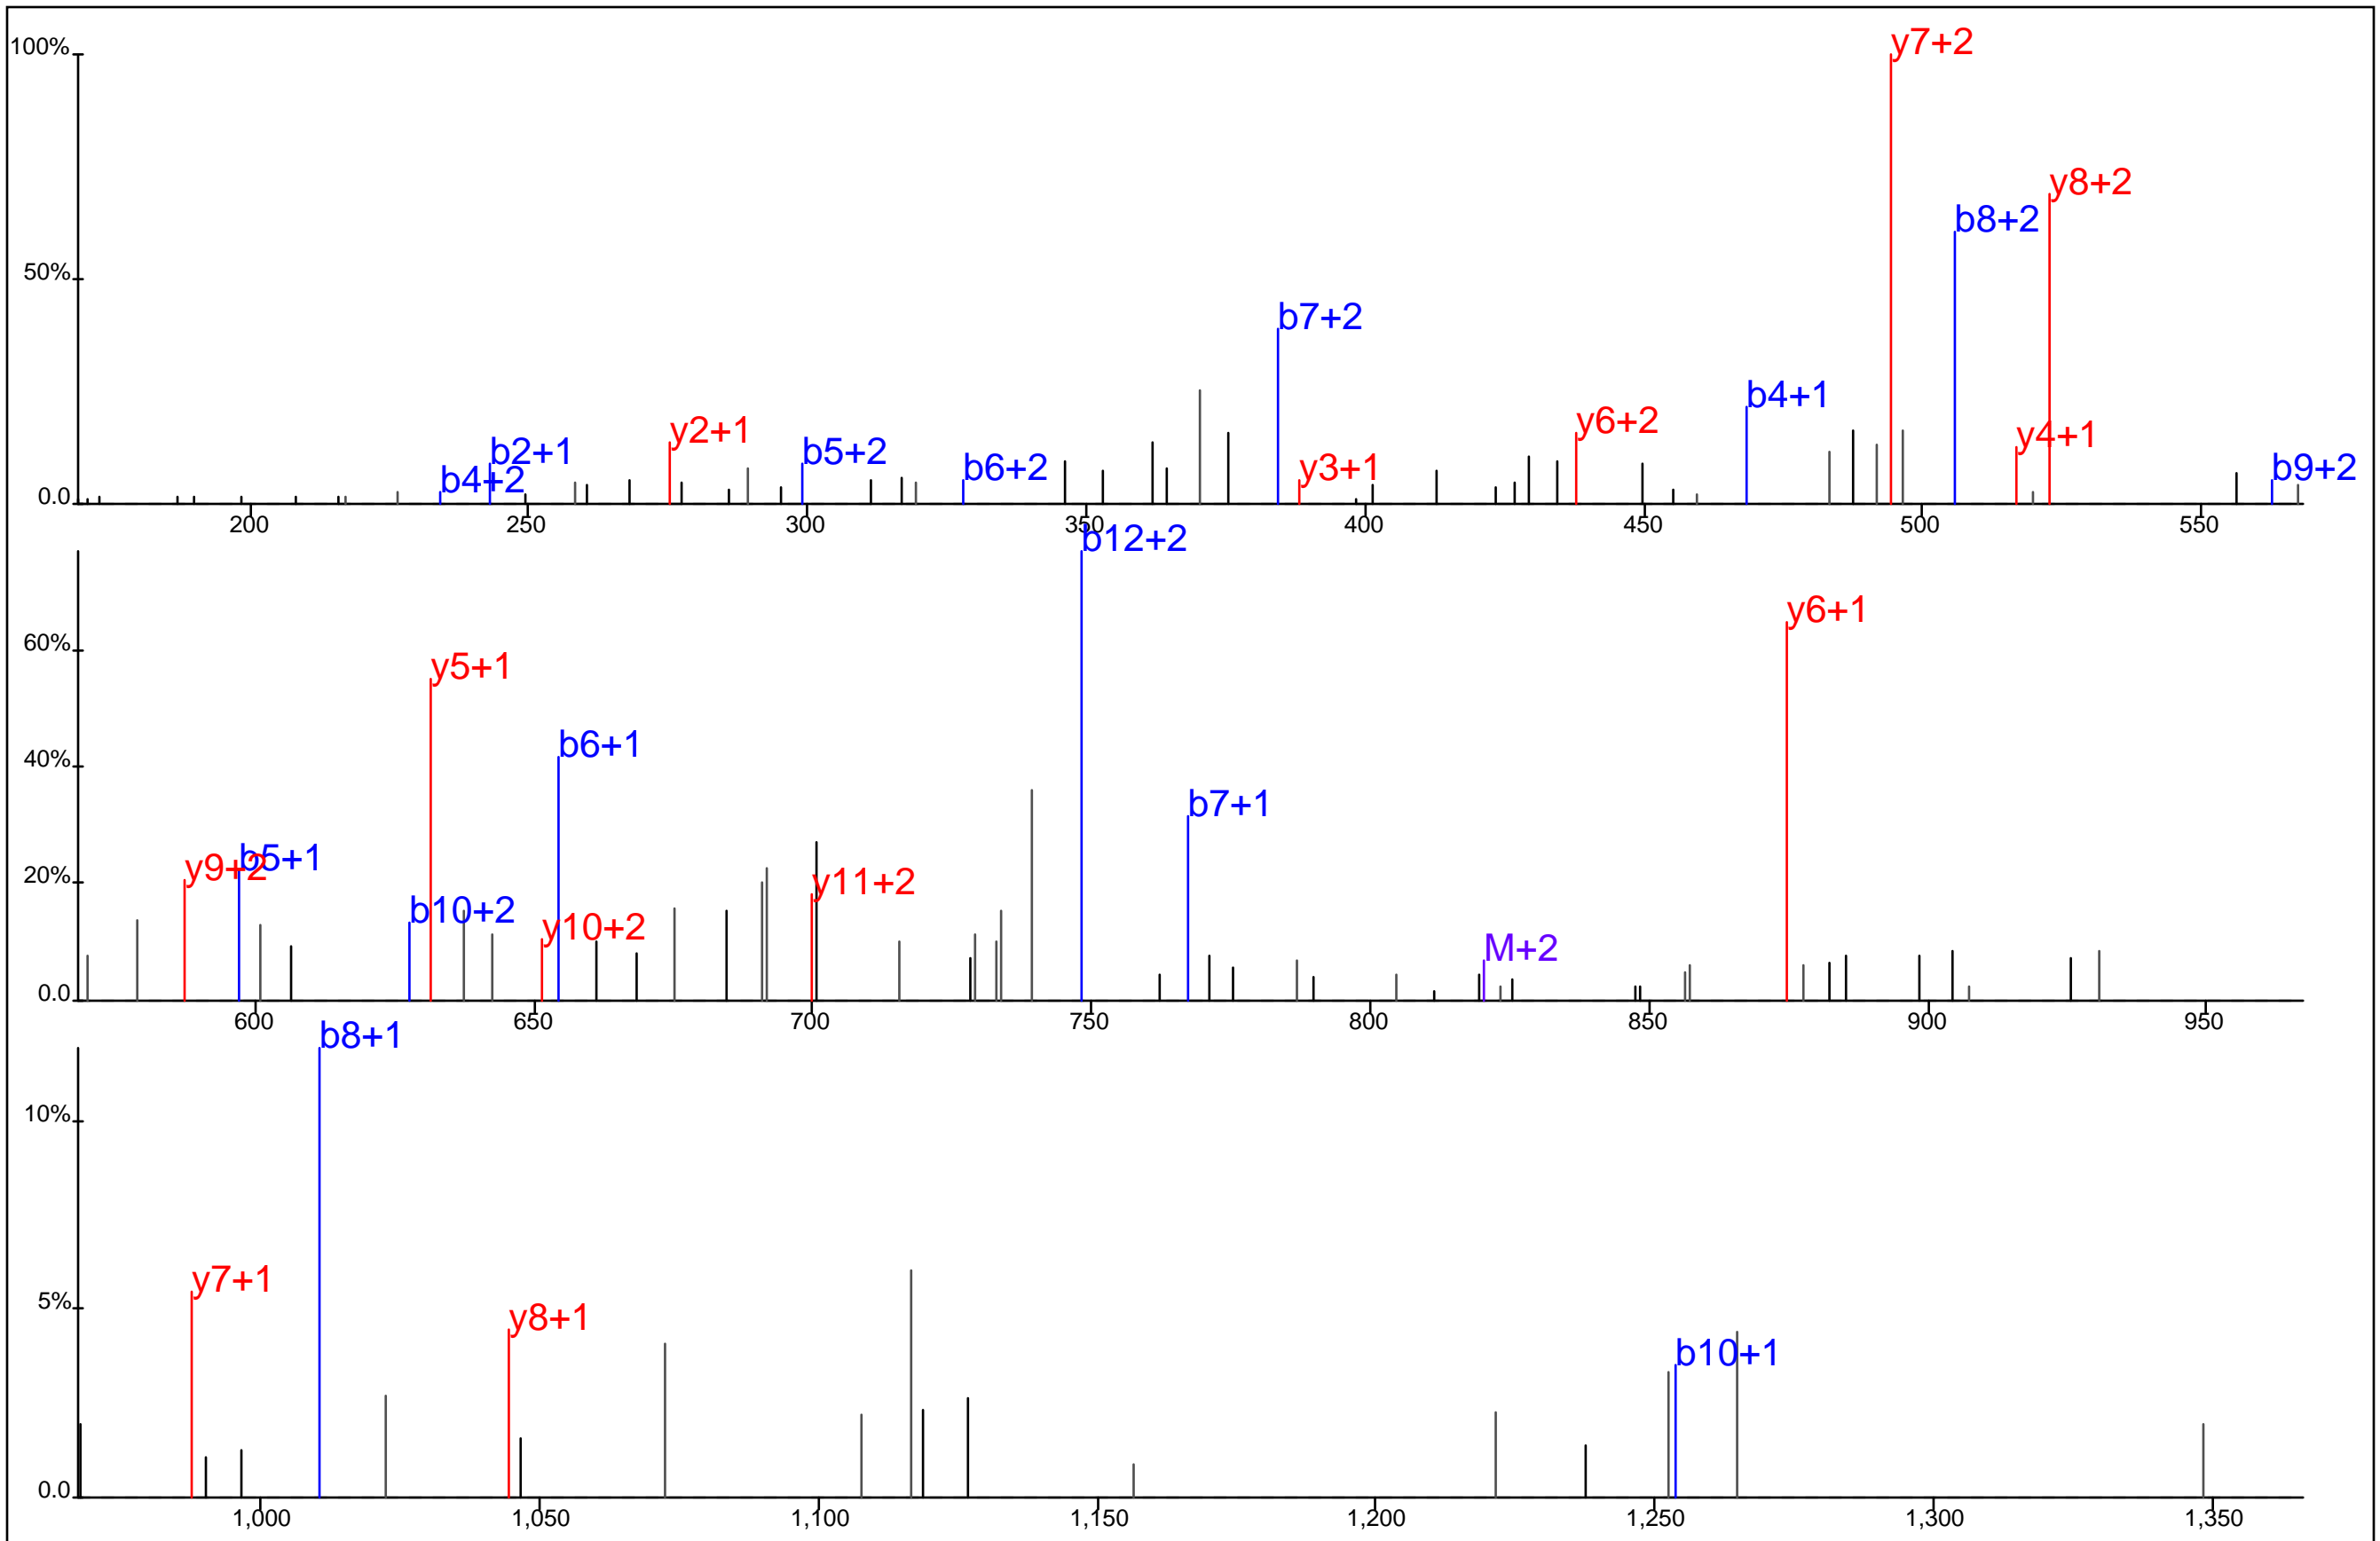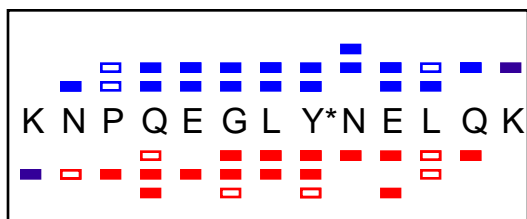

Protein Name: T cell antigen receptor, zeta  
 gi Accession: 0  
 Precursor Mass: 547.5948+3  
 Delta Mass: 1.263 ppm  
 XCorr: 49.78

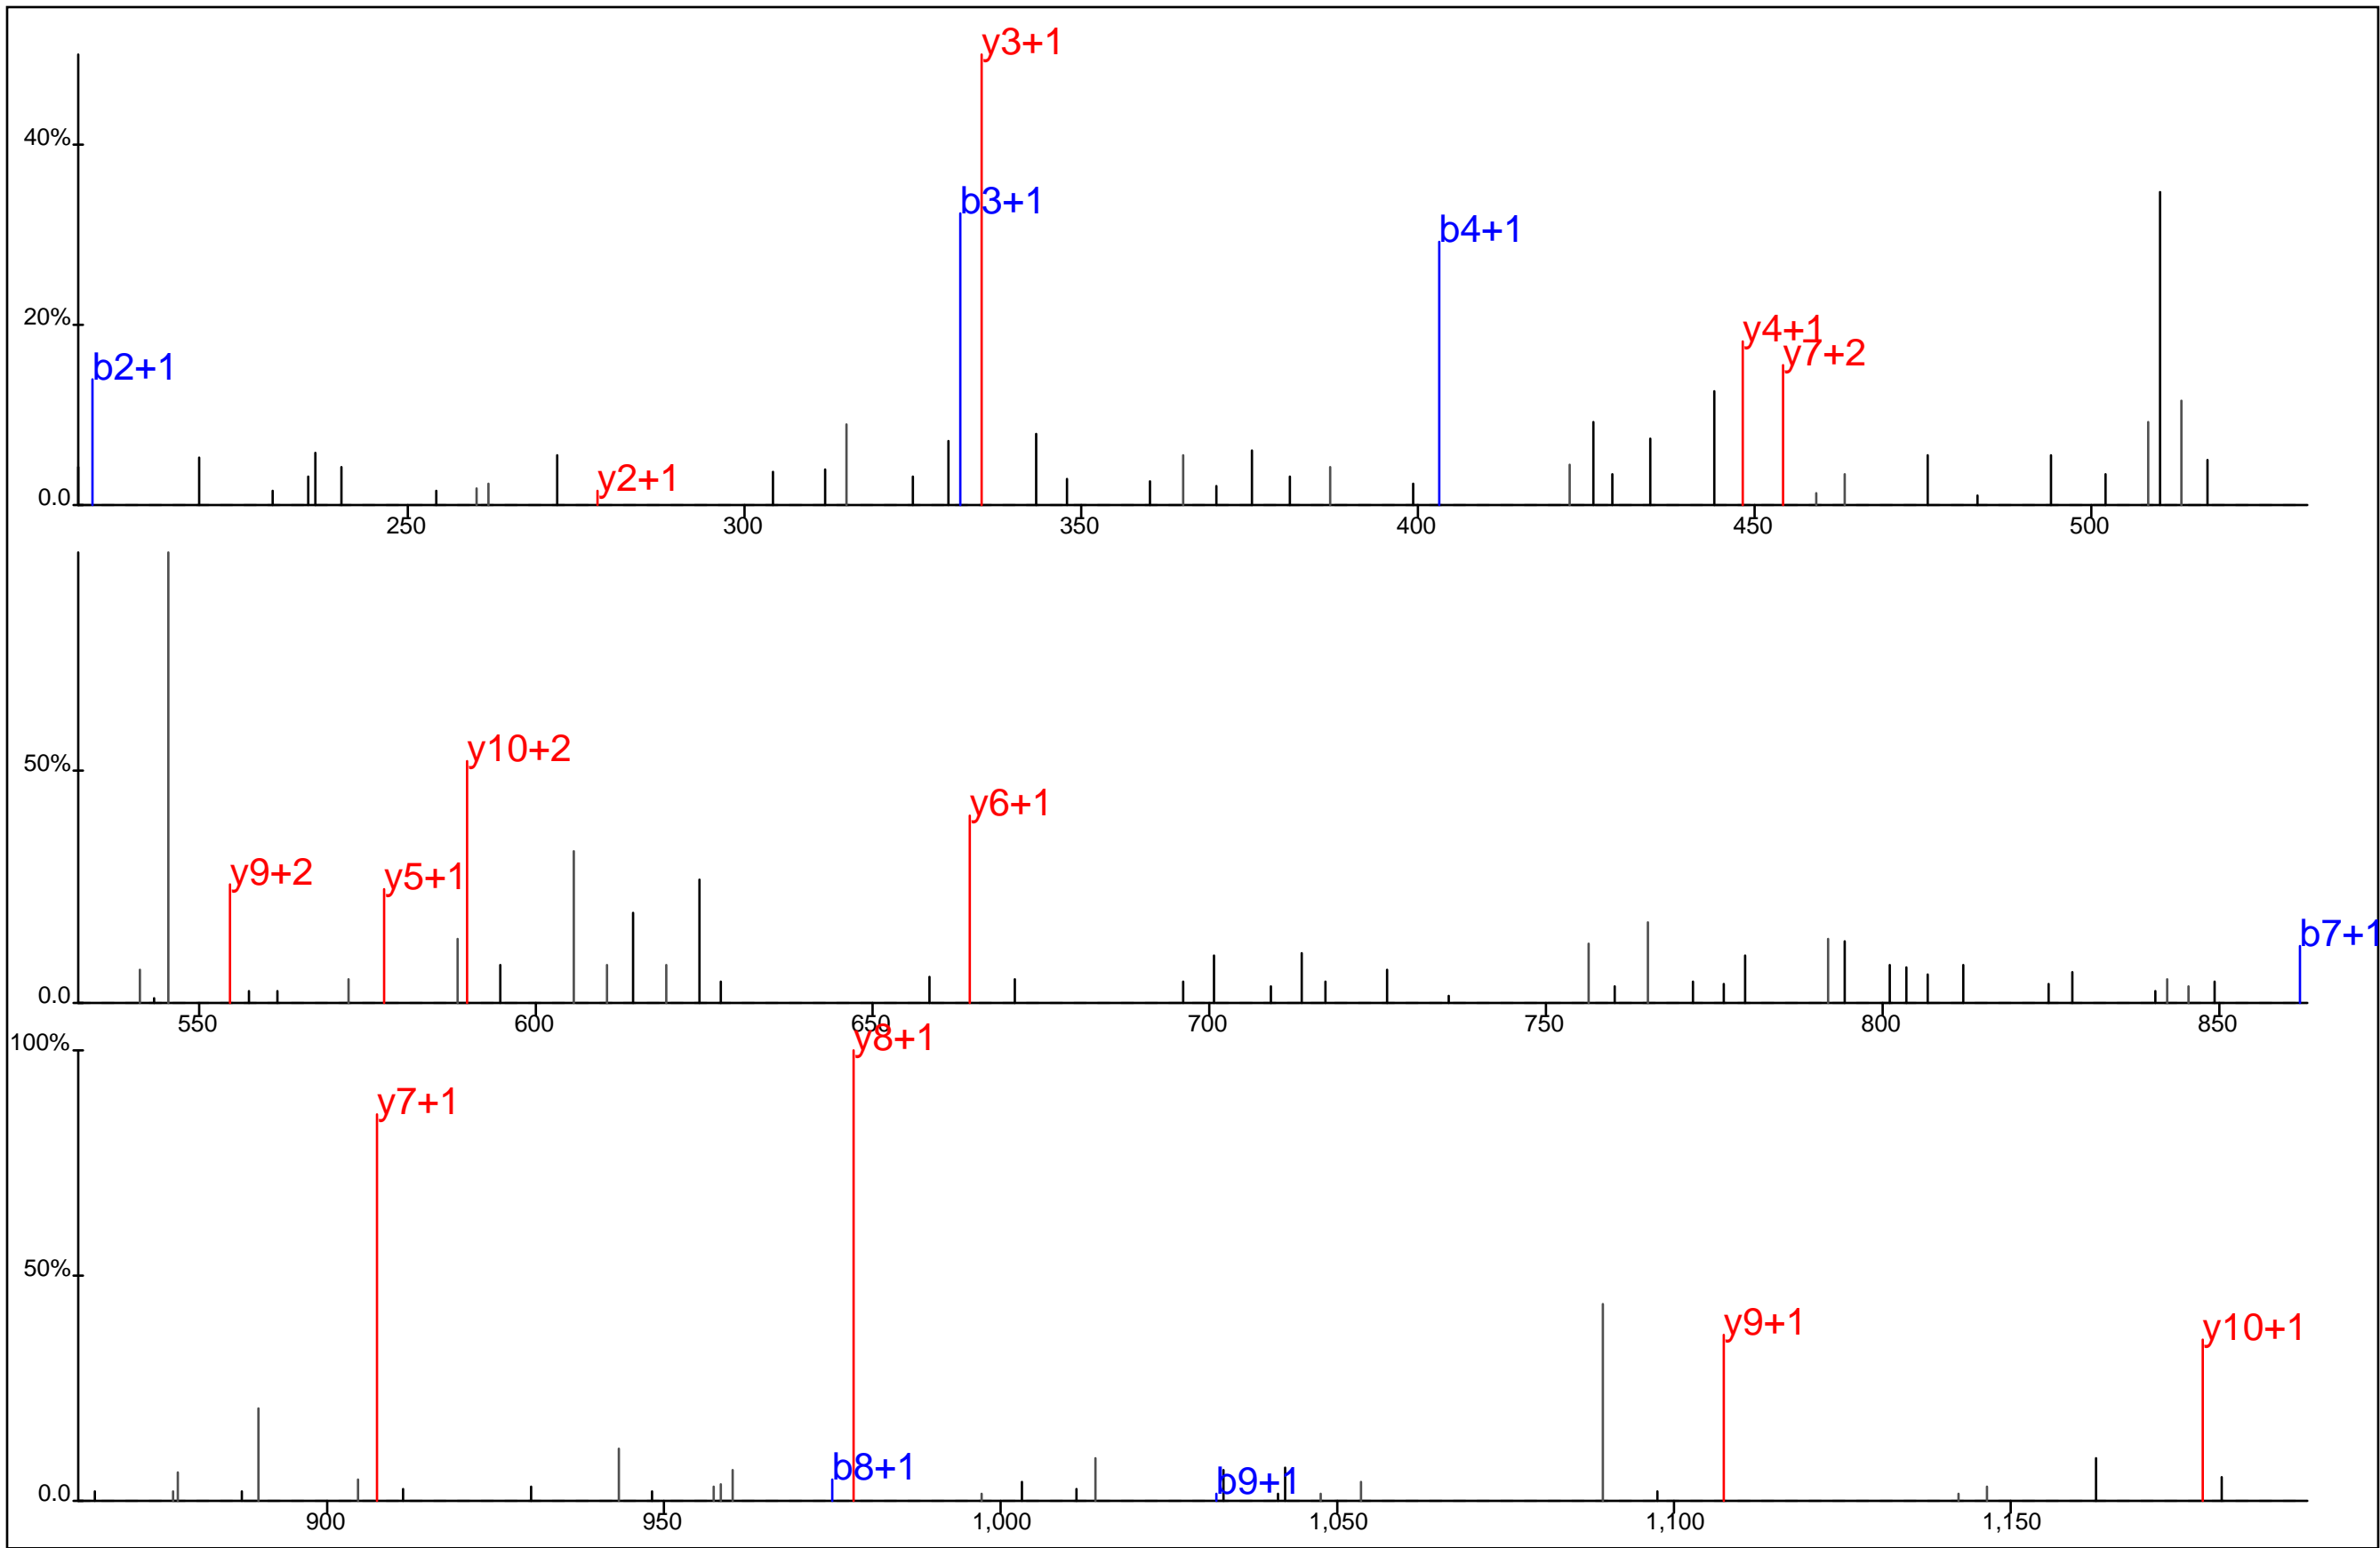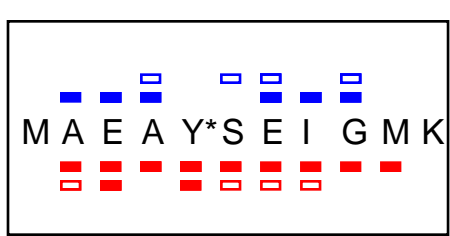

Protein Name: T cell antigen receptor, zeta  
 gi Accession: 0  
 Precursor Mass: 655.2653+2  
 Delta Mass: 2.300 ppm  
 XCorr: 58.4

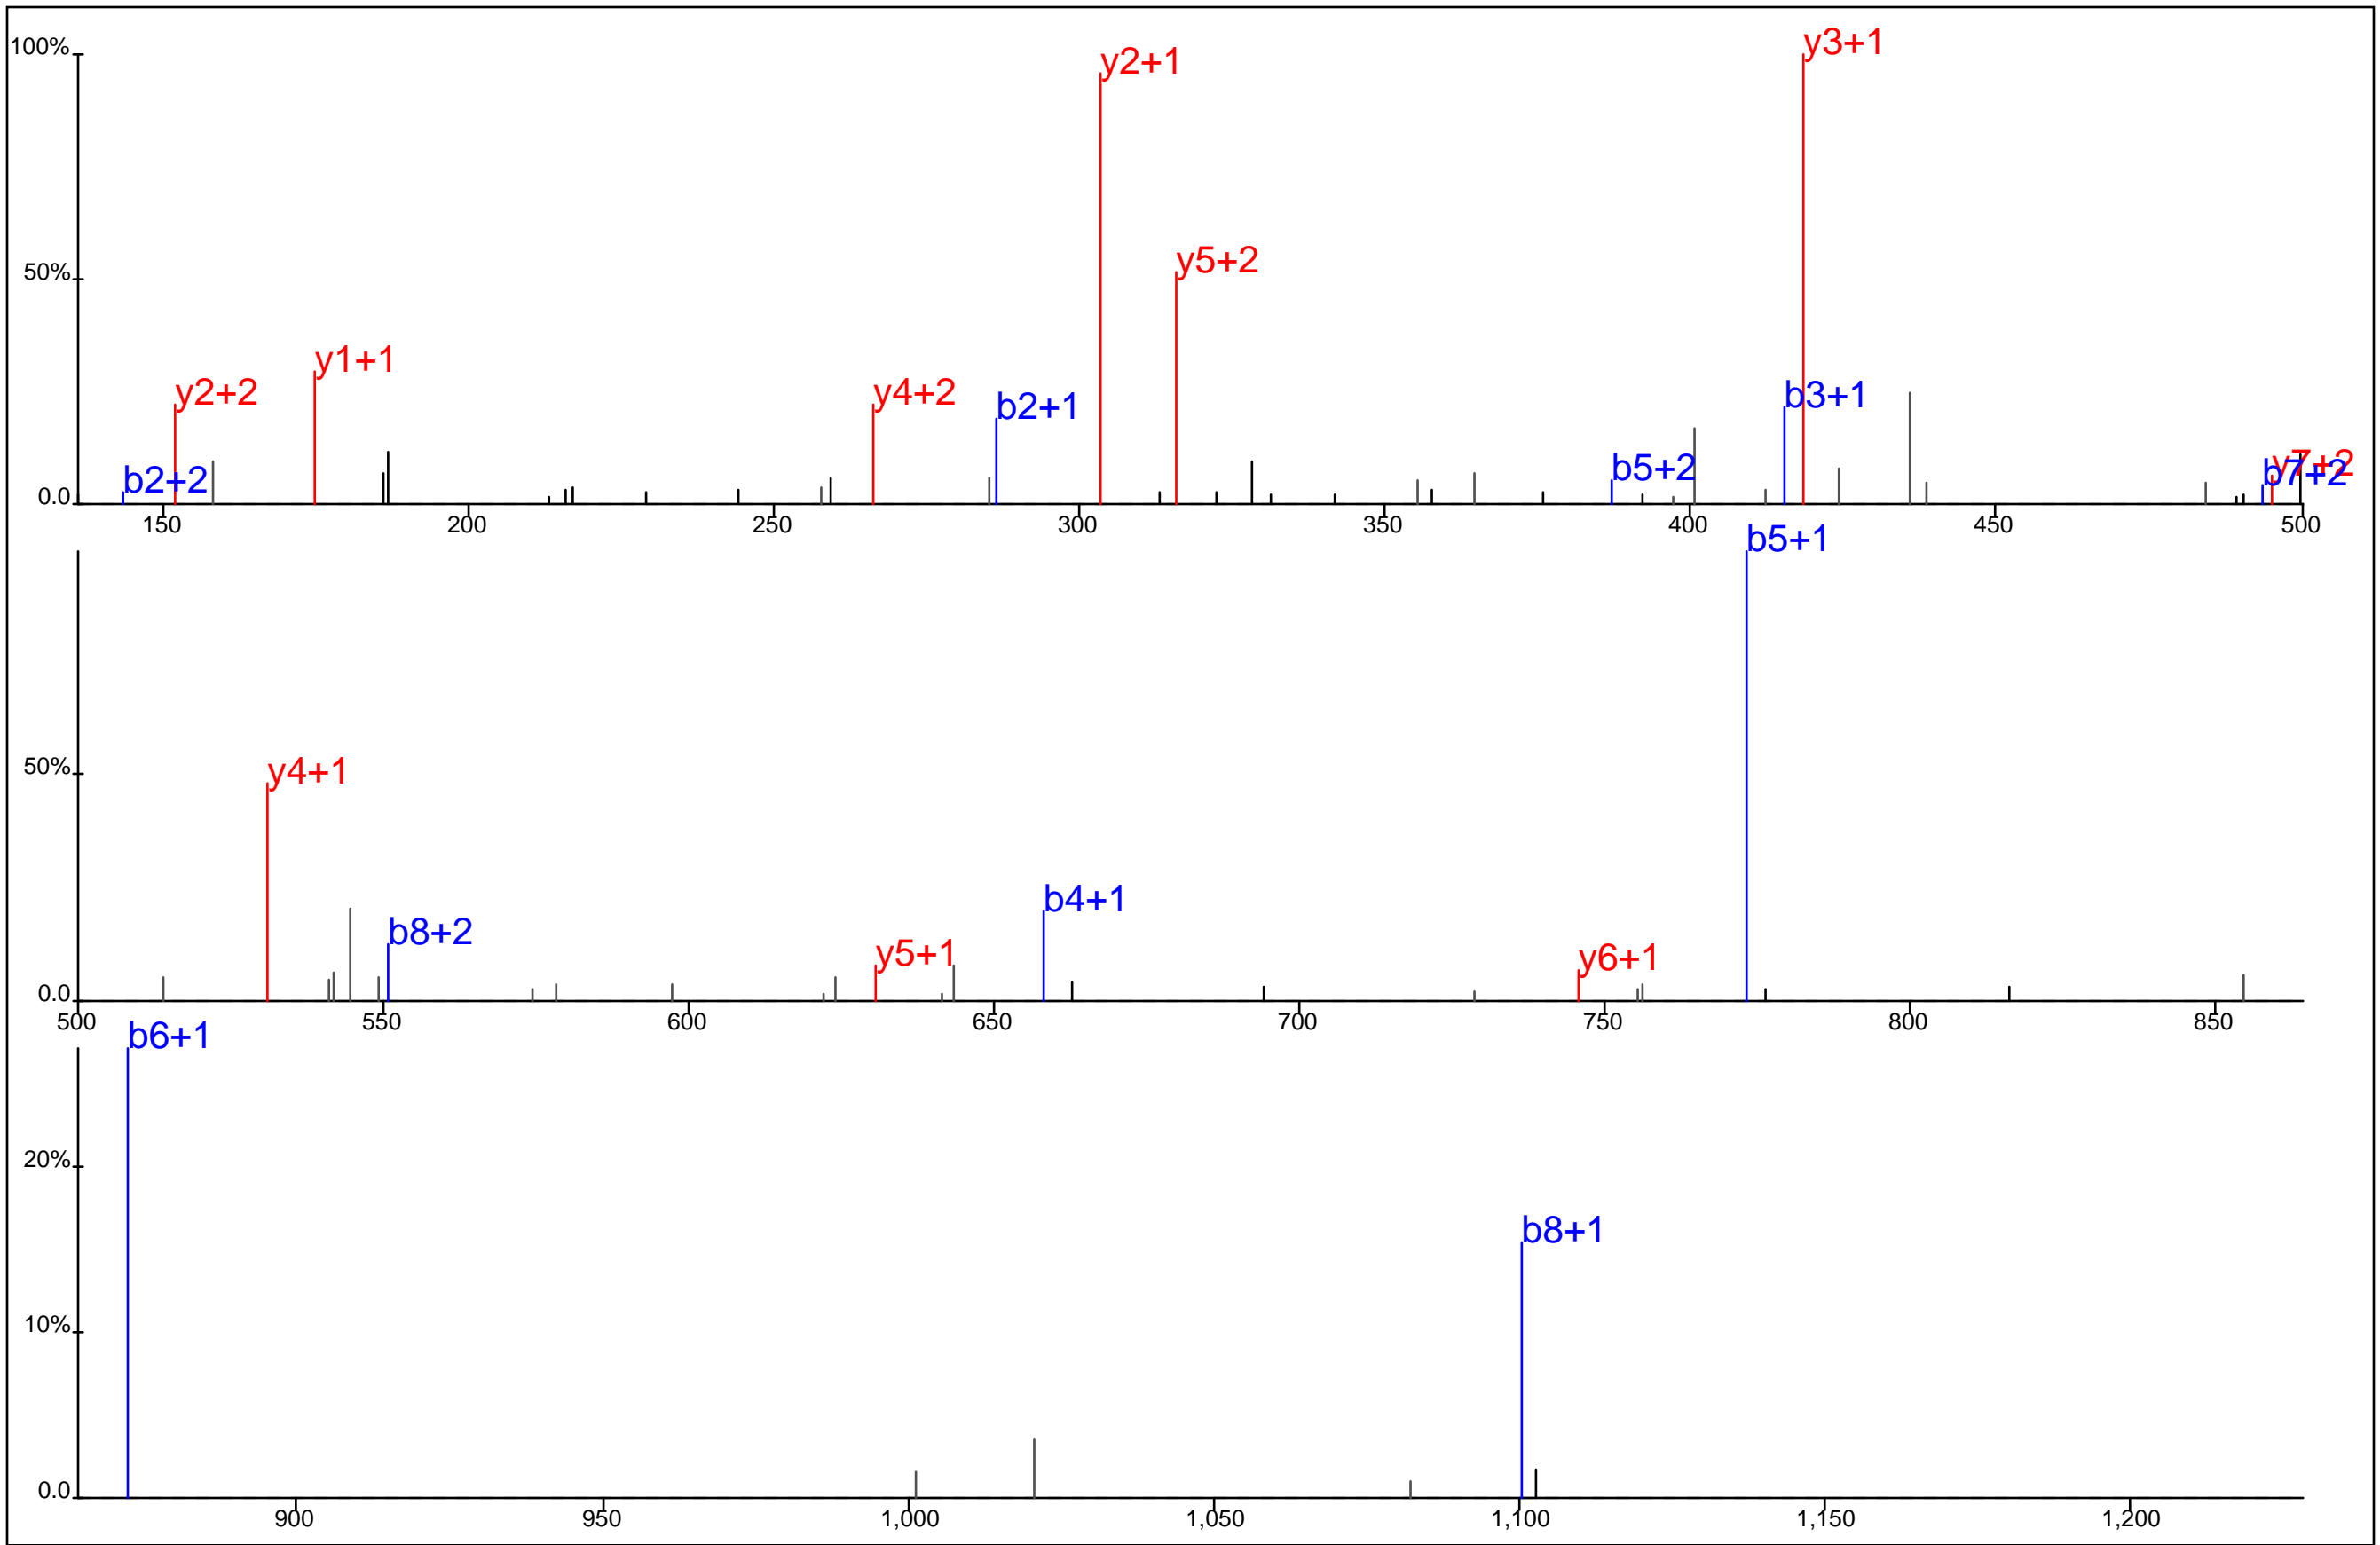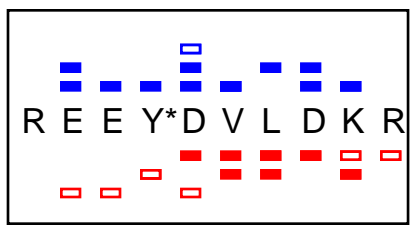

Protein Name: T cell antigen receptor, zeta  
 gi Accession: 0  
 Precursor Mass: 468.2176+3  
 Delta Mass: 1.504 ppm  
 XCorr: 48.31

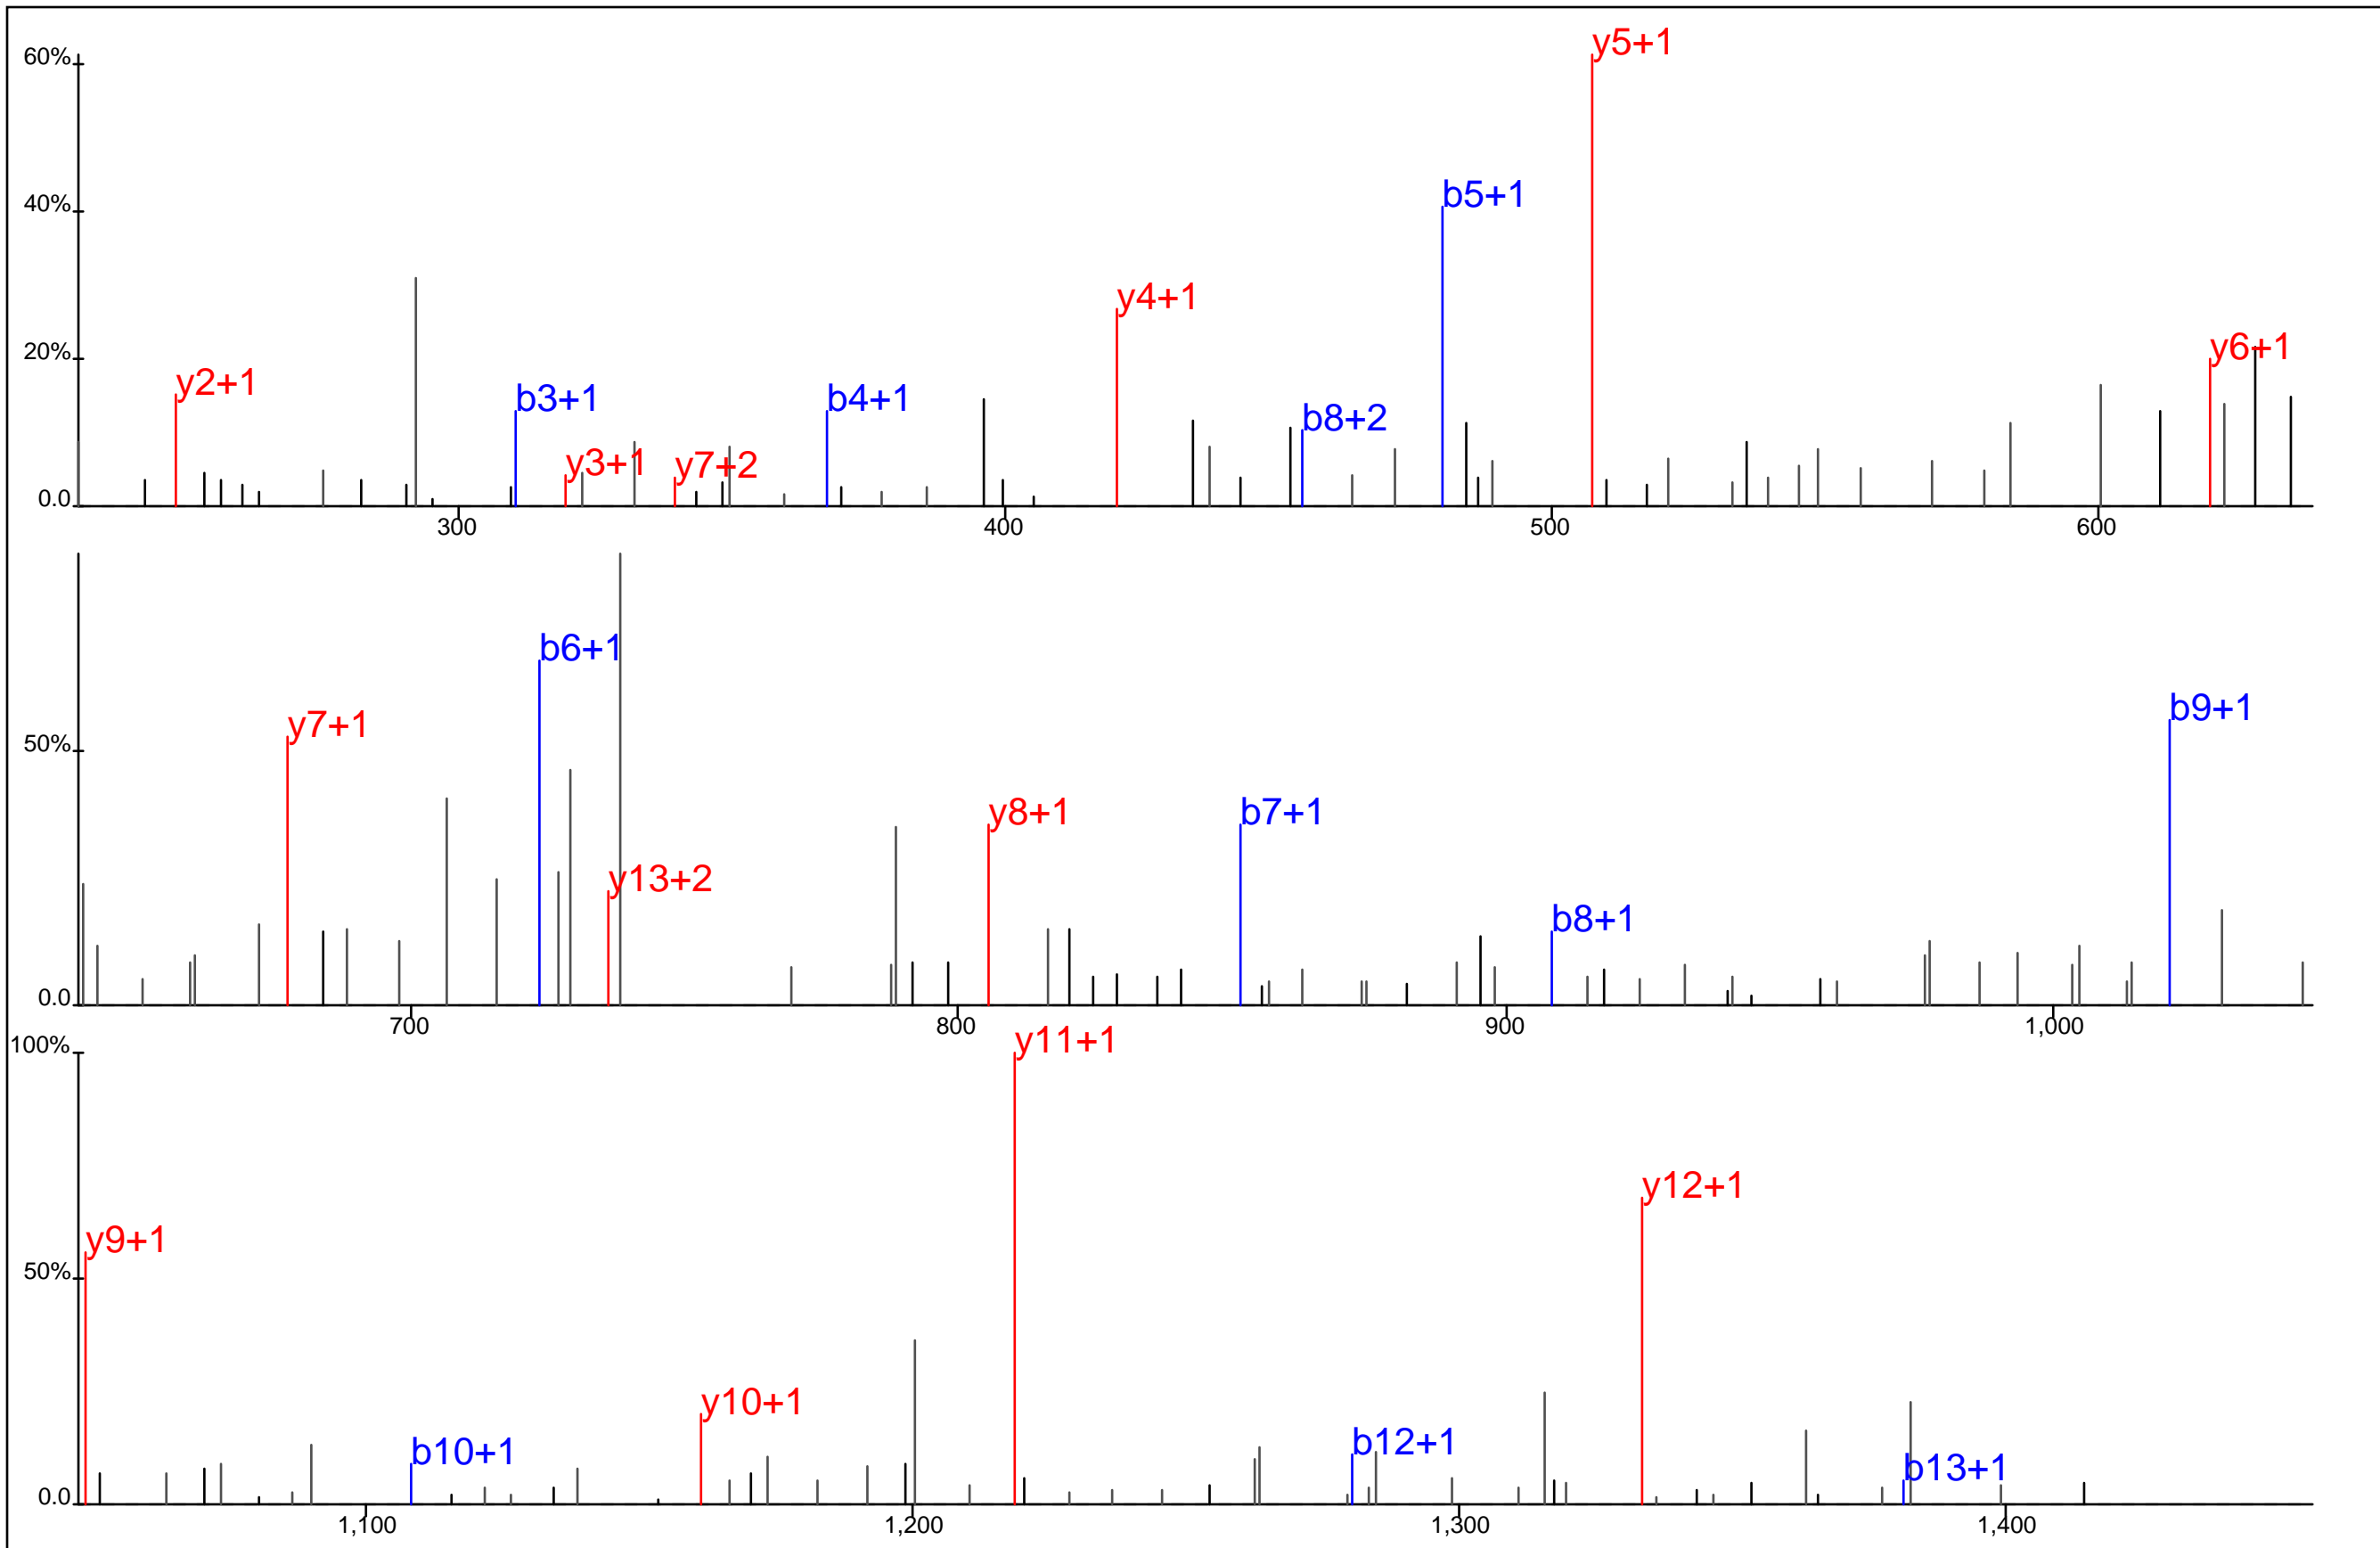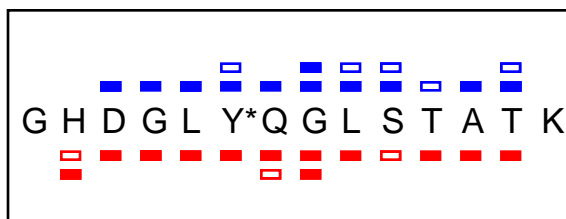

Protein Name: T cell antigen receptor, zeta  
 gi Accession: 0  
 Precursor Mass: 764.3452+2  
 Delta Mass: 0.576 ppm  
 XCorr: 77.73





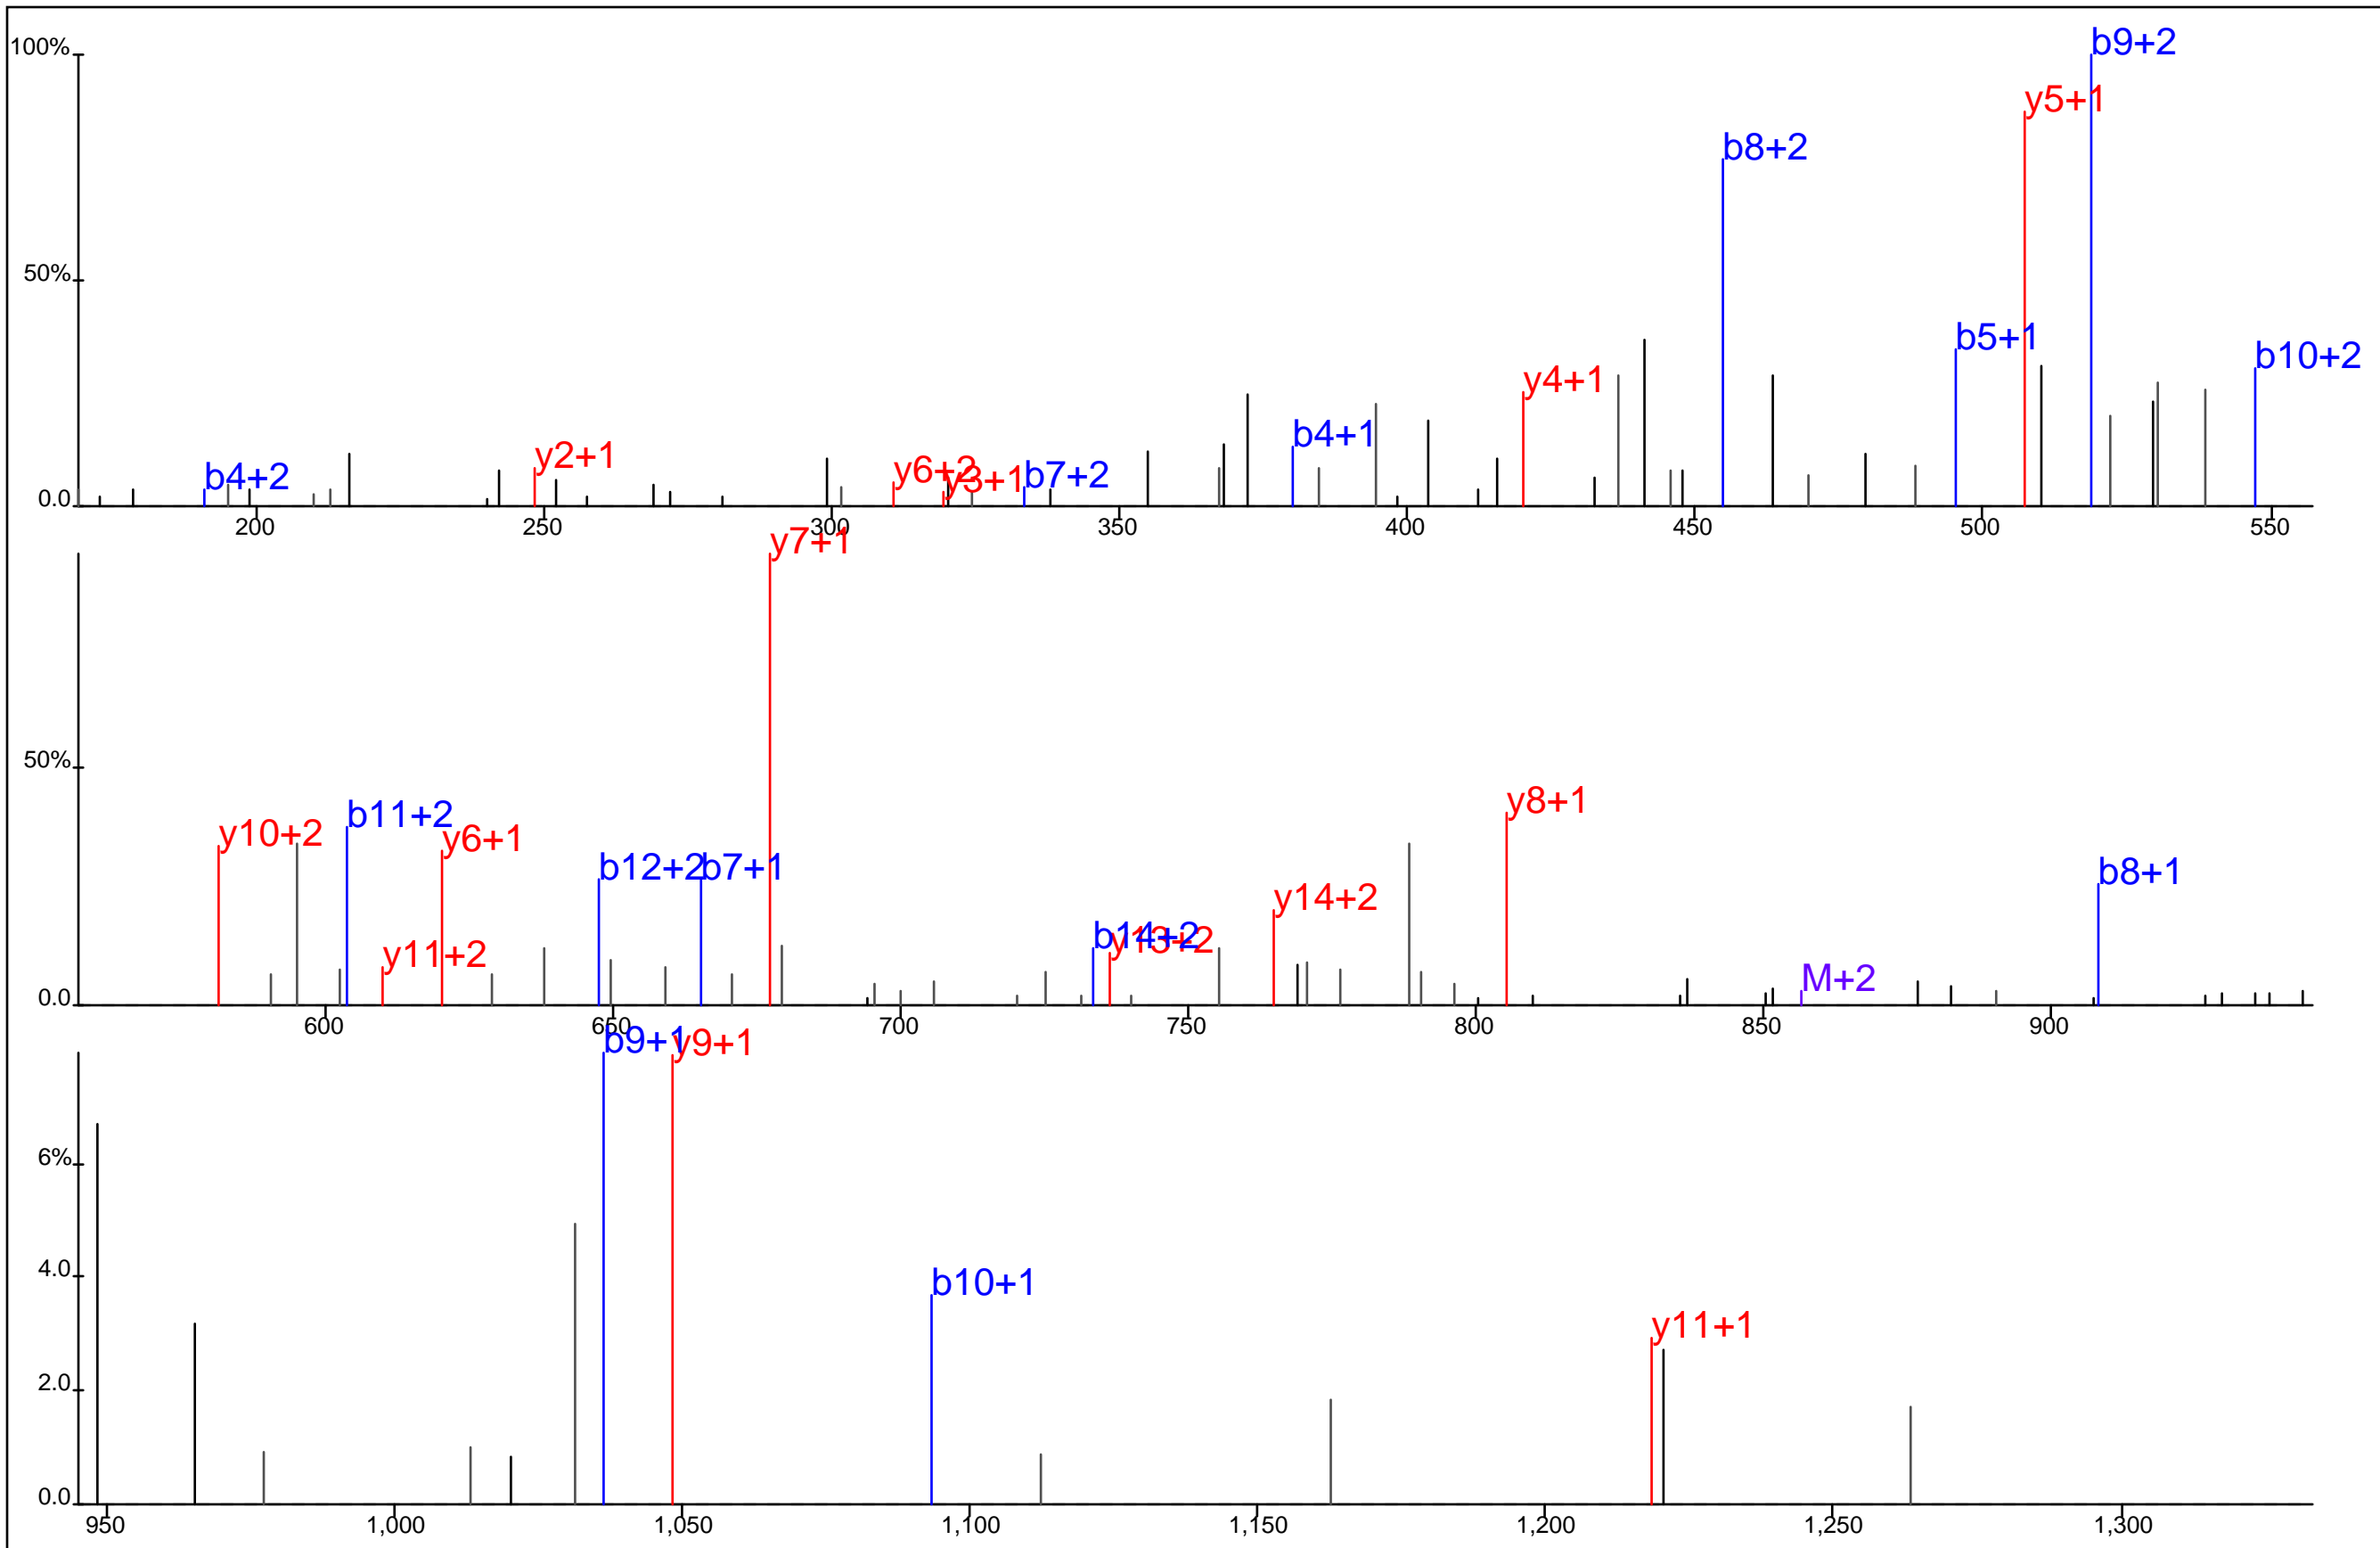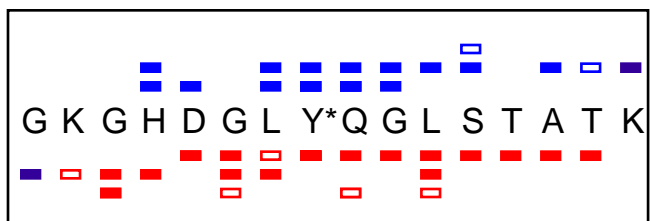

Protein Name: T cell antigen receptor, zeta  
 gi Accession: 0  
 Precursor Mass: 571.6043+3  
 Delta Mass: 1.143 ppm  
 XCorr: 43.38

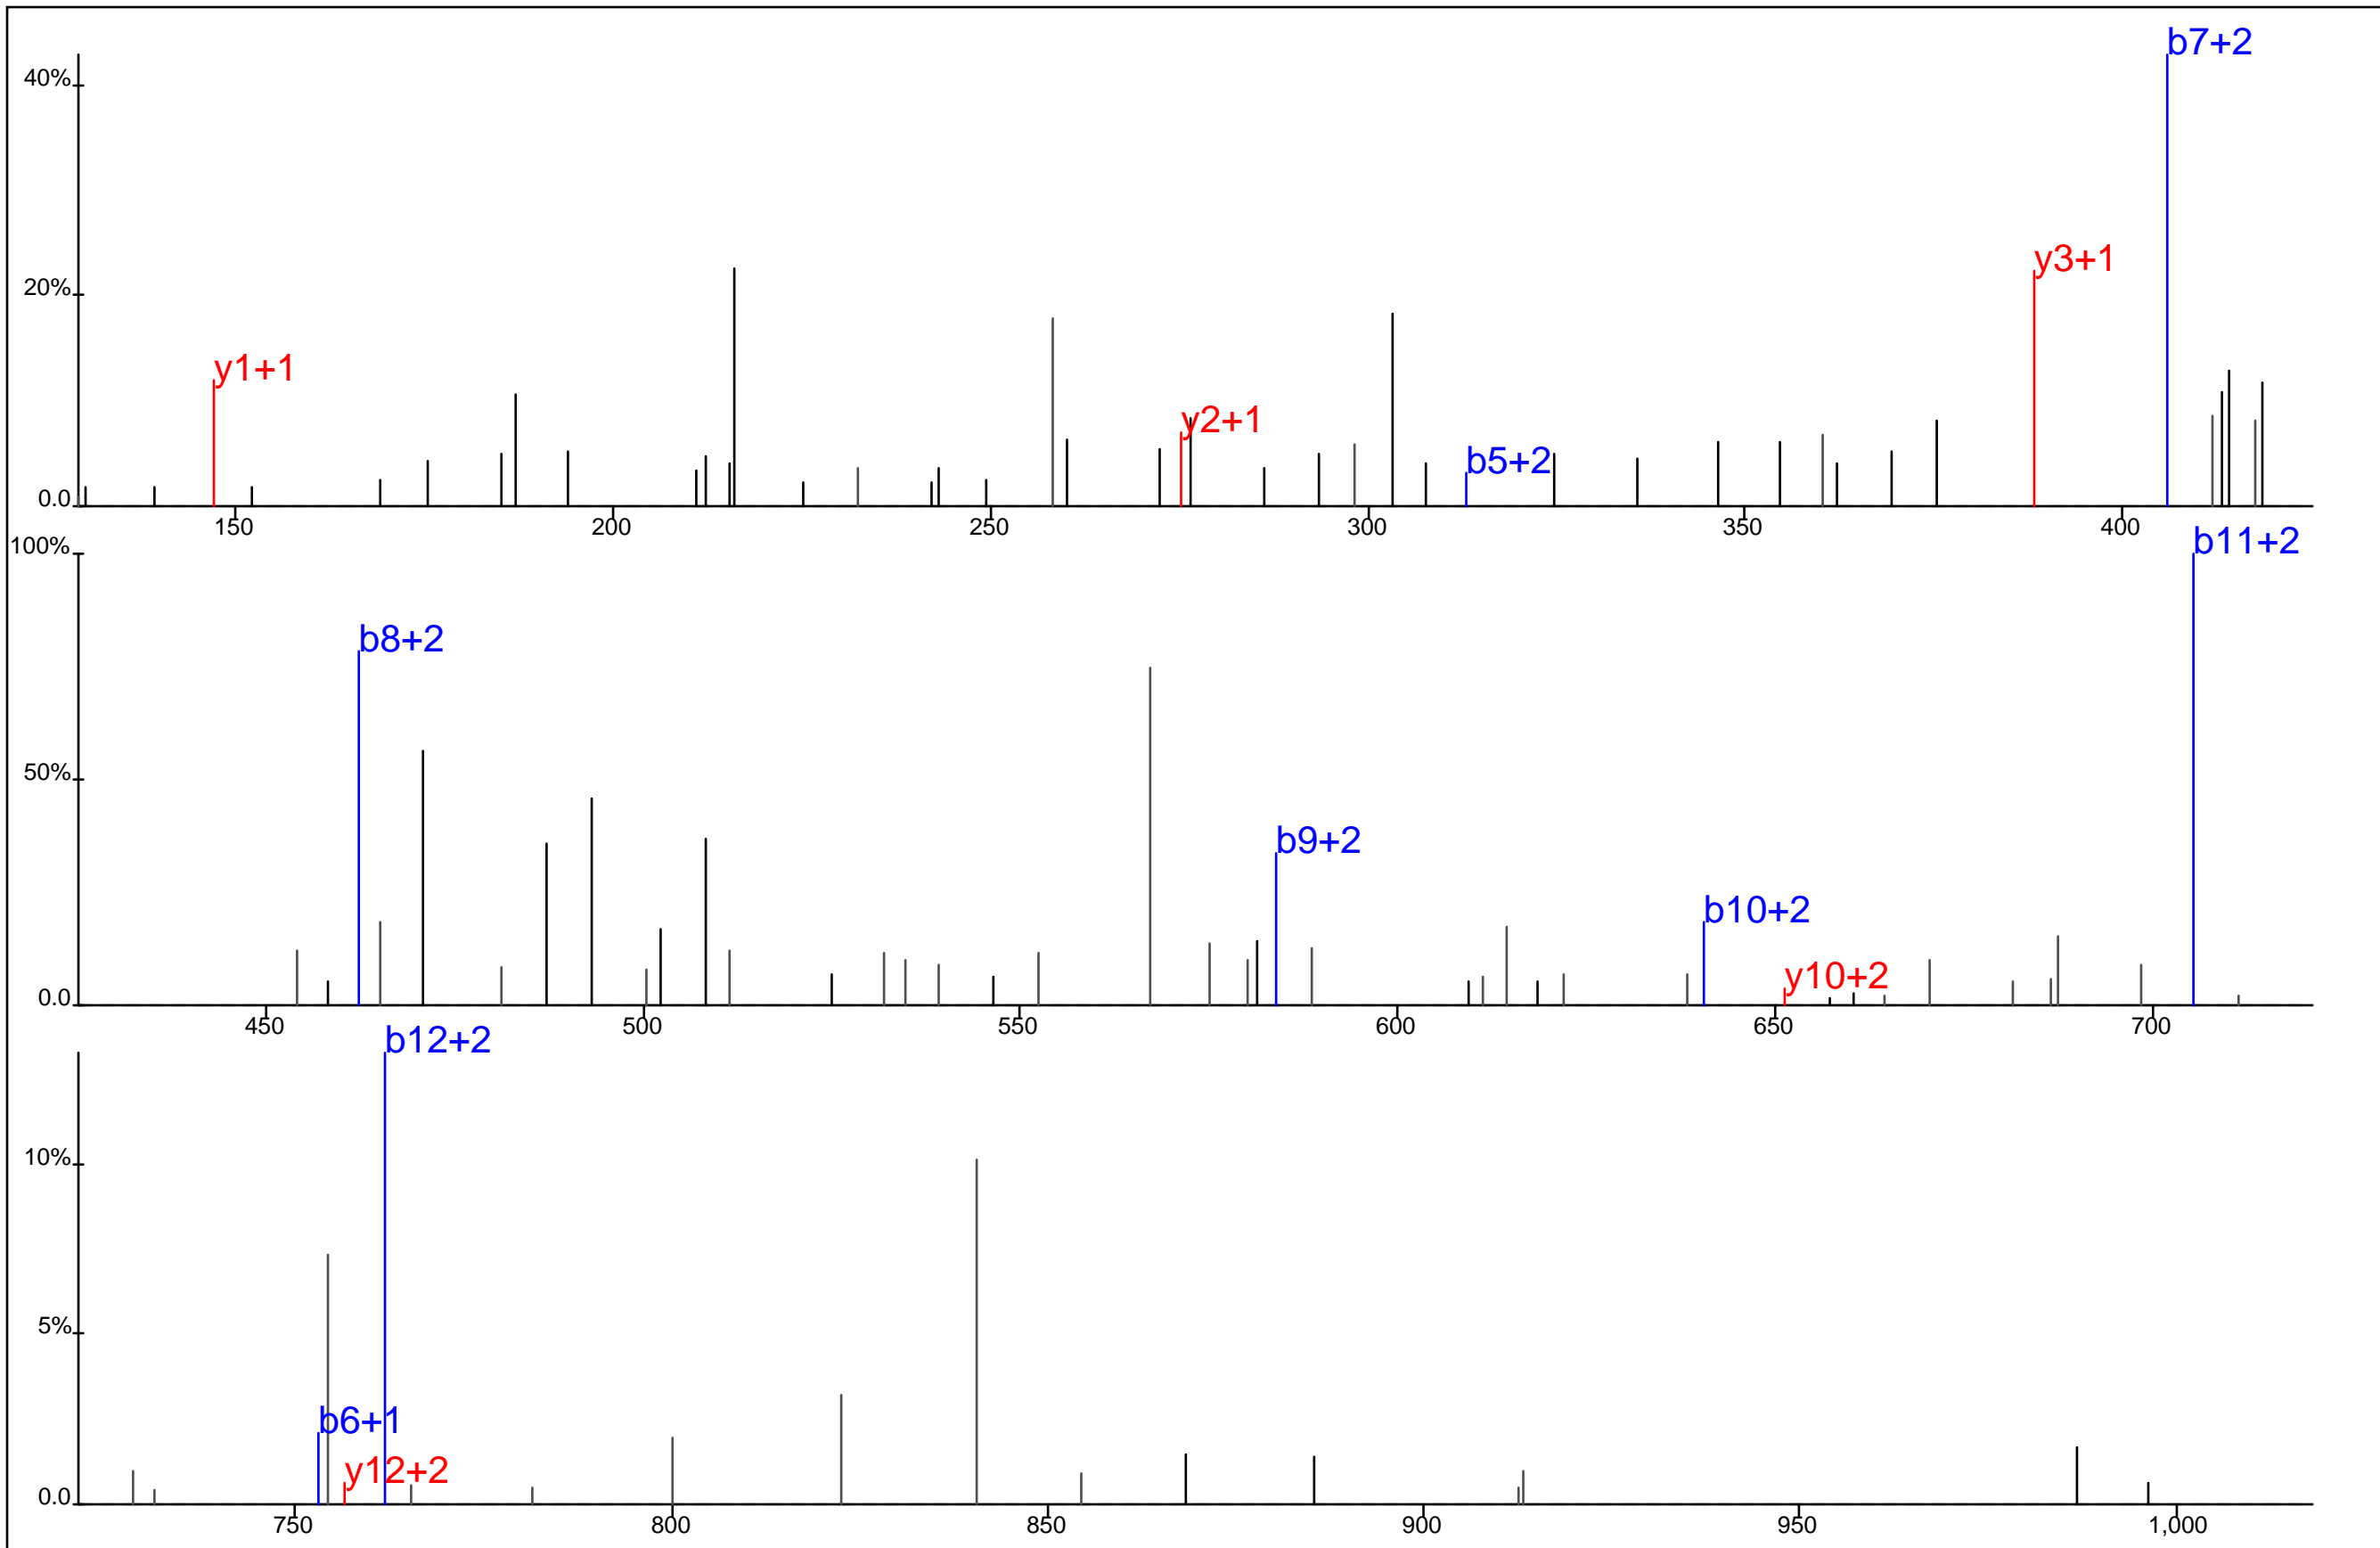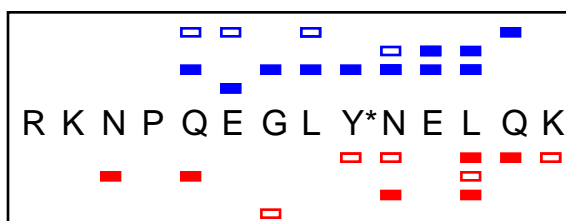

Protein Name: T cell antigen receptor, zeta  
 gi Accession: 0  
 Precursor Mass: 449.9732+4  
 Delta Mass: 1.160 ppm  
 XCorr: 28.34

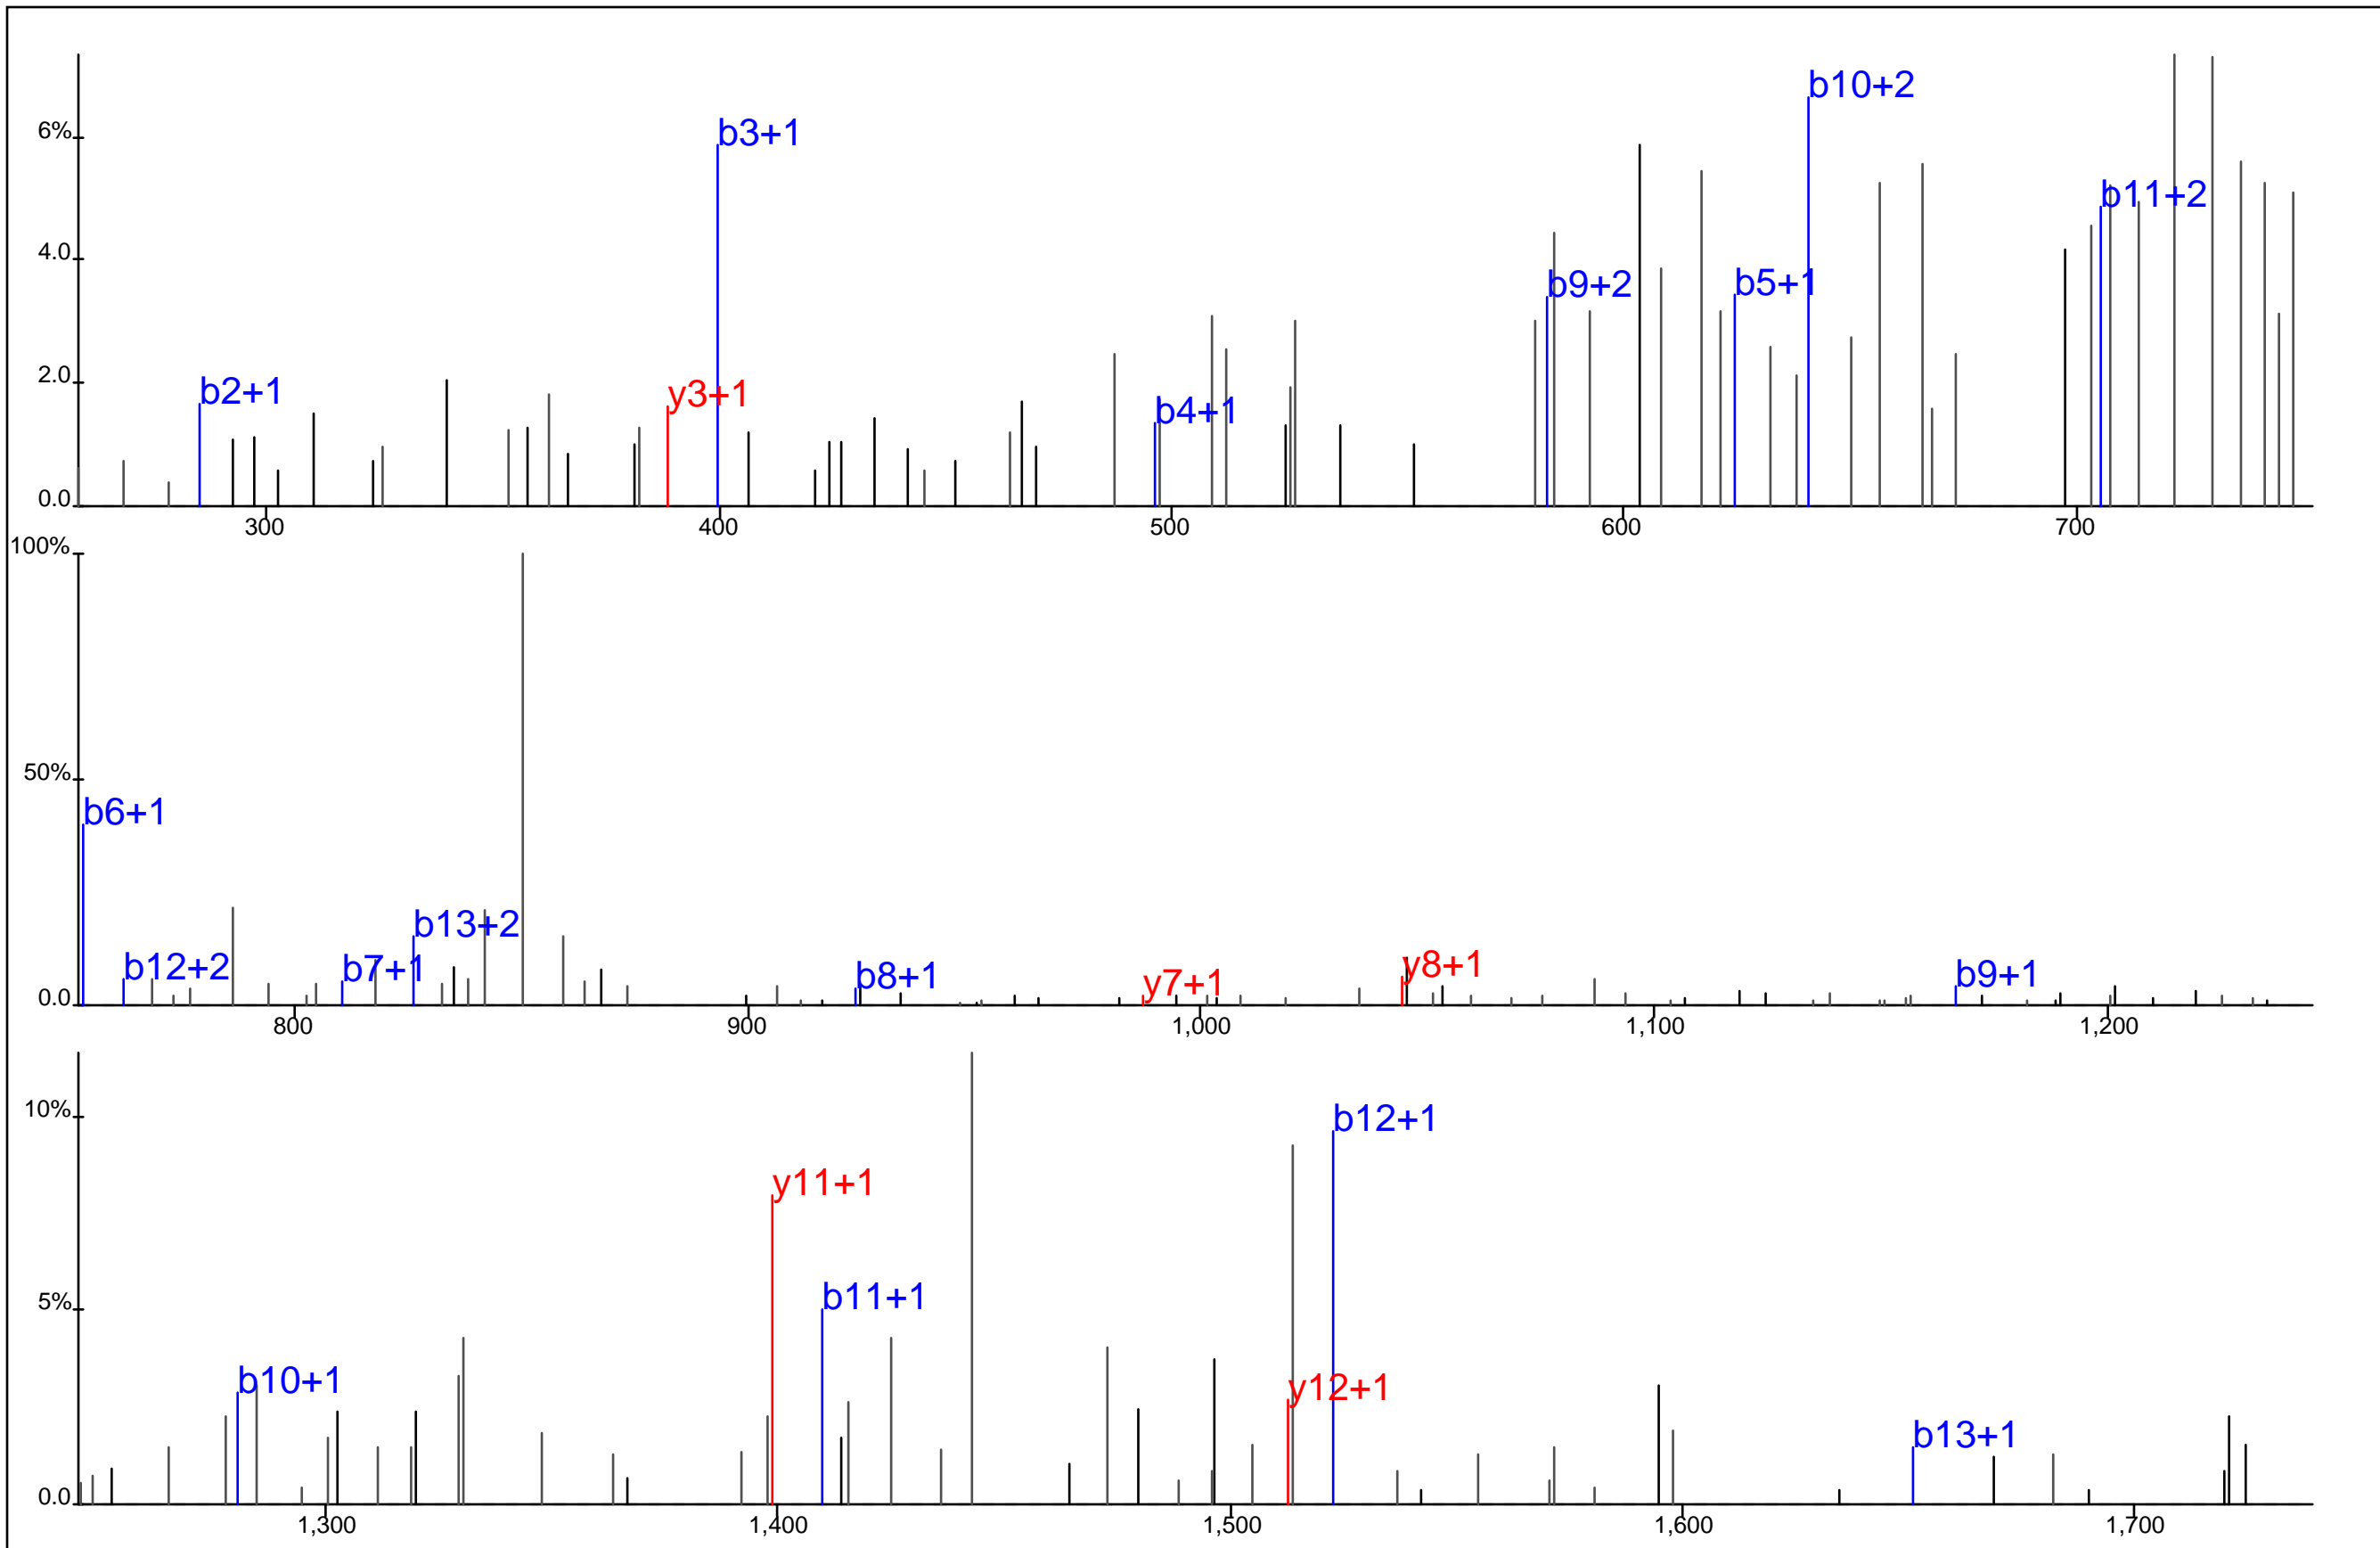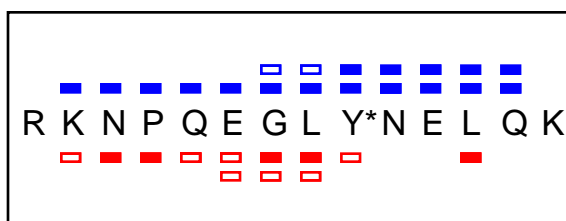

Protein Name: T cell antigen receptor, zeta  
 gi Accession: 0  
 Precursor Mass: 898.9412+2  
 Delta Mass: 3.348 ppm  
 XCorr: 26.03

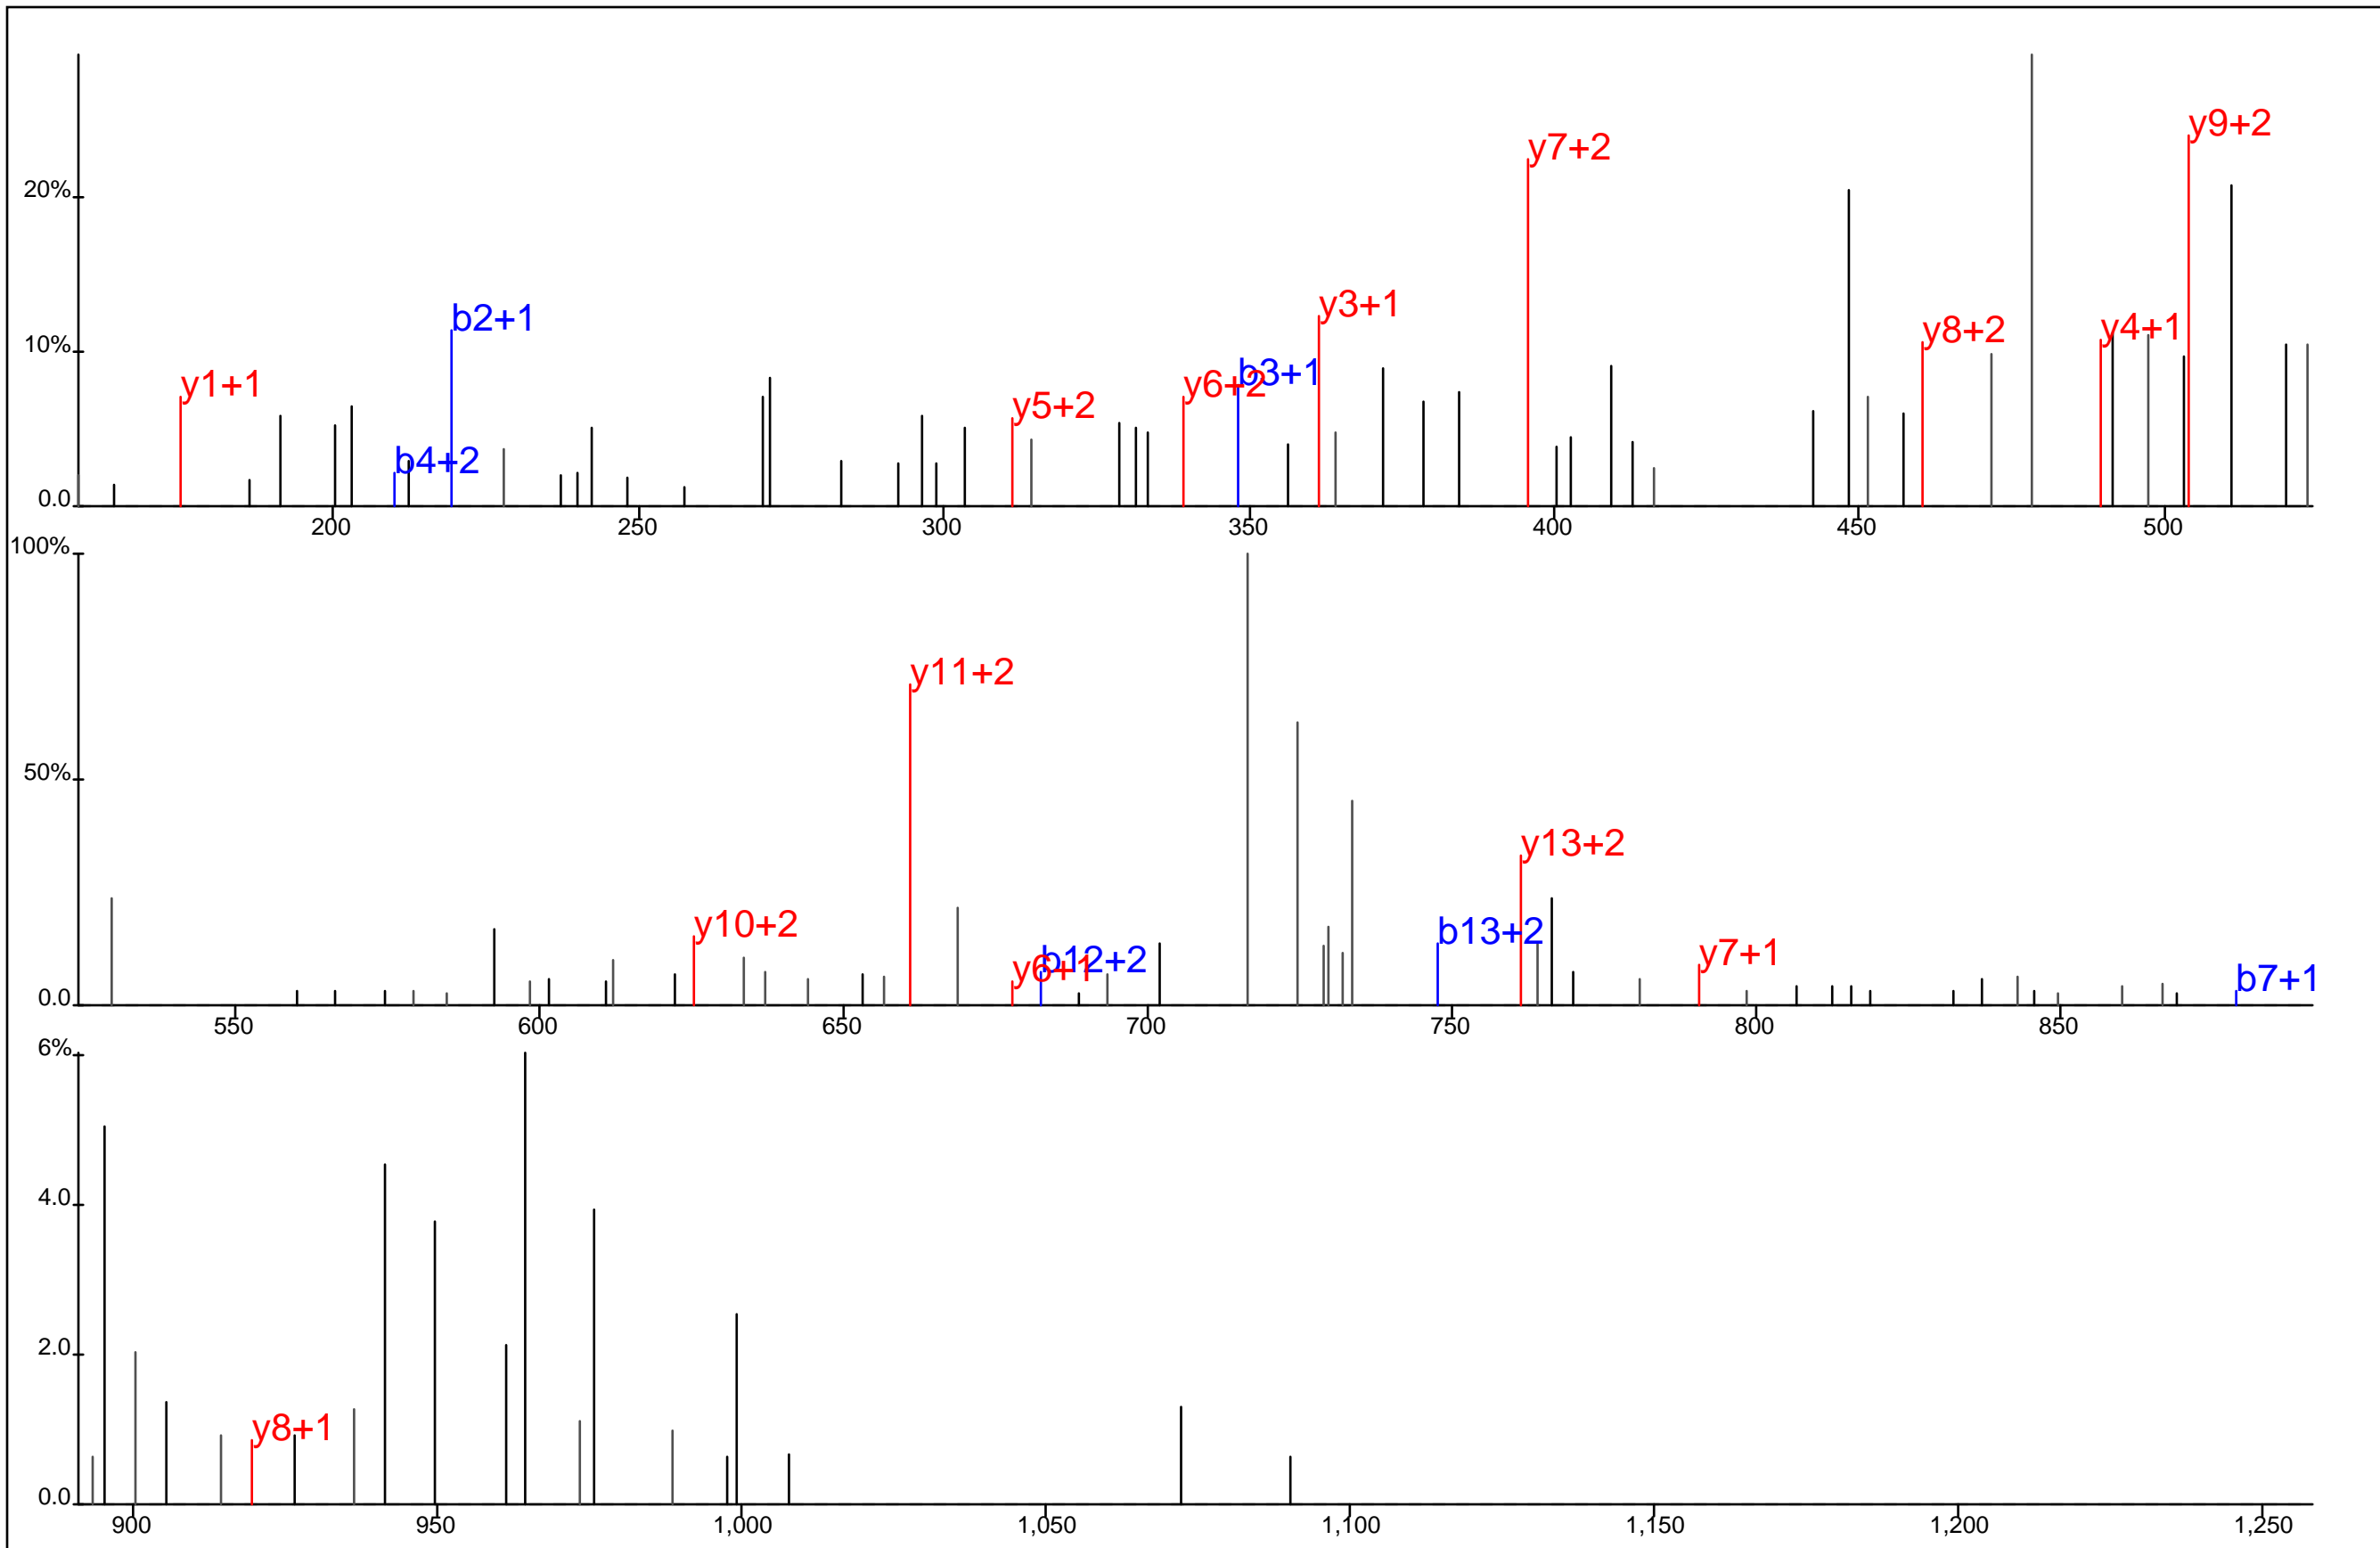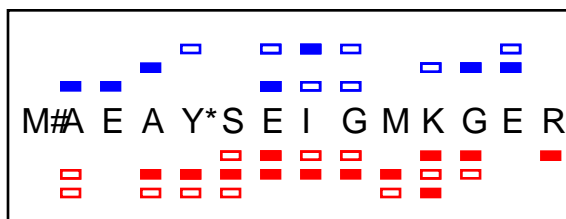

Protein Name: T cell antigen receptor, zeta  
 gi Accession: 0  
 Precursor Mass: 556.5650+3  
 Delta Mass: 0.013 ppm  
 XCorr: 21.7

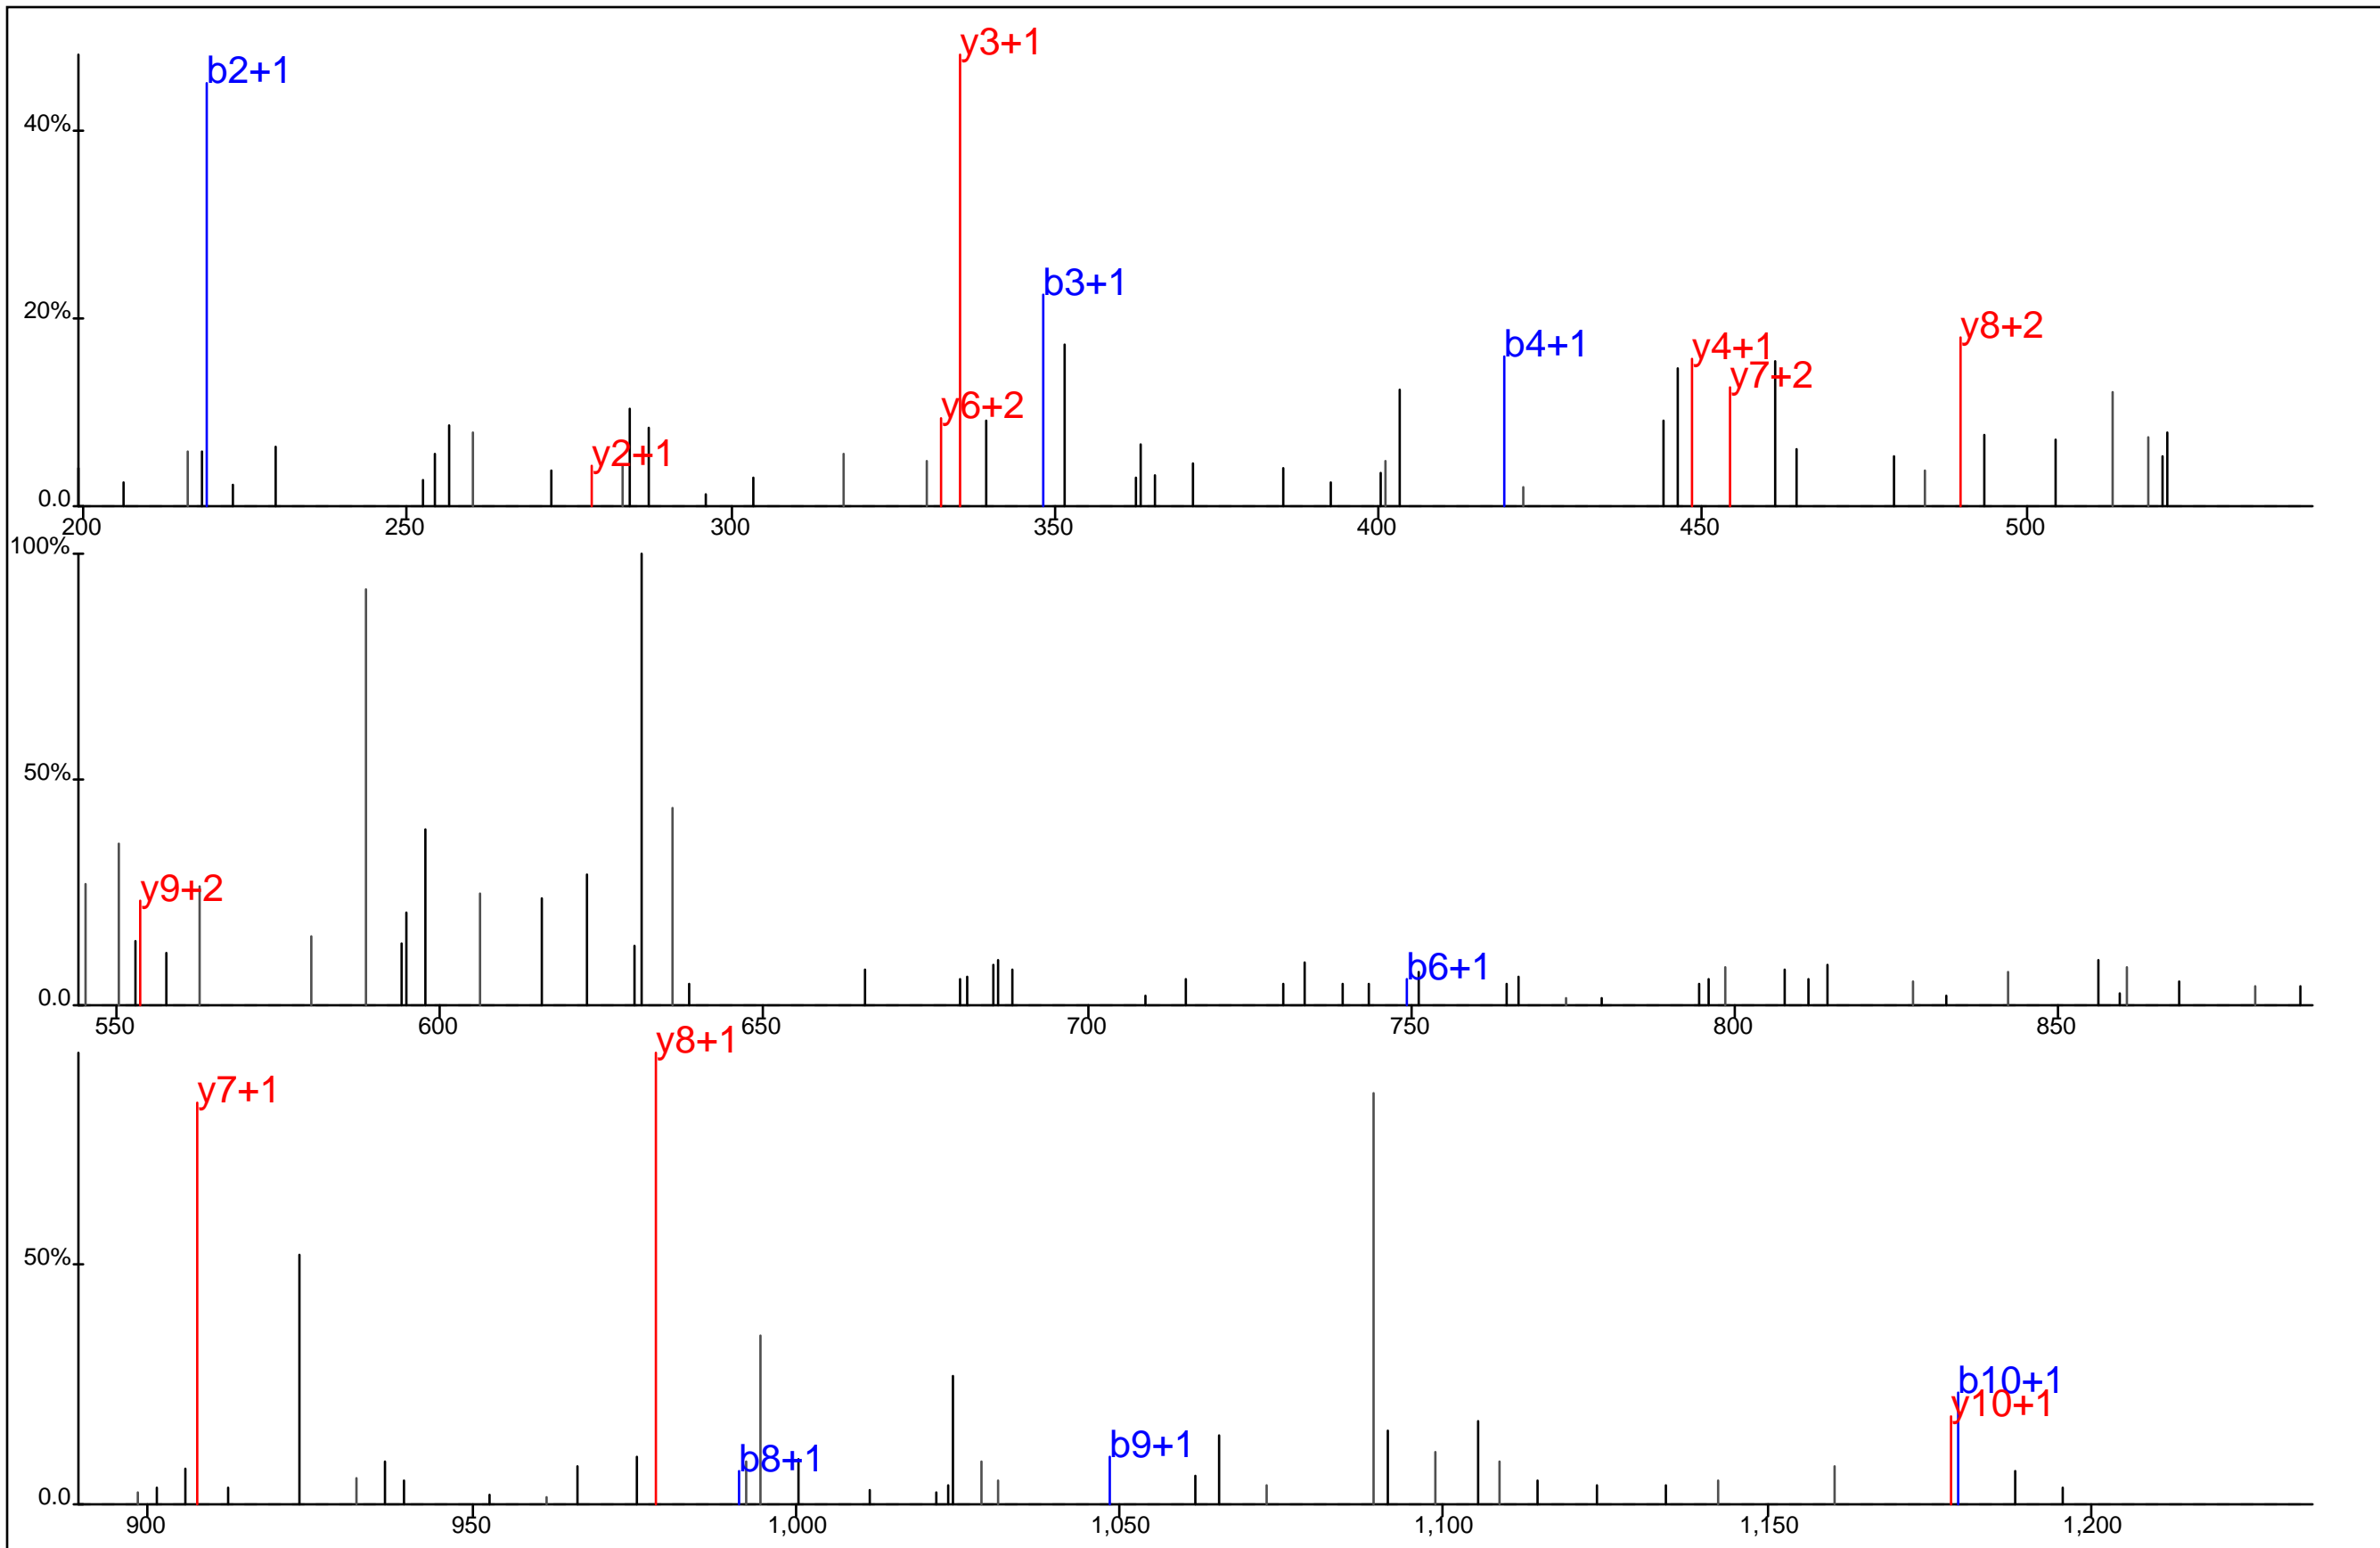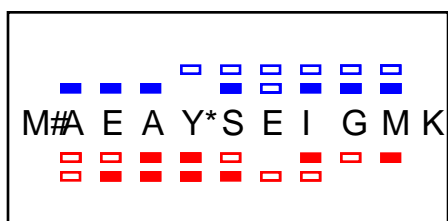

Protein Name: T cell antigen receptor, zeta  
 gi Accession: 0  
 Precursor Mass: 663.2607+2  
 Delta Mass: 0.895 ppm  
 XCorr: 26.7

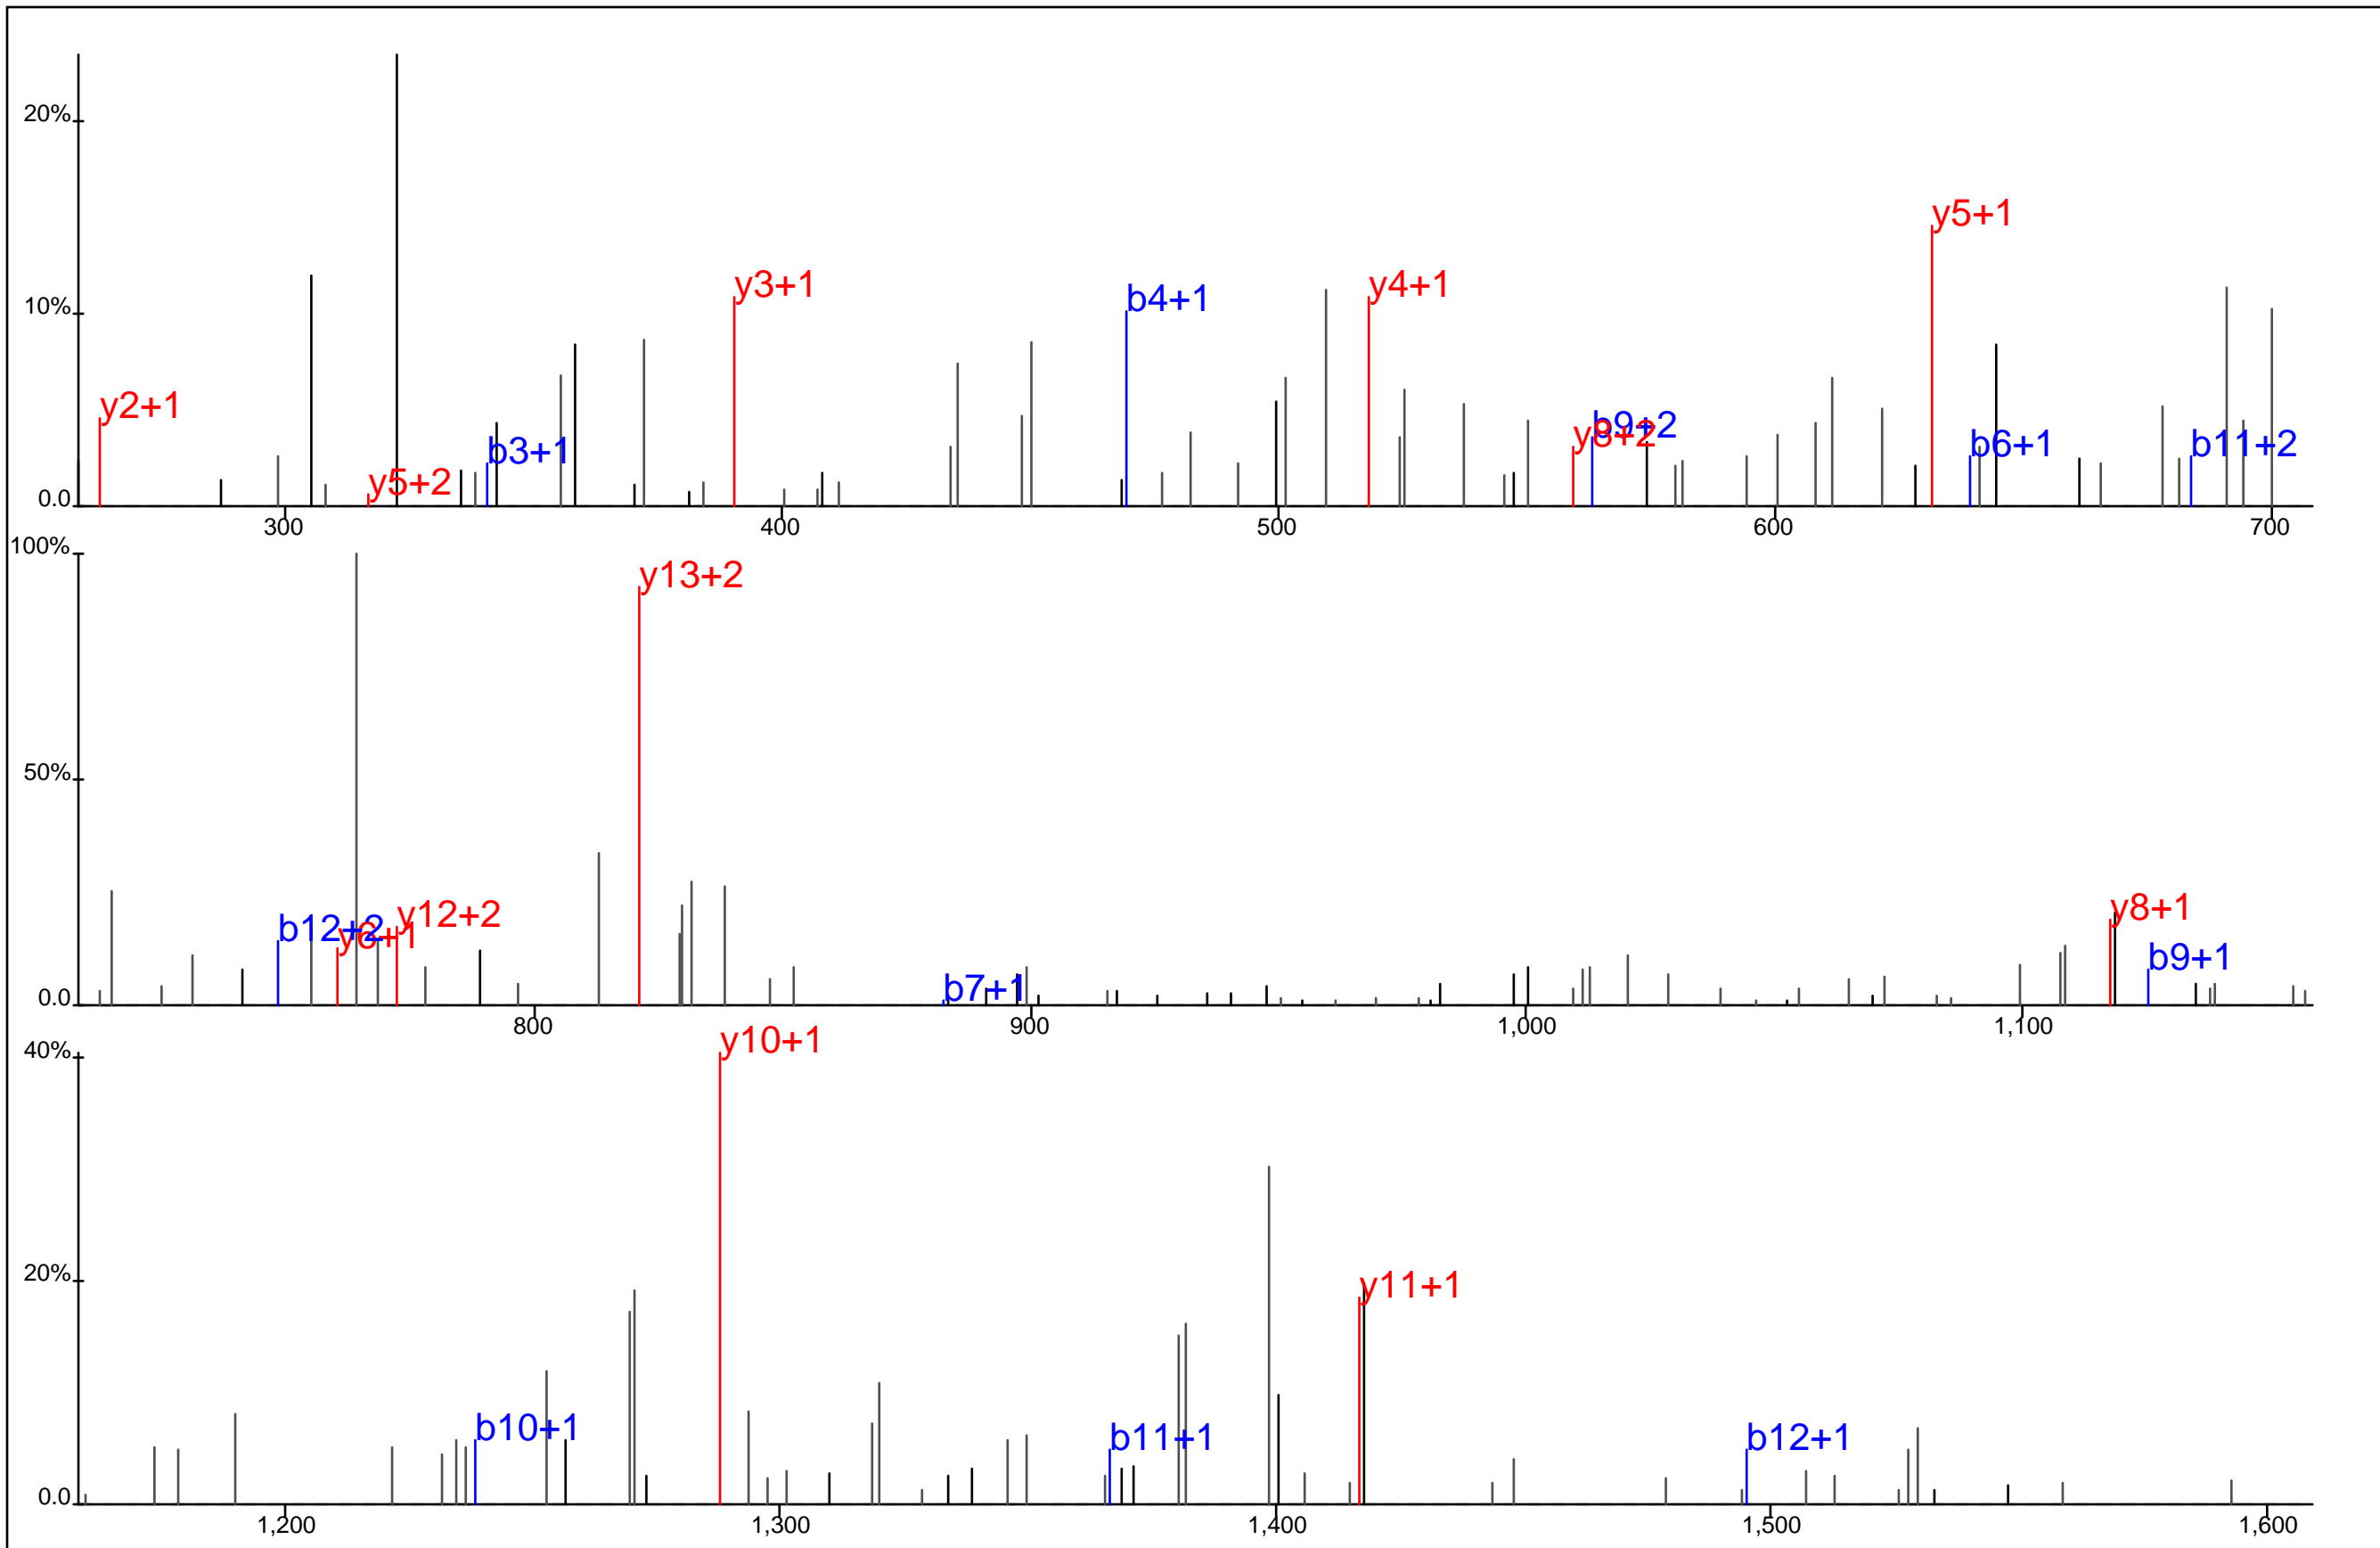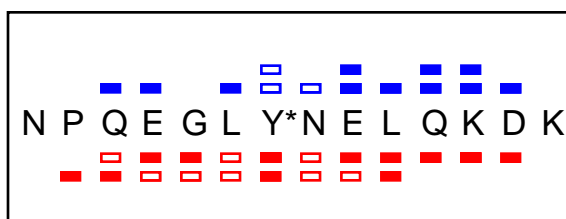

Protein Name: T cell antigen receptor, zeta  
 gi Accession: 0  
 Precursor Mass: 878.4025+2  
 Delta Mass: 1.586 ppm  
 XCorr: 24.23

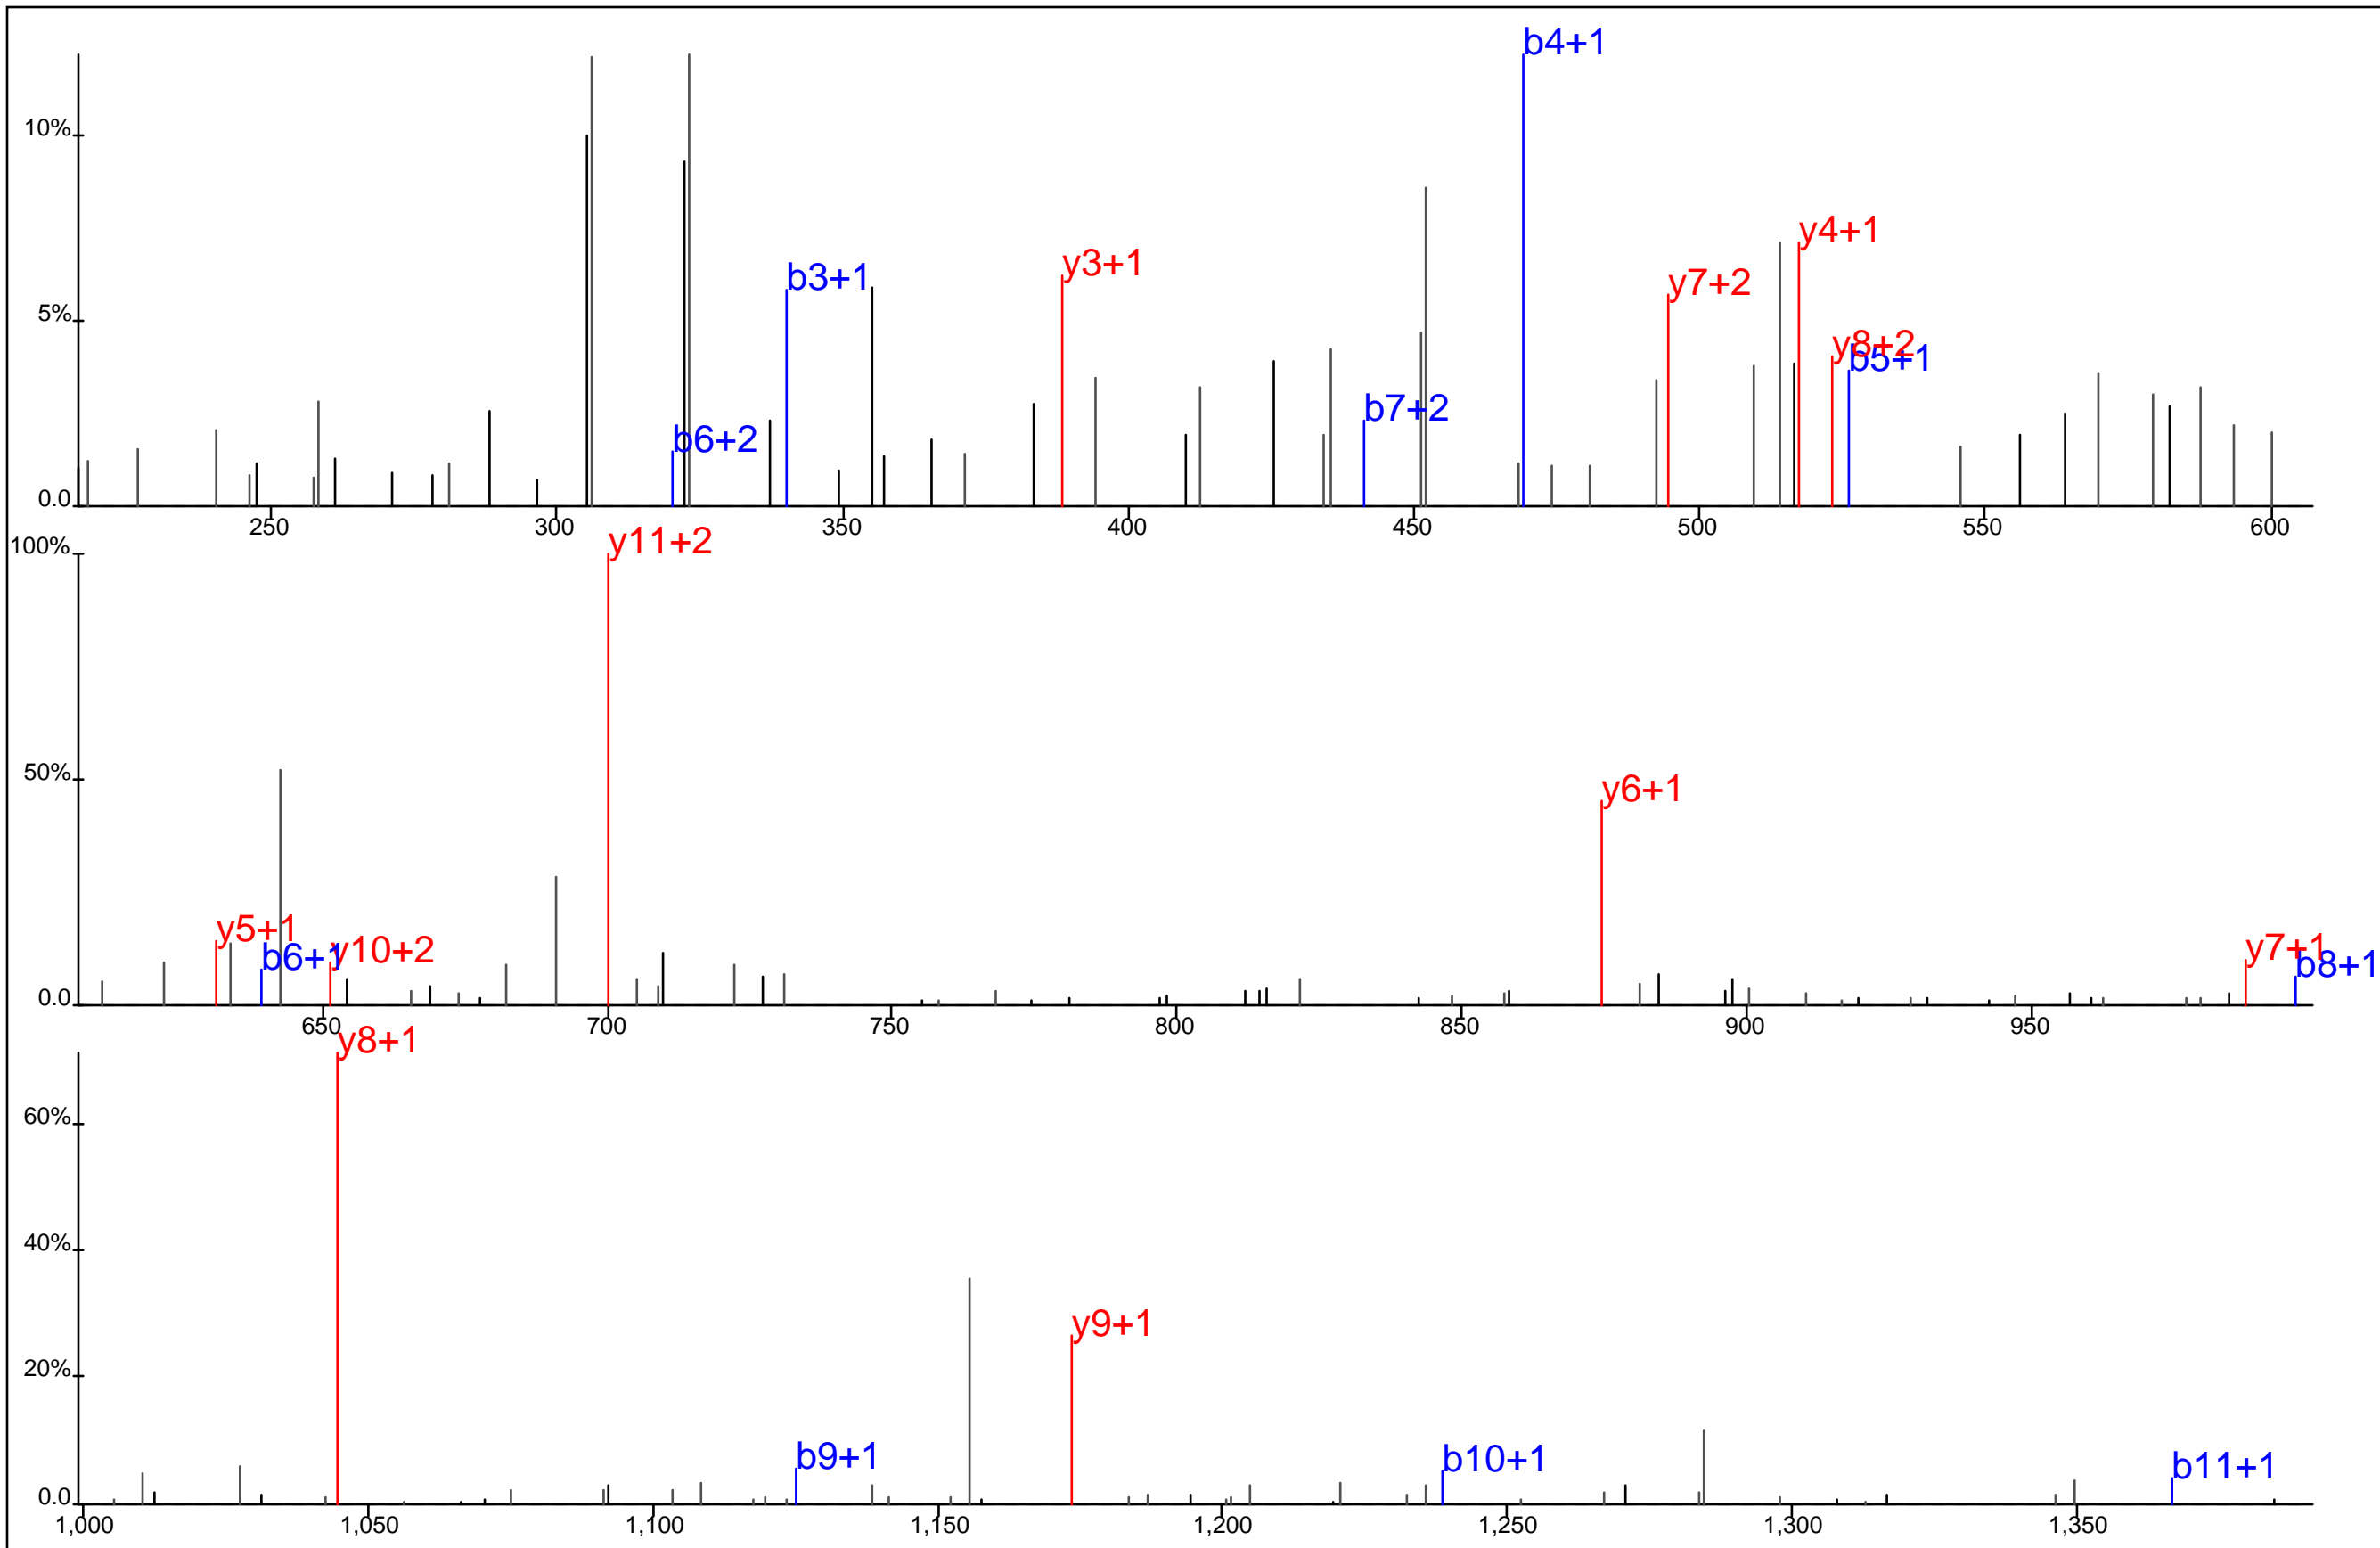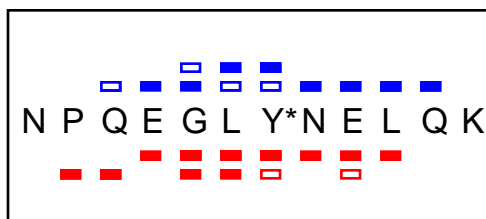

Protein Name: T cell antigen receptor, zeta  
 gi Accession: 0  
 Precursor Mass: 756.8405+2  
 Delta Mass: 0.517 ppm  
 XCorr: 41.92



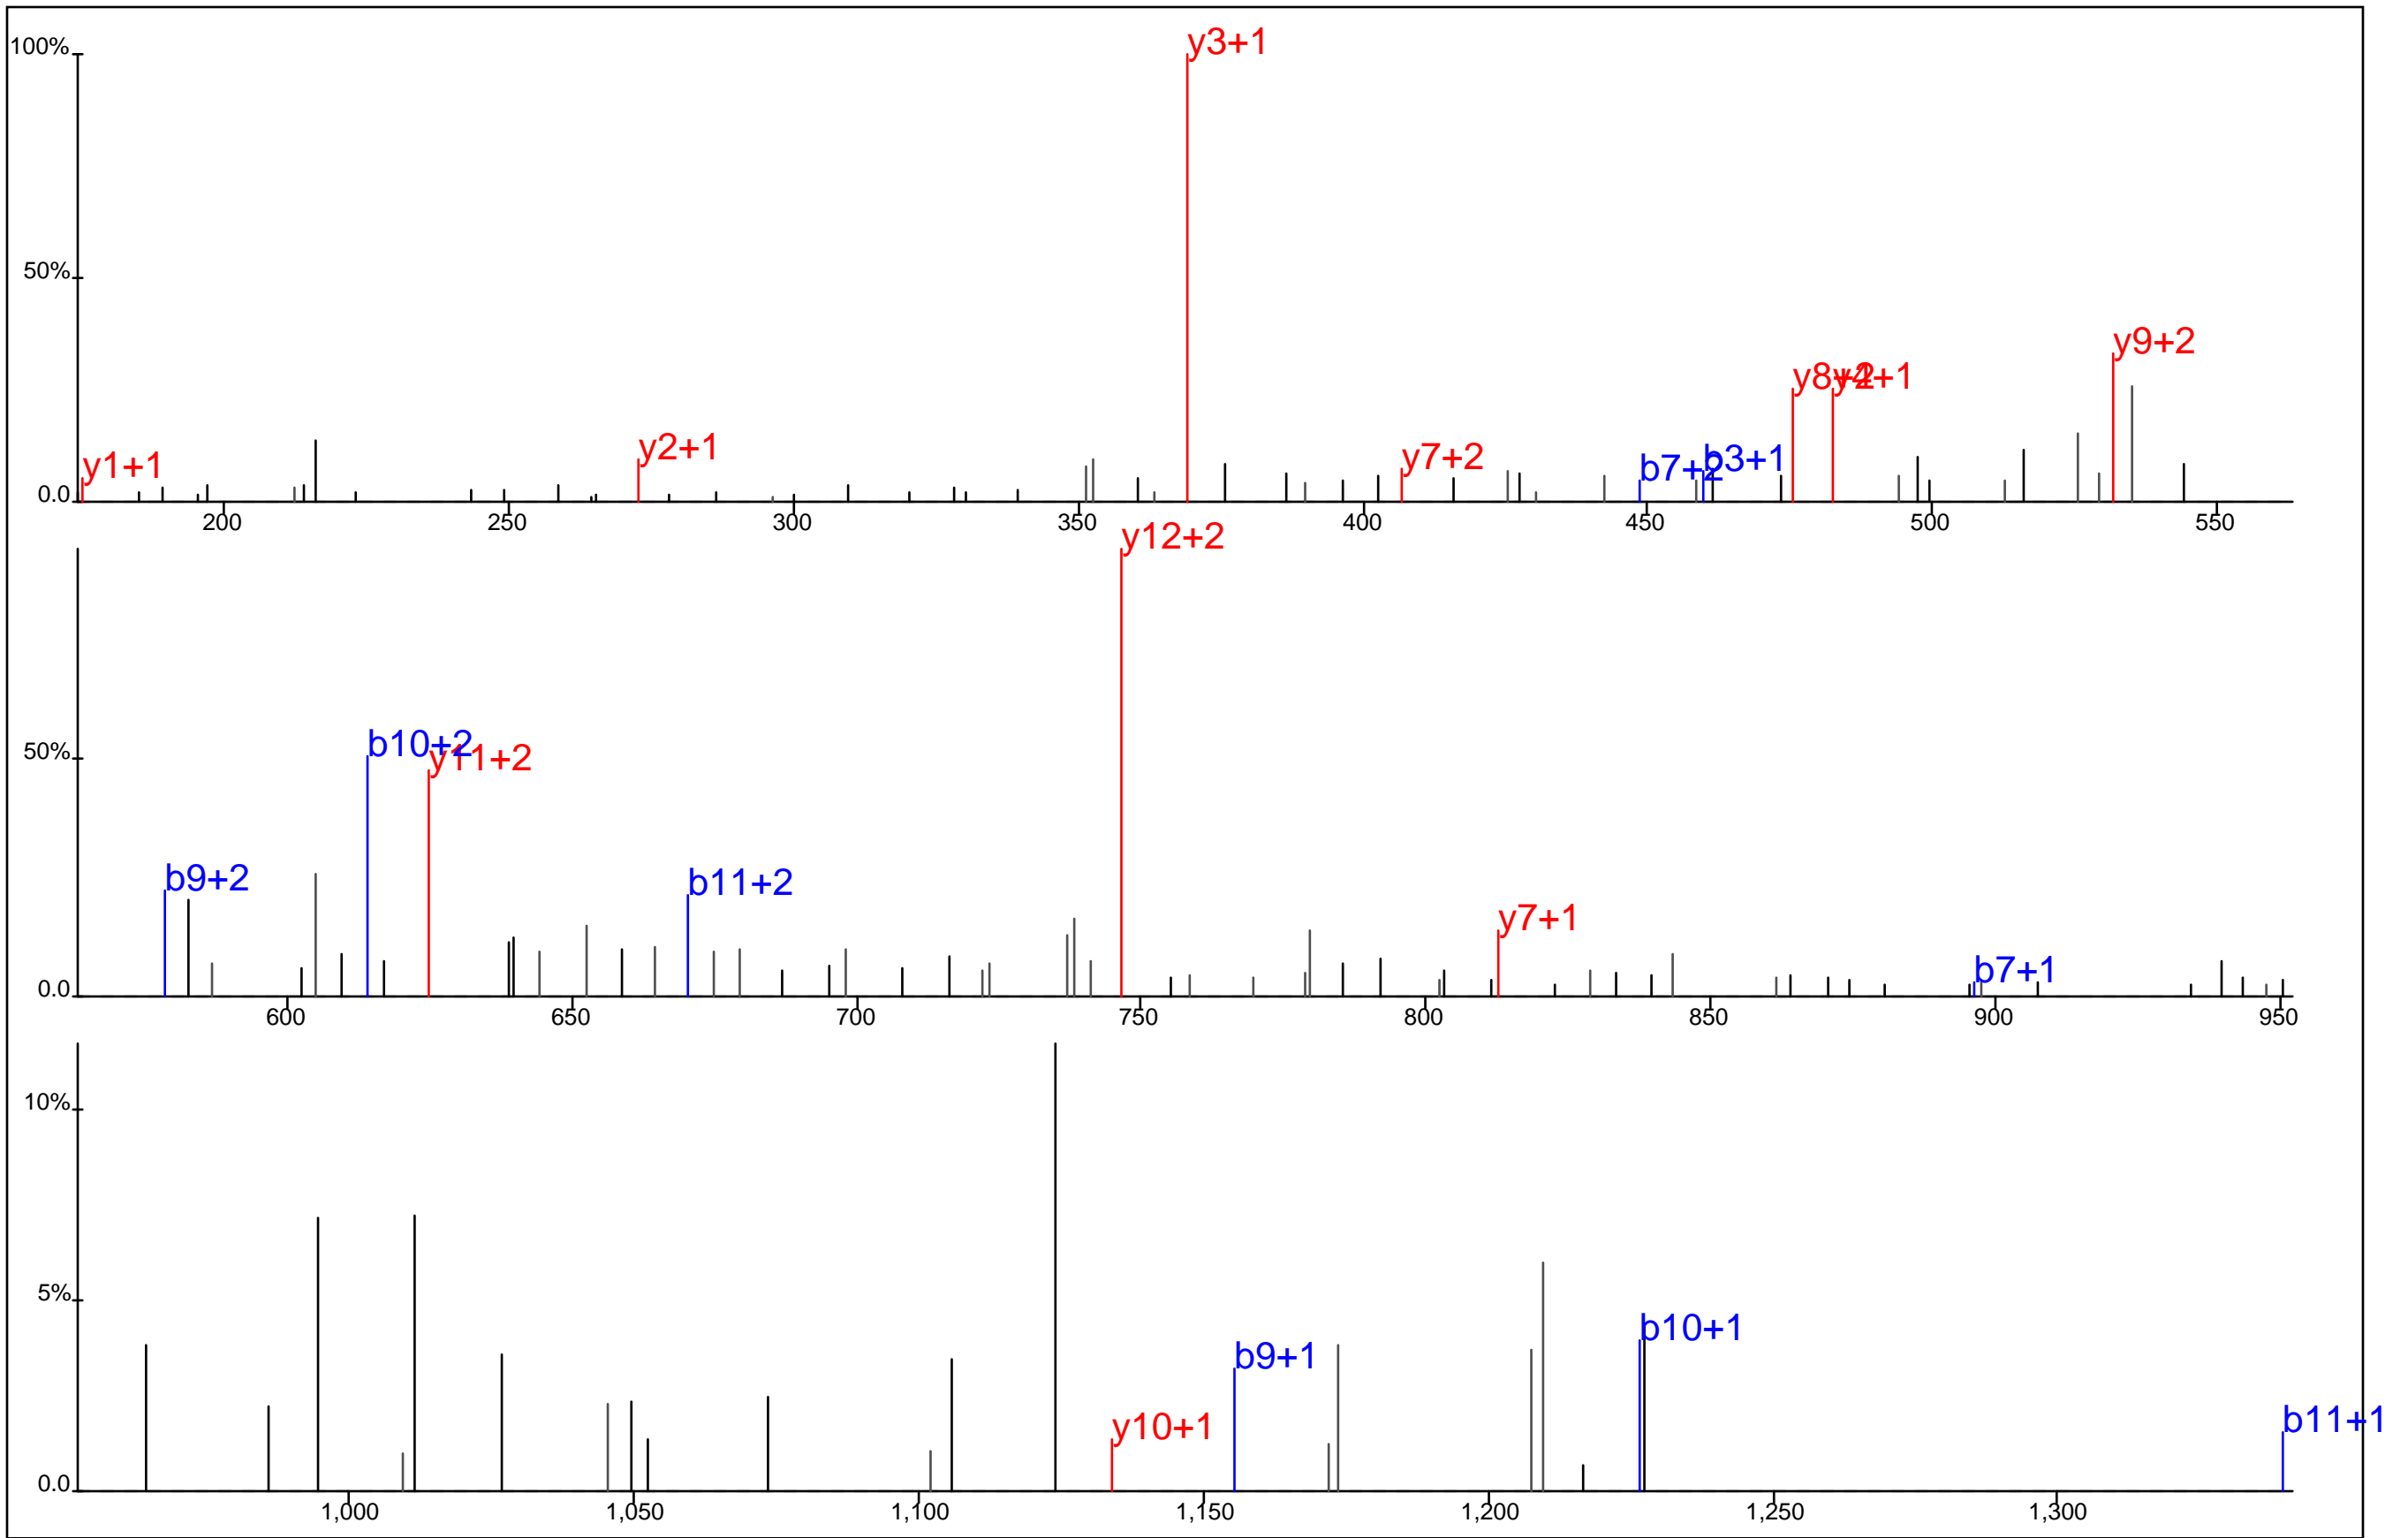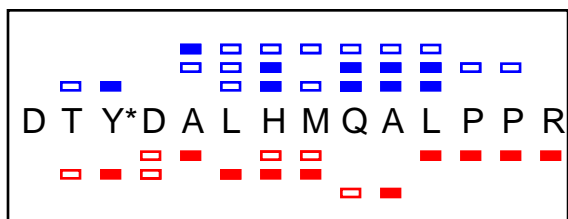

Protein Name: T cell antigen receptor, zeta  
 gi Accession: 0  
 Precursor Mass: 569.9236+3  
 Delta Mass: 0.110 ppm  
 XCorr: 26.85

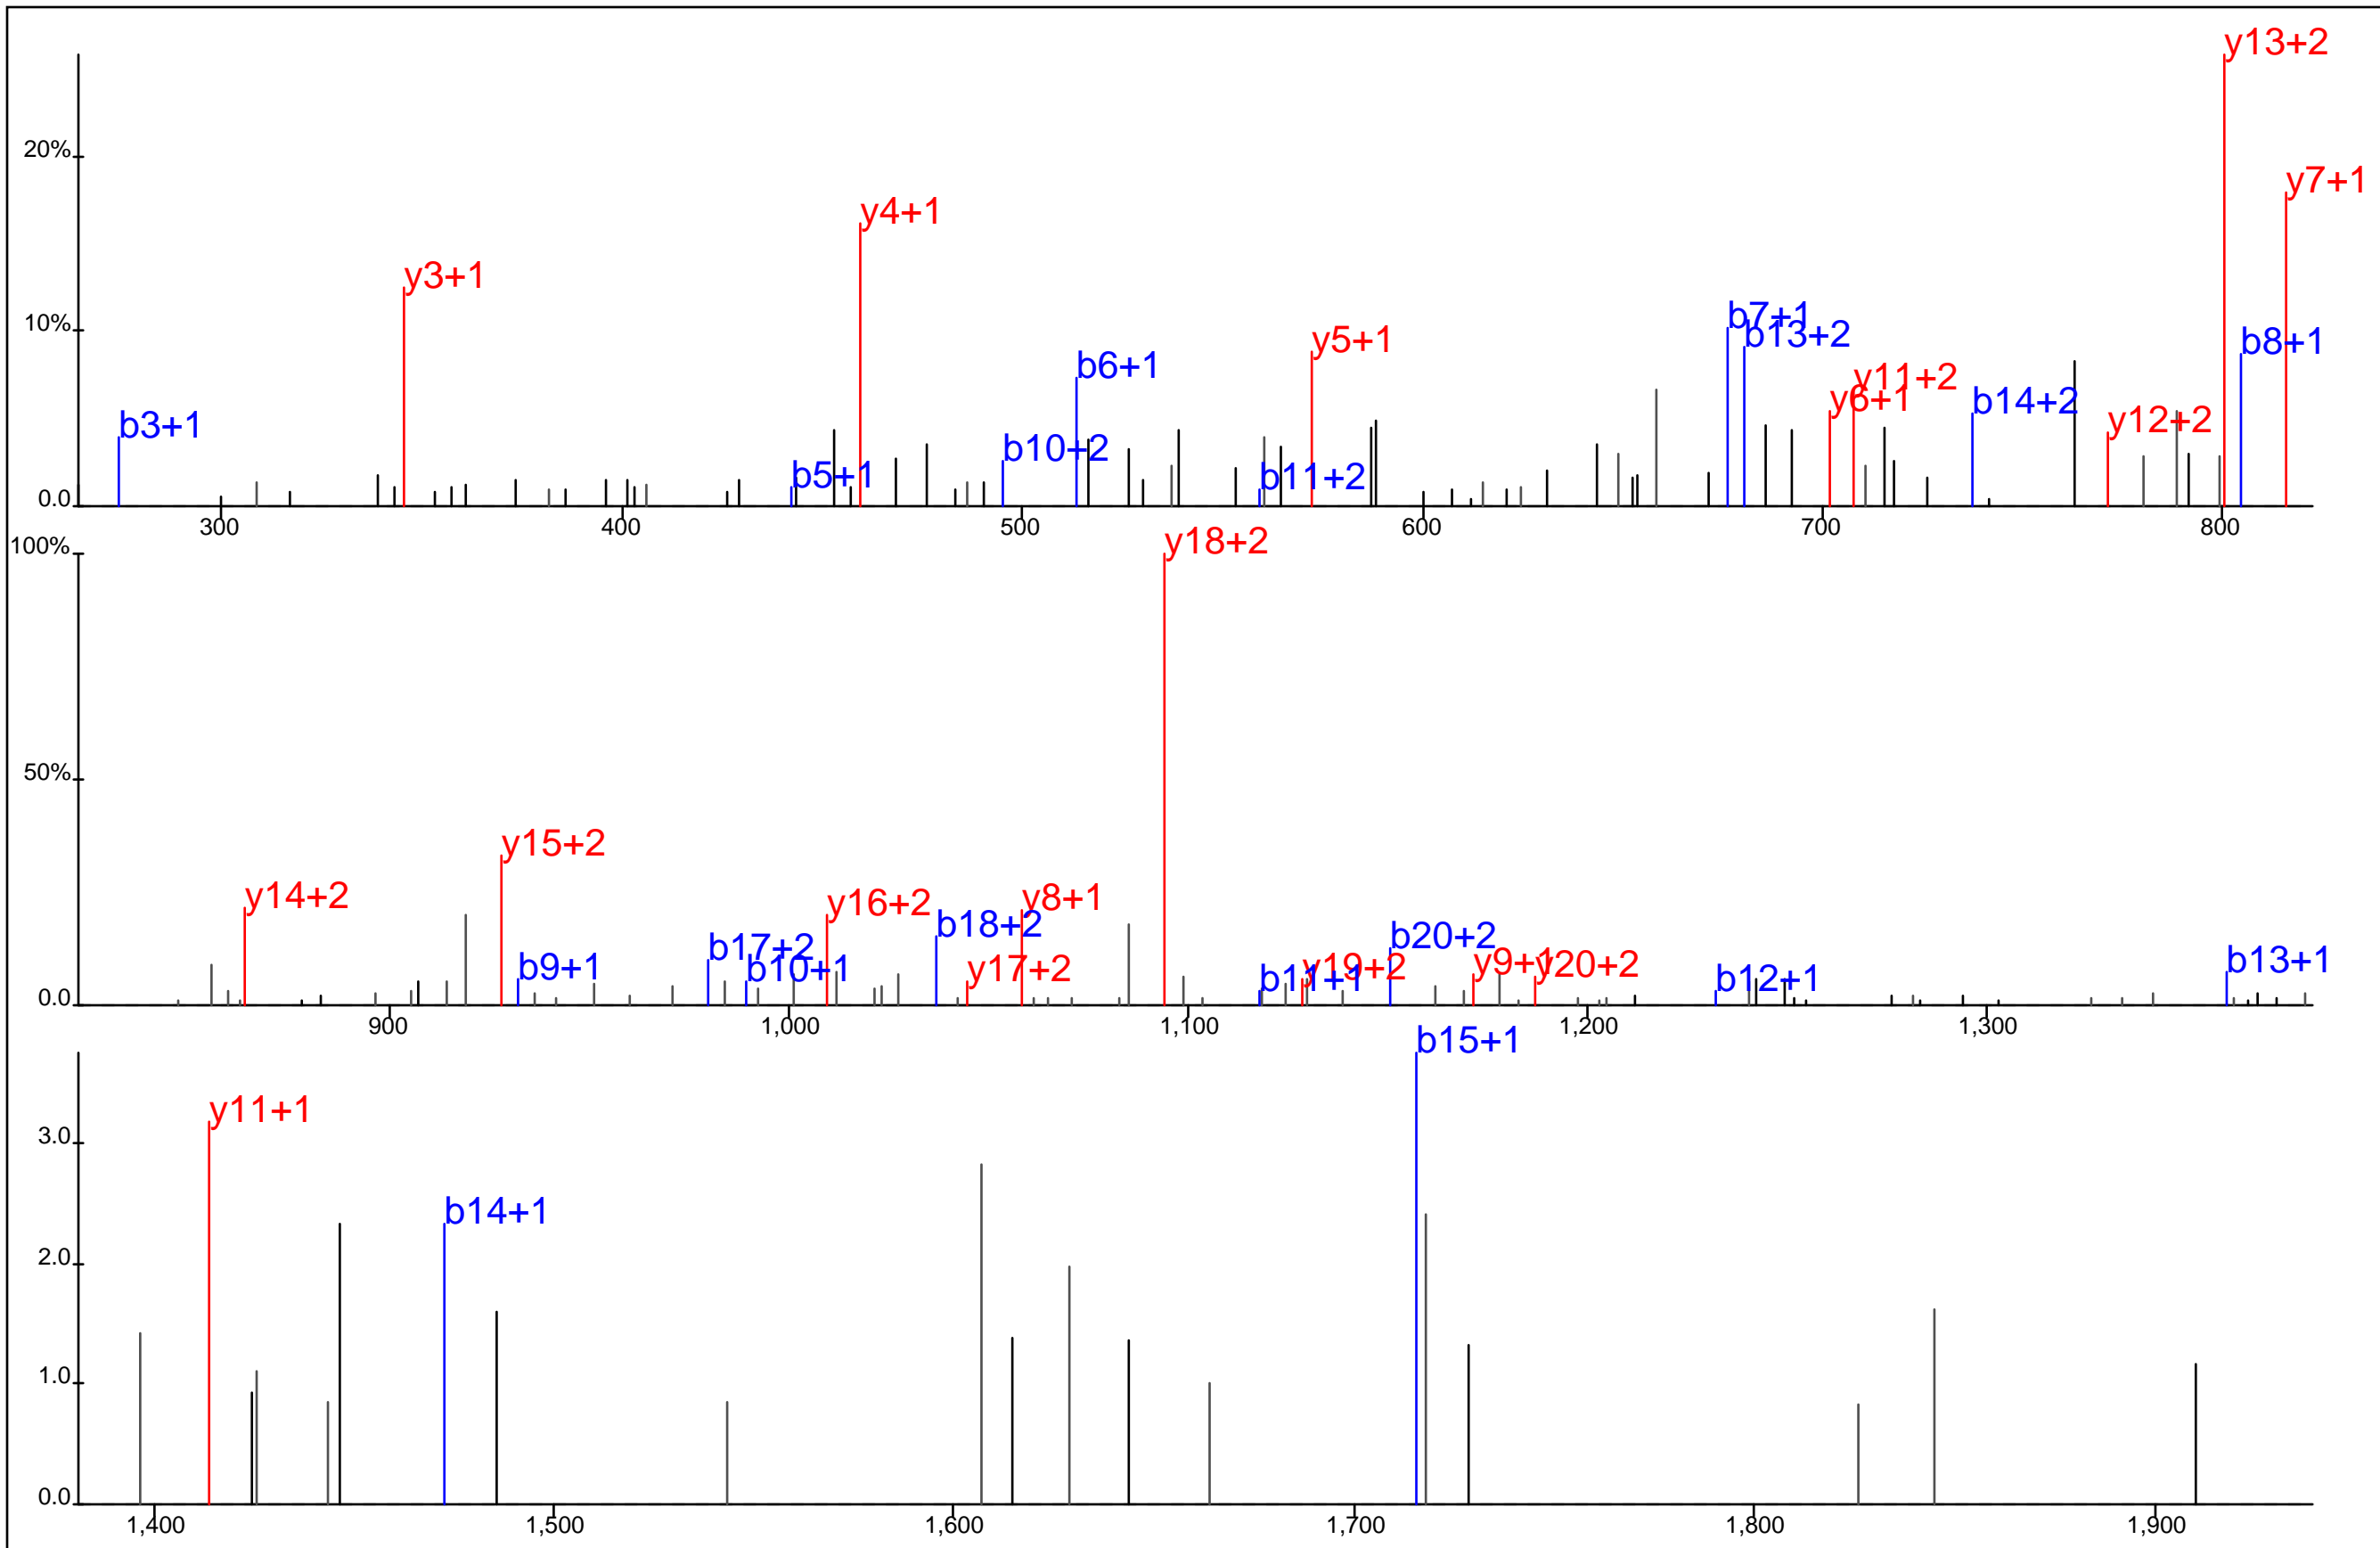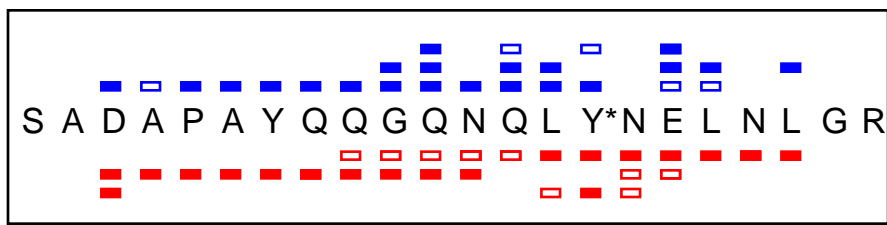

Protein Name: T cell antigen receptor, zeta  
 gi Accession: 0  
 Precursor Mass: 844.0499+3  
 Delta Mass: 0.287 ppm  
 XCorr: 52.67





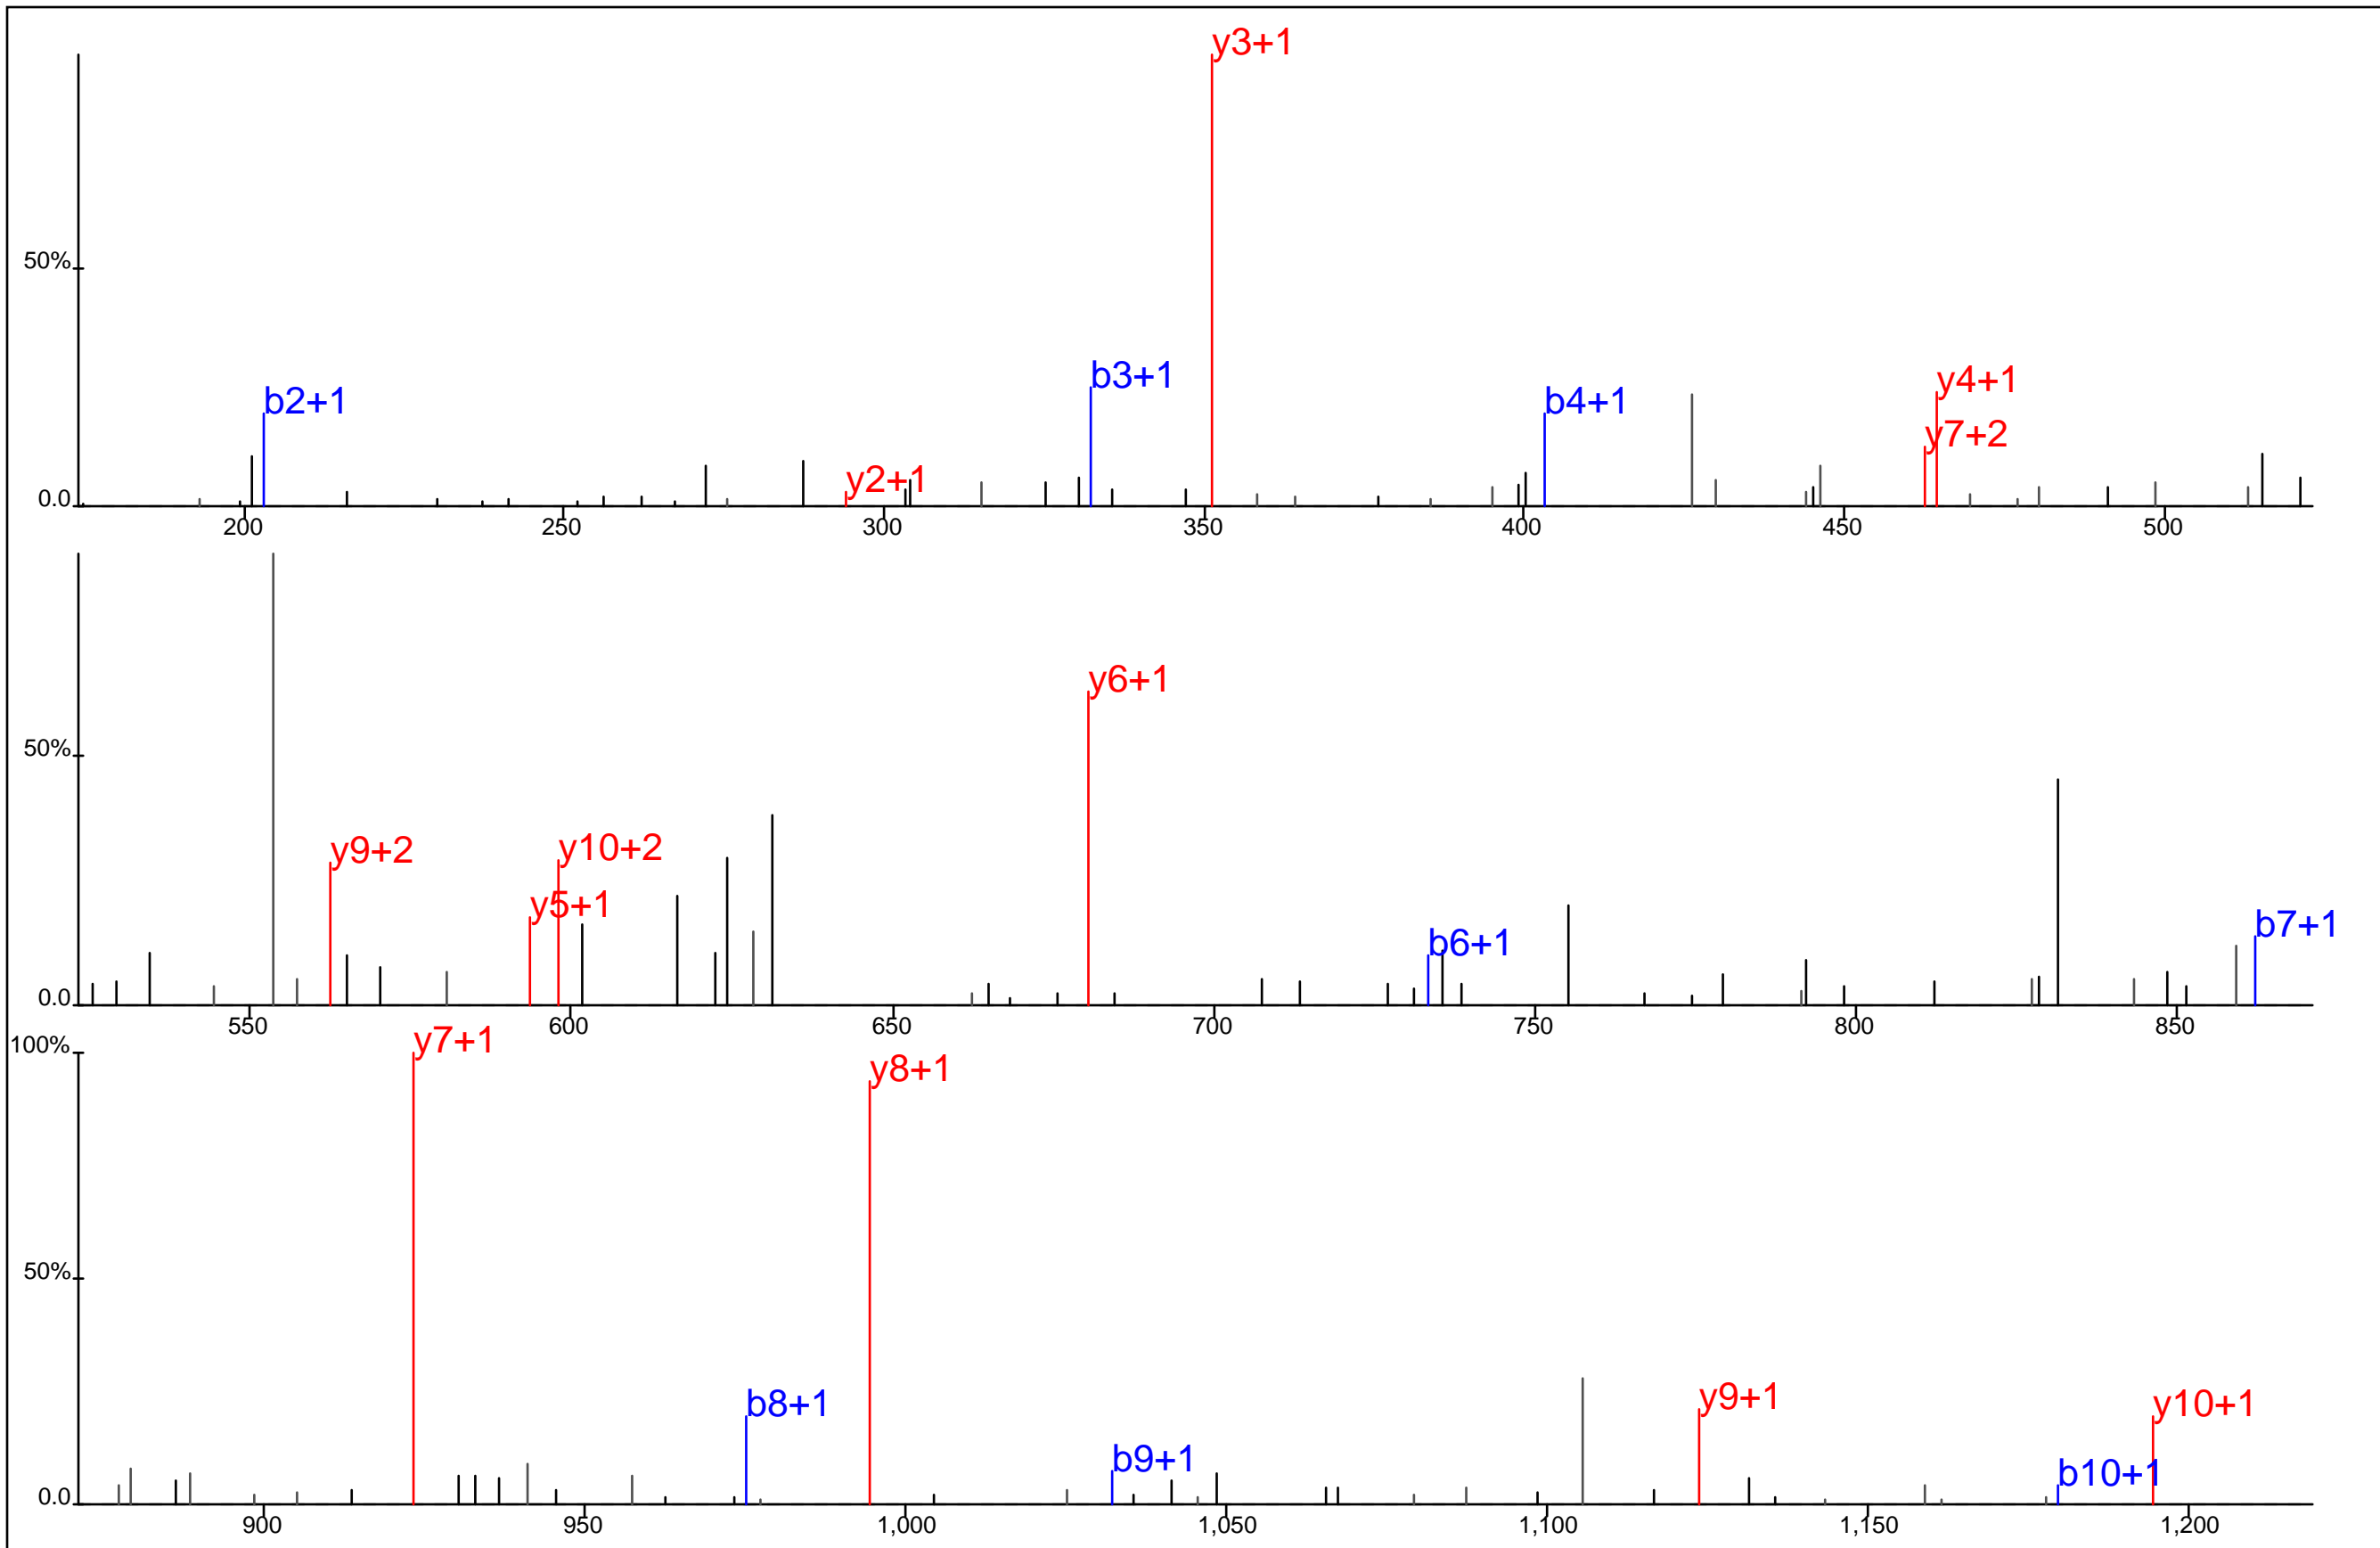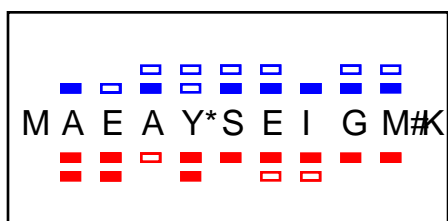

Protein Name: T cell antigen receptor, zeta  
 gi Accession: 0  
 Precursor Mass: 663.2614+2  
 Delta Mass: 0.119 ppm  
 XCorr: 55.76

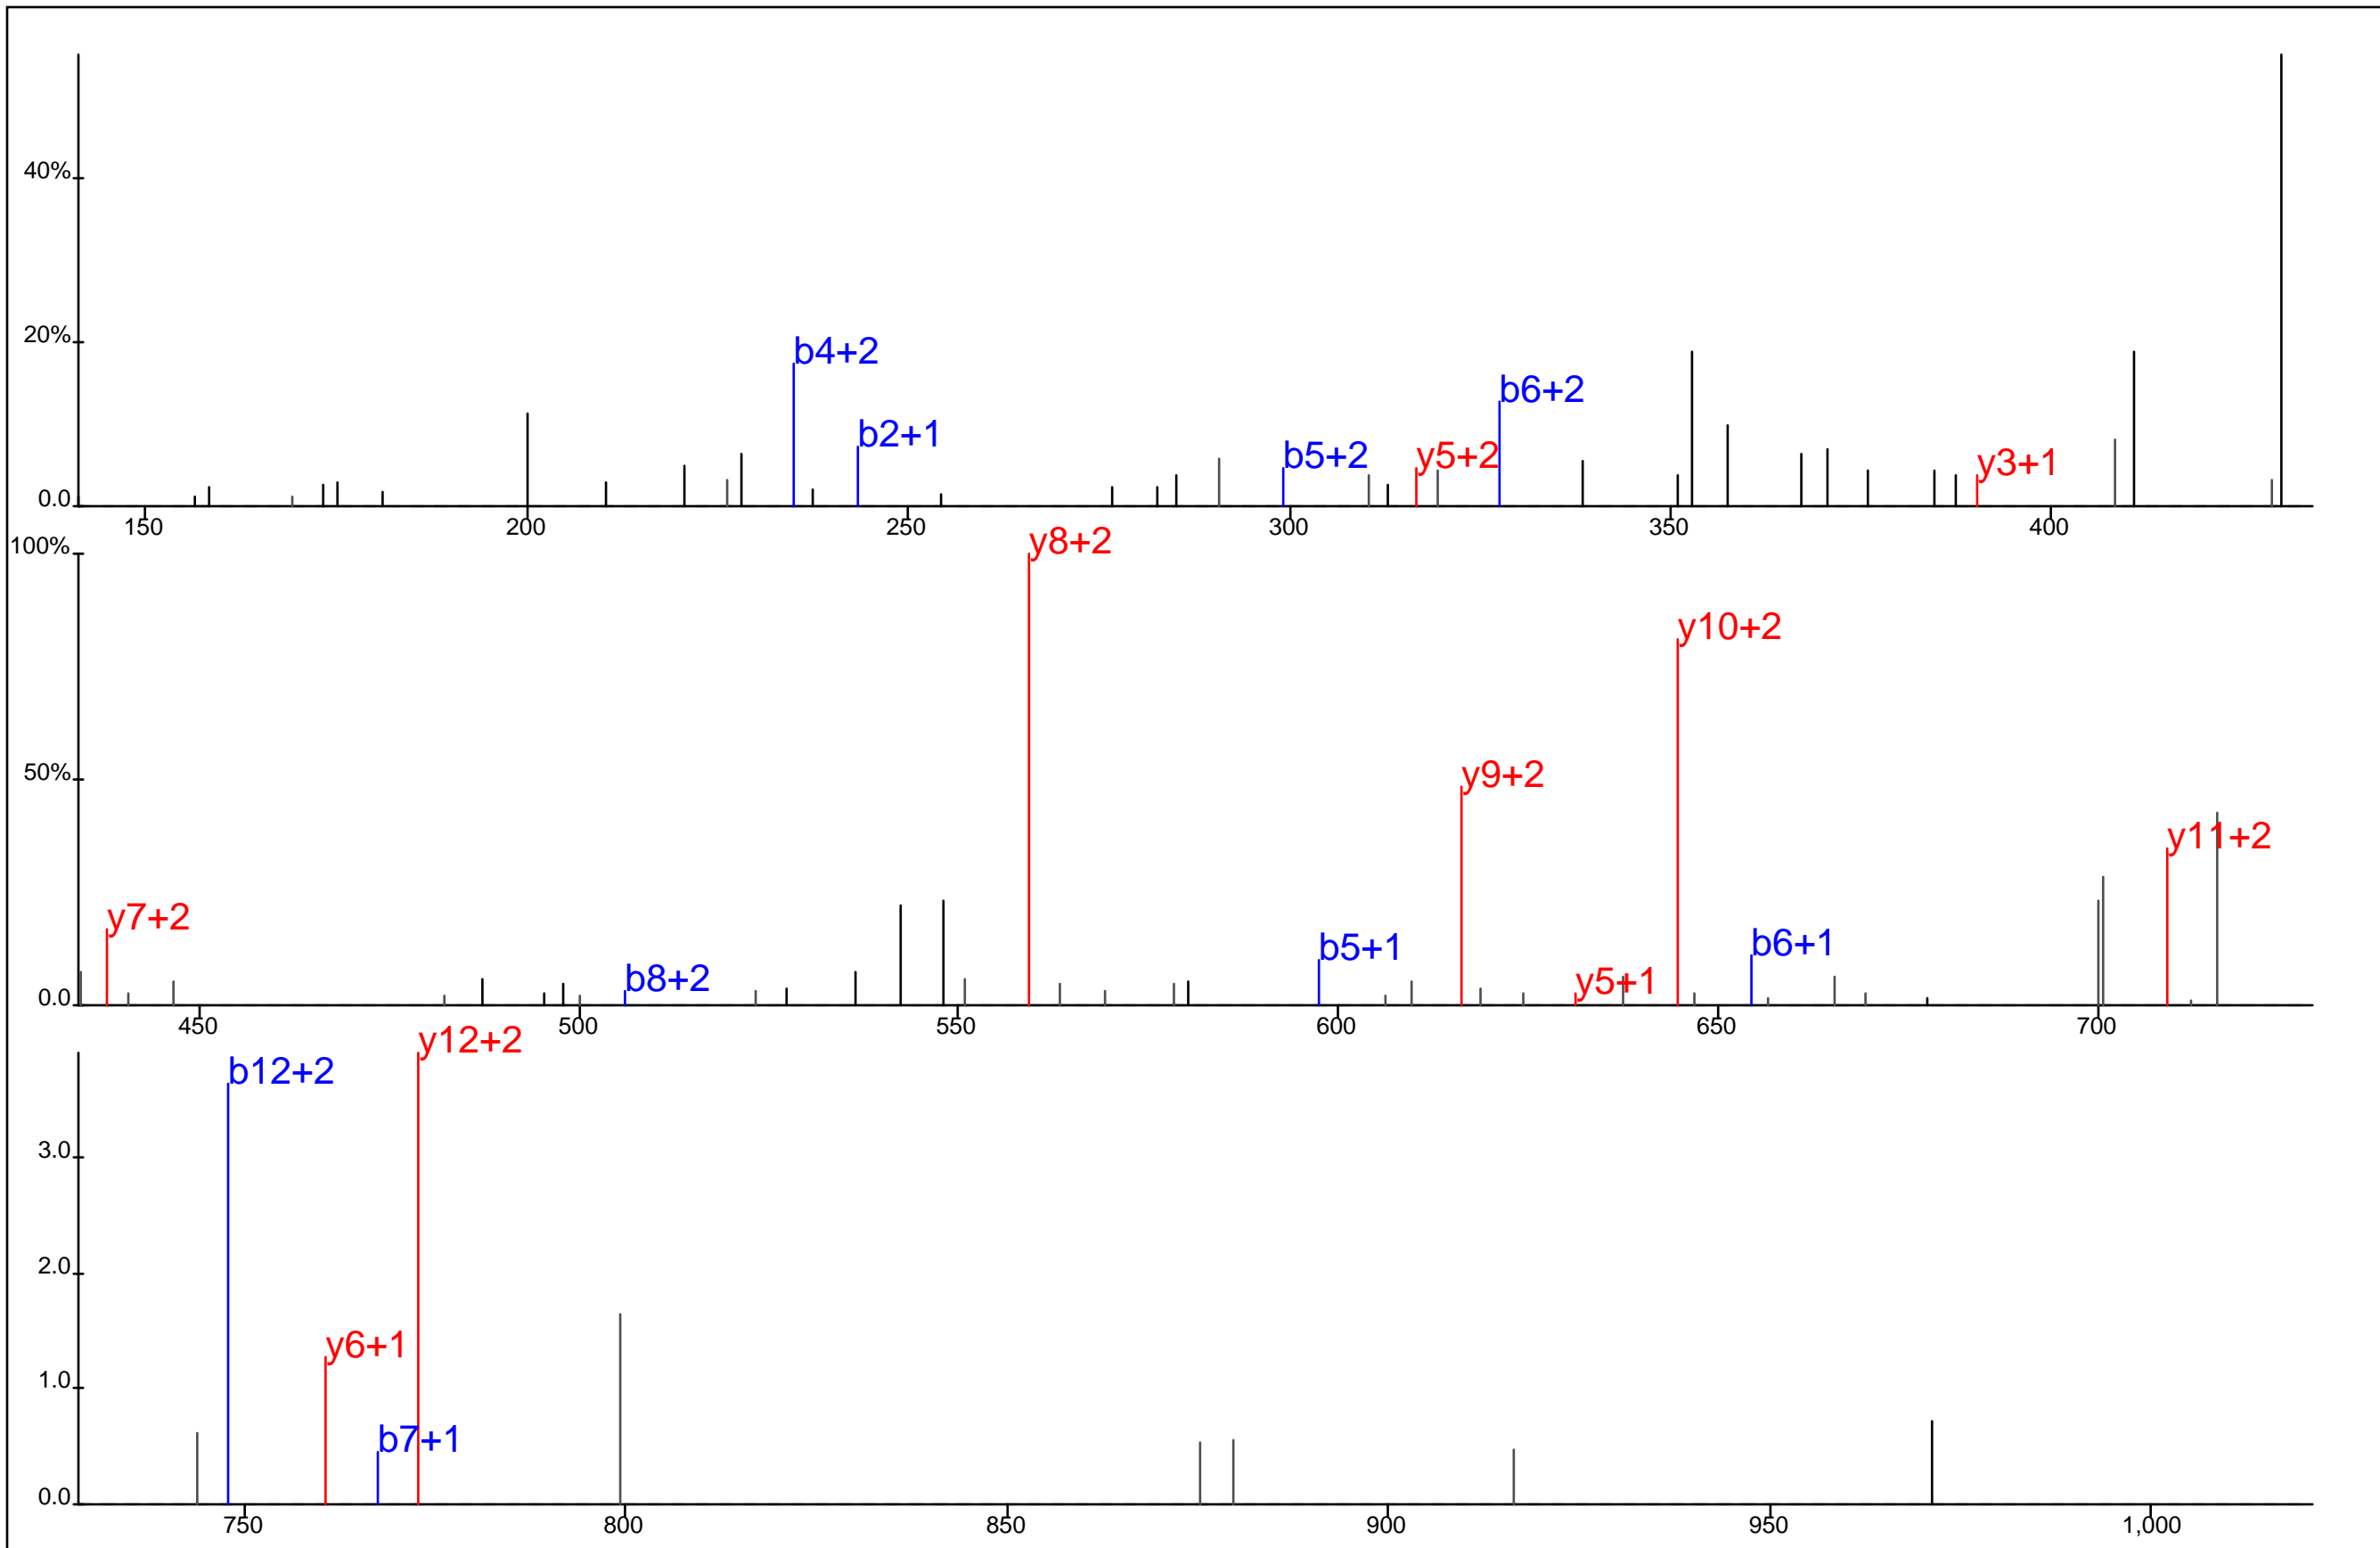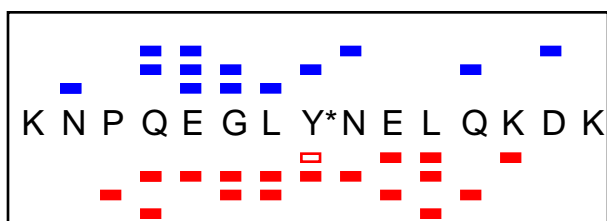

Protein Name: T cell antigen receptor, zeta  
 gi Accession: 0  
 Precursor Mass: 471.7276+4  
 Delta Mass: 0.733 ppm  
 XCorr: 23.13

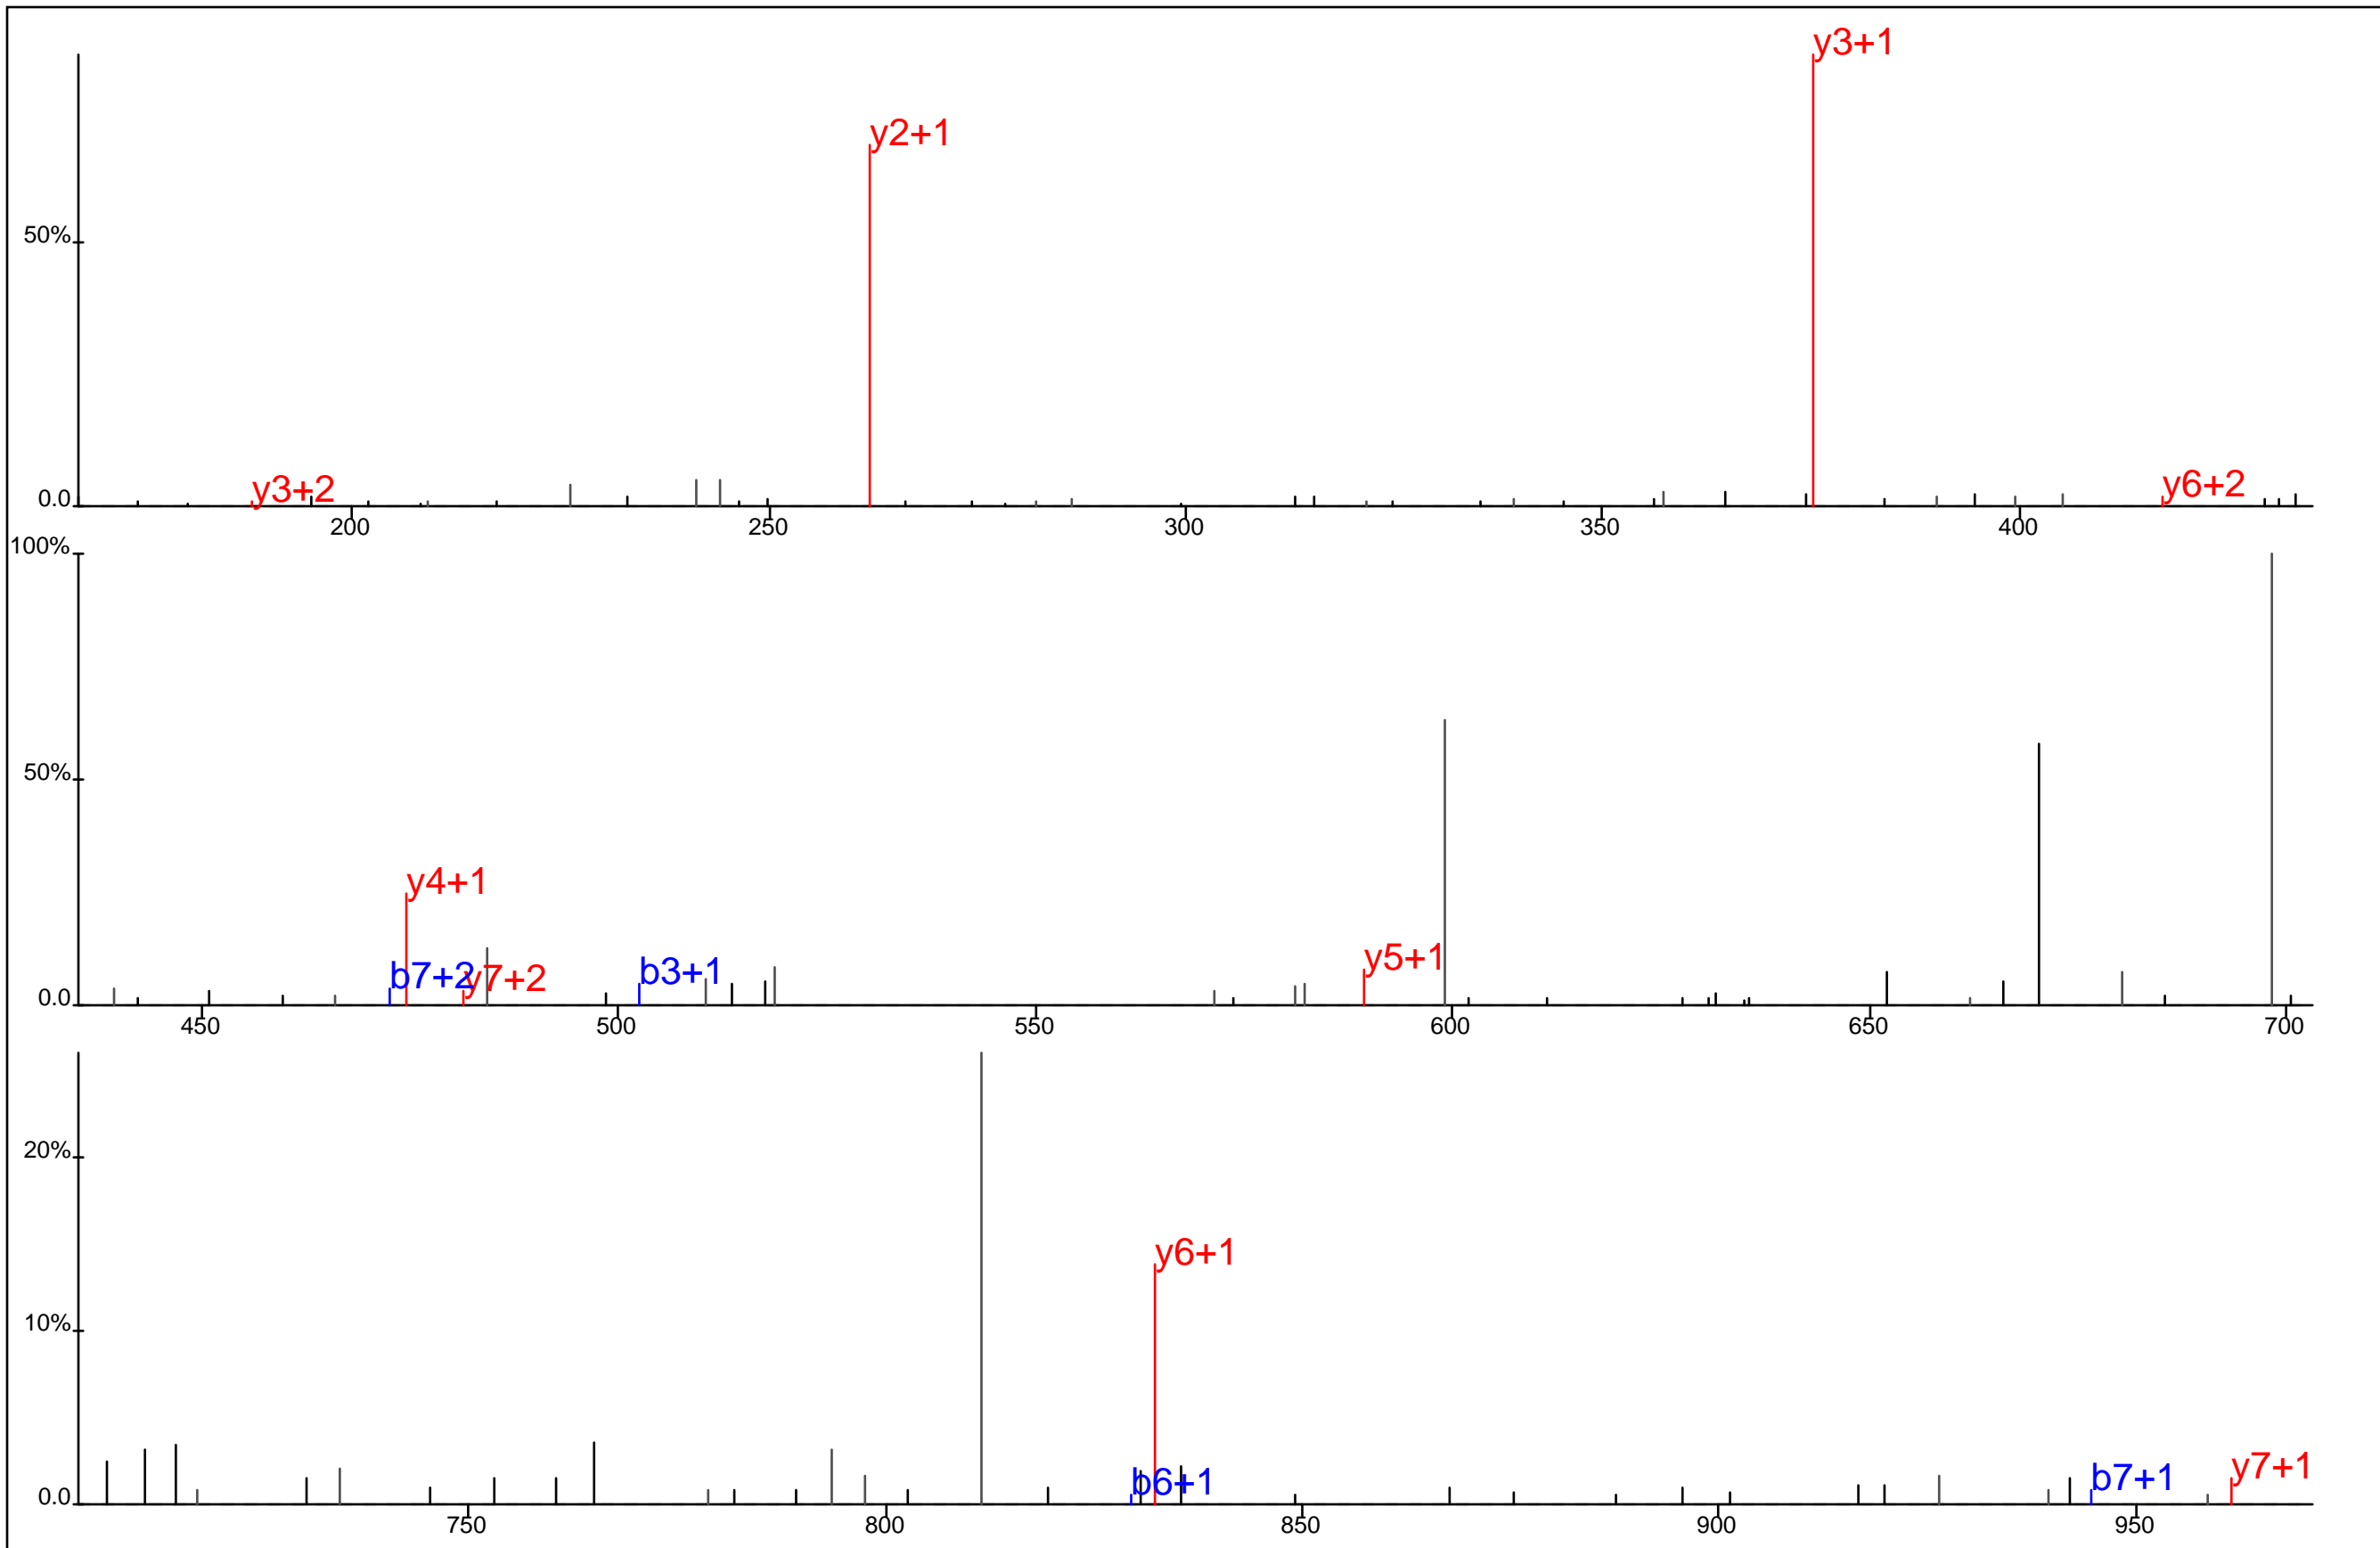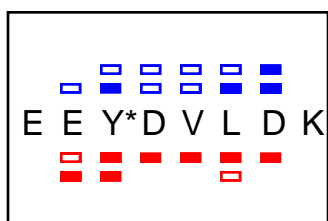

Protein Name: T cell antigen receptor, zeta  
 gi Accession: 0  
 Precursor Mass: 545.7209+2  
 Delta Mass: 0.462 ppm  
 XCorr: 24.83

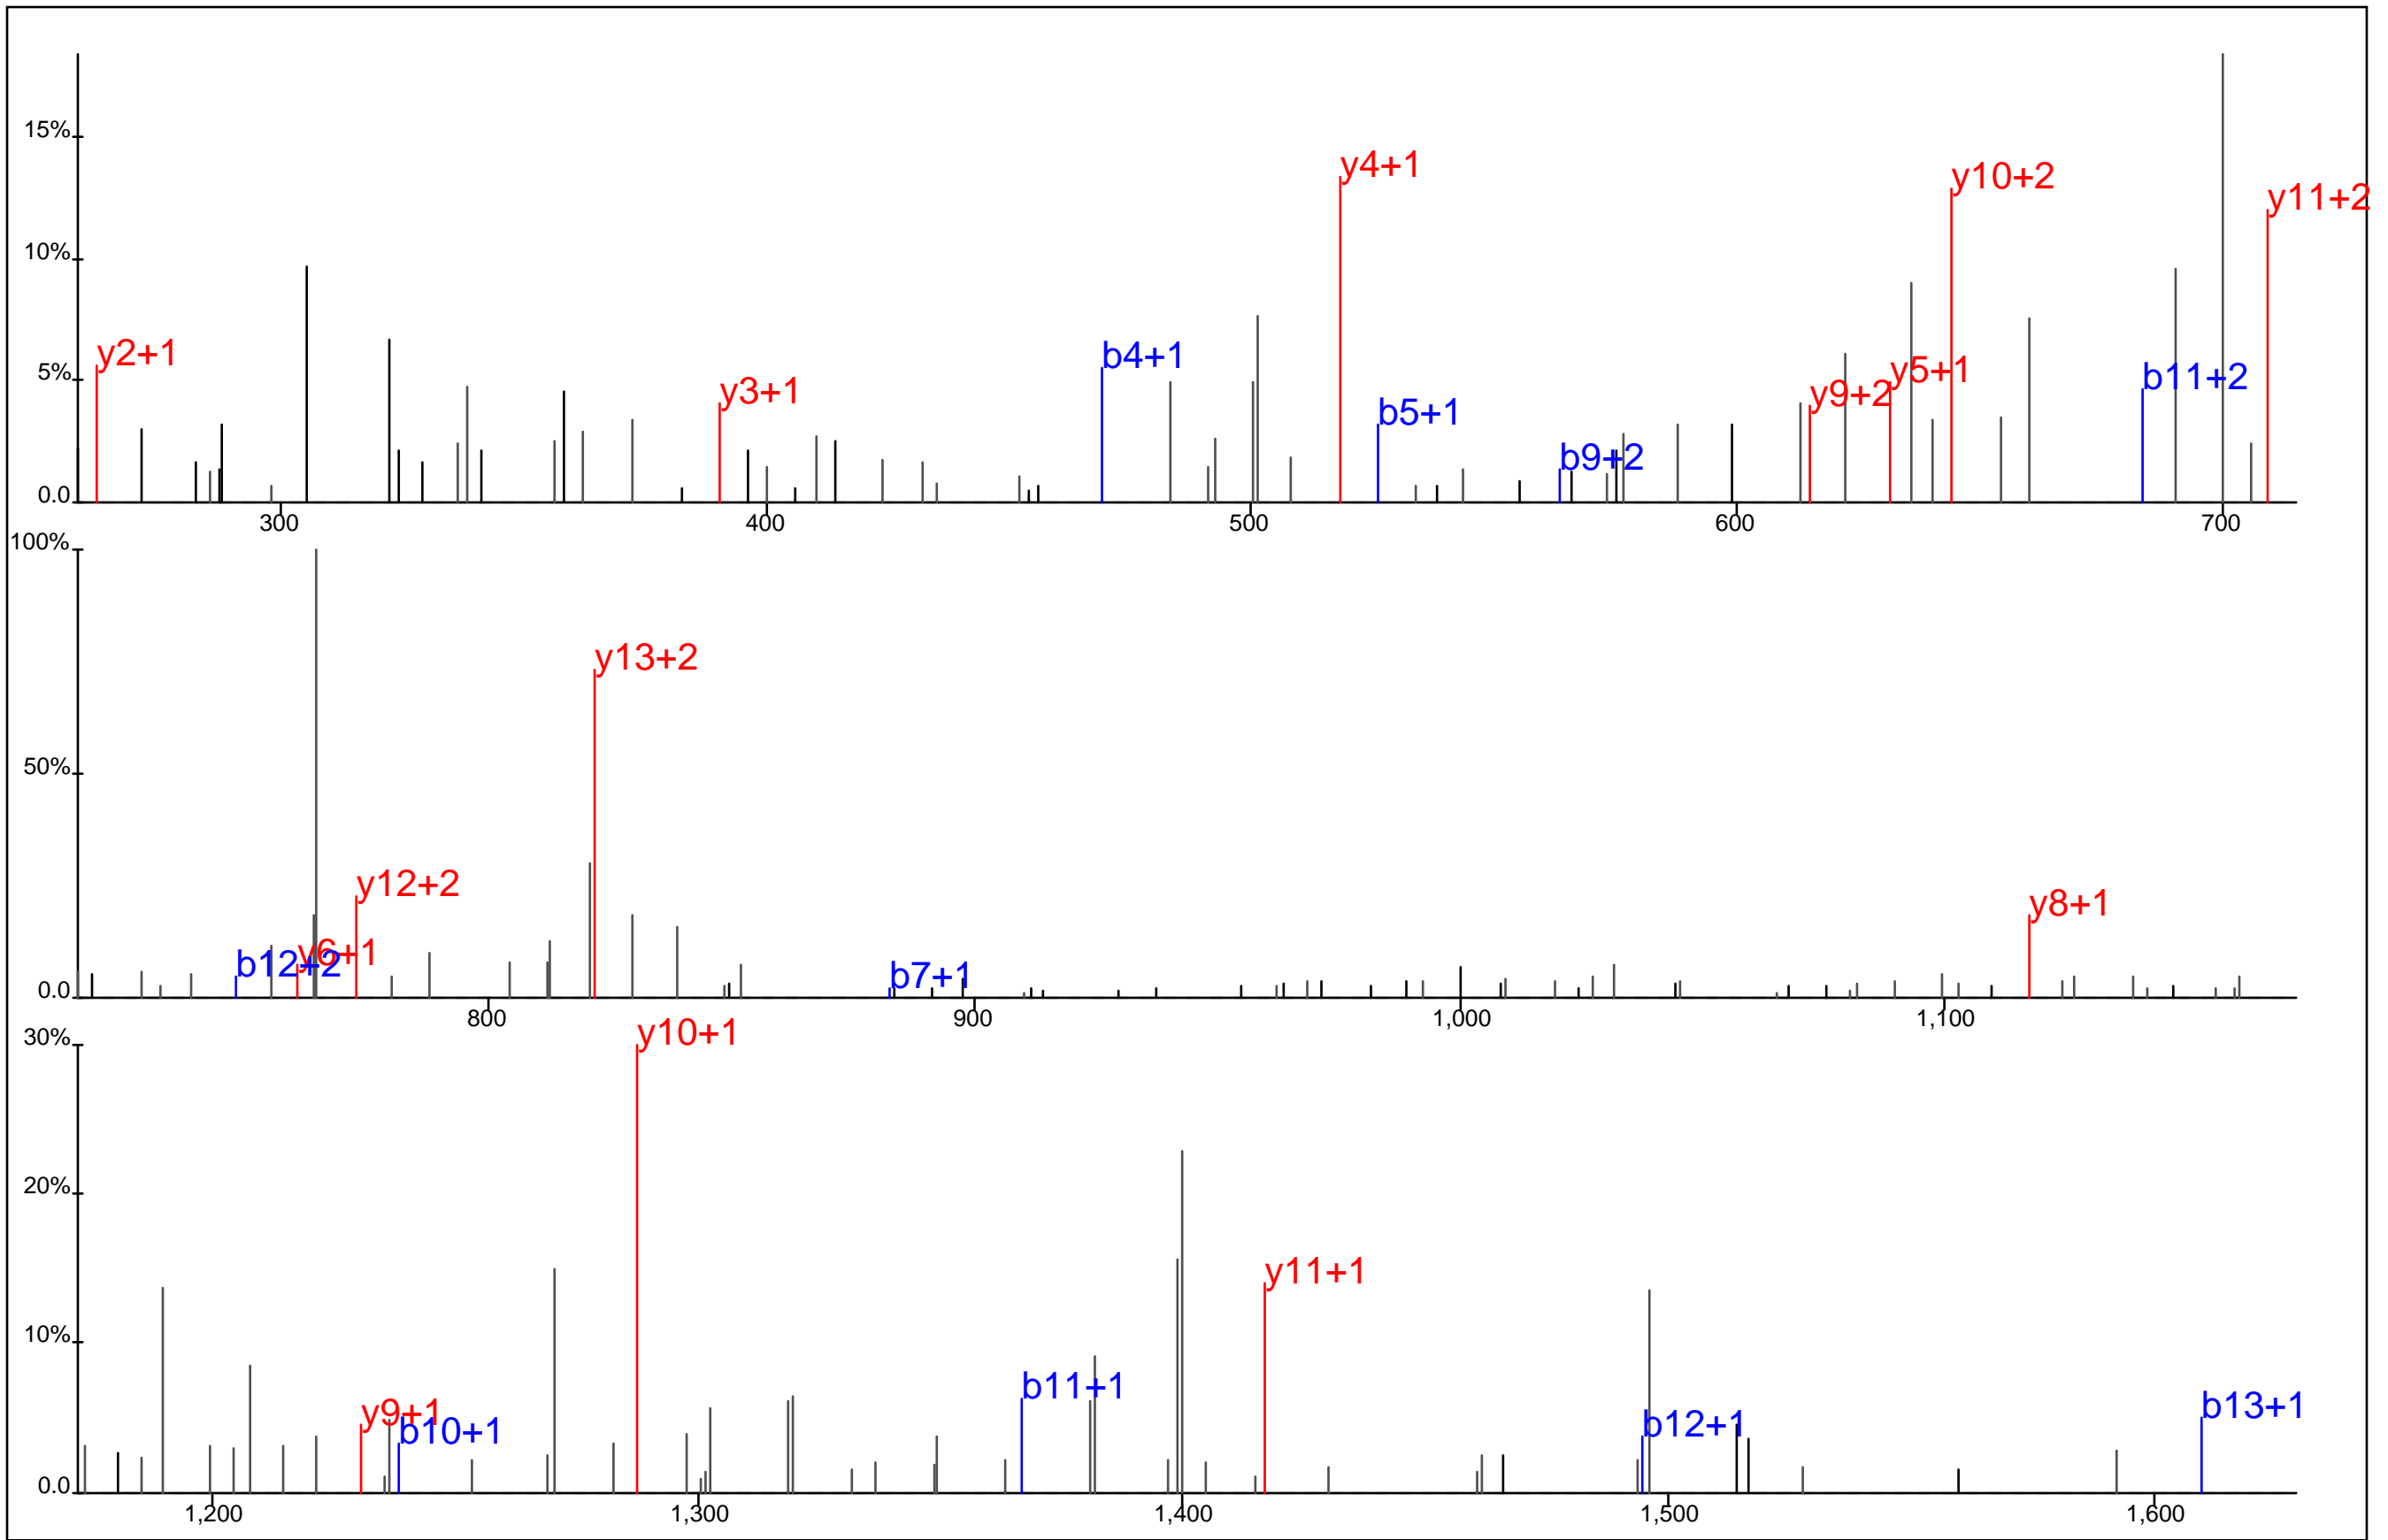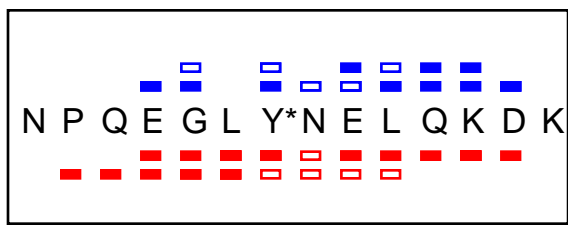

Protein Name: T cell antigen receptor, zeta  
 gi Accession: 0  
 Precursor Mass: 878.4006+2  
 Delta Mass: 0.500 ppm  
 XCorr: 34.33



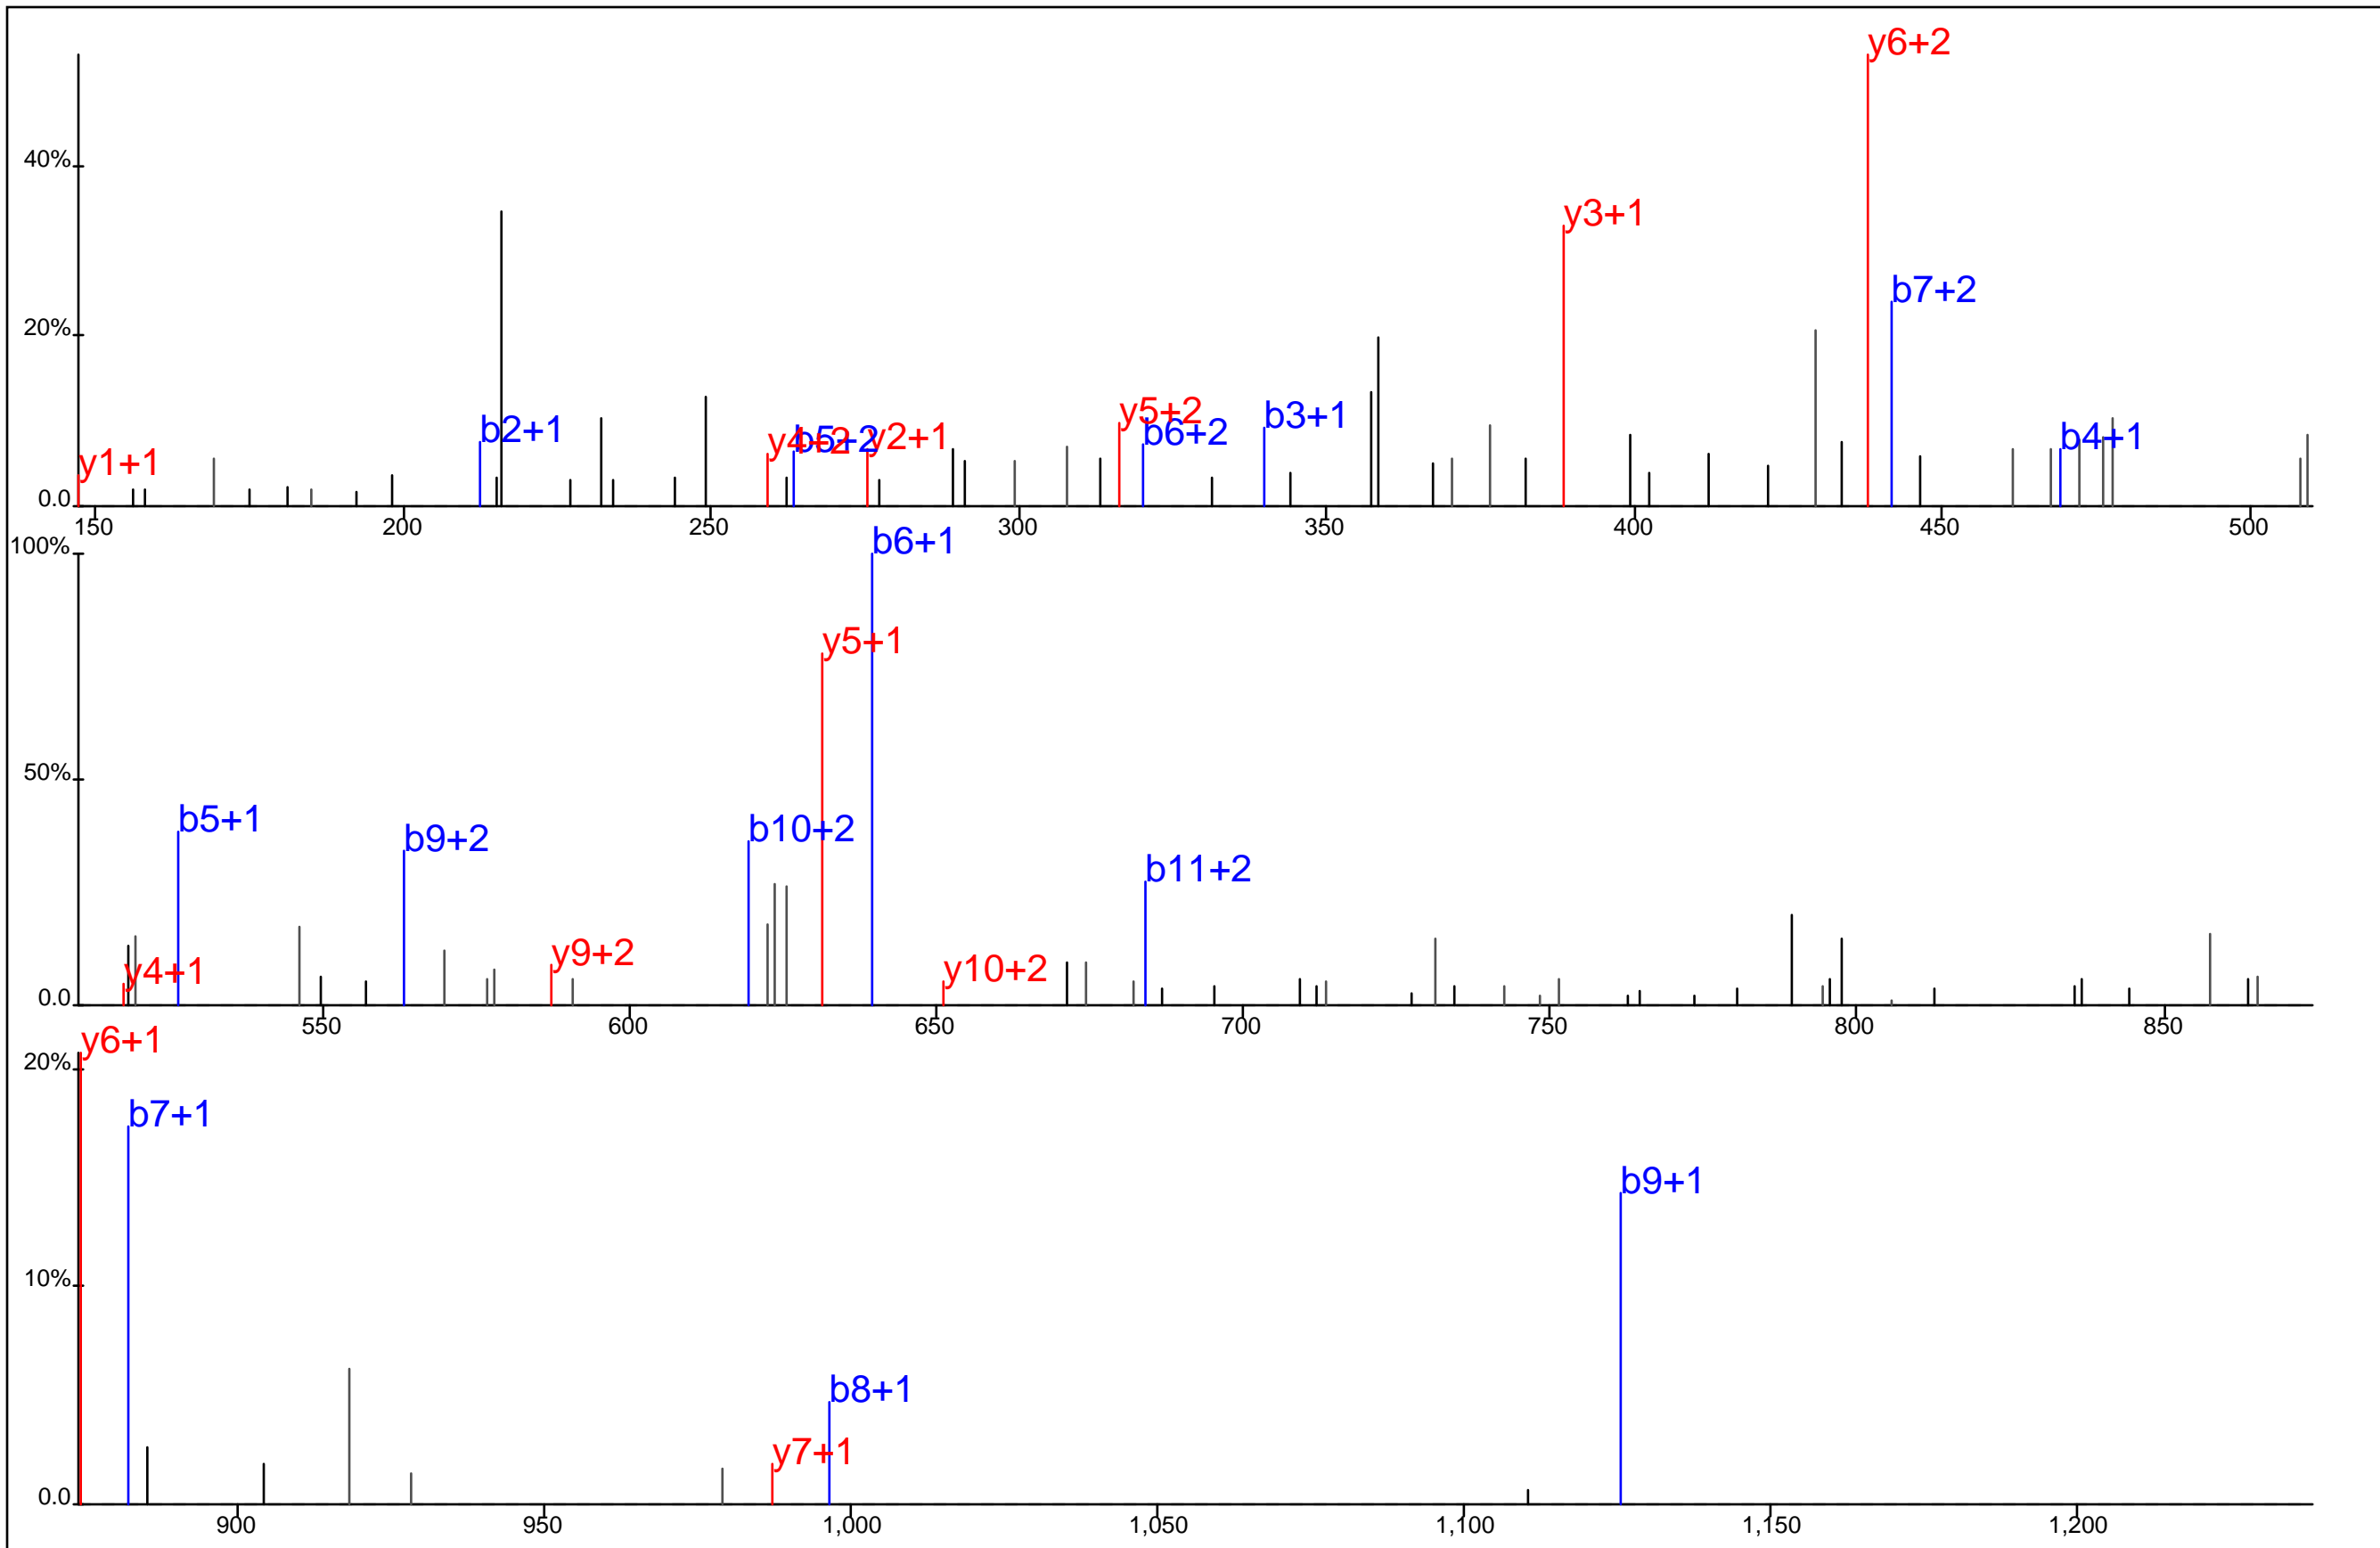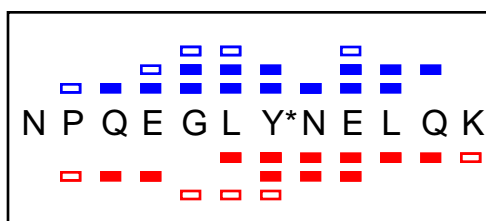

Protein Name: T cell antigen receptor, zeta  
 gi Accession: 0  
 Precursor Mass: 504.8962+3  
 Delta Mass: 0.731 ppm  
 XCorr: 52.73

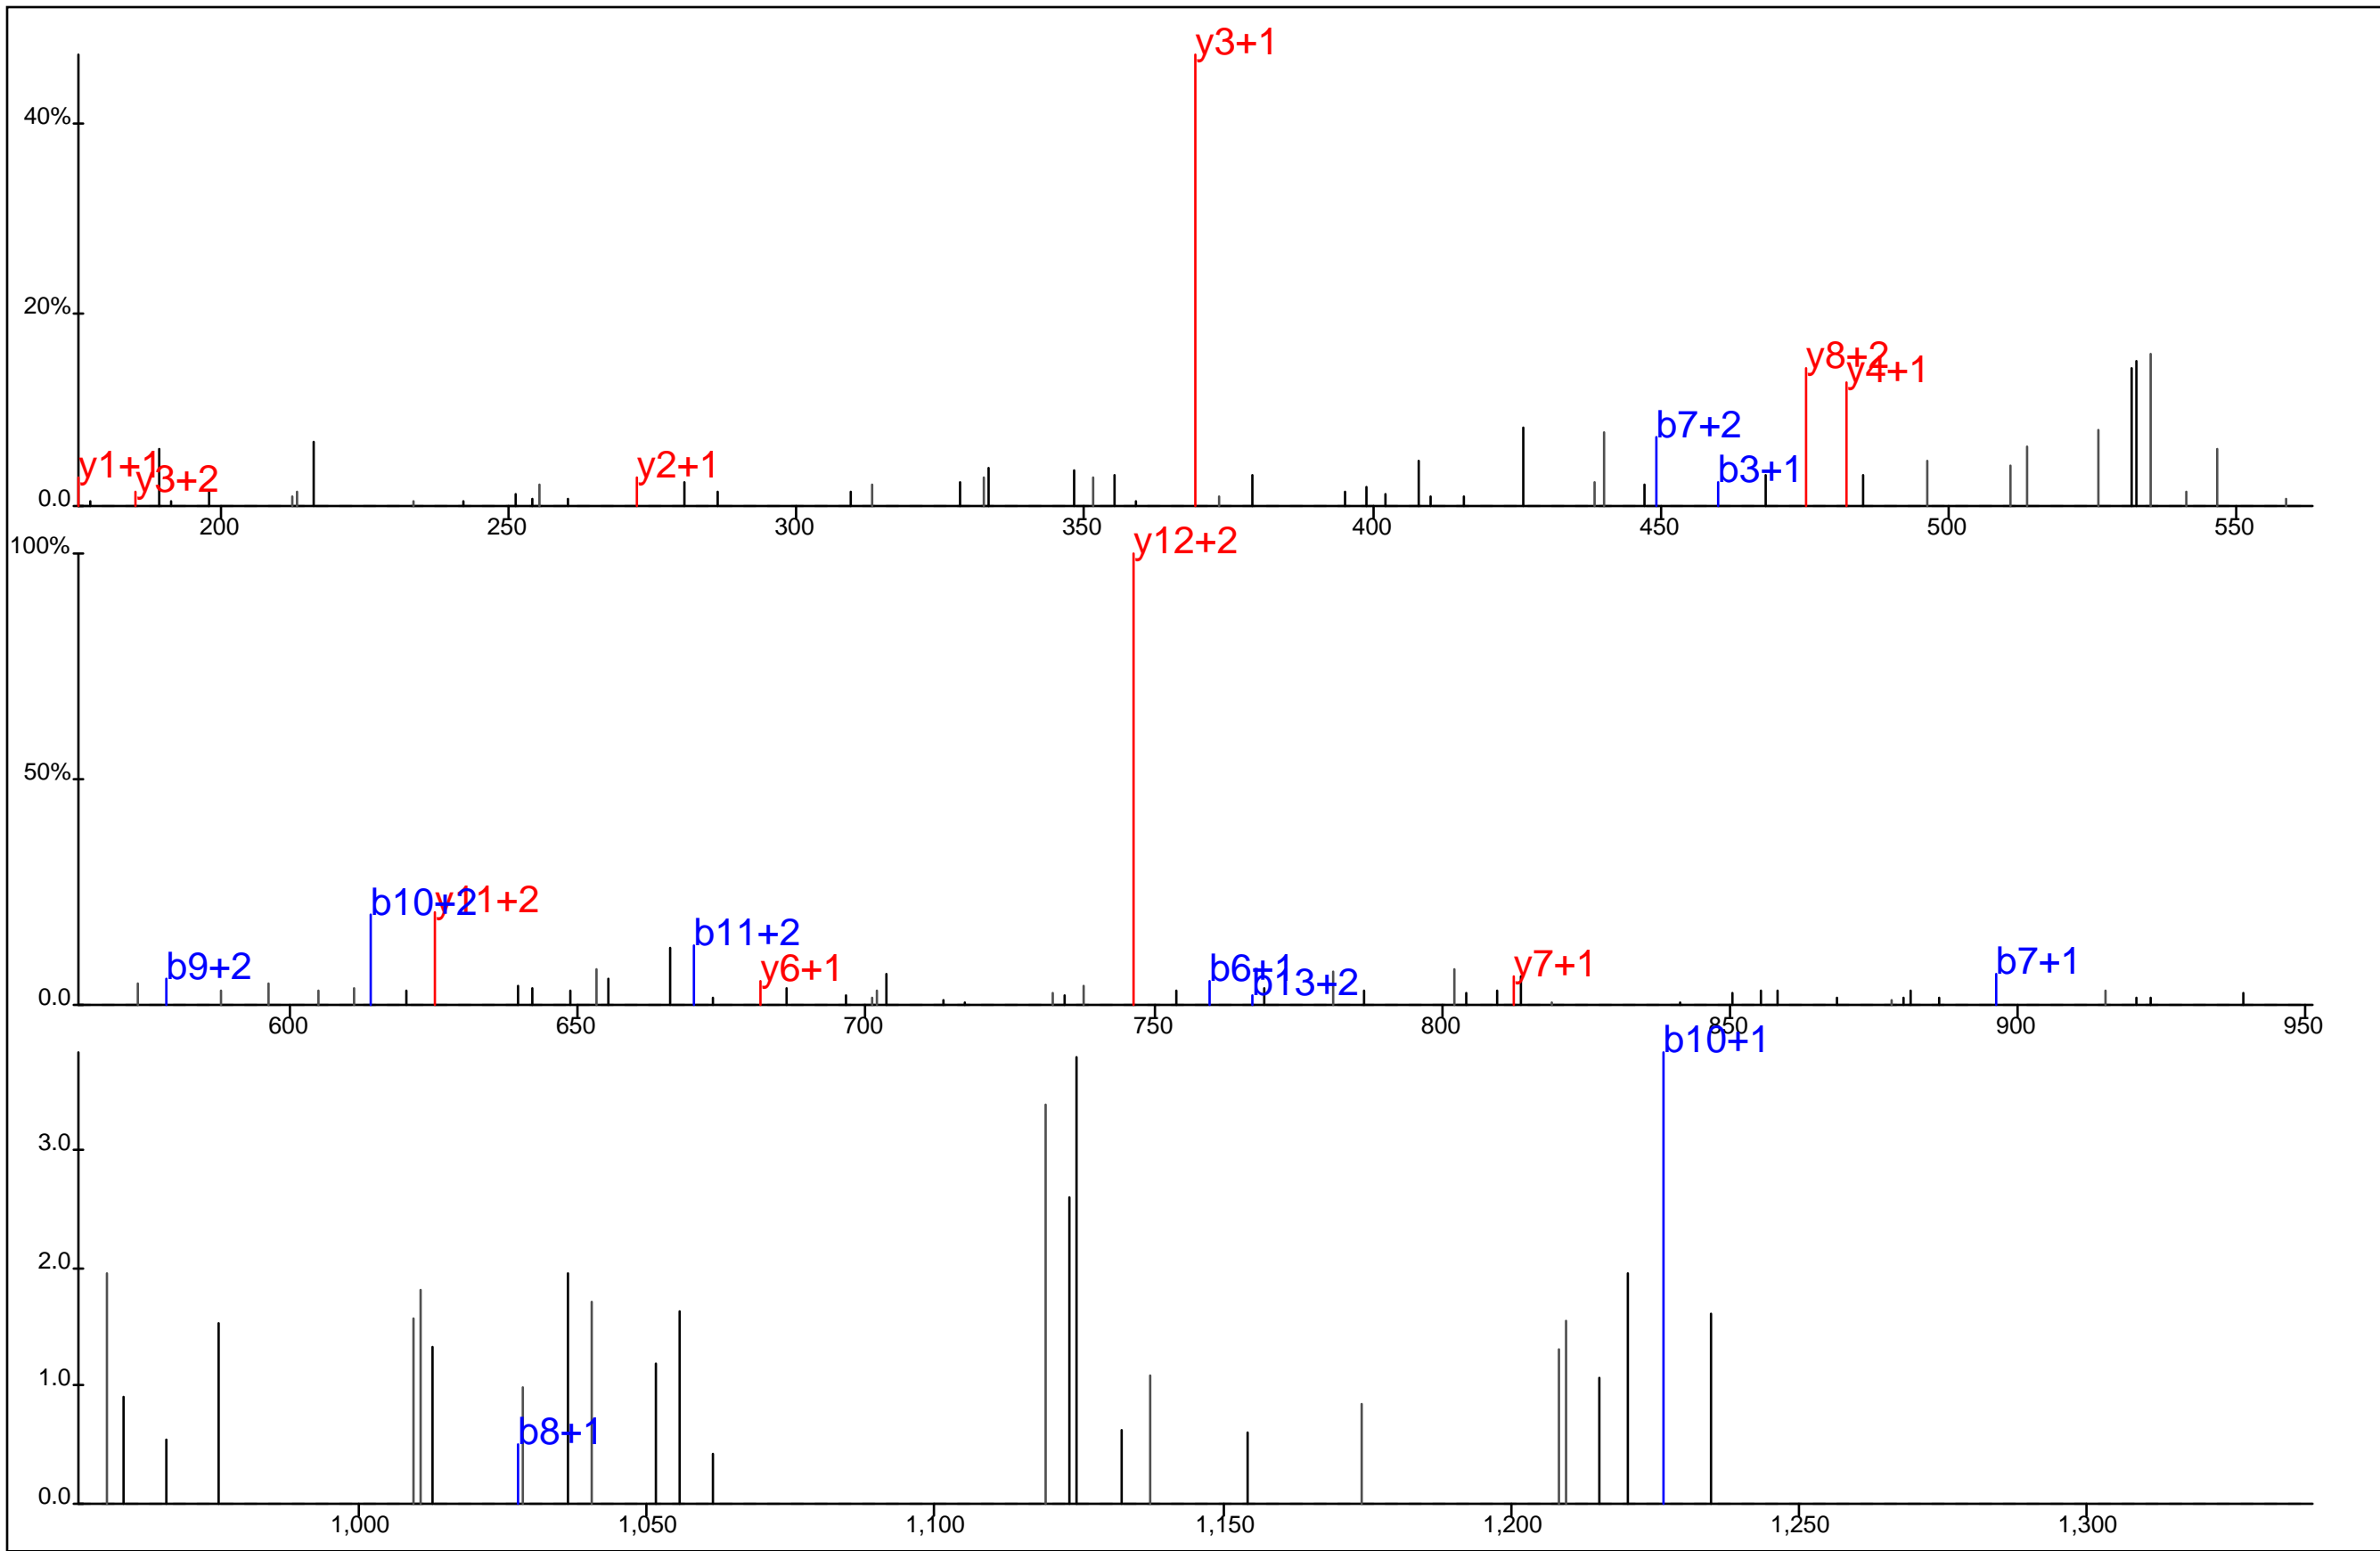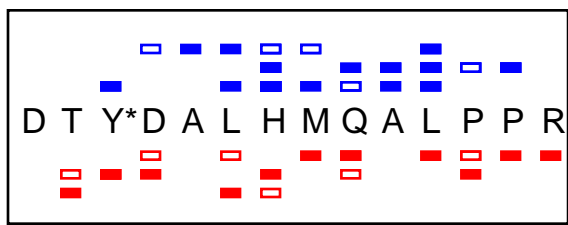

Protein Name: T cell antigen receptor, zeta  
 gi Accession: 0  
 Precursor Mass: 569.9240+3  
 Delta Mass: 0.753 ppm  
 XCorr: 25.8

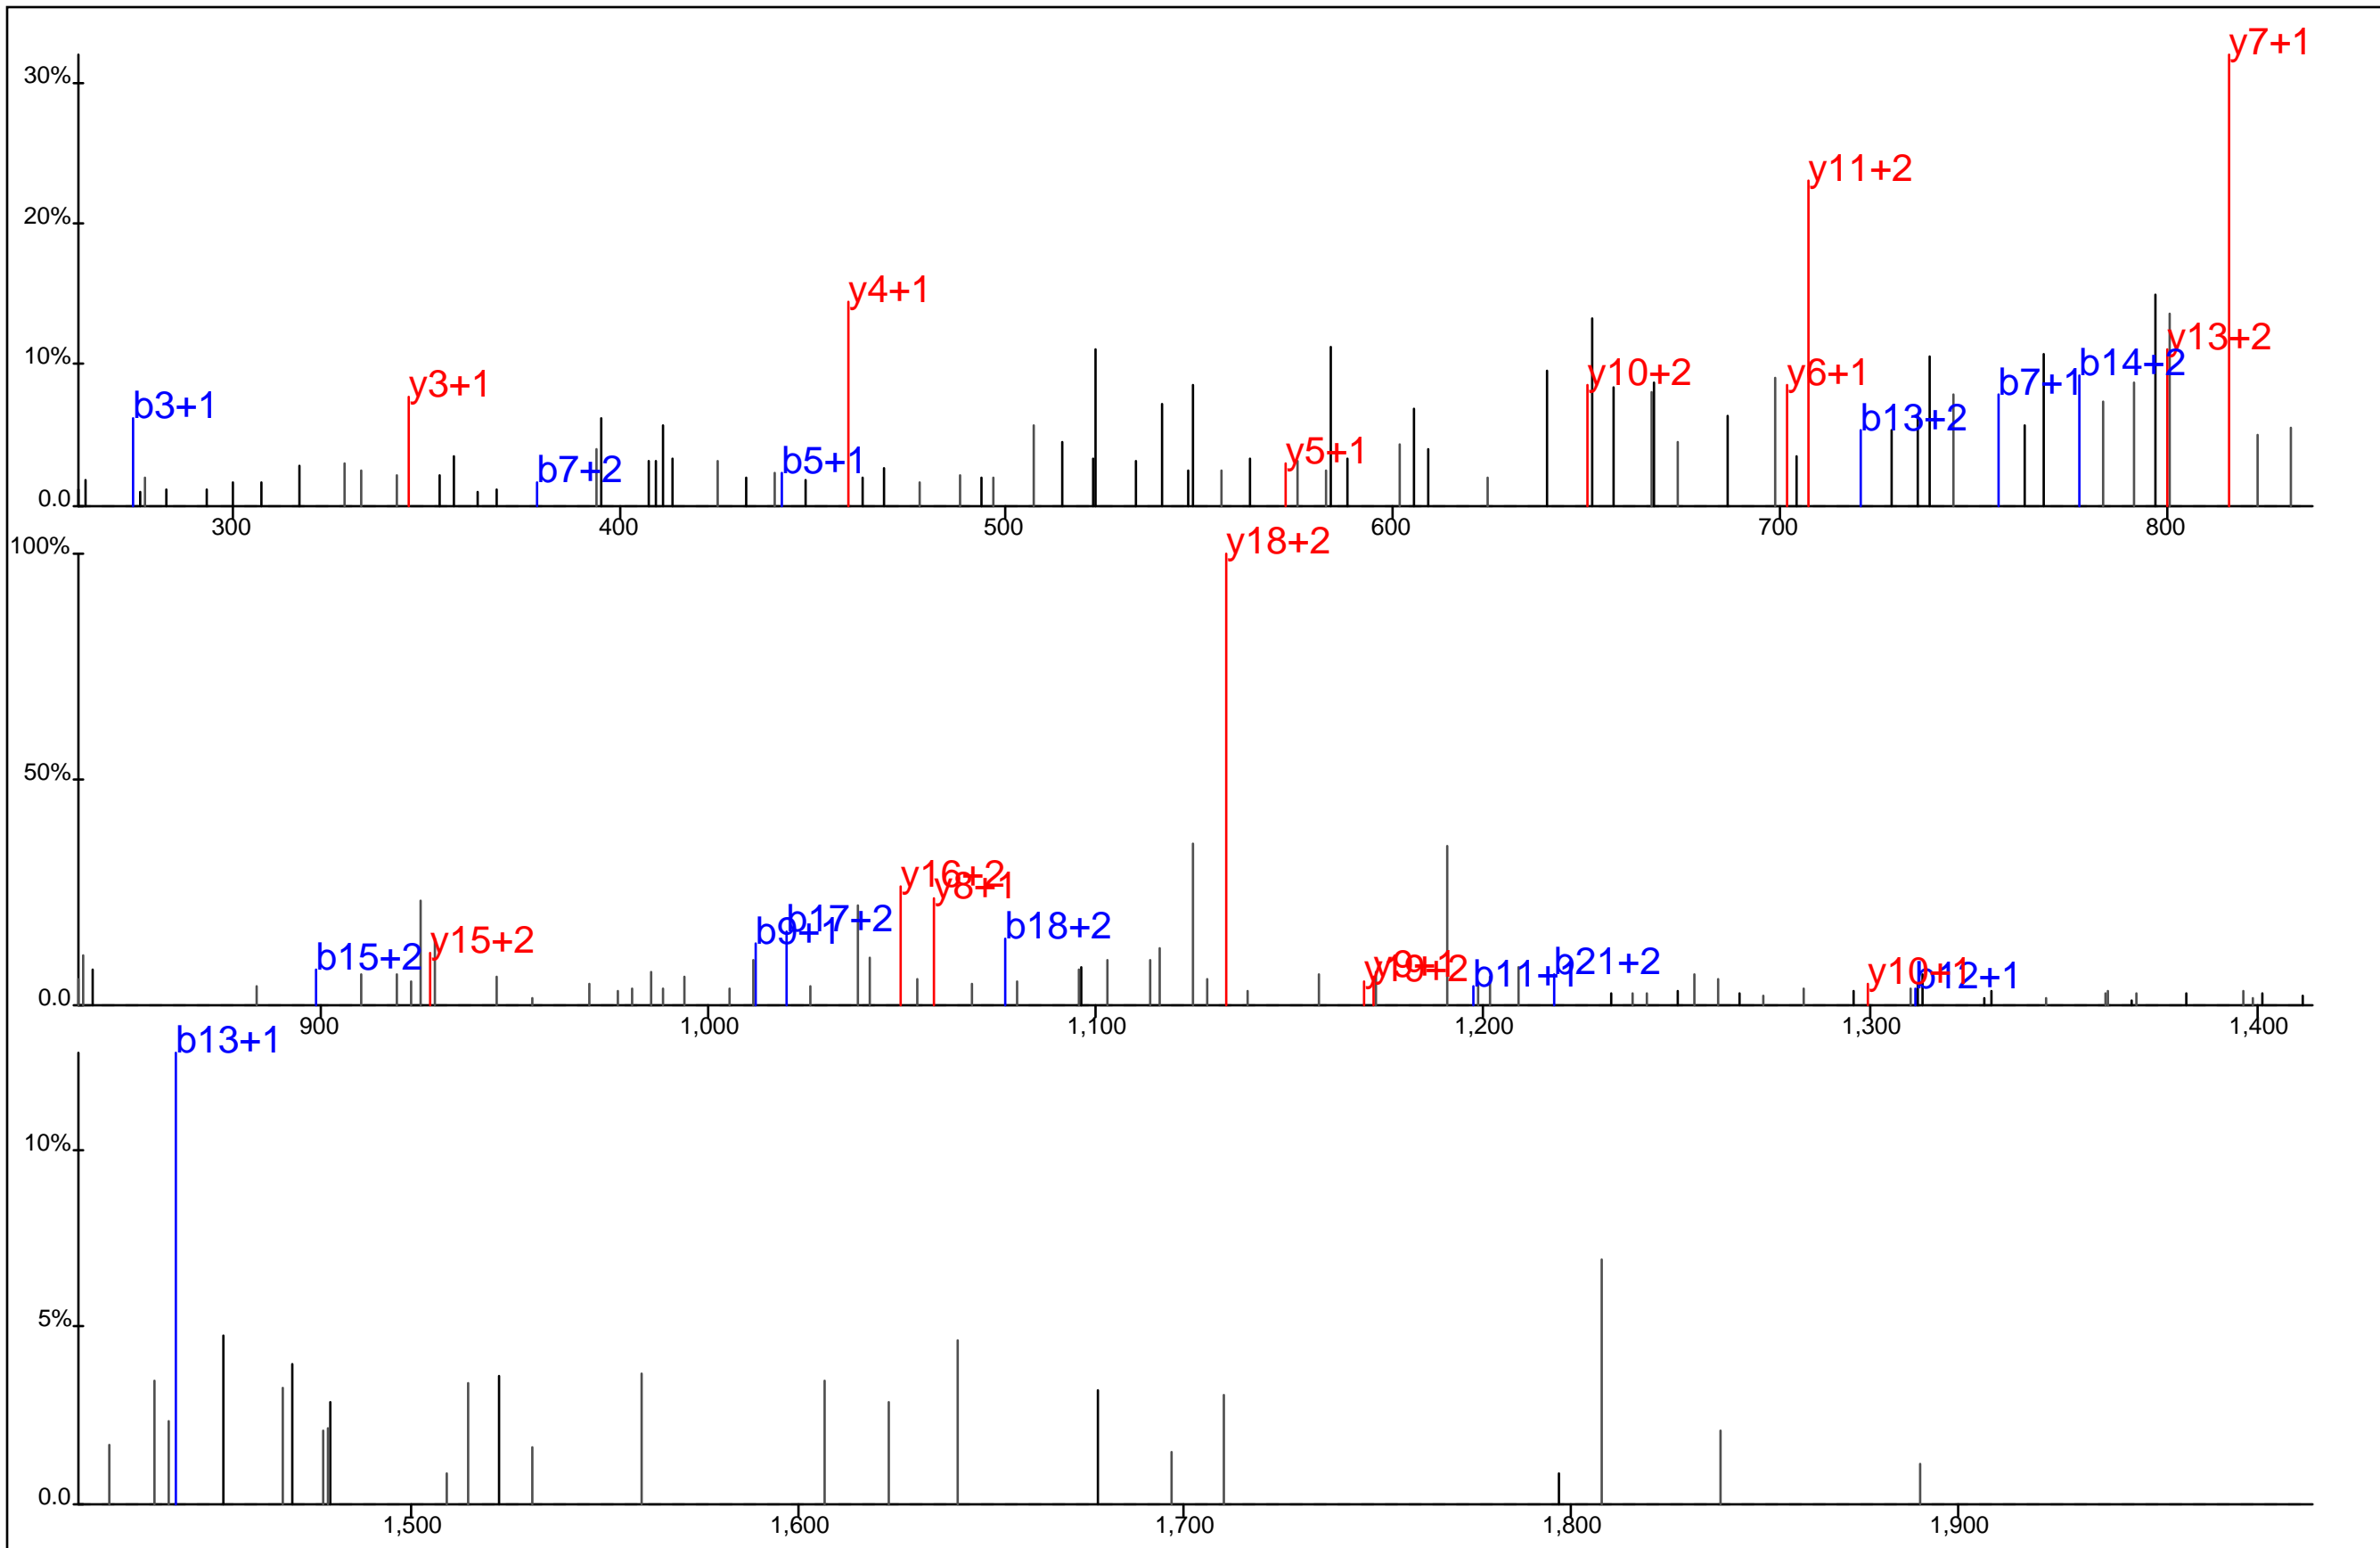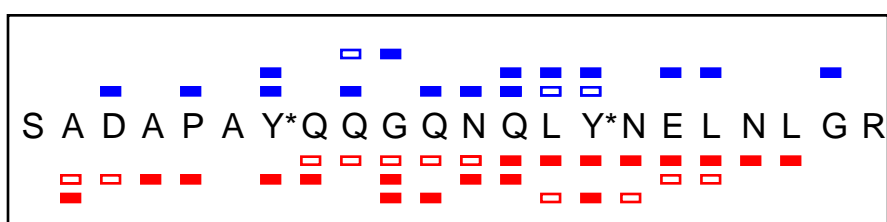

Protein Name: T cell antigen receptor, zeta  
 gi Accession: 0  
 Precursor Mass: 870.7065+3  
 Delta Mass: 1.074 ppm  
 XCorr: 21.2

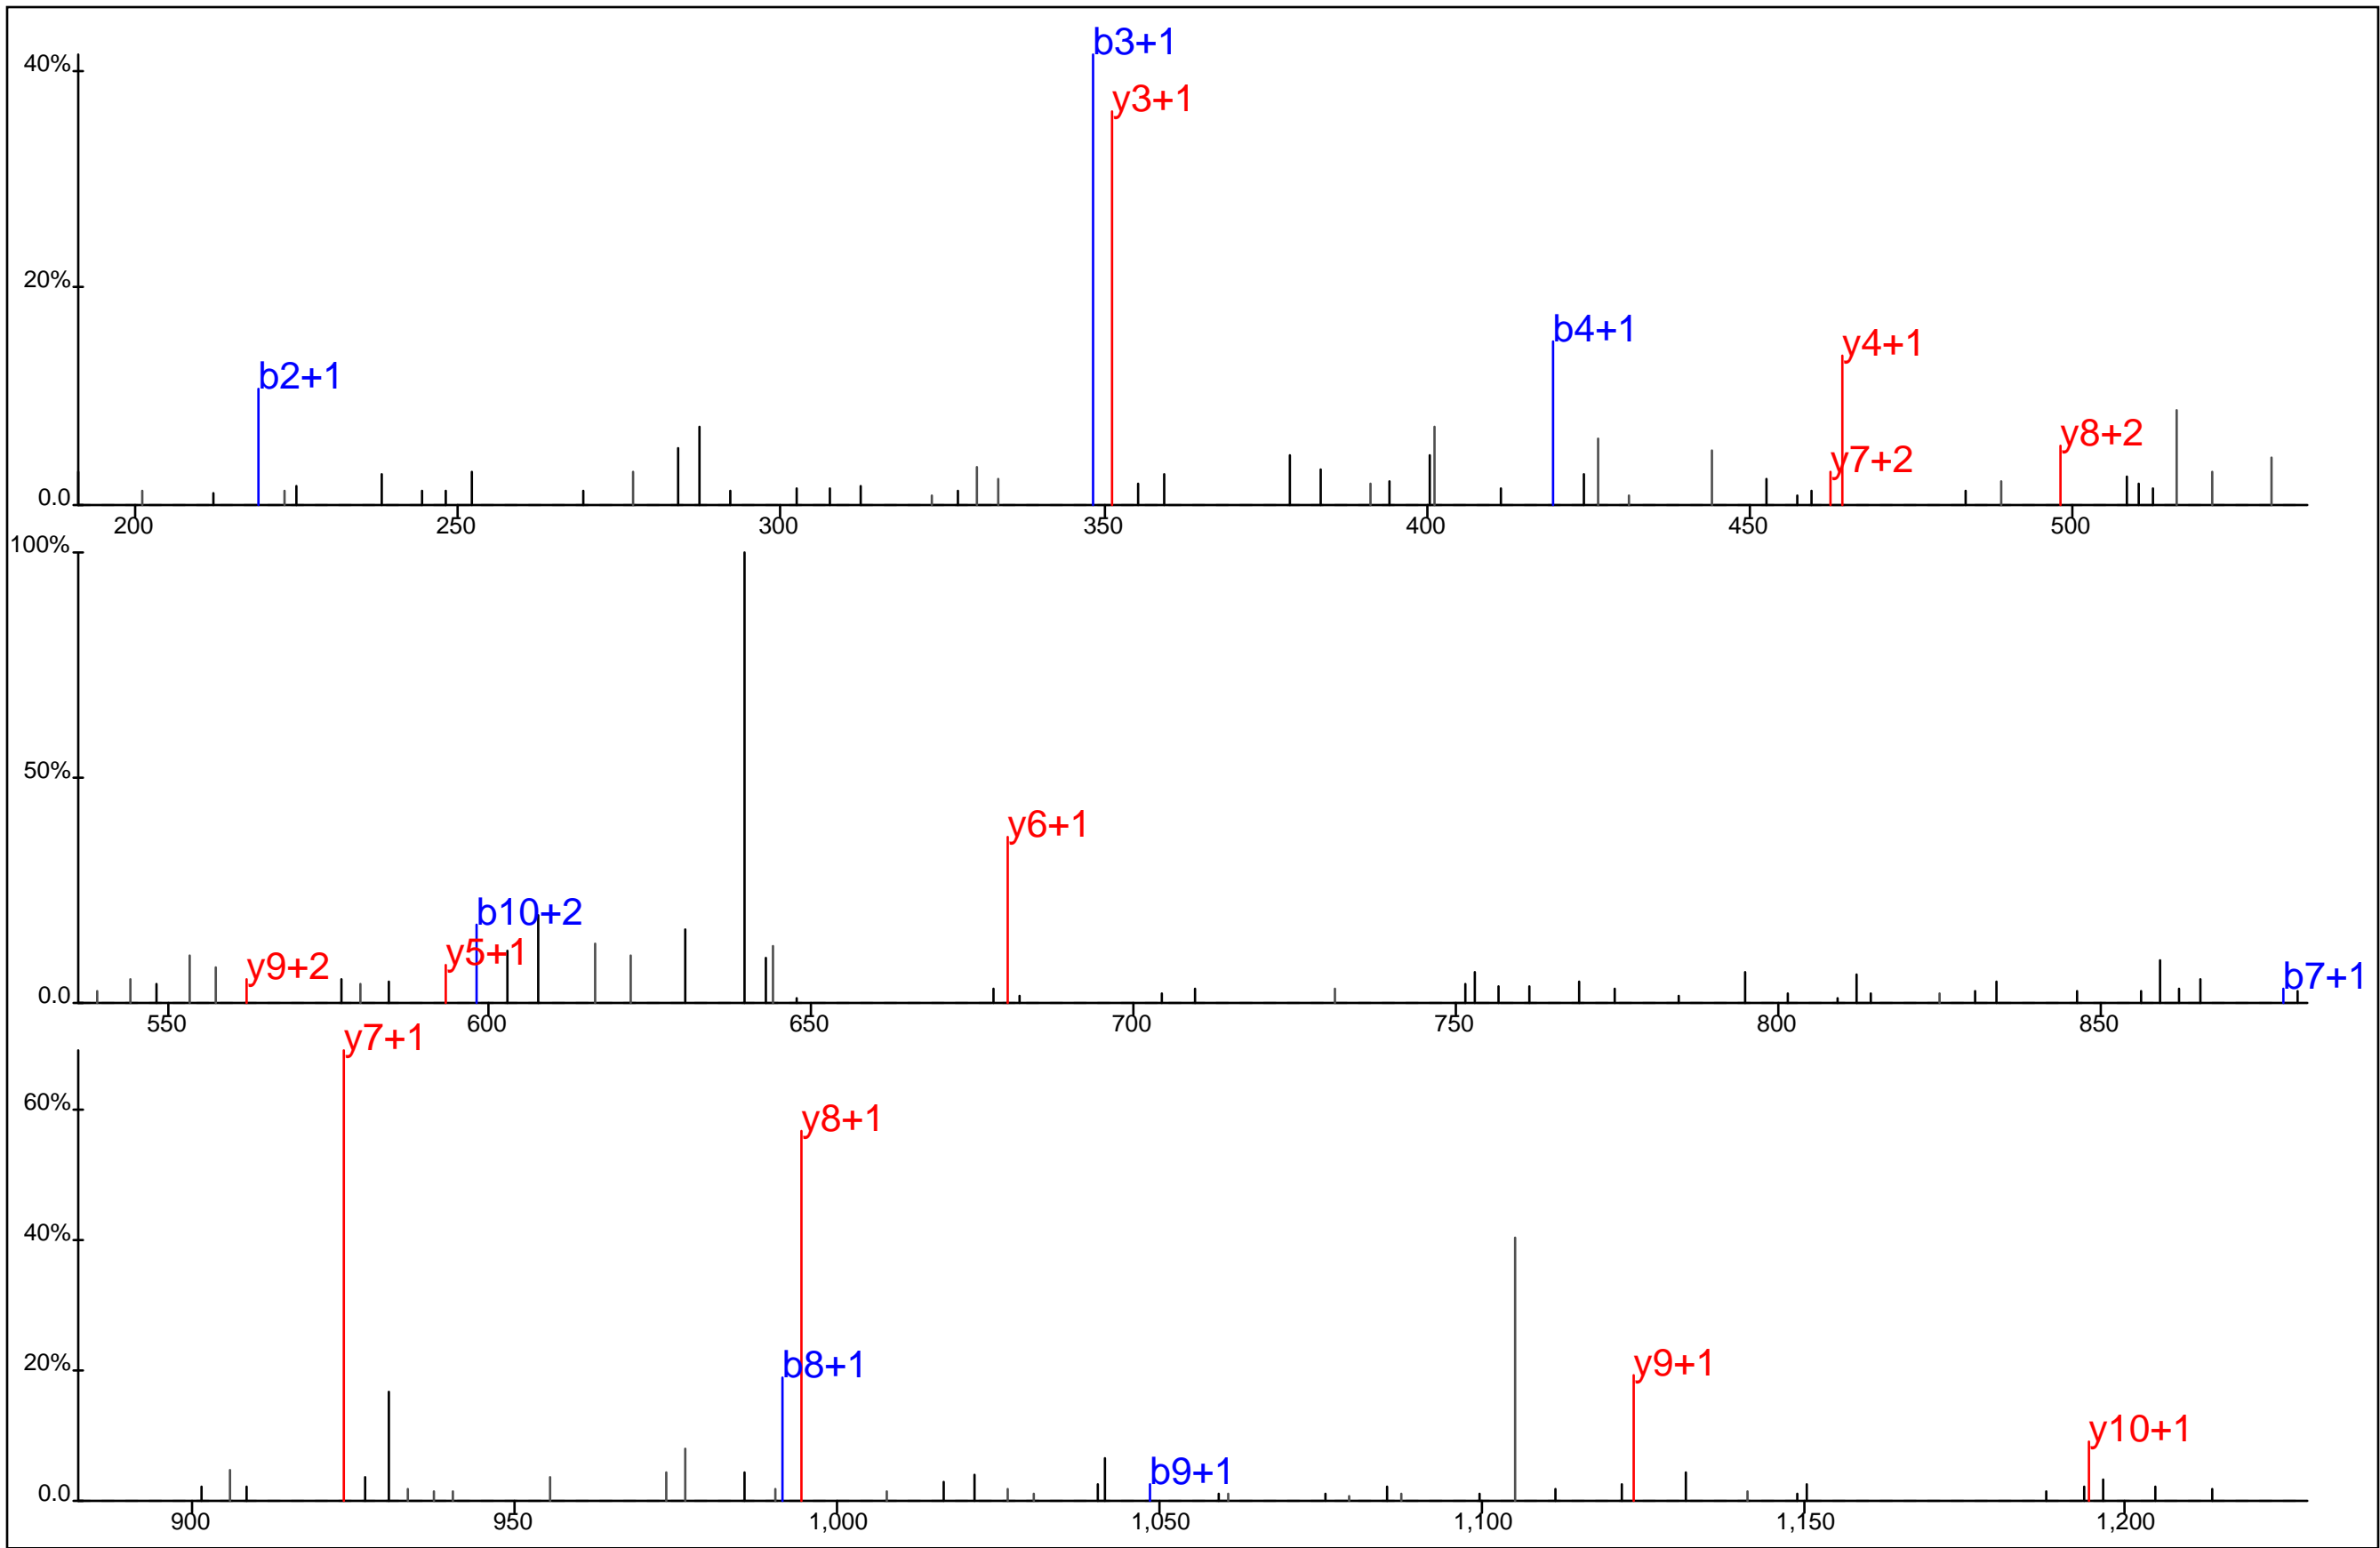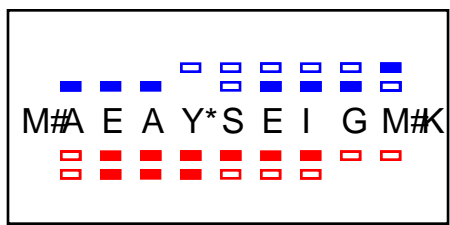

Protein Name: T cell antigen receptor, zeta  
 gi Accession: 0  
 Precursor Mass: 671.2594+2  
 Delta Mass: 0.991 ppm  
 XCorr: 54.17

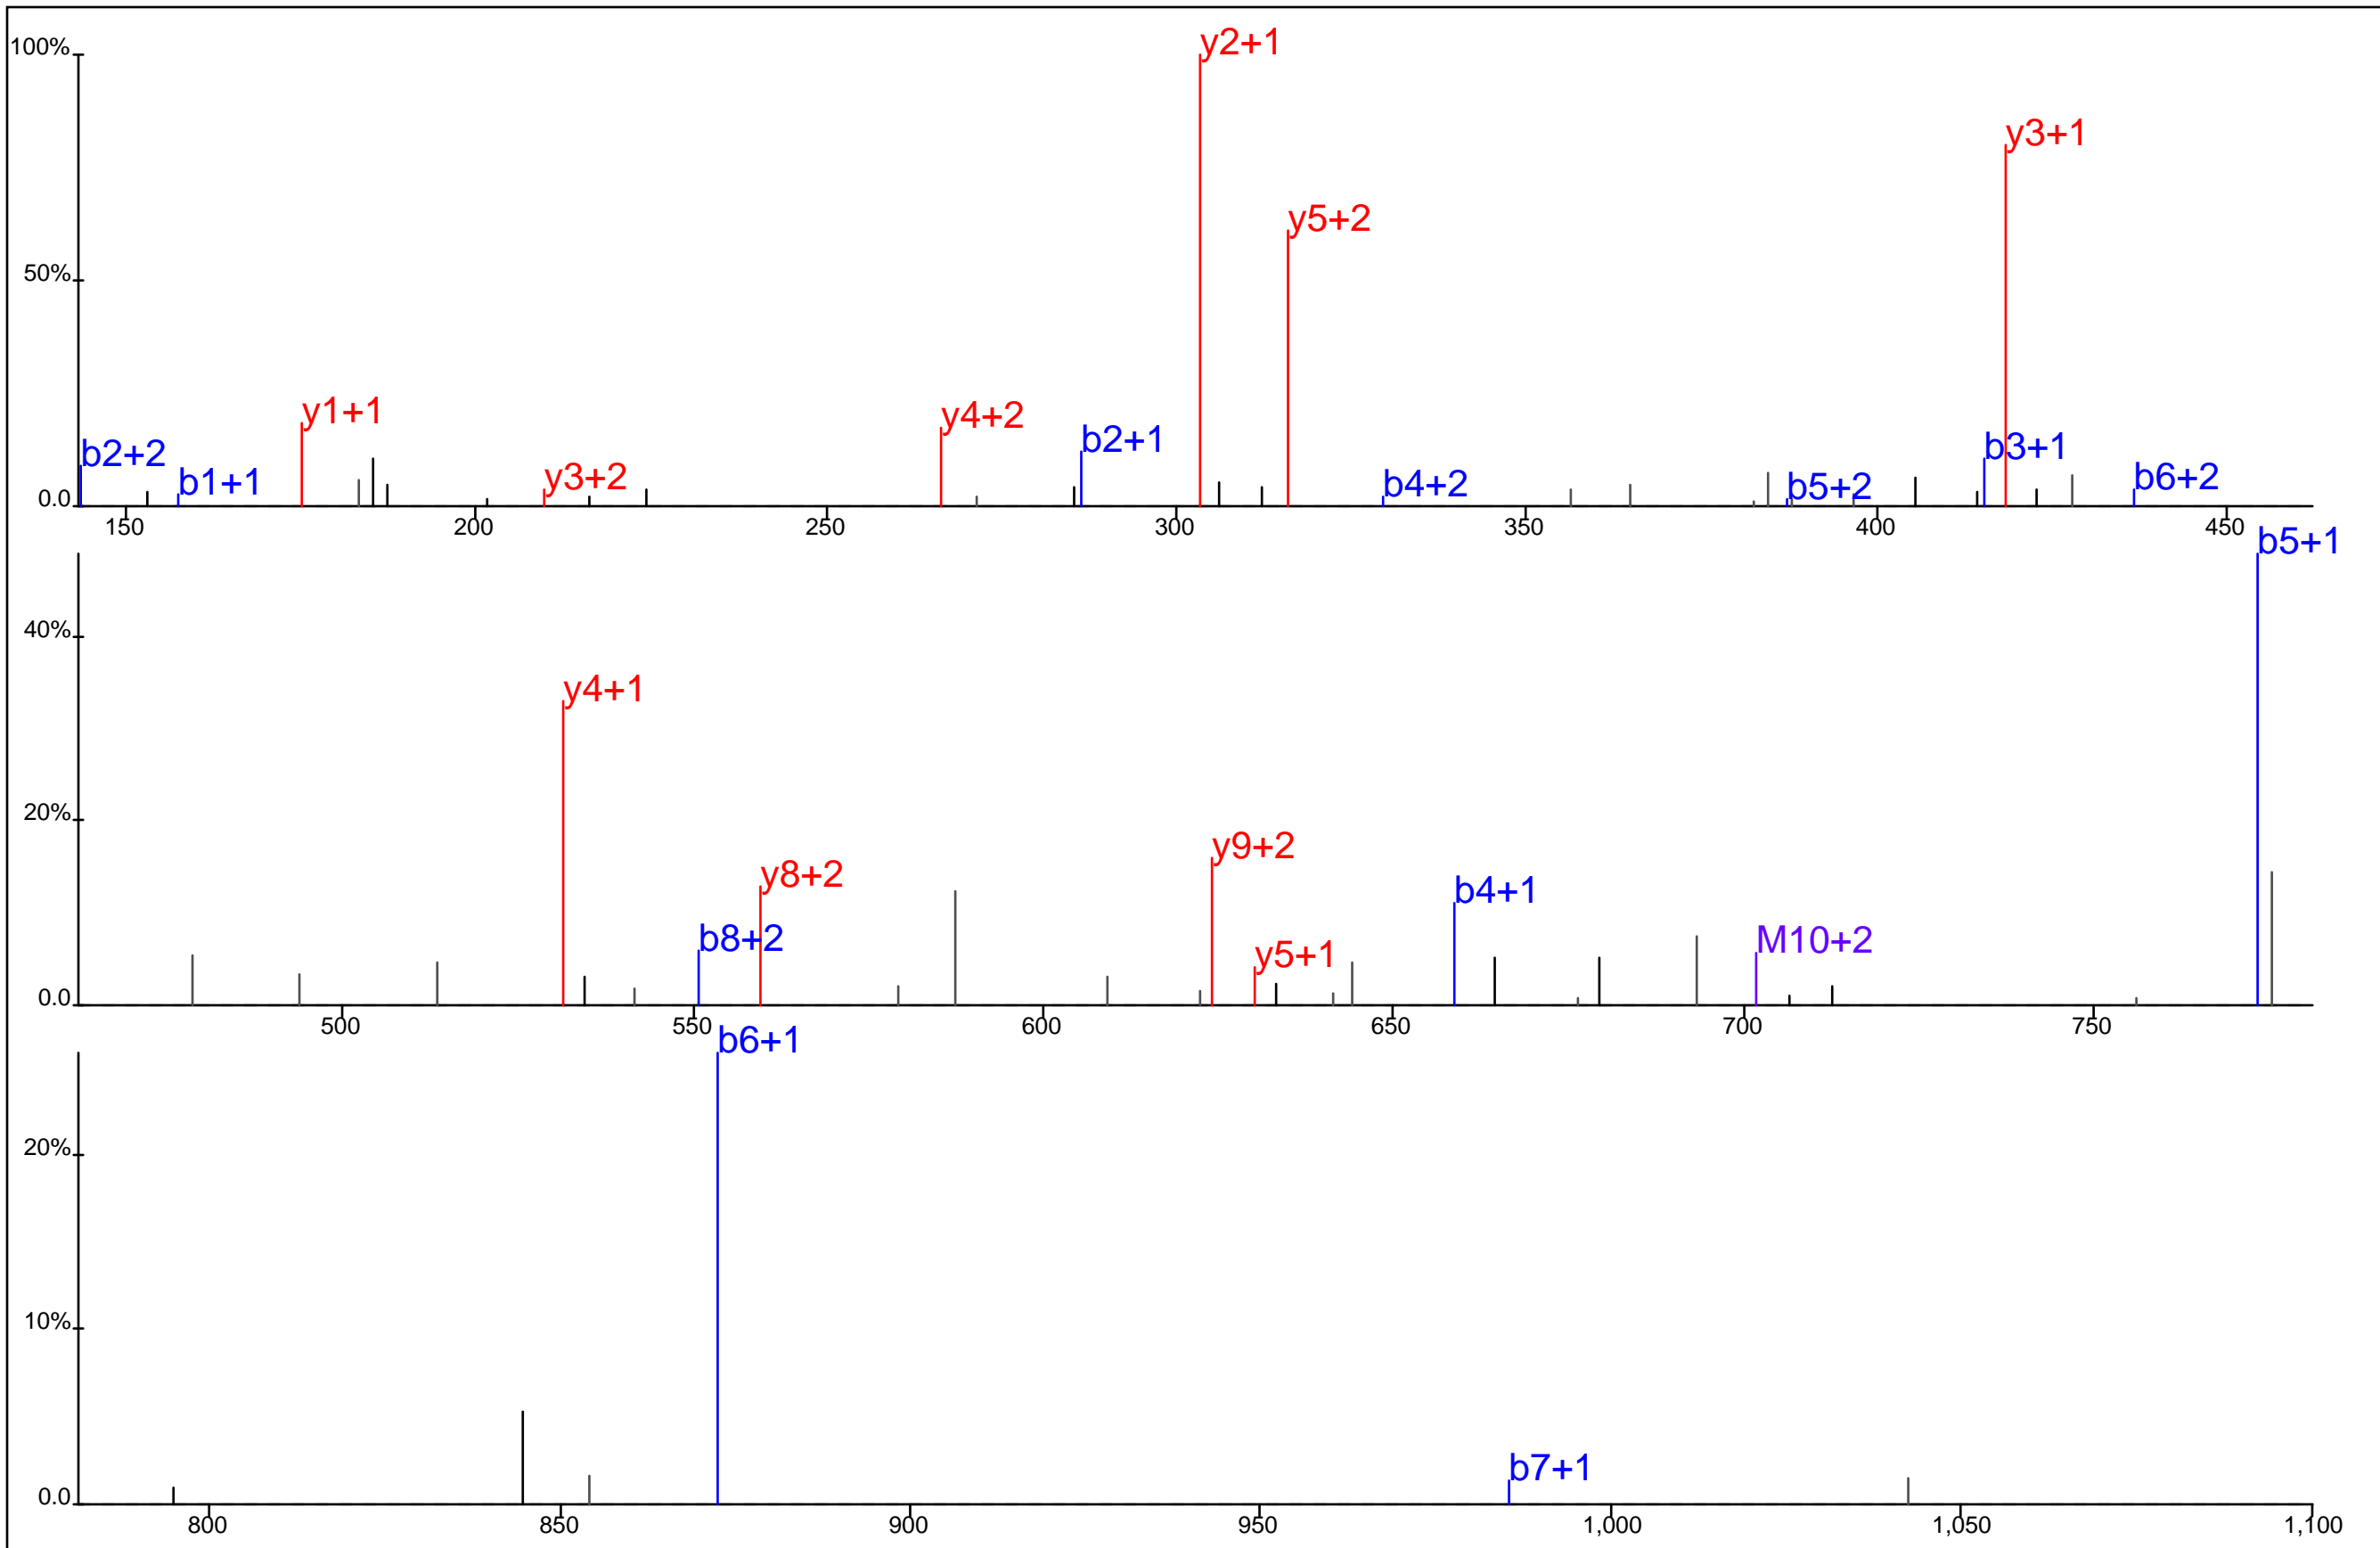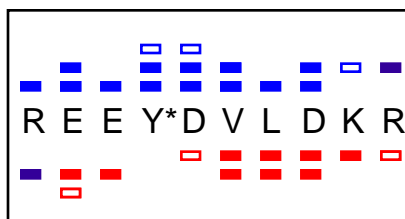

Protein Name: T cell antigen receptor, zeta  
 gi Accession: 0  
 Precursor Mass: 468.2170+3  
 Delta Mass: 0.197 ppm  
 XCorr: 47.01



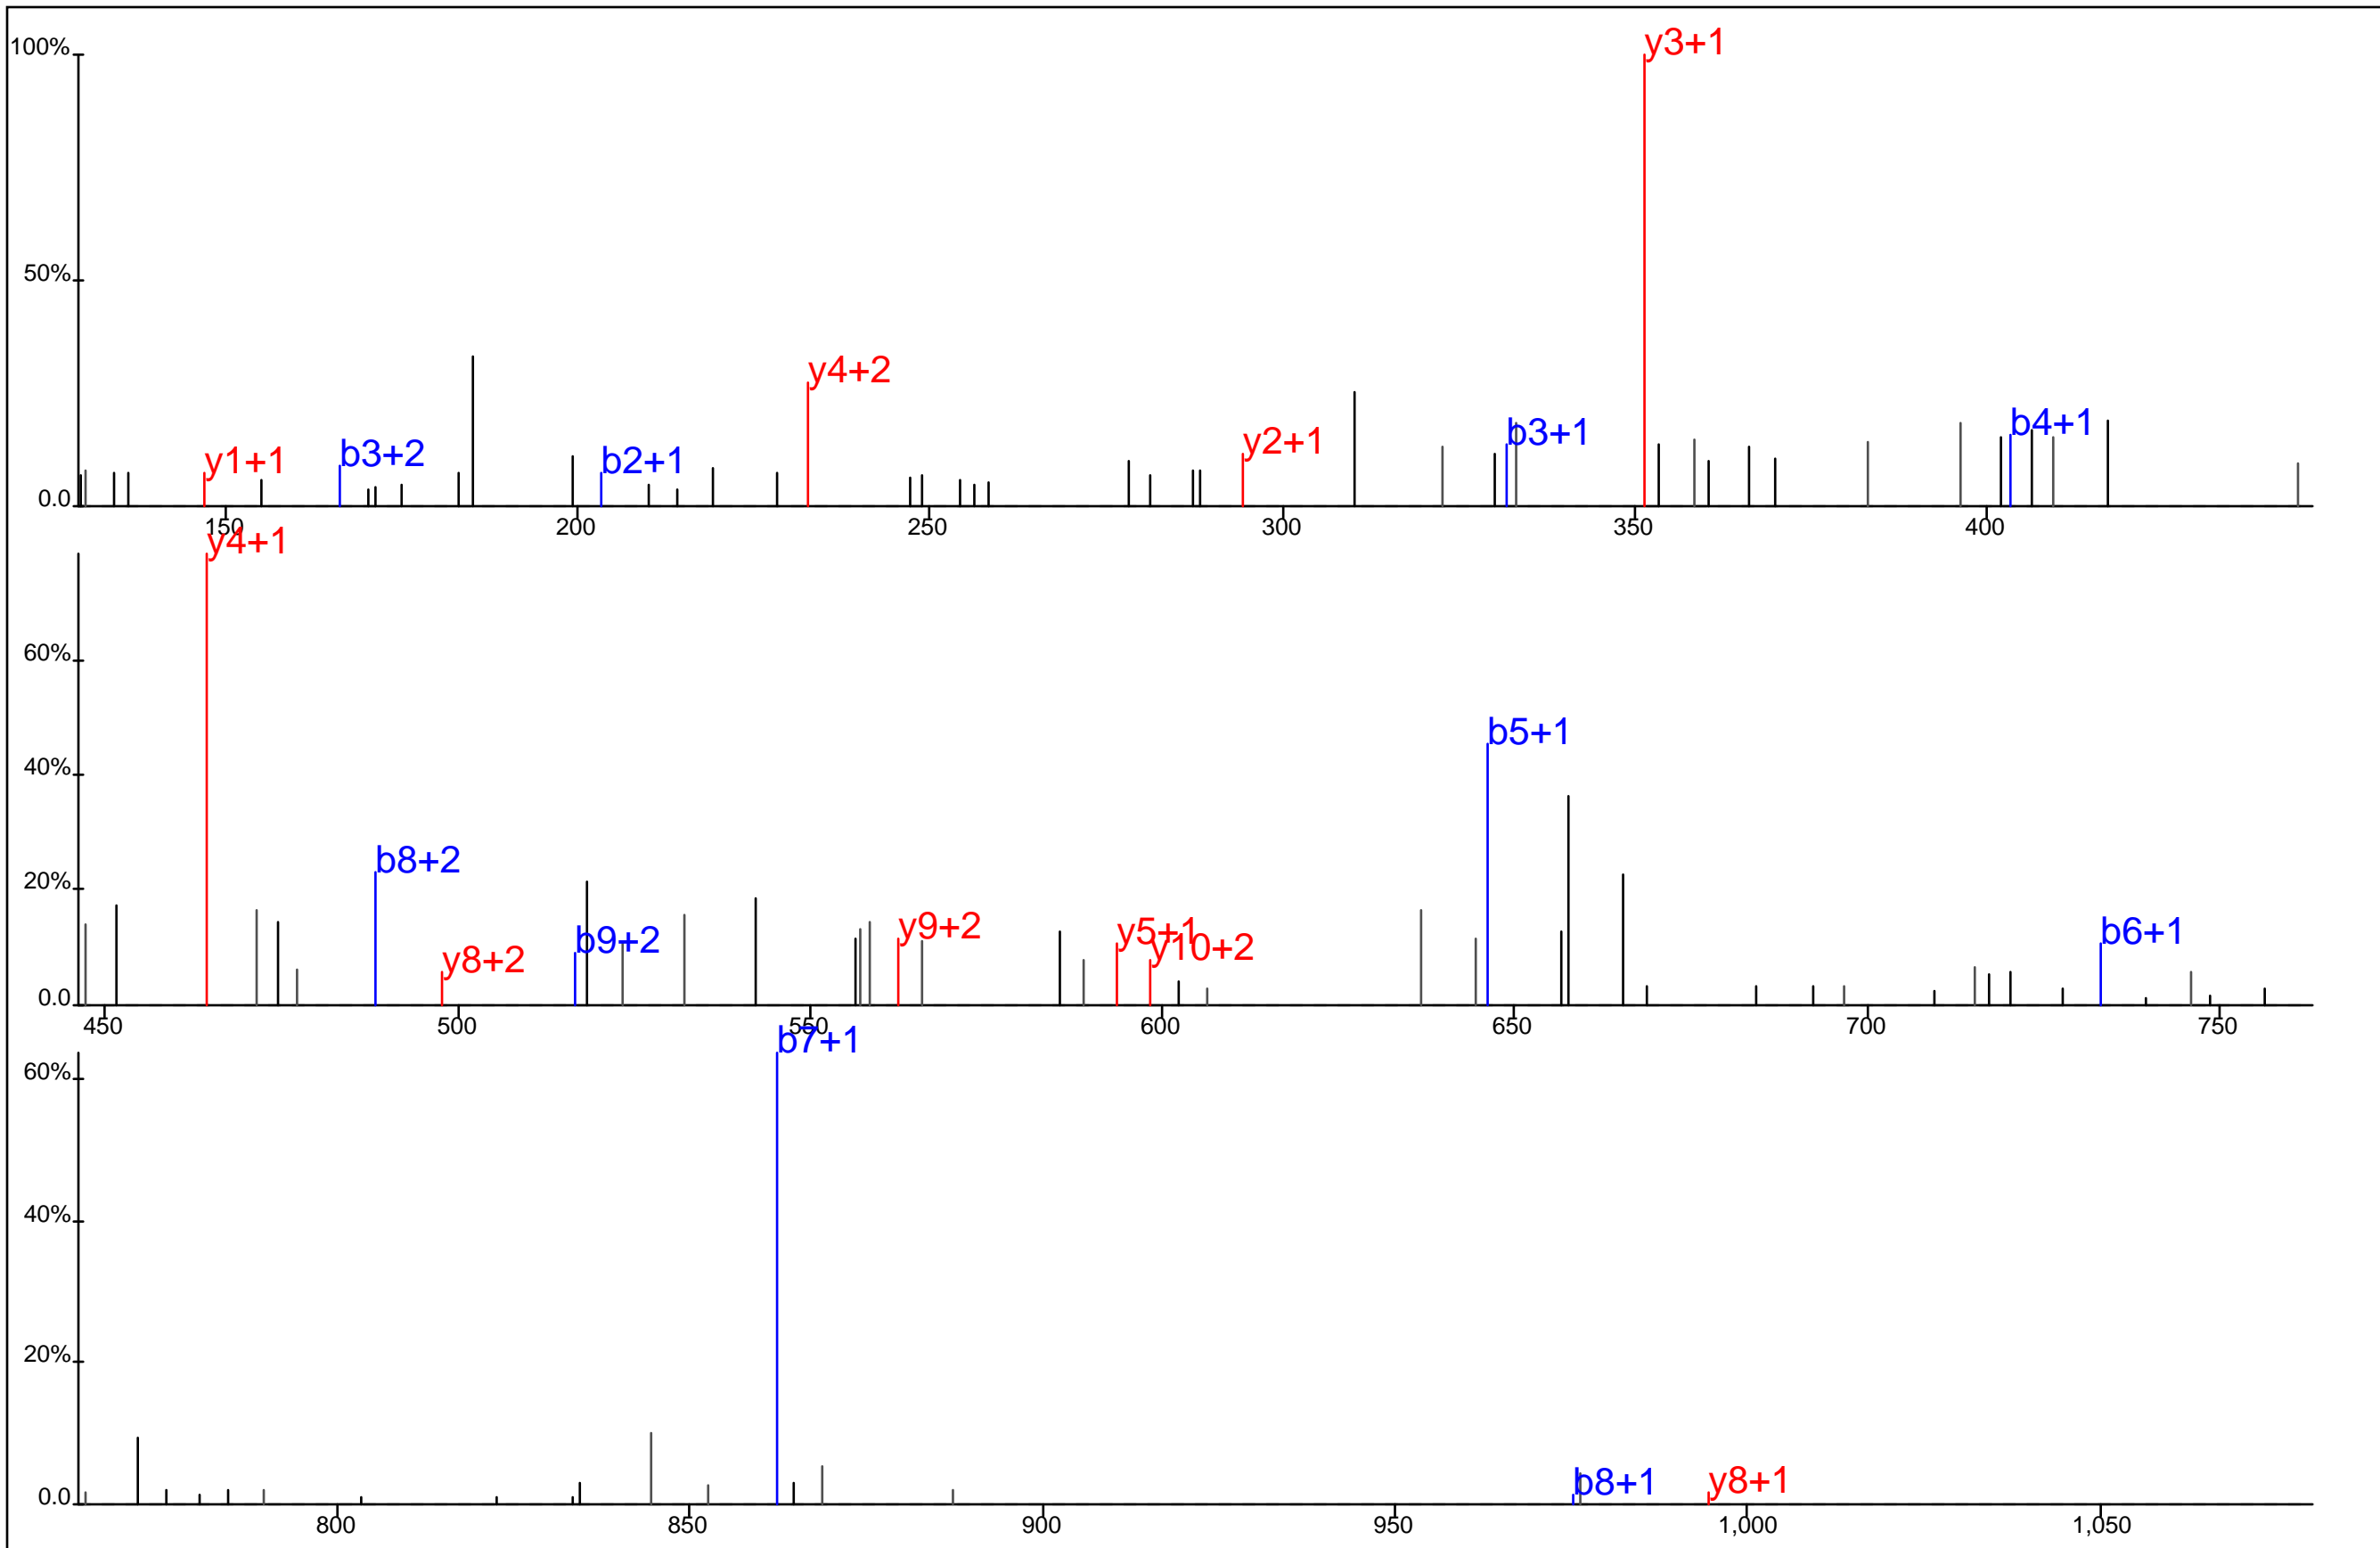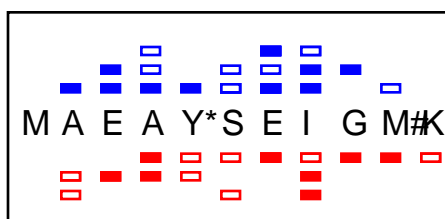

Protein Name: T cell antigen receptor, zeta  
 gi Accession: 0  
 Precursor Mass: 442.5110+3  
 Delta Mass: 2.296 ppm  
 XCorr: 23.15

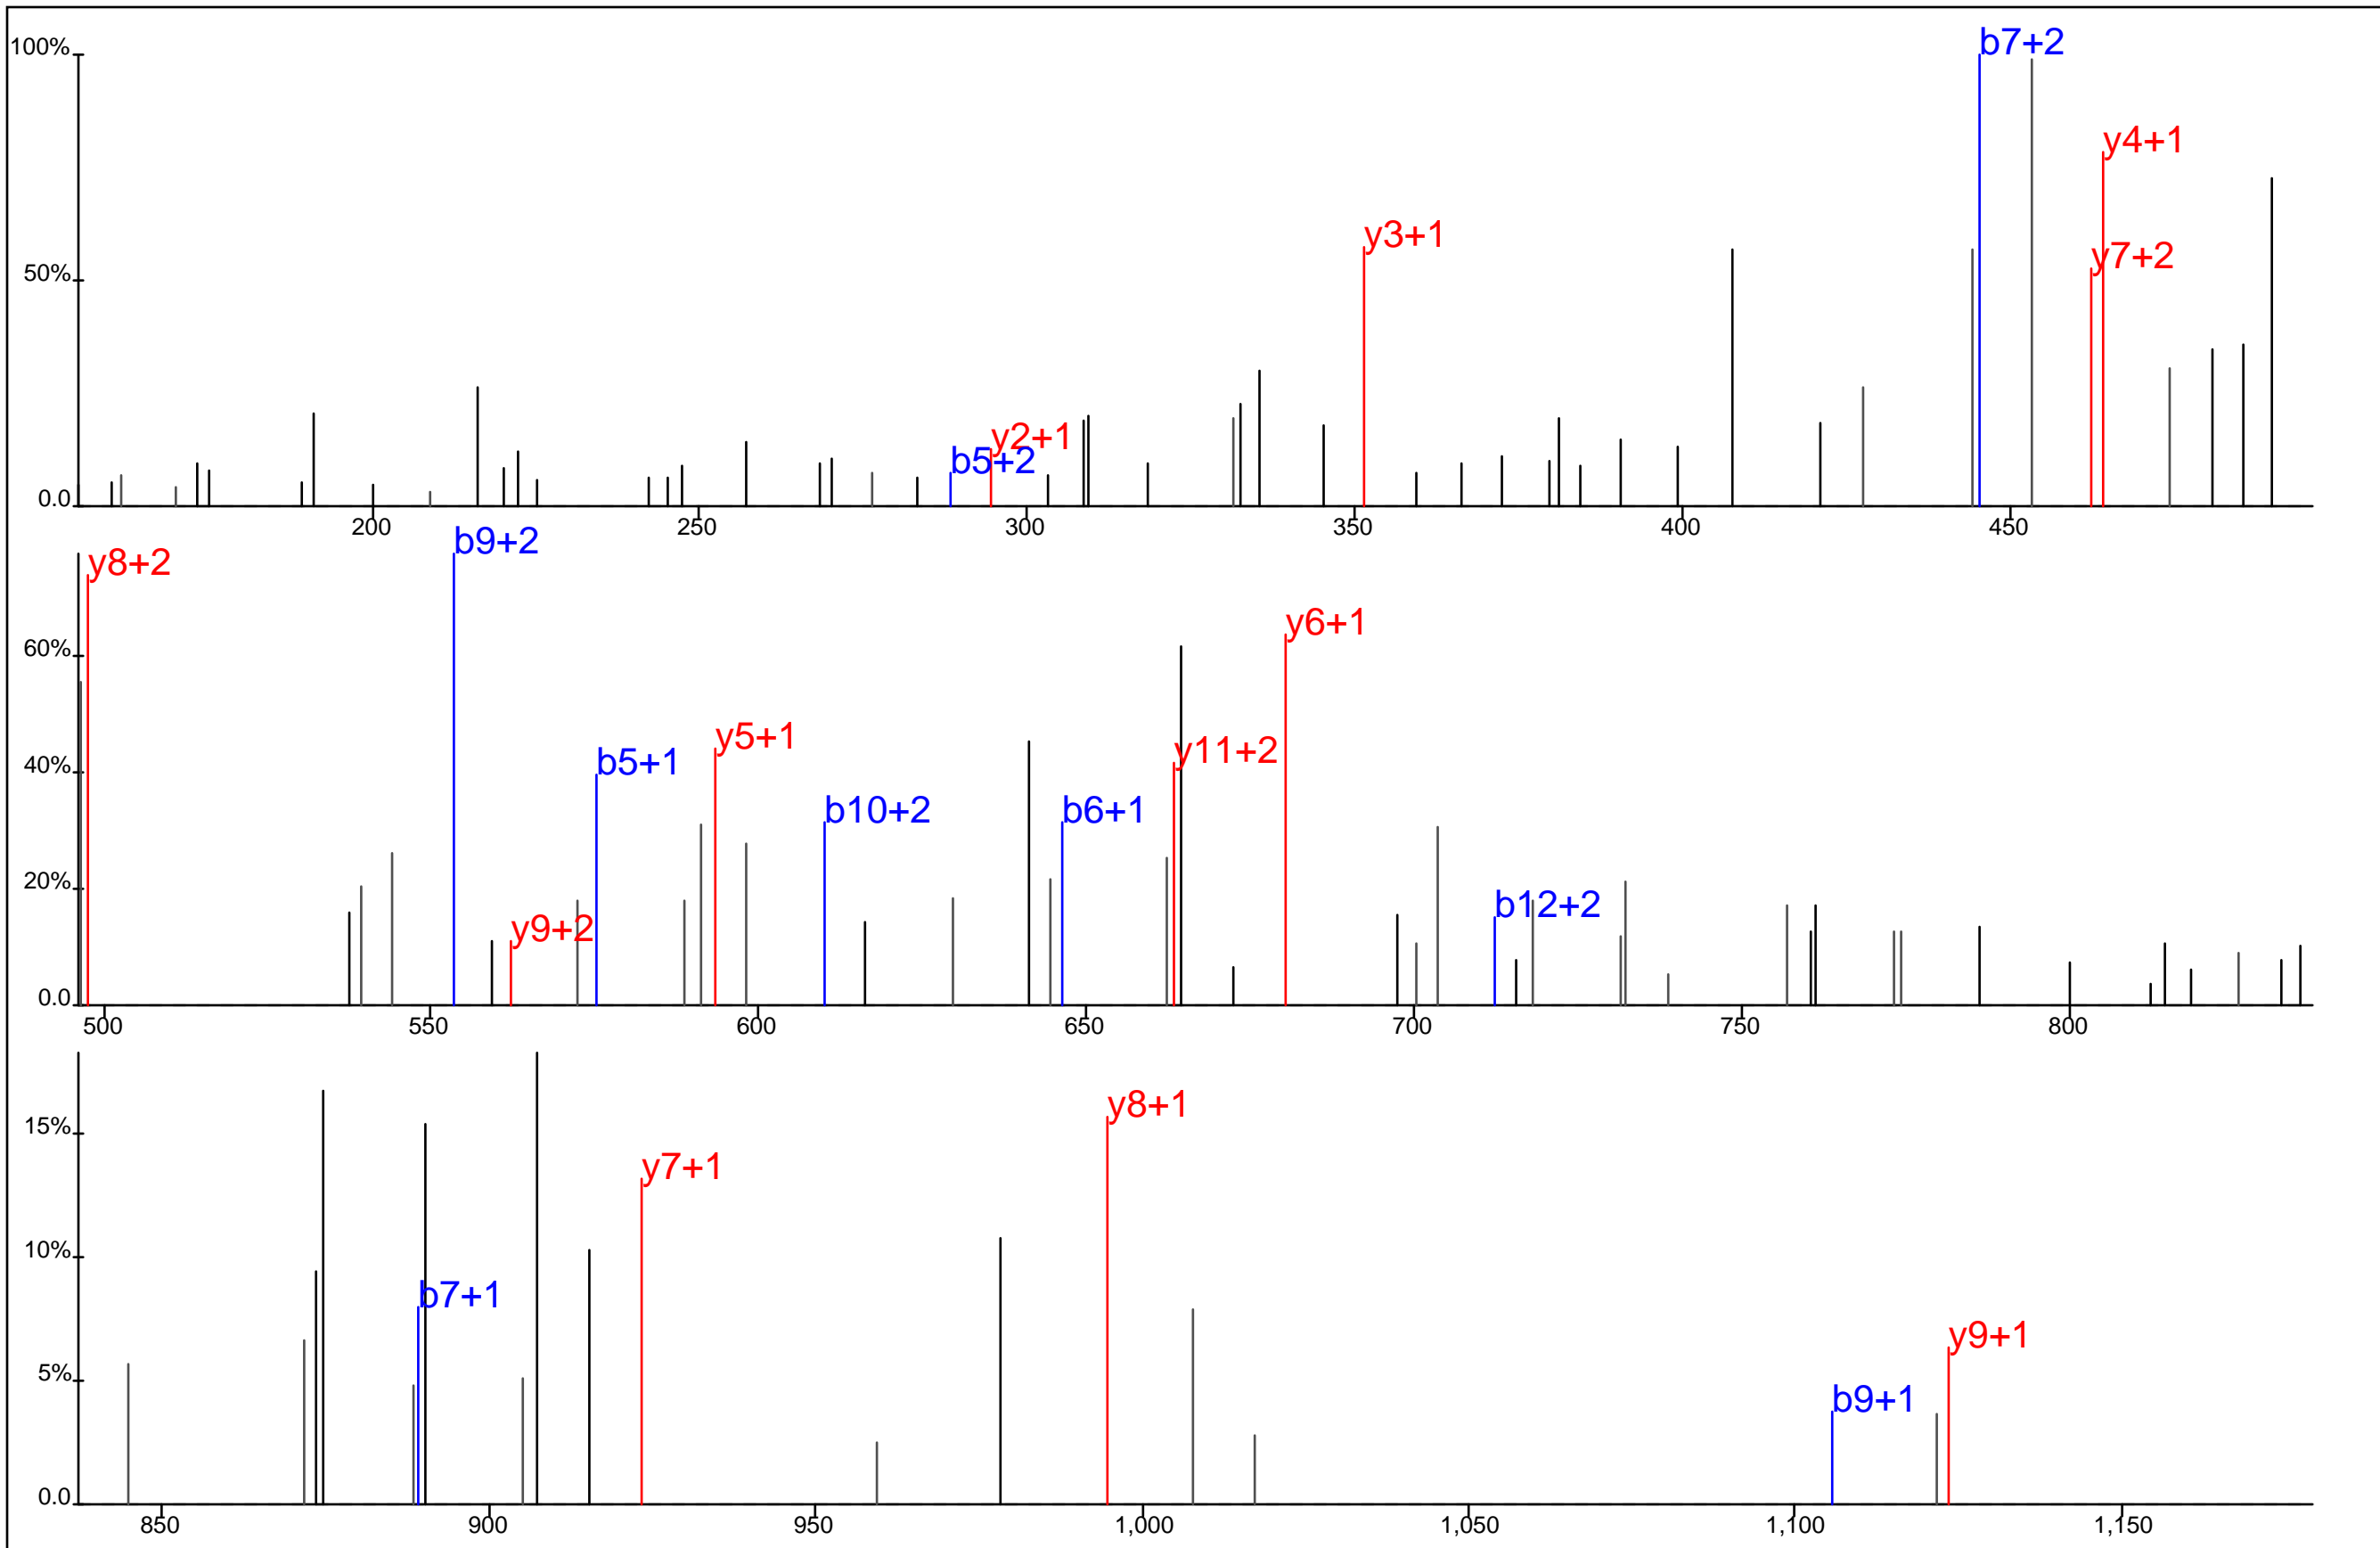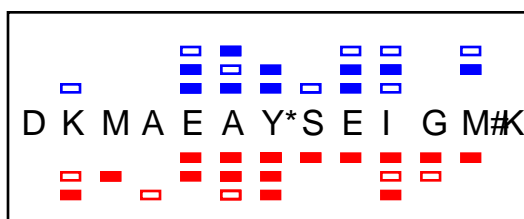

Protein Name: T cell antigen receptor, zeta  
 gi Accession: 0  
 Precursor Mass: 523.5494+3  
 Delta Mass: 2.174 ppm  
 XCorr: 27.44



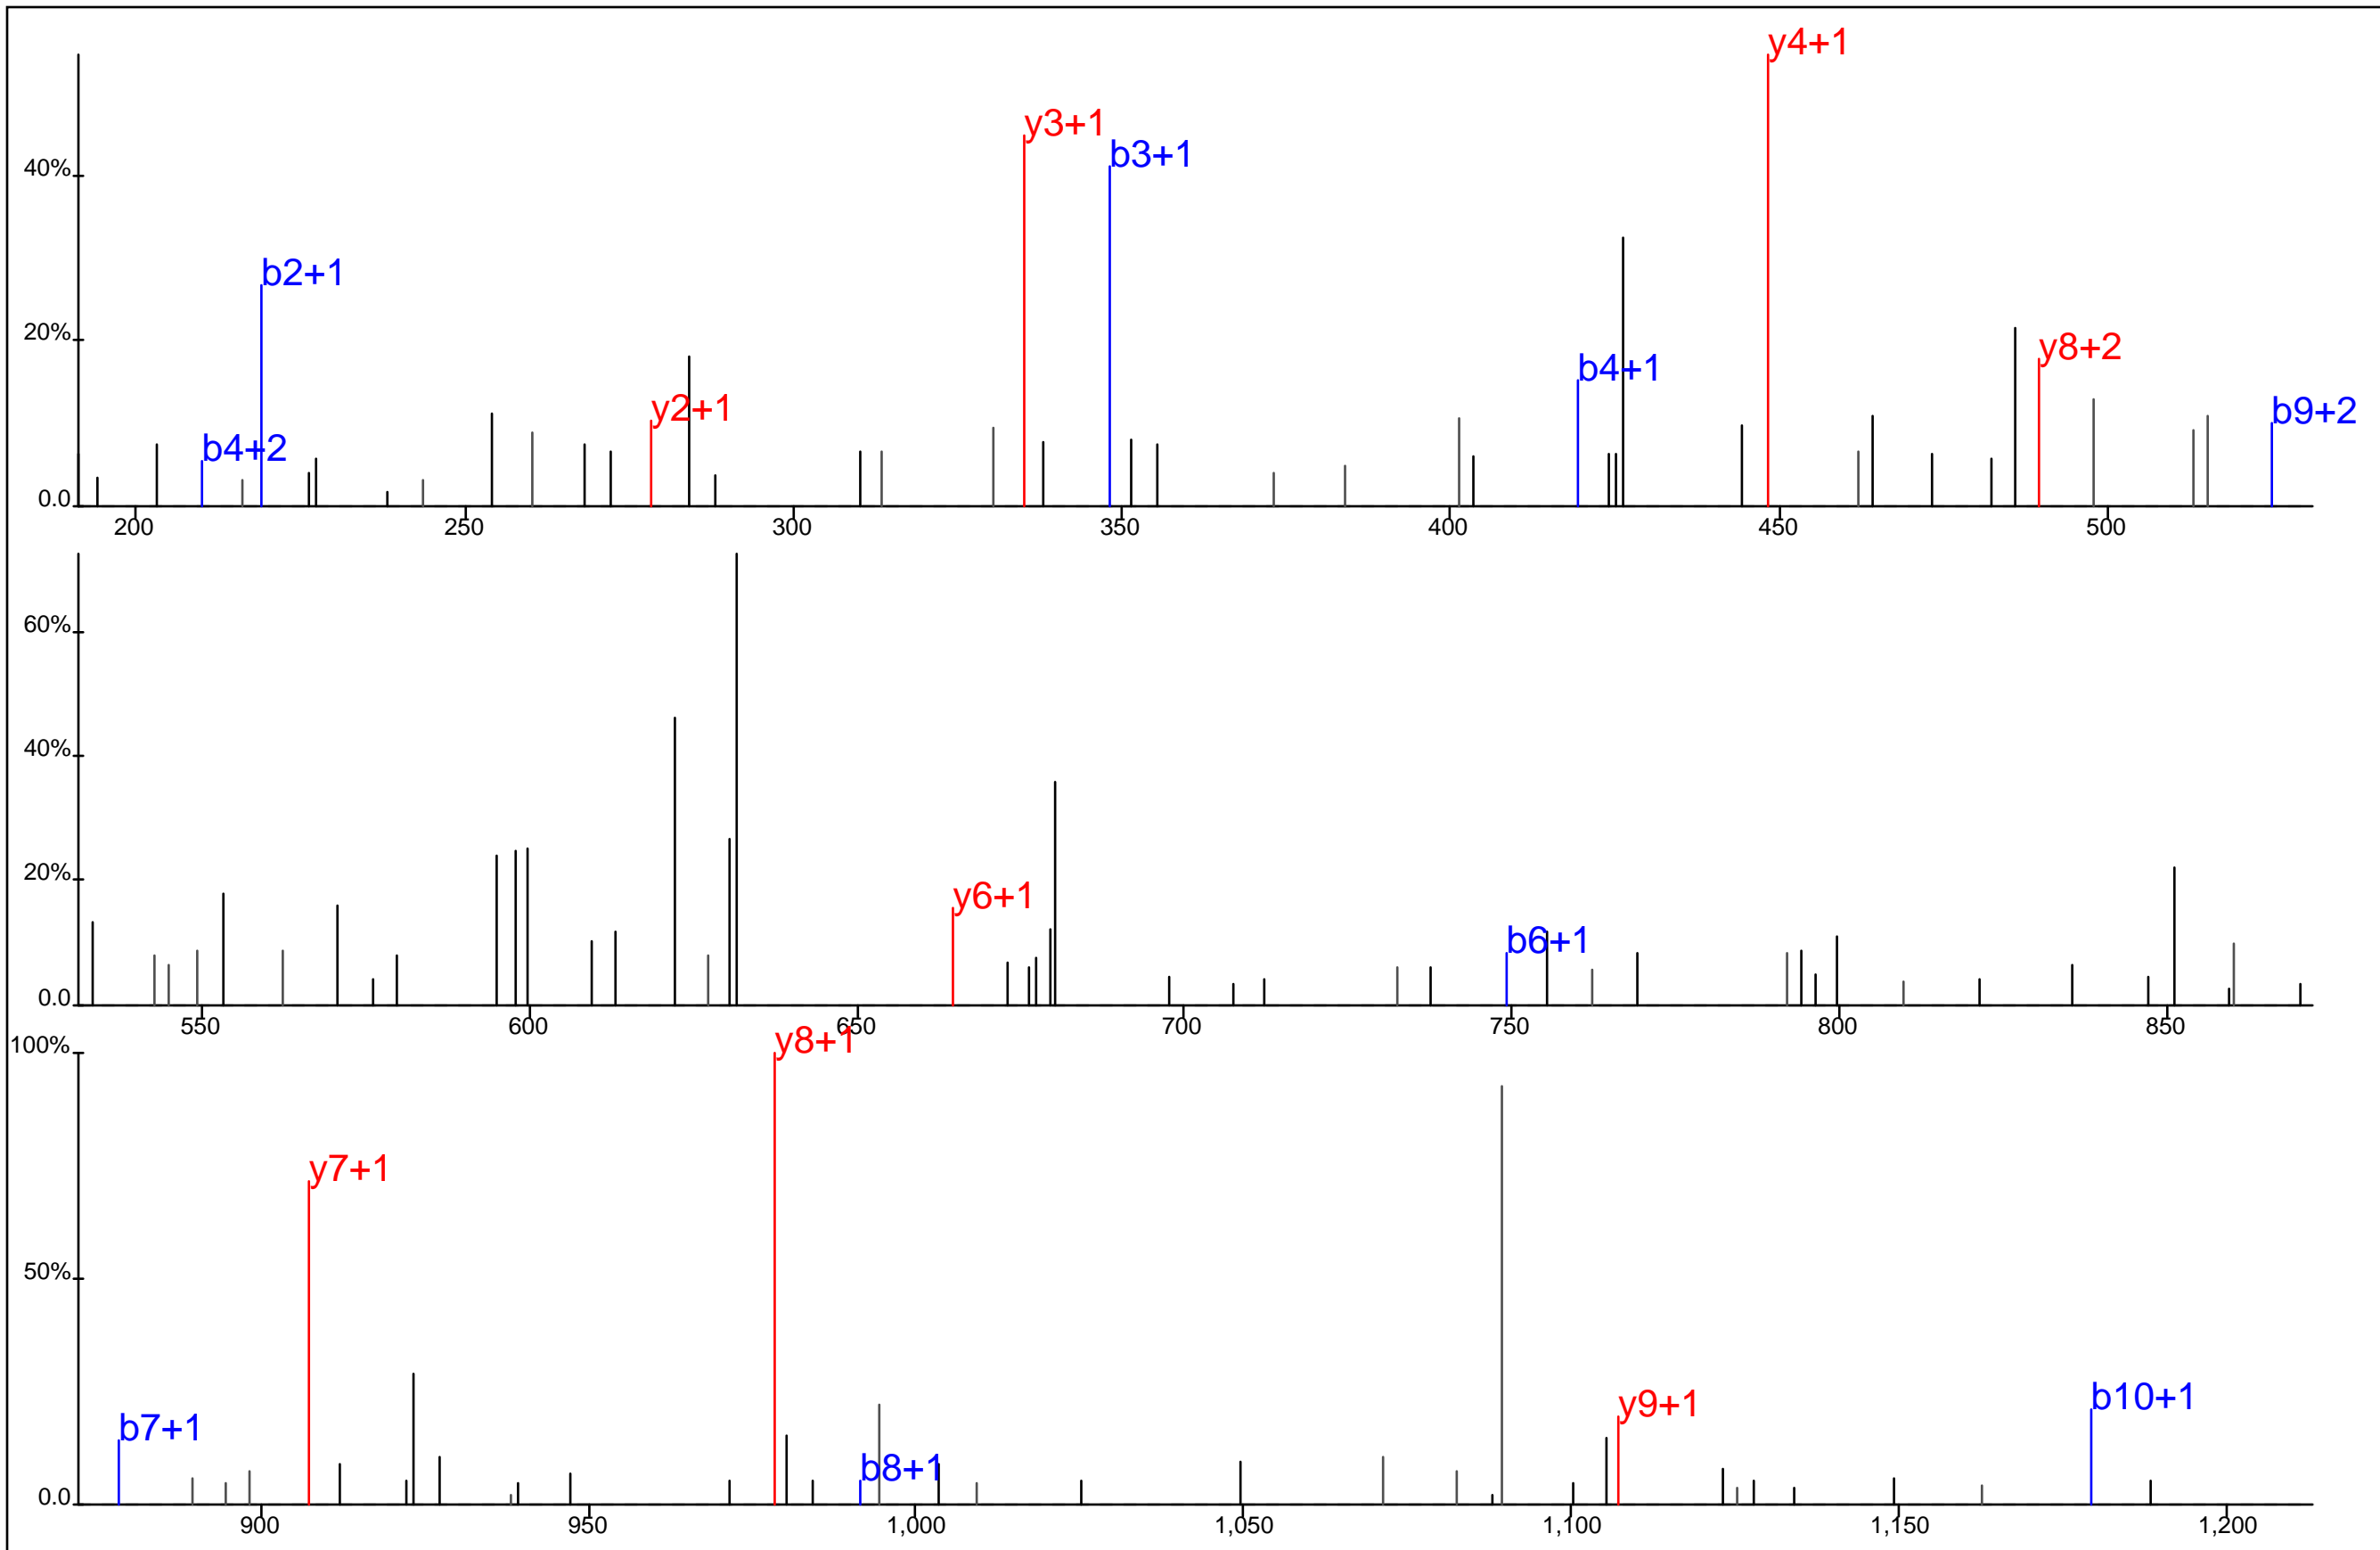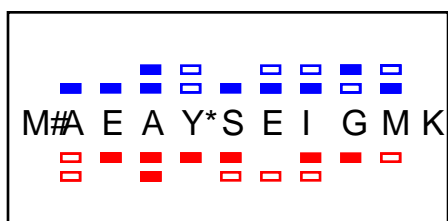

Protein Name: T cell antigen receptor, zeta  
 gi Accession: 0  
 Precursor Mass: 663.2615+2  
 Delta Mass: 0.303 ppm  
 XCorr: 29.41



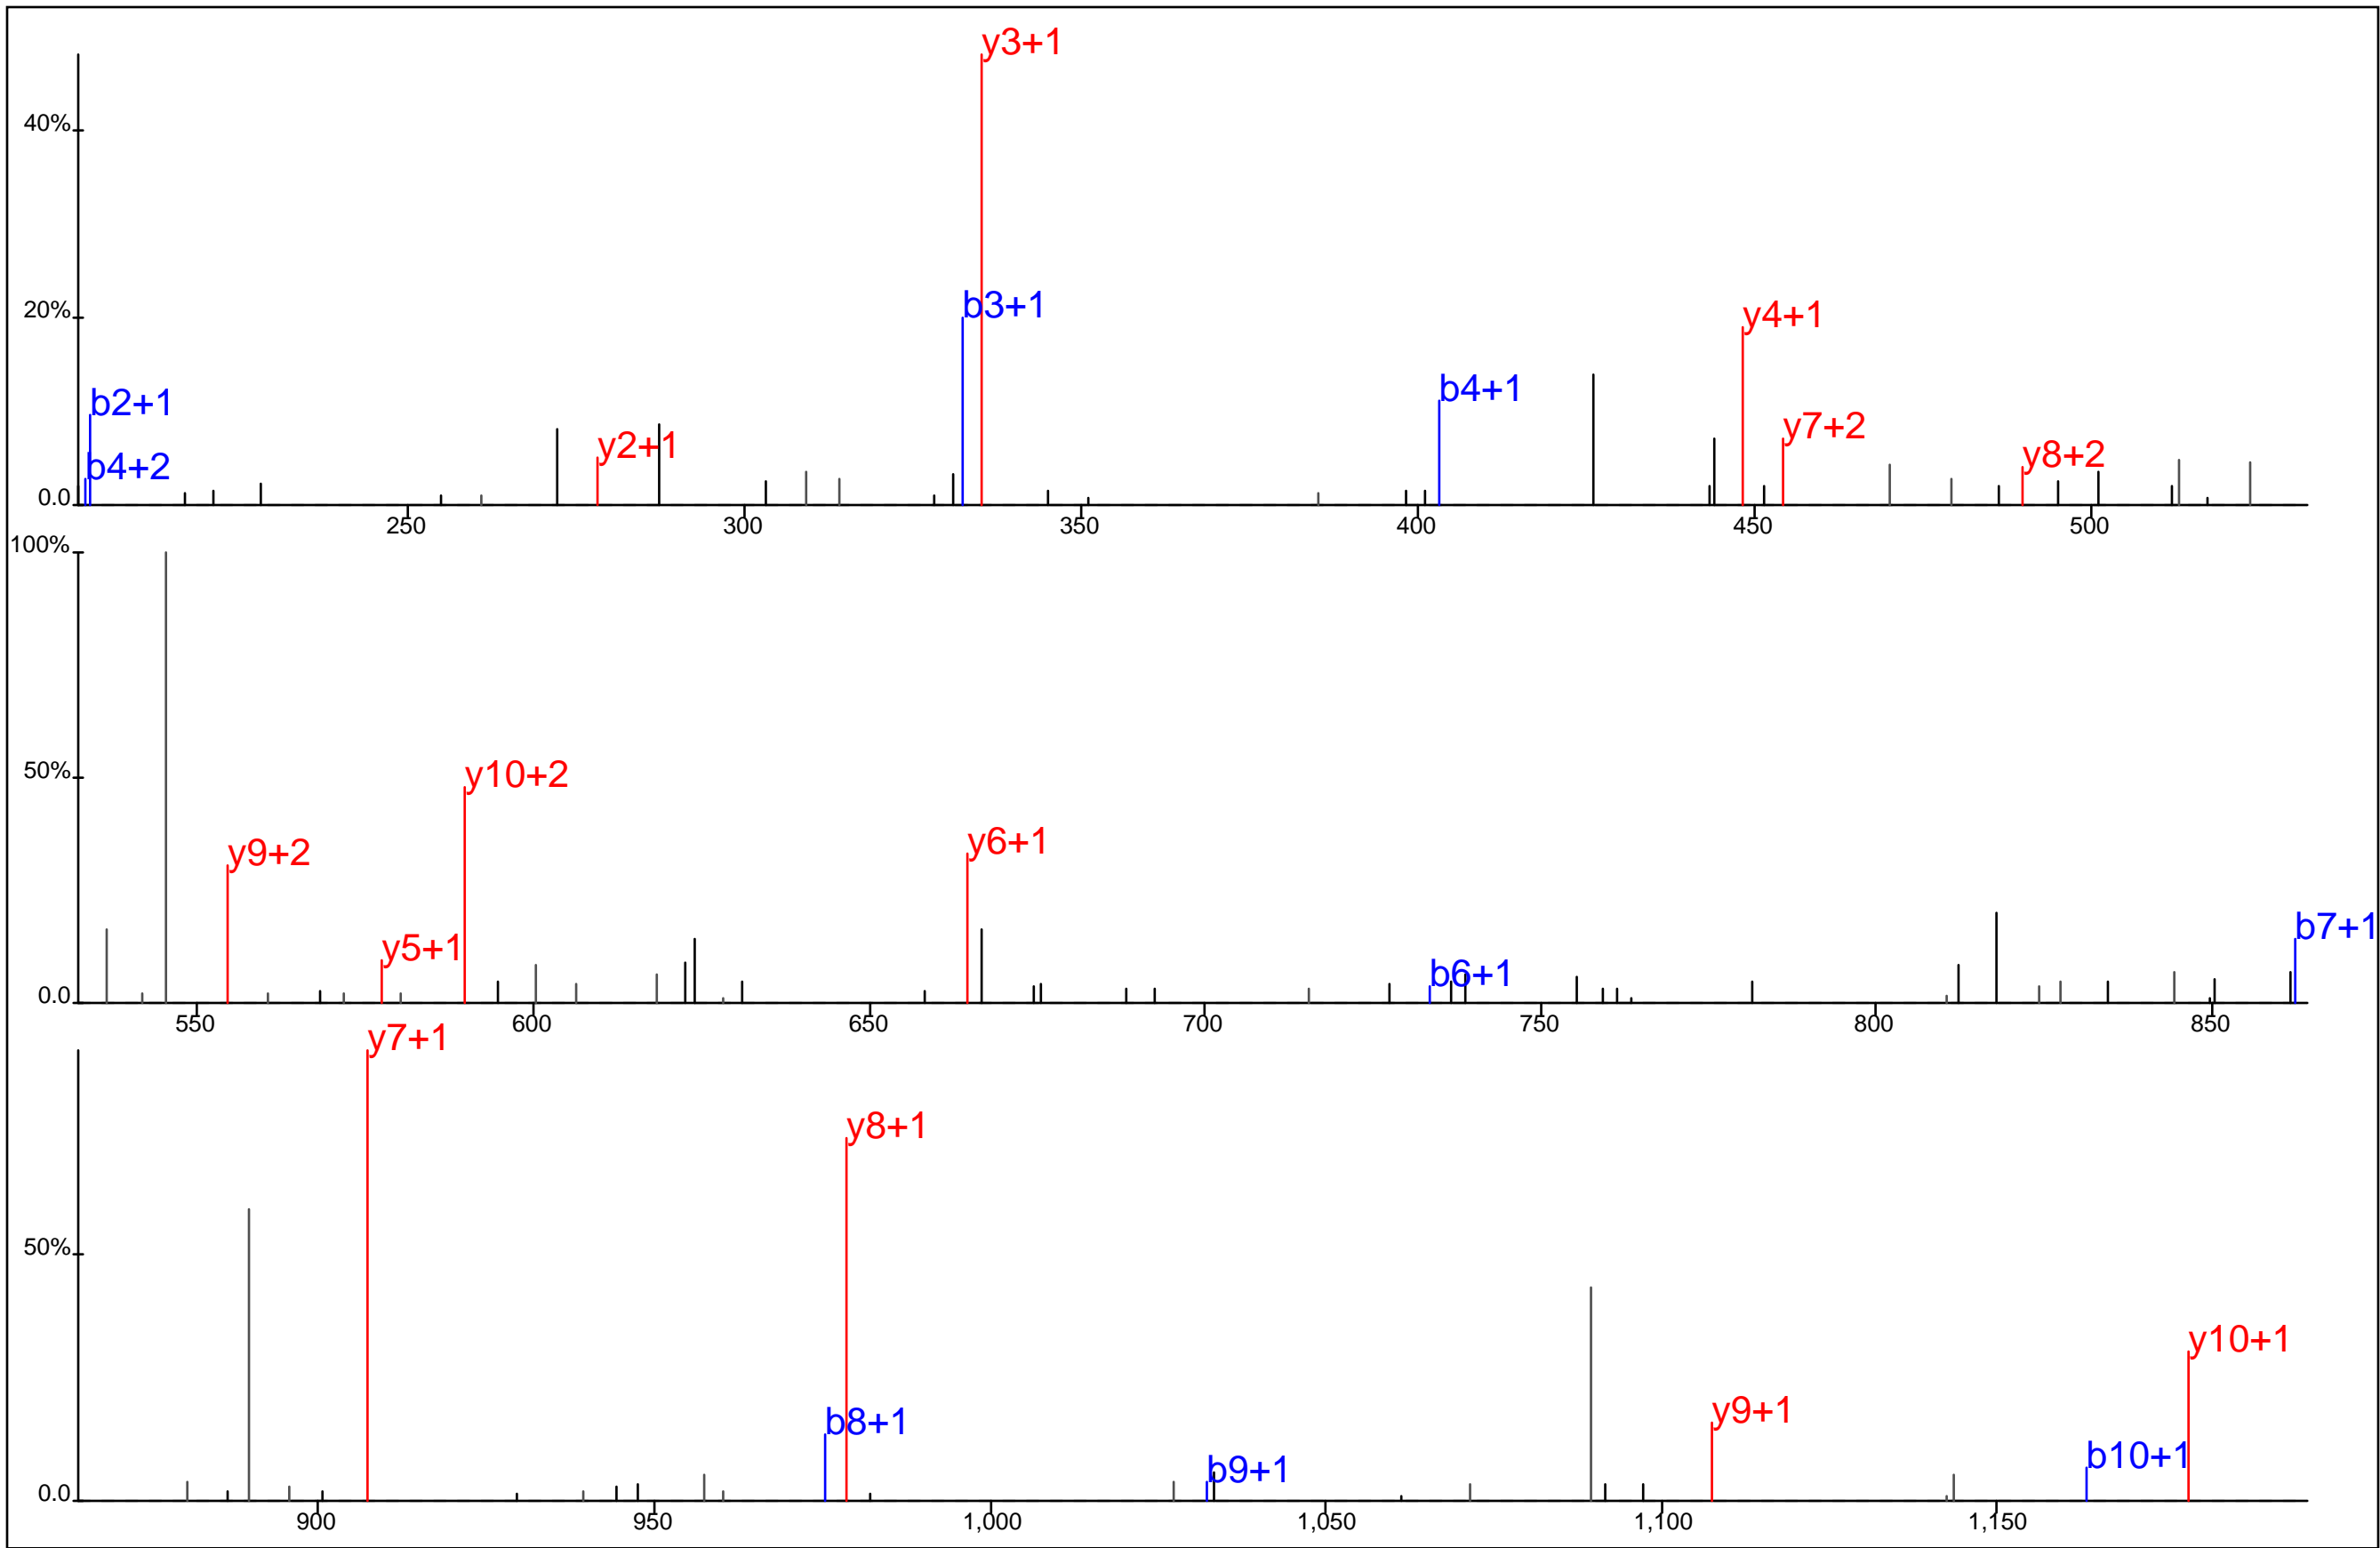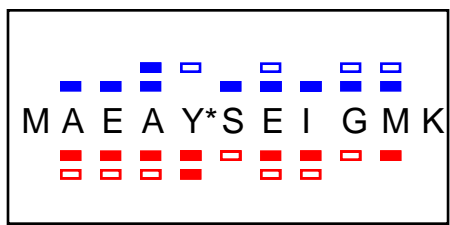

Protein Name: T cell antigen receptor, zeta  
 gi Accession: 0  
 Precursor Mass: 655.2642+2  
 Delta Mass: 0.528 ppm  
 XCorr: 54.58



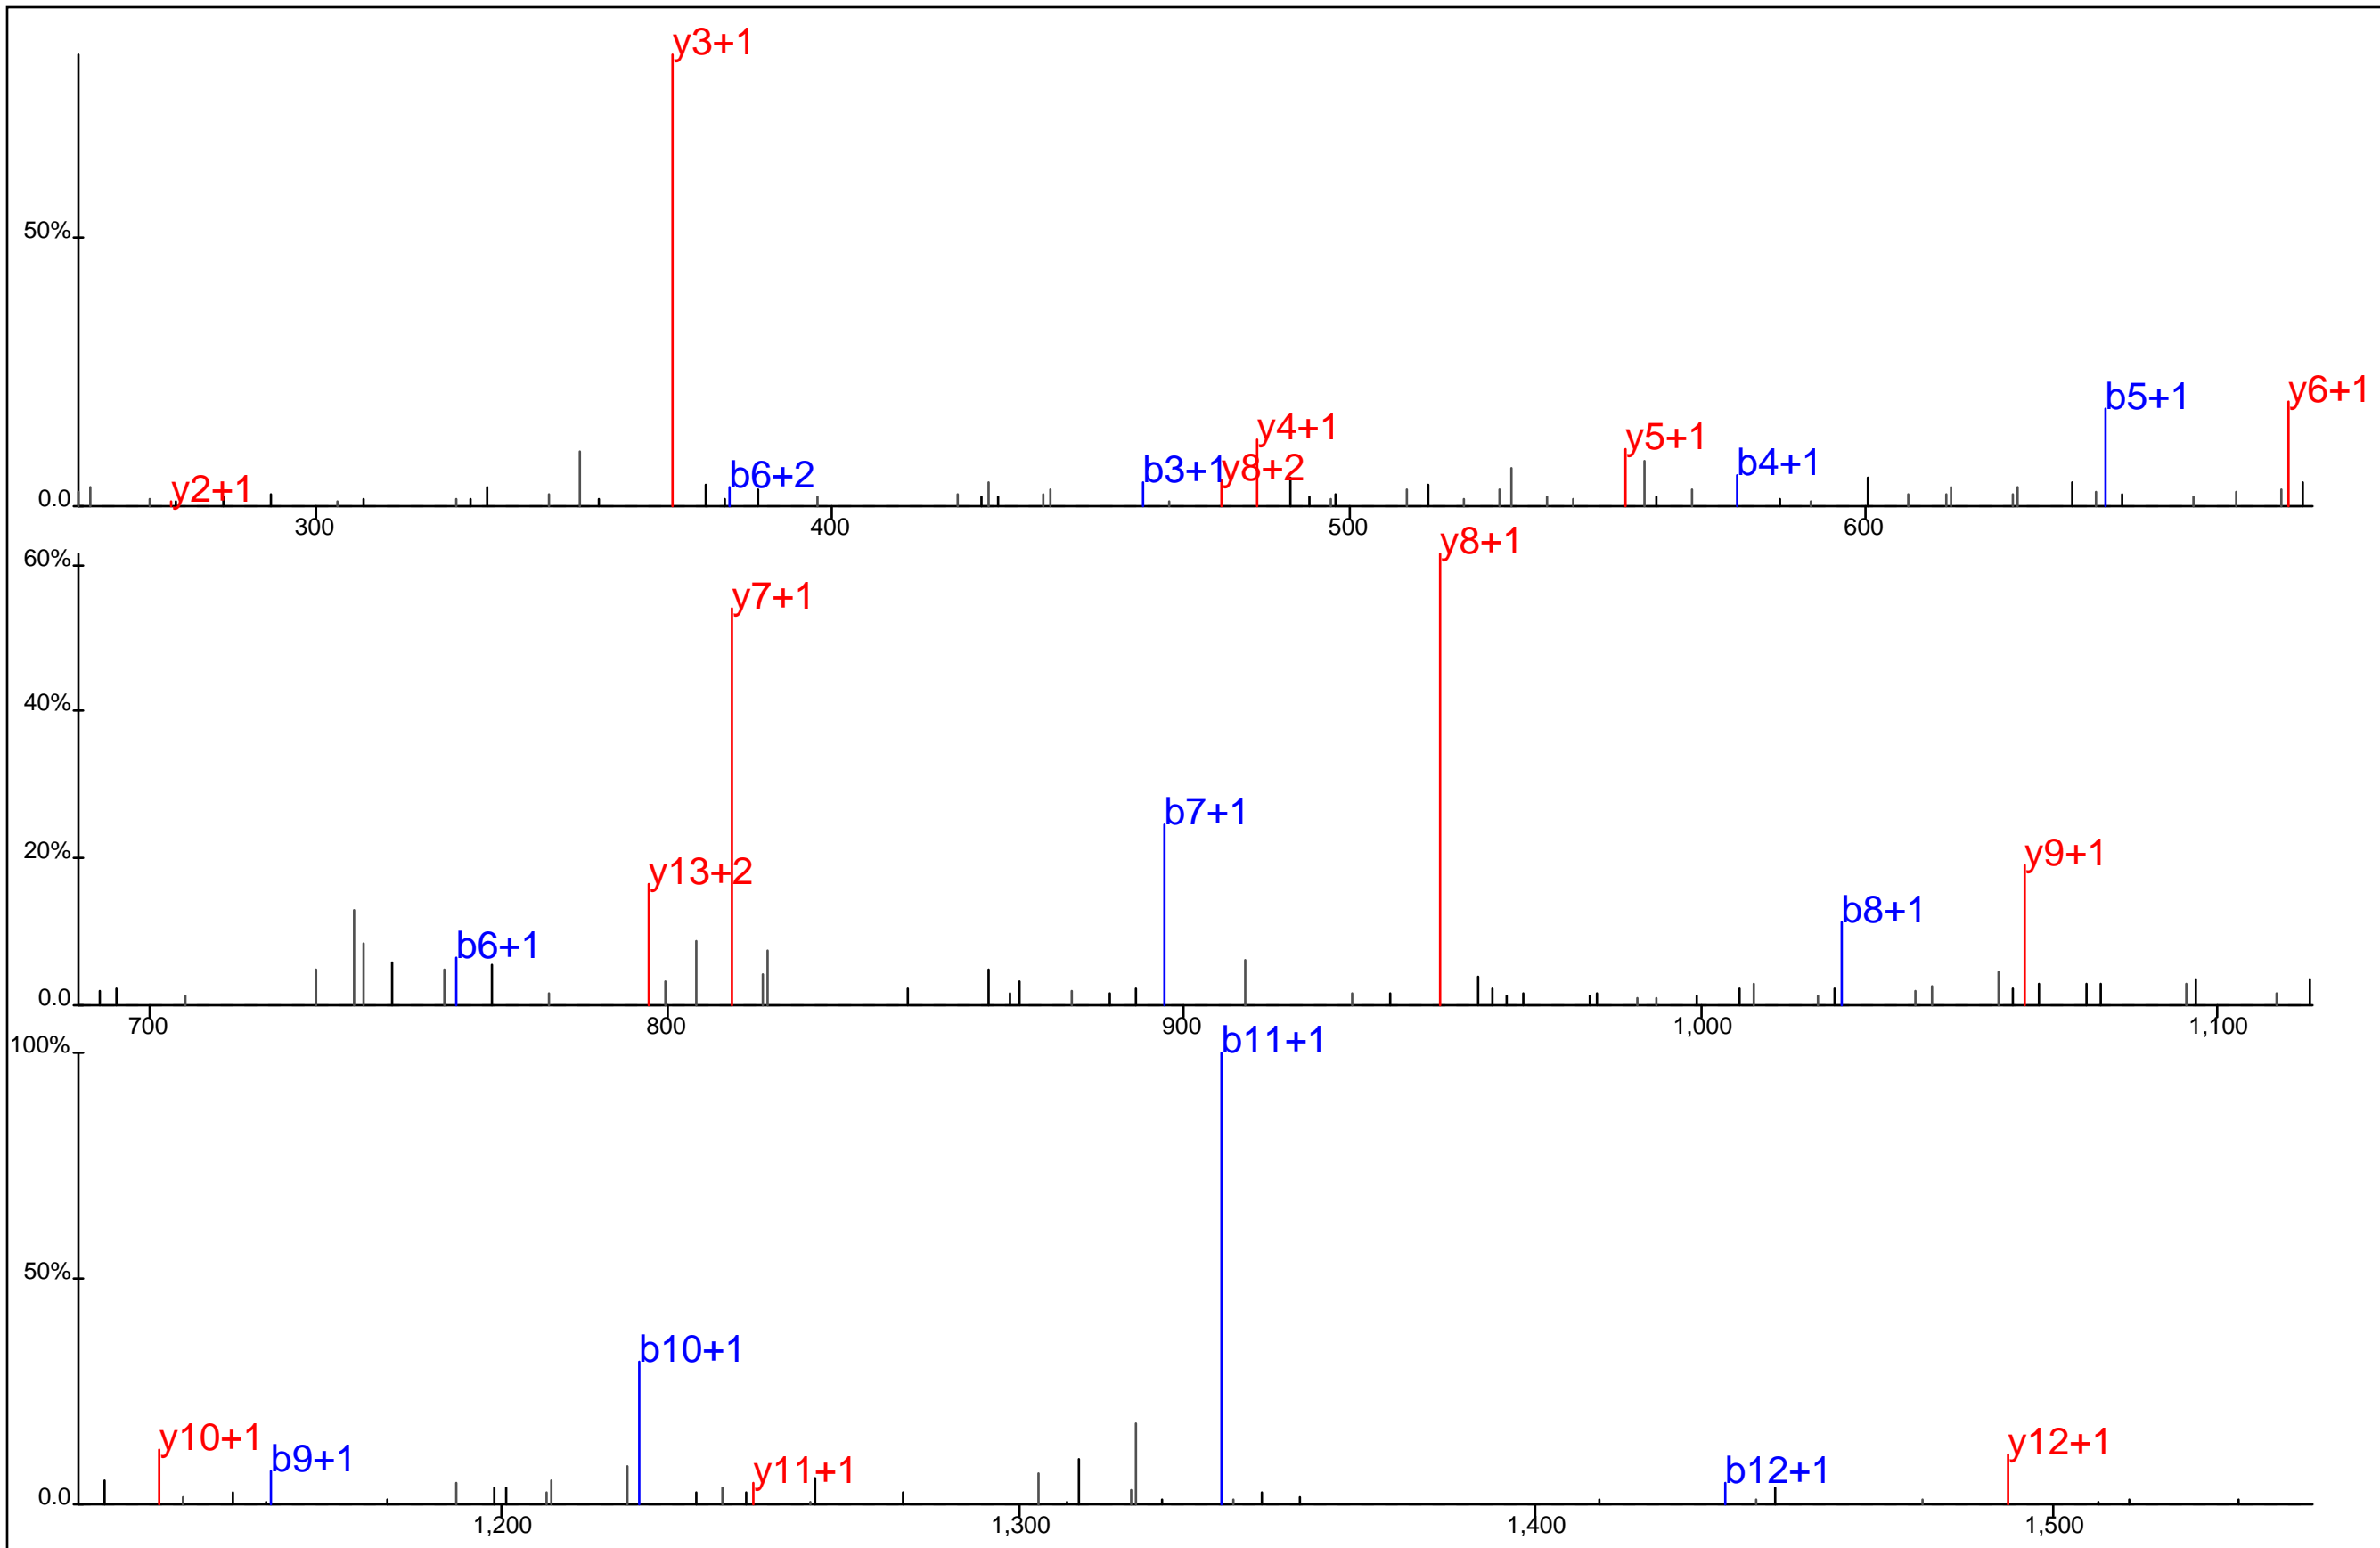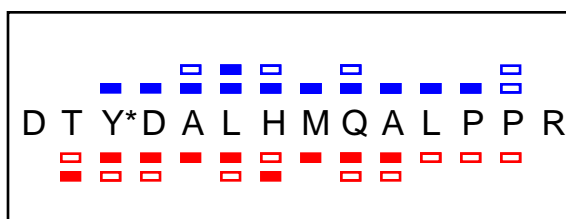

Protein Name: T cell antigen receptor, zeta  
 gi Accession: 0  
 Precursor Mass: 854.3801+2  
 Delta Mass: 1.777 ppm  
 XCorr: 64.41

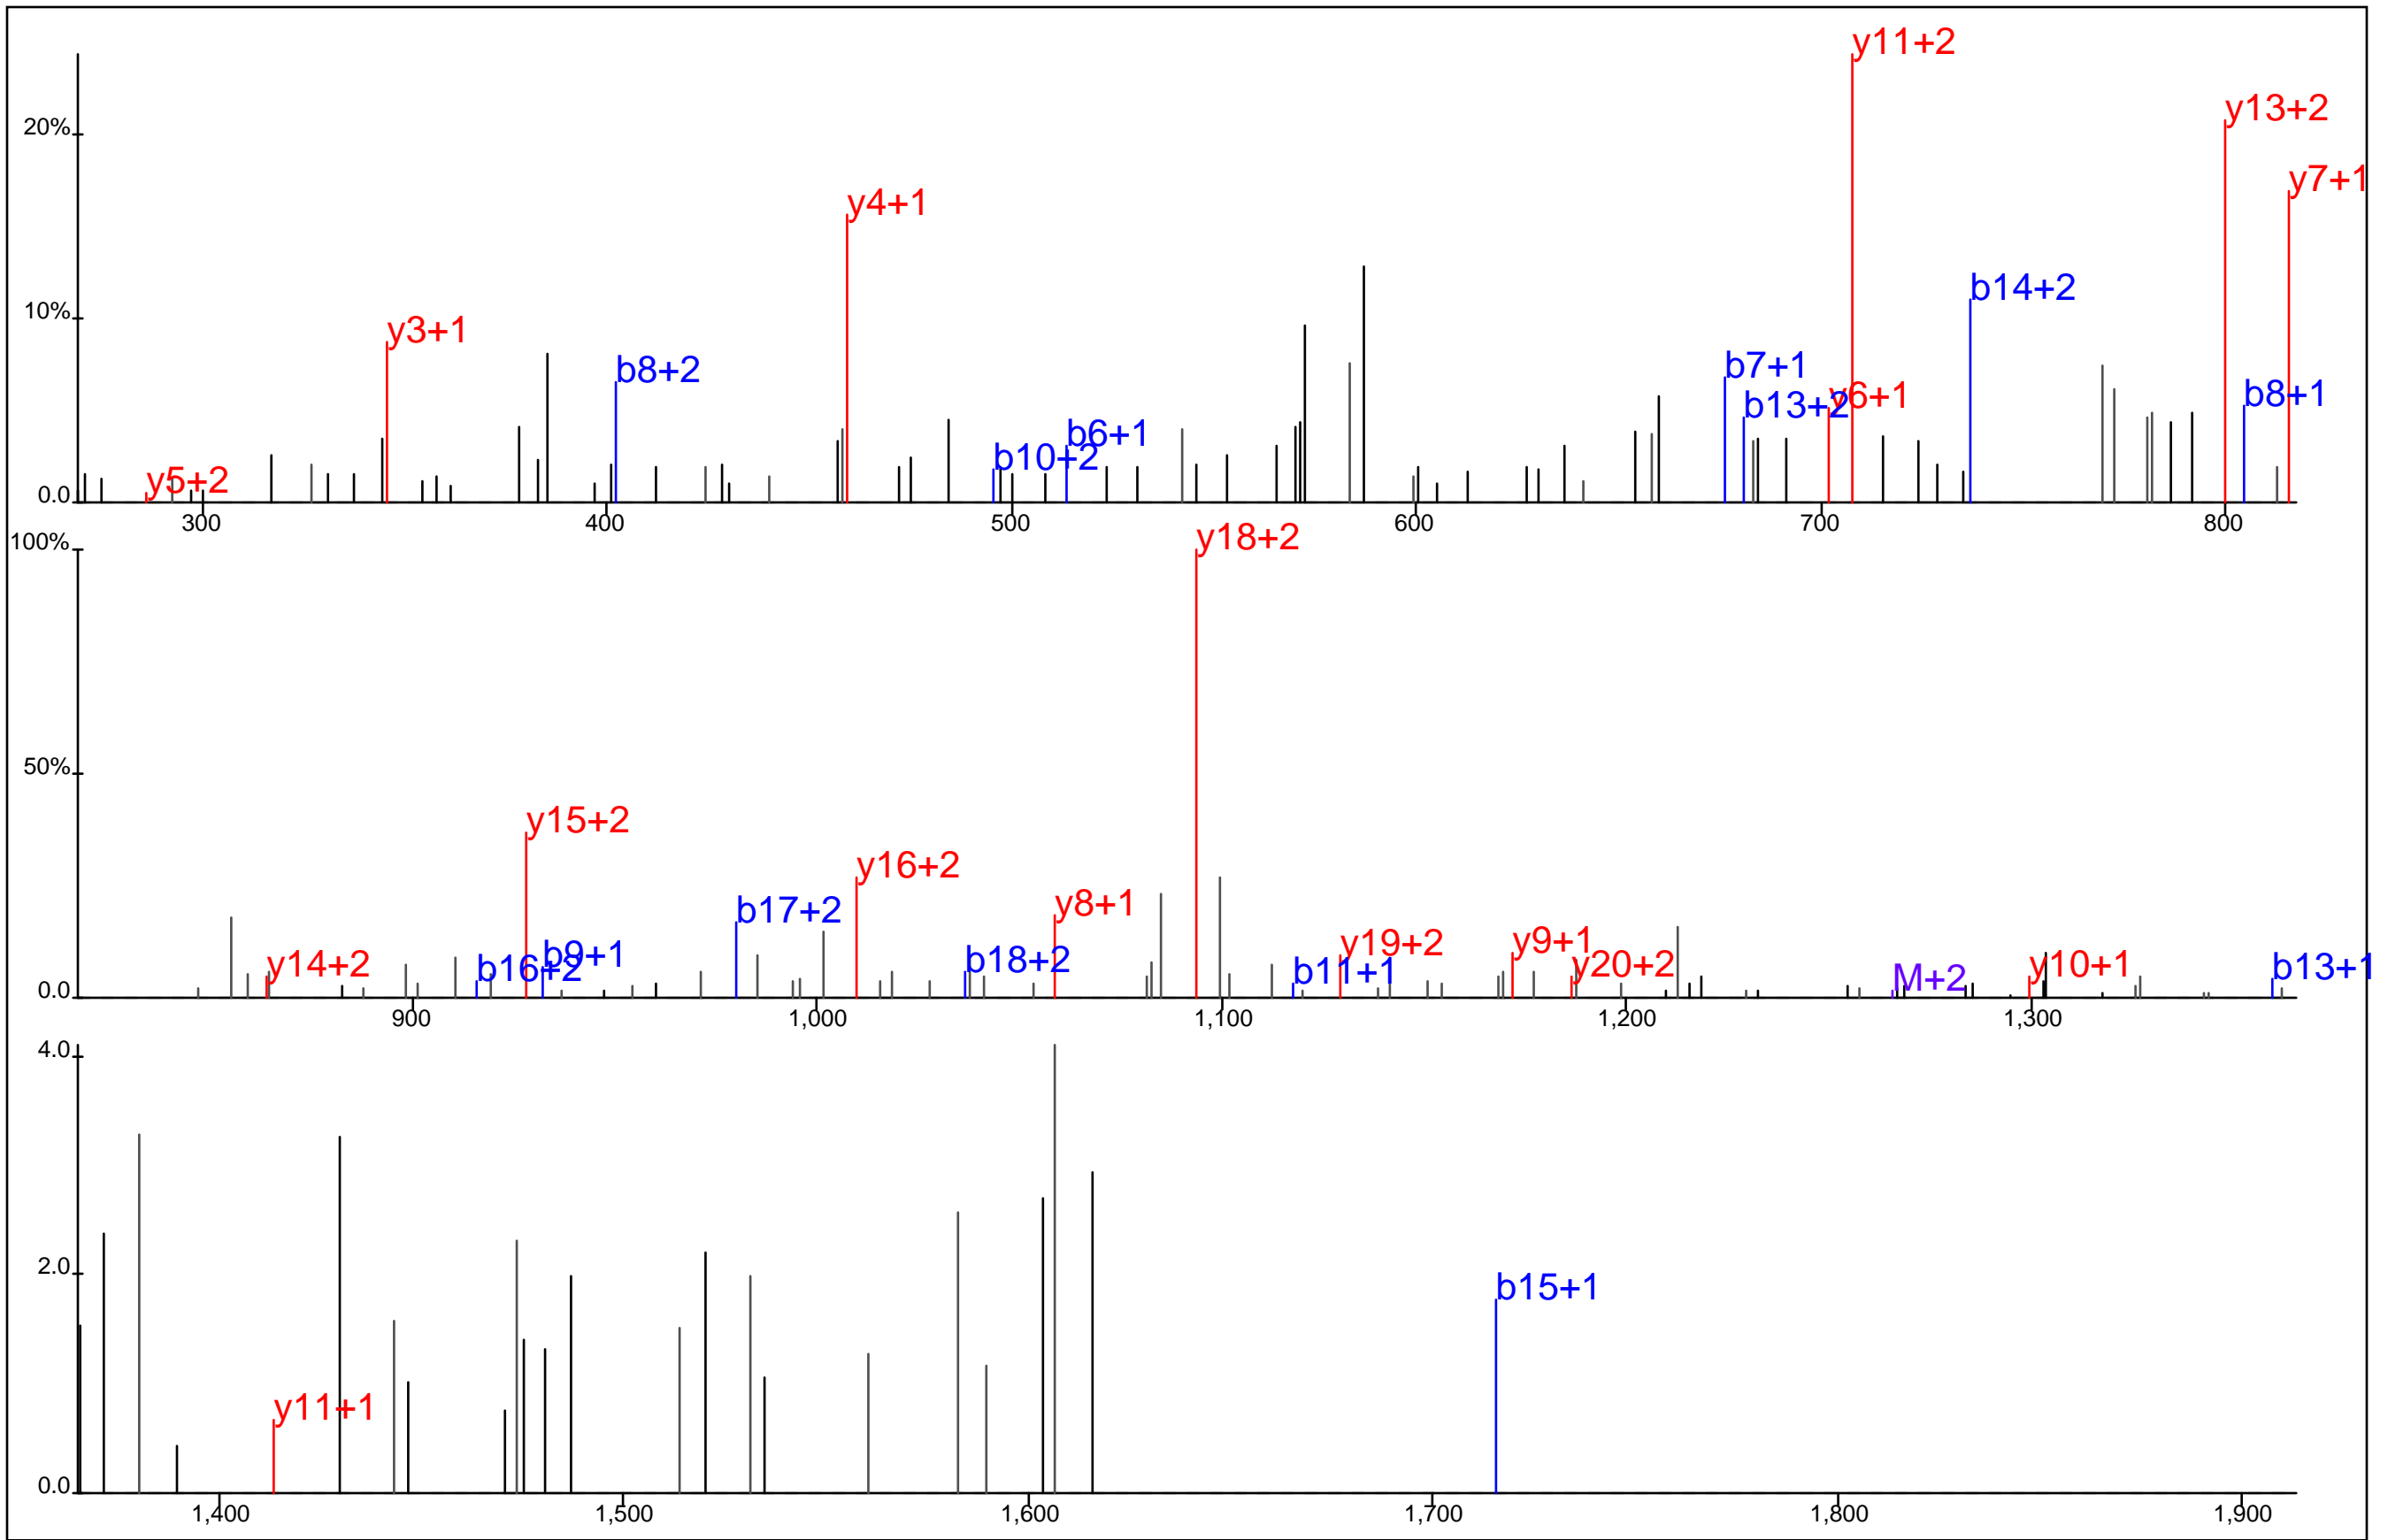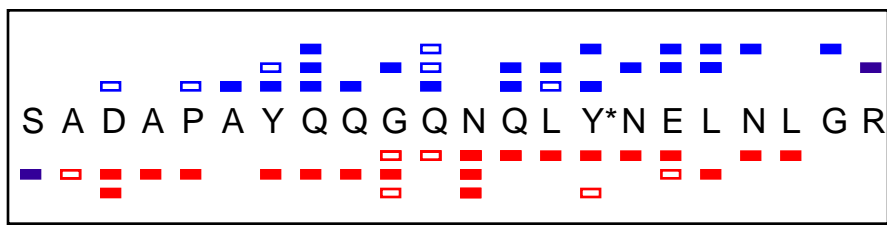

Protein Name: T cell antigen receptor, zeta  
 gi Accession: 0  
 Precursor Mass: 844.0510+3  
 Delta Mass: 1.015 ppm  
 XCorr: 36.02

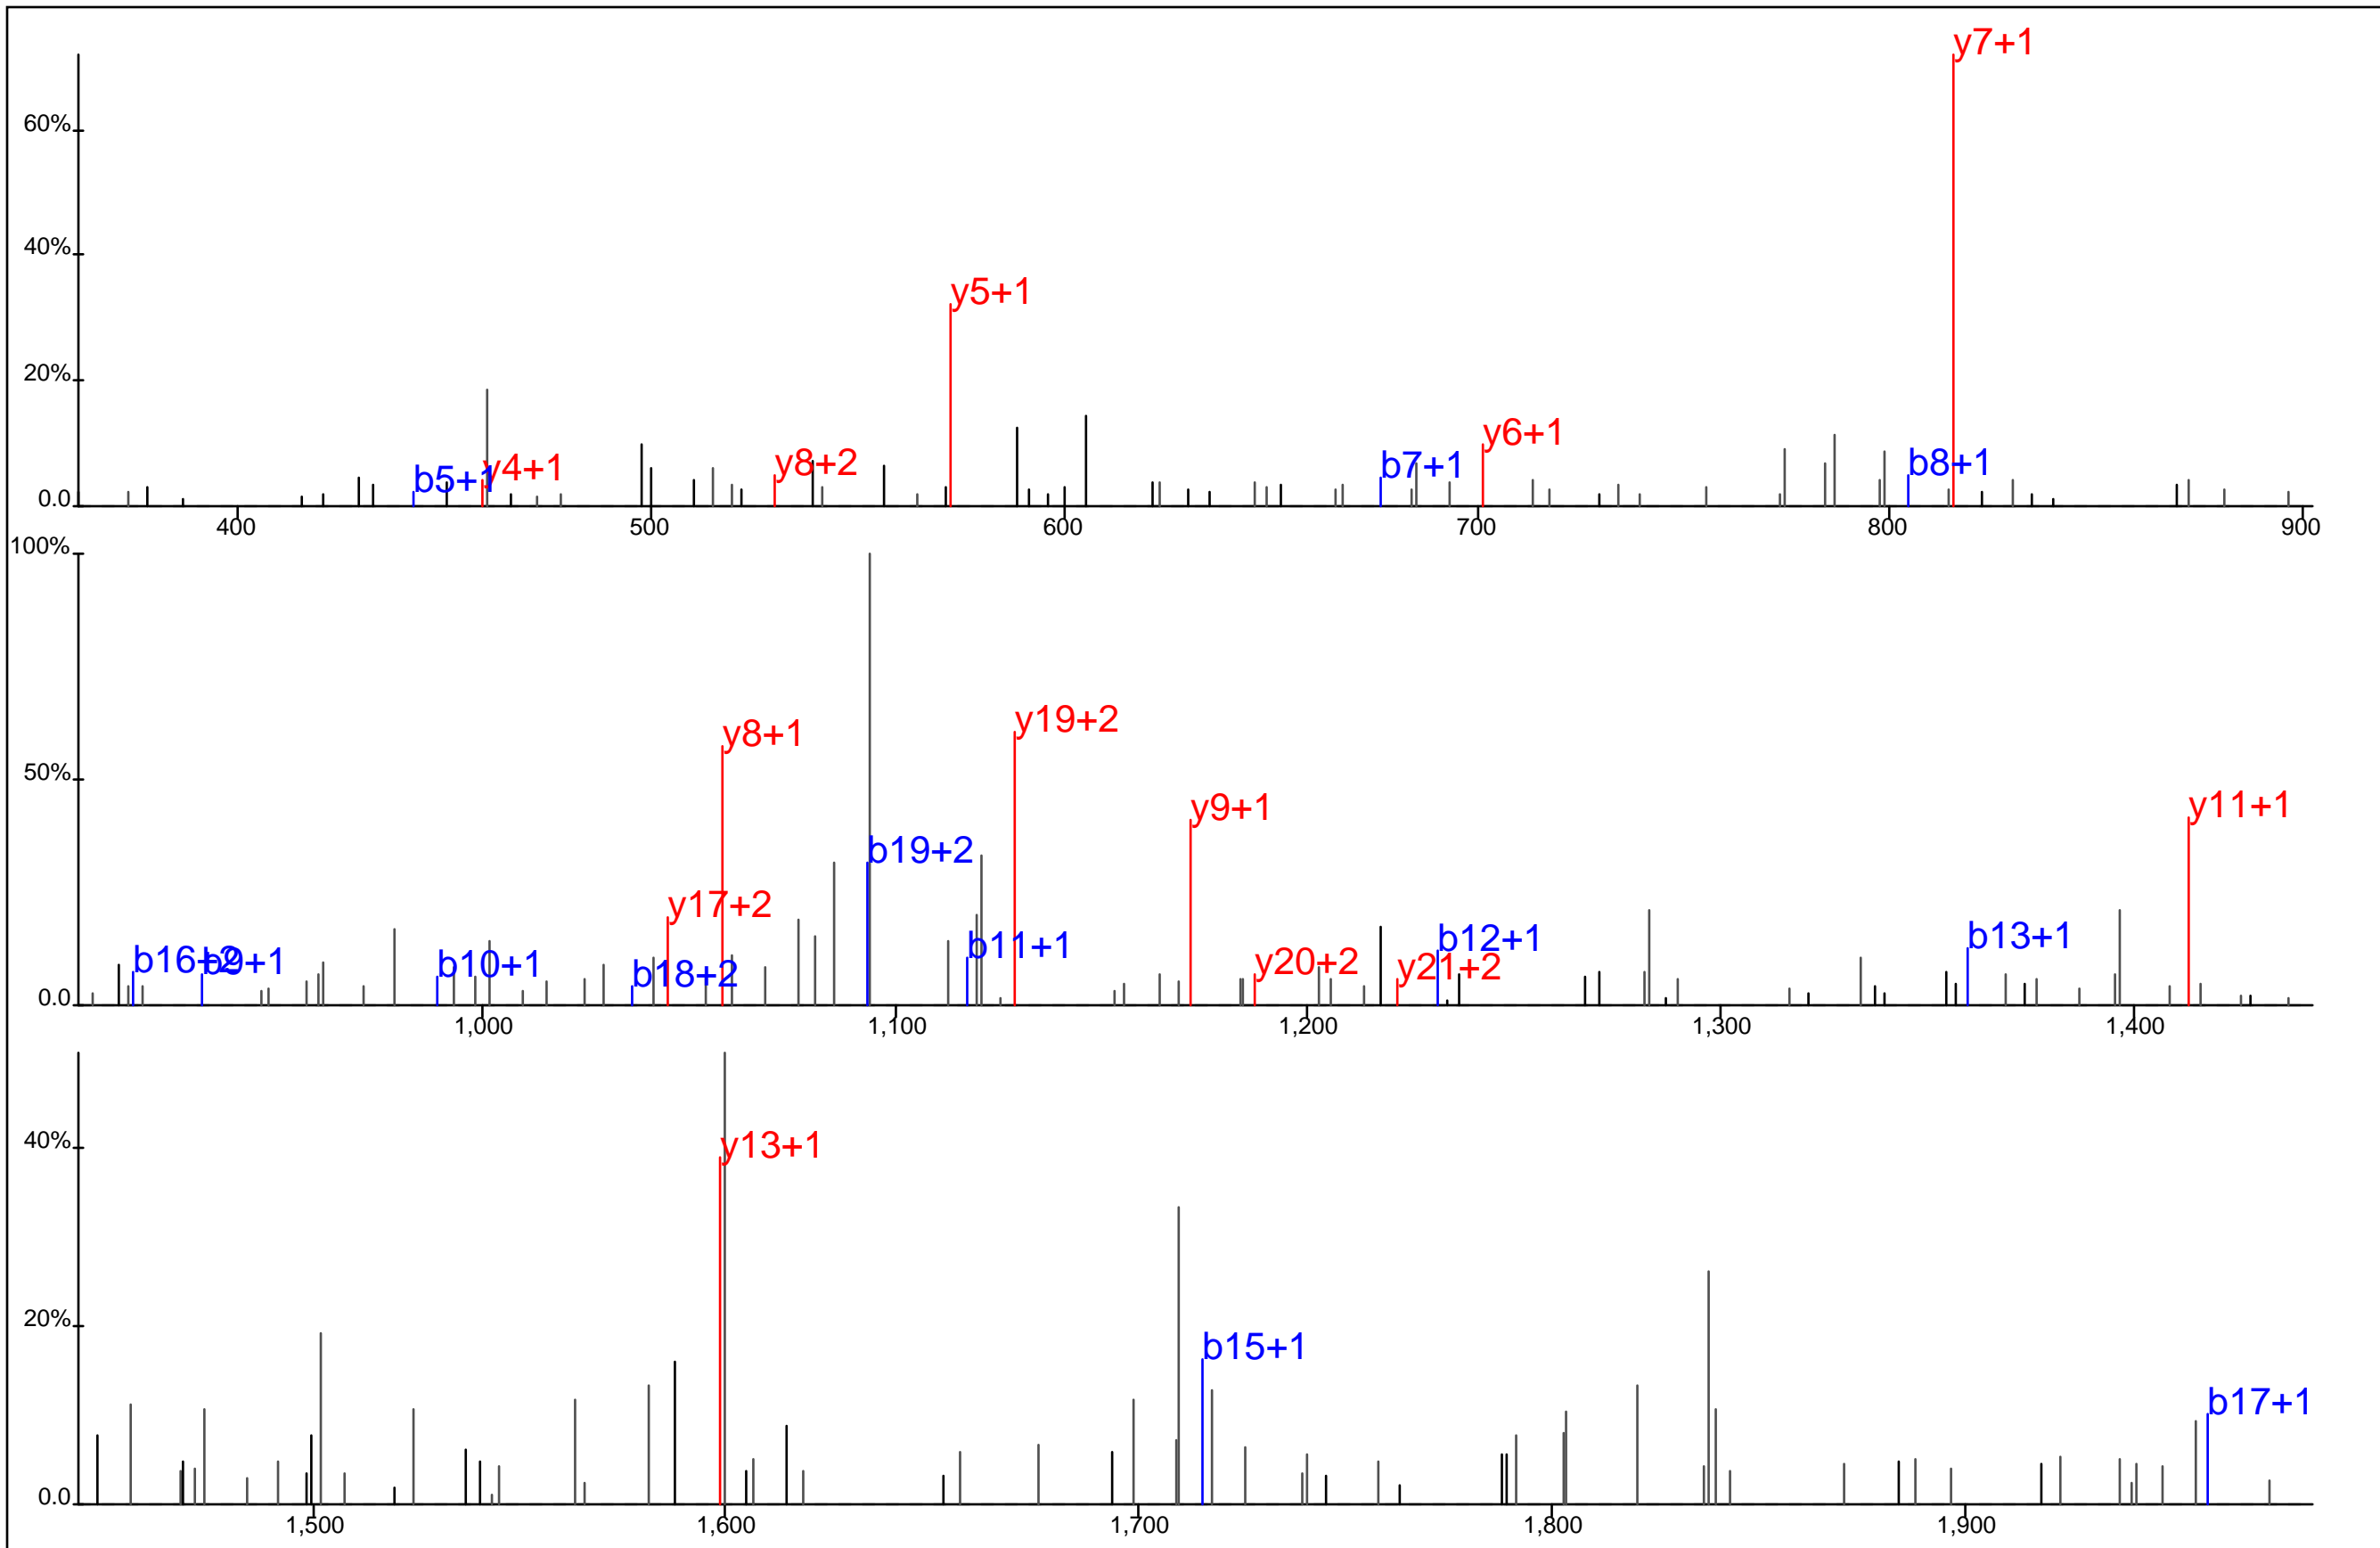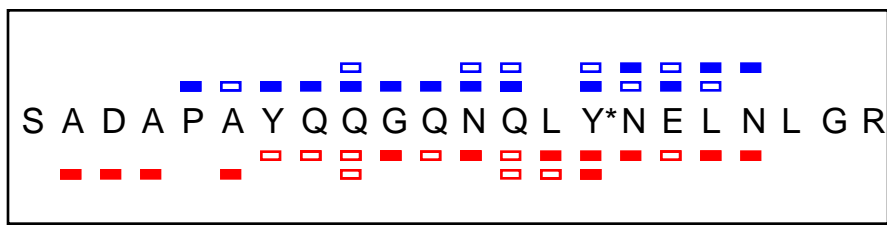

Protein Name: T cell antigen receptor, zeta  
 gi Accession: 0  
 Precursor Mass: 1,265.5734+2  
 Delta Mass: 1.454 ppm  
 XCorr: 27.27

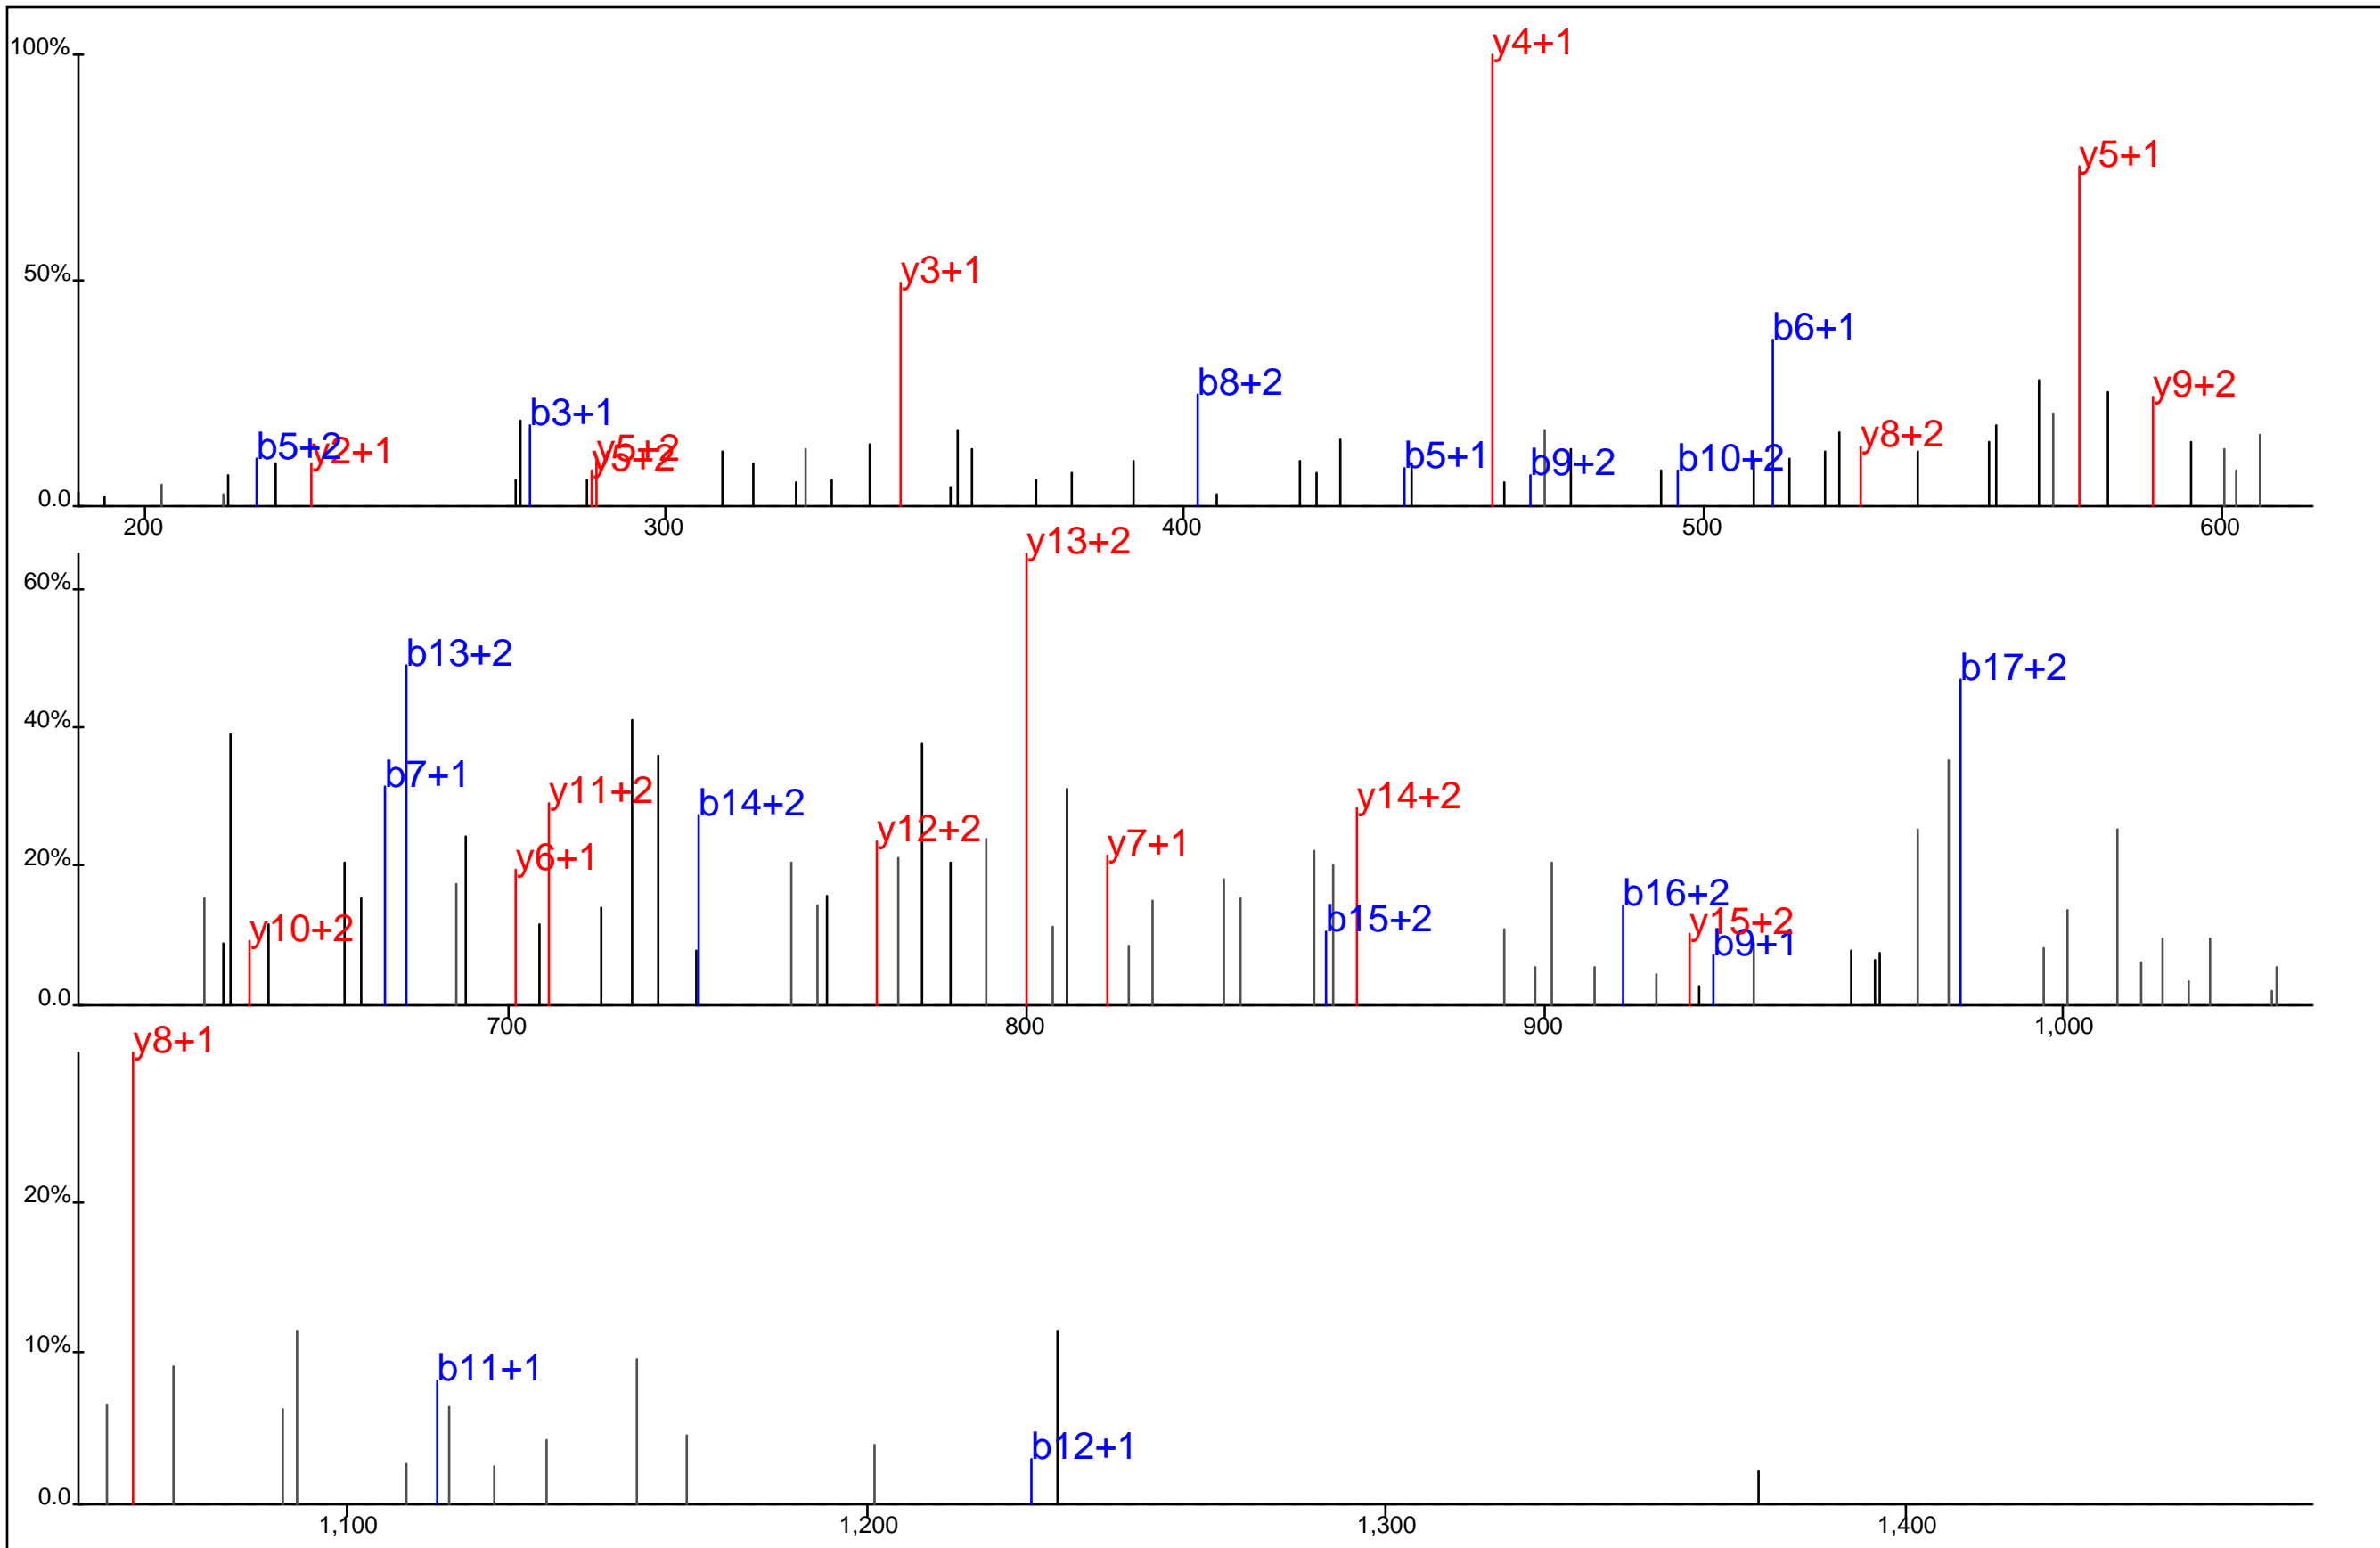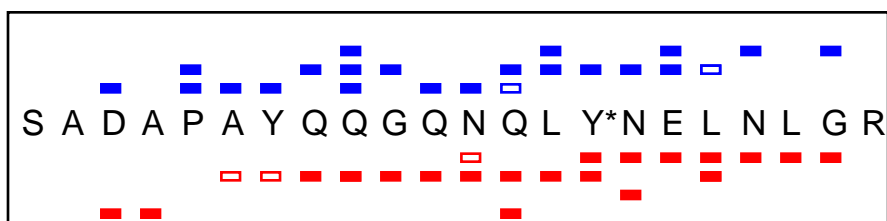

Protein Name: T cell antigen receptor, zeta  
 gi Accession: 0  
 Precursor Mass: 633.2900+4  
 Delta Mass: 0.914 ppm  
 XCorr: 34.71



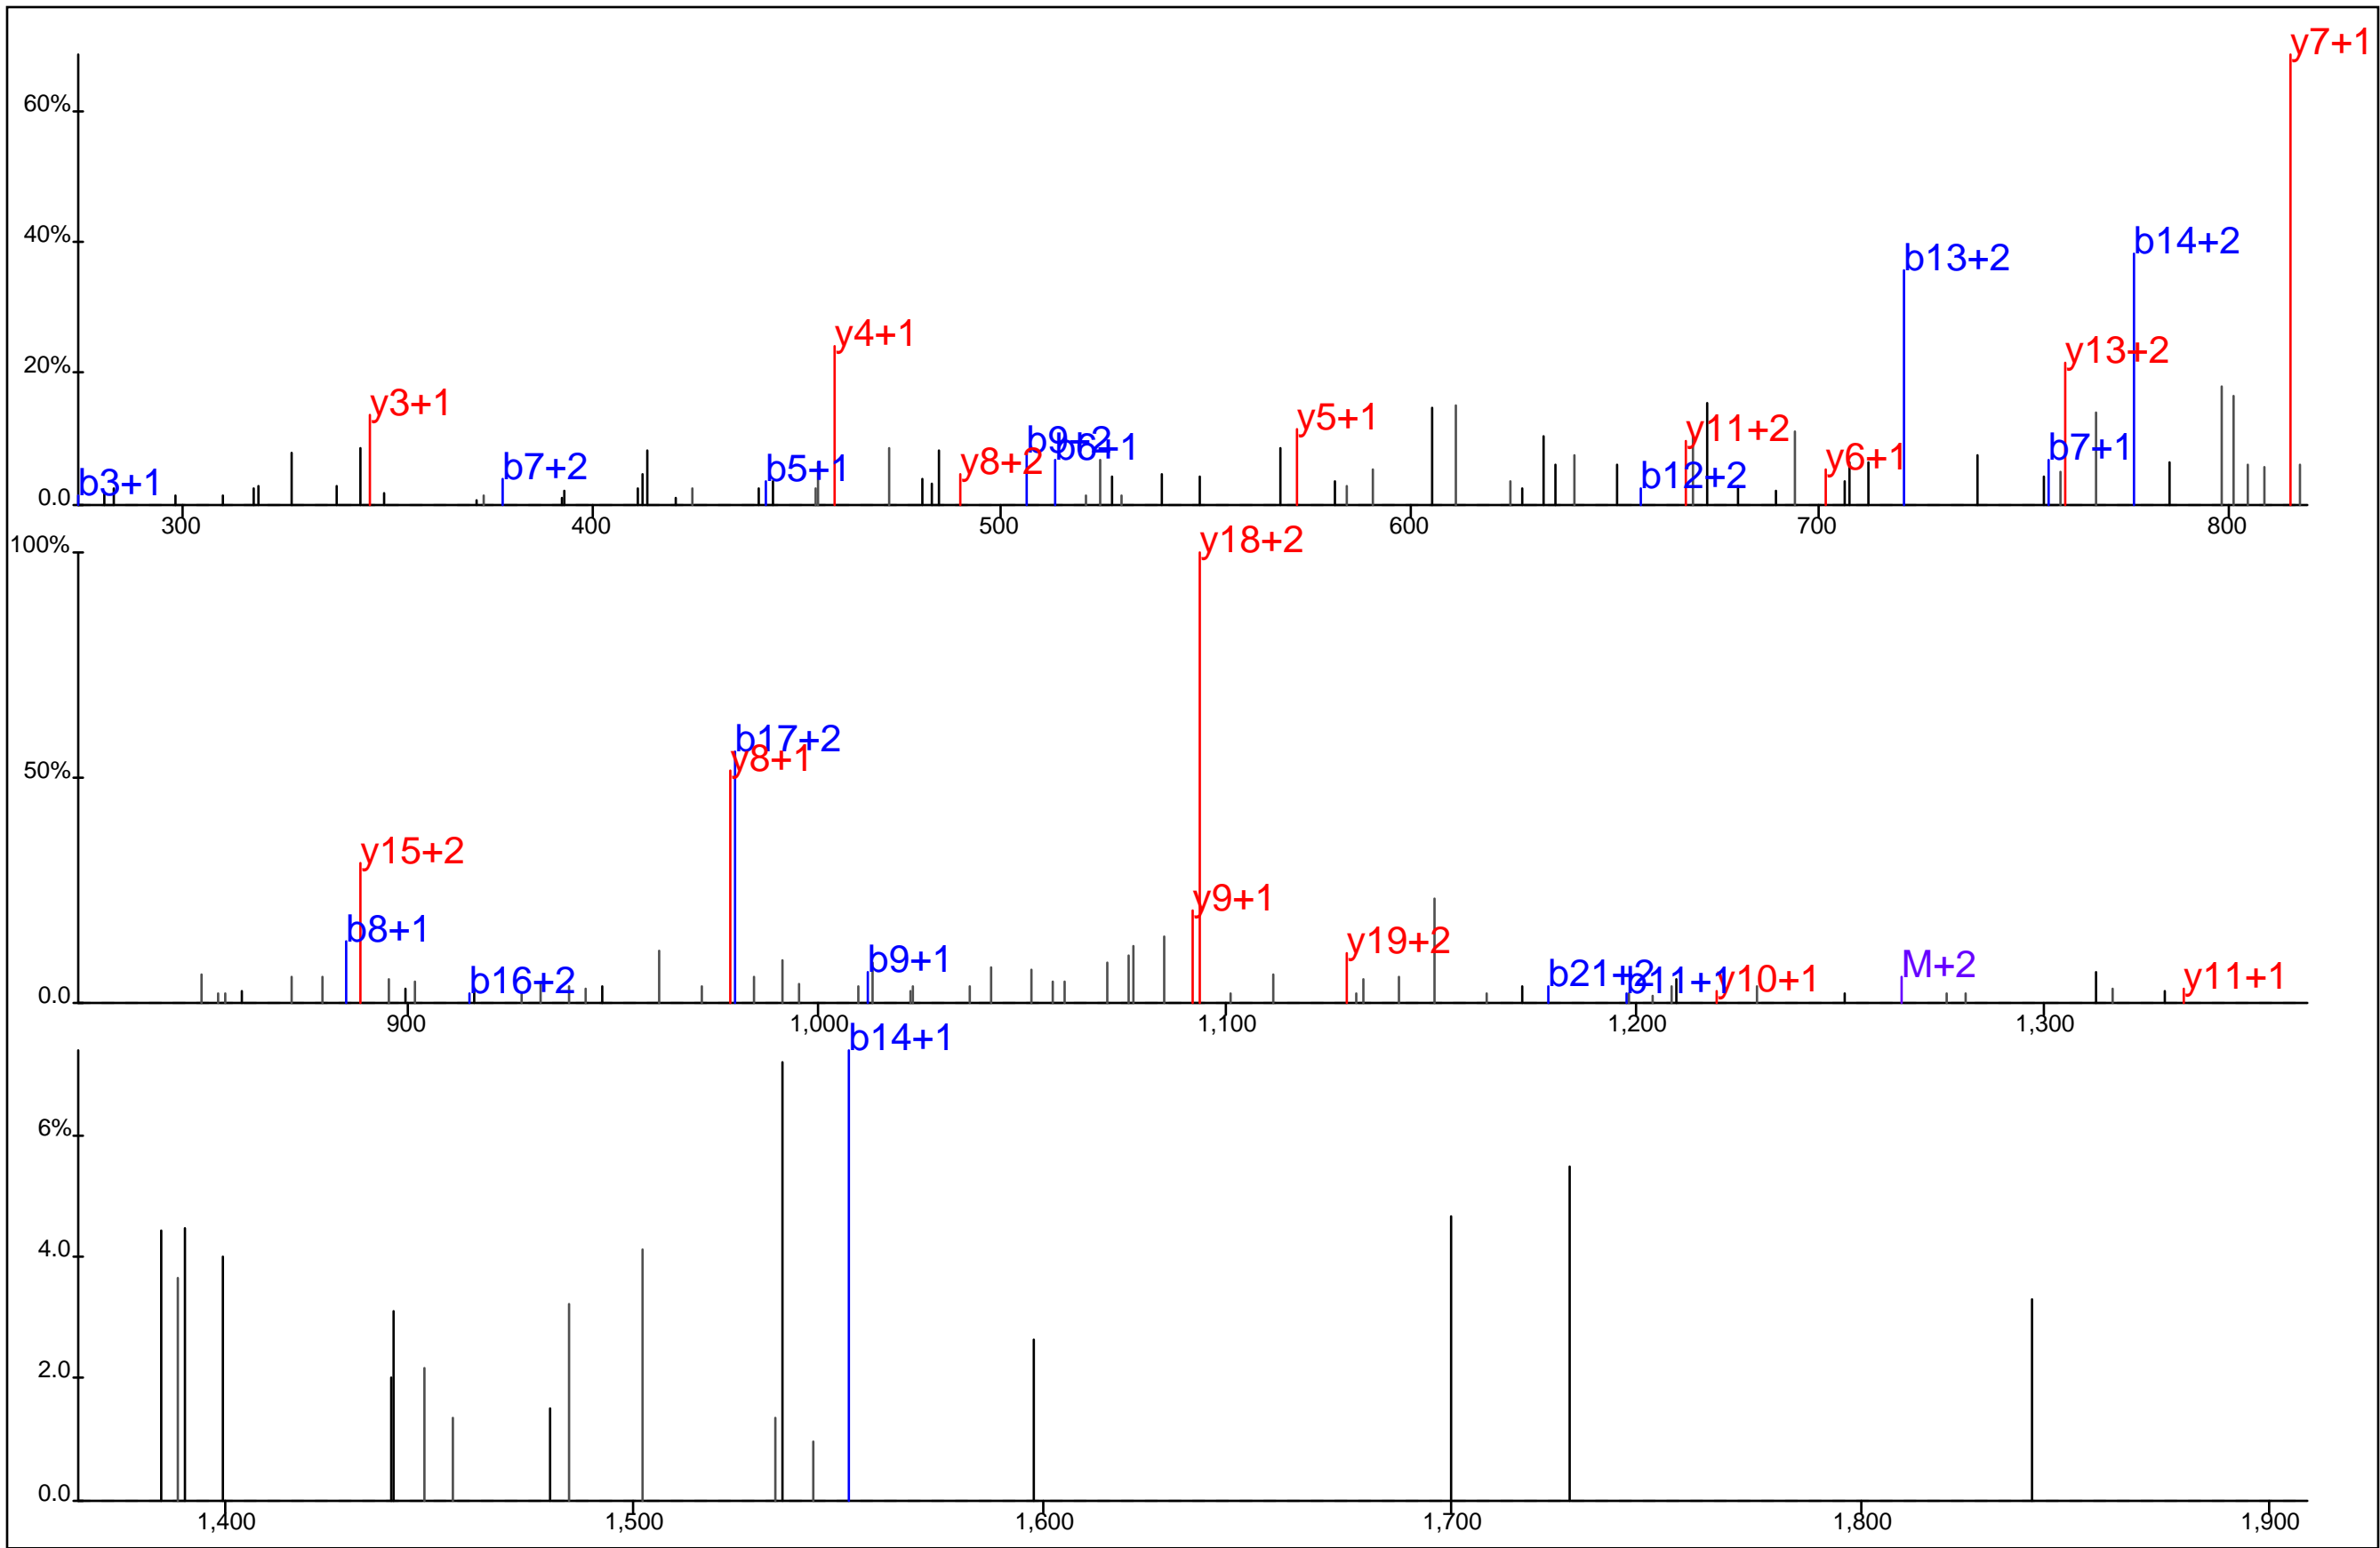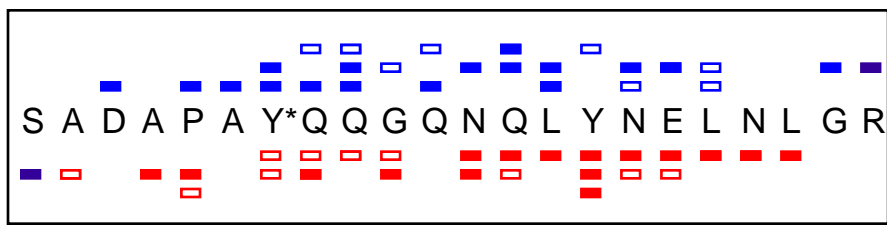

Protein Name: T cell antigen receptor, zeta  
 gi Accession: 0  
 Precursor Mass: 844.0505+3  
 Delta Mass: 0.509 ppm  
 XCorr: 31.38



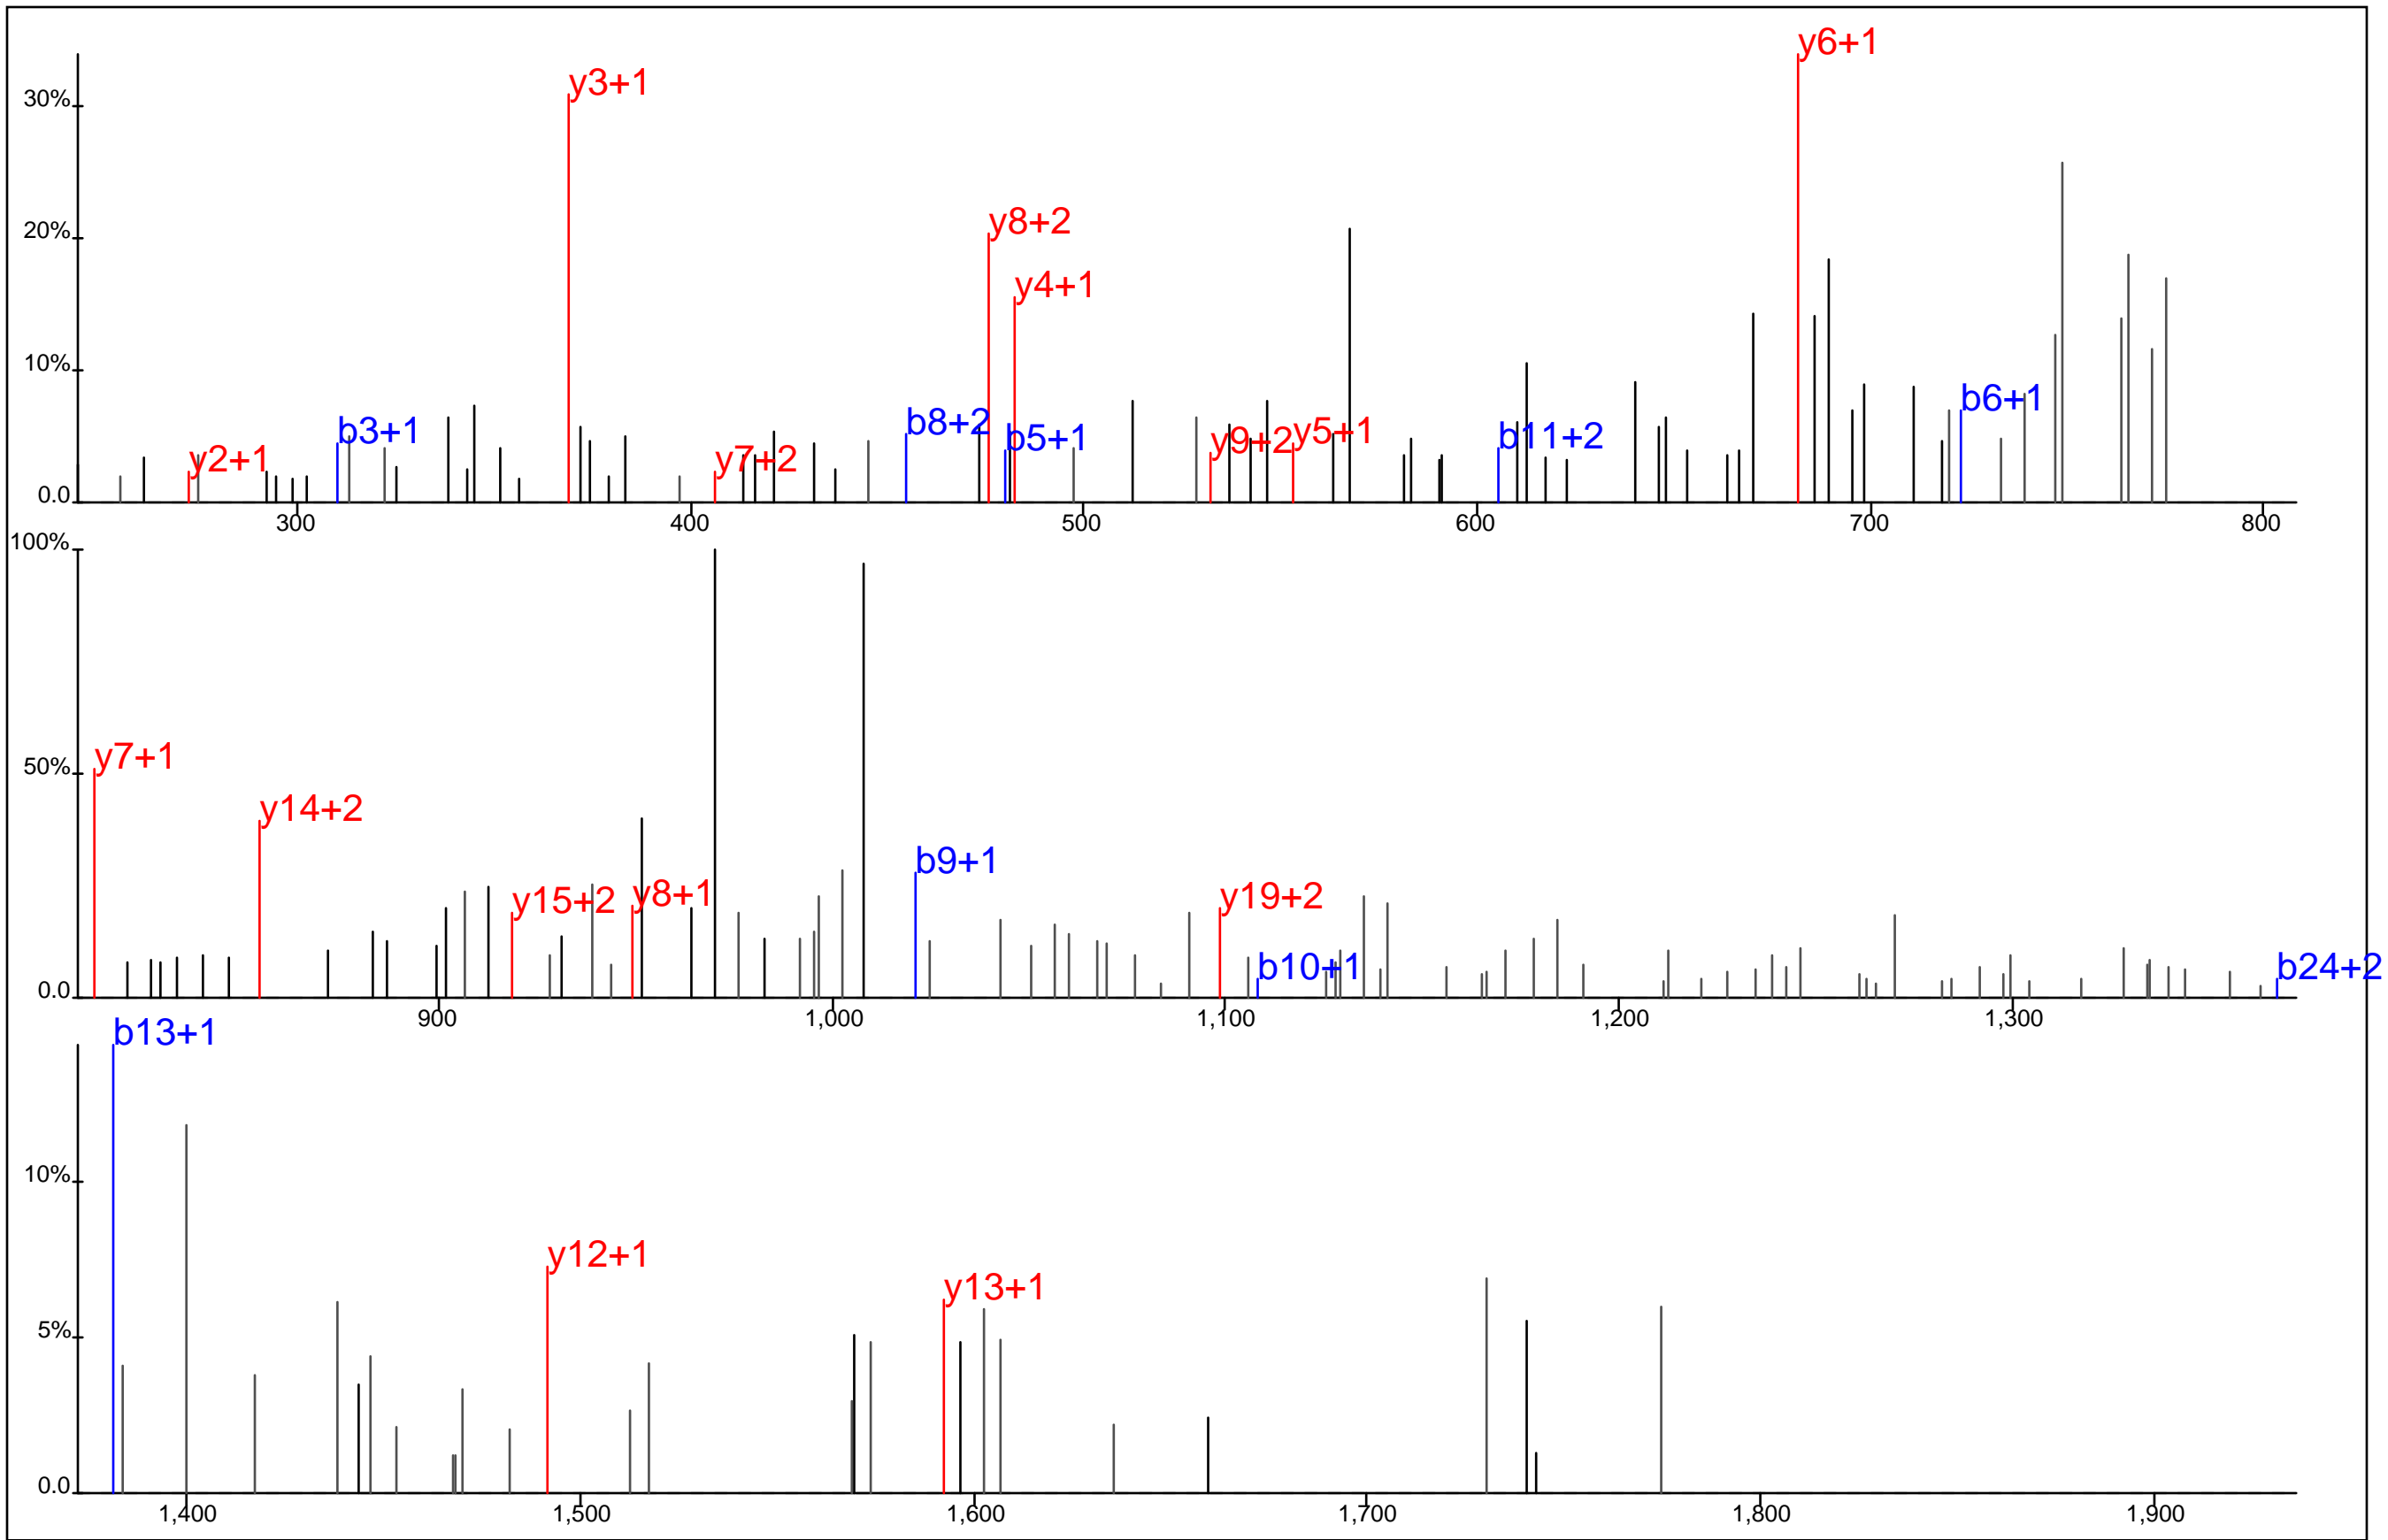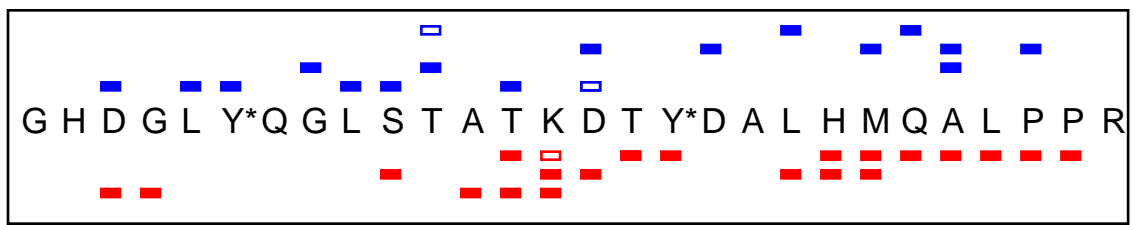

Protein Name: T cell antigen receptor, zeta  
 gi Accession: 0  
 Precursor Mass: 804.8601+4  
 Delta Mass: 1.083 ppm  
 XCorr: 22.61

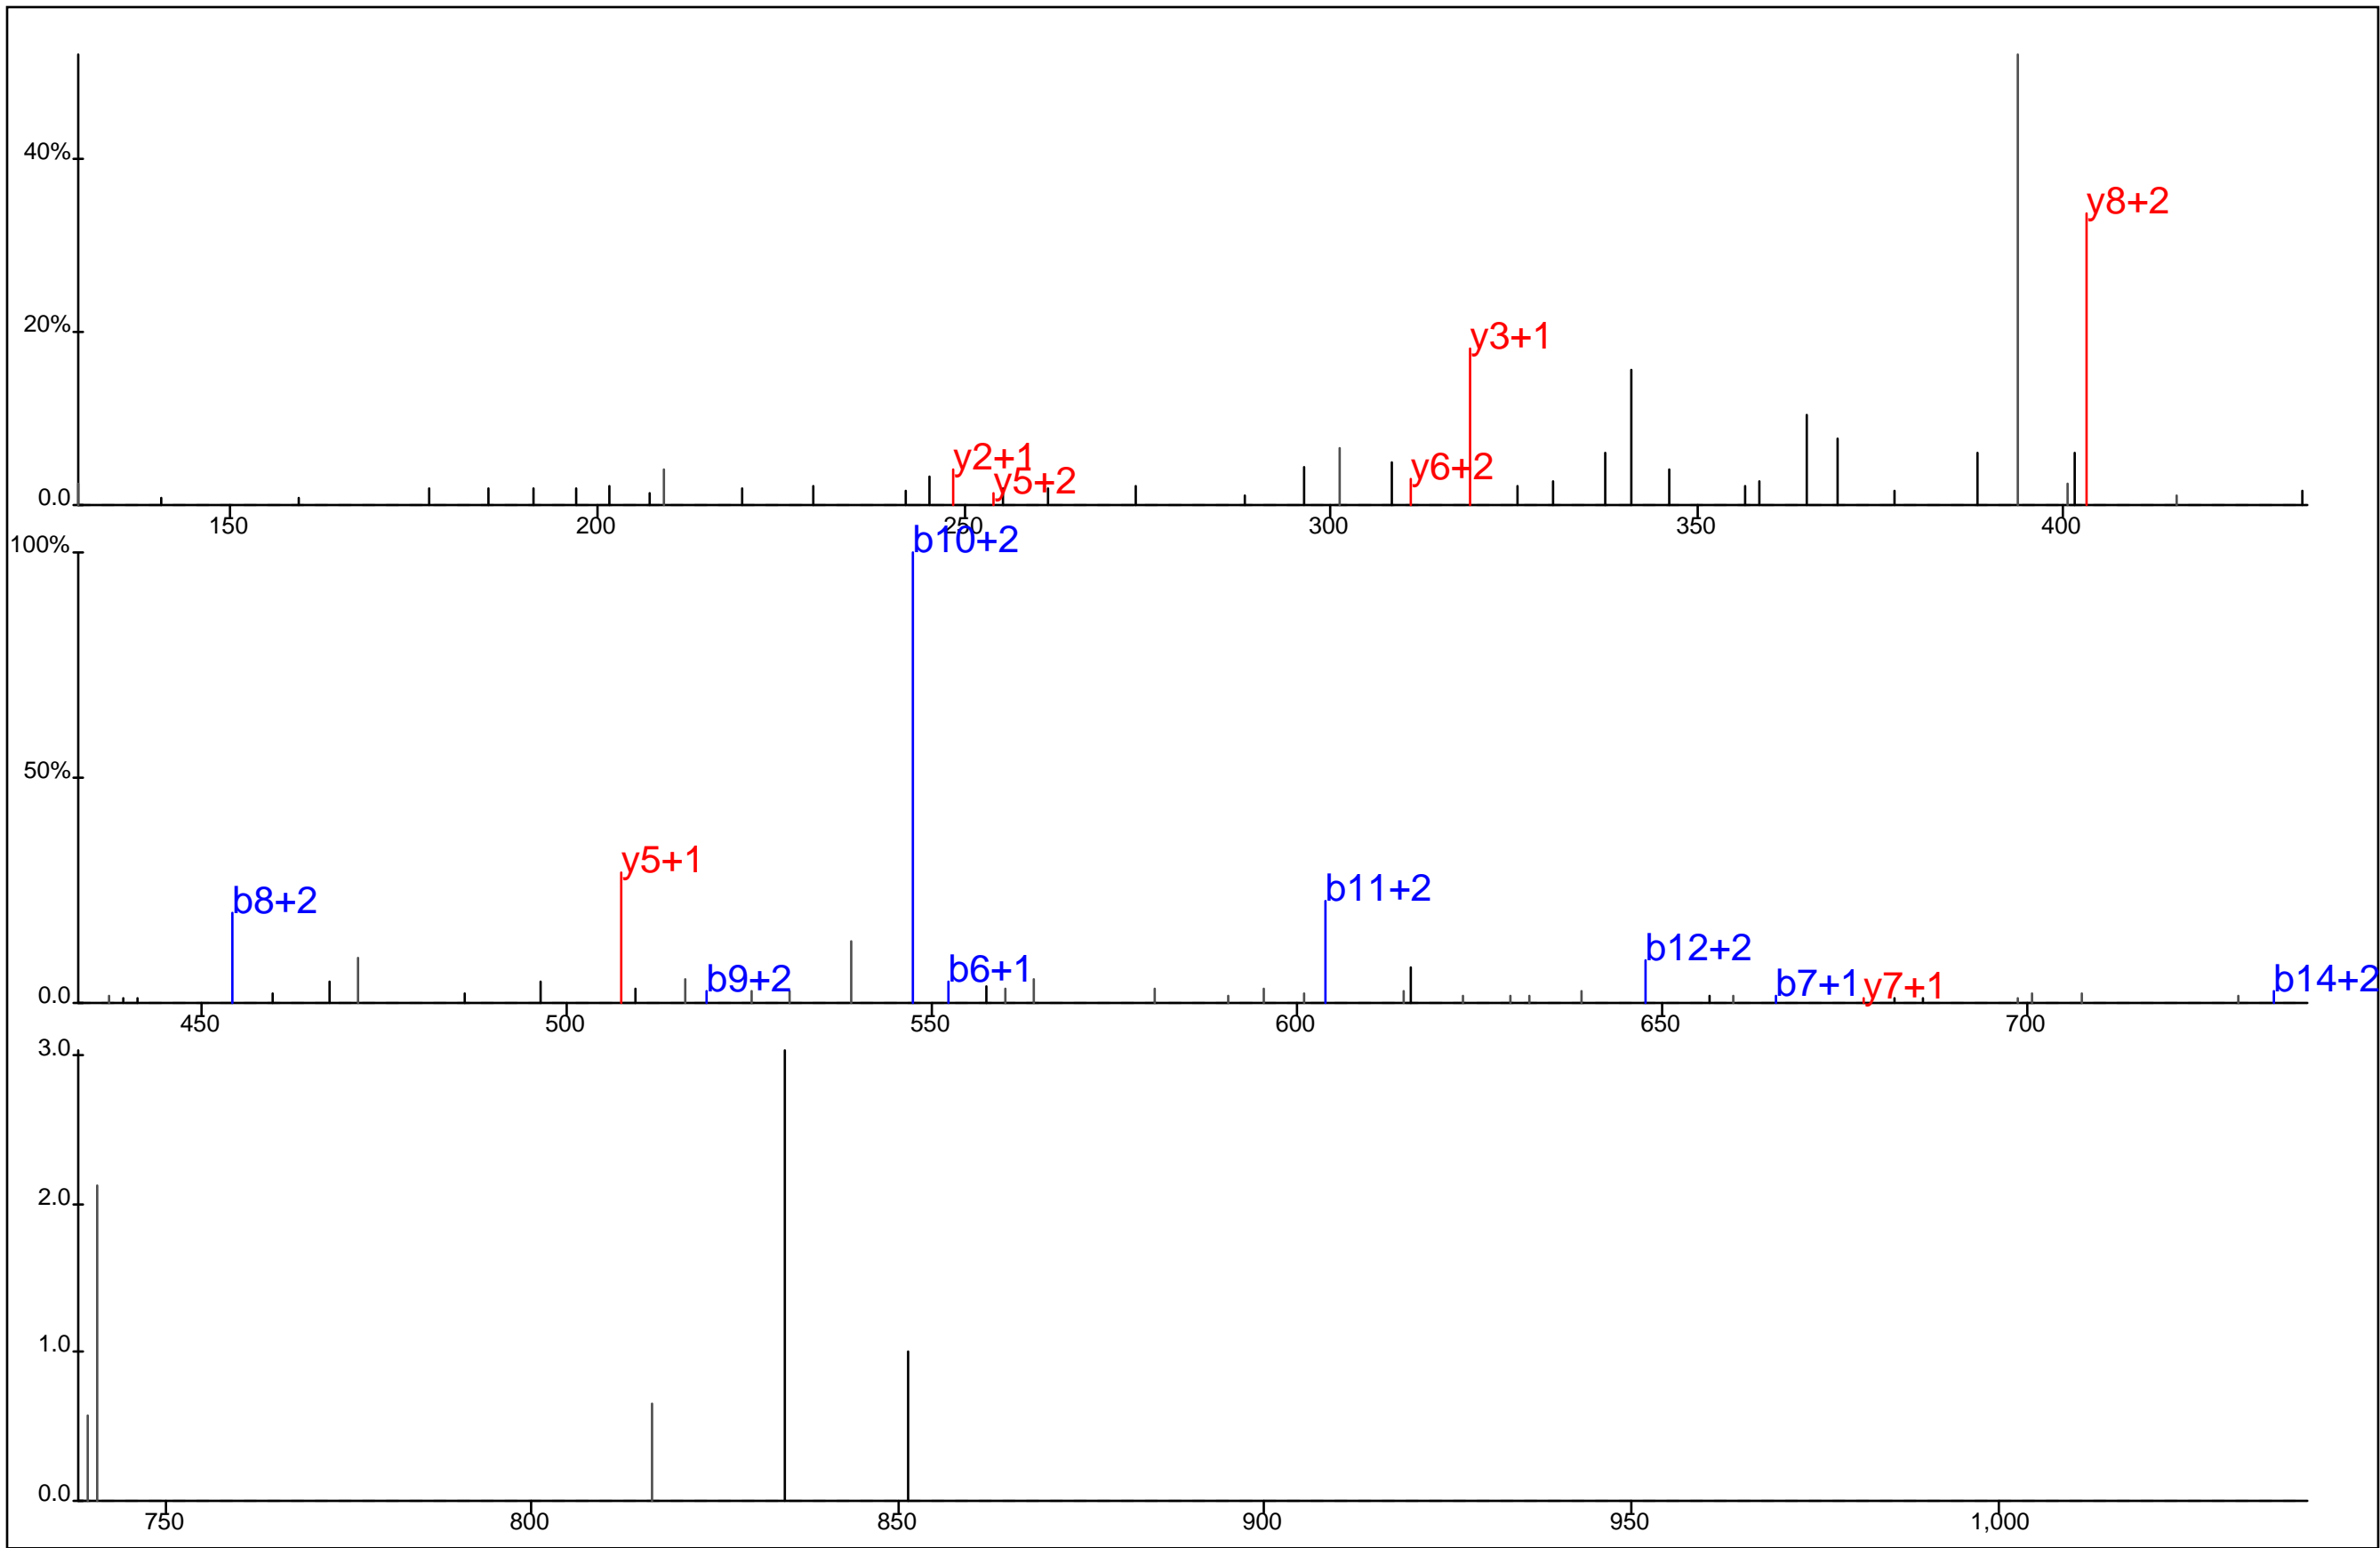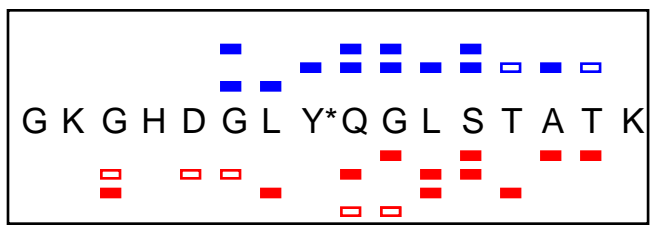

Protein Name: T cell antigen receptor, zeta  
 gi Accession: 0  
 Precursor Mass: 428.9559+4  
 Delta Mass: 0.918 ppm  
 XCorr: 26.93

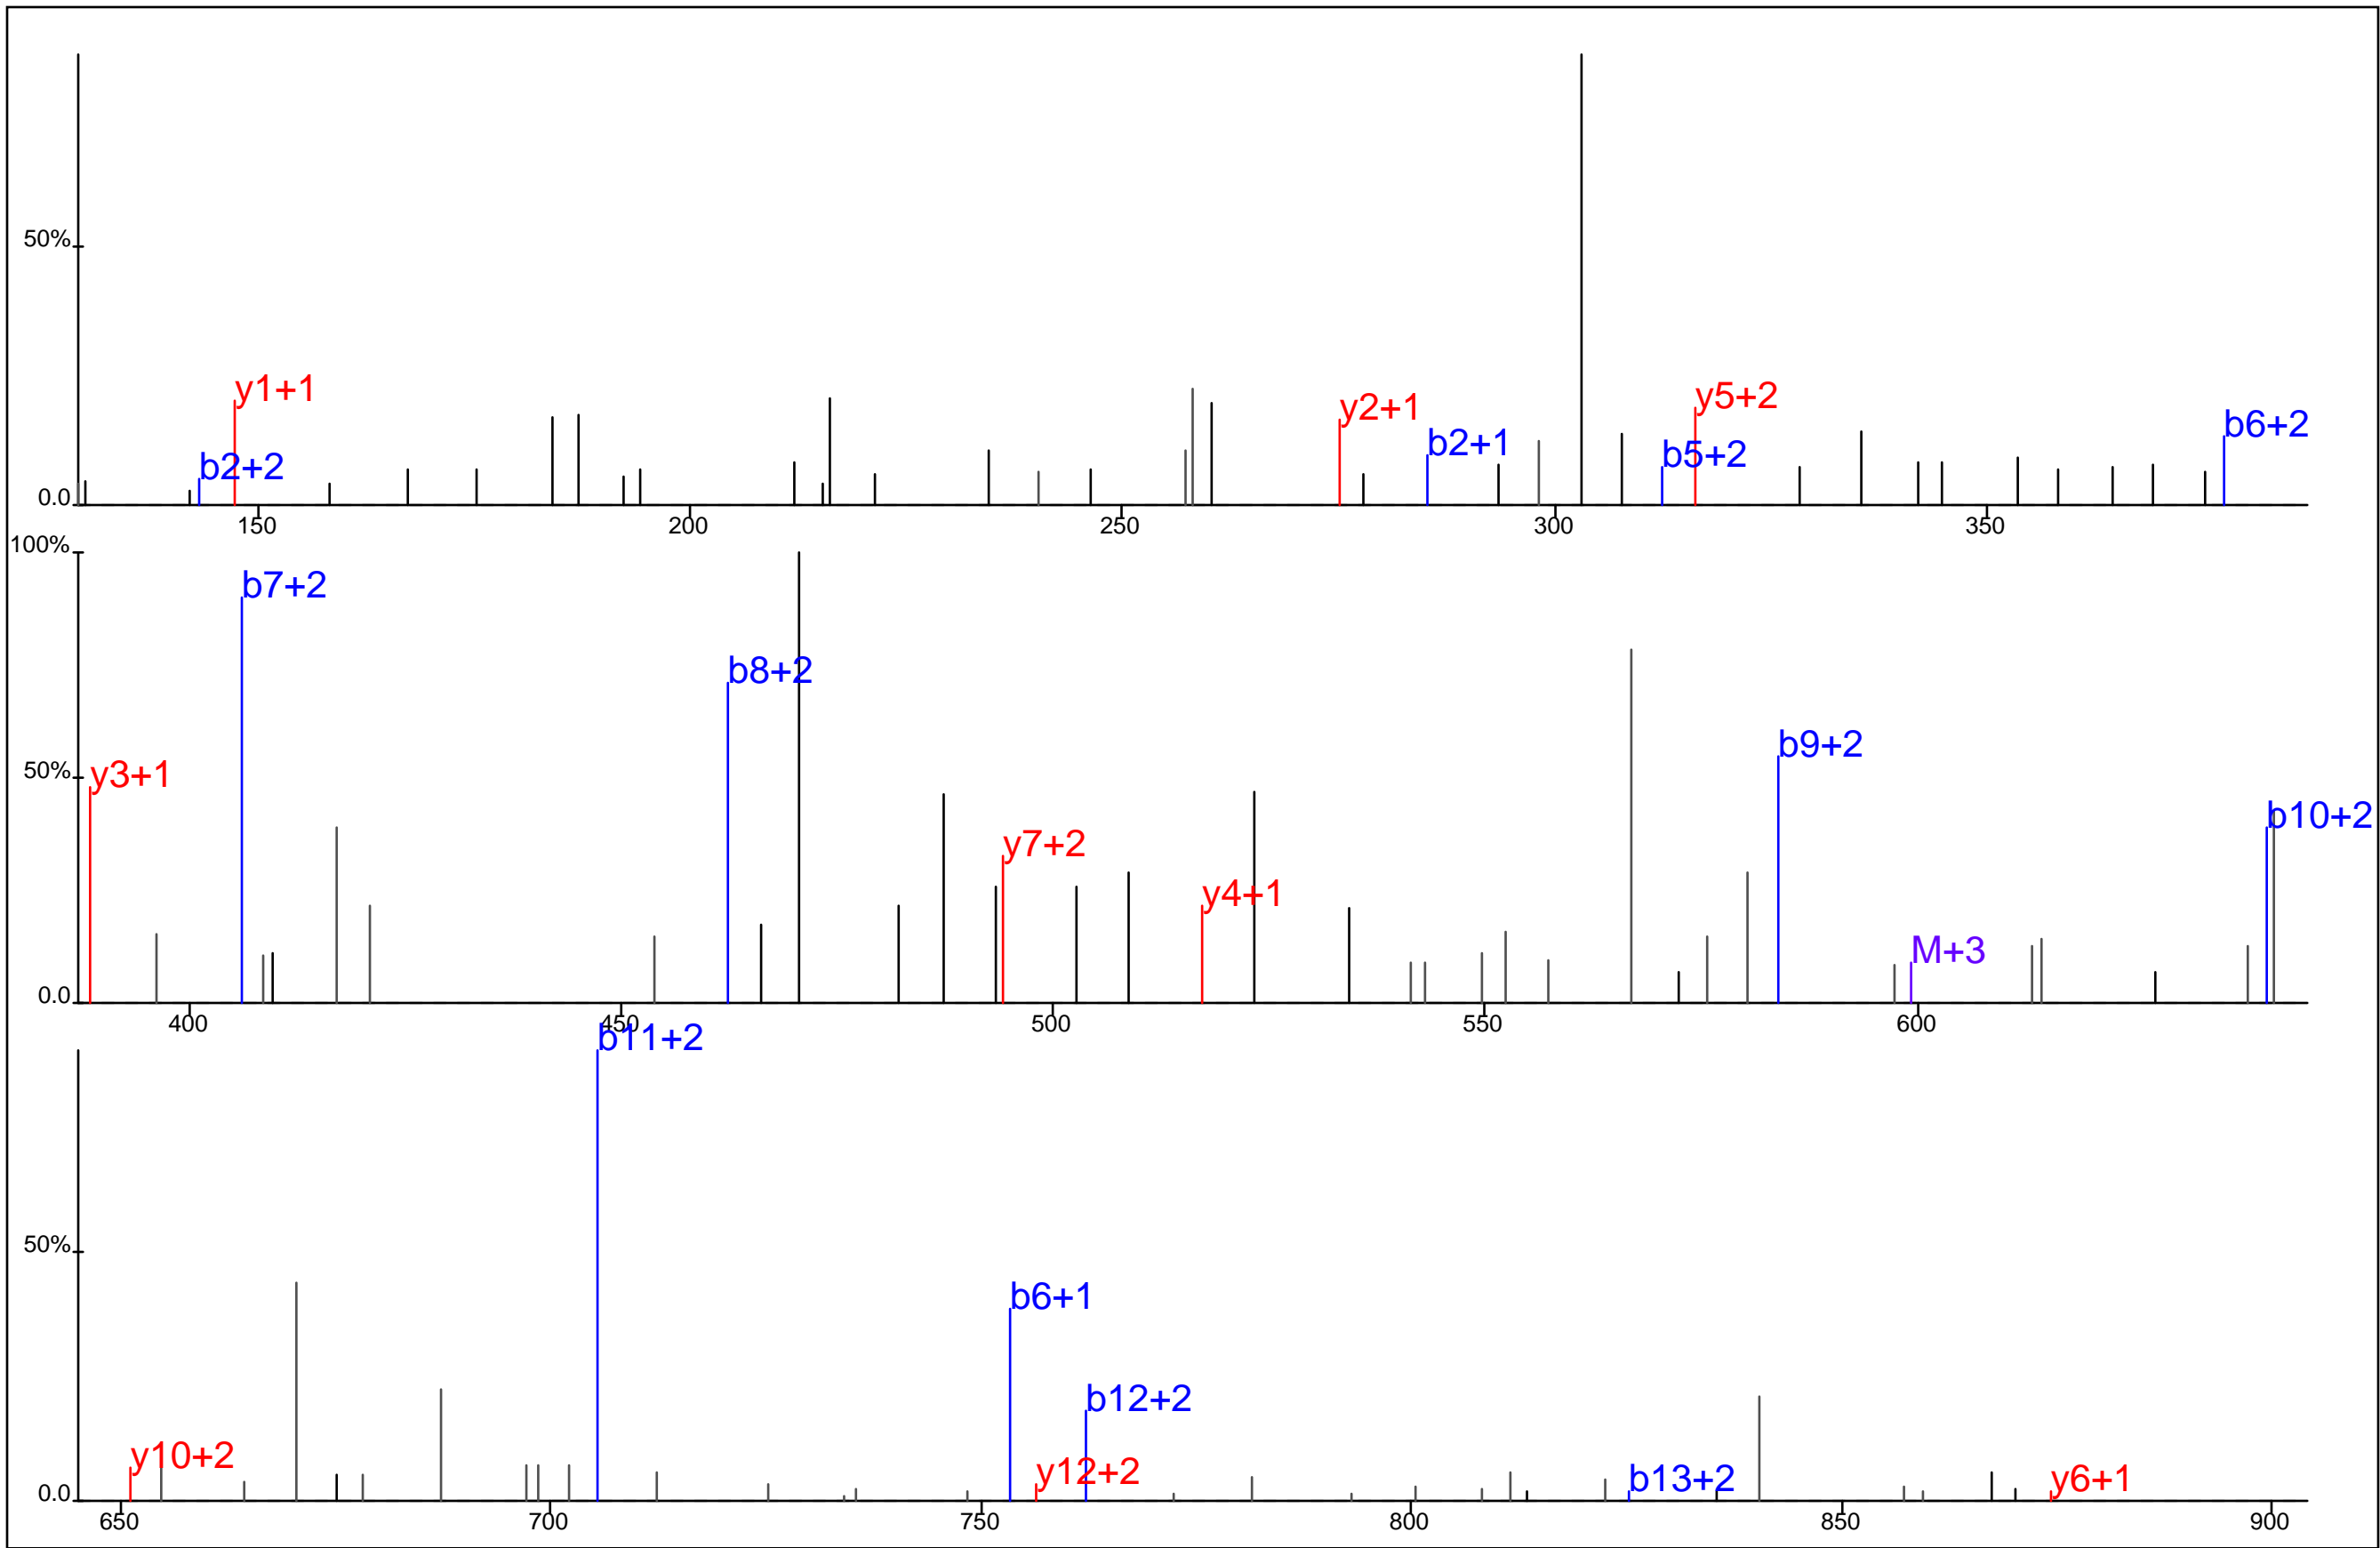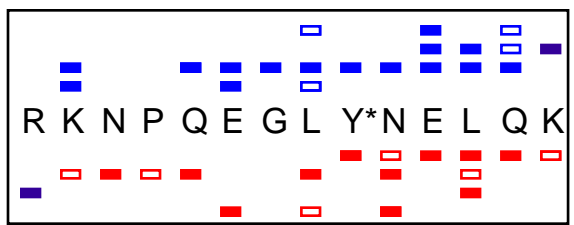

Protein Name: T cell antigen receptor, zeta  
 gi Accession: 0  
 Precursor Mass: 449.9719+4  
 Delta Mass: 1.761 ppm  
 XCorr: 20.67

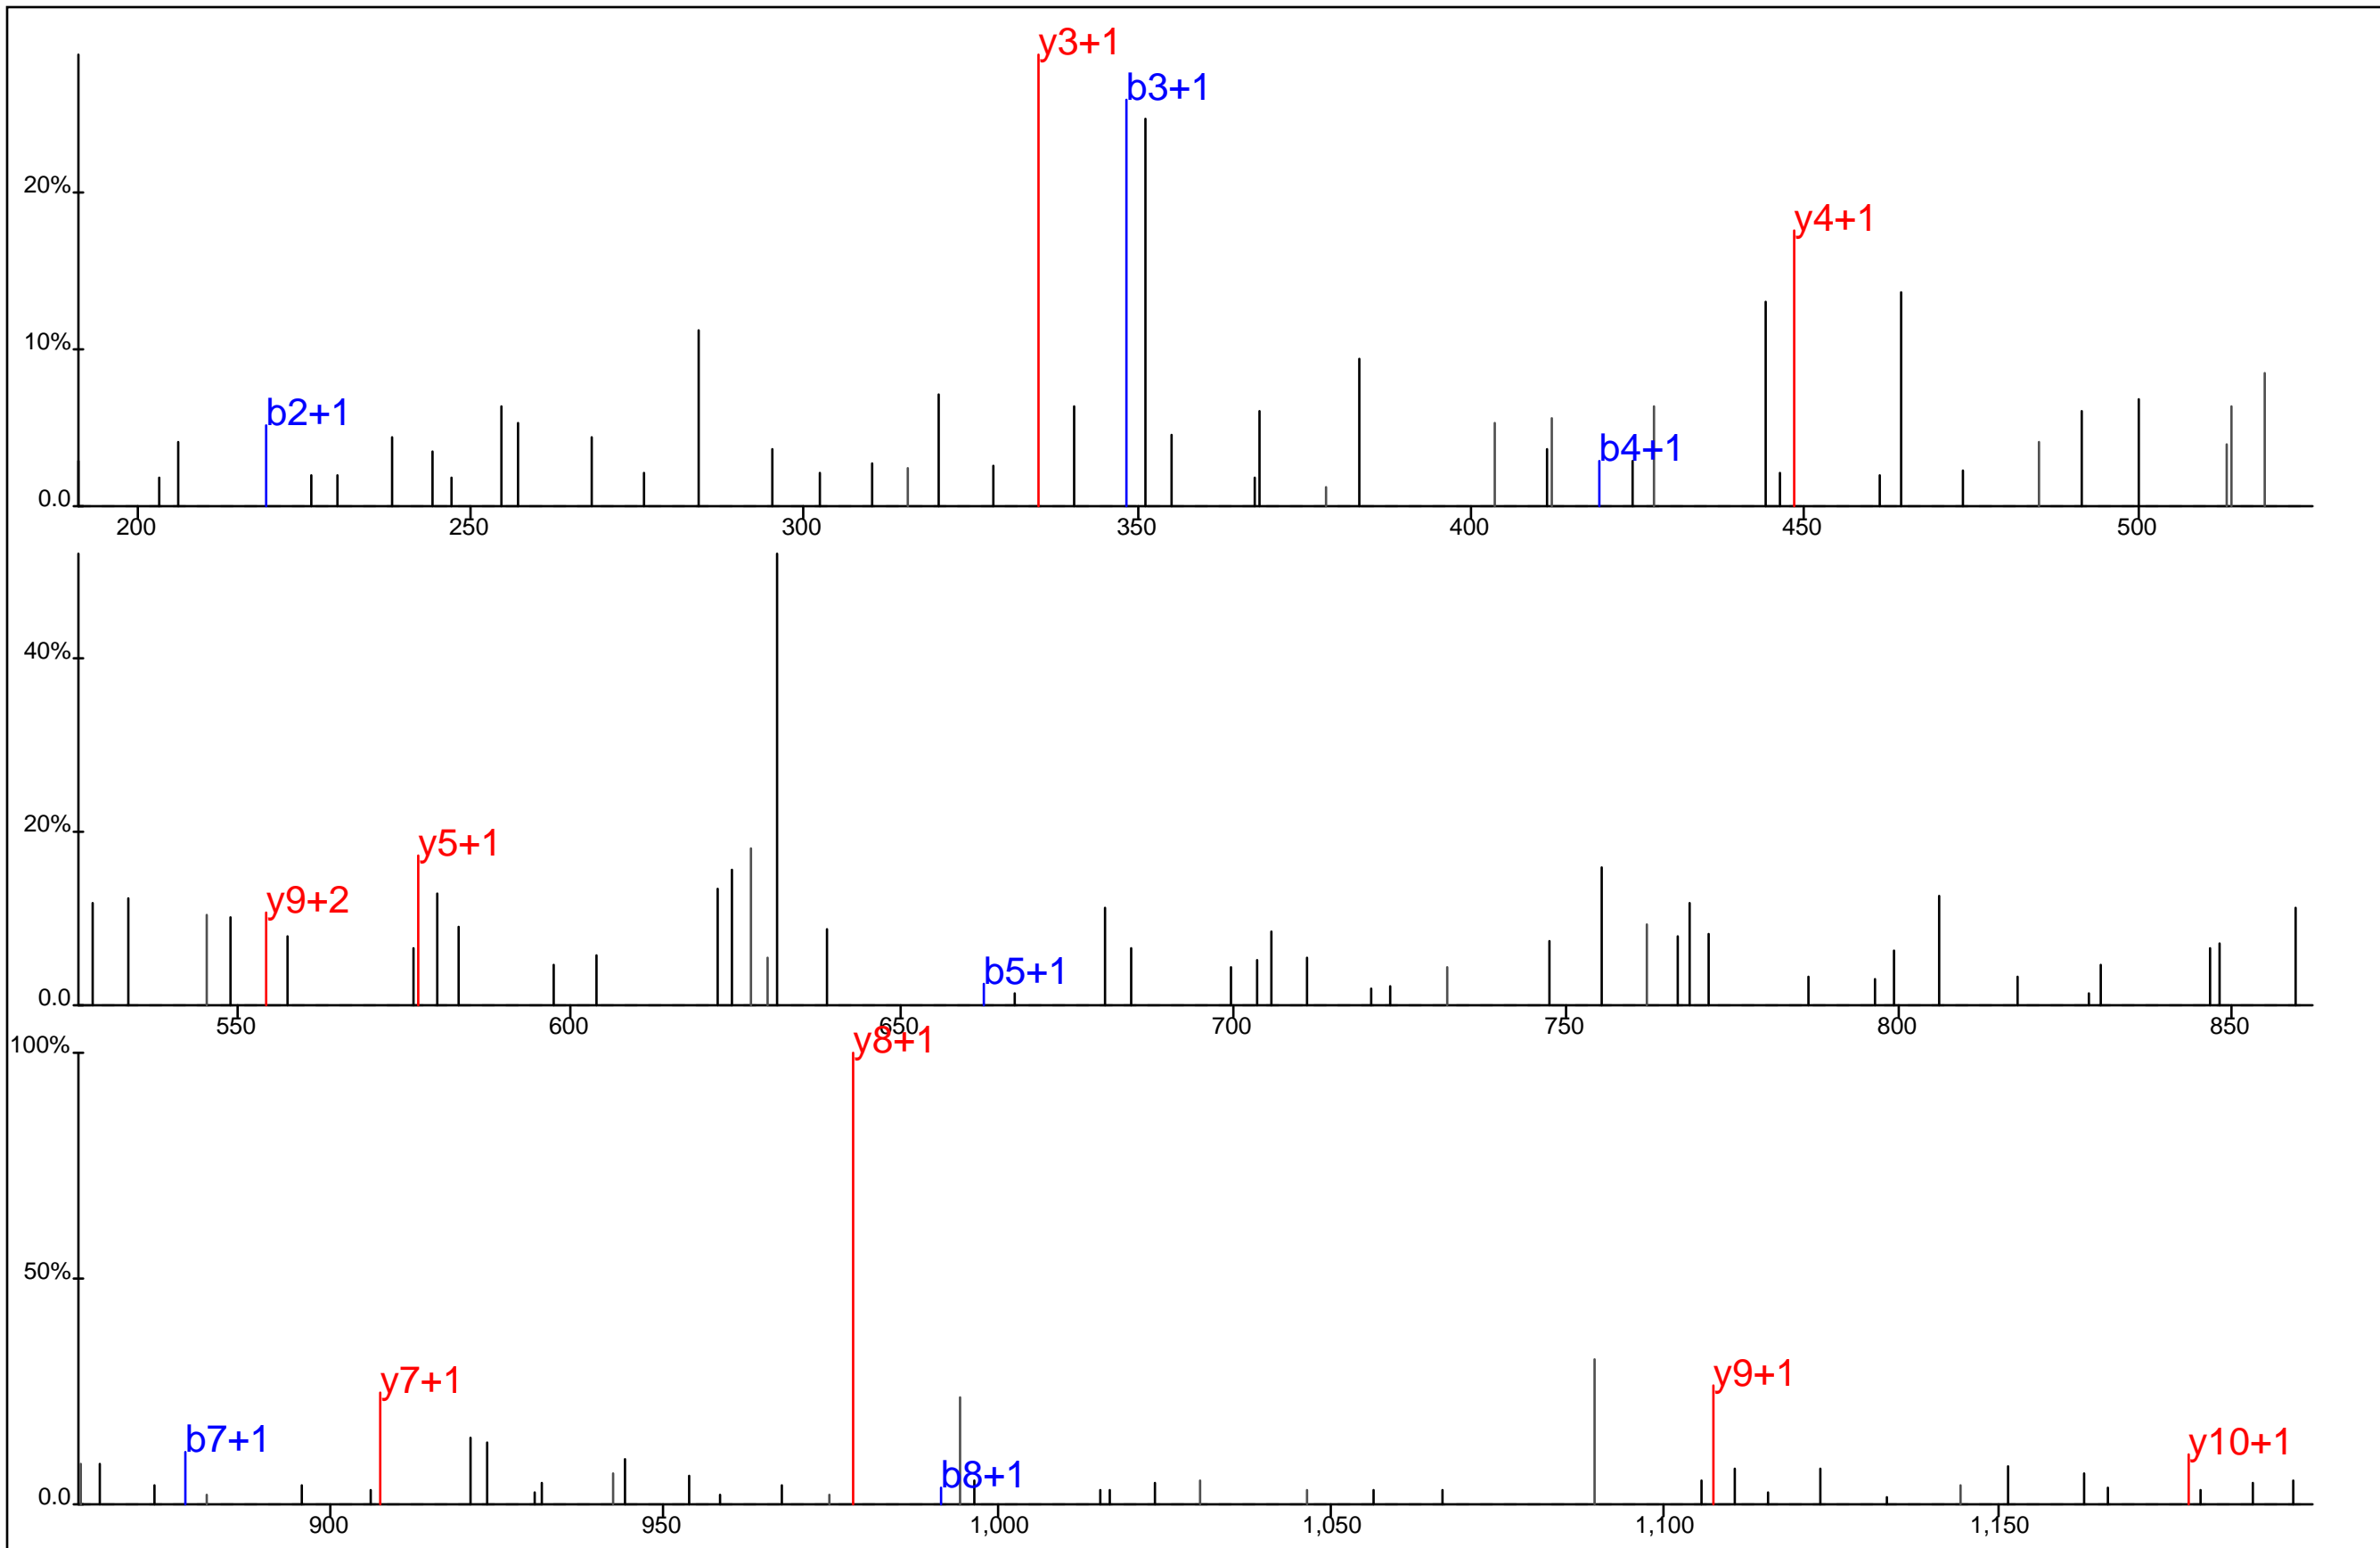

|    |   |   |   |    |   |   |   |   |   |   |
|----|---|---|---|----|---|---|---|---|---|---|
|    | ■ | ■ | ■ | ■  | ■ | ■ | ■ | ■ | ■ |   |
| M# | A | E | A | Y* | S | E | I | G | M | K |
|    | □ | □ | □ | □  | □ | □ | □ | □ | □ |   |

Protein Name: T cell antigen receptor, zeta  
 gi Accession: 0  
 Precursor Mass: 663.2623+2  
 Delta Mass: 1.500 ppm  
 XCorr: 36.42

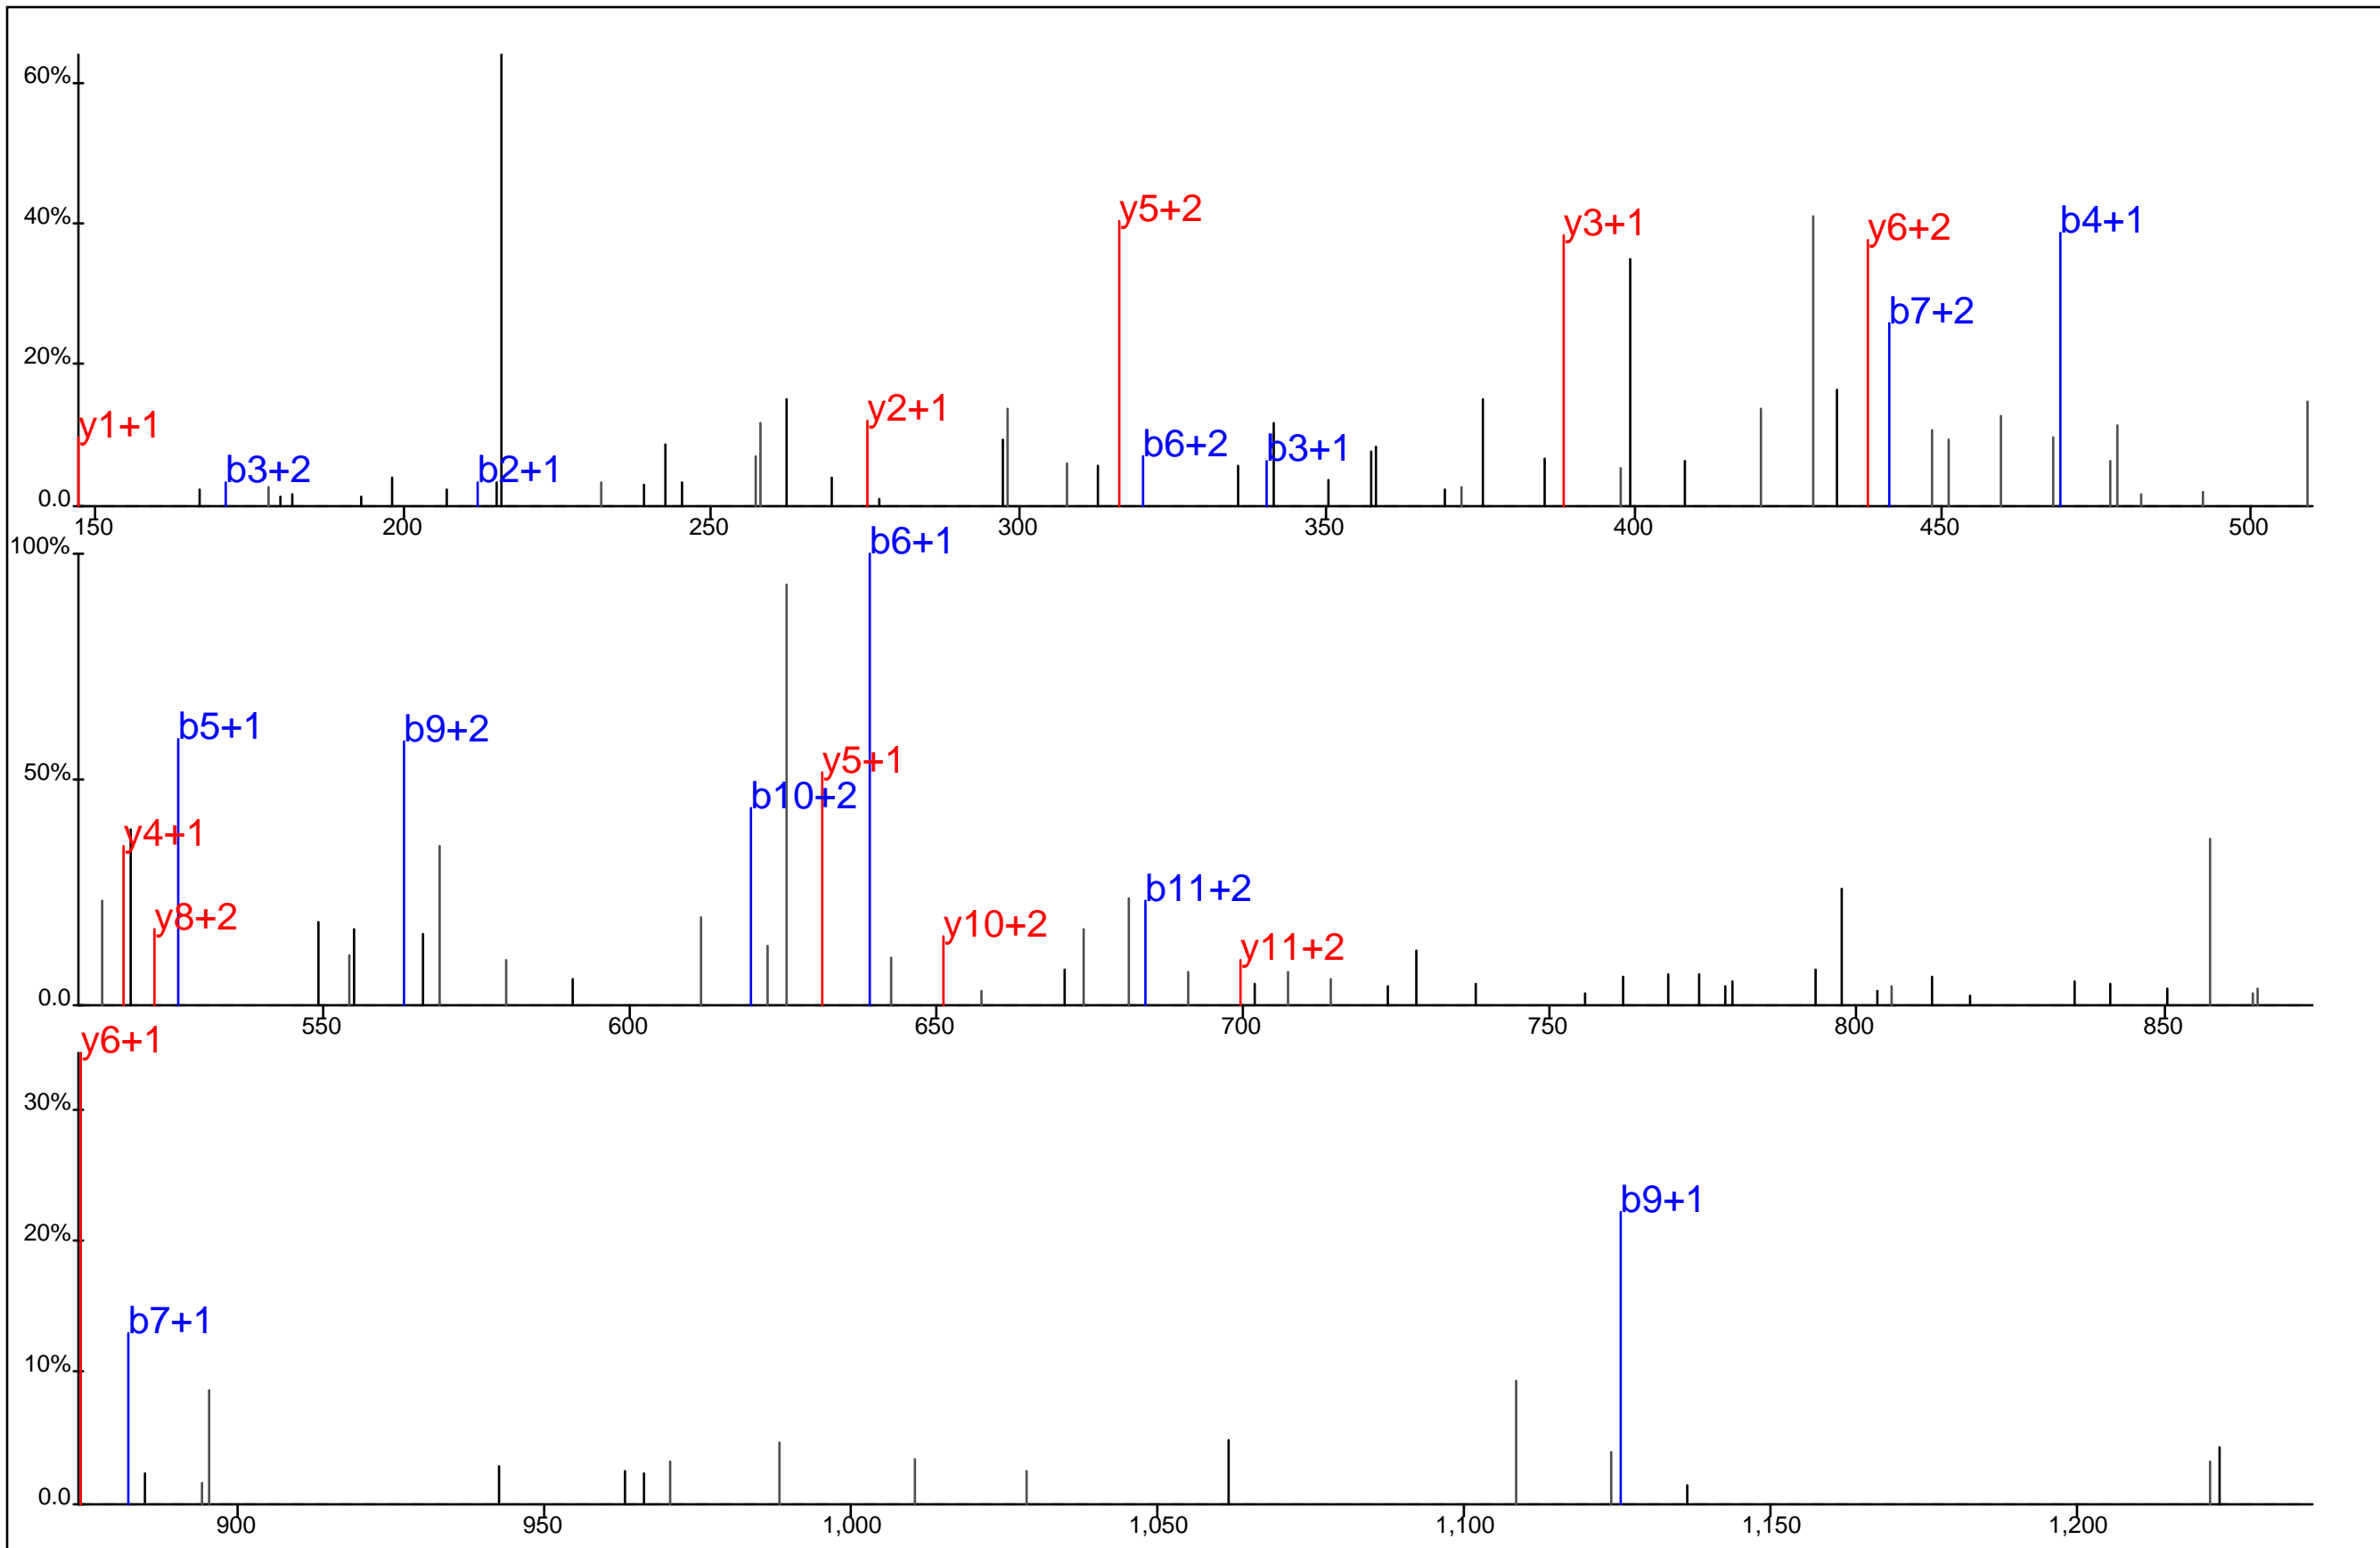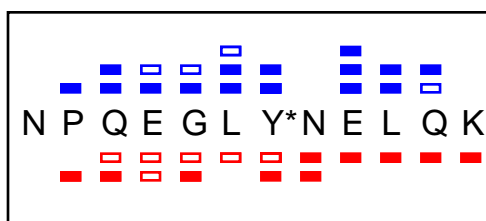

Protein Name: T cell antigen receptor, zeta  
 gi Accession: 0  
 Precursor Mass: 504.8961+3  
 Delta Mass: 0.549 ppm  
 XCorr: 29.09

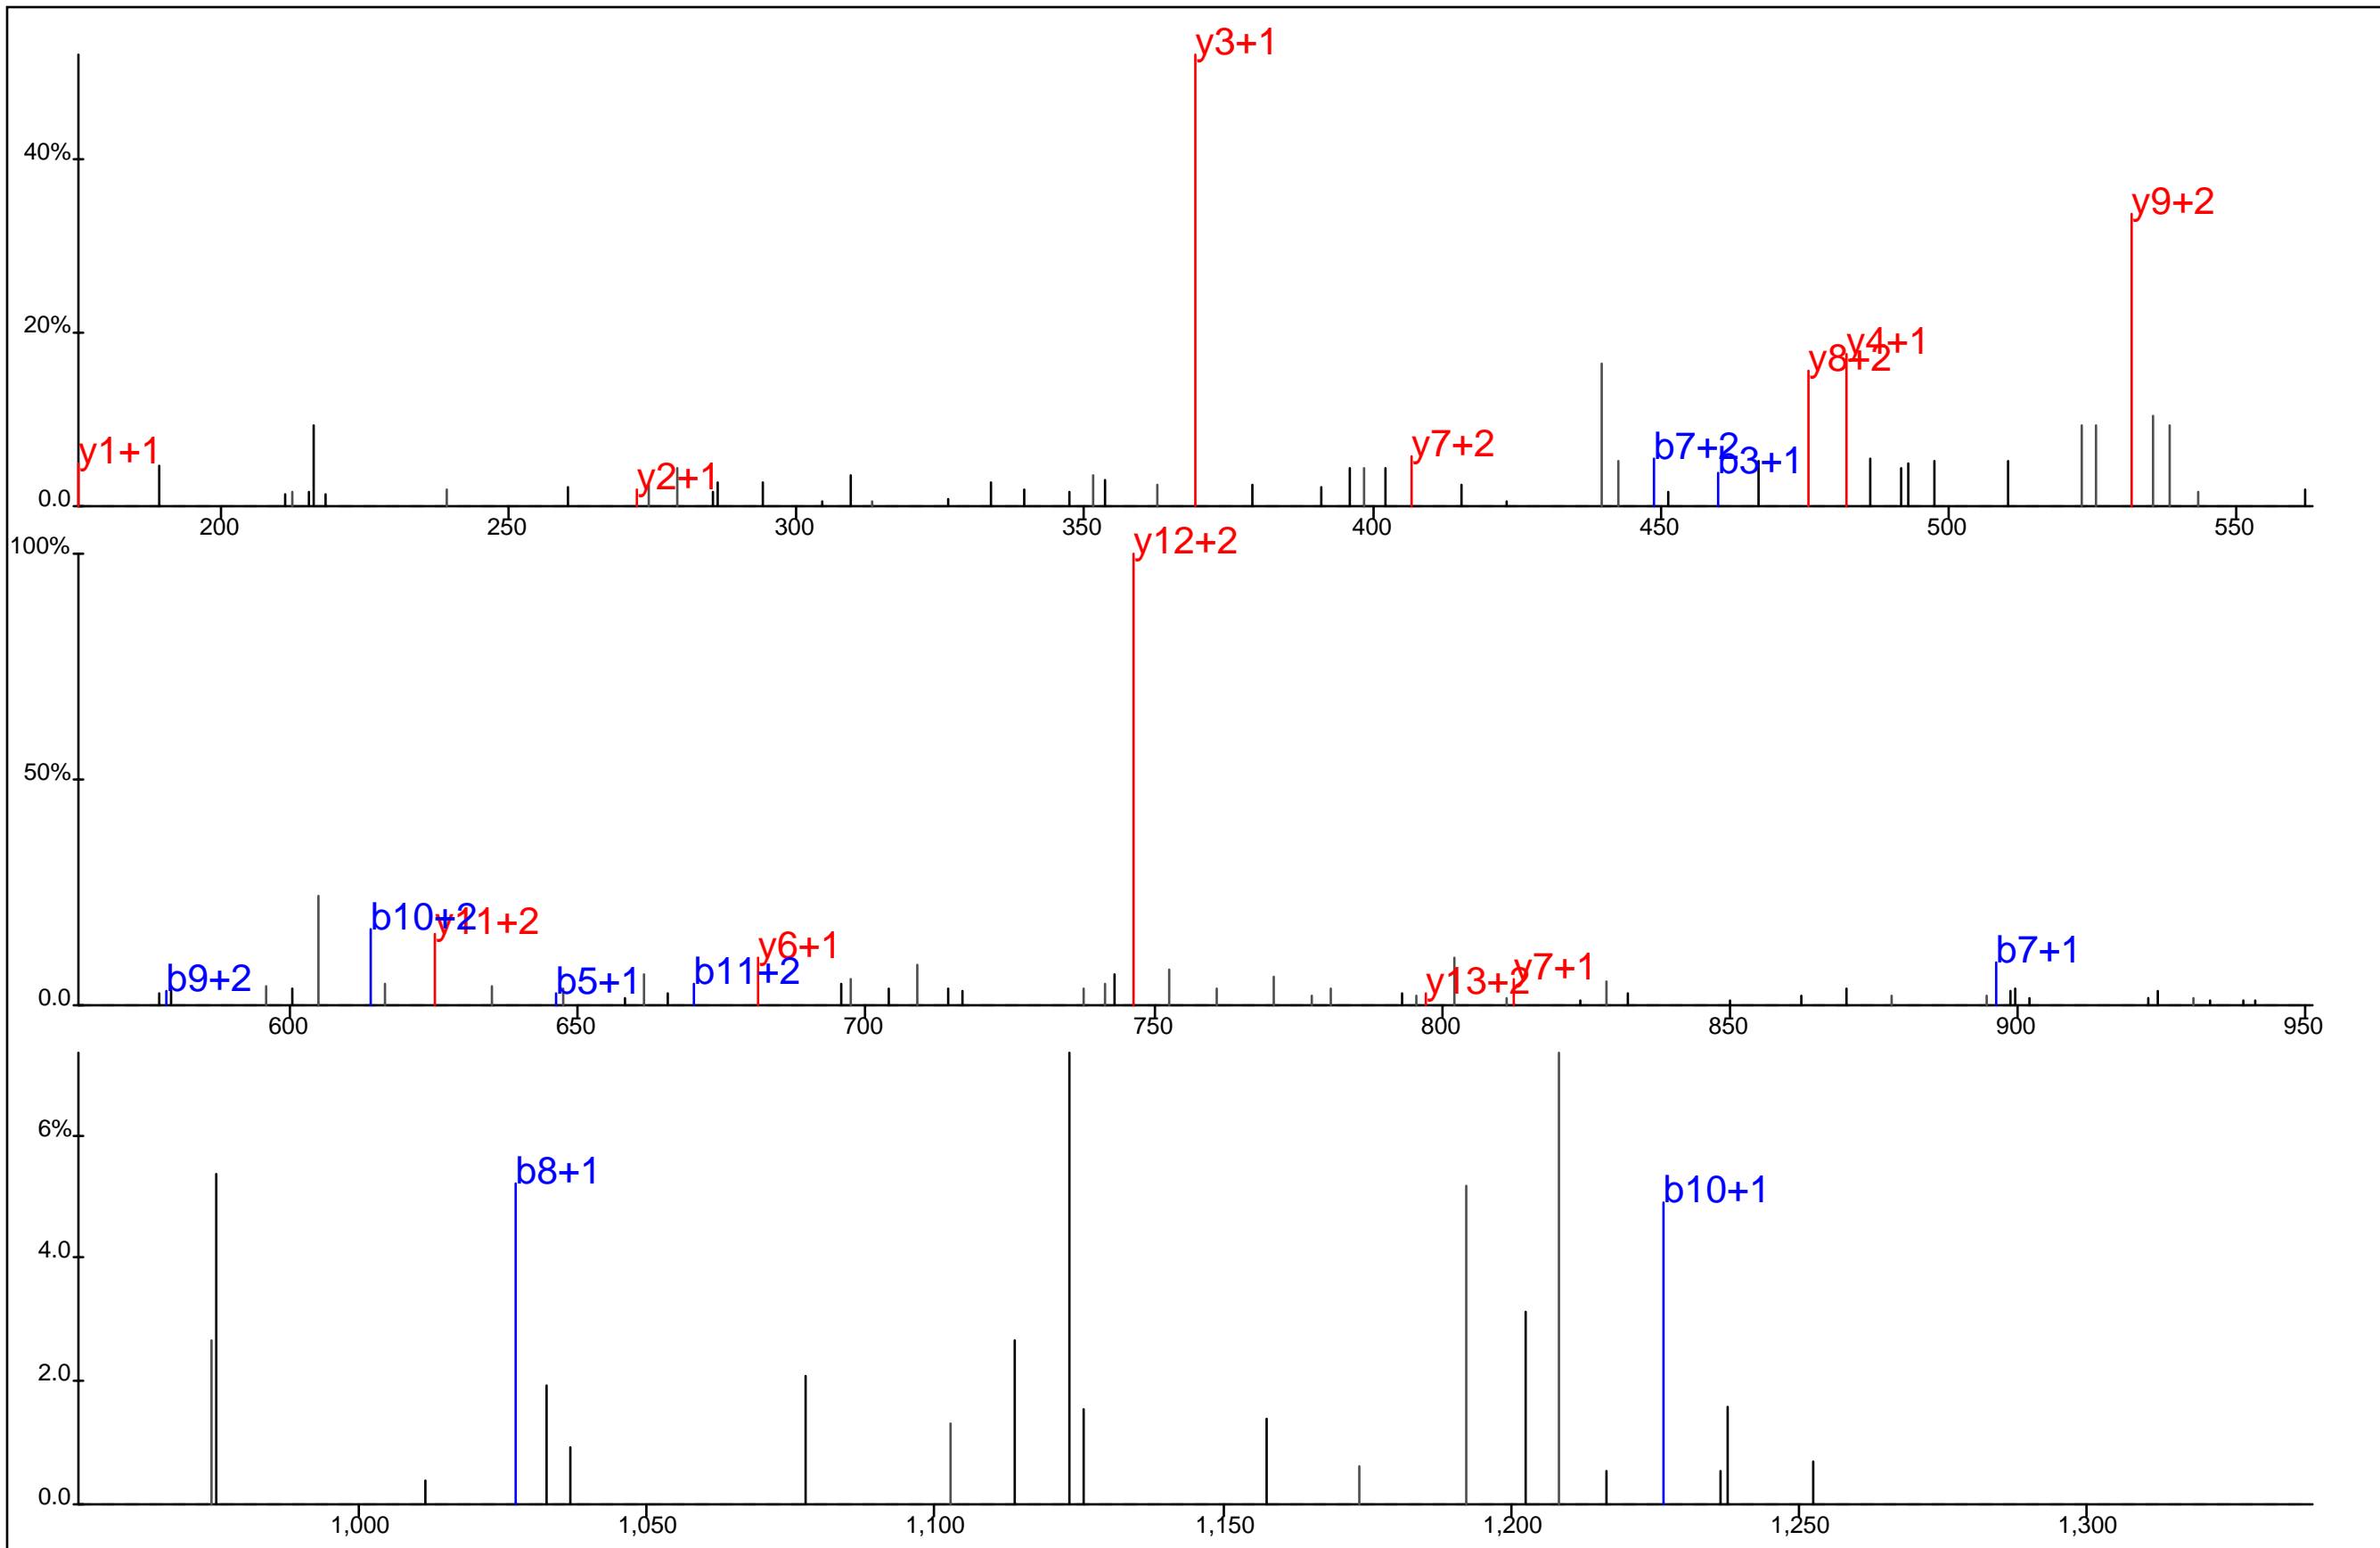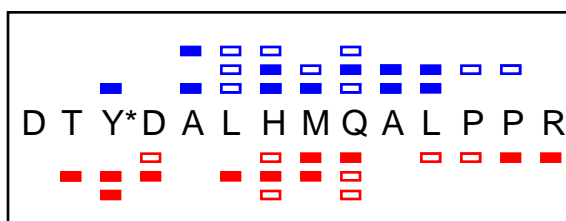

Protein Name: T cell antigen receptor, zeta  
 gi Accession: 0  
 Precursor Mass: 569.9228+3  
 Delta Mass: 1.283 ppm  
 XCorr: 34.82



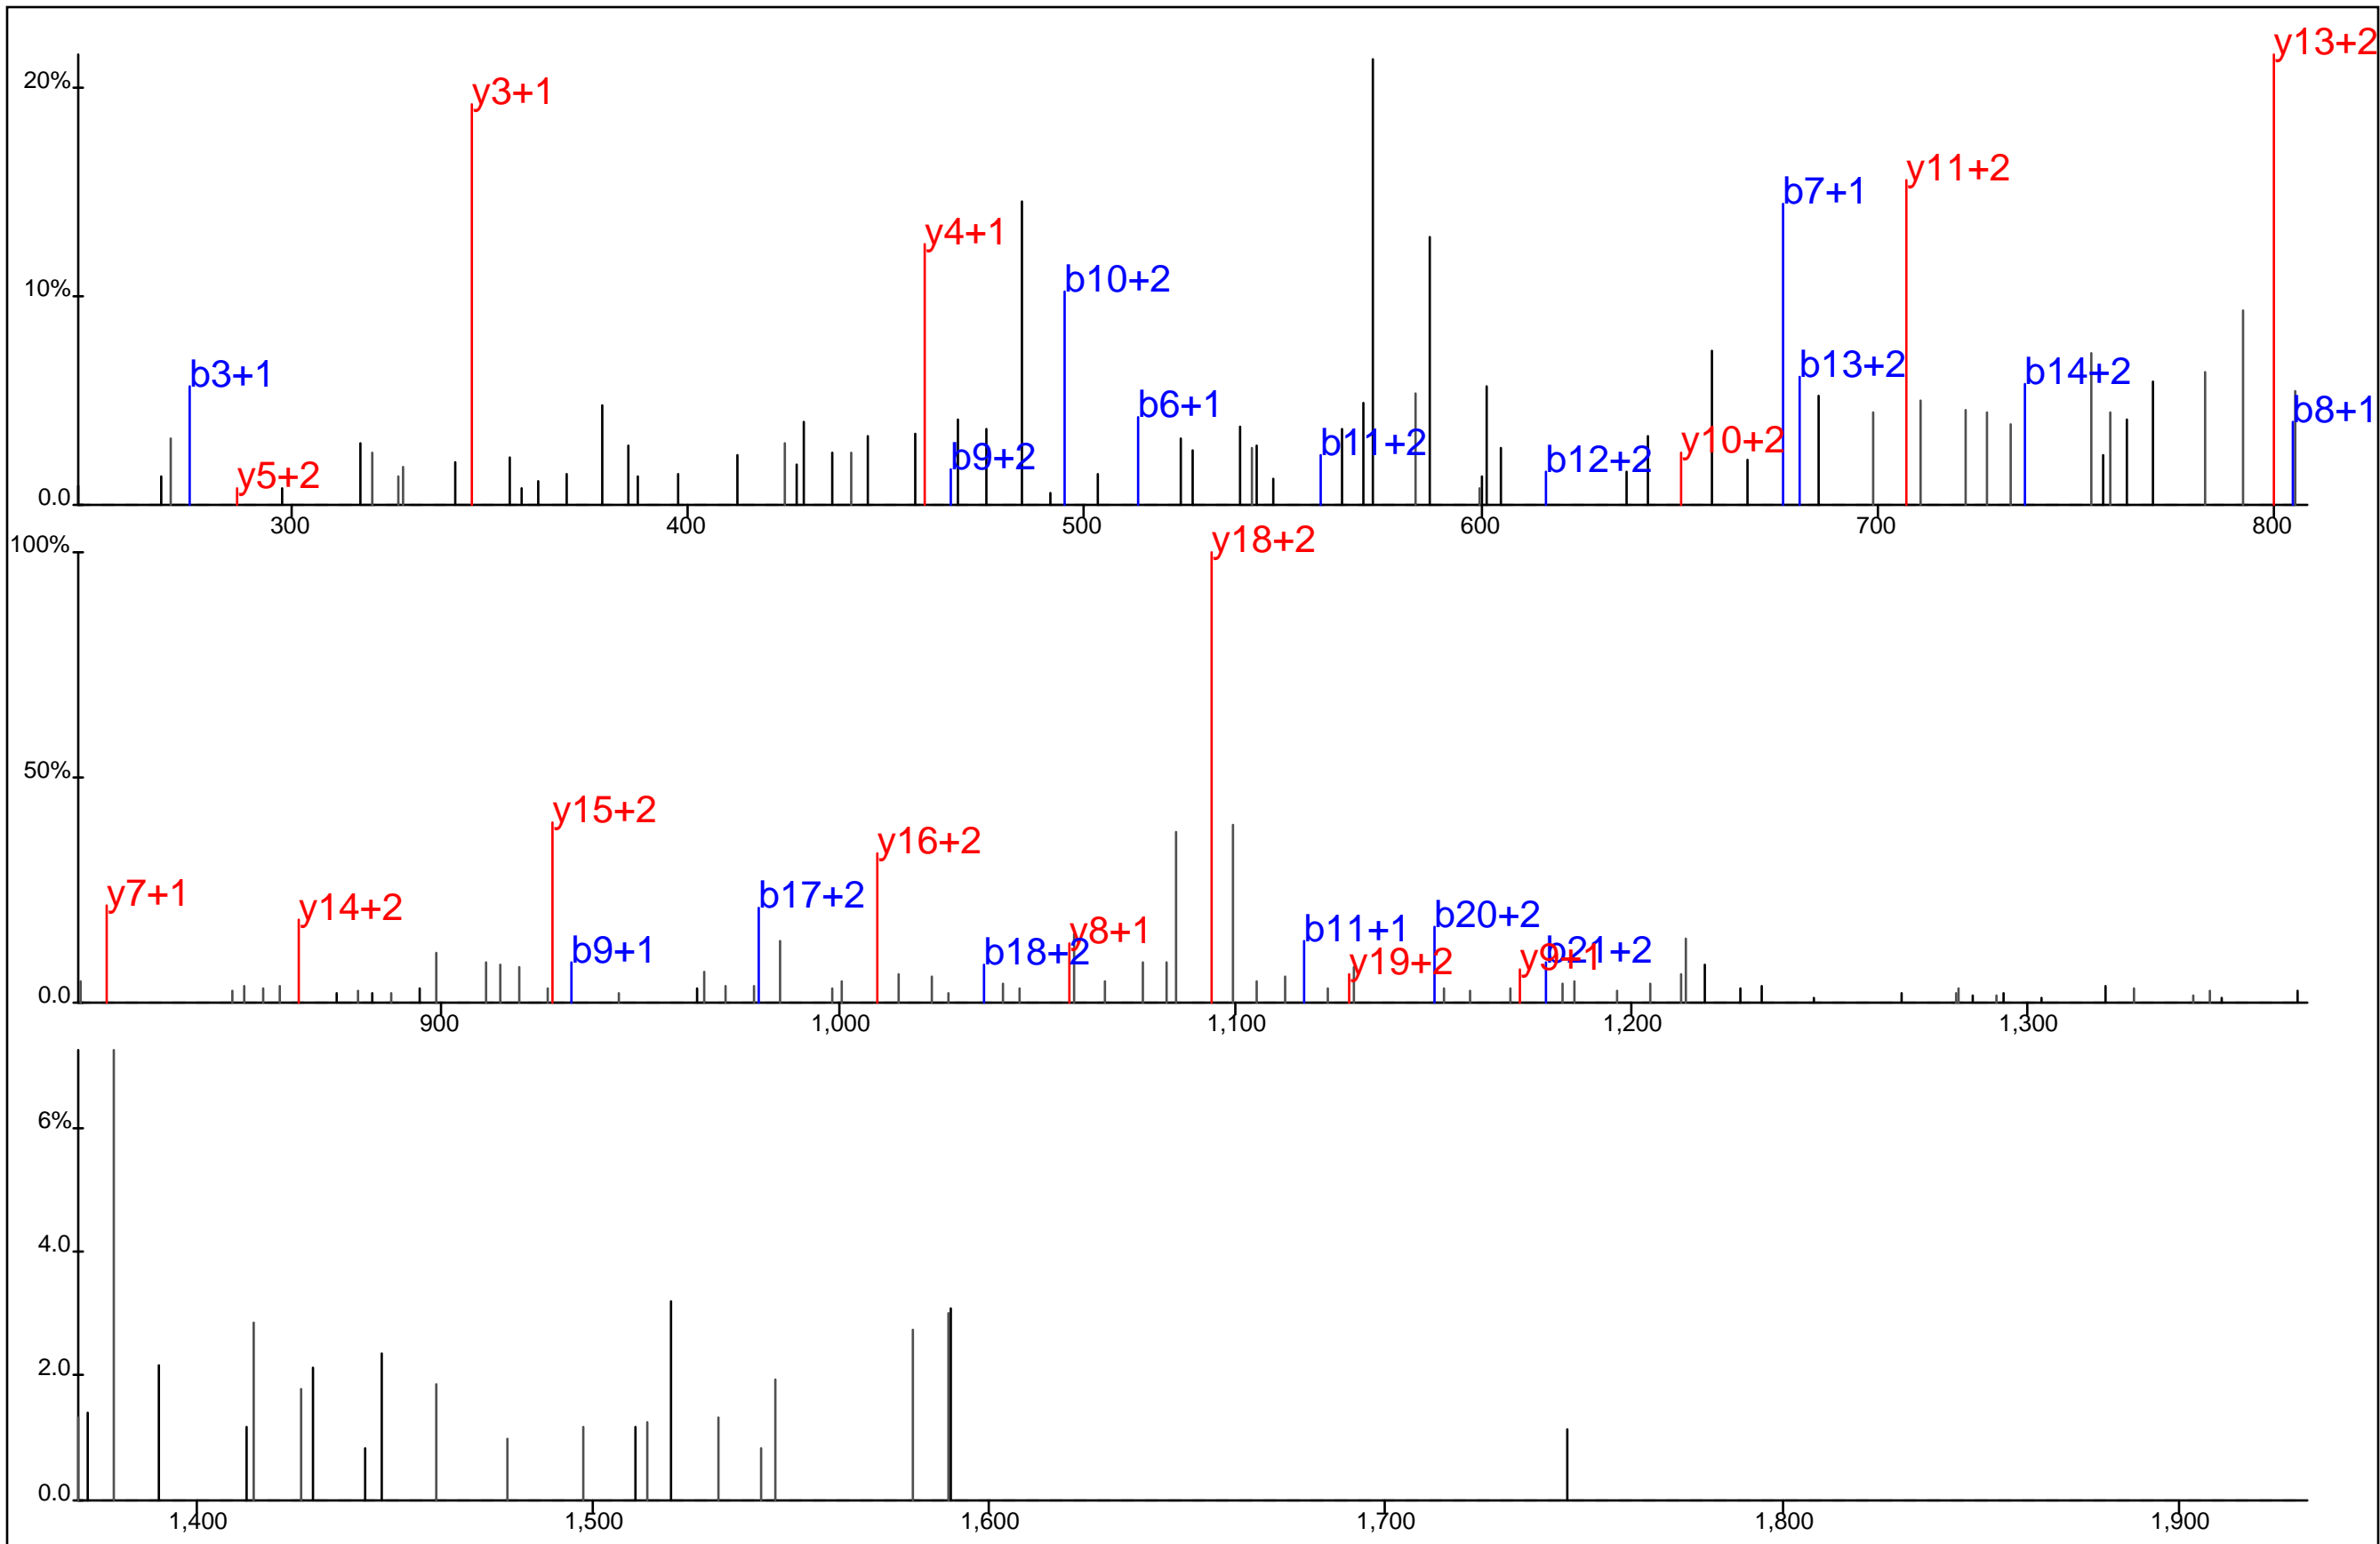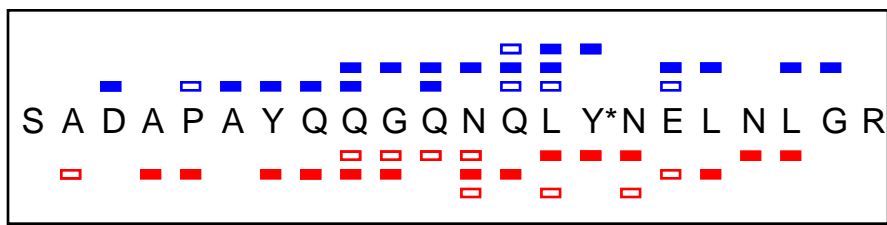

Protein Name: T cell antigen receptor, zeta  
 gi Accession: 0  
 Precursor Mass: 844.0497+3  
 Delta Mass: 0.504 ppm  
 XCorr: 37.2

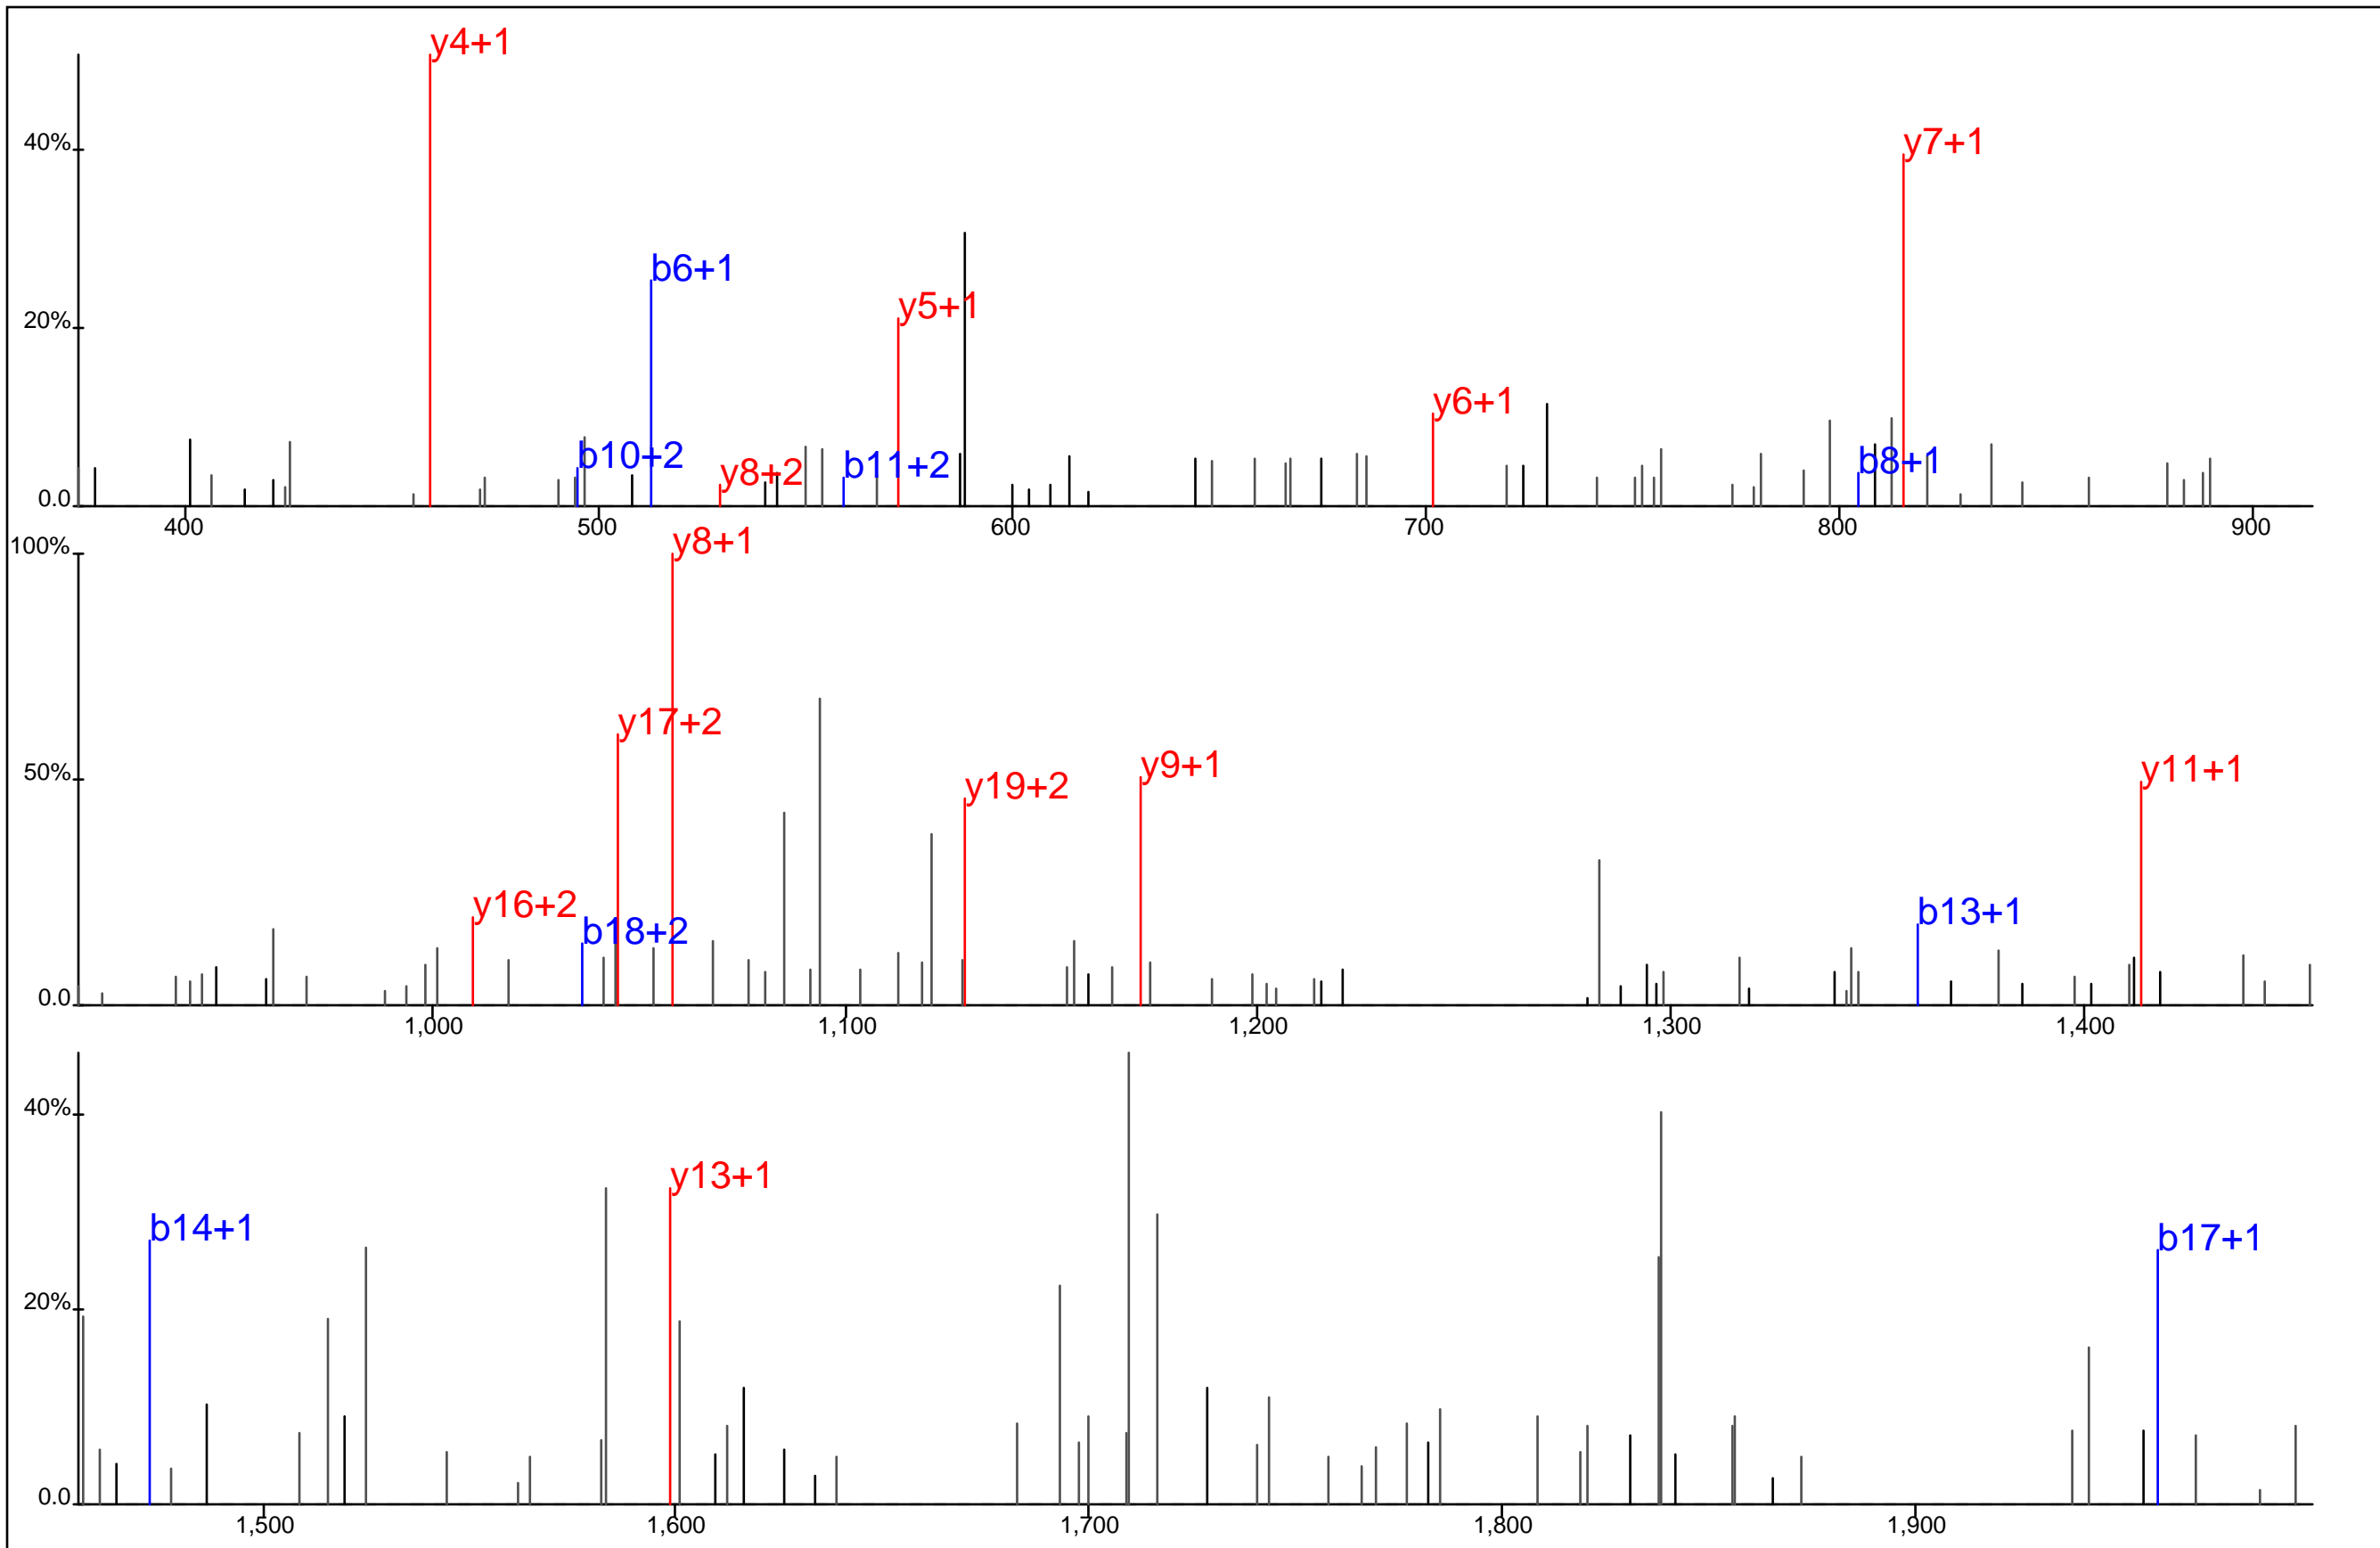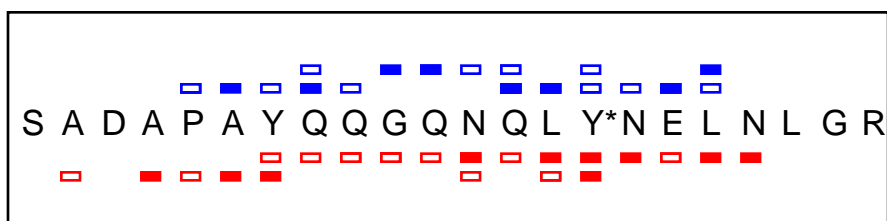

Protein Name: T cell antigen receptor, zeta  
 gi Accession: 0  
 Precursor Mass: 1,265.5703+2  
 Delta Mass: 0.957 ppm  
 XCorr: 33.62

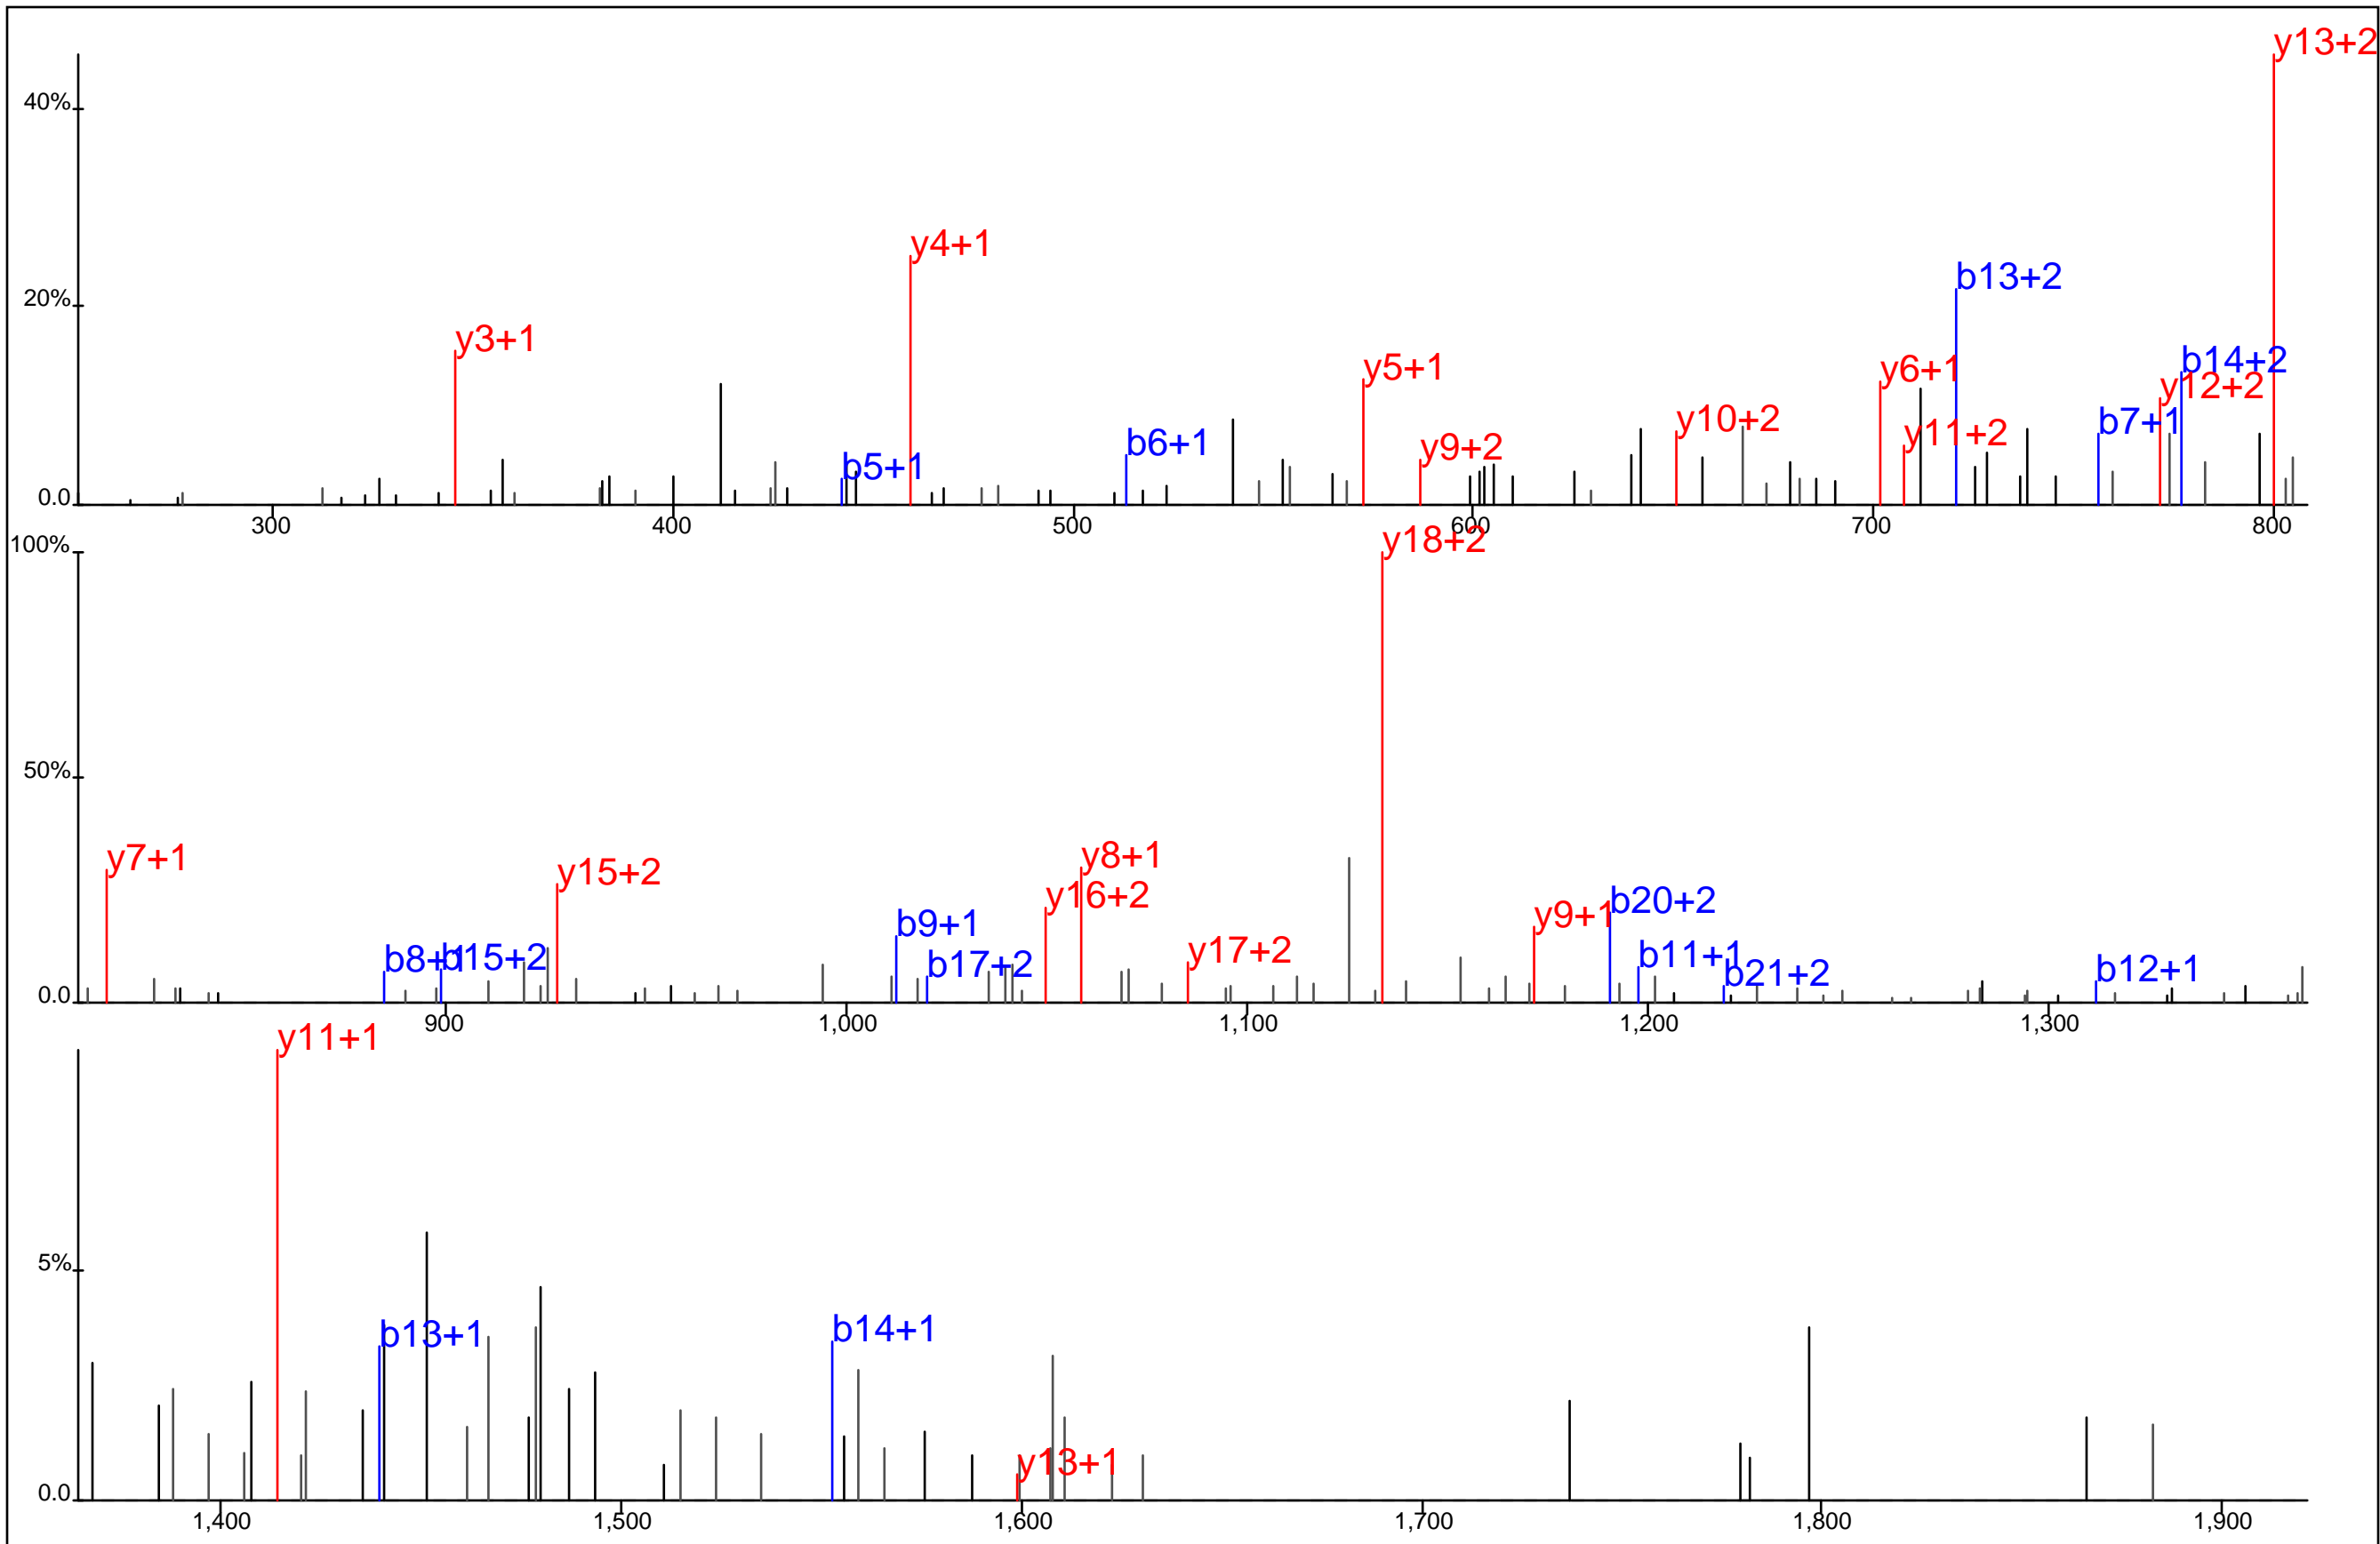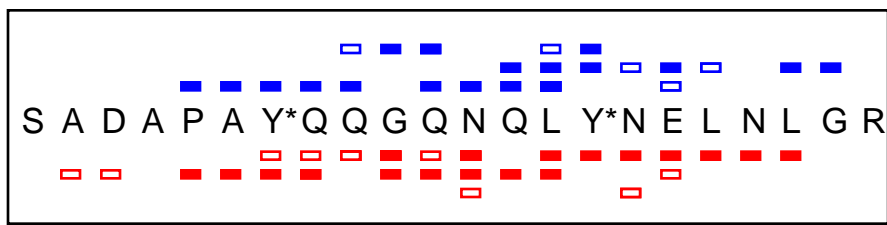

Protein Name: T cell antigen receptor, zeta  
 gi Accession: 0  
 Precursor Mass: 870.7075+3  
 Delta Mass: 2.267 ppm  
 XCorr: 42.07

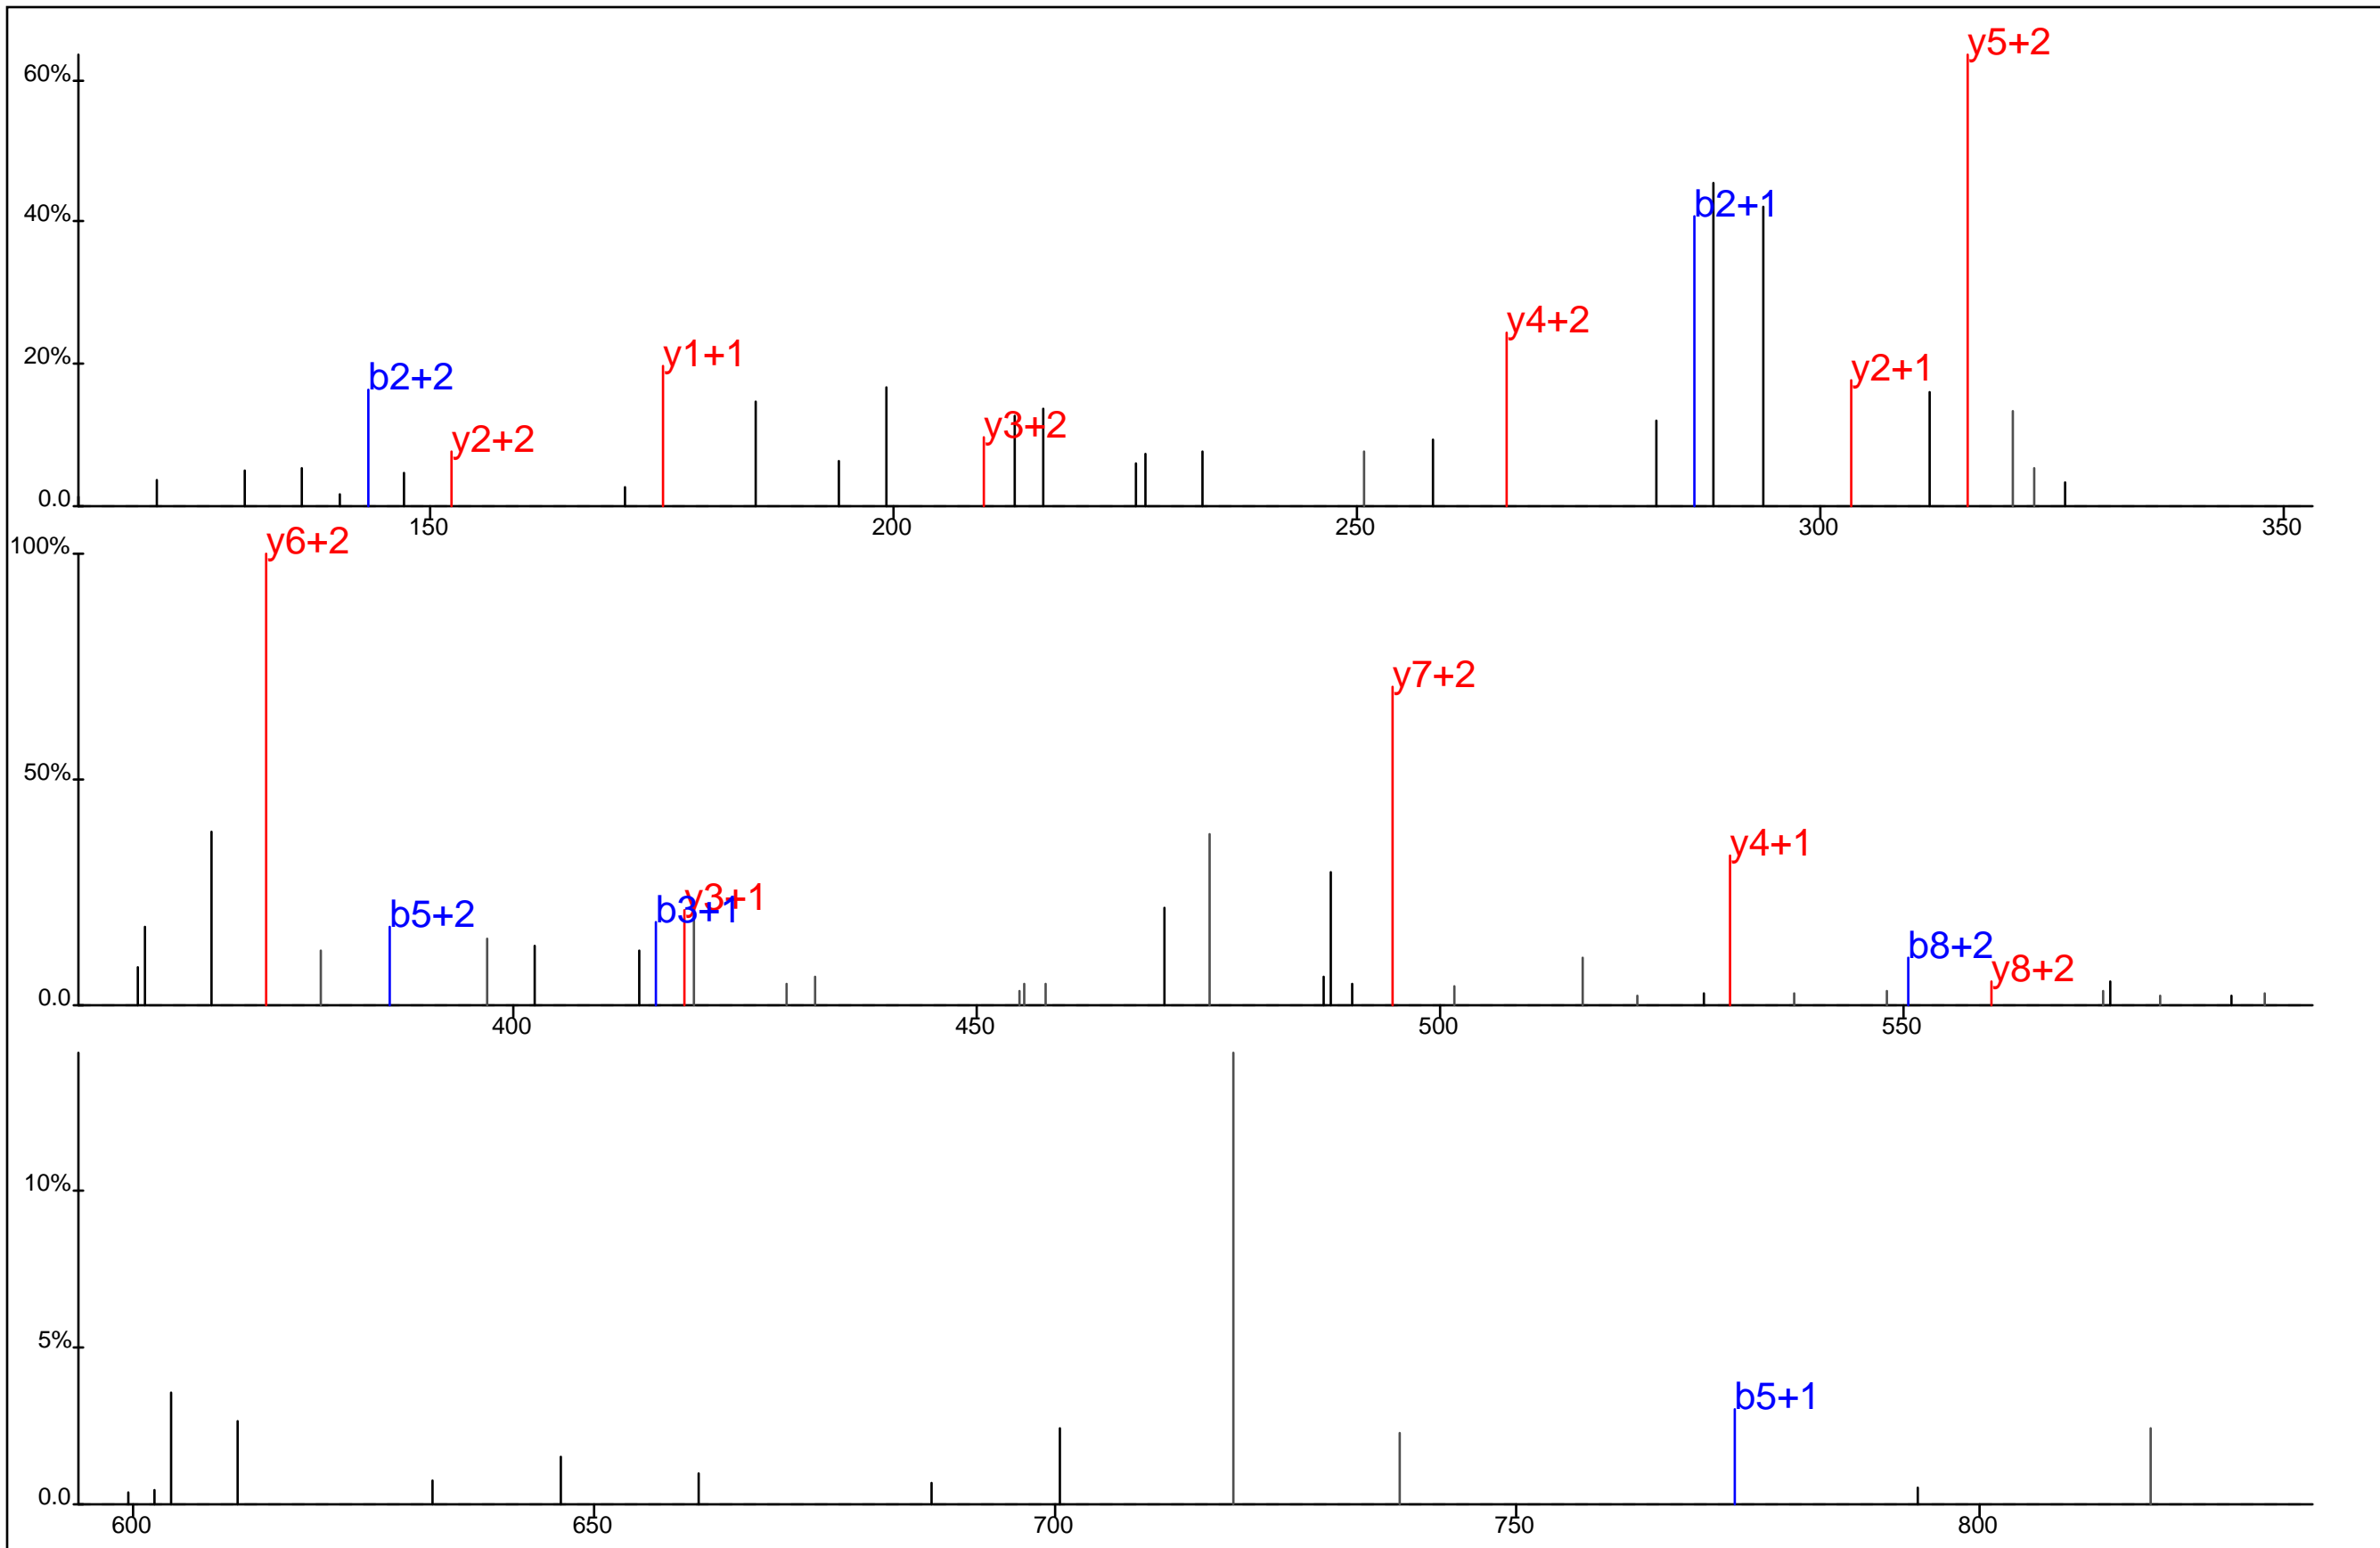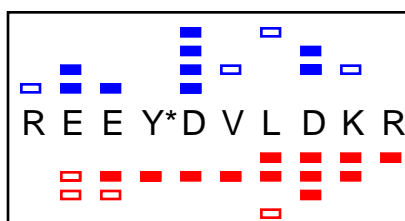

Protein Name: T cell antigen receptor, zeta  
 gi Accession: 0  
 Precursor Mass: 351.4153+4  
 Delta Mass: 2.212 ppm  
 XCorr: 31.53

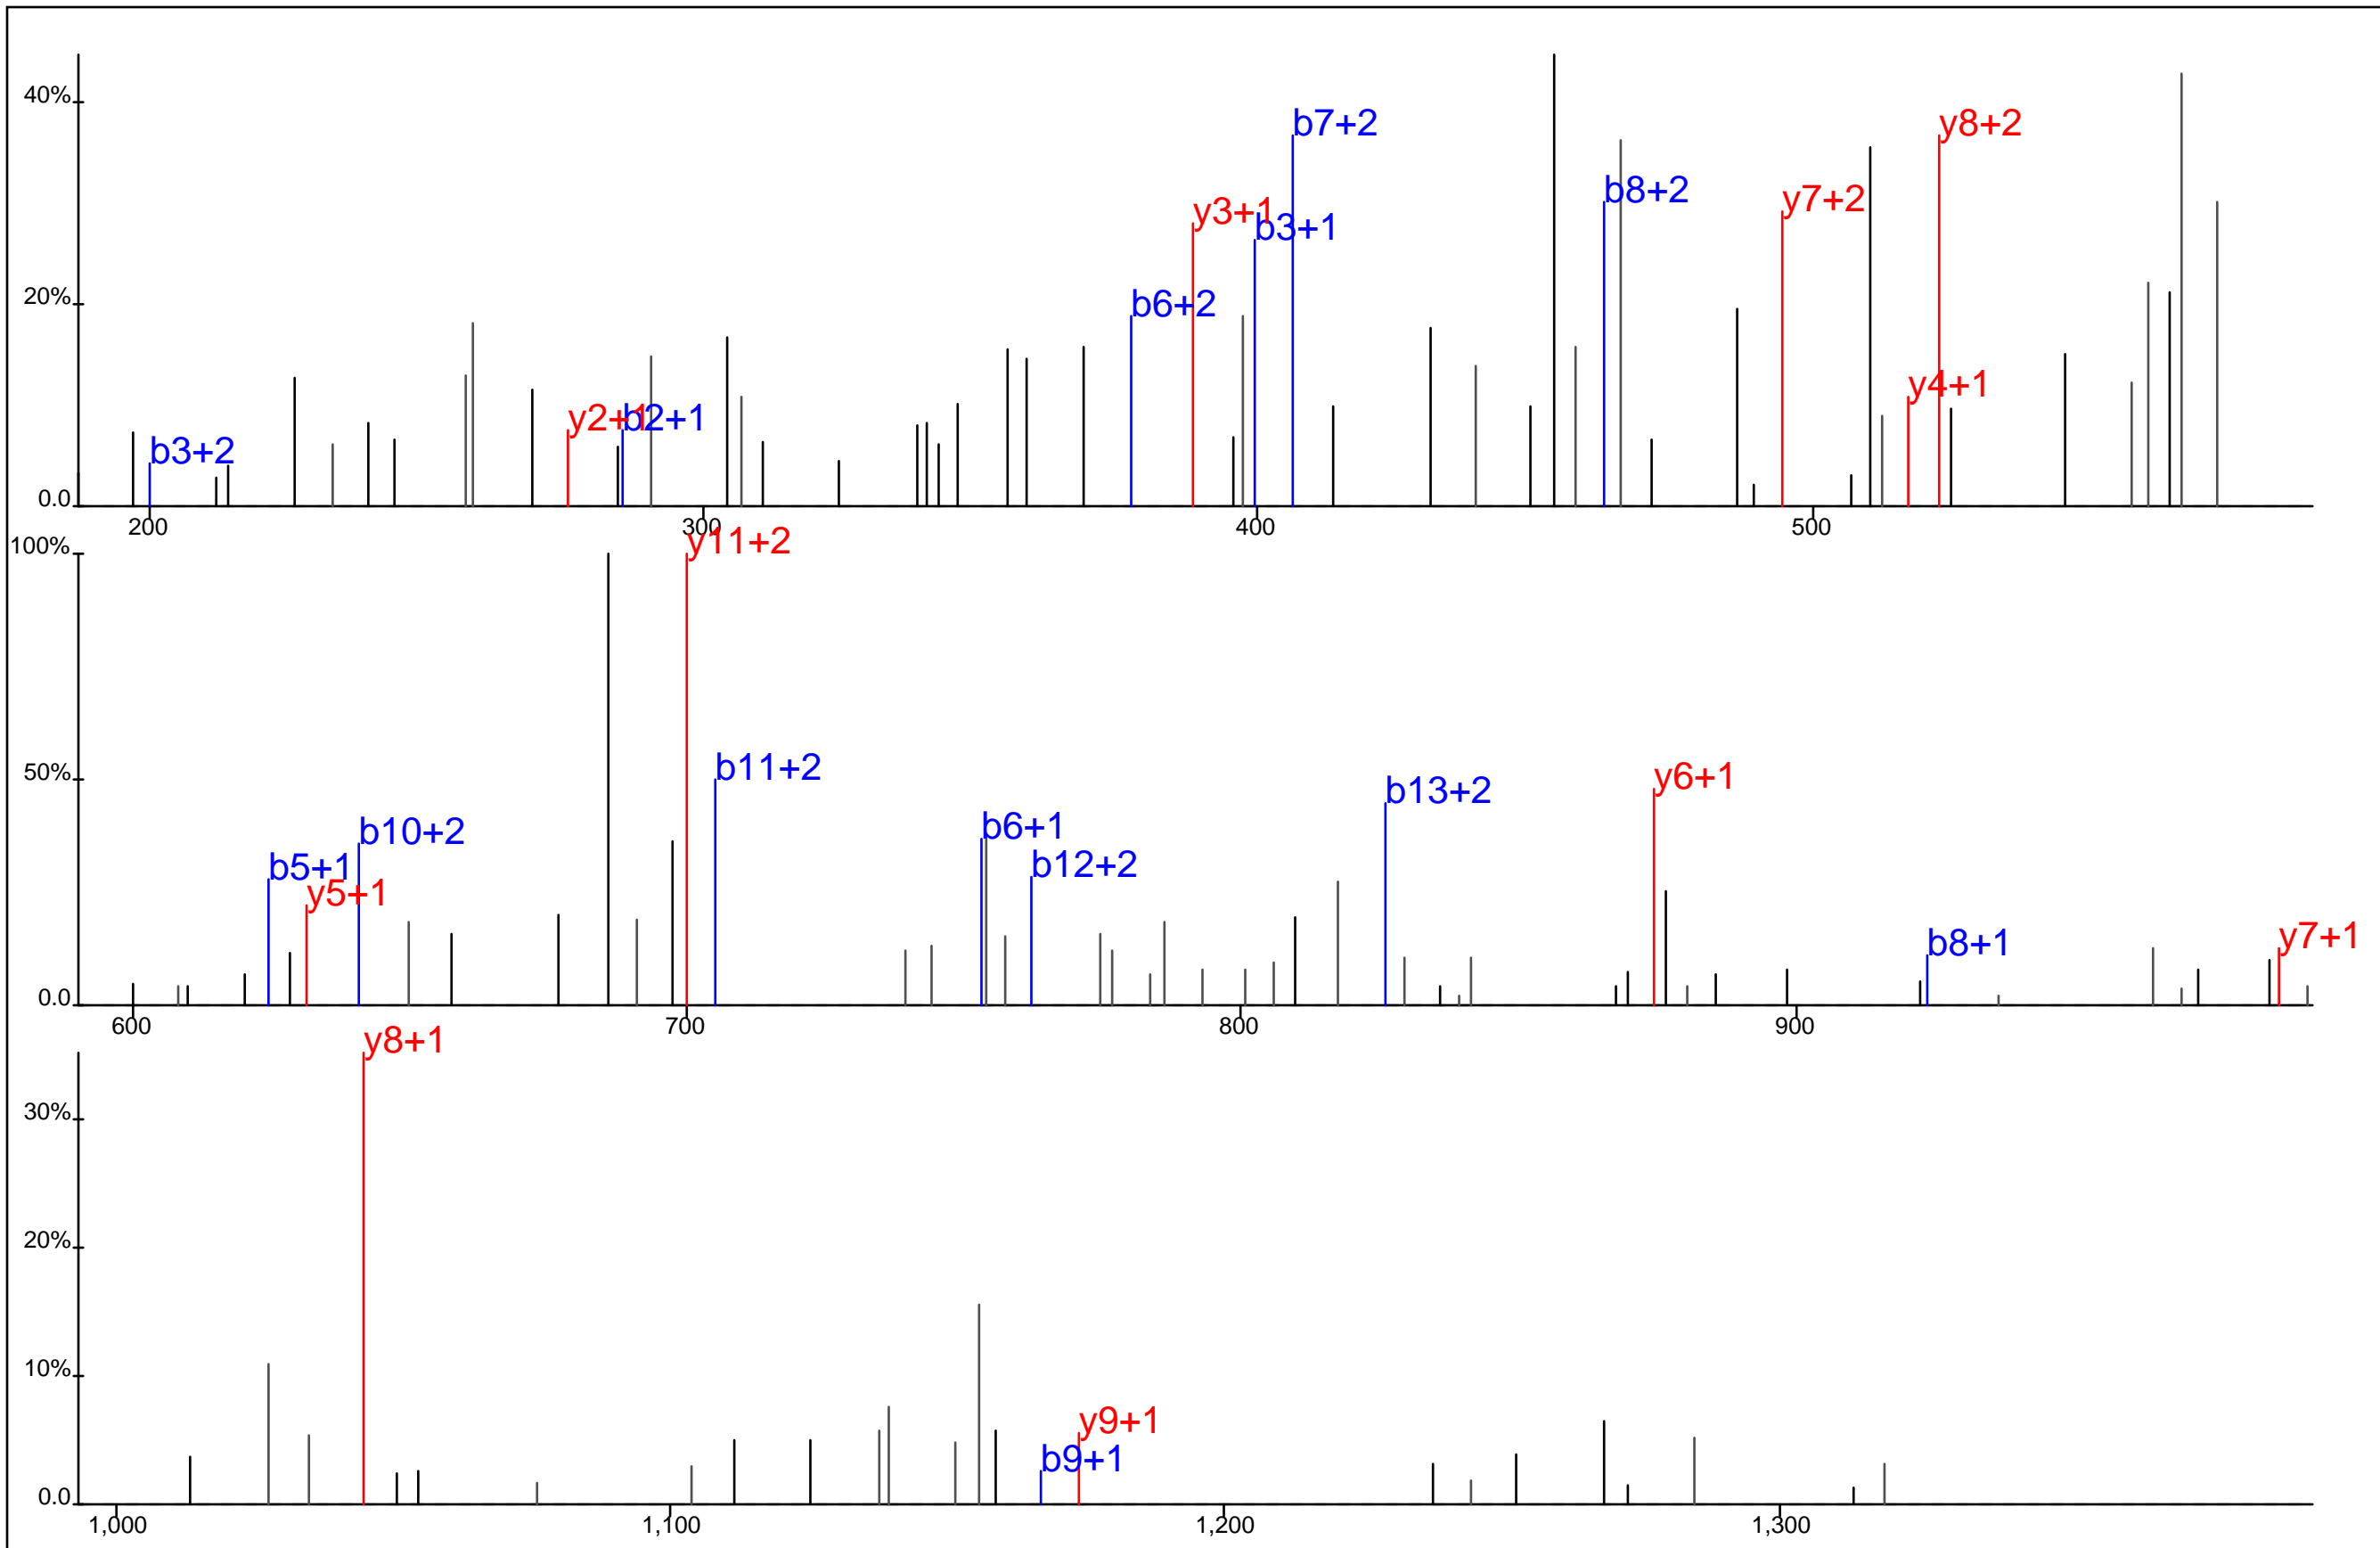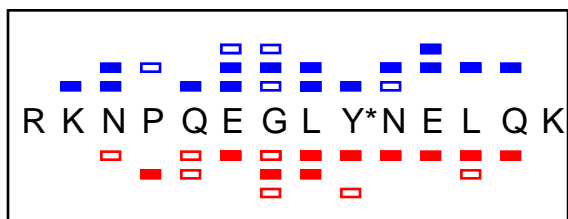

Protein Name: T cell antigen receptor, zeta  
 gi Accession: 0  
 Precursor Mass: 599.6273+3  
 Delta Mass: 1.007 ppm  
 XCorr: 25.69

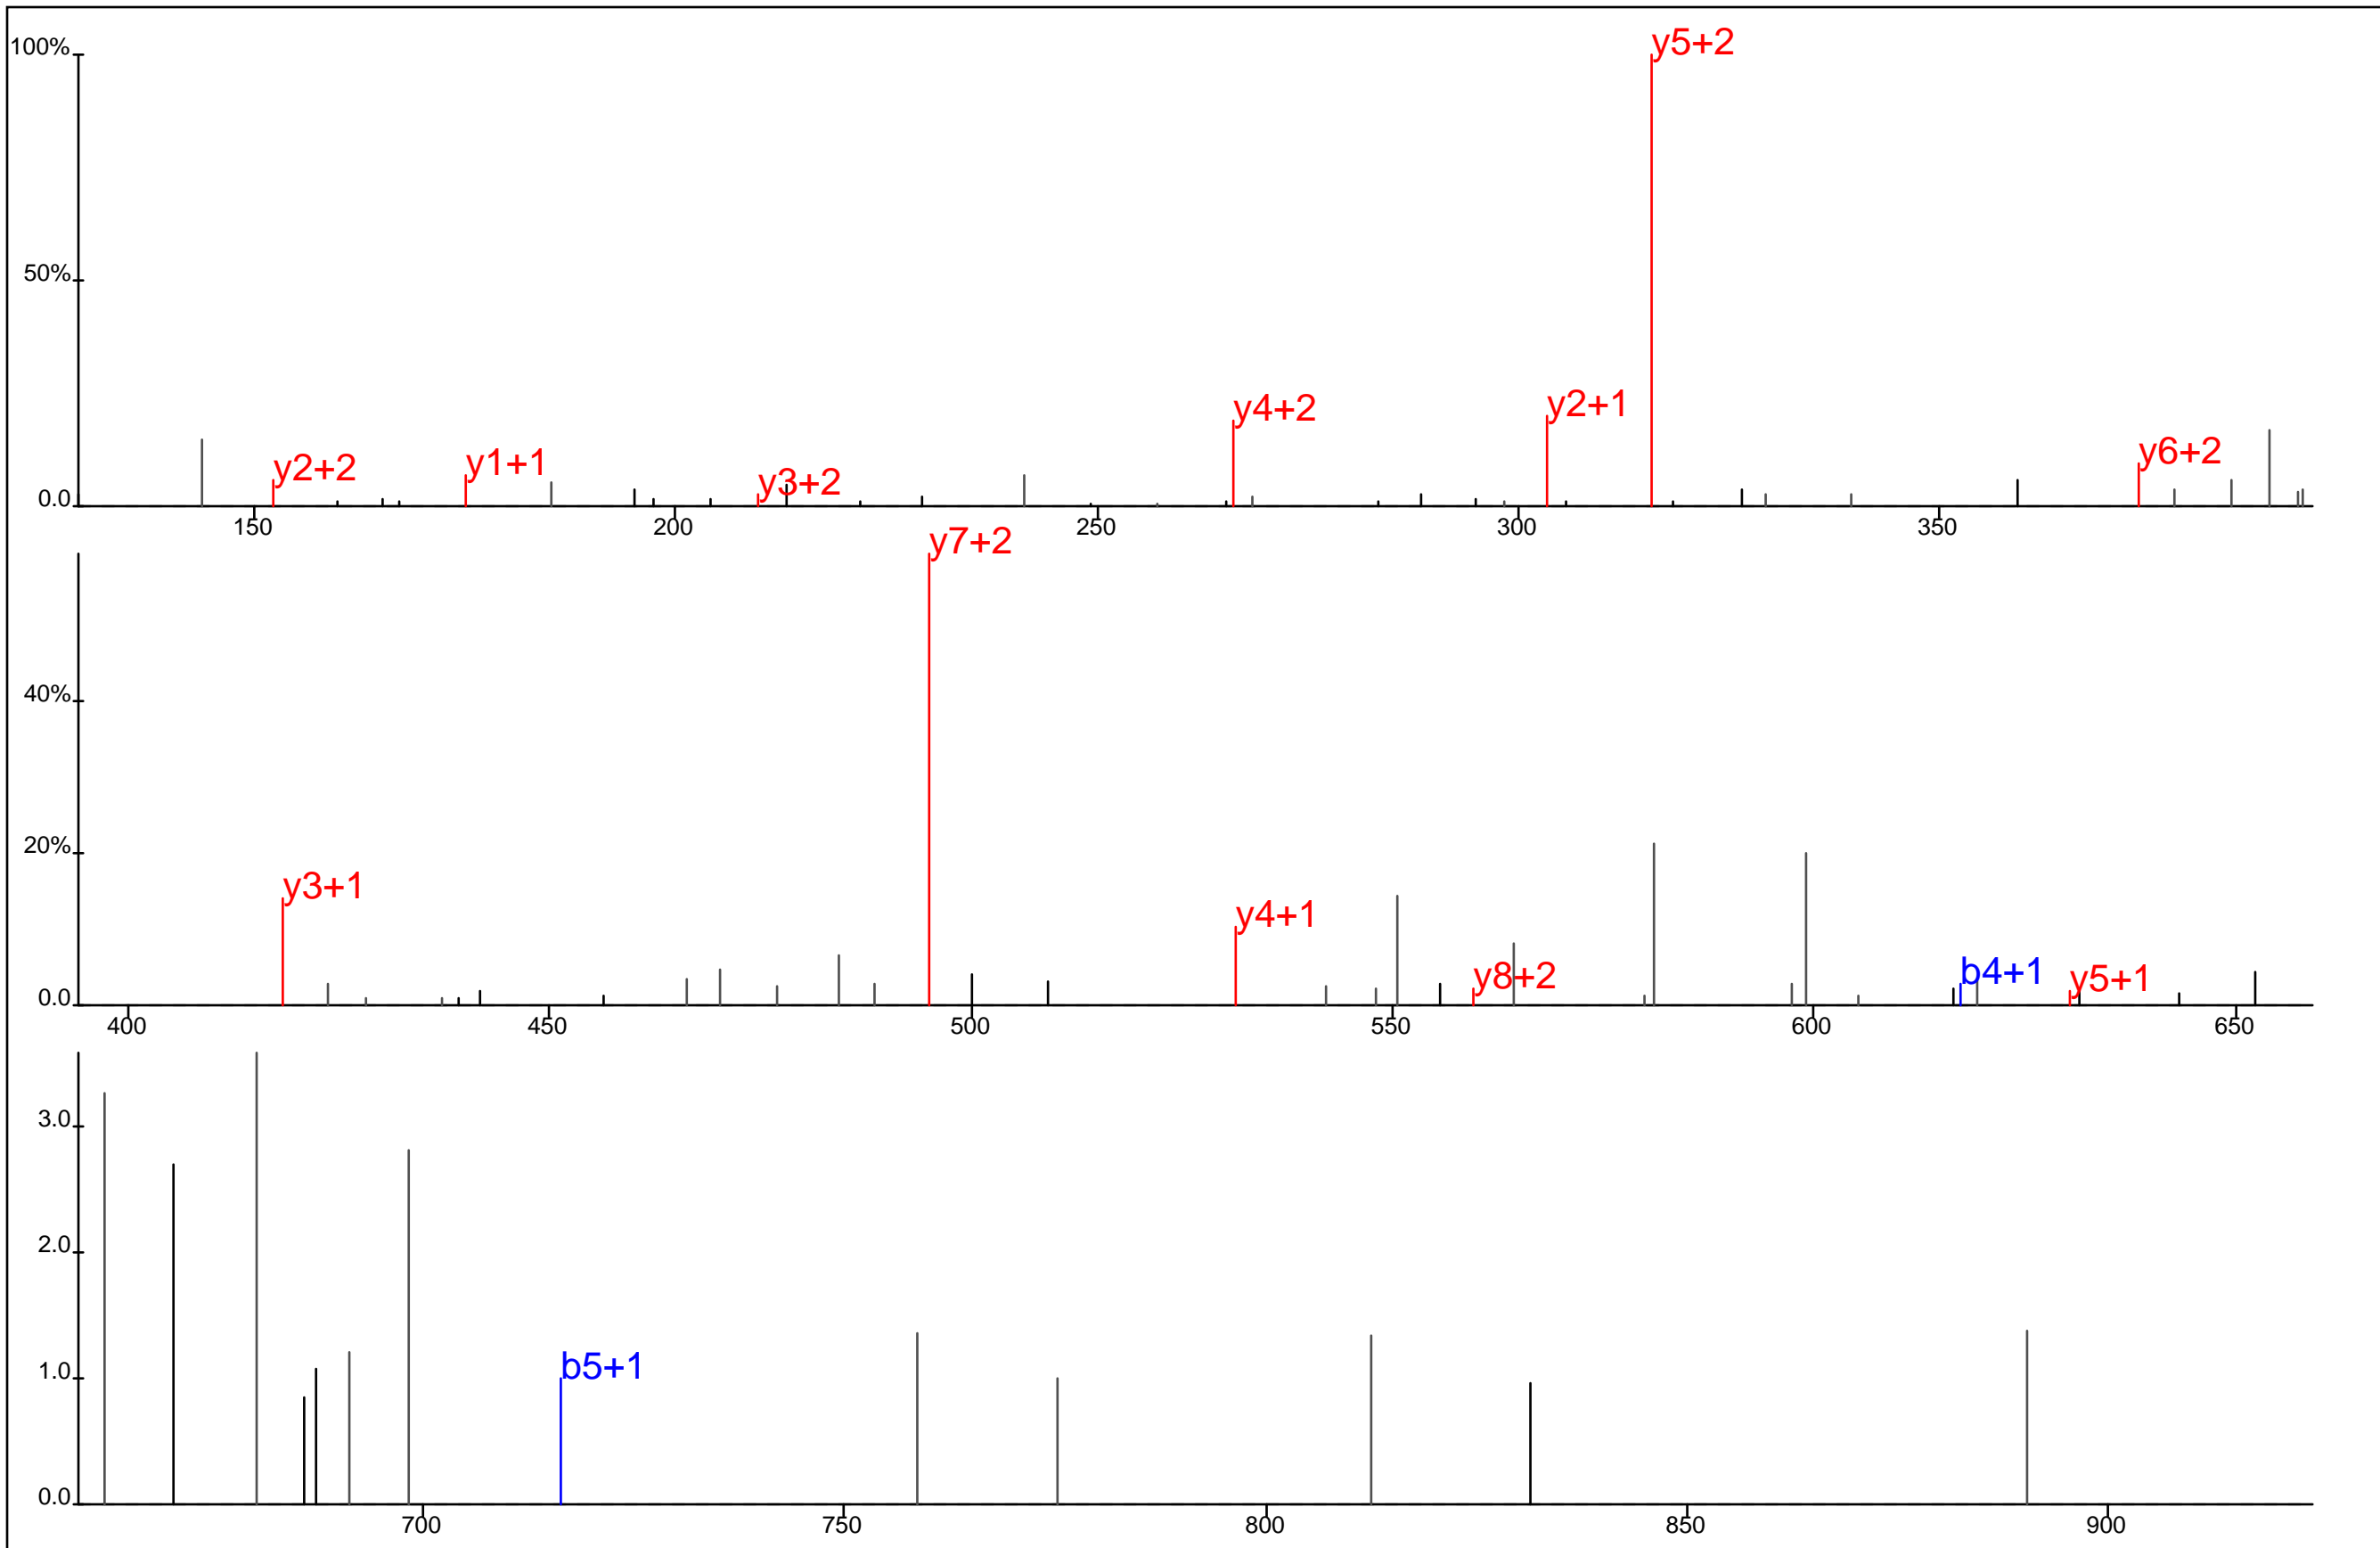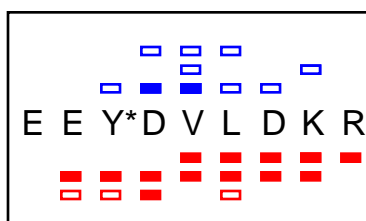

Protein Name: T cell antigen receptor, zeta  
 gi Accession: 0  
 Precursor Mass: 416.1831+3  
 Delta Mass: 0.189 ppm  
 XCorr: 23.63

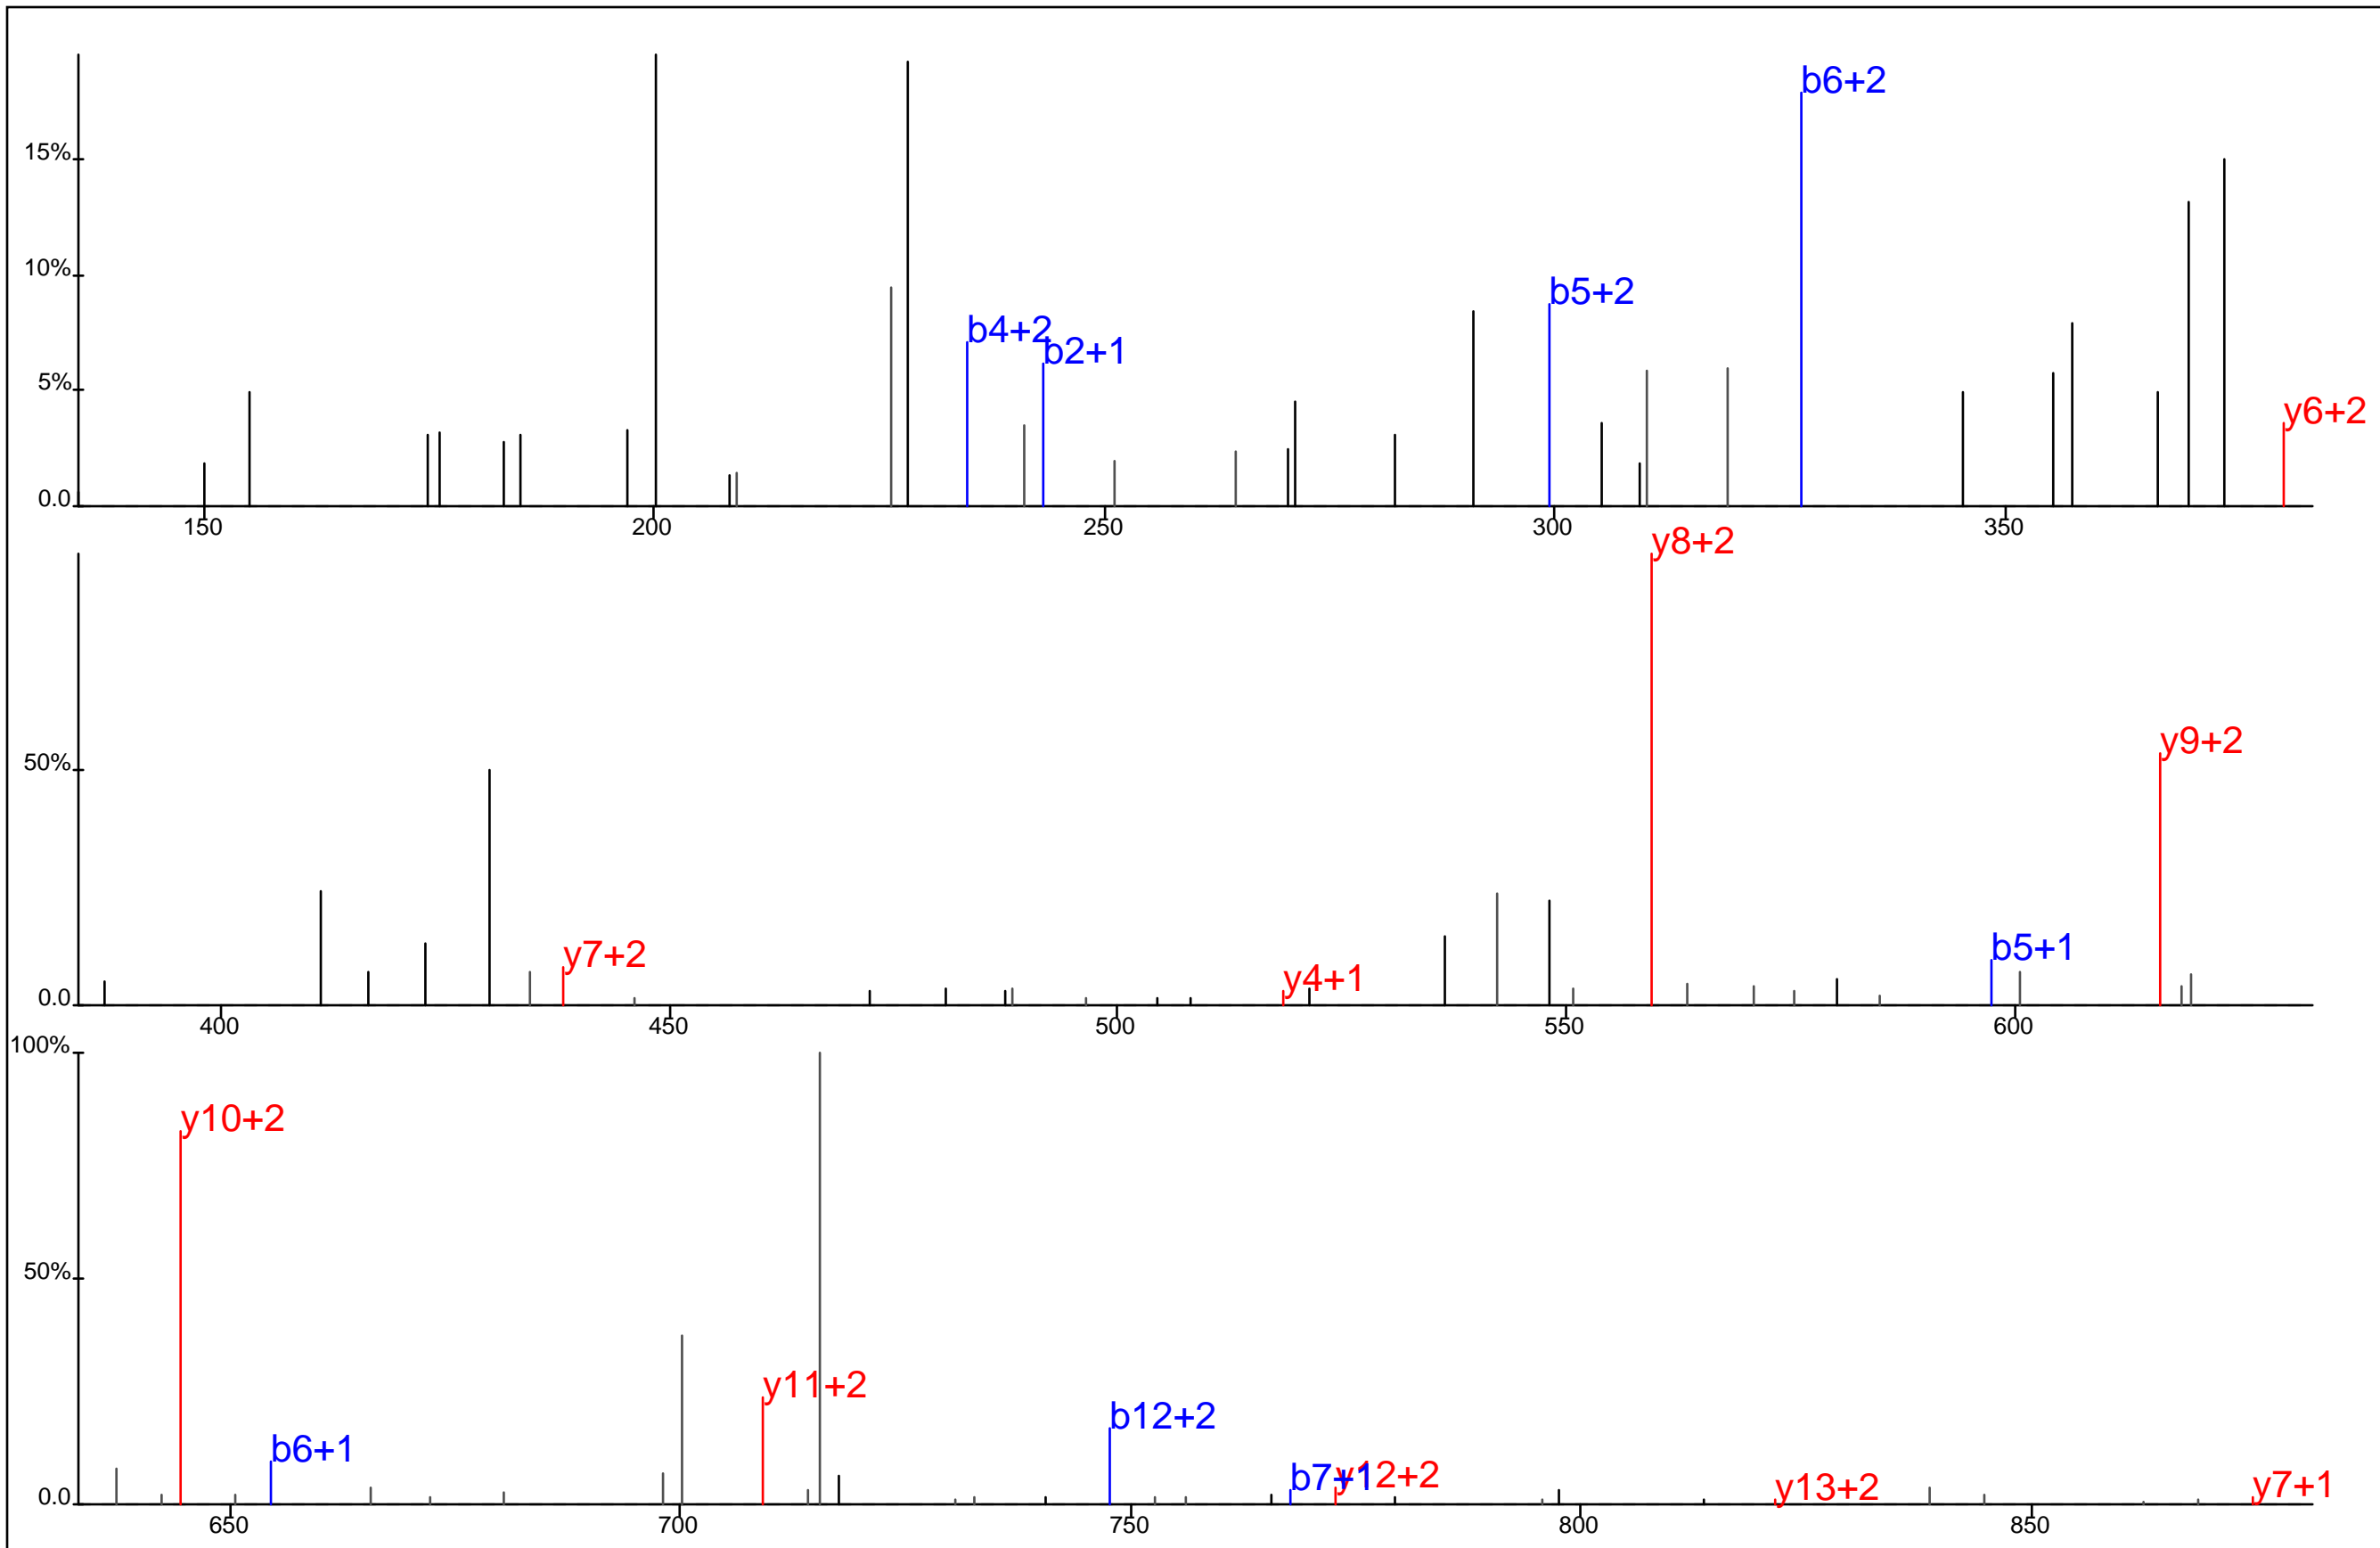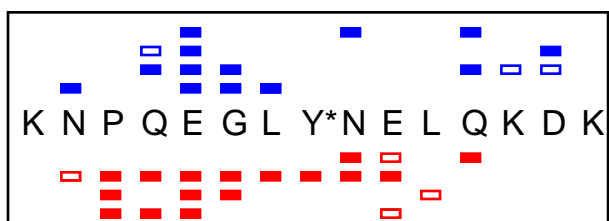

Protein Name: T cell antigen receptor, zeta  
 gi Accession: 0  
 Precursor Mass: 471.7282+4  
 Delta Mass: 0.563 ppm  
 XCorr: 21.68

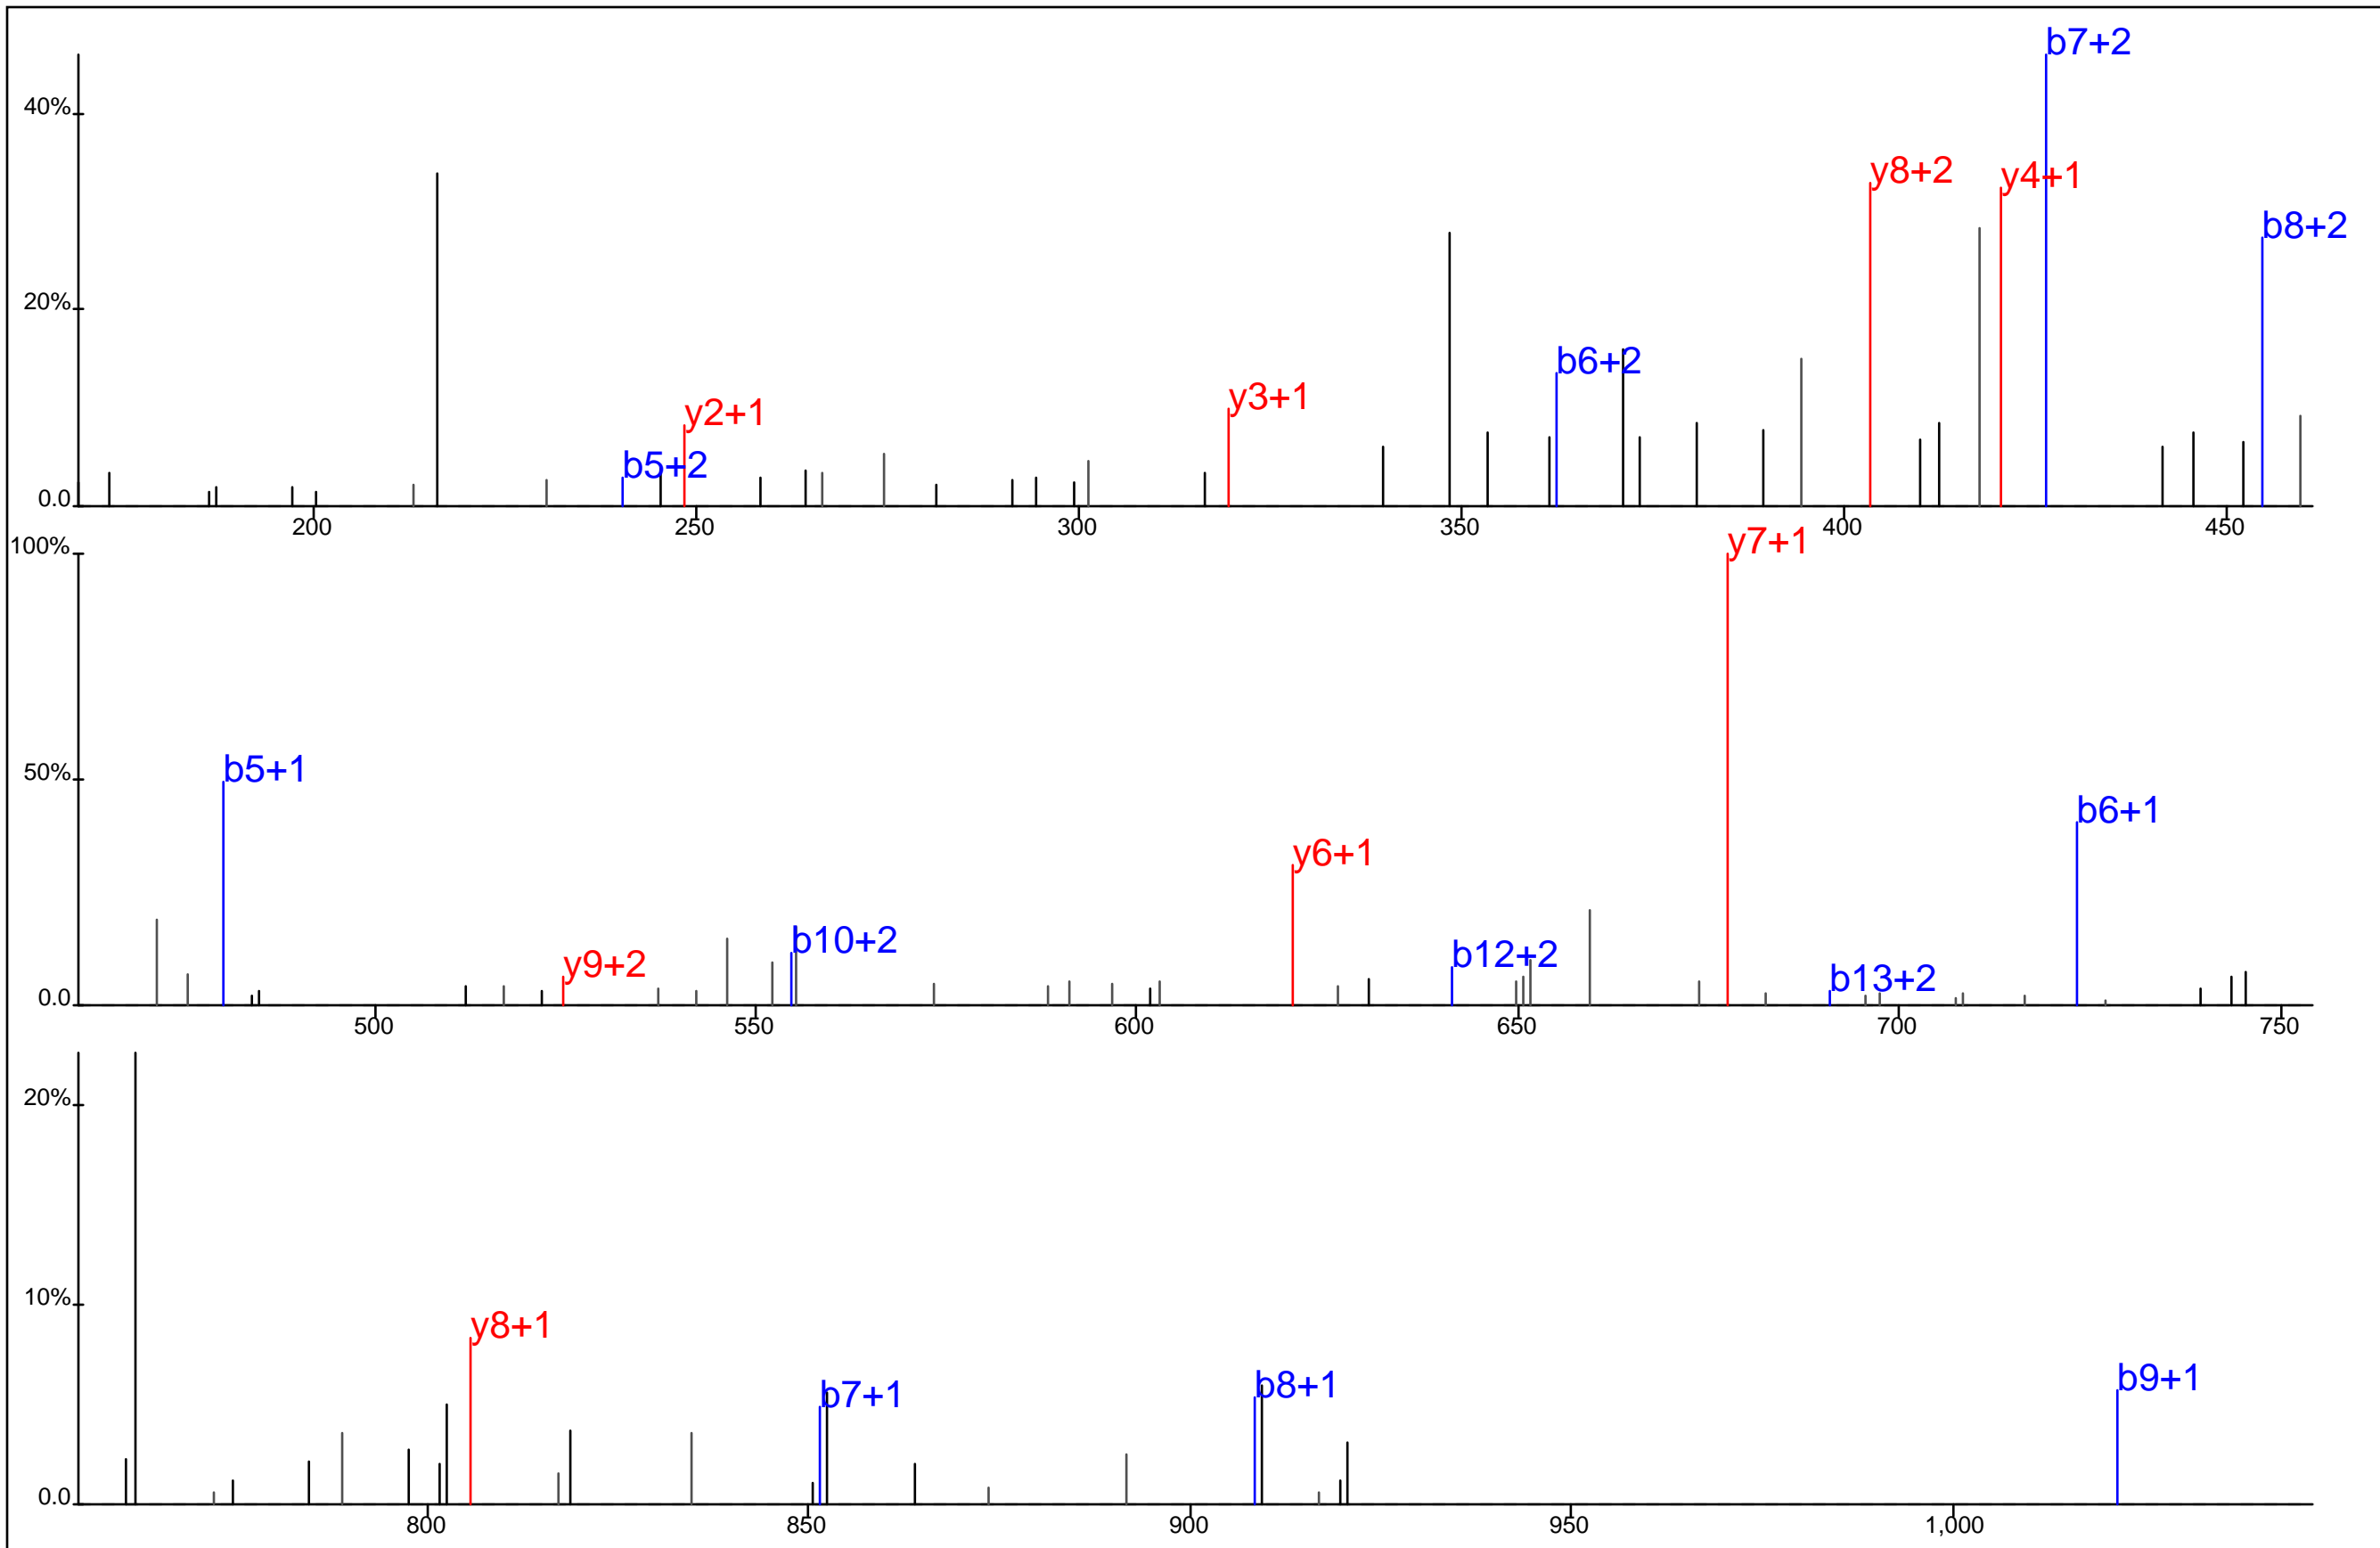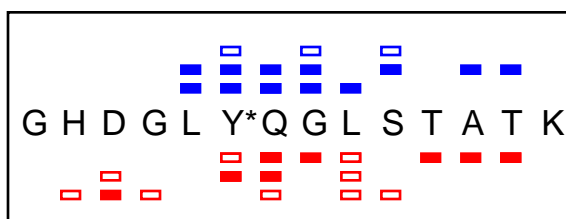

Protein Name: T cell antigen receptor, zeta  
 gi Accession: 0  
 Precursor Mass: 509.9003+3  
 Delta Mass: 1.653 ppm  
 XCorr: 36.91



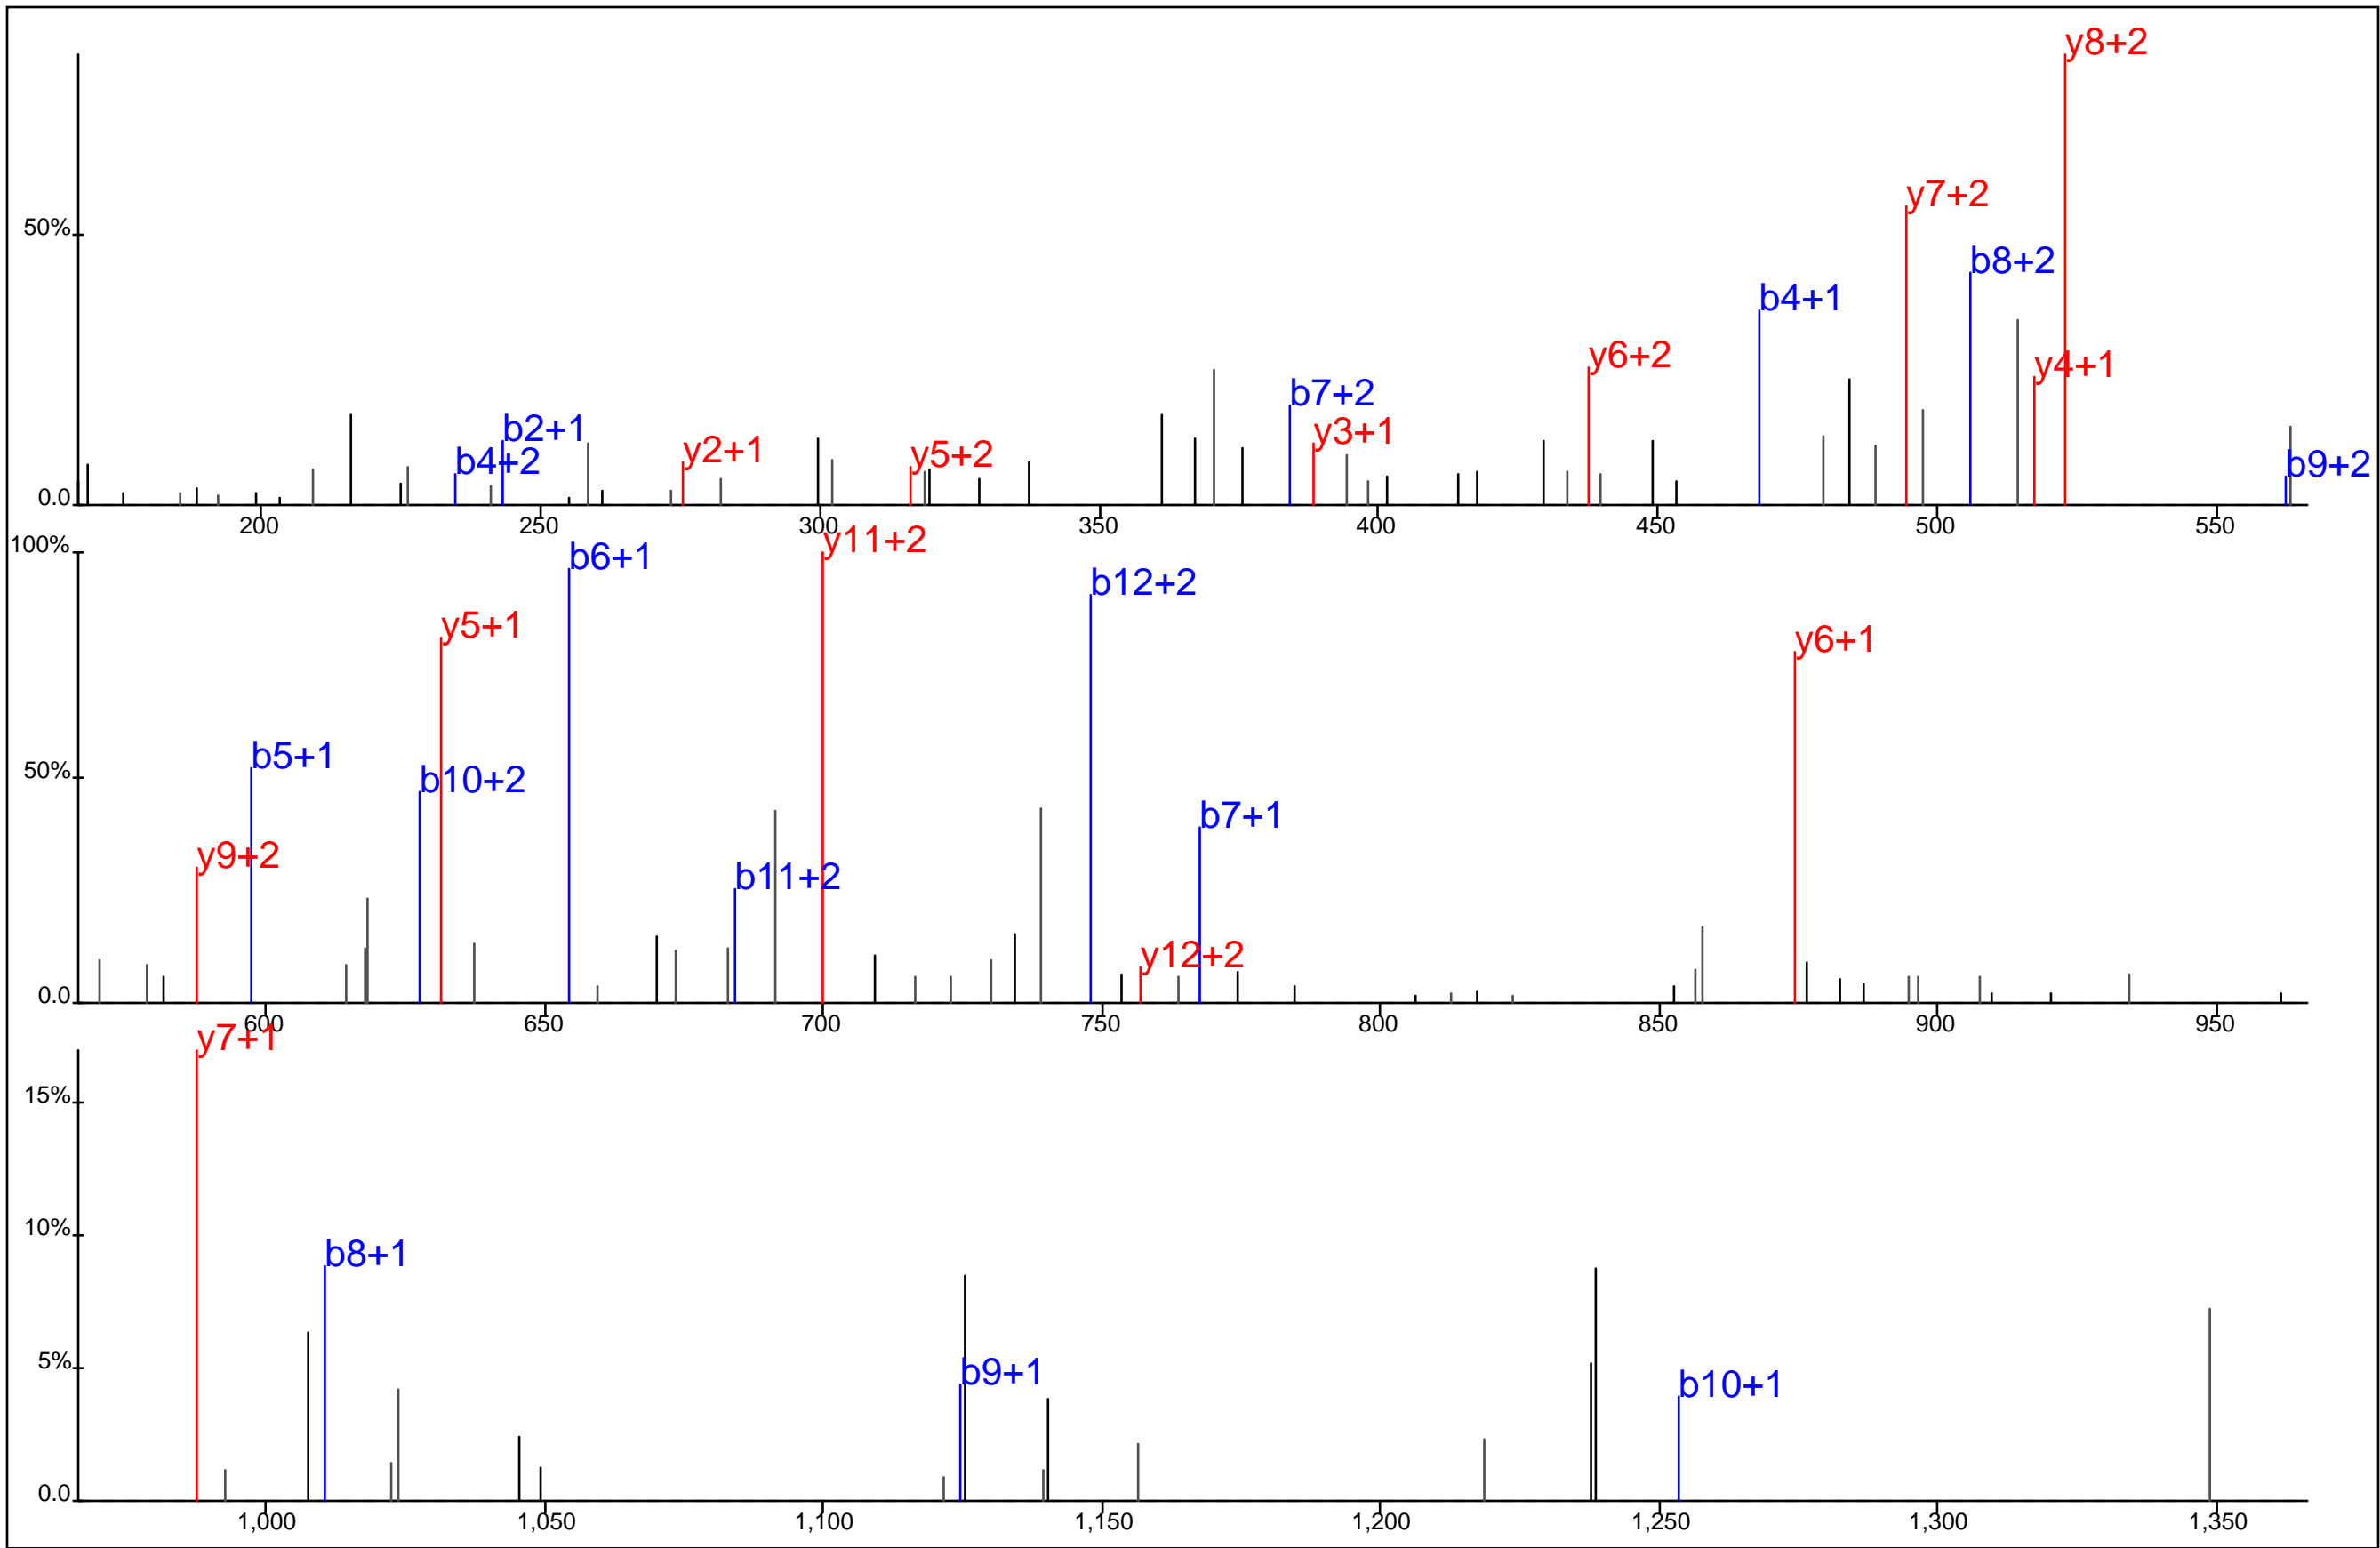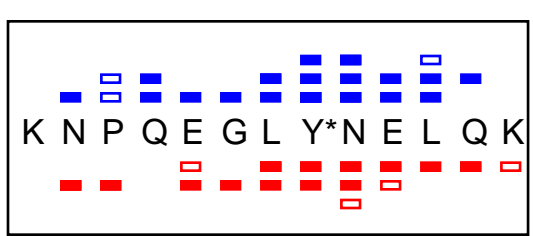

Protein Name: T cell antigen receptor, zeta  
 gi Accession: 0  
 Precursor Mass: 547.5948+3  
 Delta Mass: 1.152 ppm  
 XCorr: 55.99

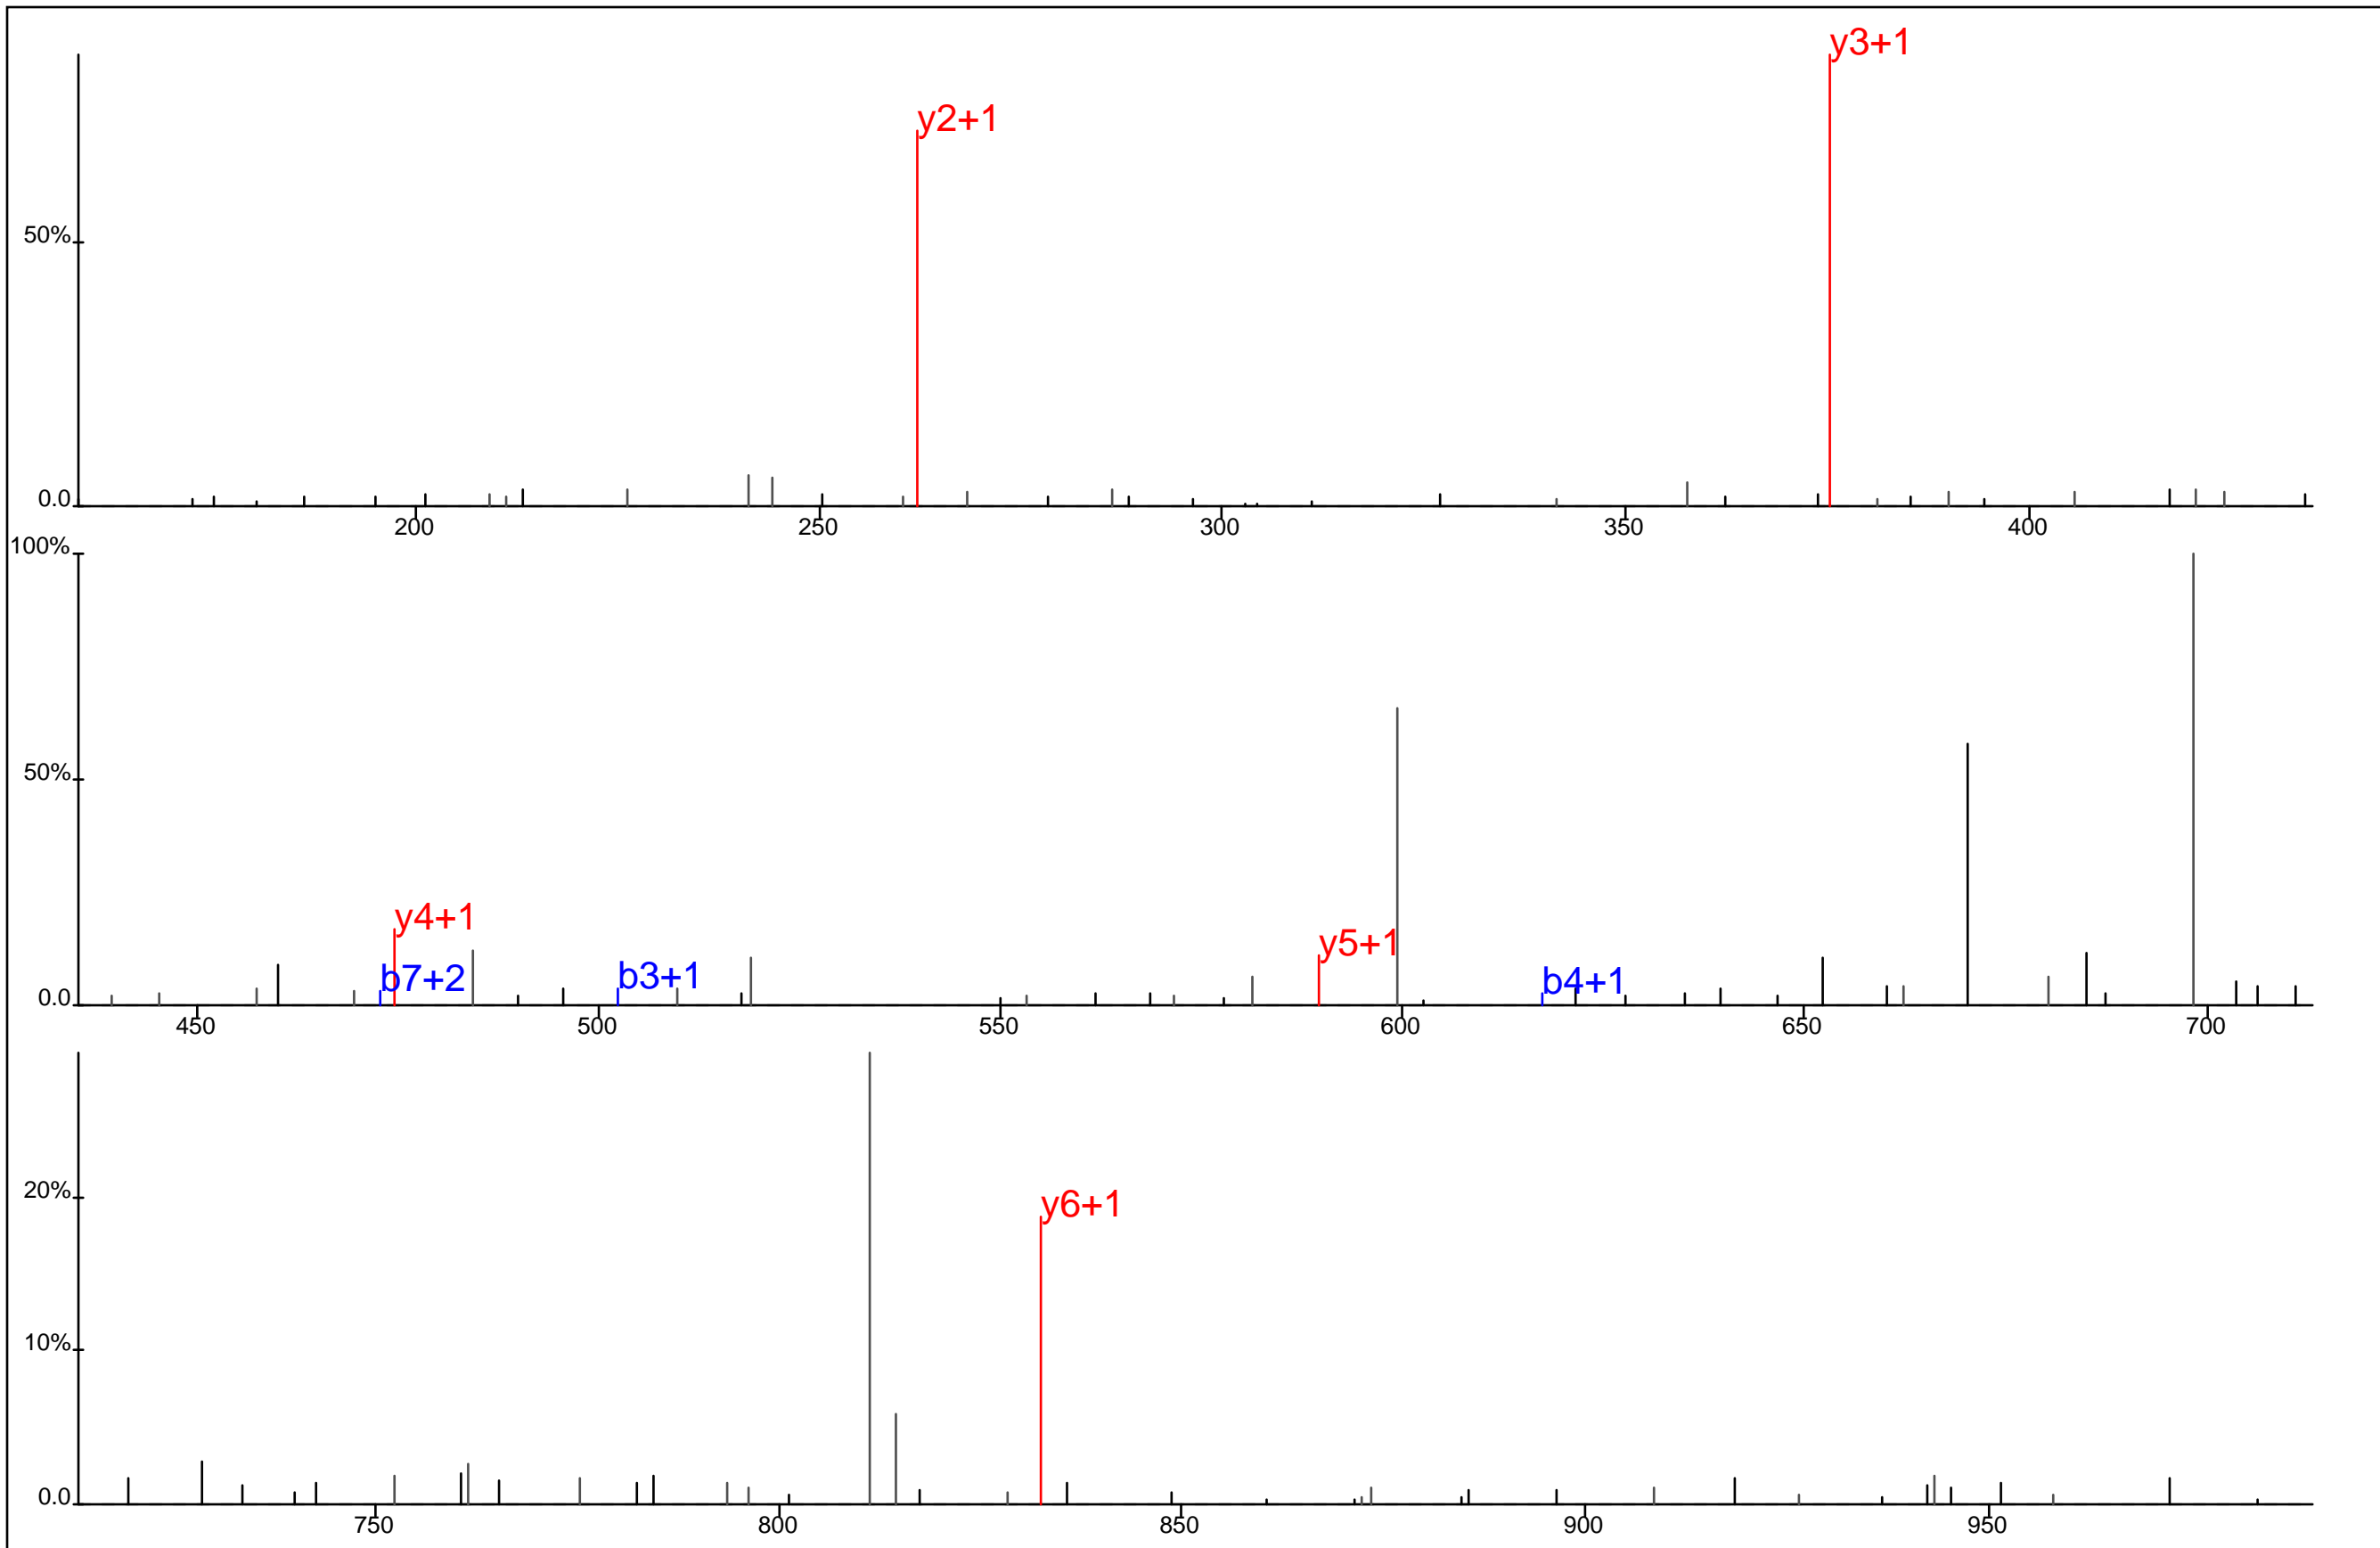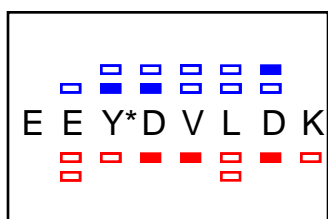

Protein Name: T cell antigen receptor, zeta  
 gi Accession: 0  
 Precursor Mass: 545.7207+2  
 Delta Mass: 0.127 ppm  
 XCorr: 25.91

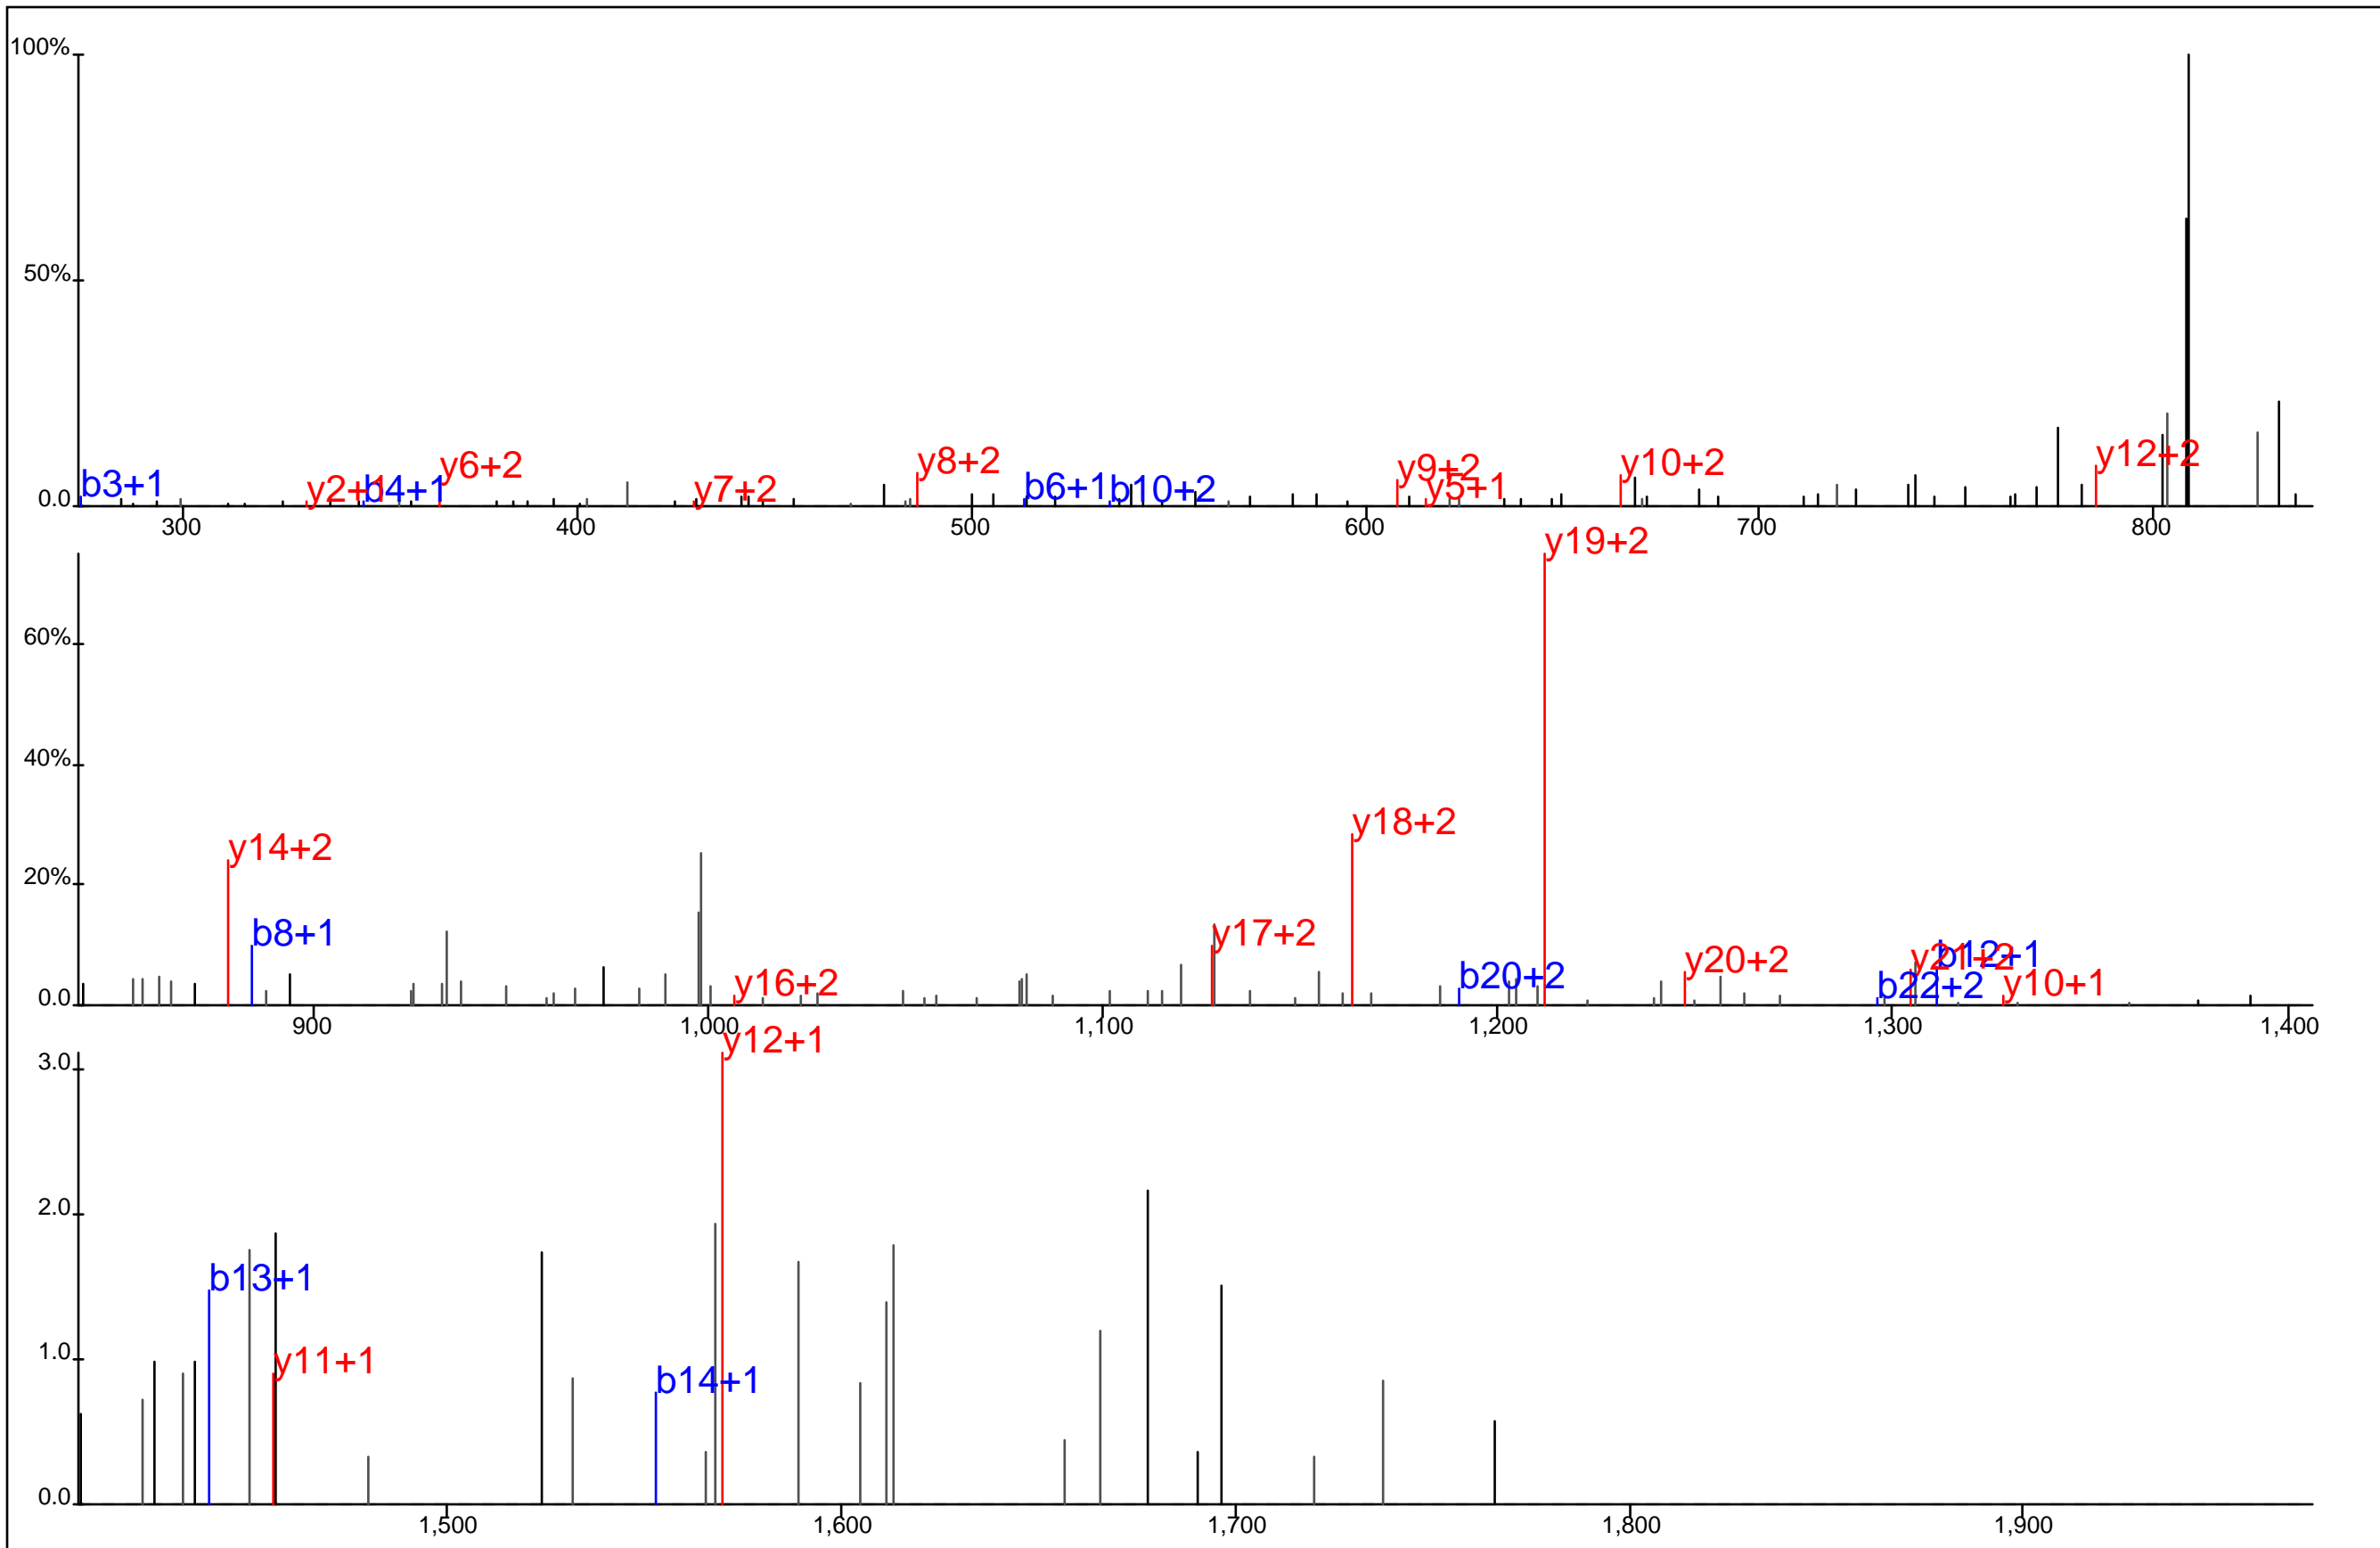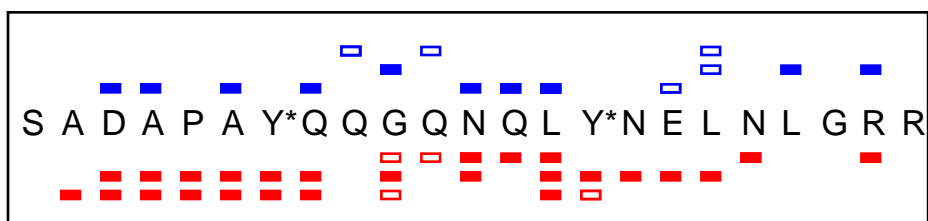

Protein Name: T cell antigen receptor, zeta  
 gi Accession: 0  
 Precursor Mass: 922.7413+3  
 Delta Mass: 2.191 ppm  
 XCorr: 31.11

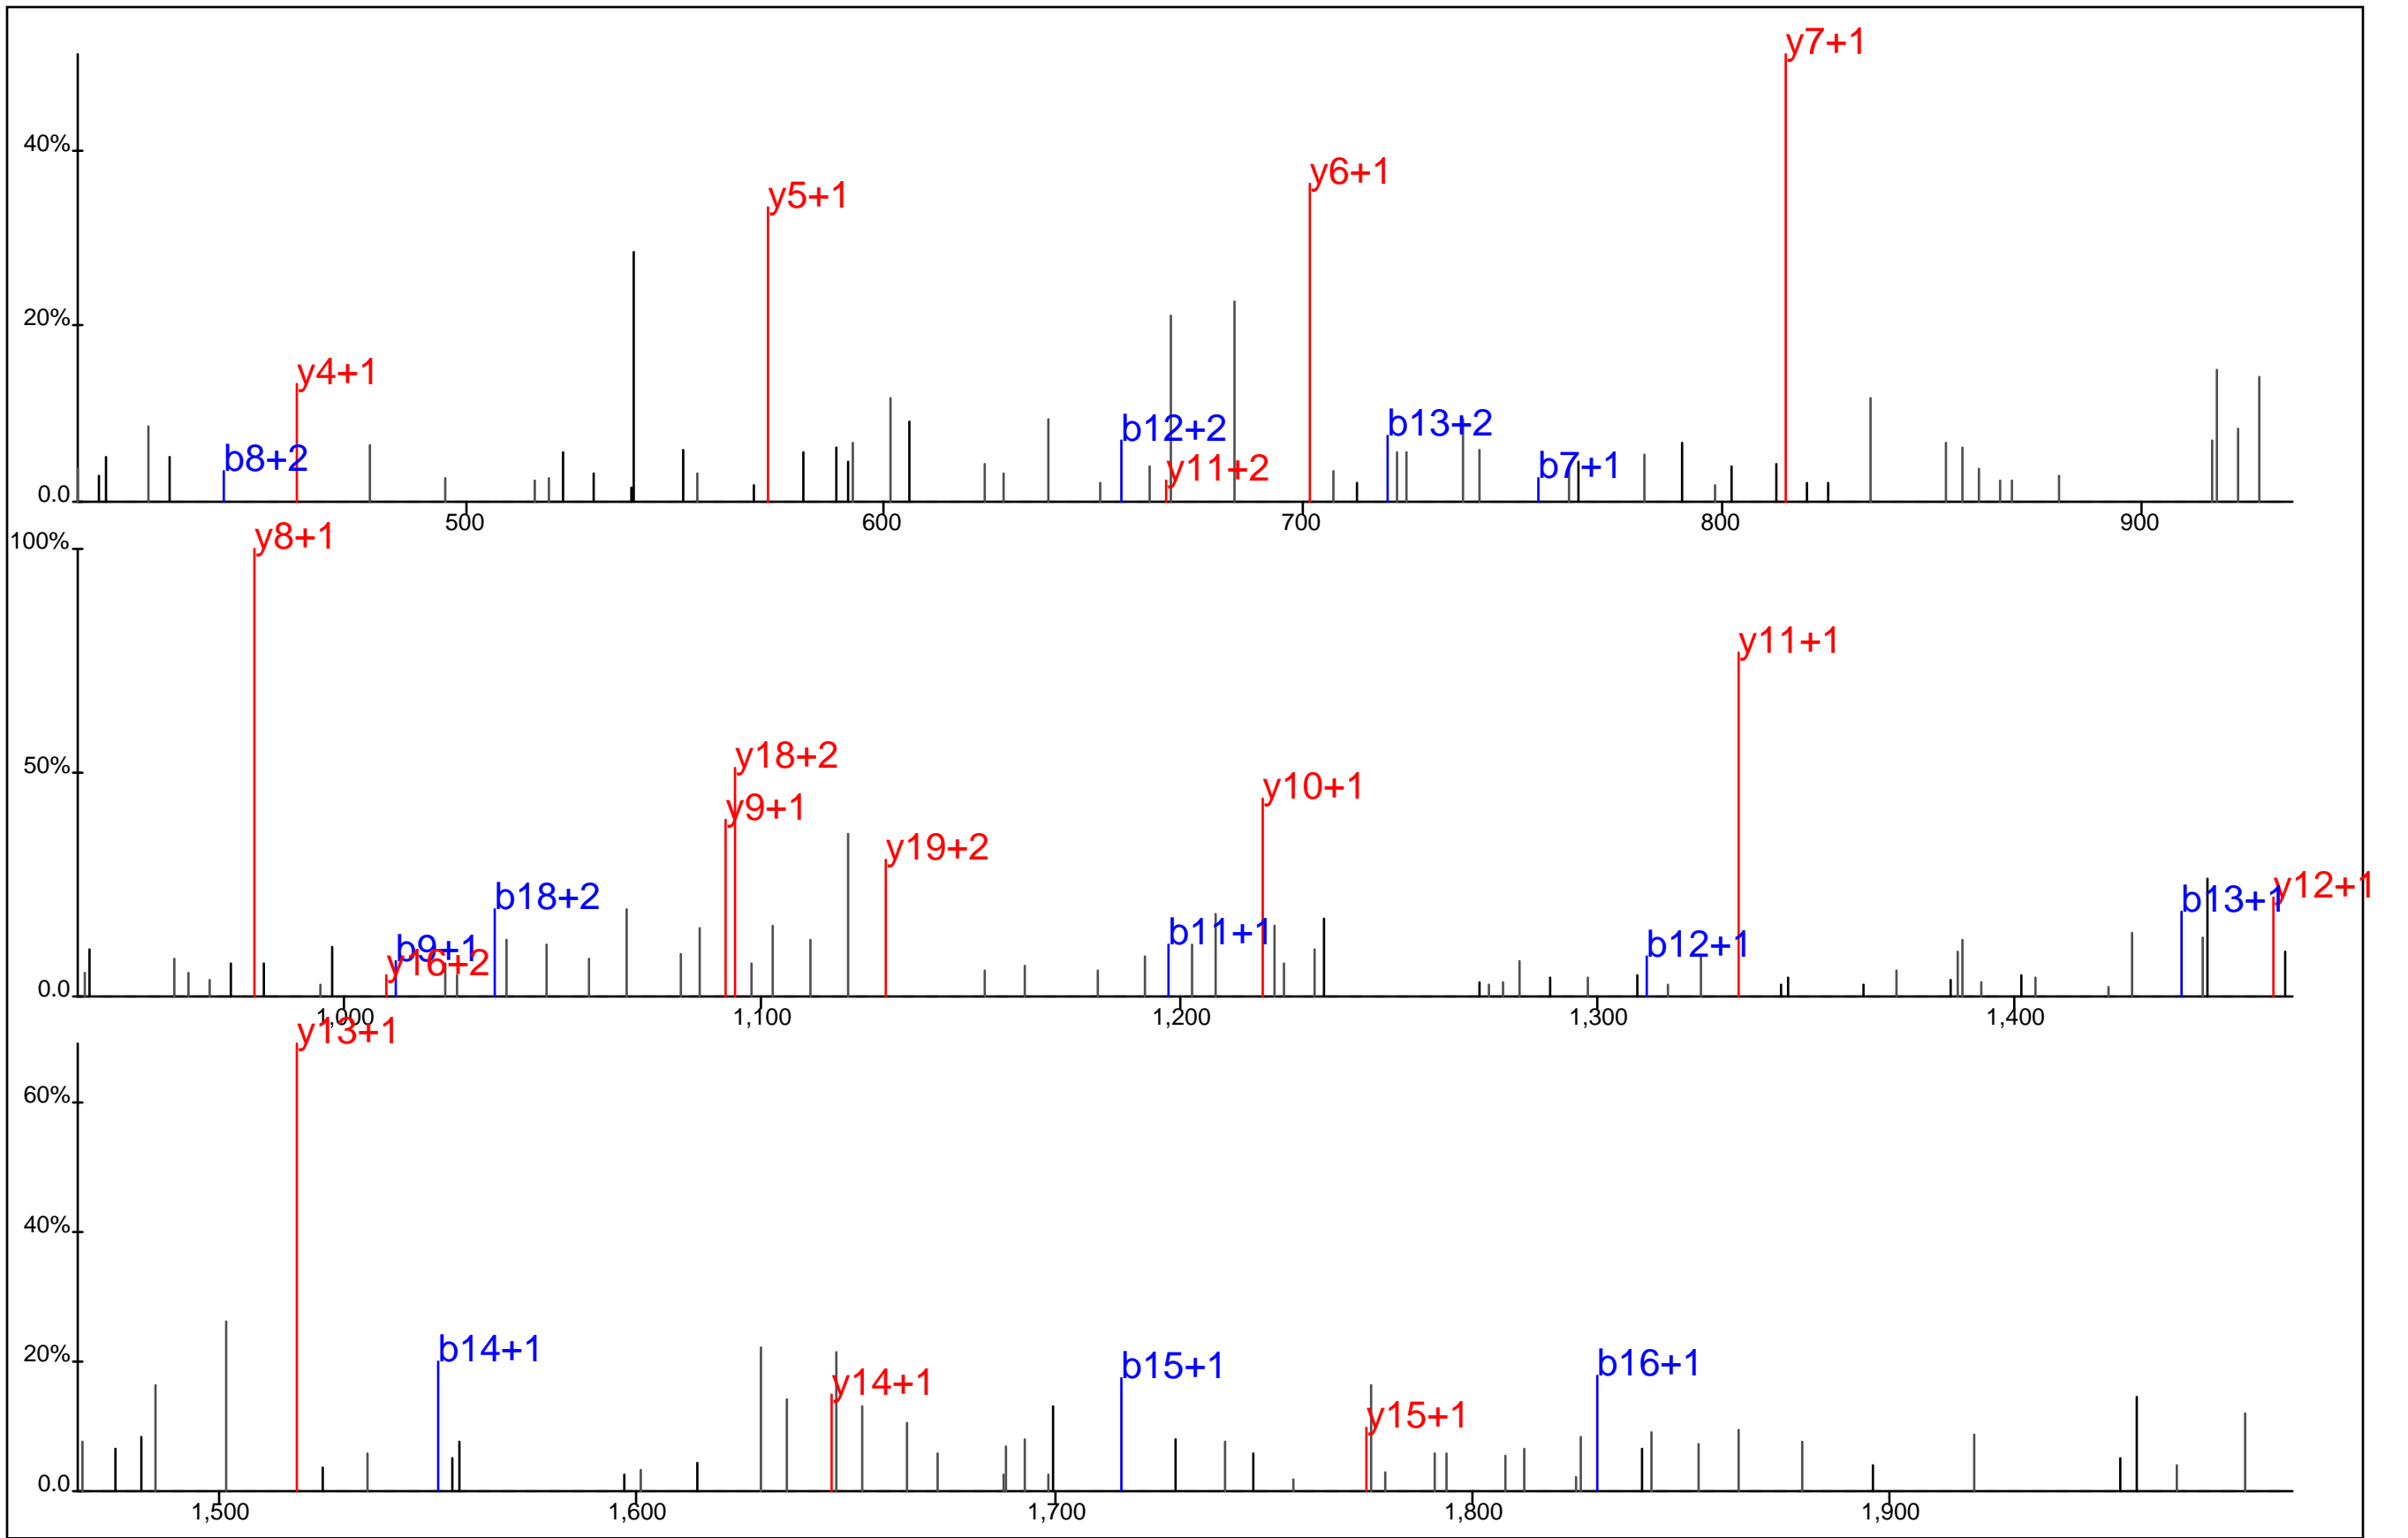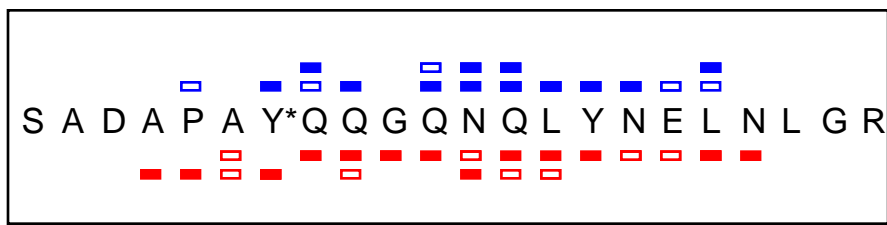

Protein Name: T cell antigen receptor, zeta  
 gi Accession: 0  
 Precursor Mass: 1,265.5748+2  
 Delta Mass: 2.613 ppm  
 XCorr: 61.85

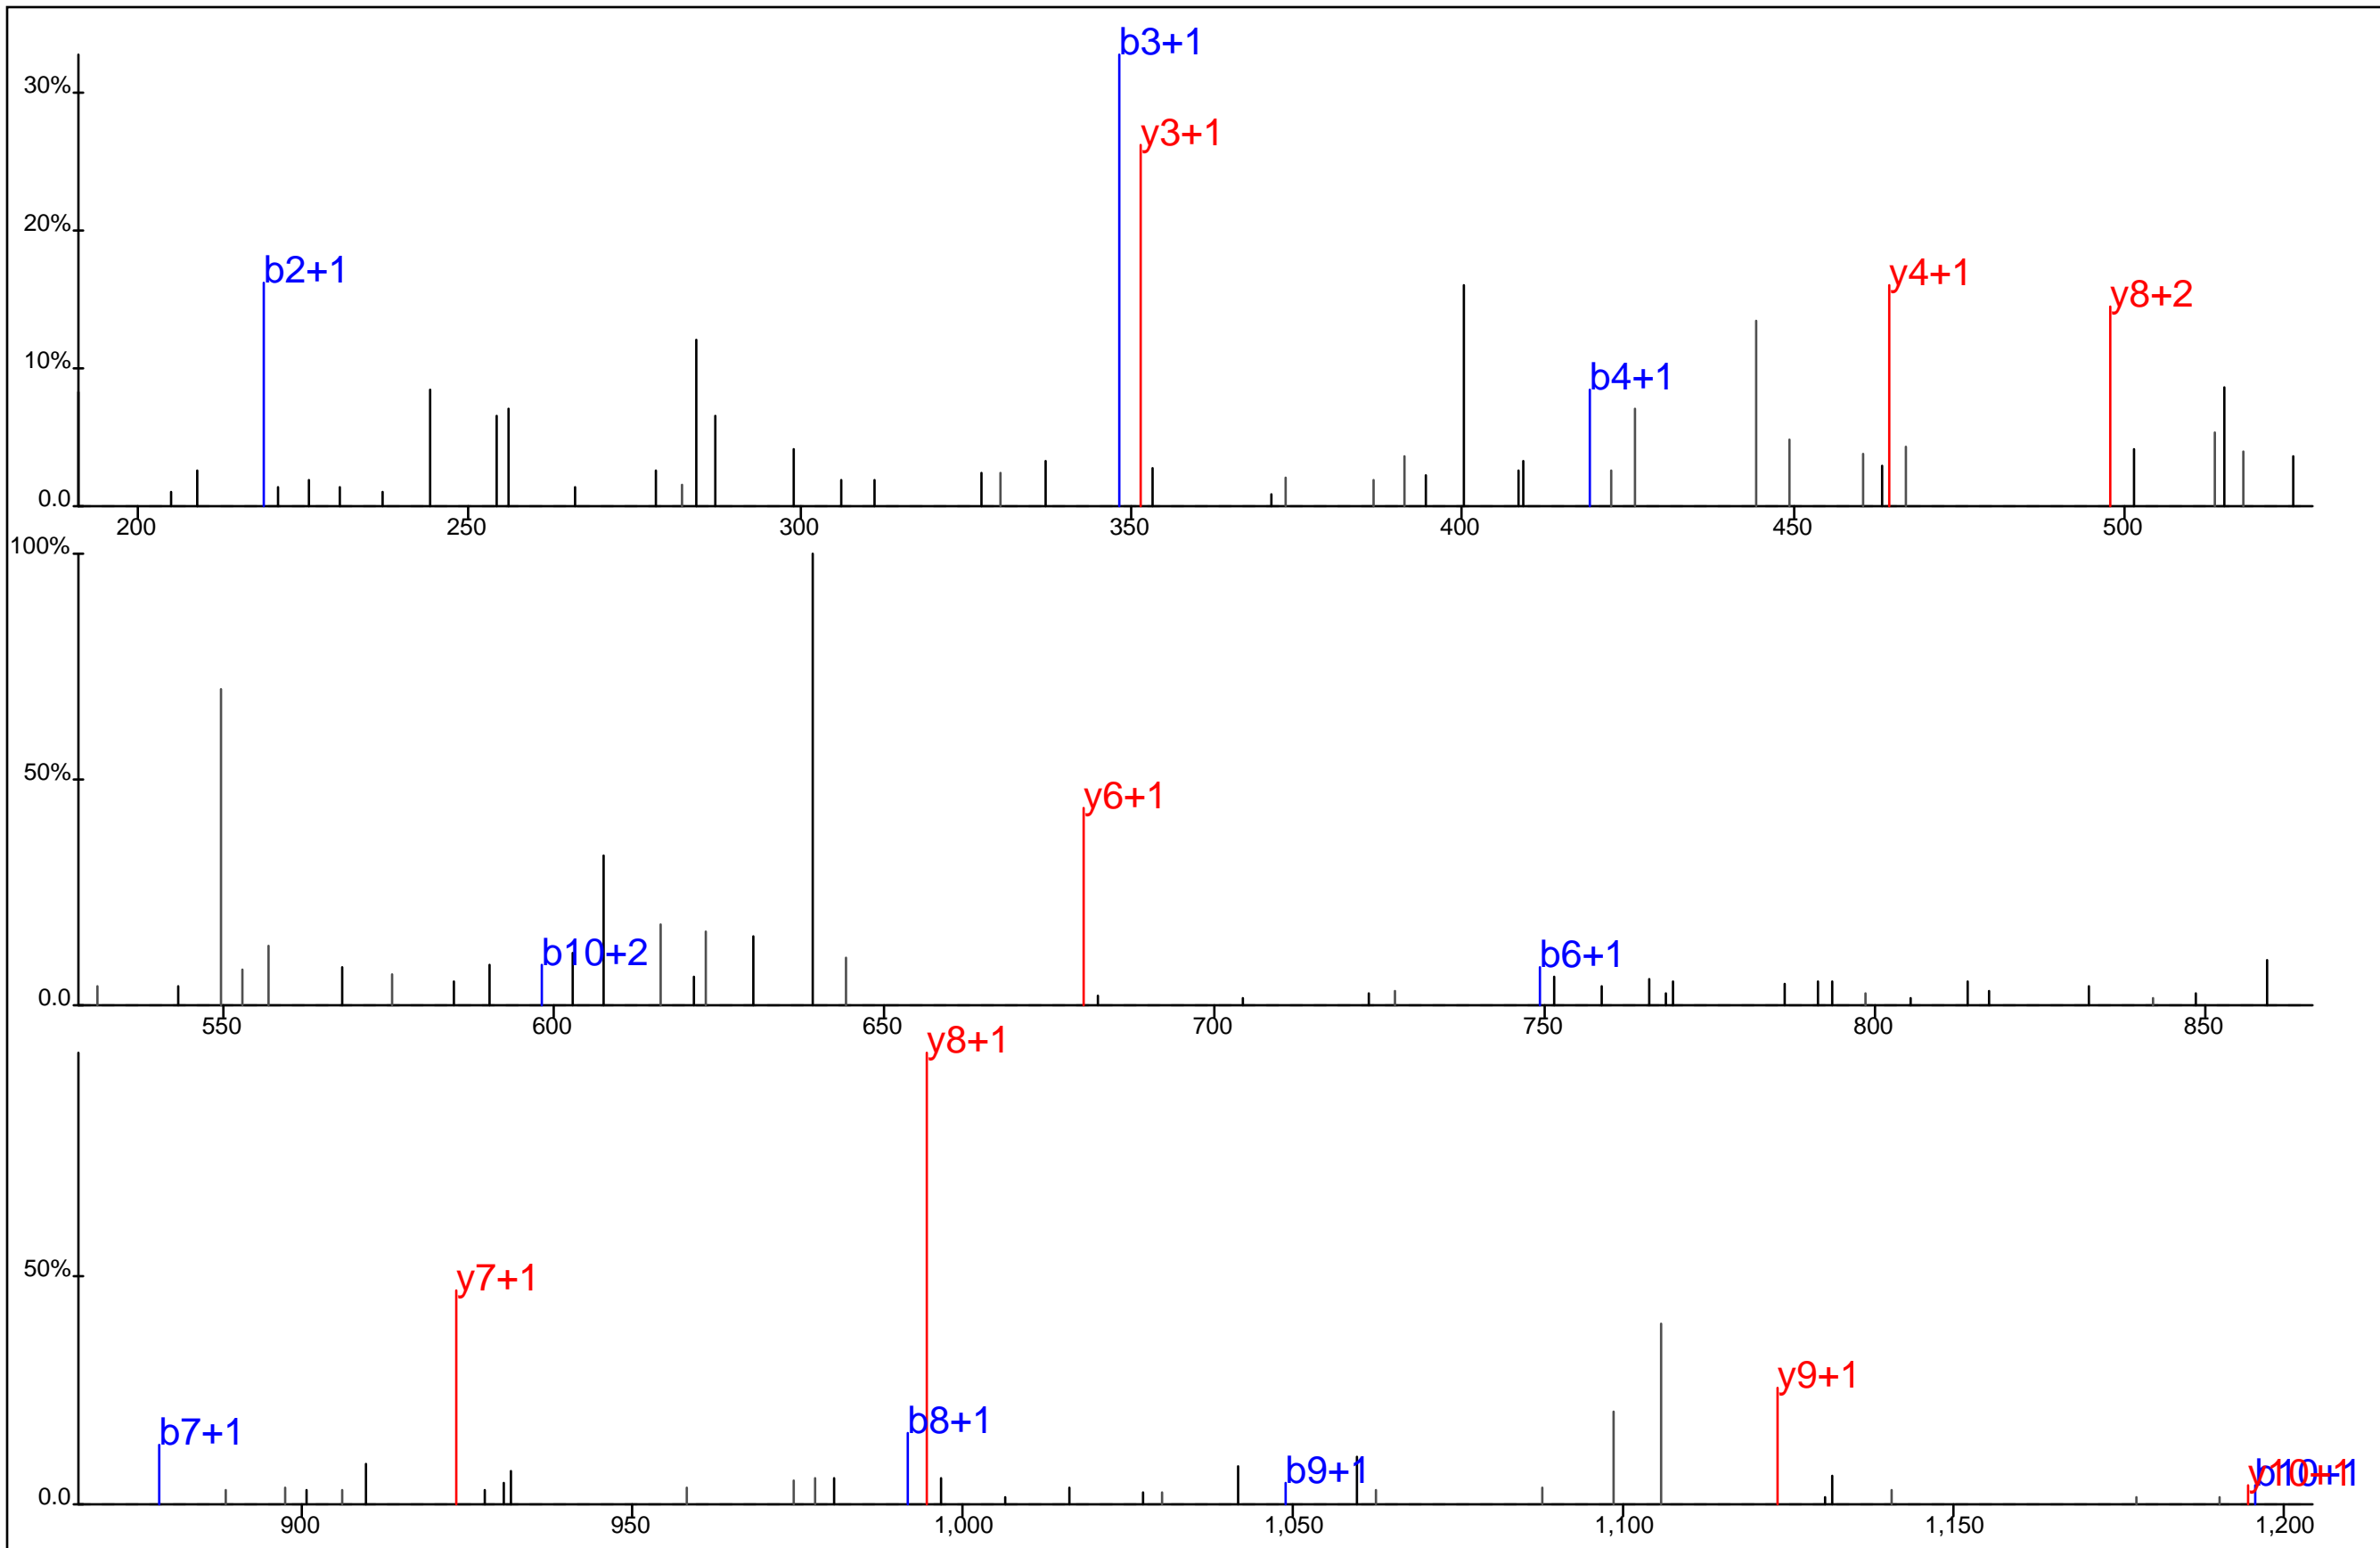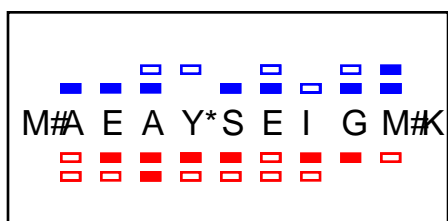

Protein Name: T cell antigen receptor, zeta  
 gi Accession: 0  
 Precursor Mass: 671.2587+2  
 Delta Mass: 0.009 ppm  
 XCorr: 60.71

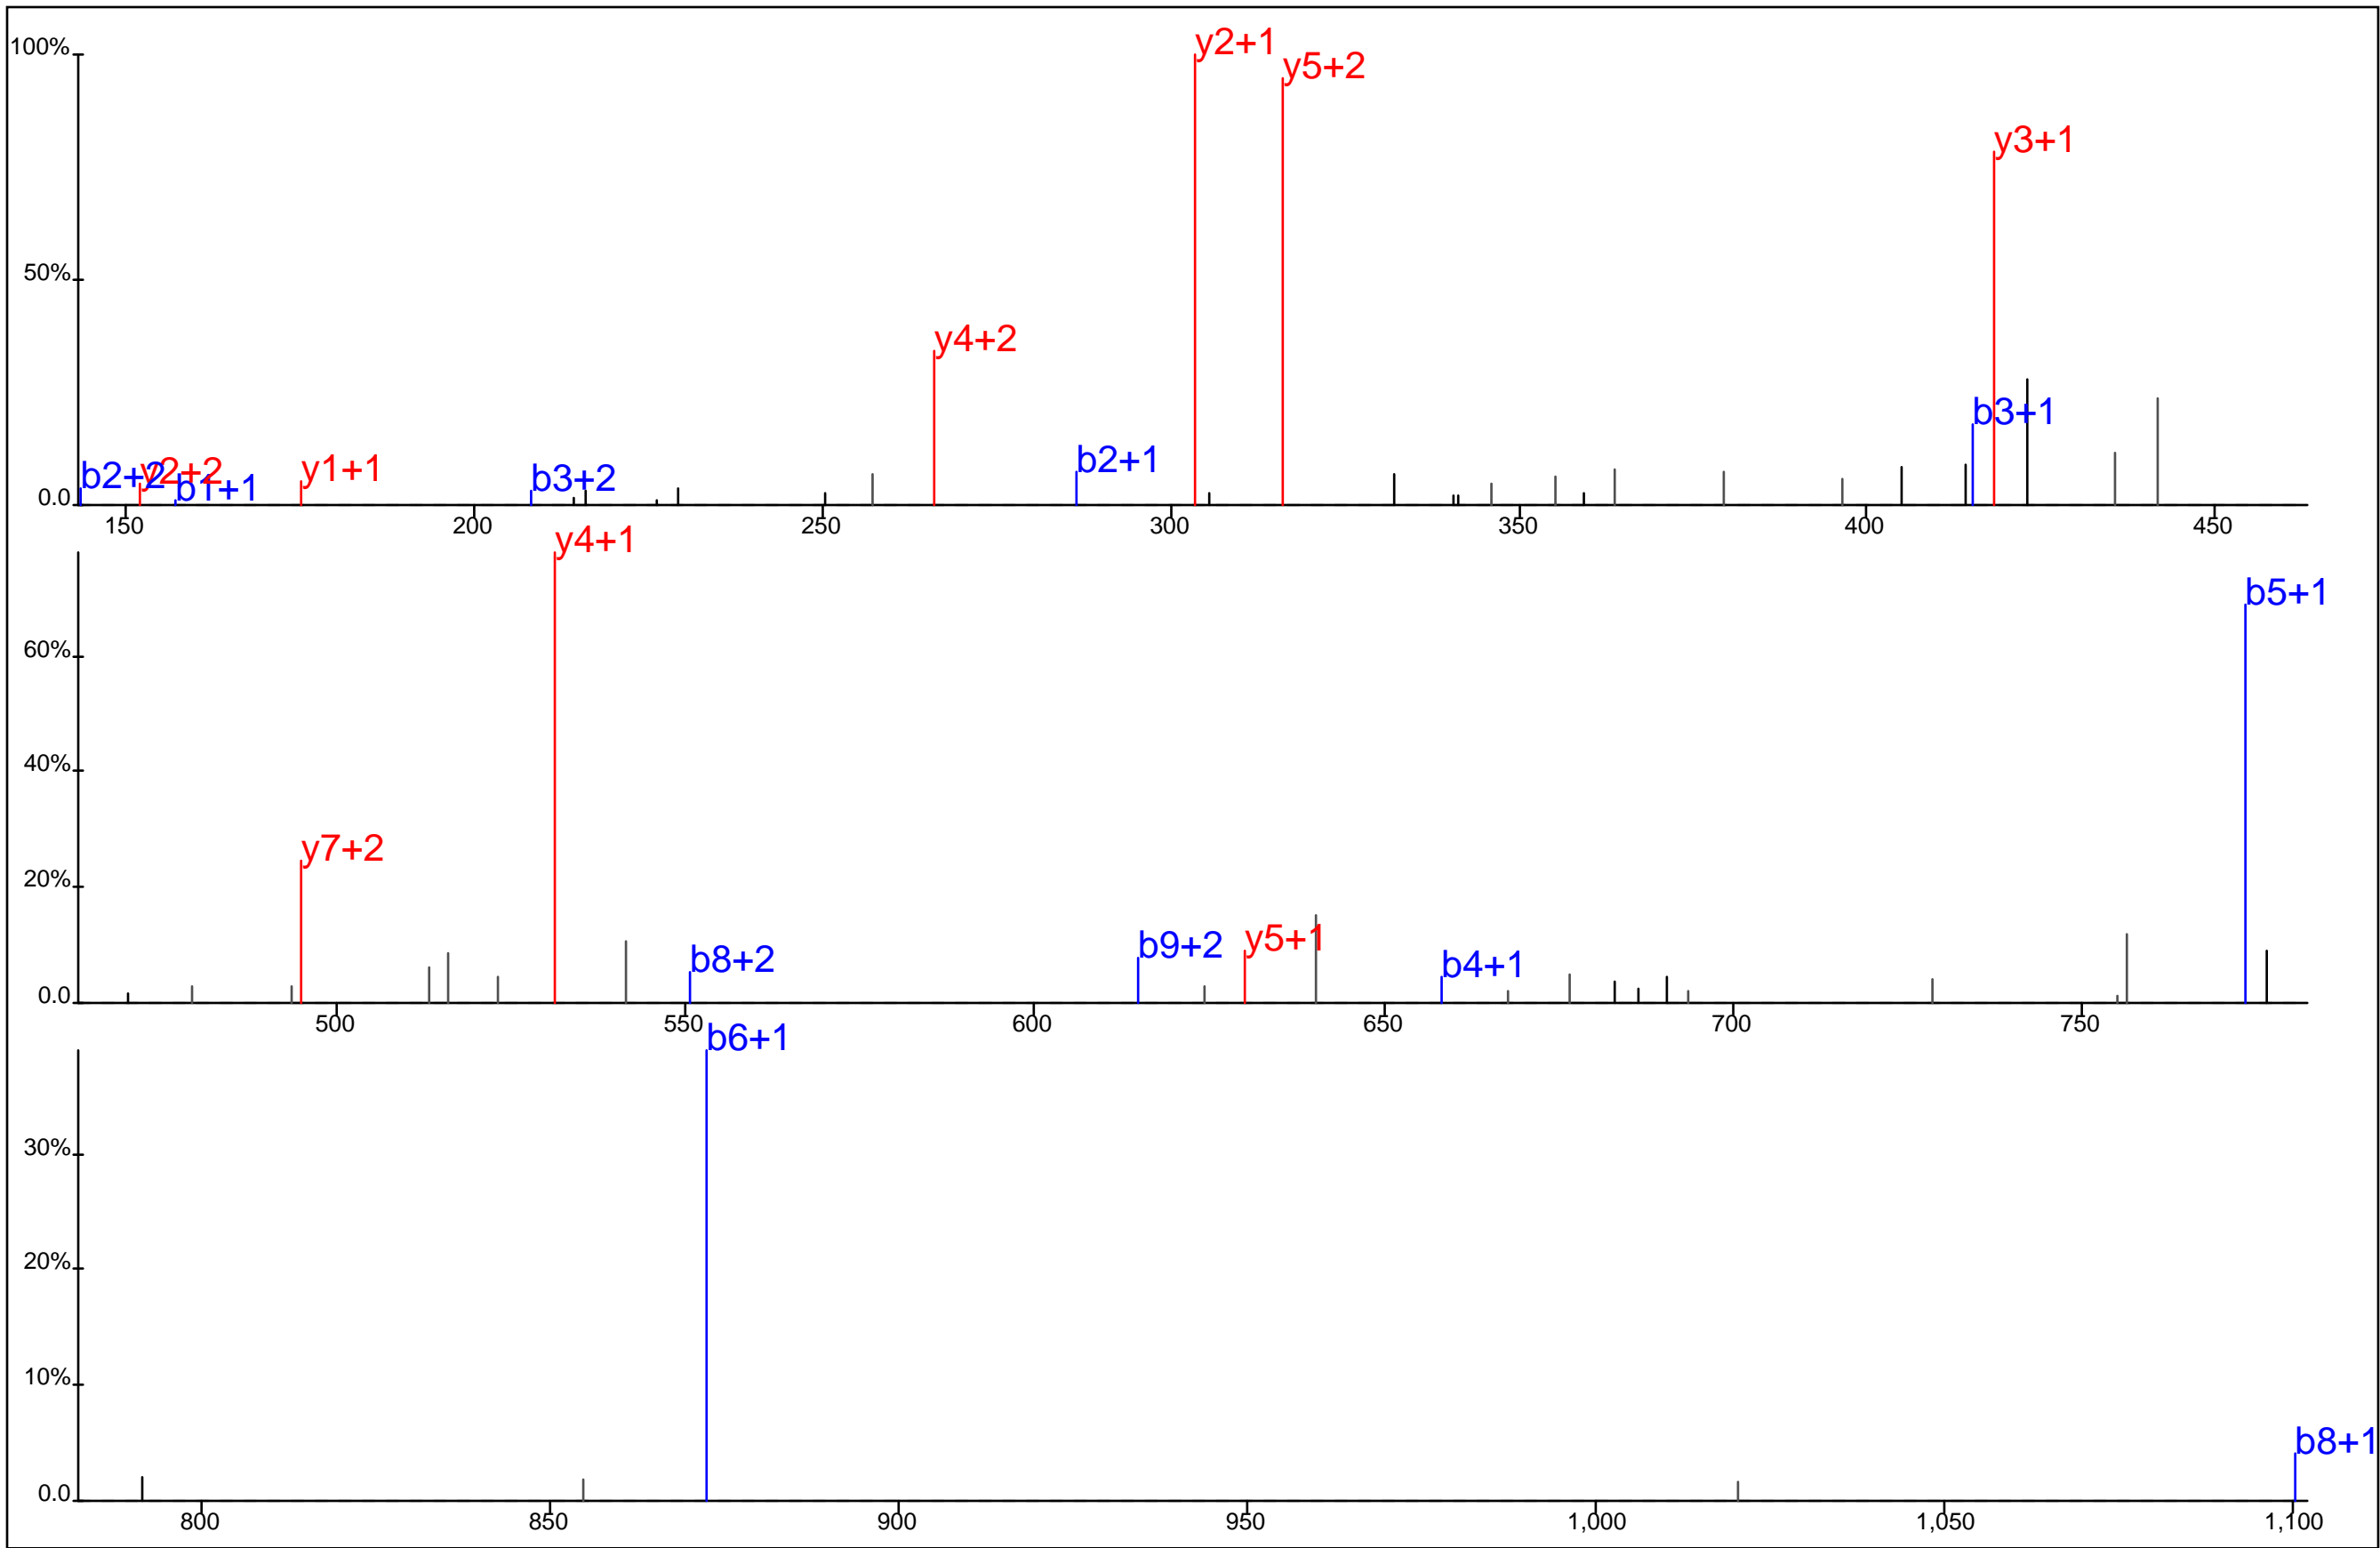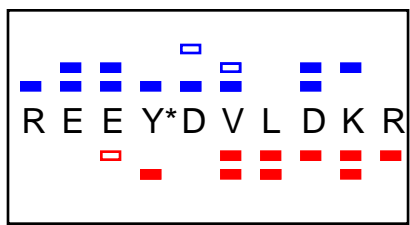

Protein Name: T cell antigen receptor, zeta  
 gi Accession: 0  
 Precursor Mass: 468.2171+3  
 Delta Mass: 0.460 ppm  
 XCorr: 43.68

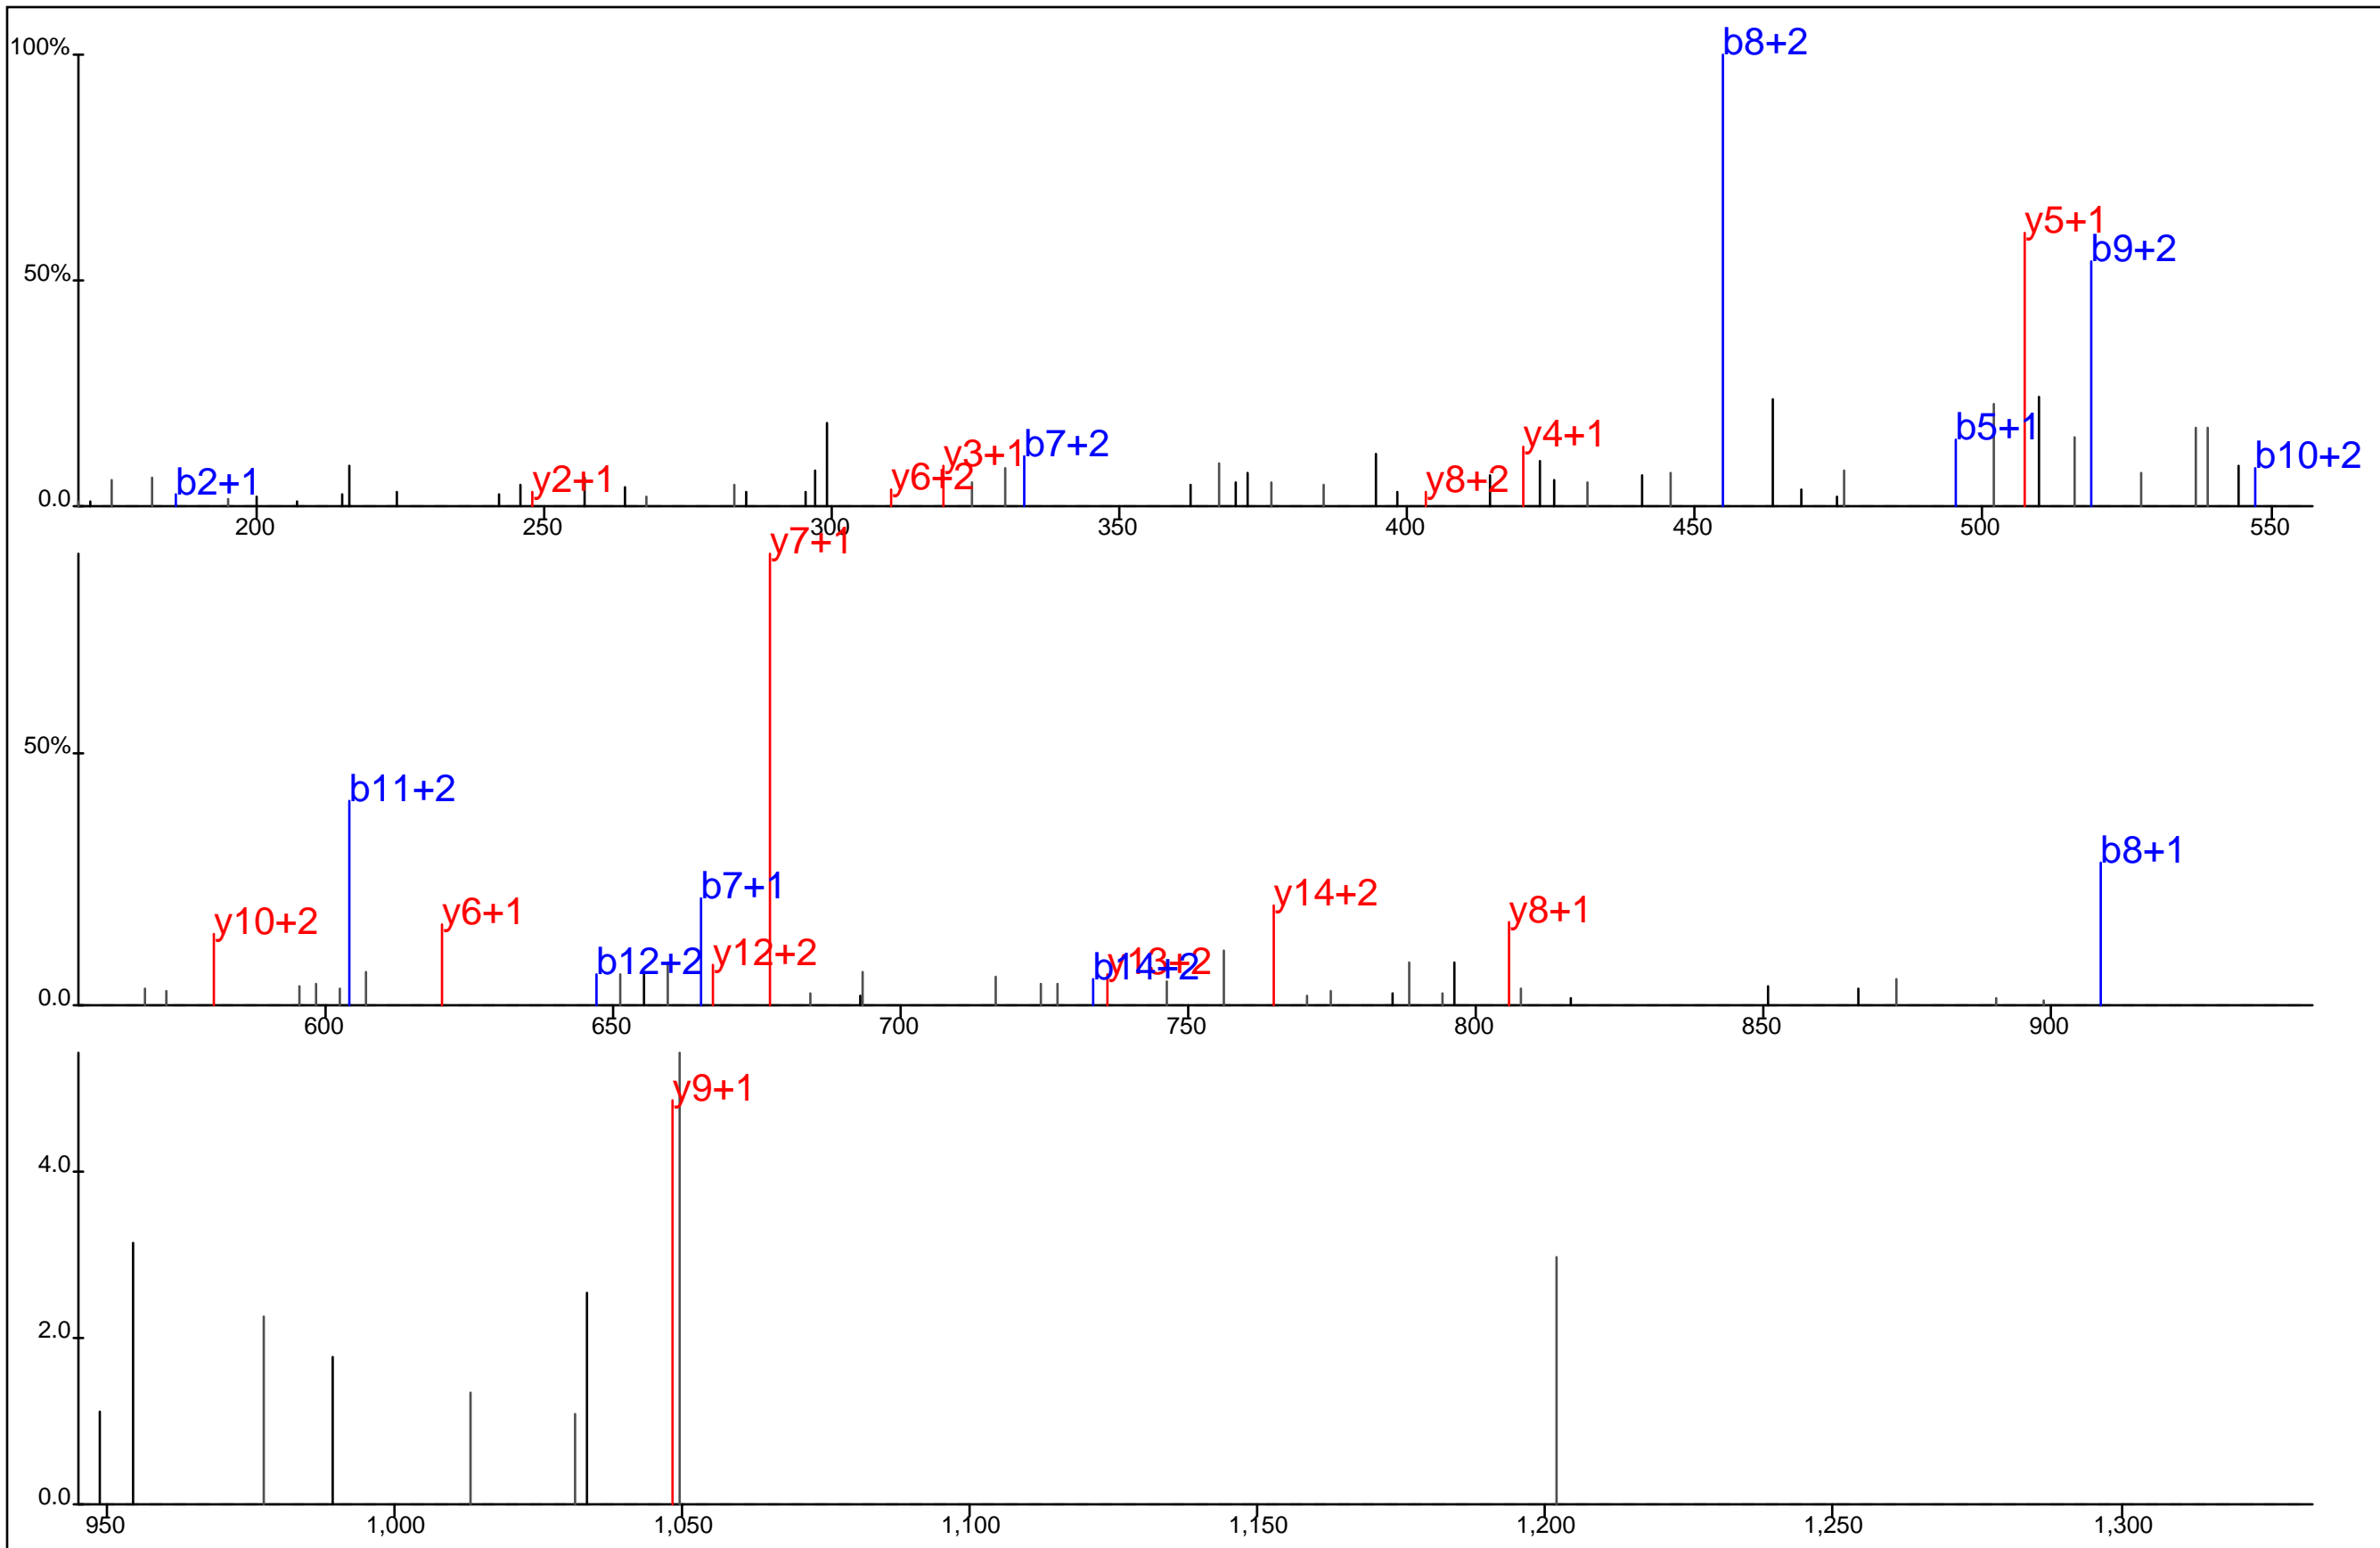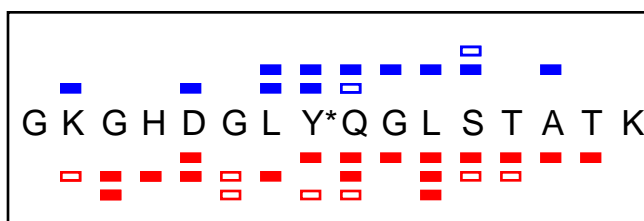

Protein Name: T cell antigen receptor, zeta  
 gi Accession: 0  
 Precursor Mass: 571.6046+3  
 Delta Mass: 0.715 ppm  
 XCorr: 46.71

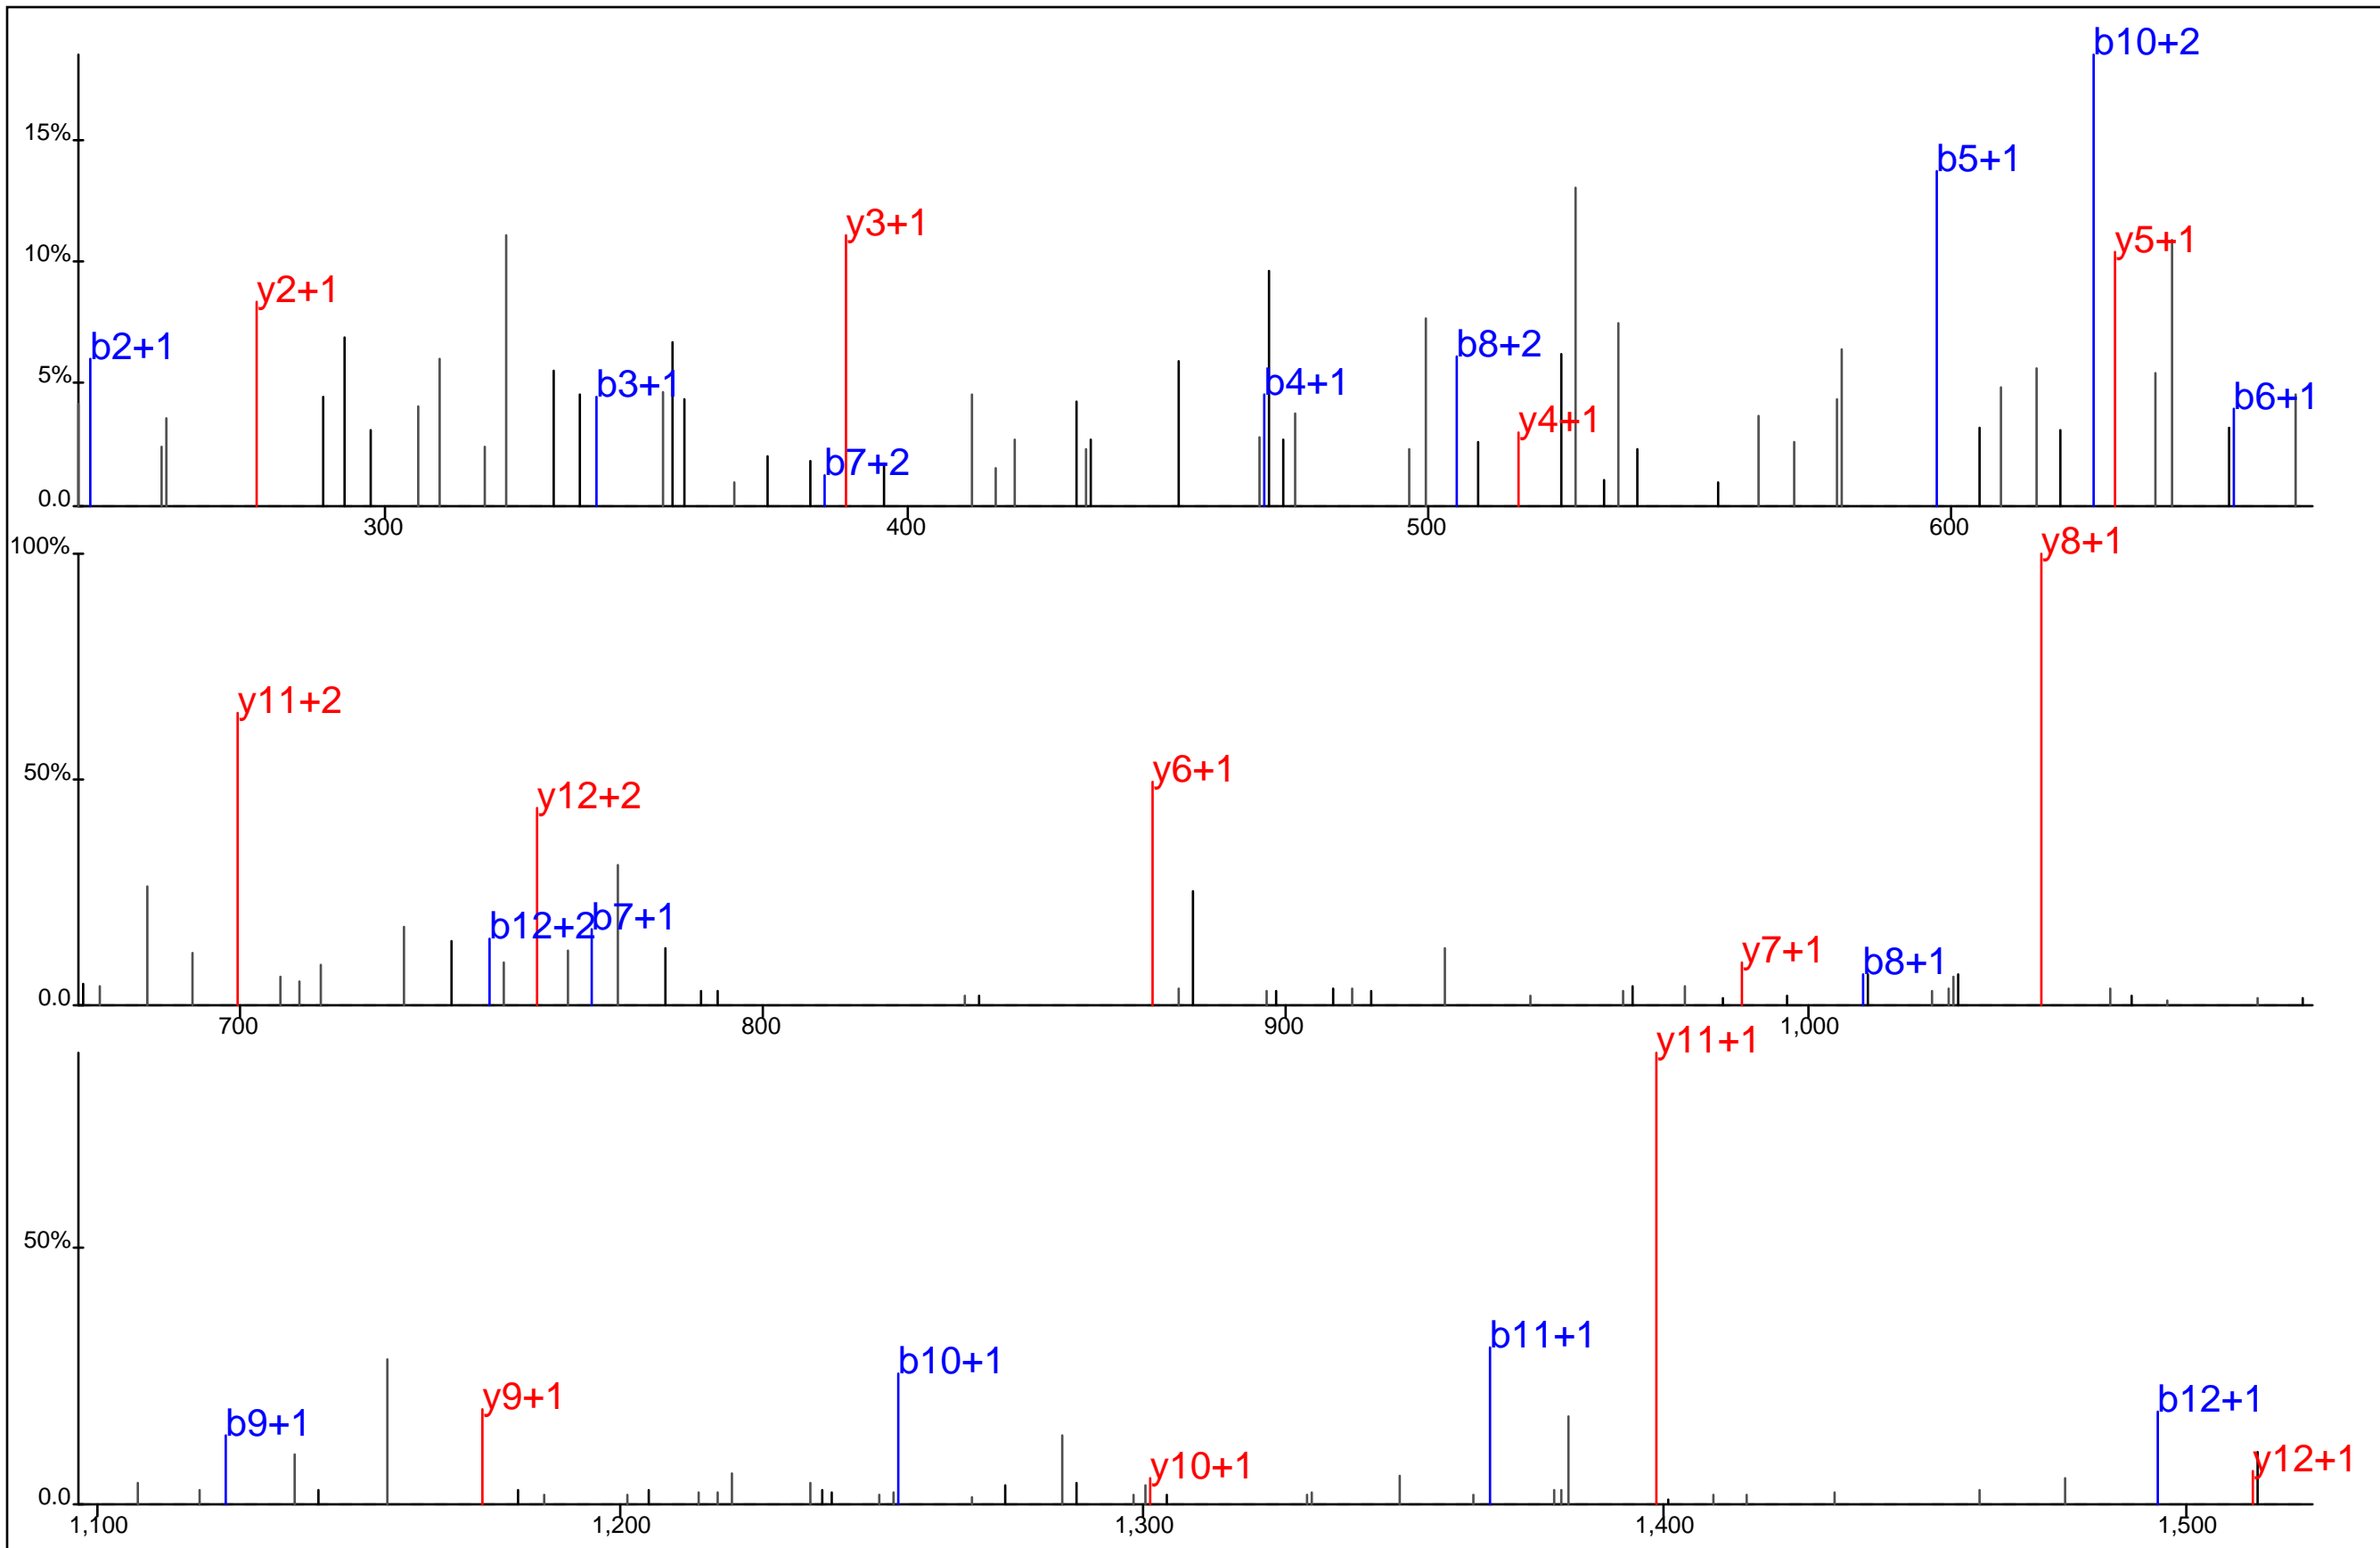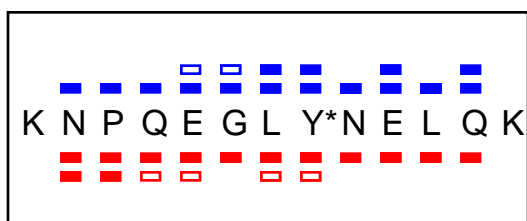

Protein Name: T cell antigen receptor, zeta  
 gi Accession: 0  
 Precursor Mass: 820.8890+2  
 Delta Mass: 1.680 ppm  
 XCorr: 66.93



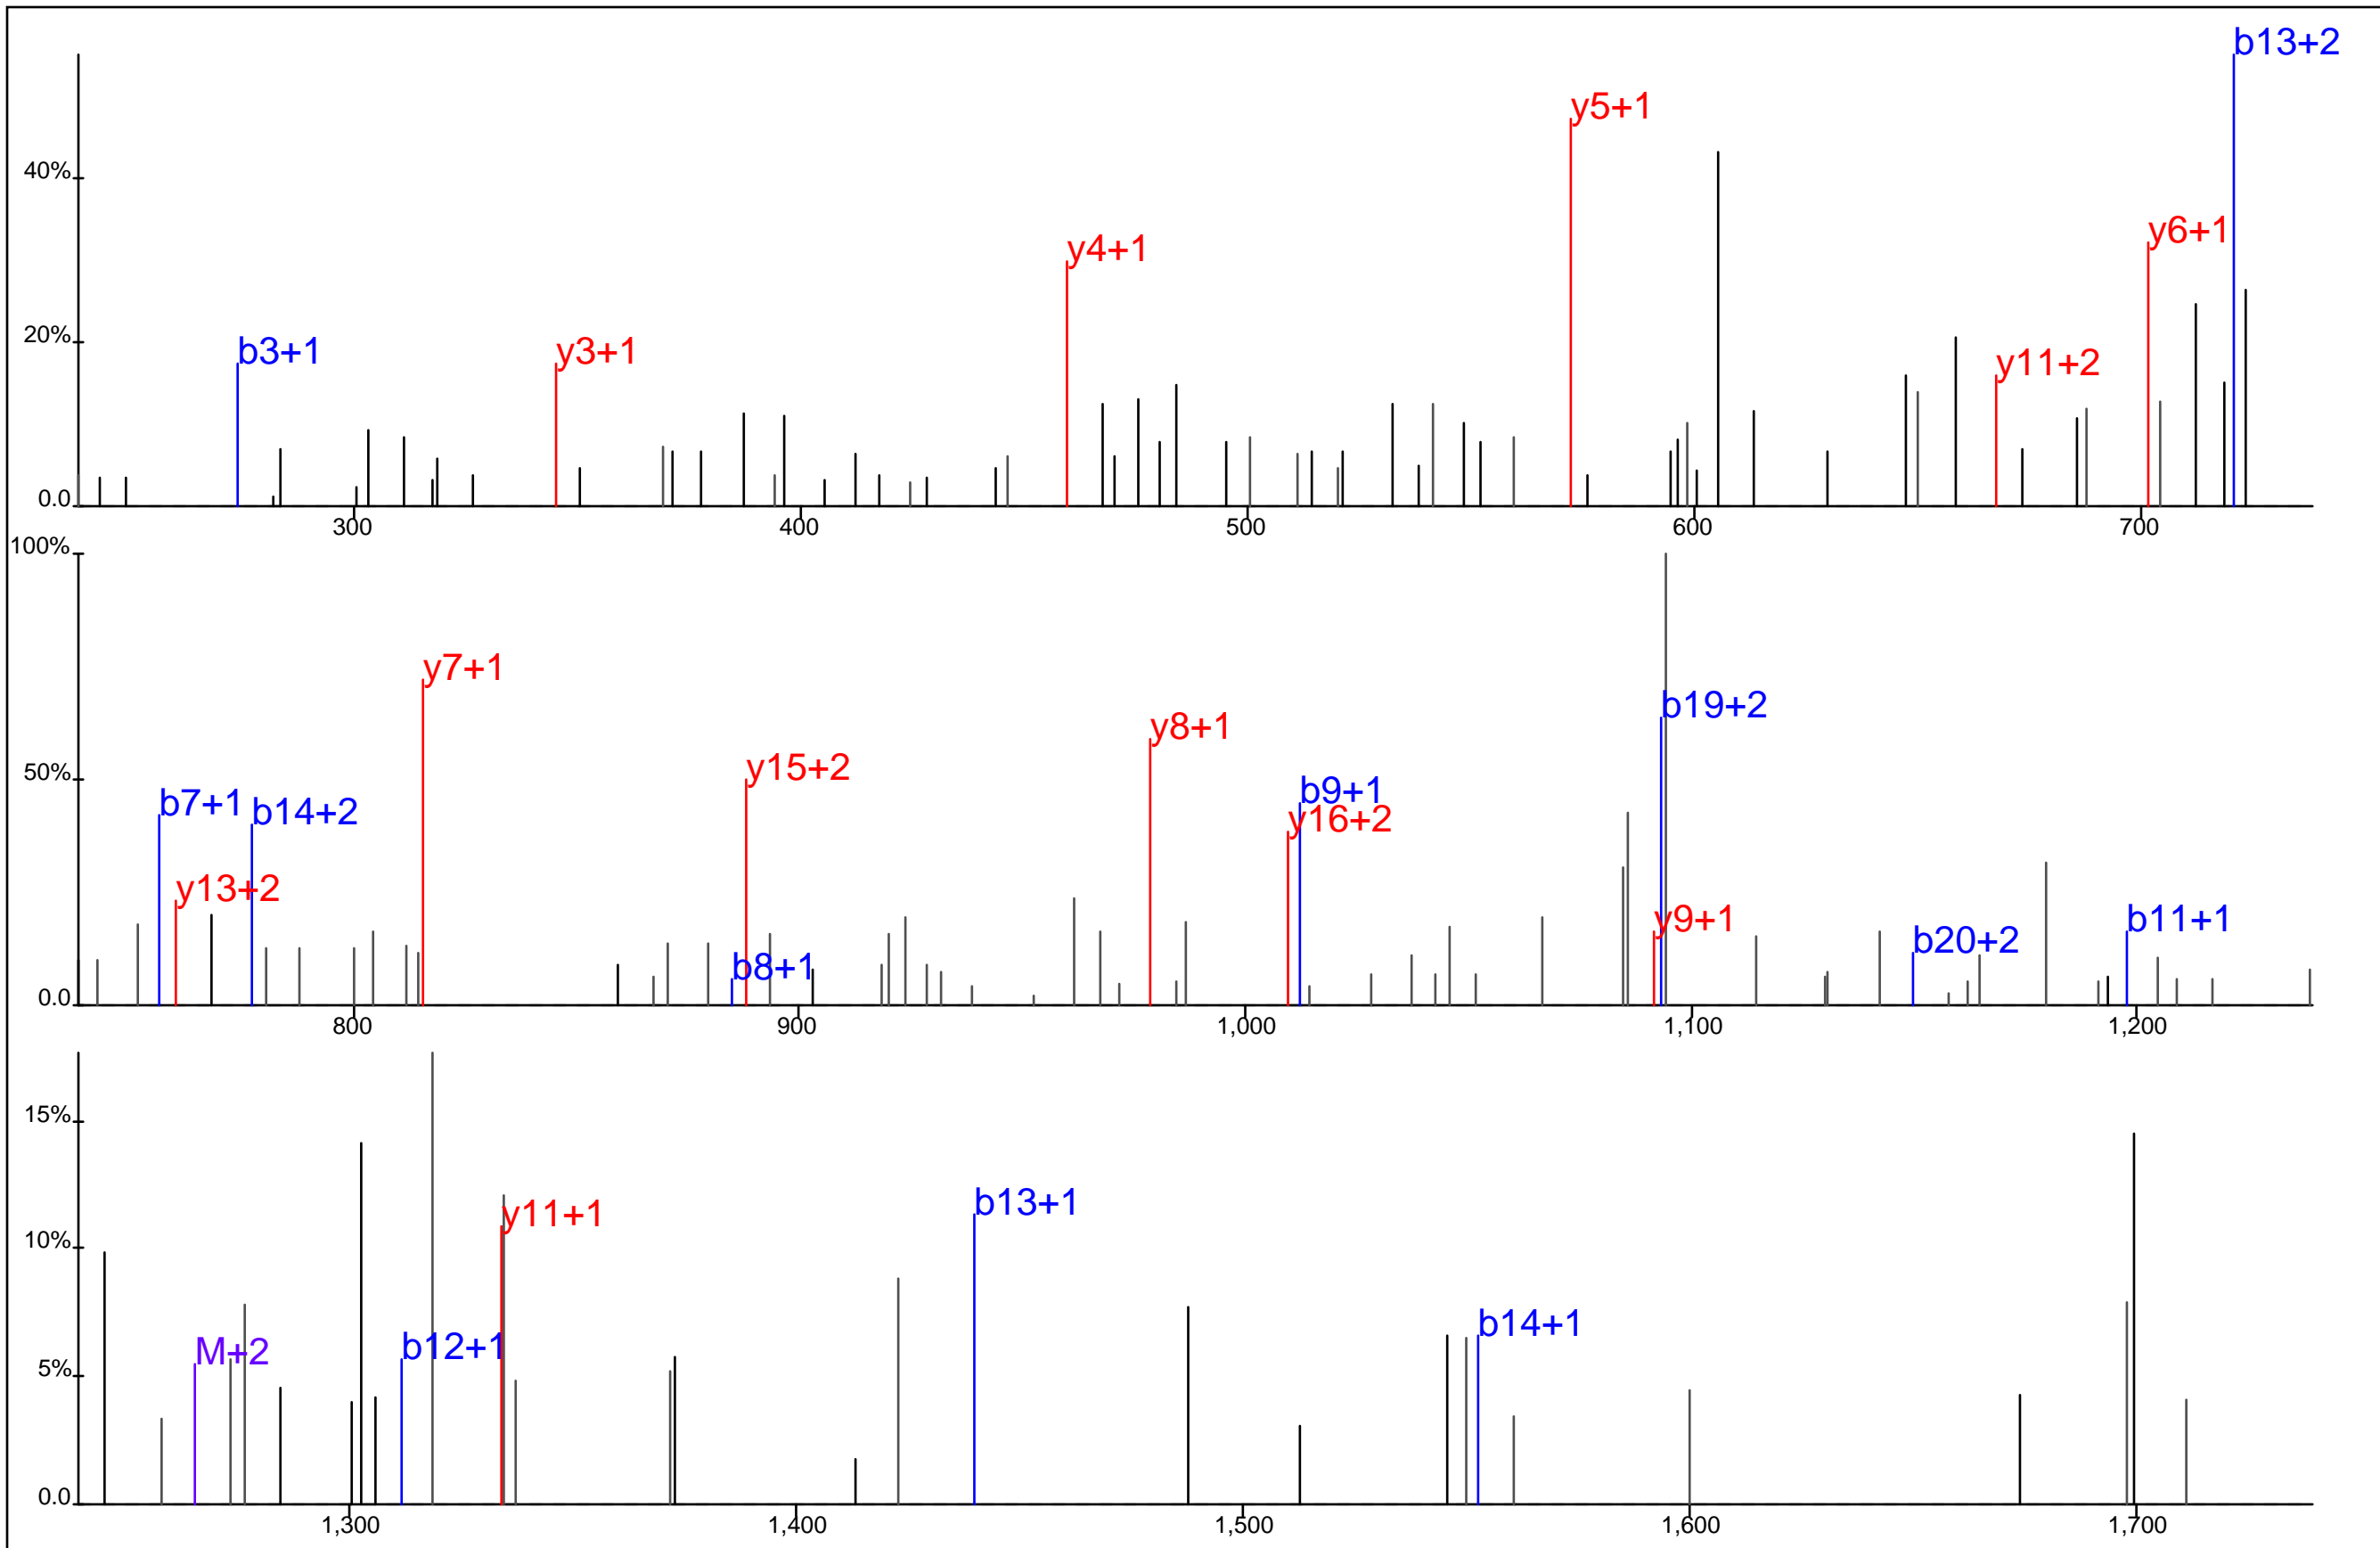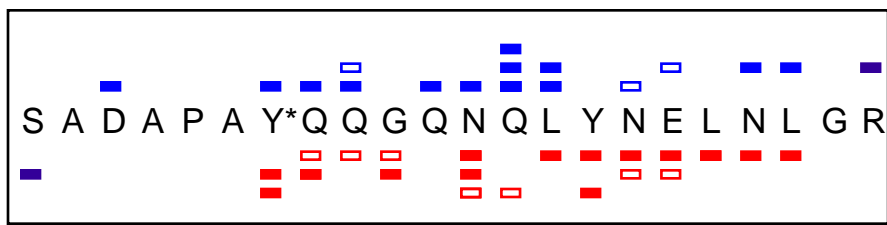

Protein Name: T cell antigen receptor, zeta  
 gi Accession: 0  
 Precursor Mass: 844.0507+3  
 Delta Mass: 0.653 ppm  
 XCorr: 41.87





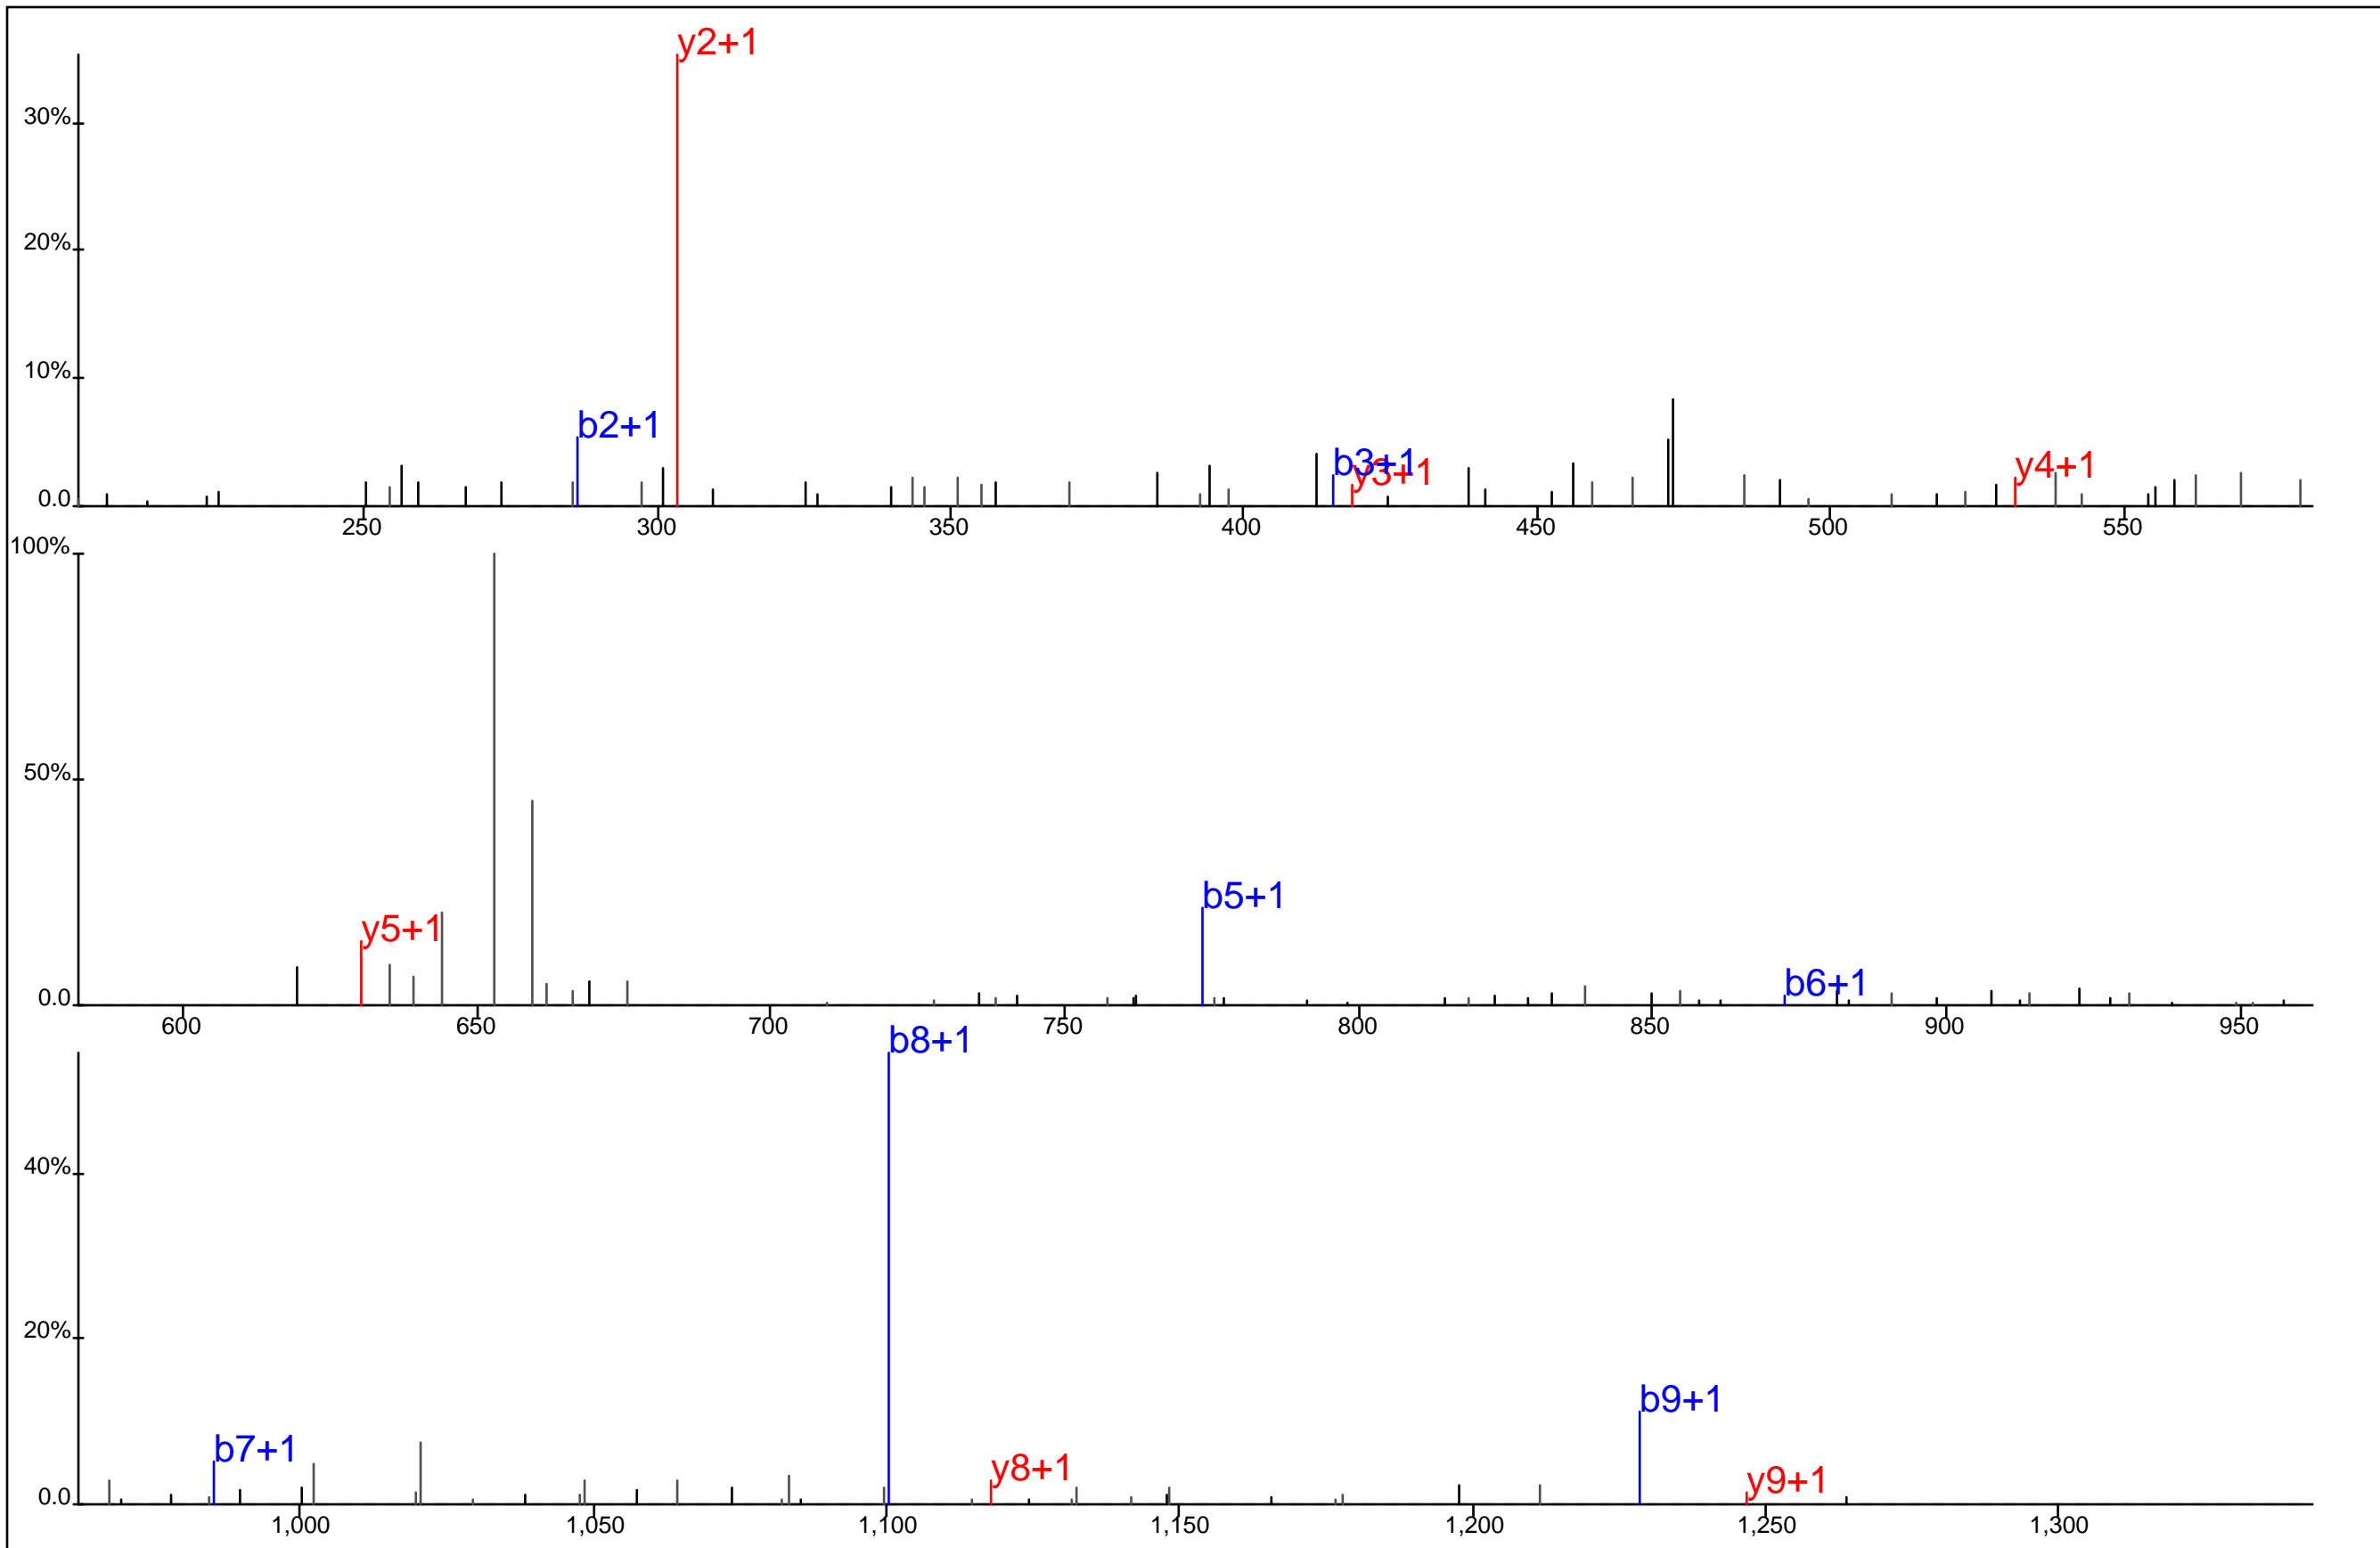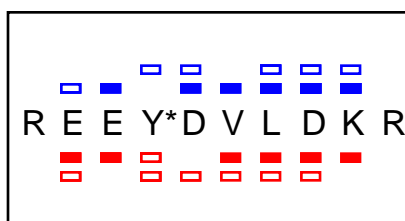

Protein Name: T cell antigen receptor, zeta  
 gi Accession: 0  
 Precursor Mass: 701.8209+2  
 Delta Mass: 1.164 ppm  
 XCorr: 27.45

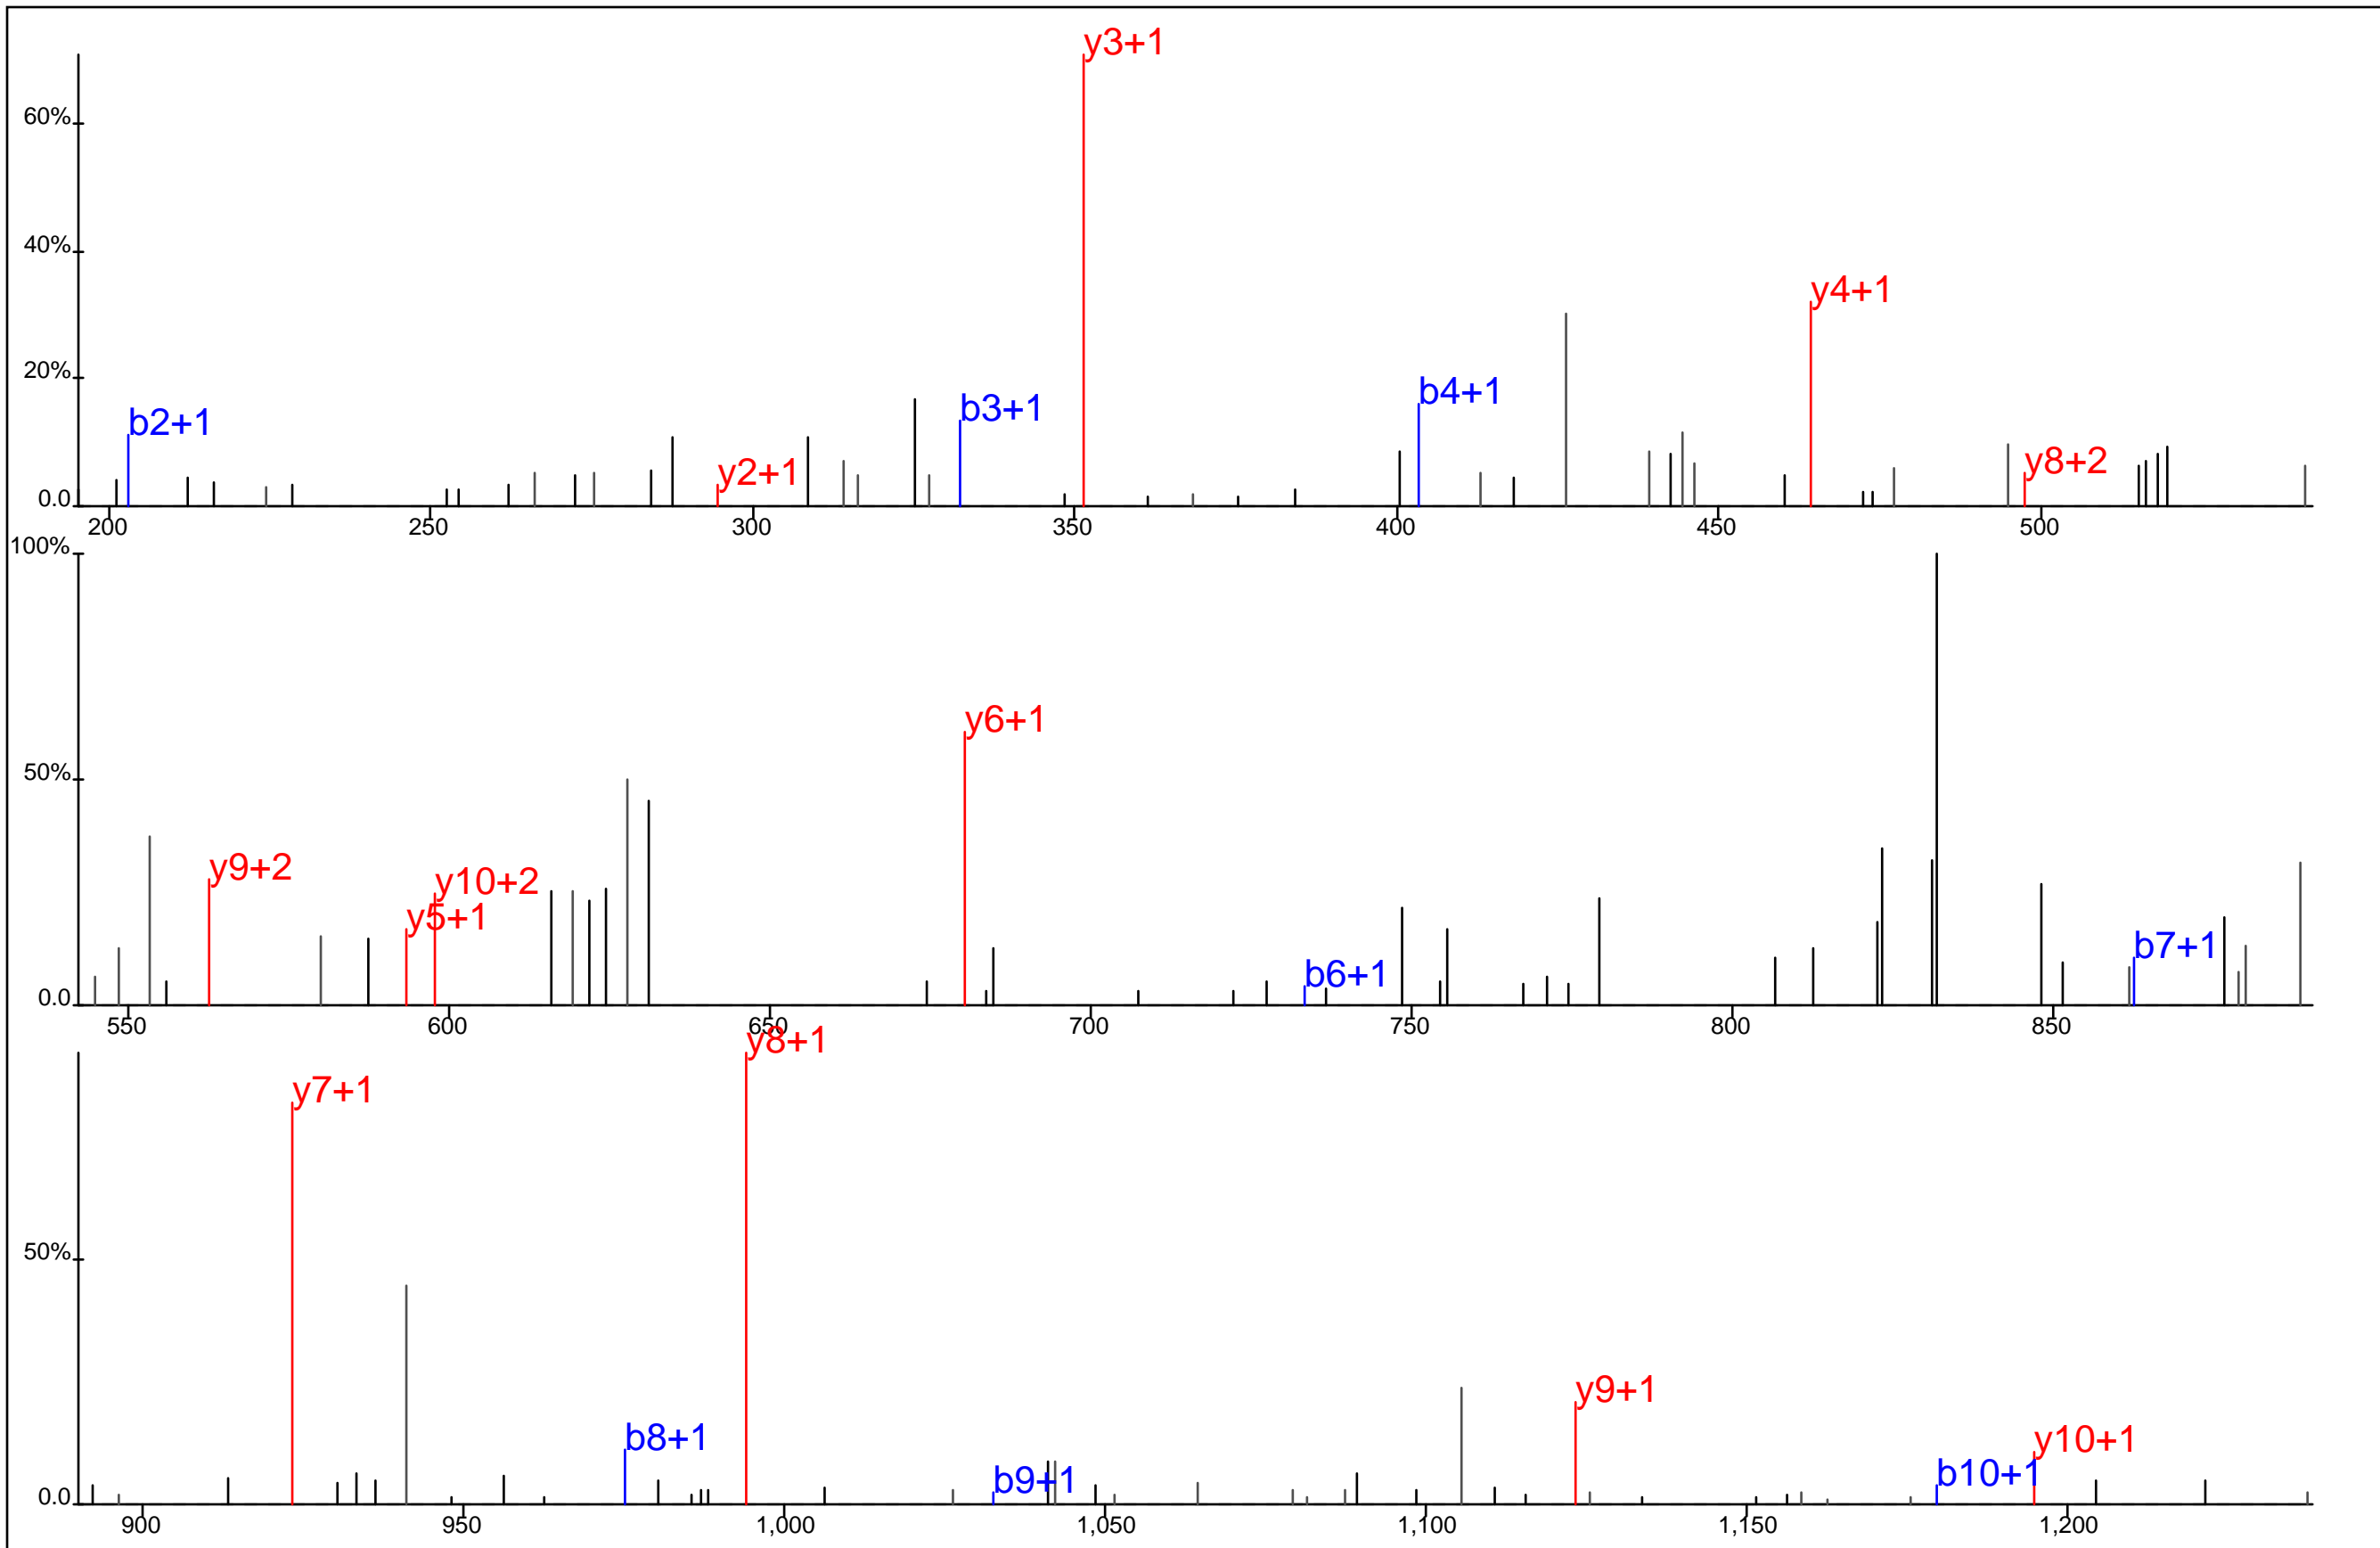

**M A E A Y\* S E I G M#K**

Protein Name: T cell antigen receptor, zeta  
 gi Accession: 0  
 Precursor Mass: 663.2627+2  
 Delta Mass: 2.144 ppm  
 XCorr: 46.2



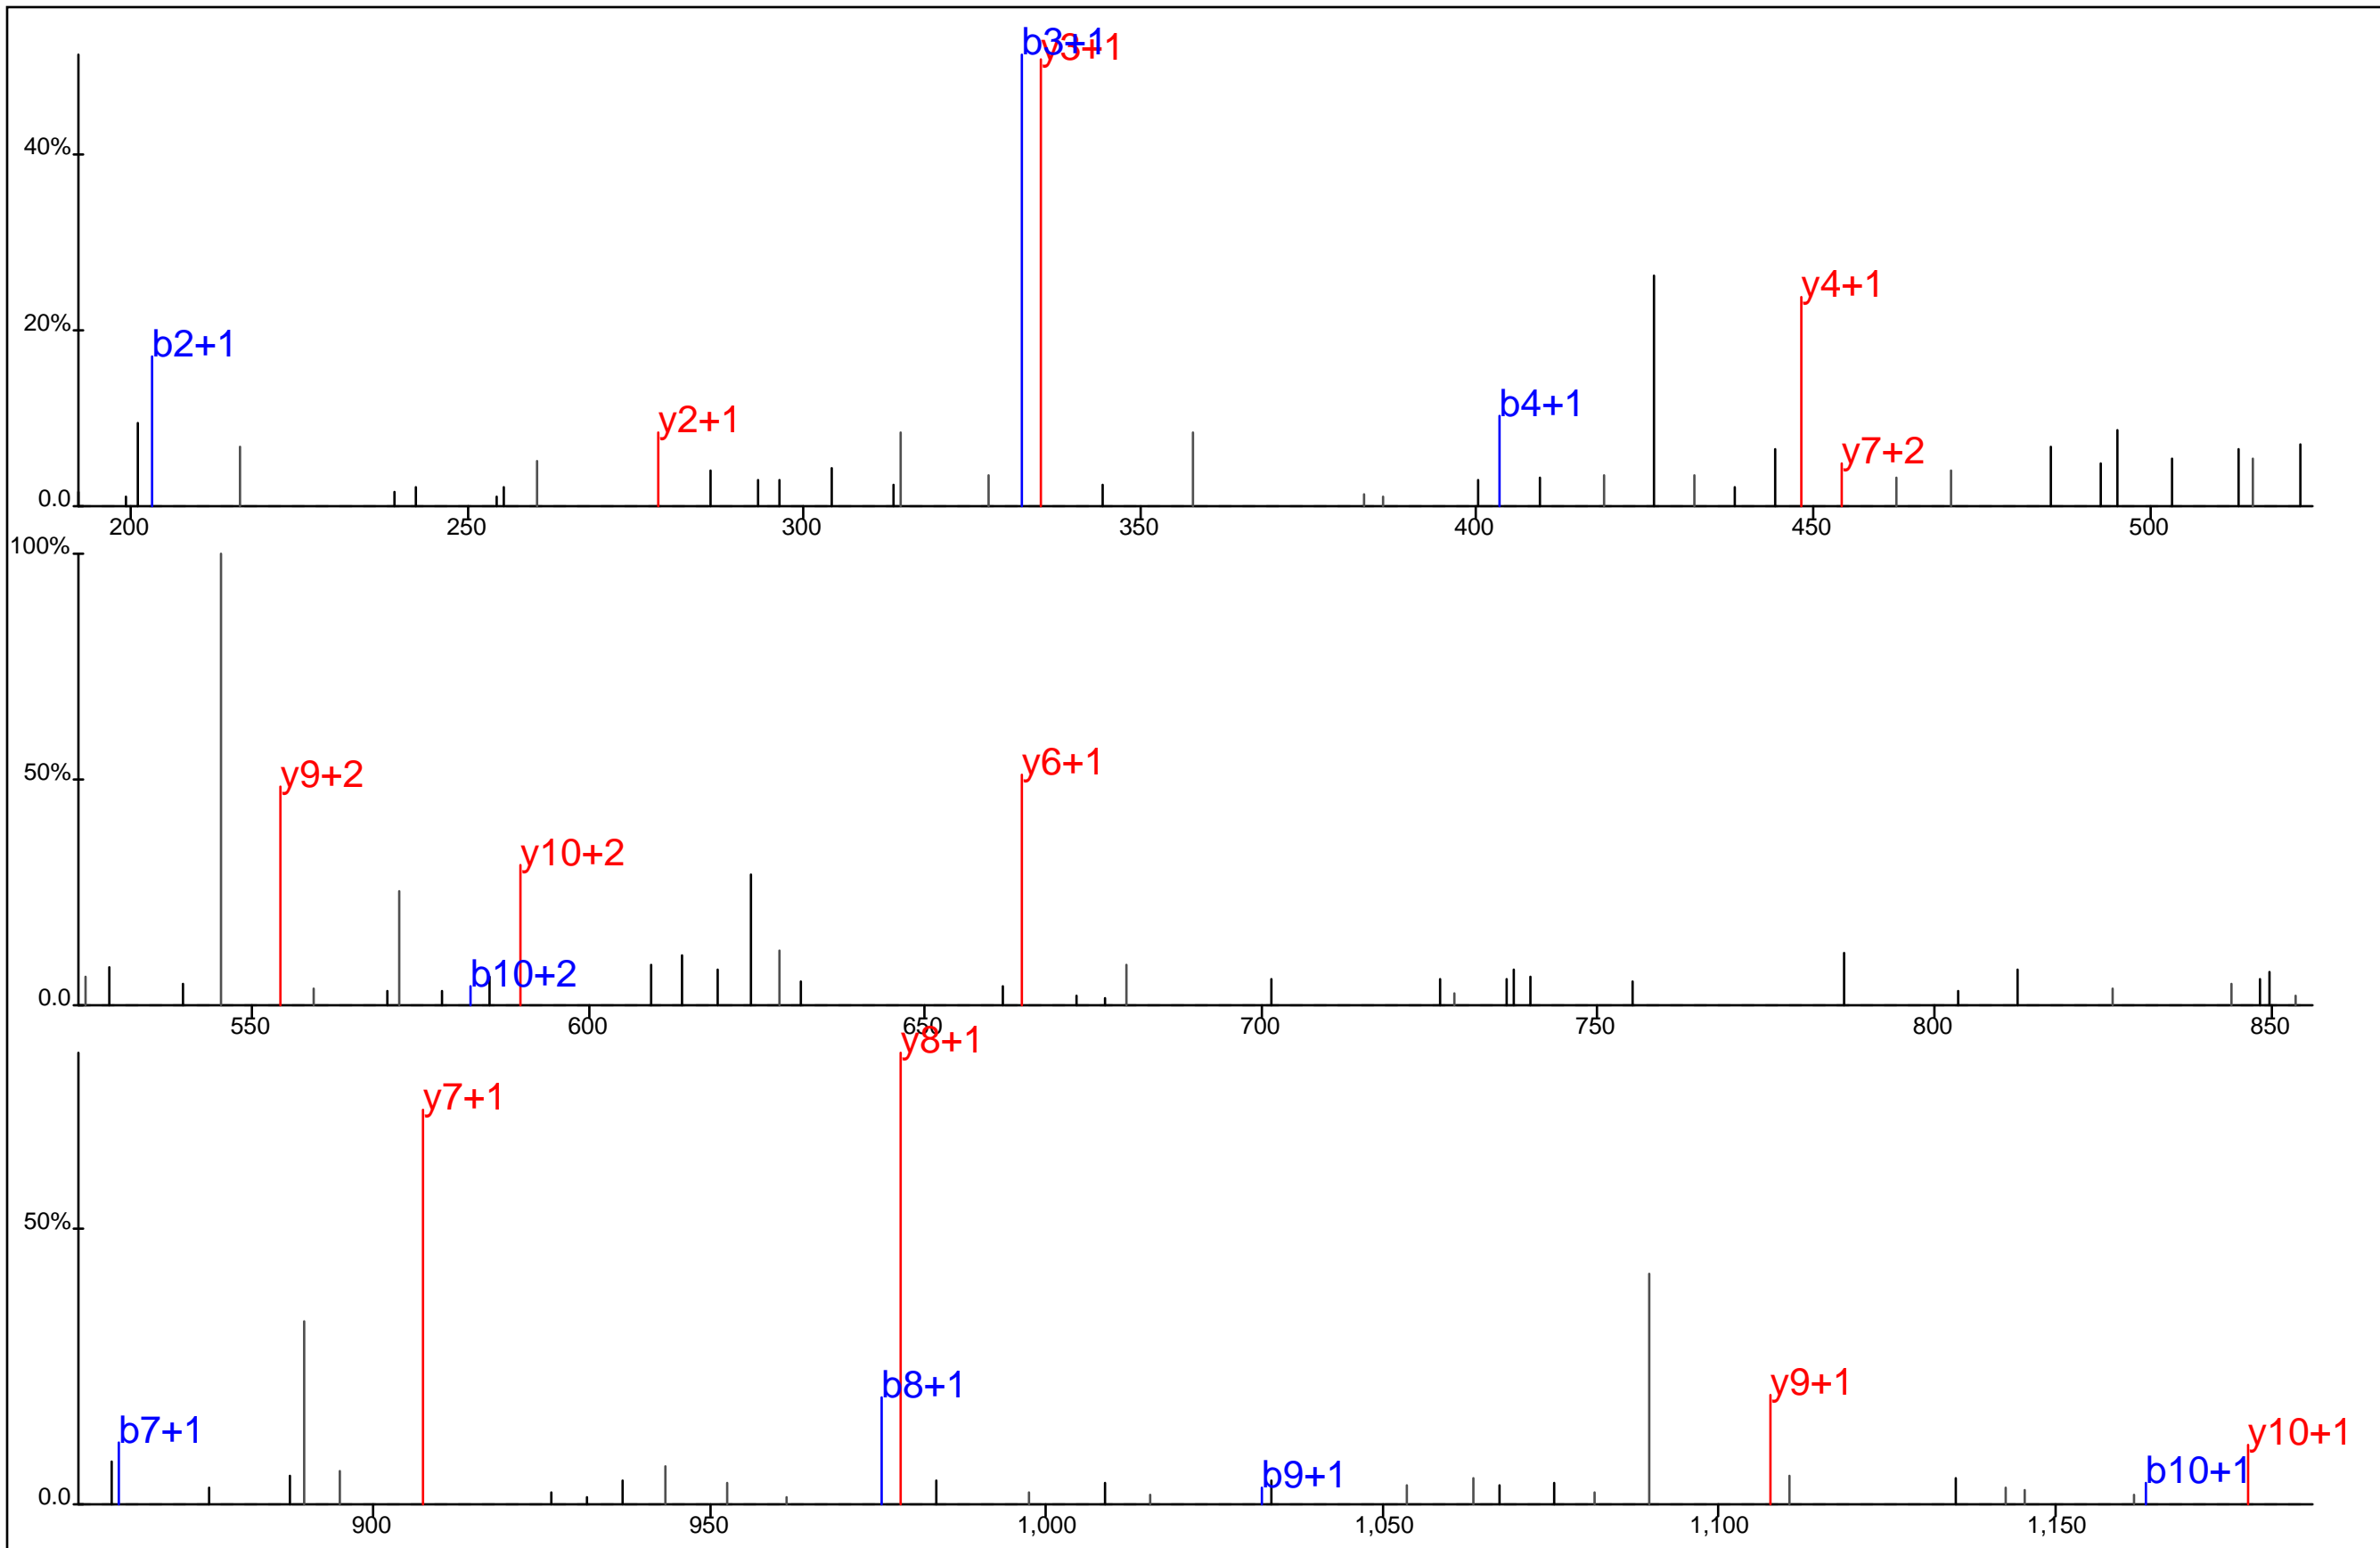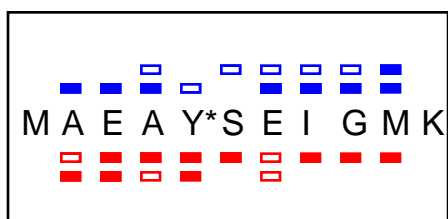

Protein Name: T cell antigen receptor, zeta  
 gi Accession: 0  
 Precursor Mass: 655.2627+2  
 Delta Mass: 1.709 ppm  
 XCorr: 59.55

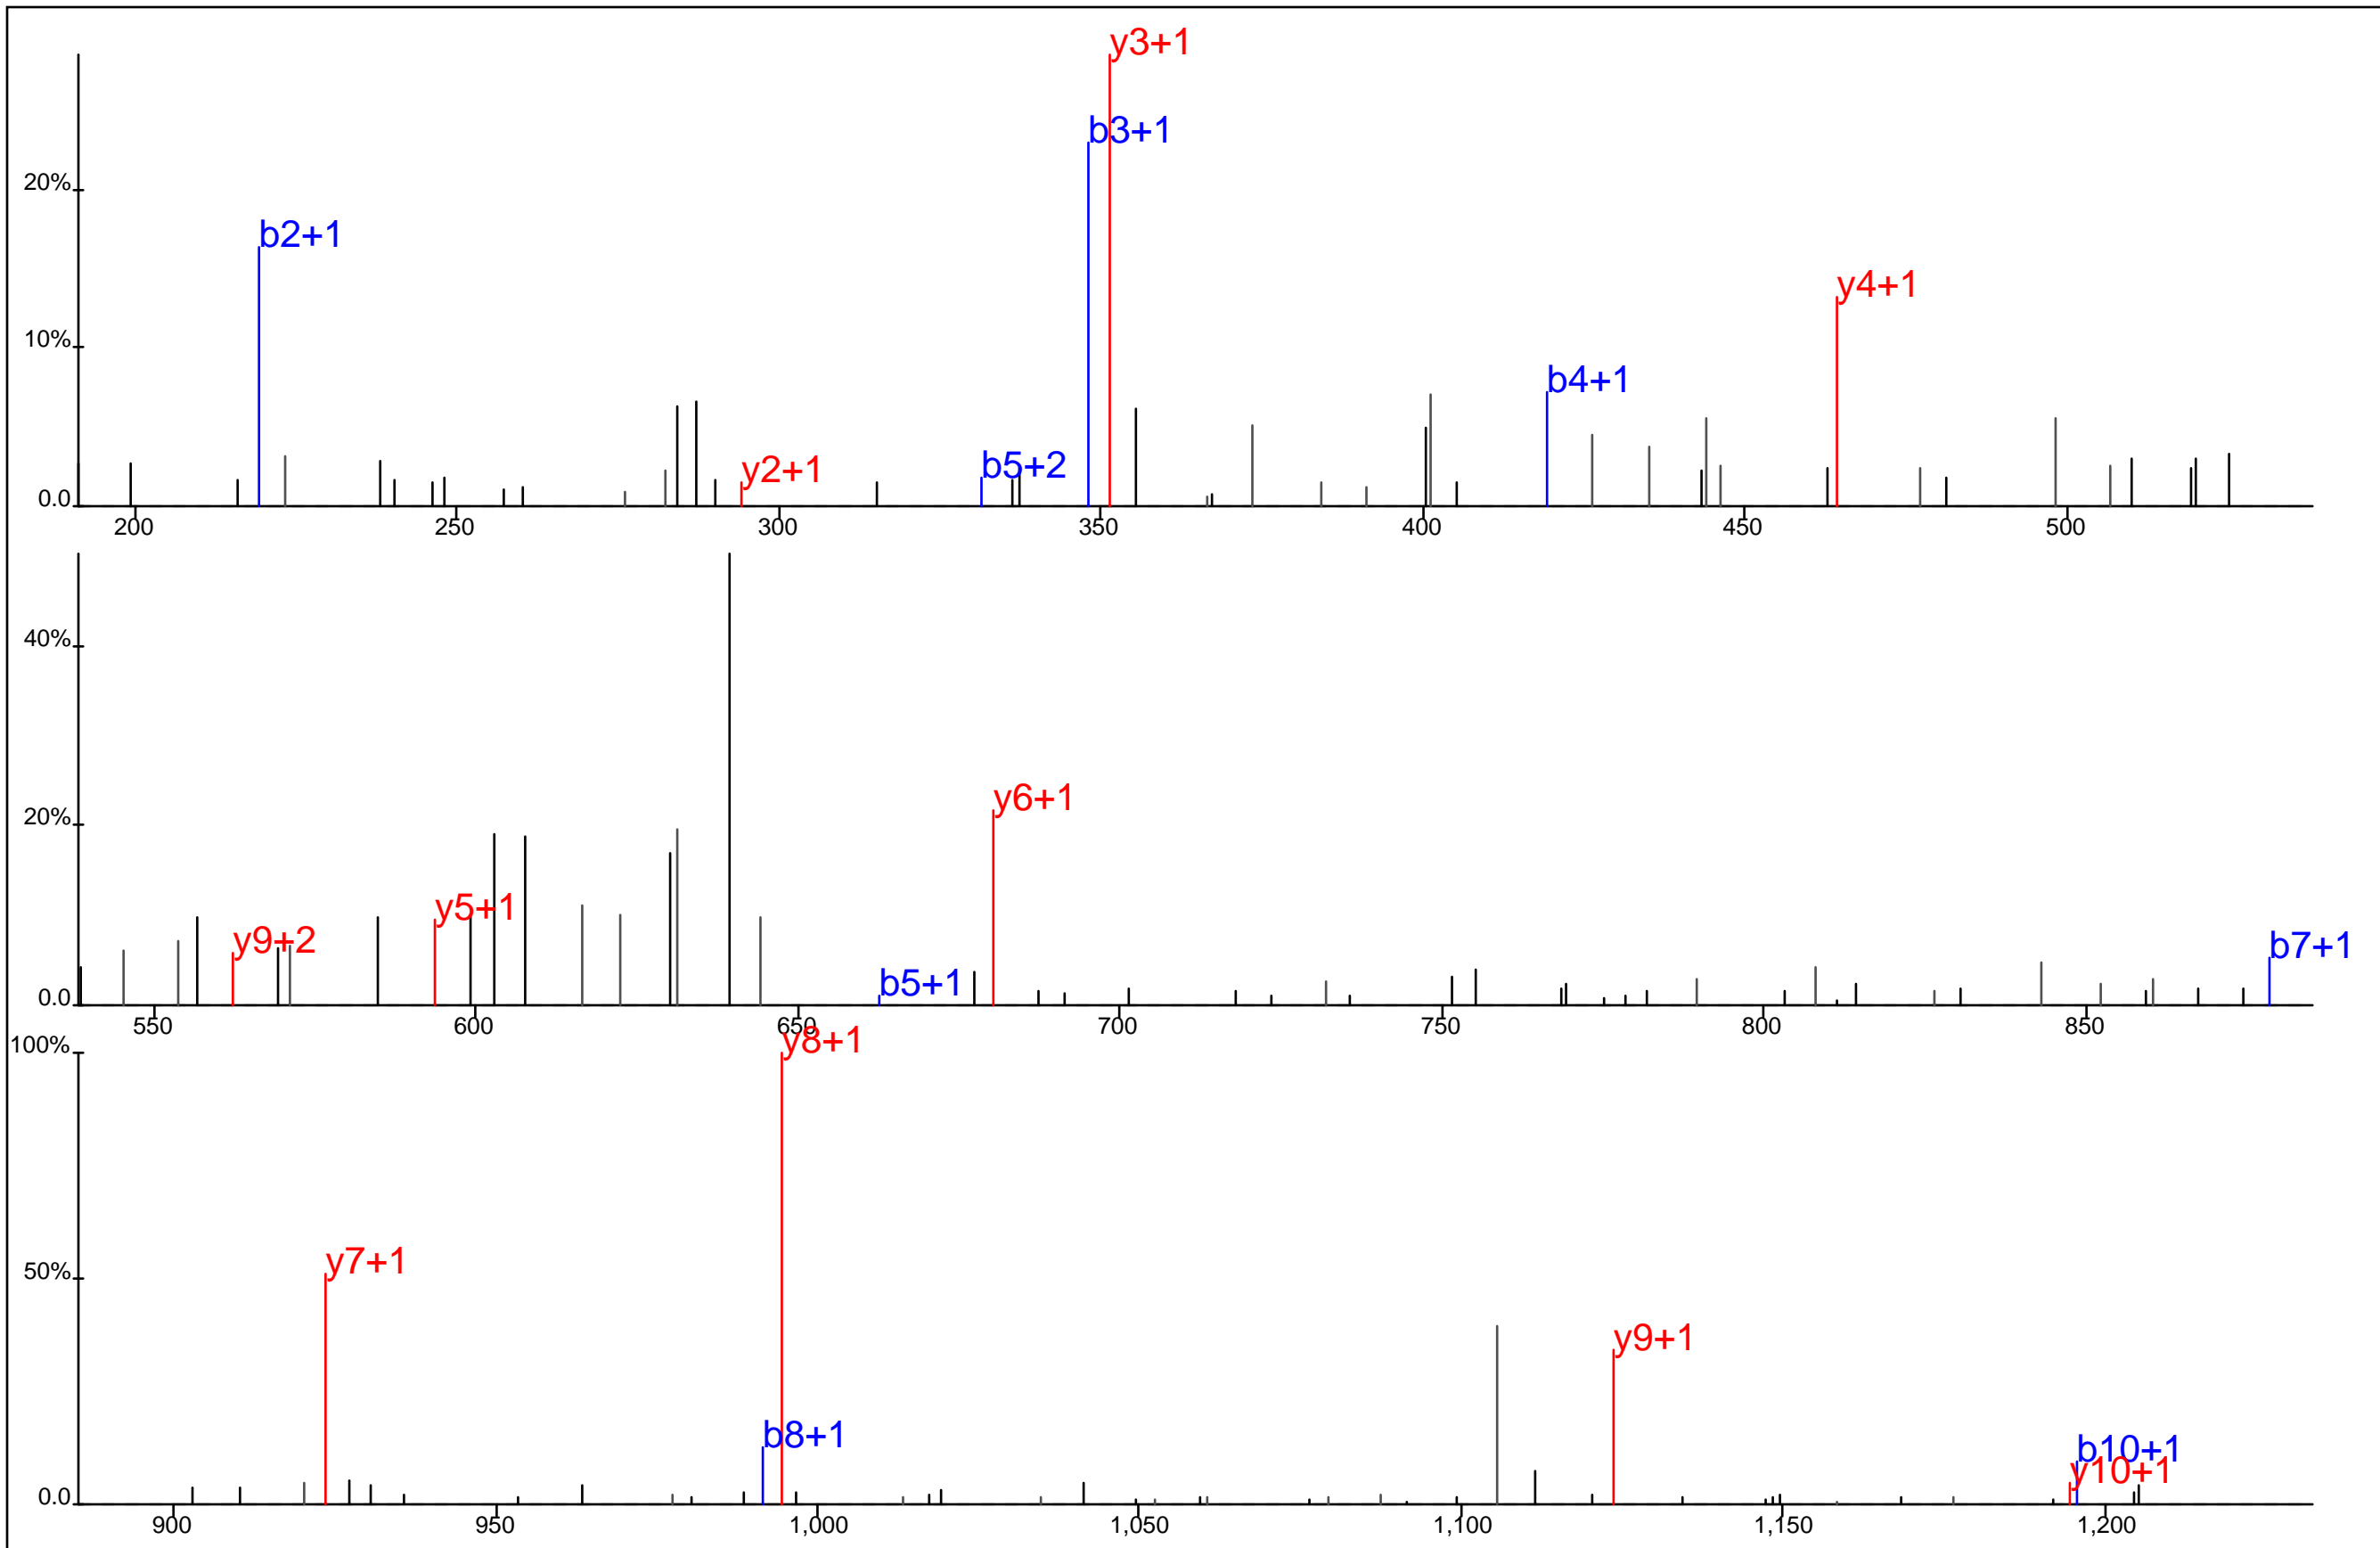

■ ■ ■ ■ ■ ■ ■ ■  
**M#A E A Y\* S E I G M#K**  
■ ■ ■ ■ ■ ■ ■ ■

Protein Name: T cell antigen receptor, zeta  
 gi Accession: 0  
 Precursor Mass: 671.2593+2  
 Delta Mass: 0.900 ppm  
 XCorr: 54.05



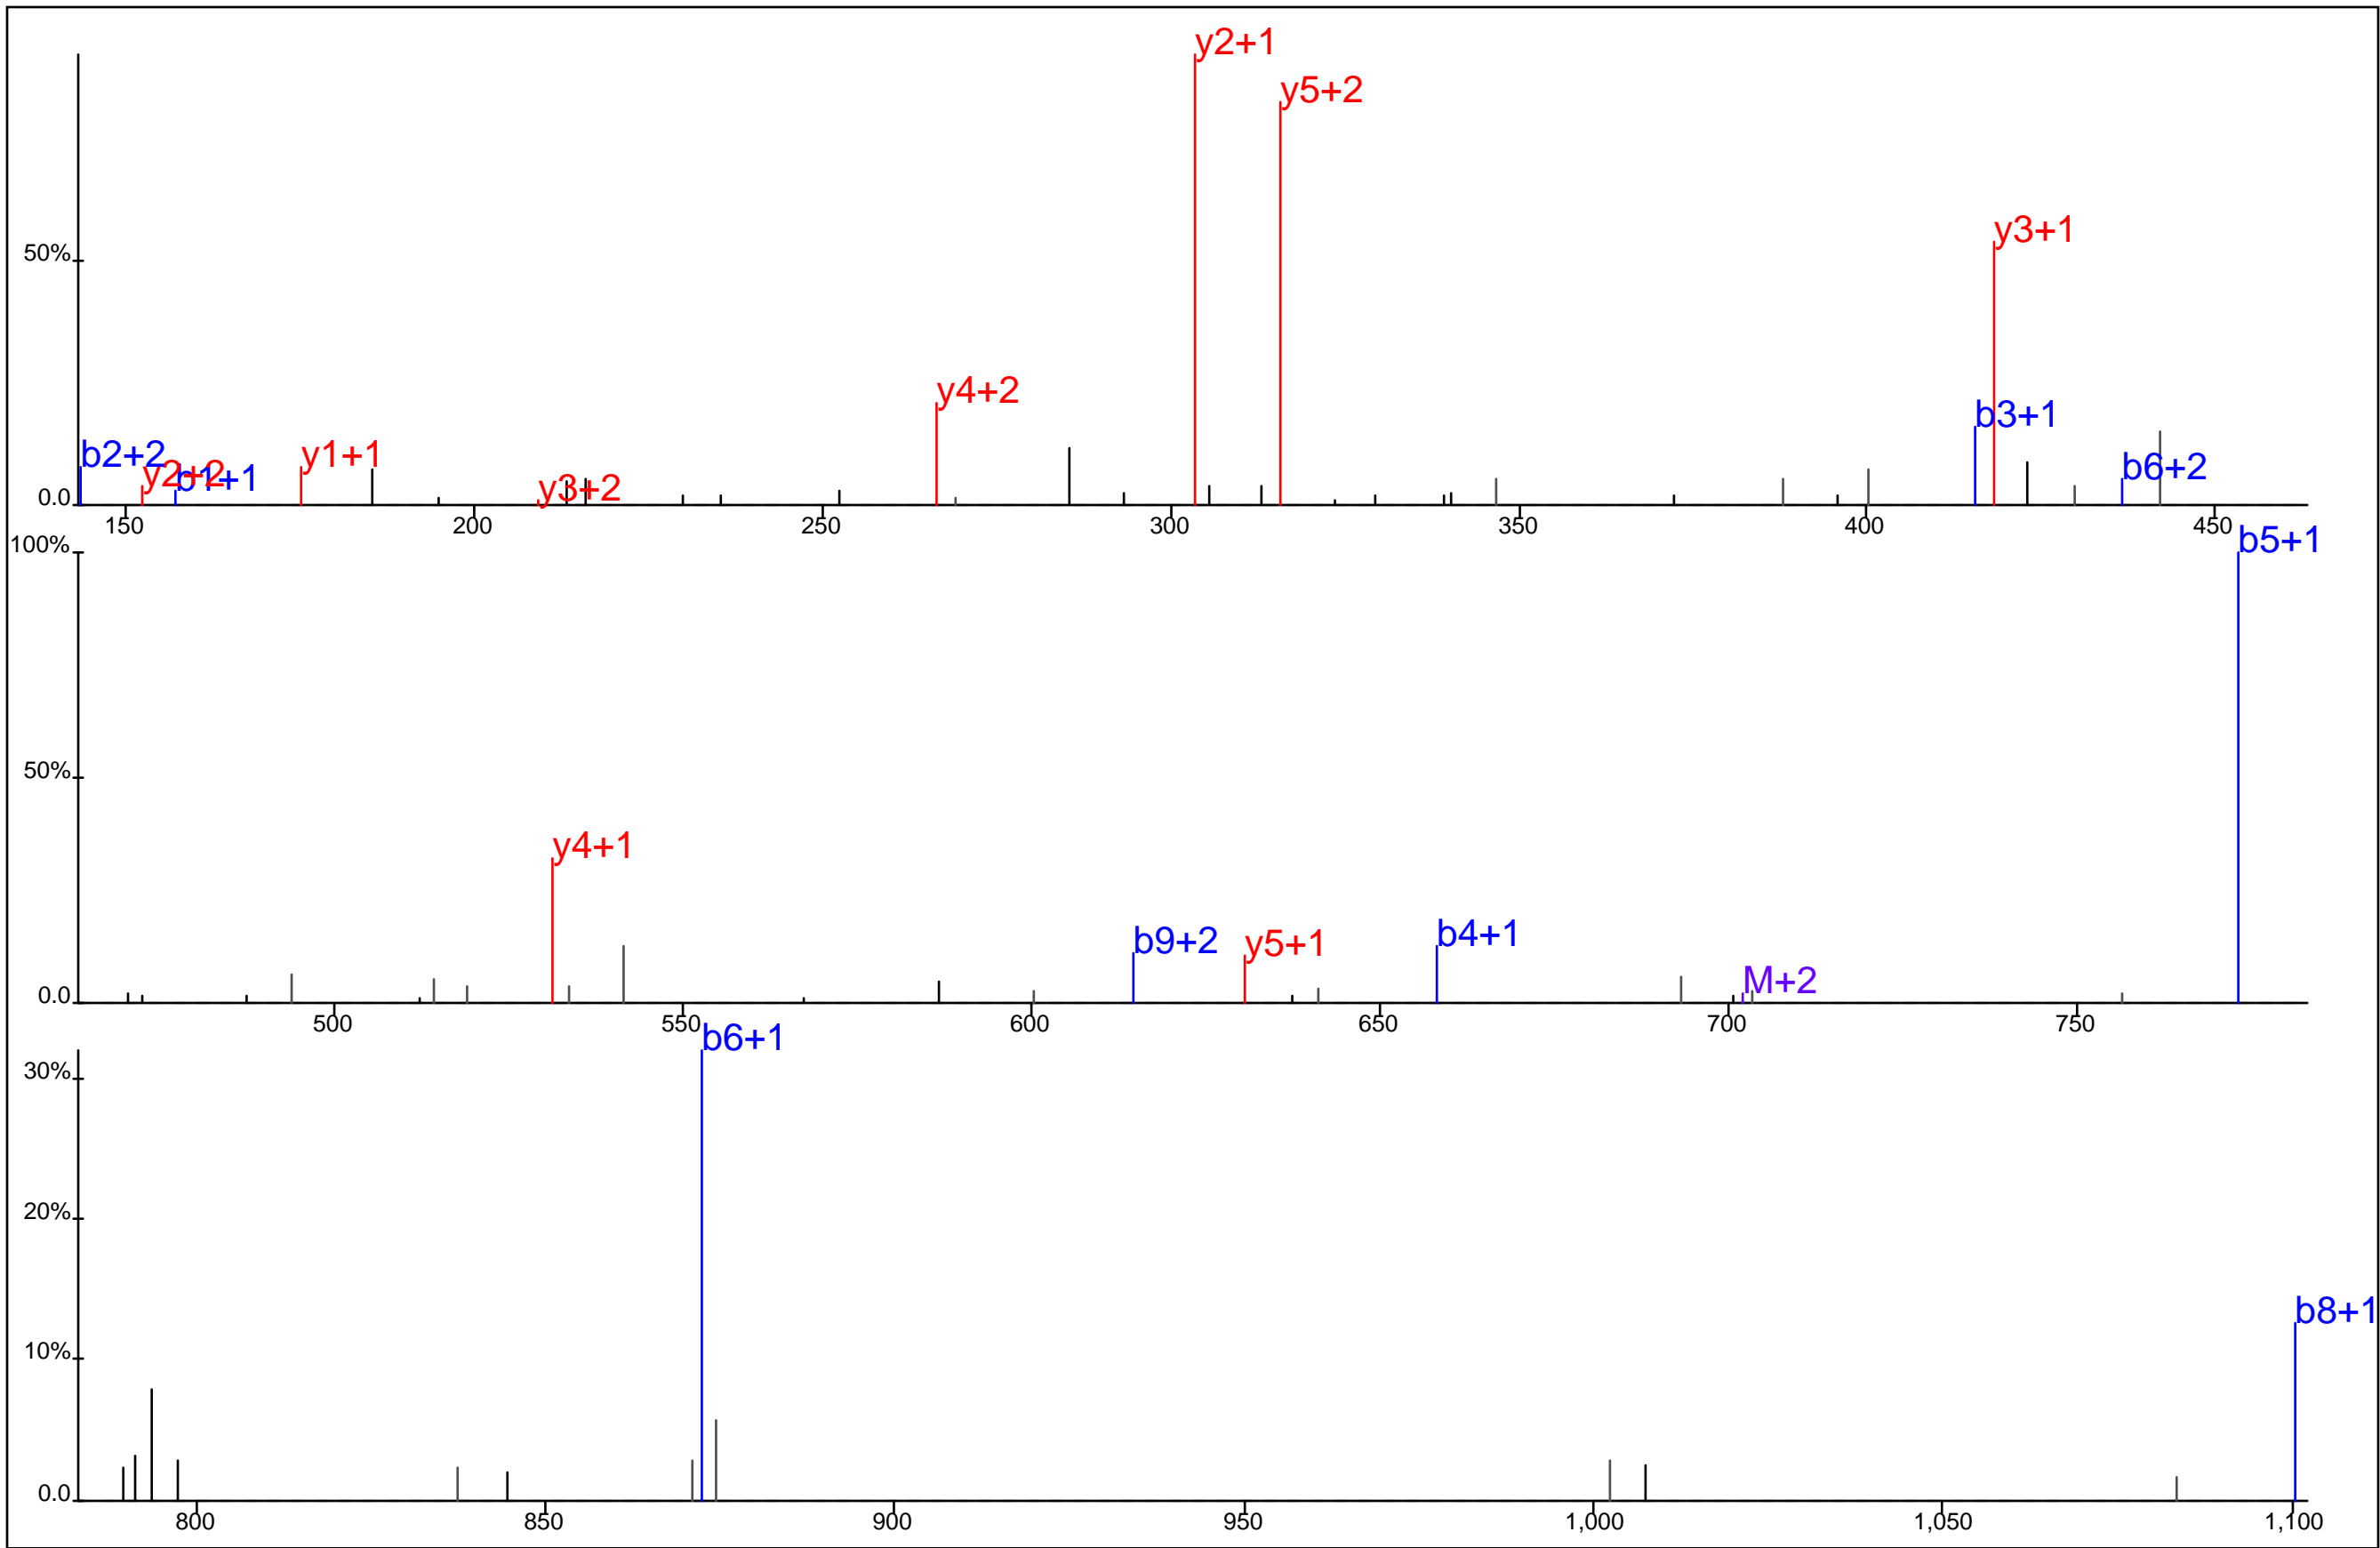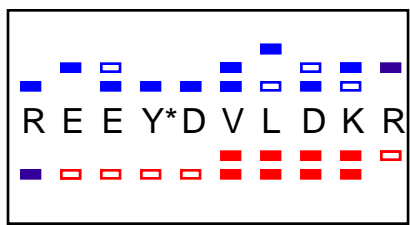

Protein Name: T cell antigen receptor, zeta  
 gi Accession: 0  
 Precursor Mass: 468.2172+3  
 Delta Mass: 0.524 ppm  
 XCorr: 41.83

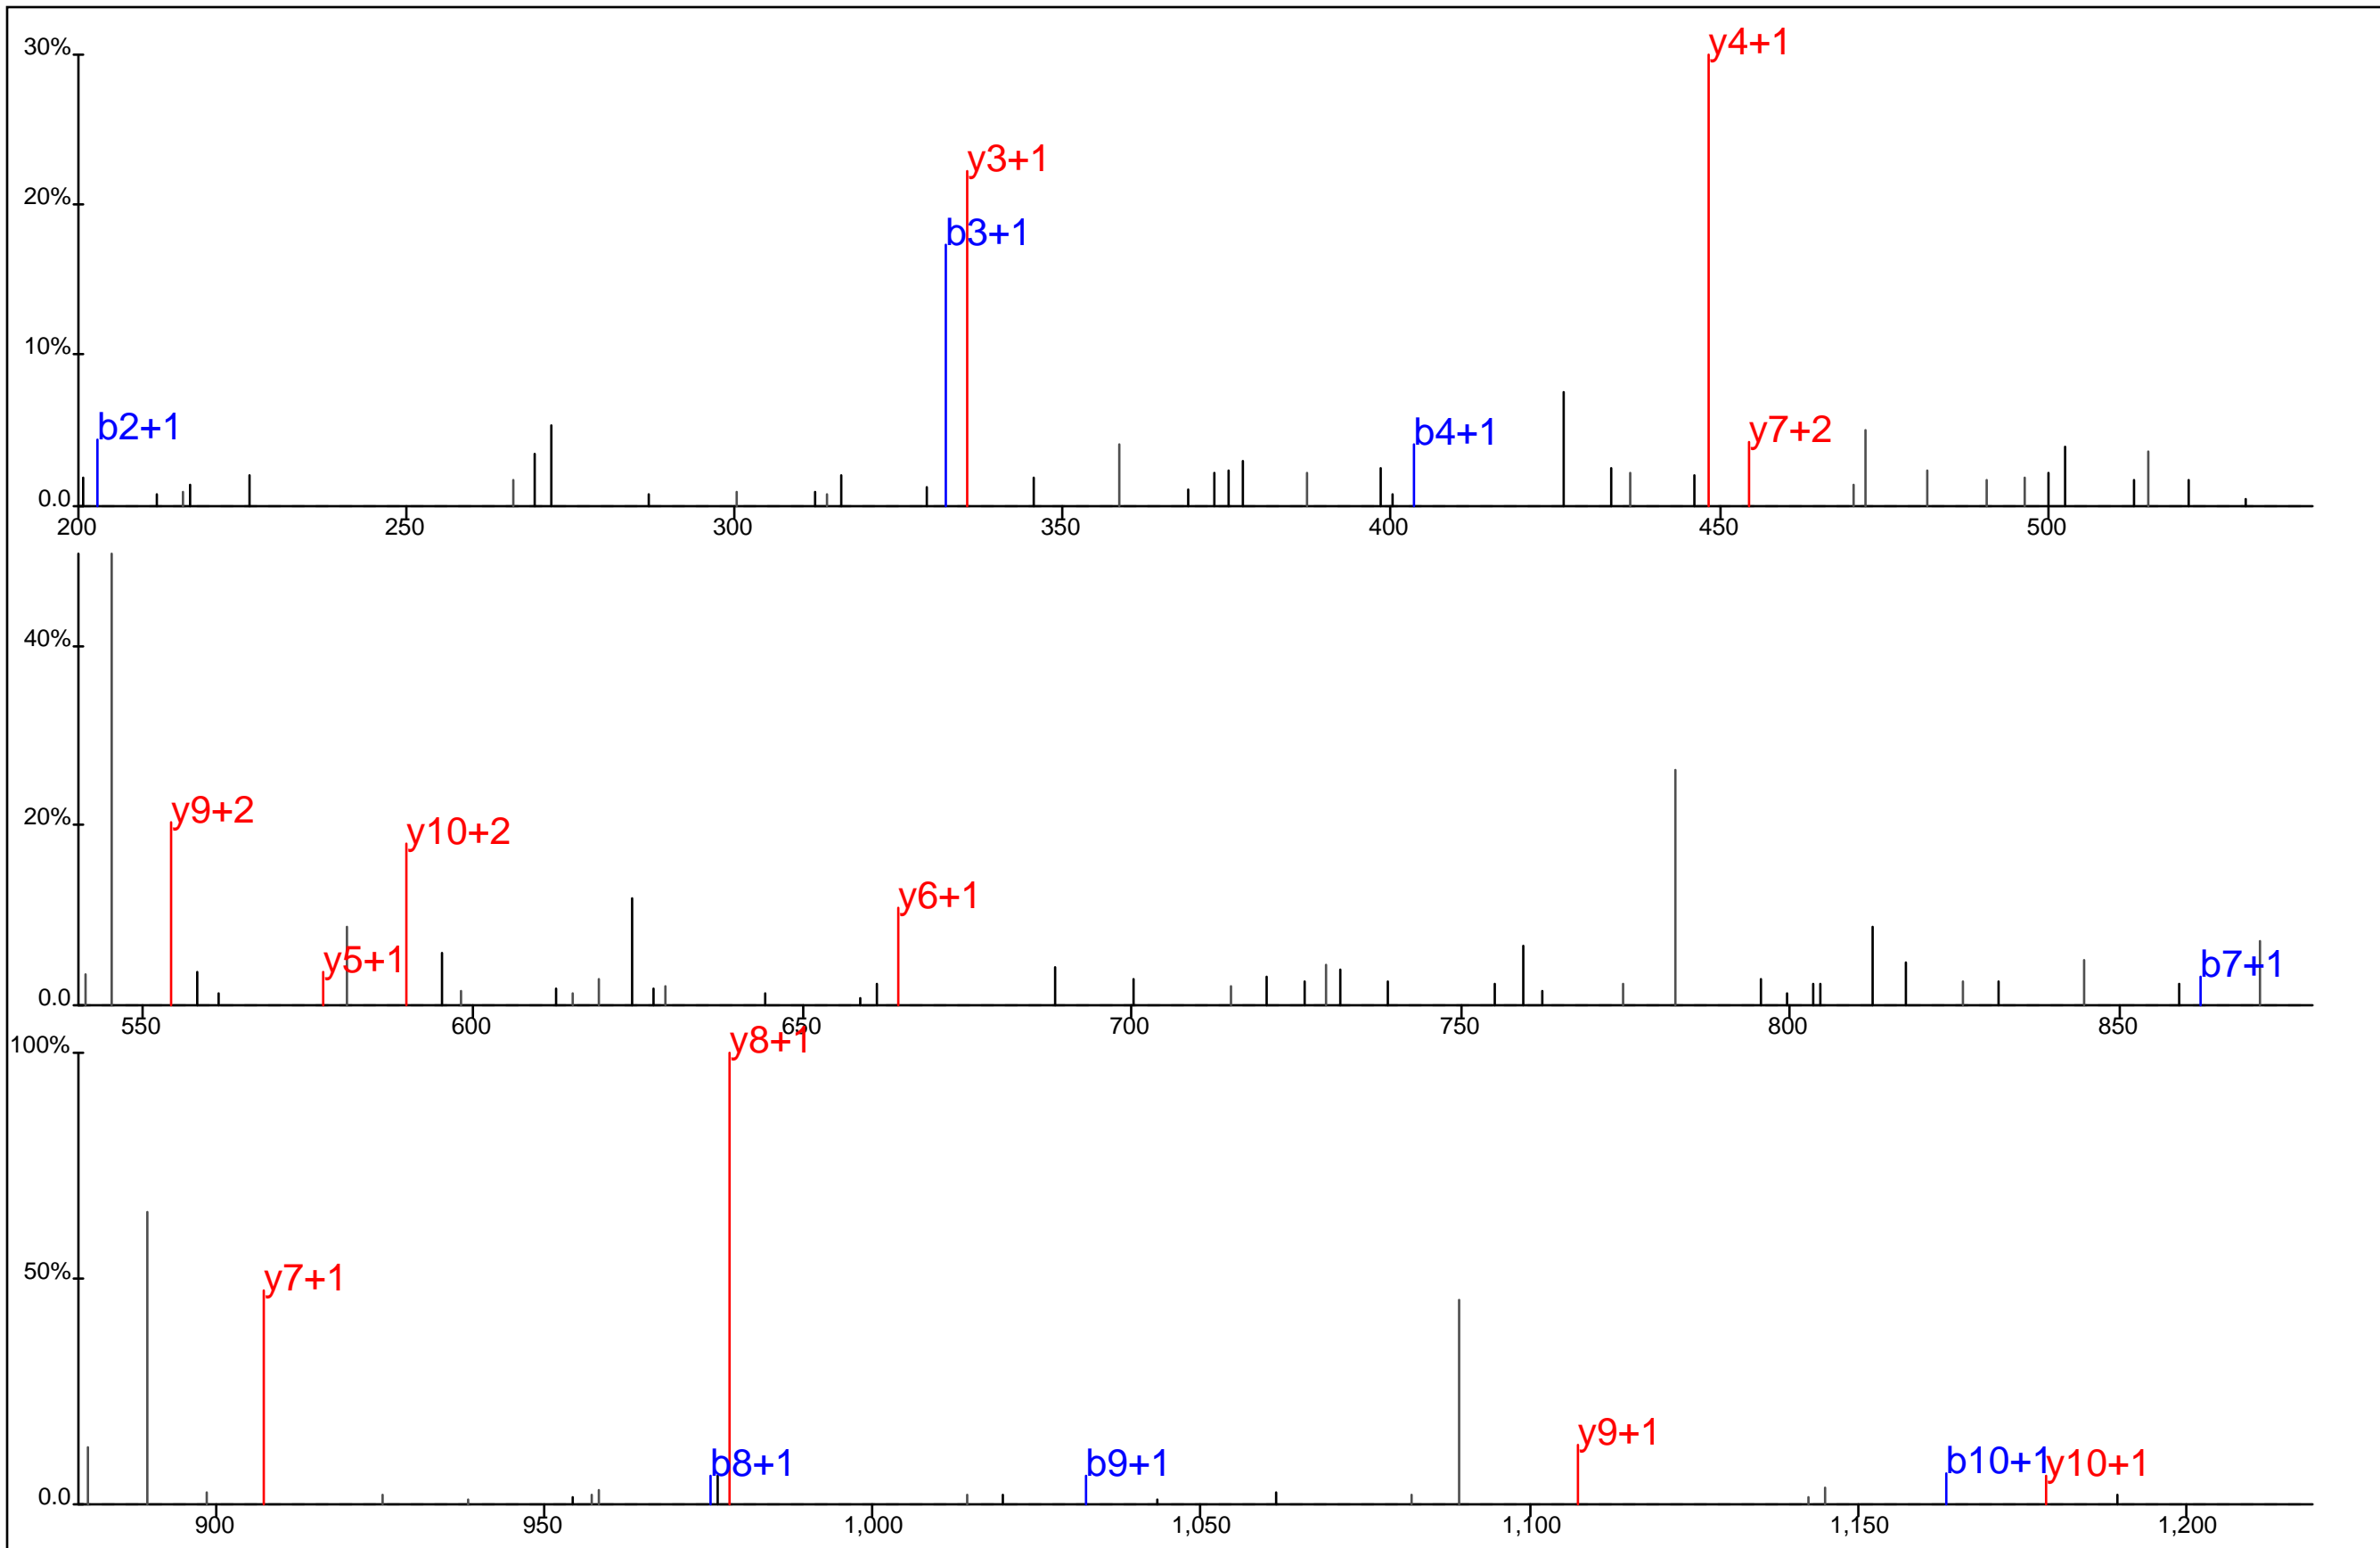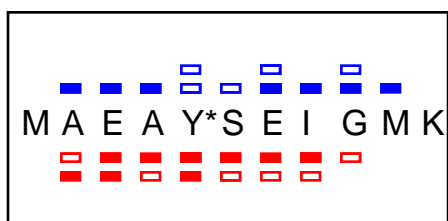

Protein Name: T cell antigen receptor, zeta  
 gi Accession: 0  
 Precursor Mass: 655.2629+2  
 Delta Mass: 1.430 ppm  
 XCorr: 44.03

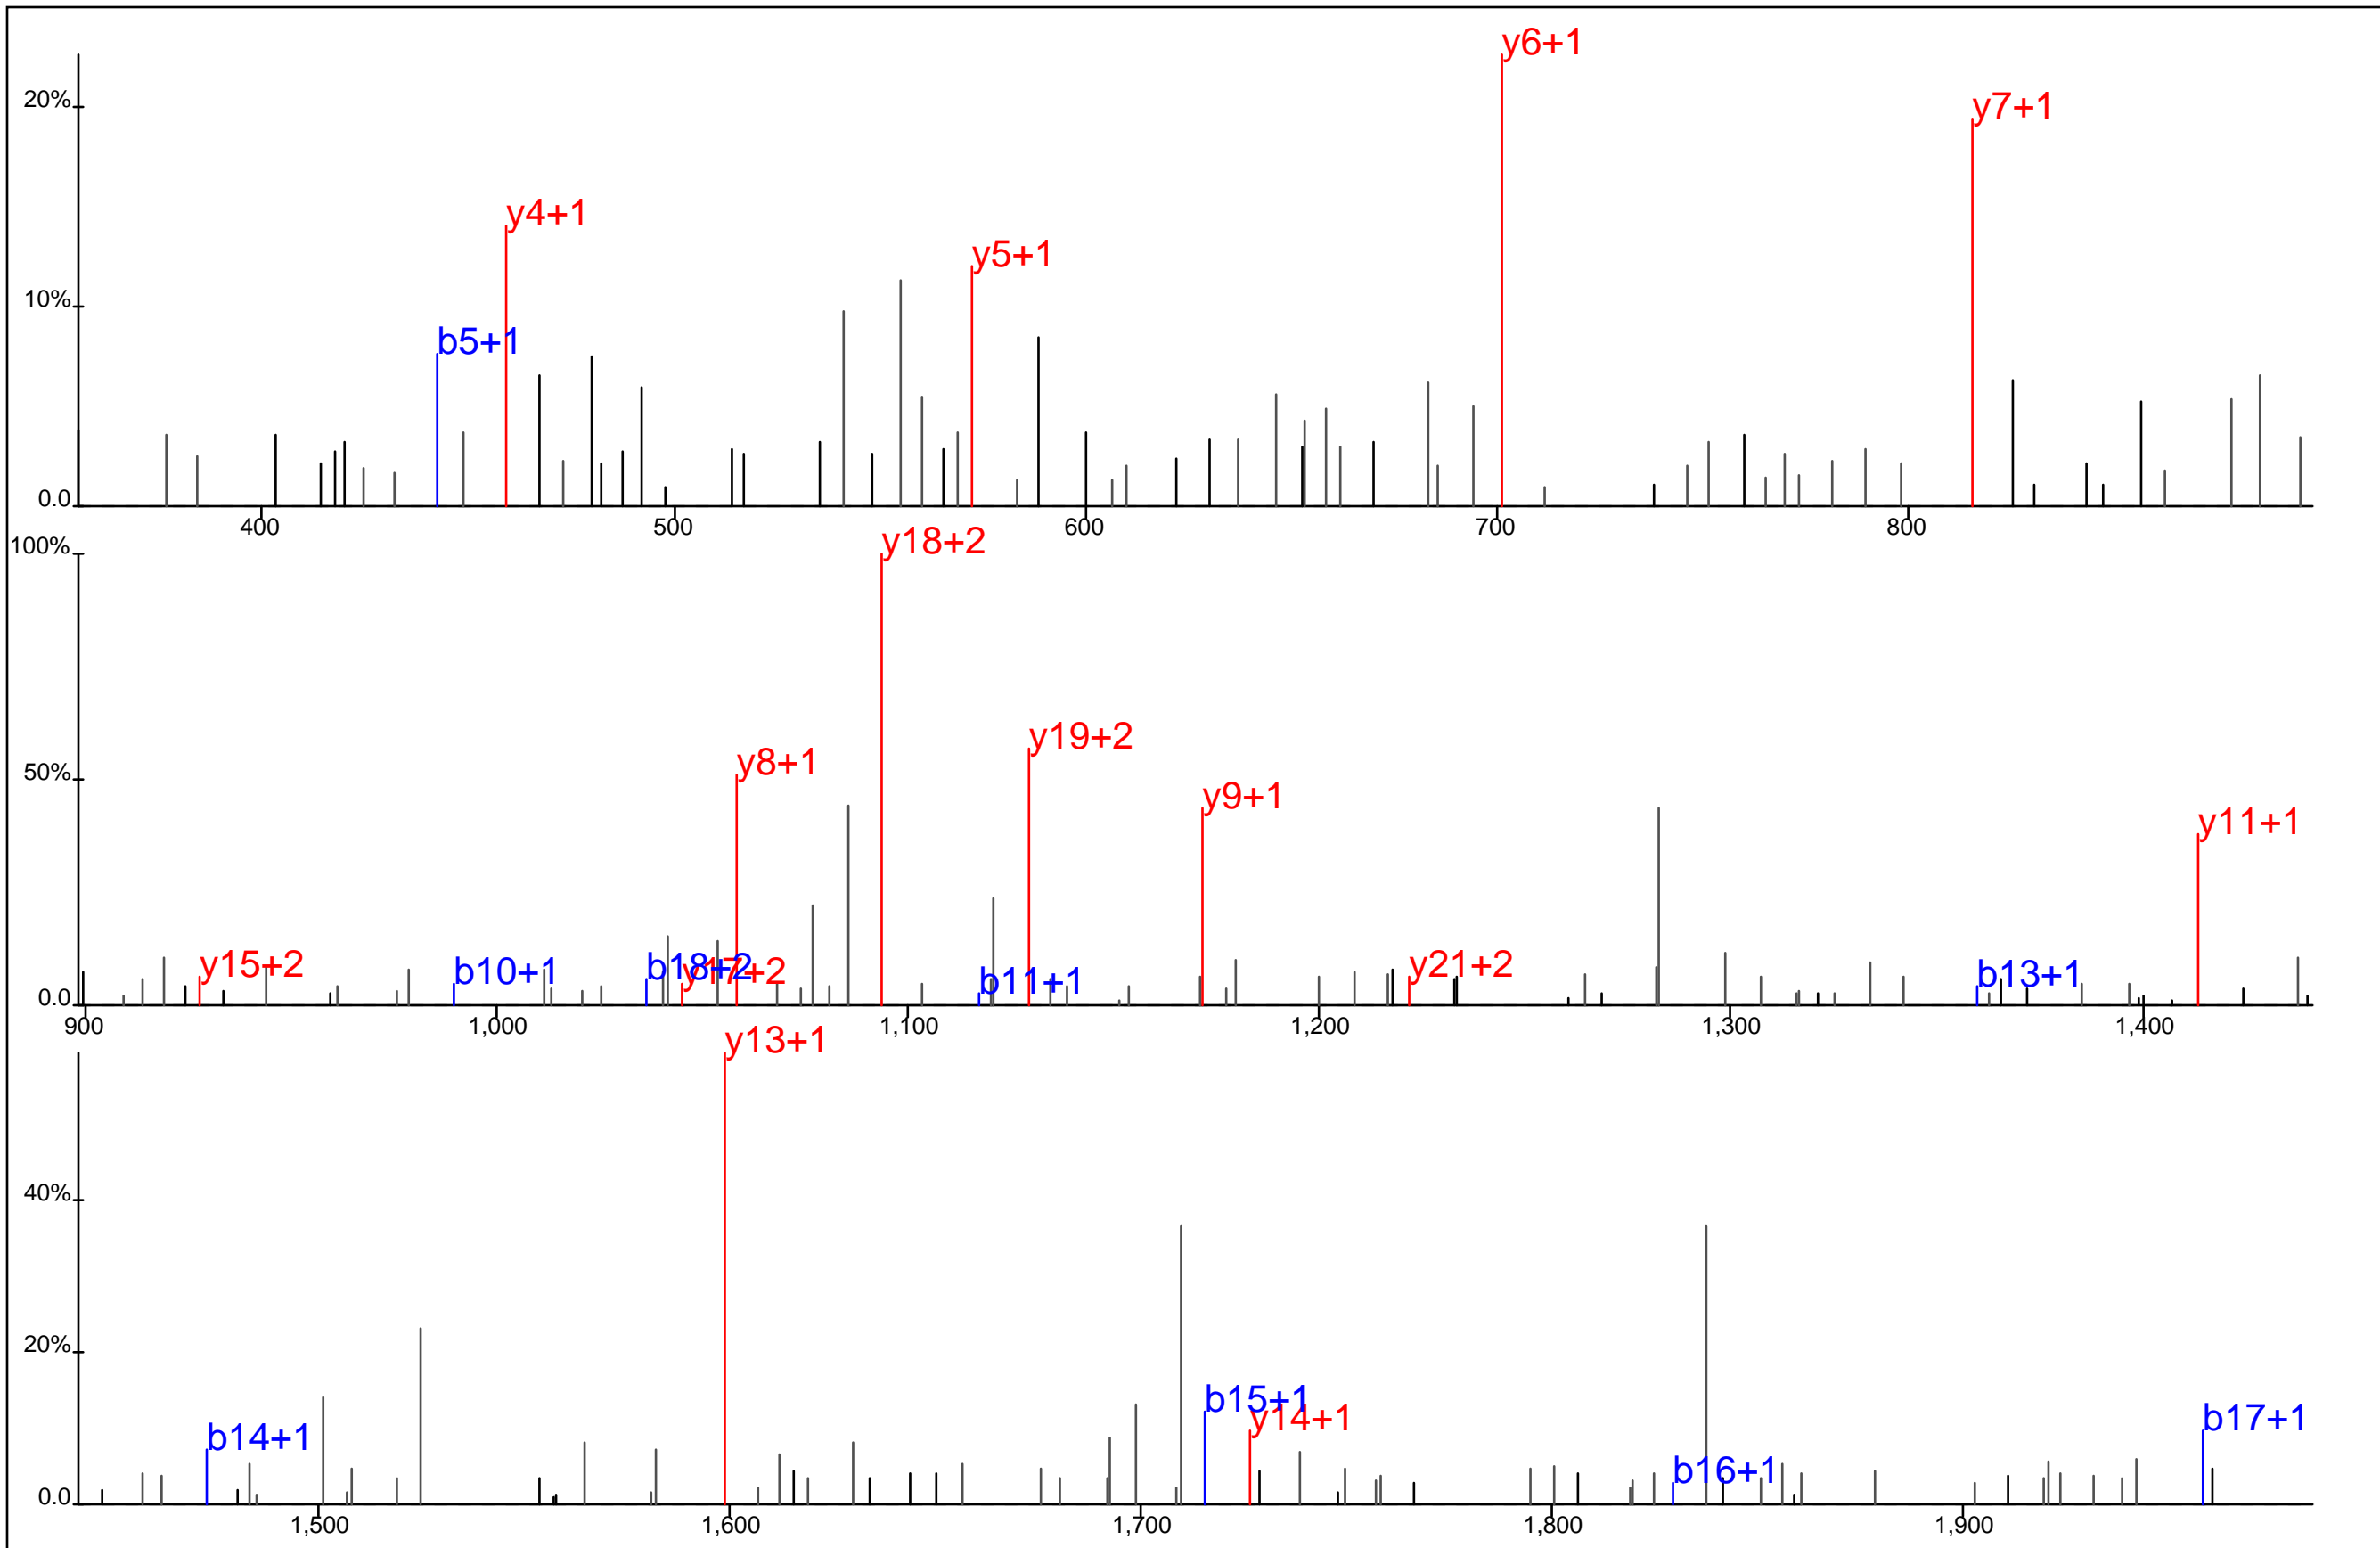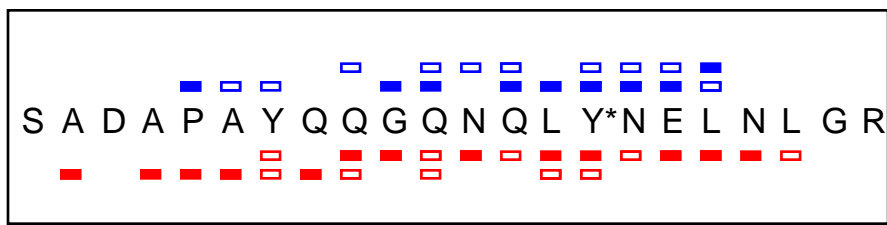

Protein Name: T cell antigen receptor, zeta  
 gi Accession: 0  
 Precursor Mass: 1,265.5752+2  
 Delta Mass: 2.902 ppm  
 XCorr: 55.76

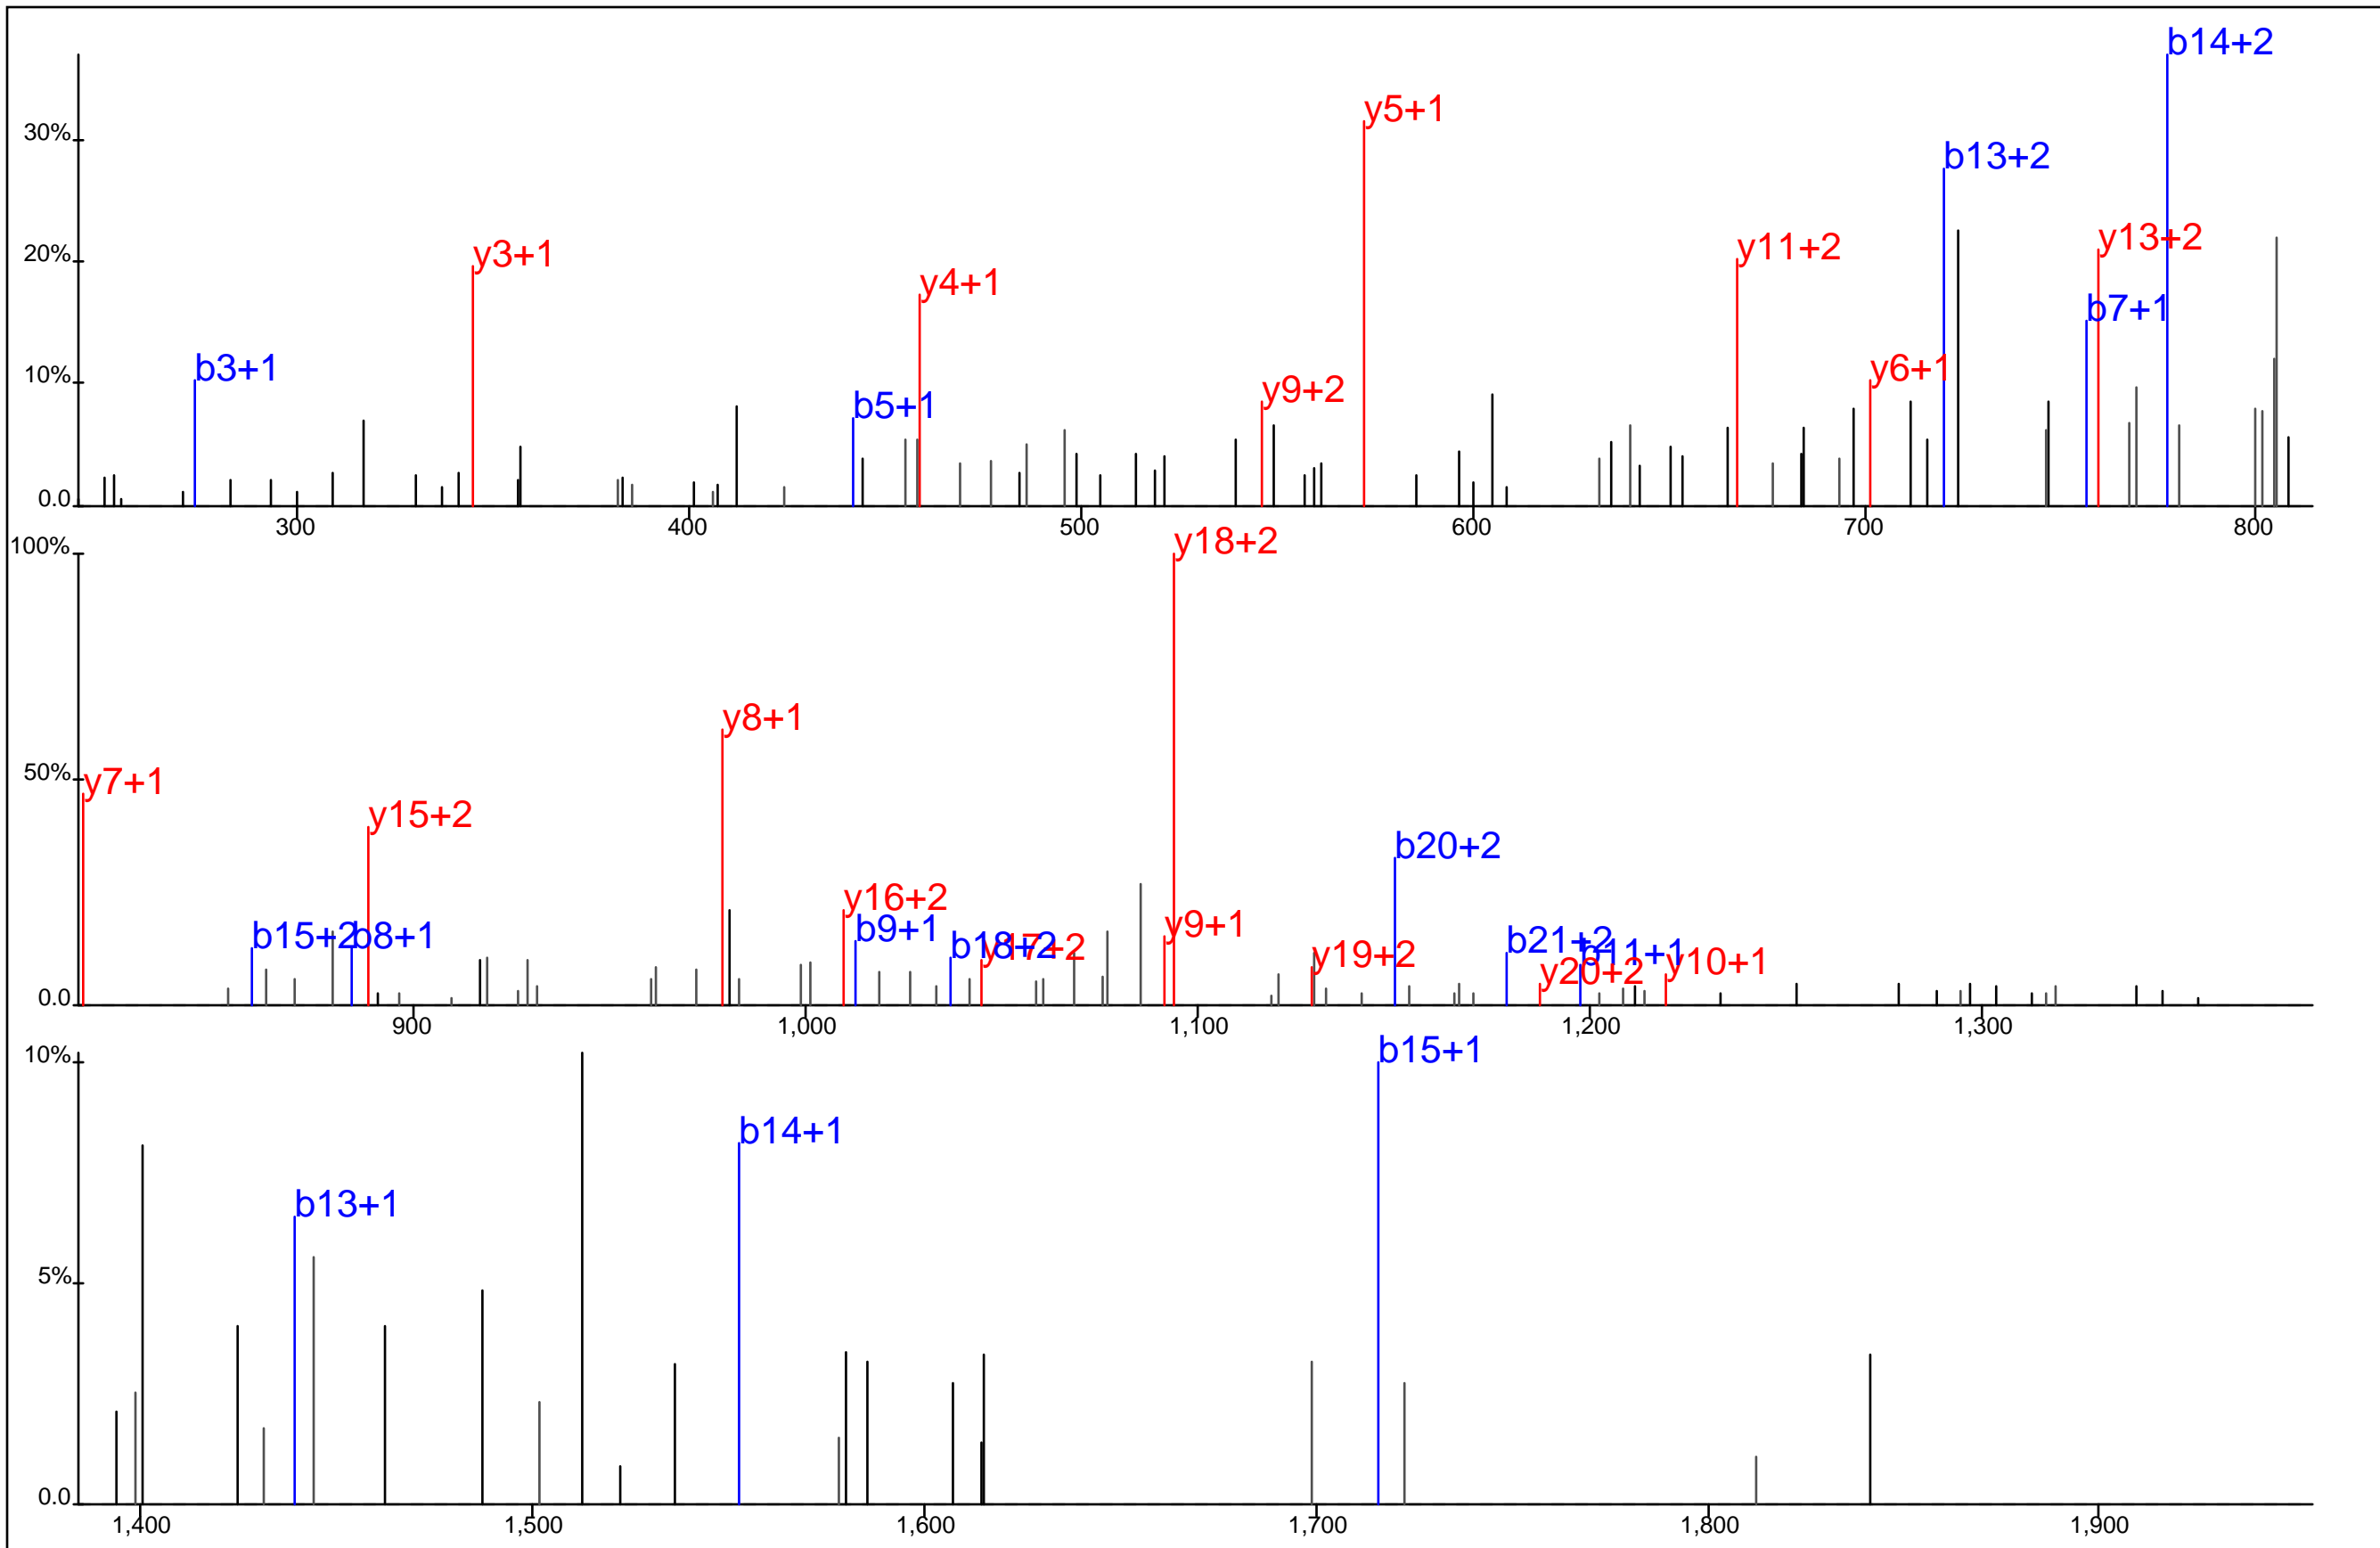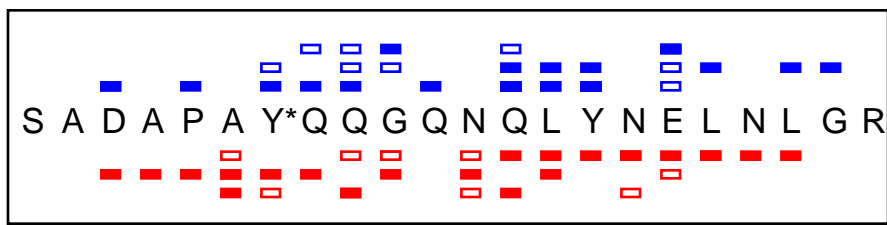

Protein Name: T cell antigen receptor, zeta  
 gi Accession: 0  
 Precursor Mass: 844.0514+3  
 Delta Mass: 1.522 ppm  
 XCorr: 49.99

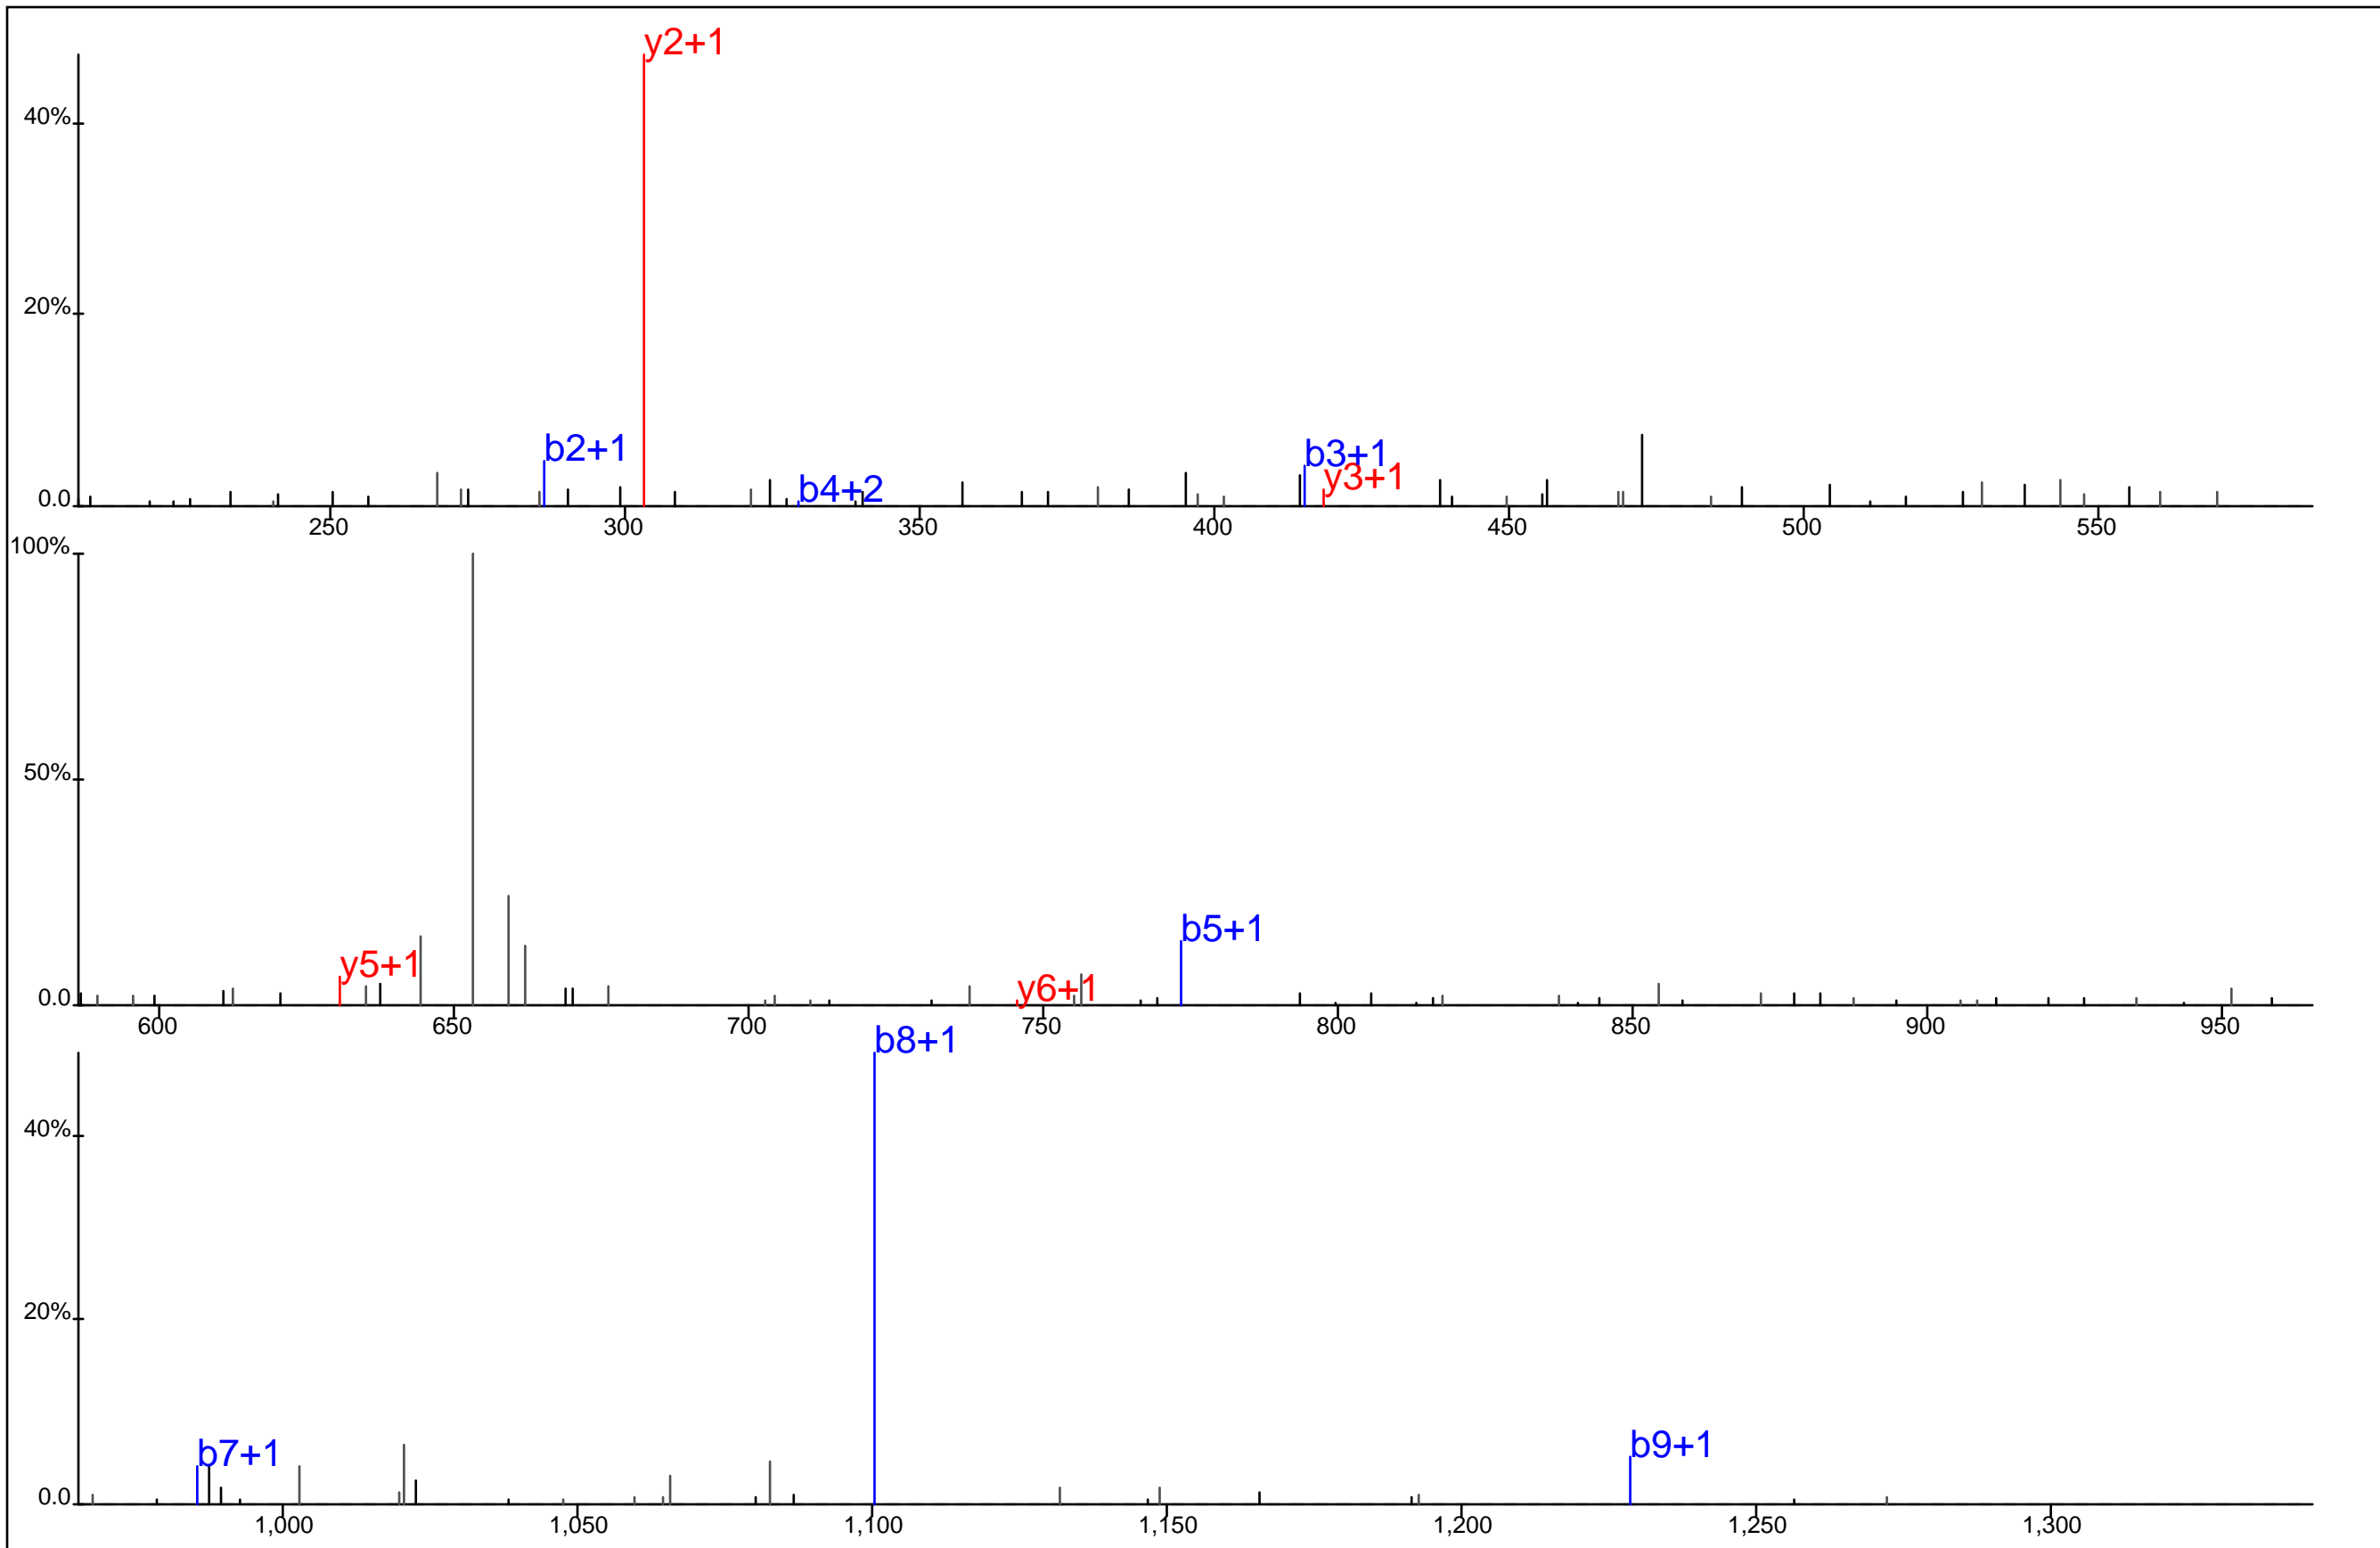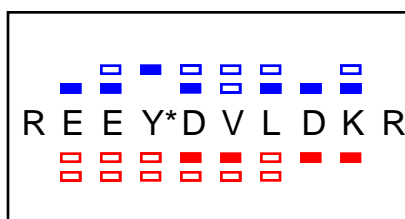

Protein Name: T cell antigen receptor, zeta  
 gi Accession: 0  
 Precursor Mass: 701.8237+2  
 Delta Mass: 2.839 ppm  
 XCorr: 22.85

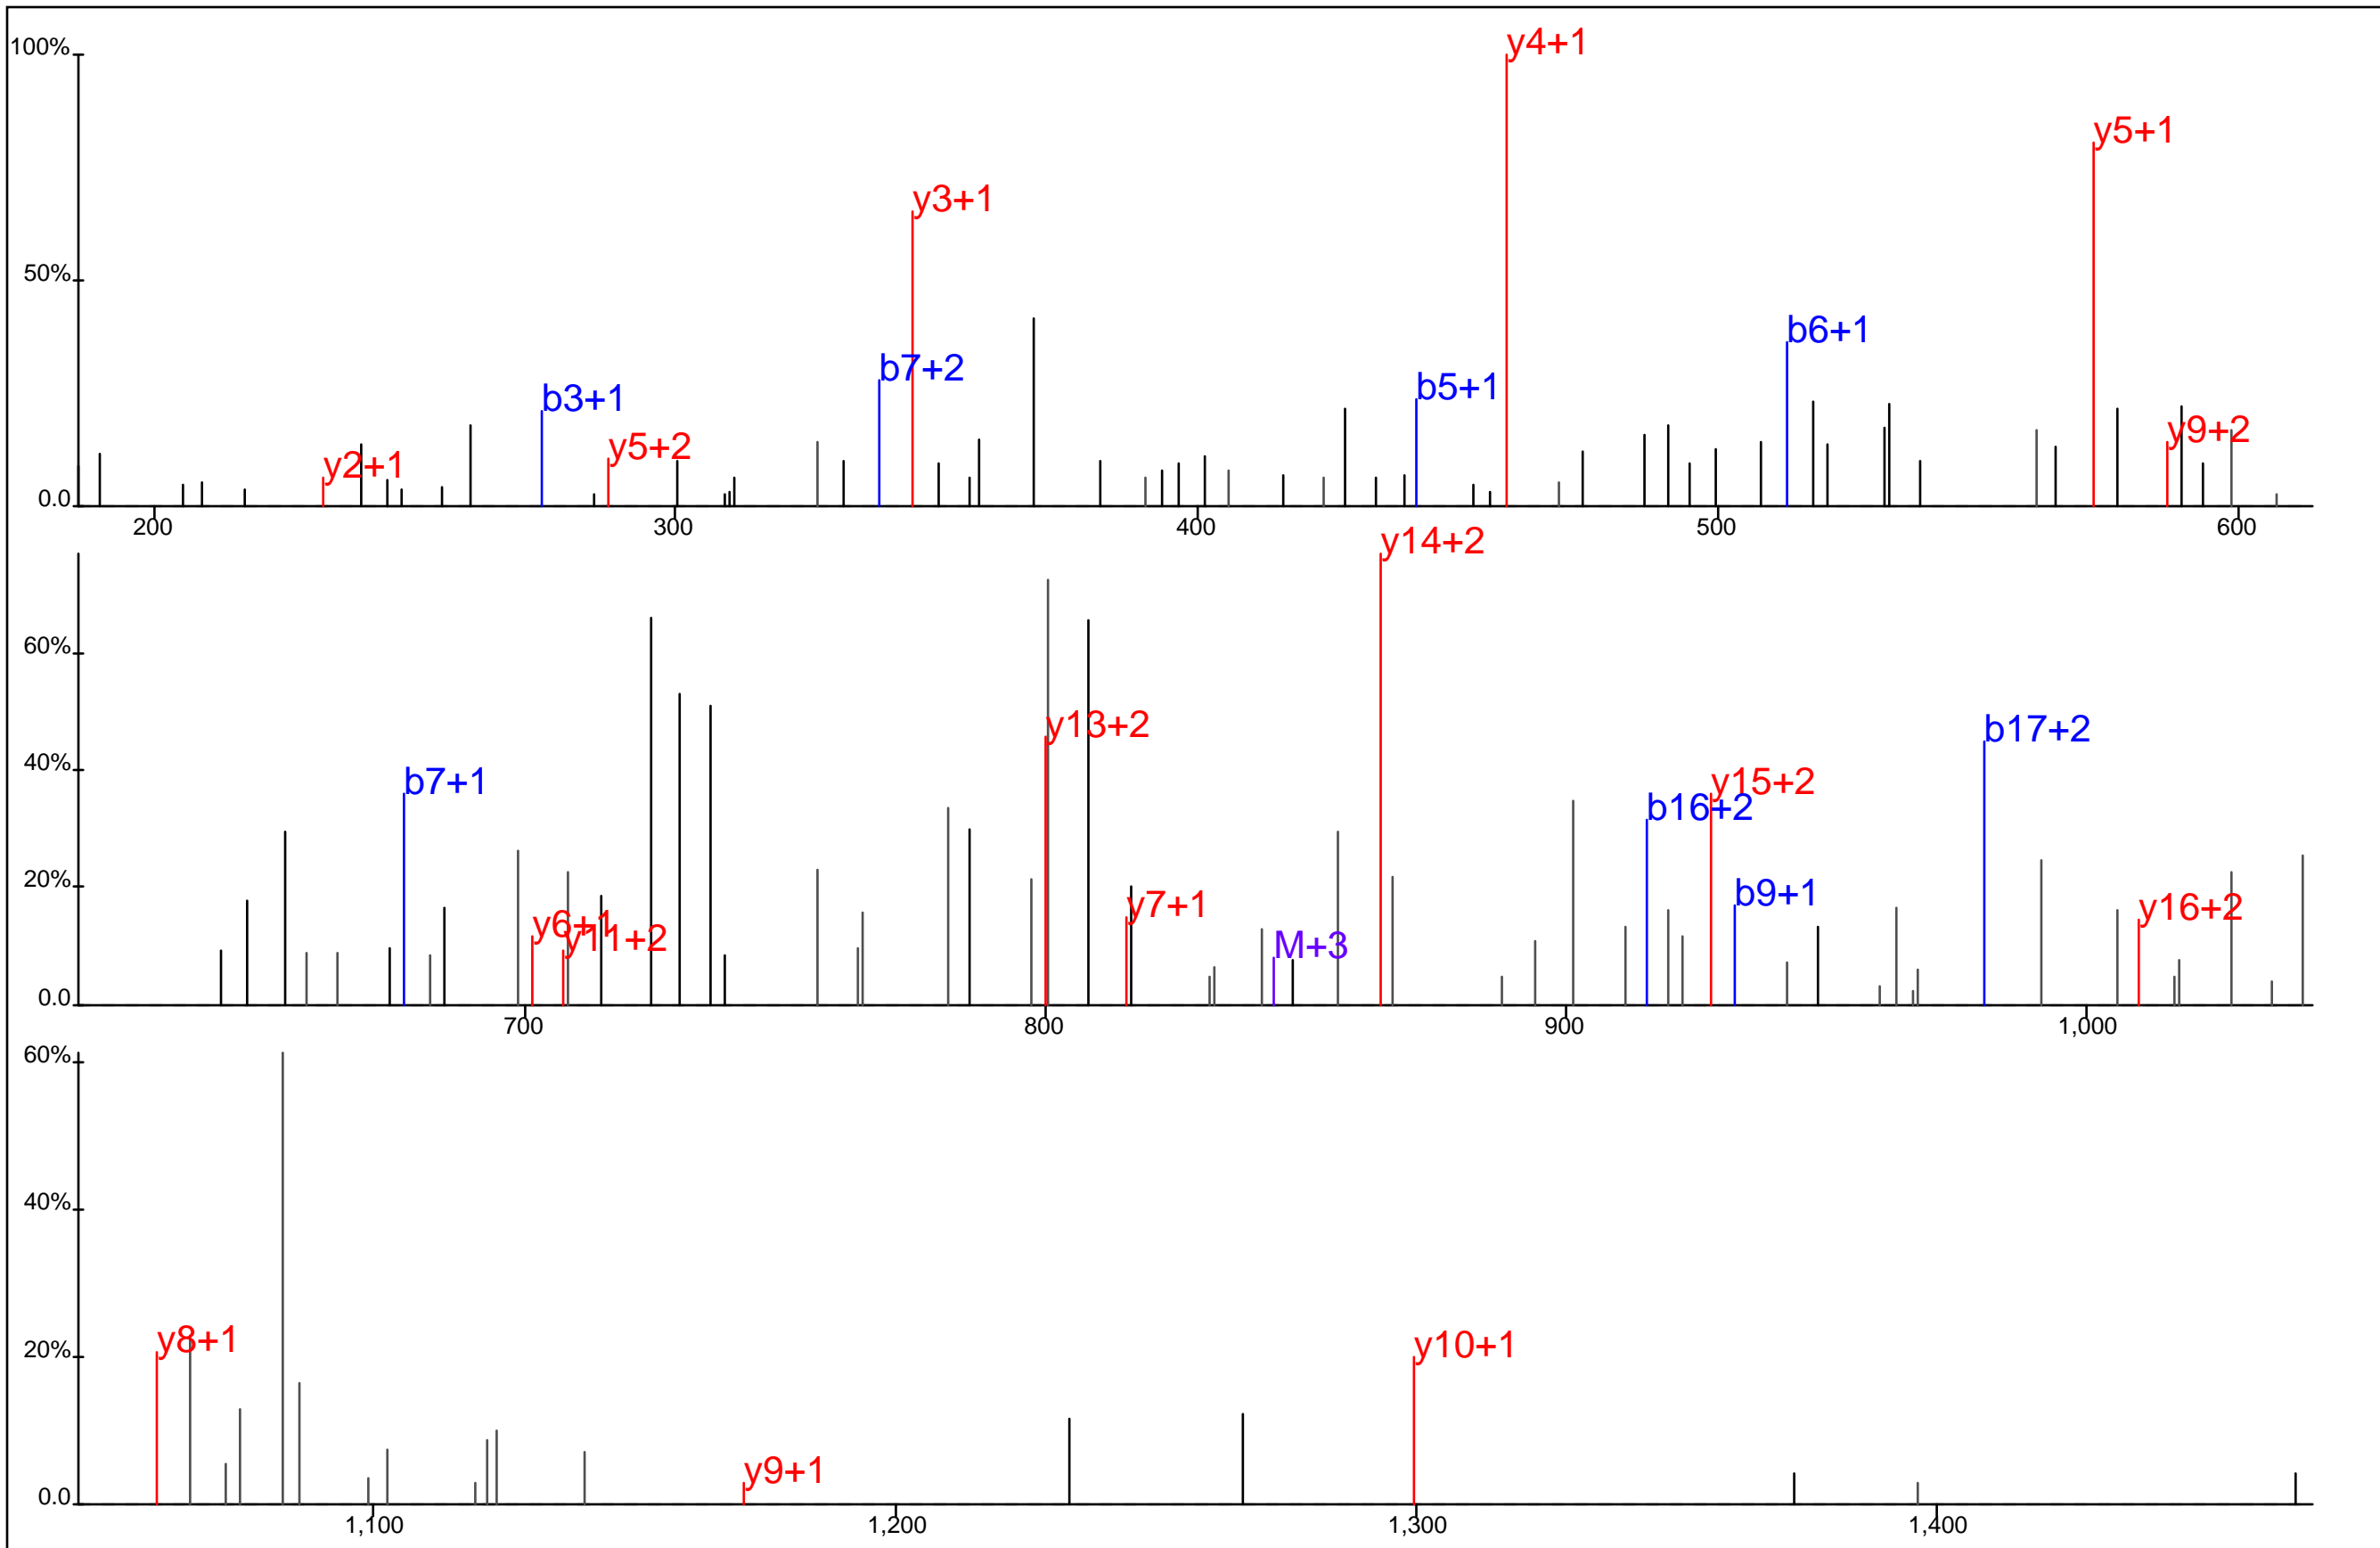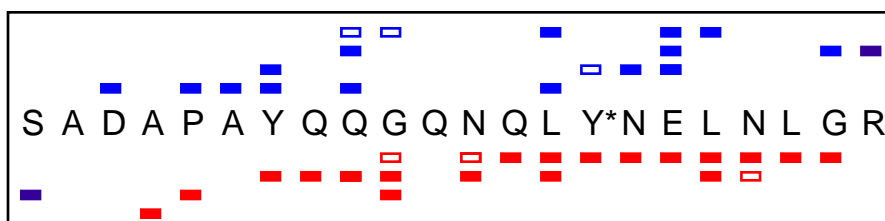

Protein Name: T cell antigen receptor, zeta  
 gi Accession: 0  
 Precursor Mass: 633.2906+4  
 Delta Mass: 1.878 ppm  
 XCorr: 28.15



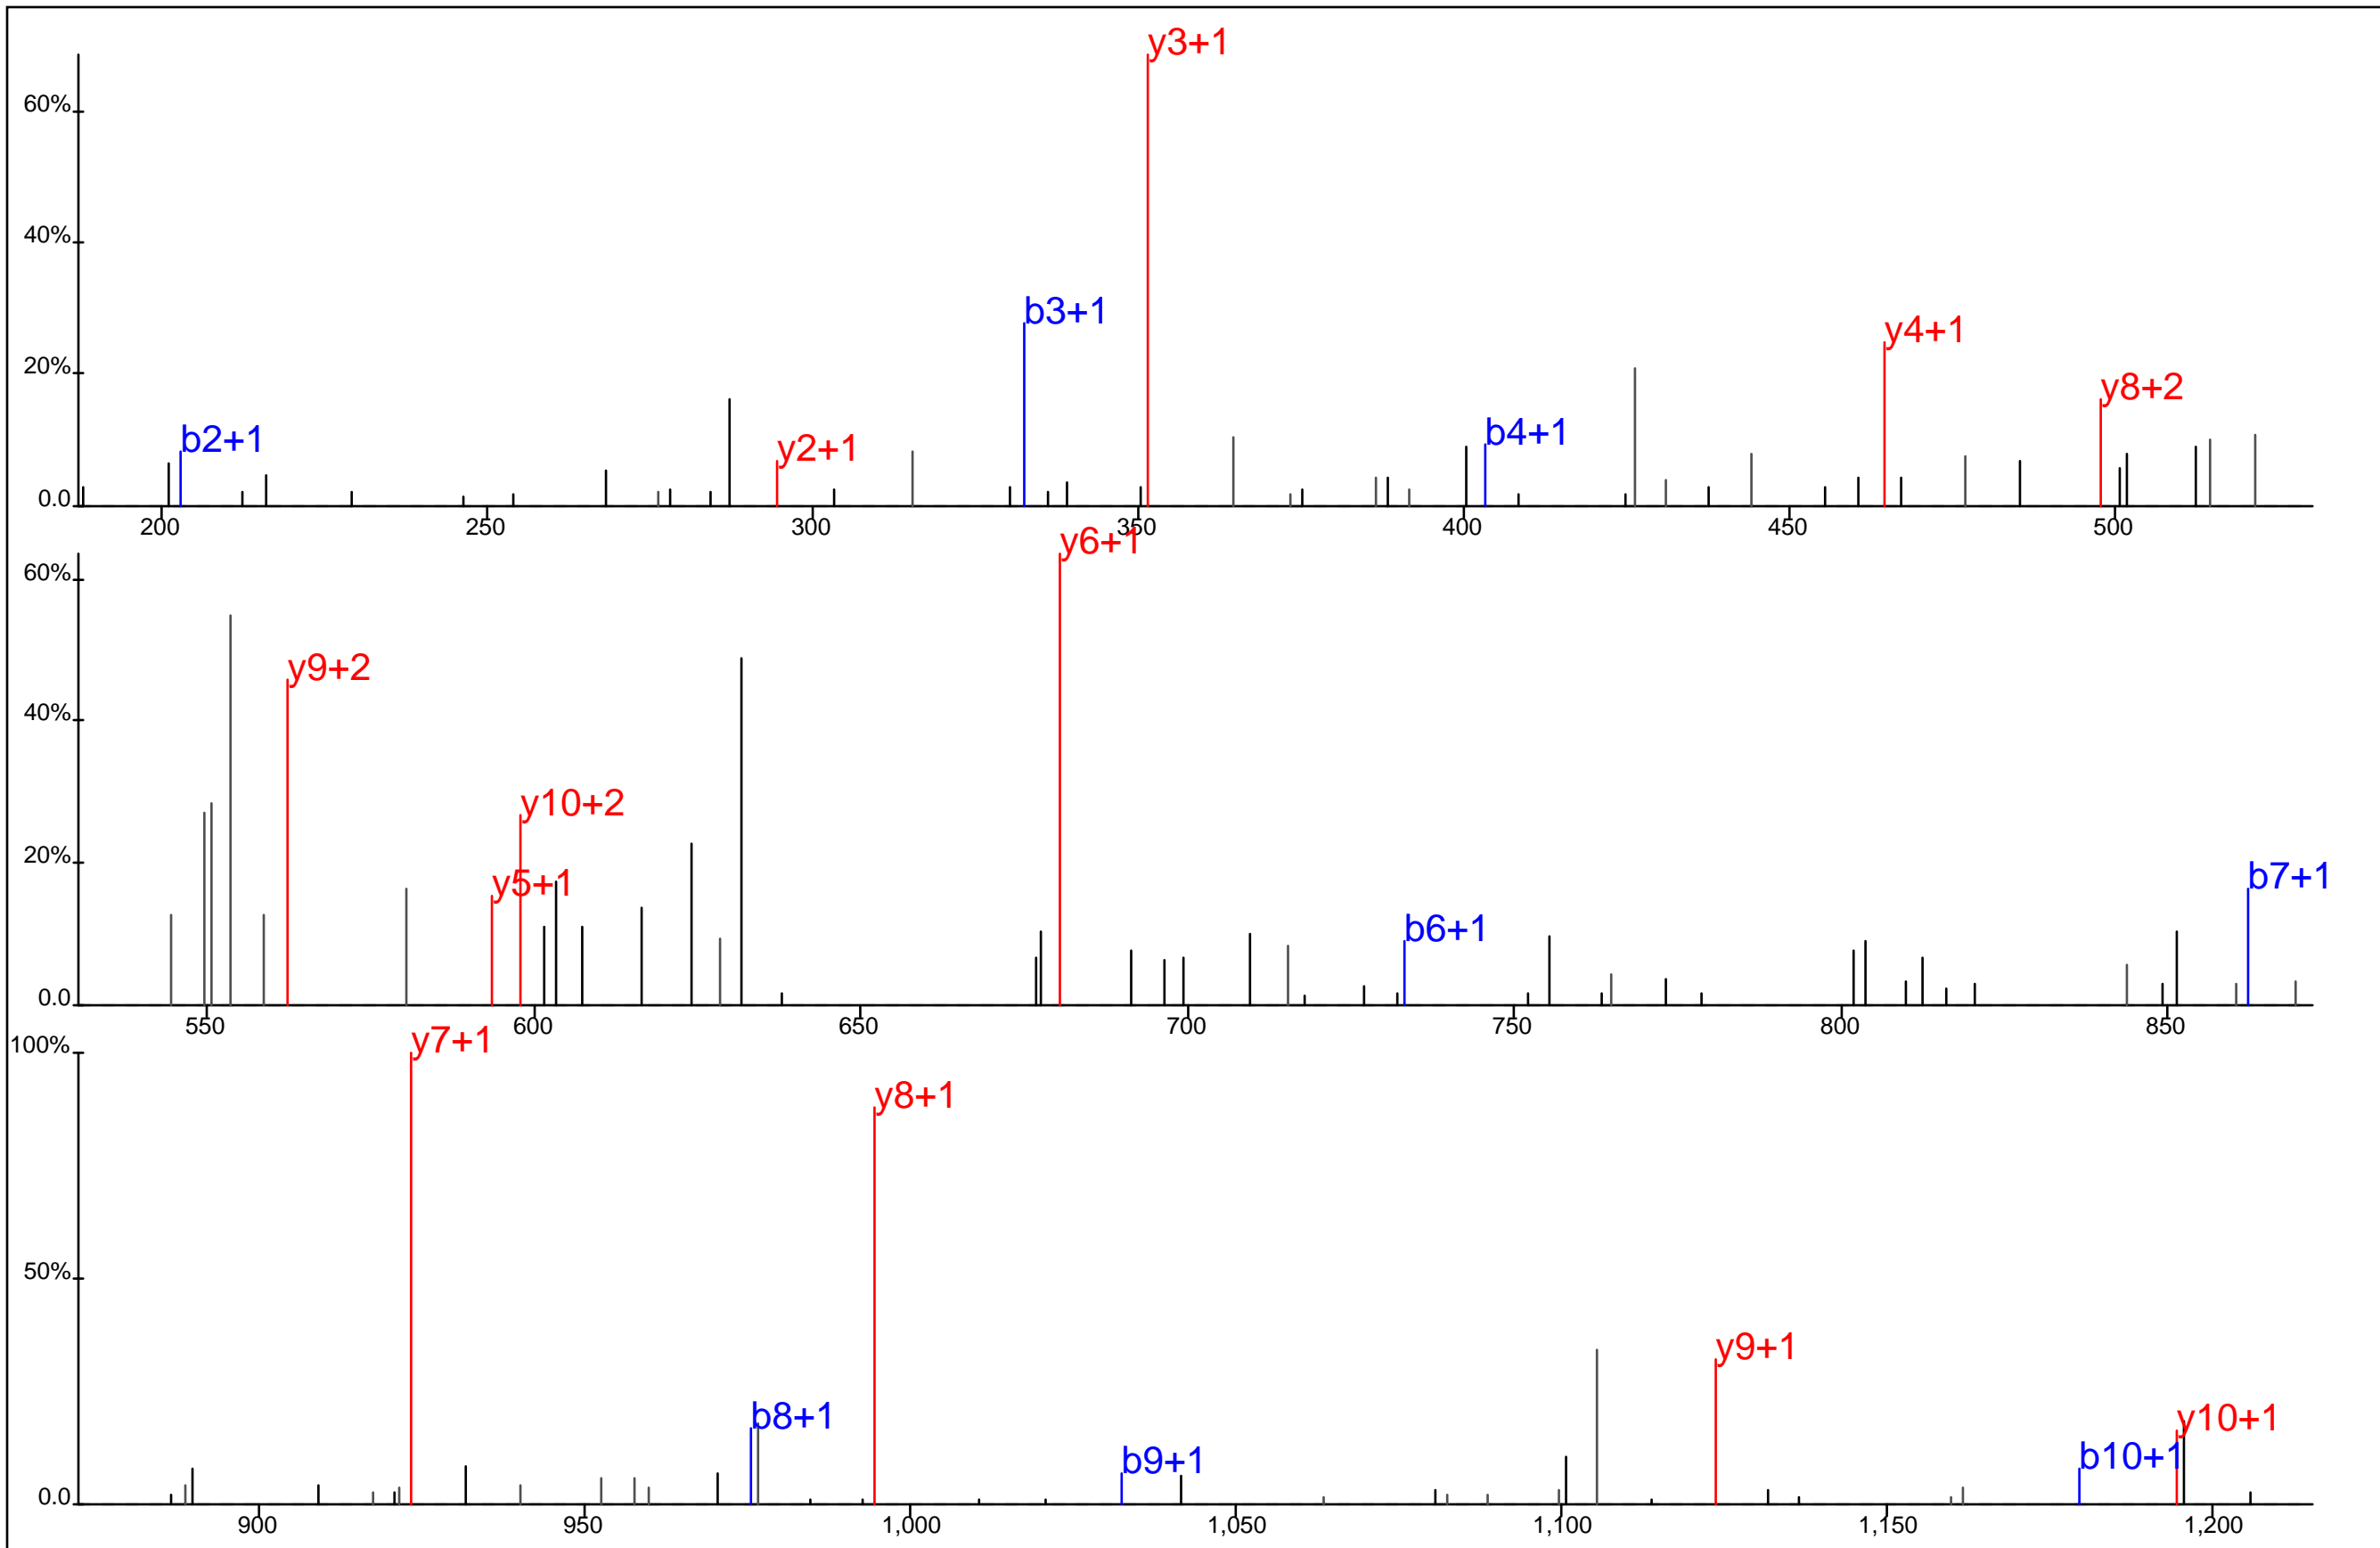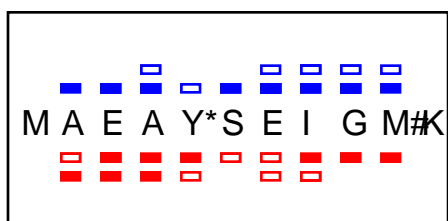

Protein Name: T cell antigen receptor, zeta  
 gi Accession: 0  
 Precursor Mass: 663.2614+2  
 Delta Mass: 0.211 ppm  
 XCorr: 55.57



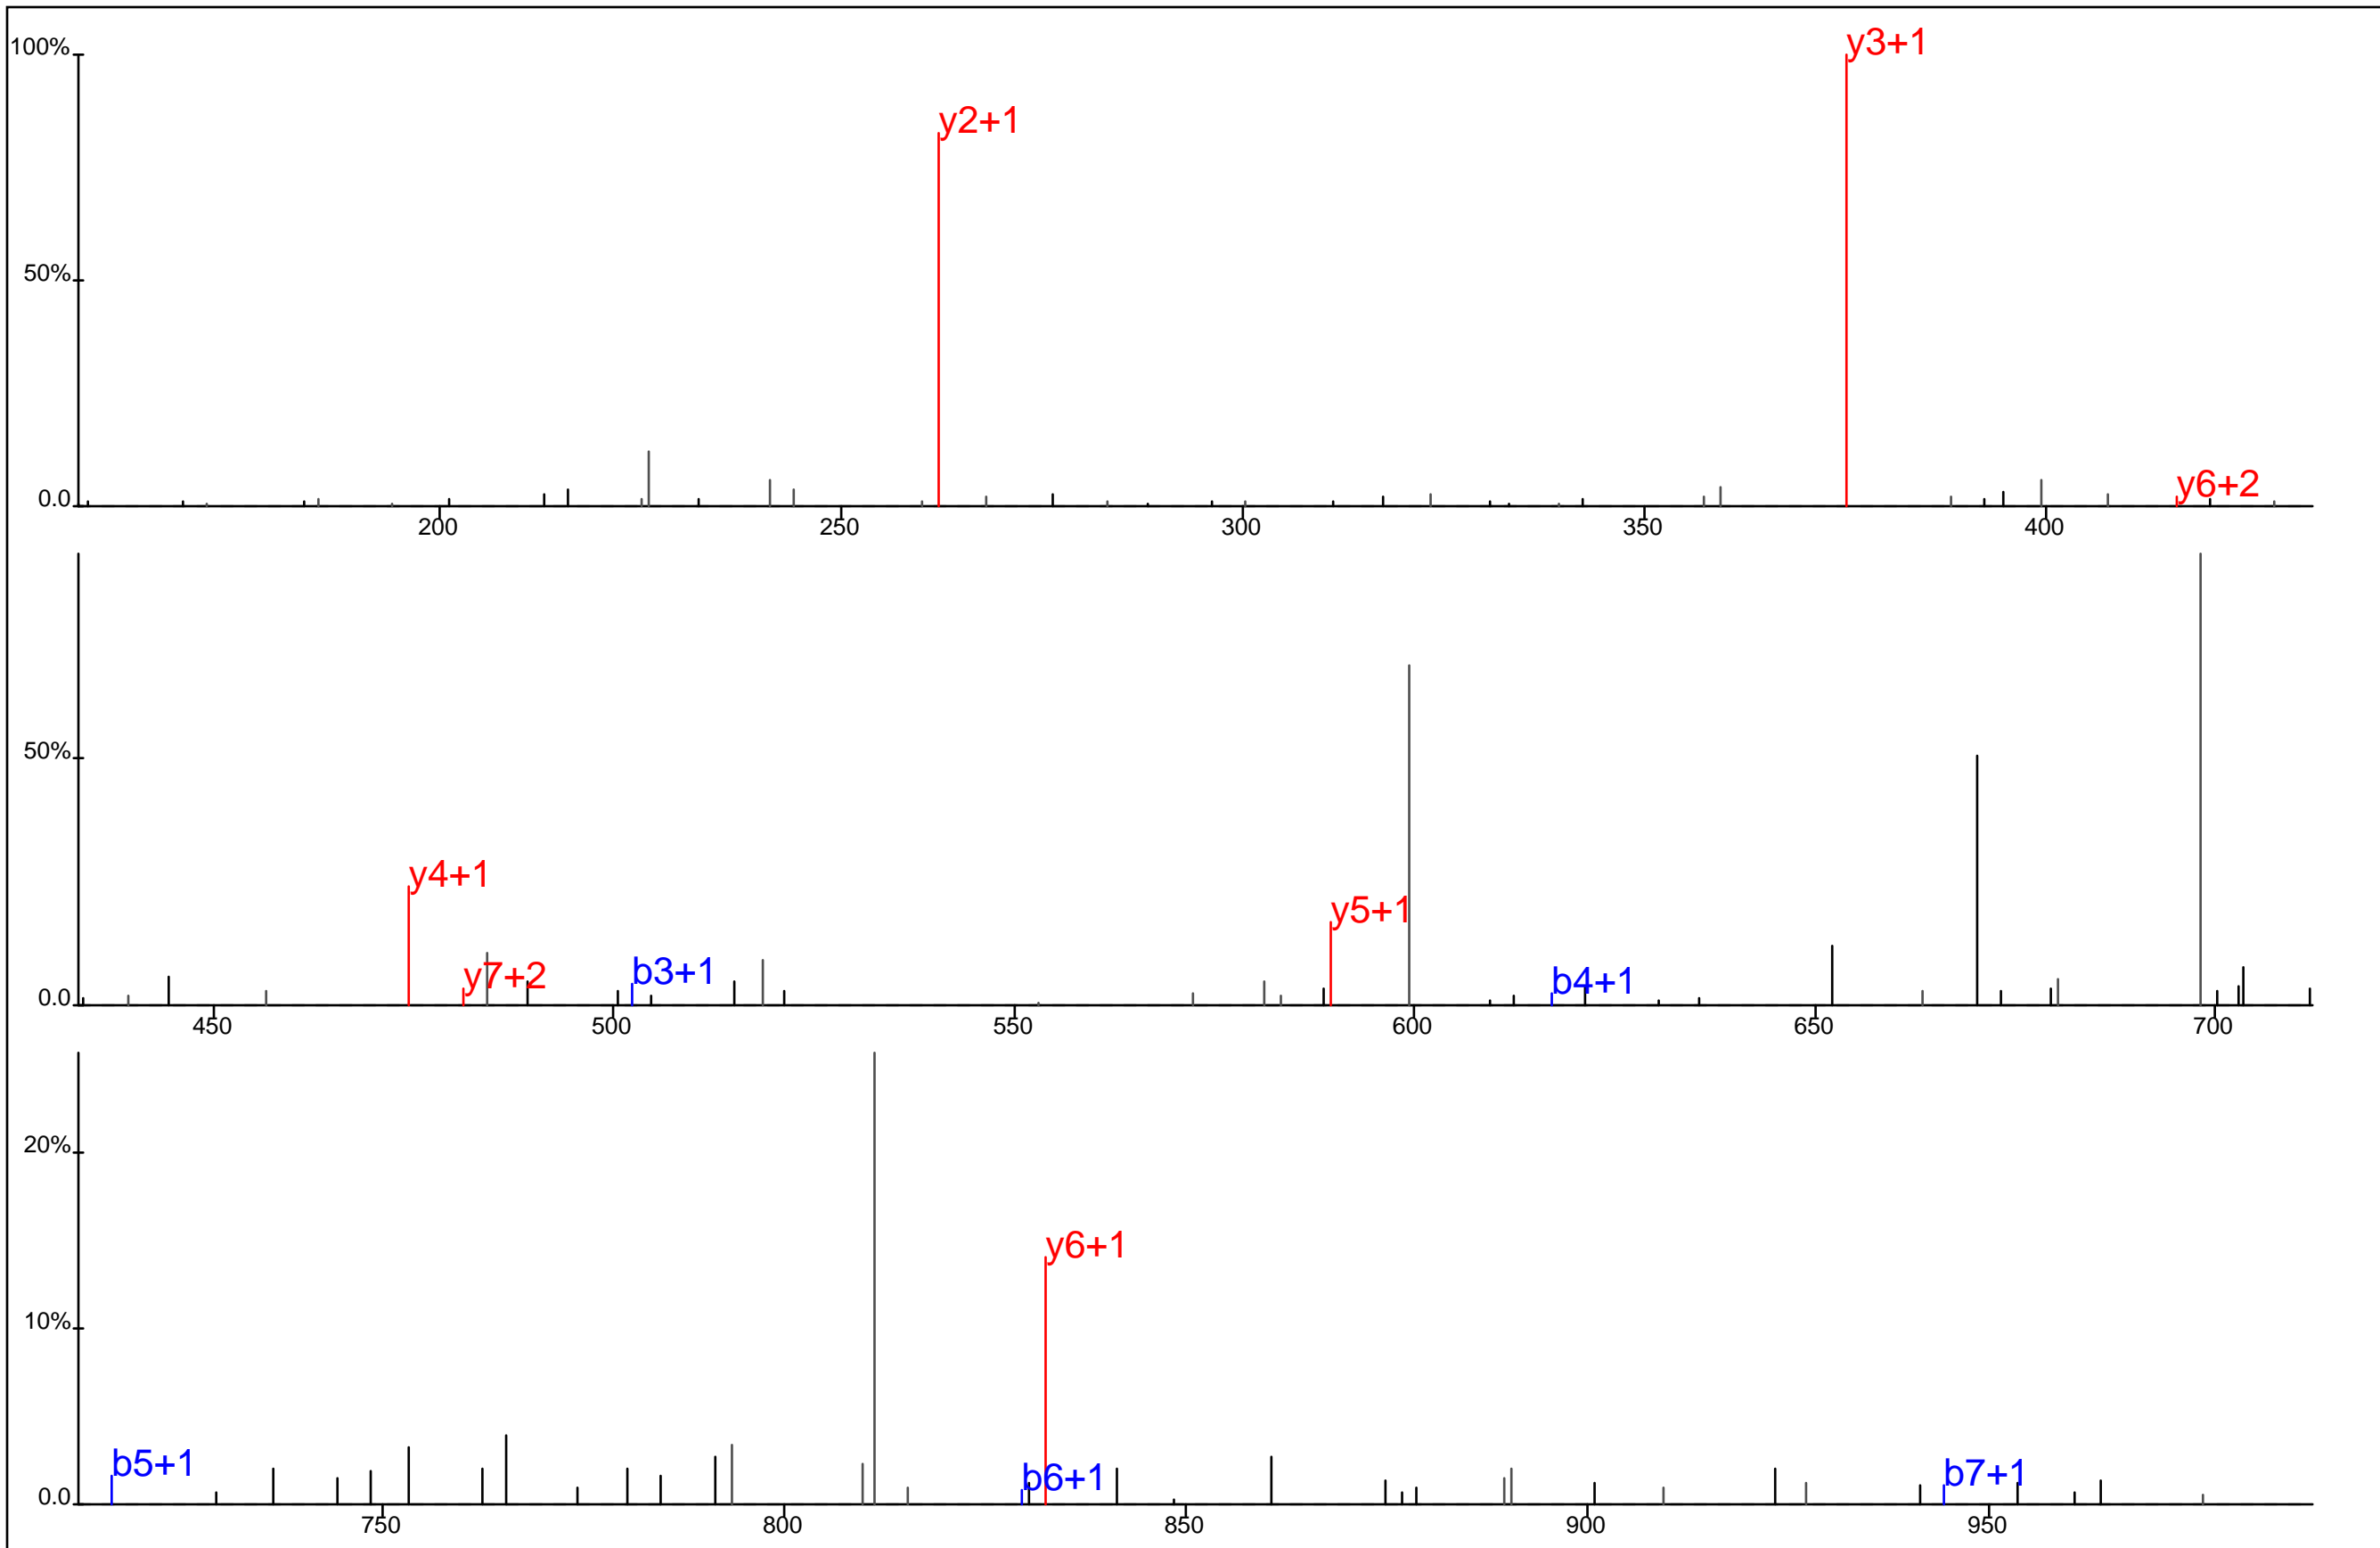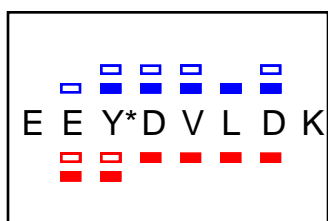

Protein Name: T cell antigen receptor, zeta  
 gi Accession: 0  
 Precursor Mass: 545.7208+2  
 Delta Mass: 0.350 ppm  
 XCorr: 20.83

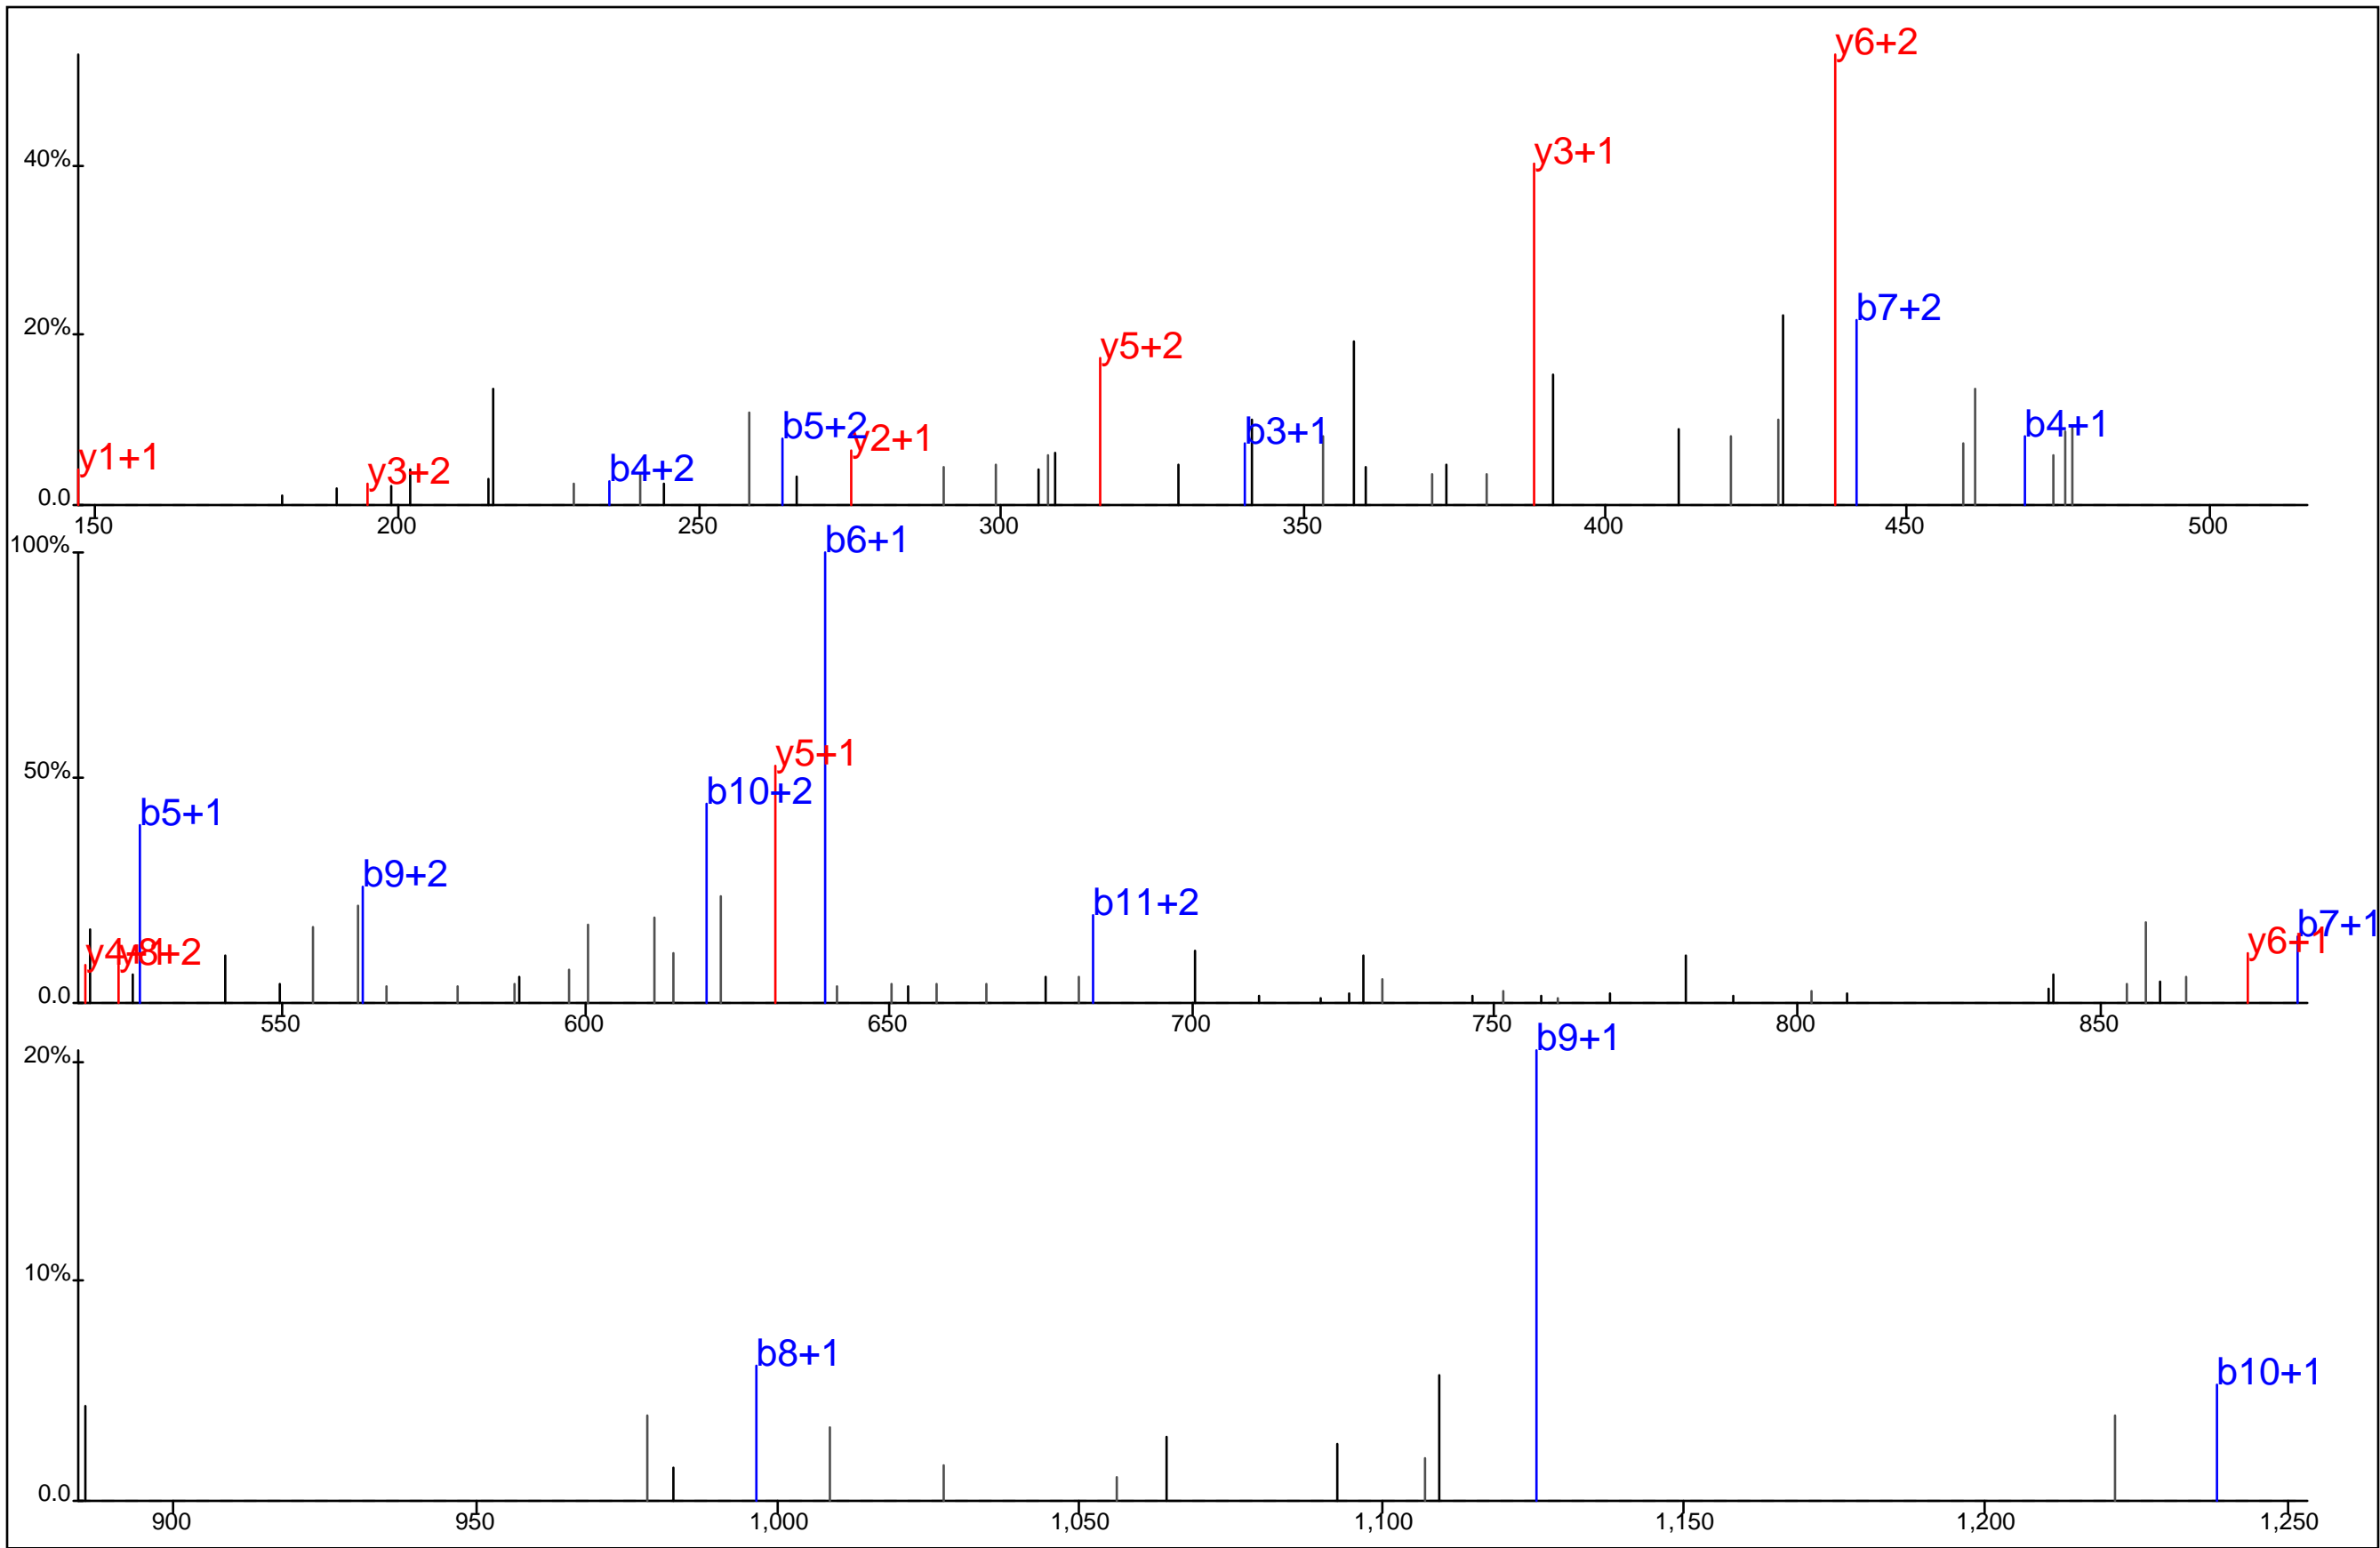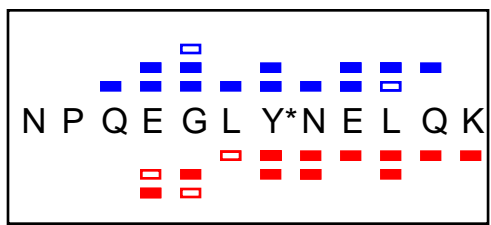

Protein Name: T cell antigen receptor, zeta  
 gi Accession: 0  
 Precursor Mass: 504.8962+3  
 Delta Mass: 0.731 ppm  
 XCorr: 35.67

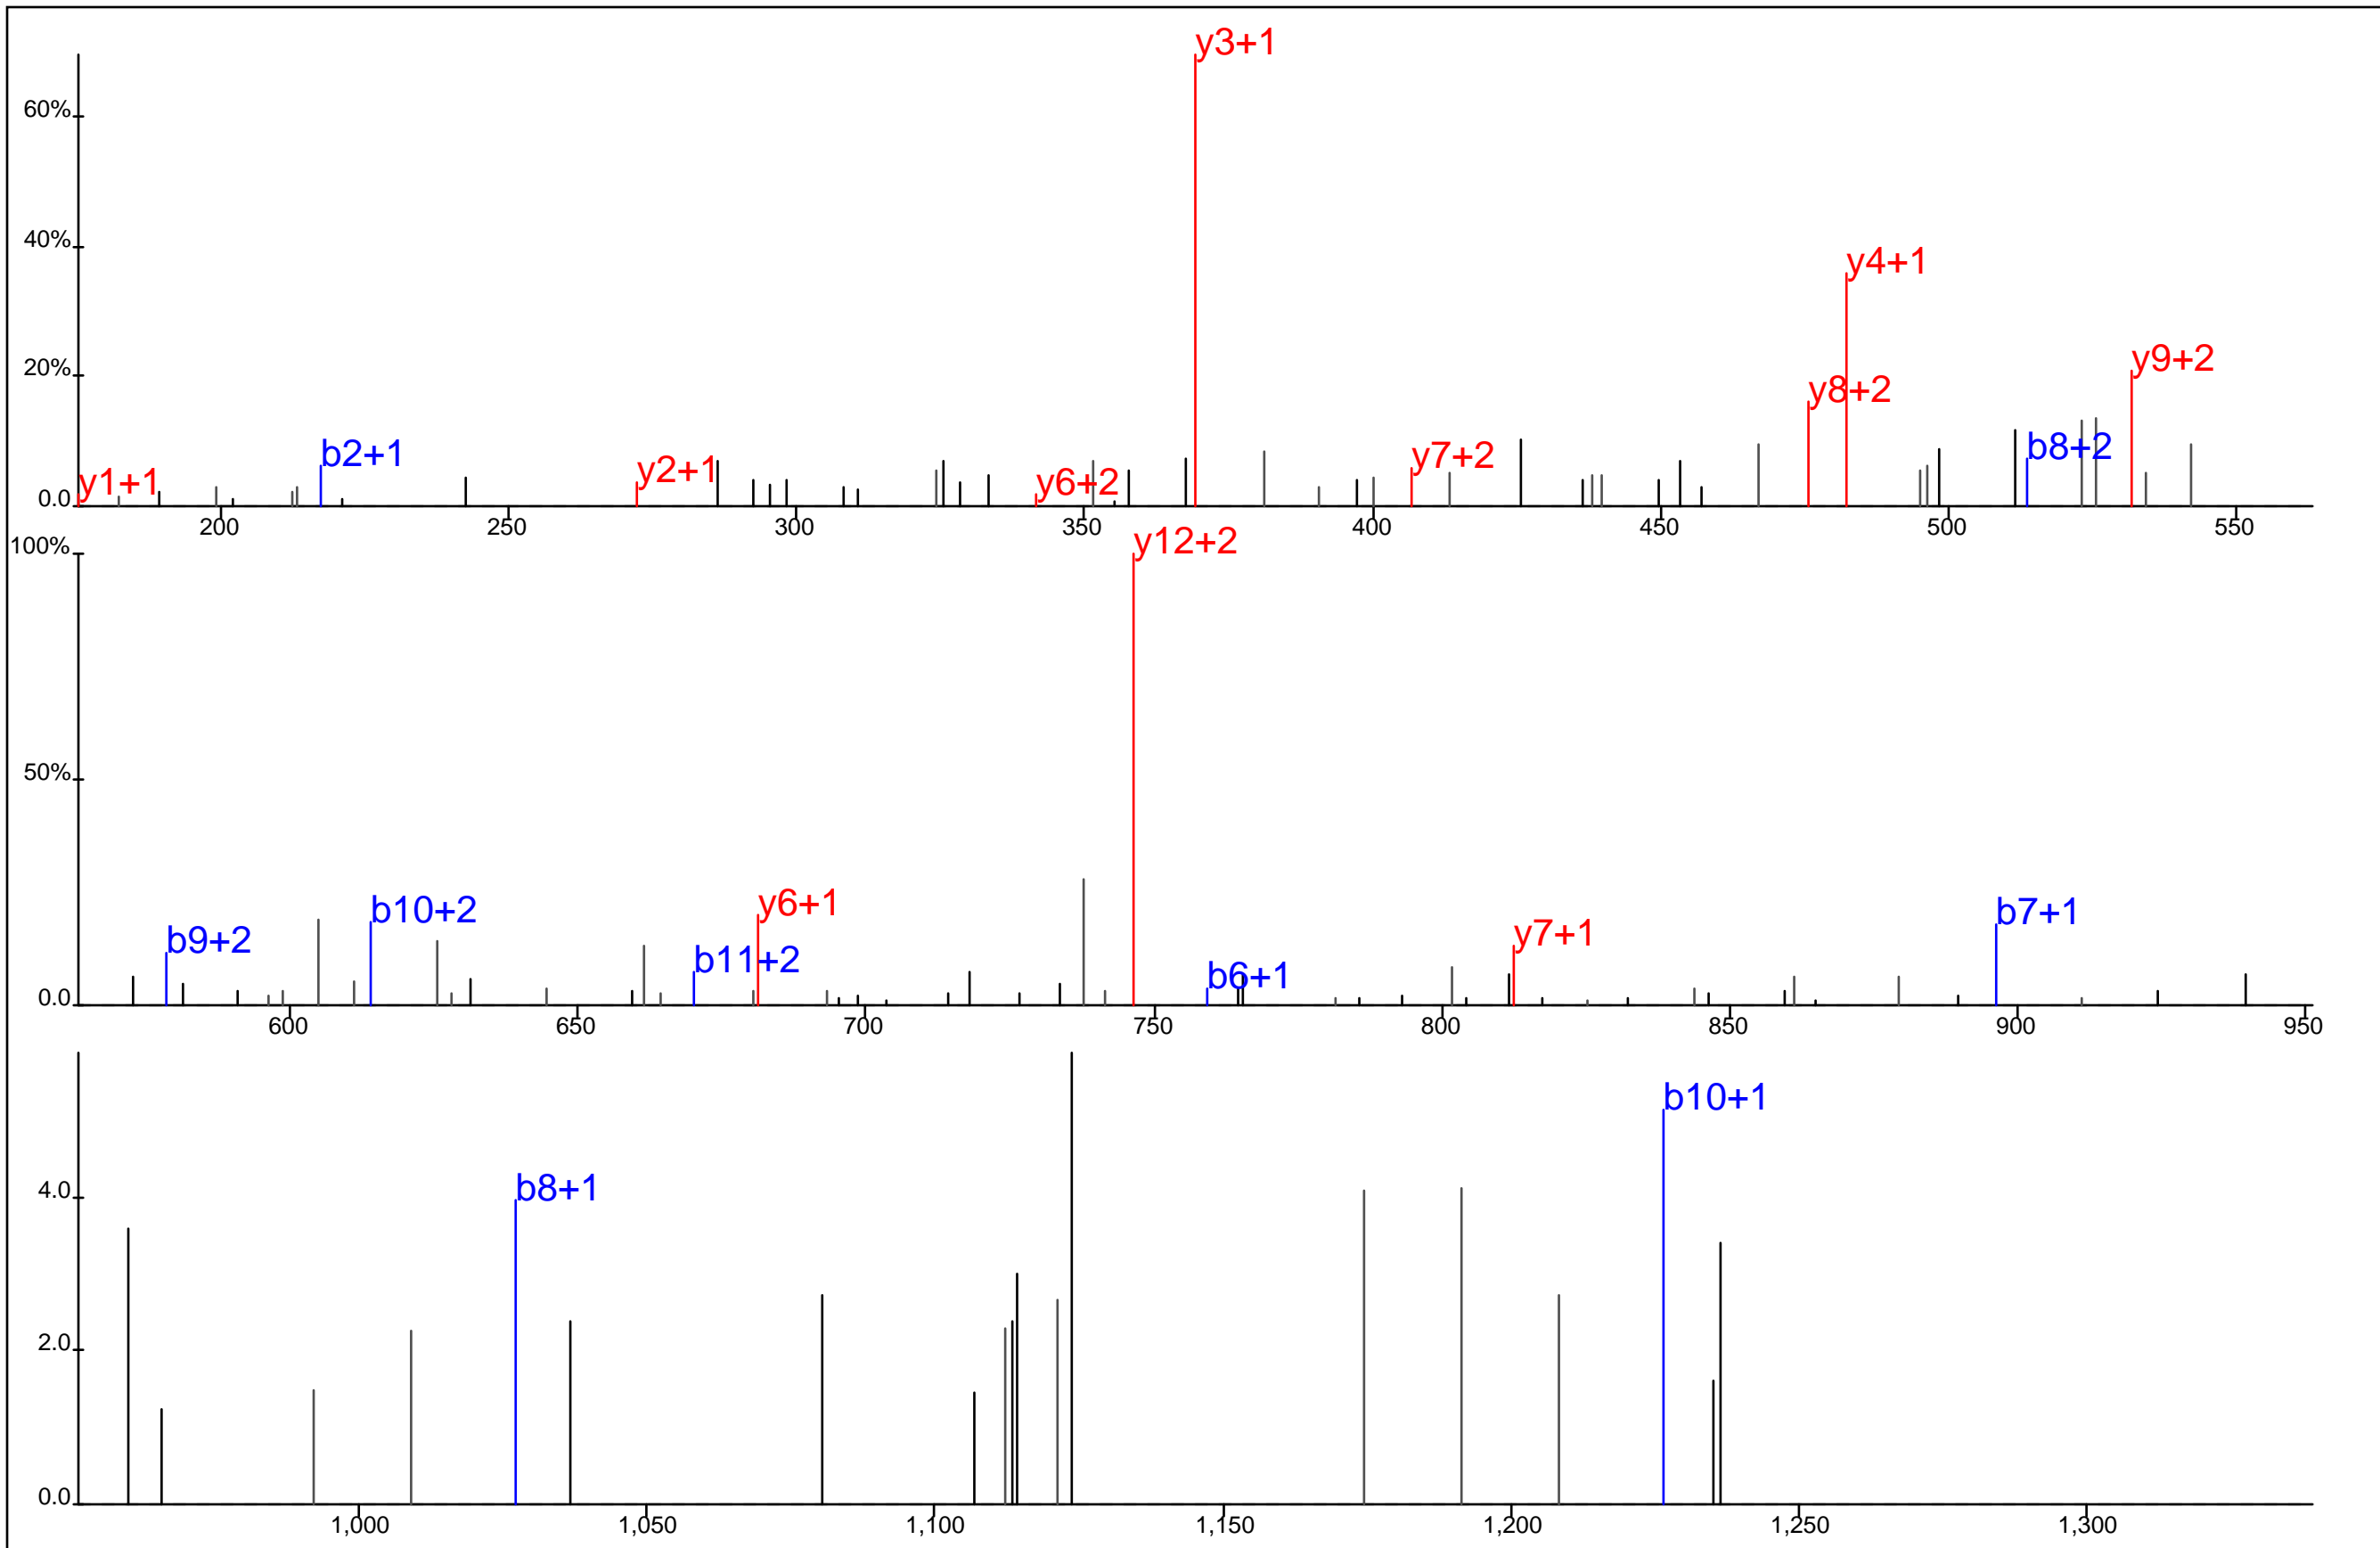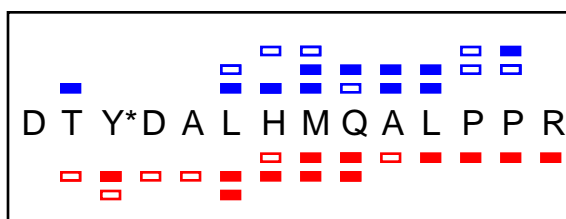

Protein Name: T cell antigen receptor, zeta  
 gi Accession: 0  
 Precursor Mass: 569.9233+3  
 Delta Mass: 0.319 ppm  
 XCorr: 32.12

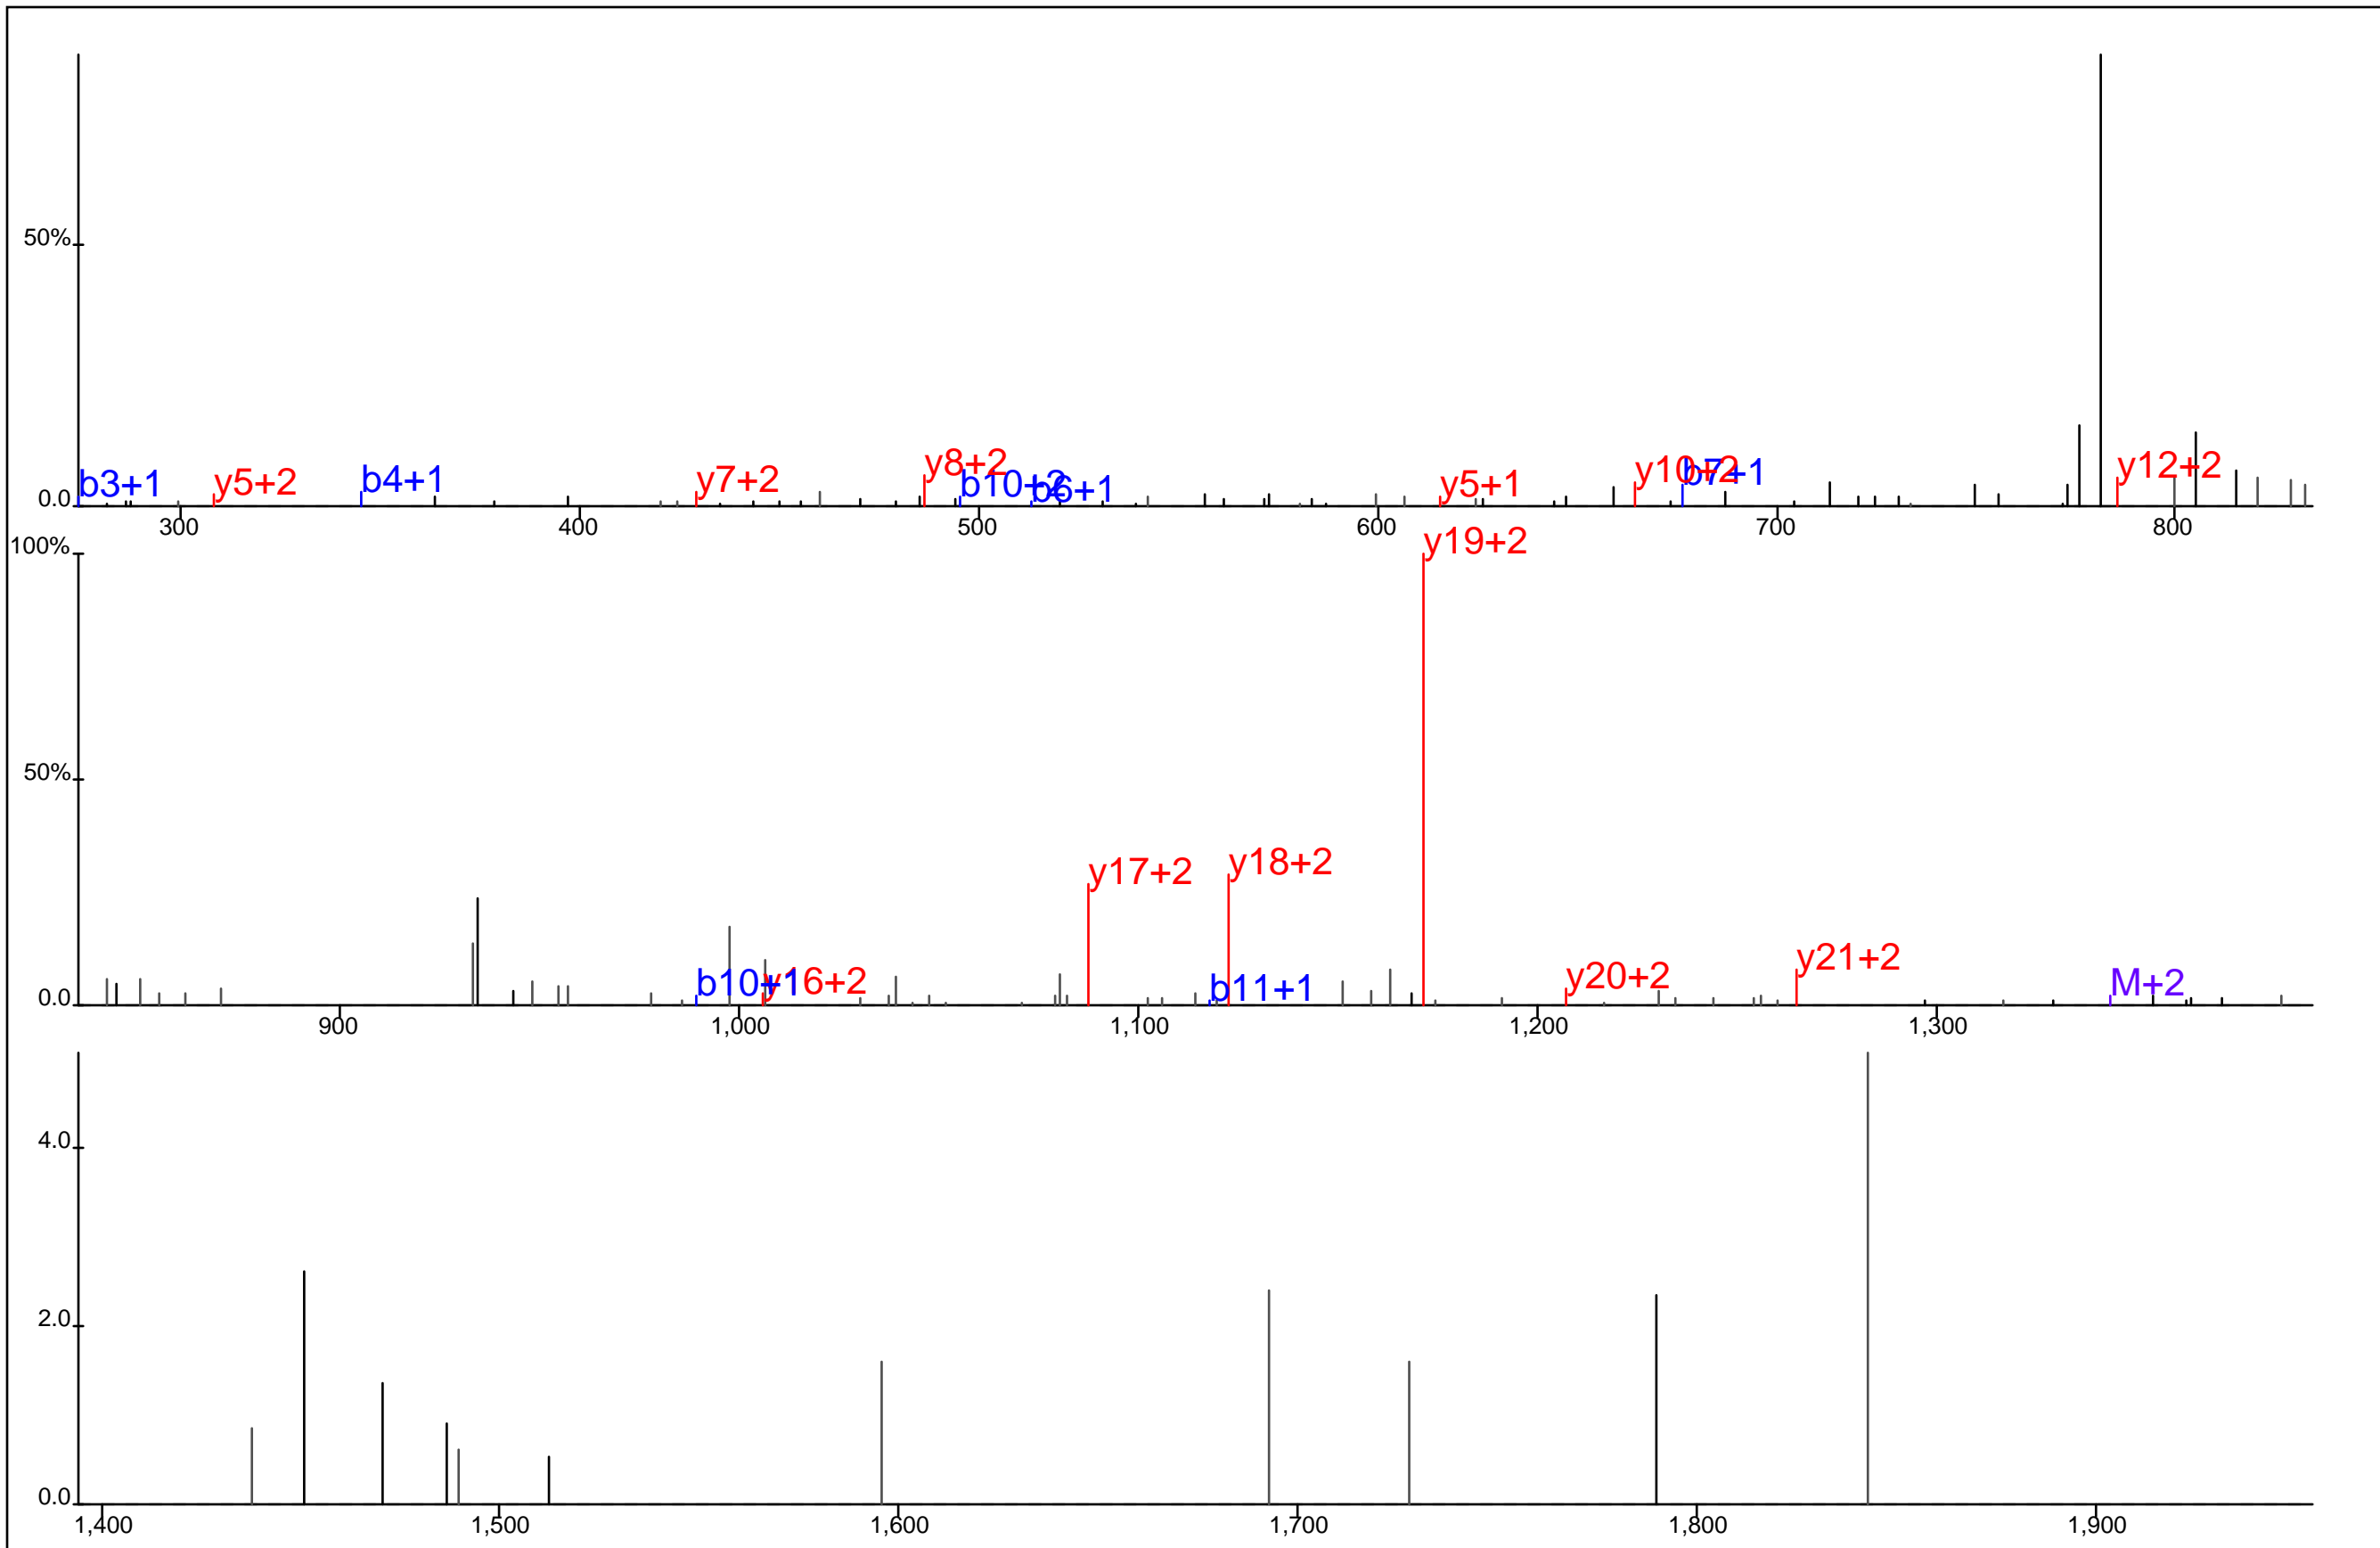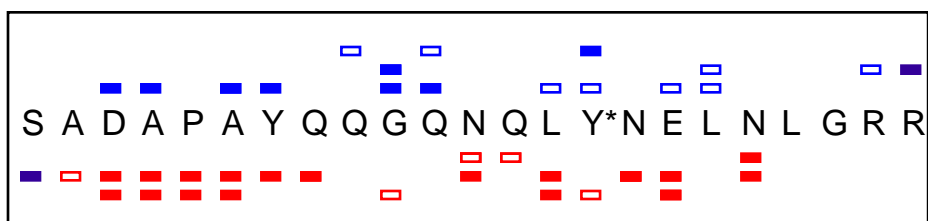

Protein Name: T cell antigen receptor, zeta  
 gi Accession: 0  
 Precursor Mass: 896.0845+3  
 Delta Mass: 0.811 ppm  
 XCorr: 22.6

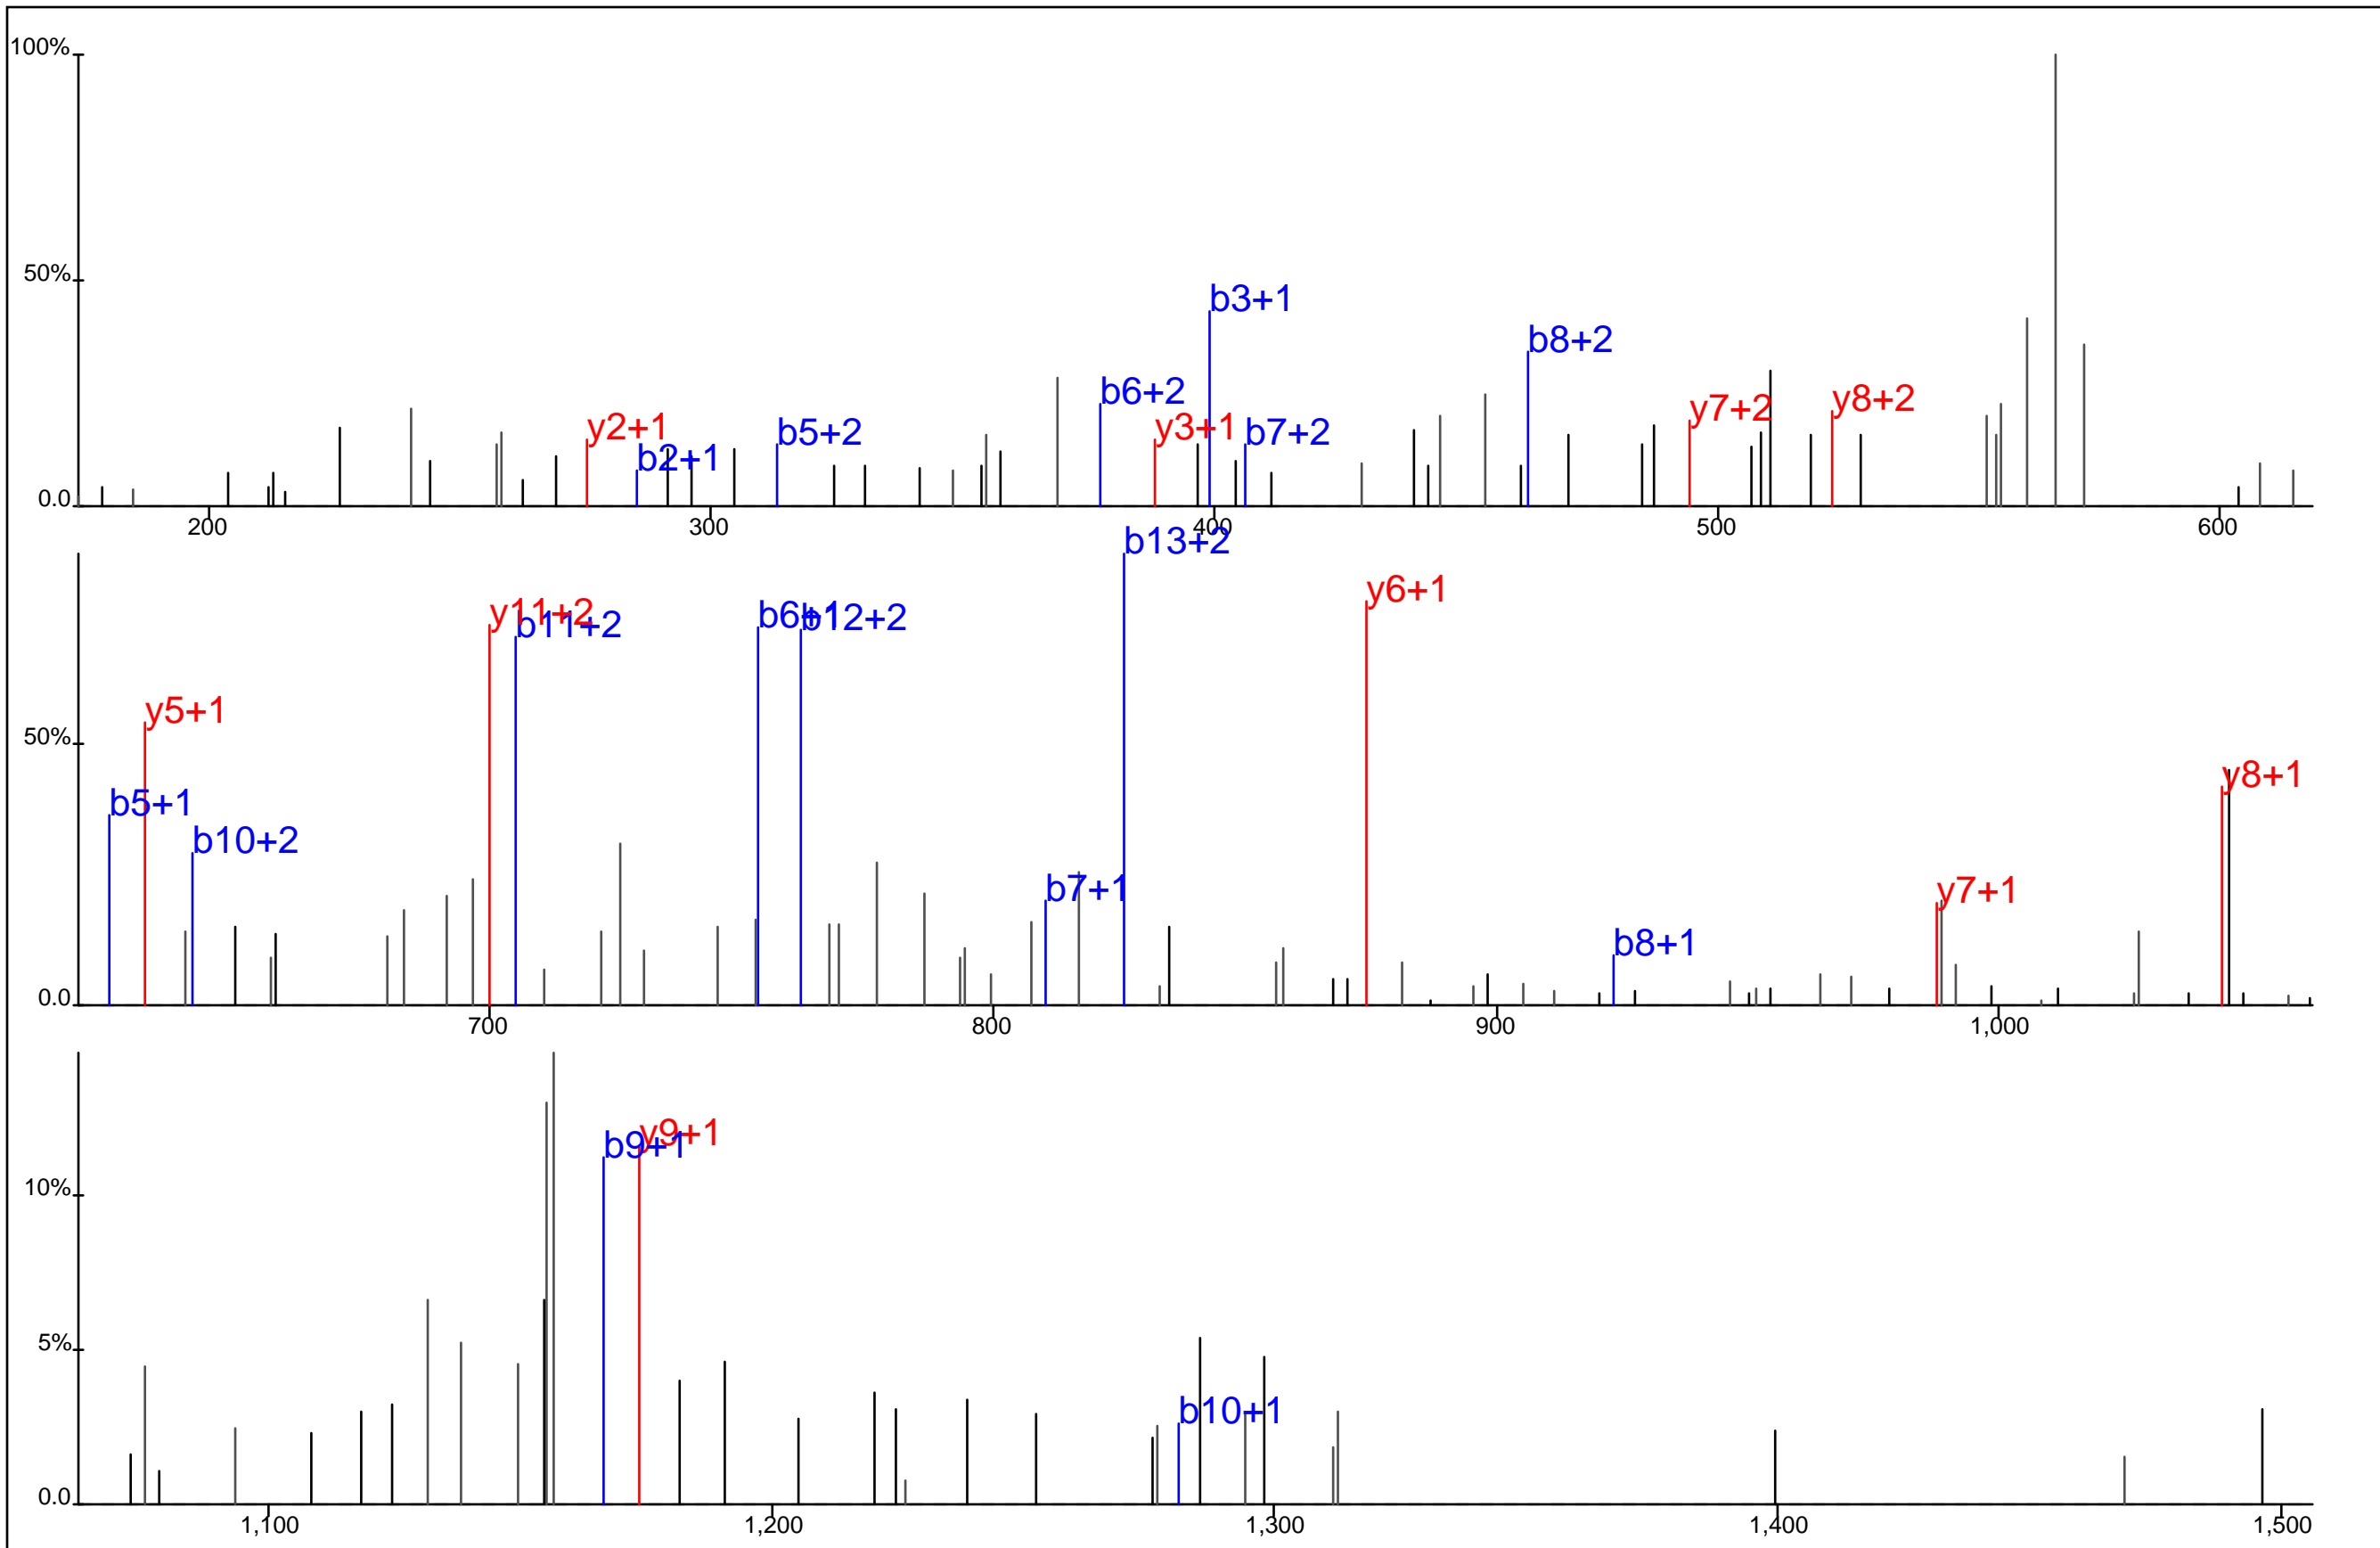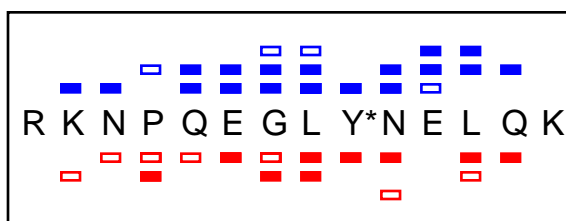

Protein Name: T cell antigen receptor, zeta  
 gi Accession: 0  
 Precursor Mass: 599.6286+3  
 Delta Mass: 1.235 ppm  
 XCorr: 32.37

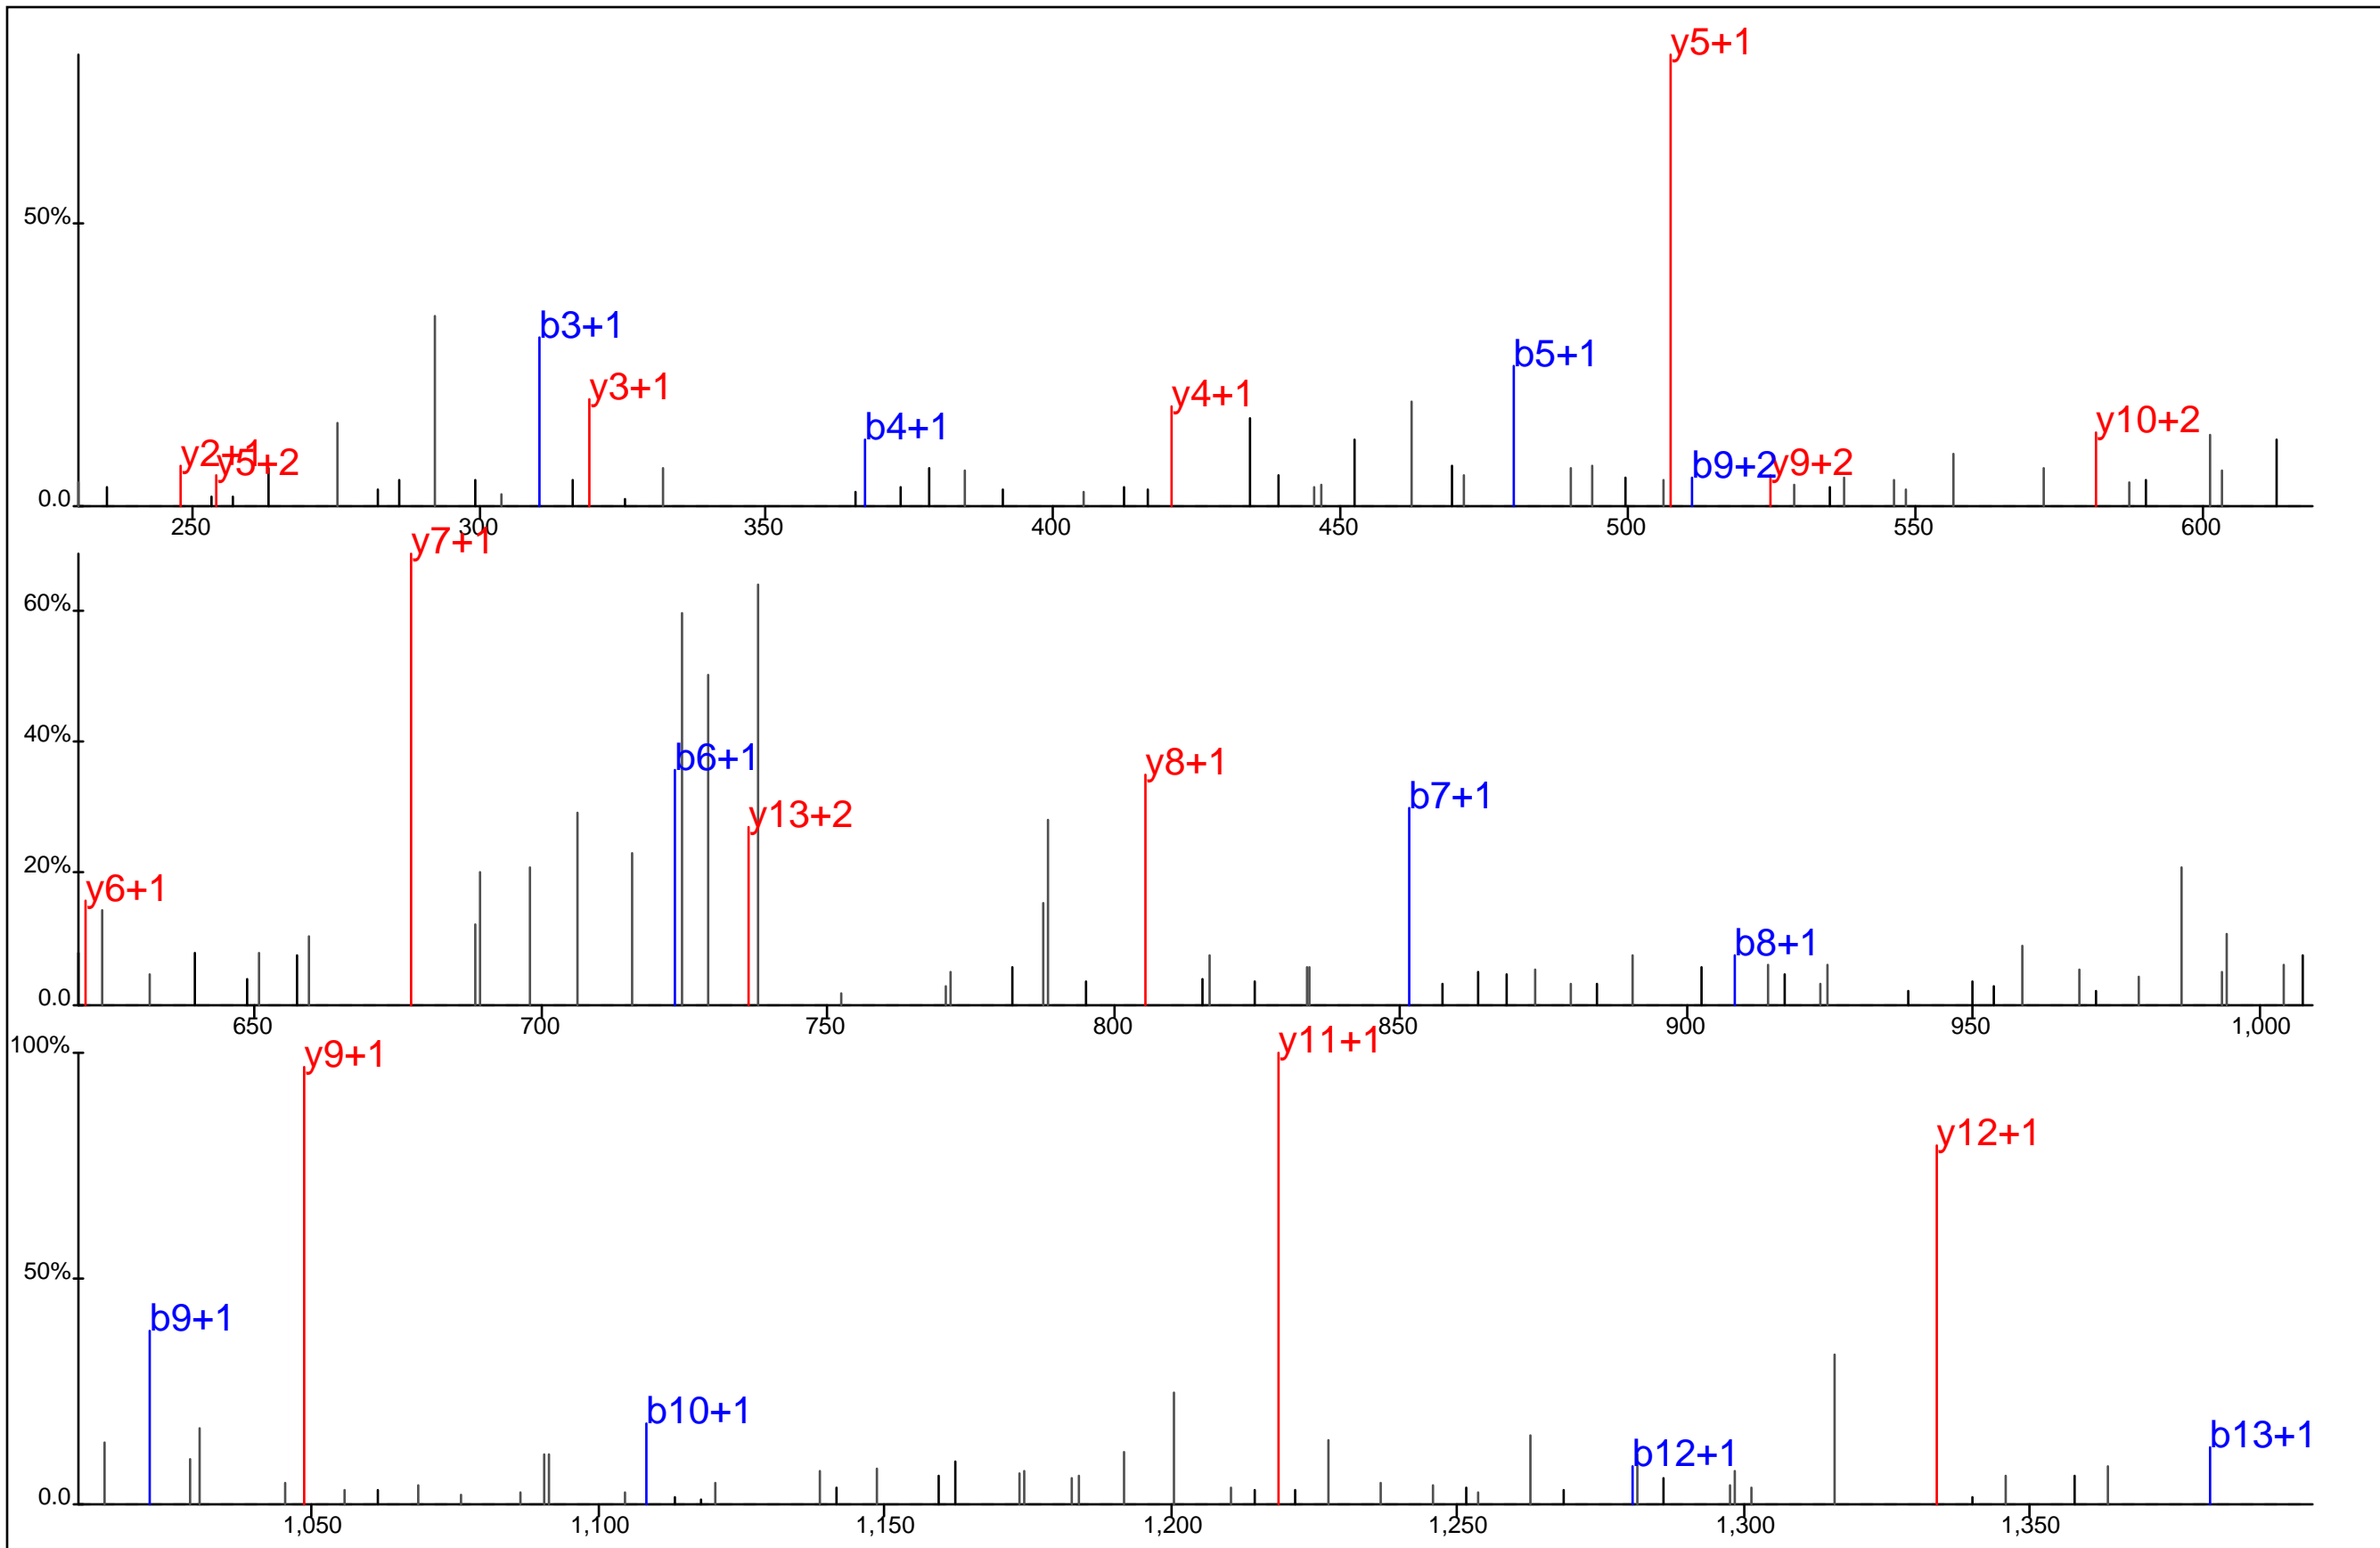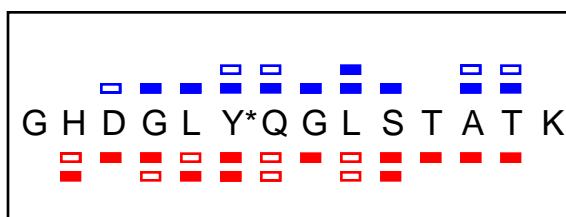

Protein Name: T cell antigen receptor, zeta  
 gi Accession: 0  
 Precursor Mass: 764.3453+2  
 Delta Mass: 0.416 ppm  
 XCorr: 78.86

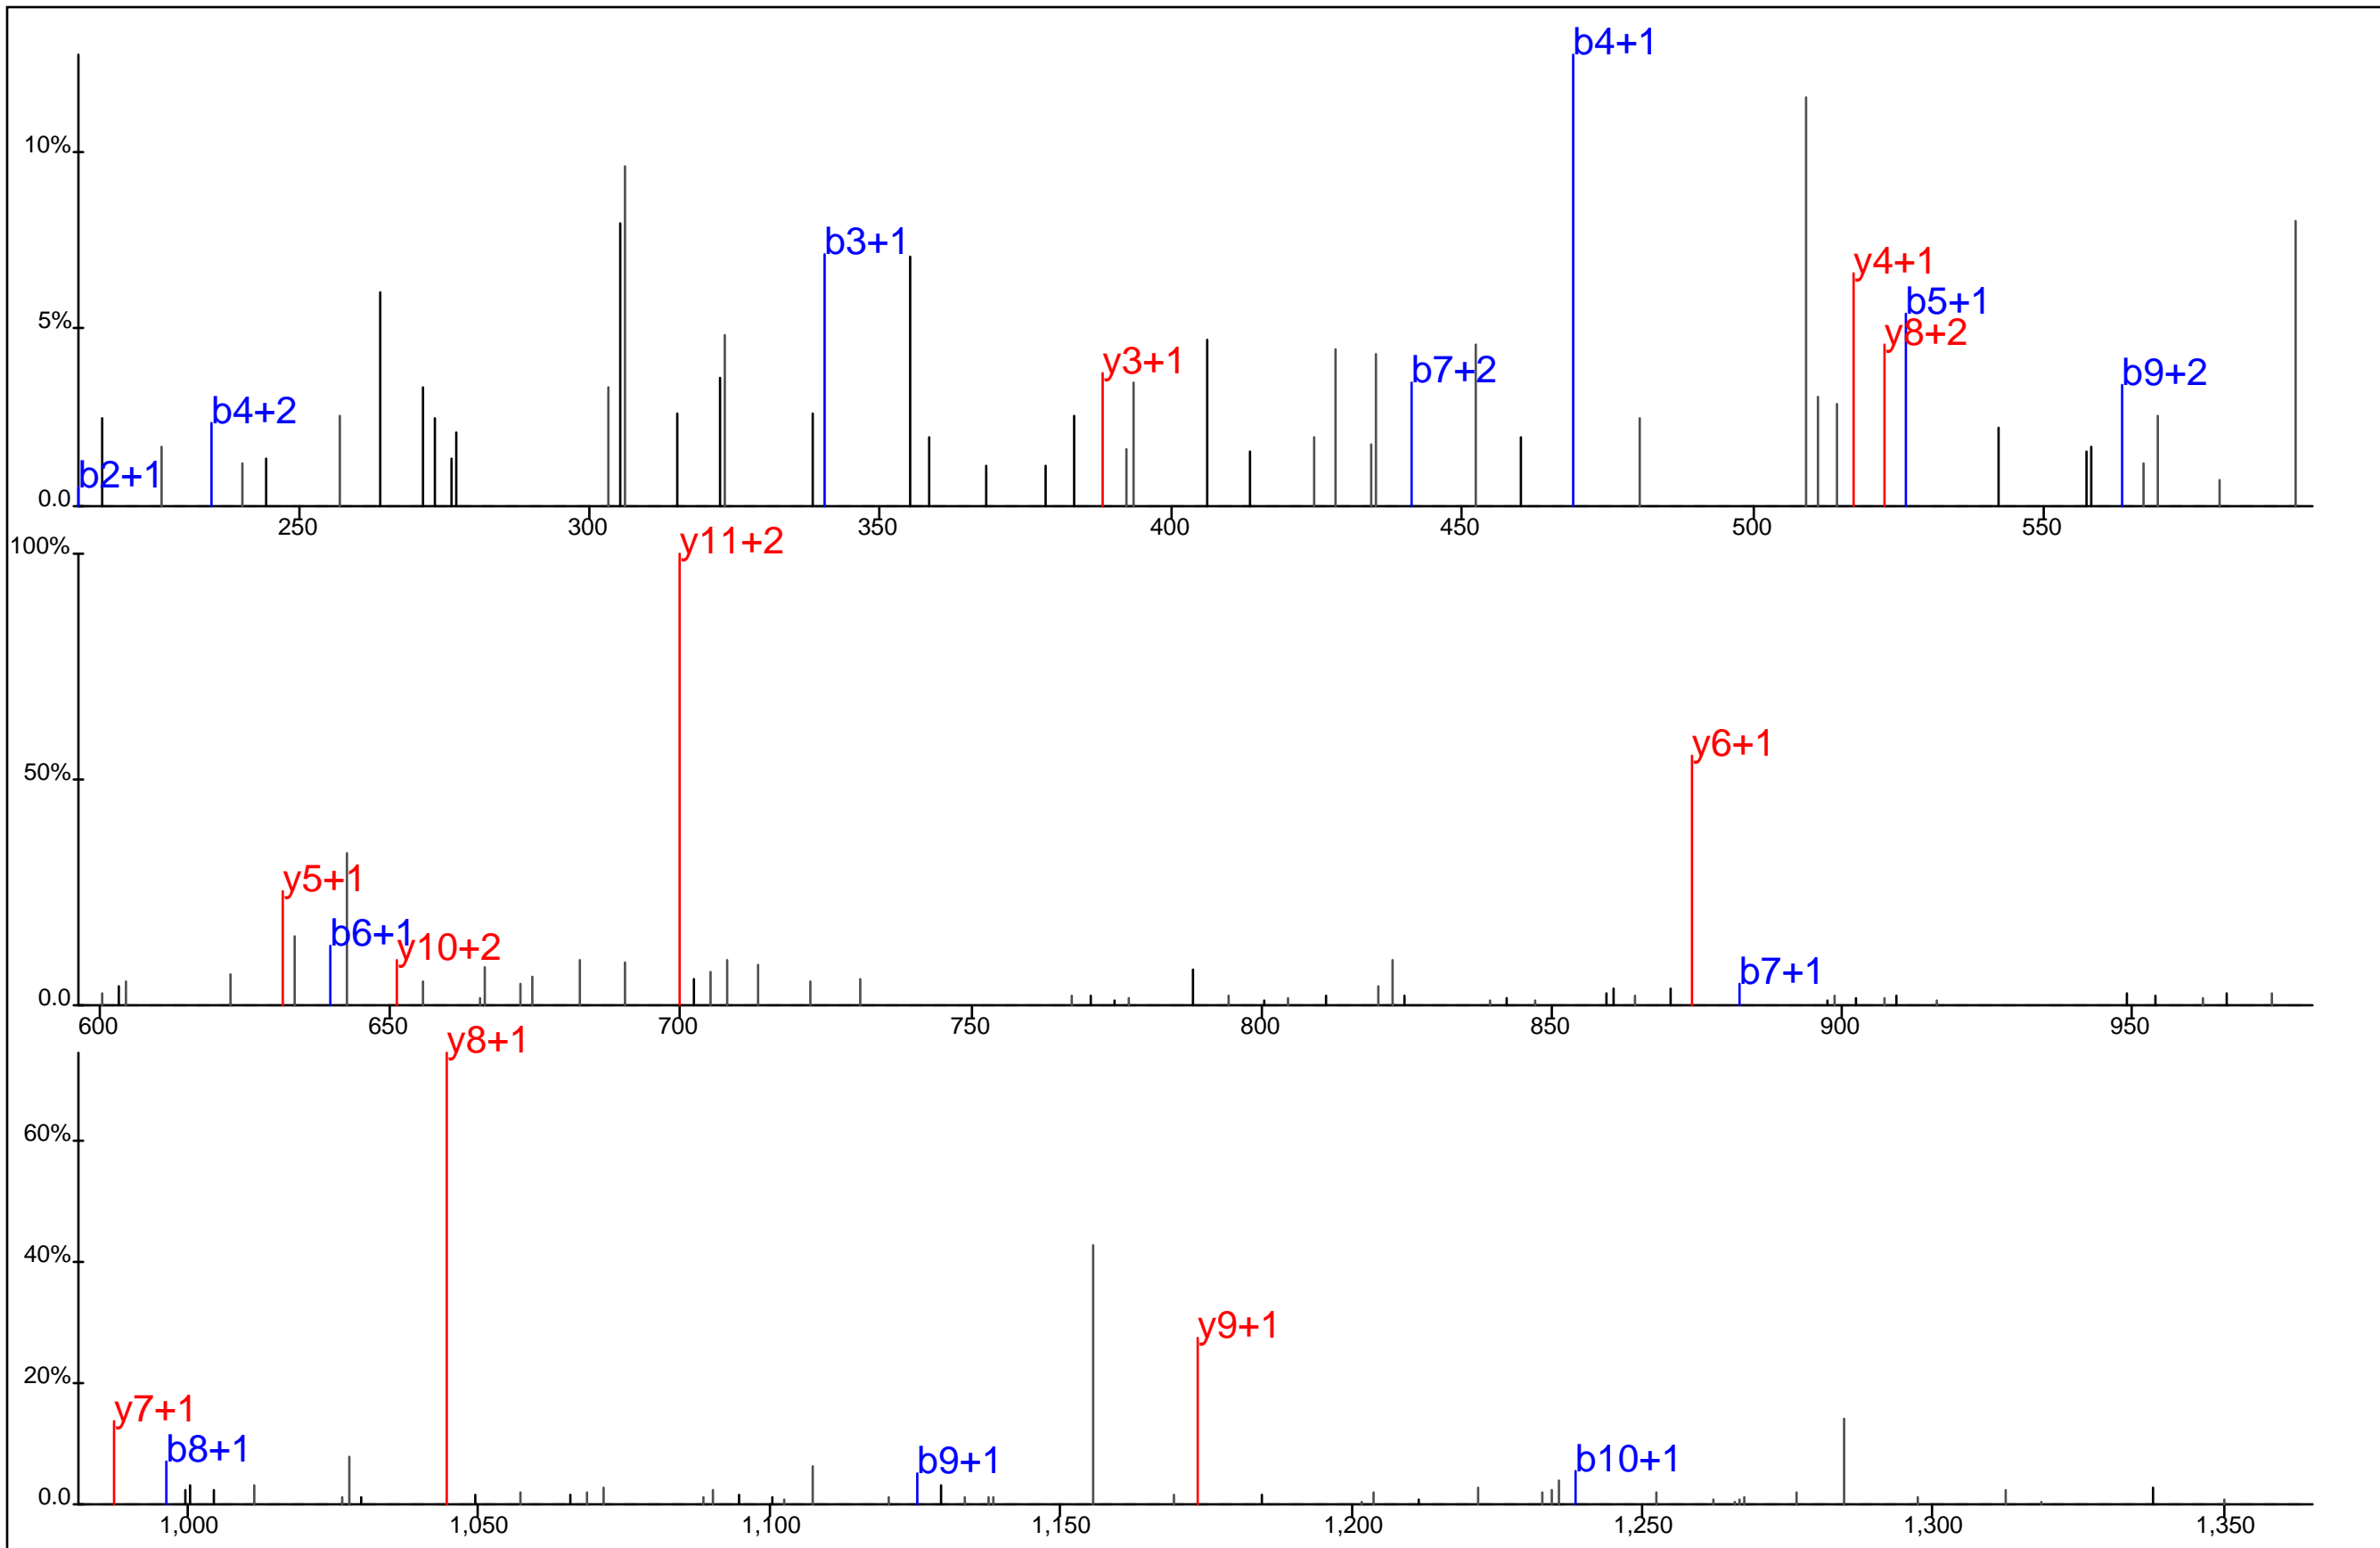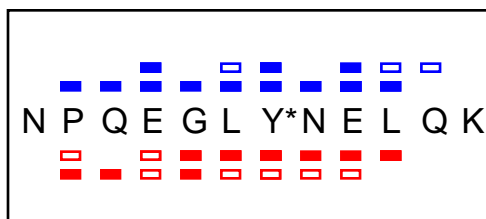

Protein Name: T cell antigen receptor, zeta  
 gi Accession: 0  
 Precursor Mass: 756.8381+2  
 Delta Mass: 2.630 ppm  
 XCorr: 40.28

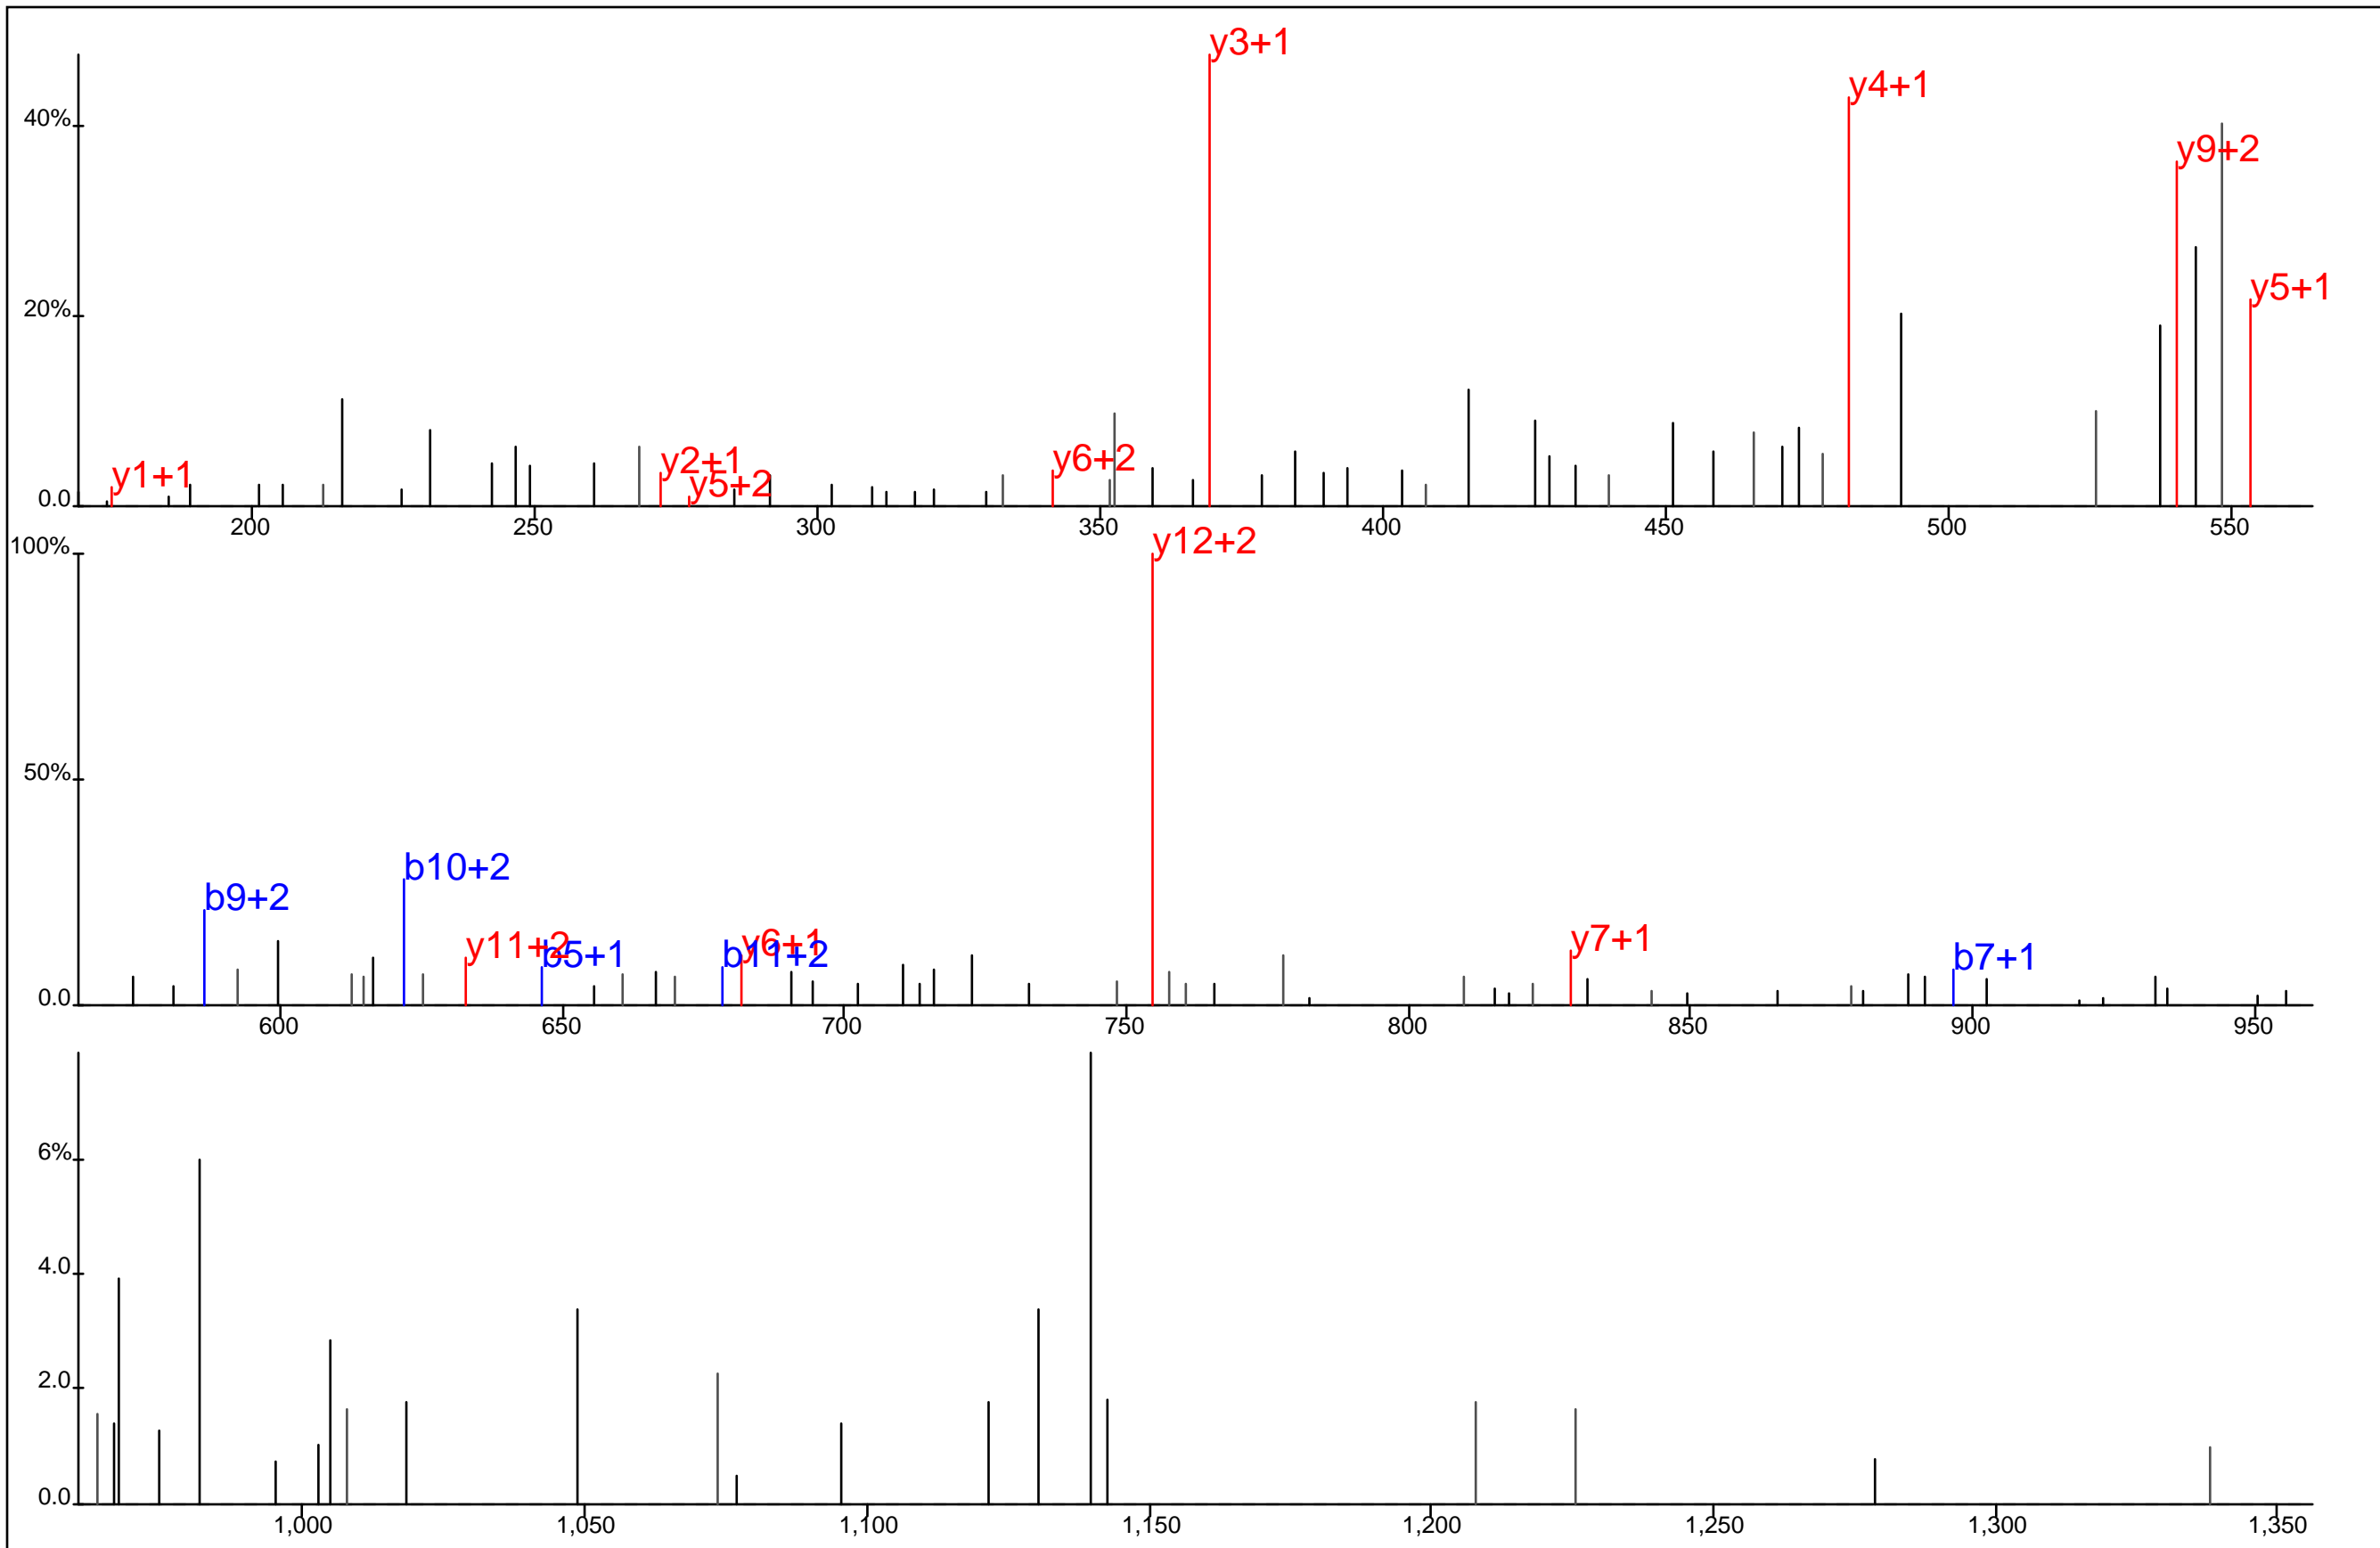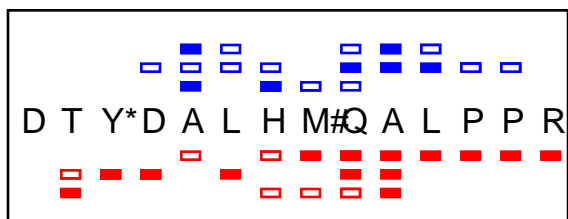

Protein Name: T cell antigen receptor, zeta  
 gi Accession: 0  
 Precursor Mass: 575.2558+3  
 Delta Mass: 1.108 ppm  
 XCorr: 22.68



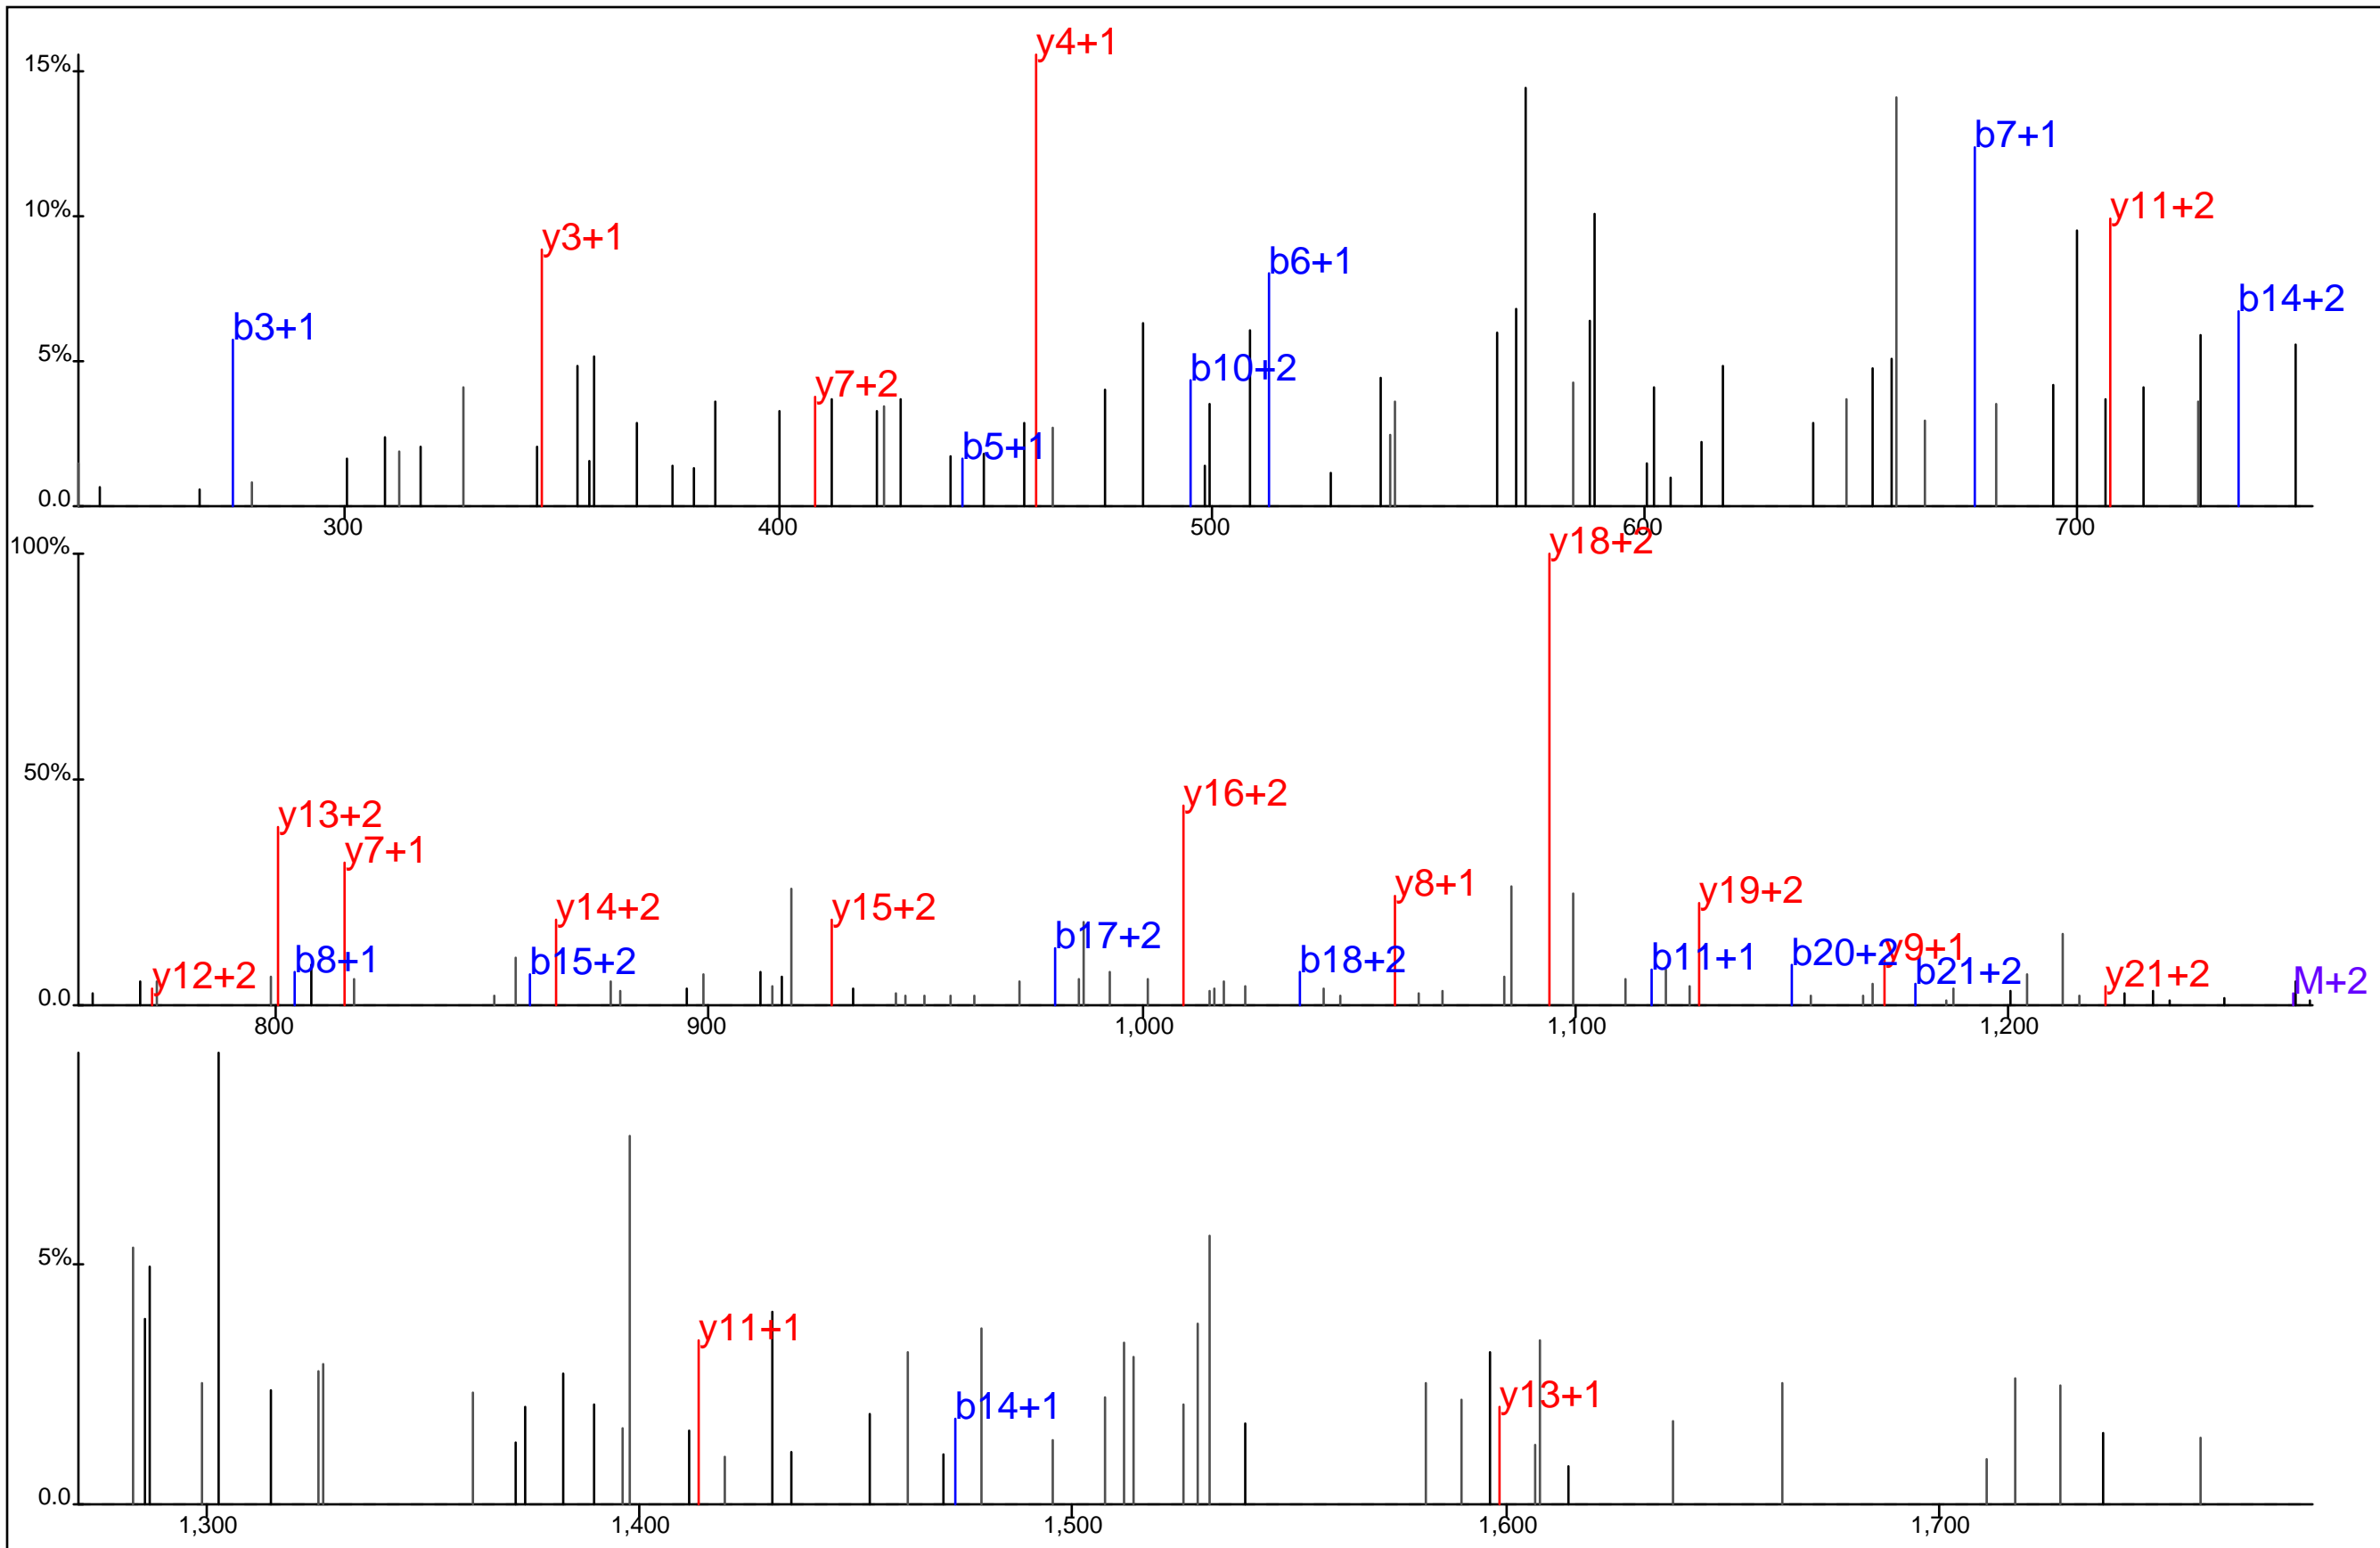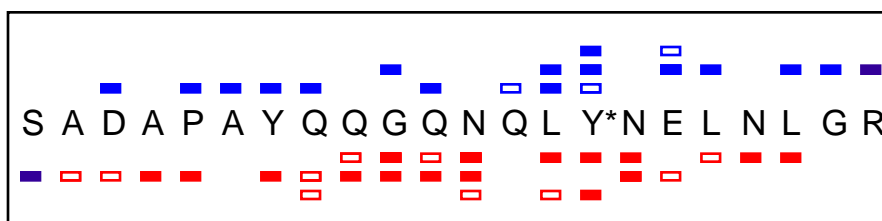

Protein Name: T cell antigen receptor, zeta  
 gi Accession: 0  
 Precursor Mass: 844.0502+3  
 Delta Mass: 0.147 ppm  
 XCorr: 40.11



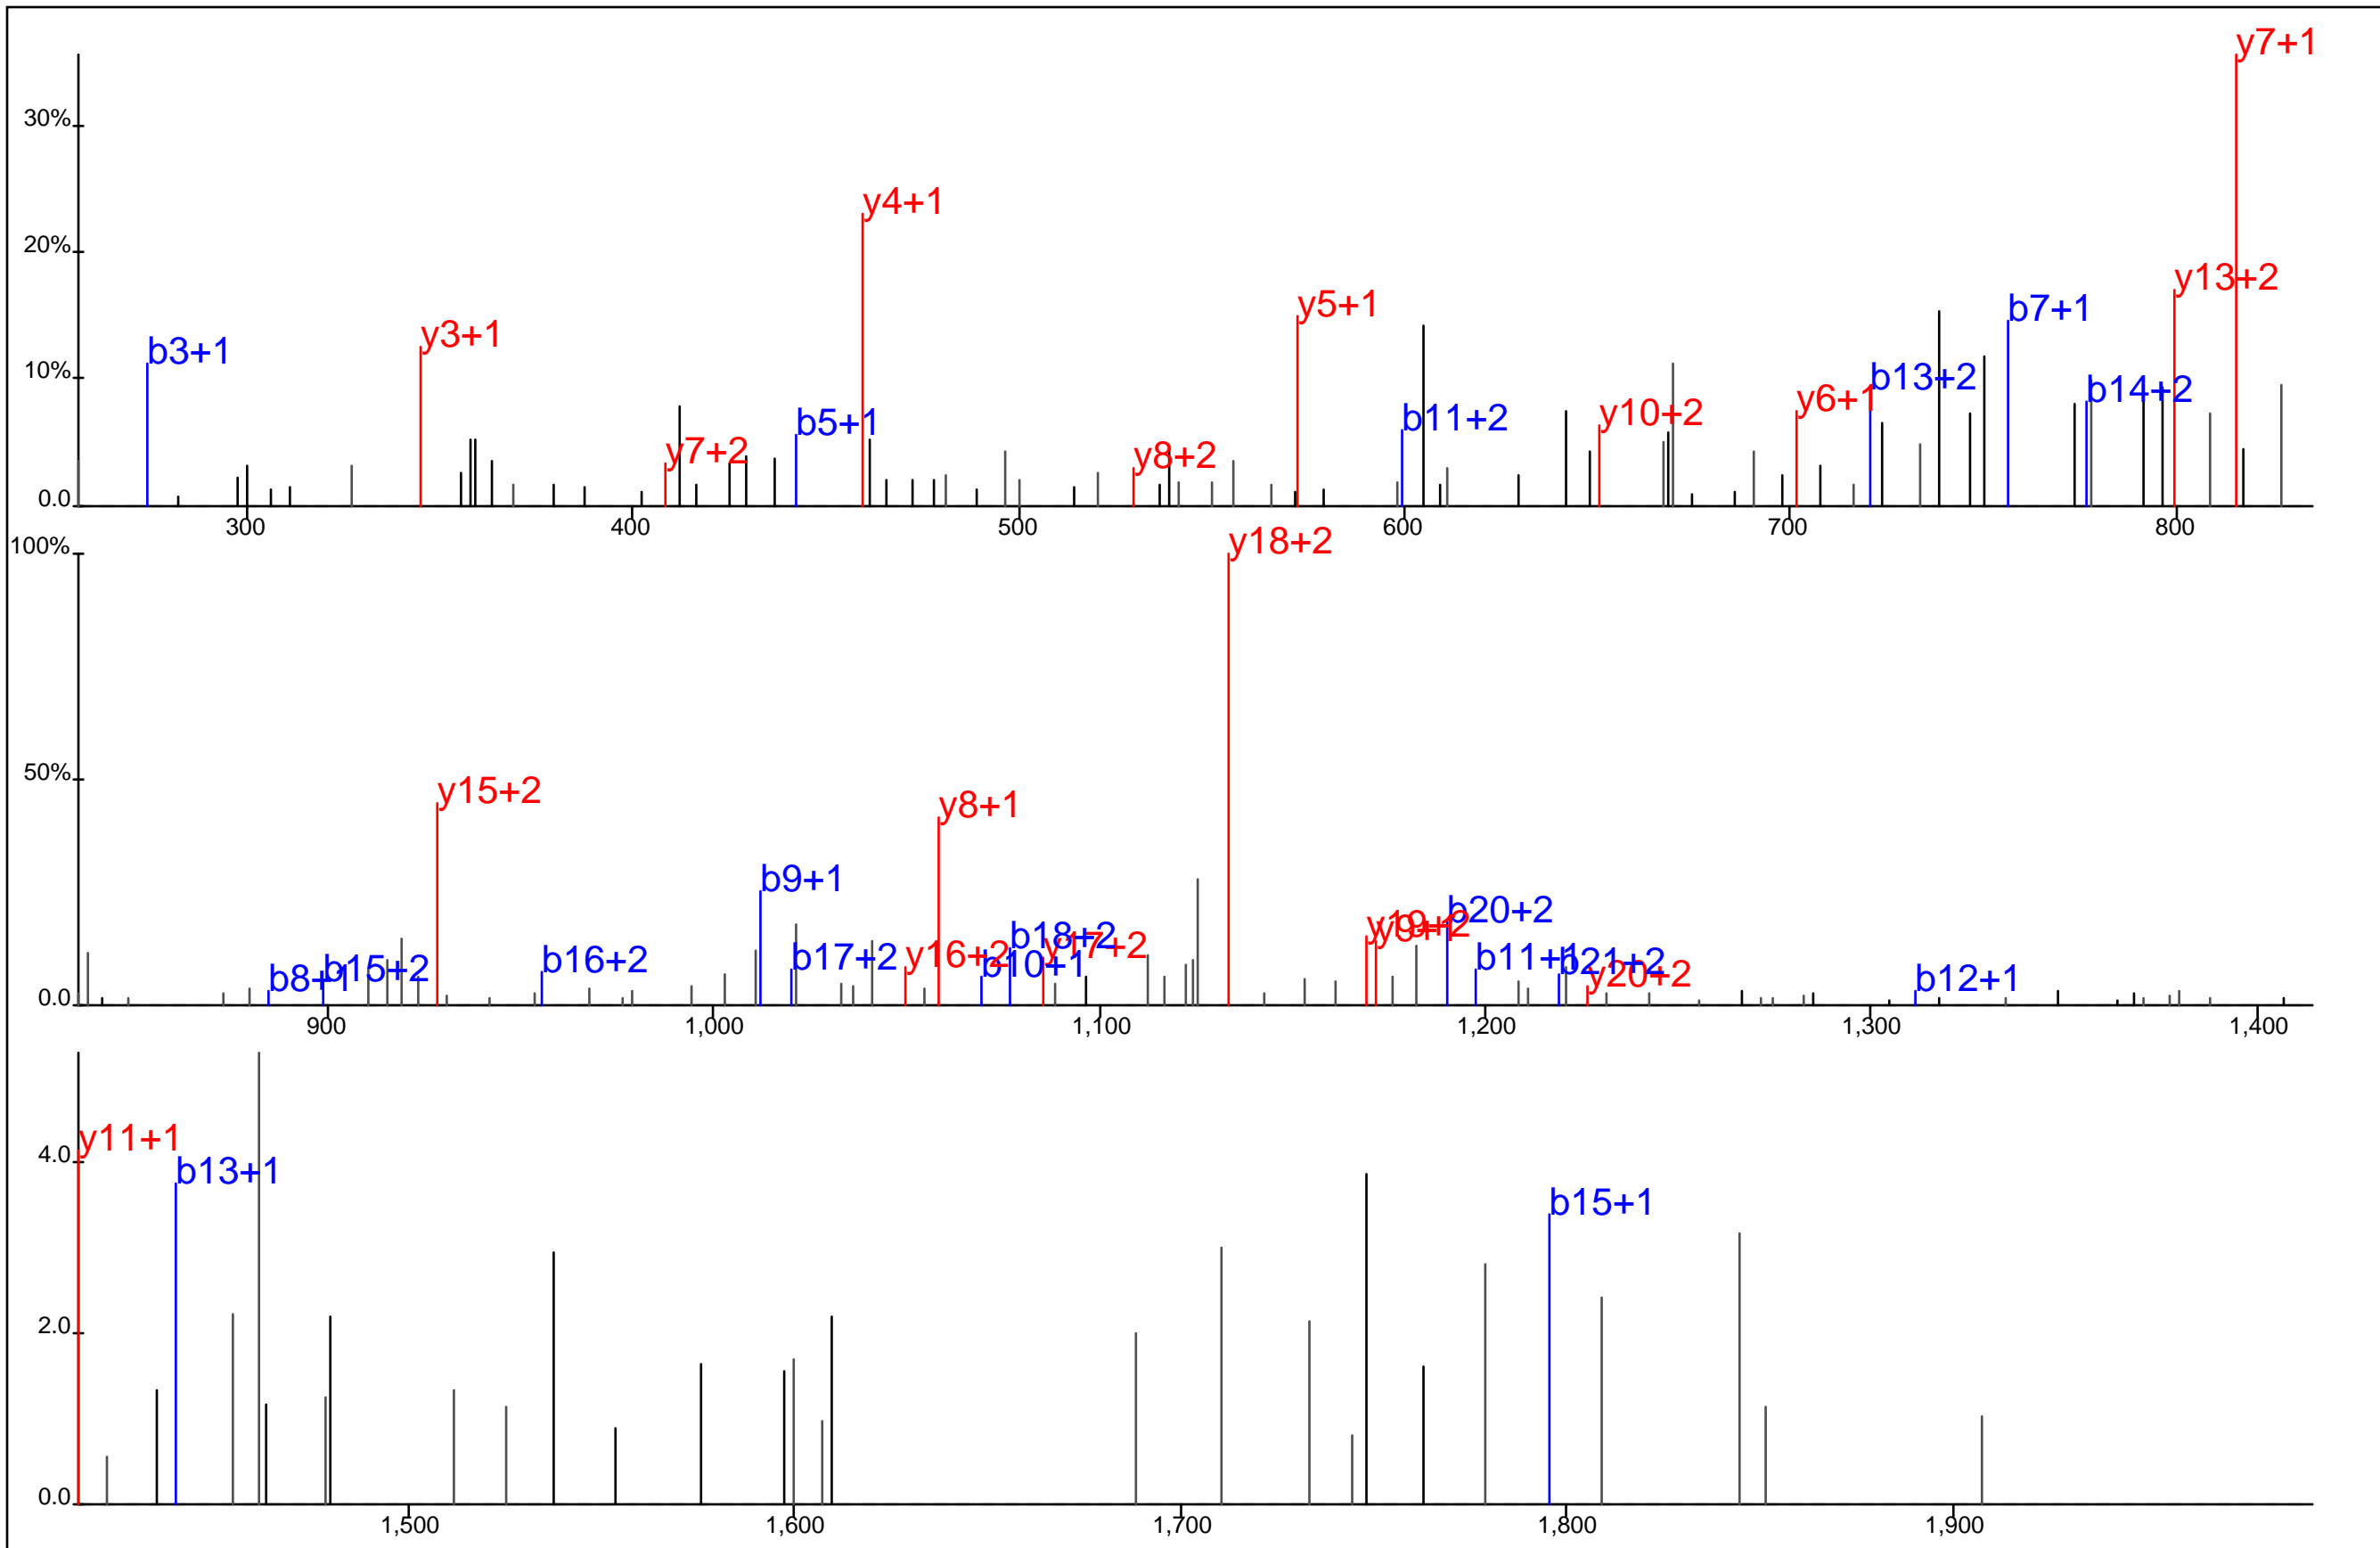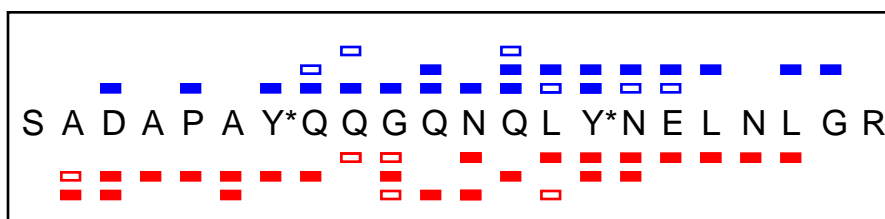

Protein Name: T cell antigen receptor, zeta  
 gi Accession: 0  
 Precursor Mass: 870.7064+3  
 Delta Mass: 0.933 ppm  
 XCorr: 43.91

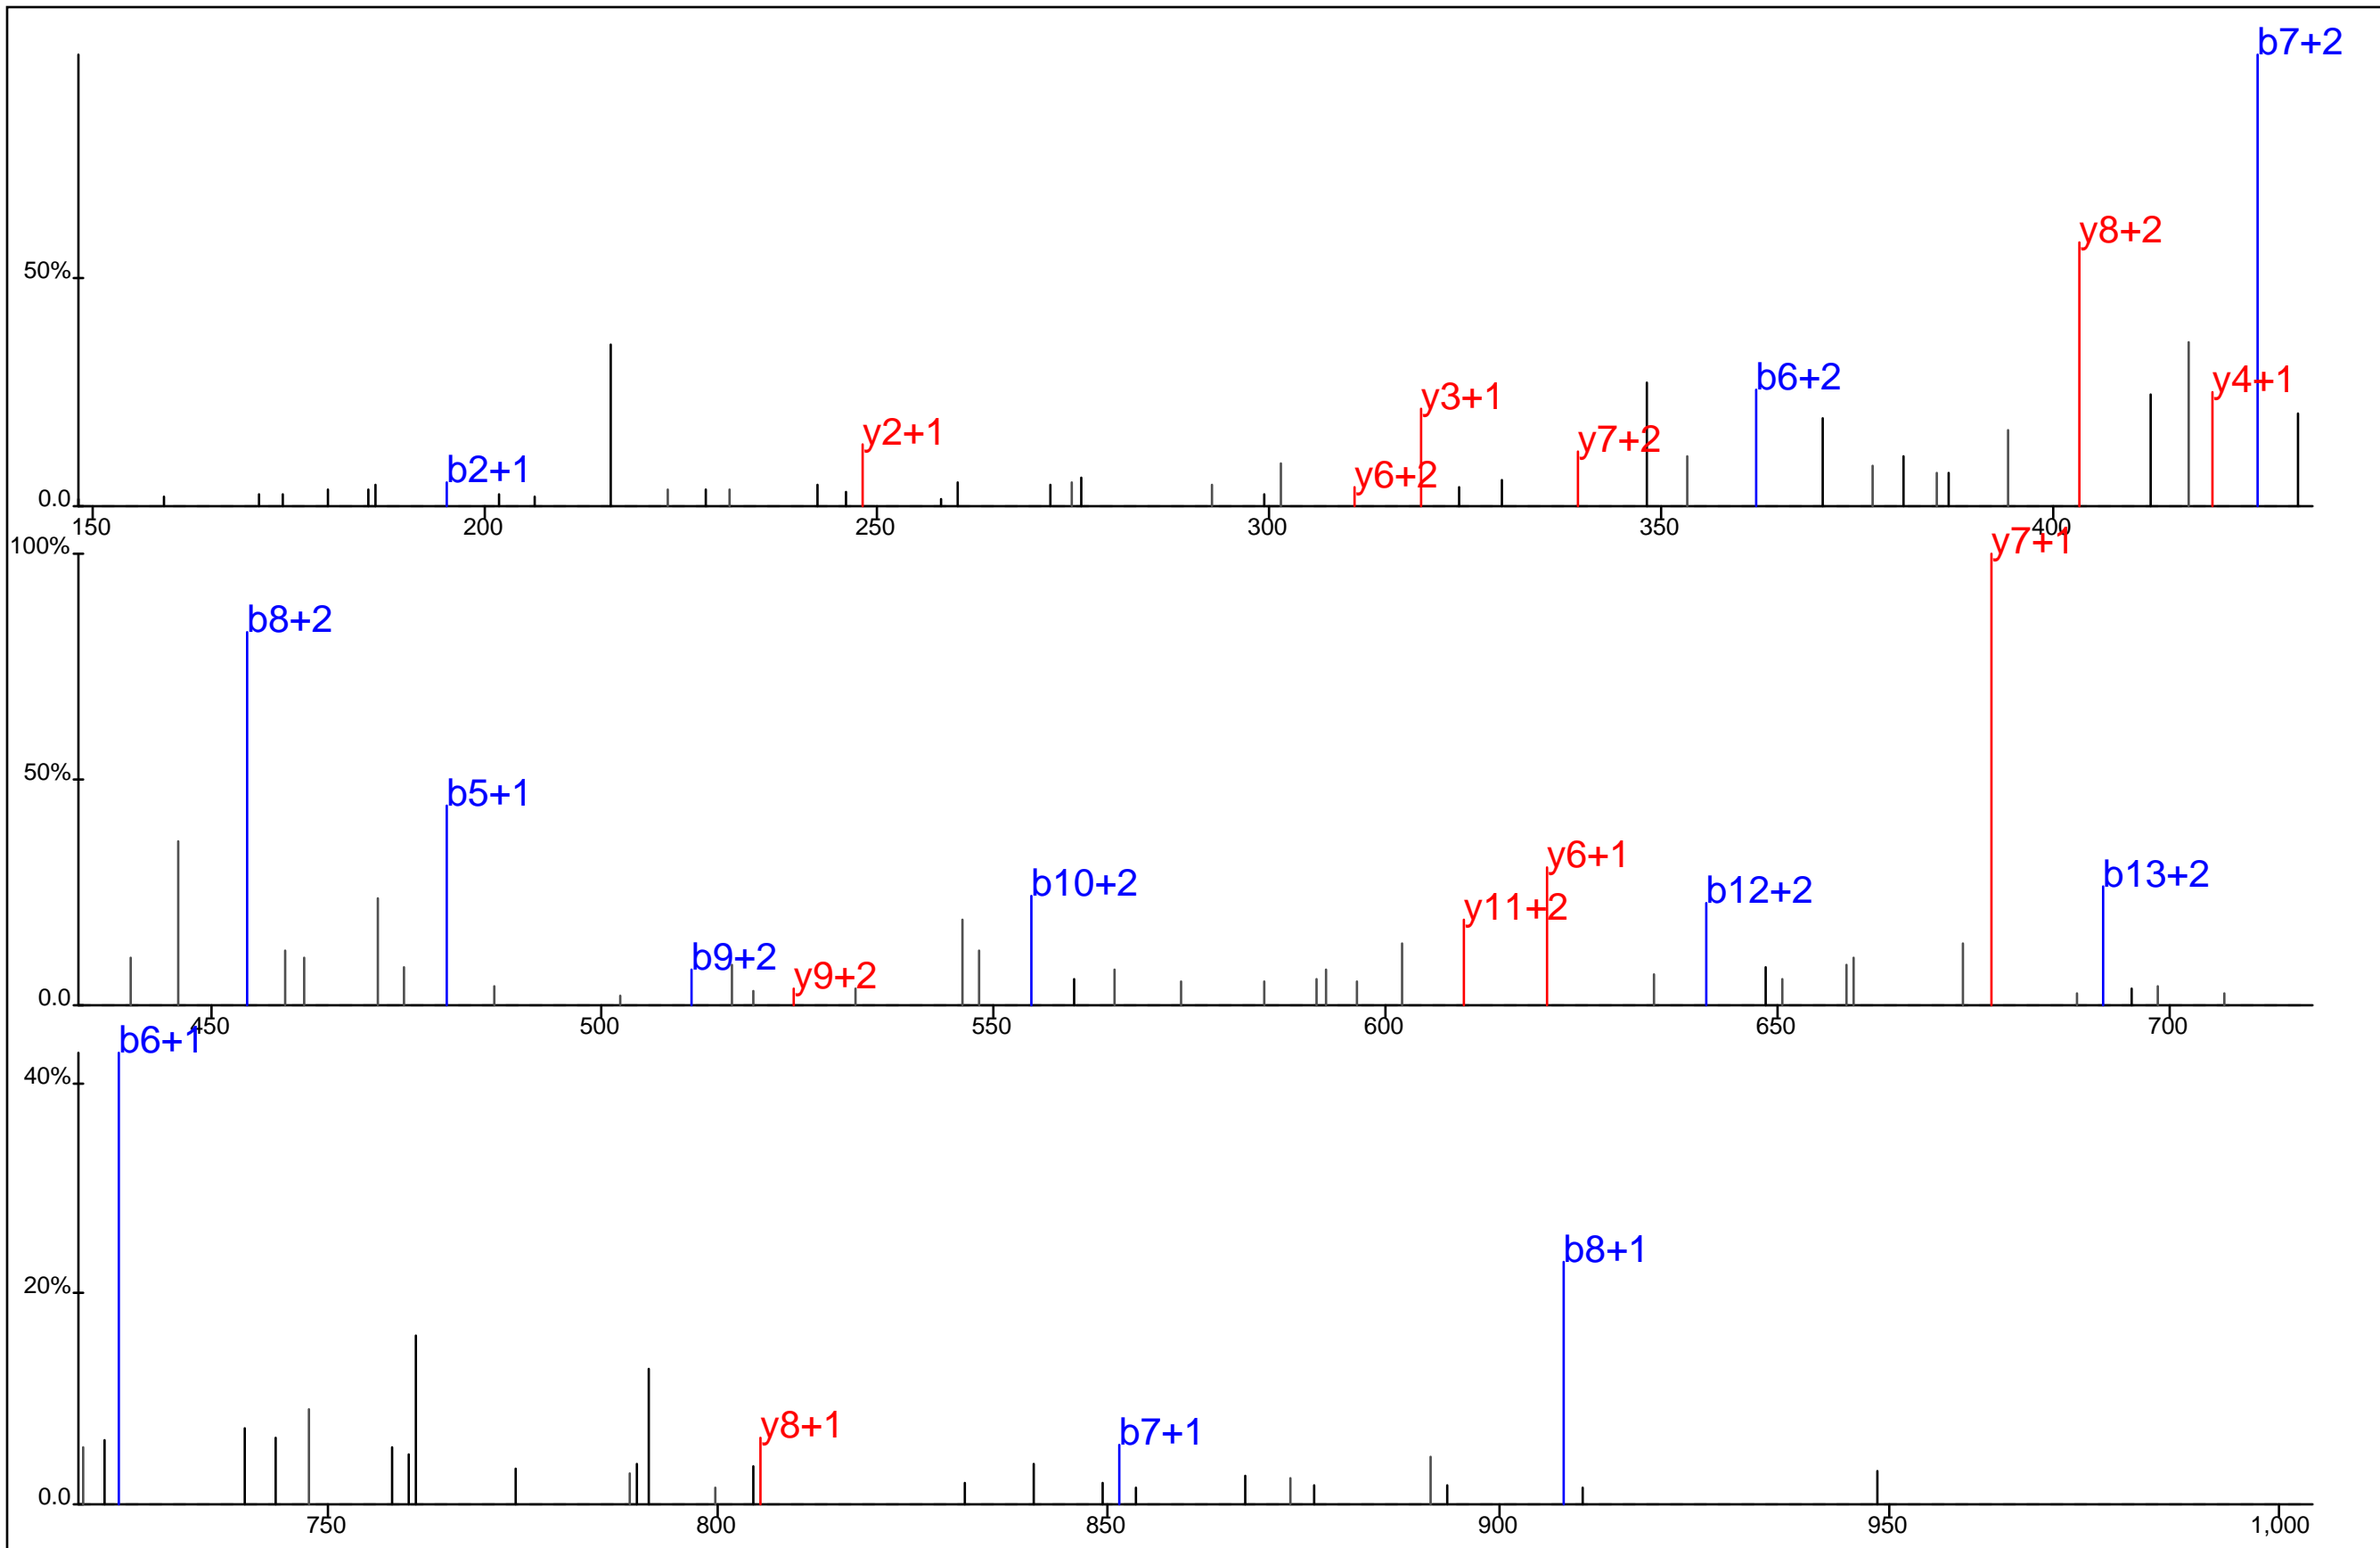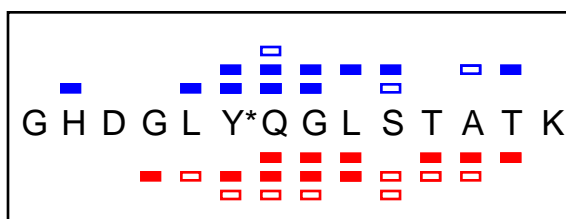

Protein Name: T cell antigen receptor, zeta  
 gi Accession: 0  
 Precursor Mass: 509.8999+3  
 Delta Mass: 0.874 ppm  
 XCorr: 45.5

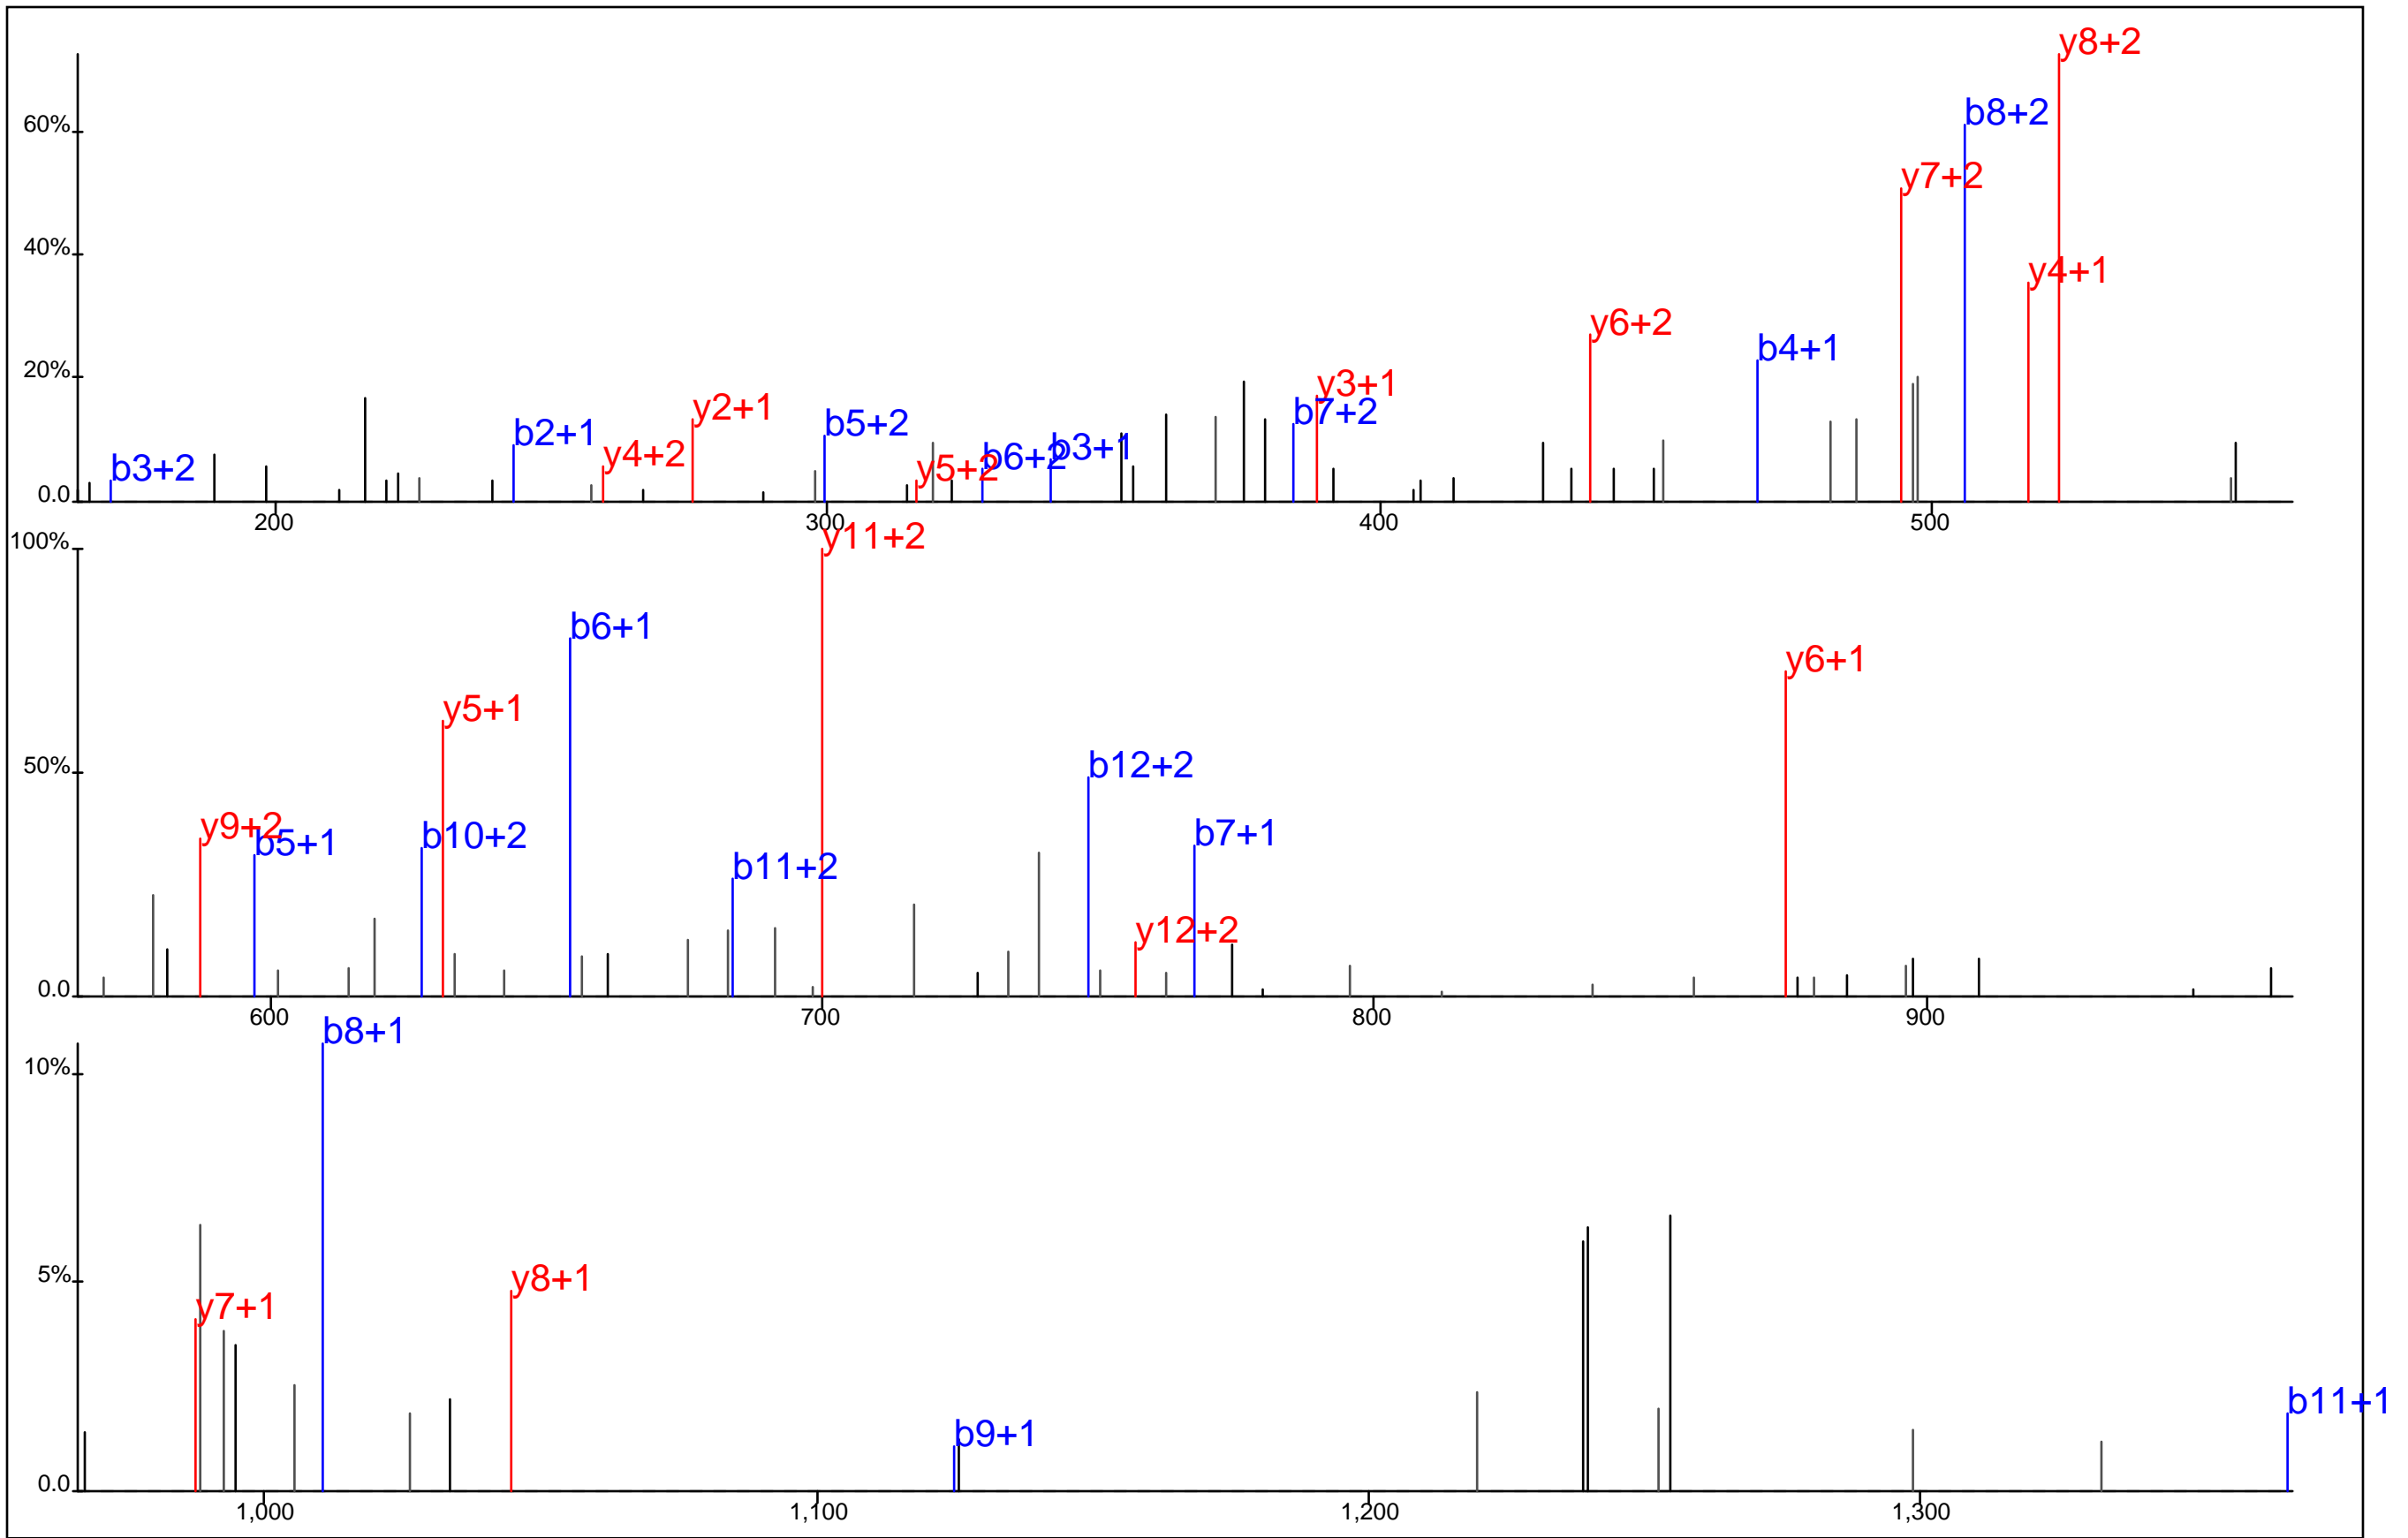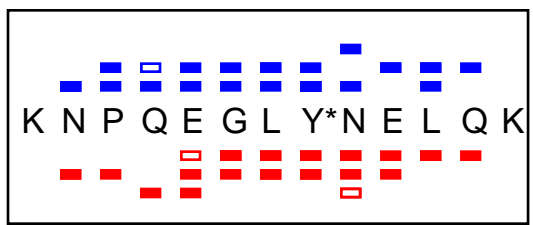

Protein Name: T cell antigen receptor, zeta  
 gi Accession: 0  
 Precursor Mass: 547.5948+3  
 Delta Mass: 1.263 ppm  
 XCorr: 48.37



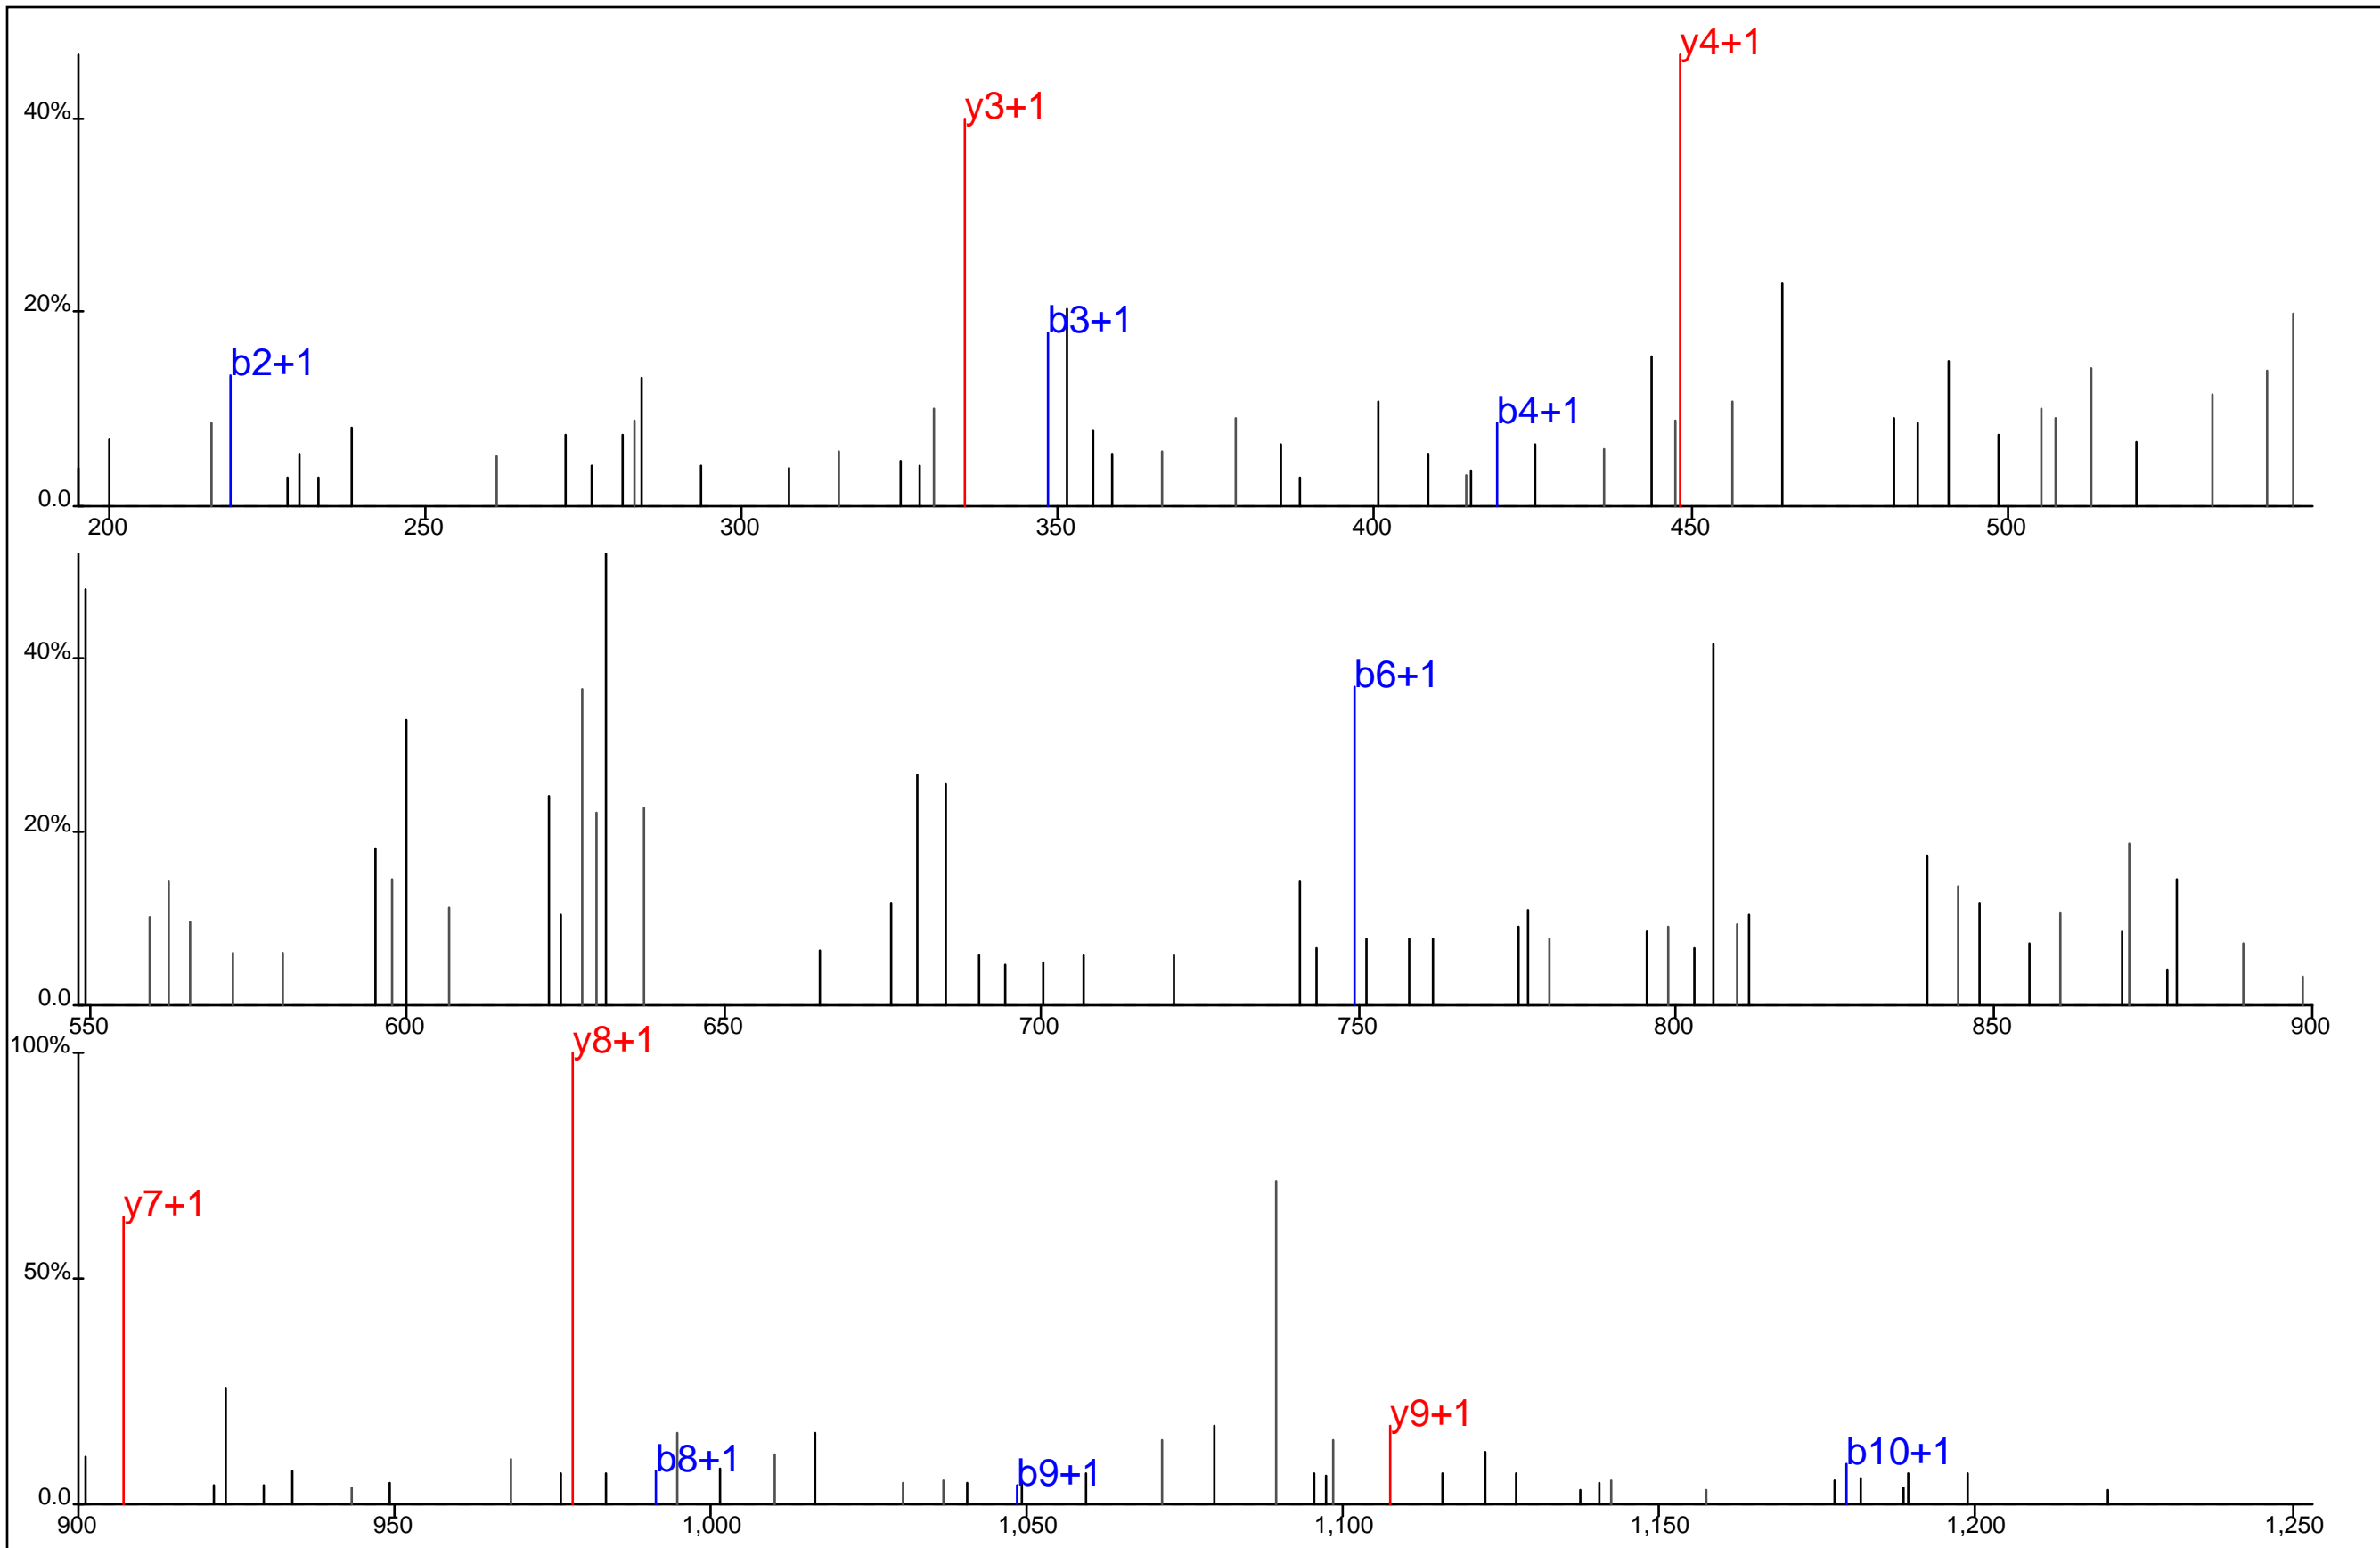

|    |   |   |   |    |   |   |   |   |   |   |
|----|---|---|---|----|---|---|---|---|---|---|
|    |   |   |   |    |   |   |   |   |   |   |
| M# | A | E | A | Y* | S | E | I | G | M | K |
|    |   |   |   |    |   |   |   |   |   |   |

Protein Name: T cell antigen receptor, zeta  
 gi Accession: 0  
 Precursor Mass: 663.2604+2  
 Delta Mass: 1.355 ppm  
 XCorr: 23.83

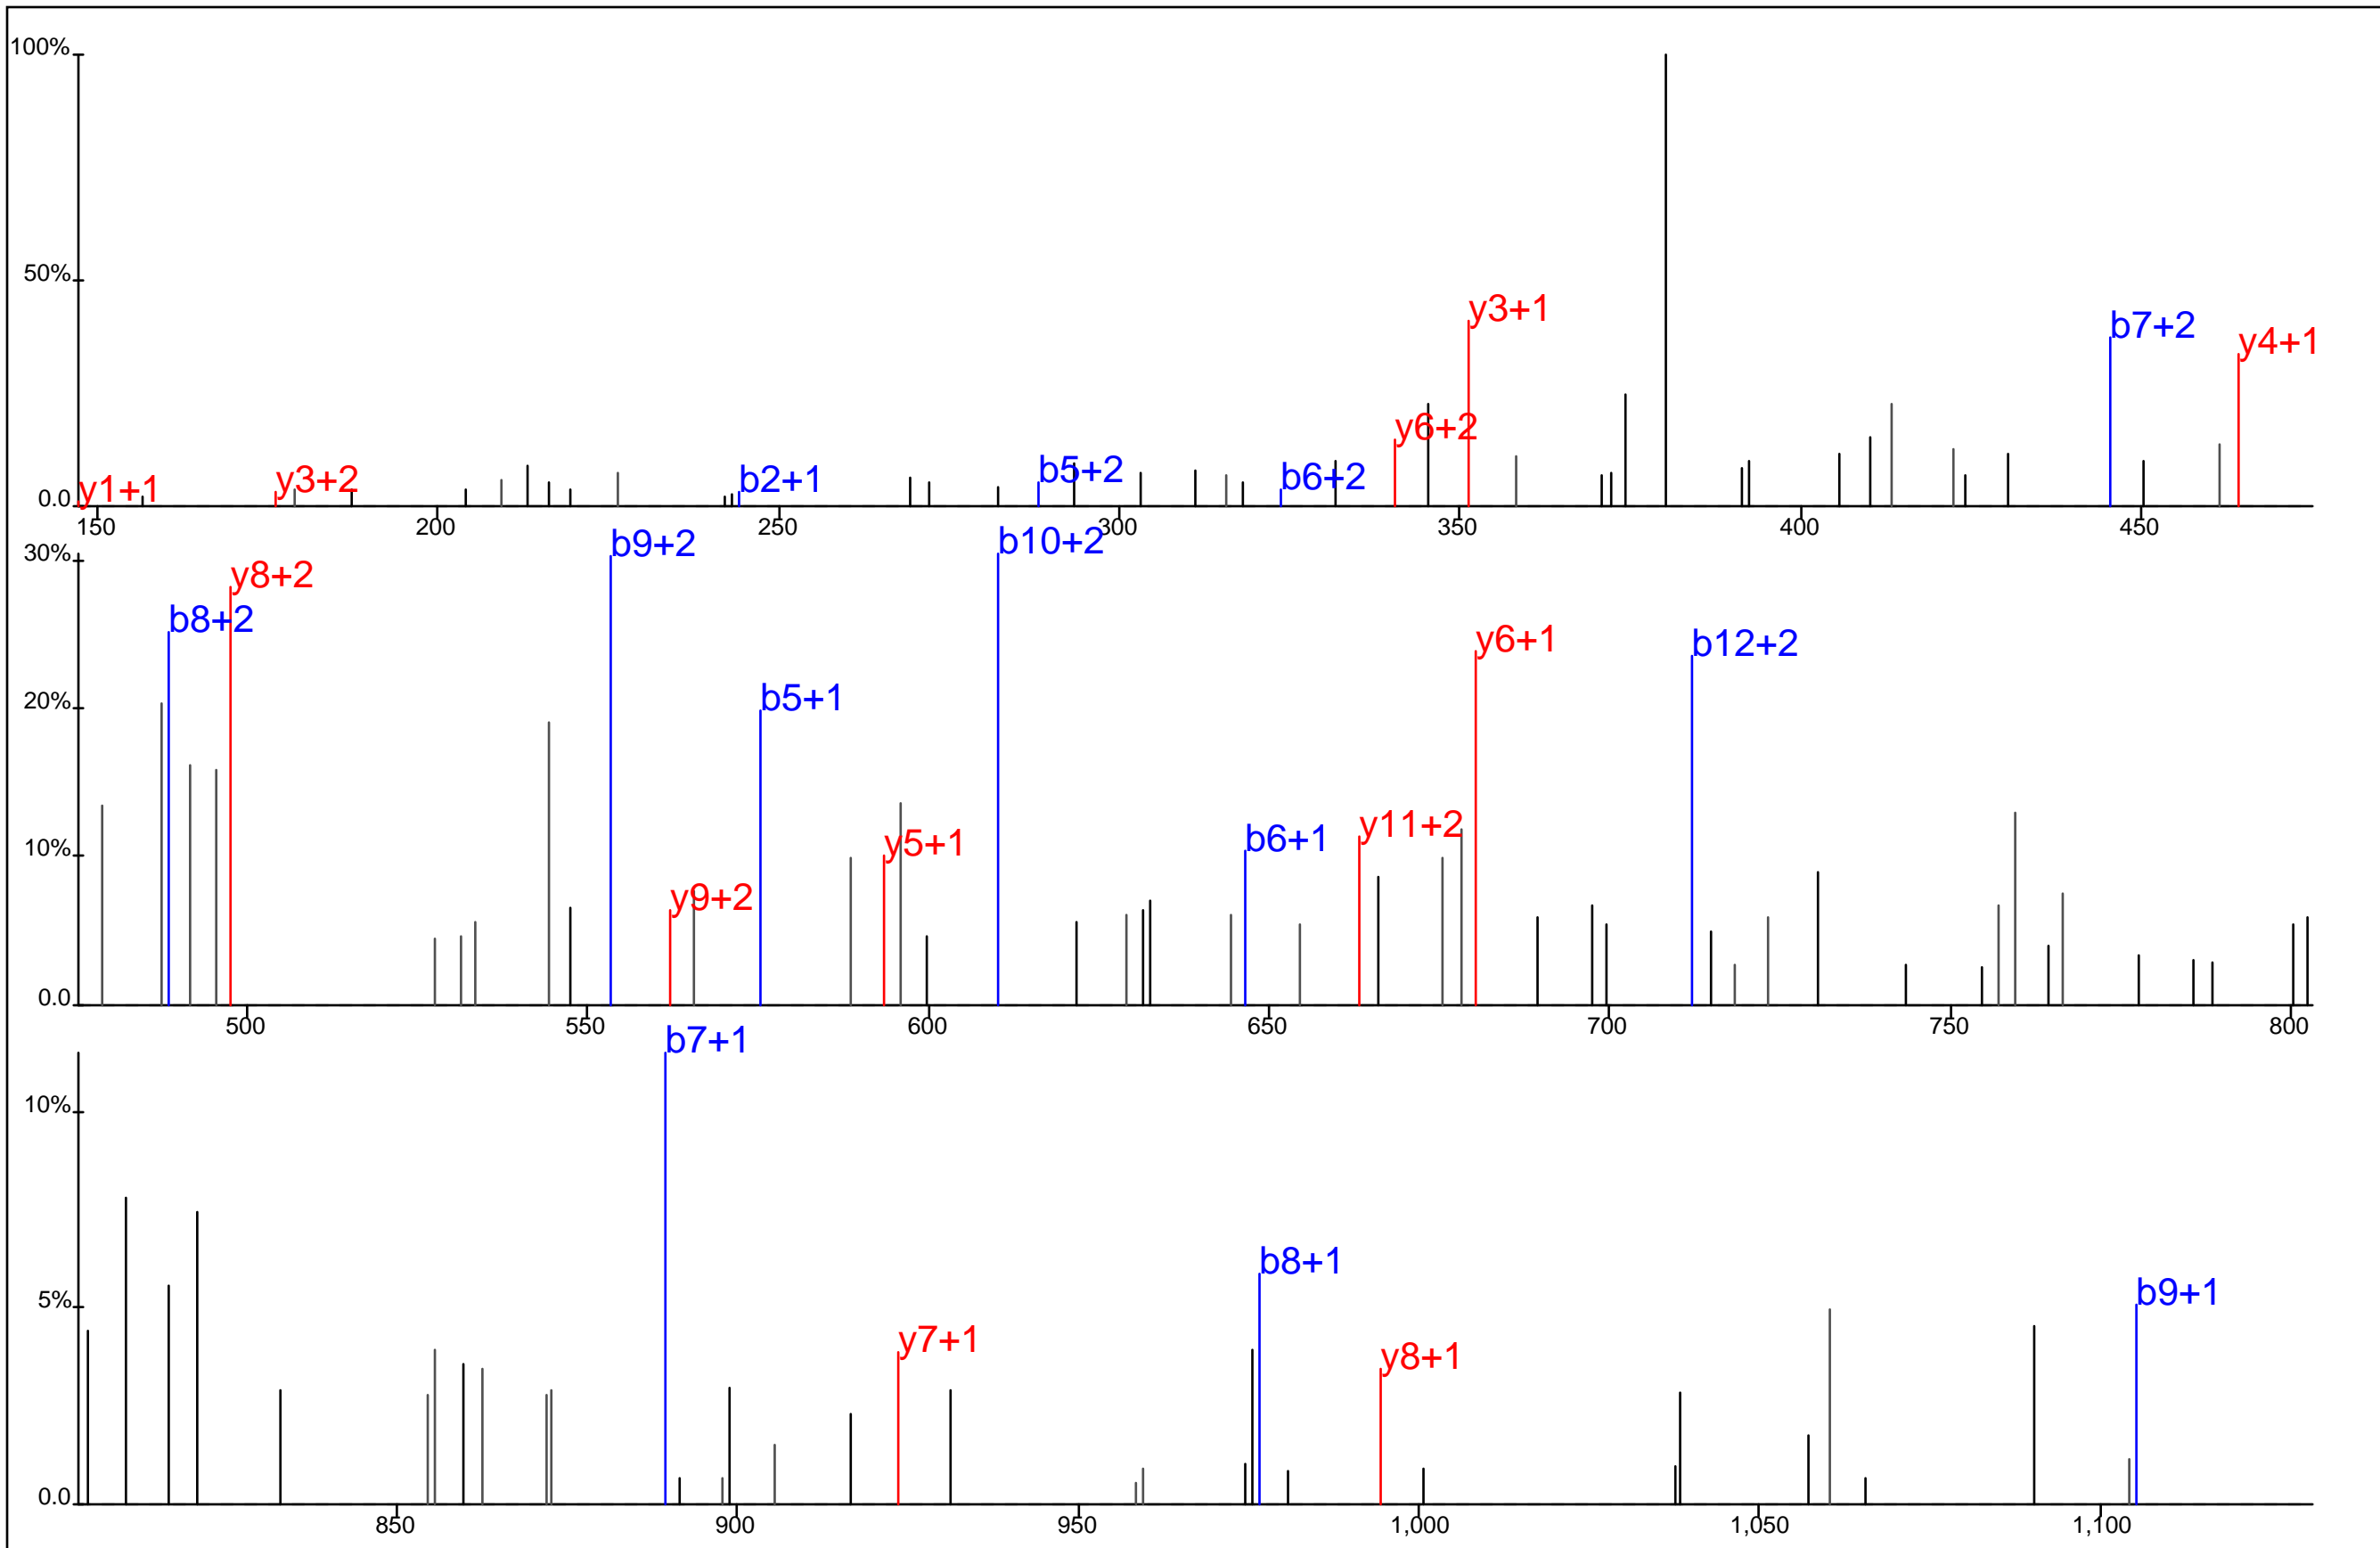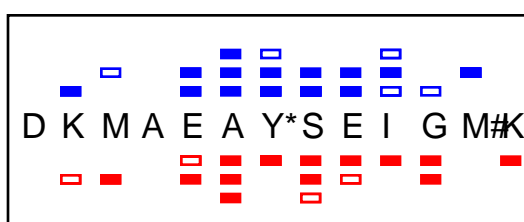

Protein Name: T cell antigen receptor, zeta  
 gi Accession: 0  
 Precursor Mass: 523.5497+3  
 Delta Mass: 1.705 ppm  
 XCorr: 29.84



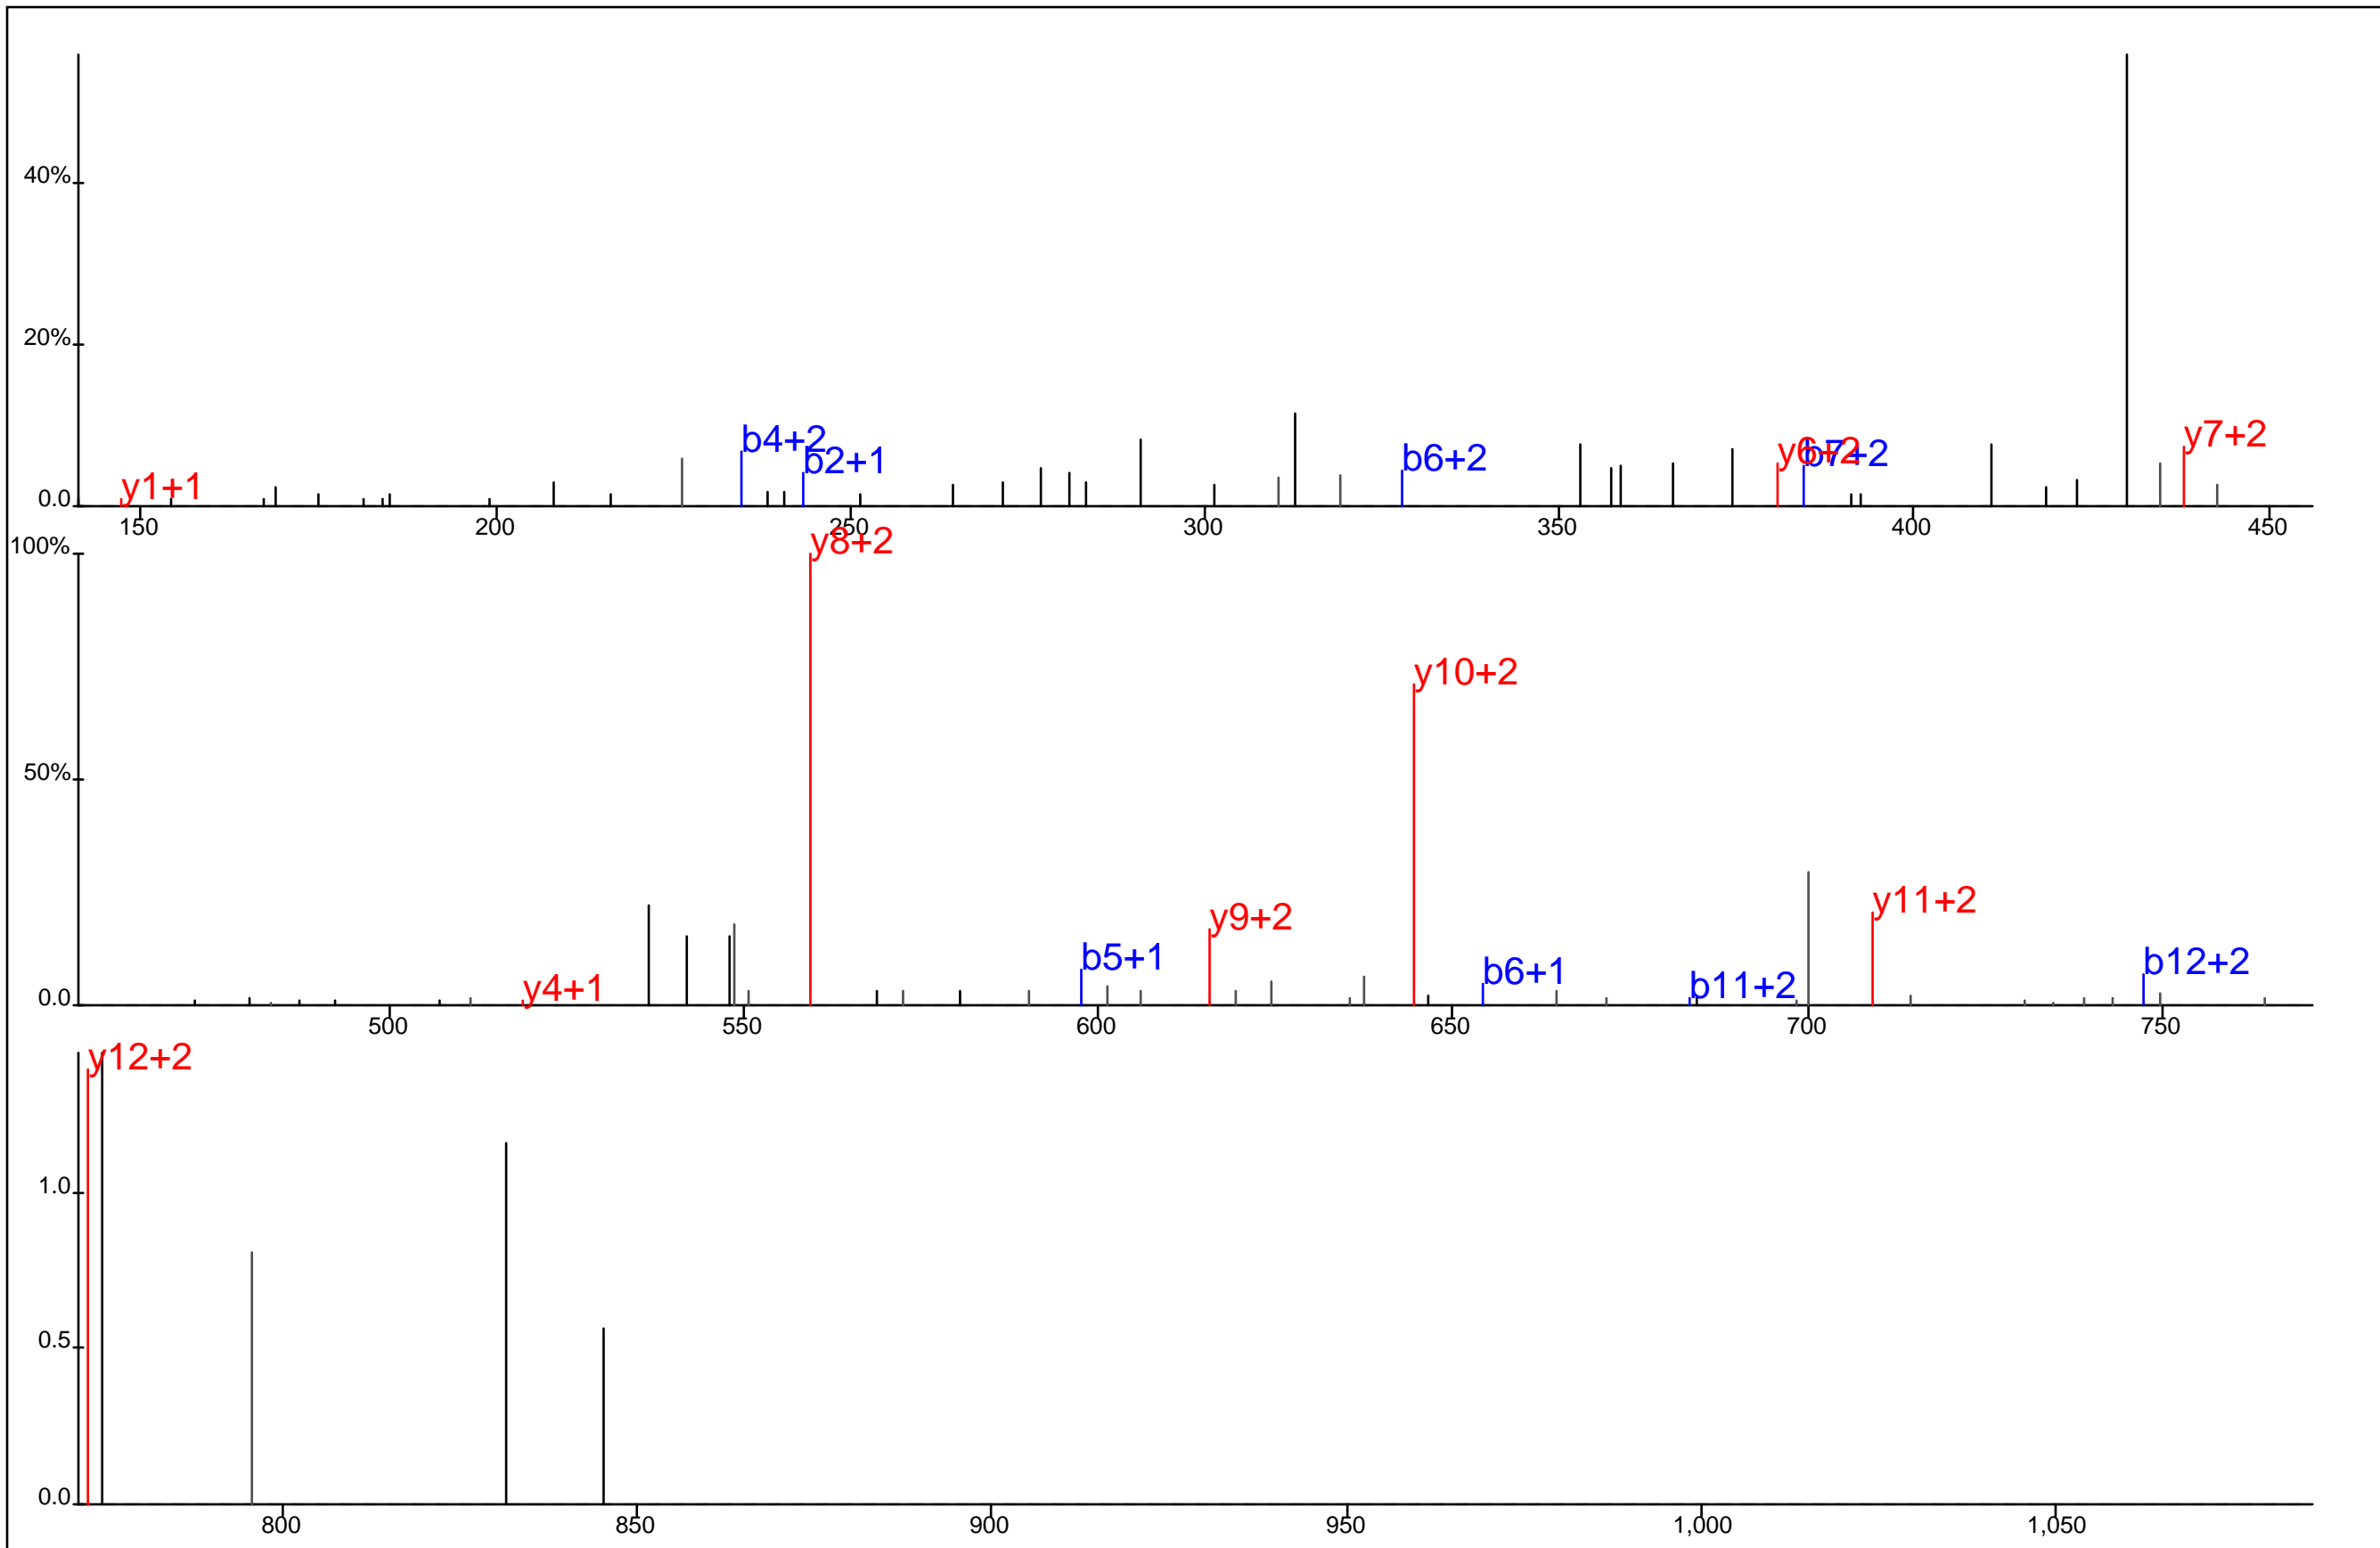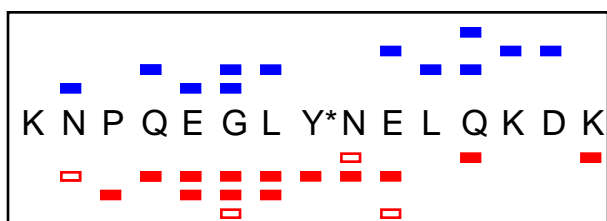

Protein Name: T cell antigen receptor, zeta  
 gi Accession: 0  
 Precursor Mass: 471.7278+4  
 Delta Mass: 0.280 ppm  
 XCorr: 21.08



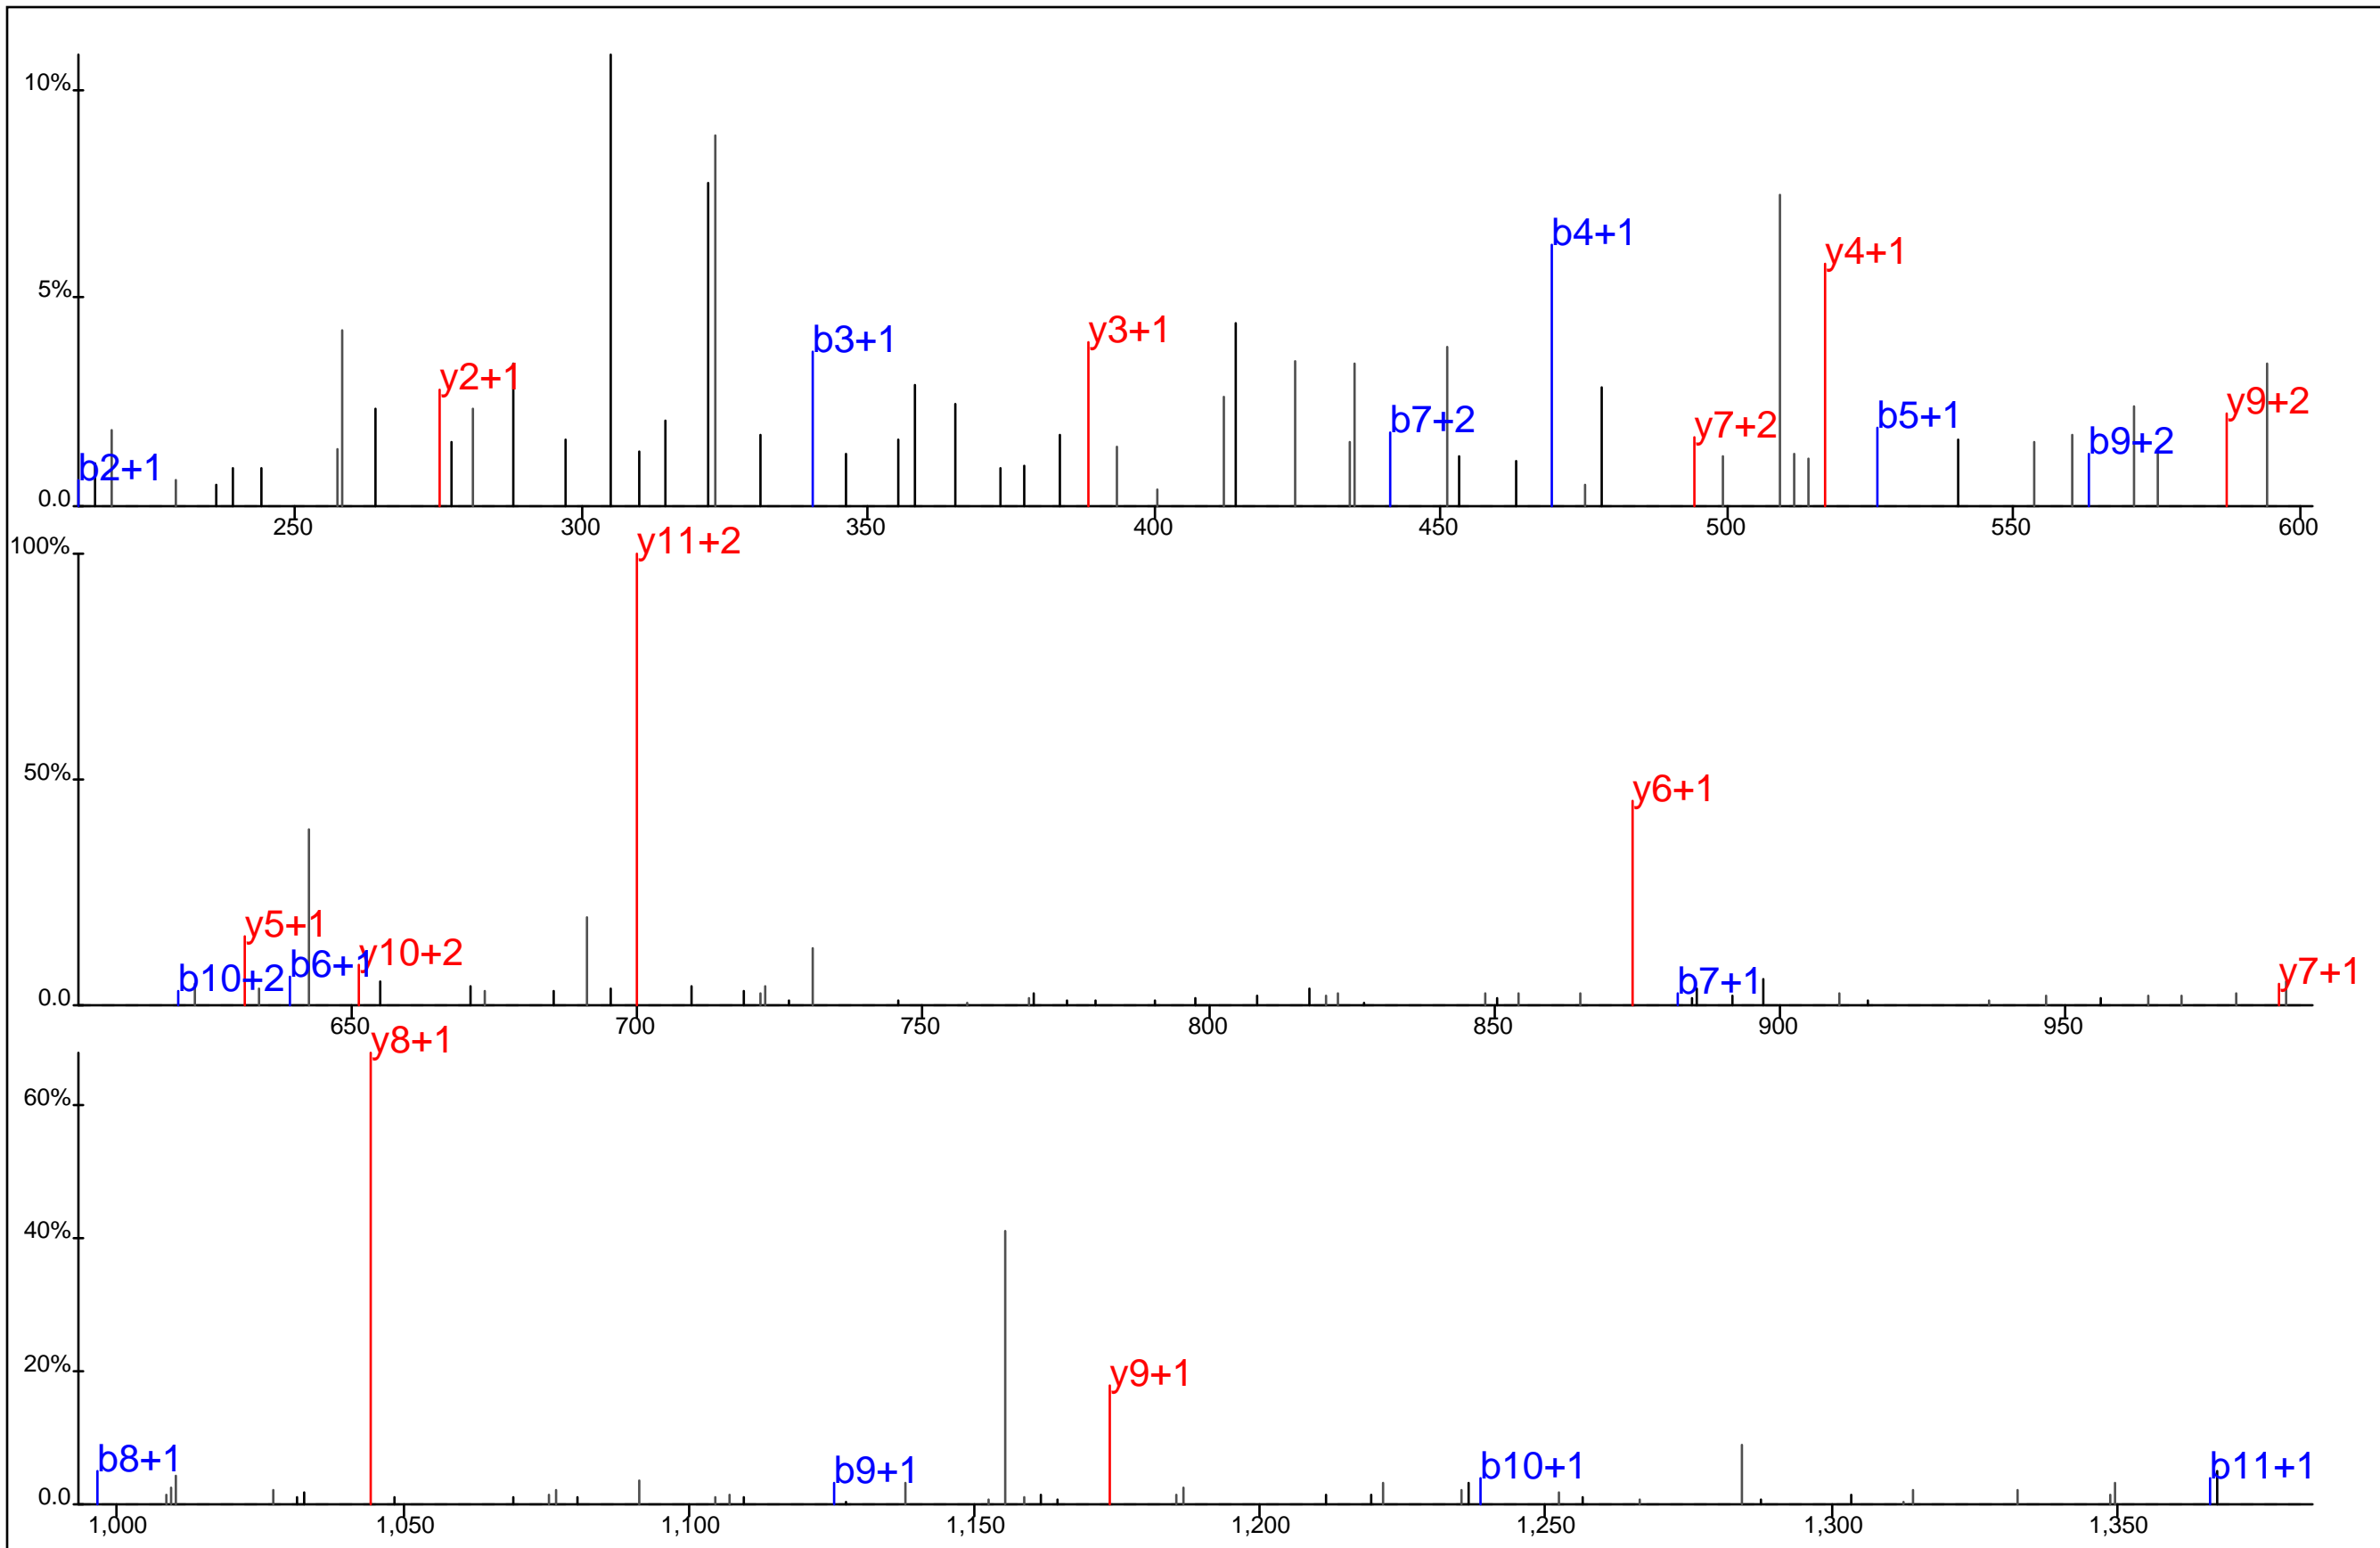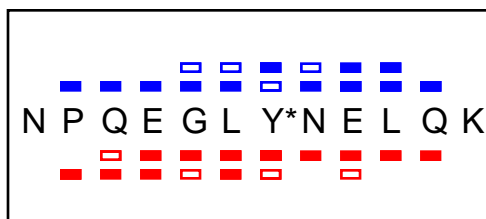

Protein Name: T cell antigen receptor, zeta  
 gi Accession: 0  
 Precursor Mass: 756.8407+2  
 Delta Mass: 0.759 ppm  
 XCorr: 42.38

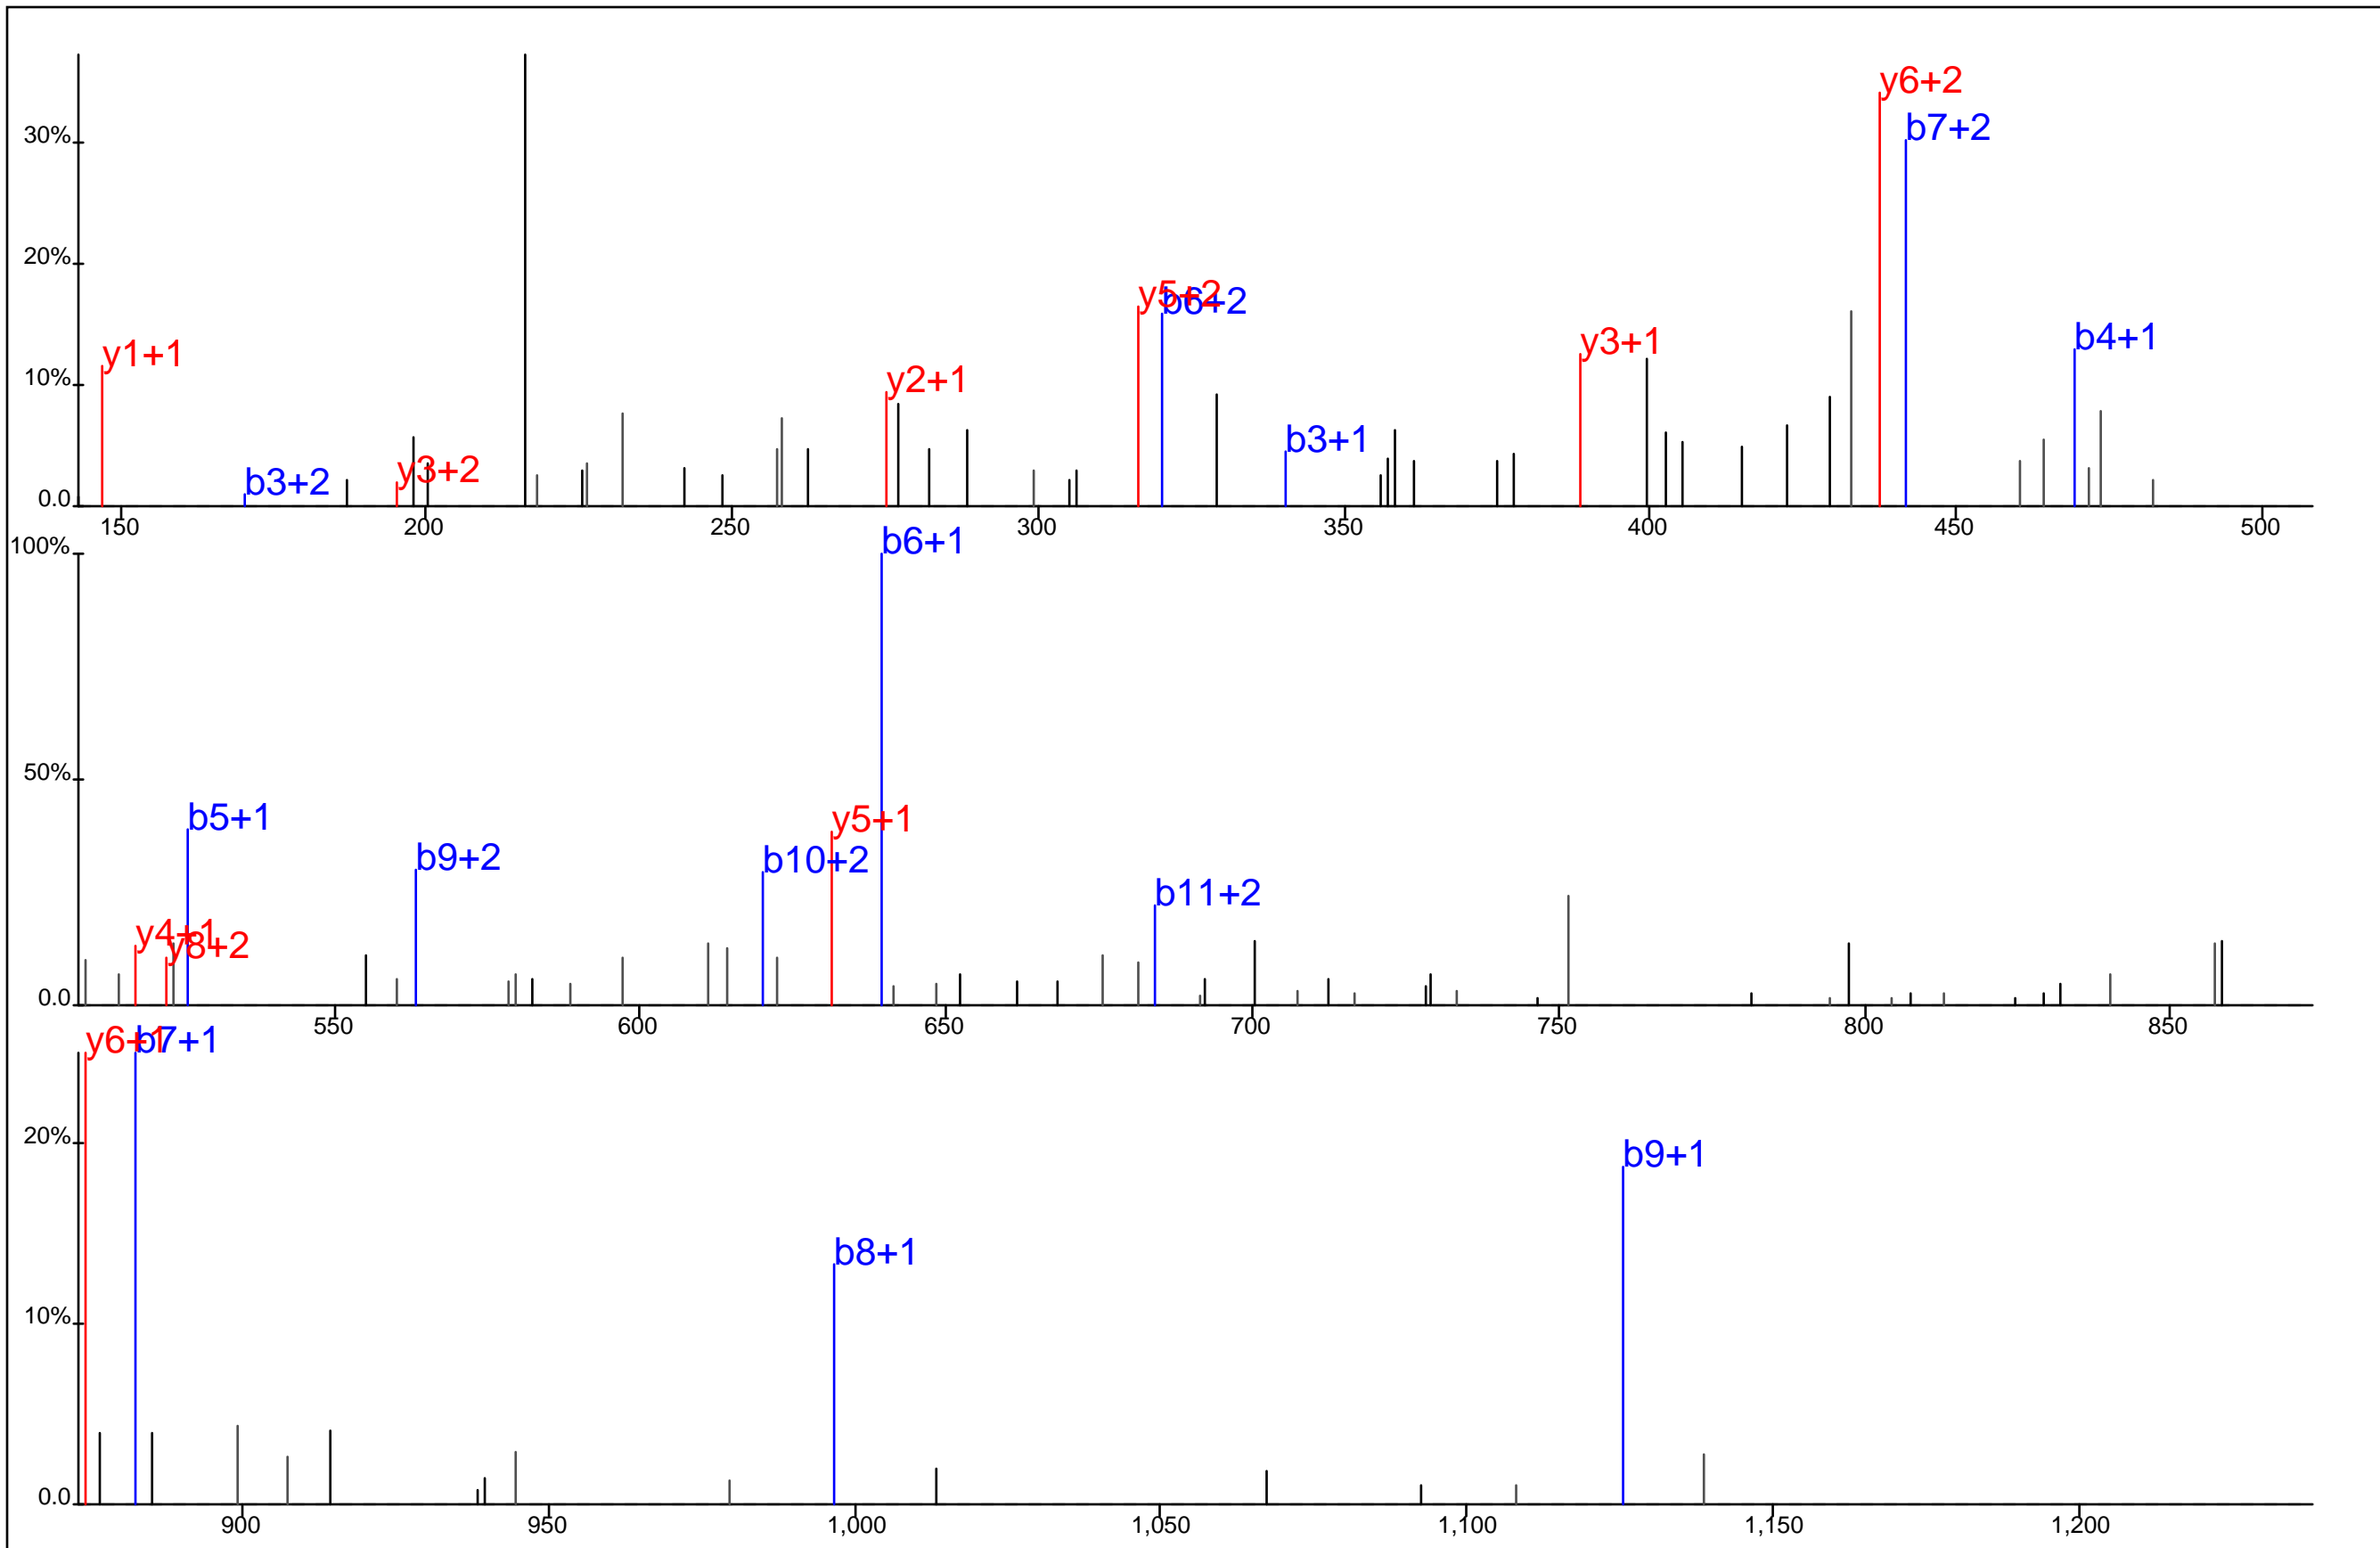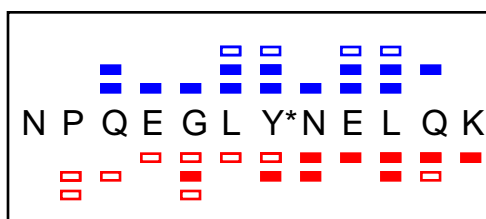

Protein Name: T cell antigen receptor, zeta  
 gi Accession: 0  
 Precursor Mass: 504.8961+3  
 Delta Mass: 0.489 ppm  
 XCorr: 39.65

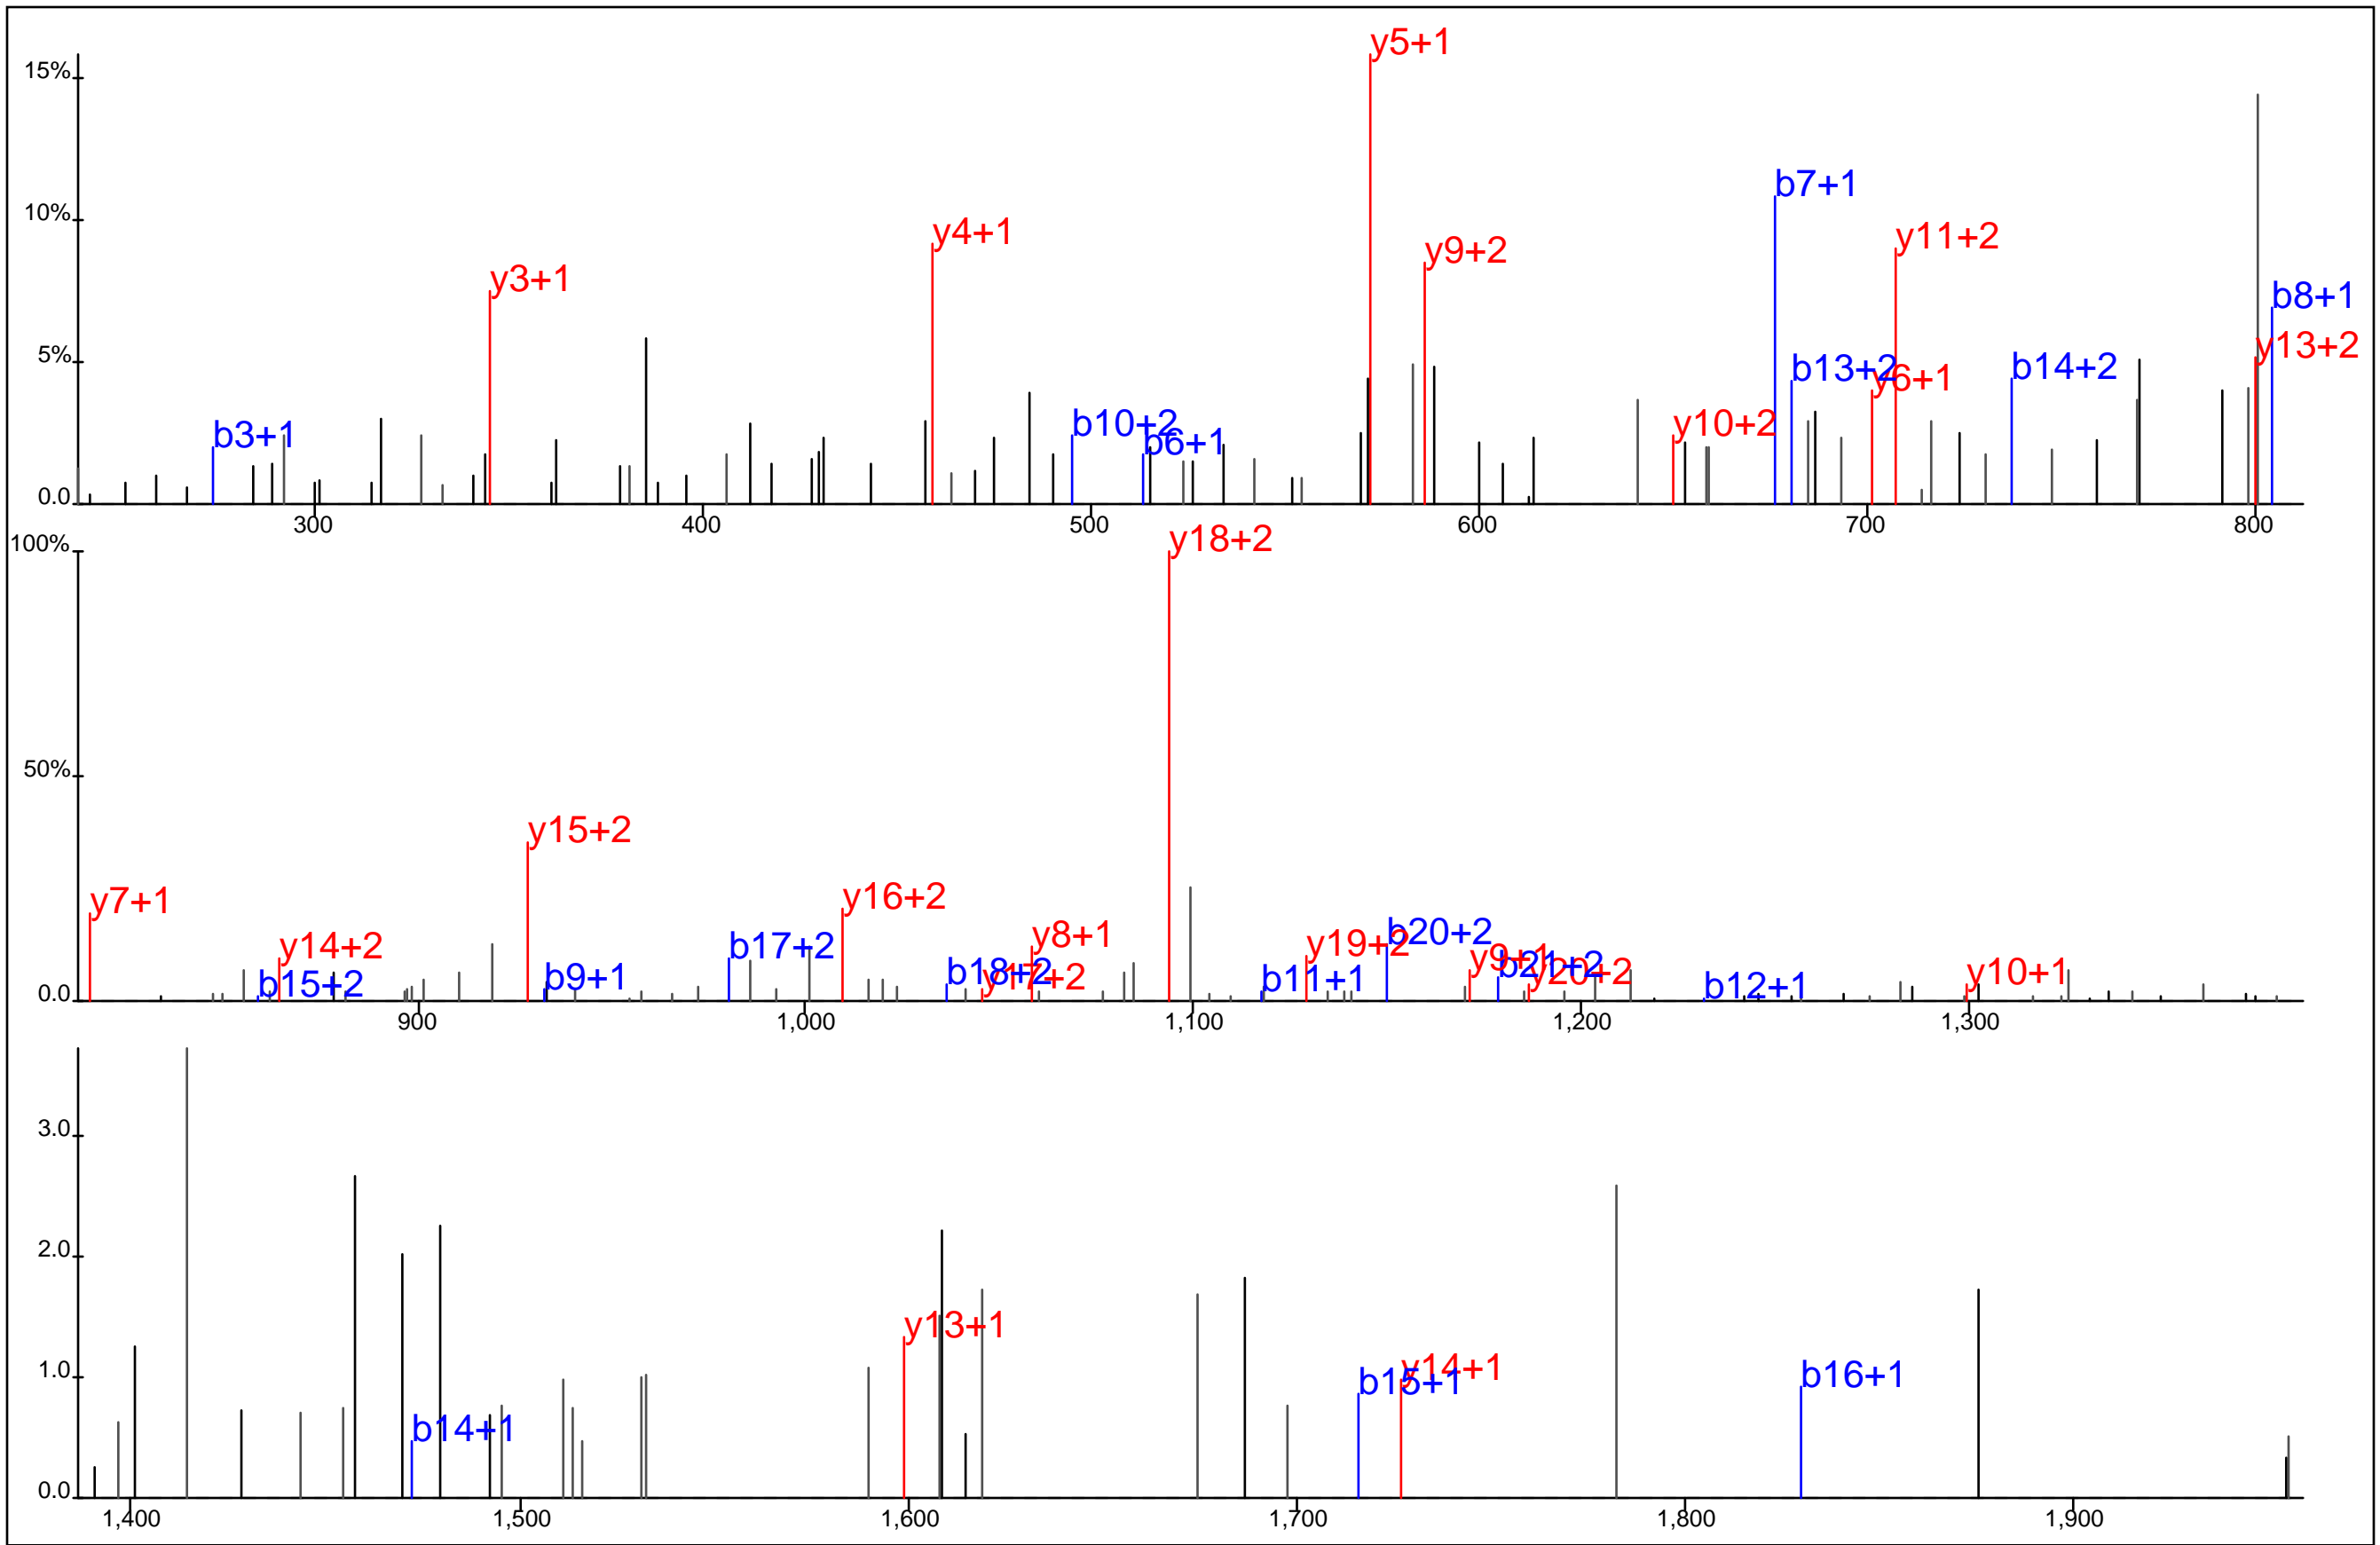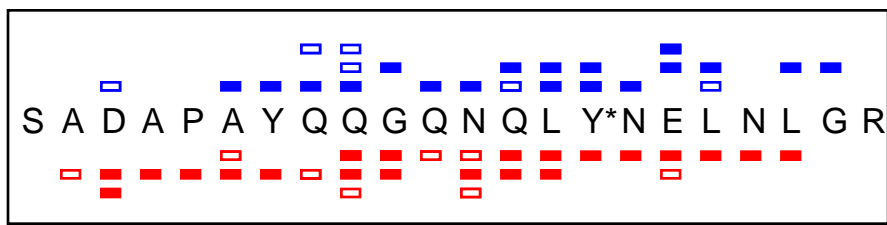

Protein Name: T cell antigen receptor, zeta  
 gi Accession: 0  
 Precursor Mass: 844.0501+3  
 Delta Mass: 0.002 ppm  
 XCorr: 49.27

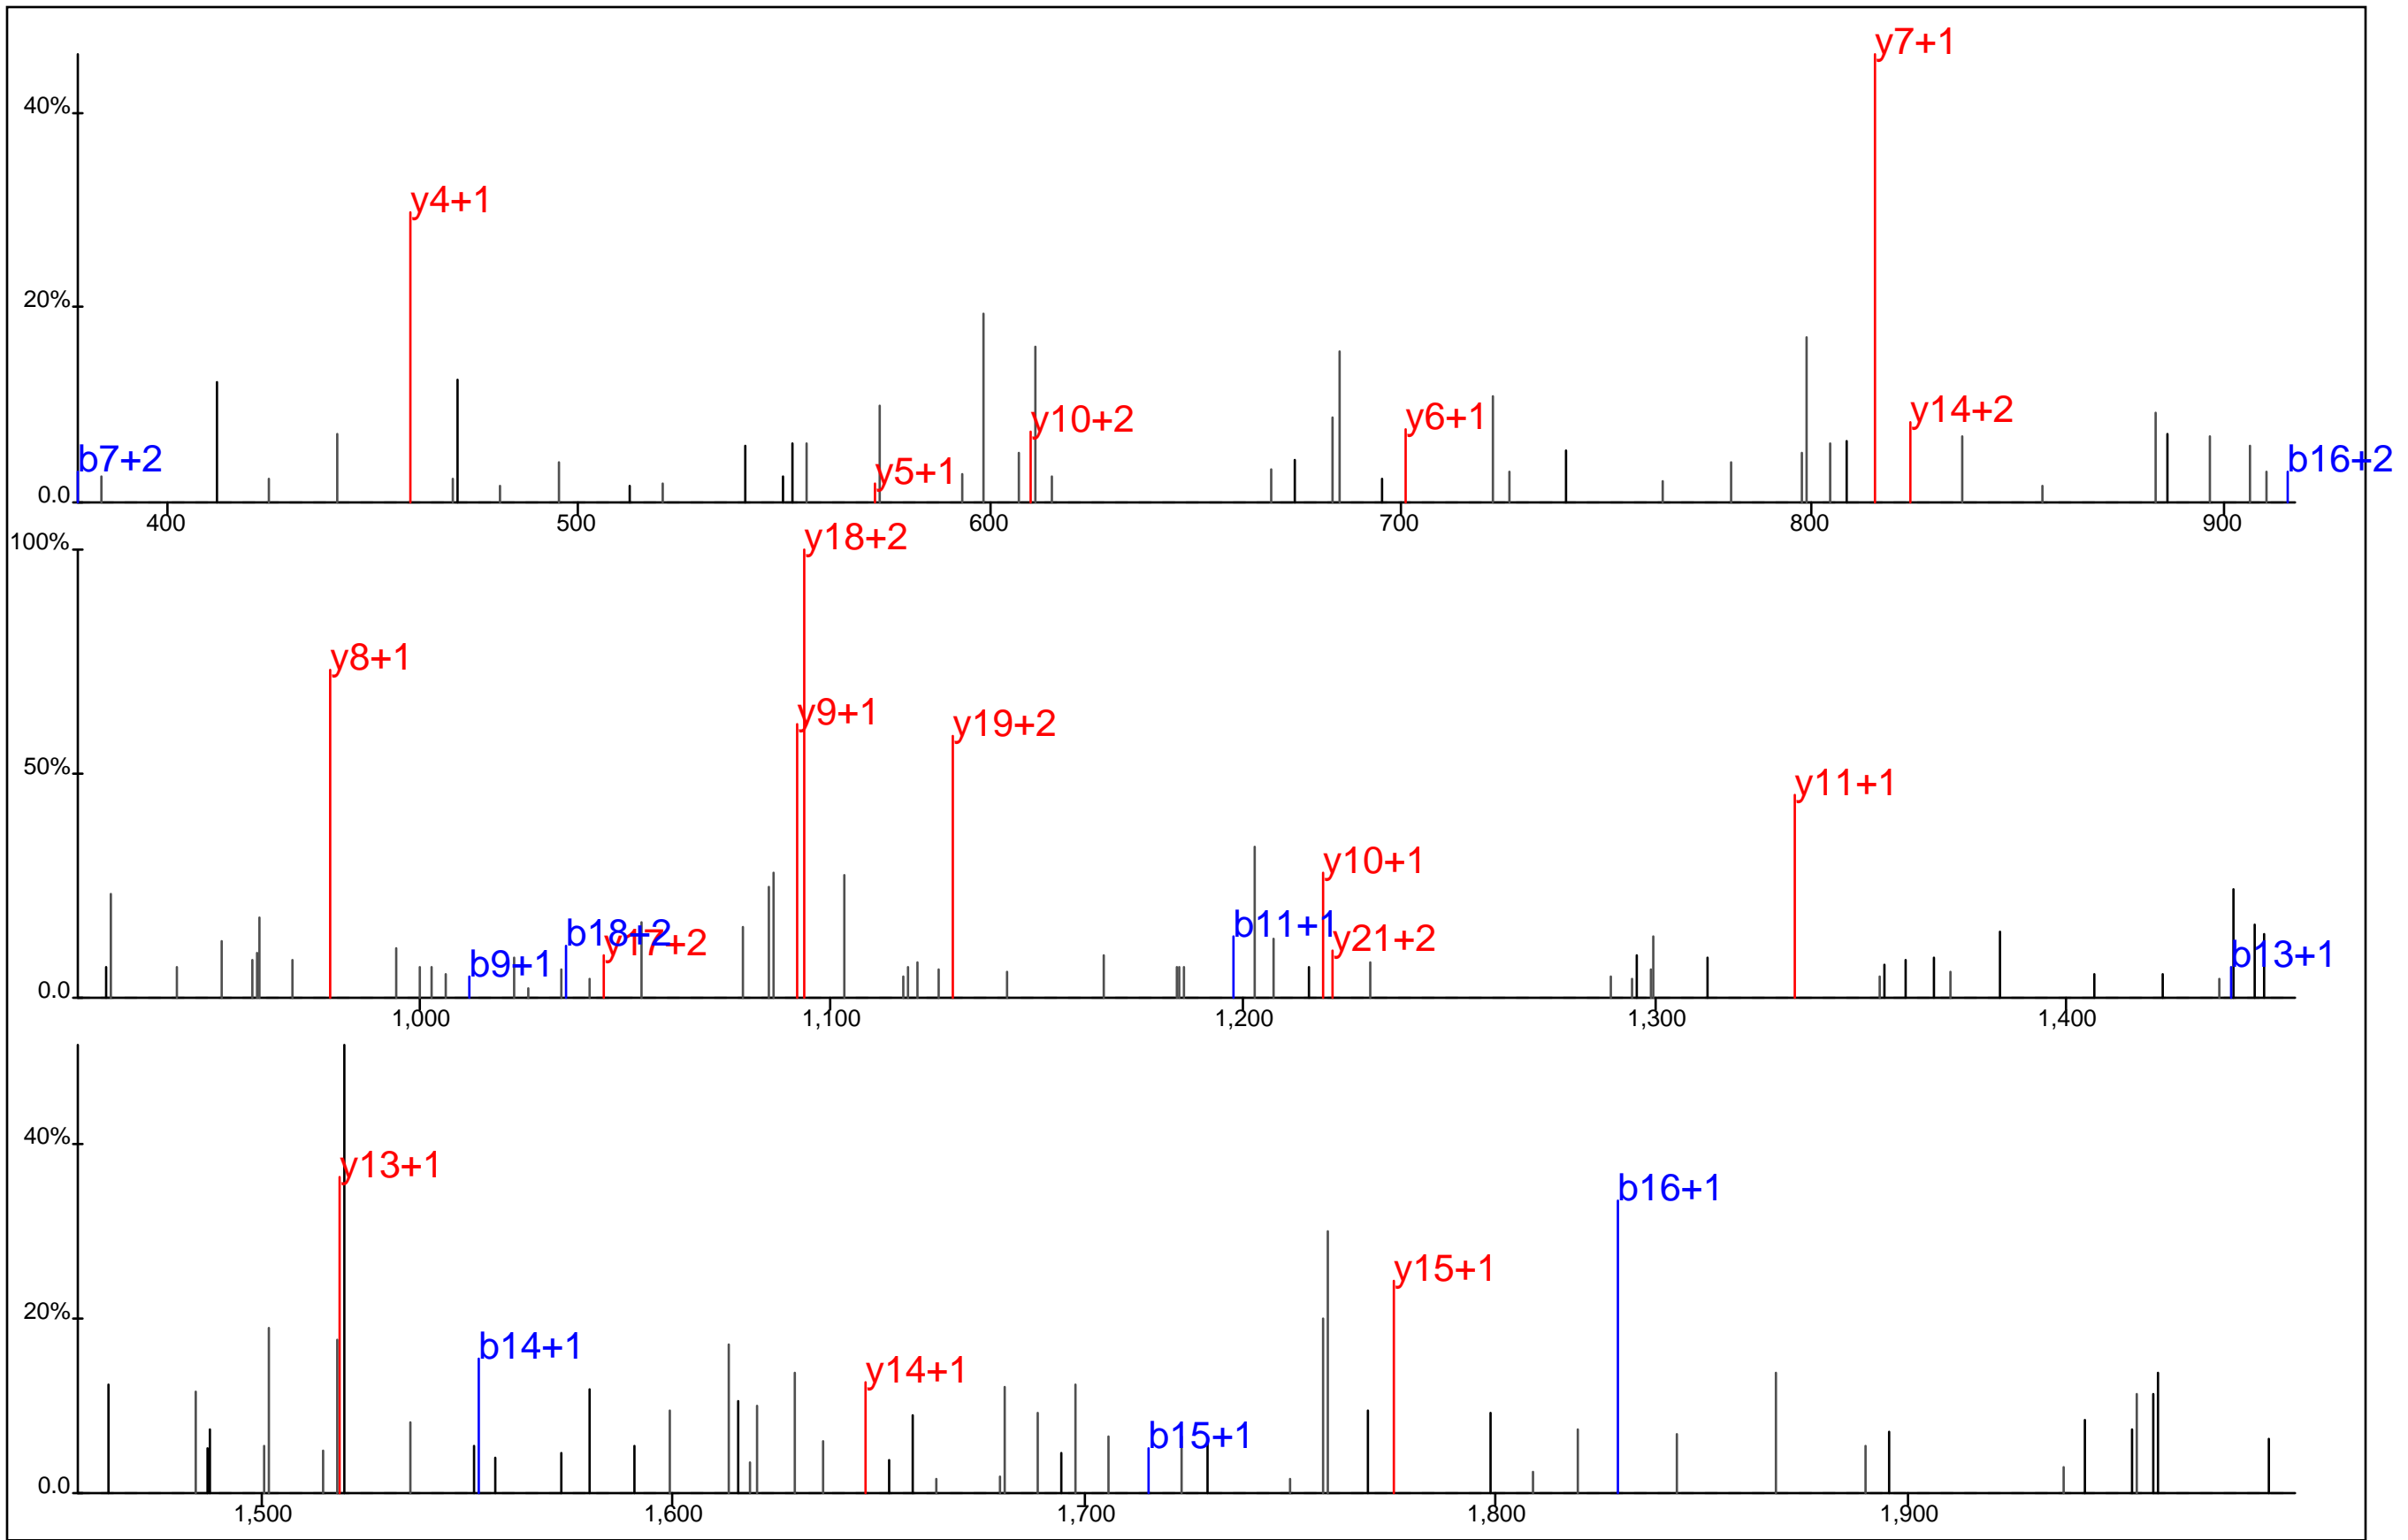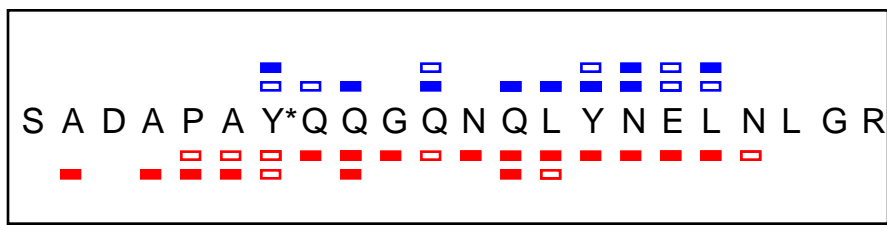

Protein Name: T cell antigen receptor, zeta  
 gi Accession: 0  
 Precursor Mass: 1,265.5724+2  
 Delta Mass: 0.683 ppm  
 XCorr: 34.42

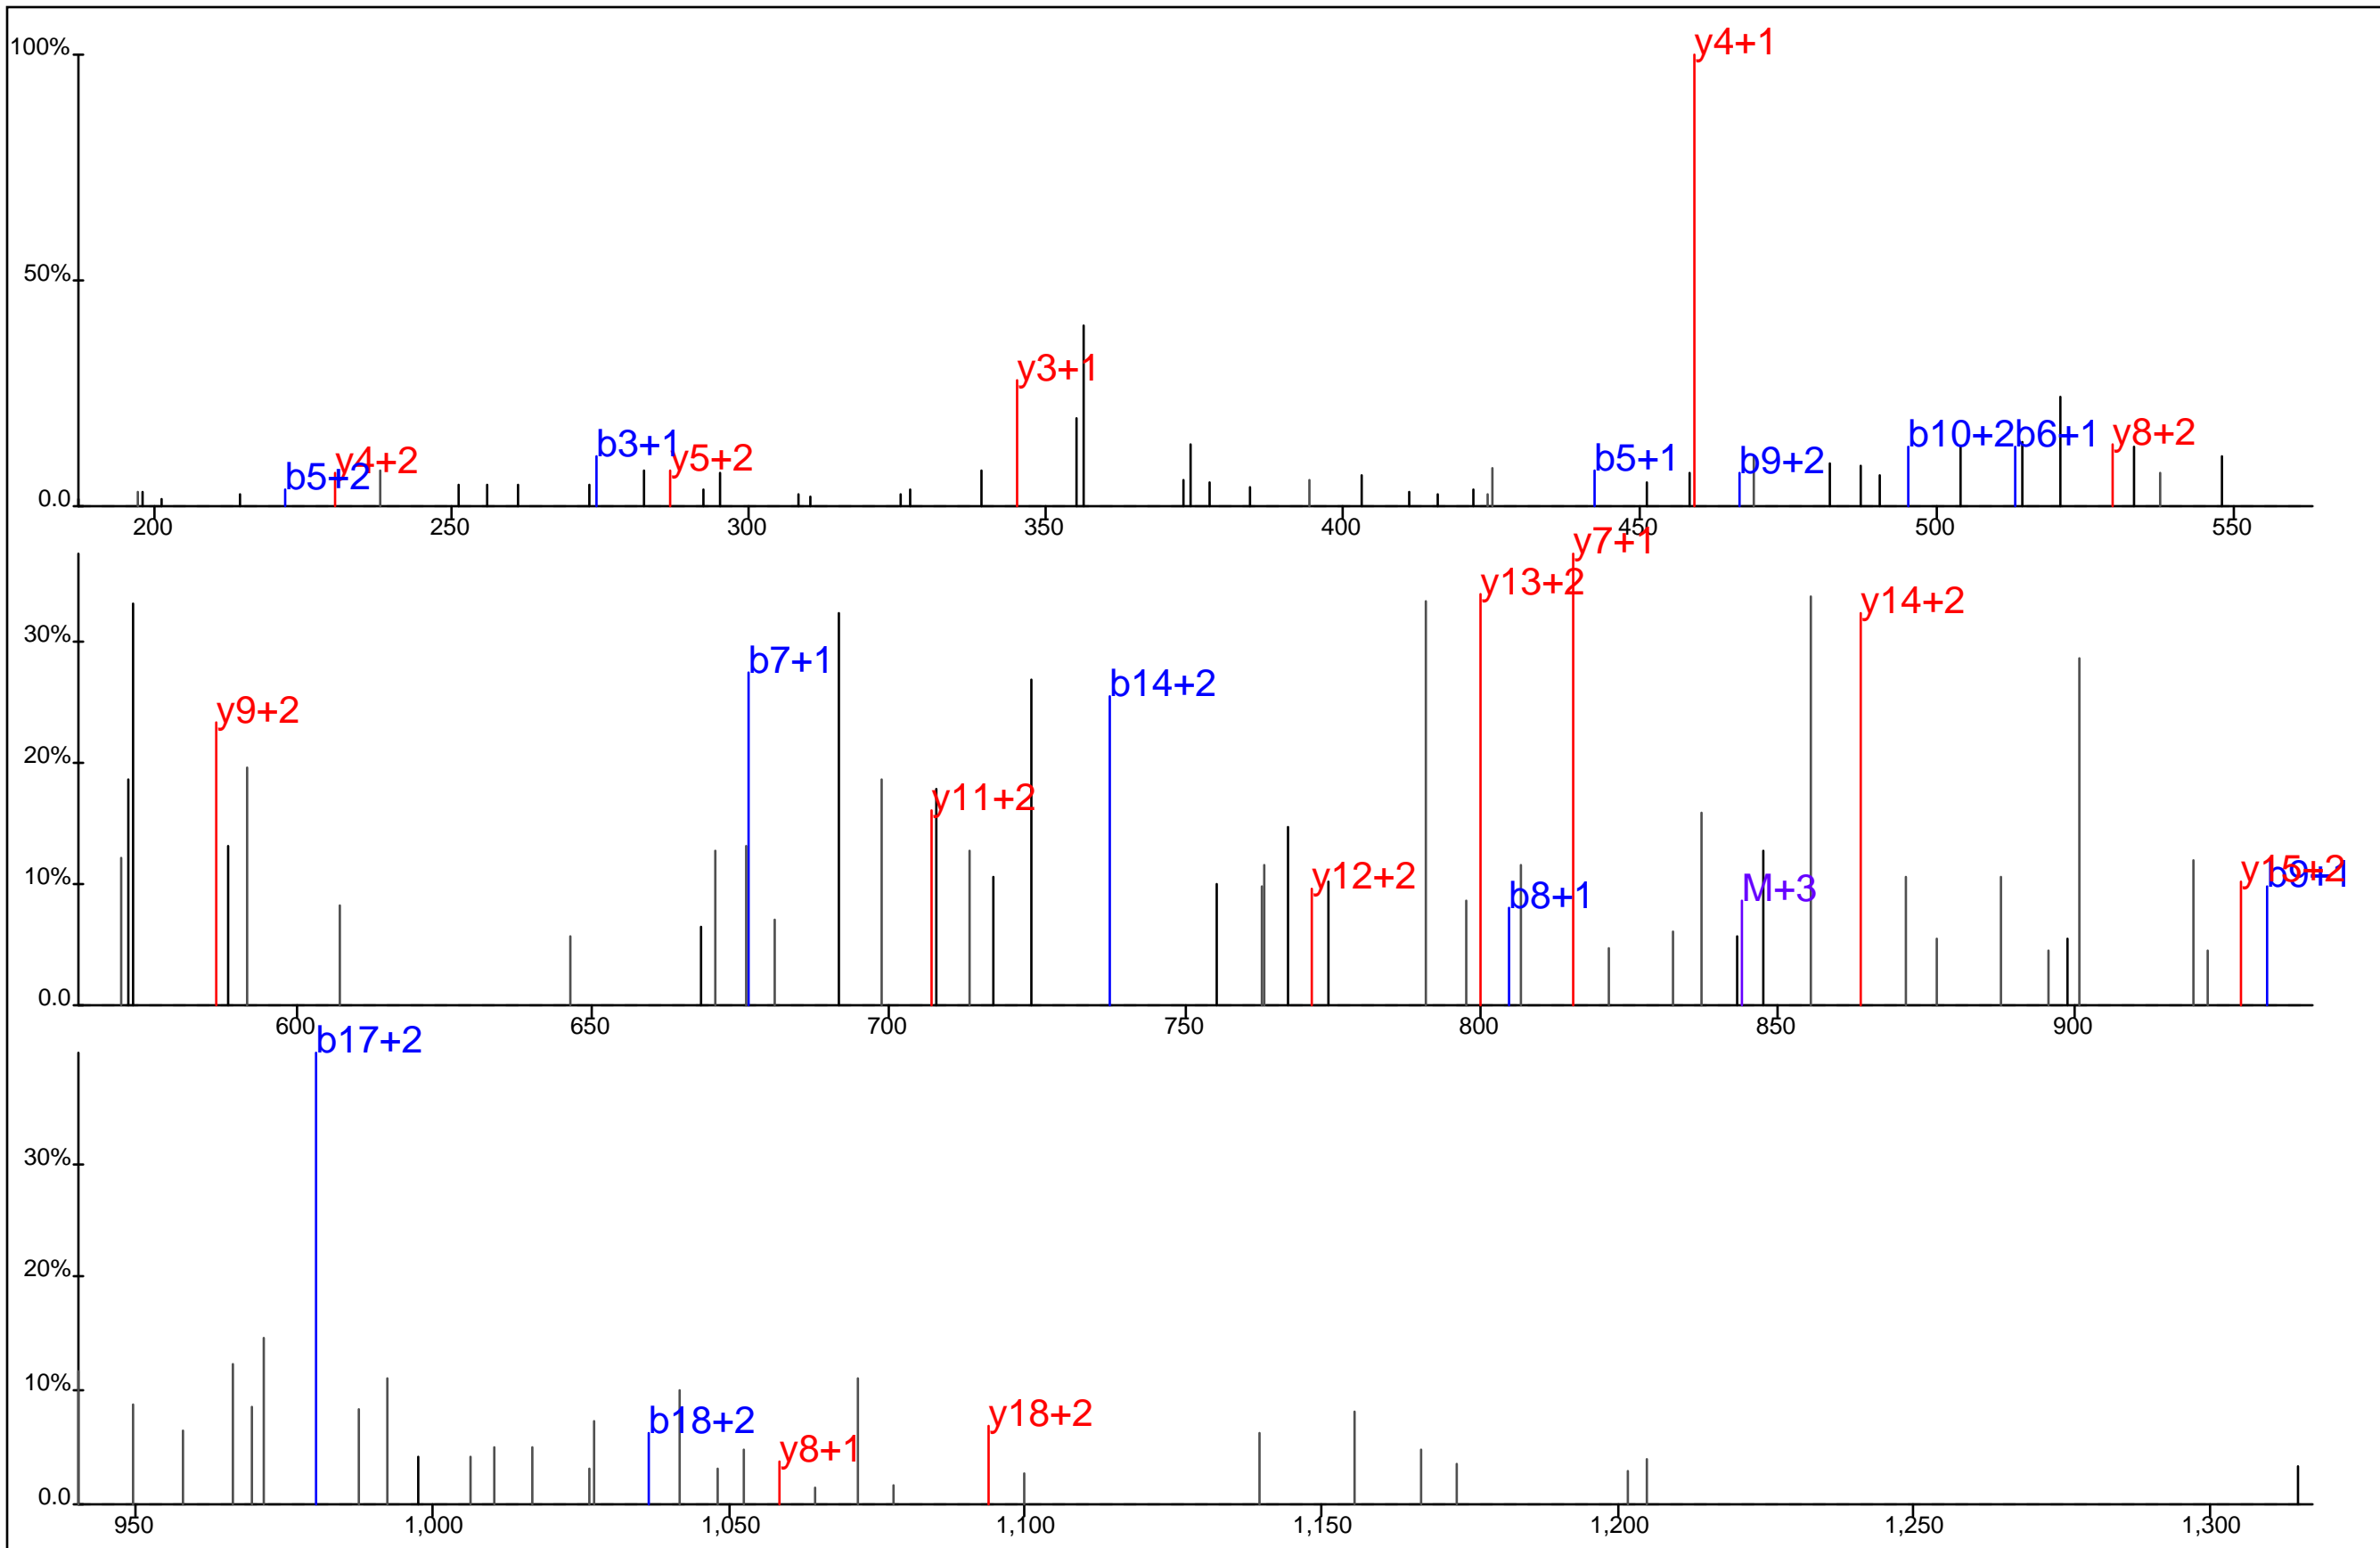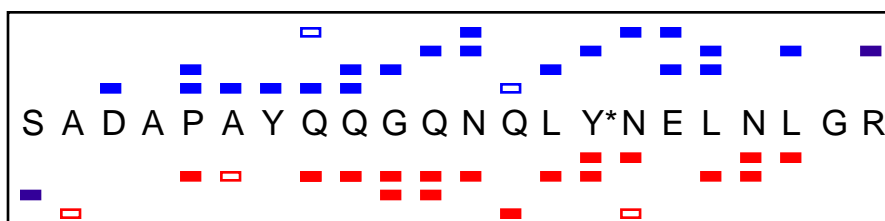

Protein Name: T cell antigen receptor, zeta  
 gi Accession: 0  
 Precursor Mass: 633.2914+4  
 Delta Mass: 3.230 ppm  
 XCorr: 28.76

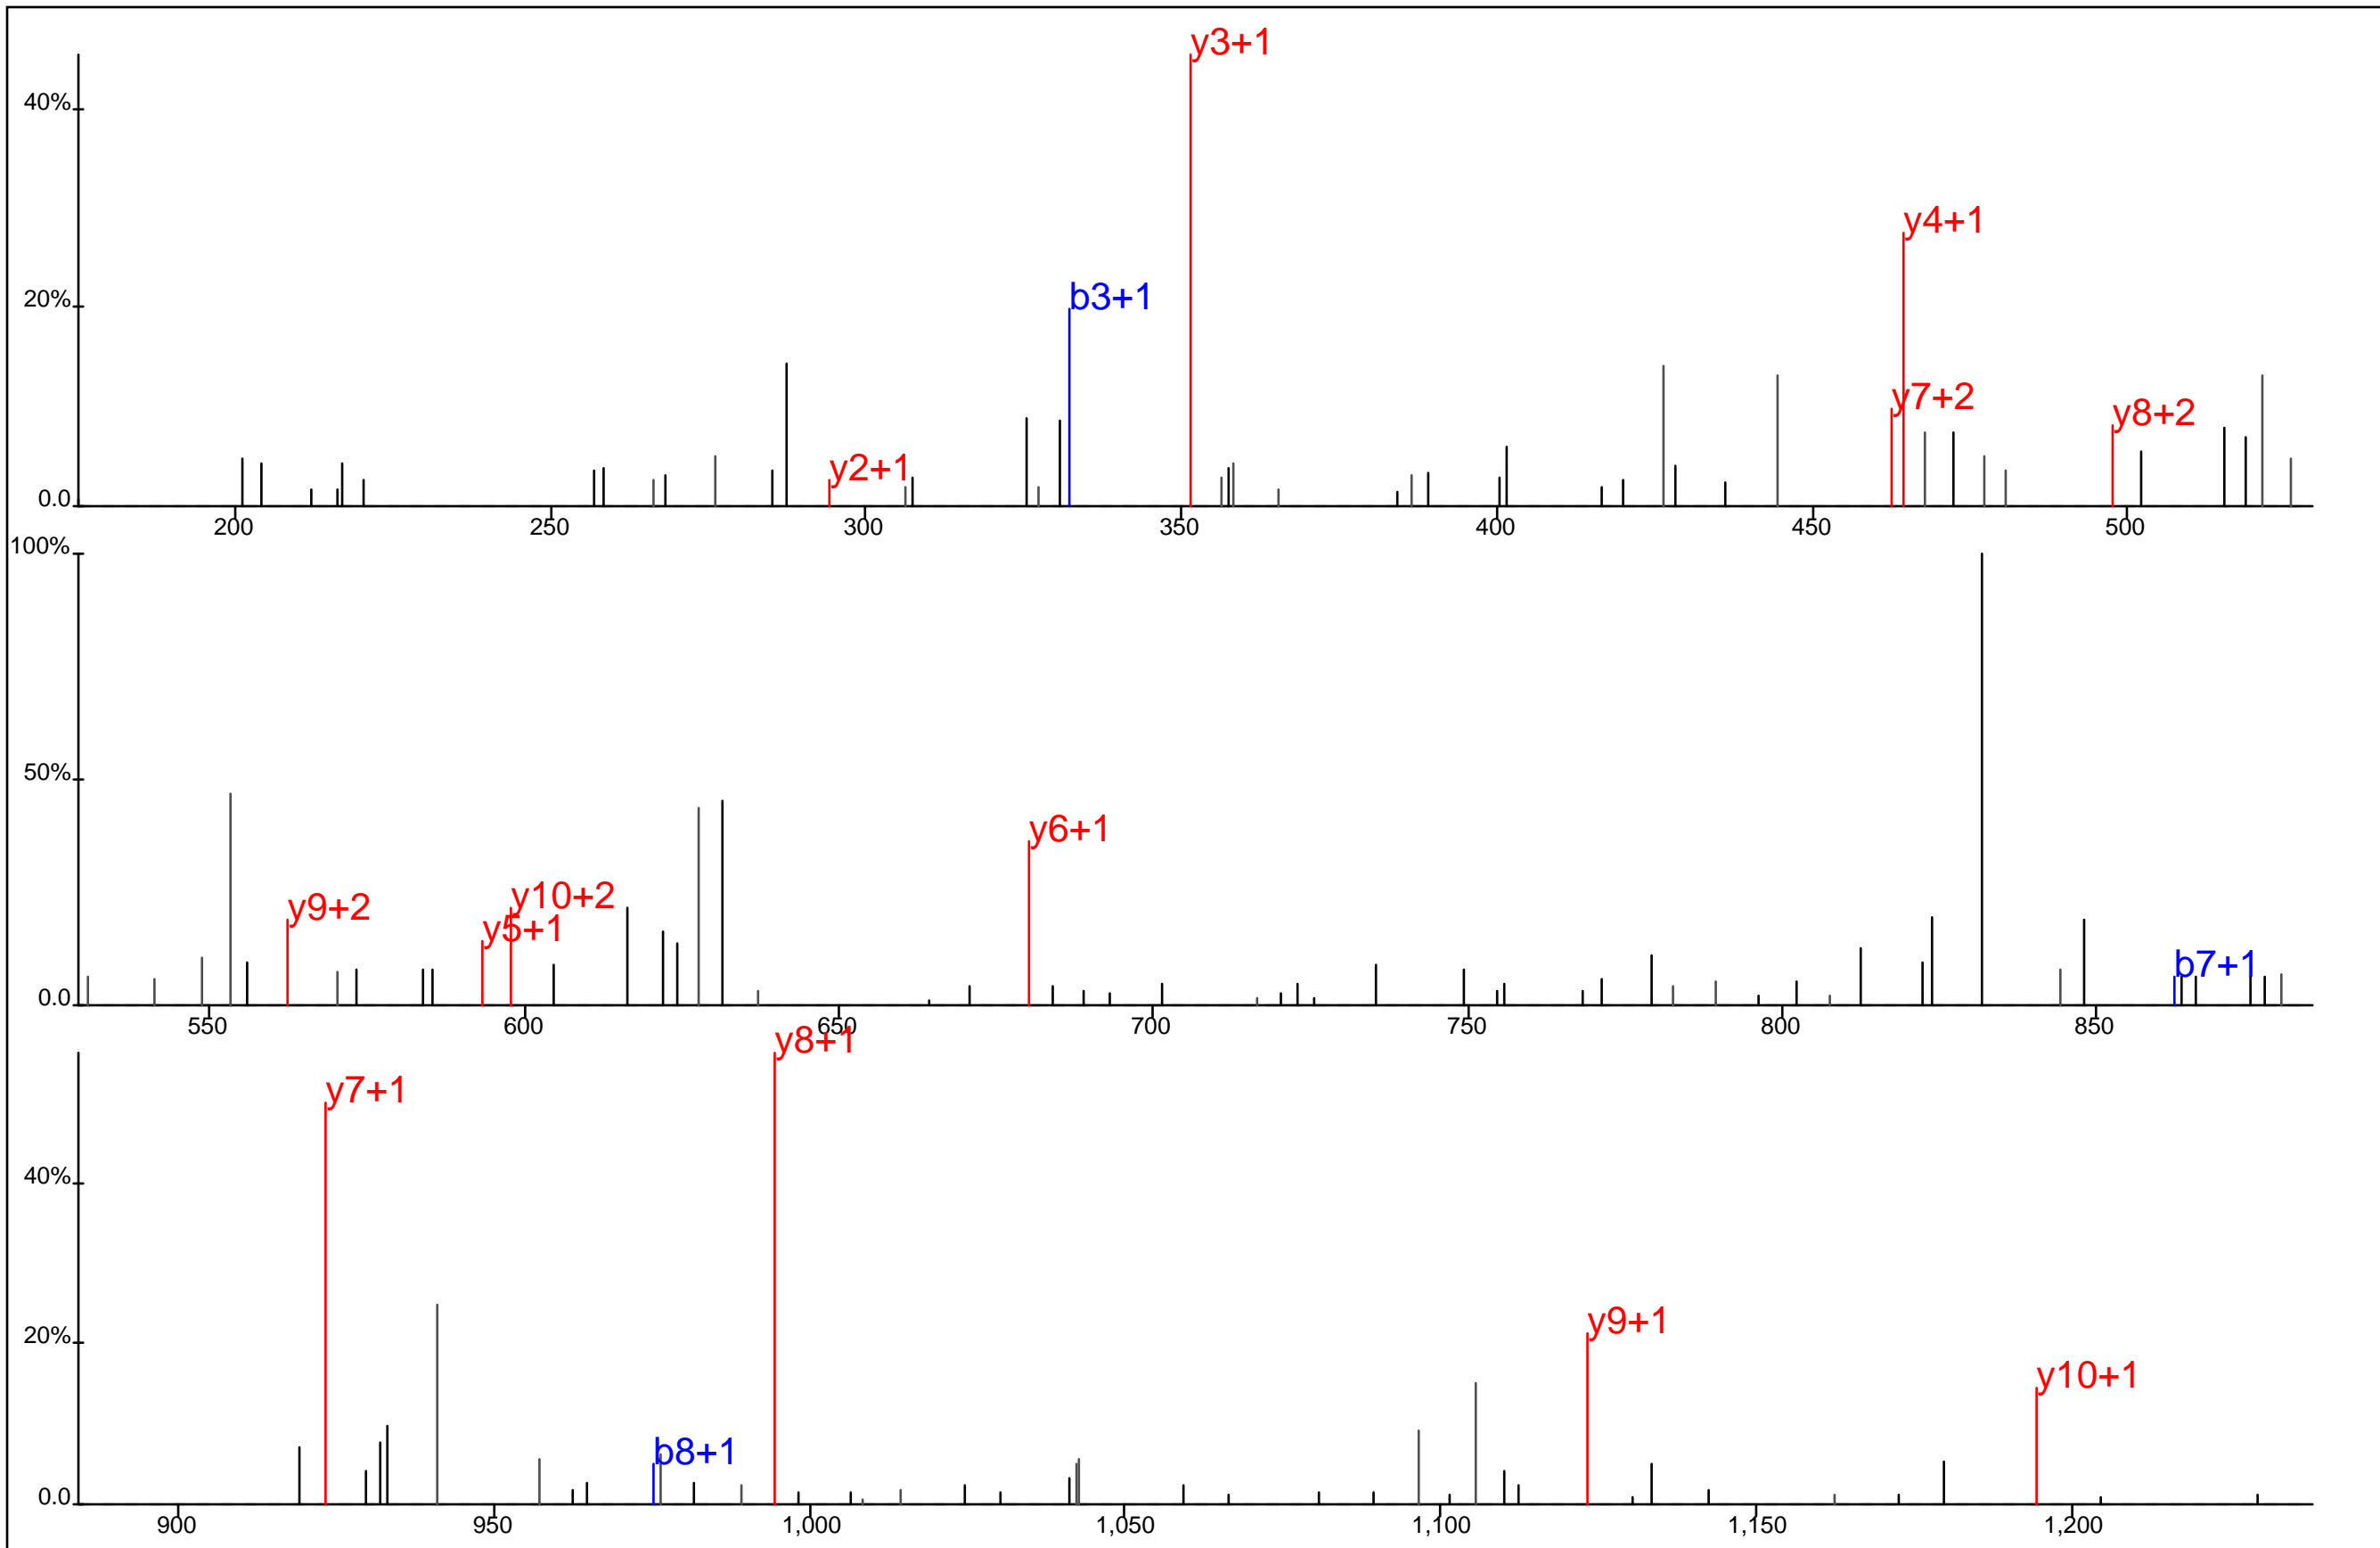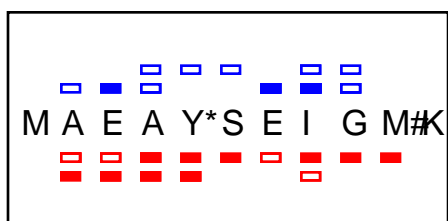

Protein Name: T cell antigen receptor, zeta  
 gi Accession: 0  
 Precursor Mass: 663.2614+2  
 Delta Mass: 0.211 ppm  
 XCorr: 60.91





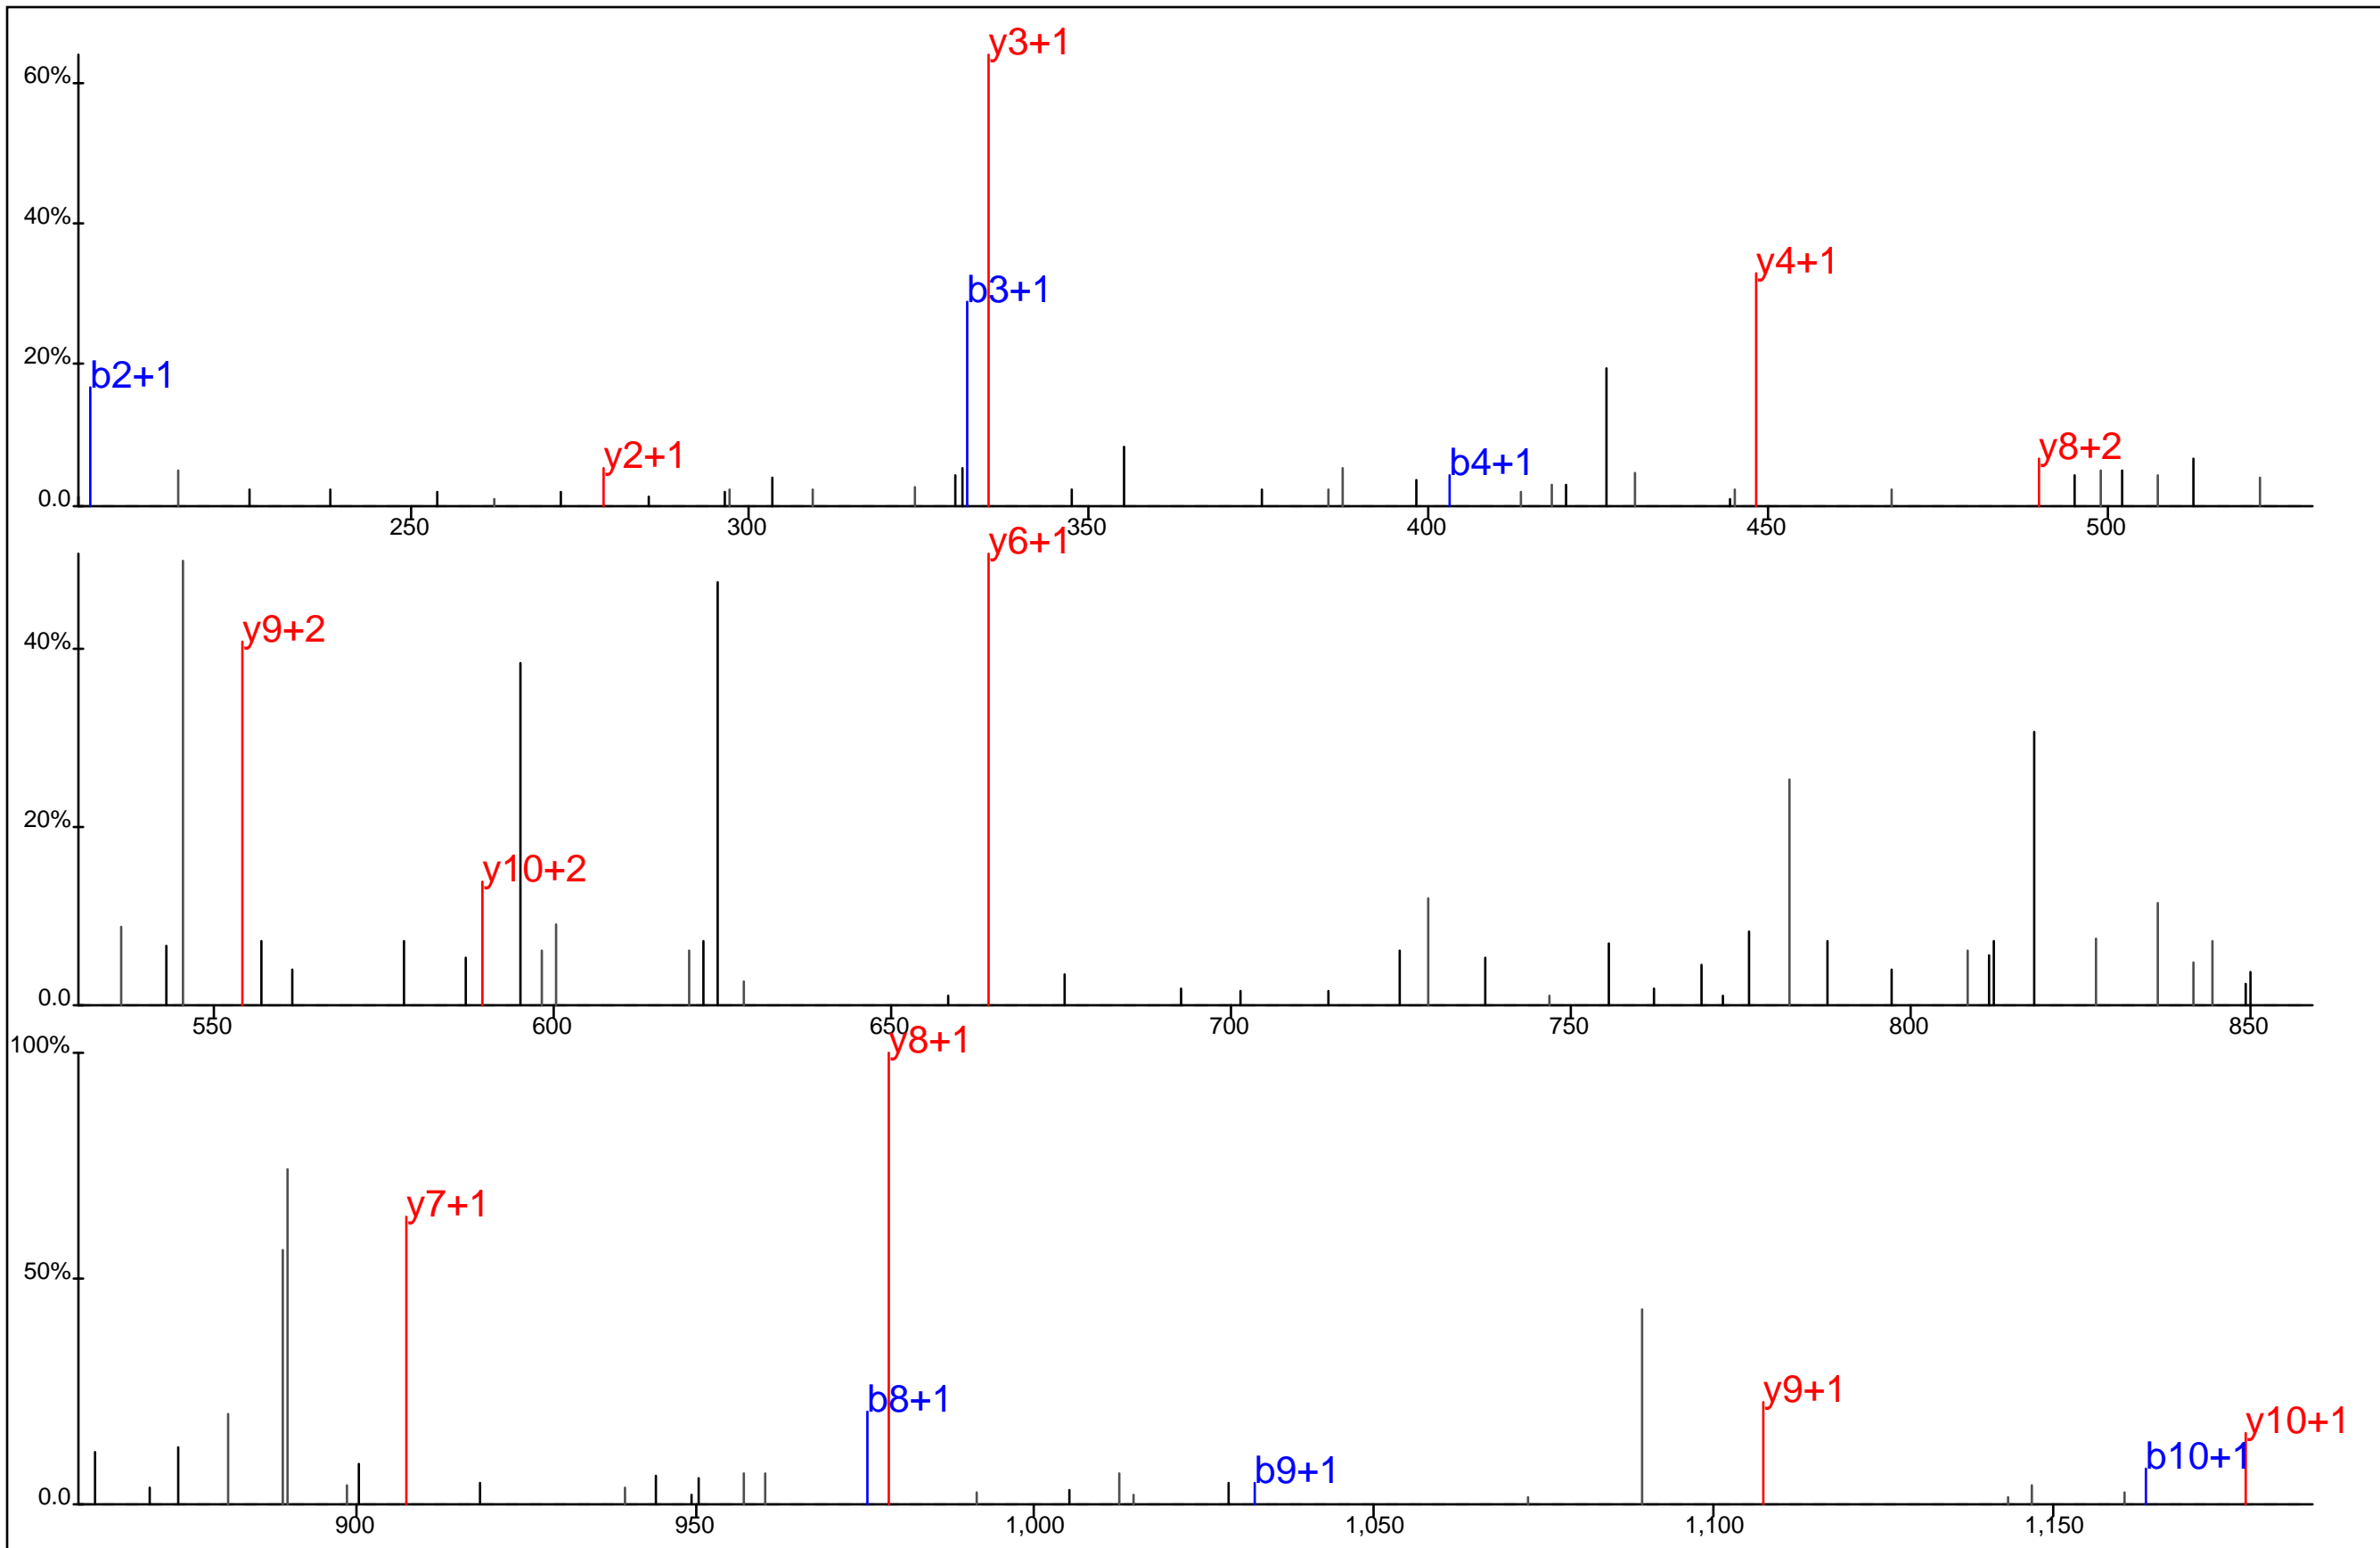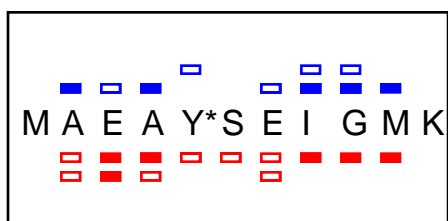

Protein Name: T cell antigen receptor, zeta  
 gi Accession: 0  
 Precursor Mass: 655.2619+2  
 Delta Mass: 2.920 ppm  
 XCorr: 68.03

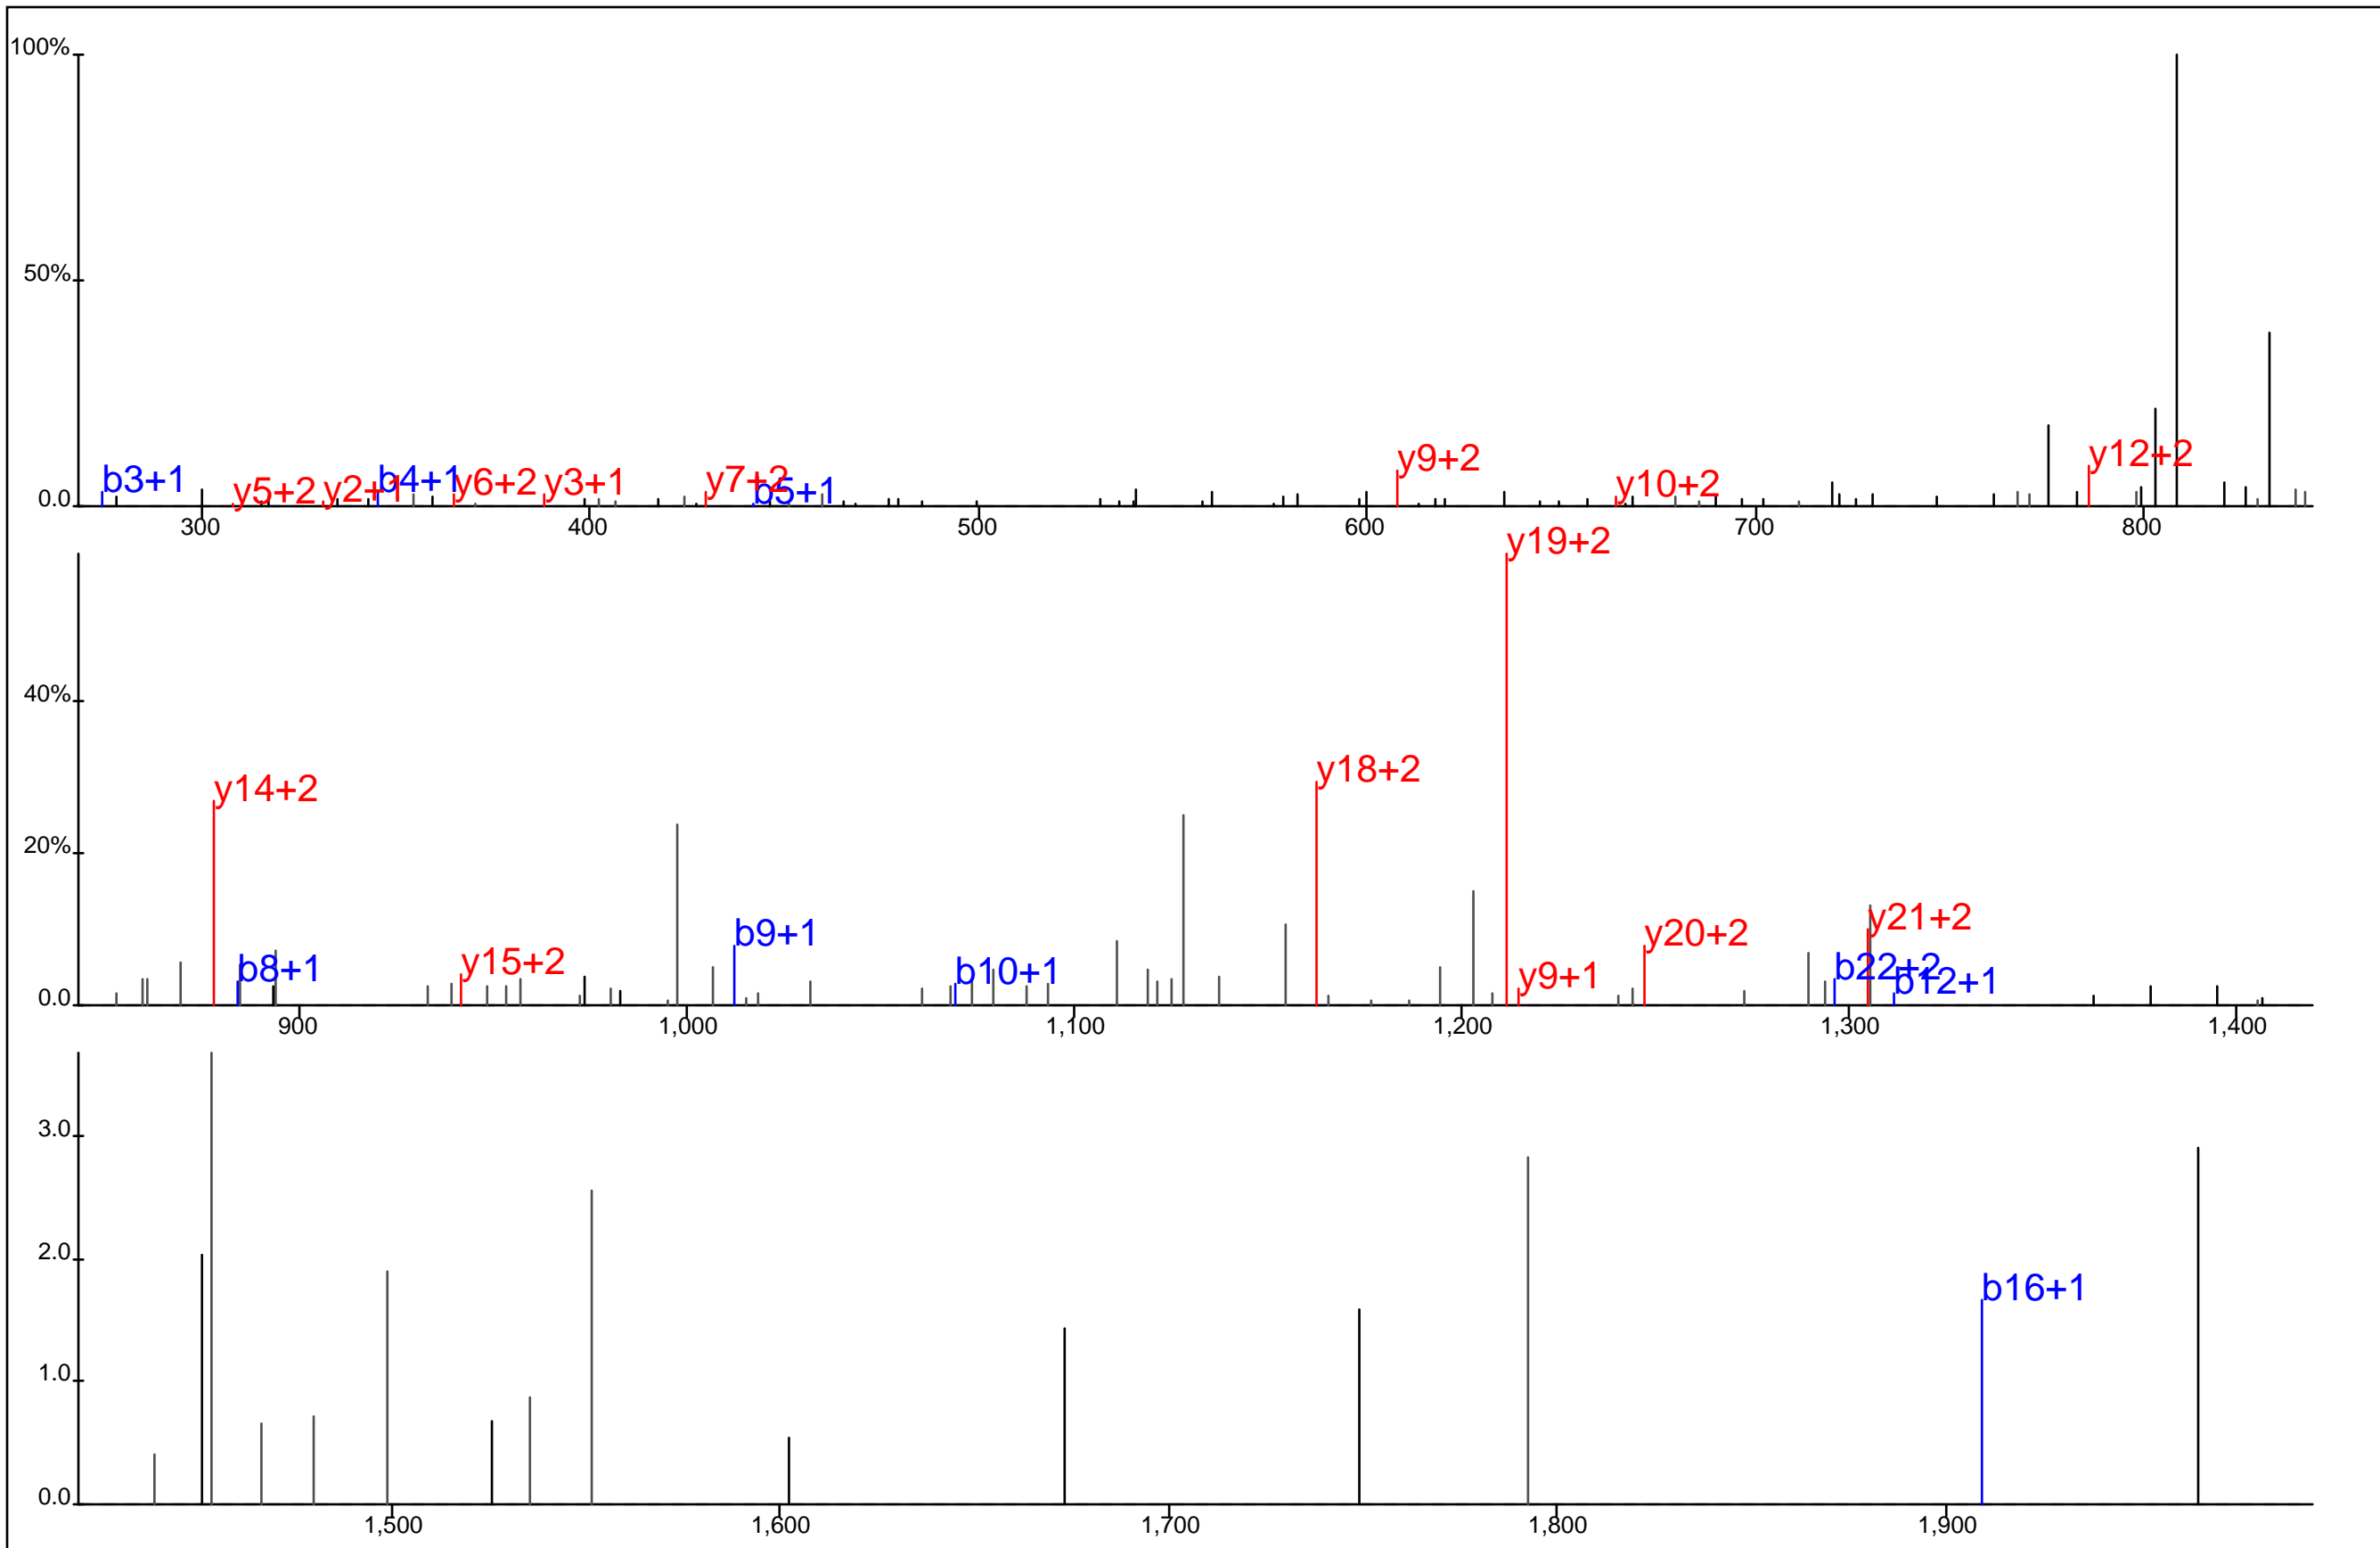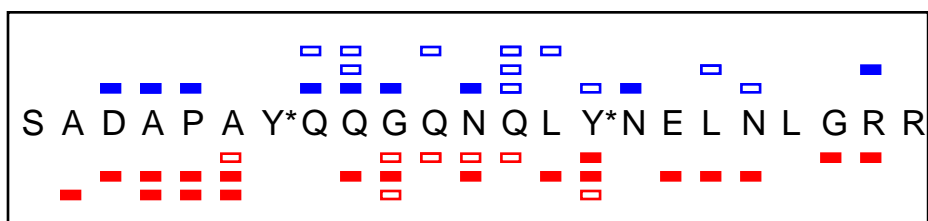

Protein Name: T cell antigen receptor, zeta  
 gi Accession: 0  
 Precursor Mass: 922.7417+3  
 Delta Mass: 2.655 ppm  
 XCorr: 24.88

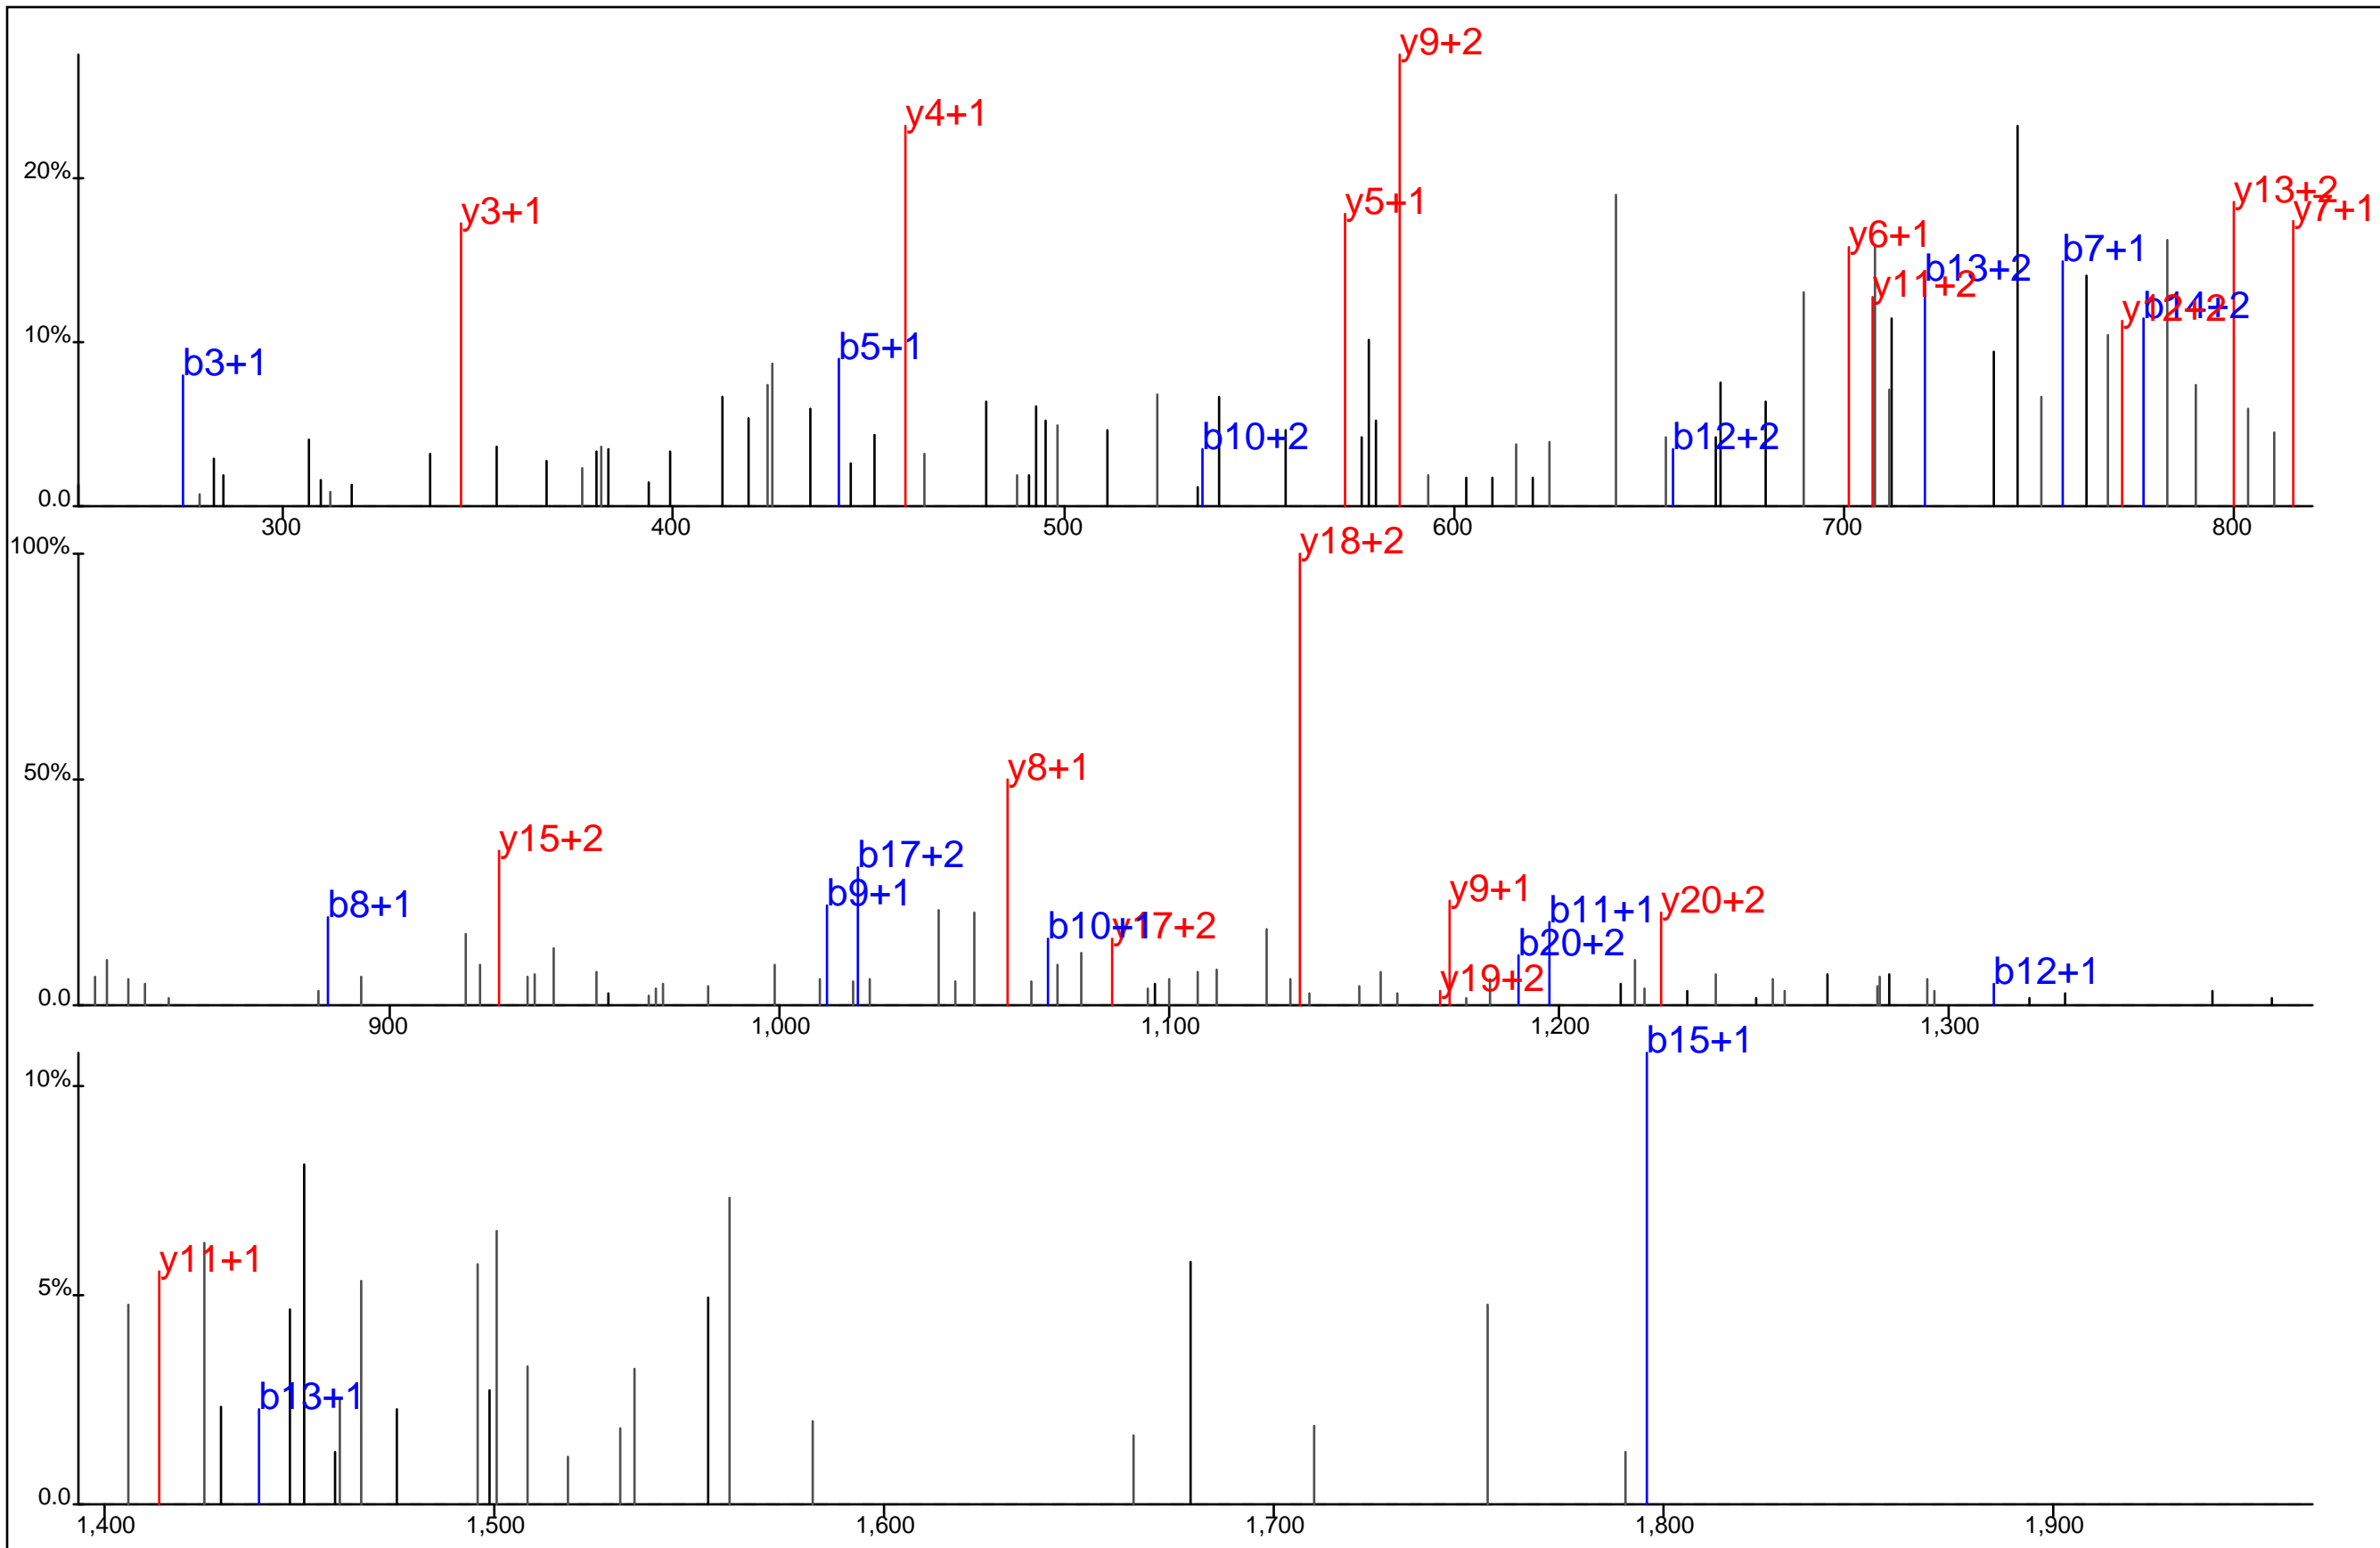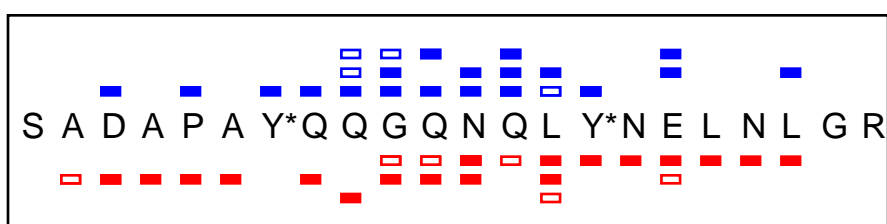

Protein Name: T cell antigen receptor, zeta  
 gi Accession: 0  
 Precursor Mass: 870.7040+3  
 Delta Mass: 1.803 ppm  
 XCorr: 48.52

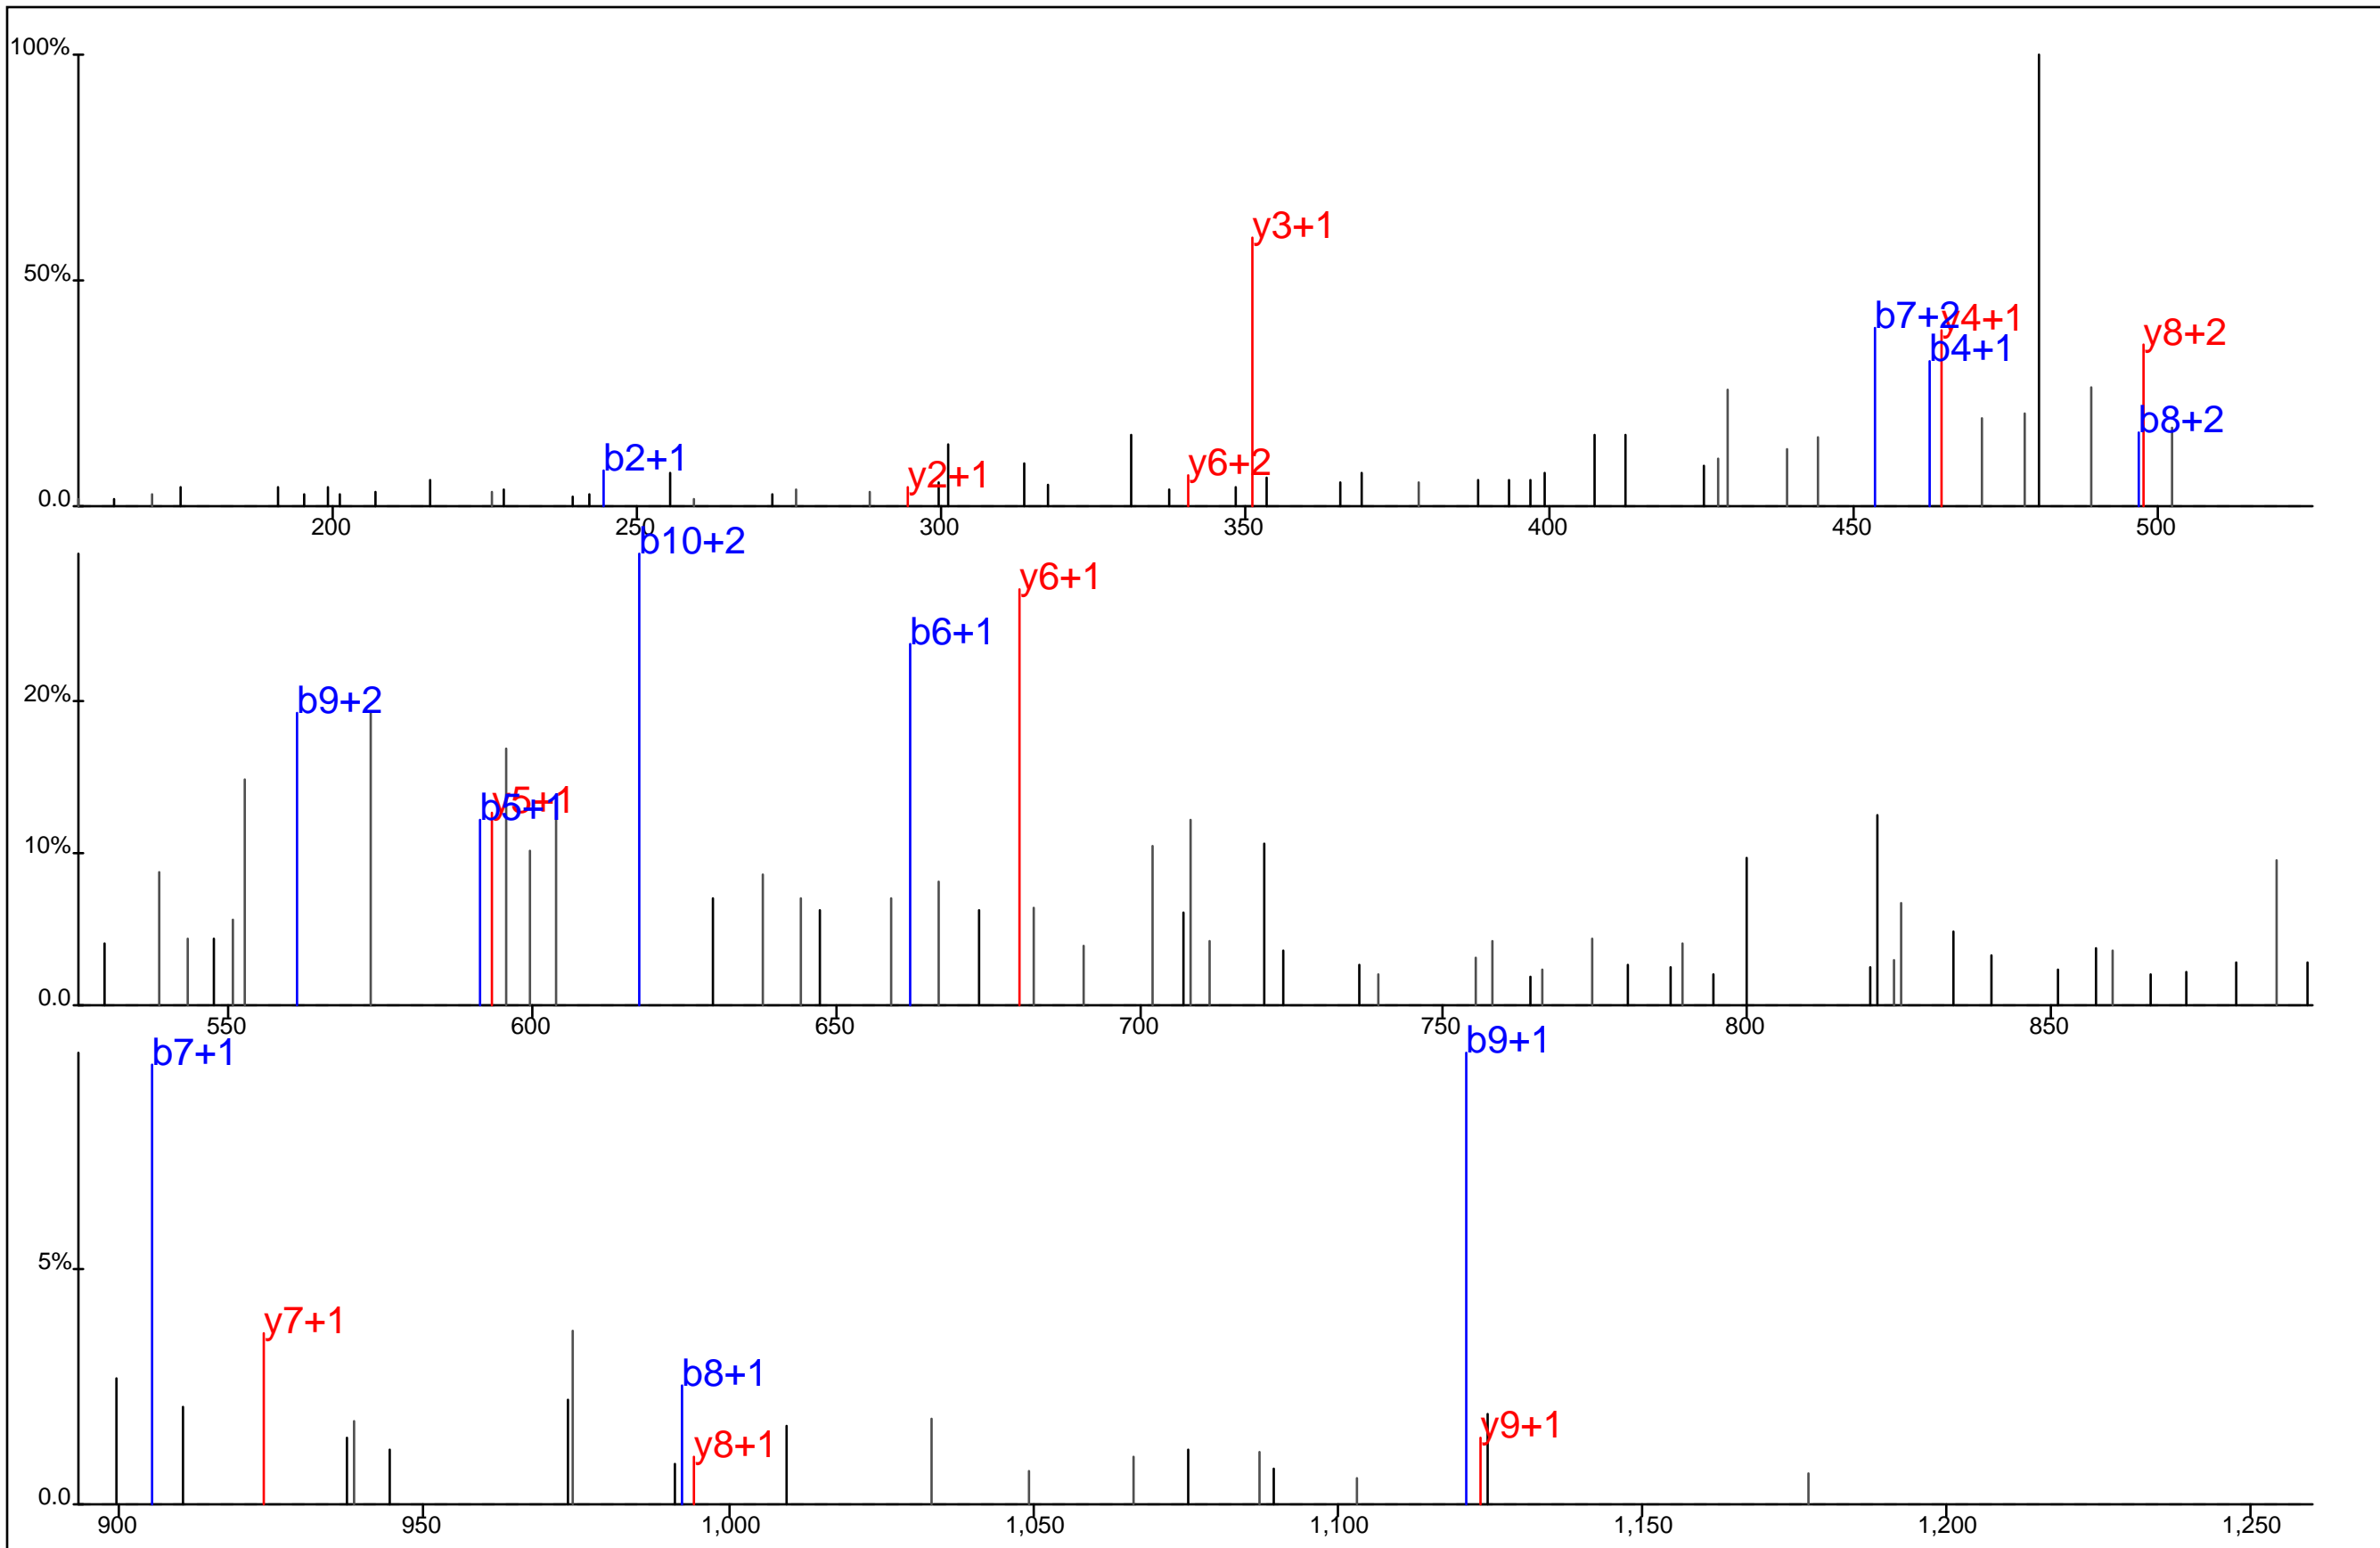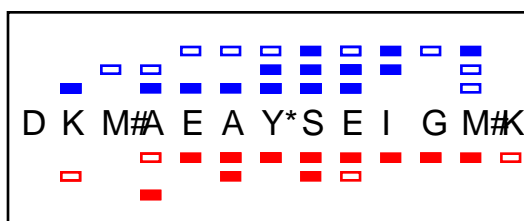

Protein Name: T cell antigen receptor, zeta  
 gi Accession: 0  
 Precursor Mass: 528.8812+3  
 Delta Mass: 1.872 ppm  
 XCorr: 26.24

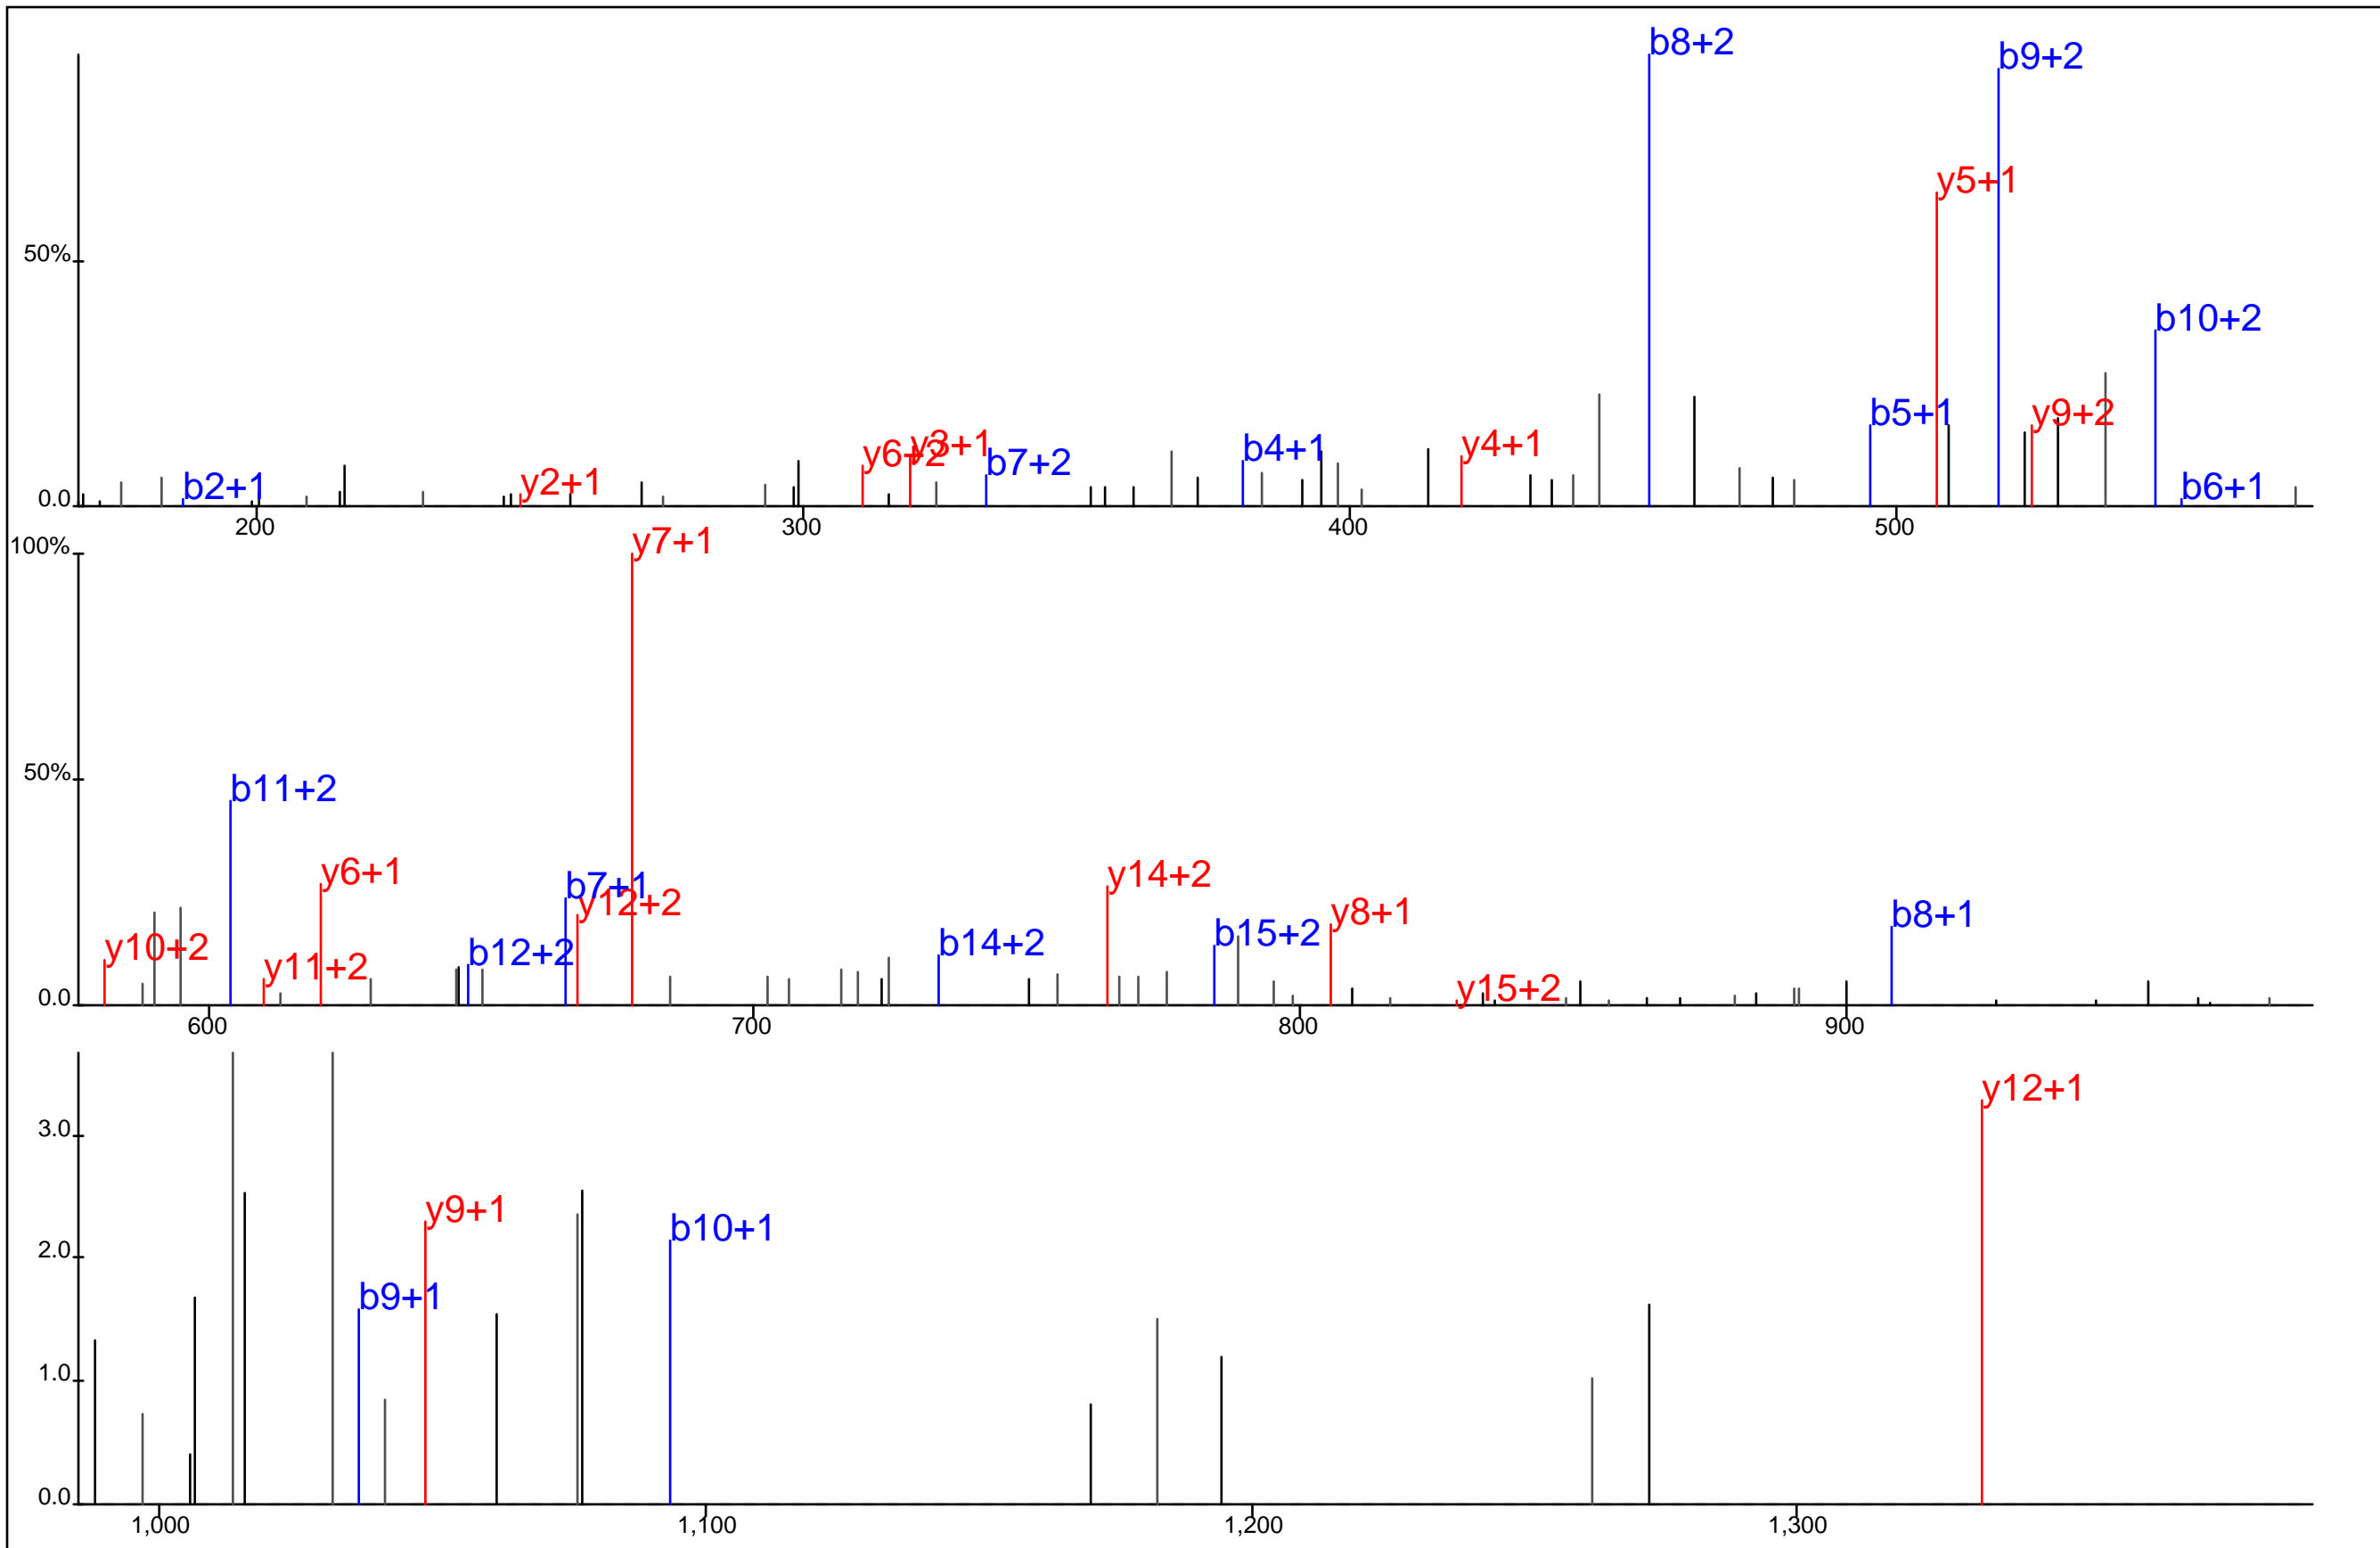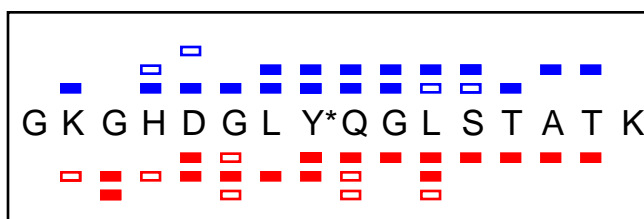

Protein Name: T cell antigen receptor, zeta  
 gi Accession: 0  
 Precursor Mass: 571.6045+3  
 Delta Mass: 0.822 ppm  
 XCorr: 46.77



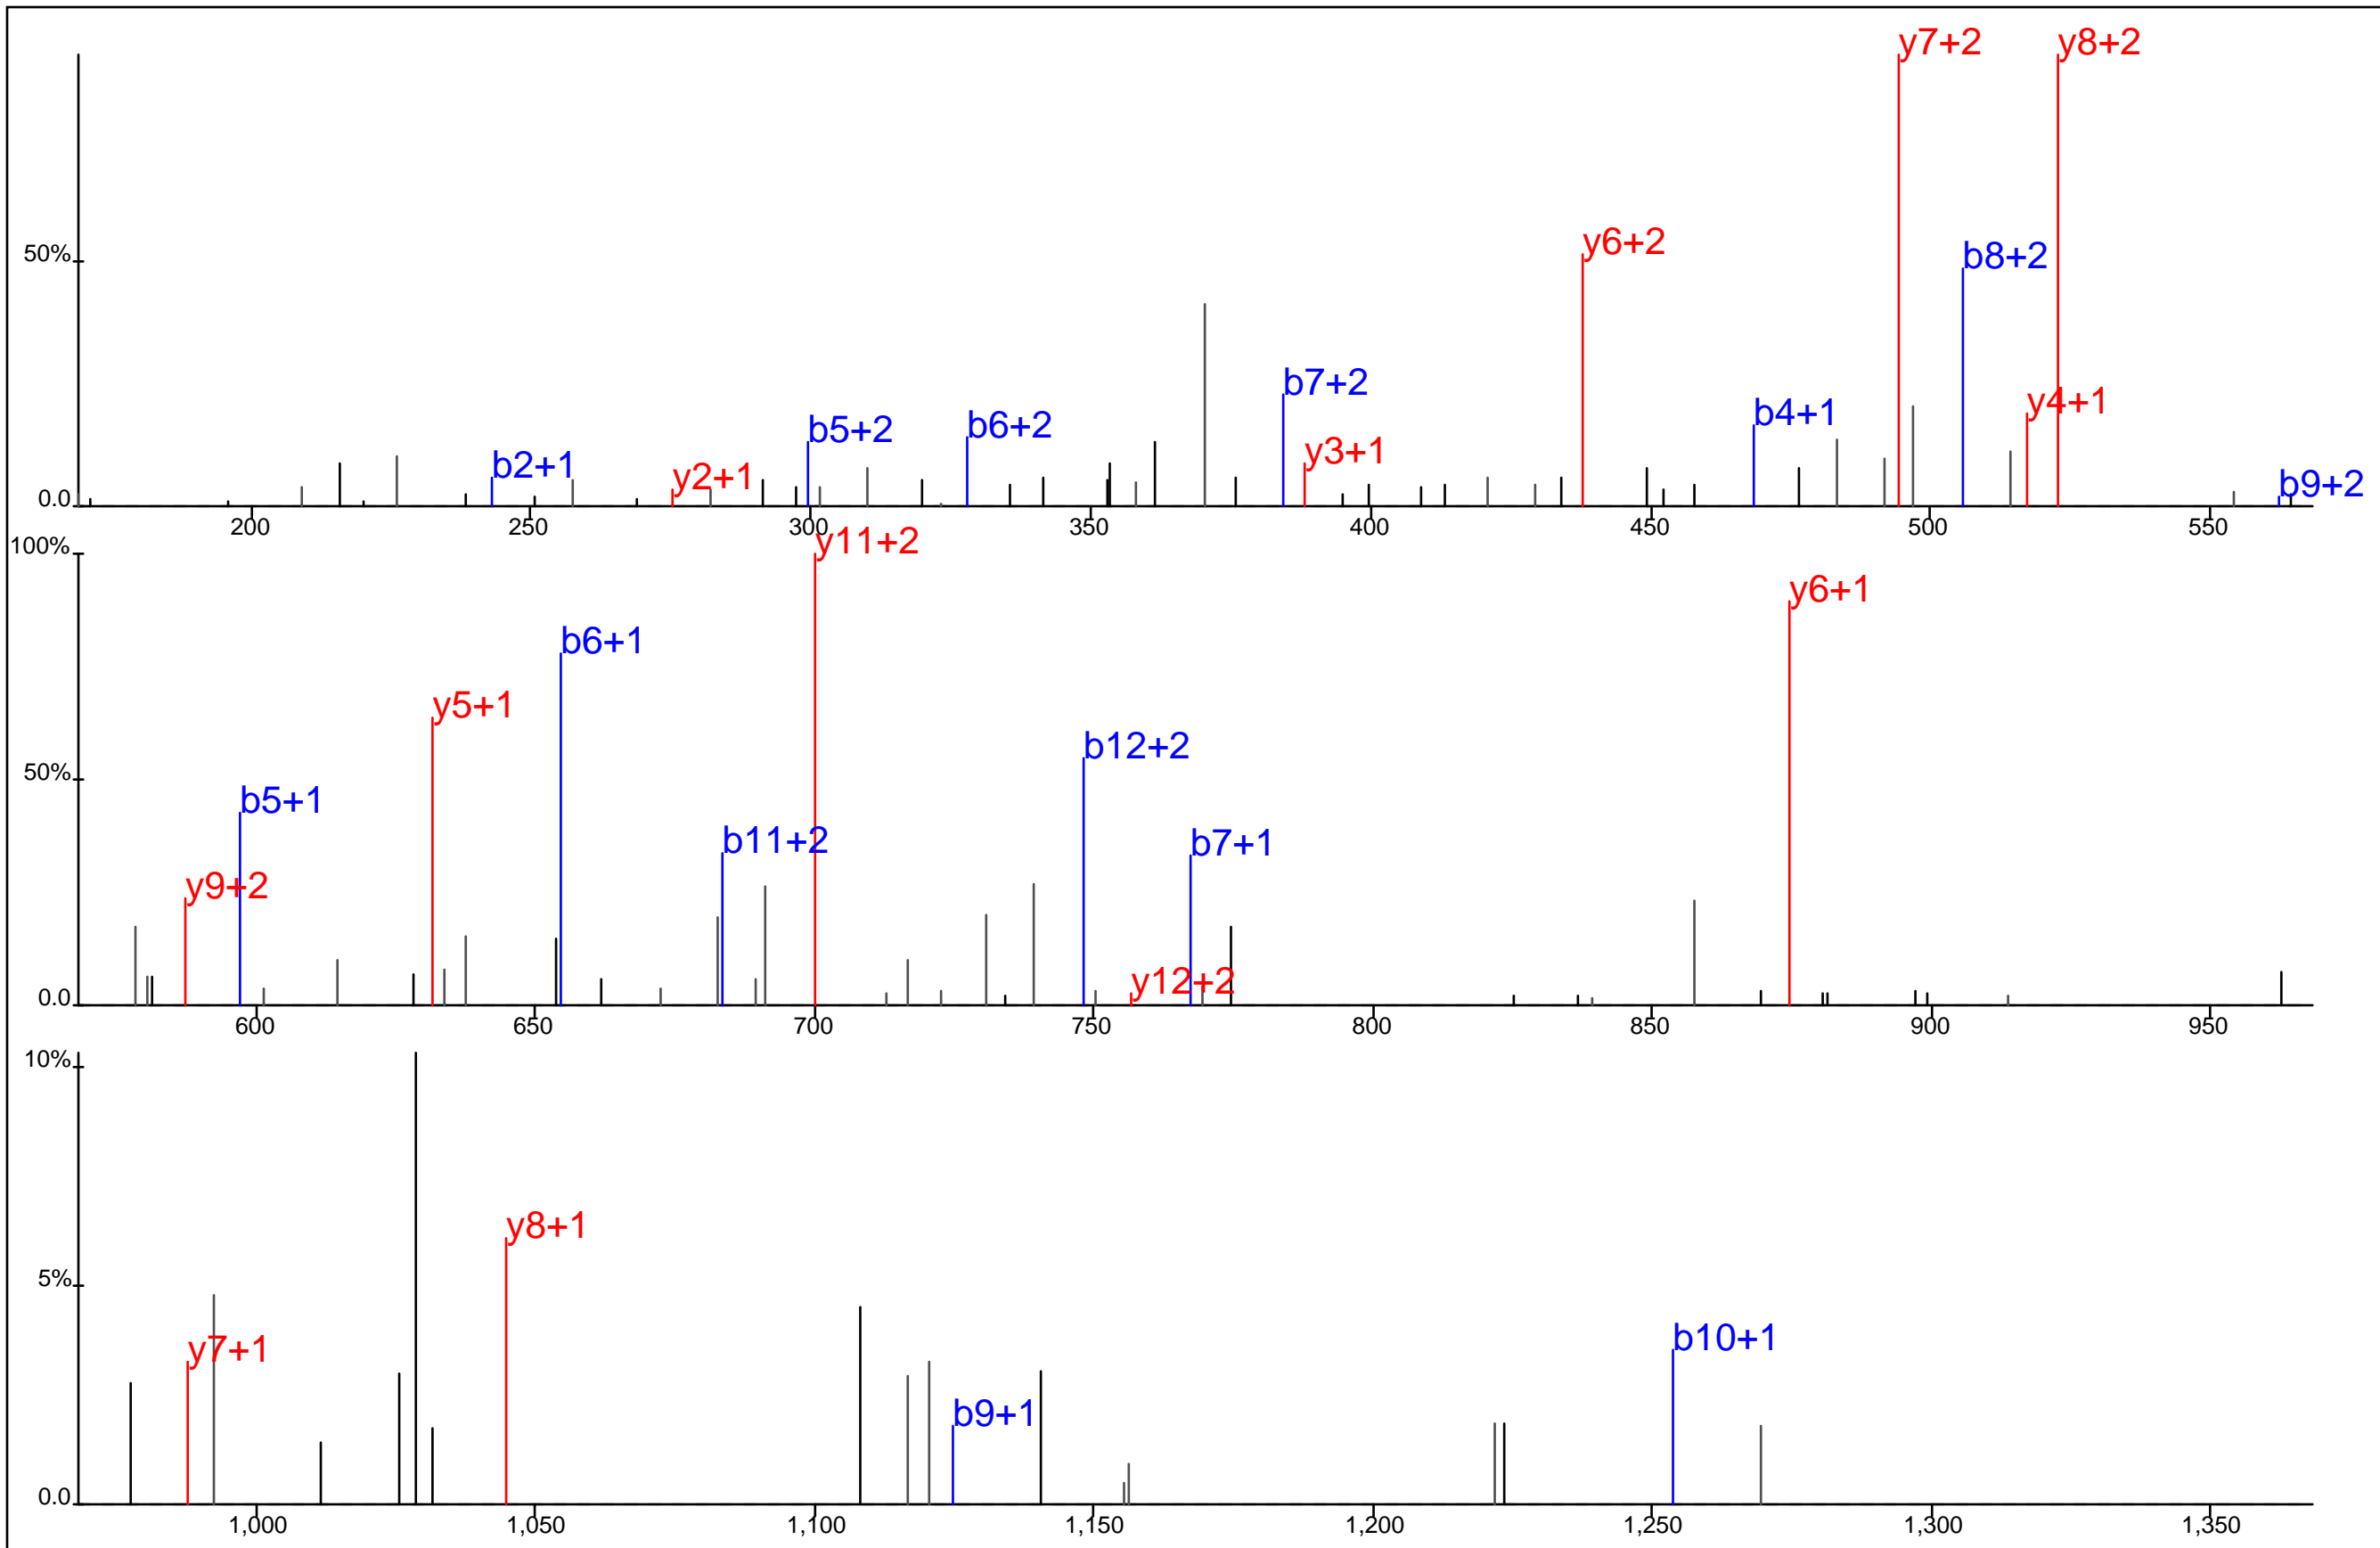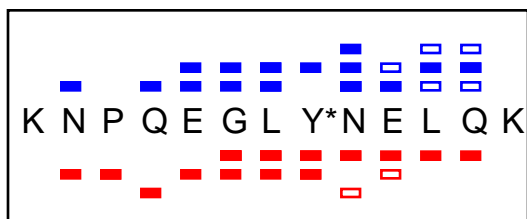

Protein Name: T cell antigen receptor, zeta  
 gi Accession: 0  
 Precursor Mass: 547.5942+3  
 Delta Mass: 0.035 ppm  
 XCorr: 40.52





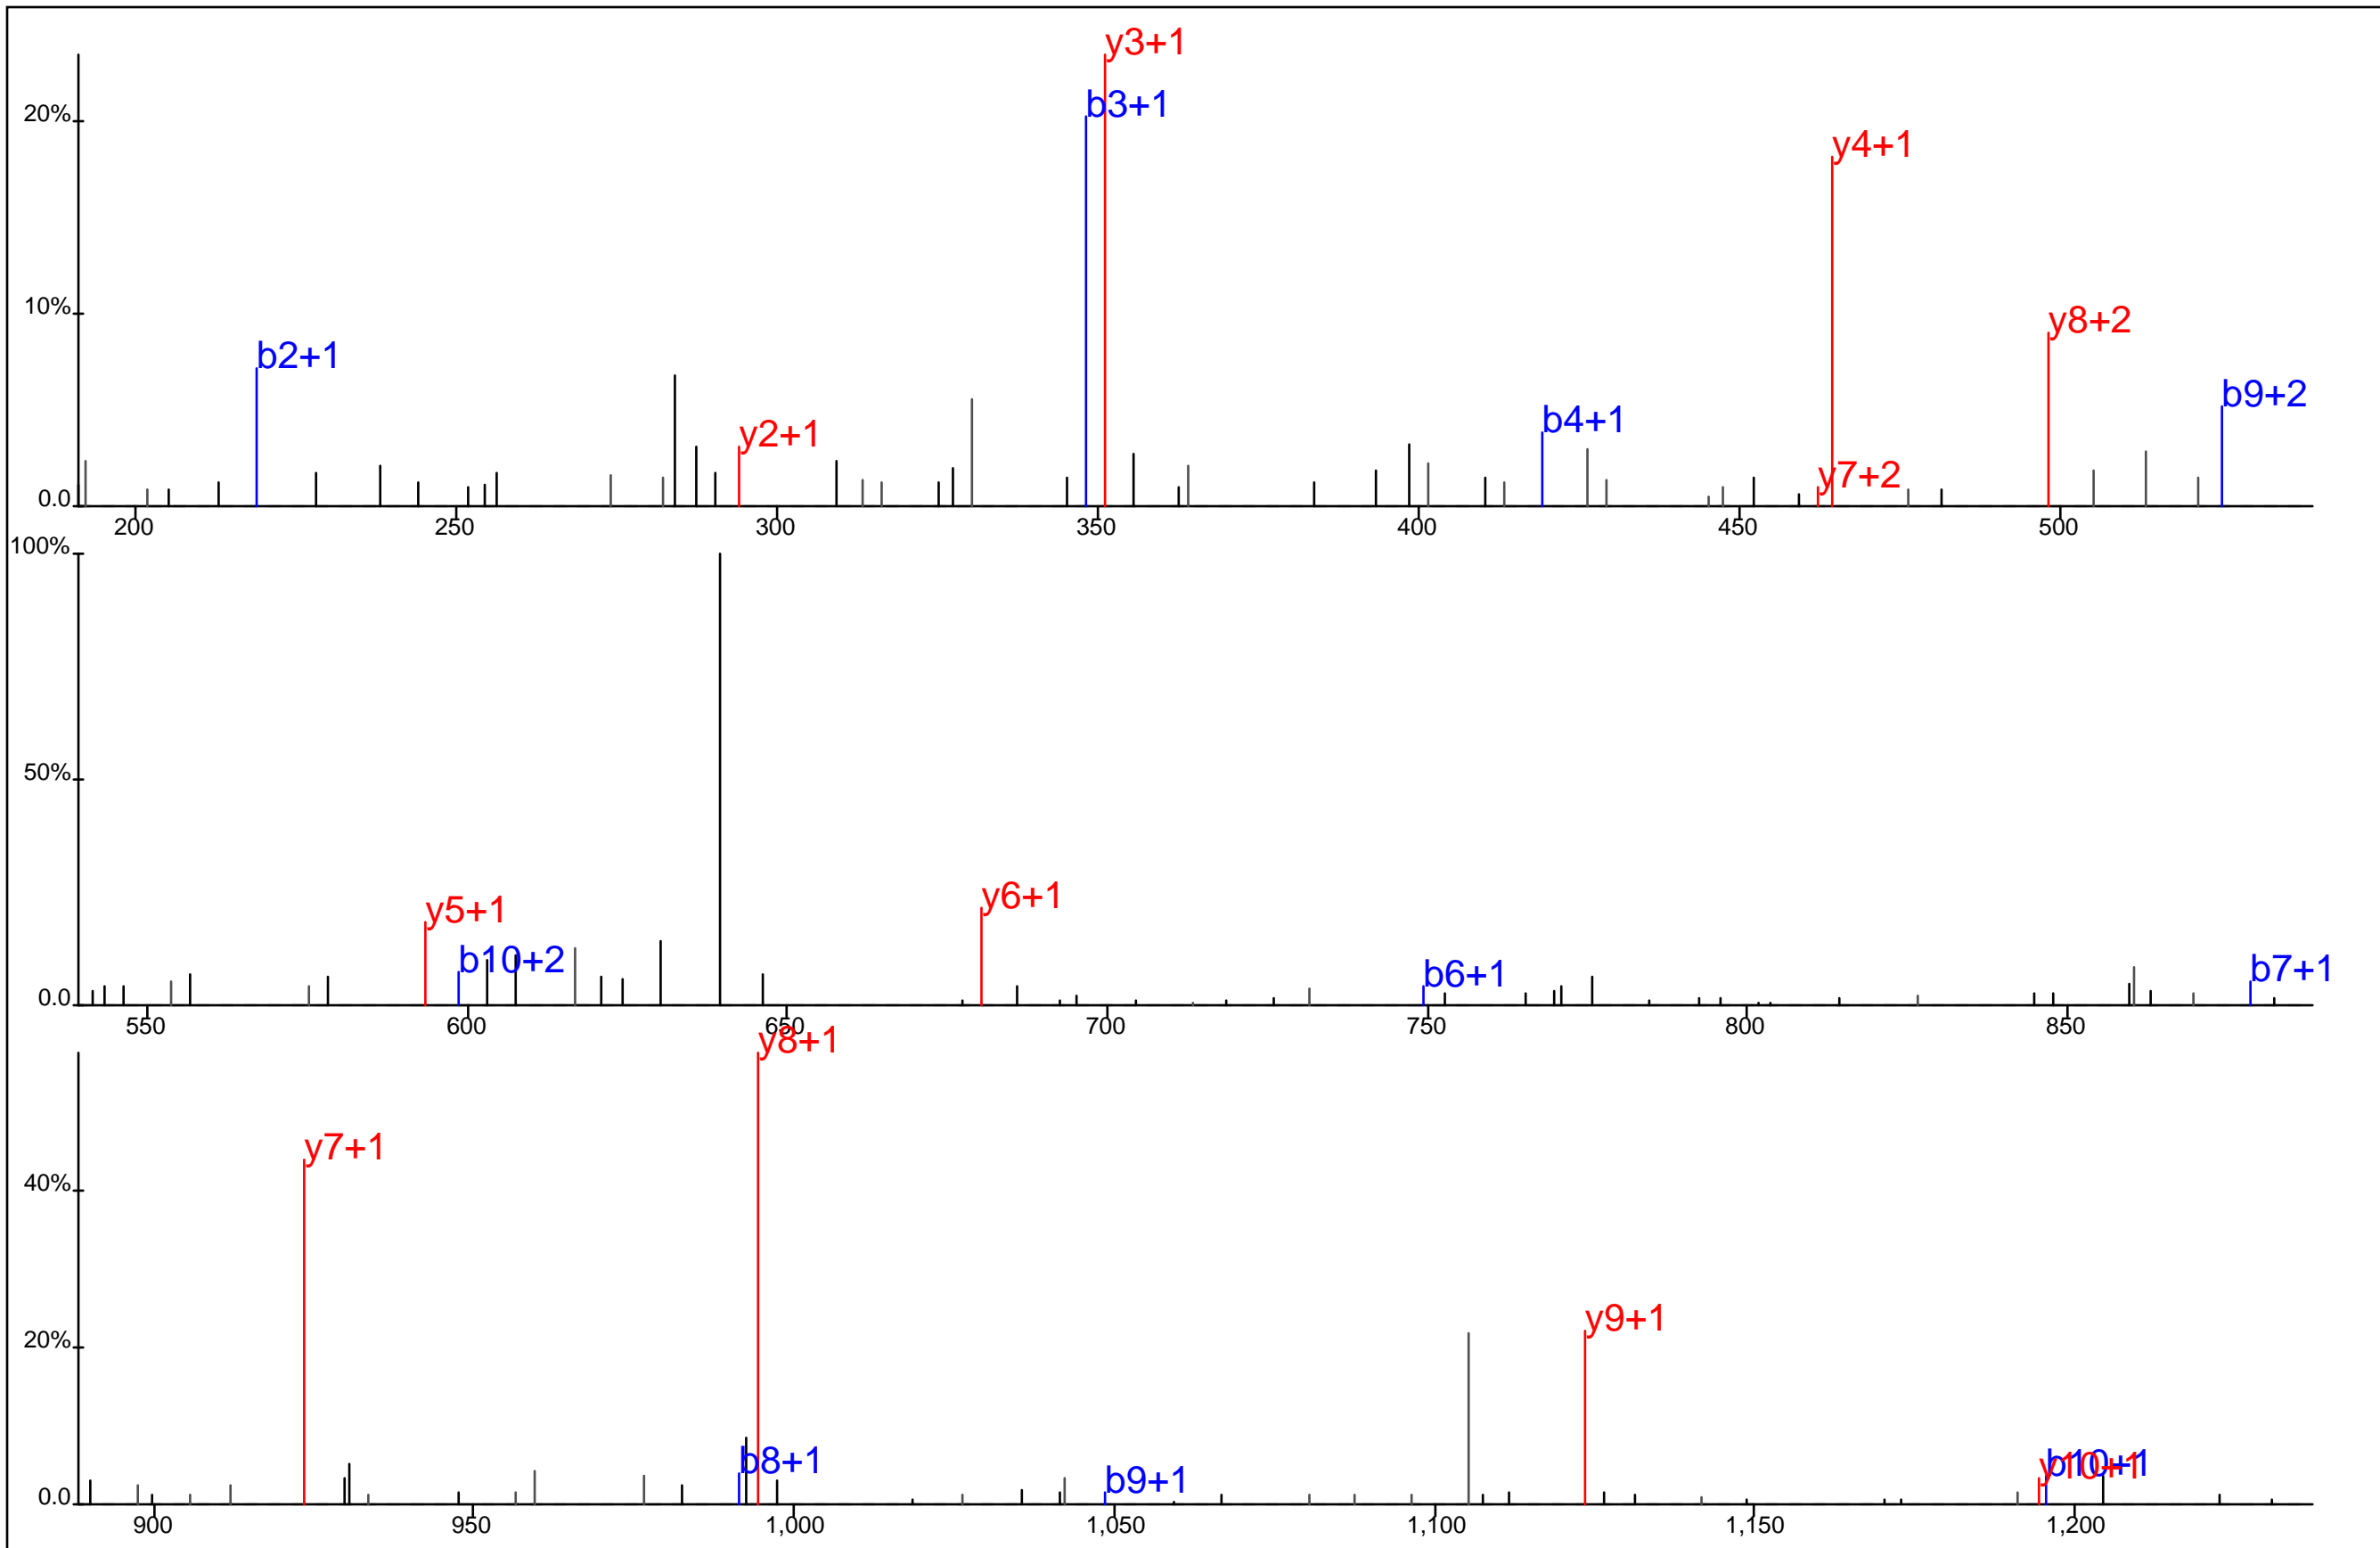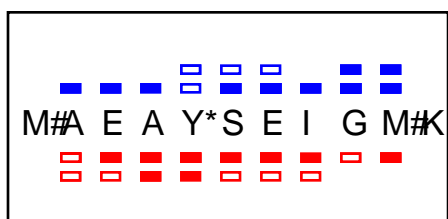

Protein Name: T cell antigen receptor, zeta  
 gi Accession: 0  
 Precursor Mass: 671.2567+2  
 Delta Mass: 3.012 ppm  
 XCorr: 58.39



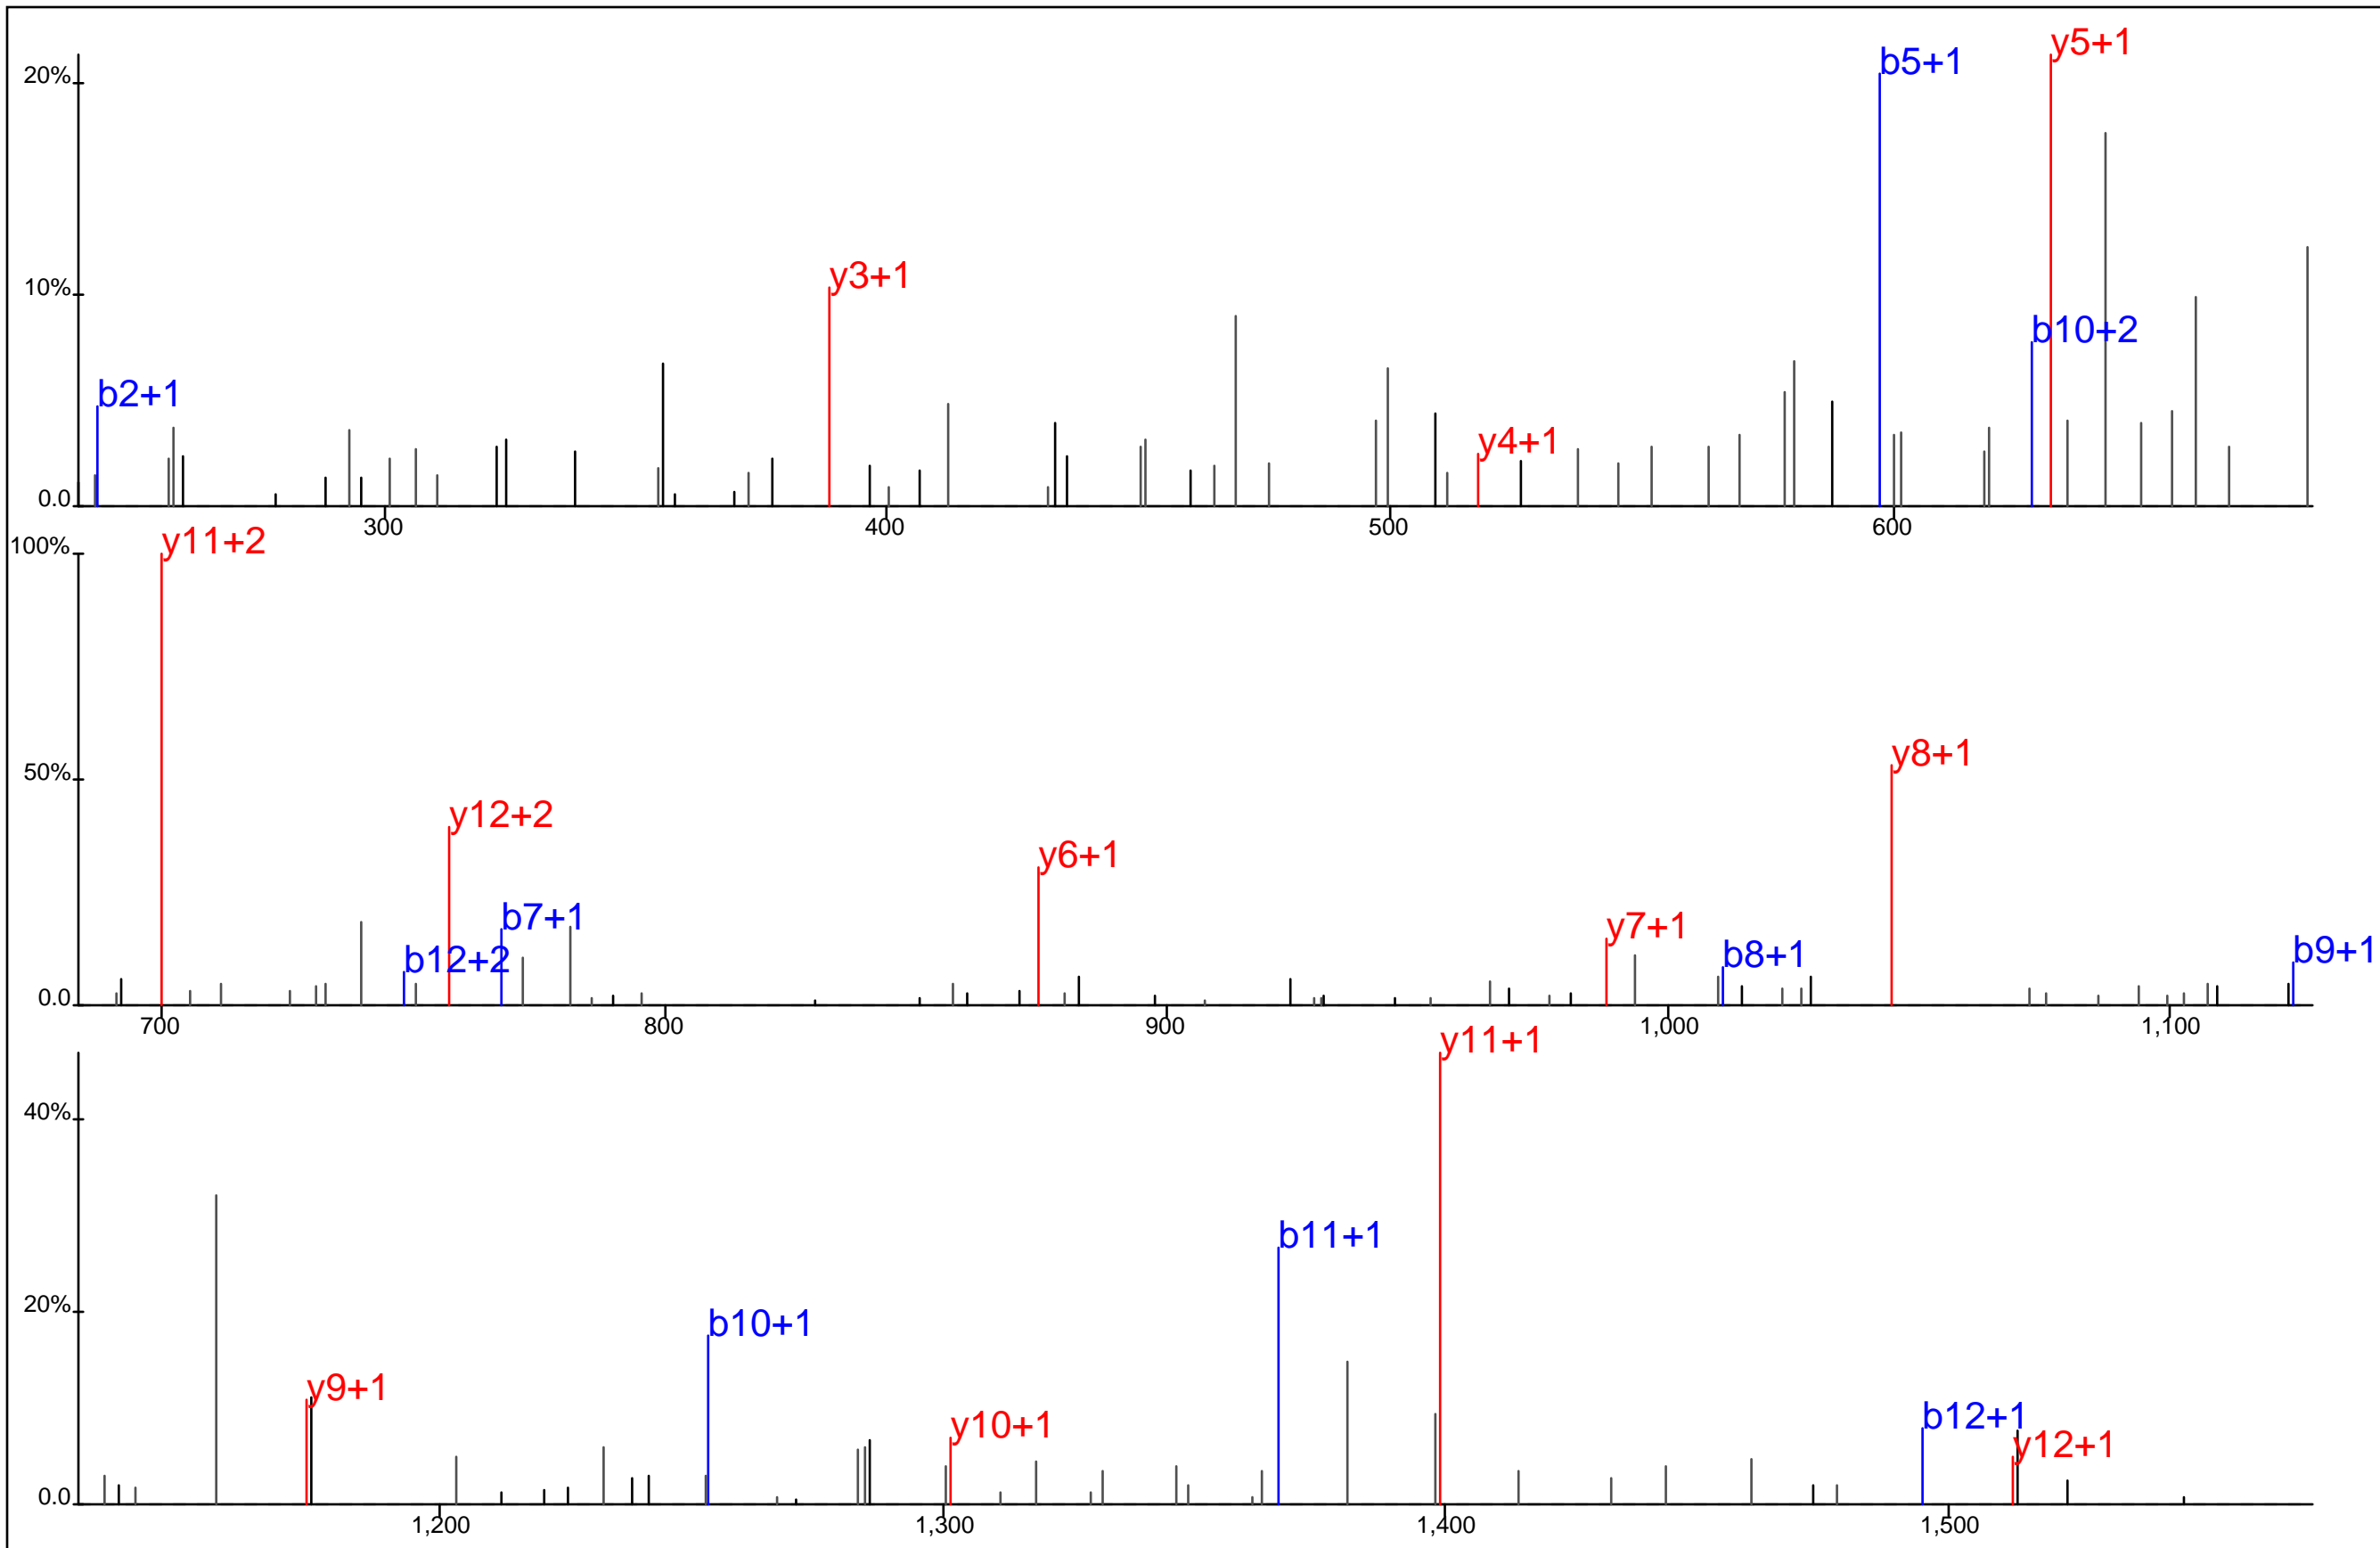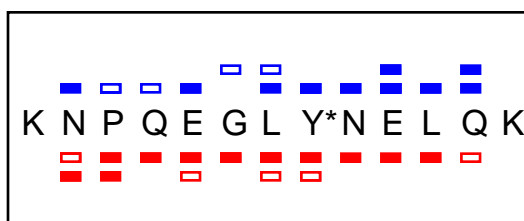

Protein Name: T cell antigen receptor, zeta  
 gi Accession: 0  
 Precursor Mass: 820.8883+2  
 Delta Mass: 0.862 ppm  
 XCorr: 64.63

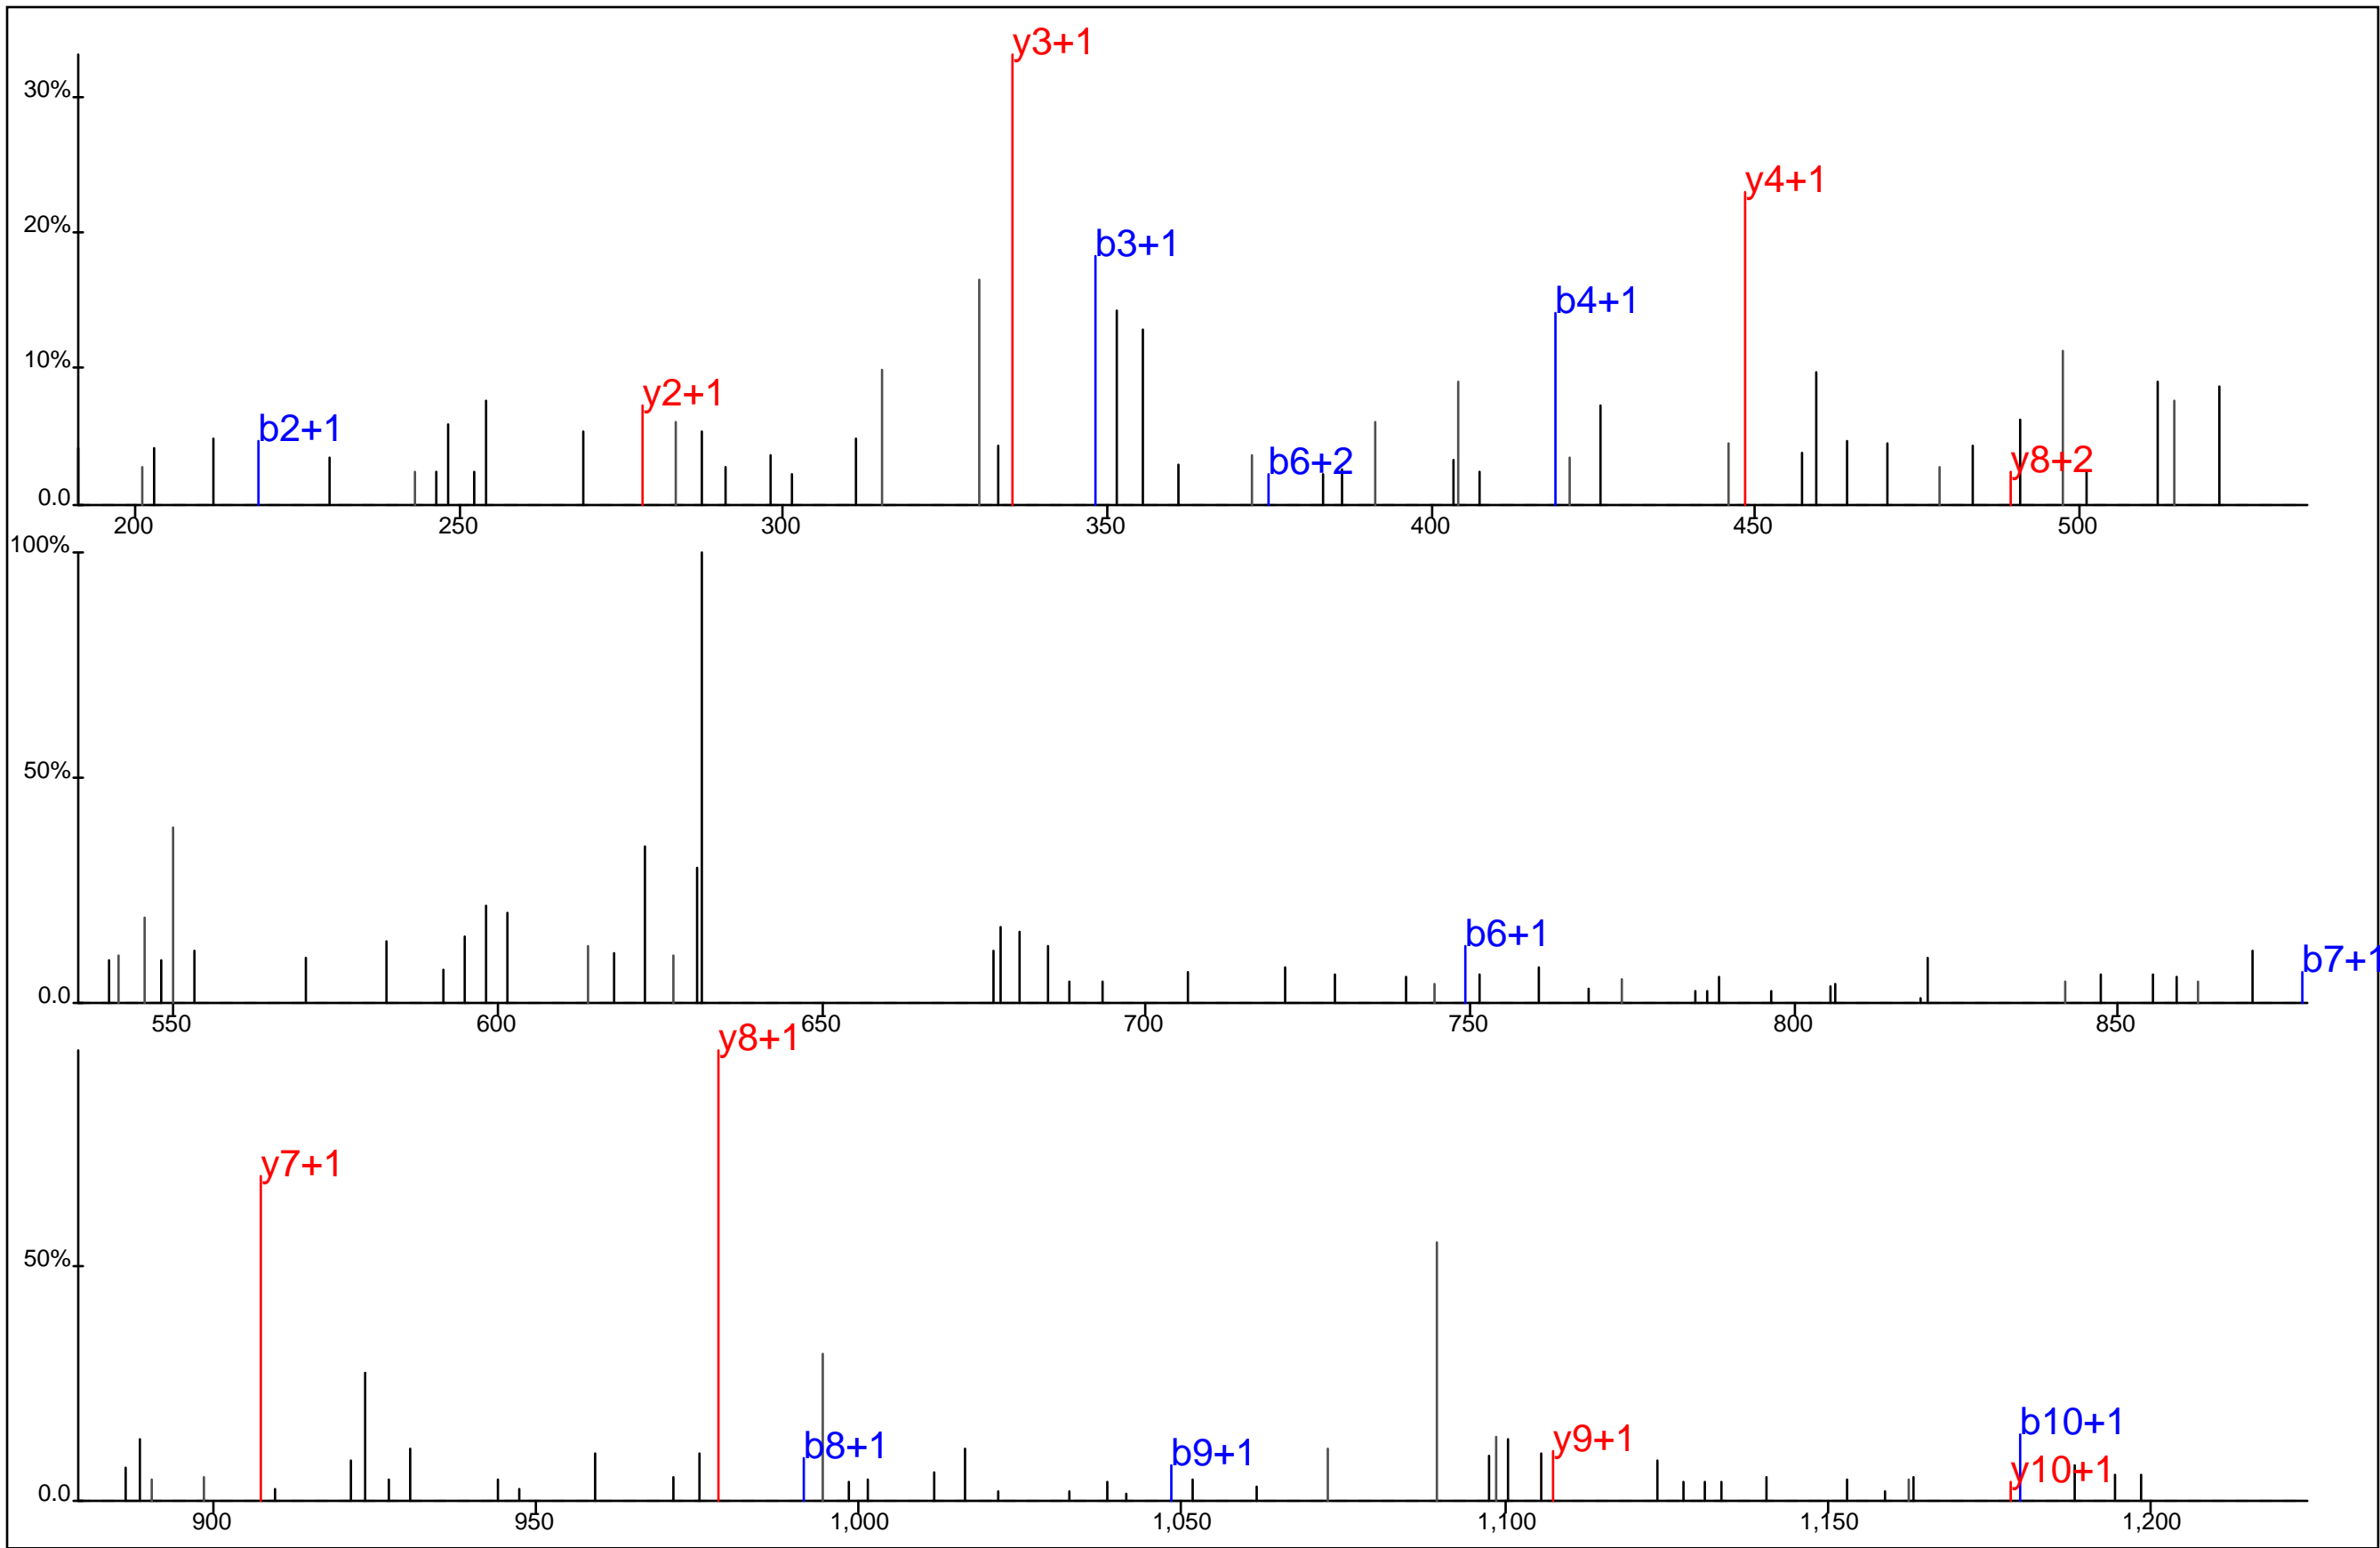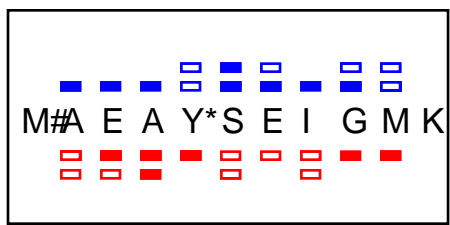

Protein Name: T cell antigen receptor, zeta  
 gi Accession: 0  
 Precursor Mass: 663.2611+2  
 Delta Mass: 0.250 ppm  
 XCorr: 31.26

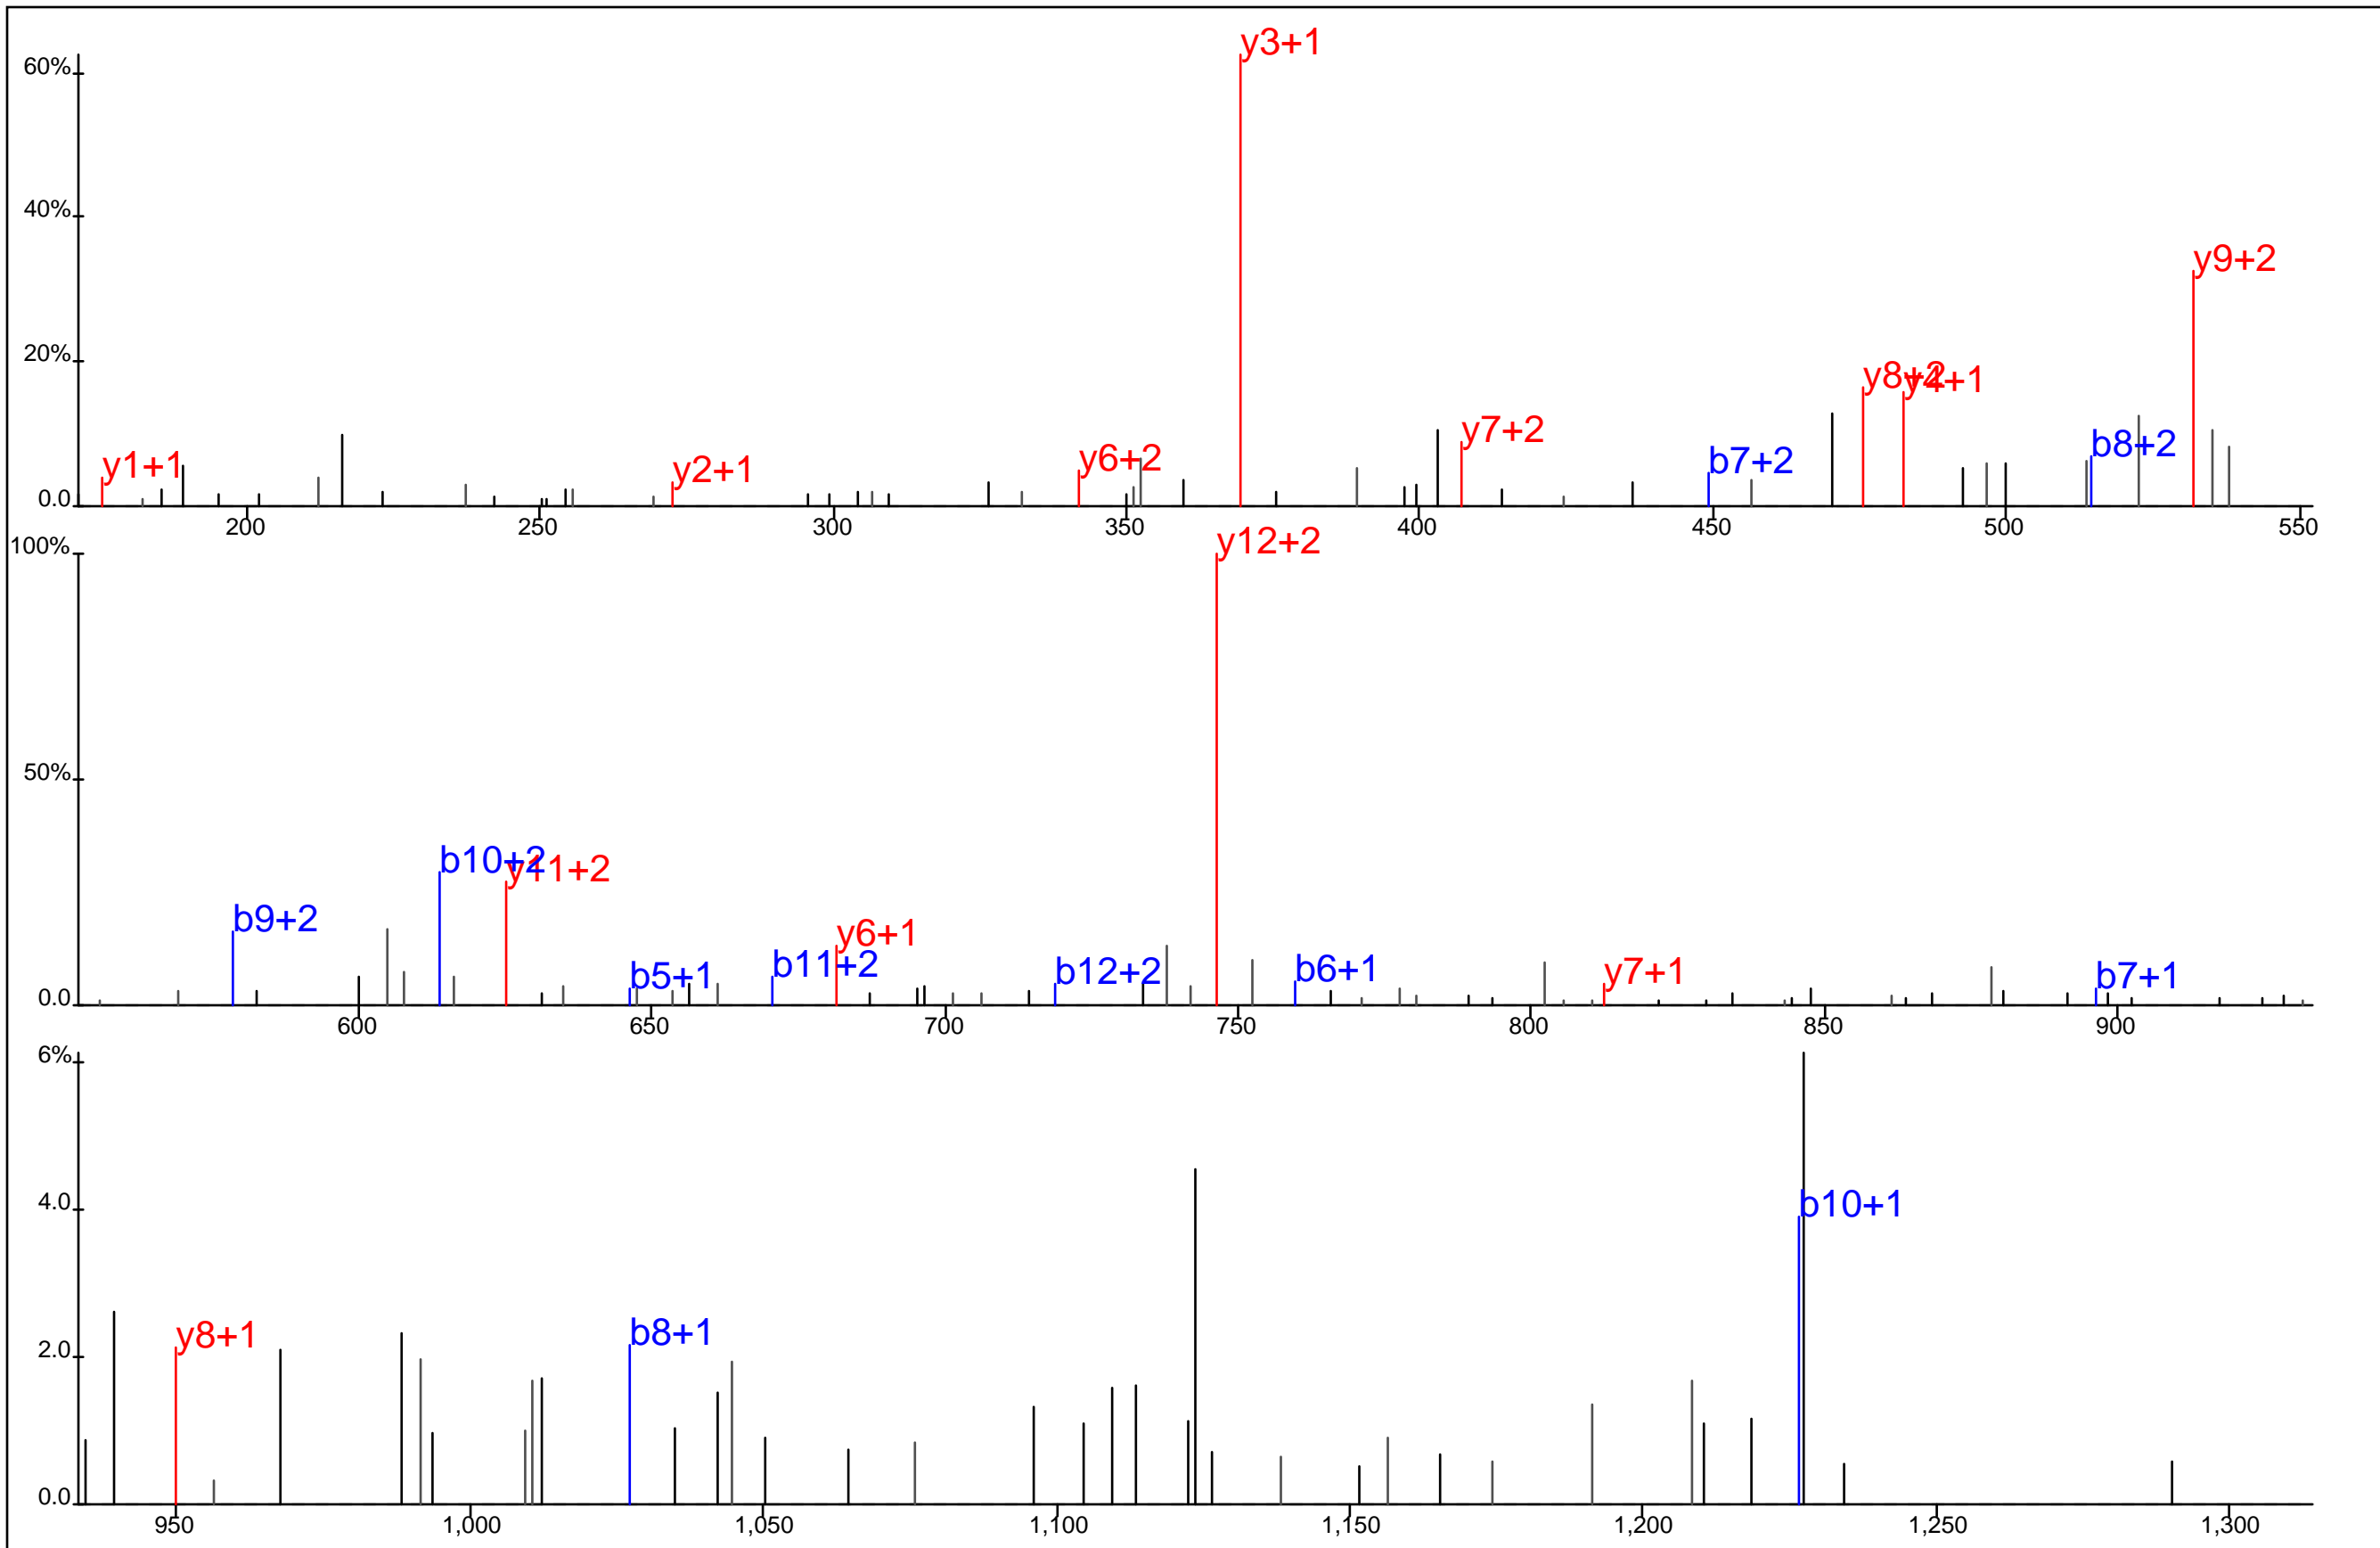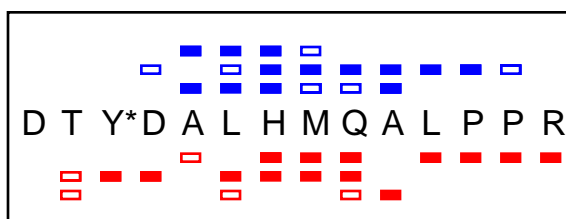

Protein Name: T cell antigen receptor, zeta  
 gi Accession: 0  
 Precursor Mass: 569.9225+3  
 Delta Mass: 1.821 ppm  
 XCorr: 29.66

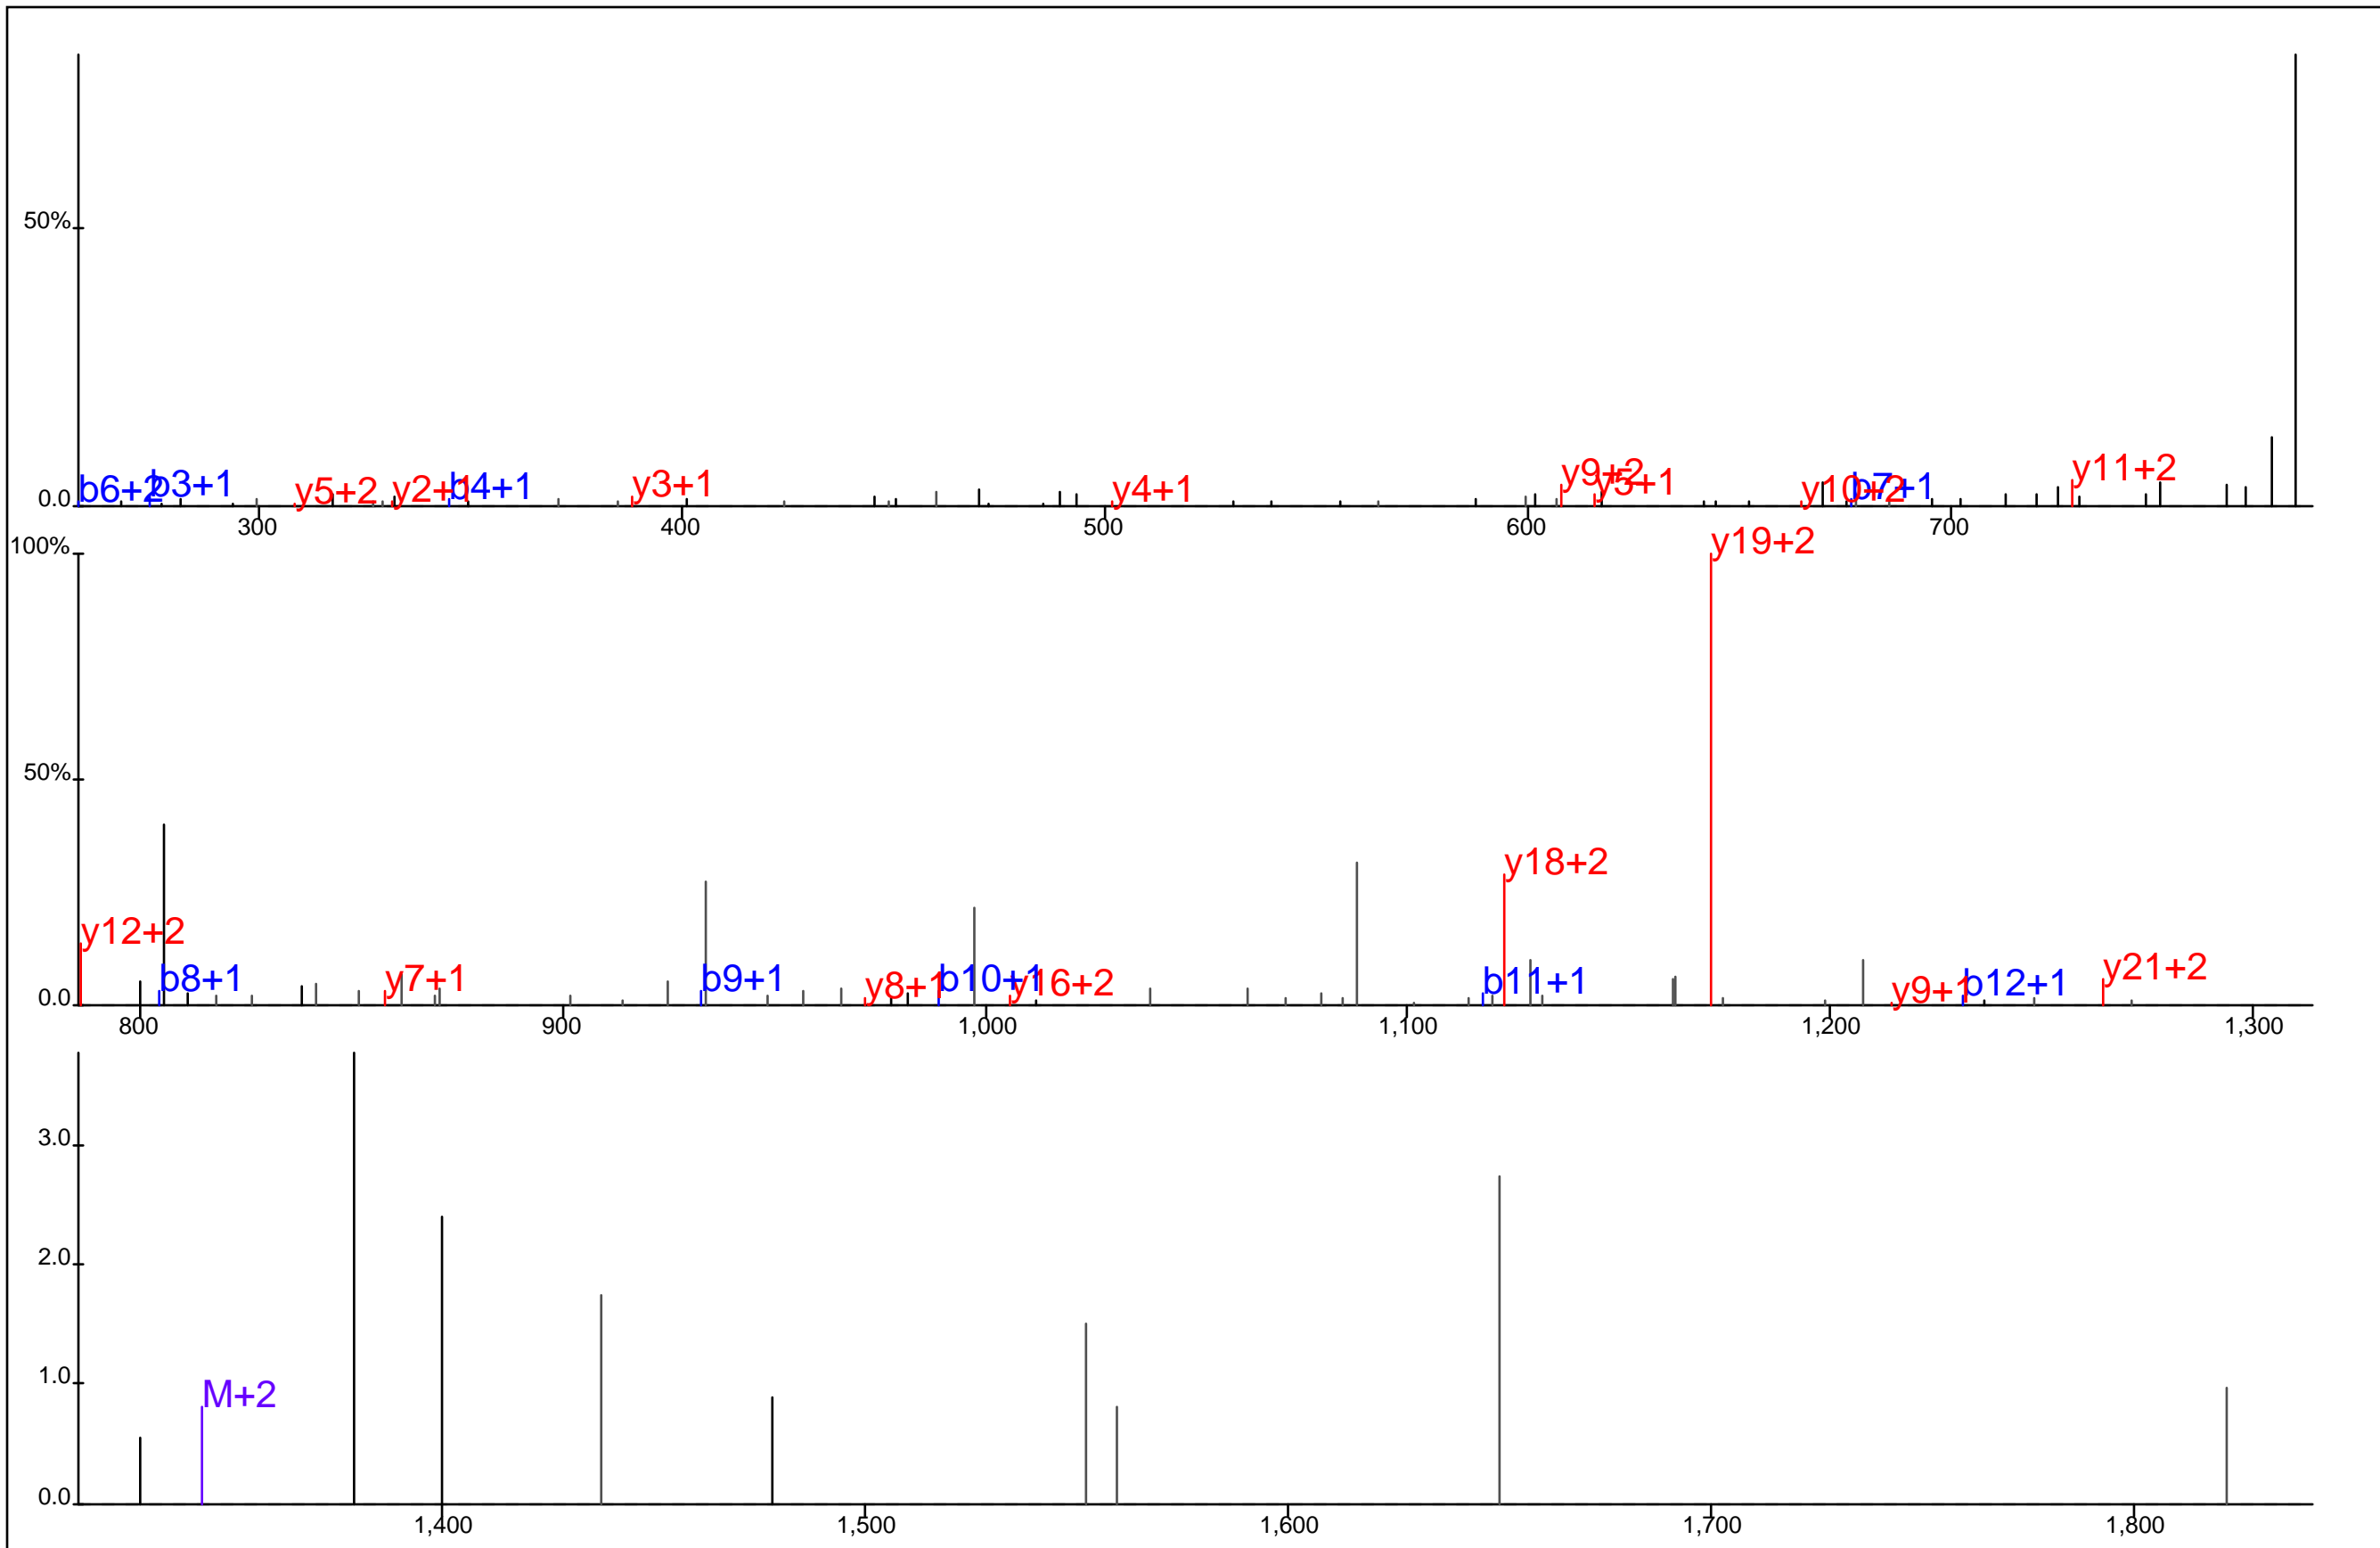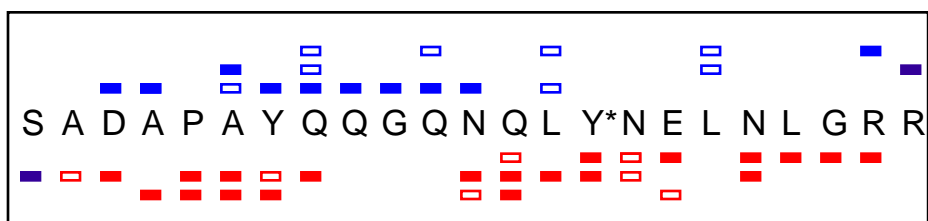

Protein Name: T cell antigen receptor, zeta  
 gi Accession: 0  
 Precursor Mass: 896.0831+3  
 Delta Mass: 0.825 ppm  
 XCorr: 22.82

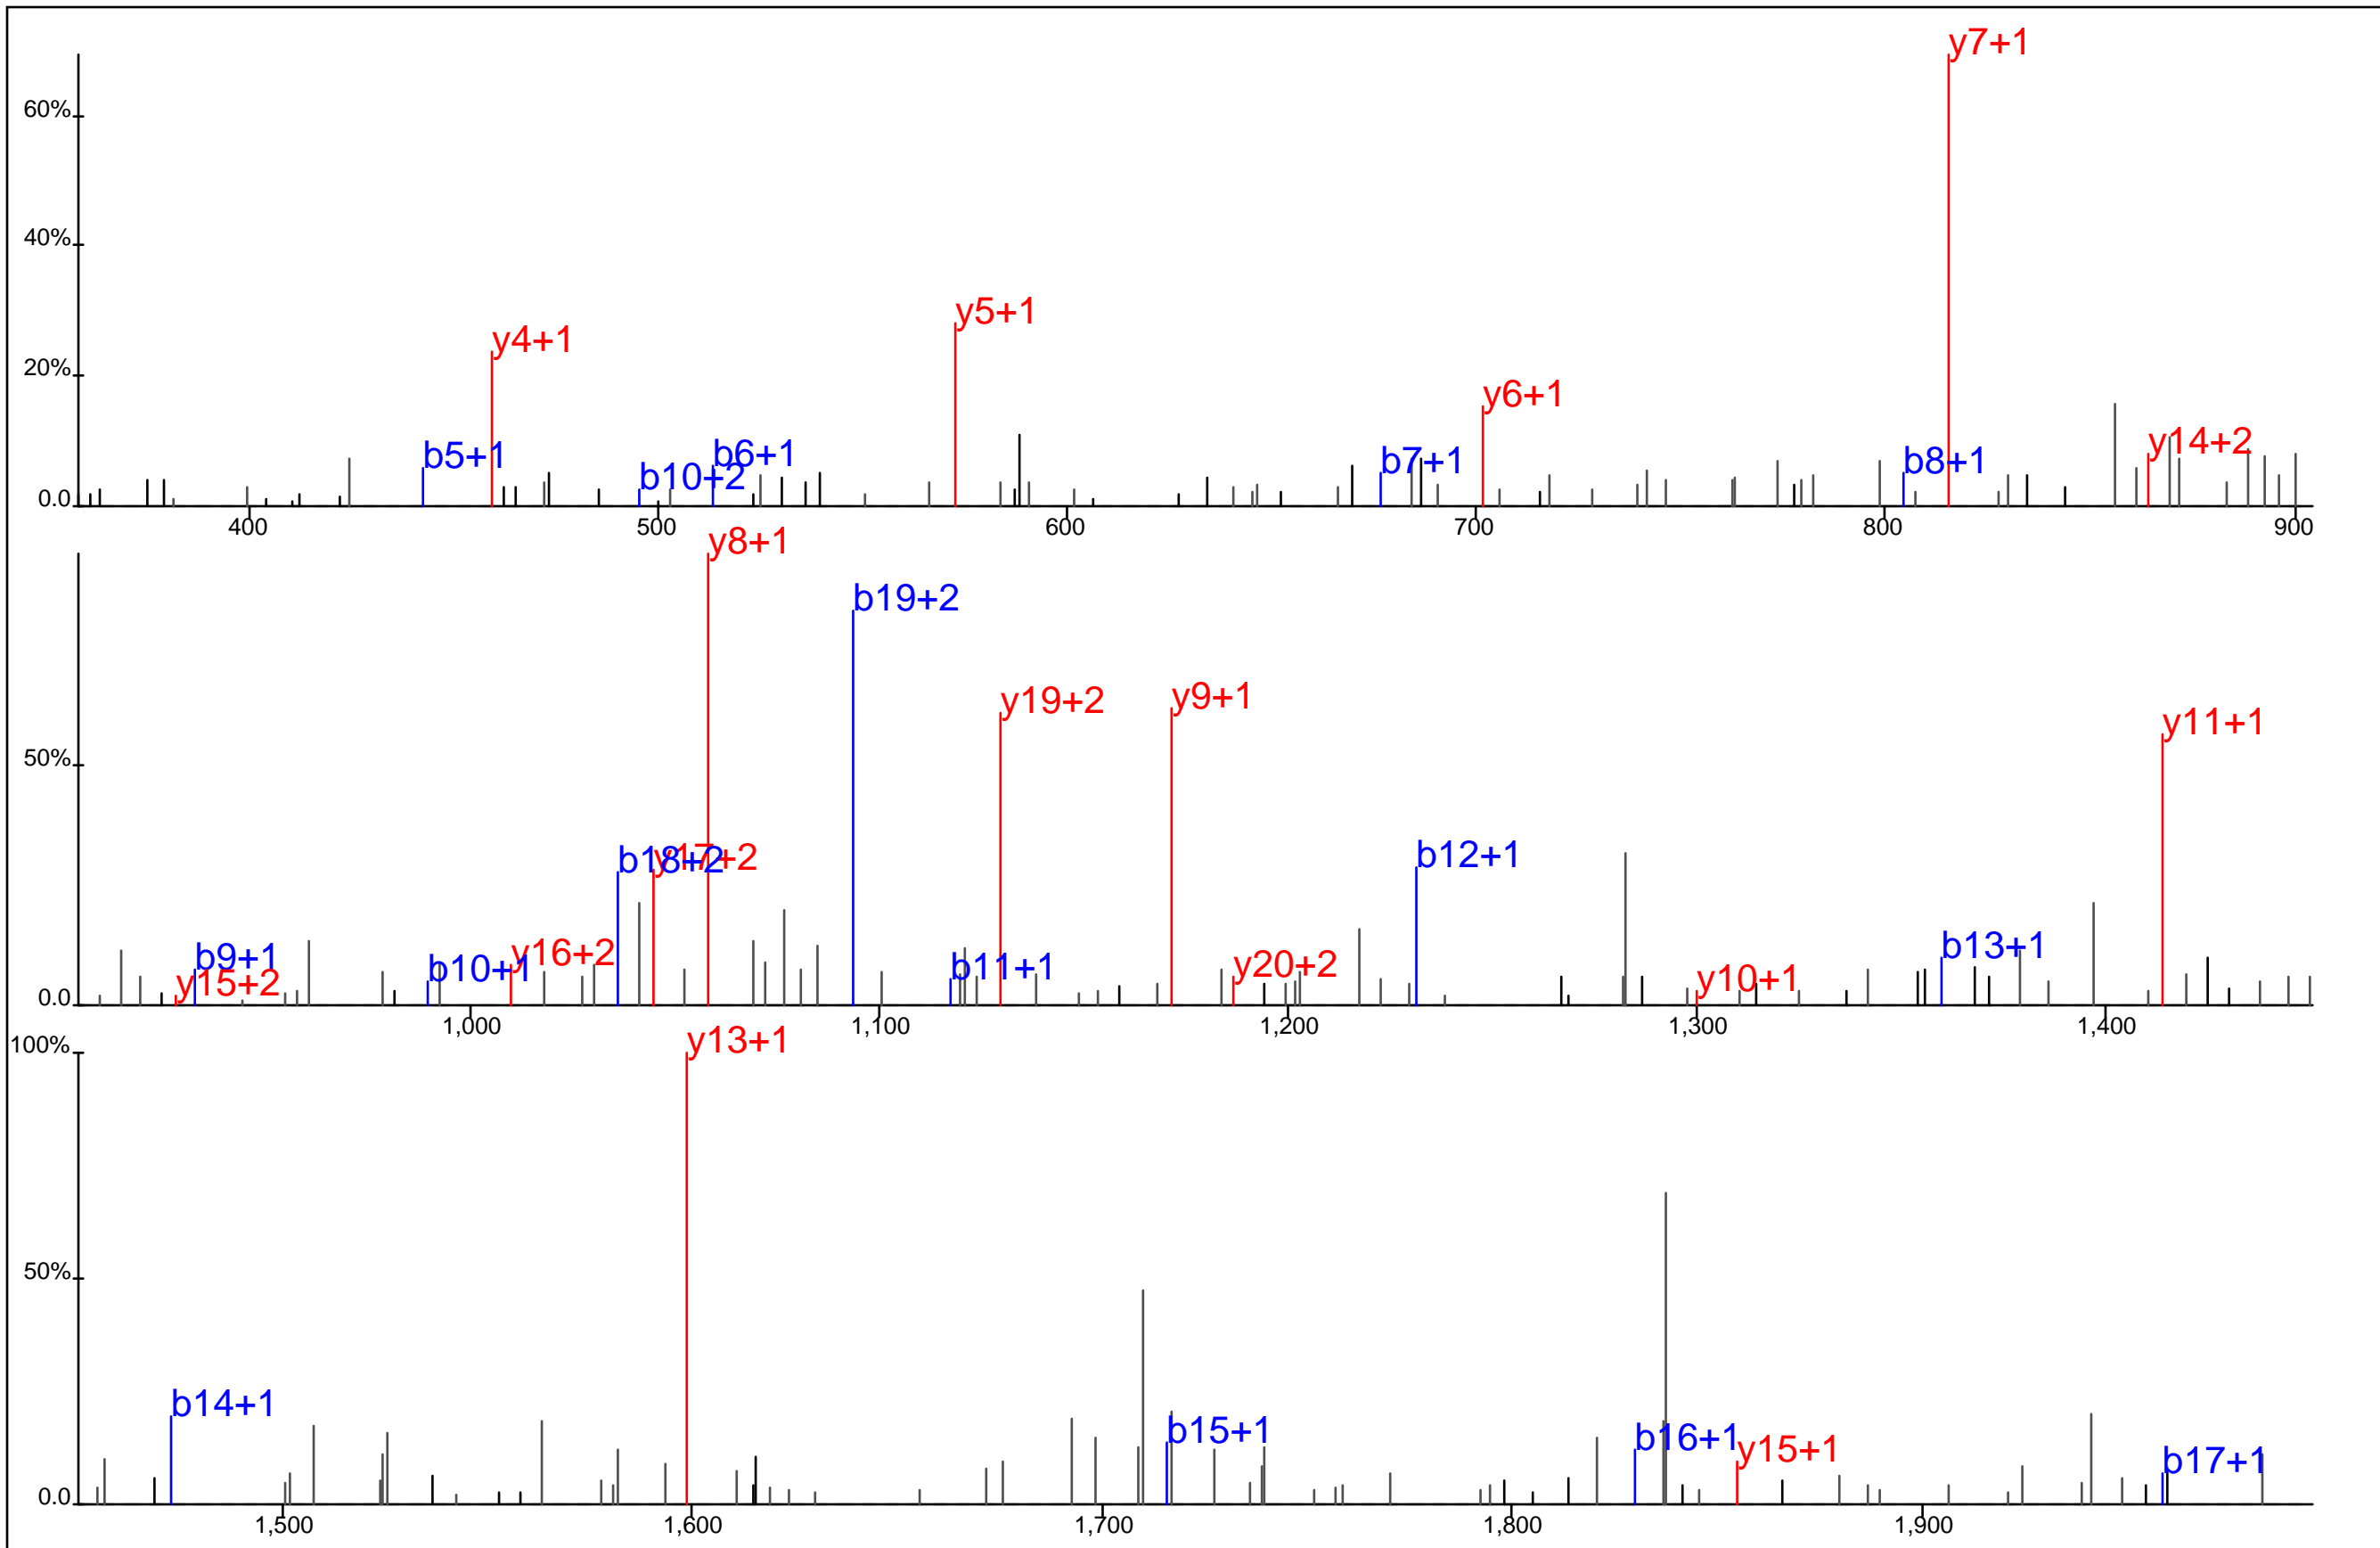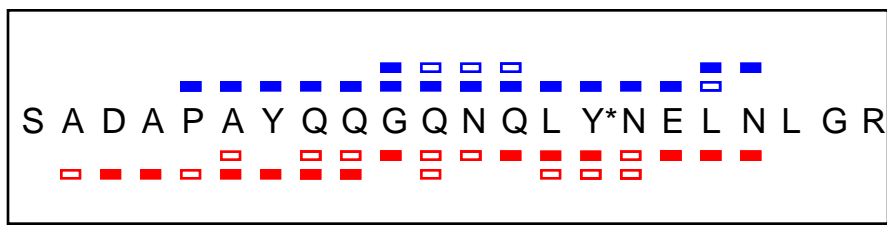

Protein Name: T cell antigen receptor, zeta  
 gi Accession: 0  
 Precursor Mass: 1,265.5710+2  
 Delta Mass: 0.379 ppm  
 XCorr: 50.96



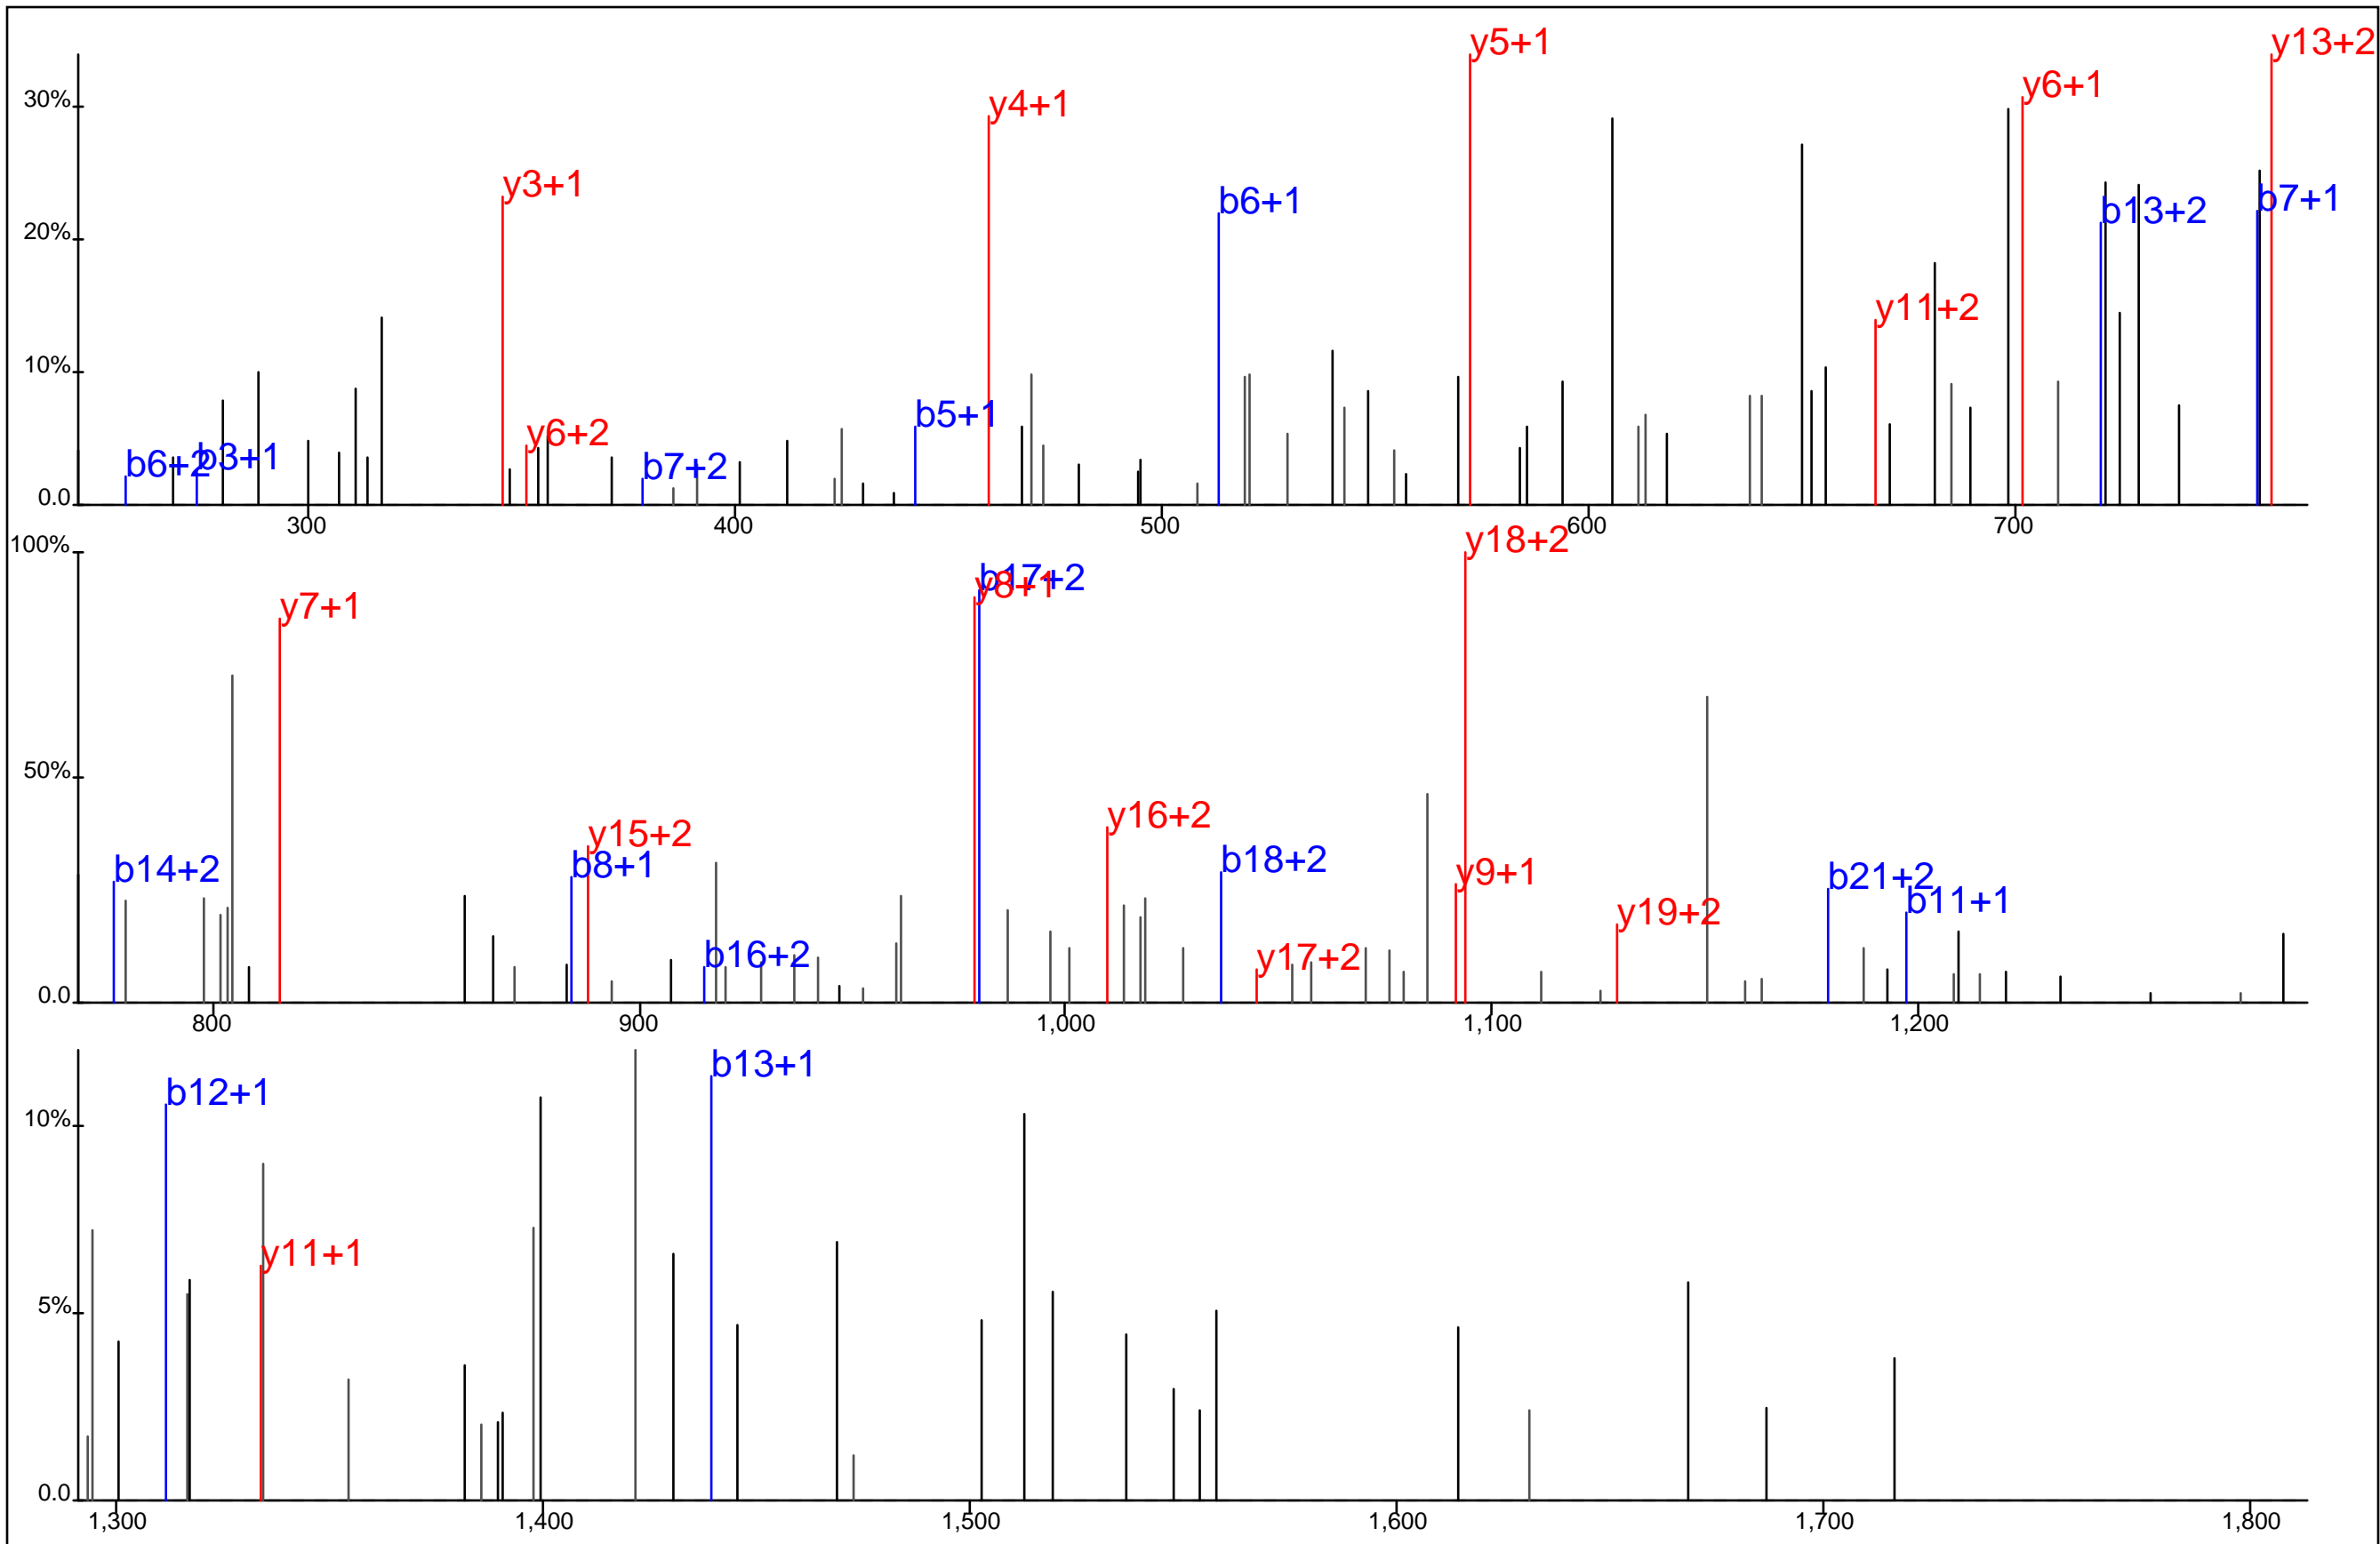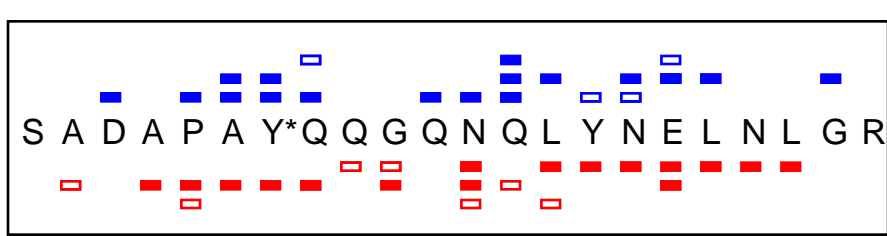

Protein Name: T cell antigen receptor, zeta  
 gi Accession: 0  
 Precursor Mass: 844.0502+3  
 Delta Mass: 0.147 ppm  
 XCorr: 36.03

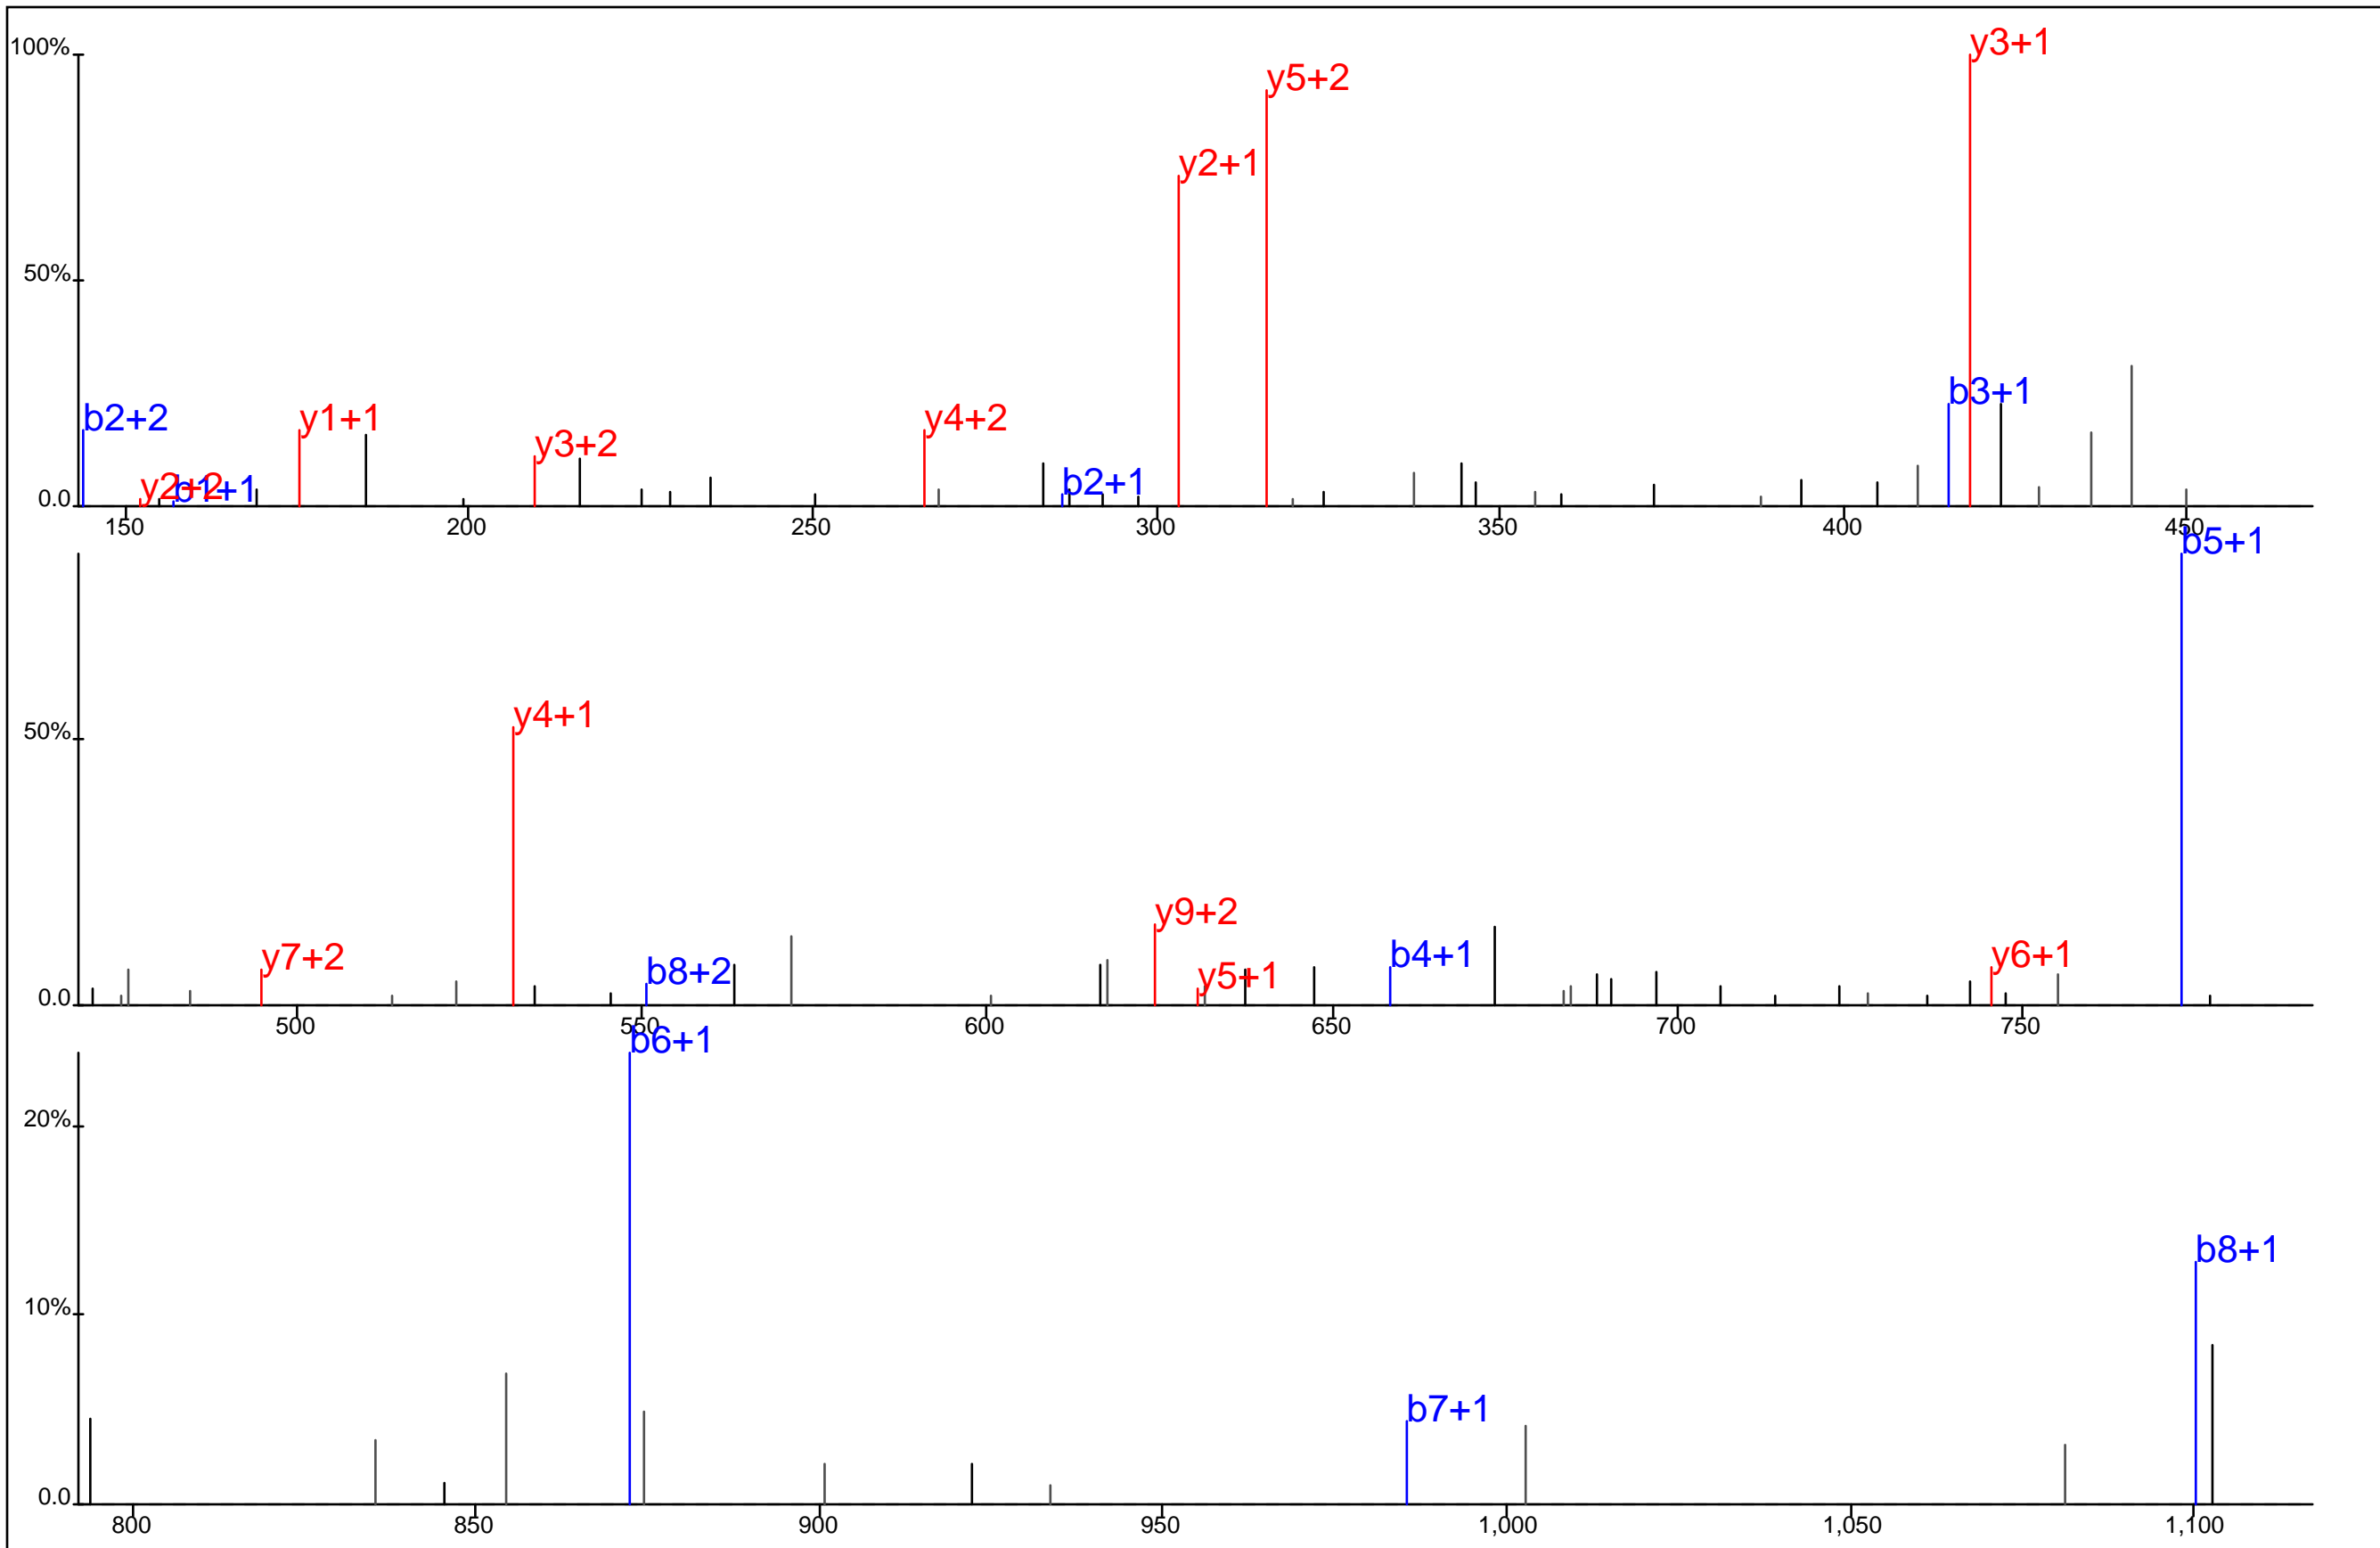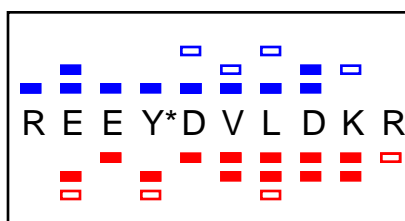

Protein Name: T cell antigen receptor, zeta  
 gi Accession: 0  
 Precursor Mass: 468.2169+3  
 Delta Mass: 0.066 ppm  
 XCorr: 41.99

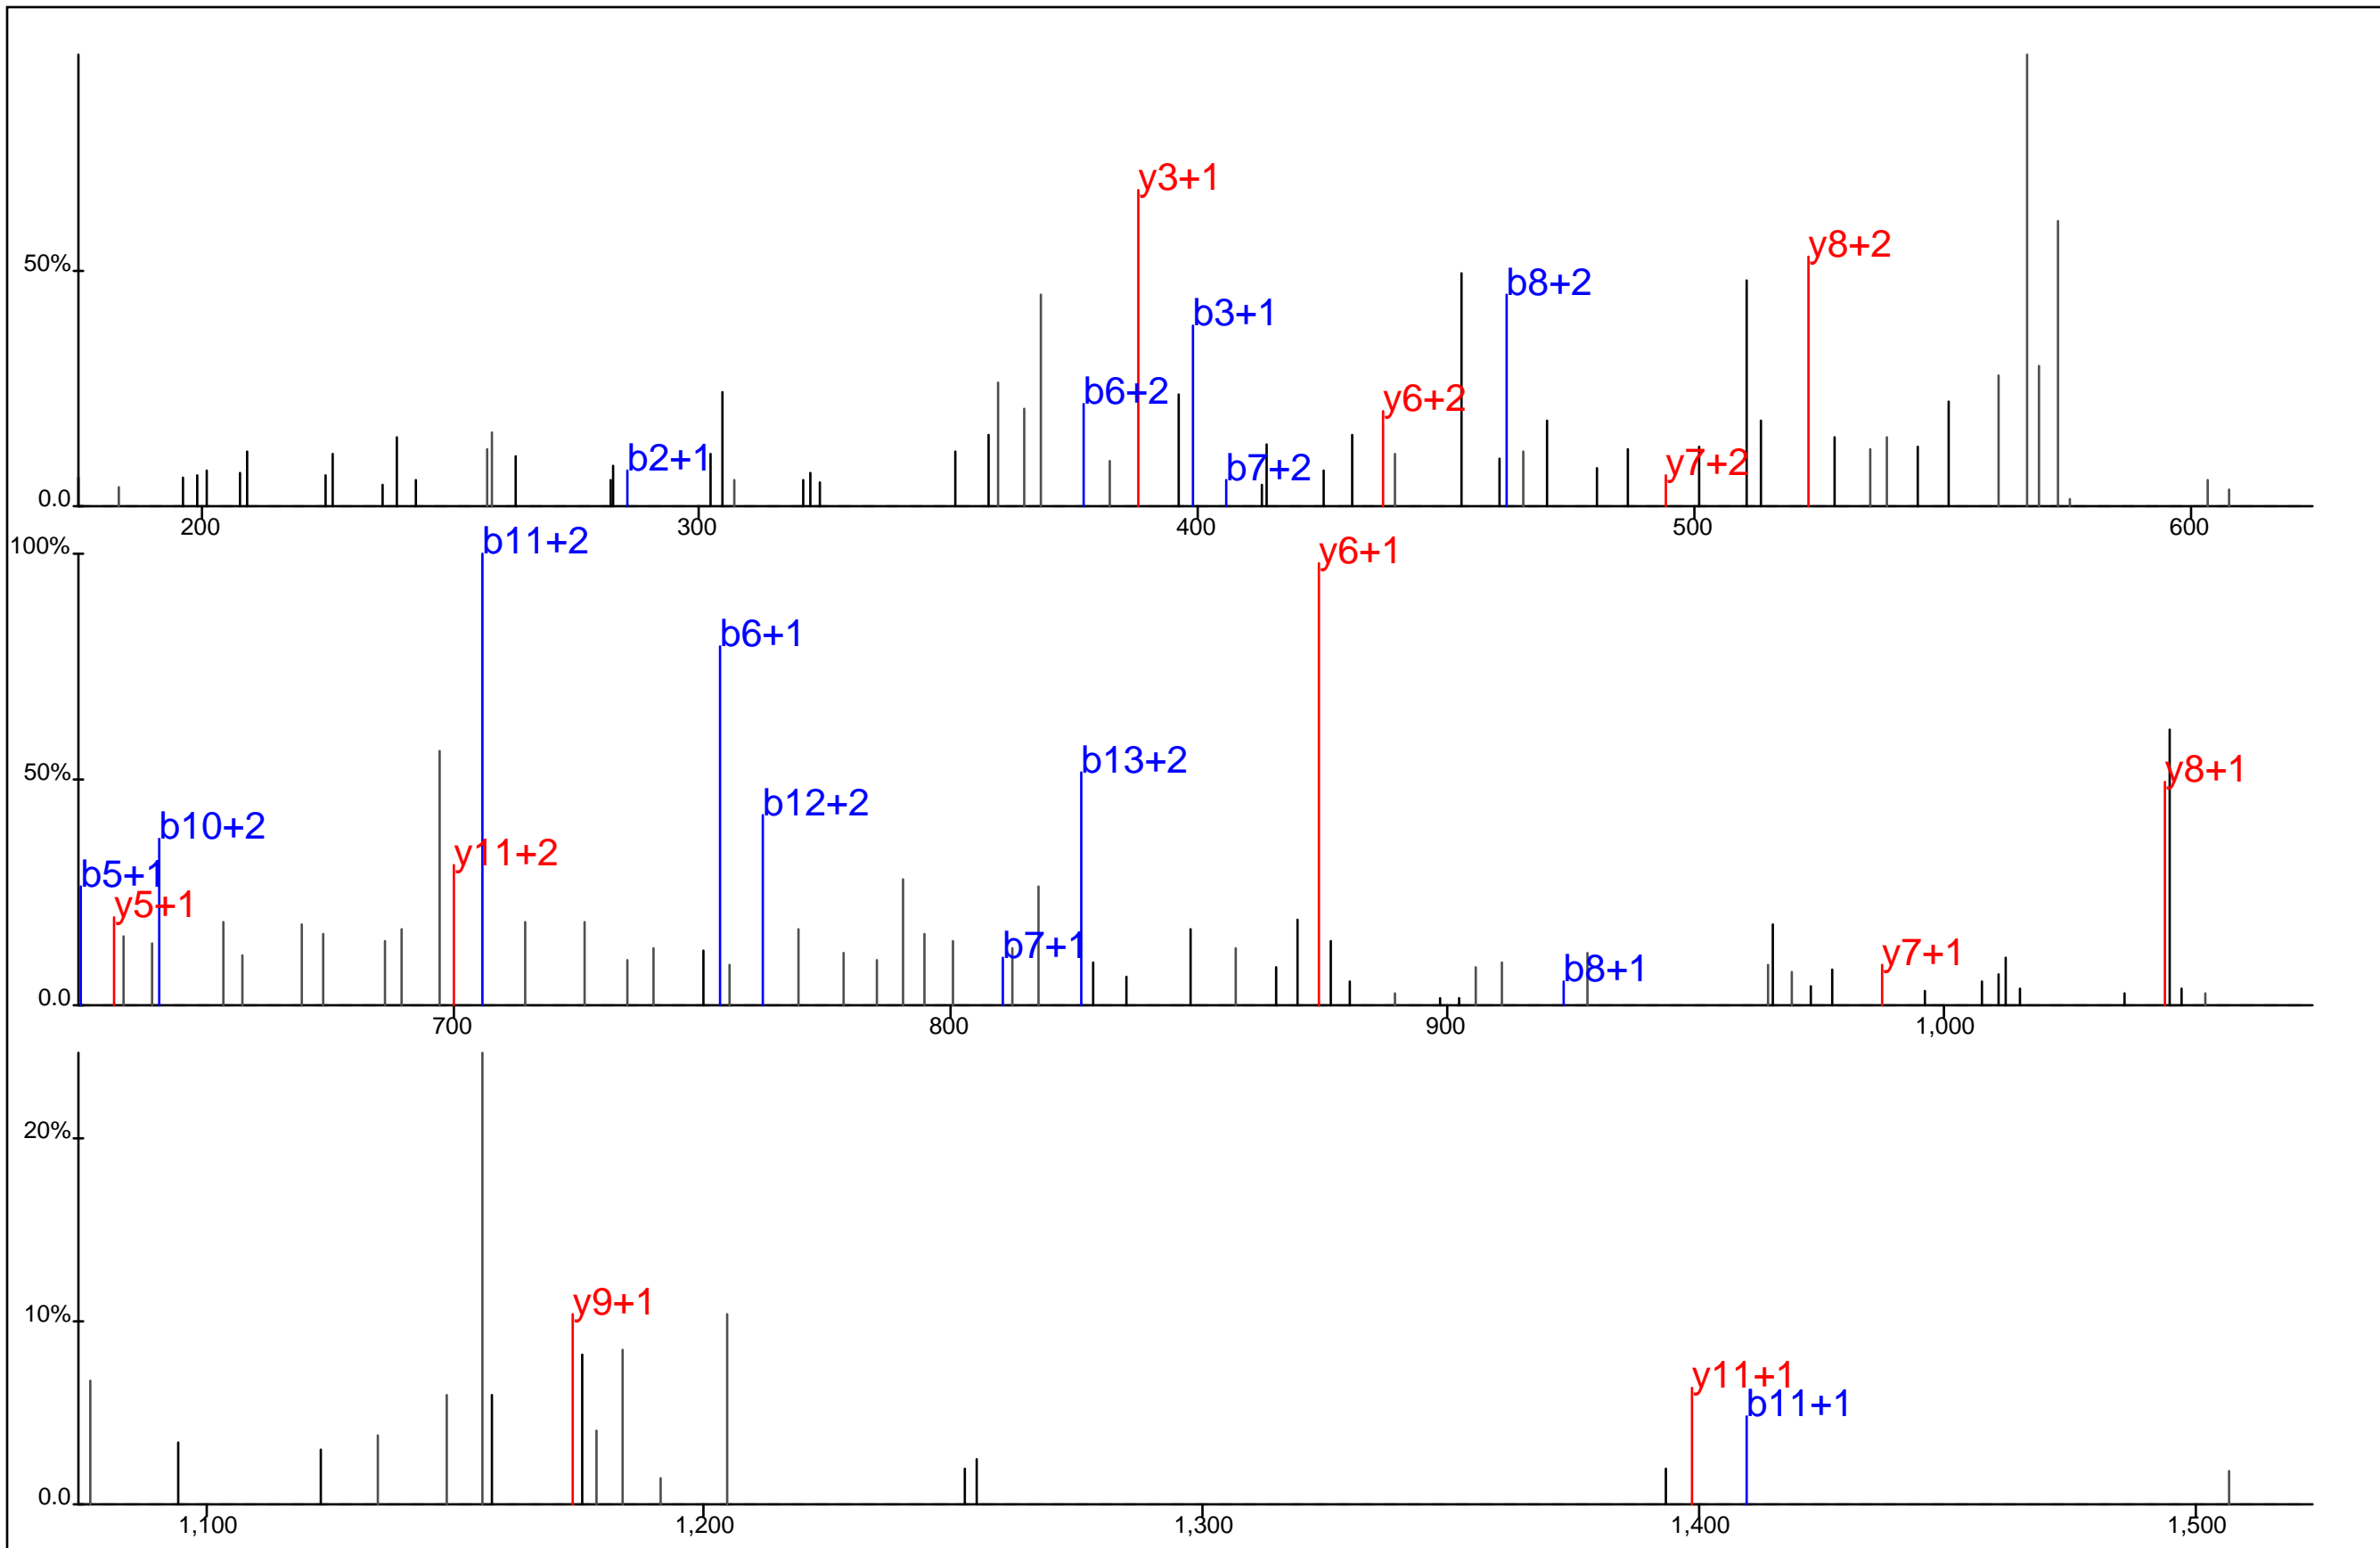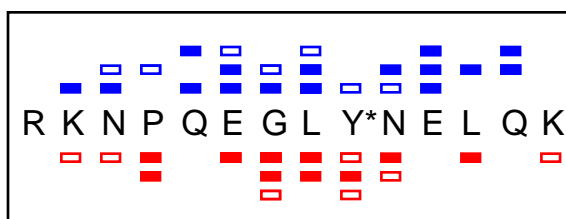

Protein Name: T cell antigen receptor, zeta  
 gi Accession: 0  
 Precursor Mass: 599.6273+3  
 Delta Mass: 1.007 ppm  
 XCorr: 31.67

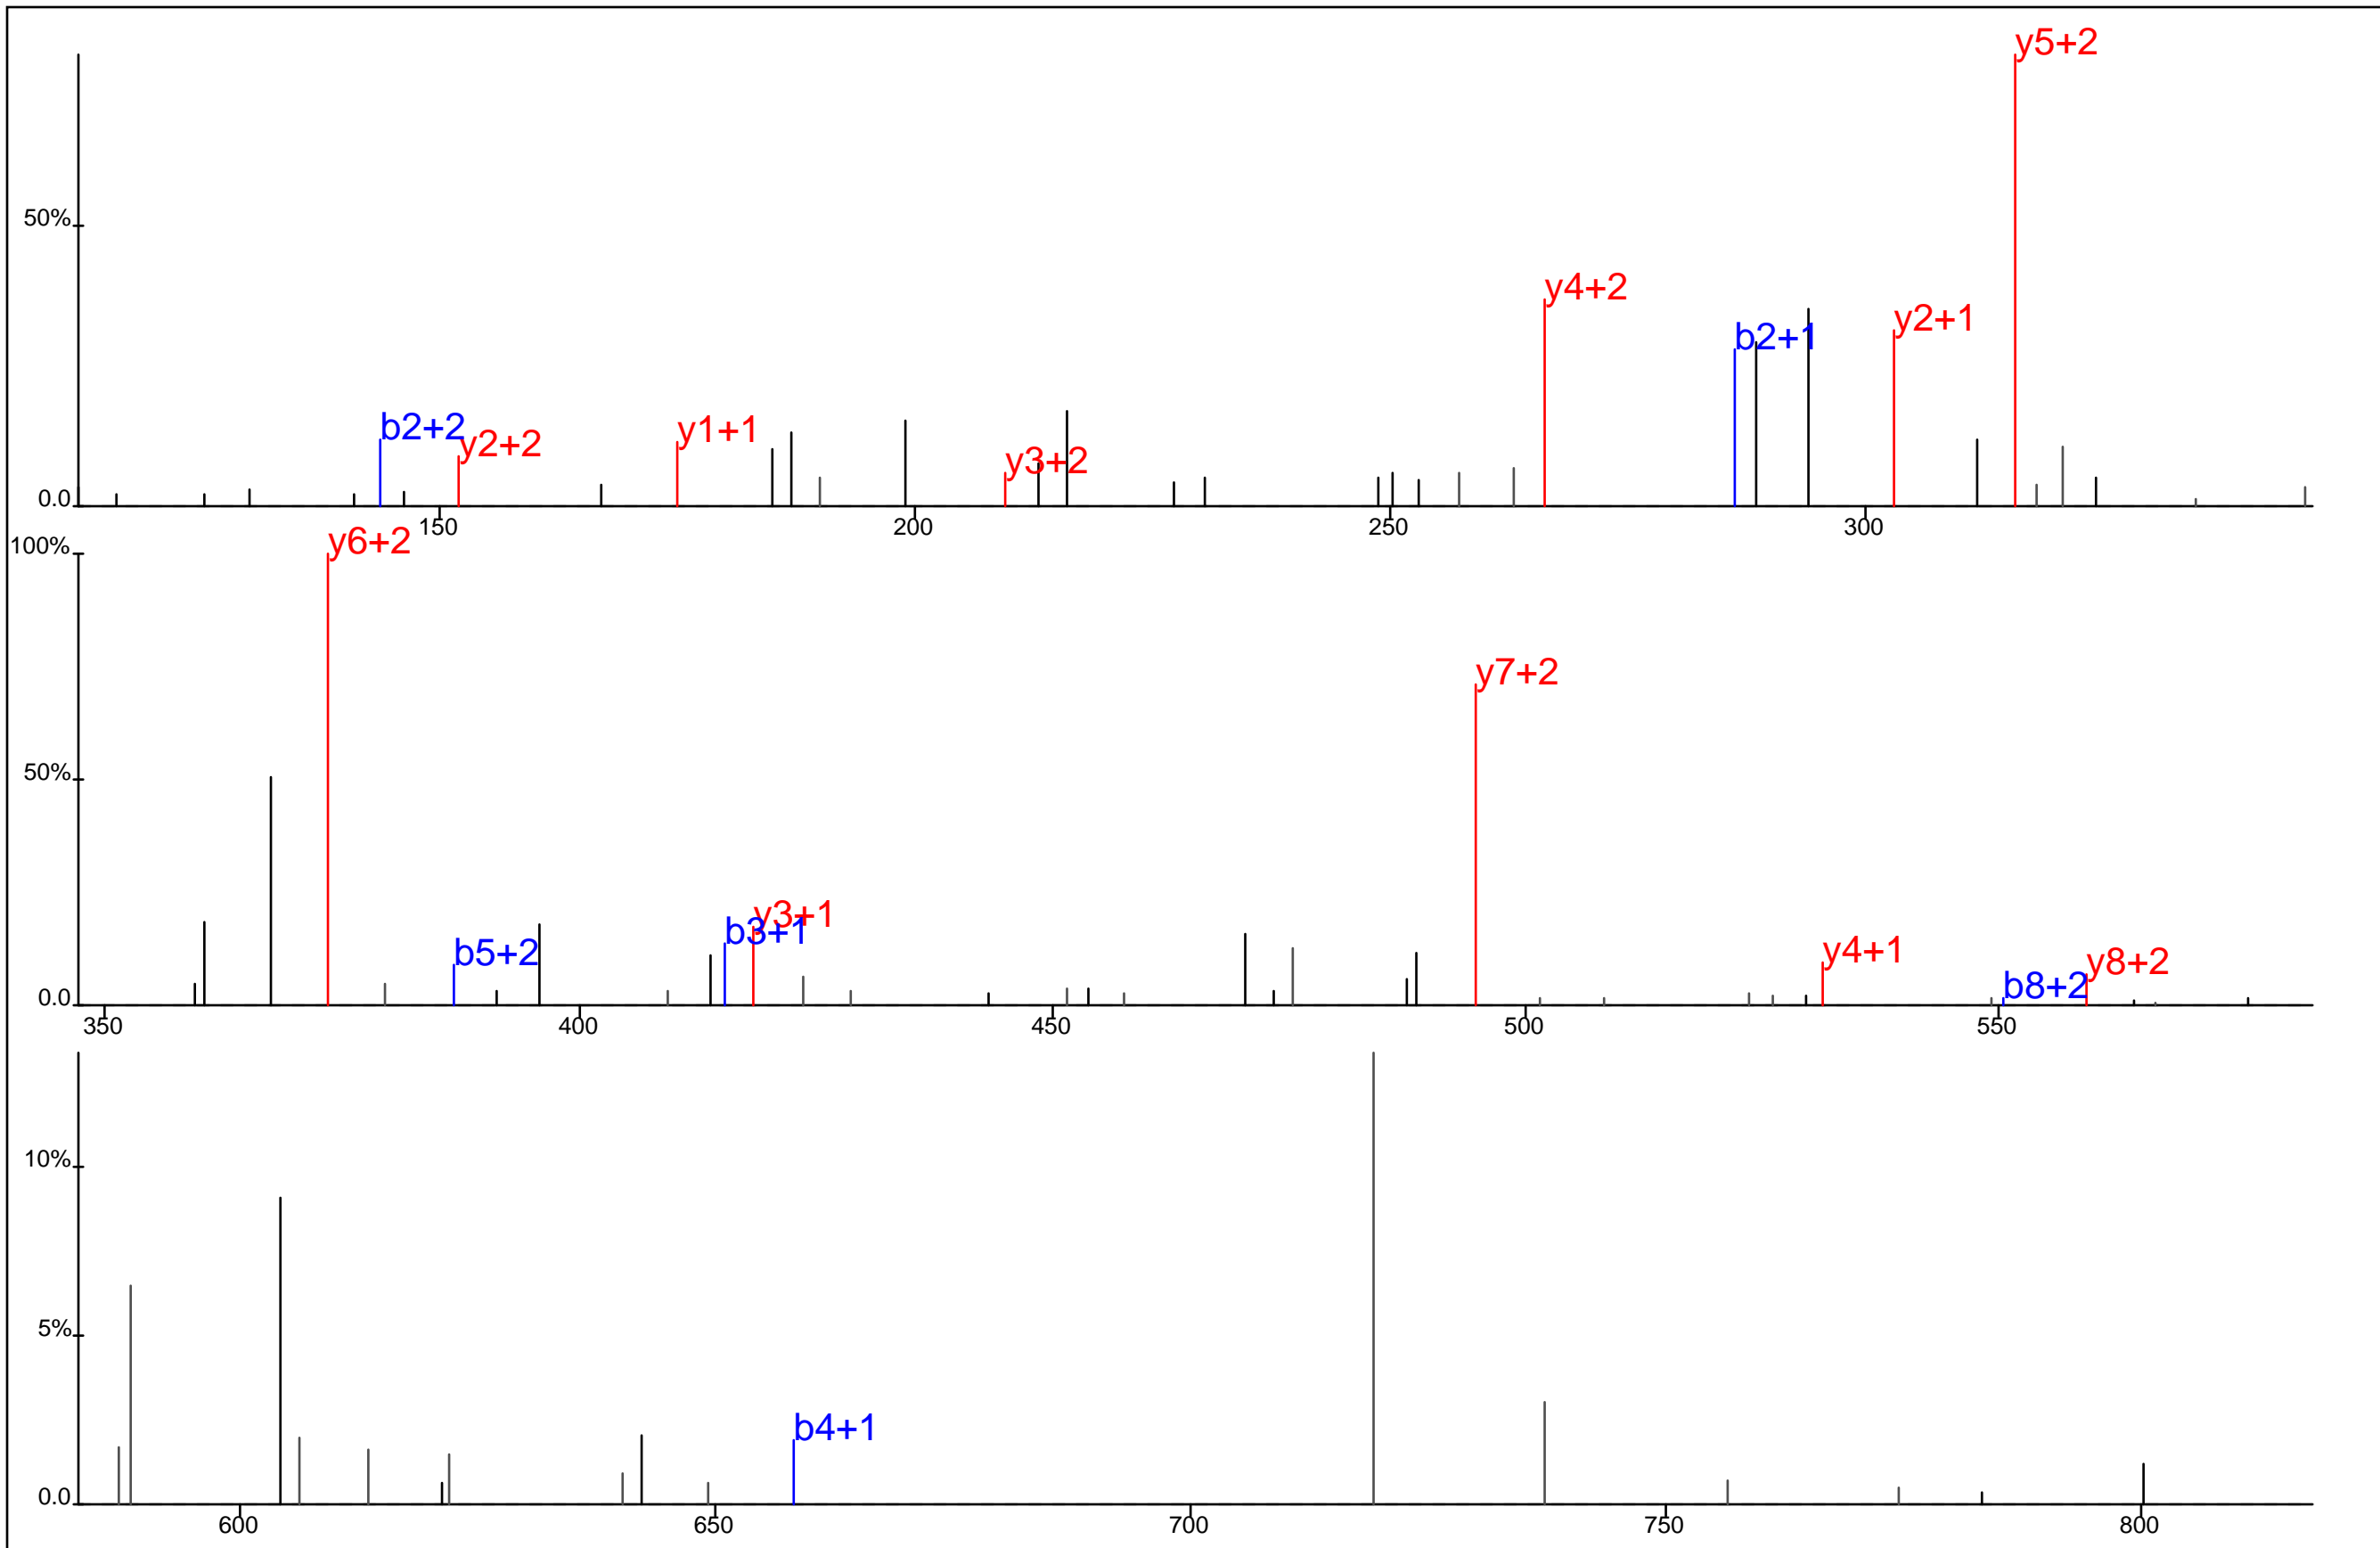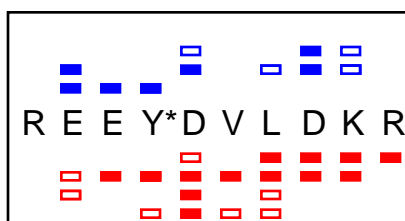

Protein Name: T cell antigen receptor, zeta  
 gi Accession: 0  
 Precursor Mass: 351.4153+4  
 Delta Mass: 2.212 ppm  
 XCorr: 29.88

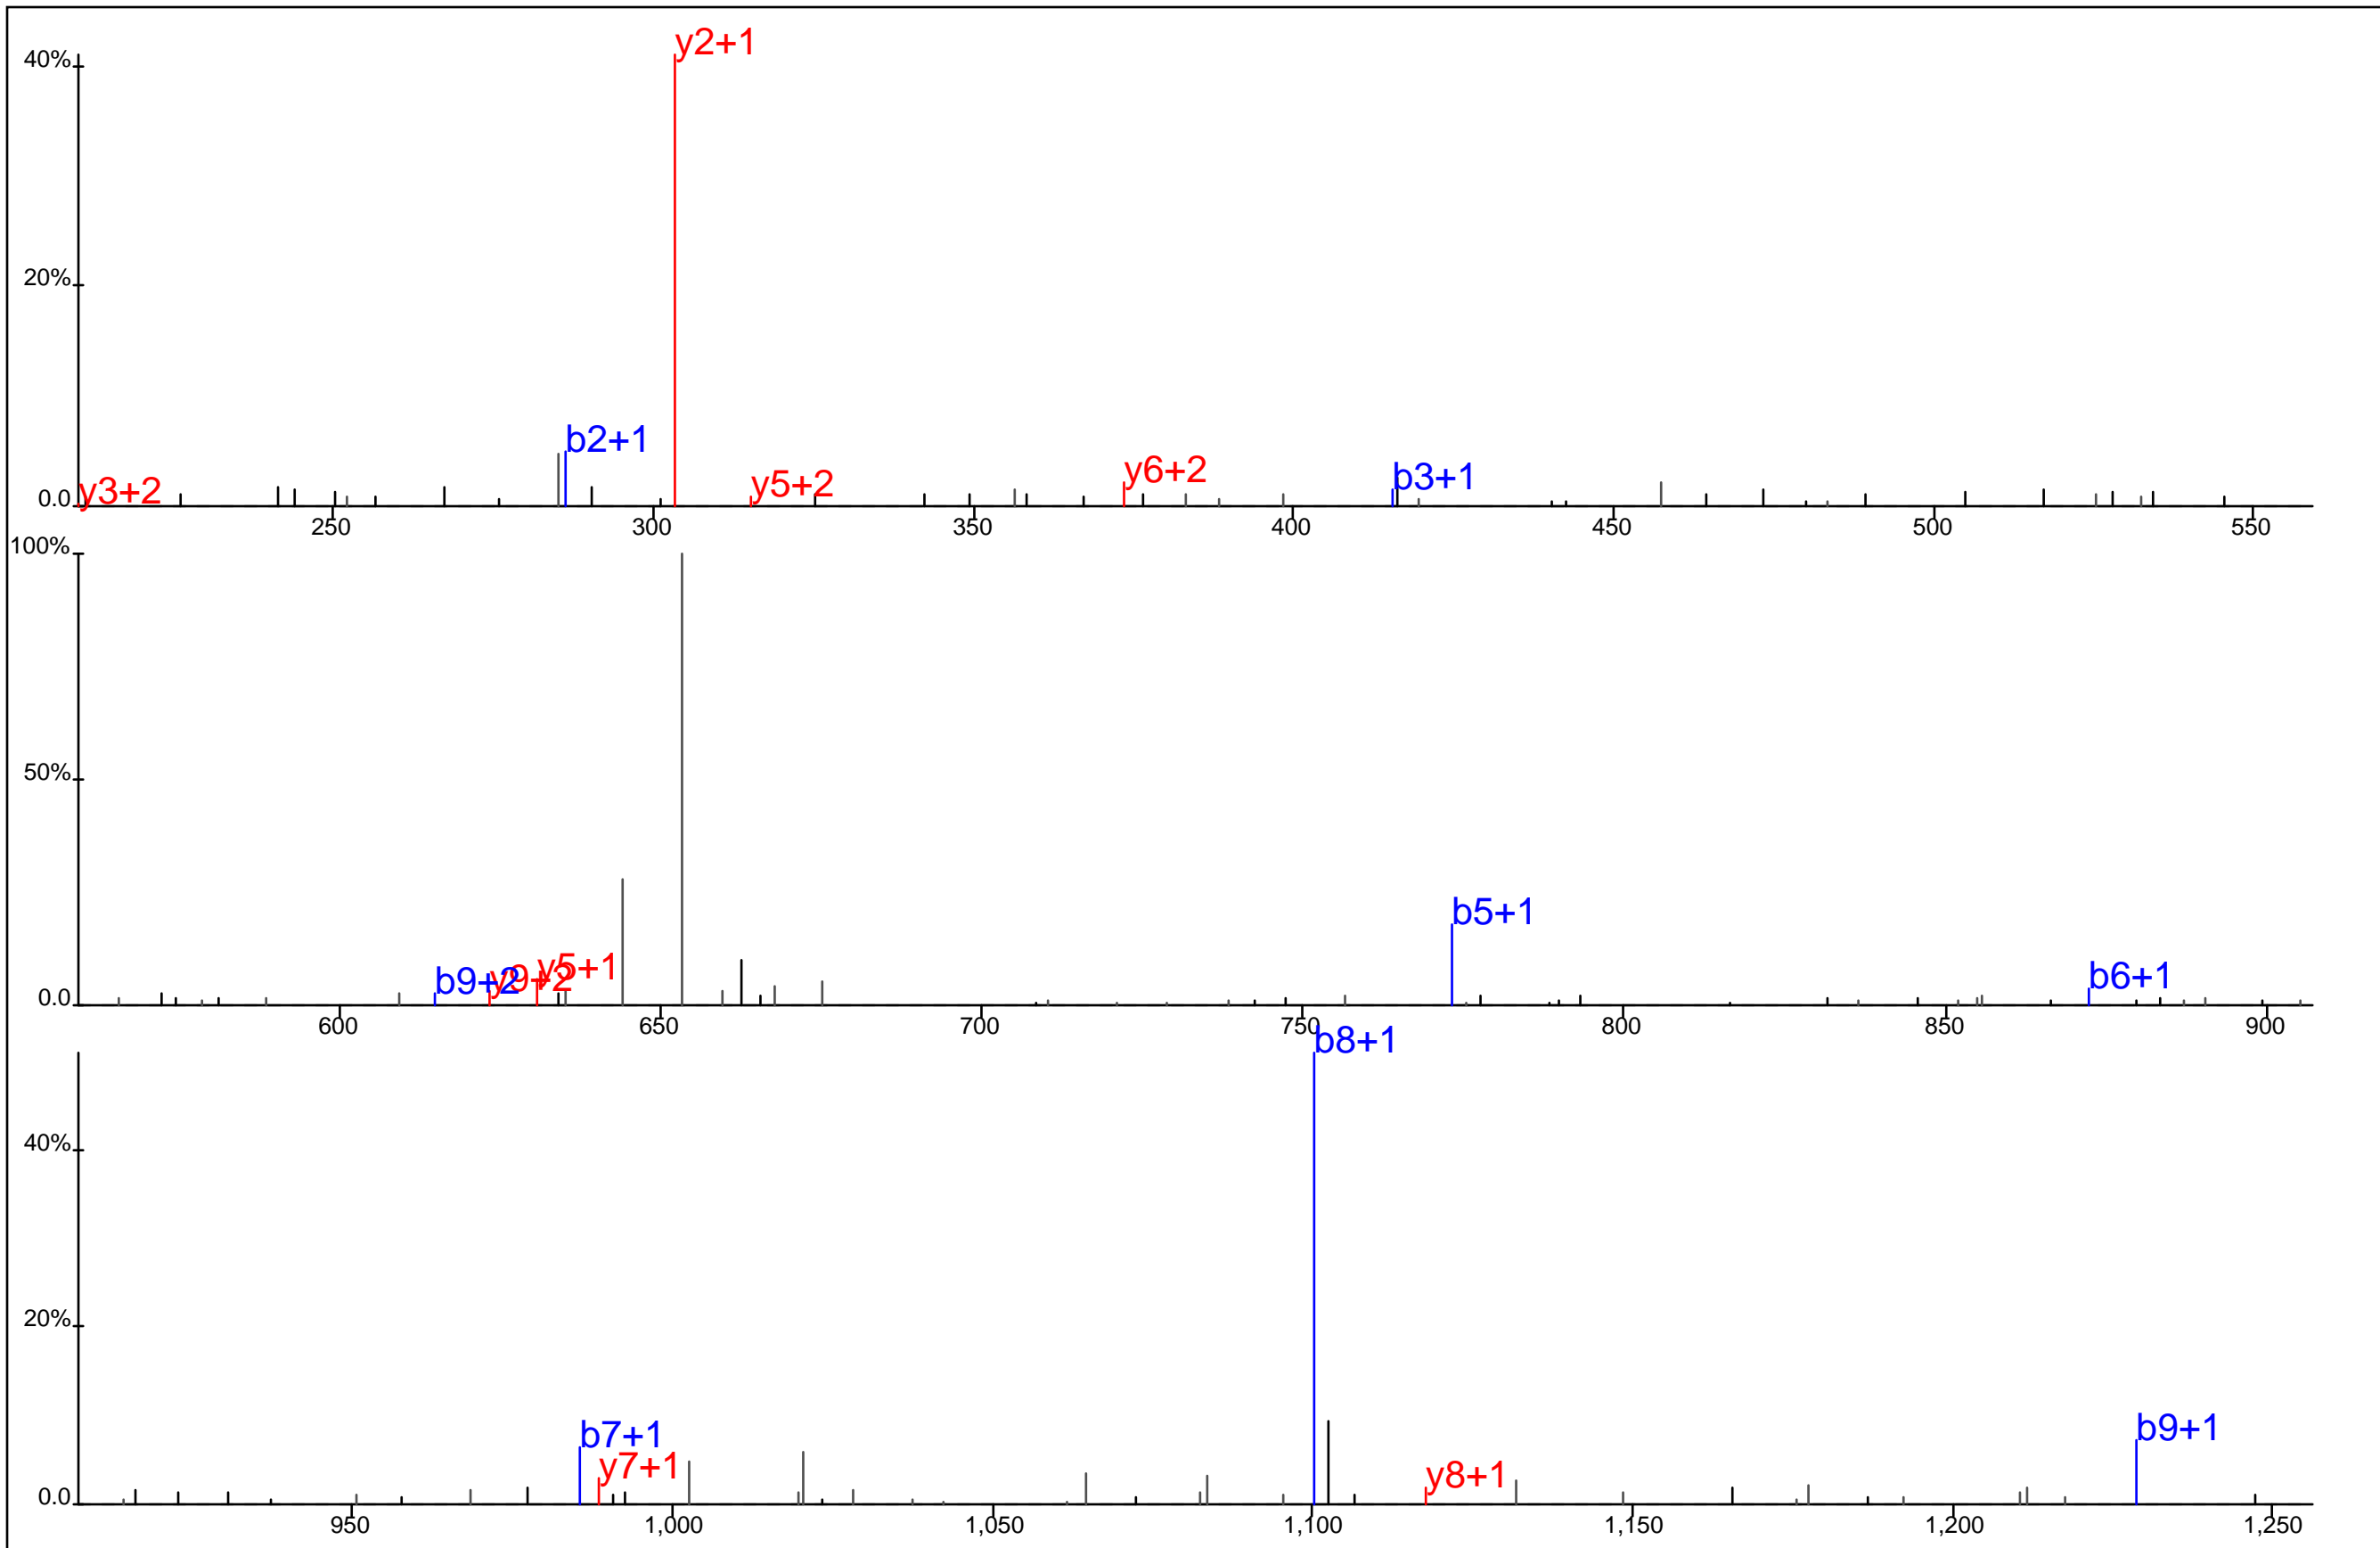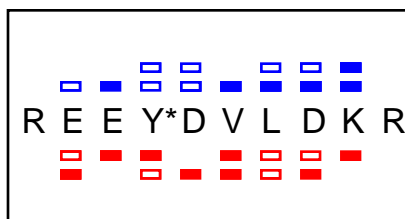

Protein Name: T cell antigen receptor, zeta  
 gi Accession: 0  
 Precursor Mass: 701.8226+2  
 Delta Mass: 1.186 ppm  
 XCorr: 26.27

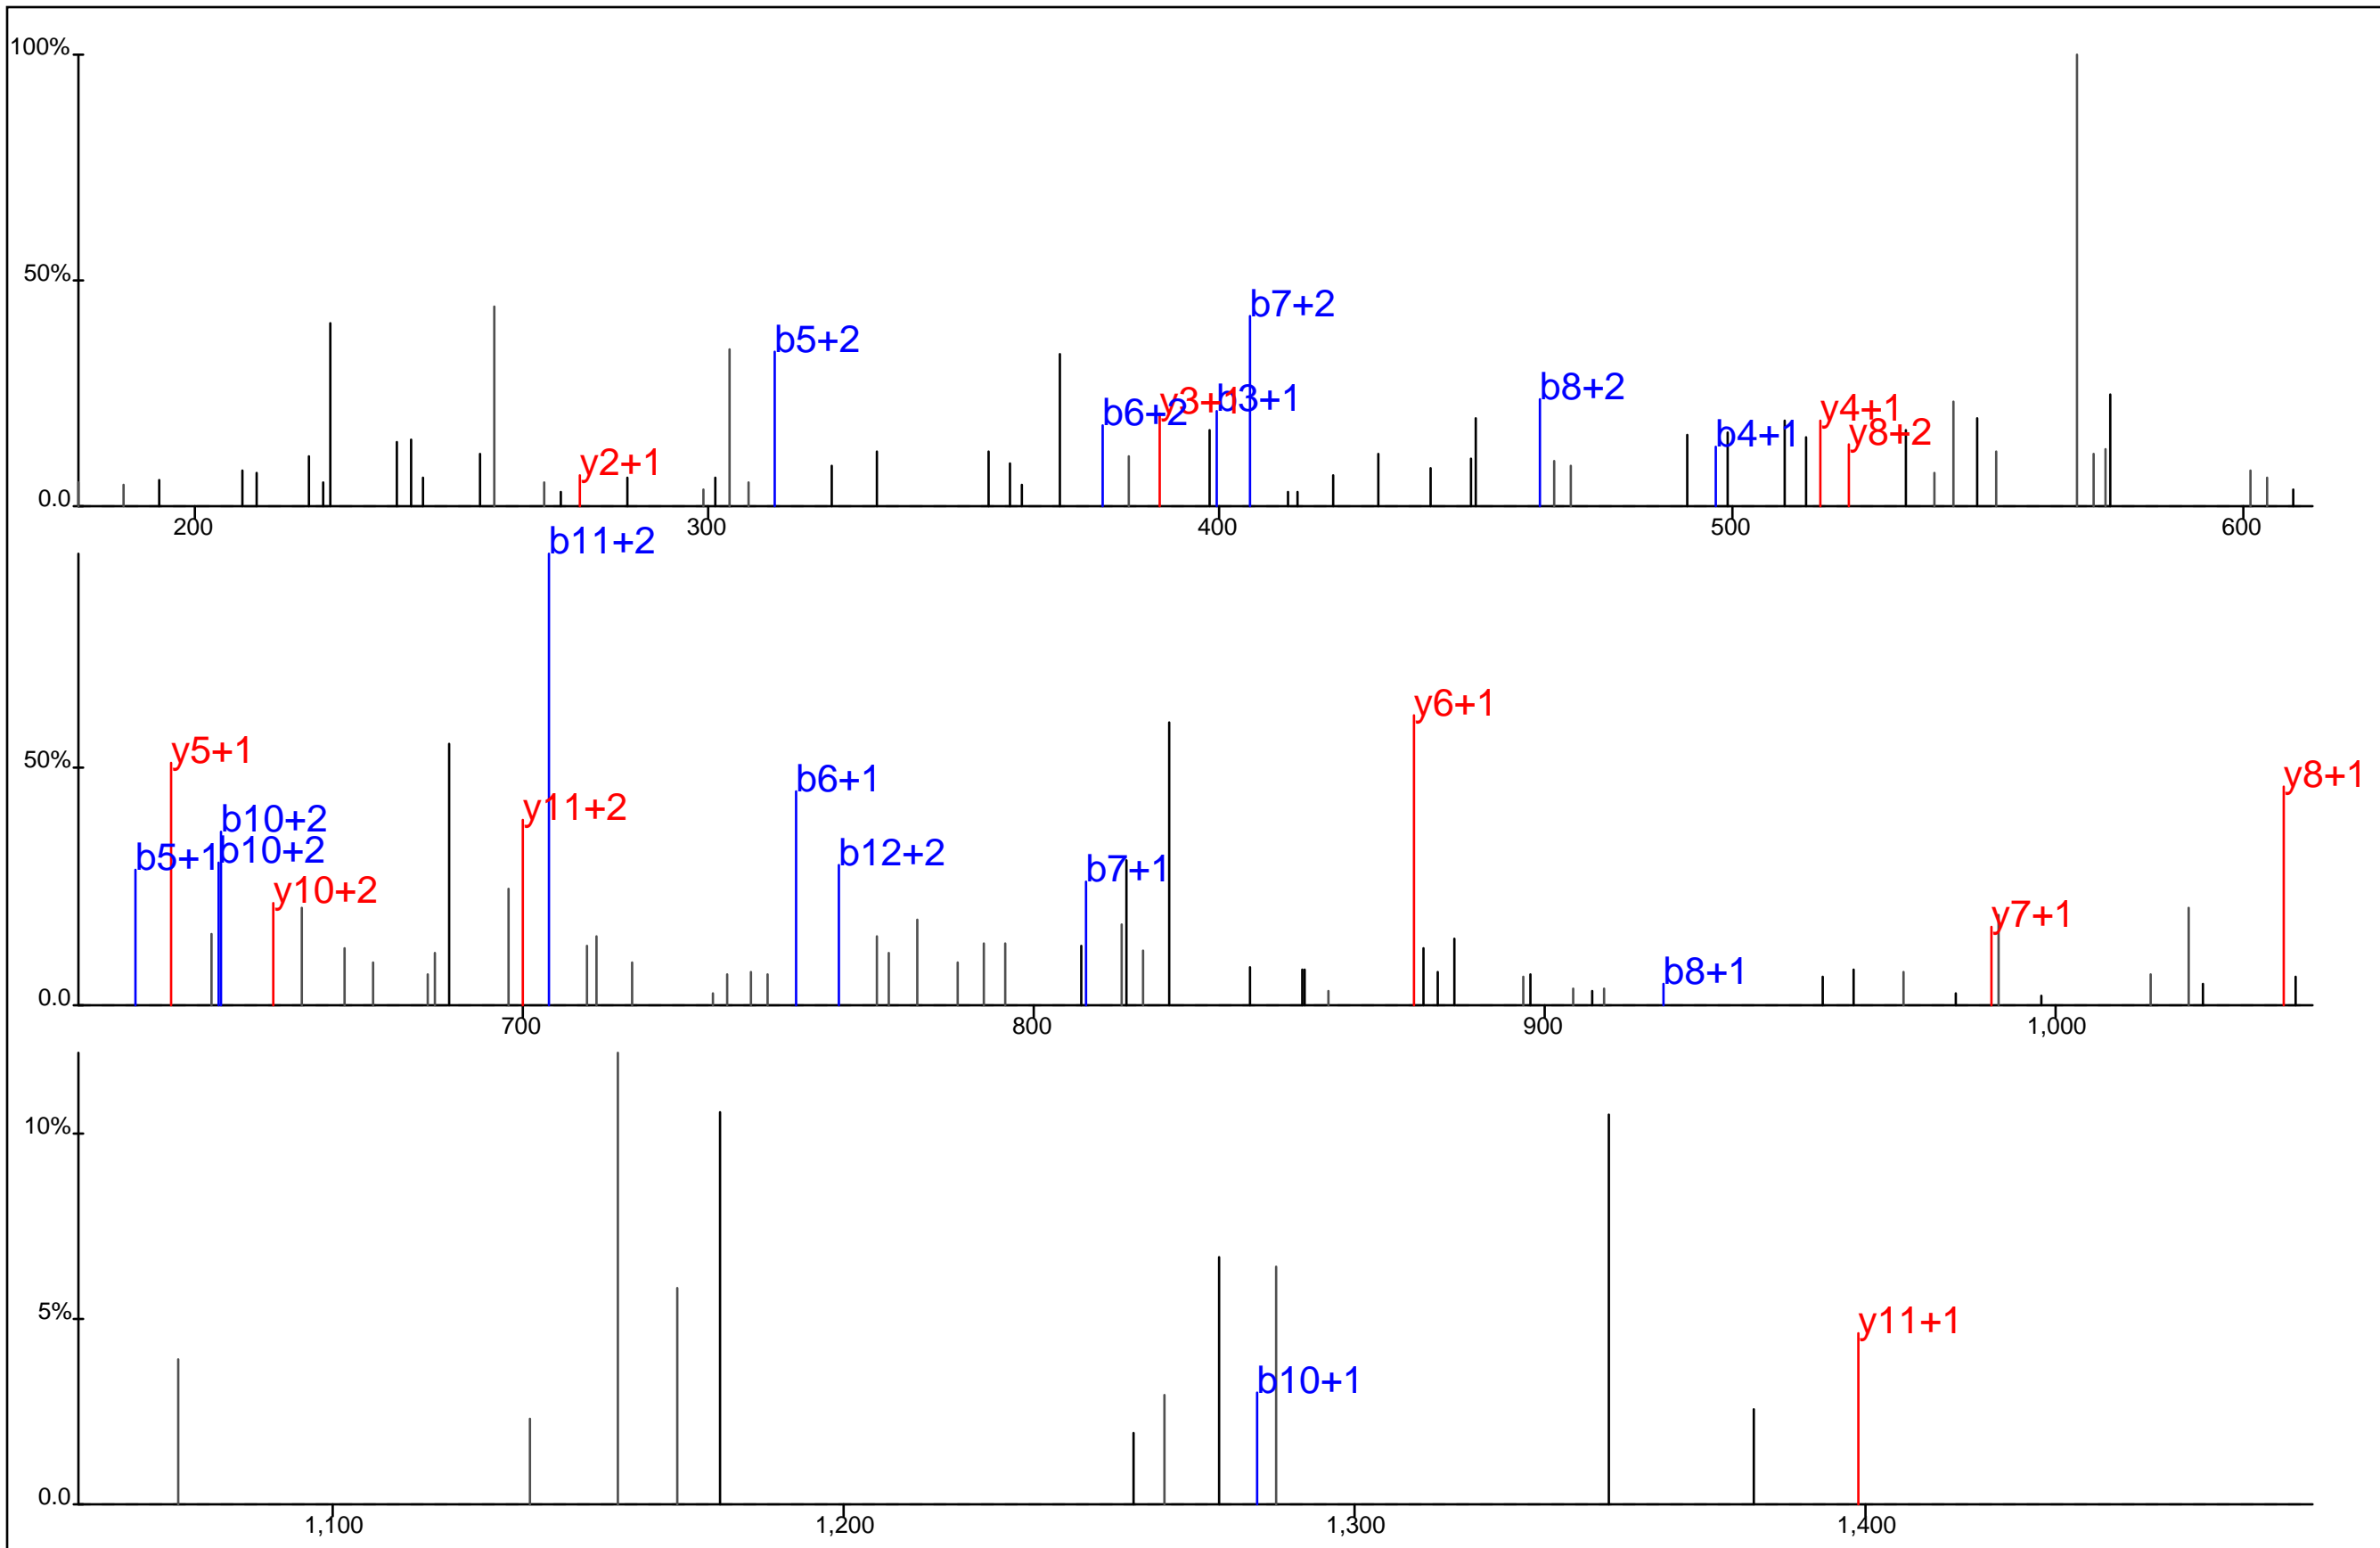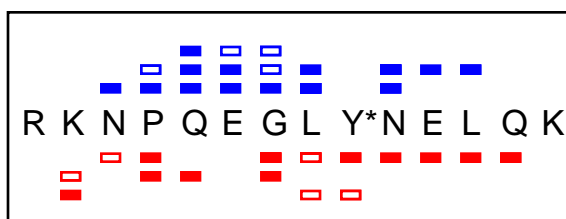

Protein Name: T cell antigen receptor, zeta  
 gi Accession: 0  
 Precursor Mass: 599.6277+3  
 Delta Mass: 0.293 ppm  
 XCorr: 28.02

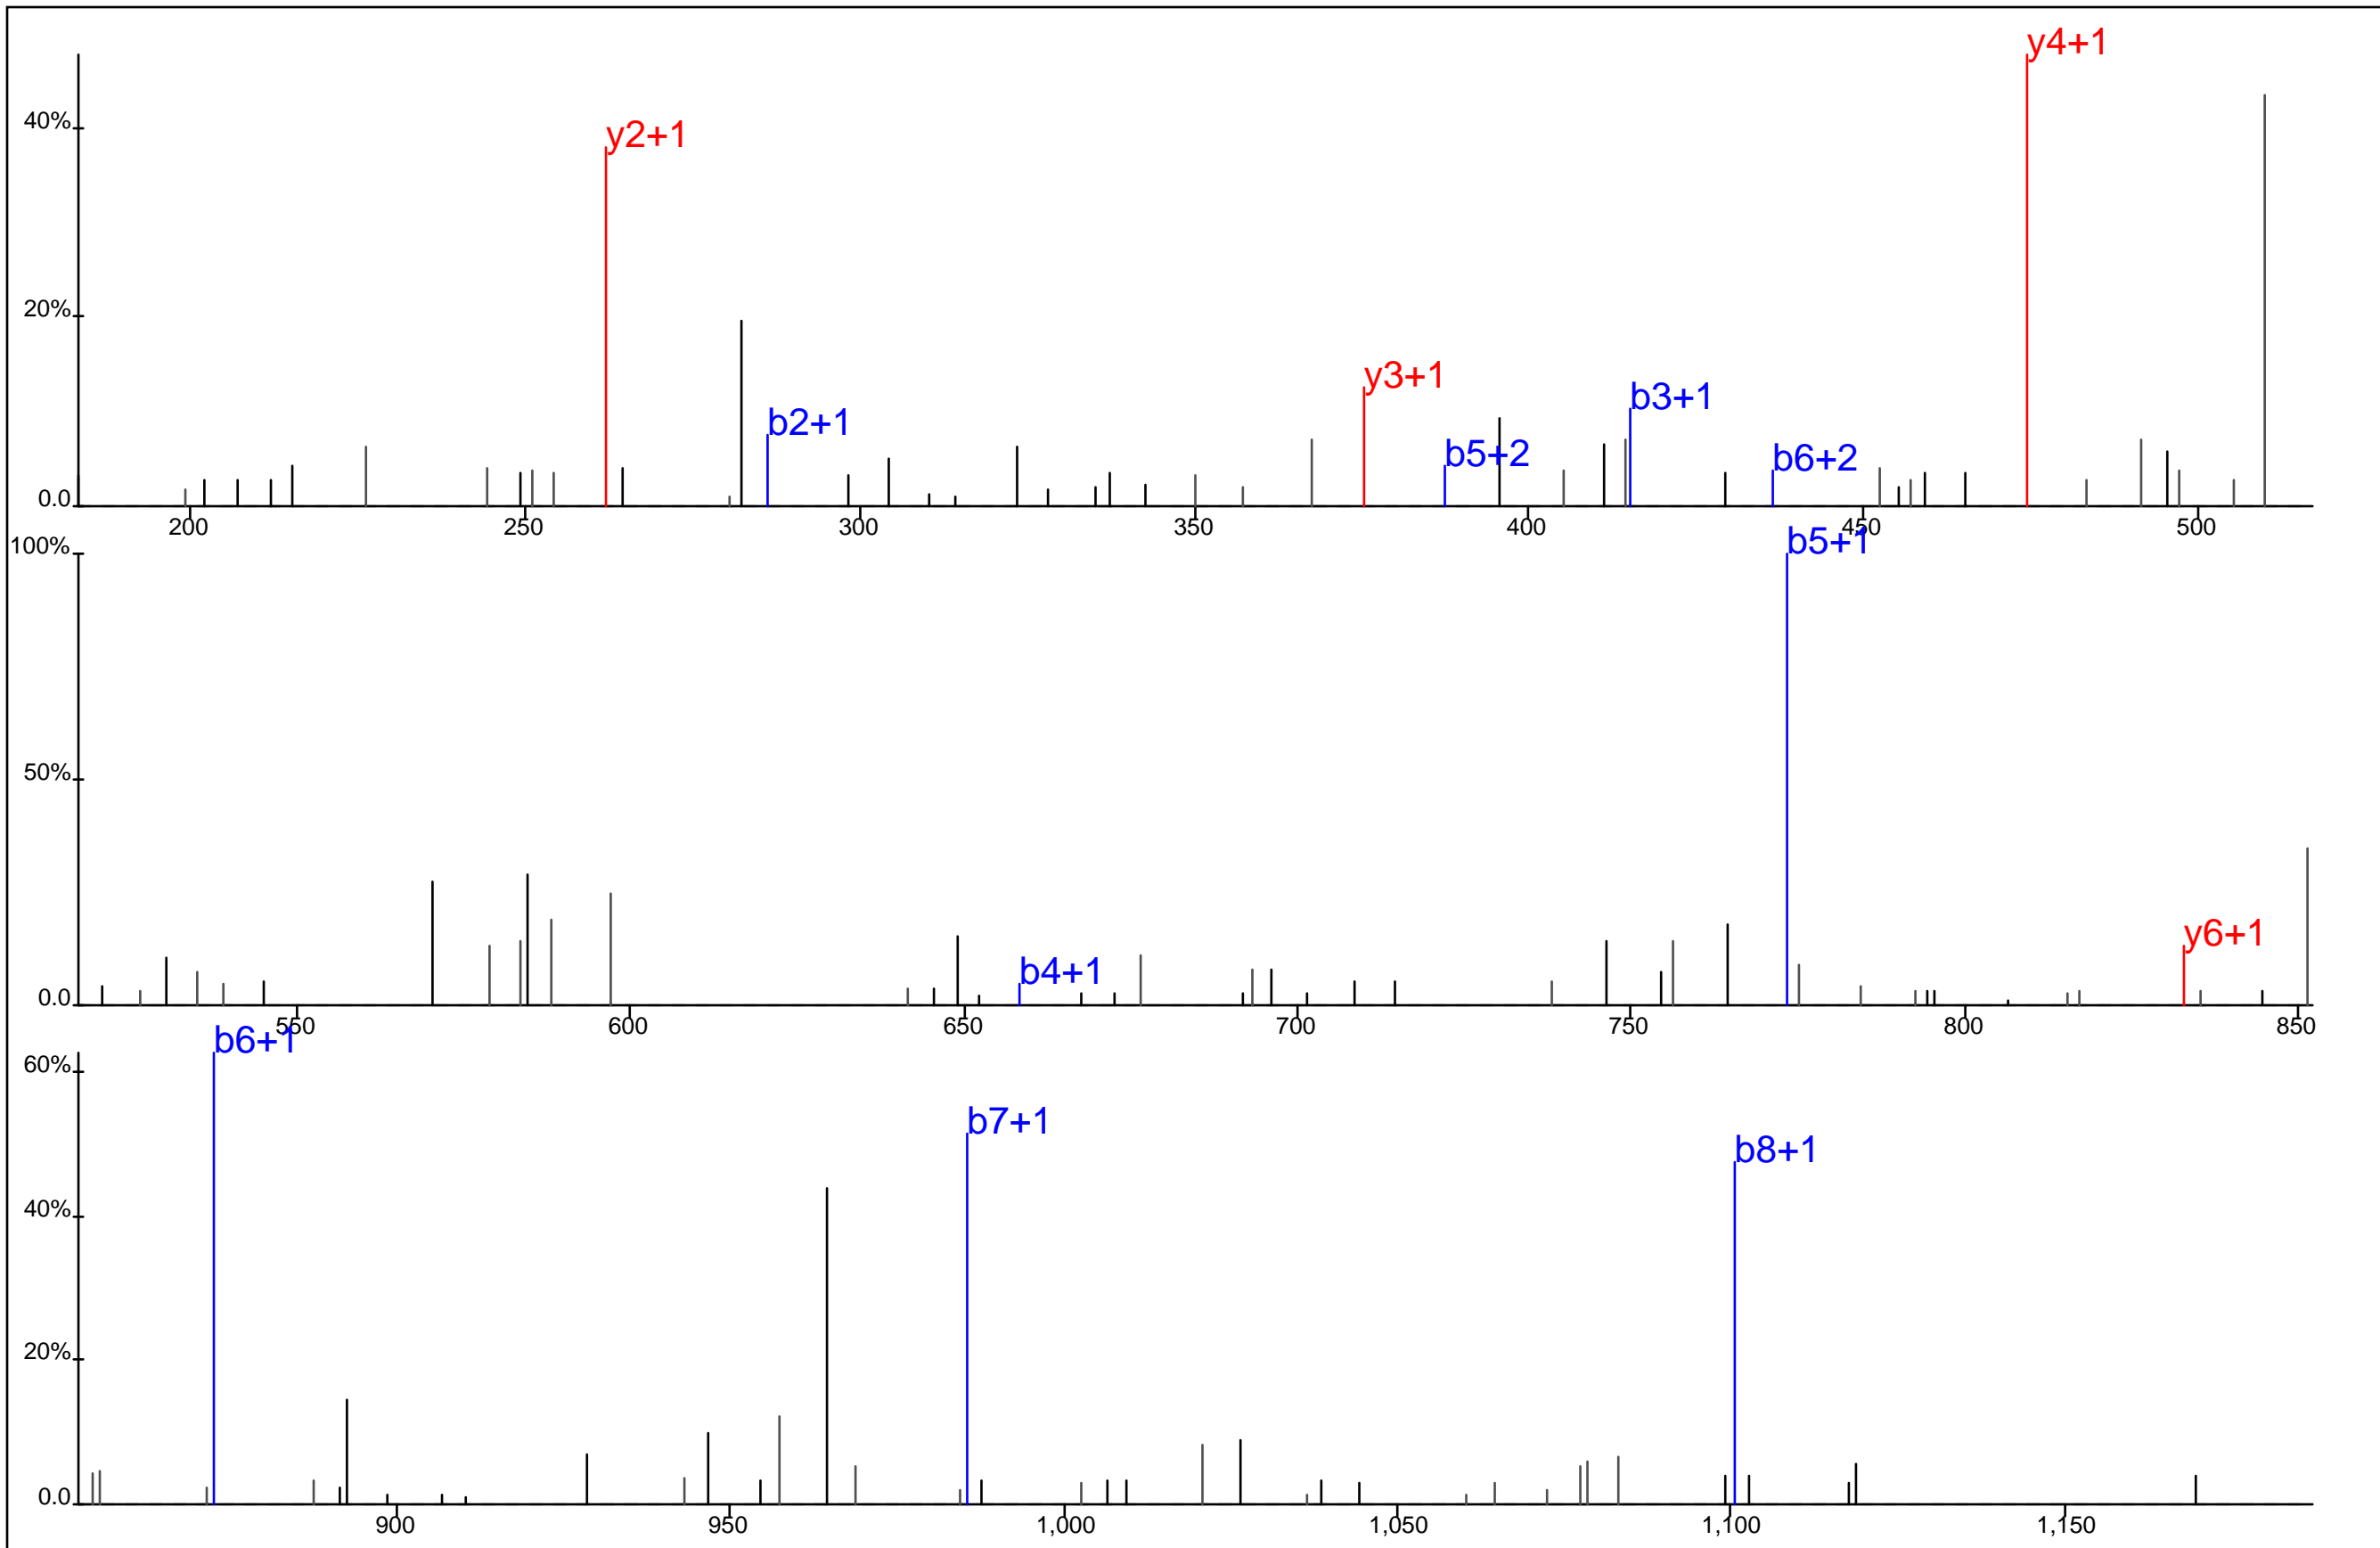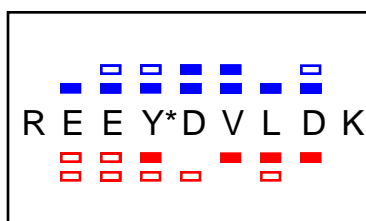

Protein Name: T cell antigen receptor, zeta  
 gi Accession: 0  
 Precursor Mass: 623.7698+2  
 Delta Mass: 2.163 ppm  
 XCorr: 30.89

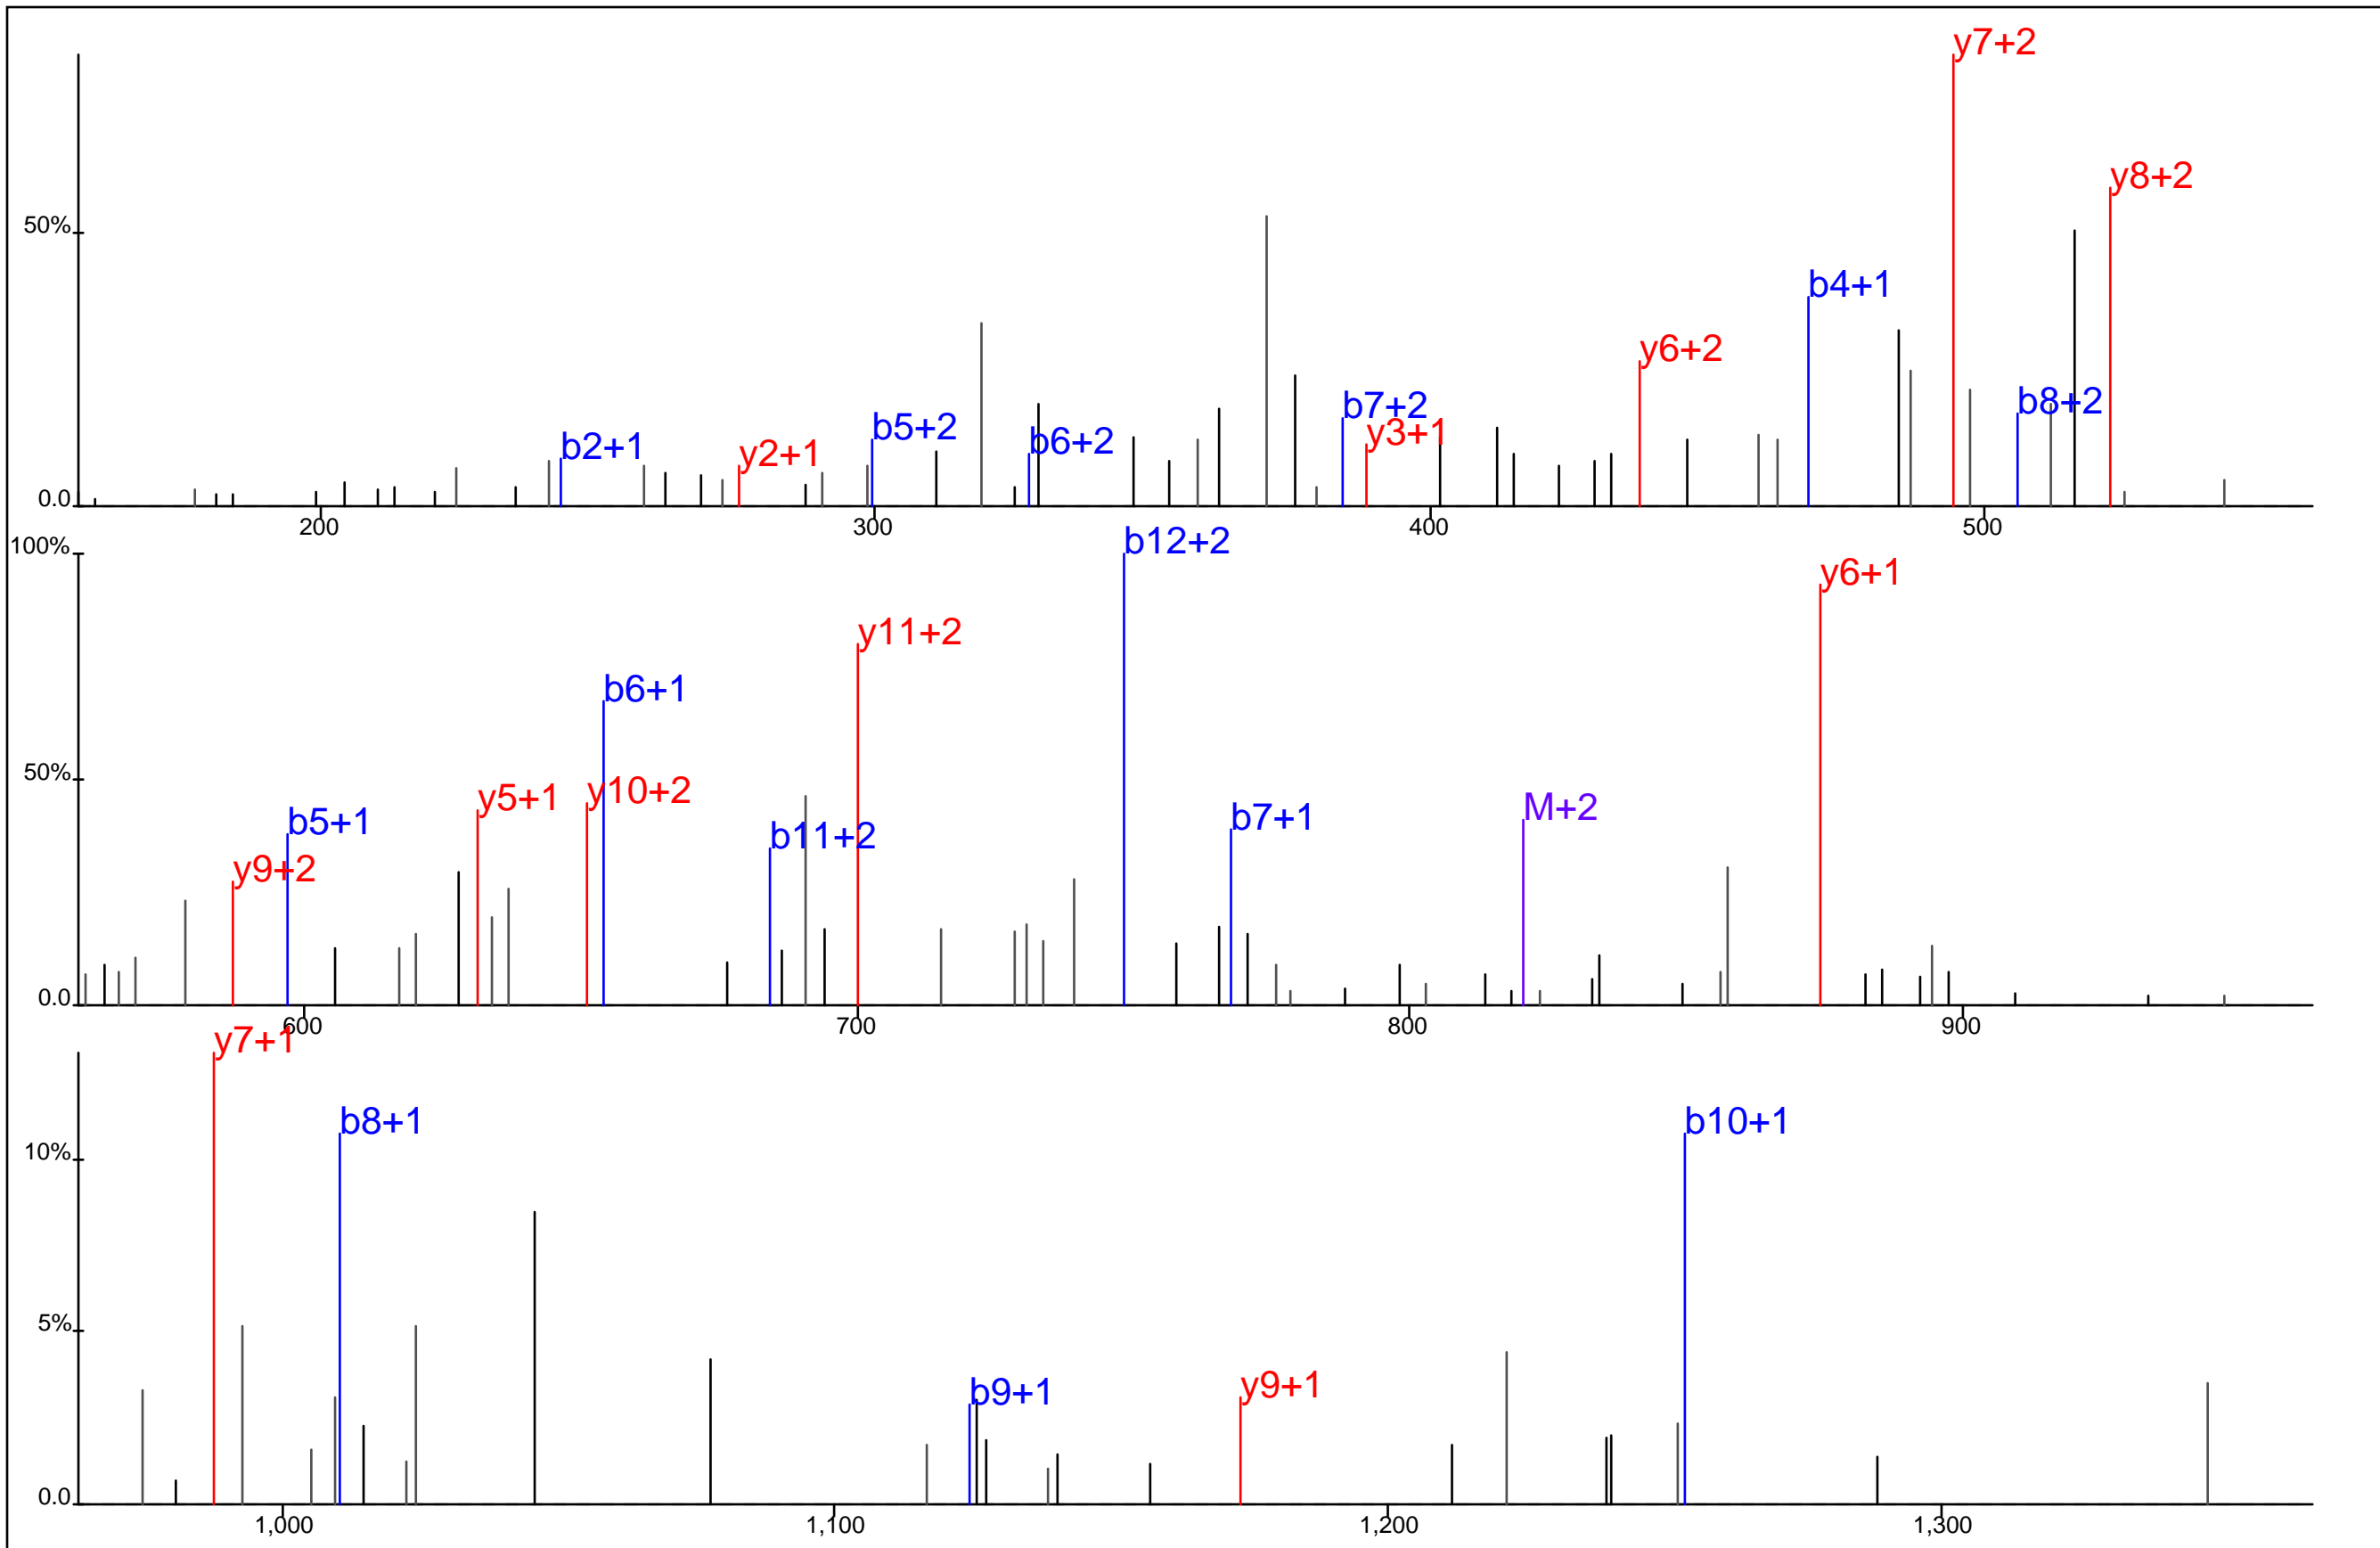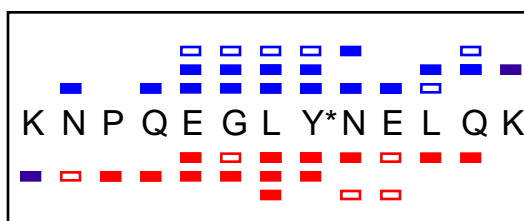

Protein Name: T cell antigen receptor, zeta  
 gi Accession: 0  
 Precursor Mass: 547.5950+3  
 Delta Mass: 1.598 ppm  
 XCorr: 43.29



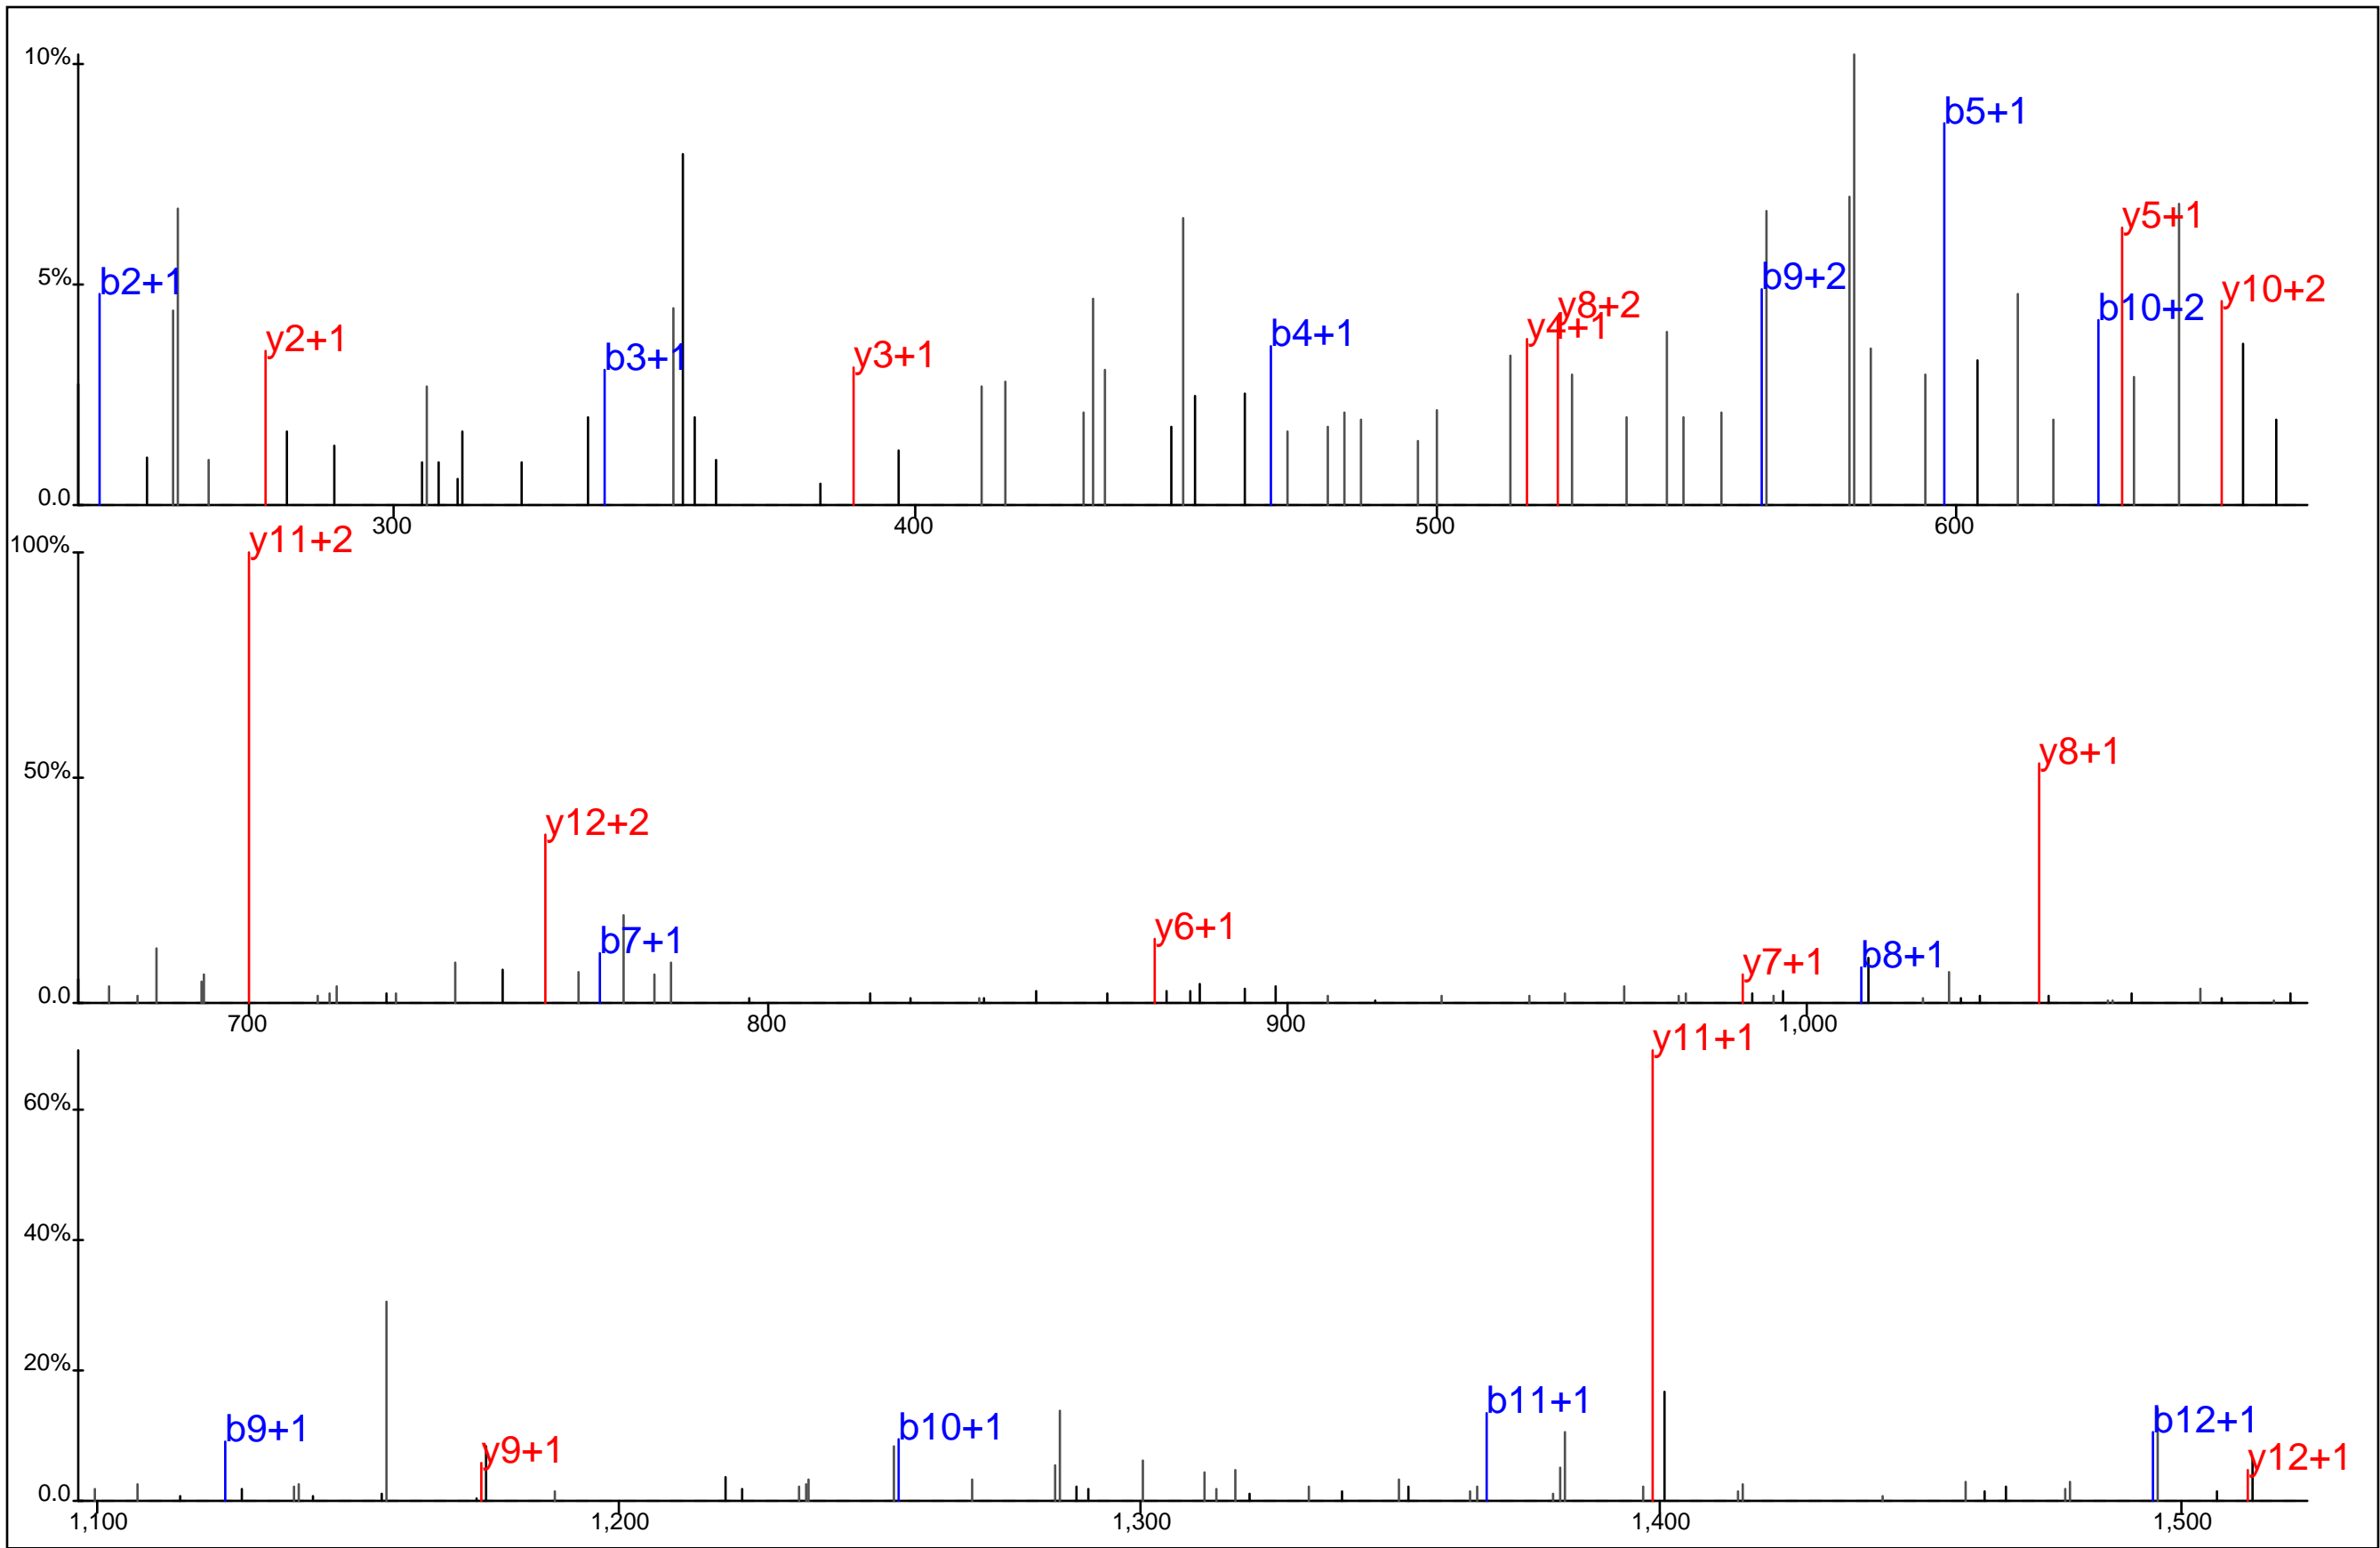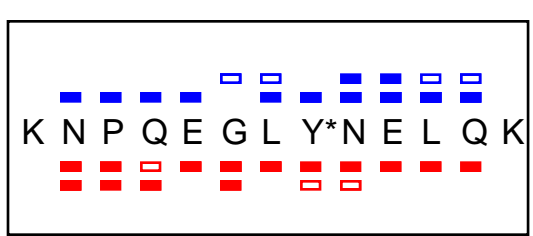

Protein Name: T cell antigen receptor, zeta  
 gi Accession: 0  
 Precursor Mass: 820.8876+2  
 Delta Mass: 0.032 ppm  
 XCorr: 67.73

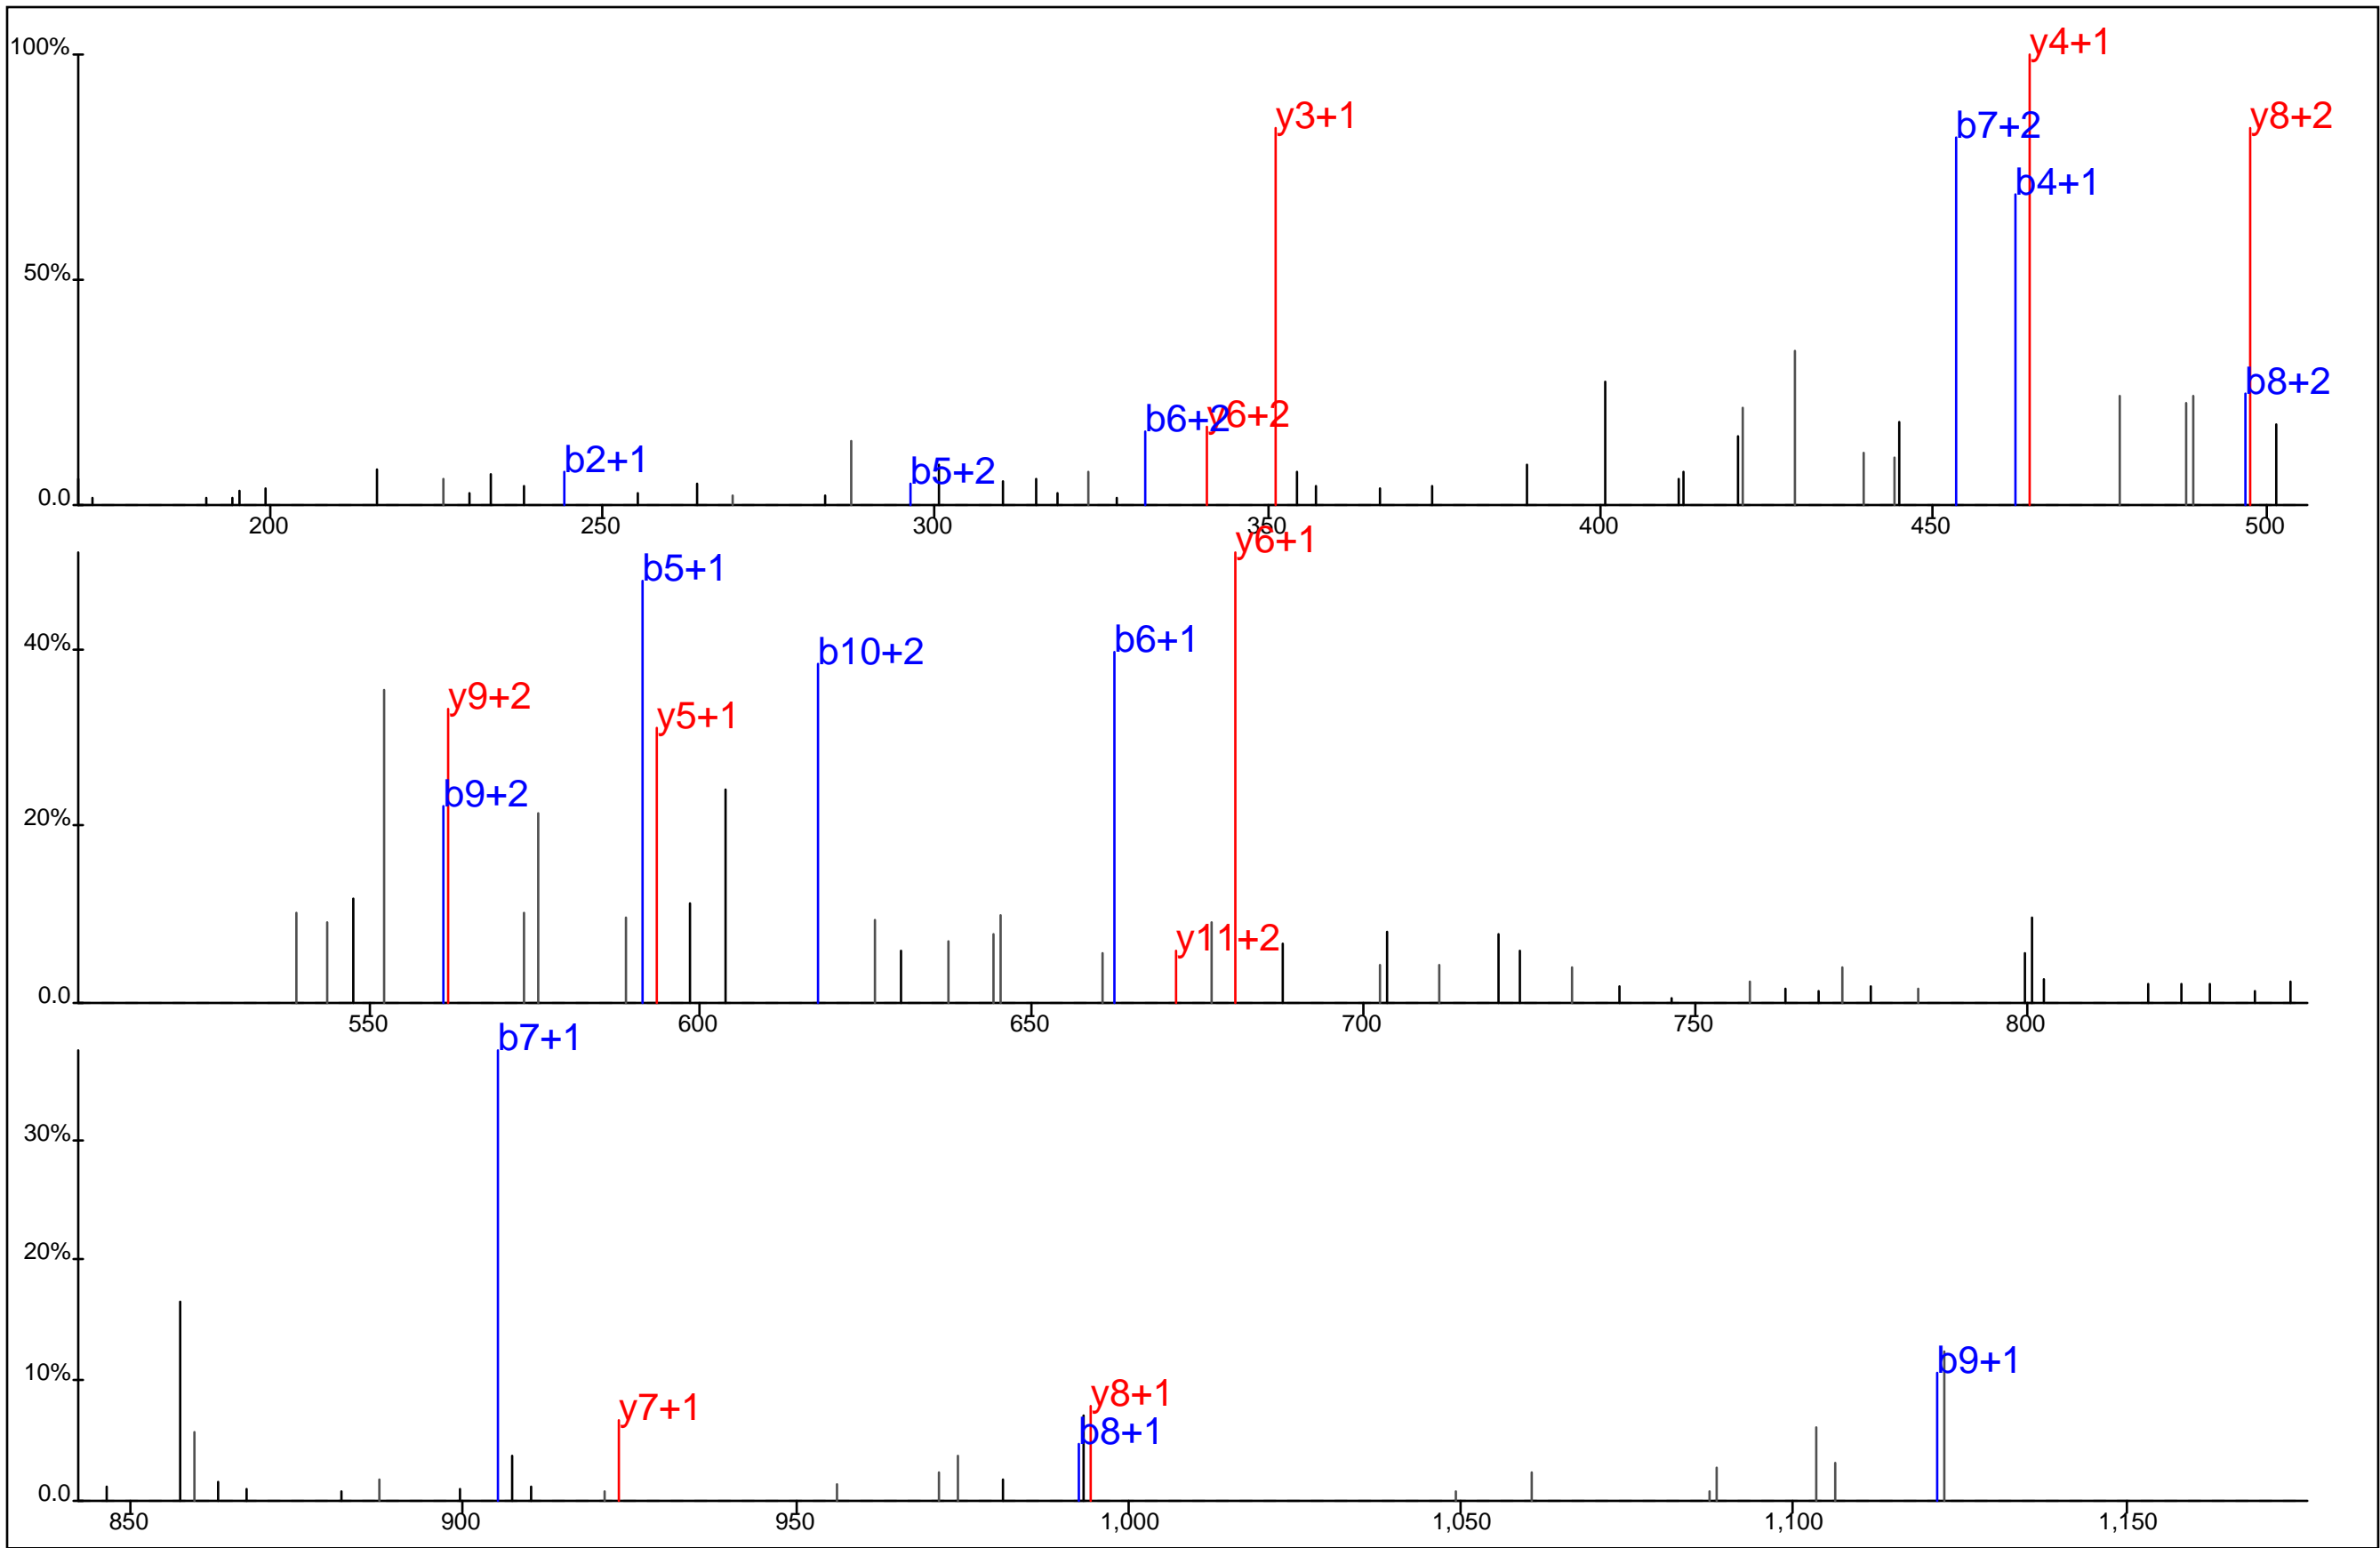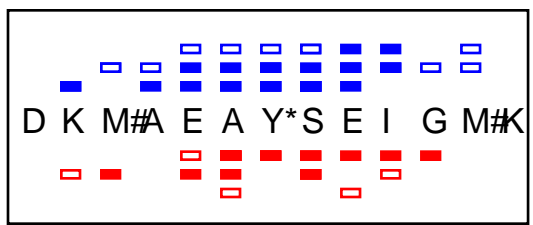

Protein Name: T cell antigen receptor, zeta  
 gi Accession: 0  
 Precursor Mass: 528.8822+3  
 Delta Mass: 0.024 ppm  
 XCorr: 45.74

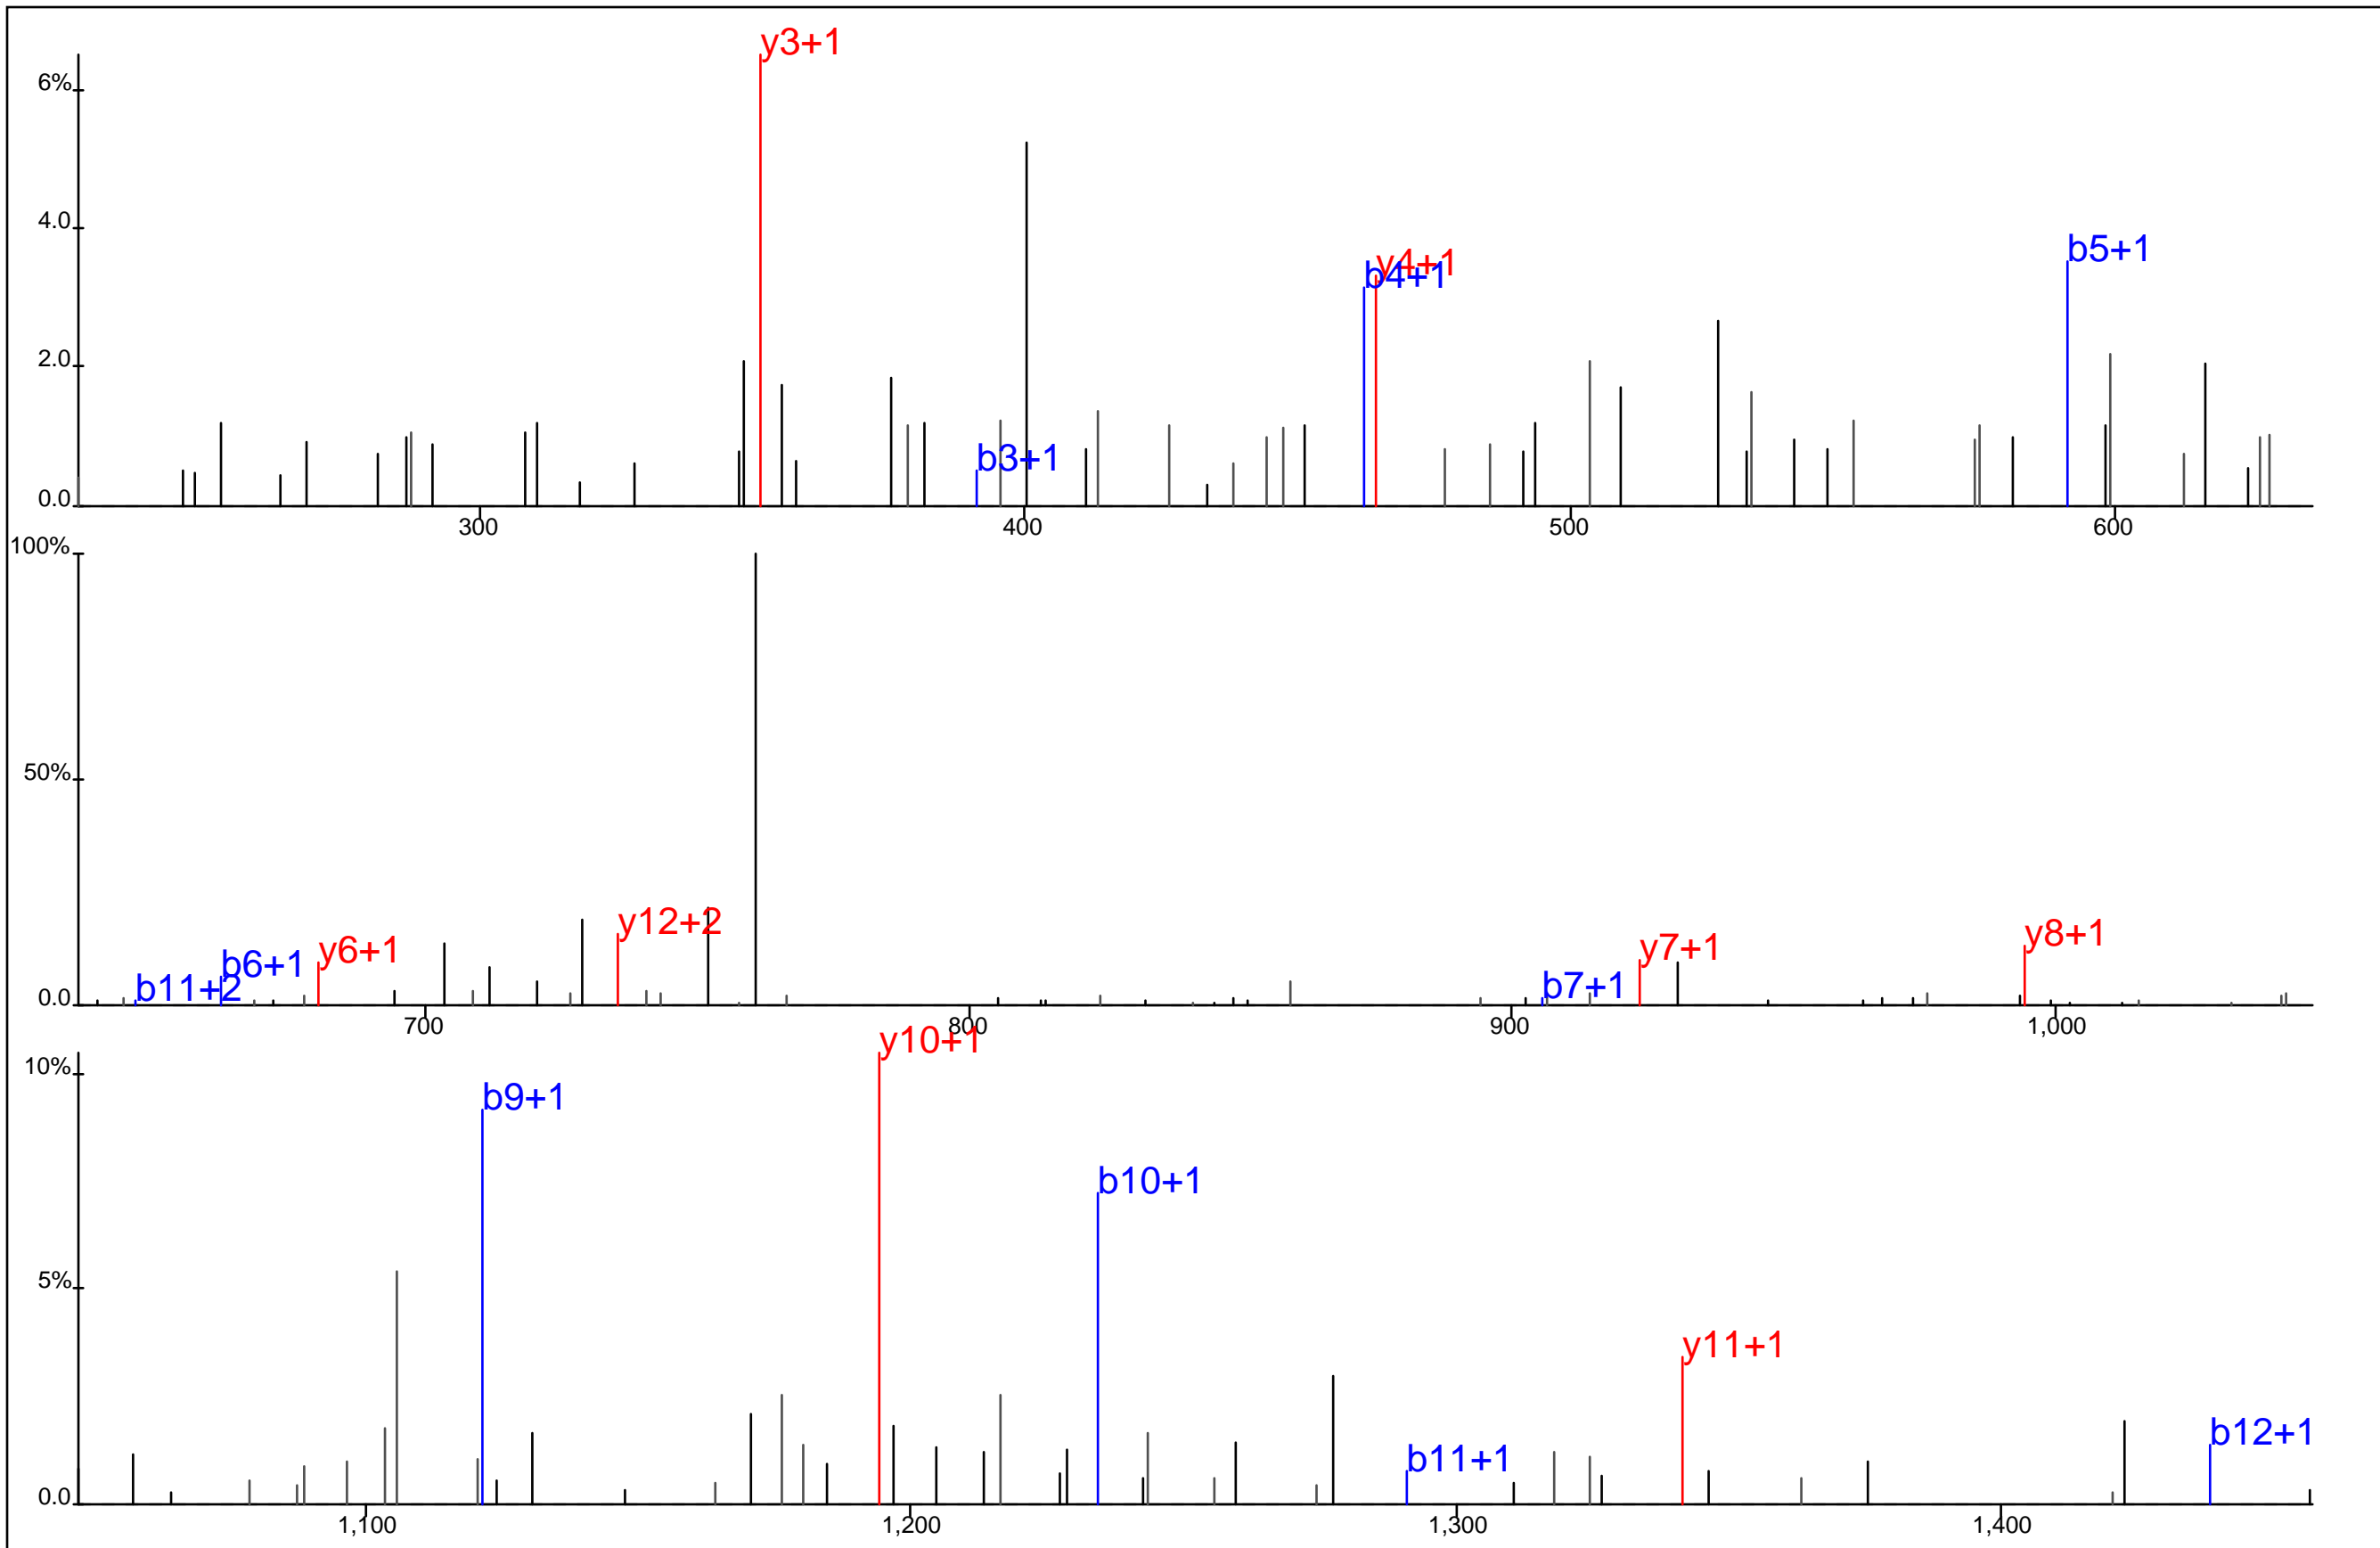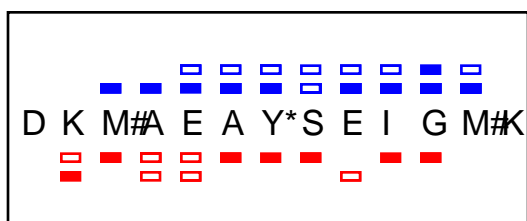

Protein Name: T cell antigen receptor, zeta  
 gi Accession: 0  
 Precursor Mass: 792.8190+2  
 Delta Mass: 0.824 ppm  
 XCorr: 47.19

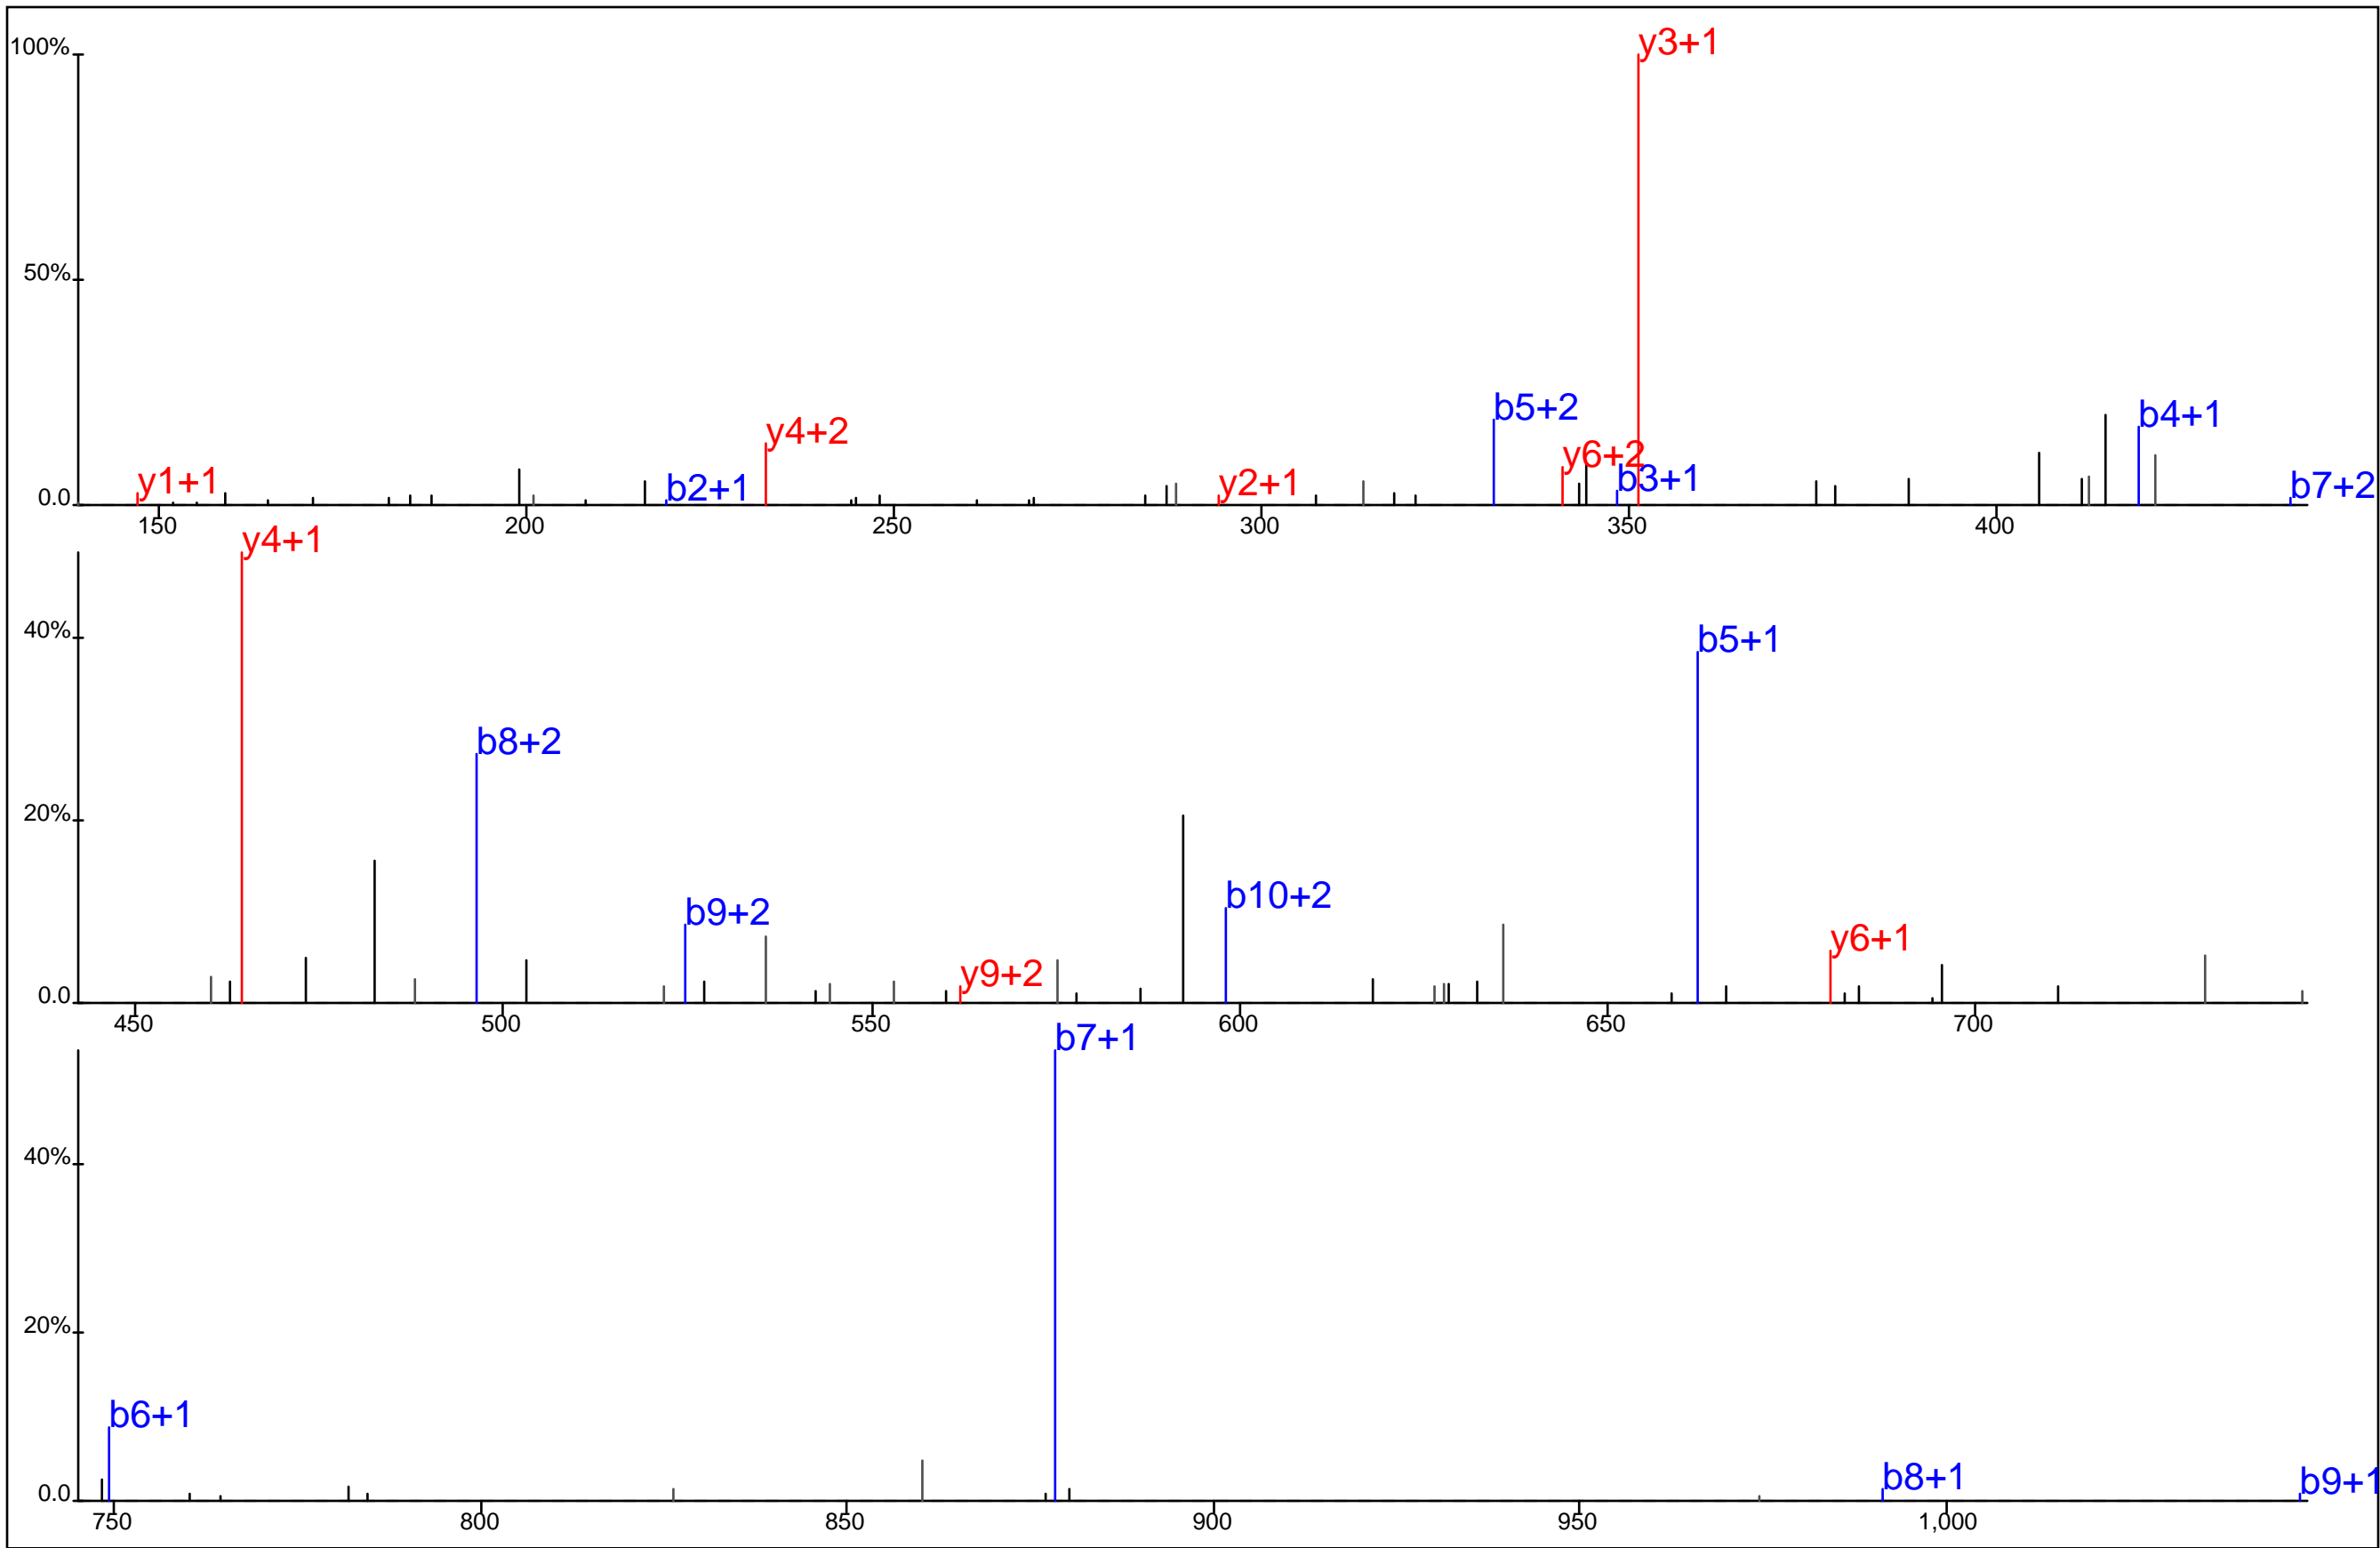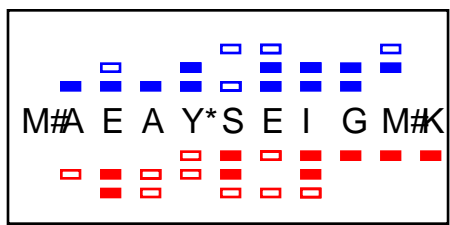

Protein Name: T cell antigen receptor, zeta  
 gi Accession: 0  
 Precursor Mass: 447.8417+3  
 Delta Mass: 0.209 ppm  
 XCorr: 33.39



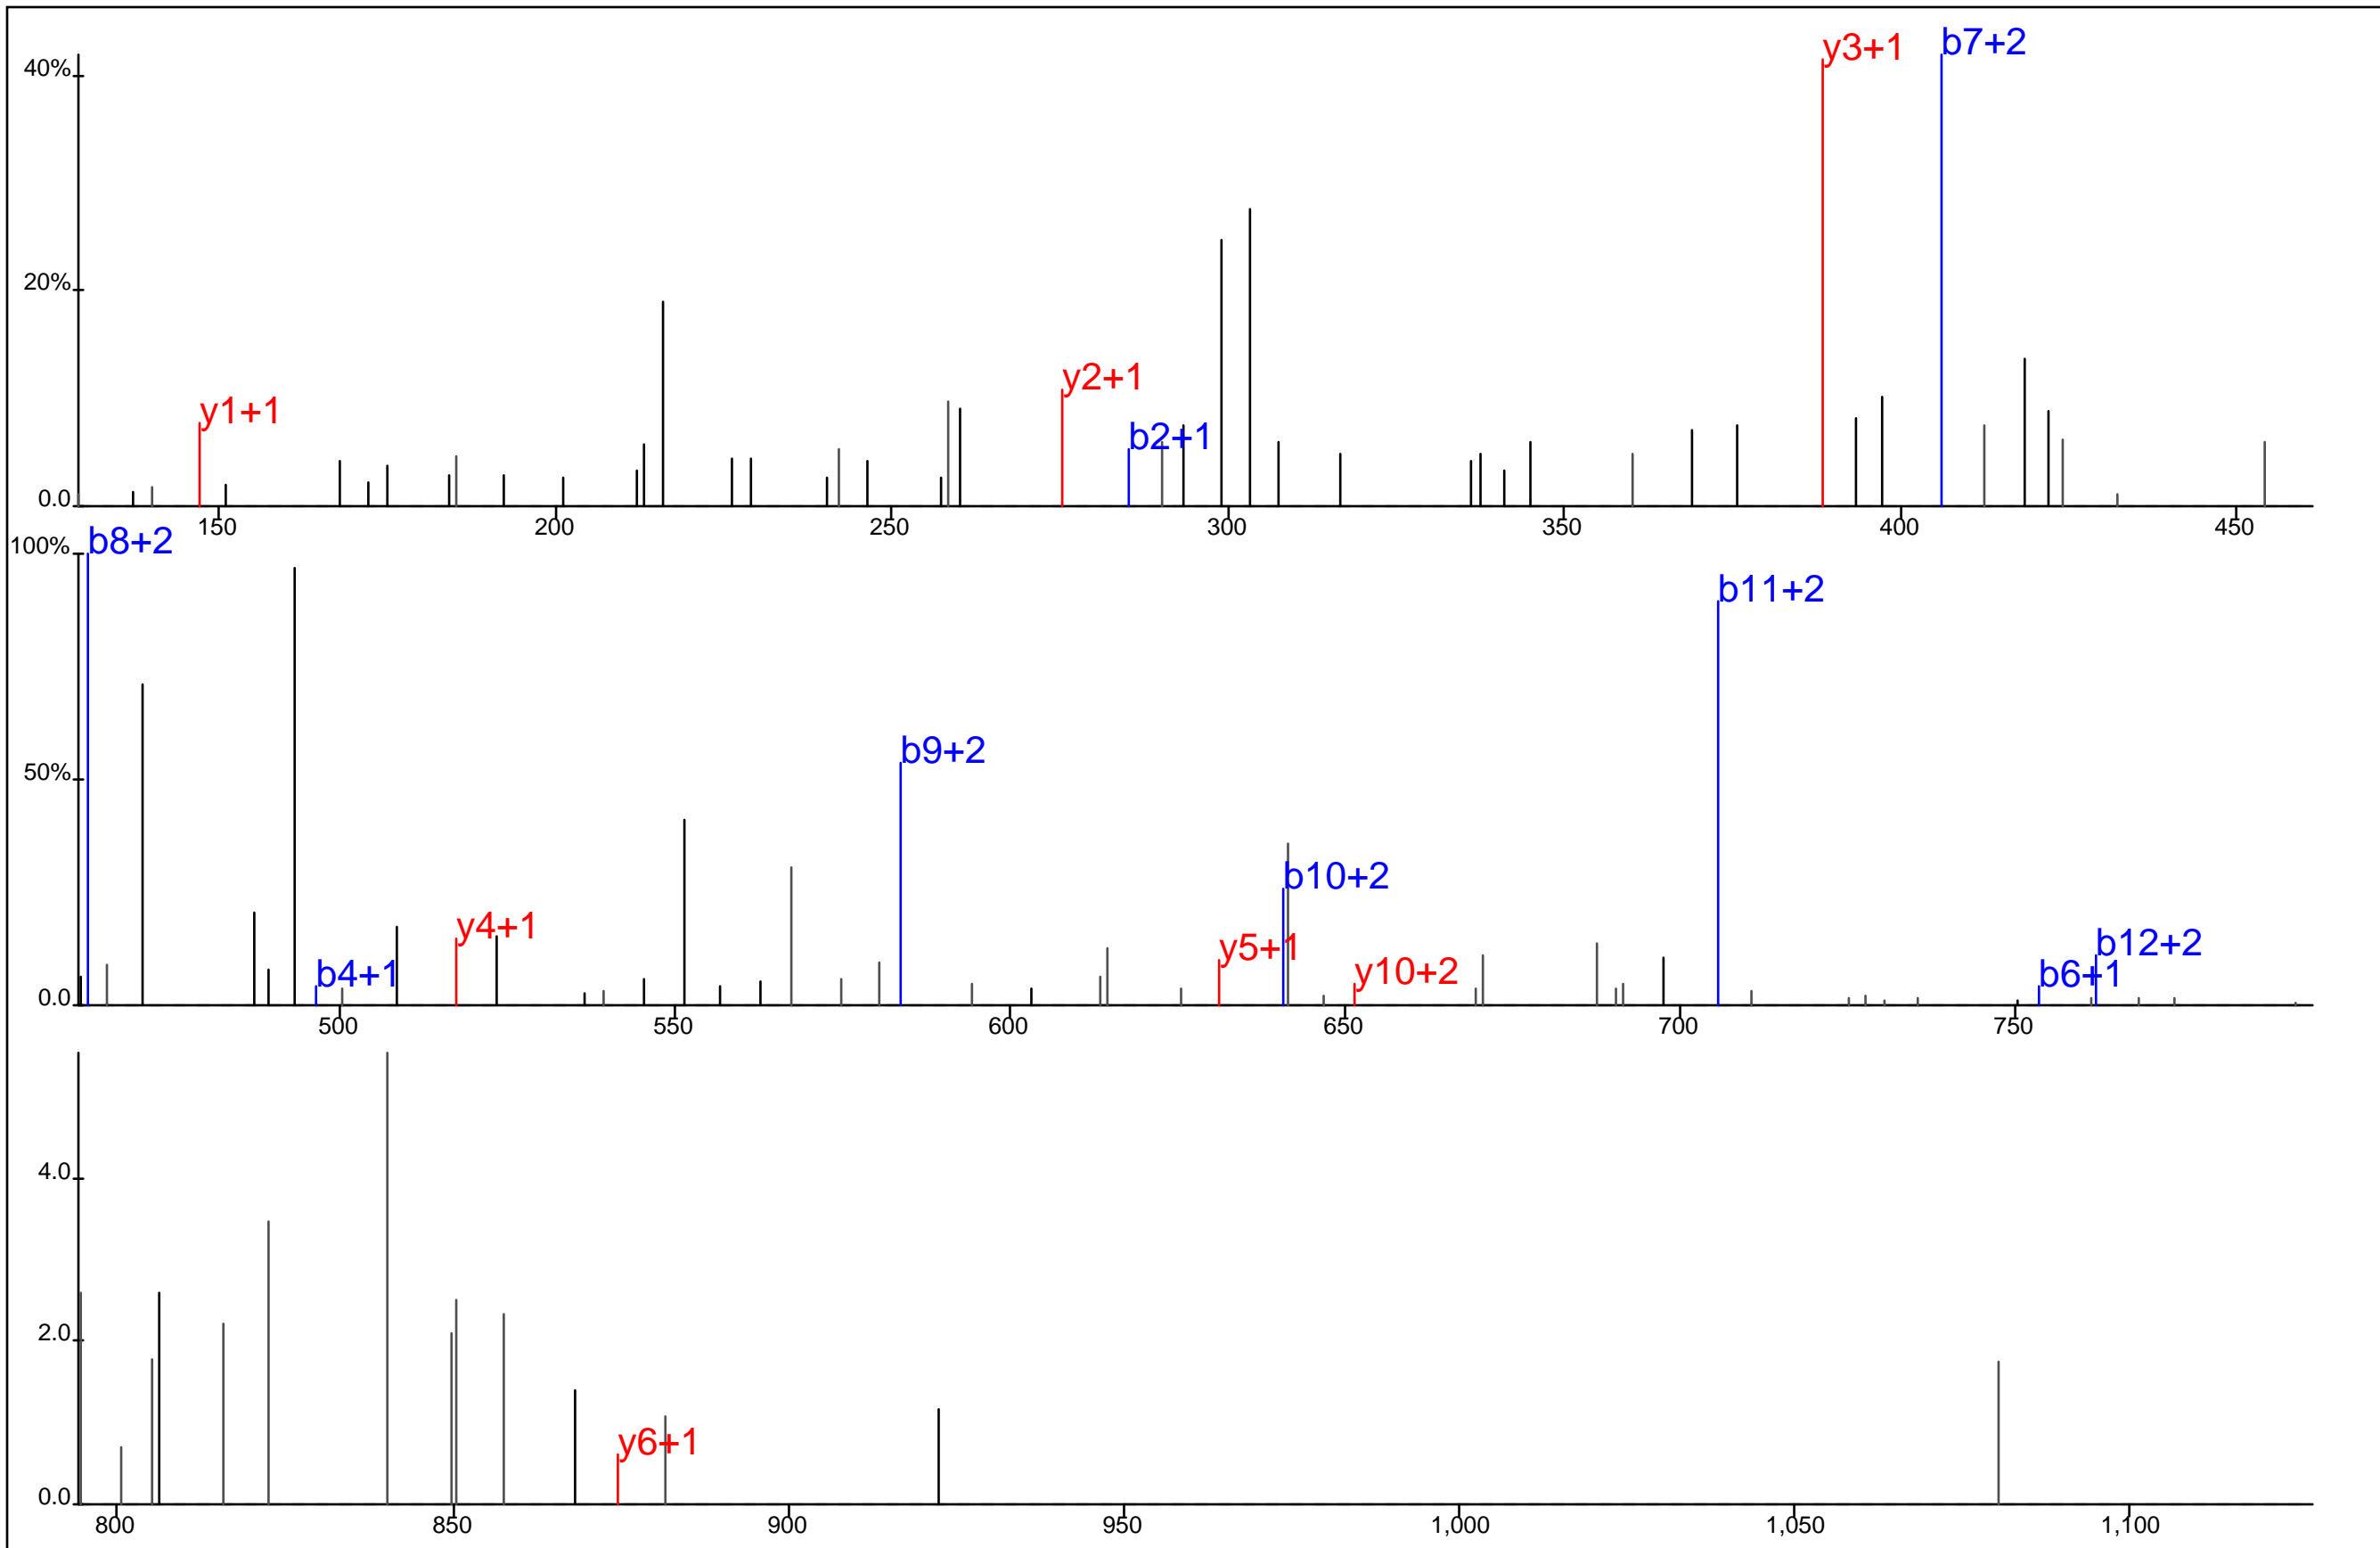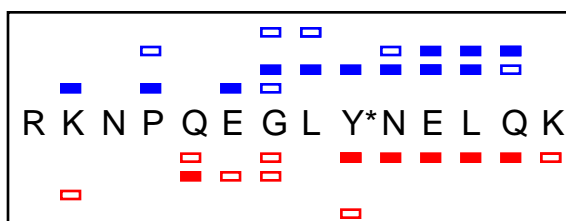

Protein Name: T cell antigen receptor, zeta  
 gi Accession: 0  
 Precursor Mass: 449.9724+4  
 Delta Mass: 0.605 ppm  
 XCorr: 26.07

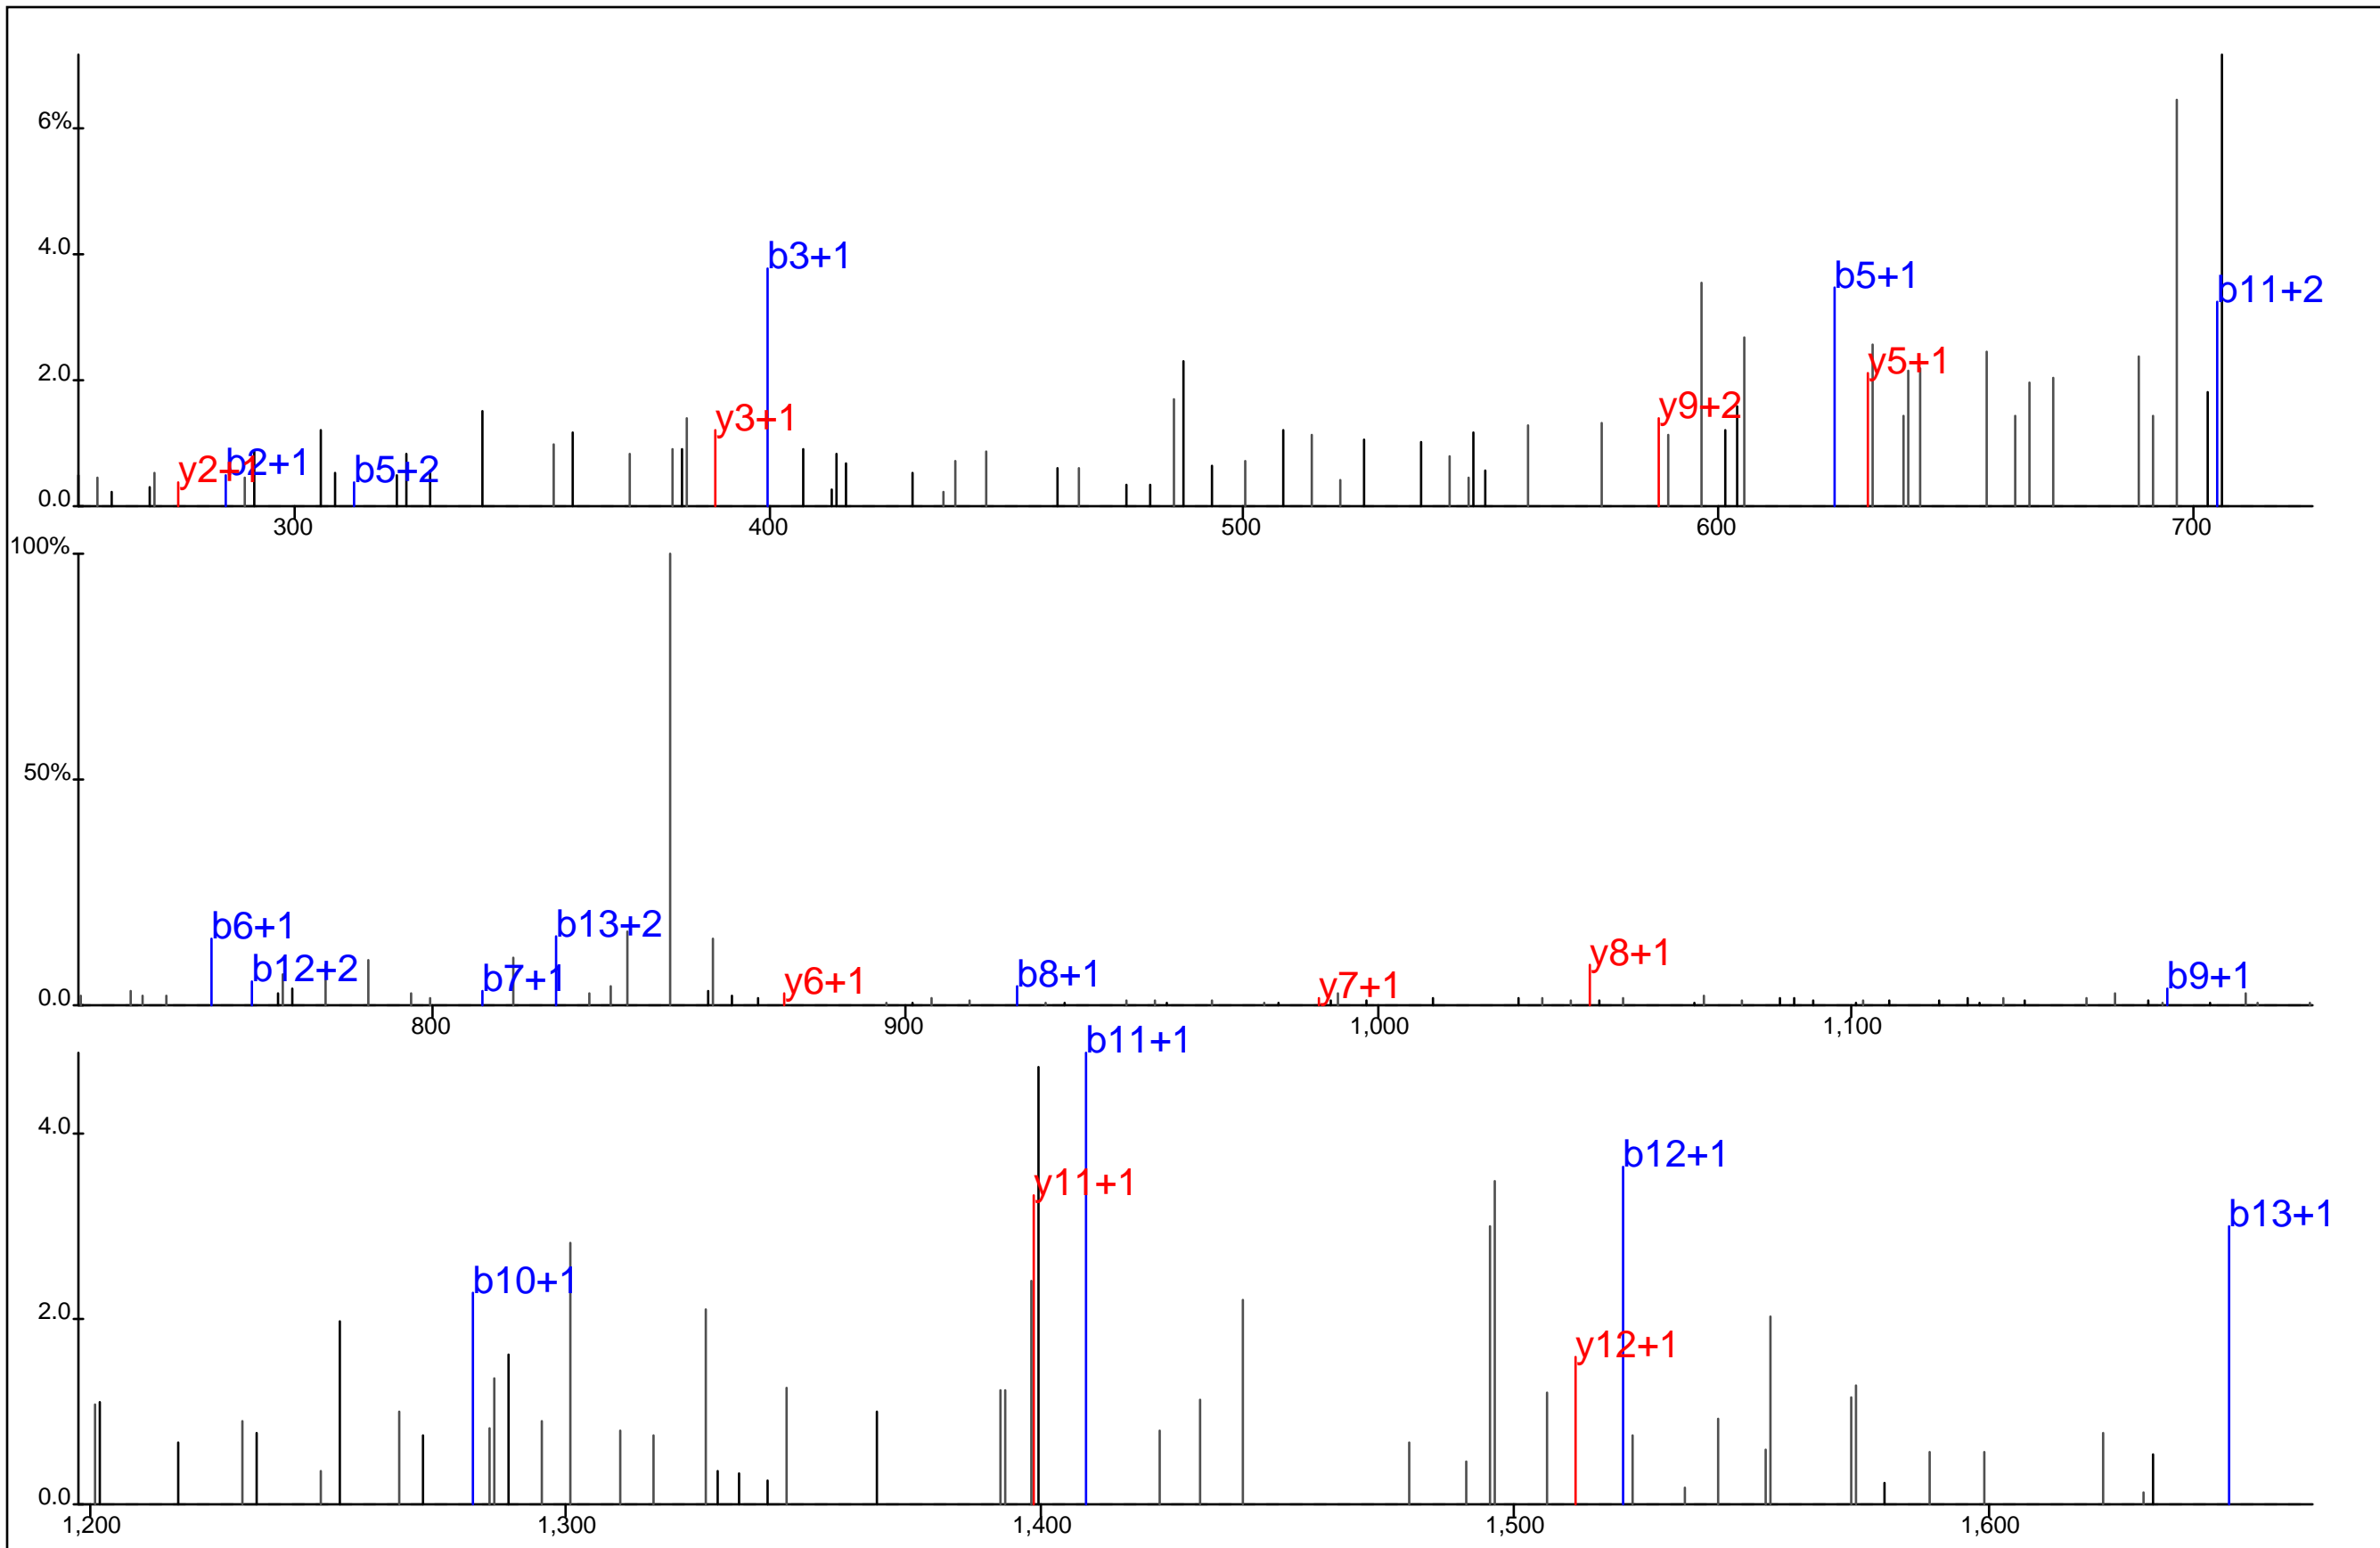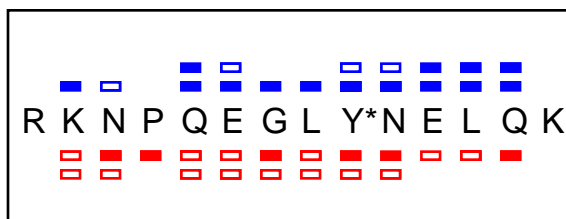

Protein Name: T cell antigen receptor, zeta  
 gi Accession: 0  
 Precursor Mass: 898.9379+2  
 Delta Mass: 0.321 ppm  
 XCorr: 37.3

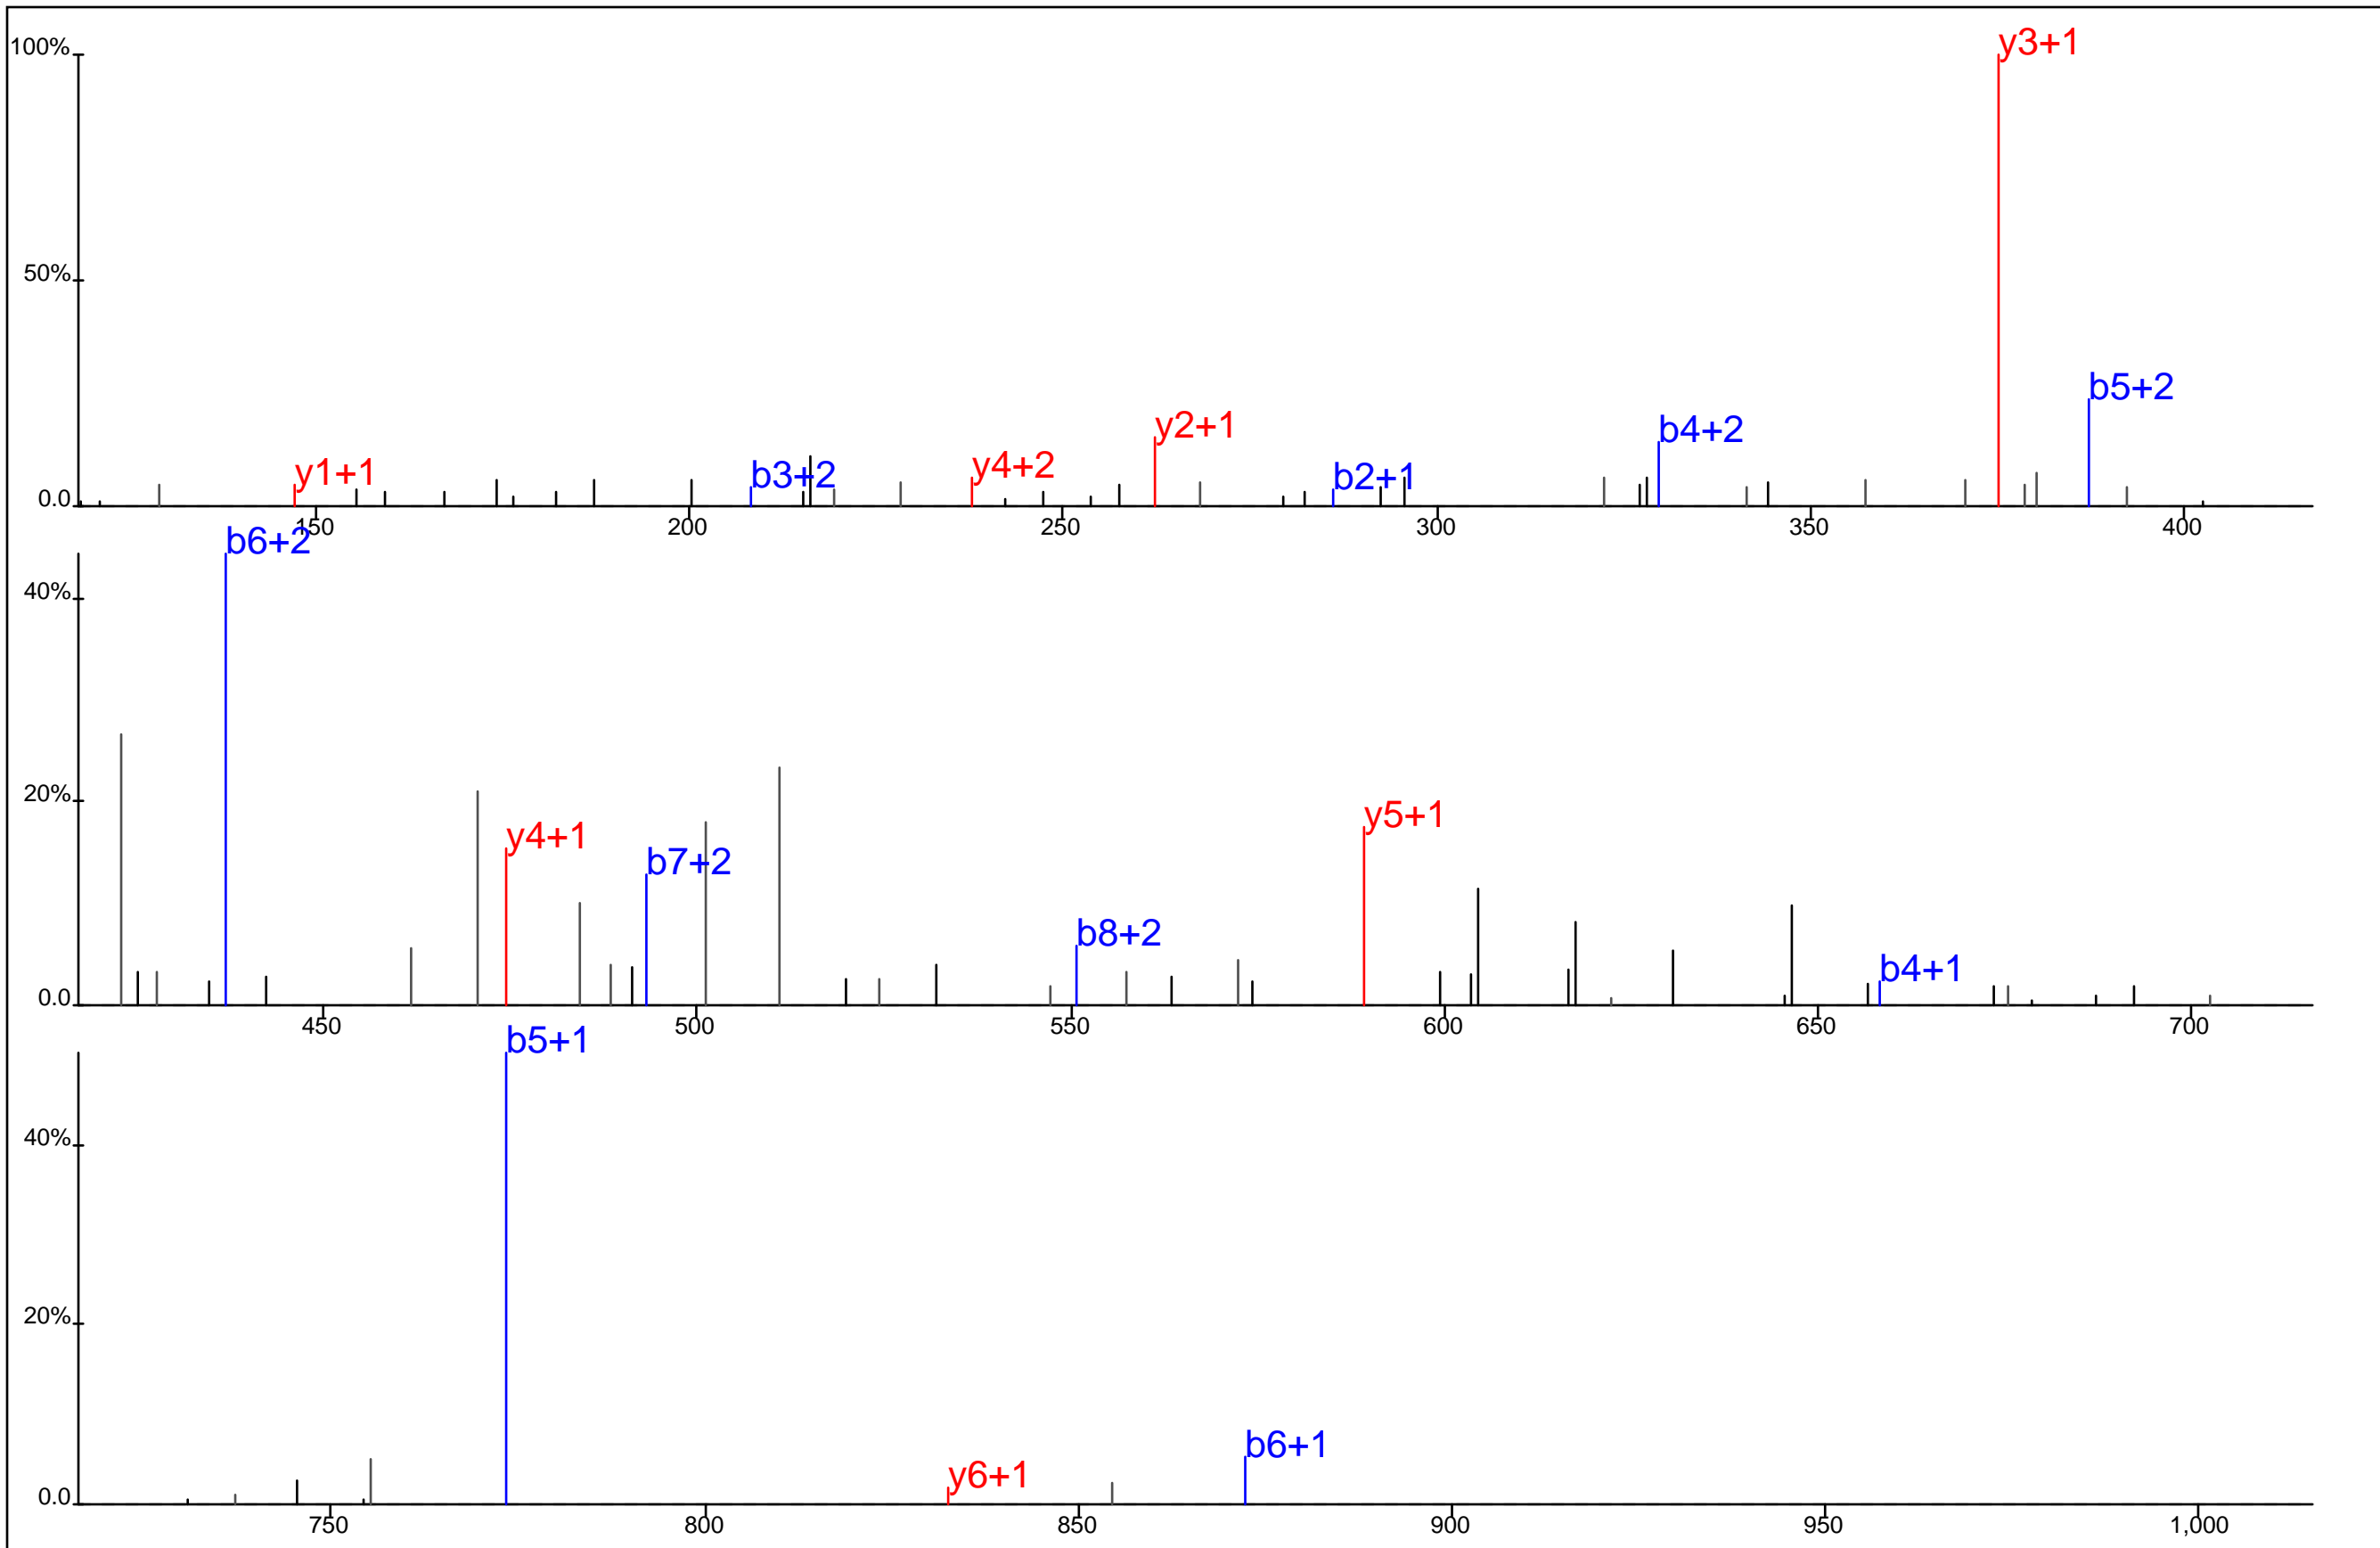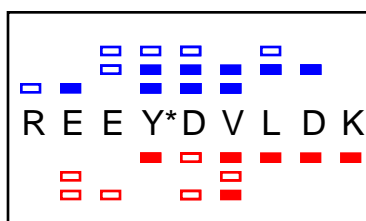

Protein Name: T cell antigen receptor, zeta  
 gi Accession: 0  
 Precursor Mass: 416.1832+3  
 Delta Mass: 0.032 ppm  
 XCorr: 22.13



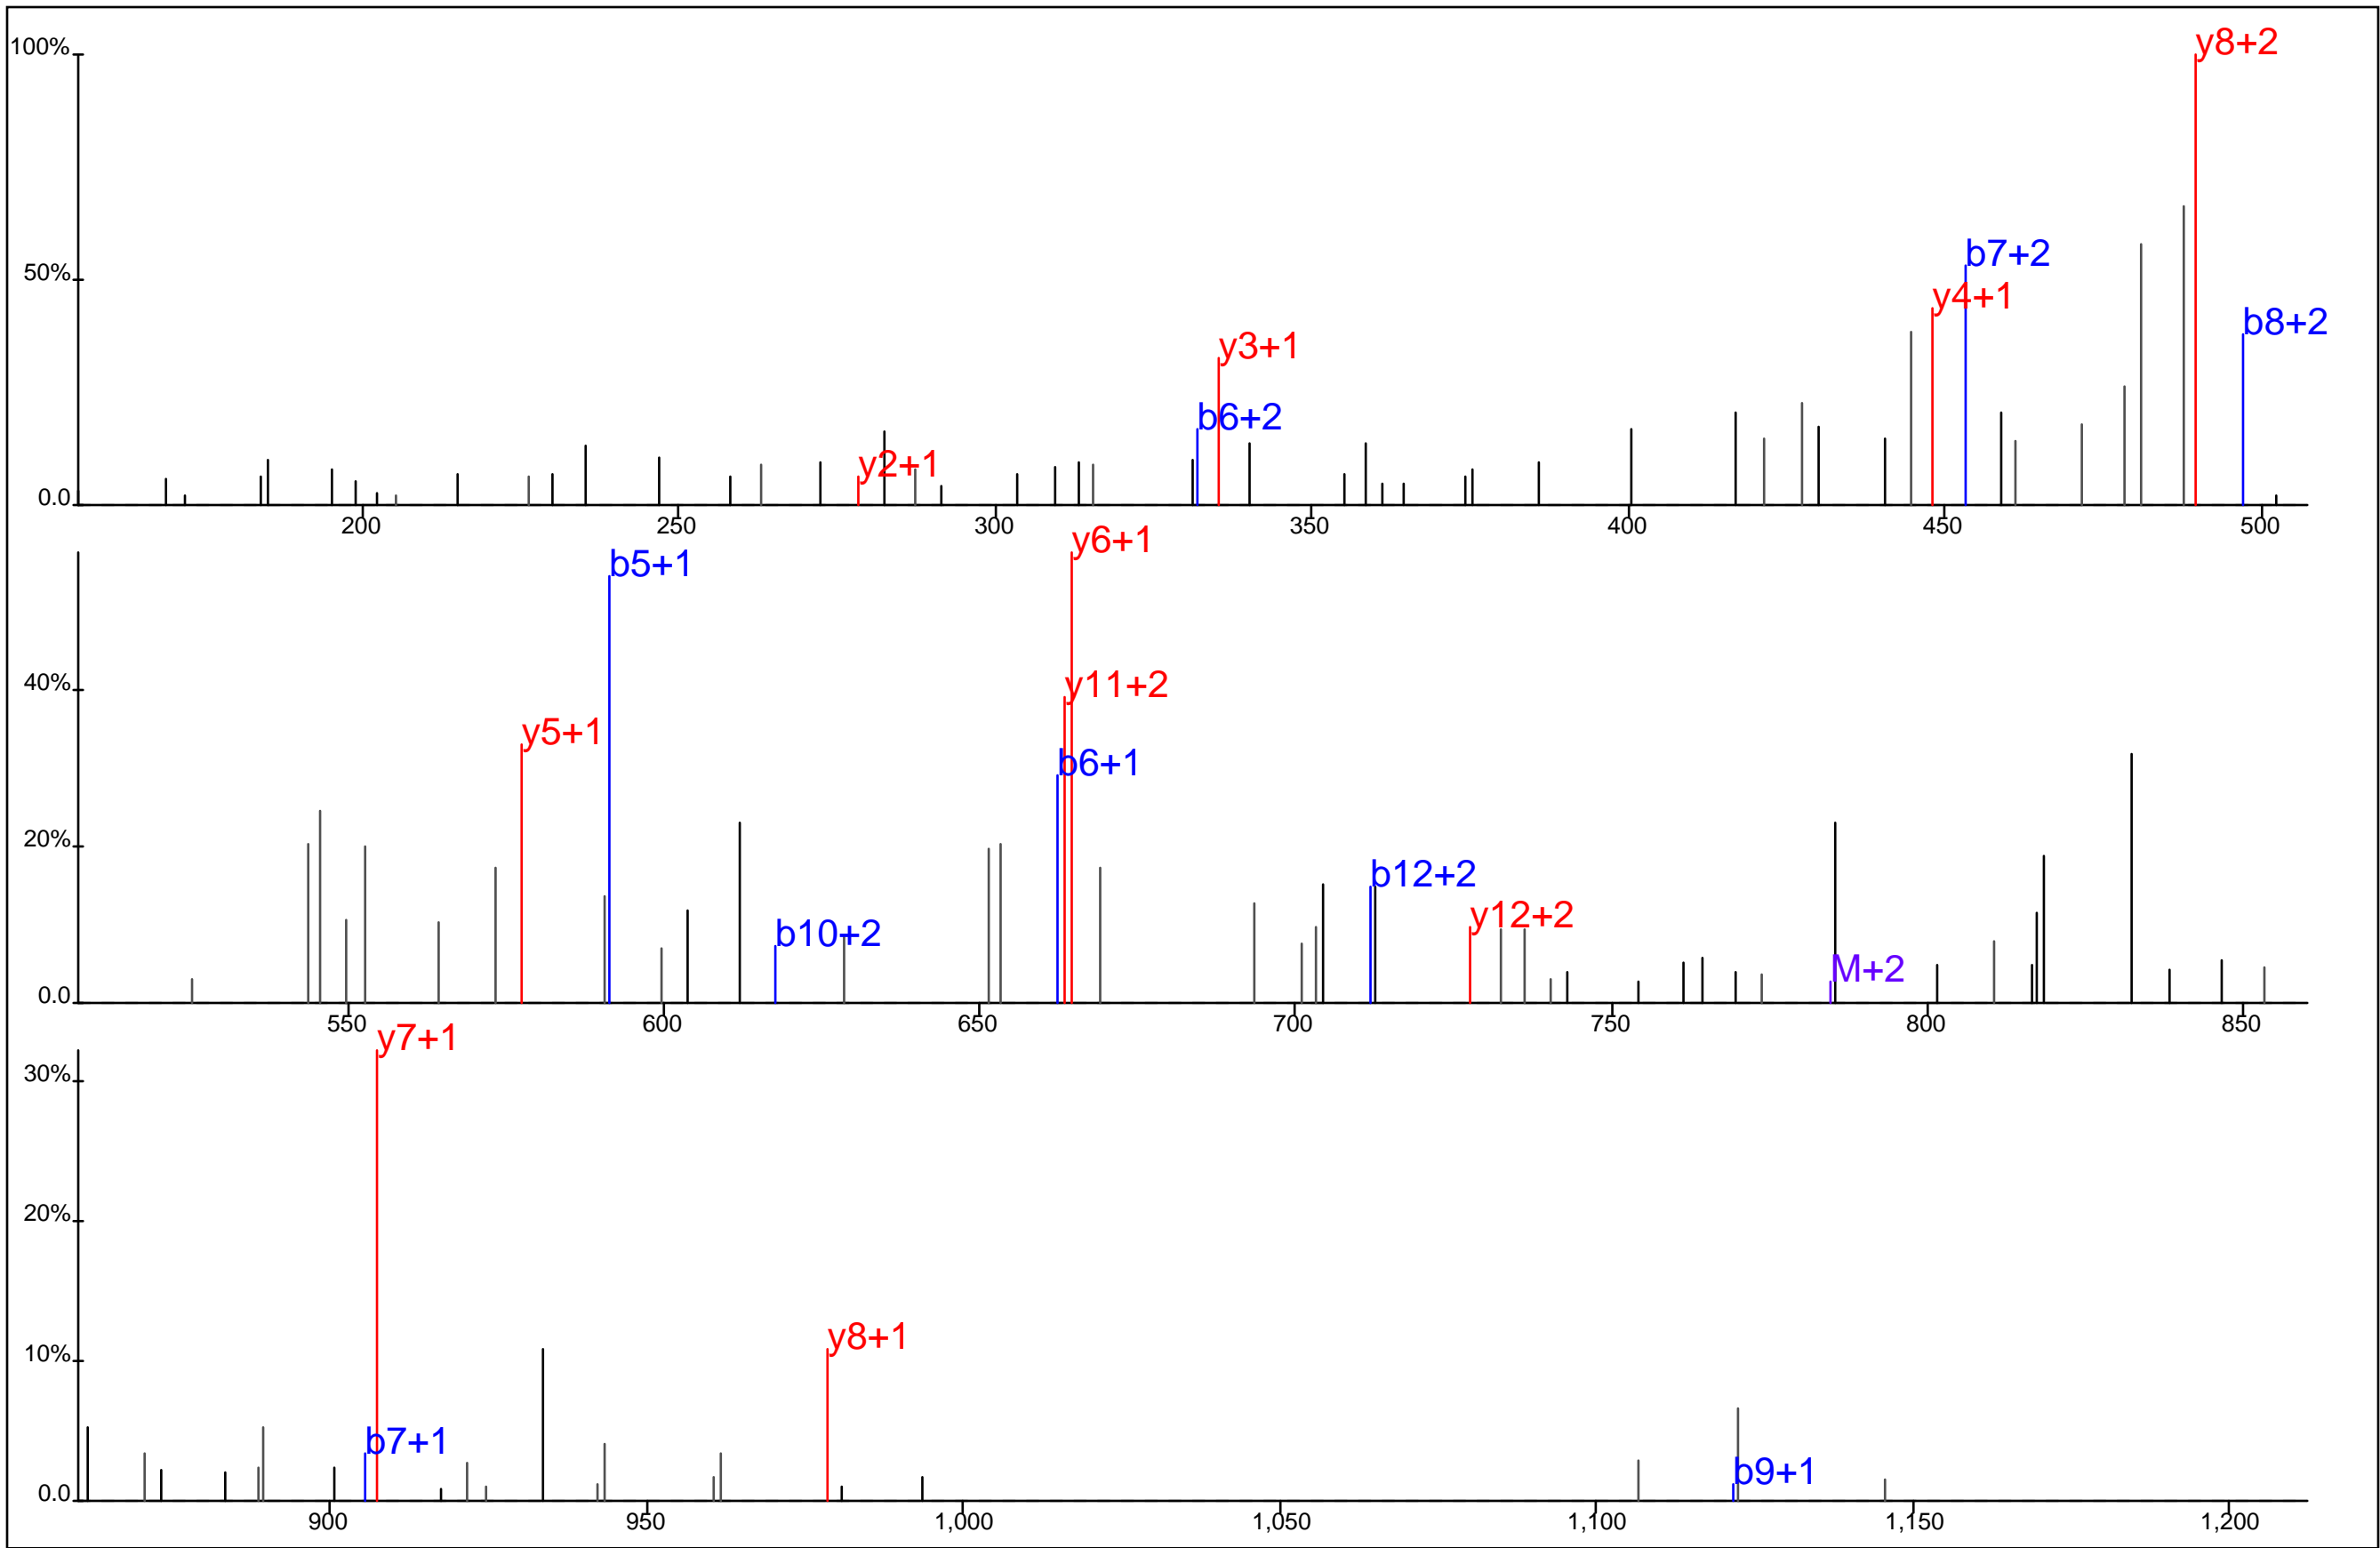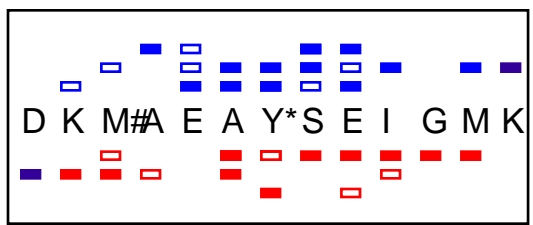

Protein Name: T cell antigen receptor, zeta  
 gi Accession: 0  
 Precursor Mass: 523.5504+3  
 Delta Mass: 0.422 ppm  
 XCorr: 29.89



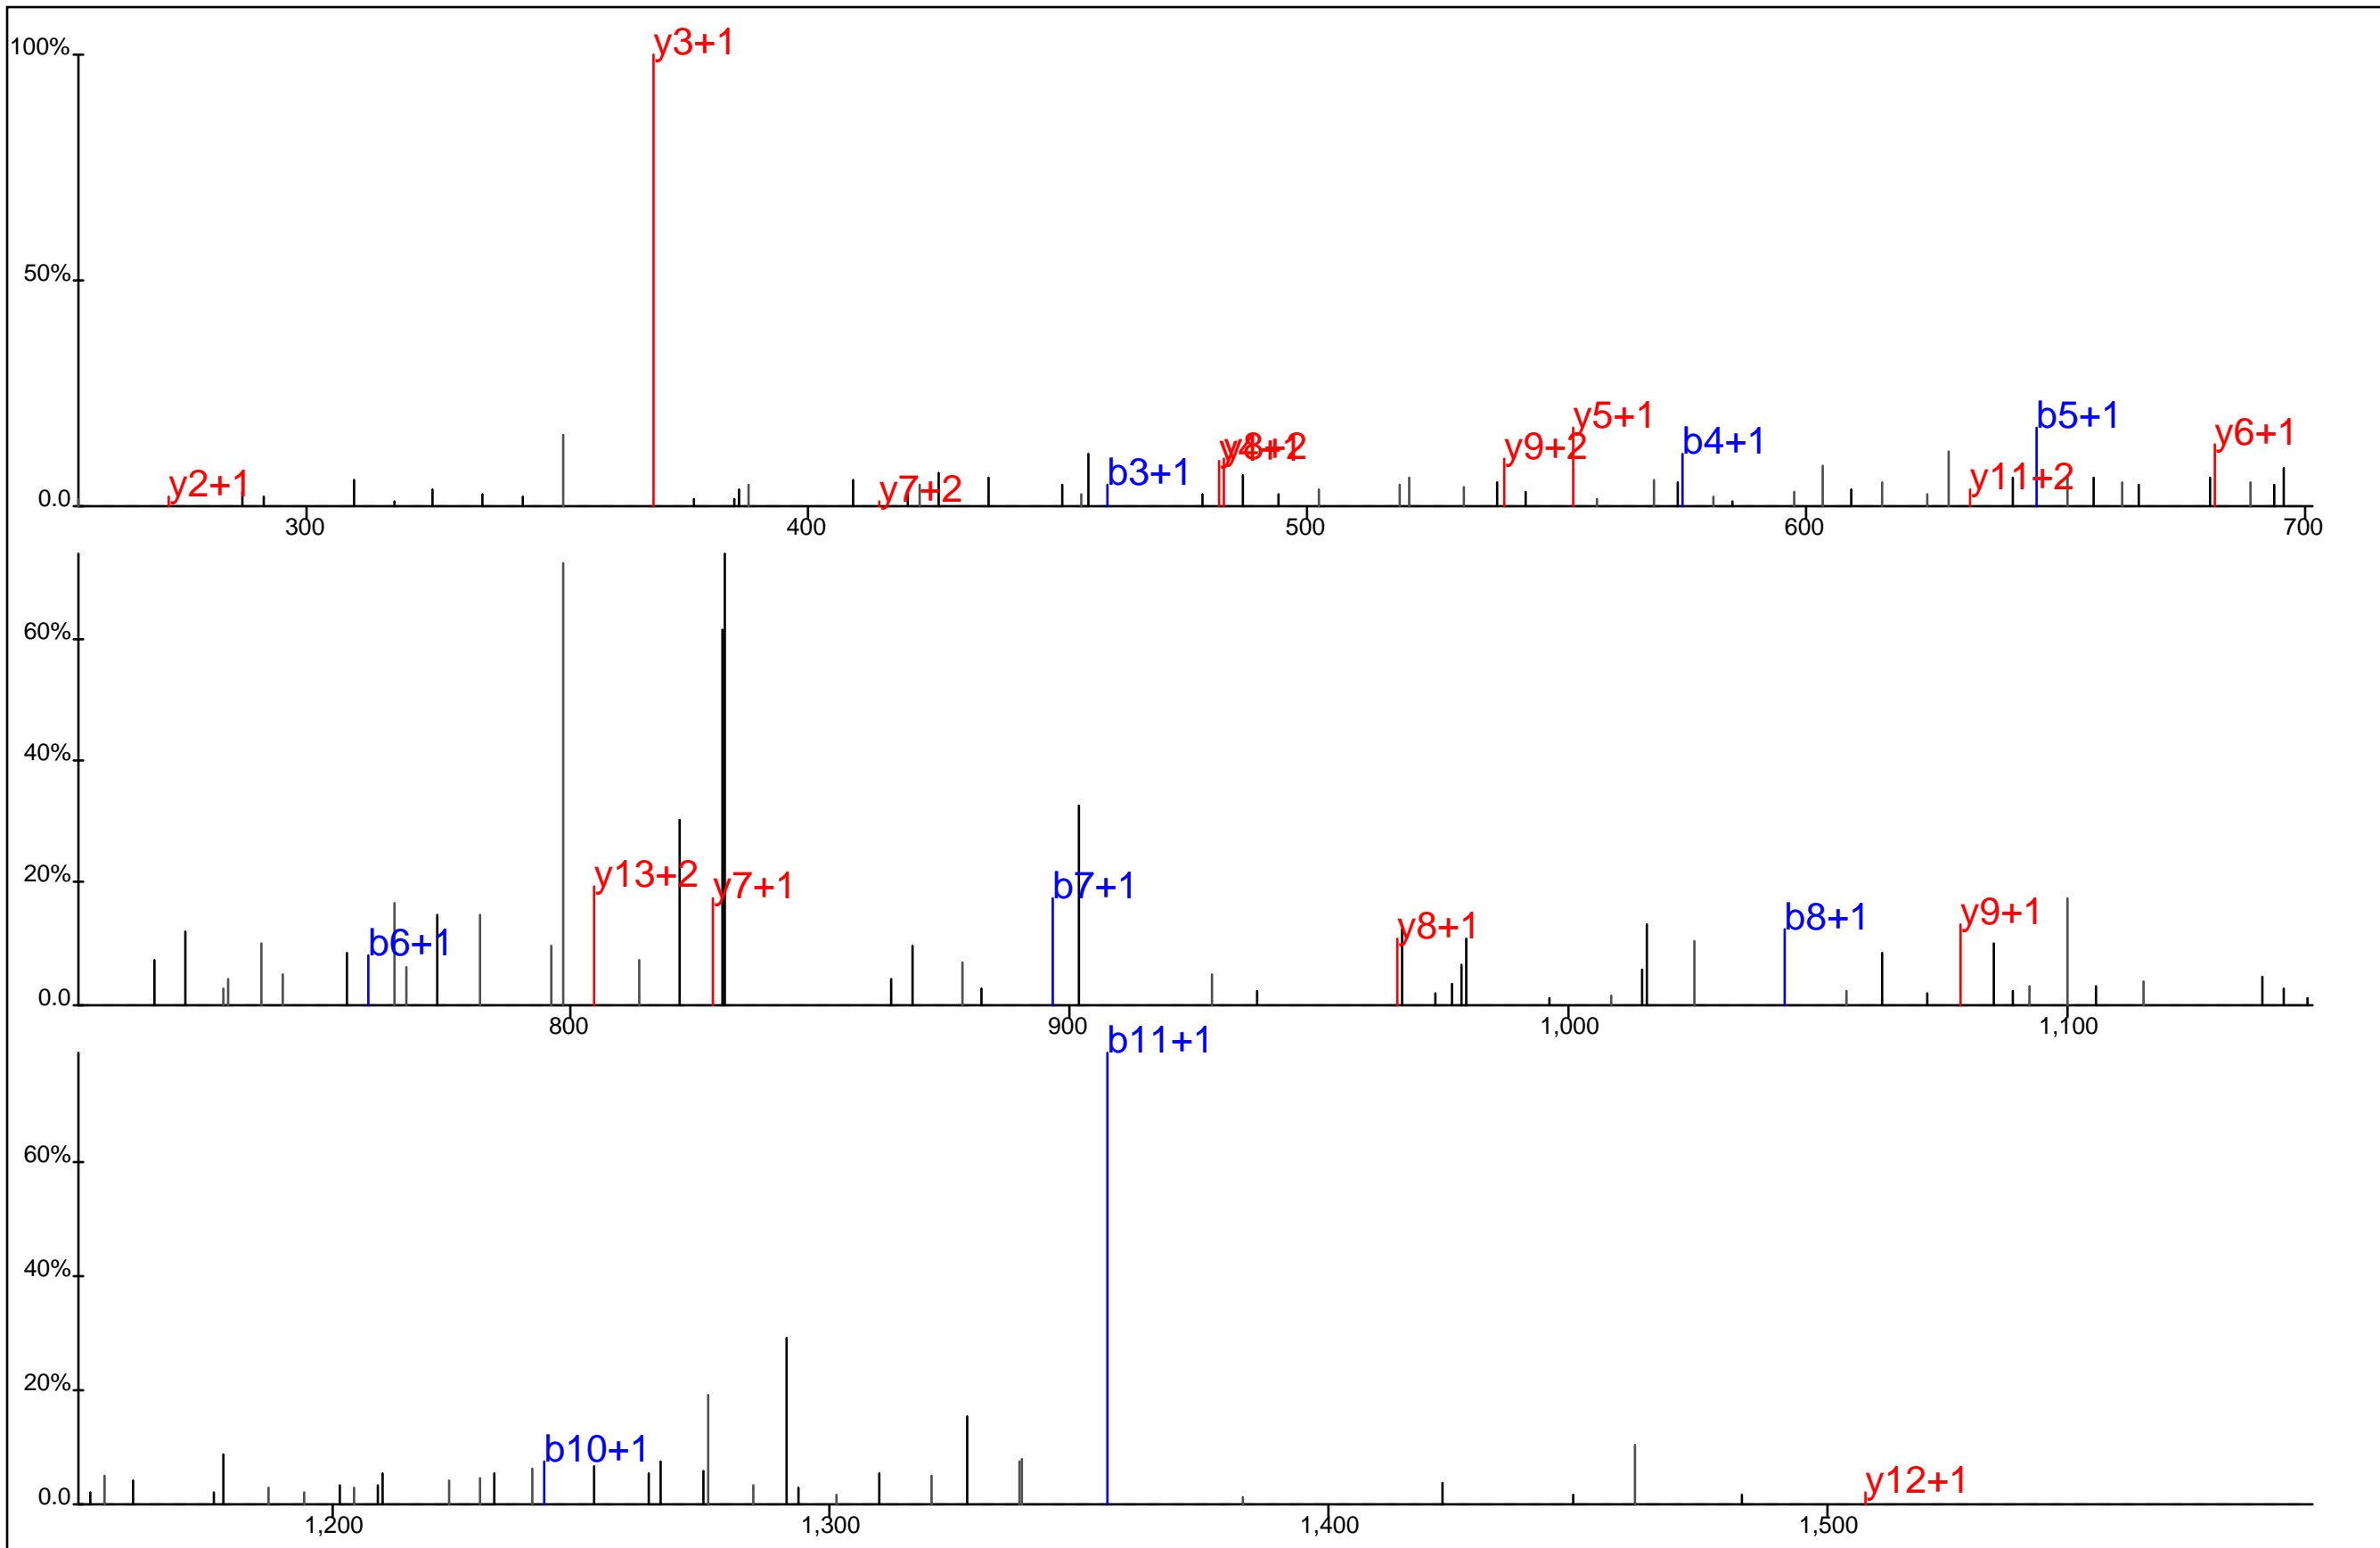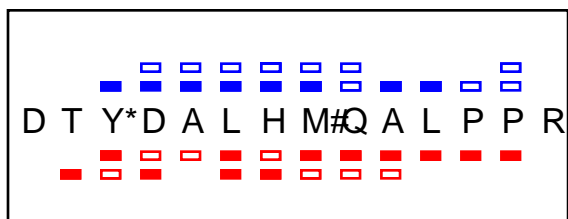

Protein Name: T cell antigen receptor, zeta  
 gi Accession: 0  
 Precursor Mass: 862.3805+2  
 Delta Mass: 1.612 ppm  
 XCorr: 35.96

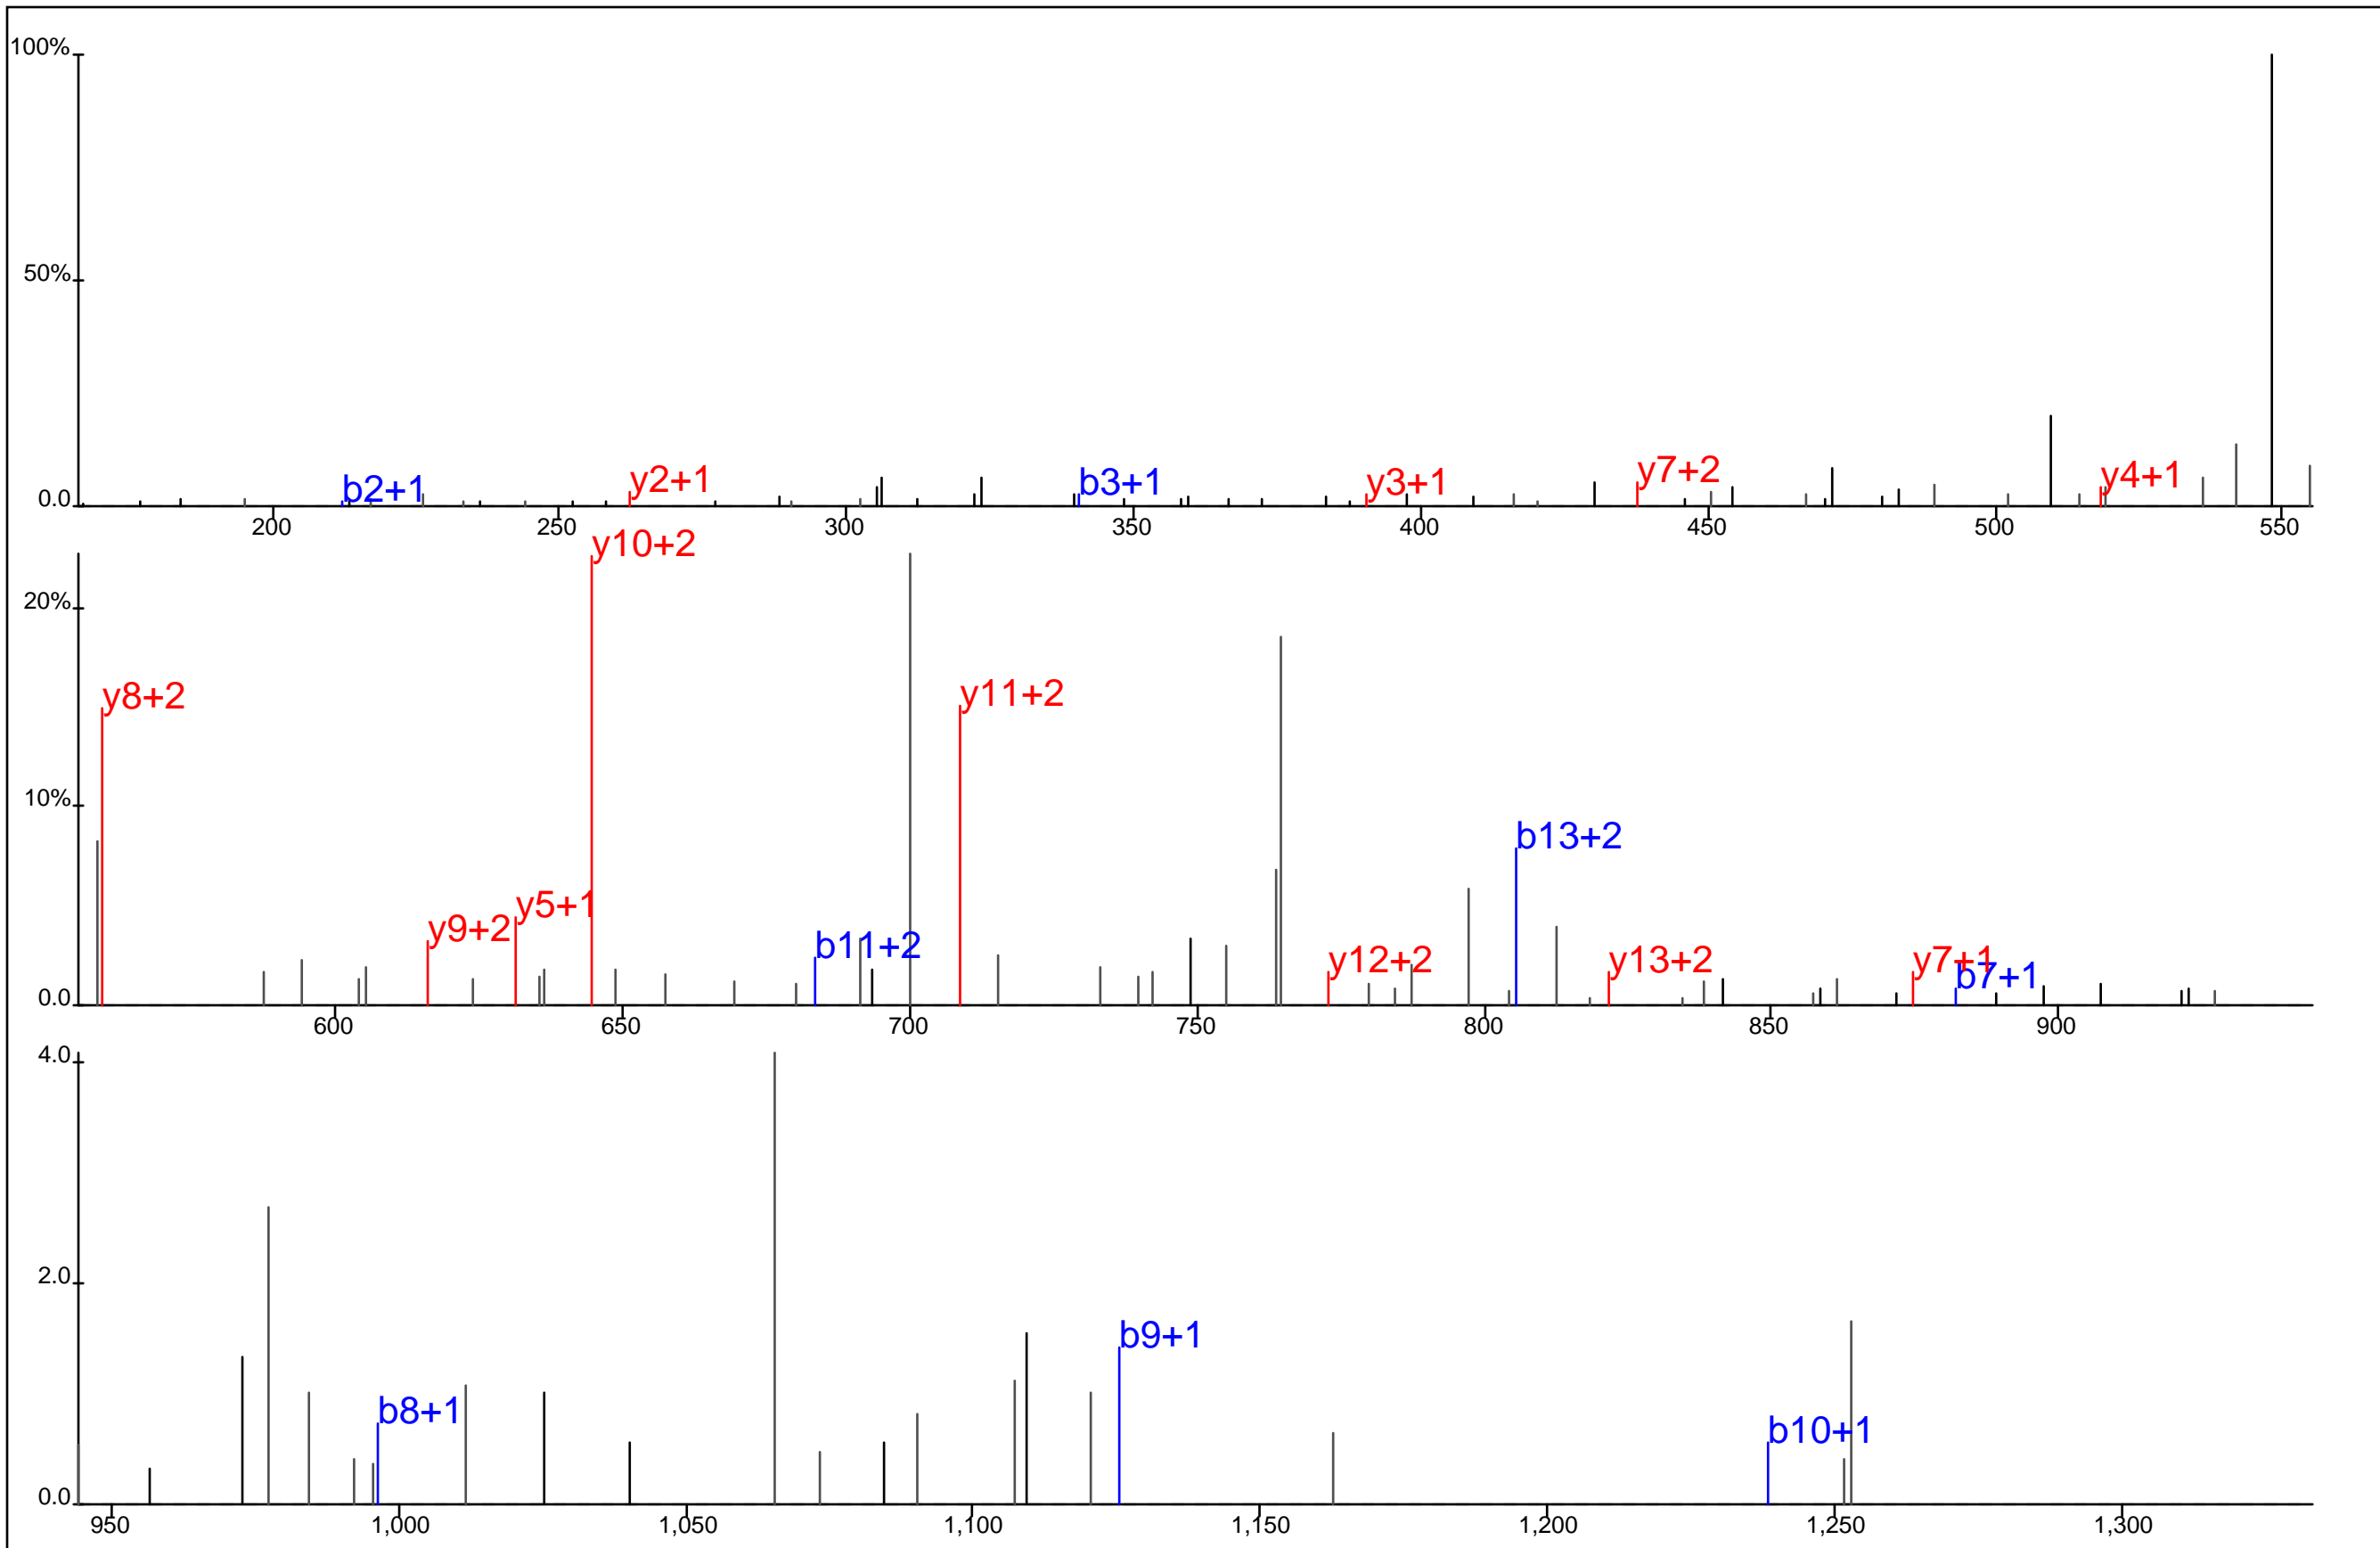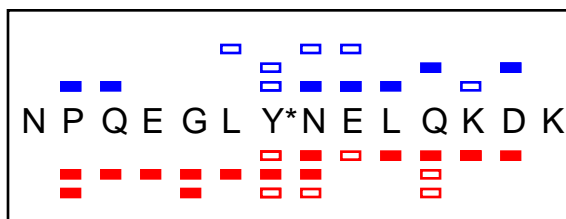

Protein Name: T cell antigen receptor, zeta  
 gi Accession: 0  
 Precursor Mass: 585.9356+3  
 Delta Mass: 1.481 ppm  
 XCorr: 24.08

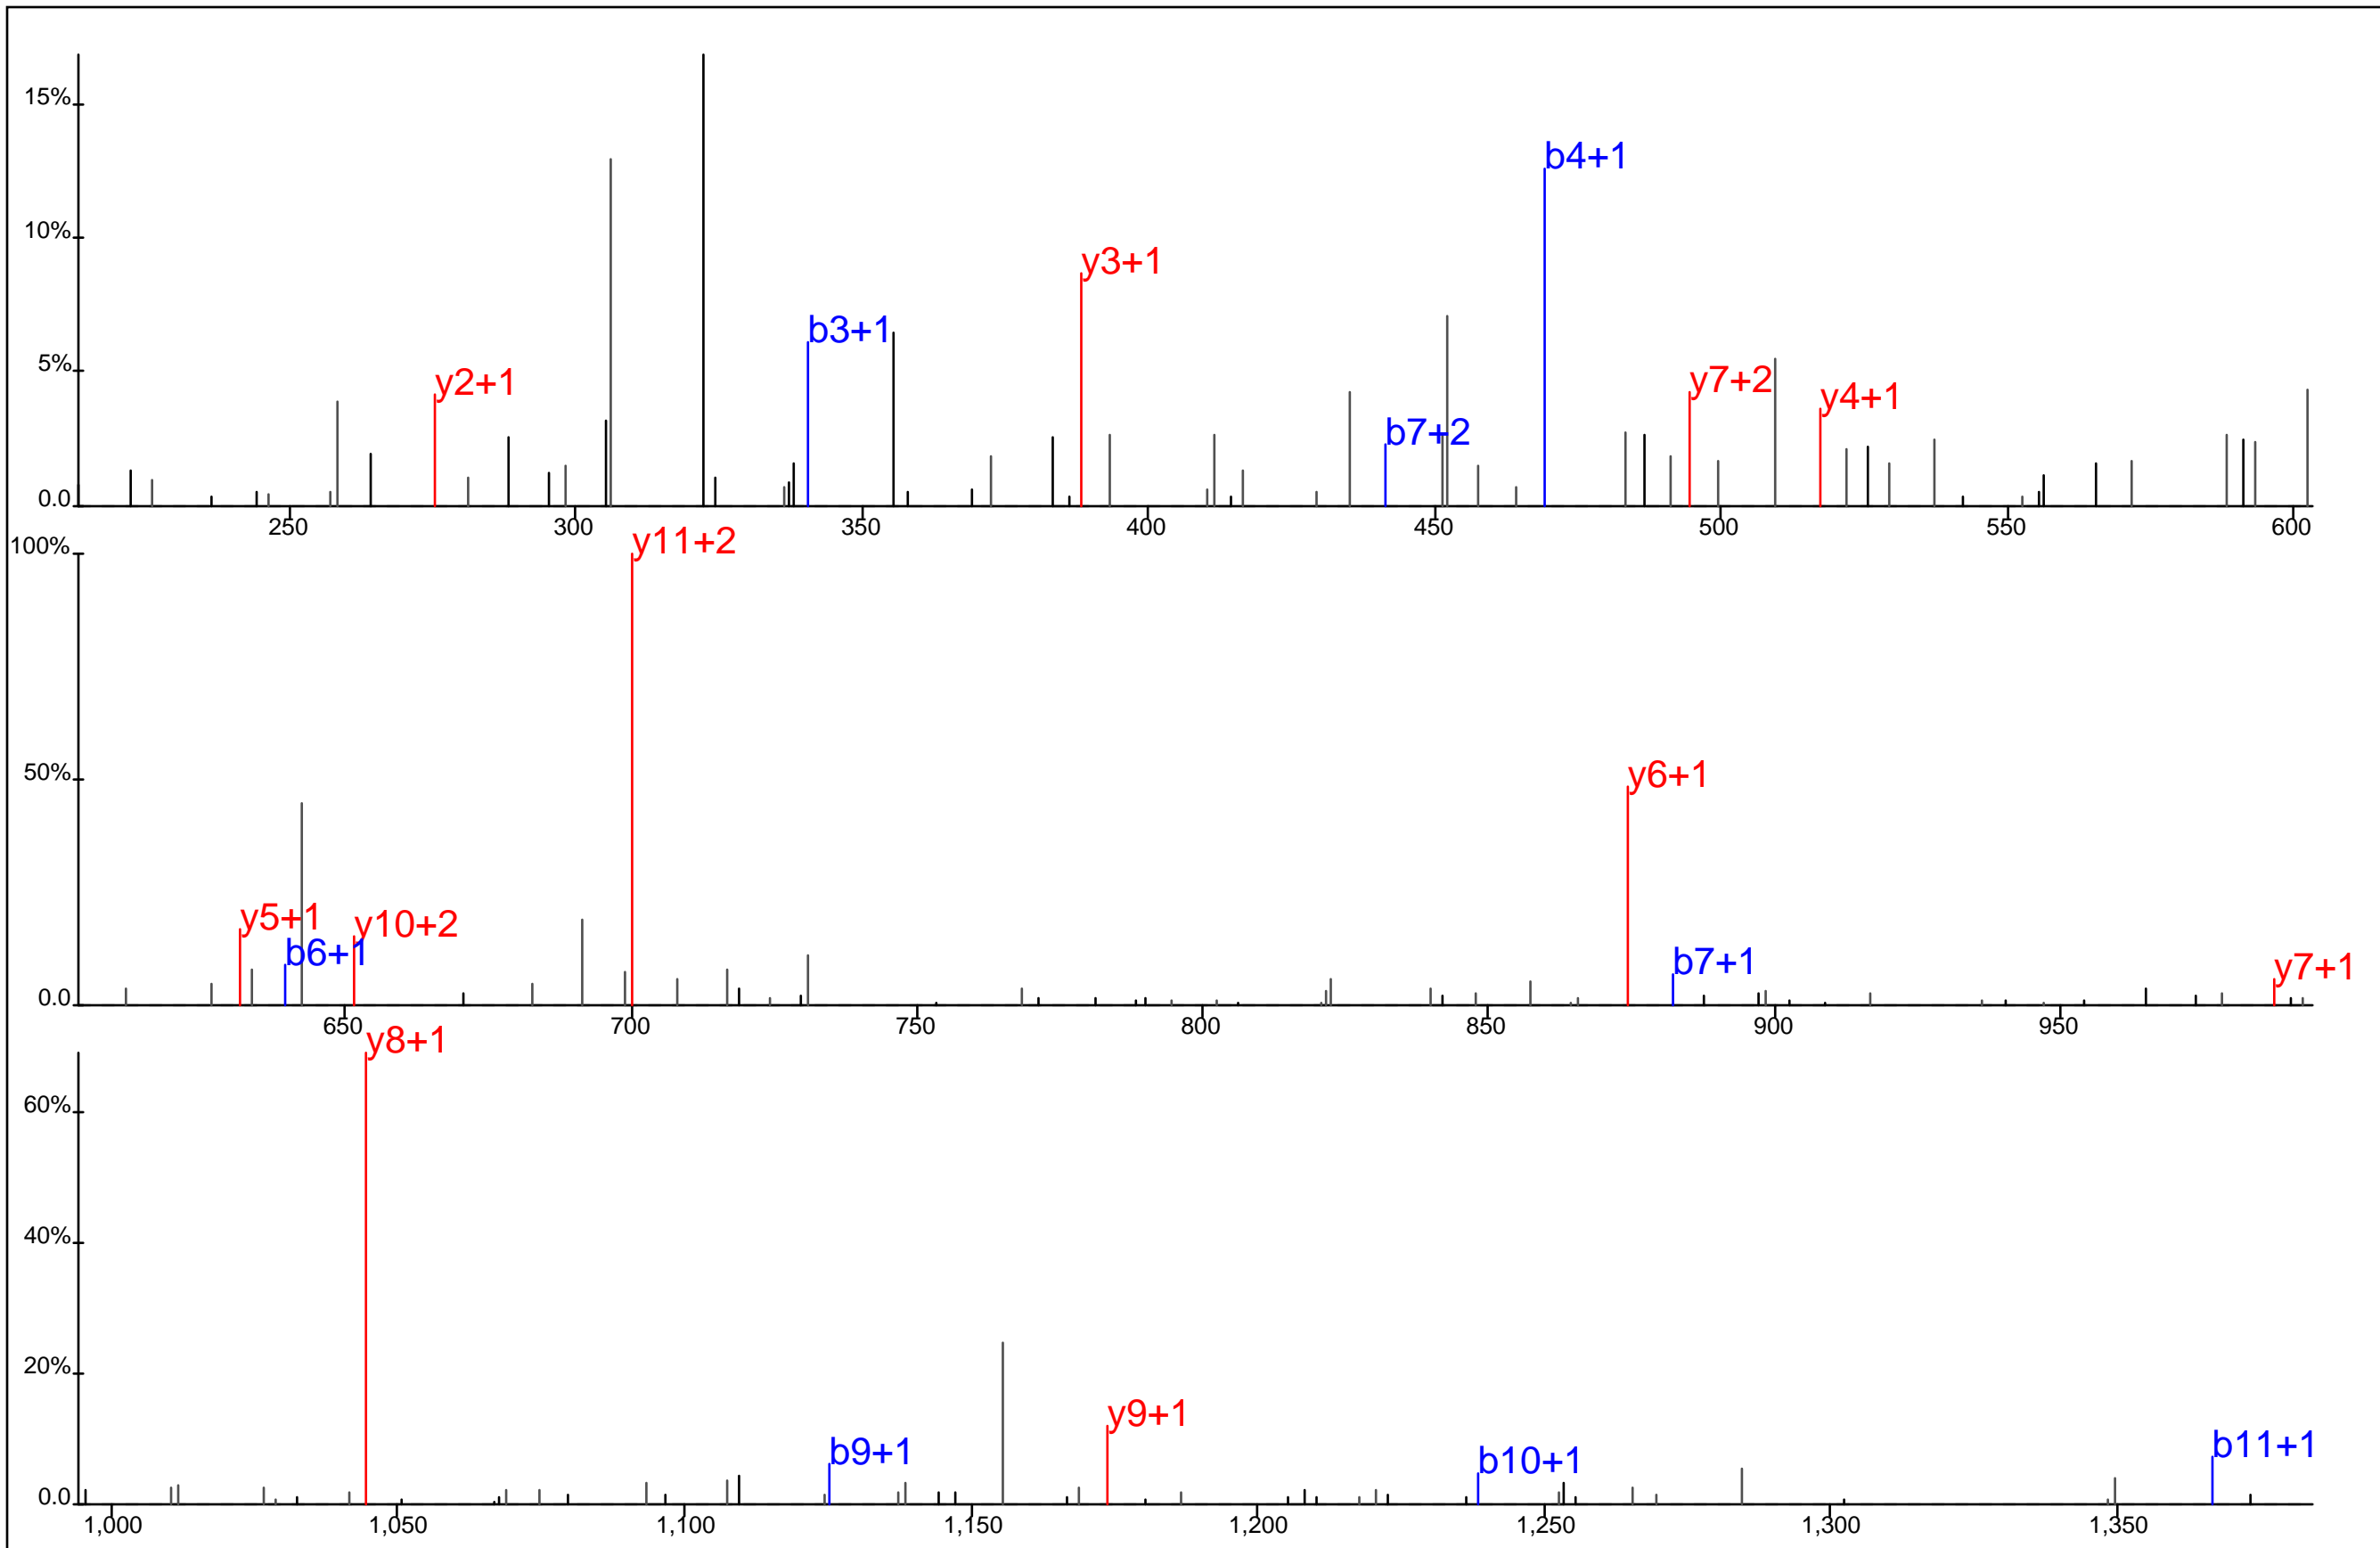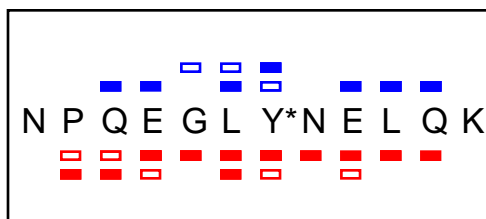

Protein Name: T cell antigen receptor, zeta  
 gi Accession: 0  
 Precursor Mass: 756.8402+2  
 Delta Mass: 0.114 ppm  
 XCorr: 47.24

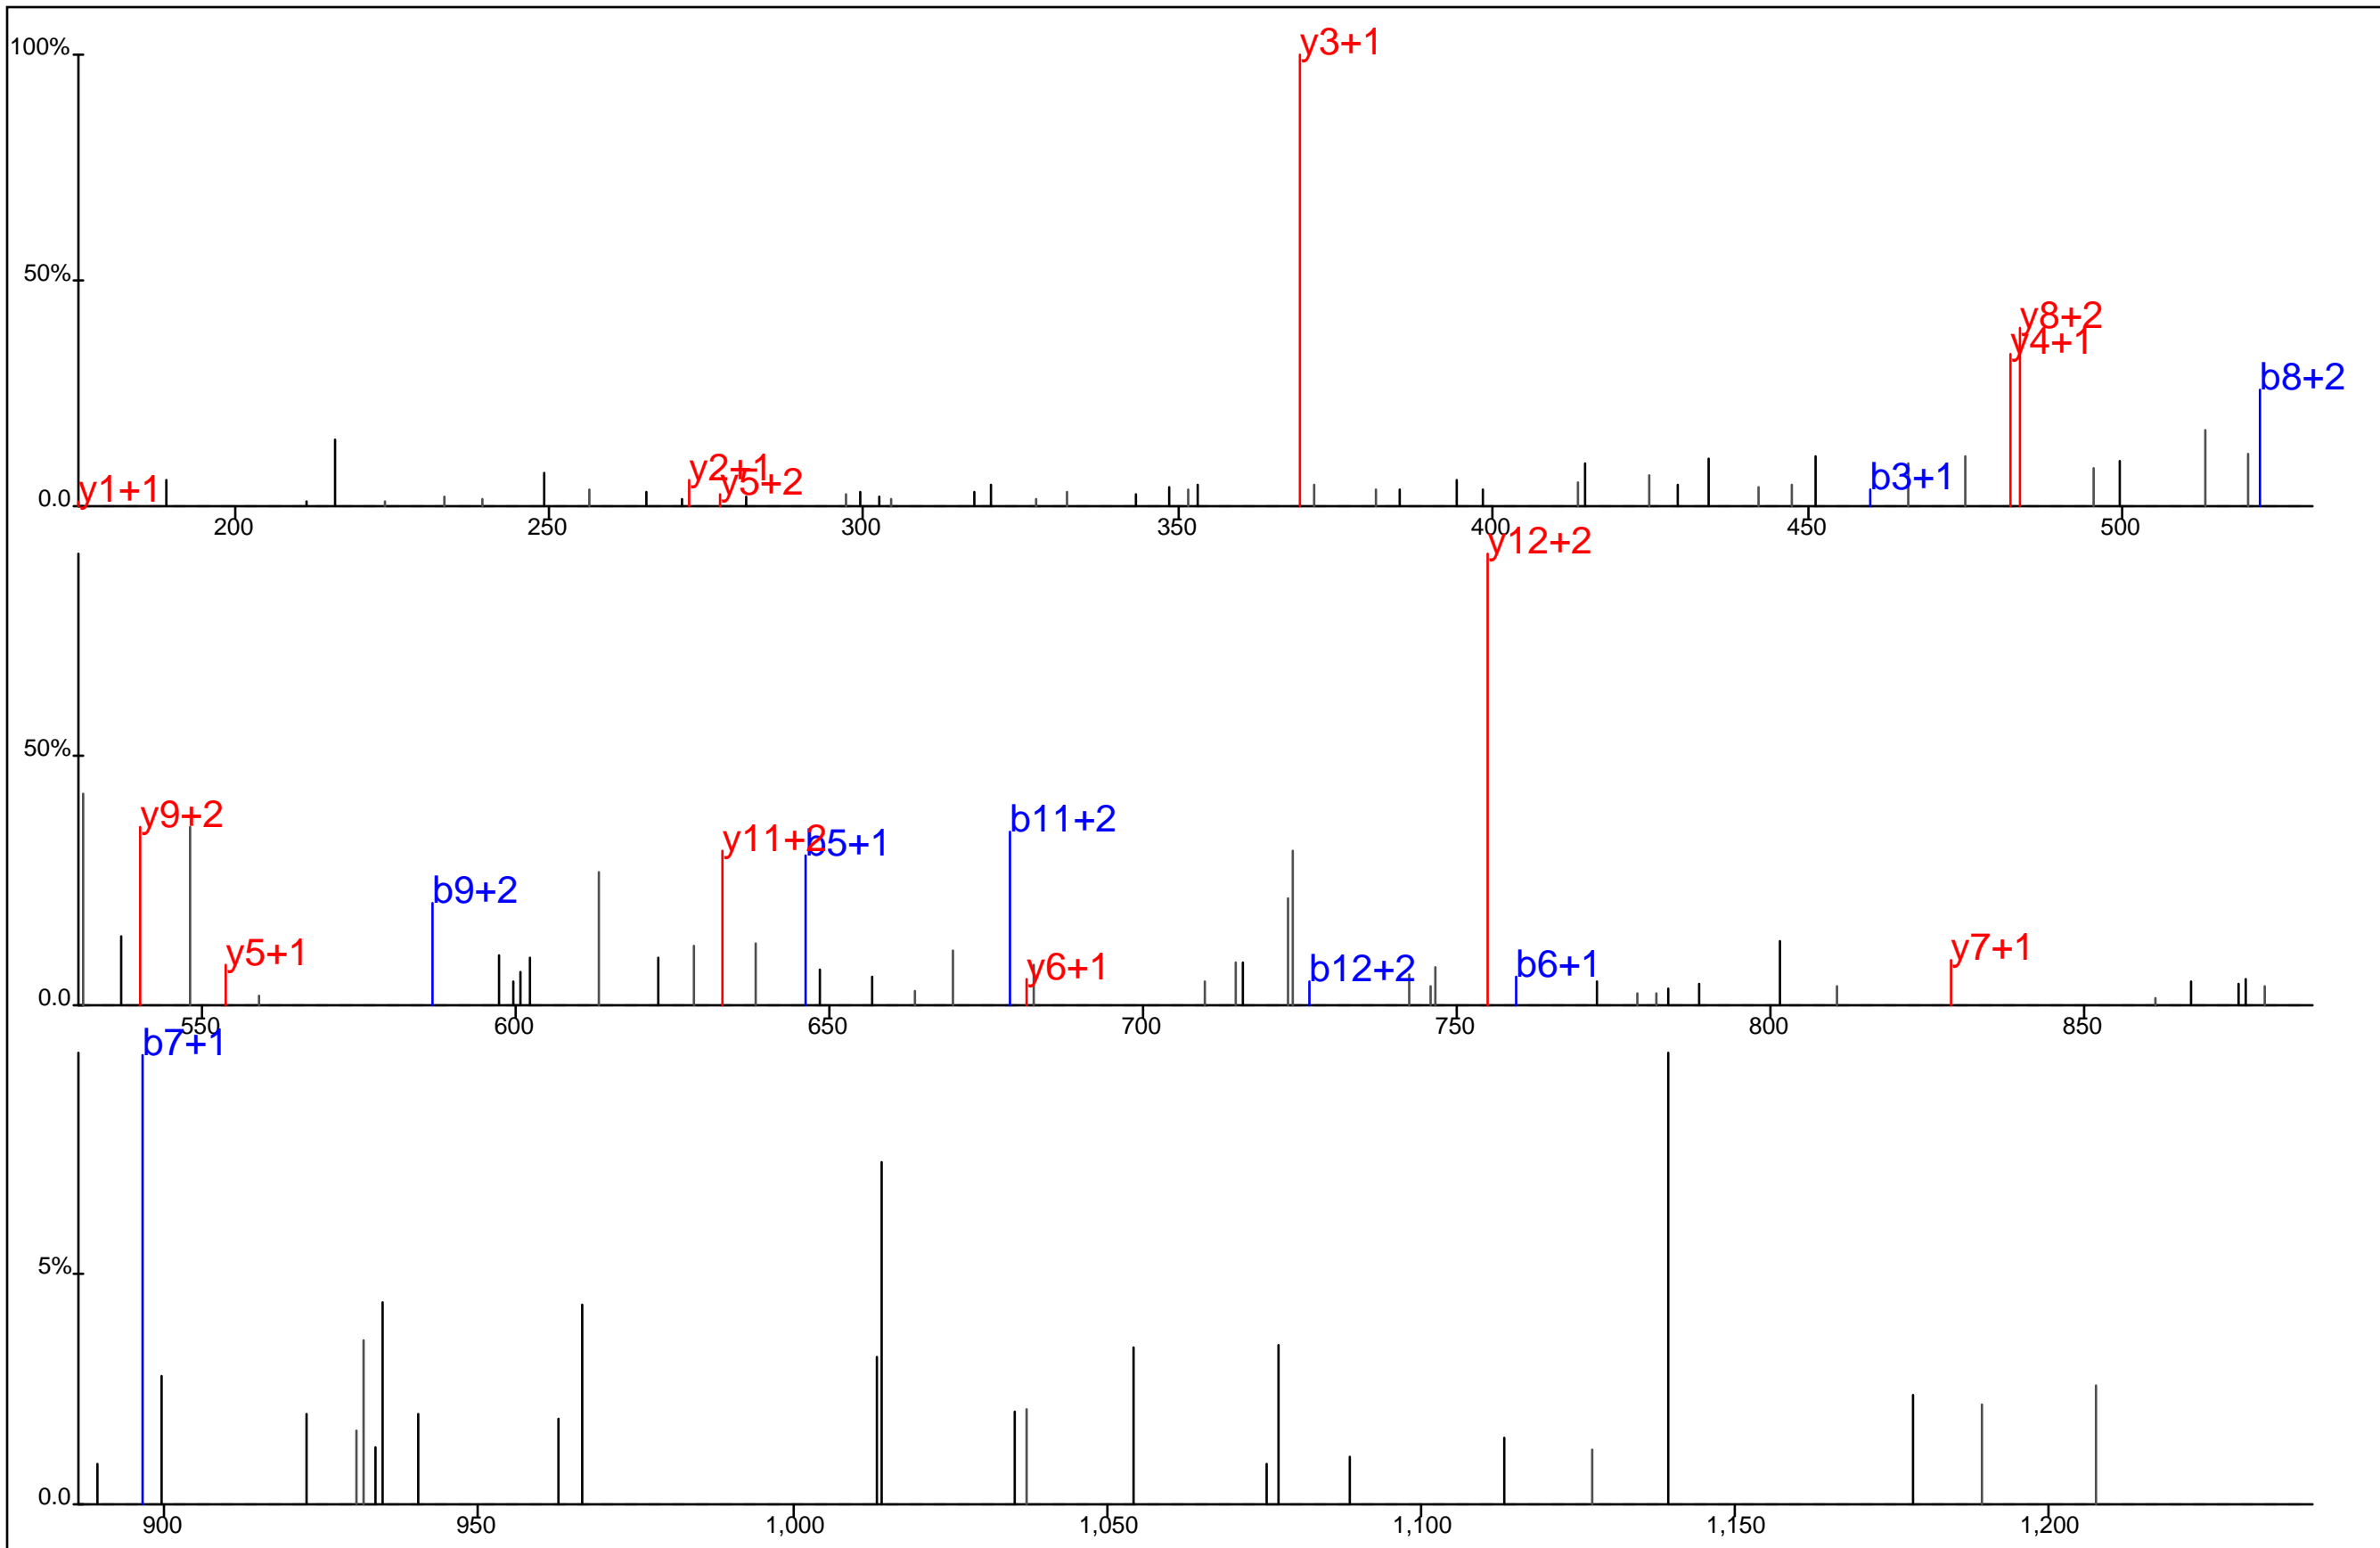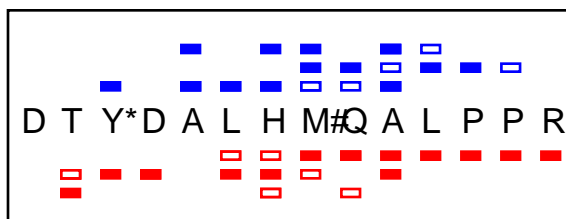

Protein Name: T cell antigen receptor, zeta  
 gi Accession: 0  
 Precursor Mass: 575.2563+3  
 Delta Mass: 2.065 ppm  
 XCorr: 22.78

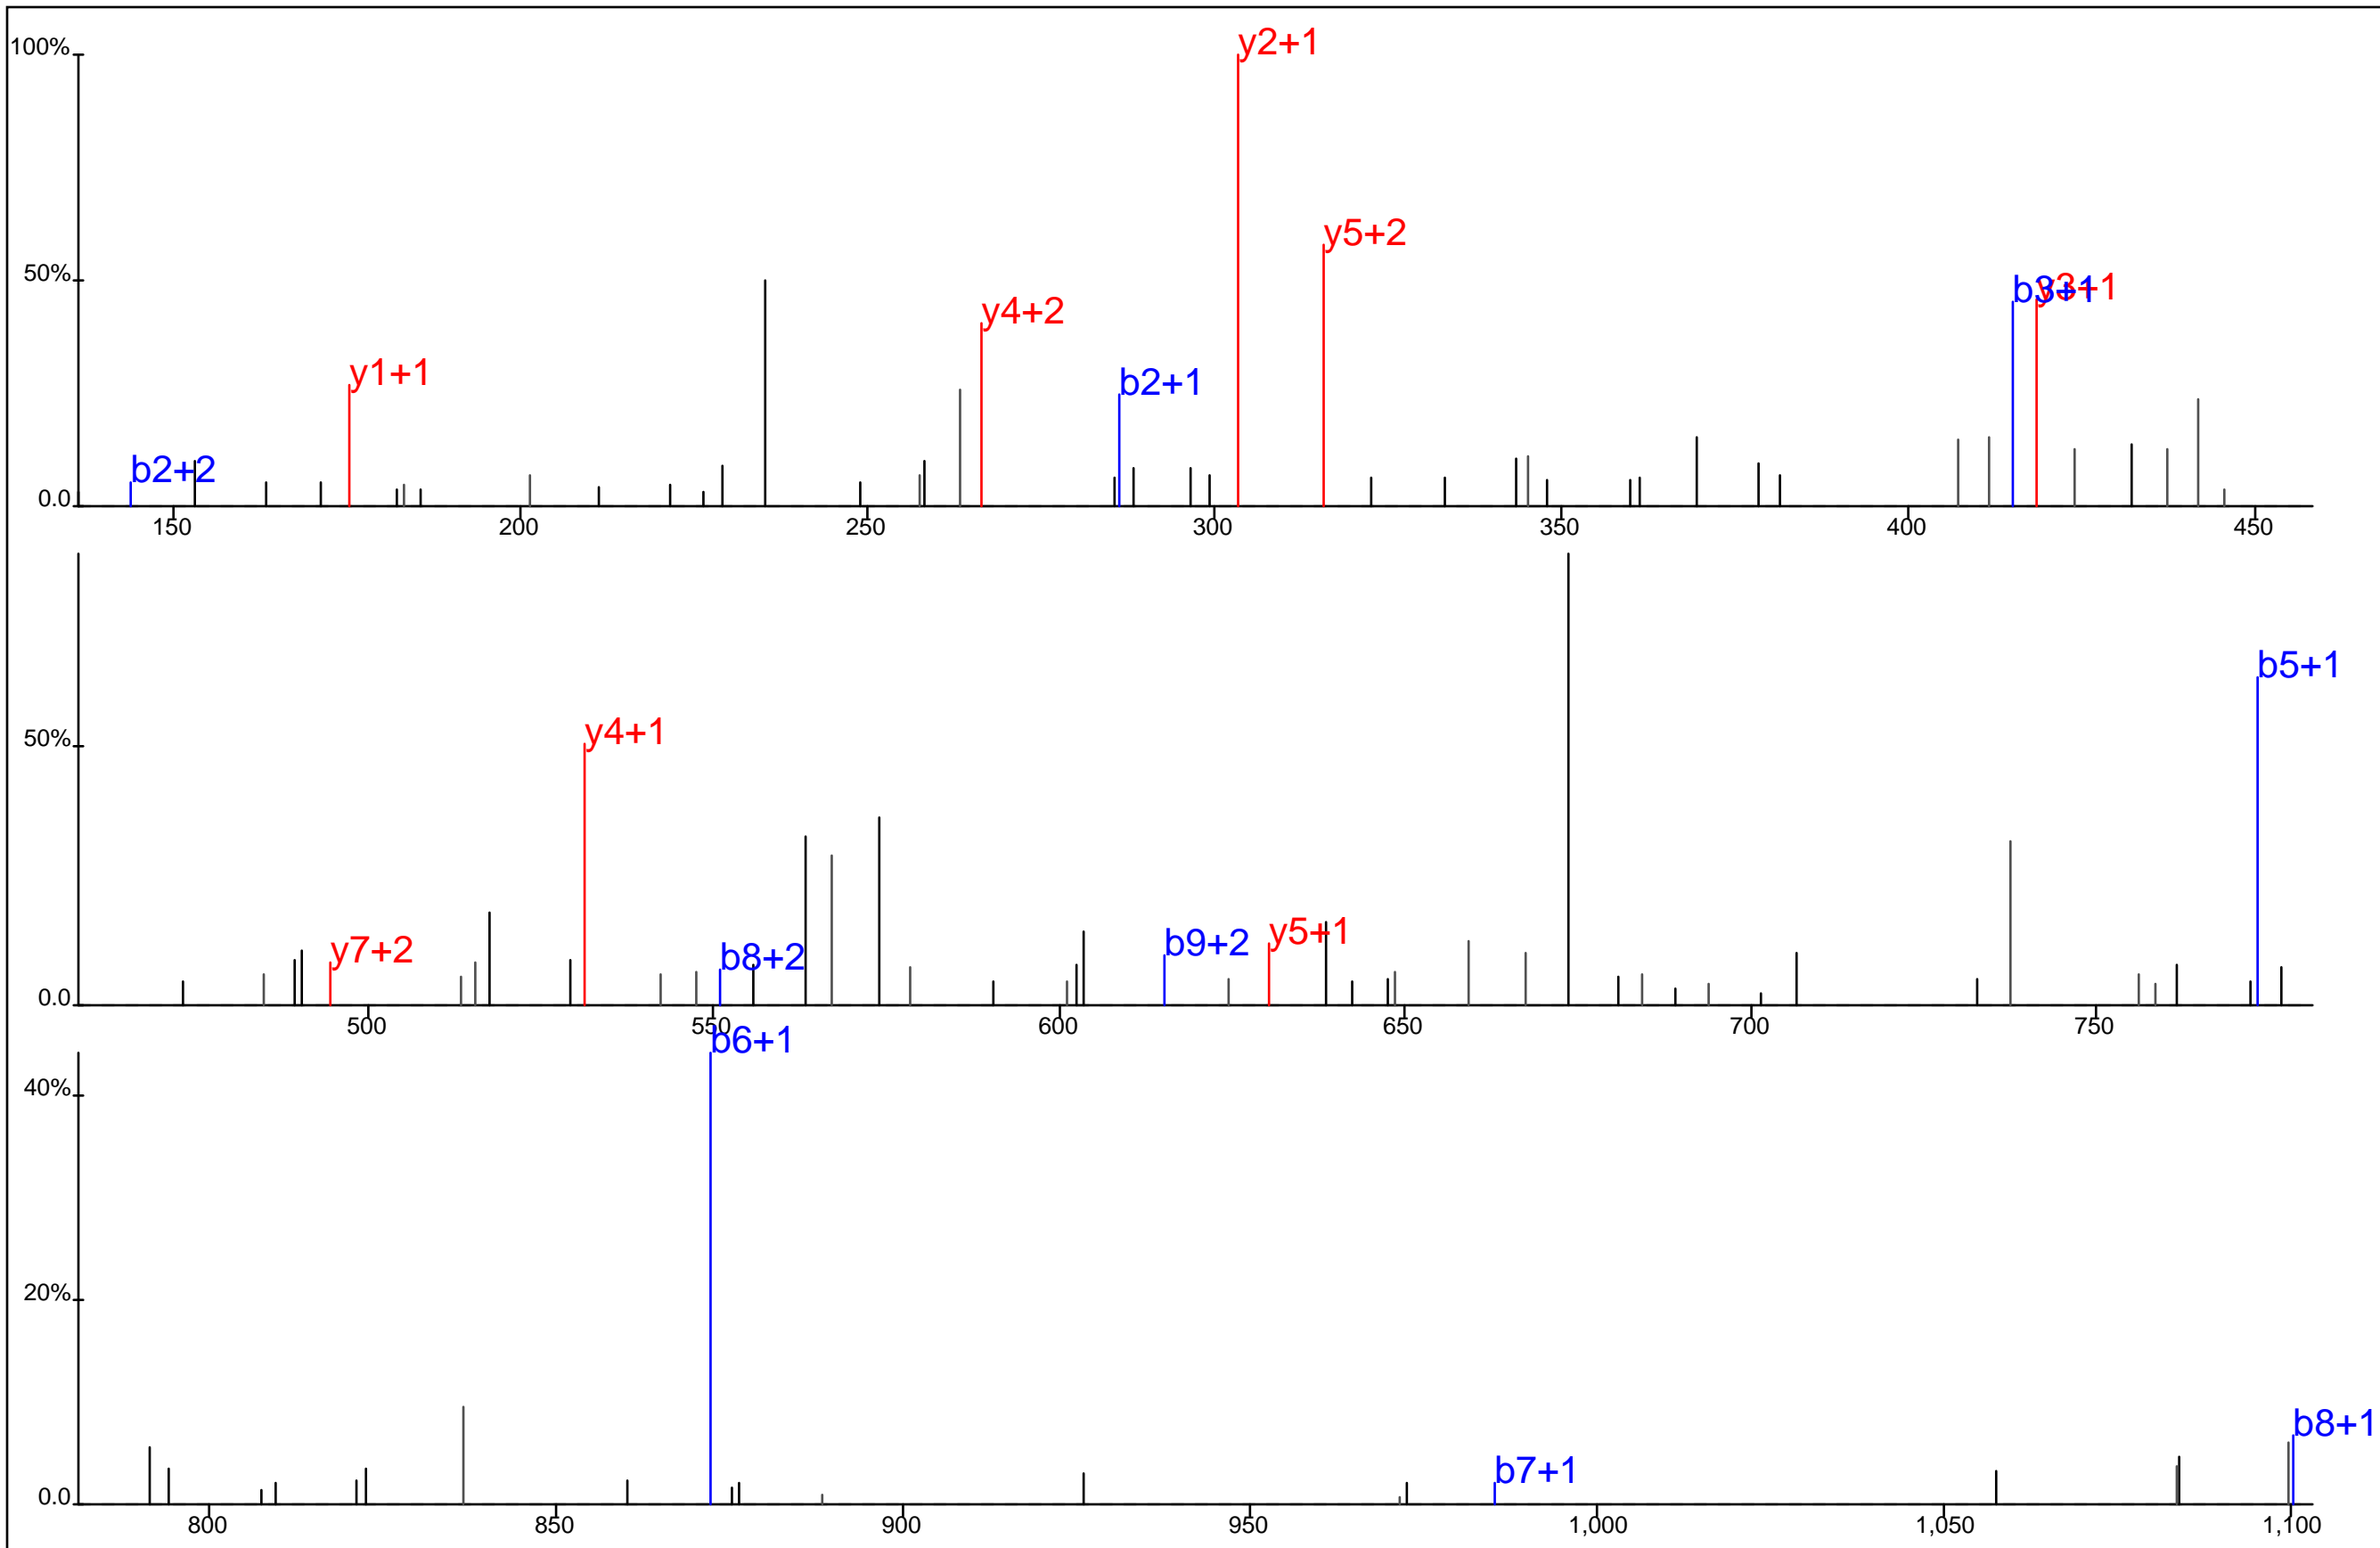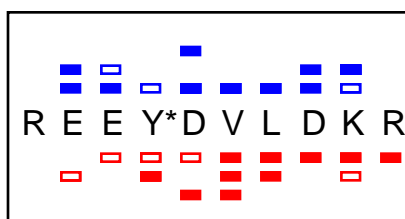

Protein Name: T cell antigen receptor, zeta  
 gi Accession: 0  
 Precursor Mass: 468.2162+3  
 Delta Mass: 1.499 ppm  
 XCorr: 24.24

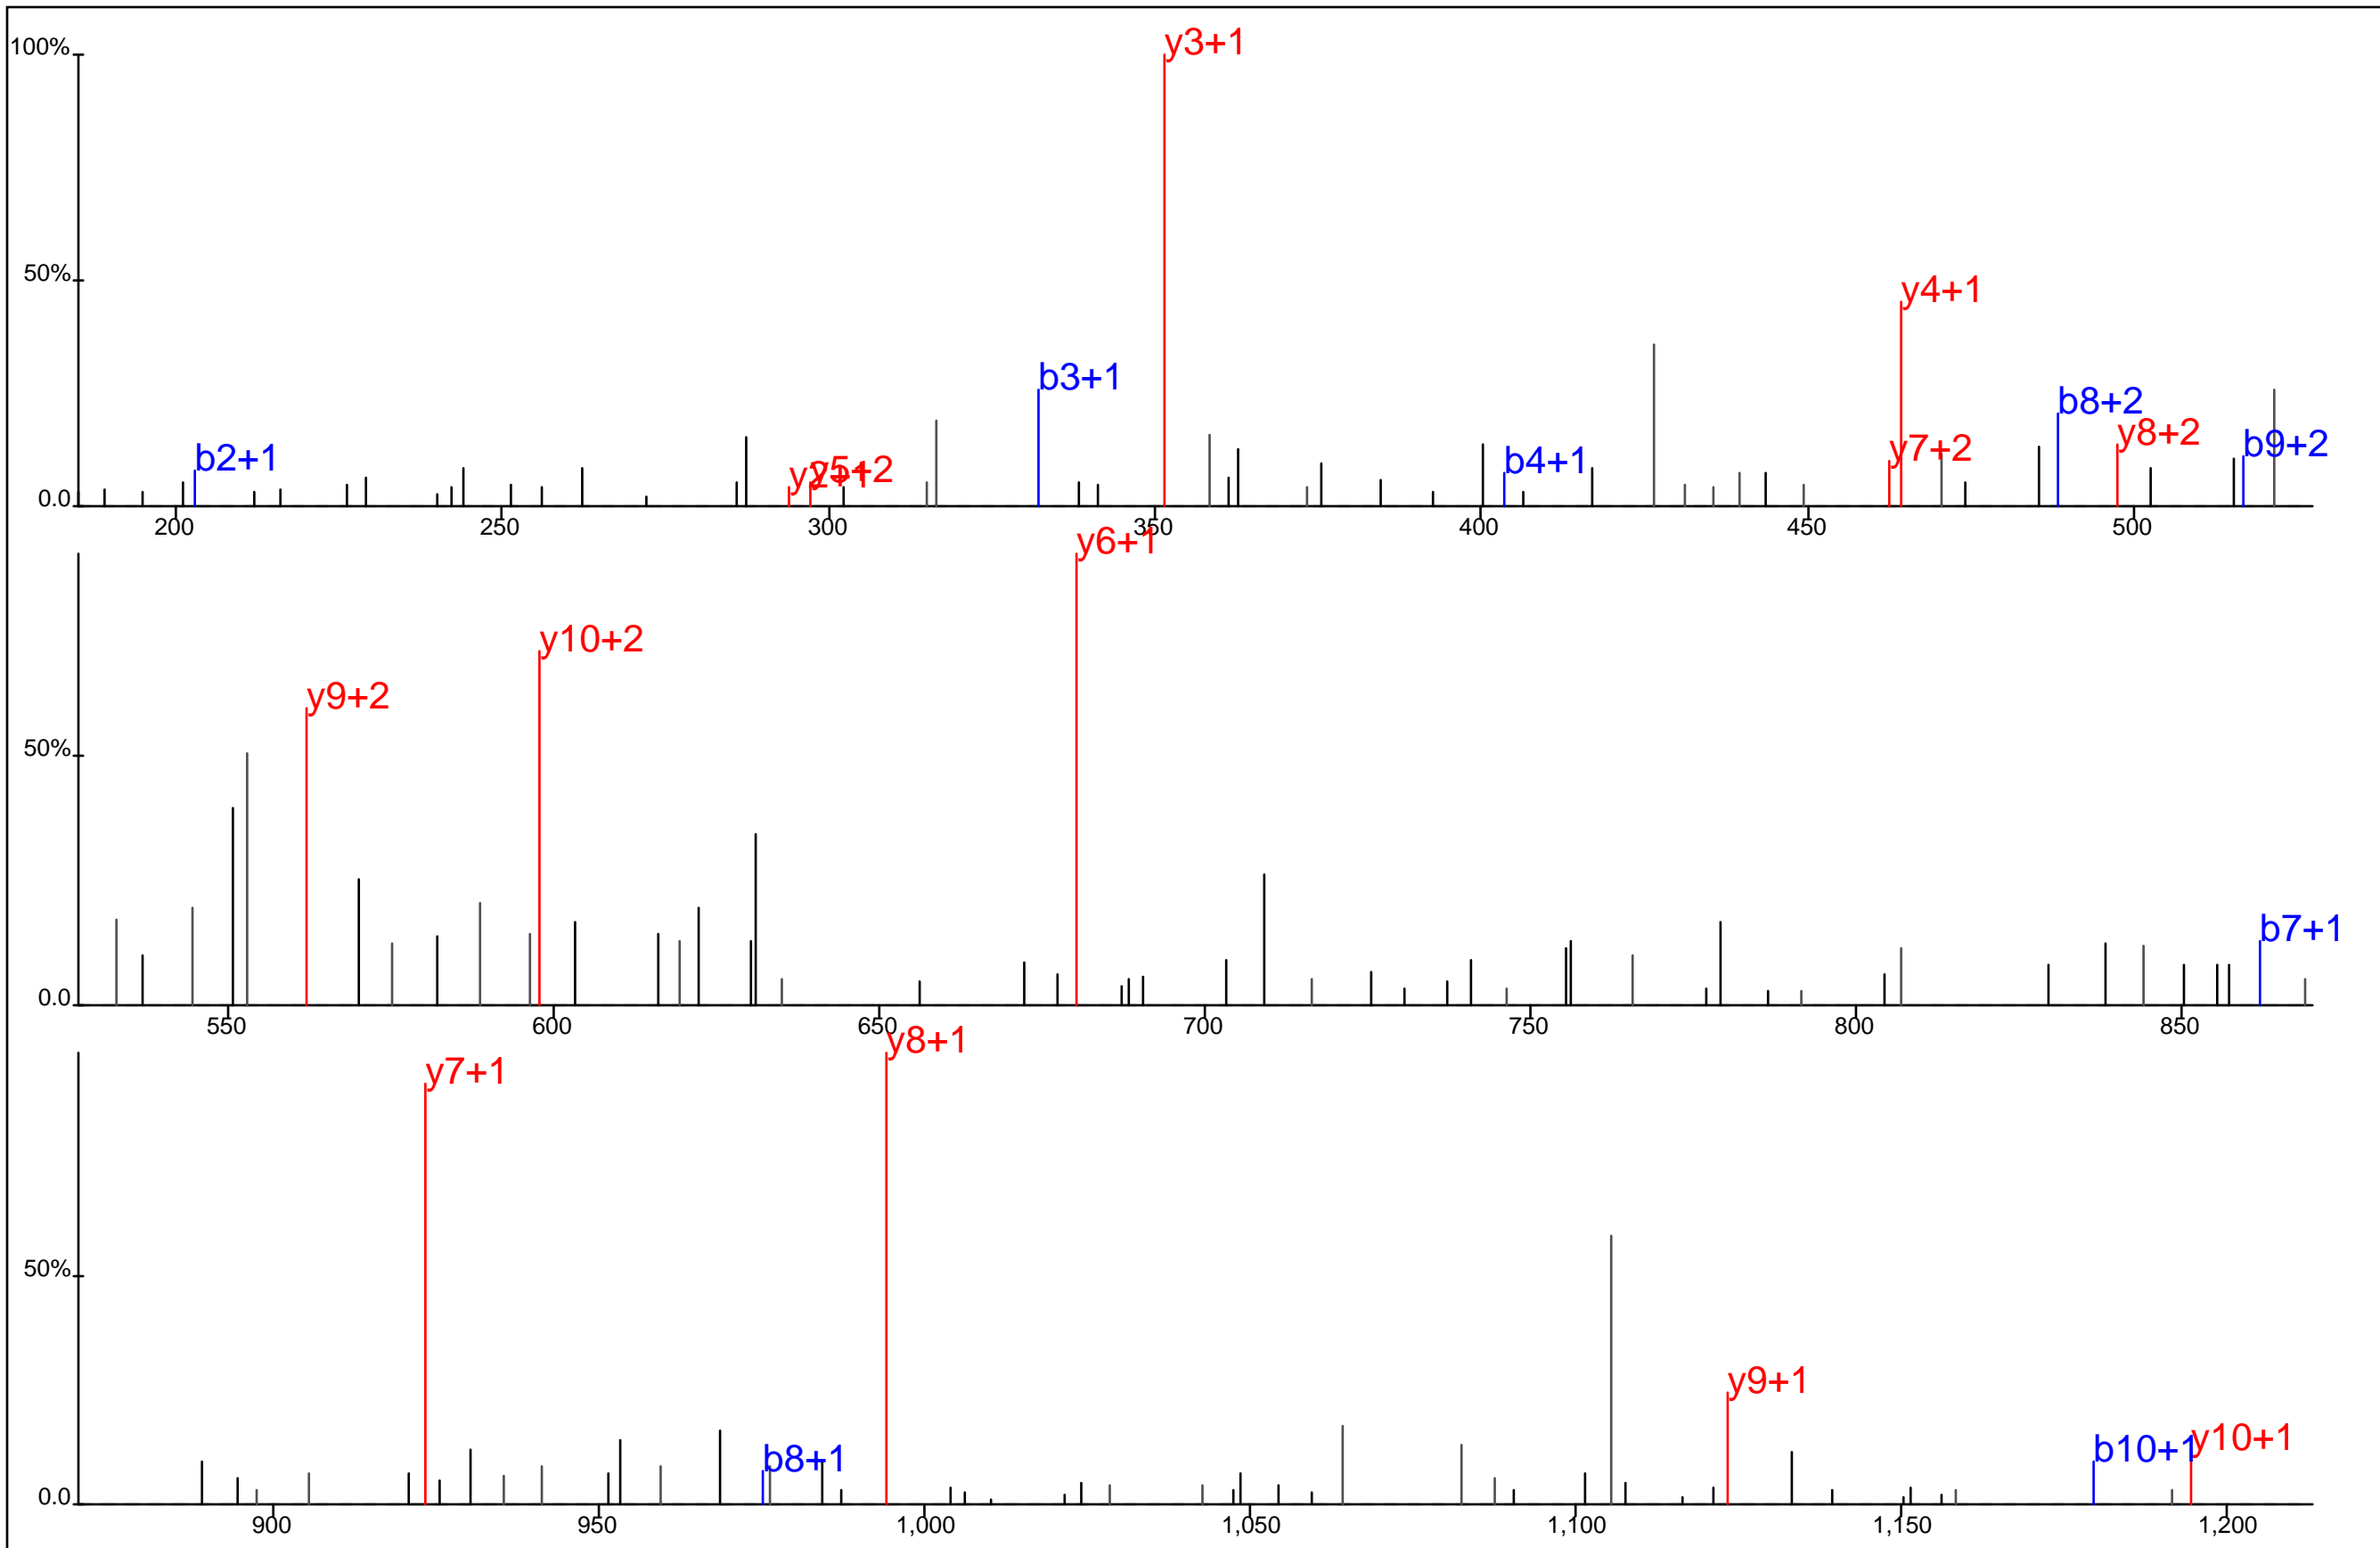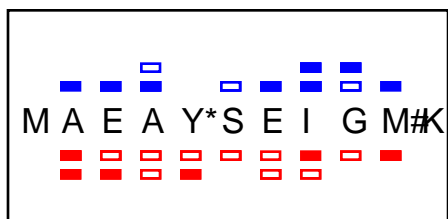

Protein Name: T cell antigen receptor, zeta  
 gi Accession: 0  
 Precursor Mass: 663.2638+2  
 Delta Mass: 3.802 ppm  
 XCorr: 46.21





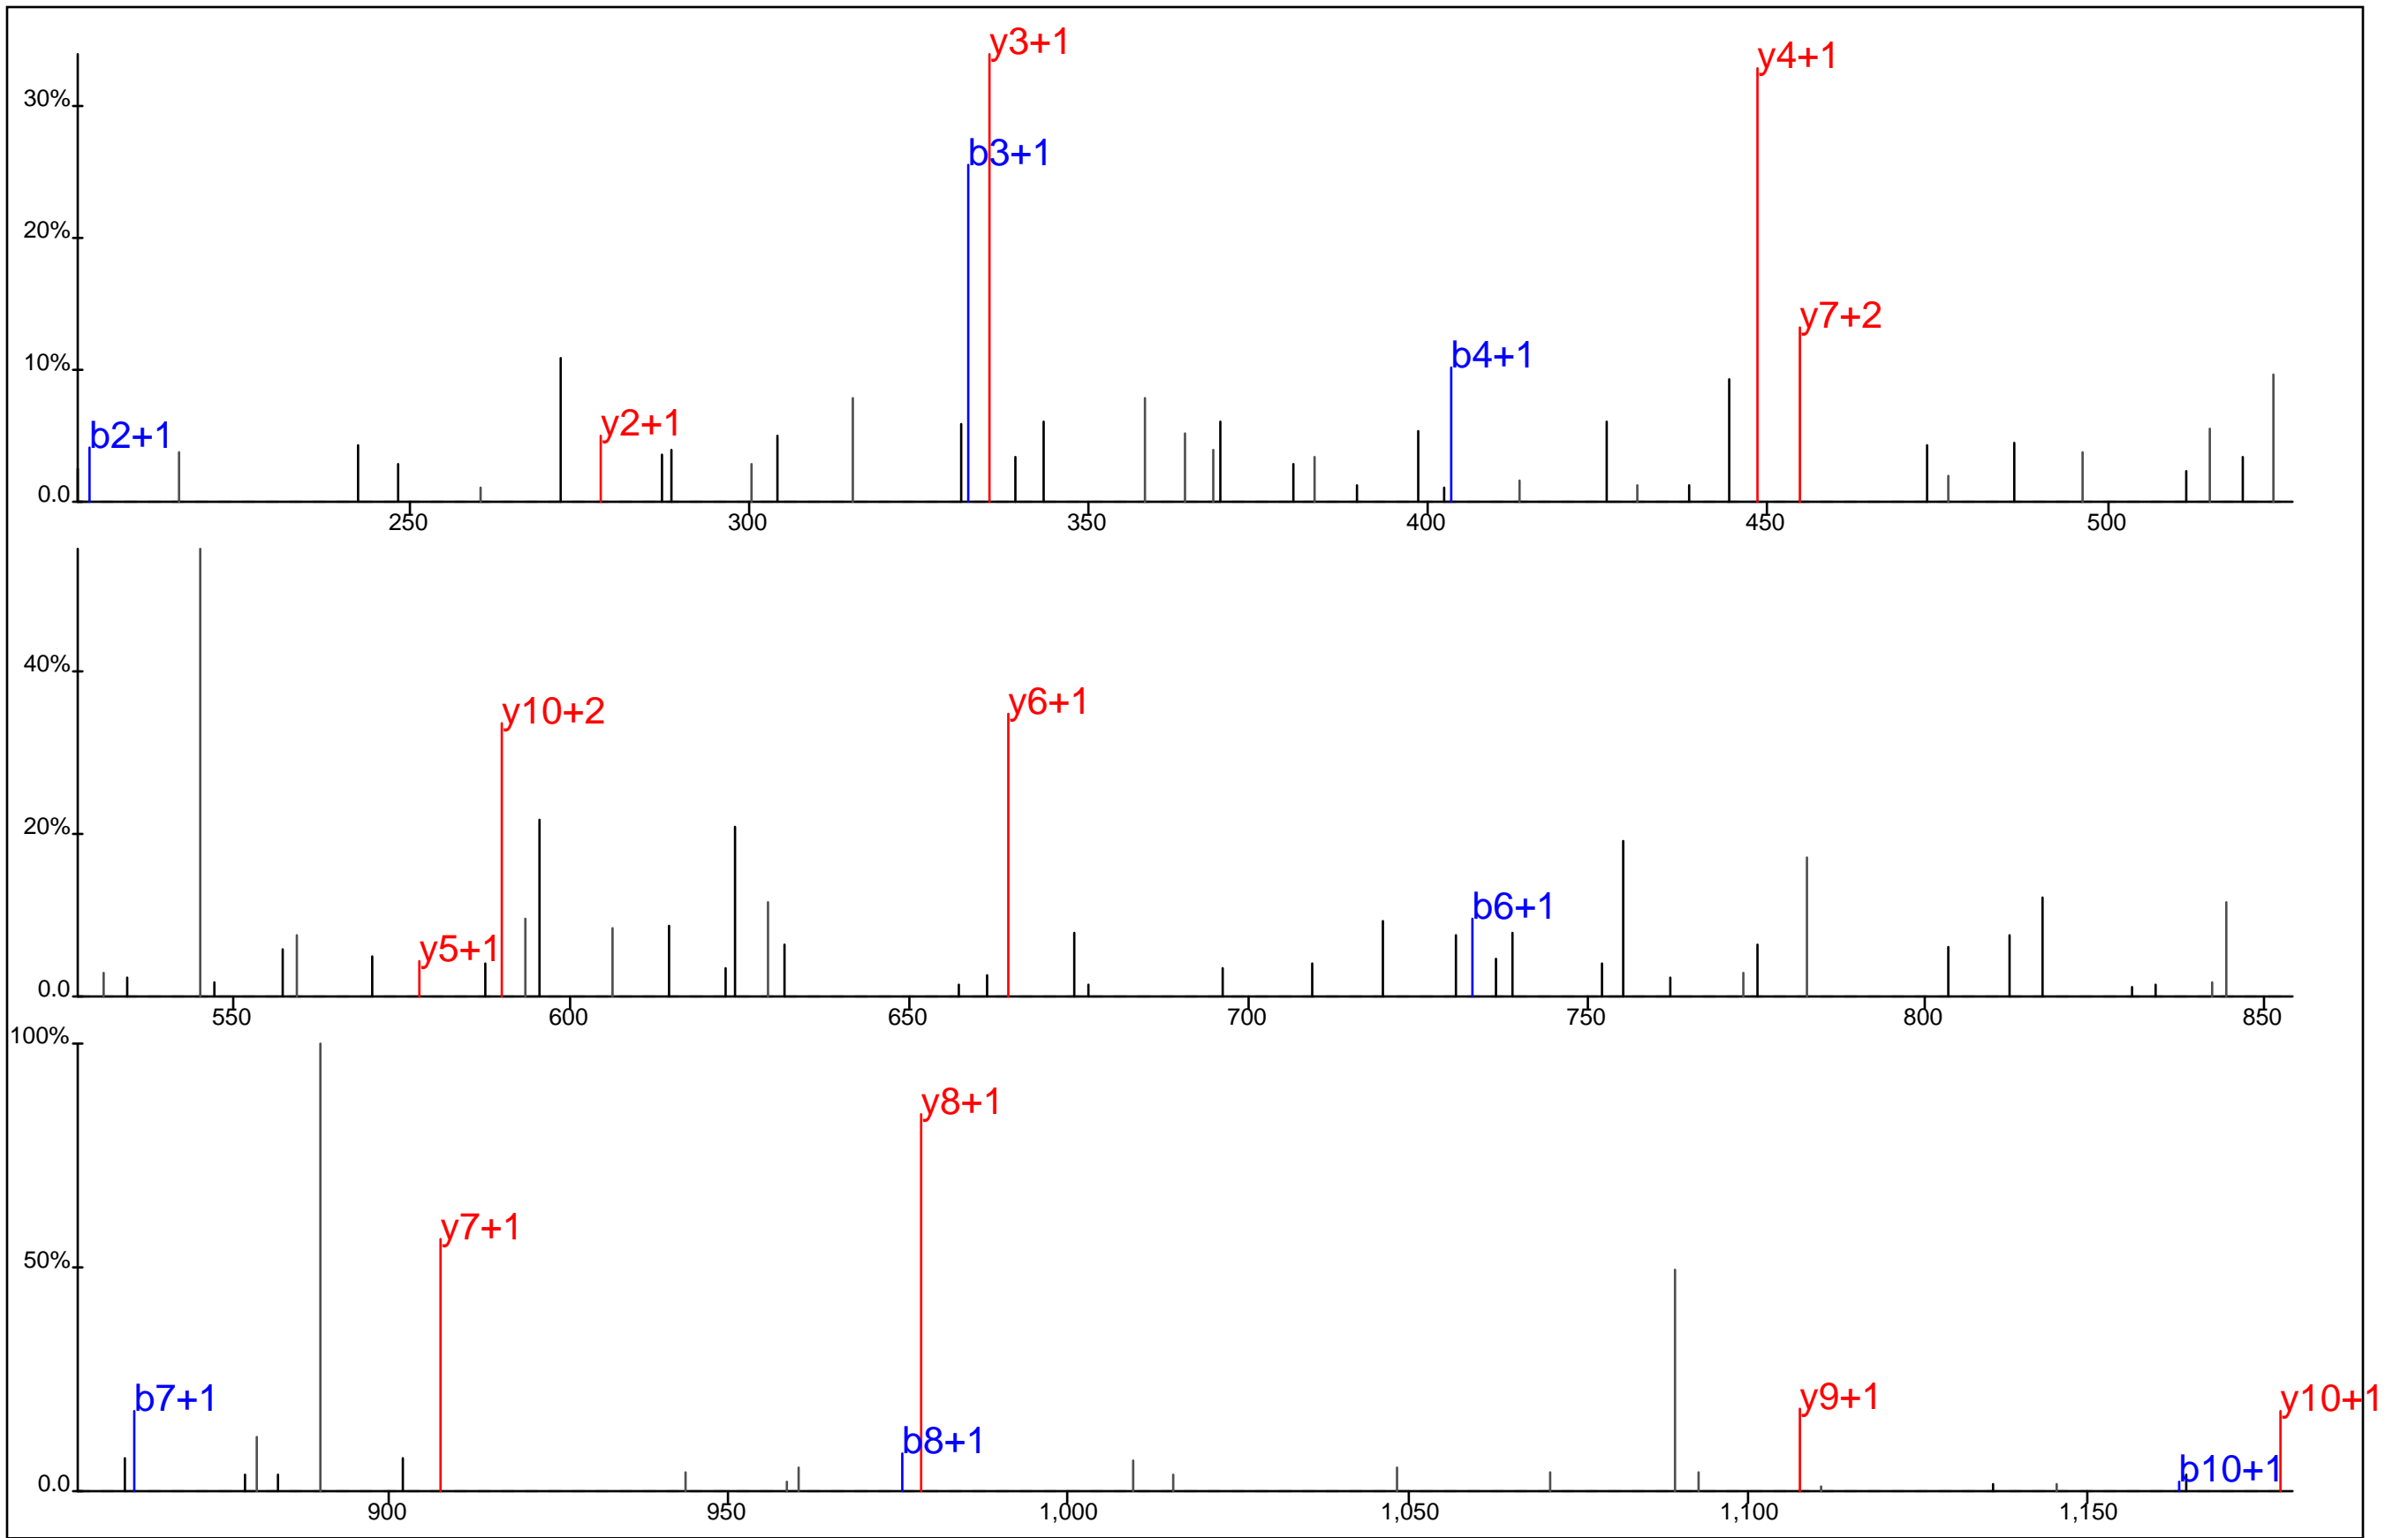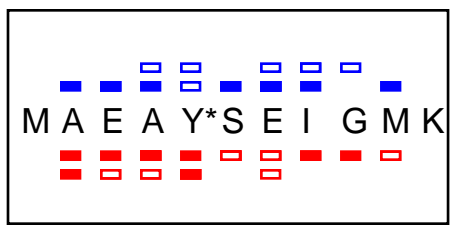

Protein Name: T cell antigen receptor, zeta  
 gi Accession: 0  
 Precursor Mass: 655.2629+2  
 Delta Mass: 1.336 ppm  
 XCorr: 68.05



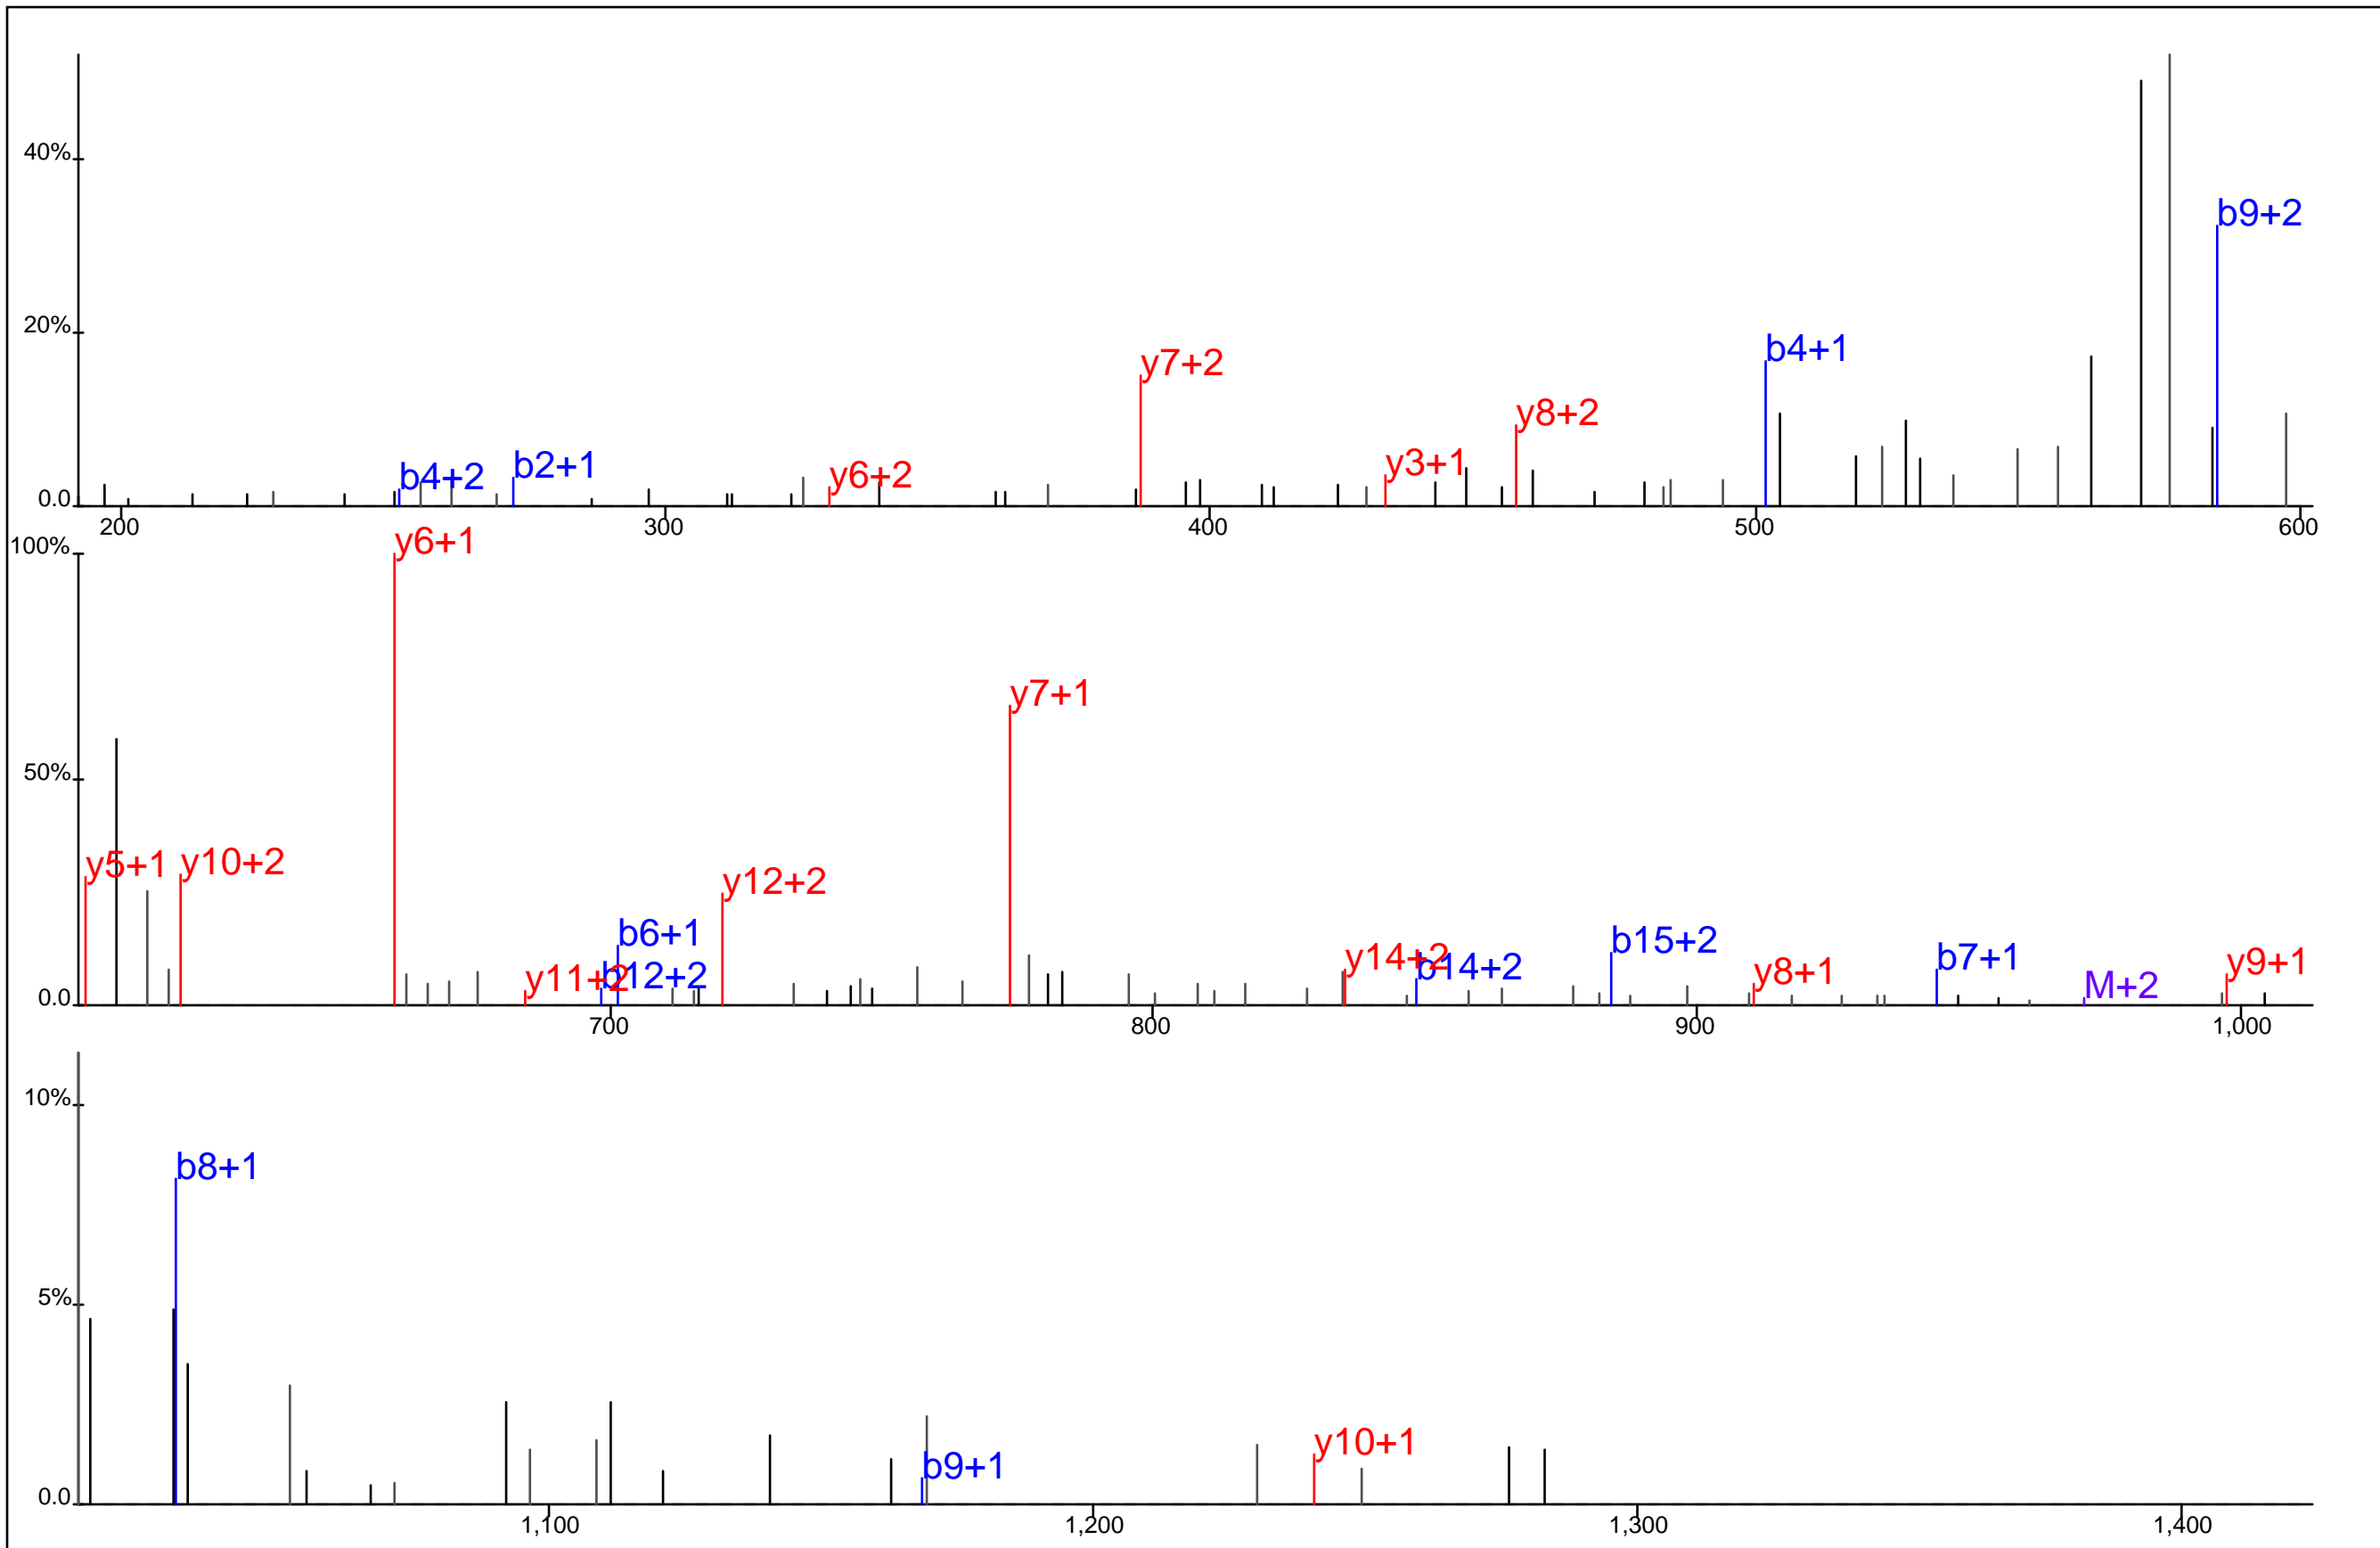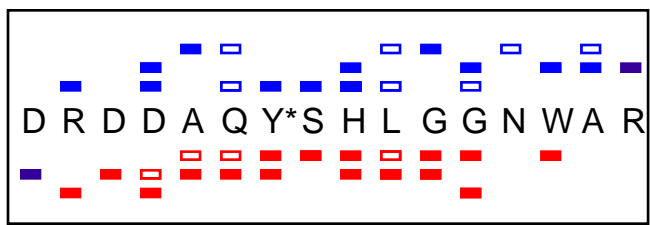

Protein Name: T cell receptor T3 delta chain  
 gi Accession: 0  
 Precursor Mass: 647.6068+3  
 Delta Mass: 1.222 ppm  
 XCorr: 33.31

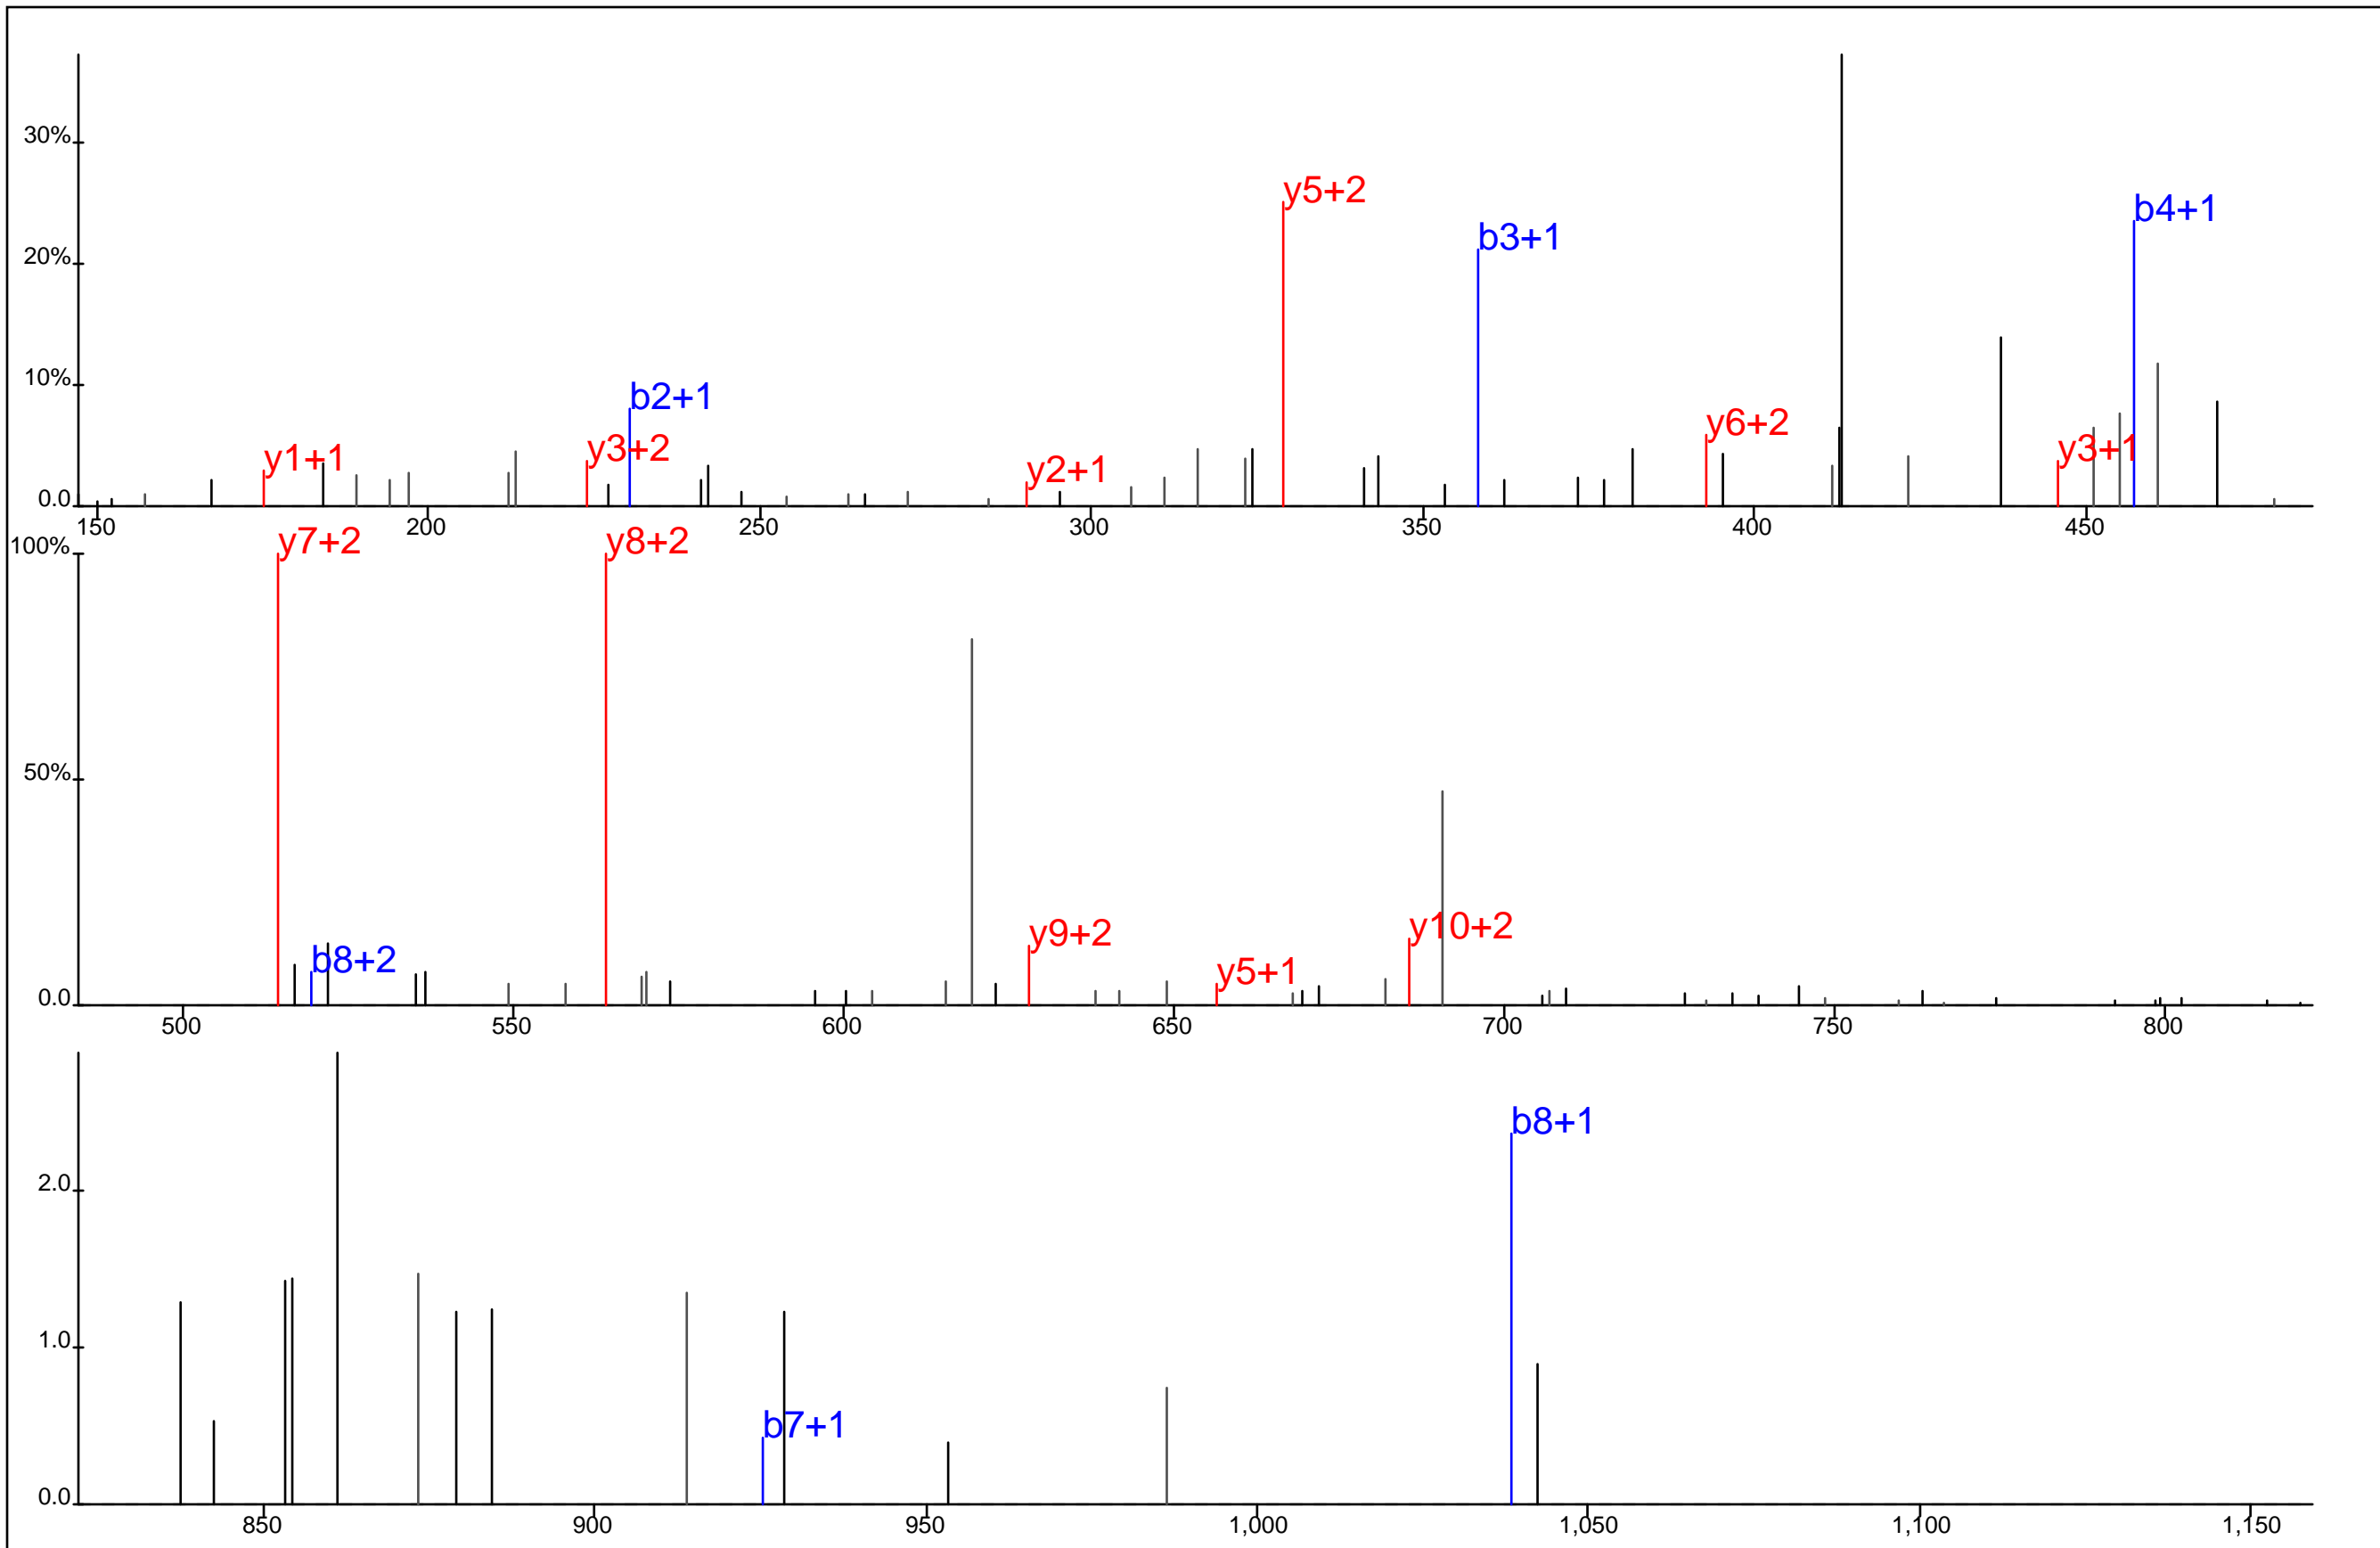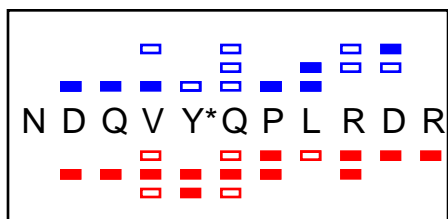

Protein Name: T cell receptor T3 delta chain  
 gi Accession: 0  
 Precursor Mass: 495.2273+3  
 Delta Mass: 1.127 ppm  
 XCorr: 26.2

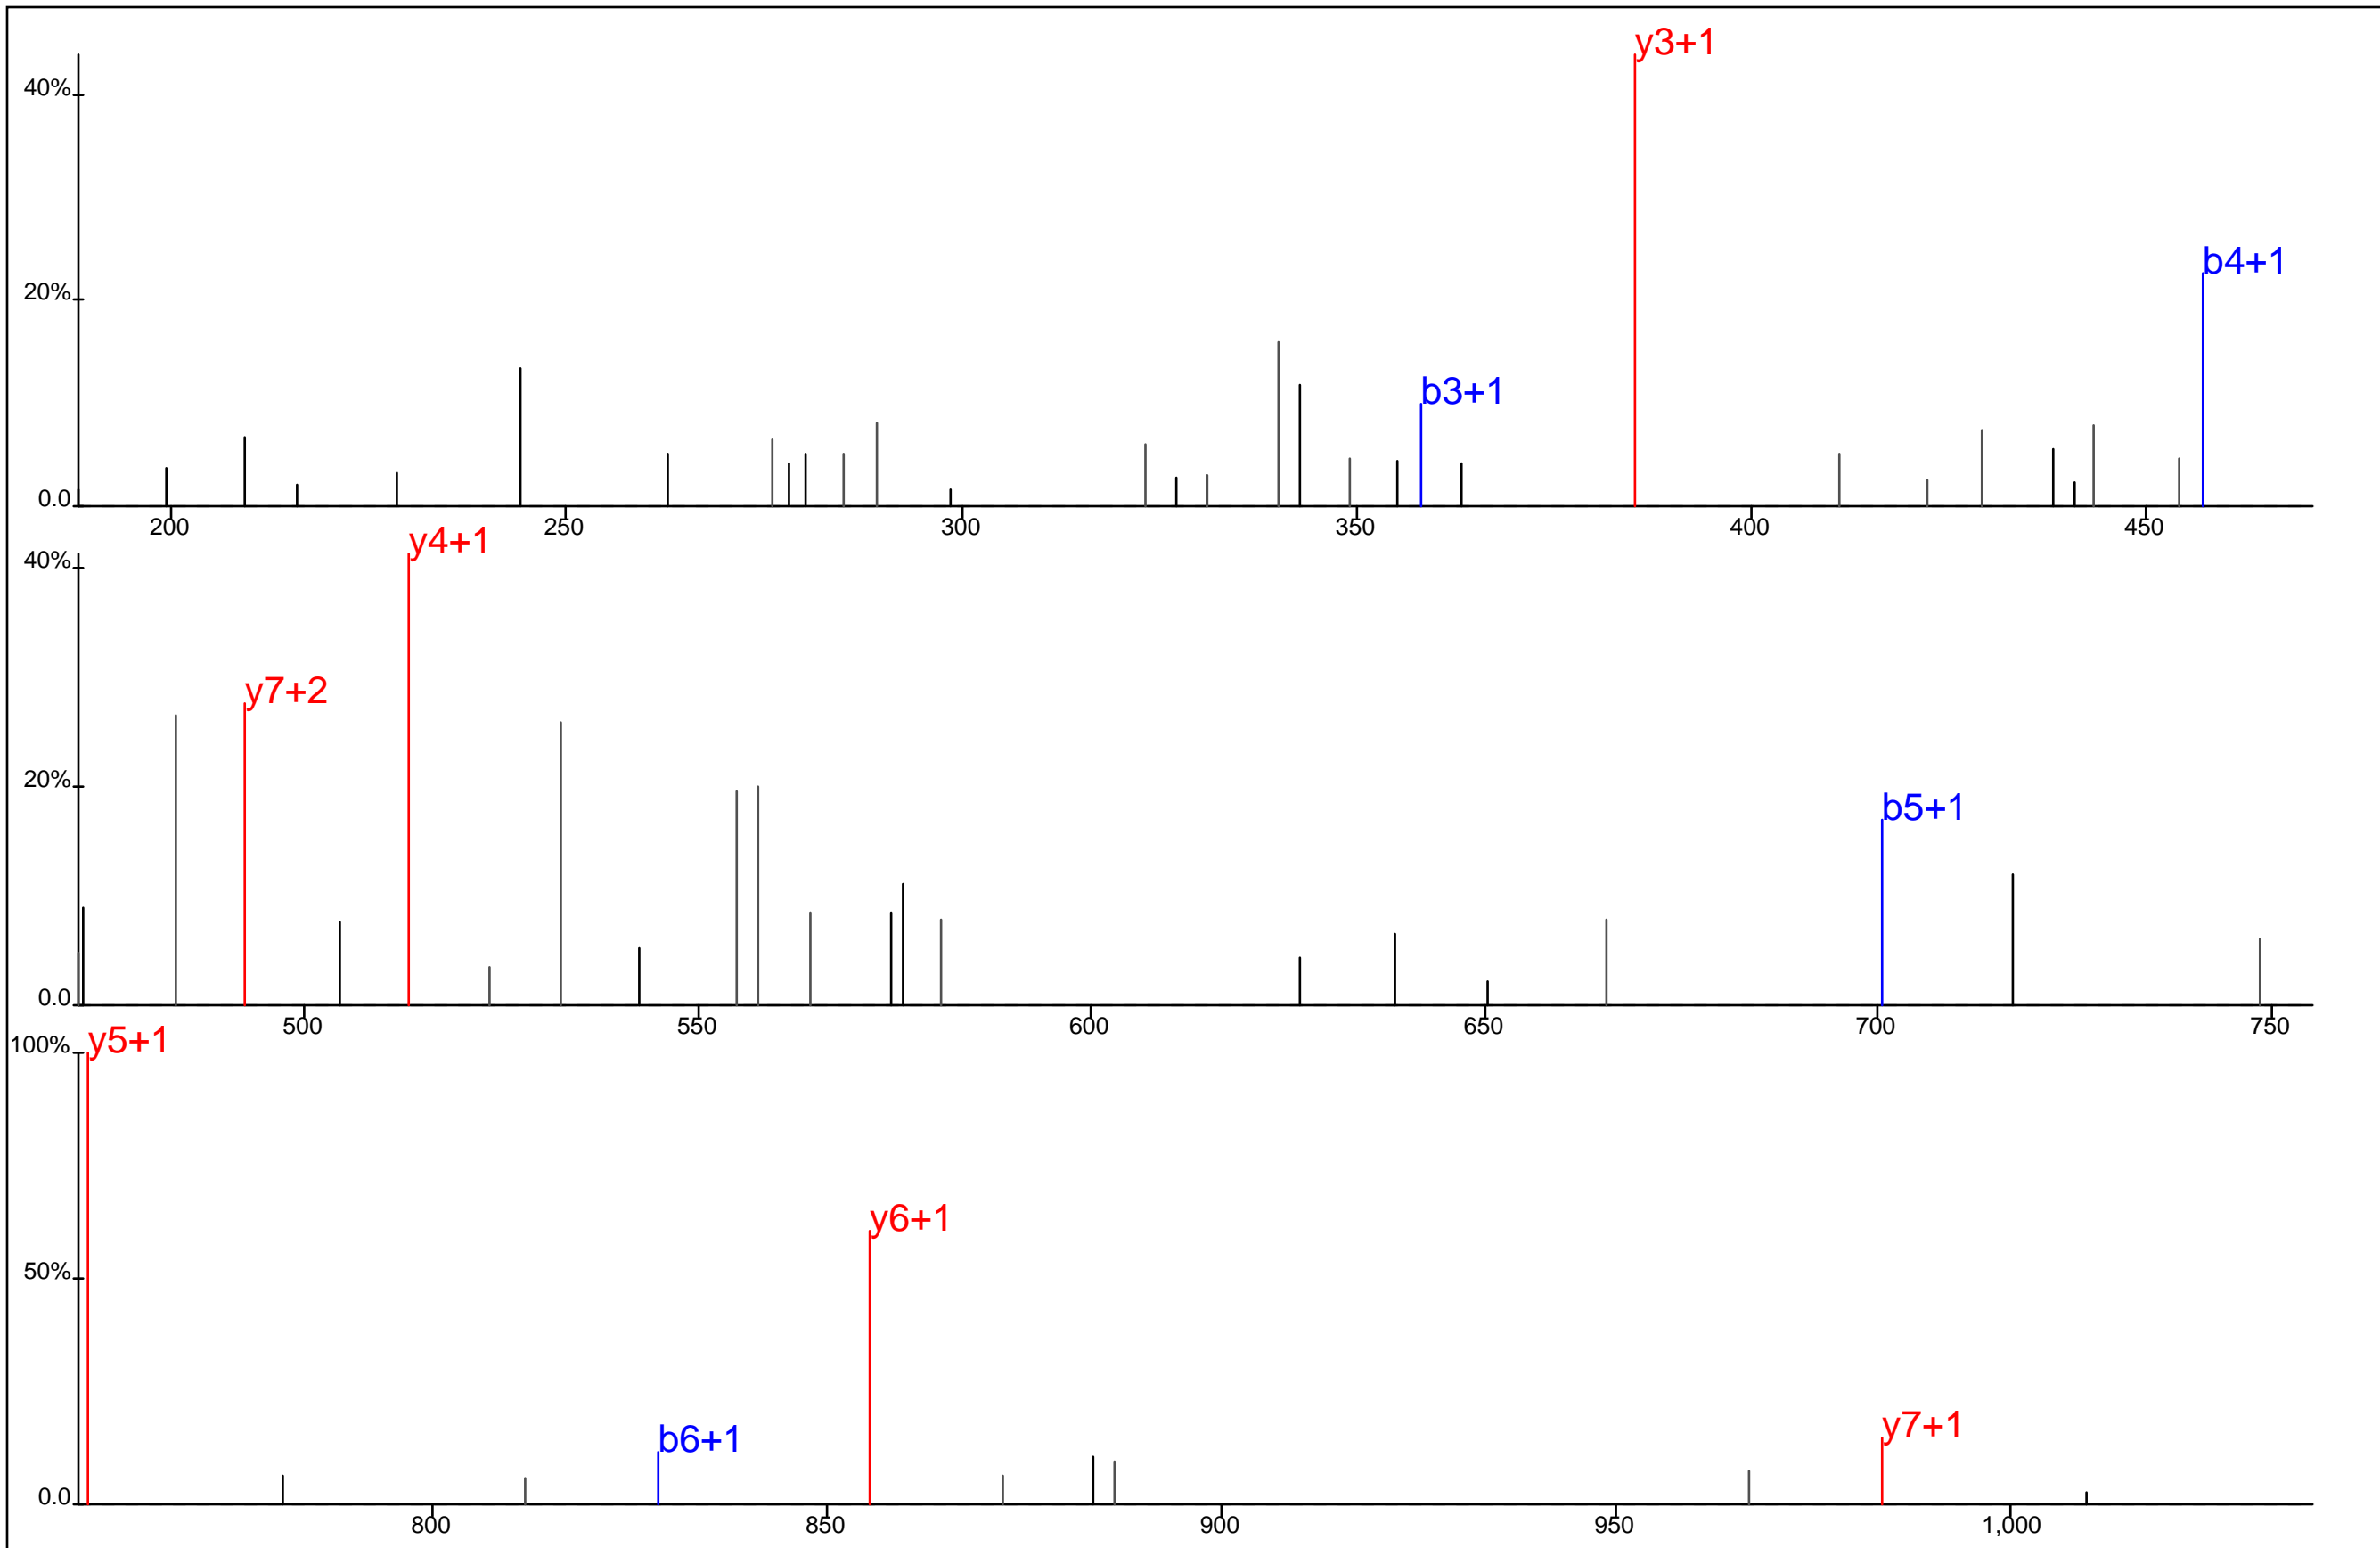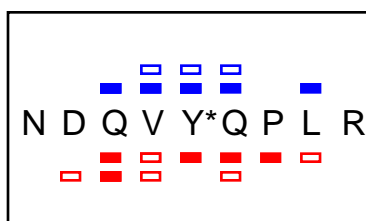

Protein Name: T cell receptor T3 delta chain  
 gi Accession: 0  
 Precursor Mass: 606.7764+2  
 Delta Mass: 3.790 ppm  
 XCorr: 35.66

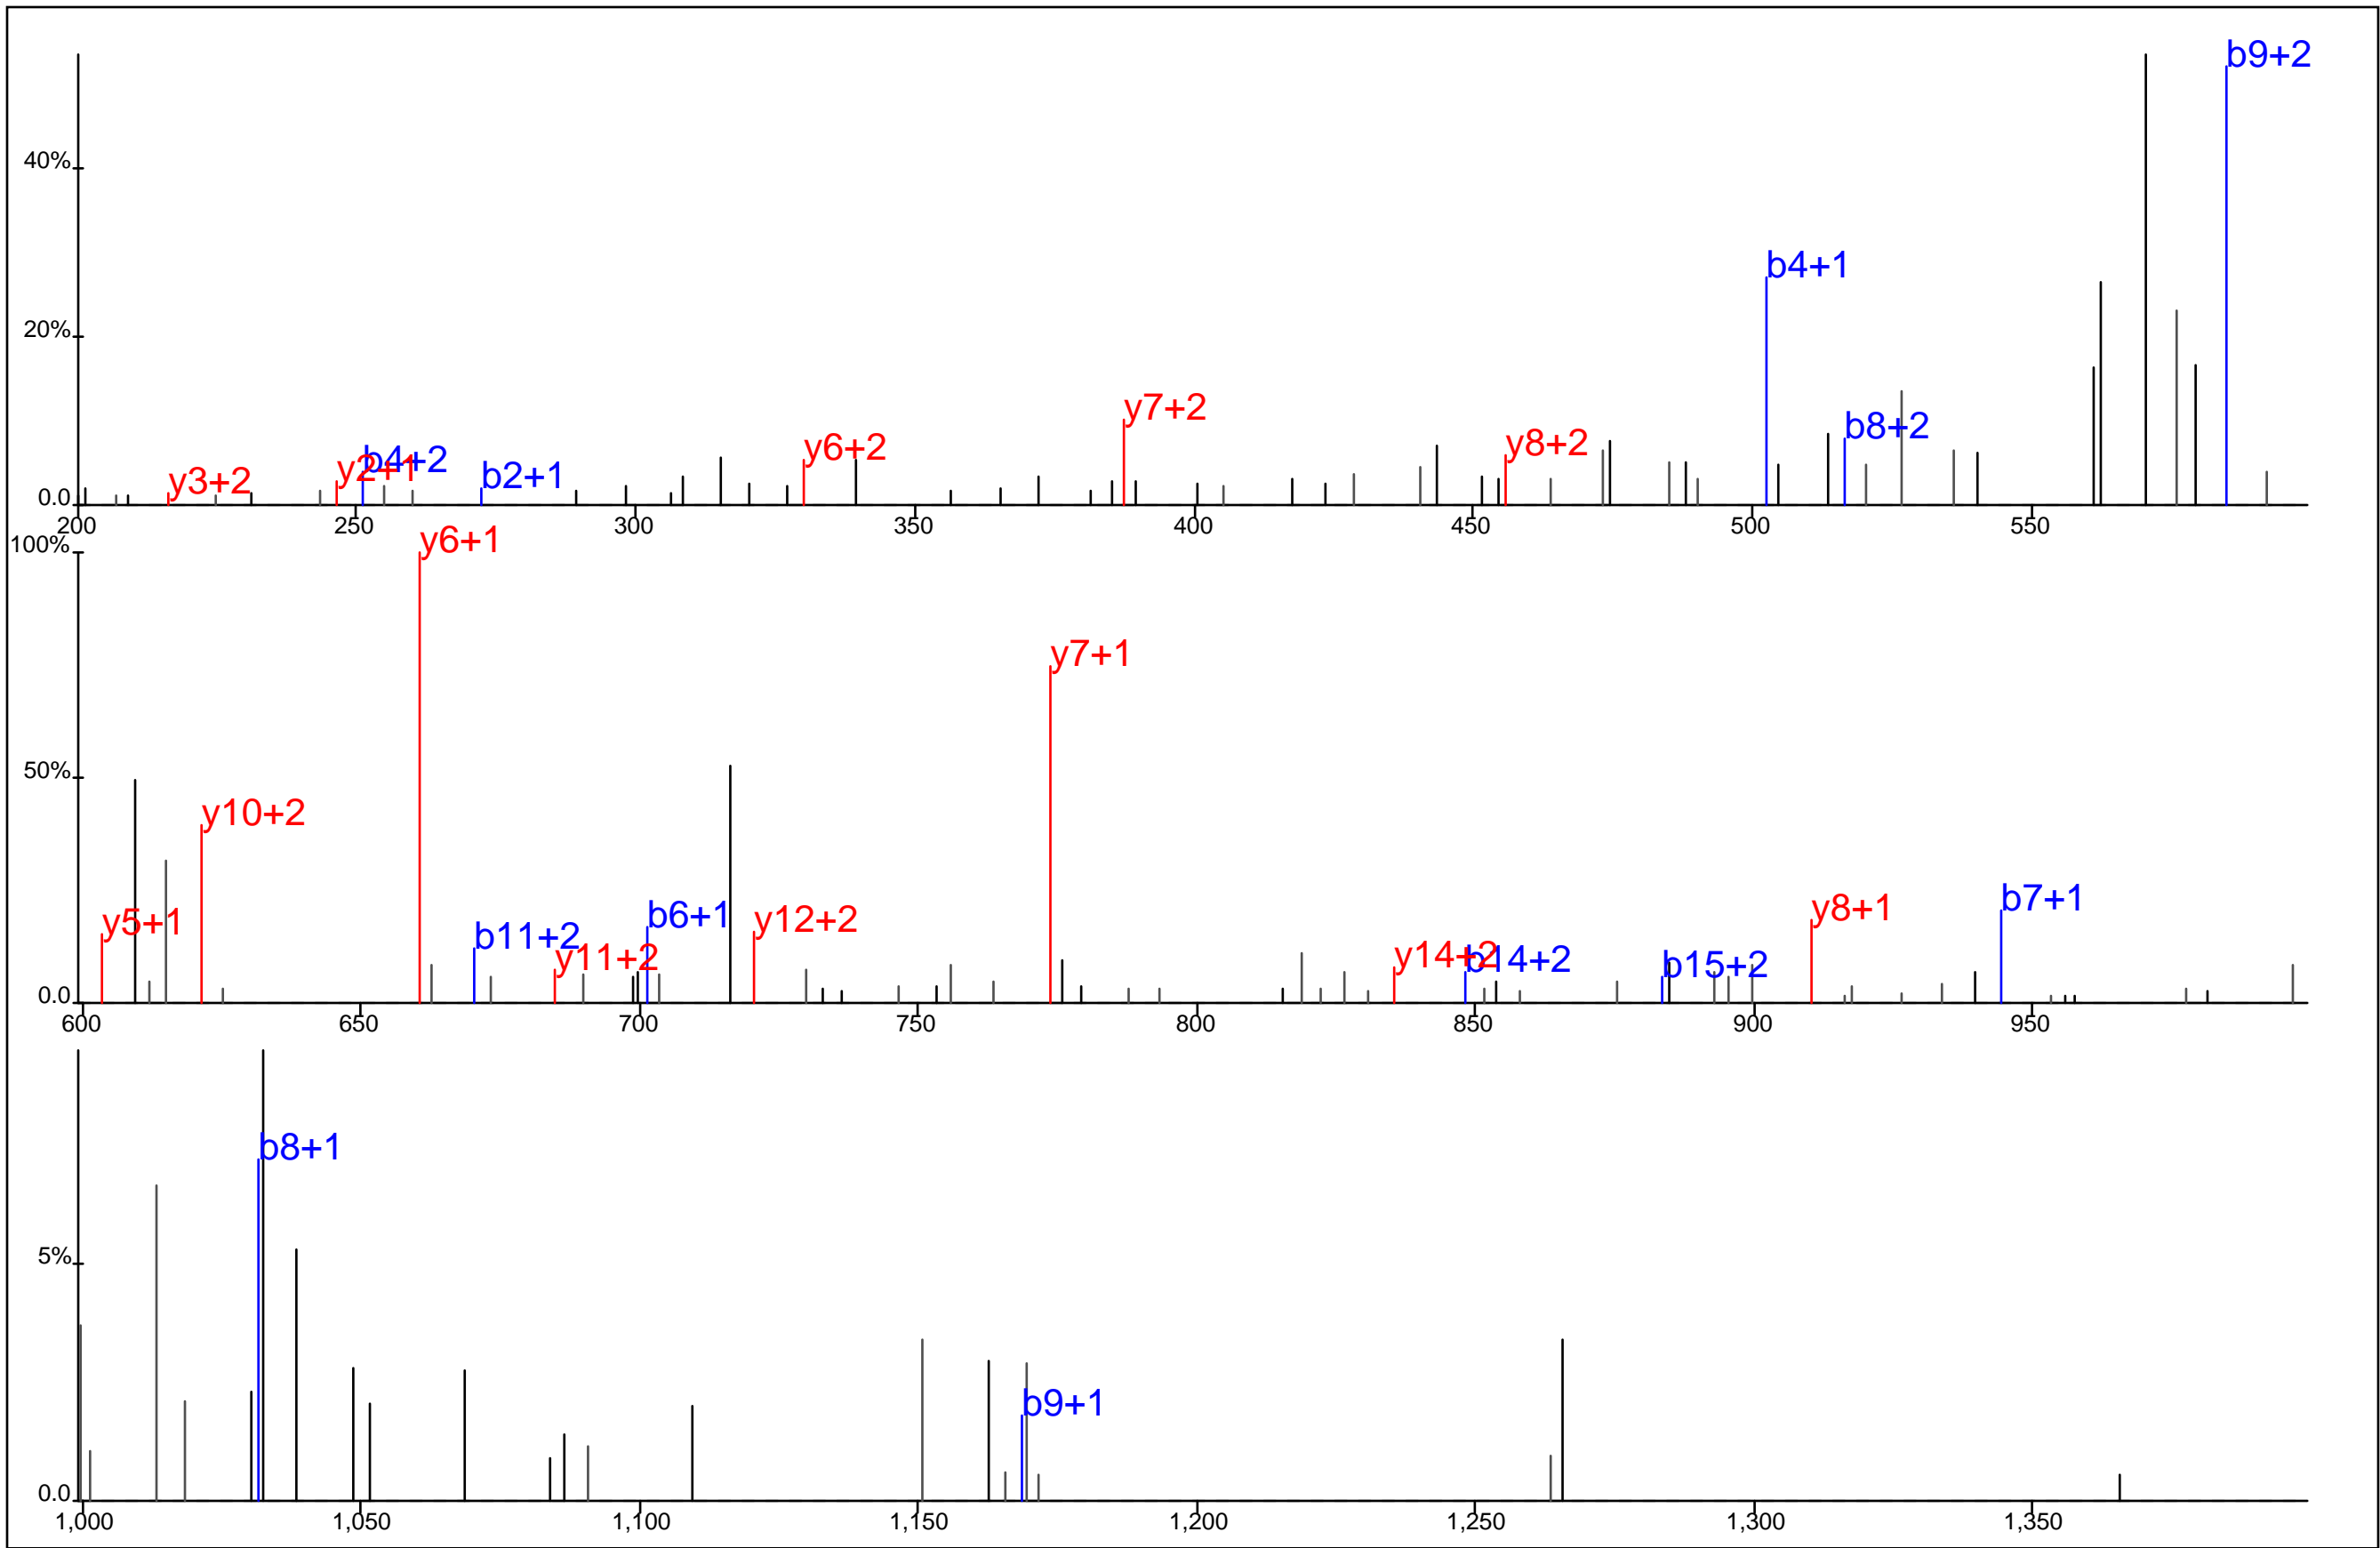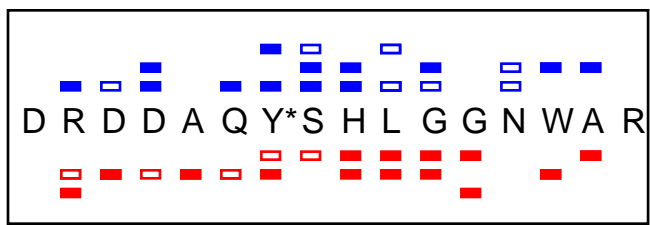

Protein Name: T cell receptor T3 delta chain  
 gi Accession: 0  
 Precursor Mass: 647.6071+3  
 Delta Mass: 1.694 ppm  
 XCorr: 27.62

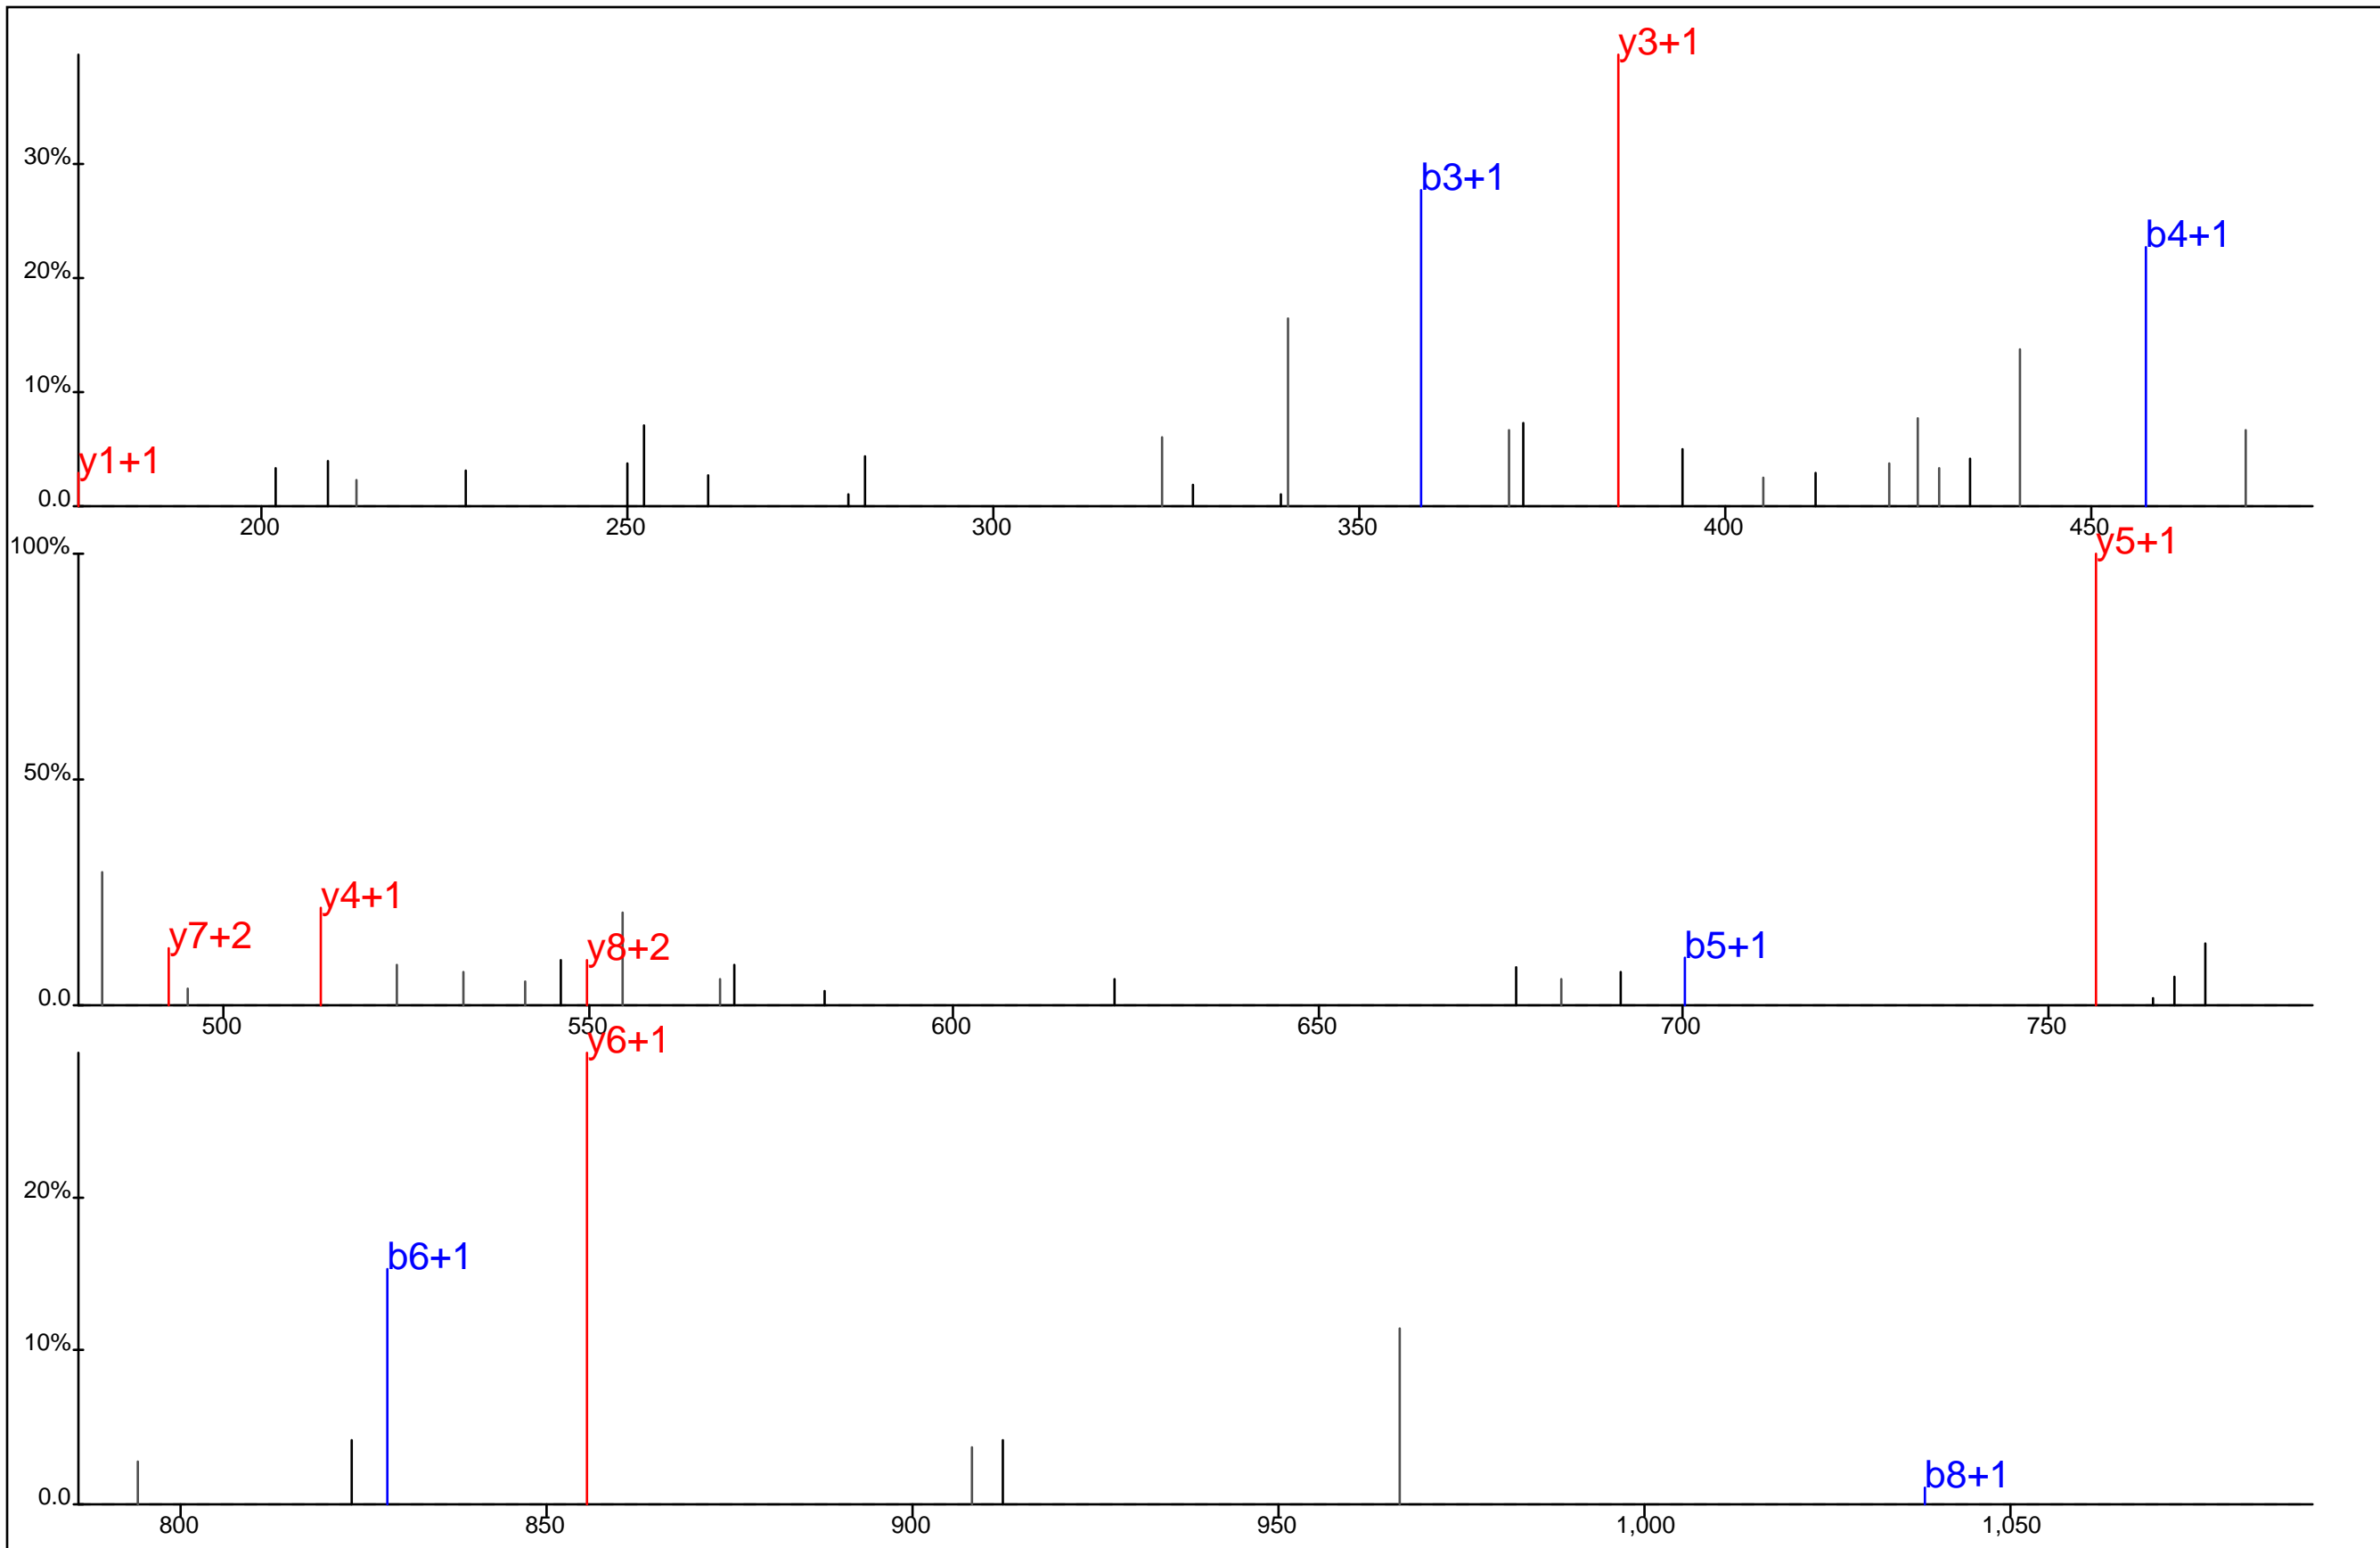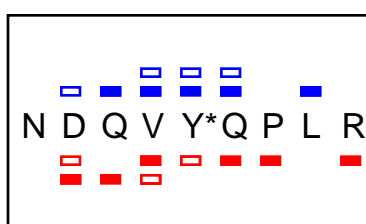

Protein Name: T cell receptor T3 delta chain  
 gi Accession: 0  
 Precursor Mass: 606.7772+2  
 Delta Mass: 5.201 ppm  
 XCorr: 27.11



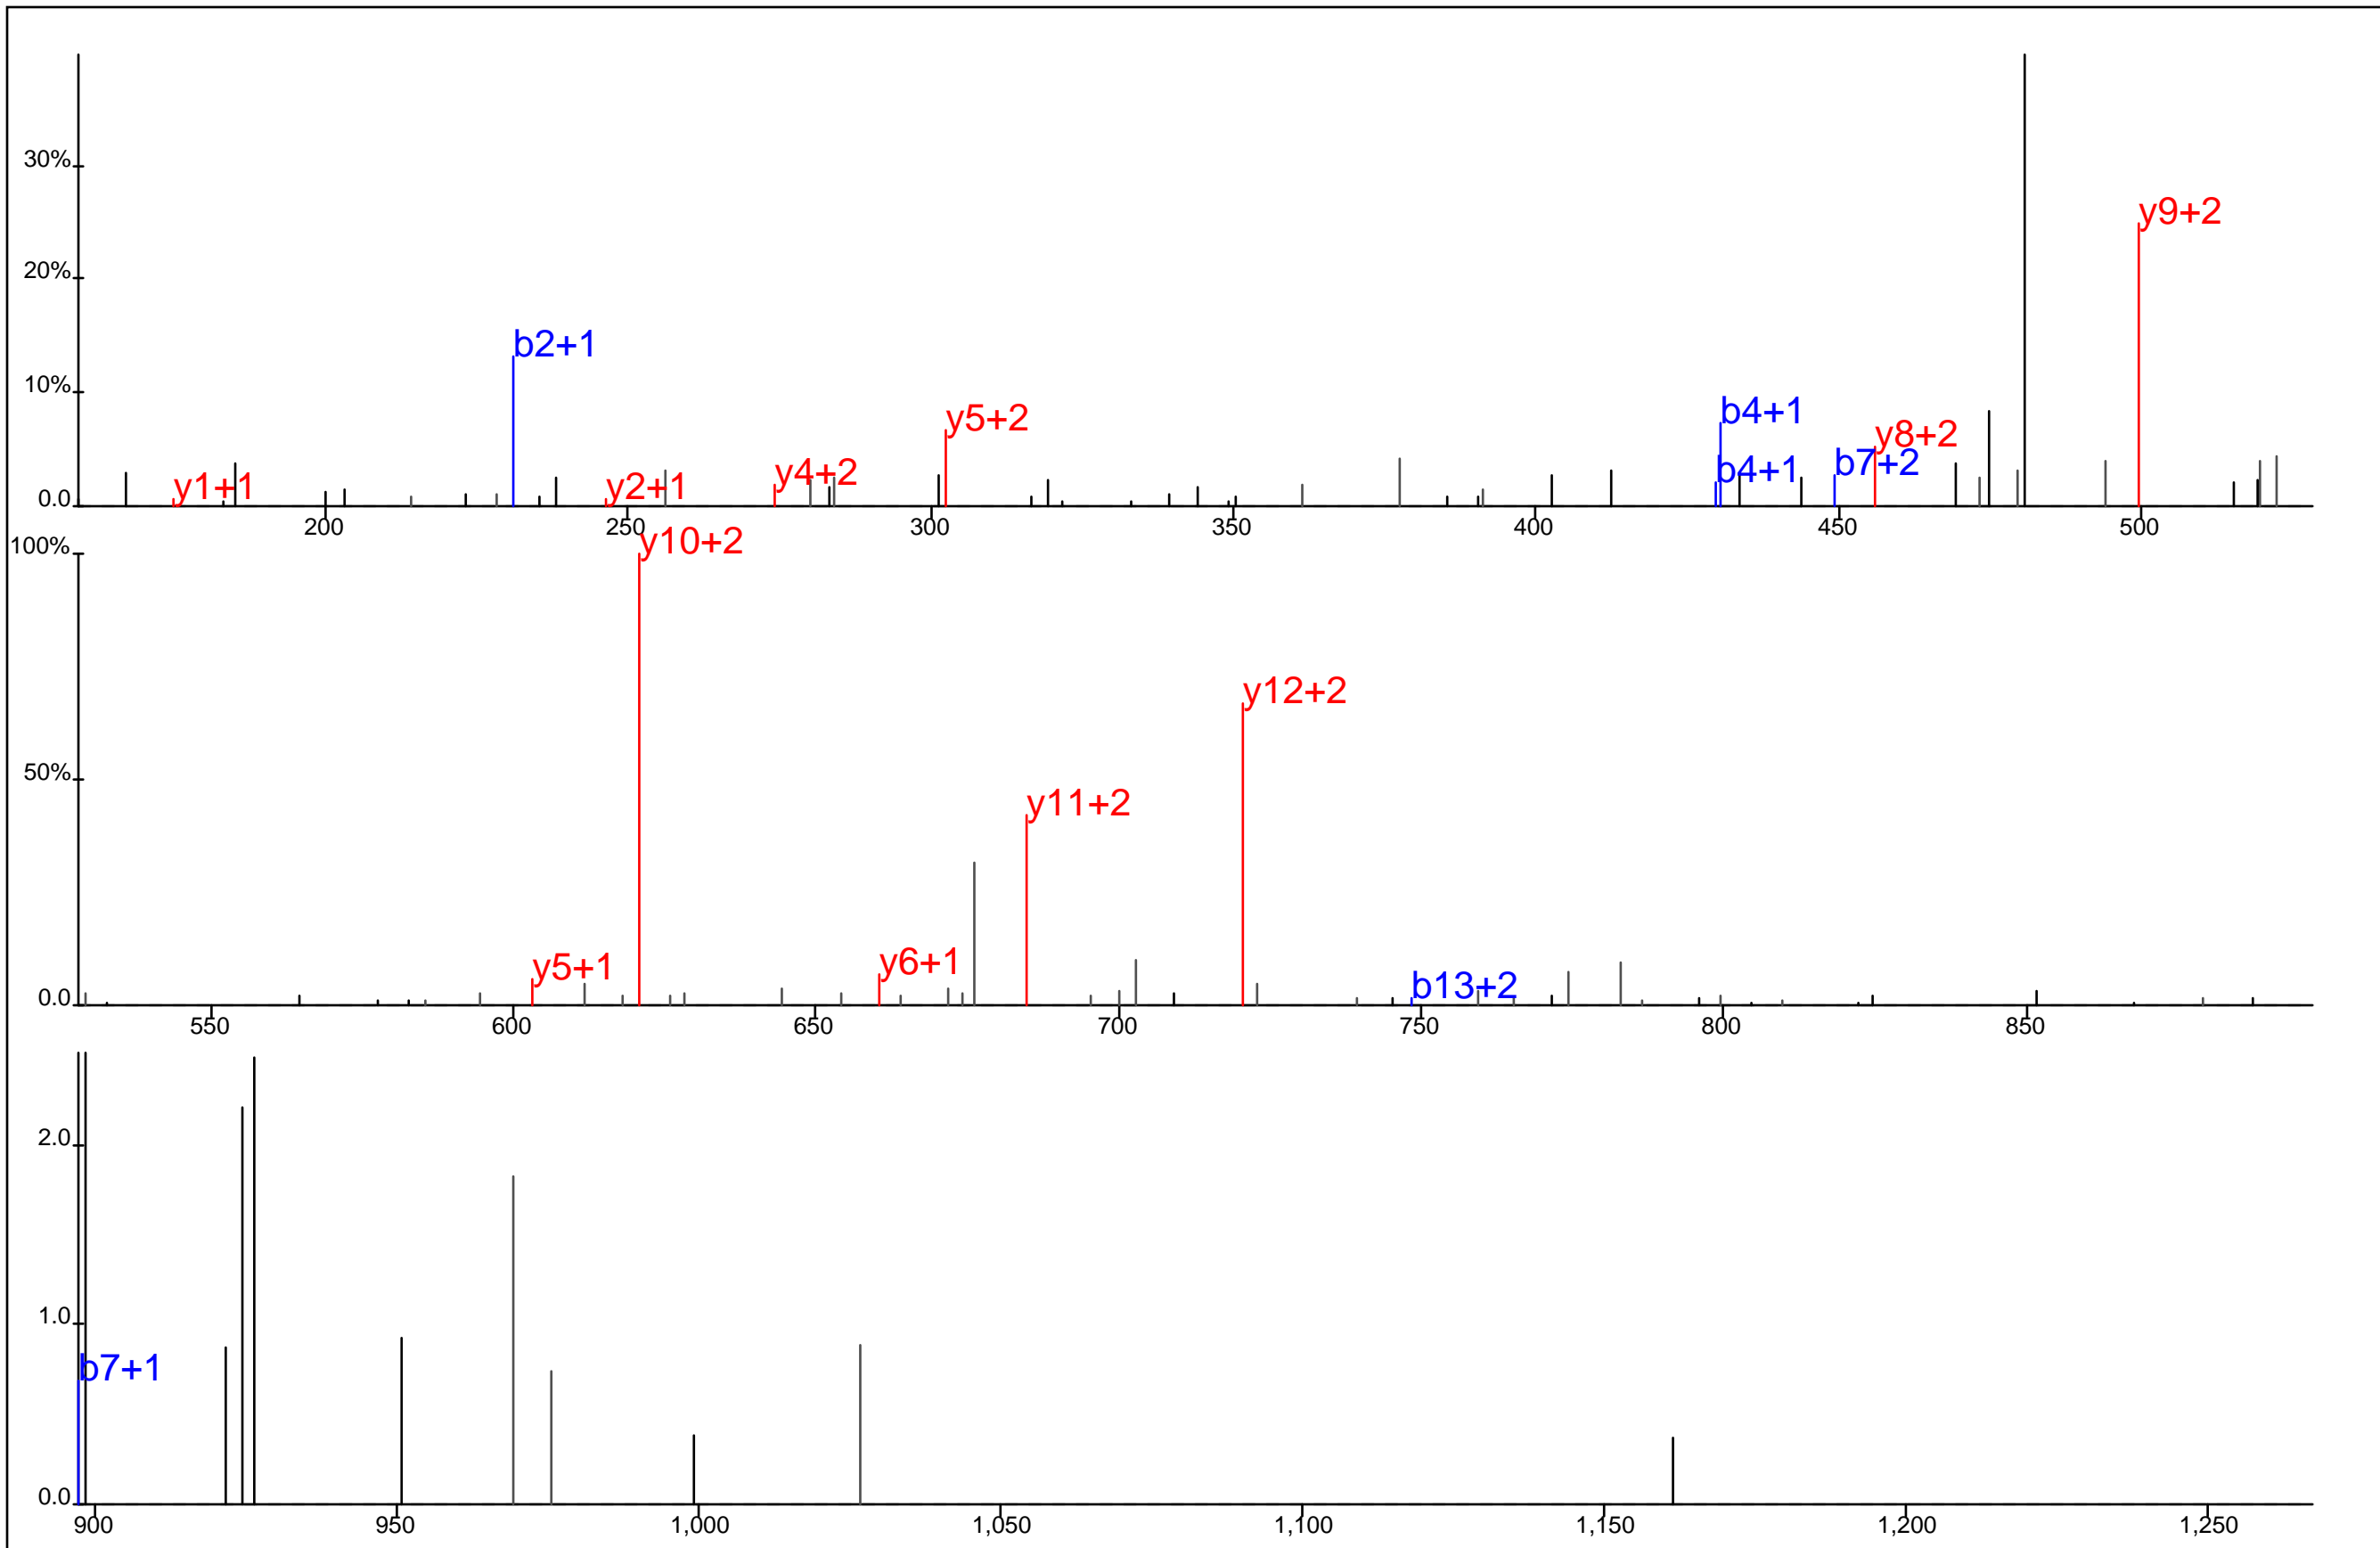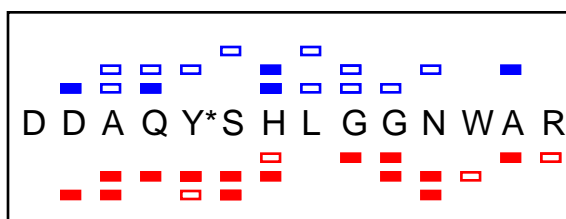

Protein Name: T cell receptor T3 delta chain  
 gi Accession: 0  
 Precursor Mass: 557.2301+3  
 Delta Mass: 0.177 ppm  
 XCorr: 26.25



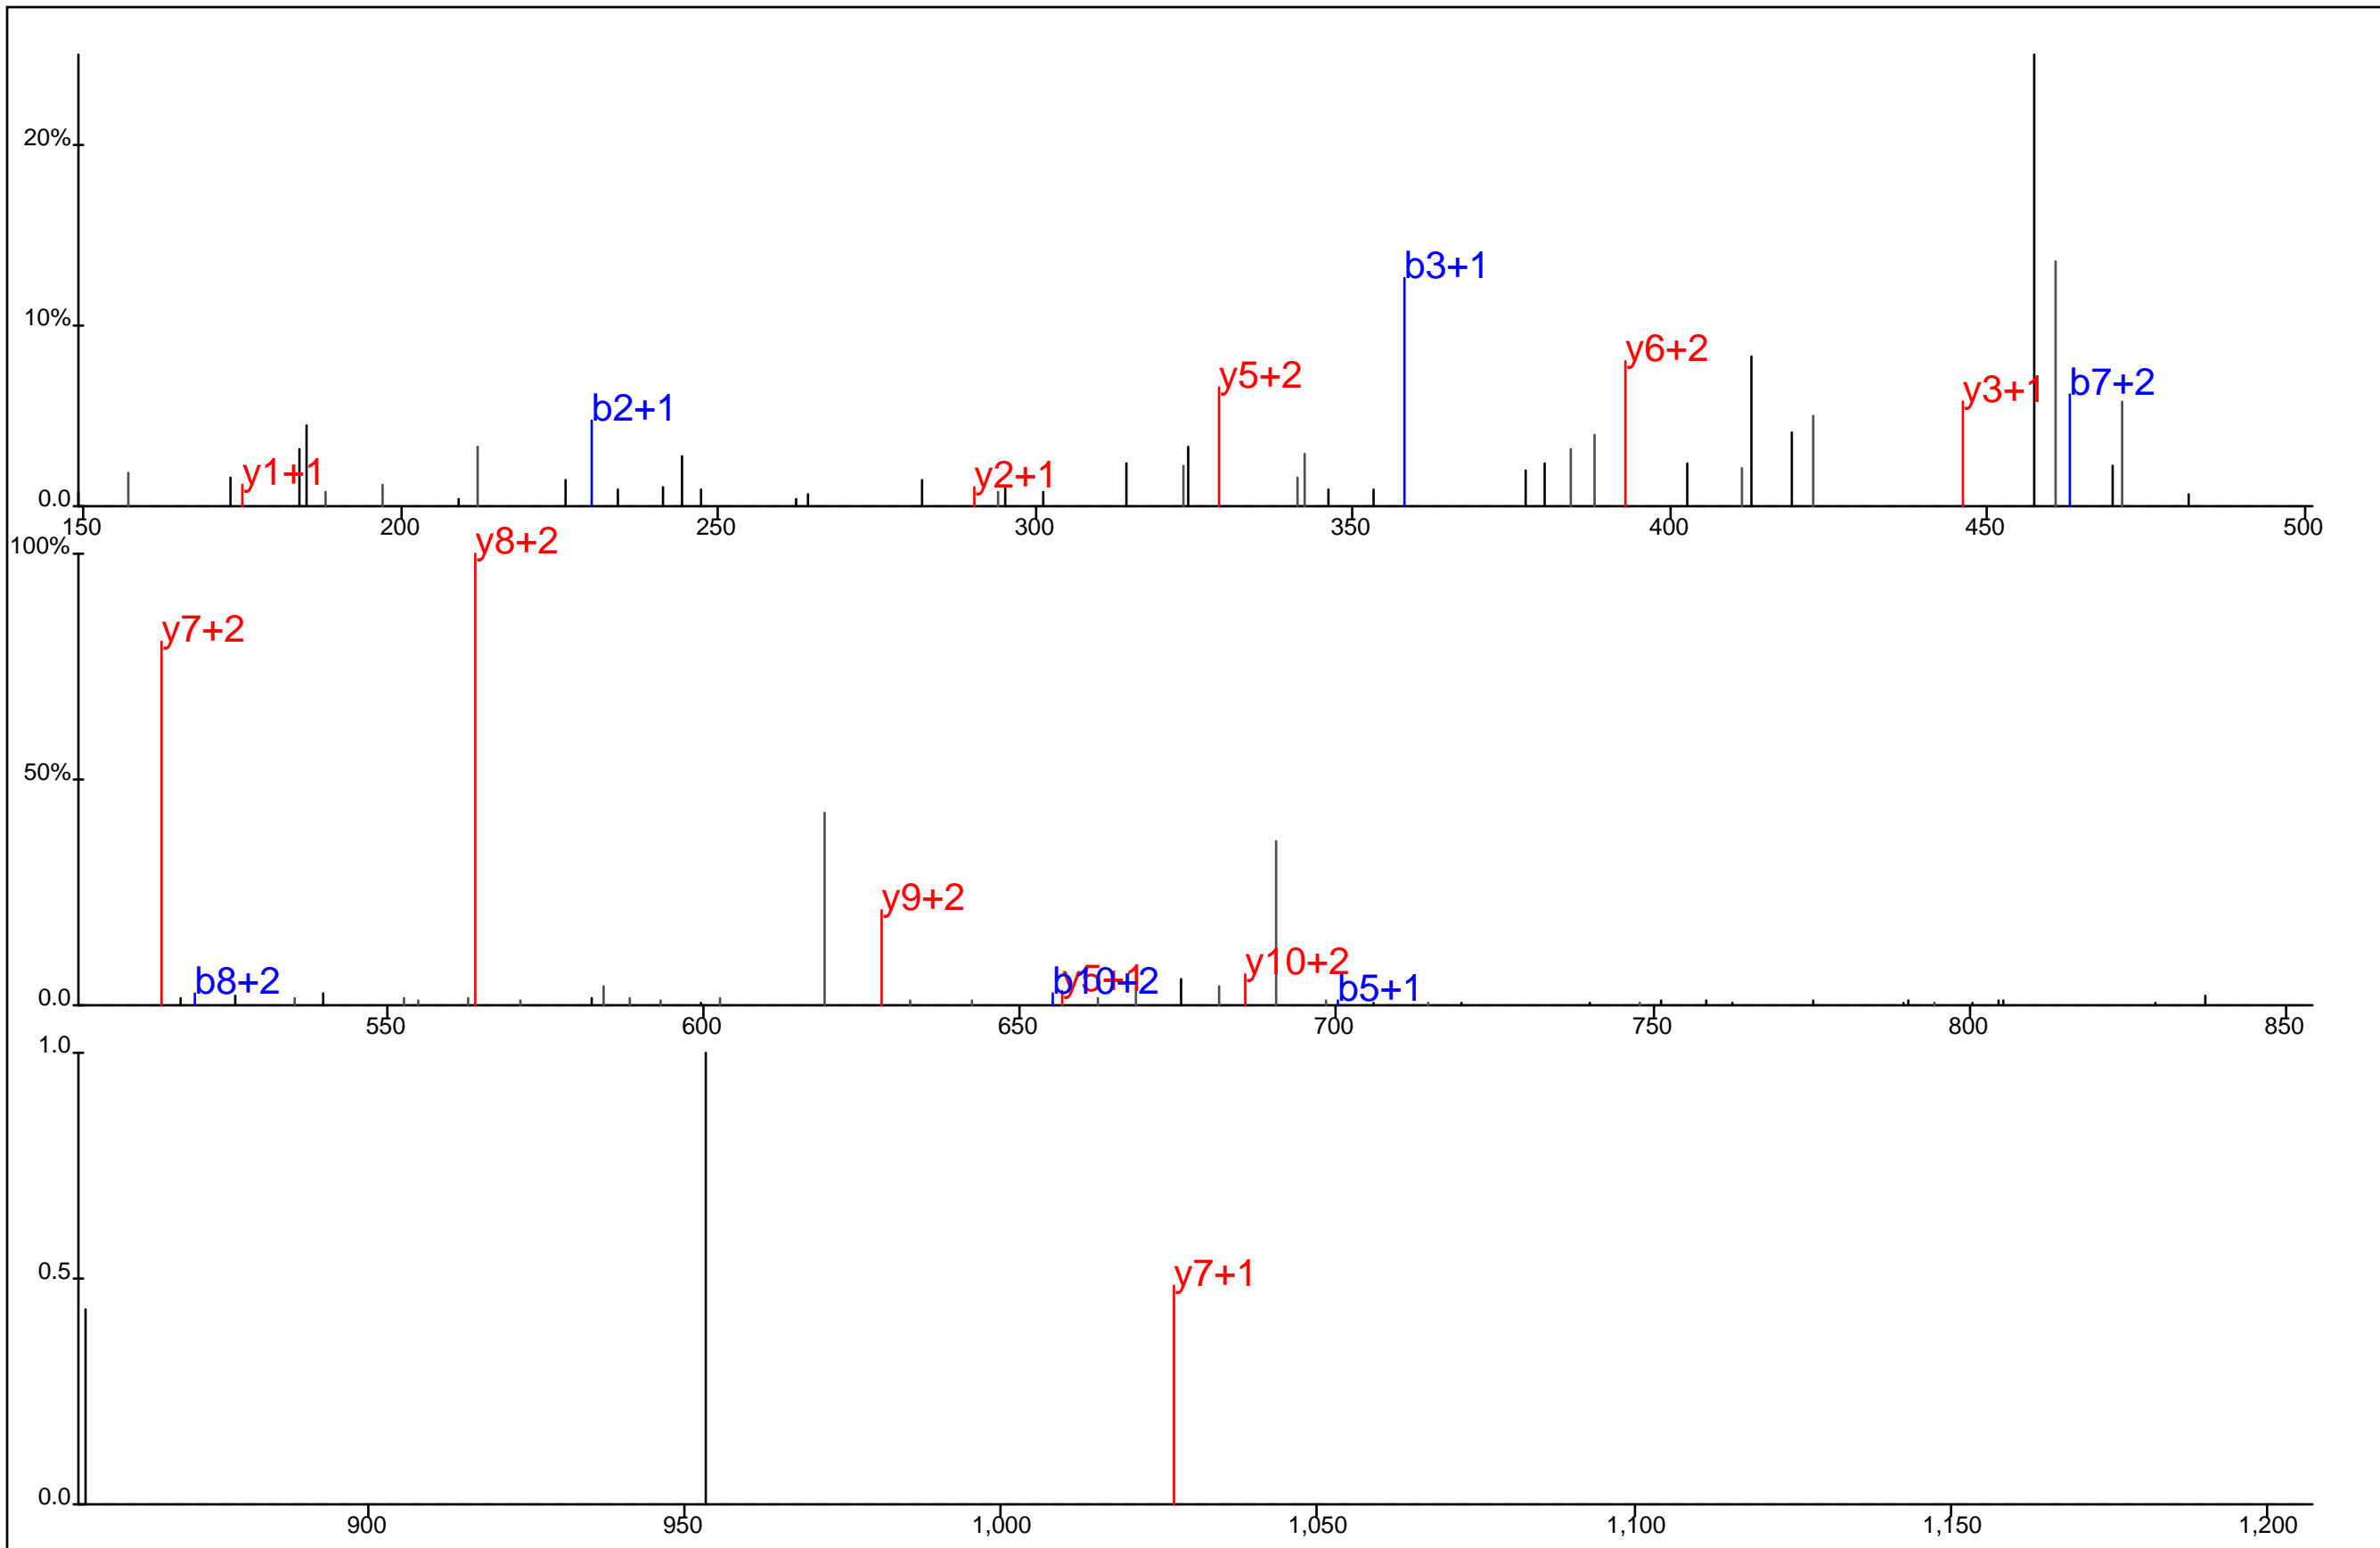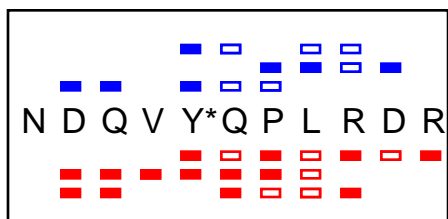

Protein Name: T cell receptor T3 delta chain  
 gi Accession: 0  
 Precursor Mass: 495.2276+3  
 Delta Mass: 0.385 ppm  
 XCorr: 28.38

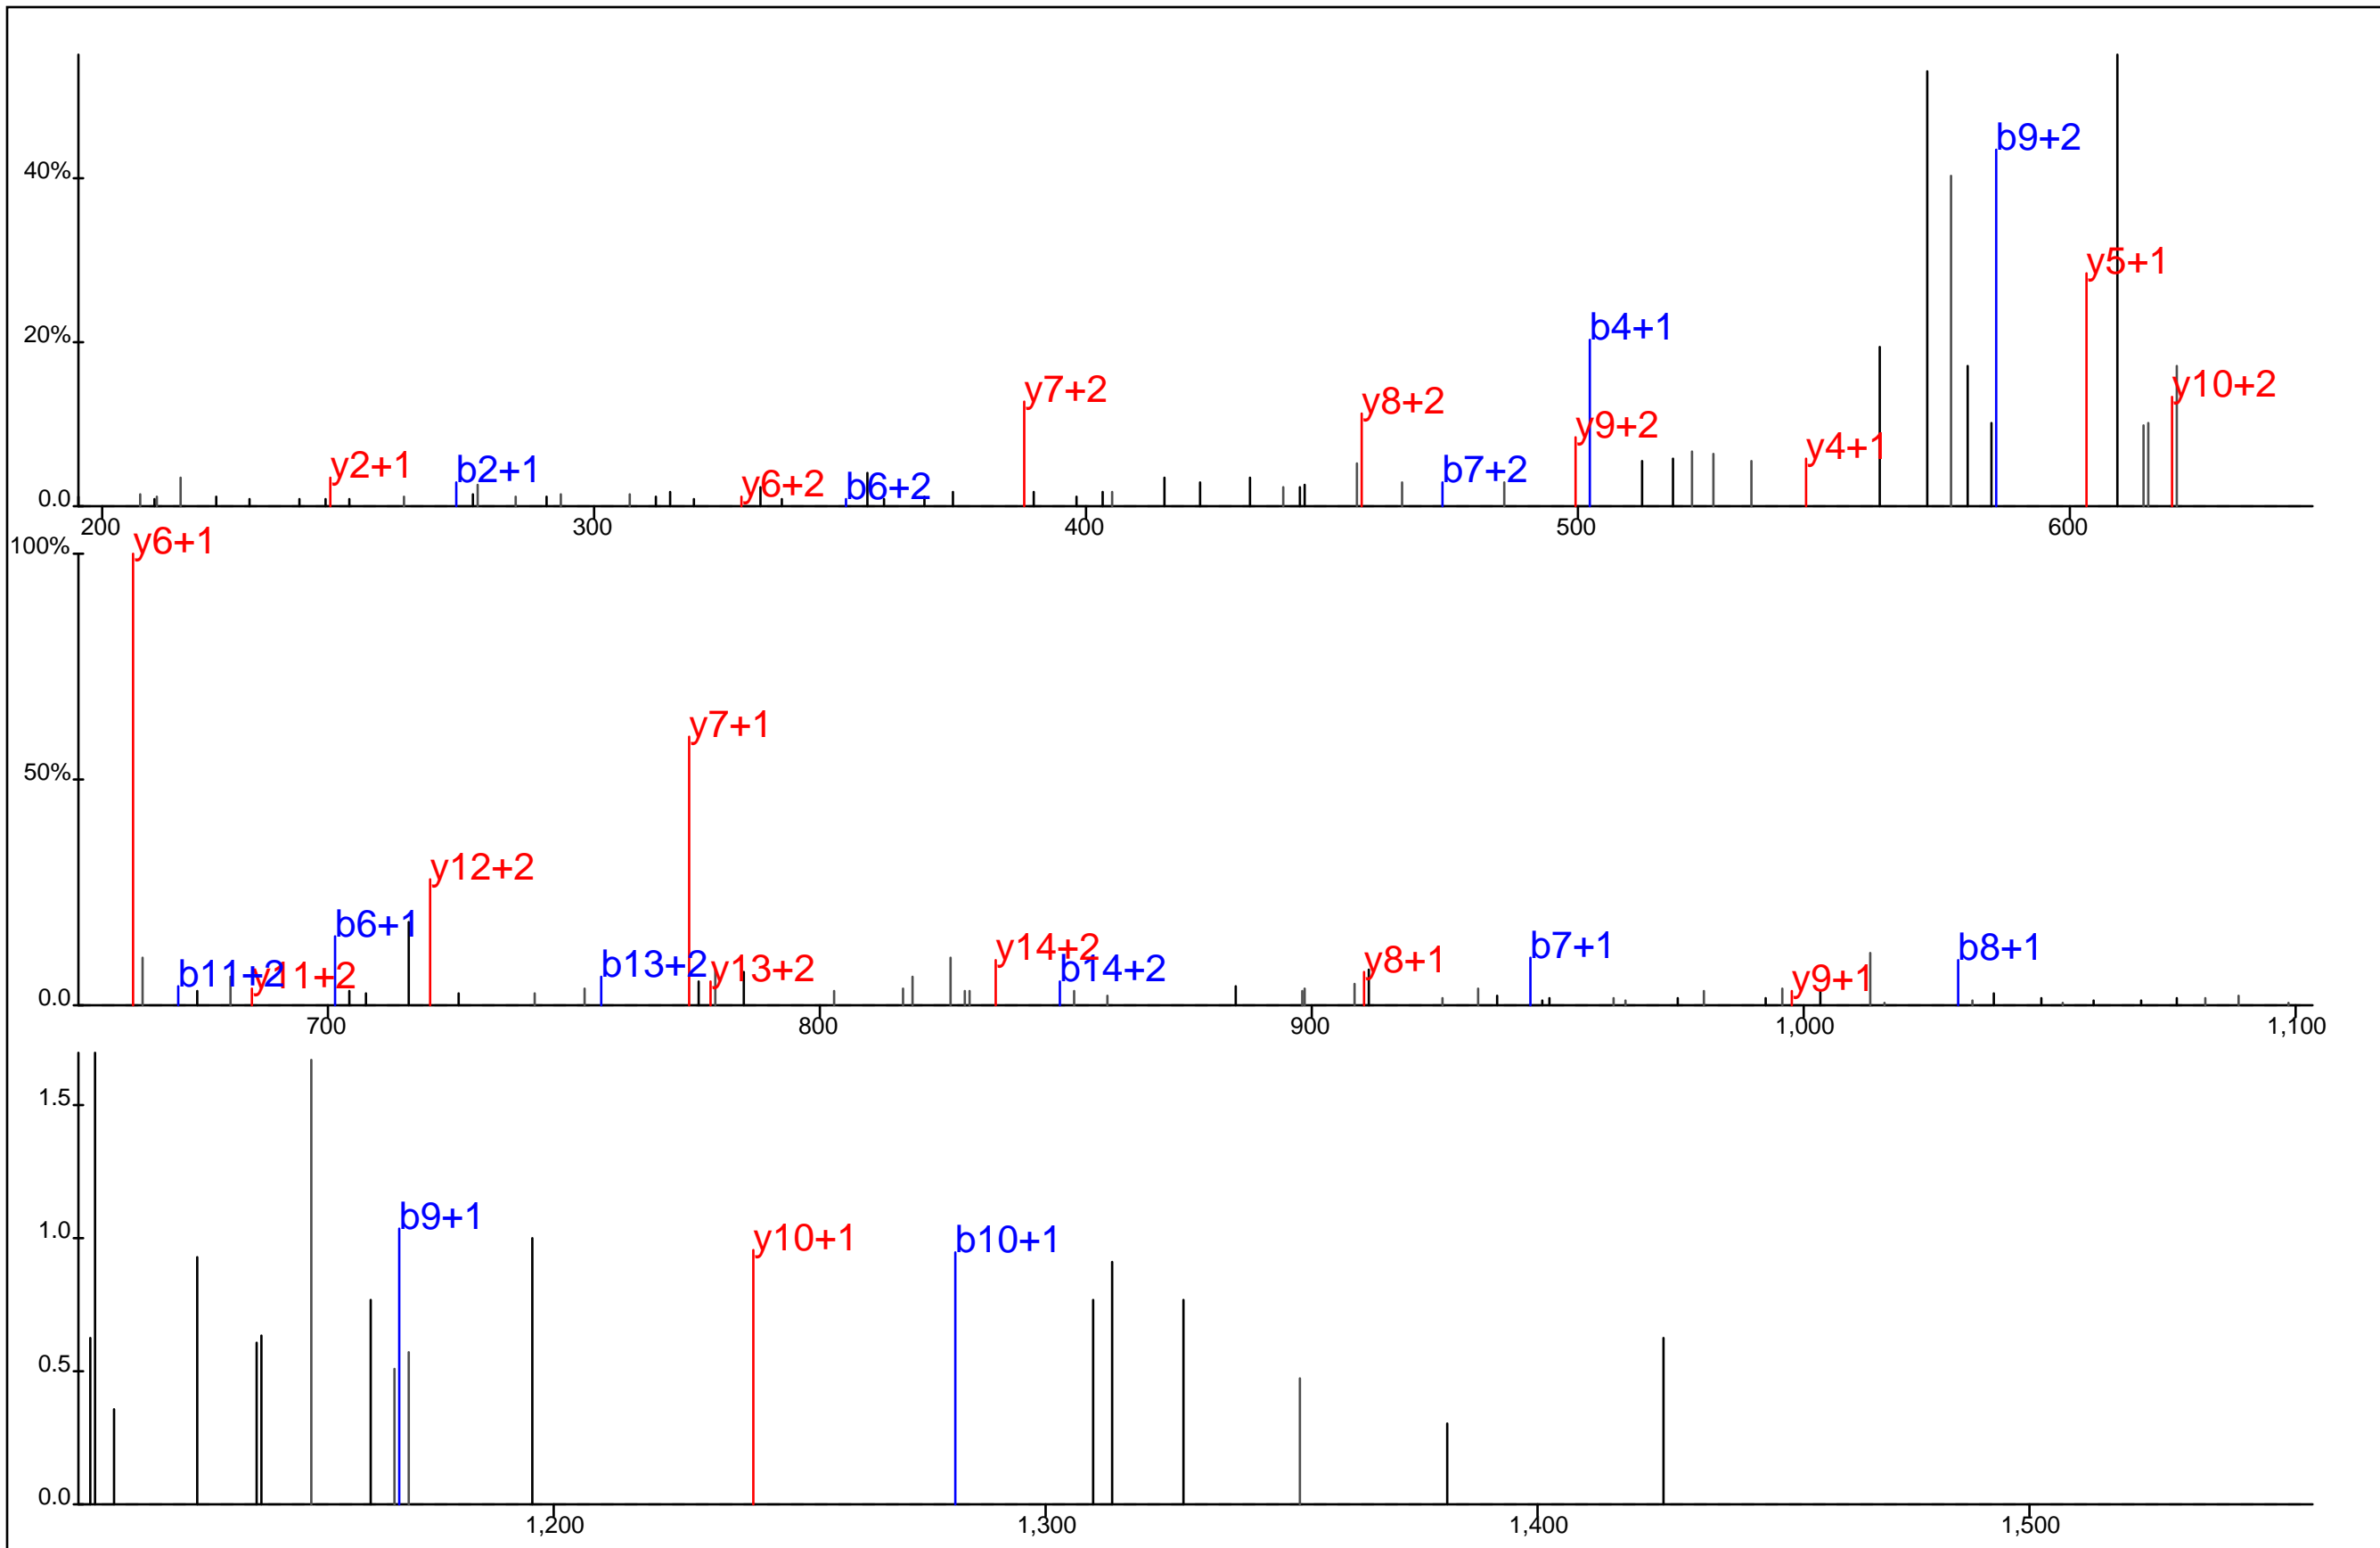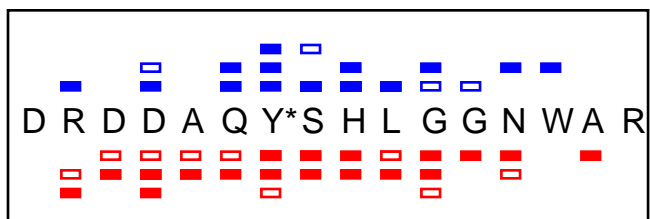

Protein Name: T cell receptor T3 delta chain  
 gi Accession: 0  
 Precursor Mass: 647.6047+3  
 Delta Mass: 1.987 ppm  
 XCorr: 37.38



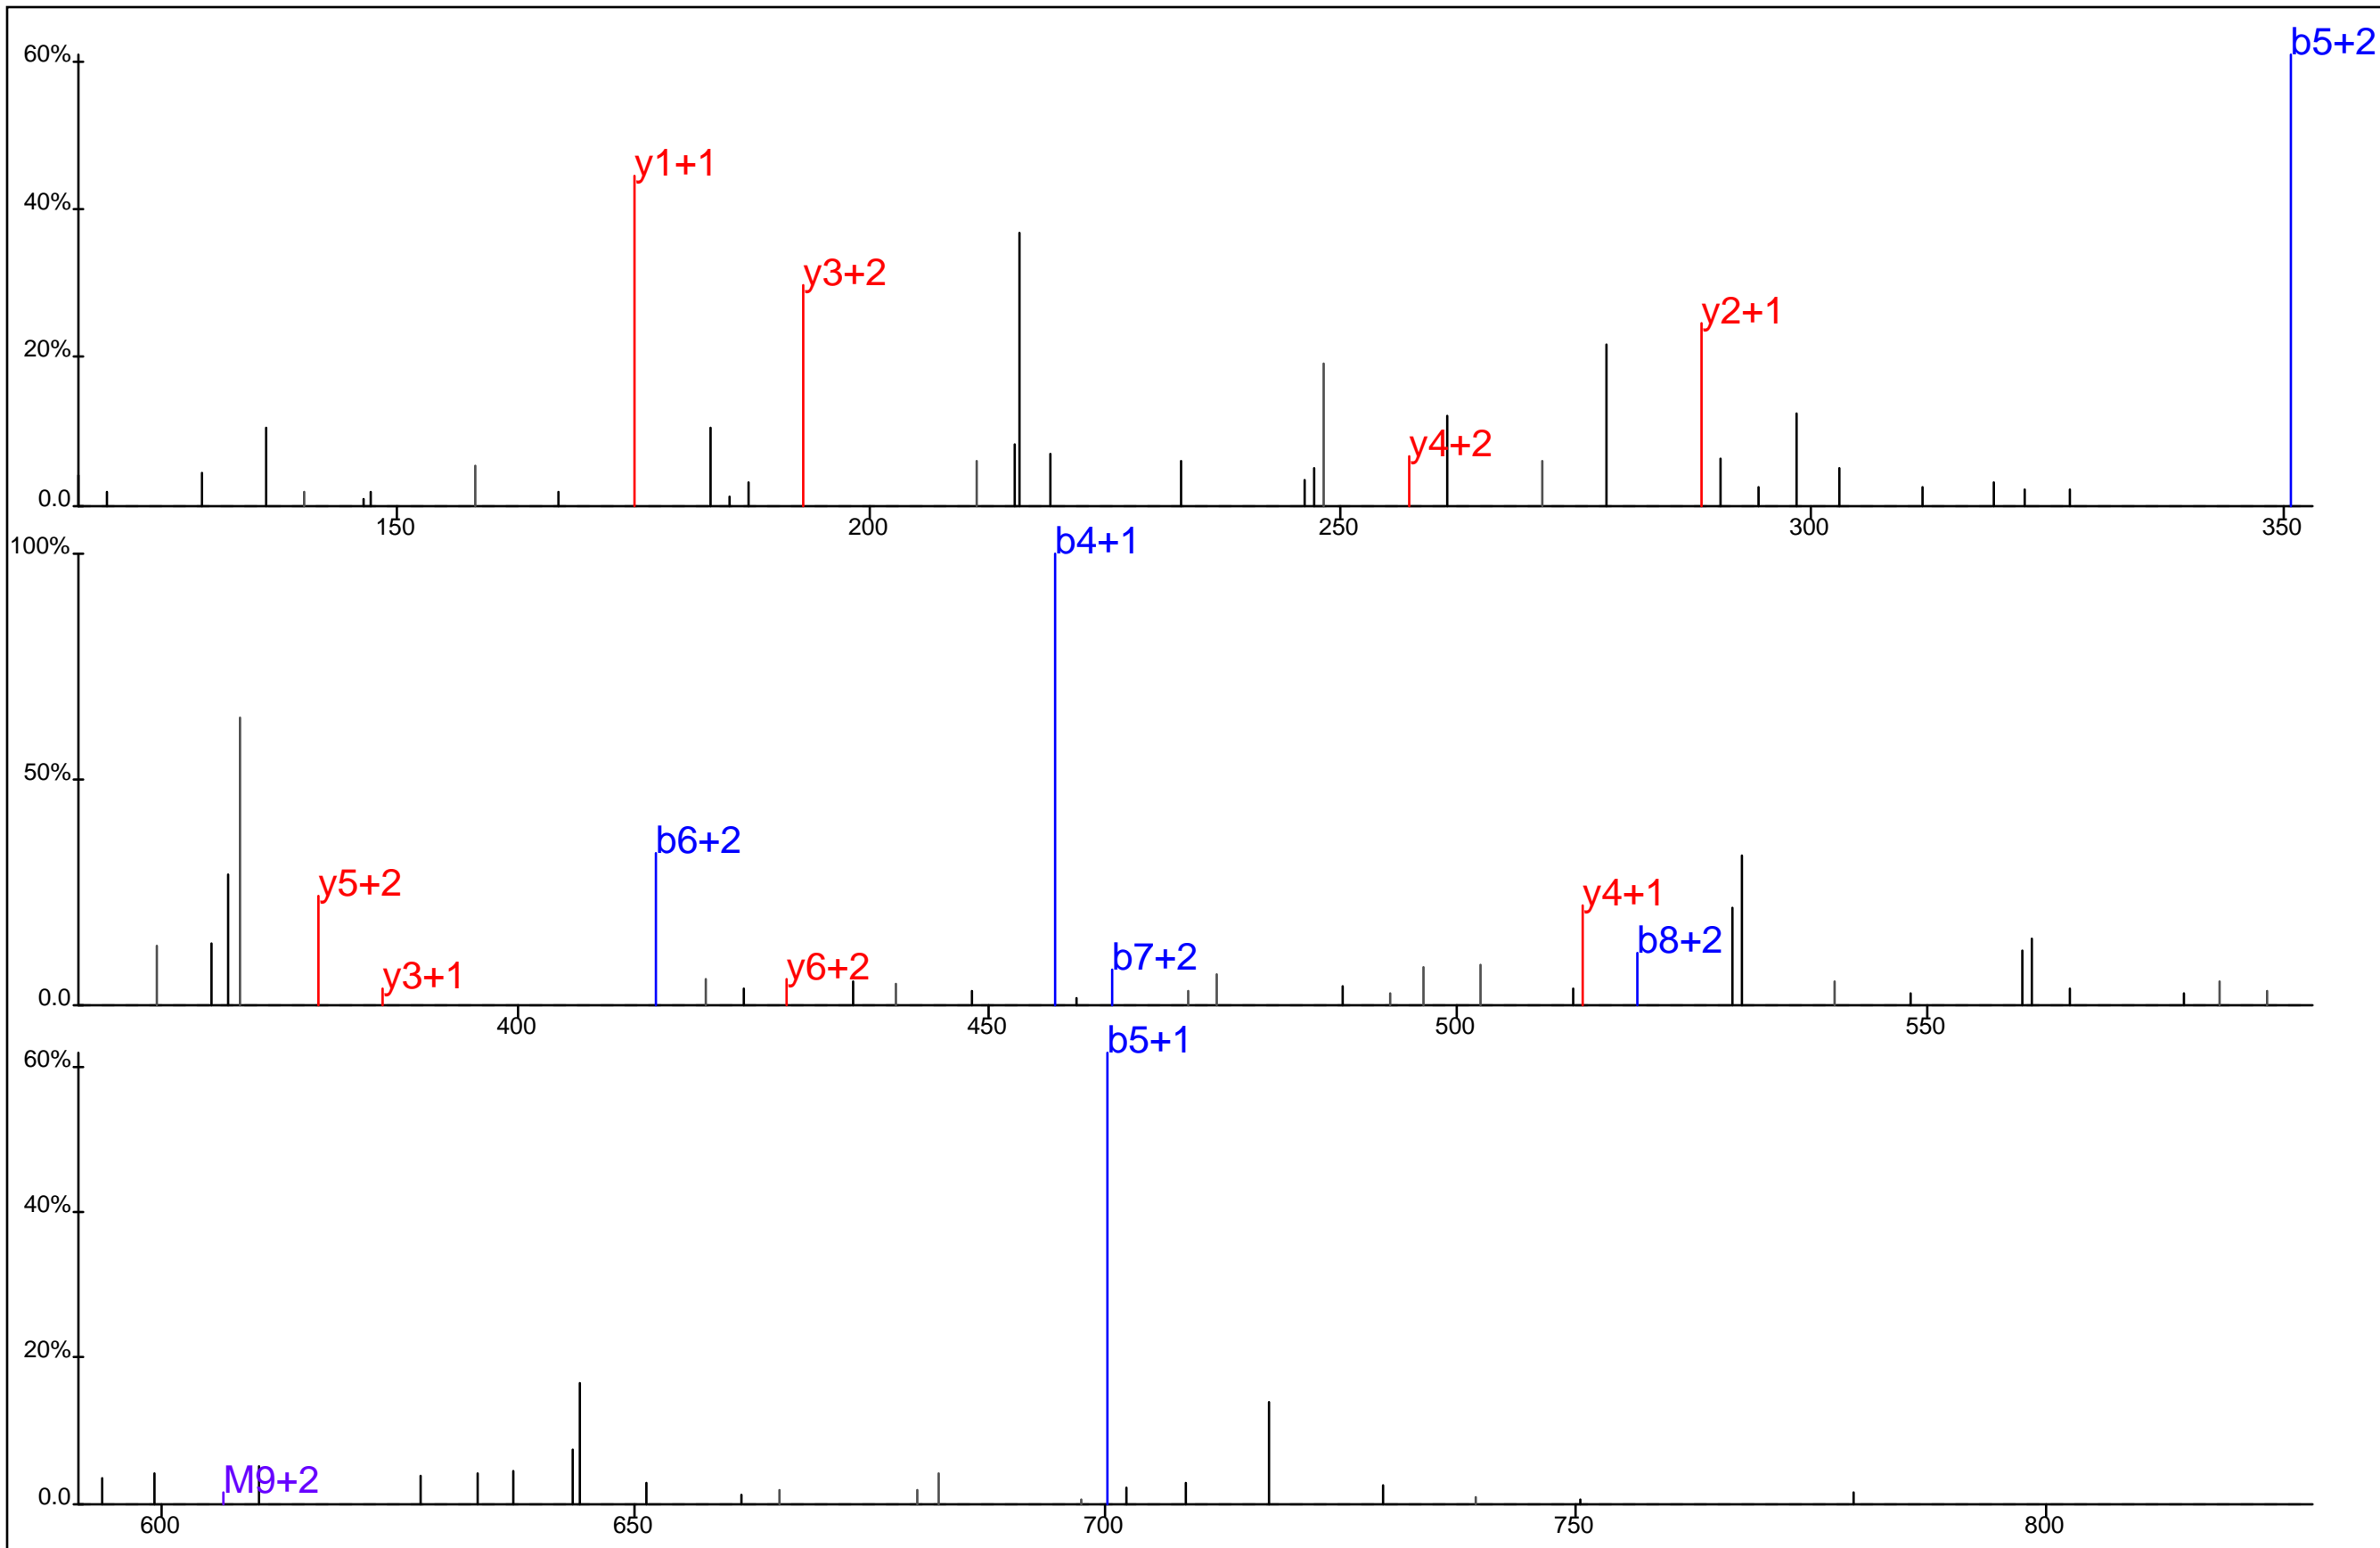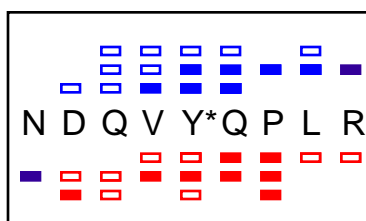

Protein Name: T cell receptor T3 delta chain  
 gi Accession: 0  
 Precursor Mass: 404.8520+3  
 Delta Mass: 0.533 ppm  
 XCorr: 22.21

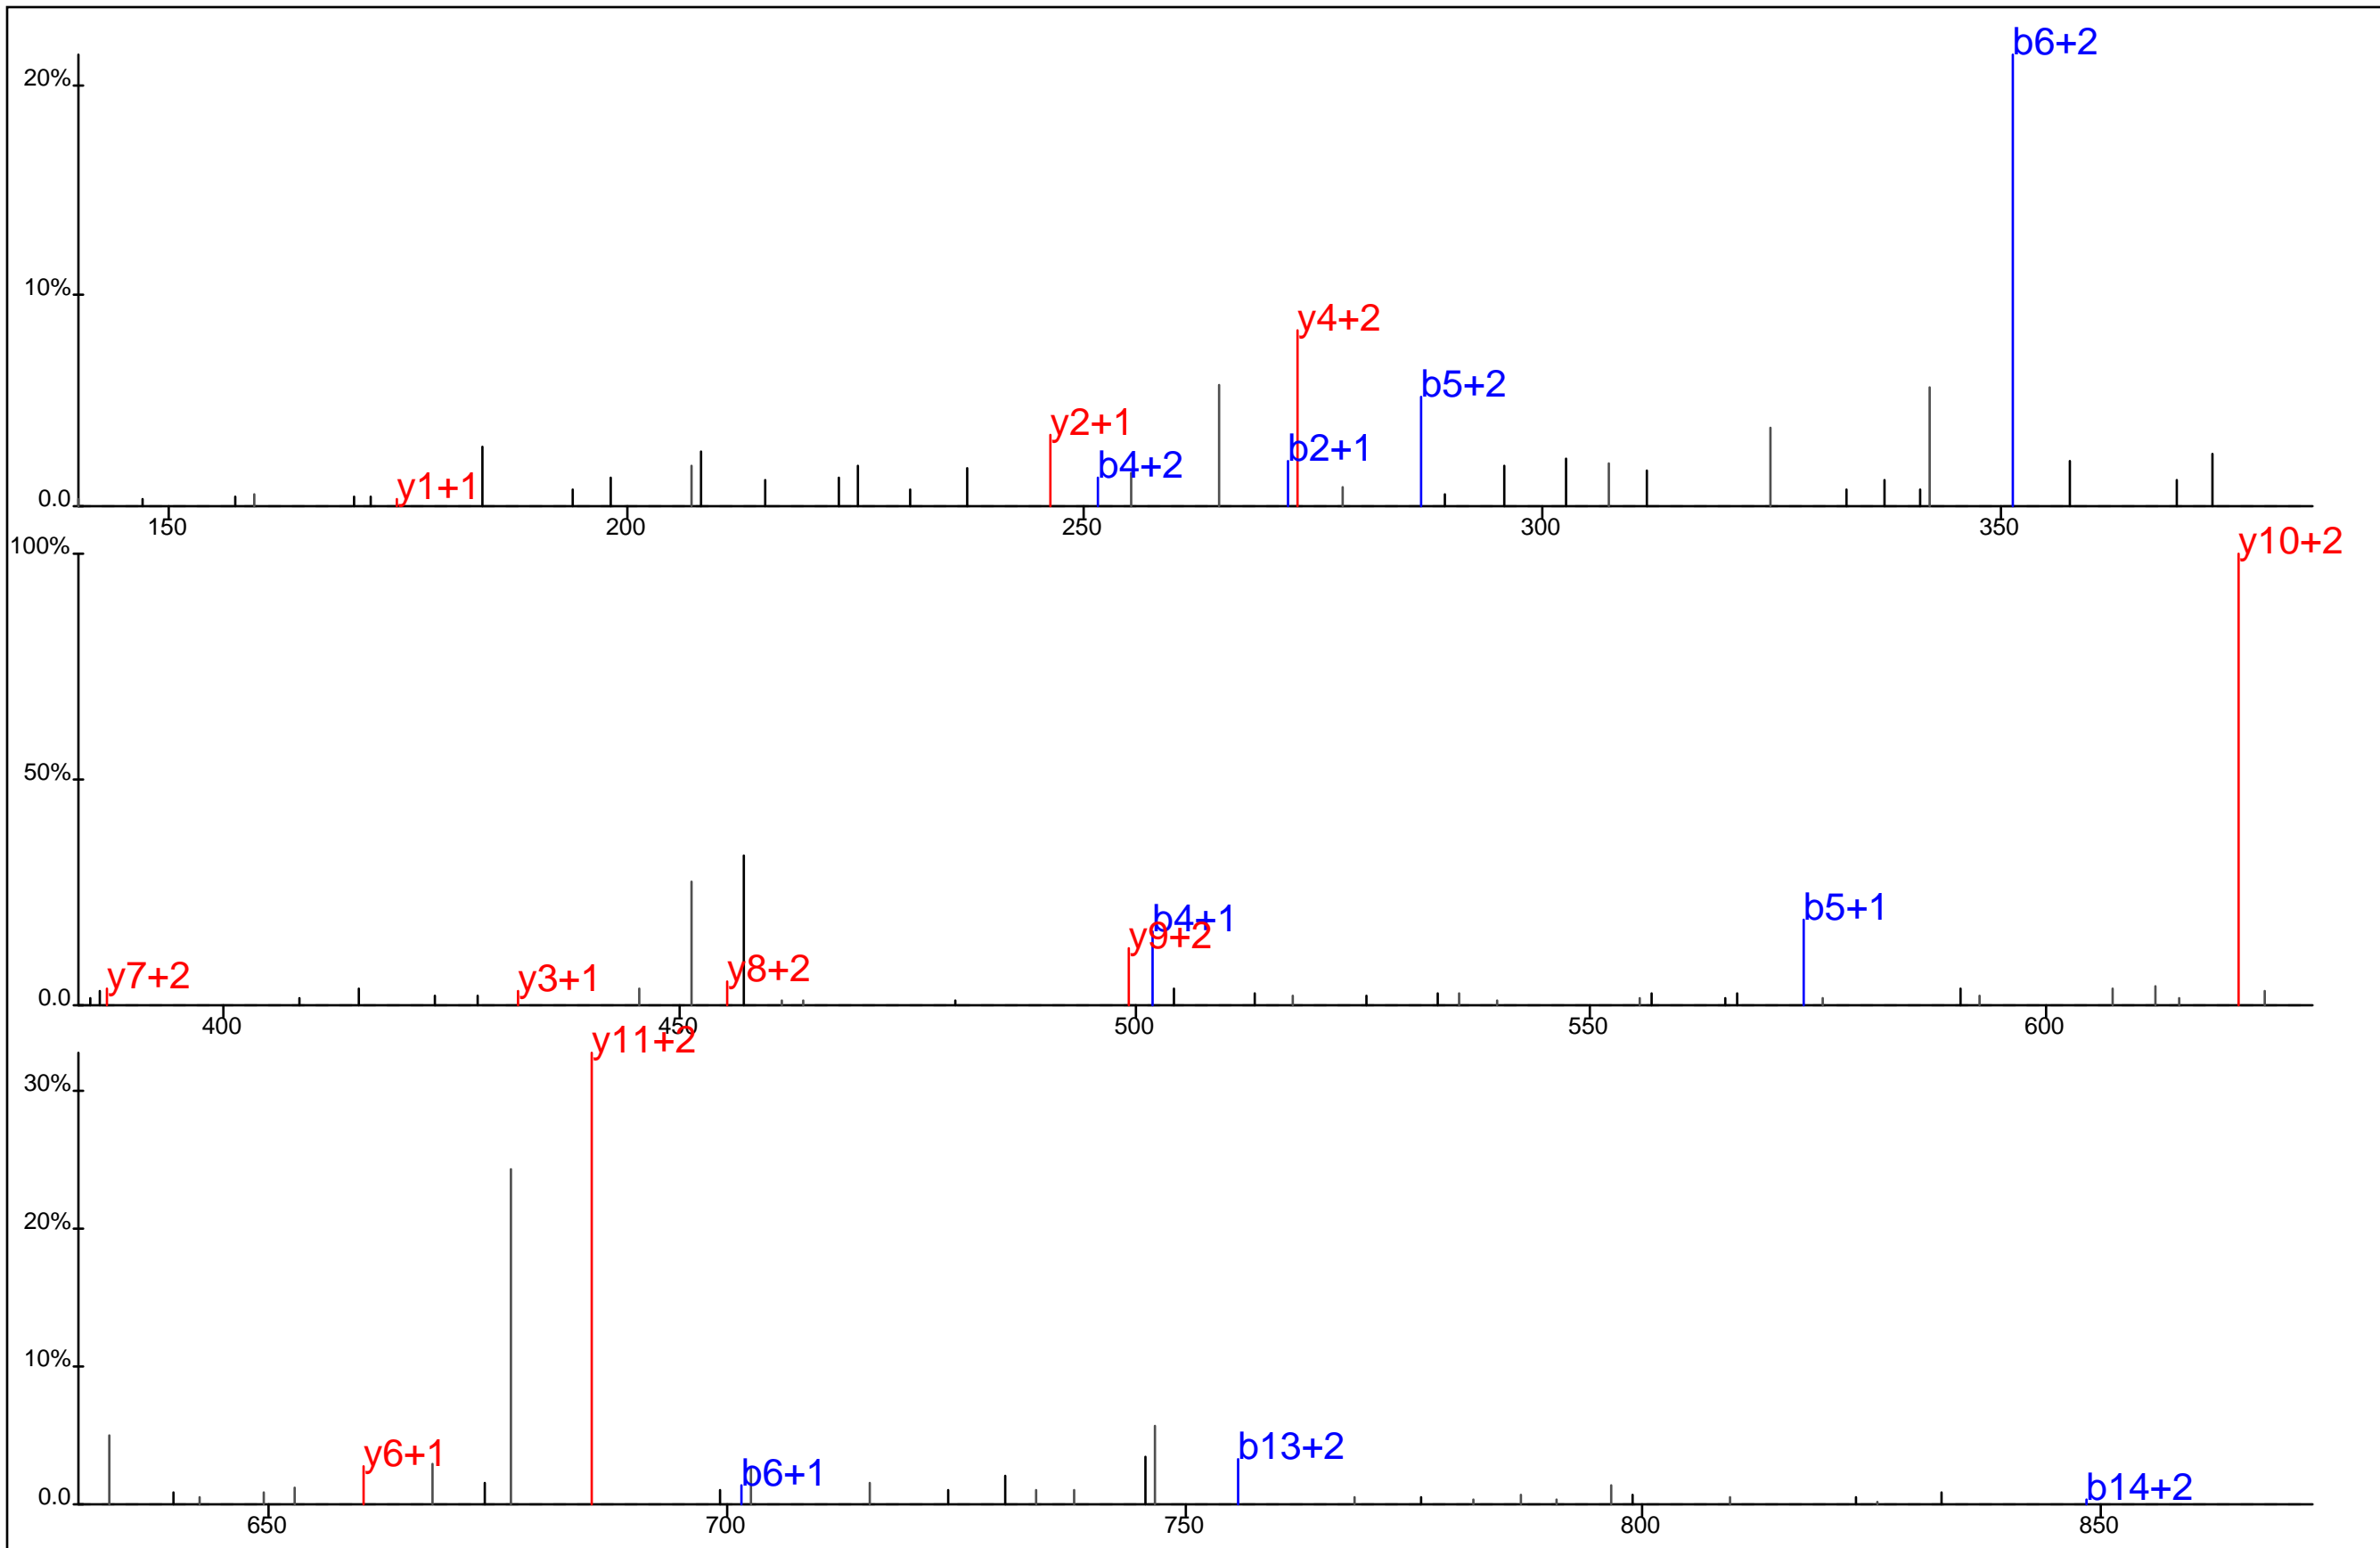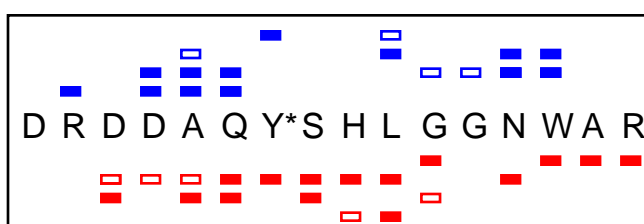

Protein Name: T cell receptor T3 delta chain  
 gi Accession: 0  
 Precursor Mass: 485.9561+4  
 Delta Mass: 0.451 ppm  
 XCorr: 29.18

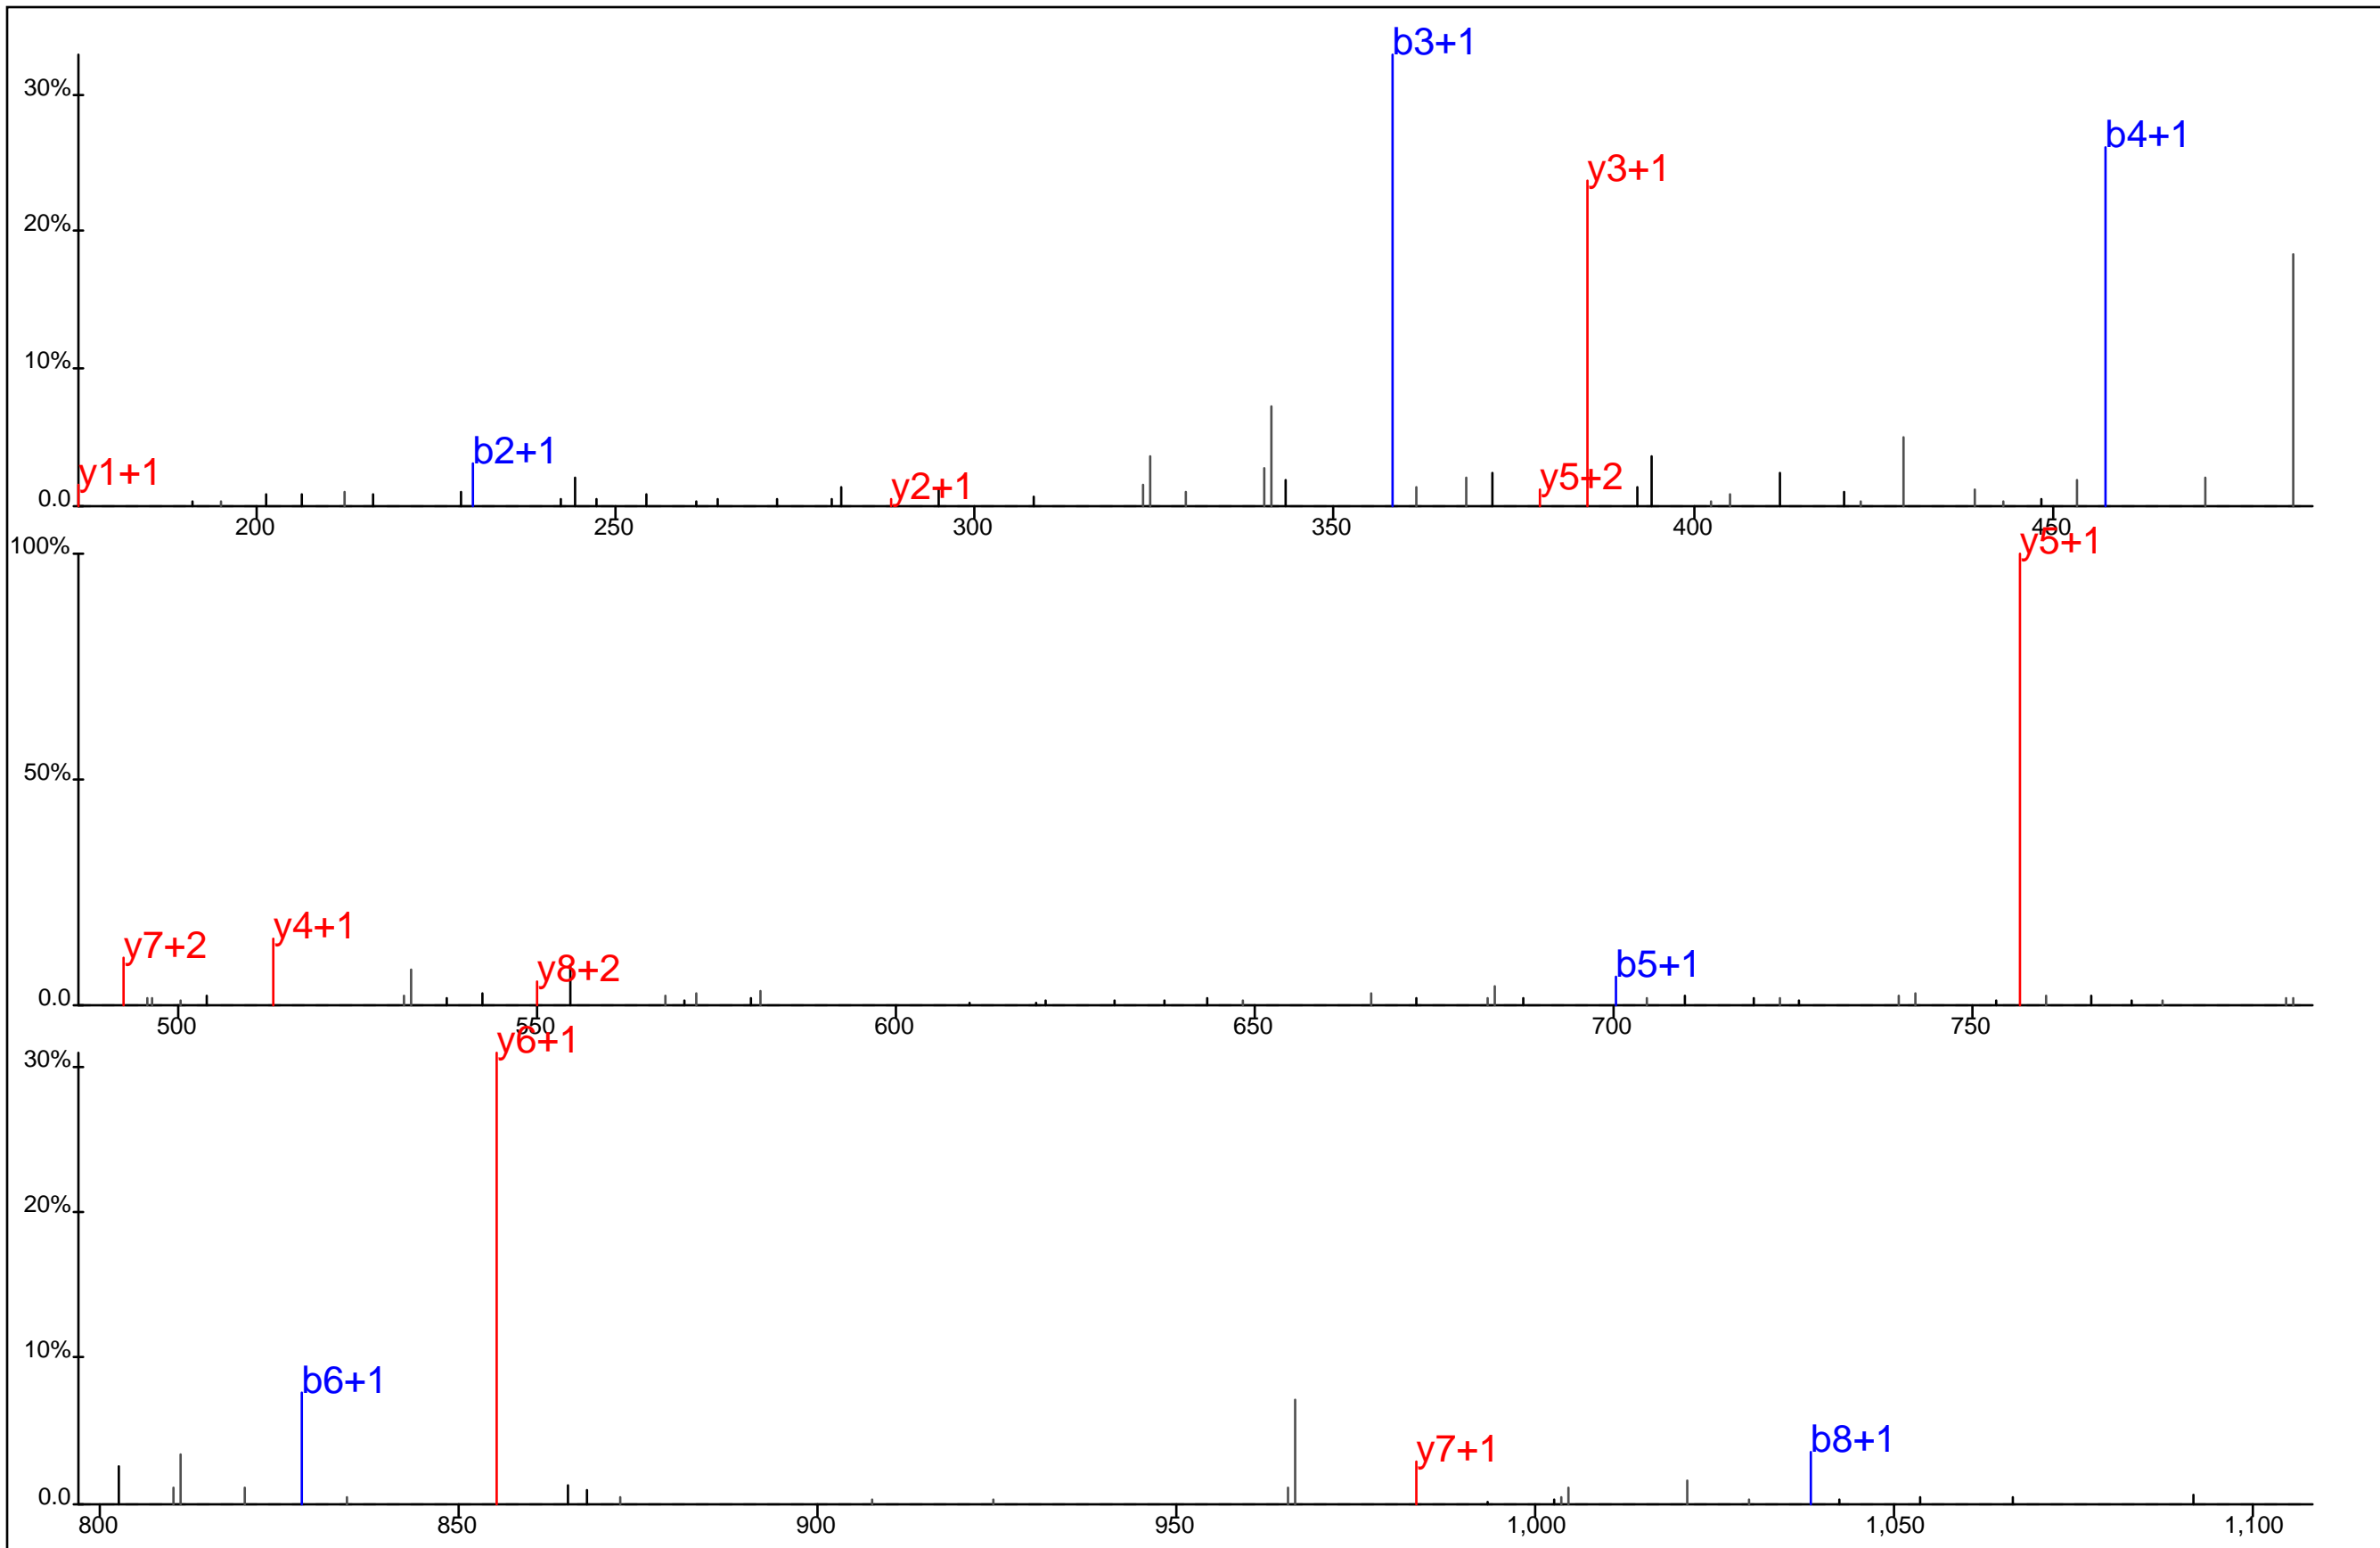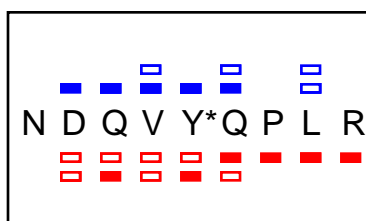

Protein Name: T cell receptor T3 delta chain  
 gi Accession: 0  
 Precursor Mass: 606.7744+2  
 Delta Mass: 0.569 ppm  
 XCorr: 44.68





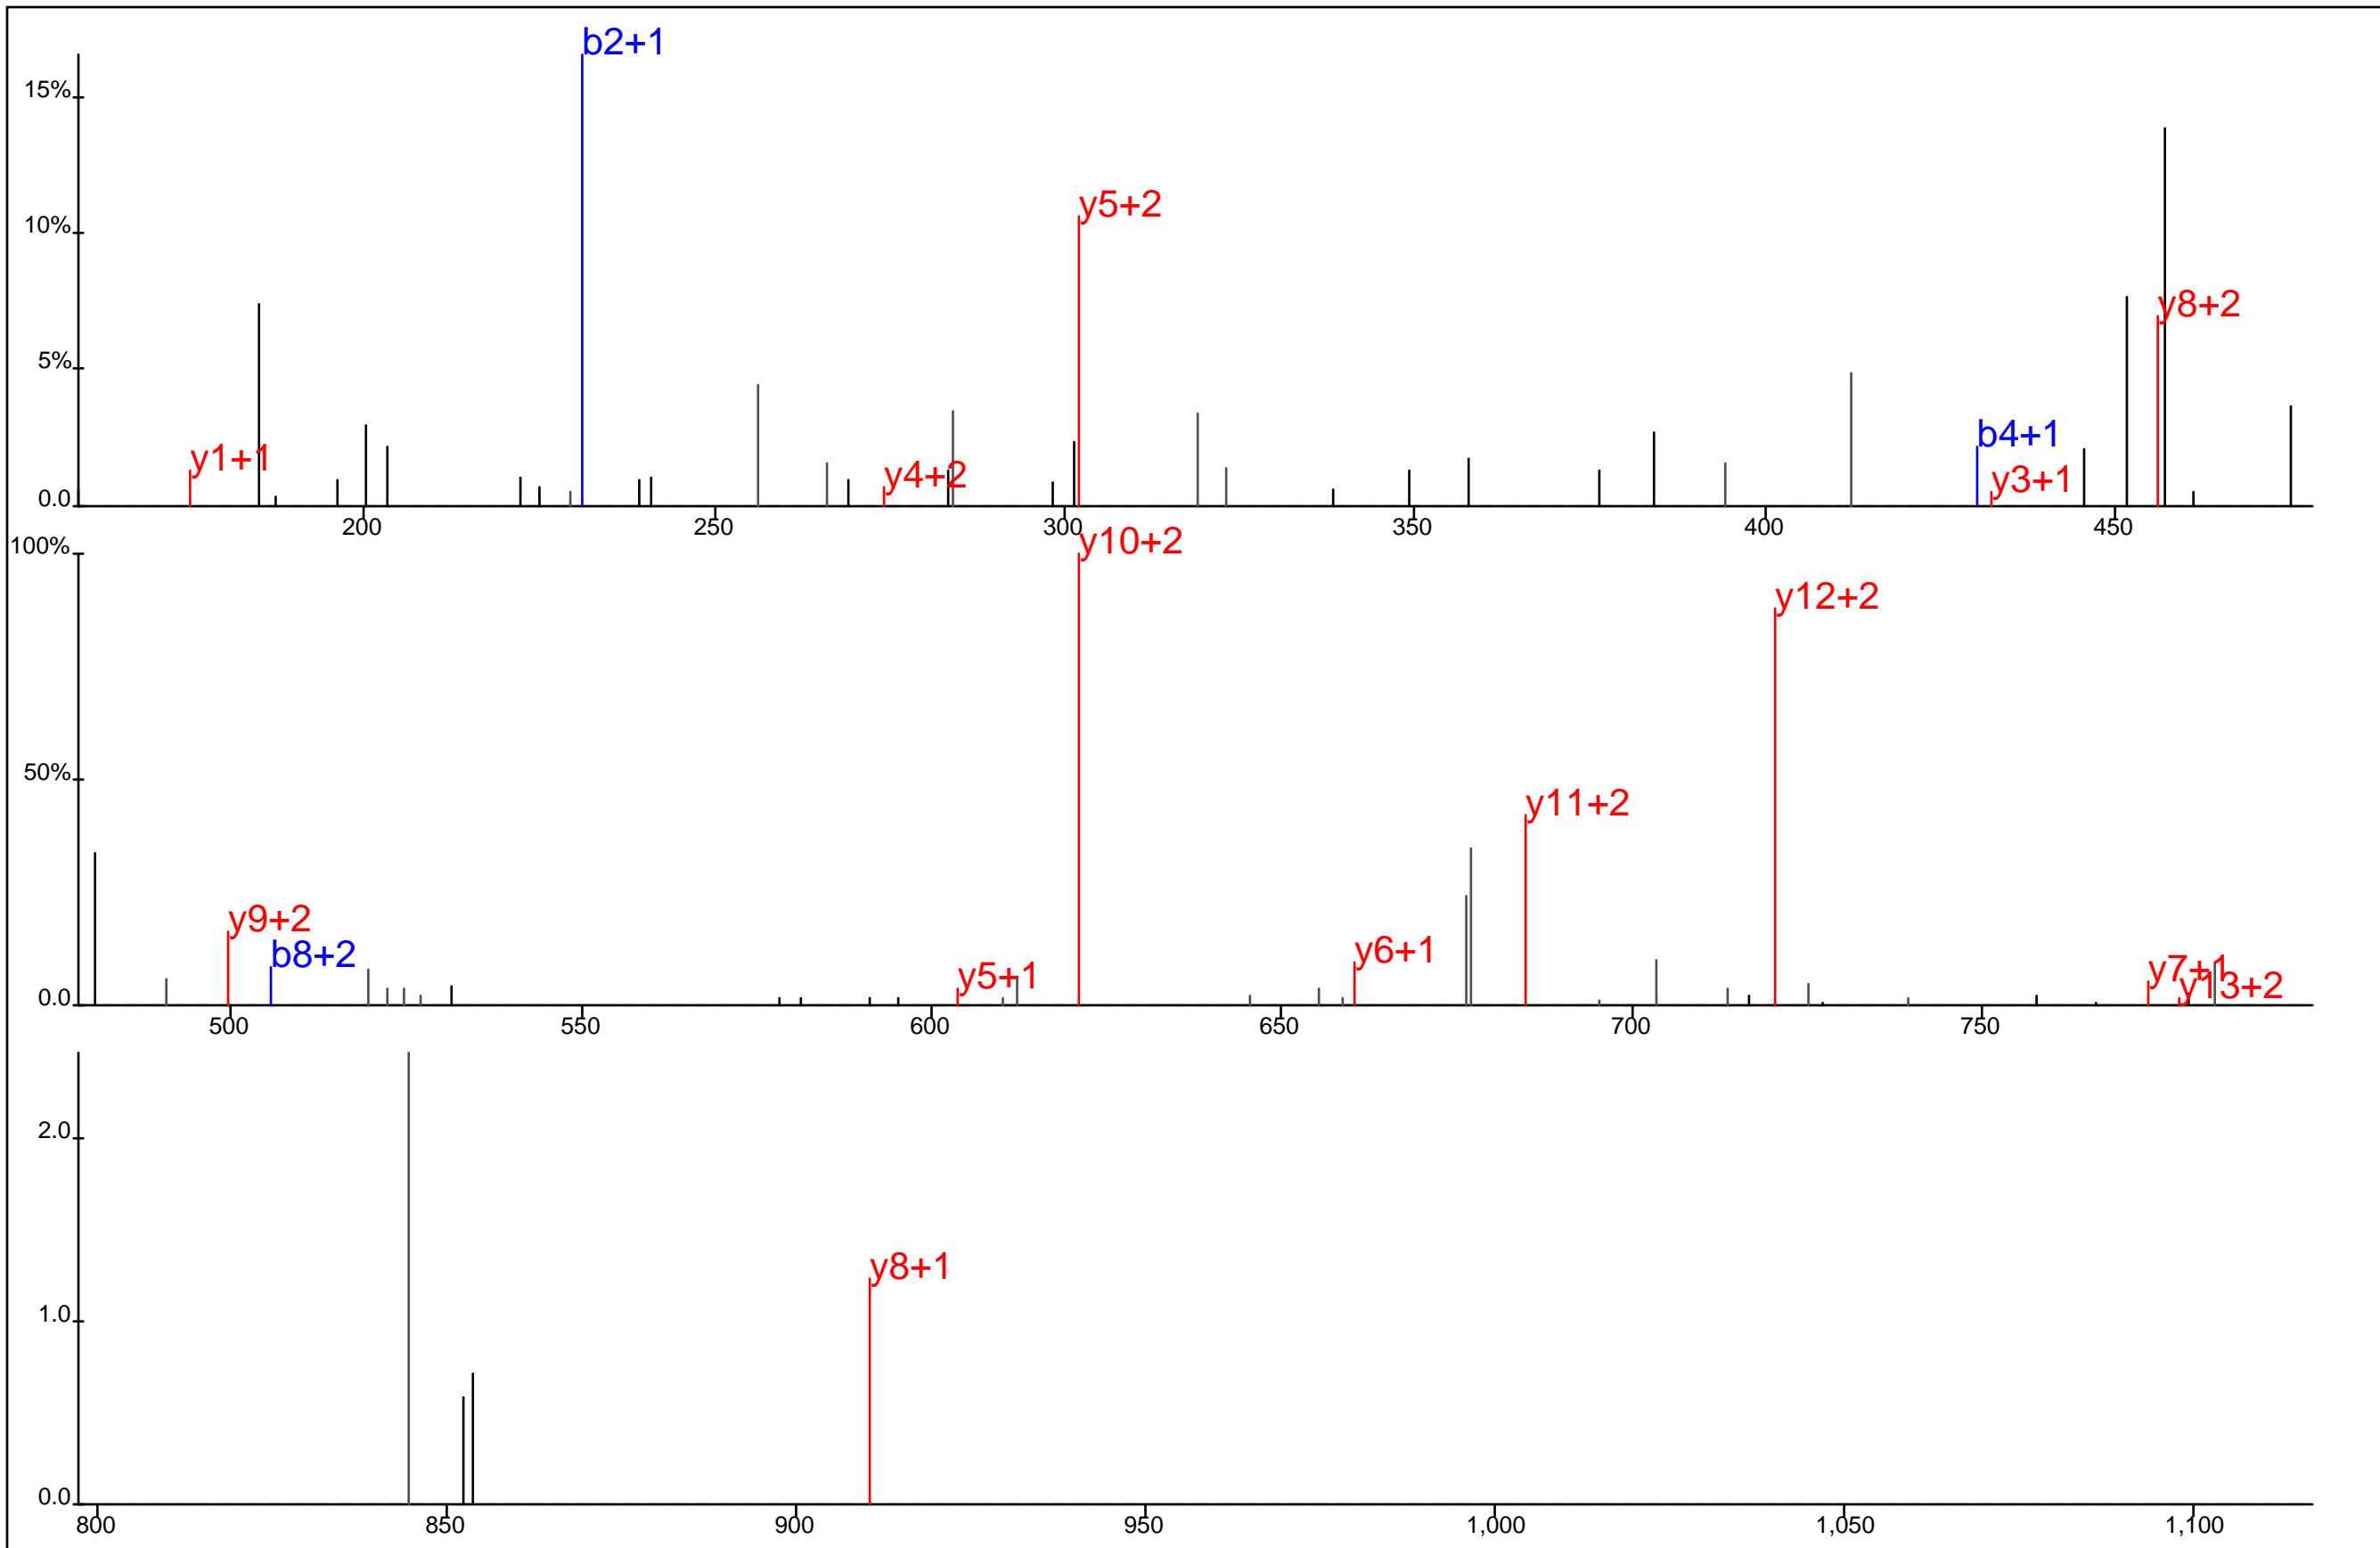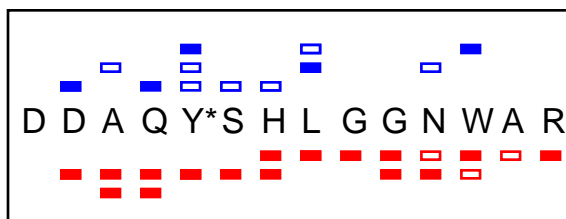

Protein Name: T cell receptor T3 delta chain  
 gi Accession: 0  
 Precursor Mass: 557.2303+3  
 Delta Mass: 0.505 ppm  
 XCorr: 36.15



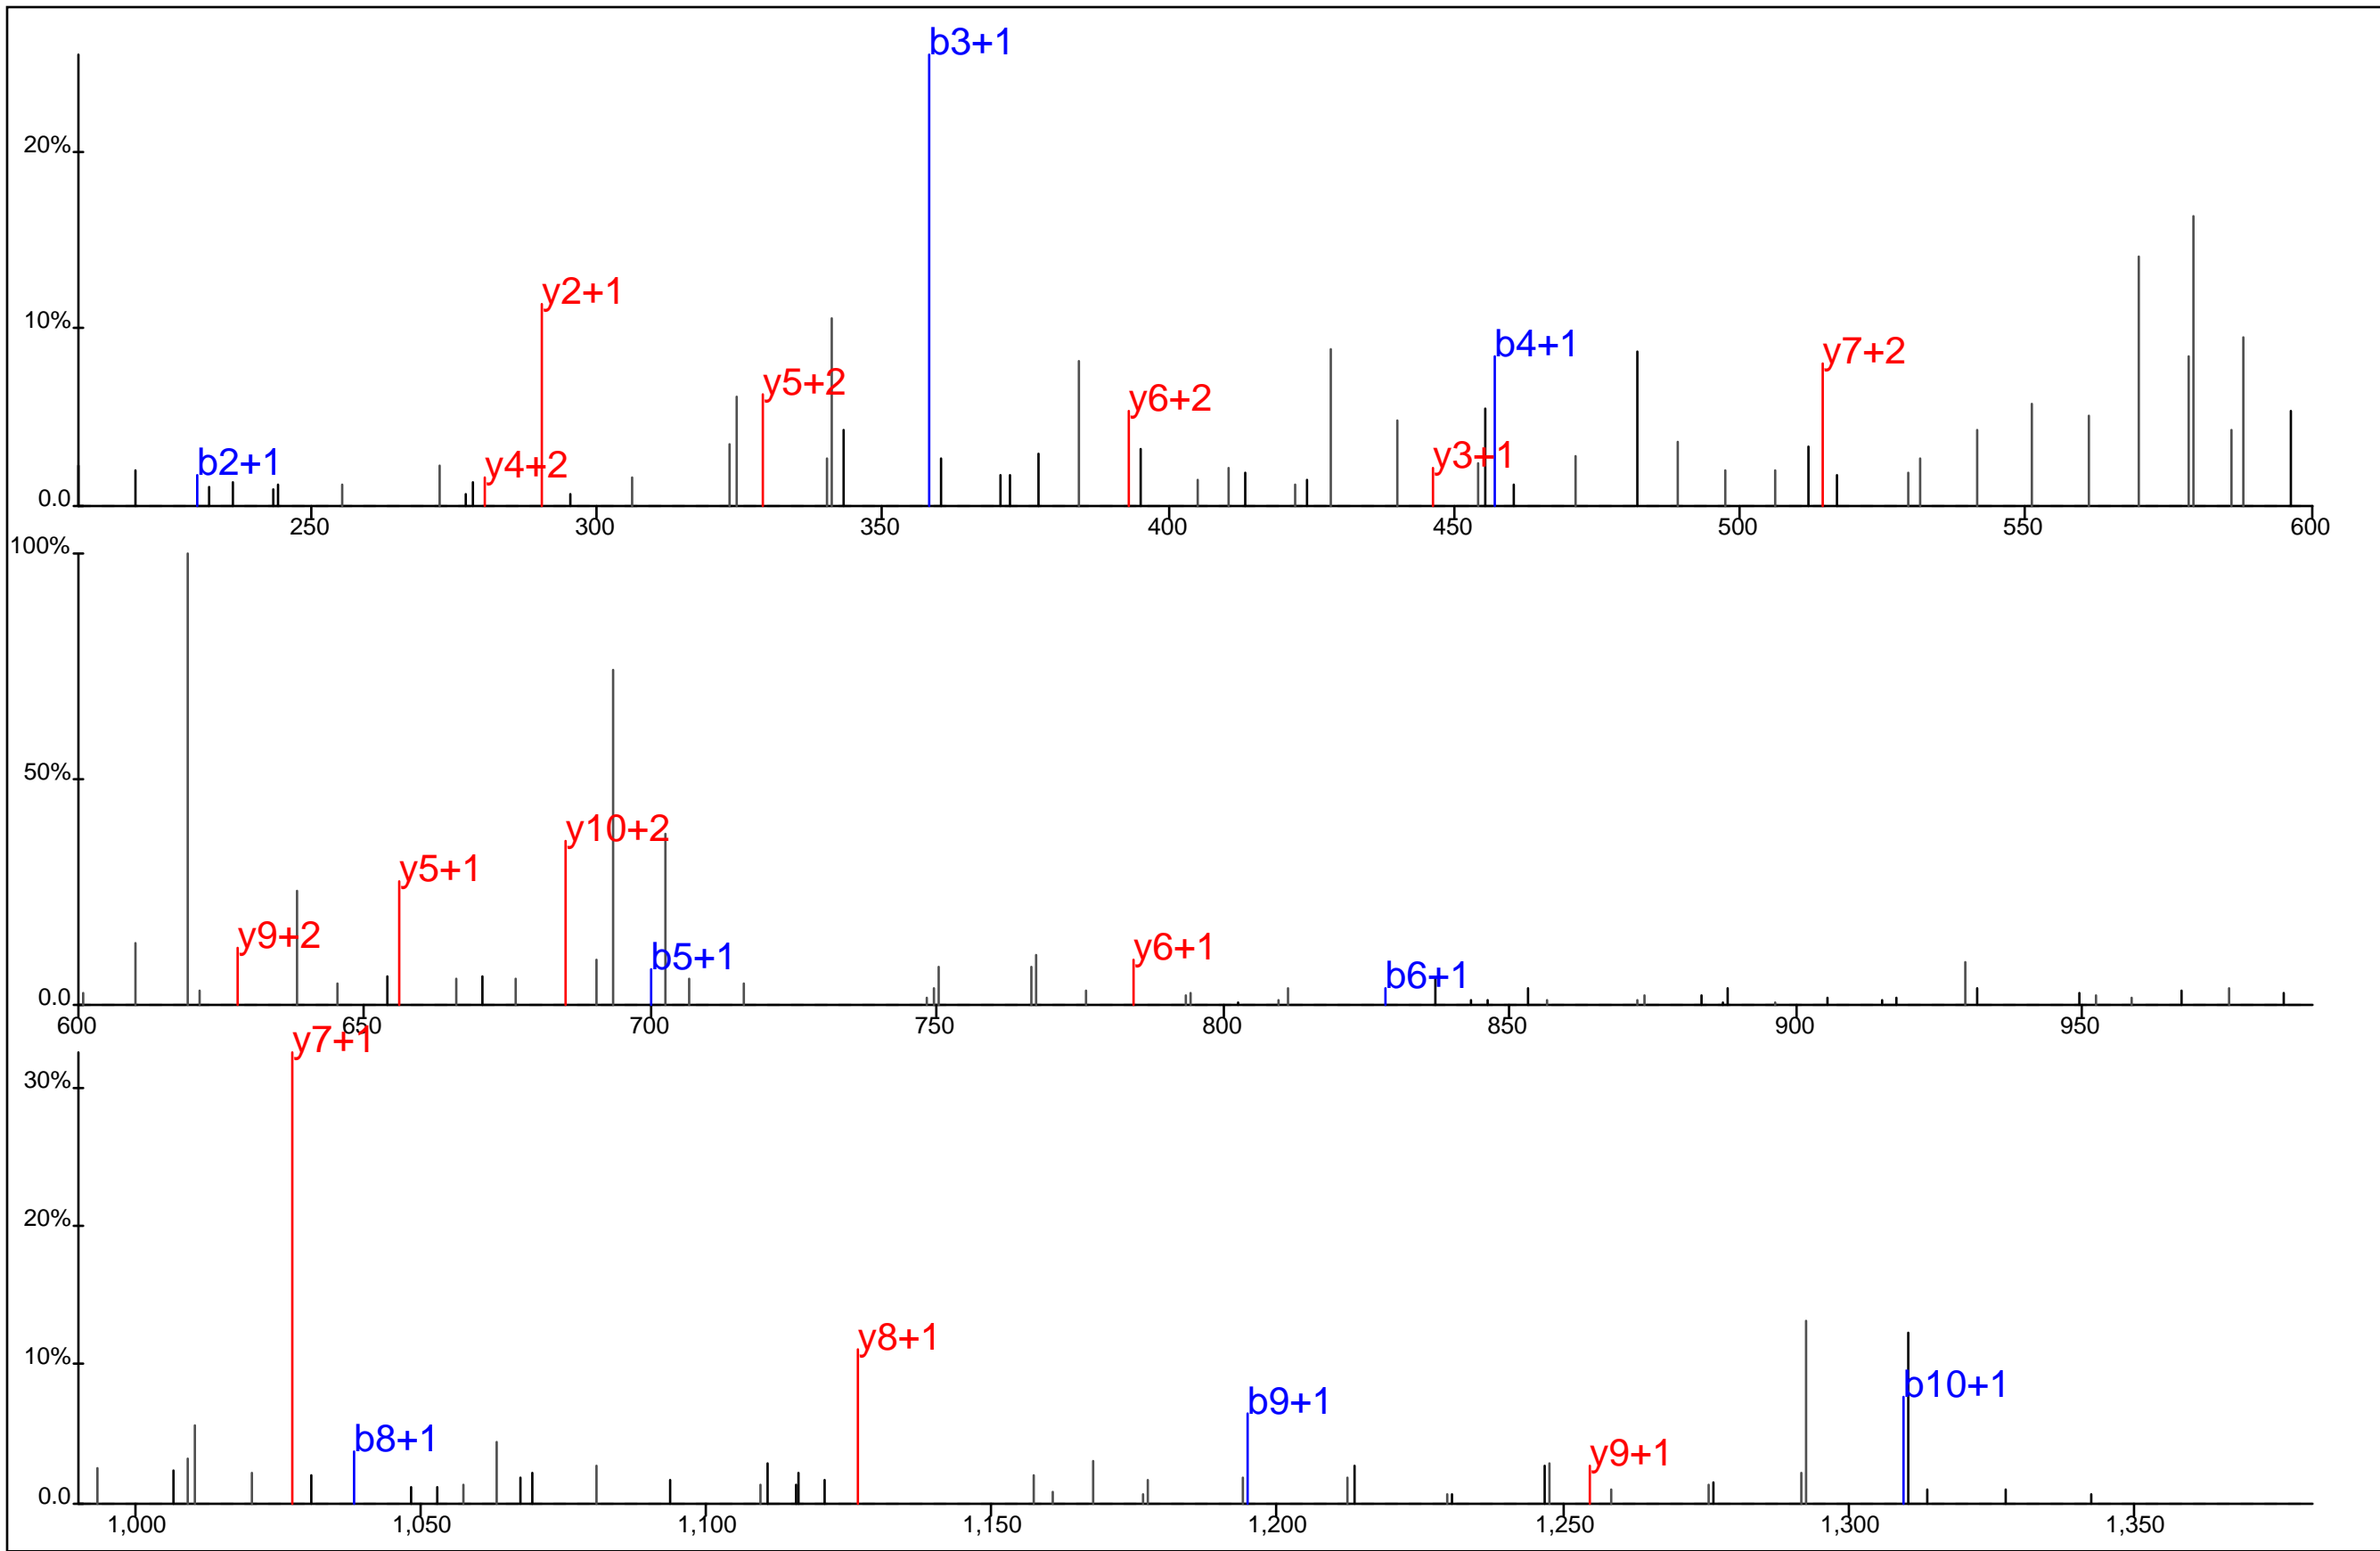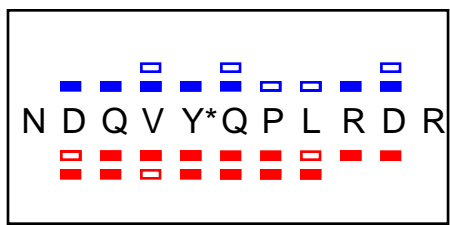

Protein Name: T cell receptor T3 delta chain  
 gi Accession: 0  
 Precursor Mass: 742.3380+2  
 Delta Mass: 0.109 ppm  
 XCorr: 30.58

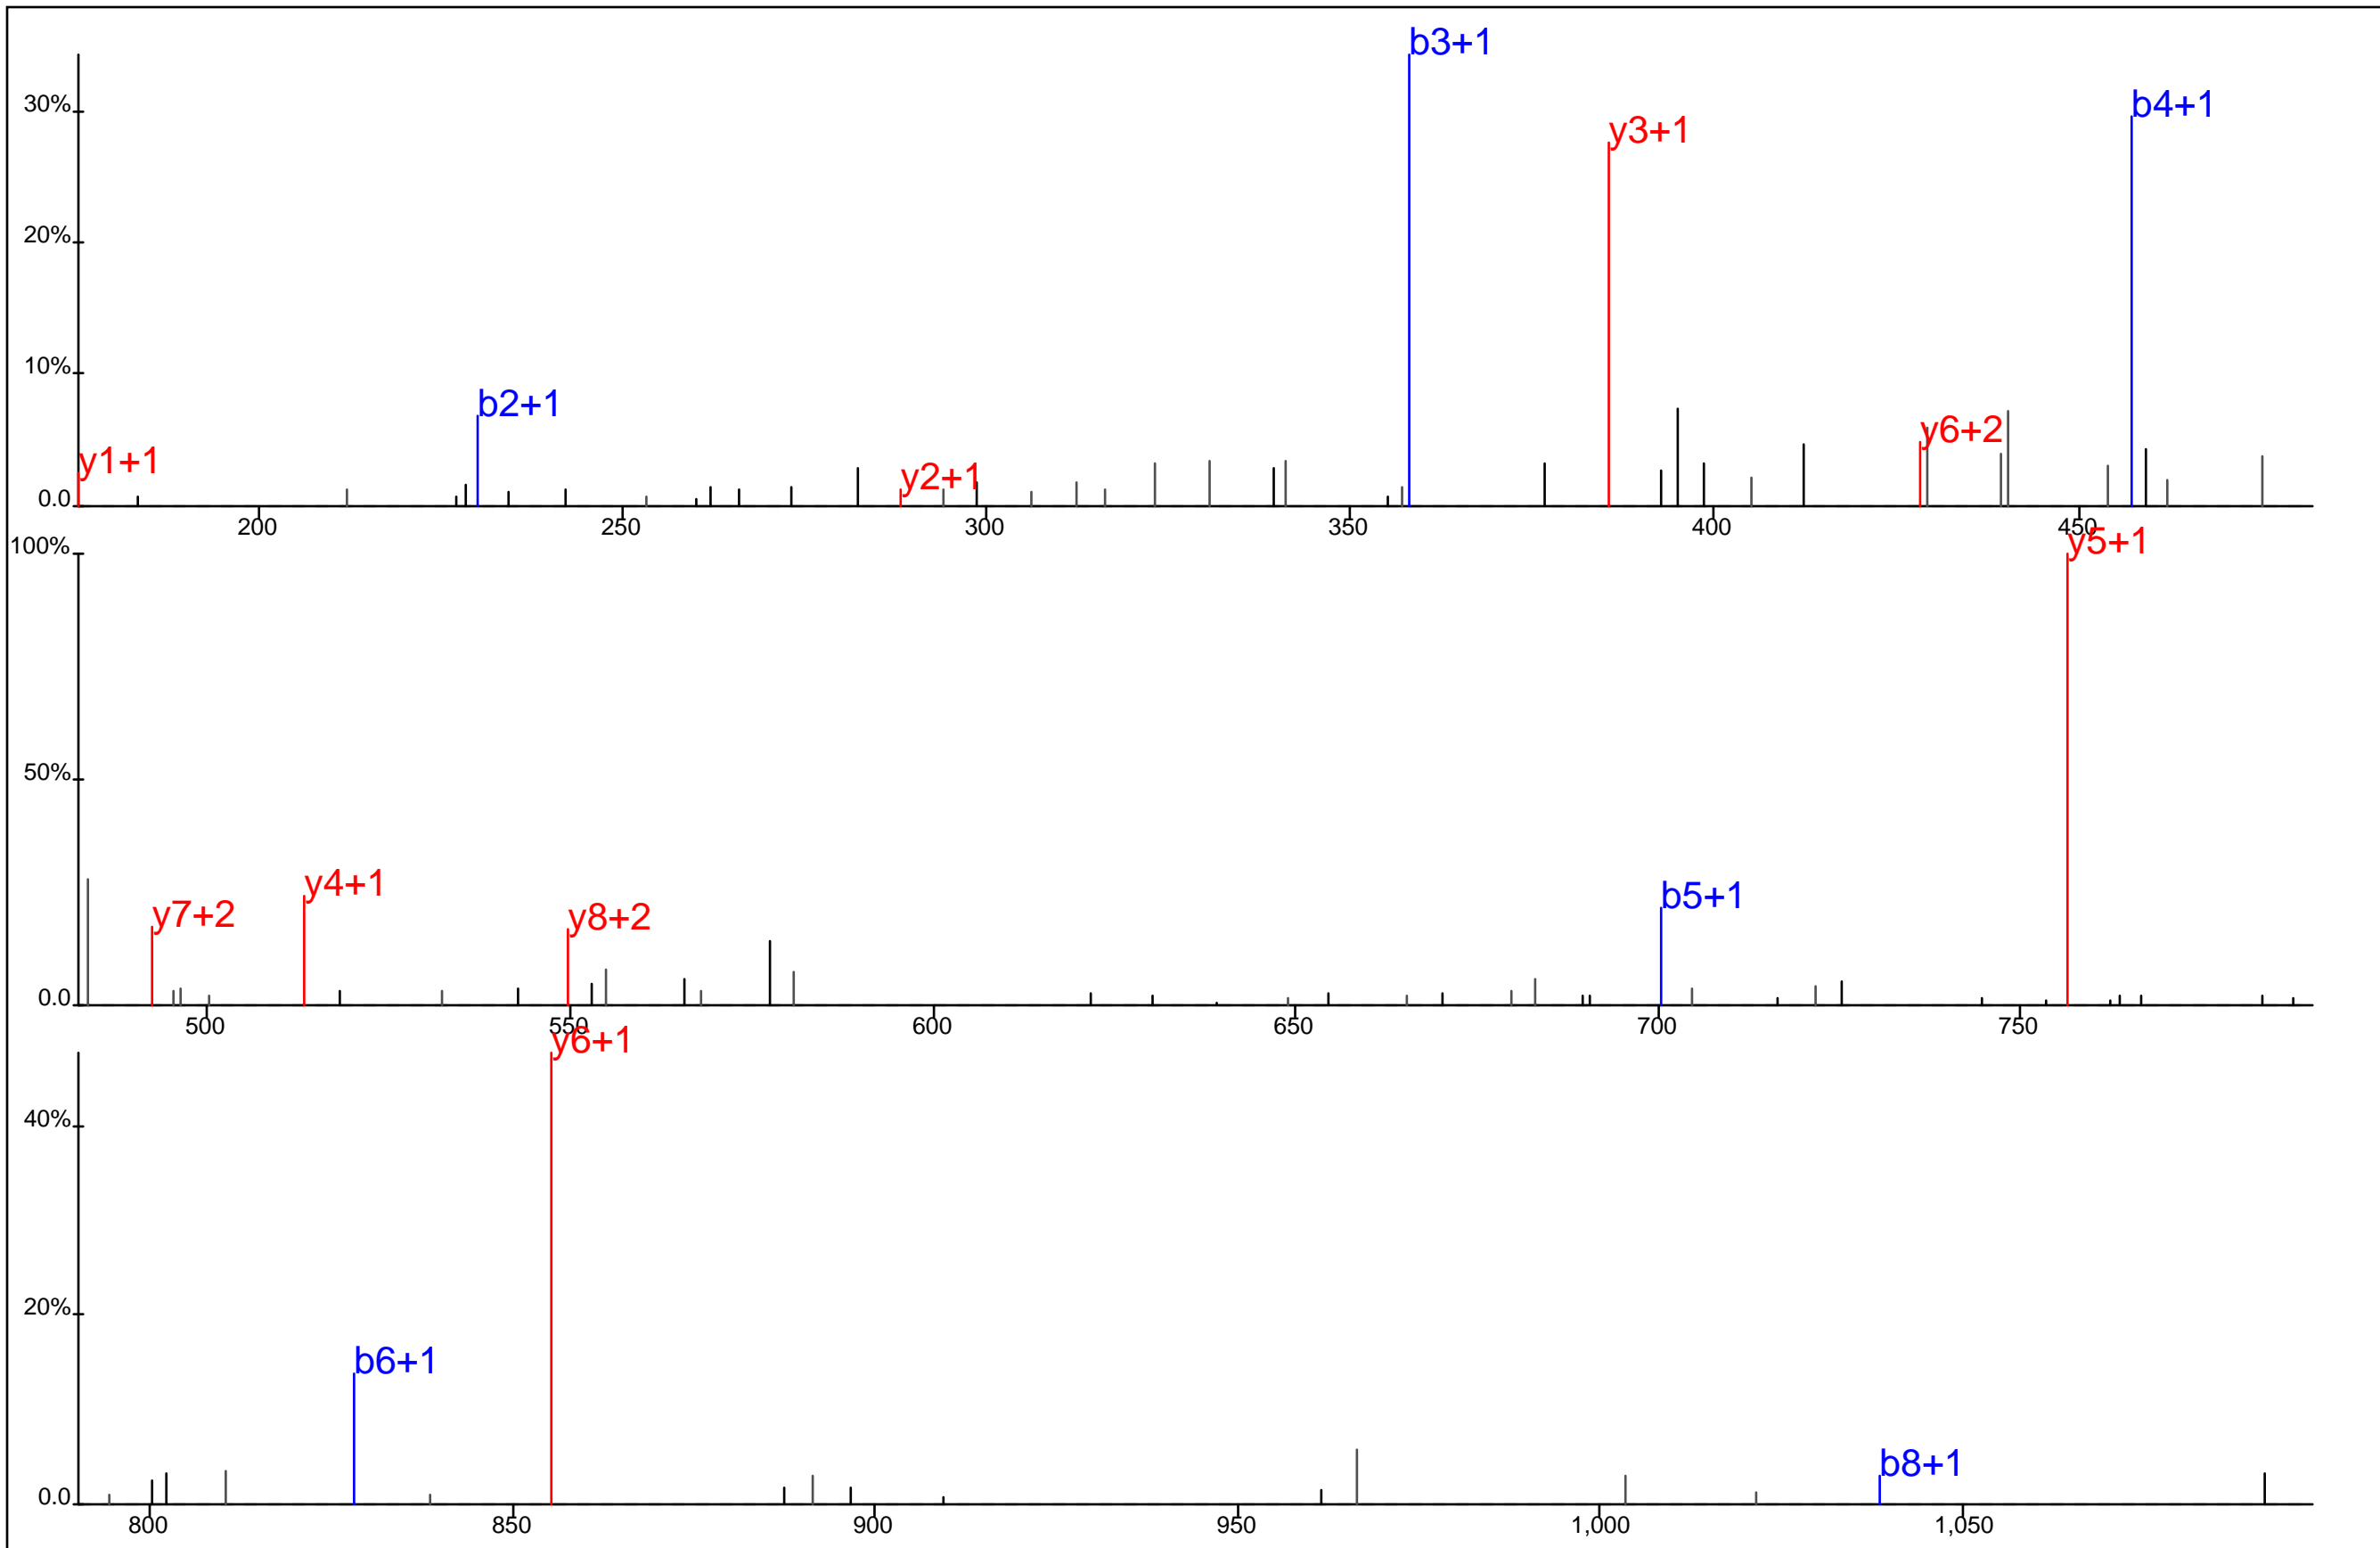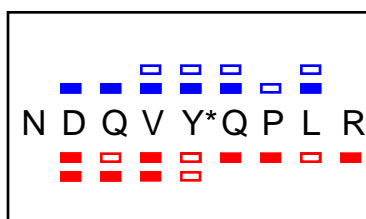

Protein Name: T cell receptor T3 delta chain  
 gi Accession: 0  
 Precursor Mass: 606.7755+2  
 Delta Mass: 2.382 ppm  
 XCorr: 49.34

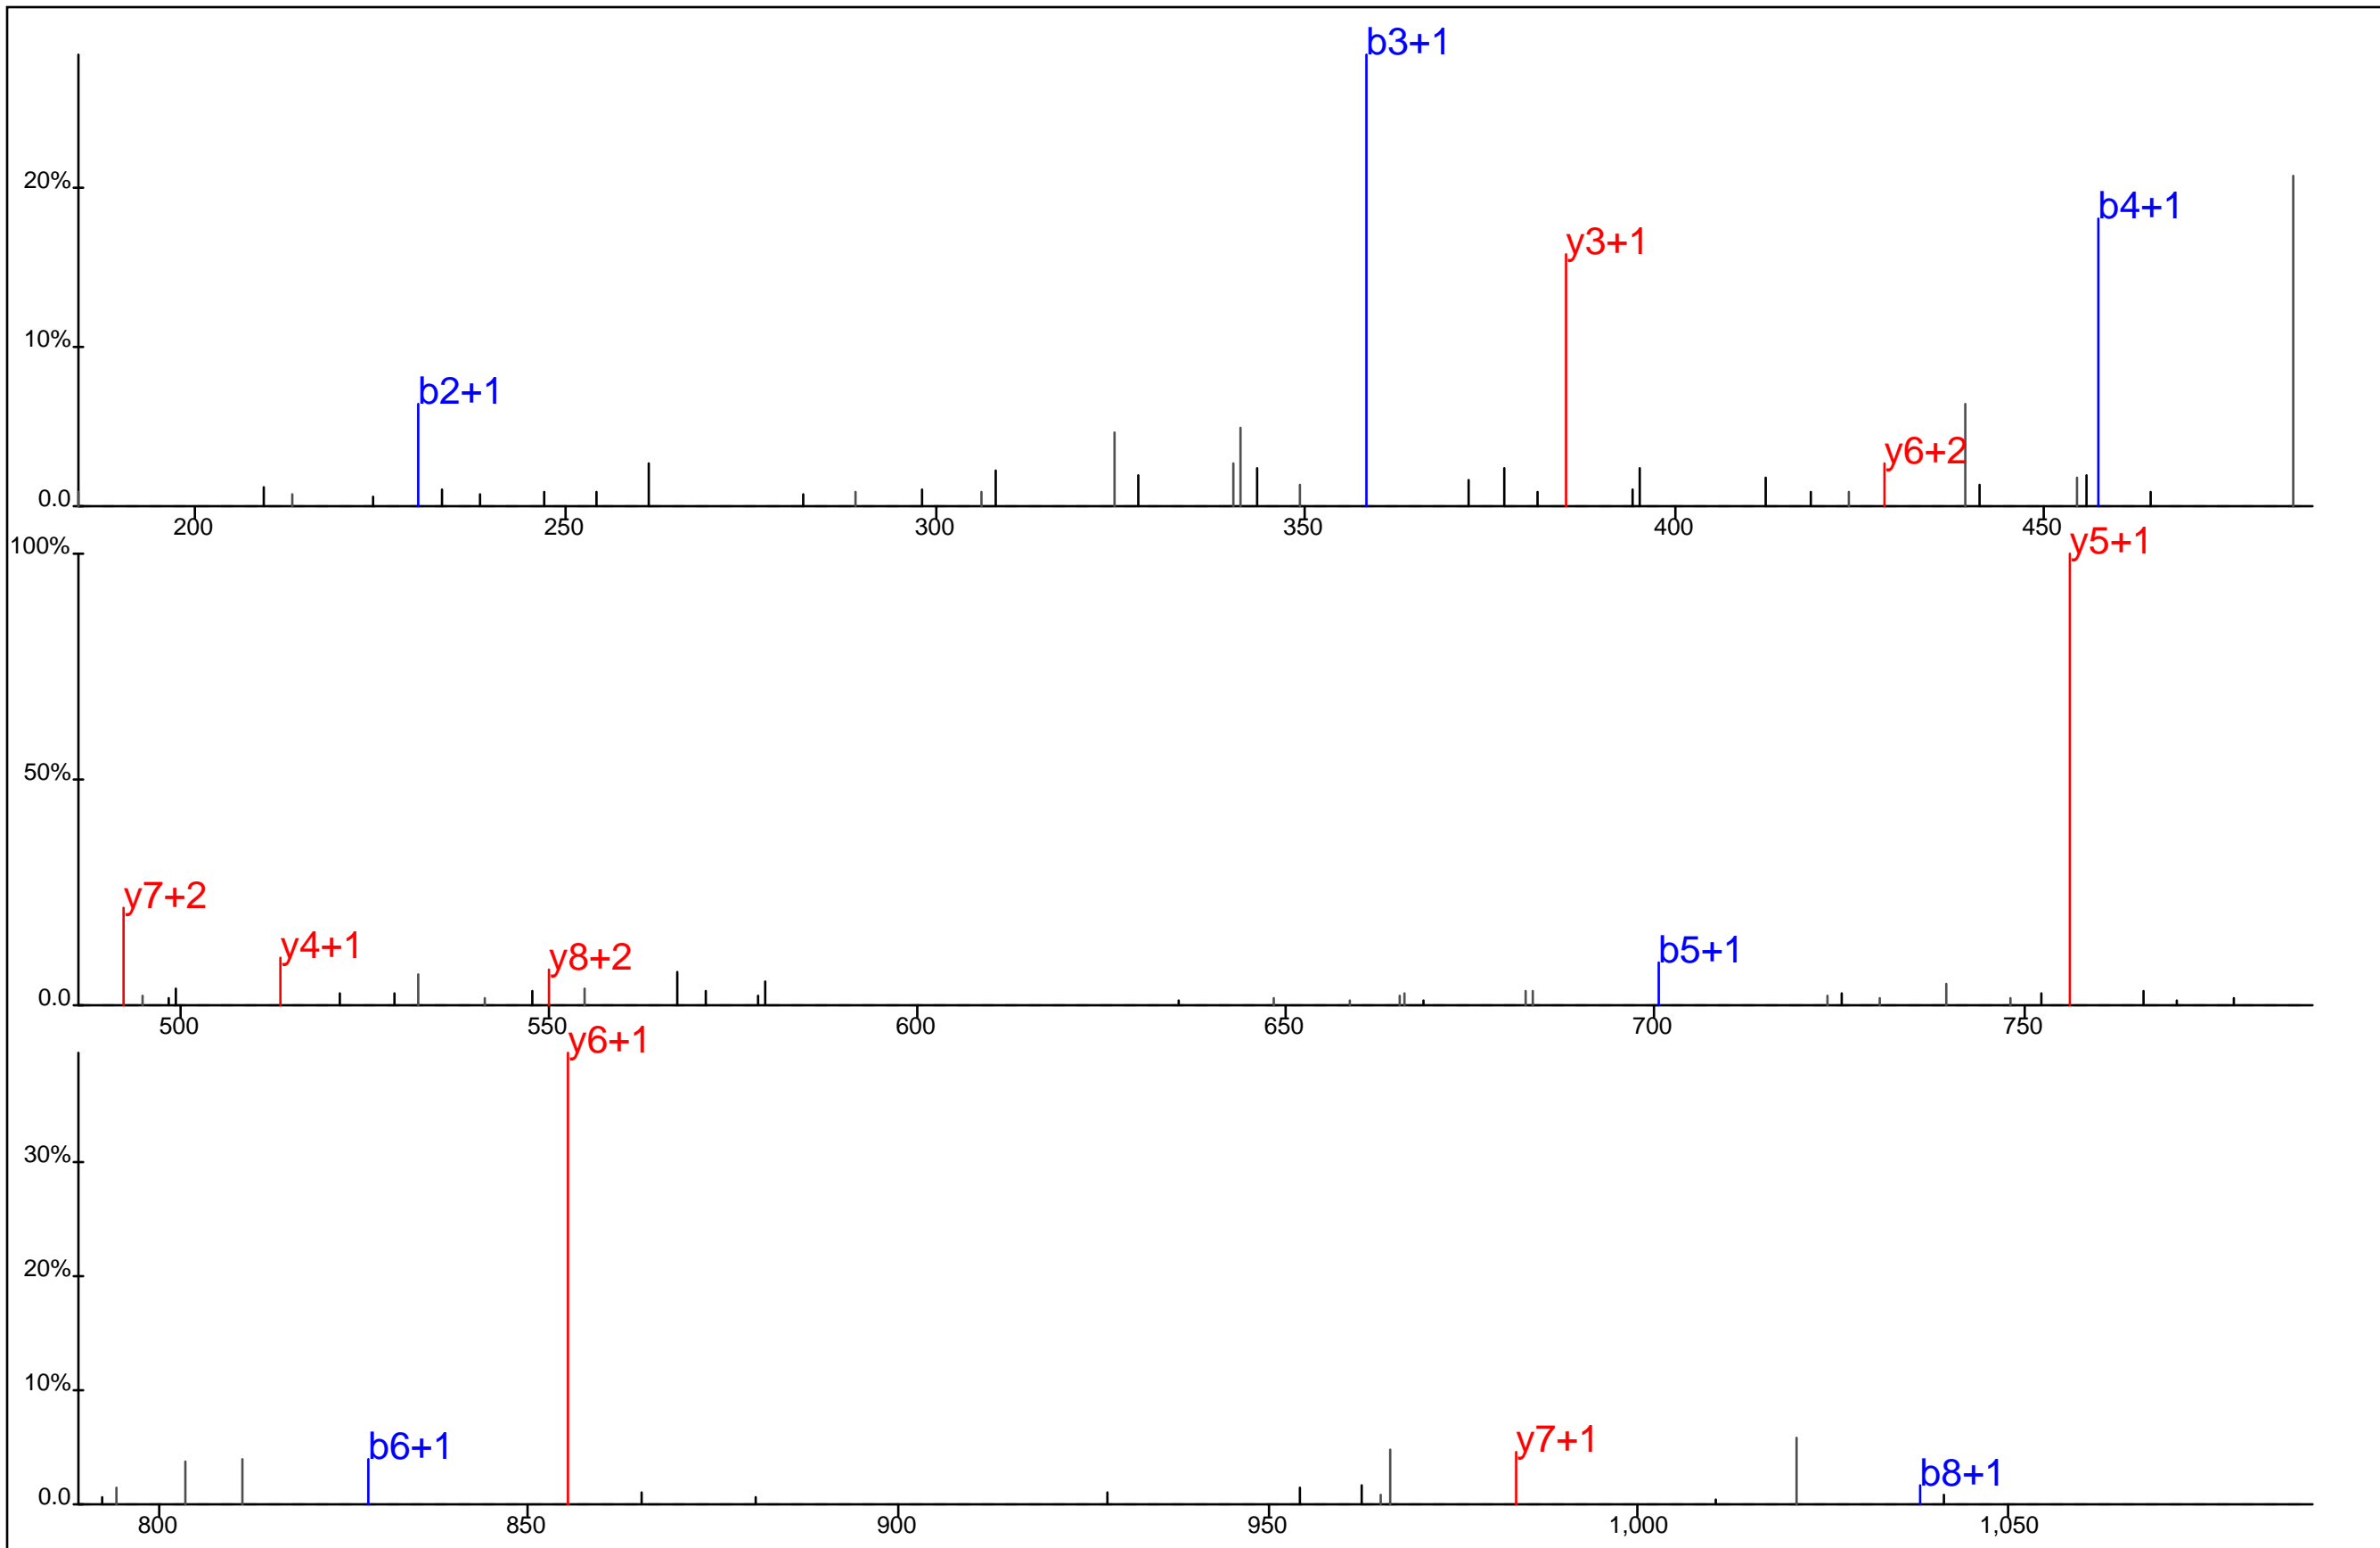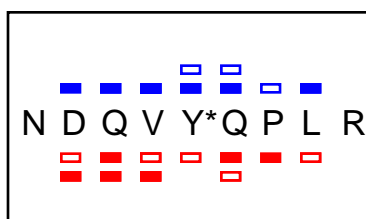

Protein Name: T cell receptor T3 delta chain  
 gi Accession: 0  
 Precursor Mass: 606.7753+2  
 Delta Mass: 1.979 ppm  
 XCorr: 51.69

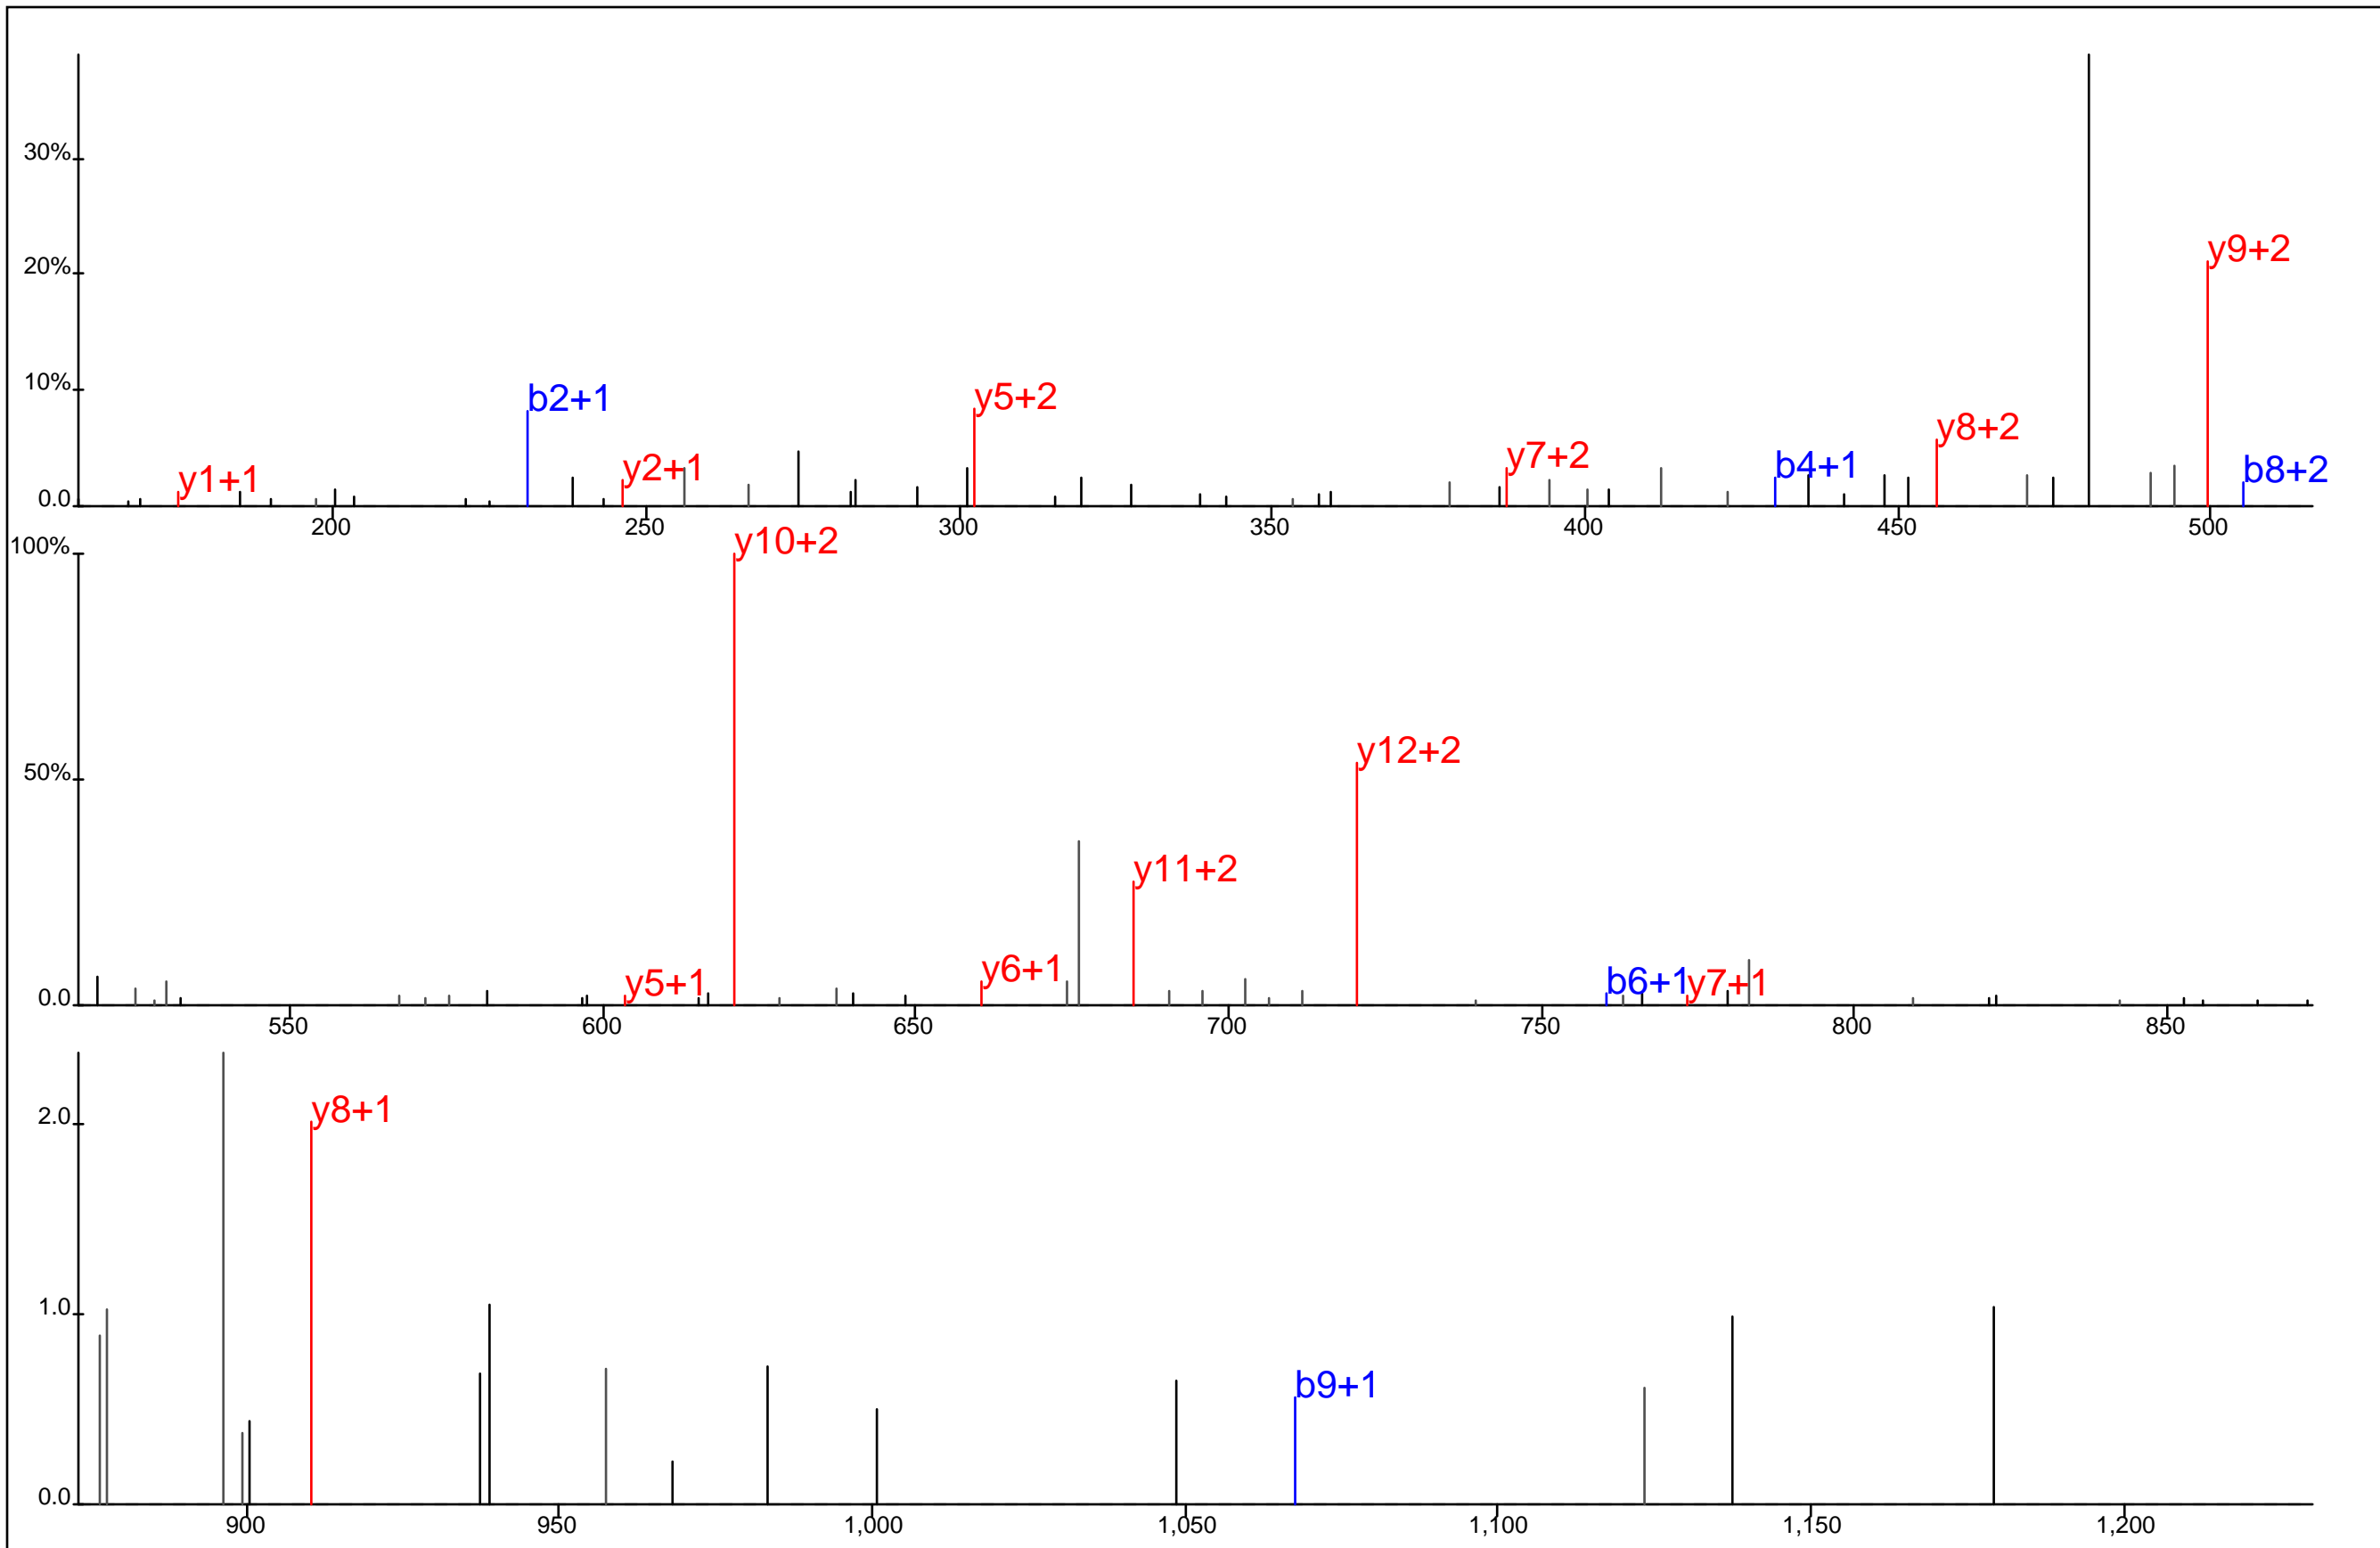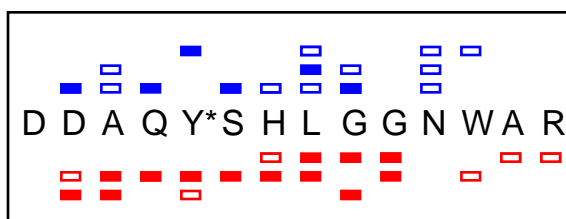

Protein Name: T cell receptor T3 delta chain  
 gi Accession: 0  
 Precursor Mass: 557.2300+3  
 Delta Mass: 0.044 ppm  
 XCorr: 27.98

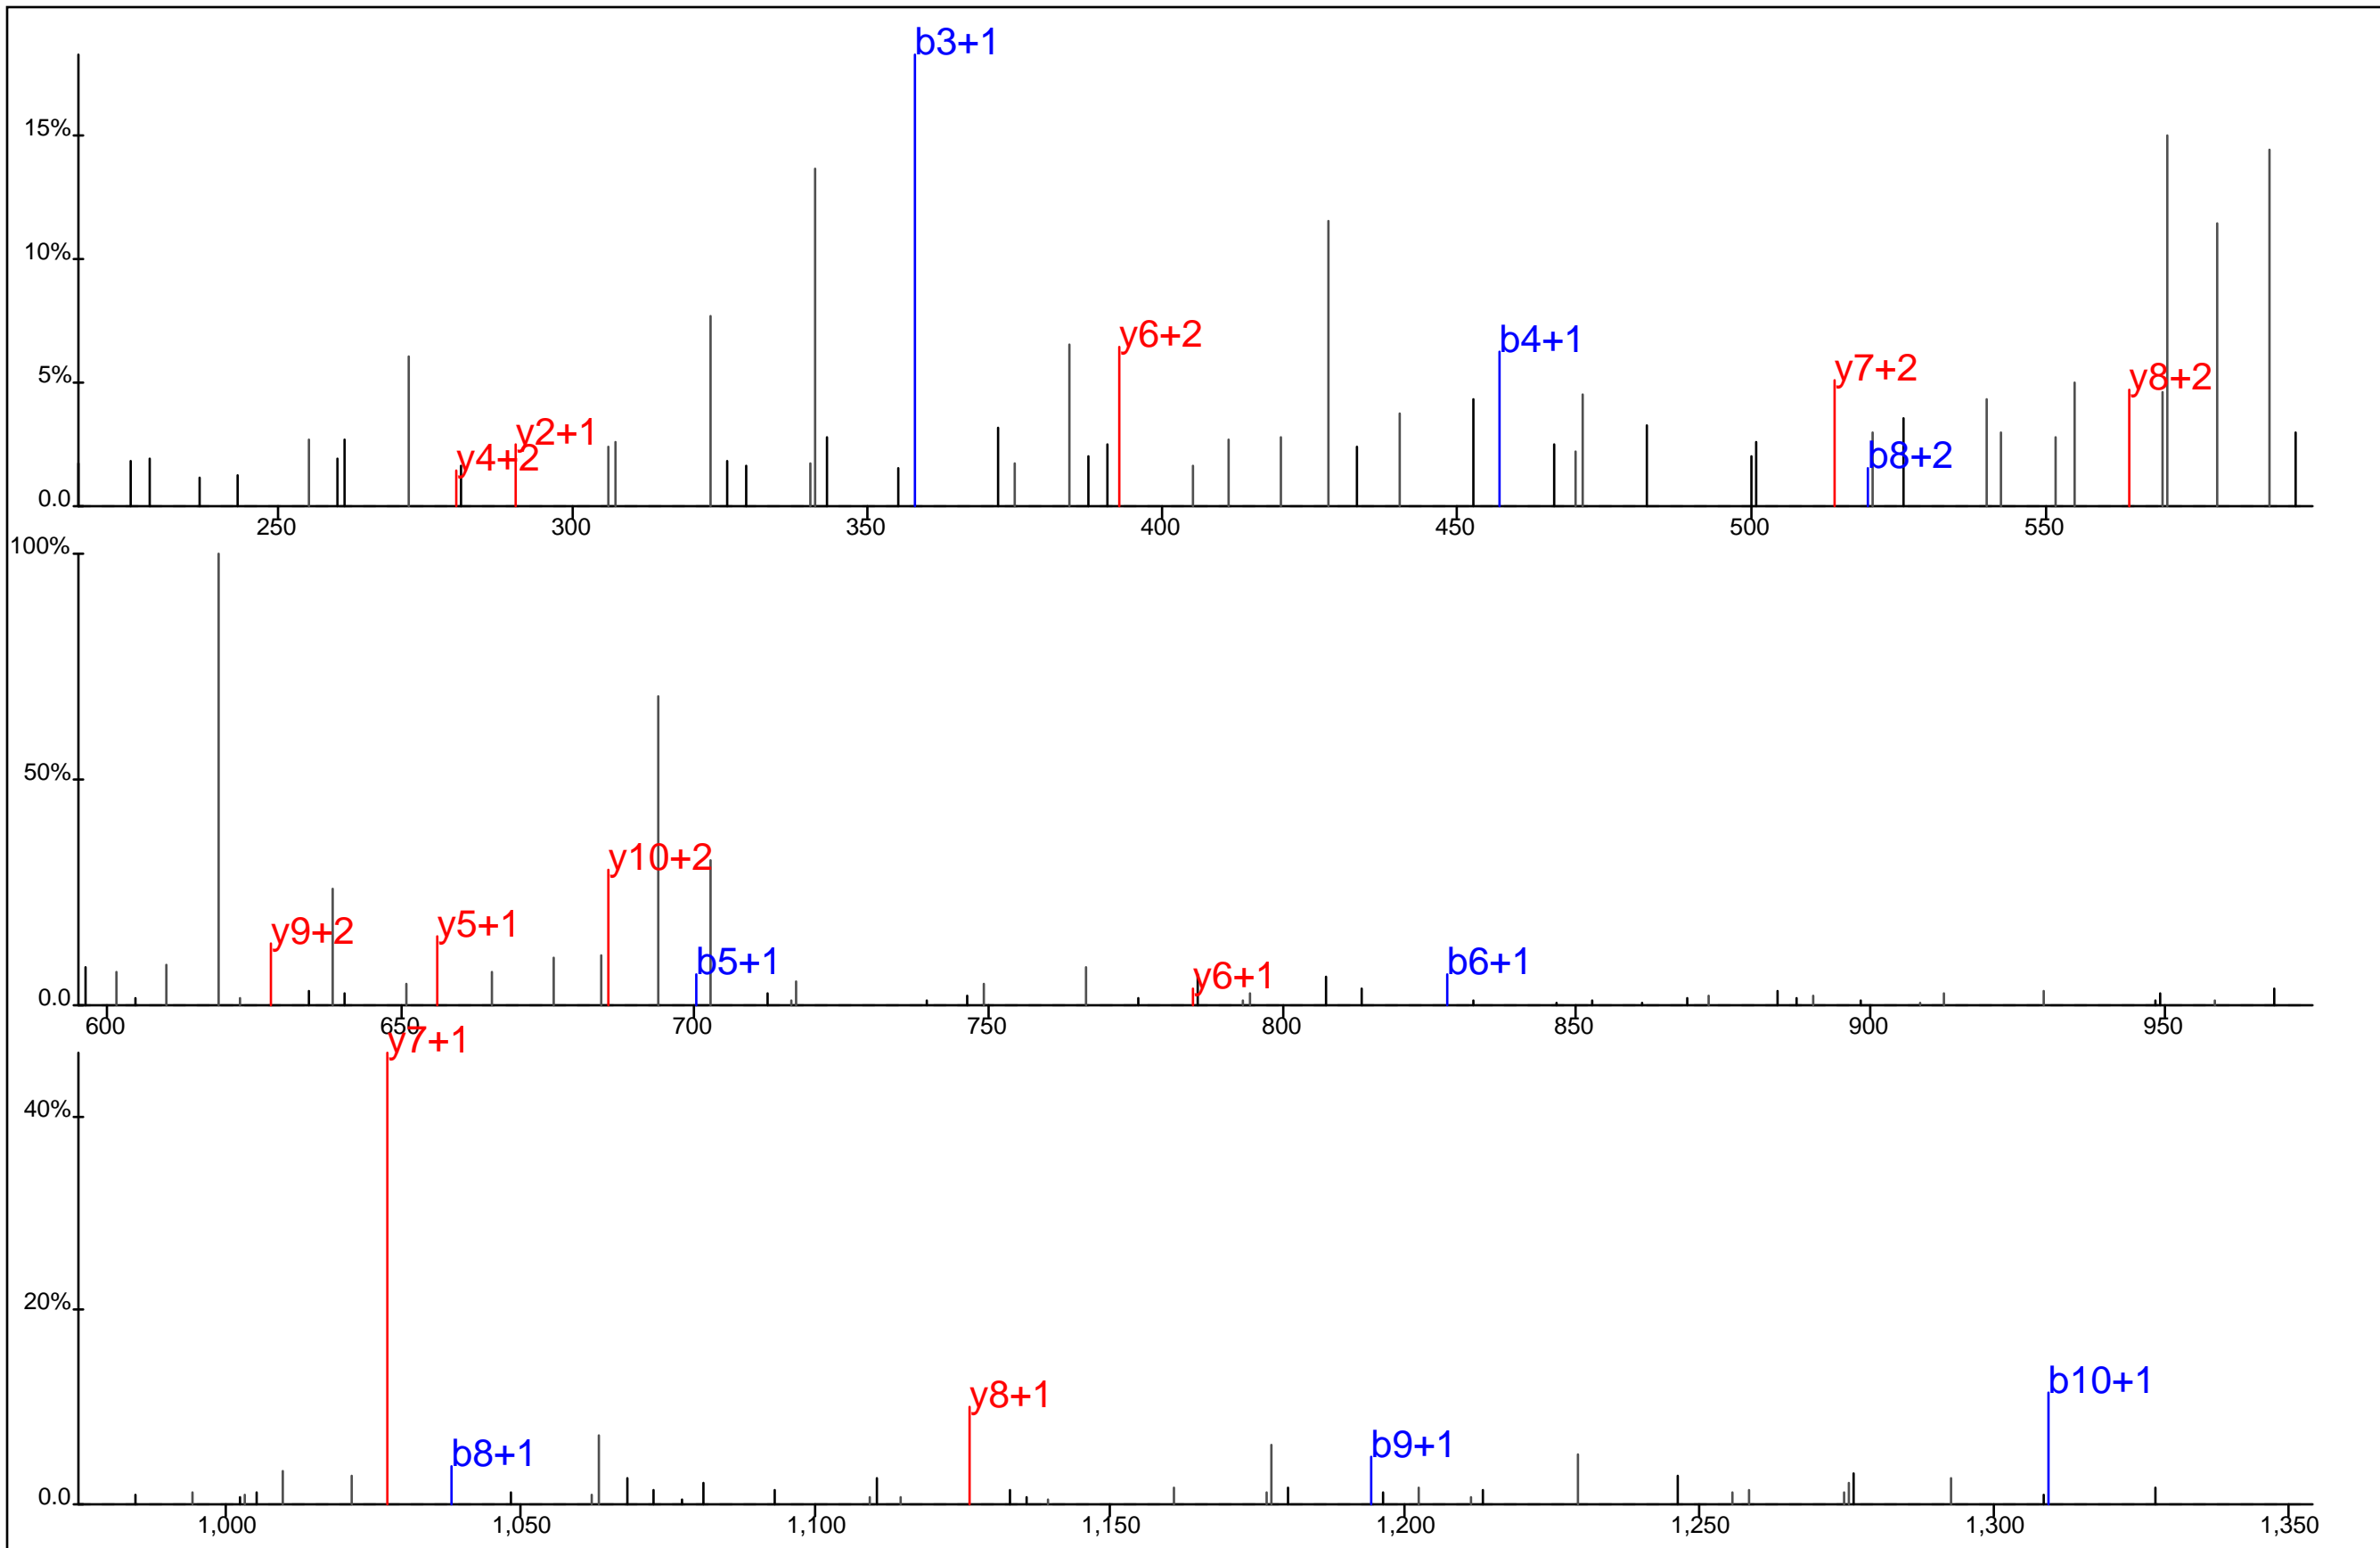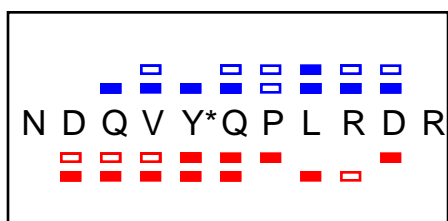

Protein Name: T cell receptor T3 delta chain  
 gi Accession: 0  
 Precursor Mass: 742.3376+2  
 Delta Mass: 0.686 ppm  
 XCorr: 22.3



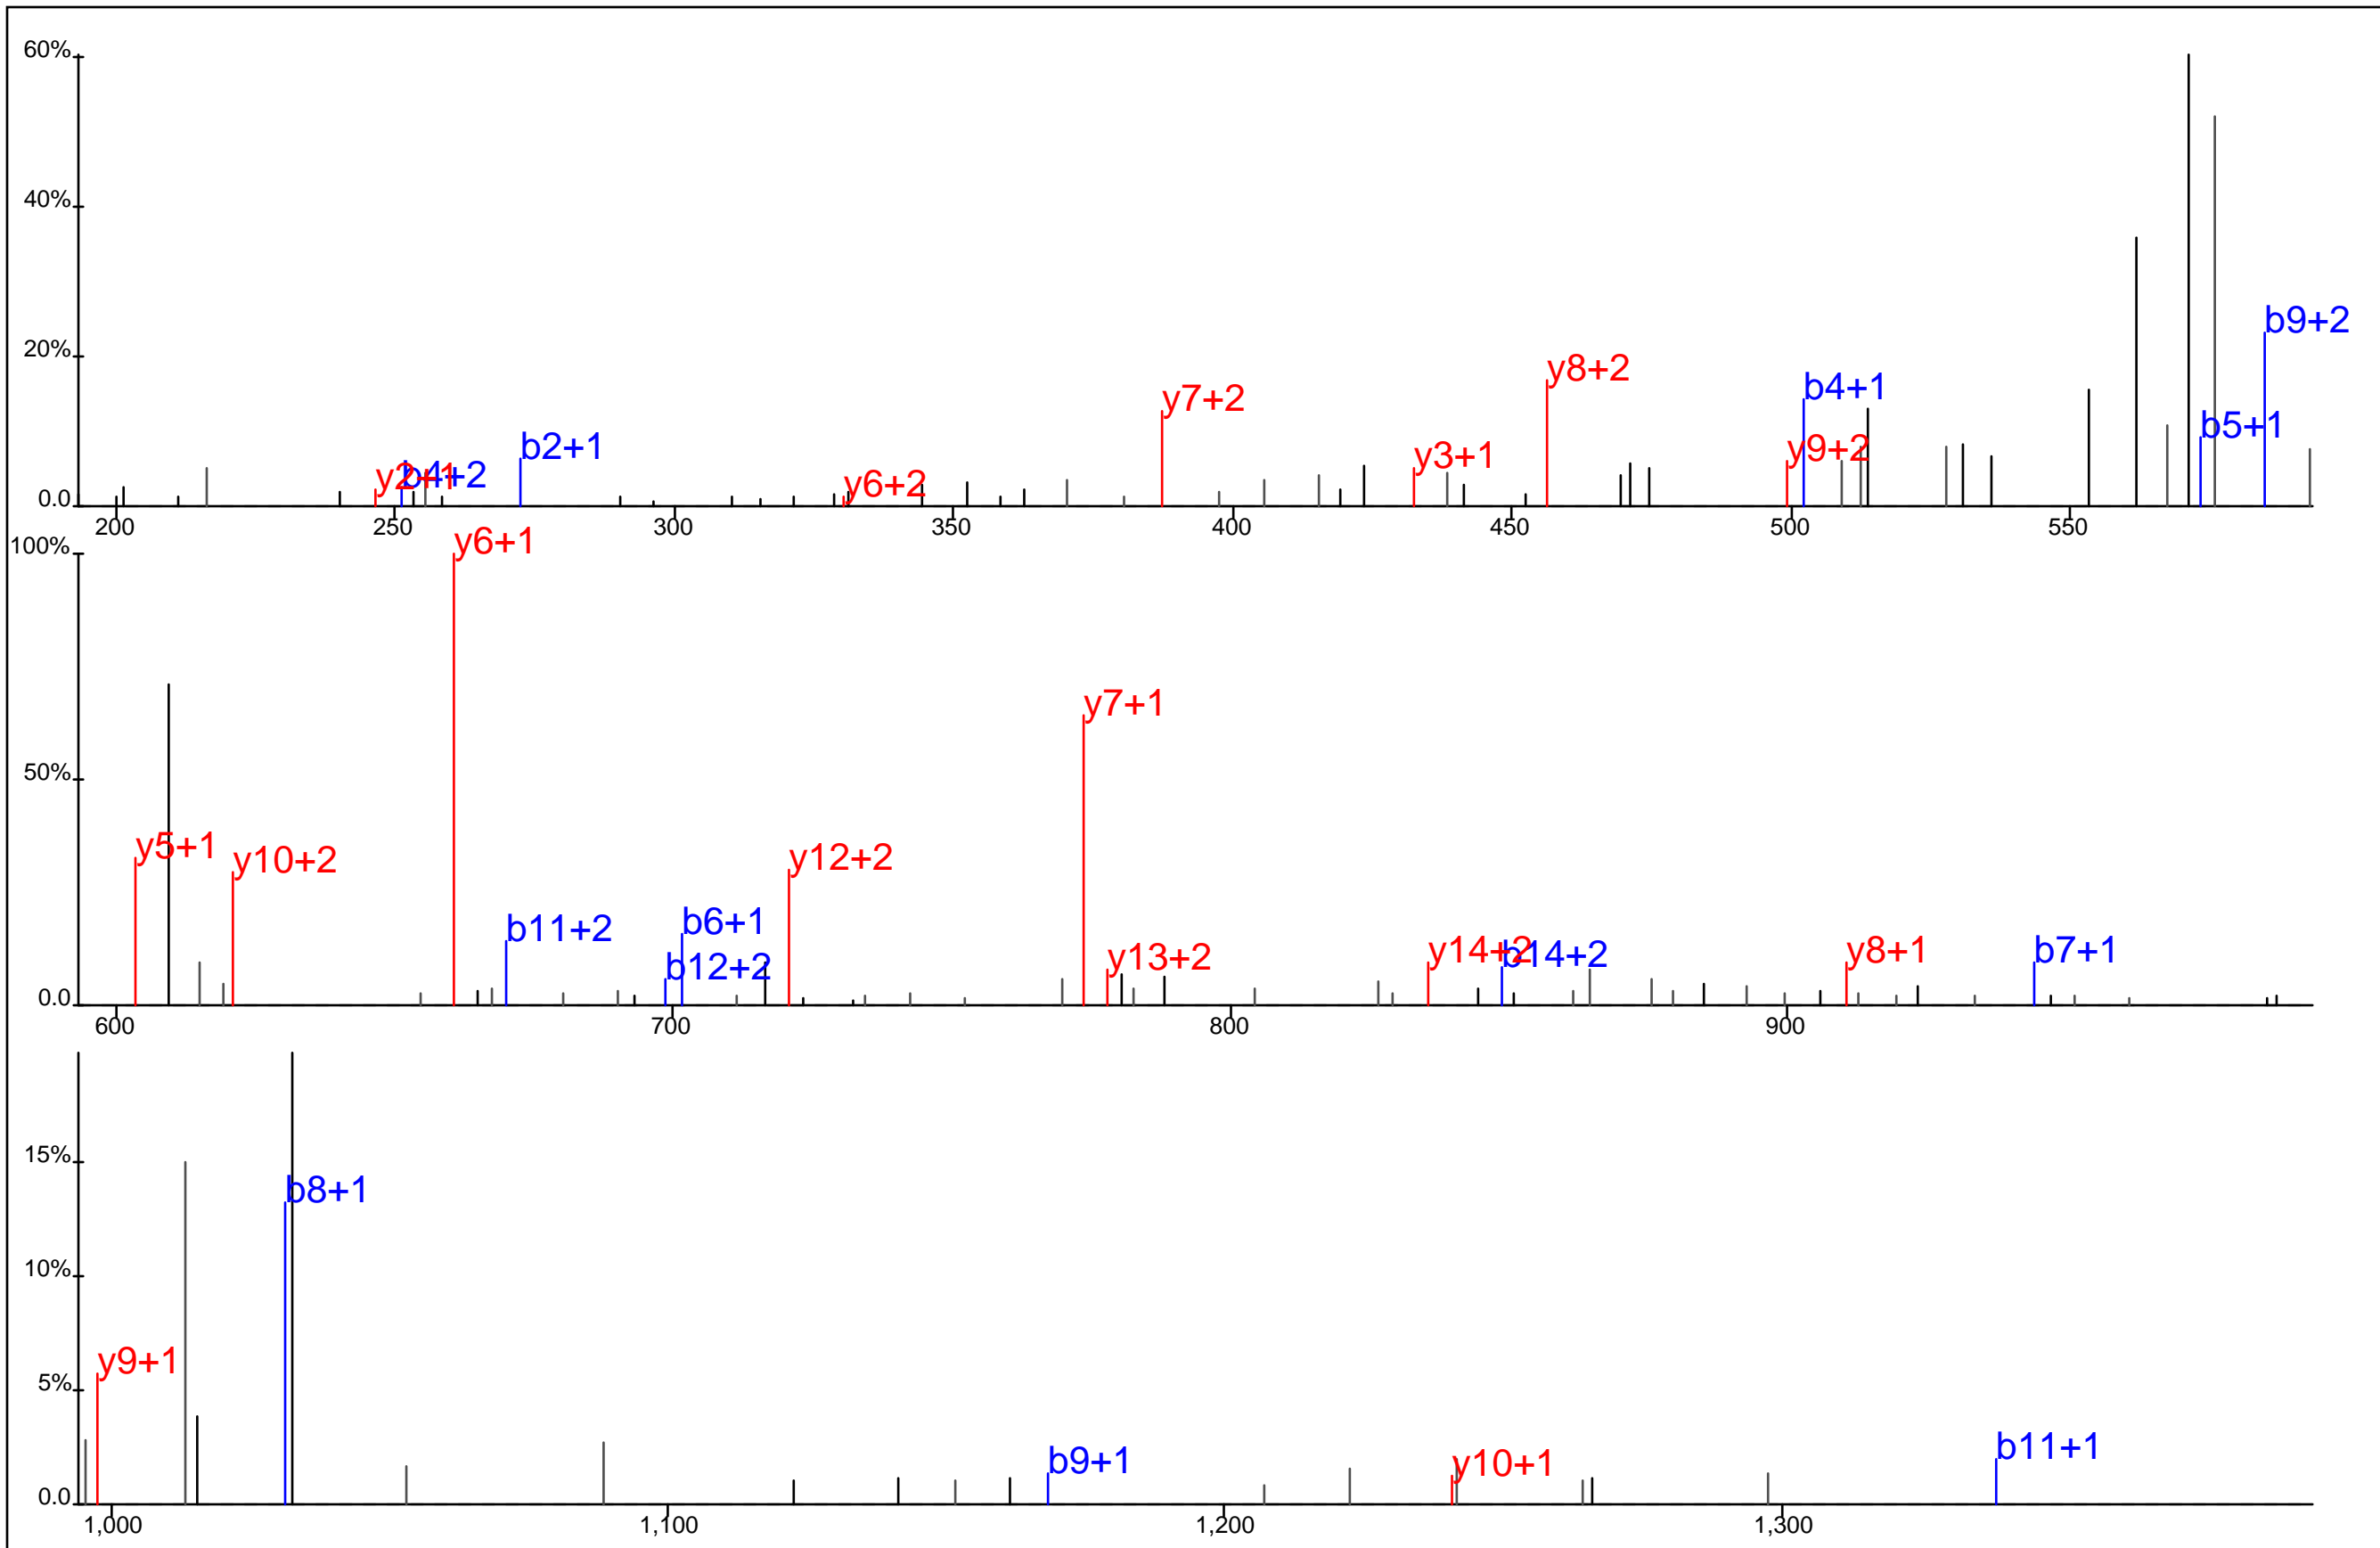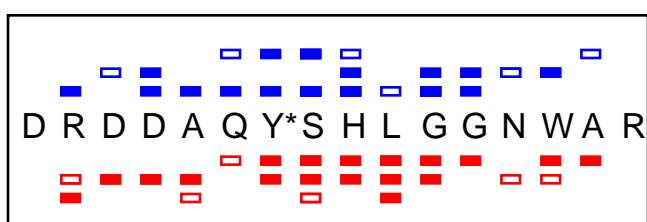

Protein Name: T cell receptor T3 delta chain  
 gi Accession: 0  
 Precursor Mass: 647.6061+3  
 Delta Mass: 0.089 ppm  
 XCorr: 47.18

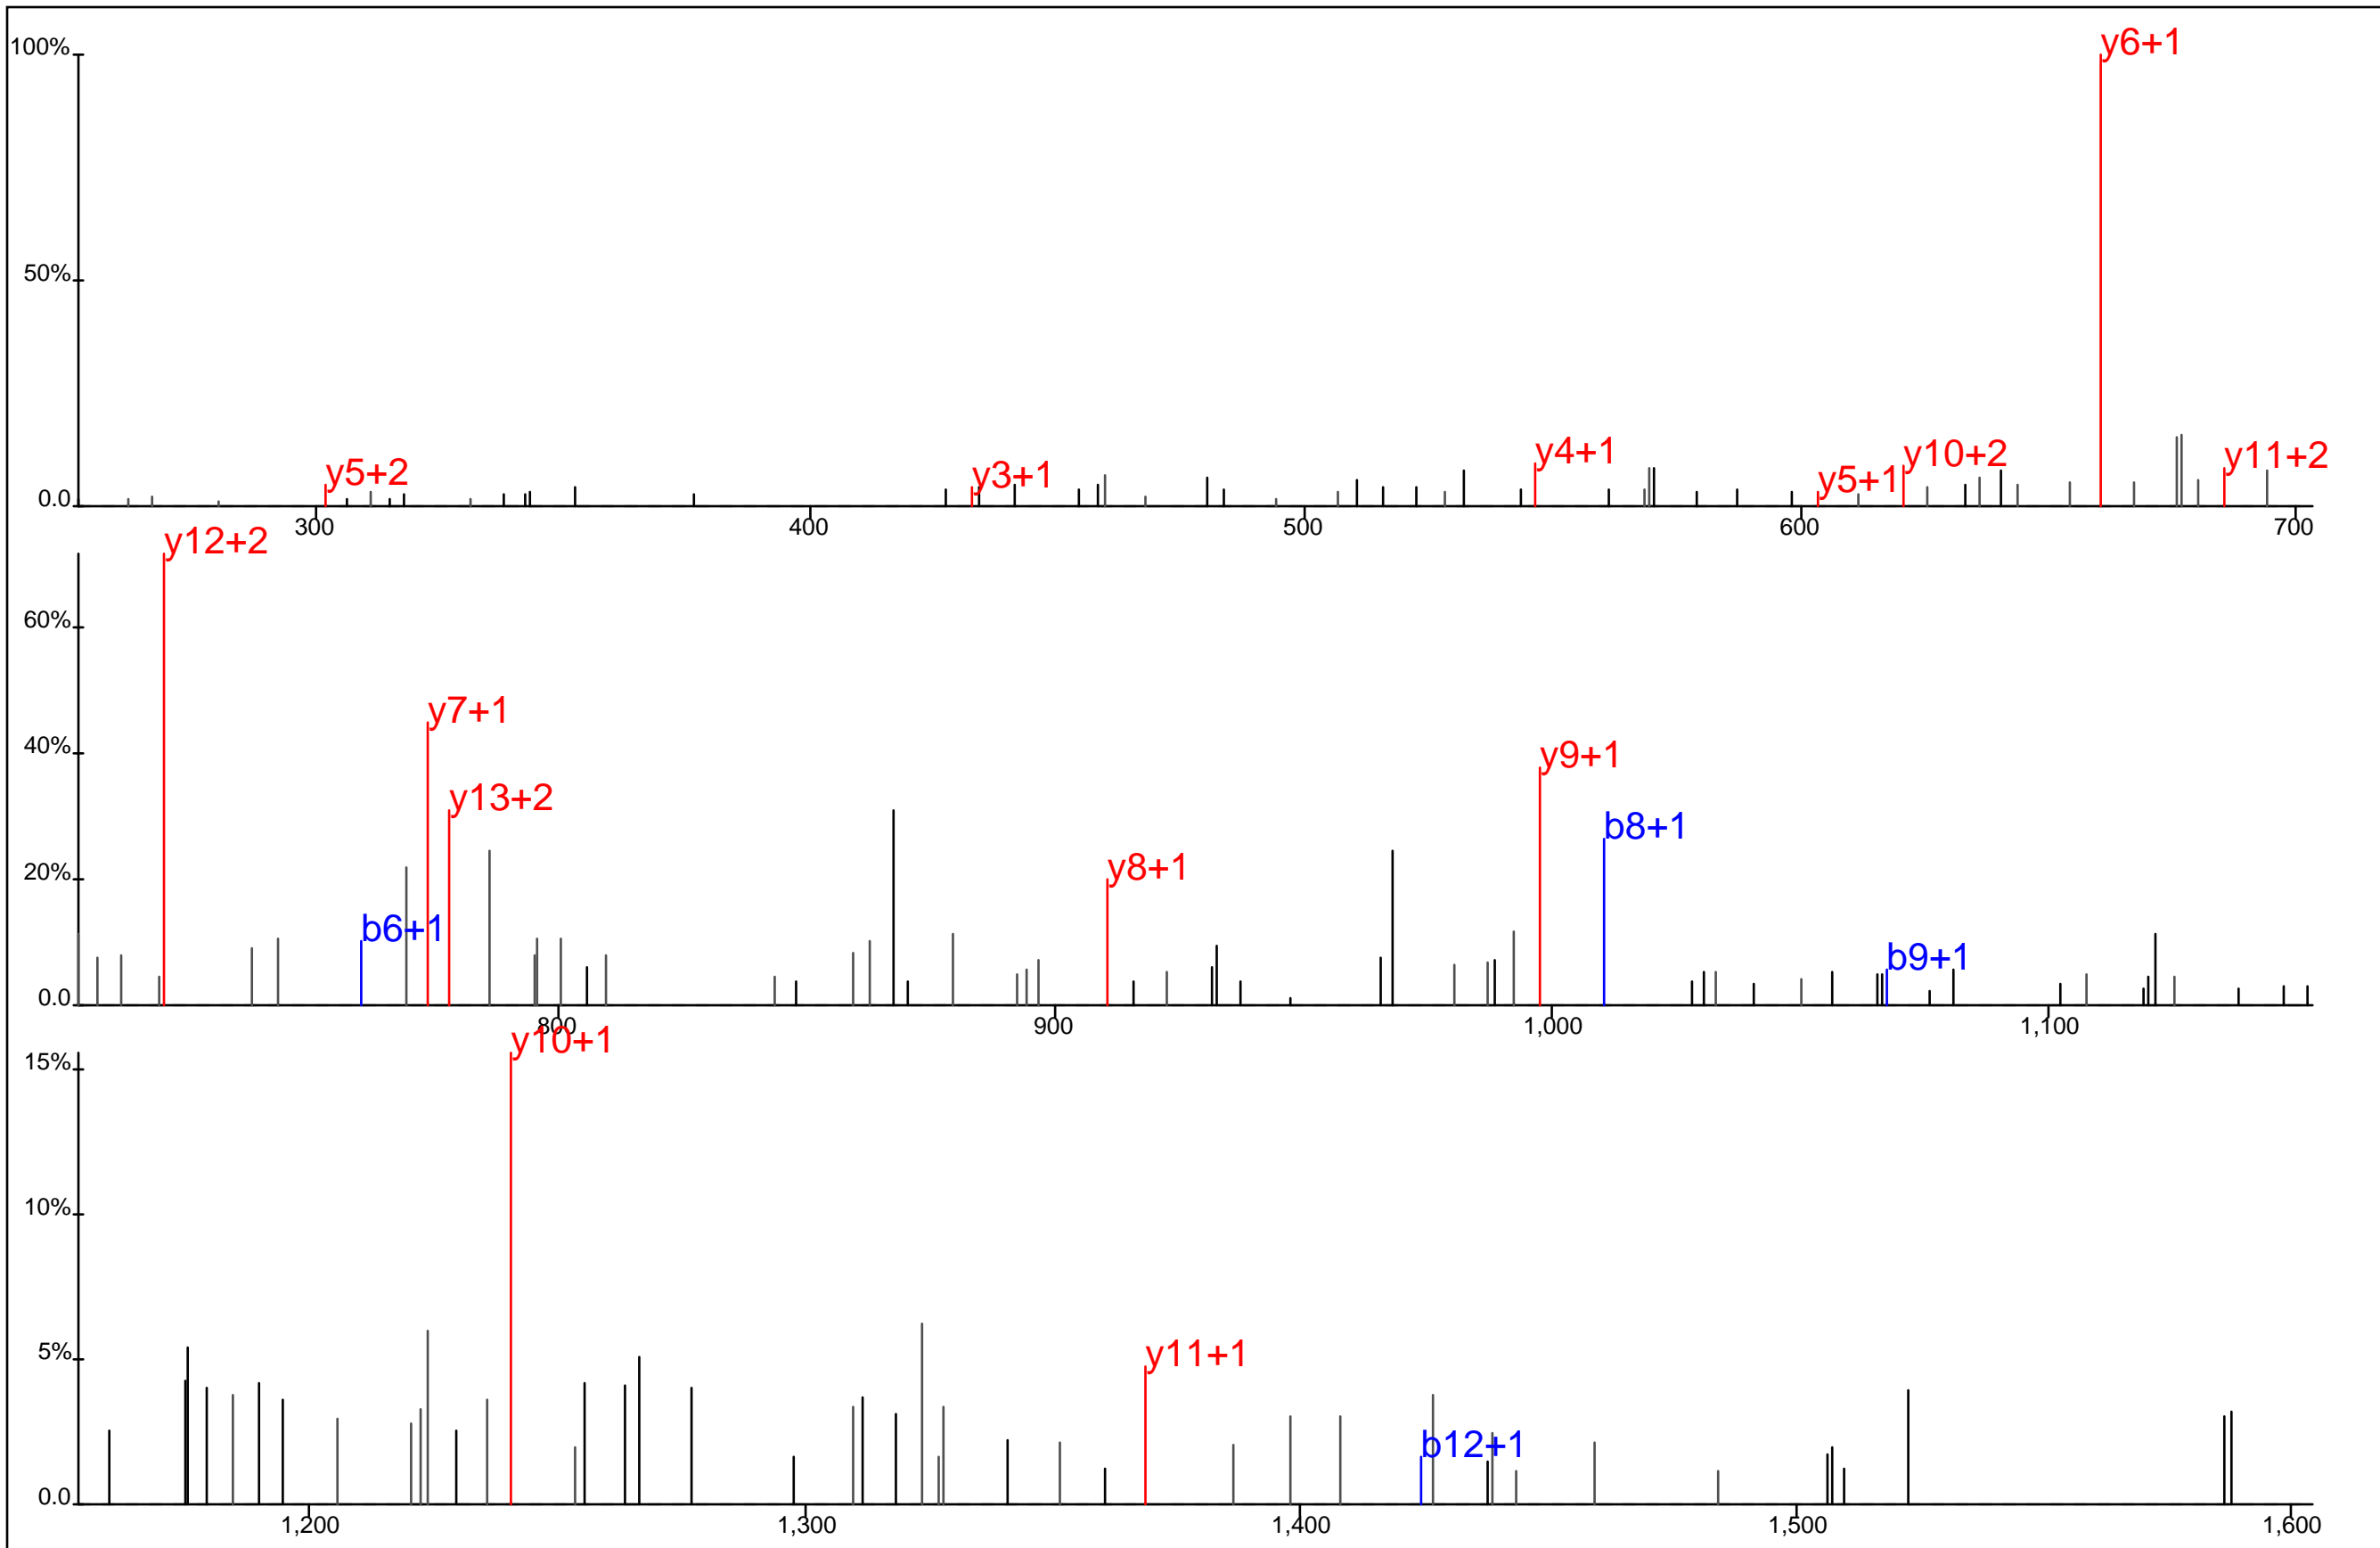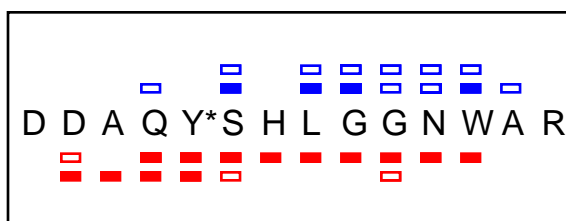

Protein Name: T cell receptor T3 delta chain  
 gi Accession: 0  
 Precursor Mass: 835.3392+2  
 Delta Mass: 2.632 ppm  
 XCorr: 34.14

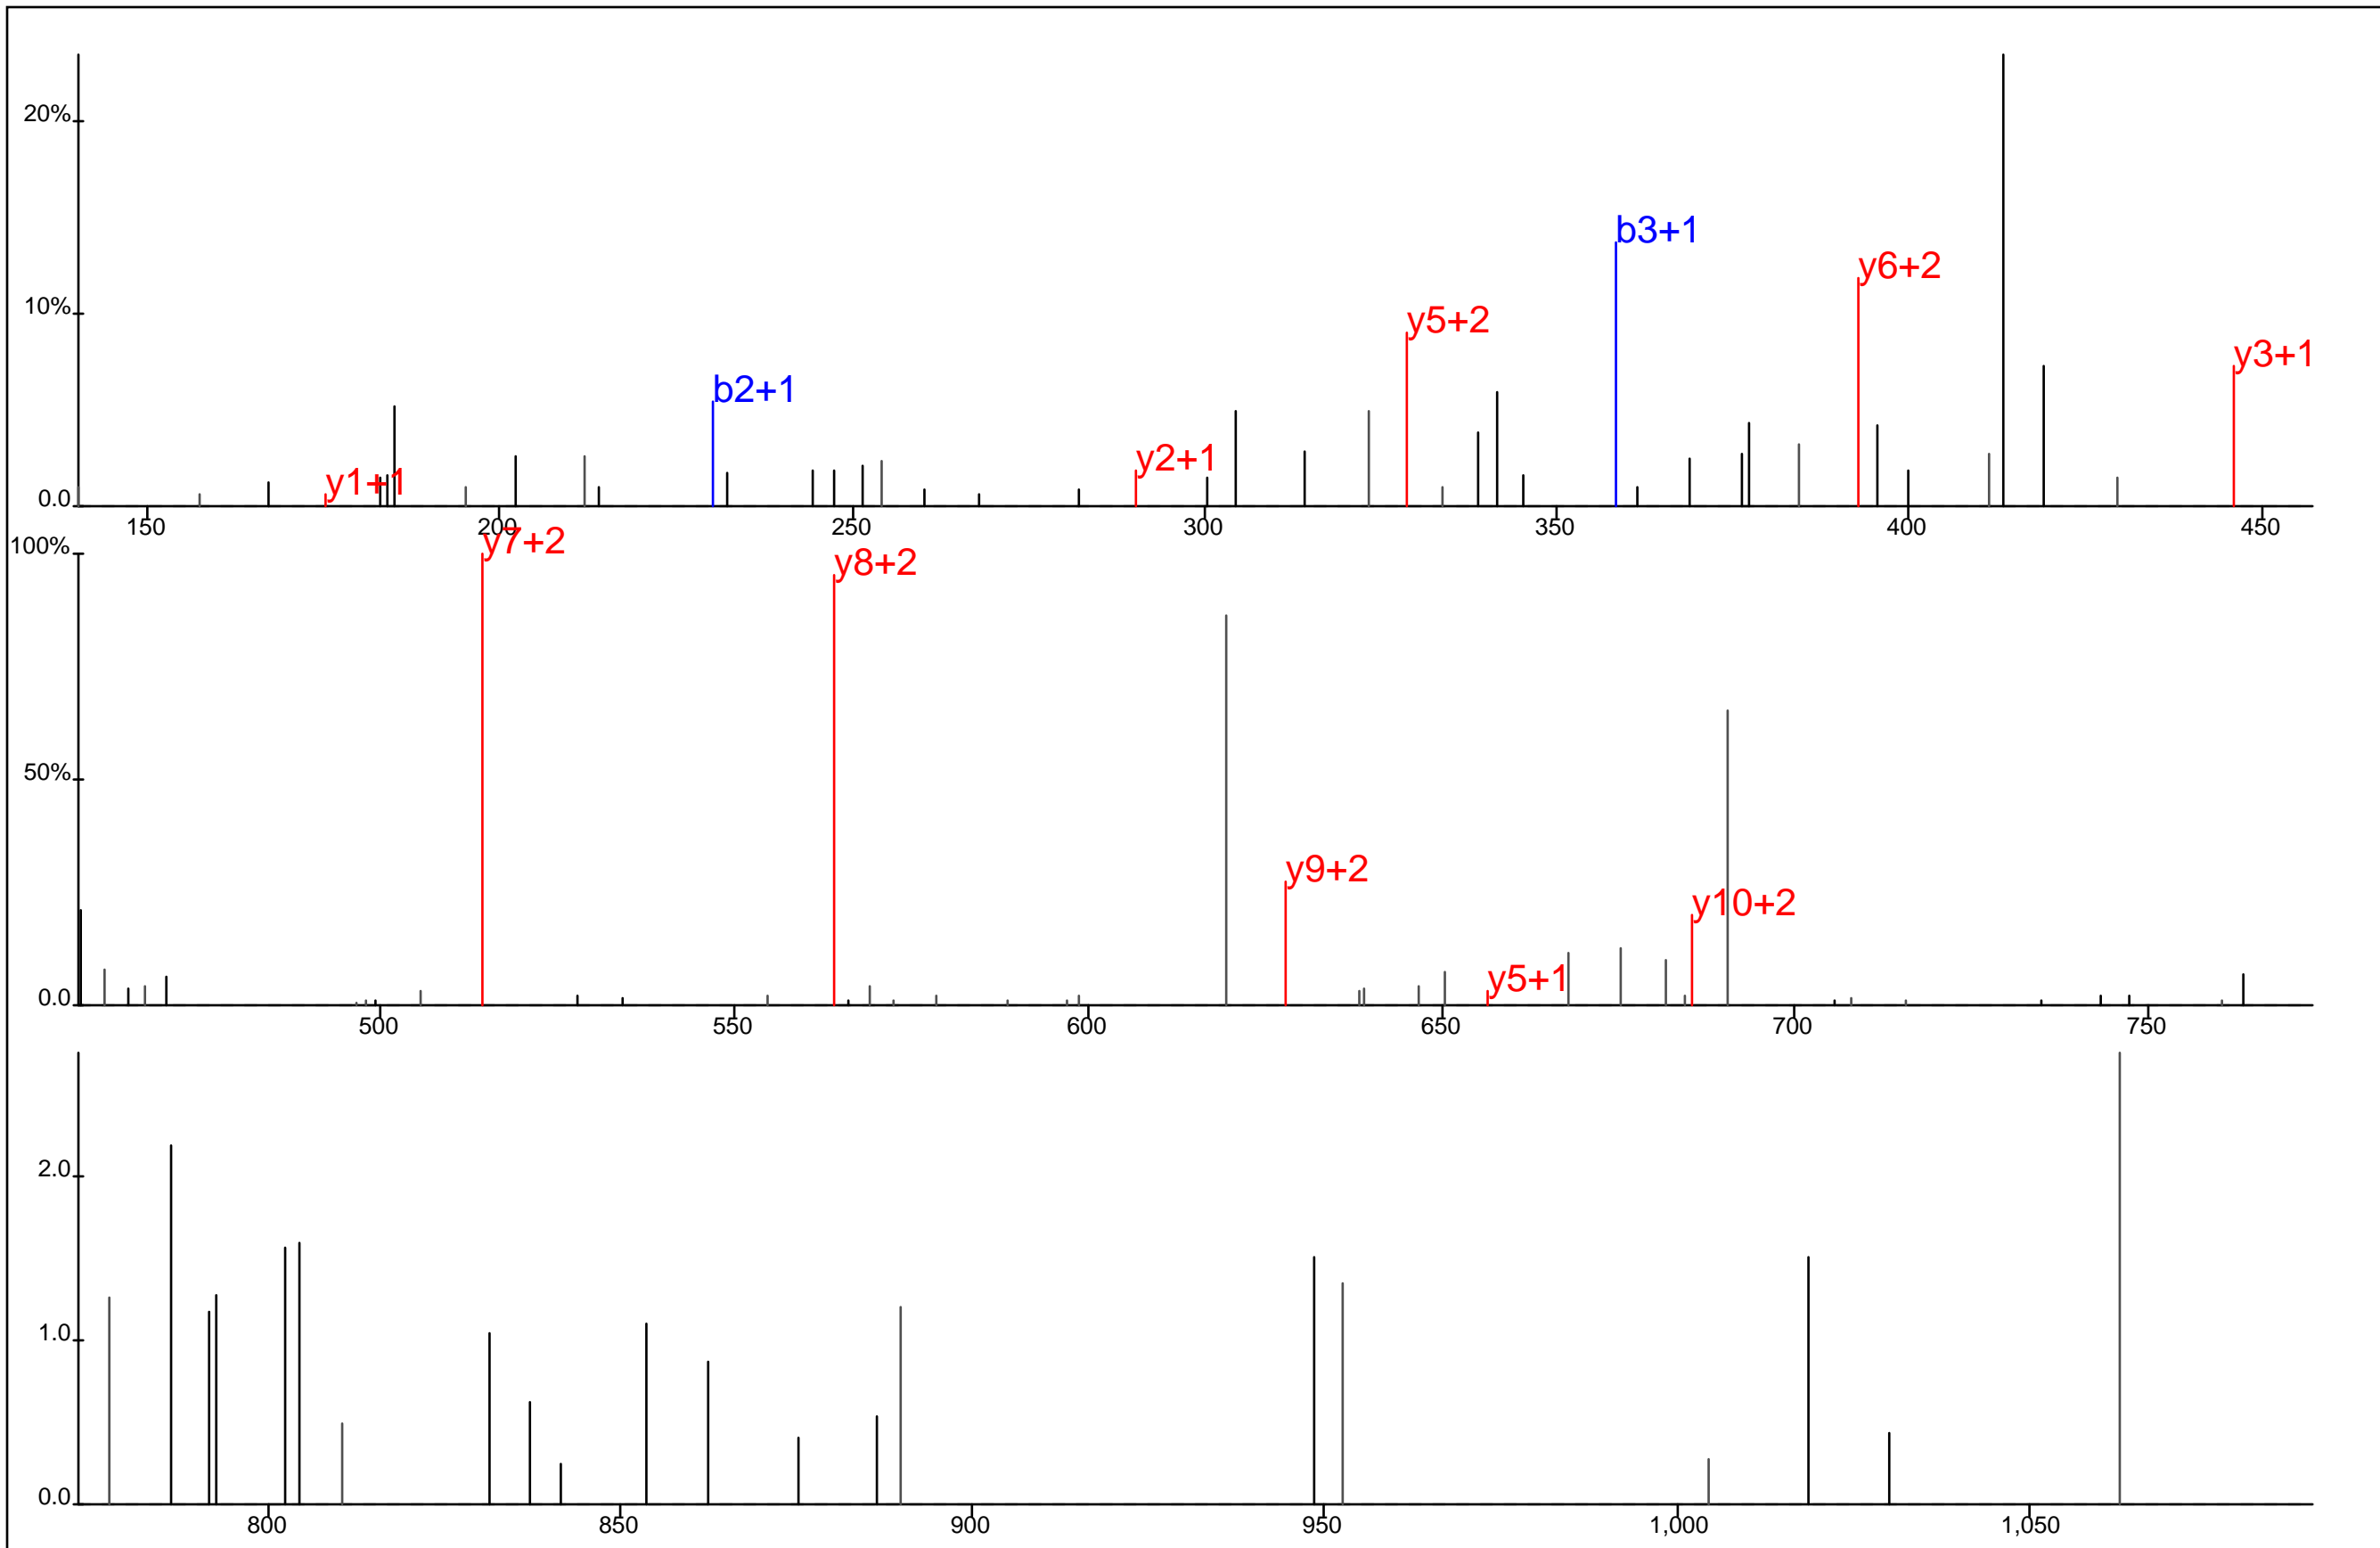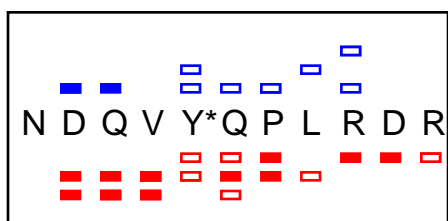

Protein Name: T cell receptor T3 delta chain  
 gi Accession: 0  
 Precursor Mass: 495.2273+3  
 Delta Mass: 1.127 ppm  
 XCorr: 22.62

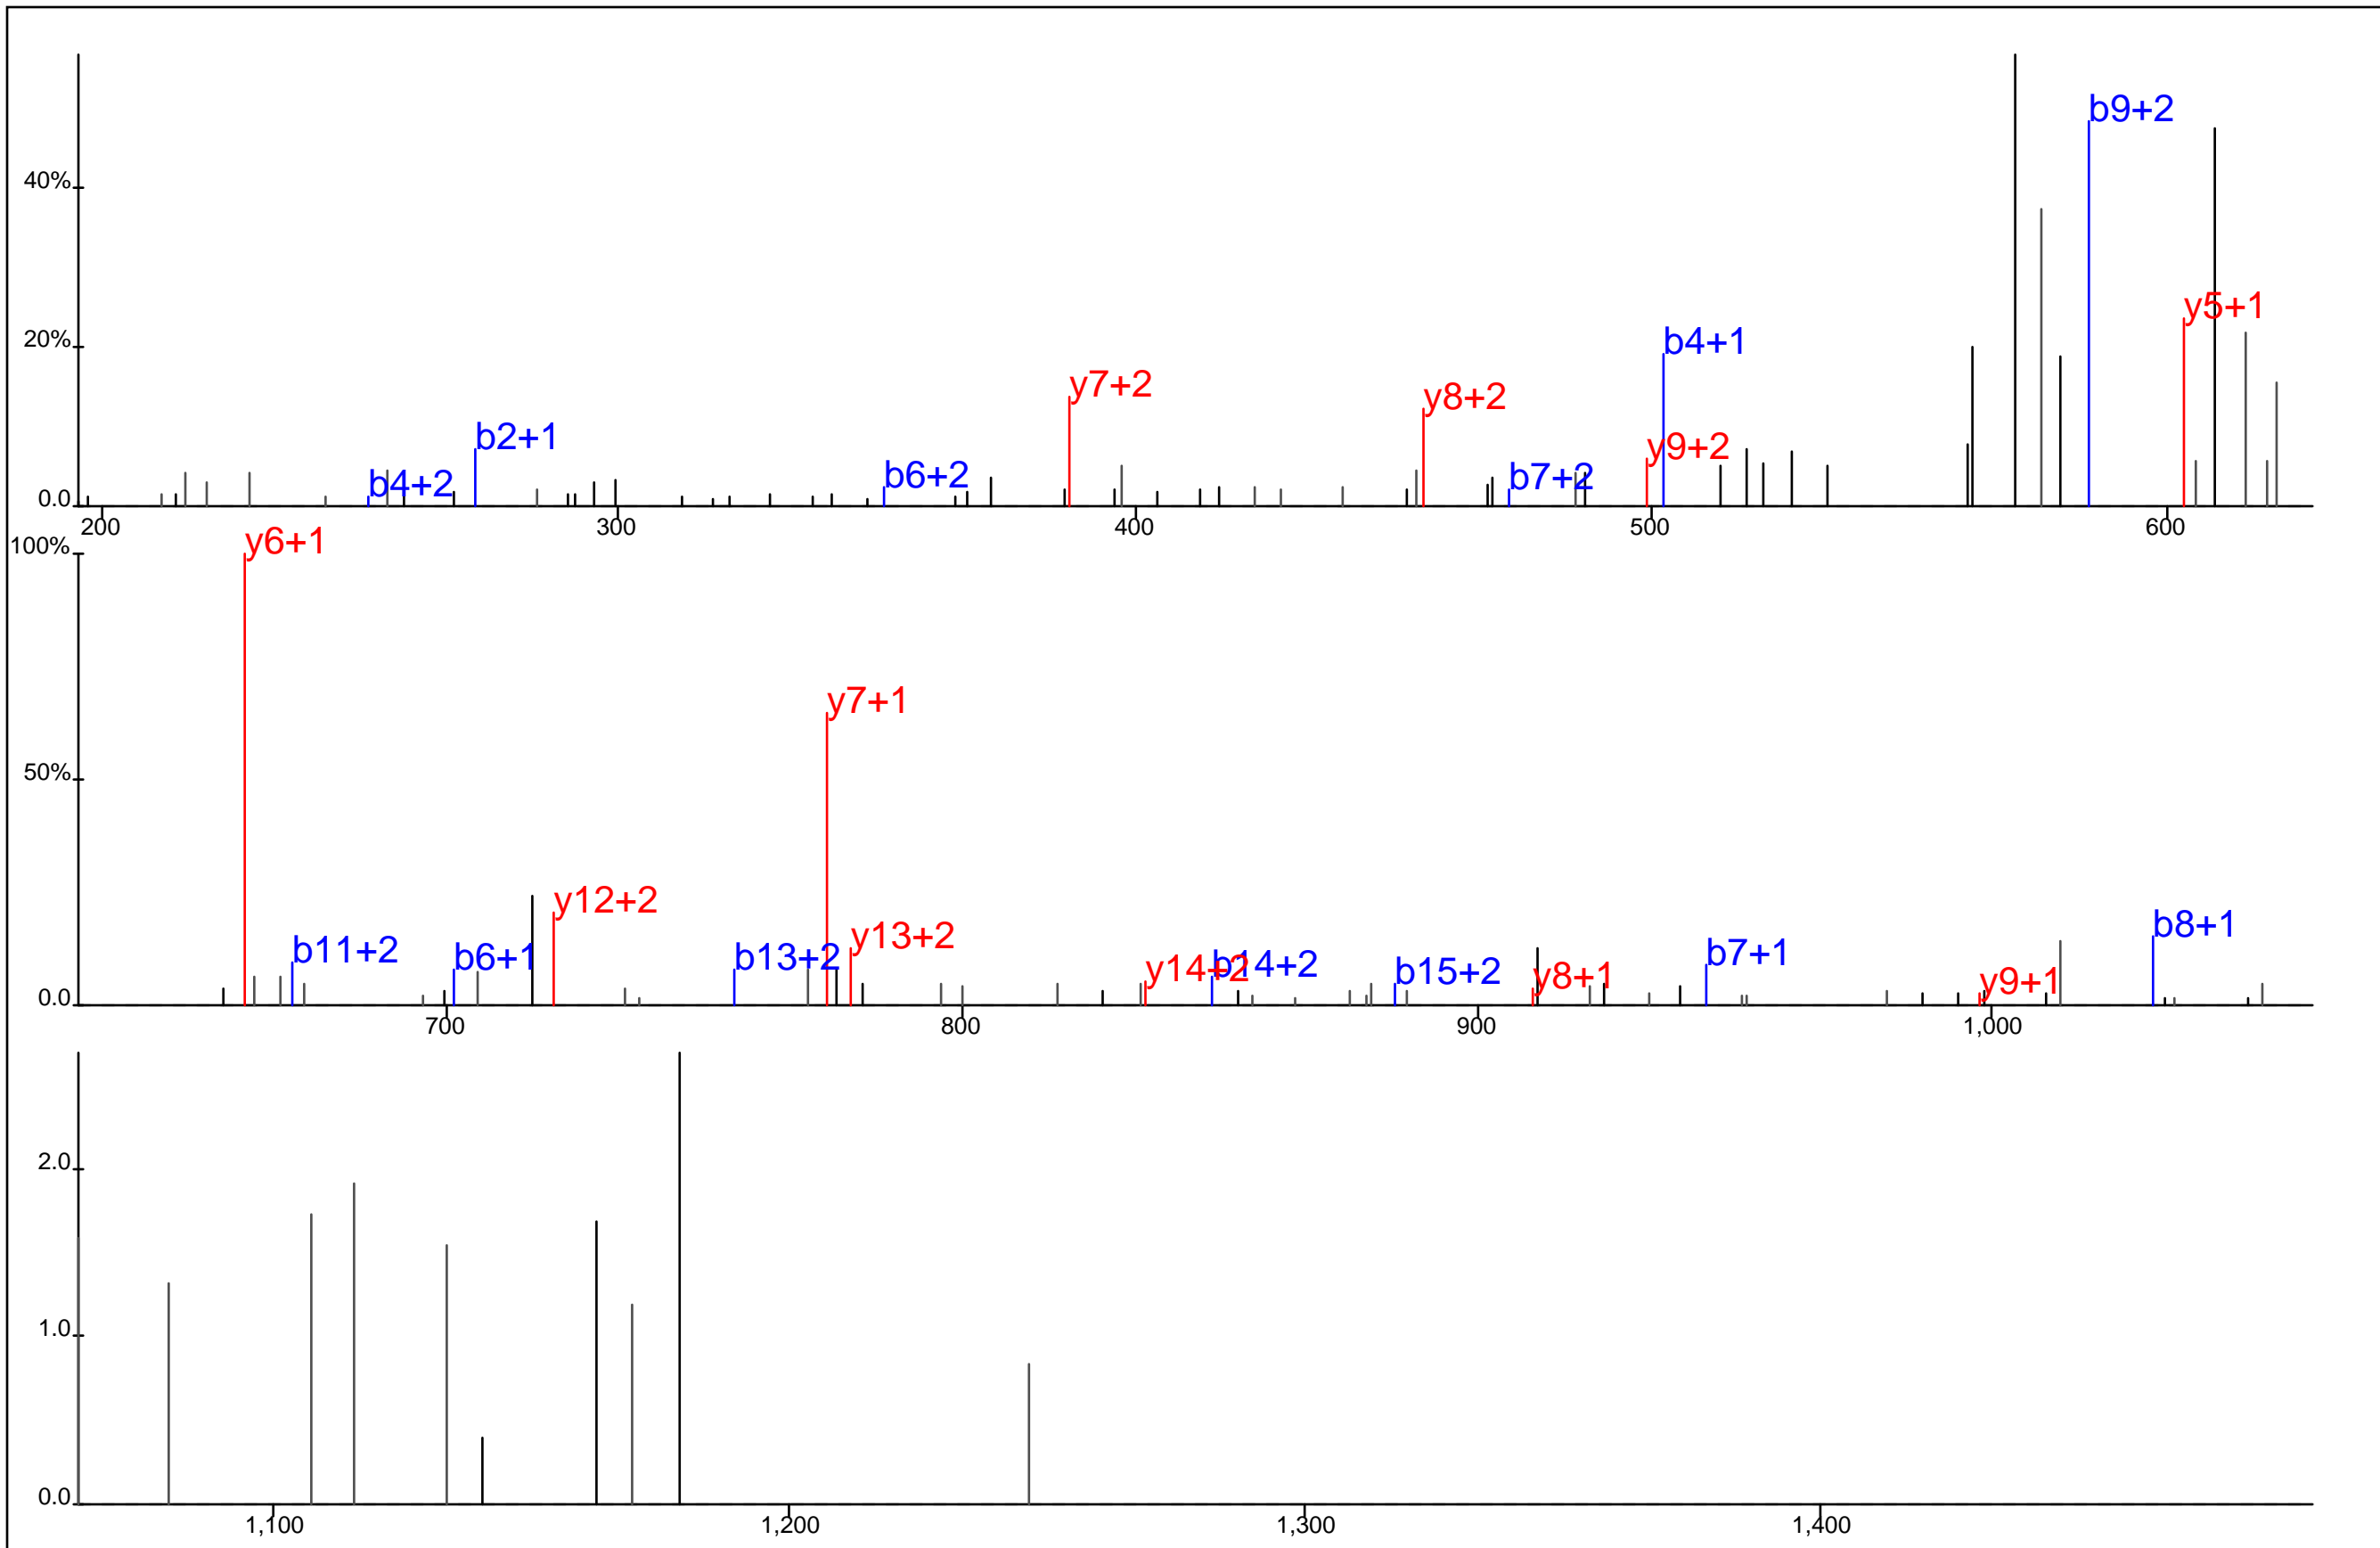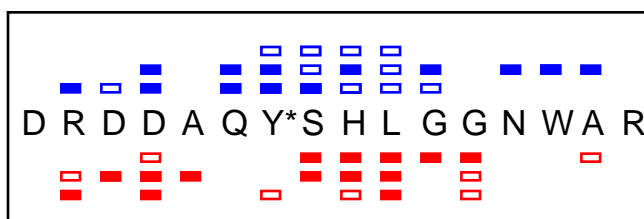

Protein Name: T cell receptor T3 delta chain  
 gi Accession: 0  
 Precursor Mass: 647.6060+3  
 Delta Mass: 0.099 ppm  
 XCorr: 28.53



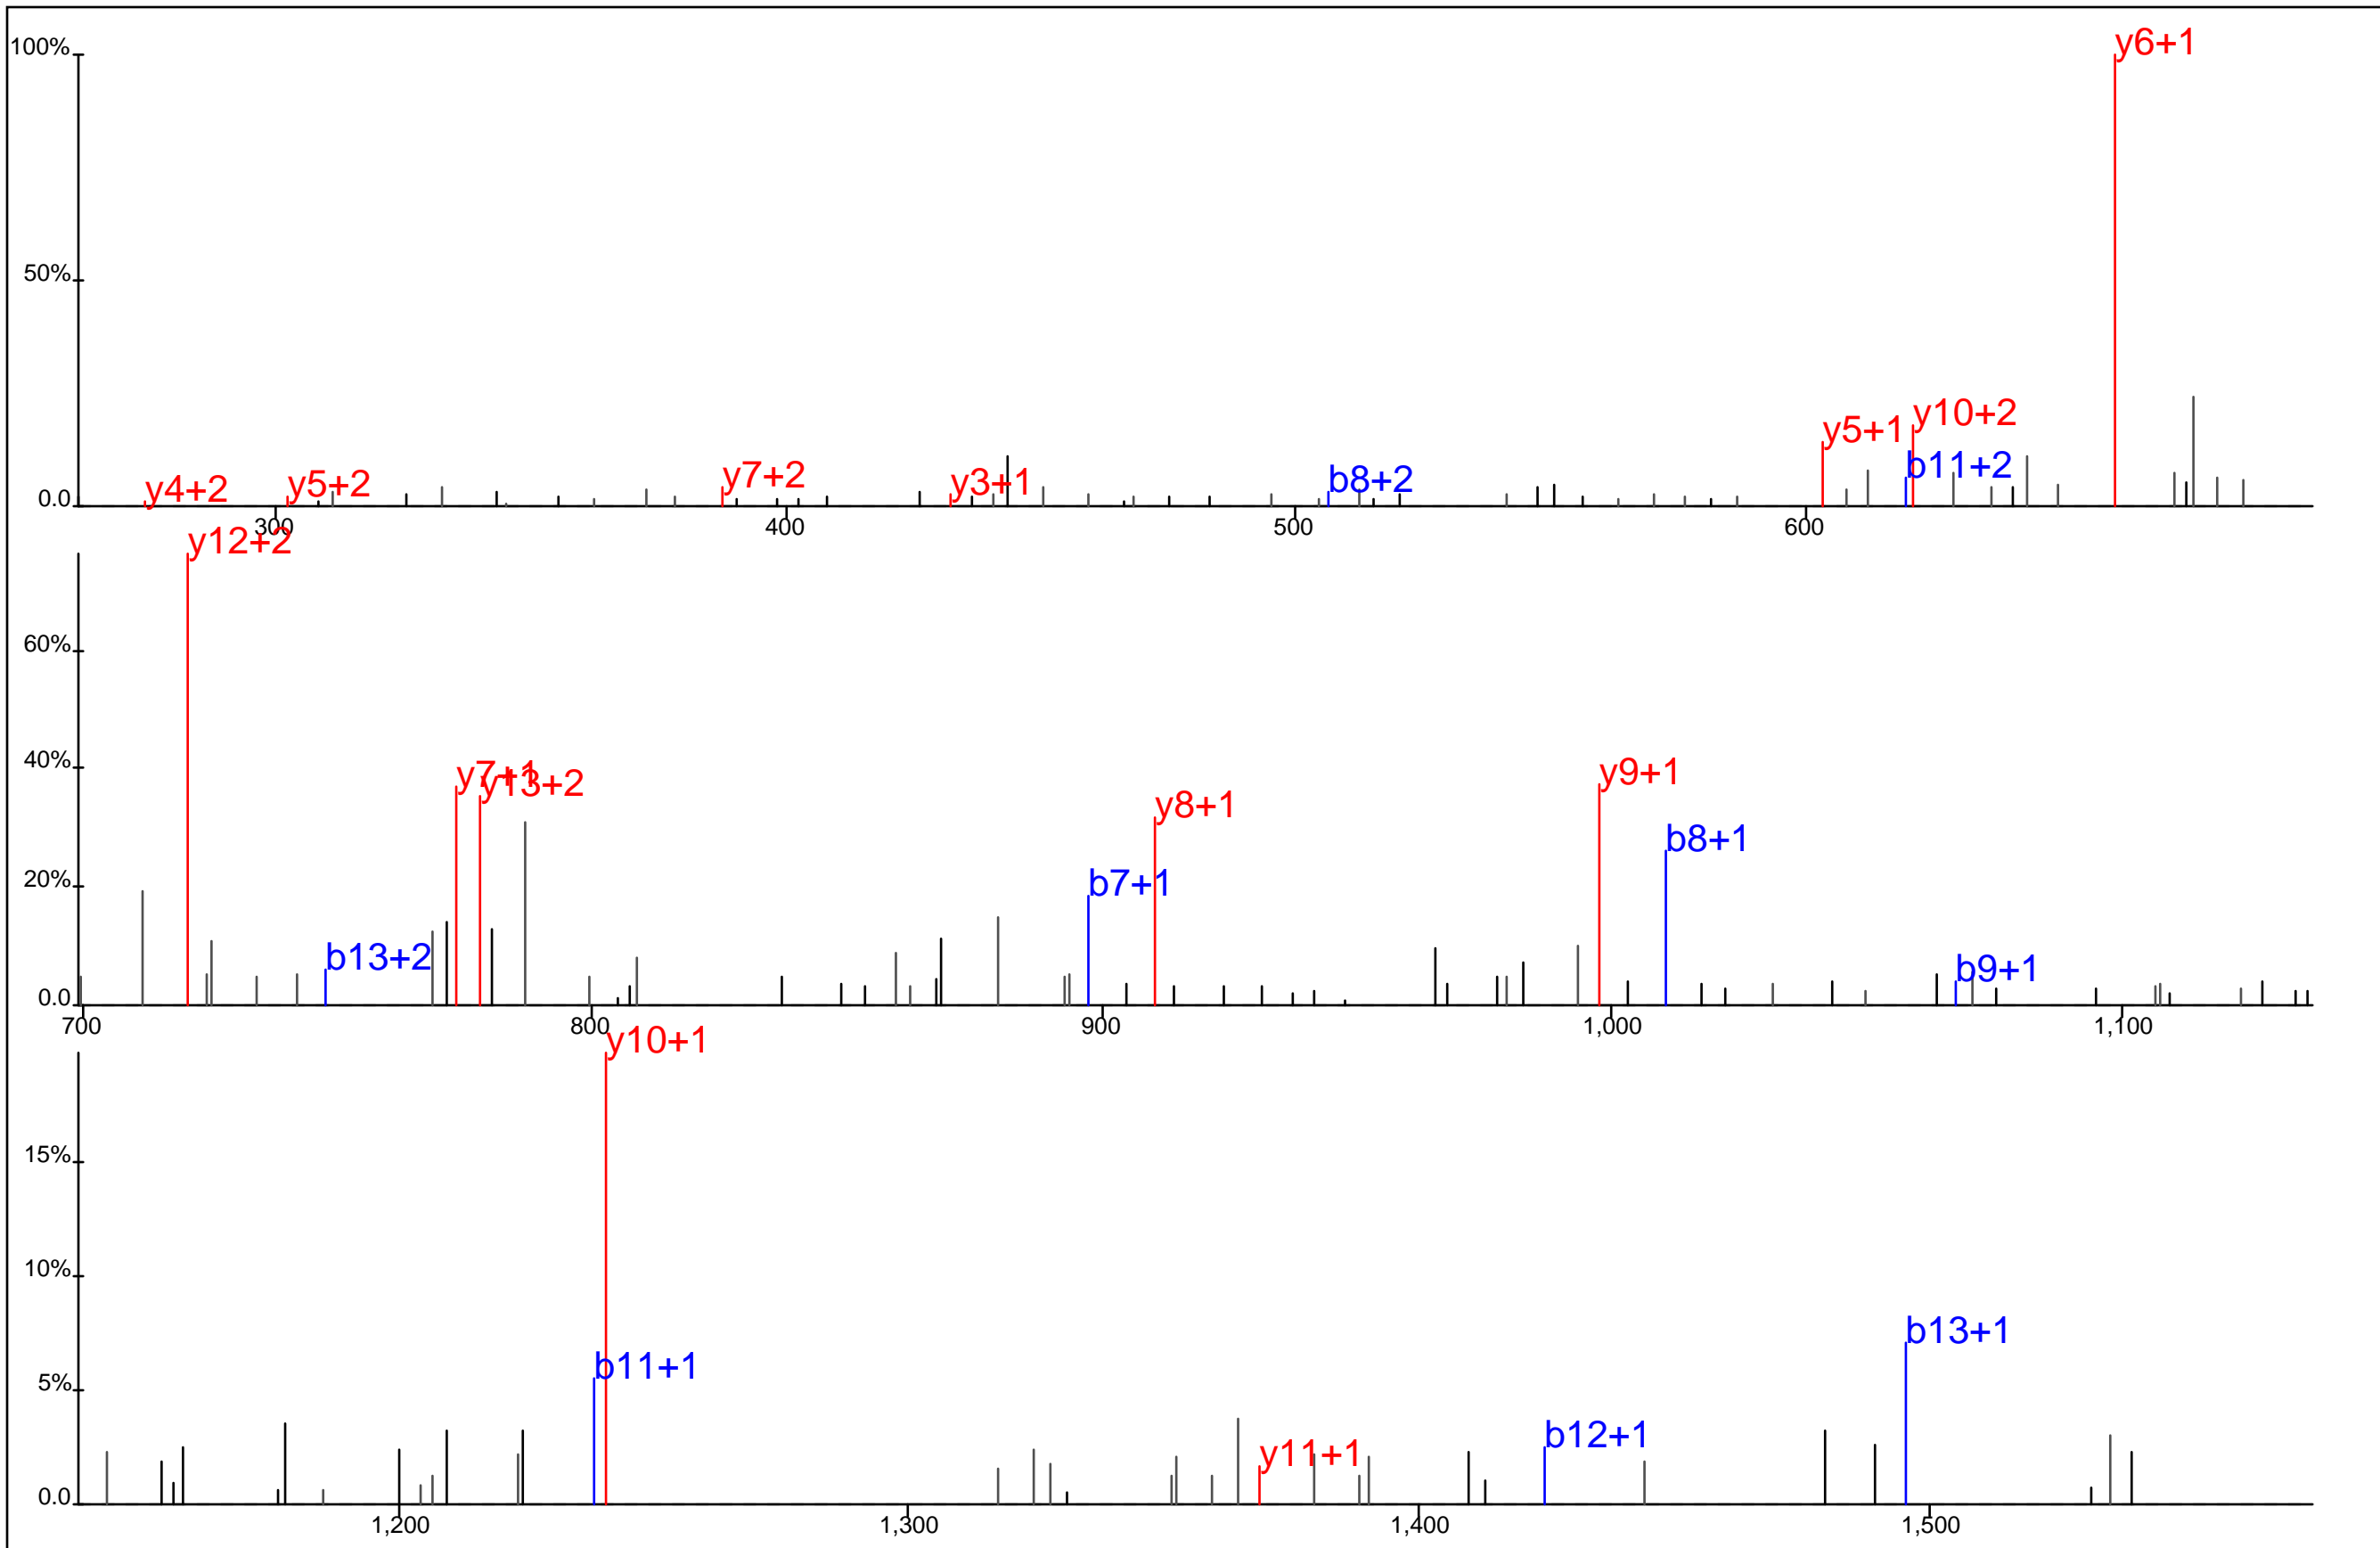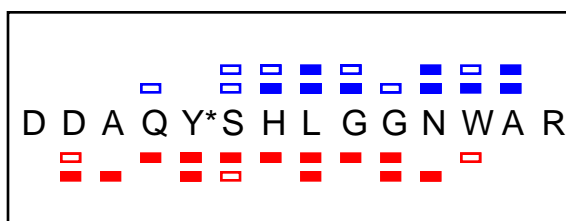

Protein Name: T cell receptor T3 delta chain  
 gi Accession: 0  
 Precursor Mass: 835.3407+2  
 Delta Mass: 0.804 ppm  
 XCorr: 34.44

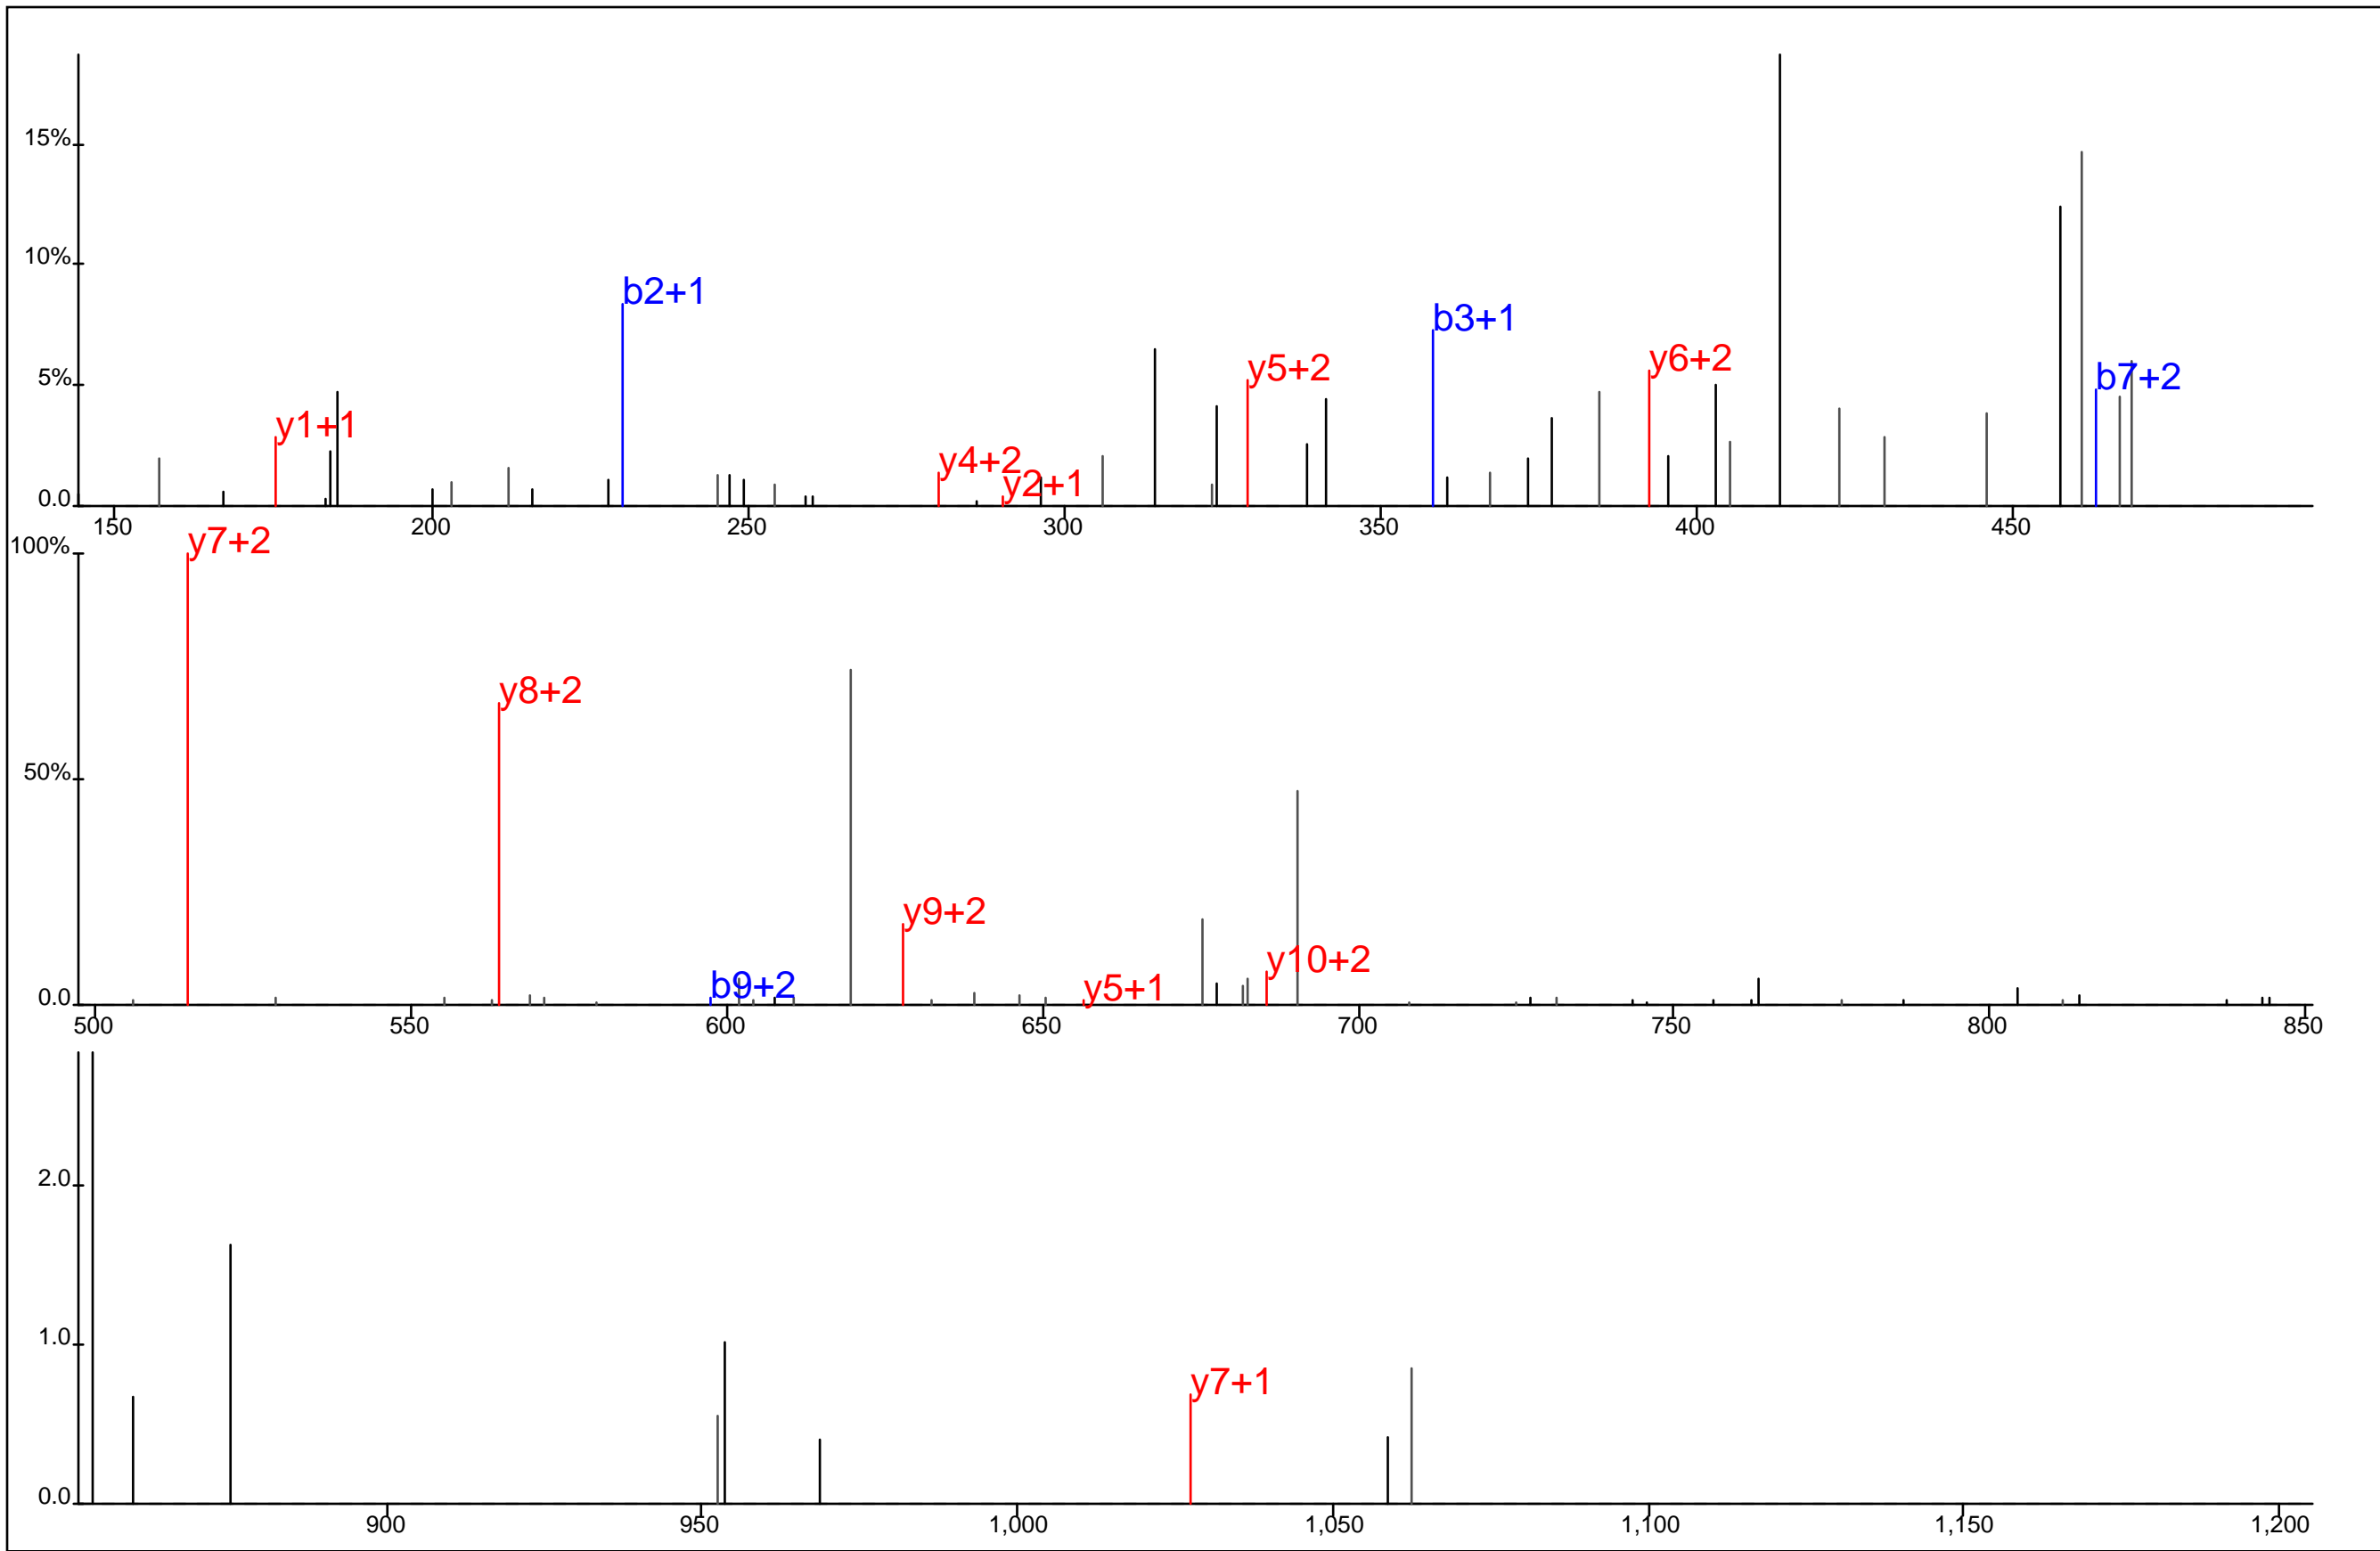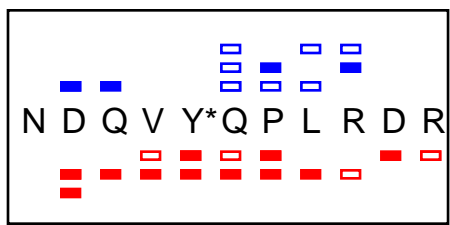

Protein Name: T cell receptor T3 delta chain  
 gi Accession: 0  
 Precursor Mass: 495.2277+3  
 Delta Mass: 0.201 ppm  
 XCorr: 25.95

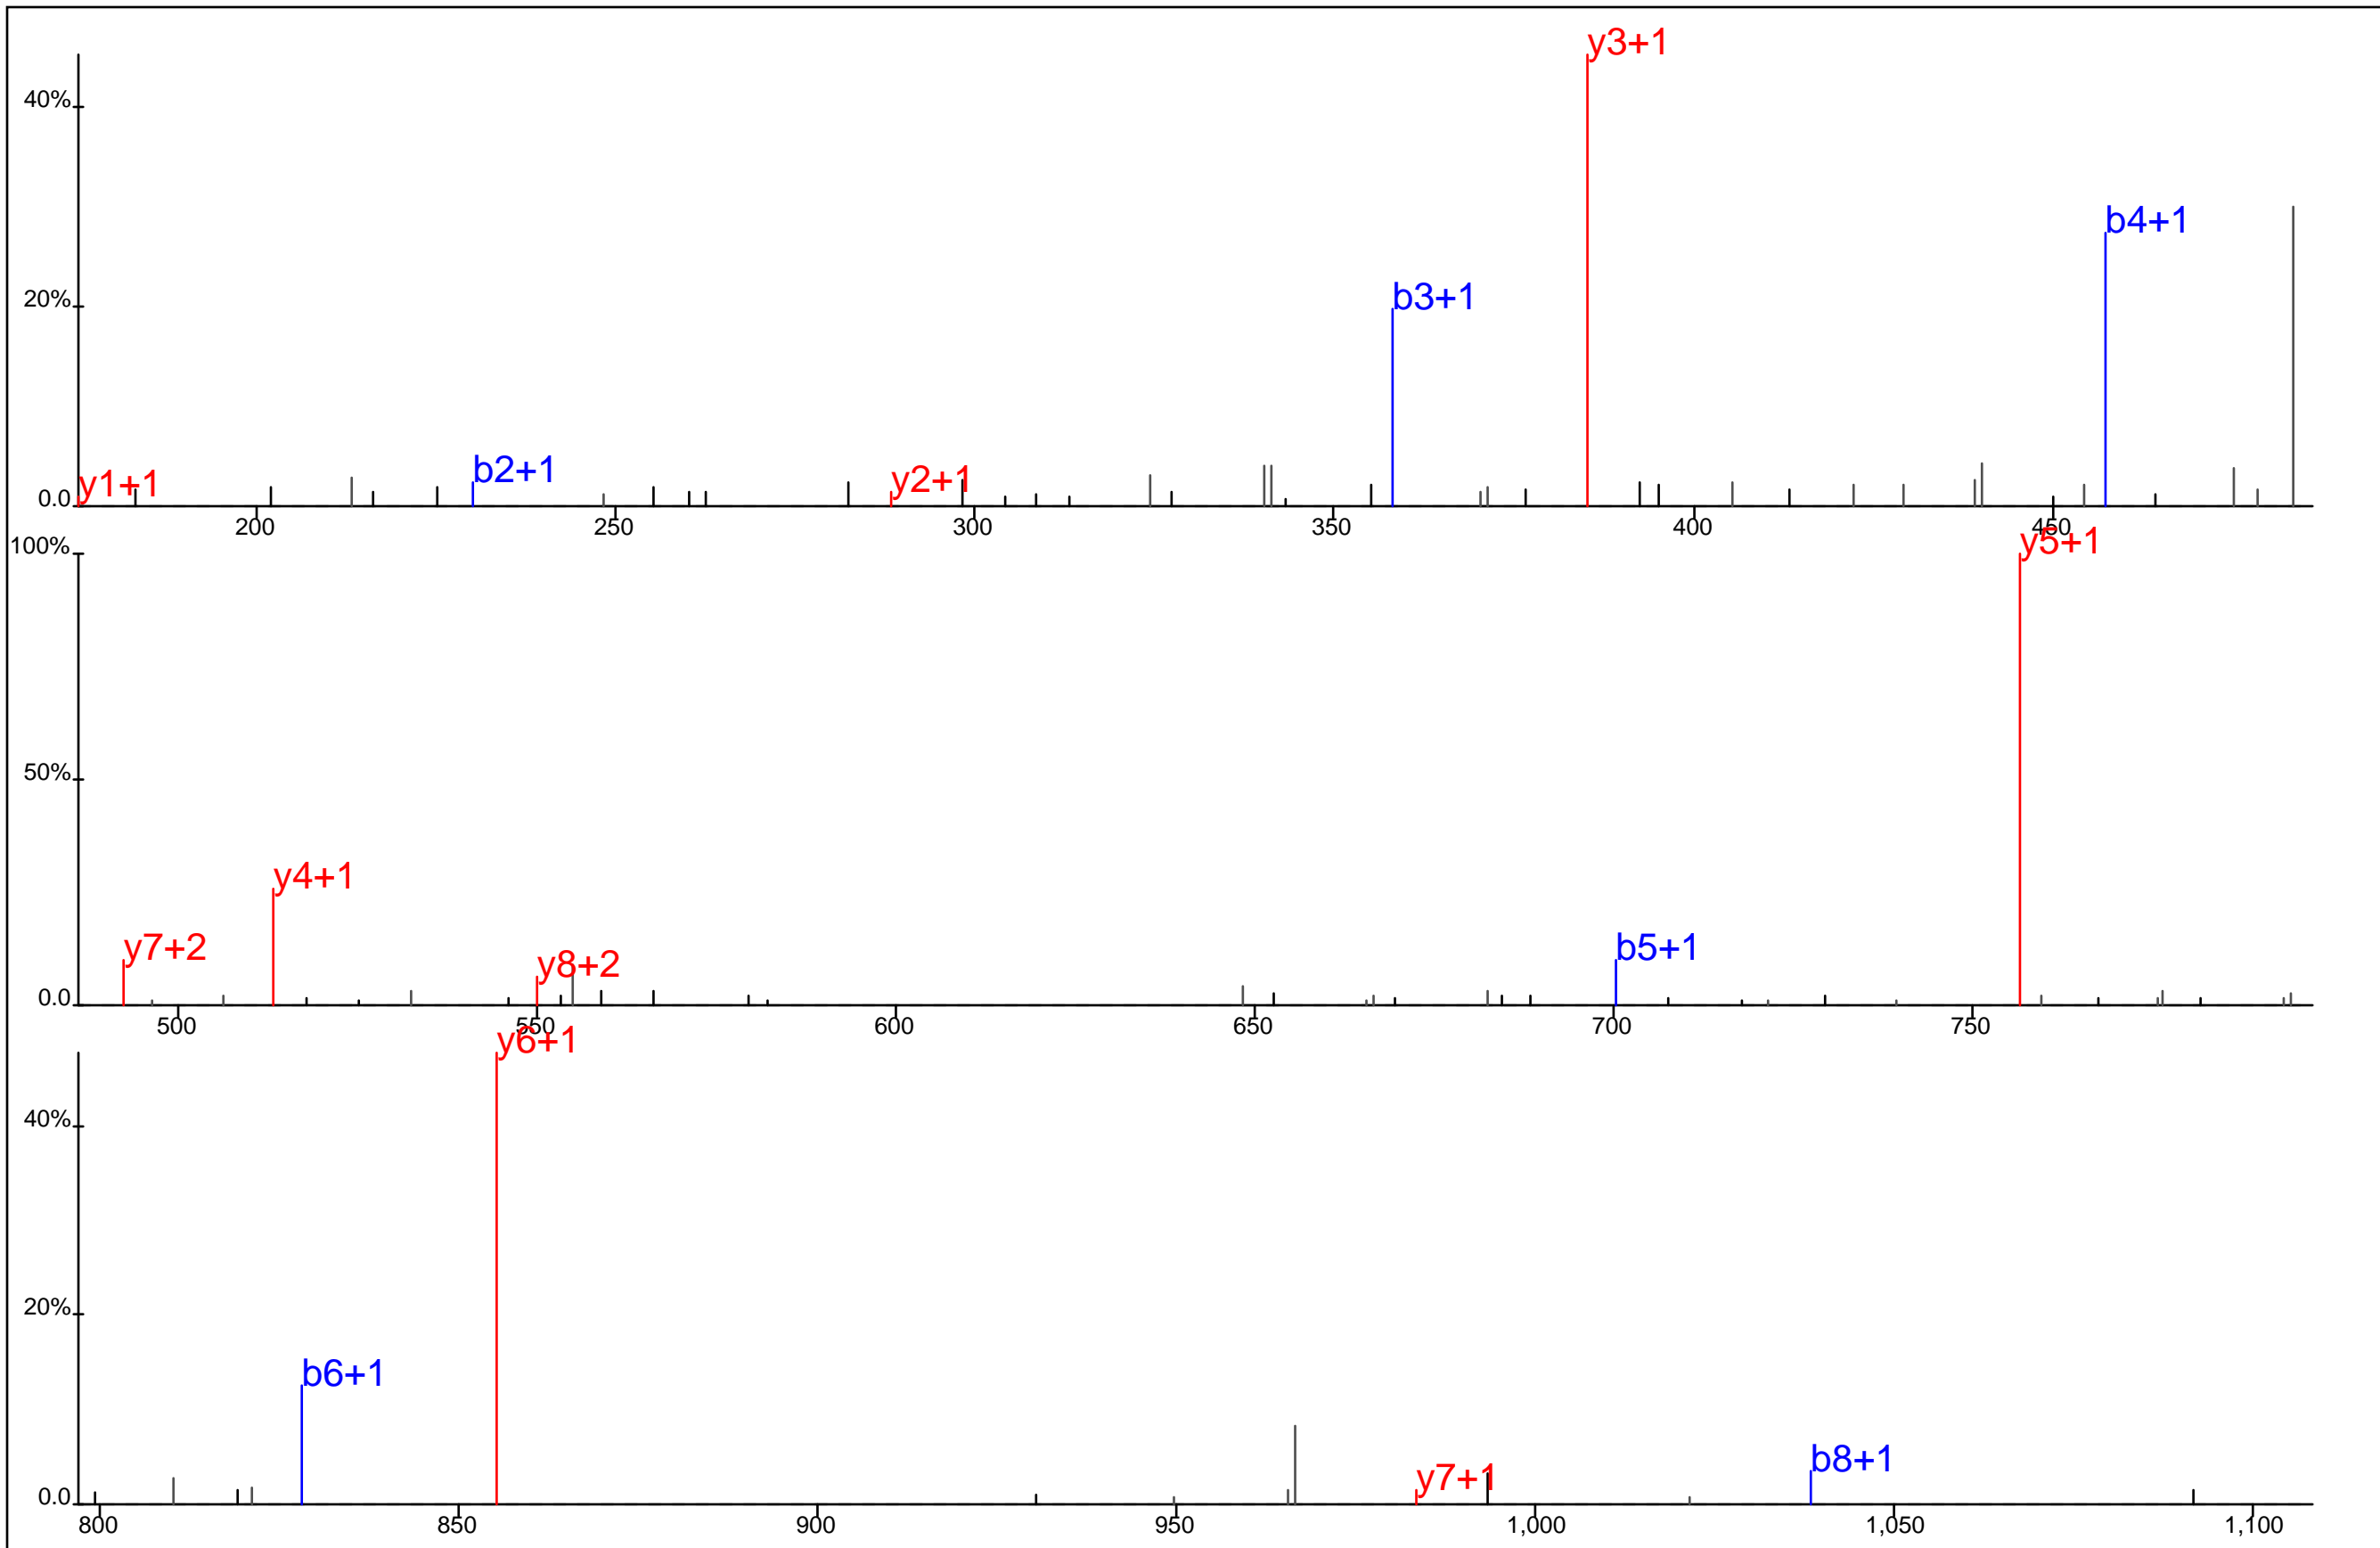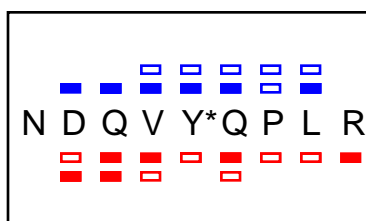

Protein Name: T cell receptor T3 delta chain  
 gi Accession: 0  
 Precursor Mass: 606.7766+2  
 Delta Mass: 4.193 ppm  
 XCorr: 44.84



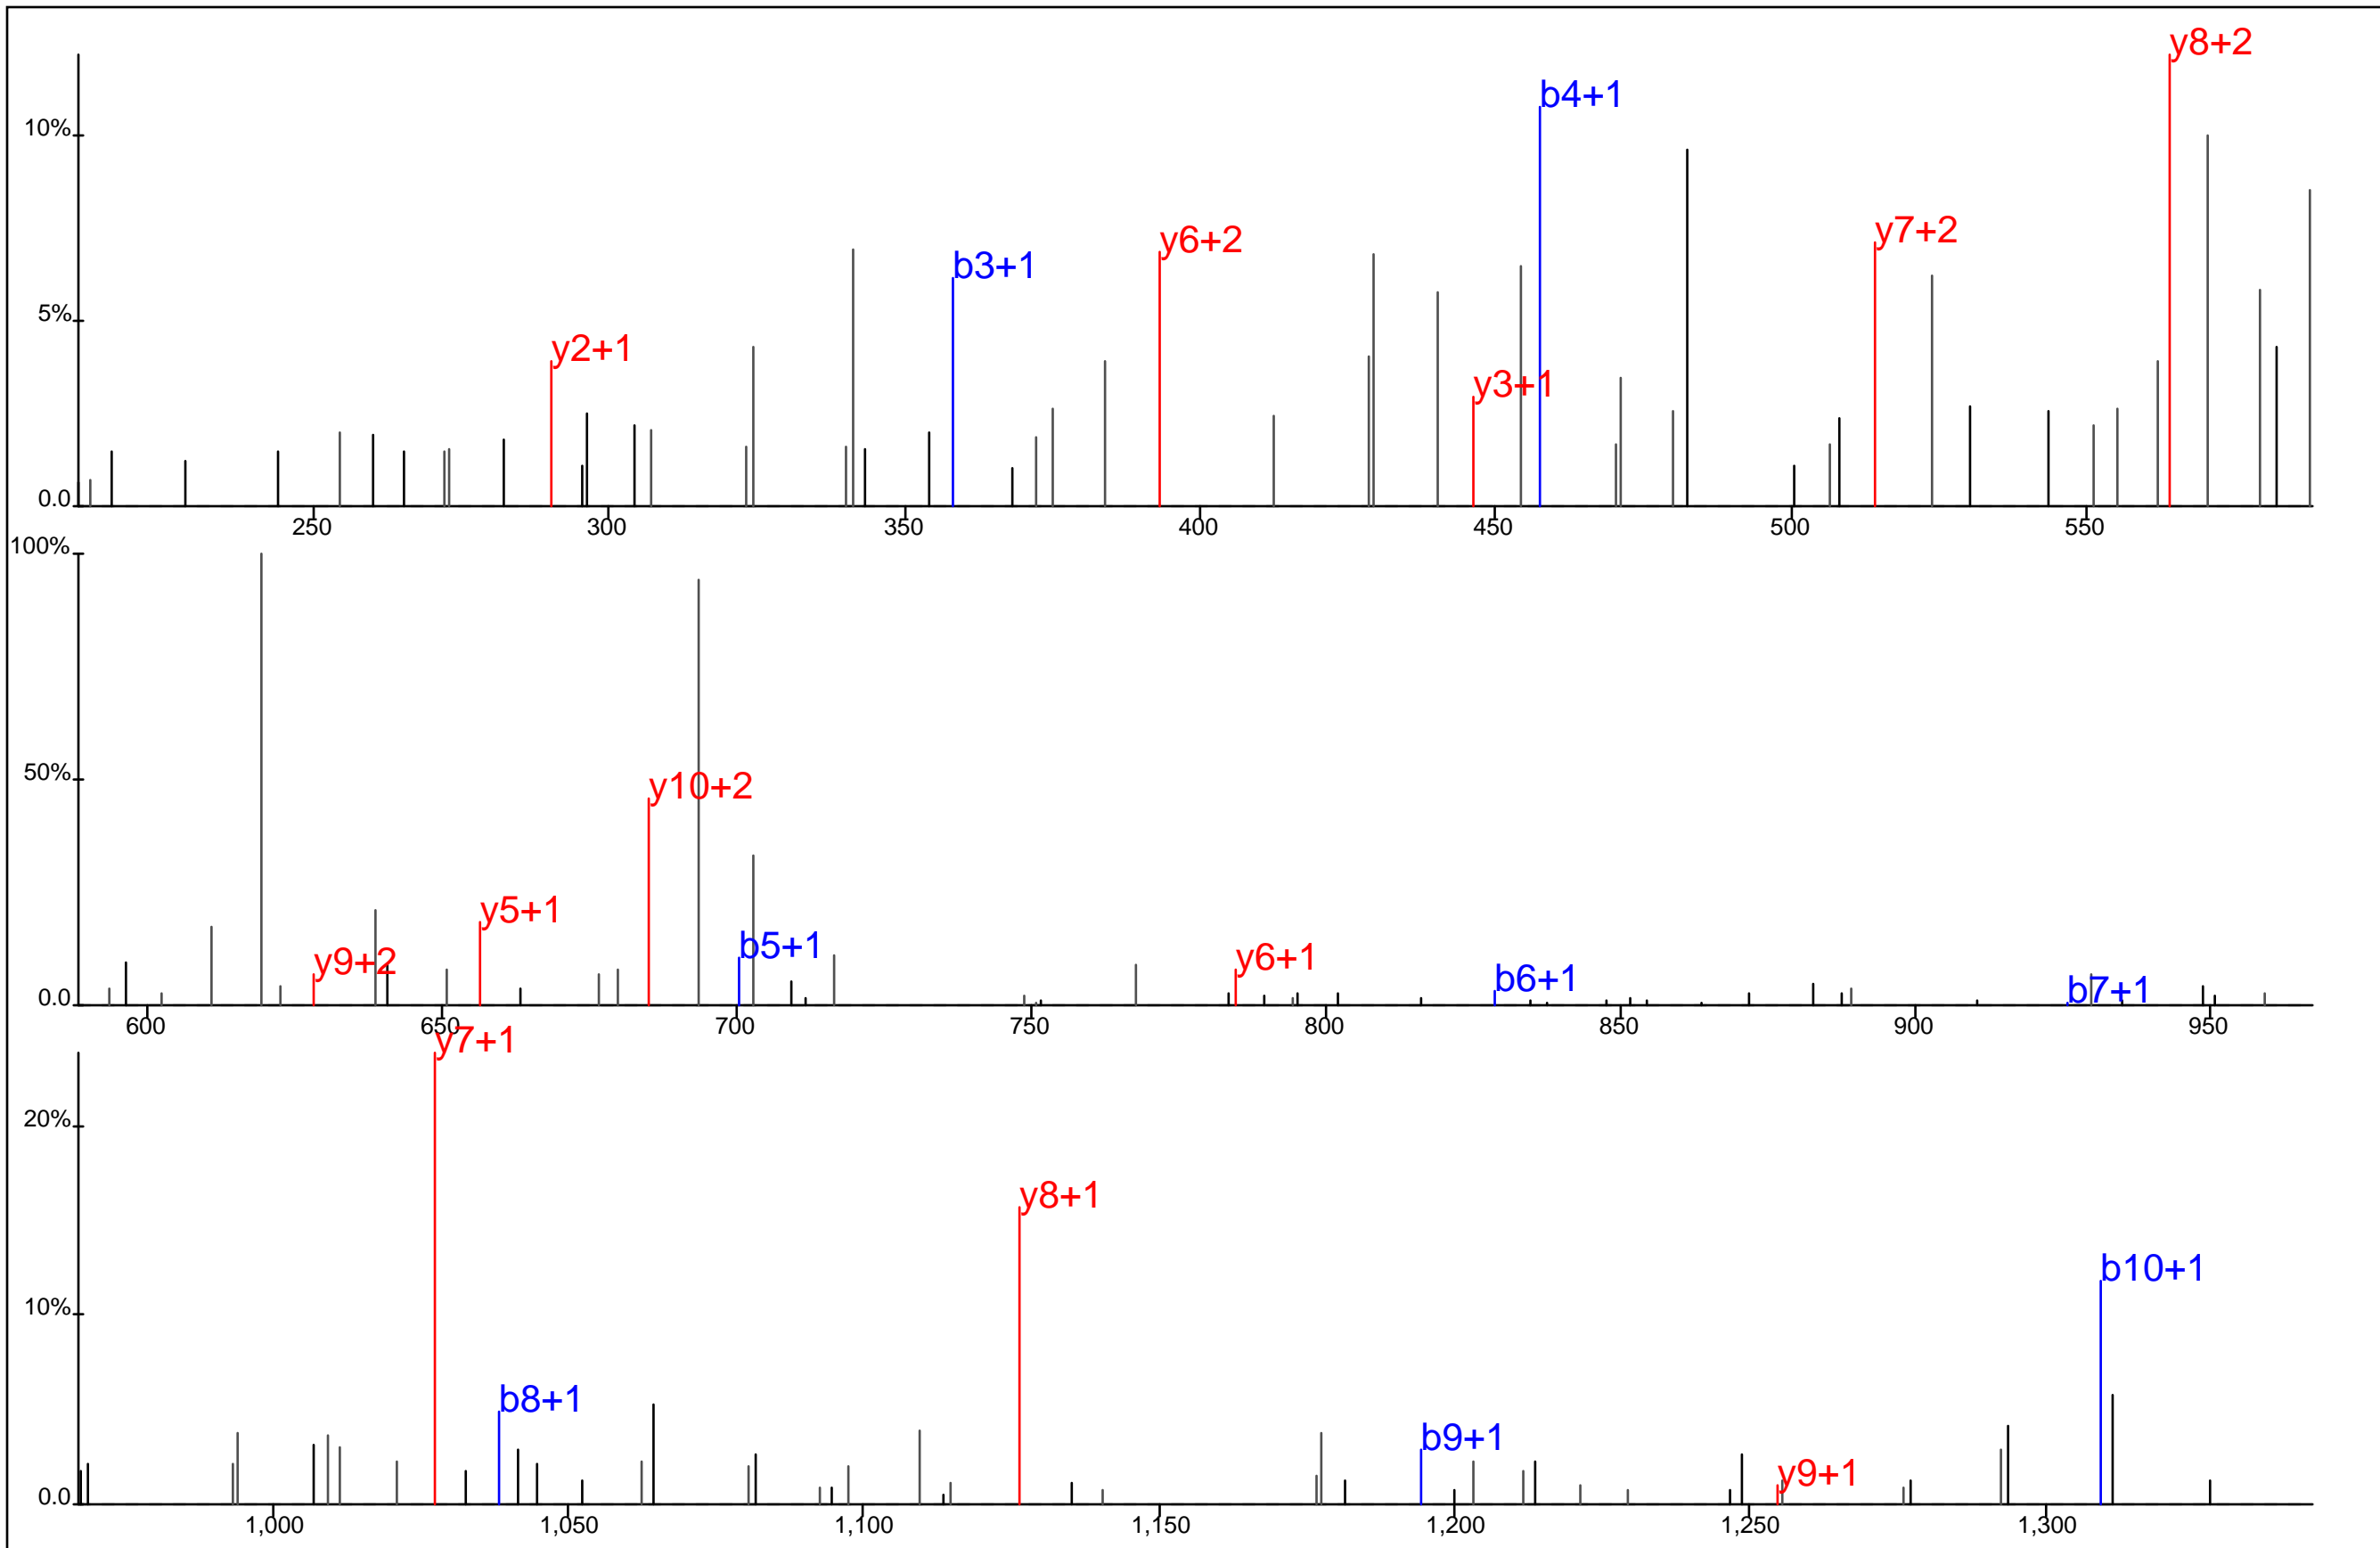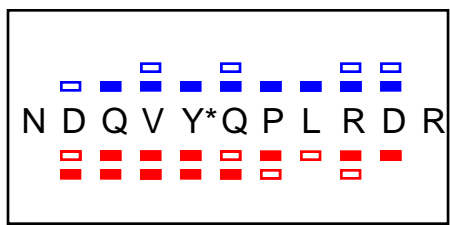

Protein Name: T cell receptor T3 delta chain  
 gi Accession: 0  
 Precursor Mass: 742.3378+2  
 Delta Mass: 0.356 ppm  
 XCorr: 26.68



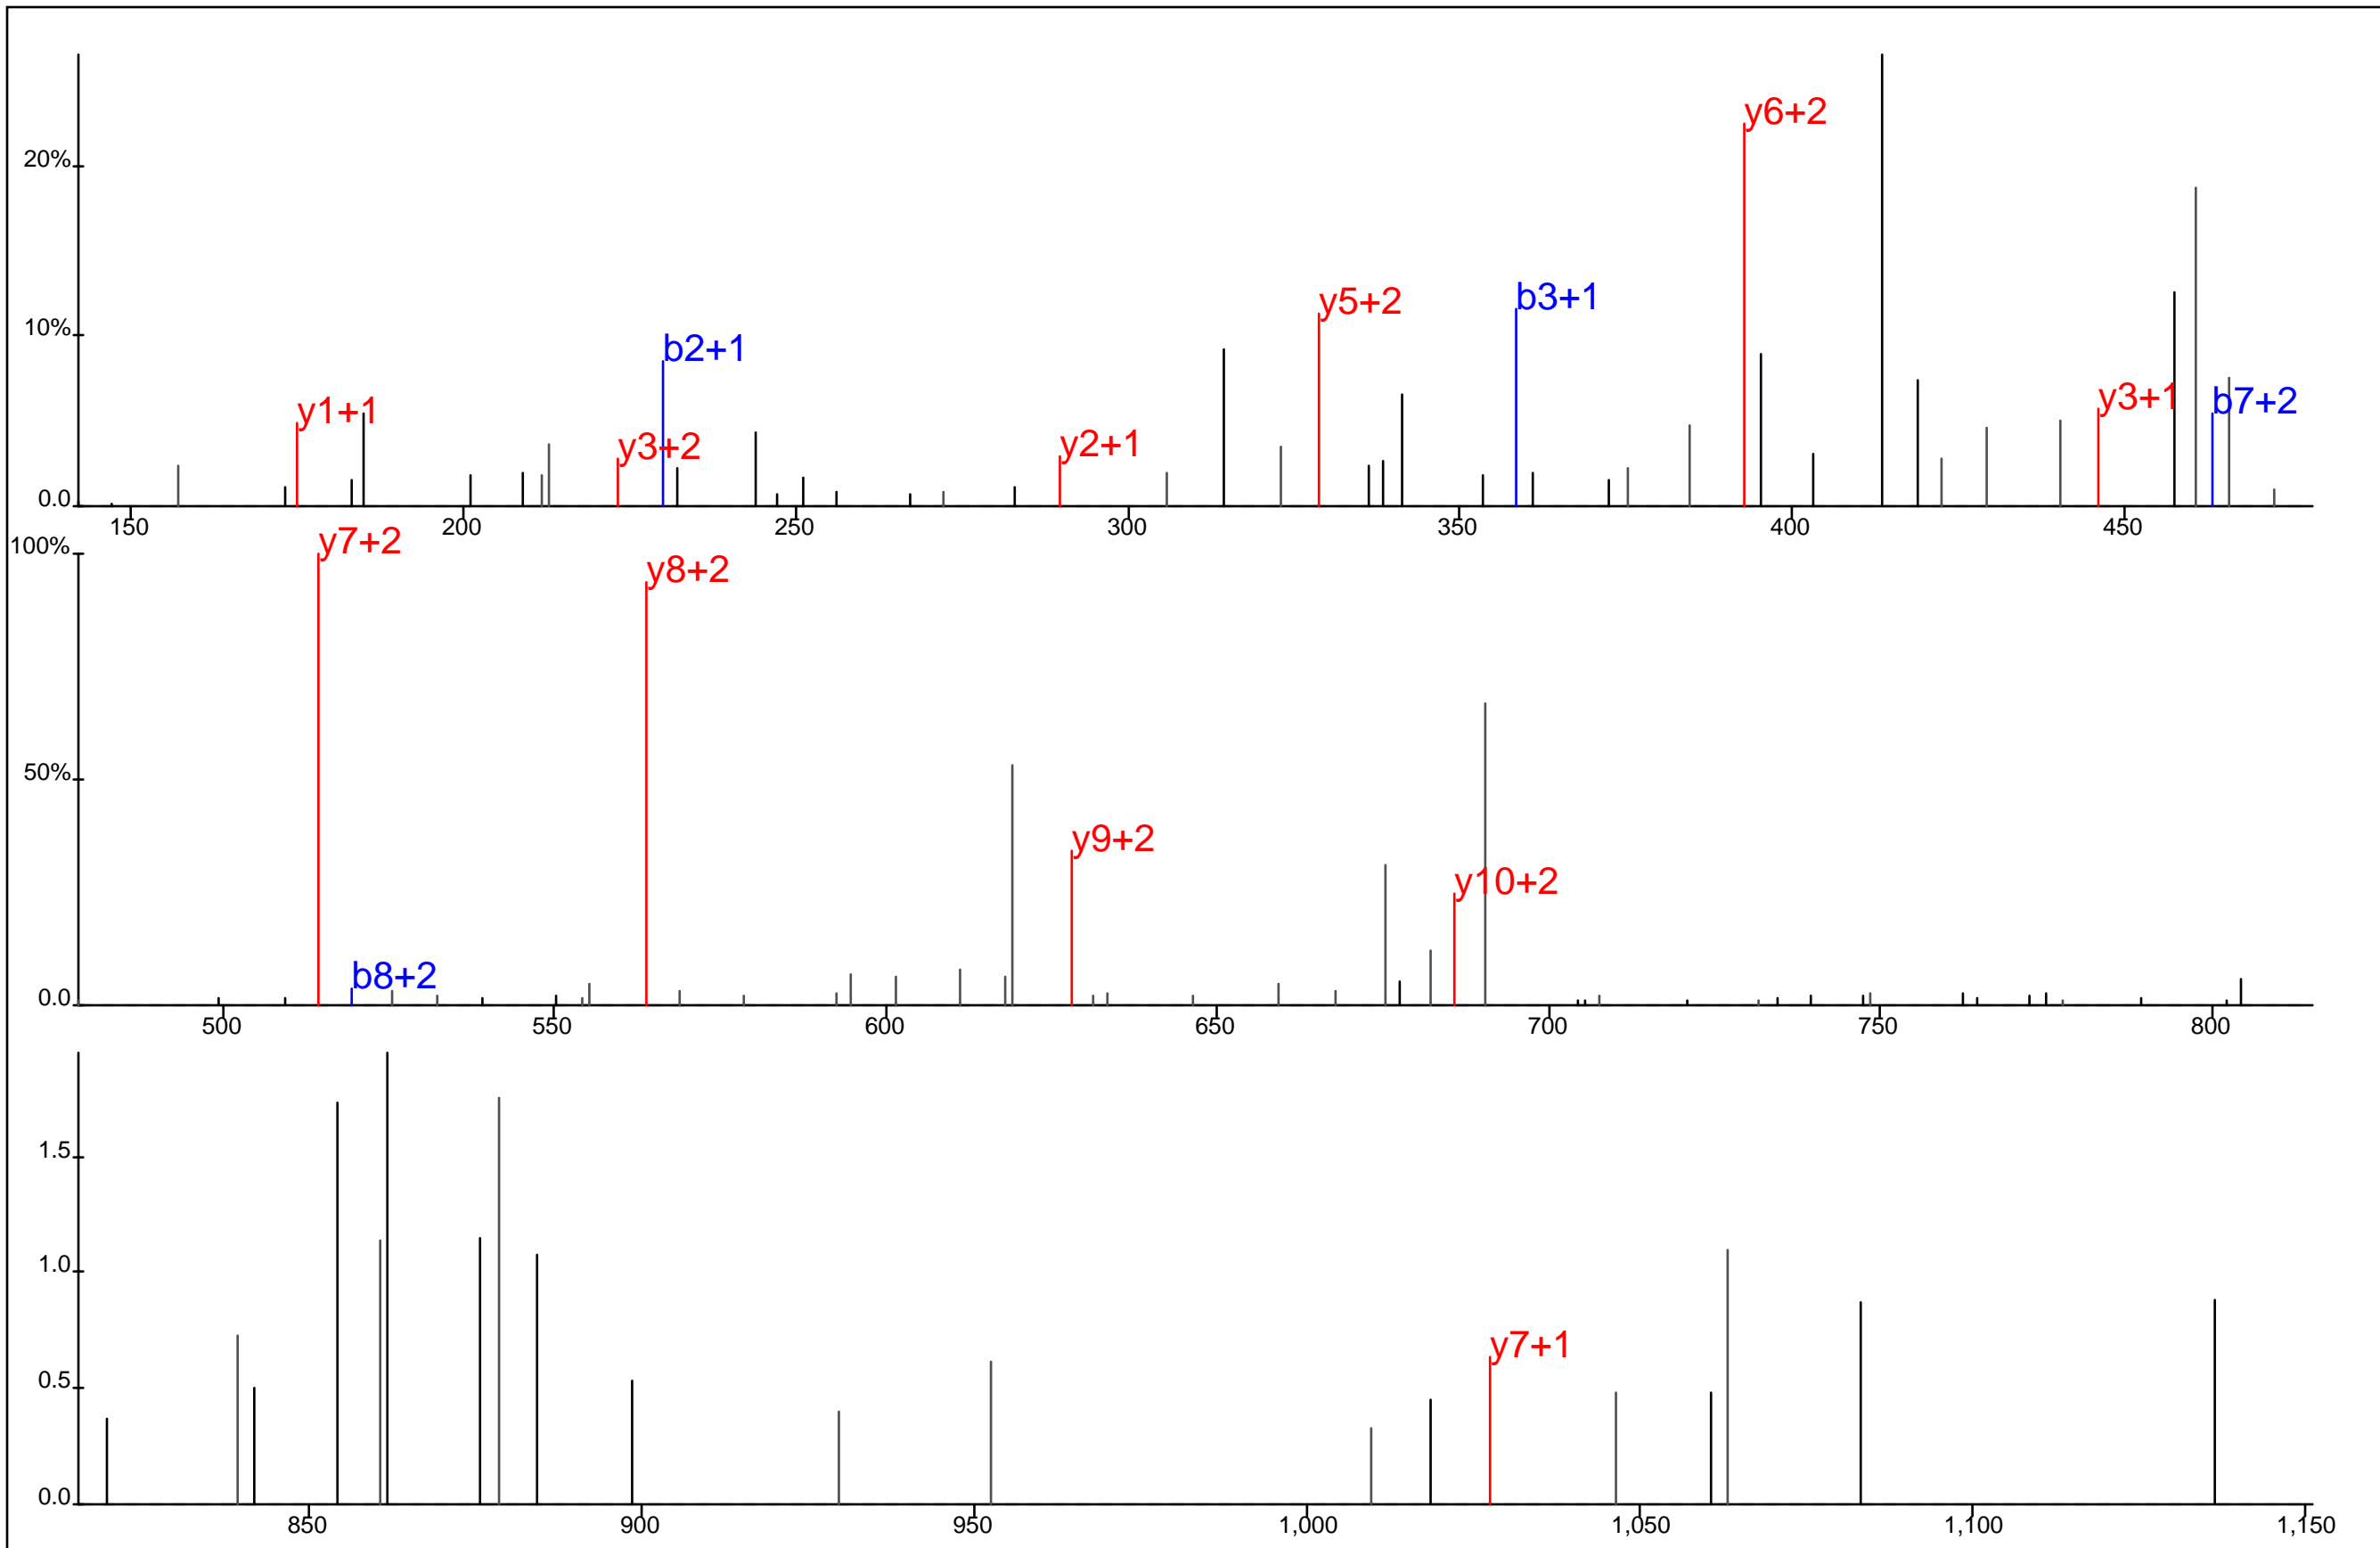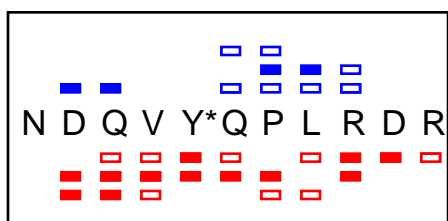

Protein Name: T cell receptor T3 delta chain  
 gi Accession: 0  
 Precursor Mass: 495.2269+3  
 Delta Mass: 1.804 ppm  
 XCorr: 24.78

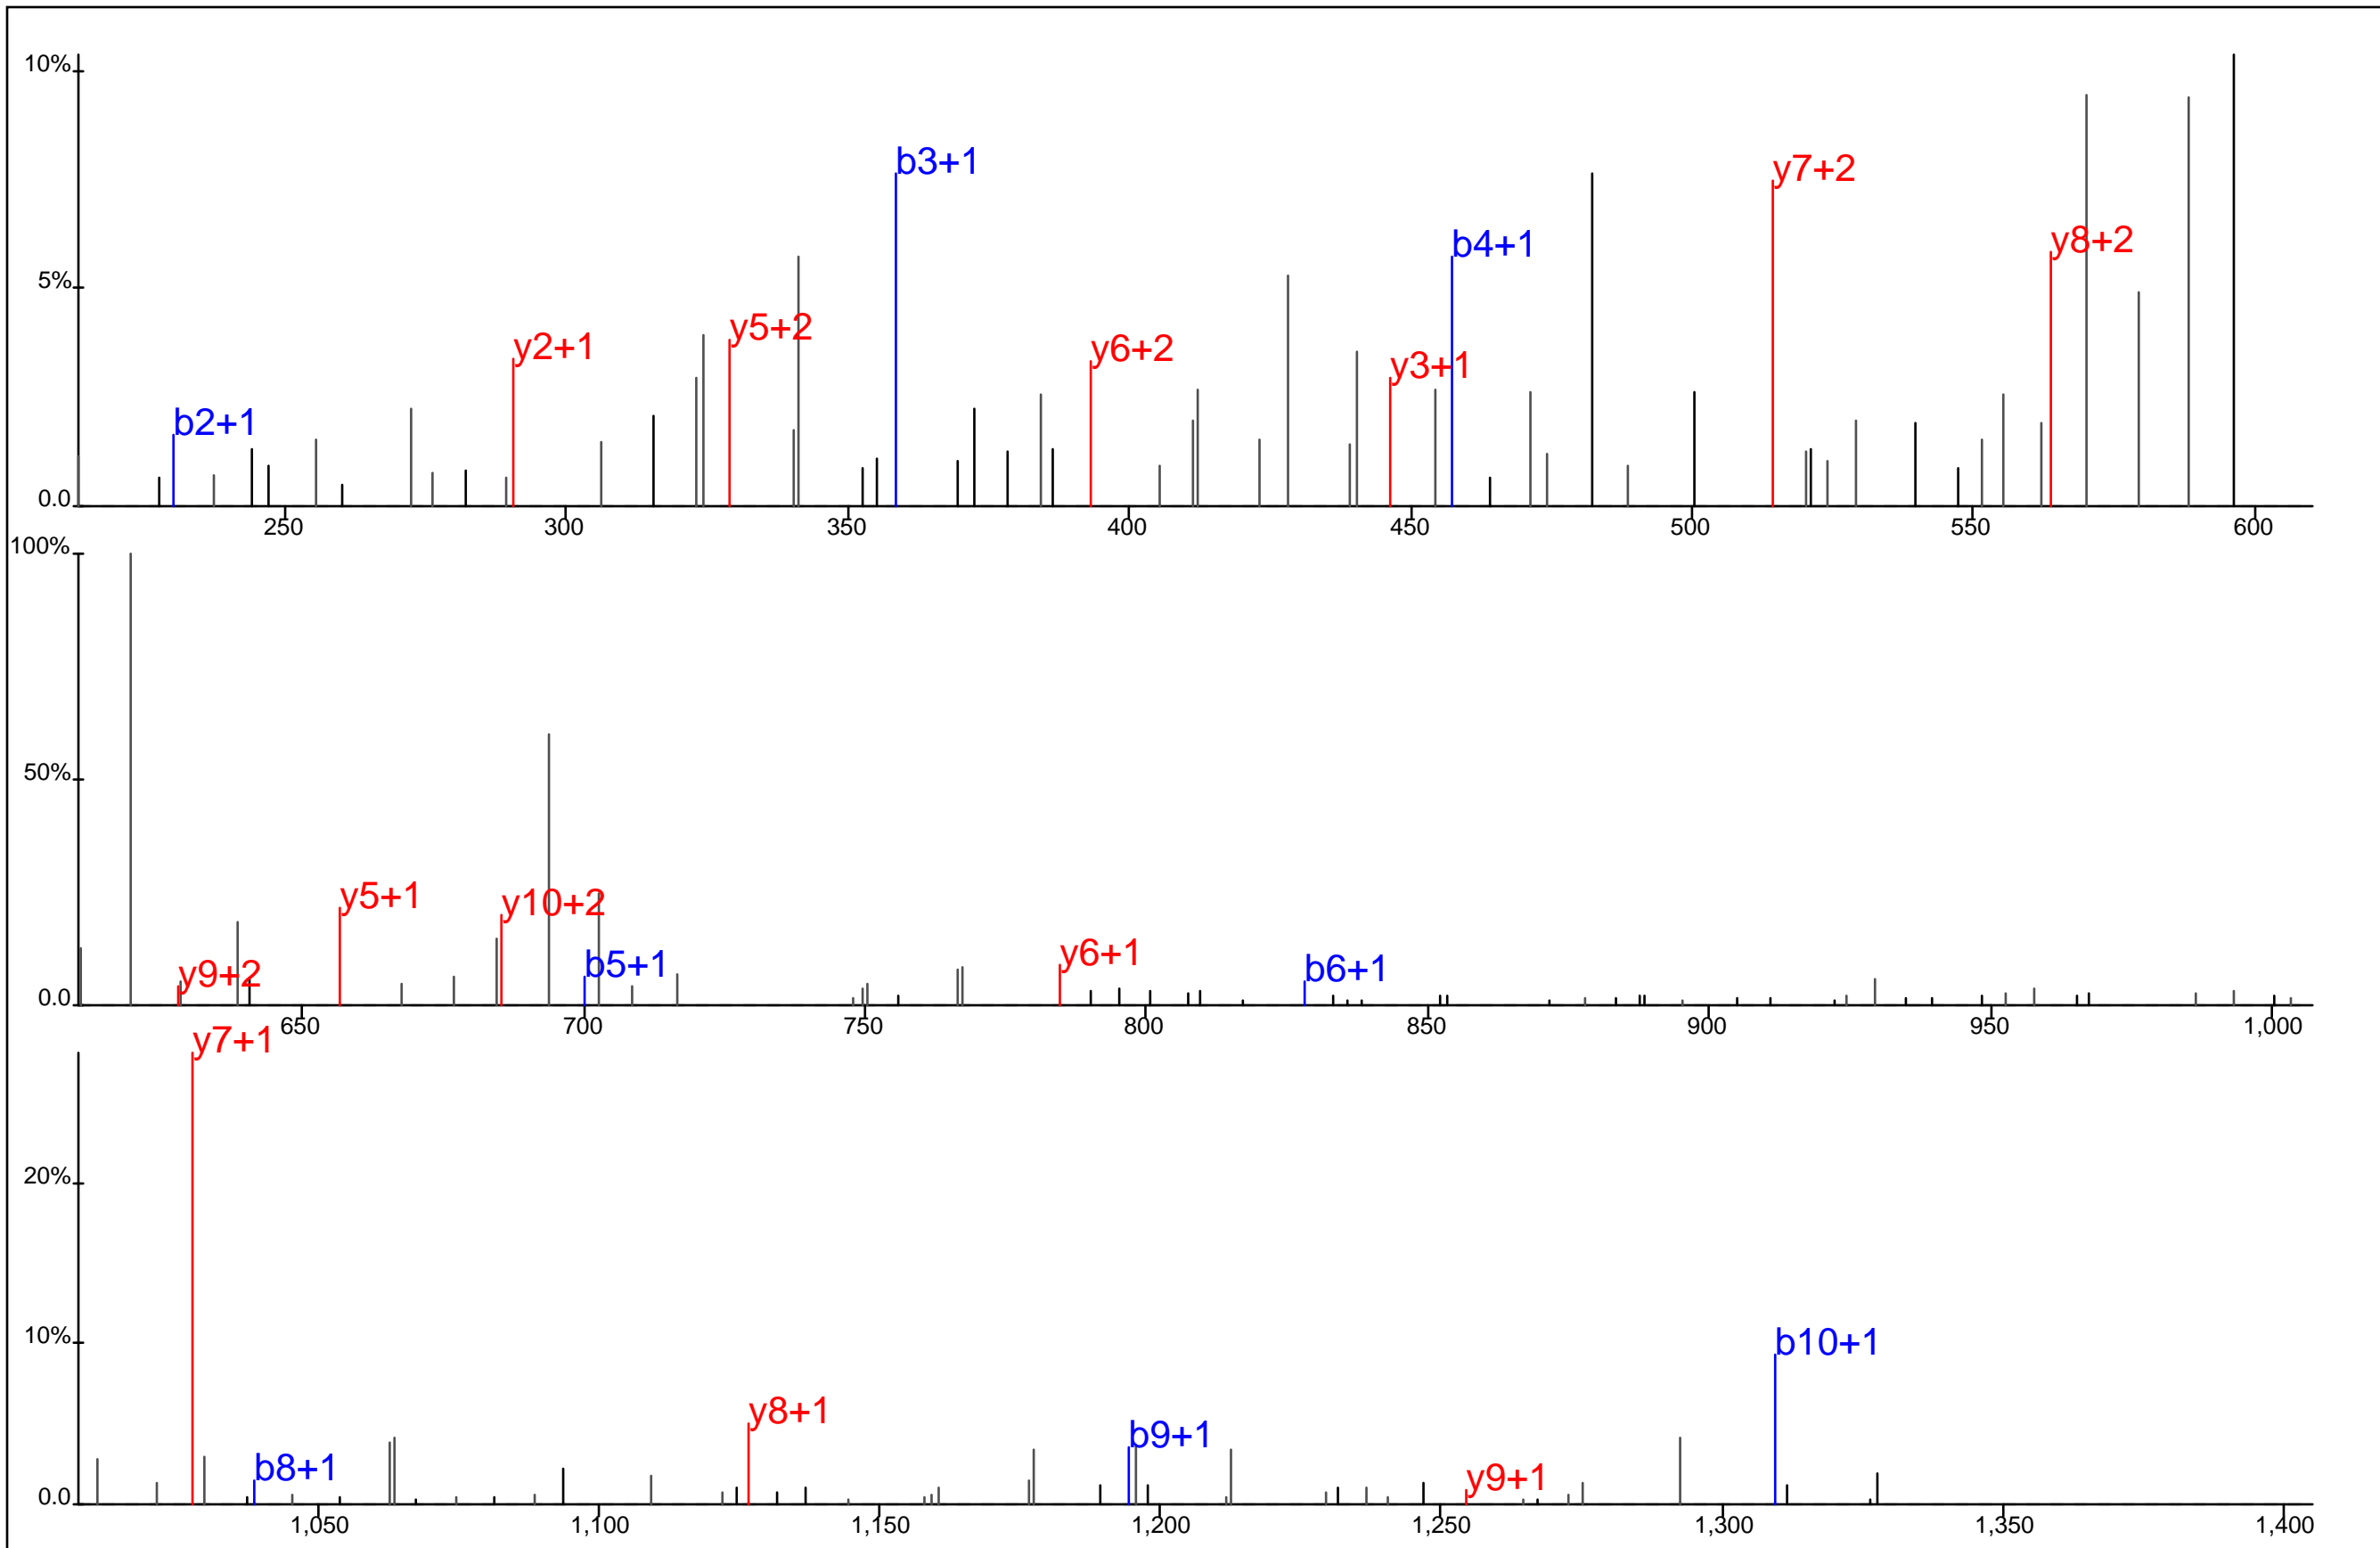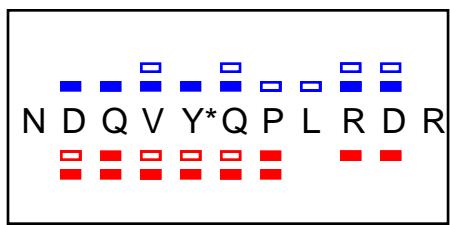

Protein Name: T cell receptor T3 delta chain  
 gi Accession: 0  
 Precursor Mass: 742.3397+2  
 Delta Mass: 2.195 ppm  
 XCorr: 26.76

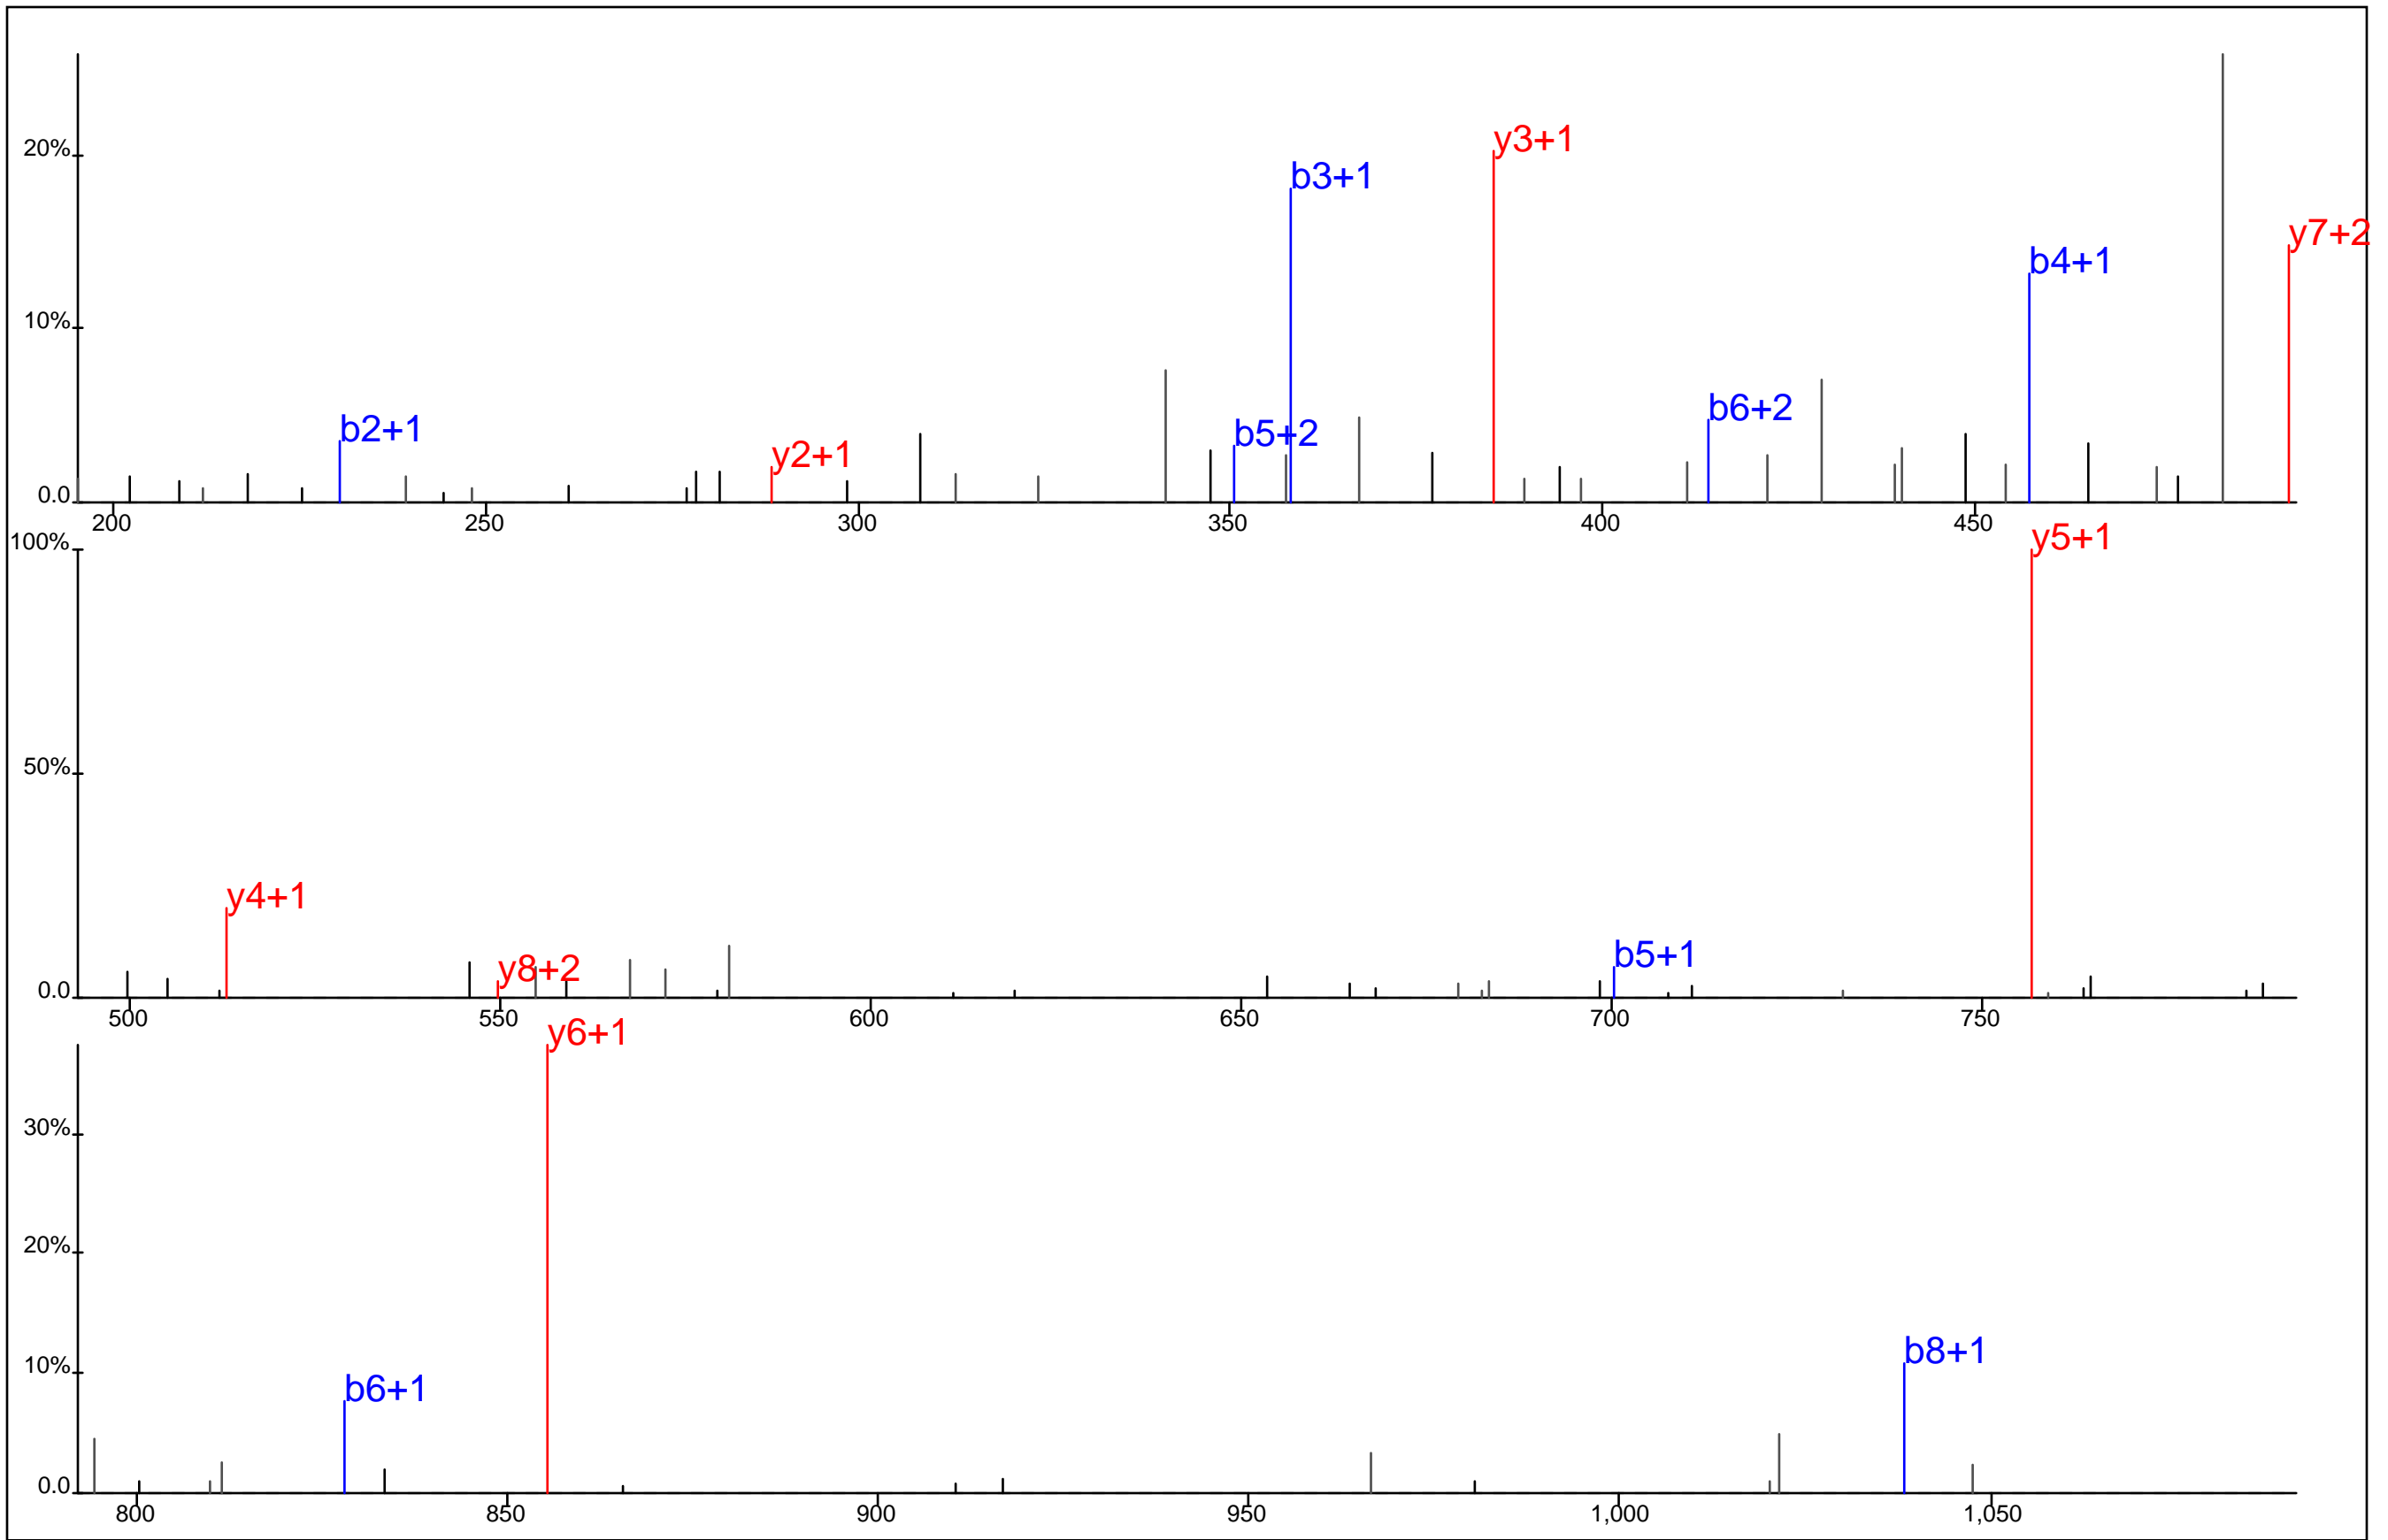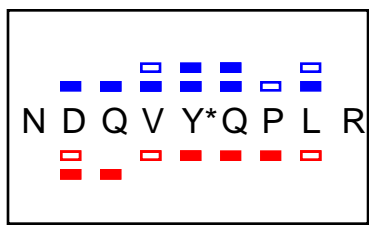

Protein Name: T cell receptor T3 delta chain  
 gi Accession: 0  
 Precursor Mass: 606.7755+2  
 Delta Mass: 2.382 ppm  
 XCorr: 47.13

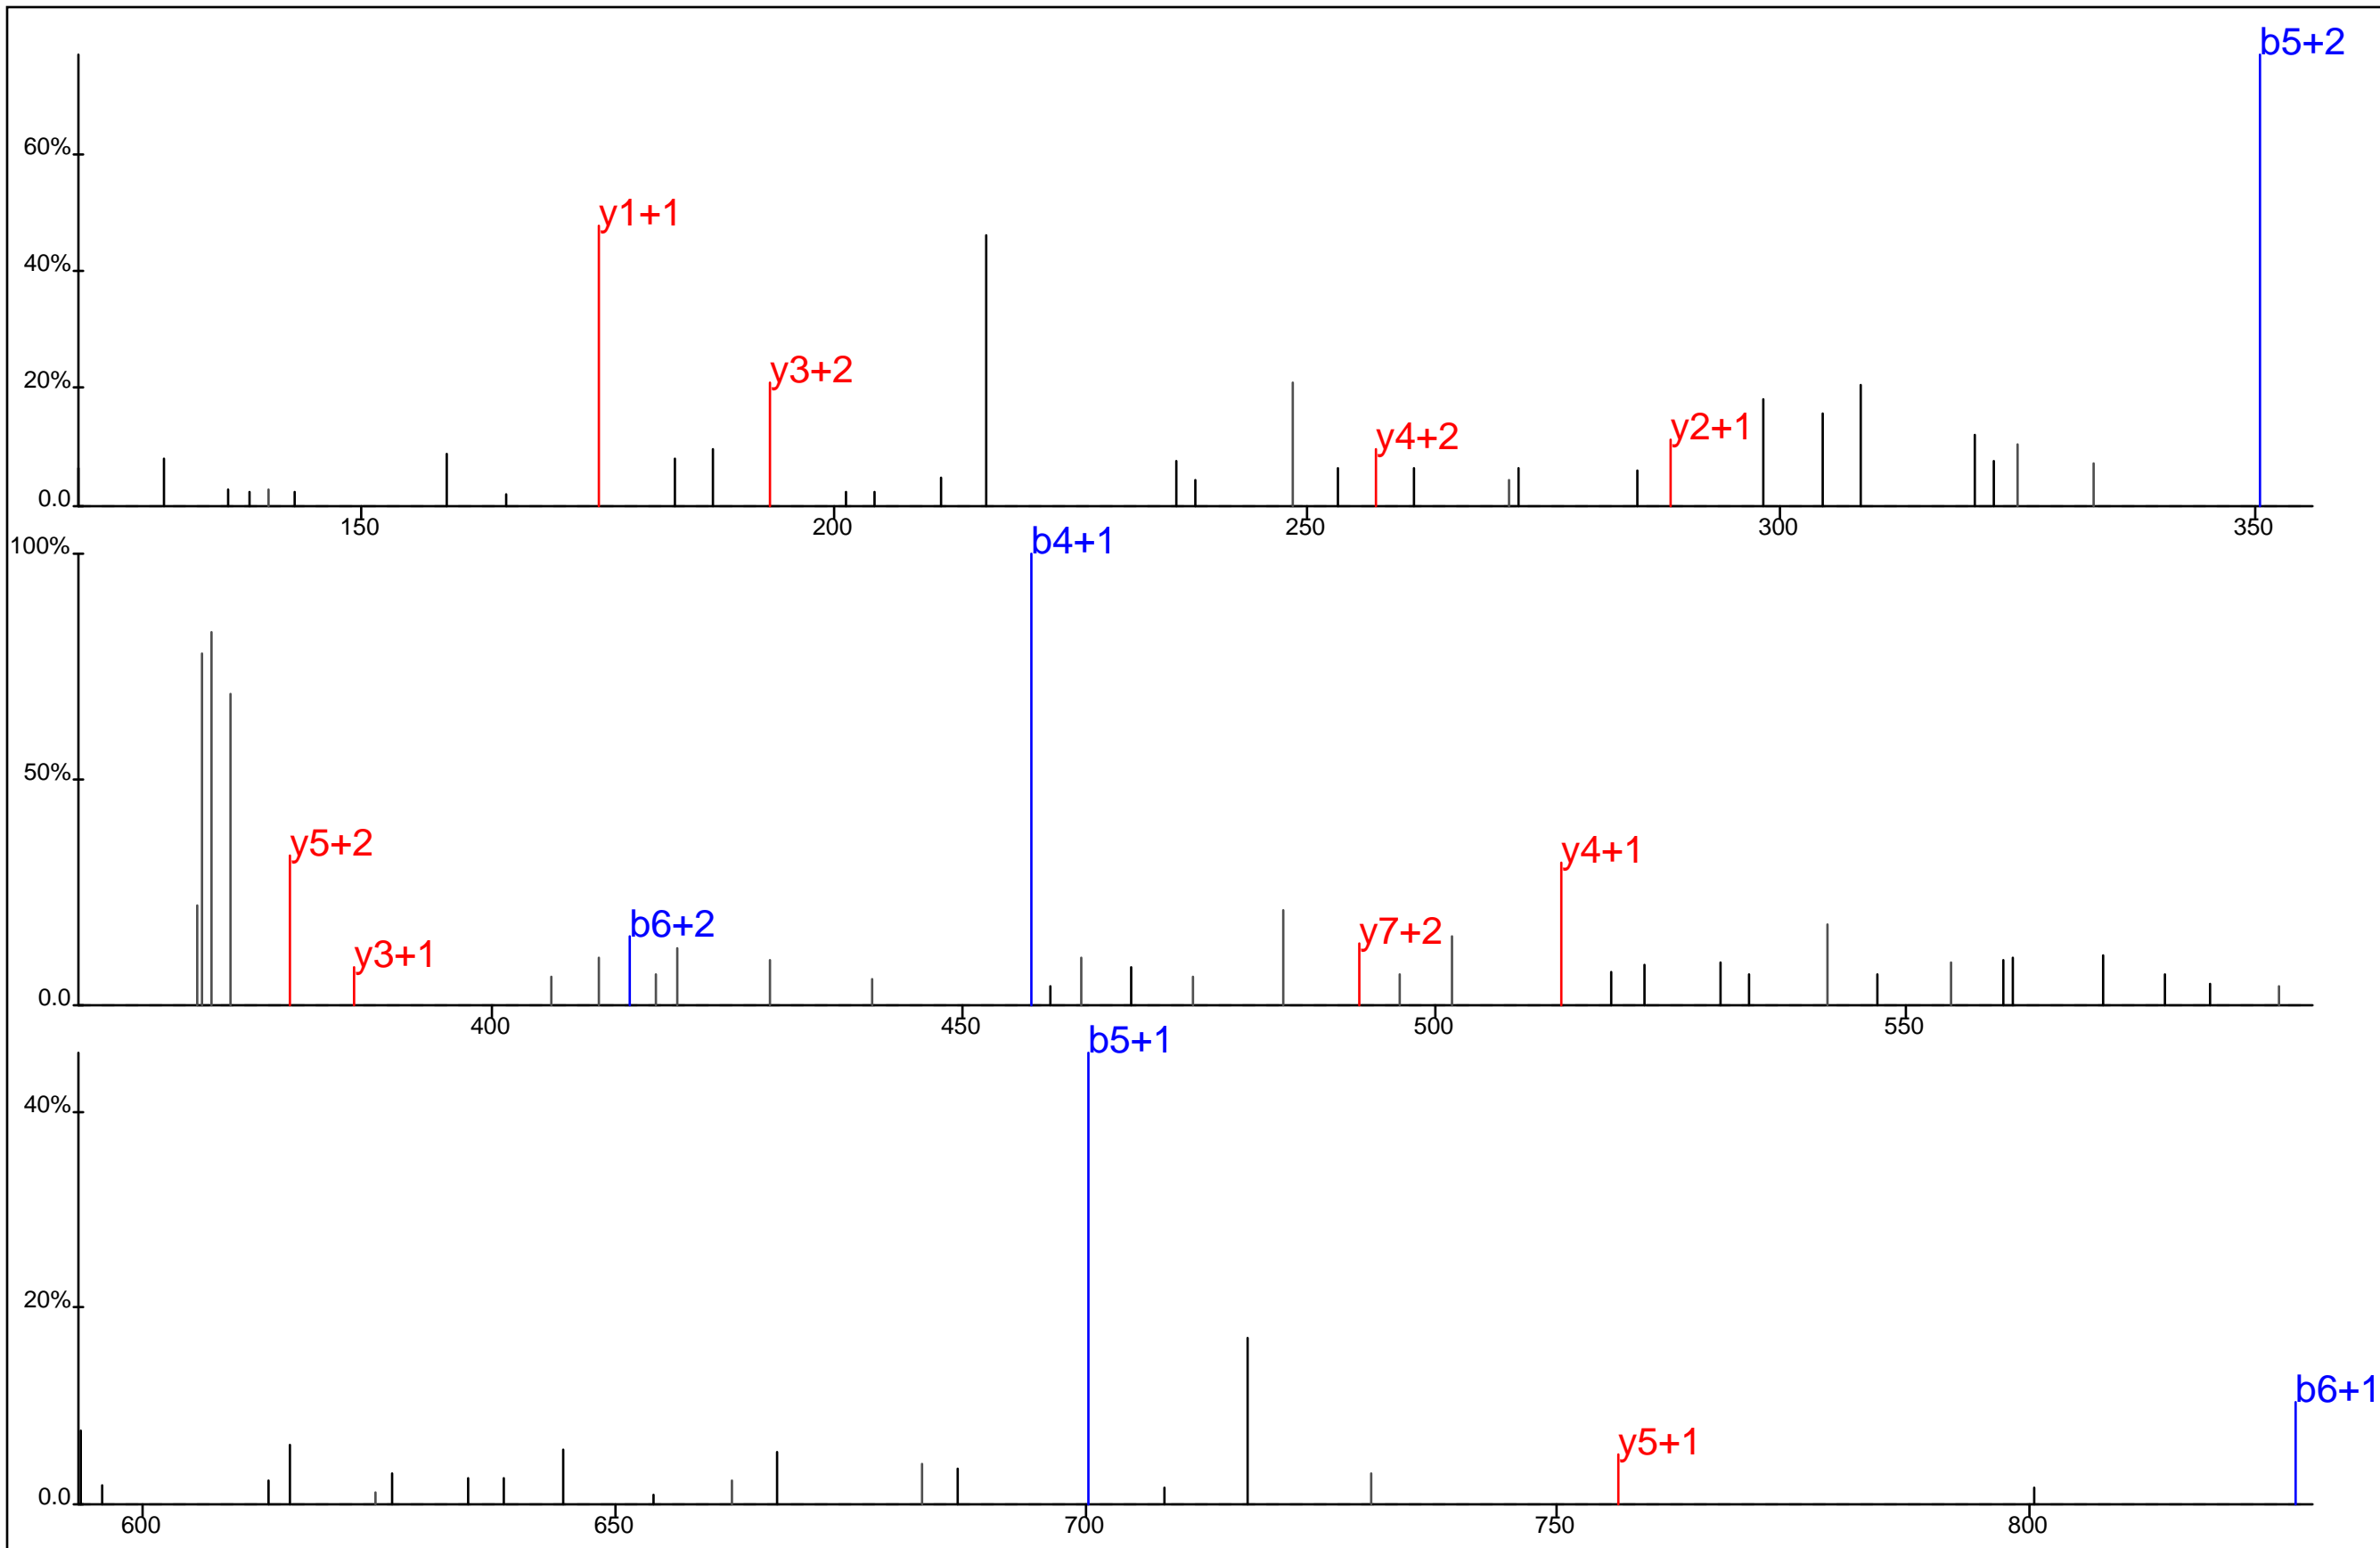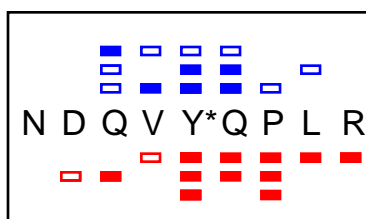

Protein Name: T cell receptor T3 delta chain  
 gi Accession: 0  
 Precursor Mass: 404.8525+3  
 Delta Mass: 1.817 ppm  
 XCorr: 25.62

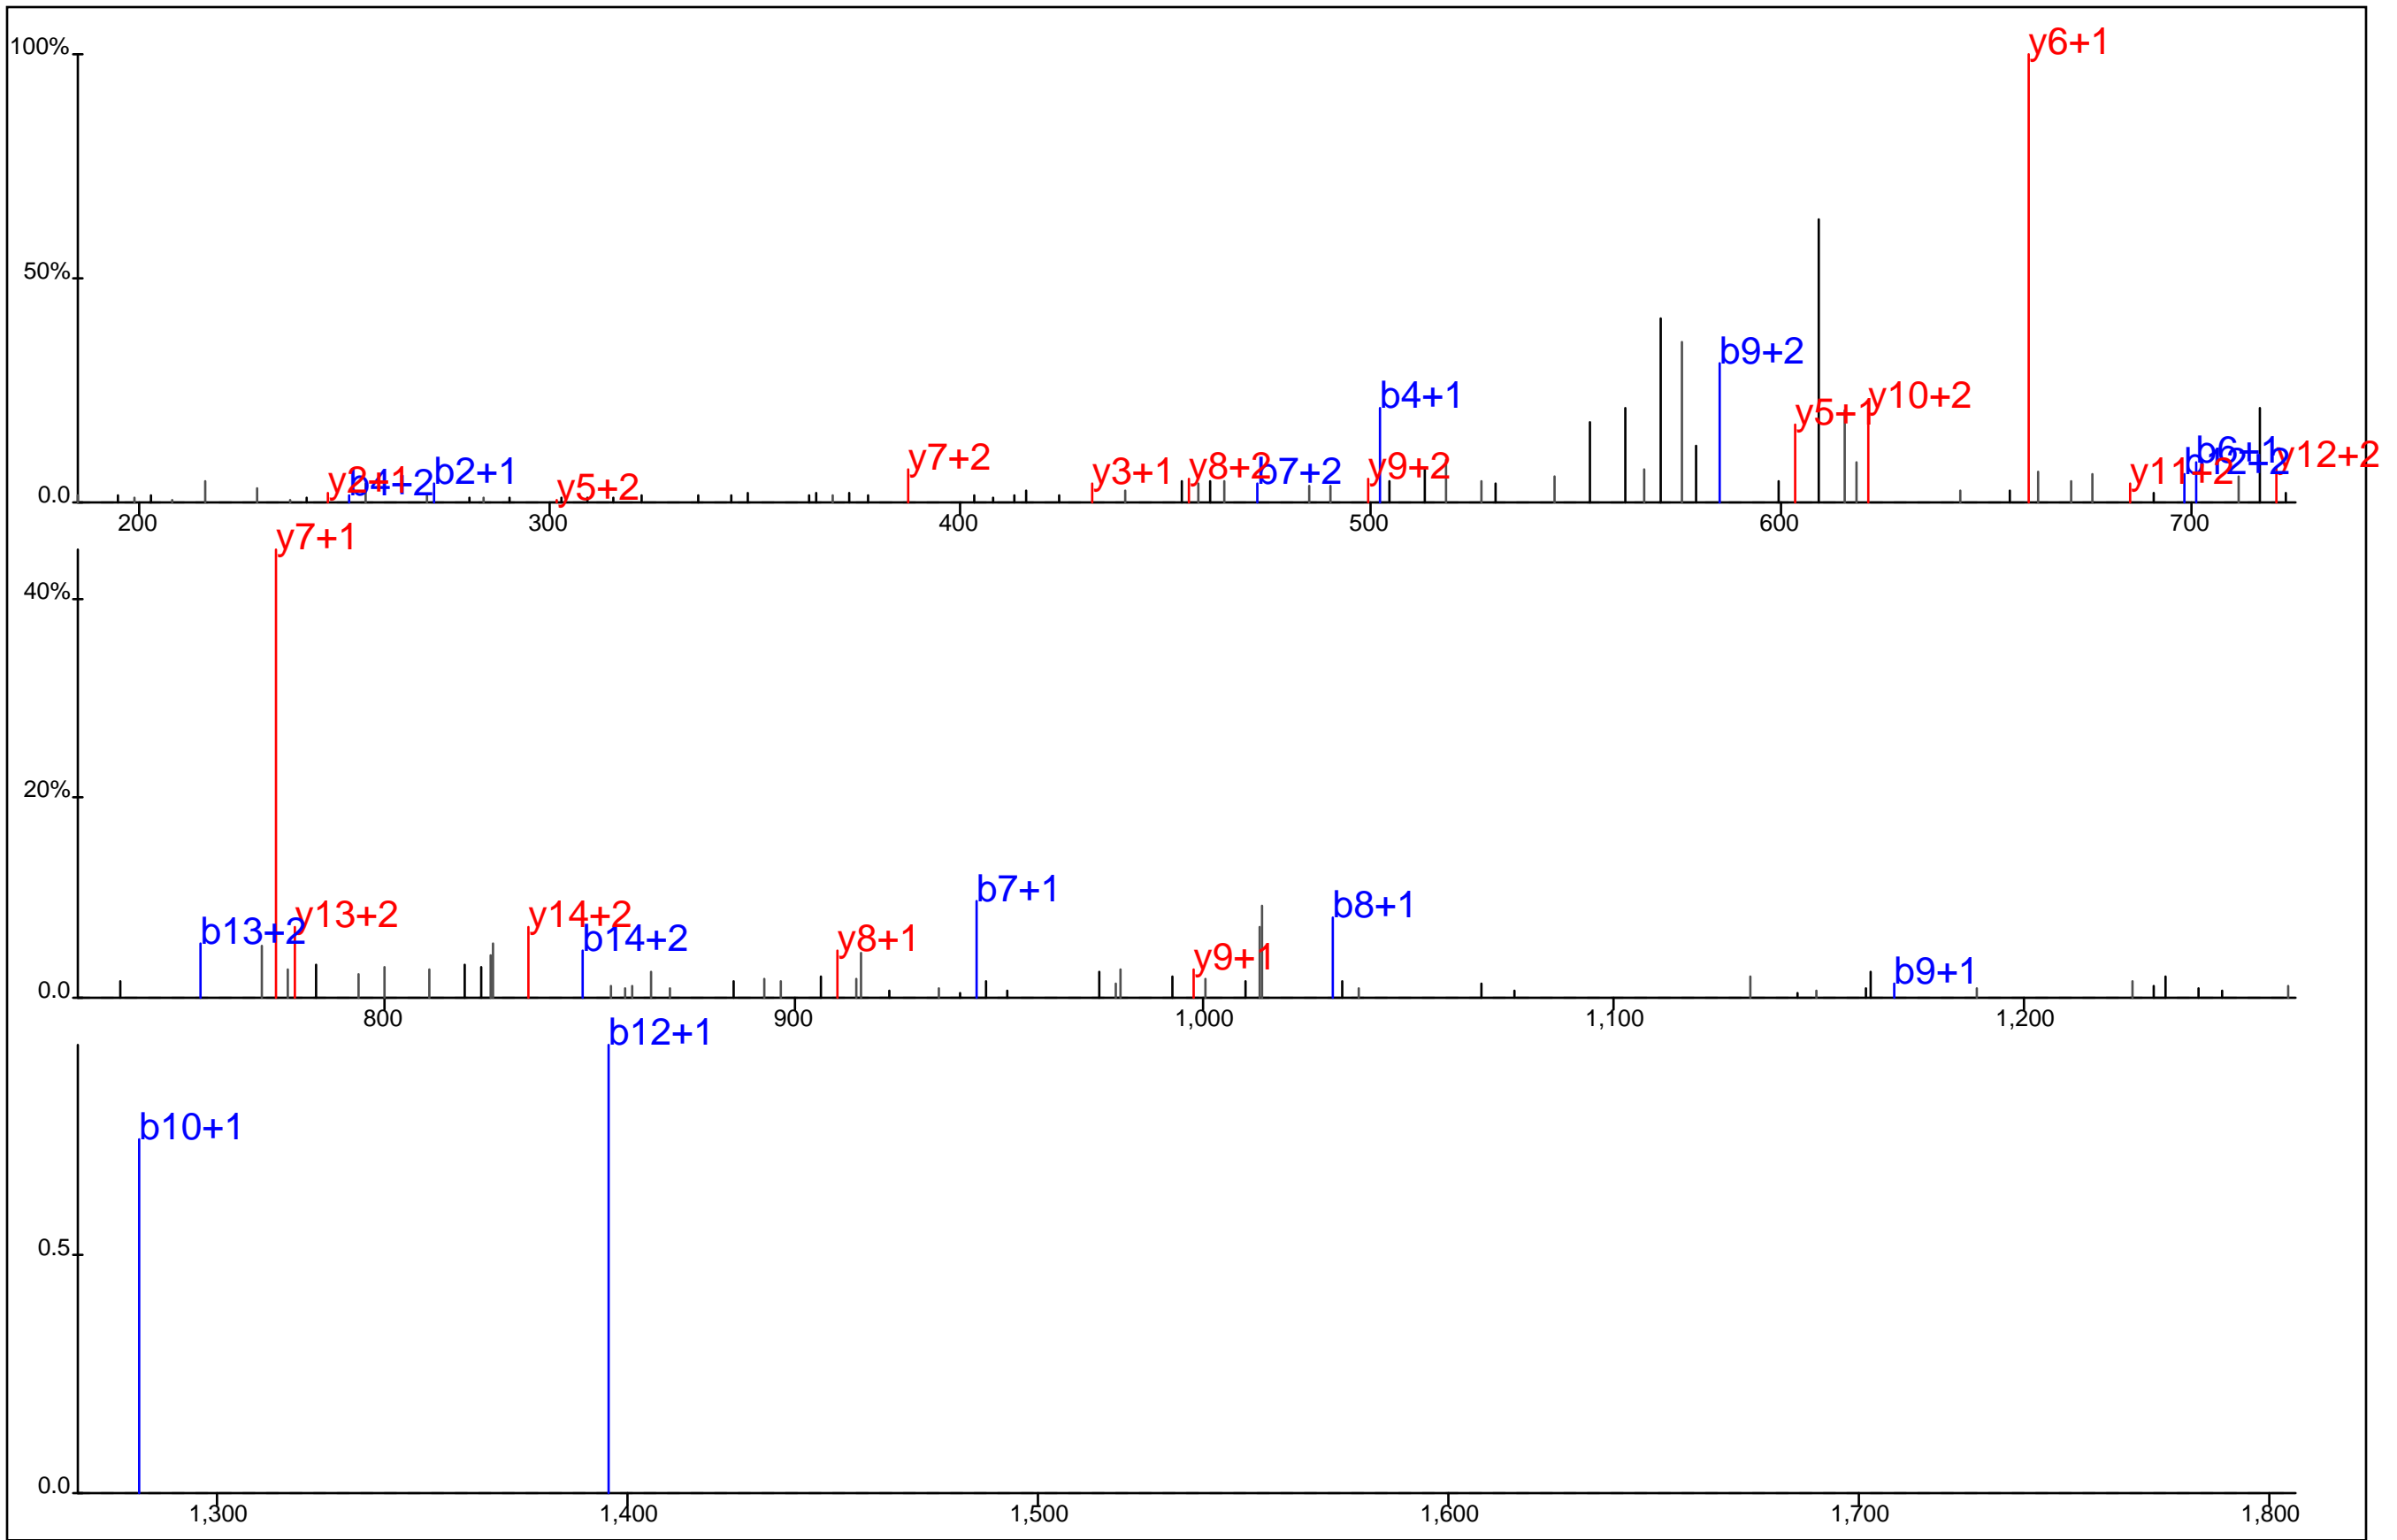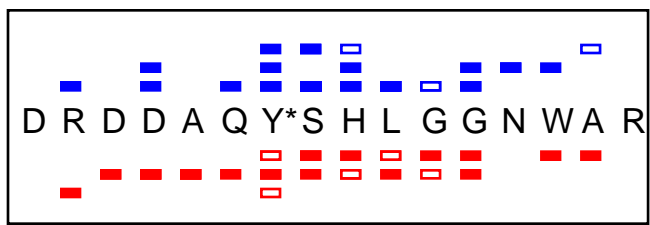

Protein Name: T cell receptor T3 delta chain  
 gi Accession: 0  
 Precursor Mass: 647.6068+3  
 Delta Mass: 1.126 ppm  
 XCorr: 41.11

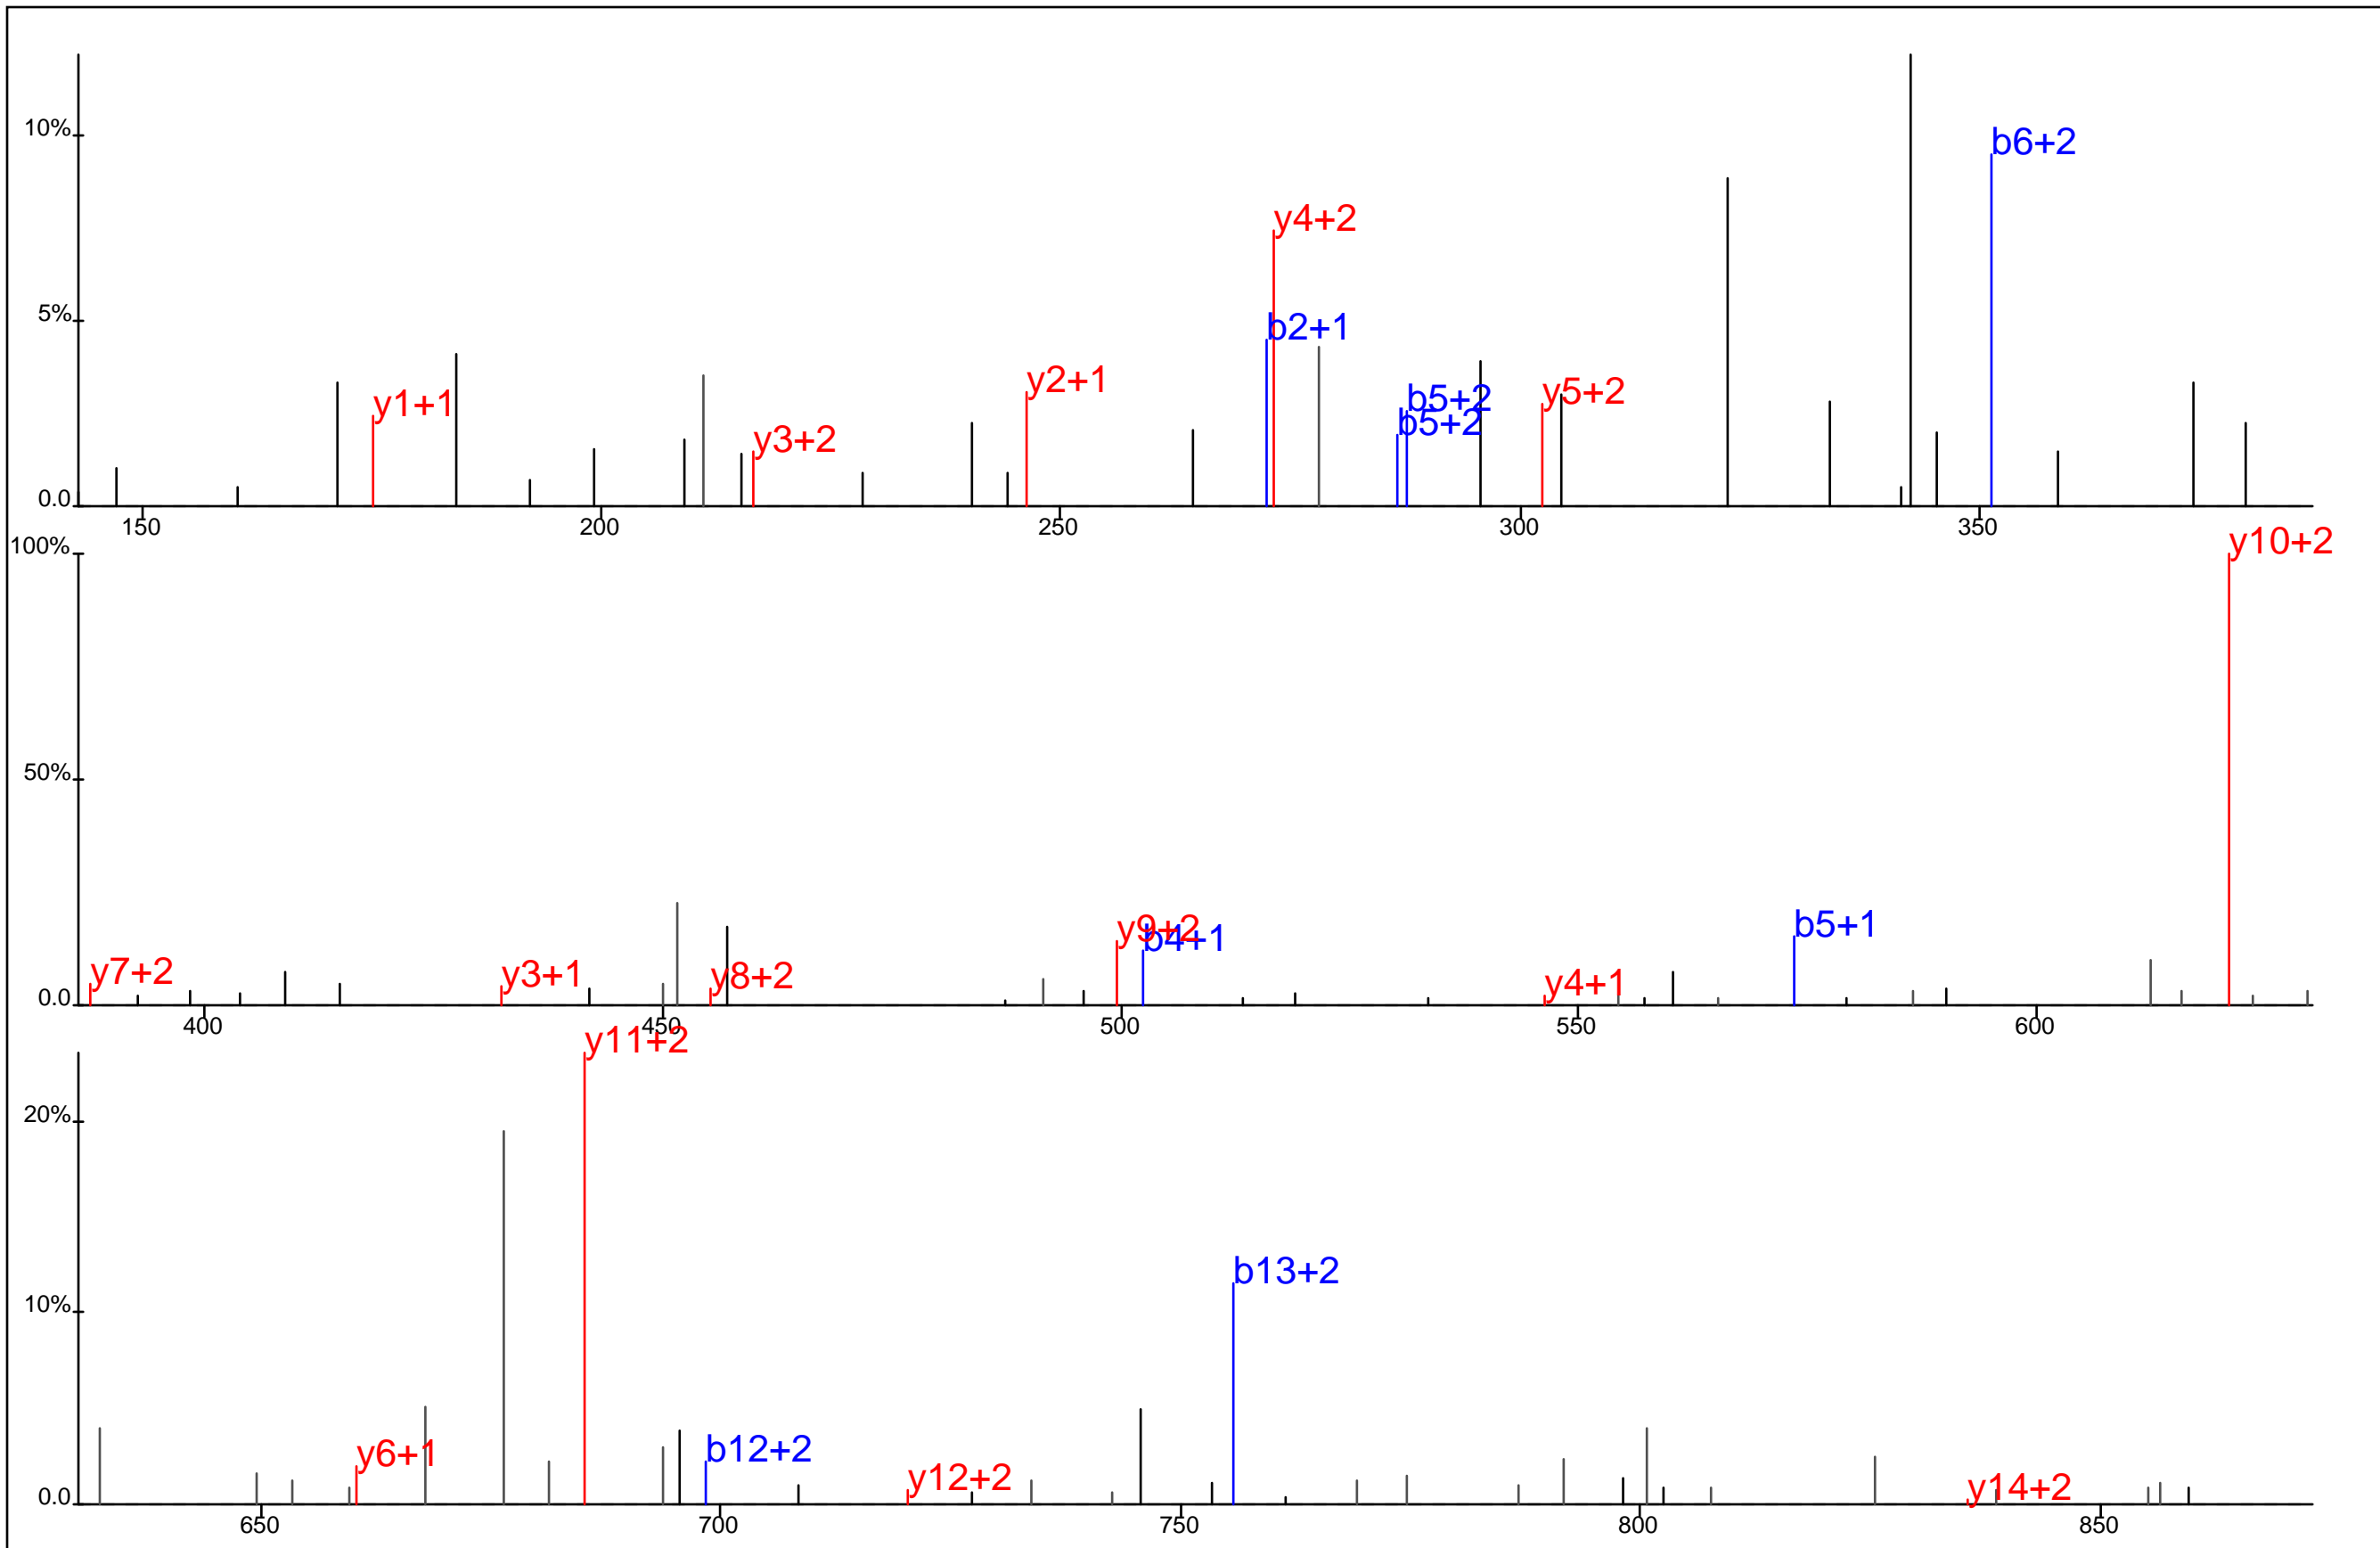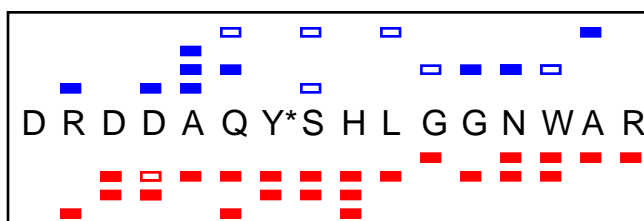

Protein Name: T cell receptor T3 delta chain  
 gi Accession: 0  
 Precursor Mass: 485.9564+4  
 Delta Mass: 0.177 ppm  
 XCorr: 26.88



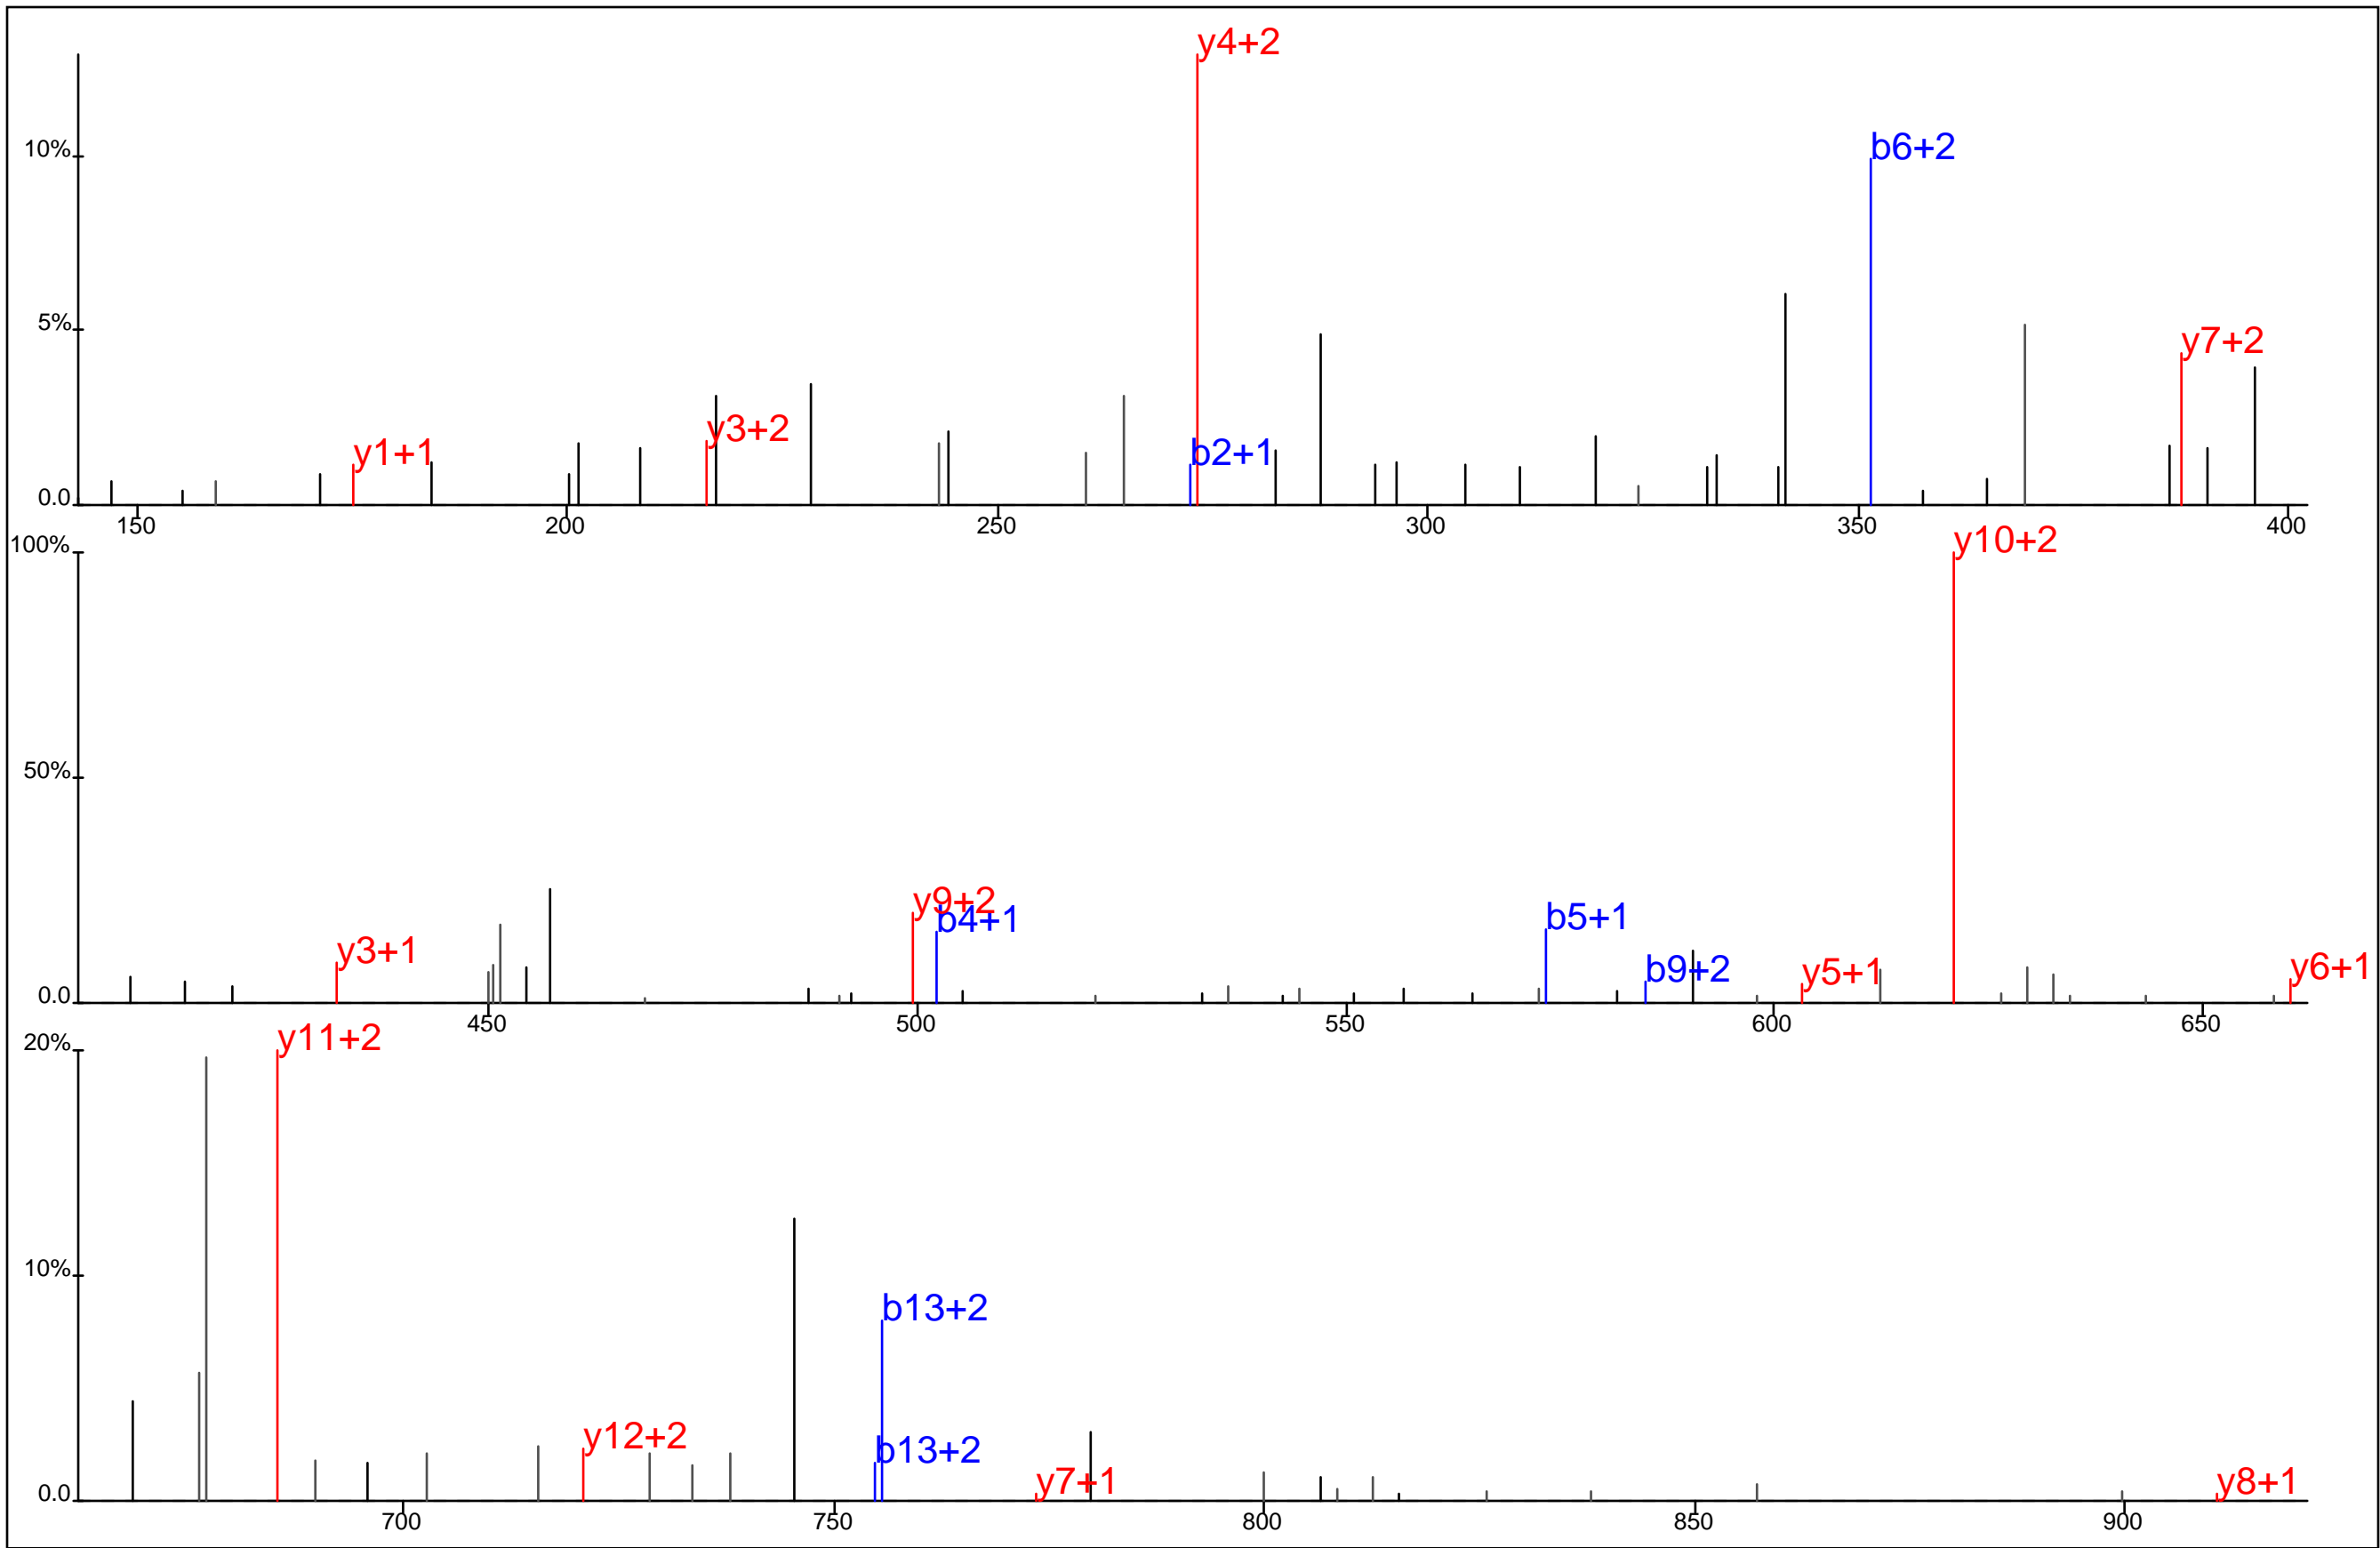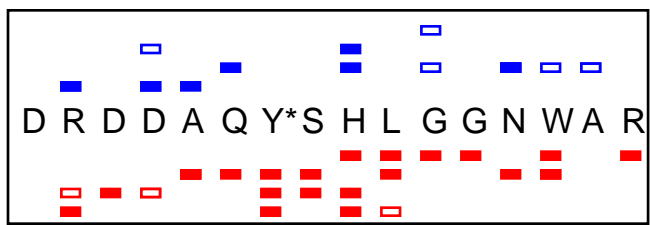

Protein Name: T cell receptor T3 delta chain  
 gi Accession: 0  
 Precursor Mass: 485.9561+4  
 Delta Mass: 0.390 ppm  
 XCorr: 26.92

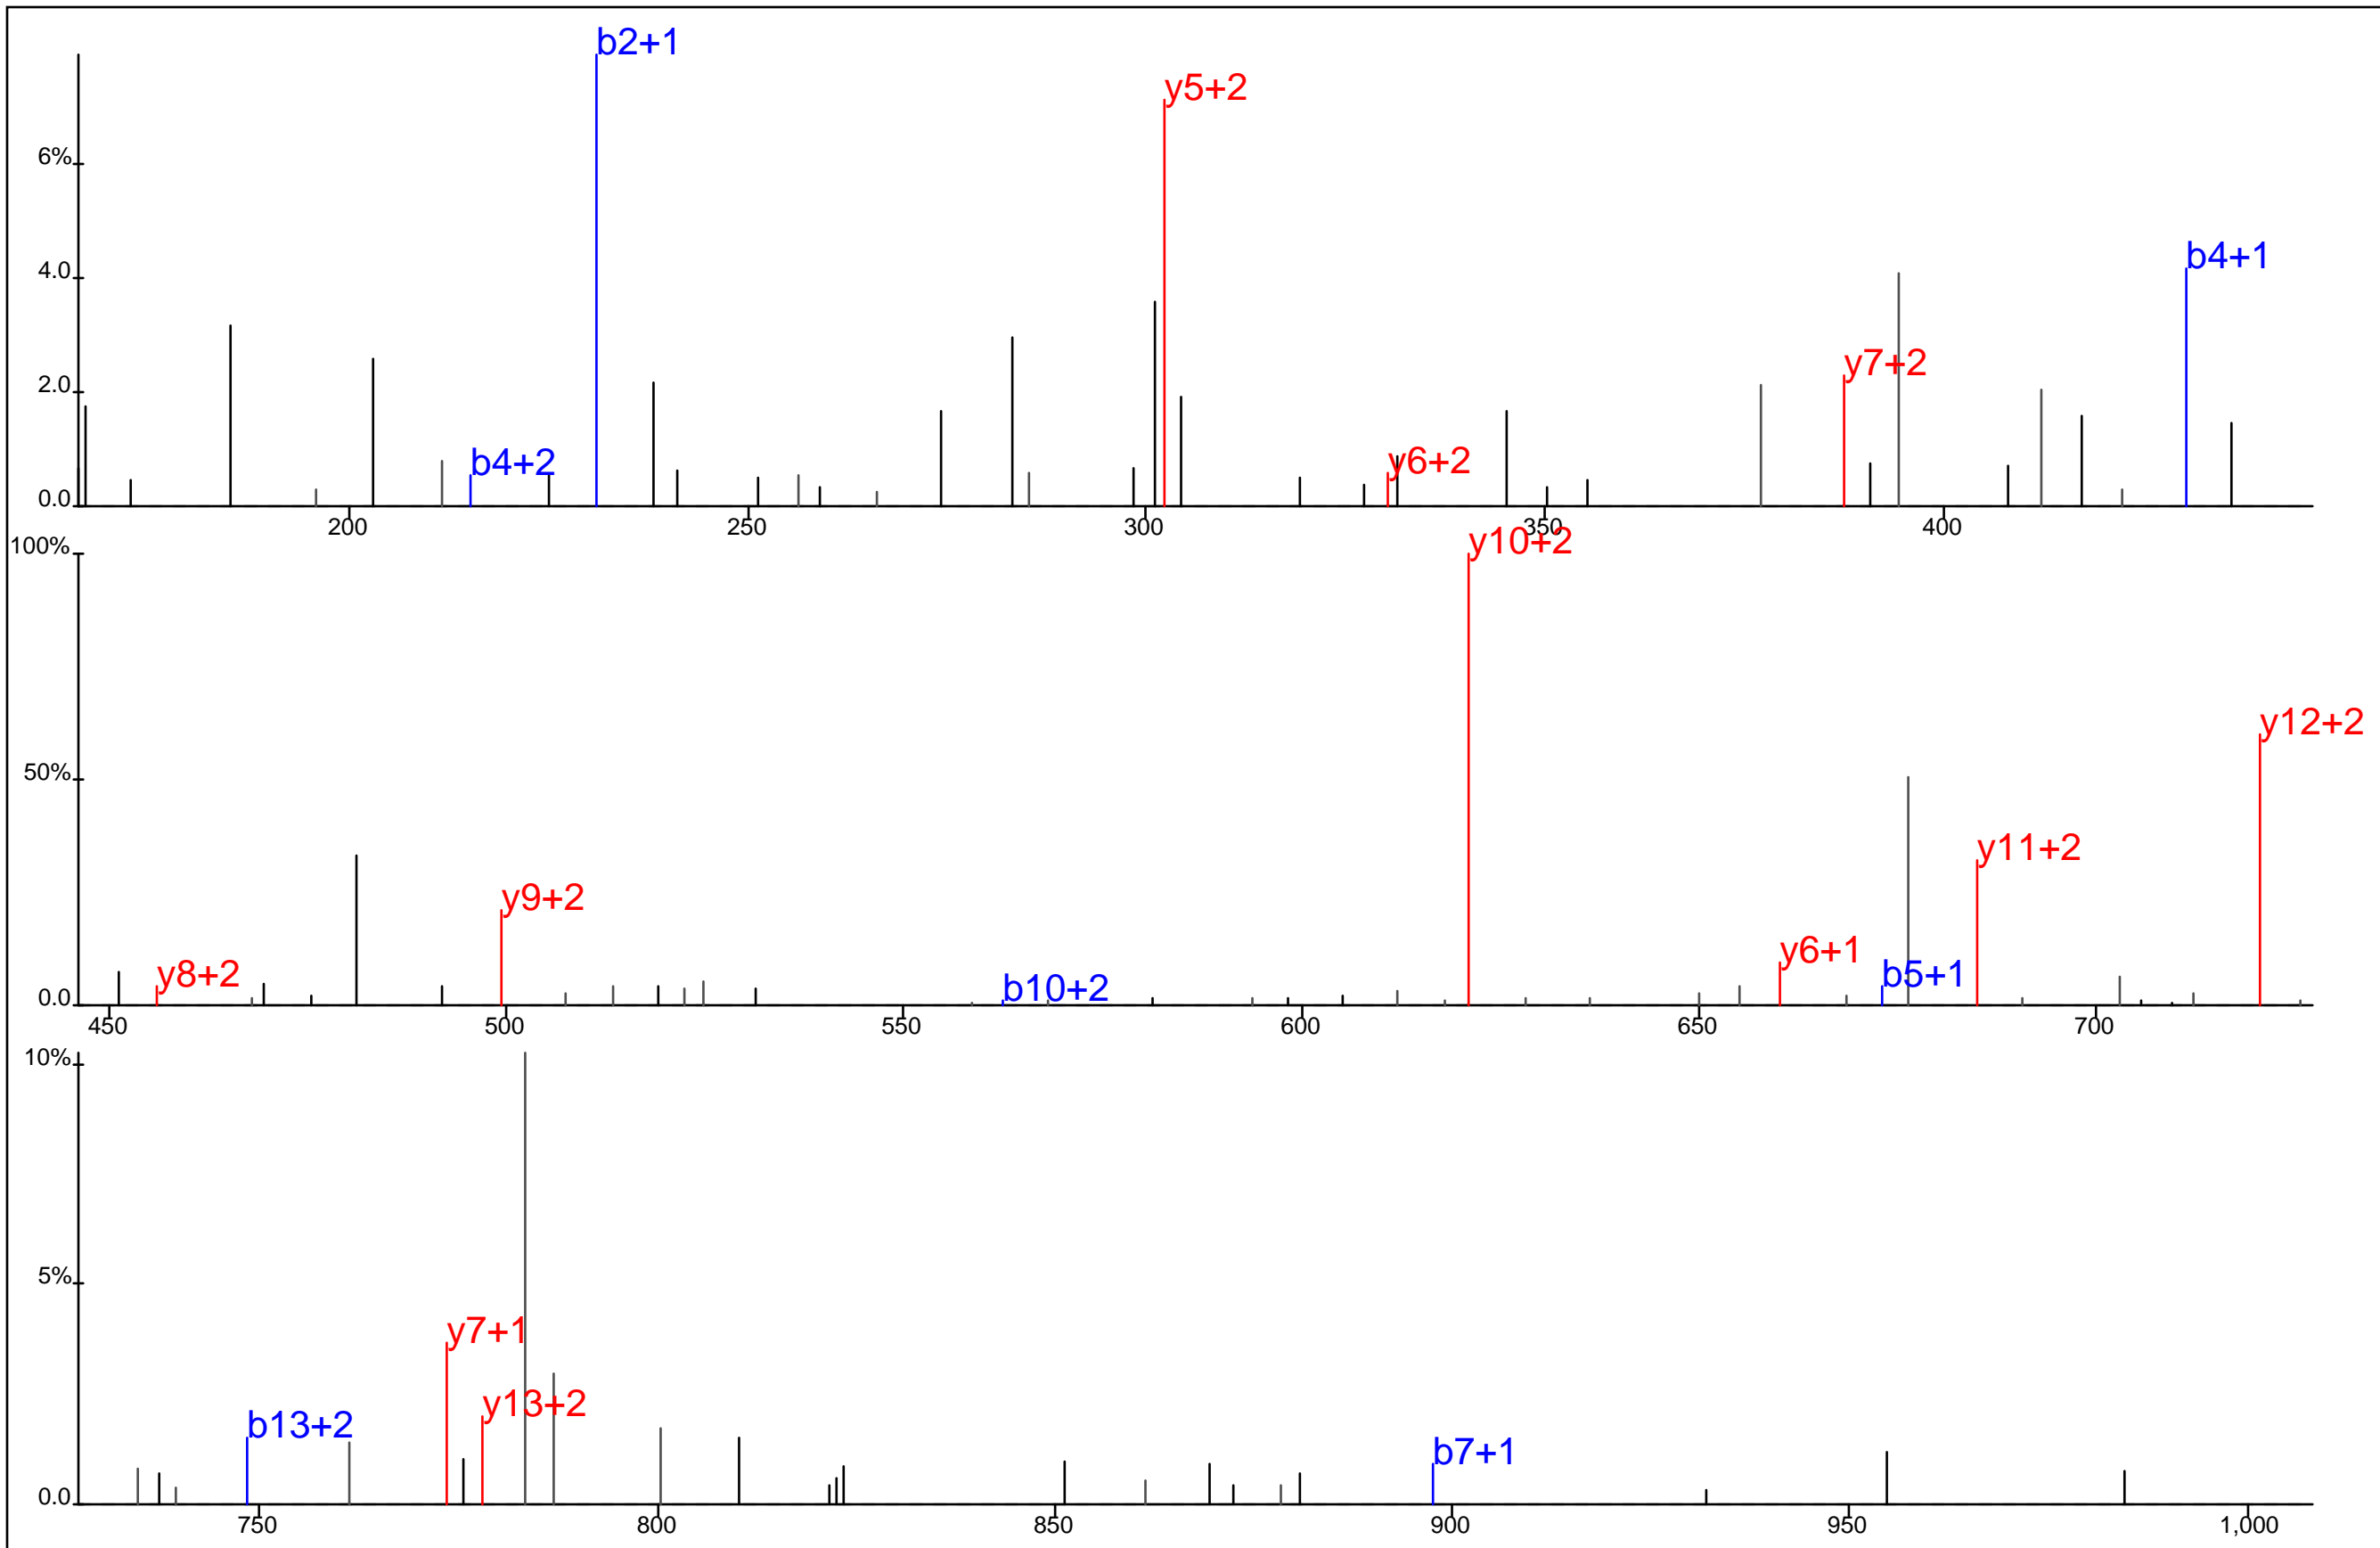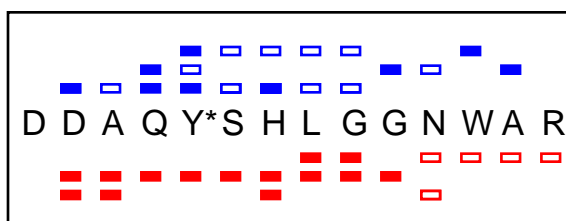

Protein Name: T cell receptor T3 delta chain  
 gi Accession: 0  
 Precursor Mass: 557.2302+3  
 Delta Mass: 0.396 ppm  
 XCorr: 36.35

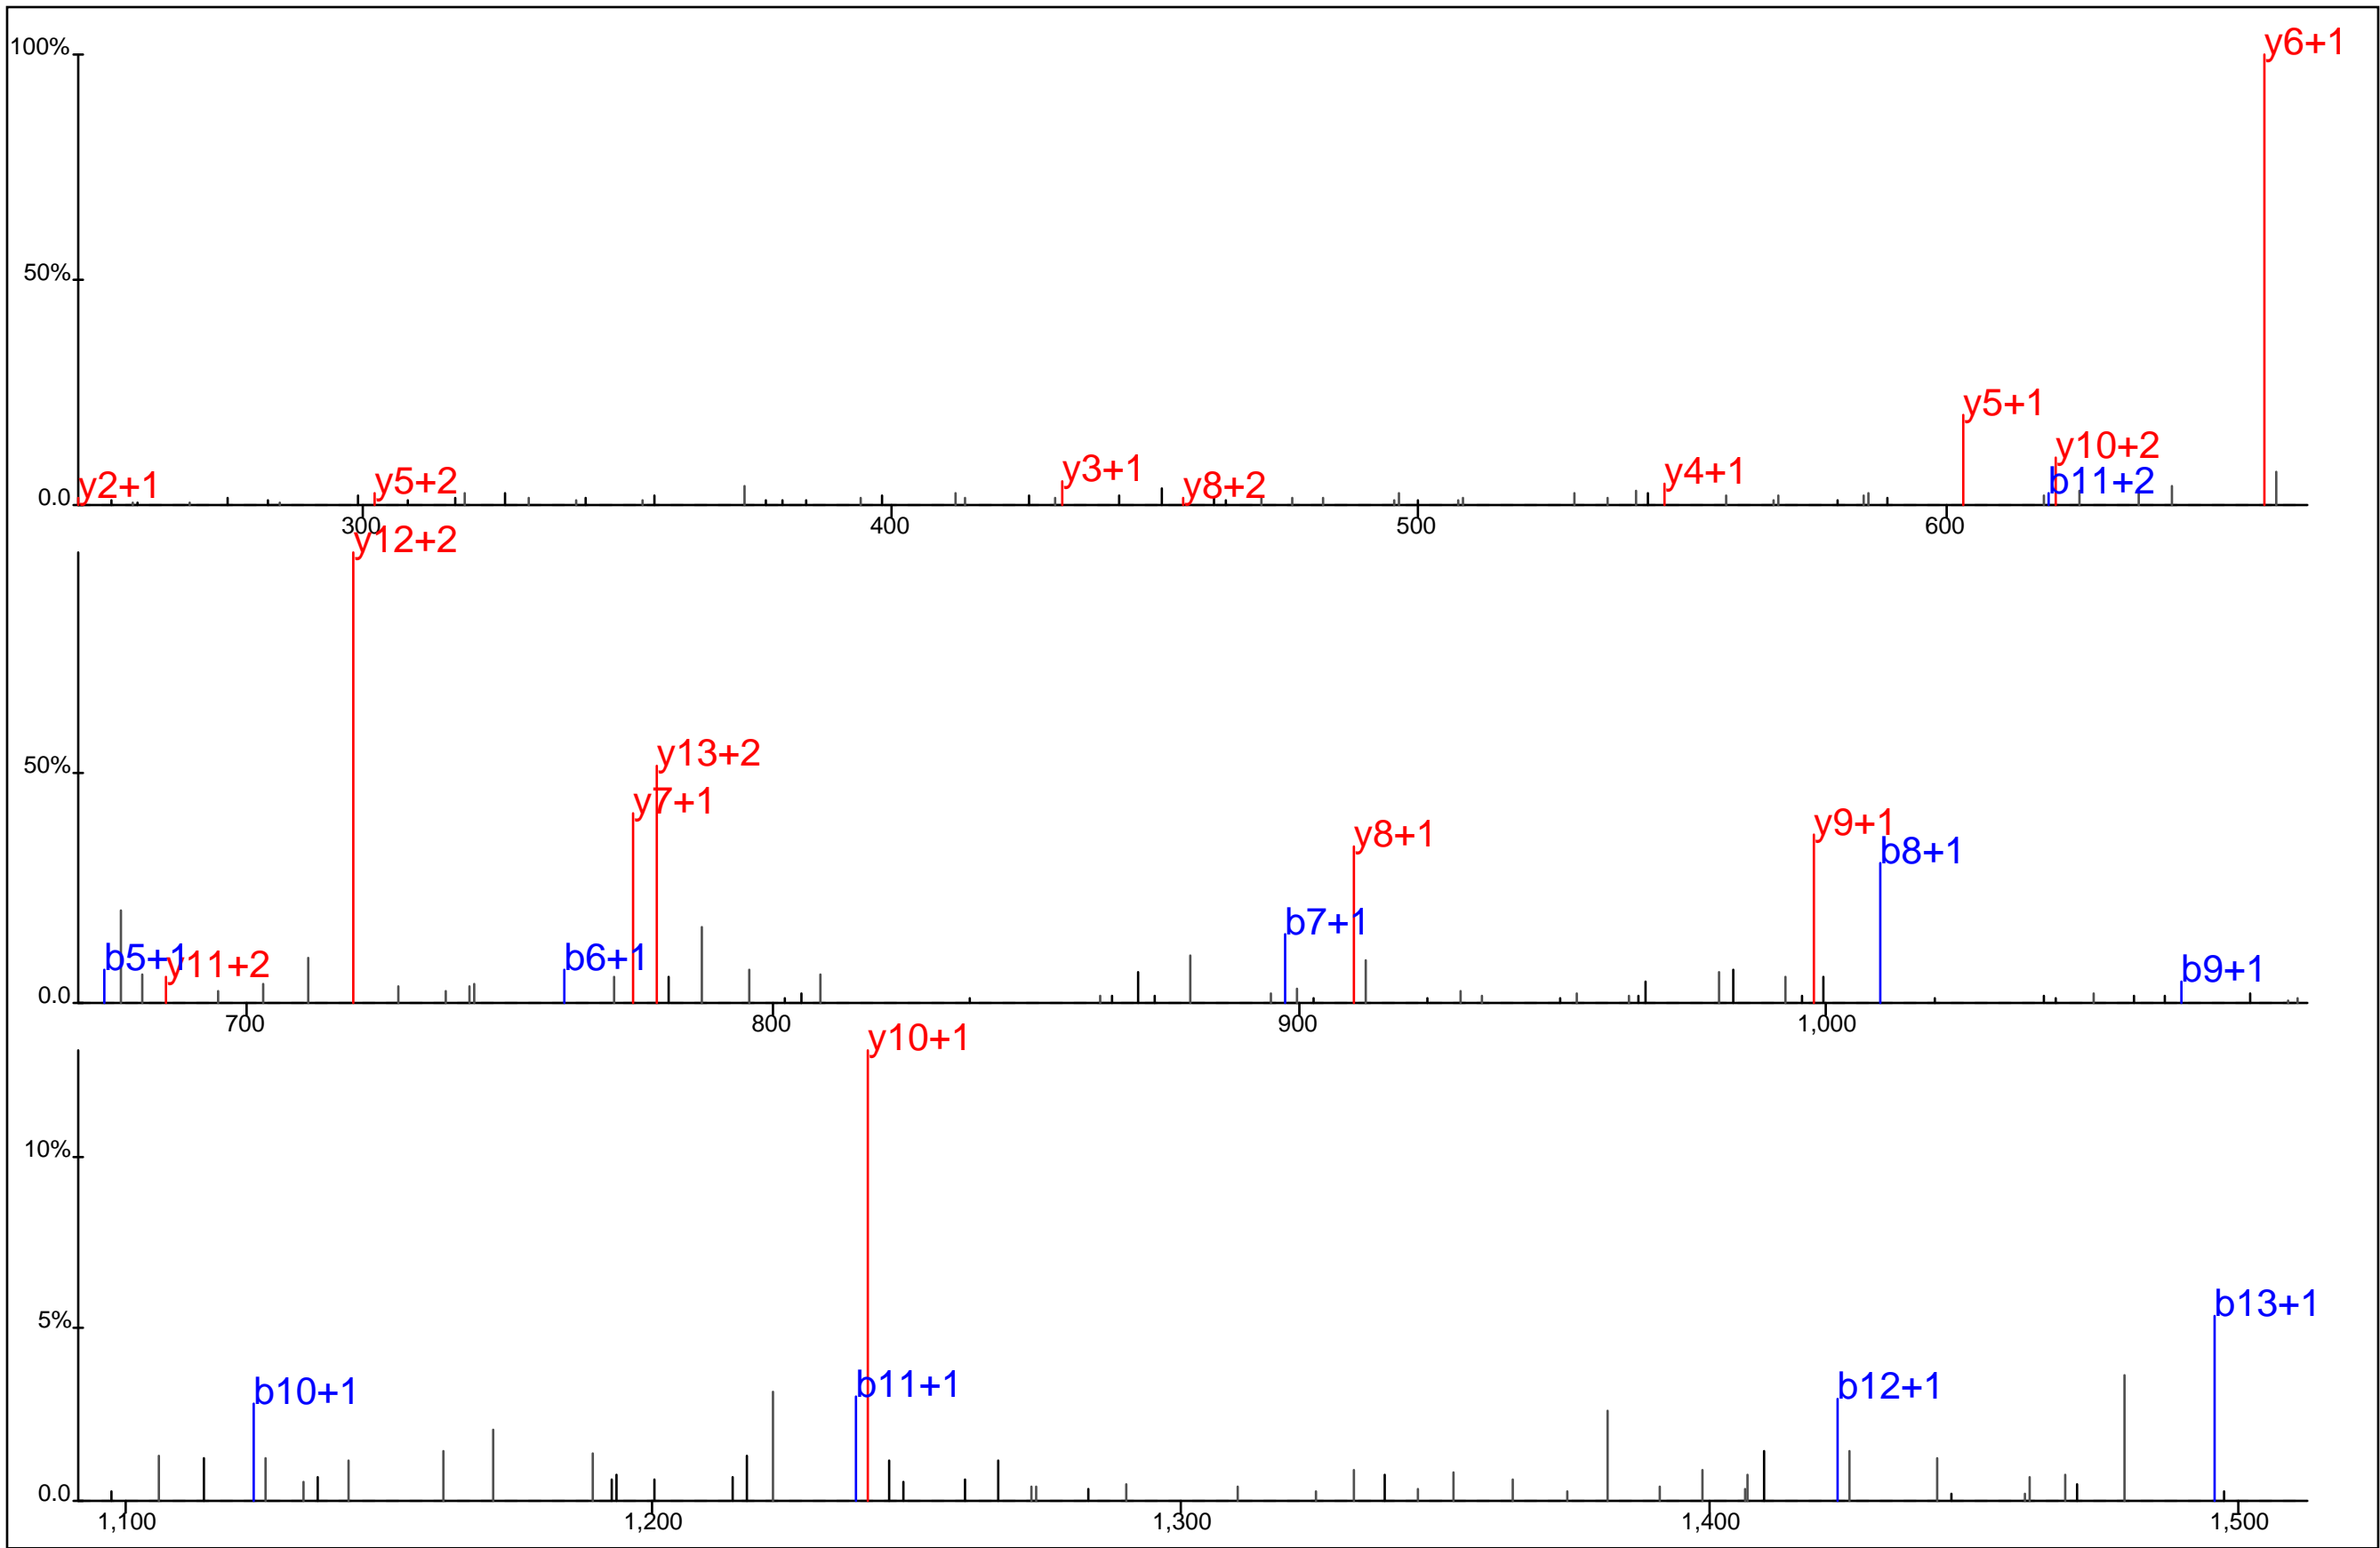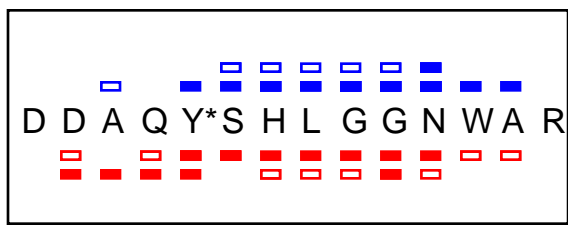

Protein Name: T cell receptor T3 delta chain  
 gi Accession: 0  
 Precursor Mass: 835.3440+2  
 Delta Mass: 3.144 ppm  
 XCorr: 69.32

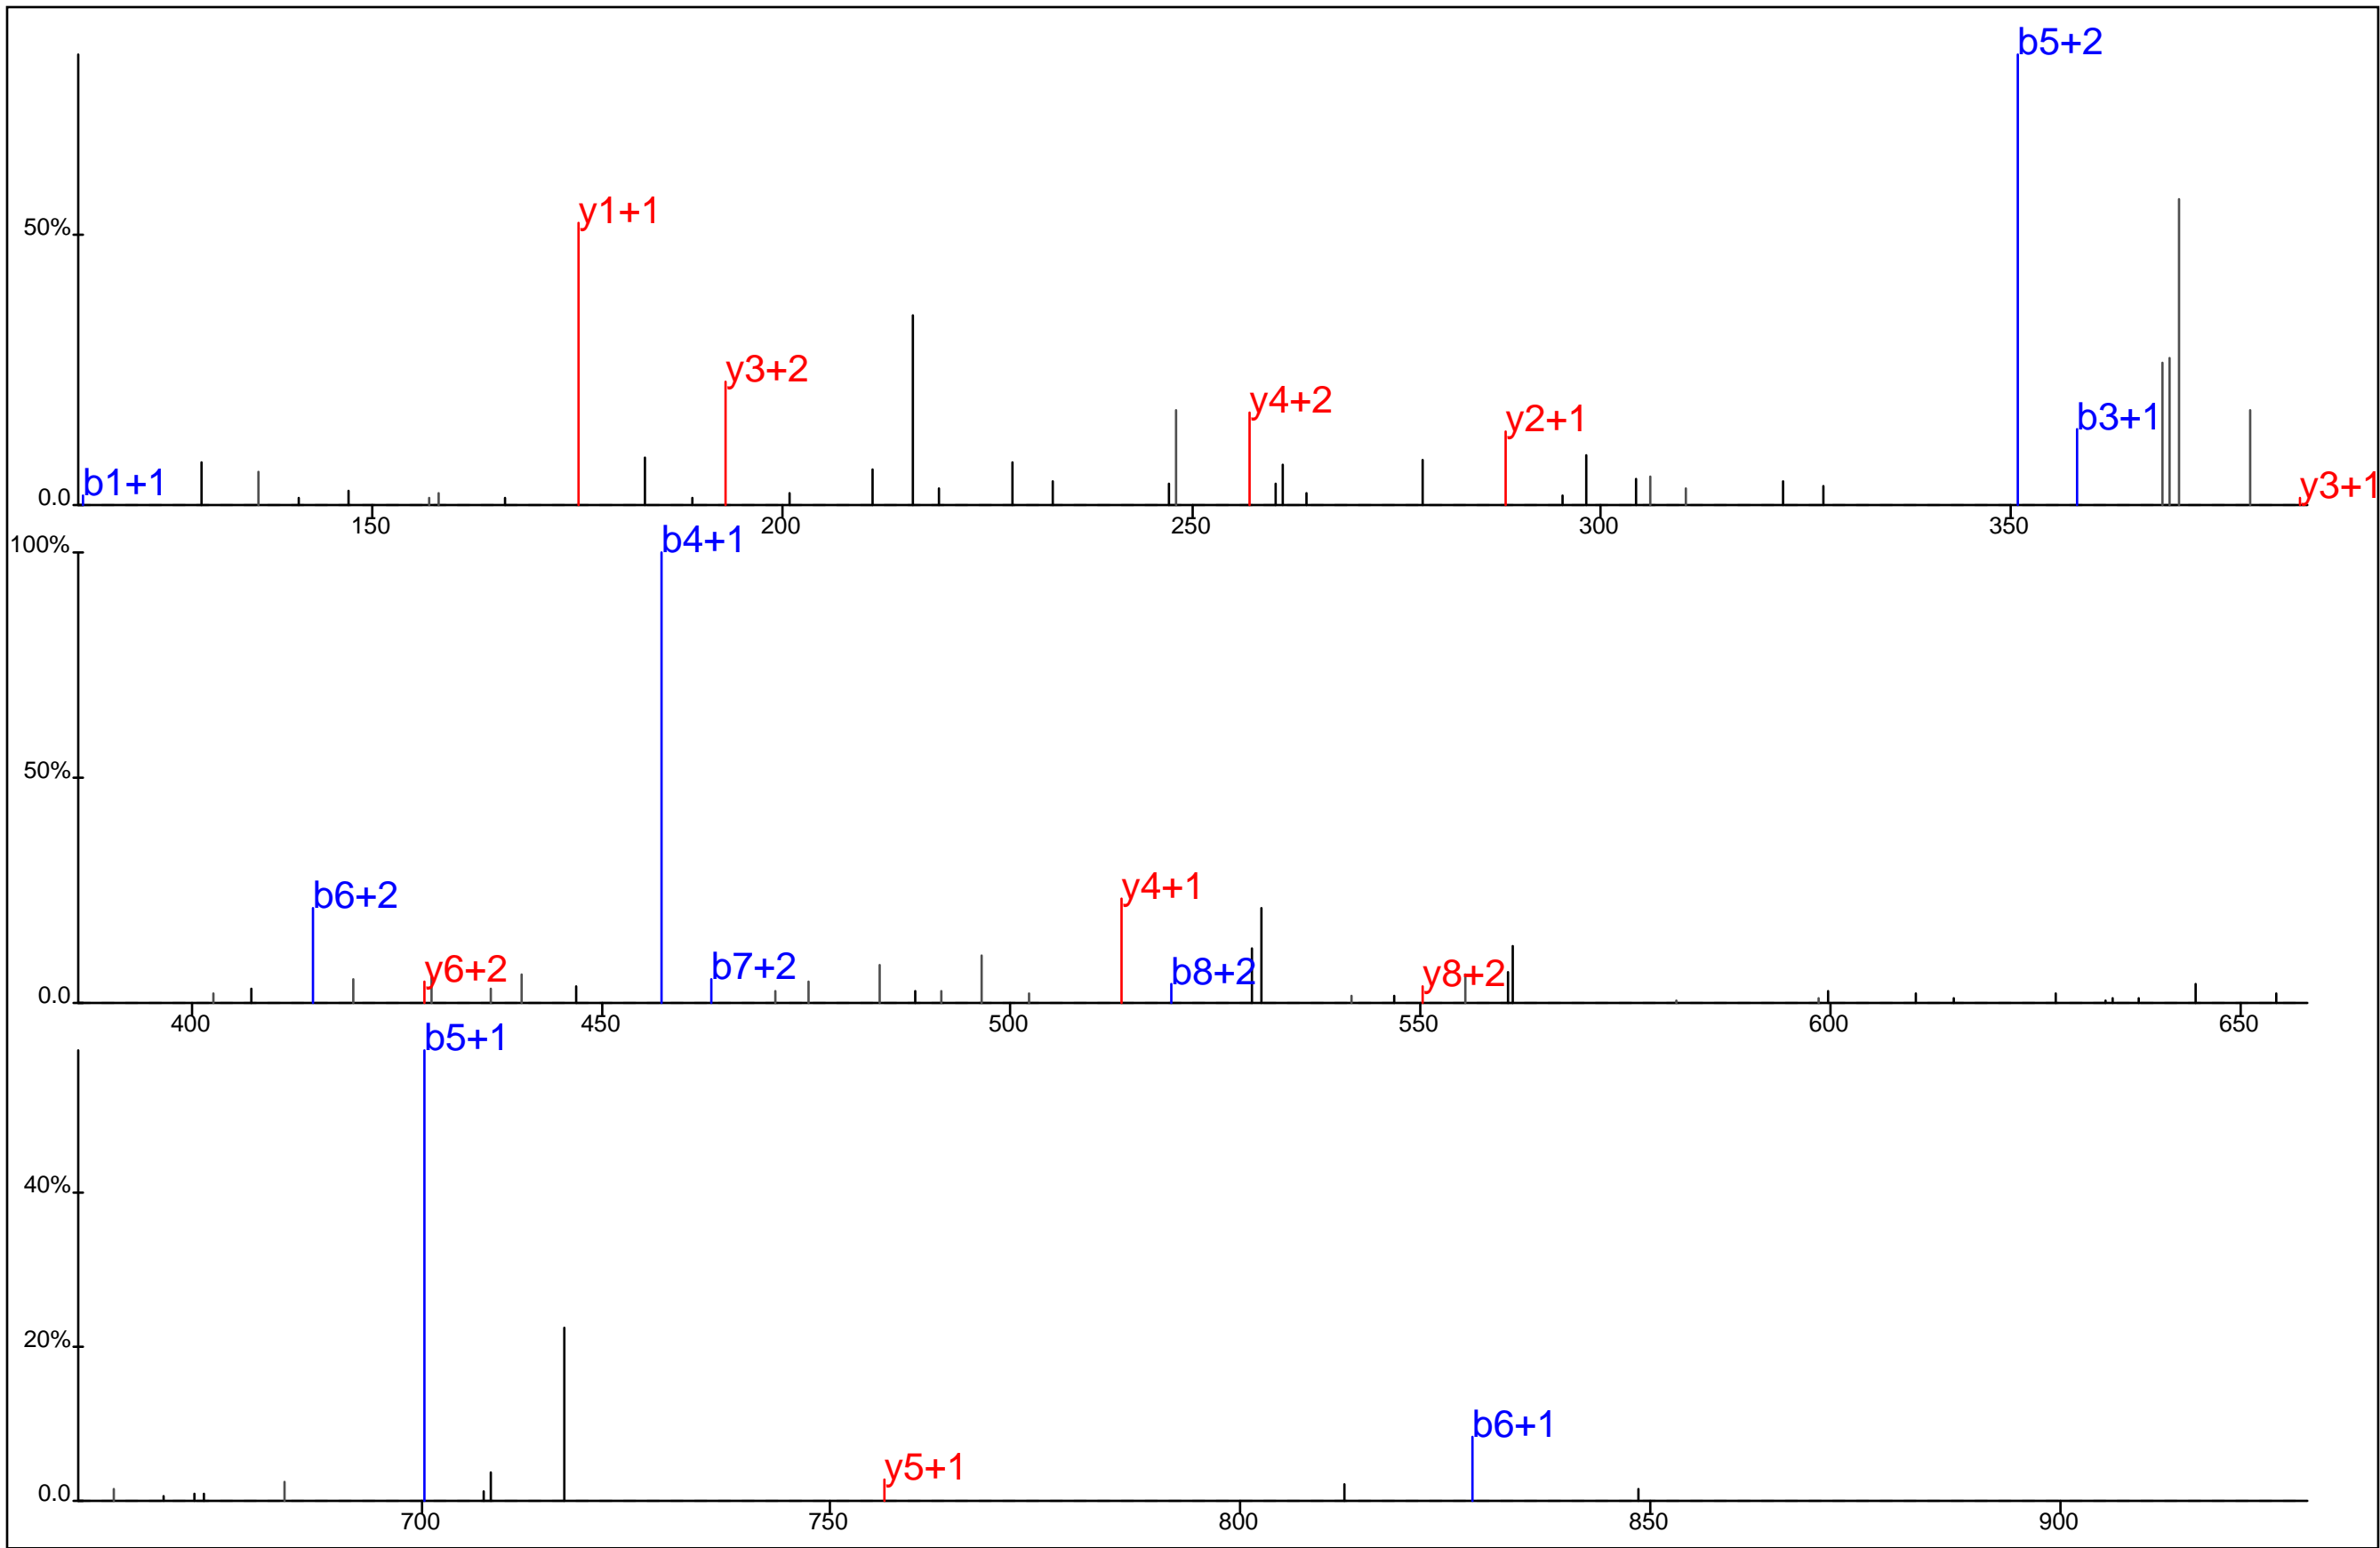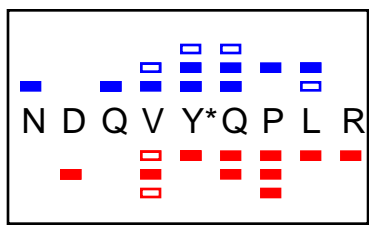

Protein Name: T cell receptor T3 delta chain  
 gi Accession: 0  
 Precursor Mass: 404.8524+3  
 Delta Mass: 1.364 ppm  
 XCorr: 20.24

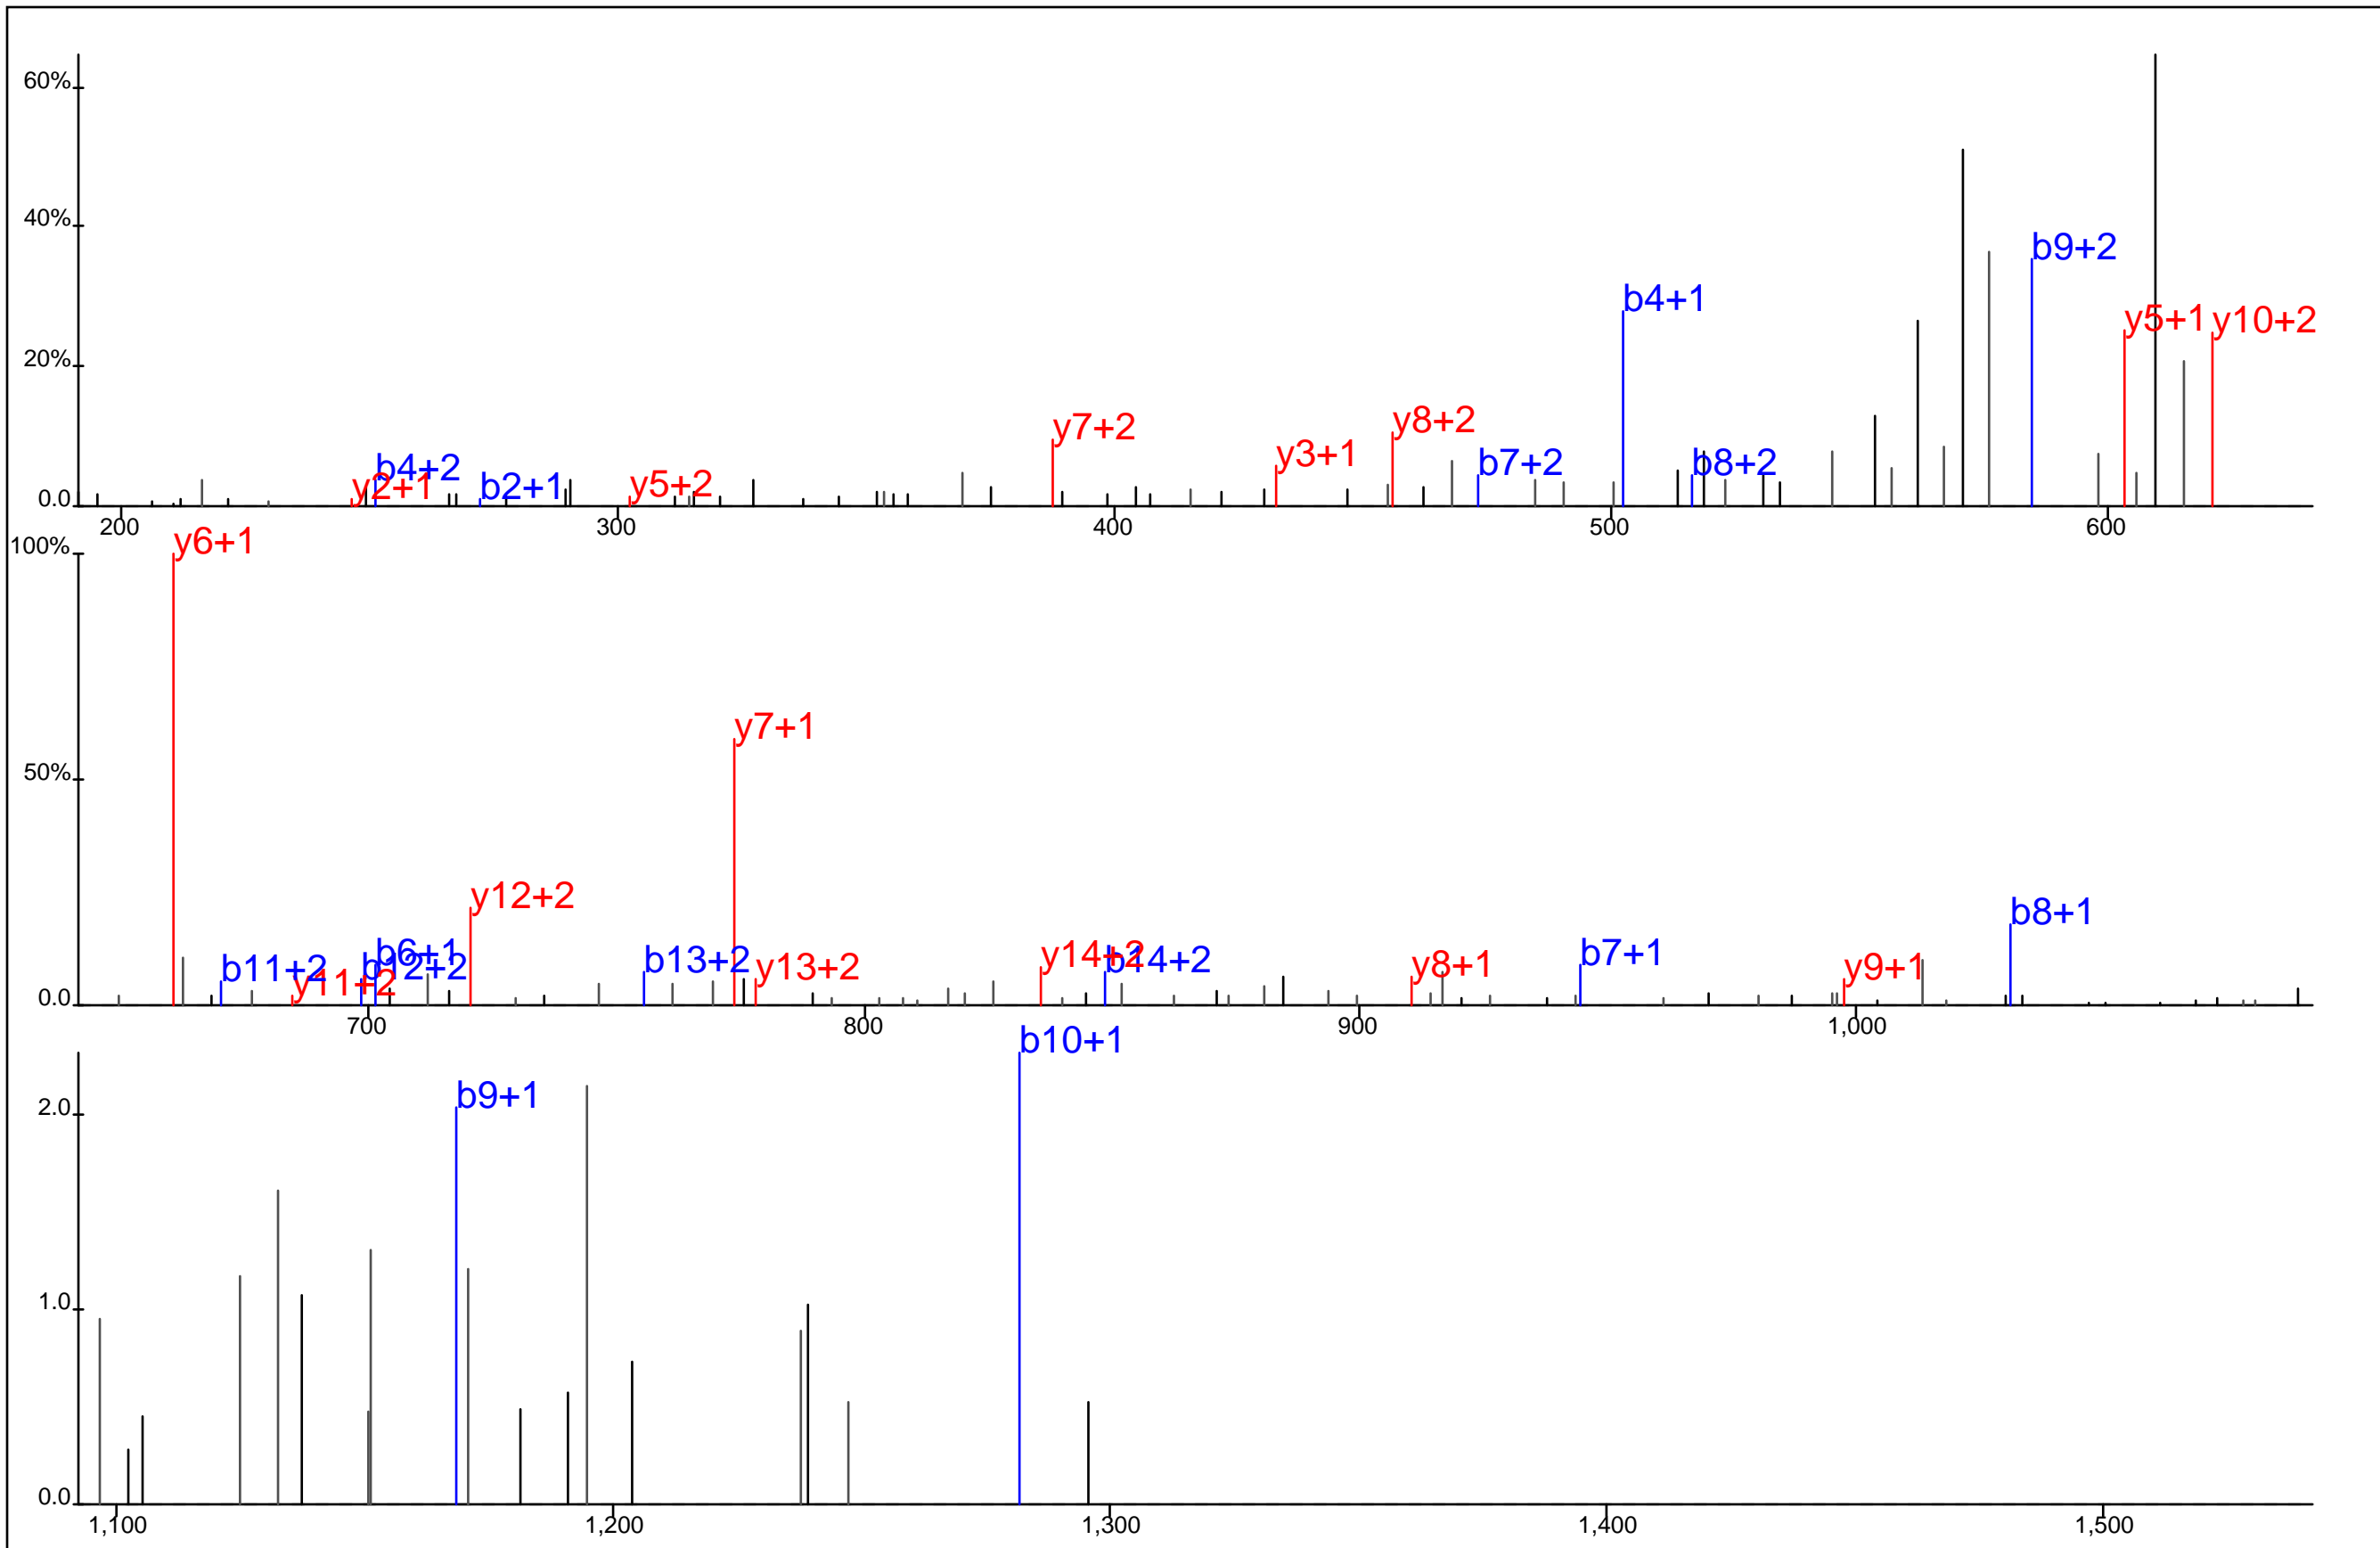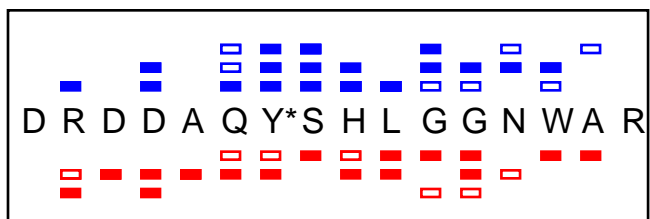

Protein Name: T cell receptor T3 delta chain  
 gi Accession: 0  
 Precursor Mass: 647.6064+3  
 Delta Mass: 0.561 ppm  
 XCorr: 37.9

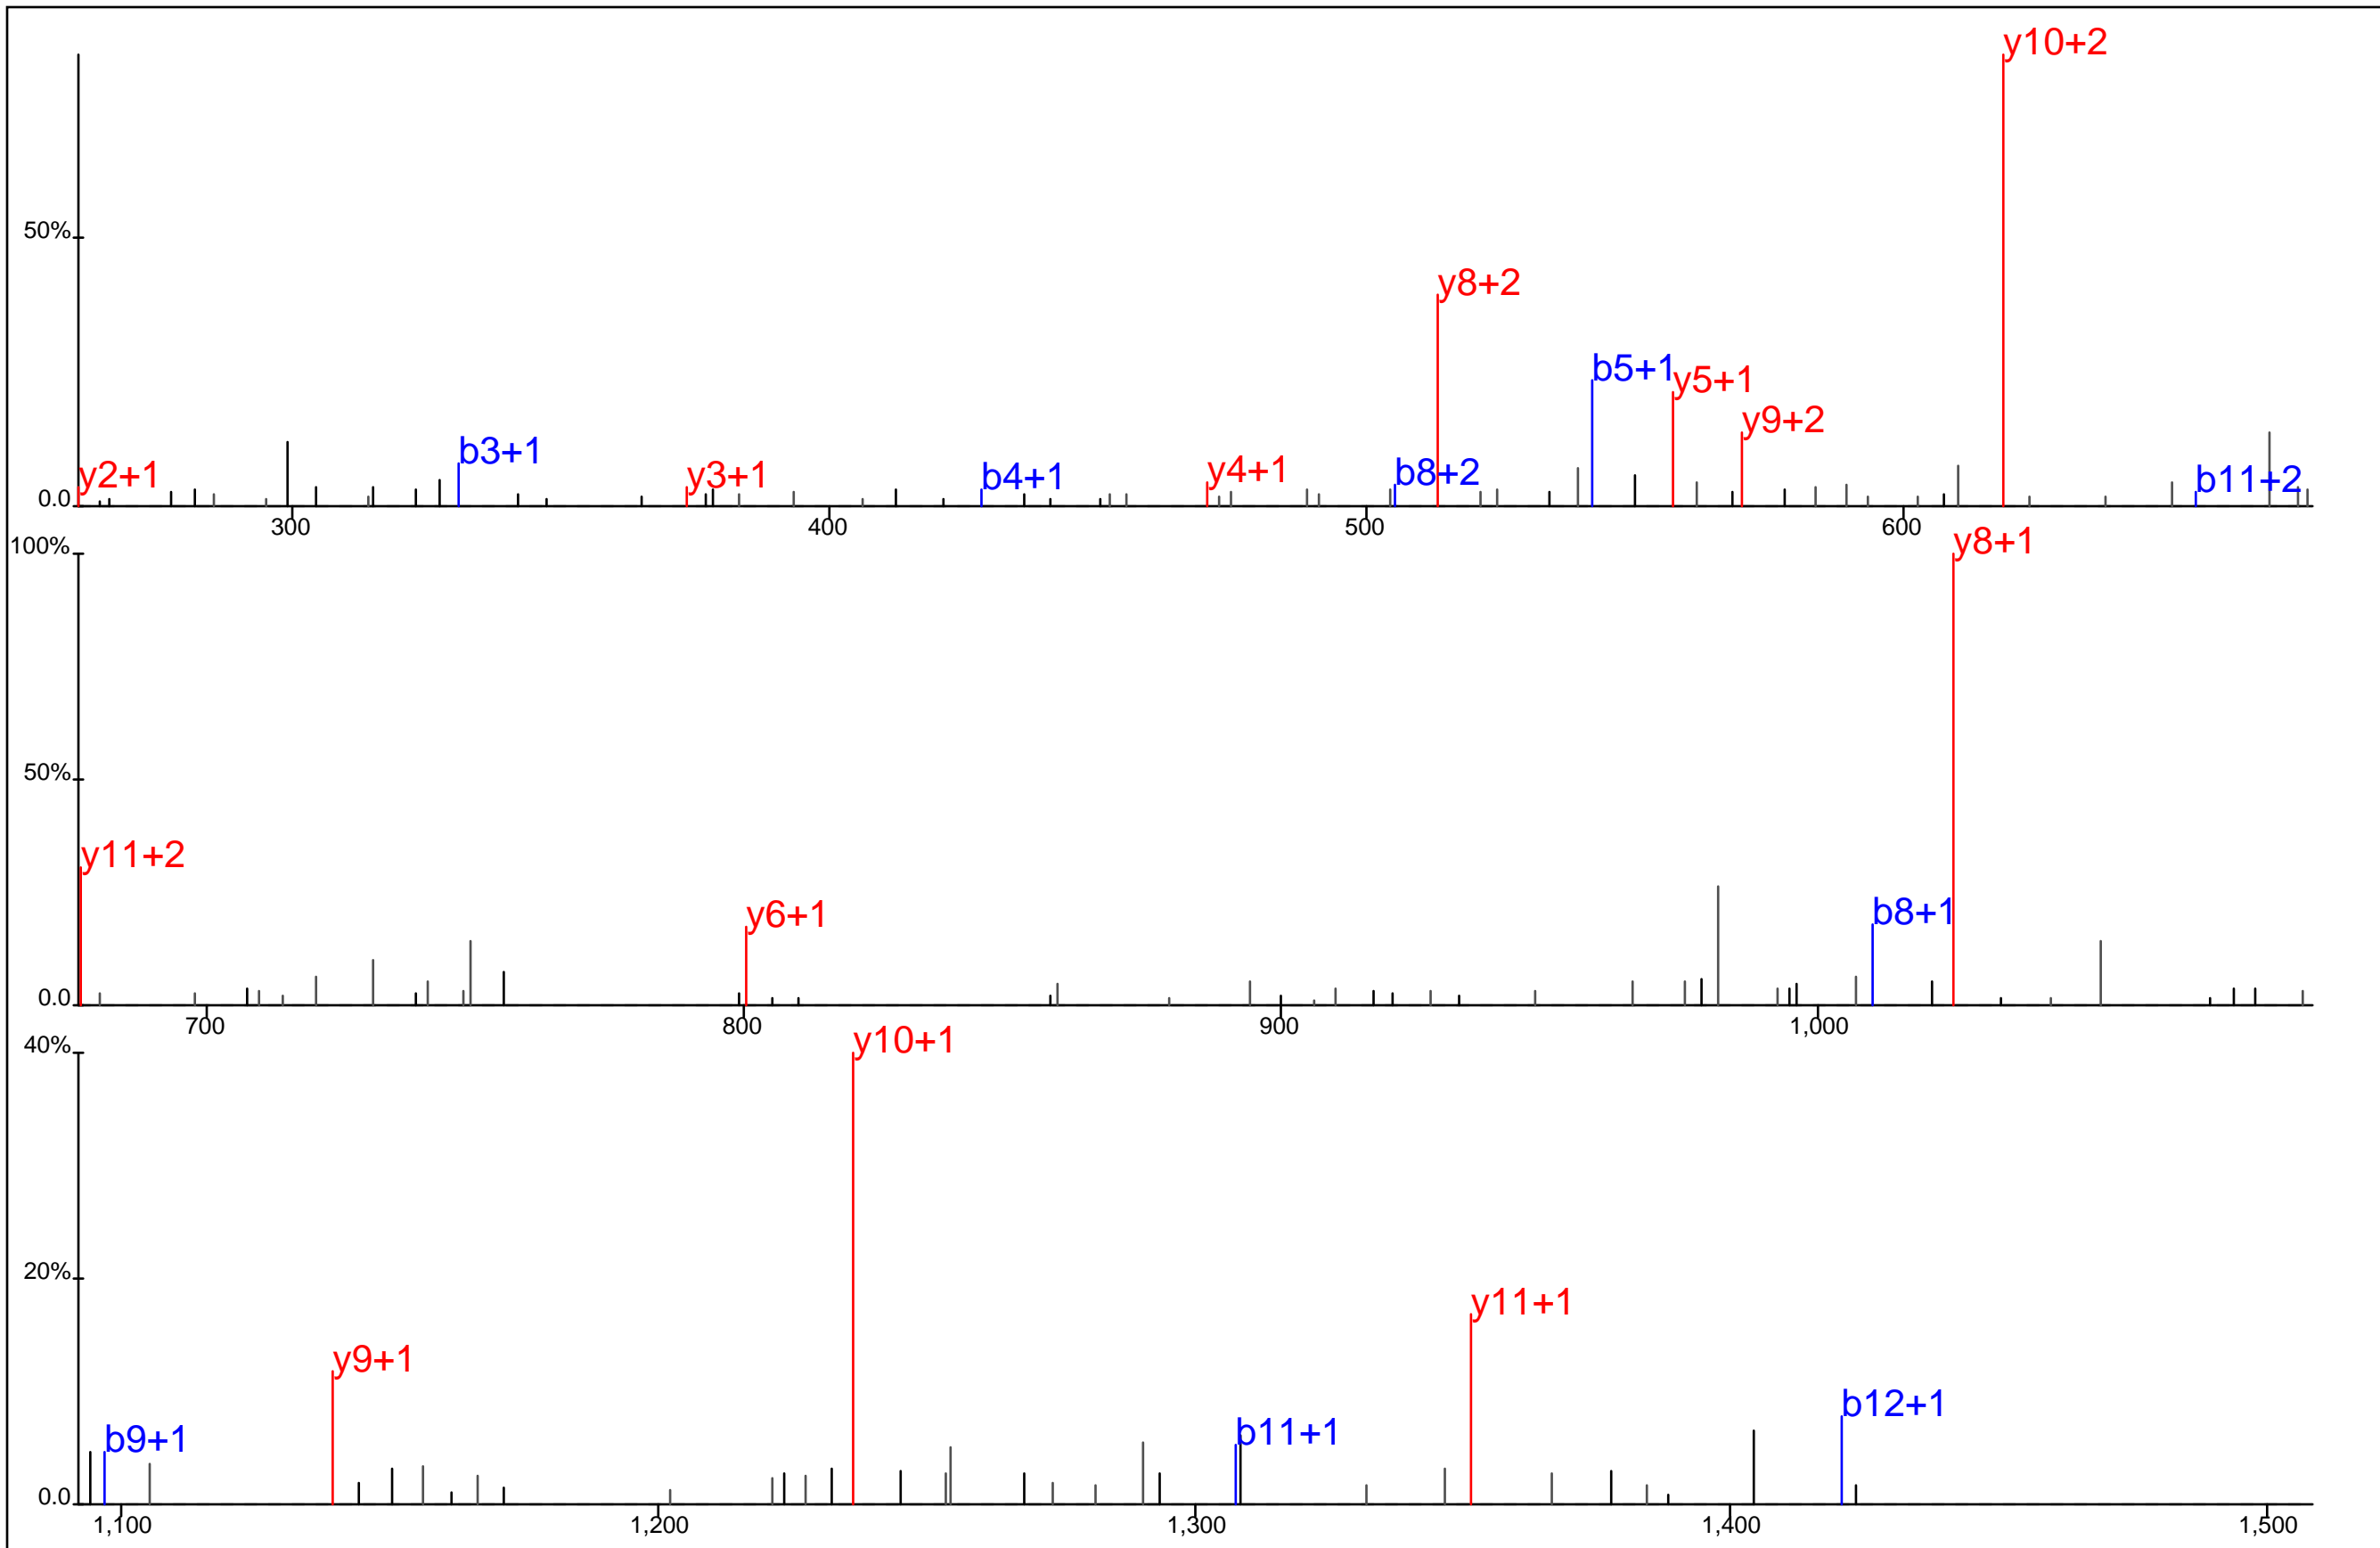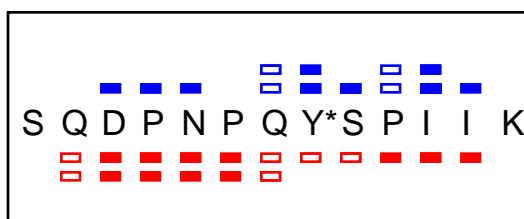

Protein Name: T cell specific adapter protein  
 gi Accession: 0  
 Precursor Mass: 783.8644+2  
 Delta Mass: 0.984 ppm  
 XCorr: 46.38



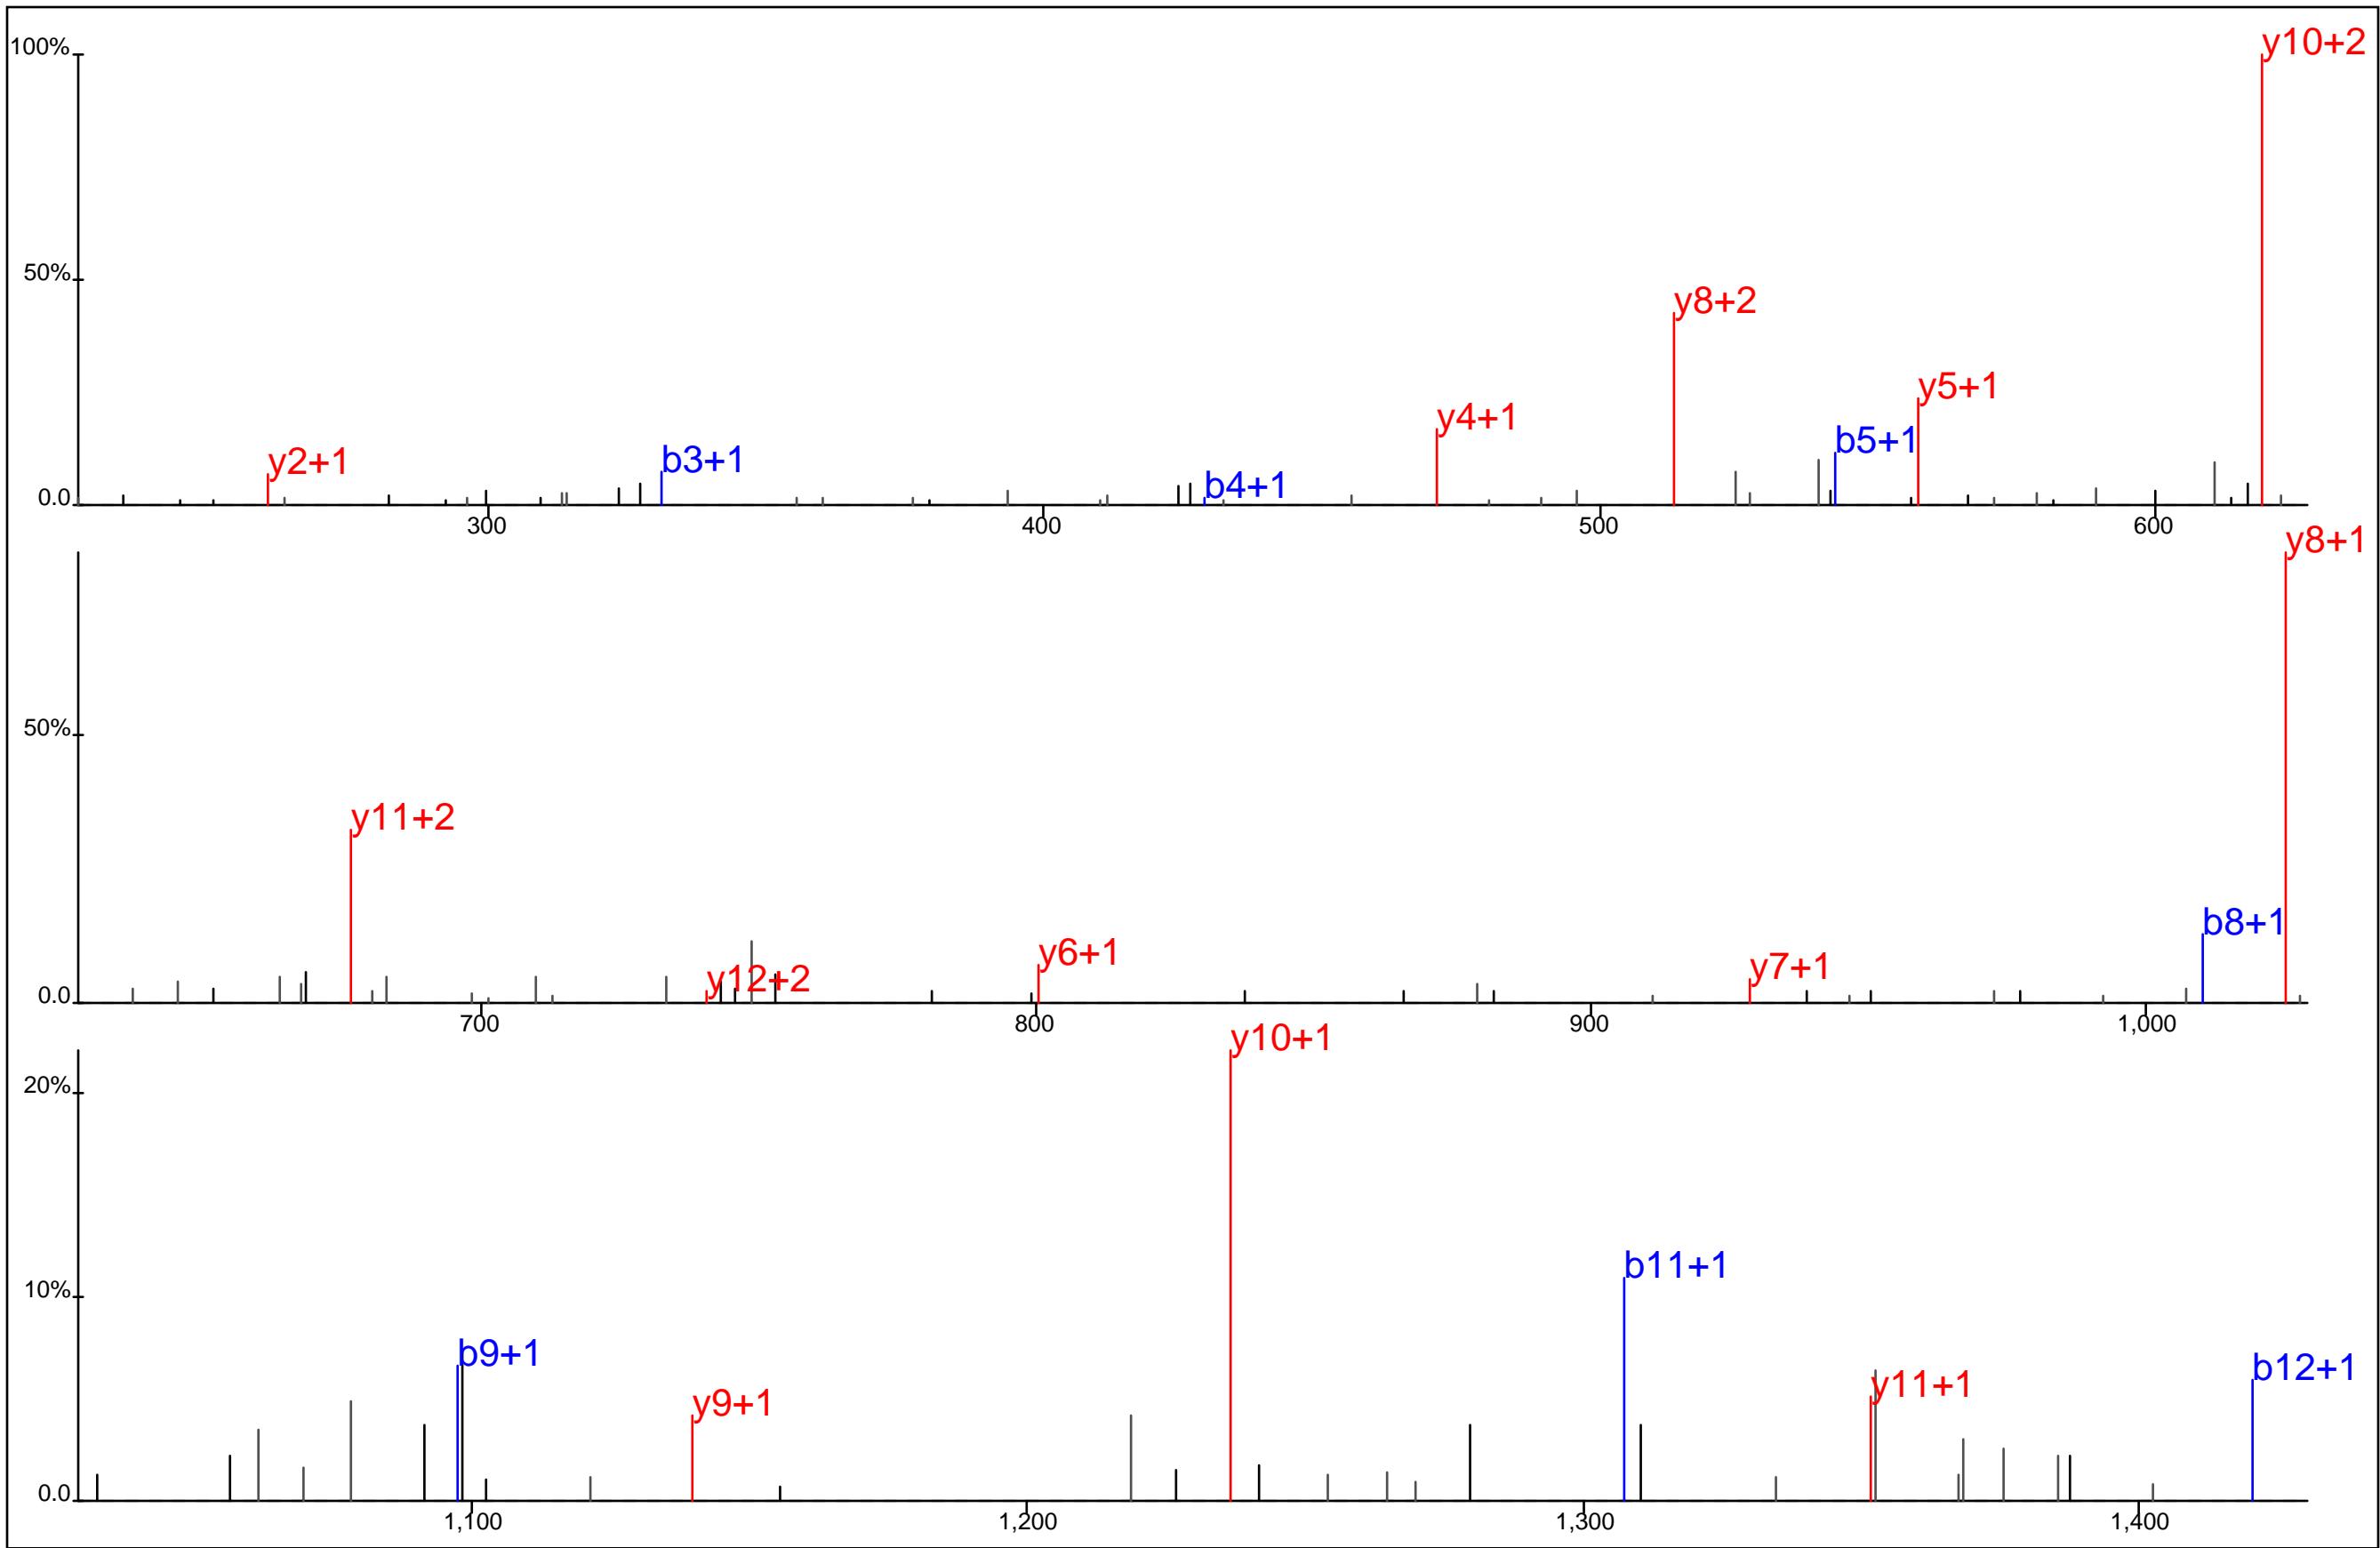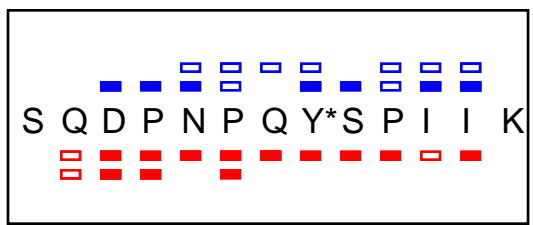

Protein Name: T cell specific adapter protein  
 gi Accession: 0  
 Precursor Mass: 783.8660+2  
 Delta Mass: 3.088 ppm  
 XCorr: 54.73







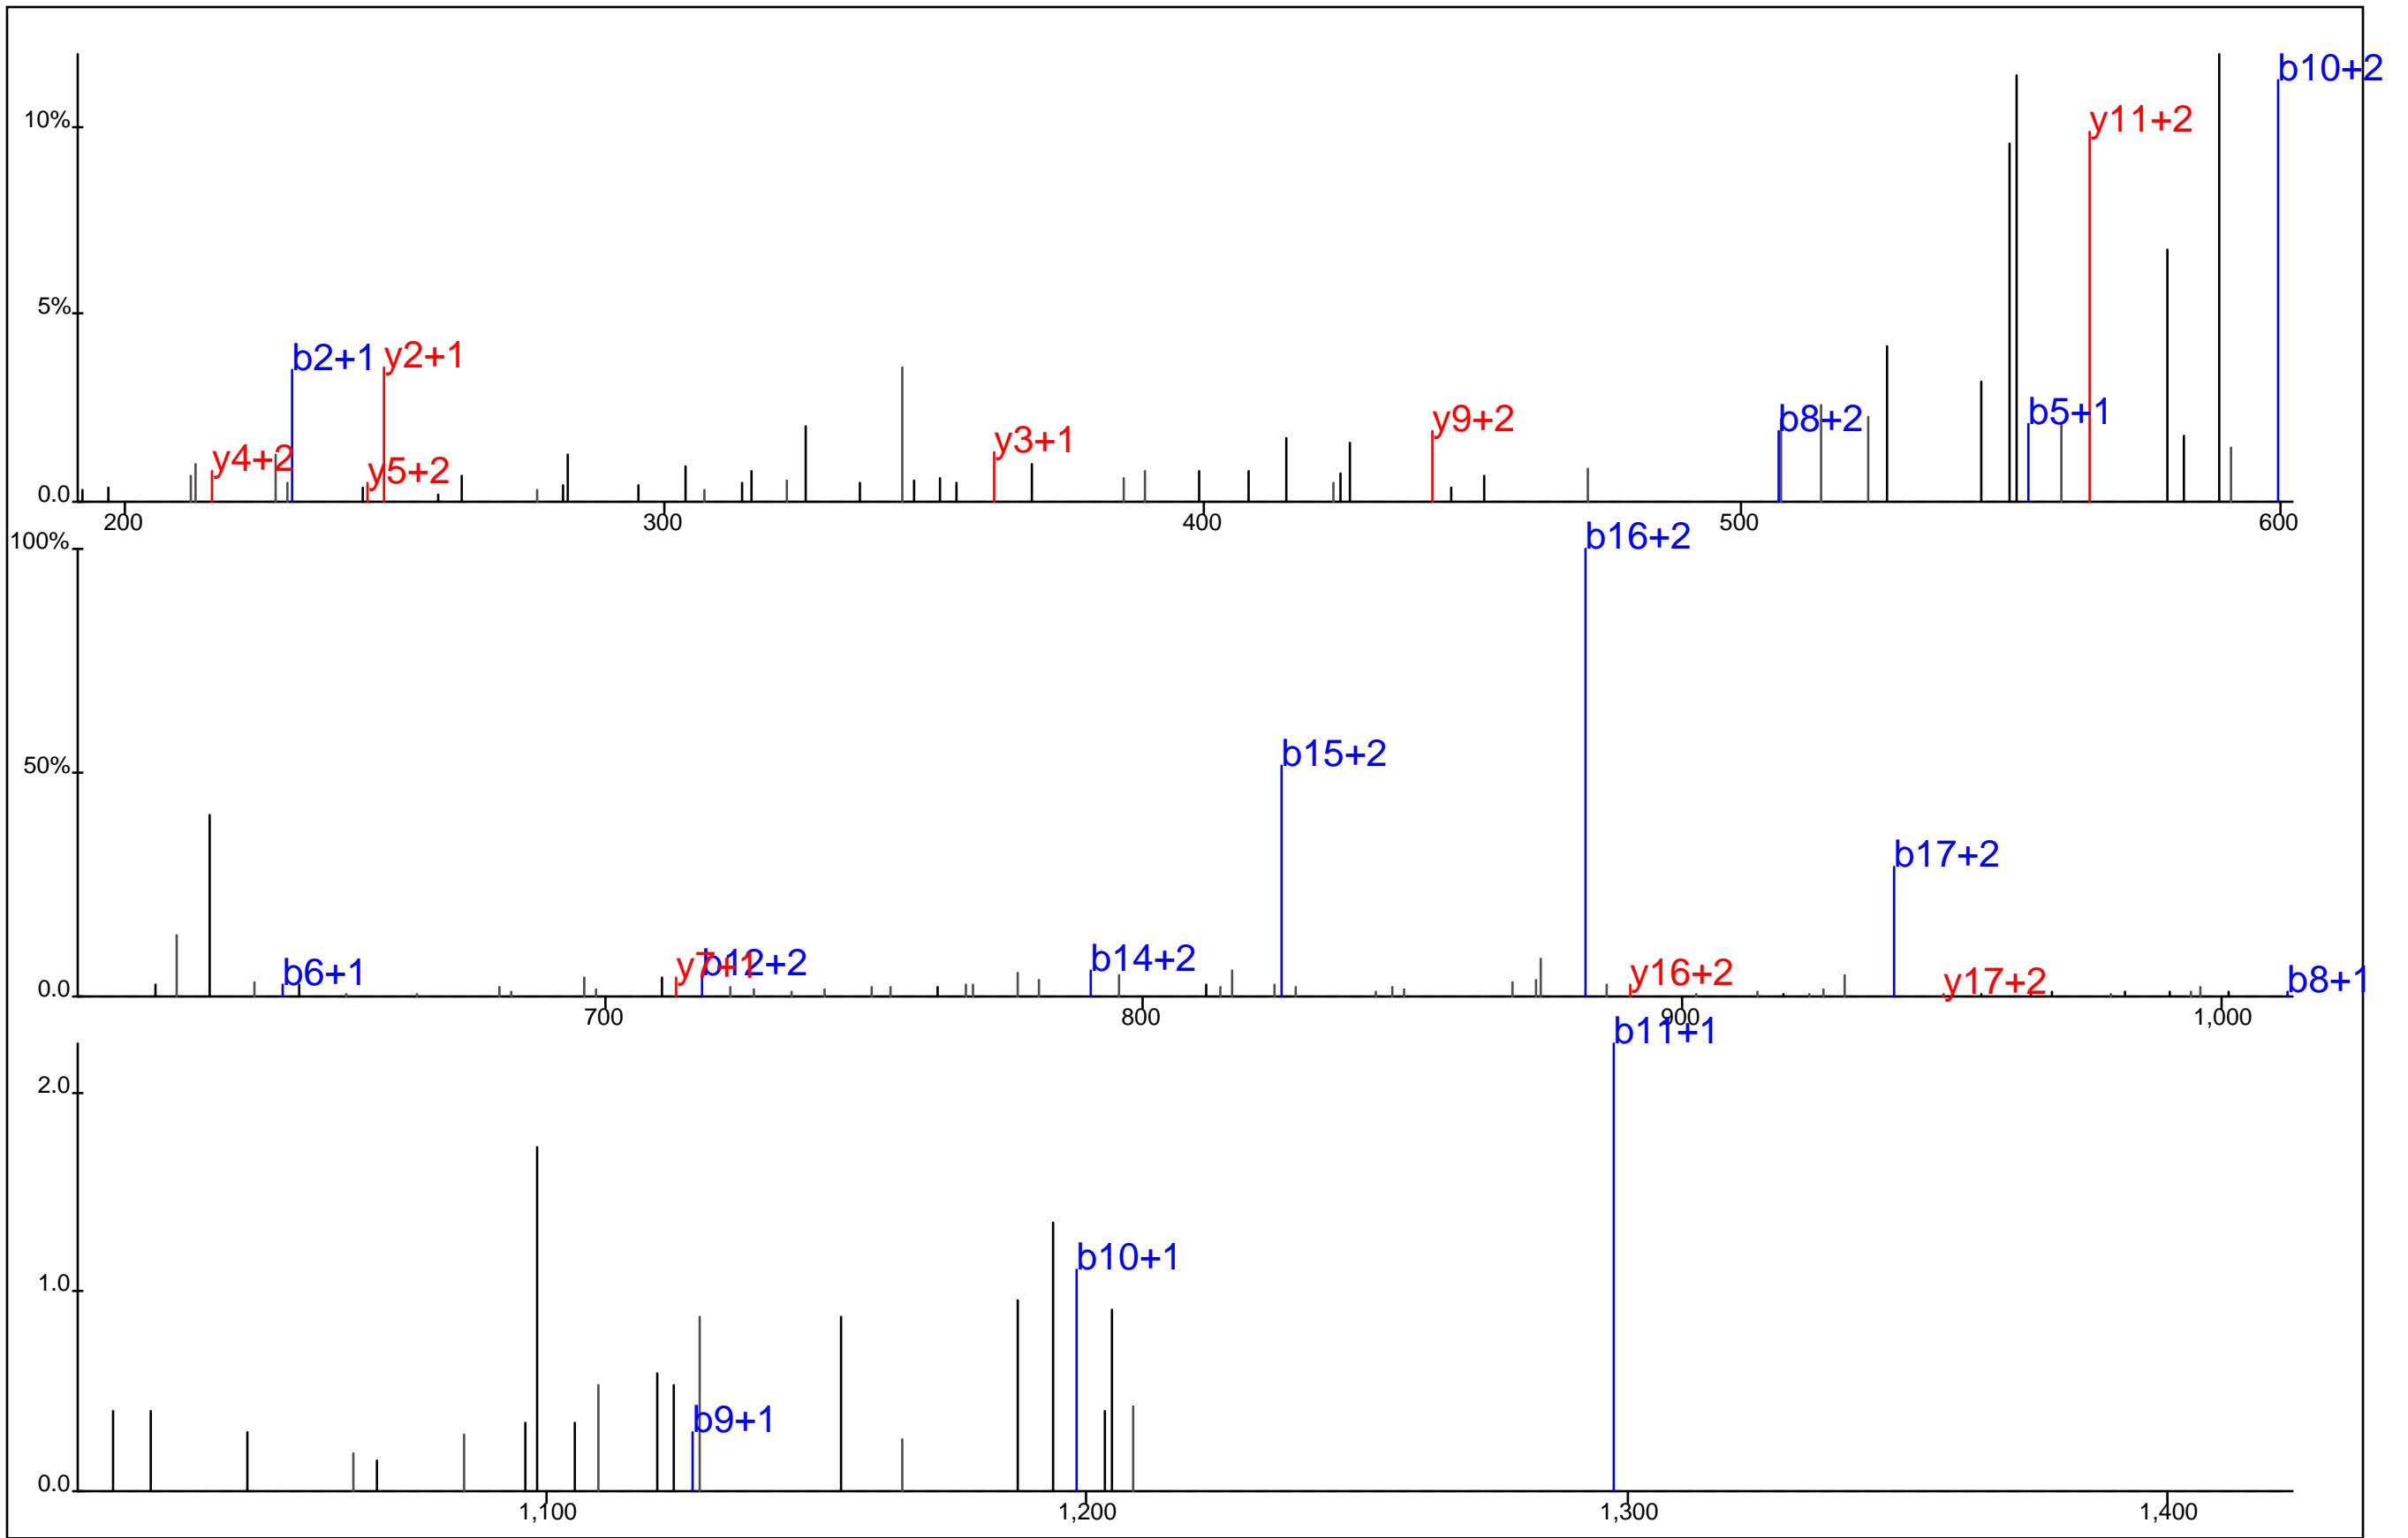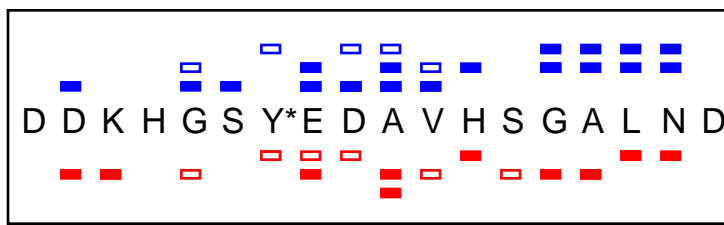

Protein Name: T Complex 1  
 gi Accession: 0  
 Precursor Mass: 670.5986+3  
 Delta Mass: 2.943 ppm  
 XCorr: 56.82

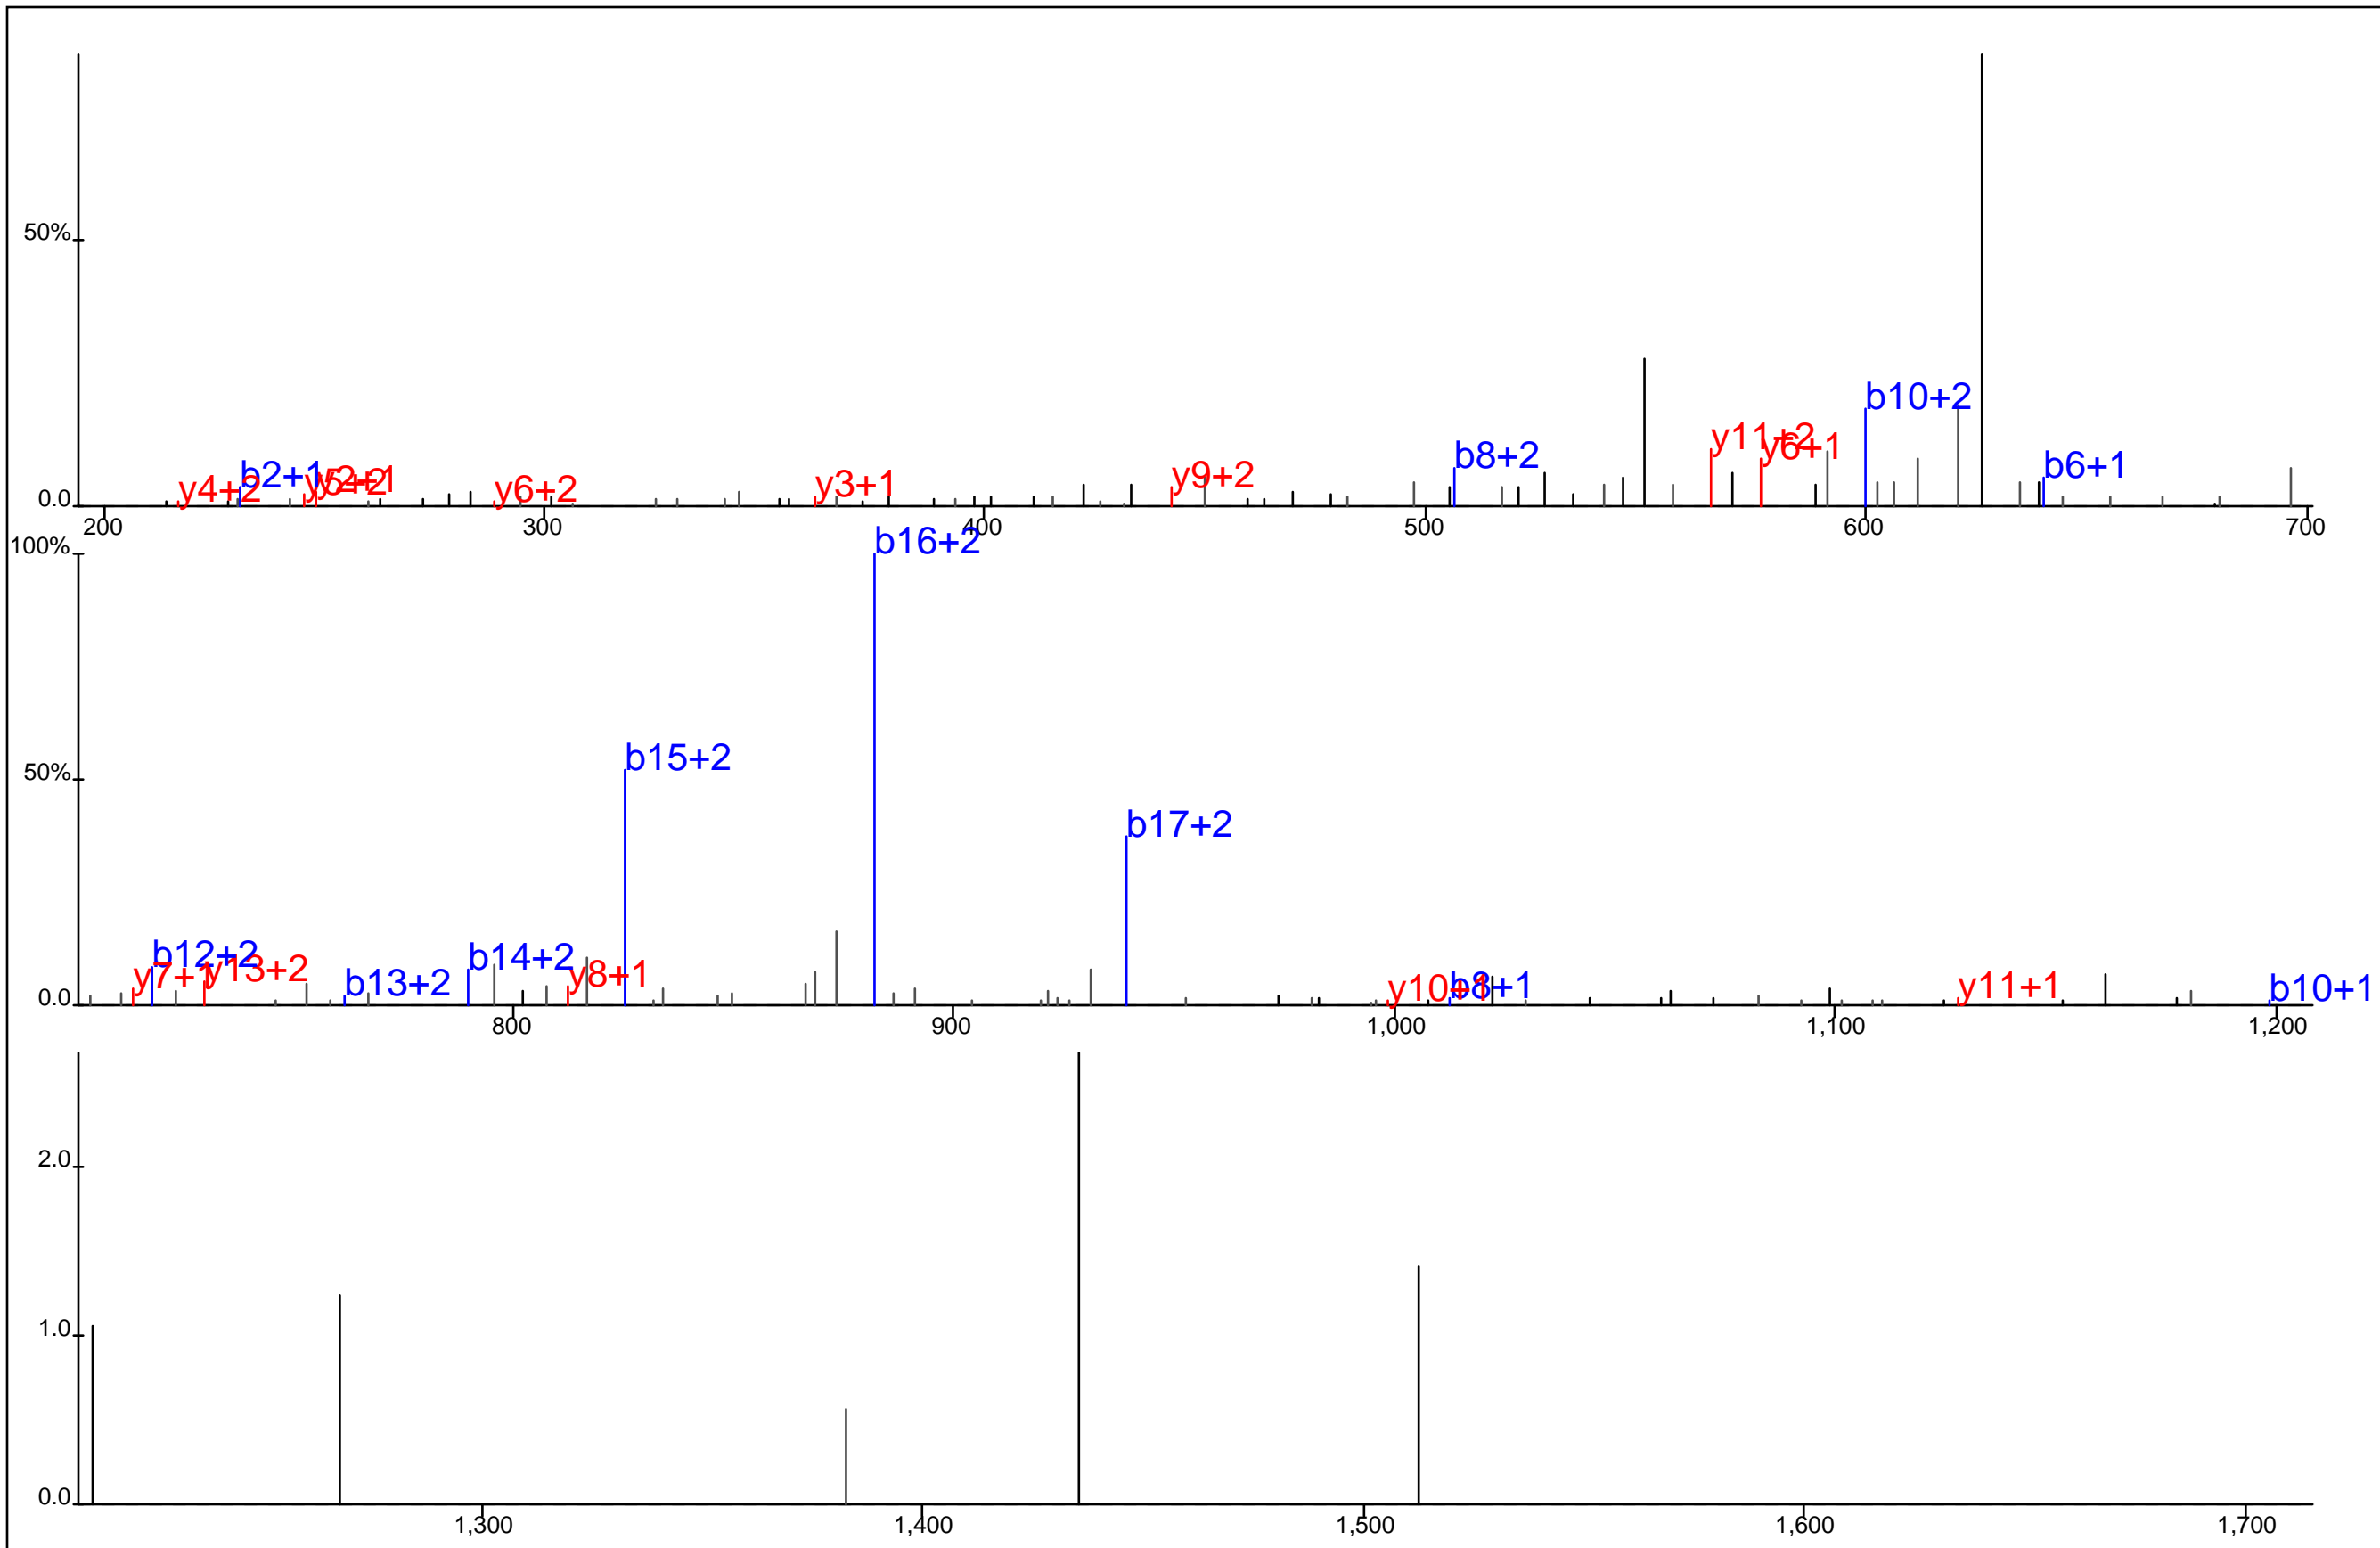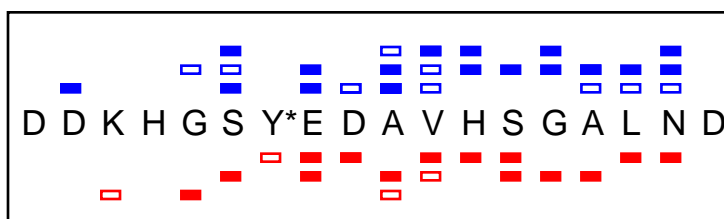

Protein Name: T Complex 1  
 gi Accession: 0  
 Precursor Mass: 670.6000+3  
 Delta Mass: 0.938 ppm  
 XCorr: 47.75

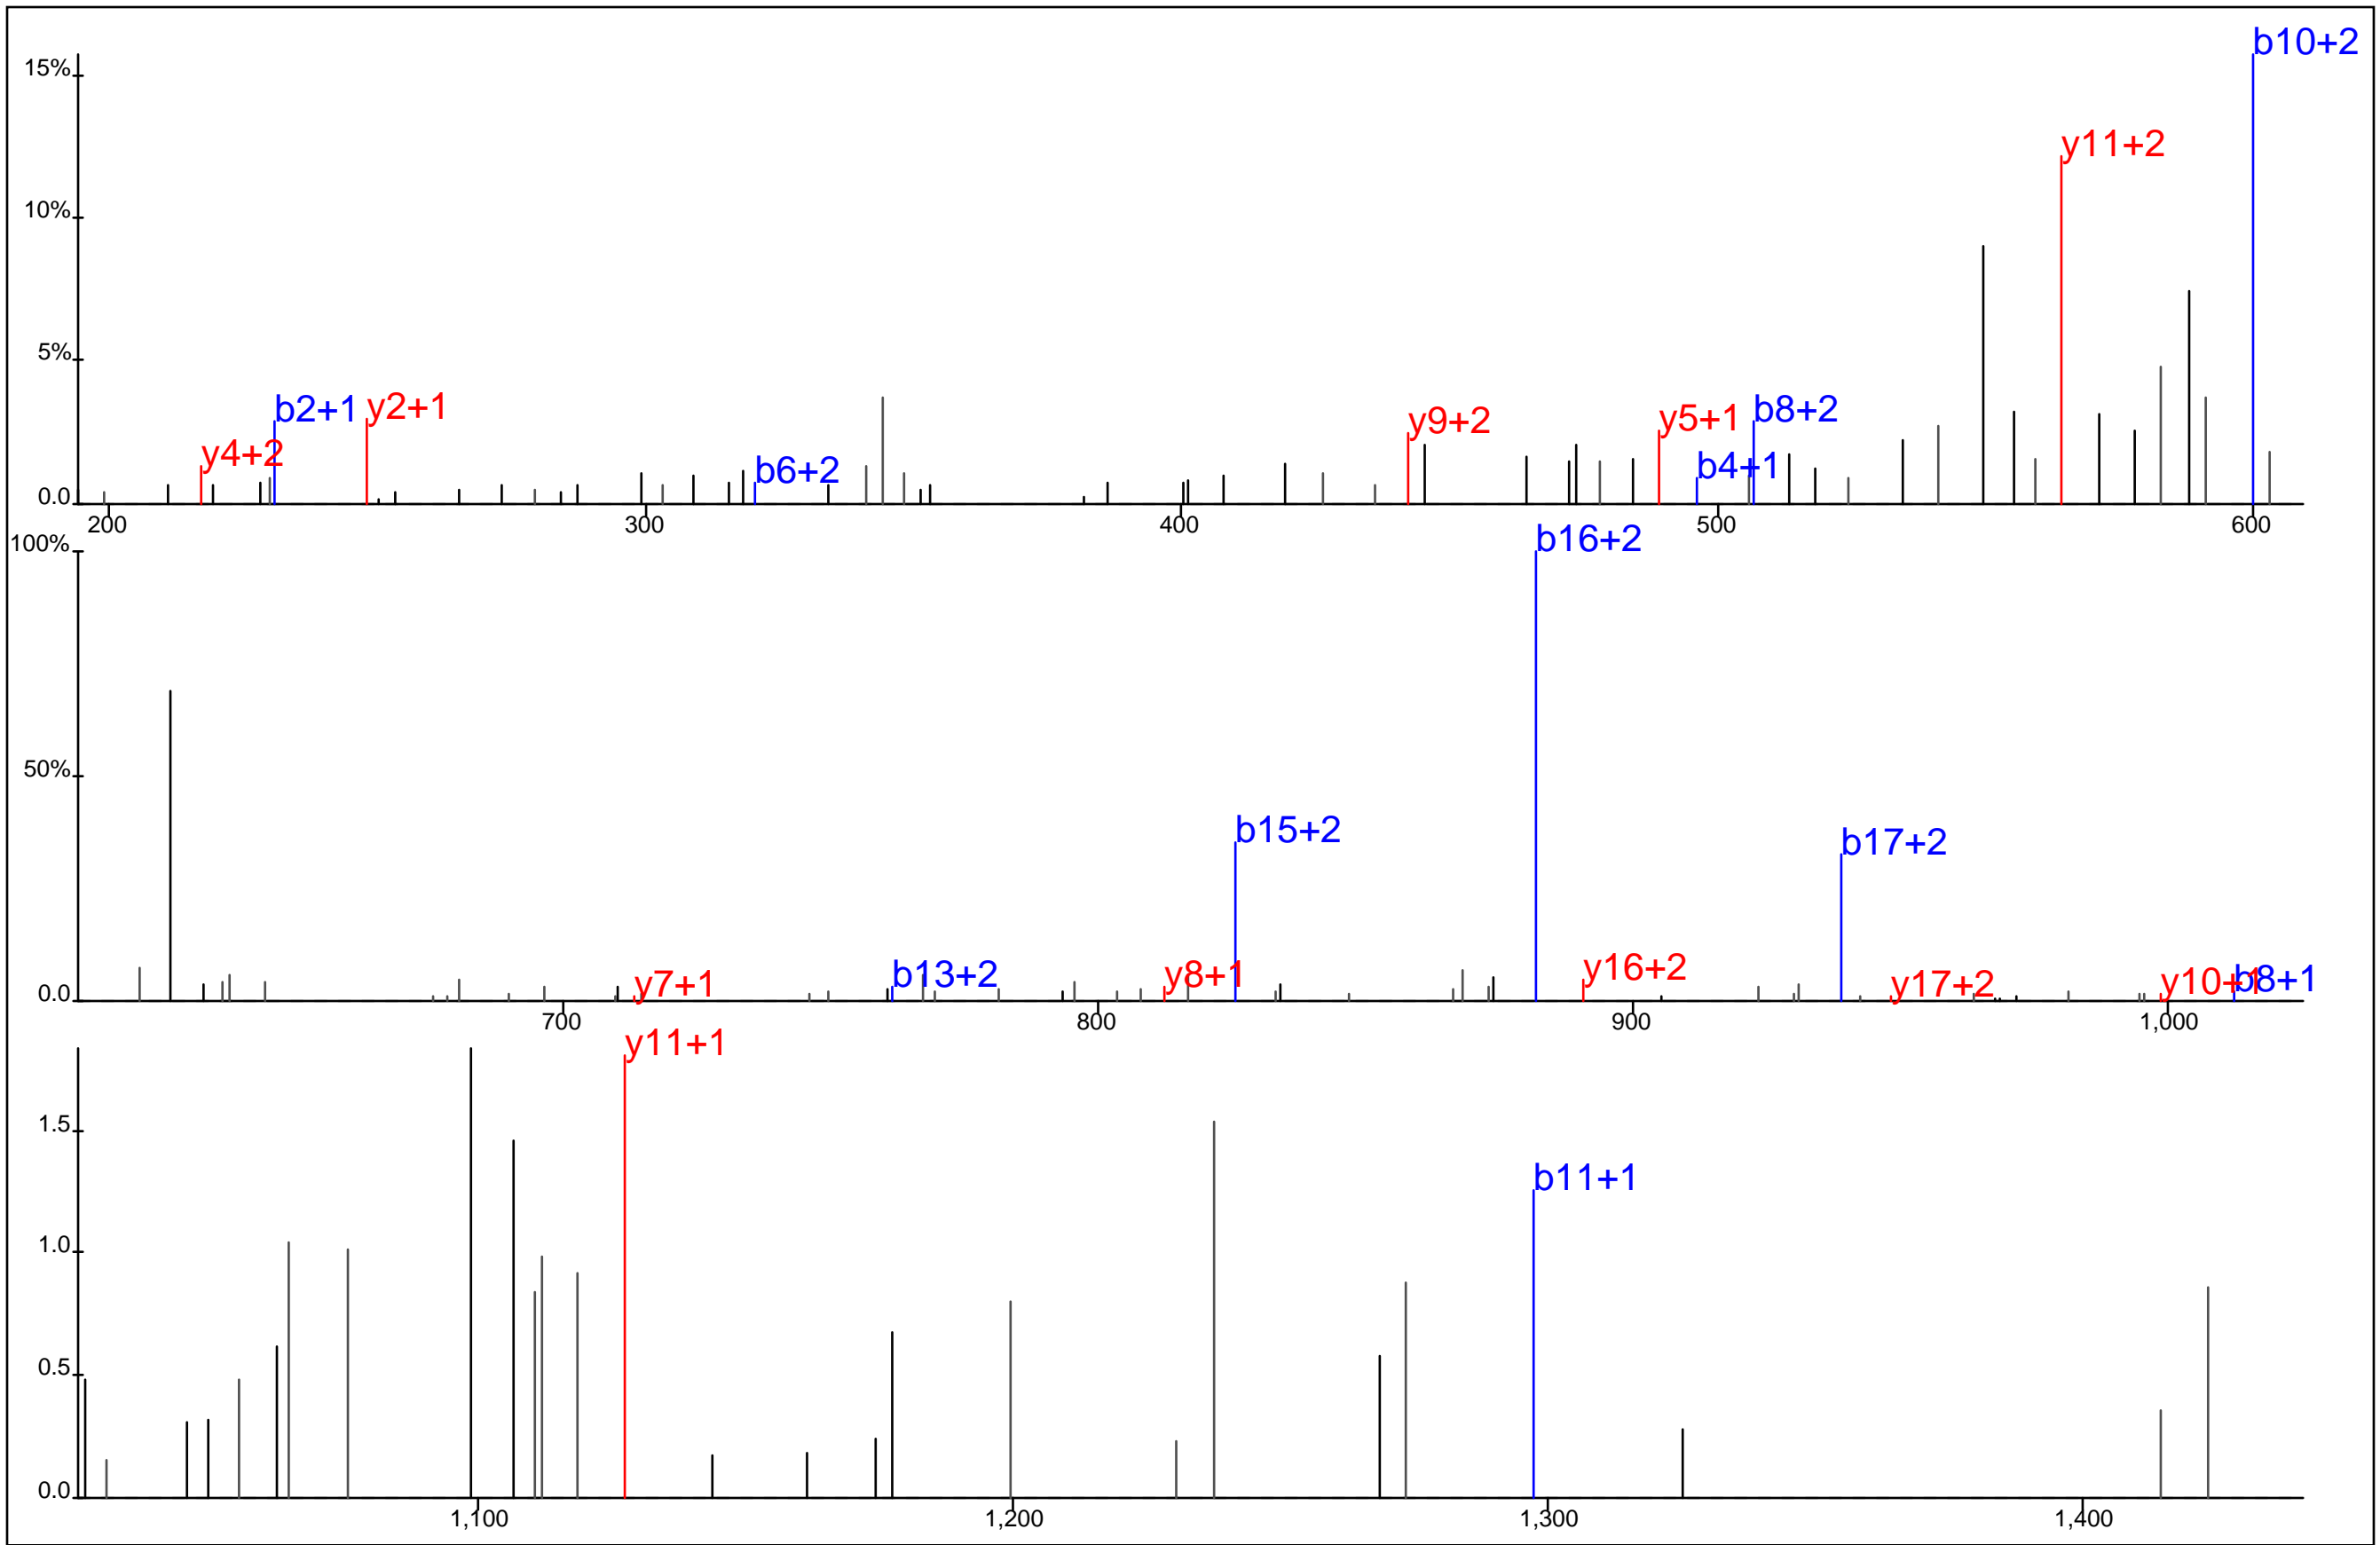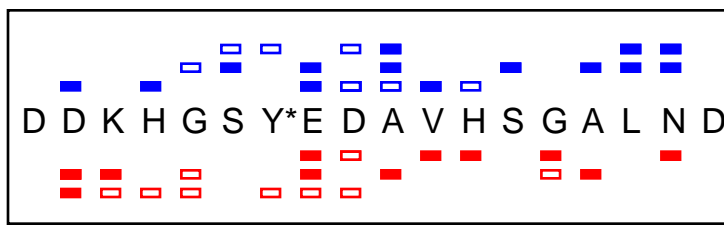

Protein Name: T Complex 1  
 gi Accession: 0  
 Precursor Mass: 670.6002+3  
 Delta Mass: 0.574 ppm  
 XCorr: 51.6

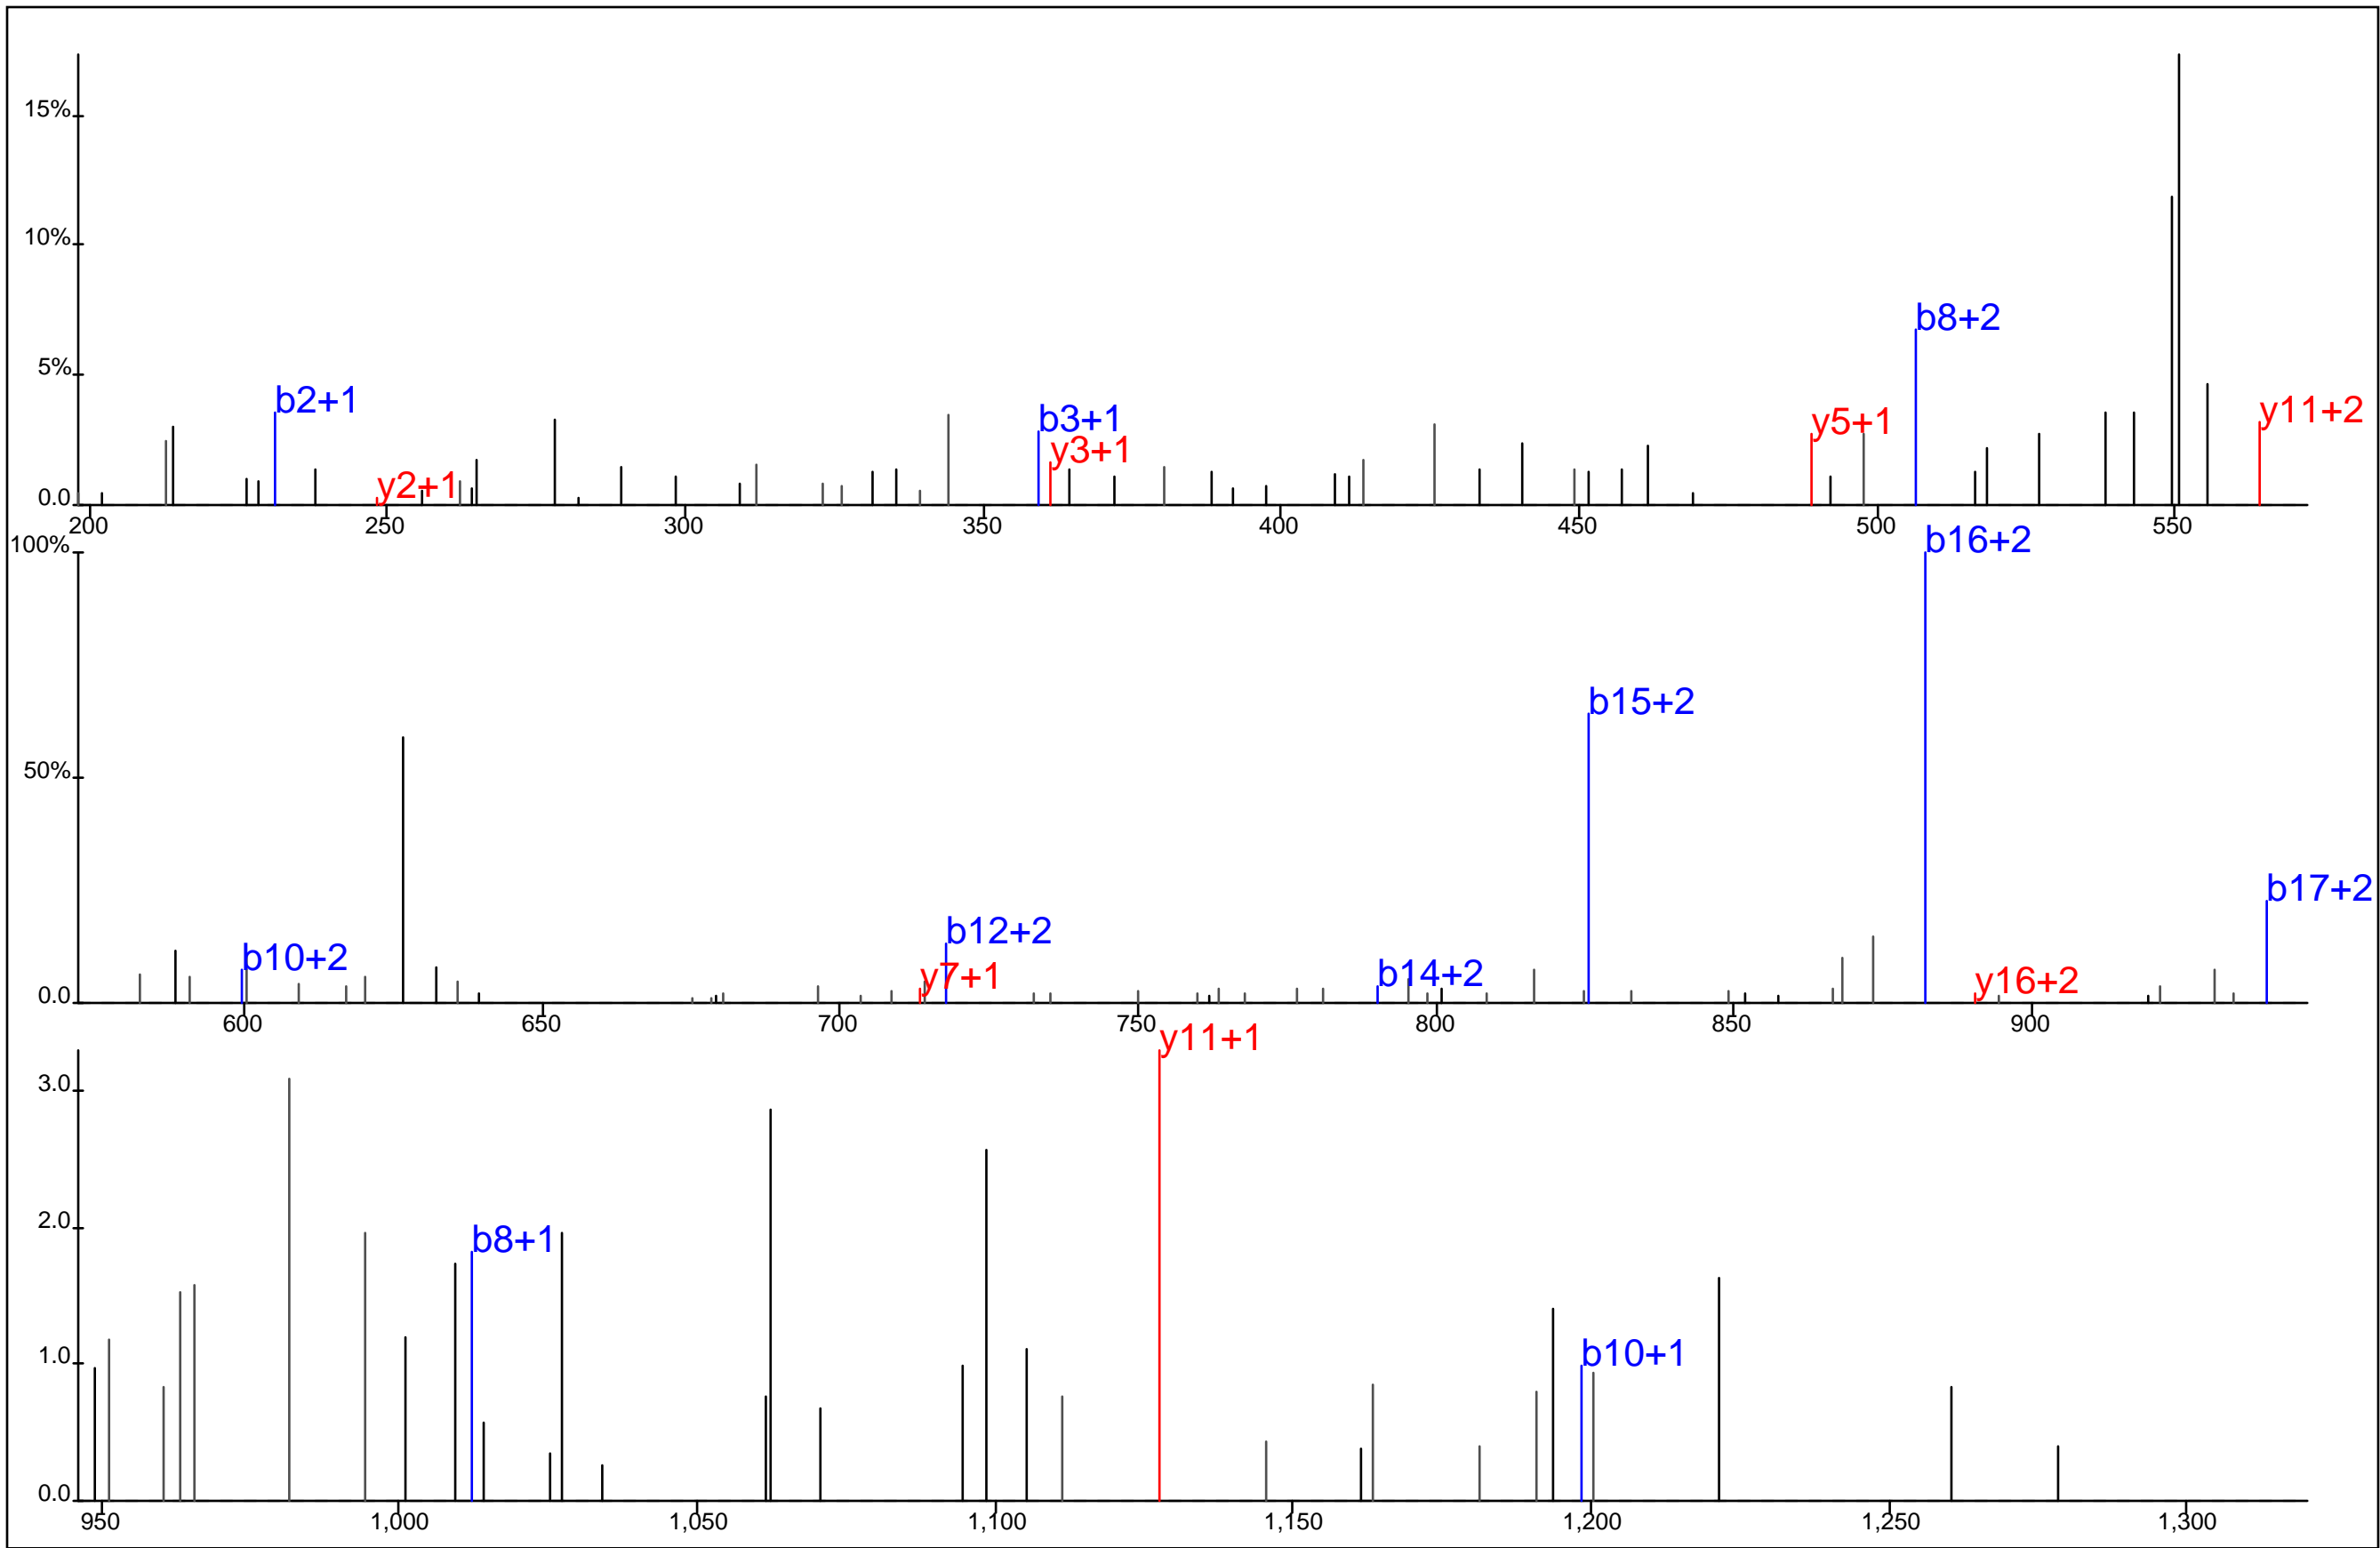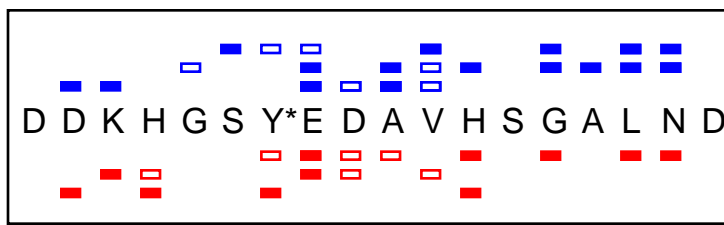

Protein Name: T Complex 1  
 gi Accession: 0  
 Precursor Mass: 670.5998+3  
 Delta Mass: 1.213 ppm  
 XCorr: 34.7

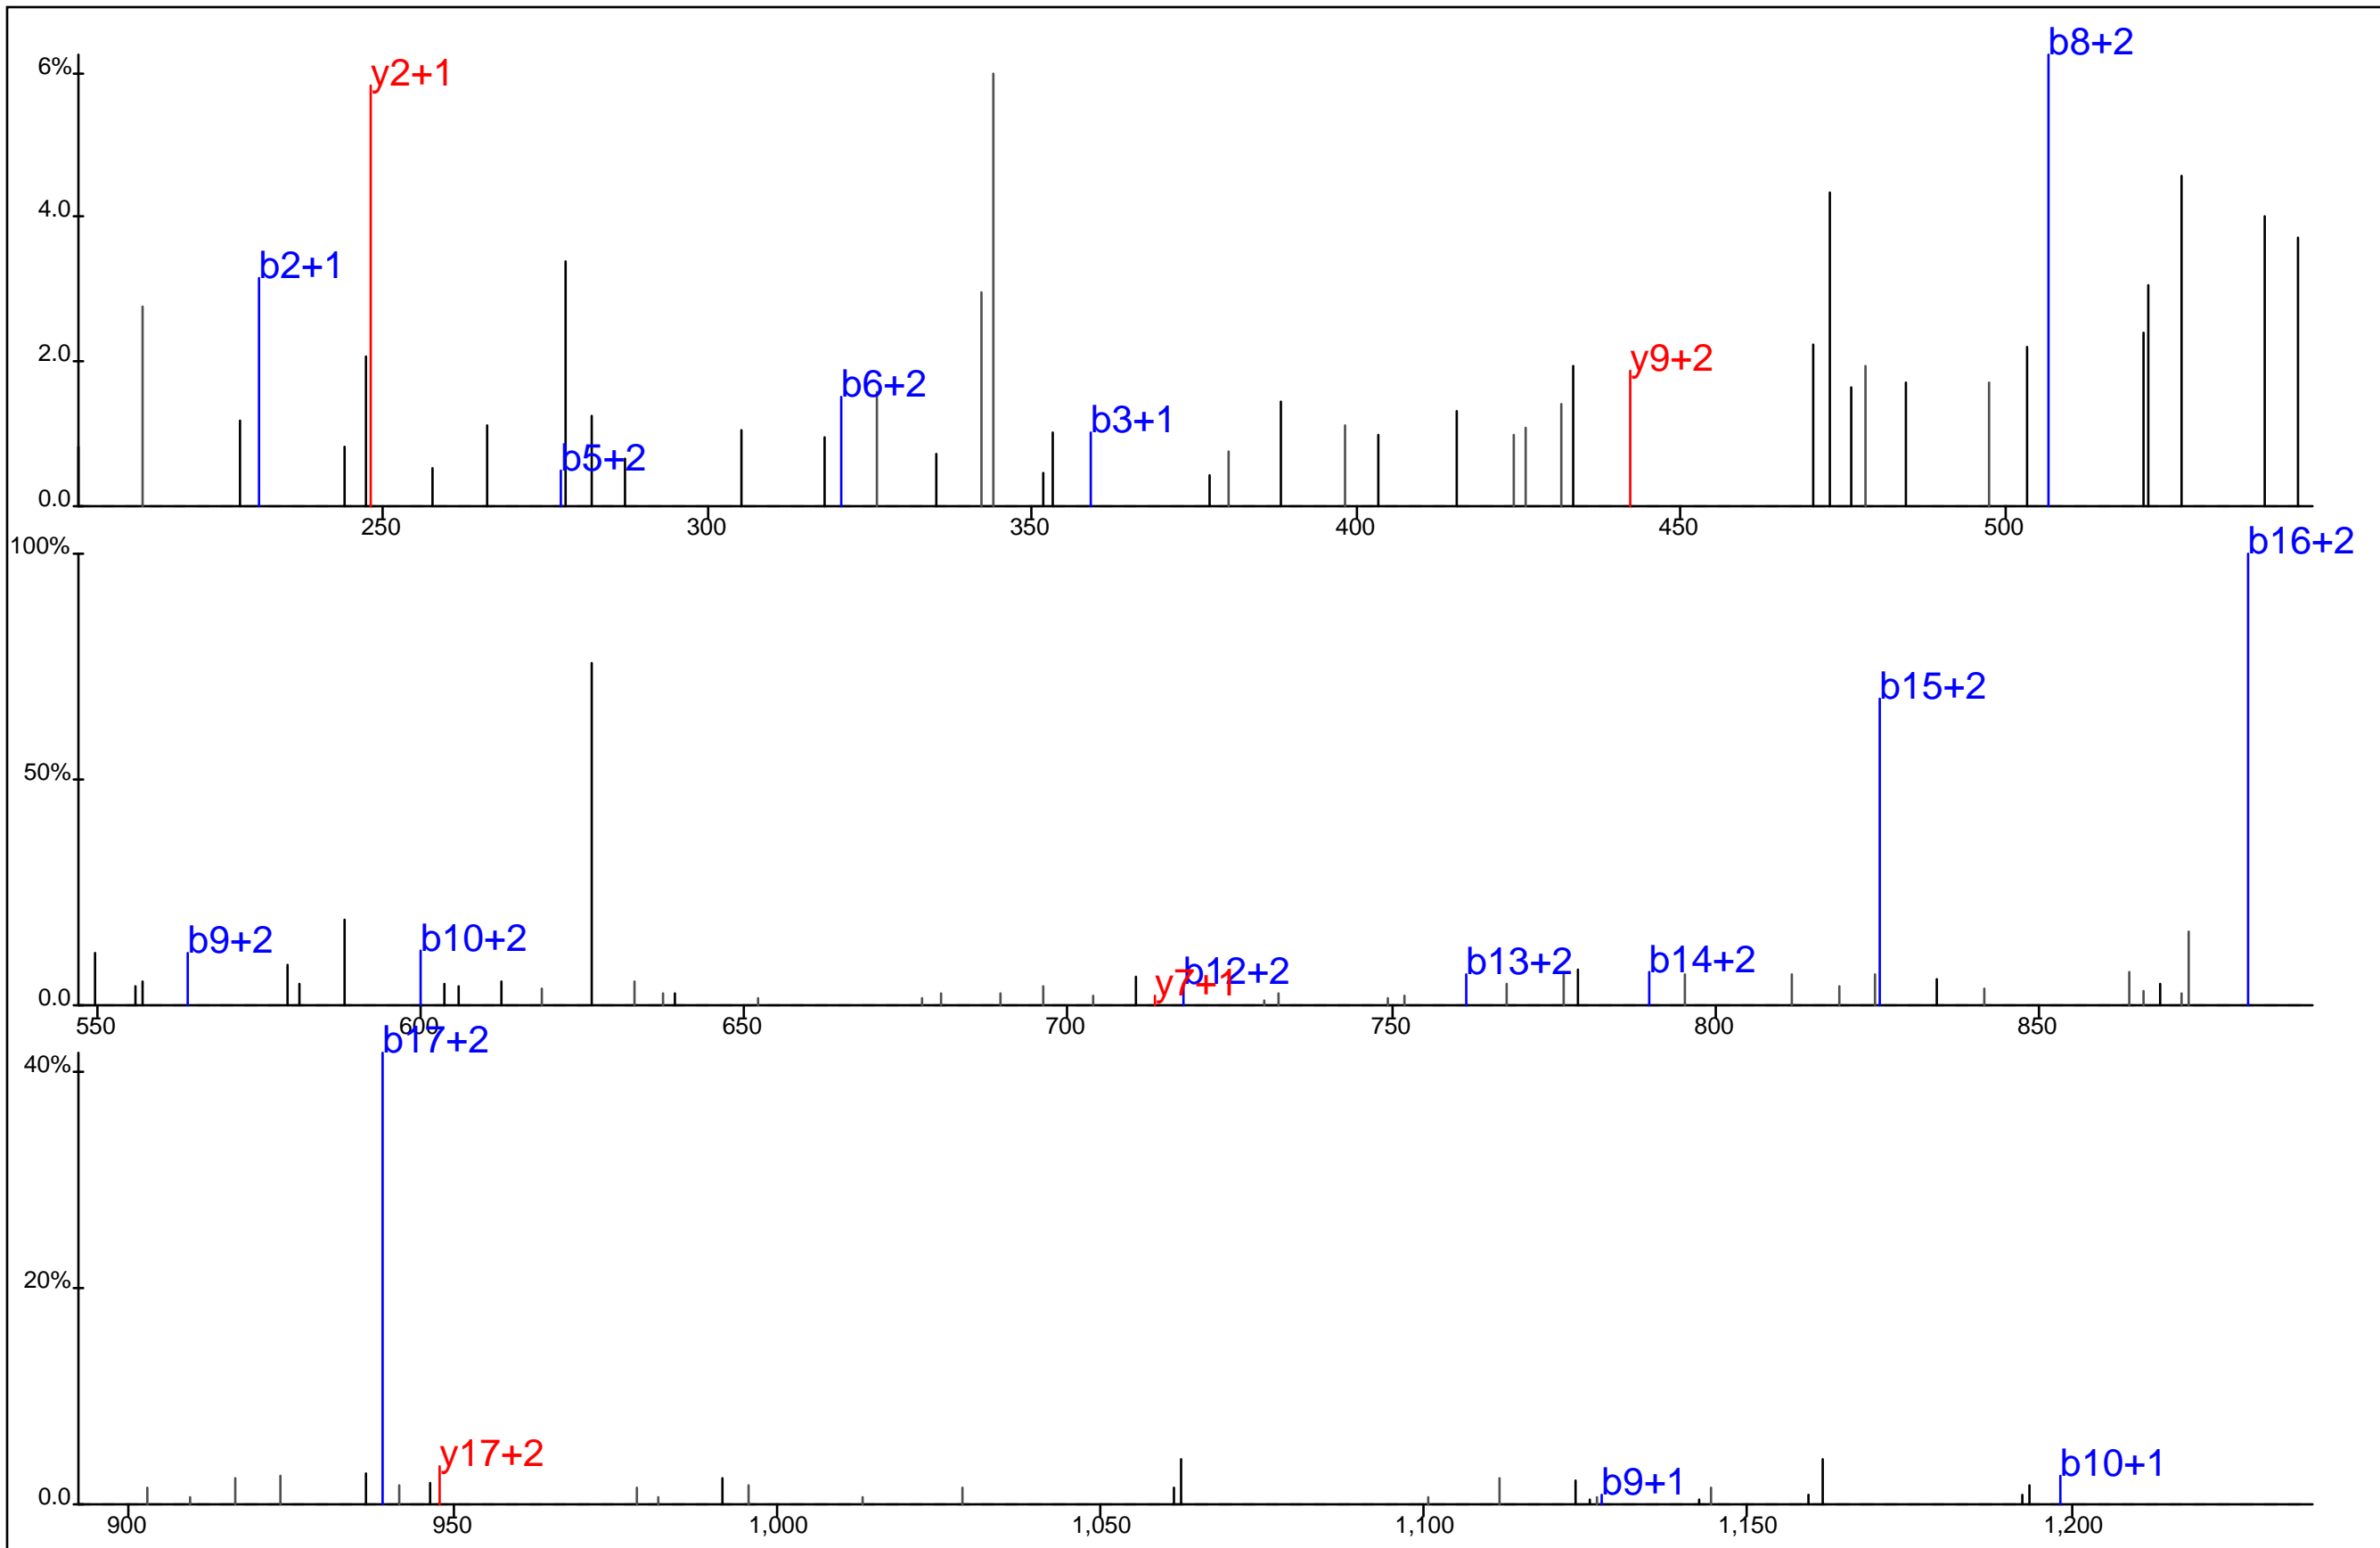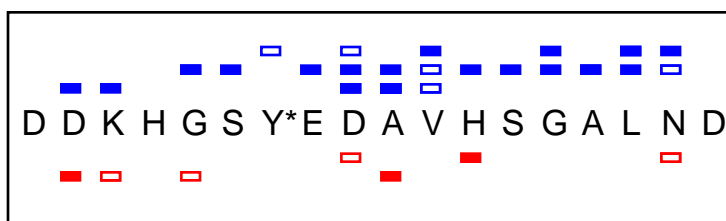

Protein Name: T Complex 1  
 gi Accession: 0  
 Precursor Mass: 670.5995+3  
 Delta Mass: 1.668 ppm  
 XCorr: 40.76

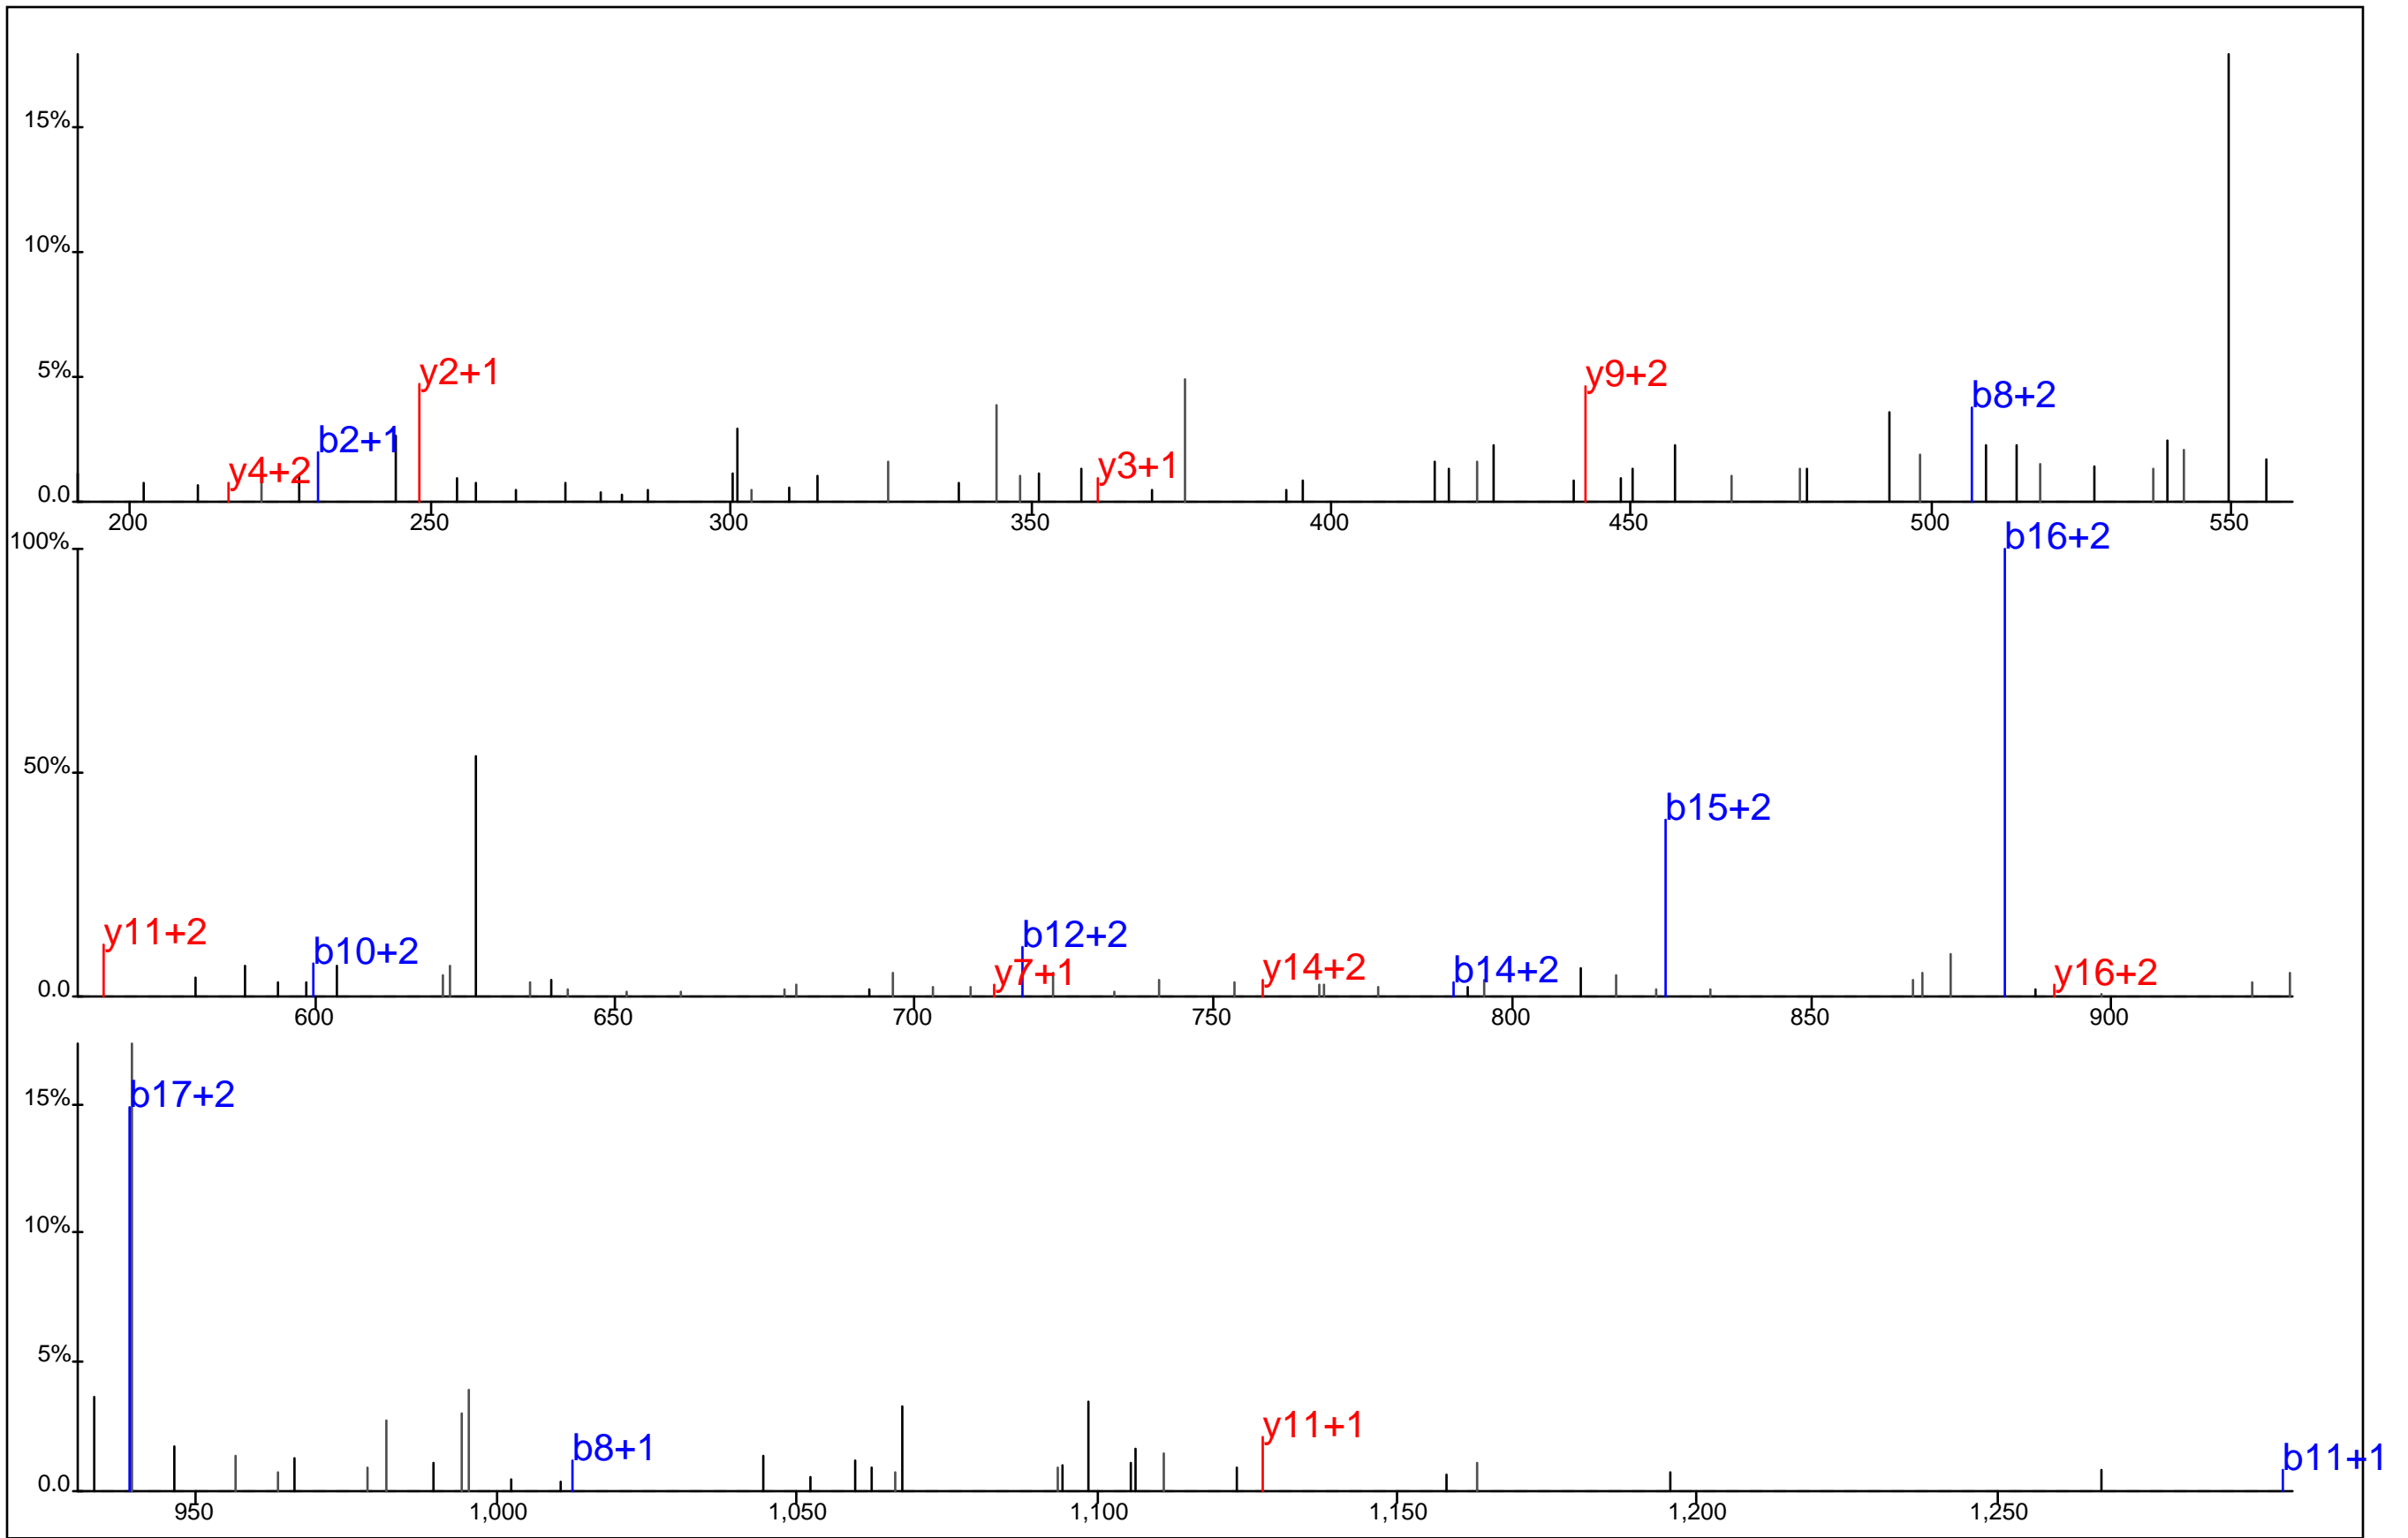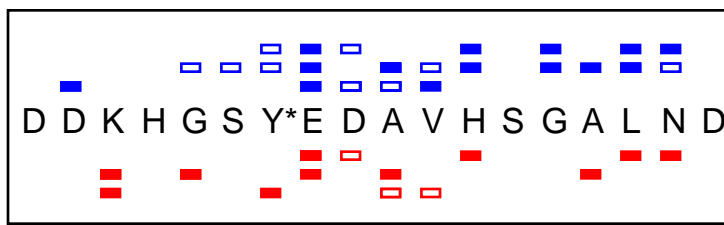

Protein Name: T Complex 1  
 gi Accession: 0  
 Precursor Mass: 670.6010+3  
 Delta Mass: 0.610 ppm  
 XCorr: 46.39



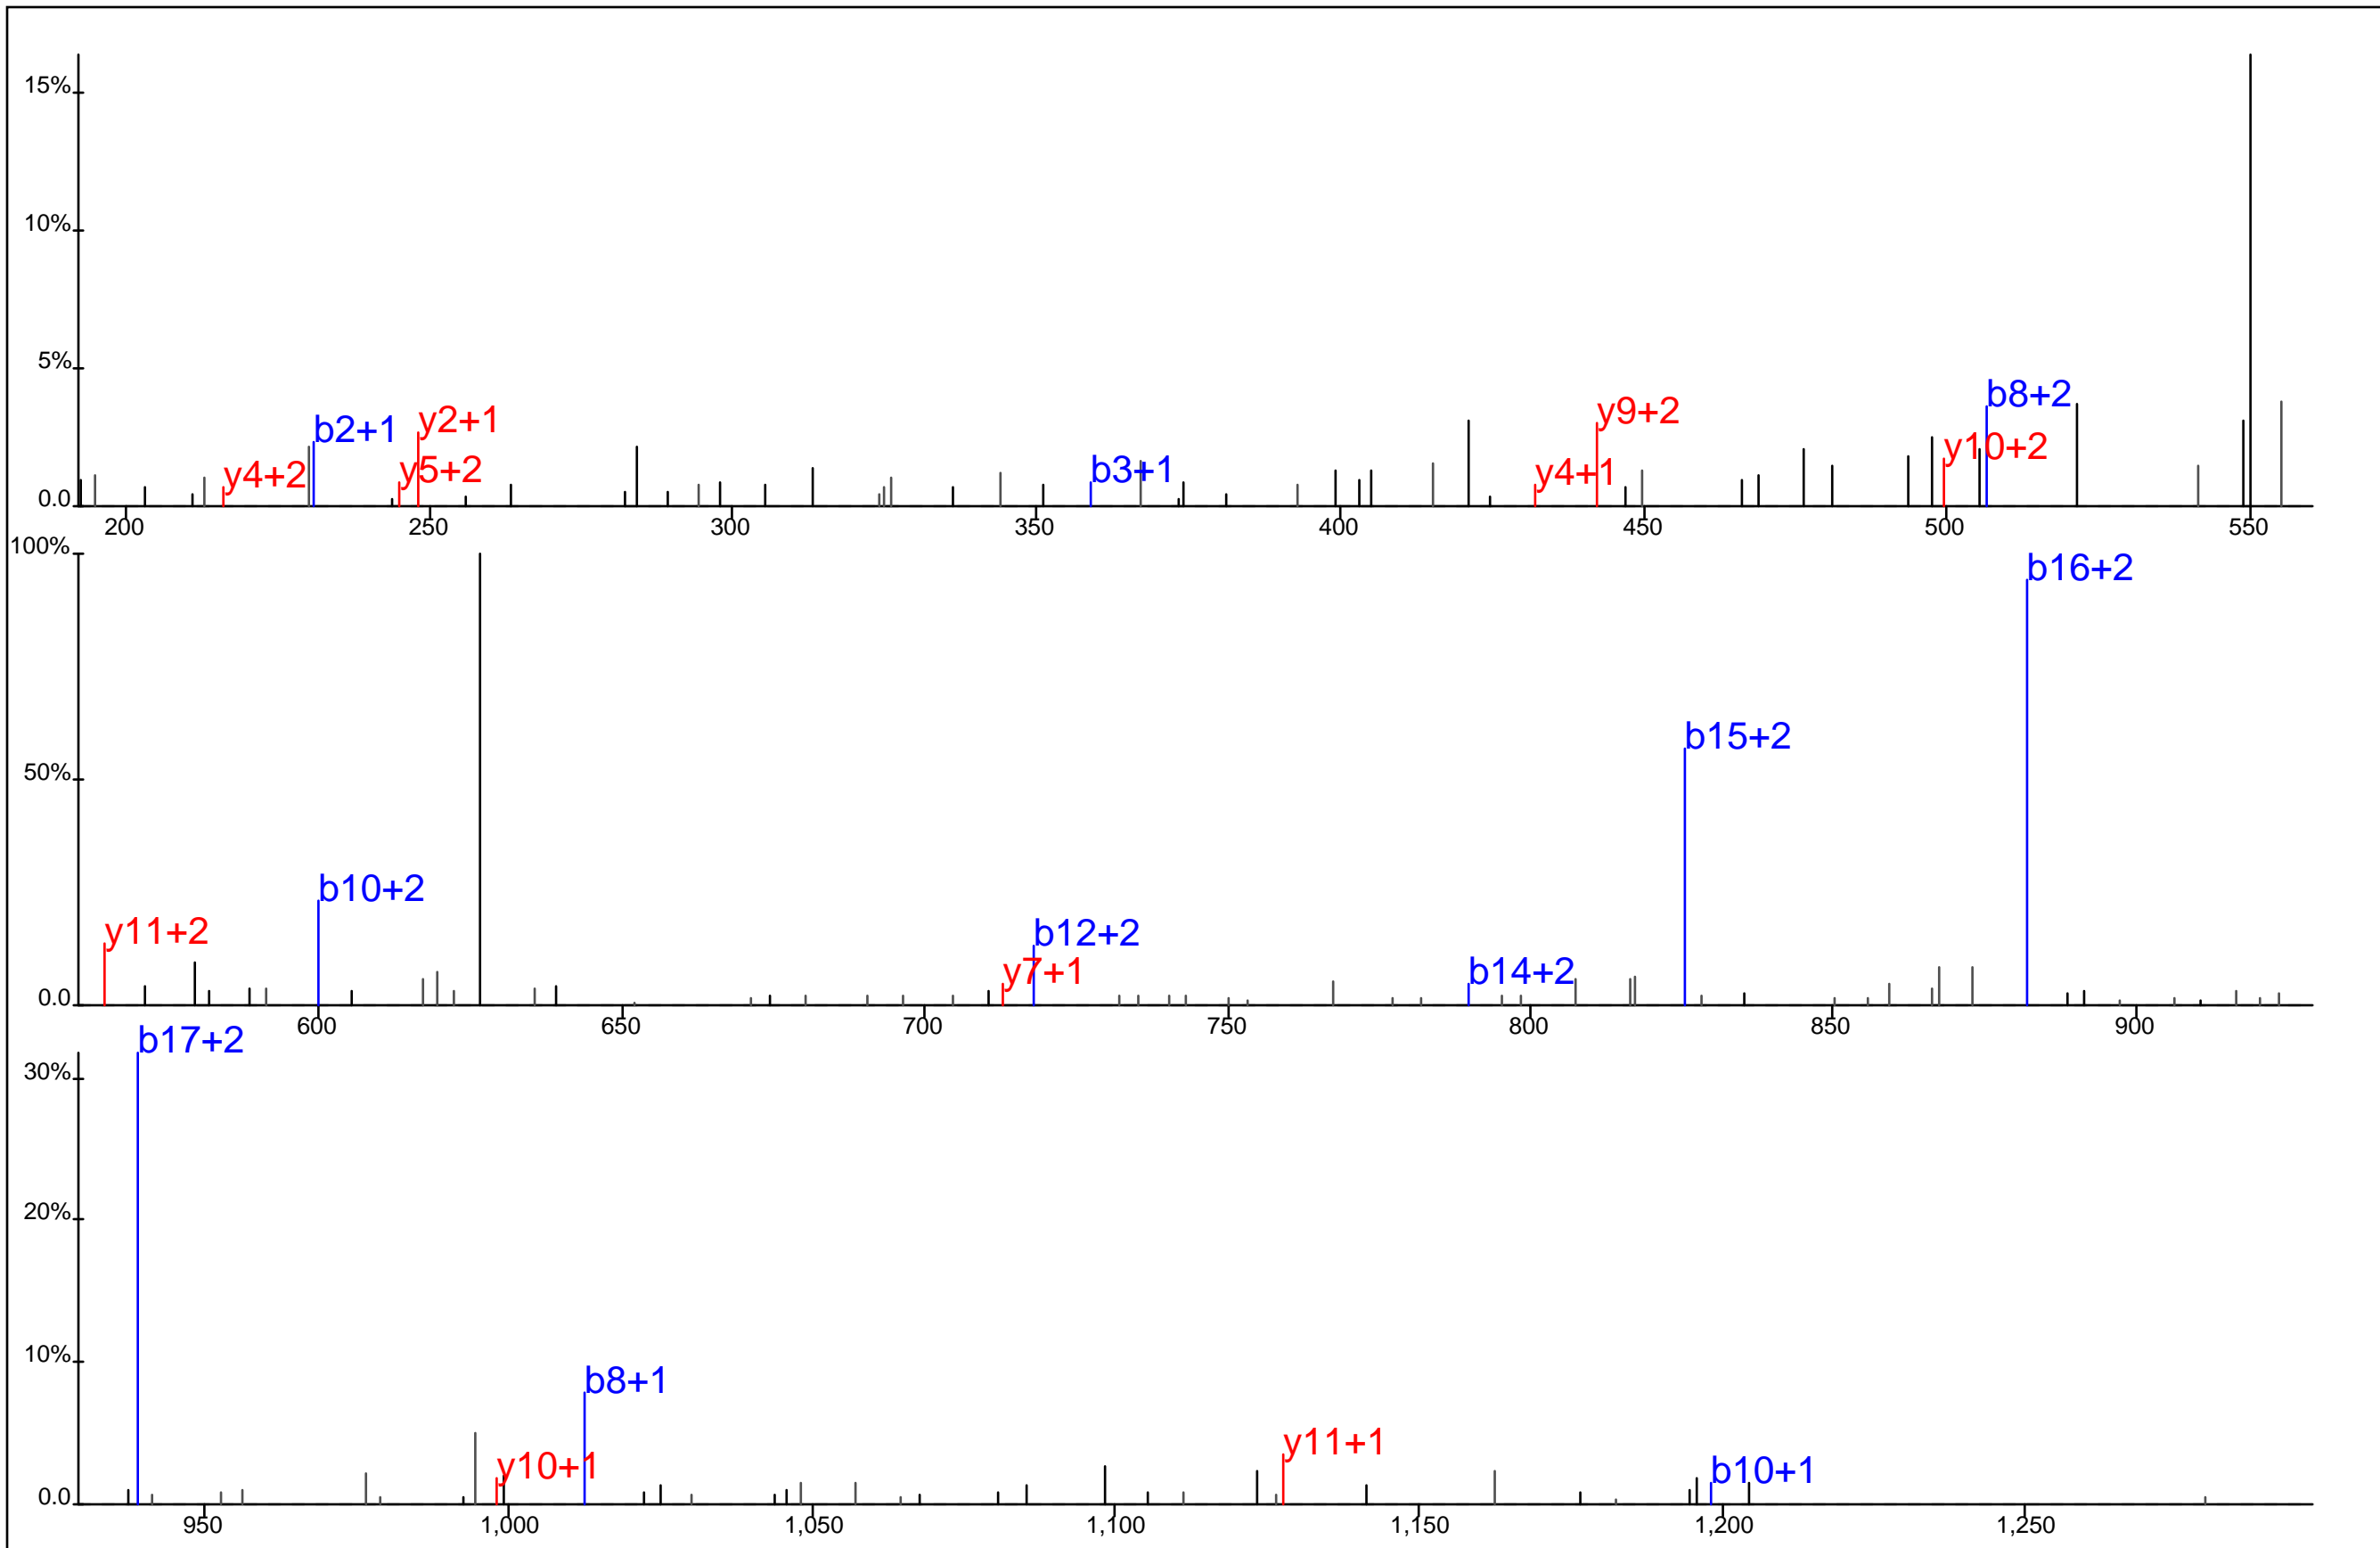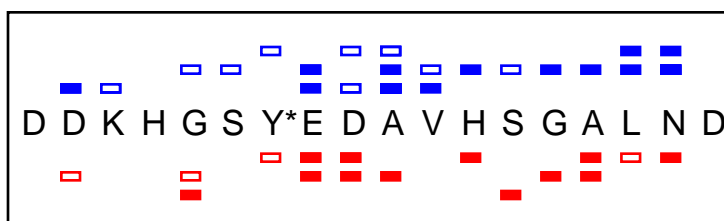

Protein Name: T Complex 1  
 gi Accession: 0  
 Precursor Mass: 670.5991+3  
 Delta Mass: 2.215 ppm  
 XCorr: 46.46

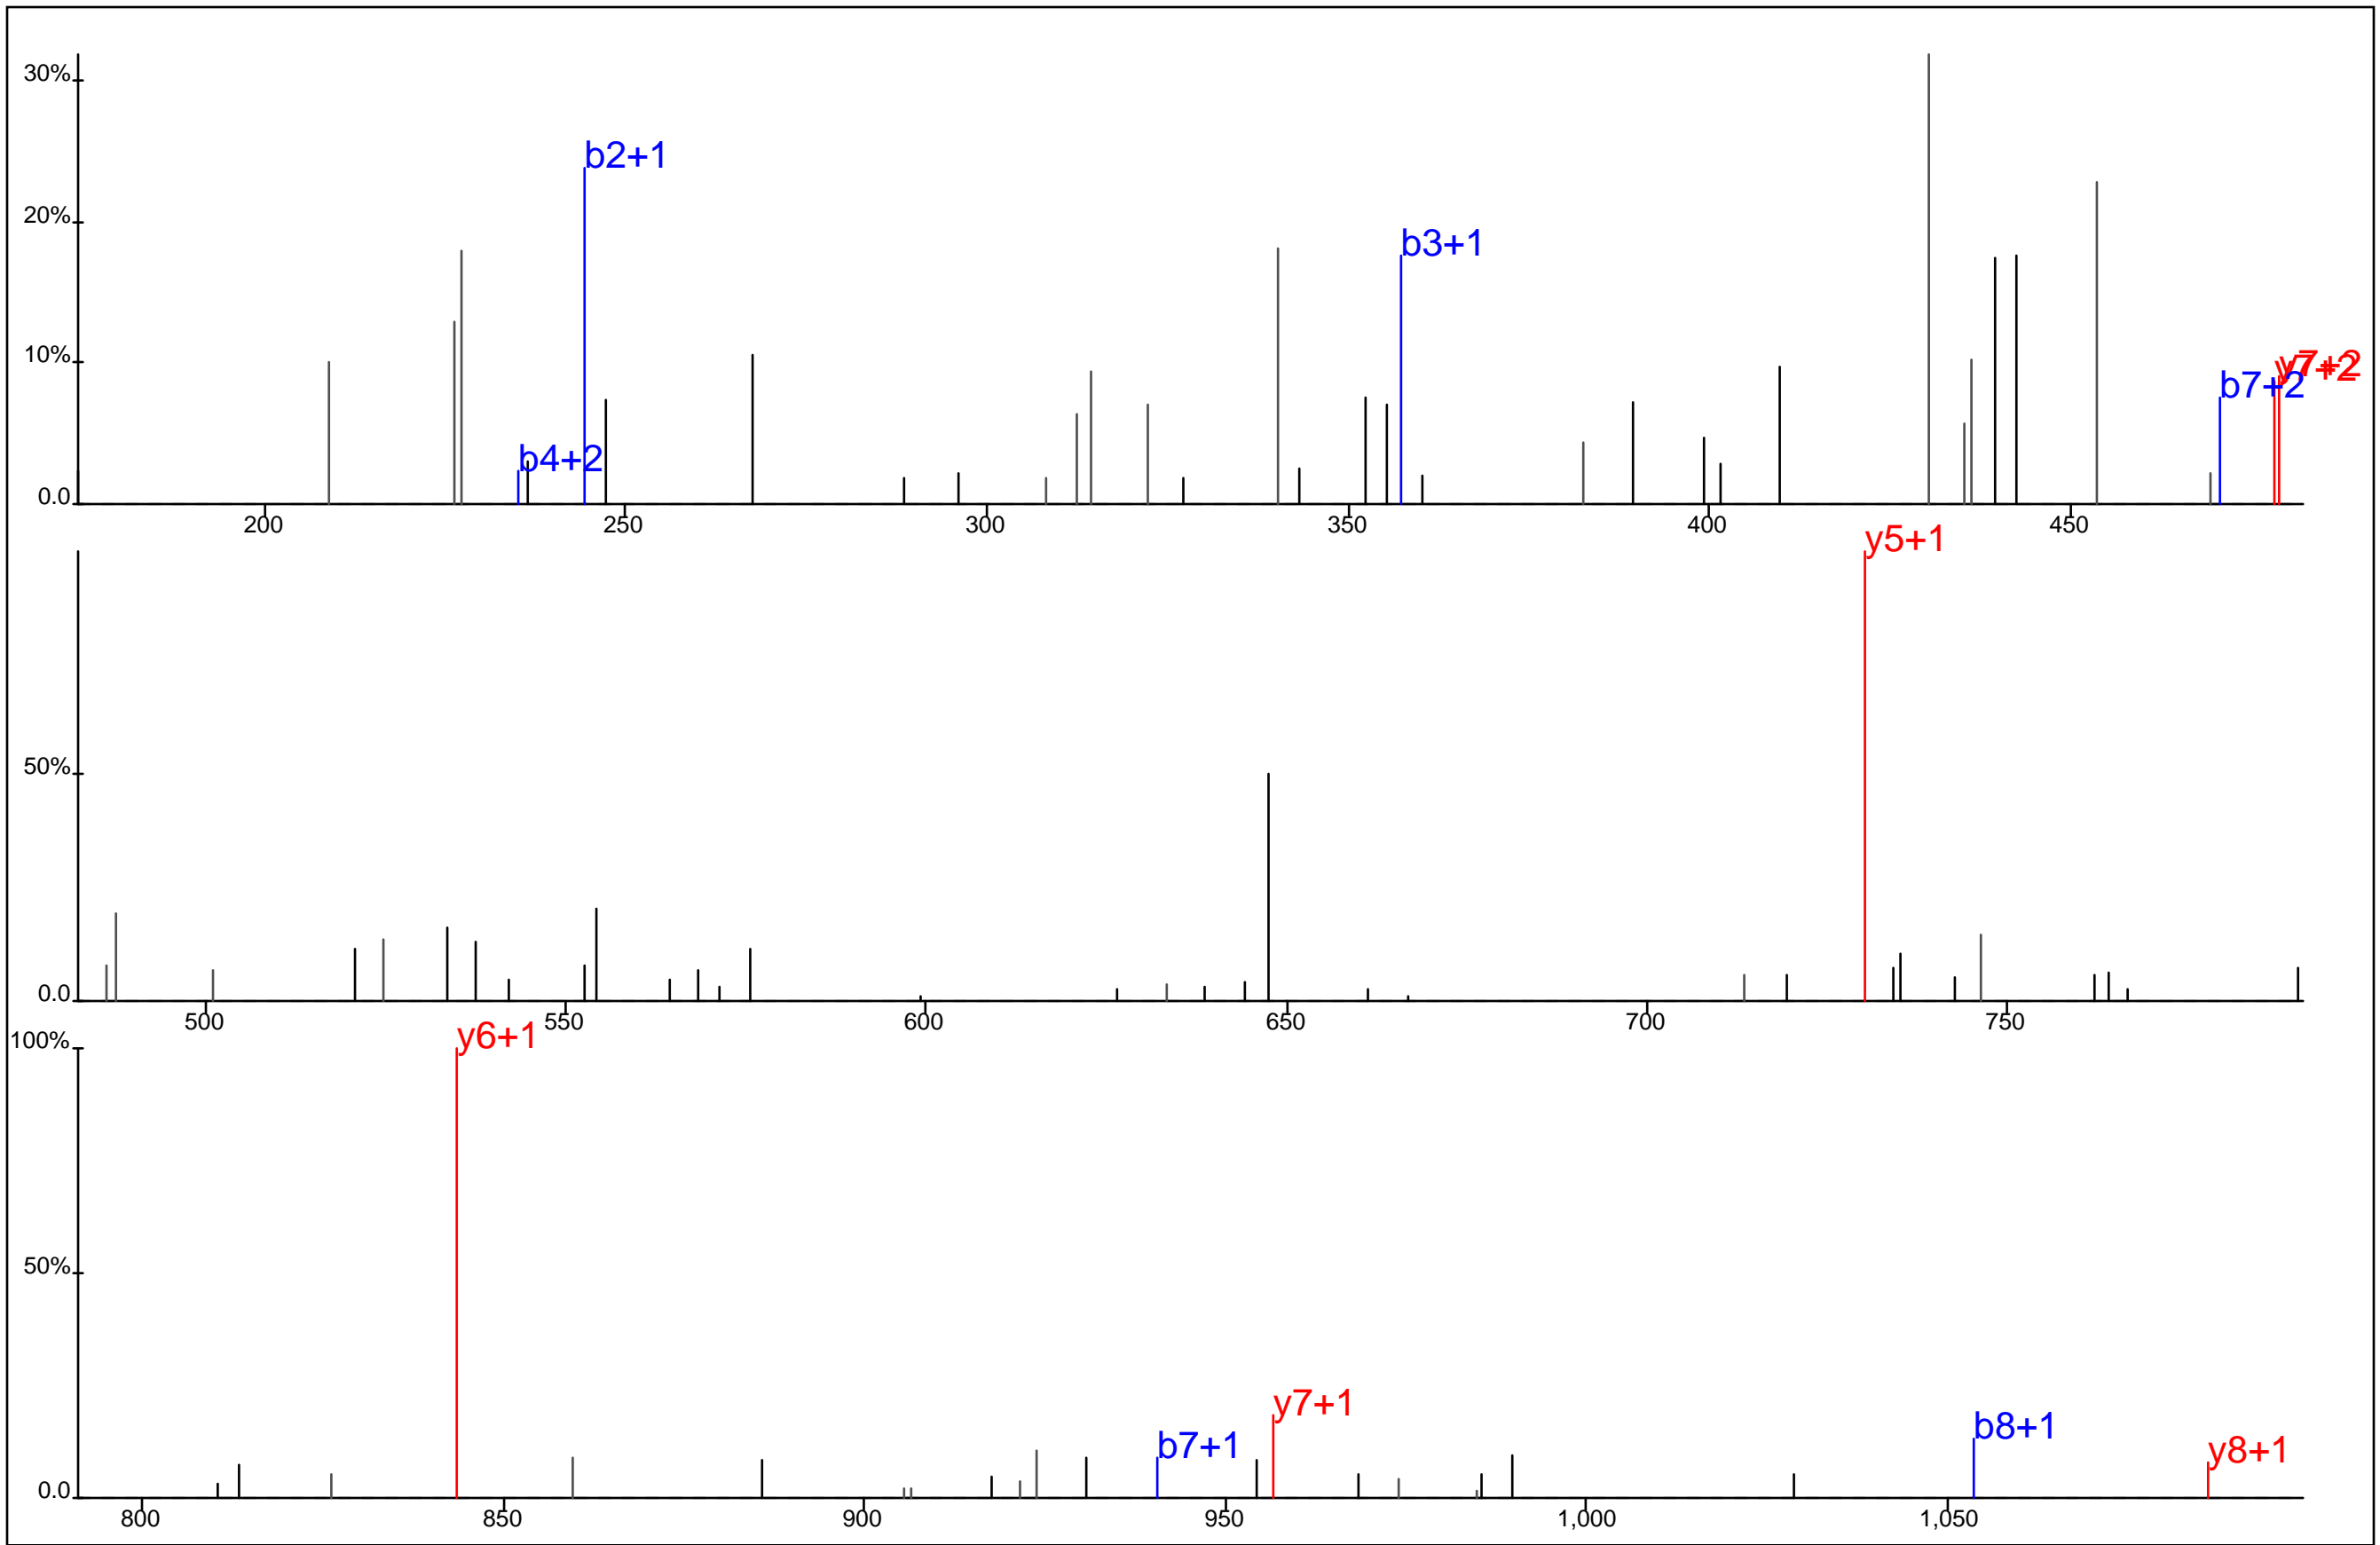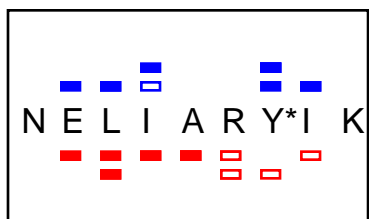

Protein Name: Tea domain family member 1  
 gi Accession: 0  
 Precursor Mass: 600.3087+2  
 Delta Mass: 6.926 ppm  
 XCorr: 24.65

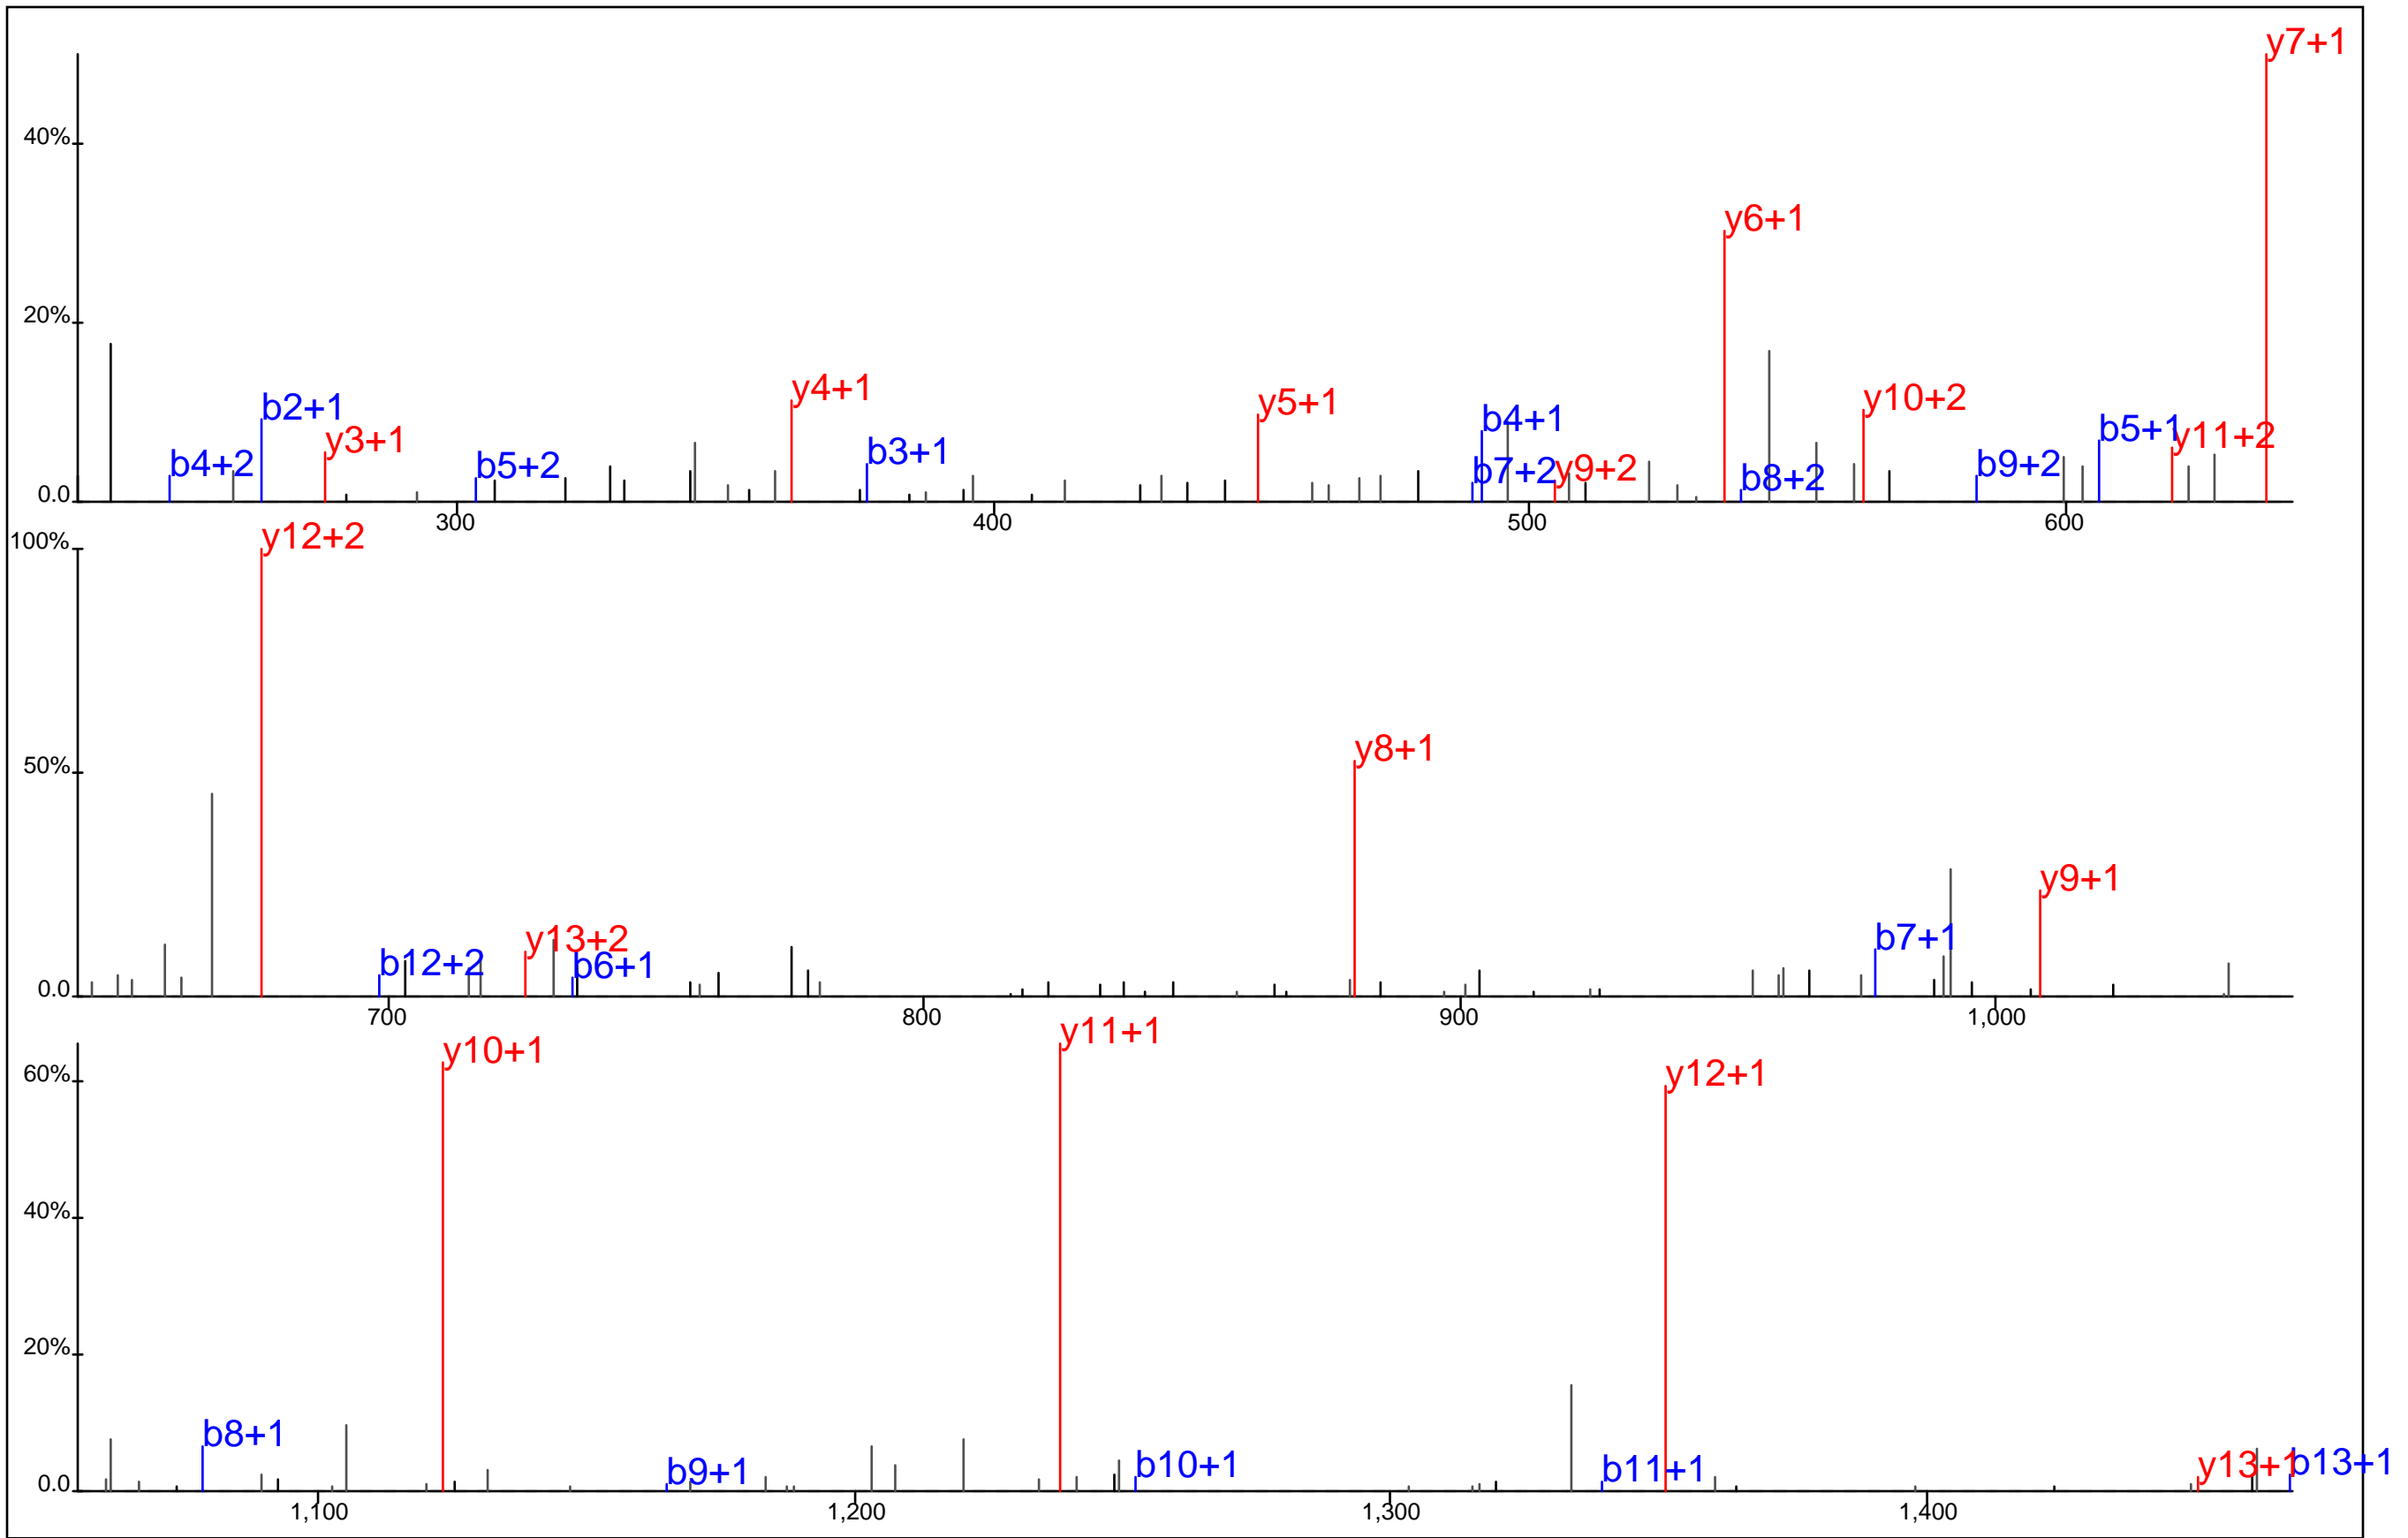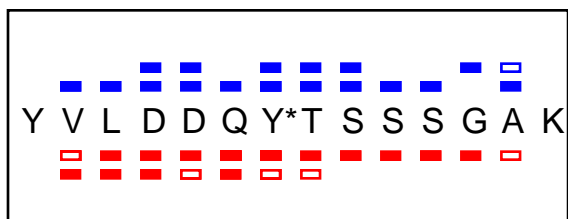

Protein Name: Tec tyrosine kinase  
 gi Accession: 0  
 Precursor Mass: 807.3400+2  
 Delta Mass: 0.252 ppm  
 XCorr: 69.52

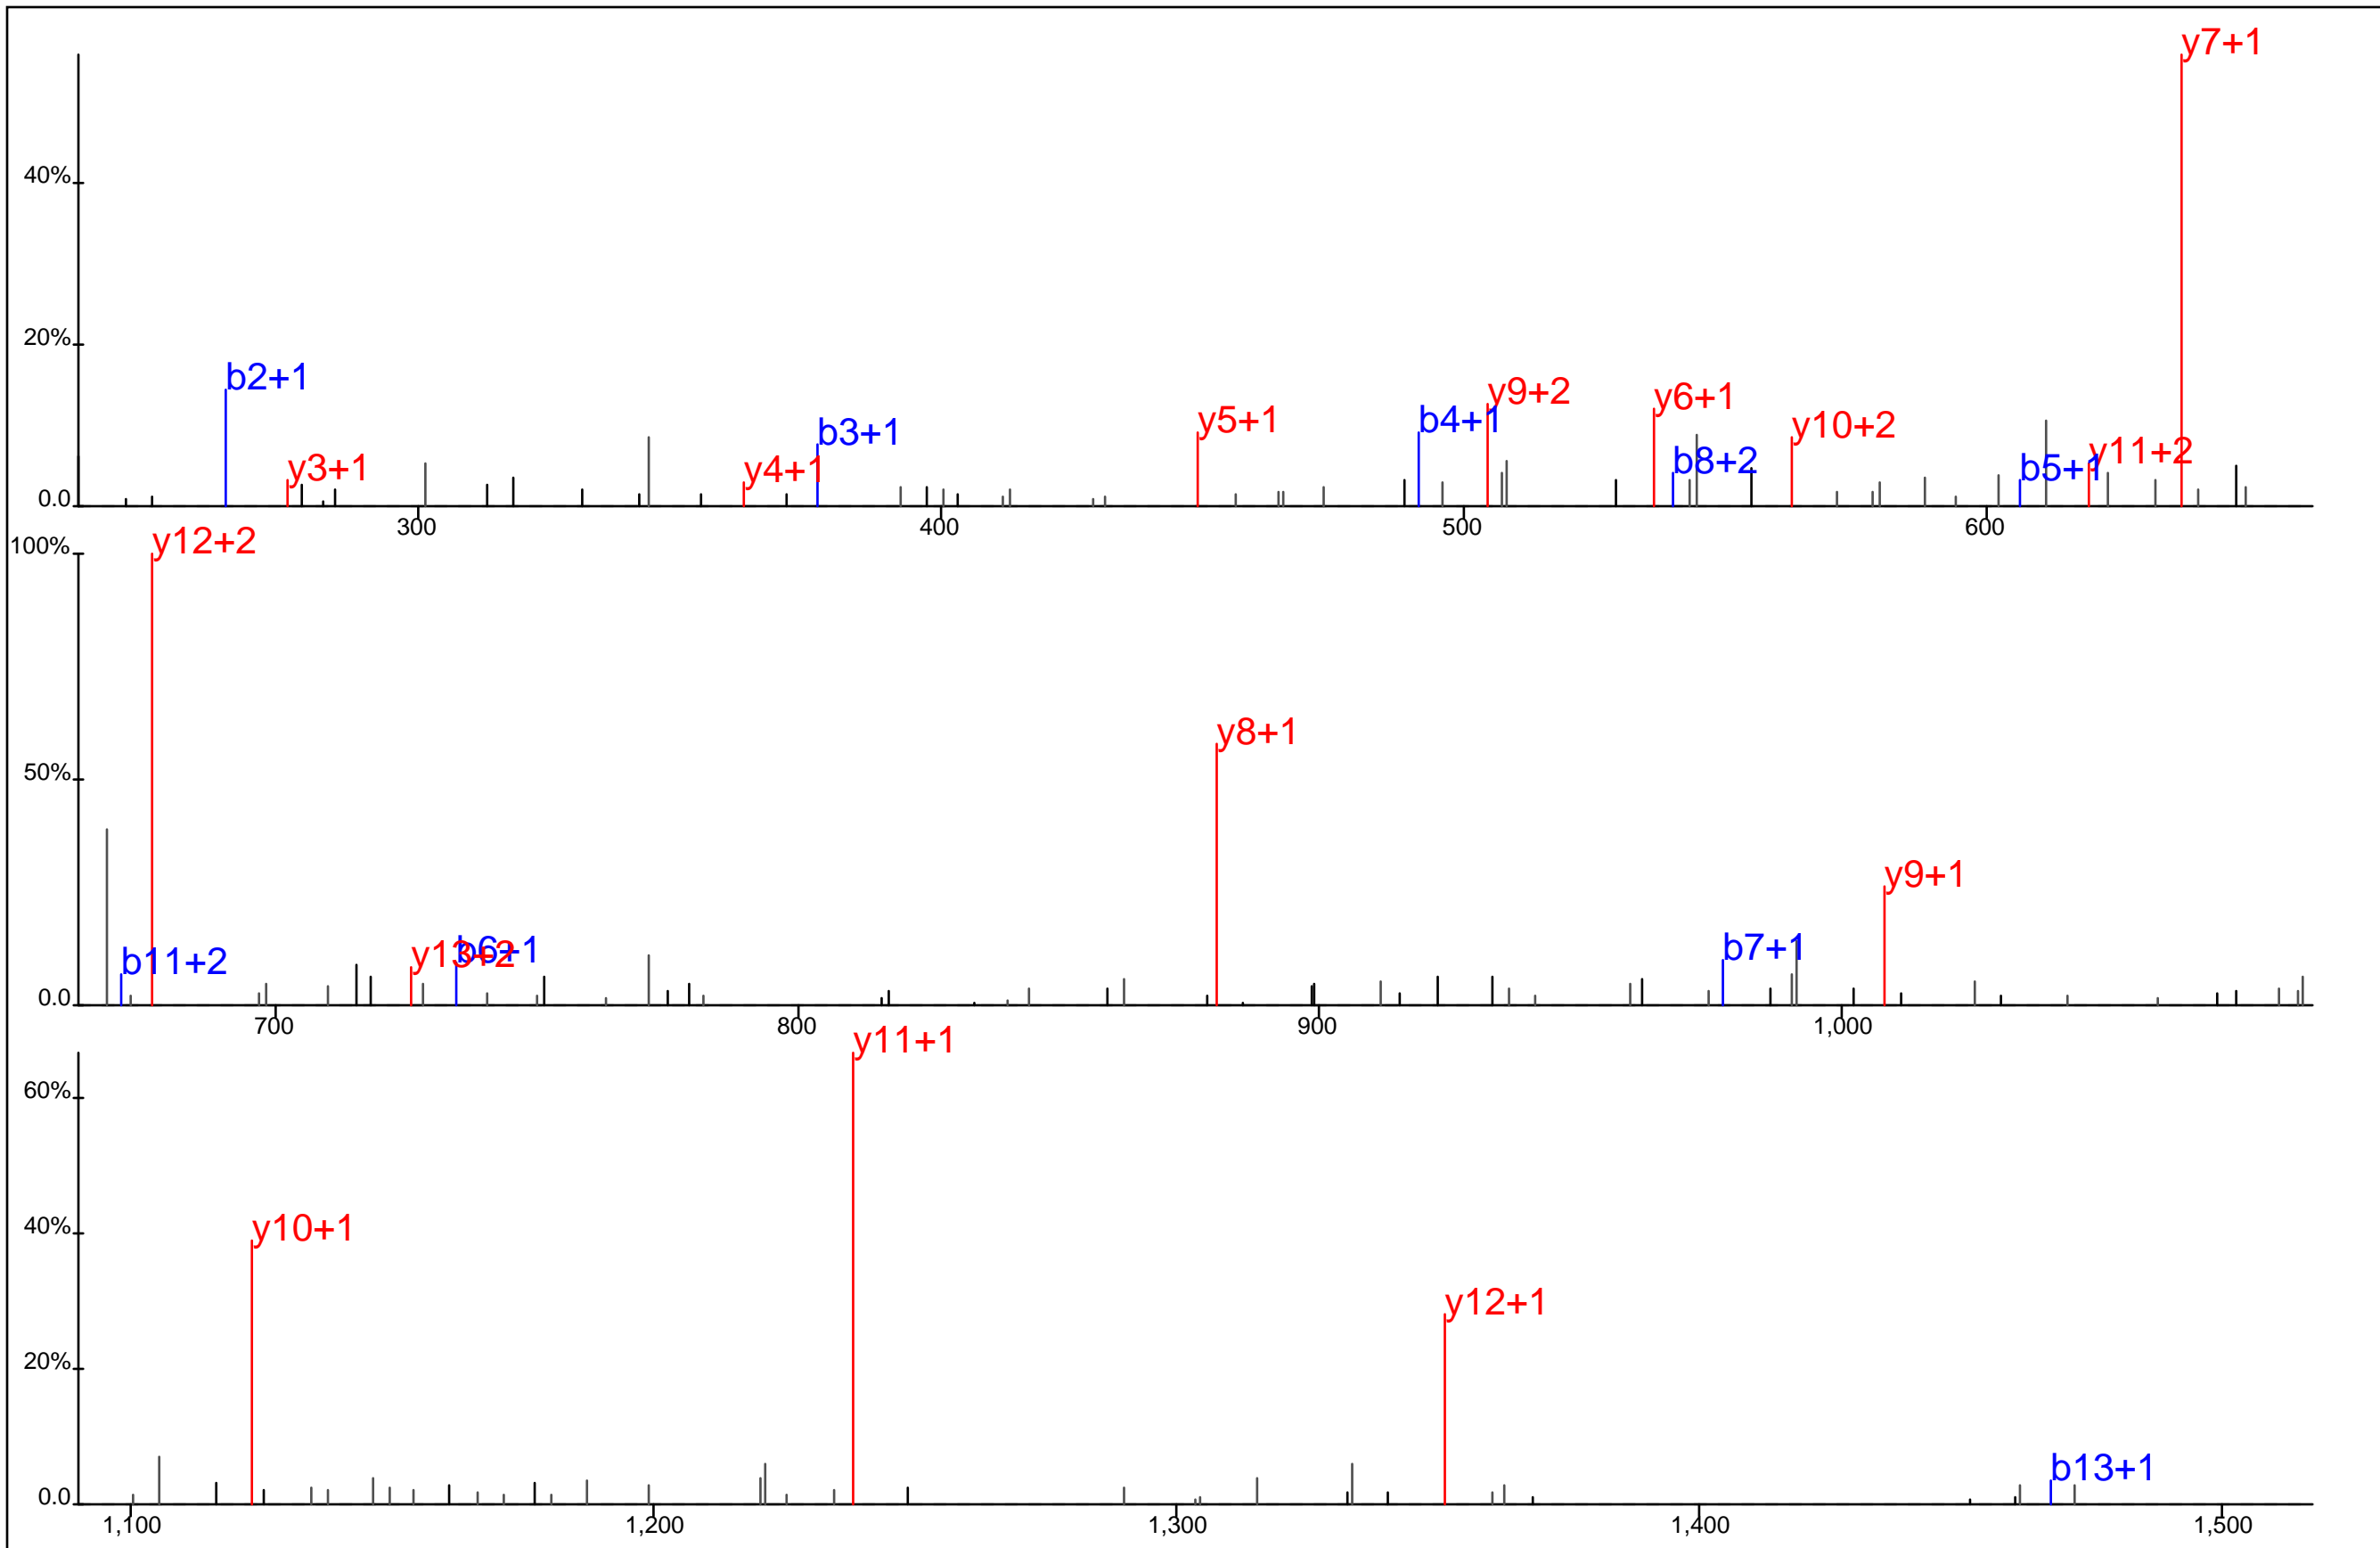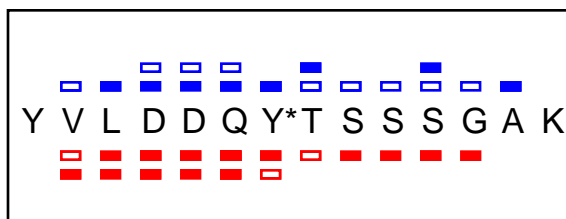

Protein Name: Tec tyrosine kinase  
 gi Accession: 0  
 Precursor Mass: 807.3383+2  
 Delta Mass: 2.294 ppm  
 XCorr: 61.69

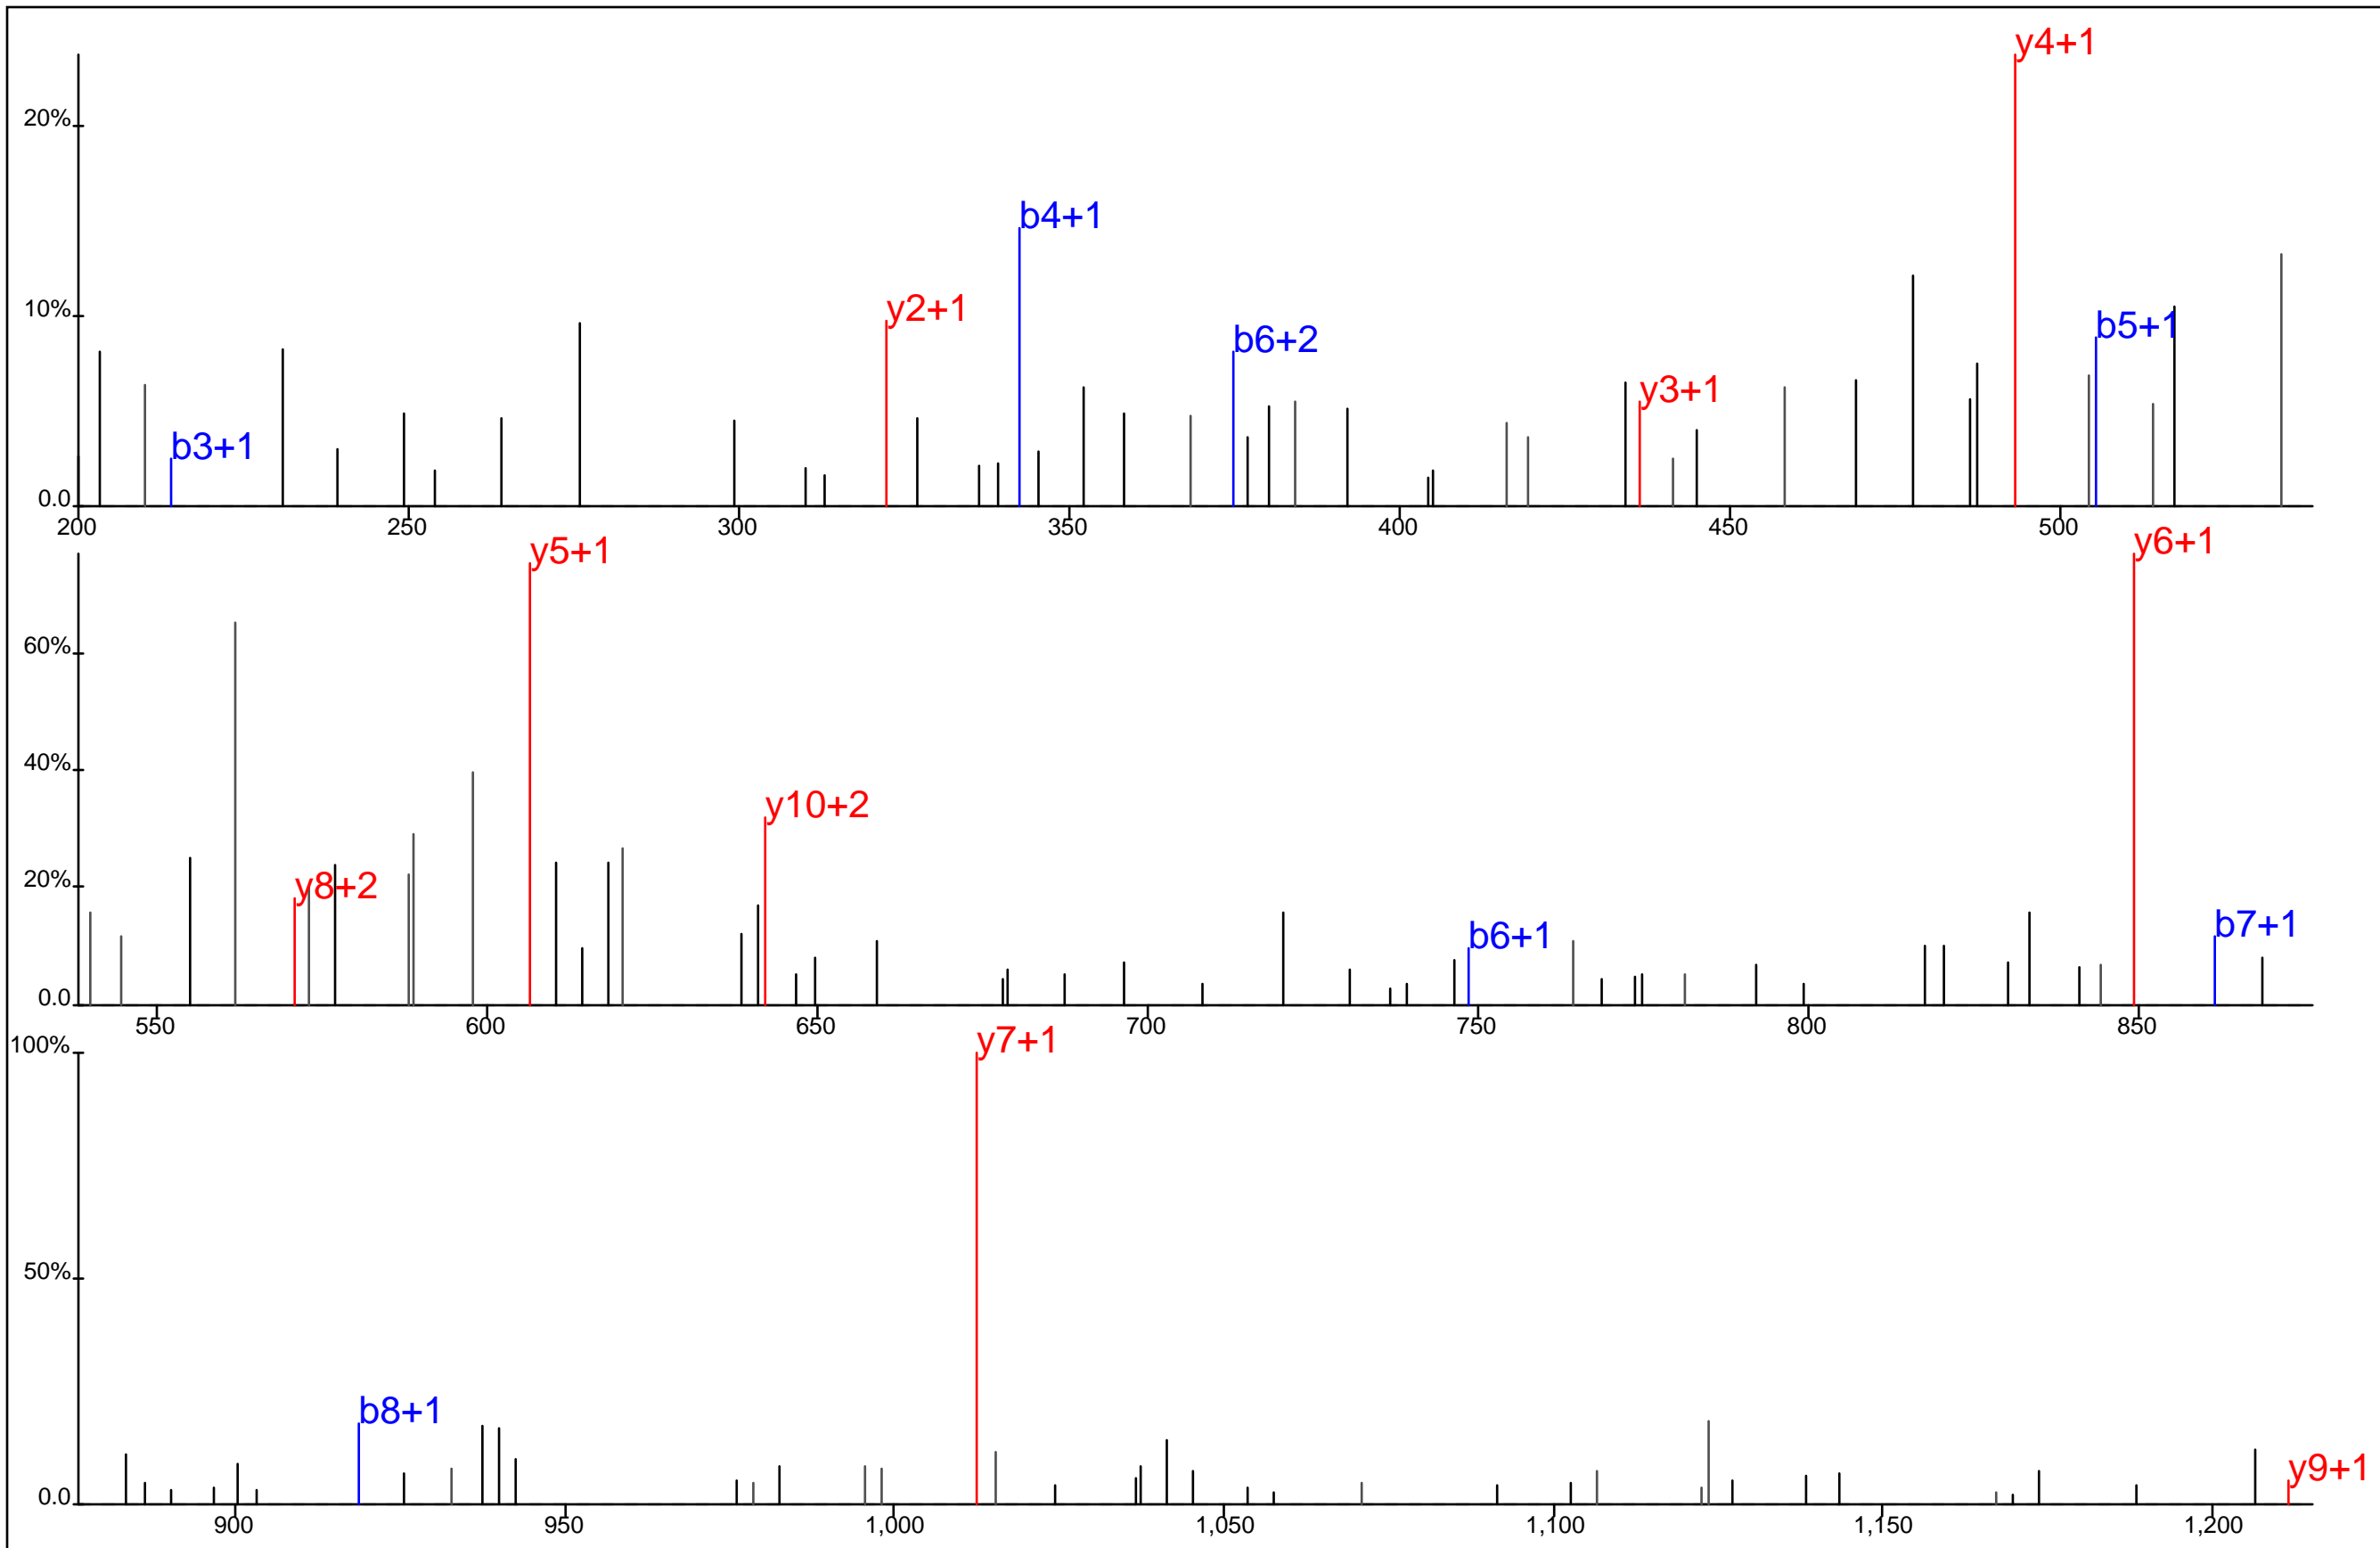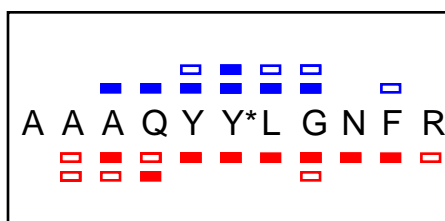

Protein Name: Tetratricopeptide repeat domain 4  
 gi Accession: 0  
 Precursor Mass: 677.3074+2  
 Delta Mass: 6.485 ppm  
 XCorr: 32.31

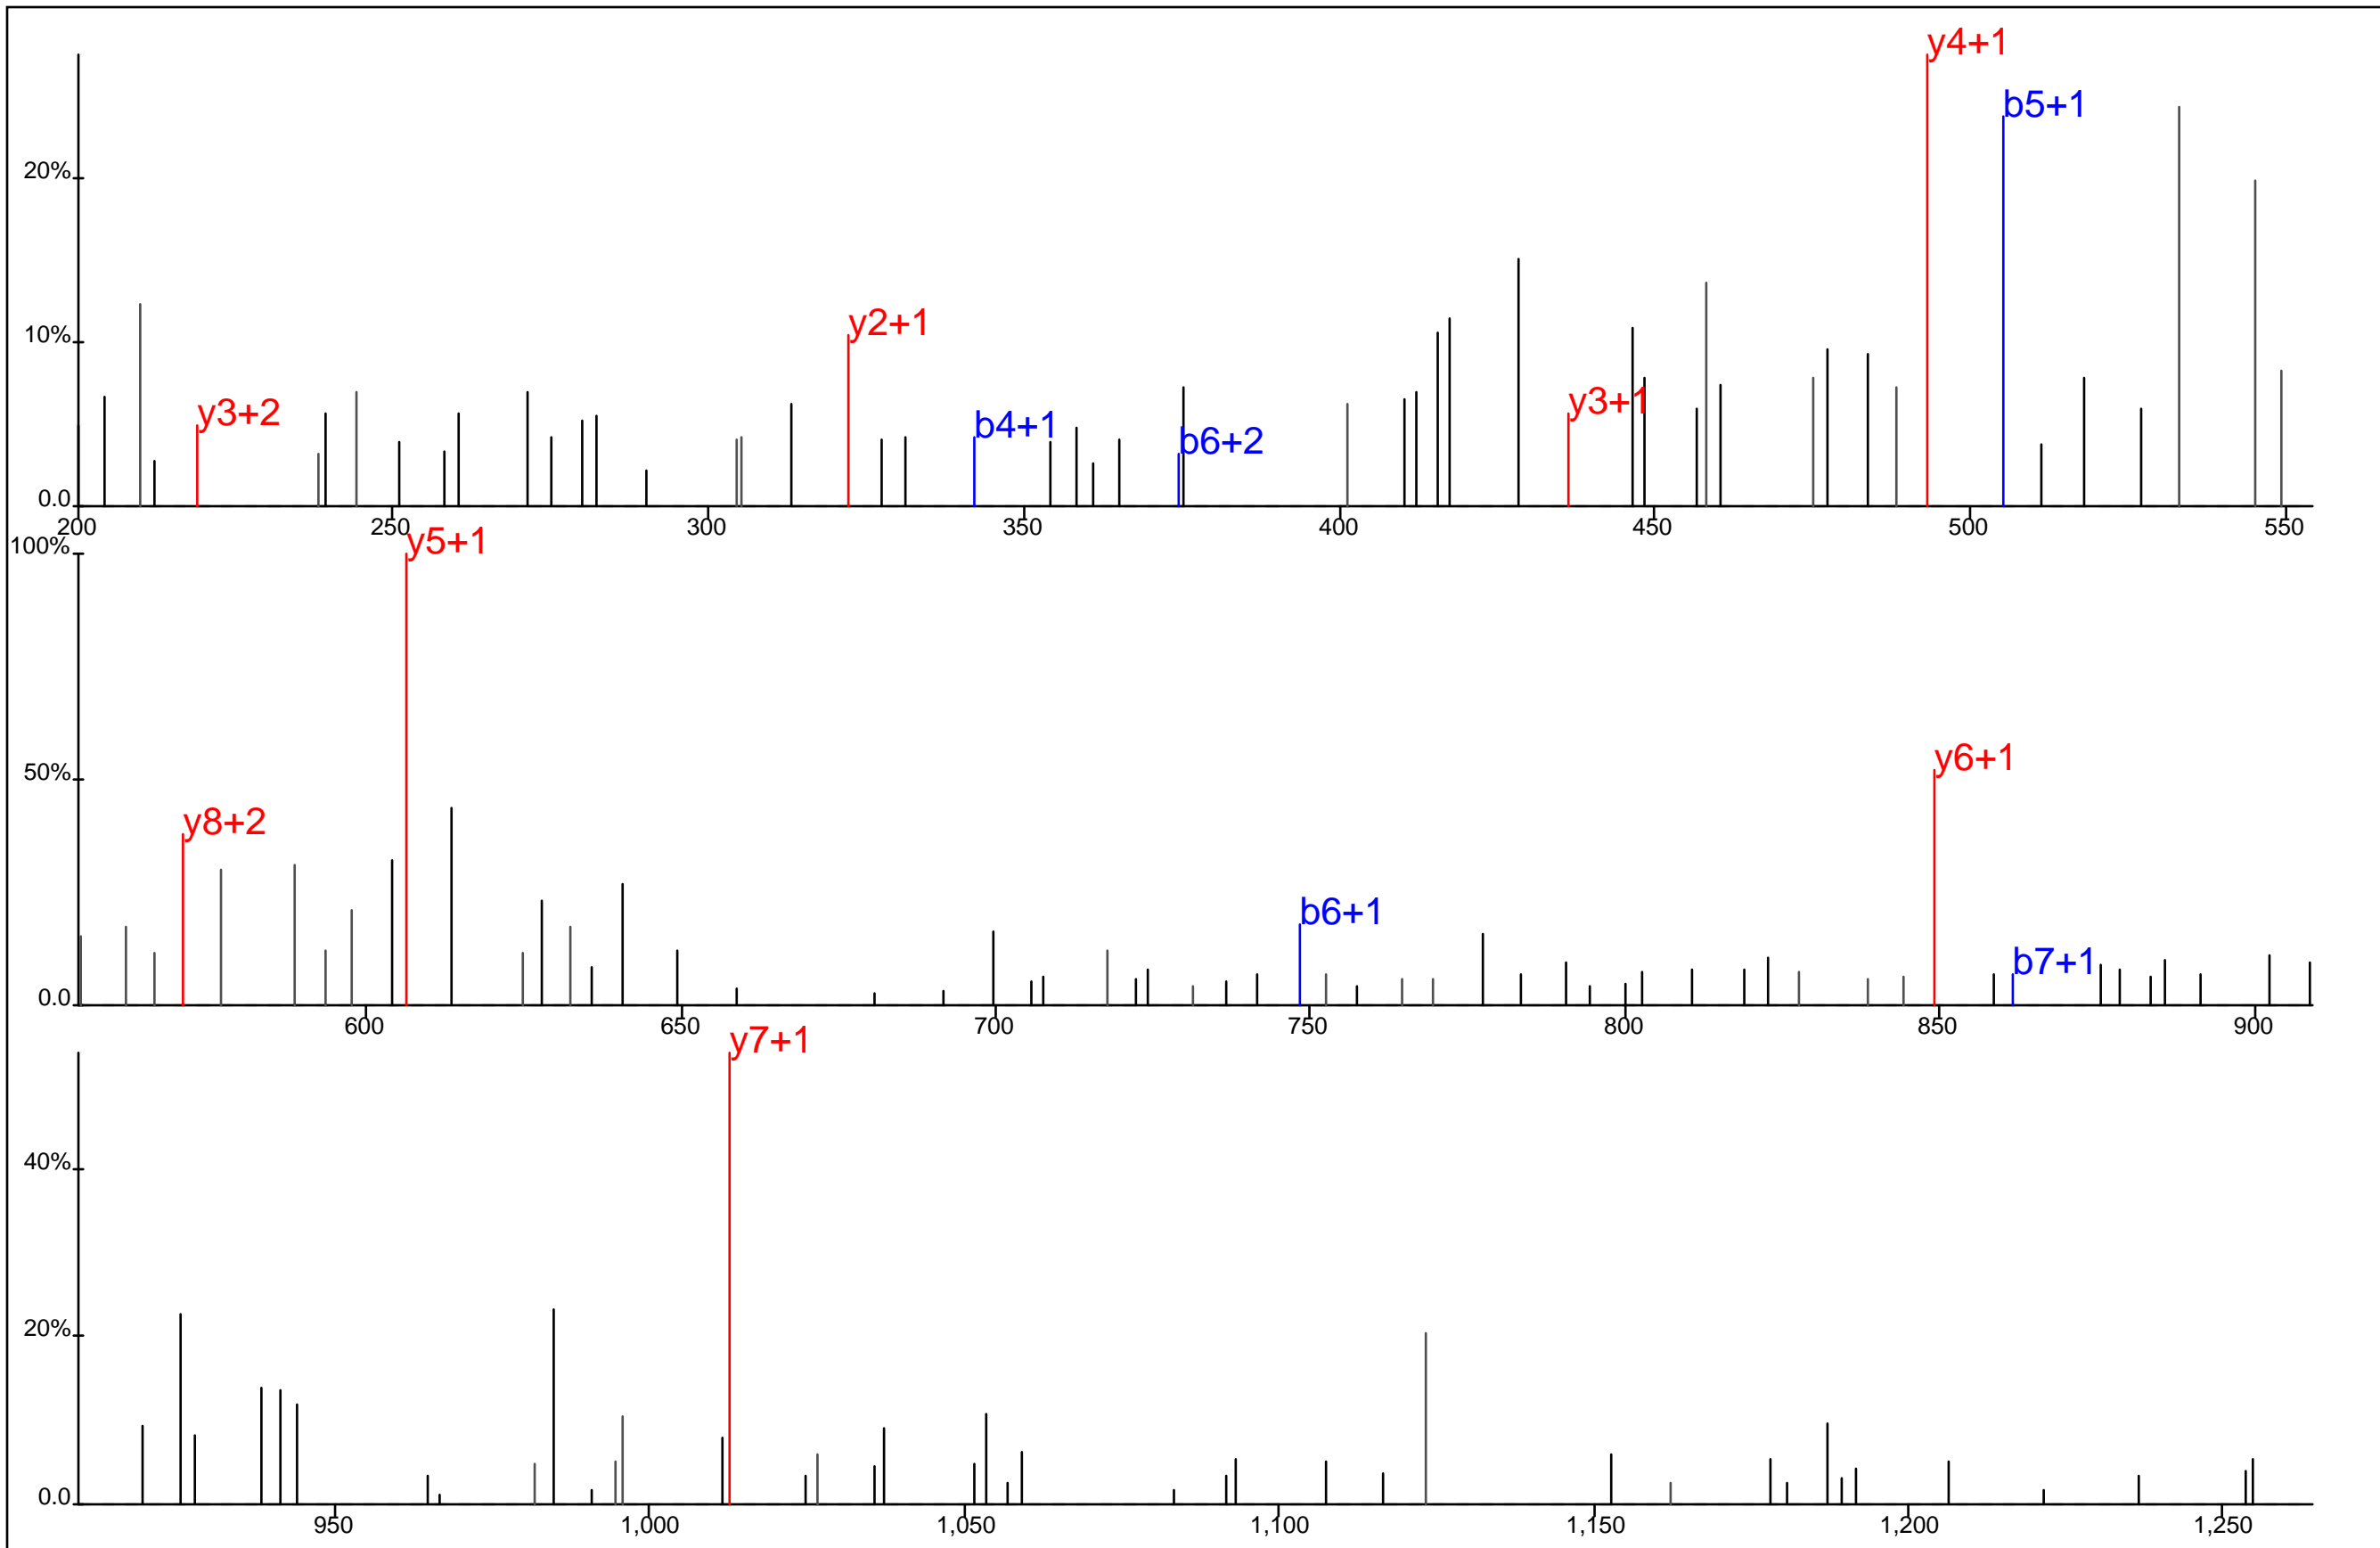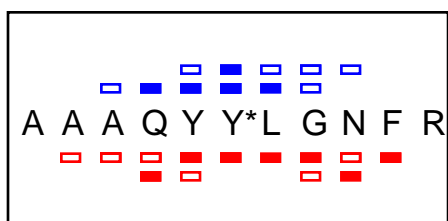

Protein Name: Tetratricopeptide repeat domain 4  
 gi Accession: 0  
 Precursor Mass: 677.3030+2  
 Delta Mass: 0.083 ppm  
 XCorr: 32.62

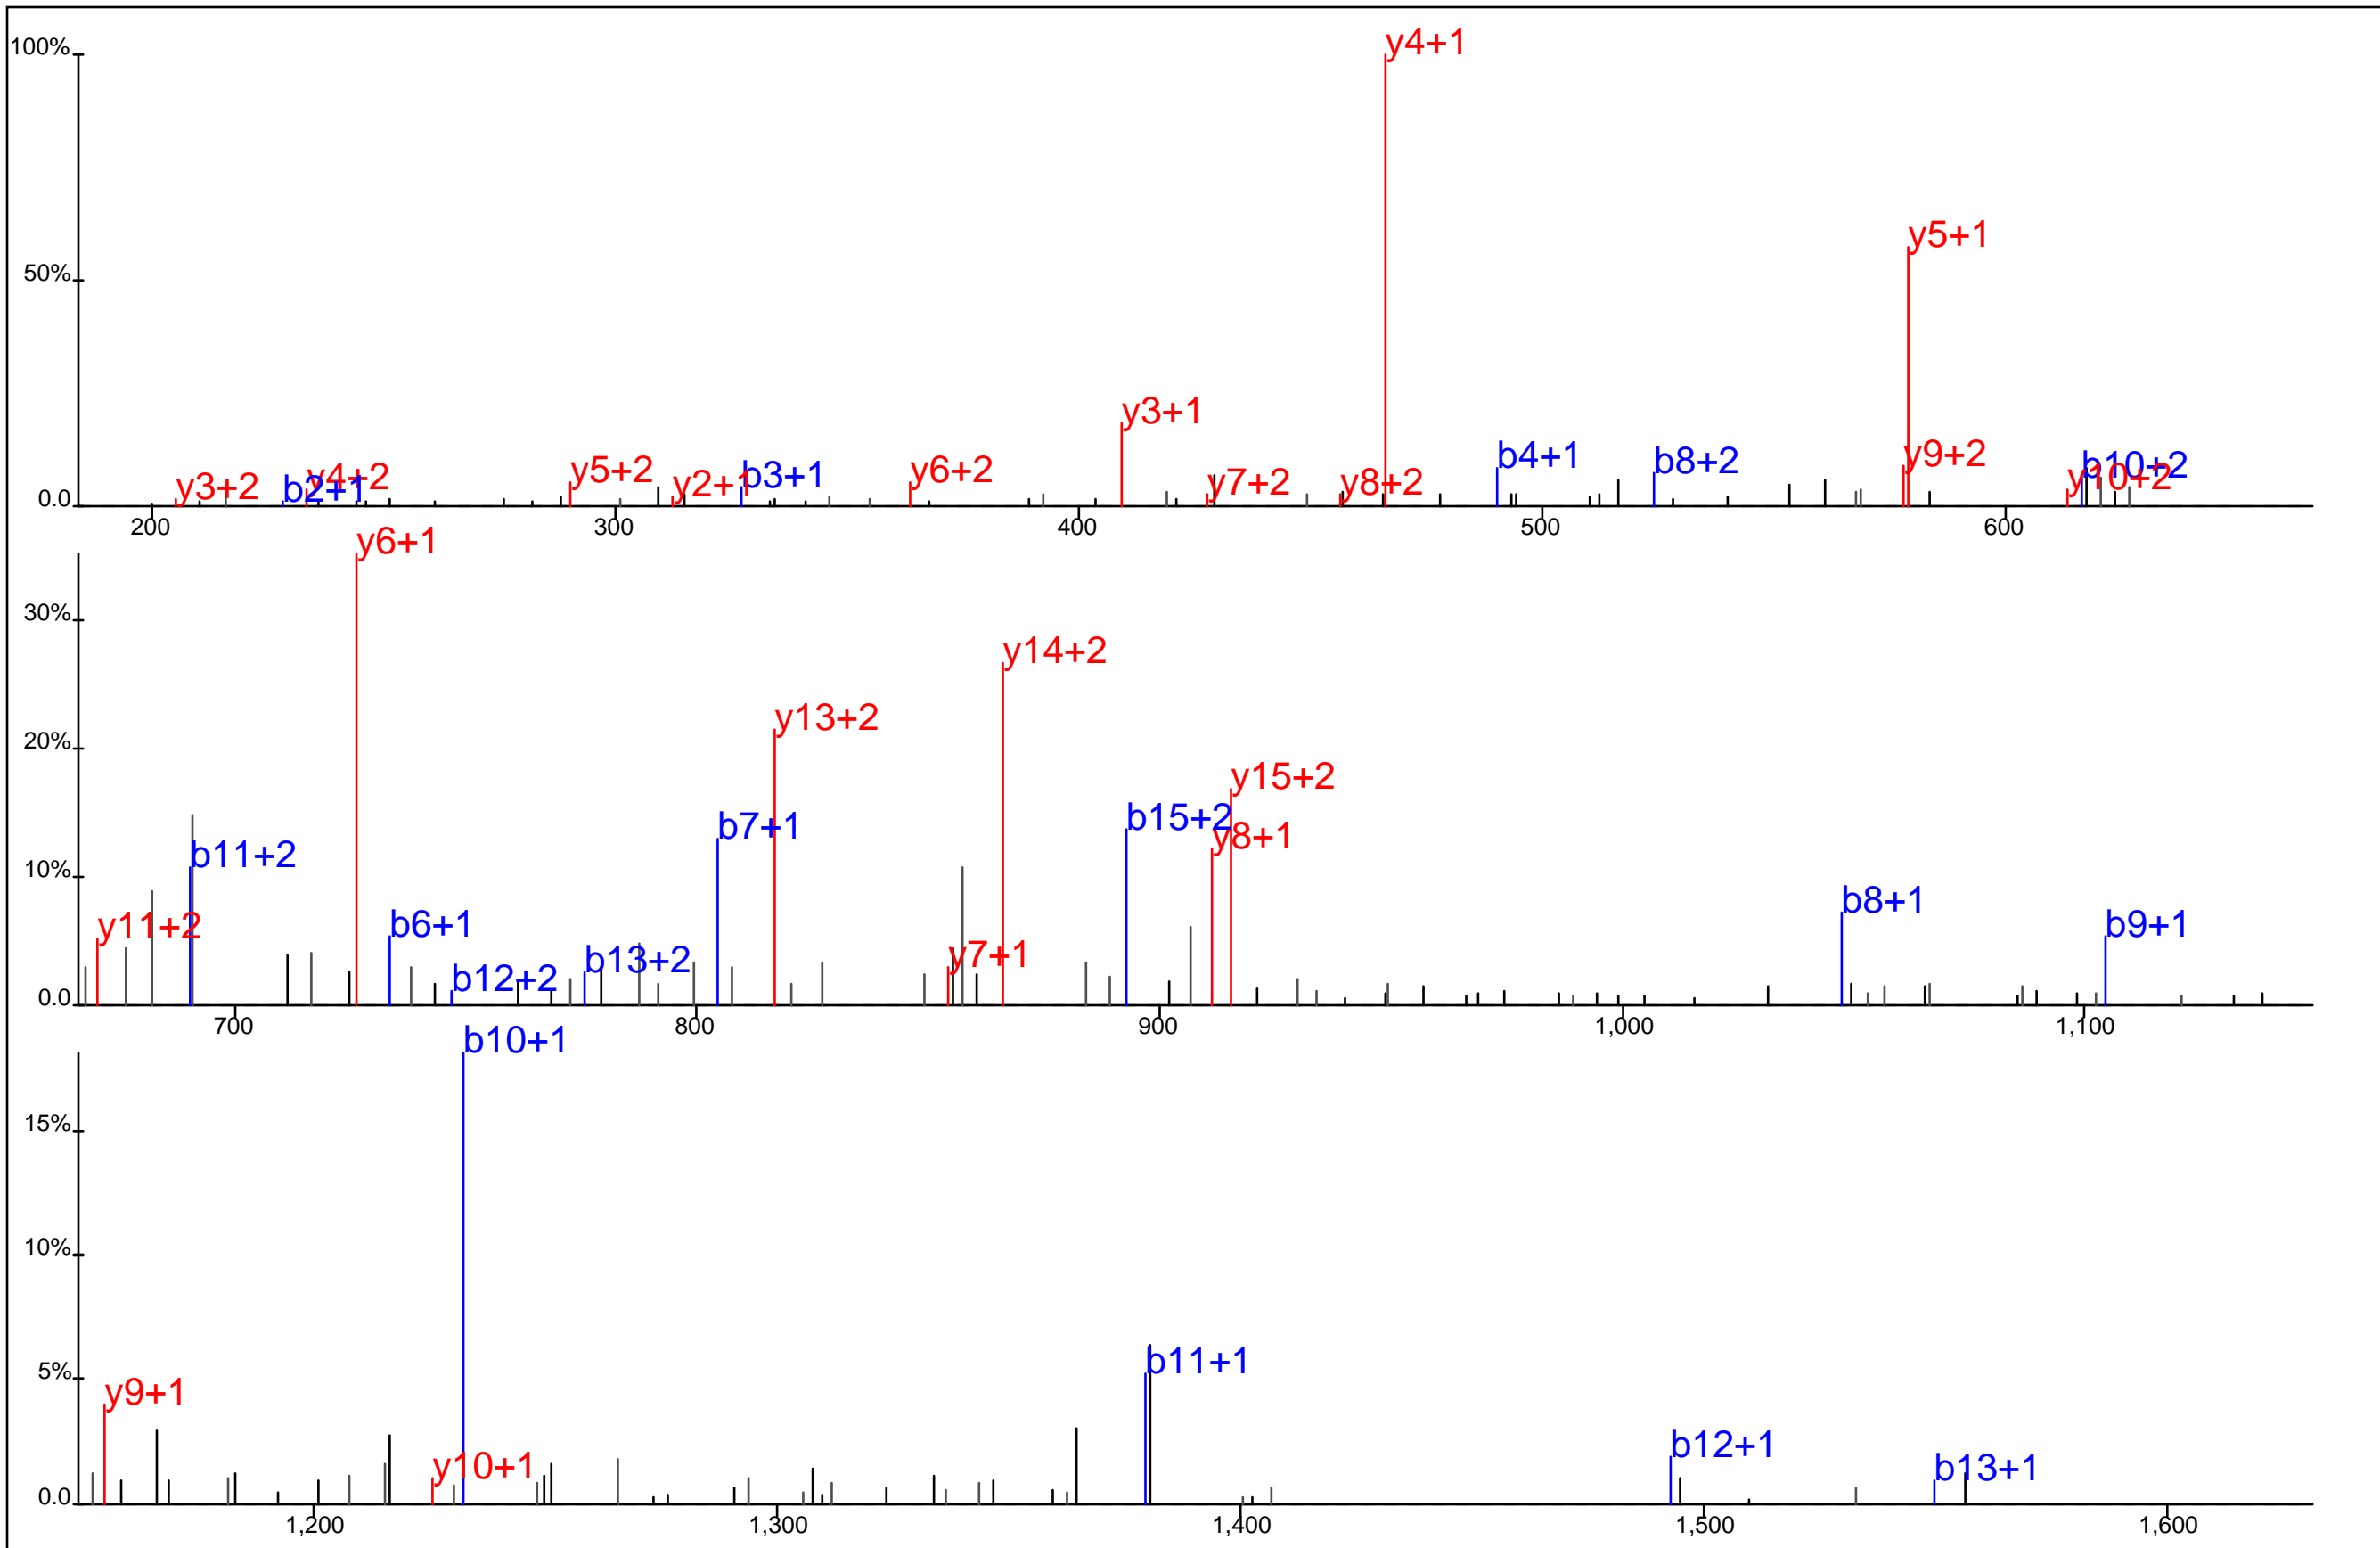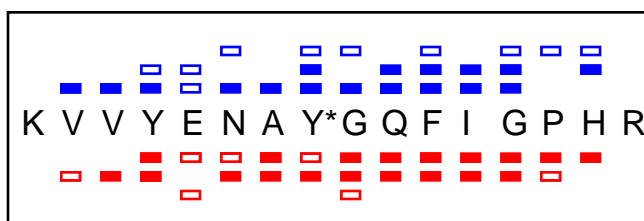

Protein Name: Thioredoxin reductase 1  
 gi Accession: 0  
 Precursor Mass: 653.3167+3  
 Delta Mass: 1.734 ppm  
 XCorr: 60.28

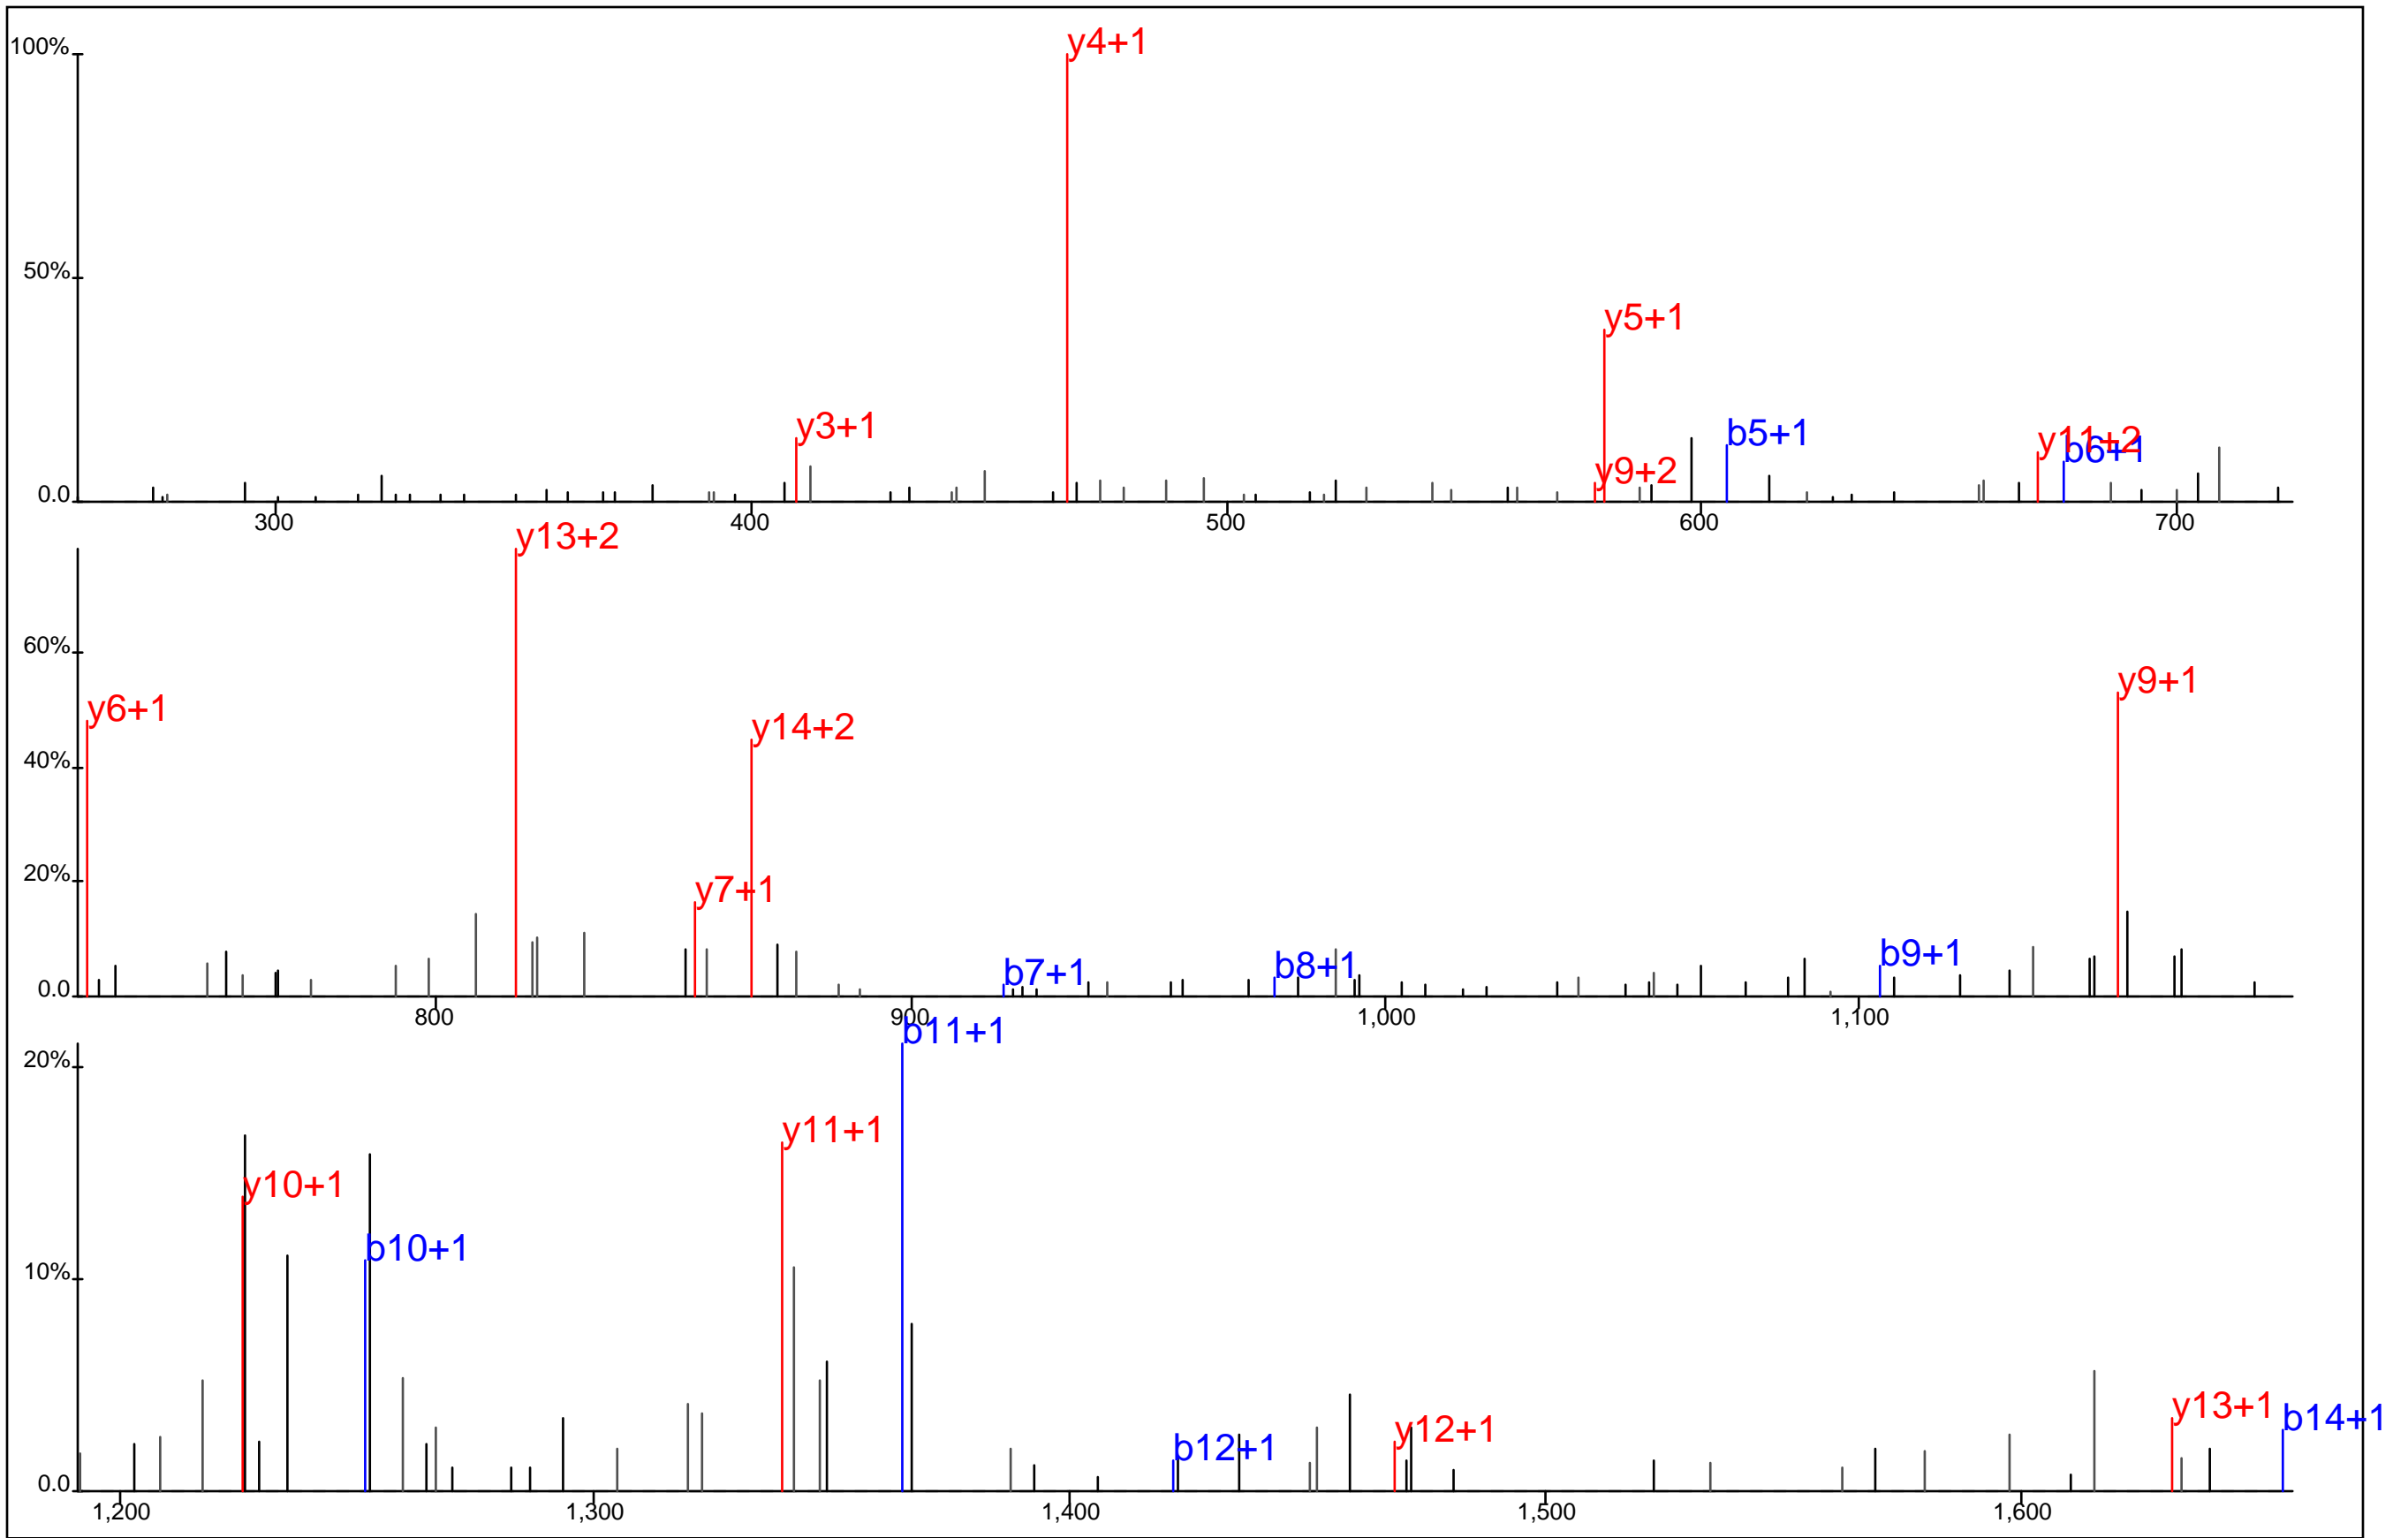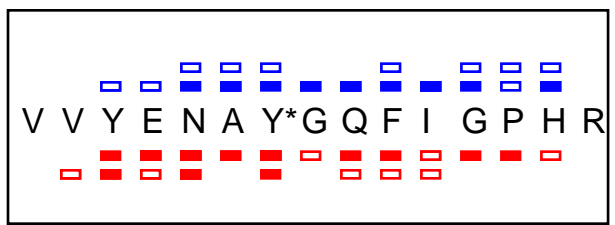

Protein Name: Thioredoxin reductase 1  
 gi Accession: 0  
 Precursor Mass: 915.4202+2  
 Delta Mass: 2.117 ppm  
 XCorr: 50.34



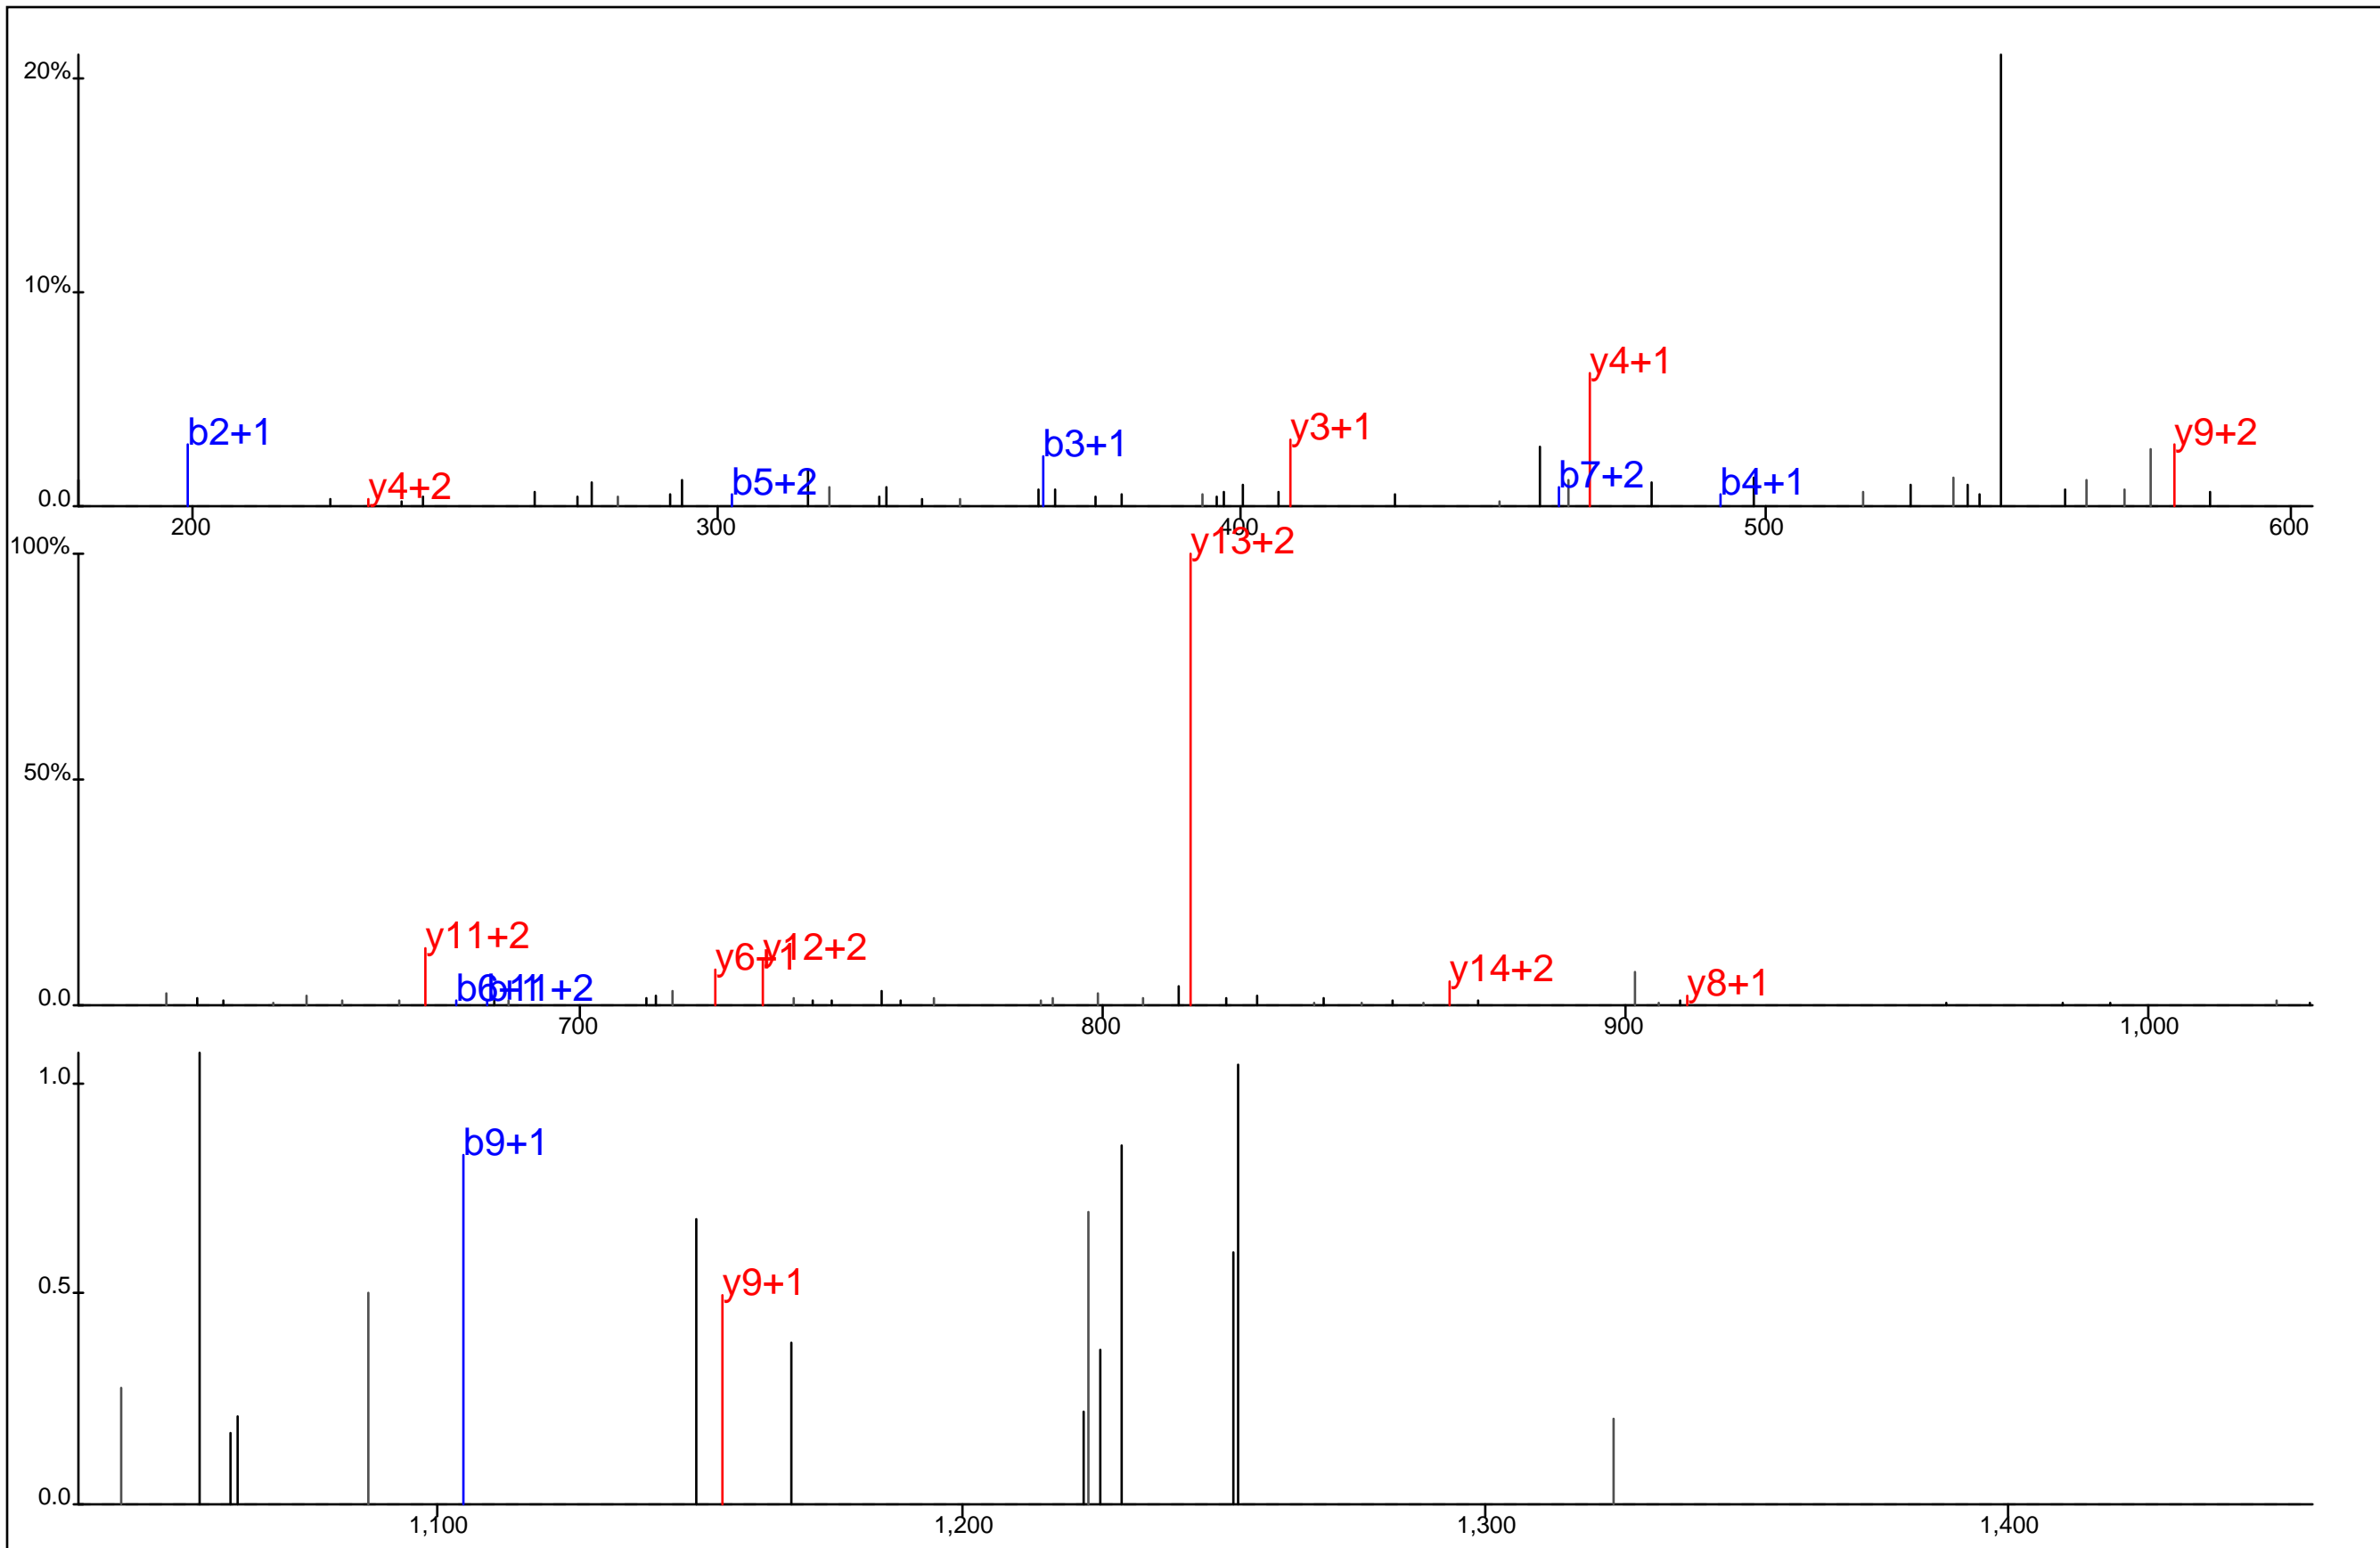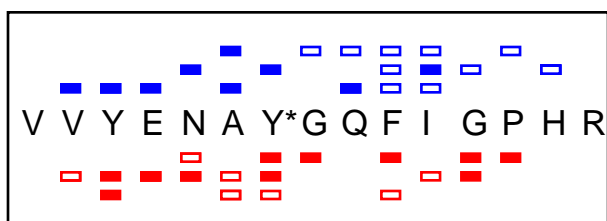

Protein Name: Thioredoxin reductase 1  
 gi Accession: 0  
 Precursor Mass: 610.6171+3  
 Delta Mass: 0.124 ppm  
 XCorr: 35.46

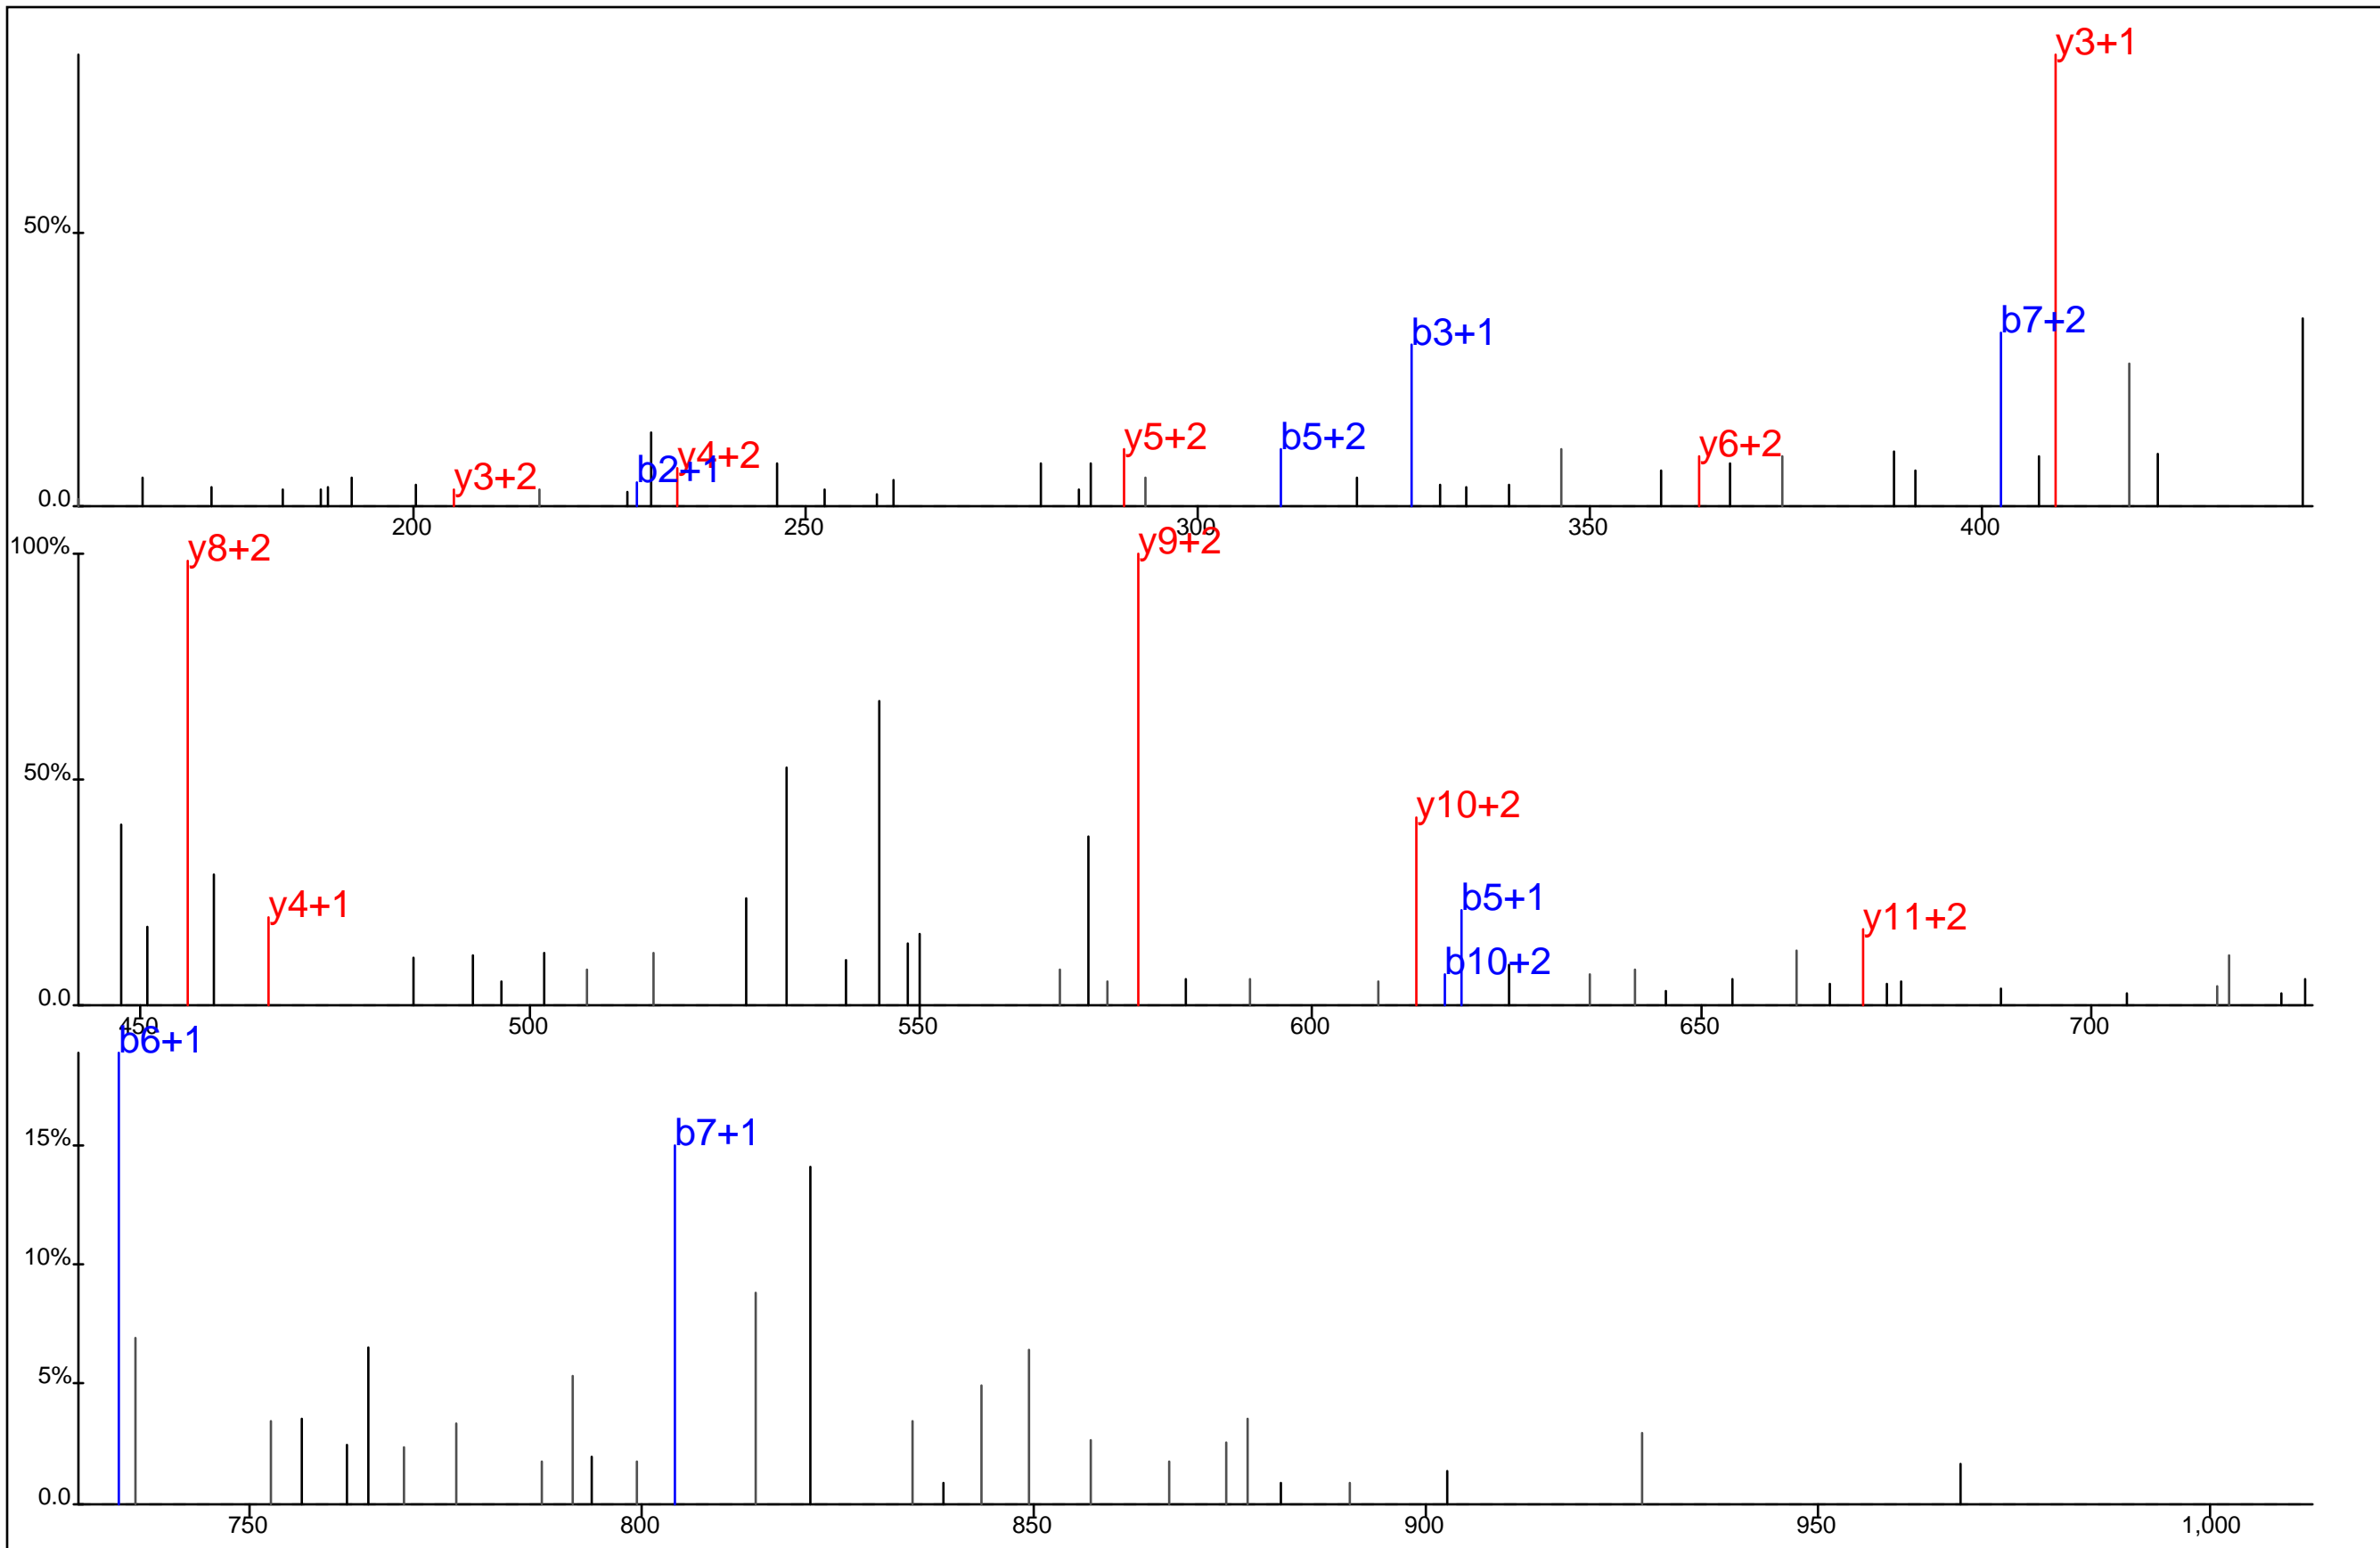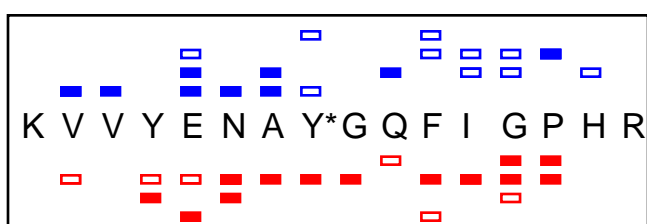

Protein Name: Thioredoxin reductase 1  
 gi Accession: 0  
 Precursor Mass: 490.2390+4  
 Delta Mass: 1.198 ppm  
 XCorr: 24.67

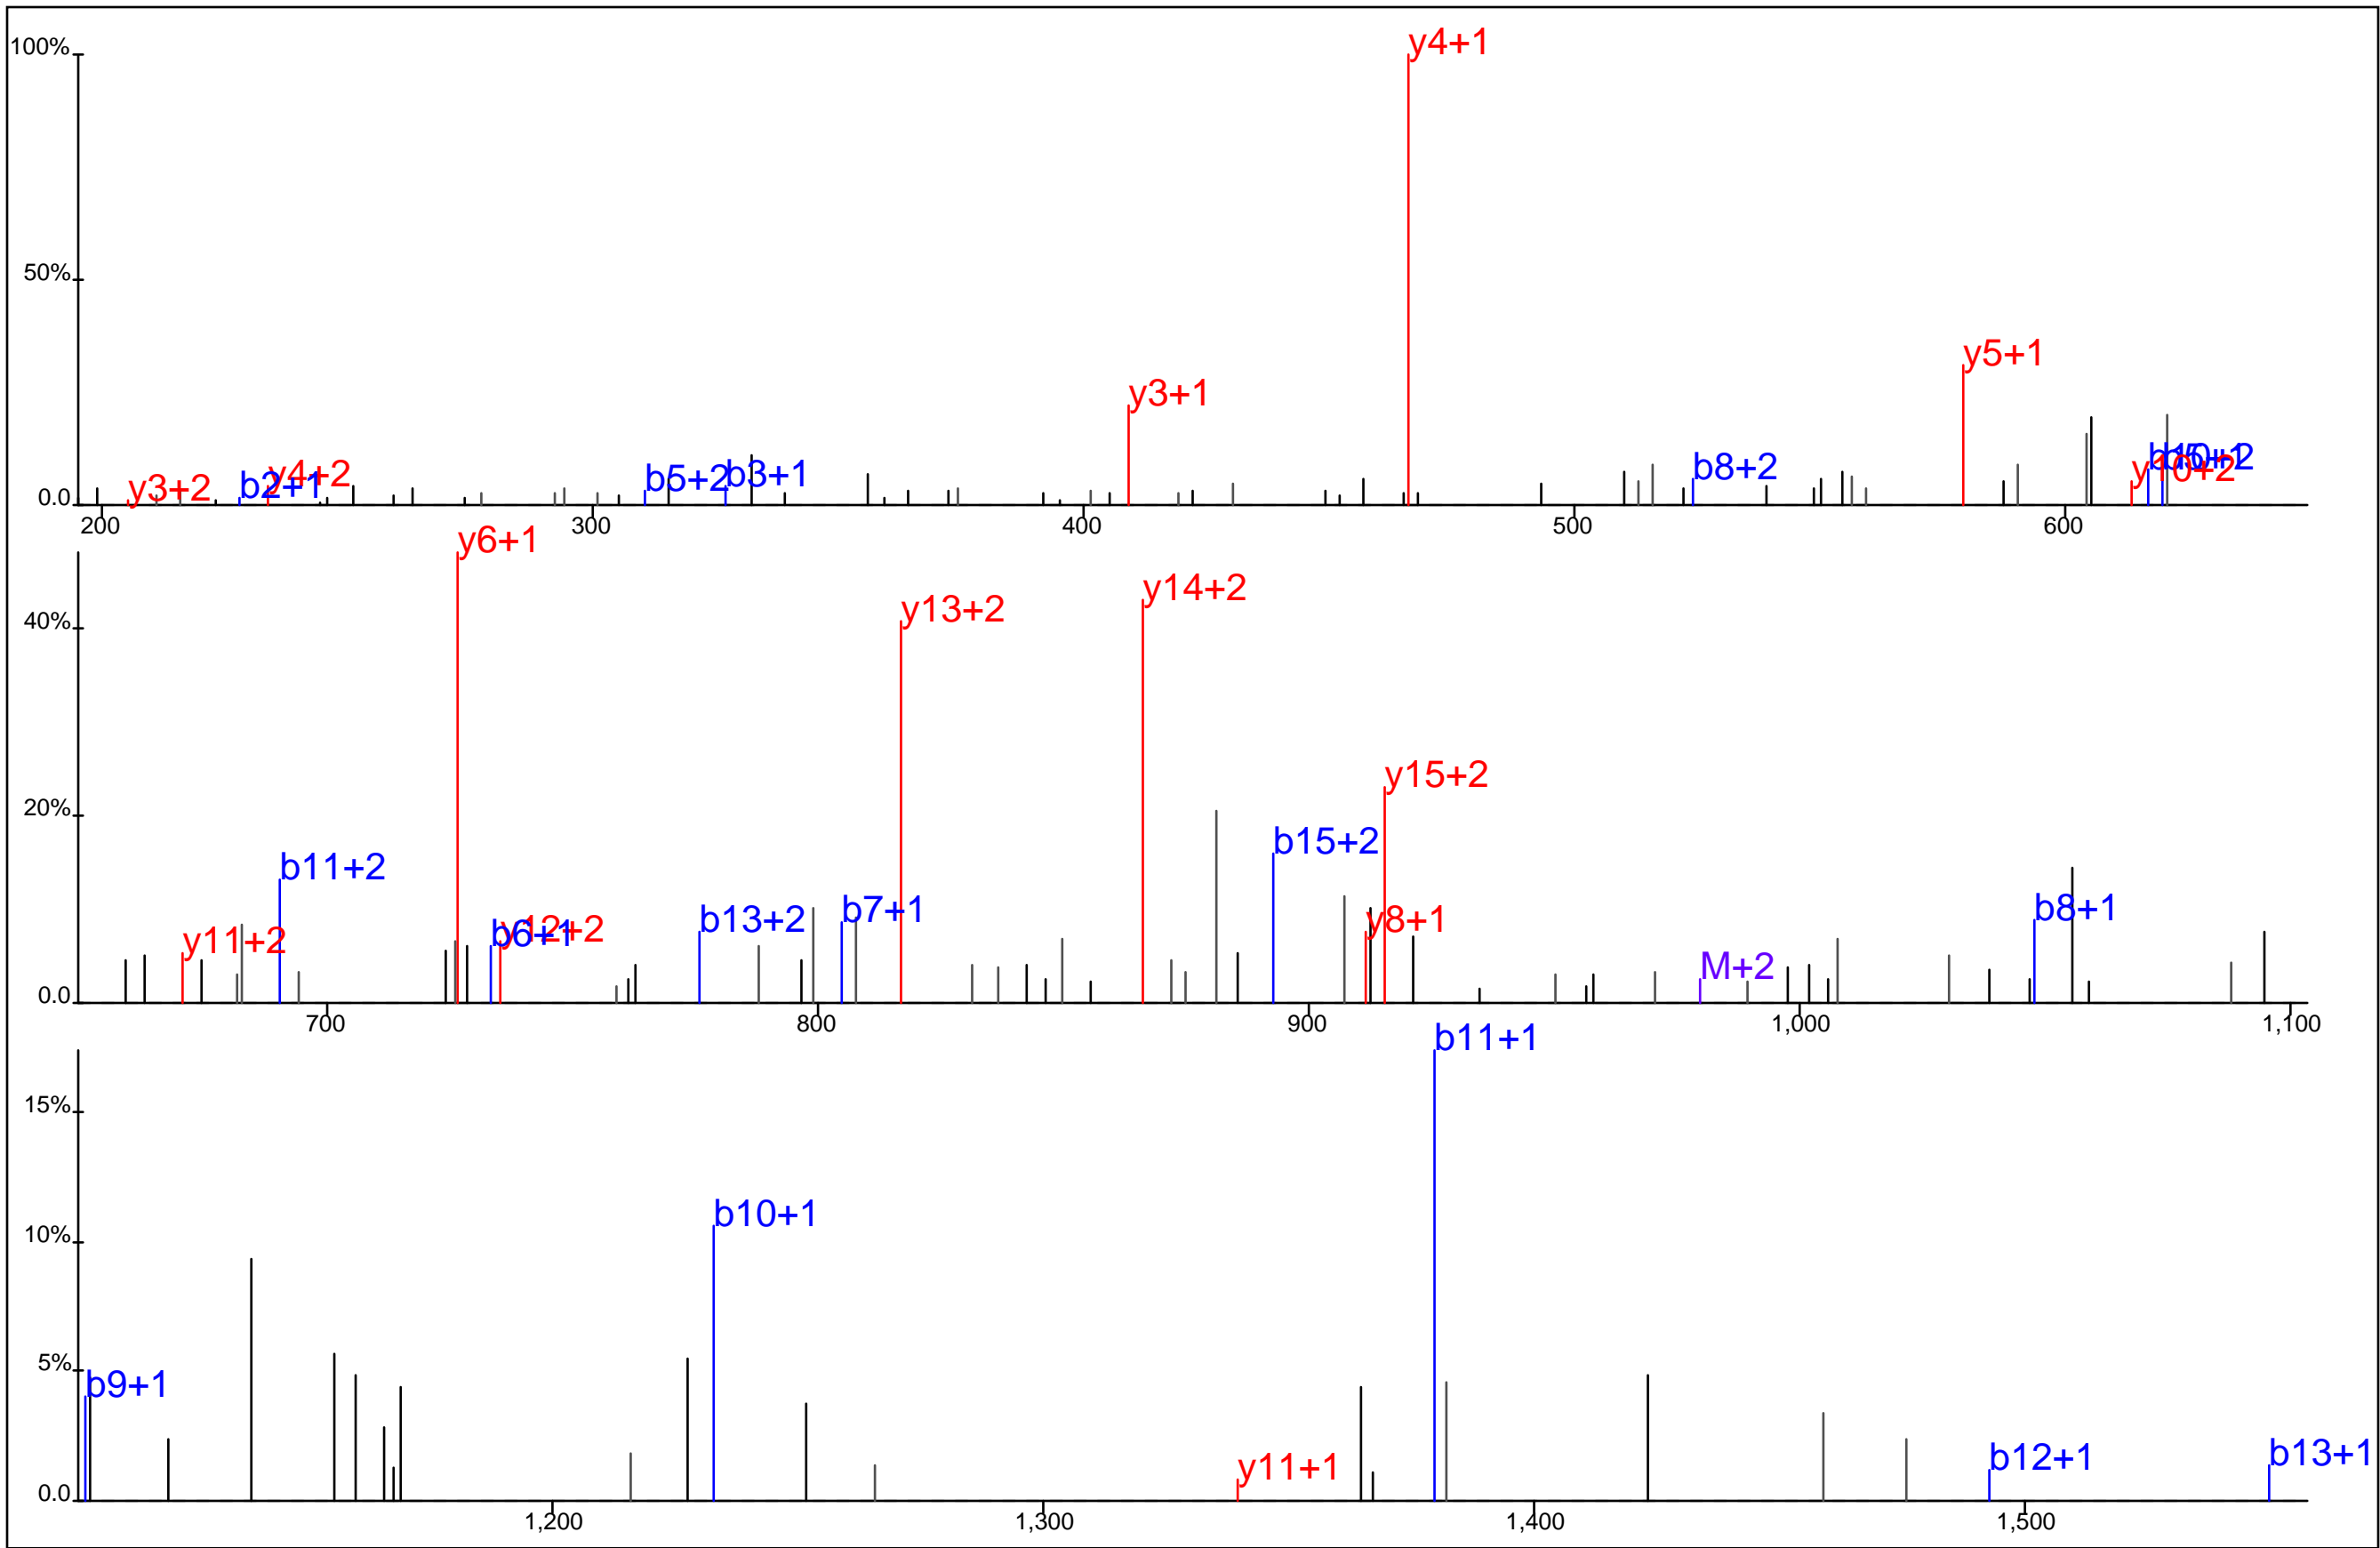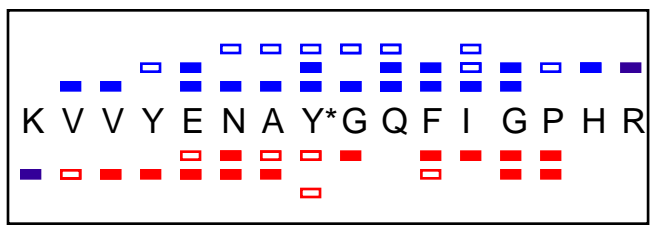

Protein Name: Thioredoxin reductase 1  
 gi Accession: 0  
 Precursor Mass: 653.3148+3  
 Delta Mass: 1.164 ppm  
 XCorr: 40.82

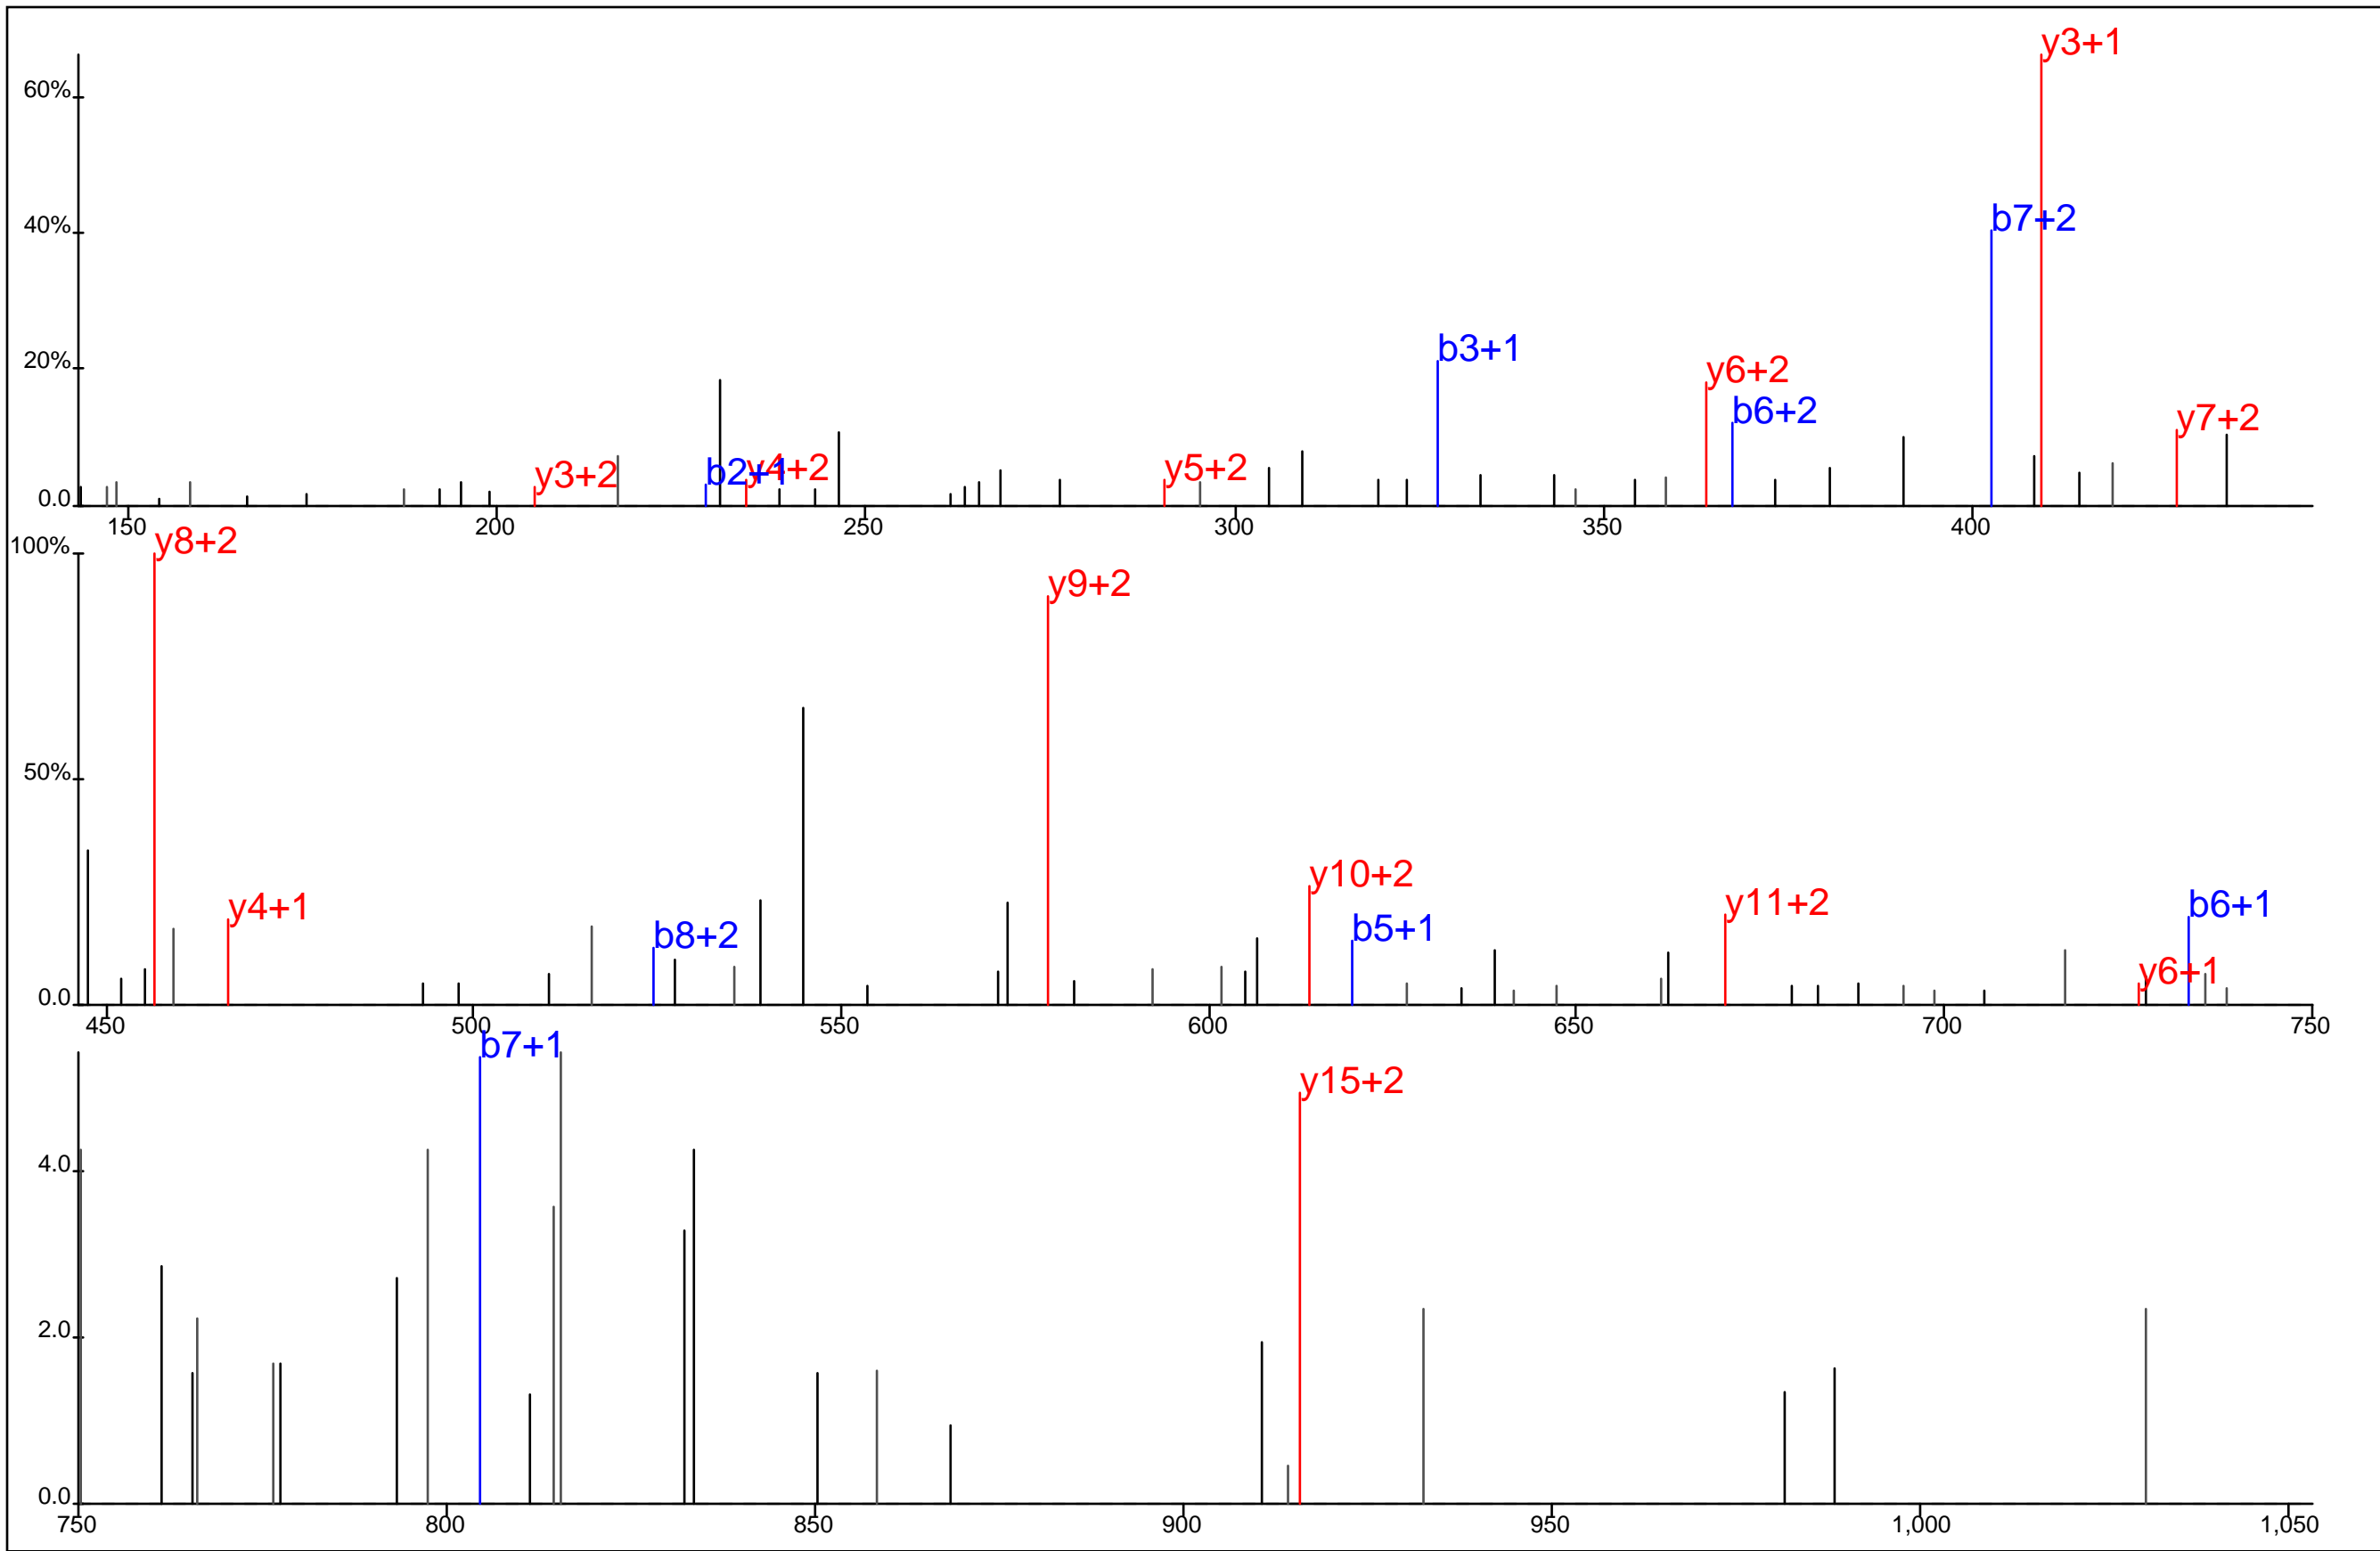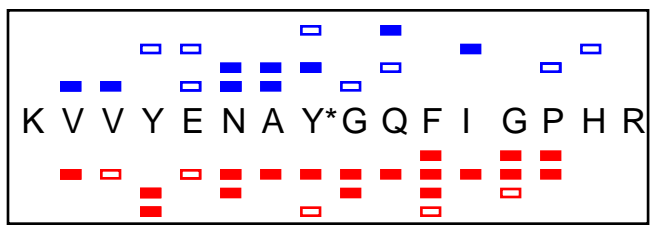

Protein Name: Thioredoxin reductase 1  
 gi Accession: 0  
 Precursor Mass: 490.2379+4  
 Delta Mass: 1.233 ppm  
 XCorr: 41.81

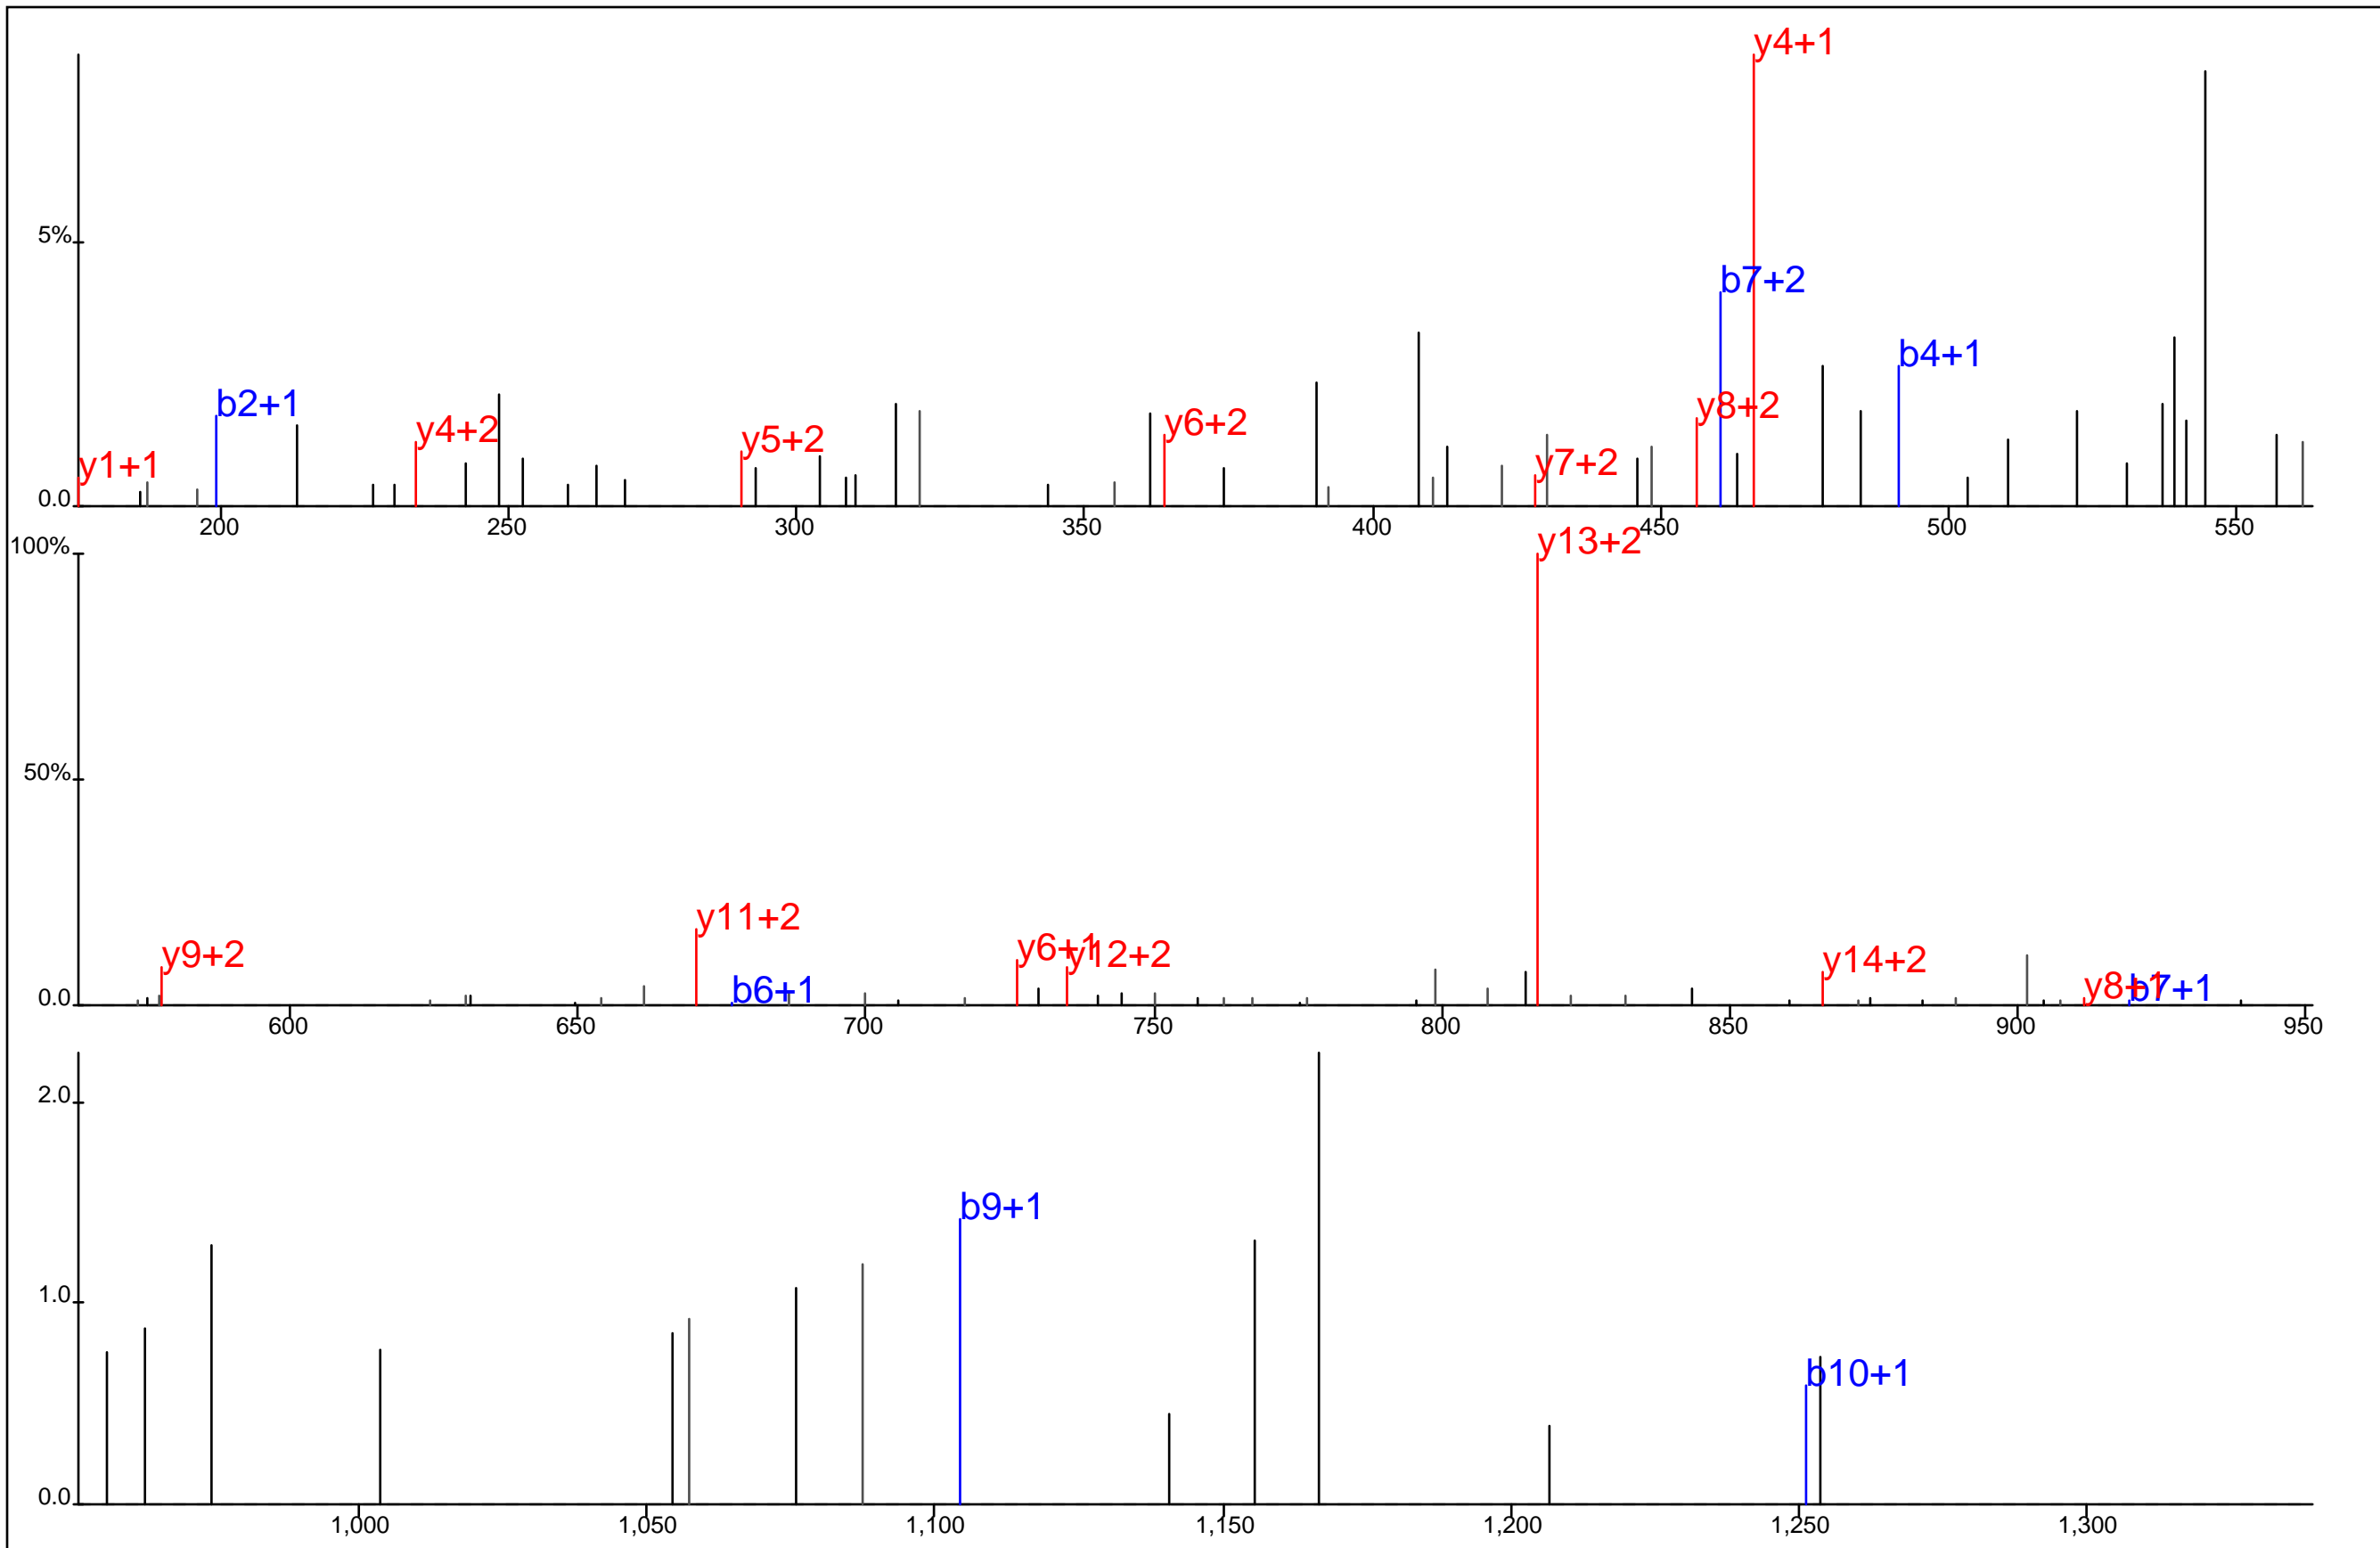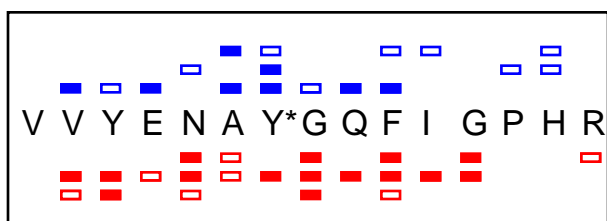

Protein Name: Thioredoxin reductase 1  
 gi Accession: 0  
 Precursor Mass: 610.6165+3  
 Delta Mass: 1.224 ppm  
 XCorr: 39.79

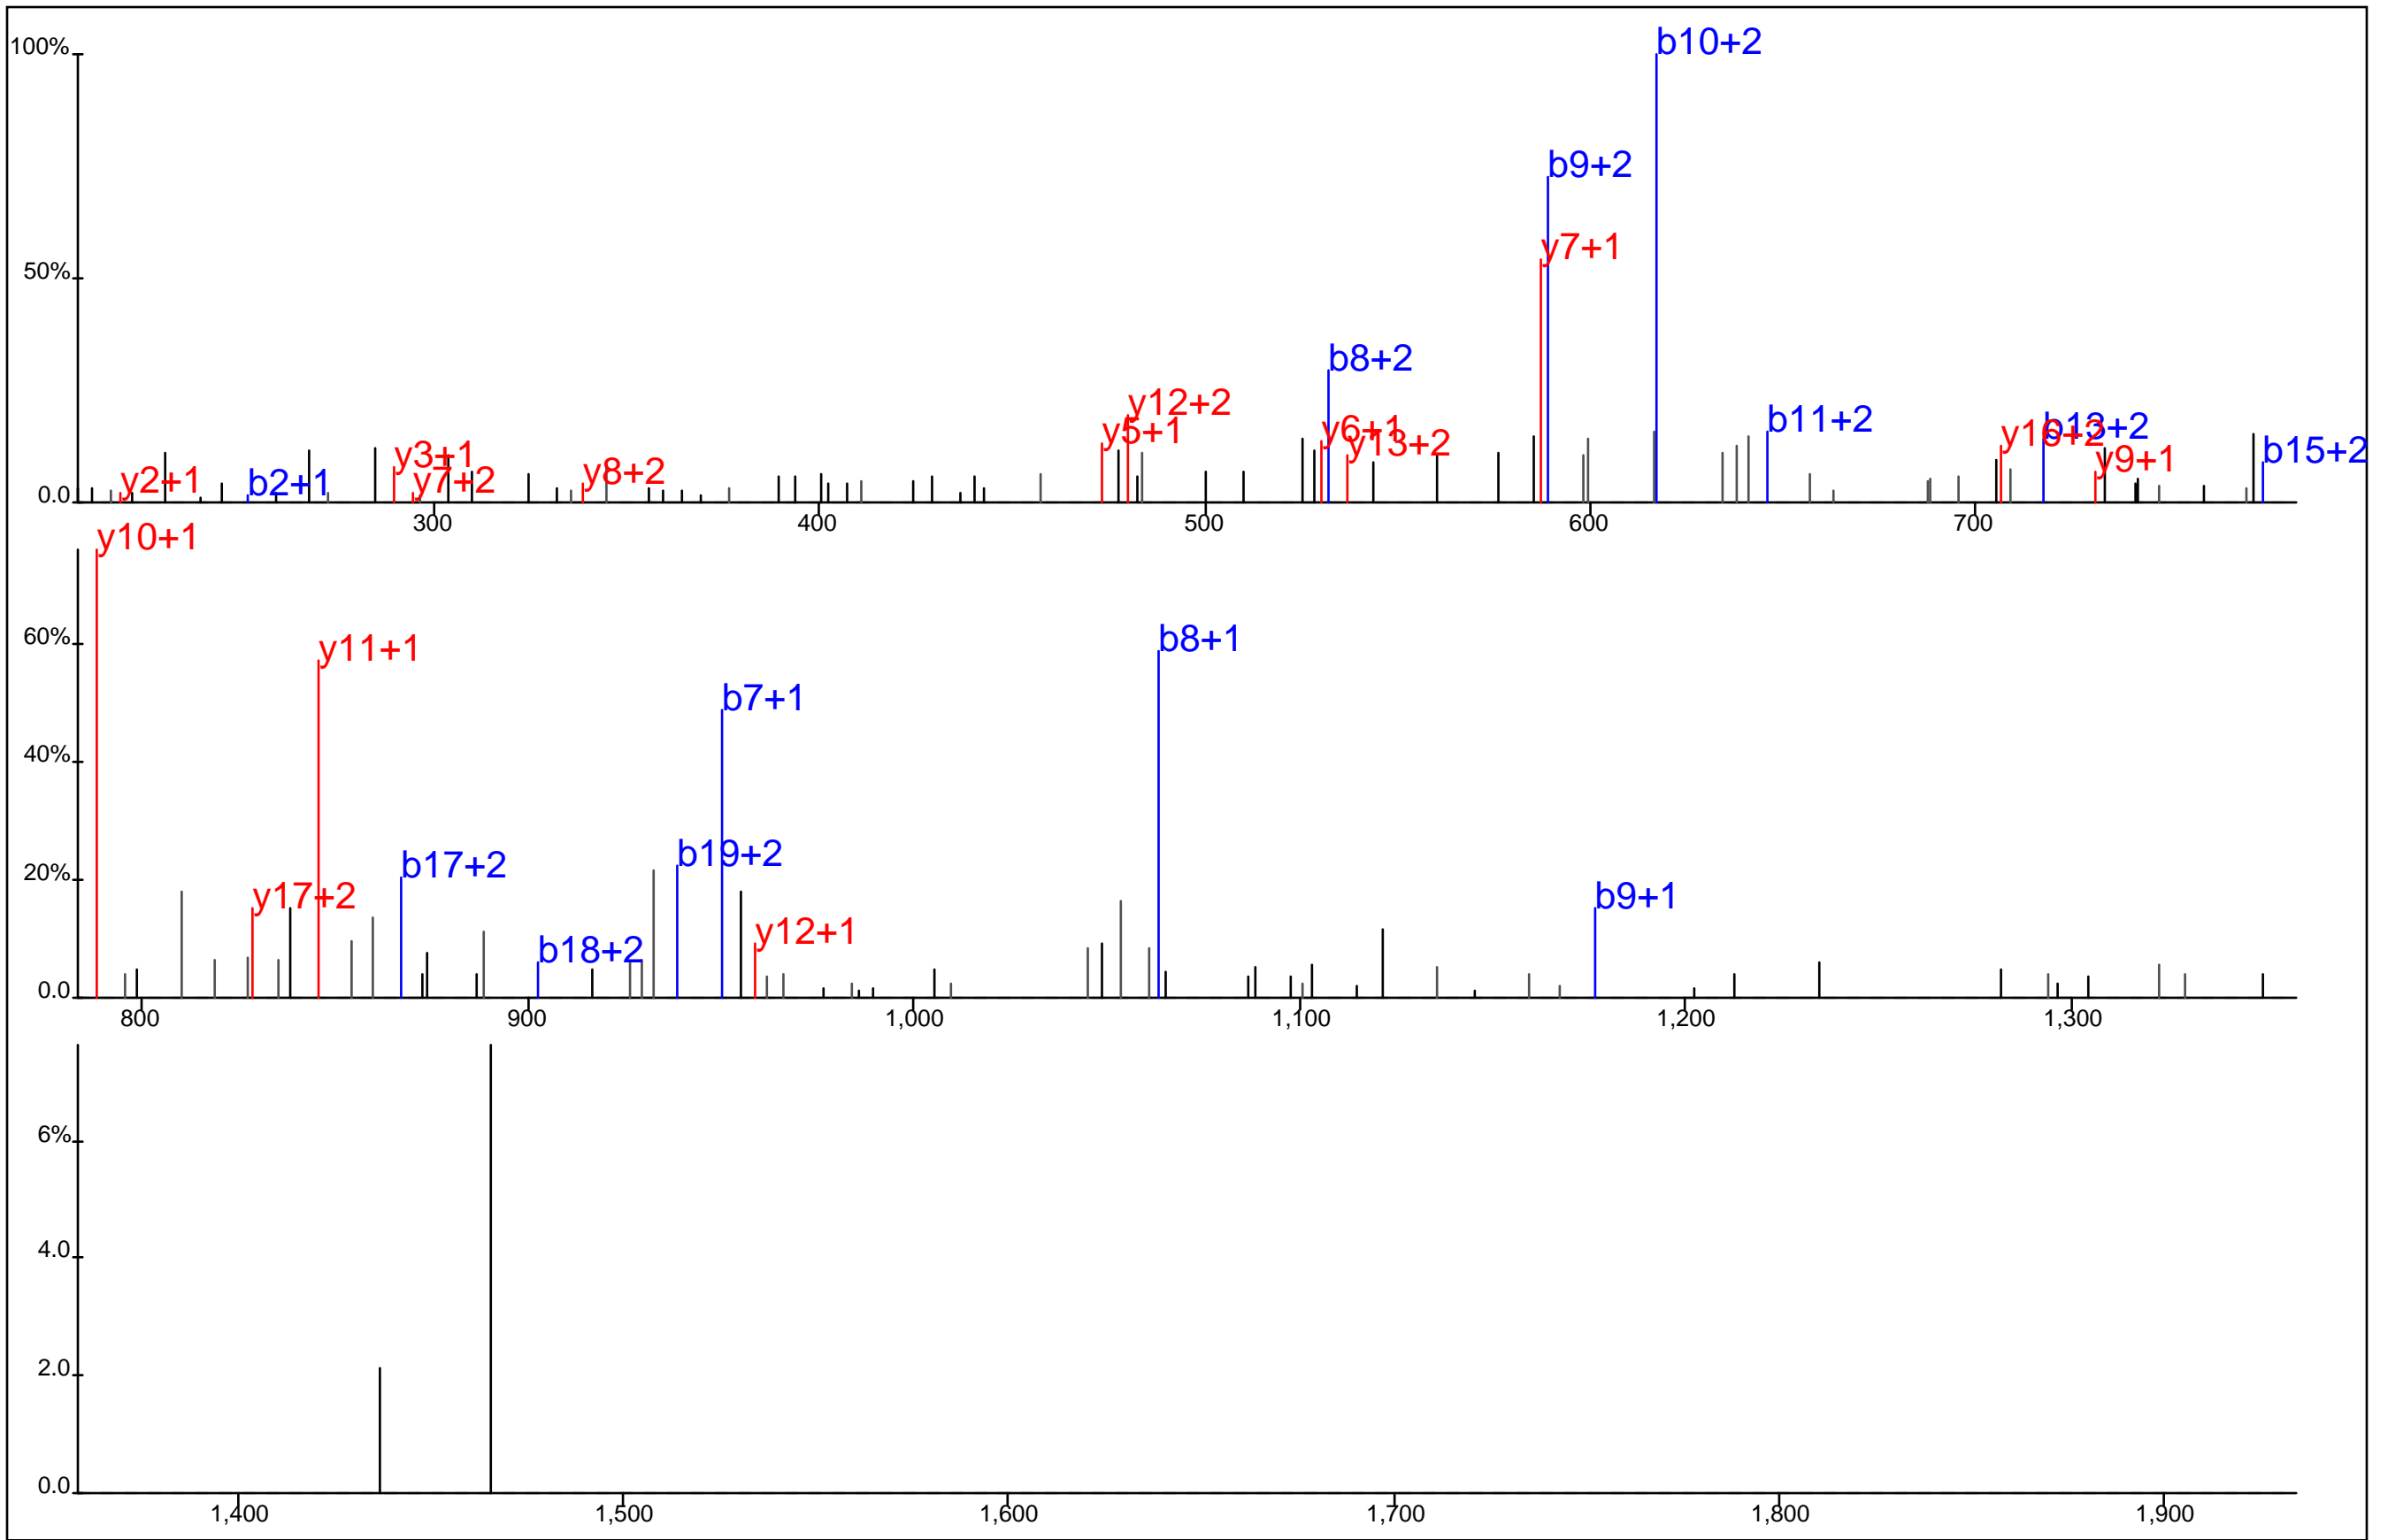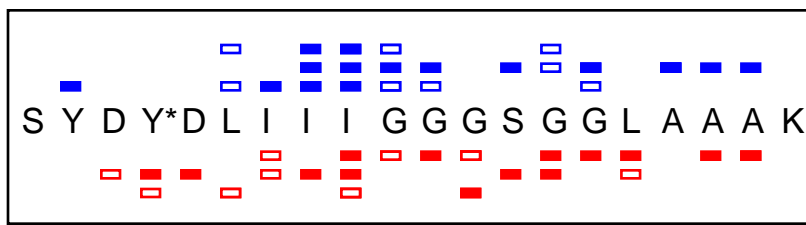

Protein Name: Thioredoxin reductase 1  
 gi Accession: 0  
 Precursor Mass: 674.3228+3  
 Delta Mass: 4.354 ppm  
 XCorr: 28.88



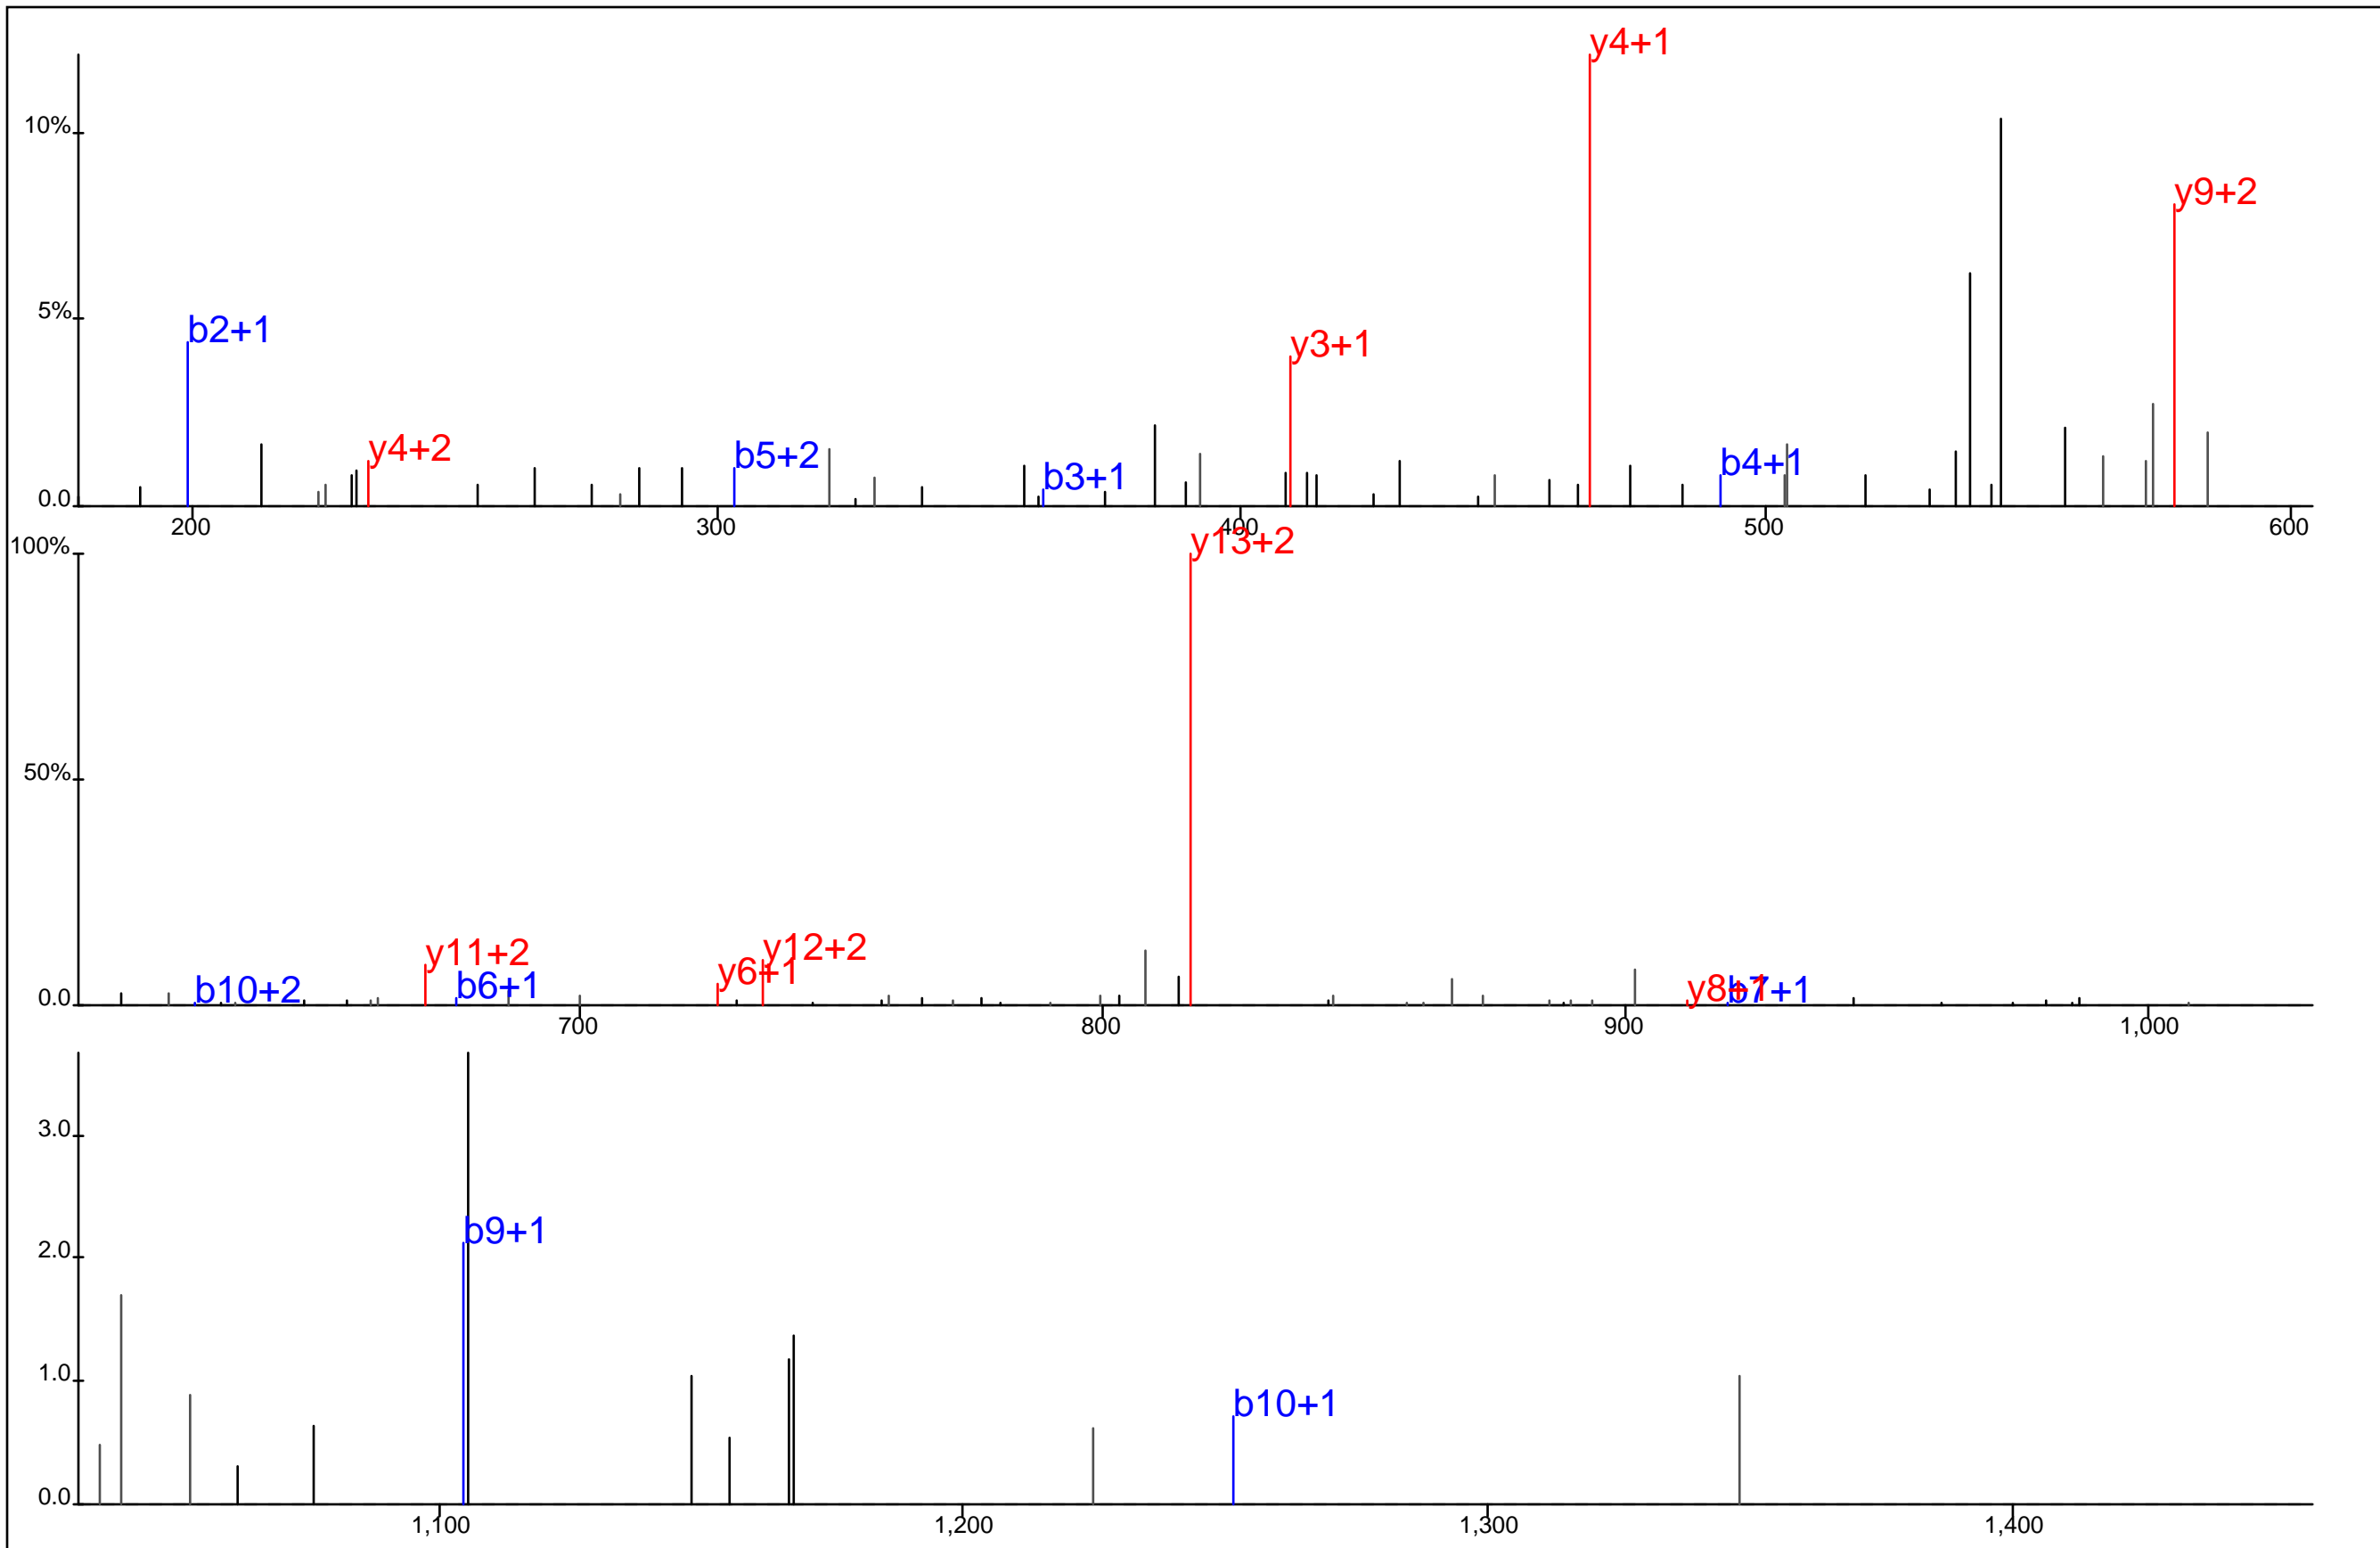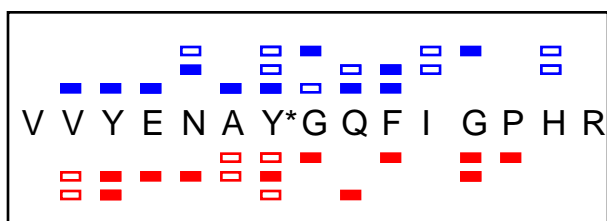

Protein Name: Thioredoxin reductase 1  
 gi Accession: 0  
 Precursor Mass: 610.6169+3  
 Delta Mass: 0.524 ppm  
 XCorr: 22.96



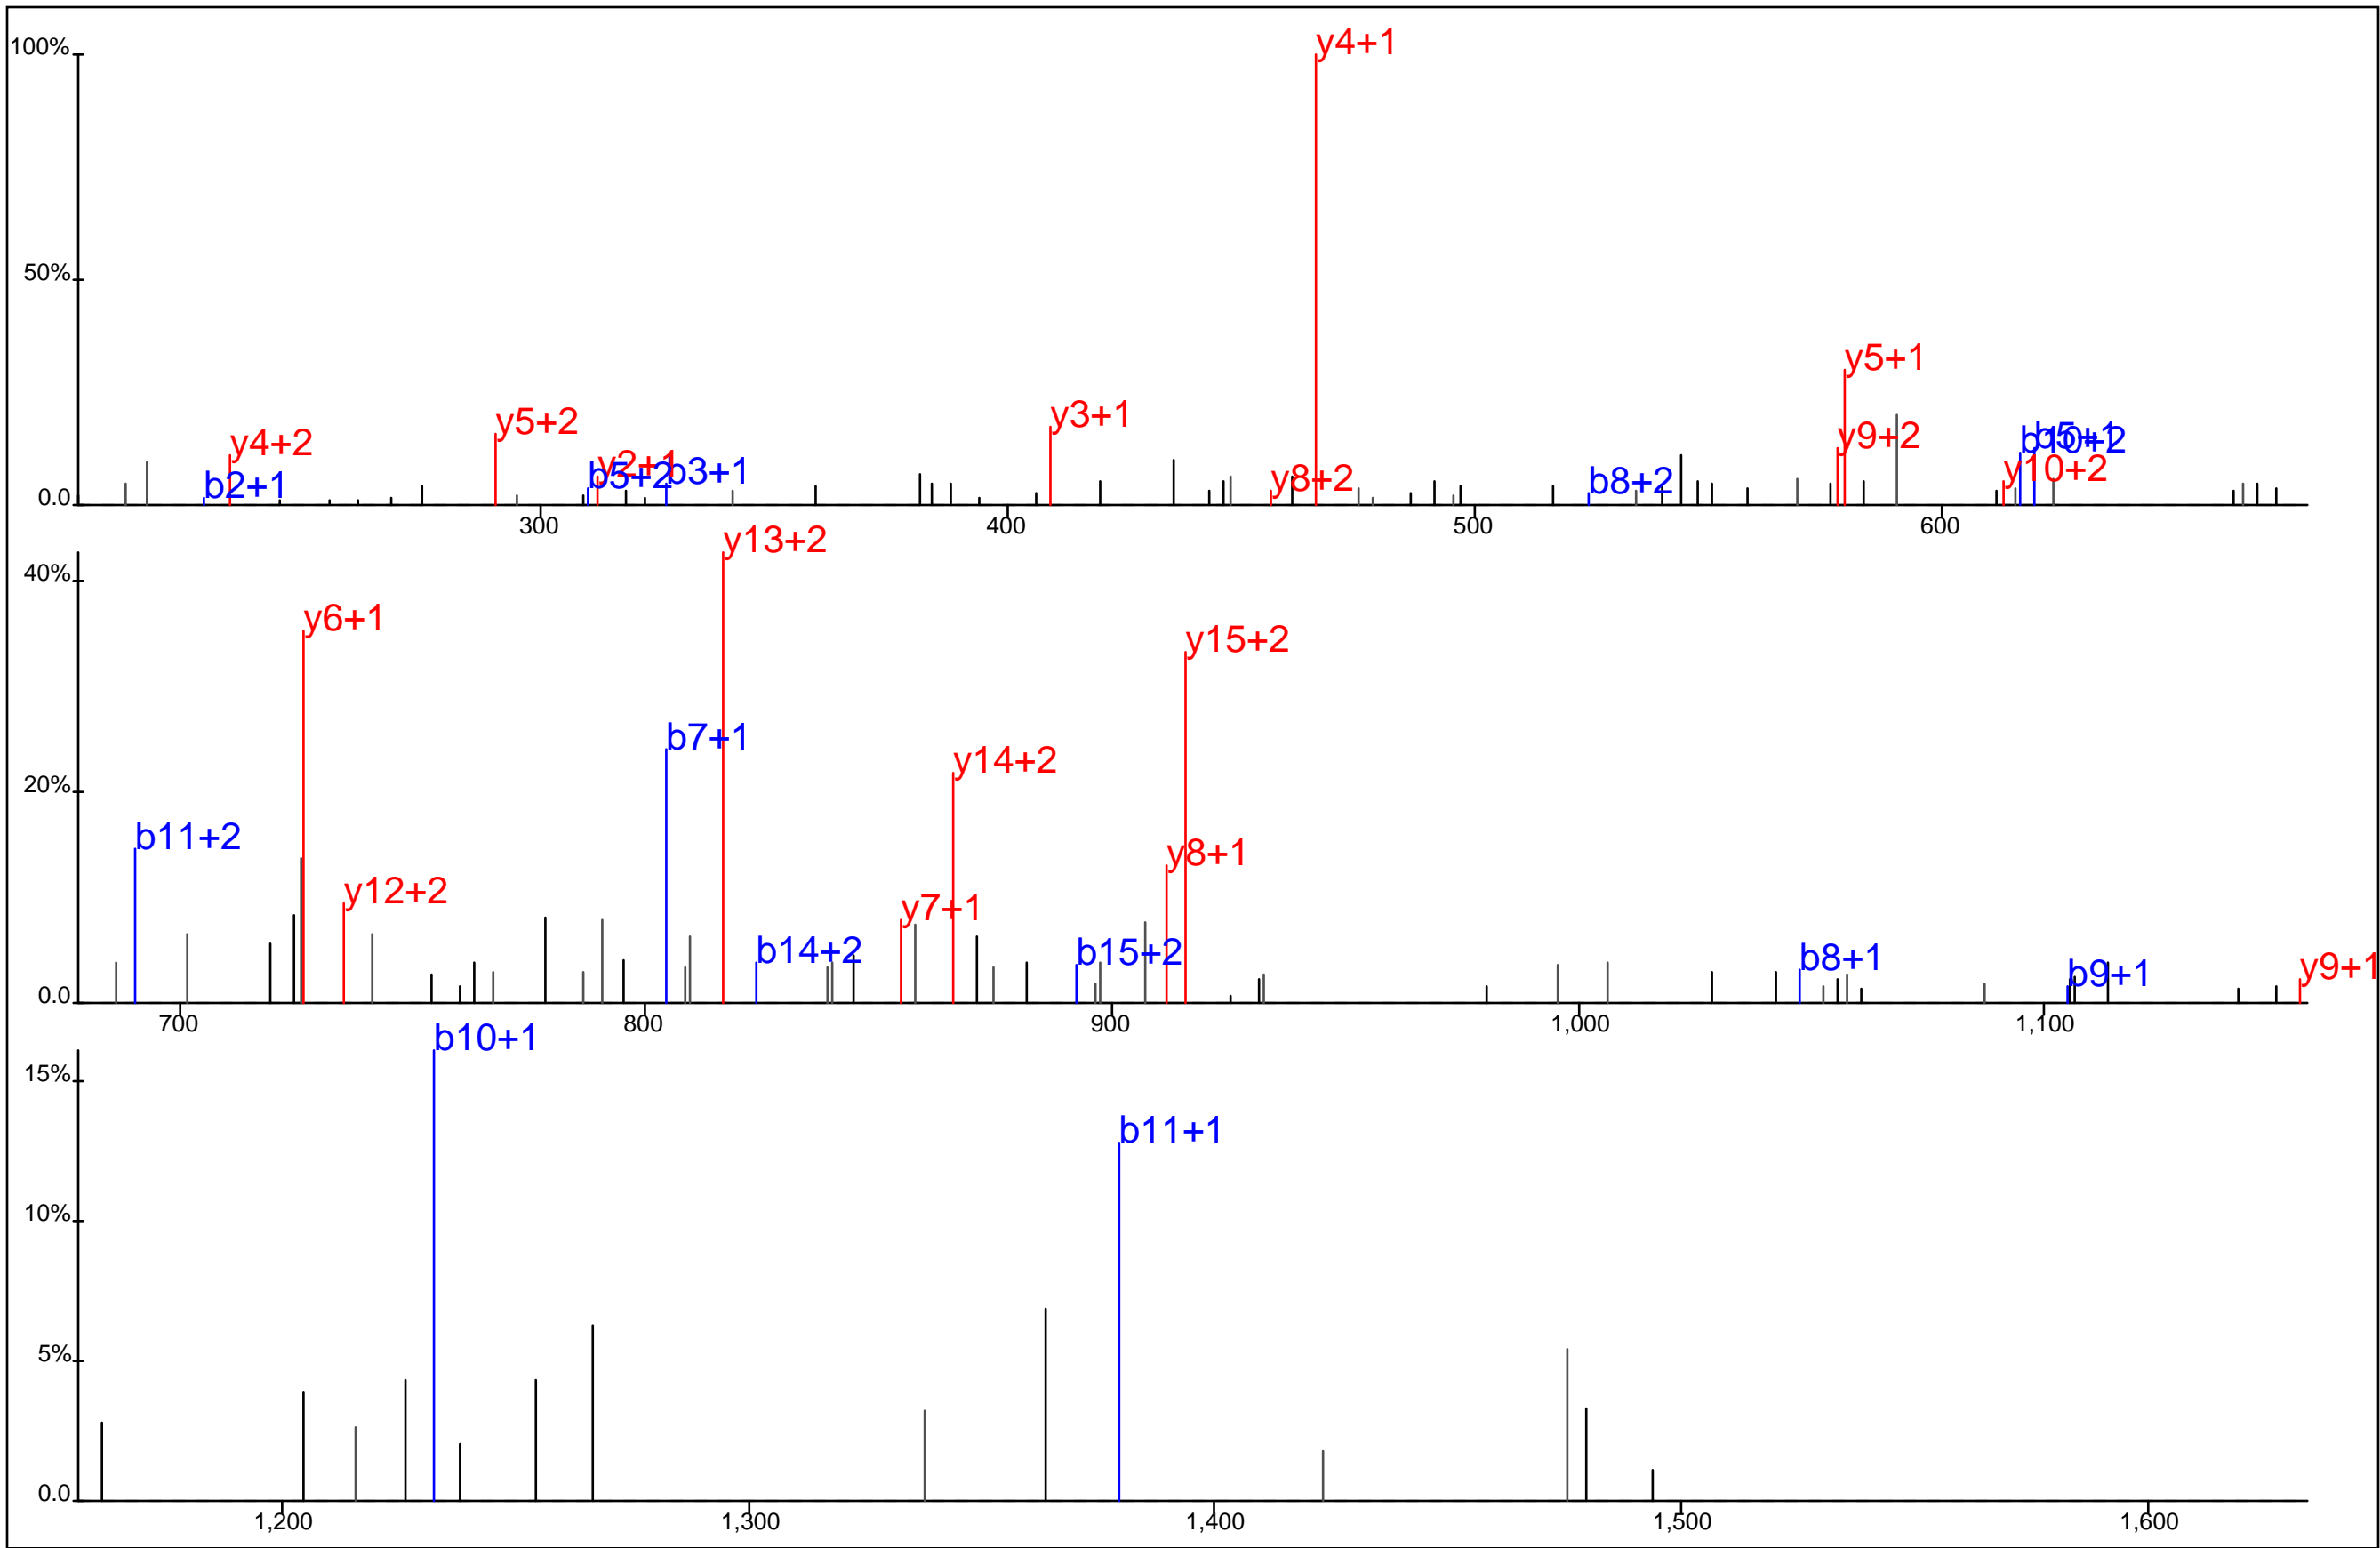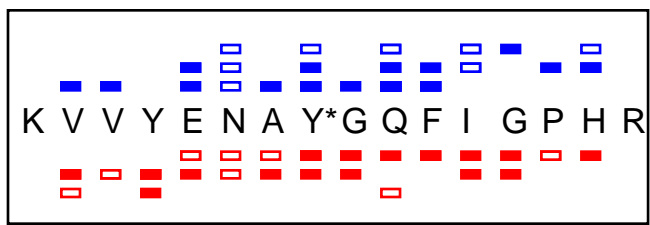

Protein Name: Thioredoxin reductase 1  
 gi Accession: 0  
 Precursor Mass: 653.3149+3  
 Delta Mass: 0.884 ppm  
 XCorr: 47.45

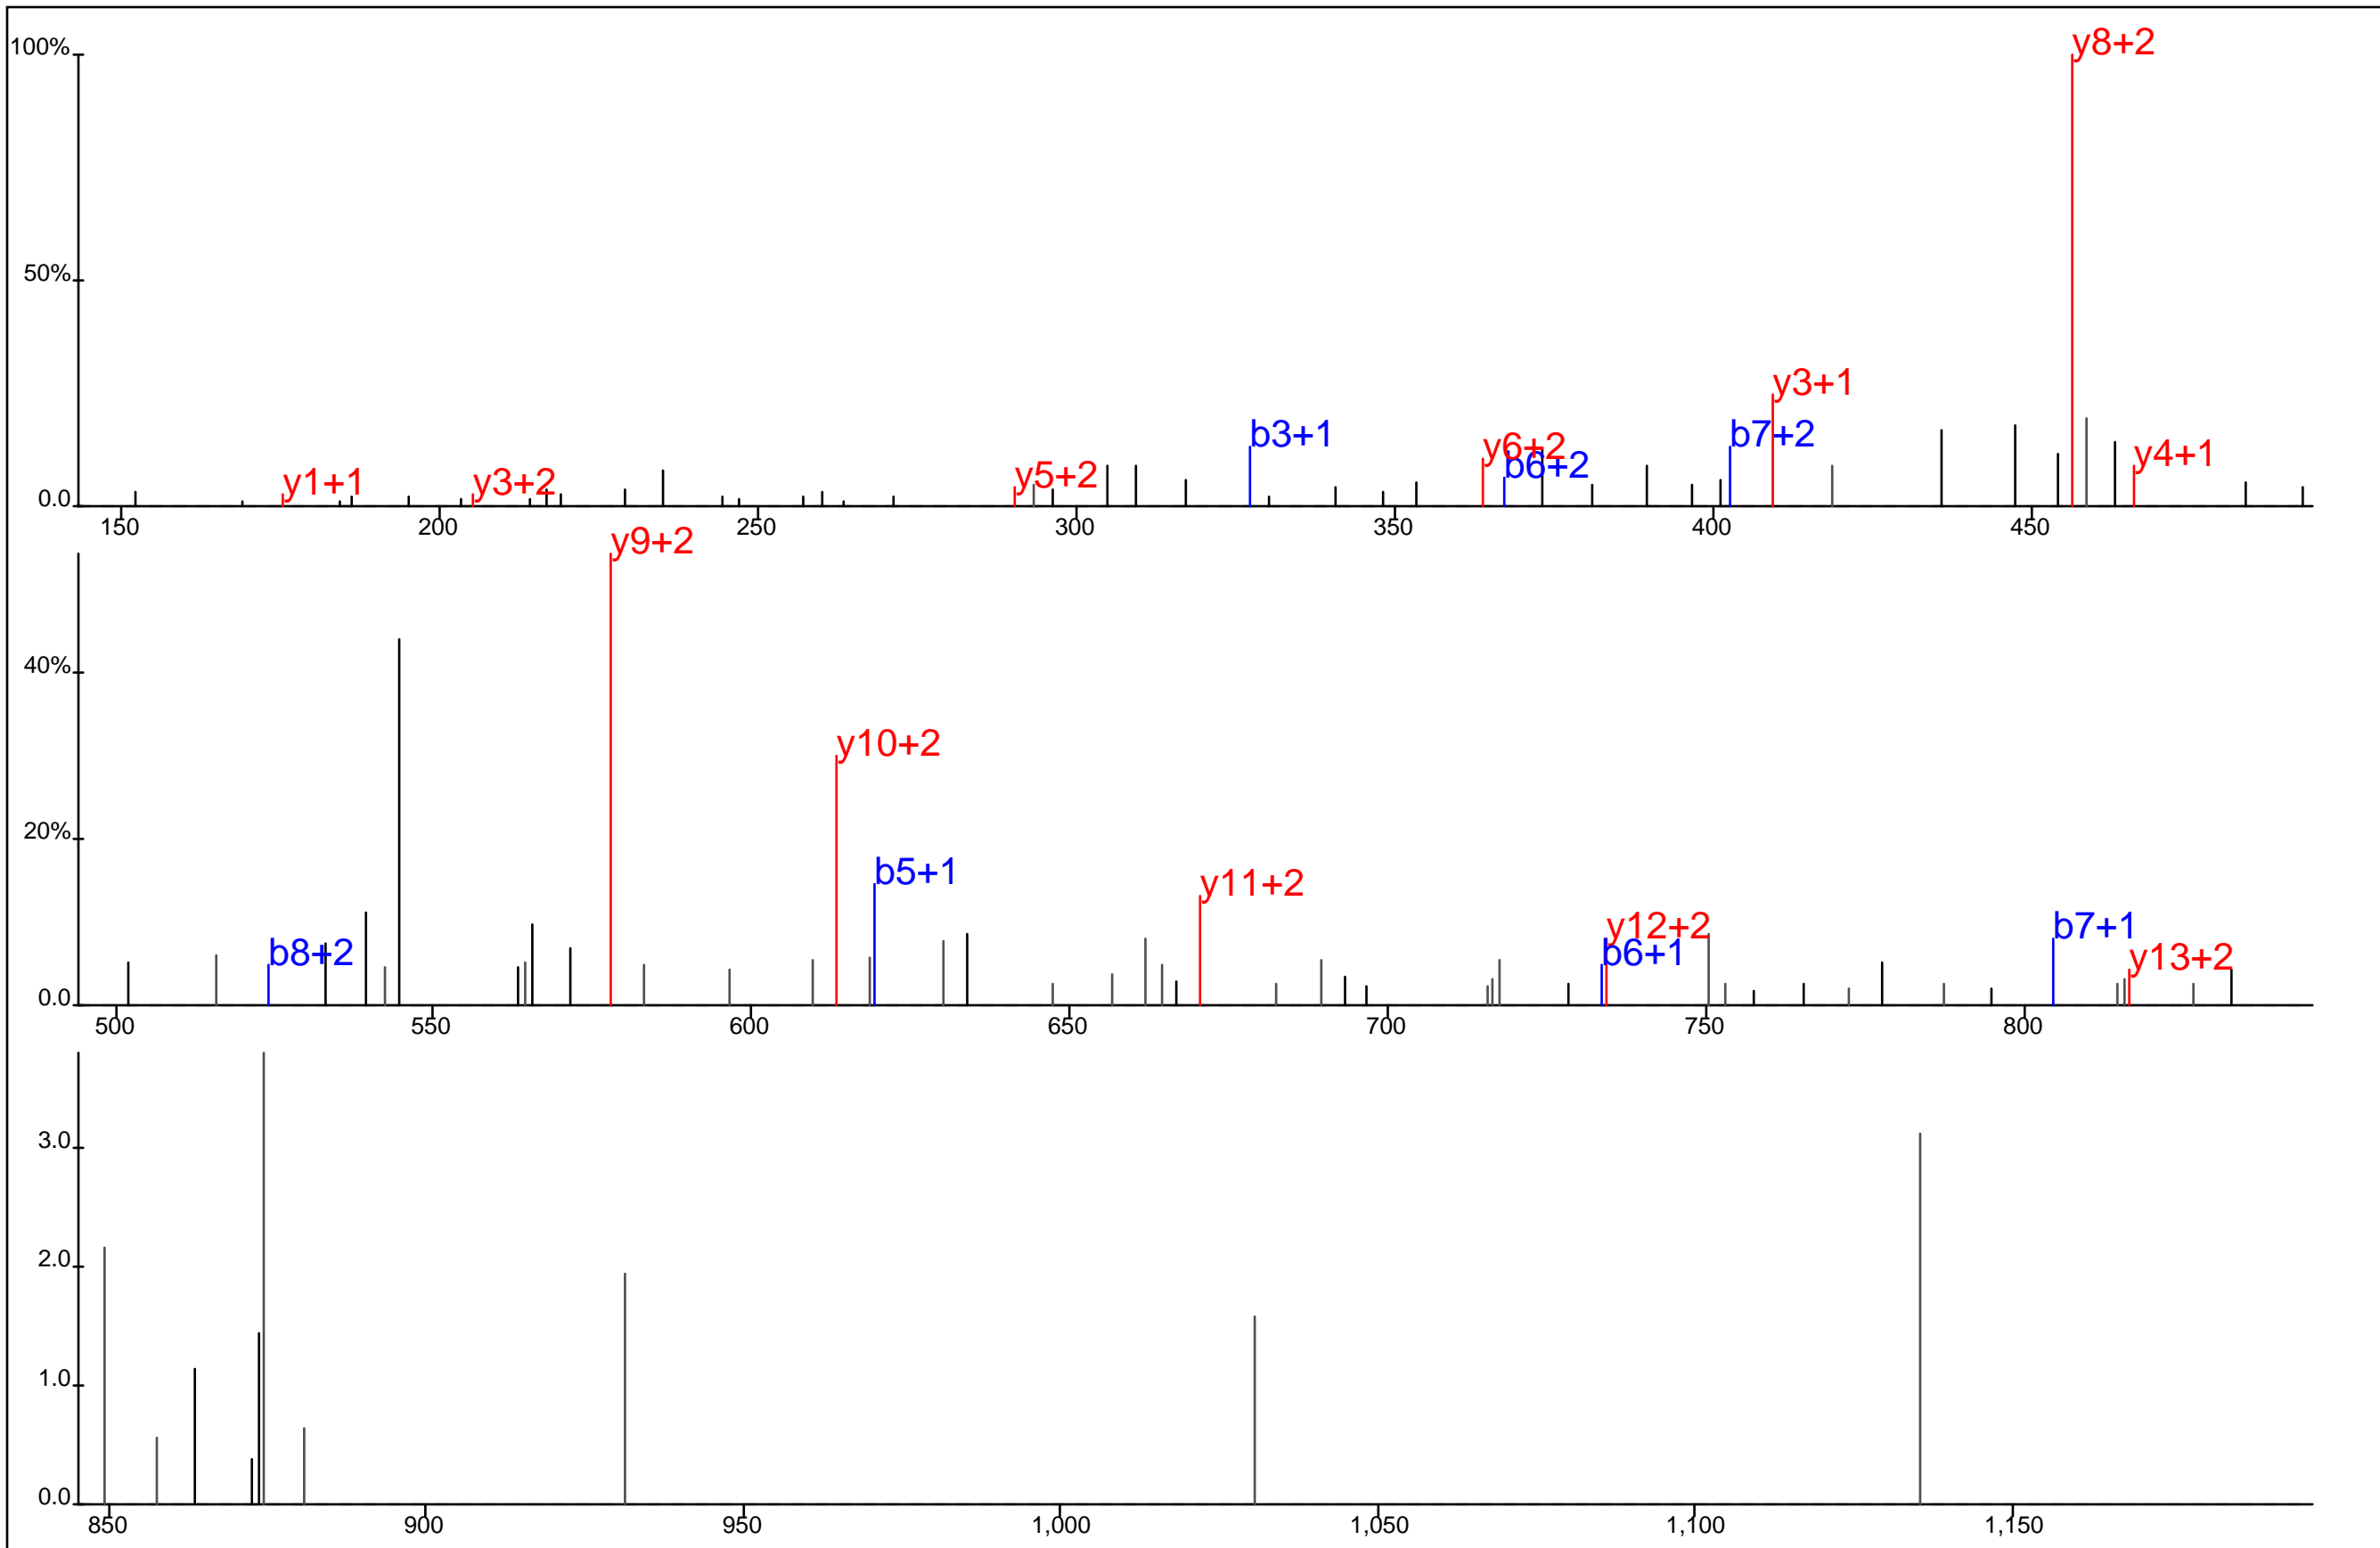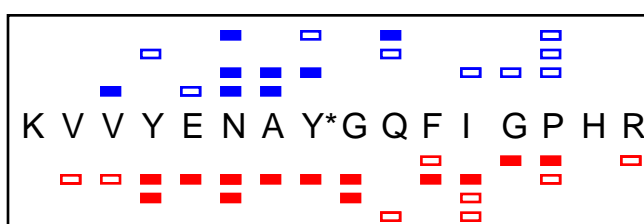

Protein Name: Thioredoxin reductase 1  
 gi Accession: 0  
 Precursor Mass: 490.2397+4  
 Delta Mass: 2.446 ppm  
 XCorr: 35.33

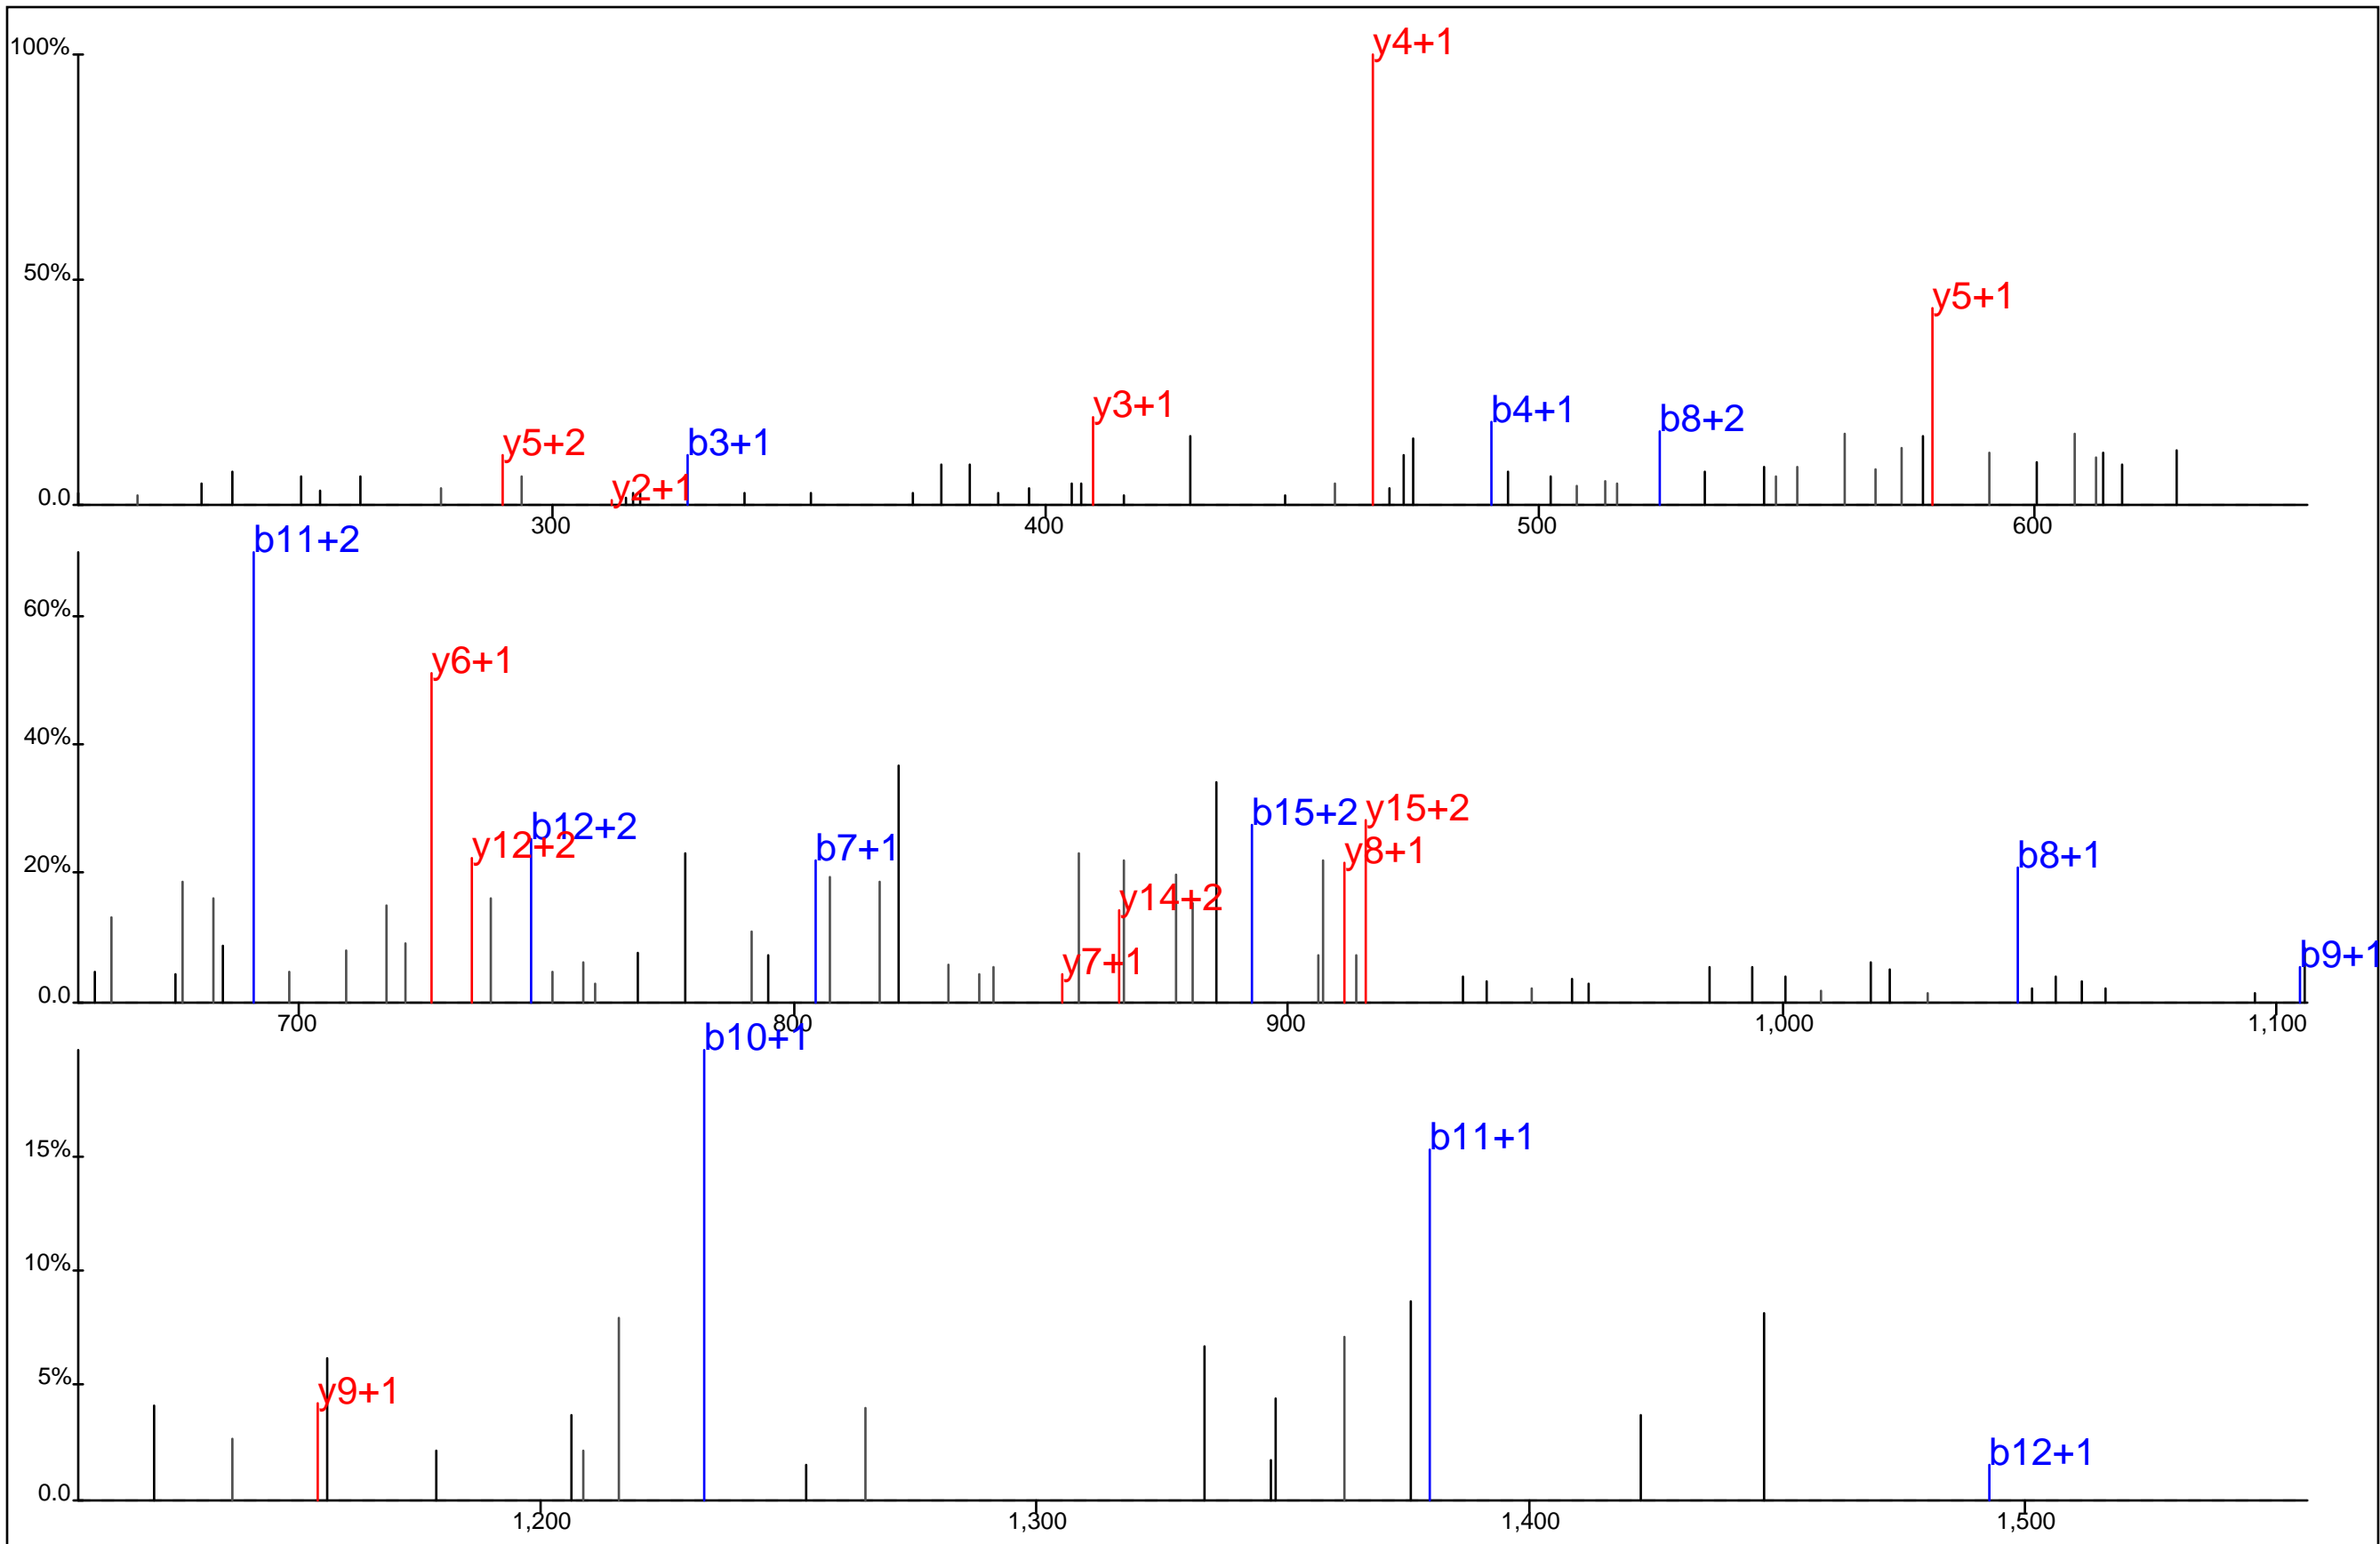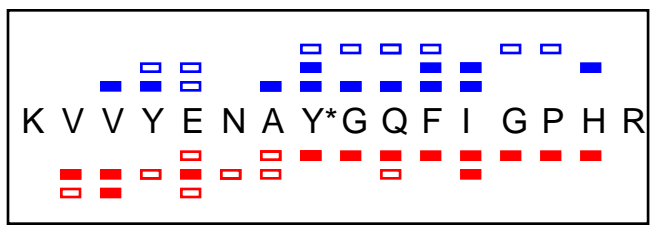

Protein Name: Thioredoxin reductase 1  
 gi Accession: 0  
 Precursor Mass: 653.3176+3  
 Delta Mass: 3.231 ppm  
 XCorr: 30.28

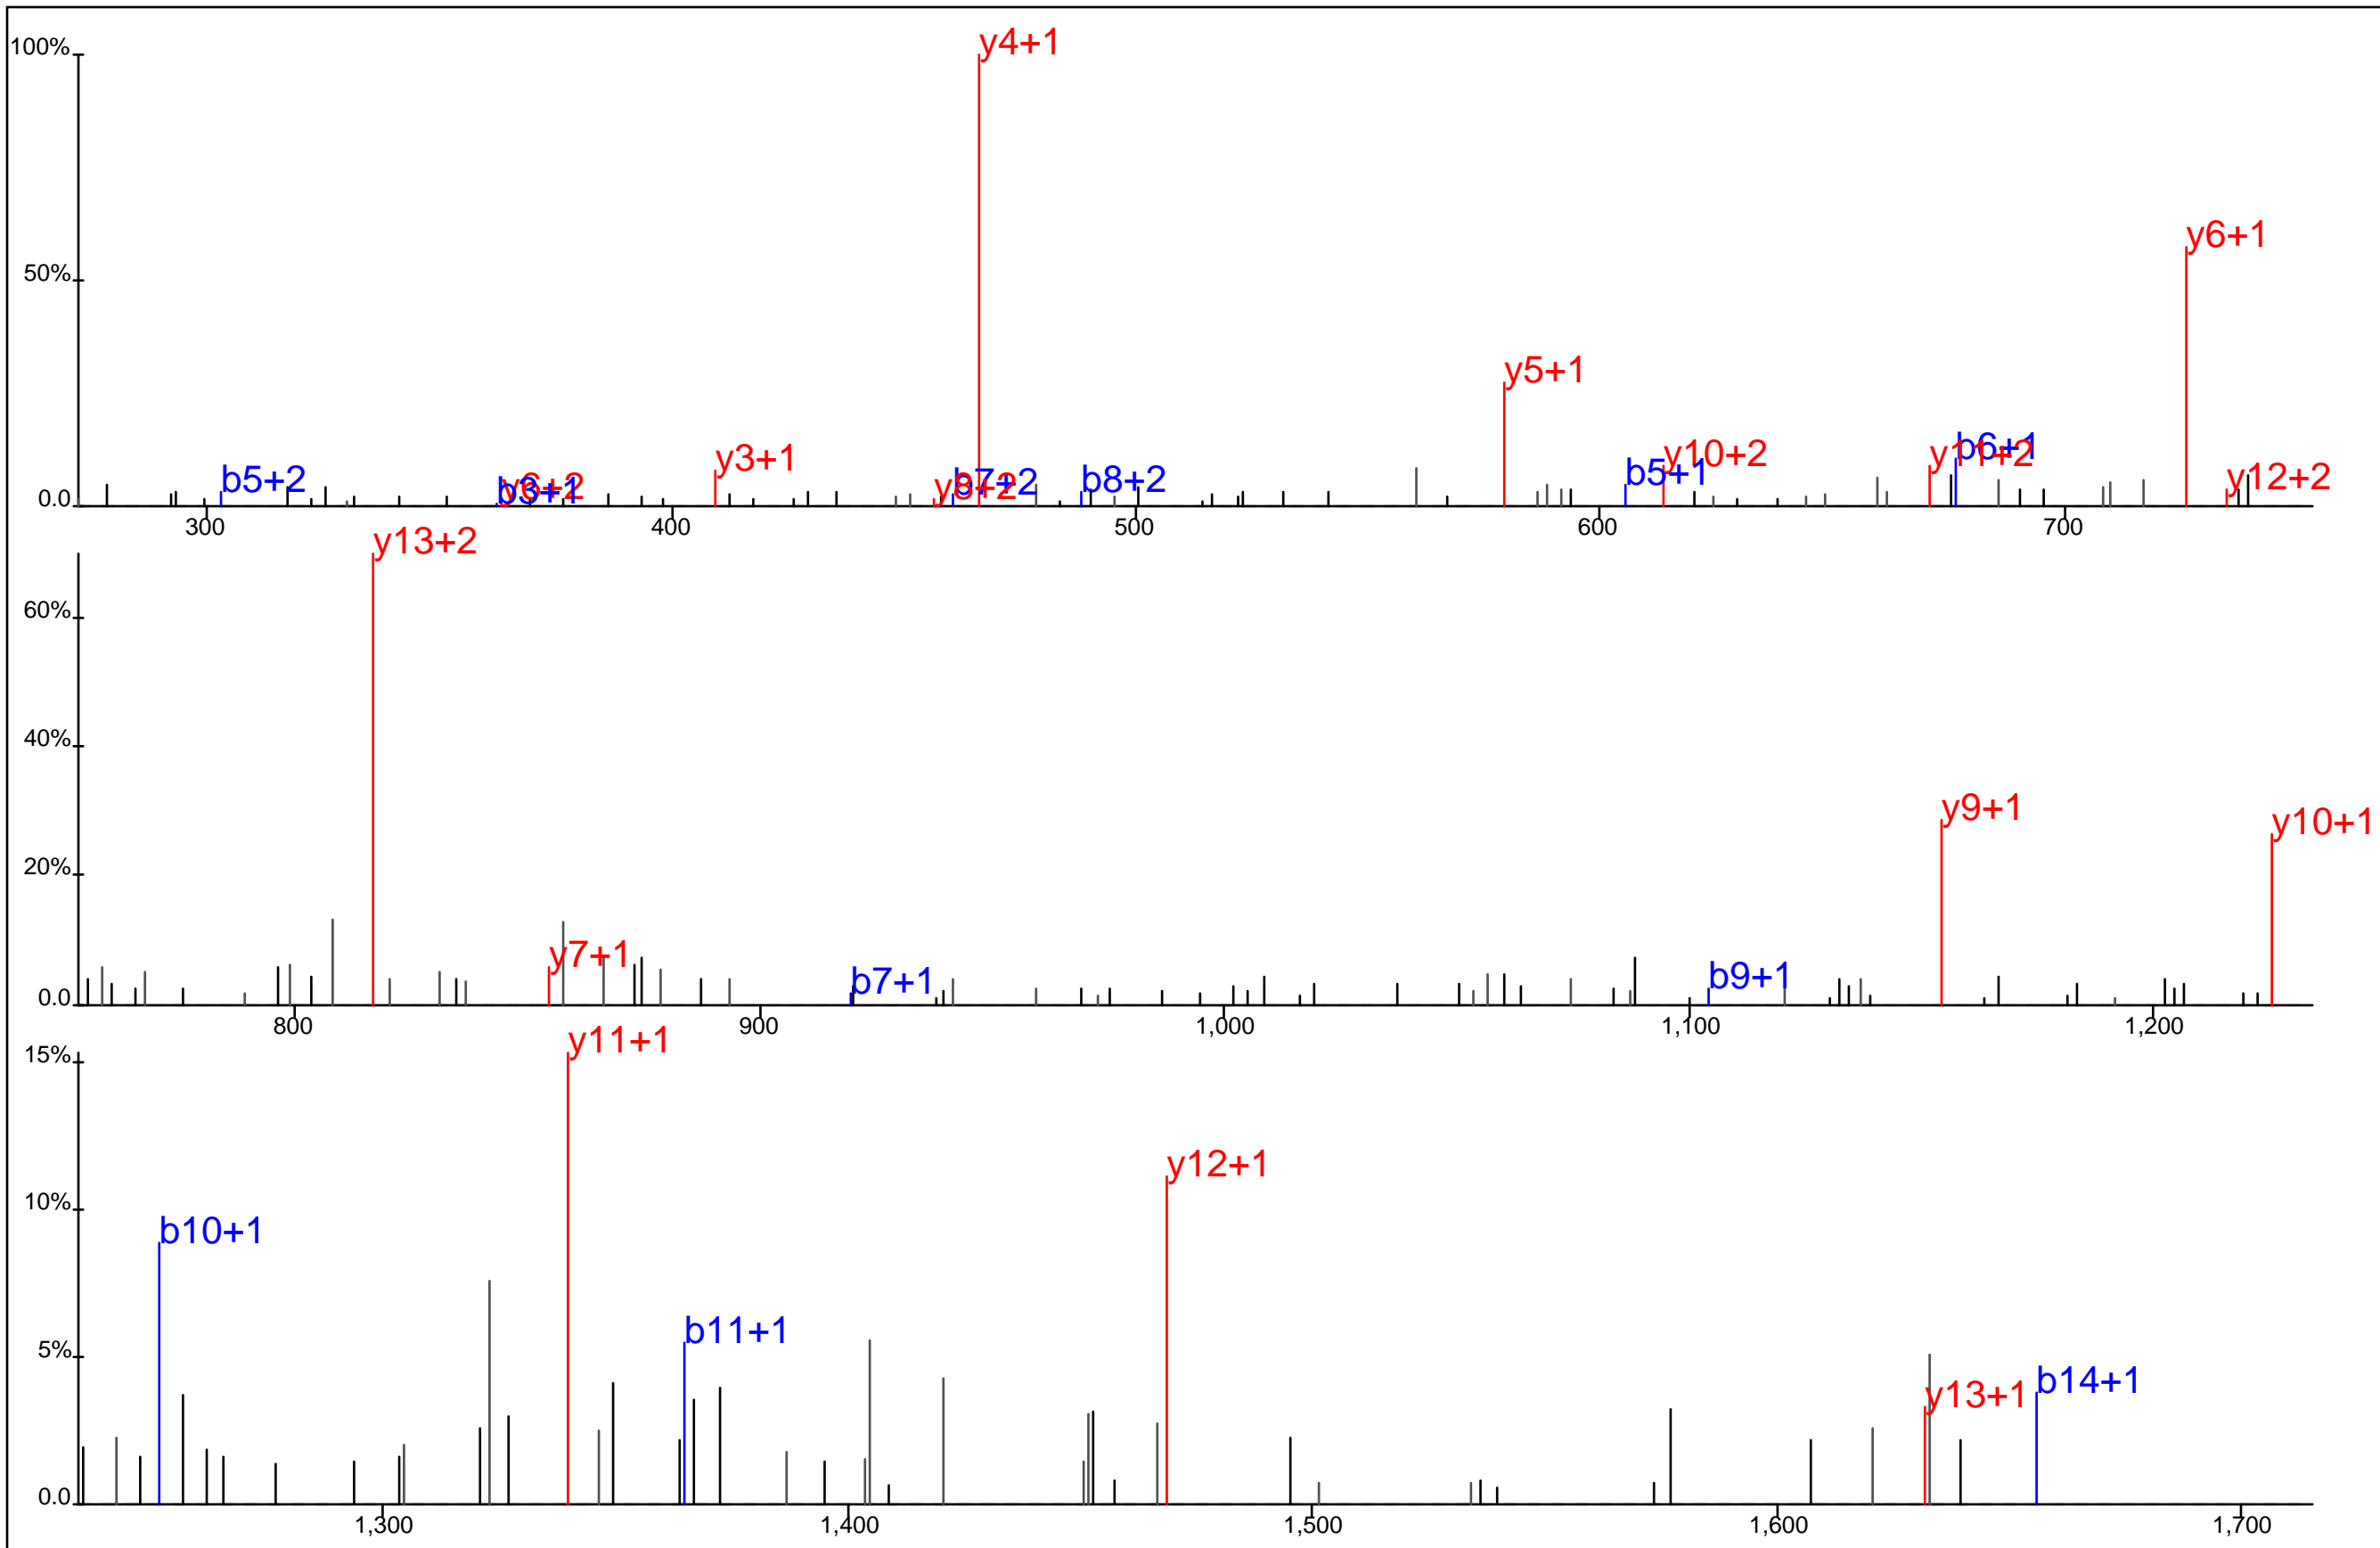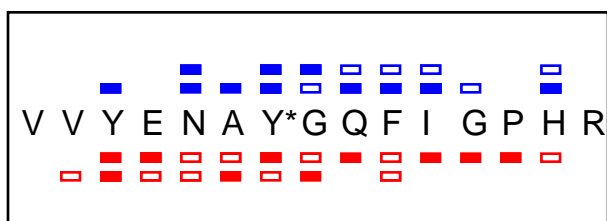

Protein Name: Thioredoxin reductase 1  
 gi Accession: 0  
 Precursor Mass: 915.4214+2  
 Delta Mass: 0.783 ppm  
 XCorr: 44.99

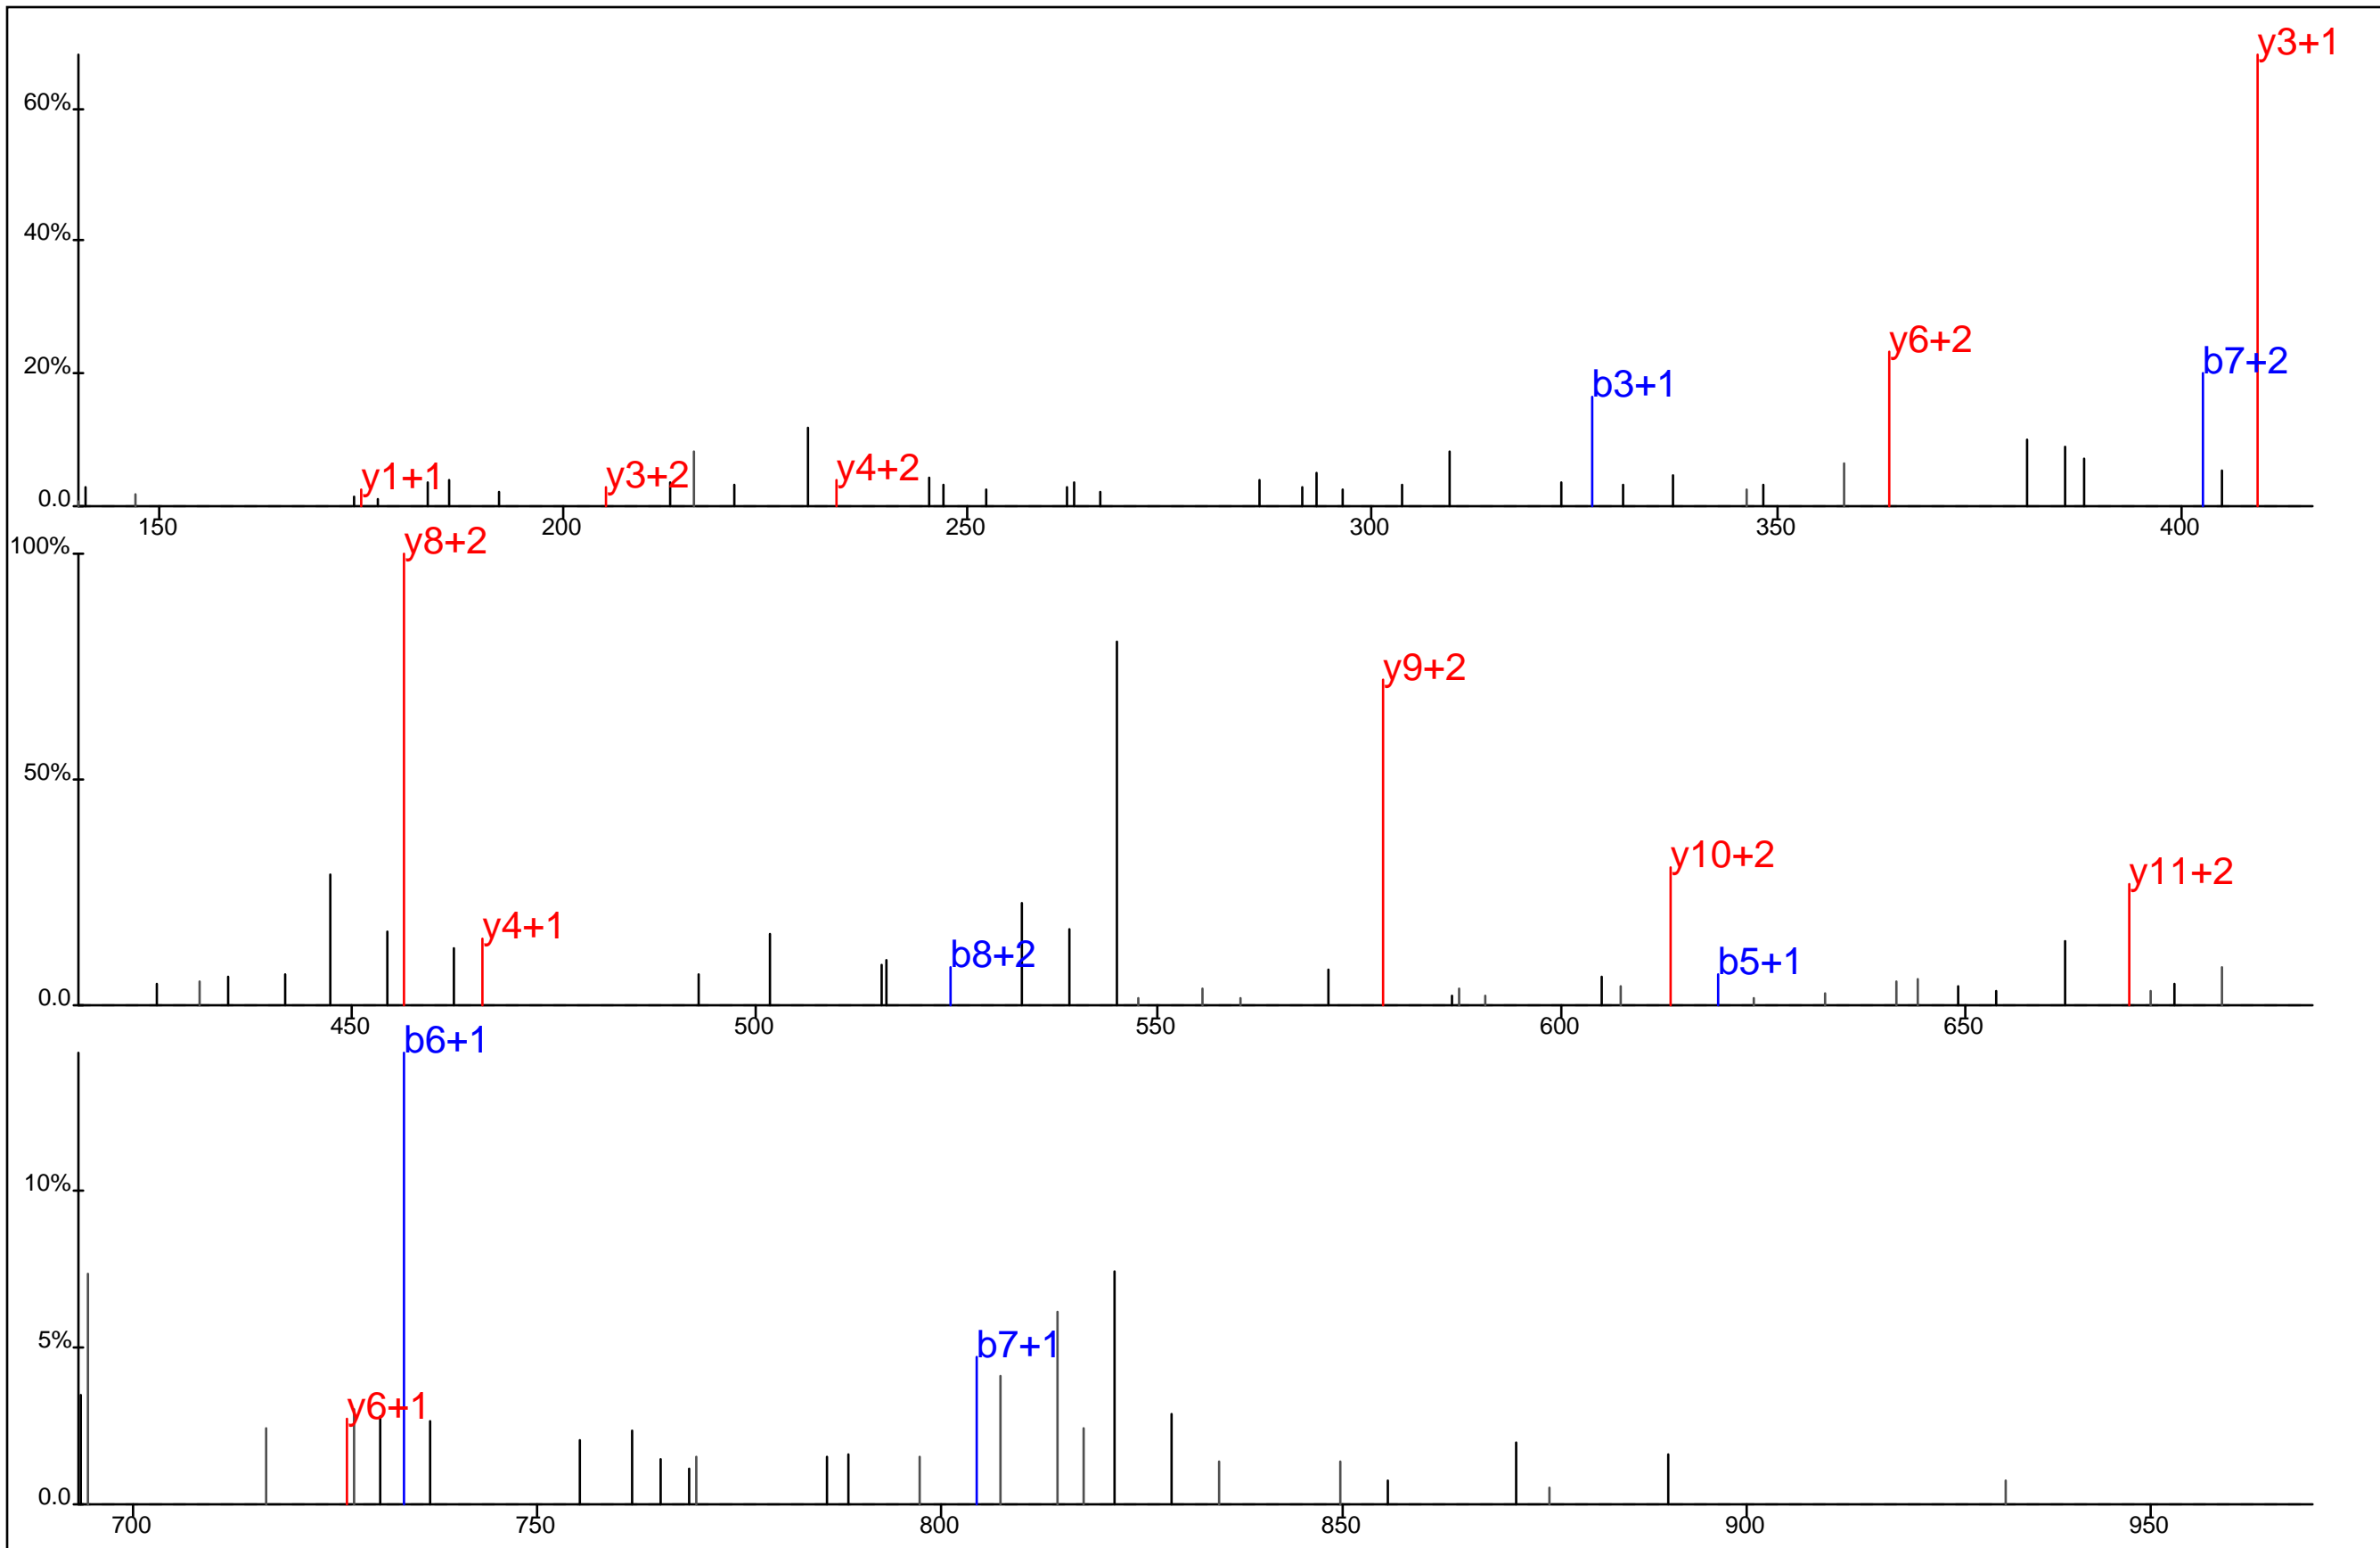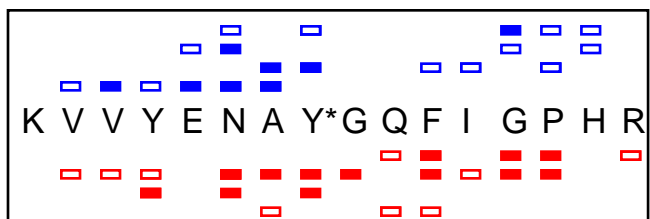

Protein Name: Thioredoxin reductase 1  
 gi Accession: 0  
 Precursor Mass: 490.2371+4  
 Delta Mass: 2.792 ppm  
 XCorr: 22.8

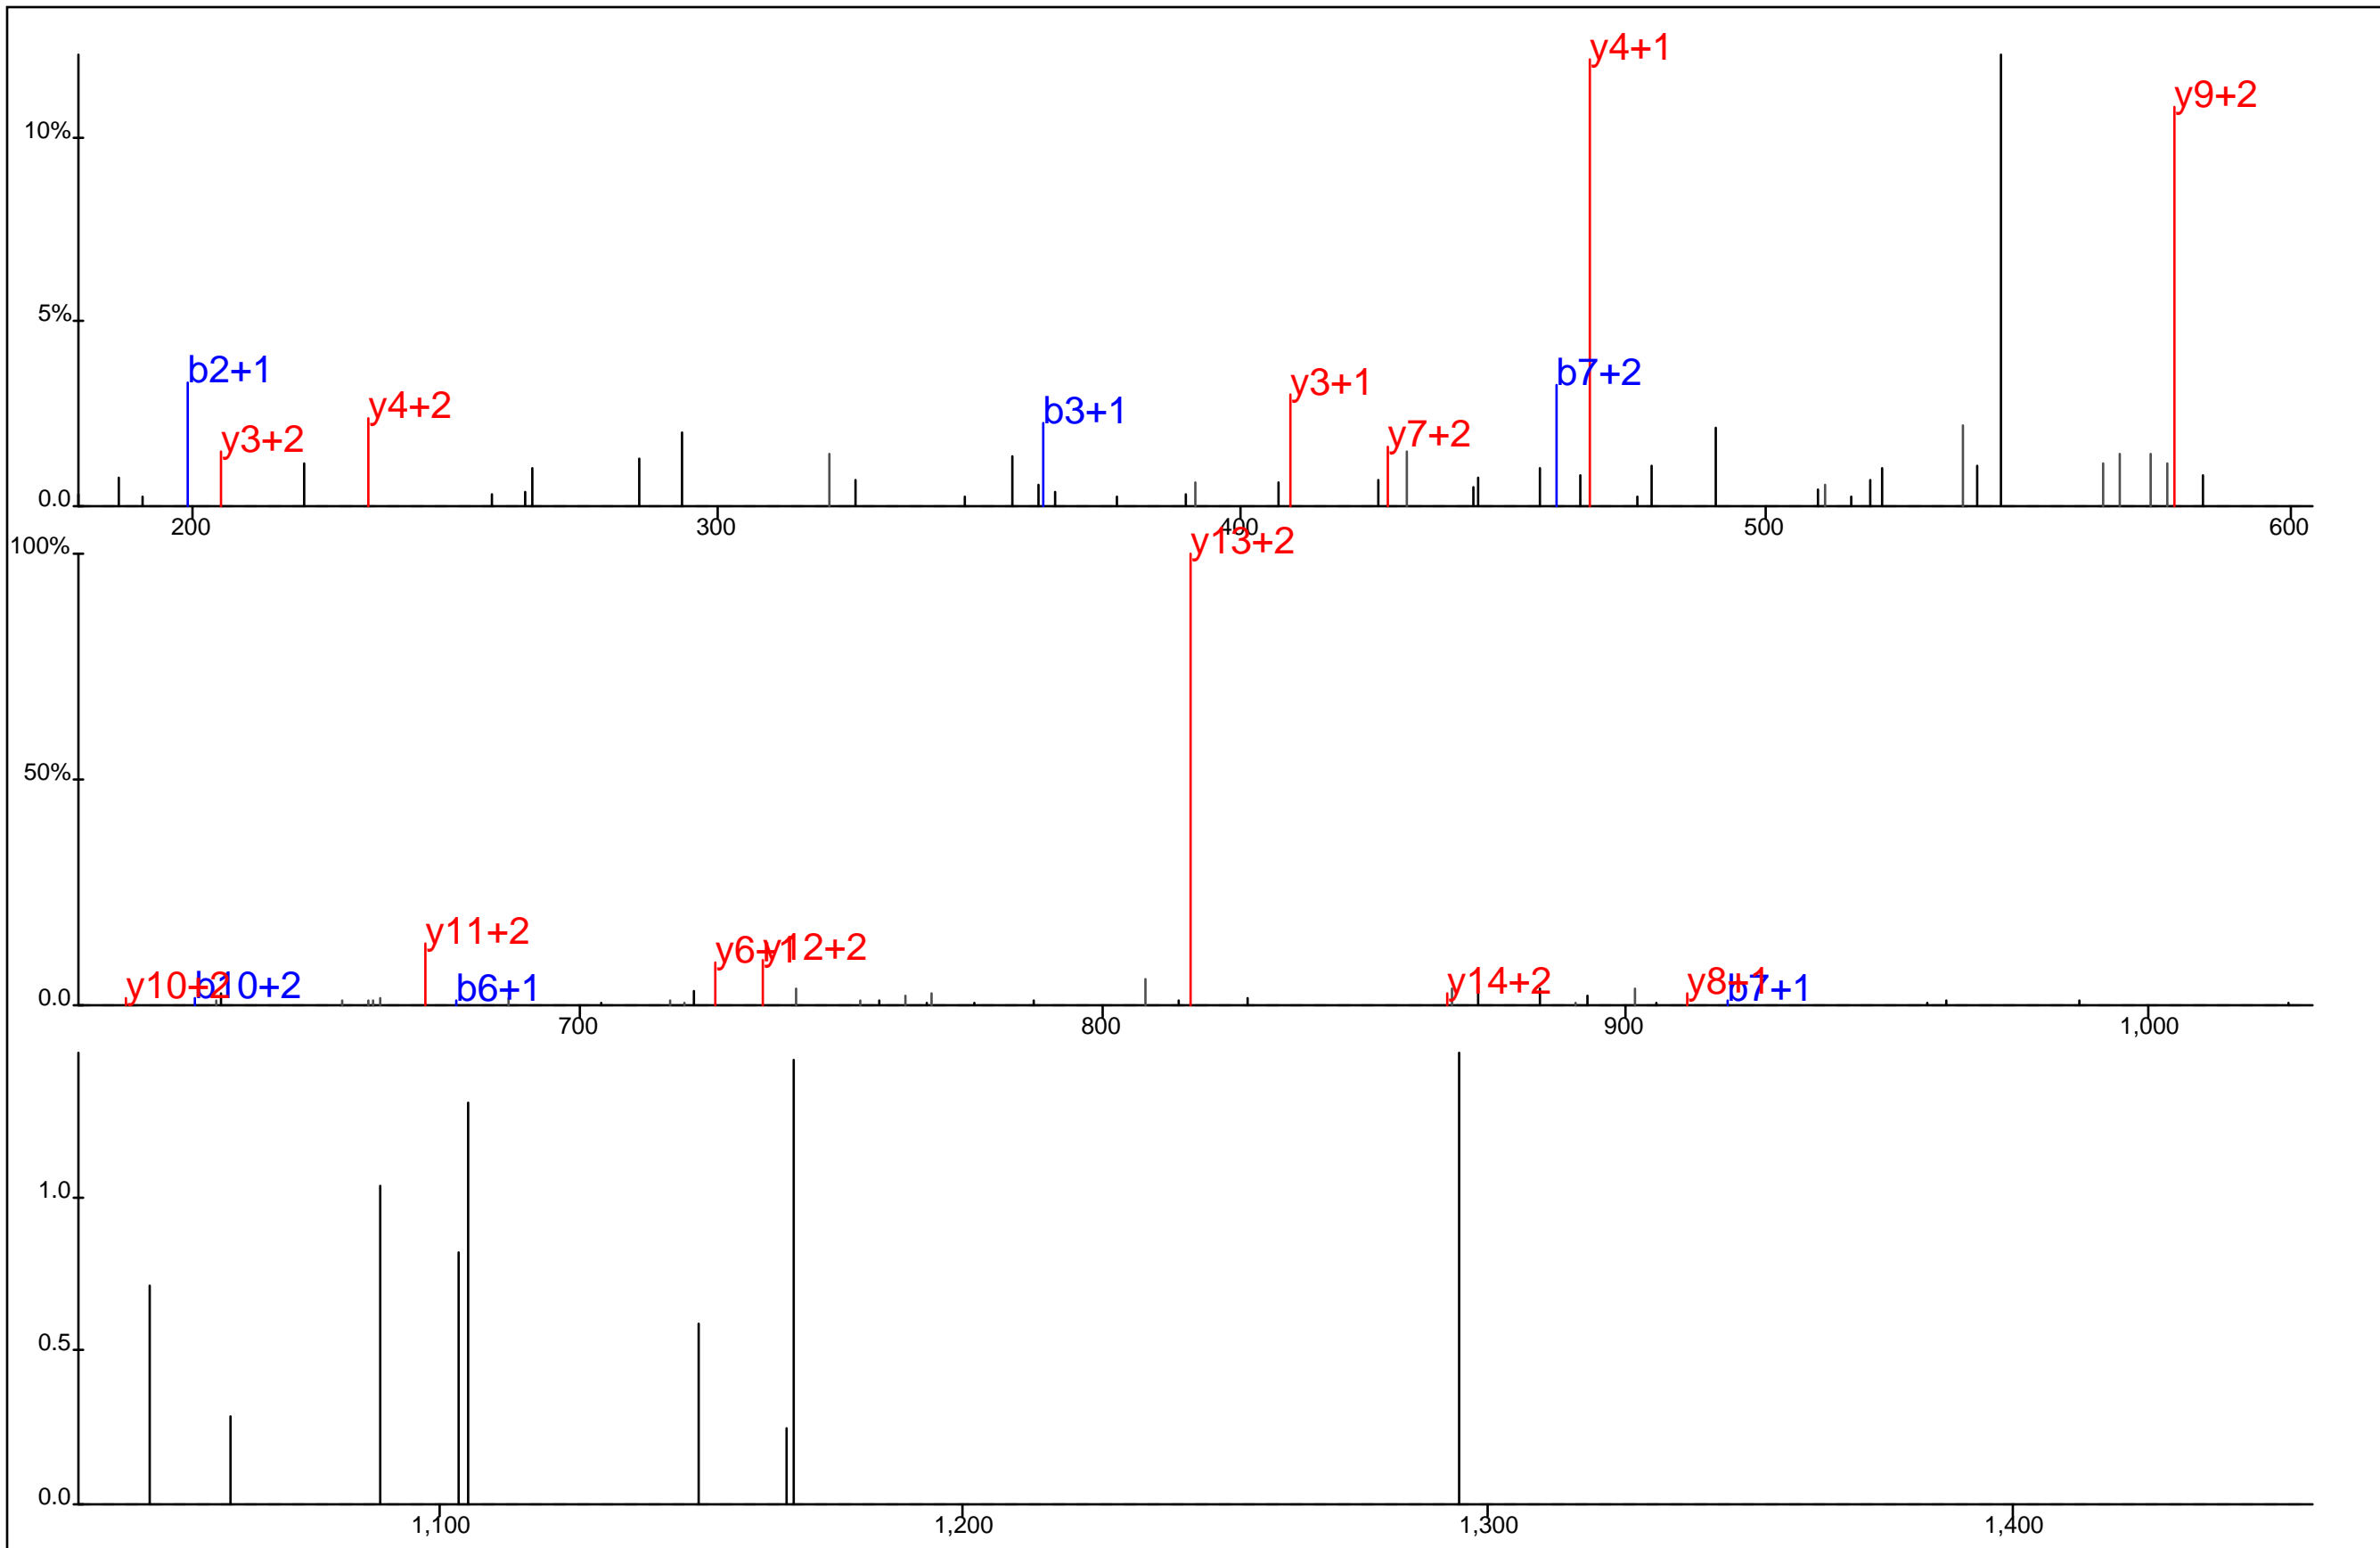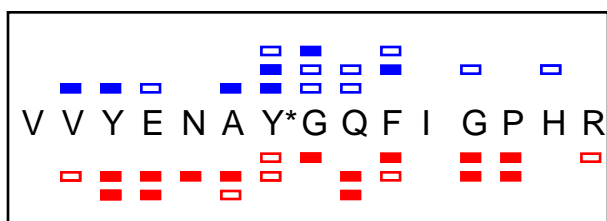

Protein Name: Thioredoxin reductase 1  
 gi Accession: 0  
 Precursor Mass: 610.6166+3  
 Delta Mass: 0.924 ppm  
 XCorr: 37.03

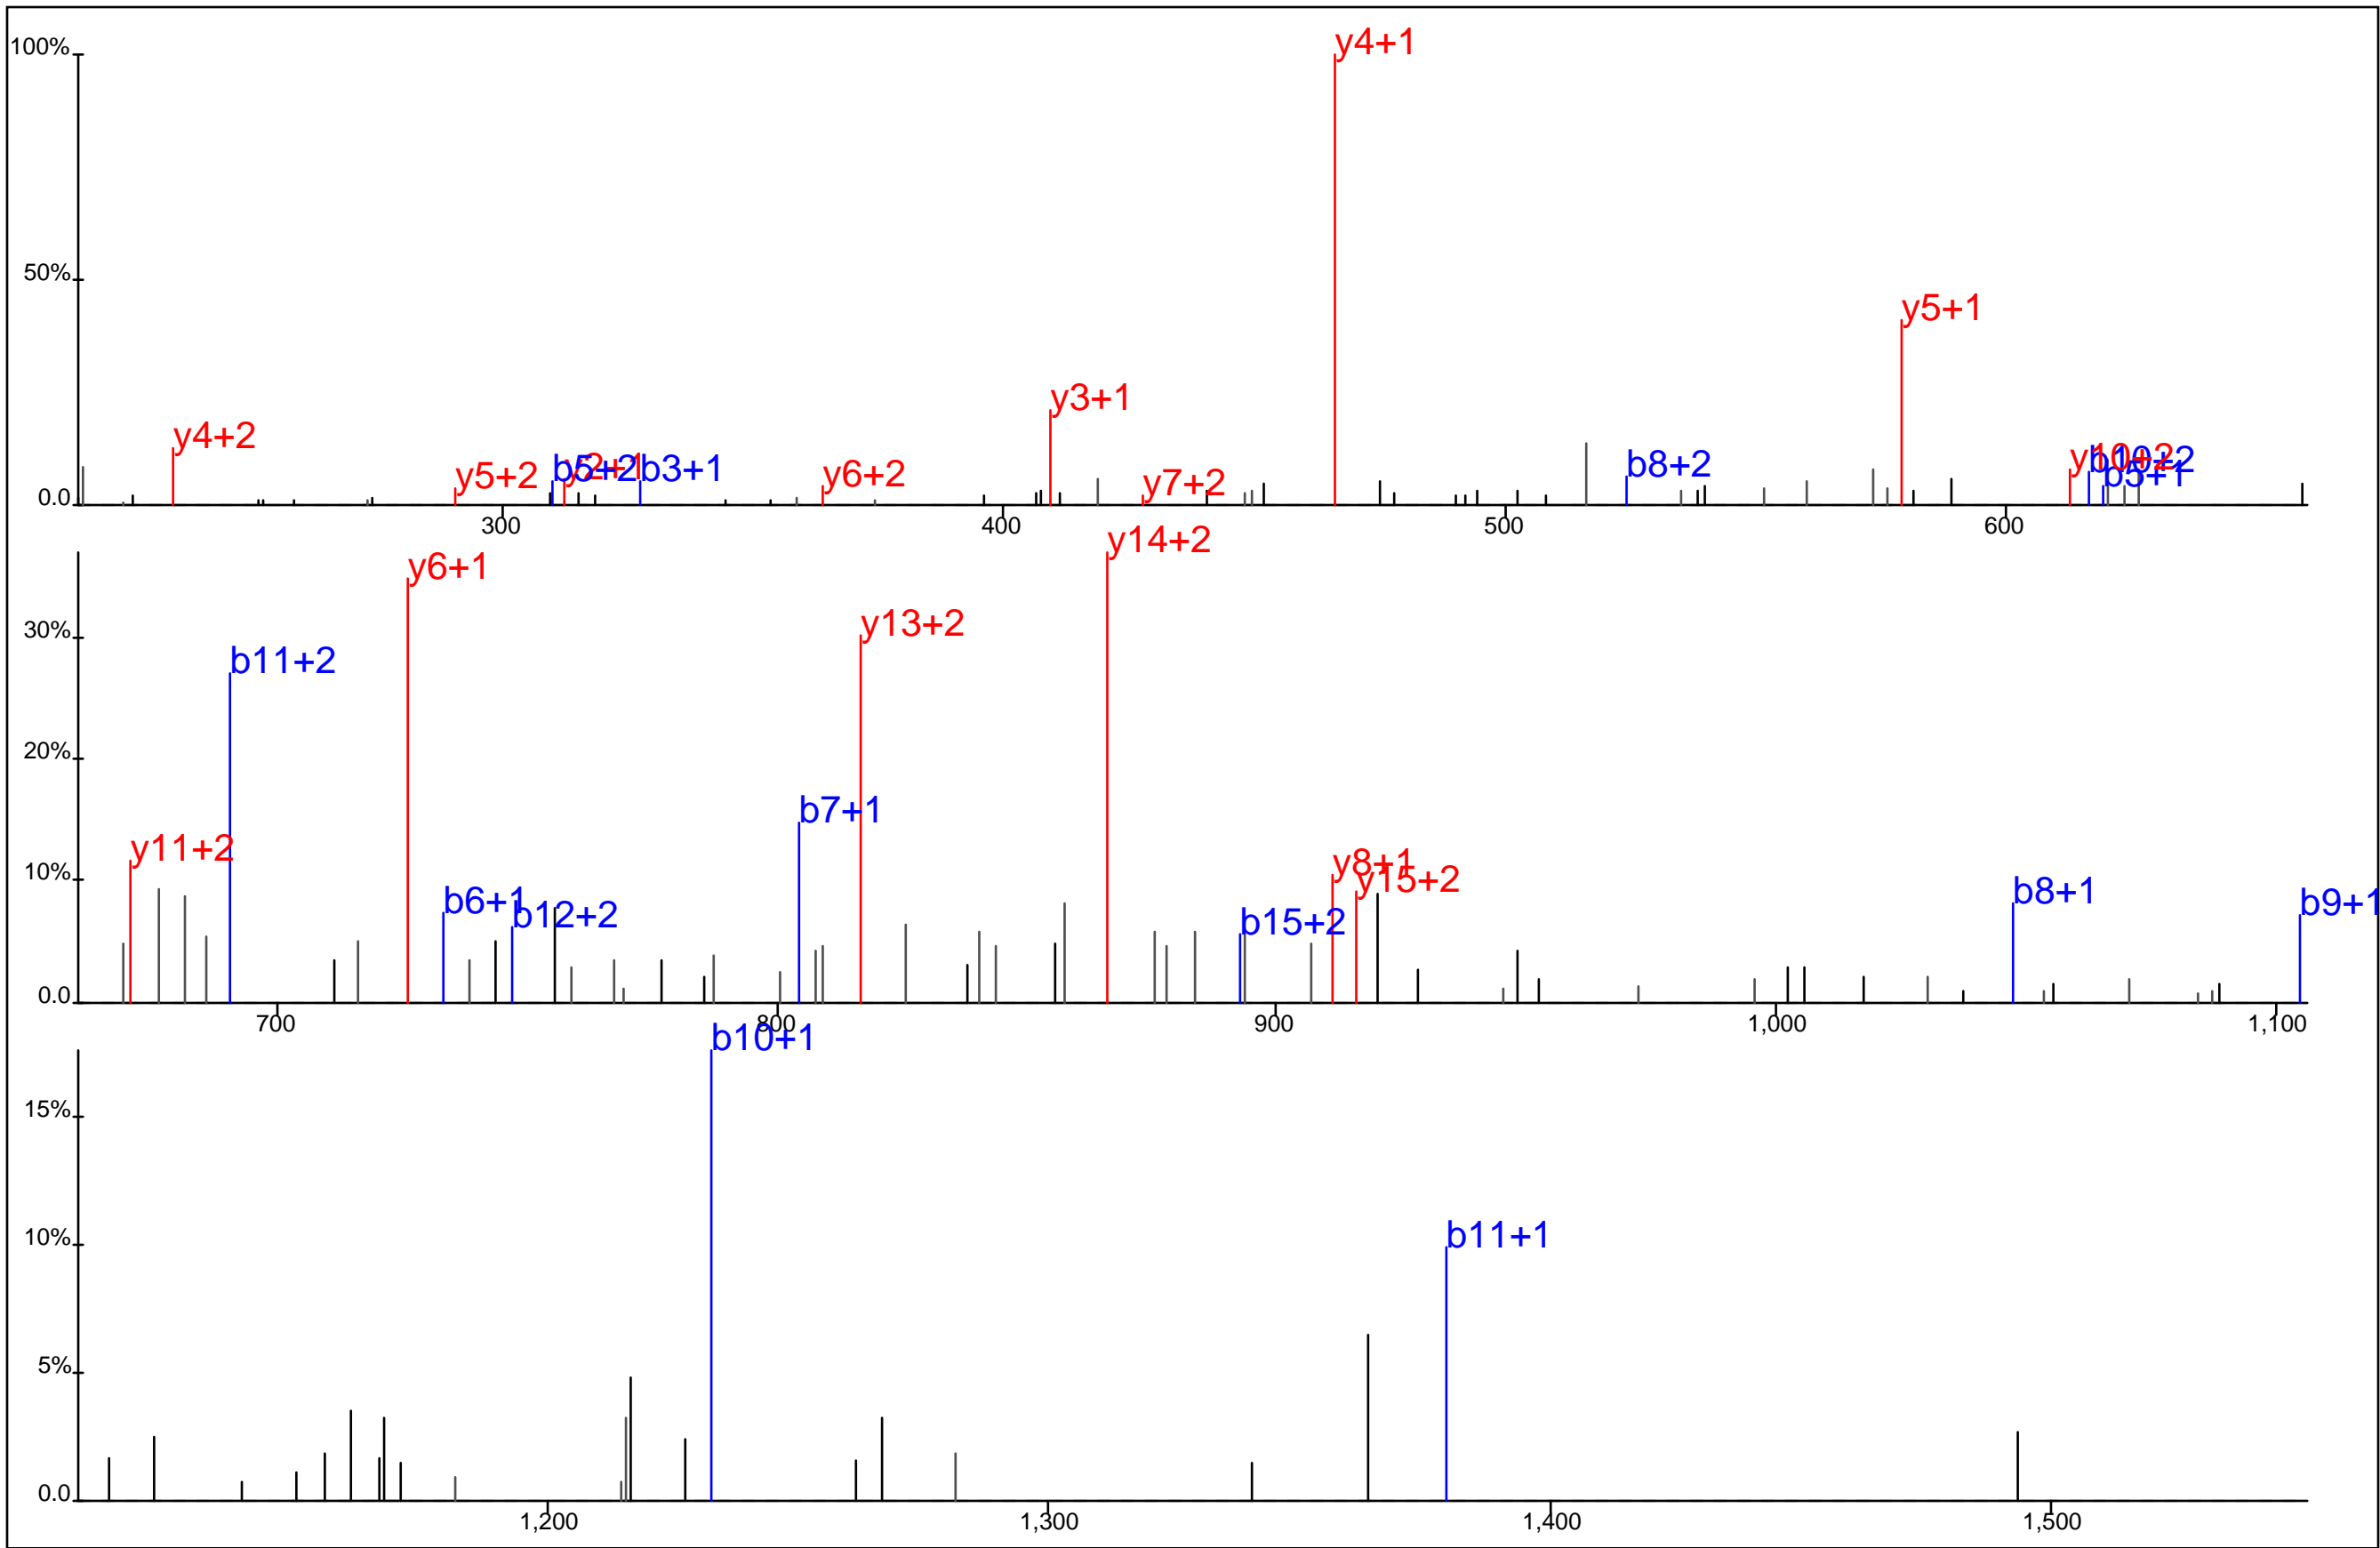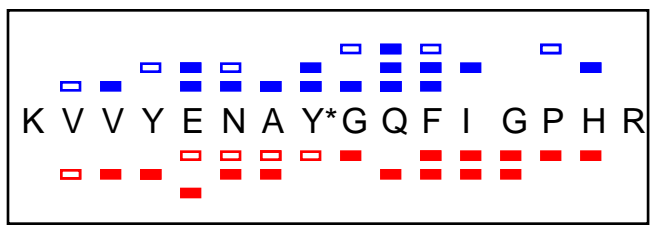

Protein Name: Thioredoxin reductase 1  
 gi Accession: 0  
 Precursor Mass: 653.3153+3  
 Delta Mass: 0.322 ppm  
 XCorr: 45.89

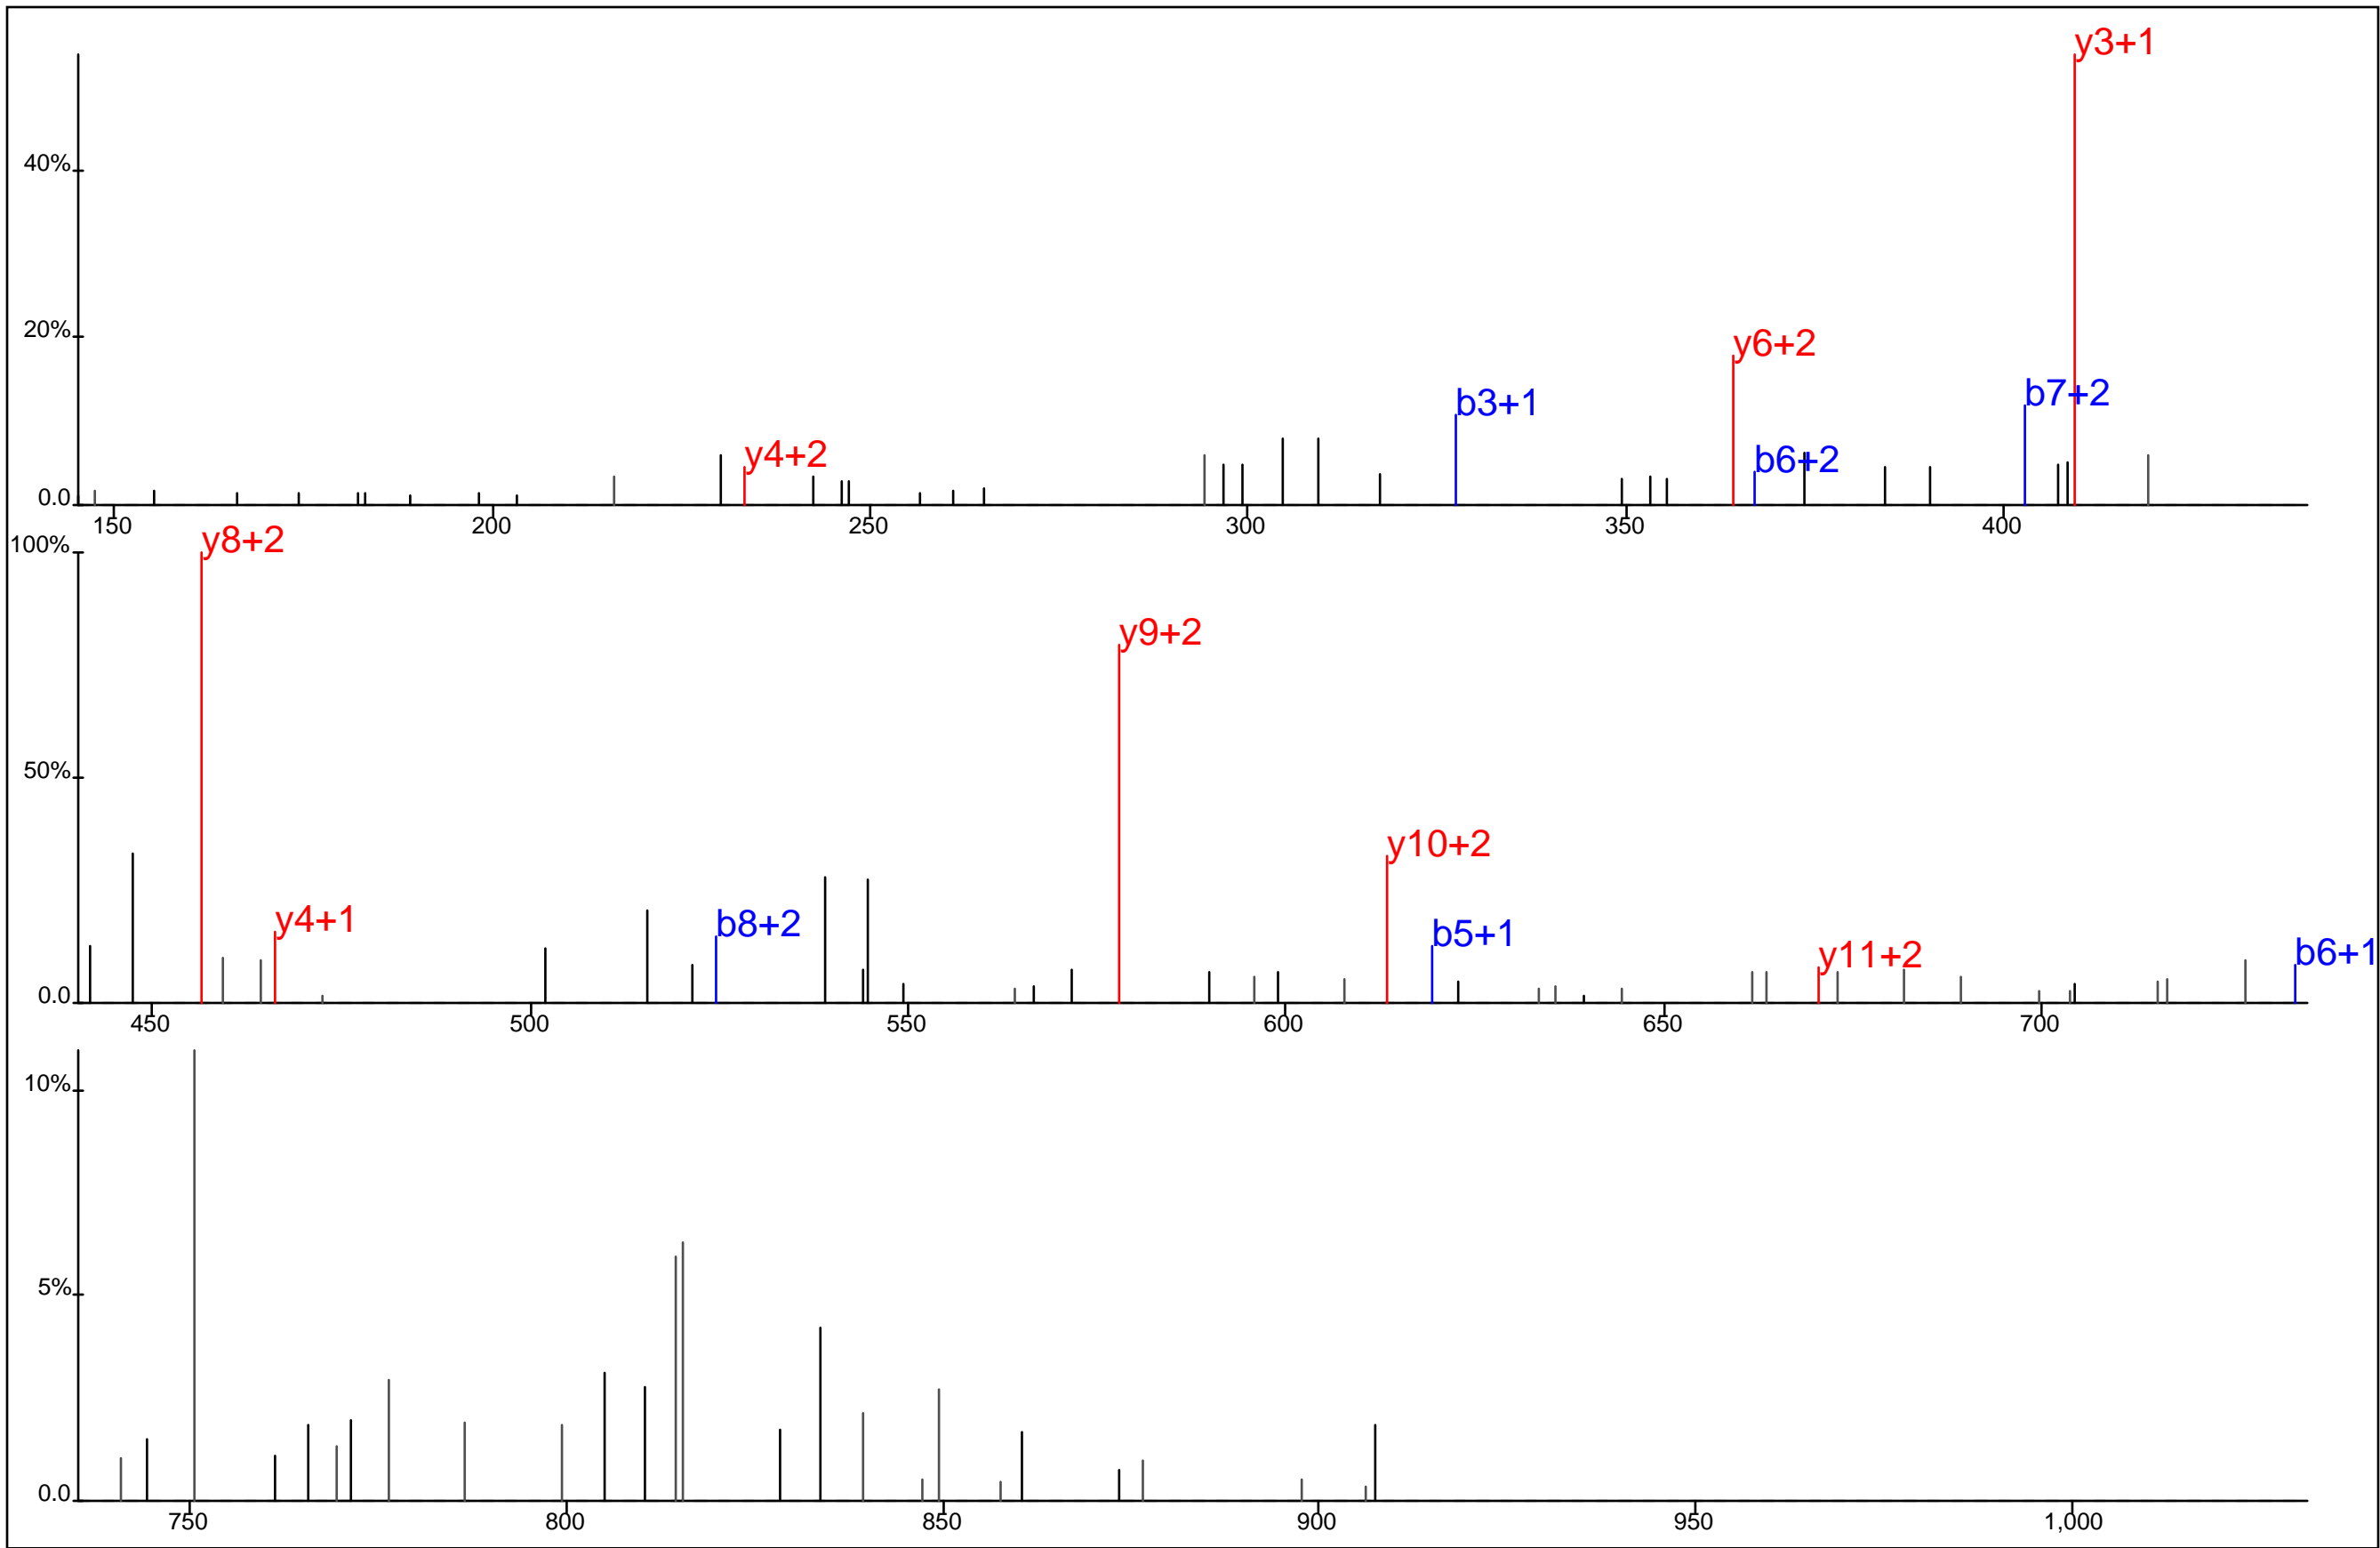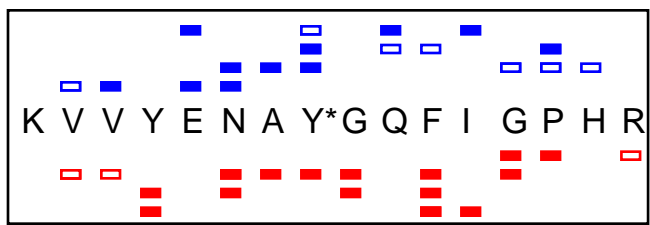

Protein Name: Thioredoxin reductase 1  
 gi Accession: 0  
 Precursor Mass: 490.2384+4  
 Delta Mass: 0.048 ppm  
 XCorr: 23.95



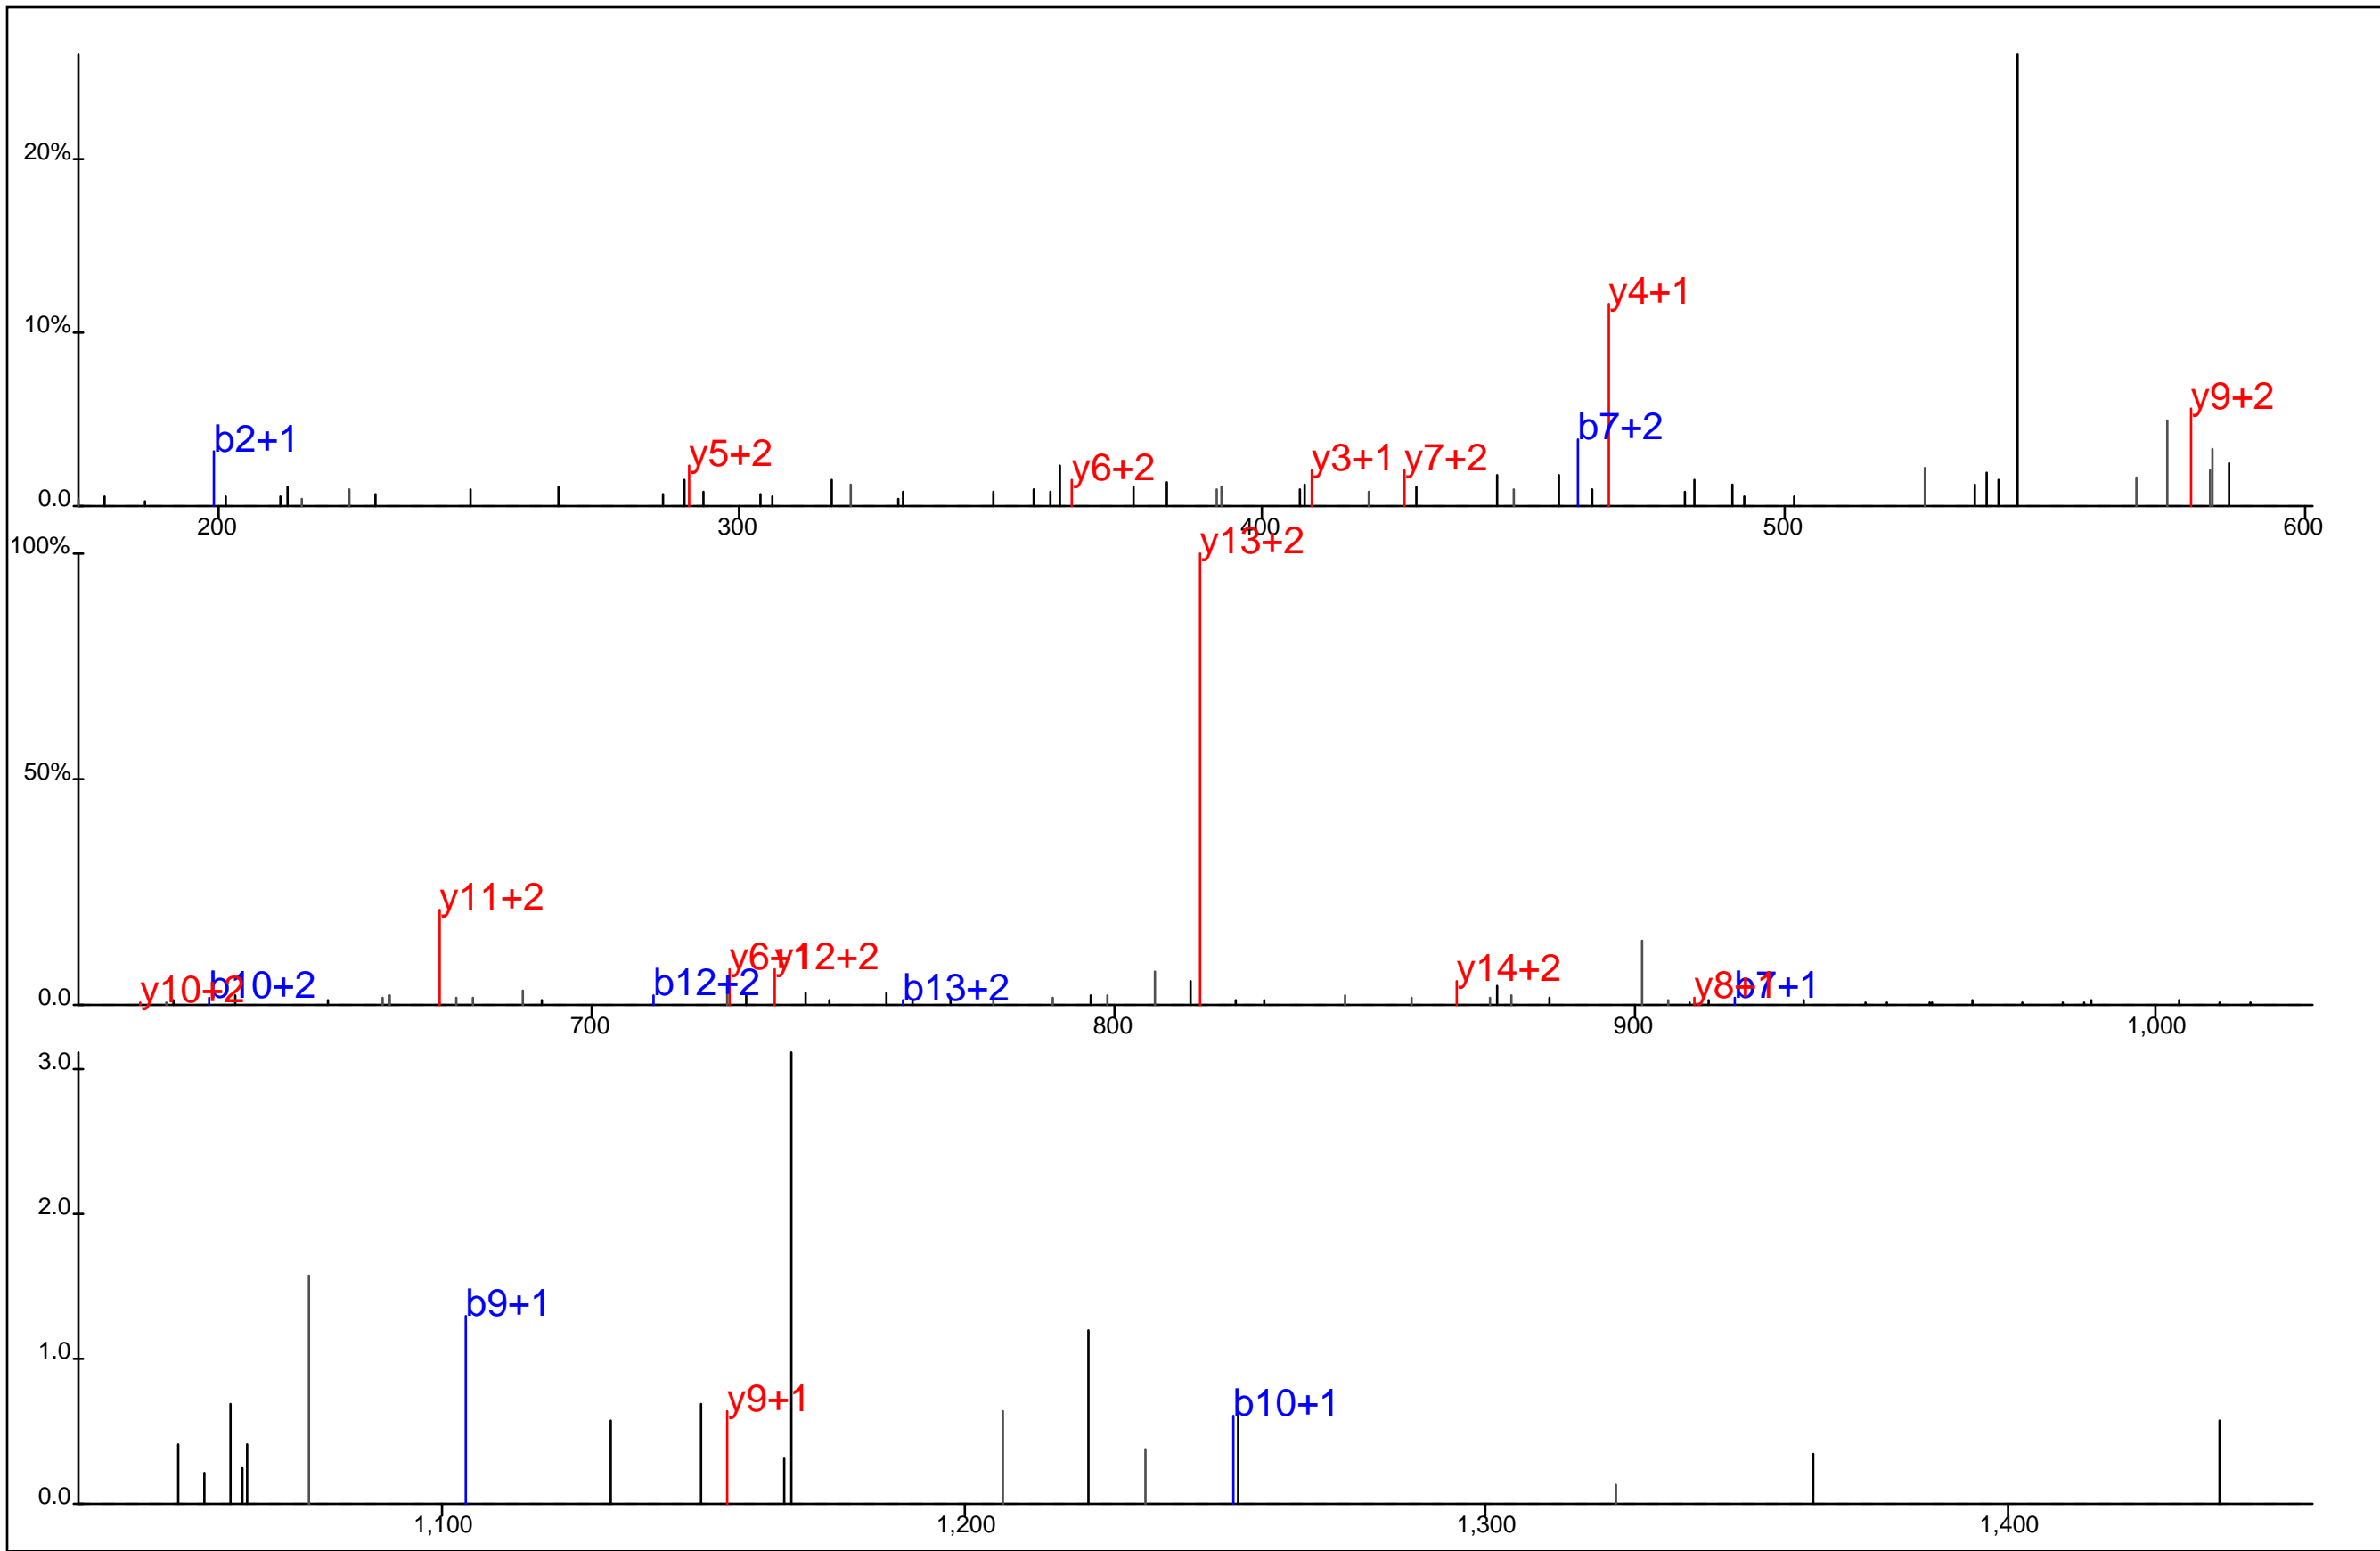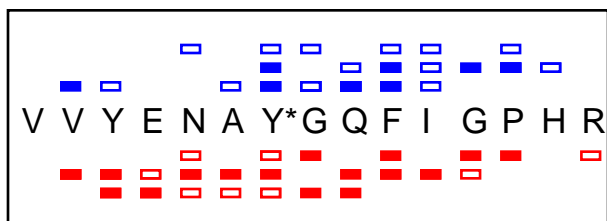

Protein Name: Thioredoxin reductase 1  
 gi Accession: 0  
 Precursor Mass: 610.6163+3  
 Delta Mass: 1.524 ppm  
 XCorr: 26.68

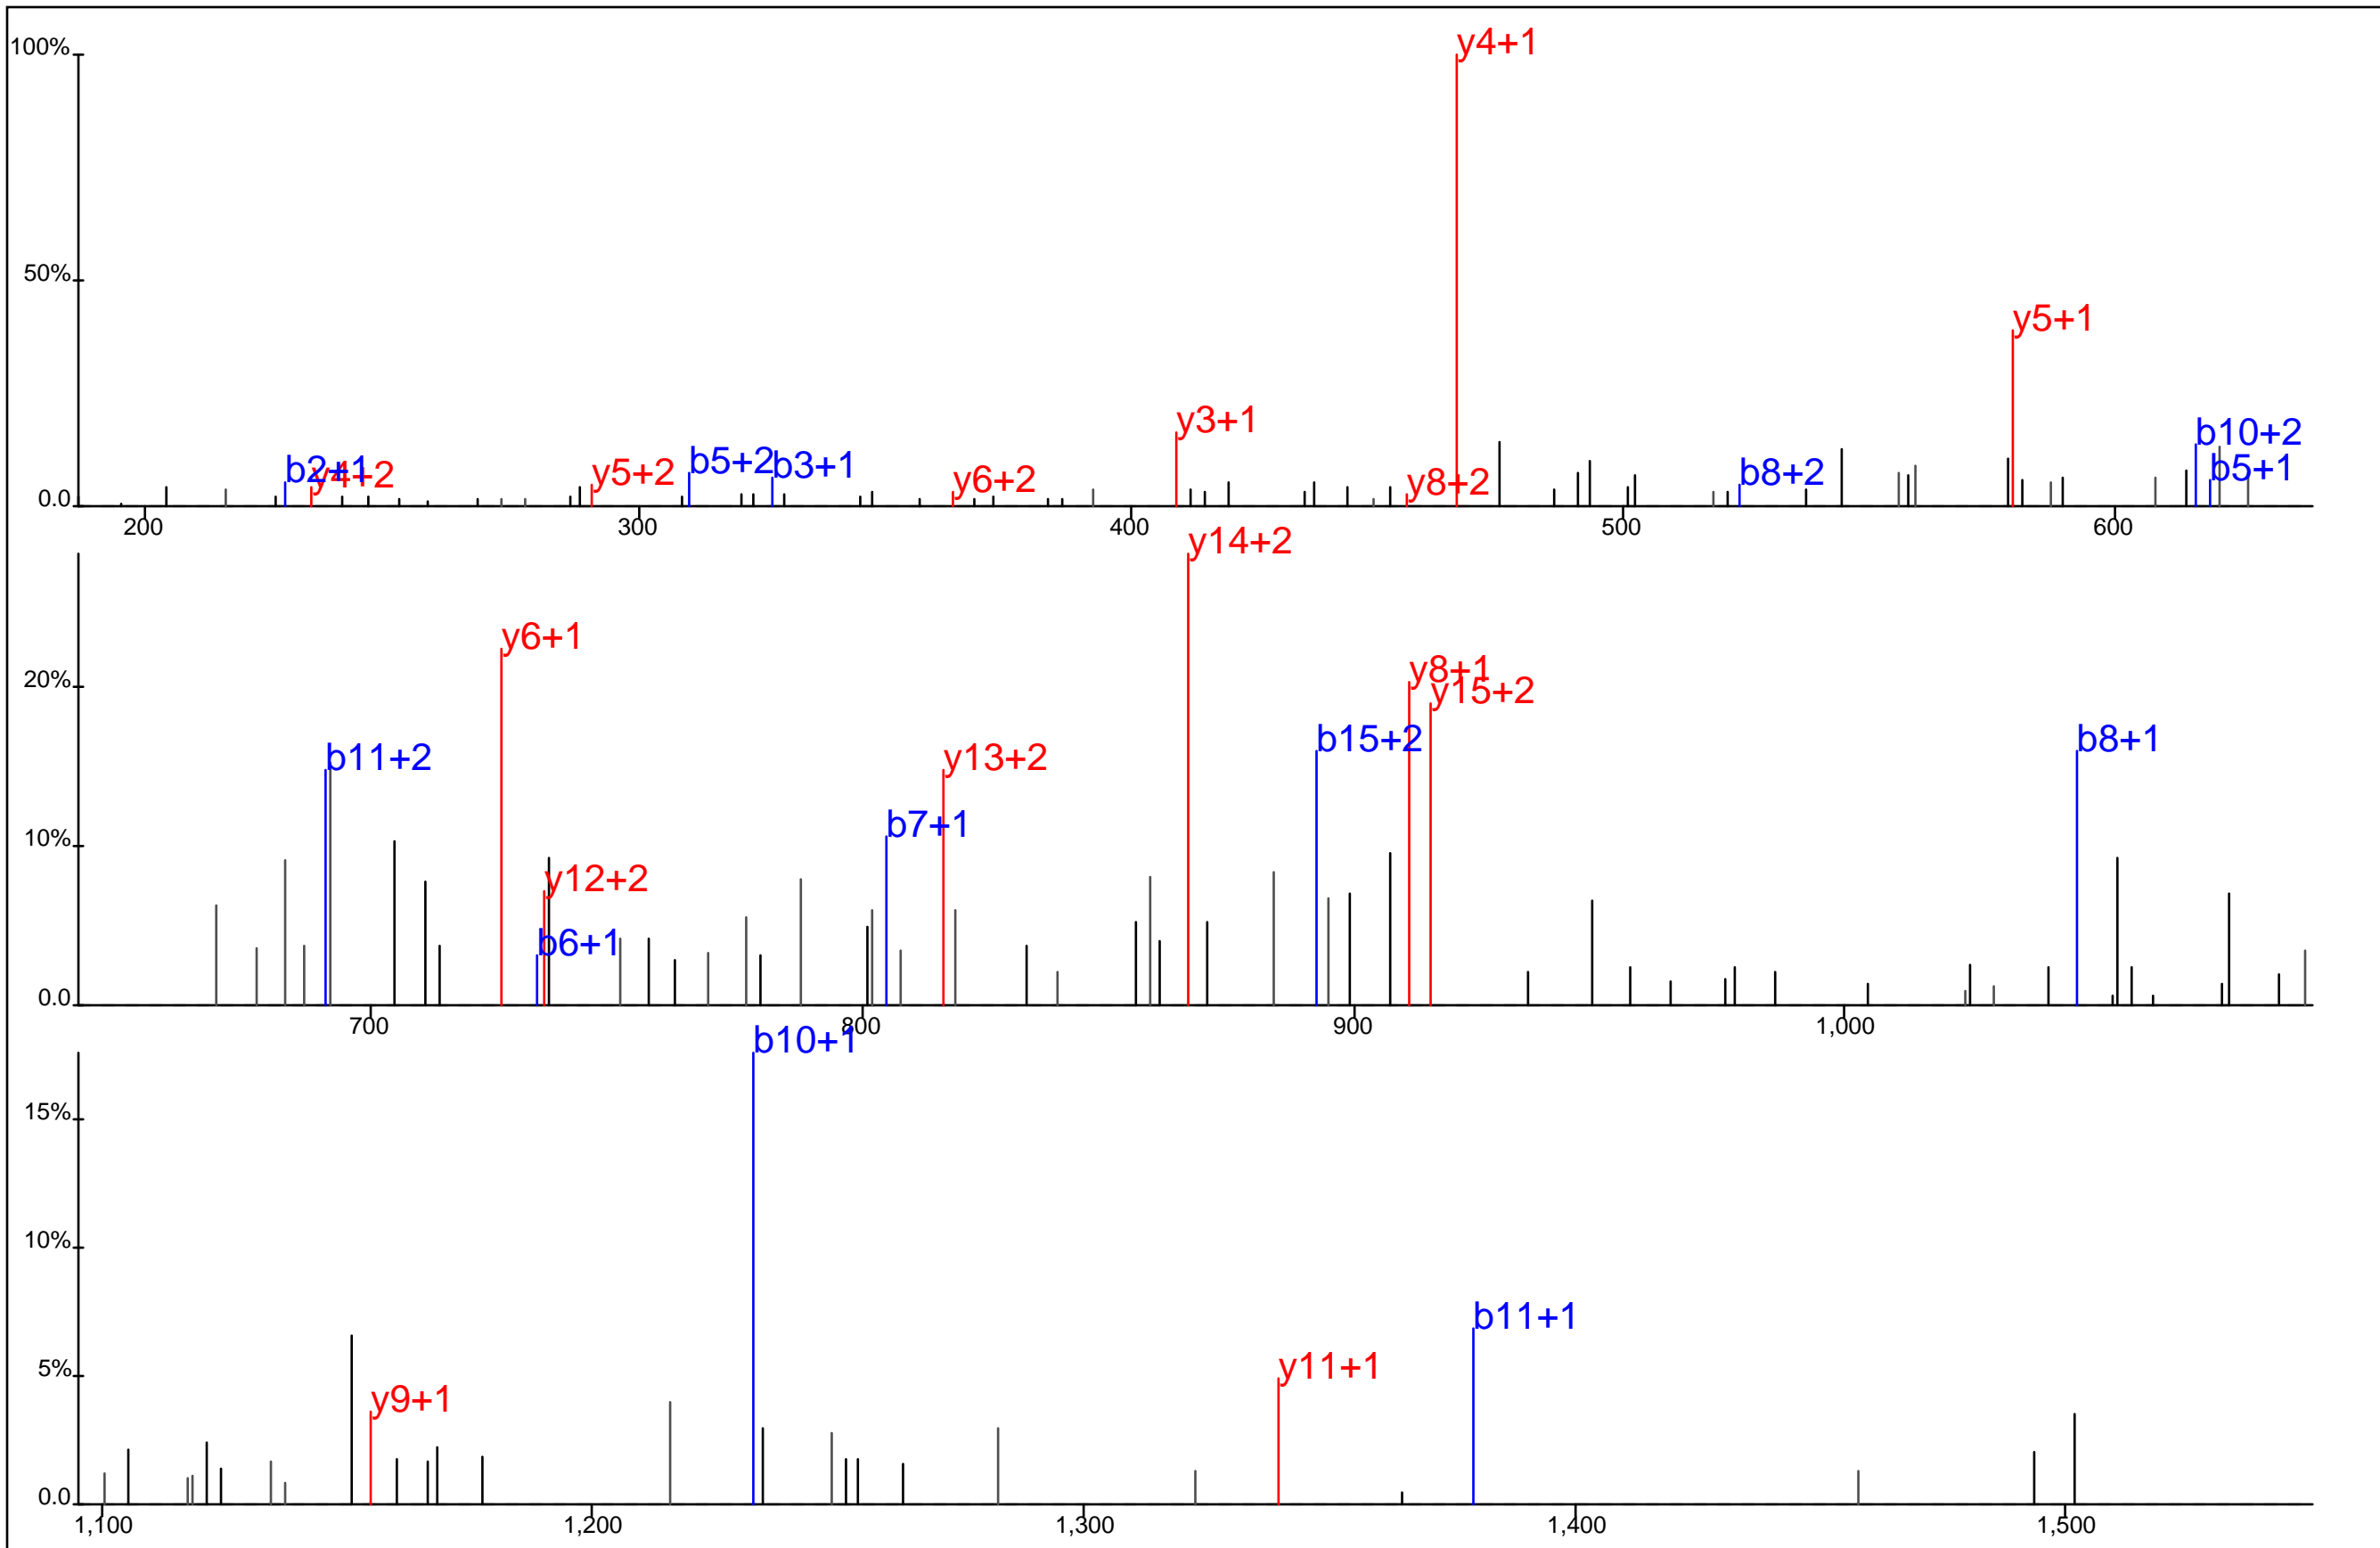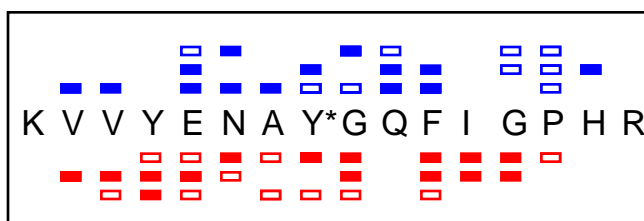

Protein Name: Thioredoxin reductase 1  
 gi Accession: 0  
 Precursor Mass: 653.3152+3  
 Delta Mass: 0.415 ppm  
 XCorr: 45.81

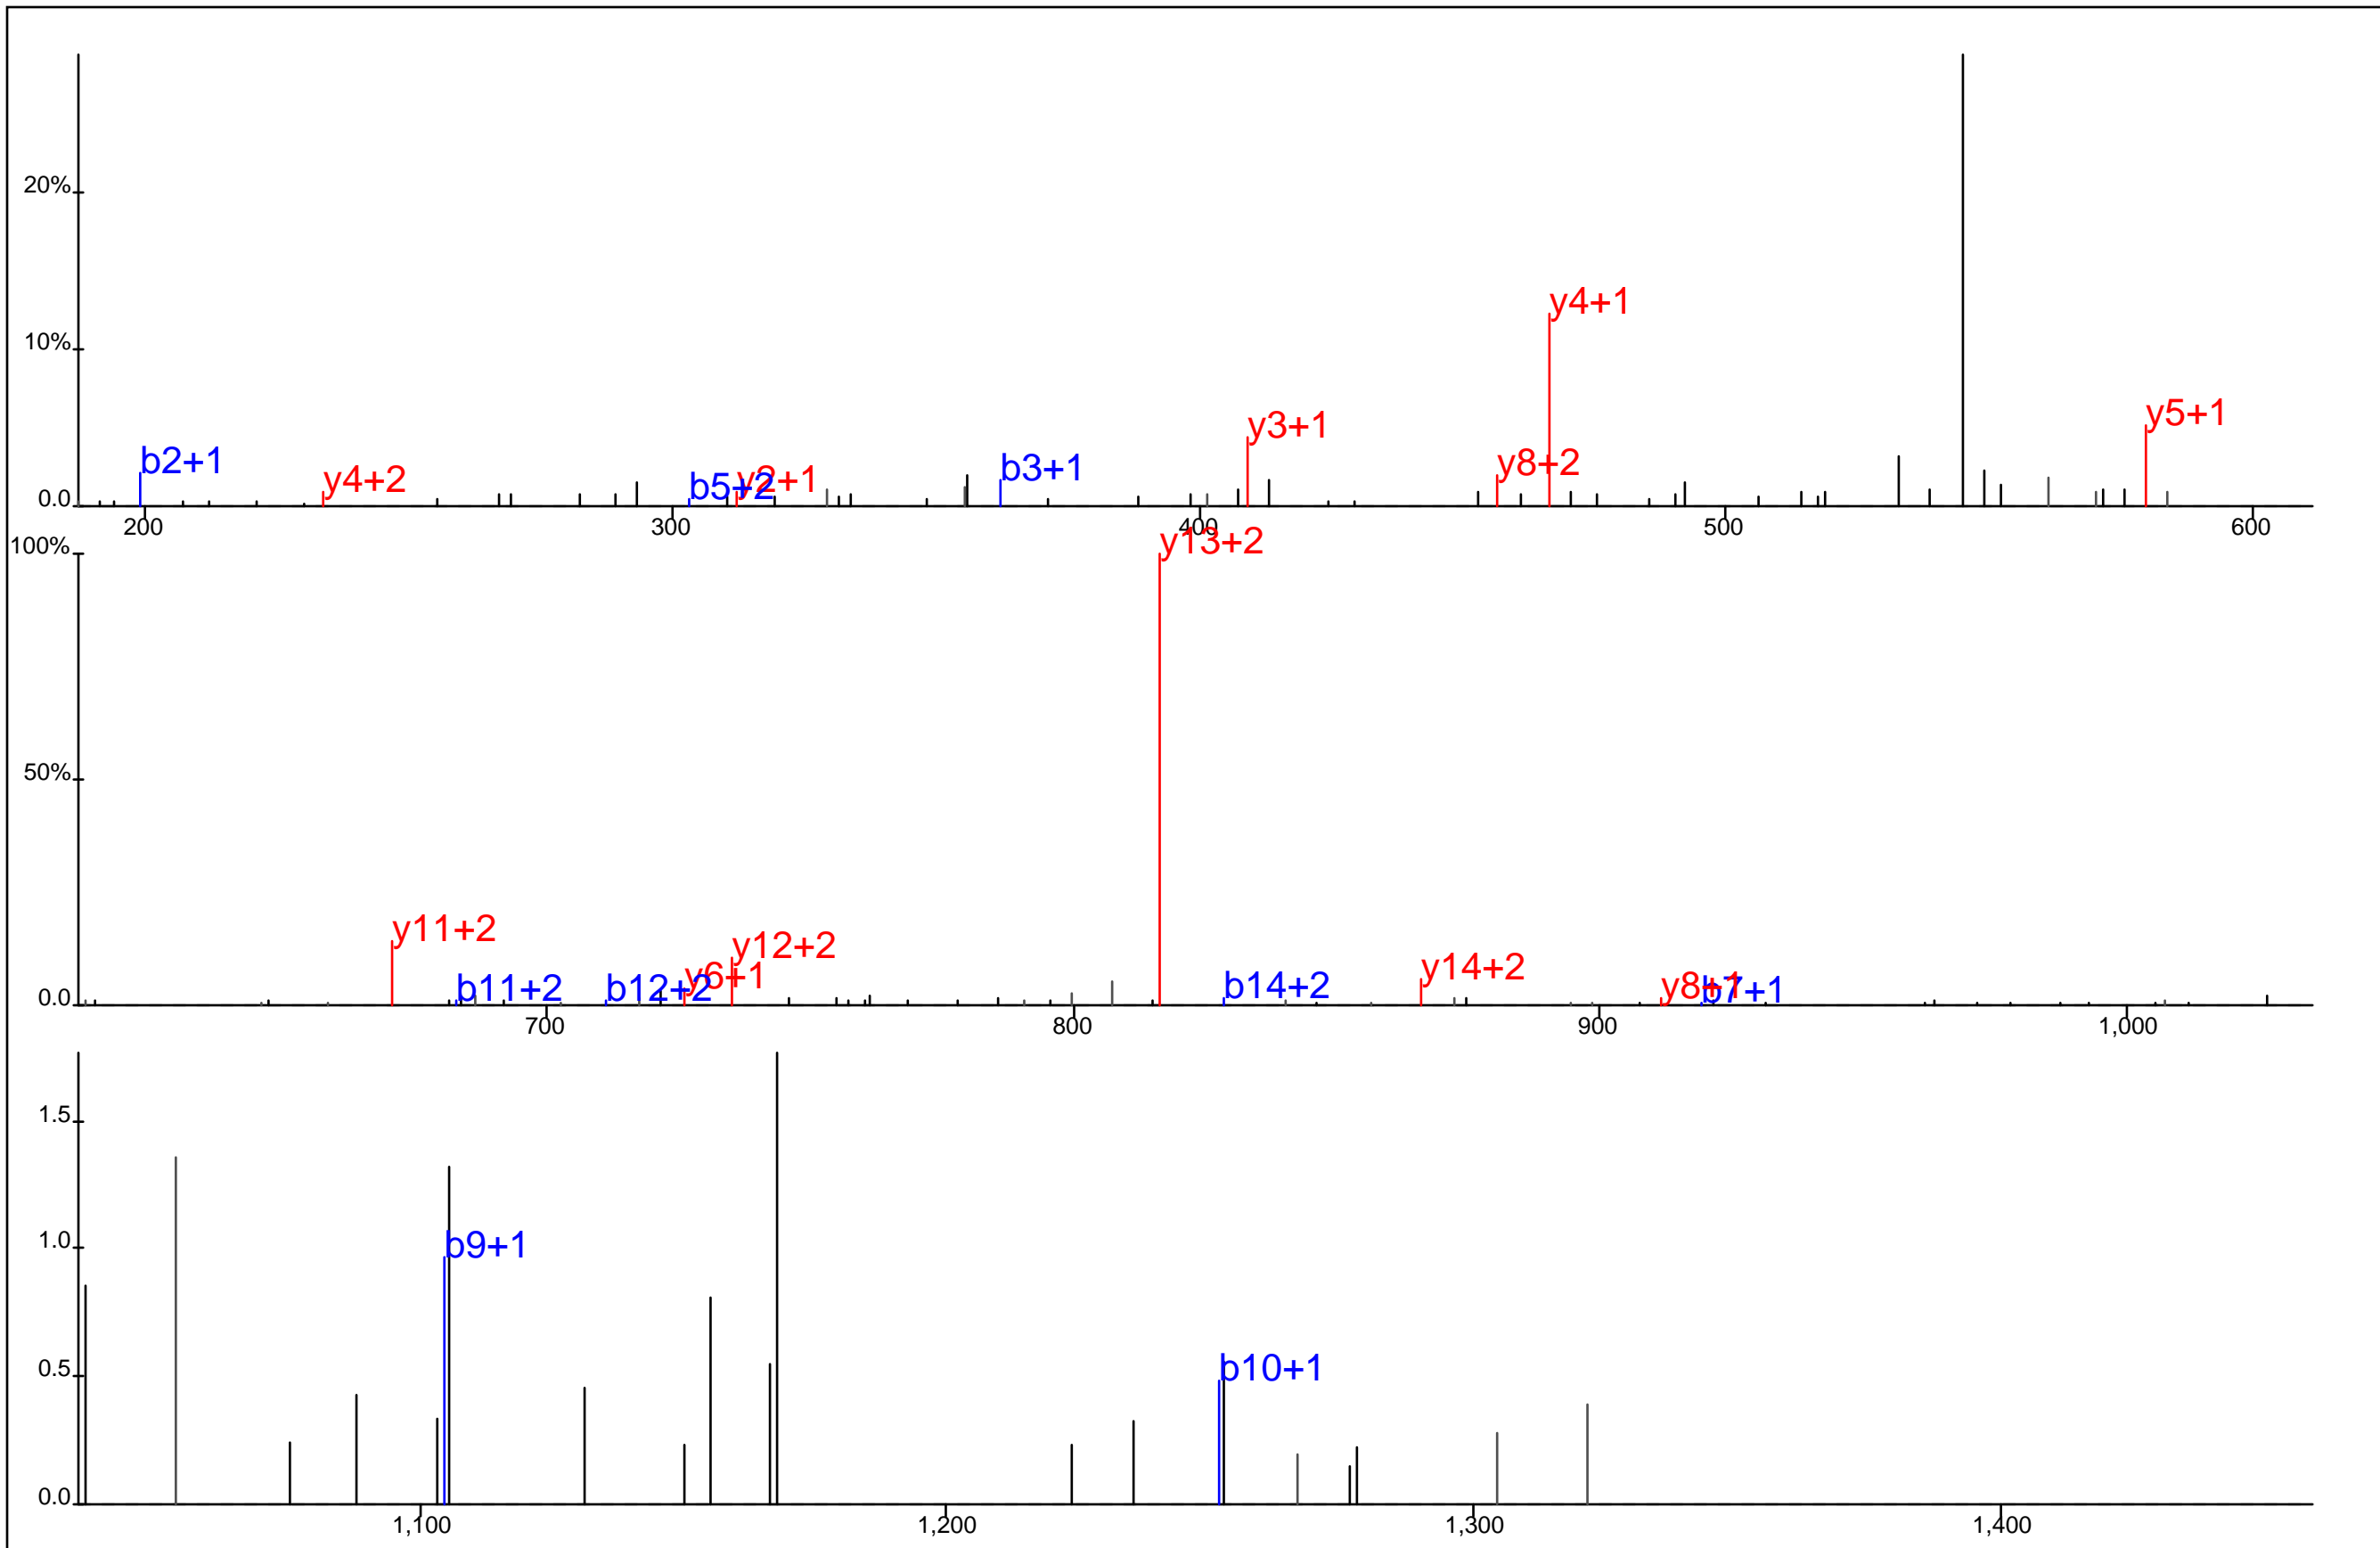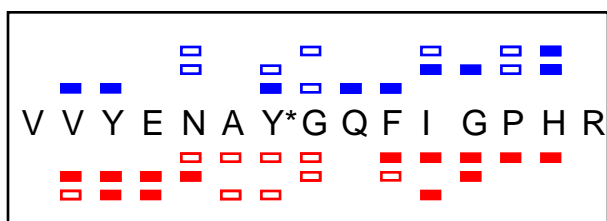

Protein Name: Thioredoxin reductase 1  
 gi Accession: 0  
 Precursor Mass: 610.6182+3  
 Delta Mass: 1.678 ppm  
 XCorr: 34.22



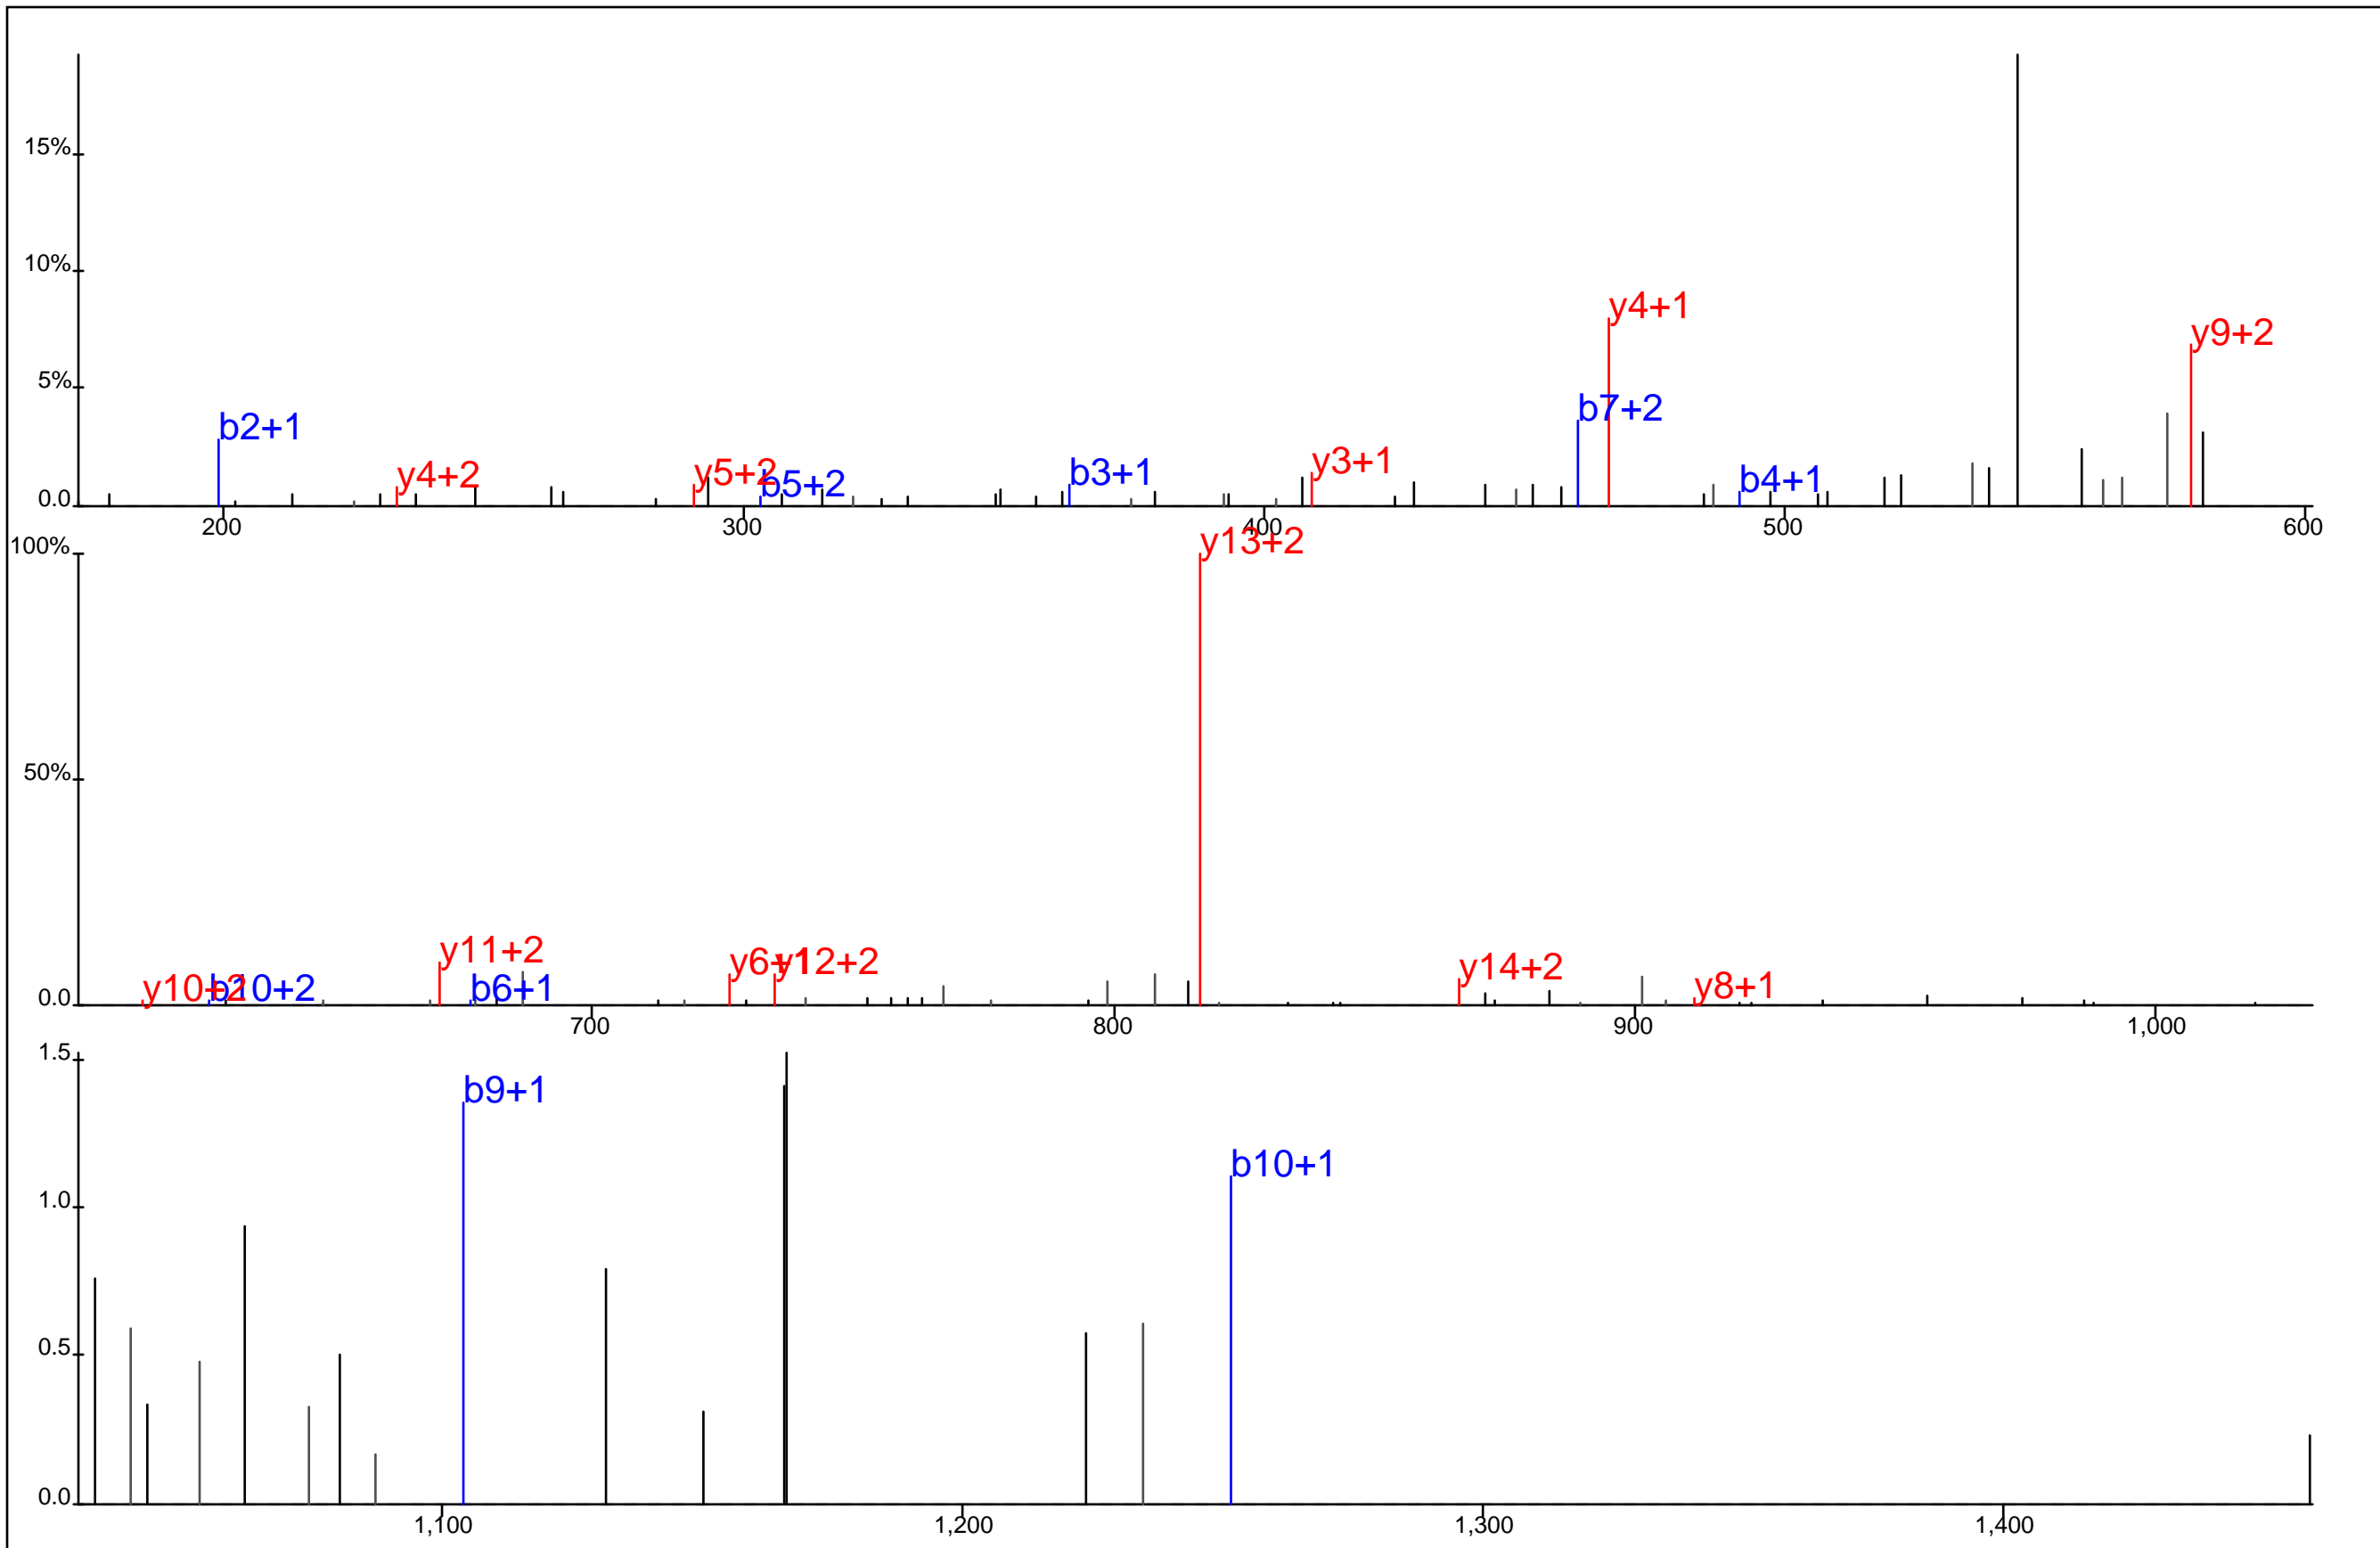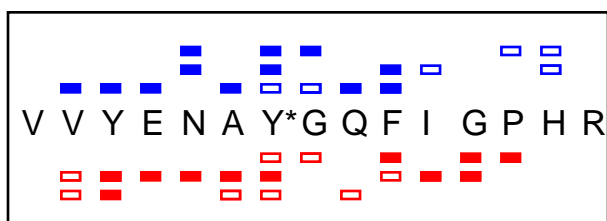

Protein Name: Thioredoxin reductase 1  
 gi Accession: 0  
 Precursor Mass: 610.6168+3  
 Delta Mass: 0.724 ppm  
 XCorr: 33.79

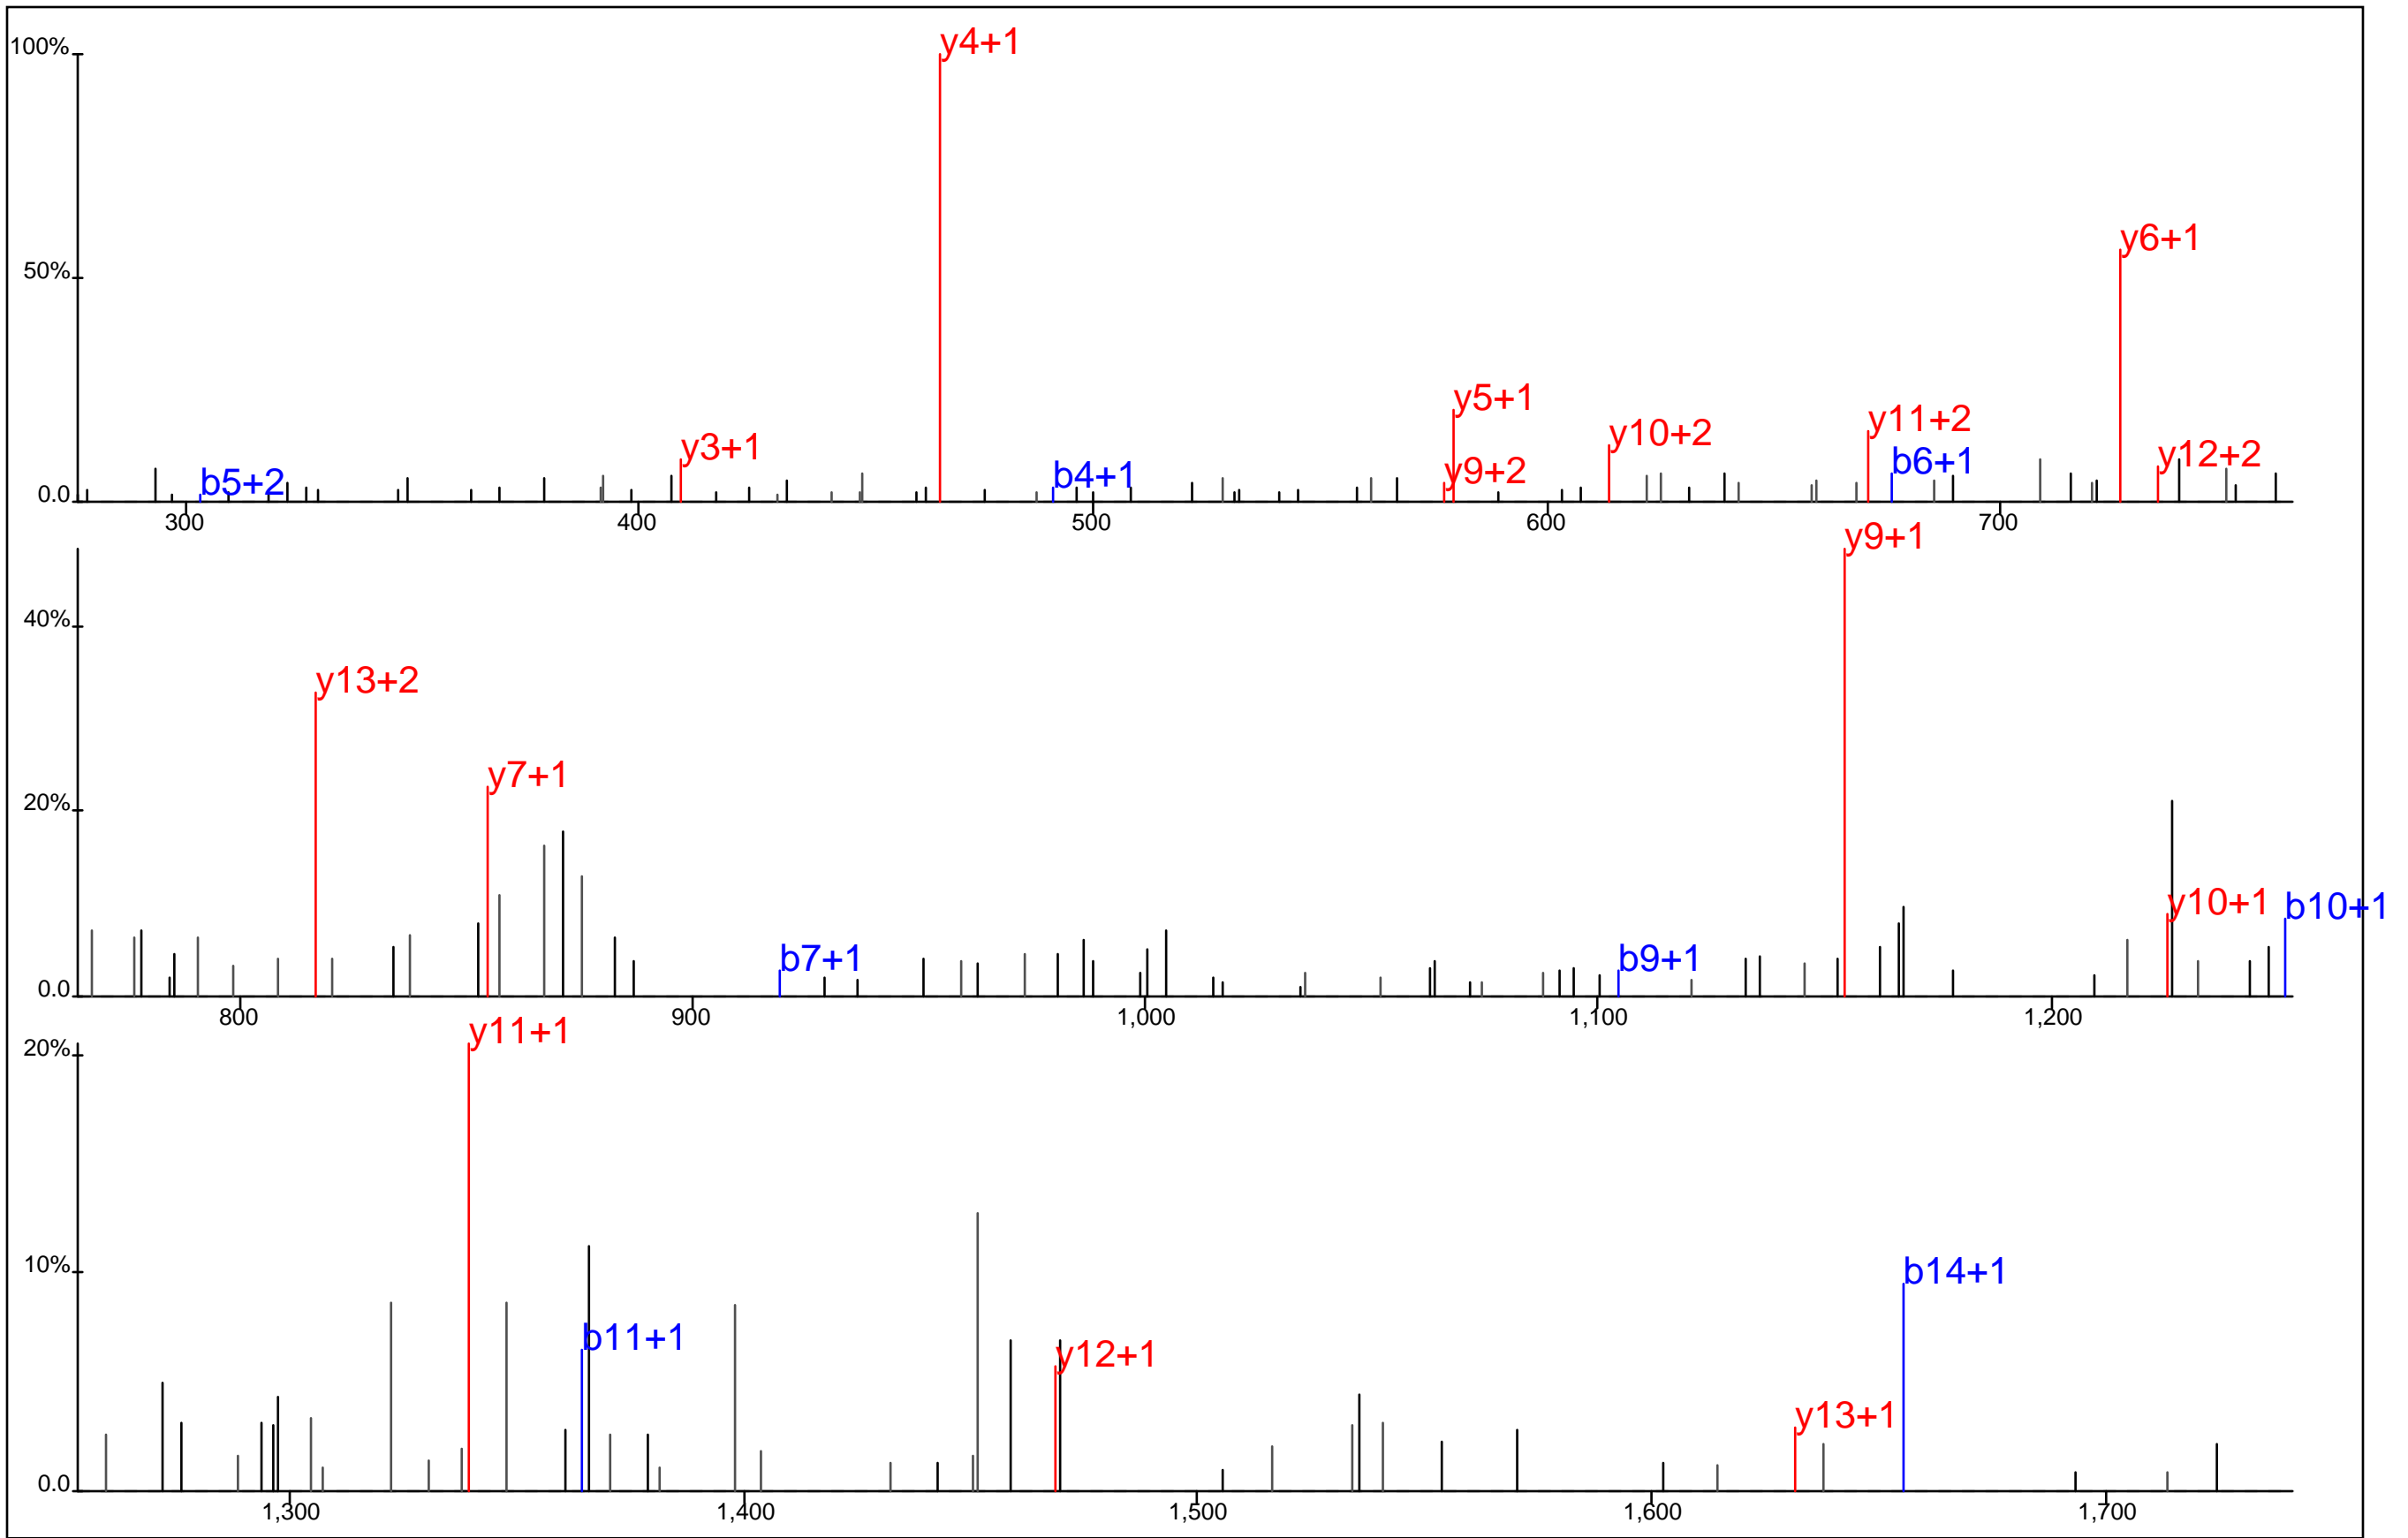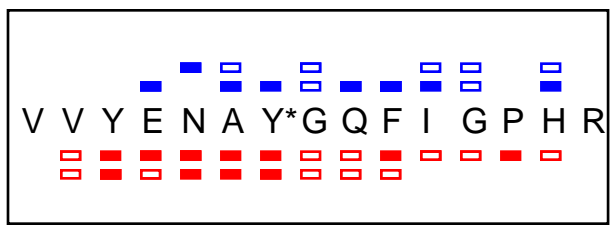

Protein Name: Thioredoxin reductase 1  
 gi Accession: 0  
 Precursor Mass: 915.4205+2  
 Delta Mass: 1.784 ppm  
 XCorr: 43.46

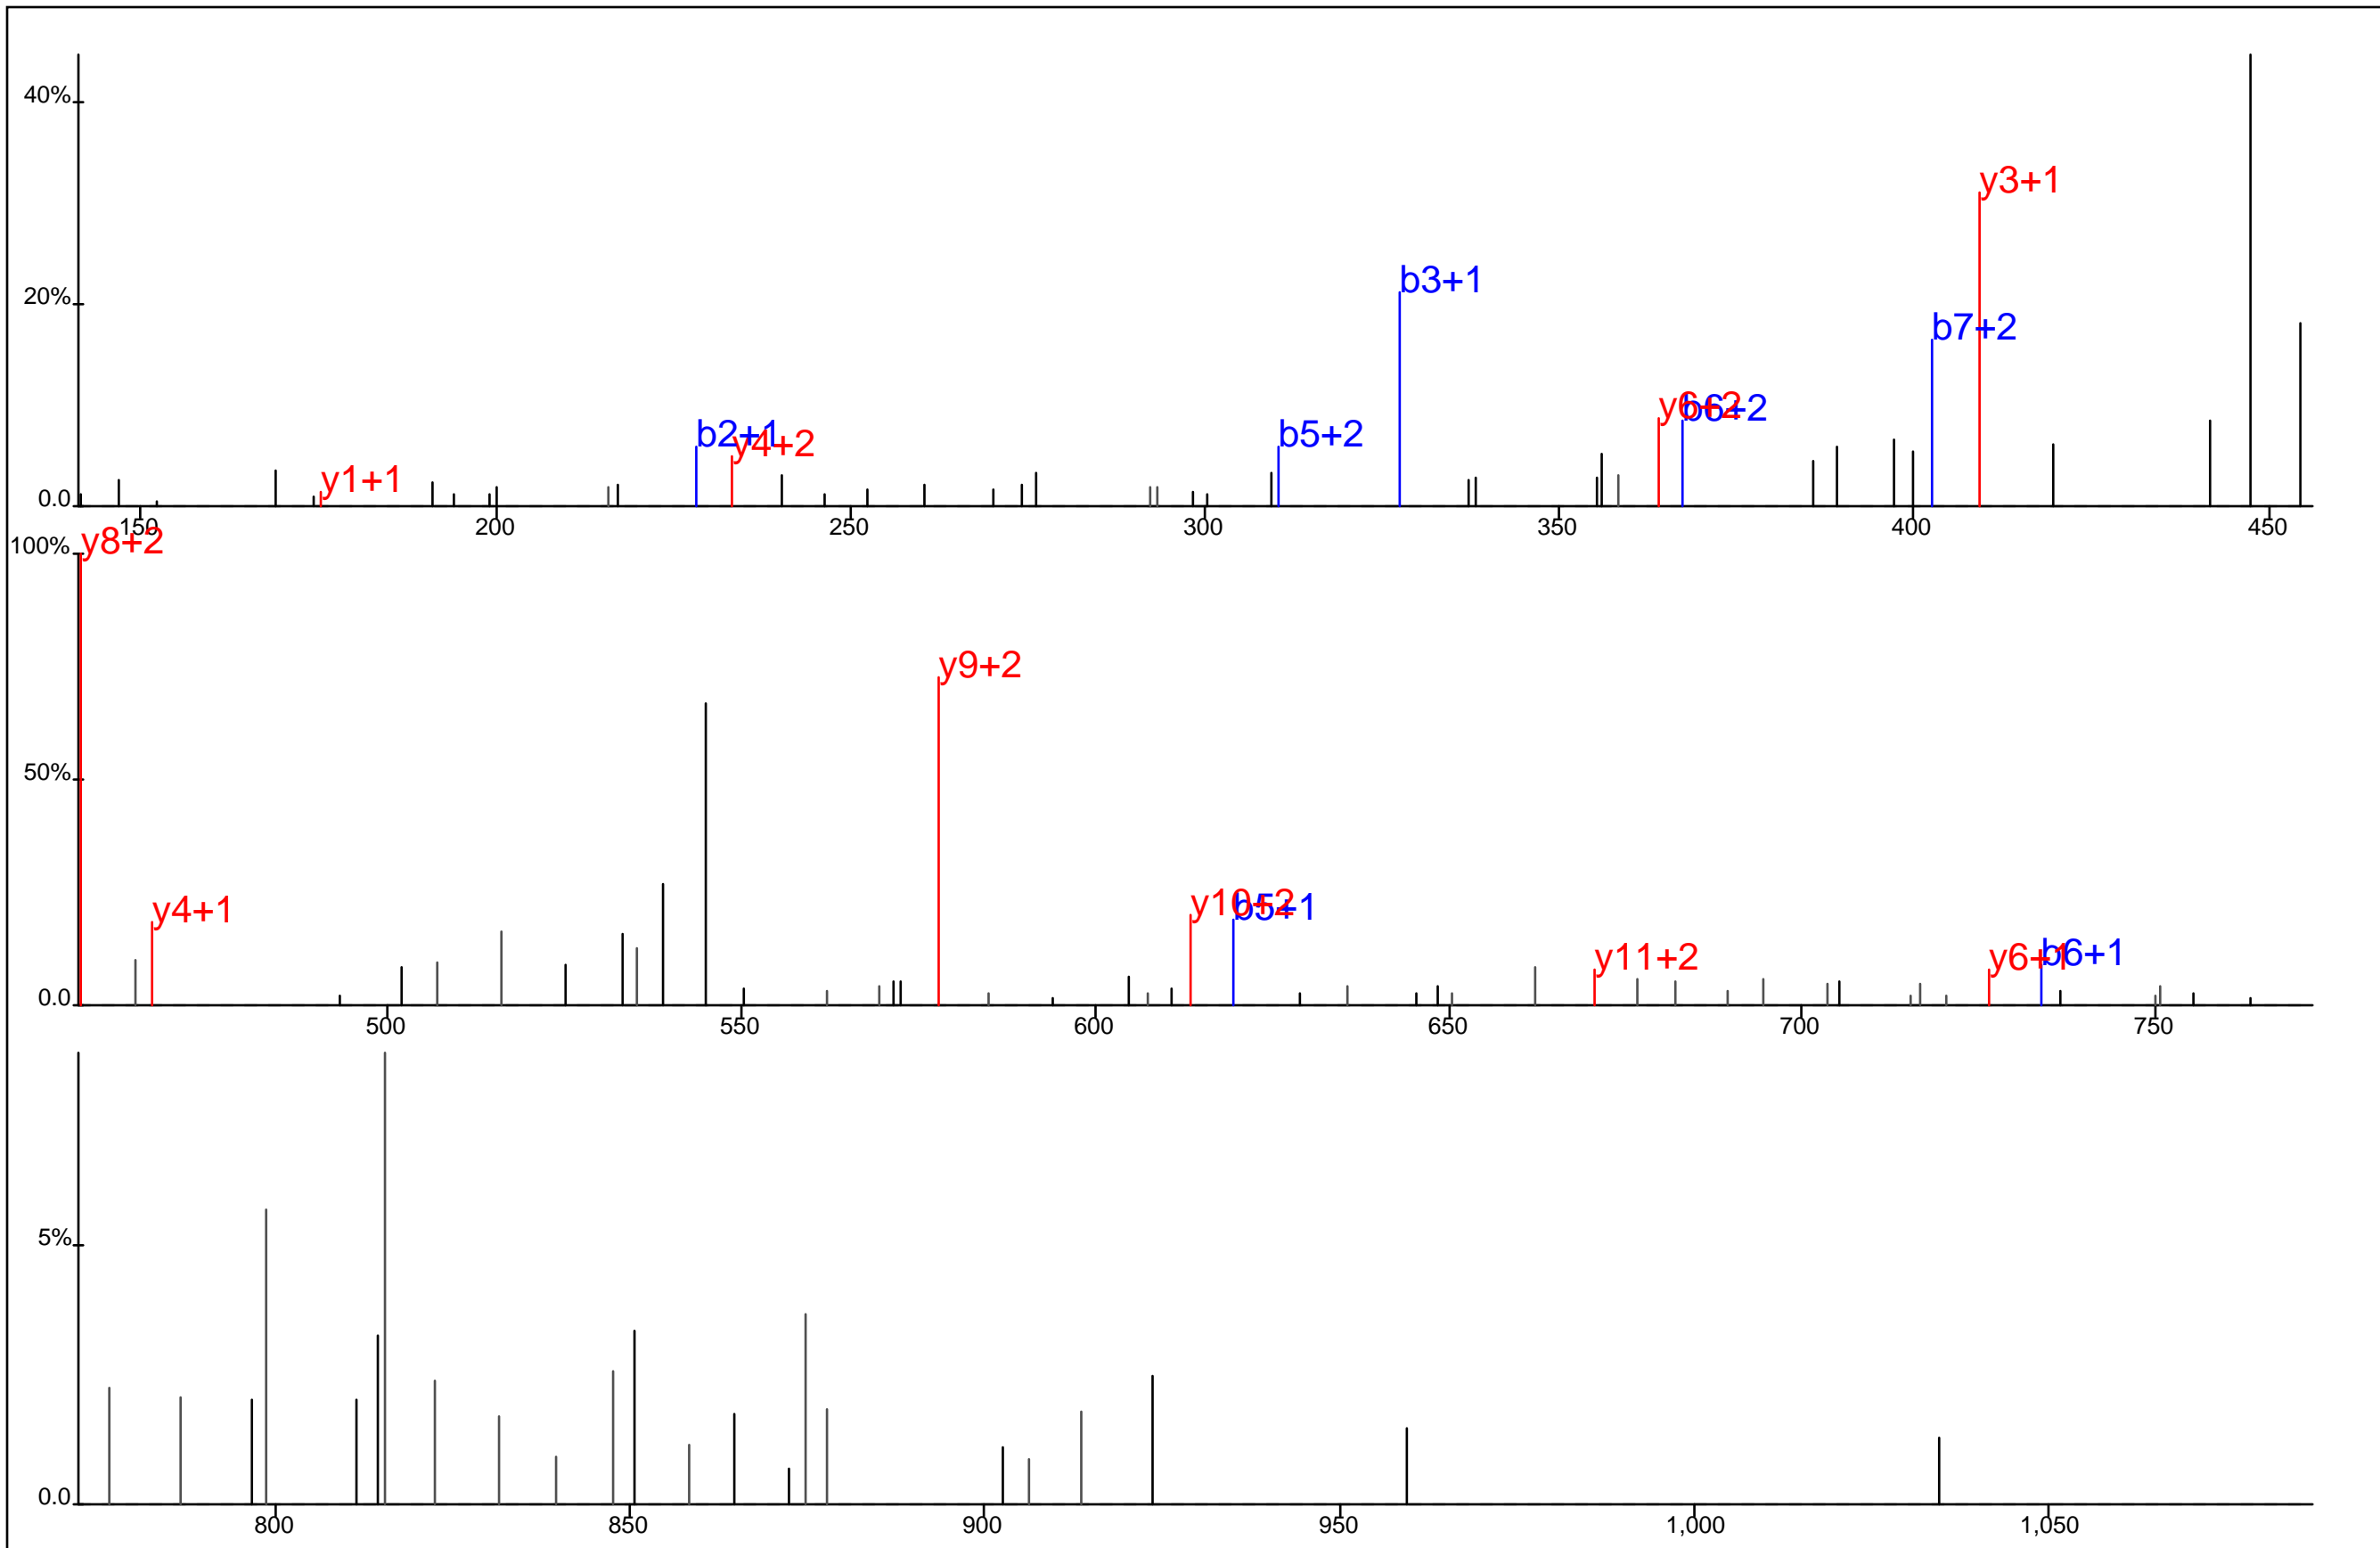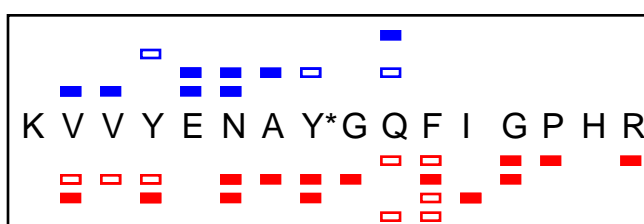

Protein Name: Thioredoxin reductase 1  
 gi Accession: 0  
 Precursor Mass: 490.2392+4  
 Delta Mass: 1.572 ppm  
 XCorr: 27.57

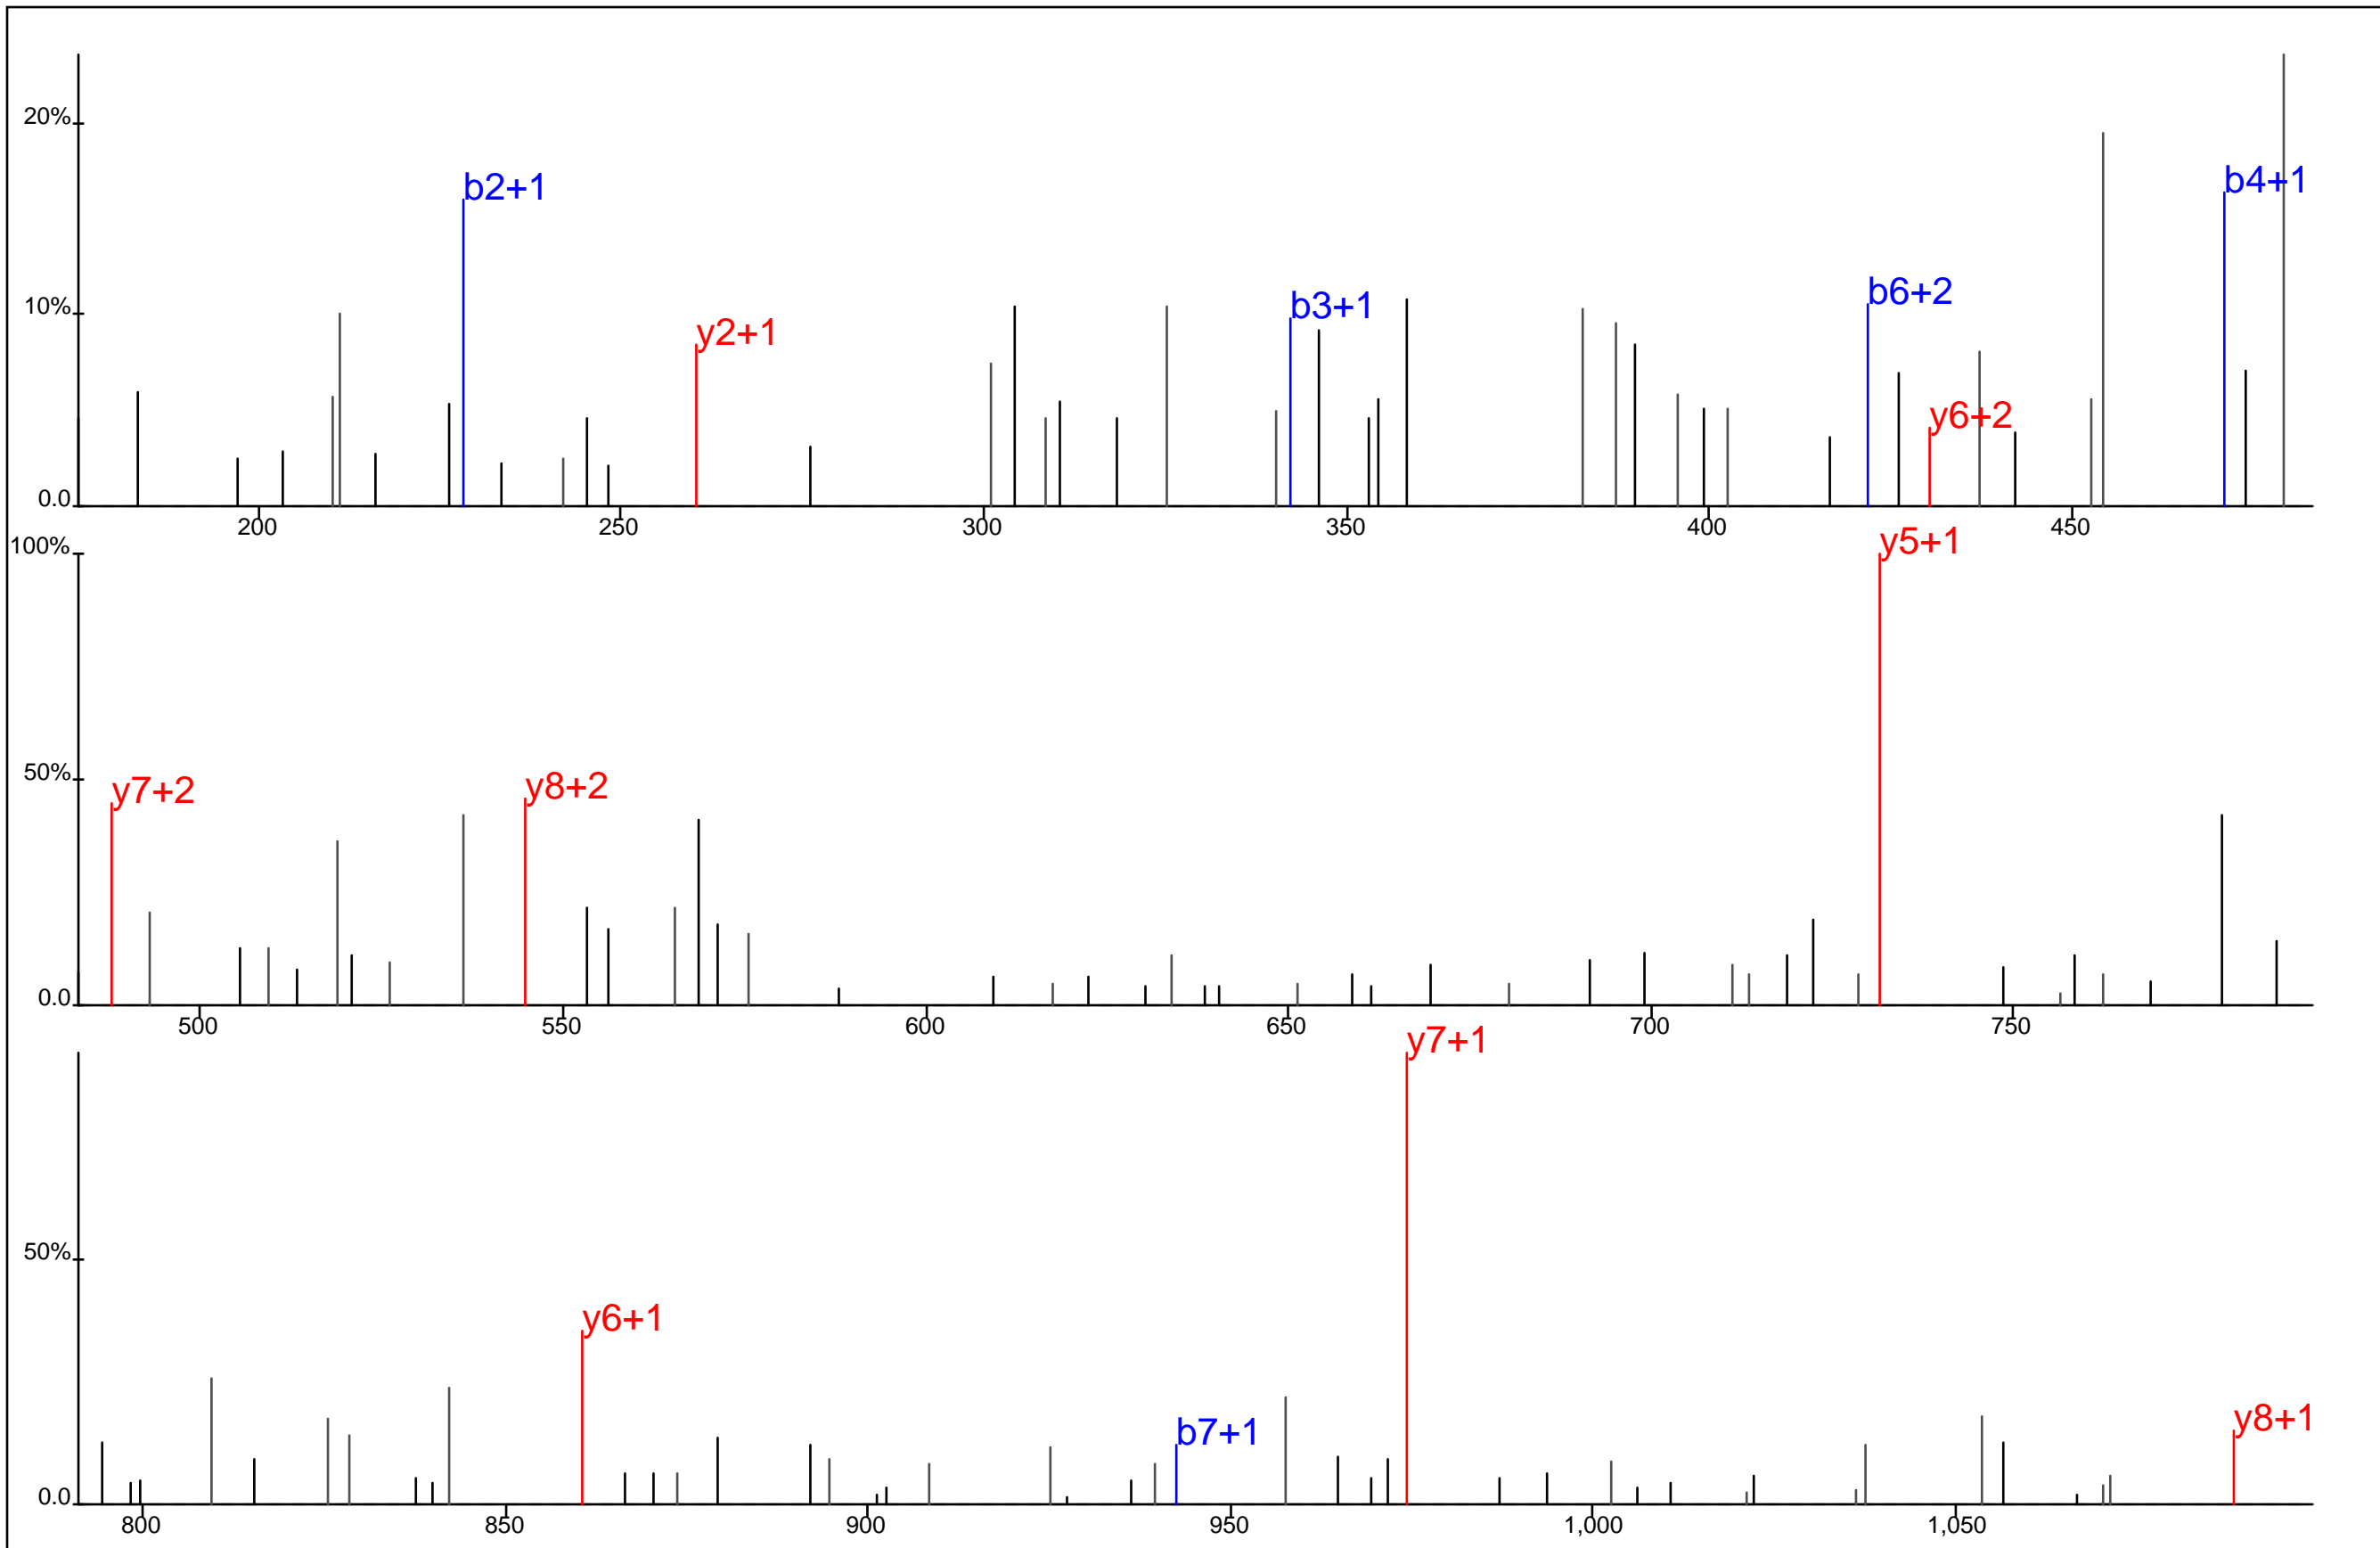

■ ■ ■ ■ ■ ■ ■ ■  
 L N N E Y\* E V I K  
■ ■ ■ ■ ■ ■ ■ ■

Protein Name: Thyroid hormone receptor interactor 11  
 gi Accession: 0  
 Precursor Mass: 601.2761+2  
 Delta Mass: 4.289 ppm  
 XCorr: 23.66



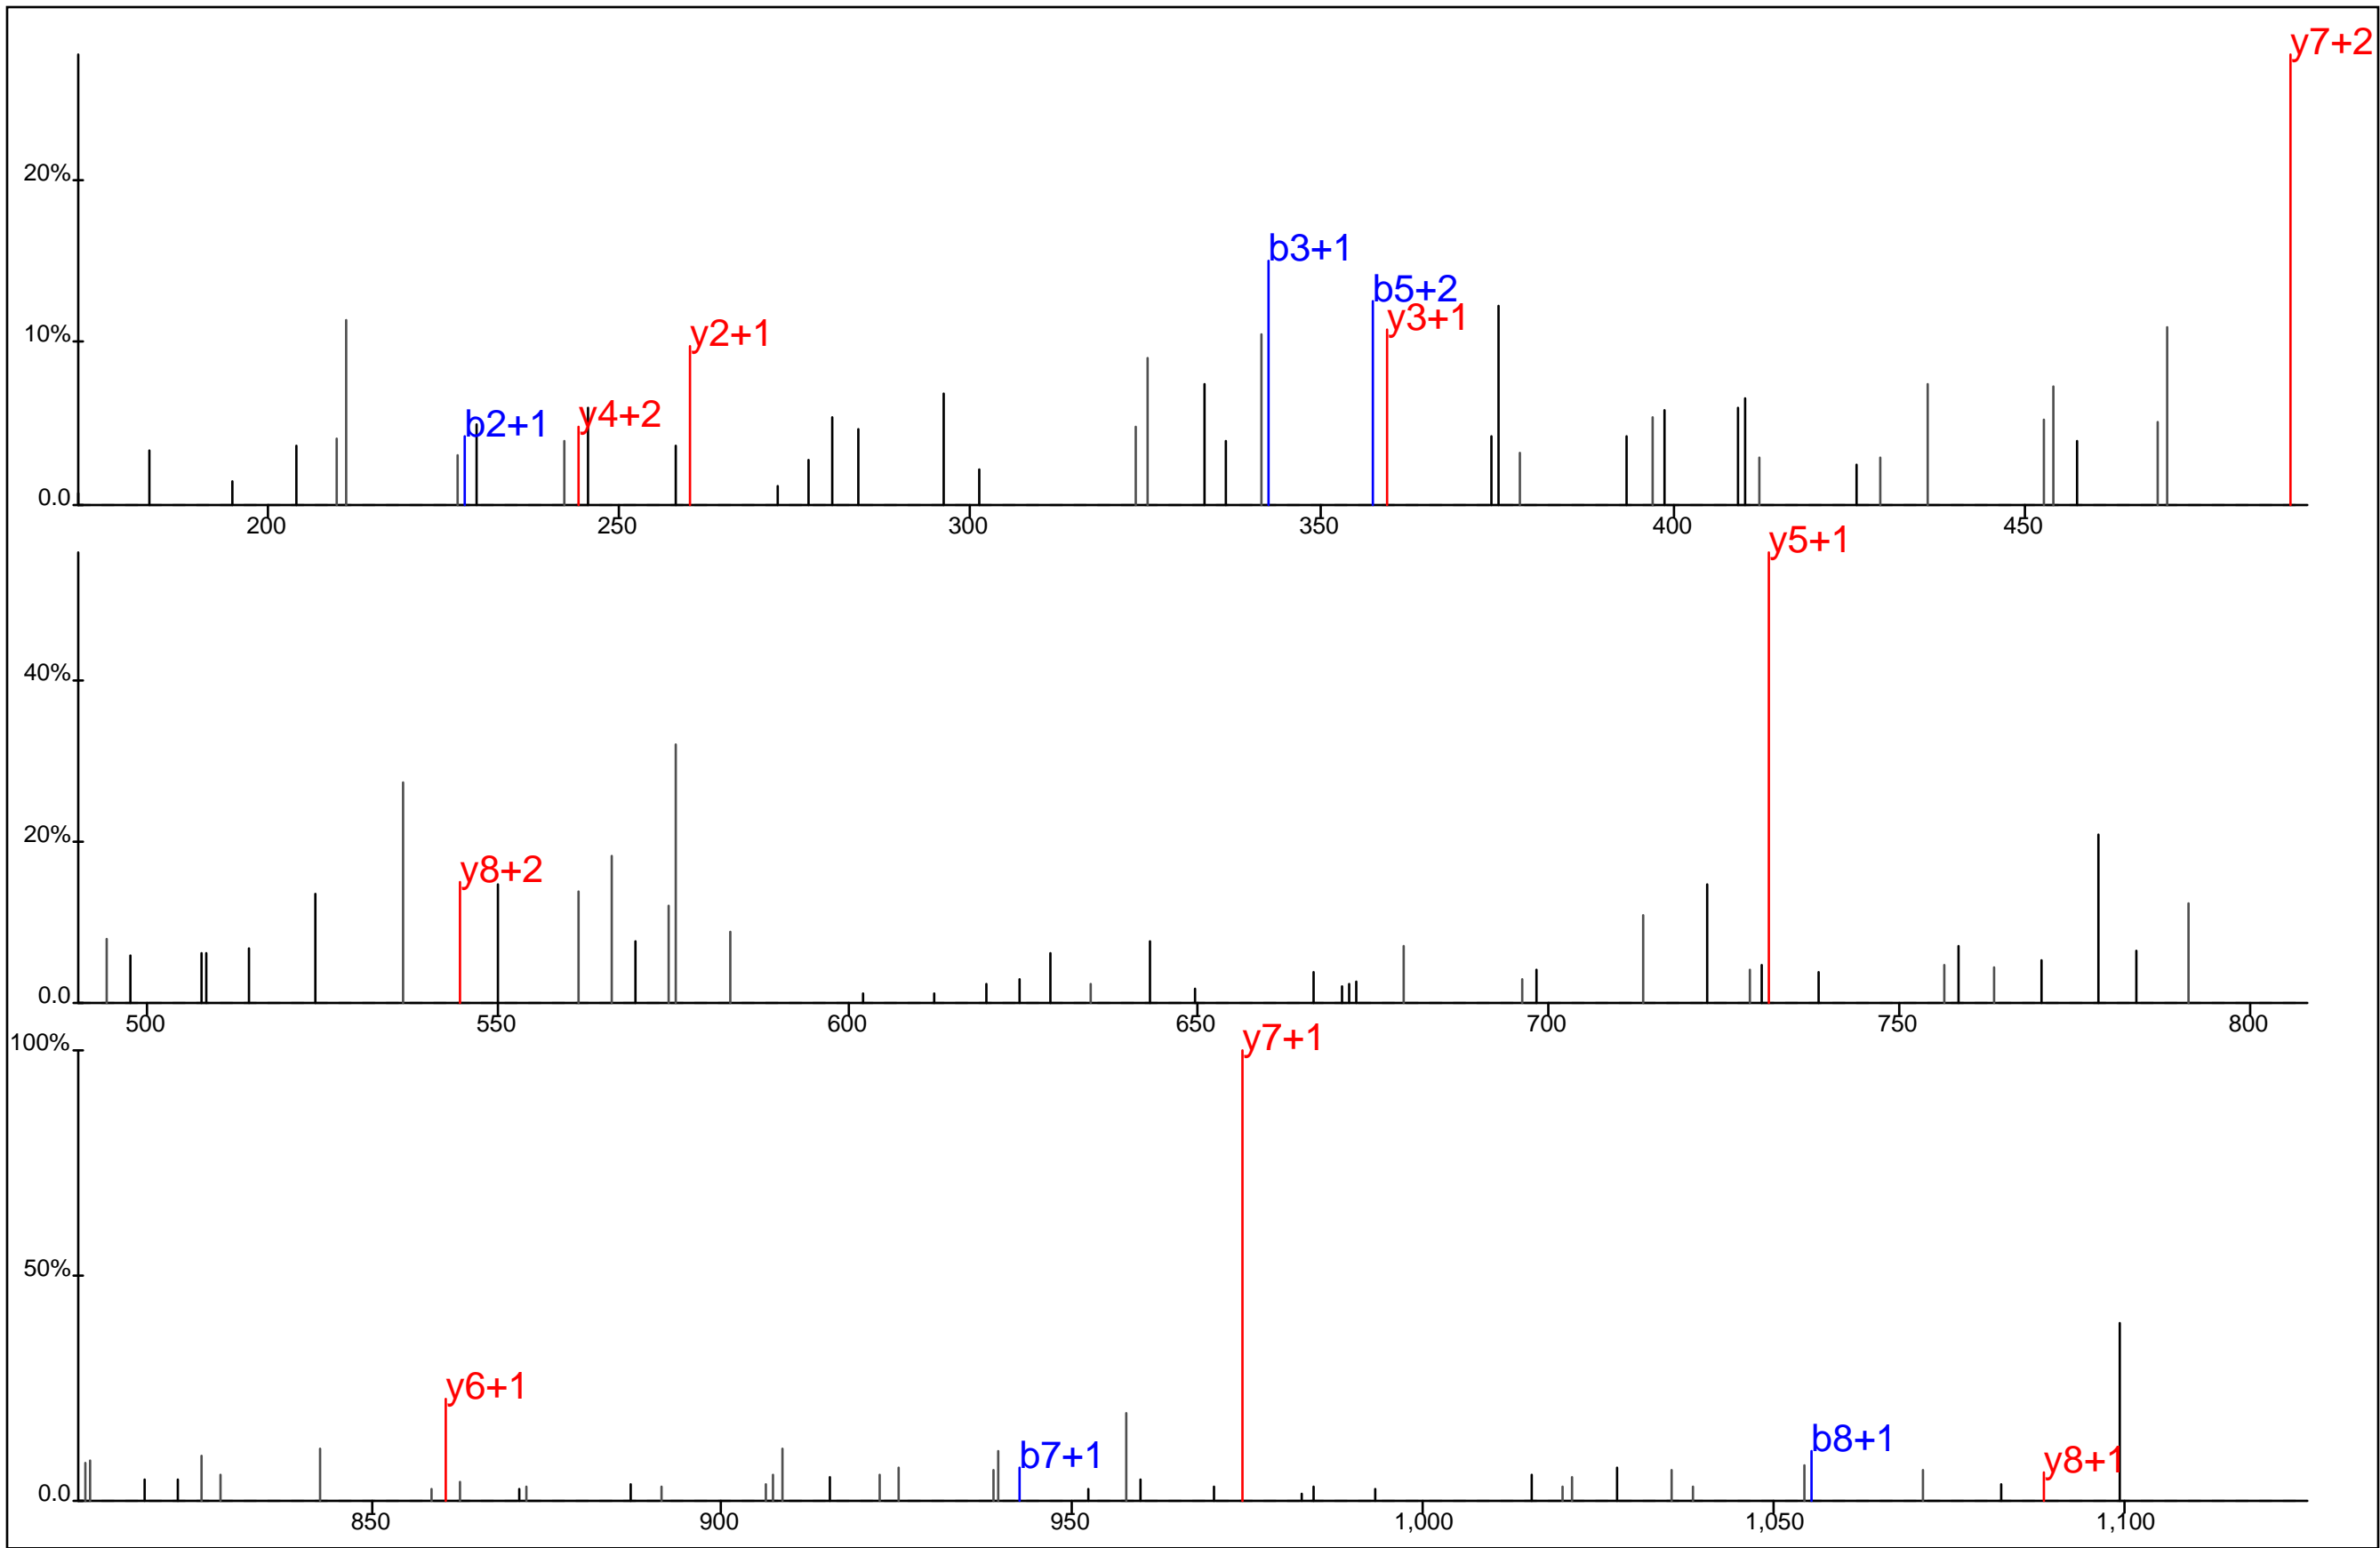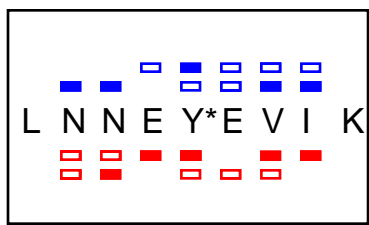

Protein Name: Thyroid hormone receptor interactor 11  
 gi Accession: 0  
 Precursor Mass: 601.2791+2  
 Delta Mass: 0.689 ppm  
 XCorr: 30.21

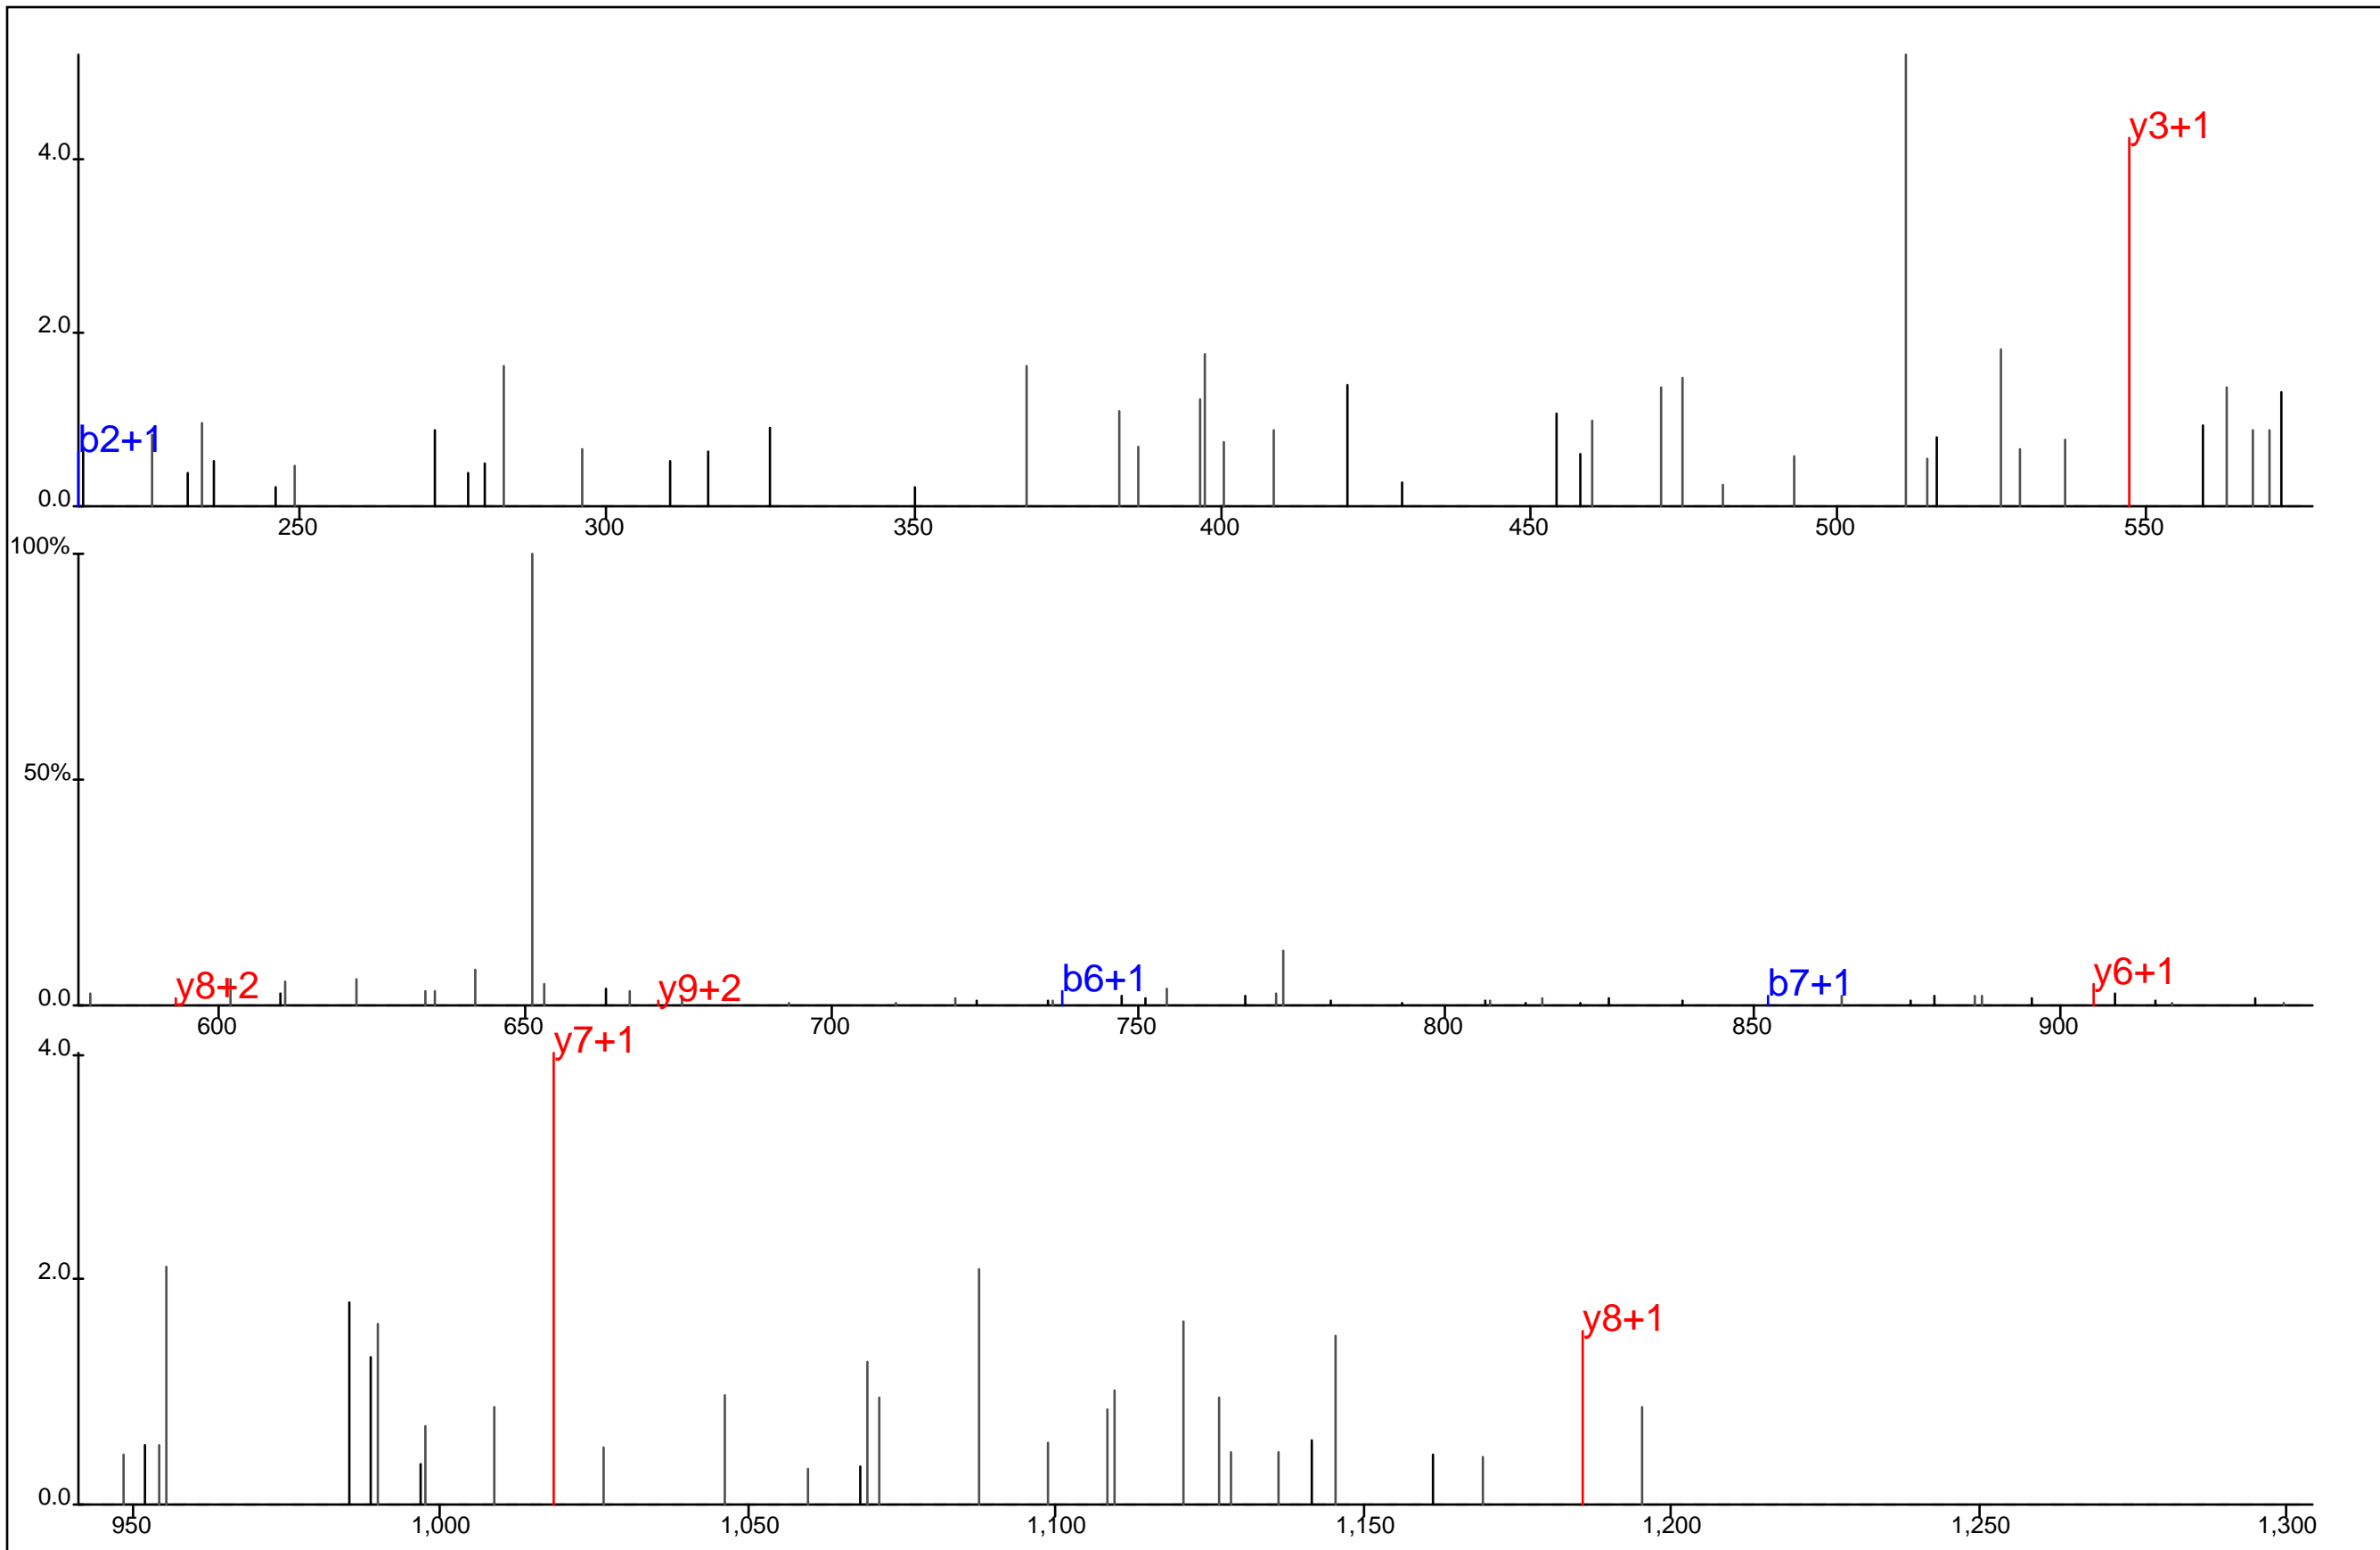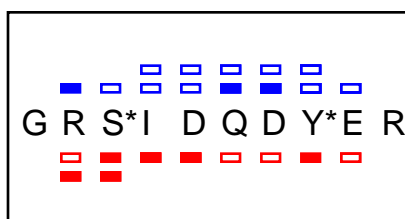

Protein Name: Tight junction protein 2  
 gi Accession: 0  
 Precursor Mass: 699.7568+2  
 Delta Mass: 1.686 ppm  
 XCorr: 20.14



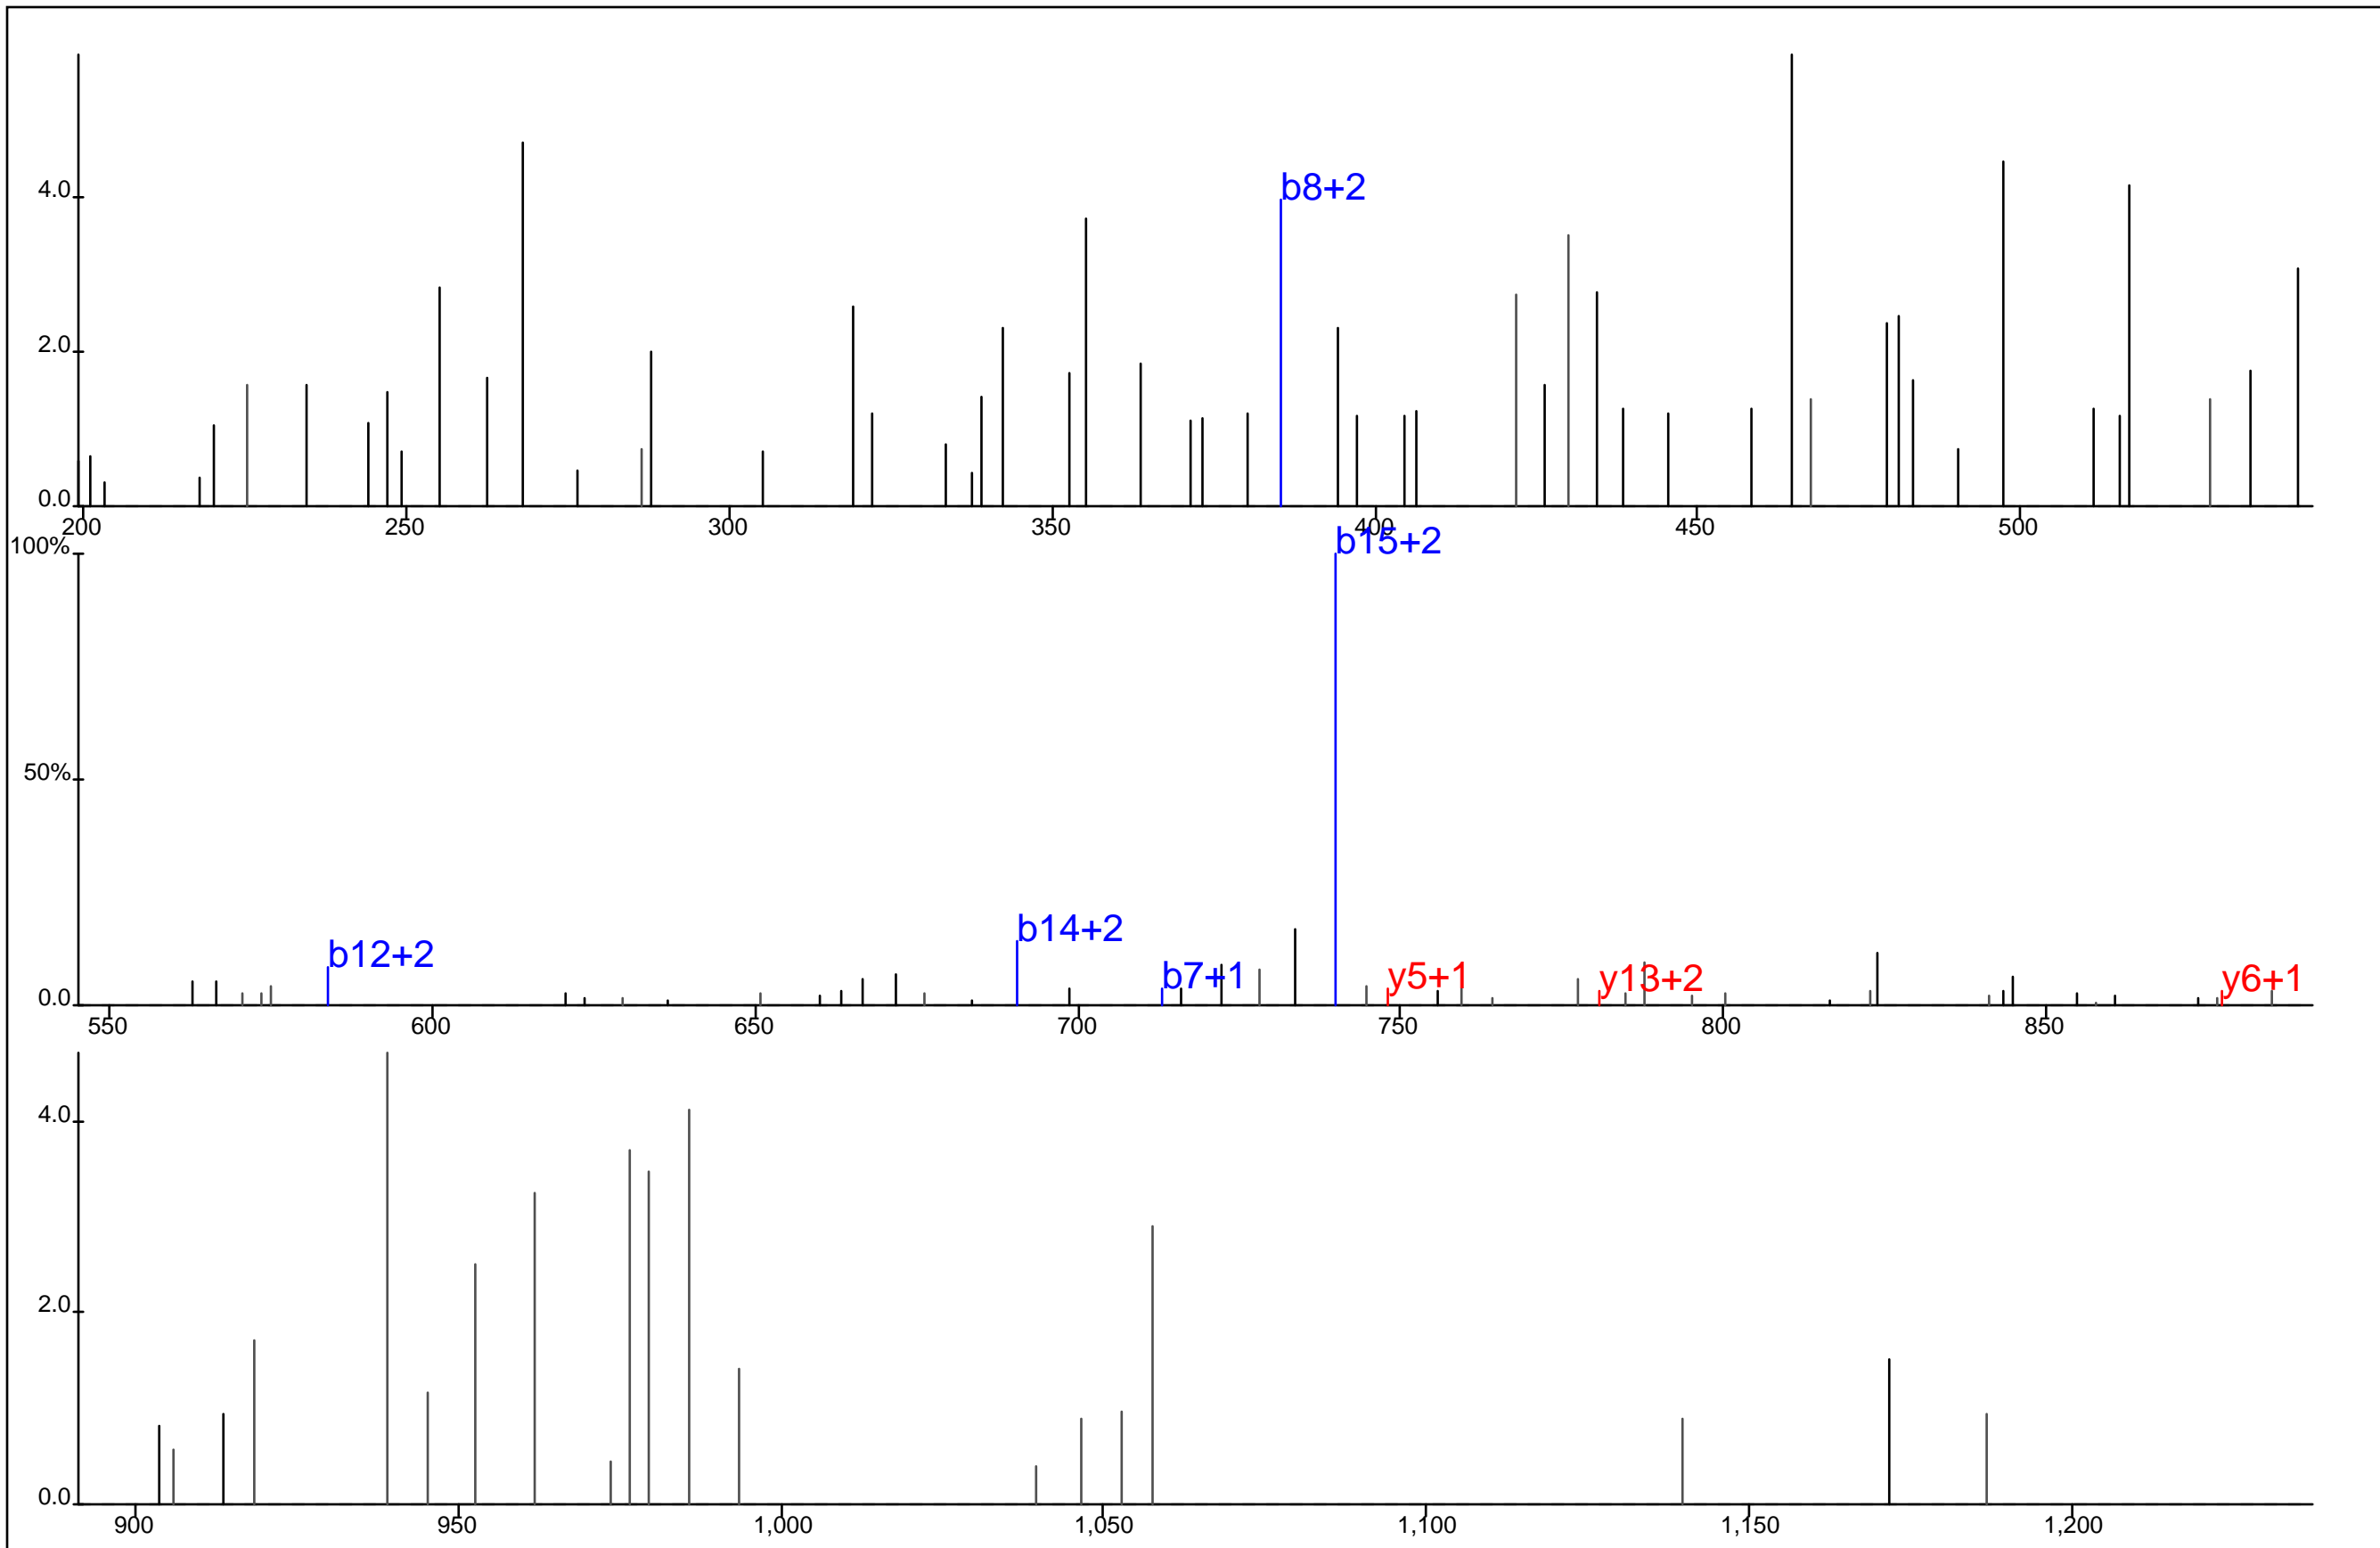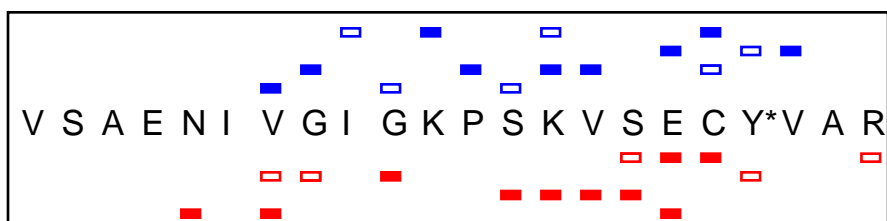

Protein Name: Titin  
 gi Accession: 0  
 Precursor Mass: 611.5599+4  
 Delta Mass: 5.263 ppm  
 XCorr: 21.02

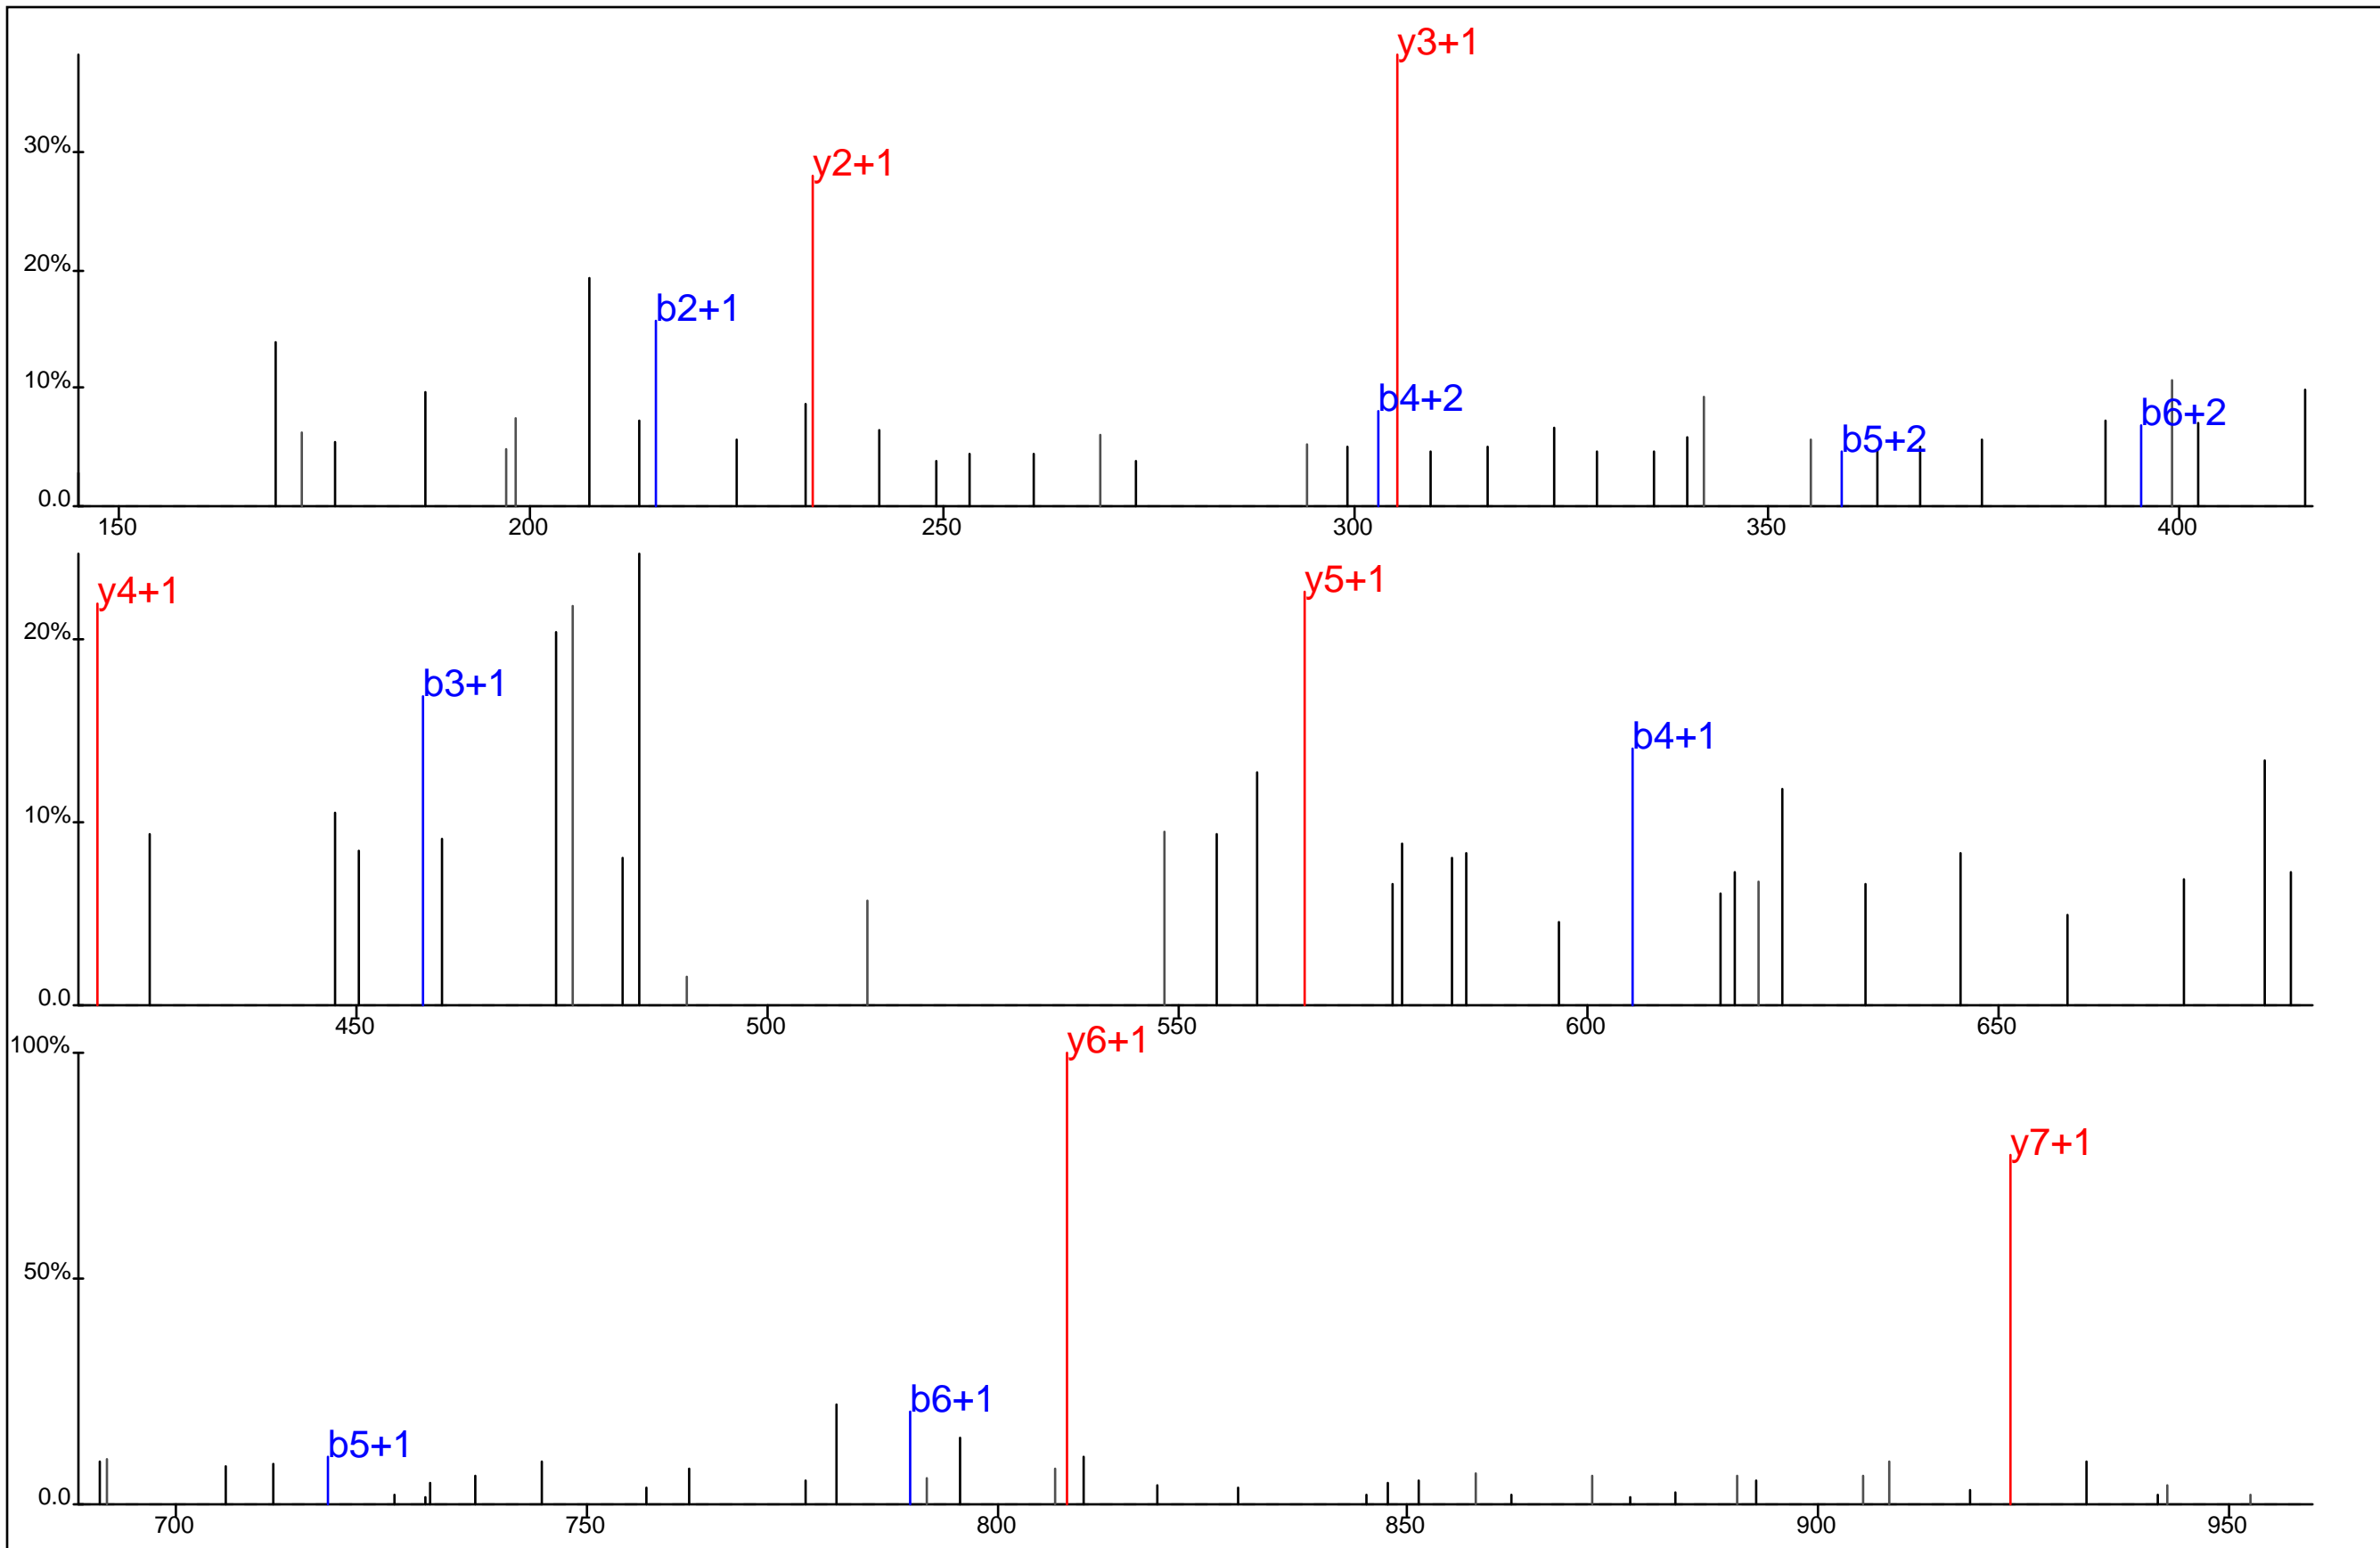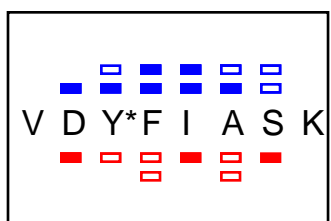

Protein Name: TLOC1  
 gi Accession: 0  
 Precursor Mass: 511.7324+2  
 Delta Mass: 1.933 ppm  
 XCorr: 46.91

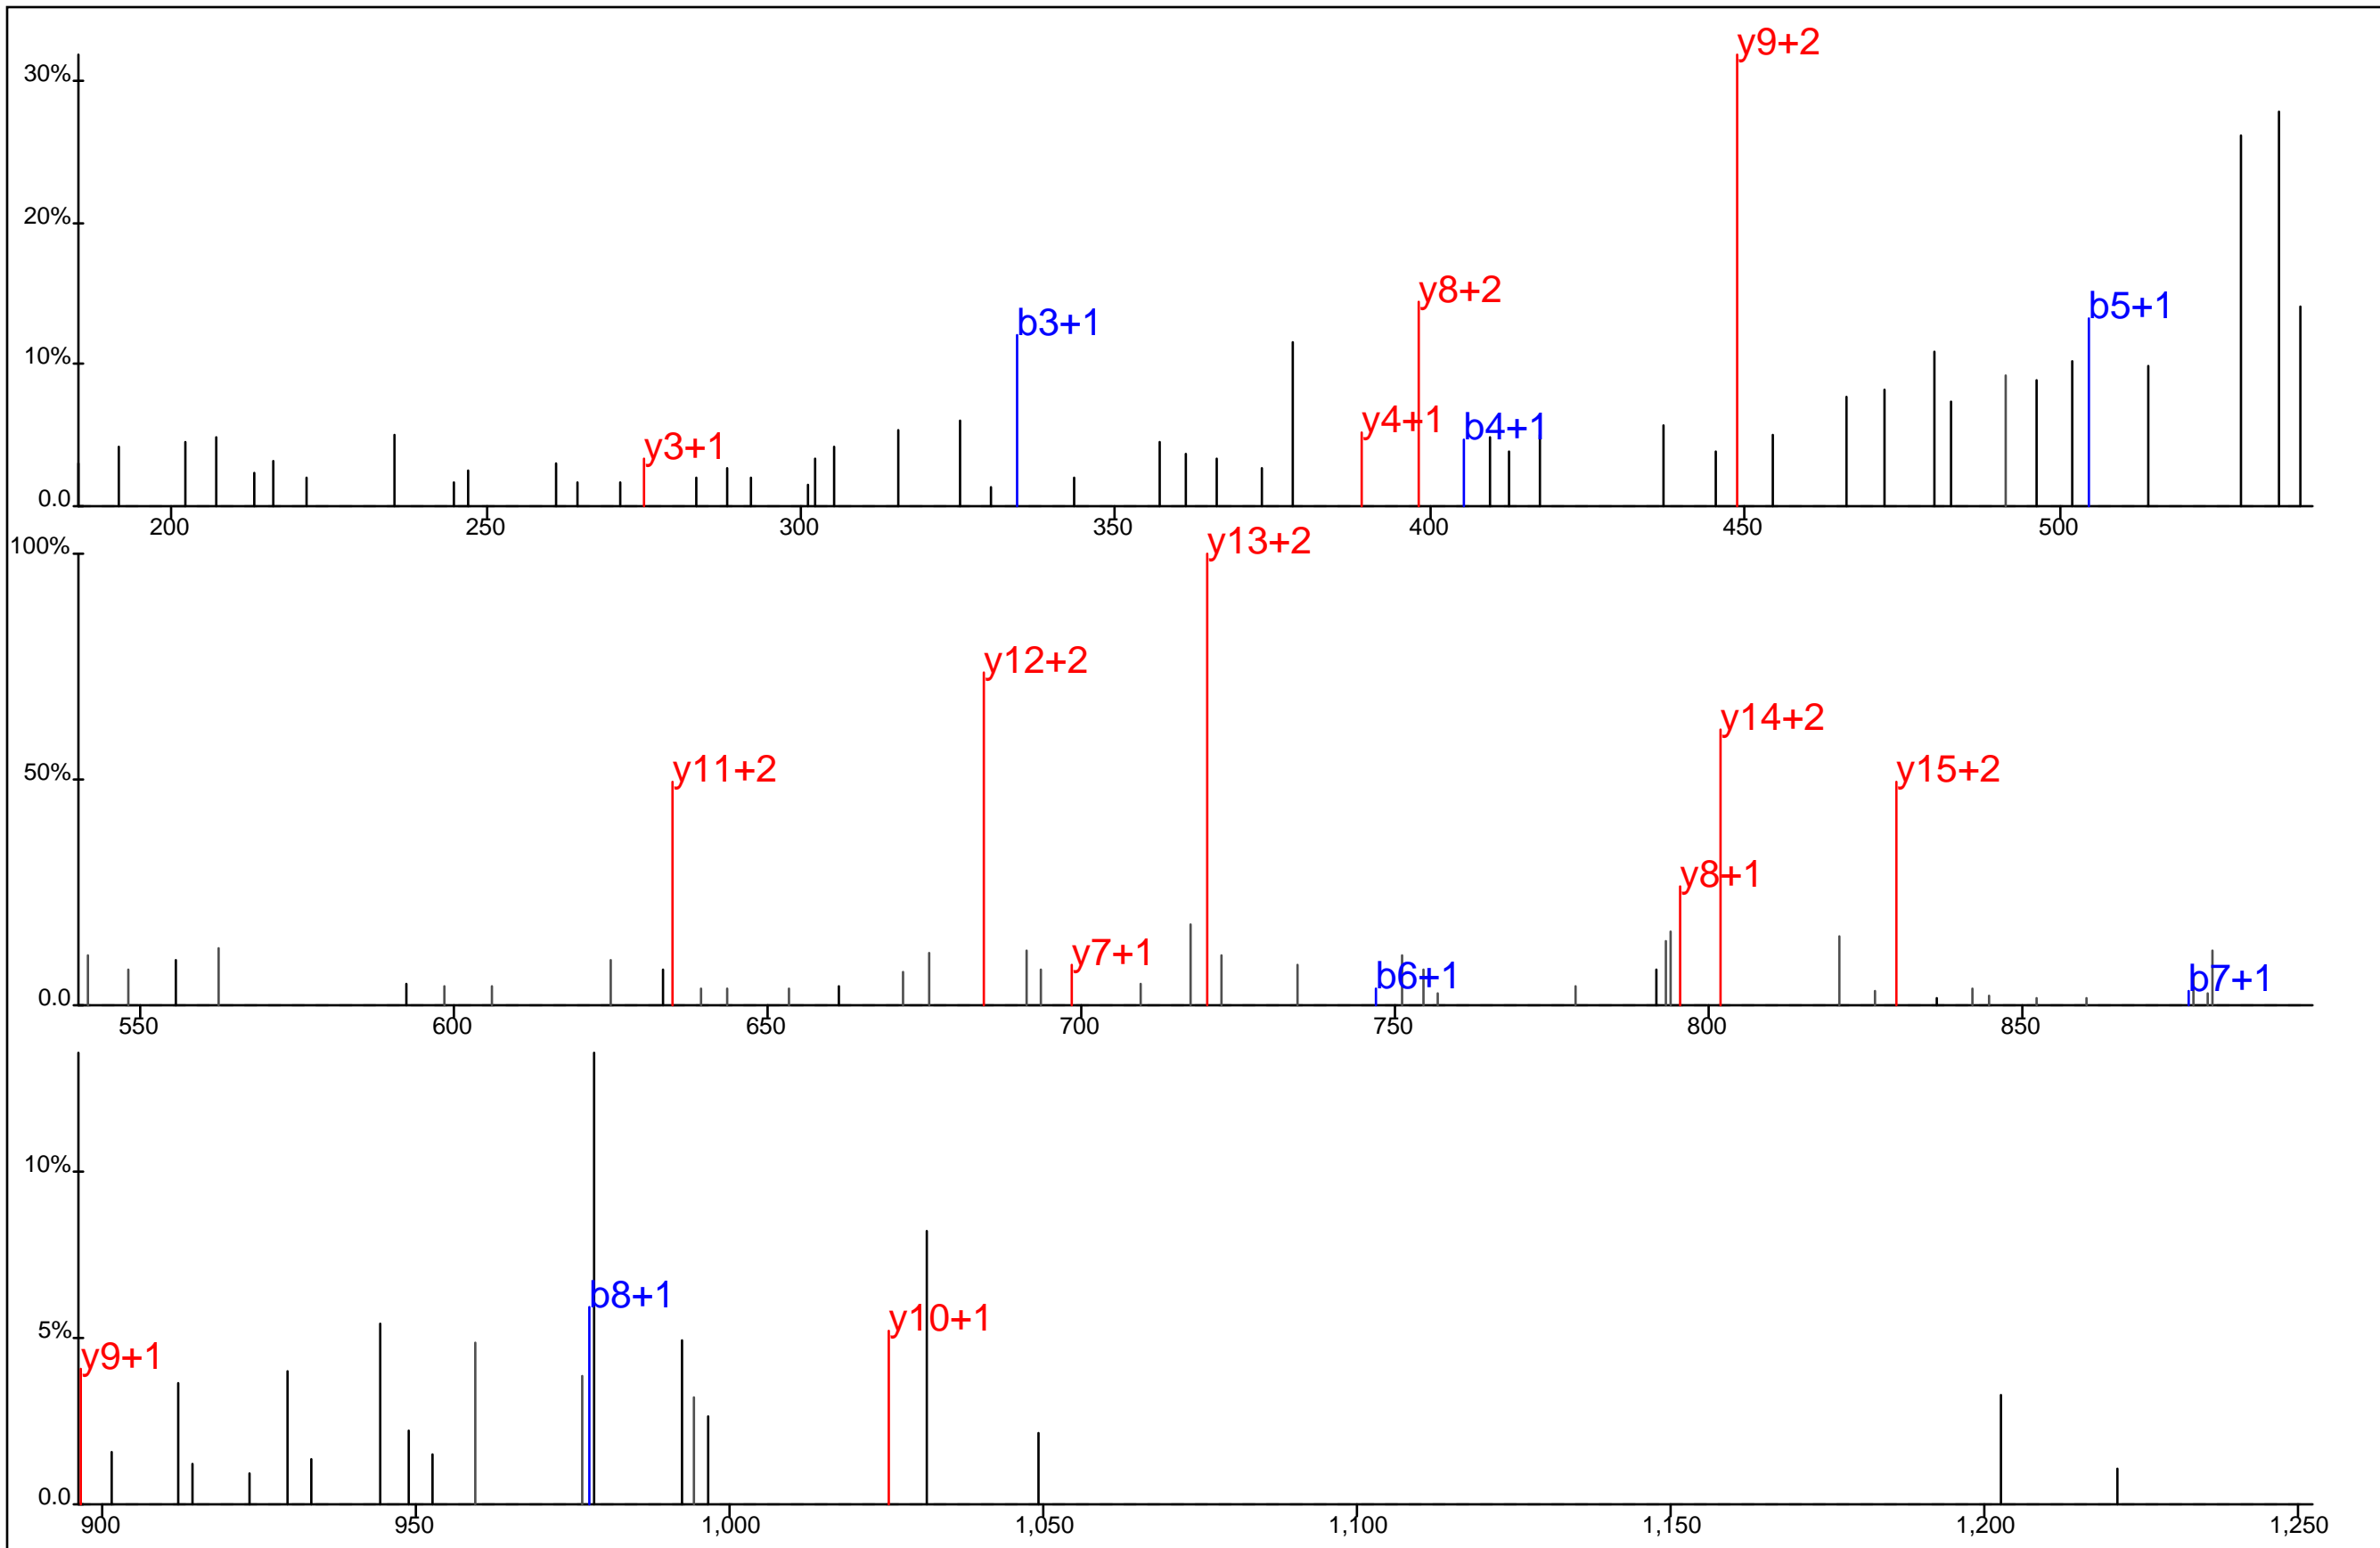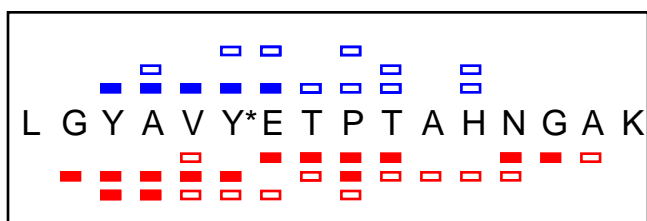

Protein Name: TOL interacting protein  
 gi Accession: 0  
 Precursor Mass: 591.2744+3  
 Delta Mass: 2.048 ppm  
 XCorr: 37.9

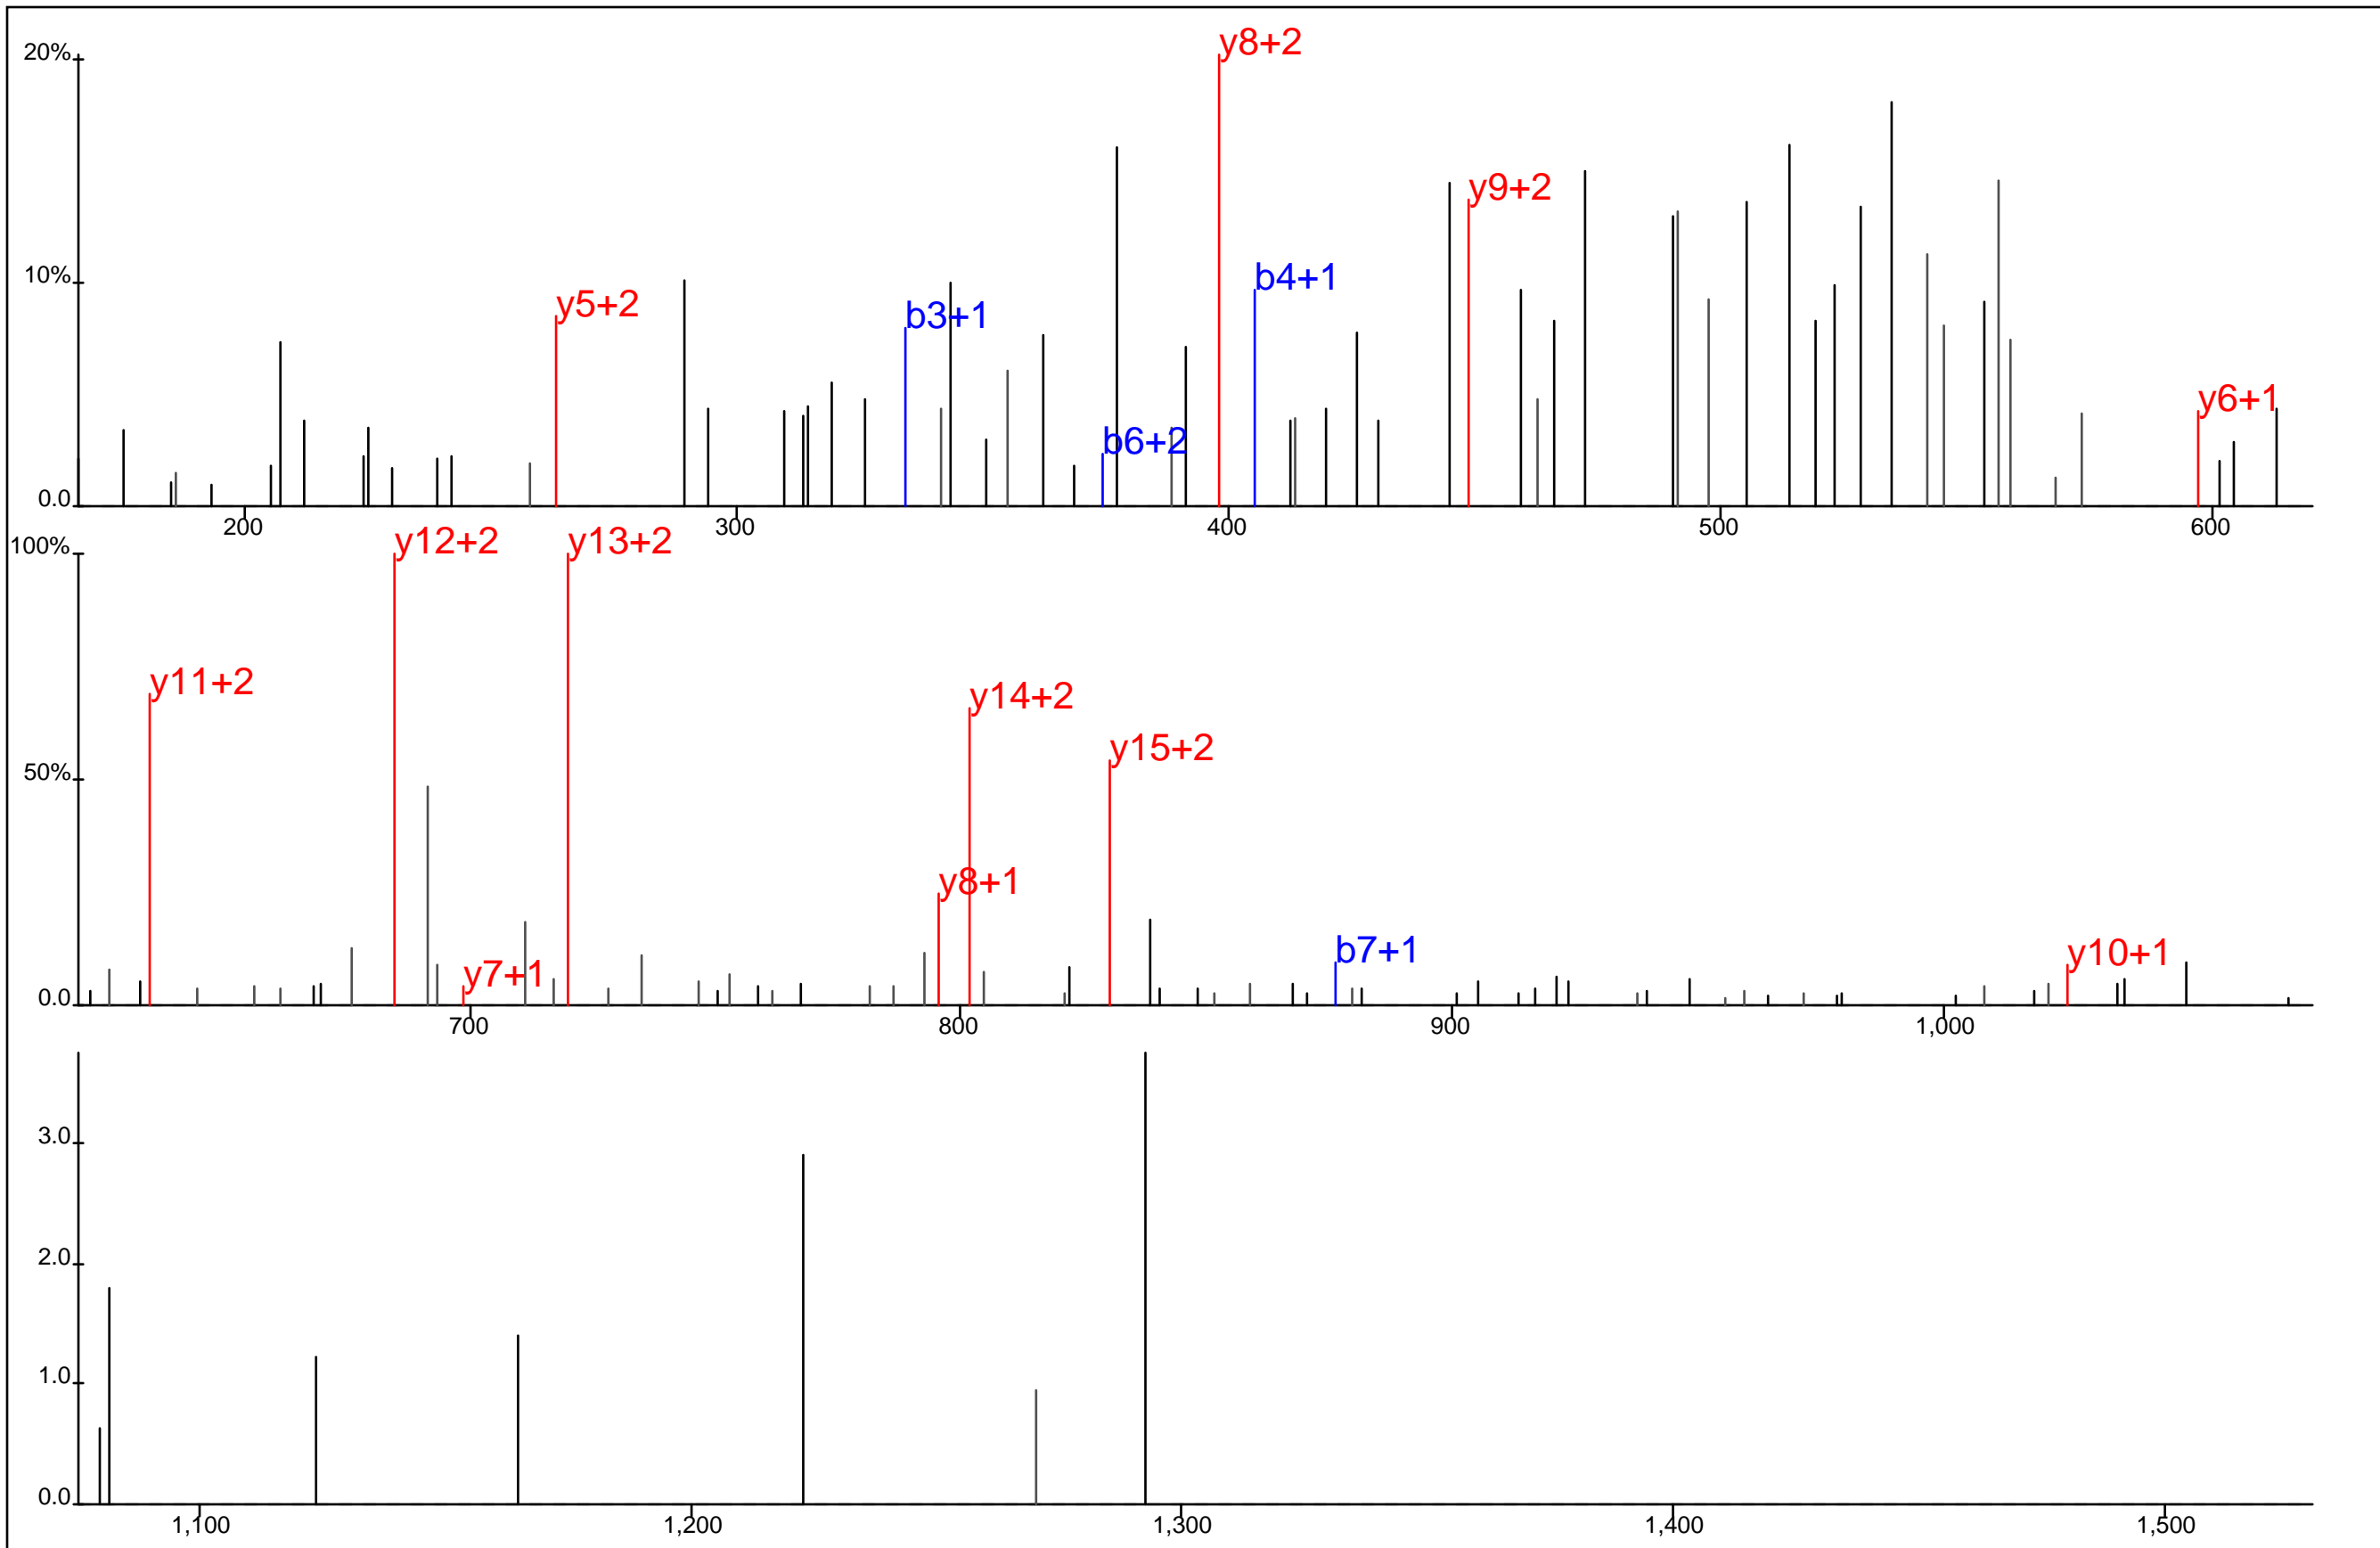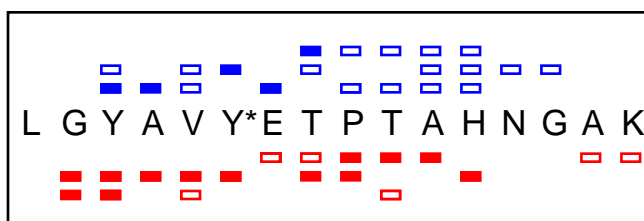

Protein Name: TOL interacting protein  
 gi Accession: 0  
 Precursor Mass: 591.2707+3  
 Delta Mass: 4.256 ppm  
 XCorr: 27.8

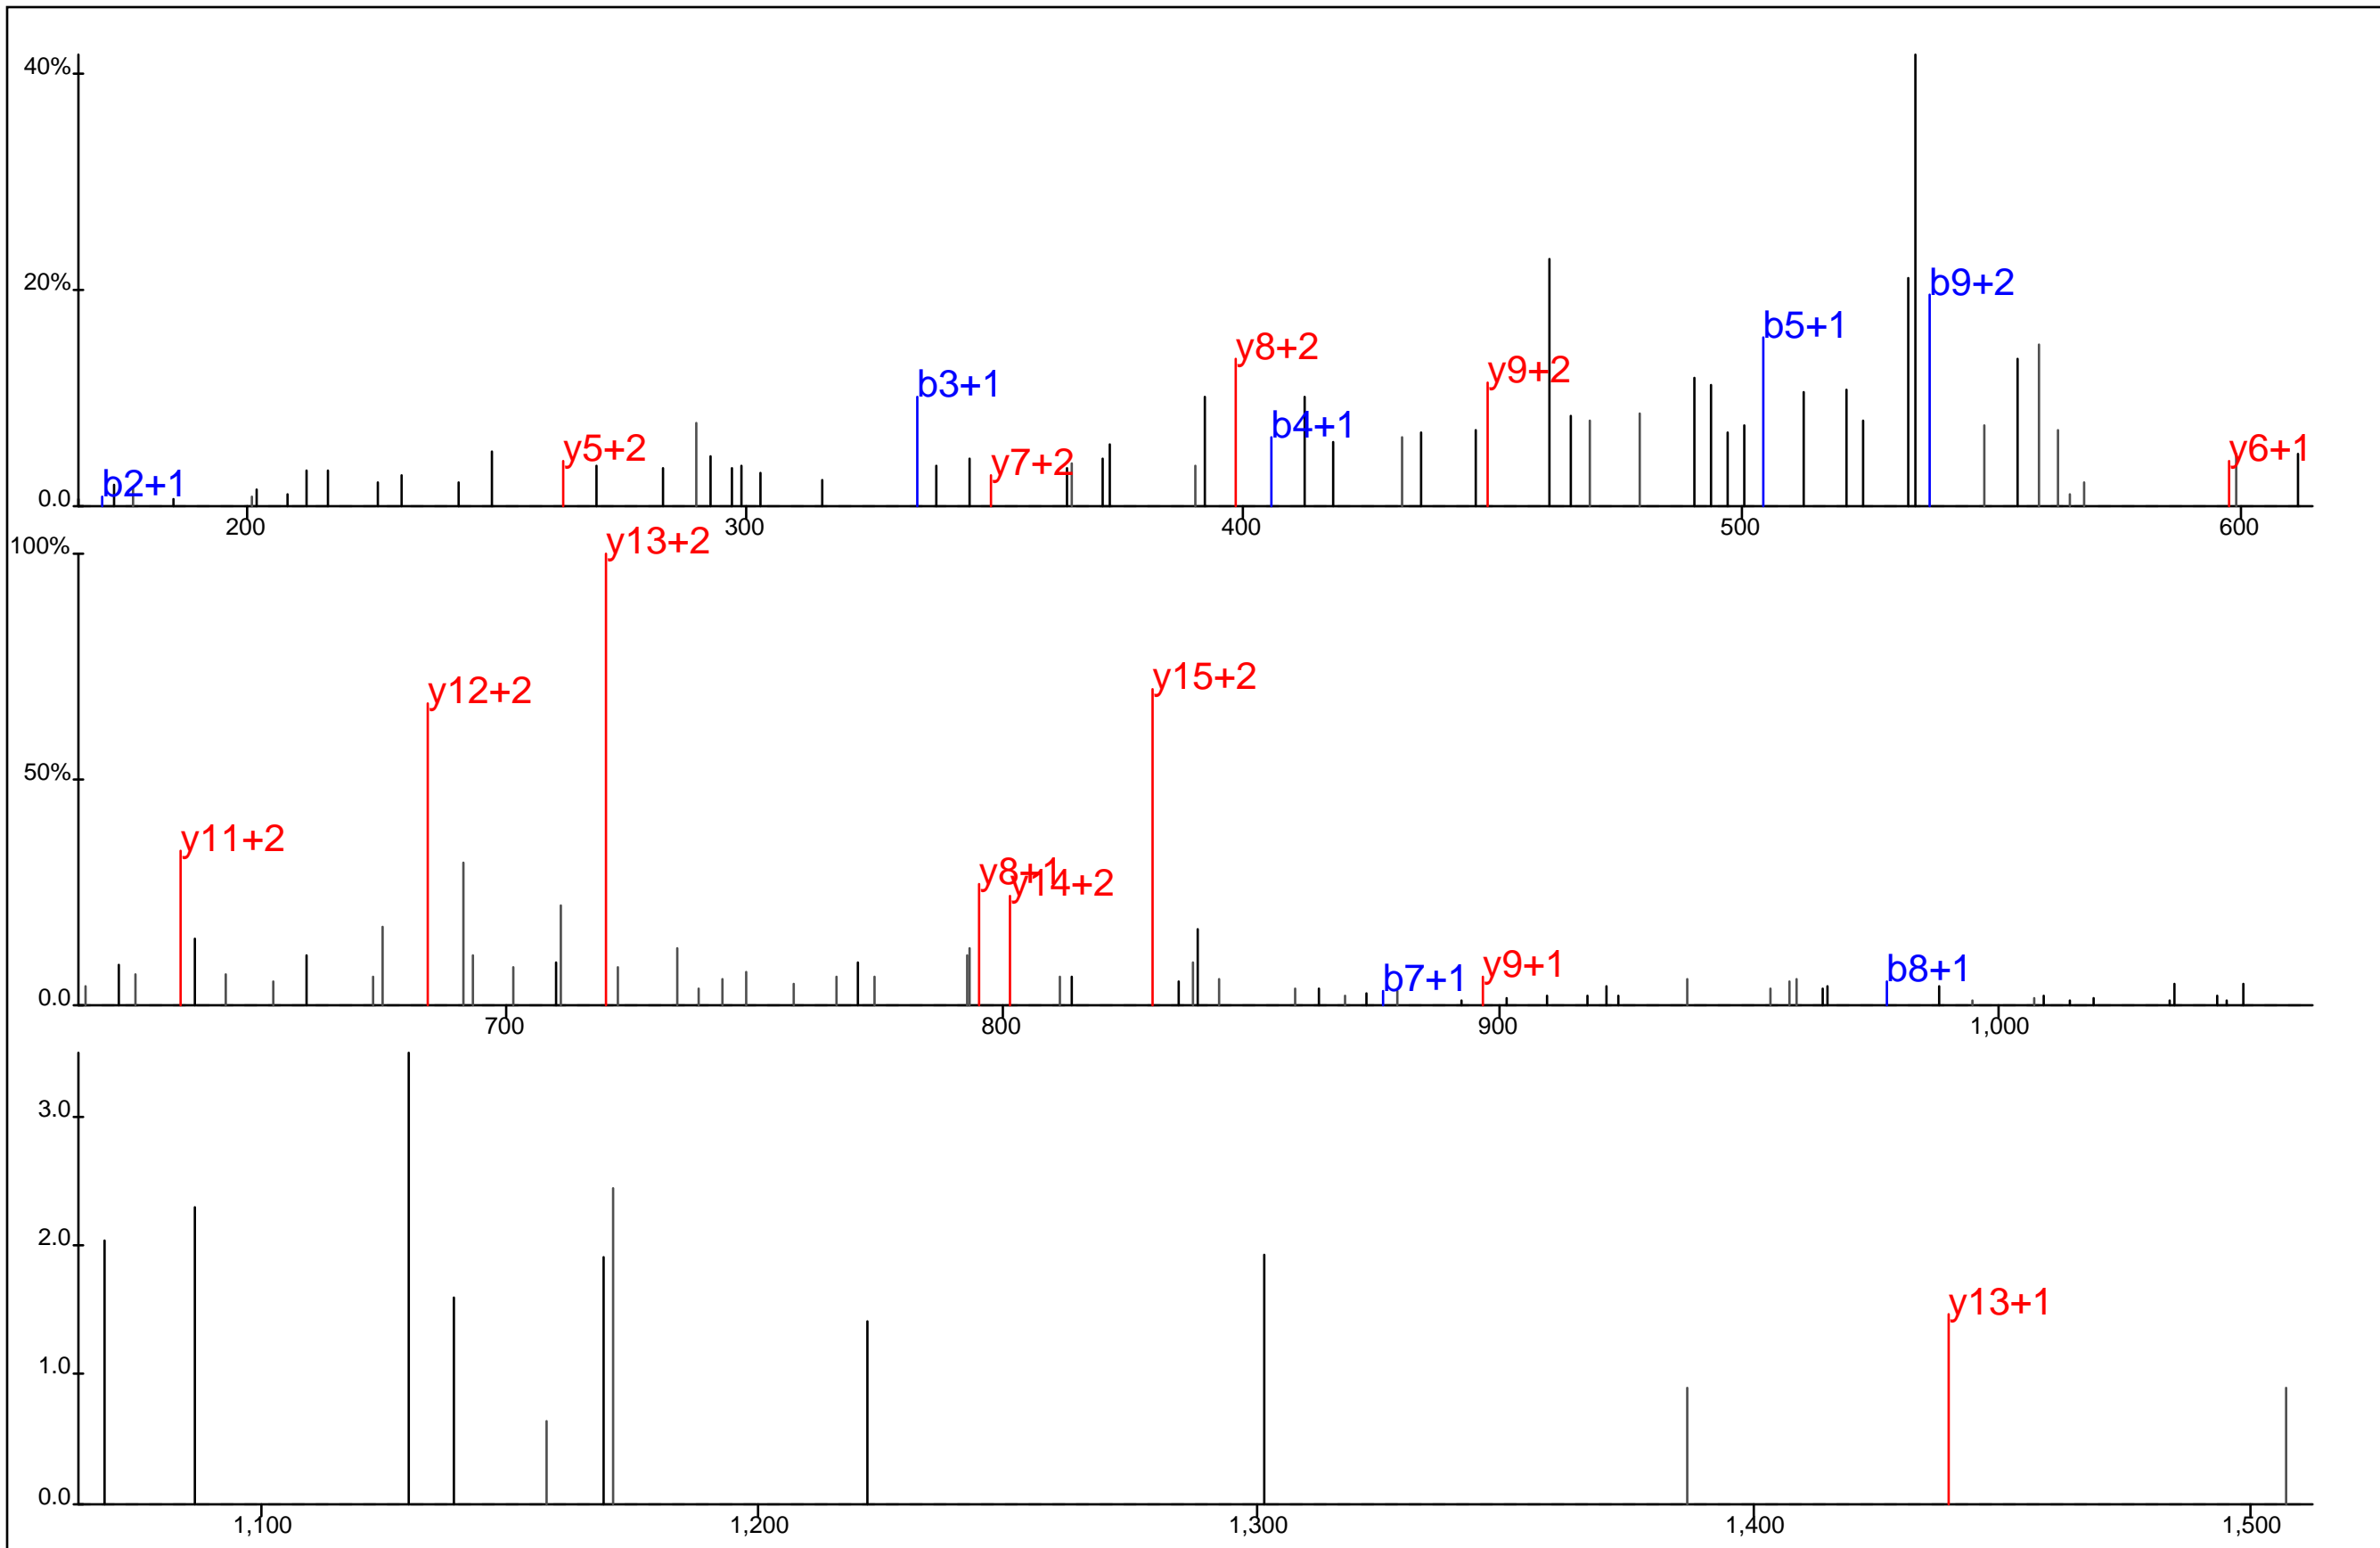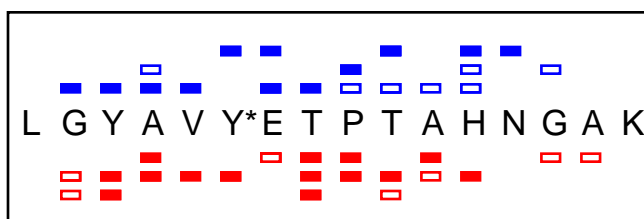

Protein Name: TOL interacting protein  
 gi Accession: 0  
 Precursor Mass: 591.2729+3  
 Delta Mass: 0.433 ppm  
 XCorr: 33.36



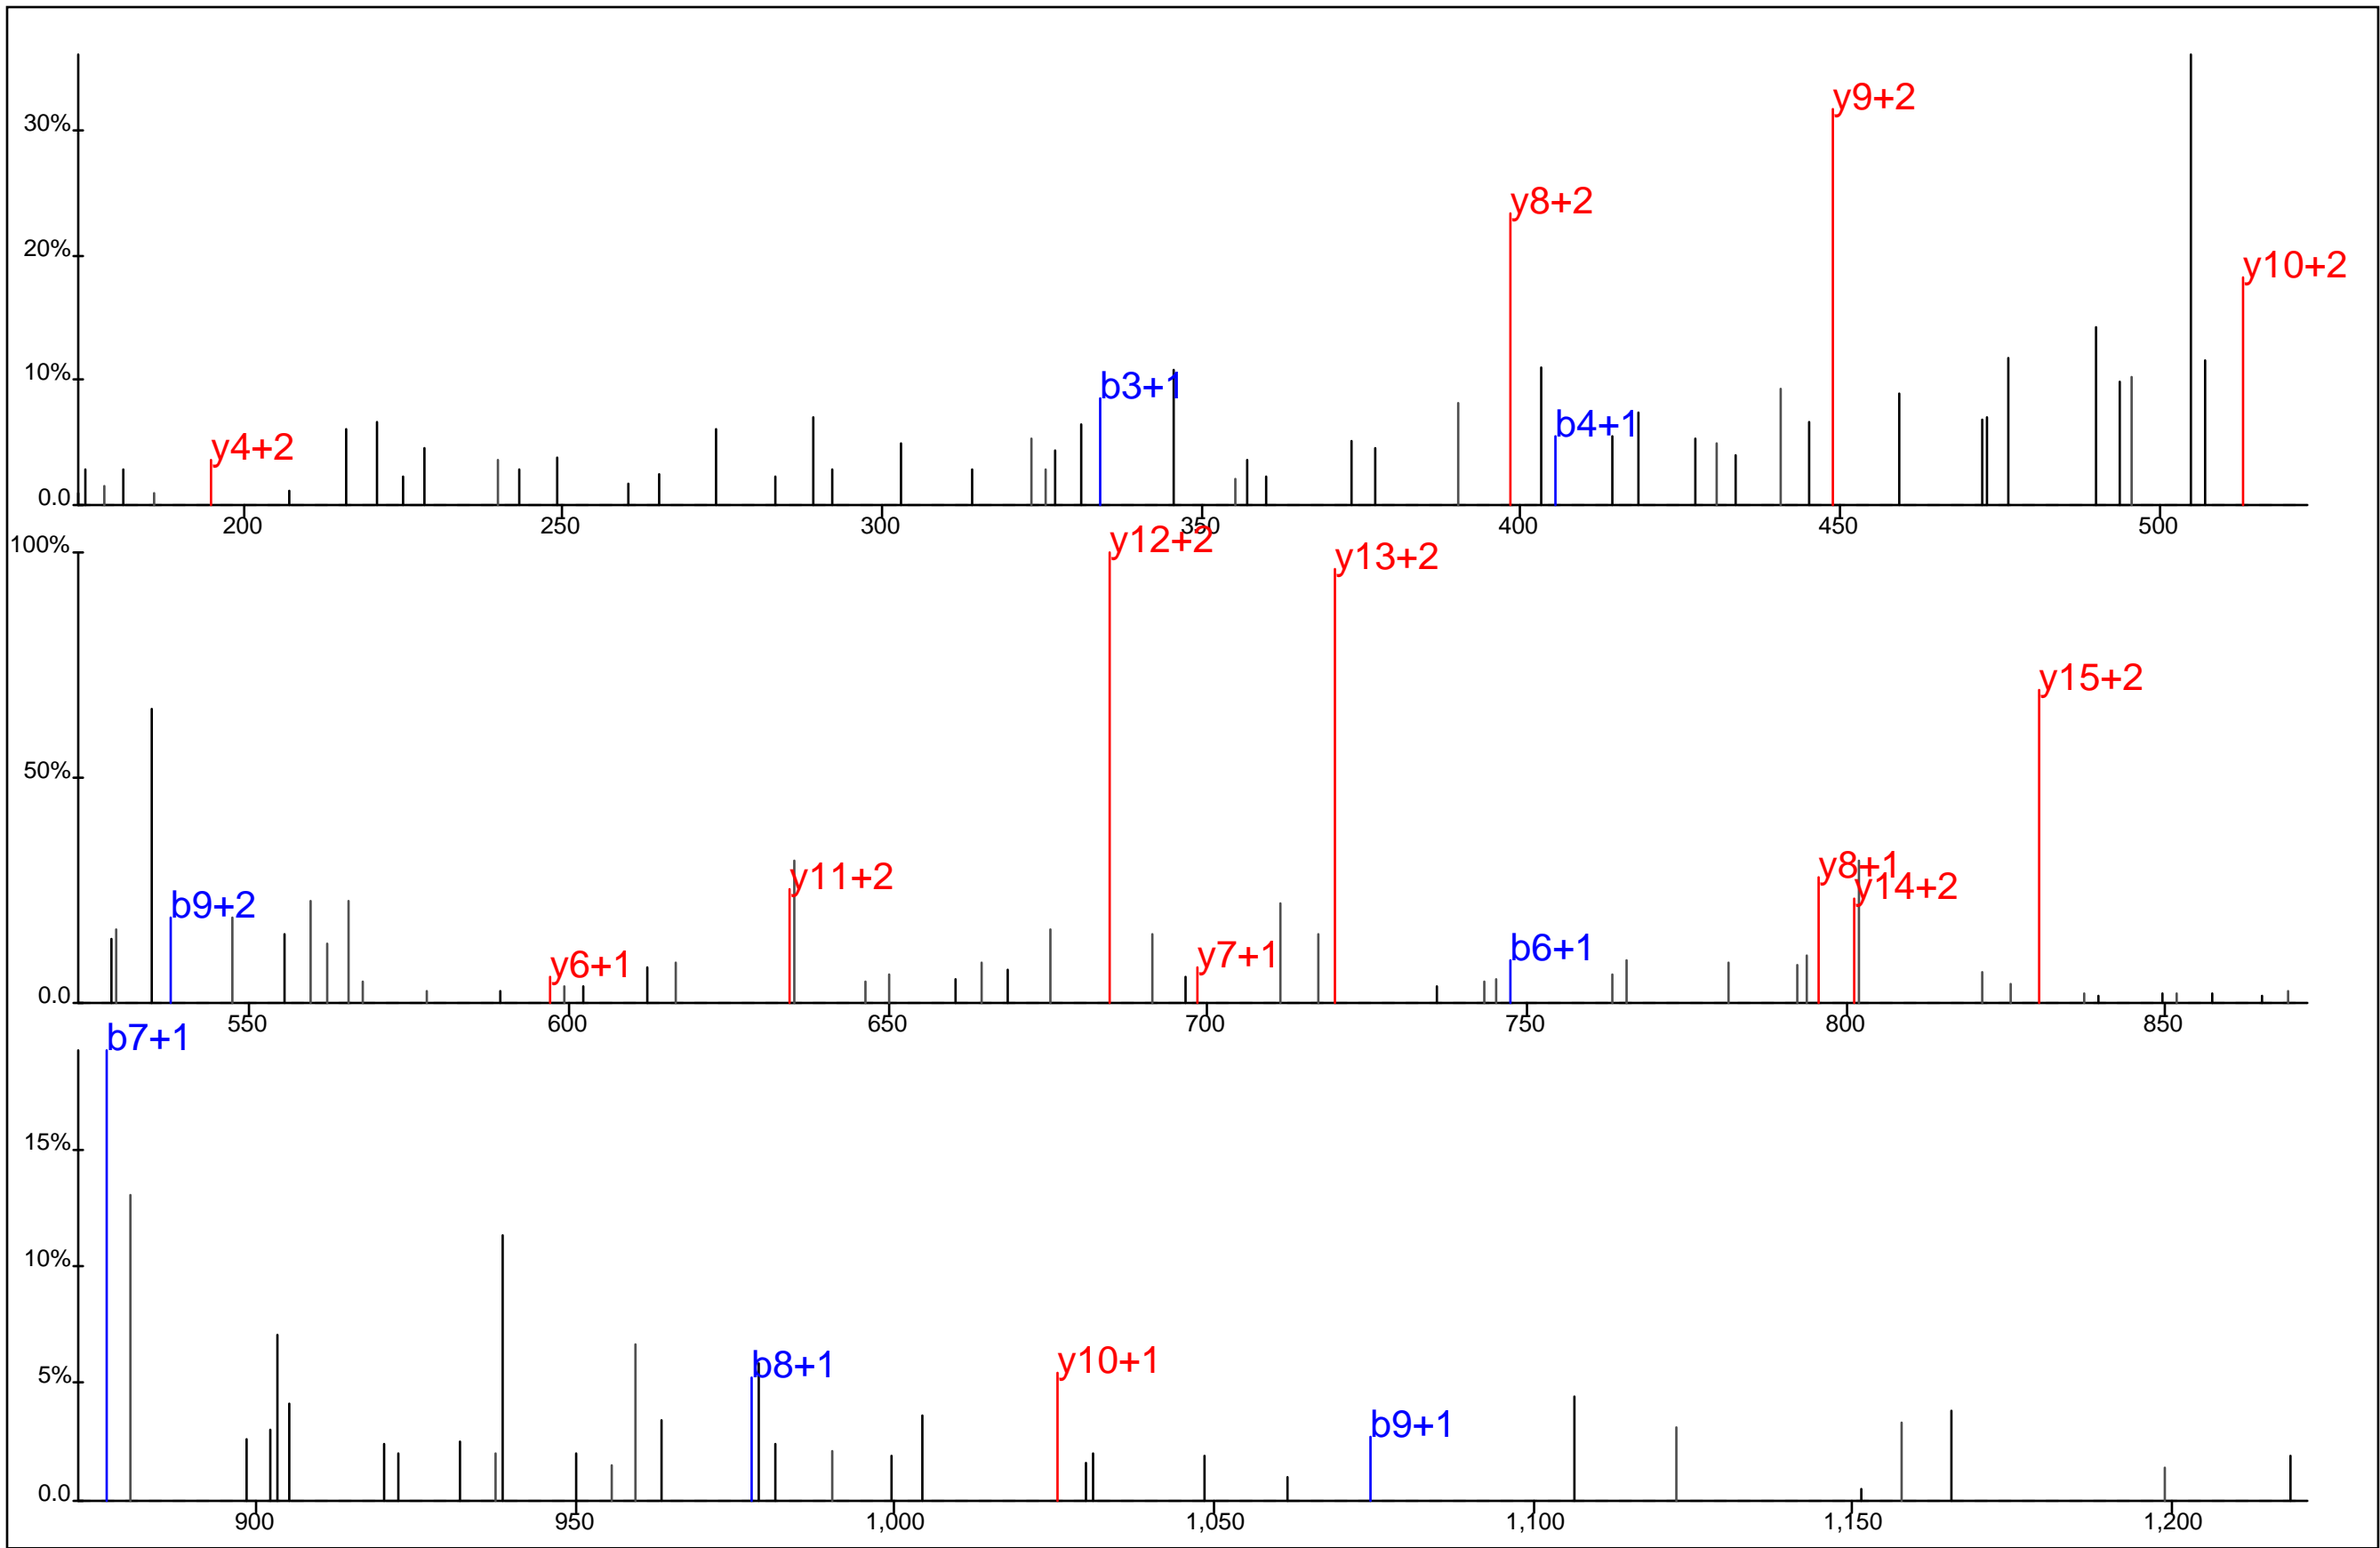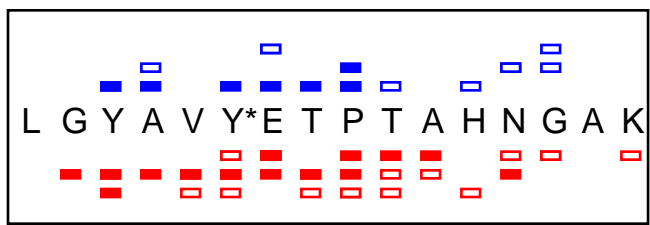

Protein Name: TOL interacting protein  
 gi Accession: 0  
 Precursor Mass: 591.2752+3  
 Delta Mass: 3.392 ppm  
 XCorr: 27.75

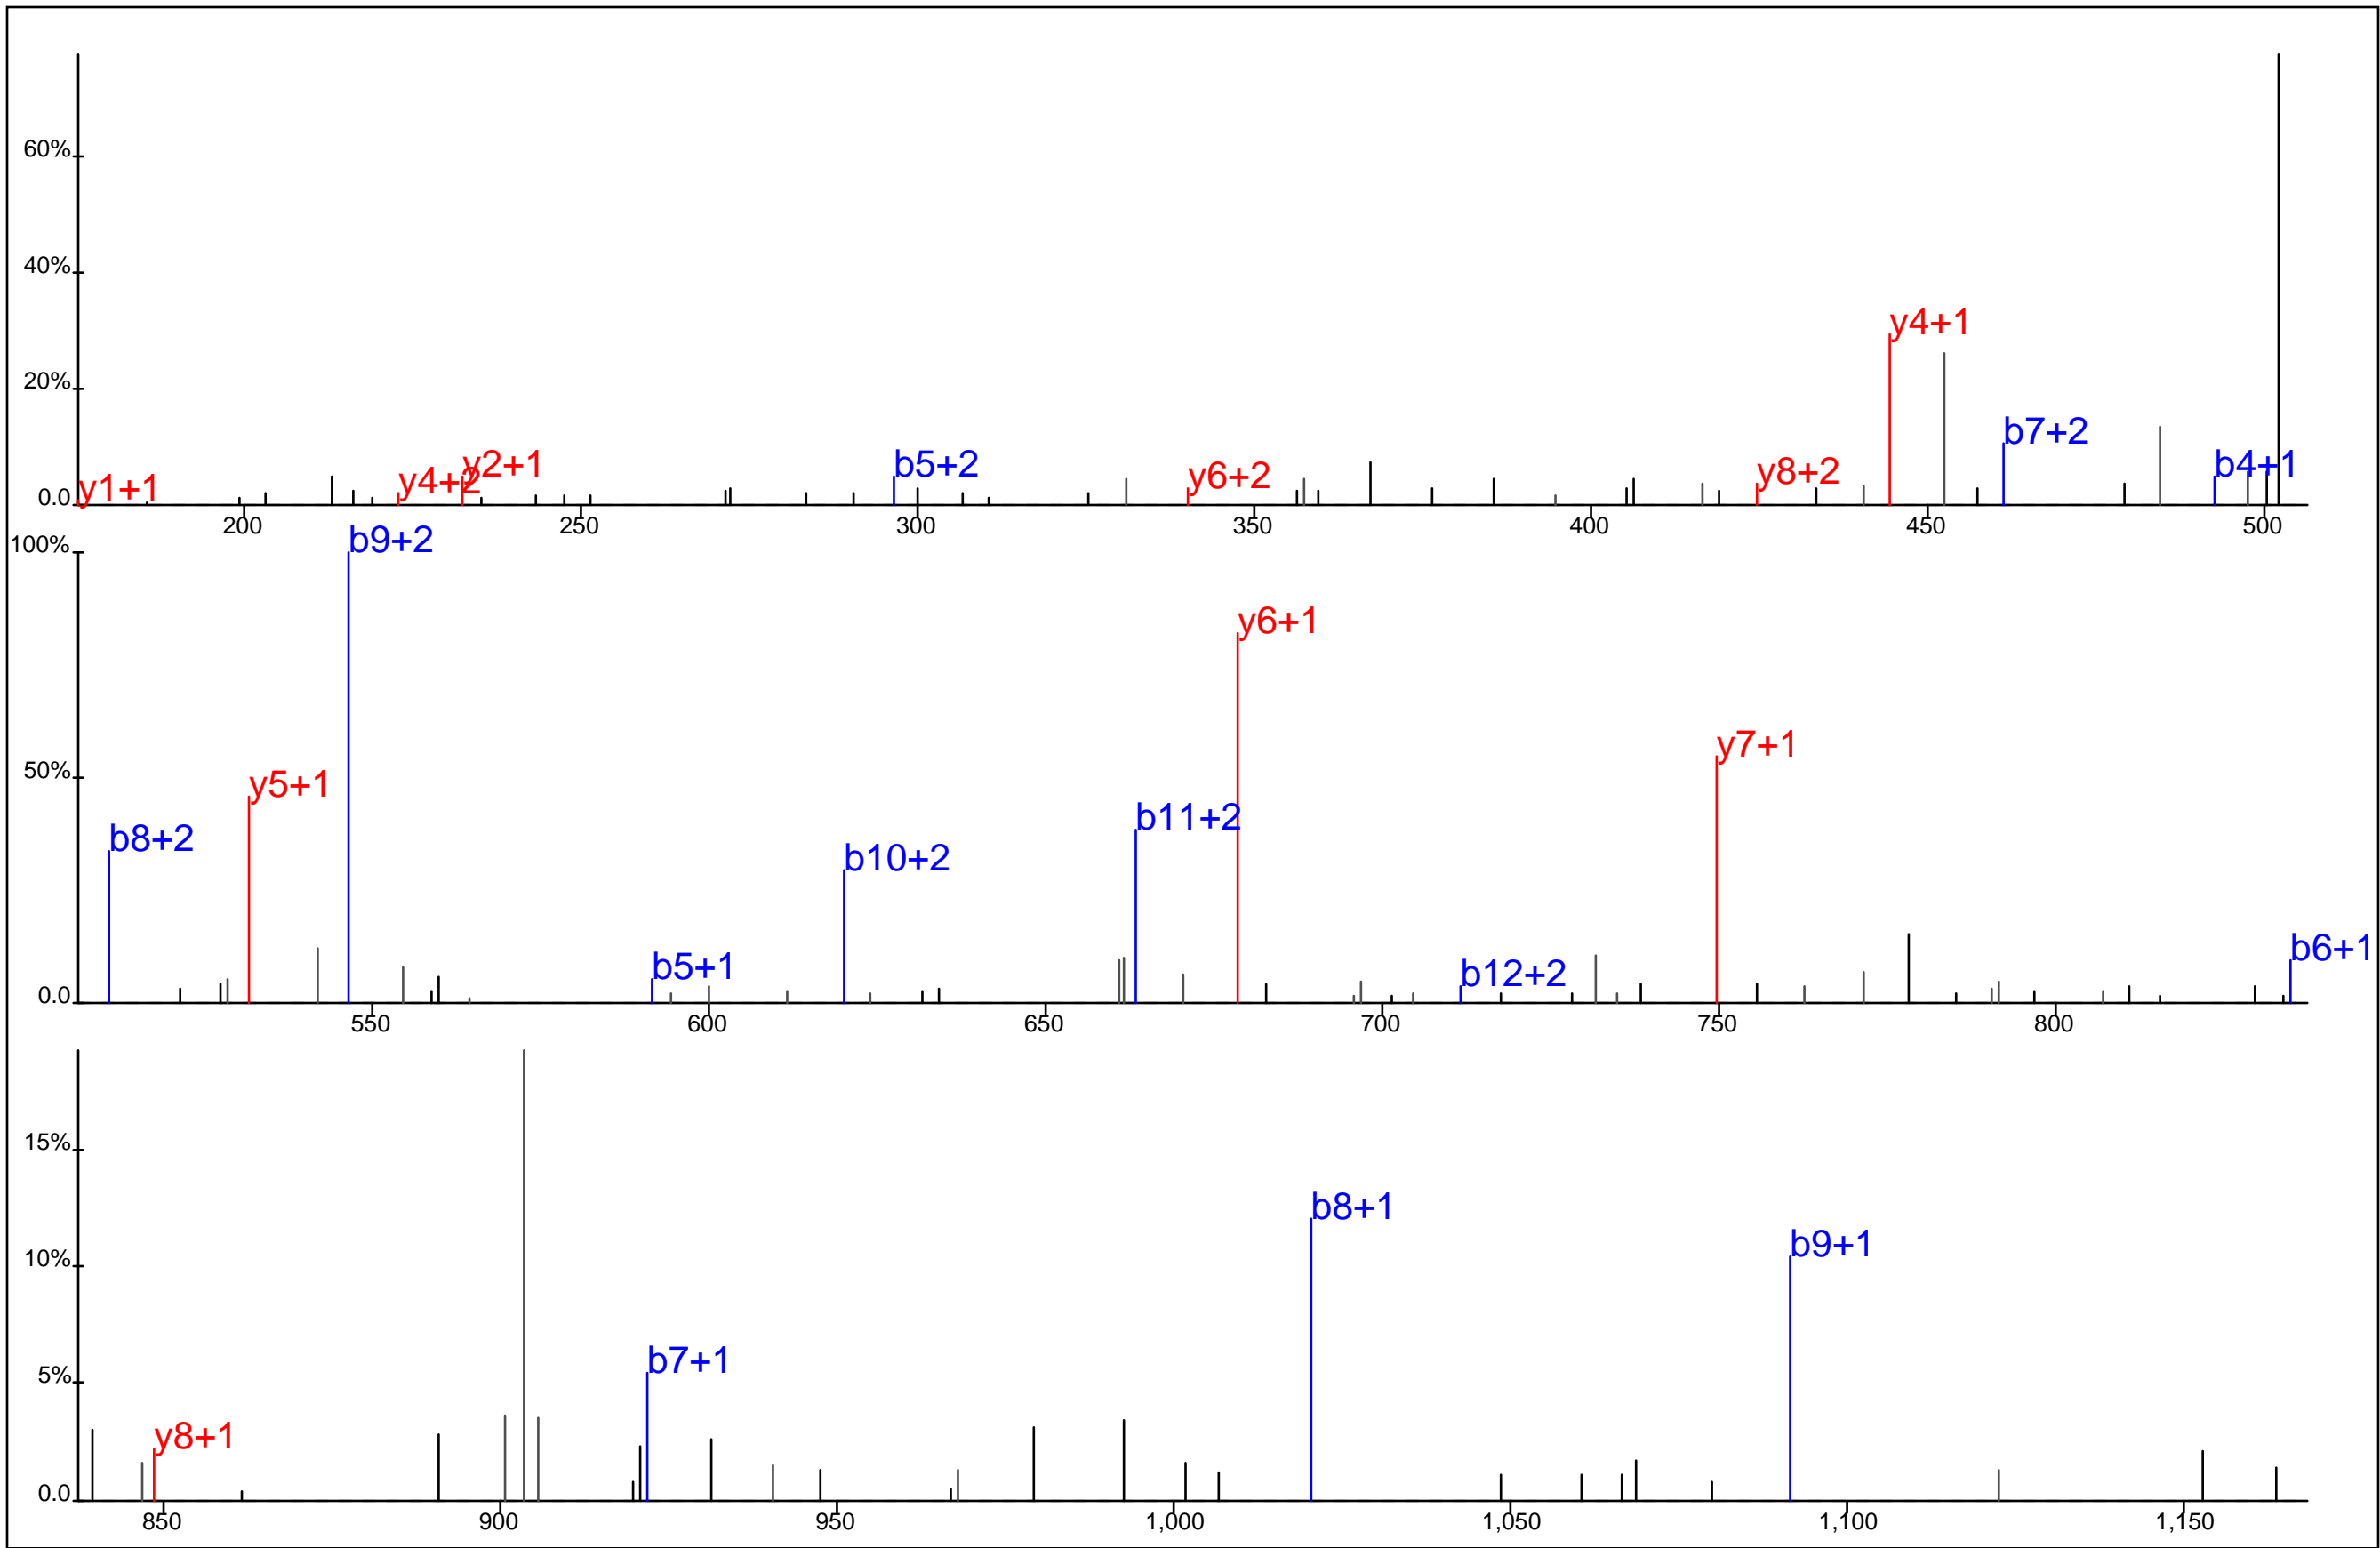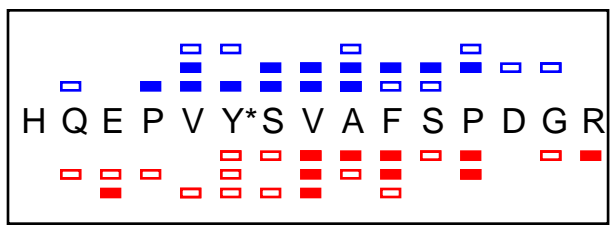

Protein Name: Transducin beta like 1X-linked receptor 1  
 gi Accession: 0  
 Precursor Mass: 590.2615+3  
 Delta Mass: 0.573 ppm  
 XCorr: 37.57

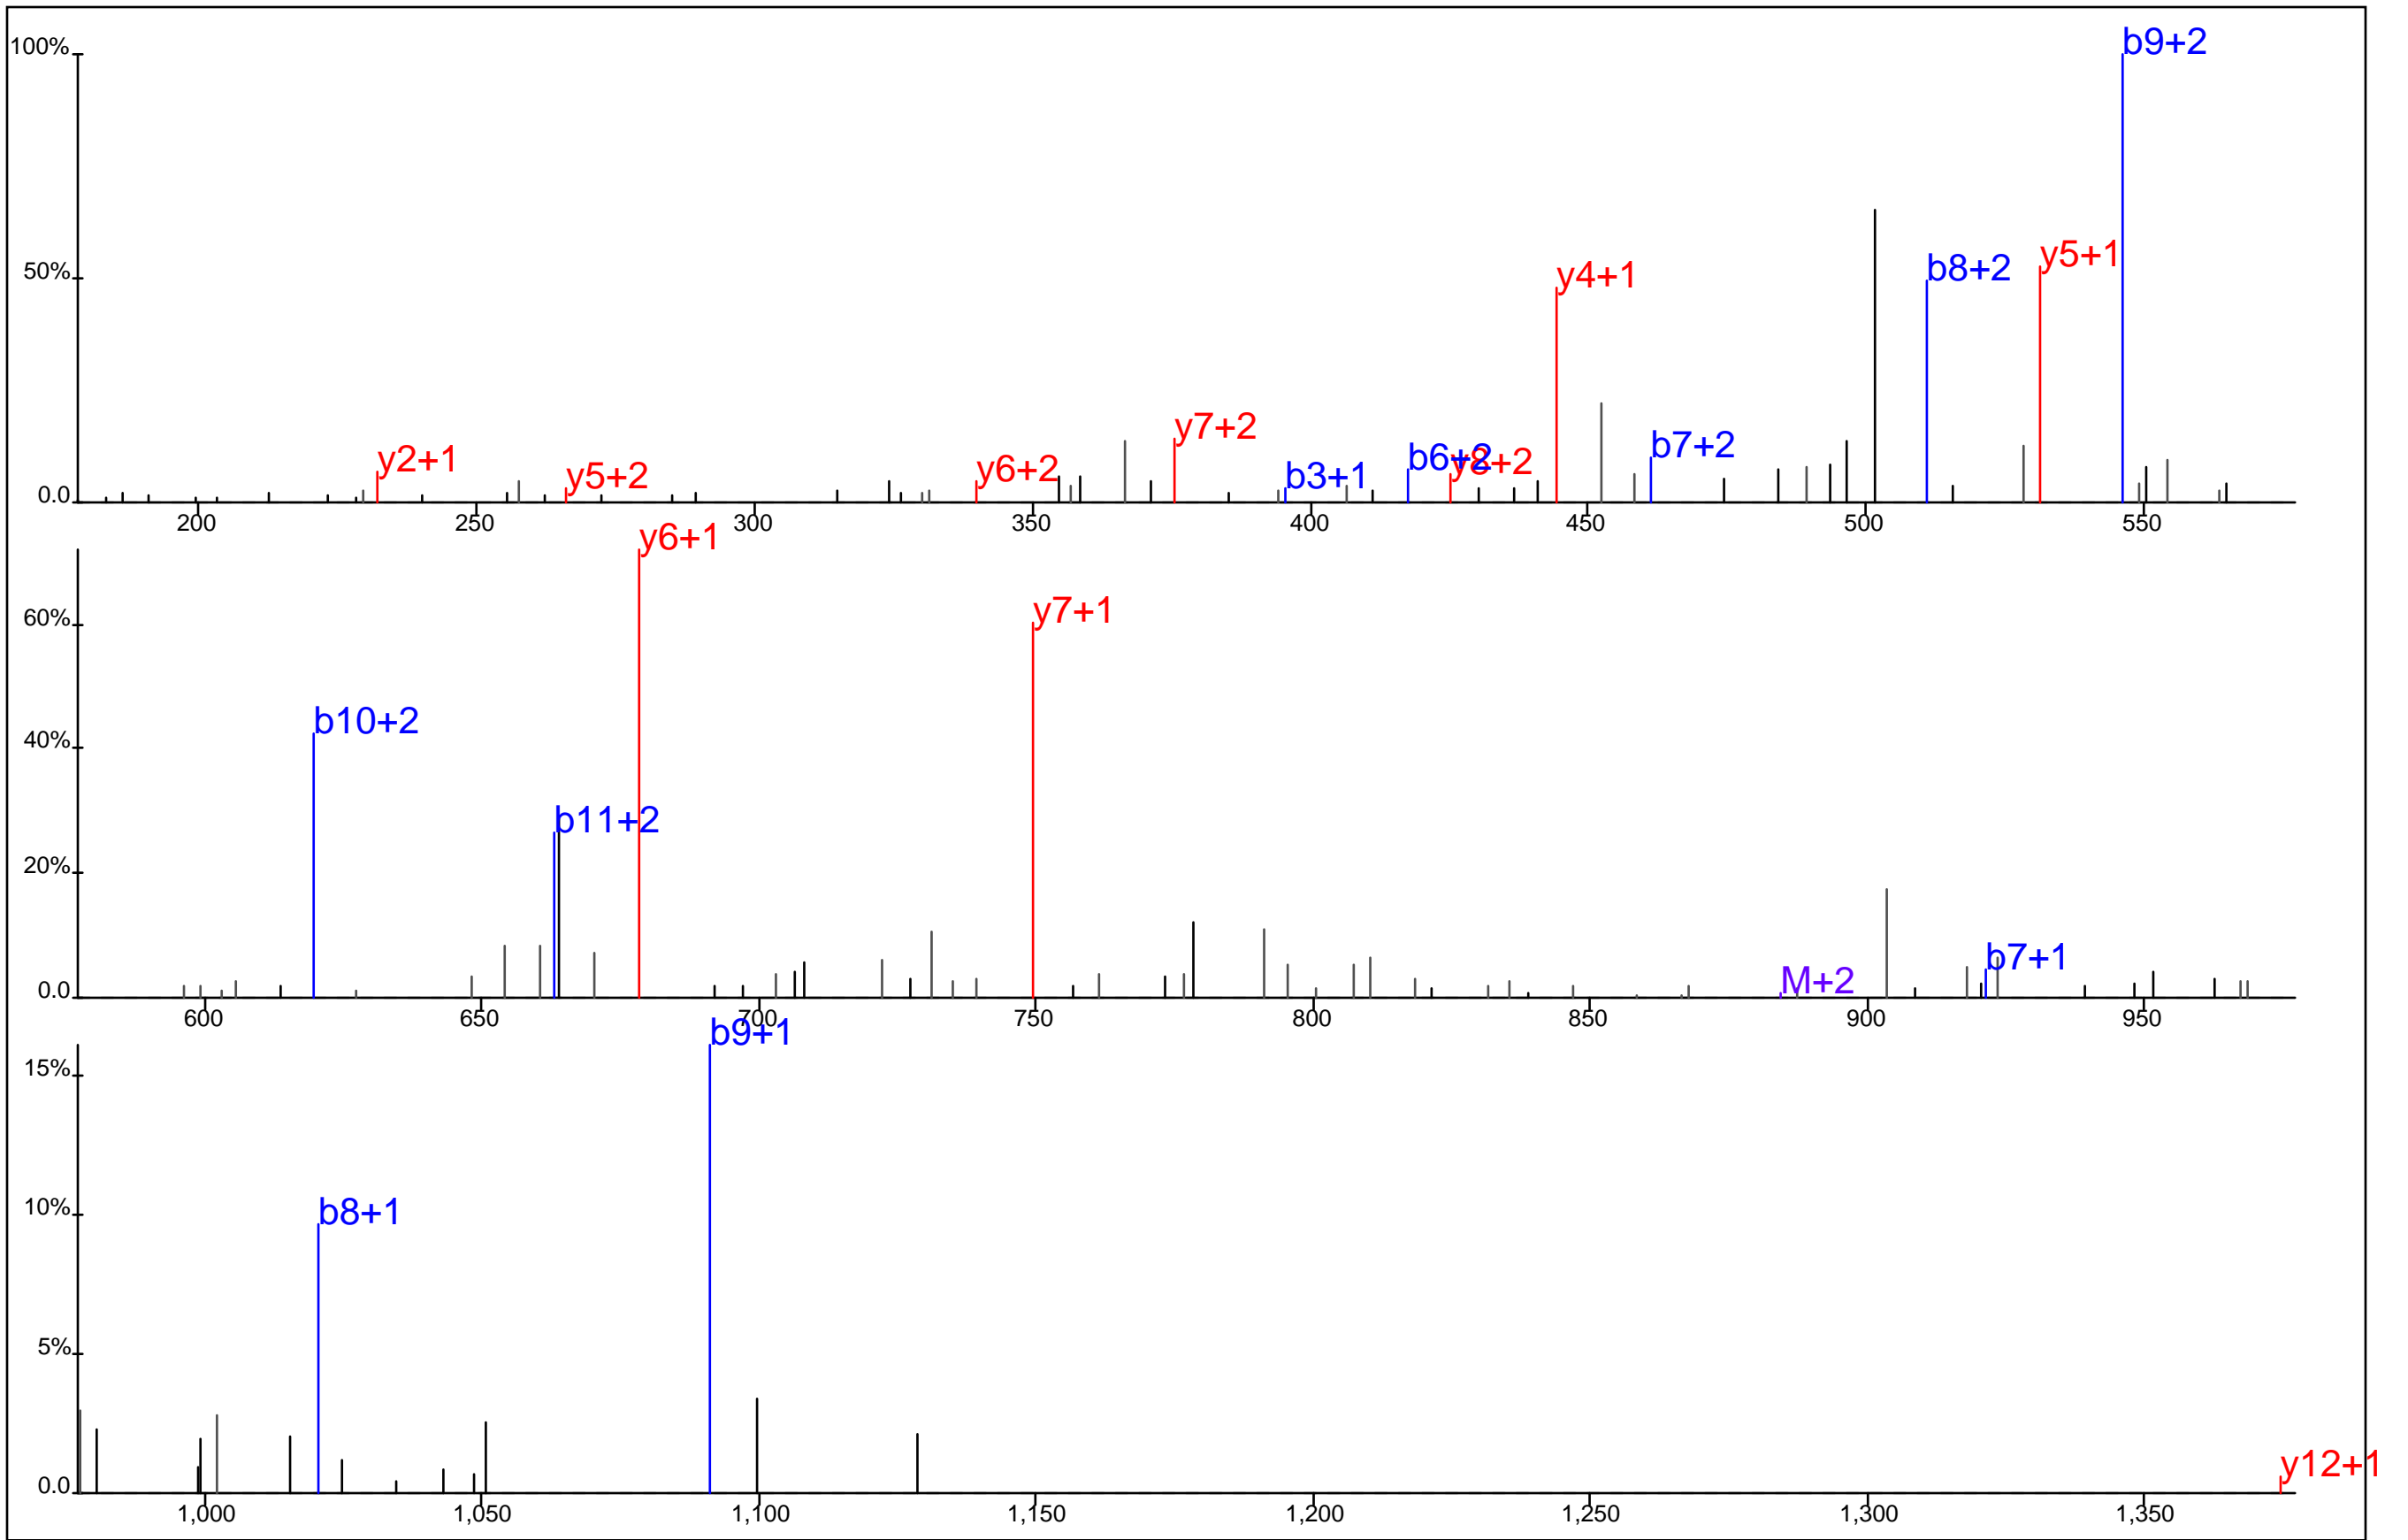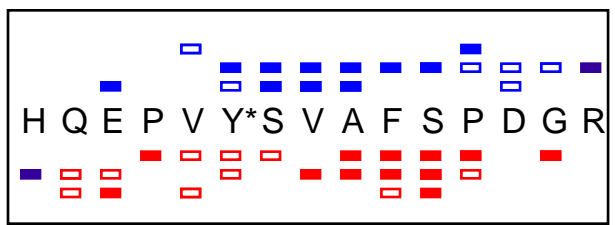

Protein Name: Transducin beta like 1X-linked receptor 1  
 gi Accession: 0  
 Precursor Mass: 590.2621+3  
 Delta Mass: 1.504 ppm  
 XCorr: 38.59



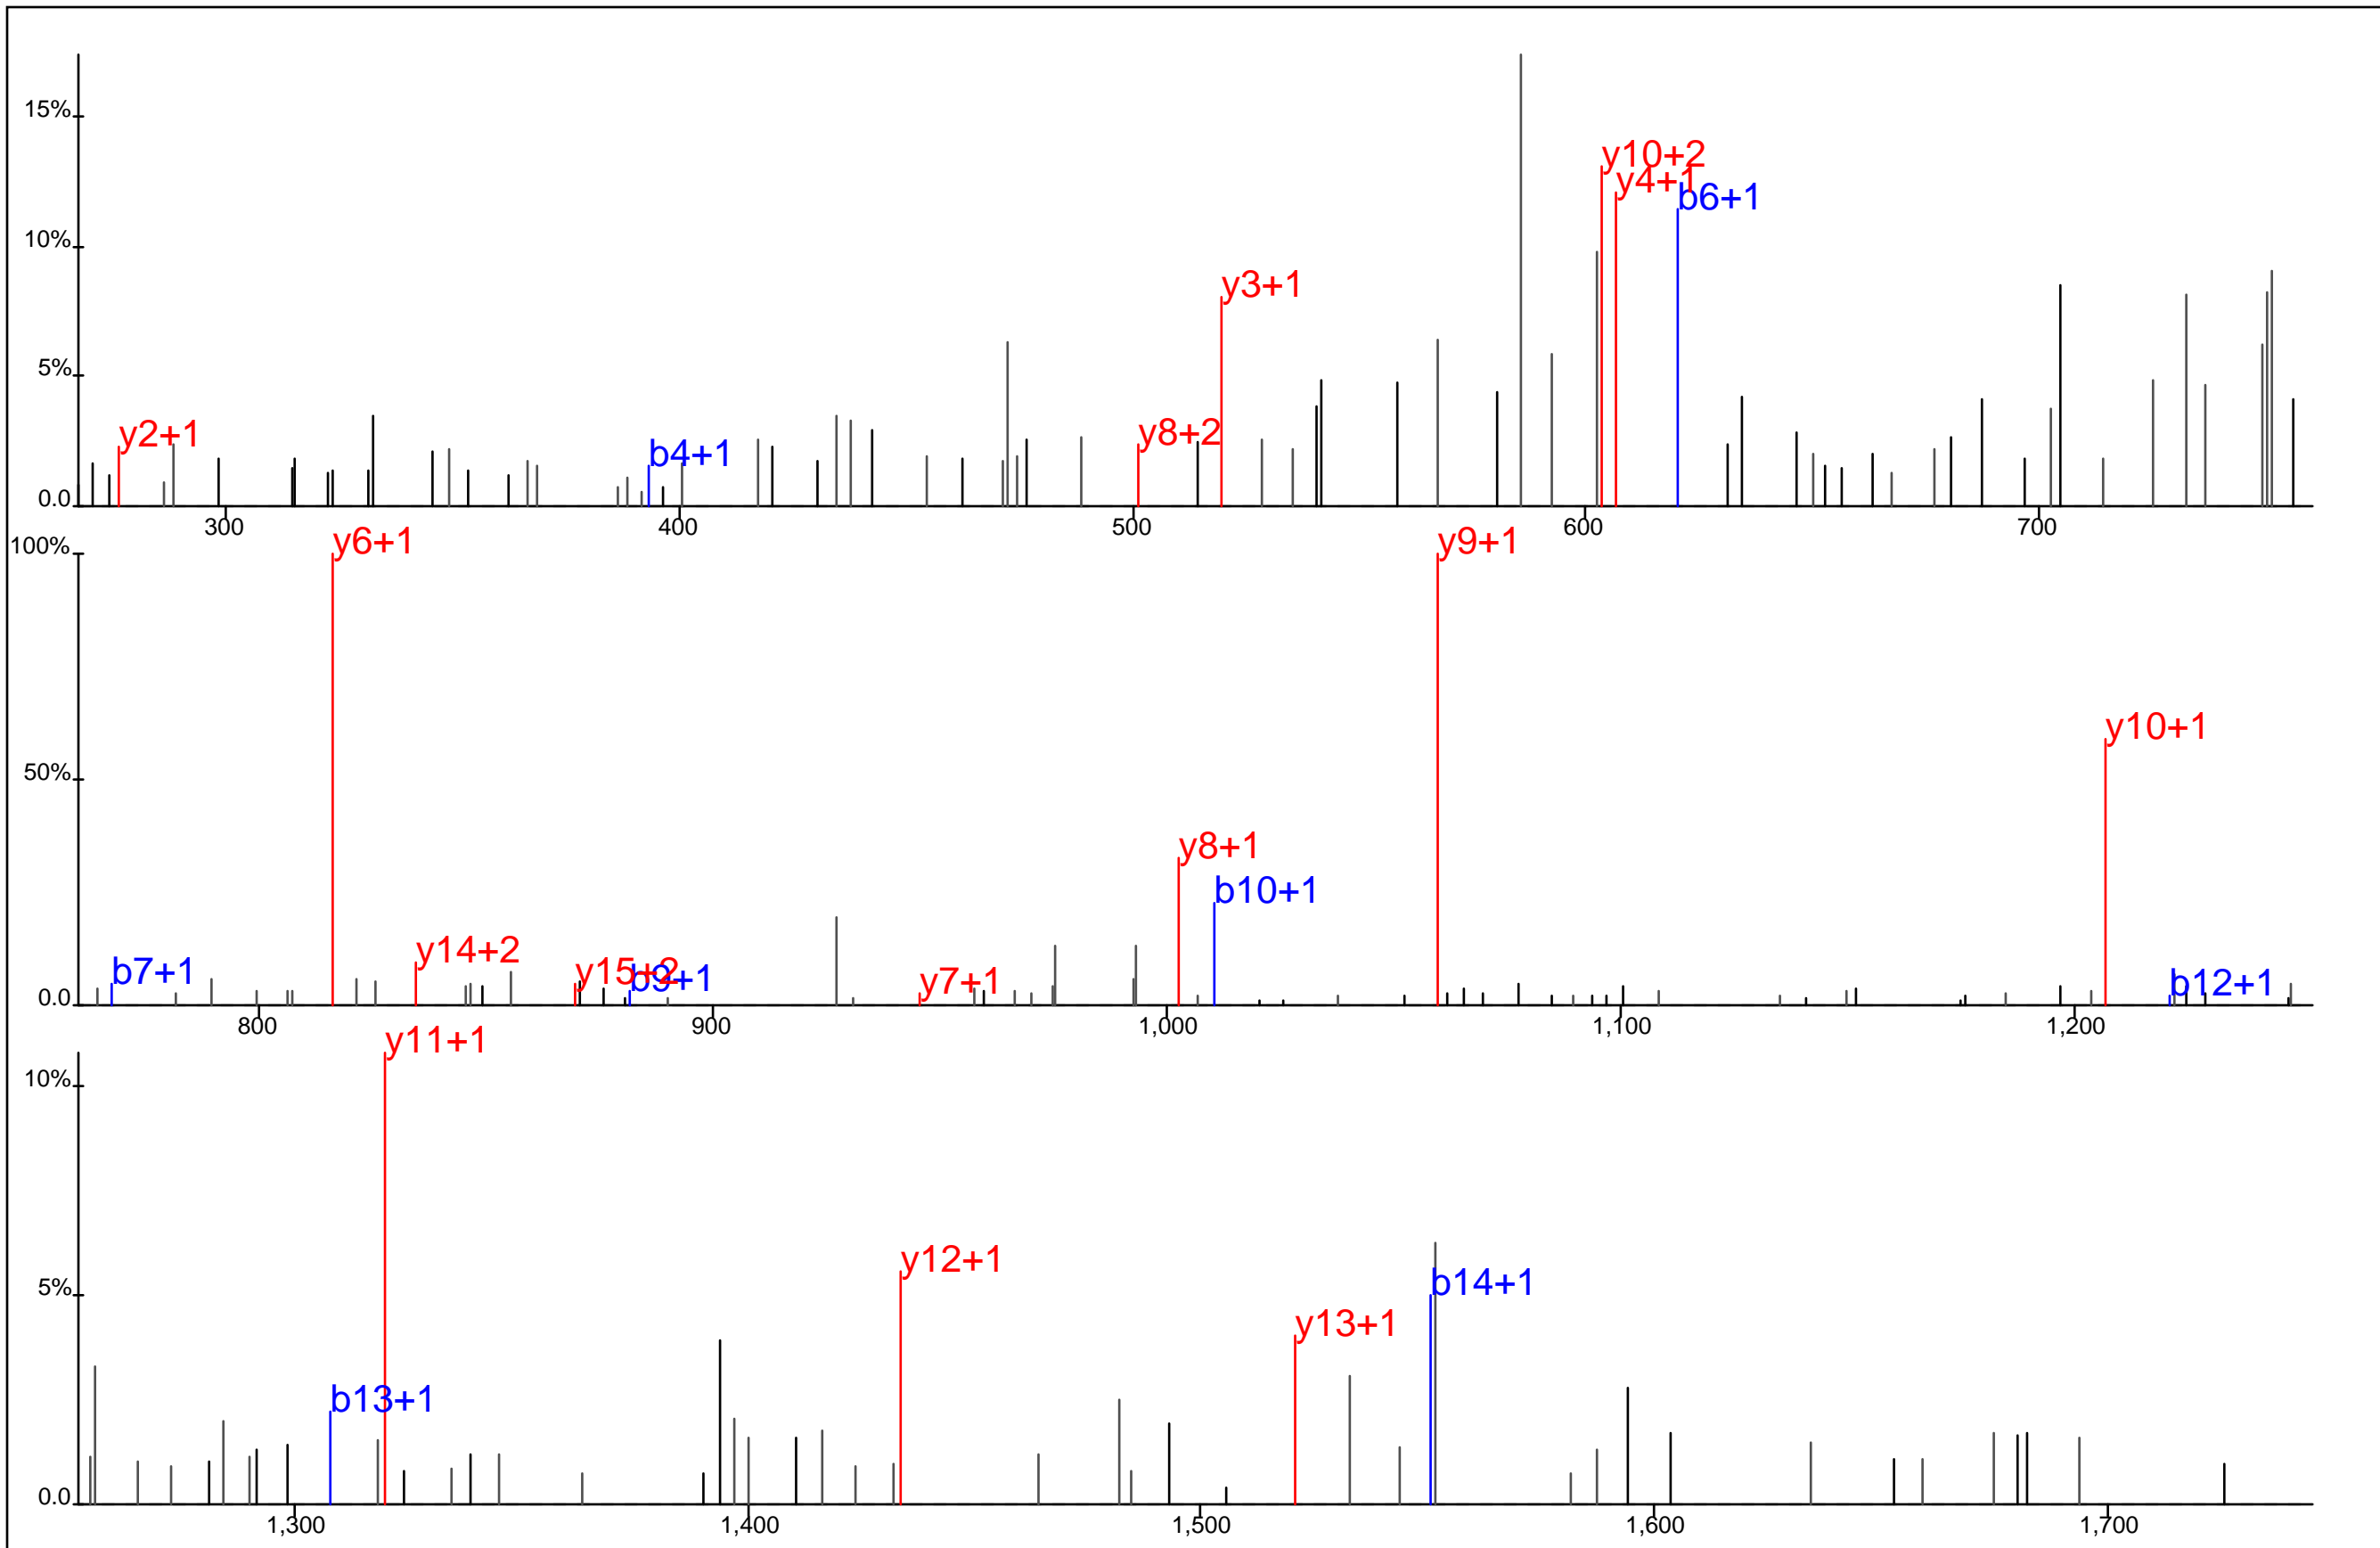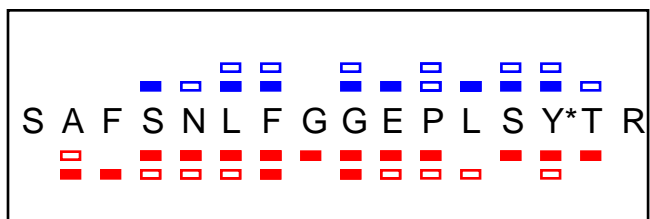

Protein Name: Transferrin receptor  
 gi Accession: 0  
 Precursor Mass: 913.4119+2  
 Delta Mass: 0.512 ppm  
 XCorr: 52.42

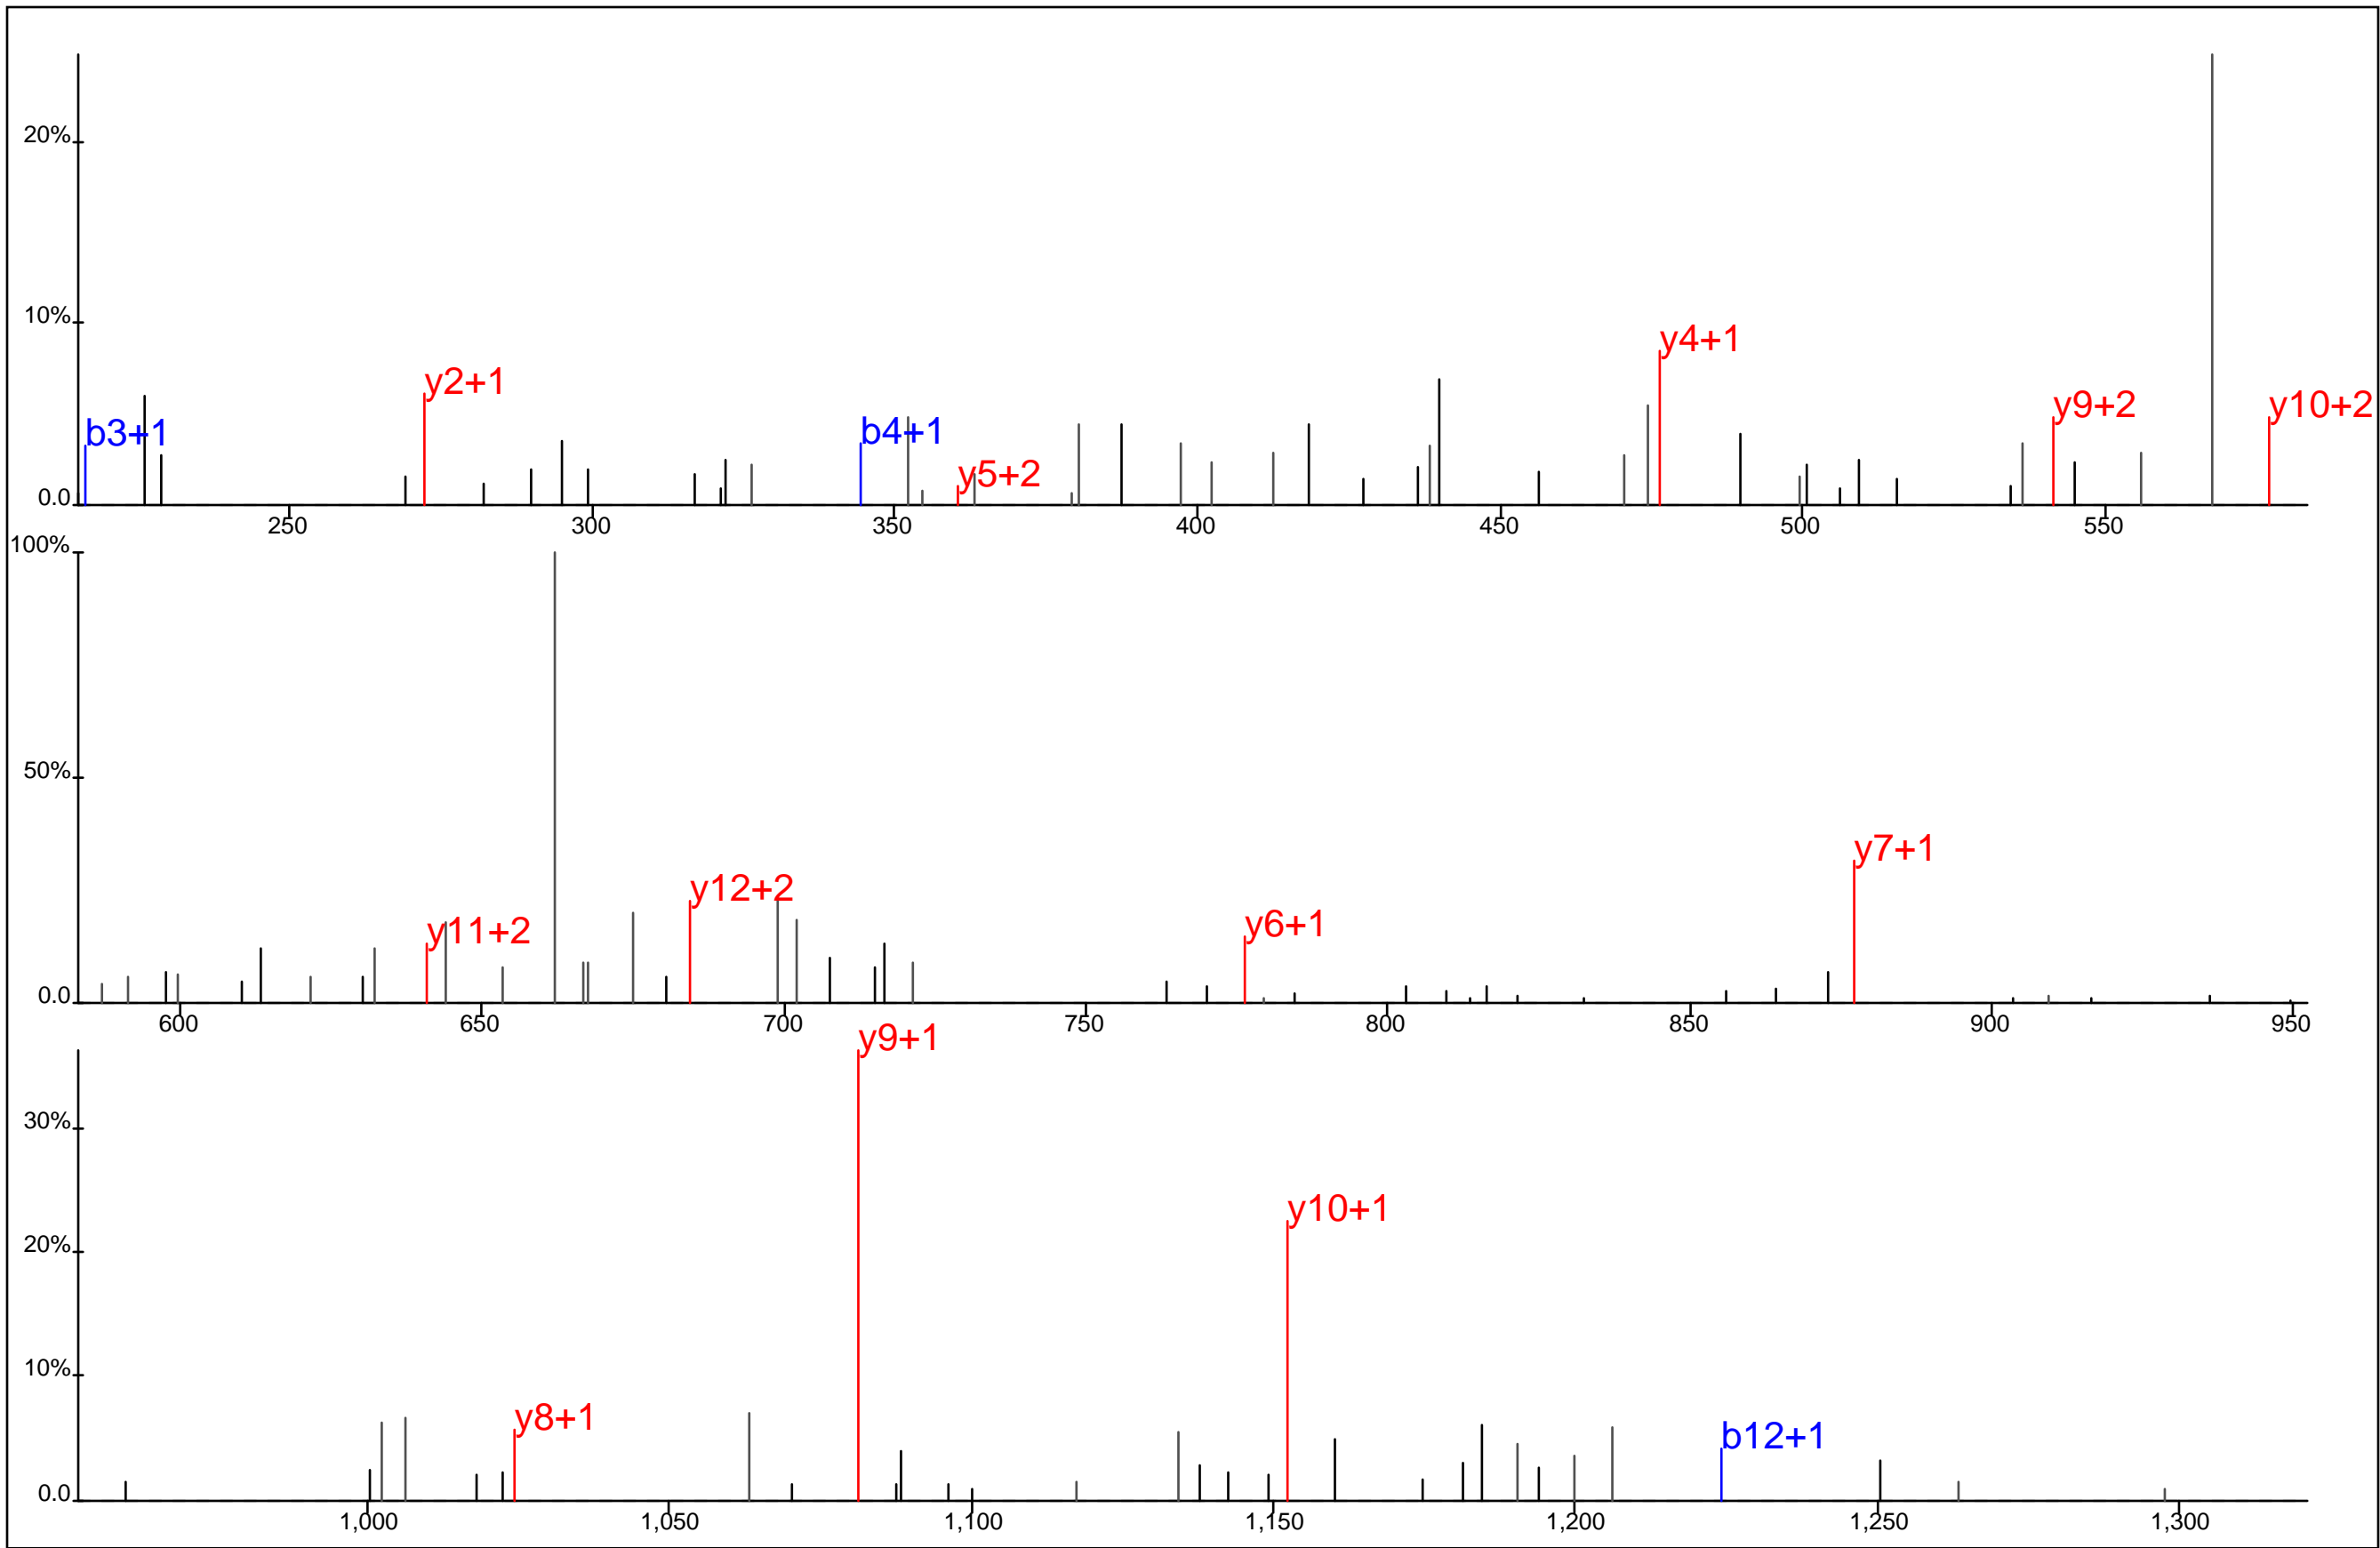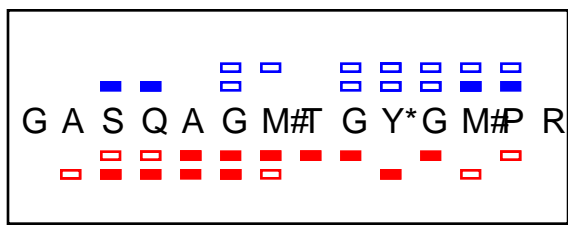

Protein Name: Transgelin 2  
 gi Accession: 0  
 Precursor Mass: 748.2911+2  
 Delta Mass: 2.981 ppm  
 XCorr: 49.7

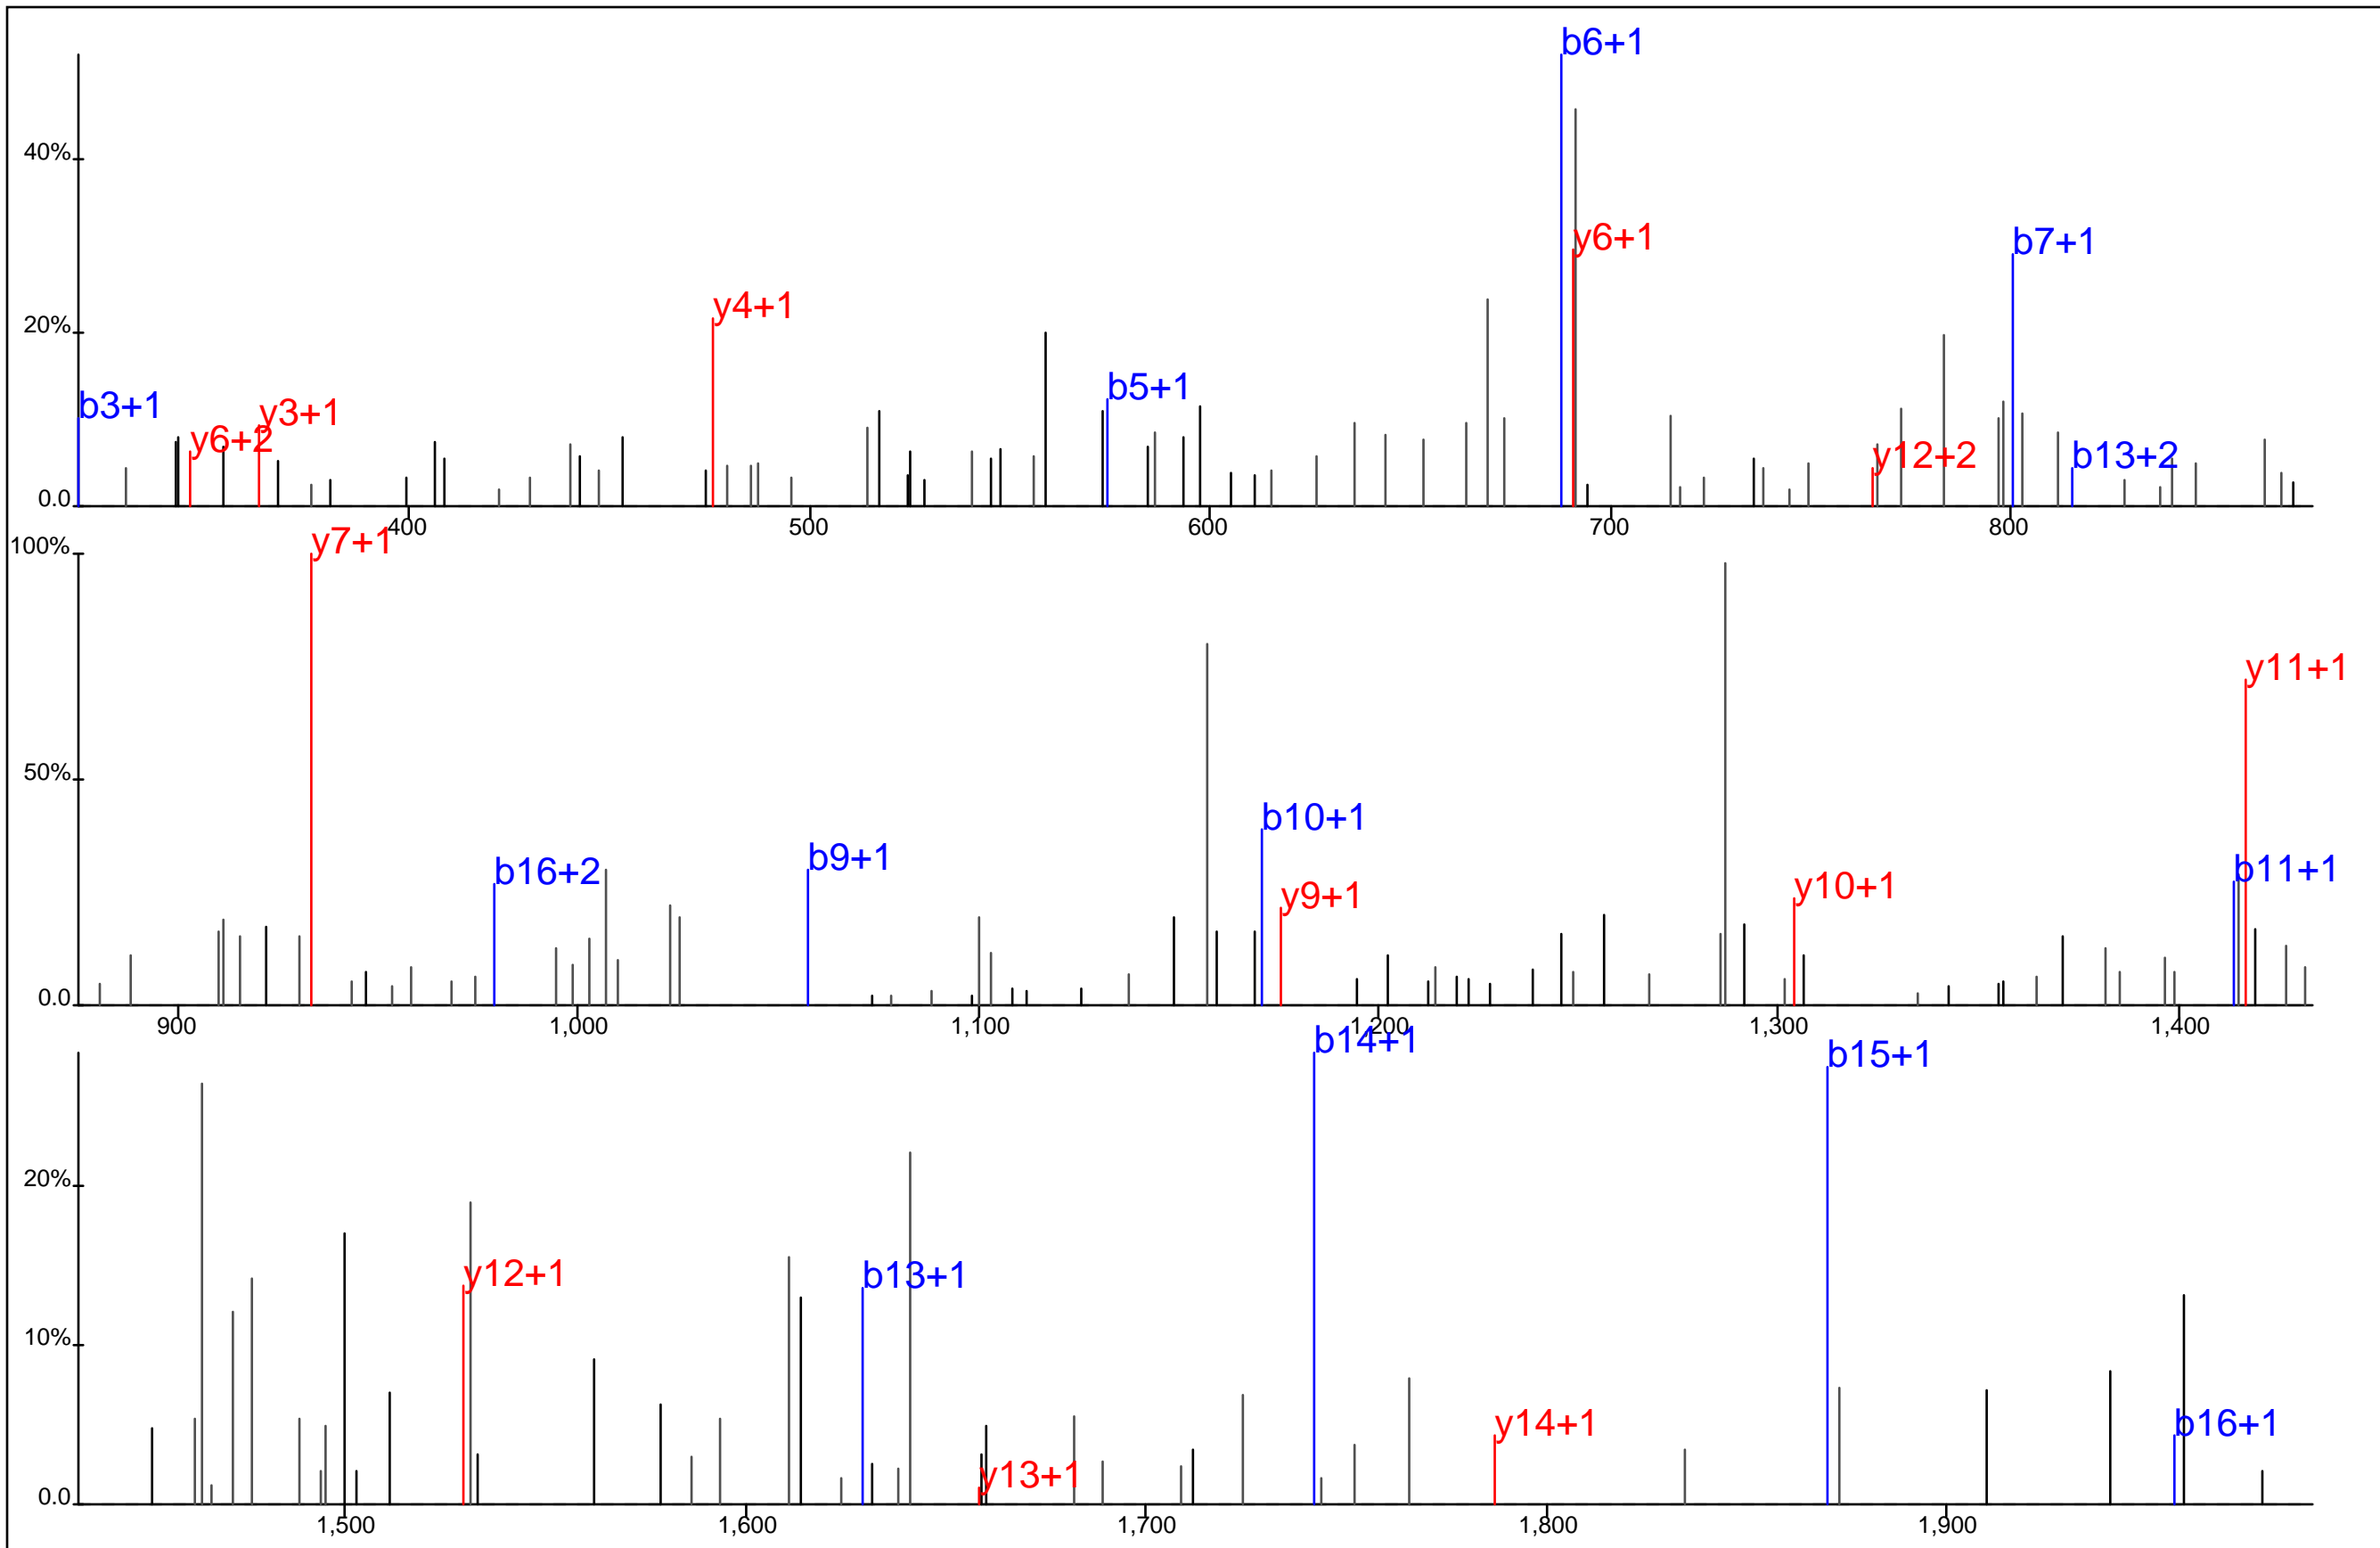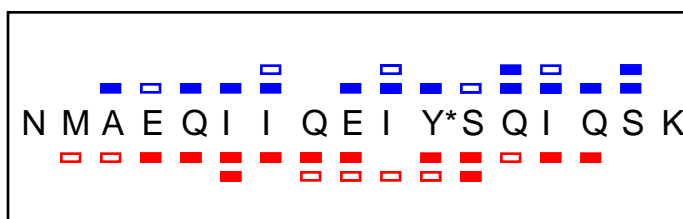

Protein Name: Transketolase  
 gi Accession: 0  
 Precursor Mass: 1,051.9927+2  
 Delta Mass: 2.219 ppm  
 XCorr: 63.53

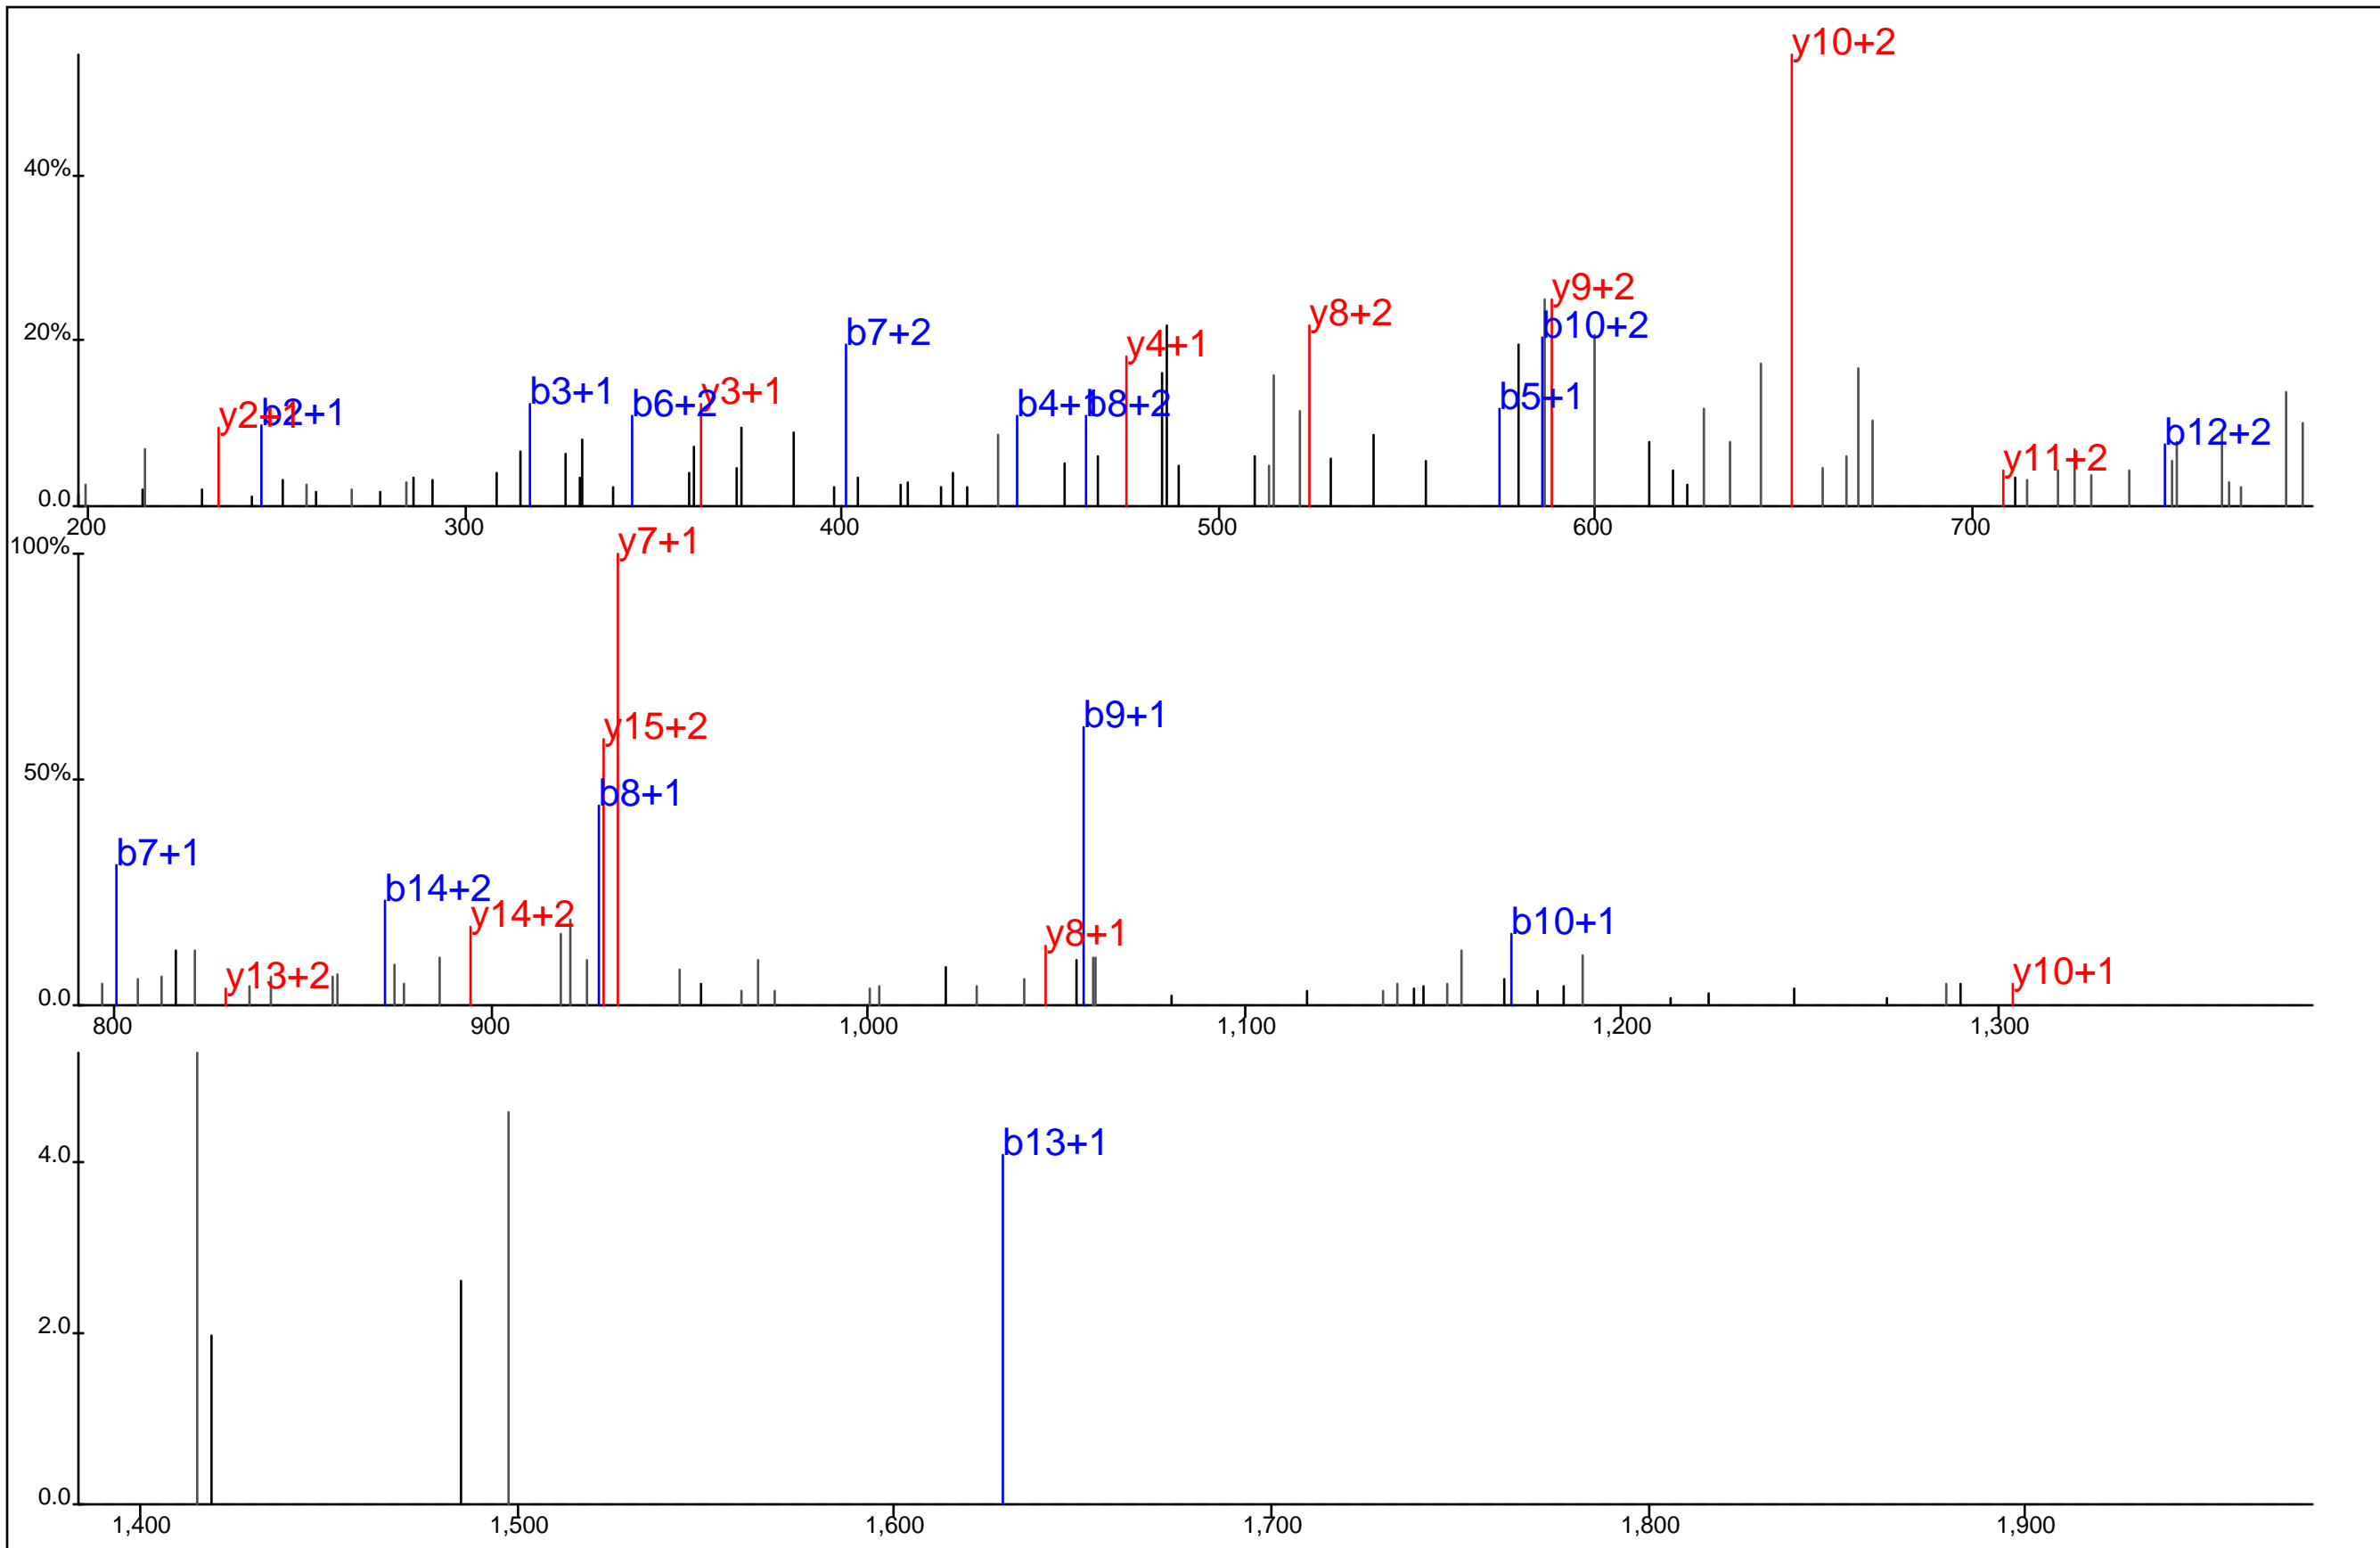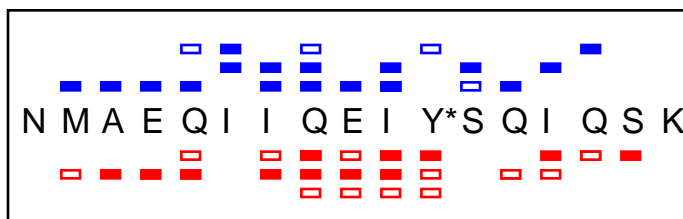

Protein Name: Transketolase  
 gi Accession: 0  
 Precursor Mass: 701.6660+3  
 Delta Mass: 0.359 ppm  
 XCorr: 43.75



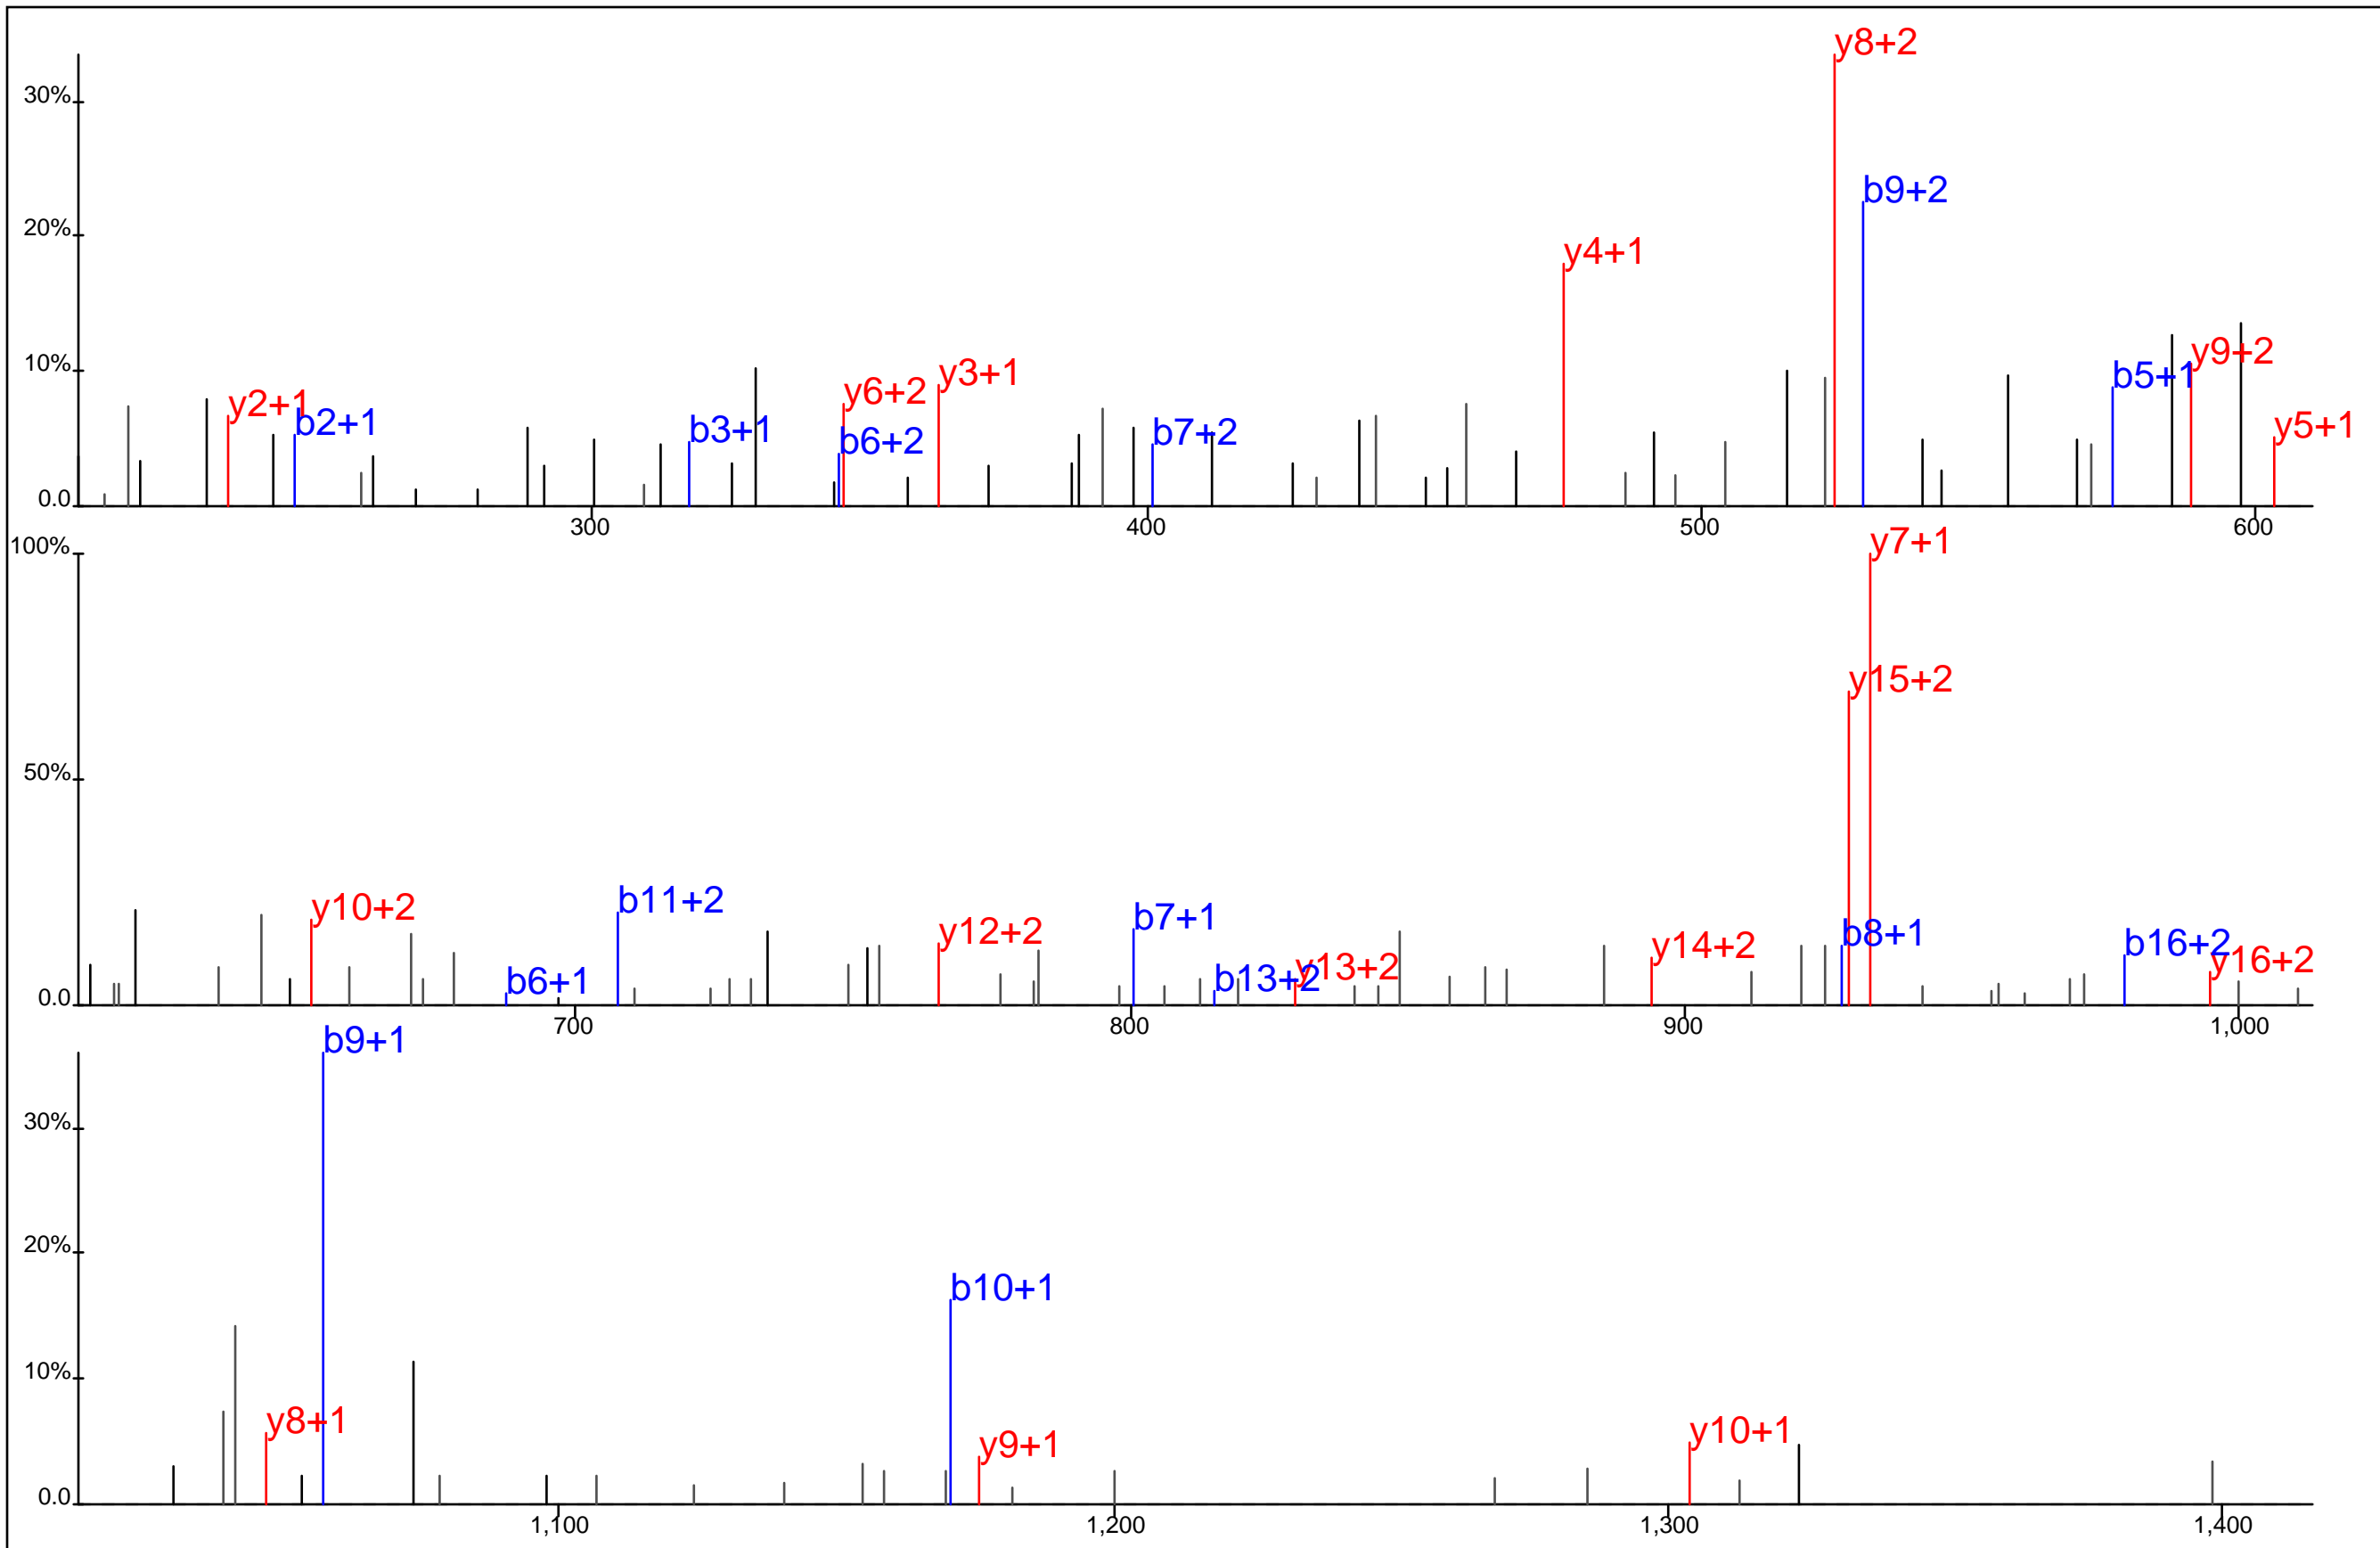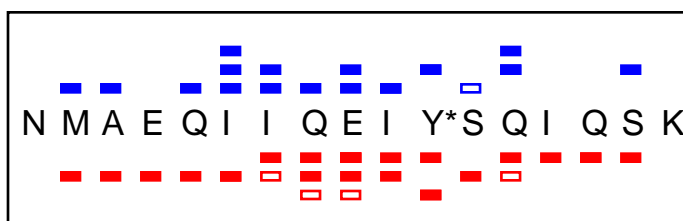

Protein Name: Transketolase  
 gi Accession: 0  
 Precursor Mass: 701.6647+3  
 Delta Mass: 1.557 ppm  
 XCorr: 49.0

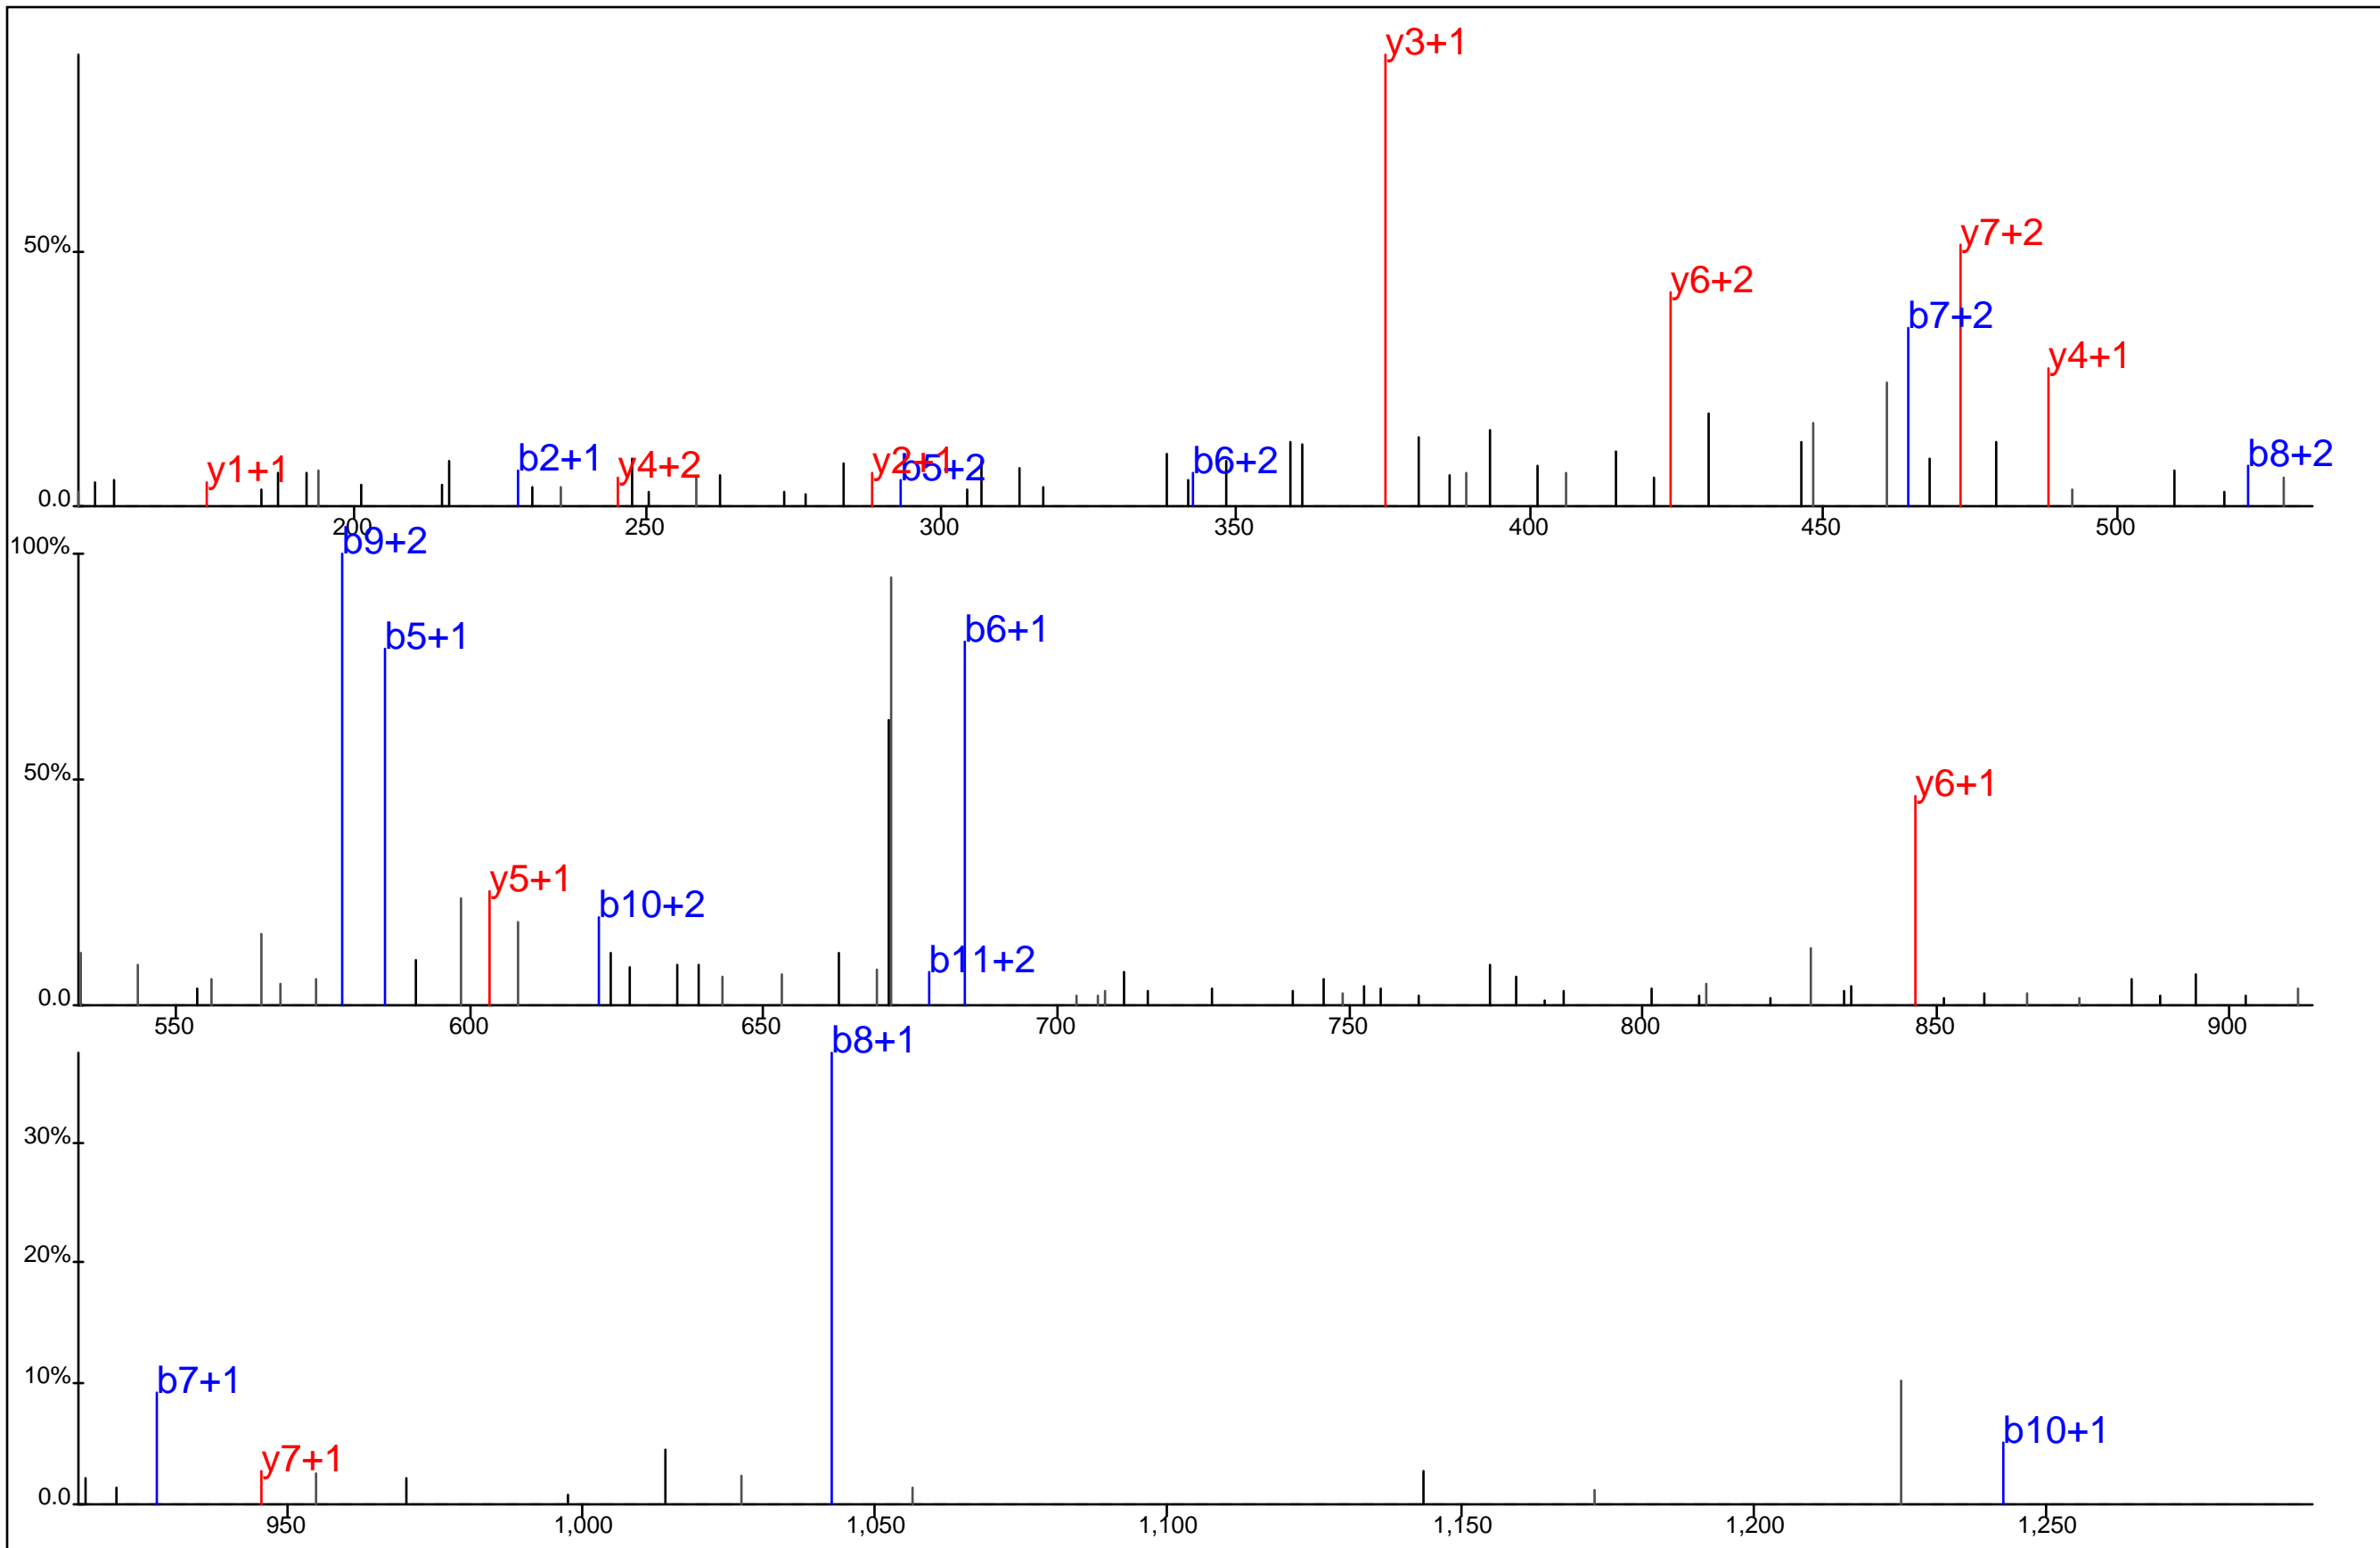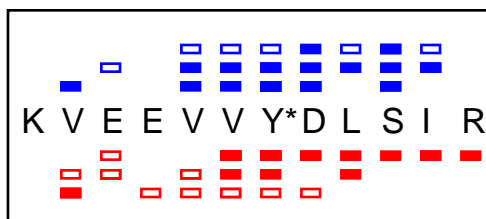

Protein Name: Translin  
 gi Accession: 0  
 Precursor Mass: 510.5939+3  
 Delta Mass: 3.917 ppm  
 XCorr: 23.98



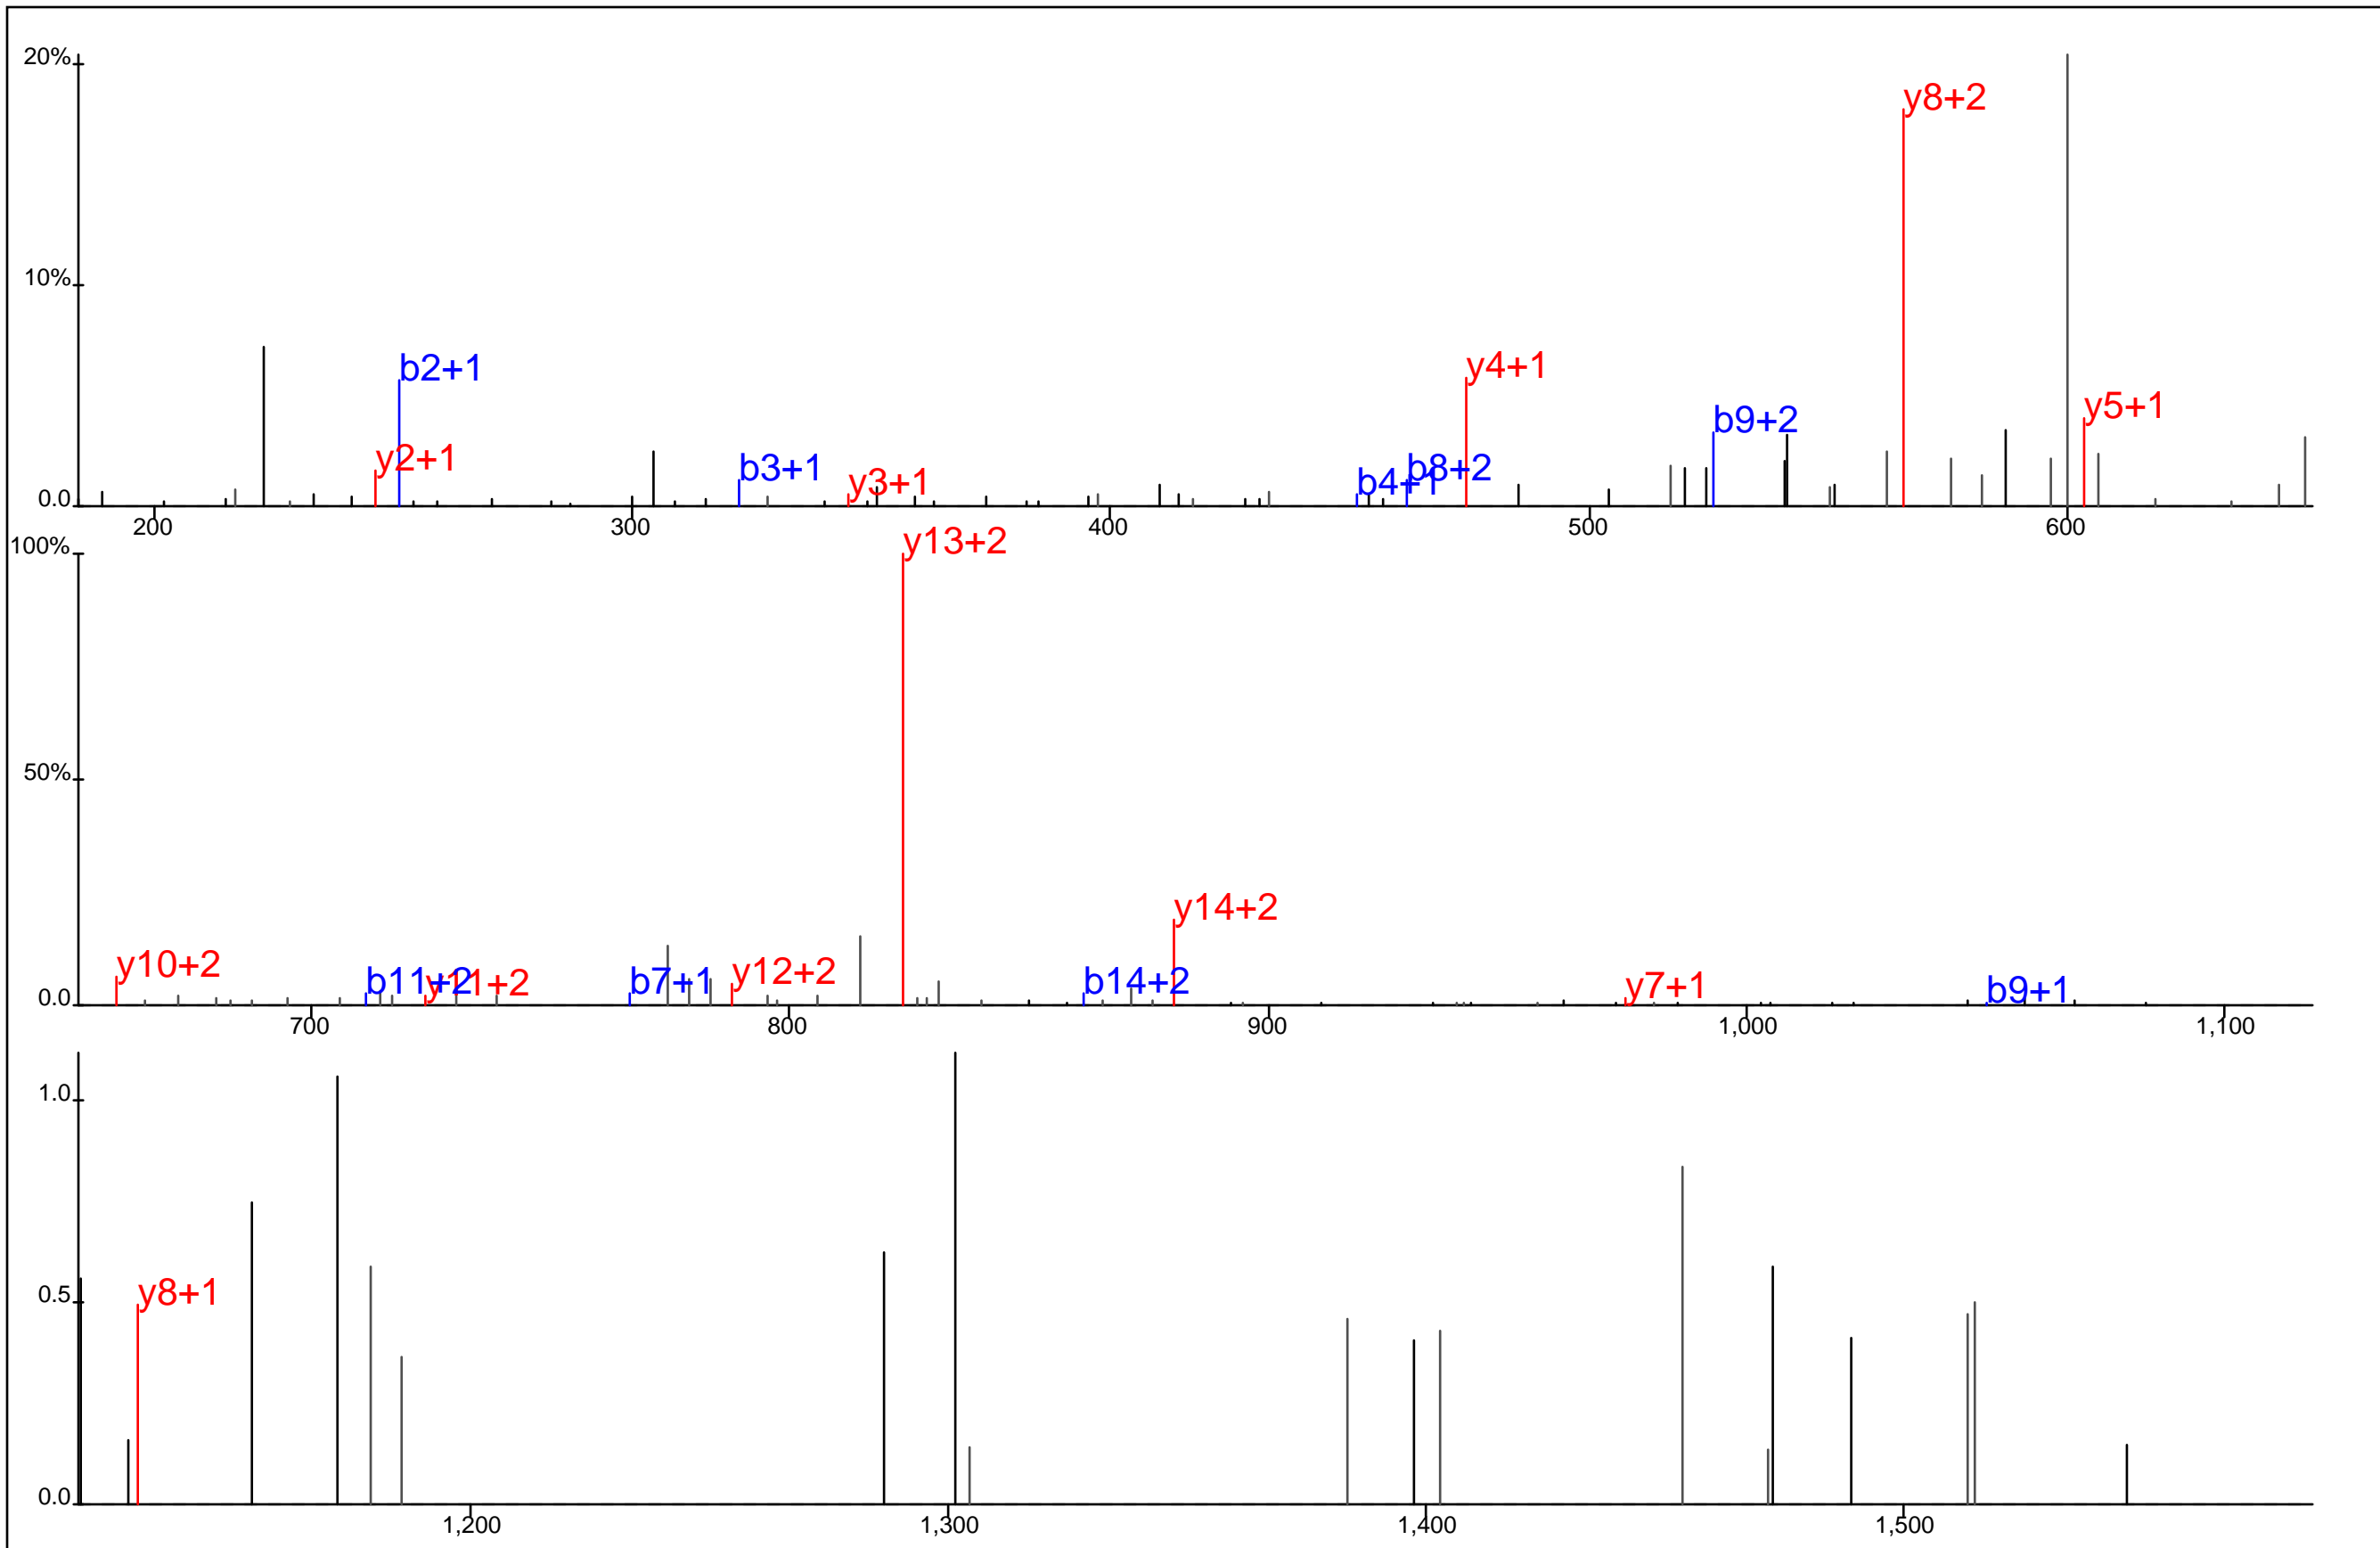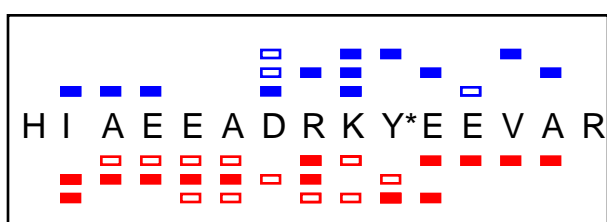

Protein Name: Tropomyosin 3  
 gi Accession: 0  
 Precursor Mass: 632.6268+3  
 Delta Mass: 0.578 ppm  
 XCorr: 25.64

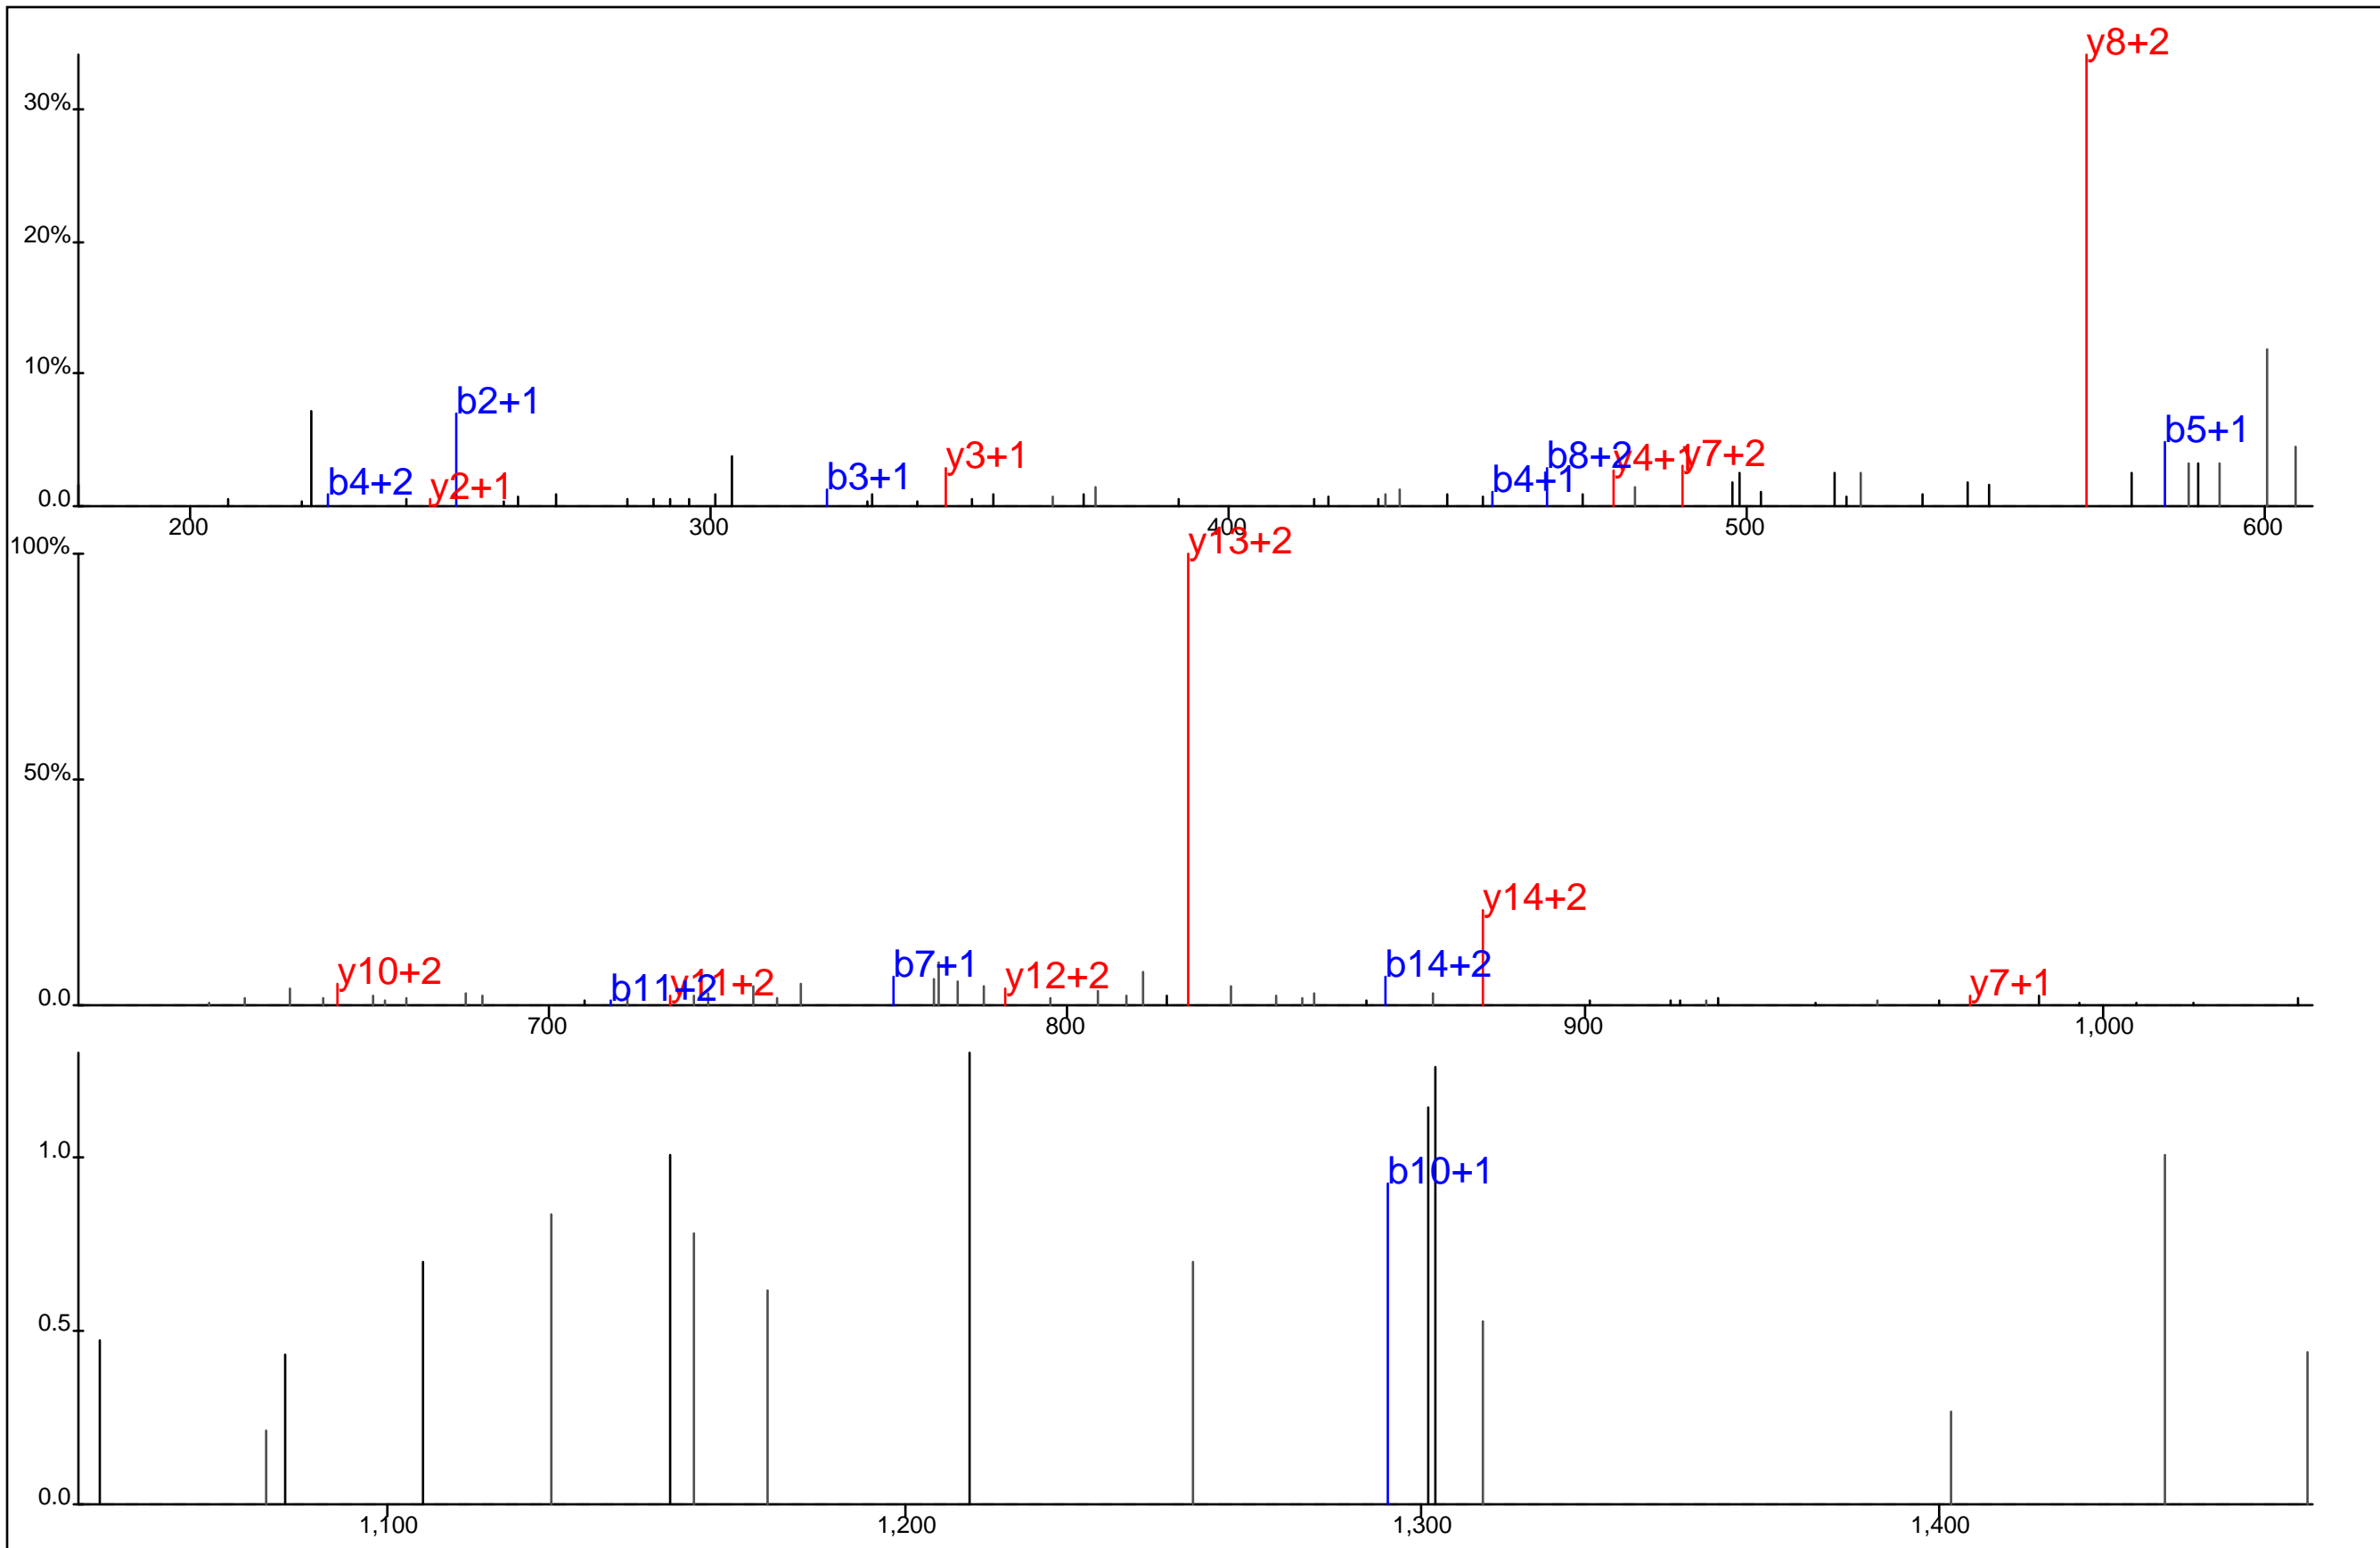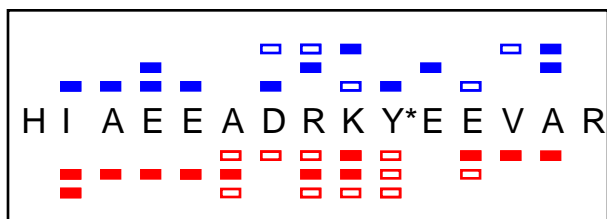

Protein Name: Tropomyosin 3  
 gi Accession: 0  
 Precursor Mass: 632.6264+3  
 Delta Mass: 0.001 ppm  
 XCorr: 23.69

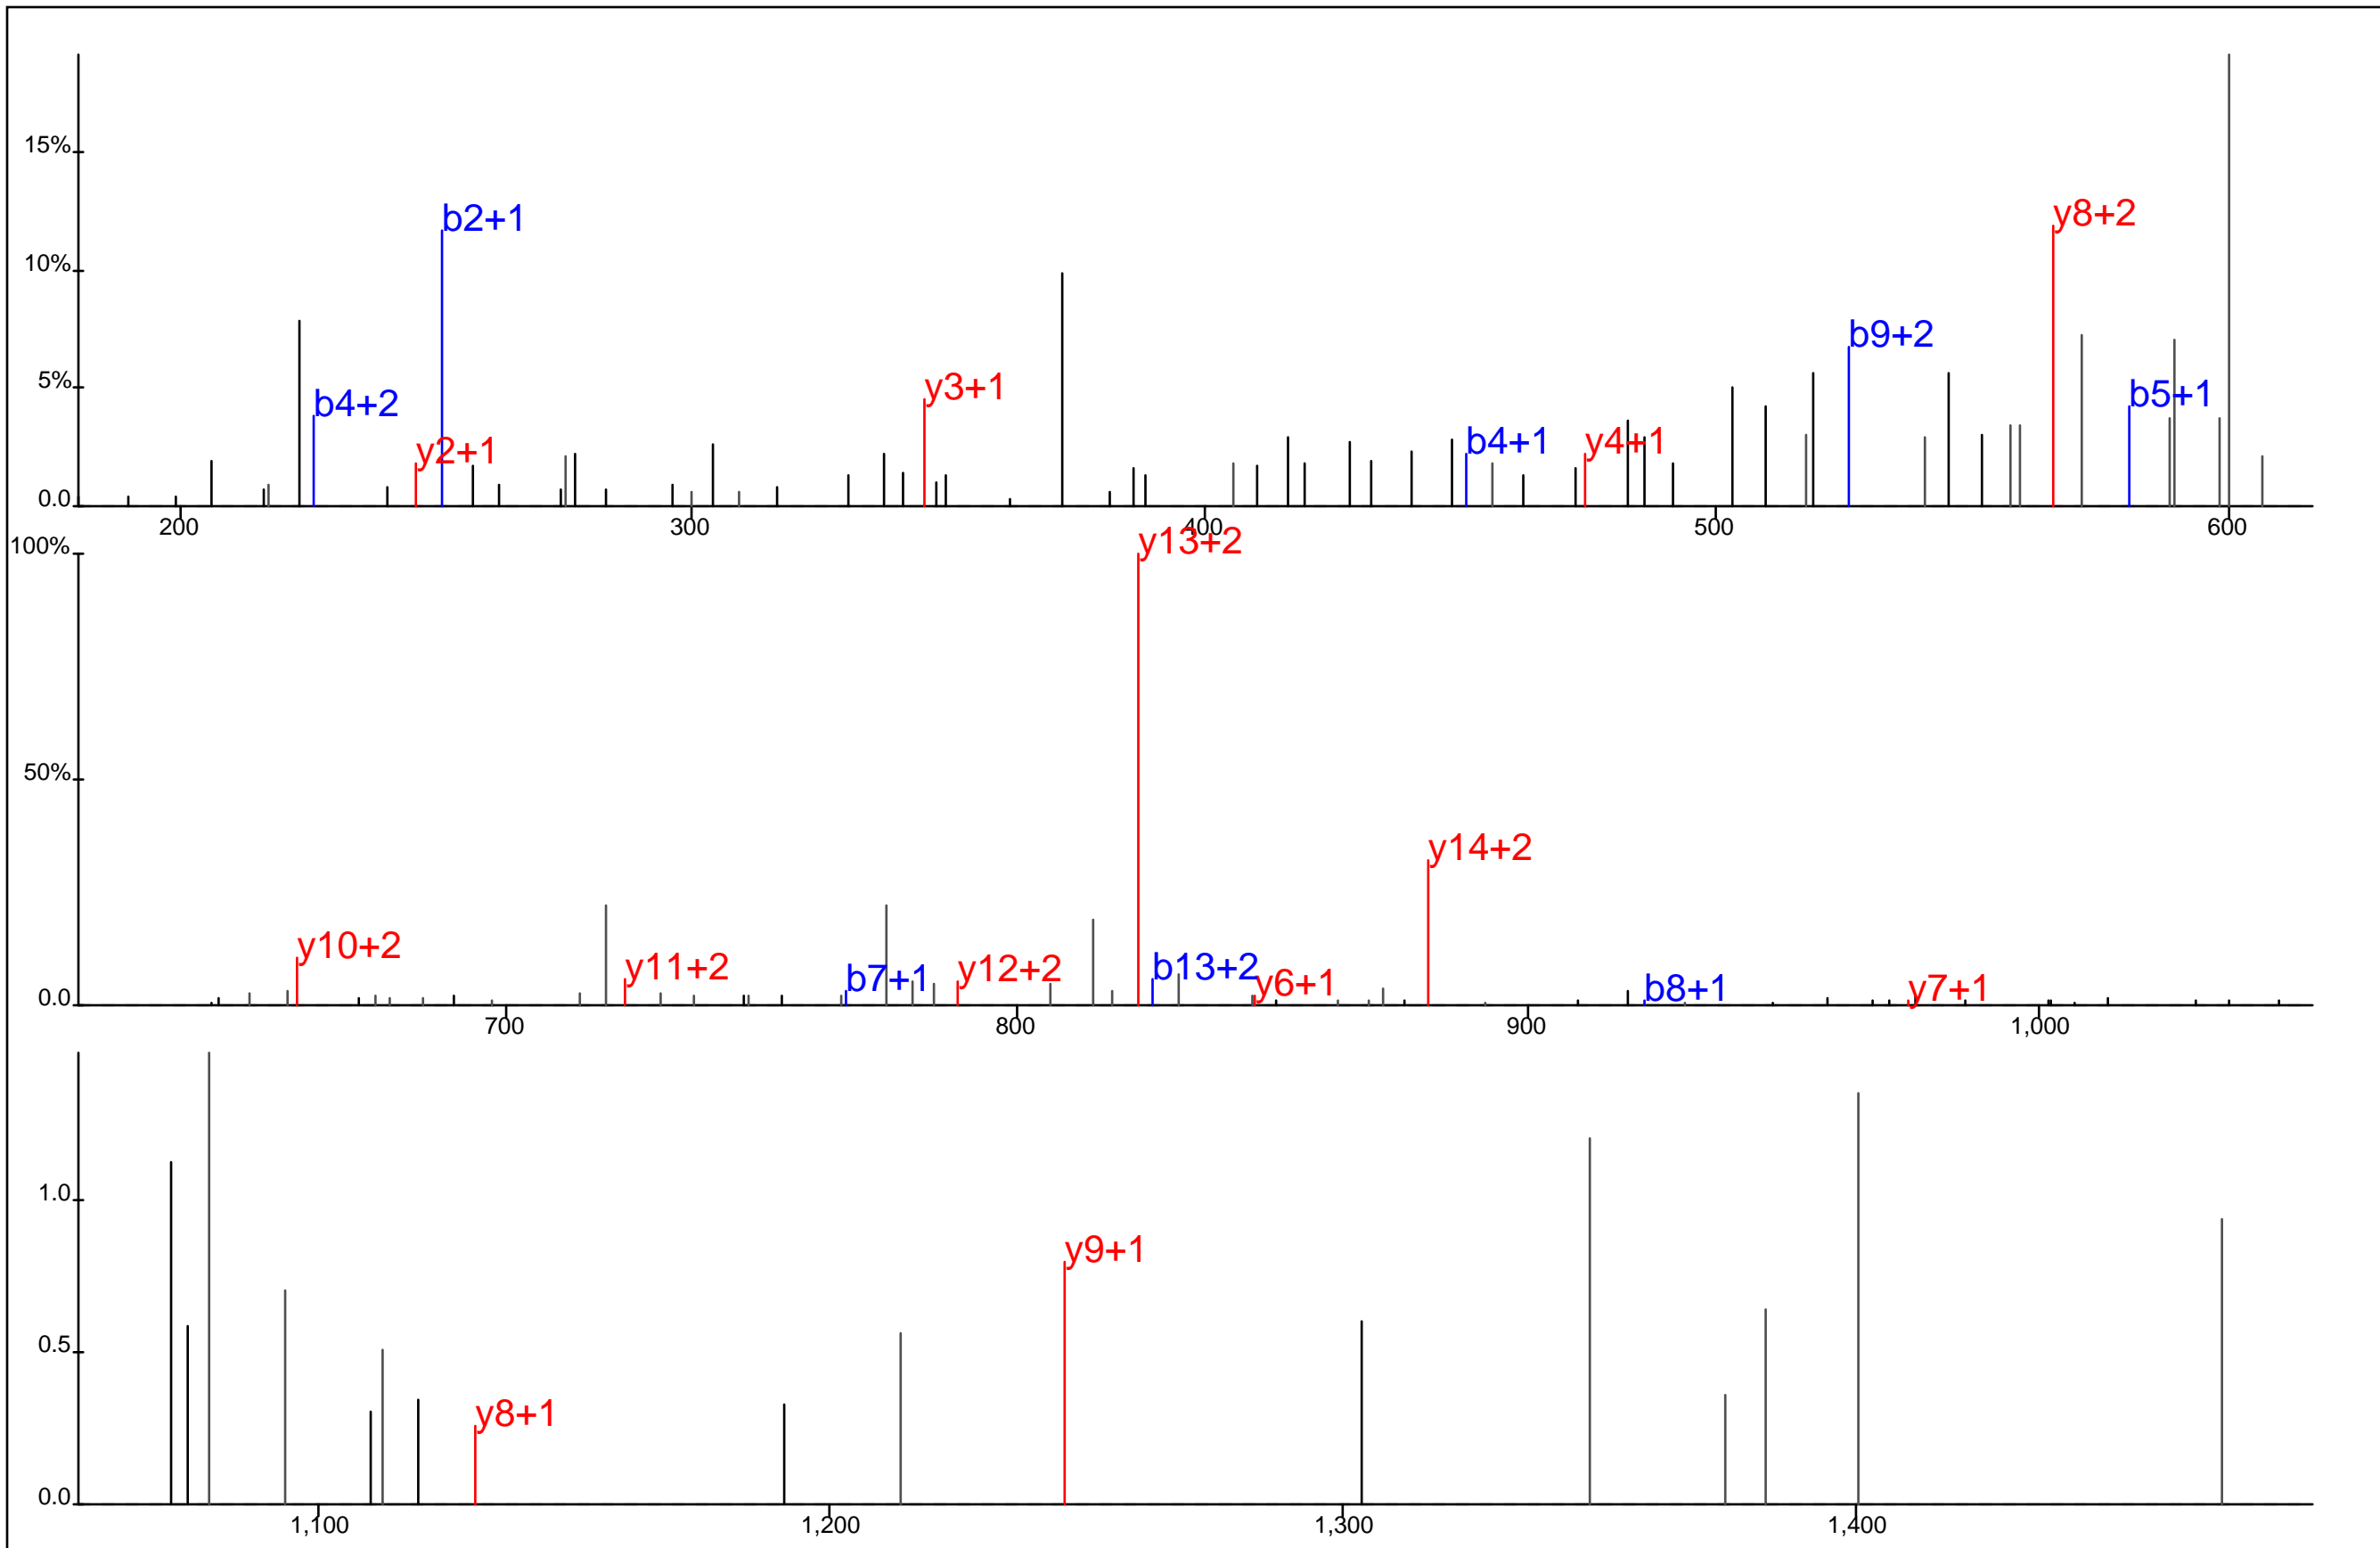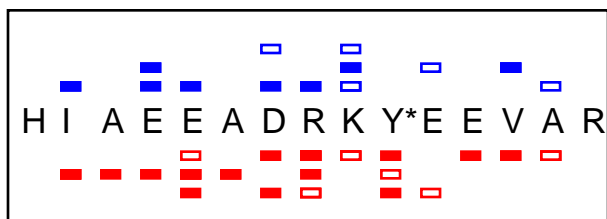

Protein Name: Tropomyosin 3  
 gi Accession: 0  
 Precursor Mass: 632.6274+3  
 Delta Mass: 1.640 ppm  
 XCorr: 20.34

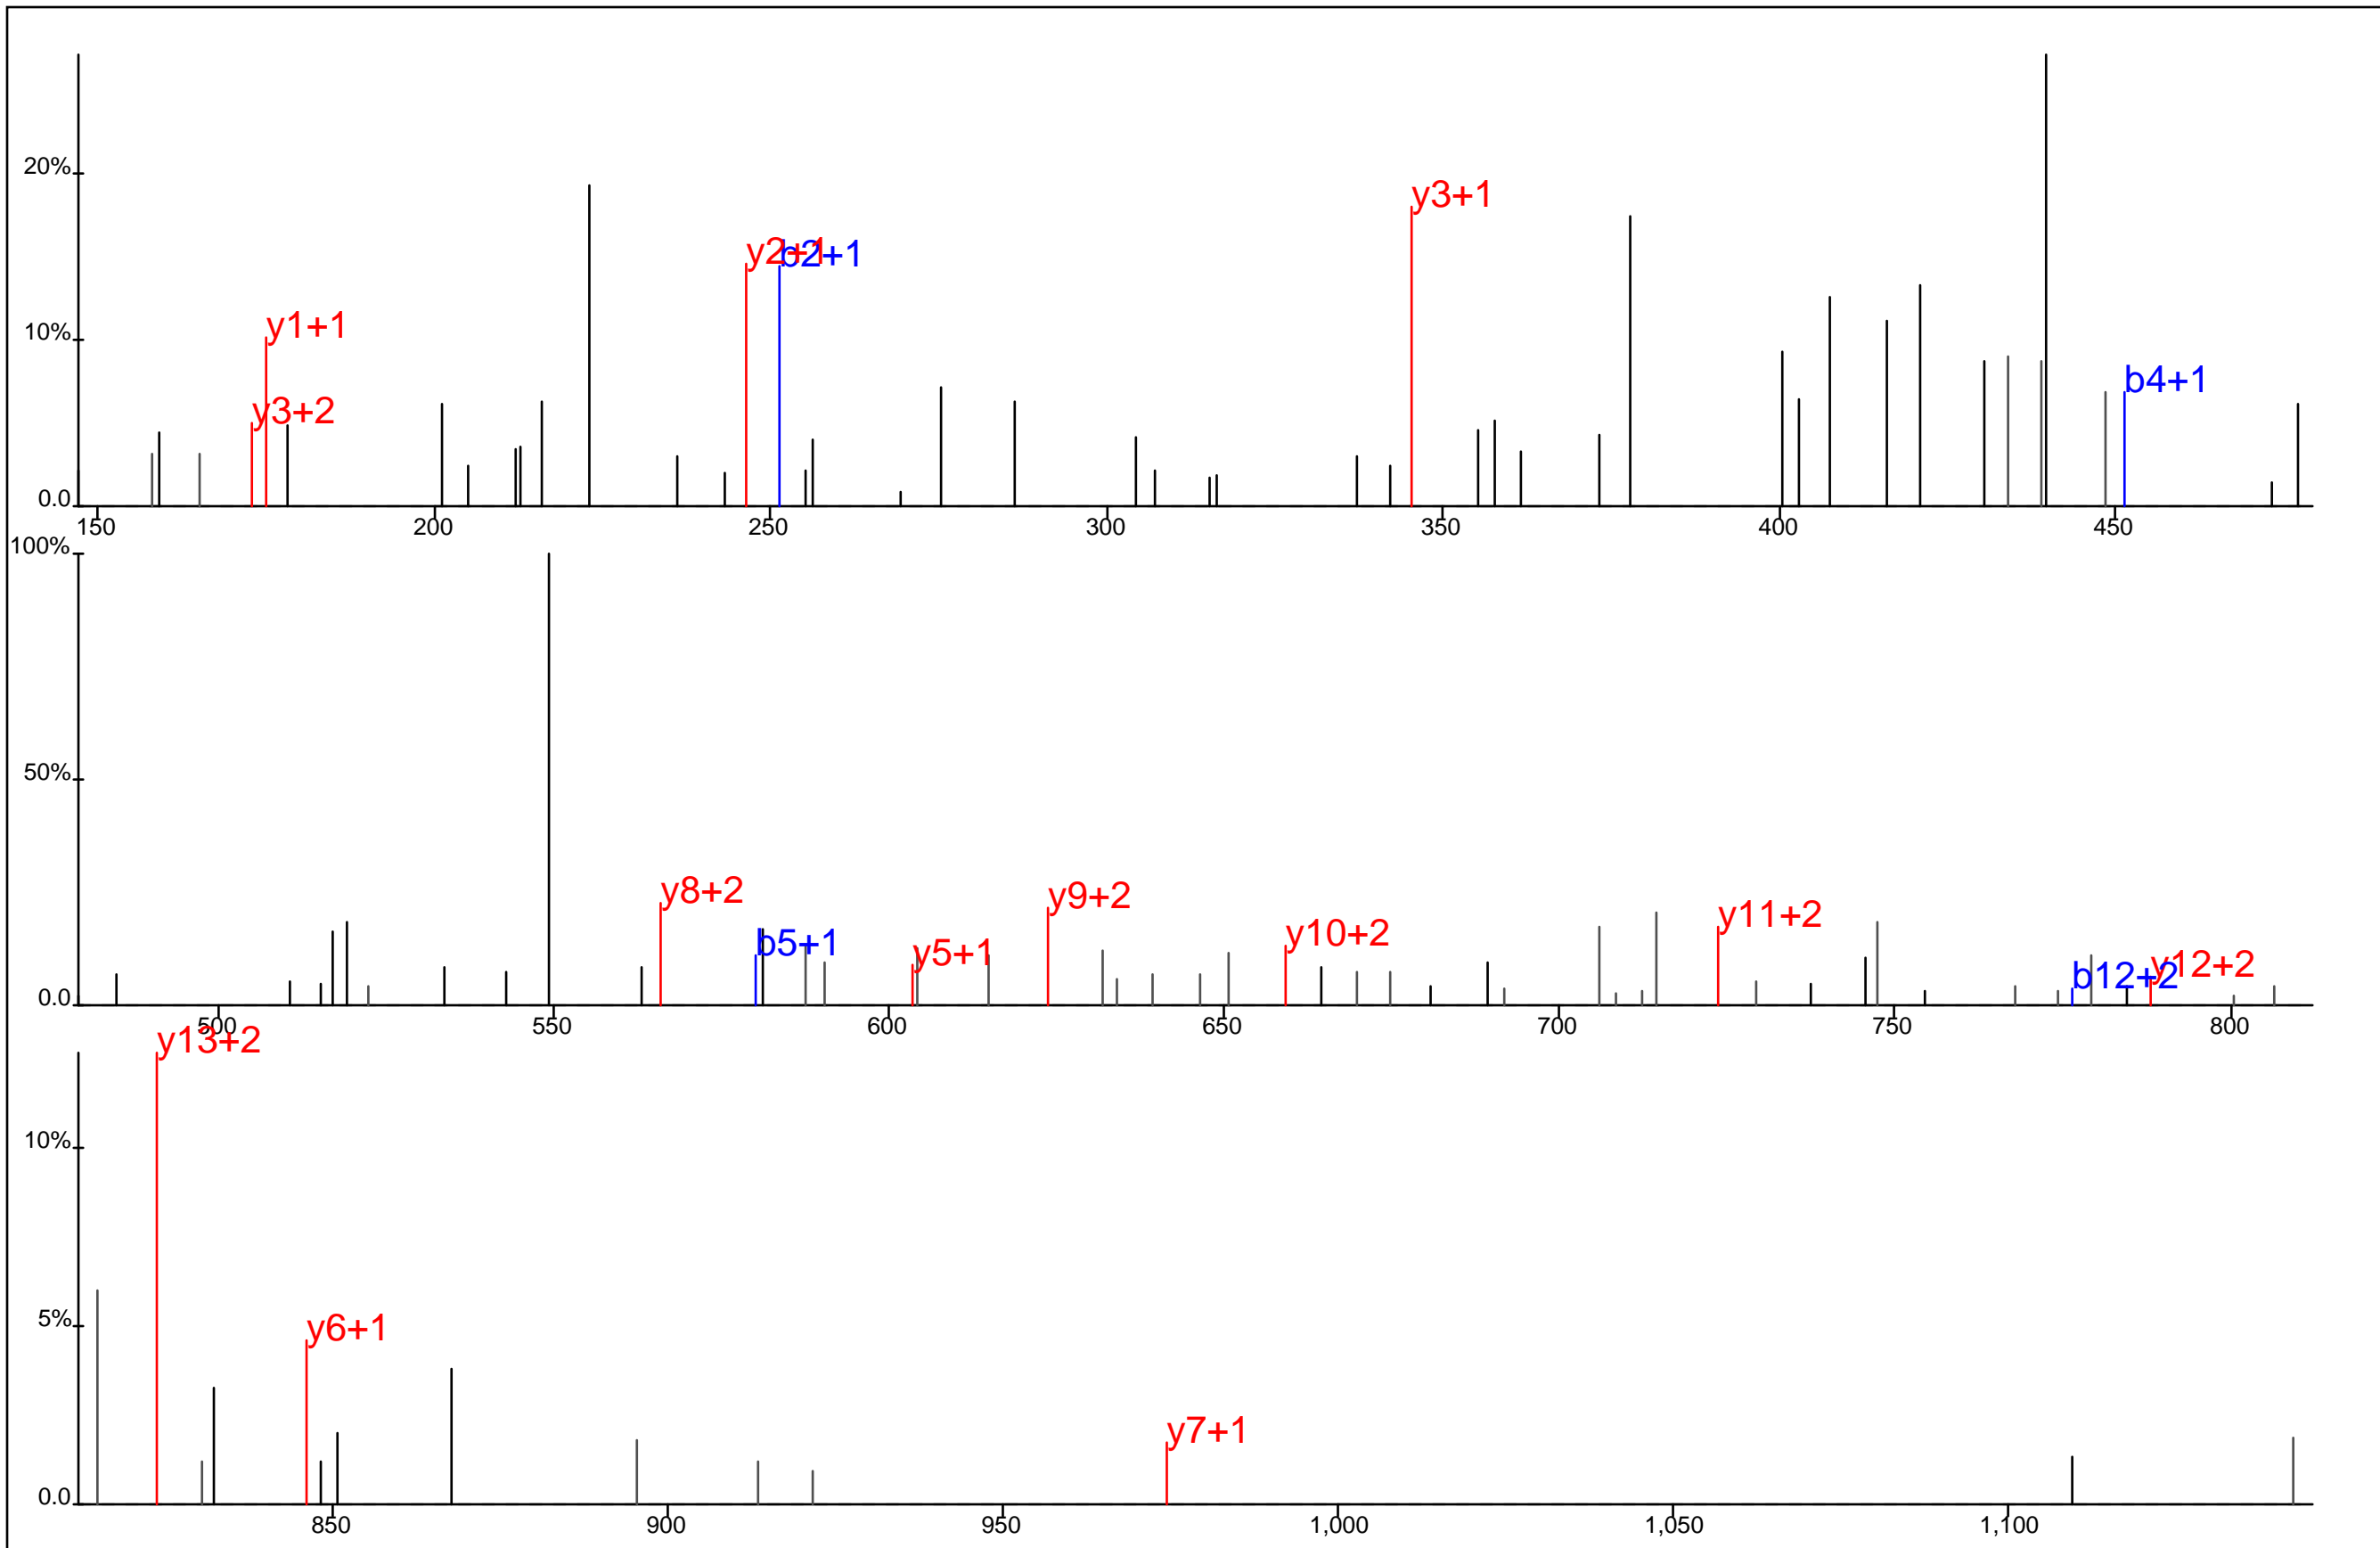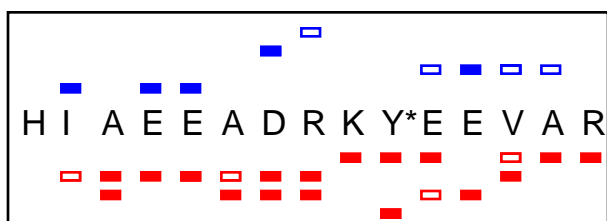

Protein Name: Tropomyosin 3  
 gi Accession: 0  
 Precursor Mass: 474.7213+4  
 Delta Mass: 0.716 ppm  
 XCorr: 22.77

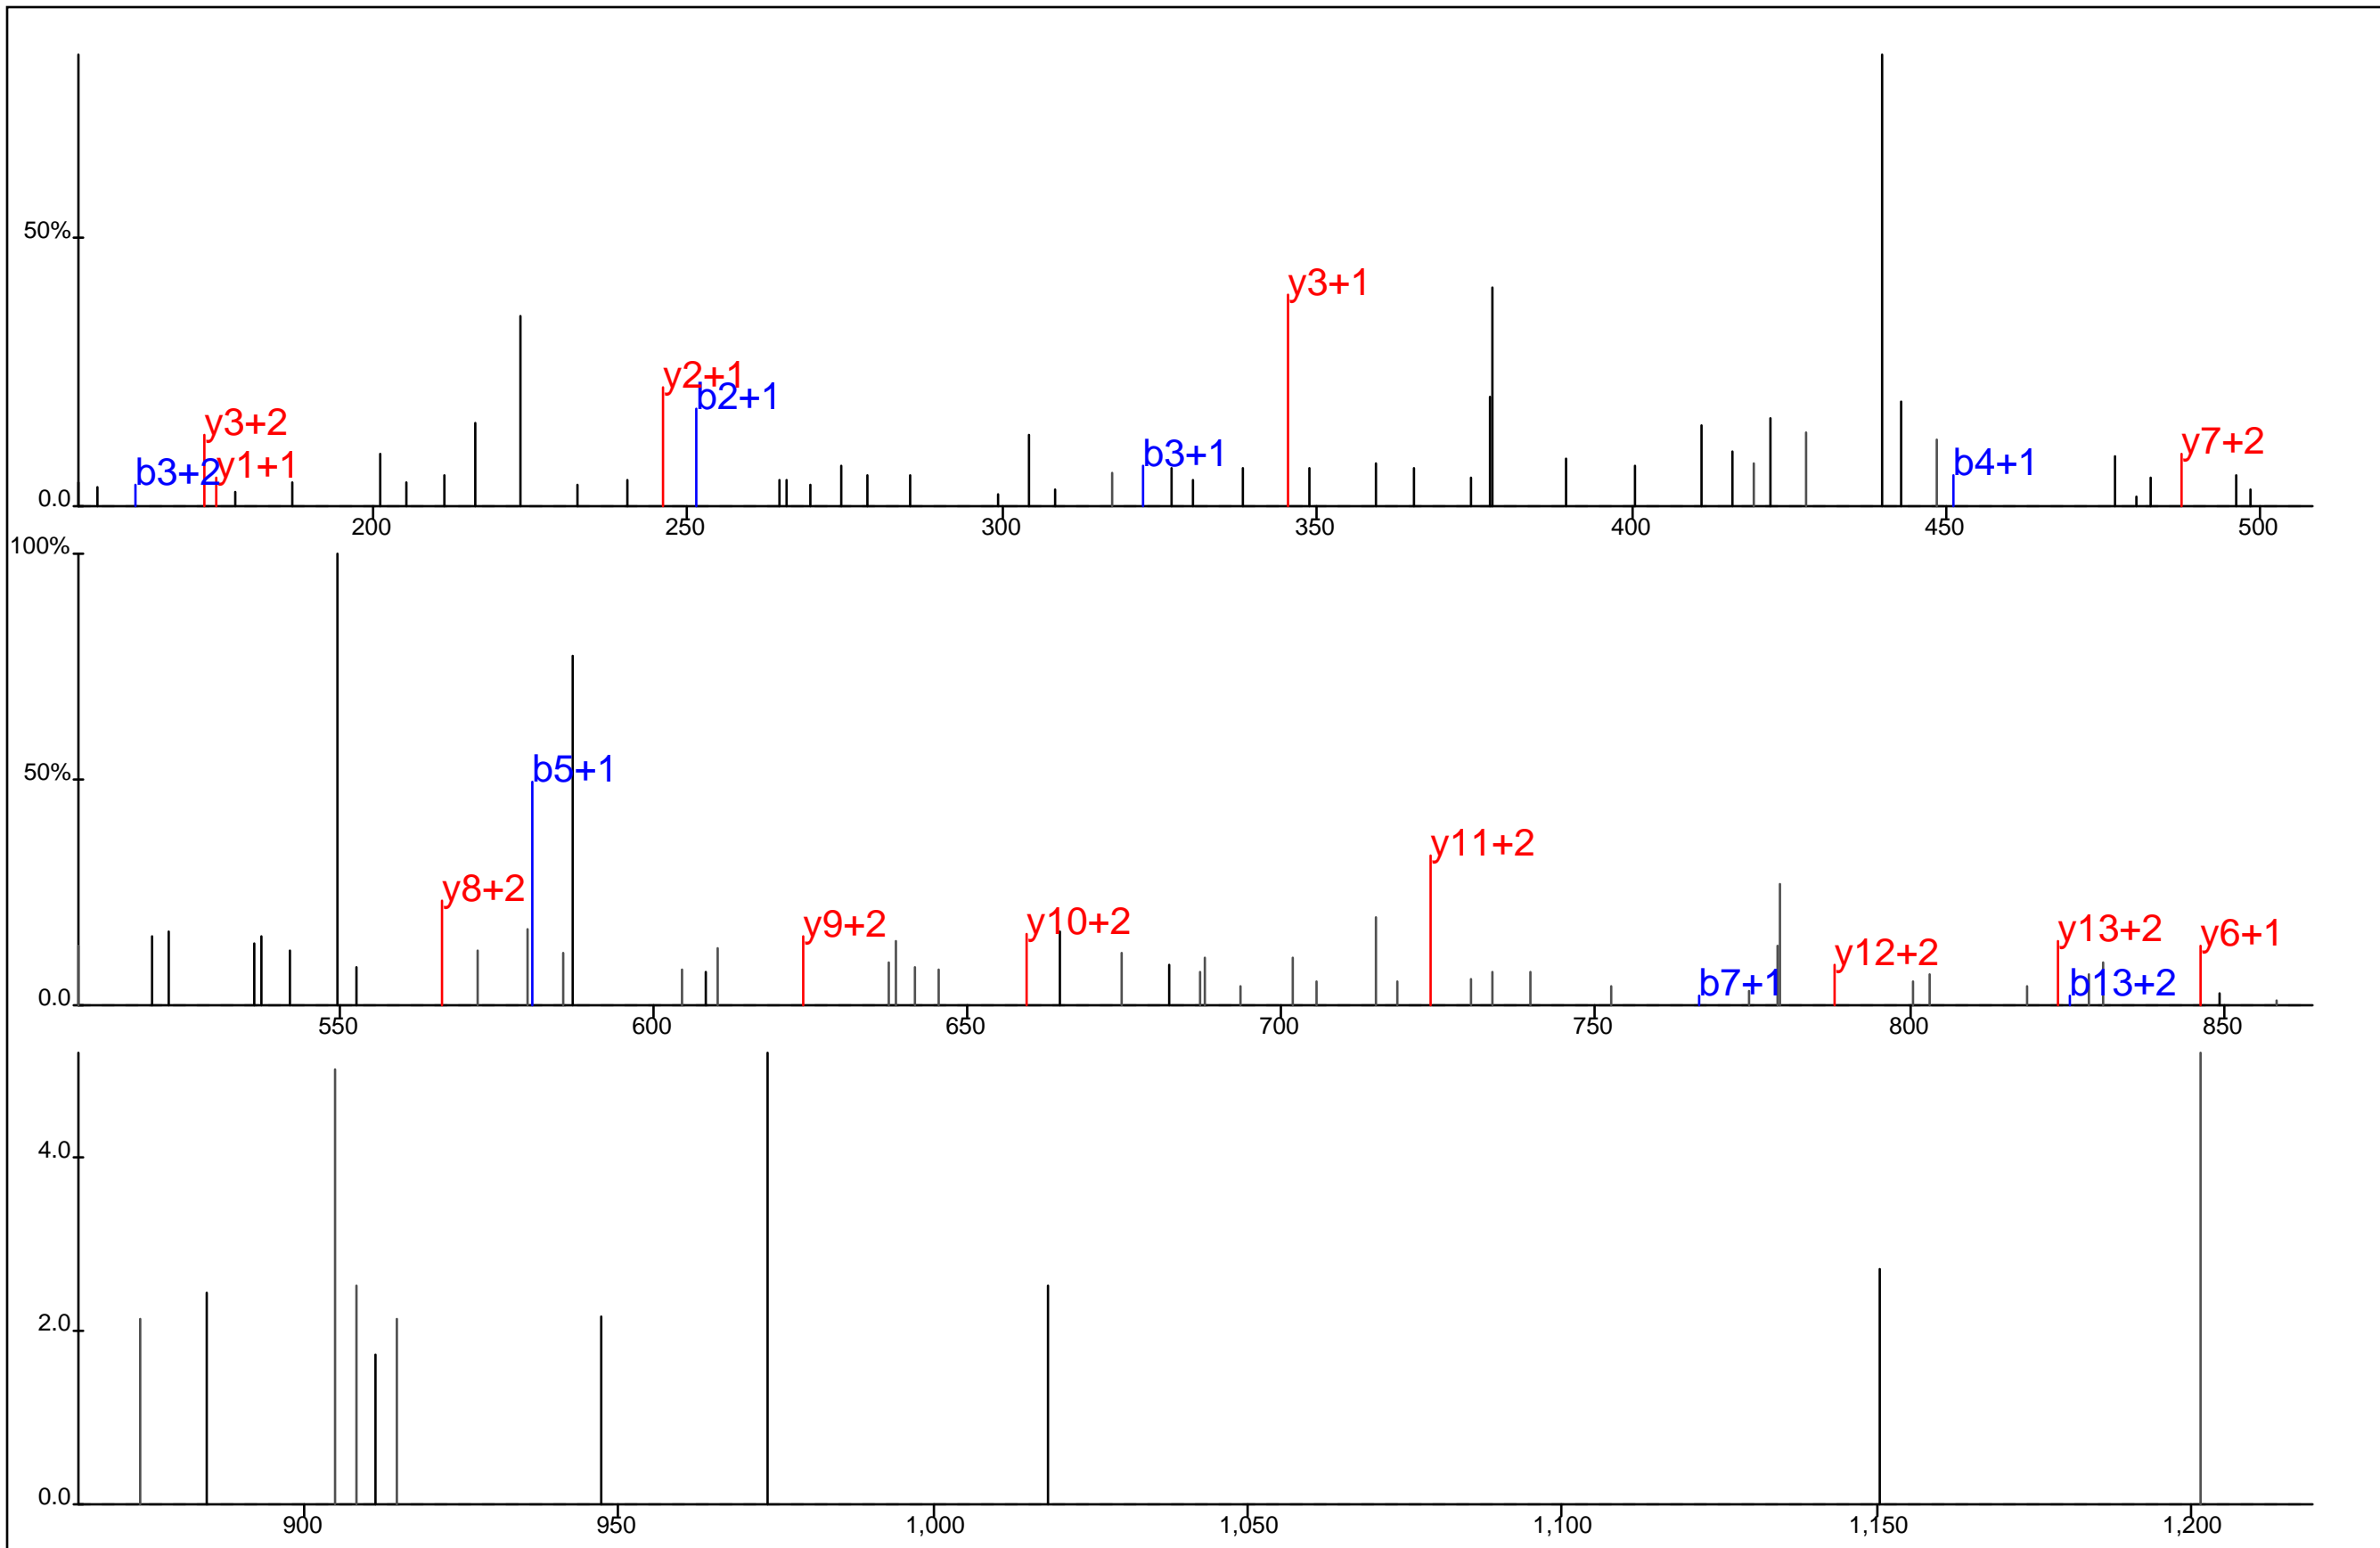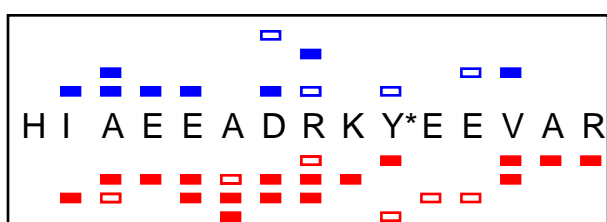

Protein Name: Tropomyosin 3  
 gi Accession: 0  
 Precursor Mass: 474.7218+4  
 Delta Mass: 0.313 ppm  
 XCorr: 21.51



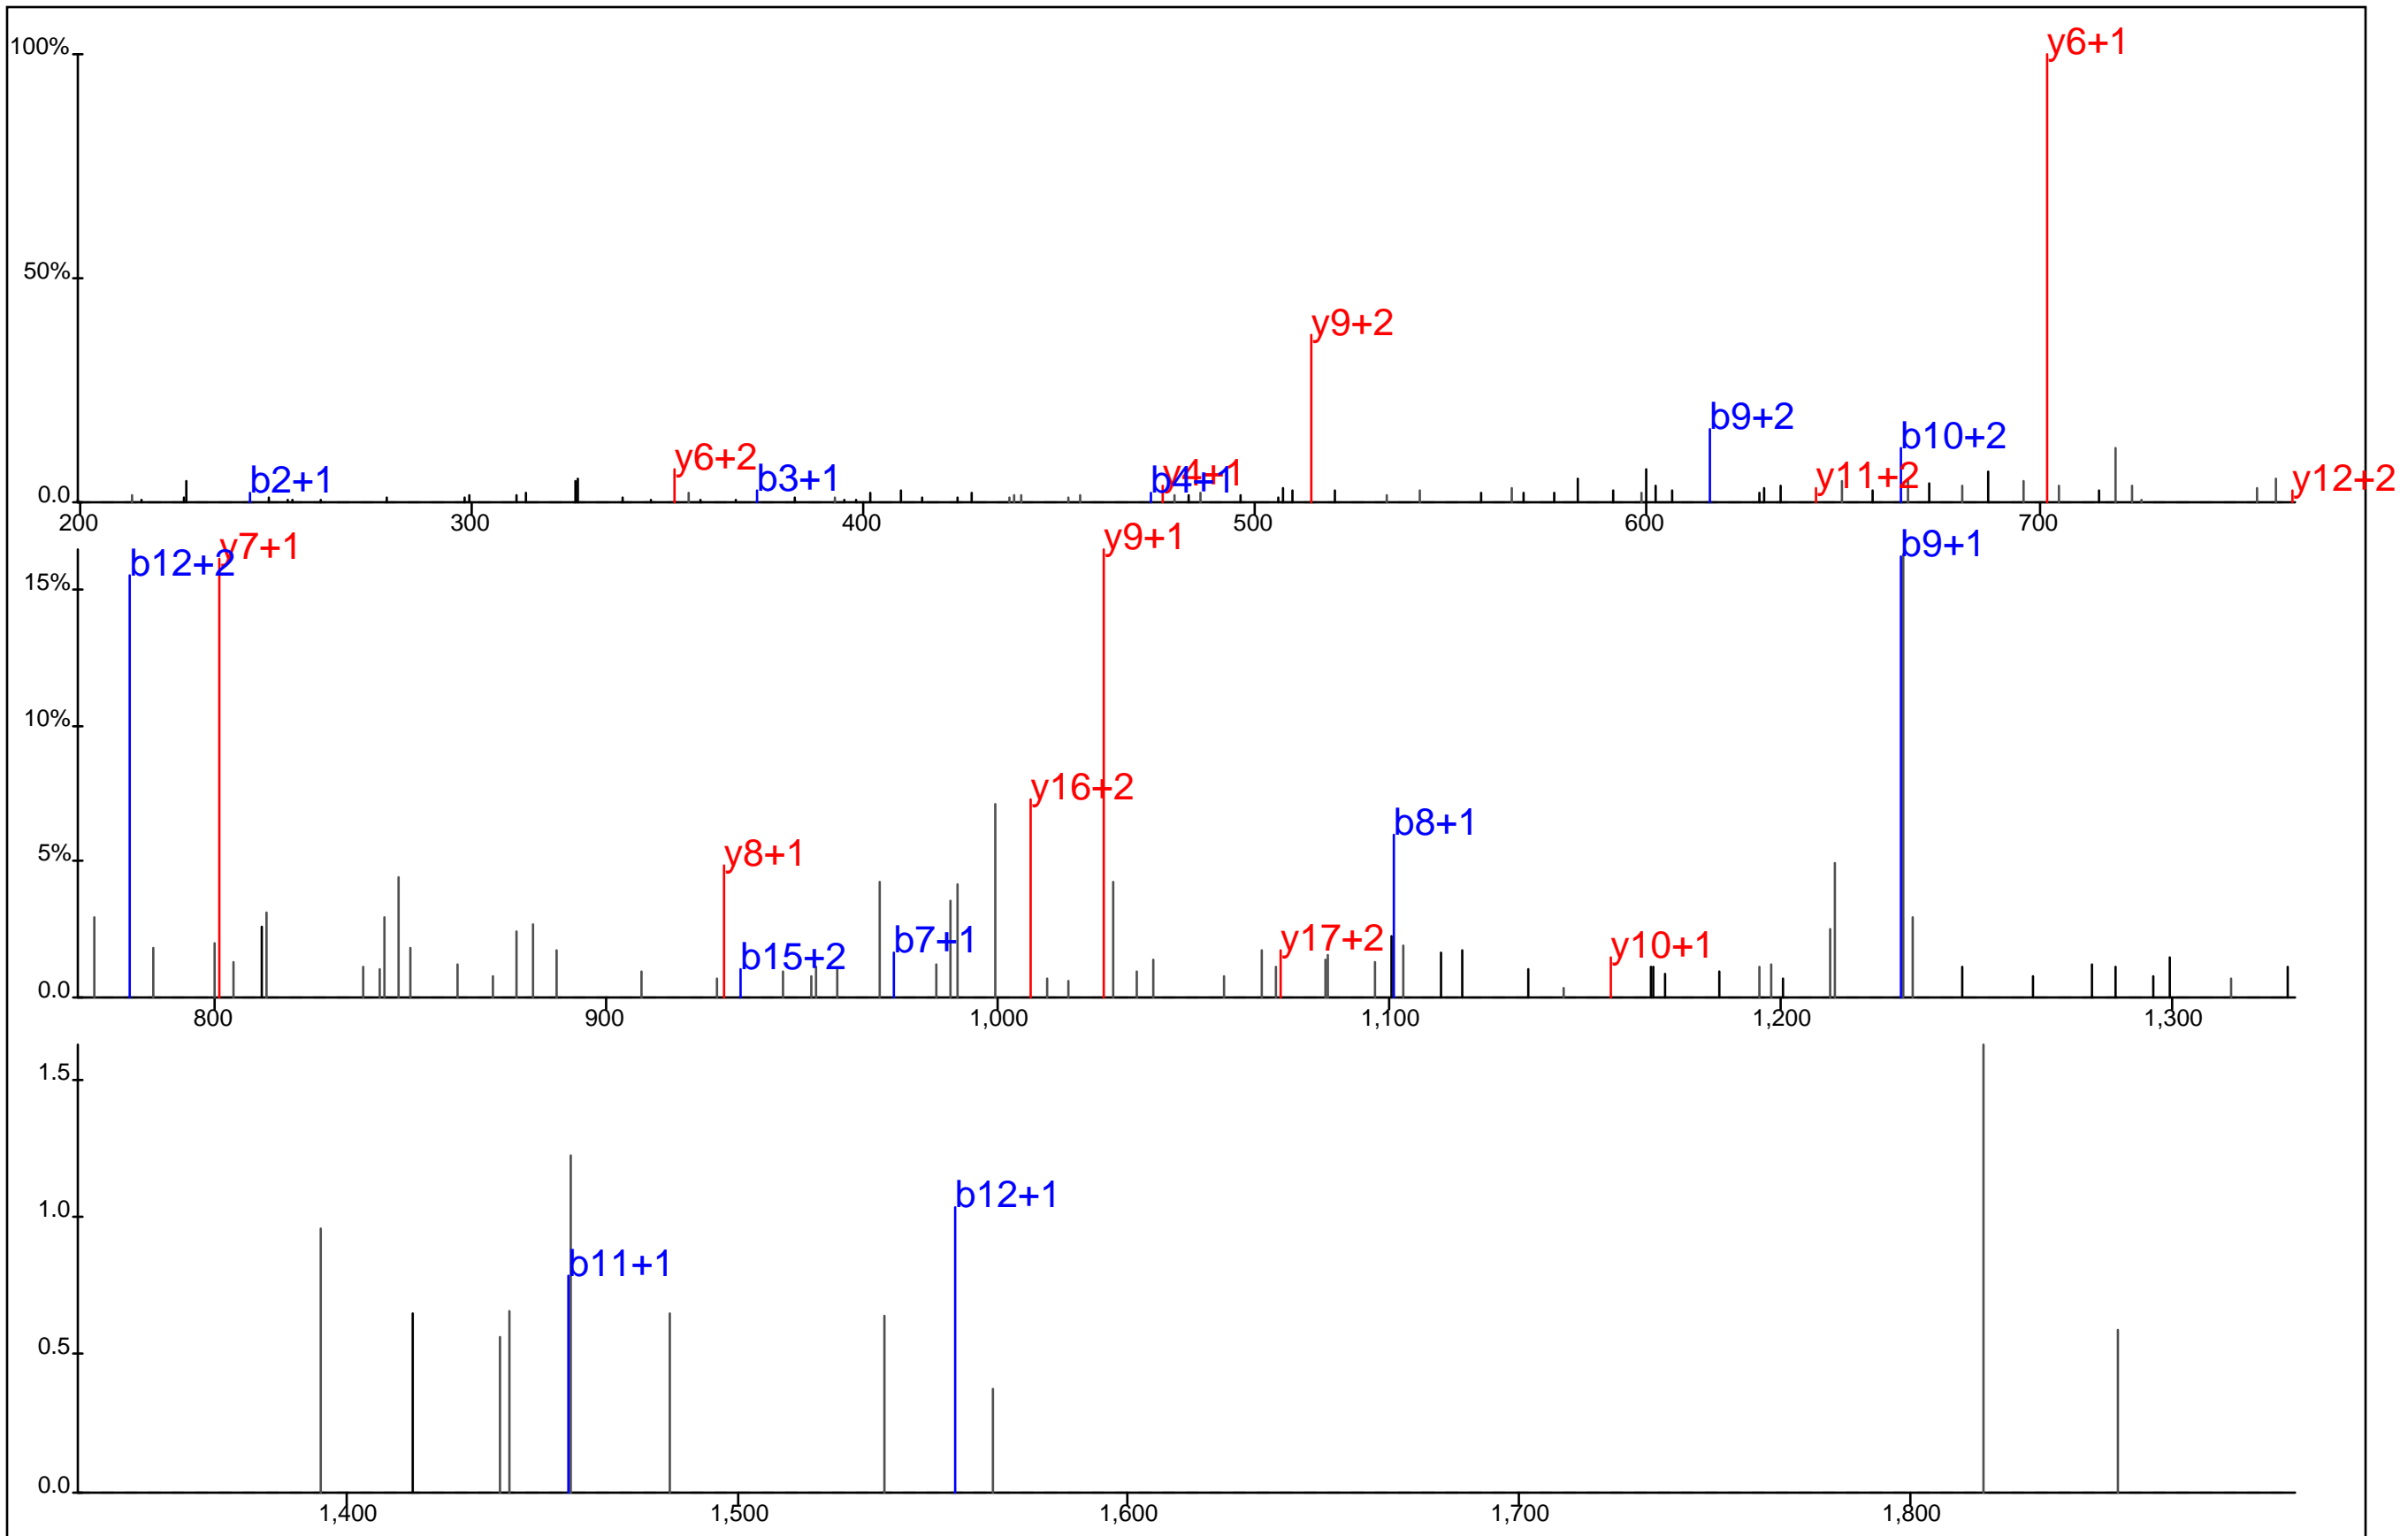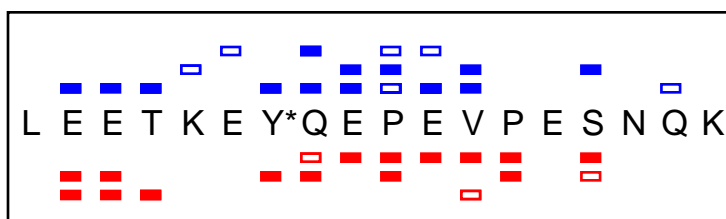

Protein Name: TTK protein kinase  
 gi Accession: 0  
 Precursor Mass: 753.0020+3  
 Delta Mass: 0.340 ppm  
 XCorr: 26.59



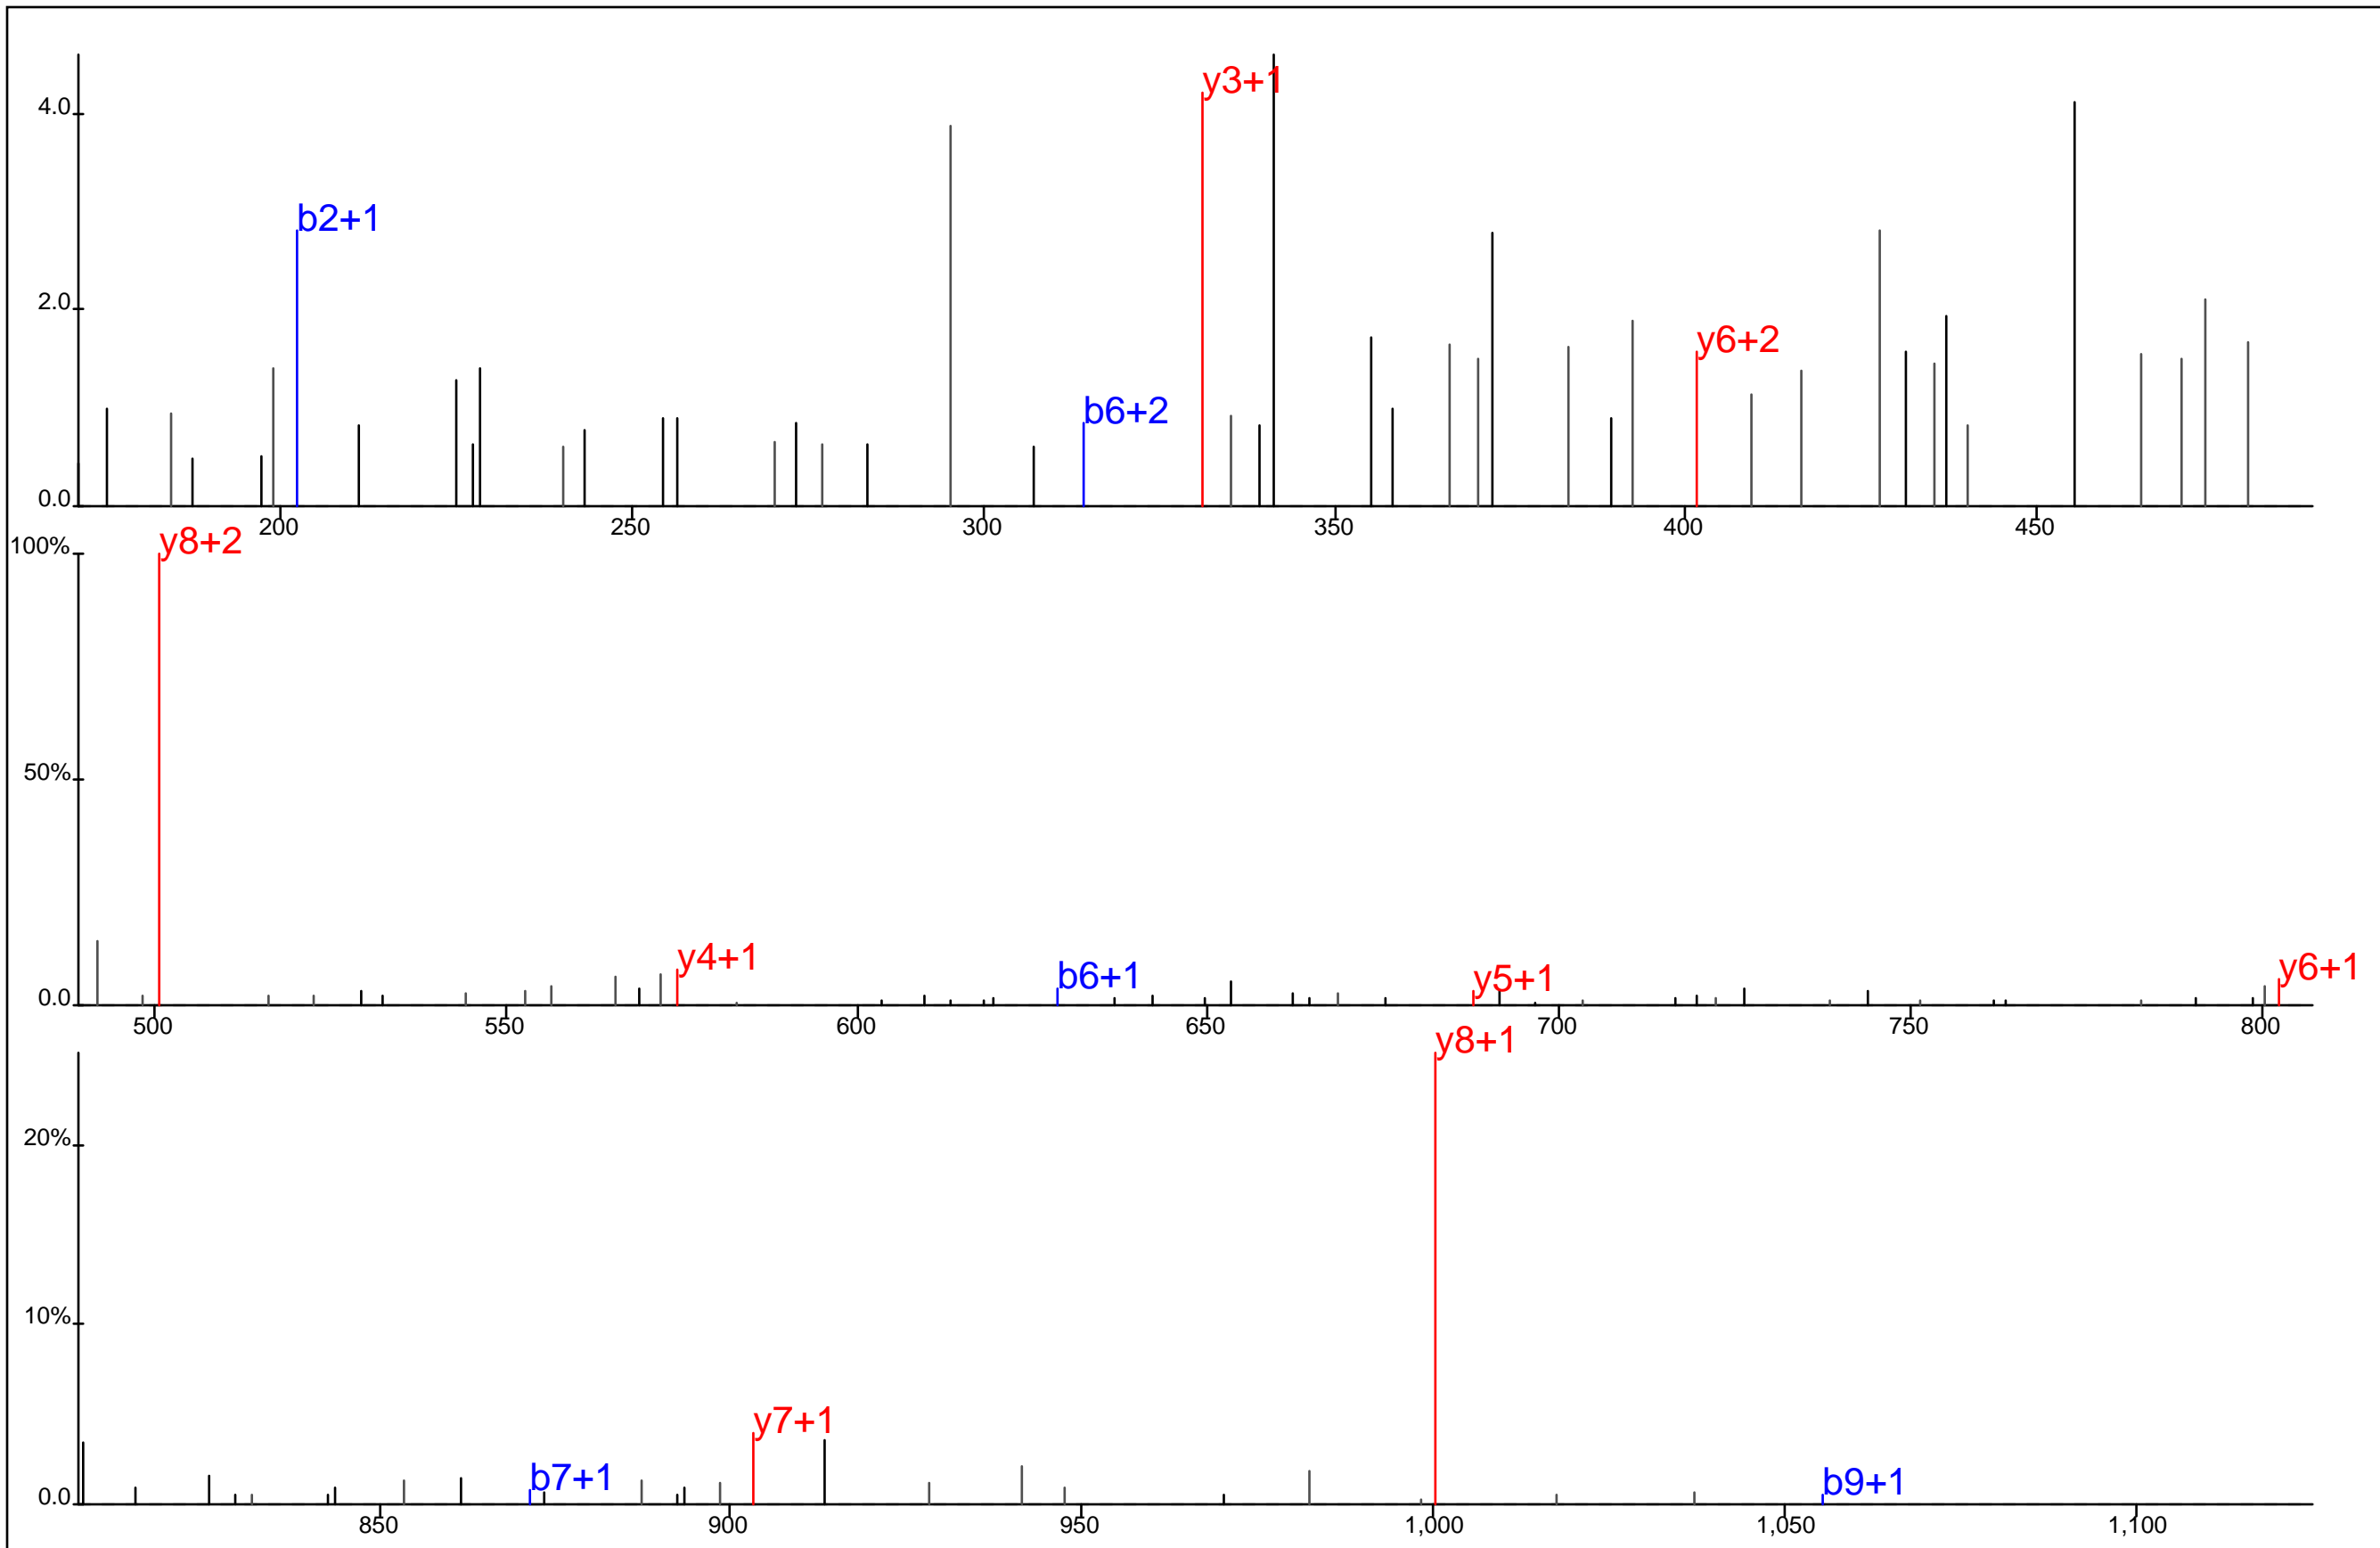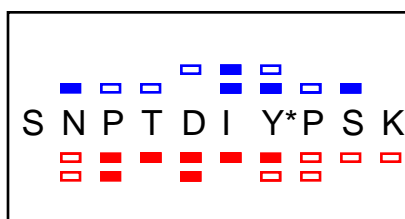

Protein Name: Tuberin  
 gi Accession: 0  
 Precursor Mass: 601.2594+2  
 Delta Mass: 1.764 ppm  
 XCorr: 25.02

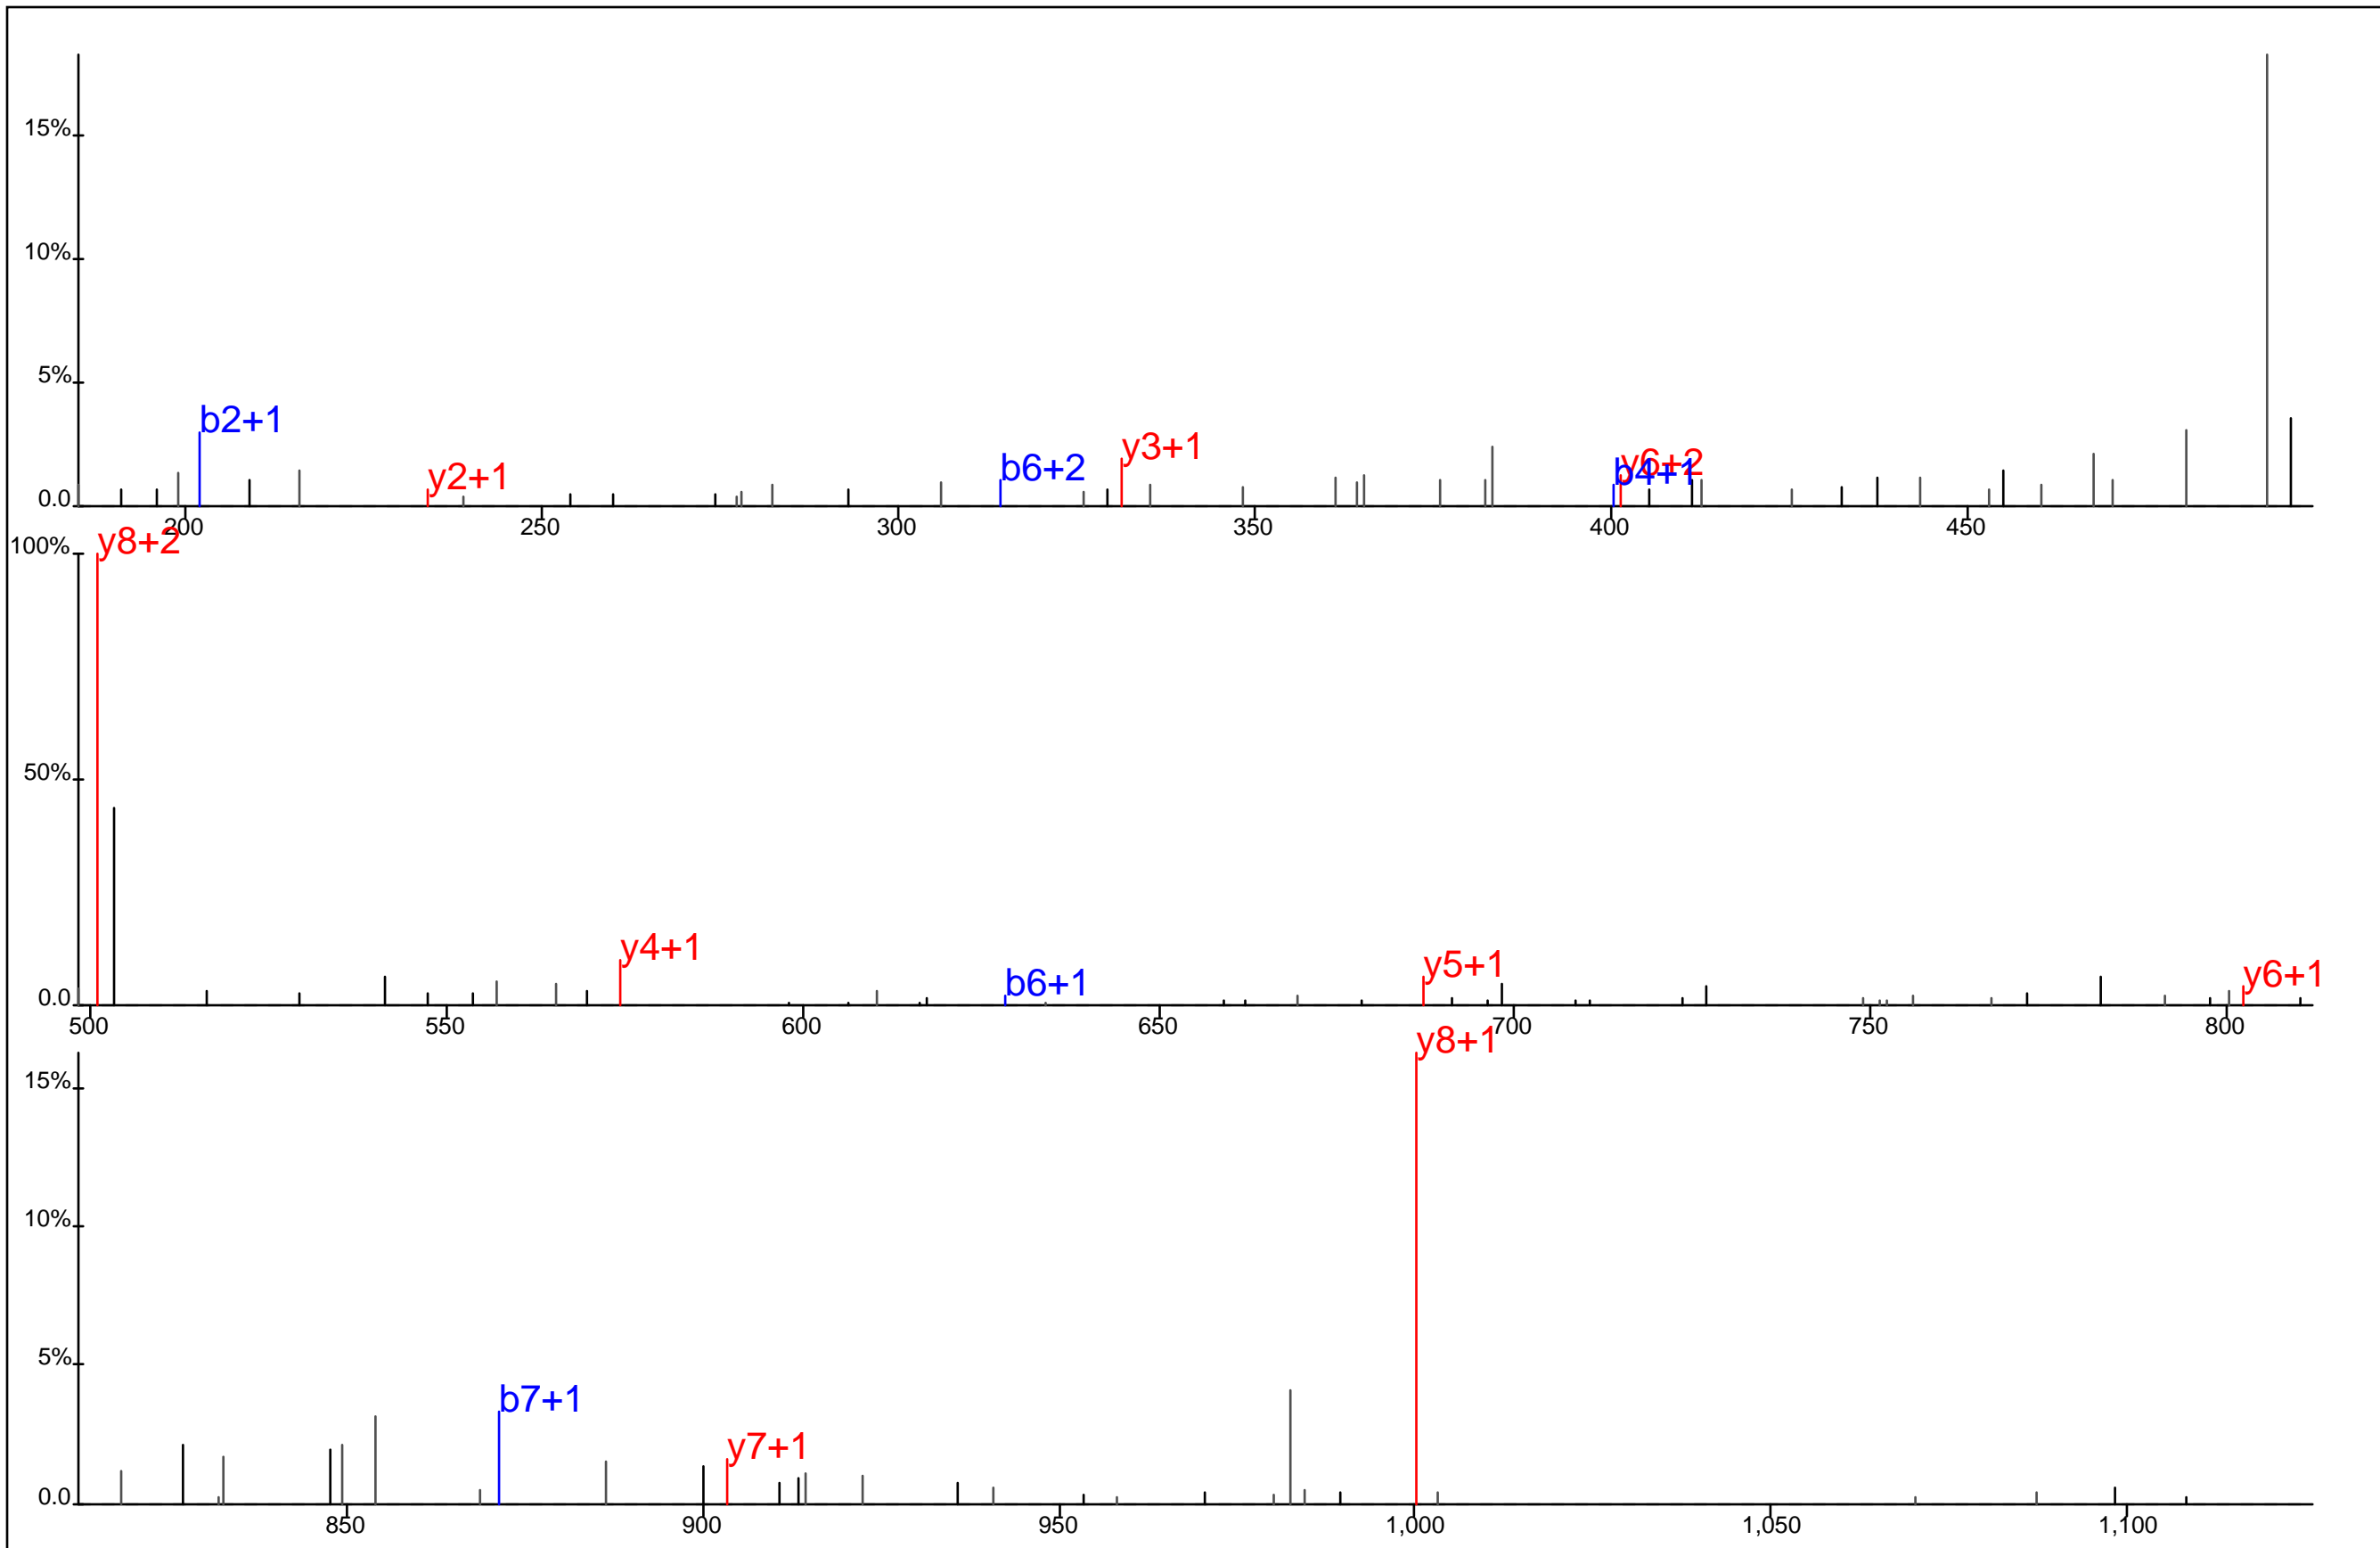

■ □ ▣ □ ■ ▣ □  
 S N P T D I Y\* P S K  
▣ ■ ▣ ■ ▣ ■ ▣

Protein Name: Tuberin  
 gi Accession: 0  
 Precursor Mass: 601.2599+2  
 Delta Mass: 0.849 ppm  
 XCorr: 28.87

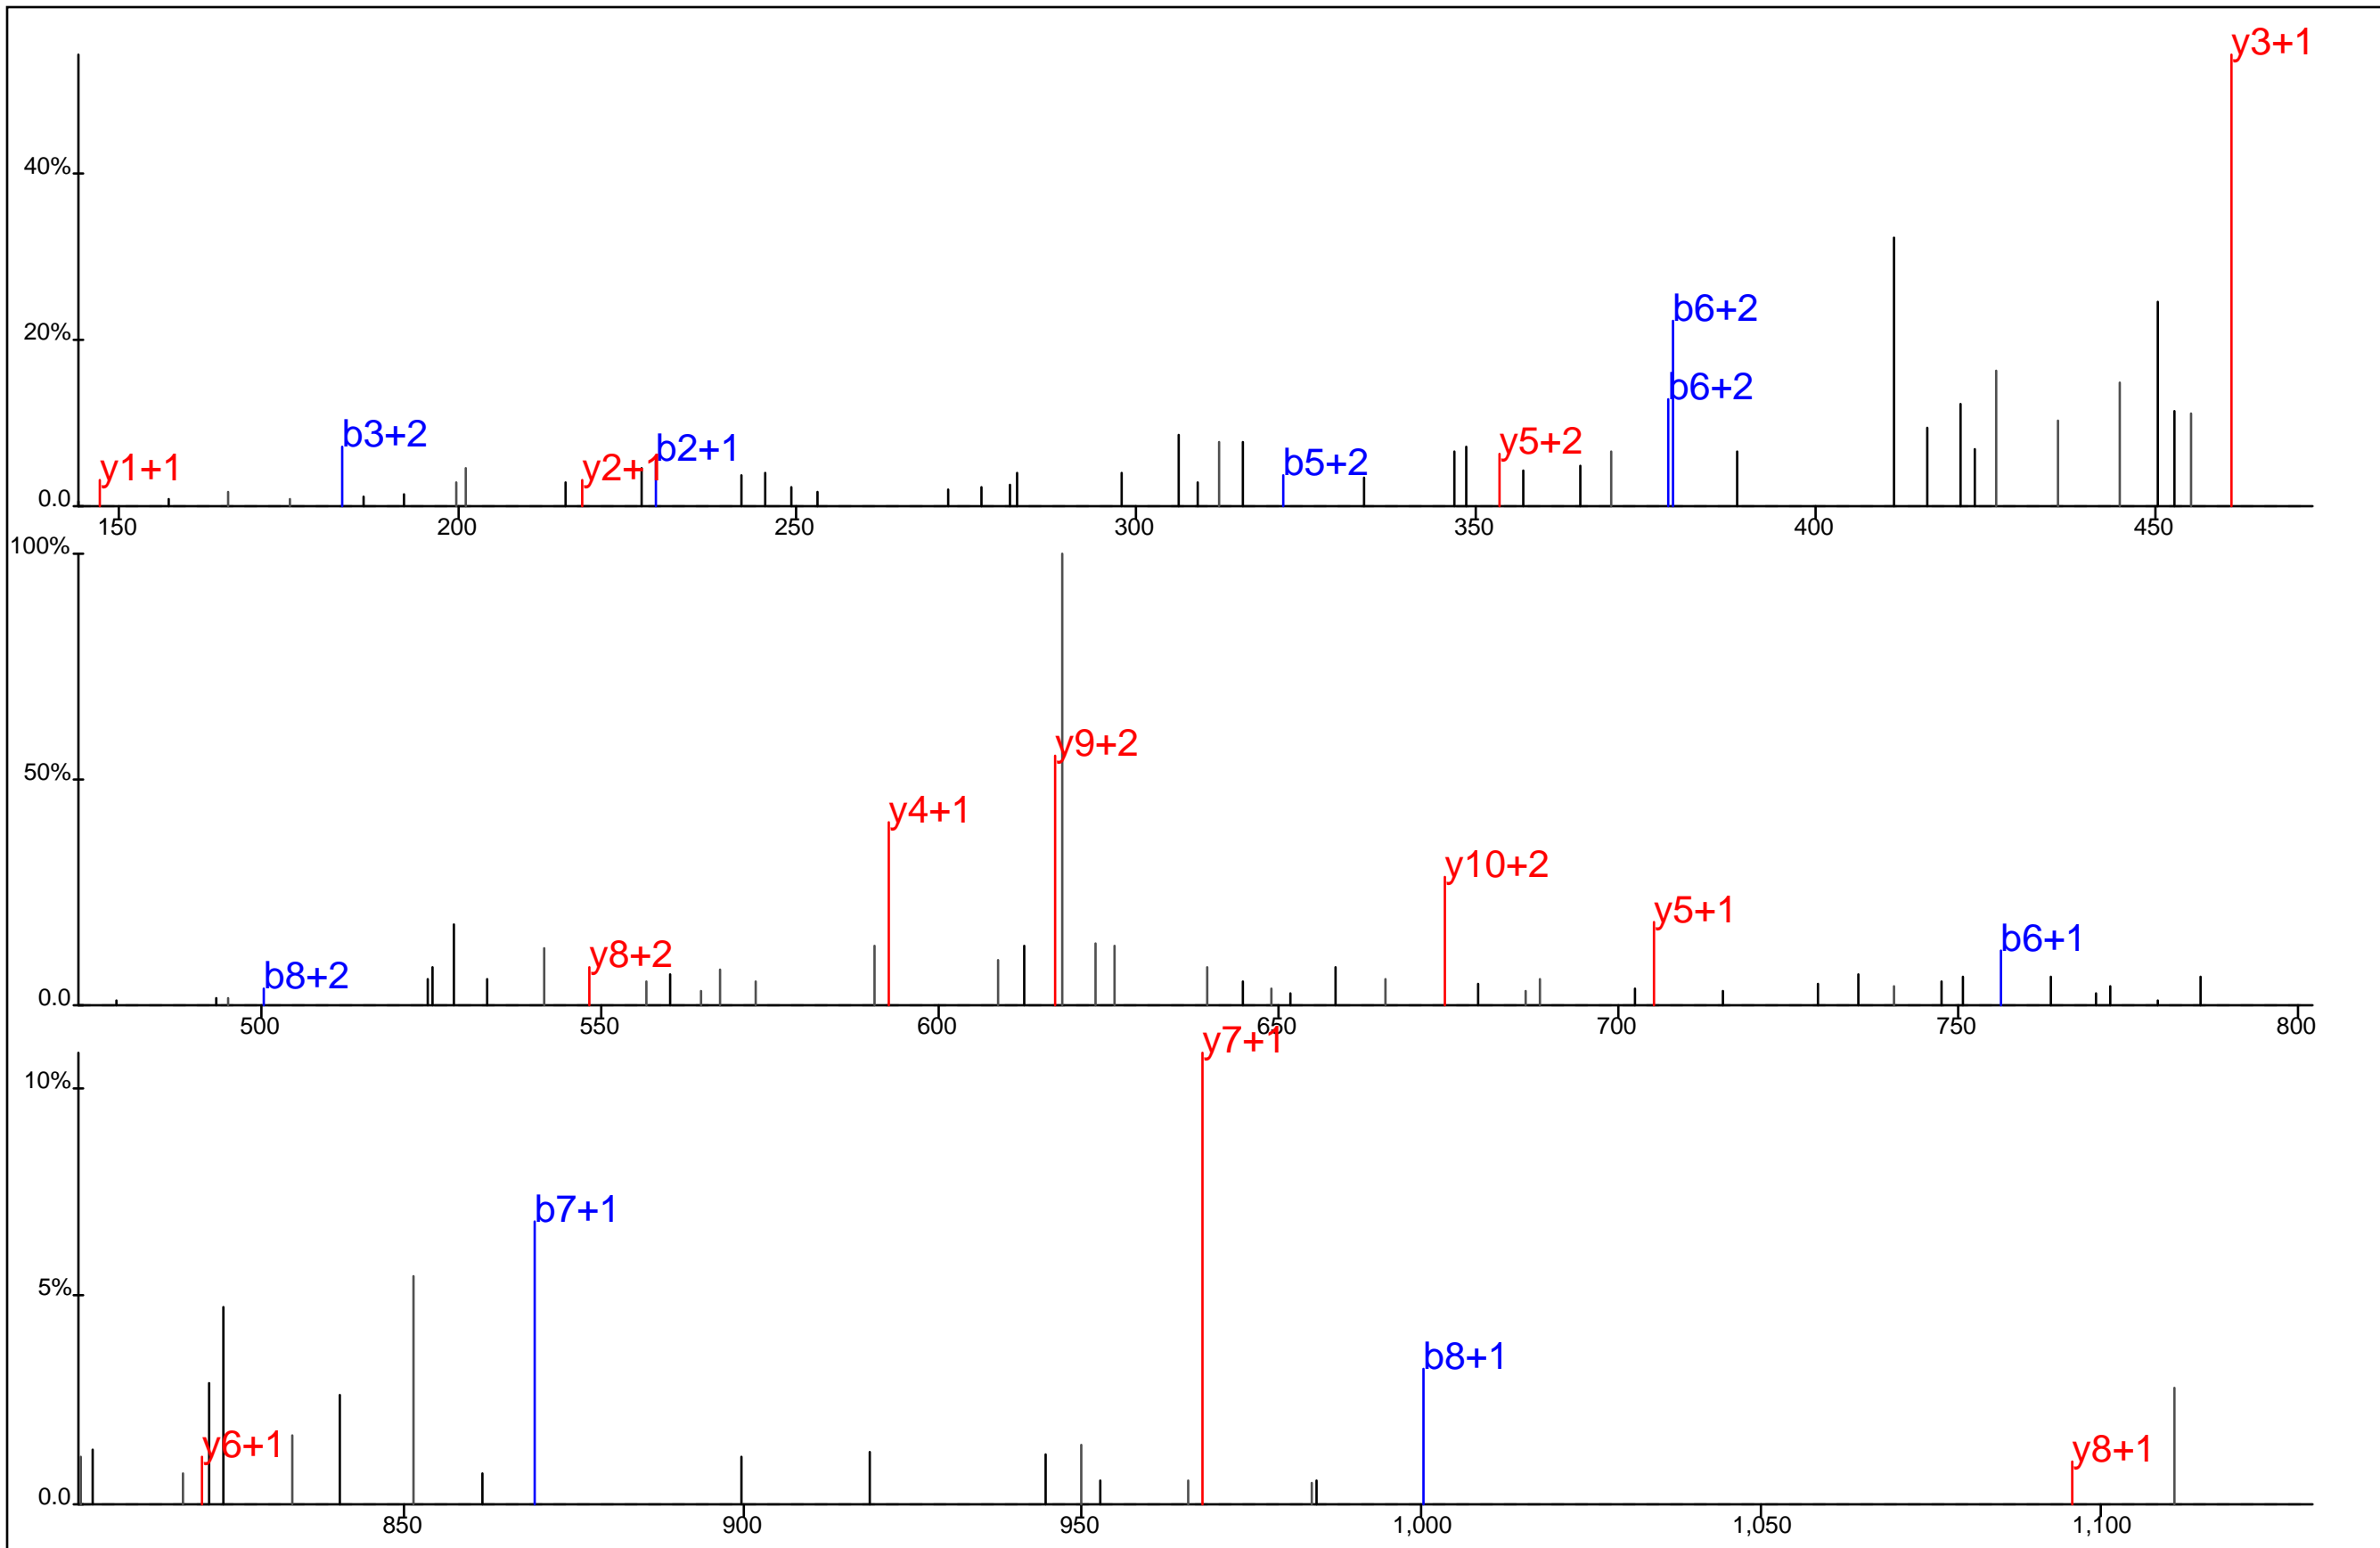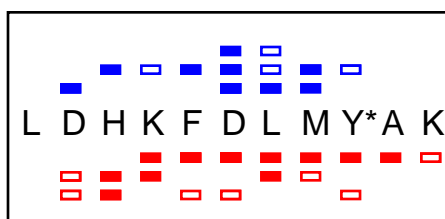

Protein Name: Tubulin alpha 1  
 gi Accession: 0  
 Precursor Mass: 487.5597+3  
 Delta Mass: 0.131 ppm  
 XCorr: 22.33

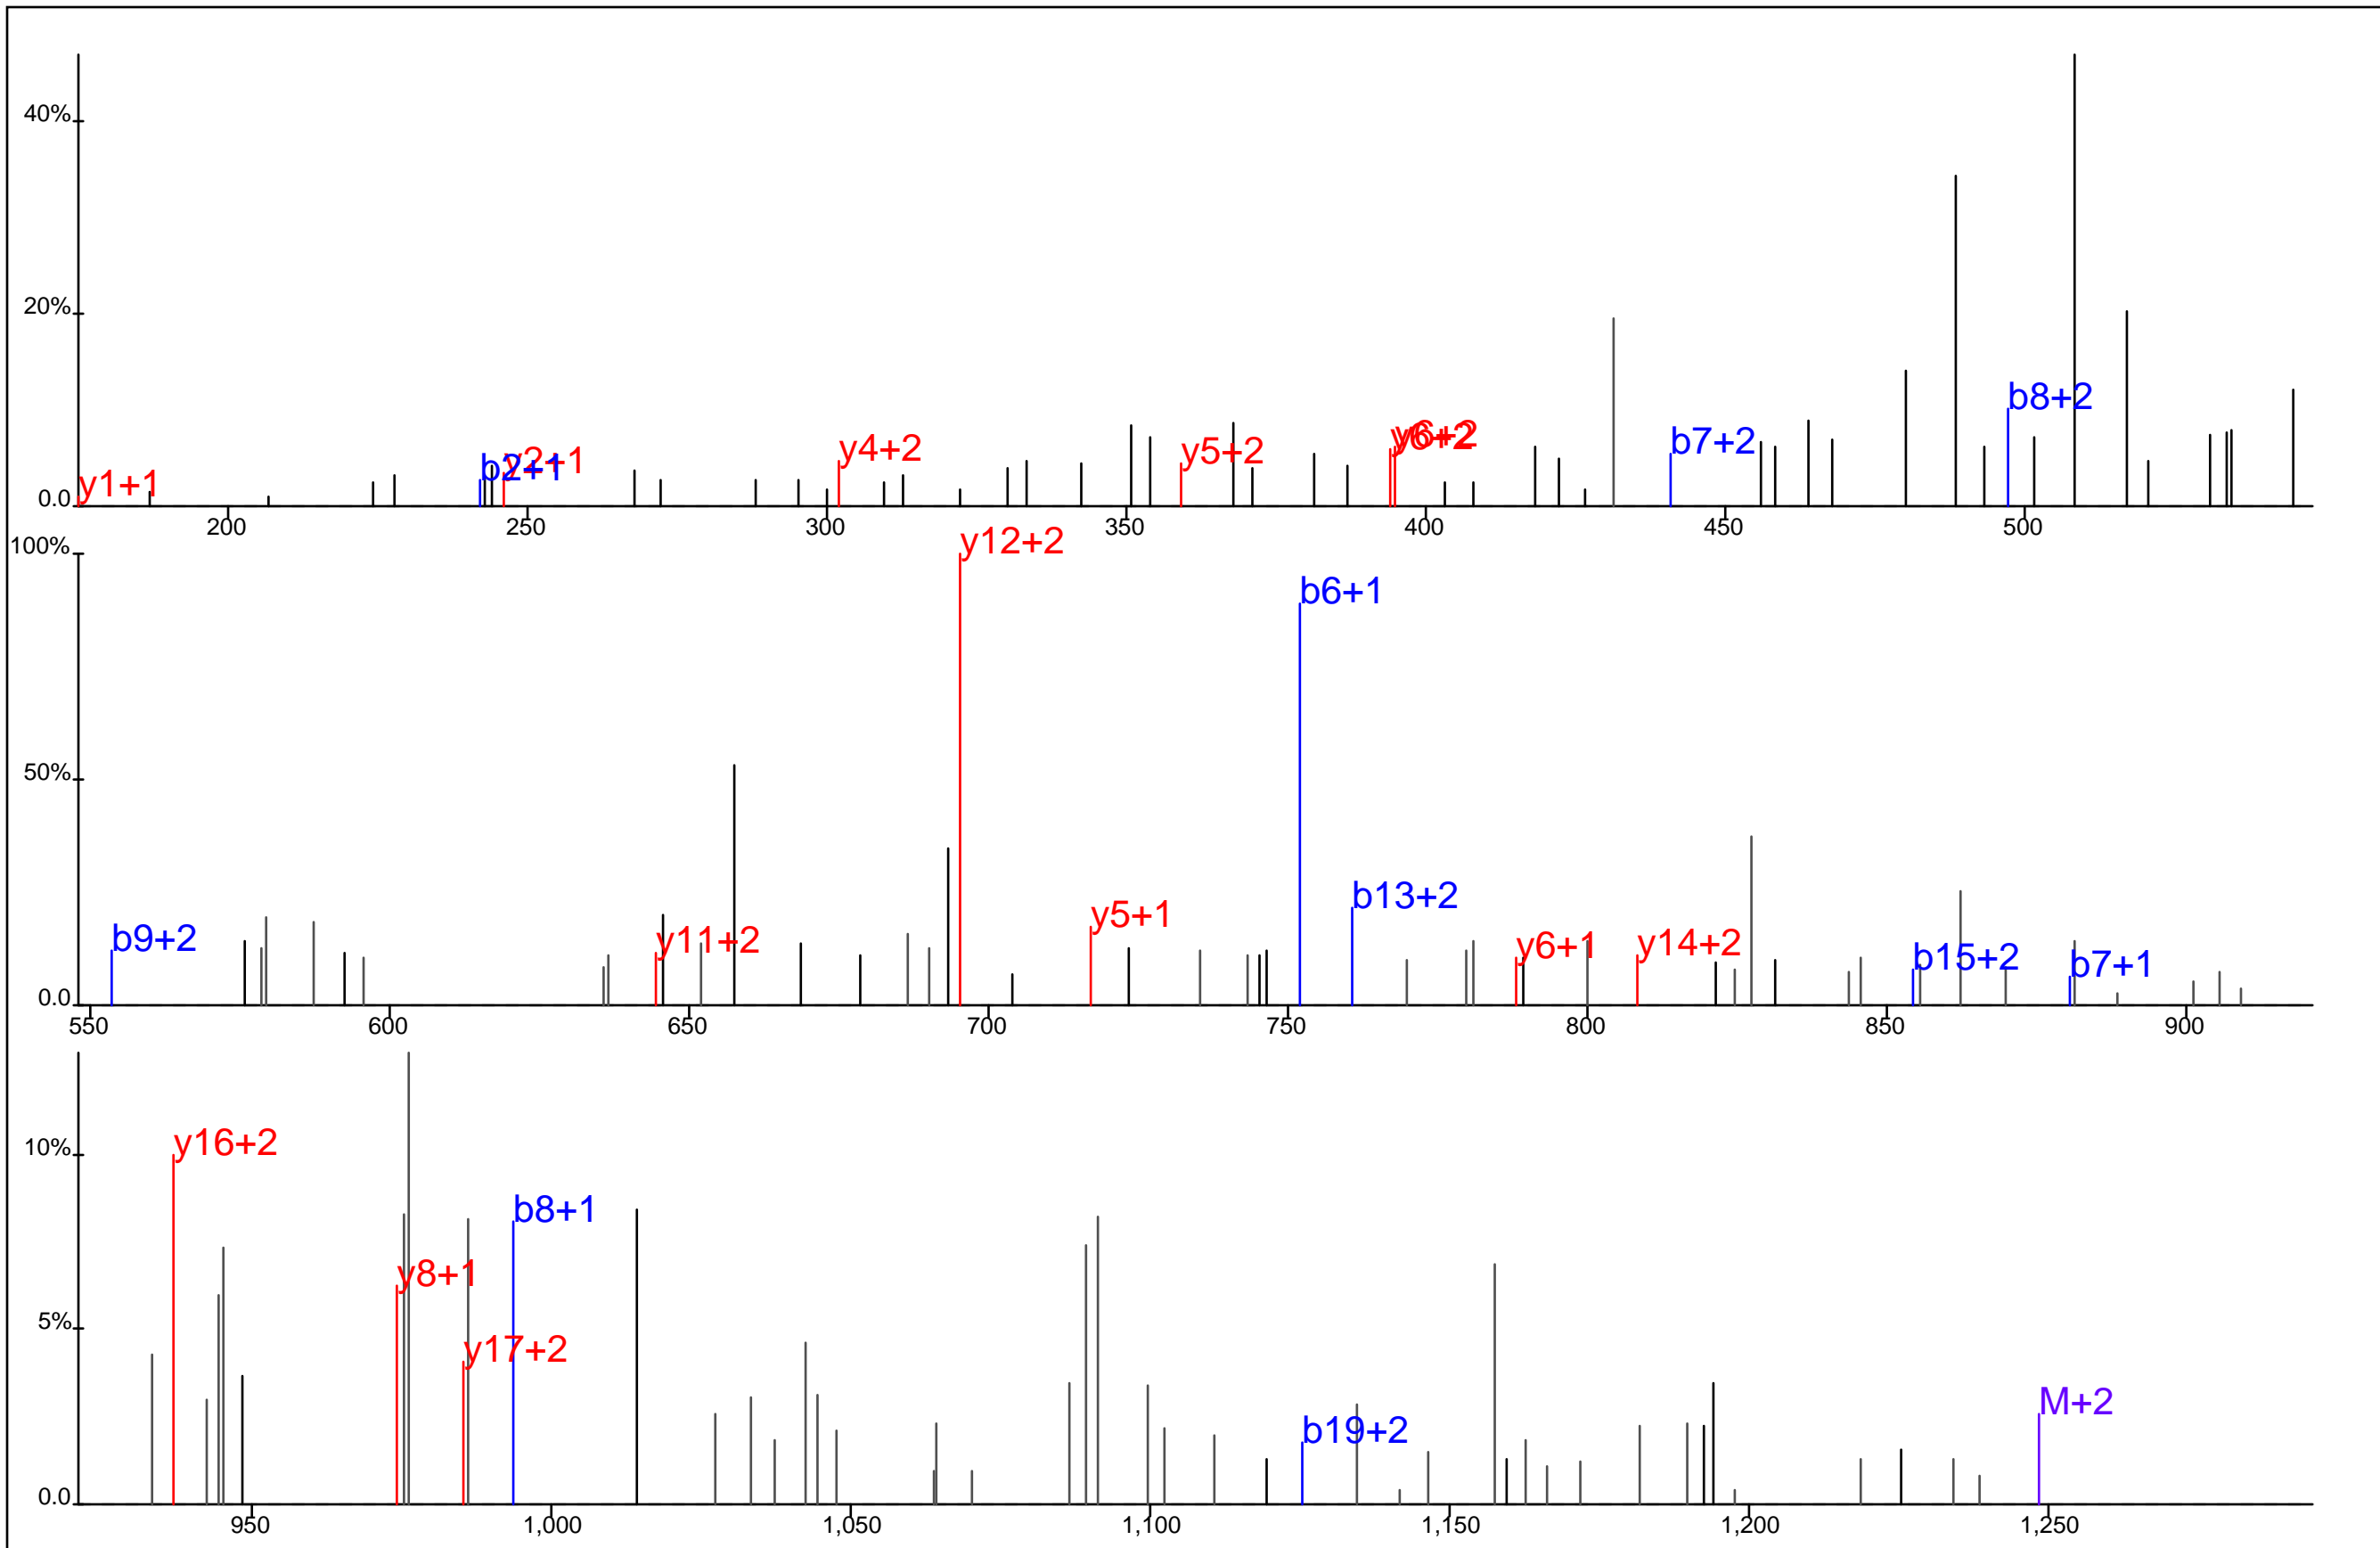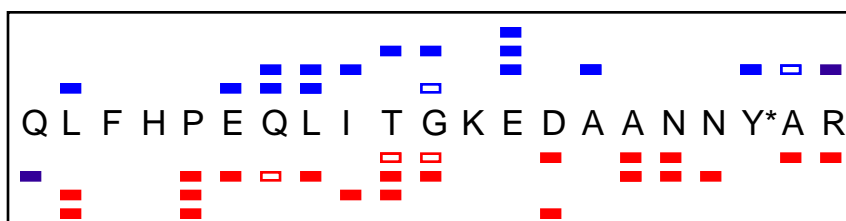

Protein Name: Tubulin alpha 1  
 gi Accession: 0  
 Precursor Mass: 624.5484+4  
 Delta Mass: 0.138 ppm  
 XCorr: 22.35

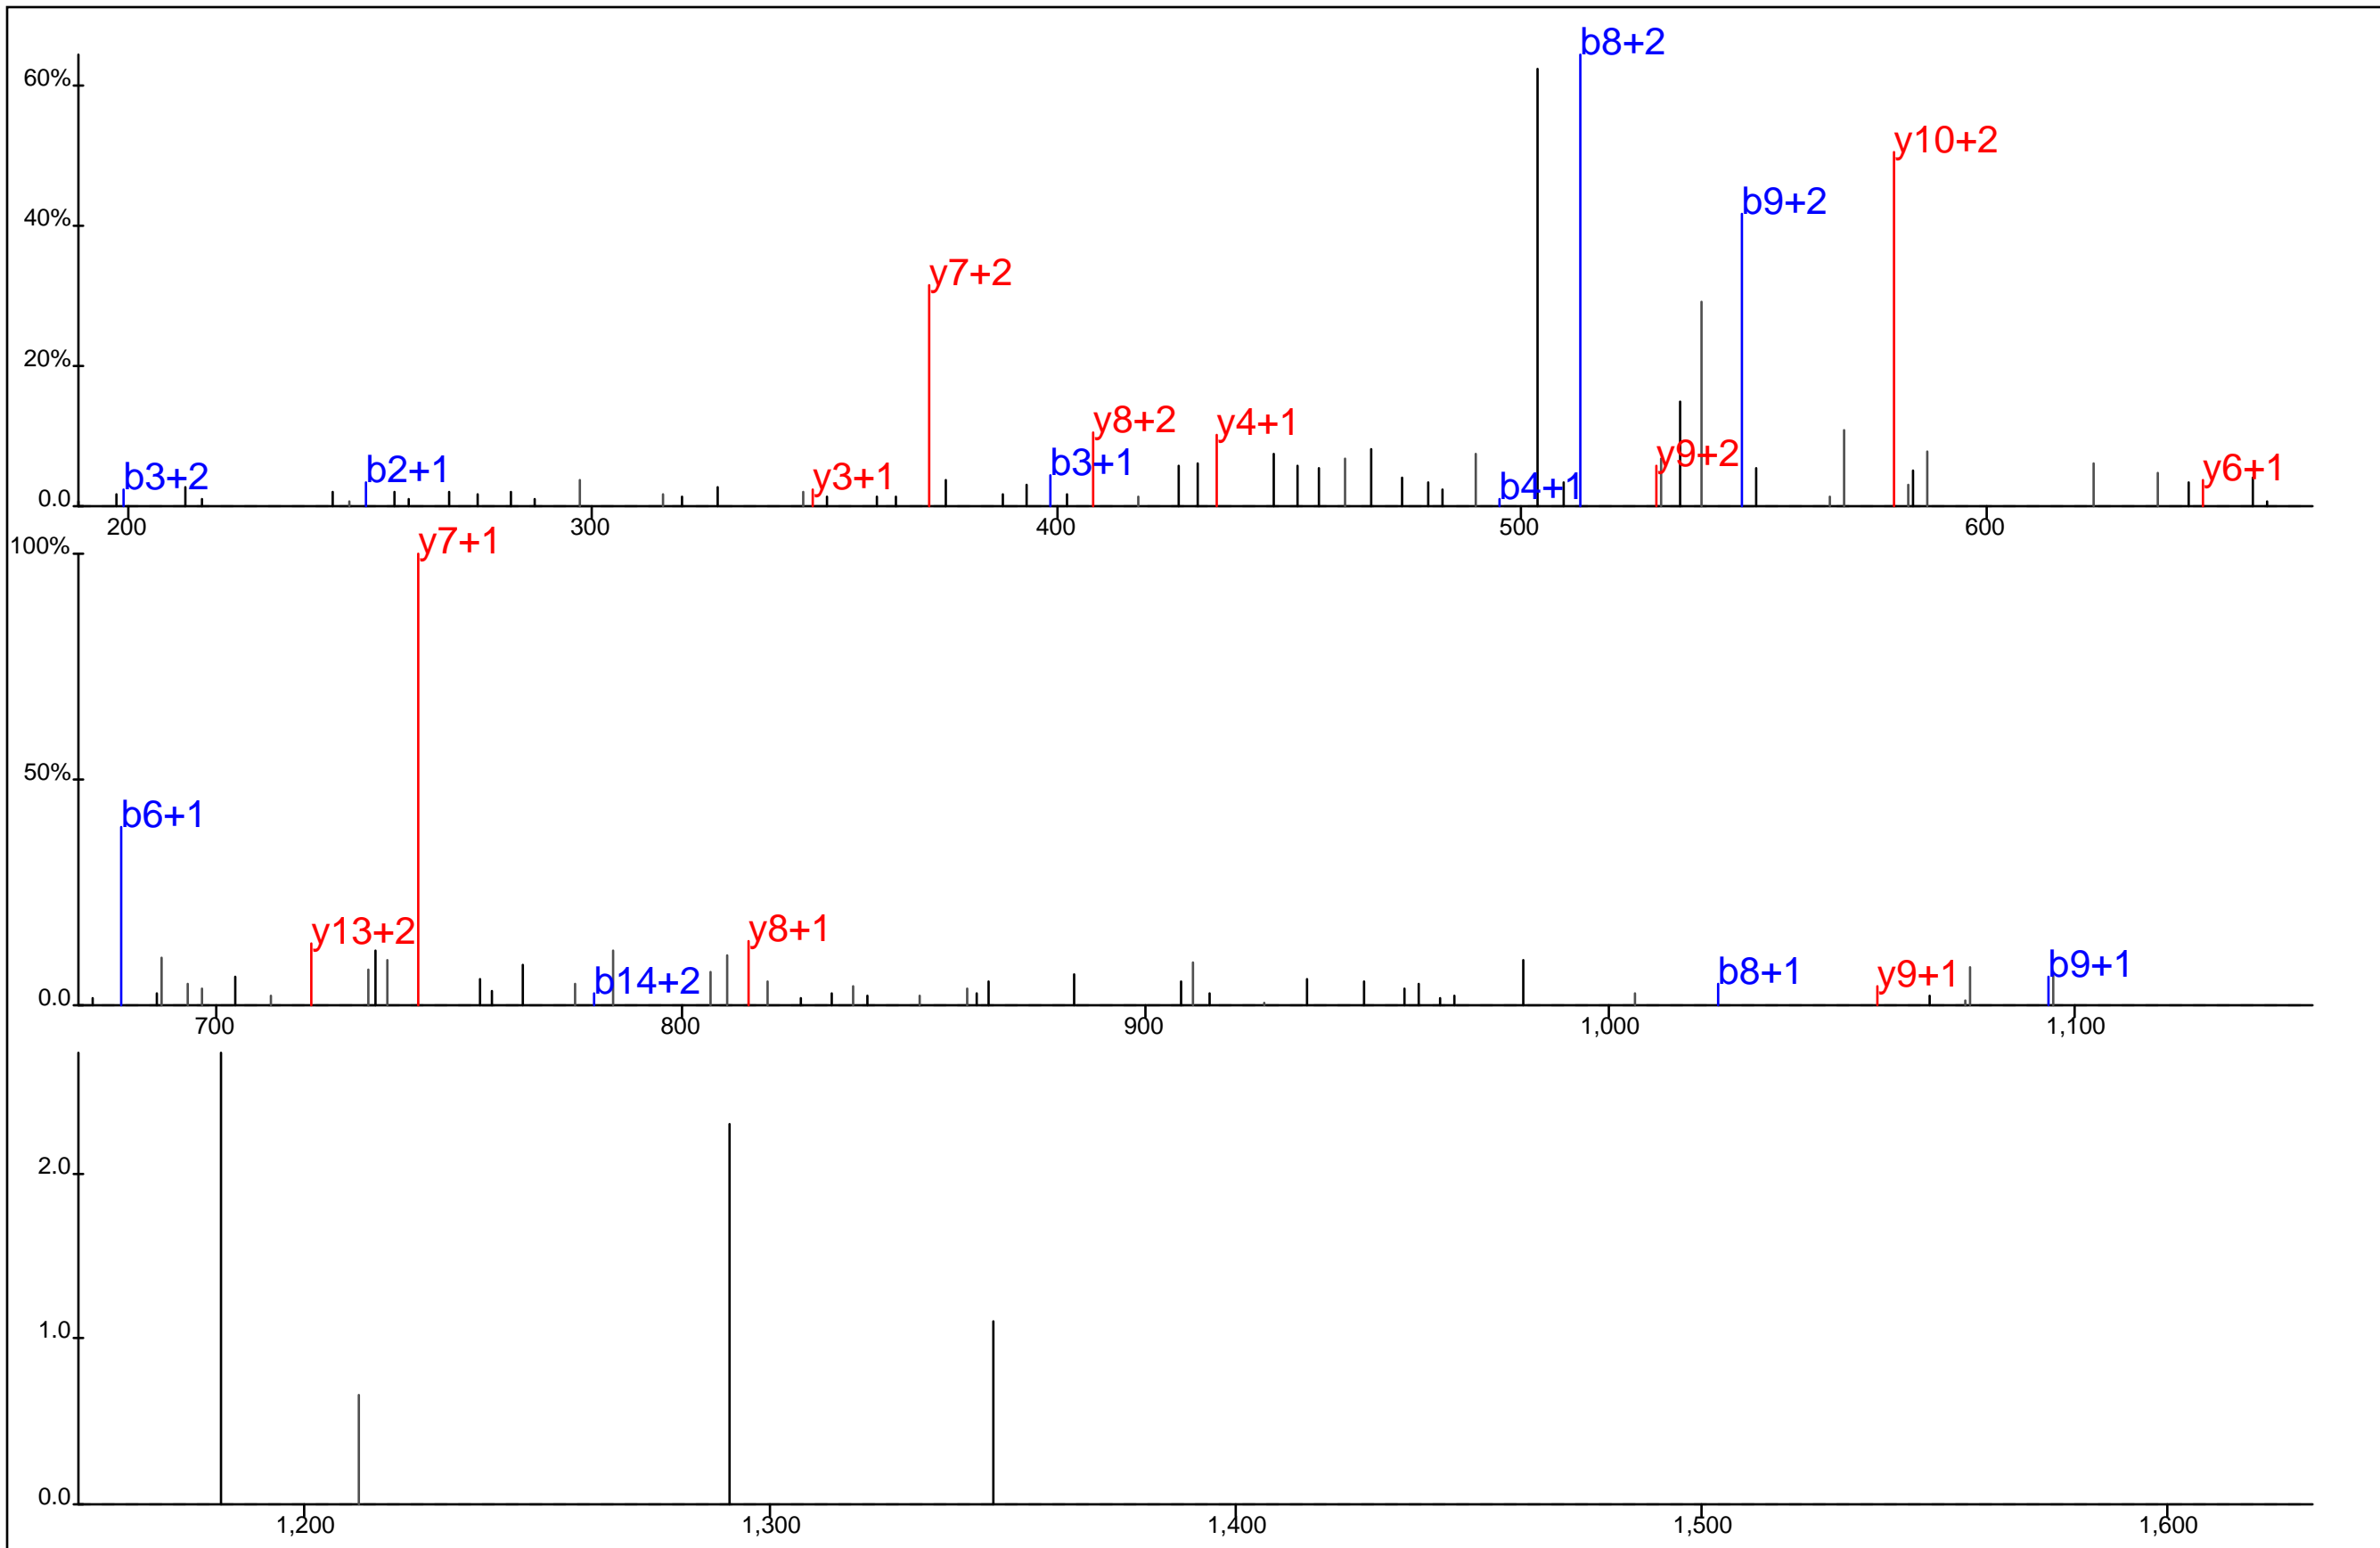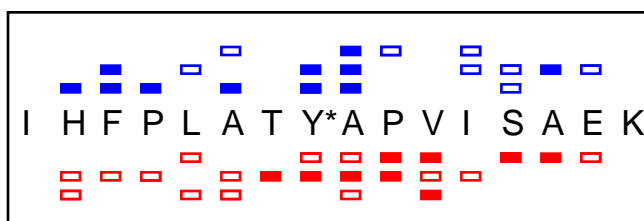

Protein Name: Tubulin alpha 1  
 gi Accession: 0  
 Precursor Mass: 612.9822+3  
 Delta Mass: 1.433 ppm  
 XCorr: 24.14

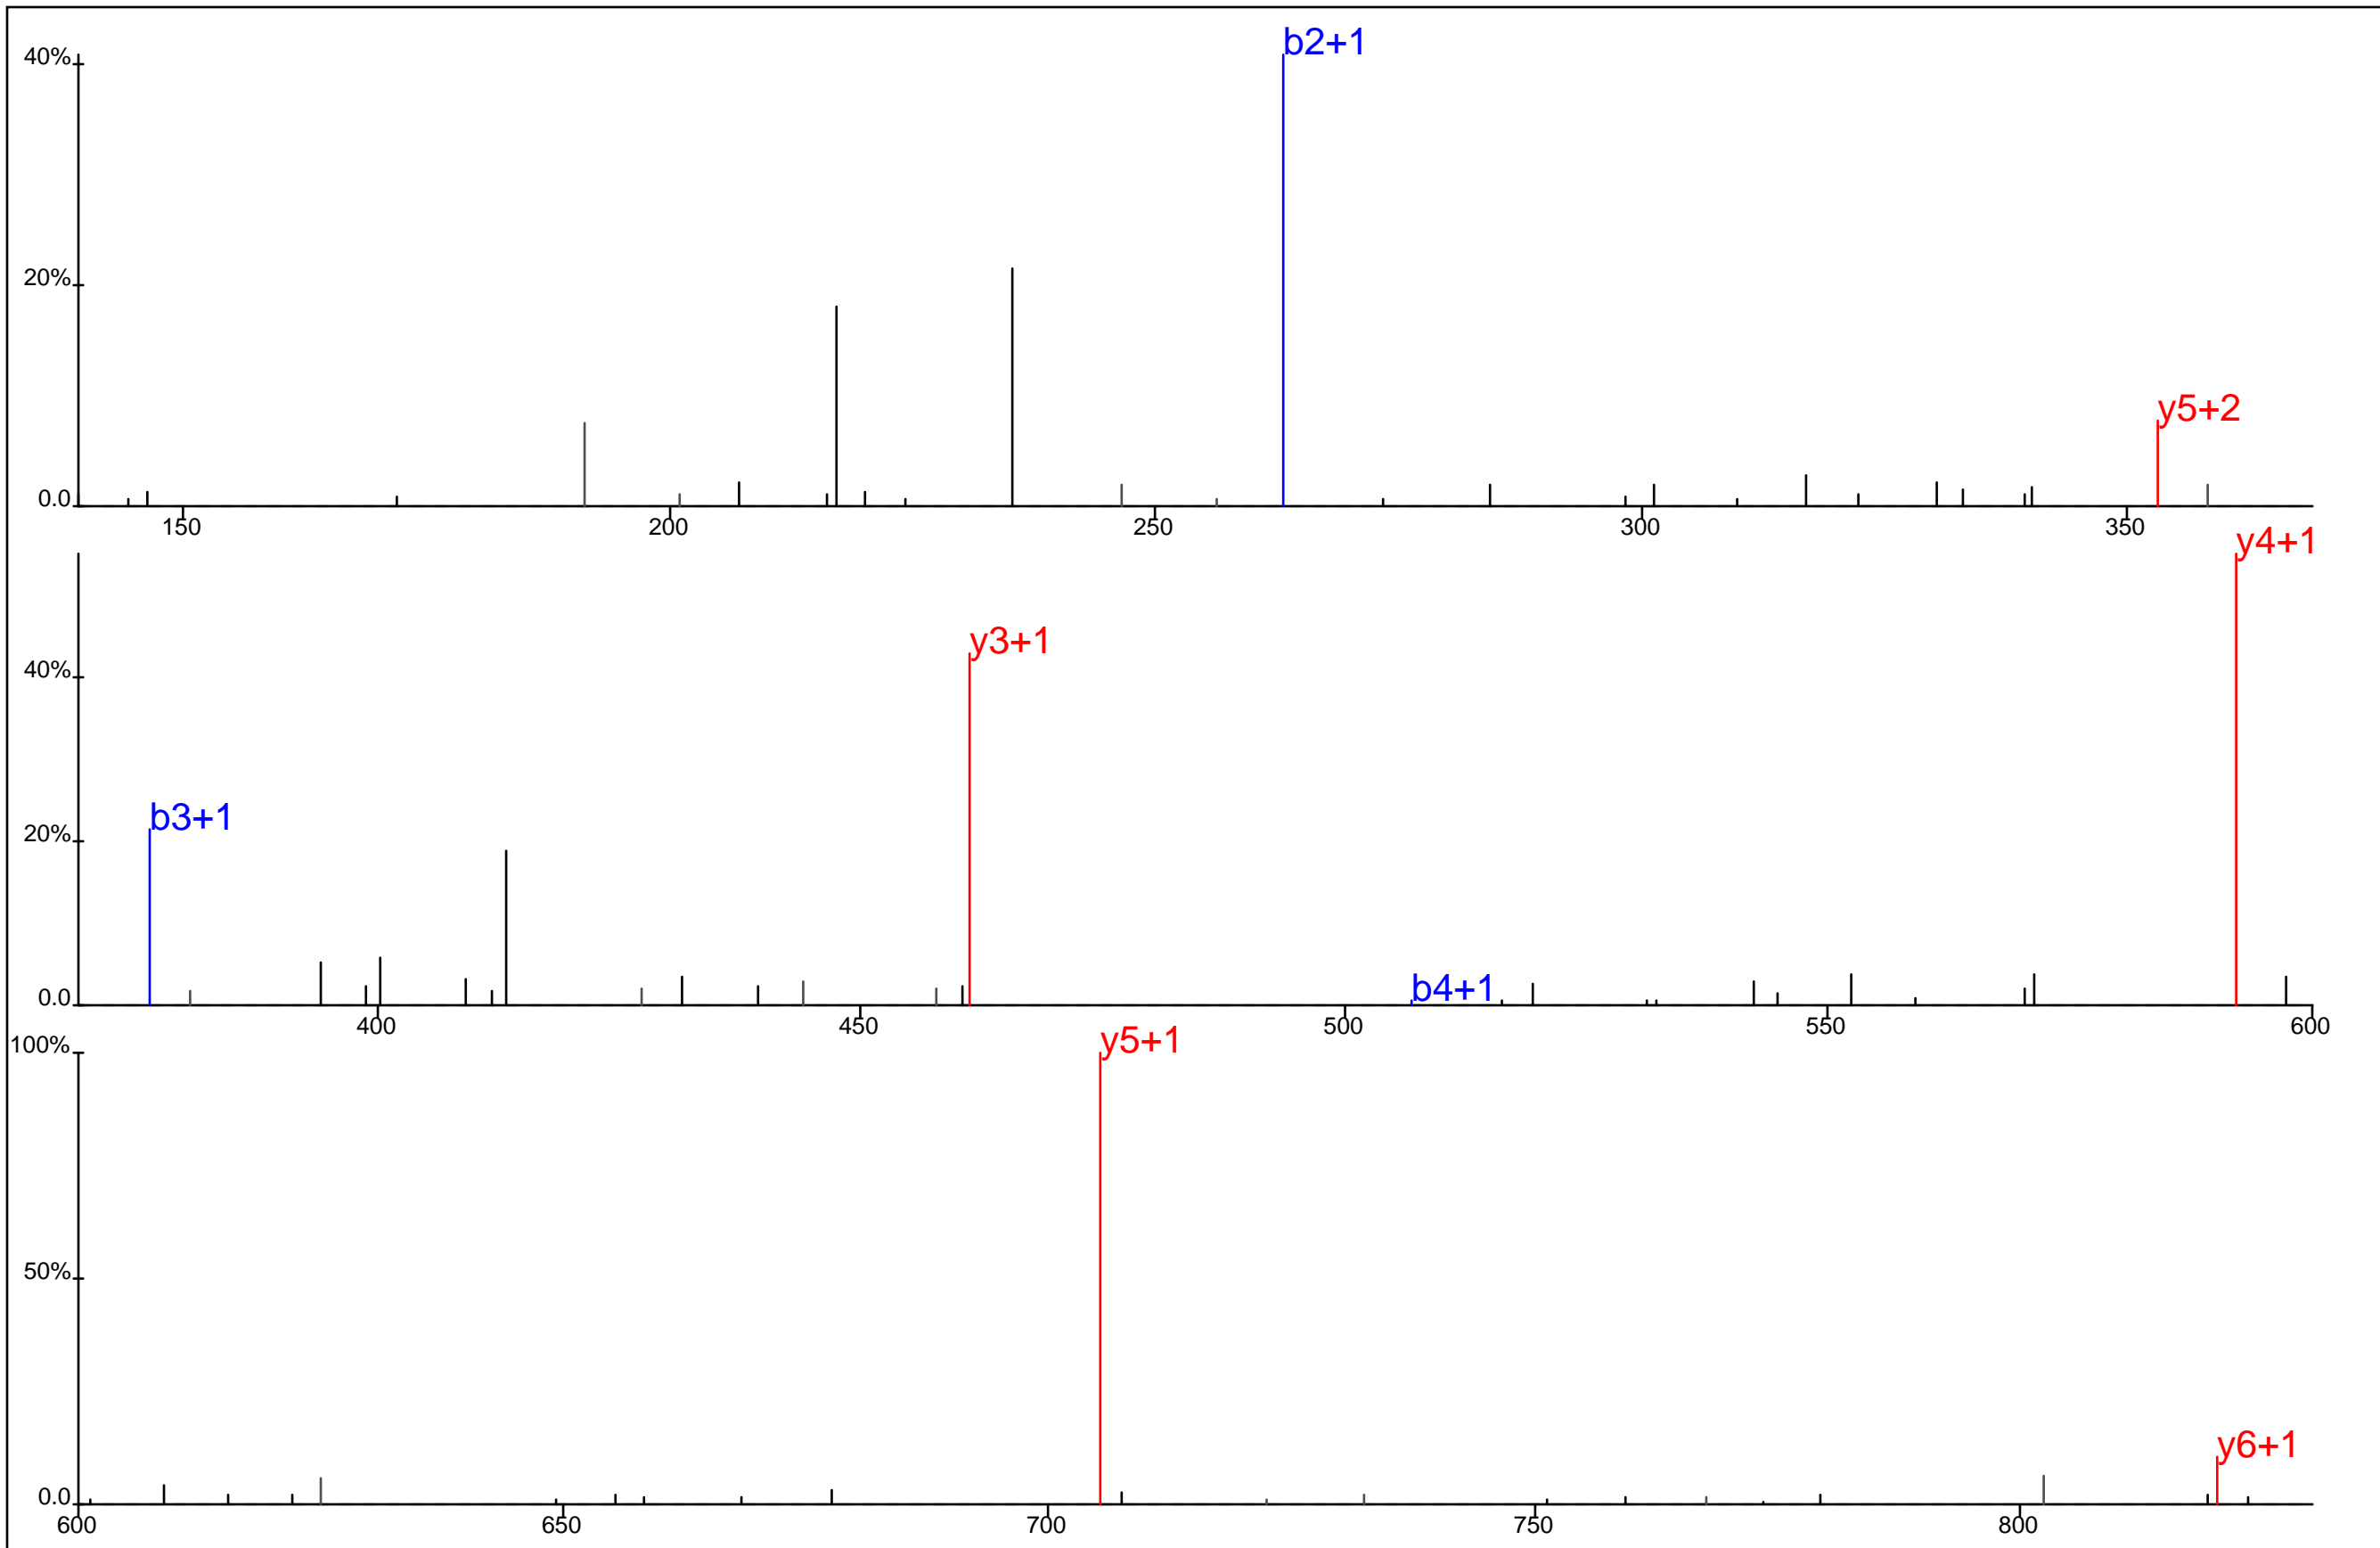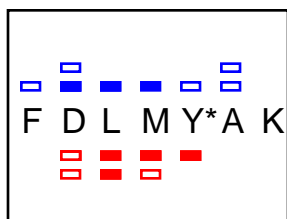

Protein Name: Tubulin alpha 1  
 gi Accession: 0  
 Precursor Mass: 484.2038+2  
 Delta Mass: 0.821 ppm  
 XCorr: 34.9





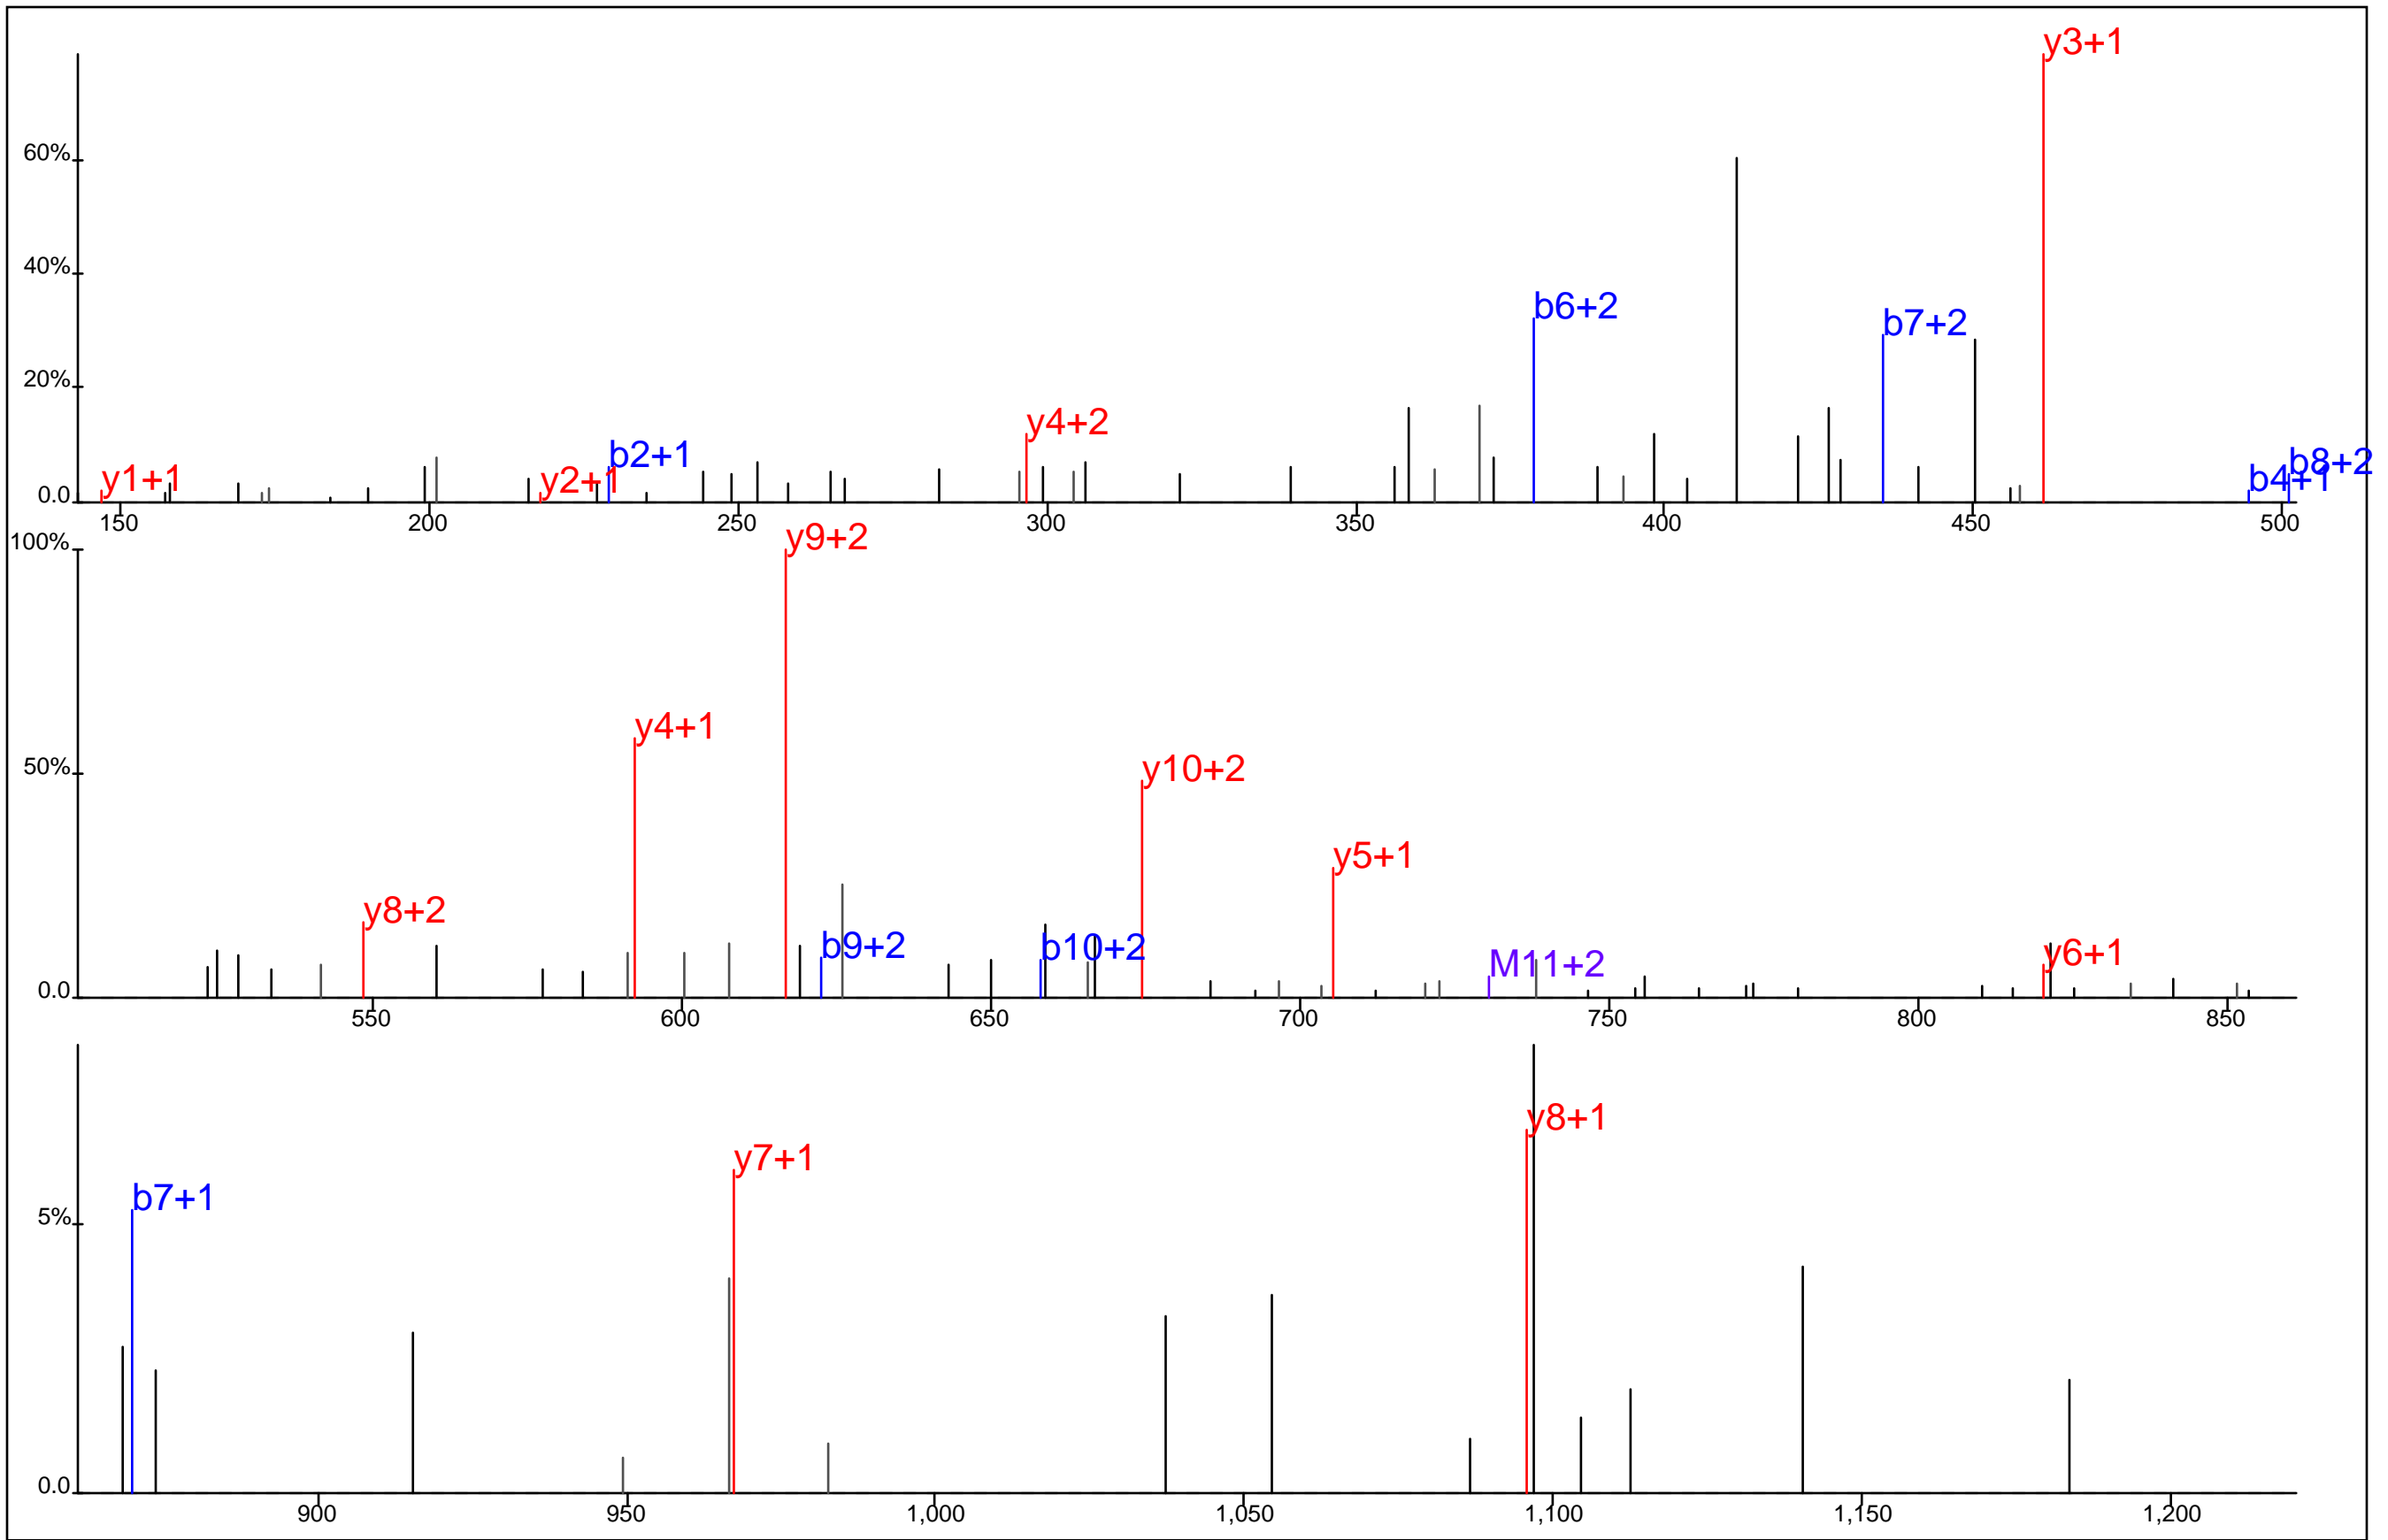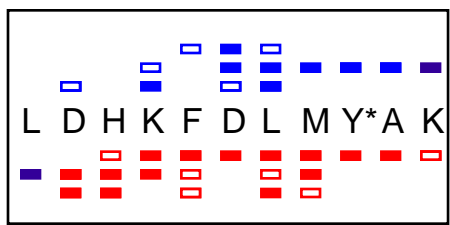

Protein Name: Tubulin alpha 1  
 gi Accession: 0  
 Precursor Mass: 487.5597+3  
 Delta Mass: 0.131 ppm  
 XCorr: 33.73

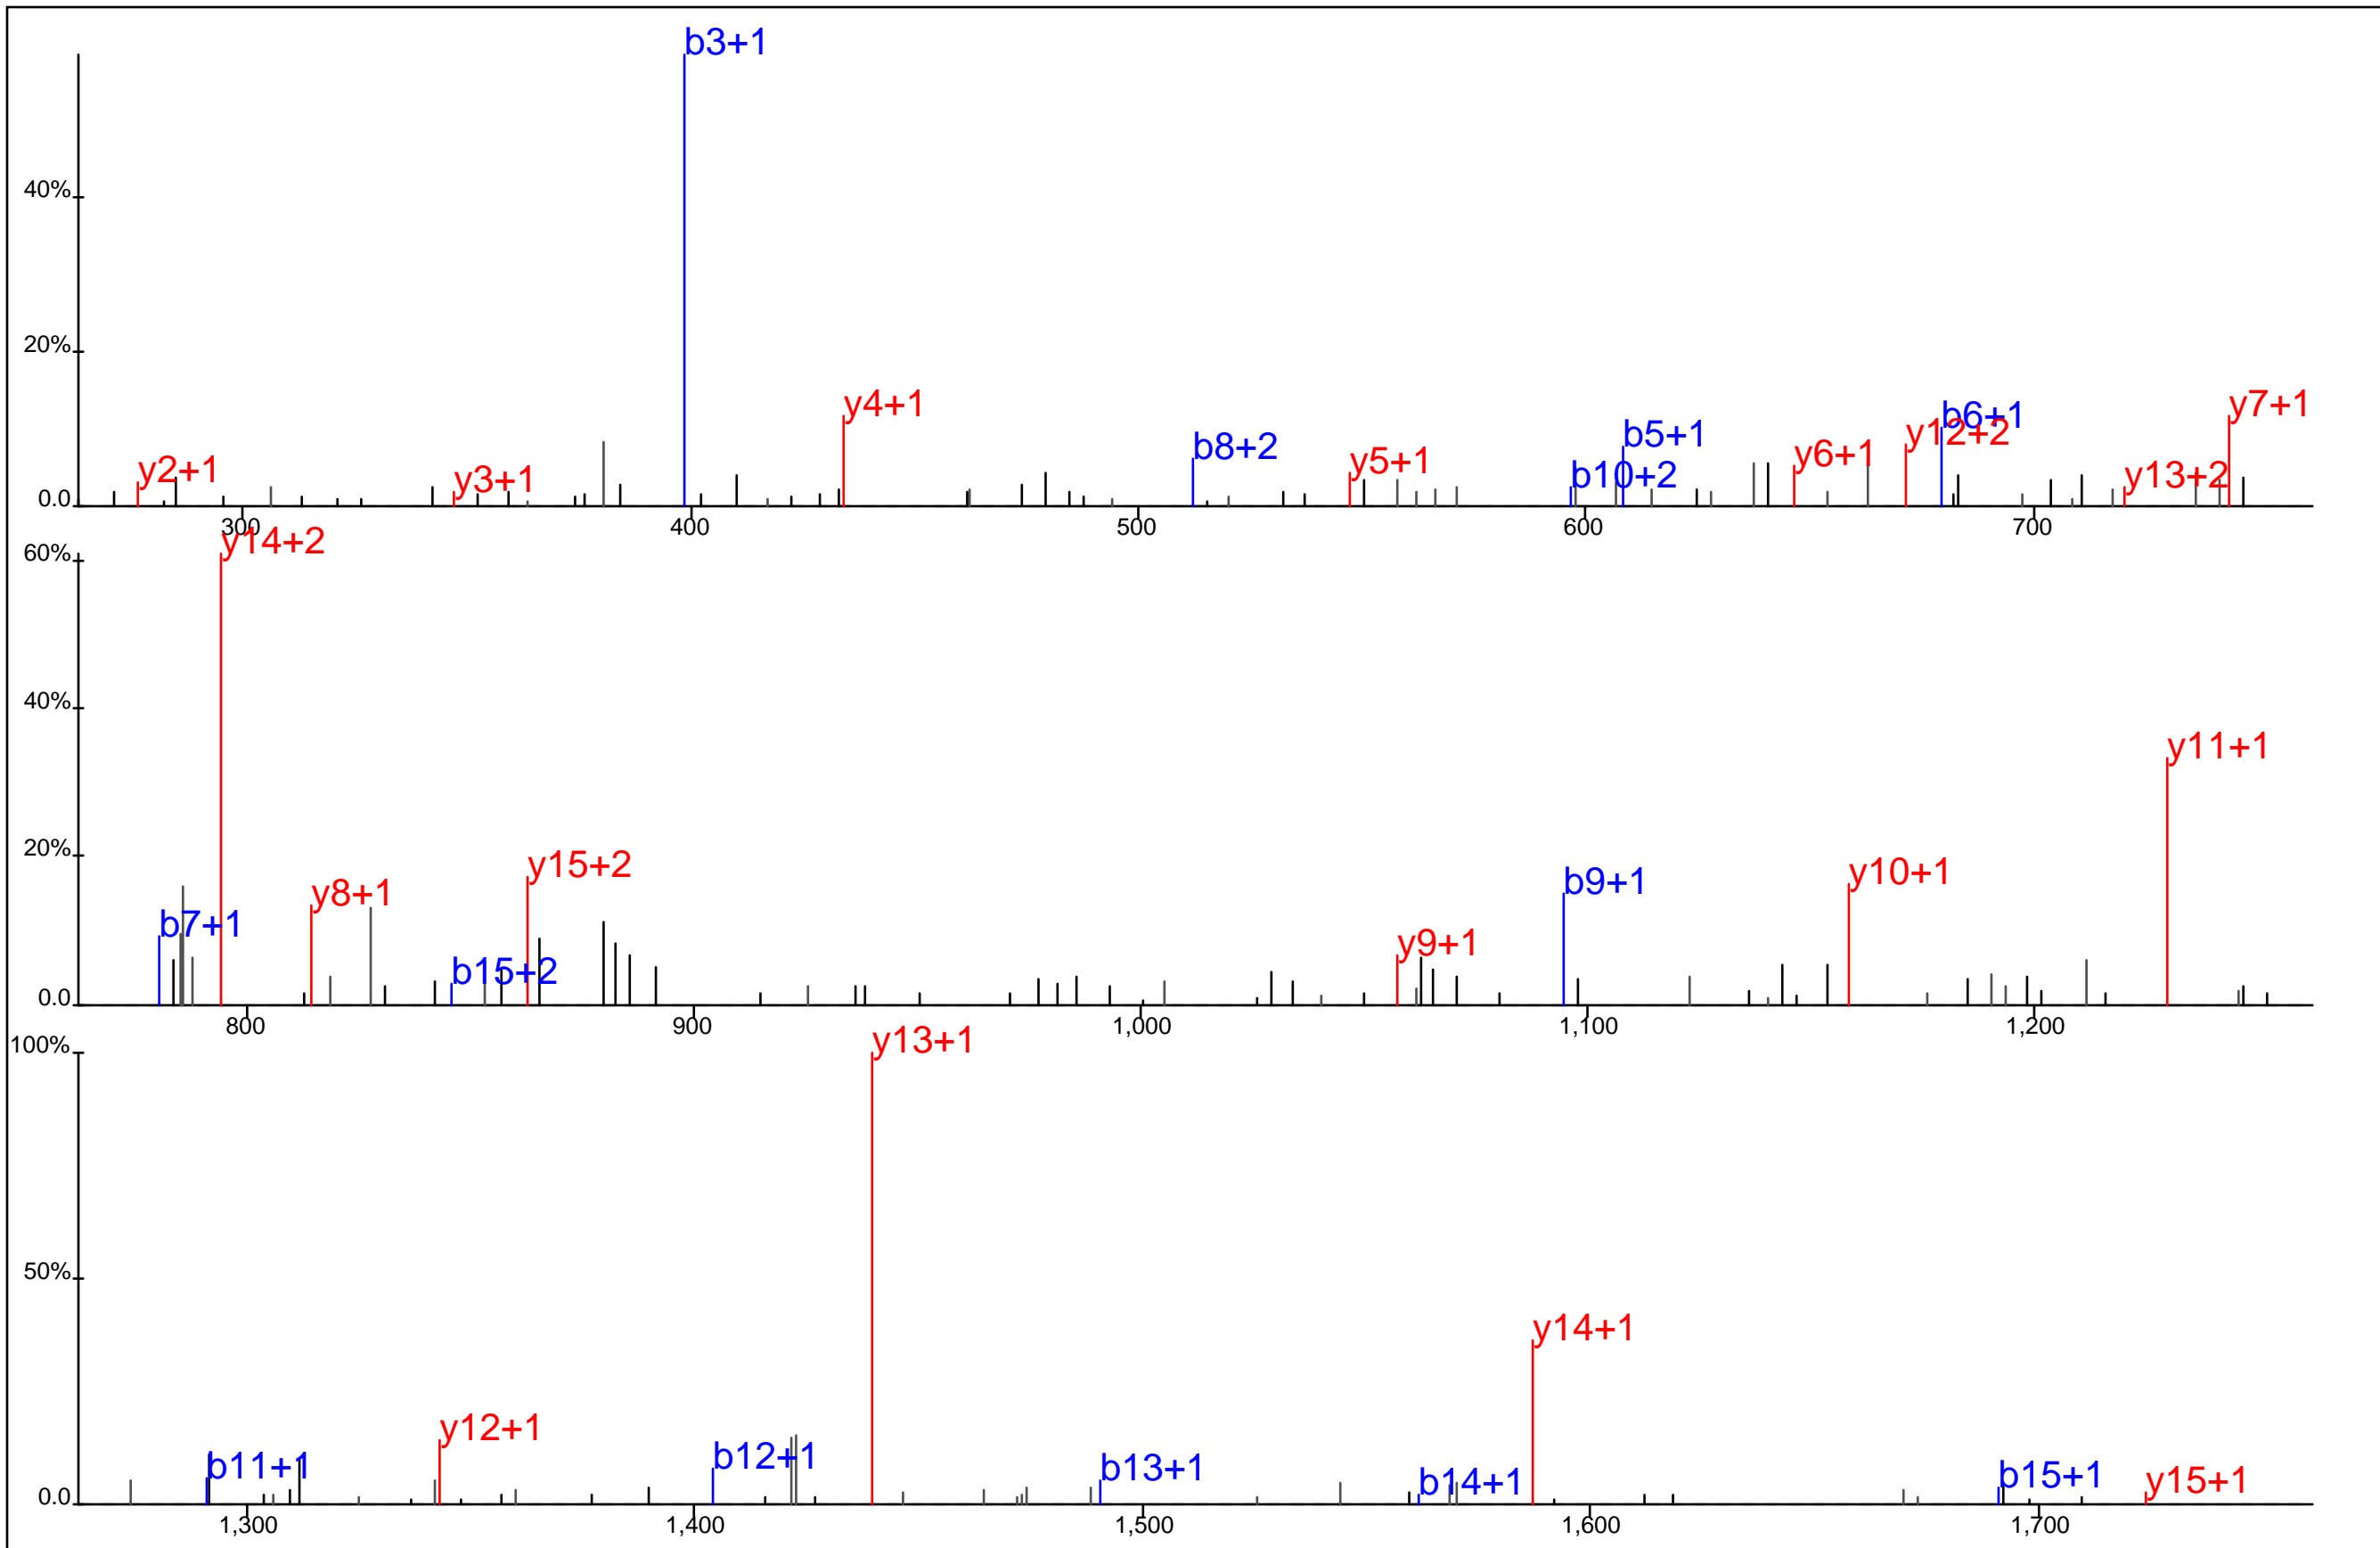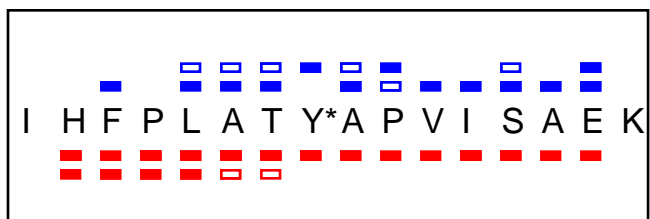

Protein Name: Tubulin alpha 1  
 gi Accession: 0  
 Precursor Mass: 918.9705+2  
 Delta Mass: 2.237 ppm  
 XCorr: 73.51

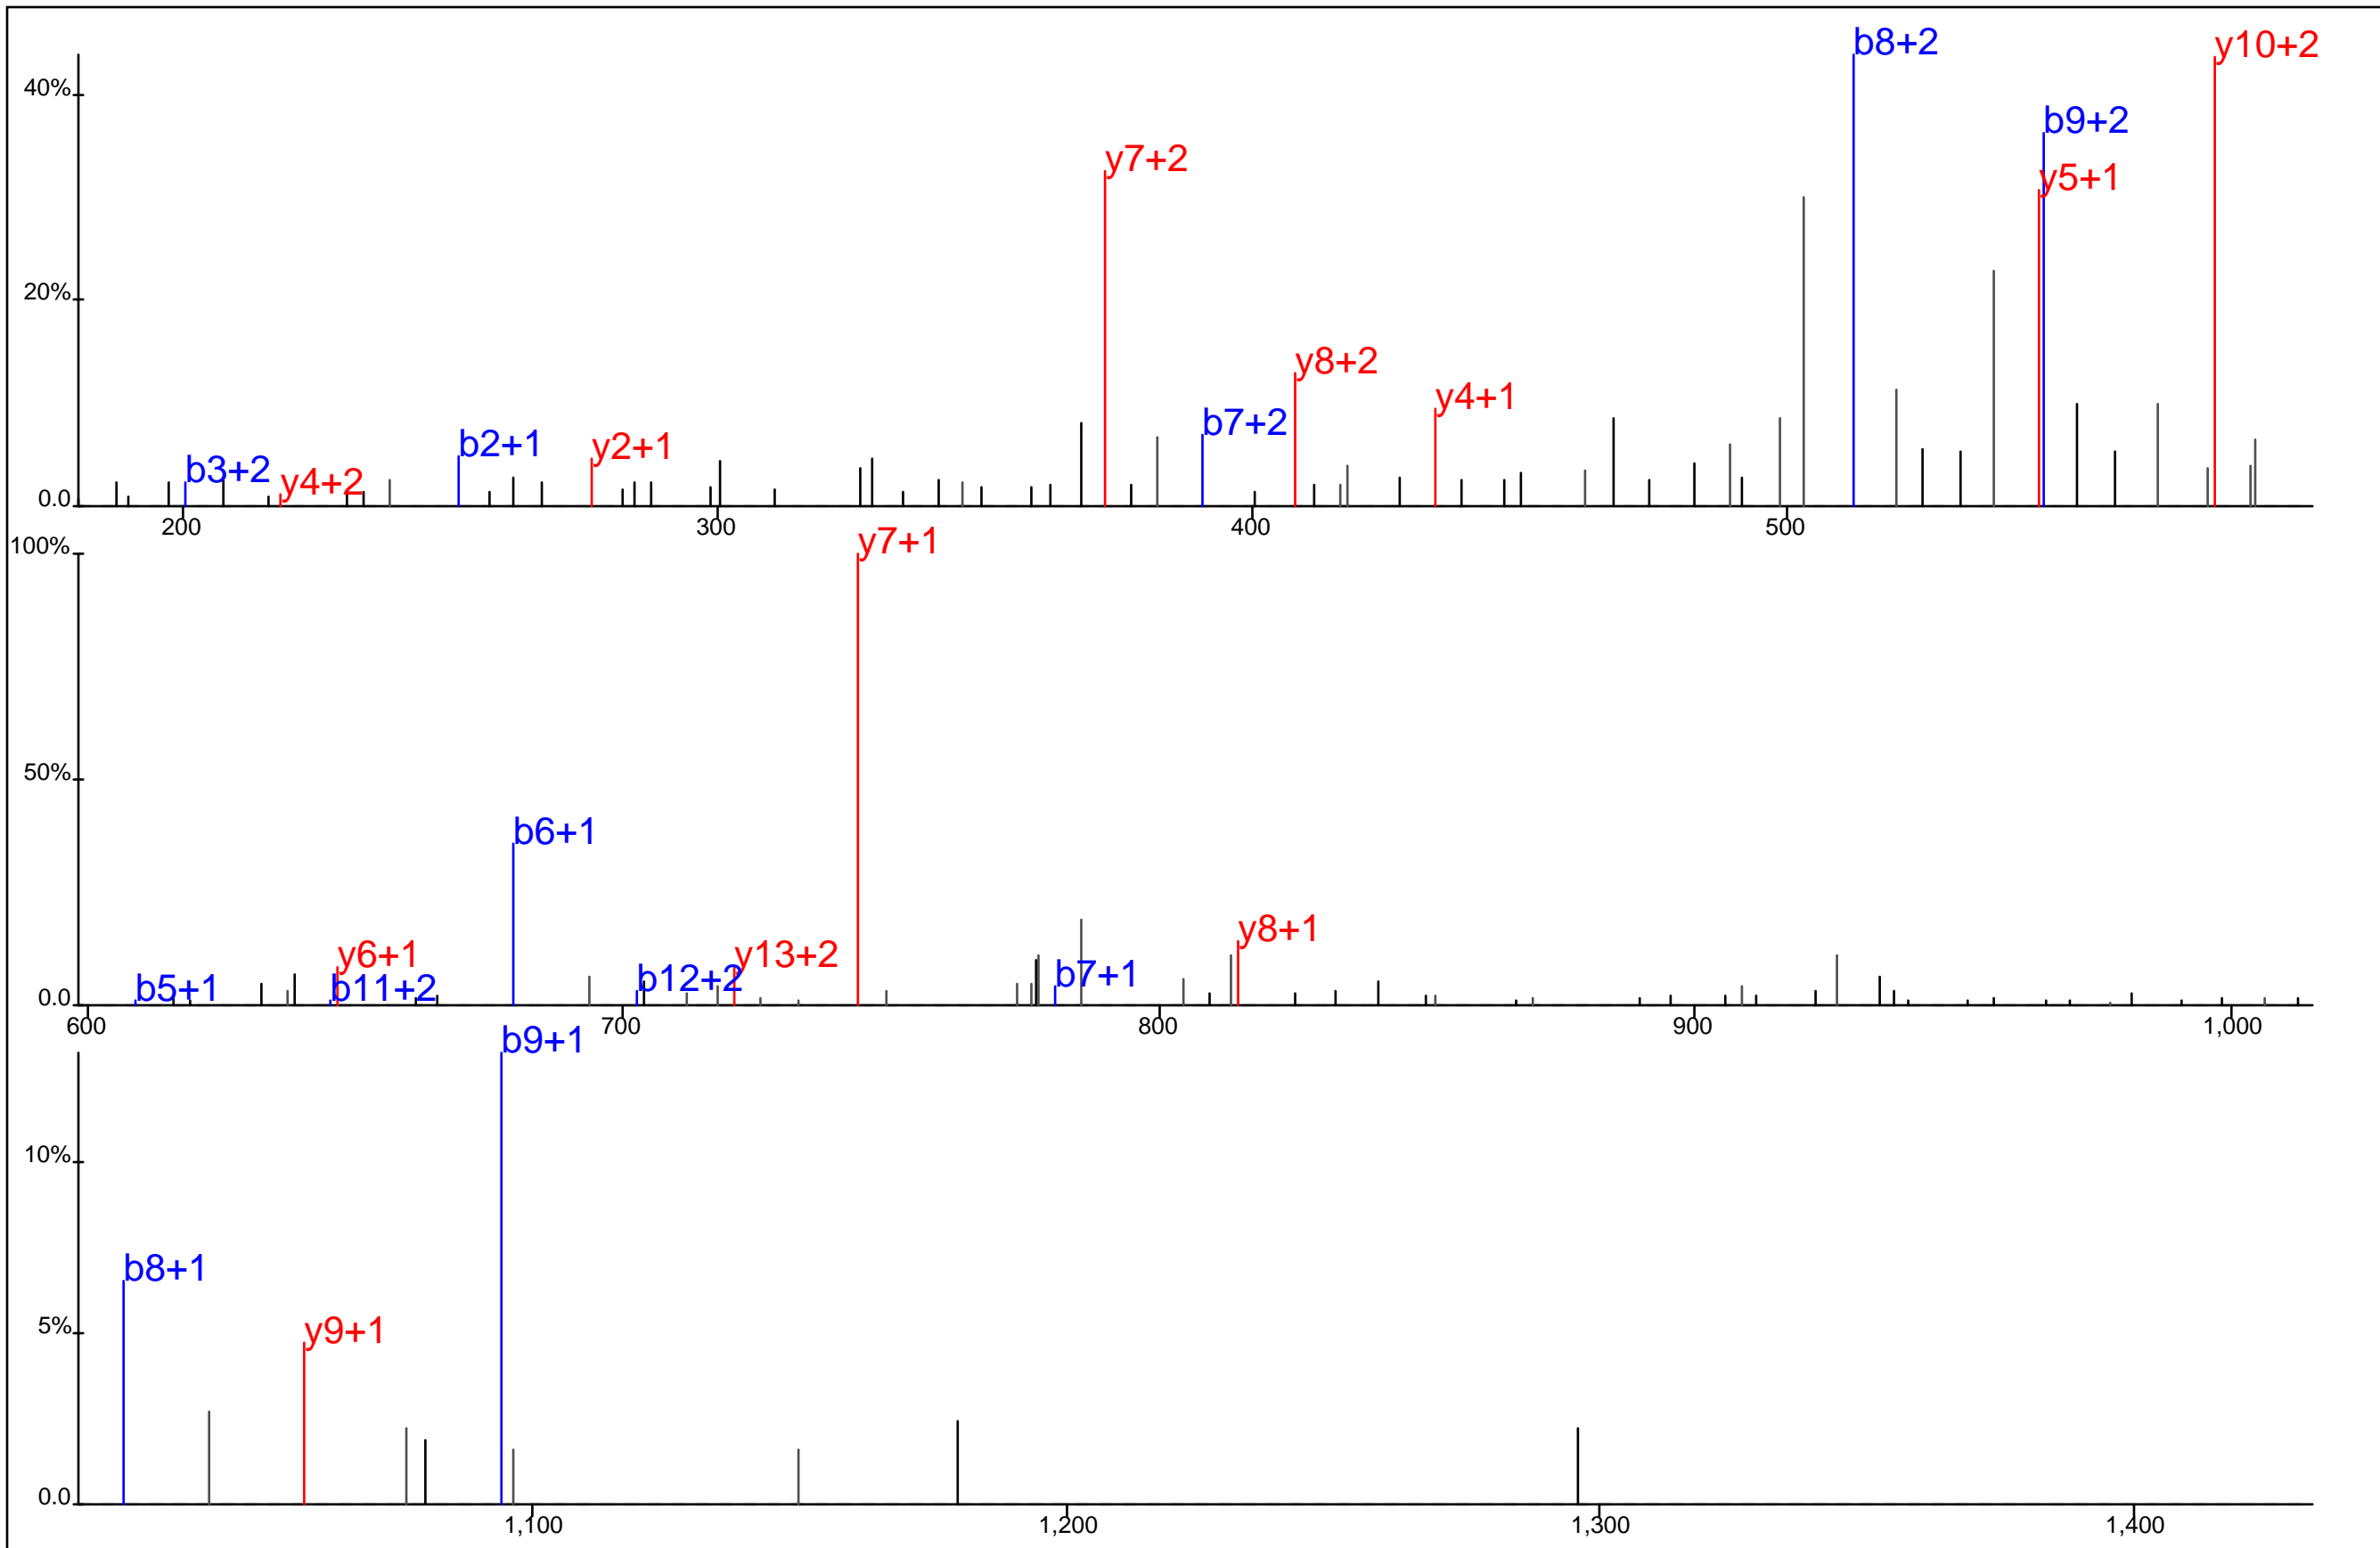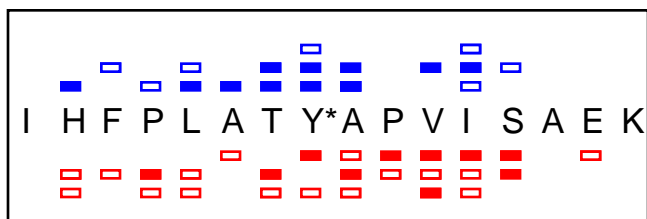

Protein Name: Tubulin alpha 1  
 gi Accession: 0  
 Precursor Mass: 612.9834+3  
 Delta Mass: 3.326 ppm  
 XCorr: 36.09

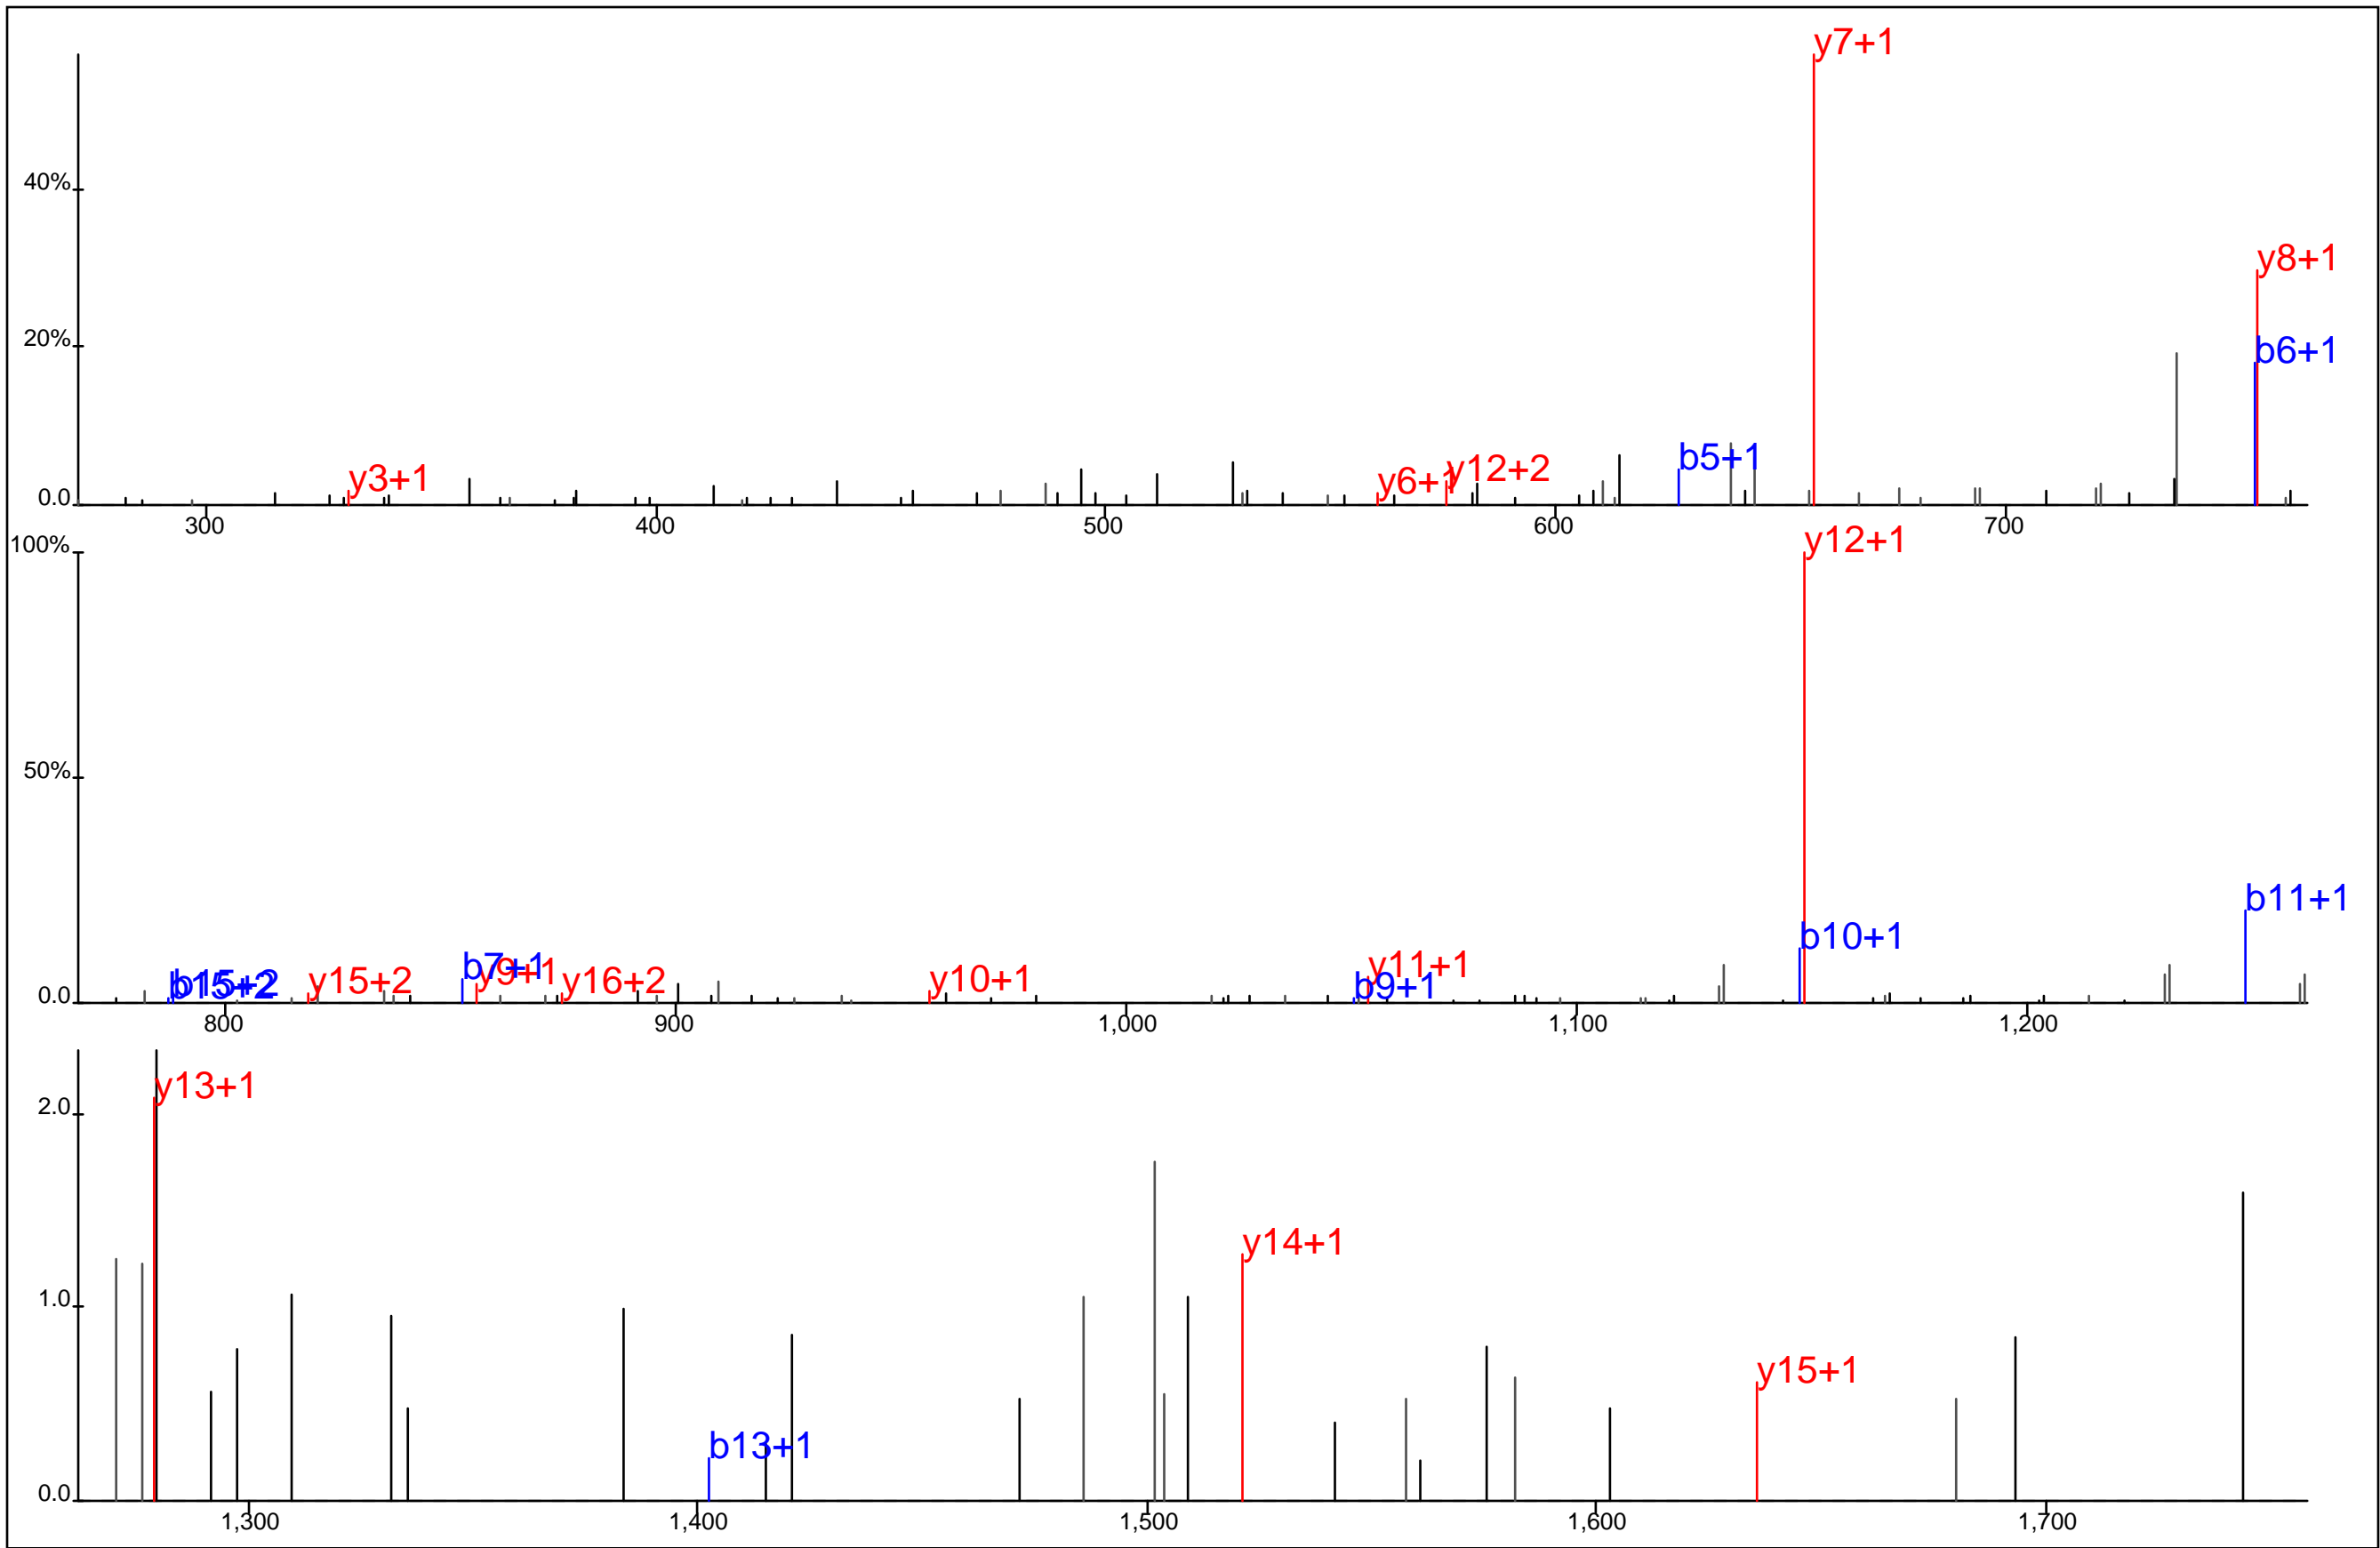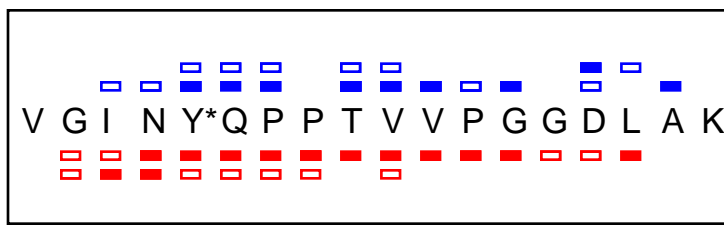

Protein Name: Tubulin alpha 1  
 gi Accession: 0  
 Precursor Mass: 952.9764+2  
 Delta Mass: 3.233 ppm  
 XCorr: 50.18

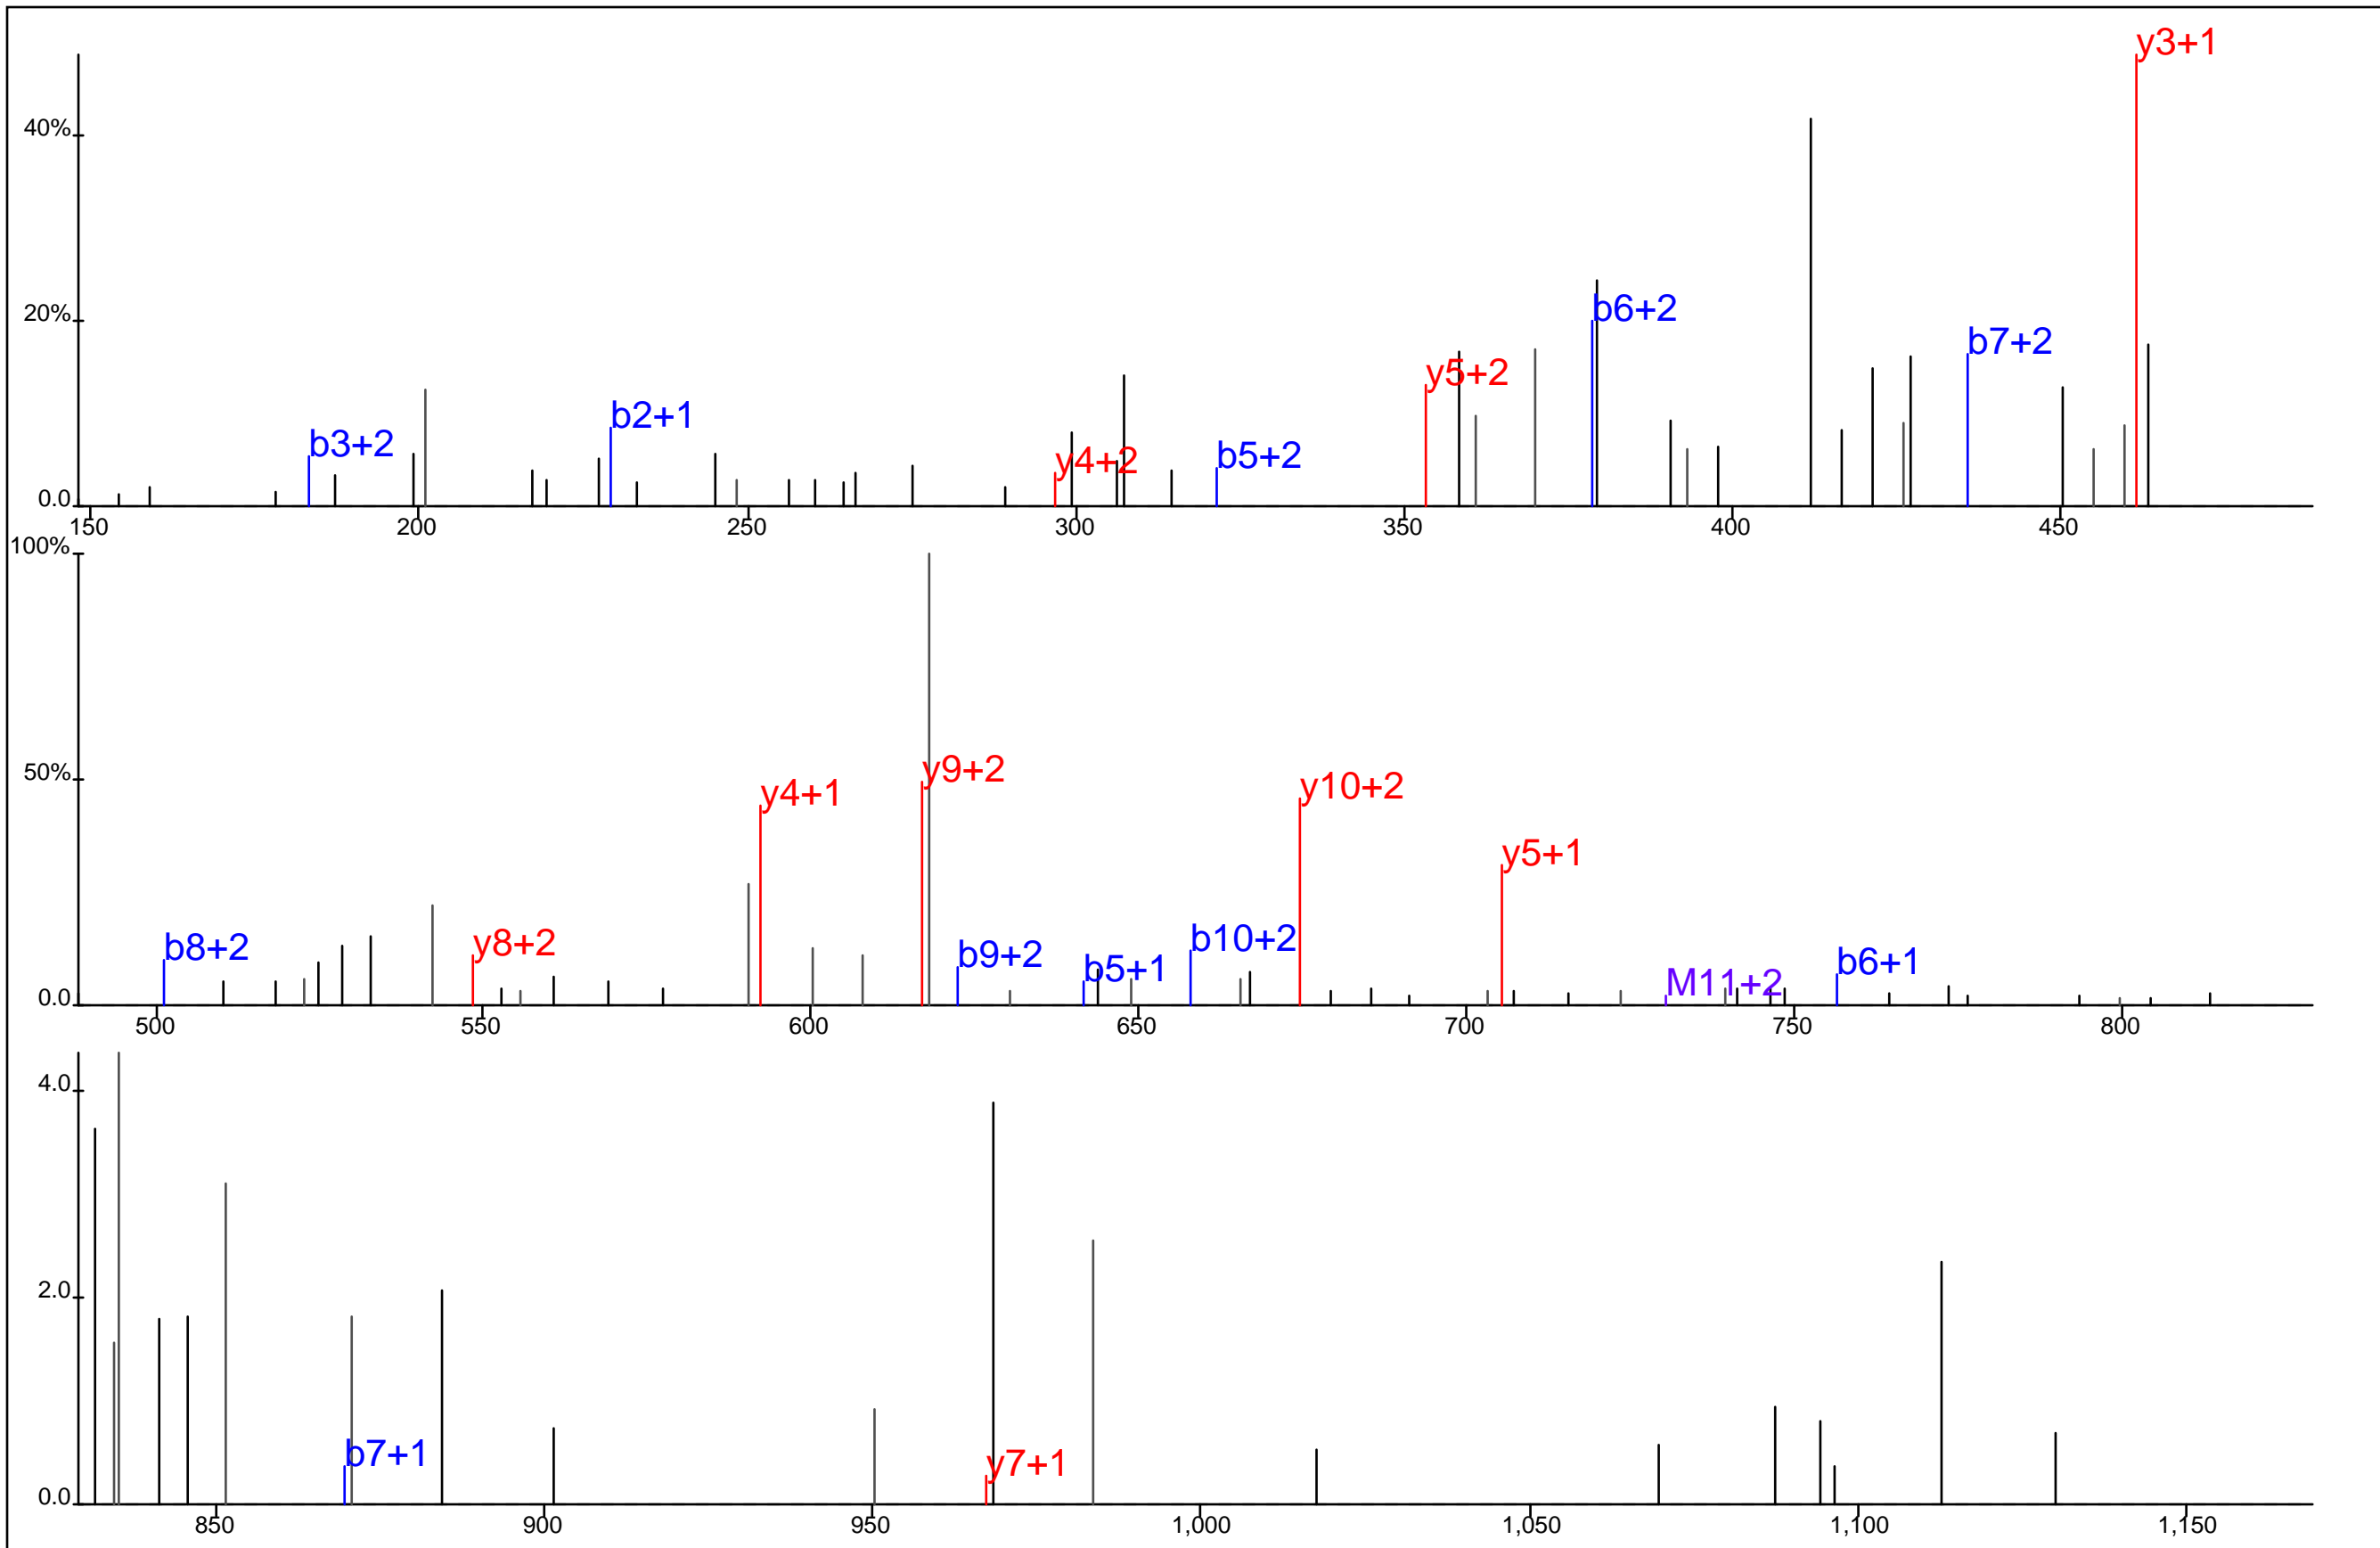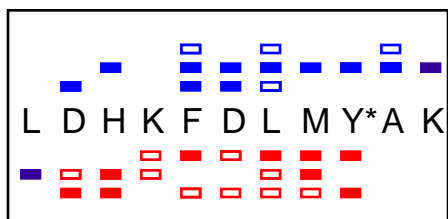

Protein Name: Tubulin alpha 1  
 gi Accession: 0  
 Precursor Mass: 487.5594+3  
 Delta Mass: 0.431 ppm  
 XCorr: 22.21

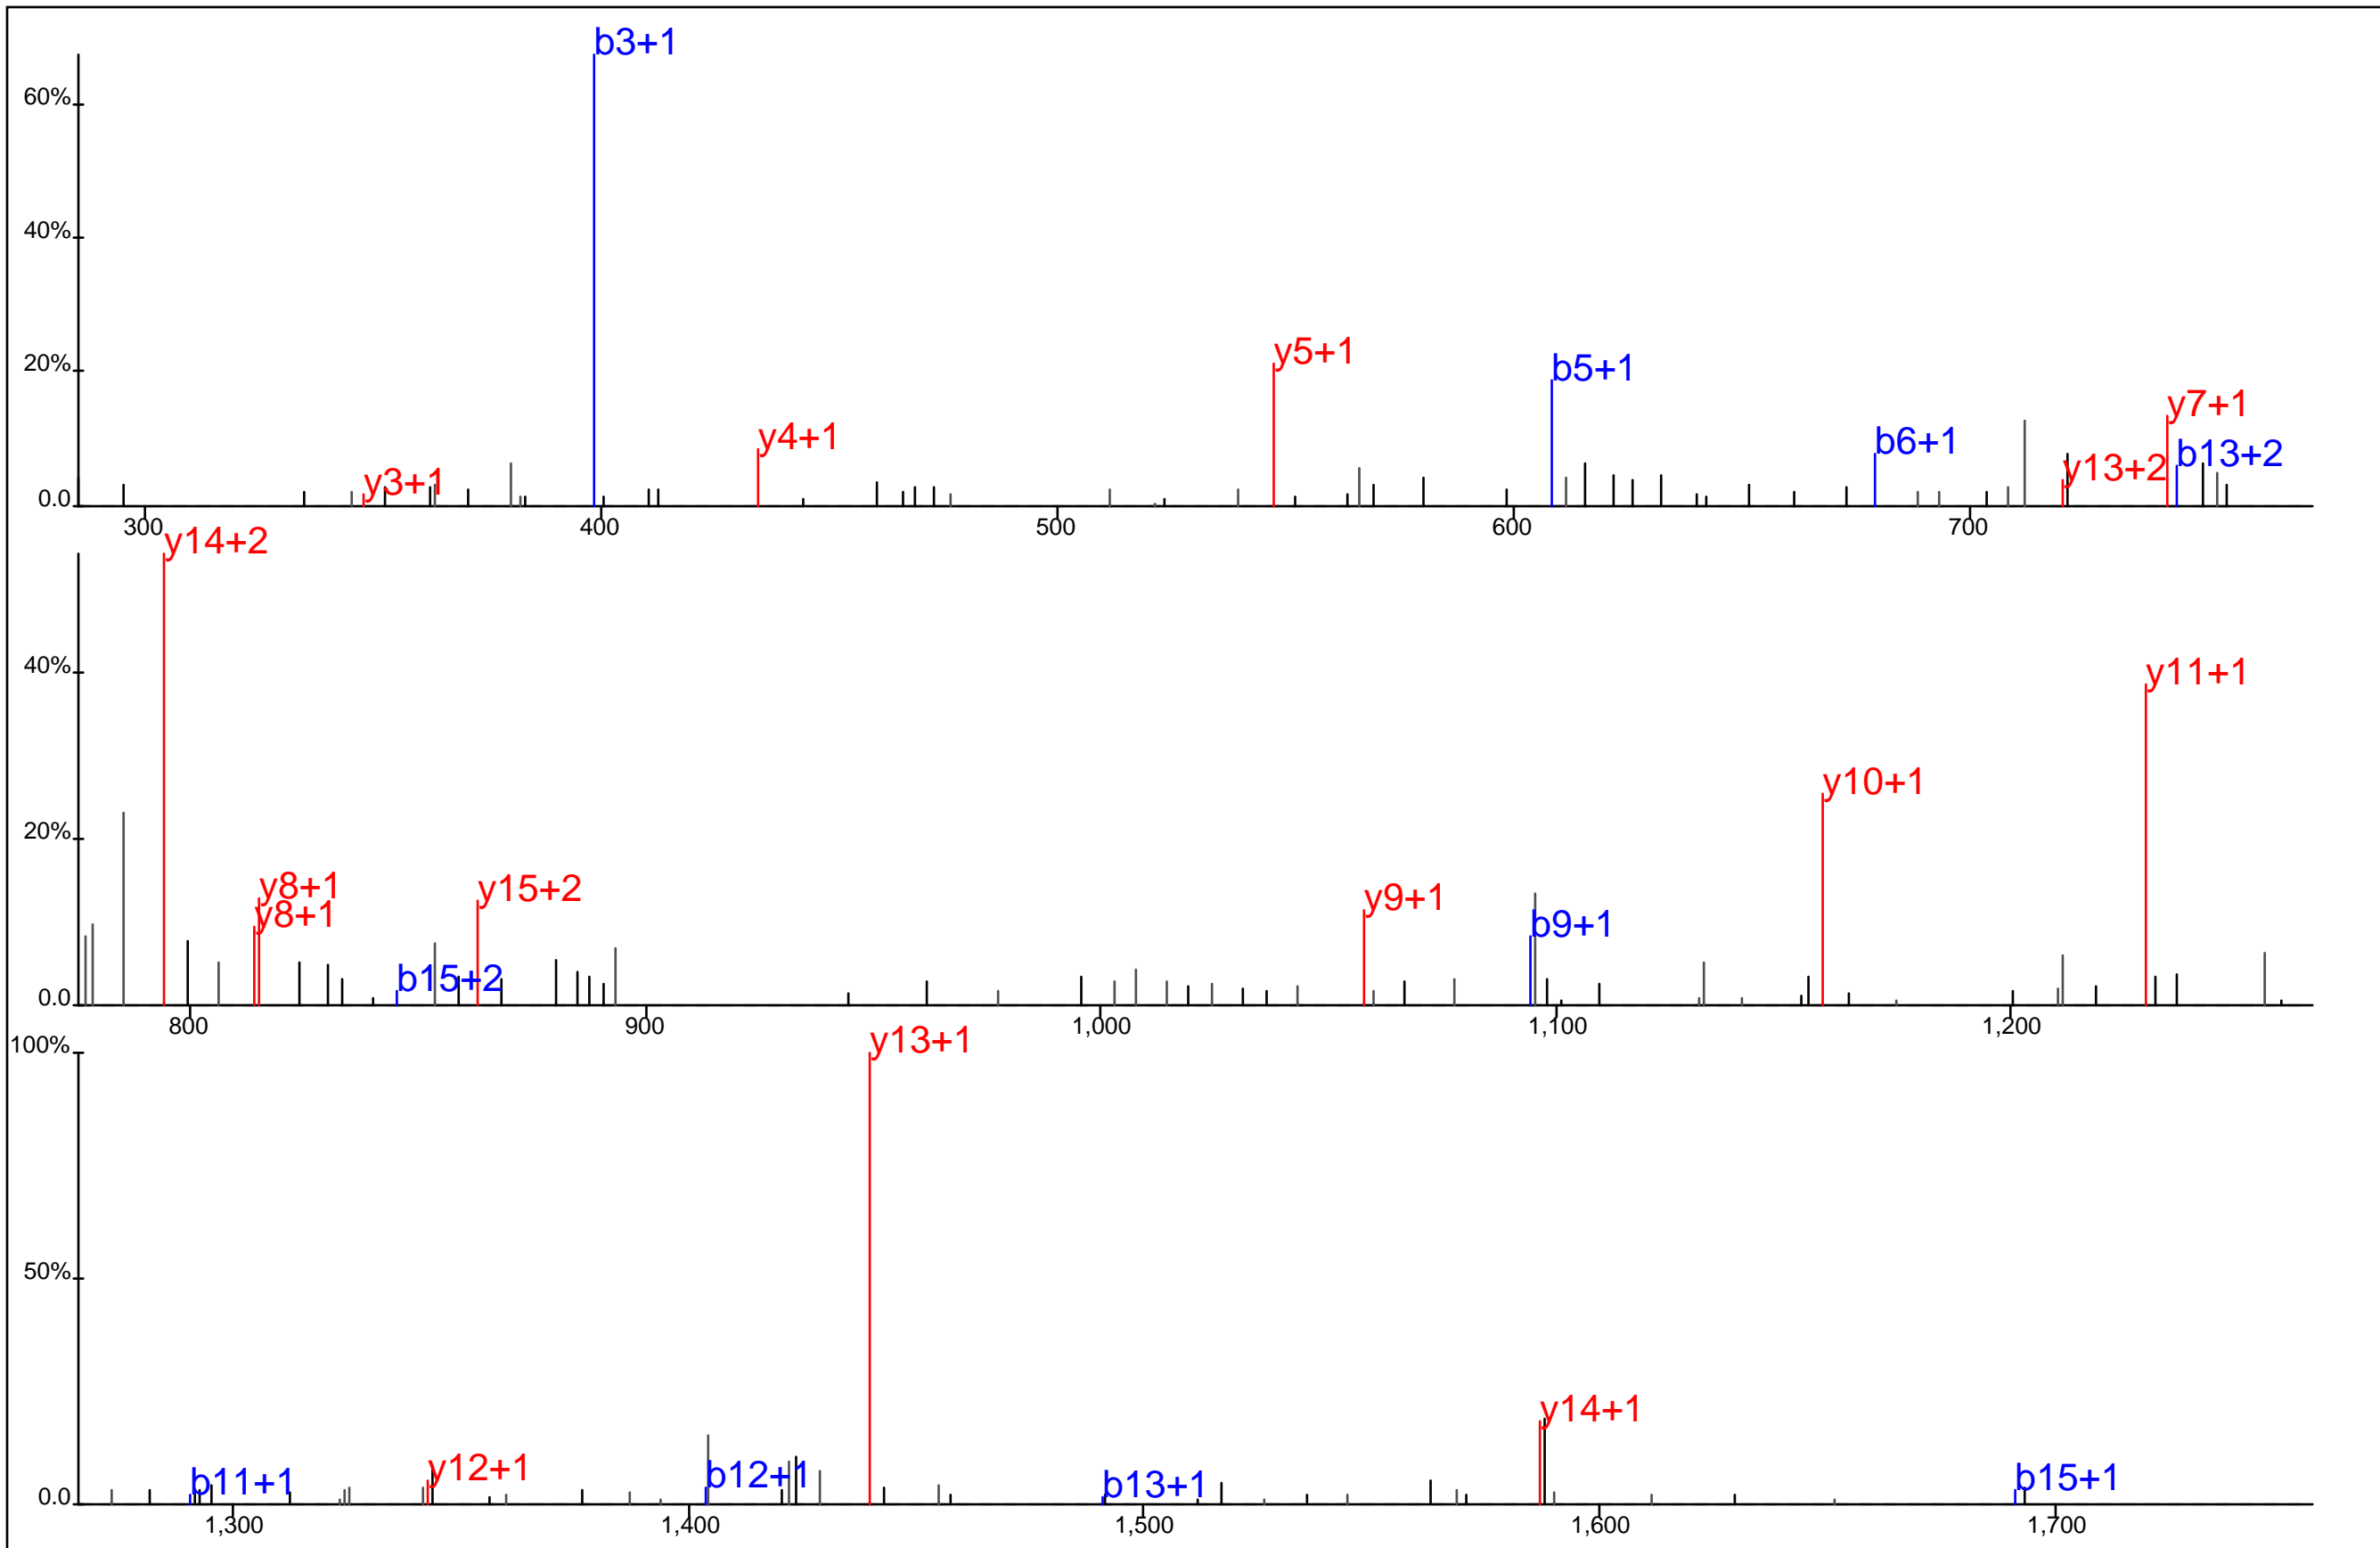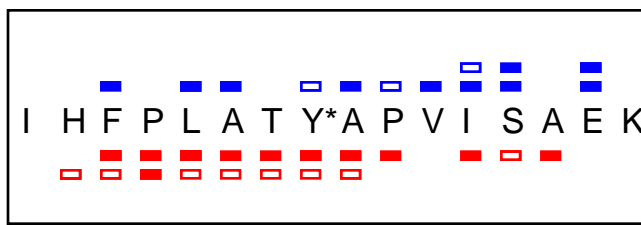

Protein Name: Tubulin alpha 1  
 gi Accession: 0  
 Precursor Mass: 918.9683+2  
 Delta Mass: 0.088 ppm  
 XCorr: 60.45

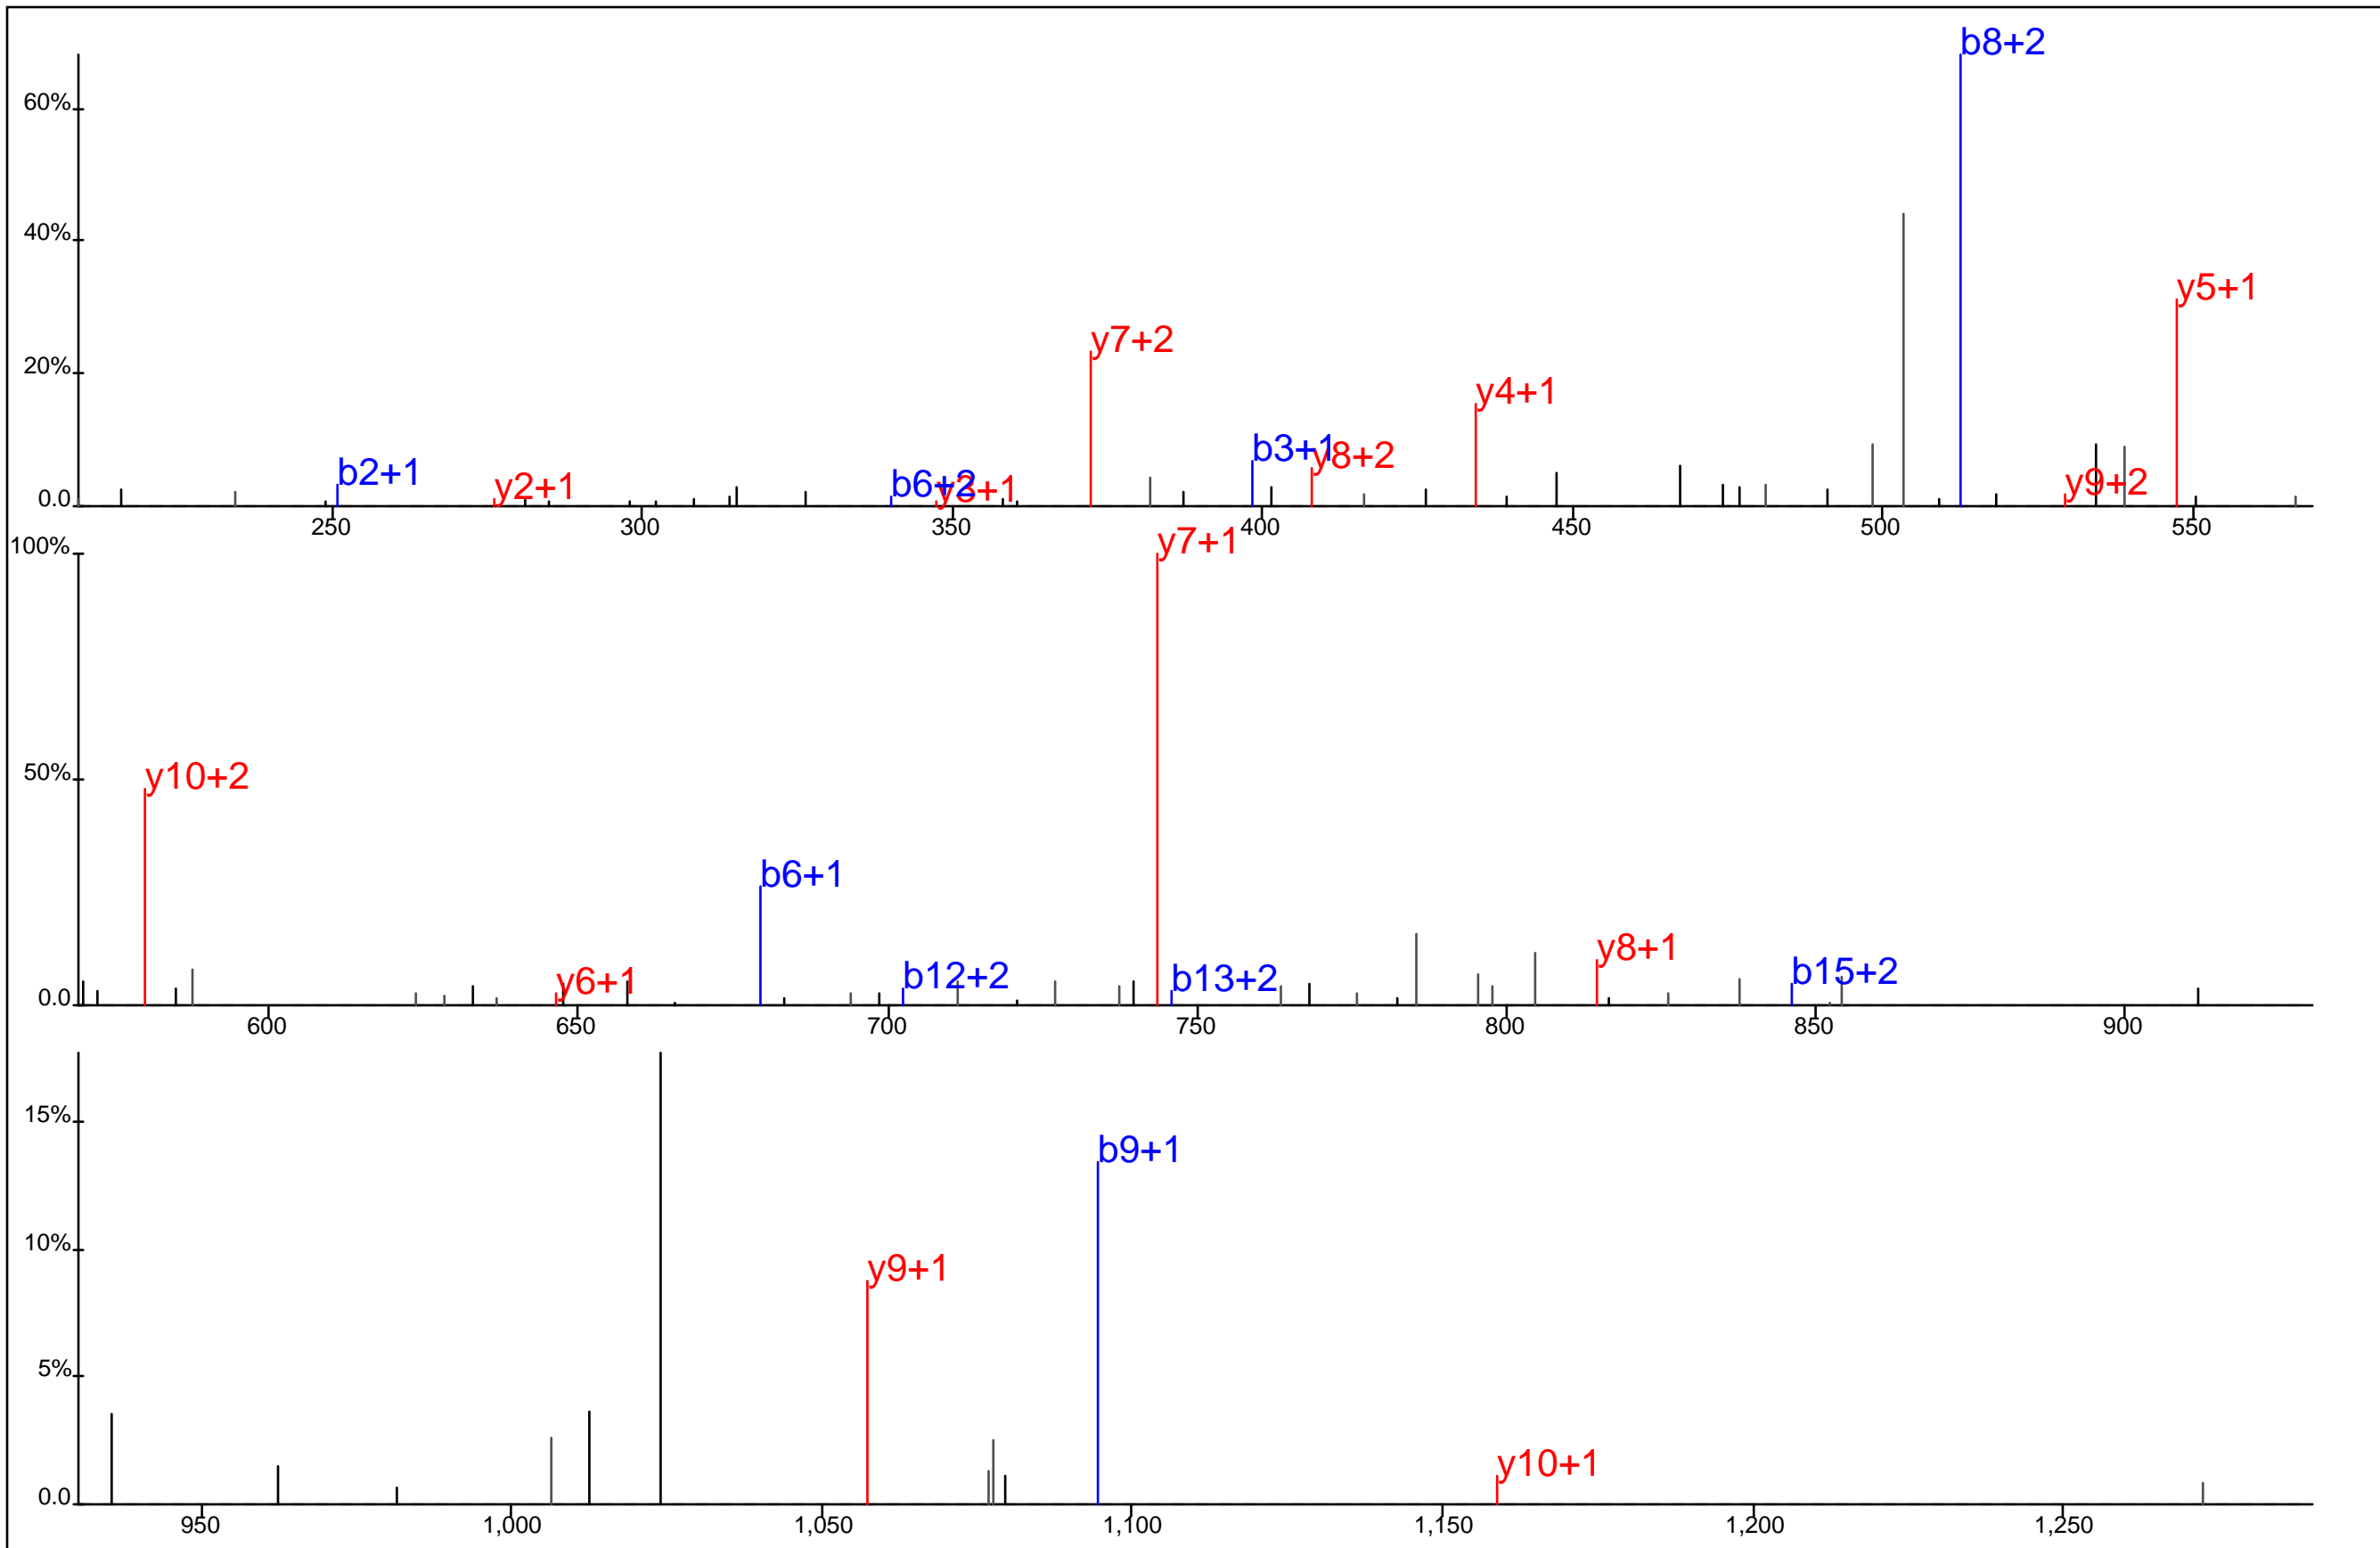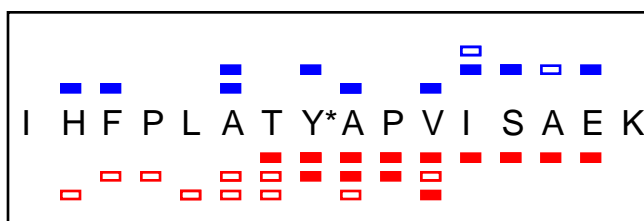

Protein Name: Tubulin alpha 1  
 gi Accession: 0  
 Precursor Mass: 612.9819+3  
 Delta Mass: 0.836 ppm  
 XCorr: 37.94



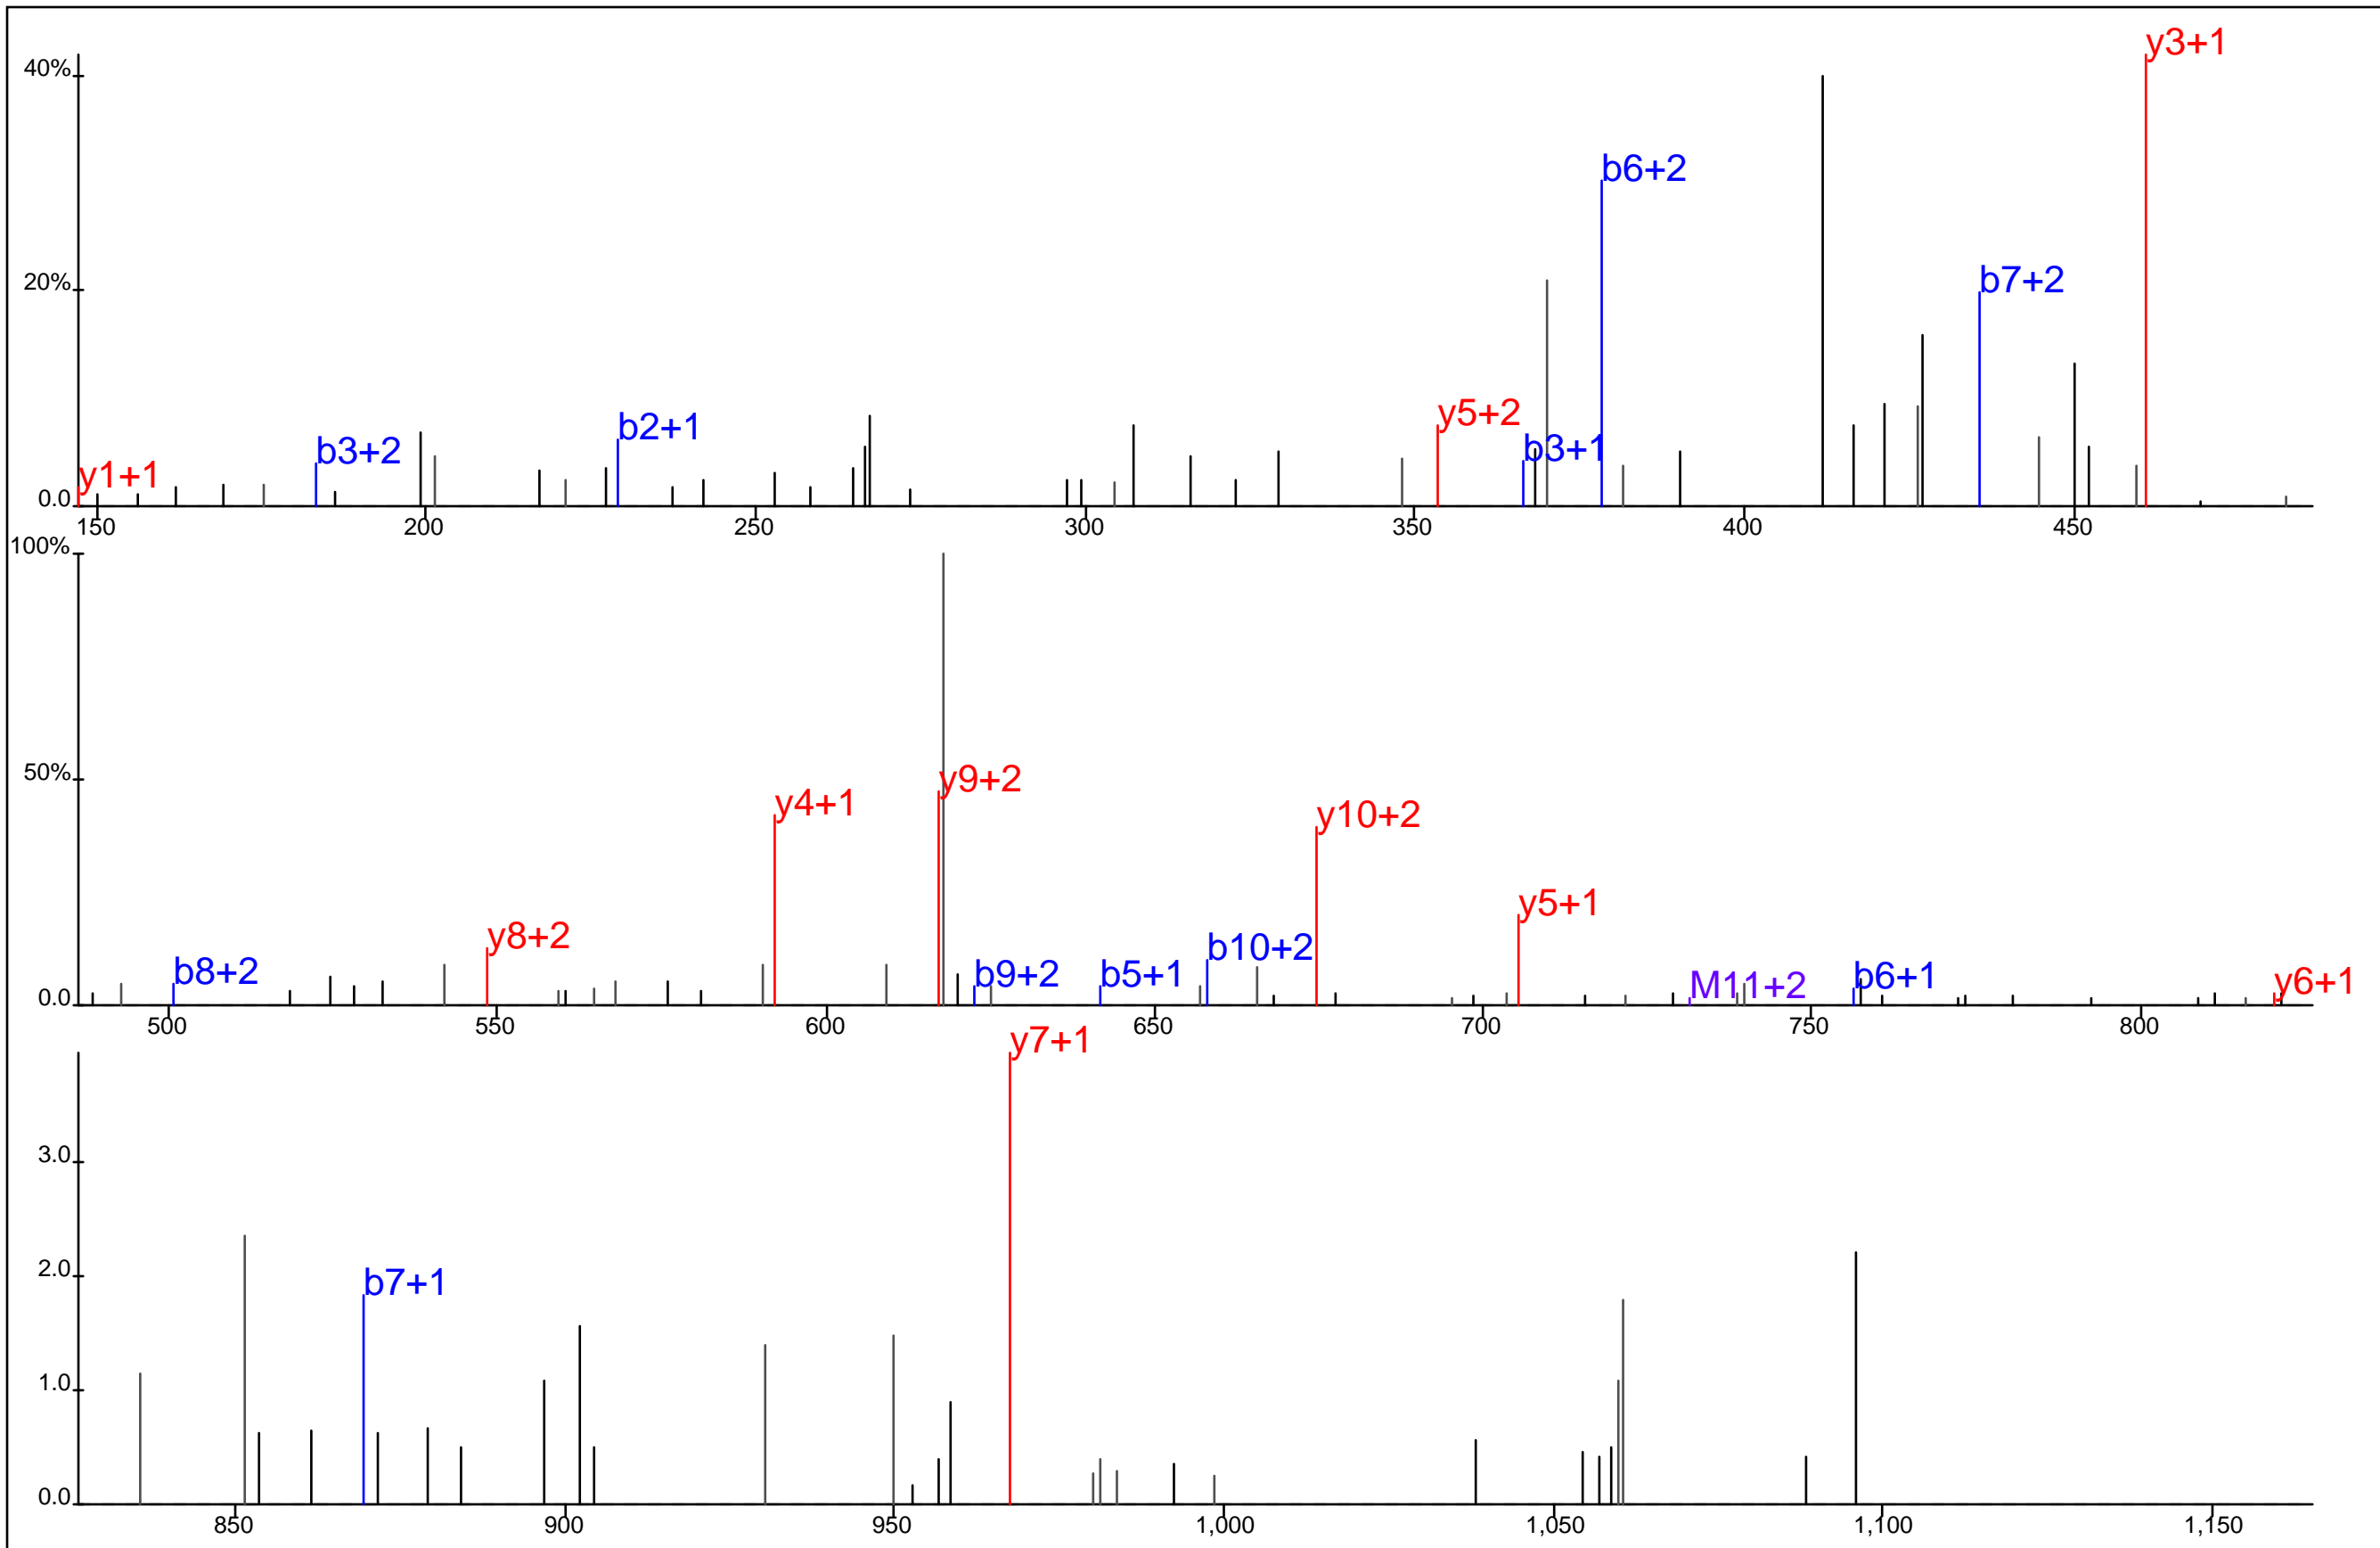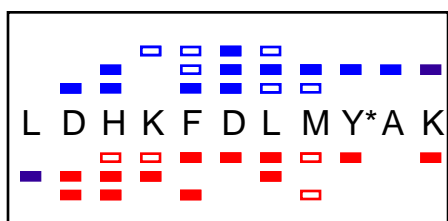

Protein Name: Tubulin alpha 1  
 gi Accession: 0  
 Precursor Mass: 487.5599+3  
 Delta Mass: 0.571 ppm  
 XCorr: 22.71

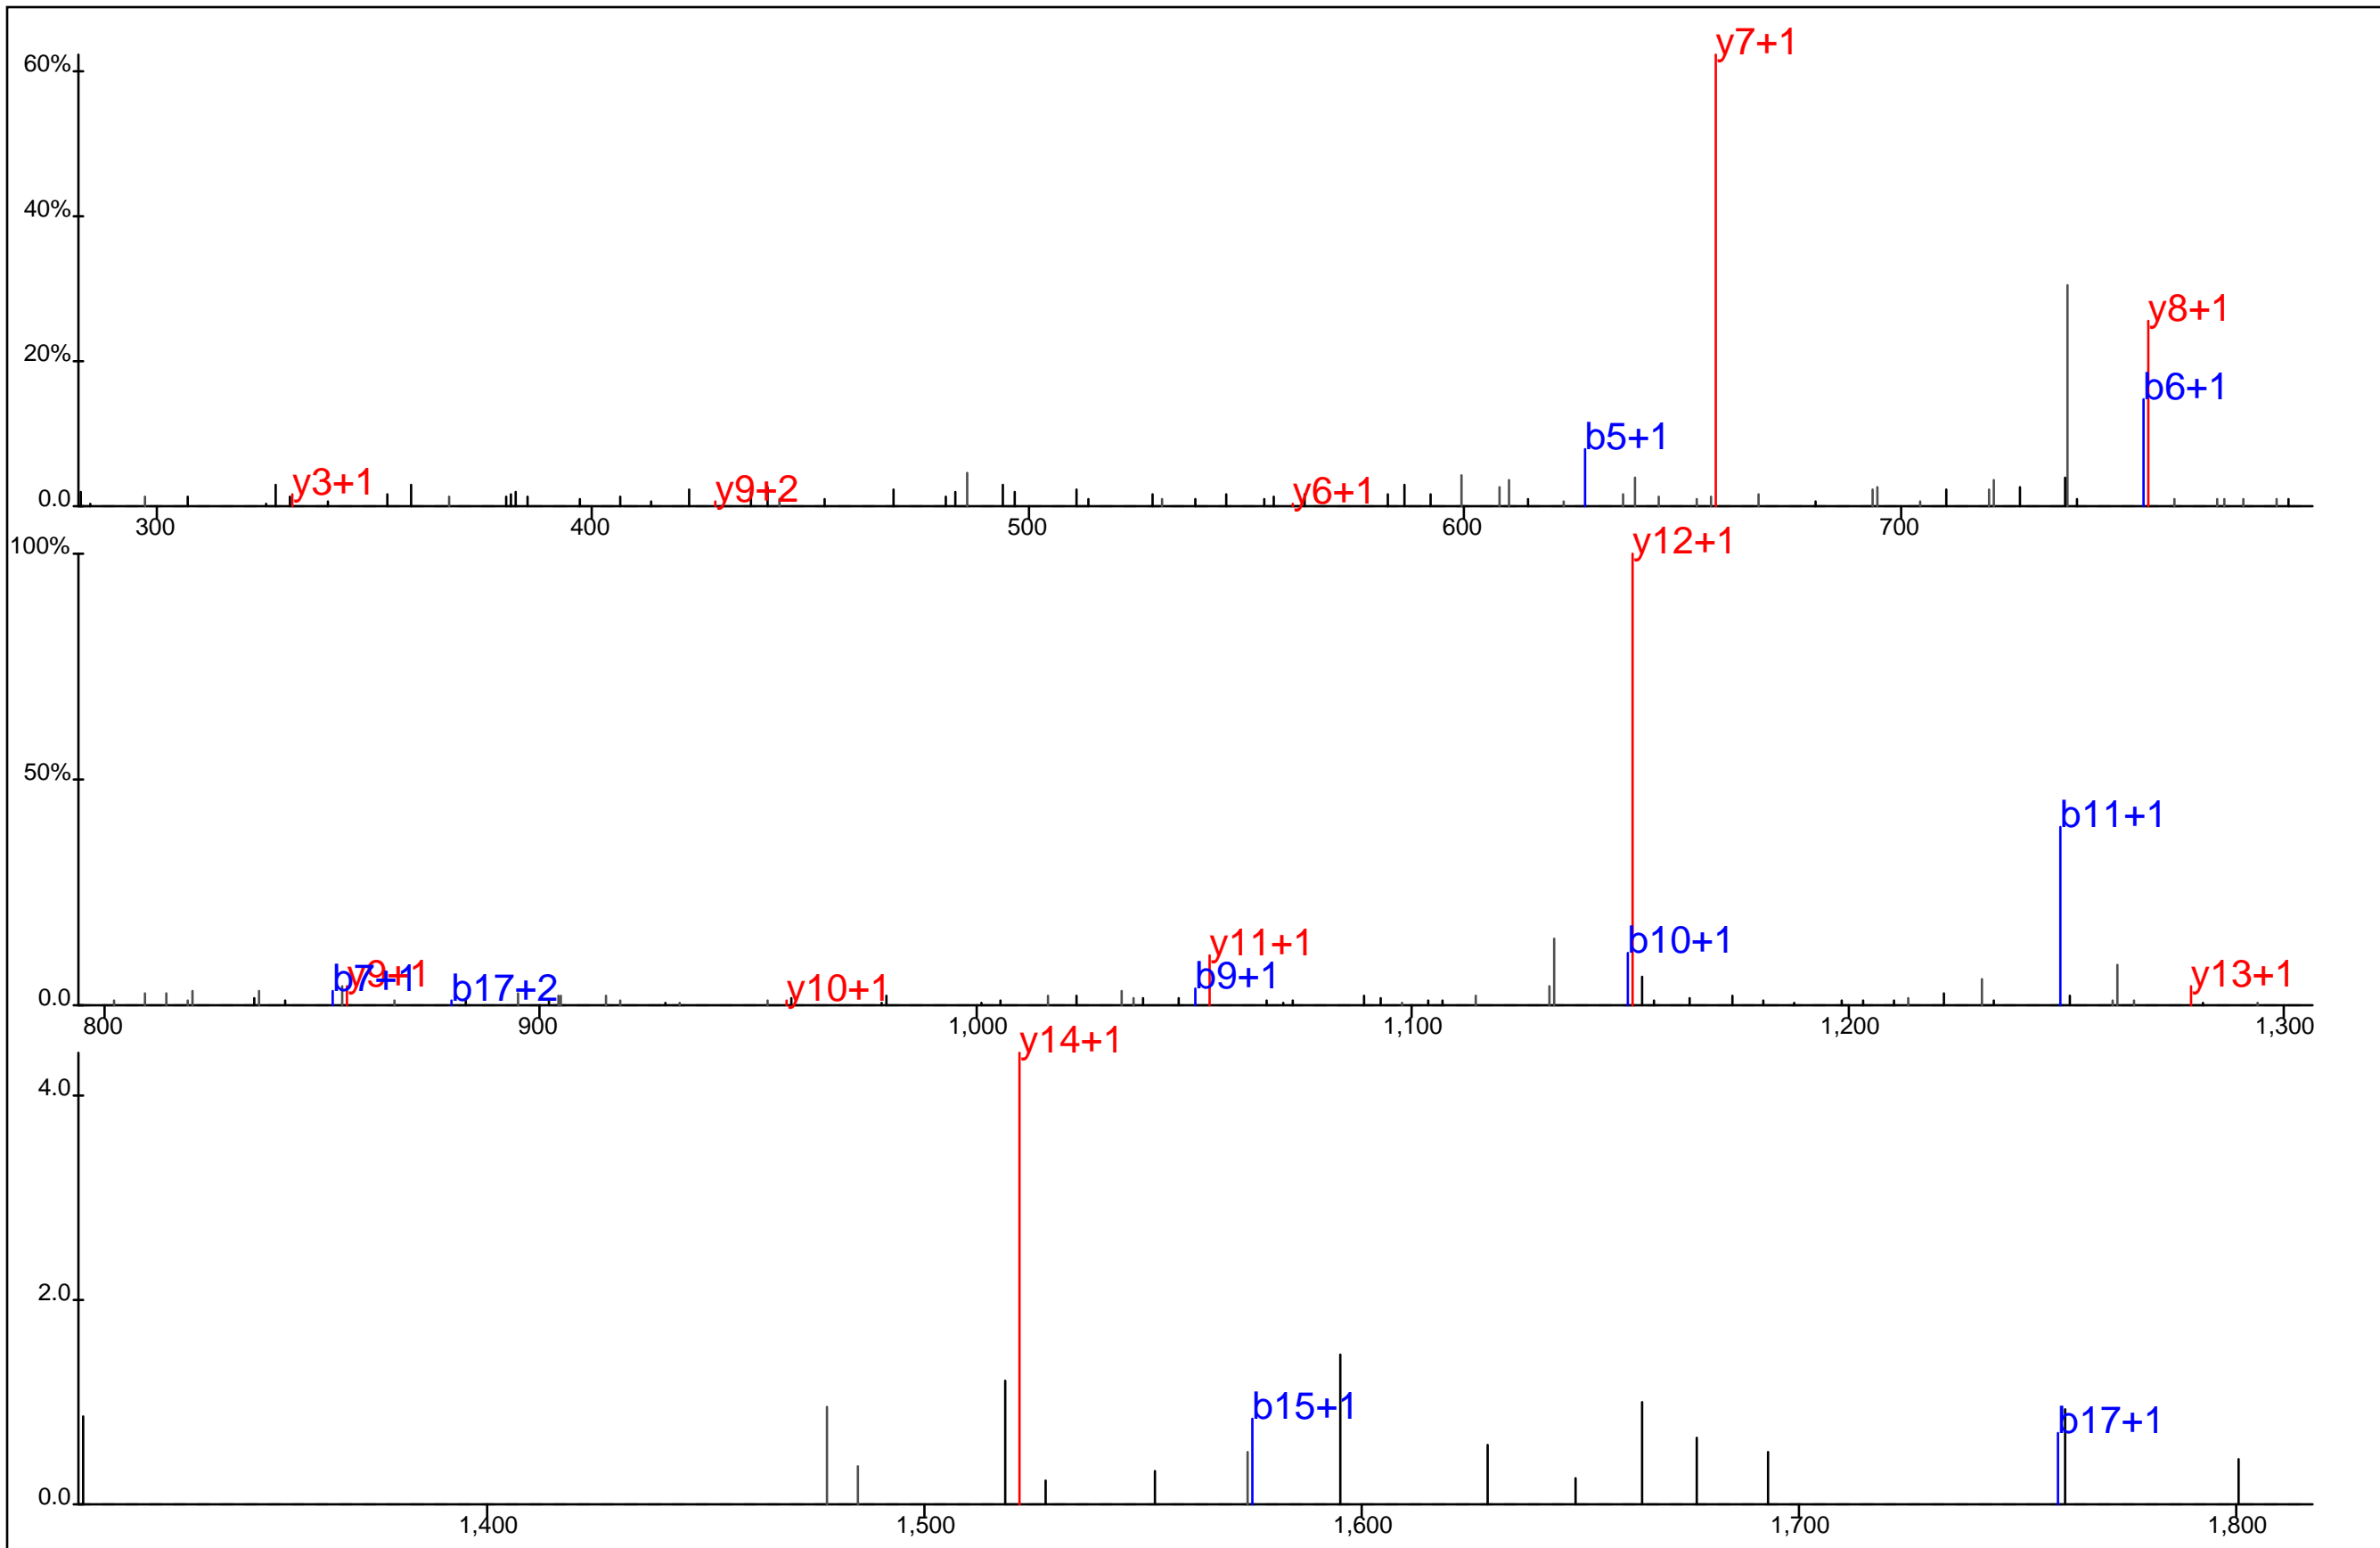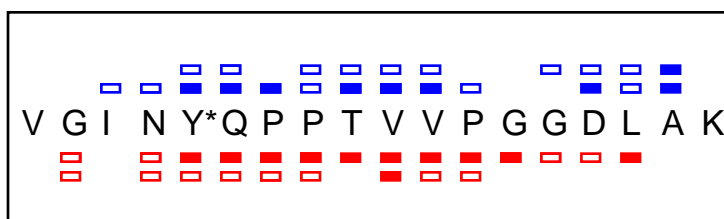

Protein Name: Tubulin alpha 1  
 gi Accession: 0  
 Precursor Mass: 952.9824+2  
 Delta Mass: 2.984 ppm  
 XCorr: 32.95

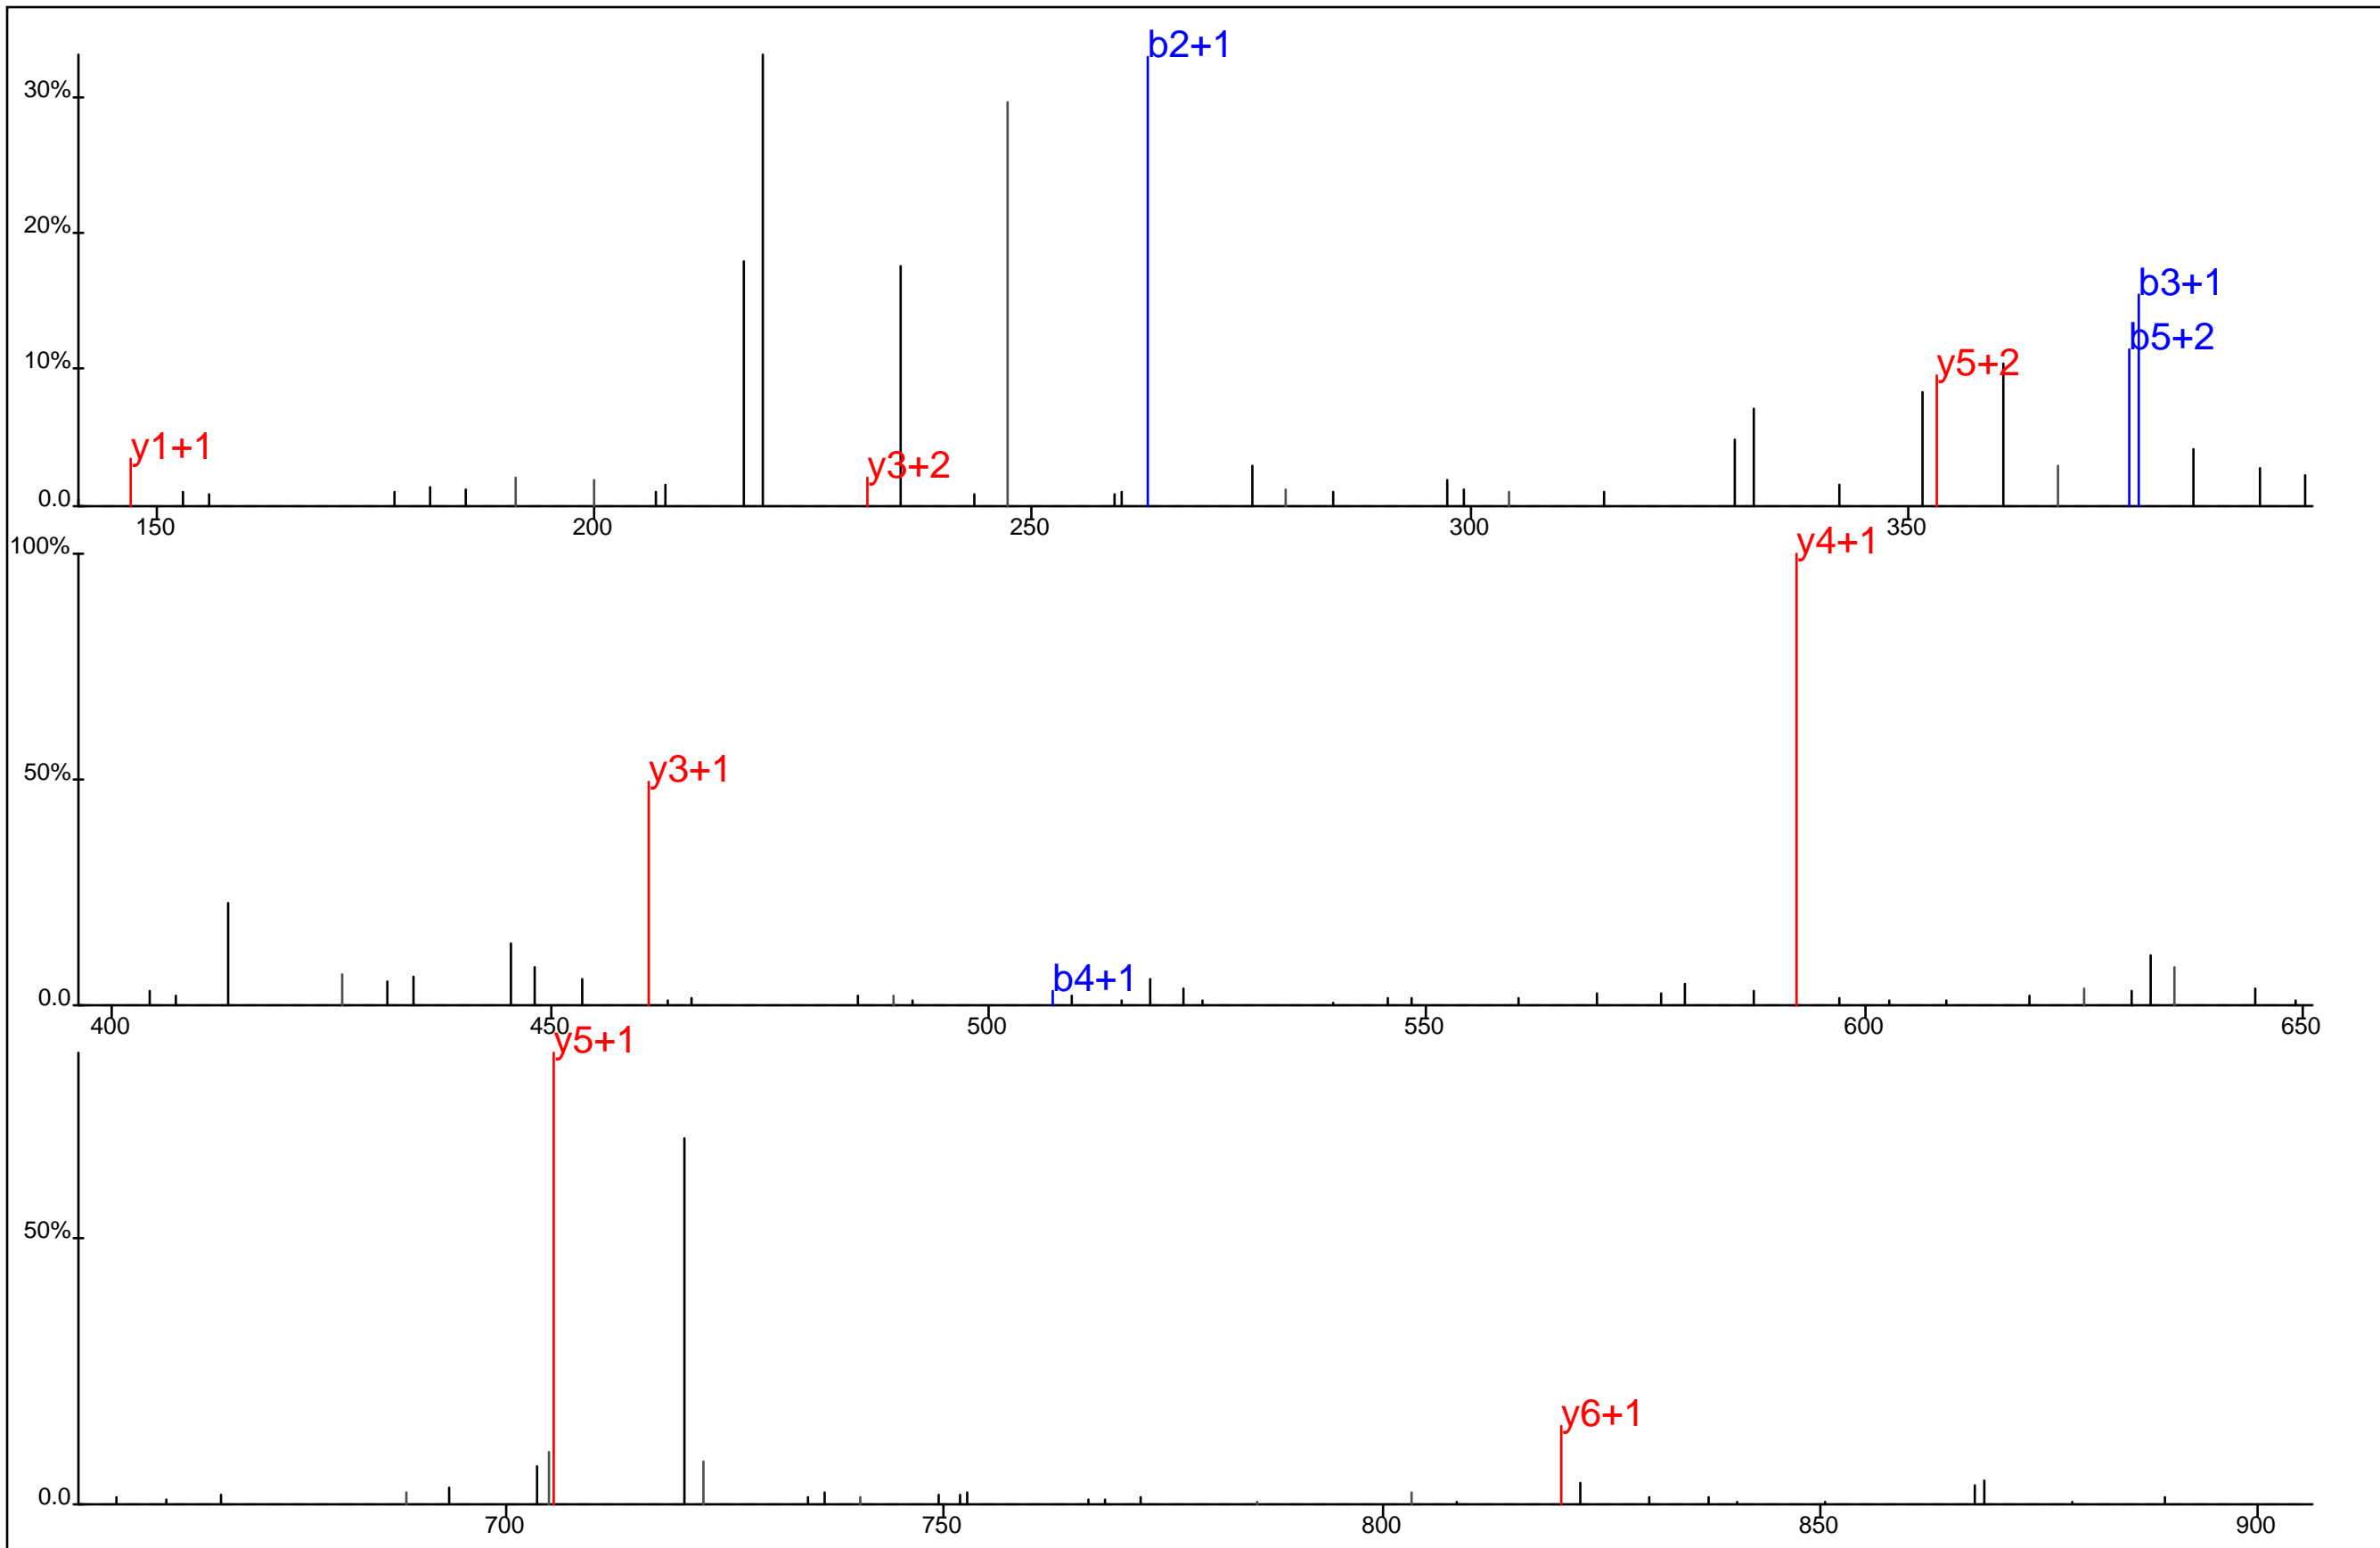

■ ■ ■ ■ ■ ■  
□ □ □ □ □ □  
**F D L M Y\* A K**

Protein Name: Tubulin alpha 1  
 gi Accession: 0  
 Precursor Mass: 484.2037+2  
 Delta Mass: 0.757 ppm  
 XCorr: 23.5

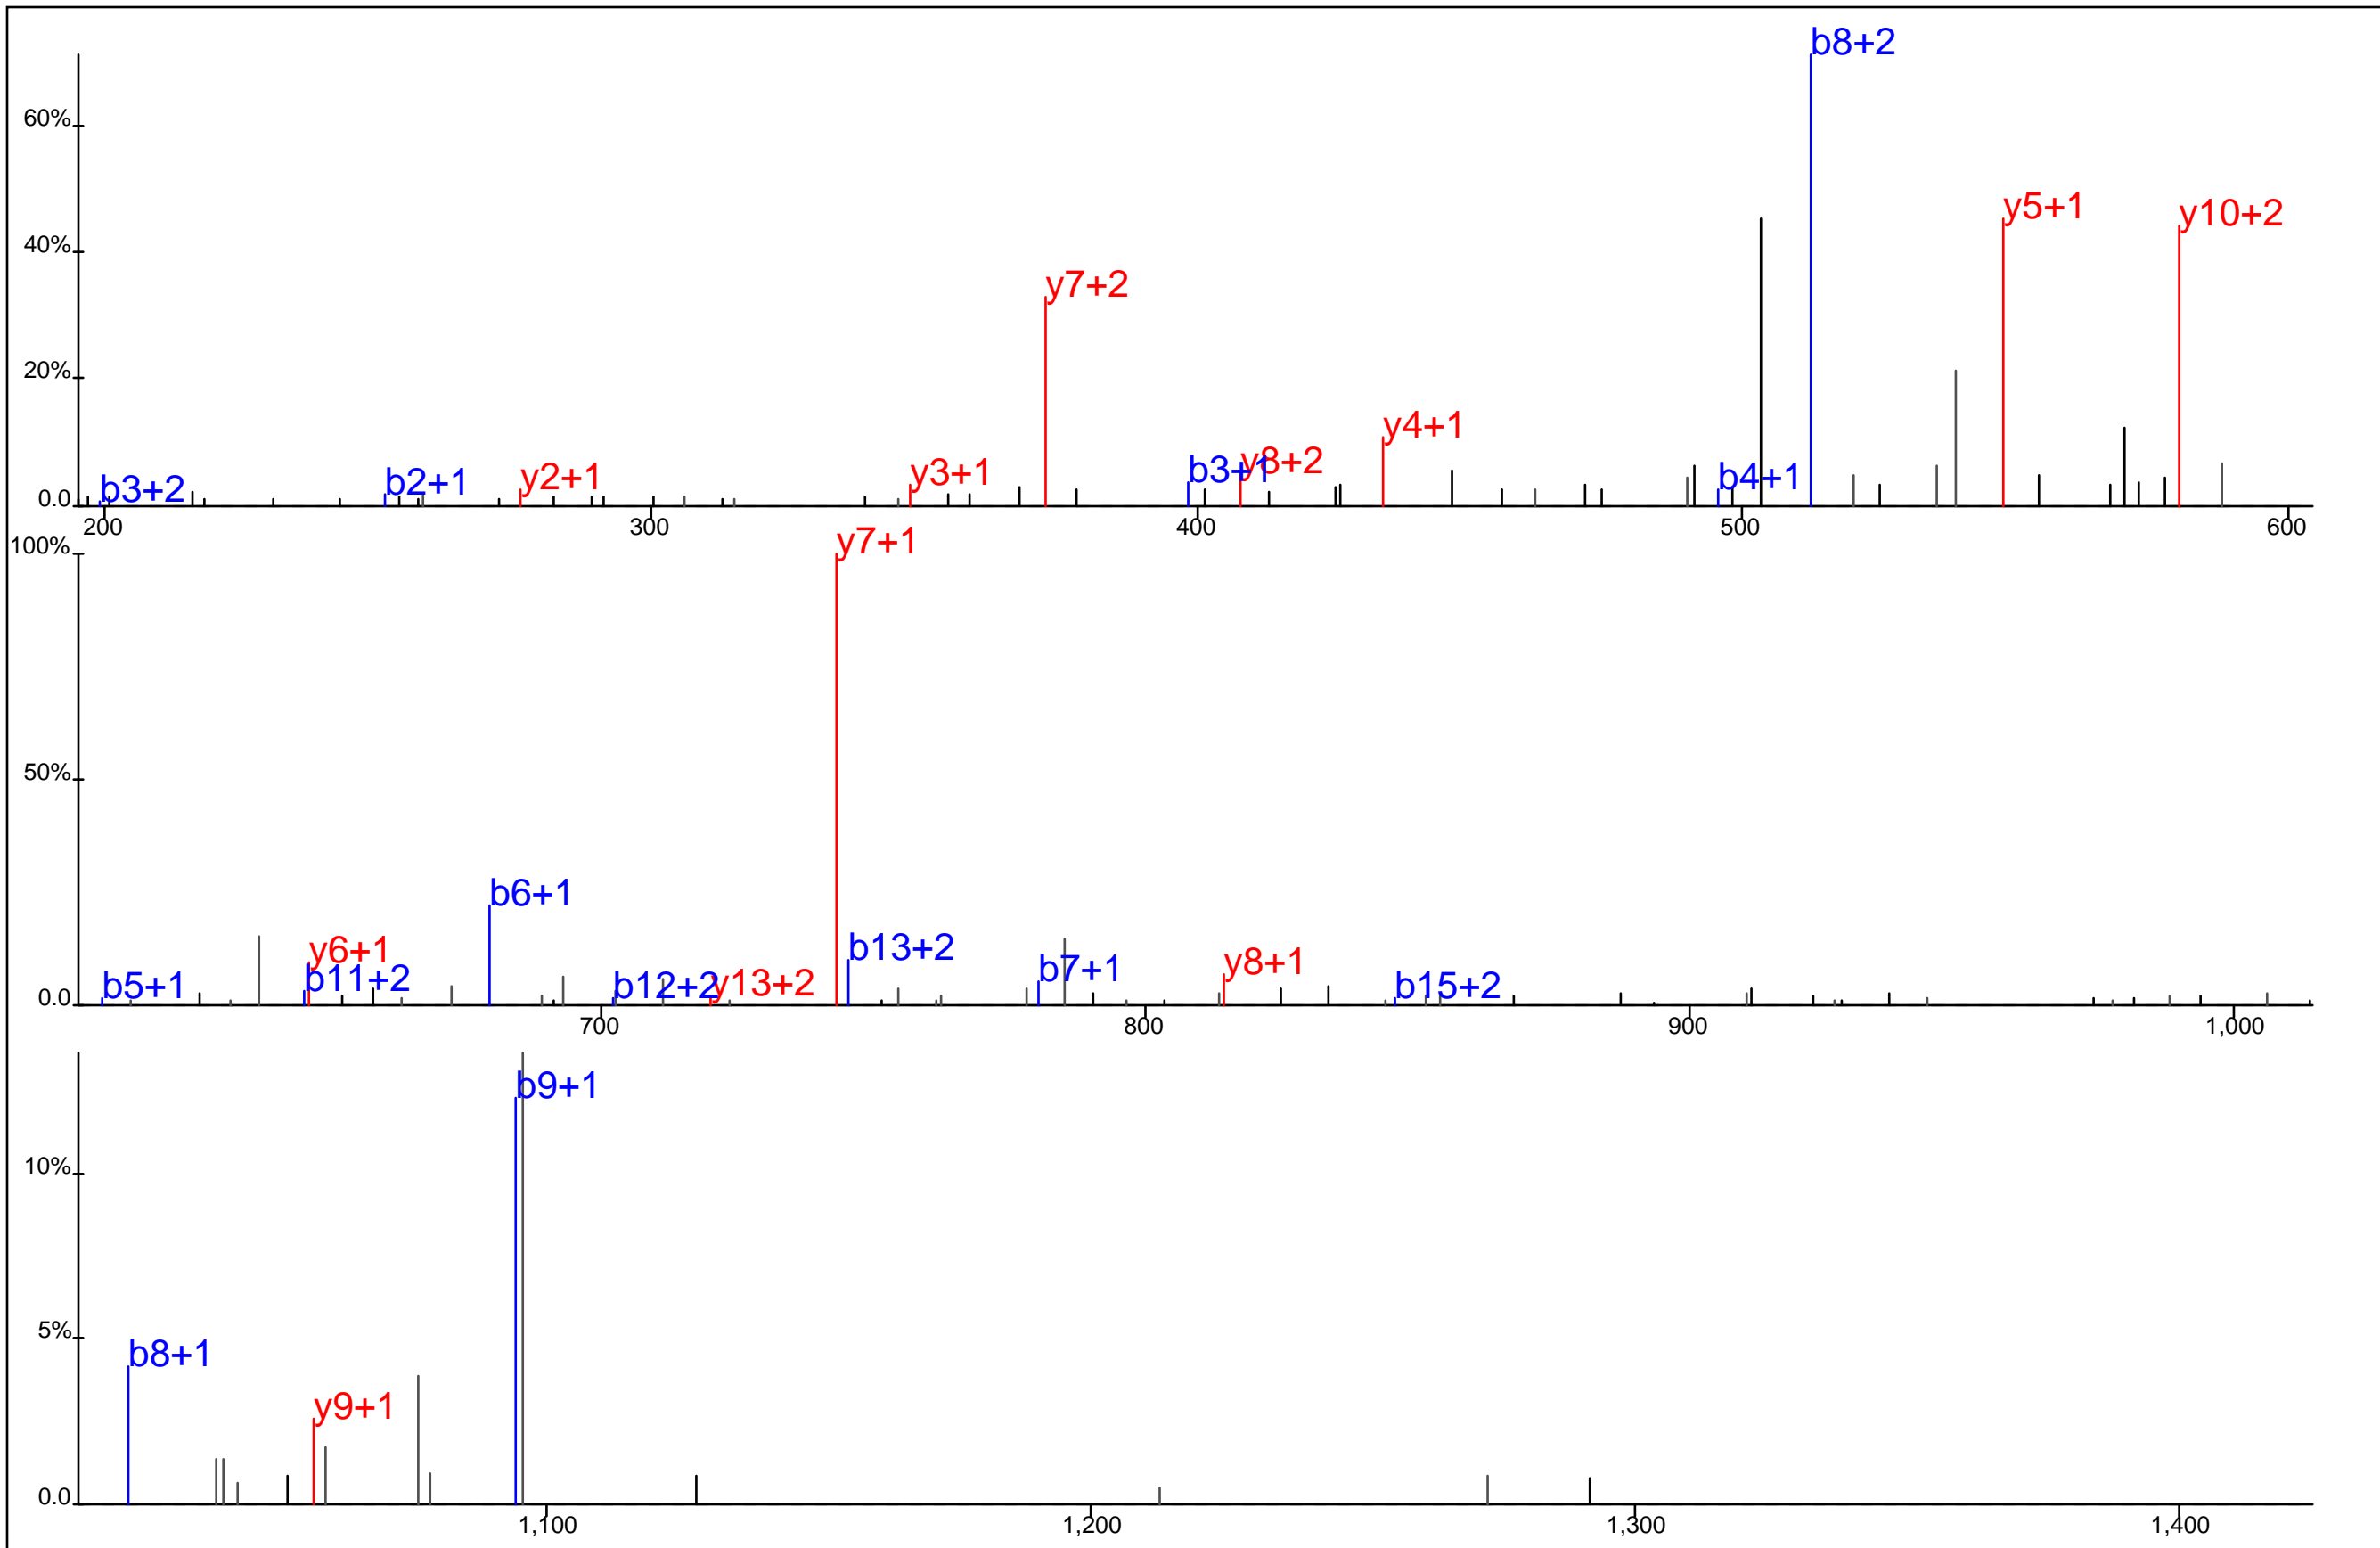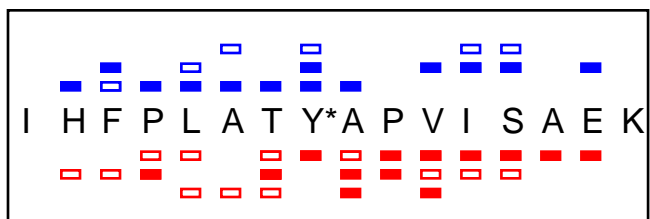

Protein Name: Tubulin alpha 1  
 gi Accession: 0  
 Precursor Mass: 612.9818+3  
 Delta Mass: 0.635 ppm  
 XCorr: 47.23

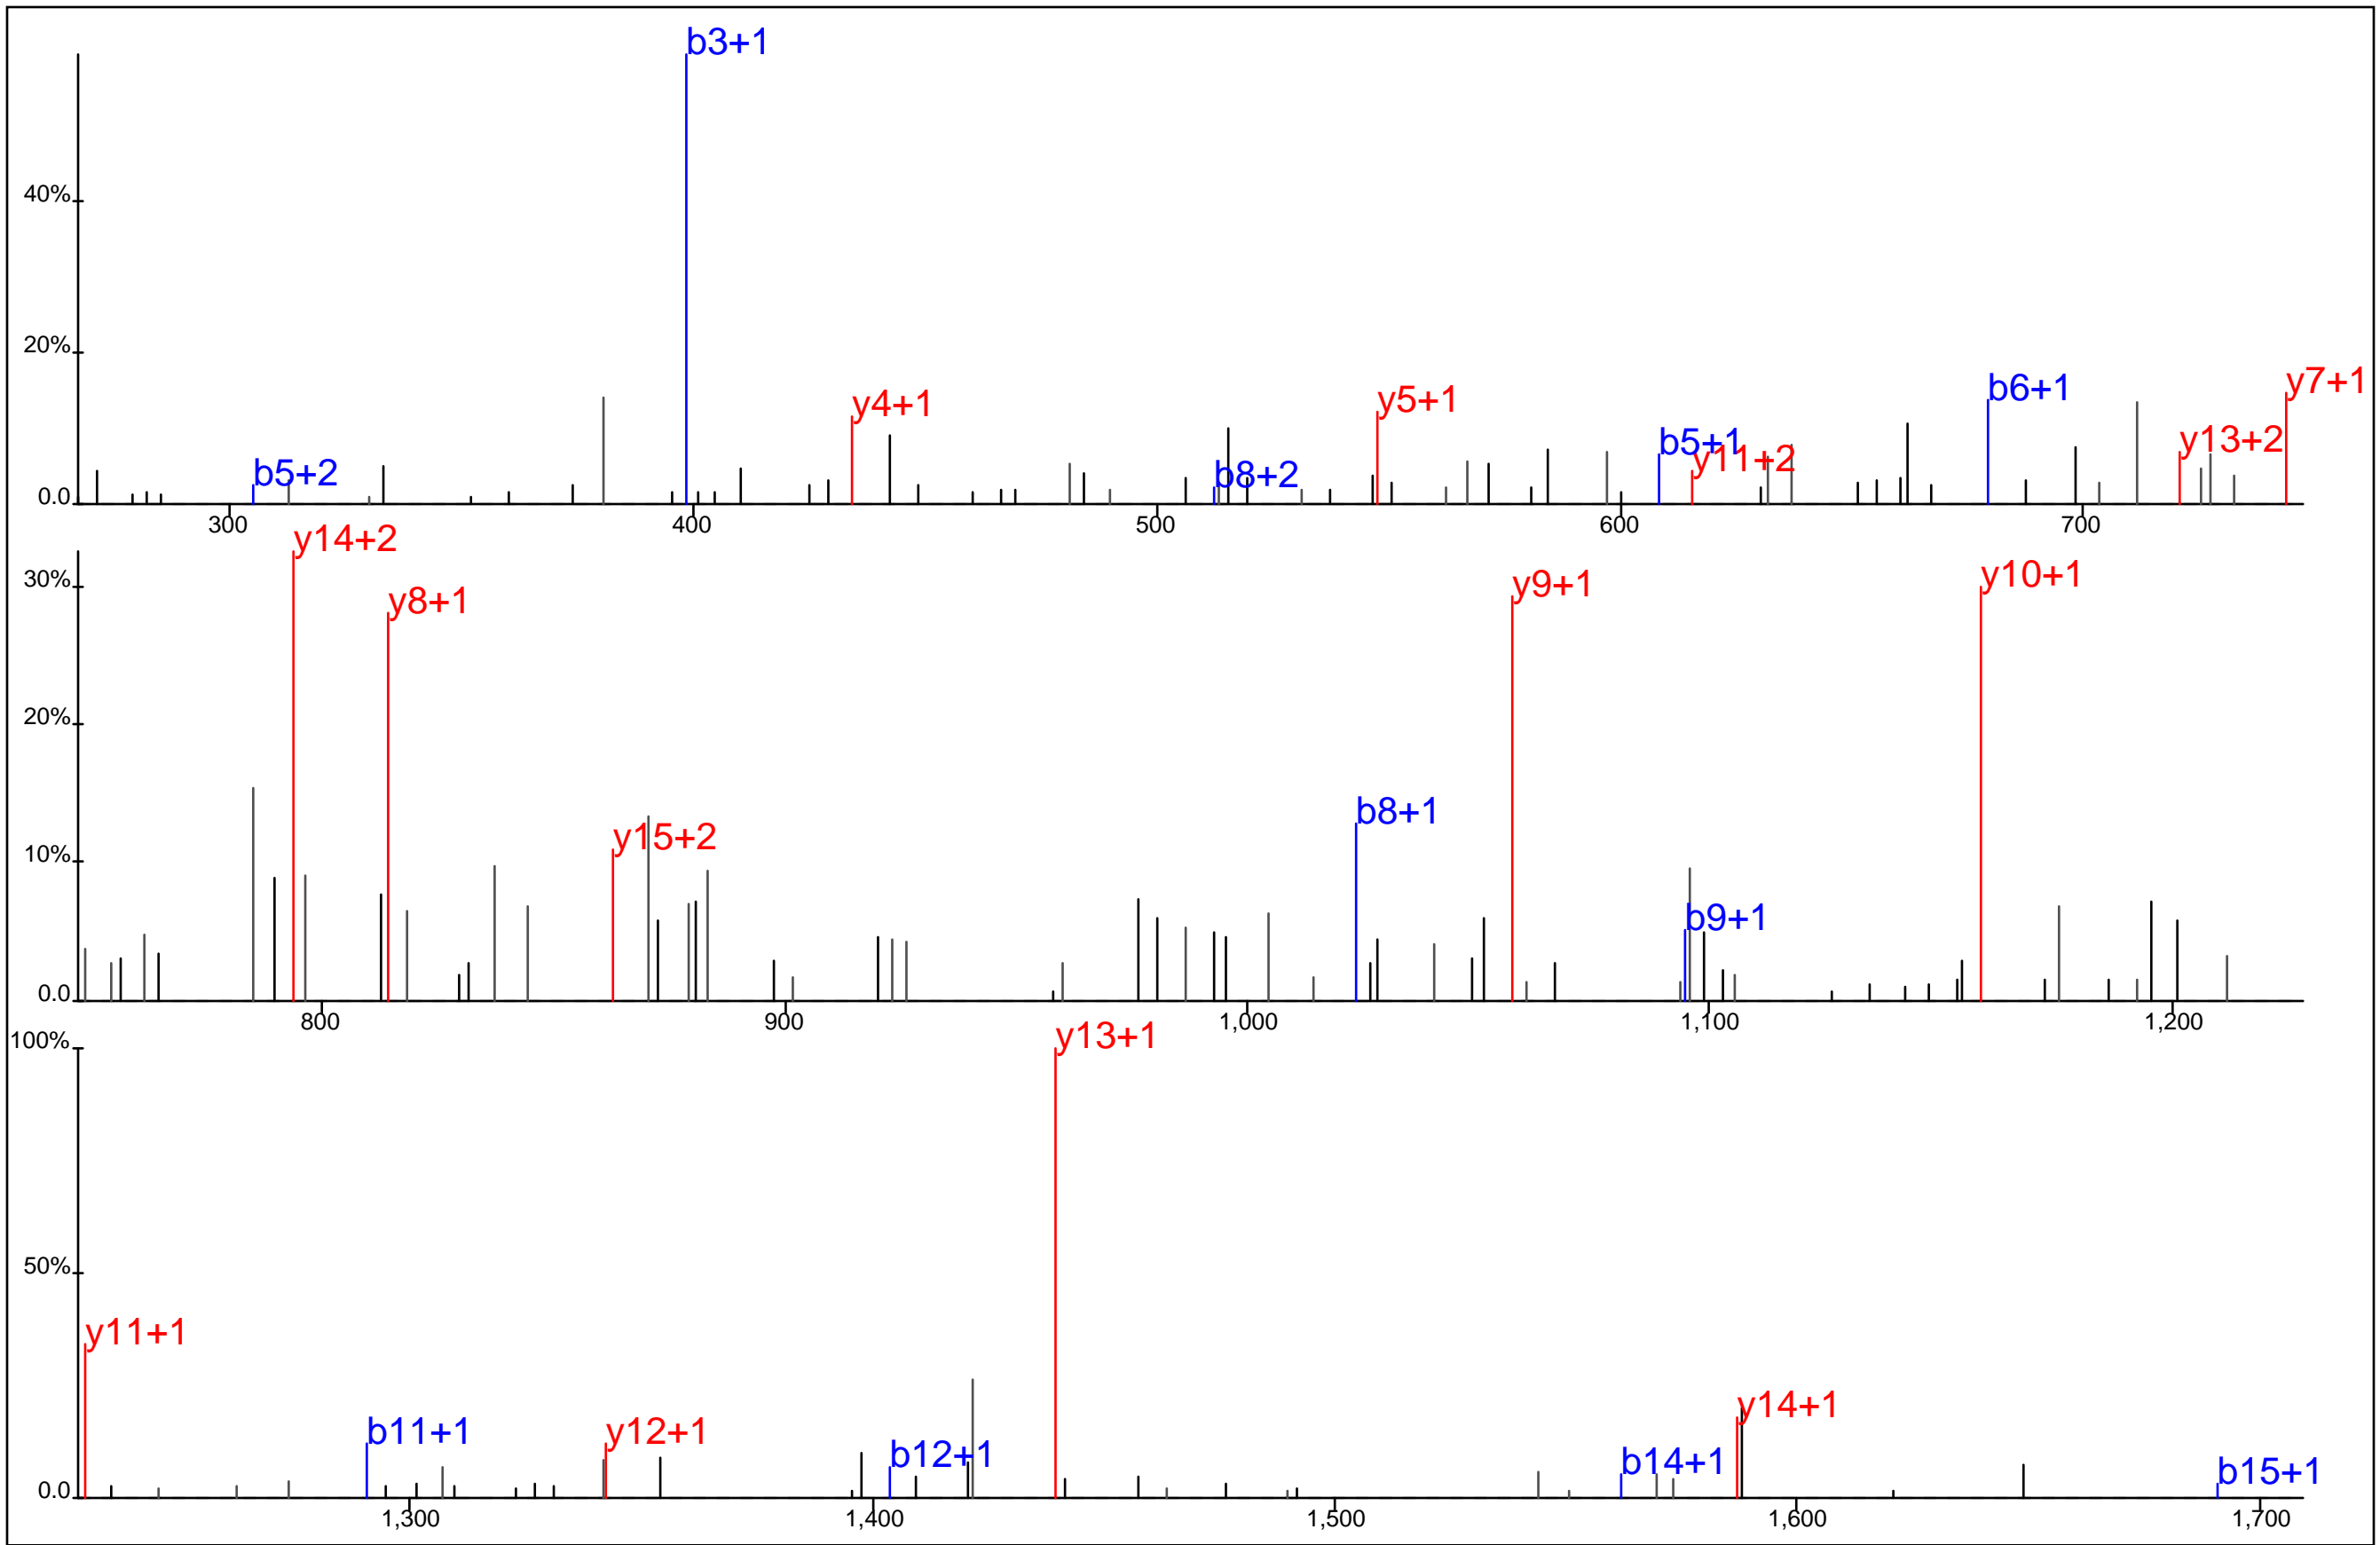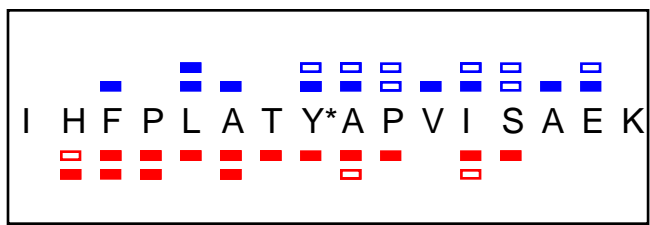

Protein Name: Tubulin alpha 1  
 gi Accession: 0  
 Precursor Mass: 918.9654+2  
 Delta Mass: 3.278 ppm  
 XCorr: 56.93

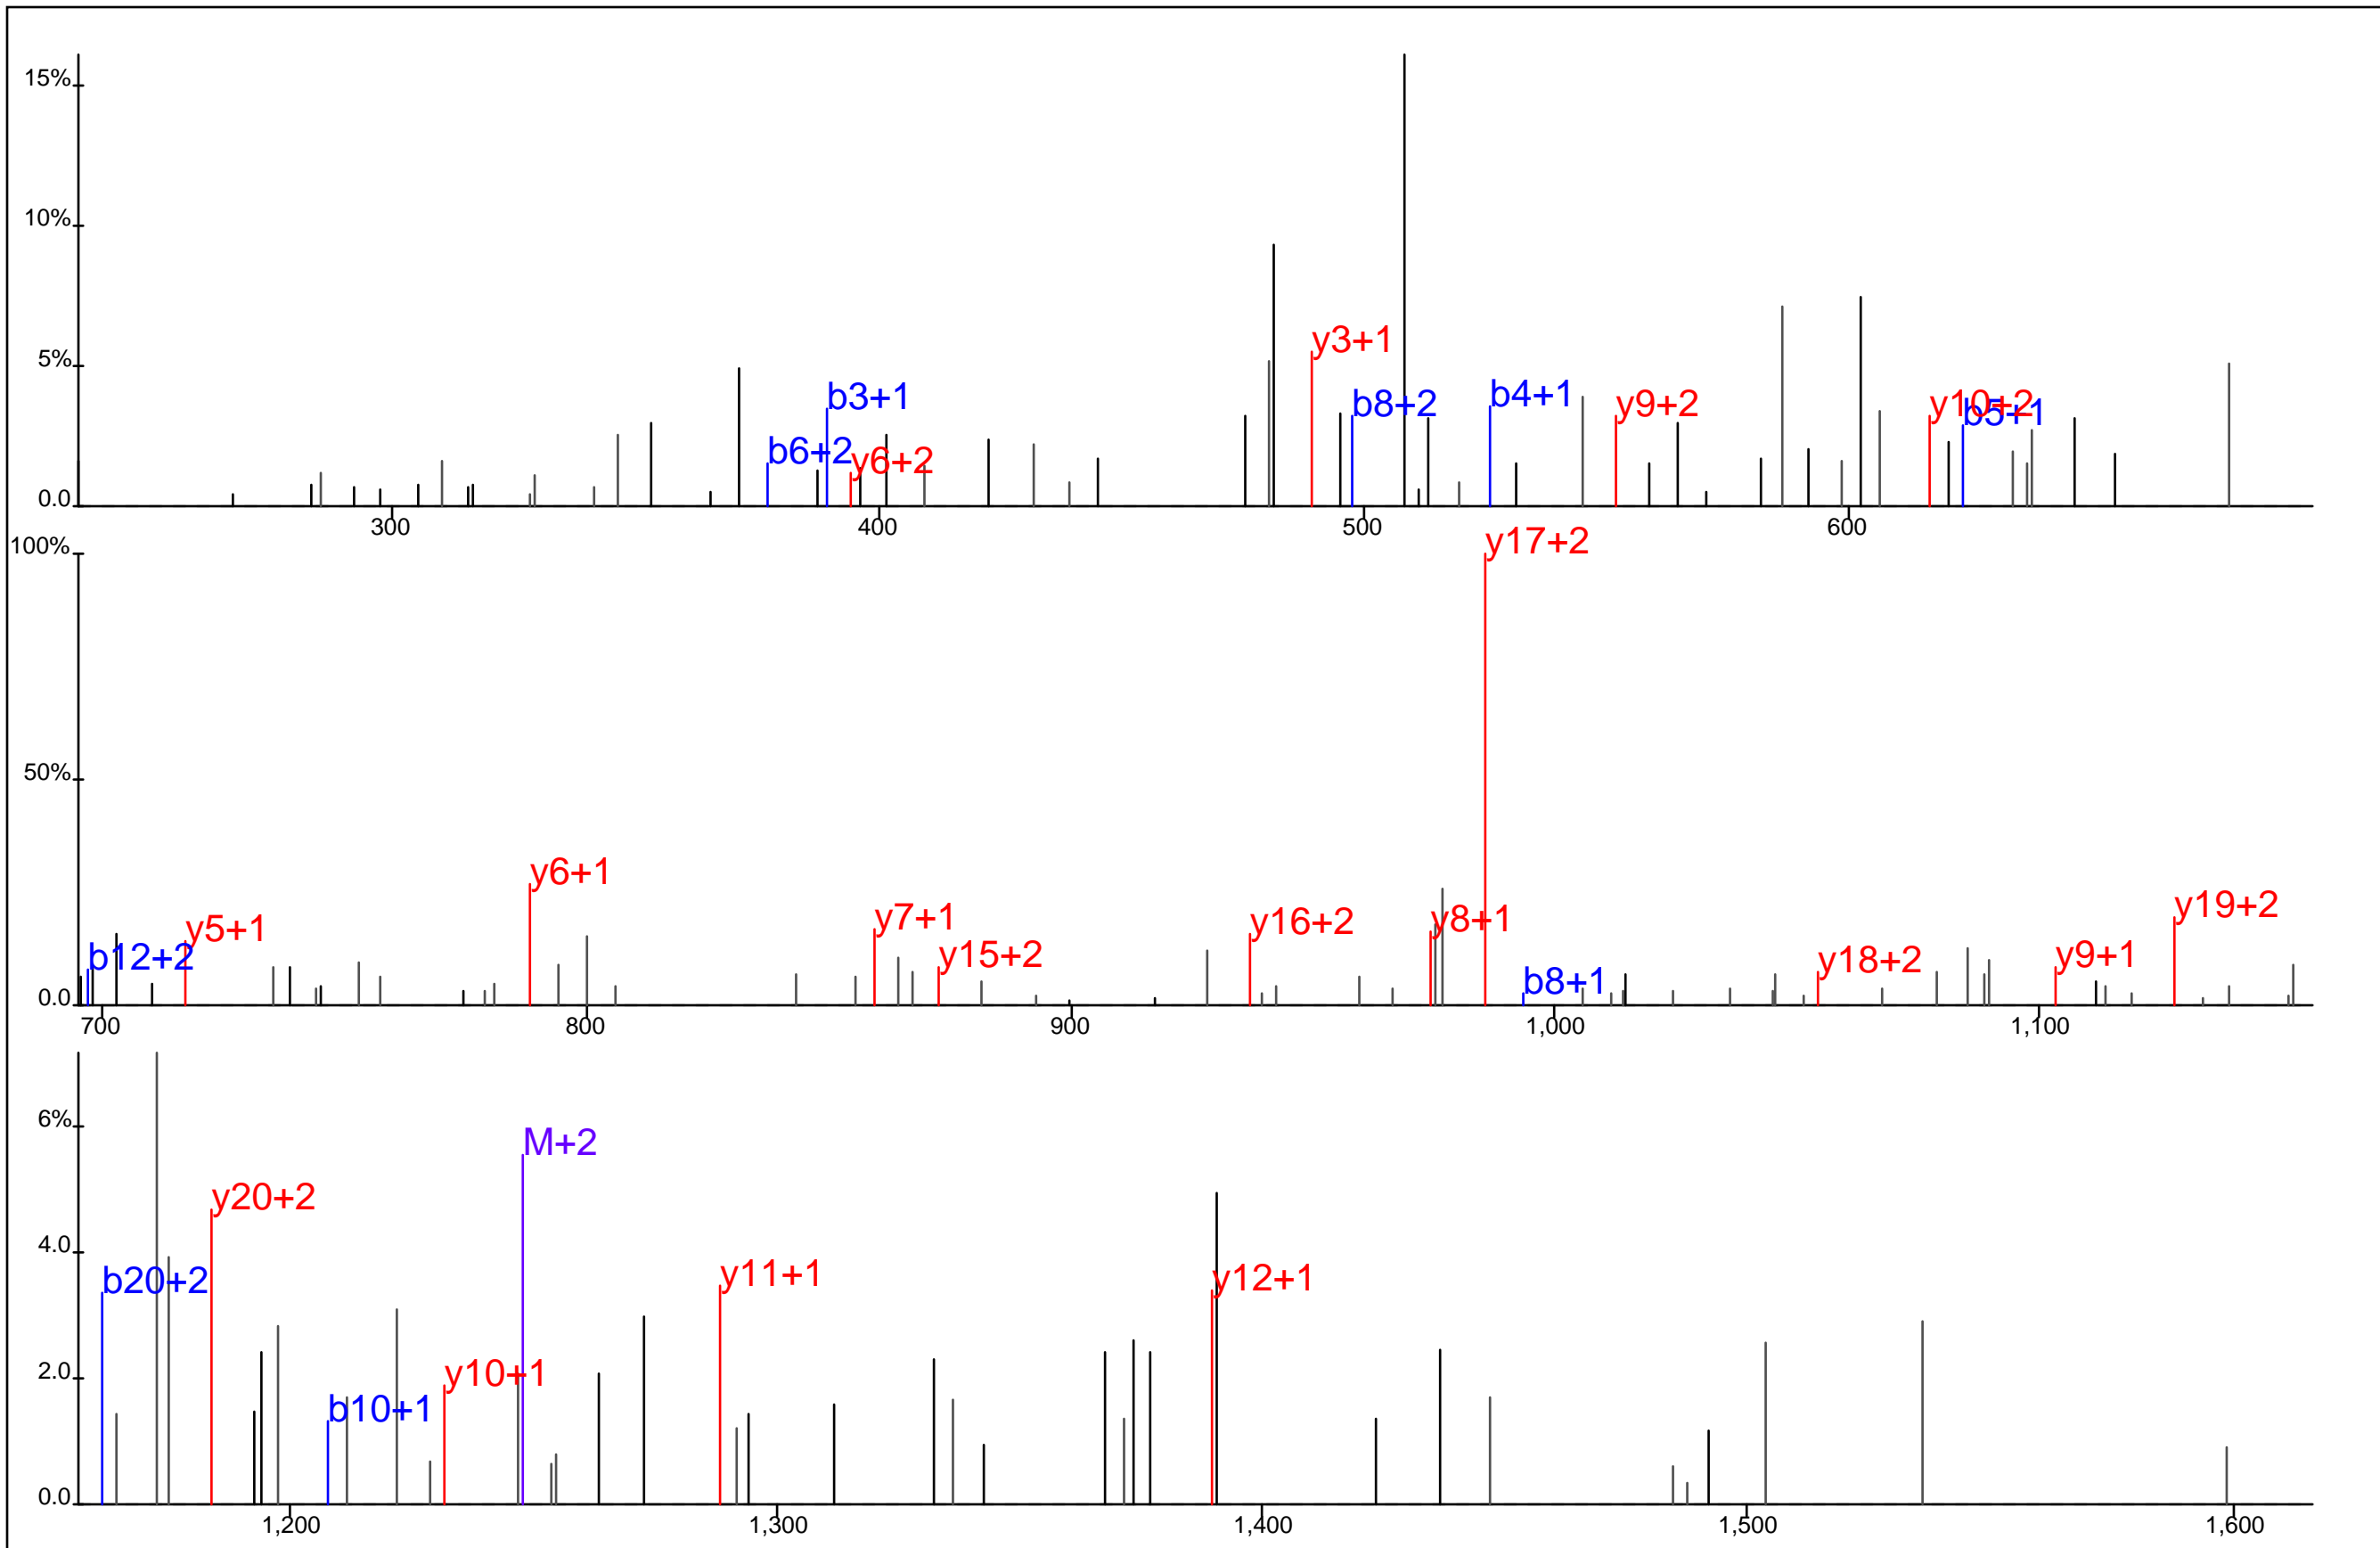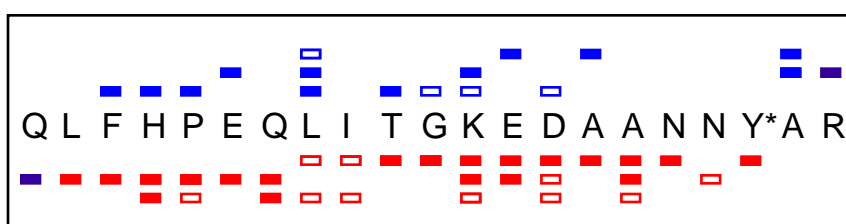

Protein Name: Tubulin alpha 1  
 gi Accession: 0  
 Precursor Mass: 832.3945+3  
 Delta Mass: 1.032 ppm  
 XCorr: 33.16

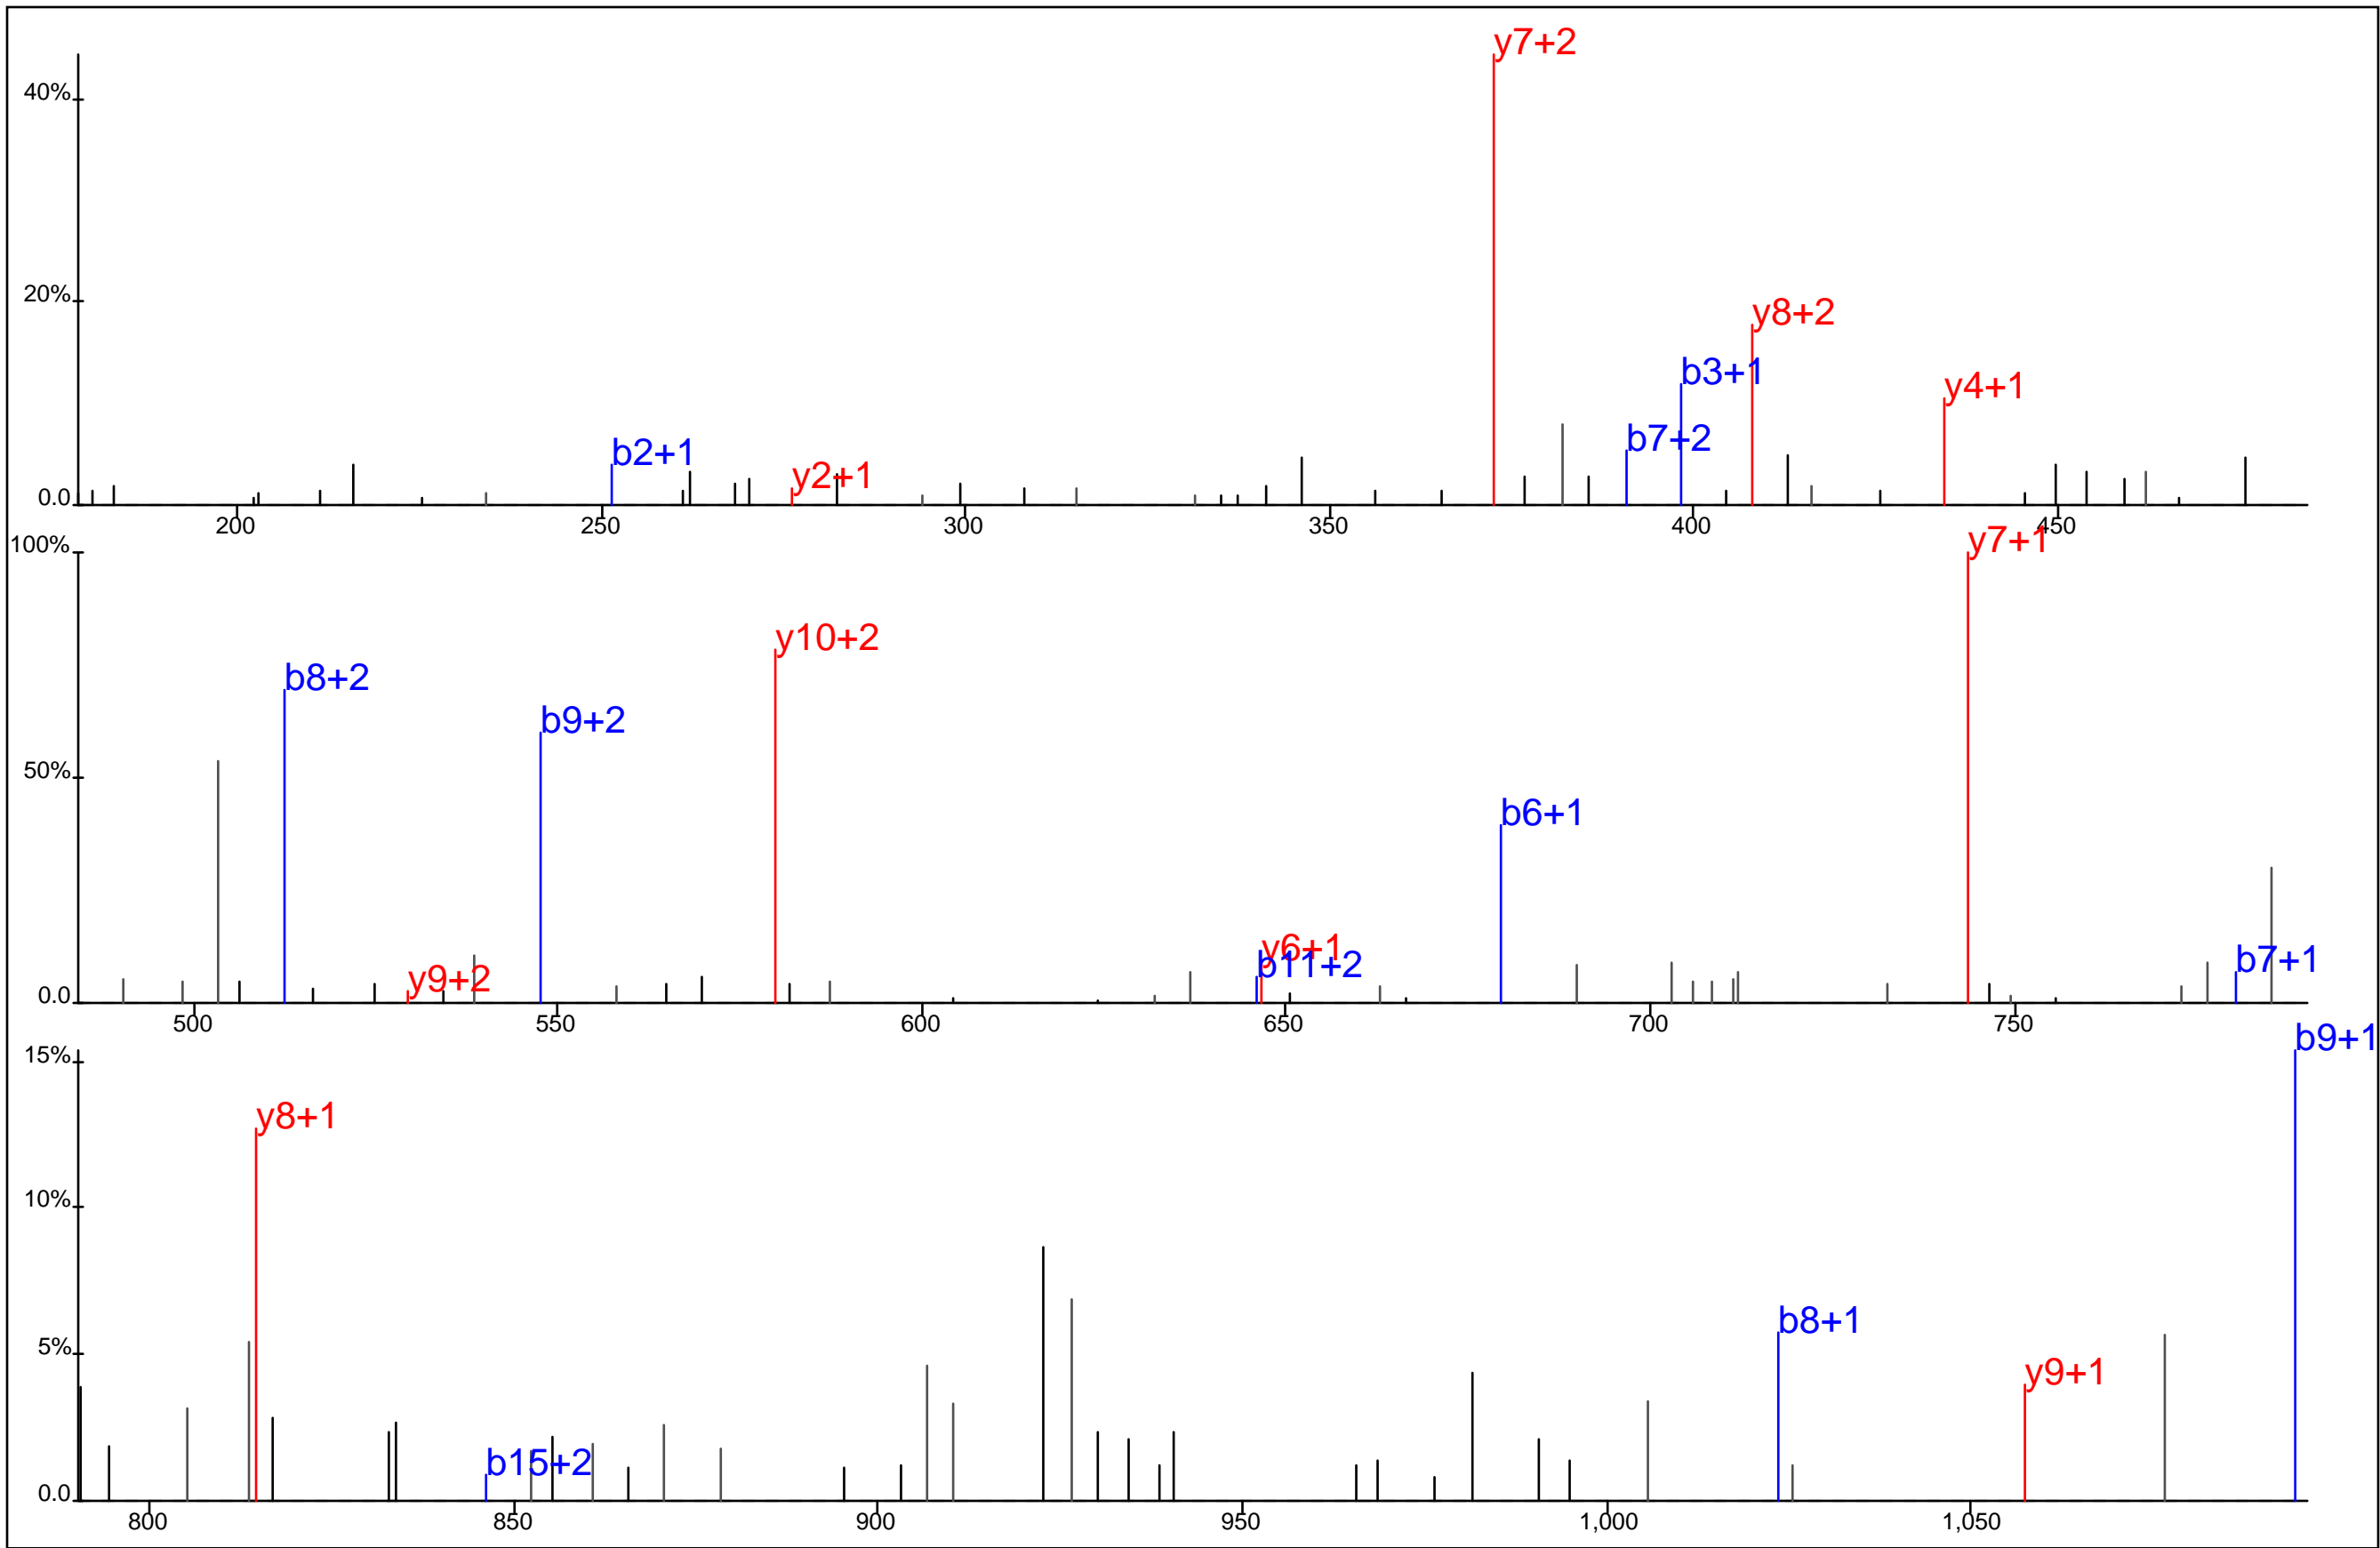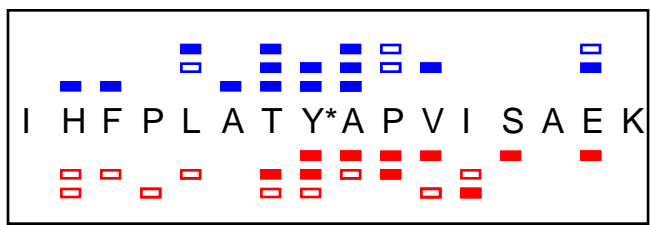

Protein Name: Tubulin alpha 1  
 gi Accession: 0  
 Precursor Mass: 612.9814+3  
 Delta Mass: 0.037 ppm  
 XCorr: 42.39

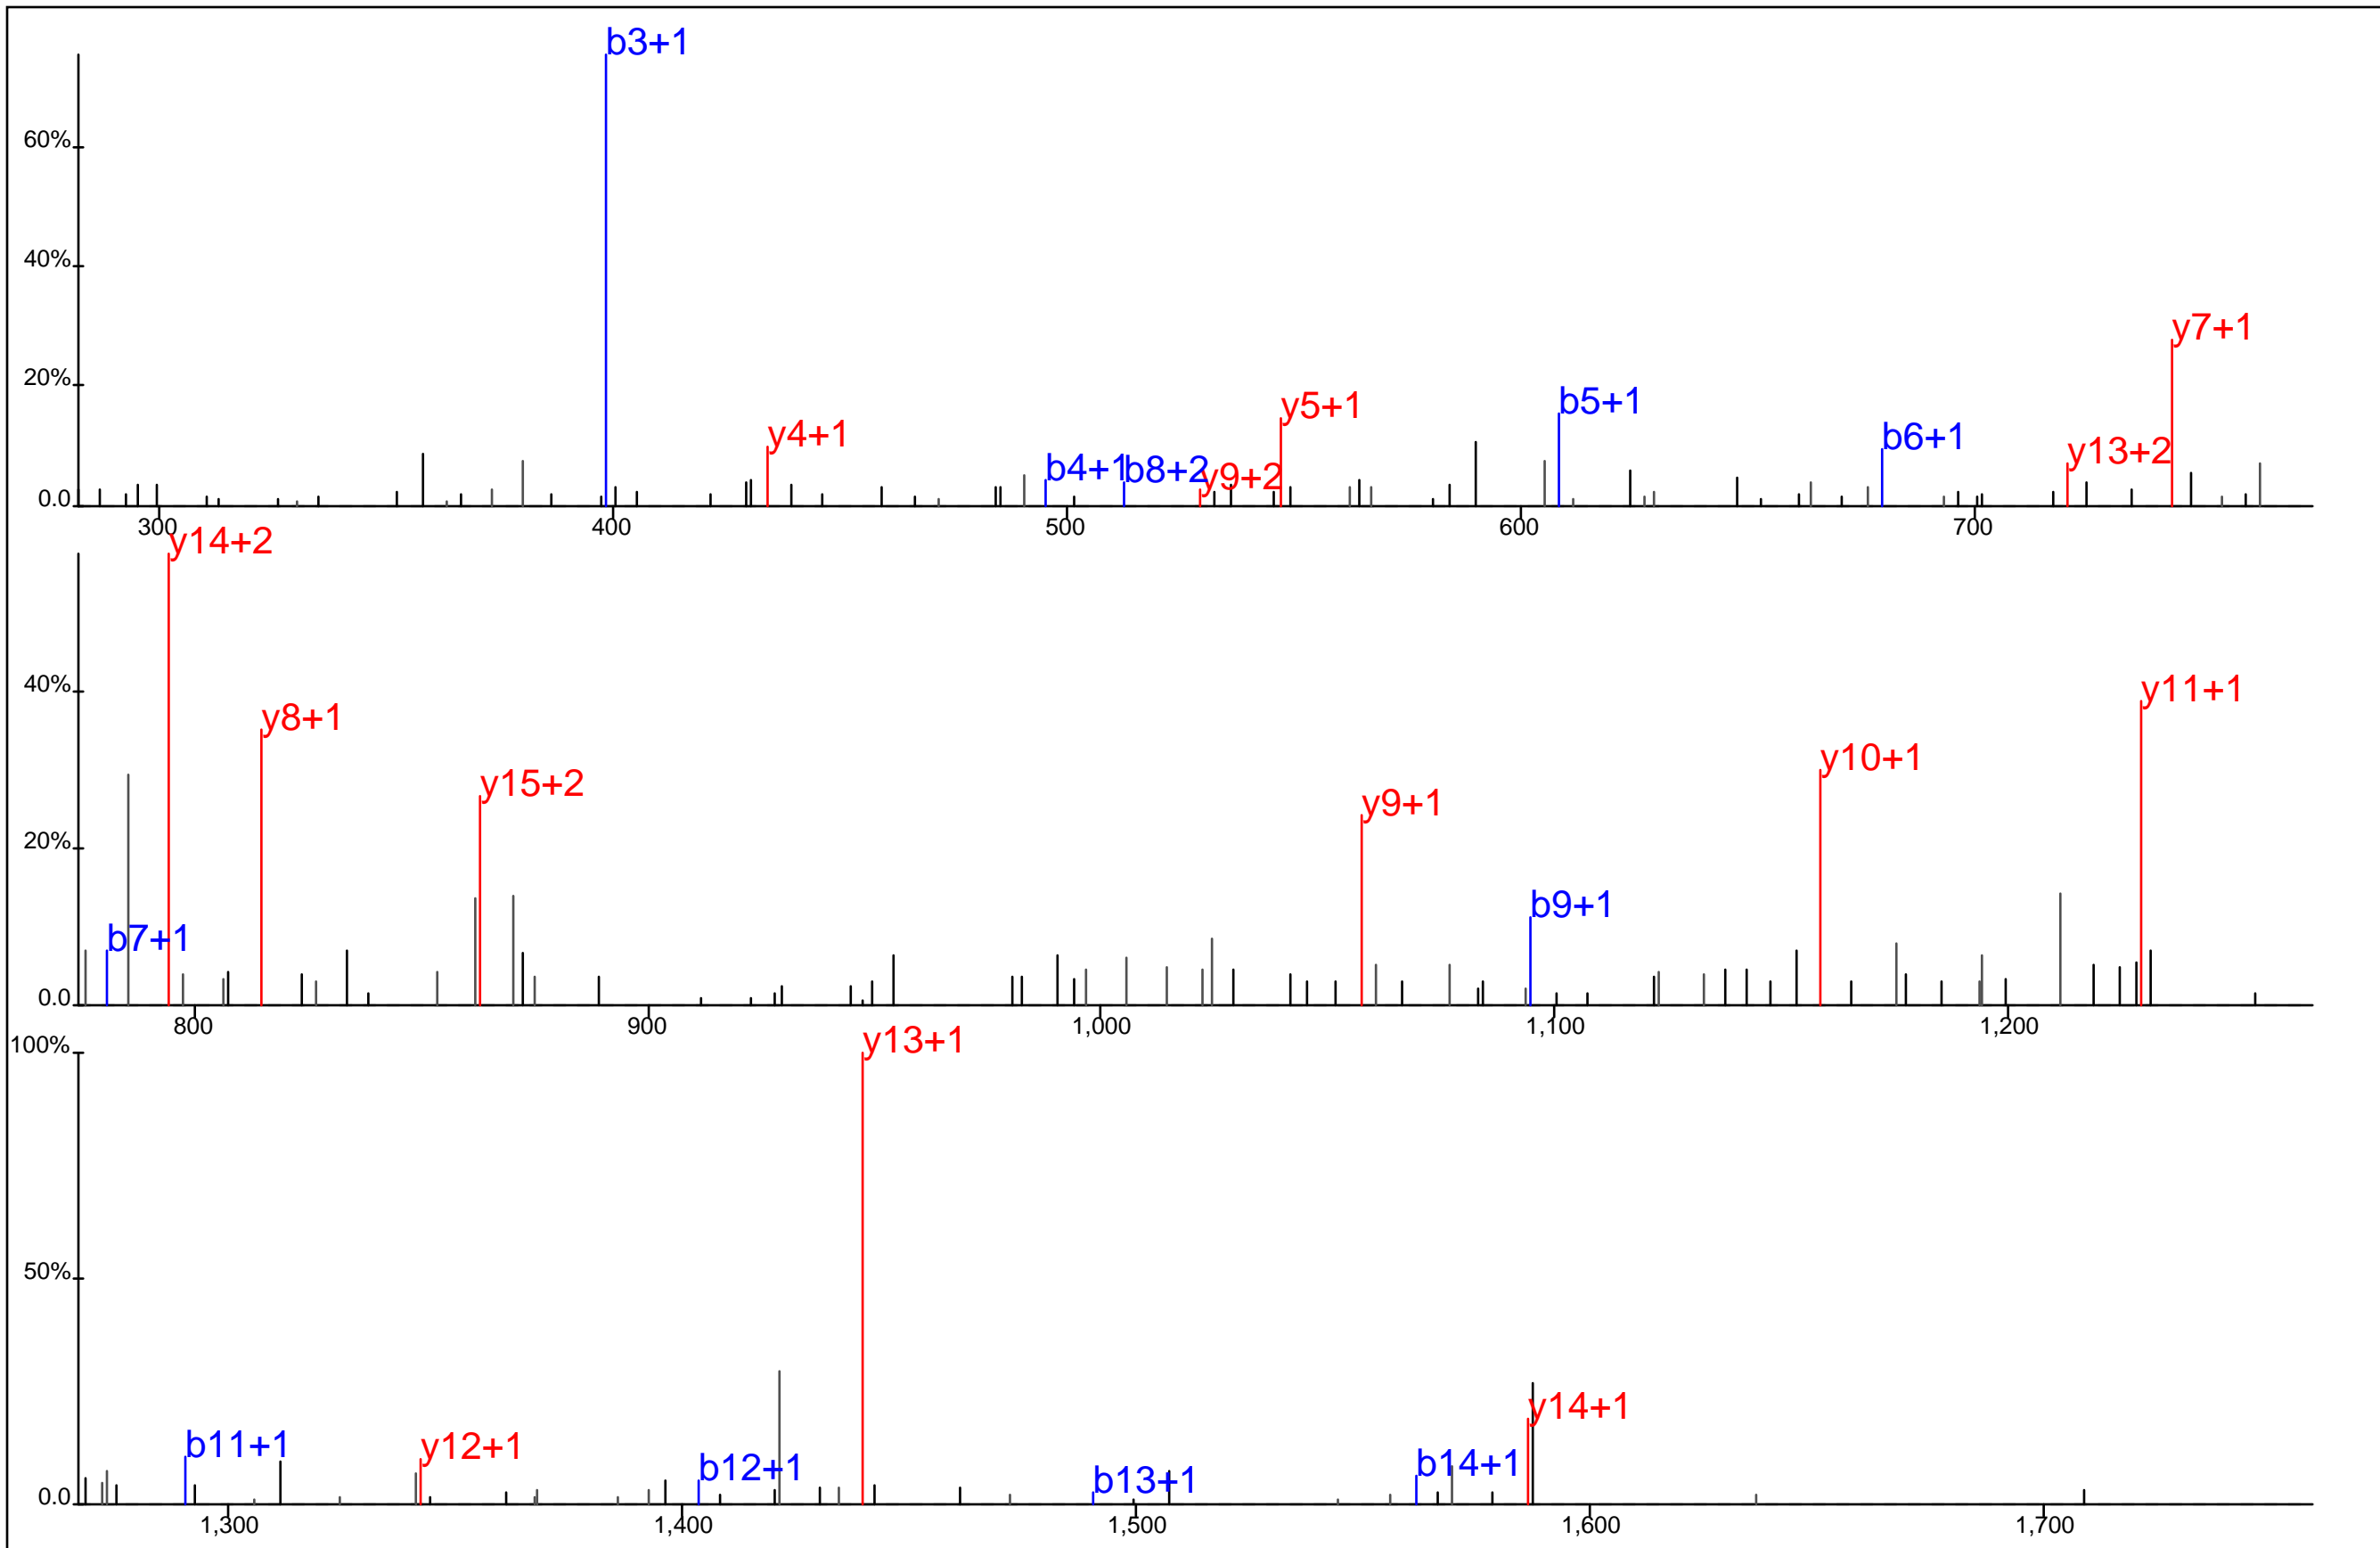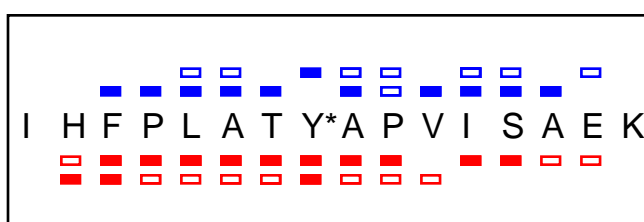

Protein Name: Tubulin alpha 1  
 gi Accession: 0  
 Precursor Mass: 918.9683+2  
 Delta Mass: 0.088 ppm  
 XCorr: 69.75



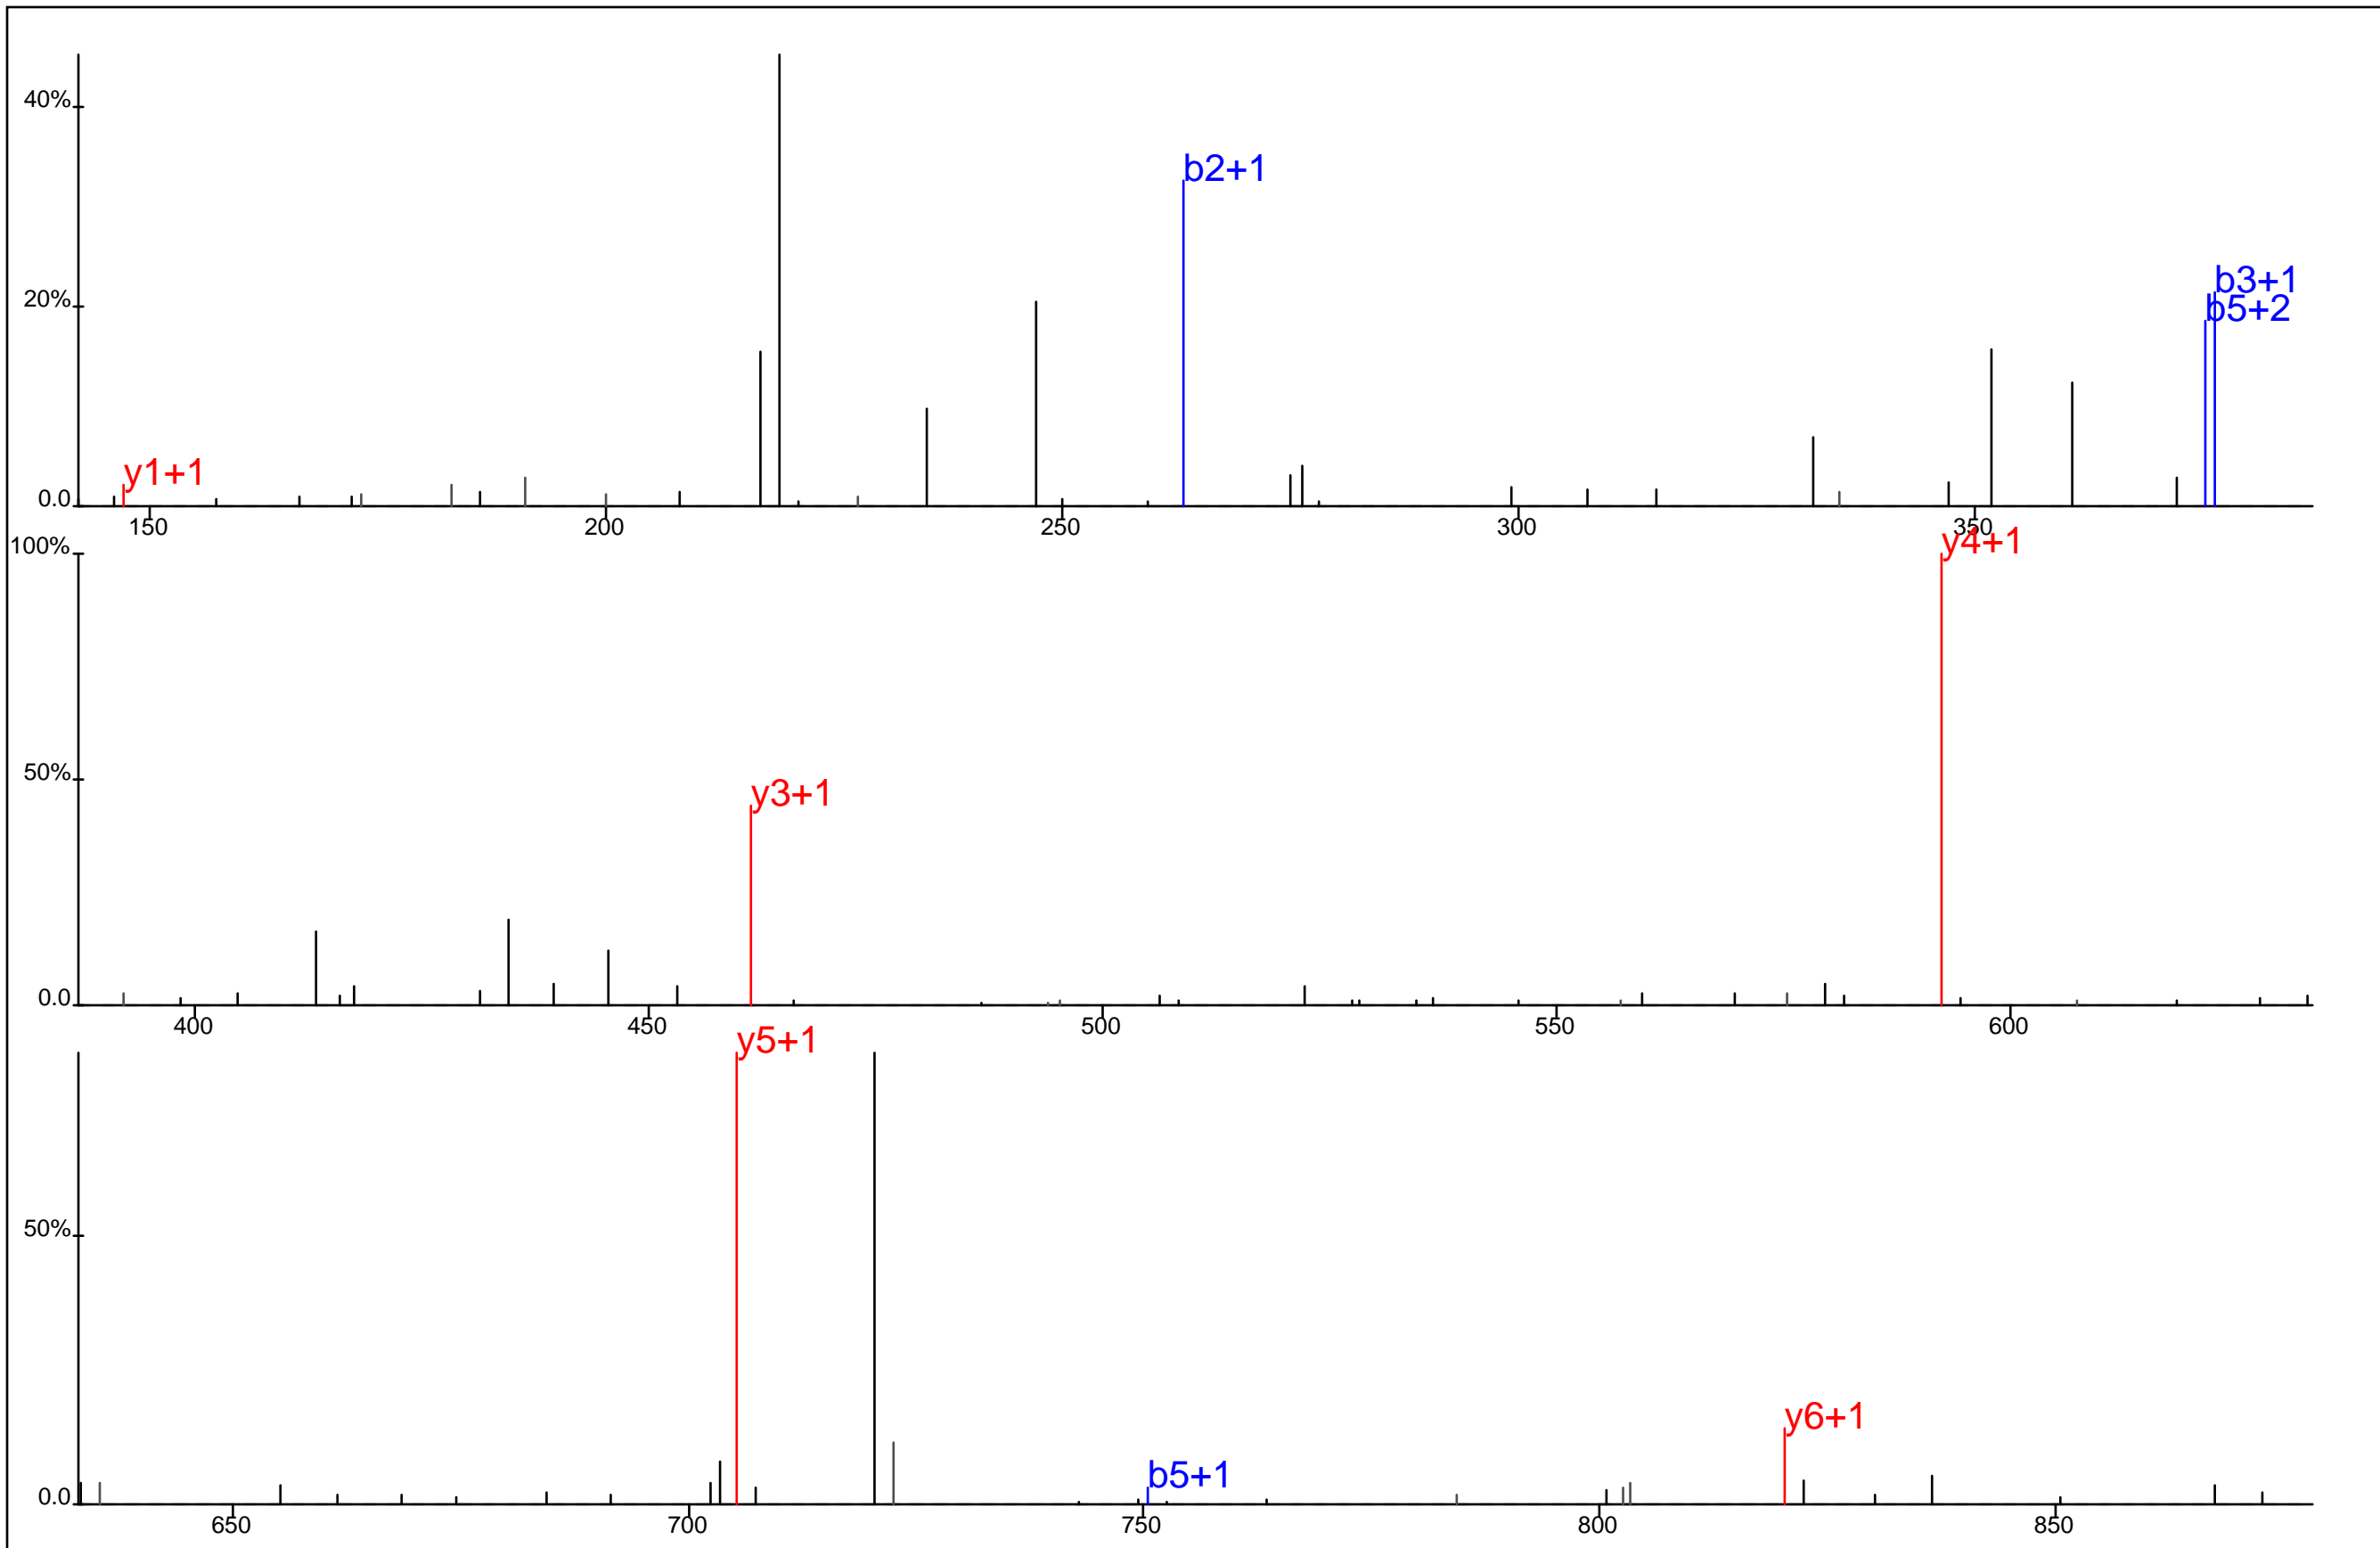

F D L M Y\* A K

Protein Name: Tubulin alpha 1  
 gi Accession: 0  
 Precursor Mass: 484.2033+2  
 Delta Mass: 0.062 ppm  
 XCorr: 30.03

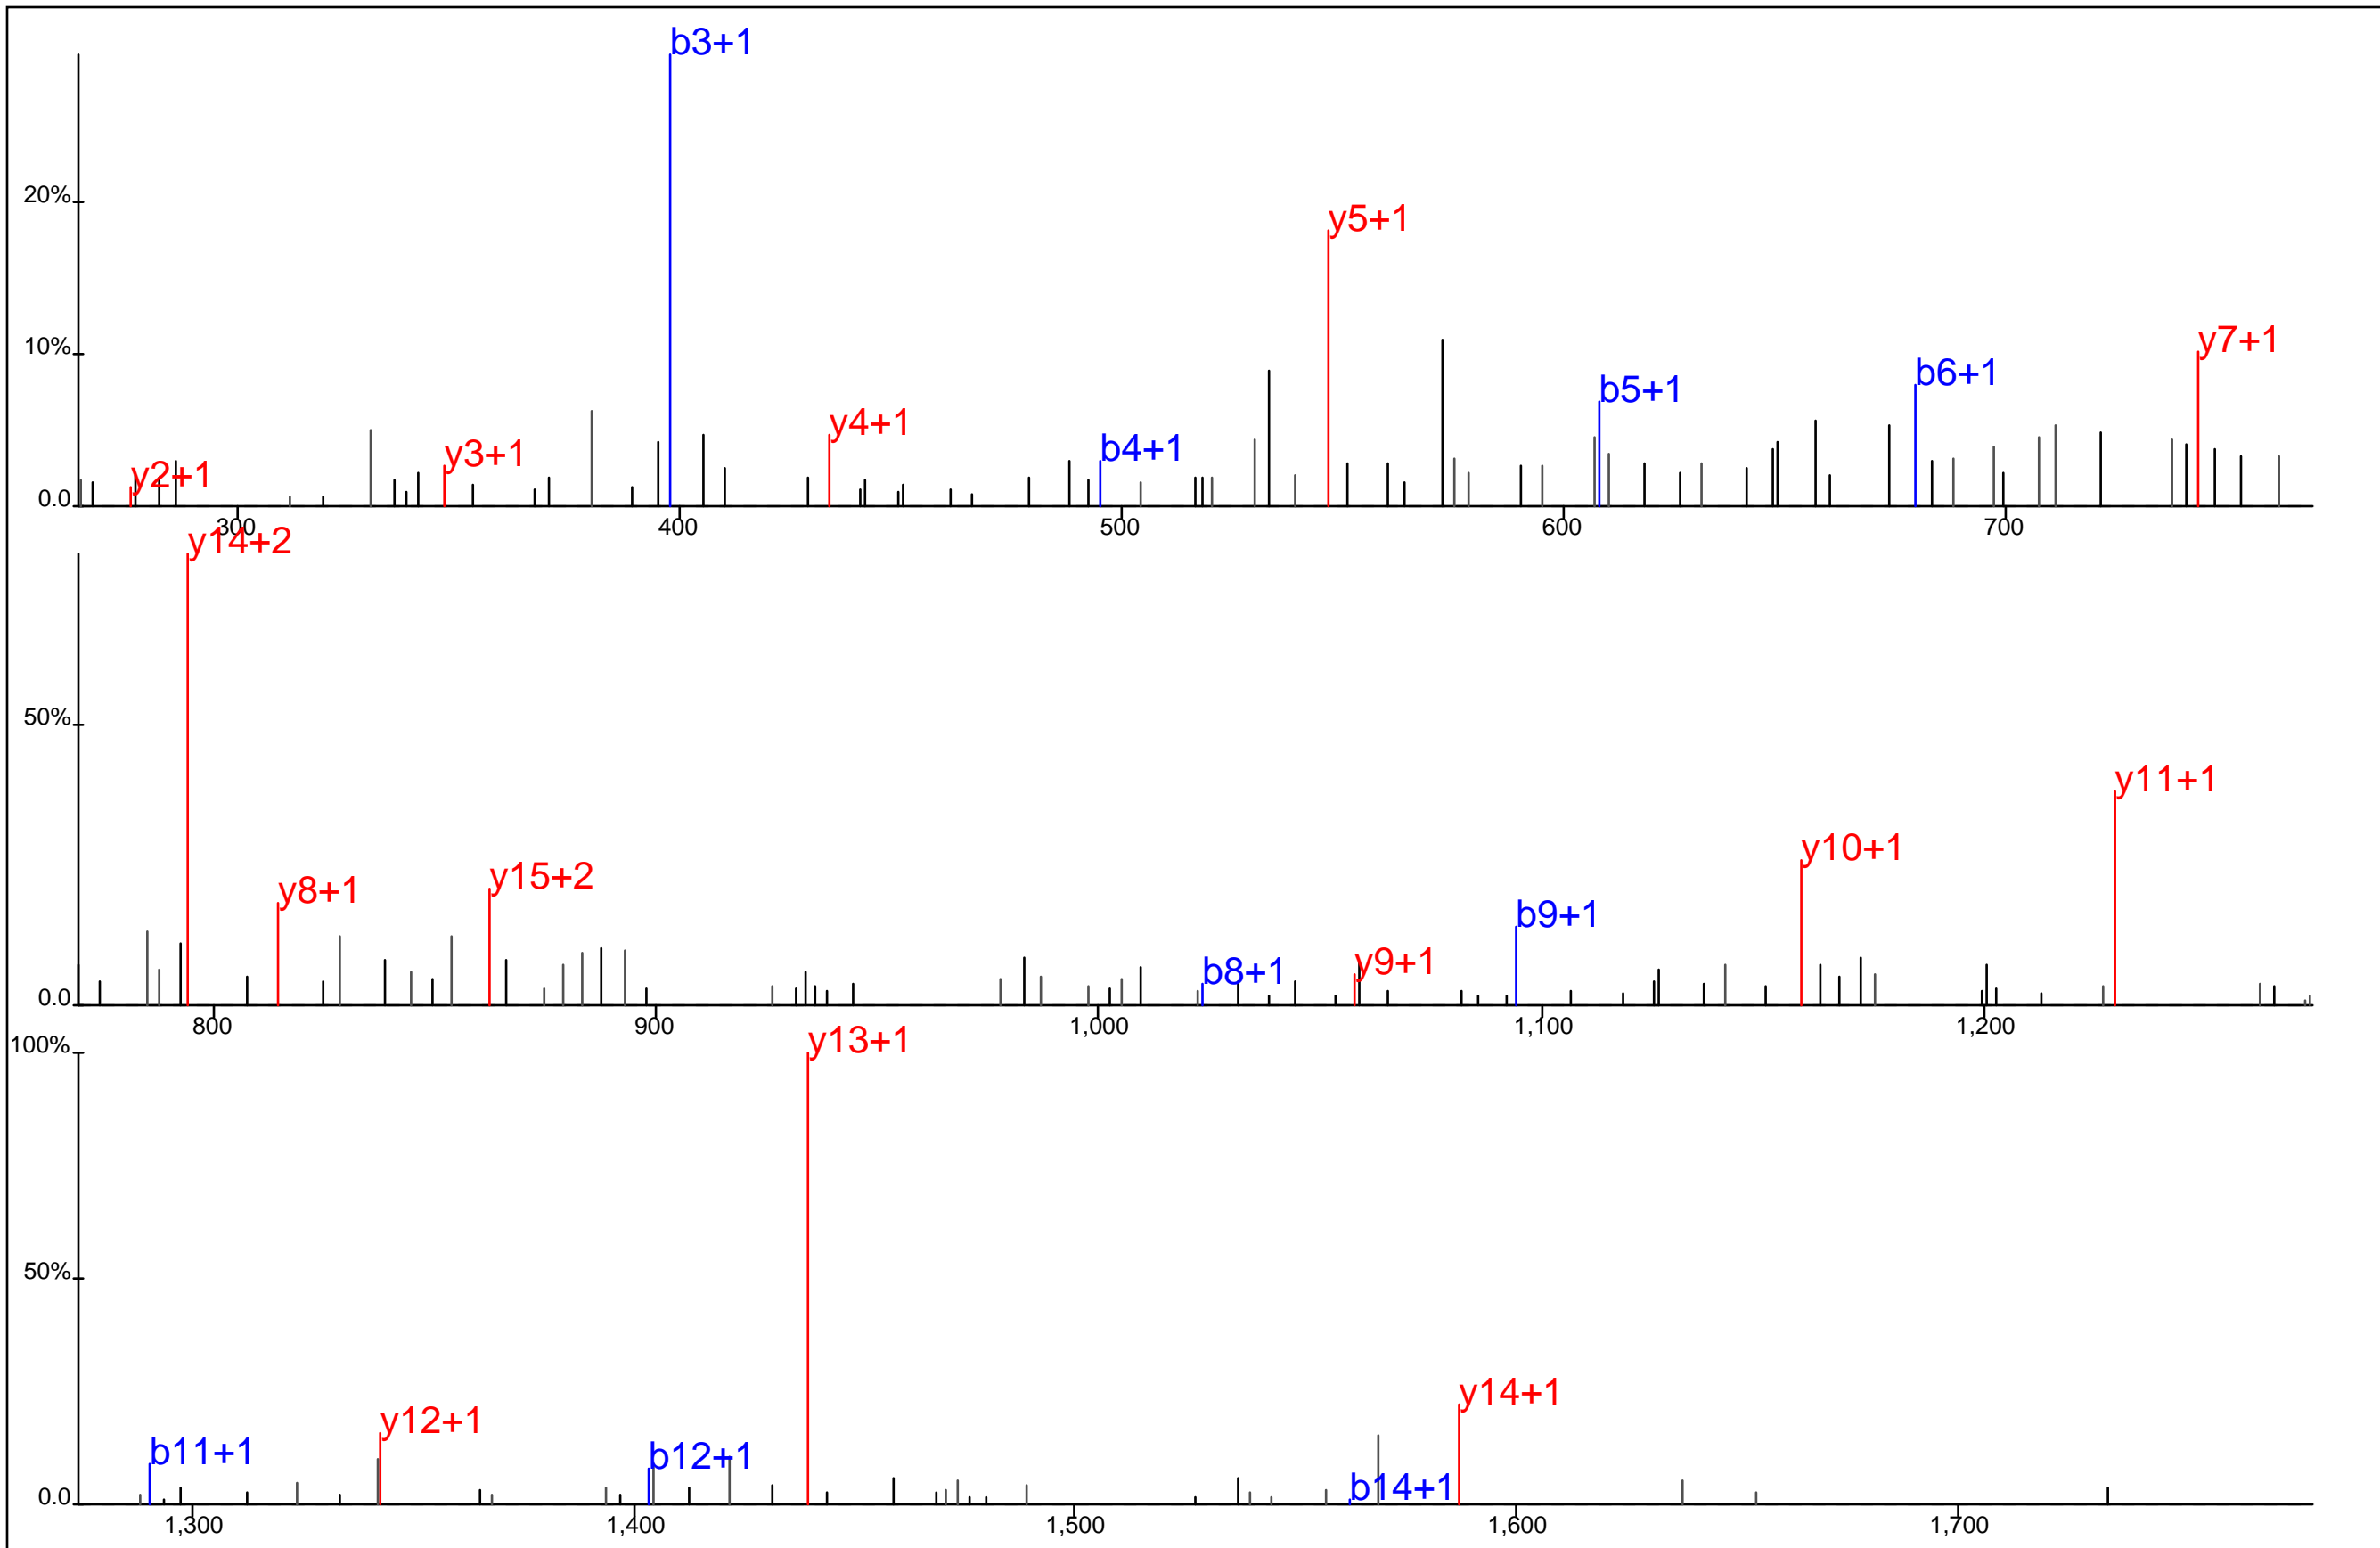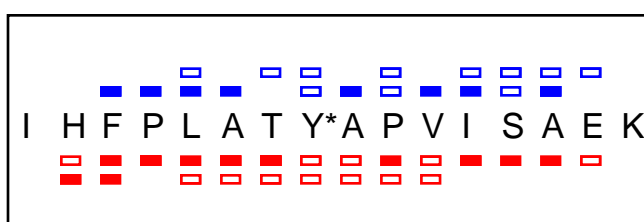

Protein Name: Tubulin alpha 1  
 gi Accession: 0  
 Precursor Mass: 918.9678+2  
 Delta Mass: 0.621 ppm  
 XCorr: 54.86



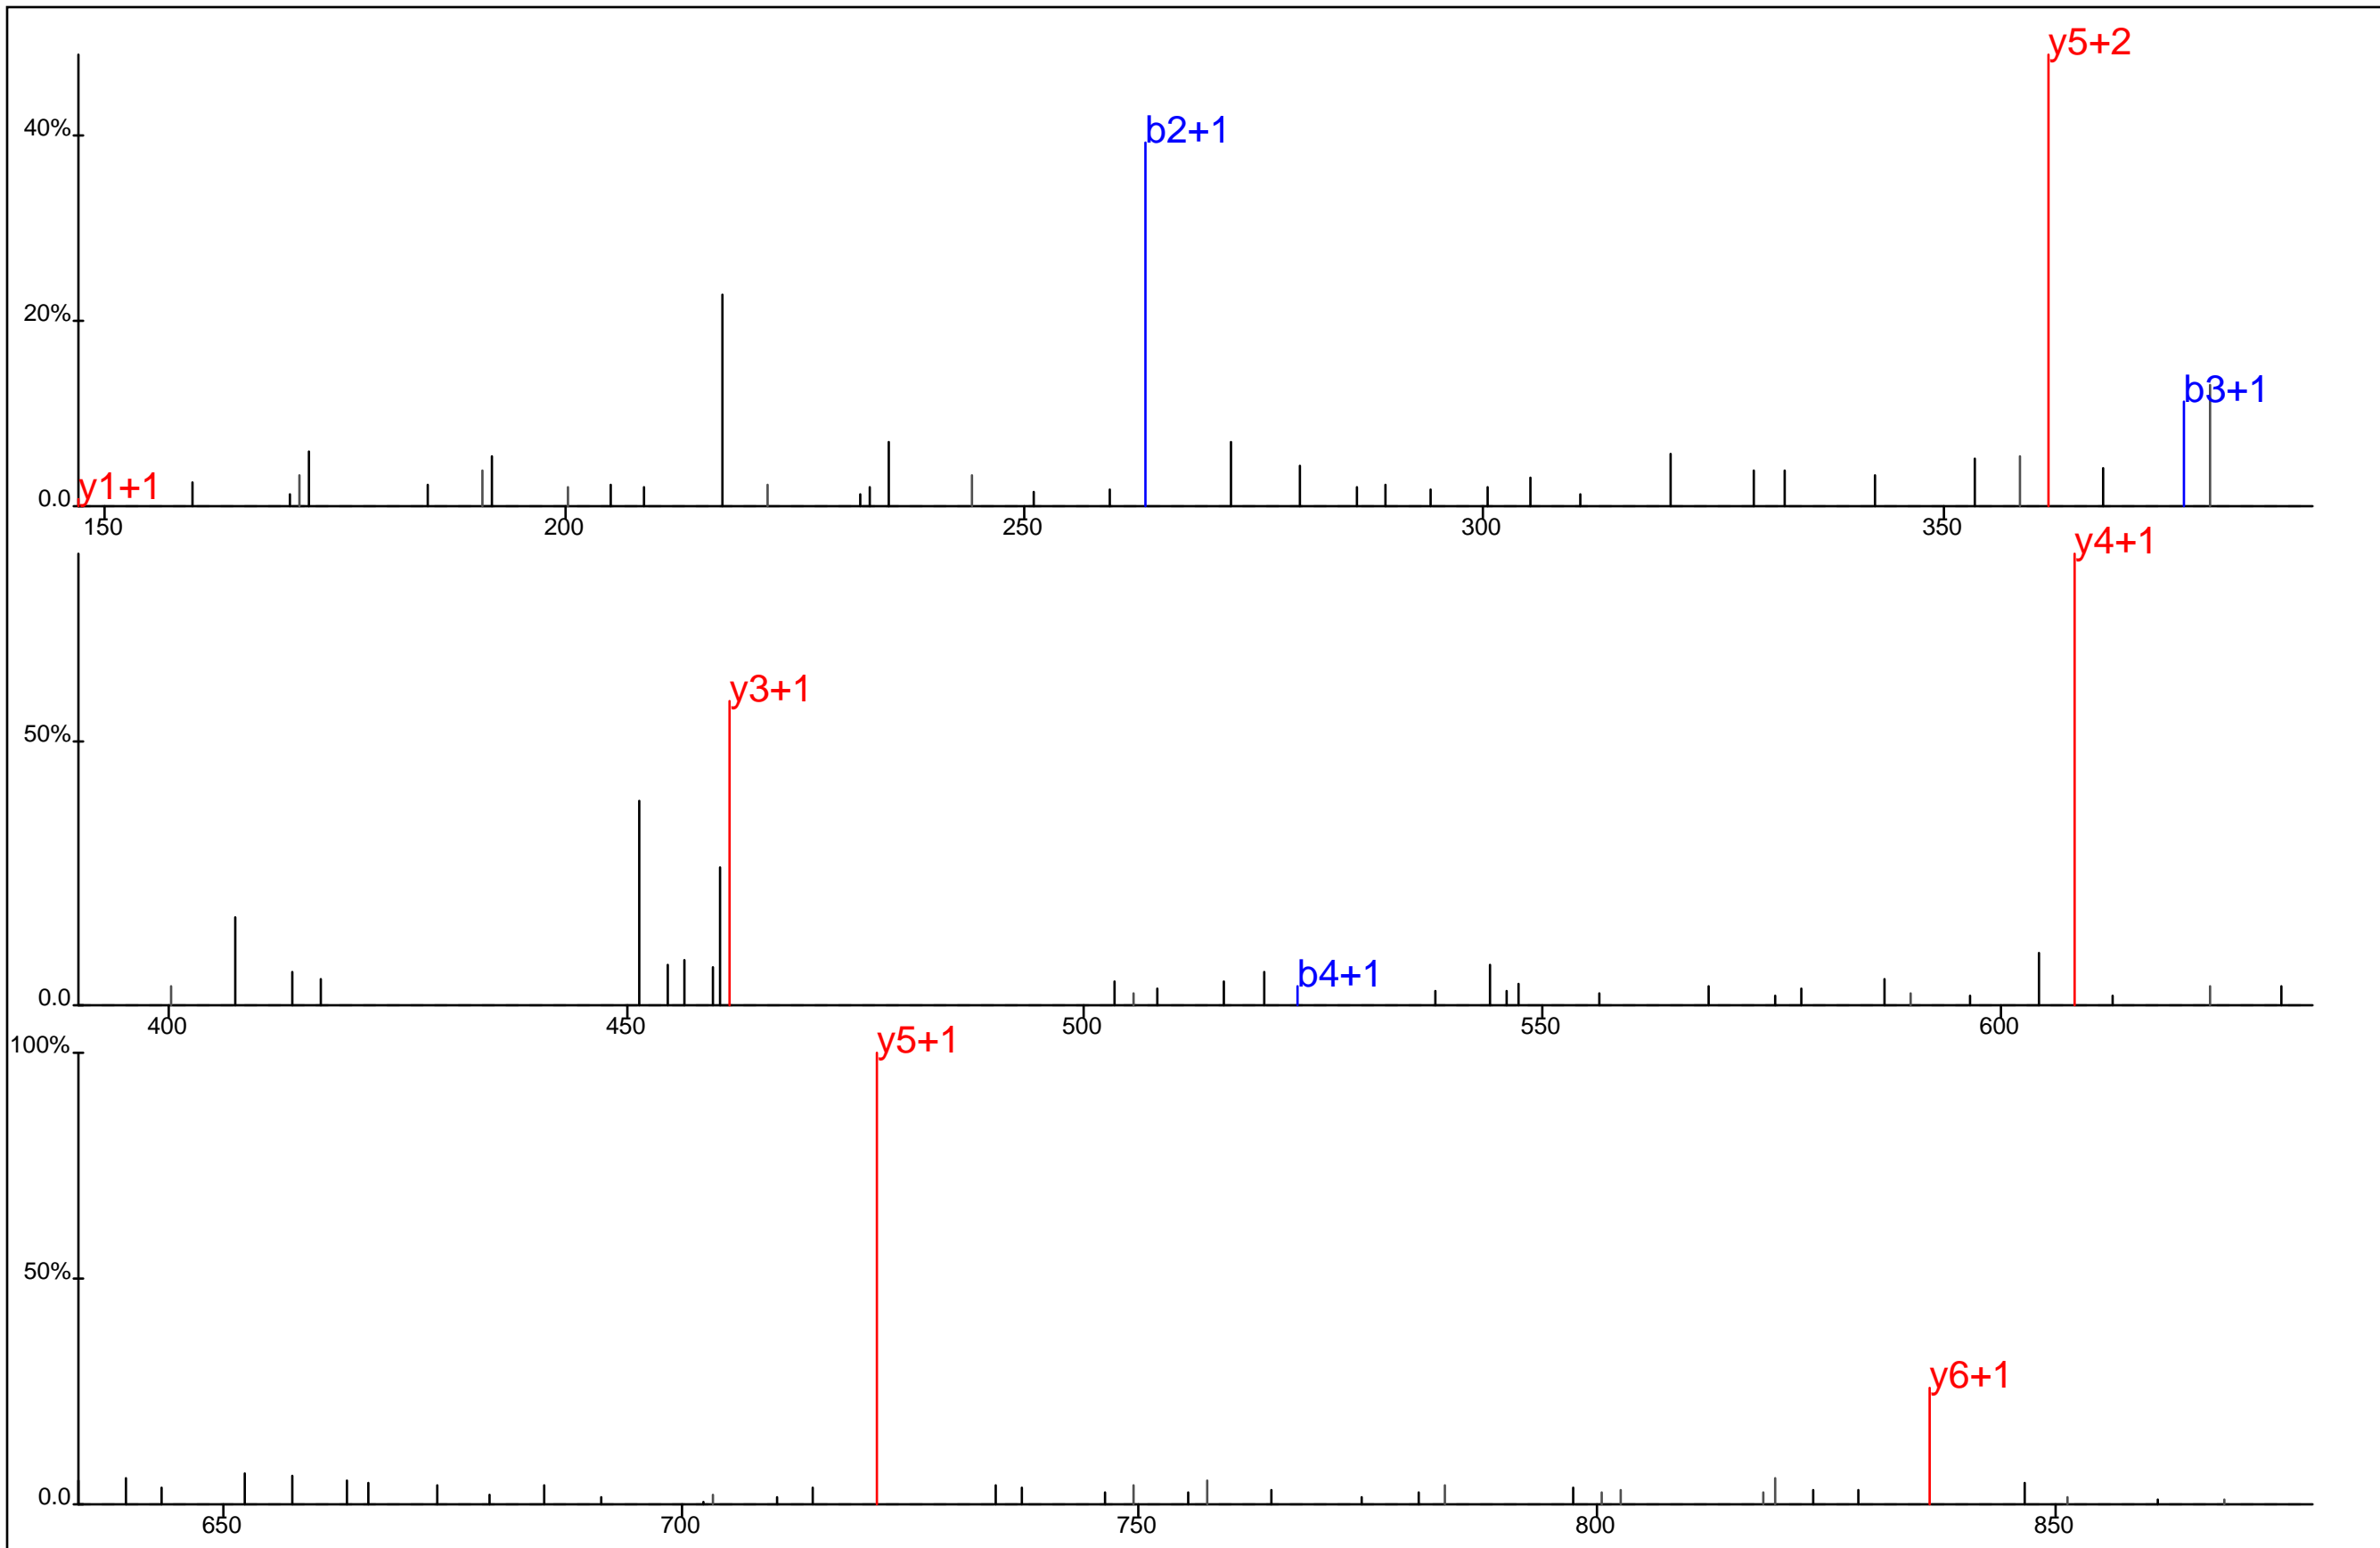

■ ■ ■ ■ ■  
 F D L M ~~N~~ A K  
■ ■ ■ ■ ■

Protein Name: Tubulin alpha 1  
 gi Accession: 0  
 Precursor Mass: 492.2012+2  
 Delta Mass: 0.769 ppm  
 XCorr: 24.4

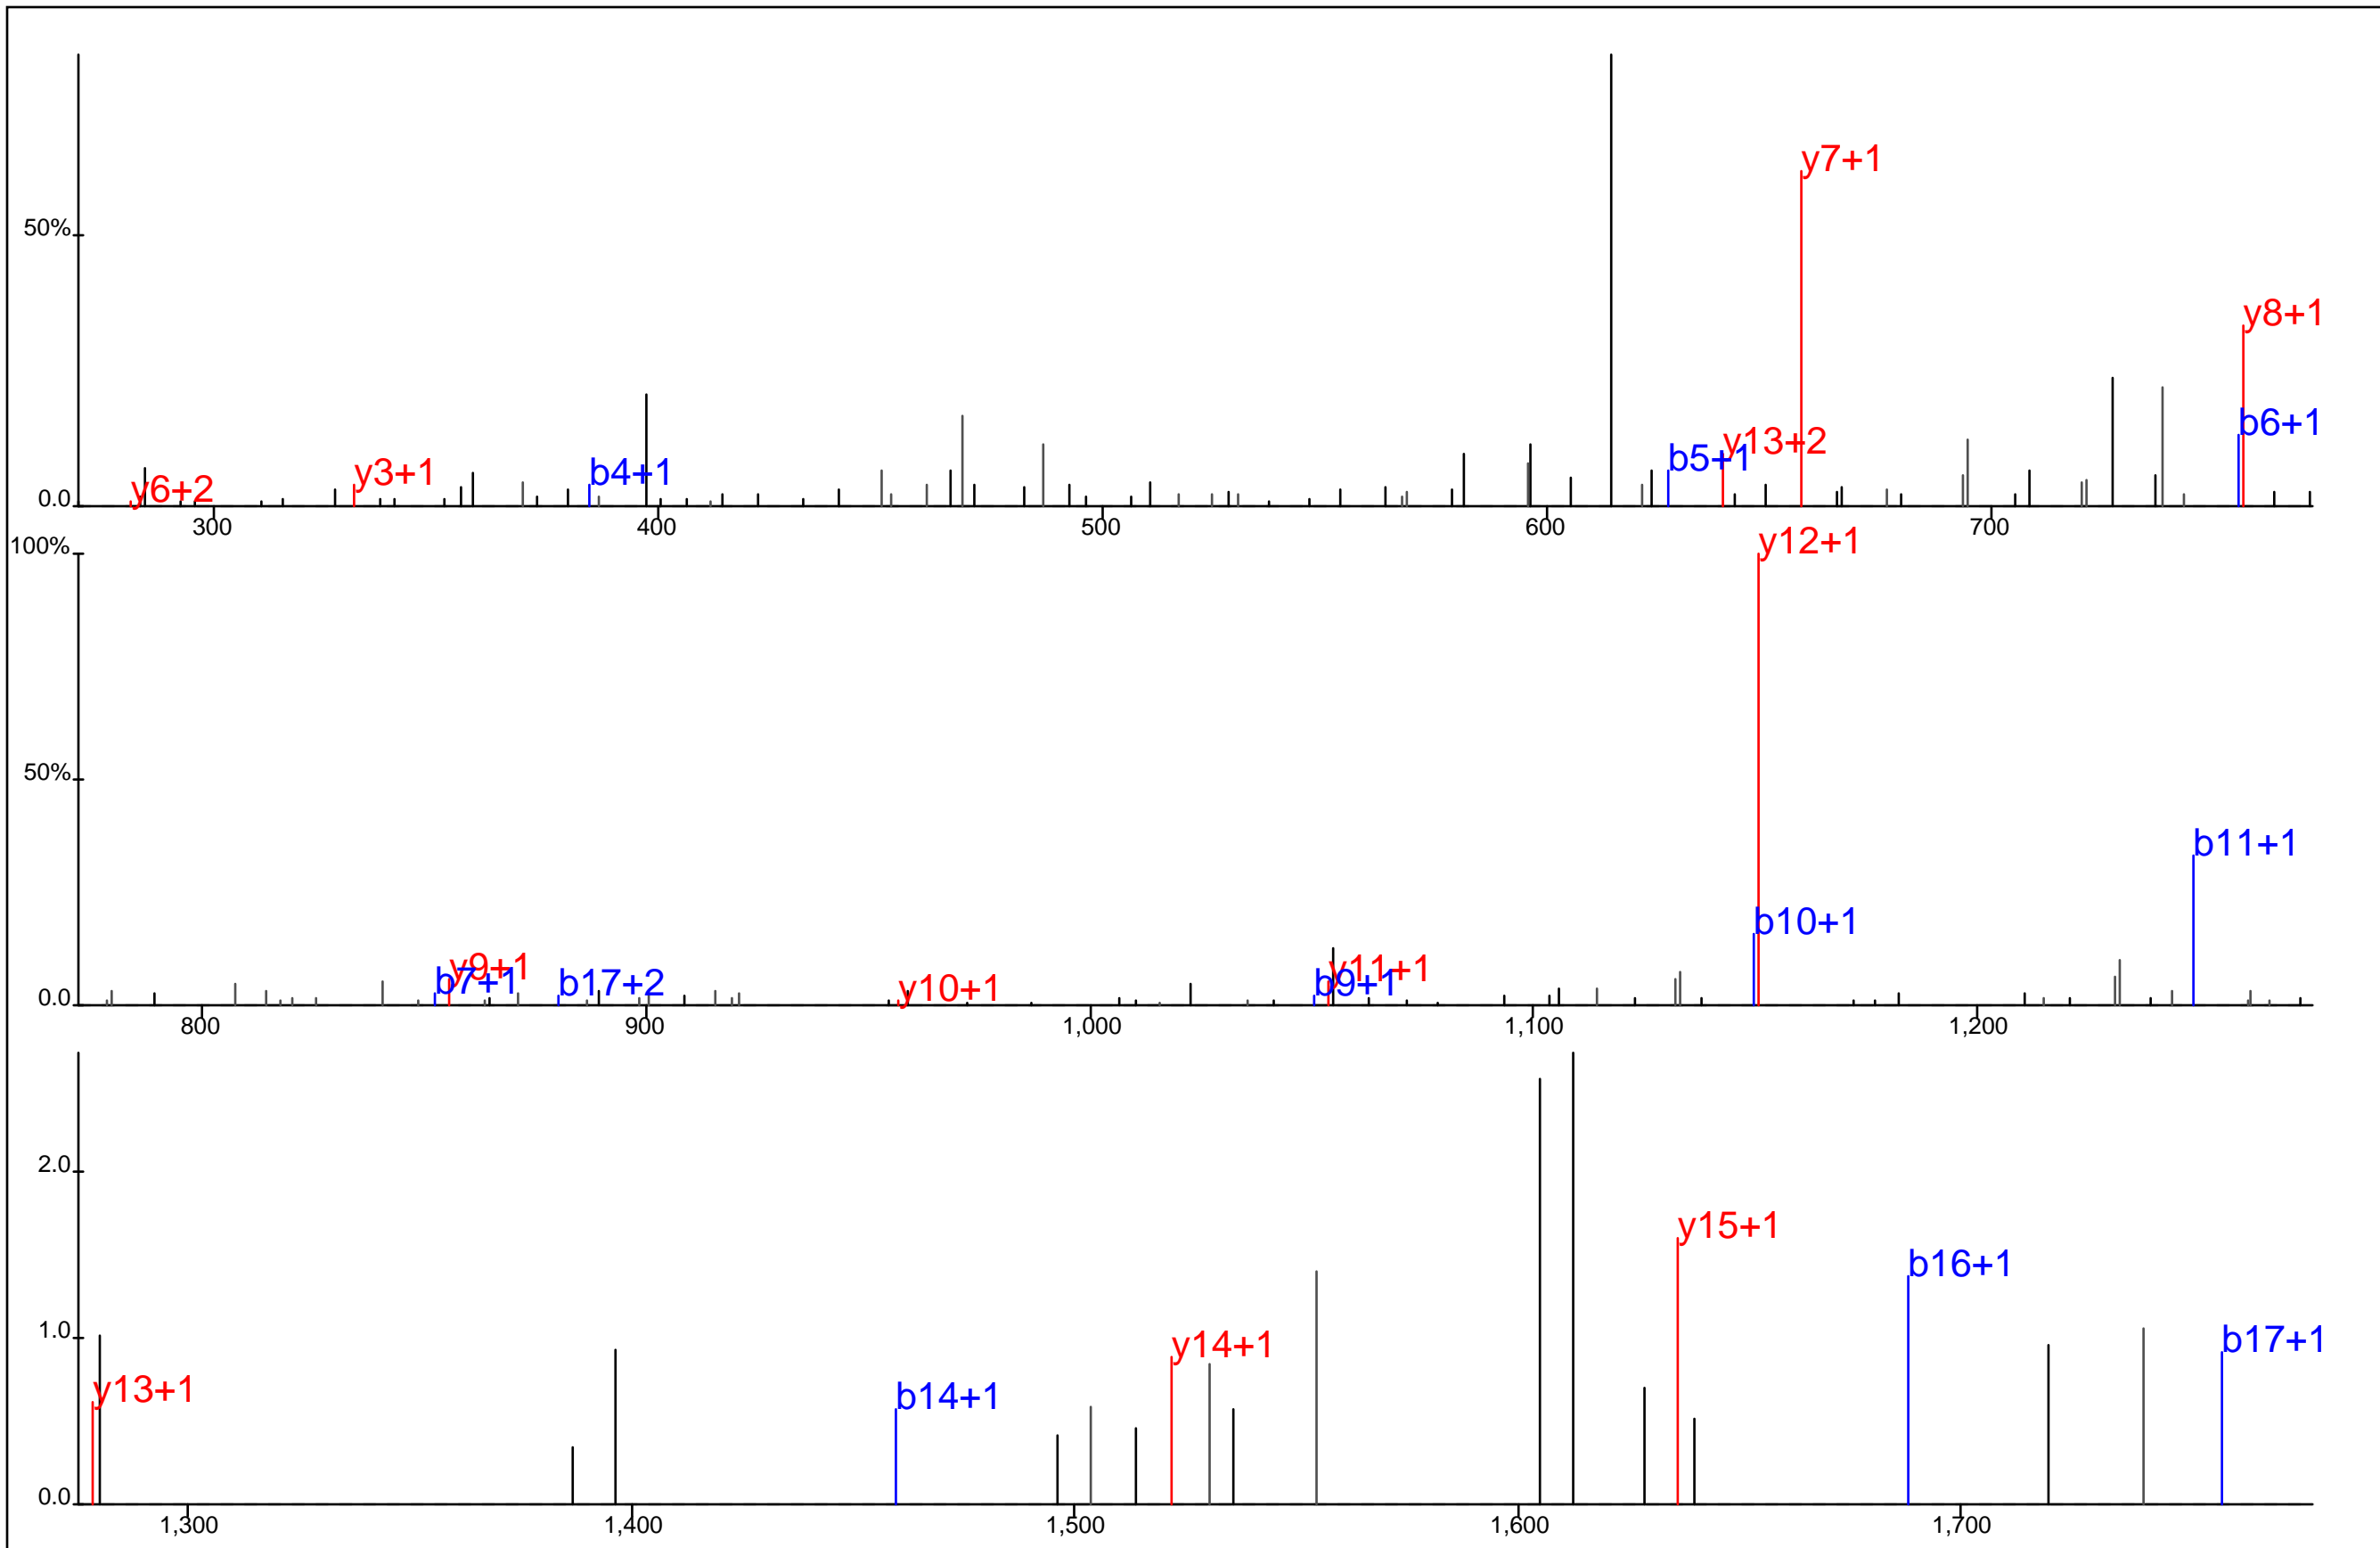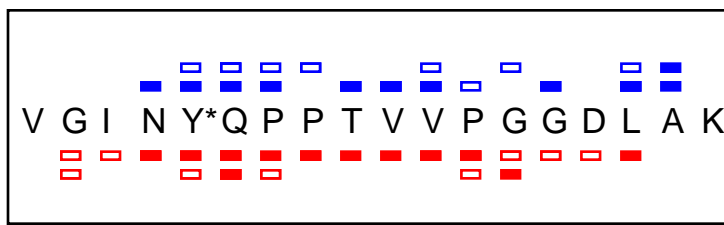

Protein Name: Tubulin alpha 1  
 gi Accession: 0  
 Precursor Mass: 952.9805+2  
 Delta Mass: 1.061 ppm  
 XCorr: 40.65

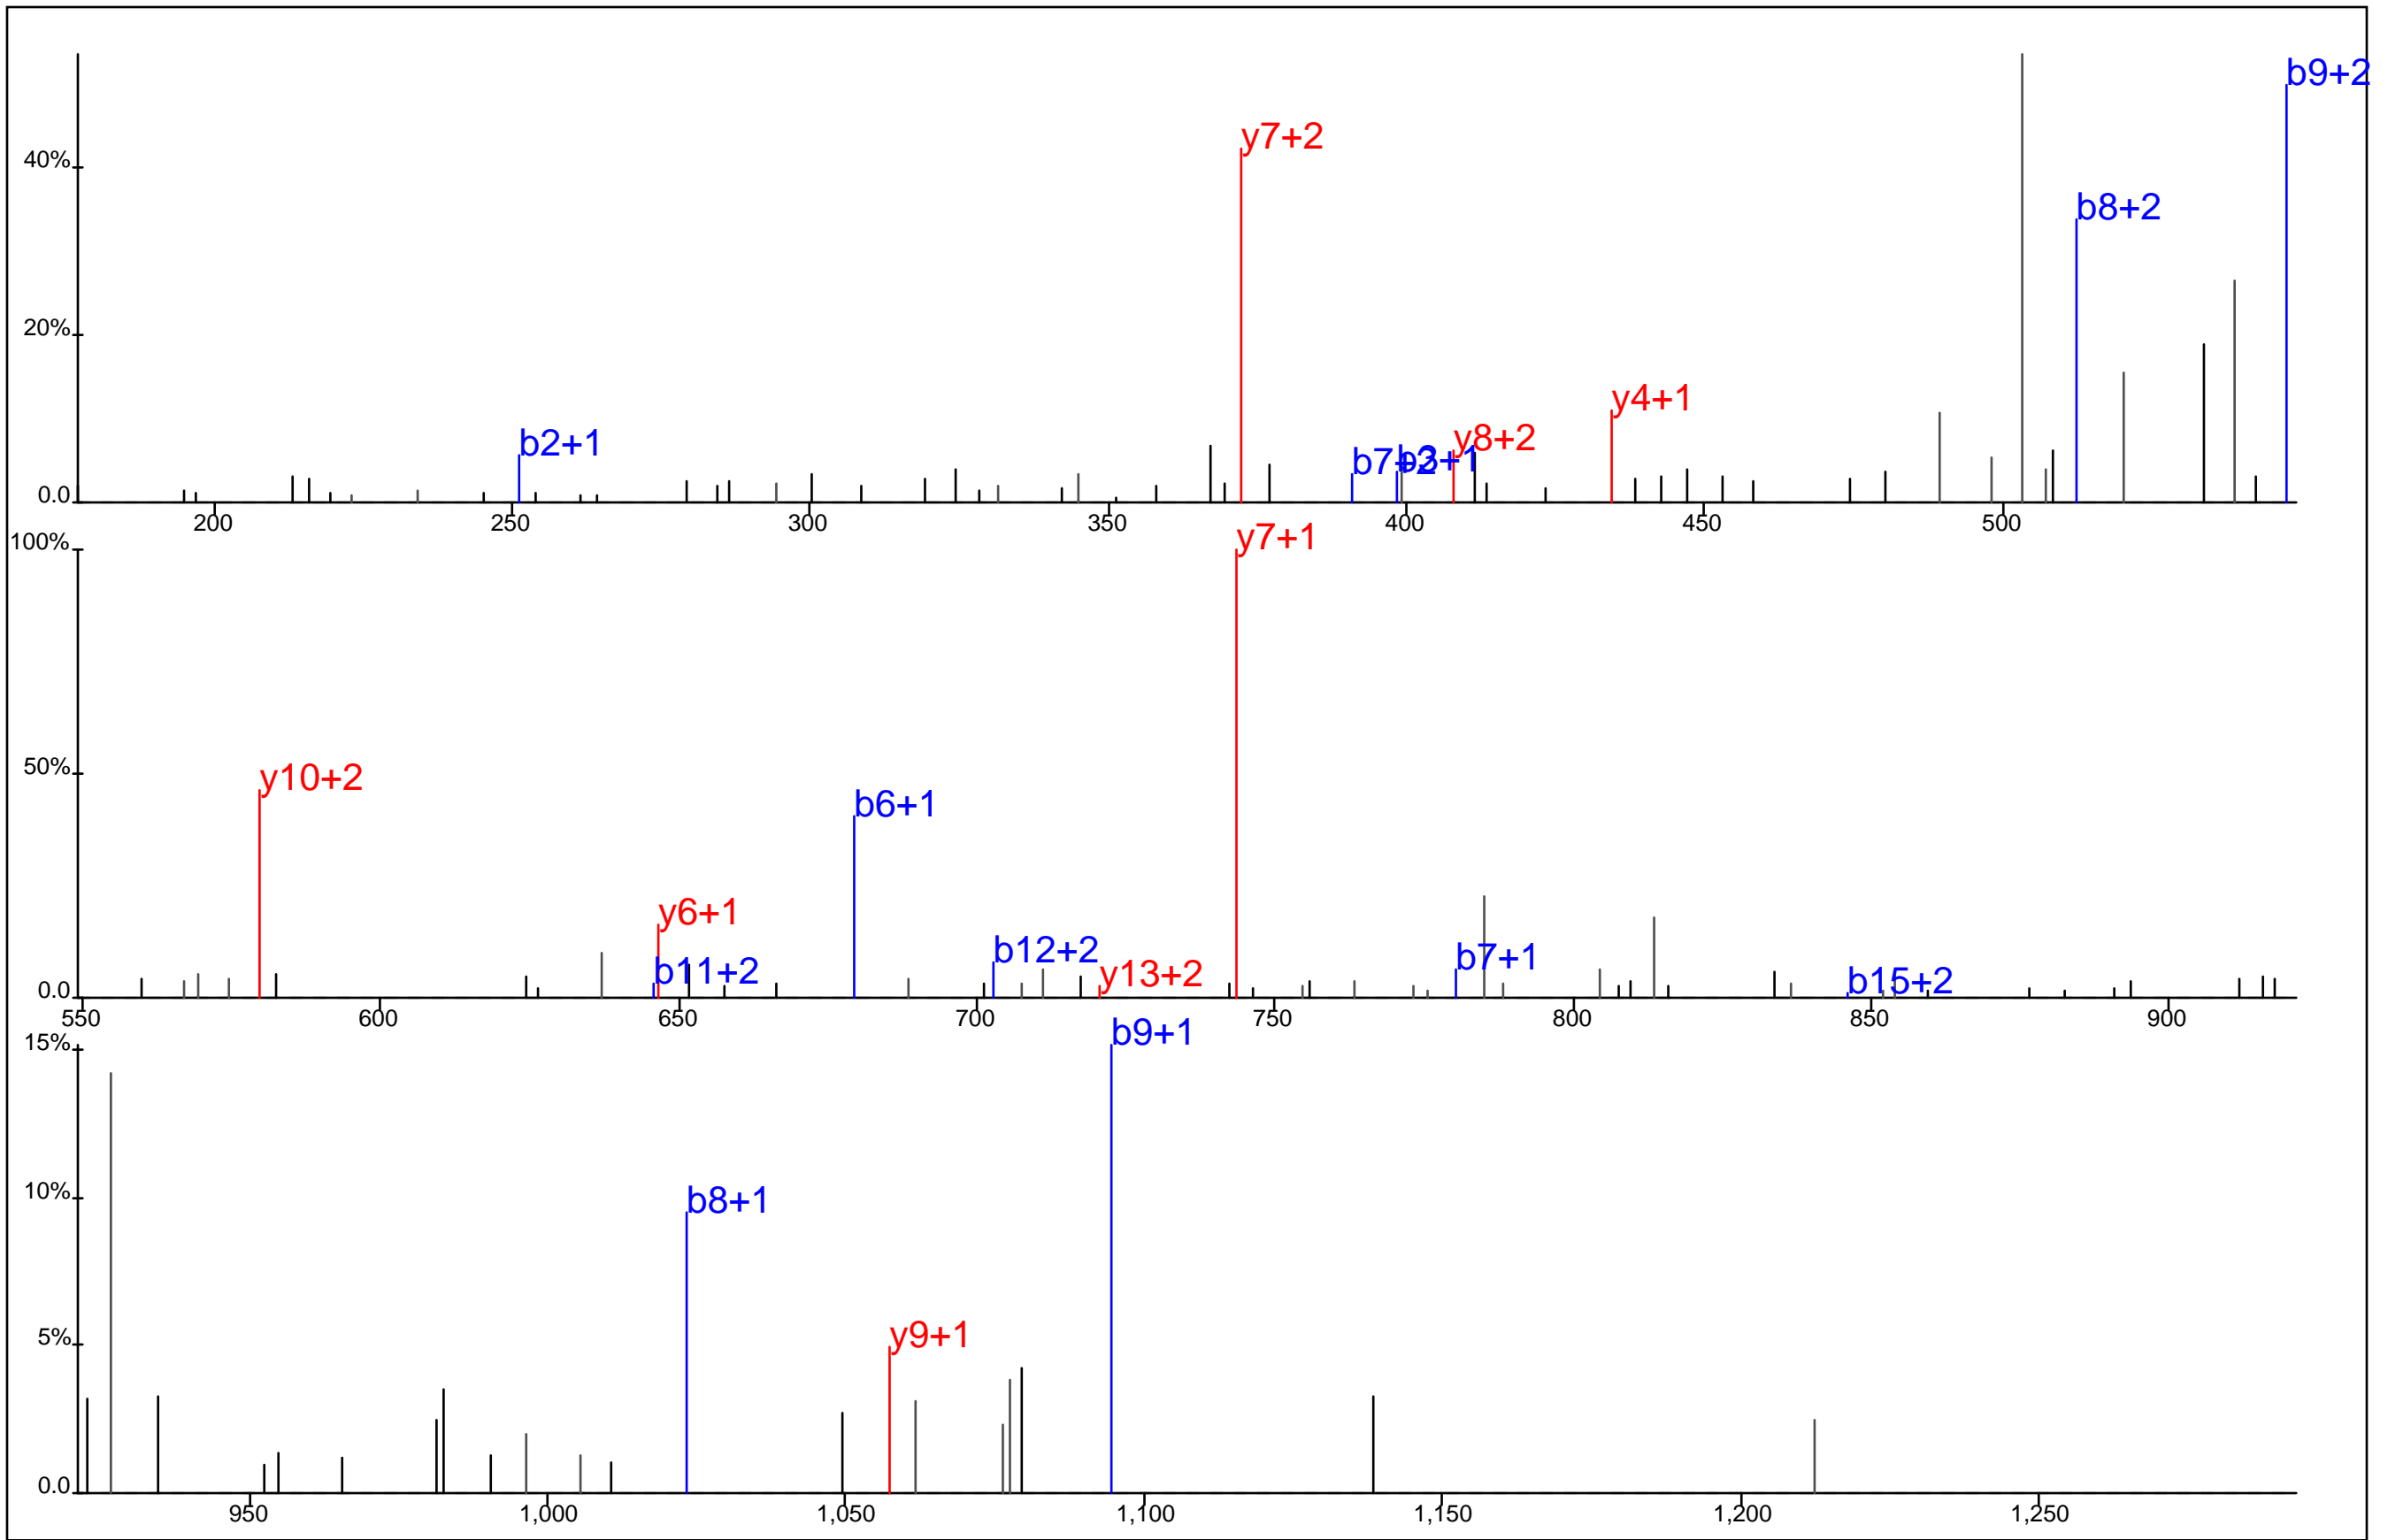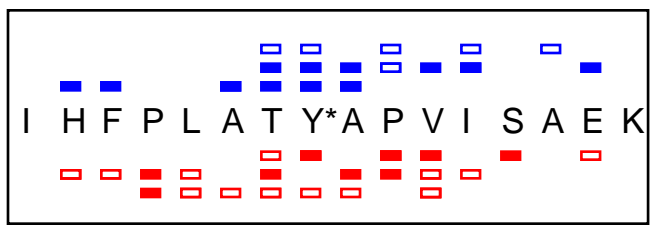

Protein Name: Tubulin alpha 1  
 gi Accession: 0  
 Precursor Mass: 612.9815+3  
 Delta Mass: 0.236 ppm  
 XCorr: 35.46

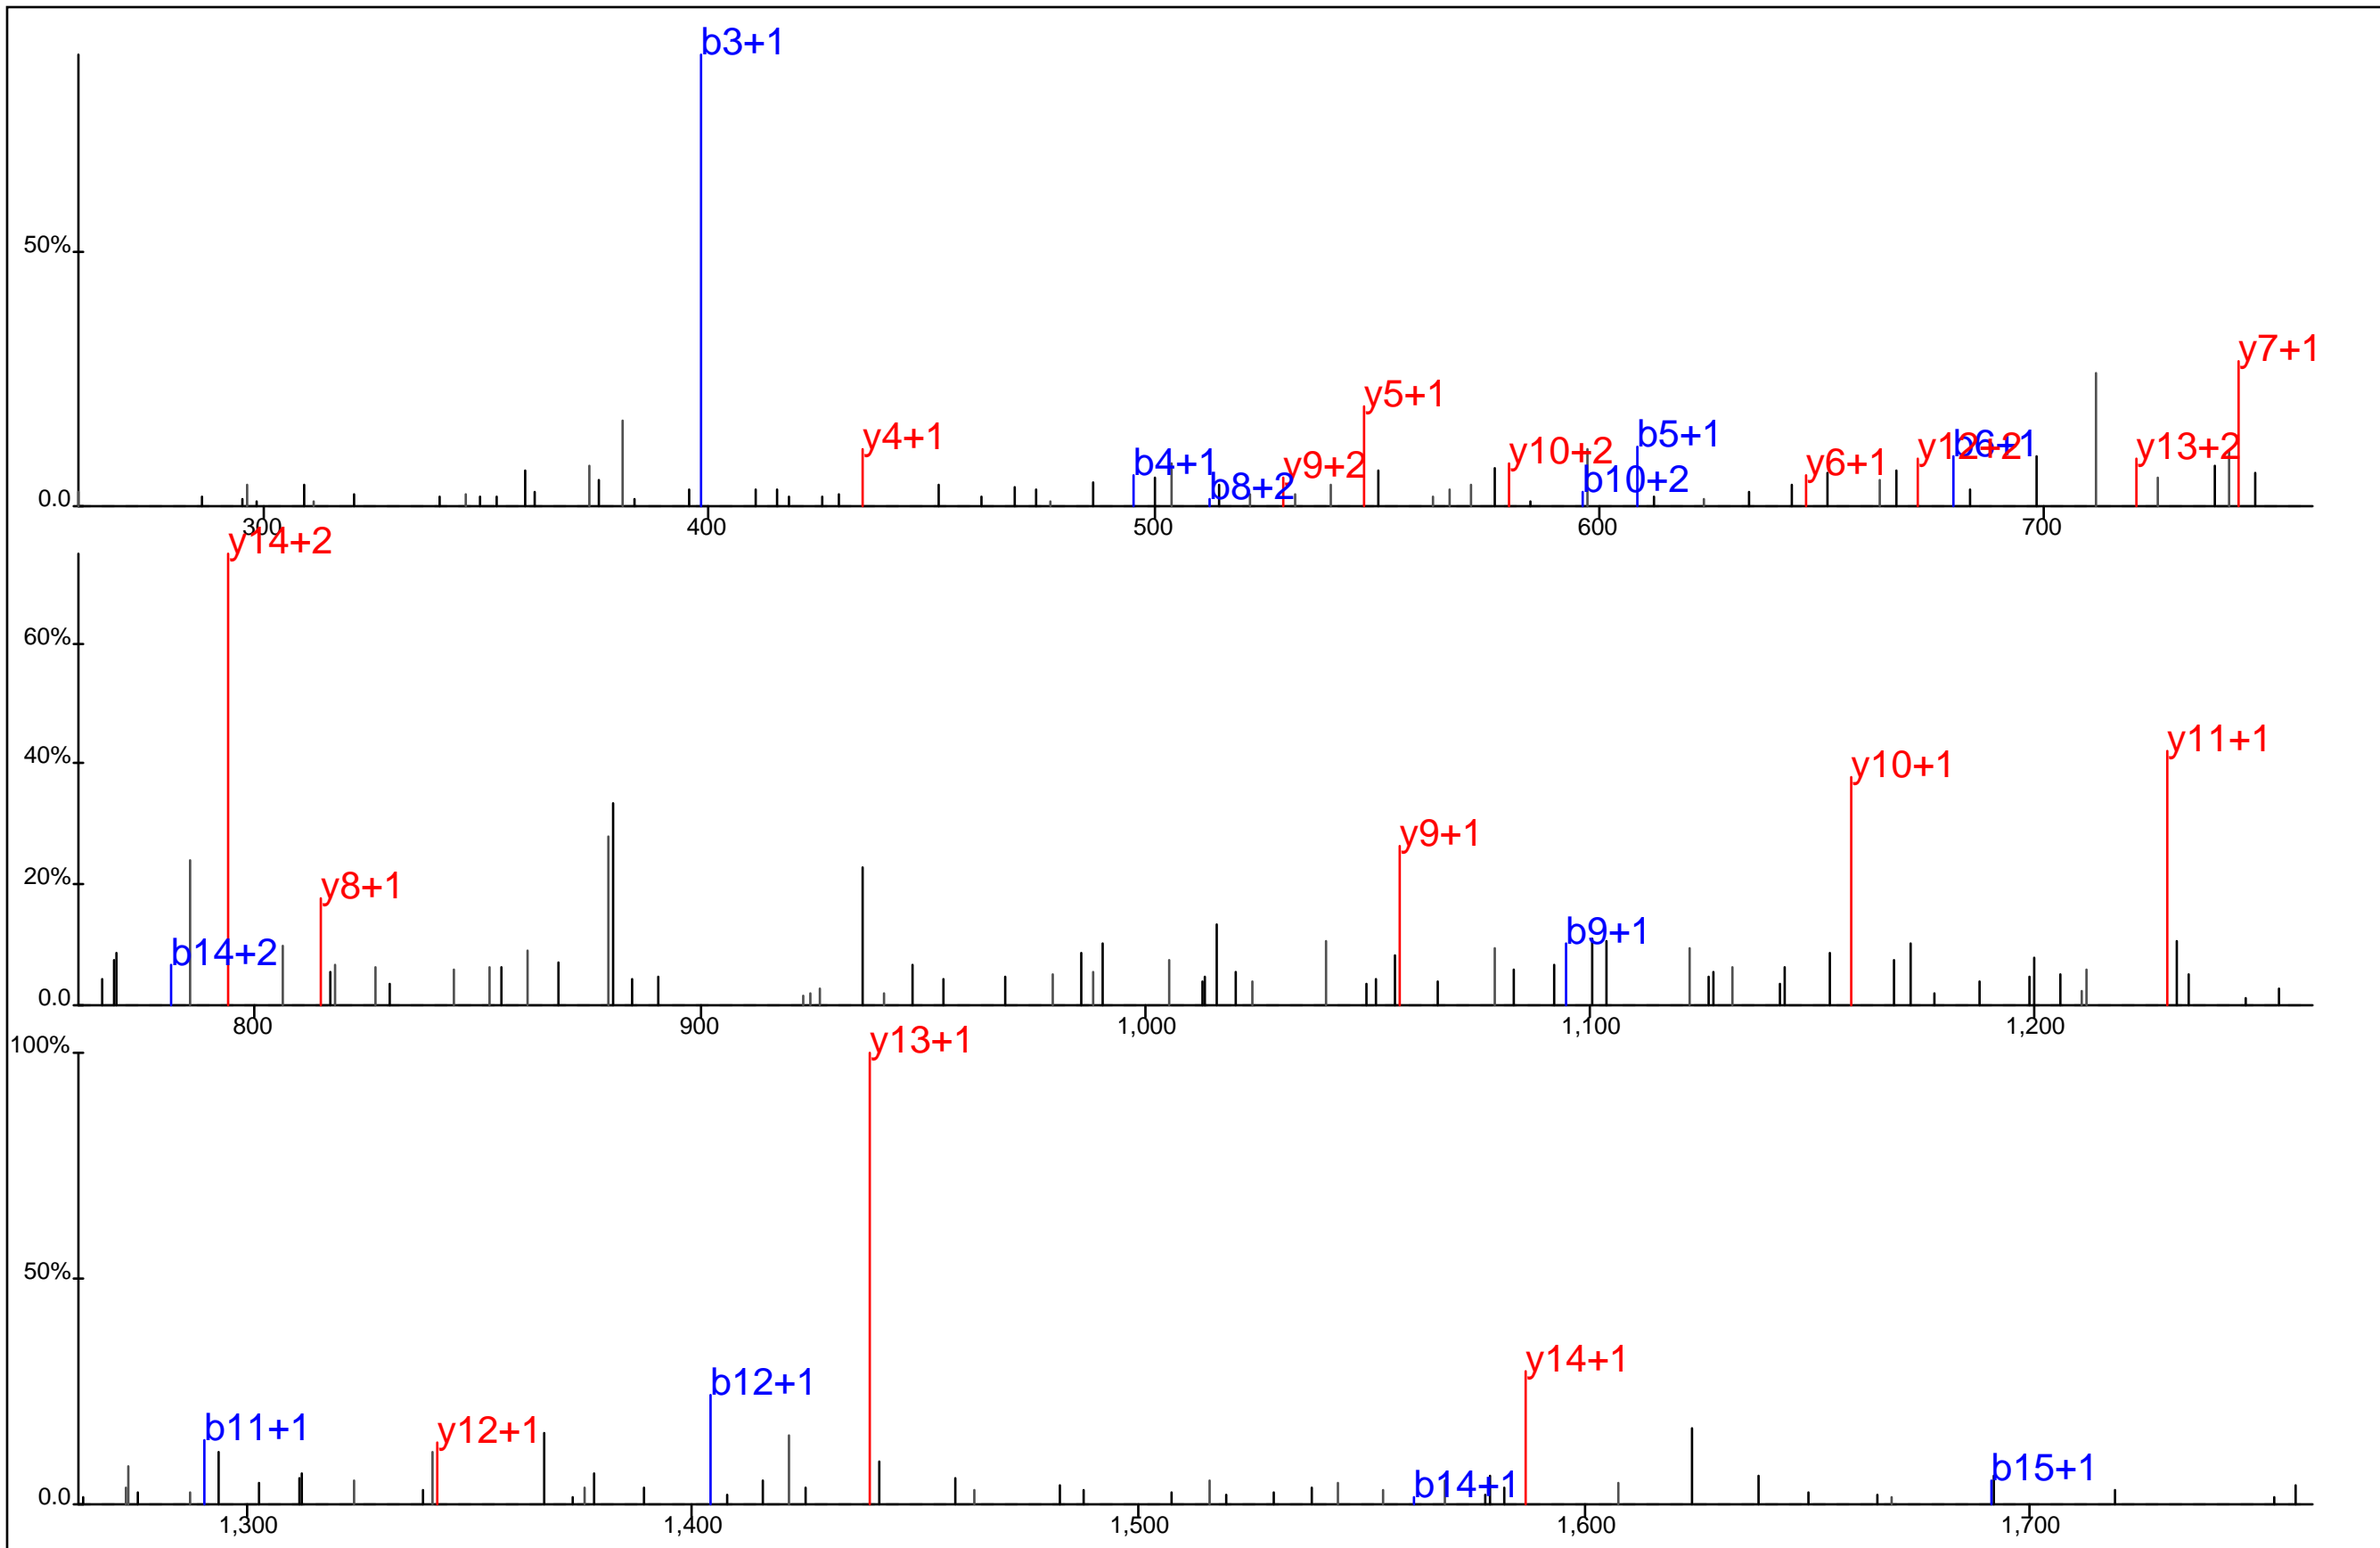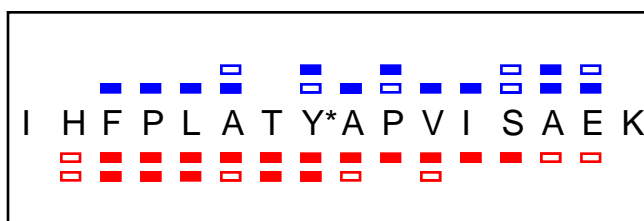

Protein Name: Tubulin alpha 1  
 gi Accession: 0  
 Precursor Mass: 918.9675+2  
 Delta Mass: 1.019 ppm  
 XCorr: 48.07

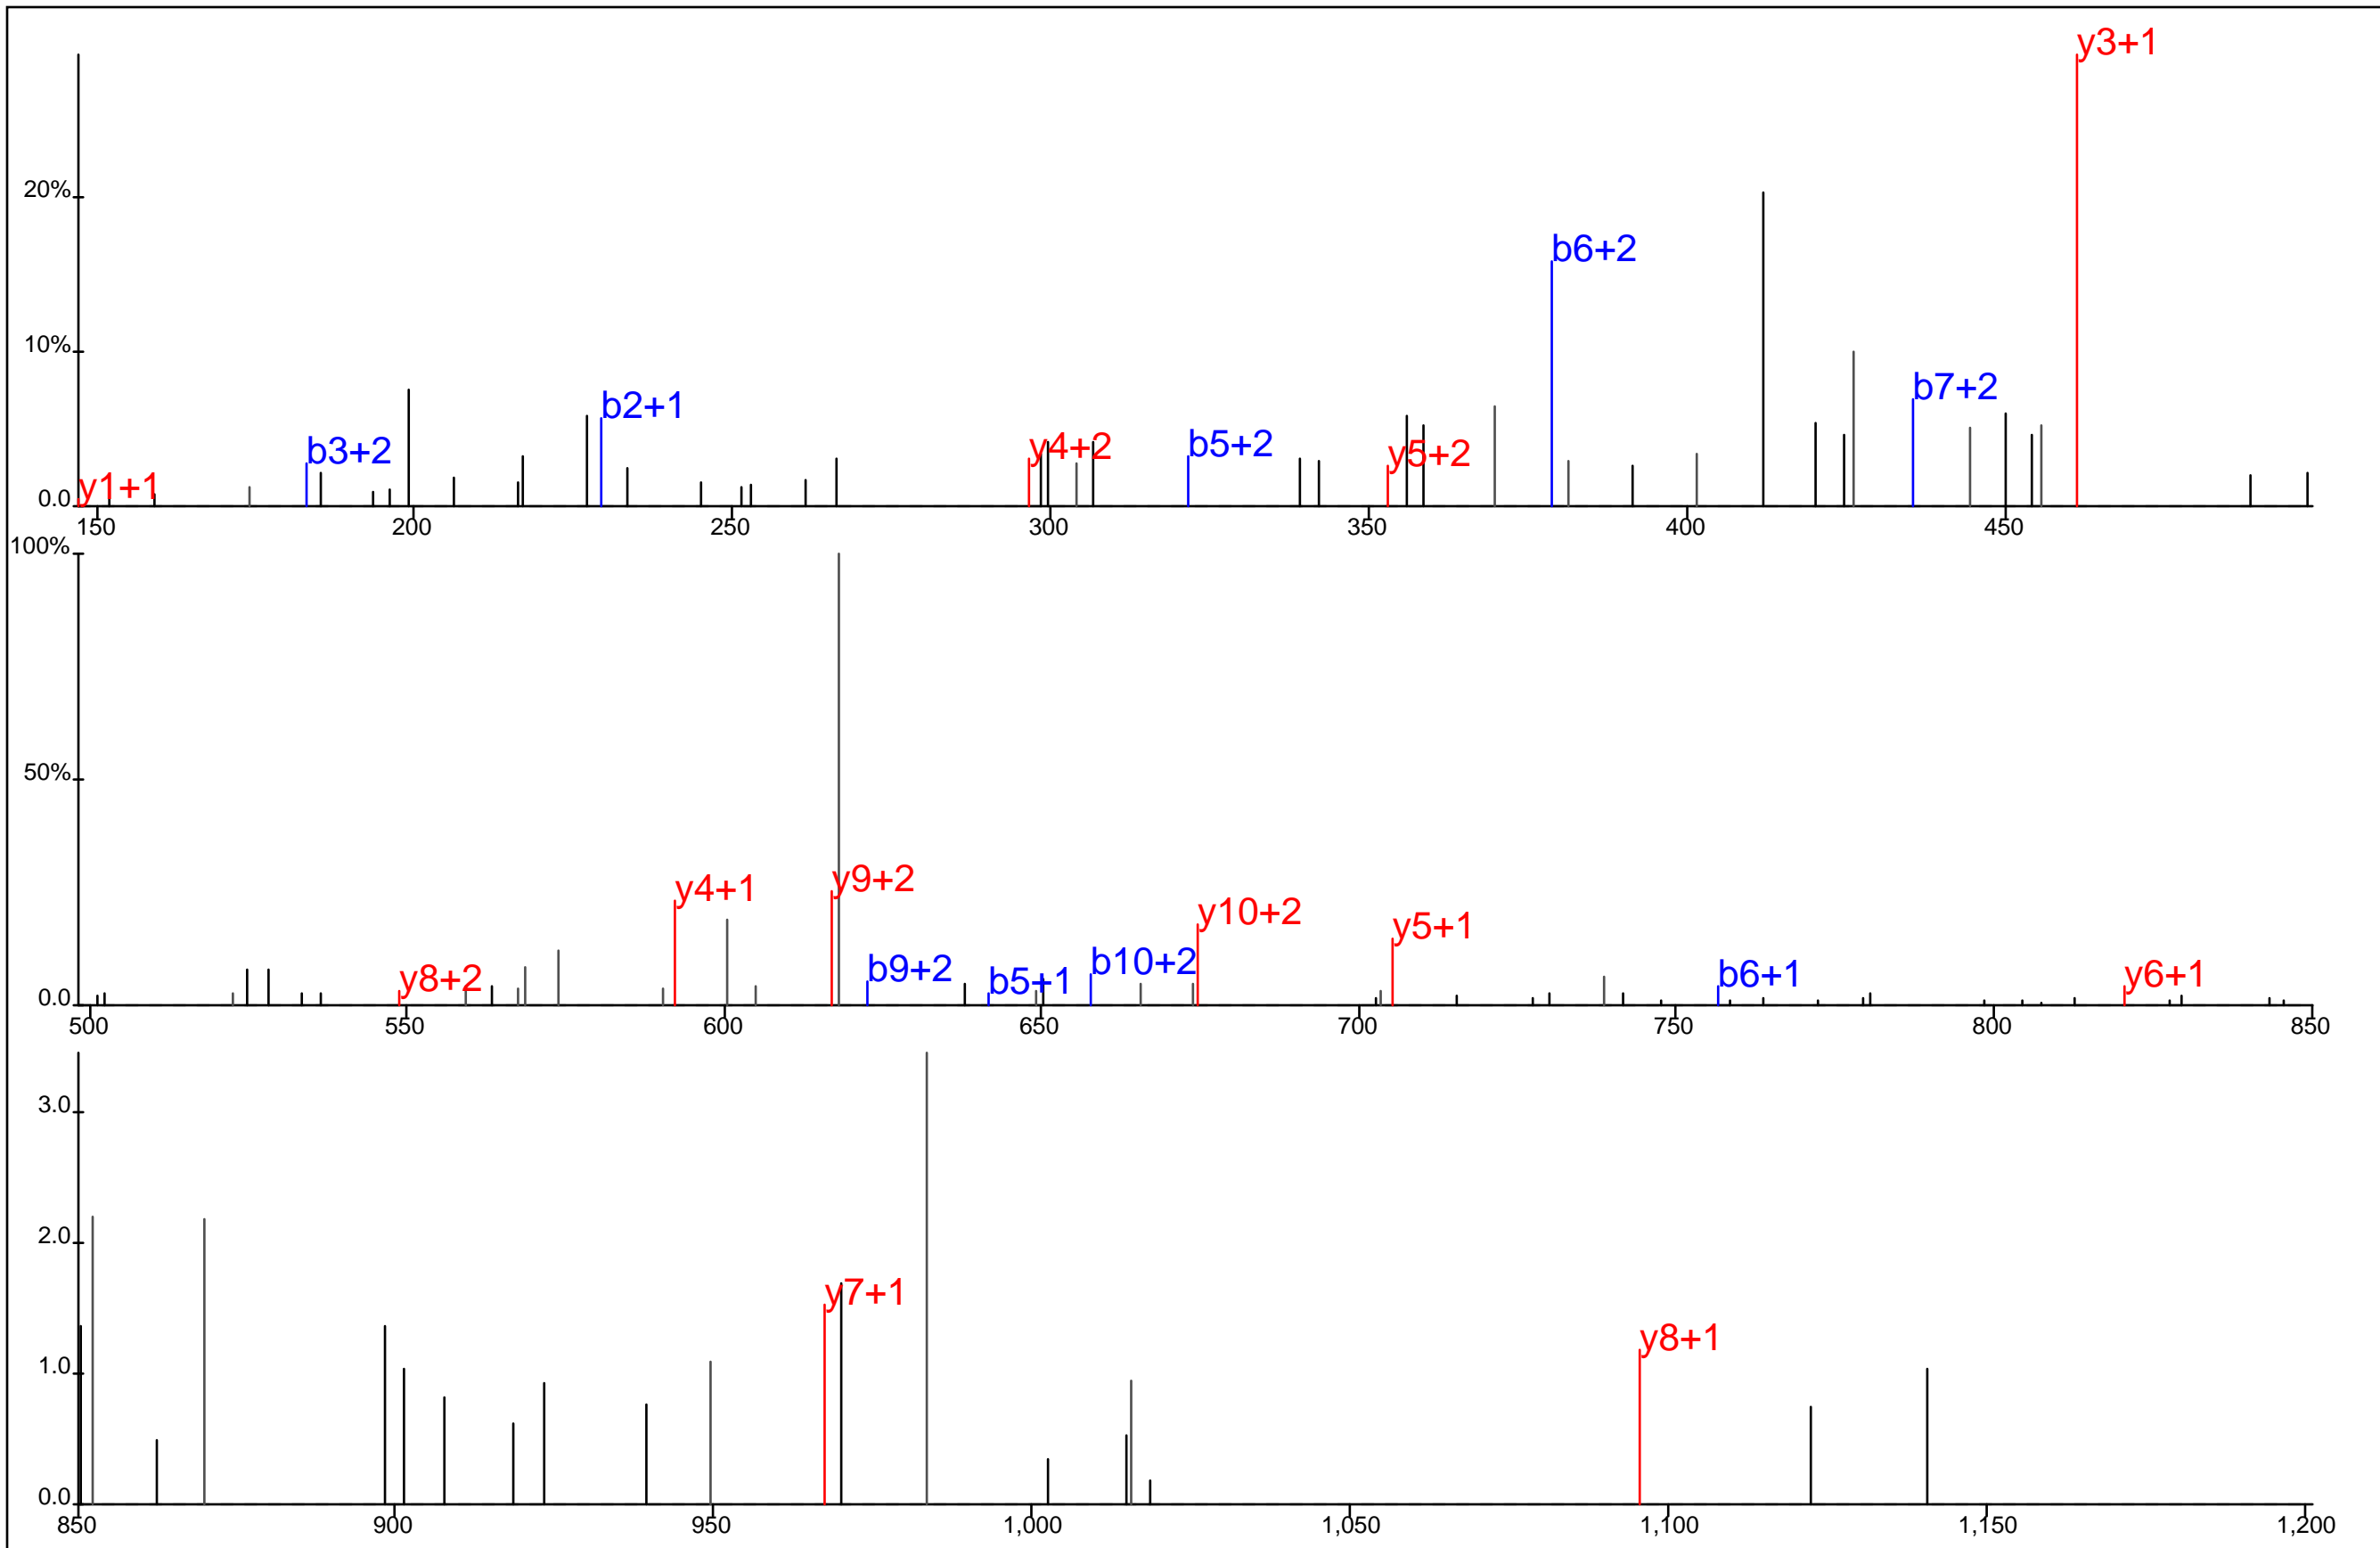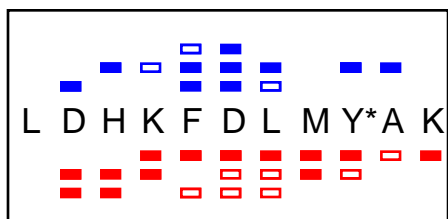

Protein Name: Tubulin alpha 1  
 gi Accession: 0  
 Precursor Mass: 487.5600+3  
 Delta Mass: 0.696 ppm  
 XCorr: 25.03



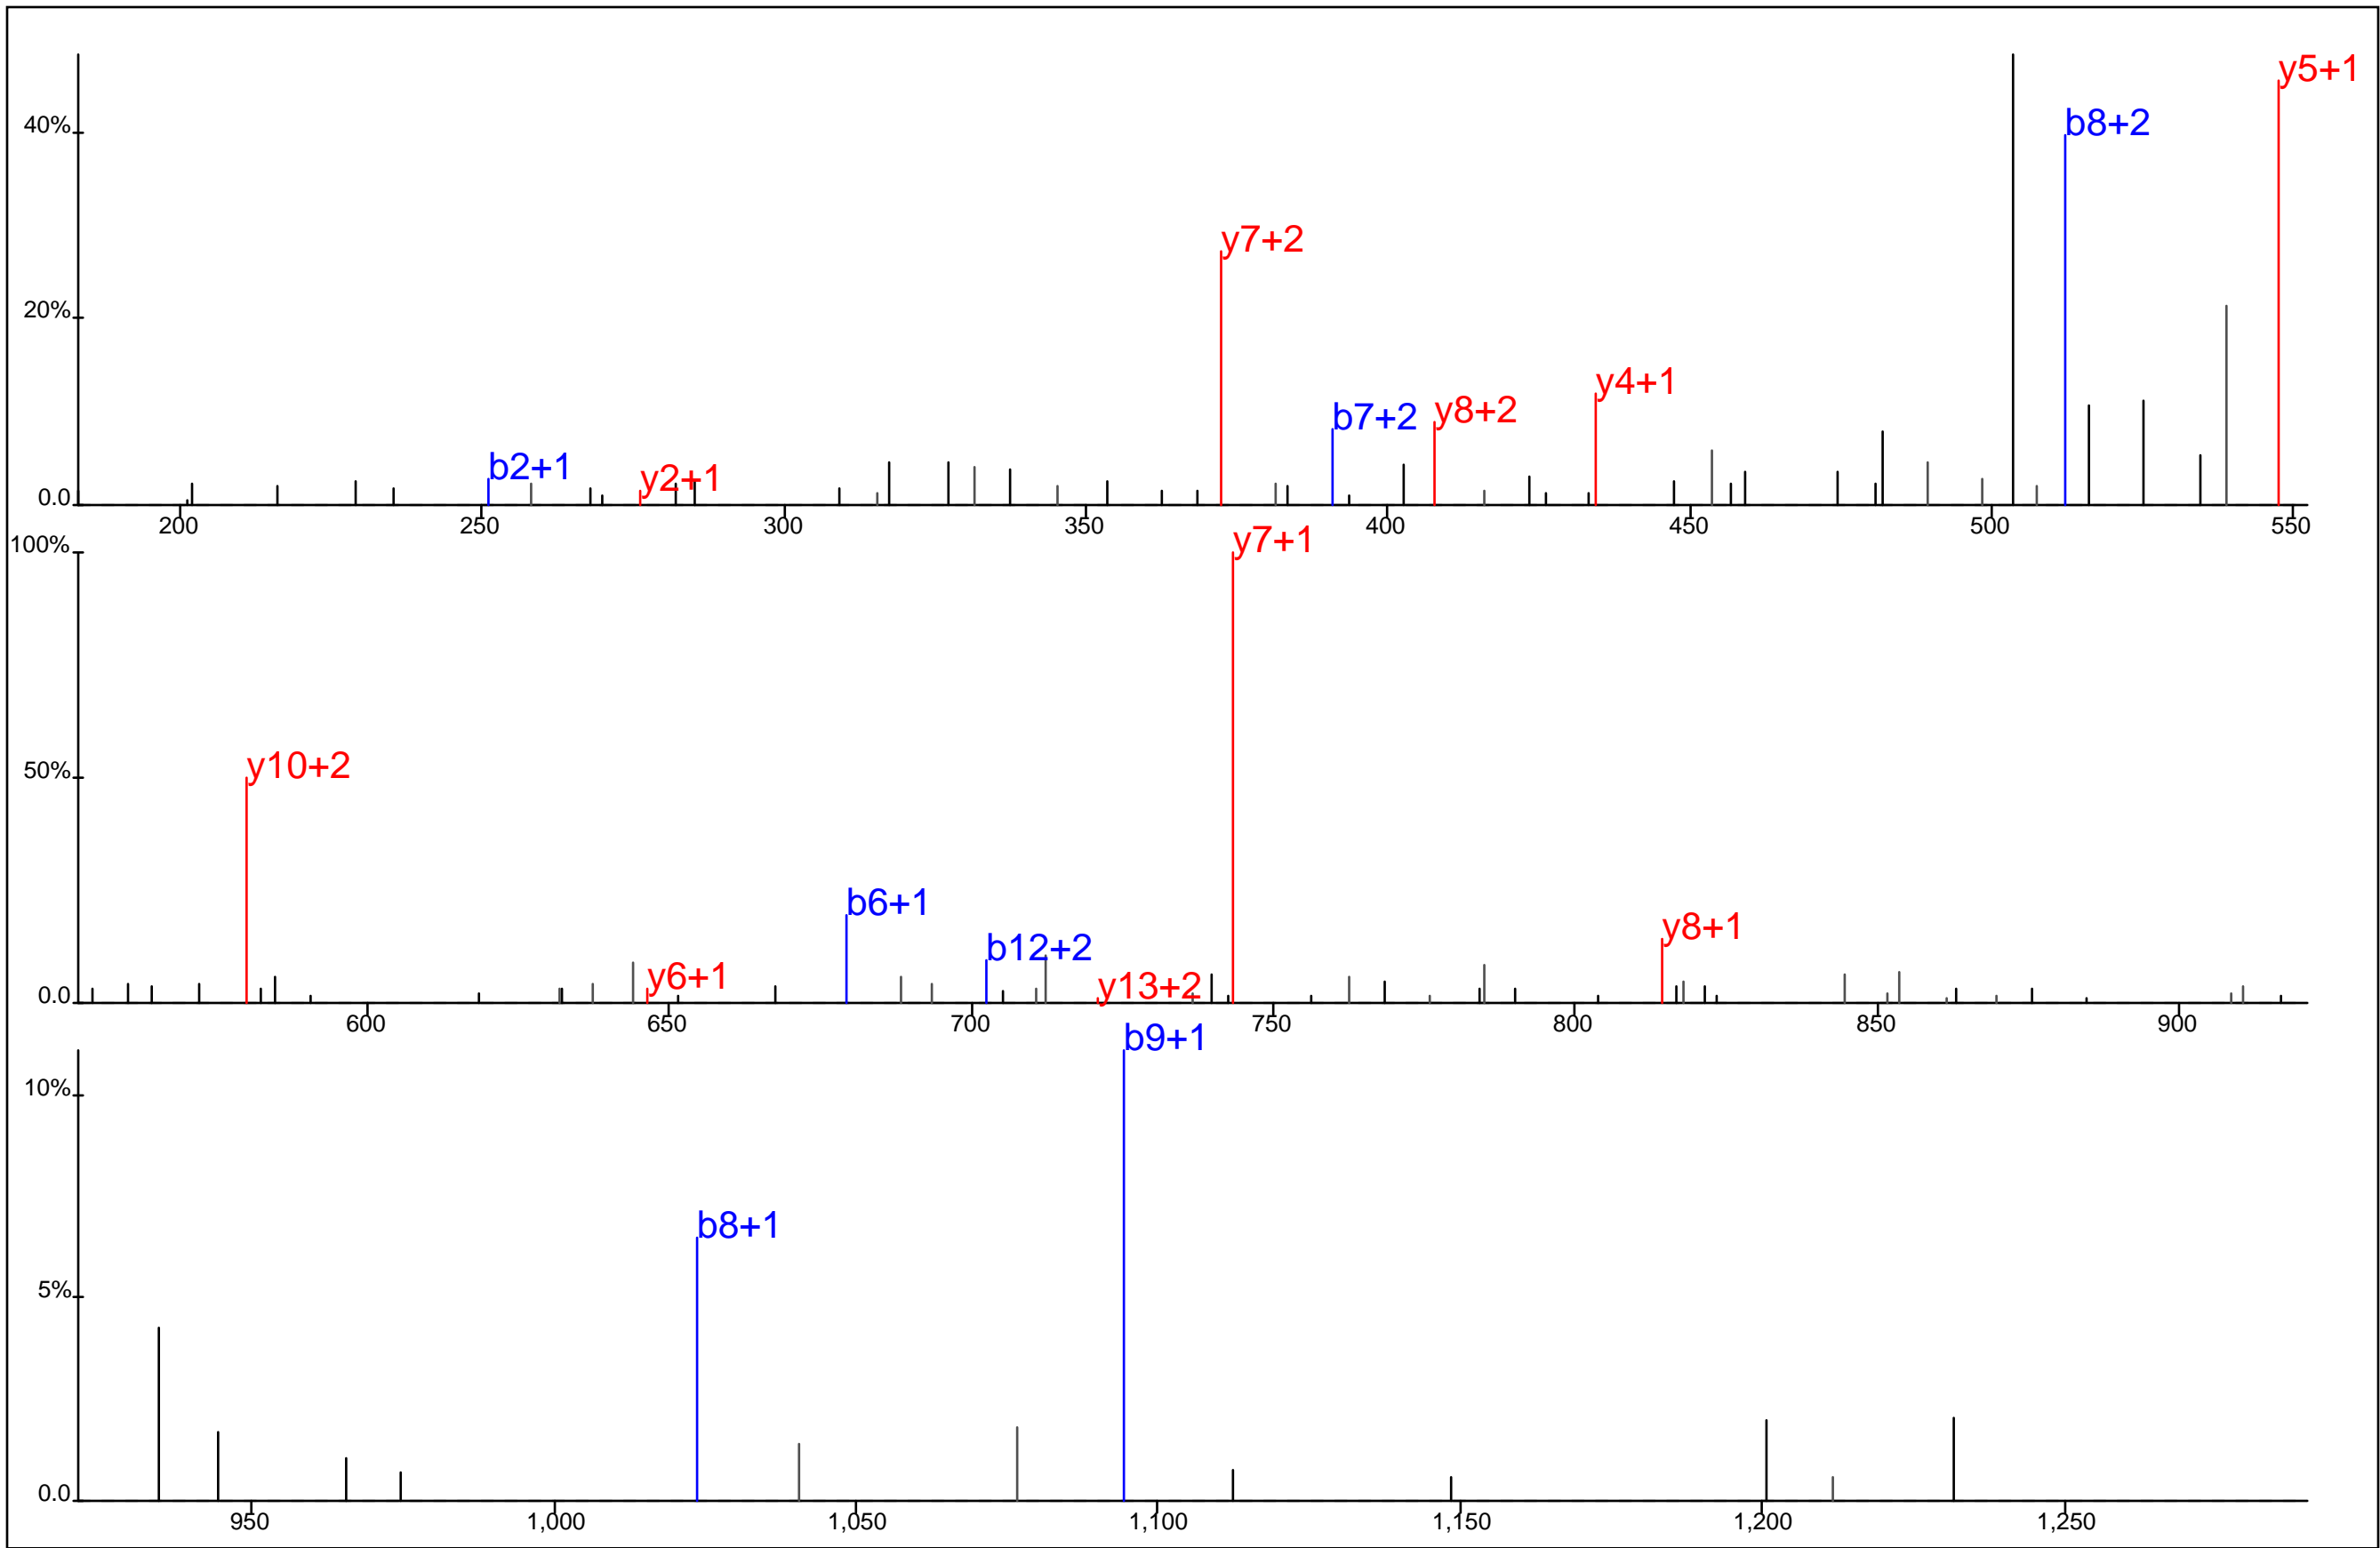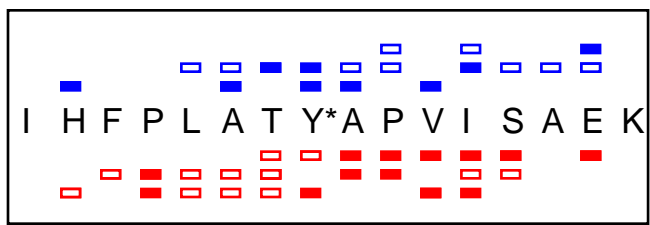

Protein Name: Tubulin alpha 1  
 gi Accession: 0  
 Precursor Mass: 612.9831+3  
 Delta Mass: 2.828 ppm  
 XCorr: 34.61

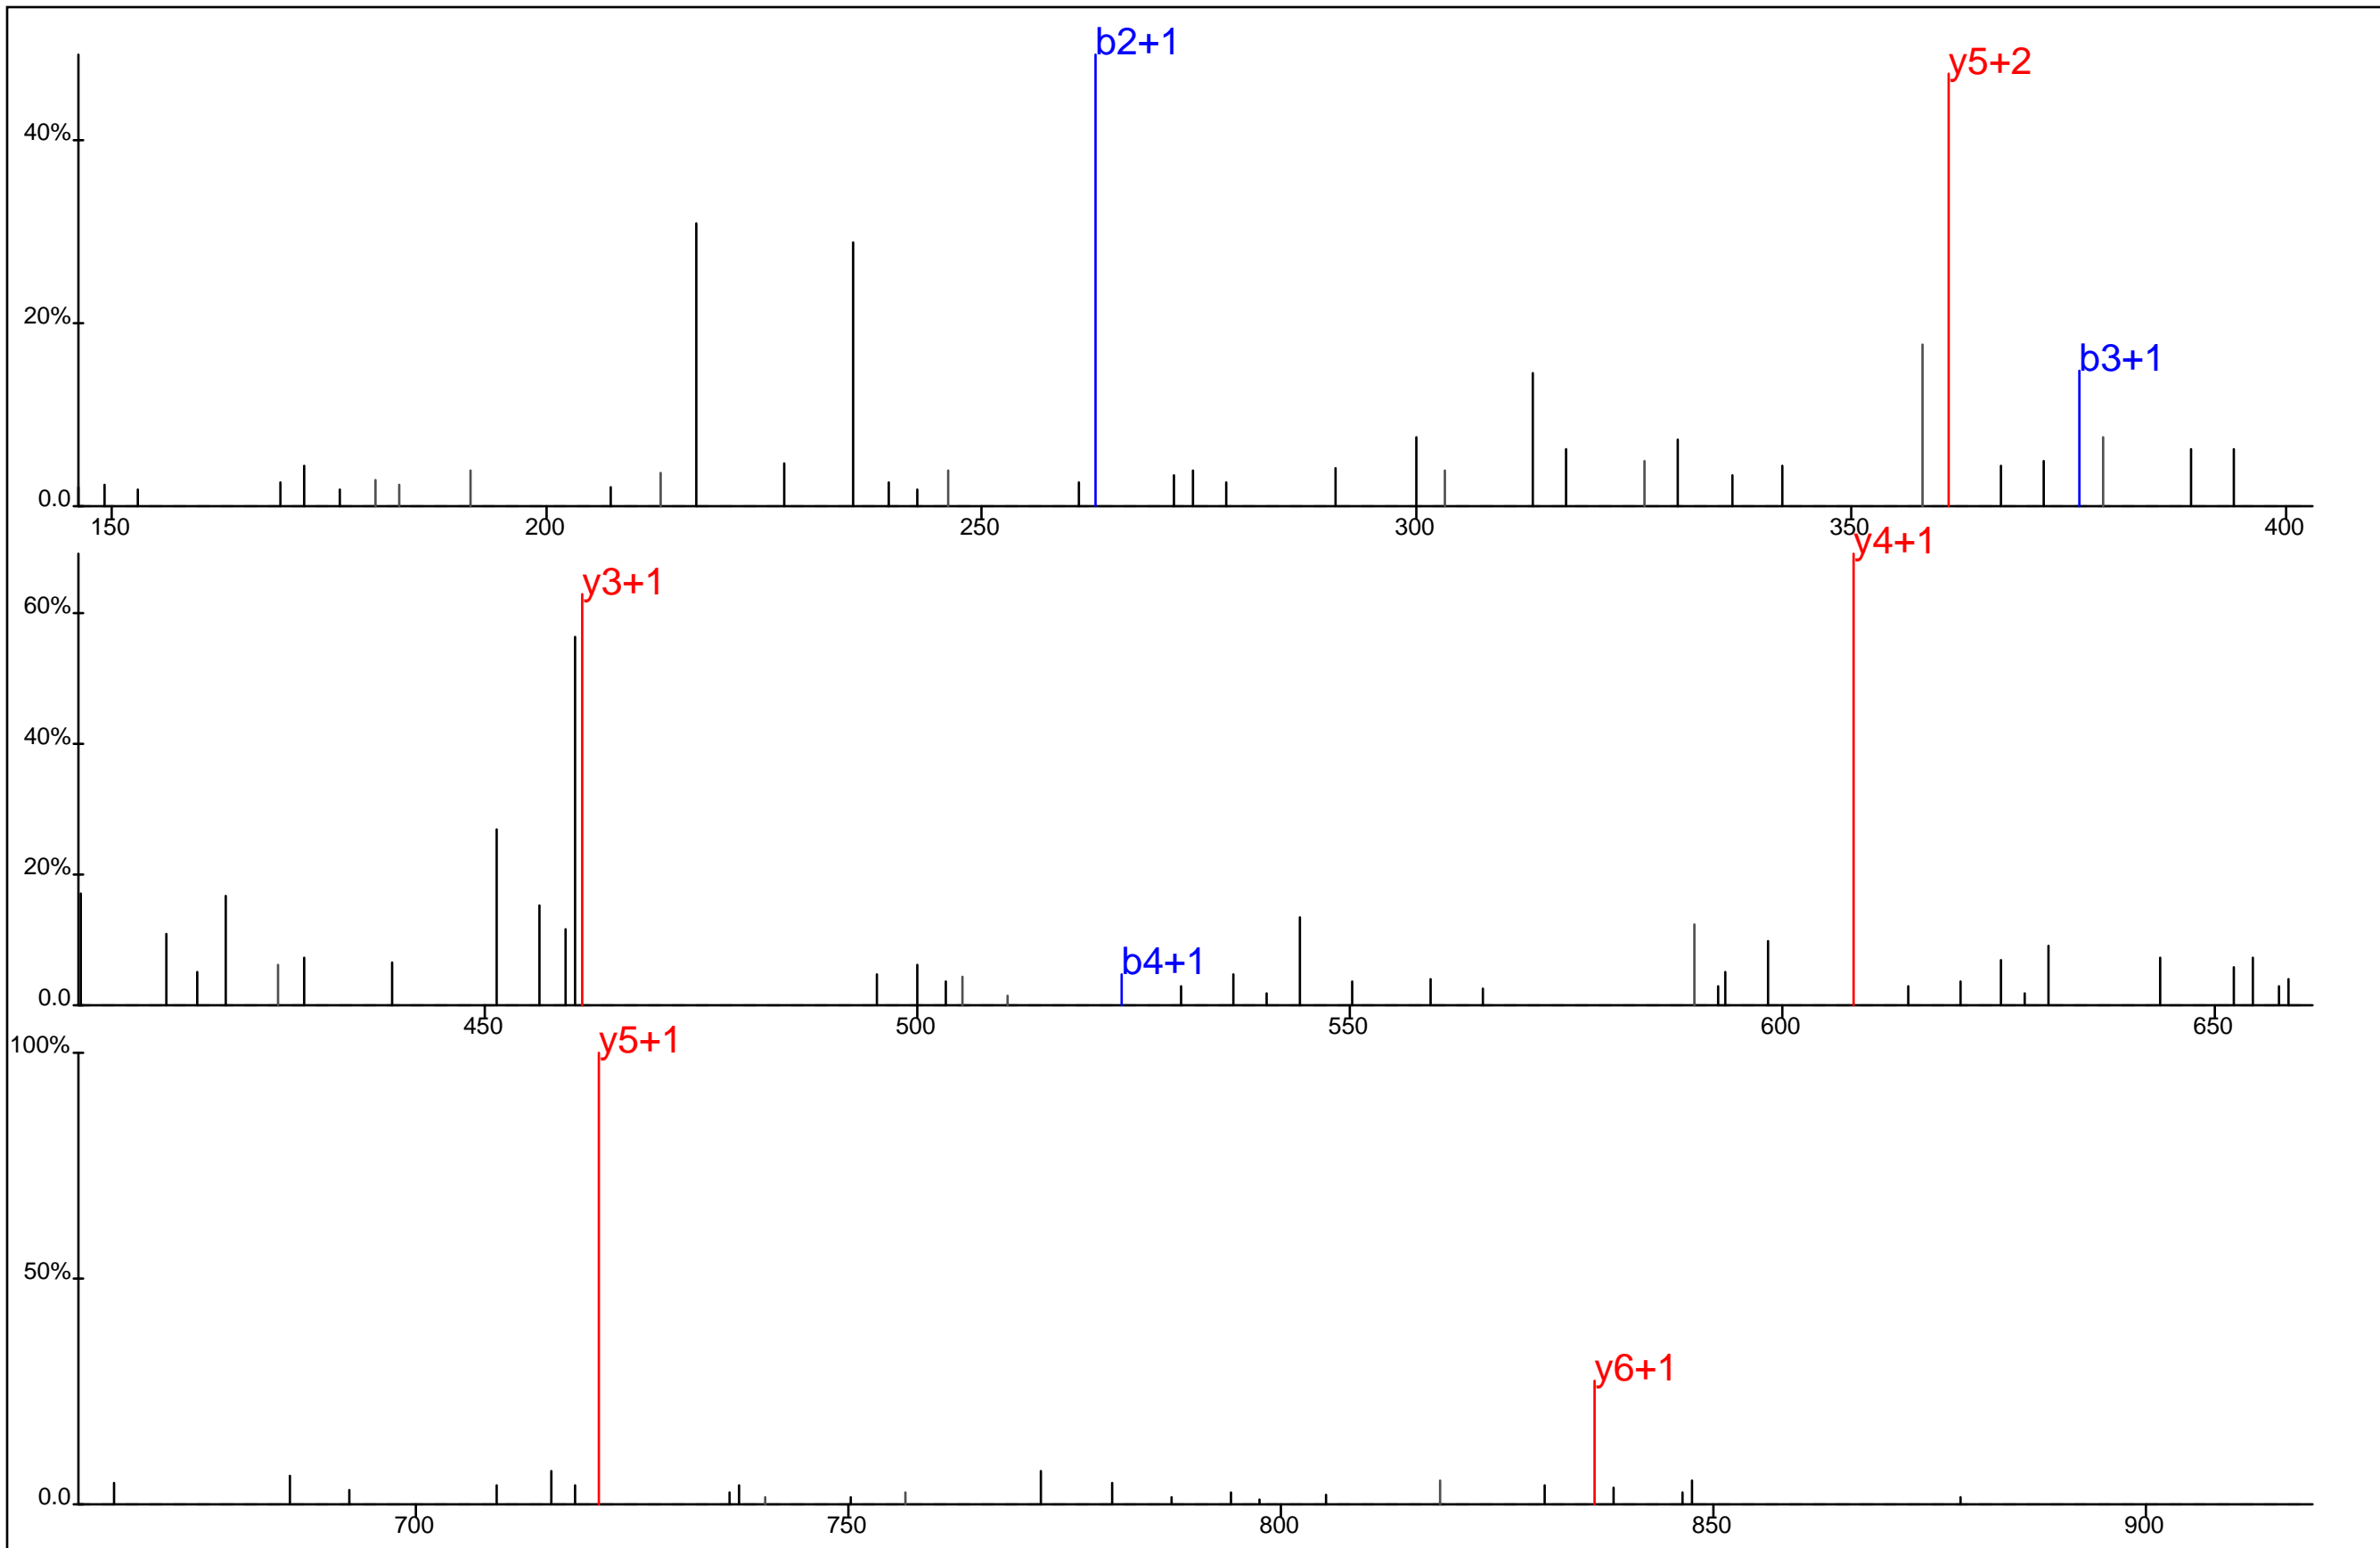

□ □ ■ □ □  
 F D L M ~~N~~ A K  
□ □ □ □

Protein Name: Tubulin alpha 1  
 gi Accession: 0  
 Precursor Mass: 492.2008+2  
 Delta Mass: 0.037 ppm  
 XCorr: 23.64

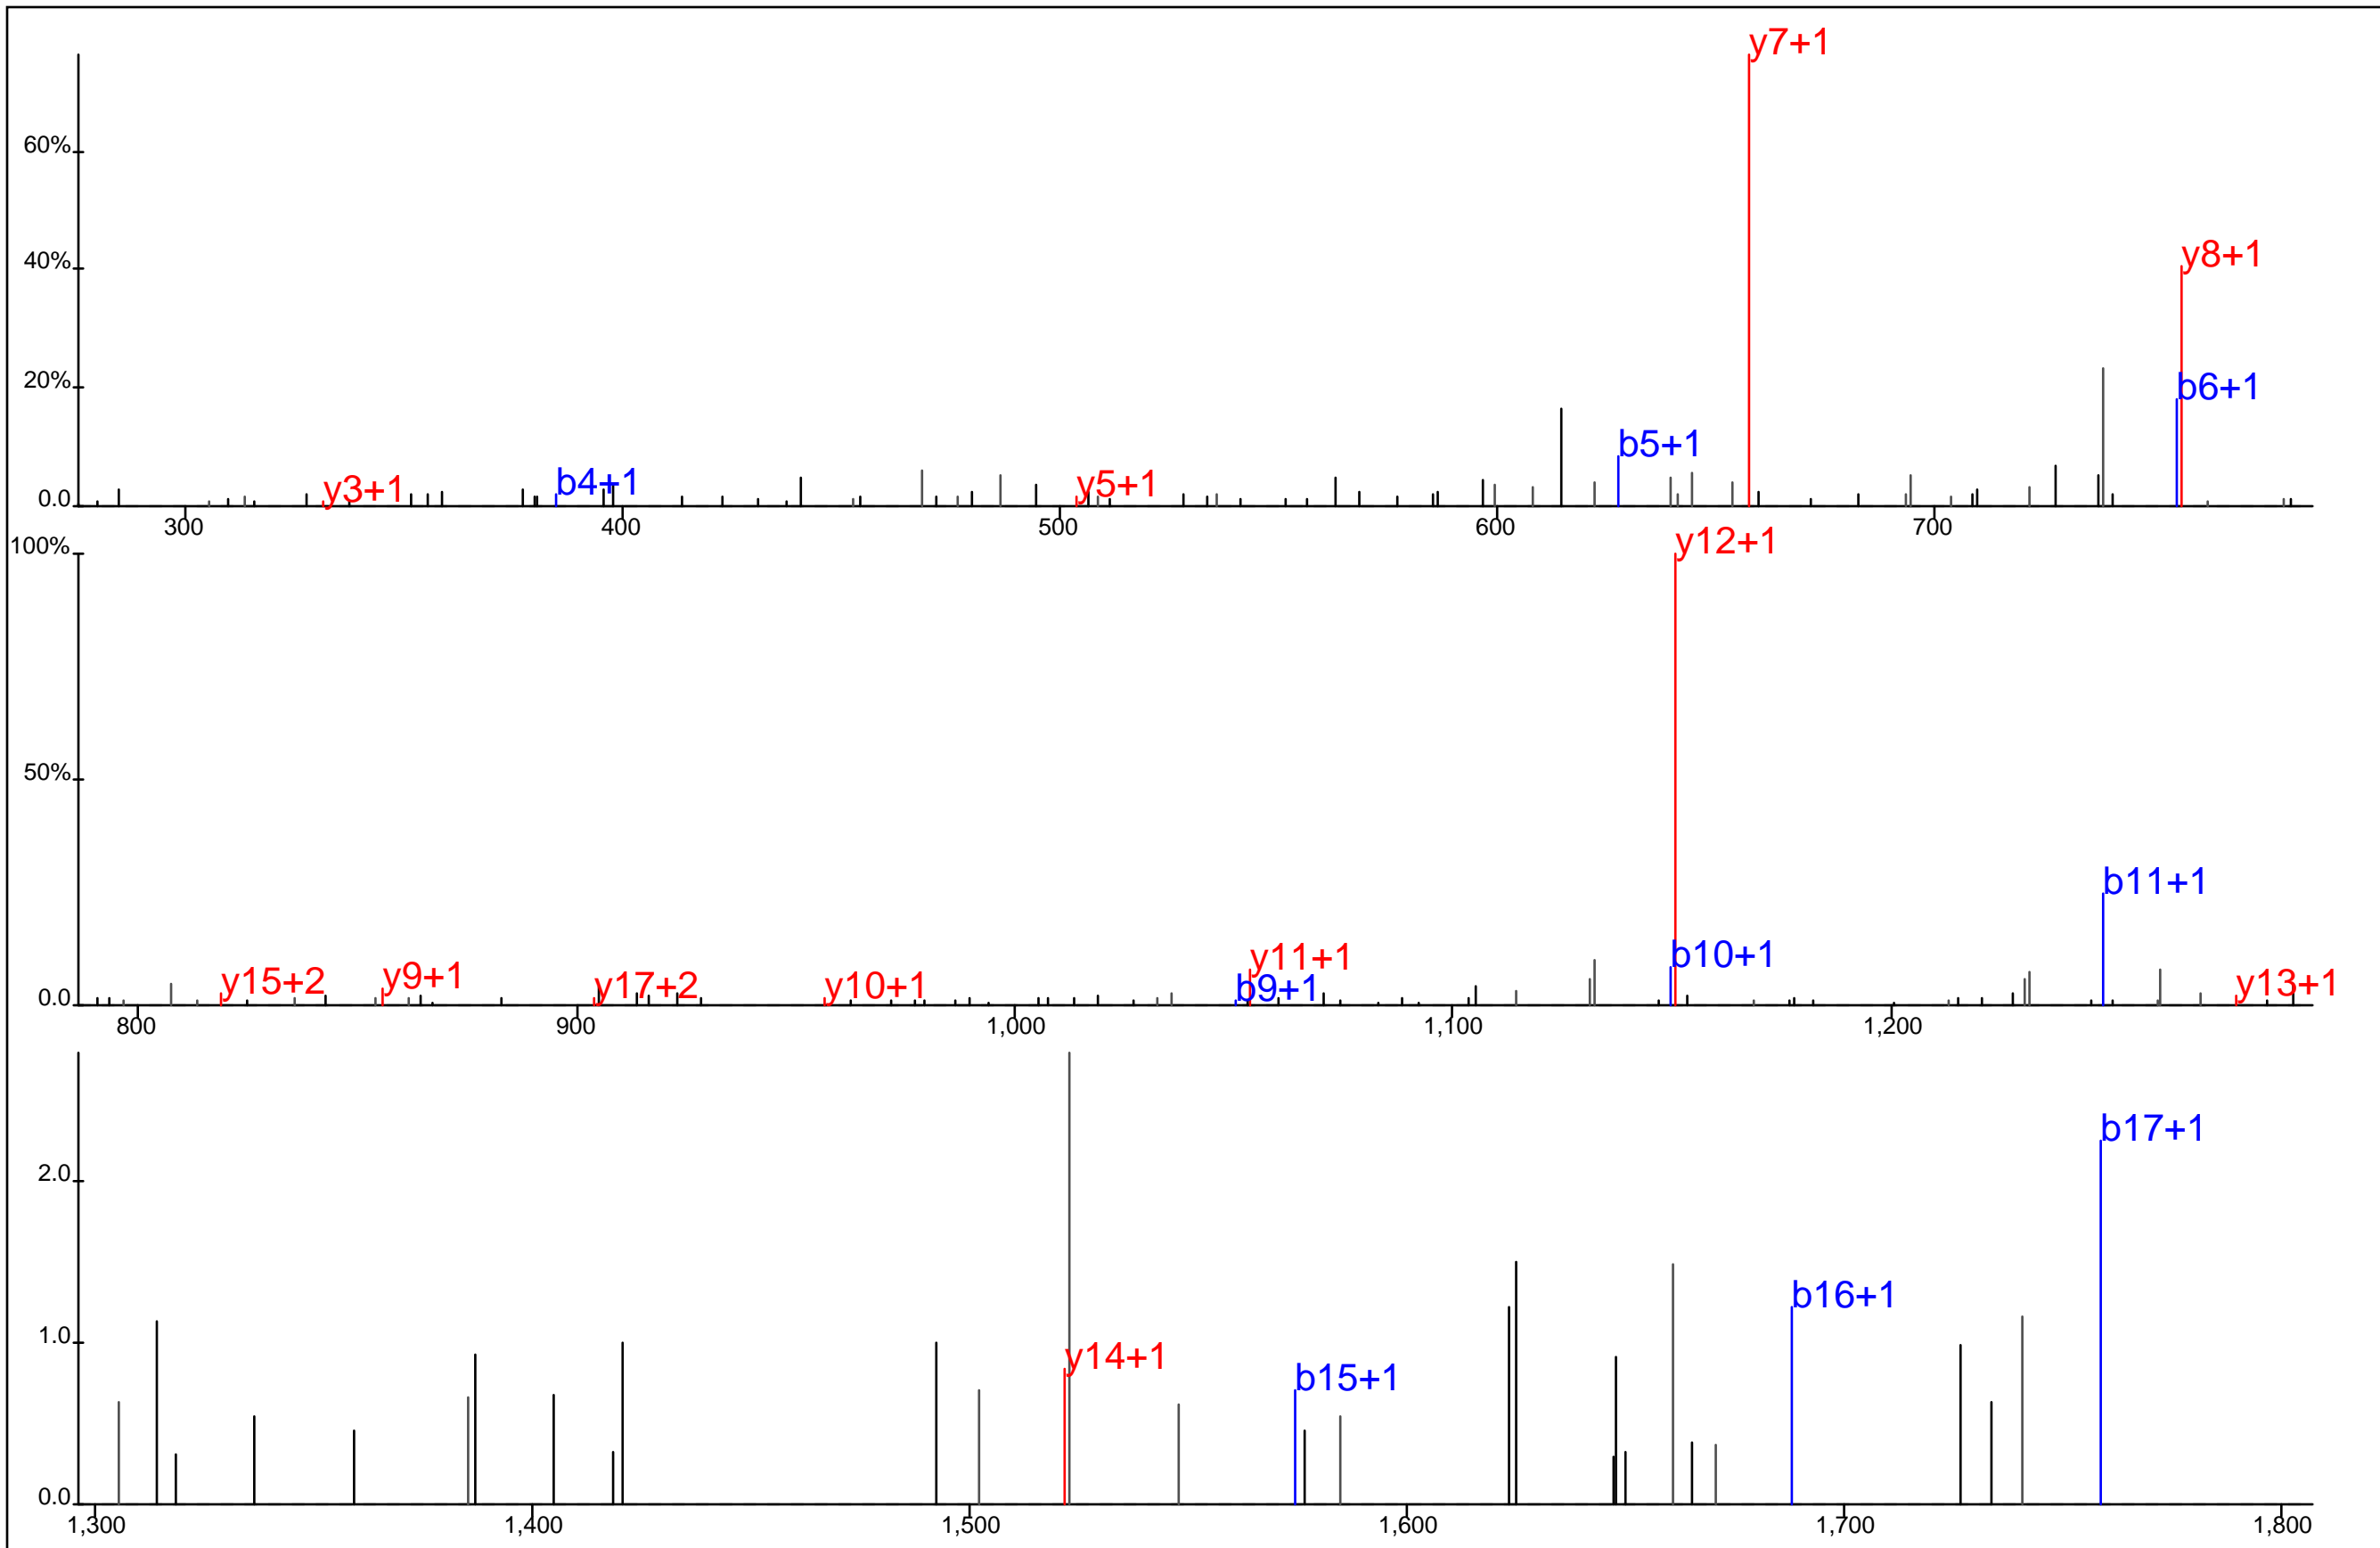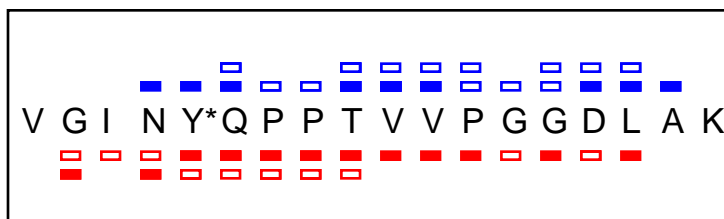

Protein Name: Tubulin alpha 1  
 gi Accession: 0  
 Precursor Mass: 952.9812+2  
 Delta Mass: 1.766 ppm  
 XCorr: 29.78

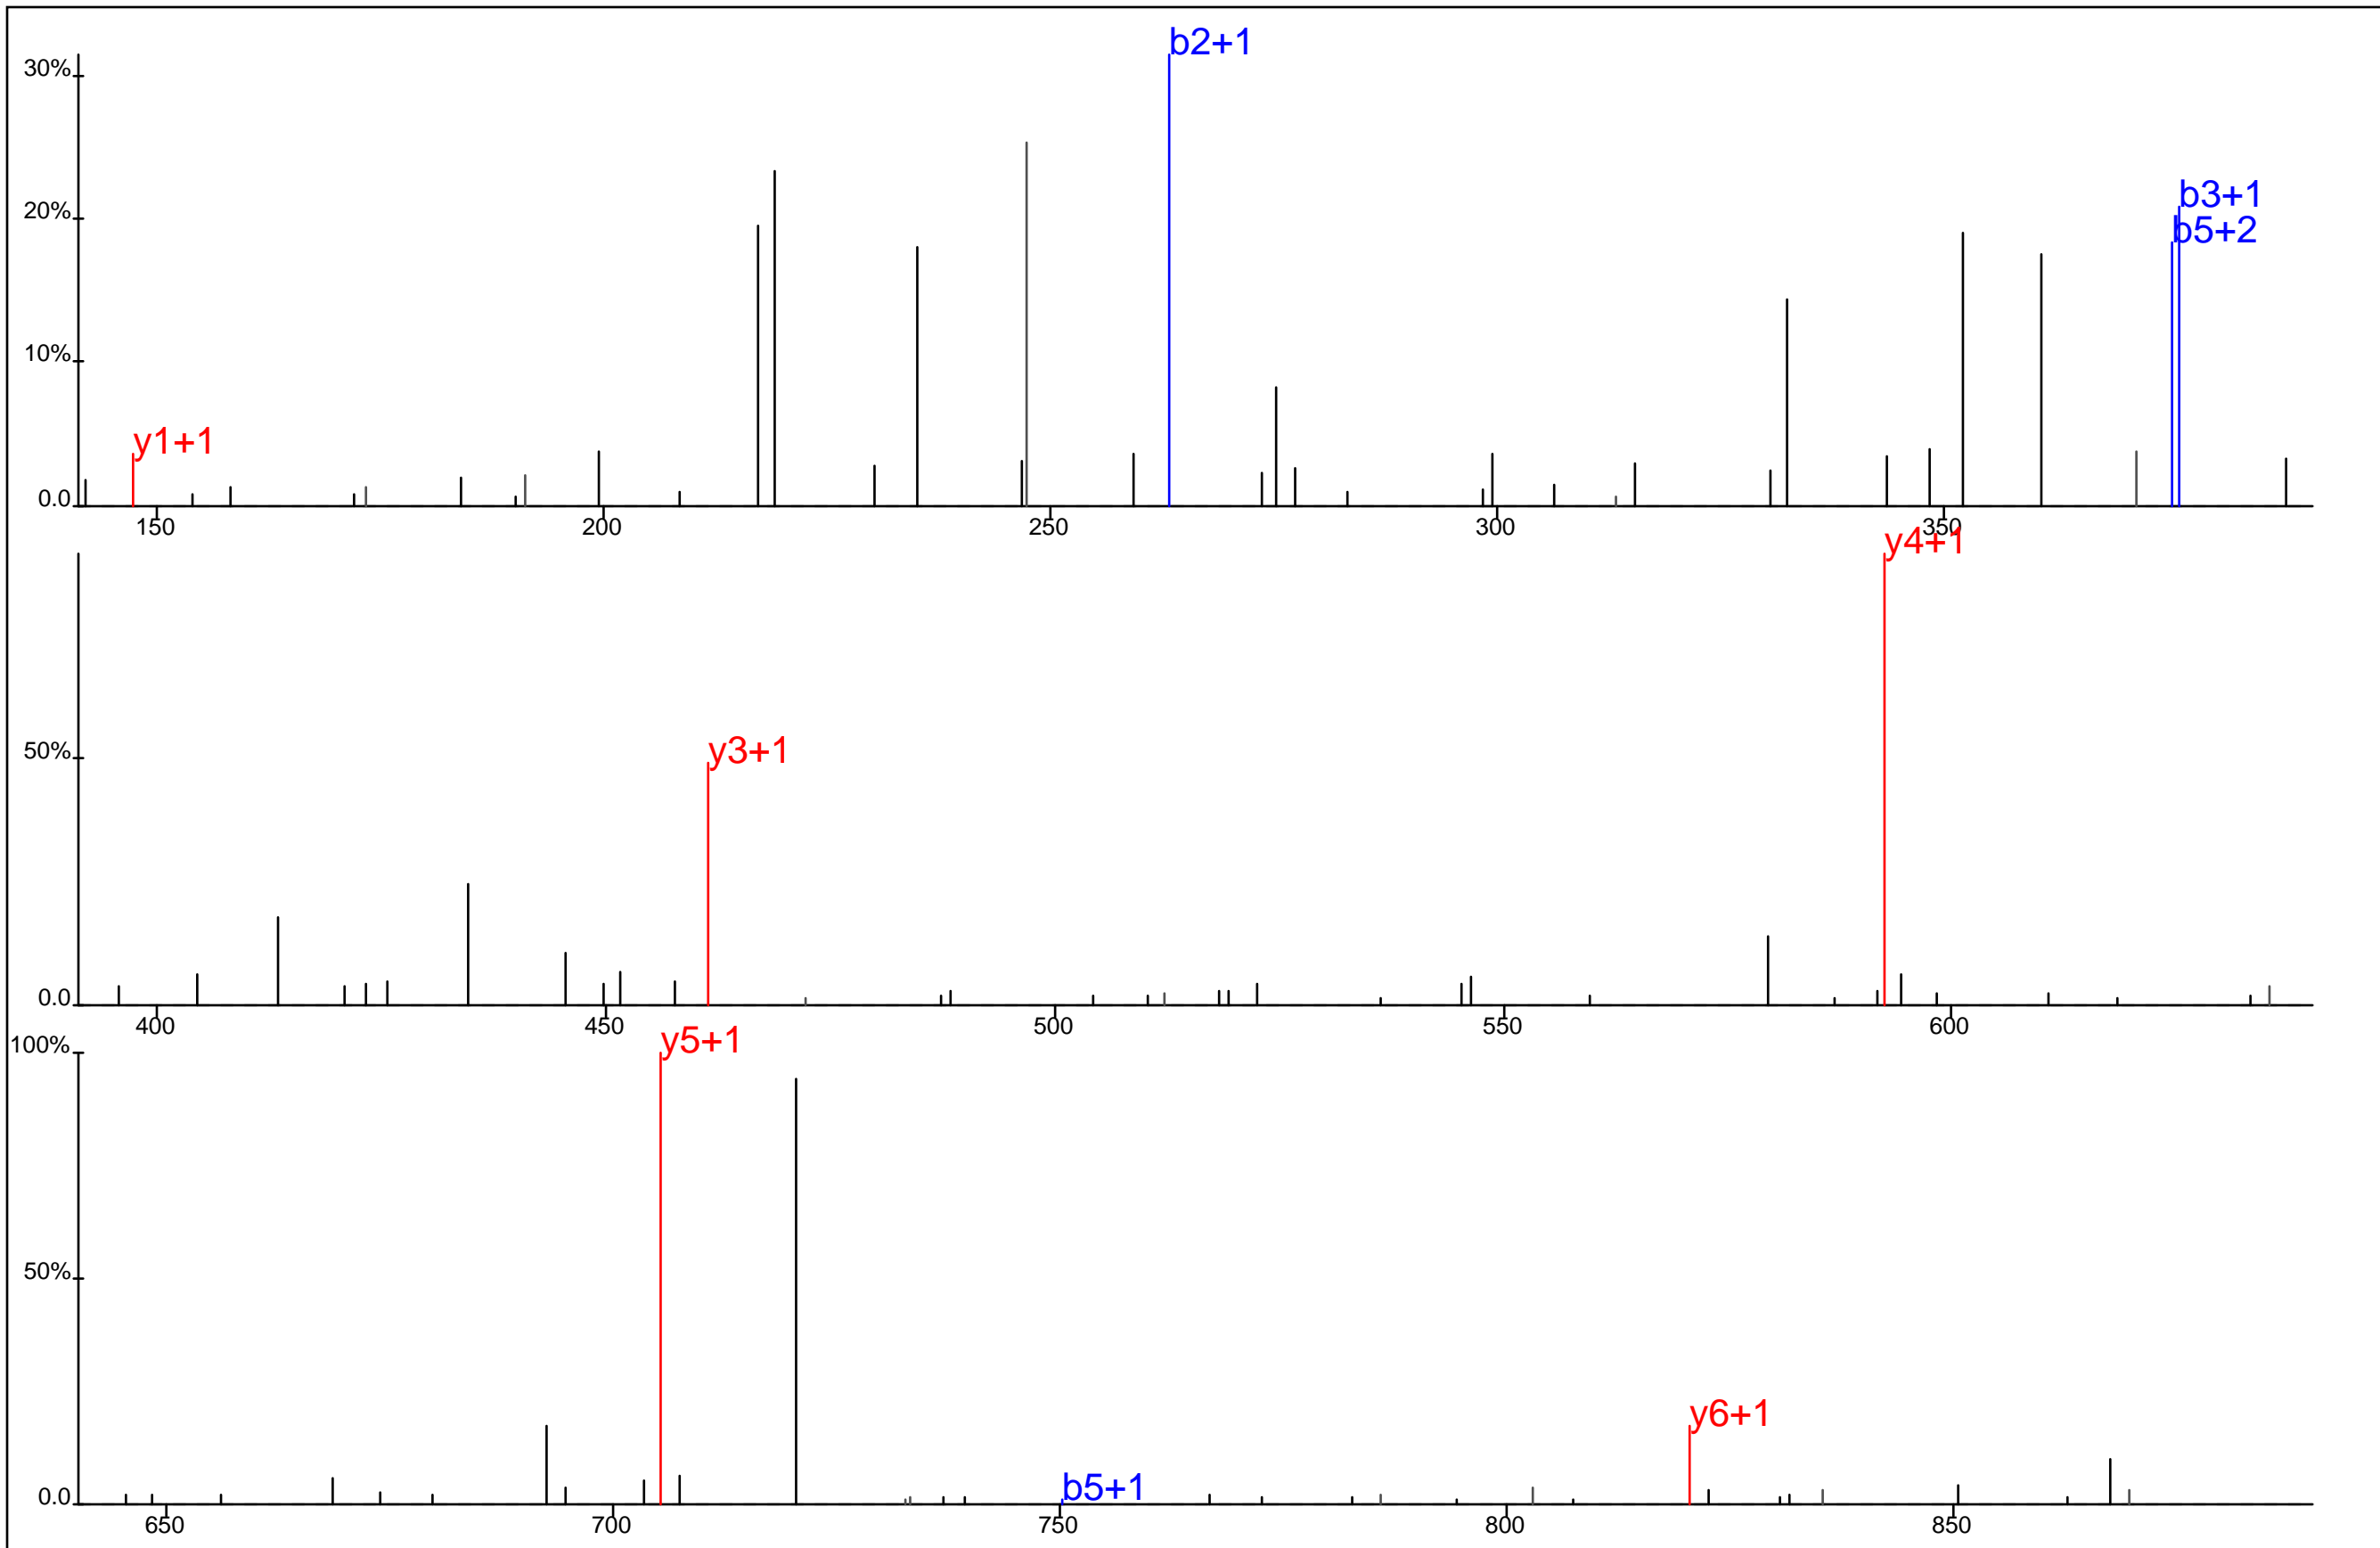

■ ■ ■ ■ ■ ■  
■ ■ ■ ■ ■ ■  
**F D L M Y\* A K**

Protein Name: Tubulin alpha 1  
 gi Accession: 0  
 Precursor Mass: 484.2036+2  
 Delta Mass: 0.504 ppm  
 XCorr: 23.07

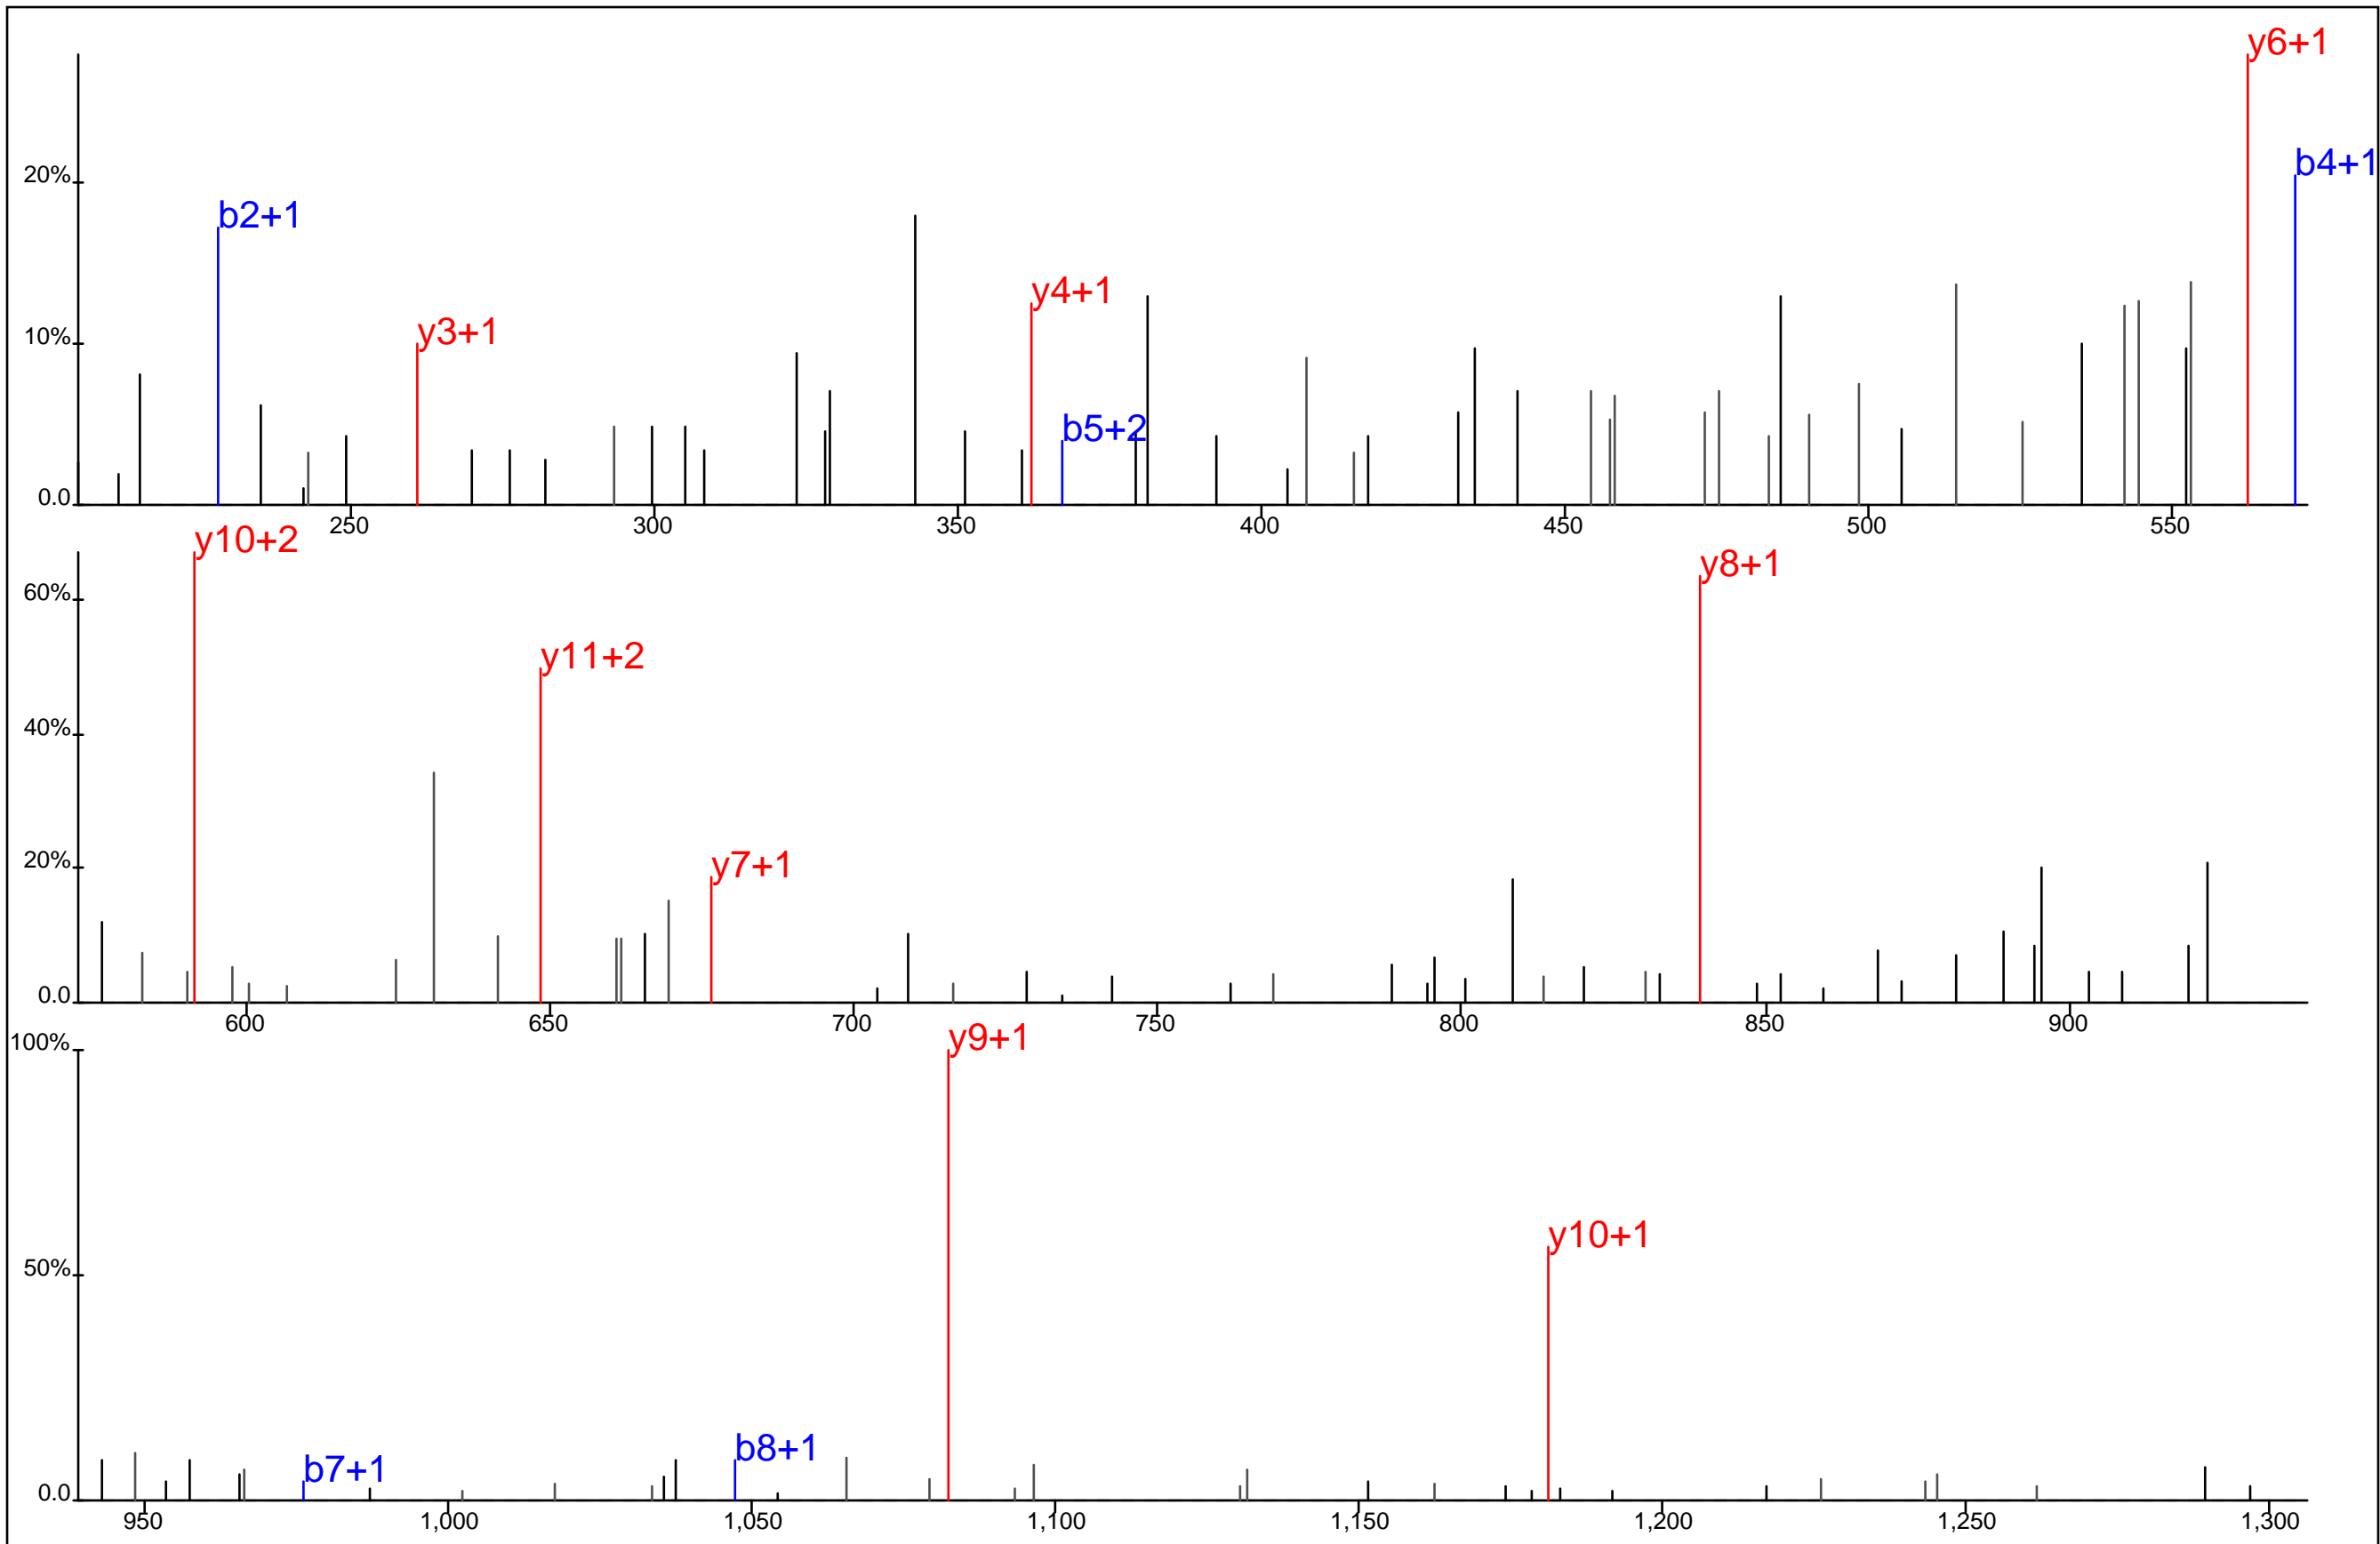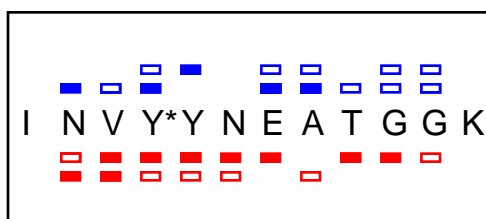

Protein Name: Tubulin, beta-2  
 gi Accession: 0  
 Precursor Mass: 704.8068+2  
 Delta Mass: 5.708 ppm  
 XCorr: 31.23

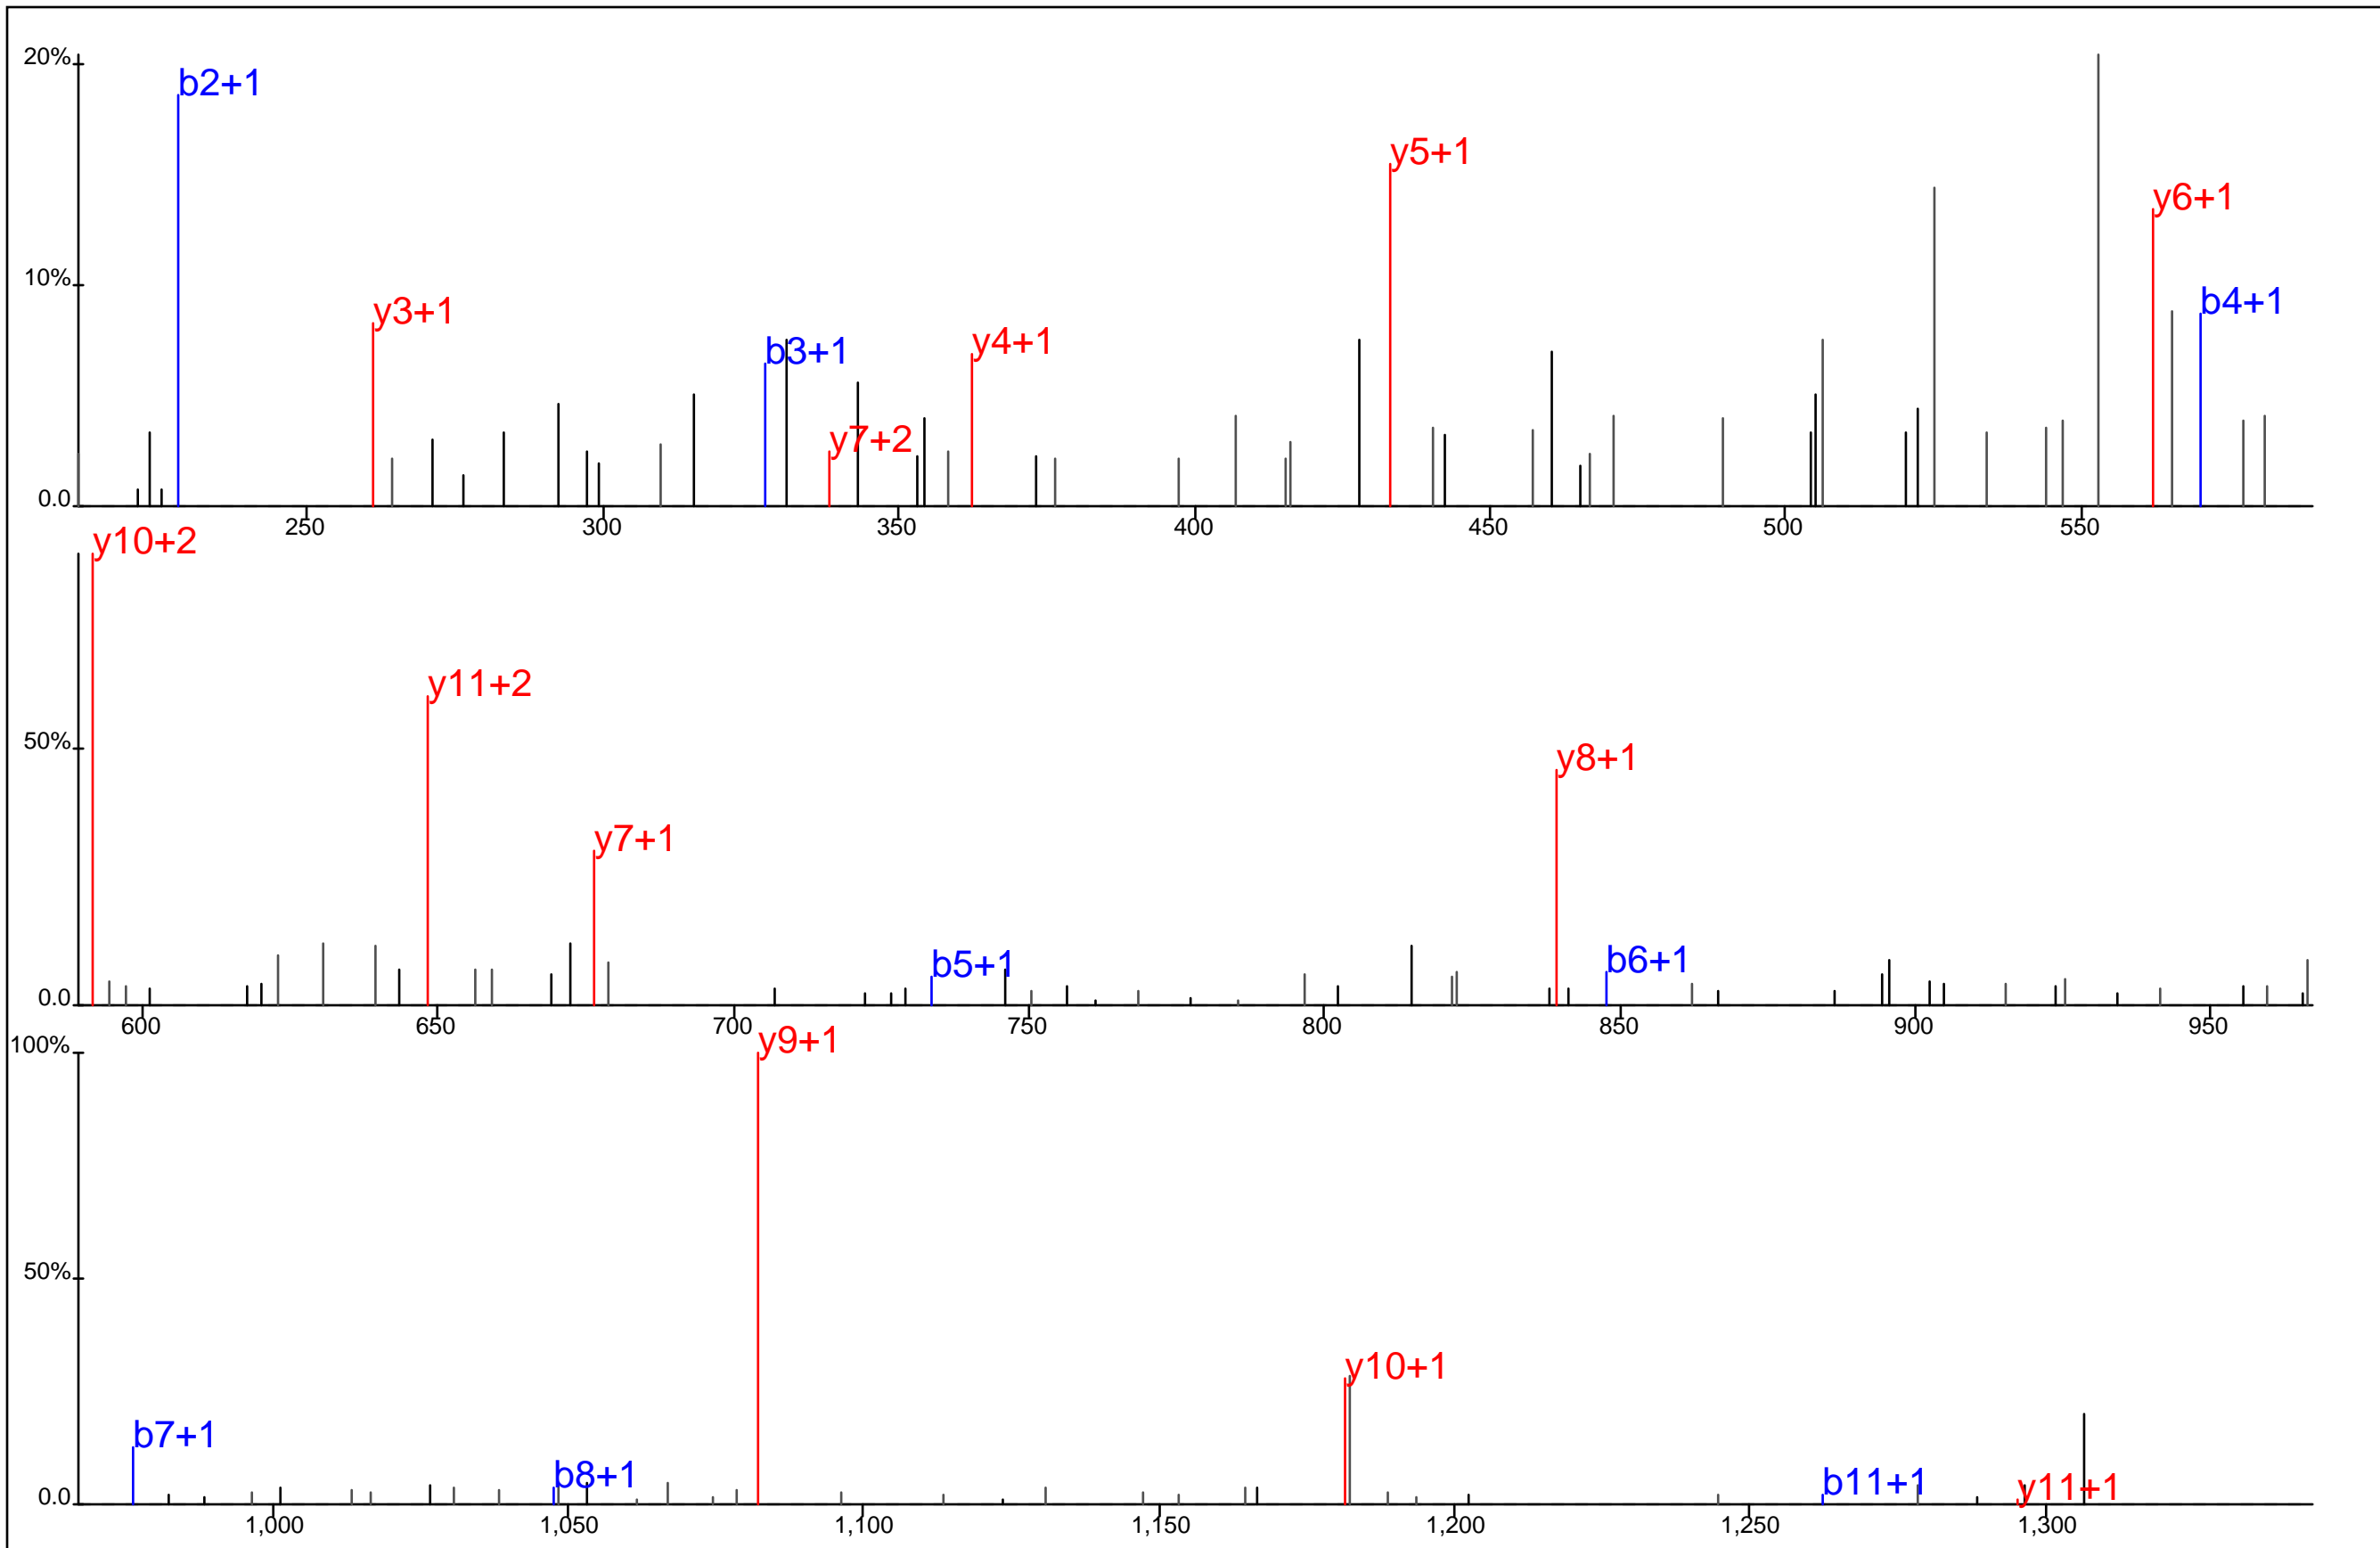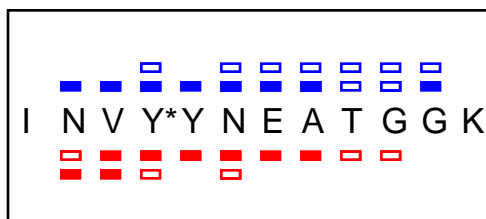

Protein Name: Tubulin, beta-2  
 gi Accession: 0  
 Precursor Mass: 704.8090+2  
 Delta Mass: 2.588 ppm  
 XCorr: 43.41

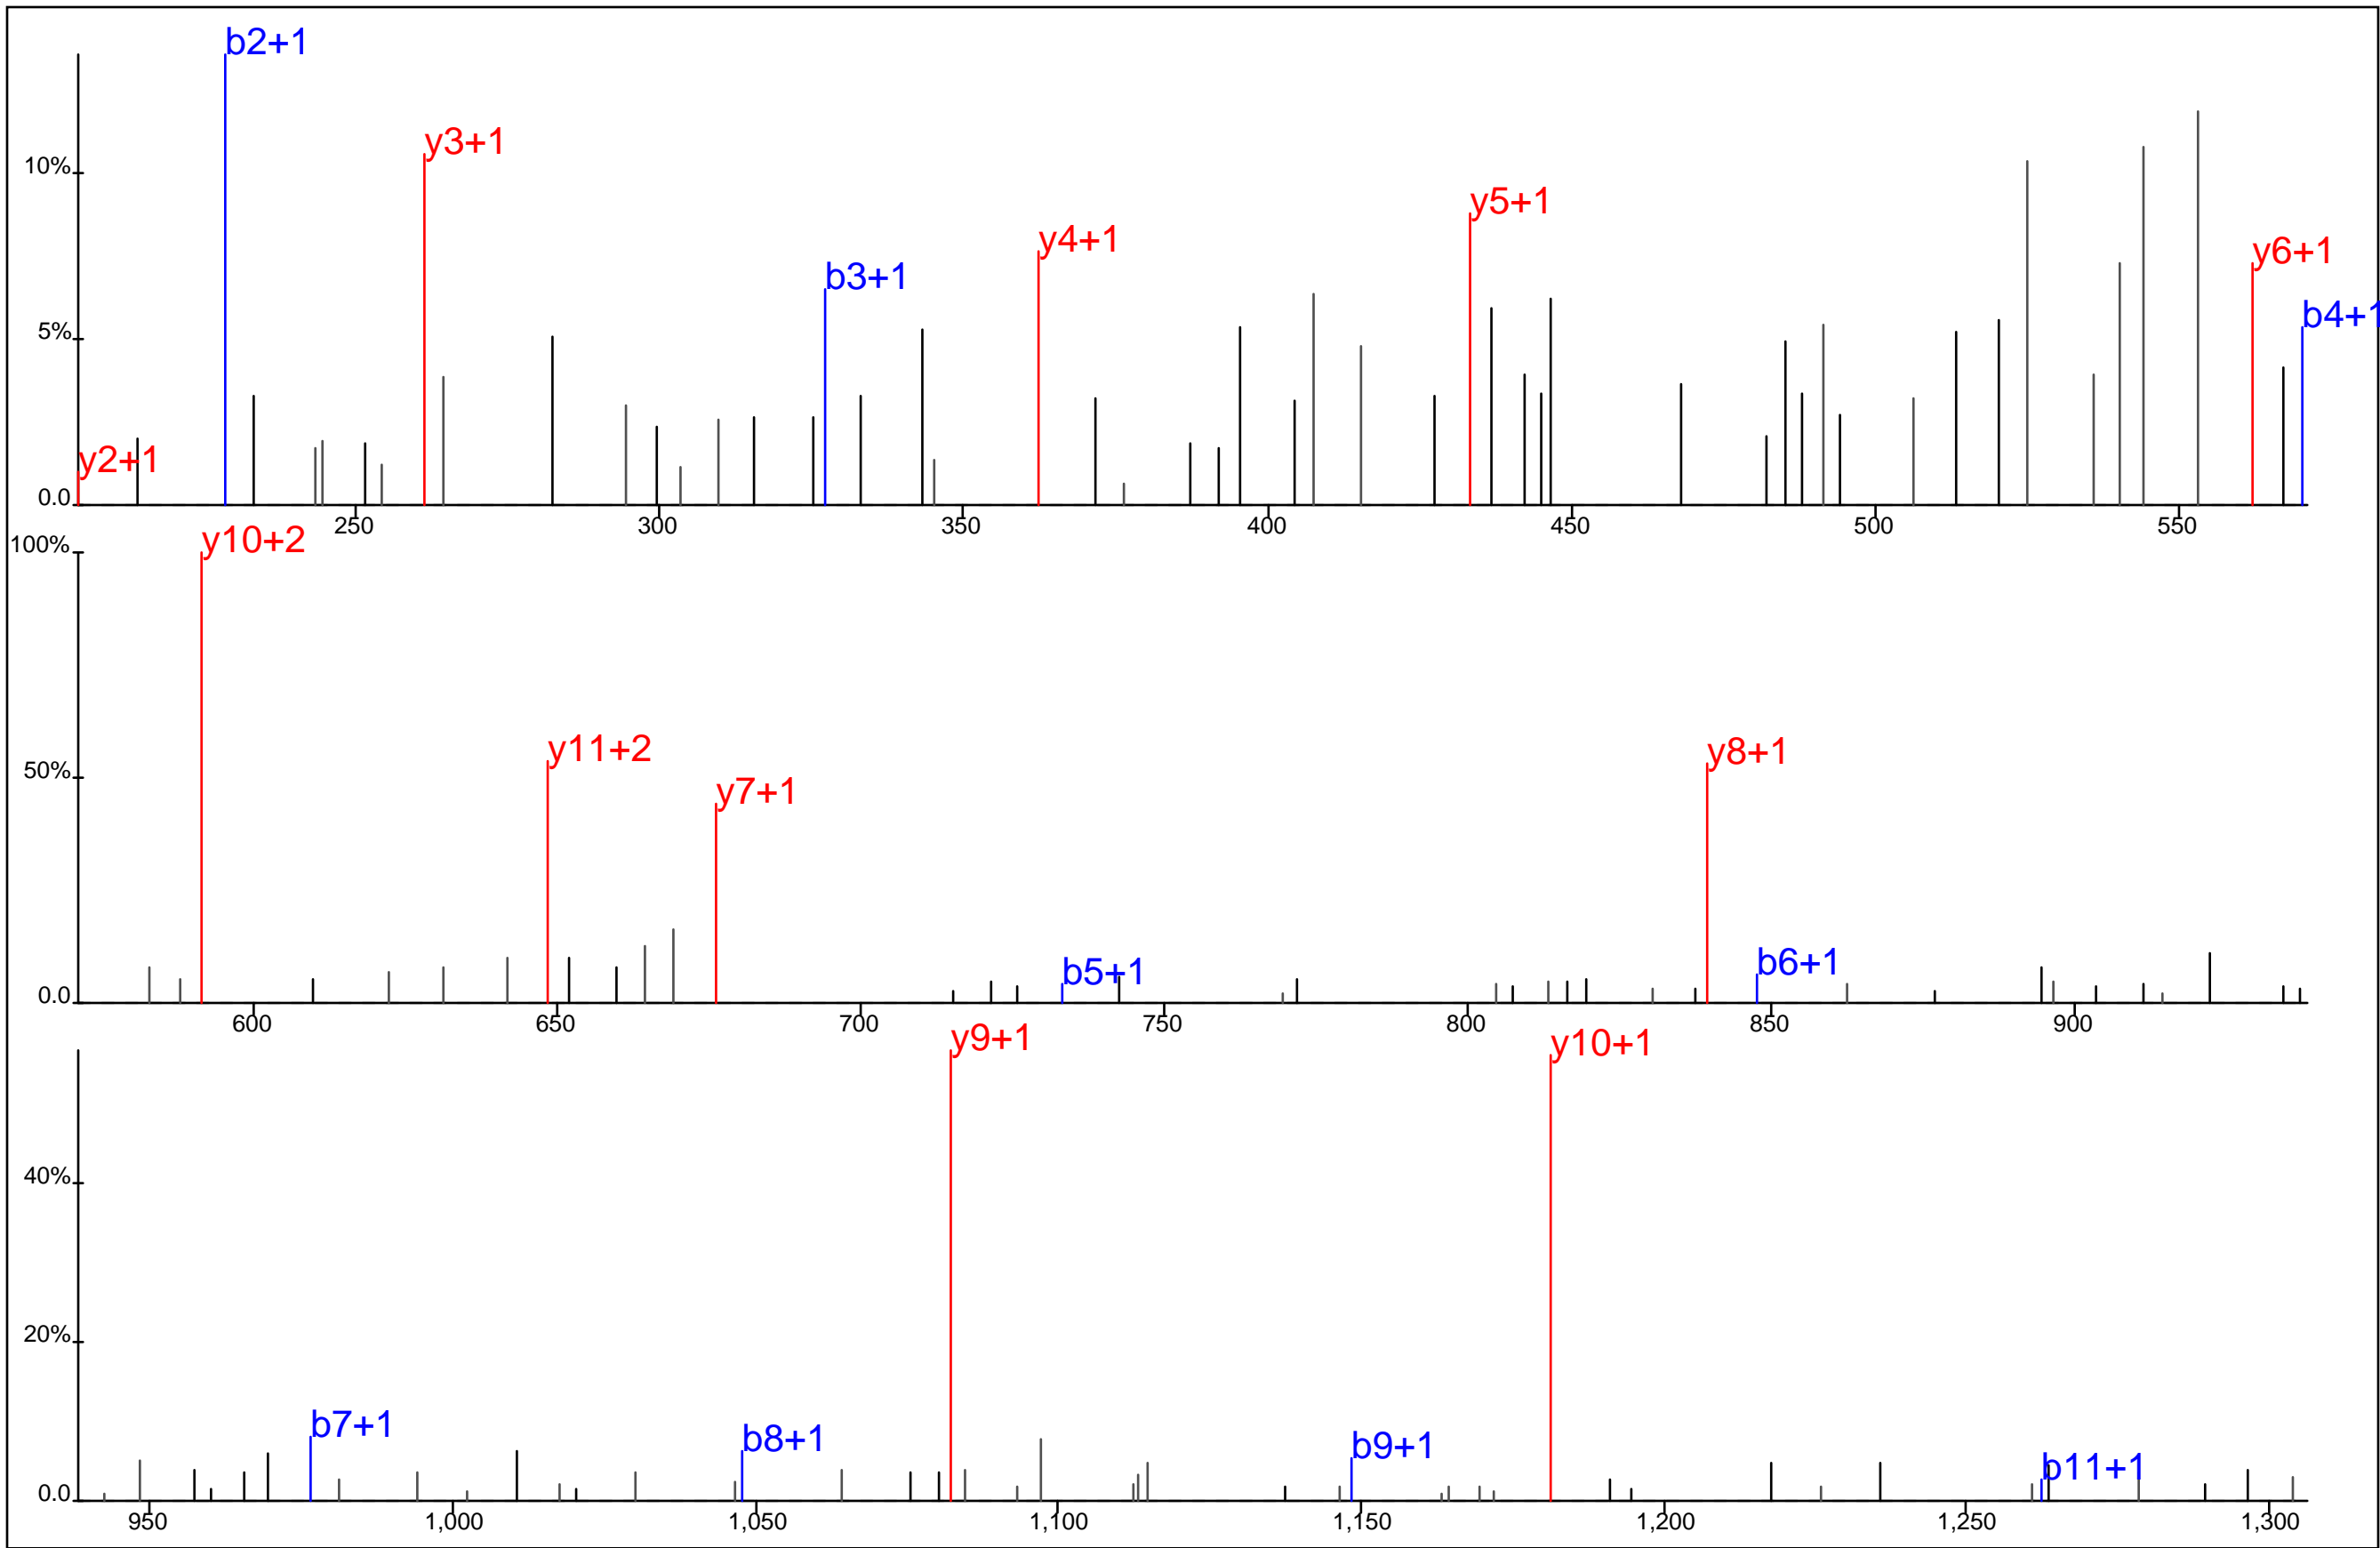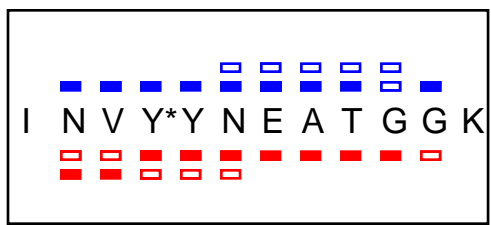

Protein Name: Tubulin, beta-2  
 gi Accession: 0  
 Precursor Mass: 704.8073+2  
 Delta Mass: 5.015 ppm  
 XCorr: 45.58

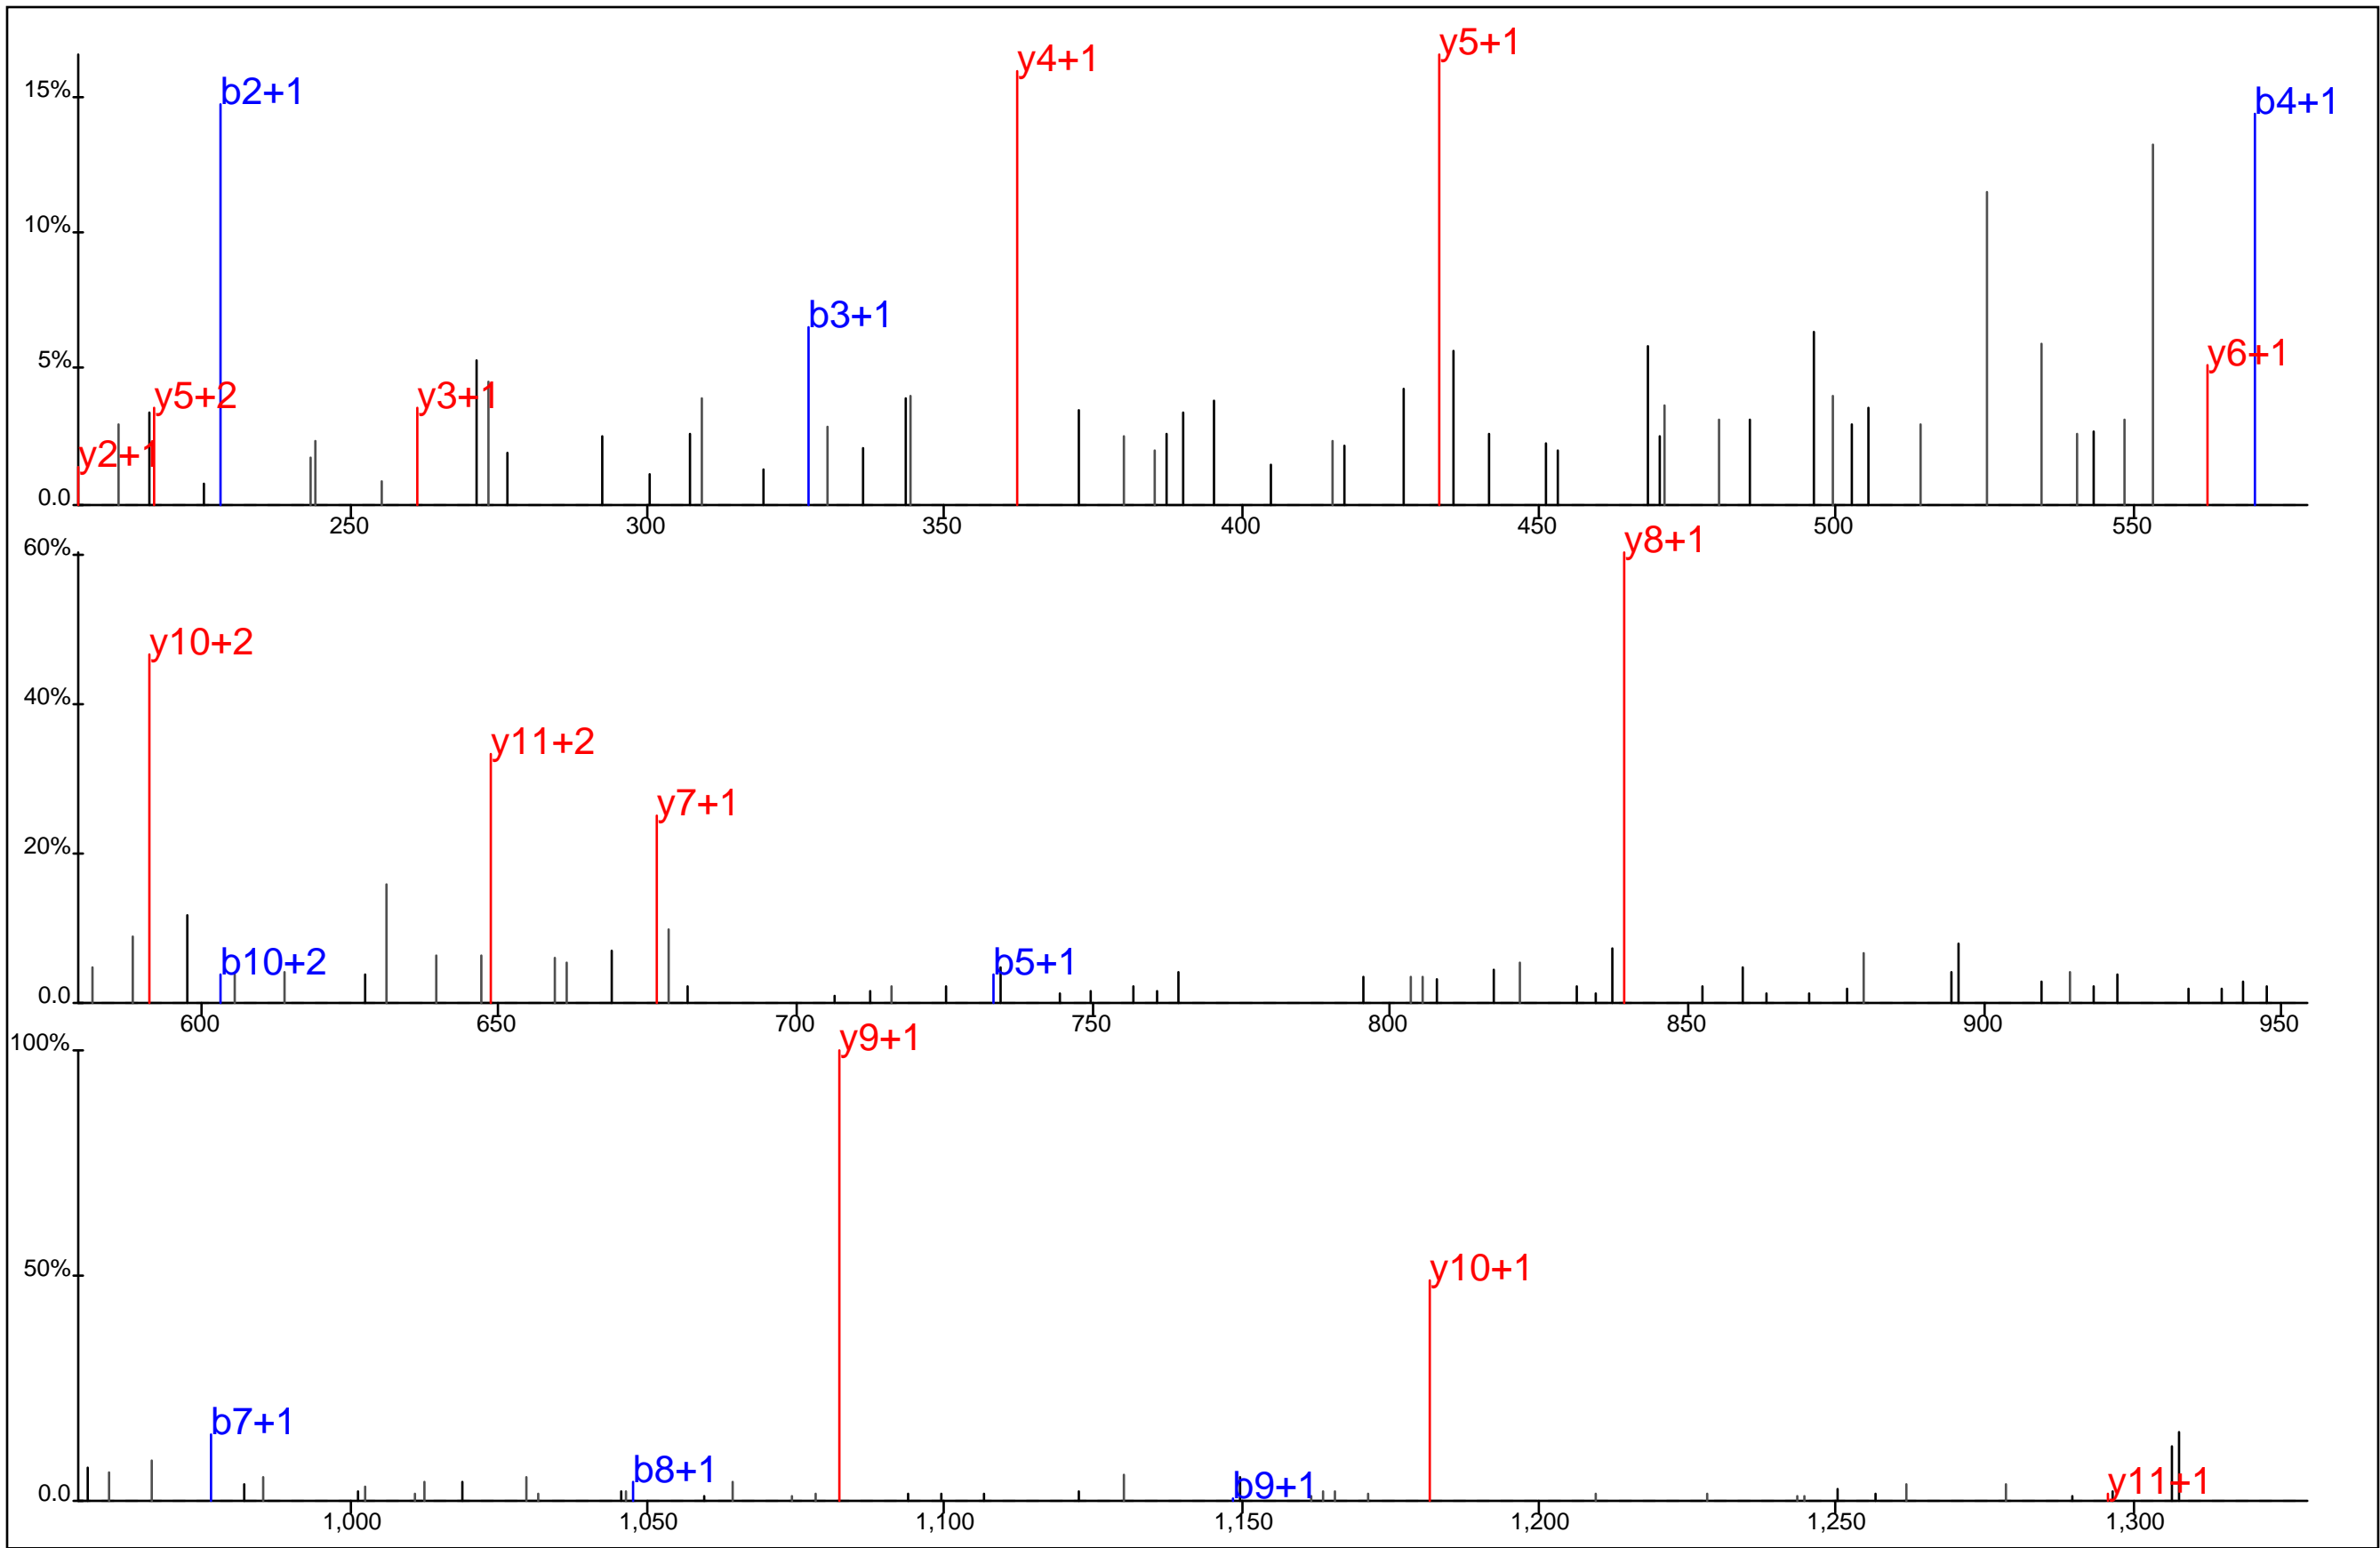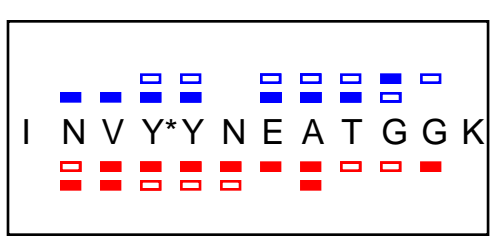

Protein Name: Tubulin, beta-2  
 gi Accession: 0  
 Precursor Mass: 704.8087+2  
 Delta Mass: 3.108 ppm  
 XCorr: 37.03



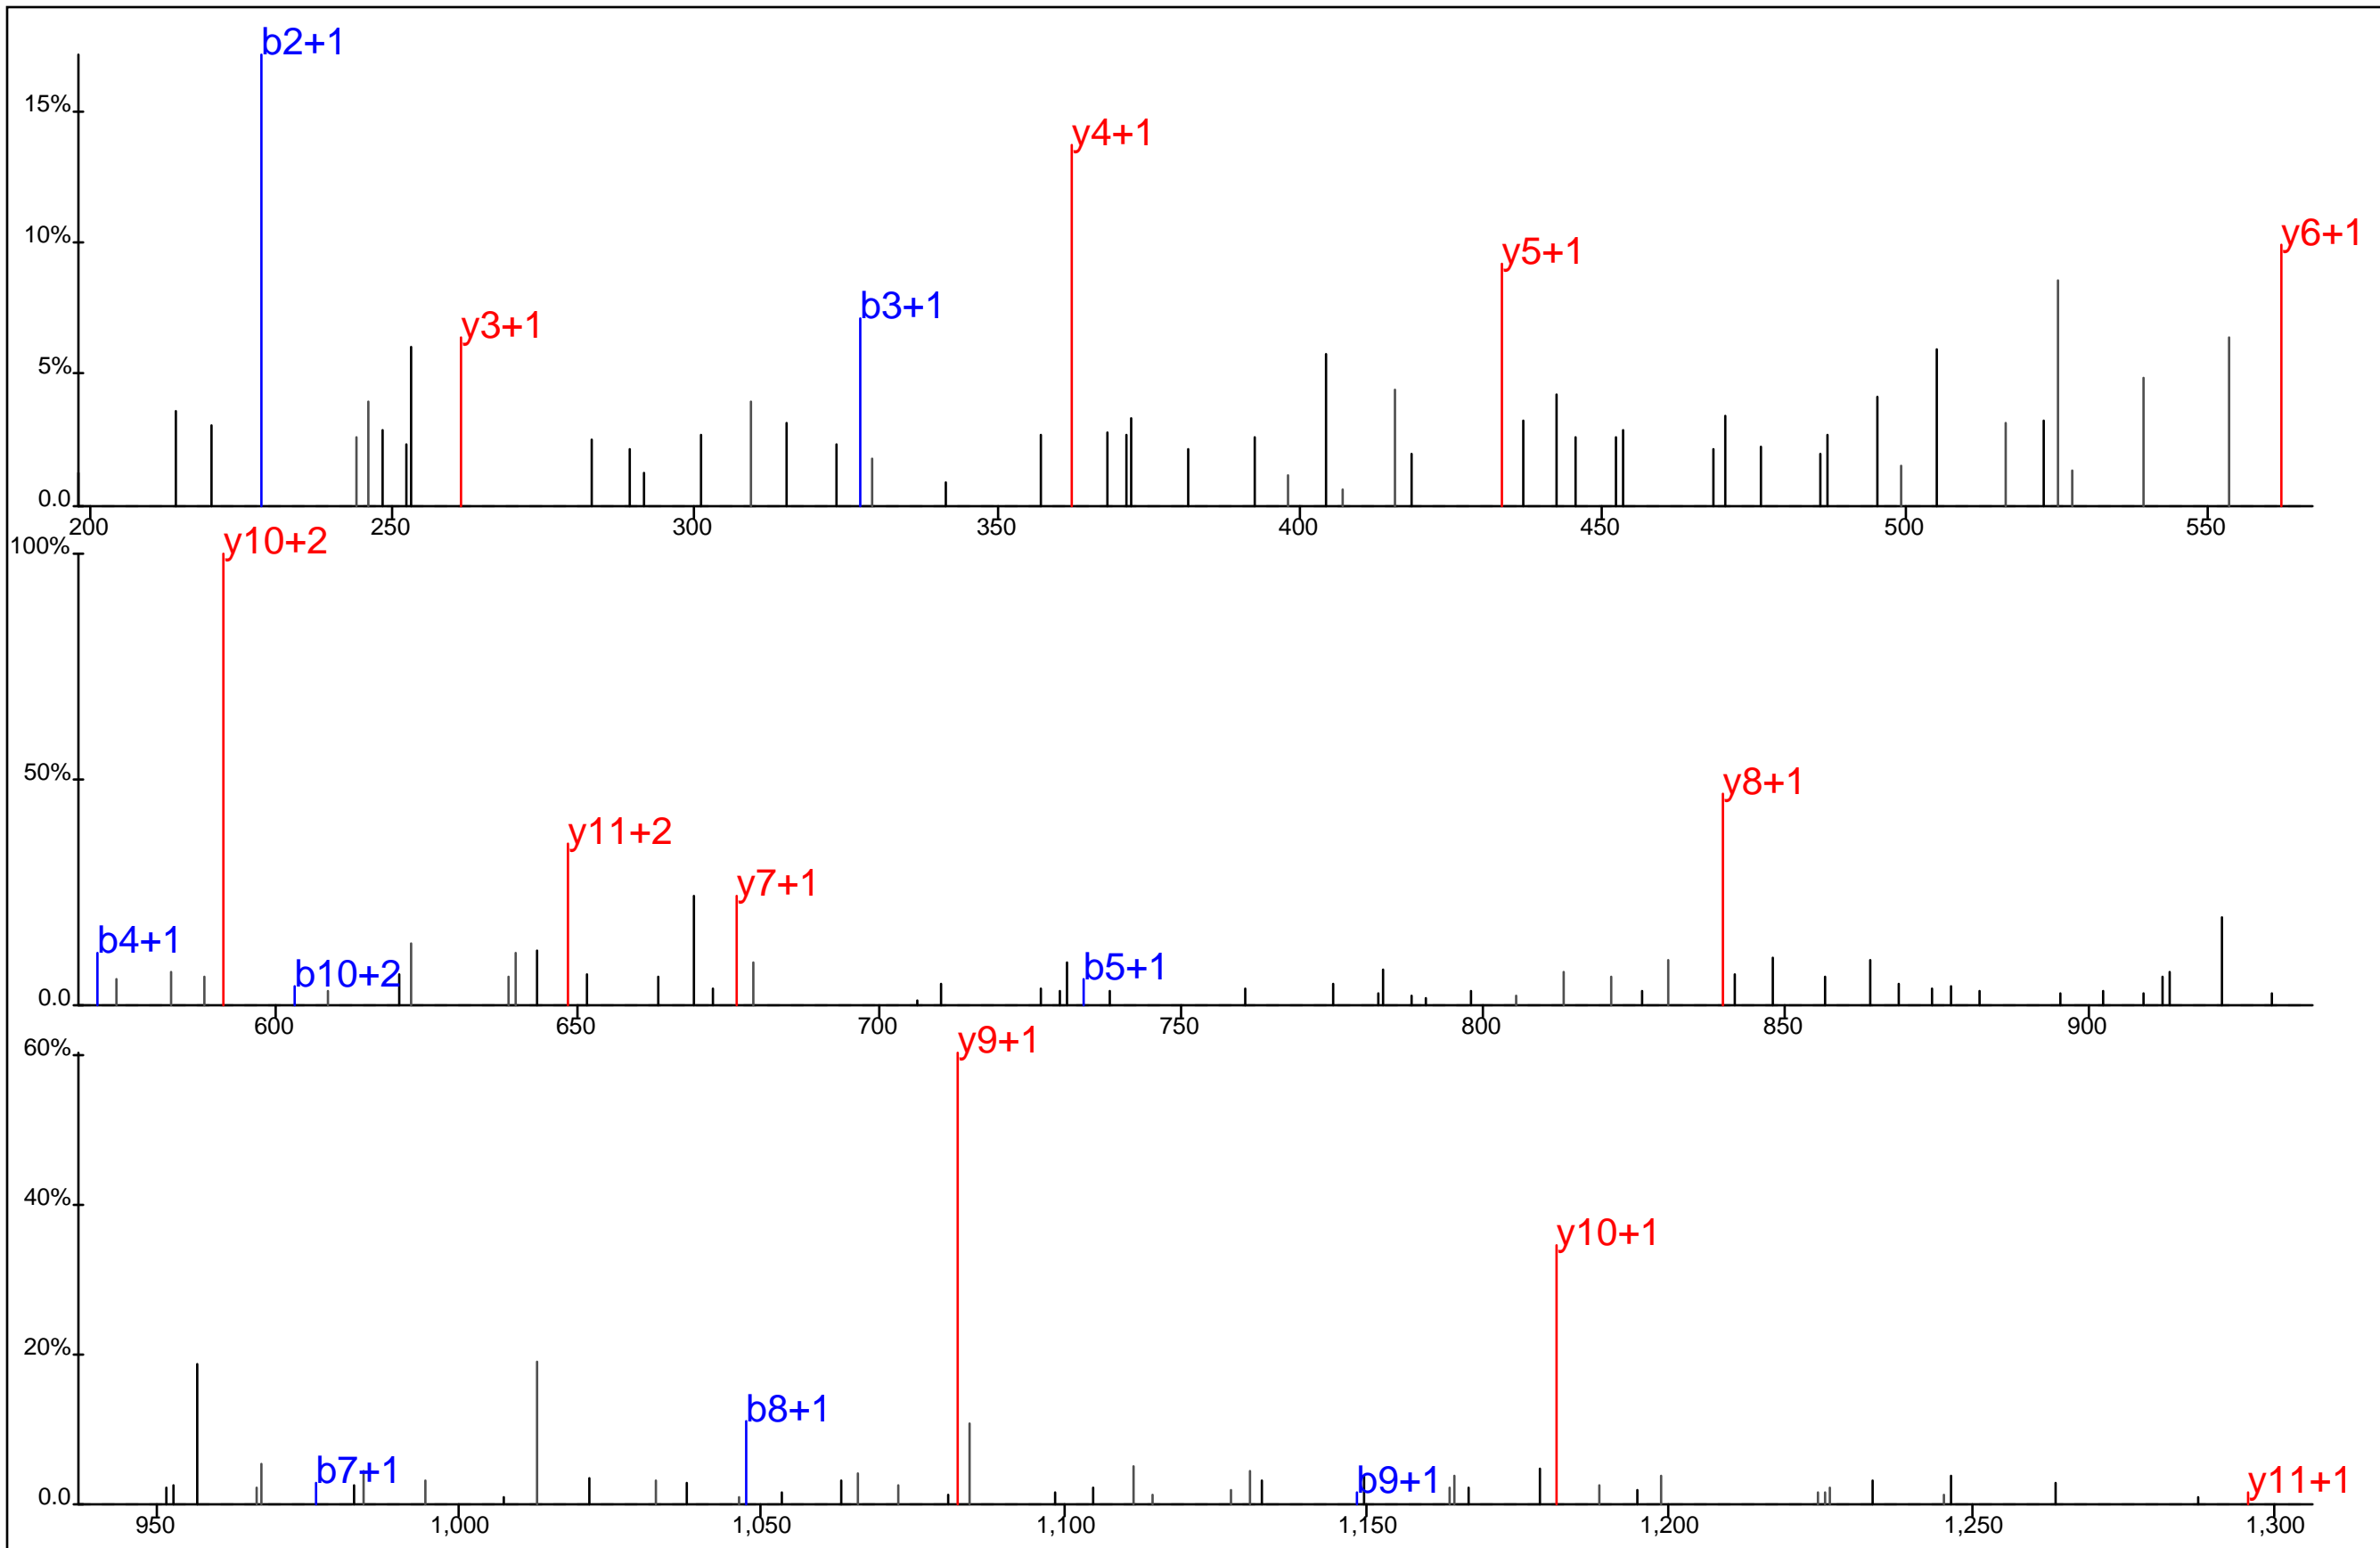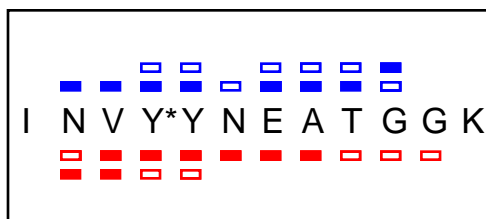

Protein Name: Tubulin, beta-2  
 gi Accession: 0  
 Precursor Mass: 704.8077+2  
 Delta Mass: 4.495 ppm  
 XCorr: 45.41

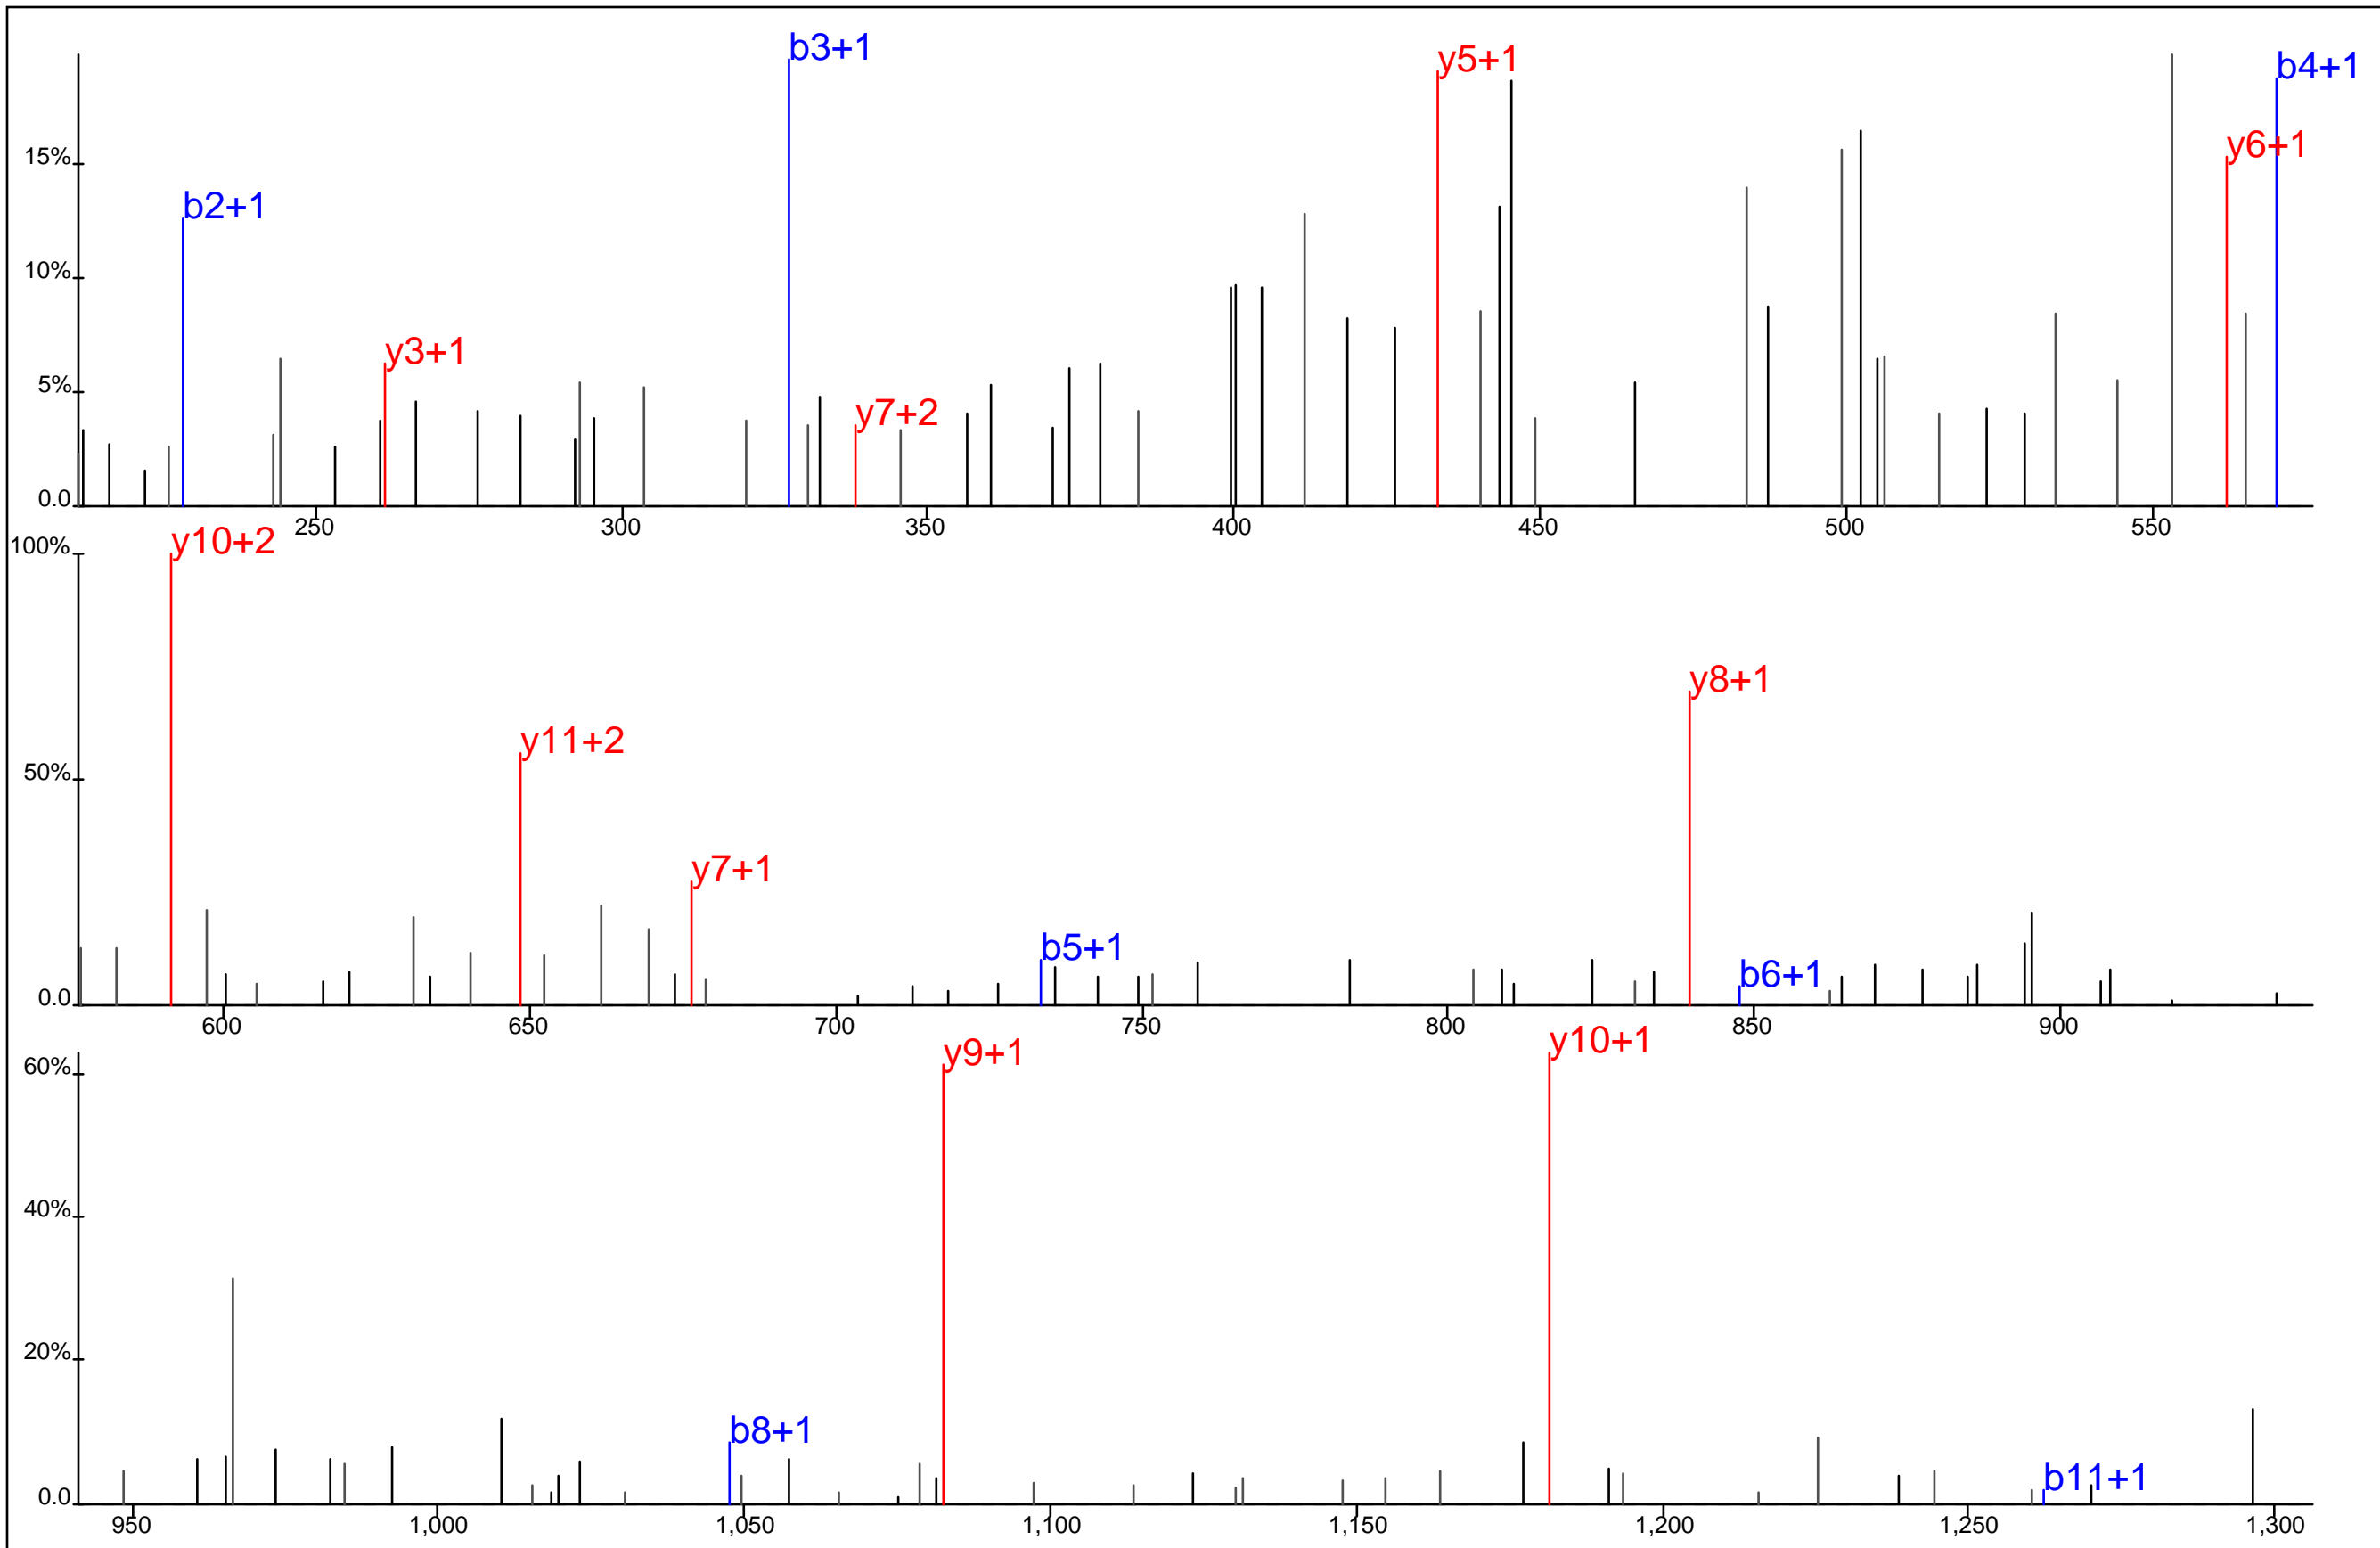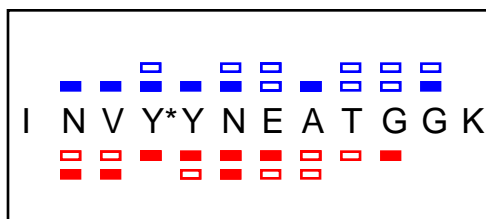

Protein Name: Tubulin, beta-2  
 gi Accession: 0  
 Precursor Mass: 704.8089+2  
 Delta Mass: 2.762 ppm  
 XCorr: 25.11

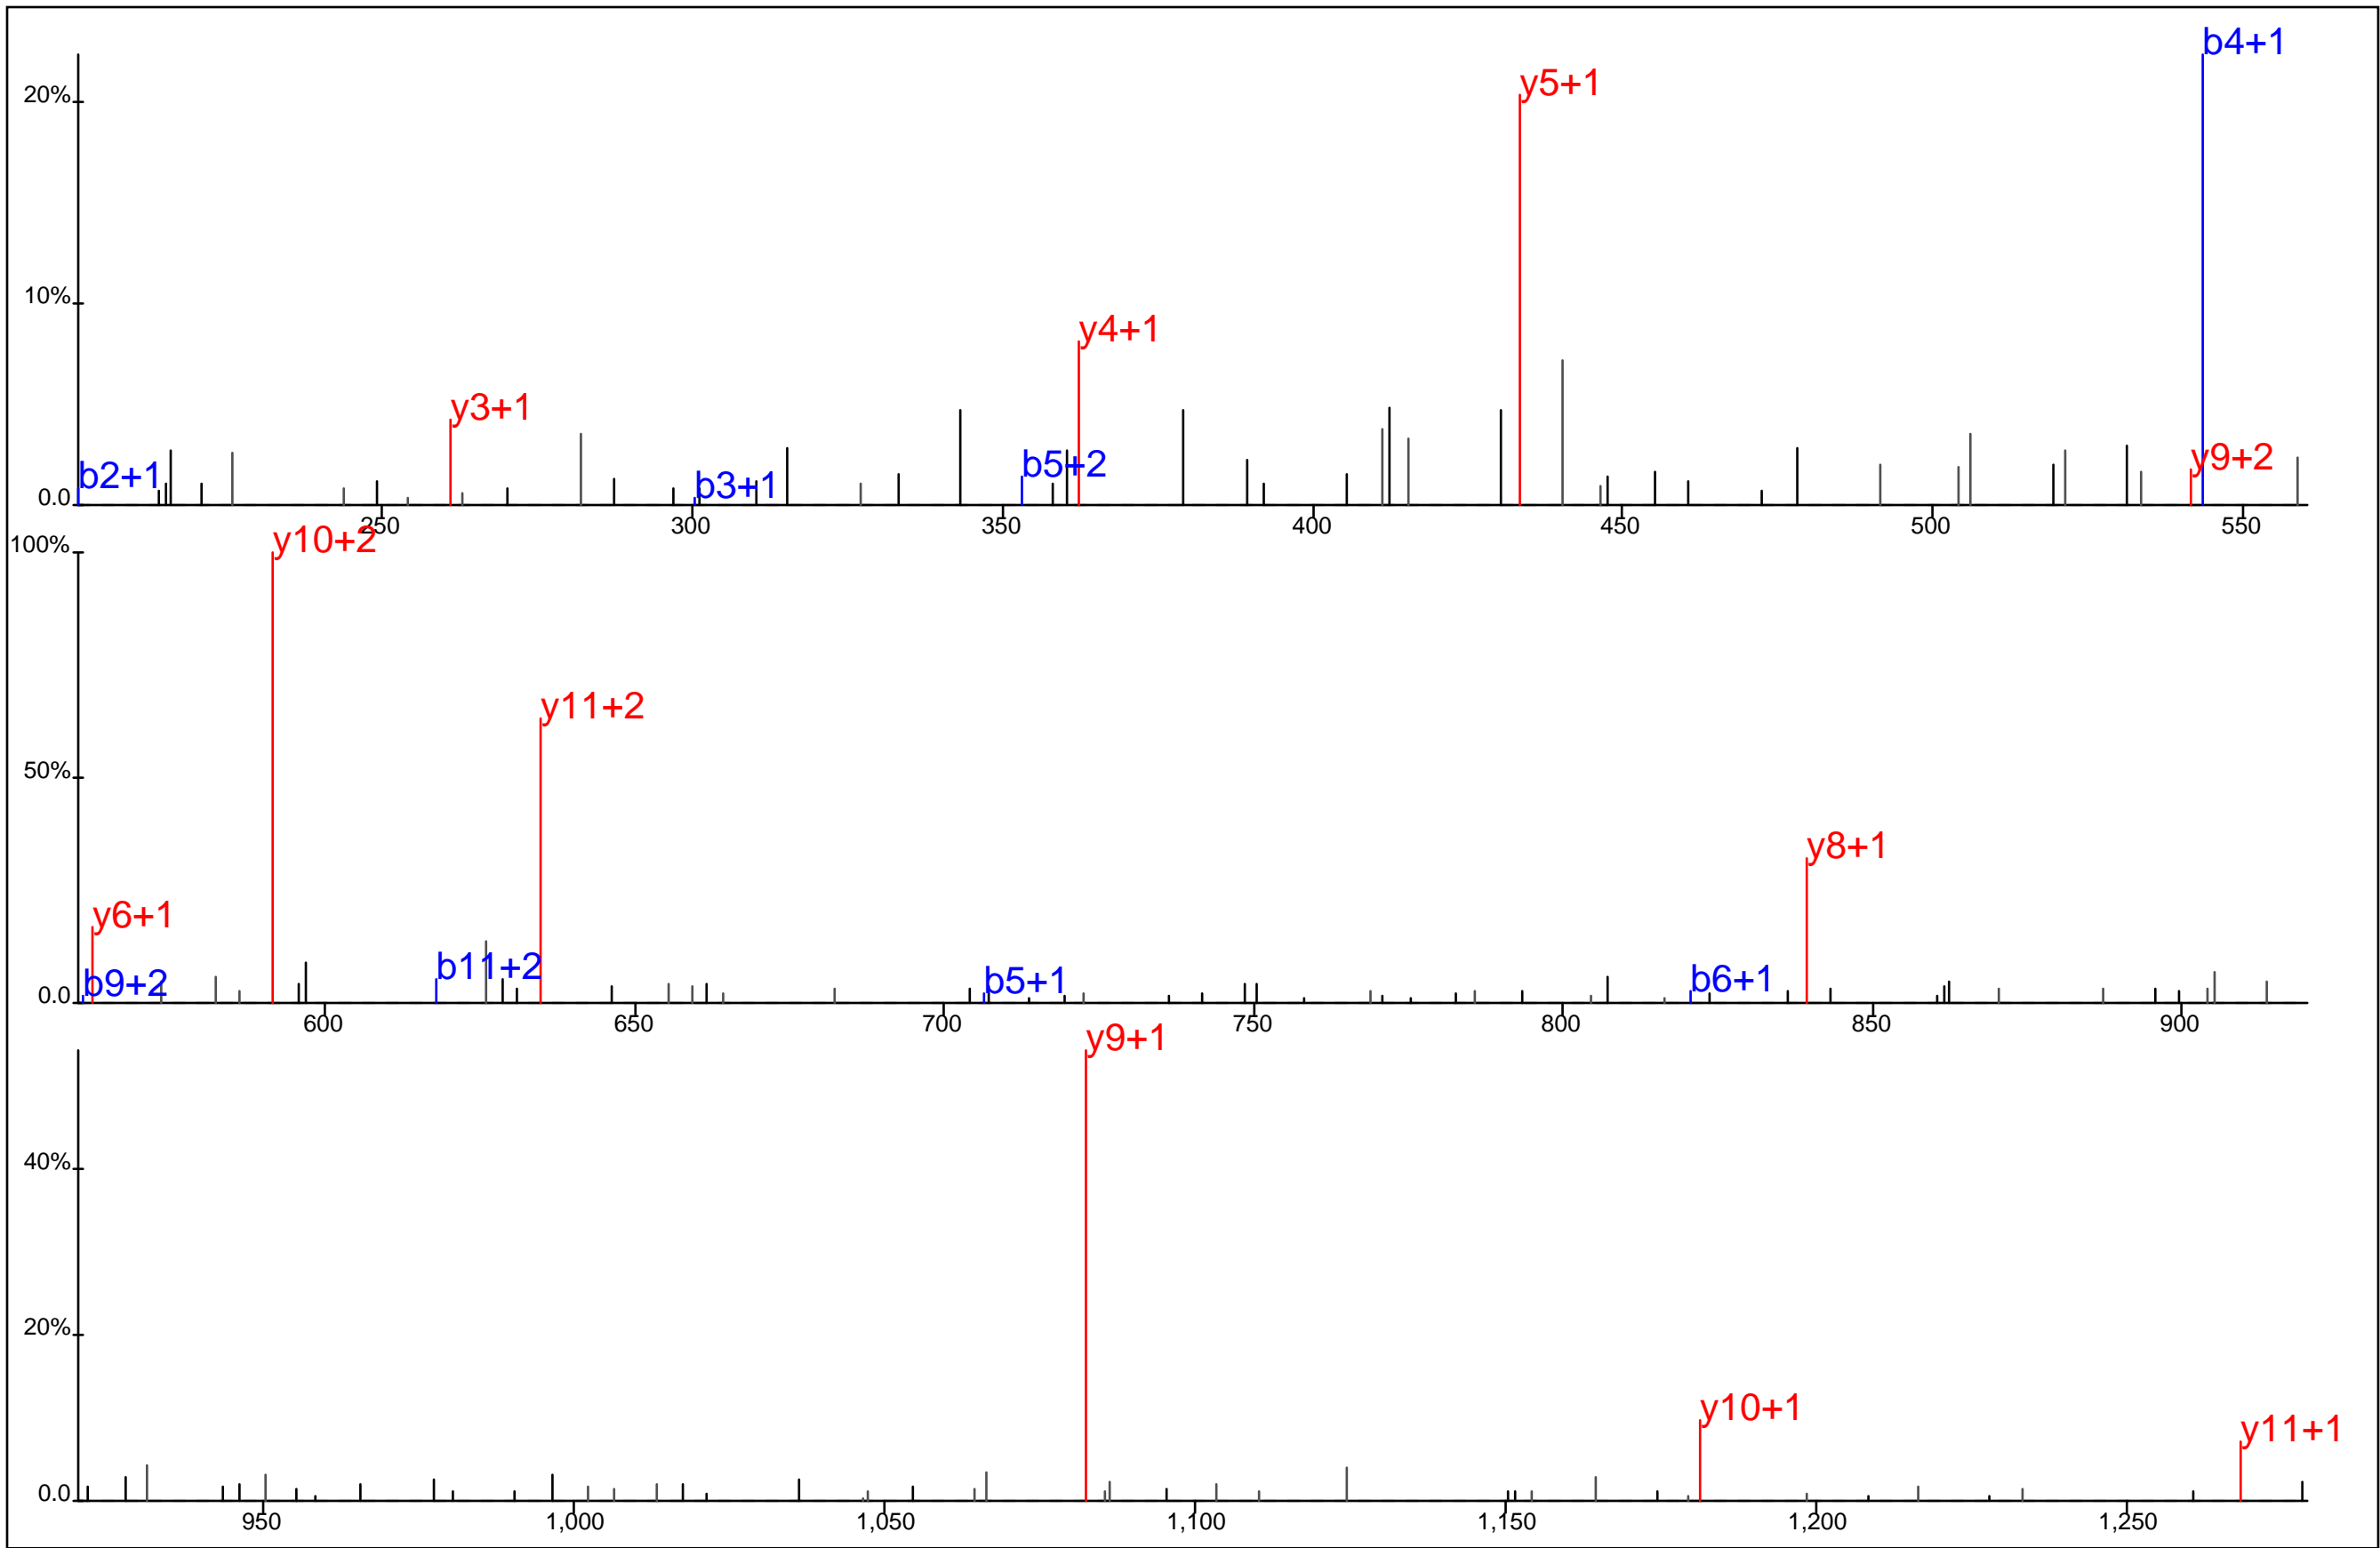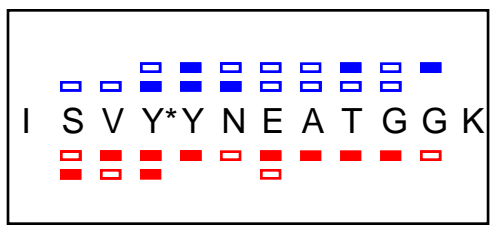

Protein Name: Tubulin, beta  
 gi Accession: 0  
 Precursor Mass: 691.3044+2  
 Delta Mass: 1.377 ppm  
 XCorr: 61.51



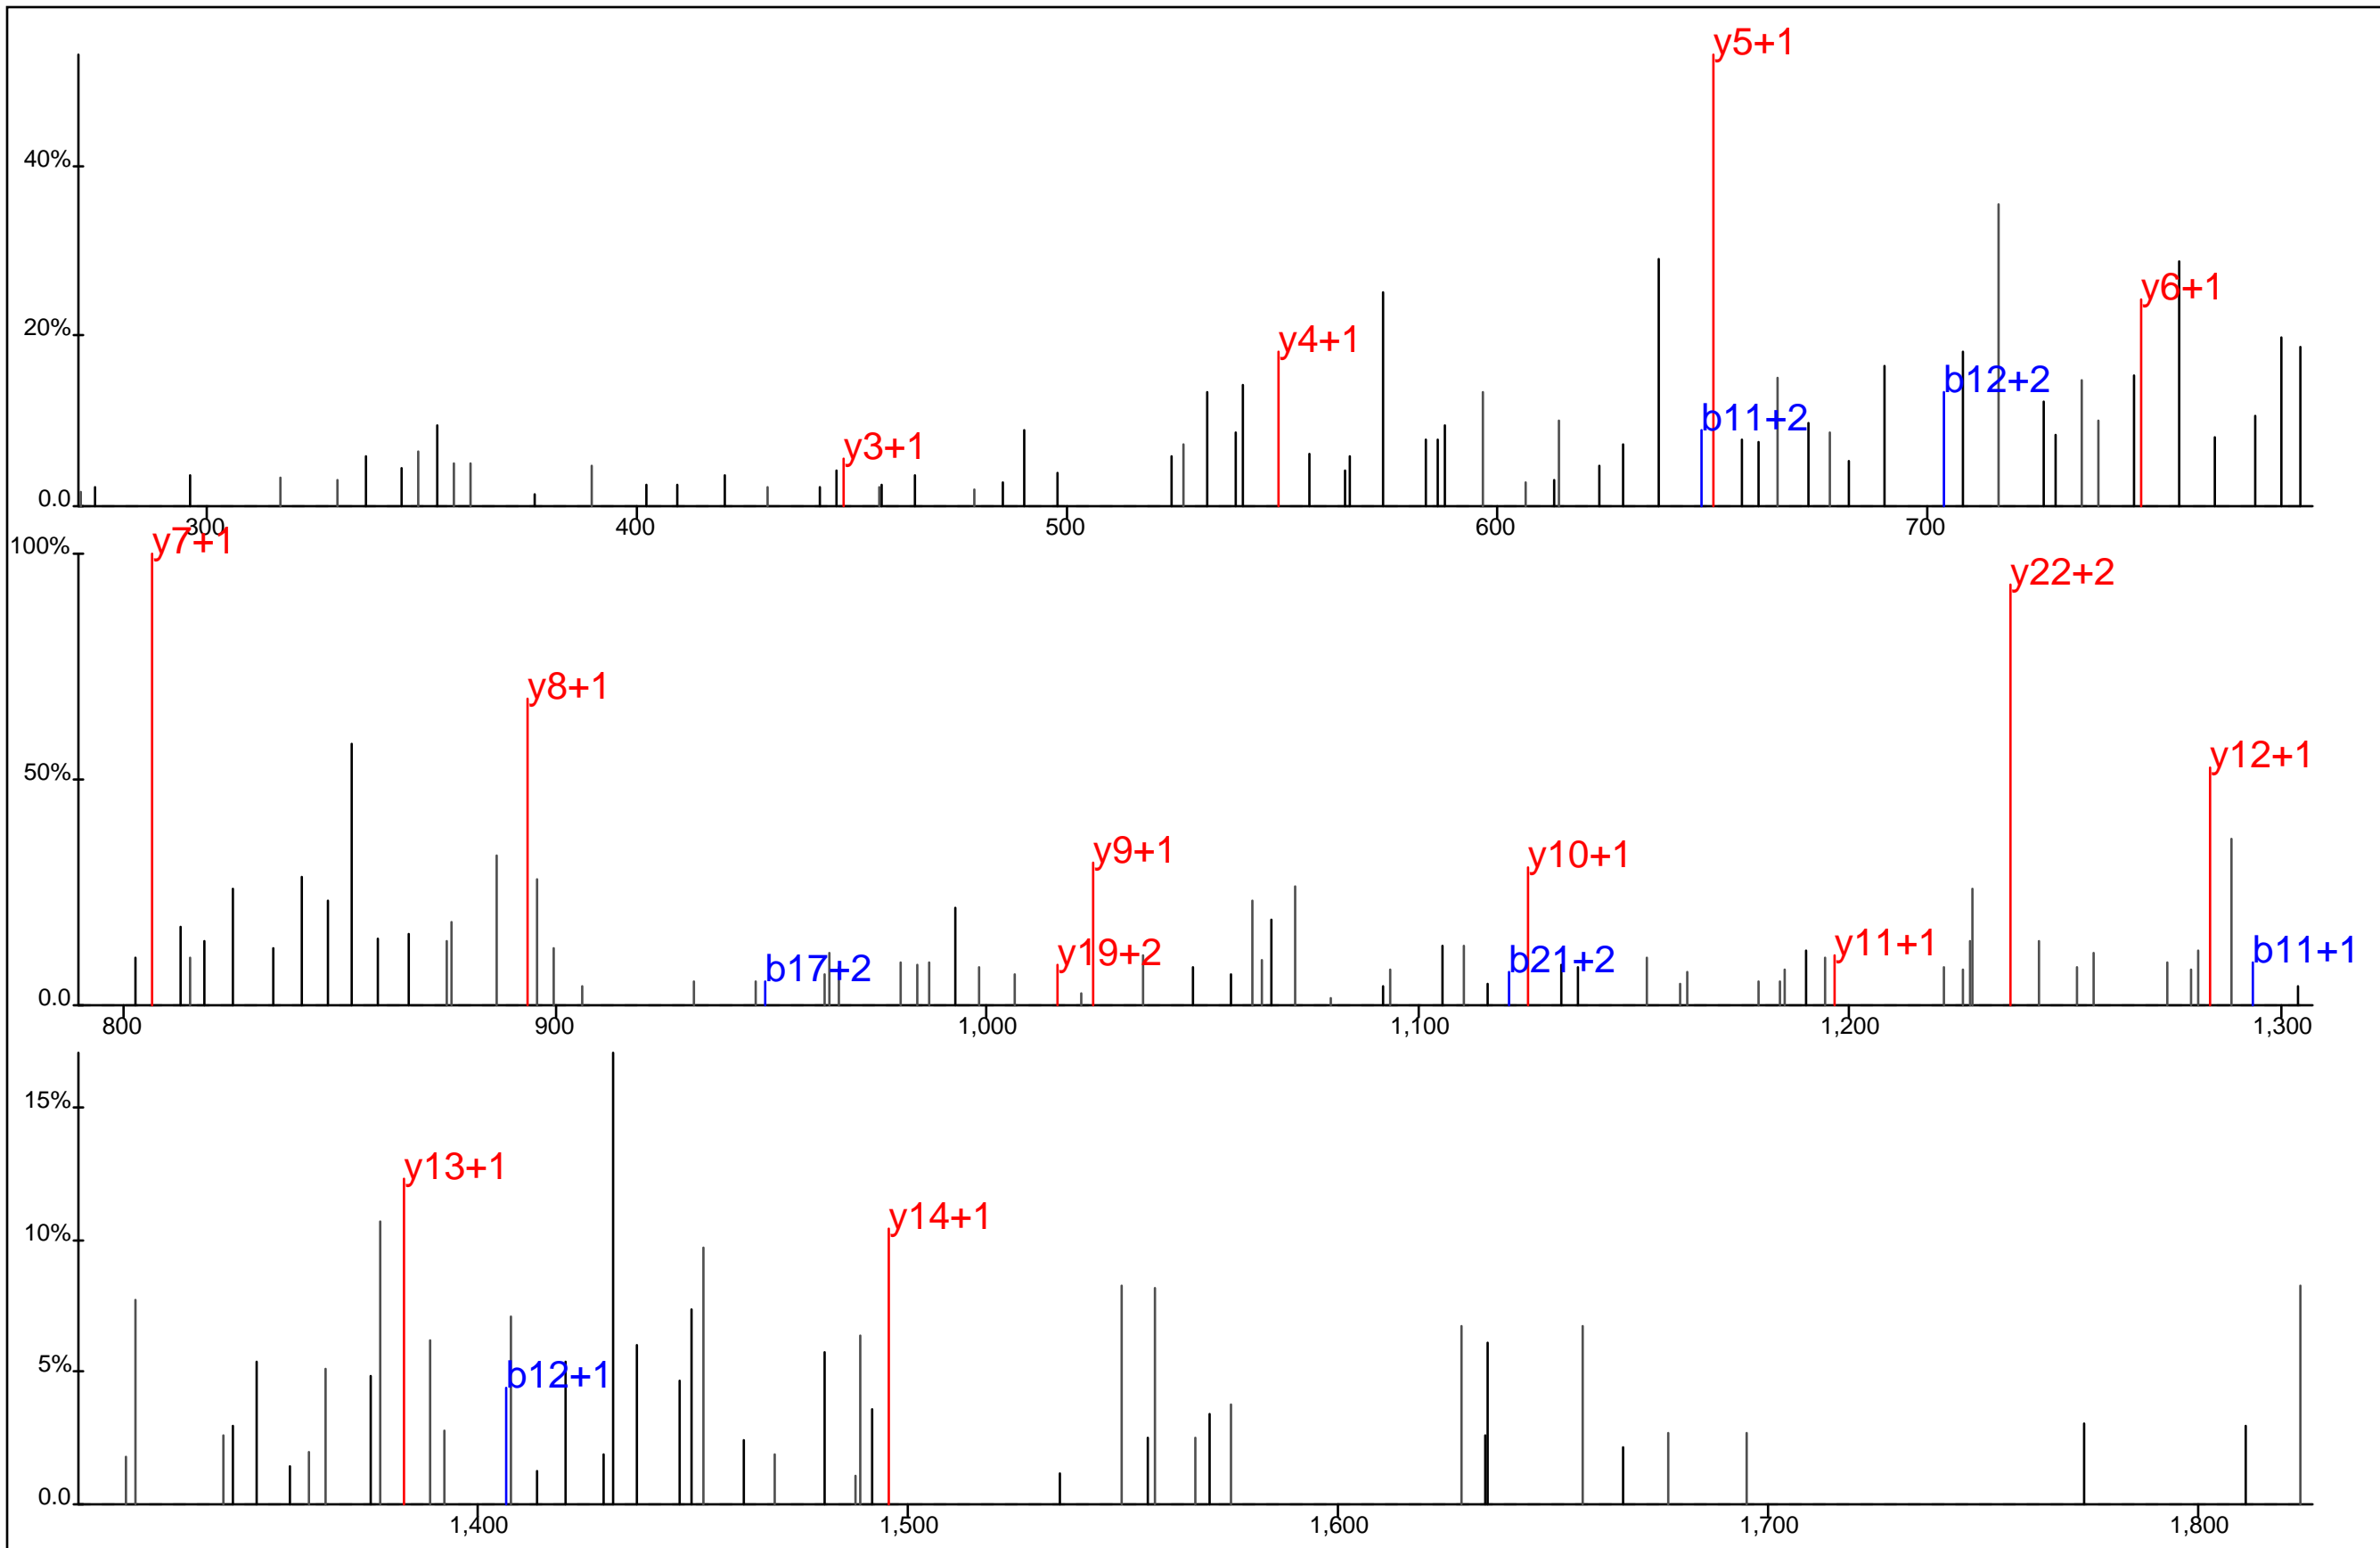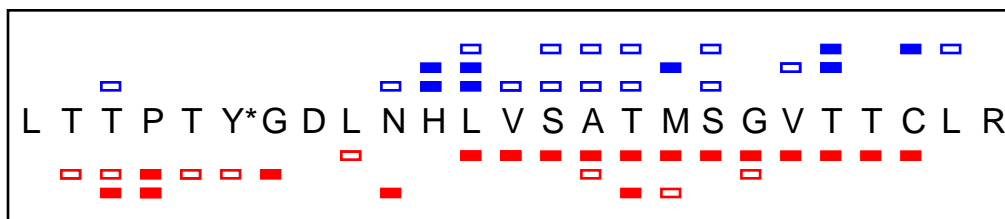

Protein Name: Tubulin, beta  
 gi Accession: 0  
 Precursor Mass: 930.1013+3  
 Delta Mass: 5.503 ppm  
 XCorr: 50.63



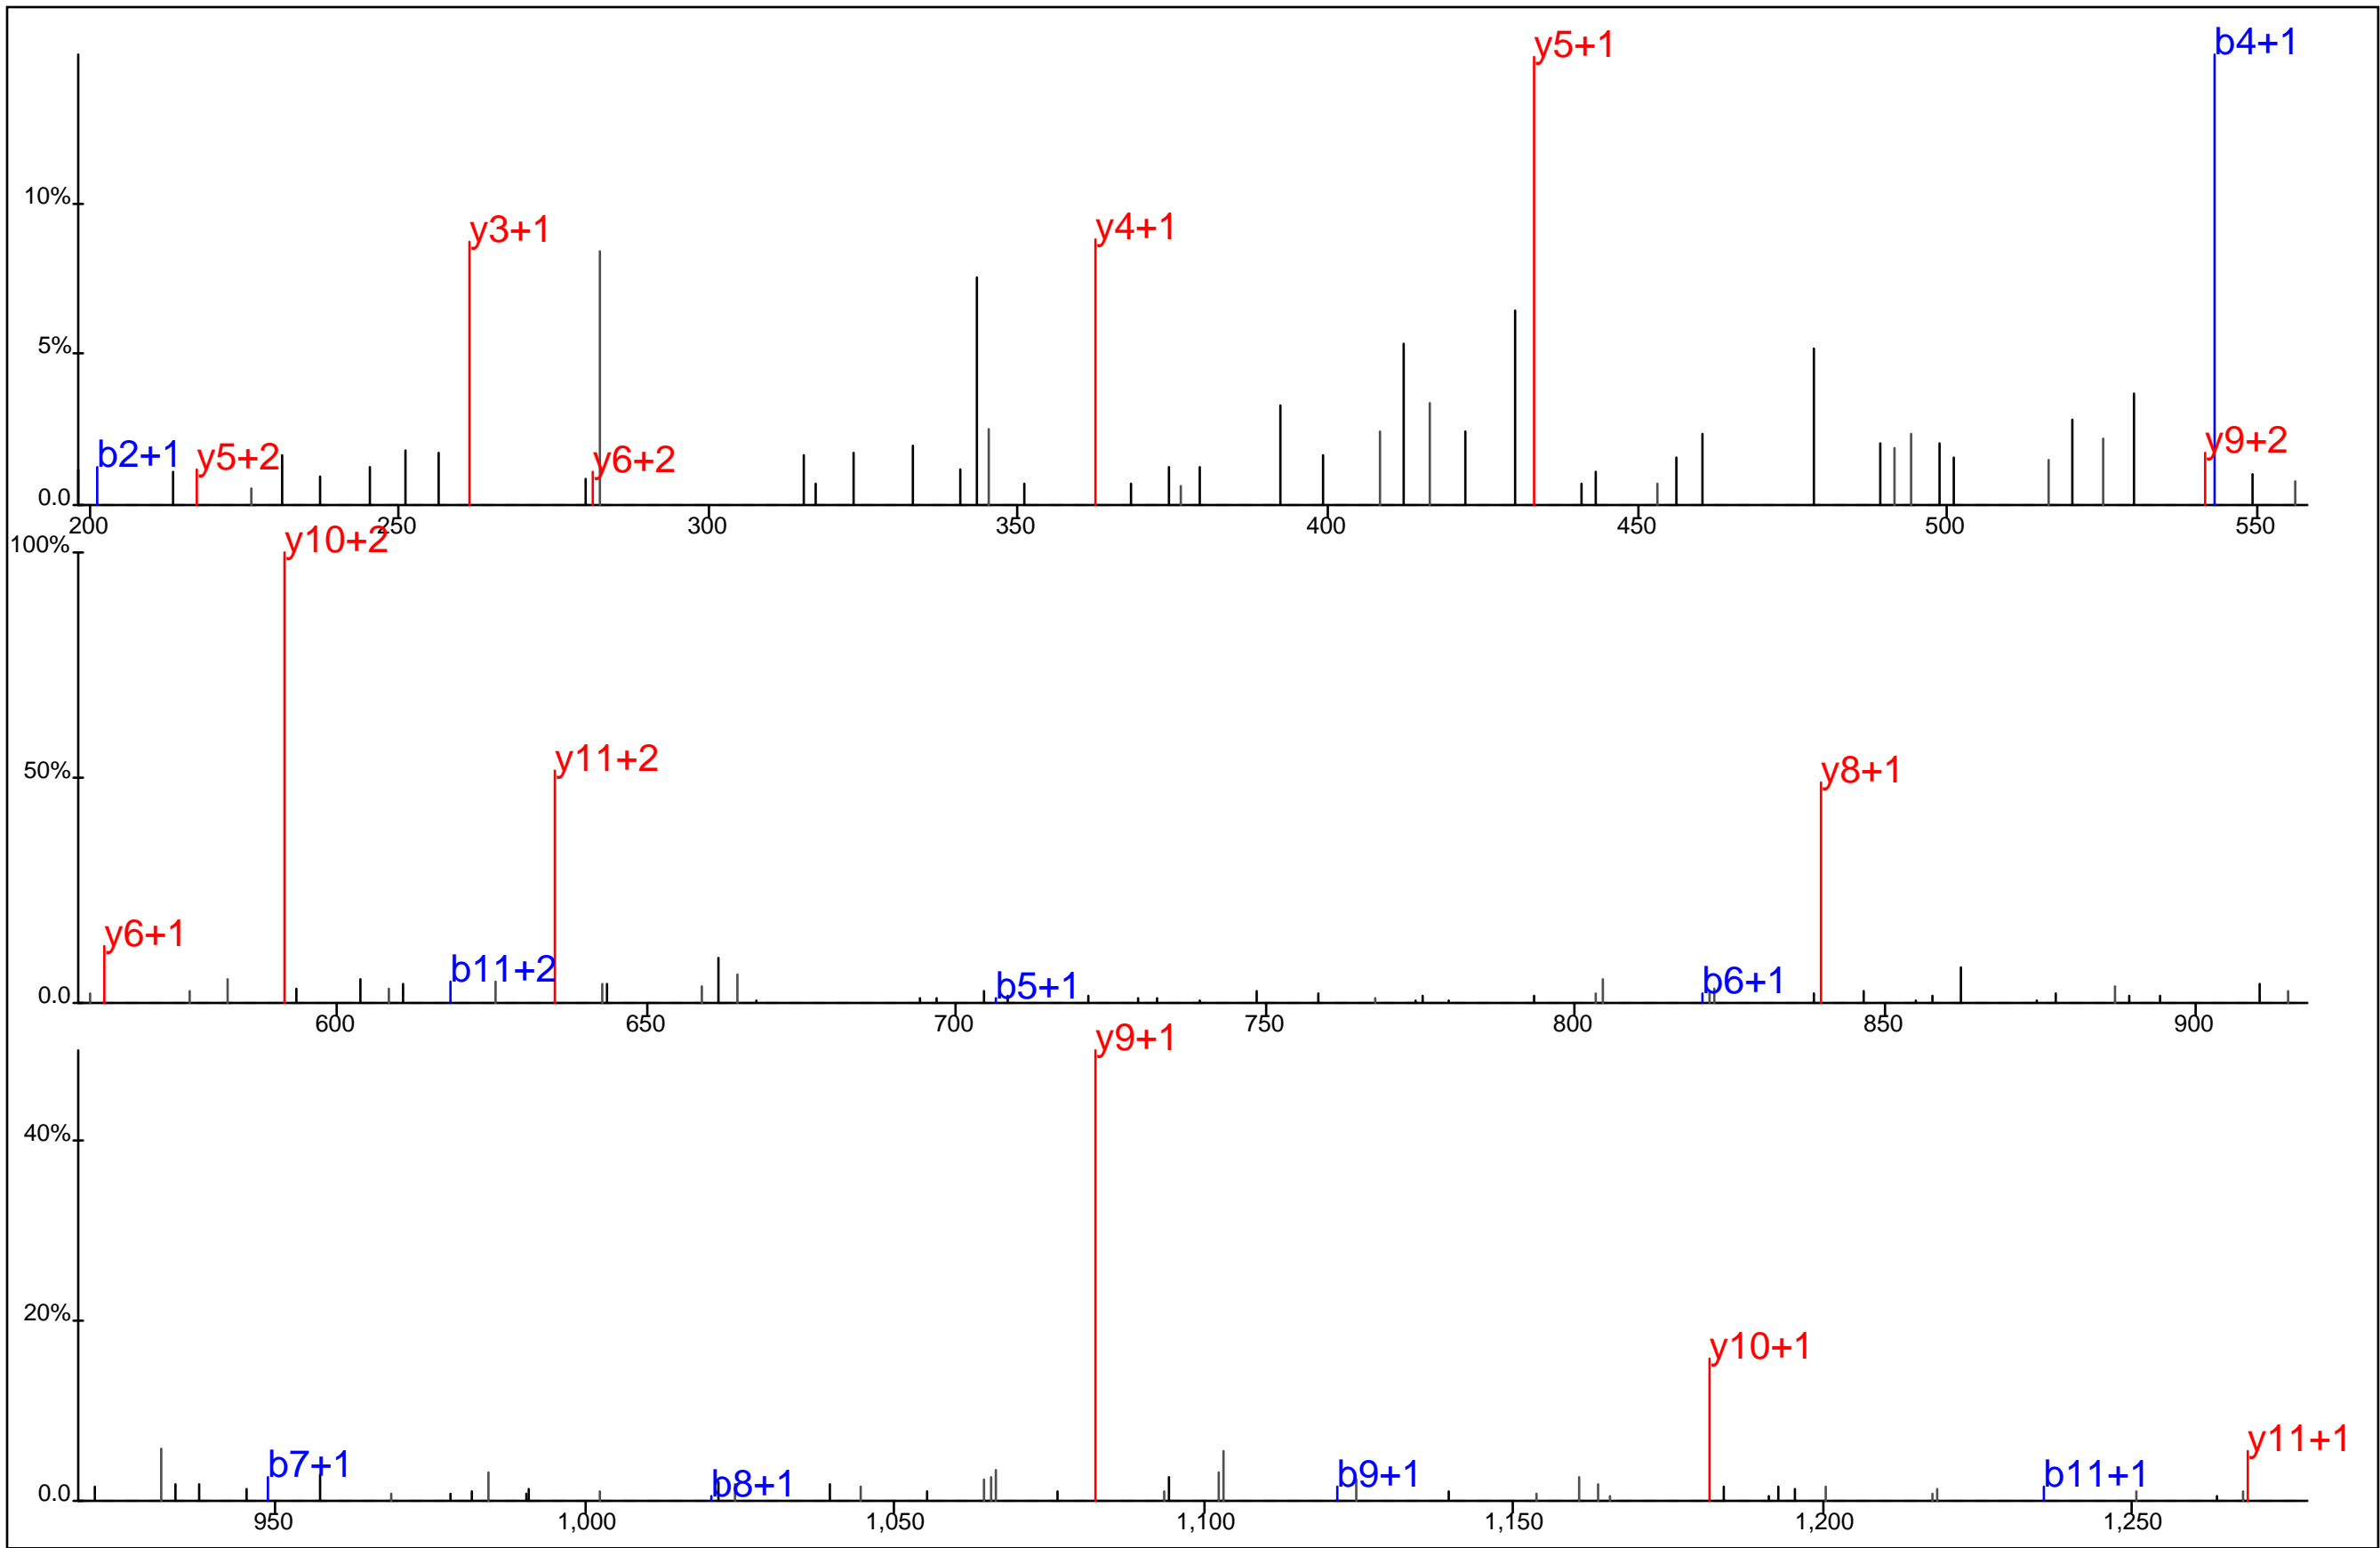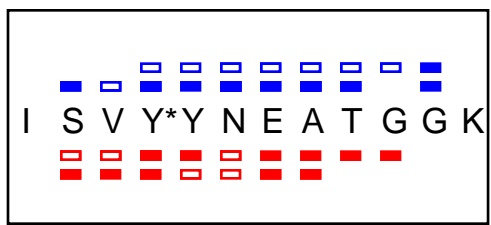

Protein Name: Tubulin, beta  
 gi Accession: 0  
 Precursor Mass: 691.3060+2  
 Delta Mass: 0.921 ppm  
 XCorr: 46.26

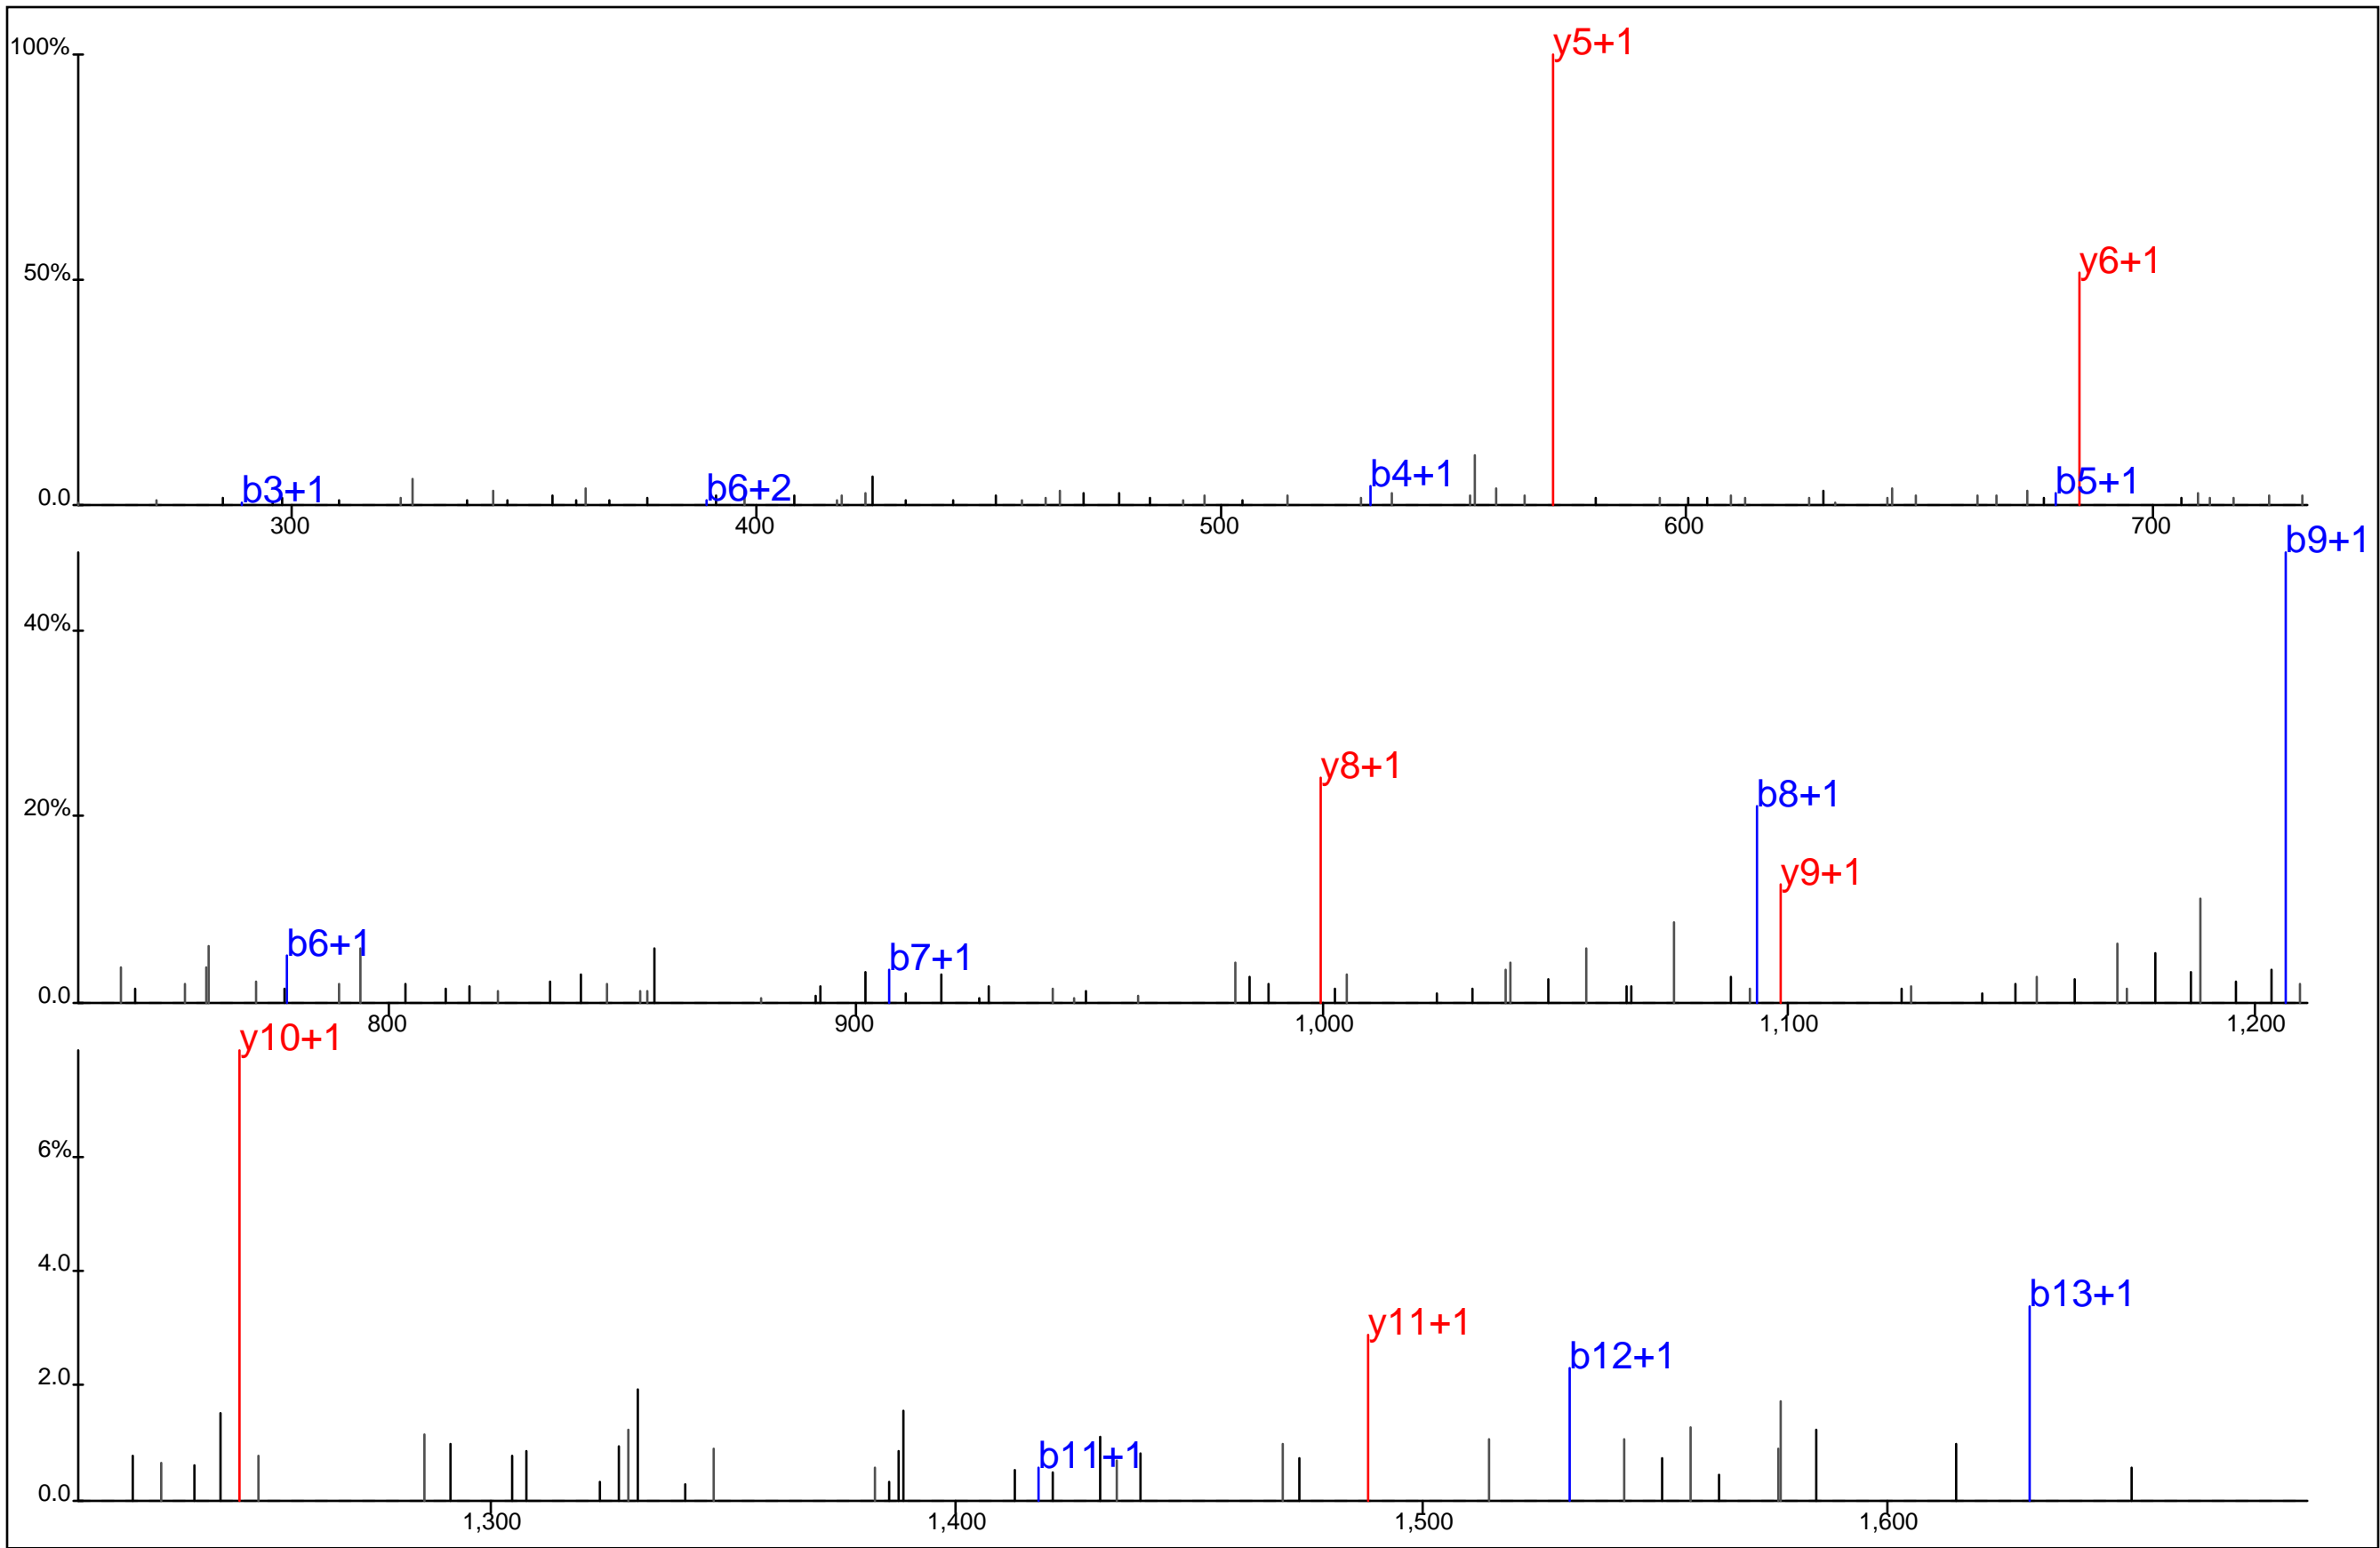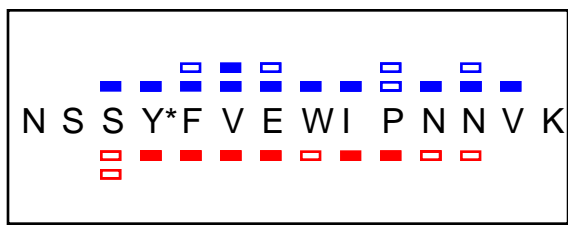

Protein Name: Tubulin, beta  
 gi Accession: 0  
 Precursor Mass: 888.9031+2  
 Delta Mass: 0.143 ppm  
 XCorr: 35.84



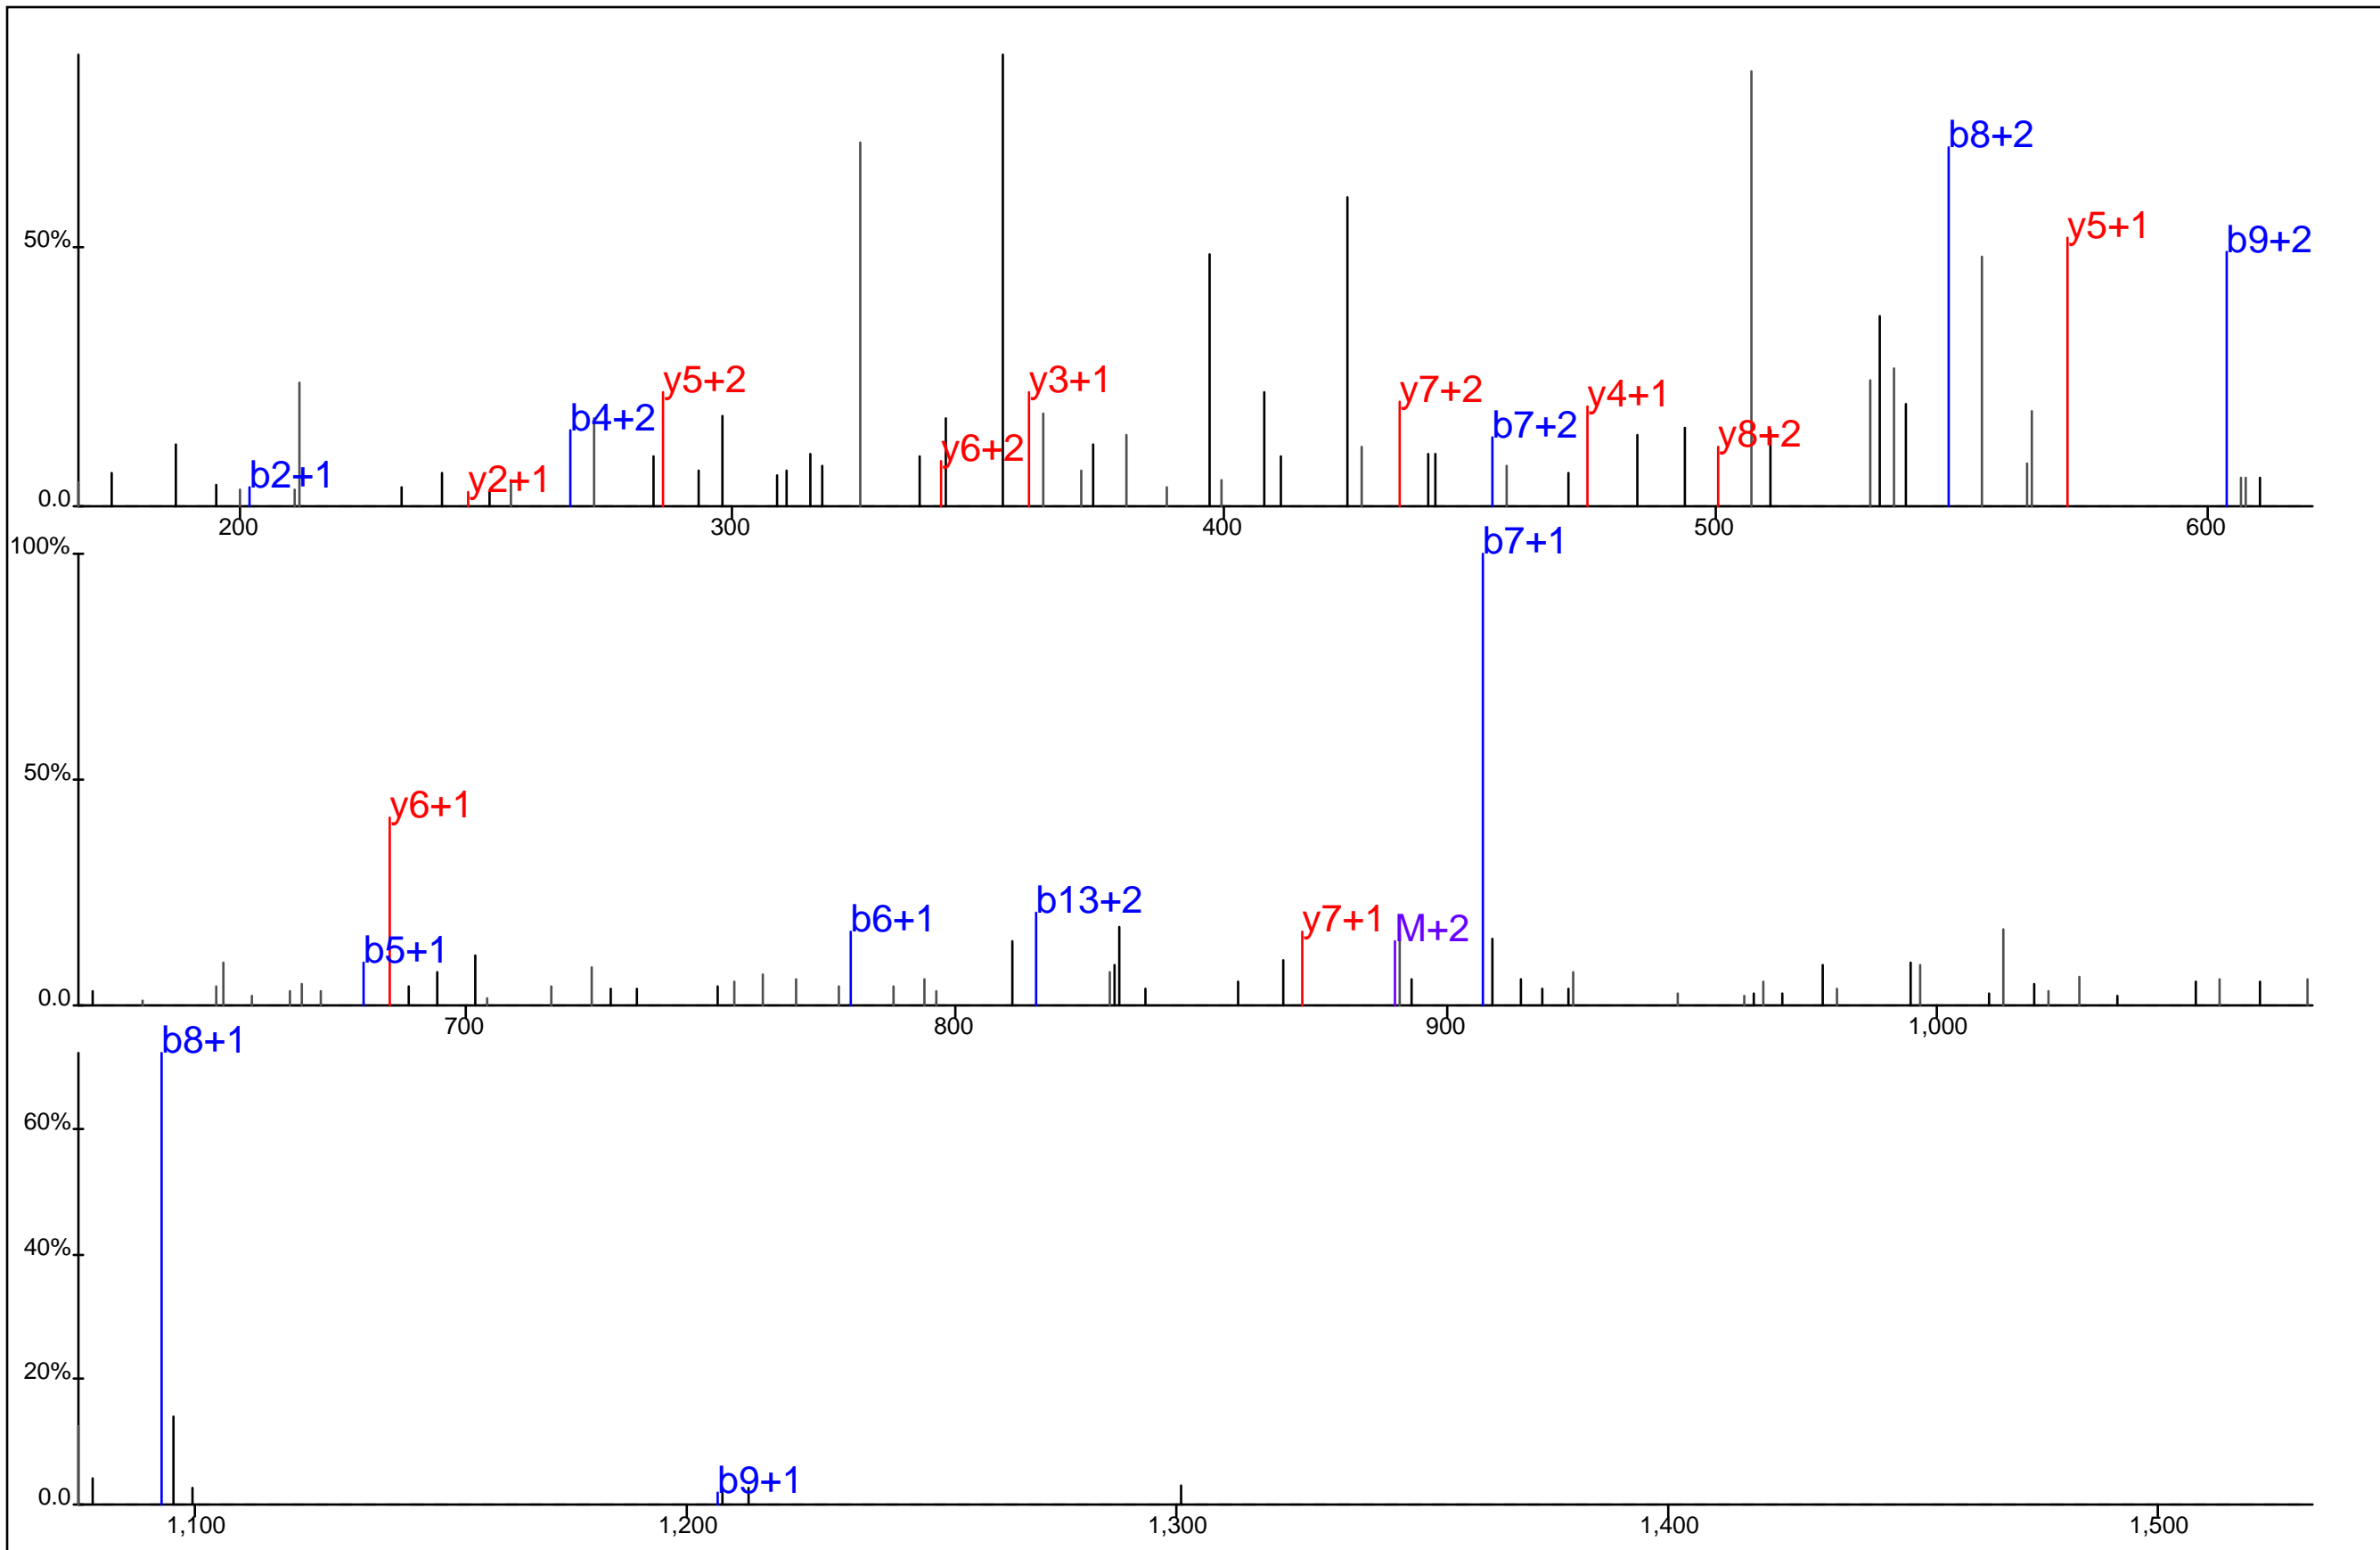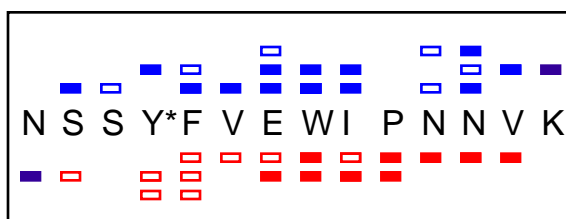

Protein Name: Tubulin, beta  
 gi Accession: 0  
 Precursor Mass: 592.9392+3  
 Delta Mass: 2.152 ppm  
 XCorr: 24.86

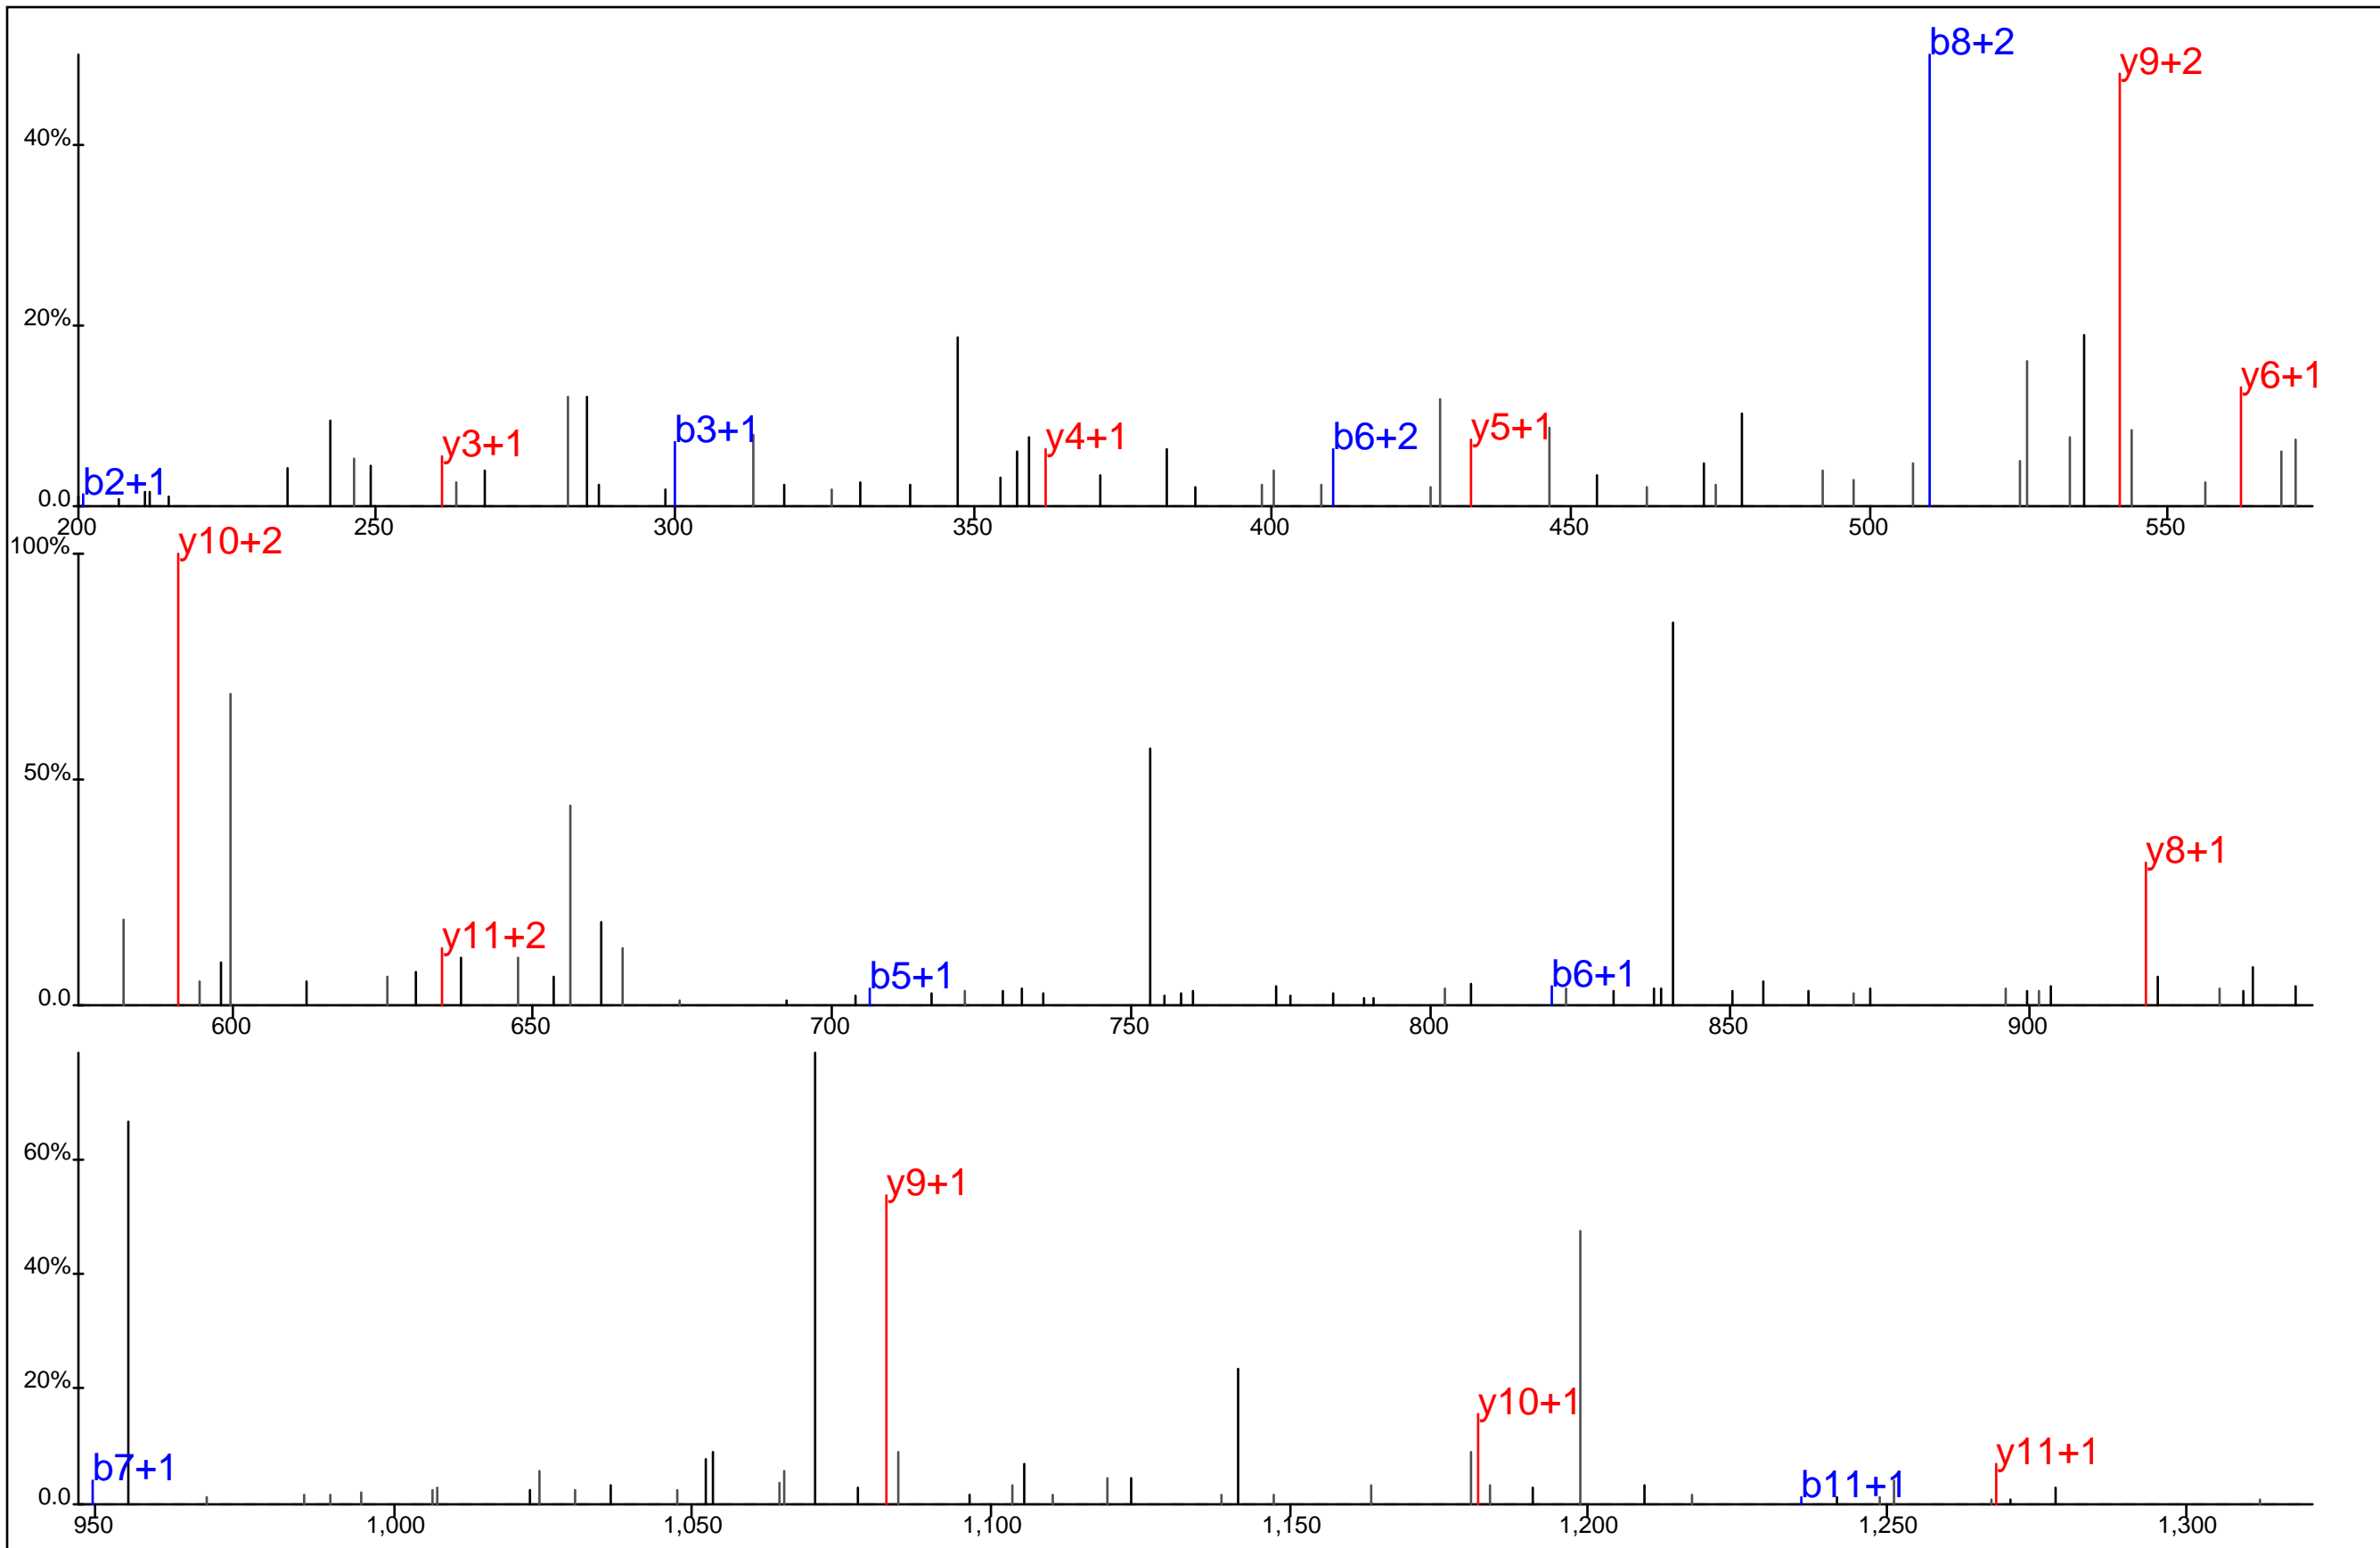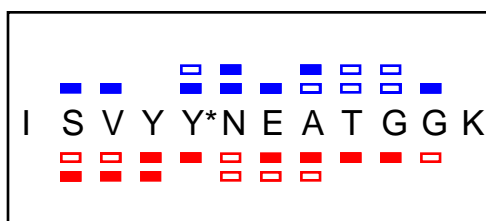

Protein Name: Tubulin, beta  
 gi Accession: 0  
 Precursor Mass: 691.3044+2  
 Delta Mass: 1.465 ppm  
 XCorr: 20.89

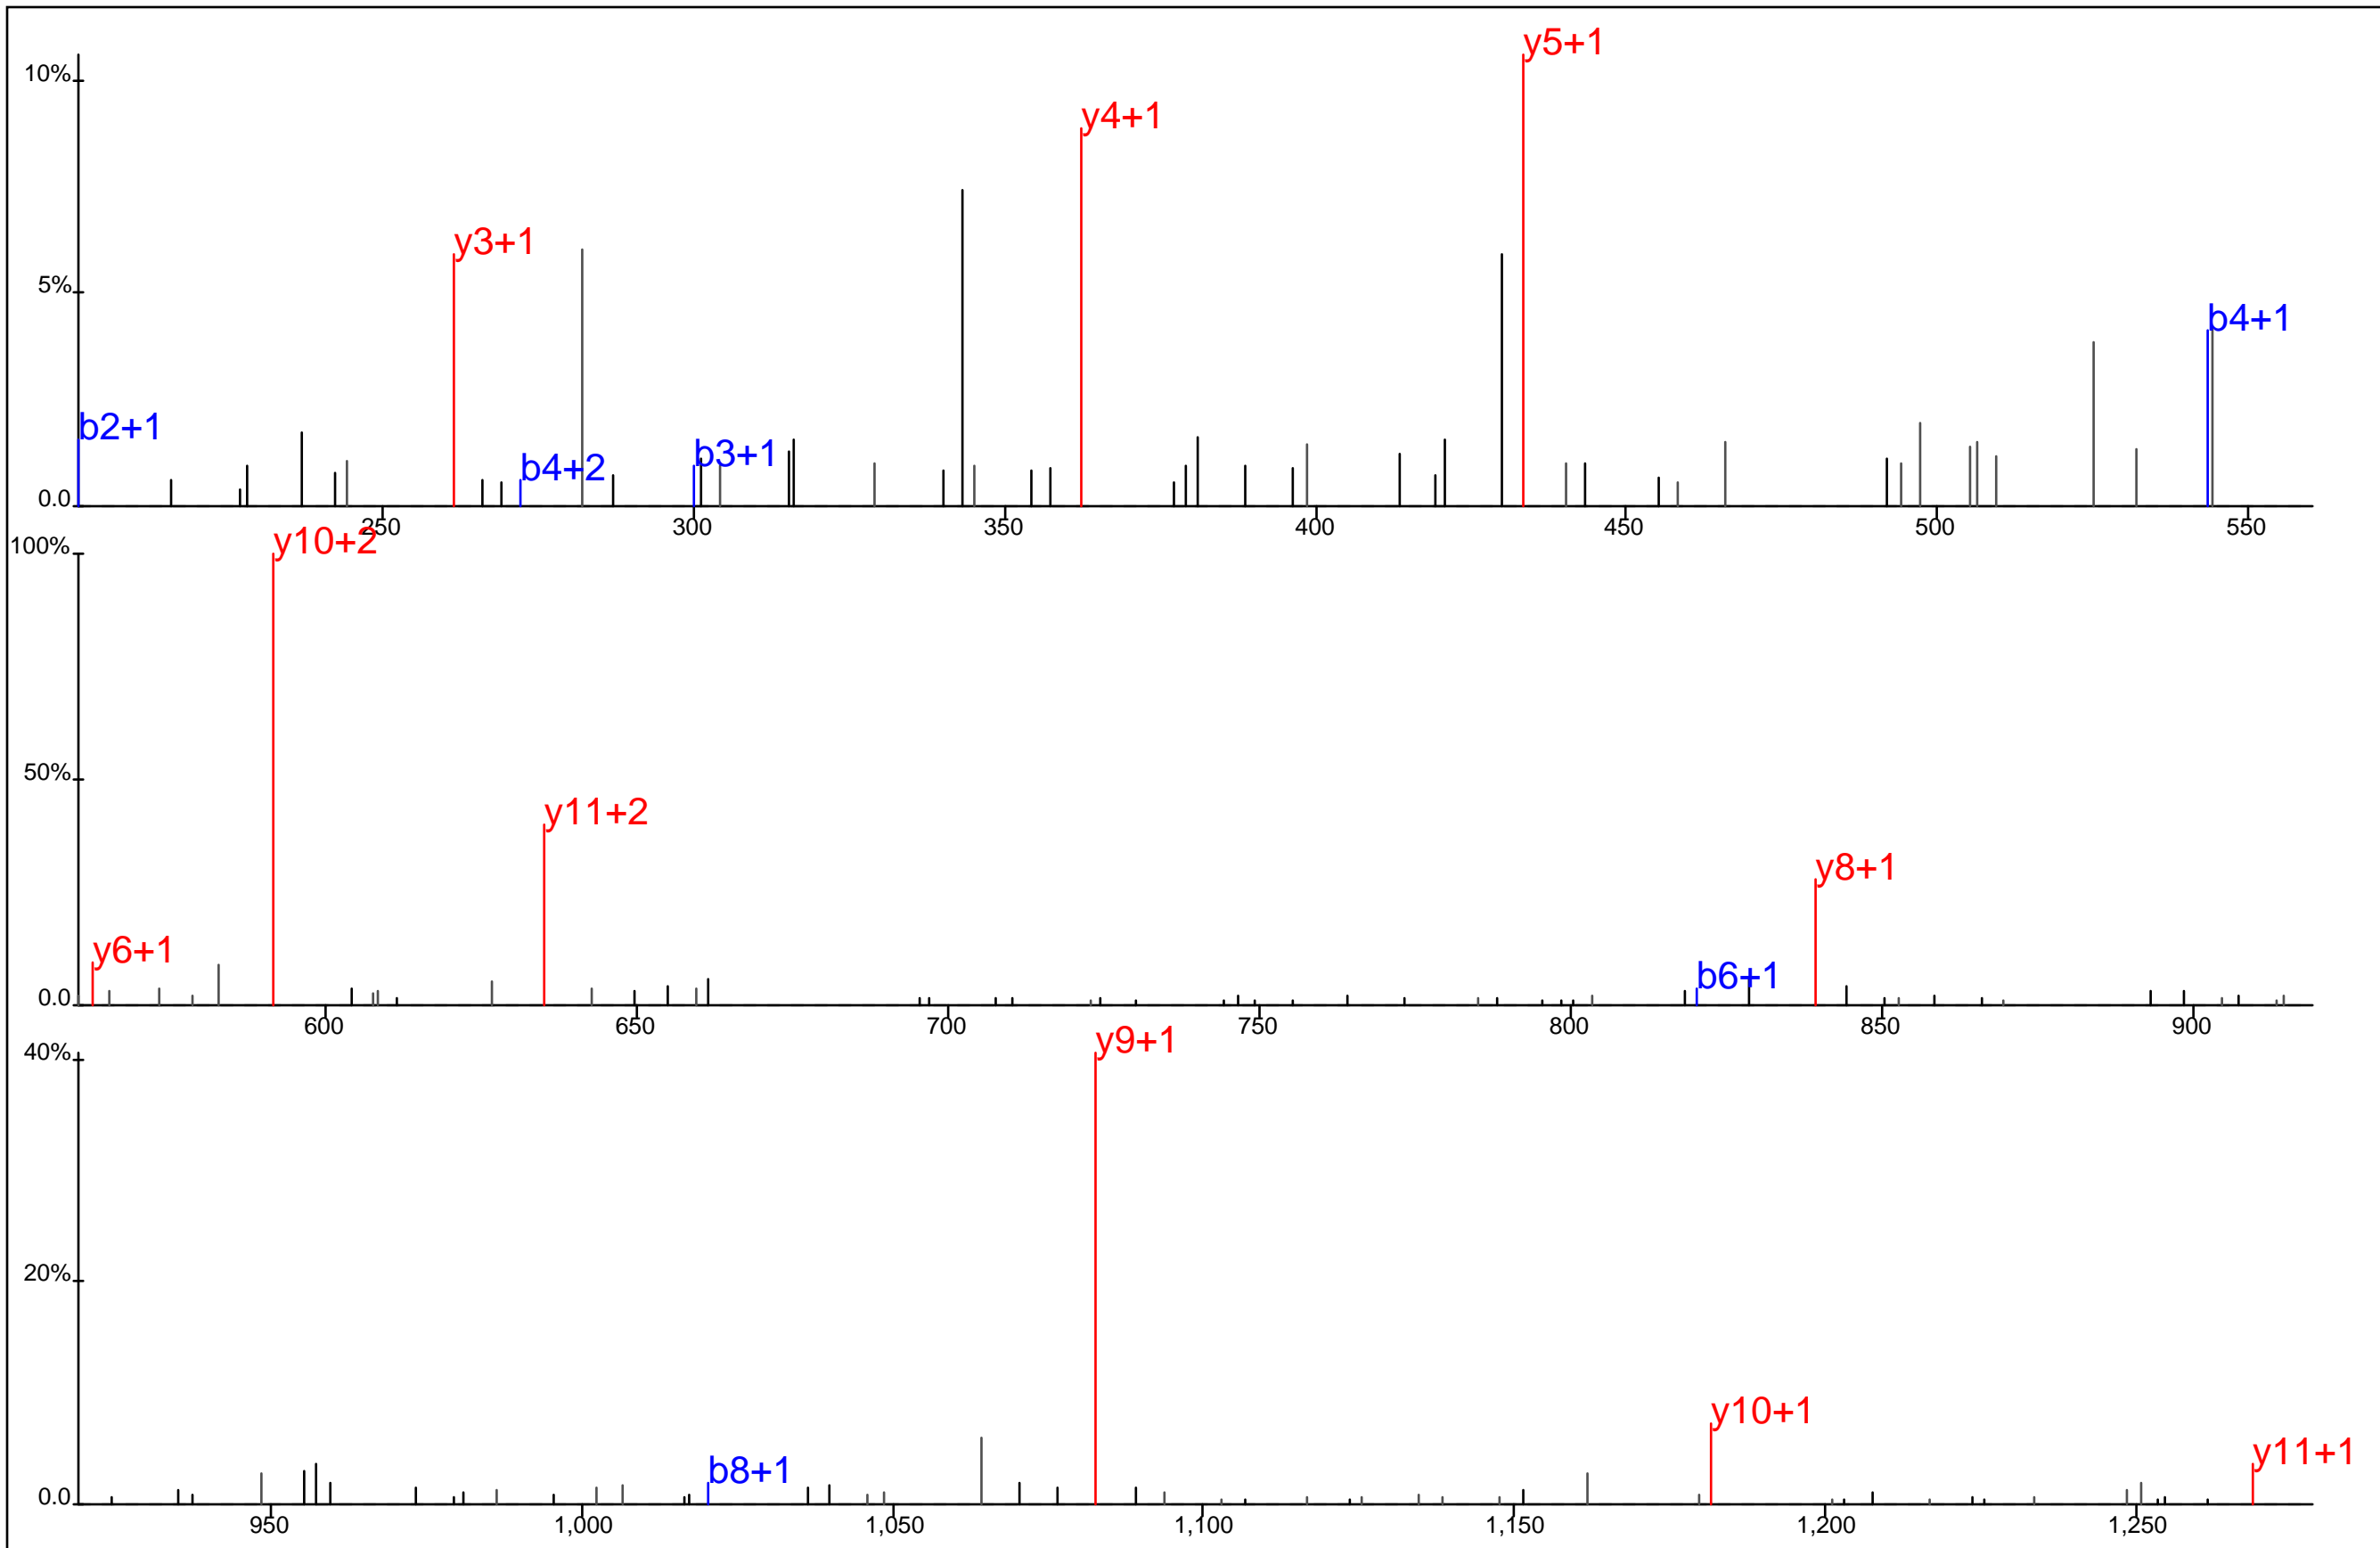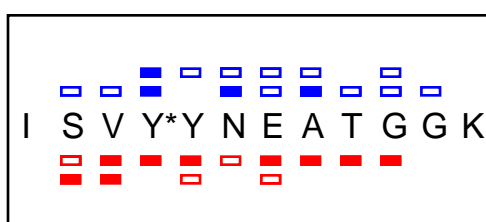

Protein Name: Tubulin, beta  
 gi Accession: 0  
 Precursor Mass: 691.3065+2  
 Delta Mass: 1.540 ppm  
 XCorr: 51.62







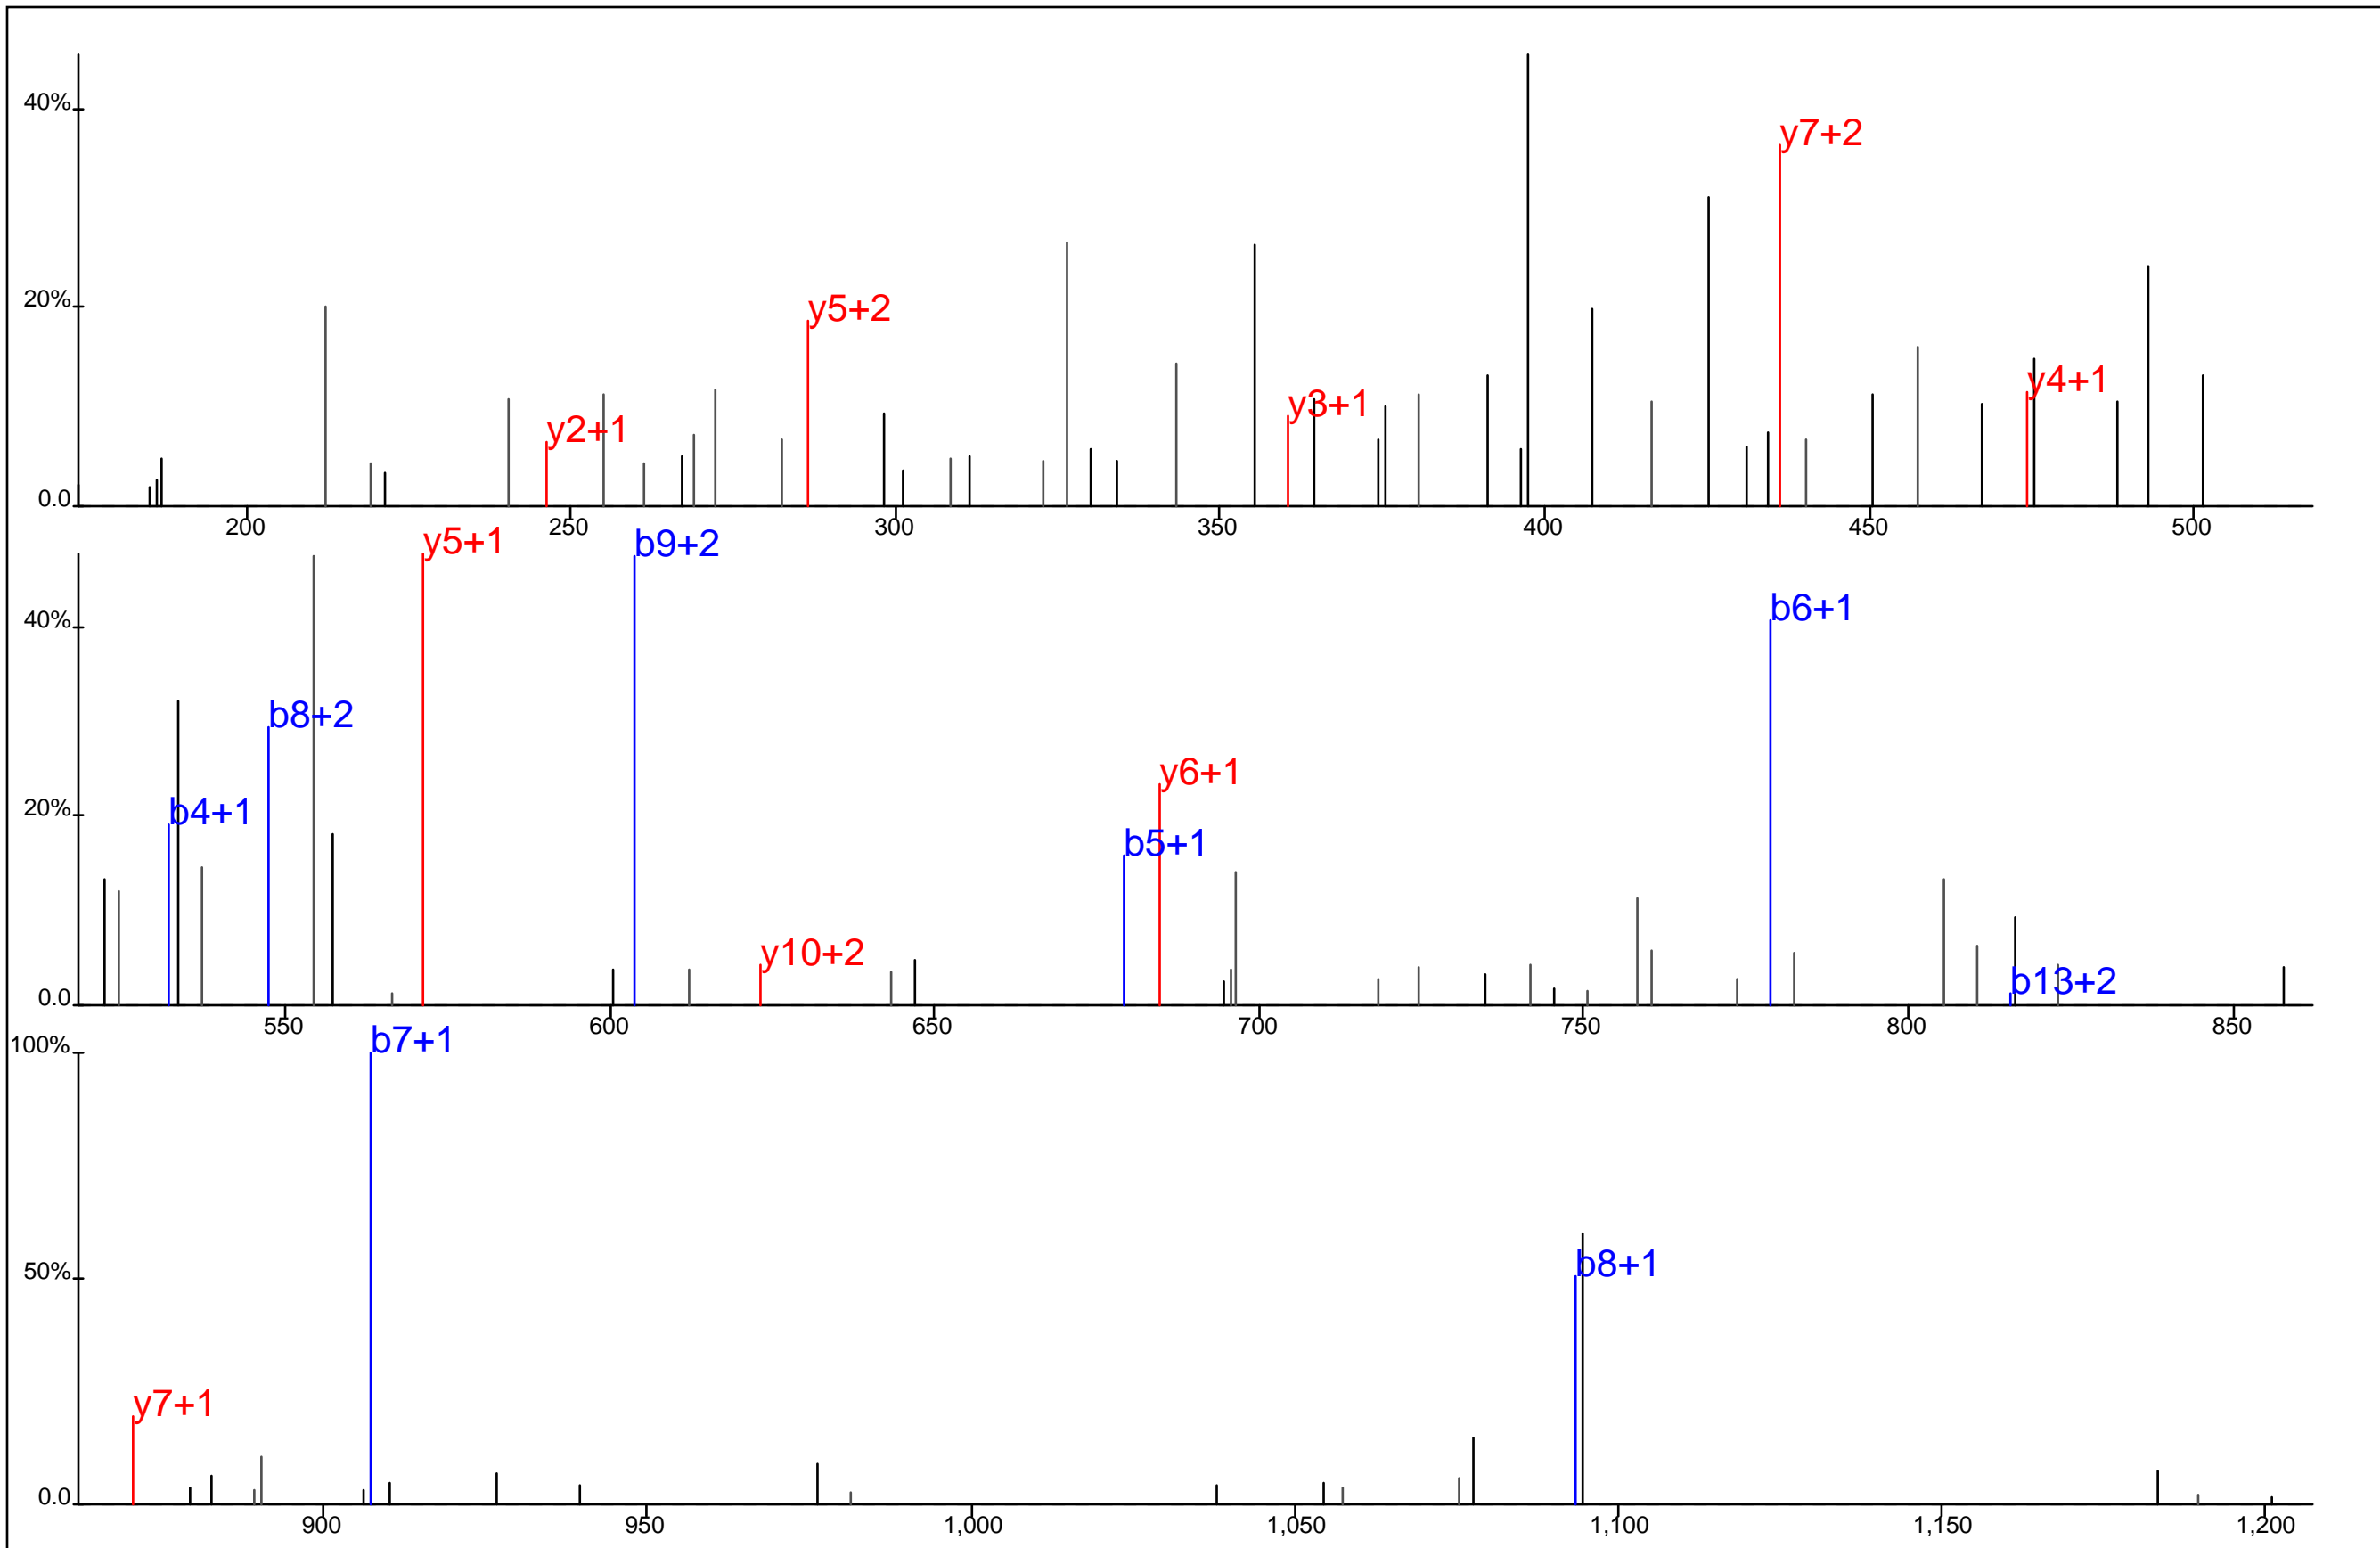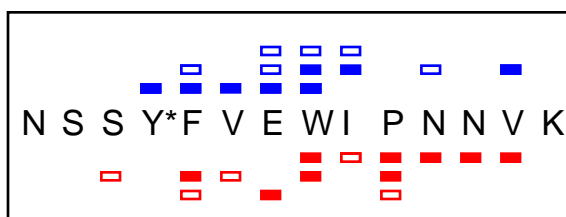

Protein Name: Tubulin, beta  
 gi Accession: 0  
 Precursor Mass: 592.9378+3  
 Delta Mass: 0.219 ppm  
 XCorr: 20.71

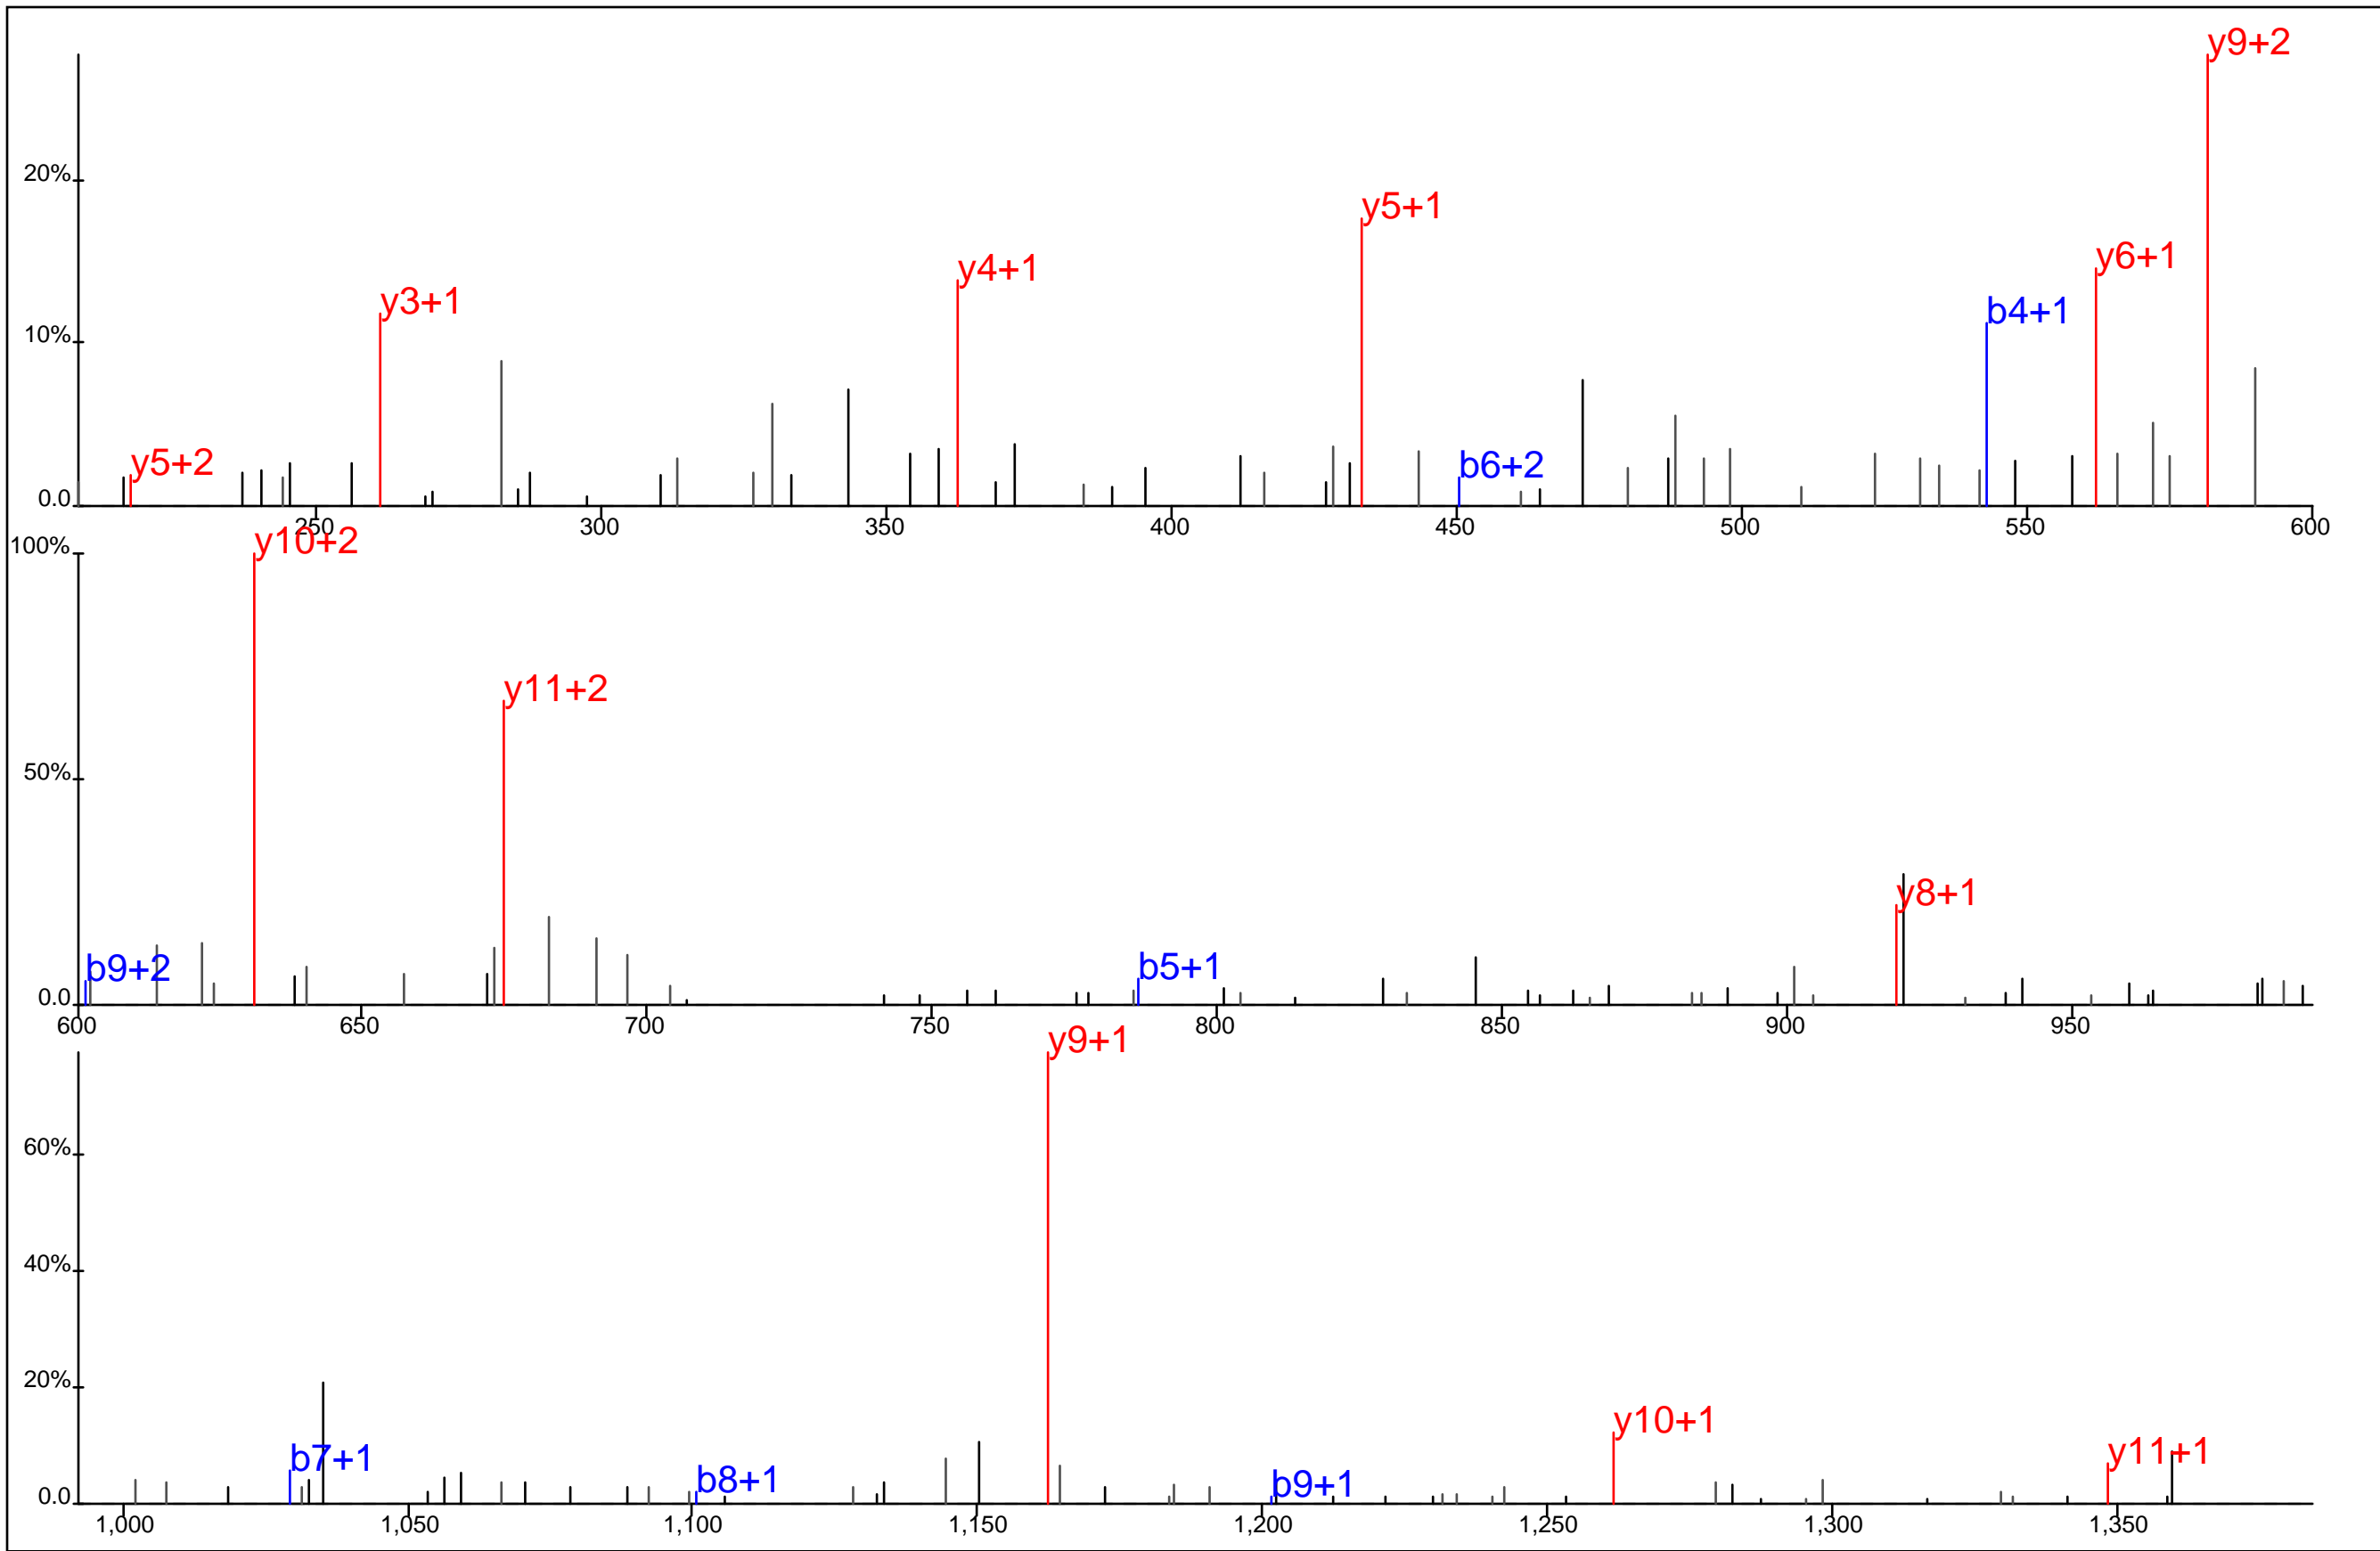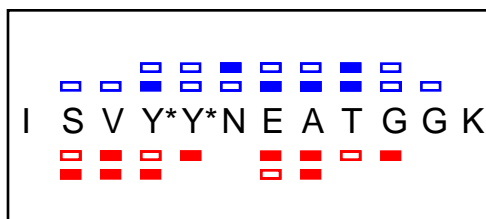

Protein Name: Tubulin, beta  
 gi Accession: 0  
 Precursor Mass: 731.2888+2  
 Delta Mass: 0.354 ppm  
 XCorr: 57.12





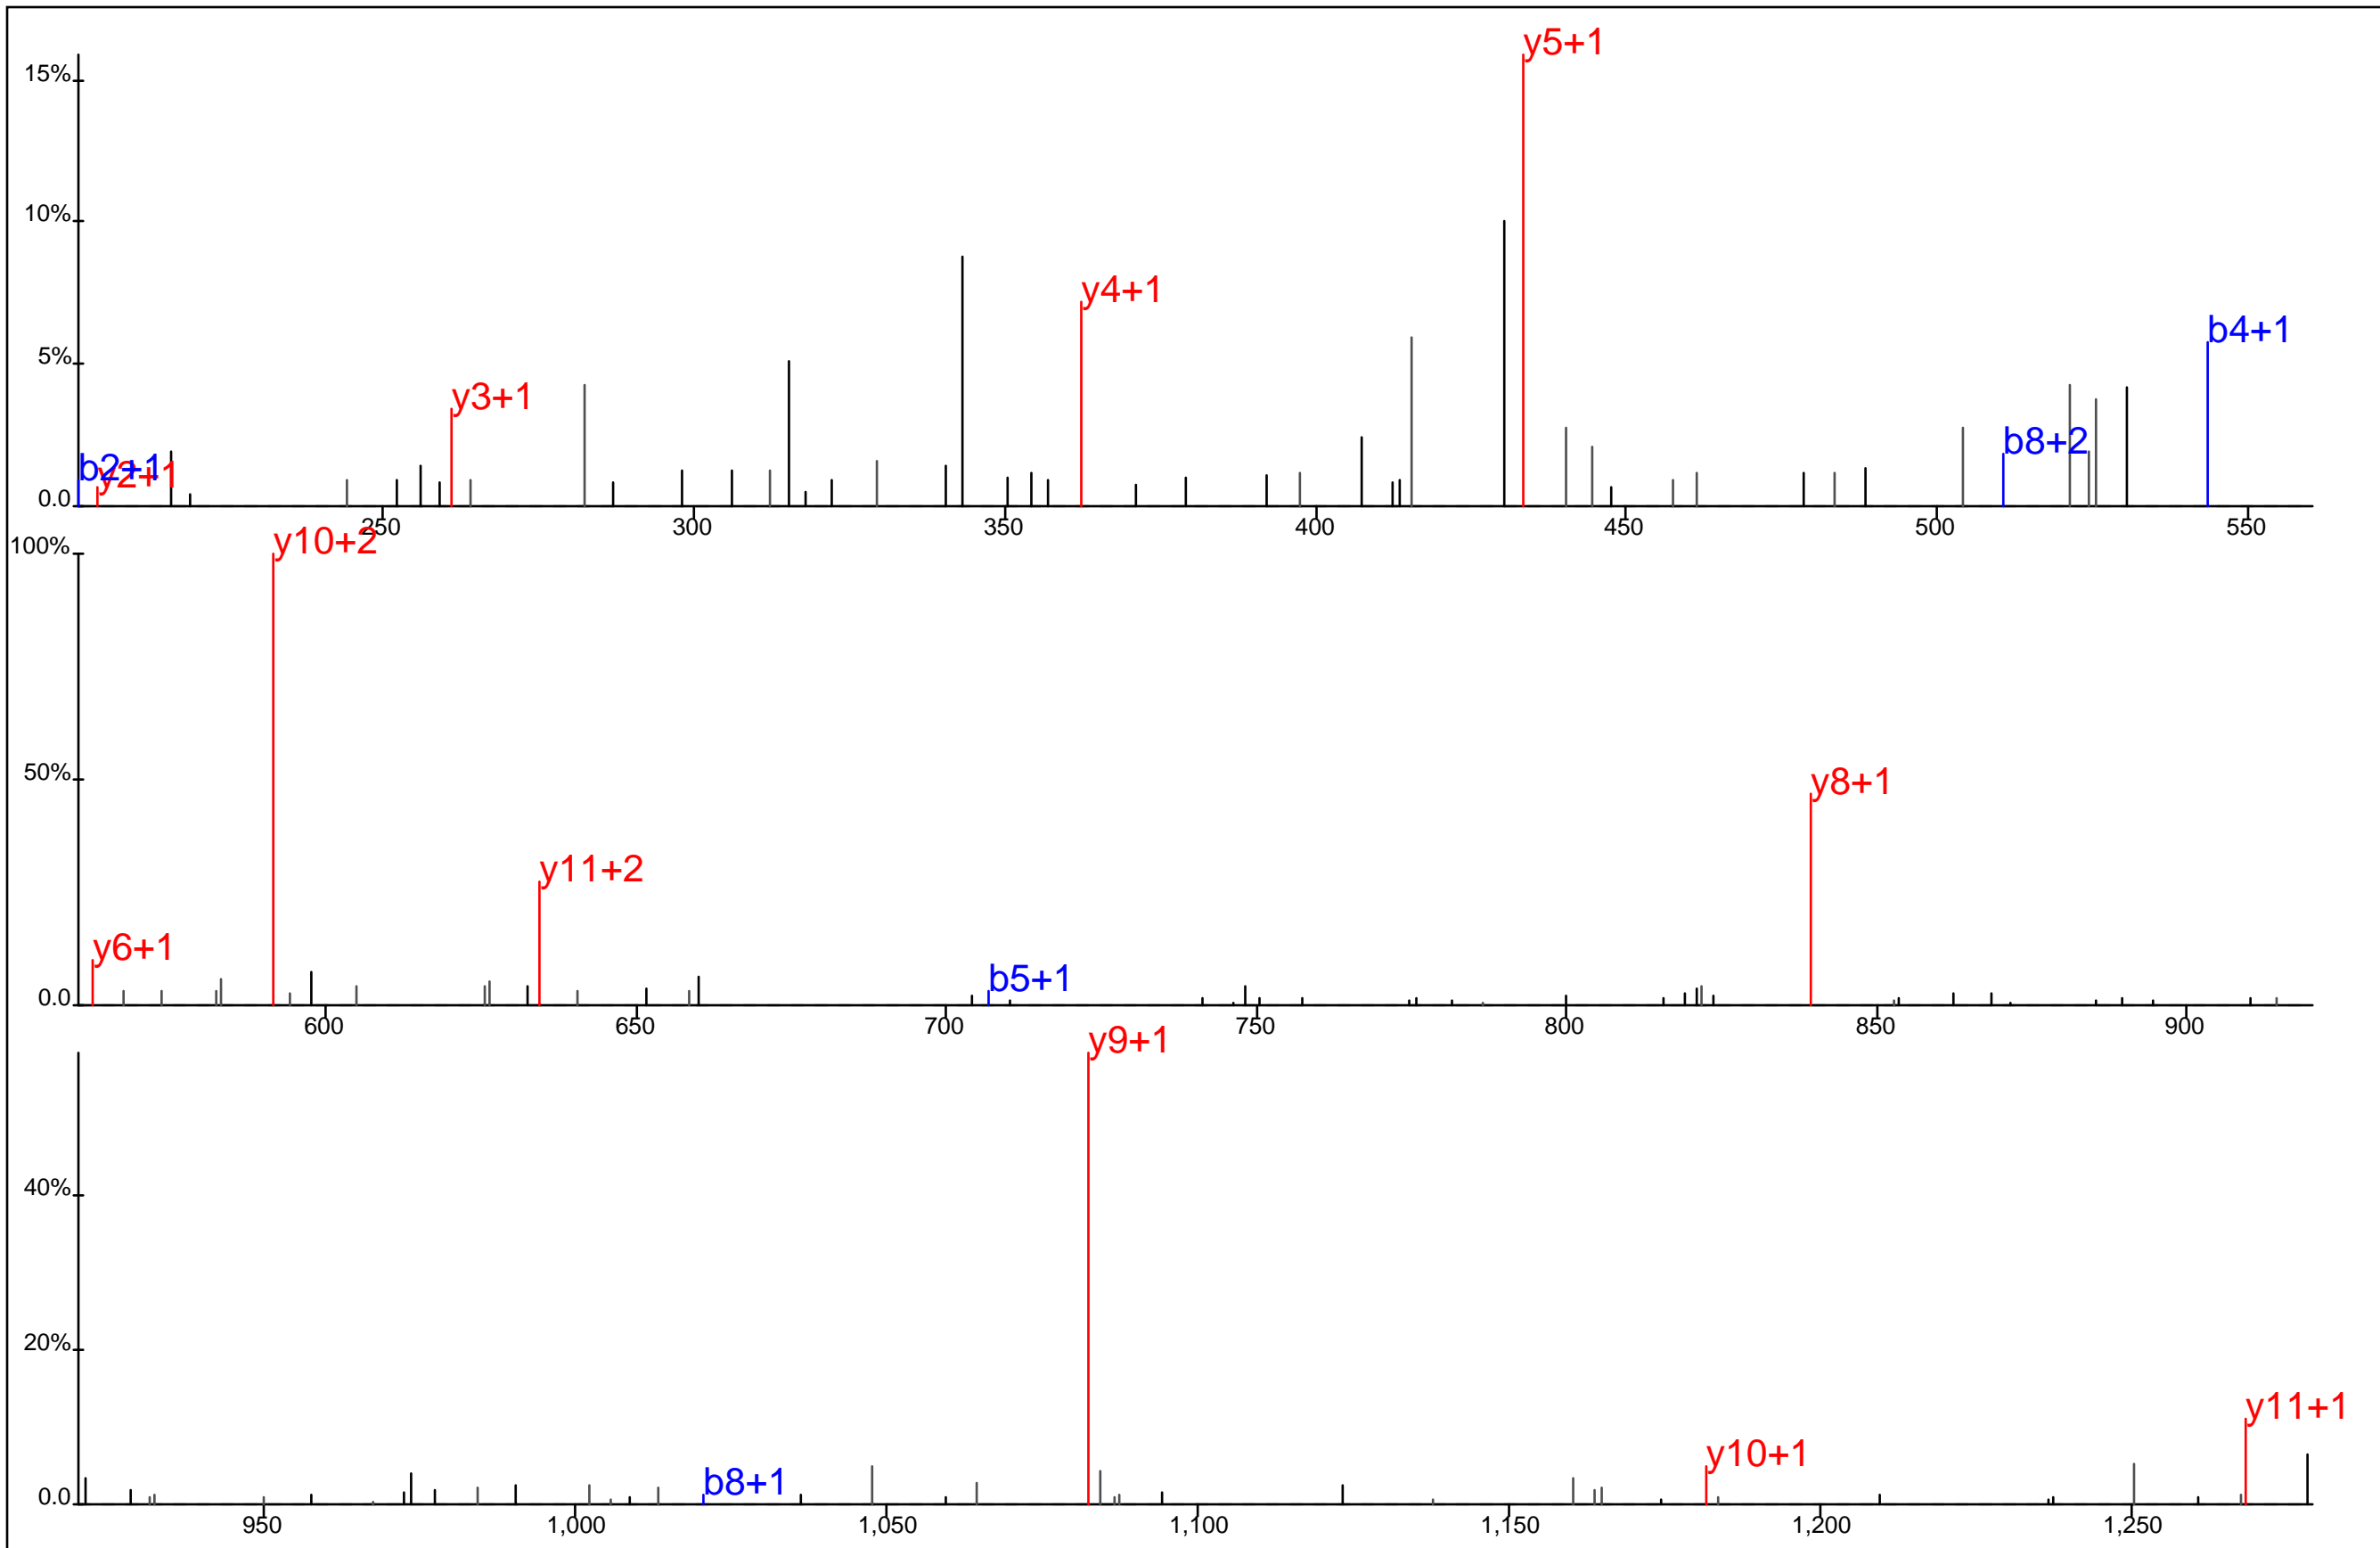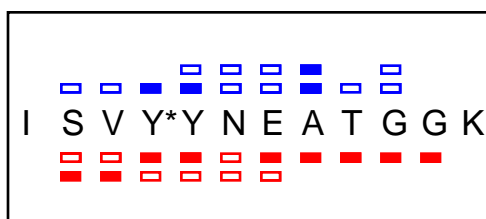

Protein Name: Tubulin, beta  
 gi Accession: 0  
 Precursor Mass: 691.3041+2  
 Delta Mass: 1.818 ppm  
 XCorr: 51.49





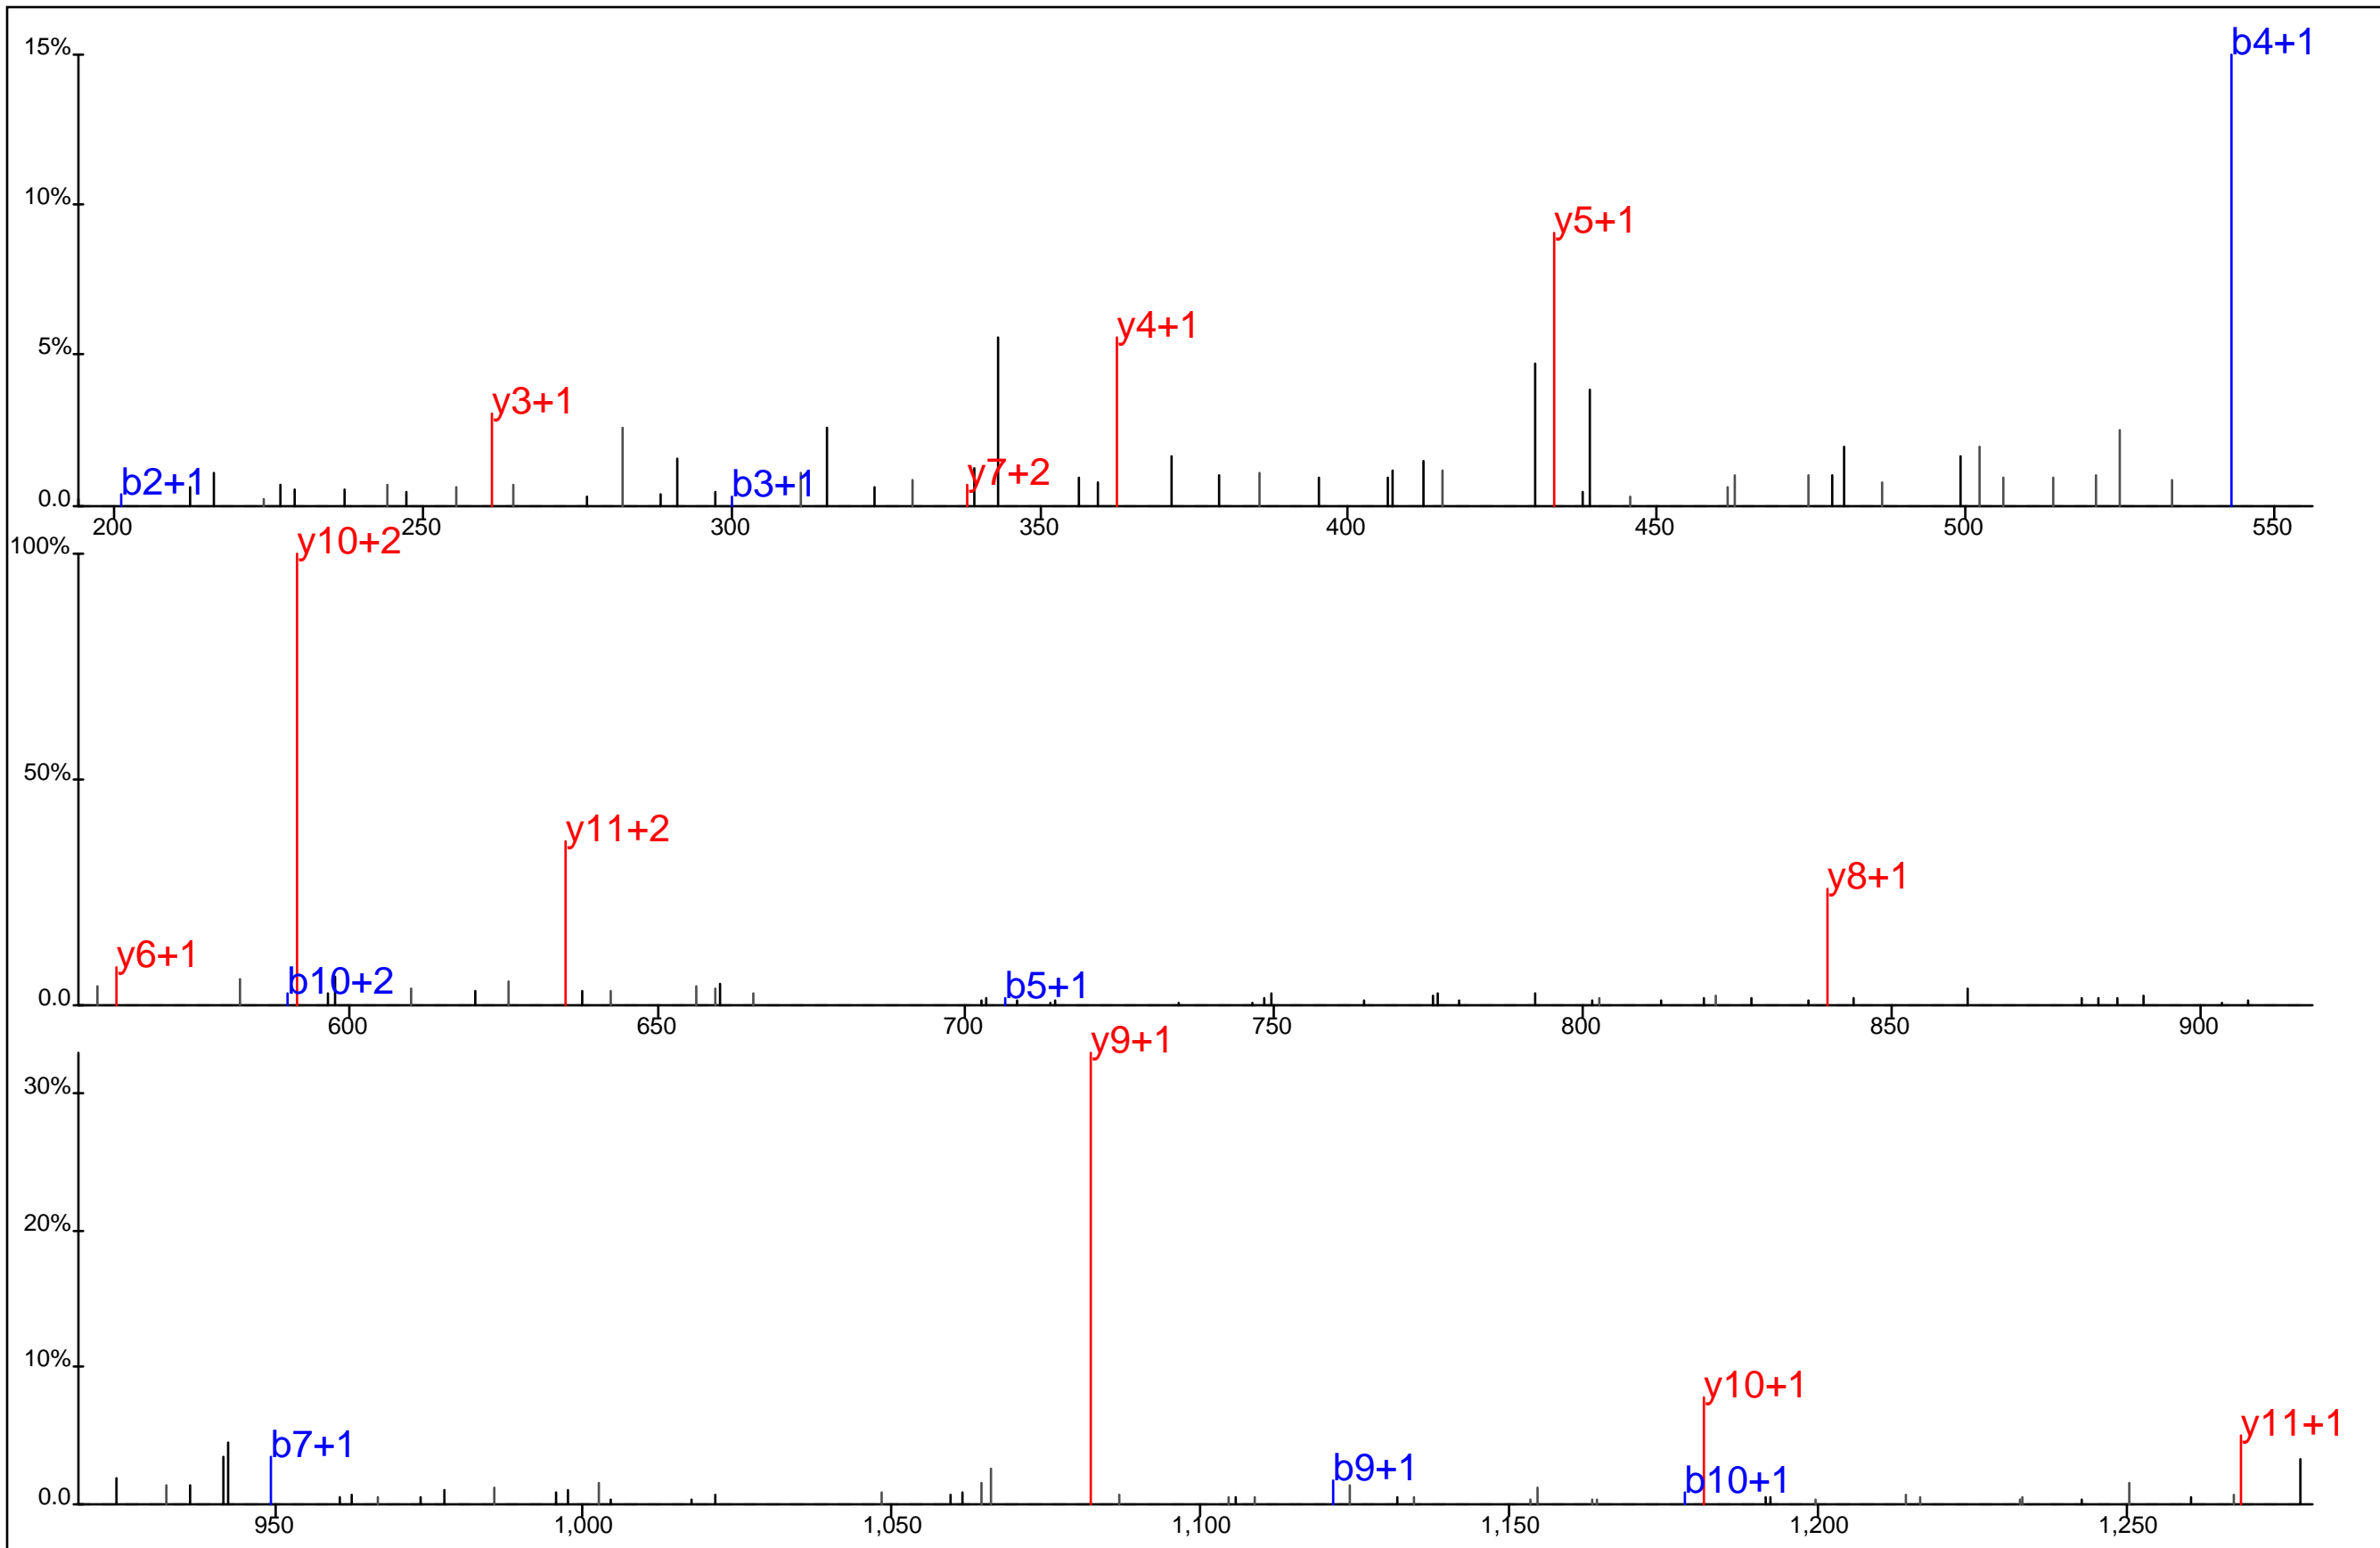

I S V Y\*Y N E A T G G K

Protein Name: Tubulin, beta  
 gi Accession: 0  
 Precursor Mass: 691.3040+2  
 Delta Mass: 1.995 ppm  
 XCorr: 61.96

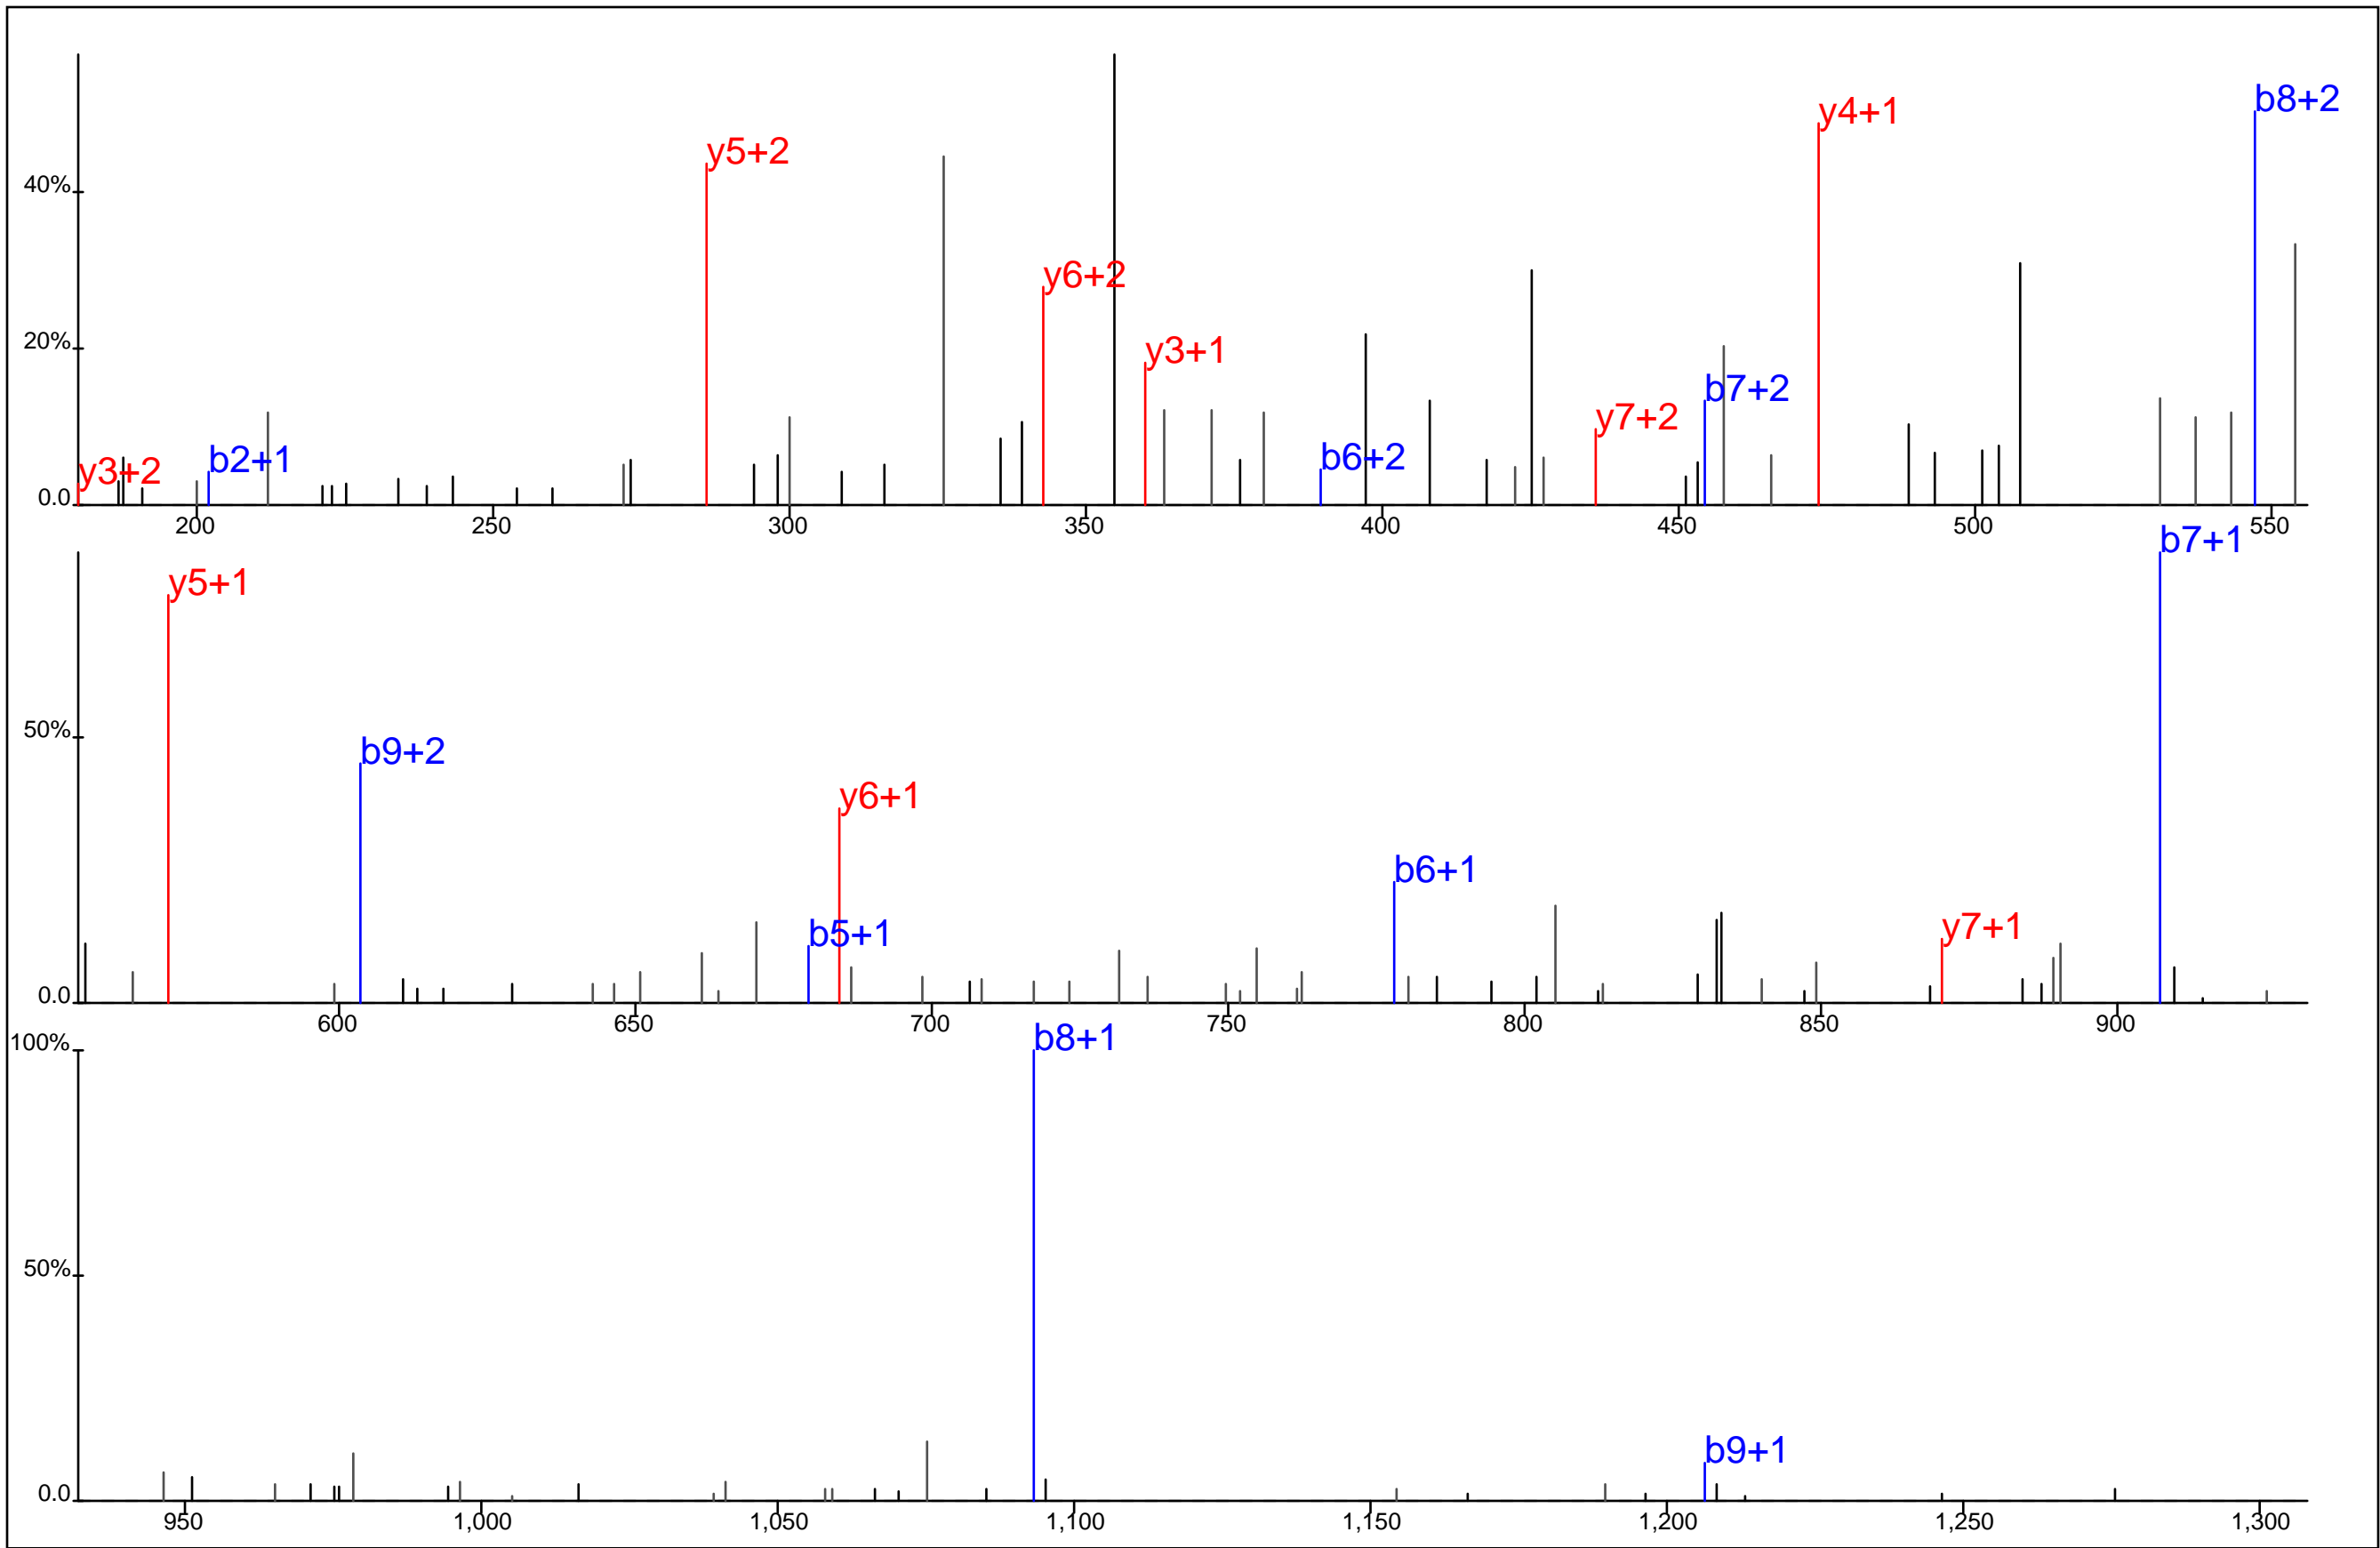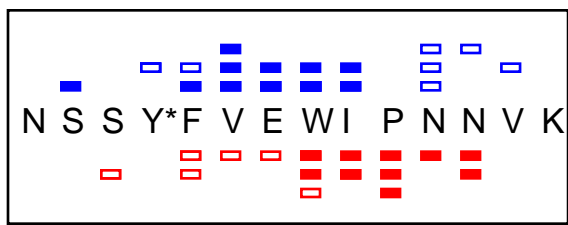

Protein Name: Tubulin, beta  
 gi Accession: 0  
 Precursor Mass: 592.9373+3  
 Delta Mass: 1.146 ppm  
 XCorr: 20.93

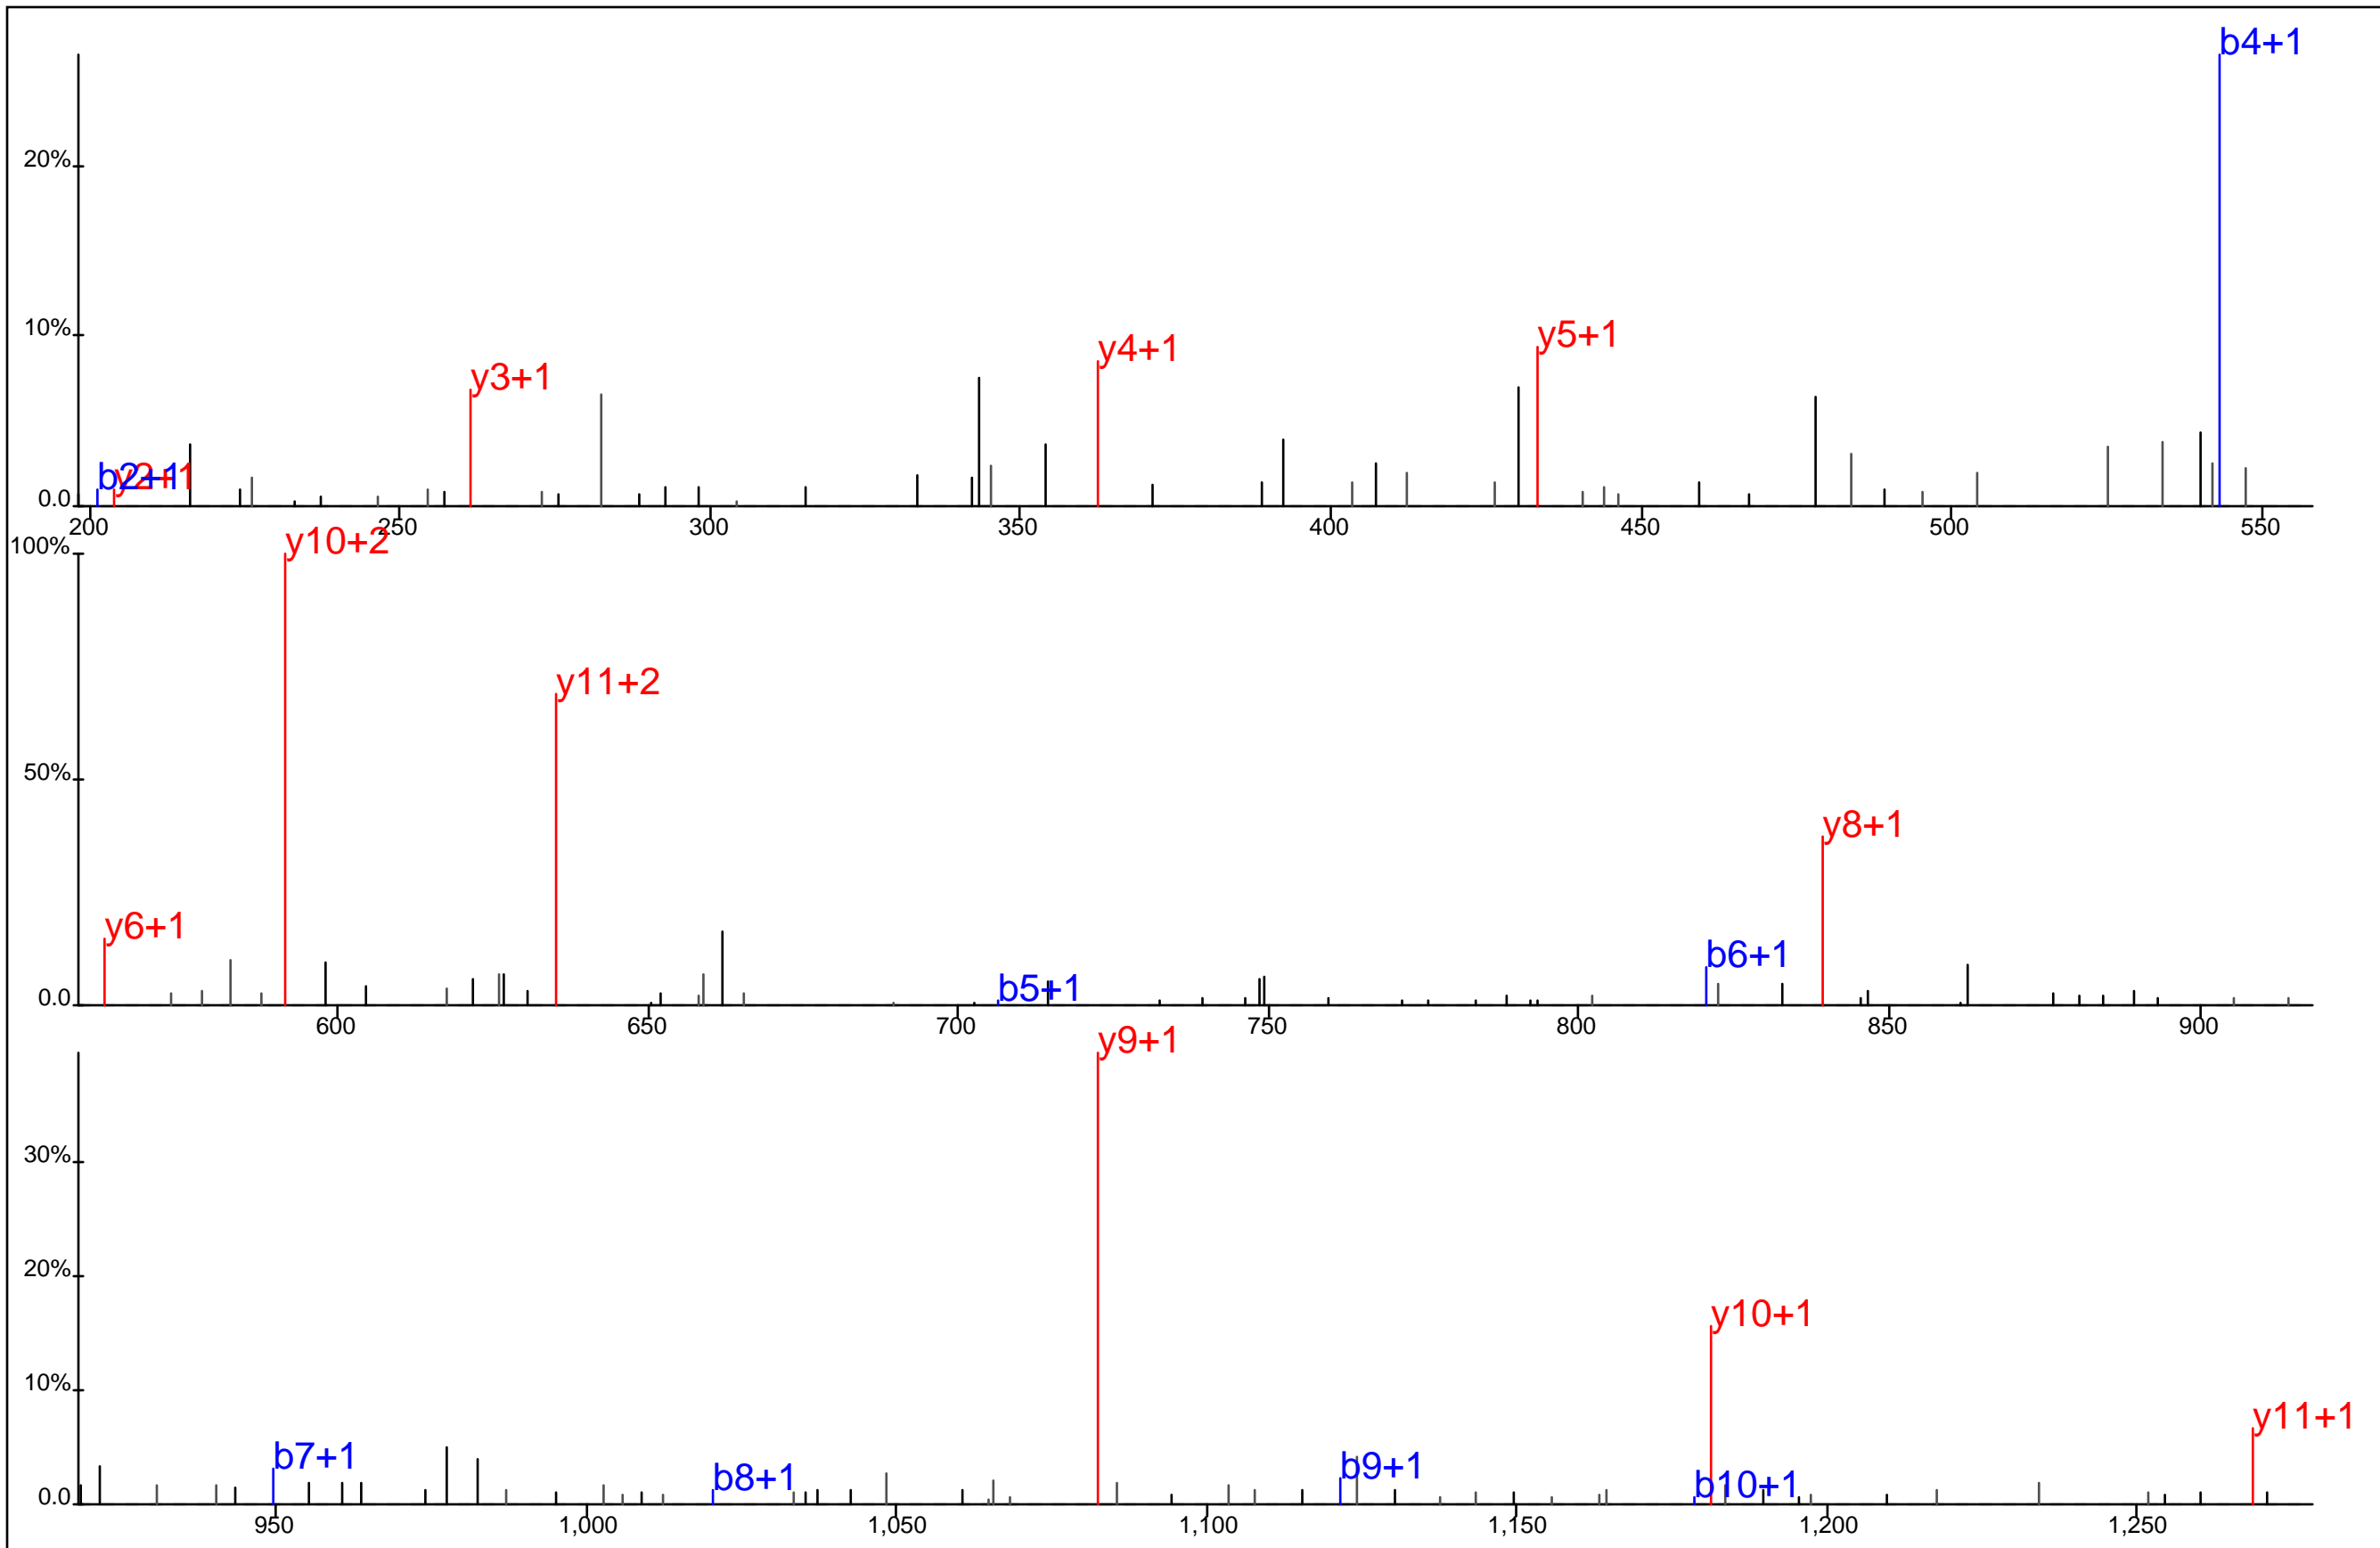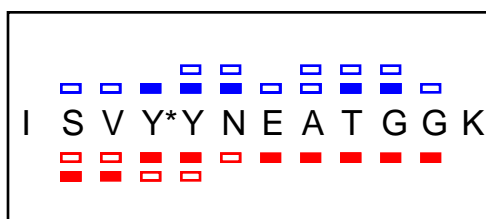

Protein Name: Tubulin, beta  
 gi Accession: 0  
 Precursor Mass: 691.3029+2  
 Delta Mass: 3.674 ppm  
 XCorr: 61.38

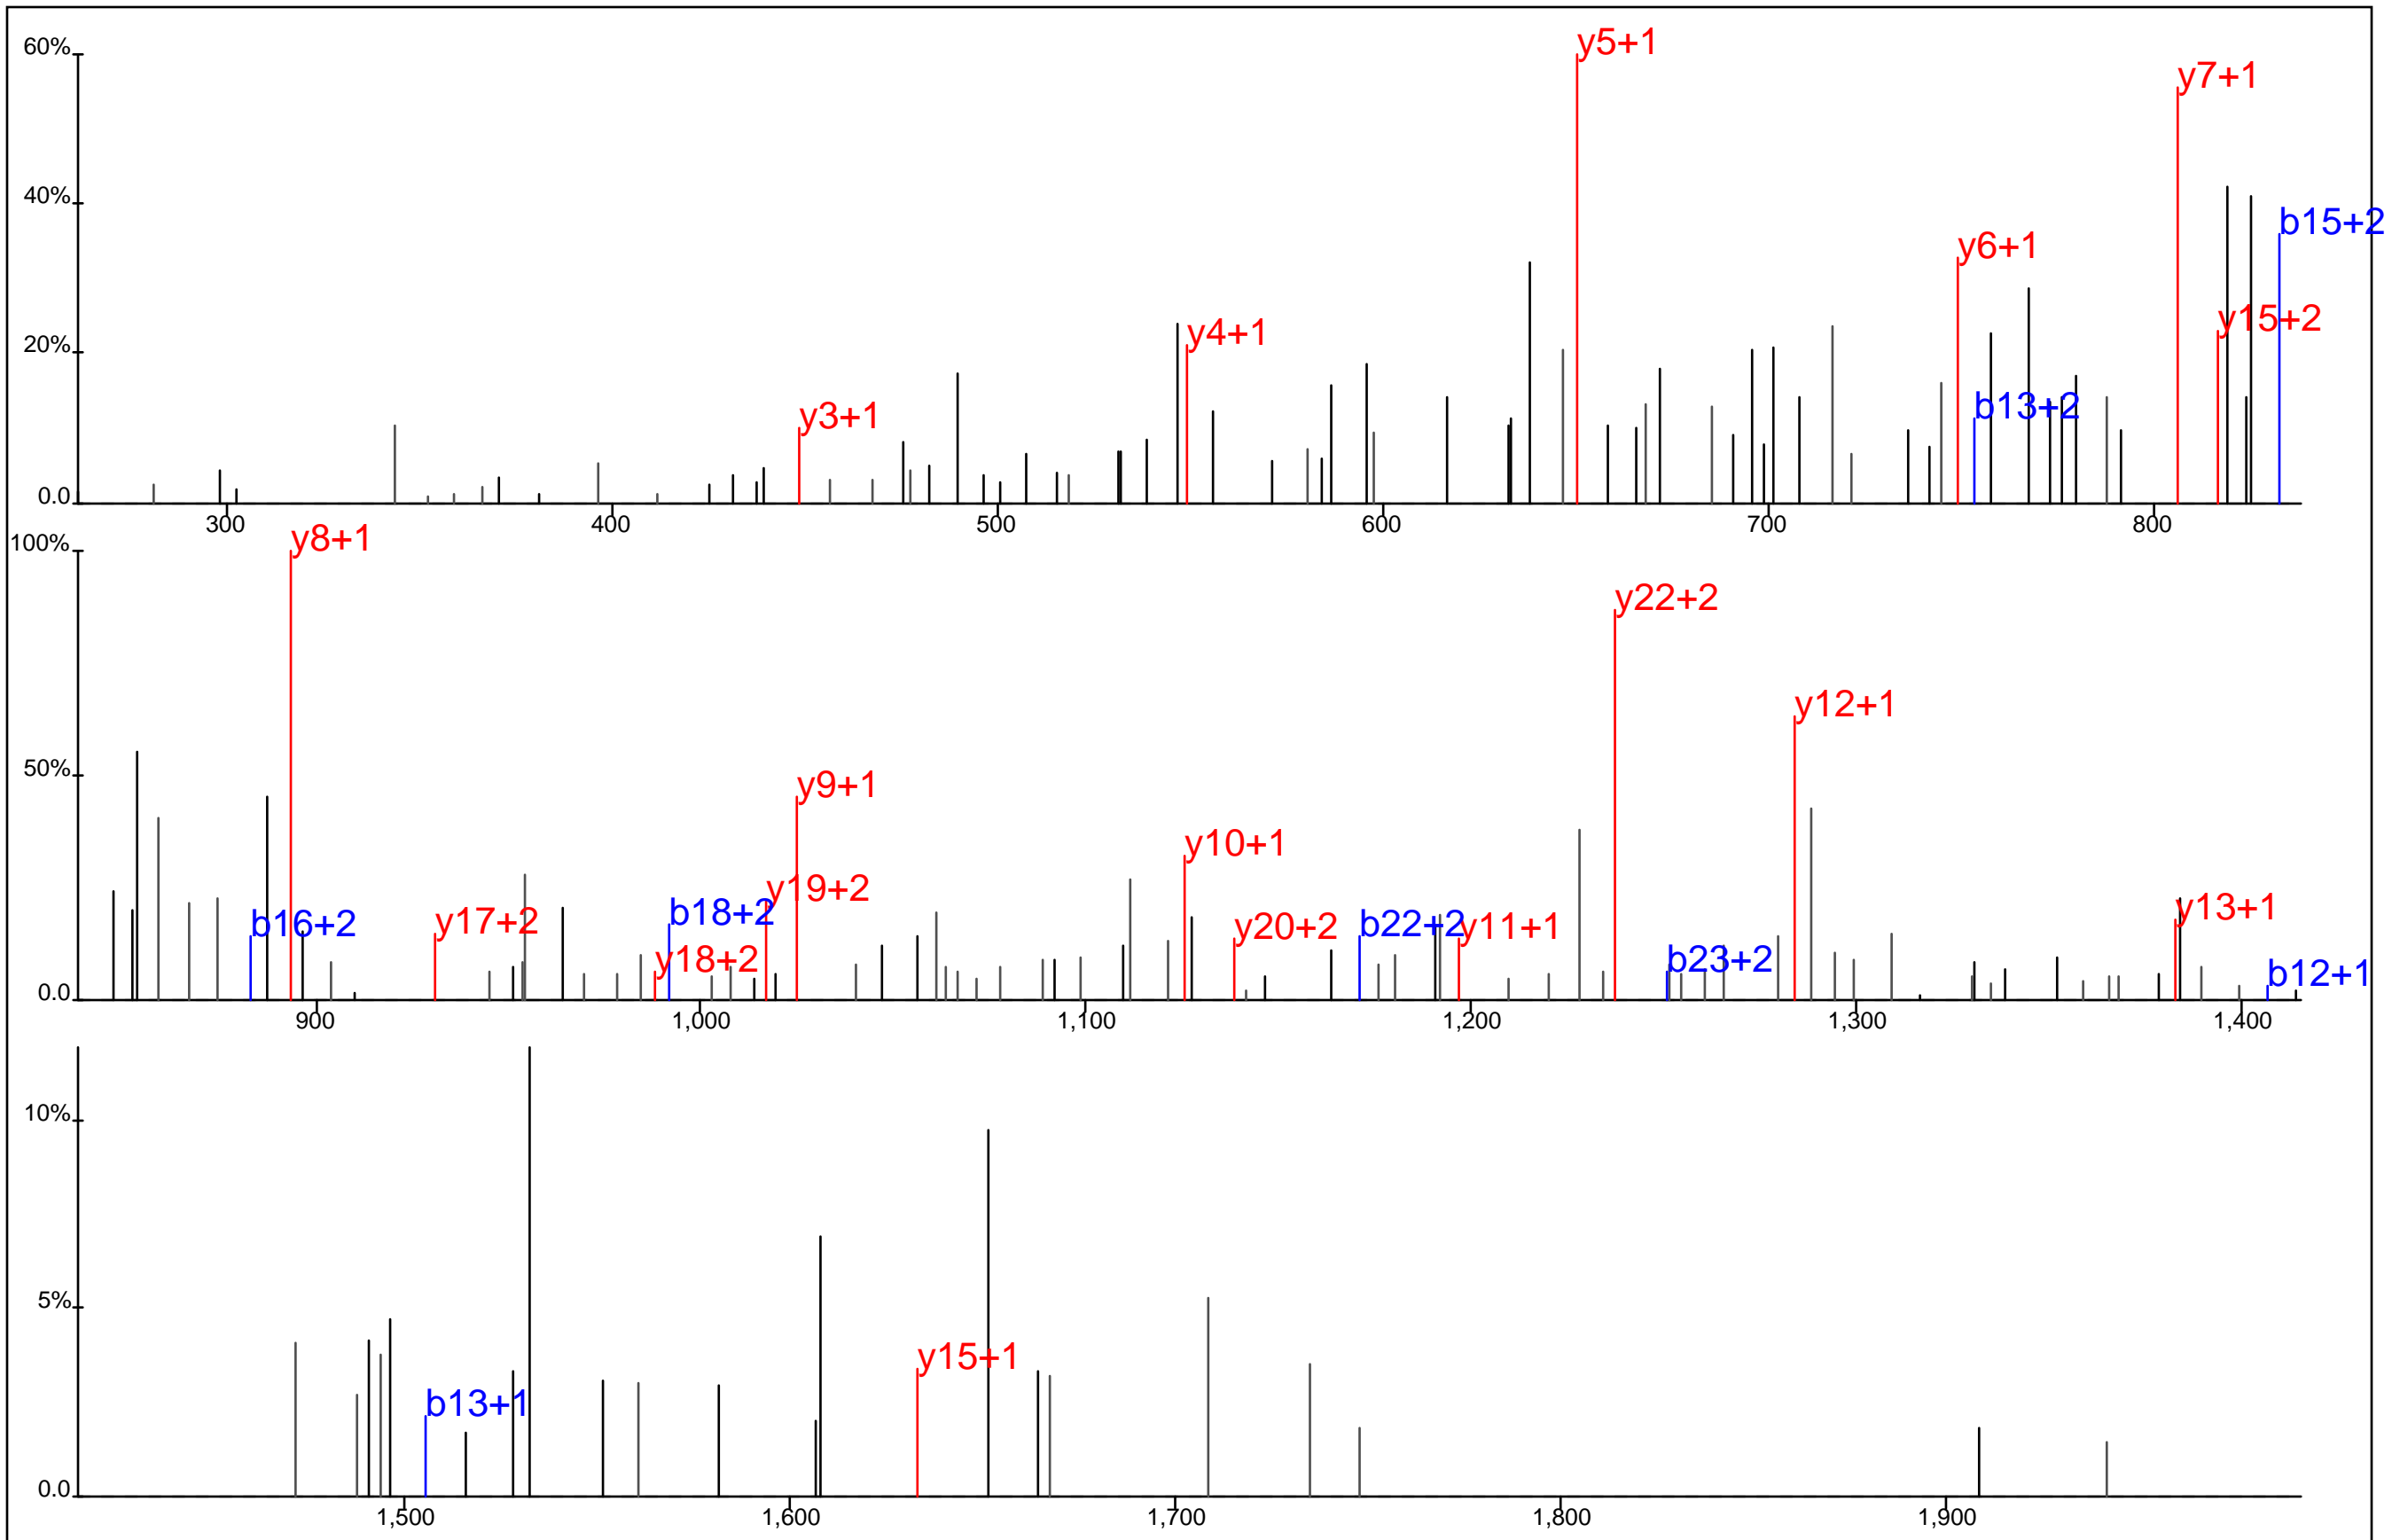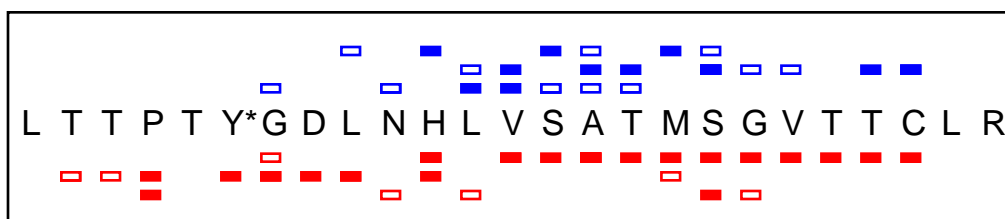

Protein Name: Tubulin, beta  
 gi Accession: 0  
 Precursor Mass: 930.1083+3  
 Delta Mass: 2.049 ppm  
 XCorr: 39.65





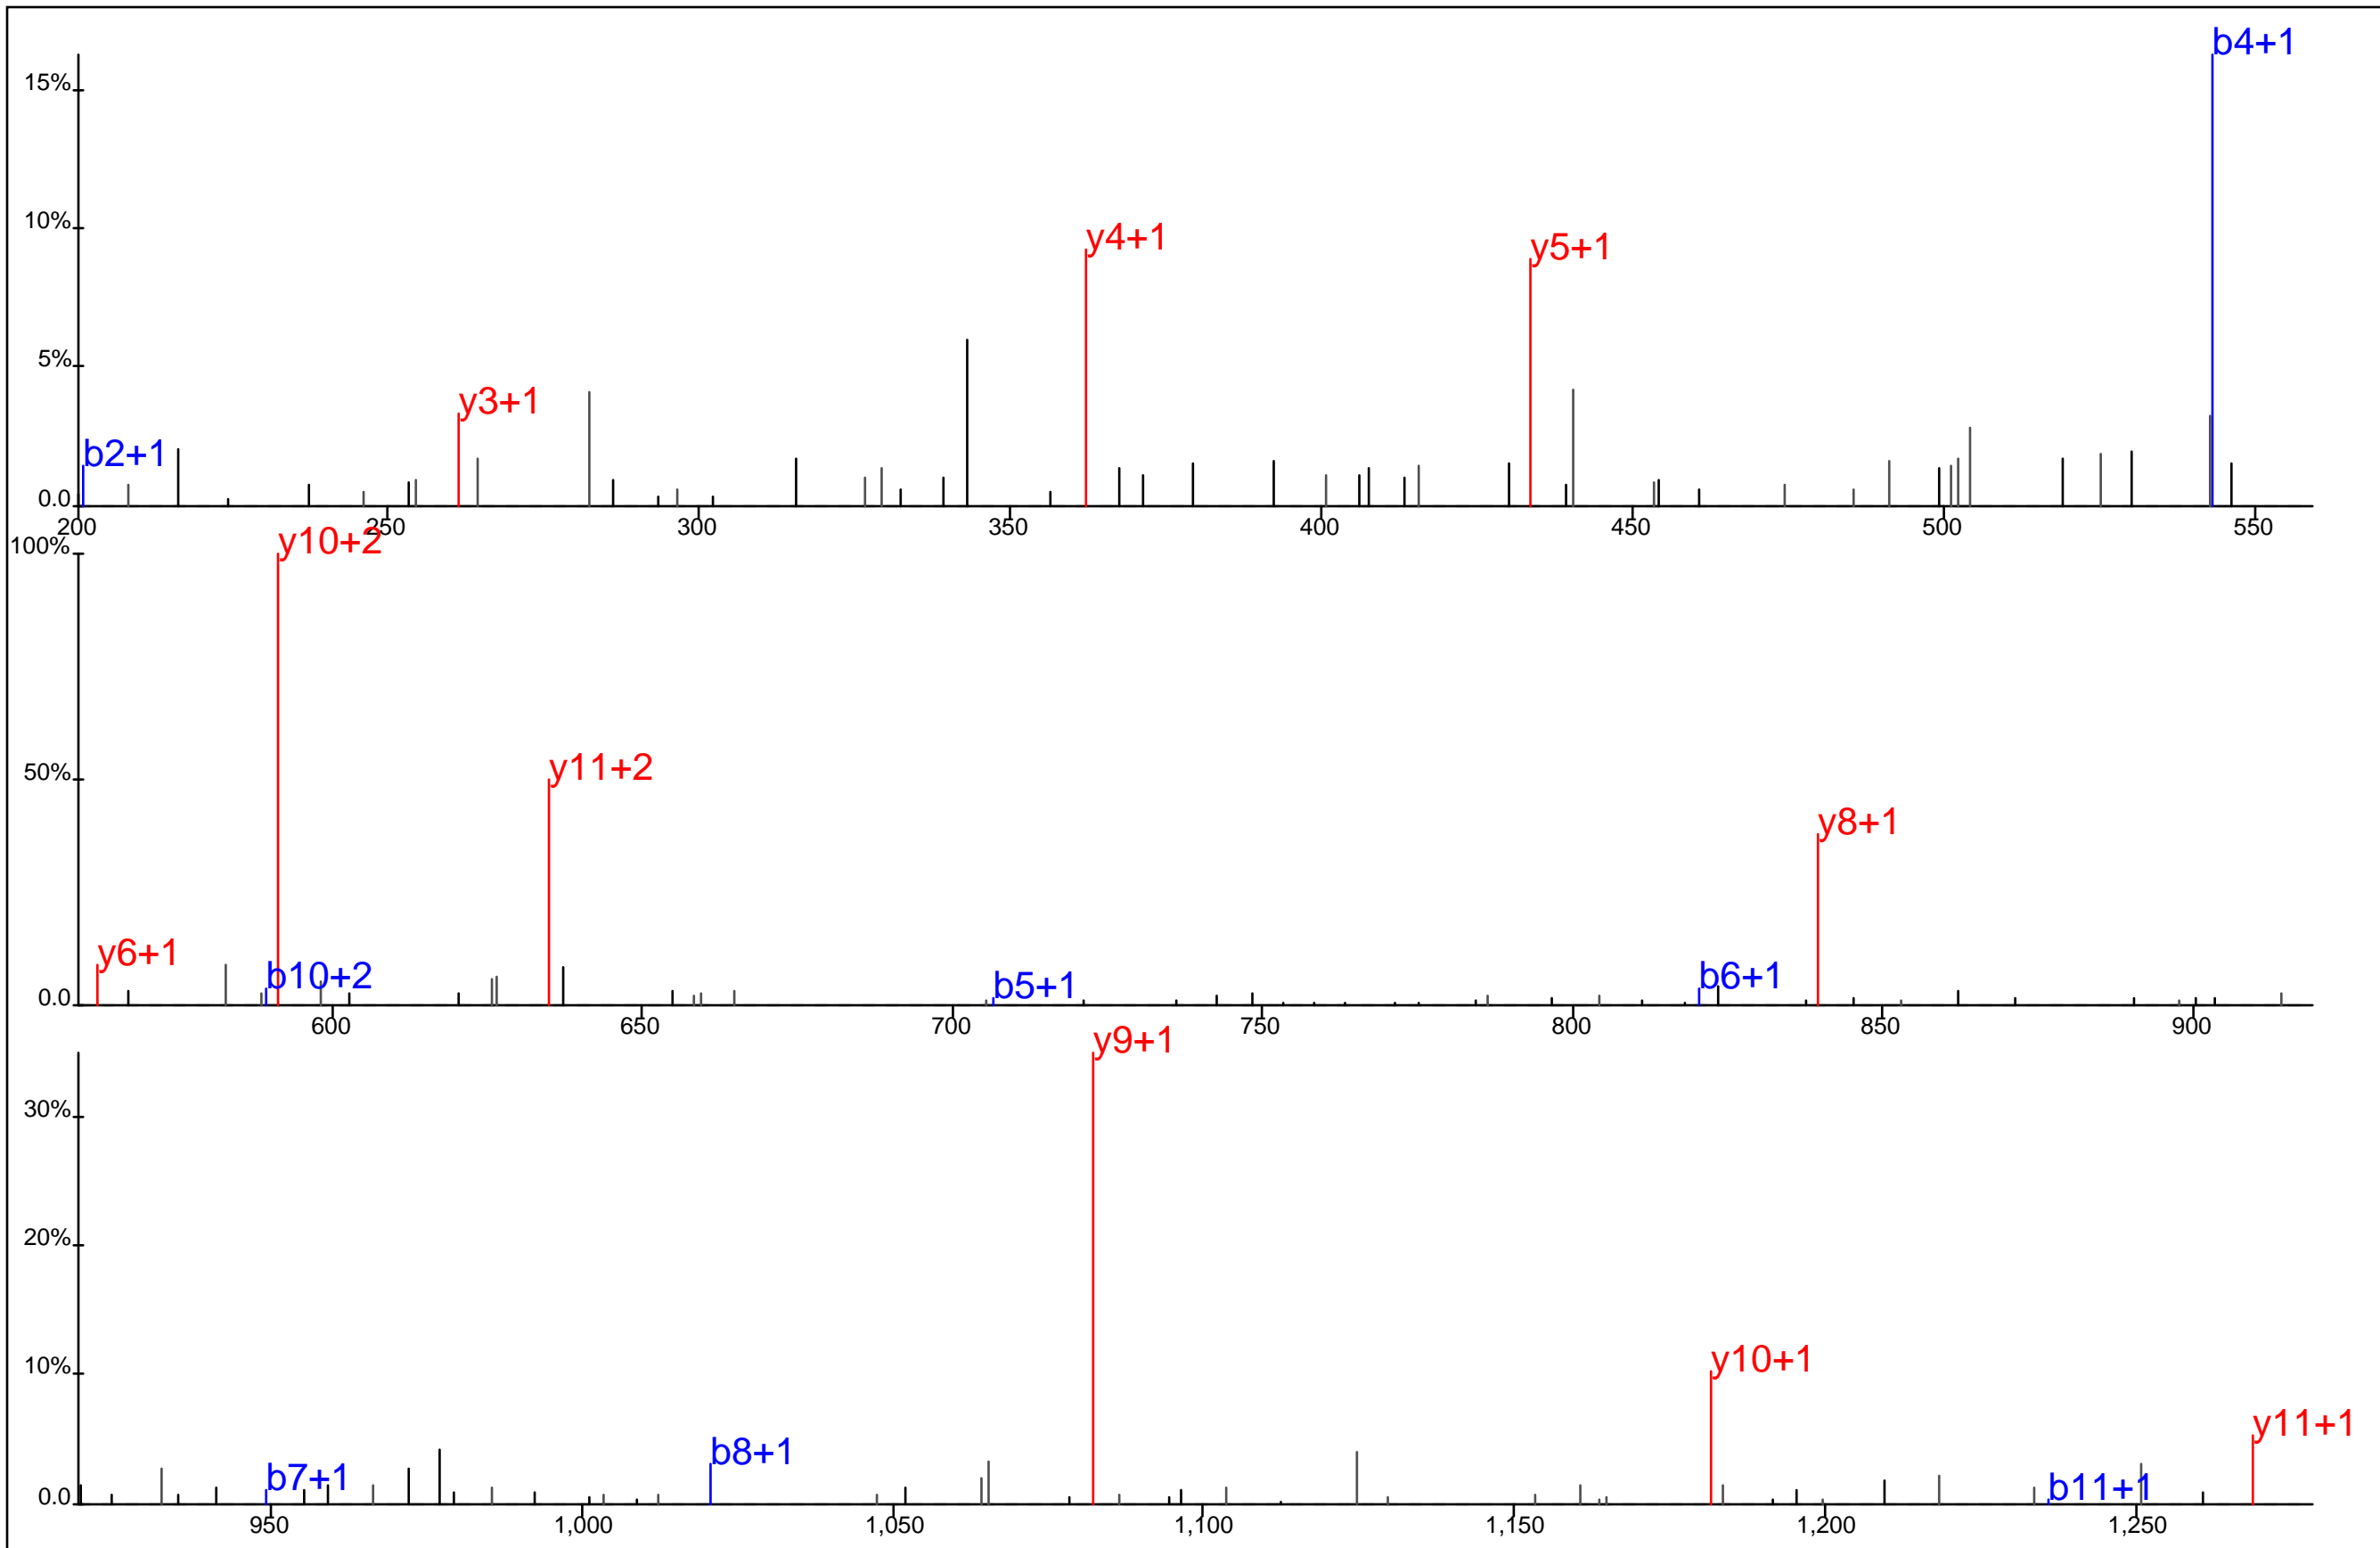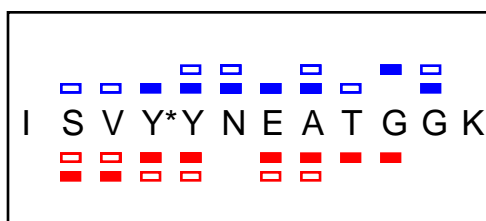

Protein Name: Tubulin, beta  
 gi Accession: 0  
 Precursor Mass: 691.3063+2  
 Delta Mass: 1.274 ppm  
 XCorr: 49.85

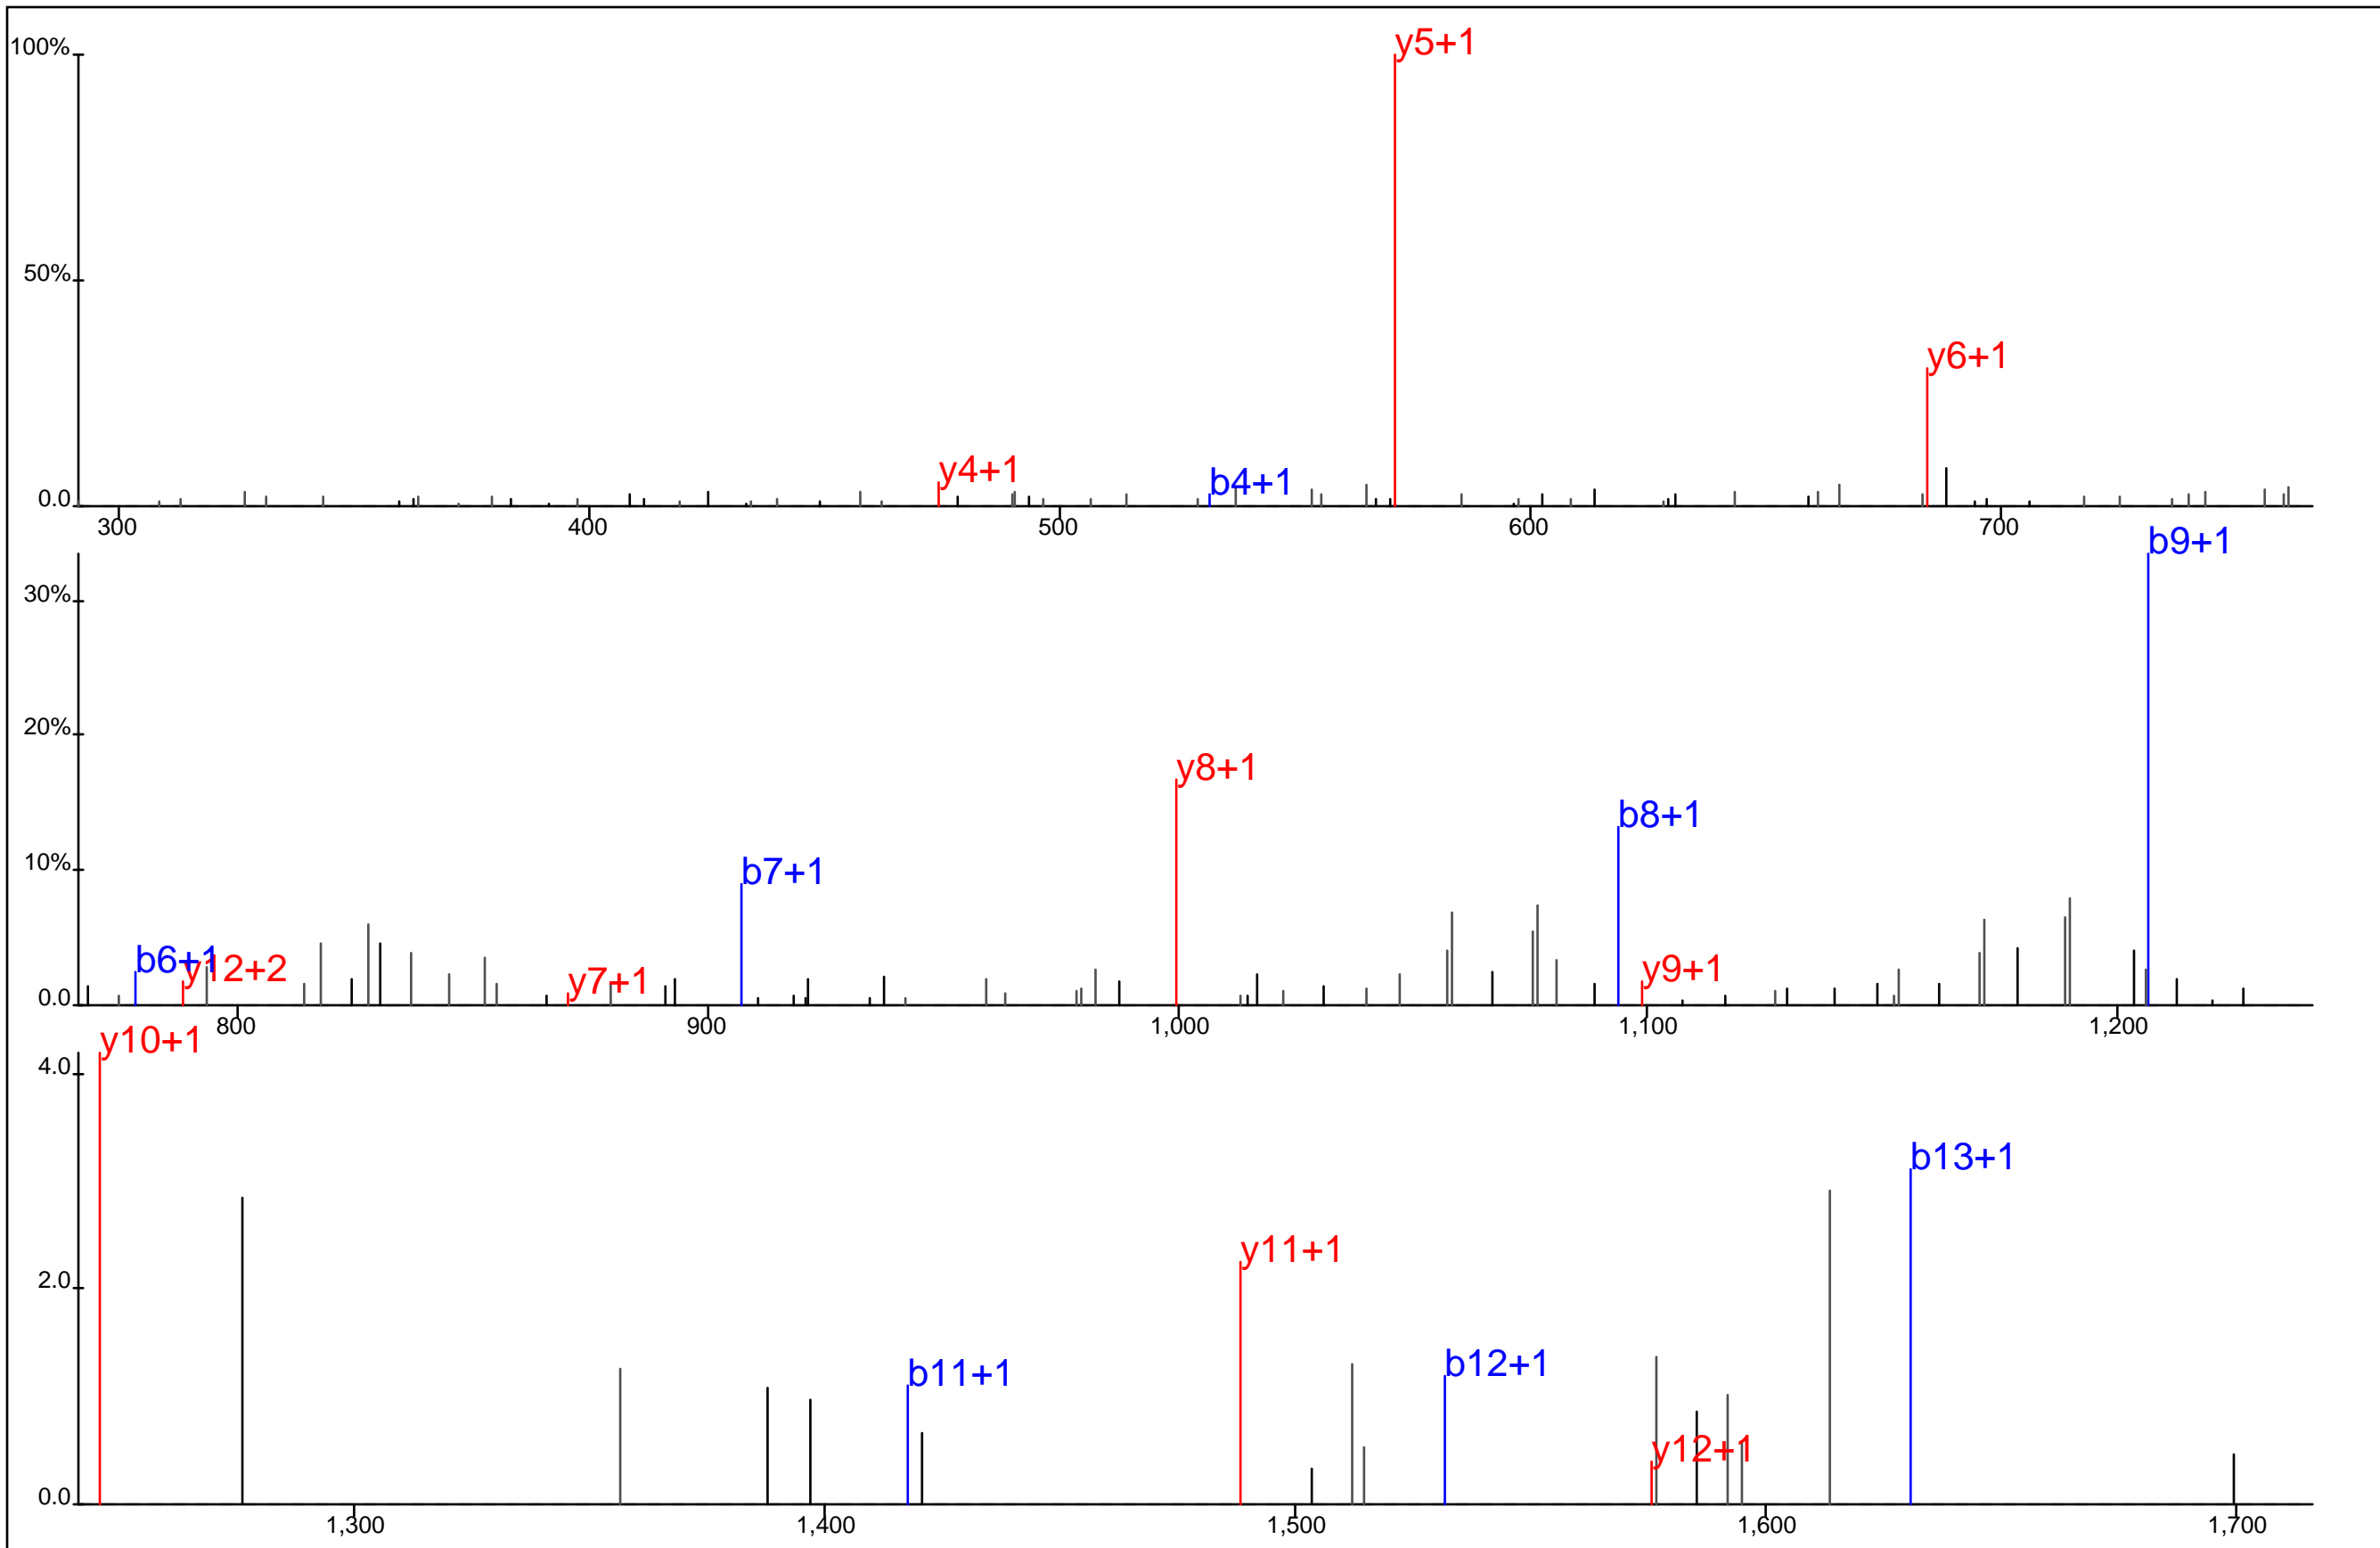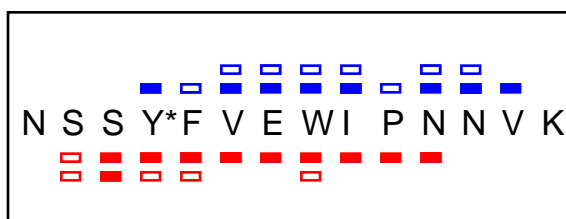

Protein Name: Tubulin, beta  
 gi Accession: 0  
 Precursor Mass: 888.8989+2  
 Delta Mass: 4.883 ppm  
 XCorr: 37.48

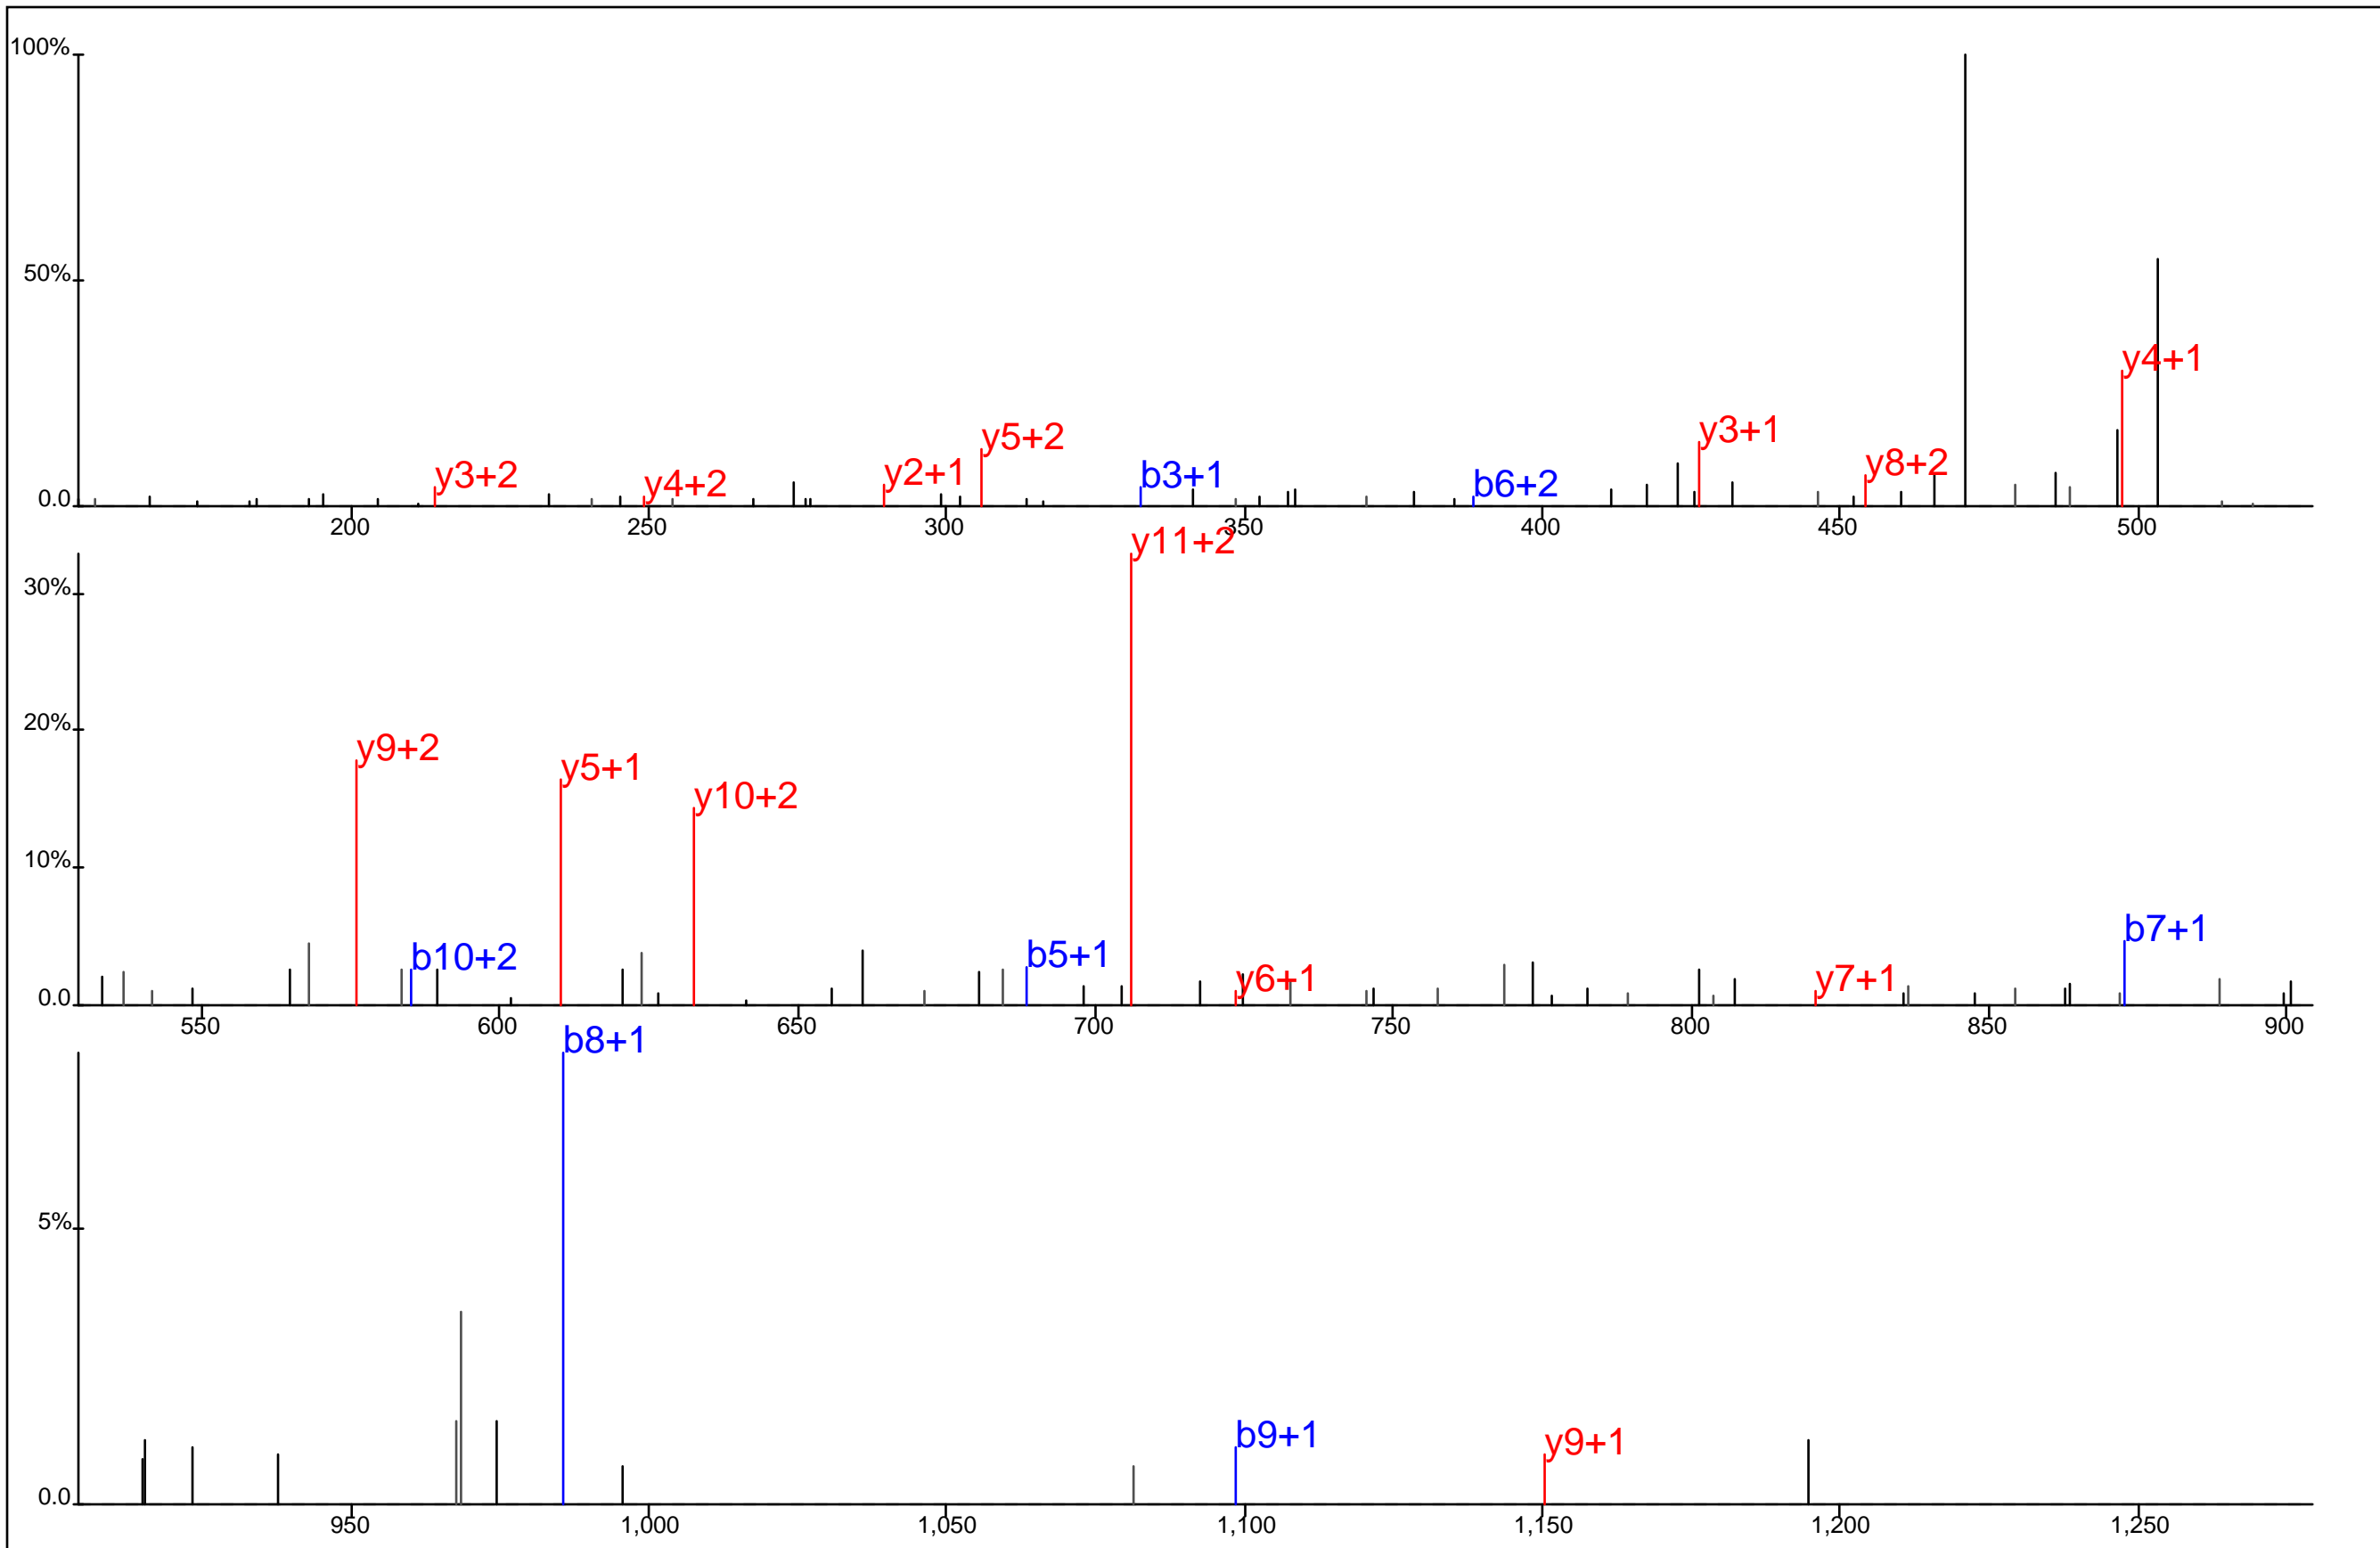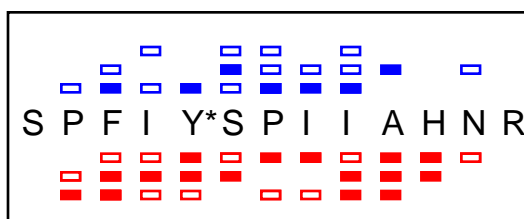

Protein Name: Tularik gene 1  
 gi Accession: 0  
 Precursor Mass: 532.2651+3  
 Delta Mass: 1.852 ppm  
 XCorr: 23.65

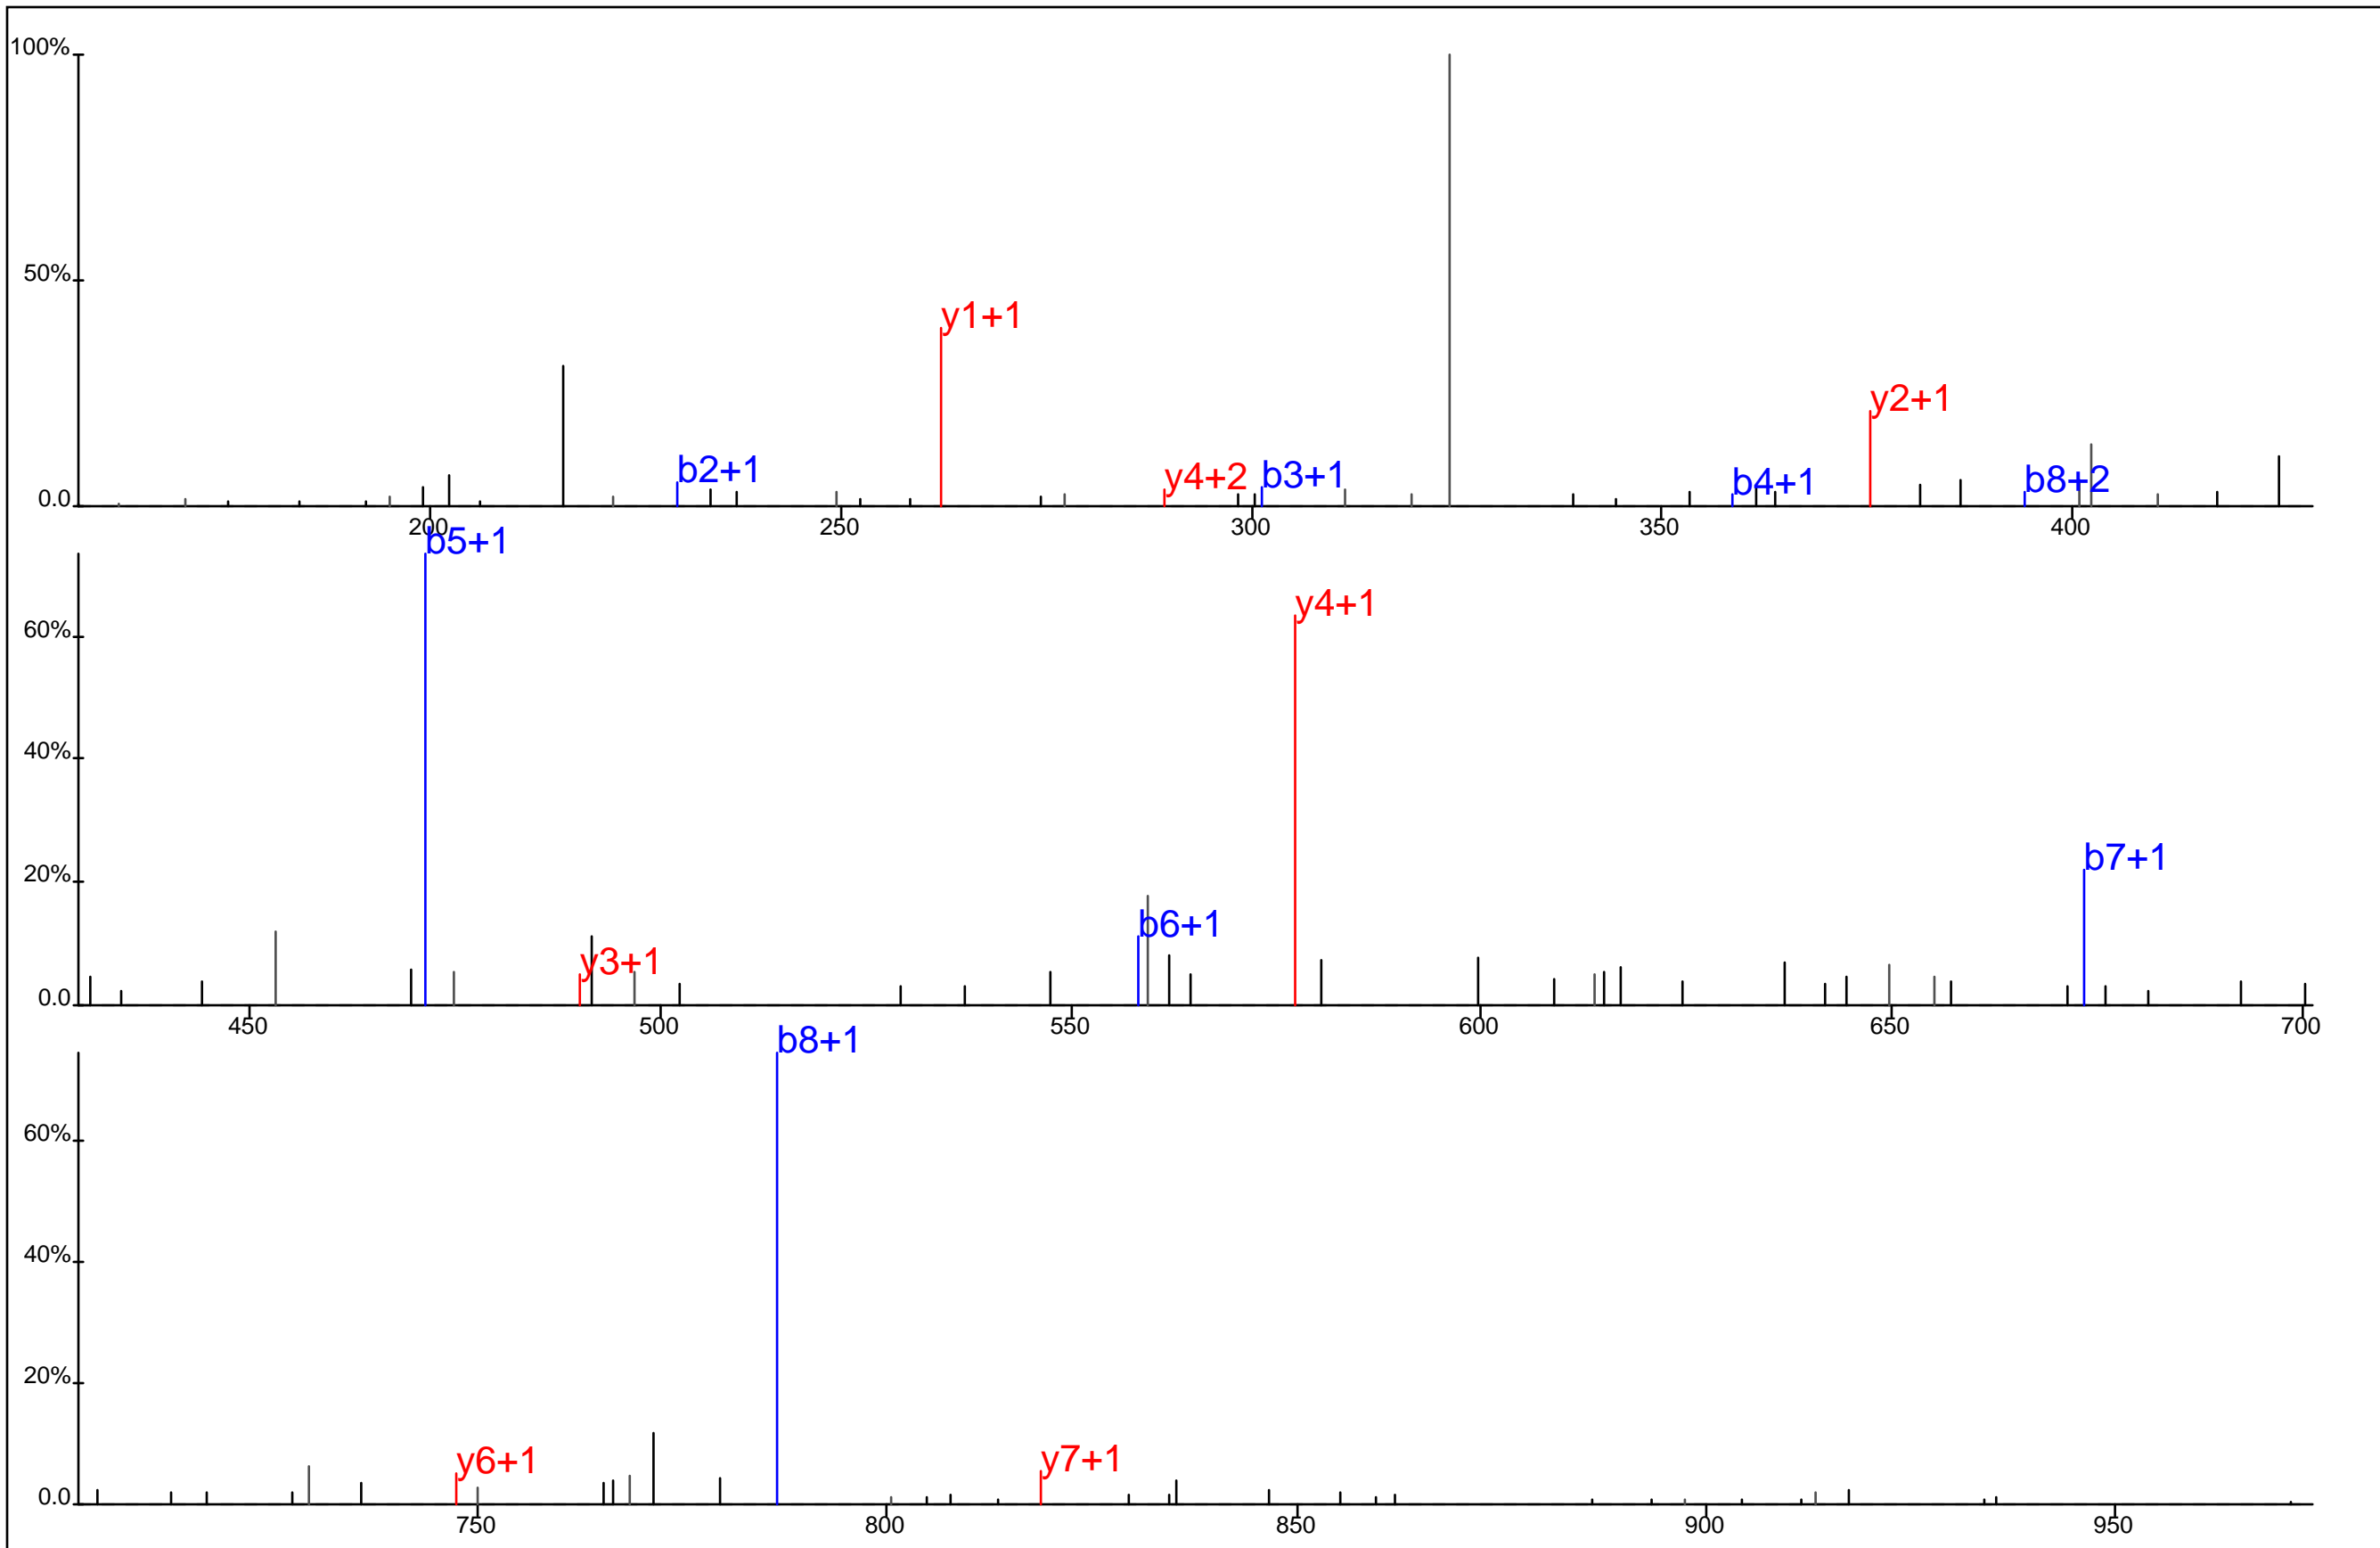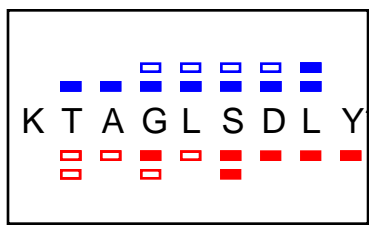

Protein Name: Tumor susceptibility gene 101  
 gi Accession: 0  
 Precursor Mass: 524.2424+2  
 Delta Mass: 1.705 ppm  
 XCorr: 35.66



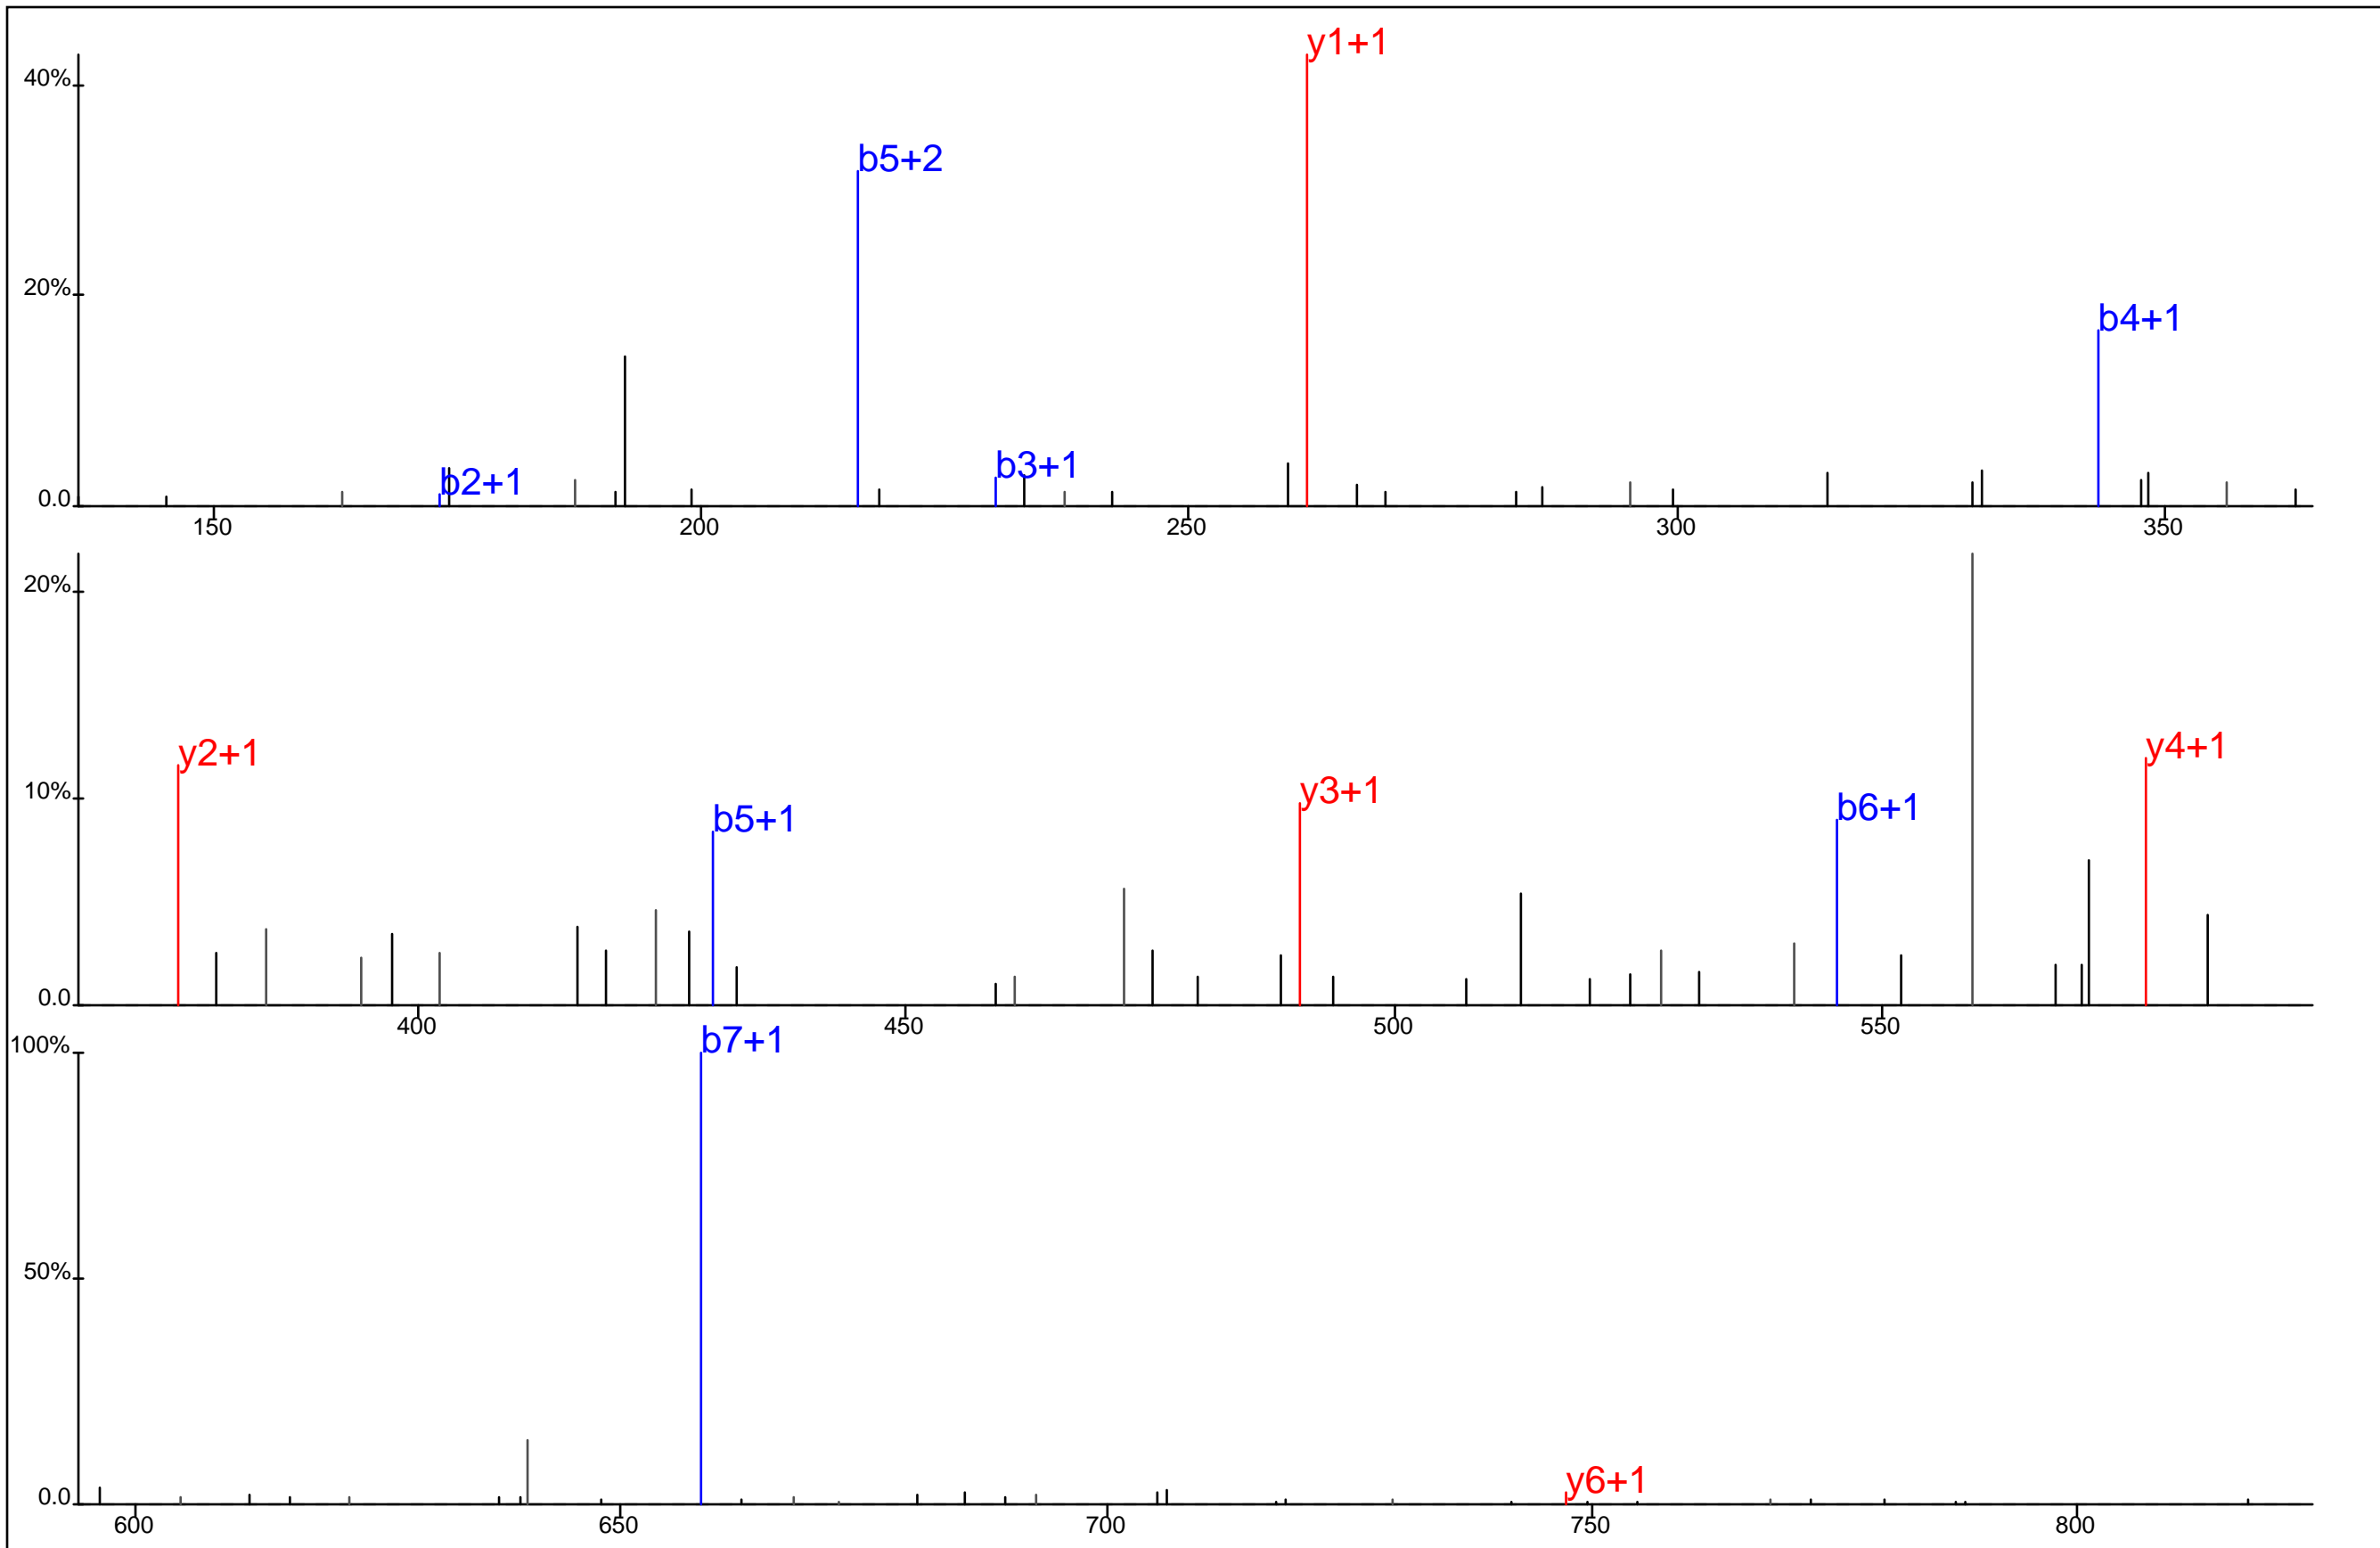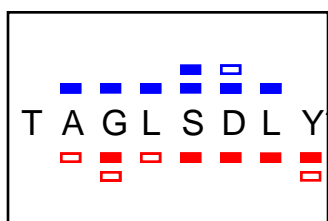

Protein Name: Tumor susceptibility gene 101  
 gi Accession: 0  
 Precursor Mass: 460.1941+2  
 Delta Mass: 0.004 ppm  
 XCorr: 39.15





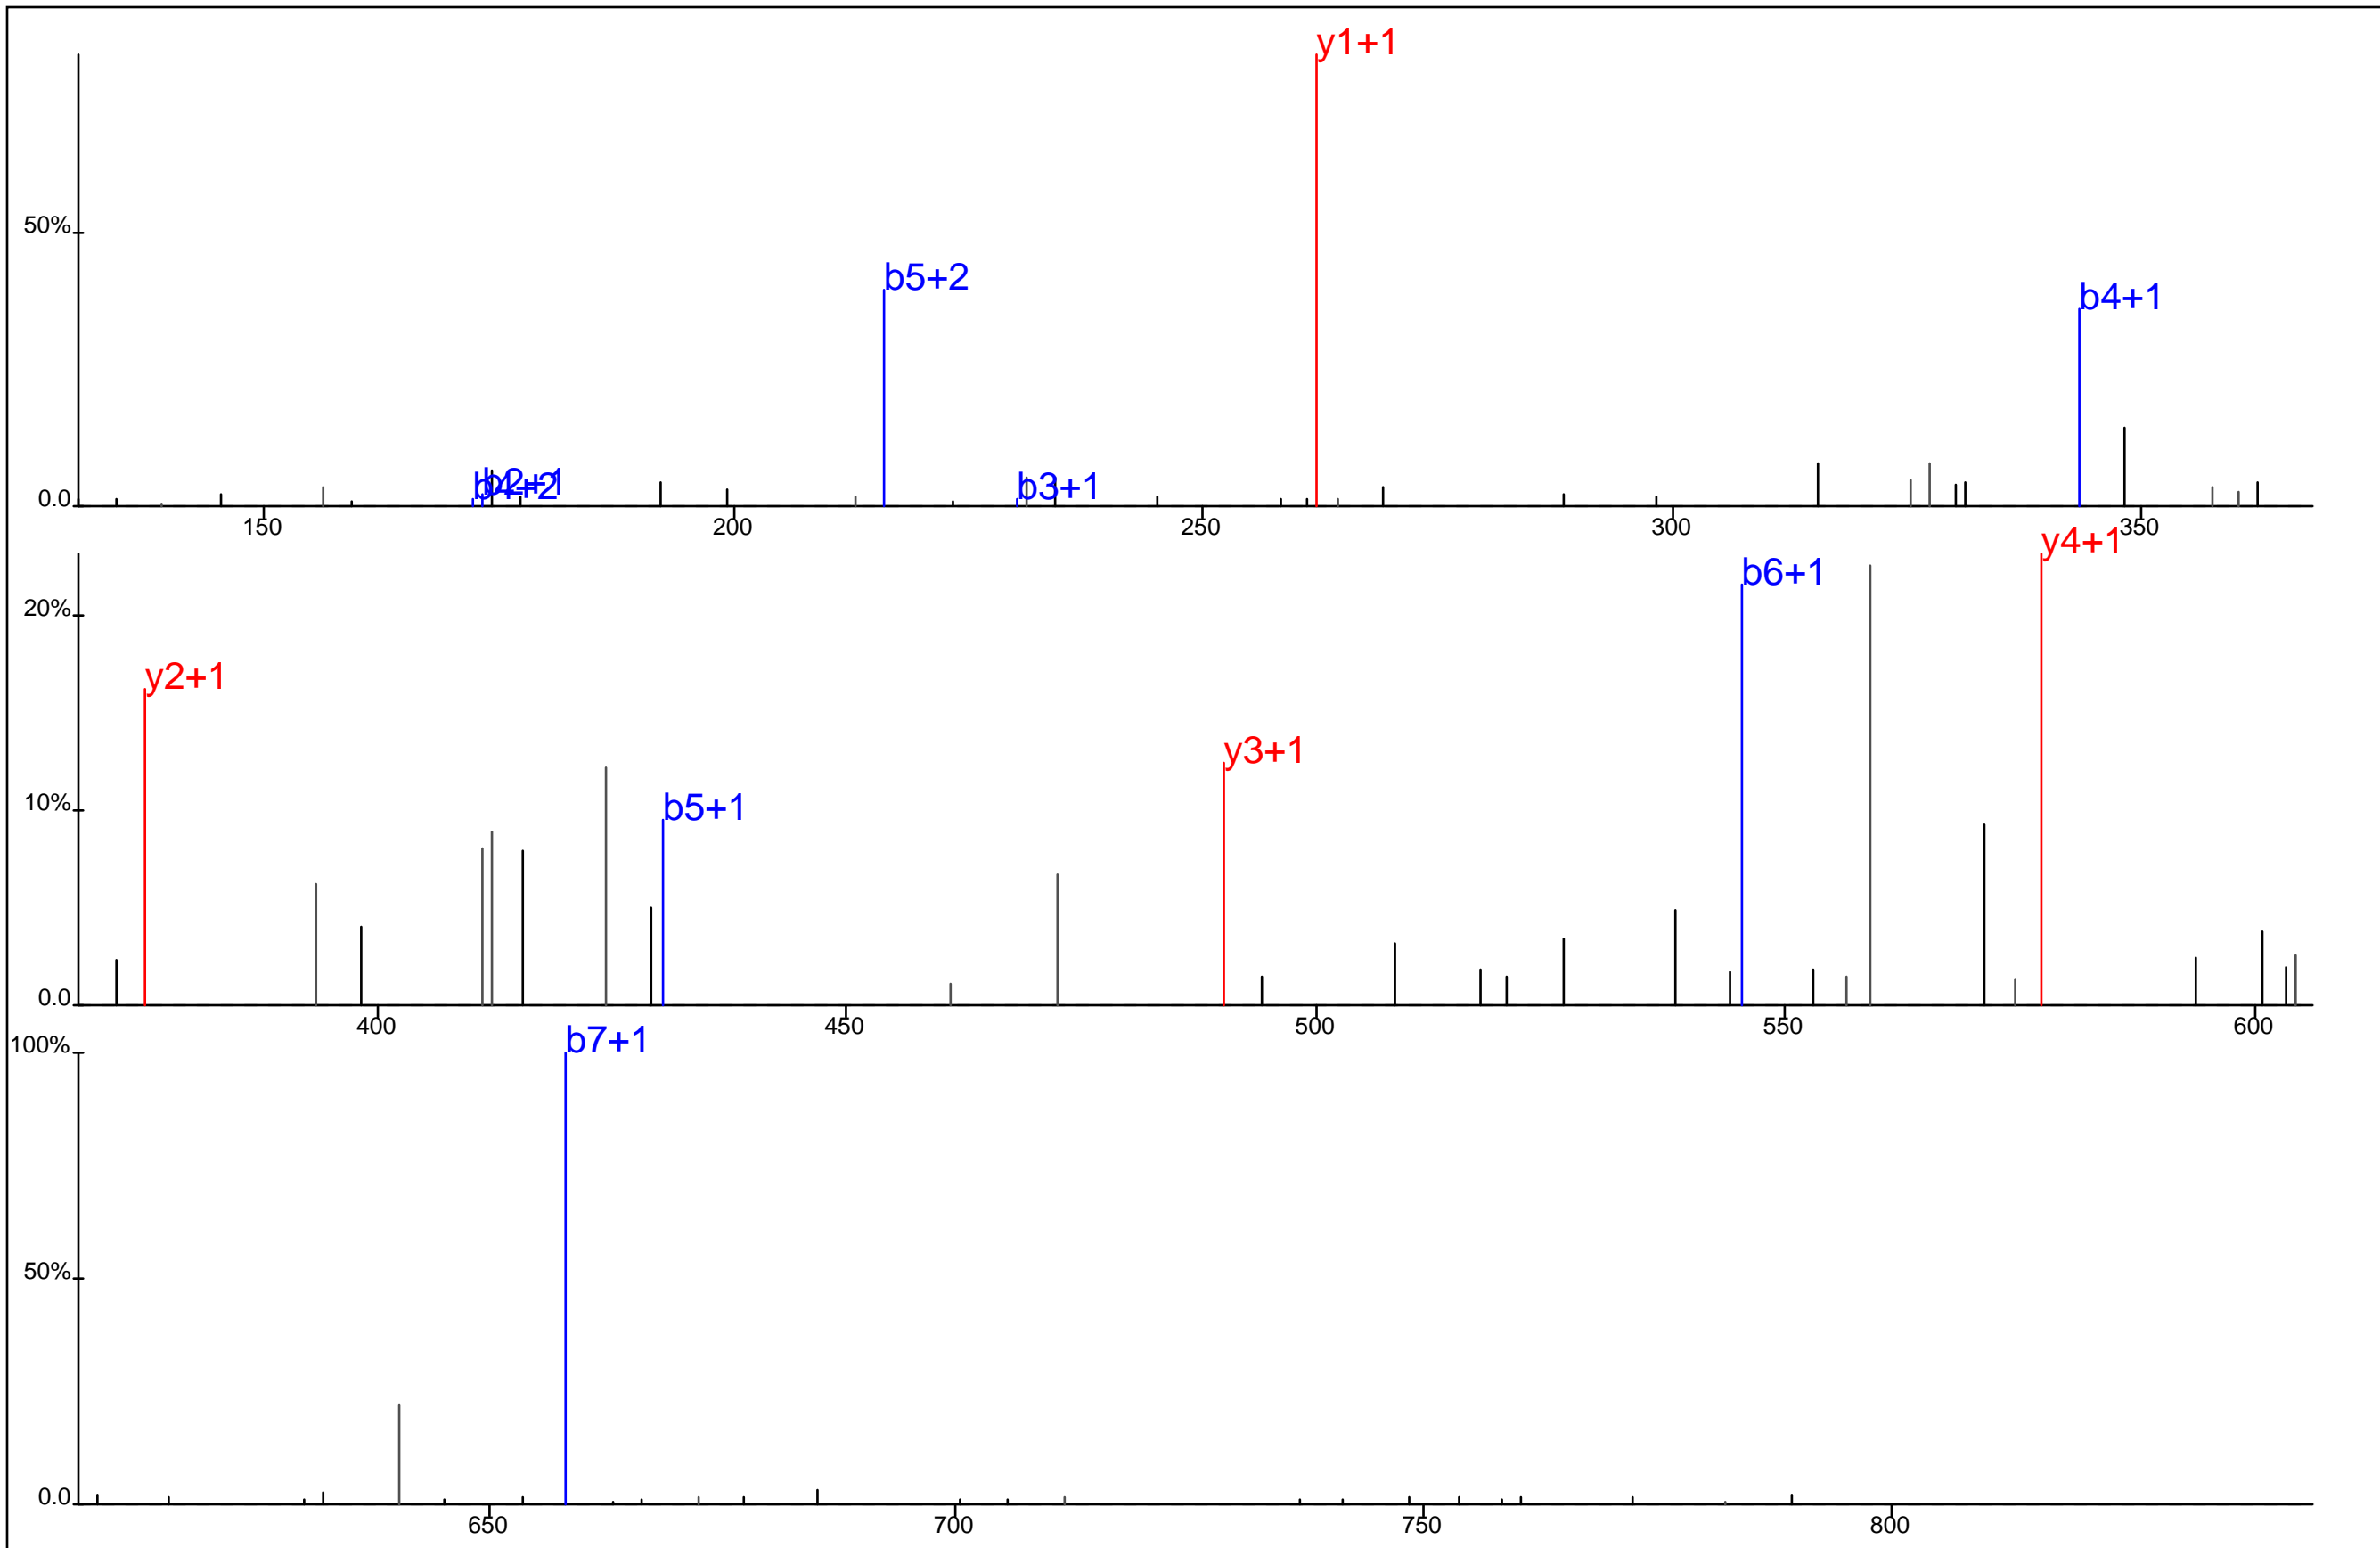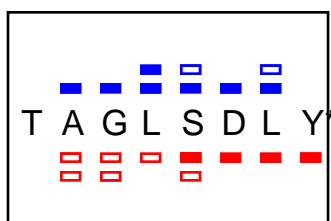

Protein Name: Tumor susceptibility gene 101  
 gi Accession: 0  
 Precursor Mass: 460.1944+2  
 Delta Mass: 0.735 ppm  
 XCorr: 24.81

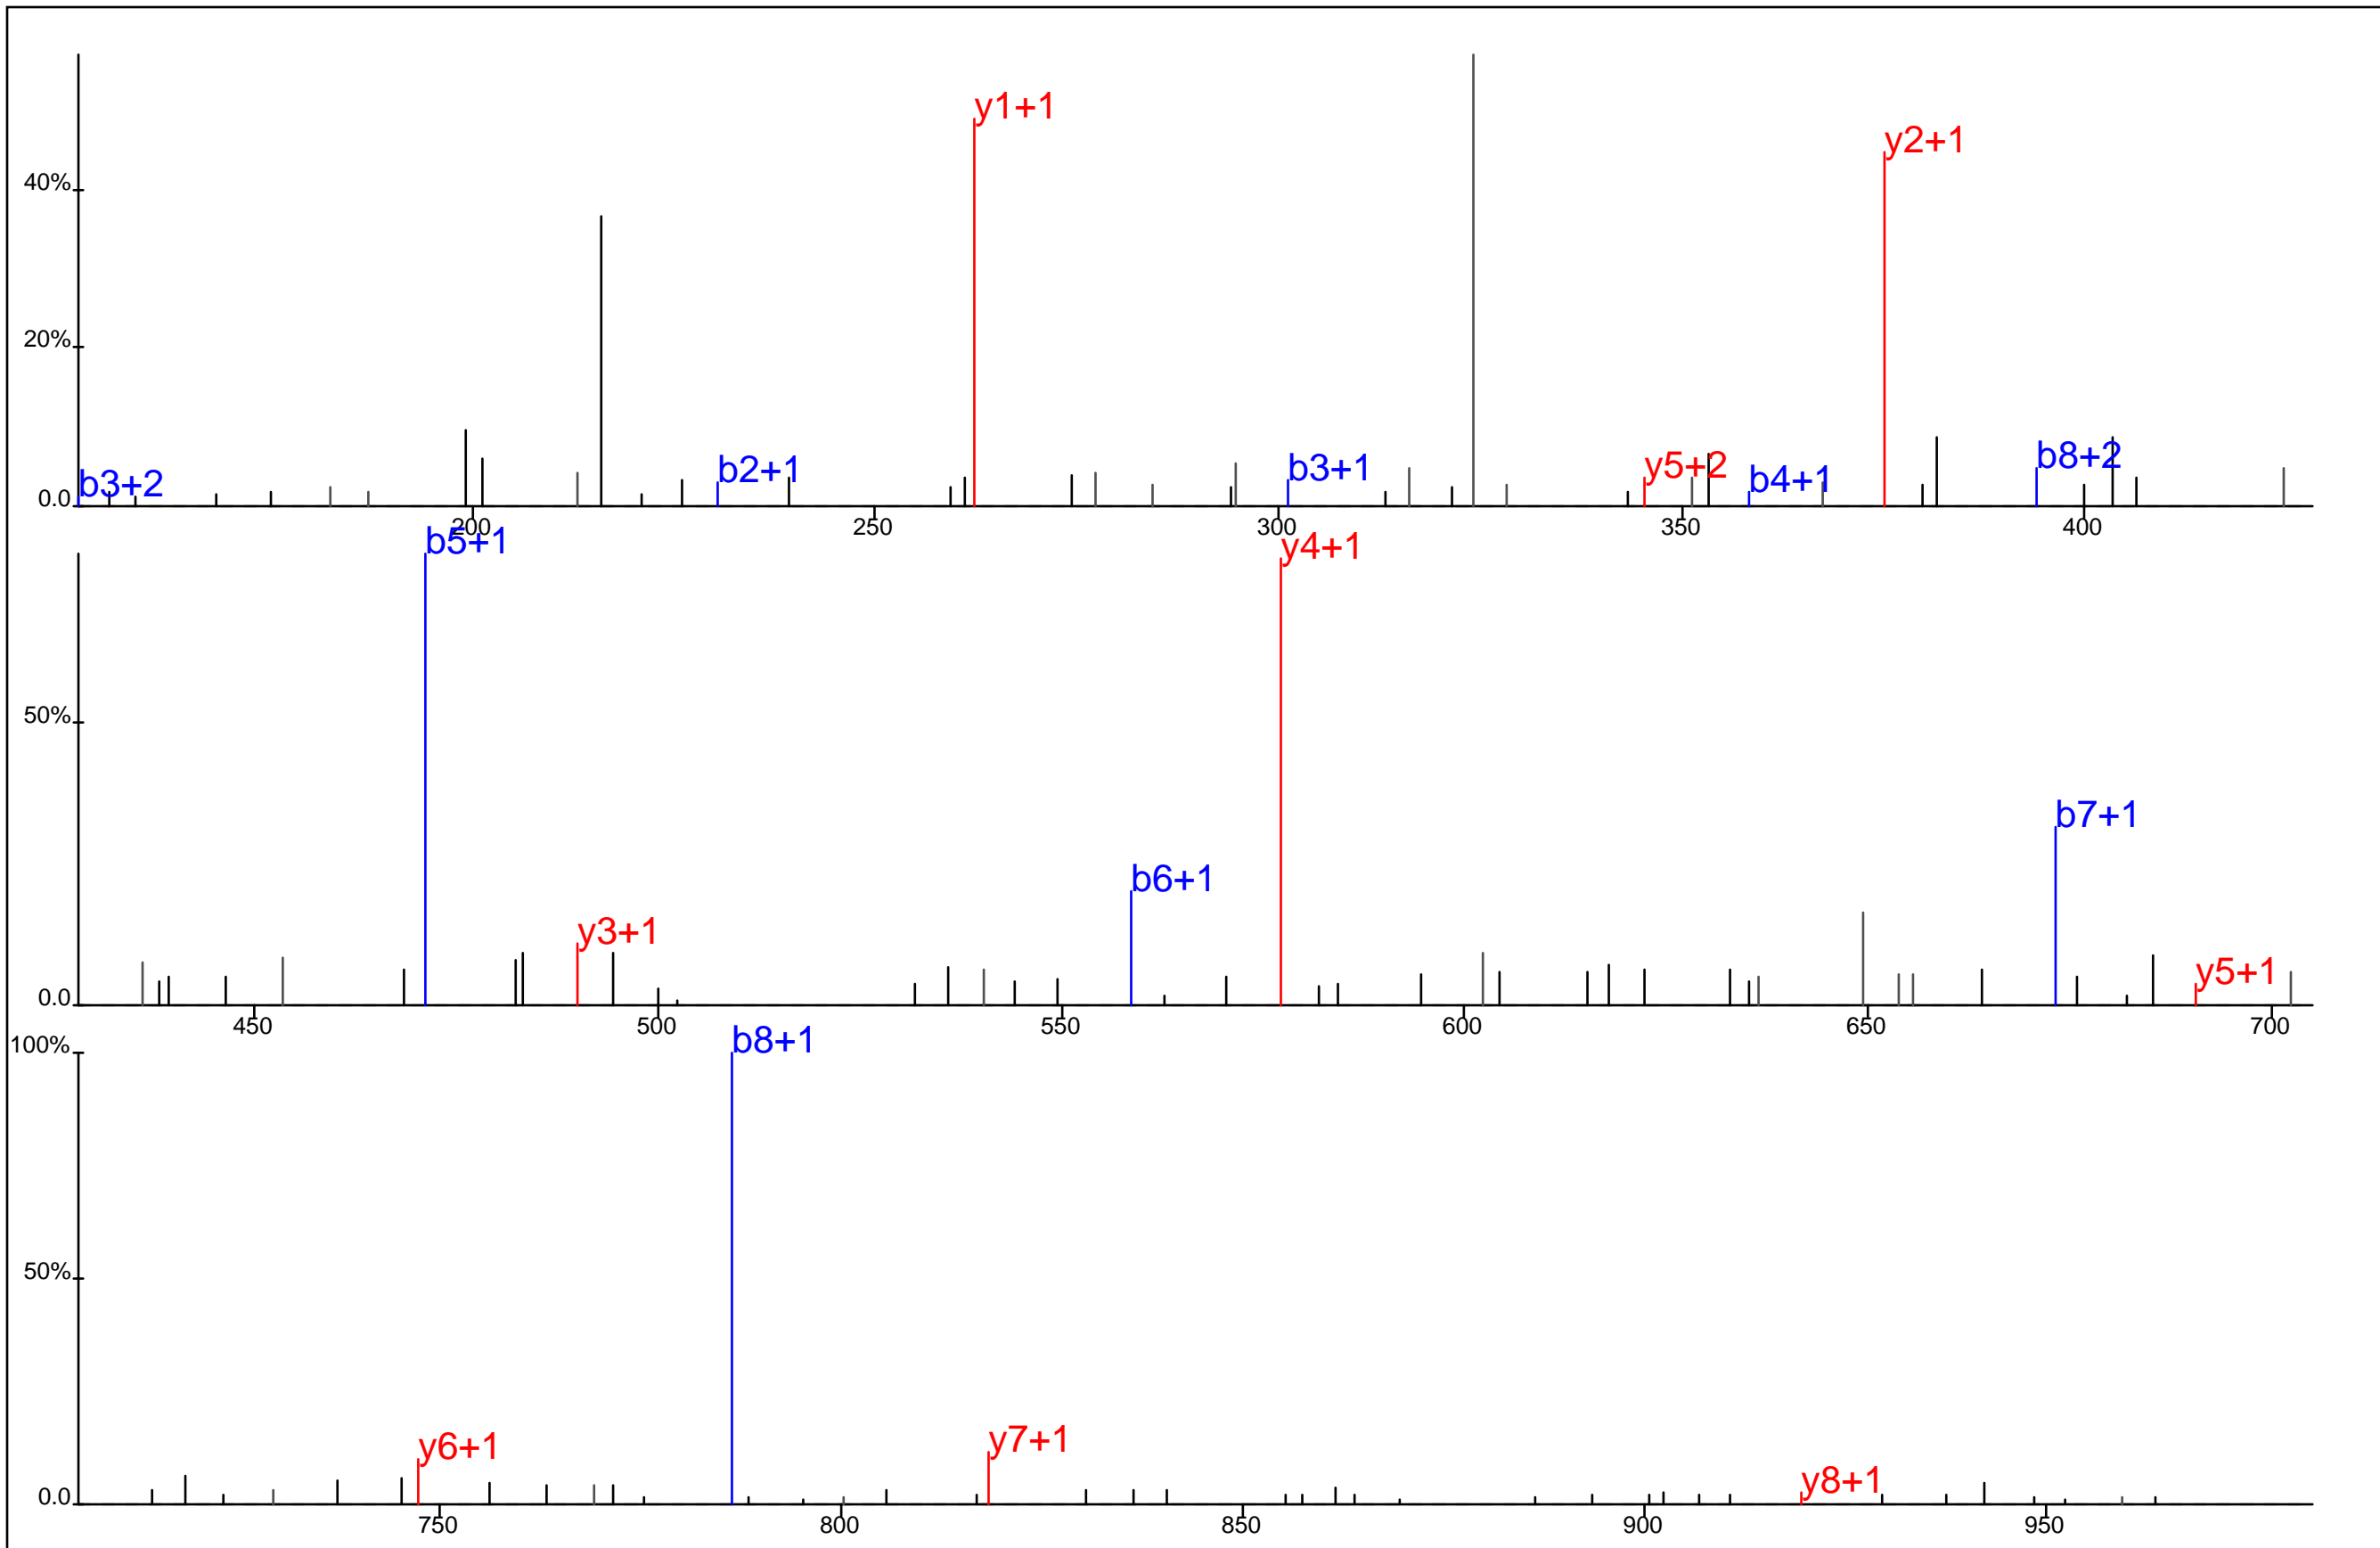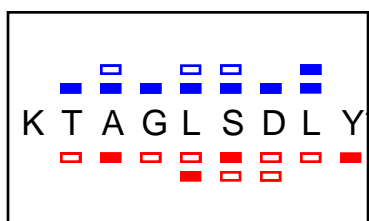

Protein Name: Tumor susceptibility gene 101  
 gi Accession: 0  
 Precursor Mass: 524.2409+2  
 Delta Mass: 1.209 ppm  
 XCorr: 39.72

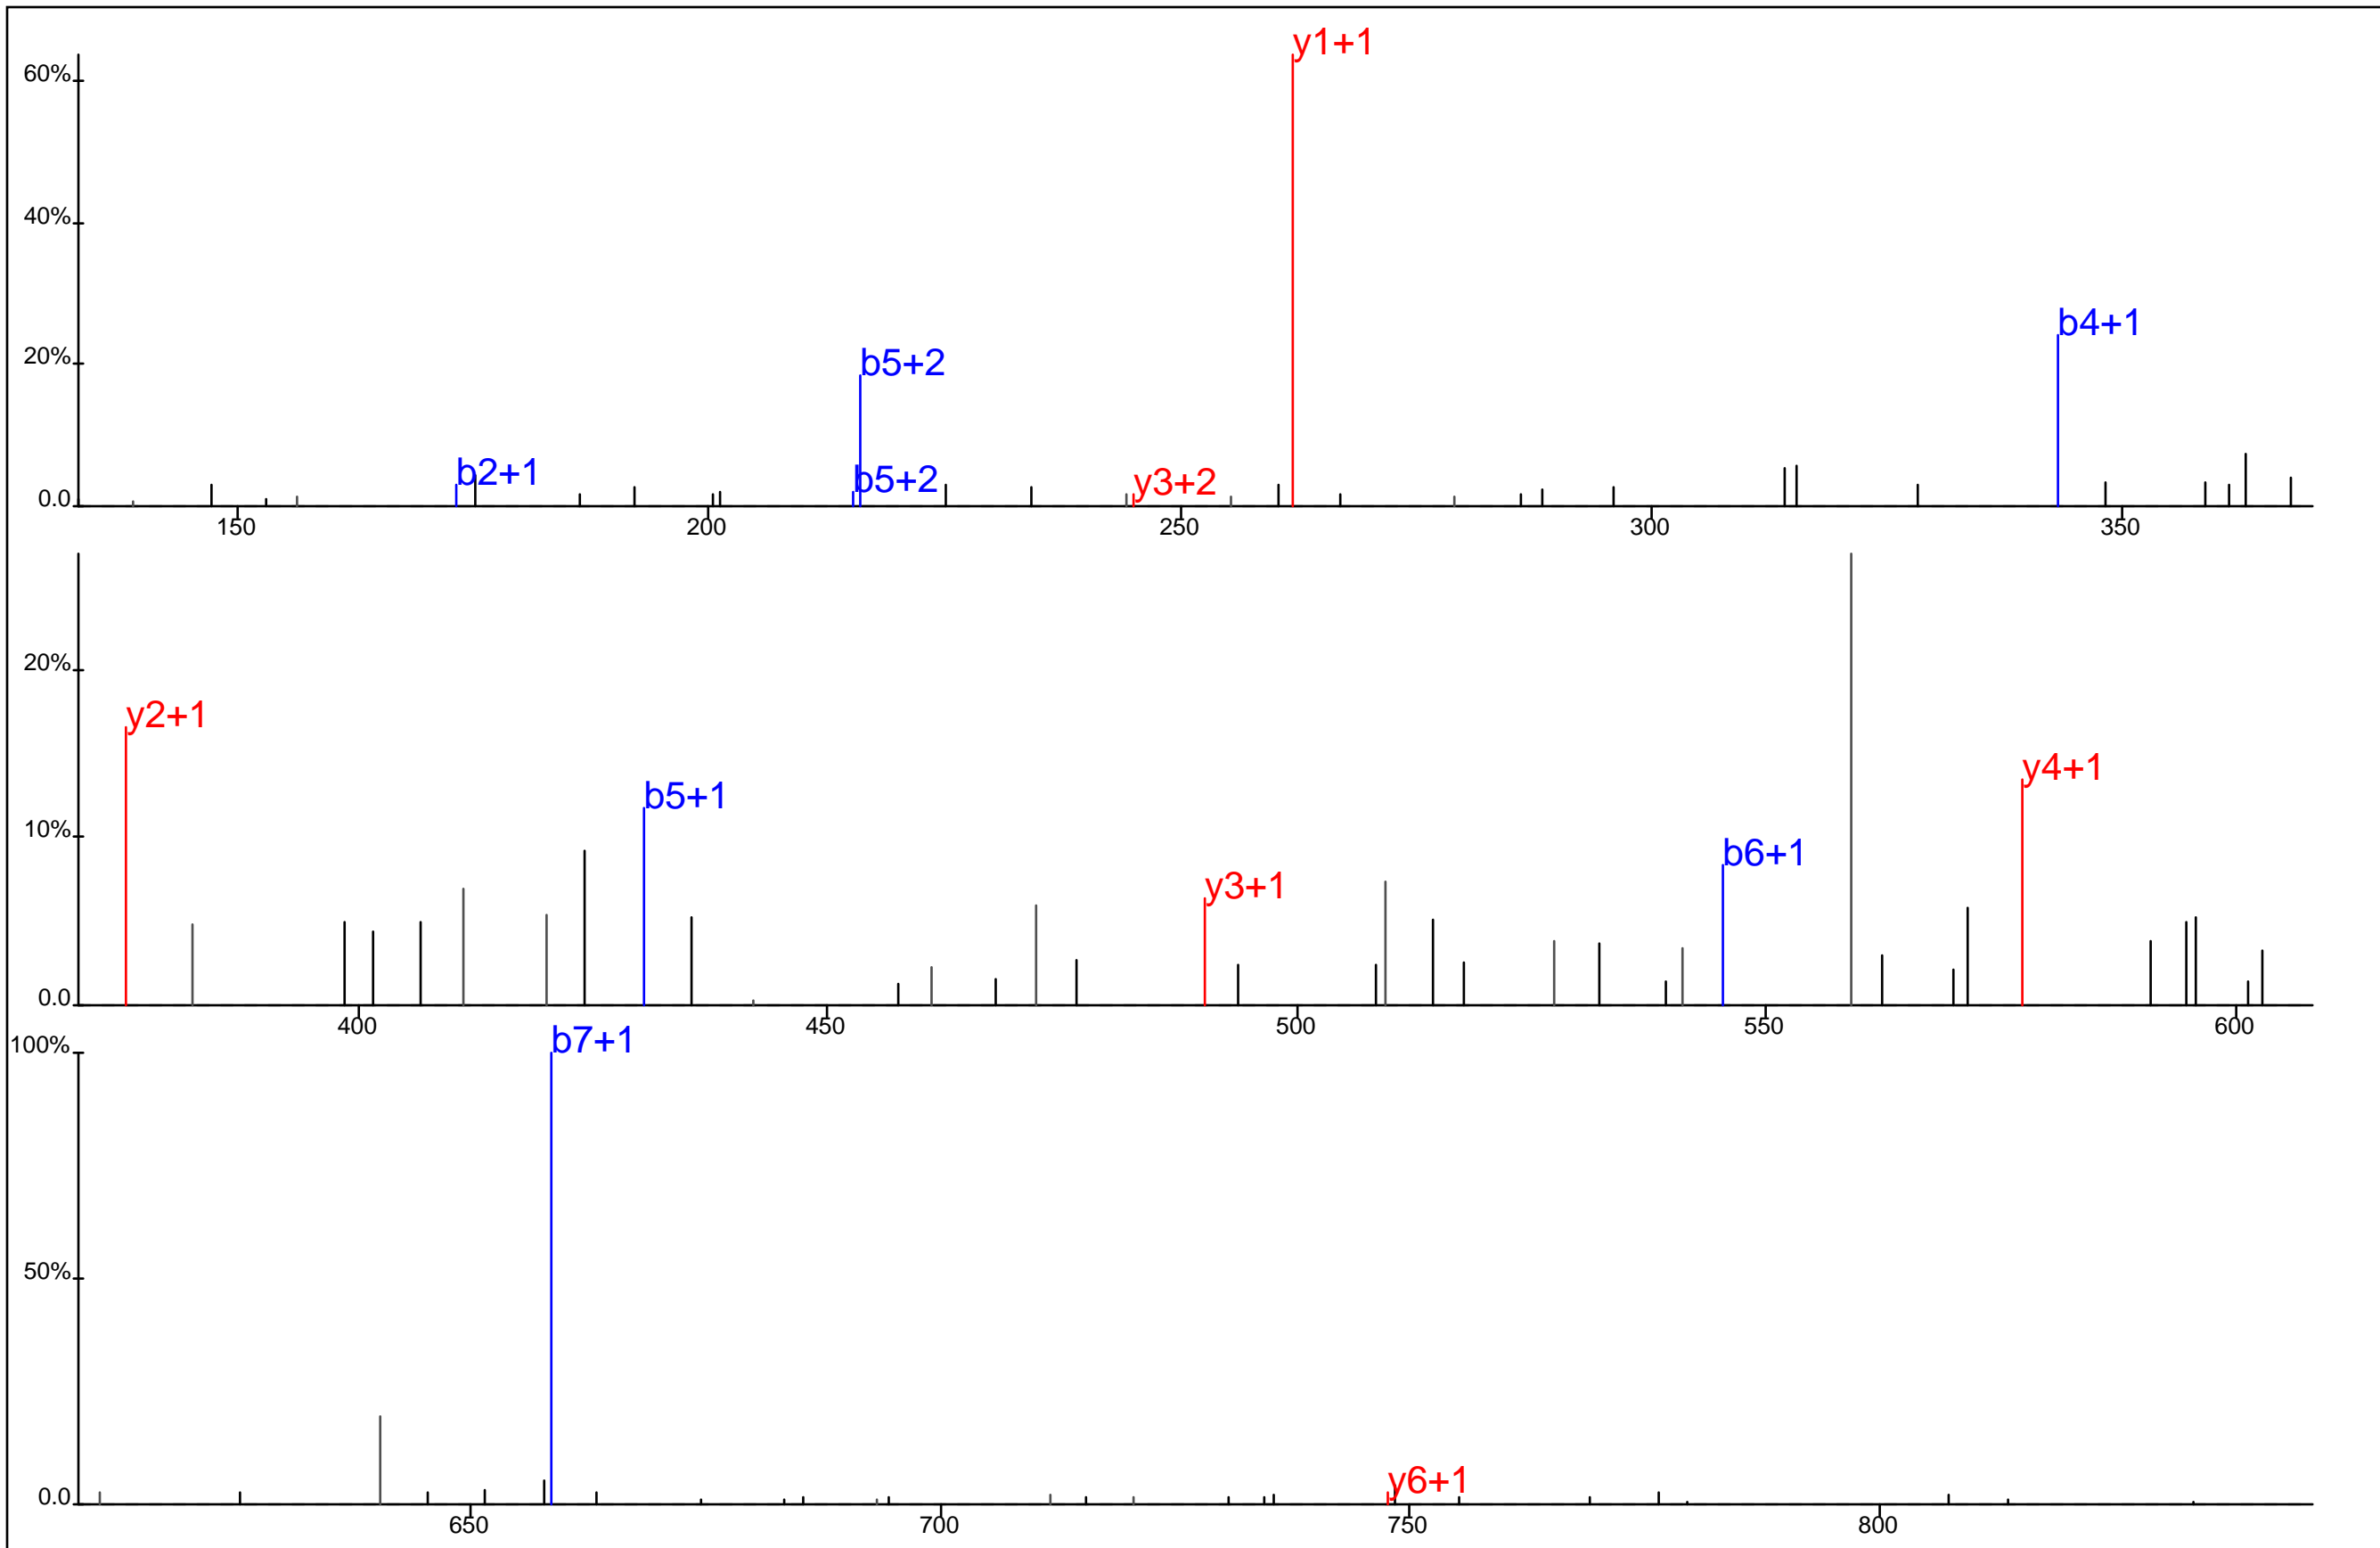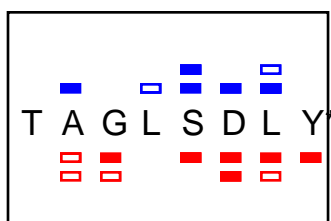

Protein Name: Tumor susceptibility gene 101  
 gi Accession: 0  
 Precursor Mass: 460.1948+2  
 Delta Mass: 1.664 ppm  
 XCorr: 32.68

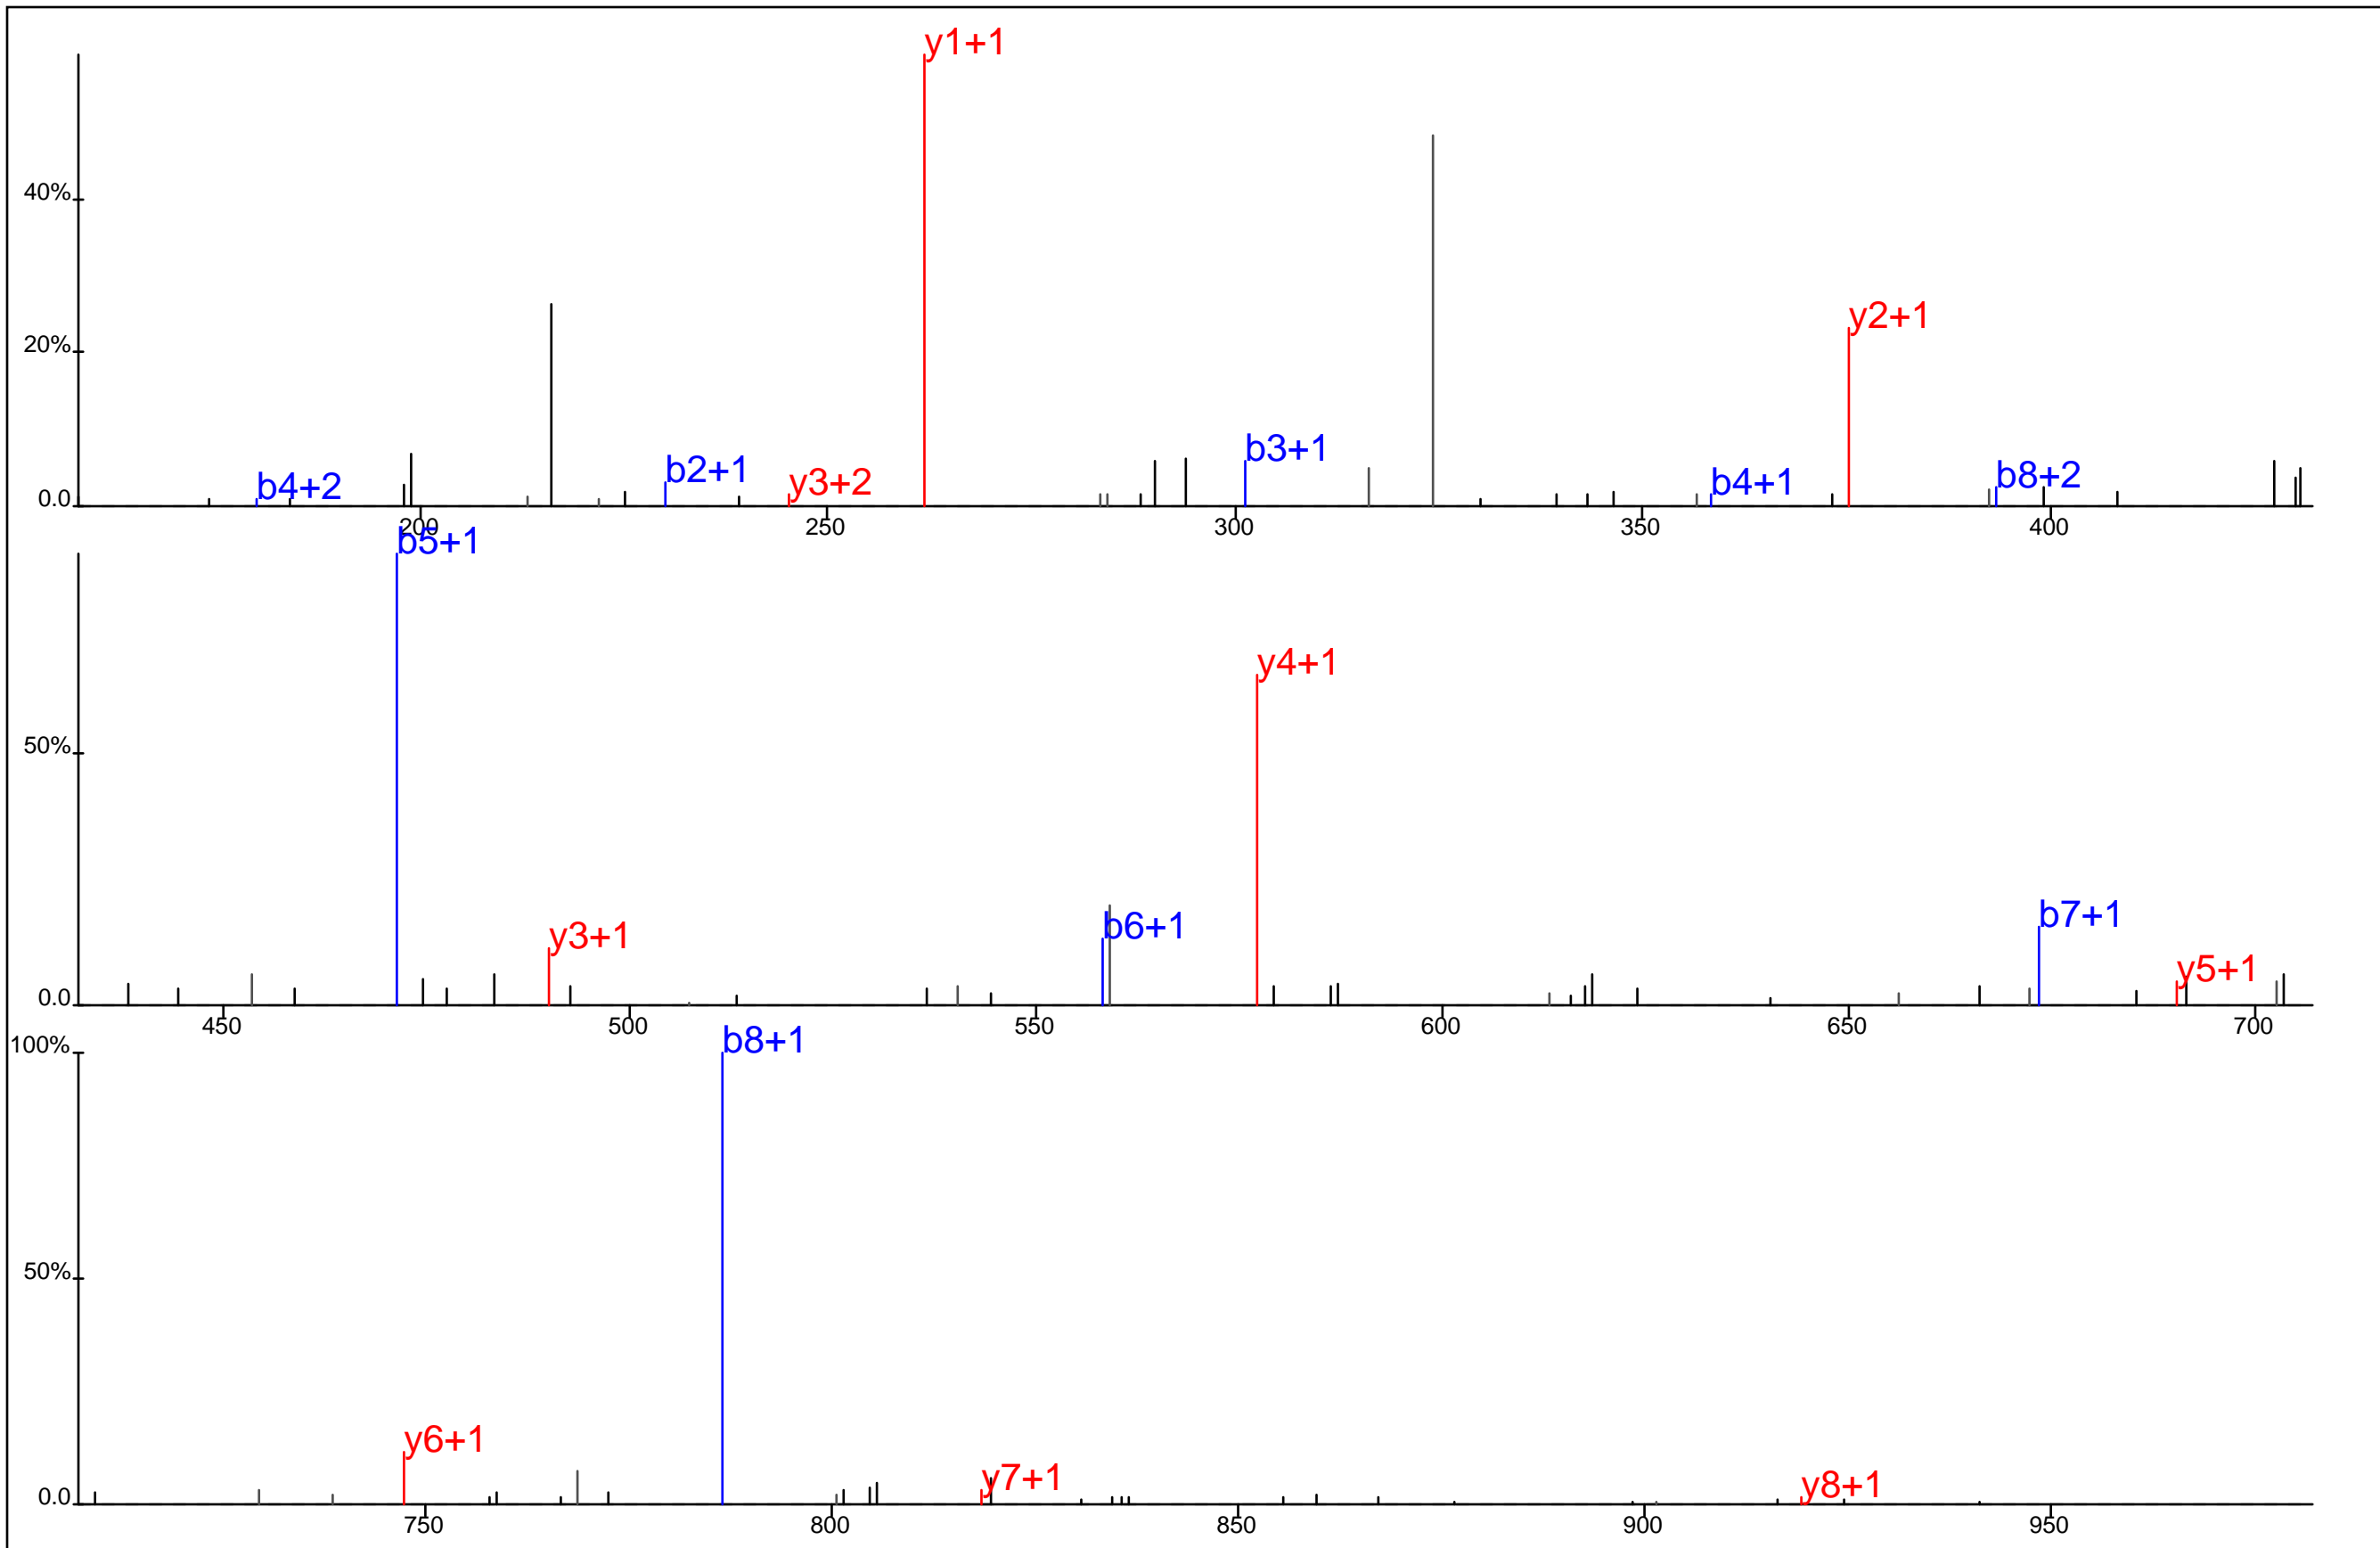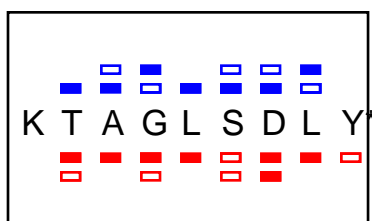

Protein Name: Tumor susceptibility gene 101  
 gi Accession: 0  
 Precursor Mass: 524.2405+2  
 Delta Mass: 2.024 ppm  
 XCorr: 41.14

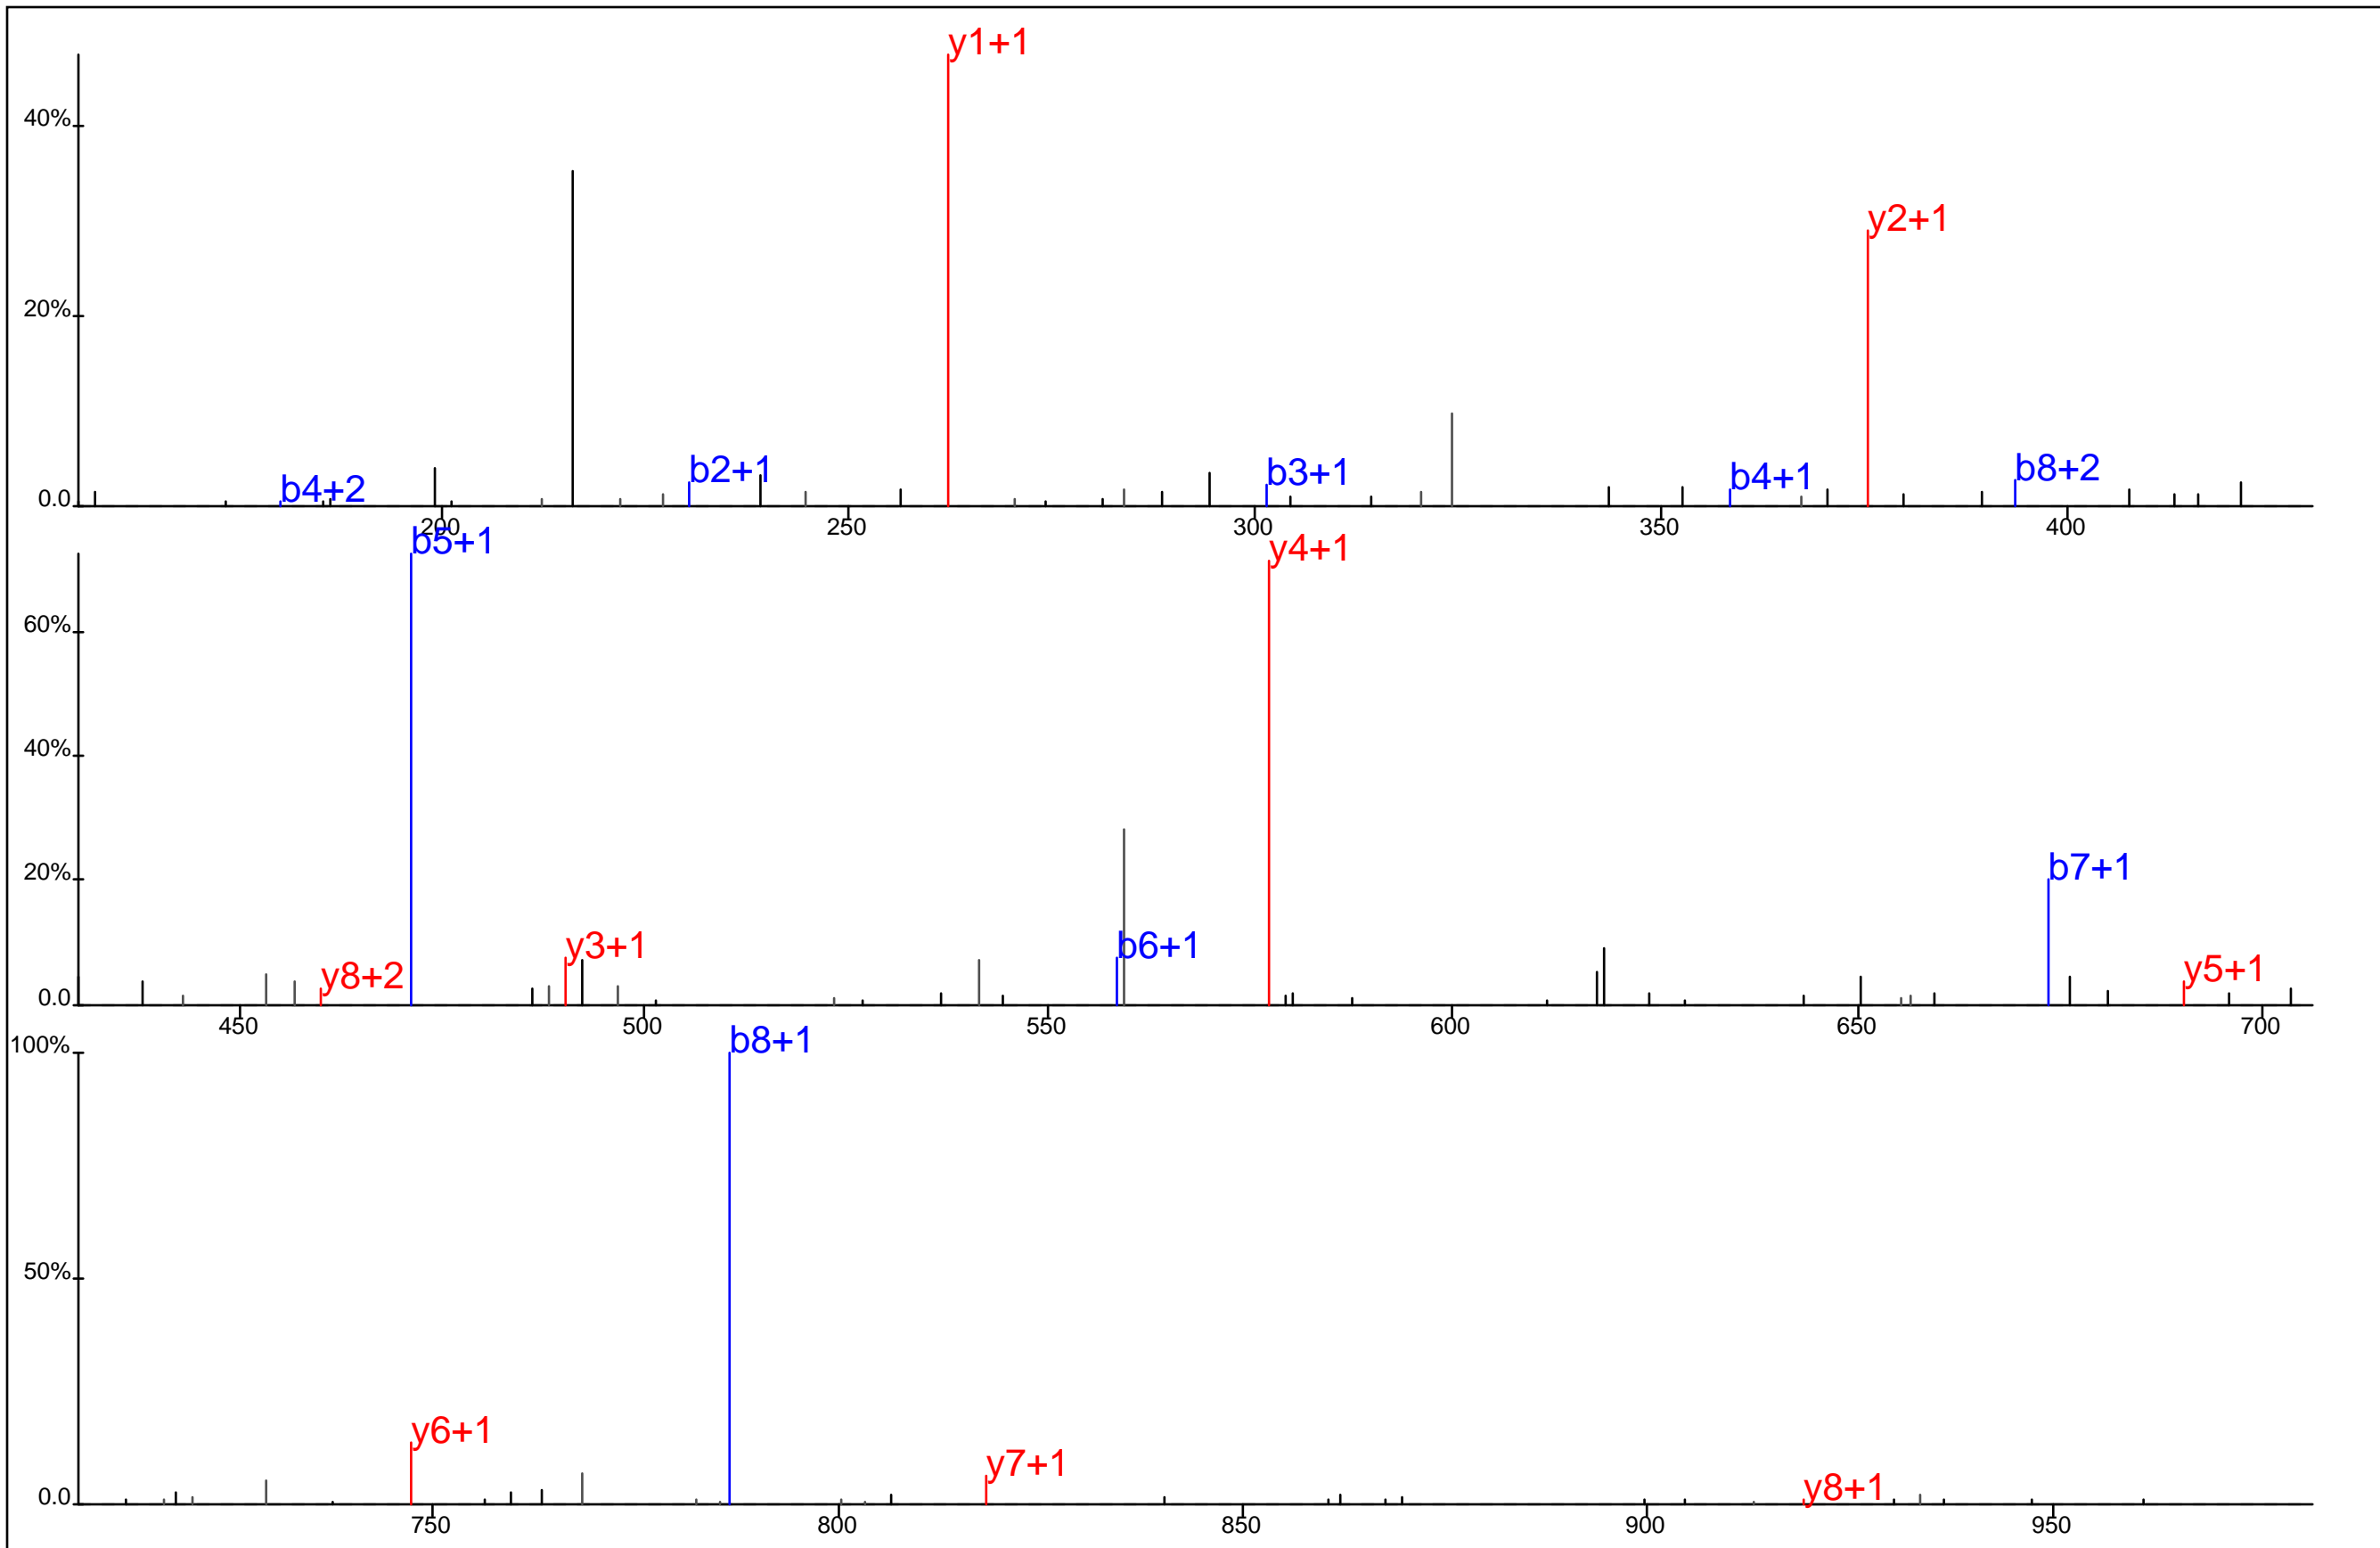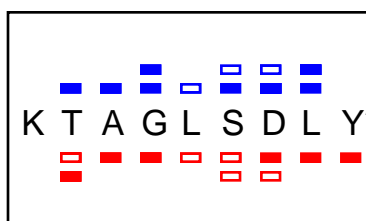

Protein Name: Tumor susceptibility gene 101  
 gi Accession: 0  
 Precursor Mass: 524.2411+2  
 Delta Mass: 0.859 ppm  
 XCorr: 48.69

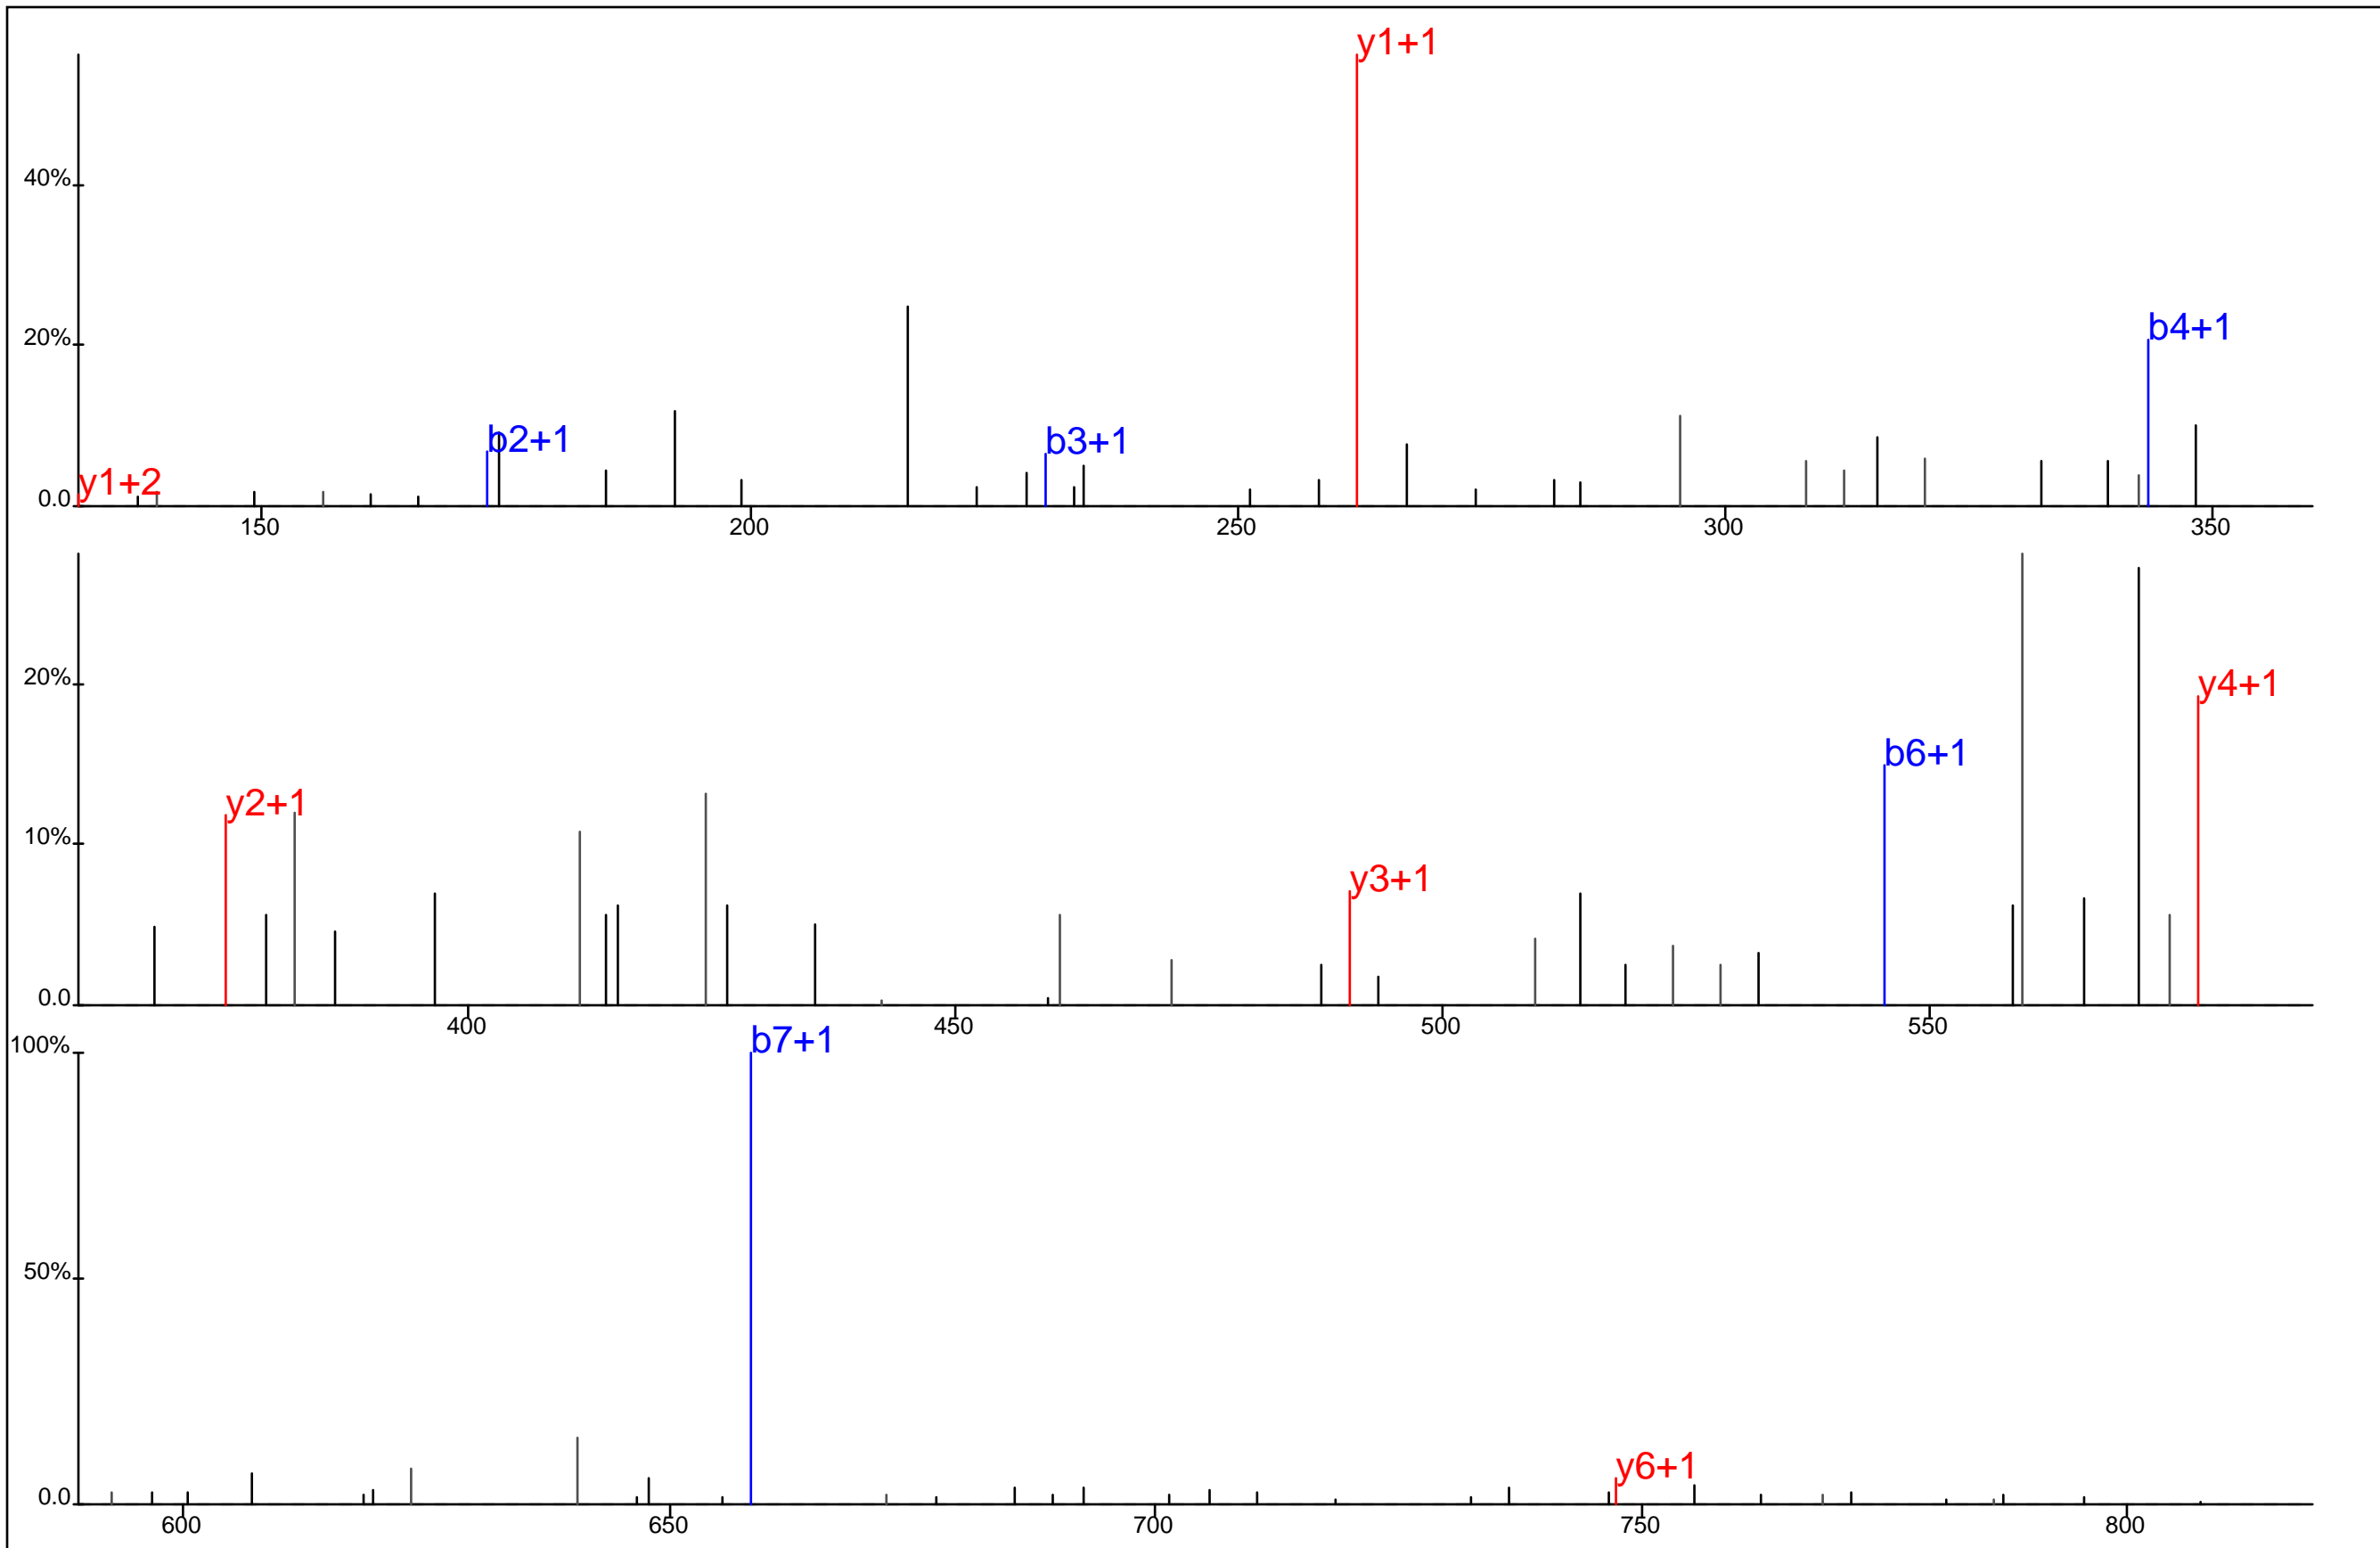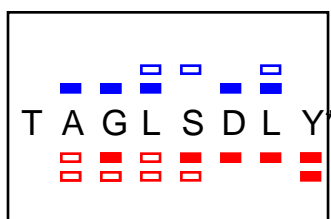

Protein Name: Tumor susceptibility gene 101  
 gi Accession: 0  
 Precursor Mass: 460.1939+2  
 Delta Mass: 0.261 ppm  
 XCorr: 23.42

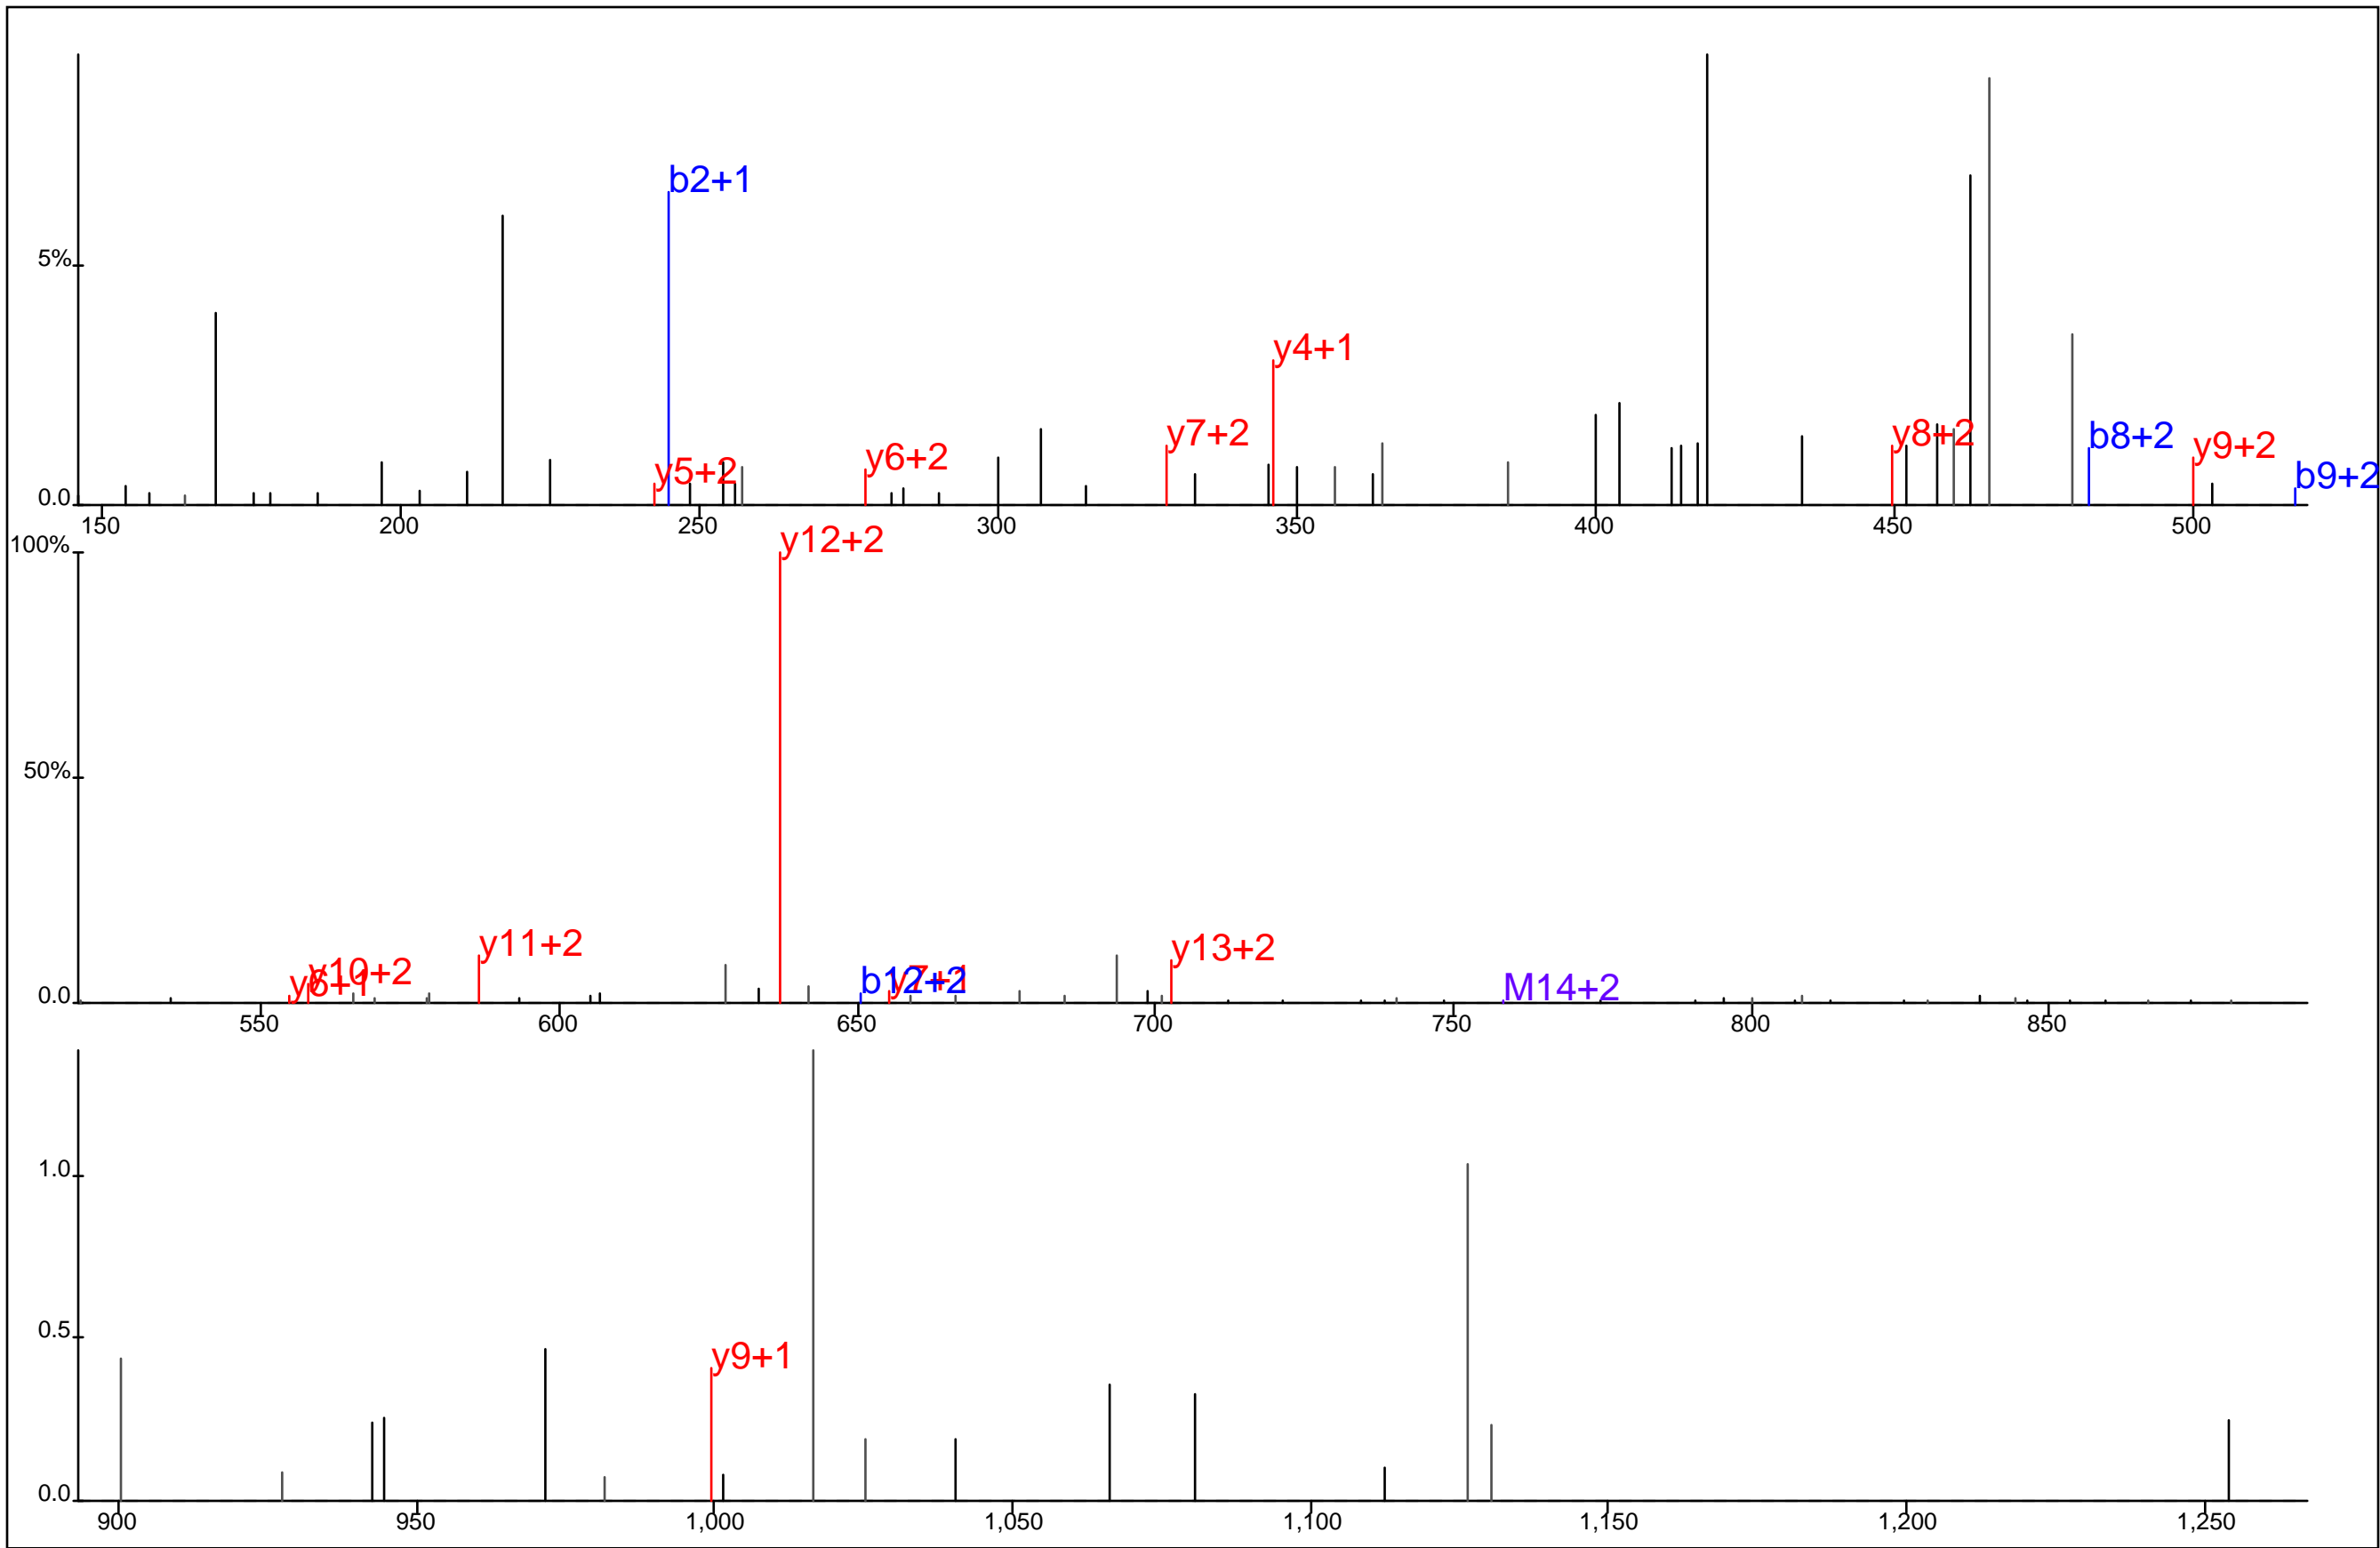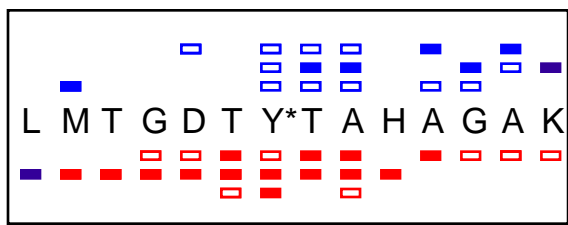

Protein Name: Tyrosine protein kinase ABL2  
 gi Accession: 0  
 Precursor Mass: 506.2220+3  
 Delta Mass: 0.757 ppm  
 XCorr: 24.38

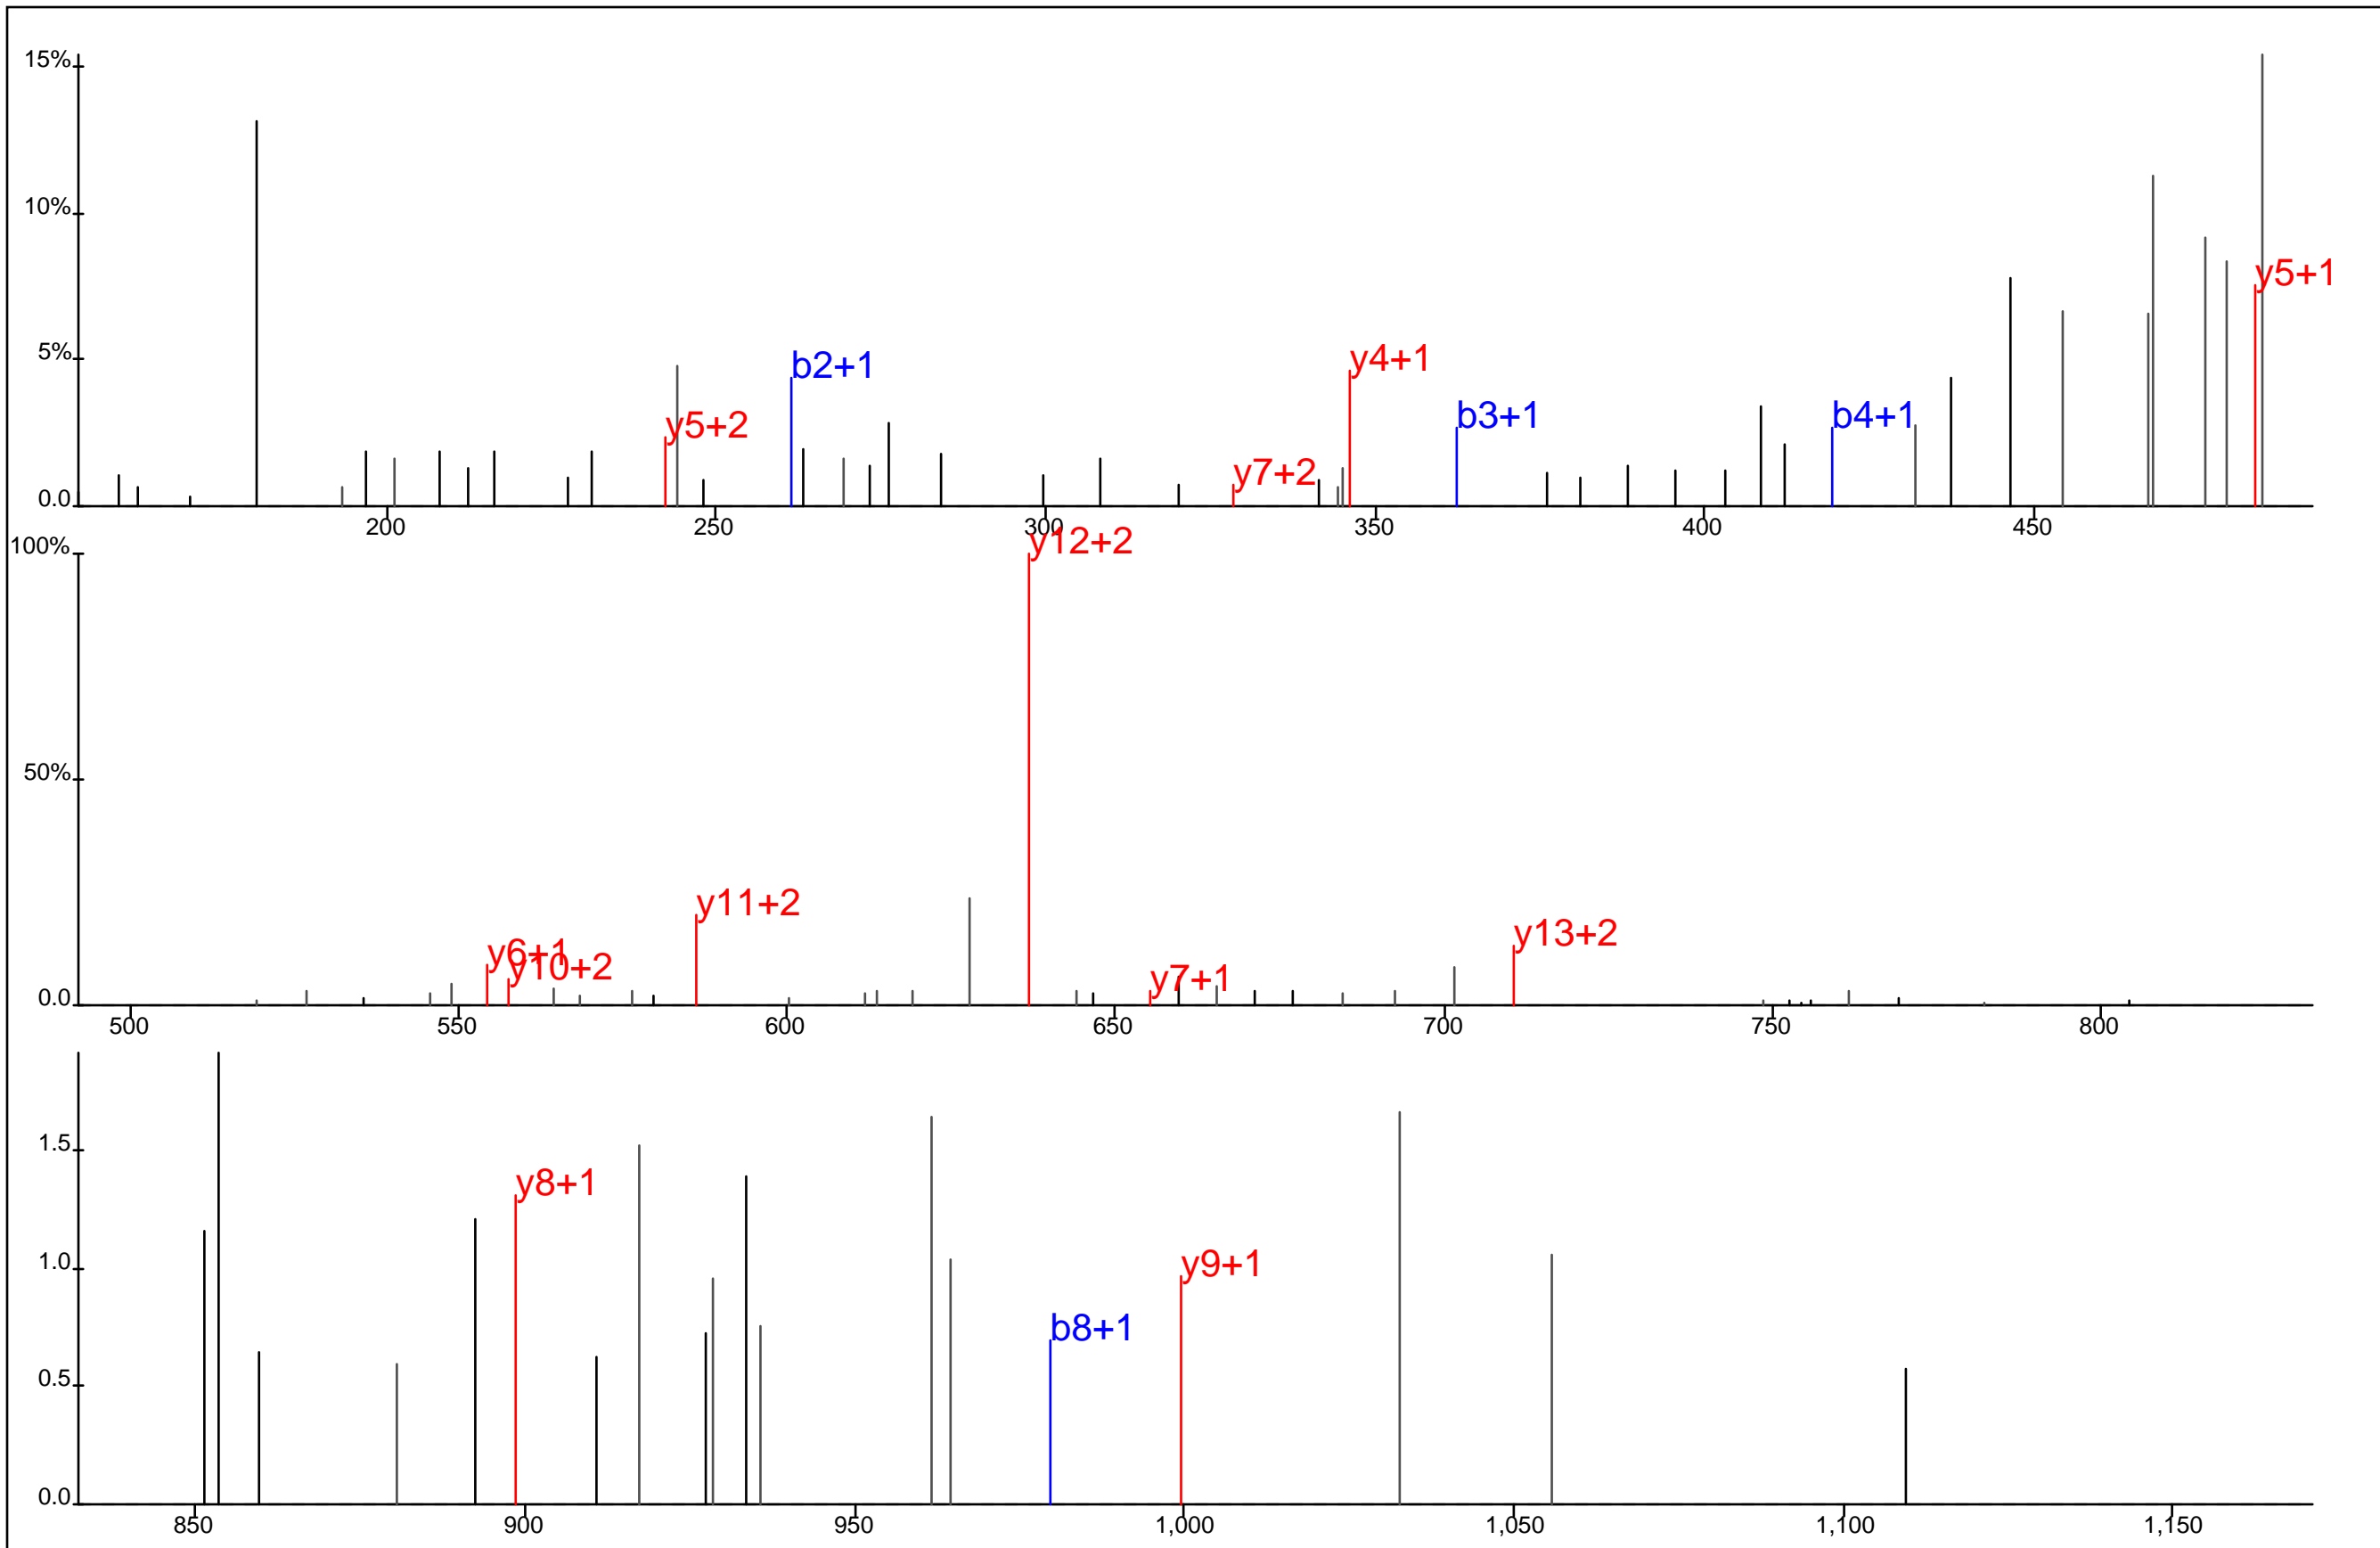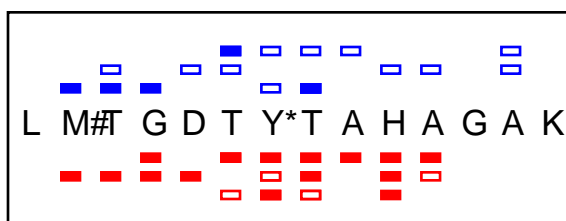

Protein Name: Tyrosine protein kinase ABL2  
 gi Accession: 0  
 Precursor Mass: 511.5525+3  
 Delta Mass: 1.351 ppm  
 XCorr: 29.93



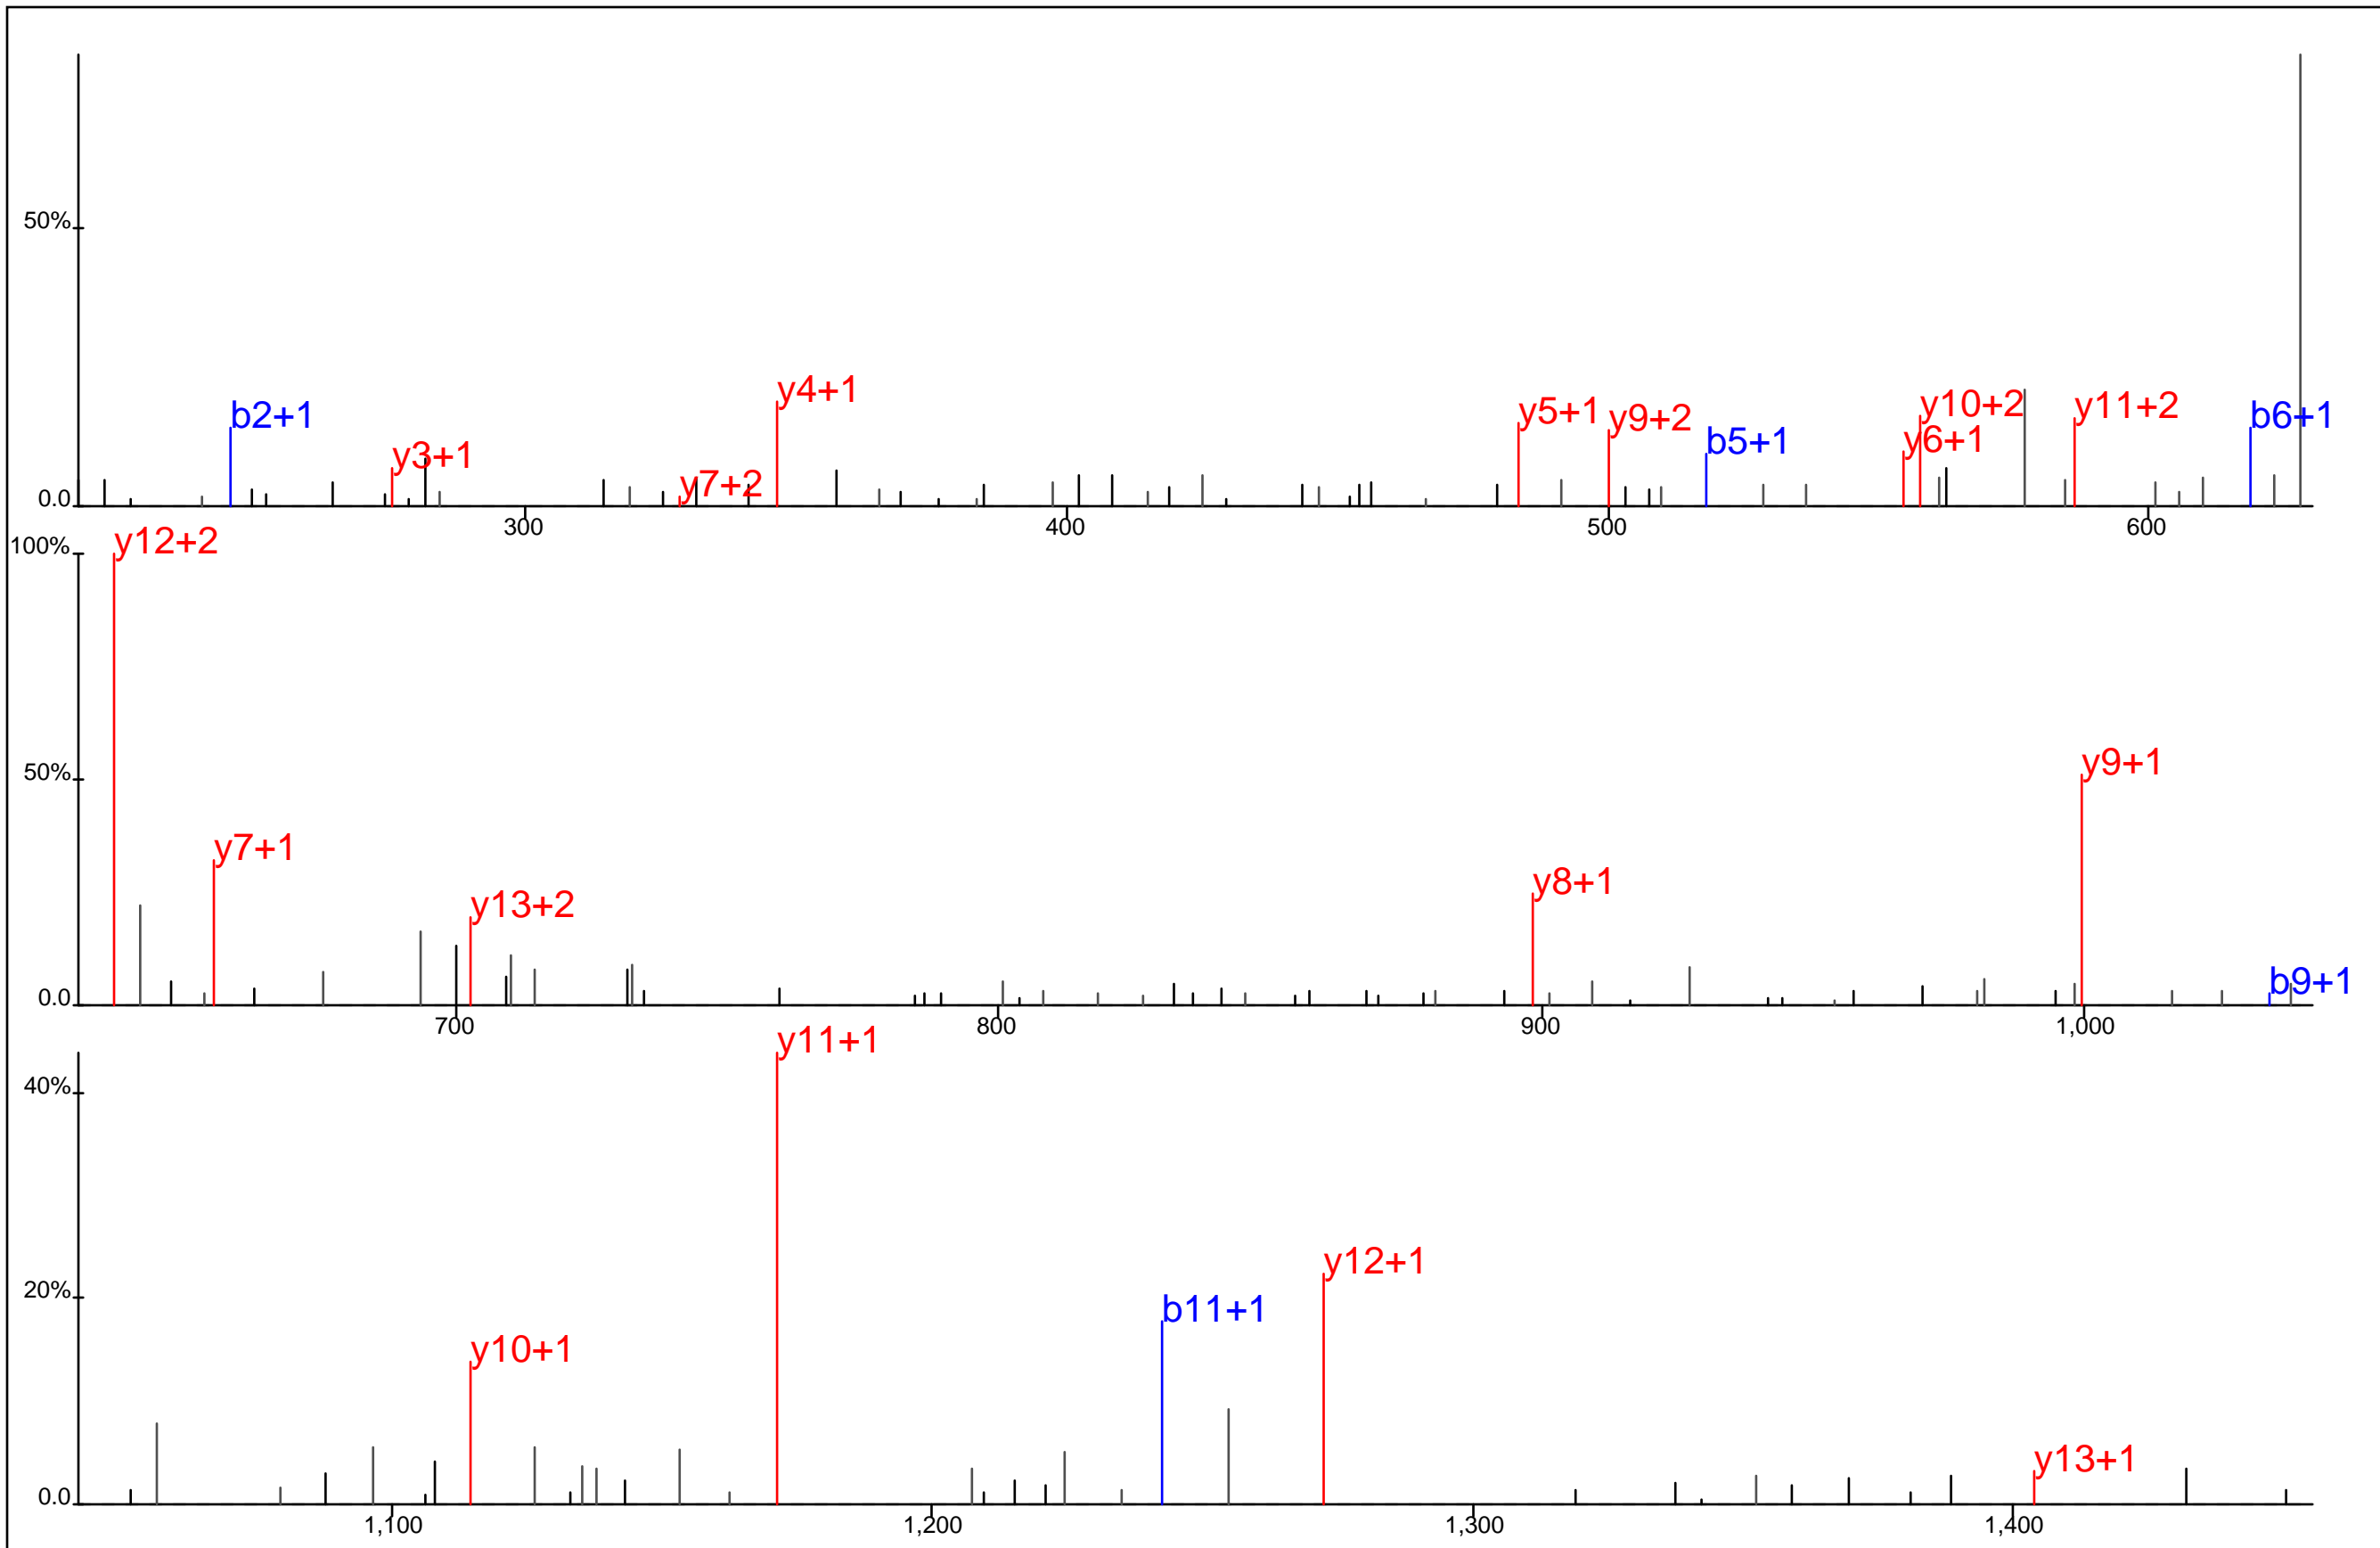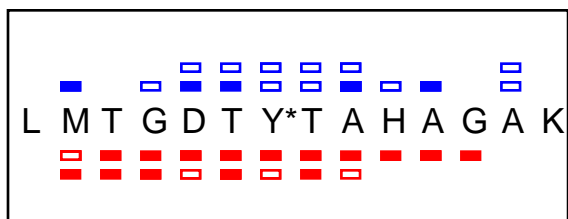

Protein Name: Tyrosine protein kinase ABL2  
 gi Accession: 0  
 Precursor Mass: 758.8257+2  
 Delta Mass: 4.002 ppm  
 XCorr: 72.43

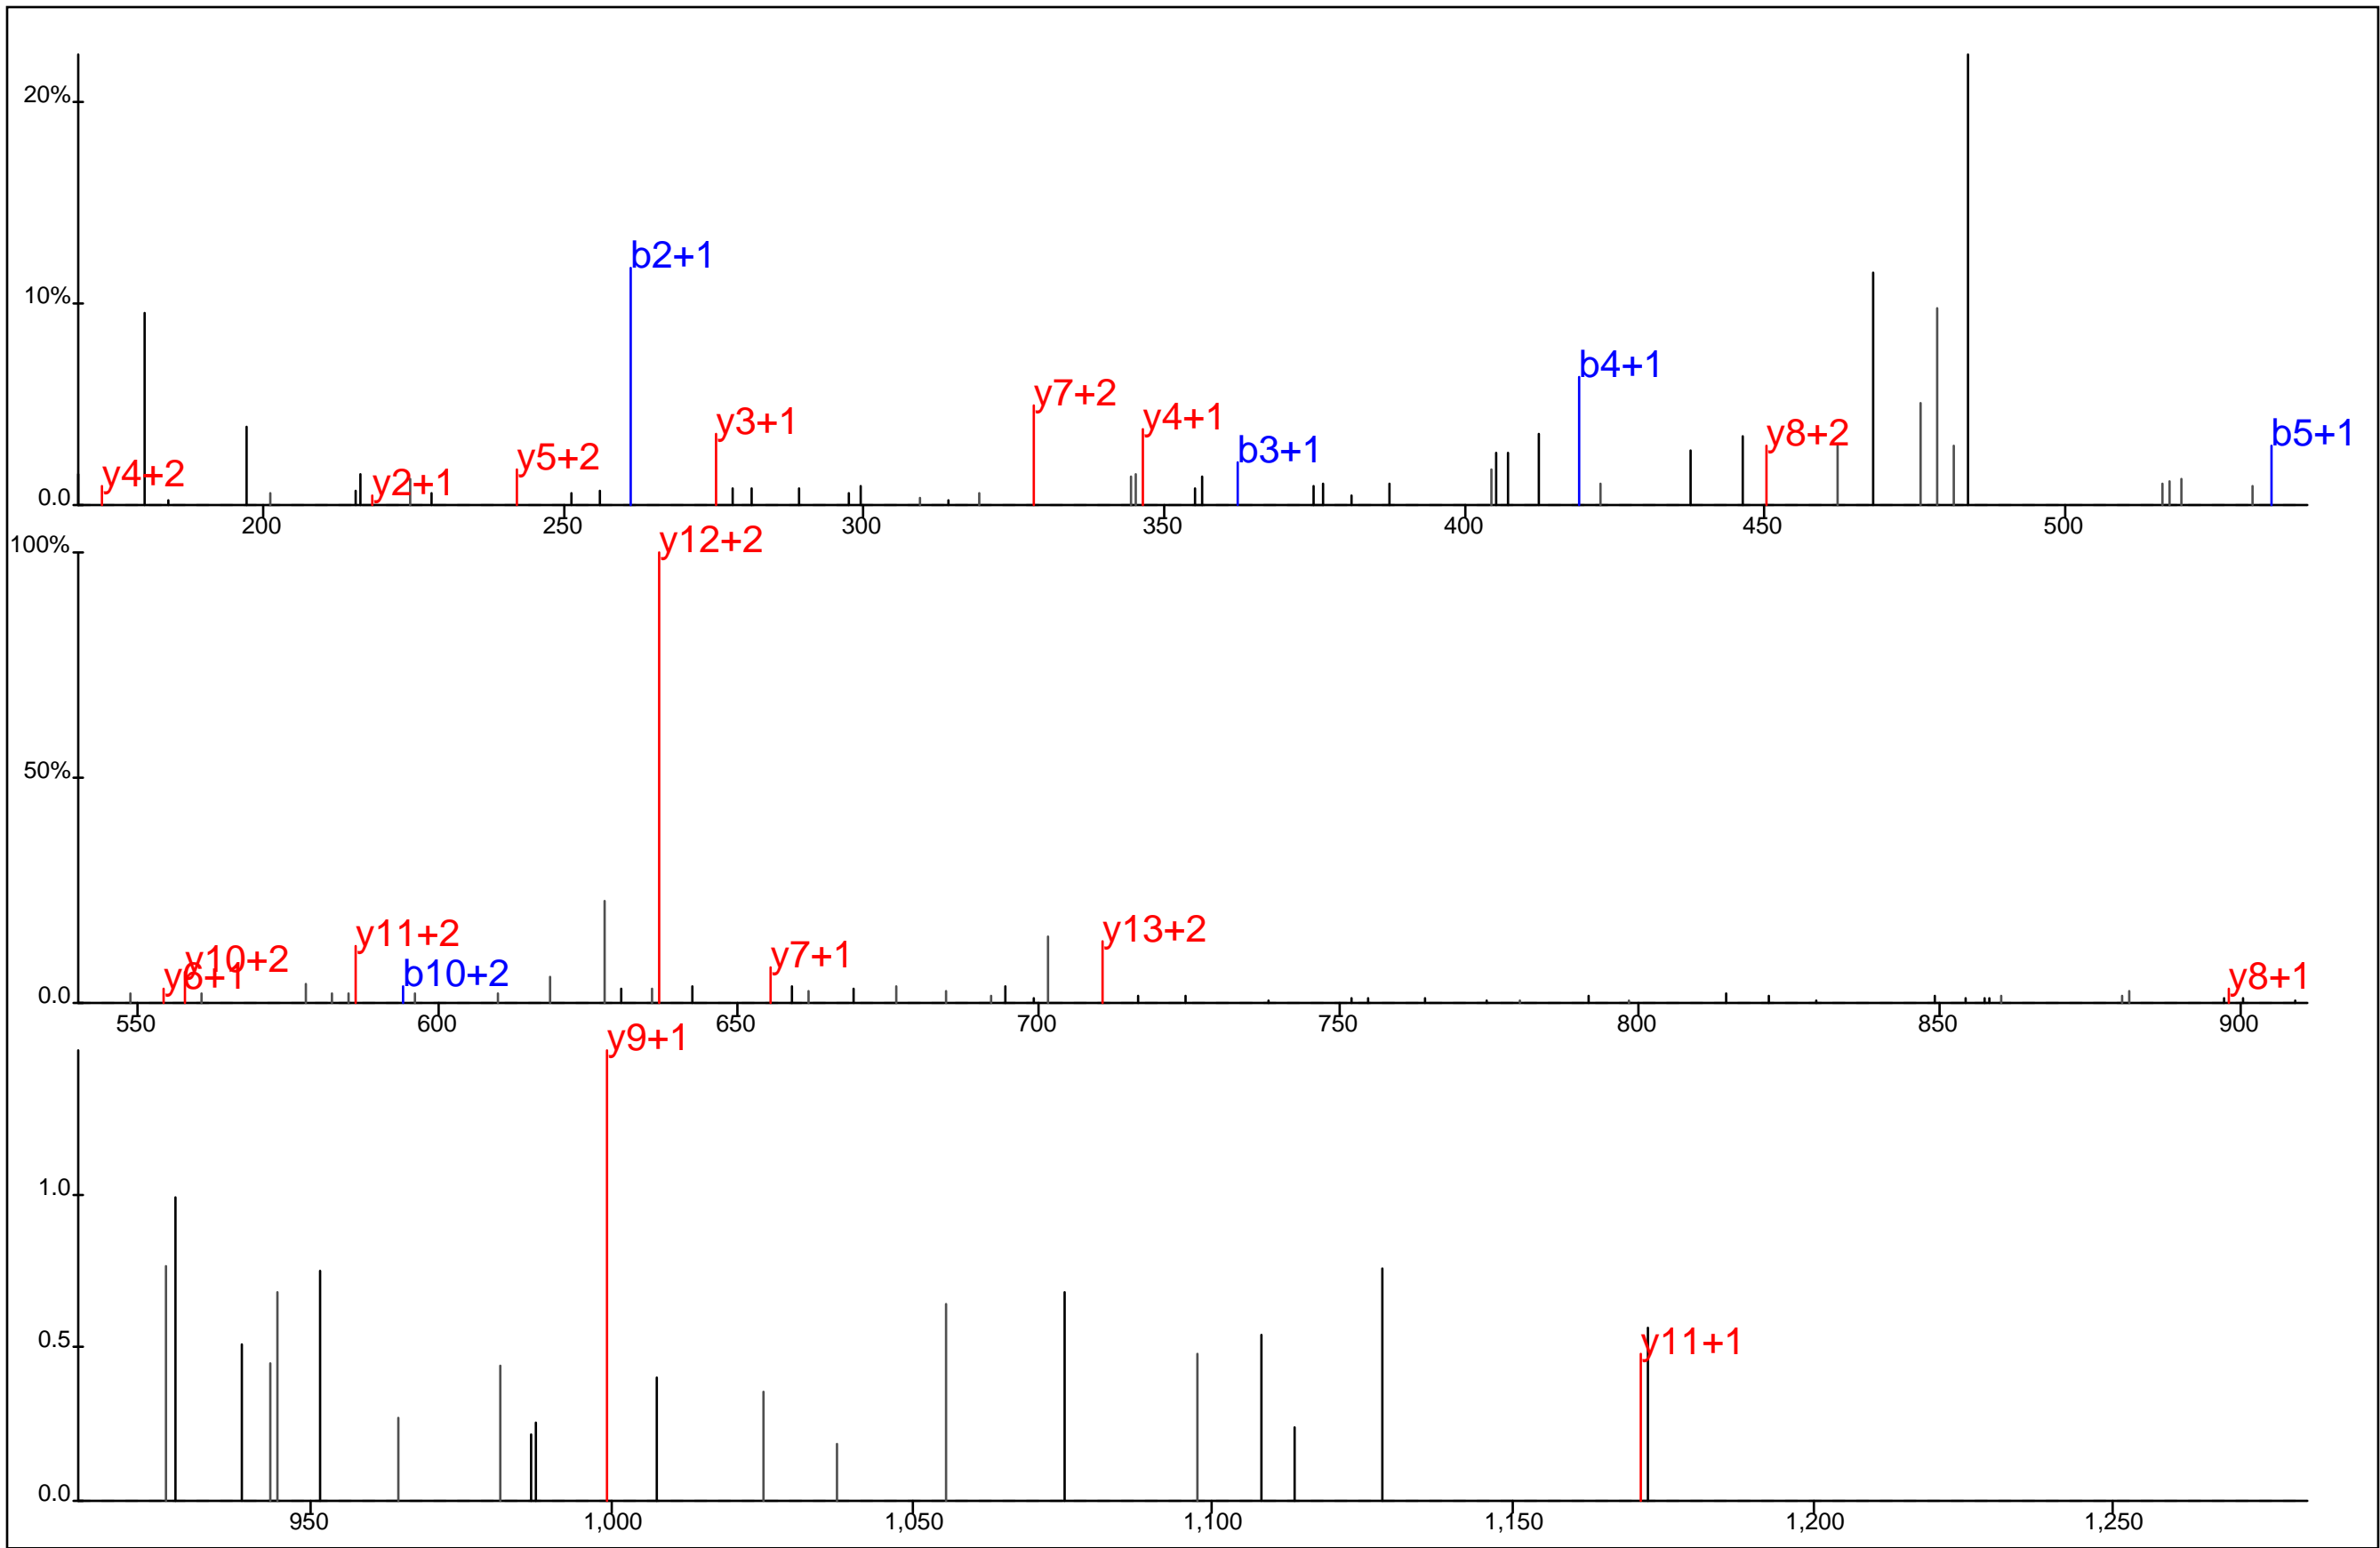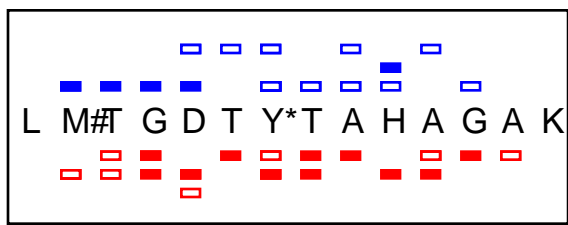

Protein Name: Tyrosine protein kinase ABL2  
 gi Accession: 0  
 Precursor Mass: 511.5533+3  
 Delta Mass: 0.082 ppm  
 XCorr: 45.41

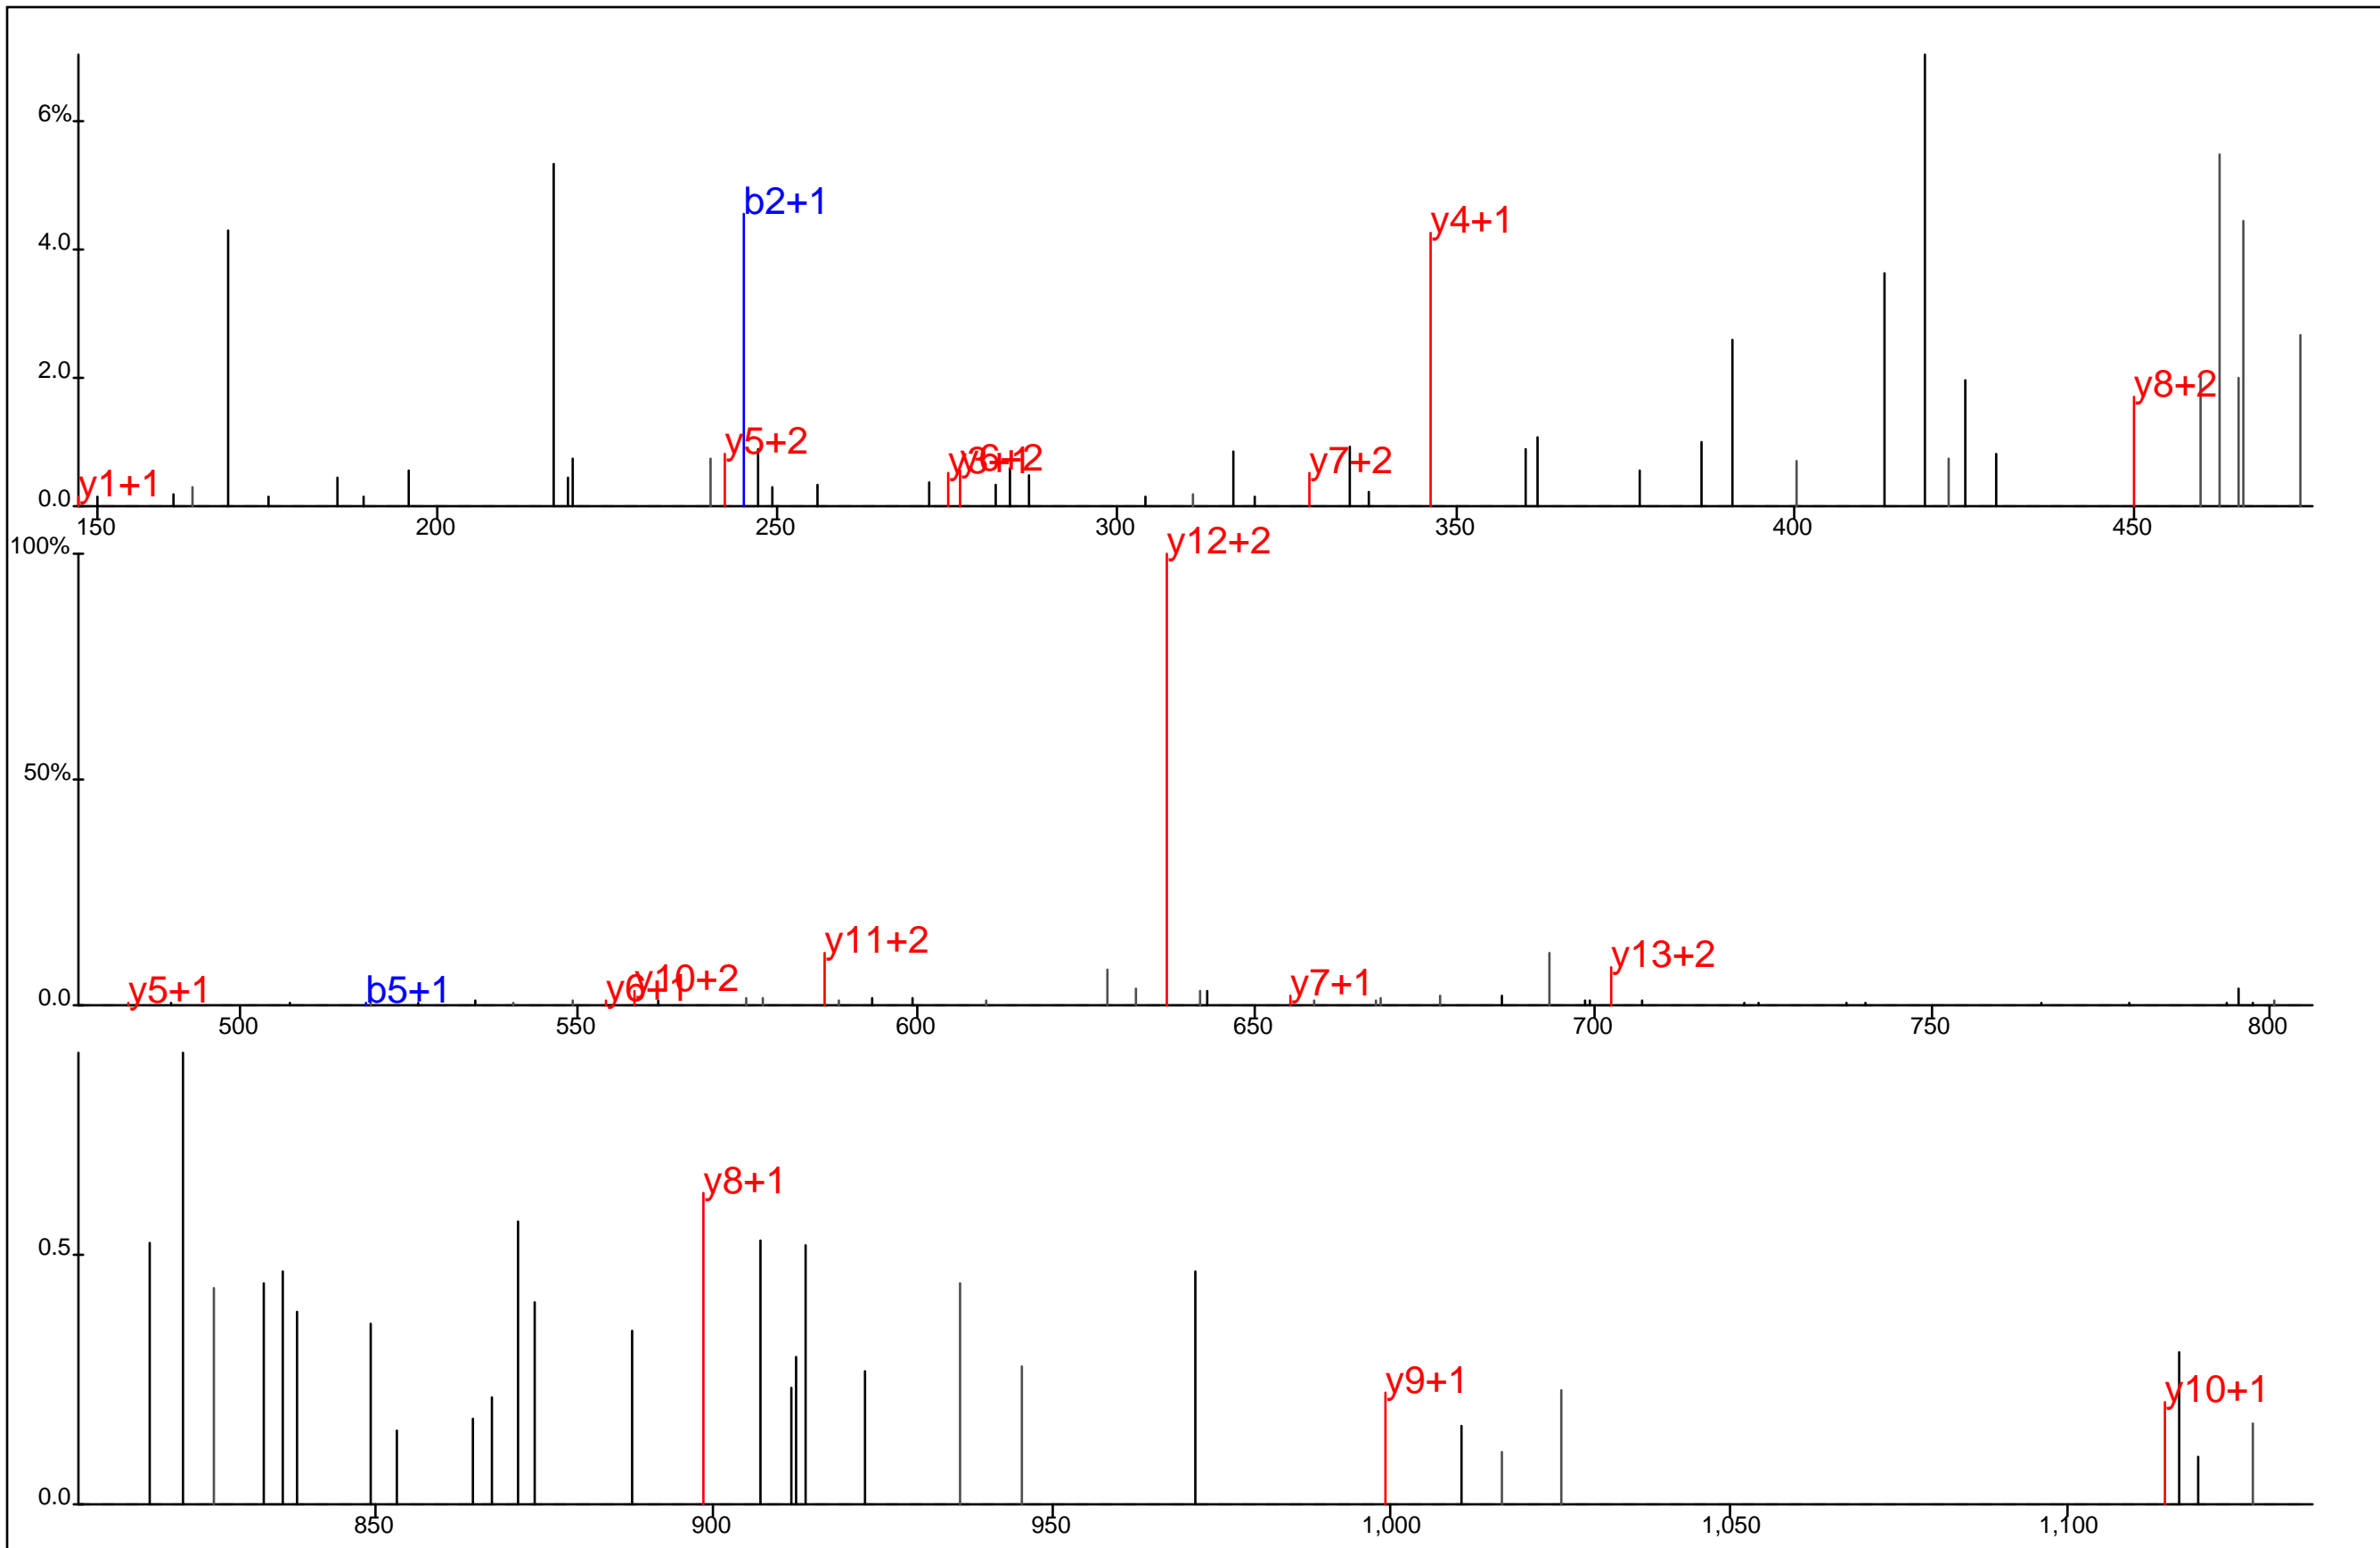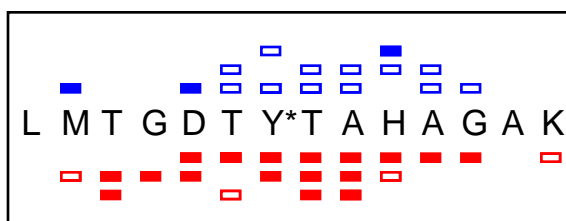

Protein Name: Tyrosine protein kinase ABL2  
 gi Accession: 0  
 Precursor Mass: 506.2205+3  
 Delta Mass: 2.139 ppm  
 XCorr: 23.06



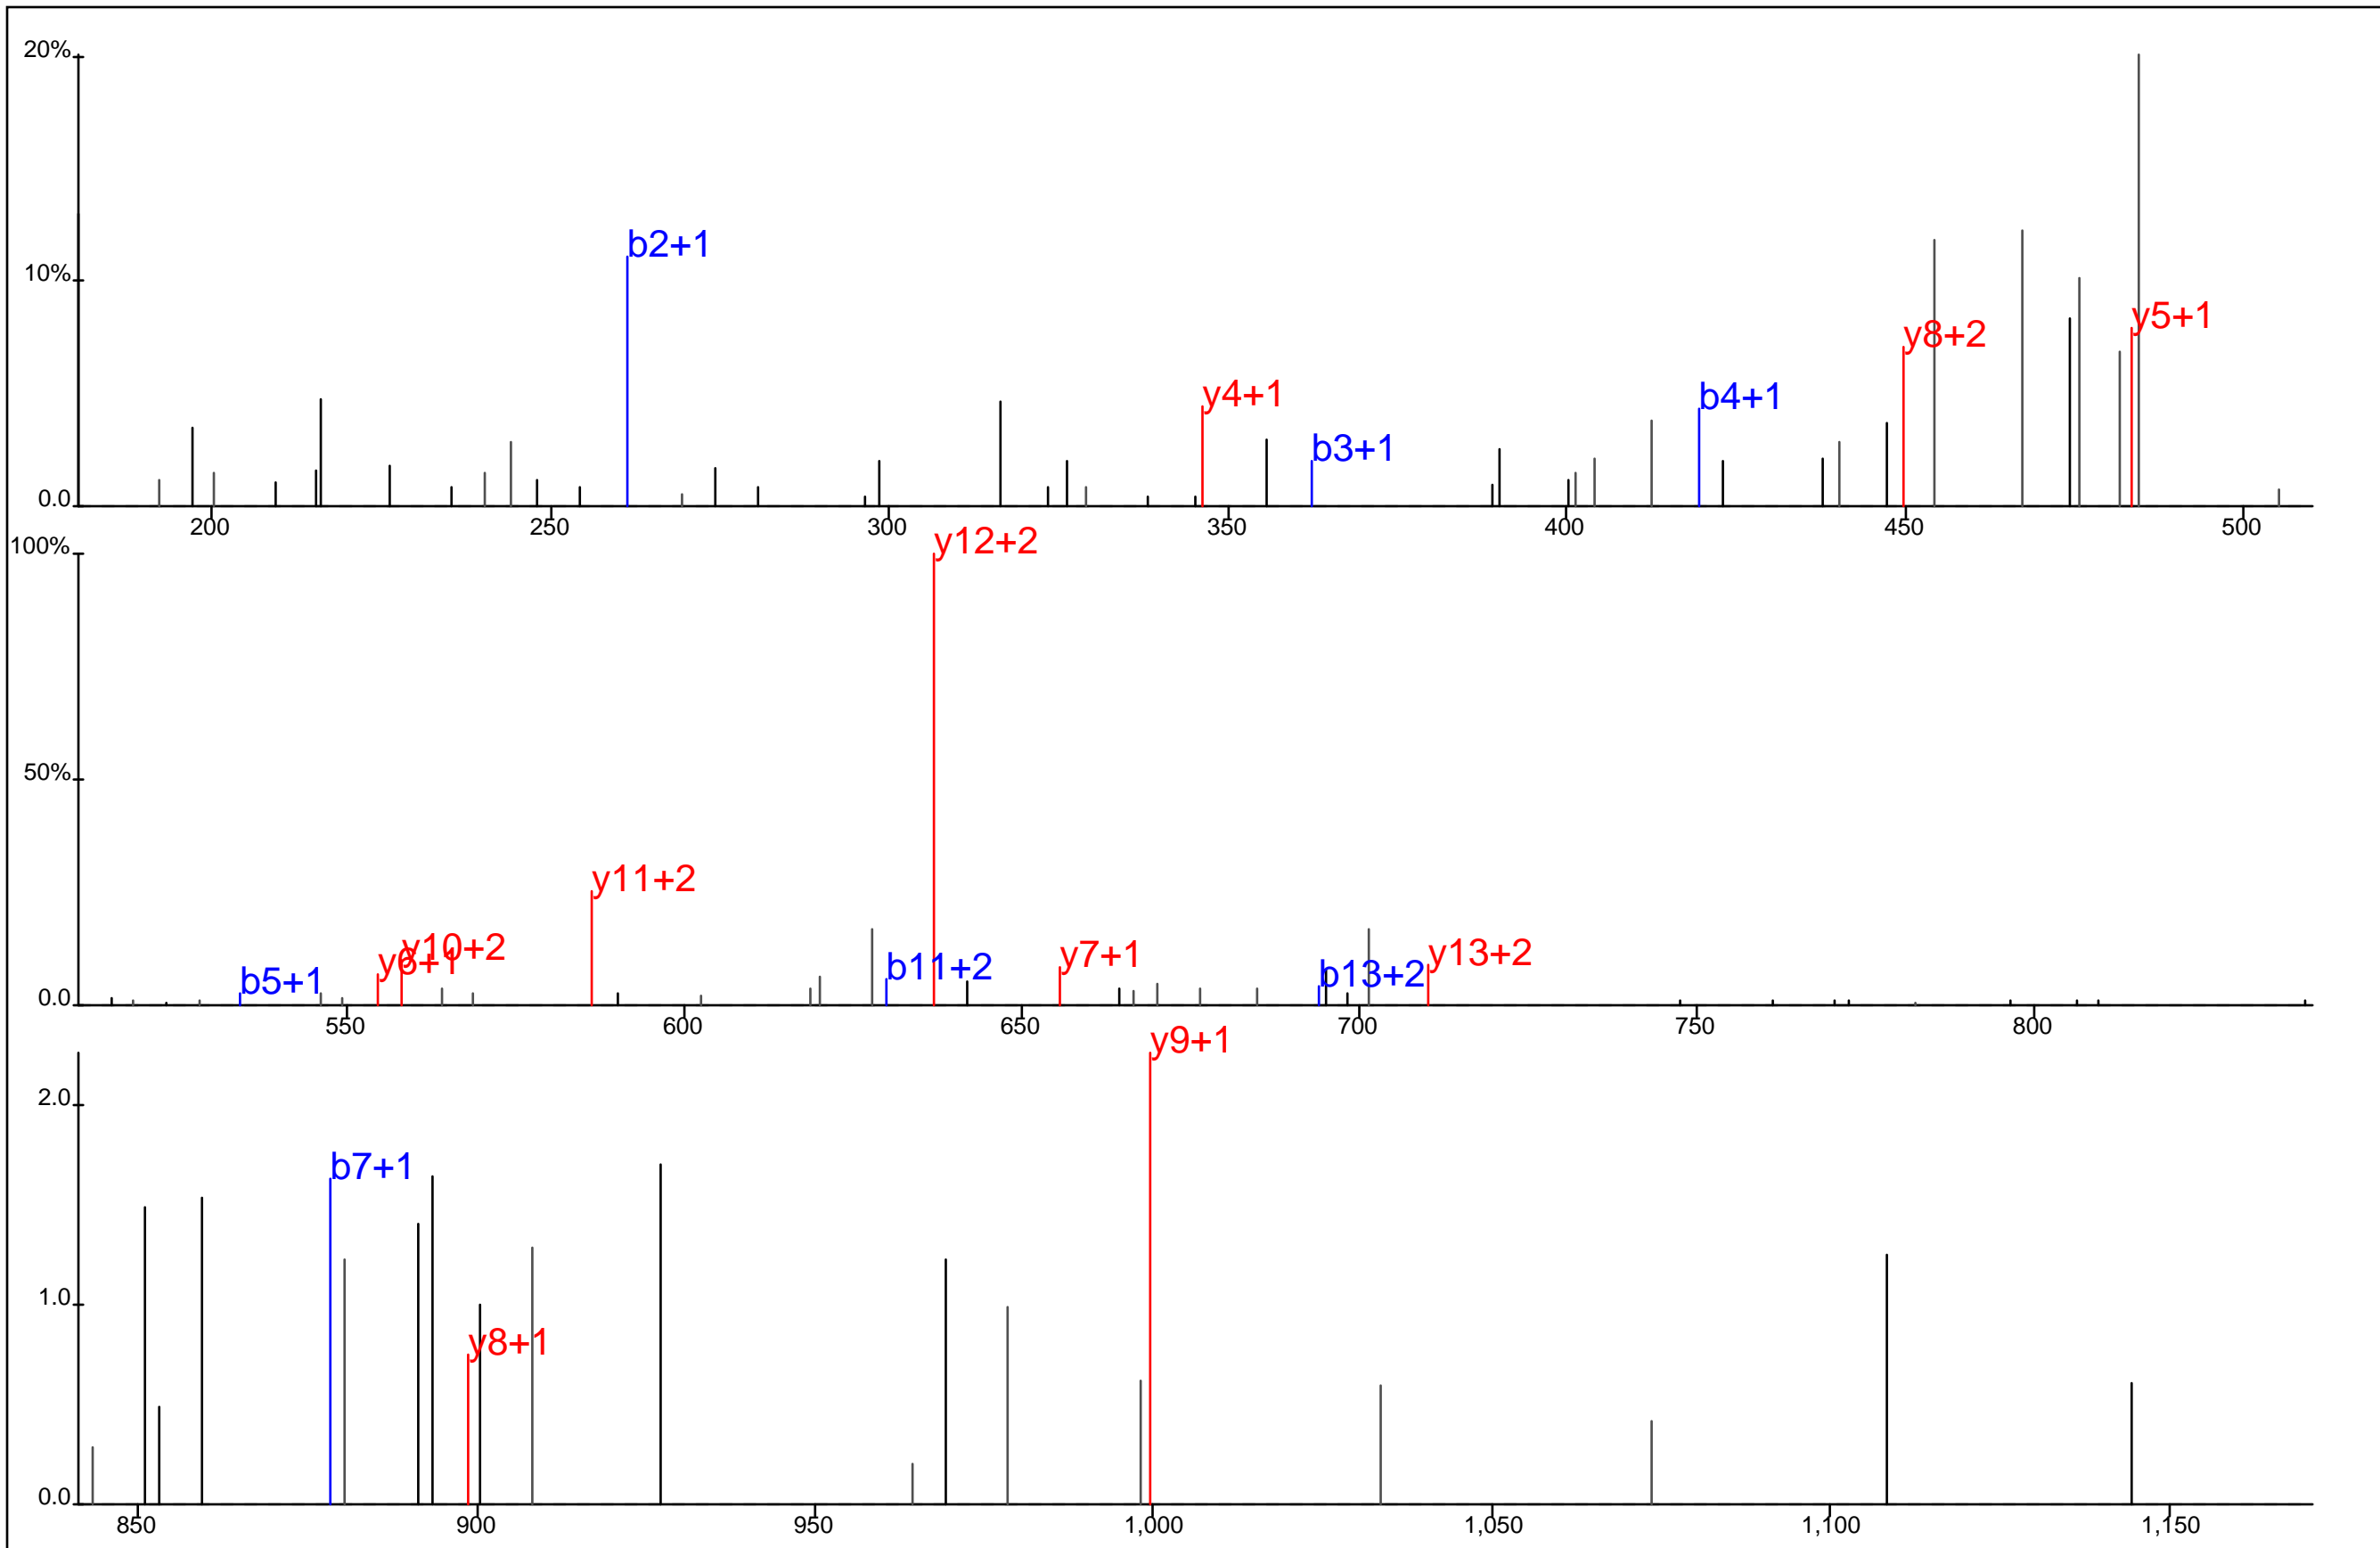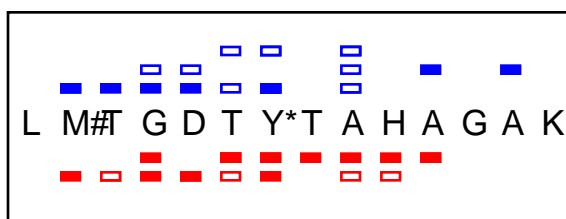

Protein Name: Tyrosine protein kinase ABL2  
 gi Accession: 0  
 Precursor Mass: 511.5531+3  
 Delta Mass: 0.157 ppm  
 XCorr: 30.35

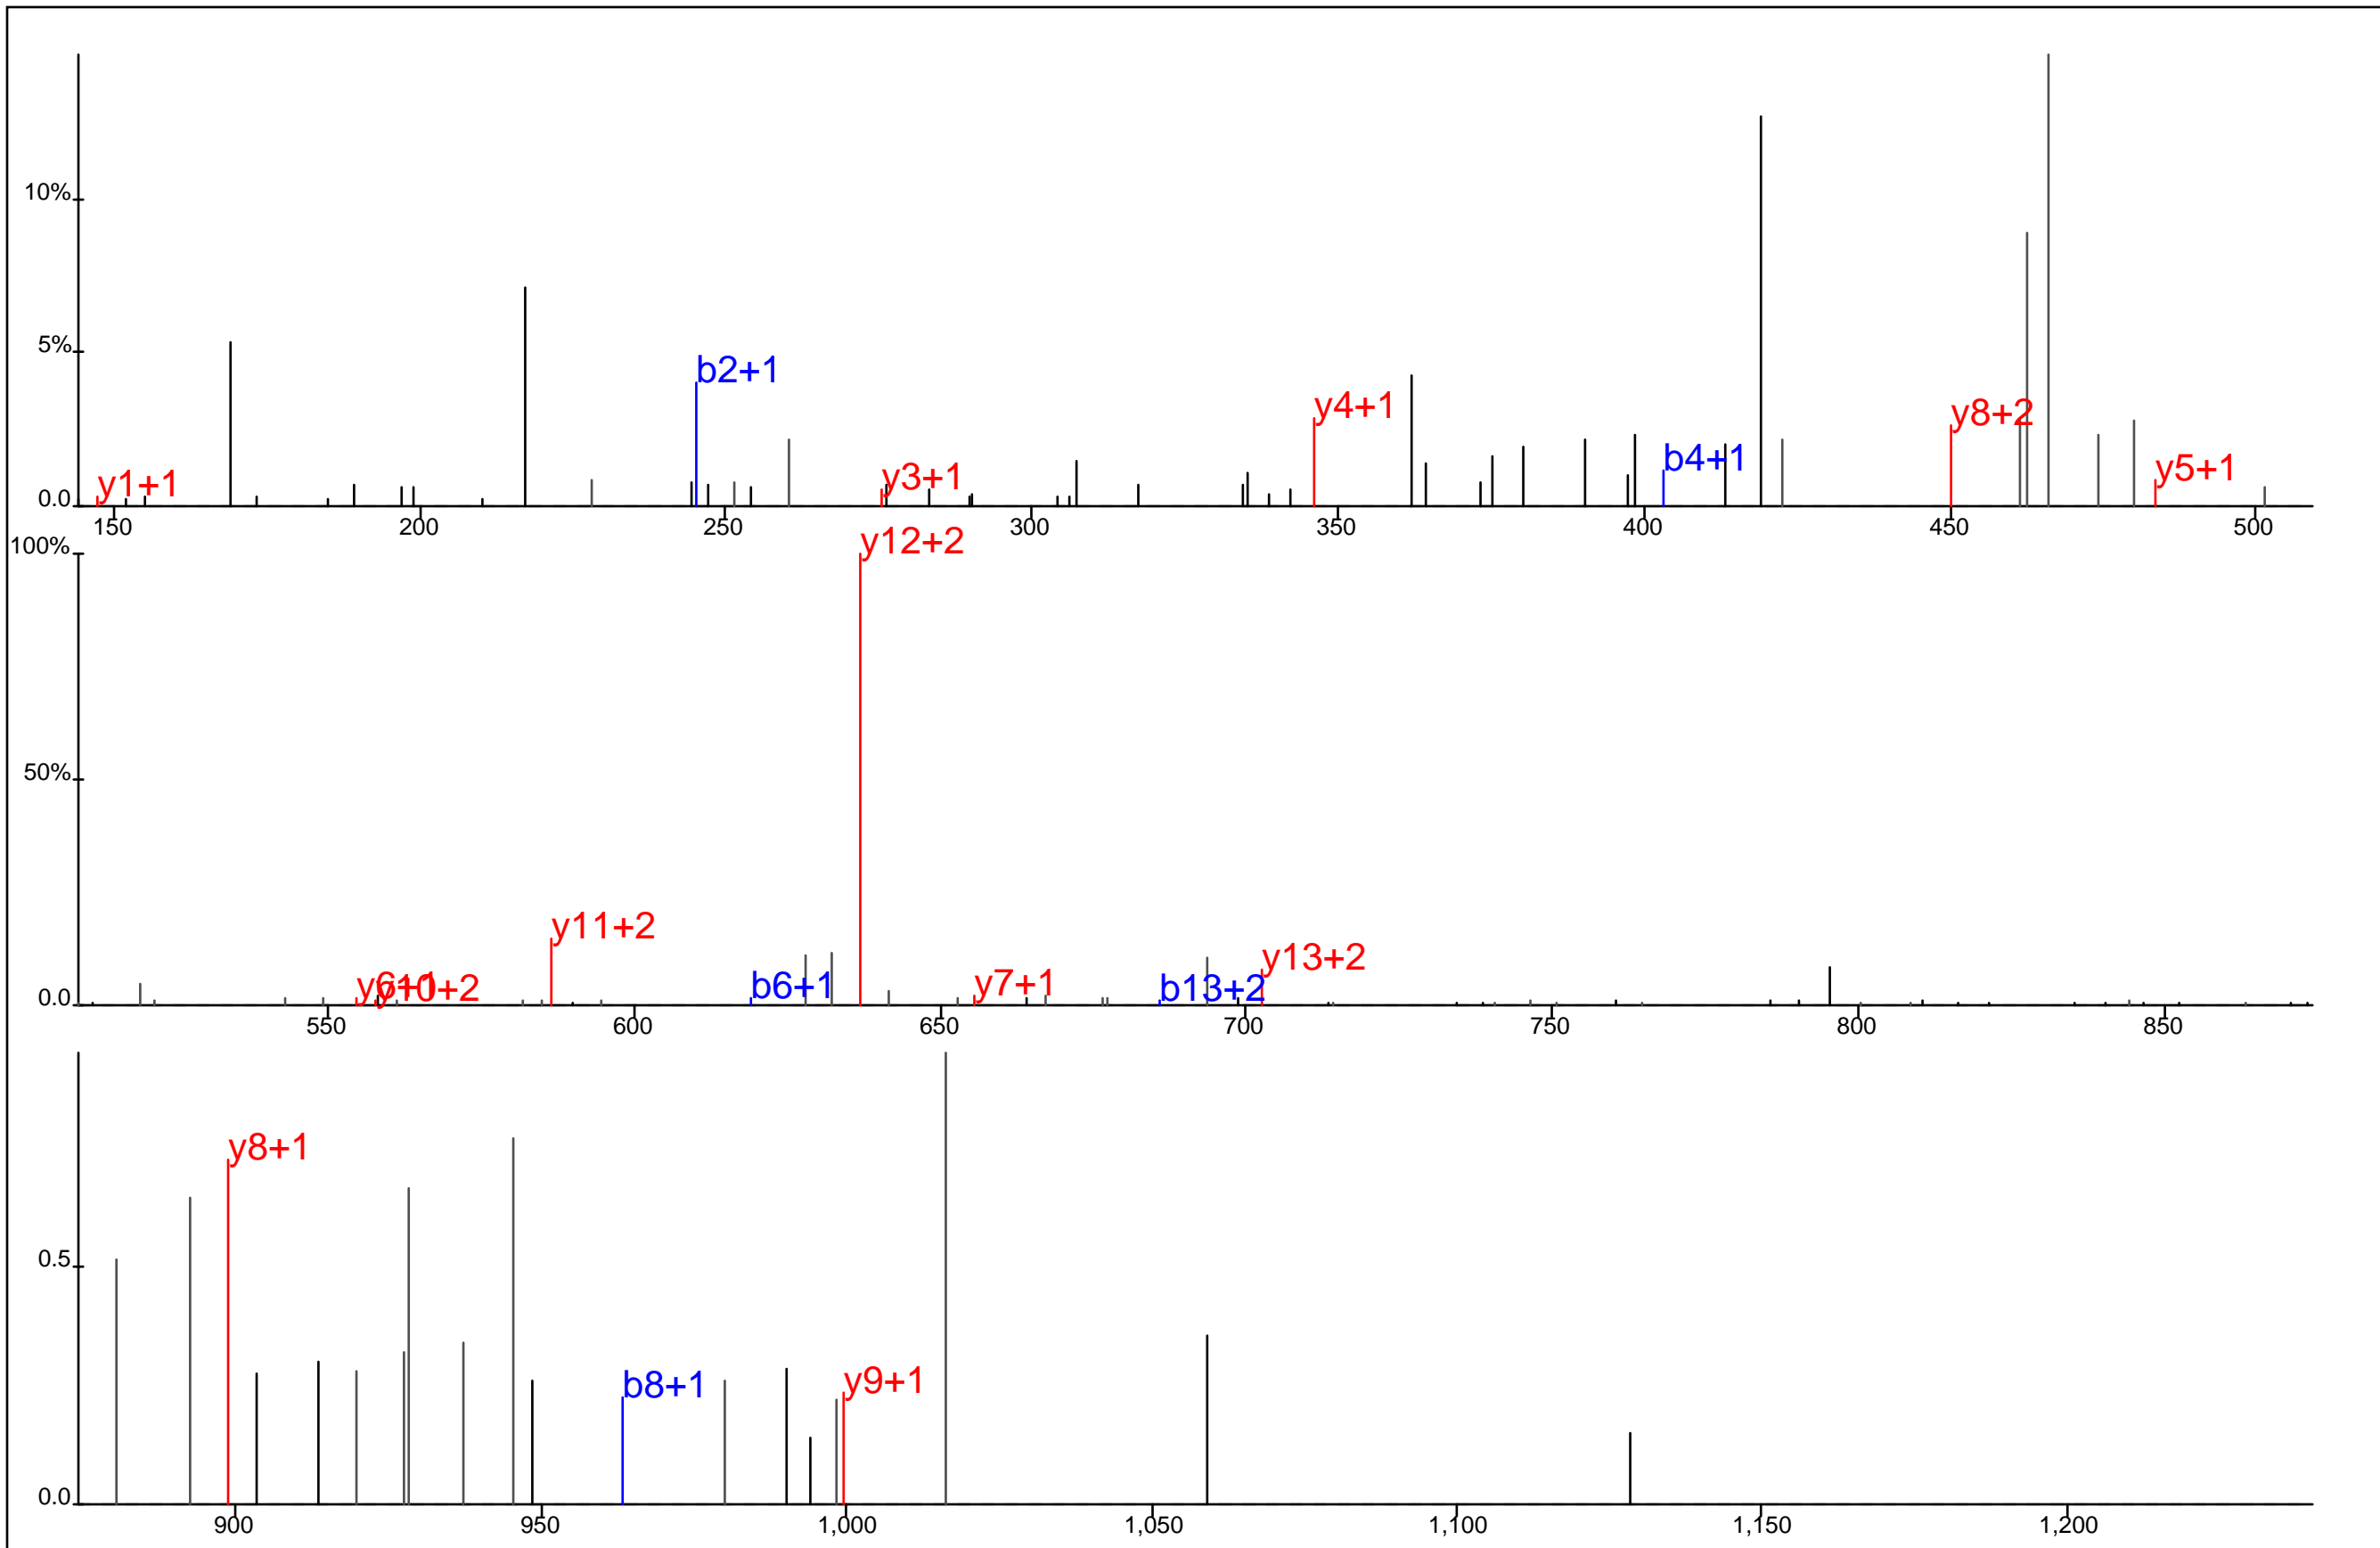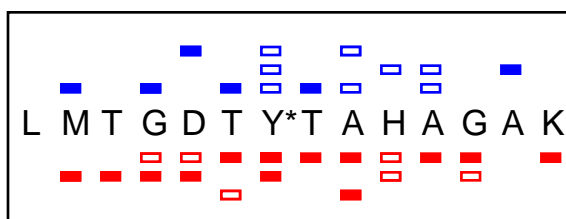

Protein Name: Tyrosine protein kinase ABL2  
 gi Accession: 0  
 Precursor Mass: 506.2206+3  
 Delta Mass: 1.959 ppm  
 XCorr: 20.4

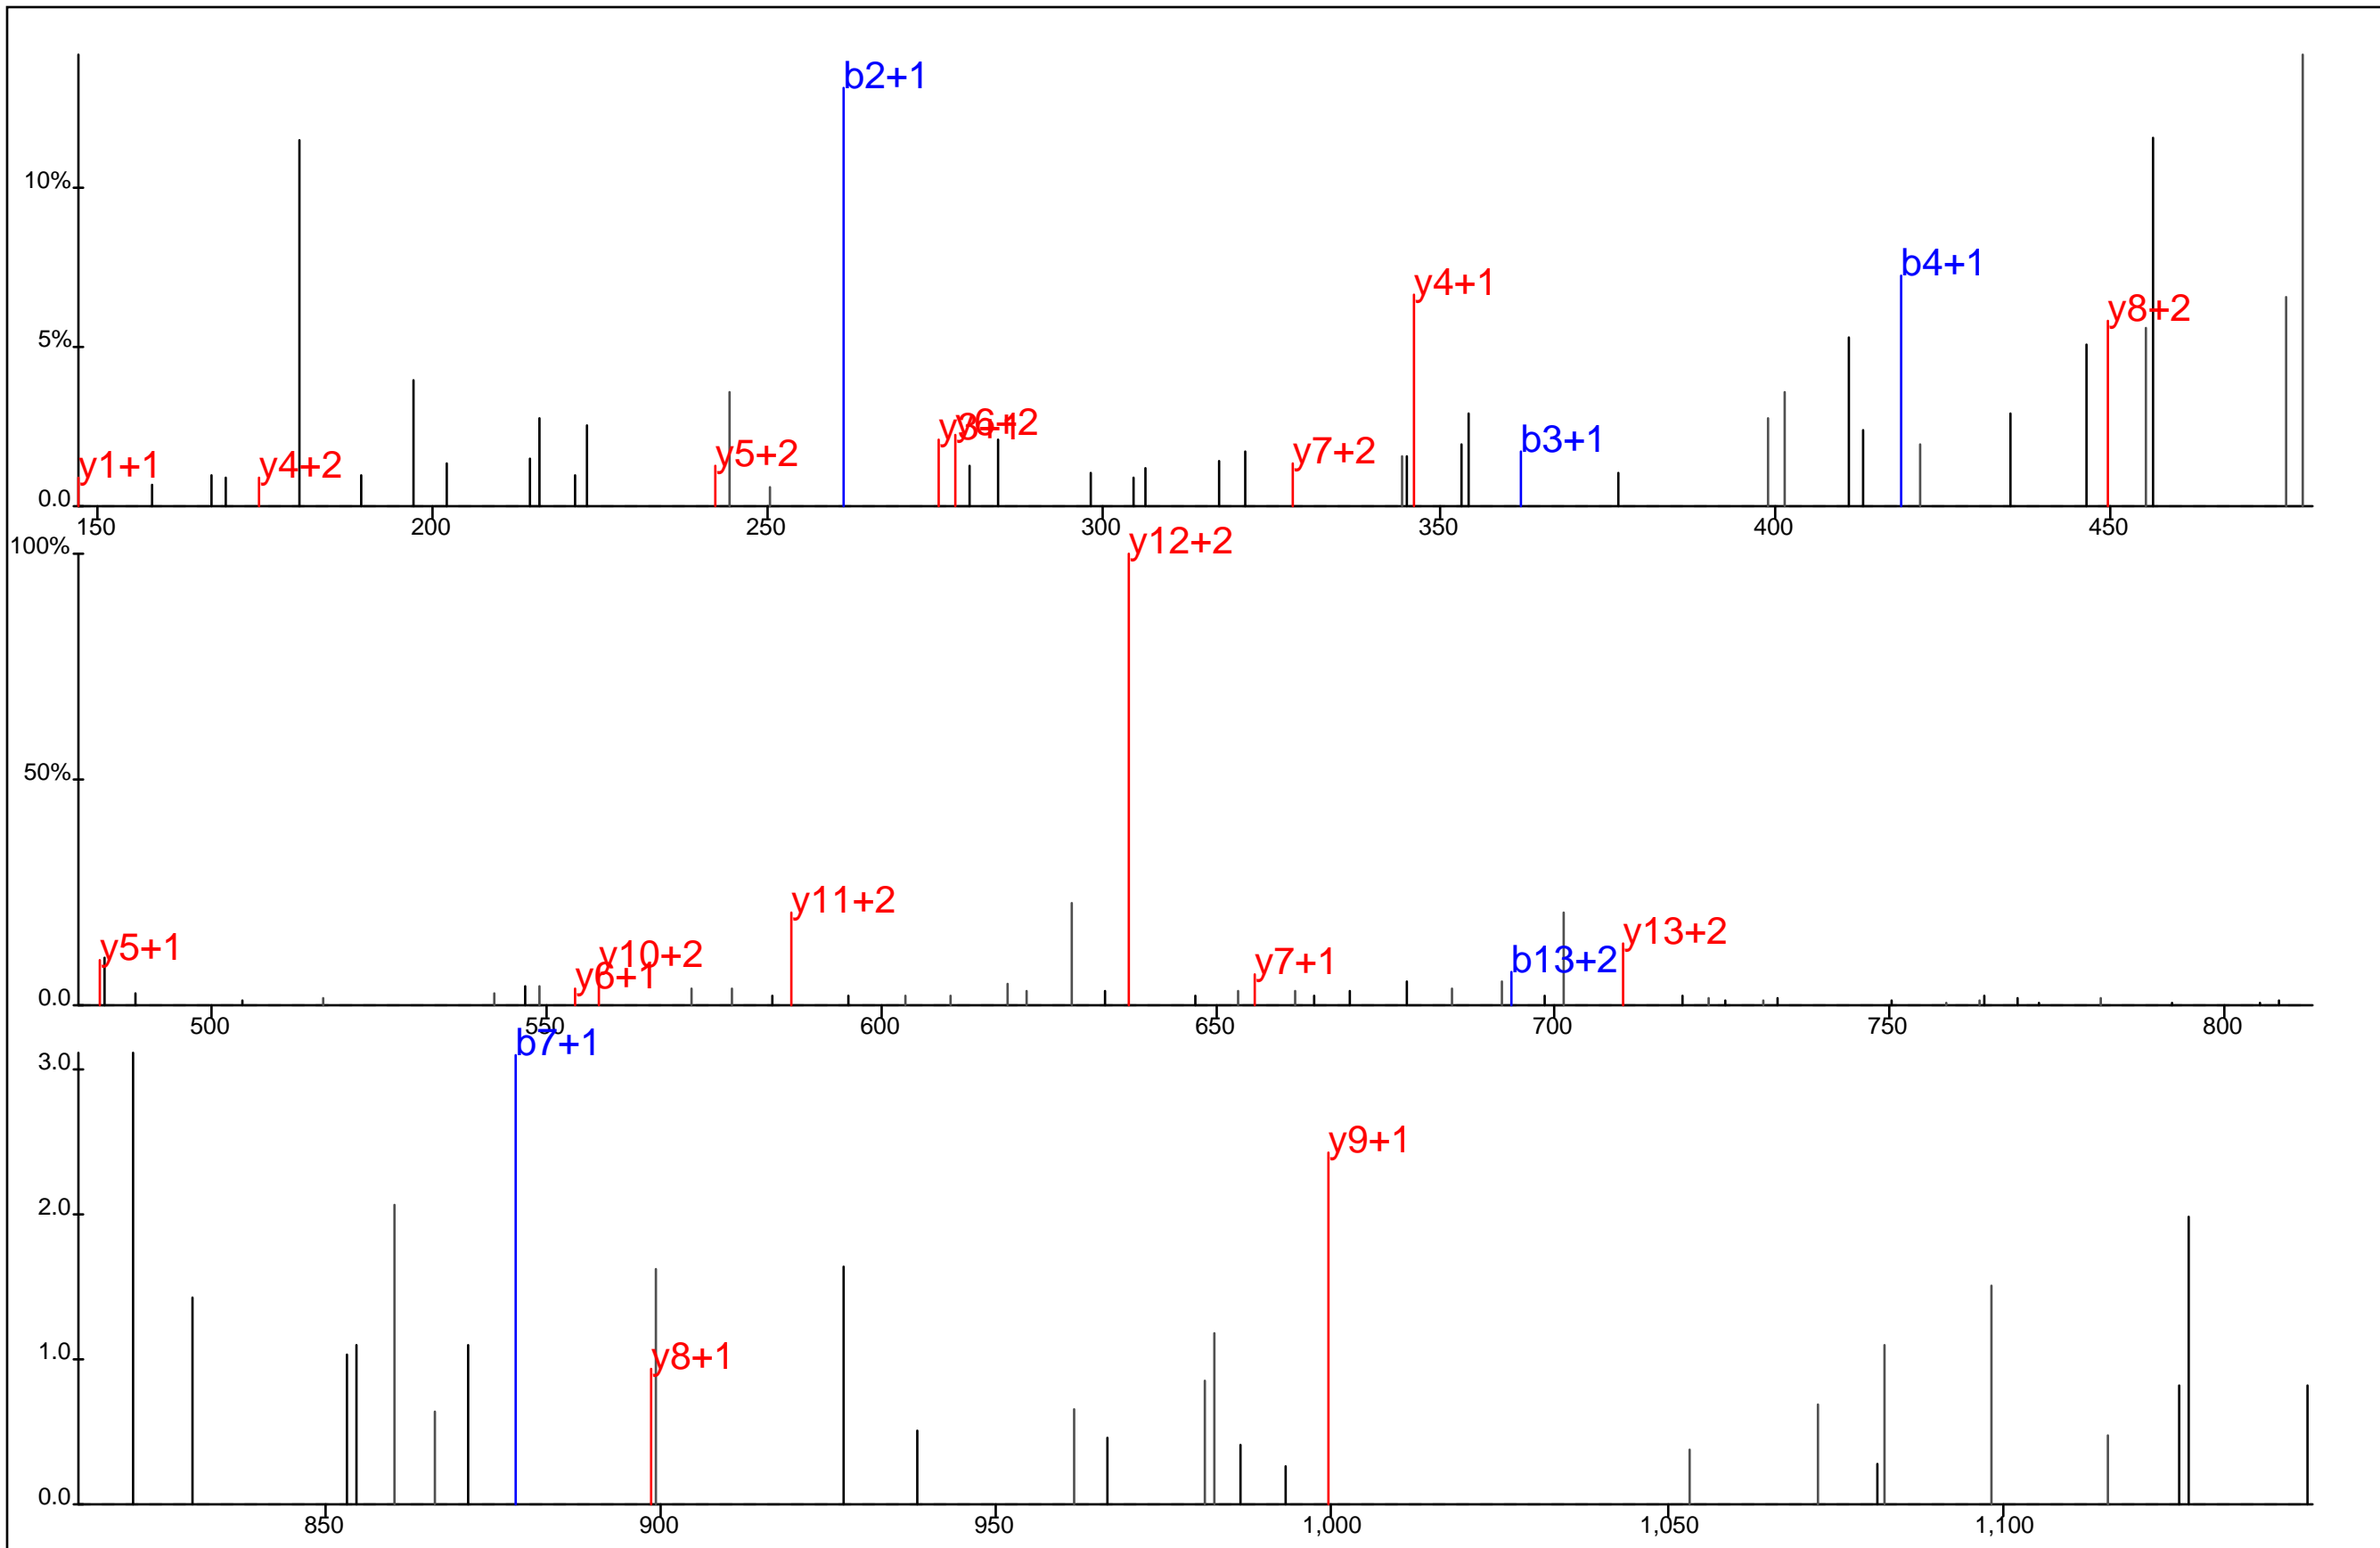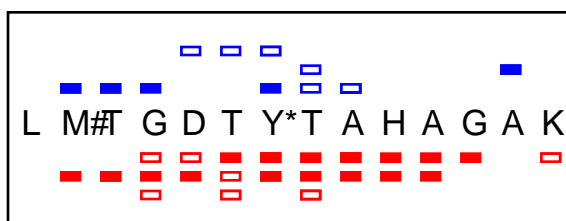

Protein Name: Tyrosine protein kinase ABL2  
 gi Accession: 0  
 Precursor Mass: 511.5536+3  
 Delta Mass: 0.798 ppm  
 XCorr: 37.06

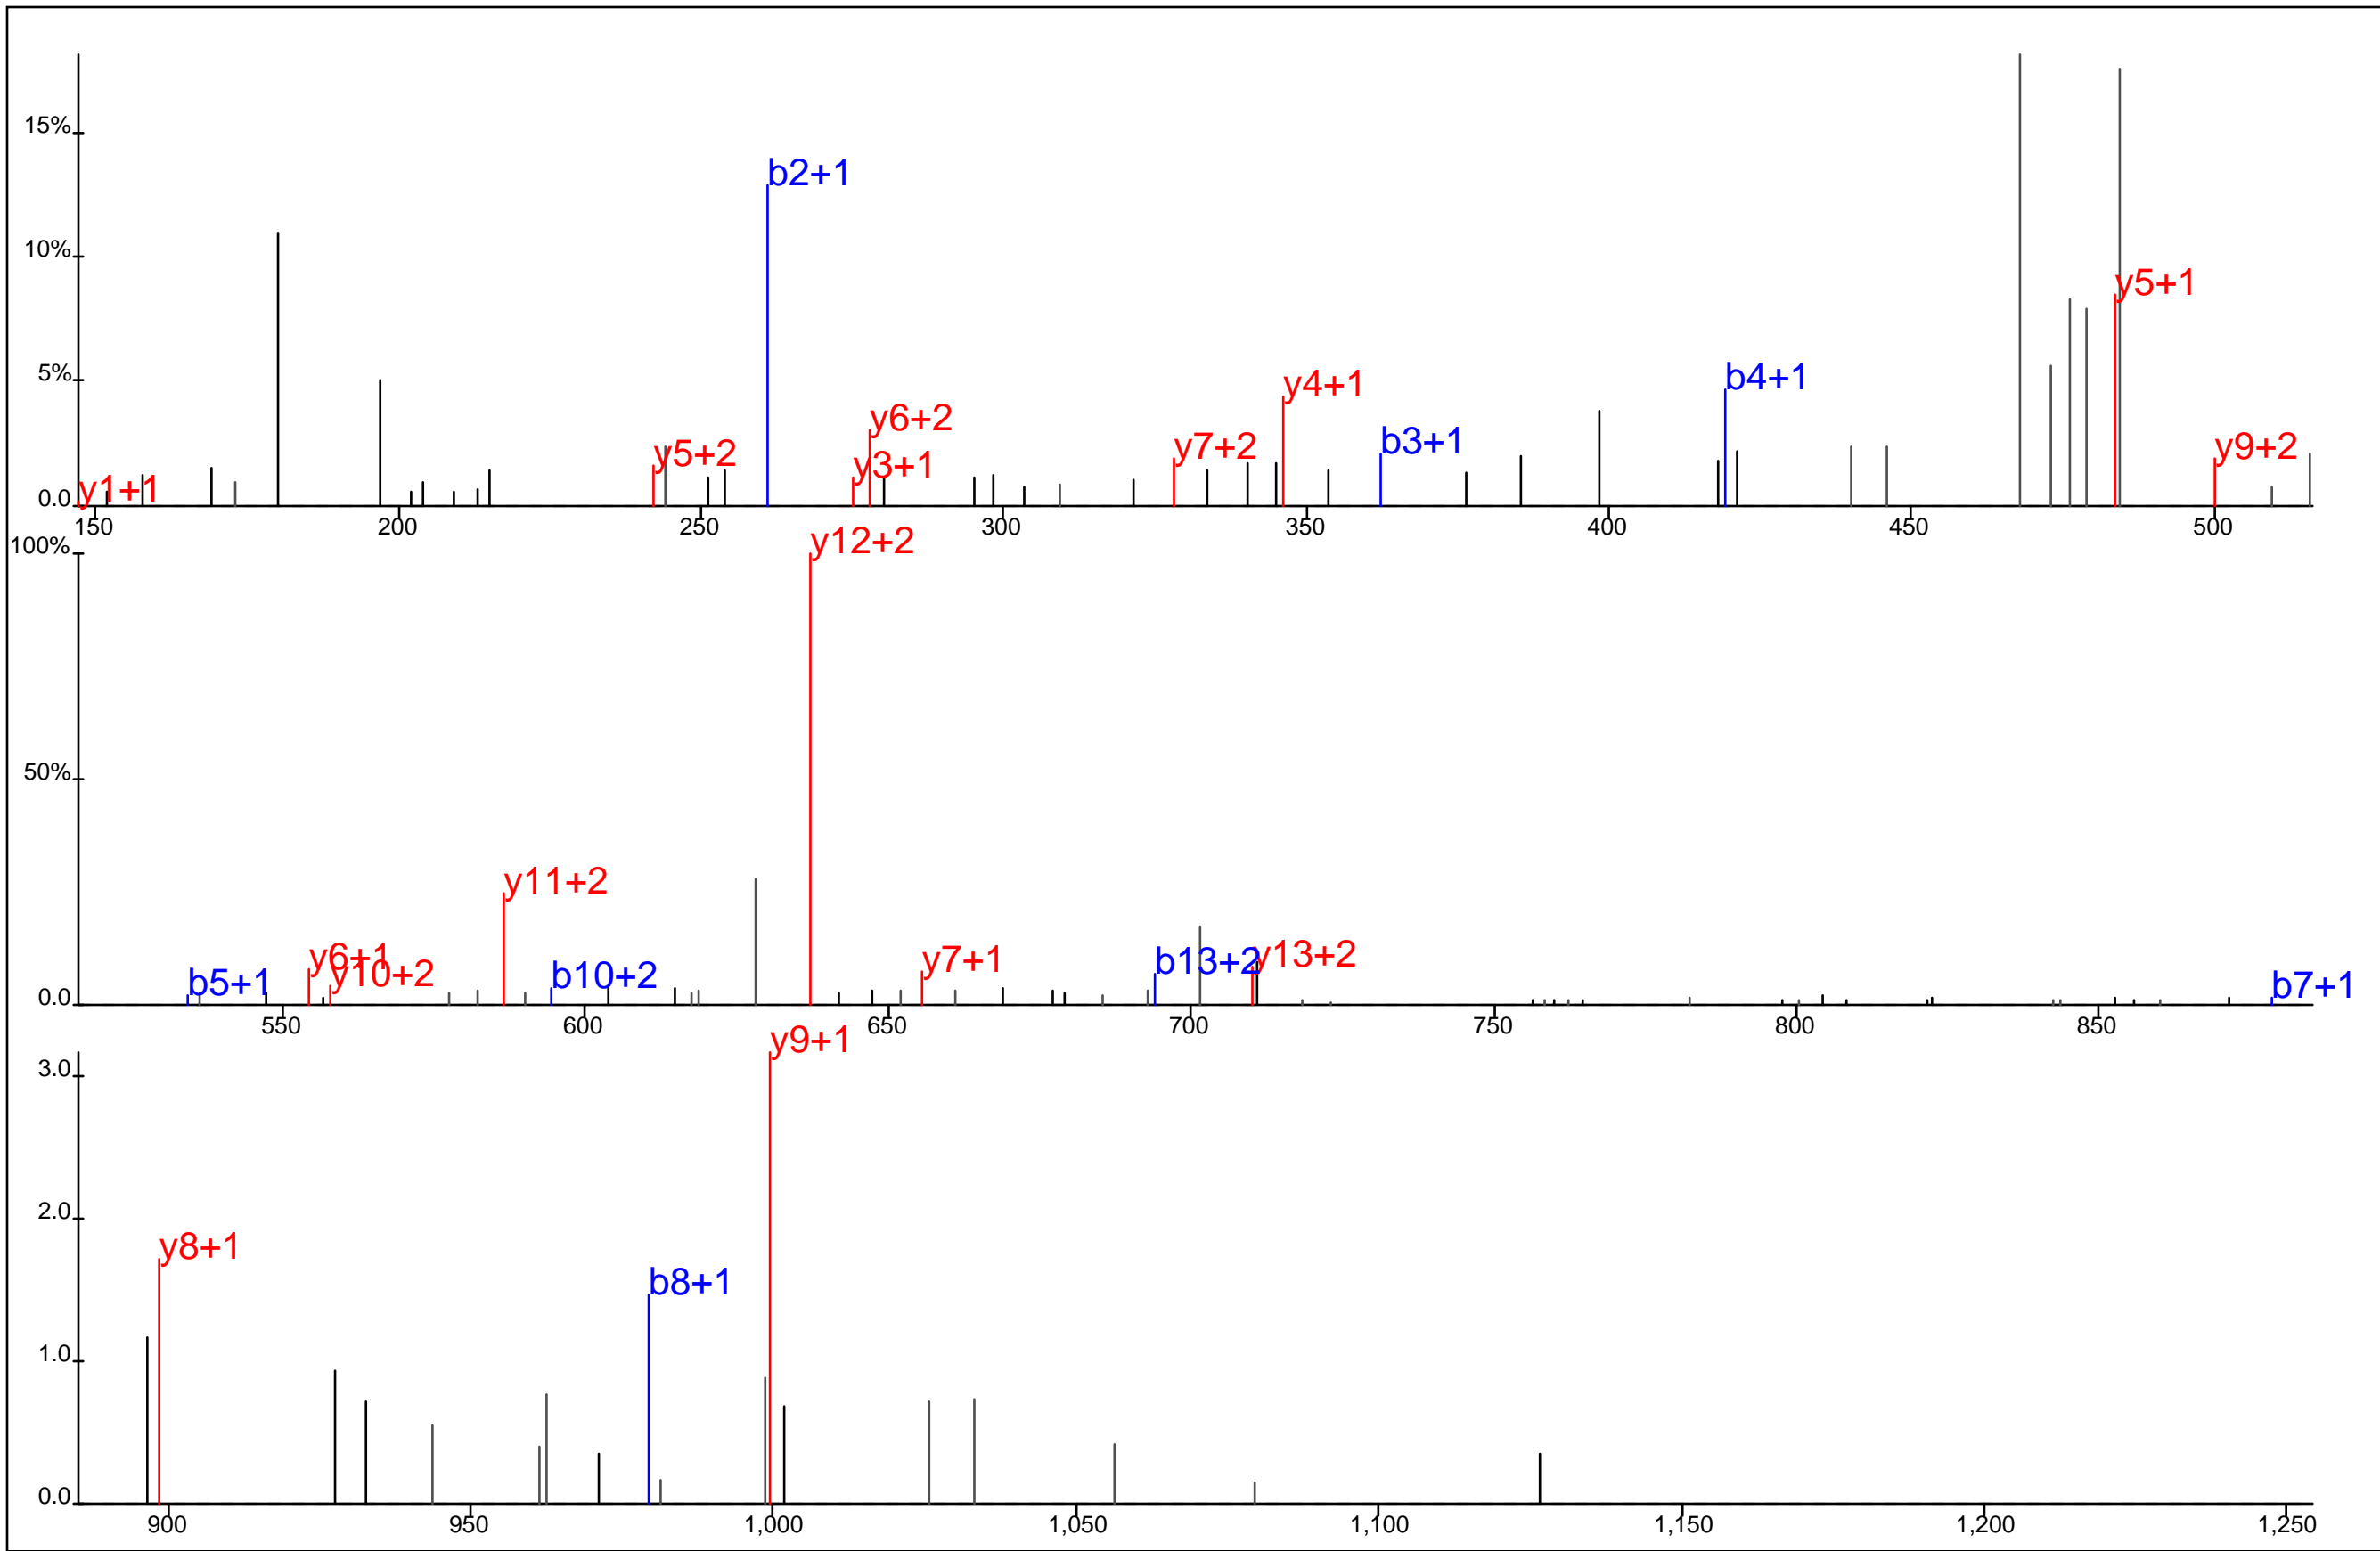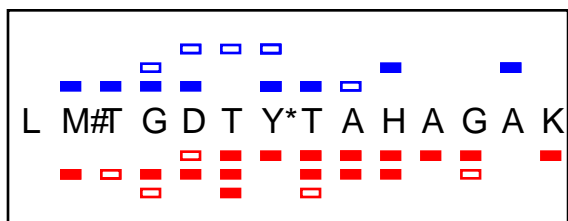

Protein Name: Tyrosine protein kinase ABL2  
 gi Accession: 0  
 Precursor Mass: 511.5525+3  
 Delta Mass: 1.351 ppm  
 XCorr: 37.53



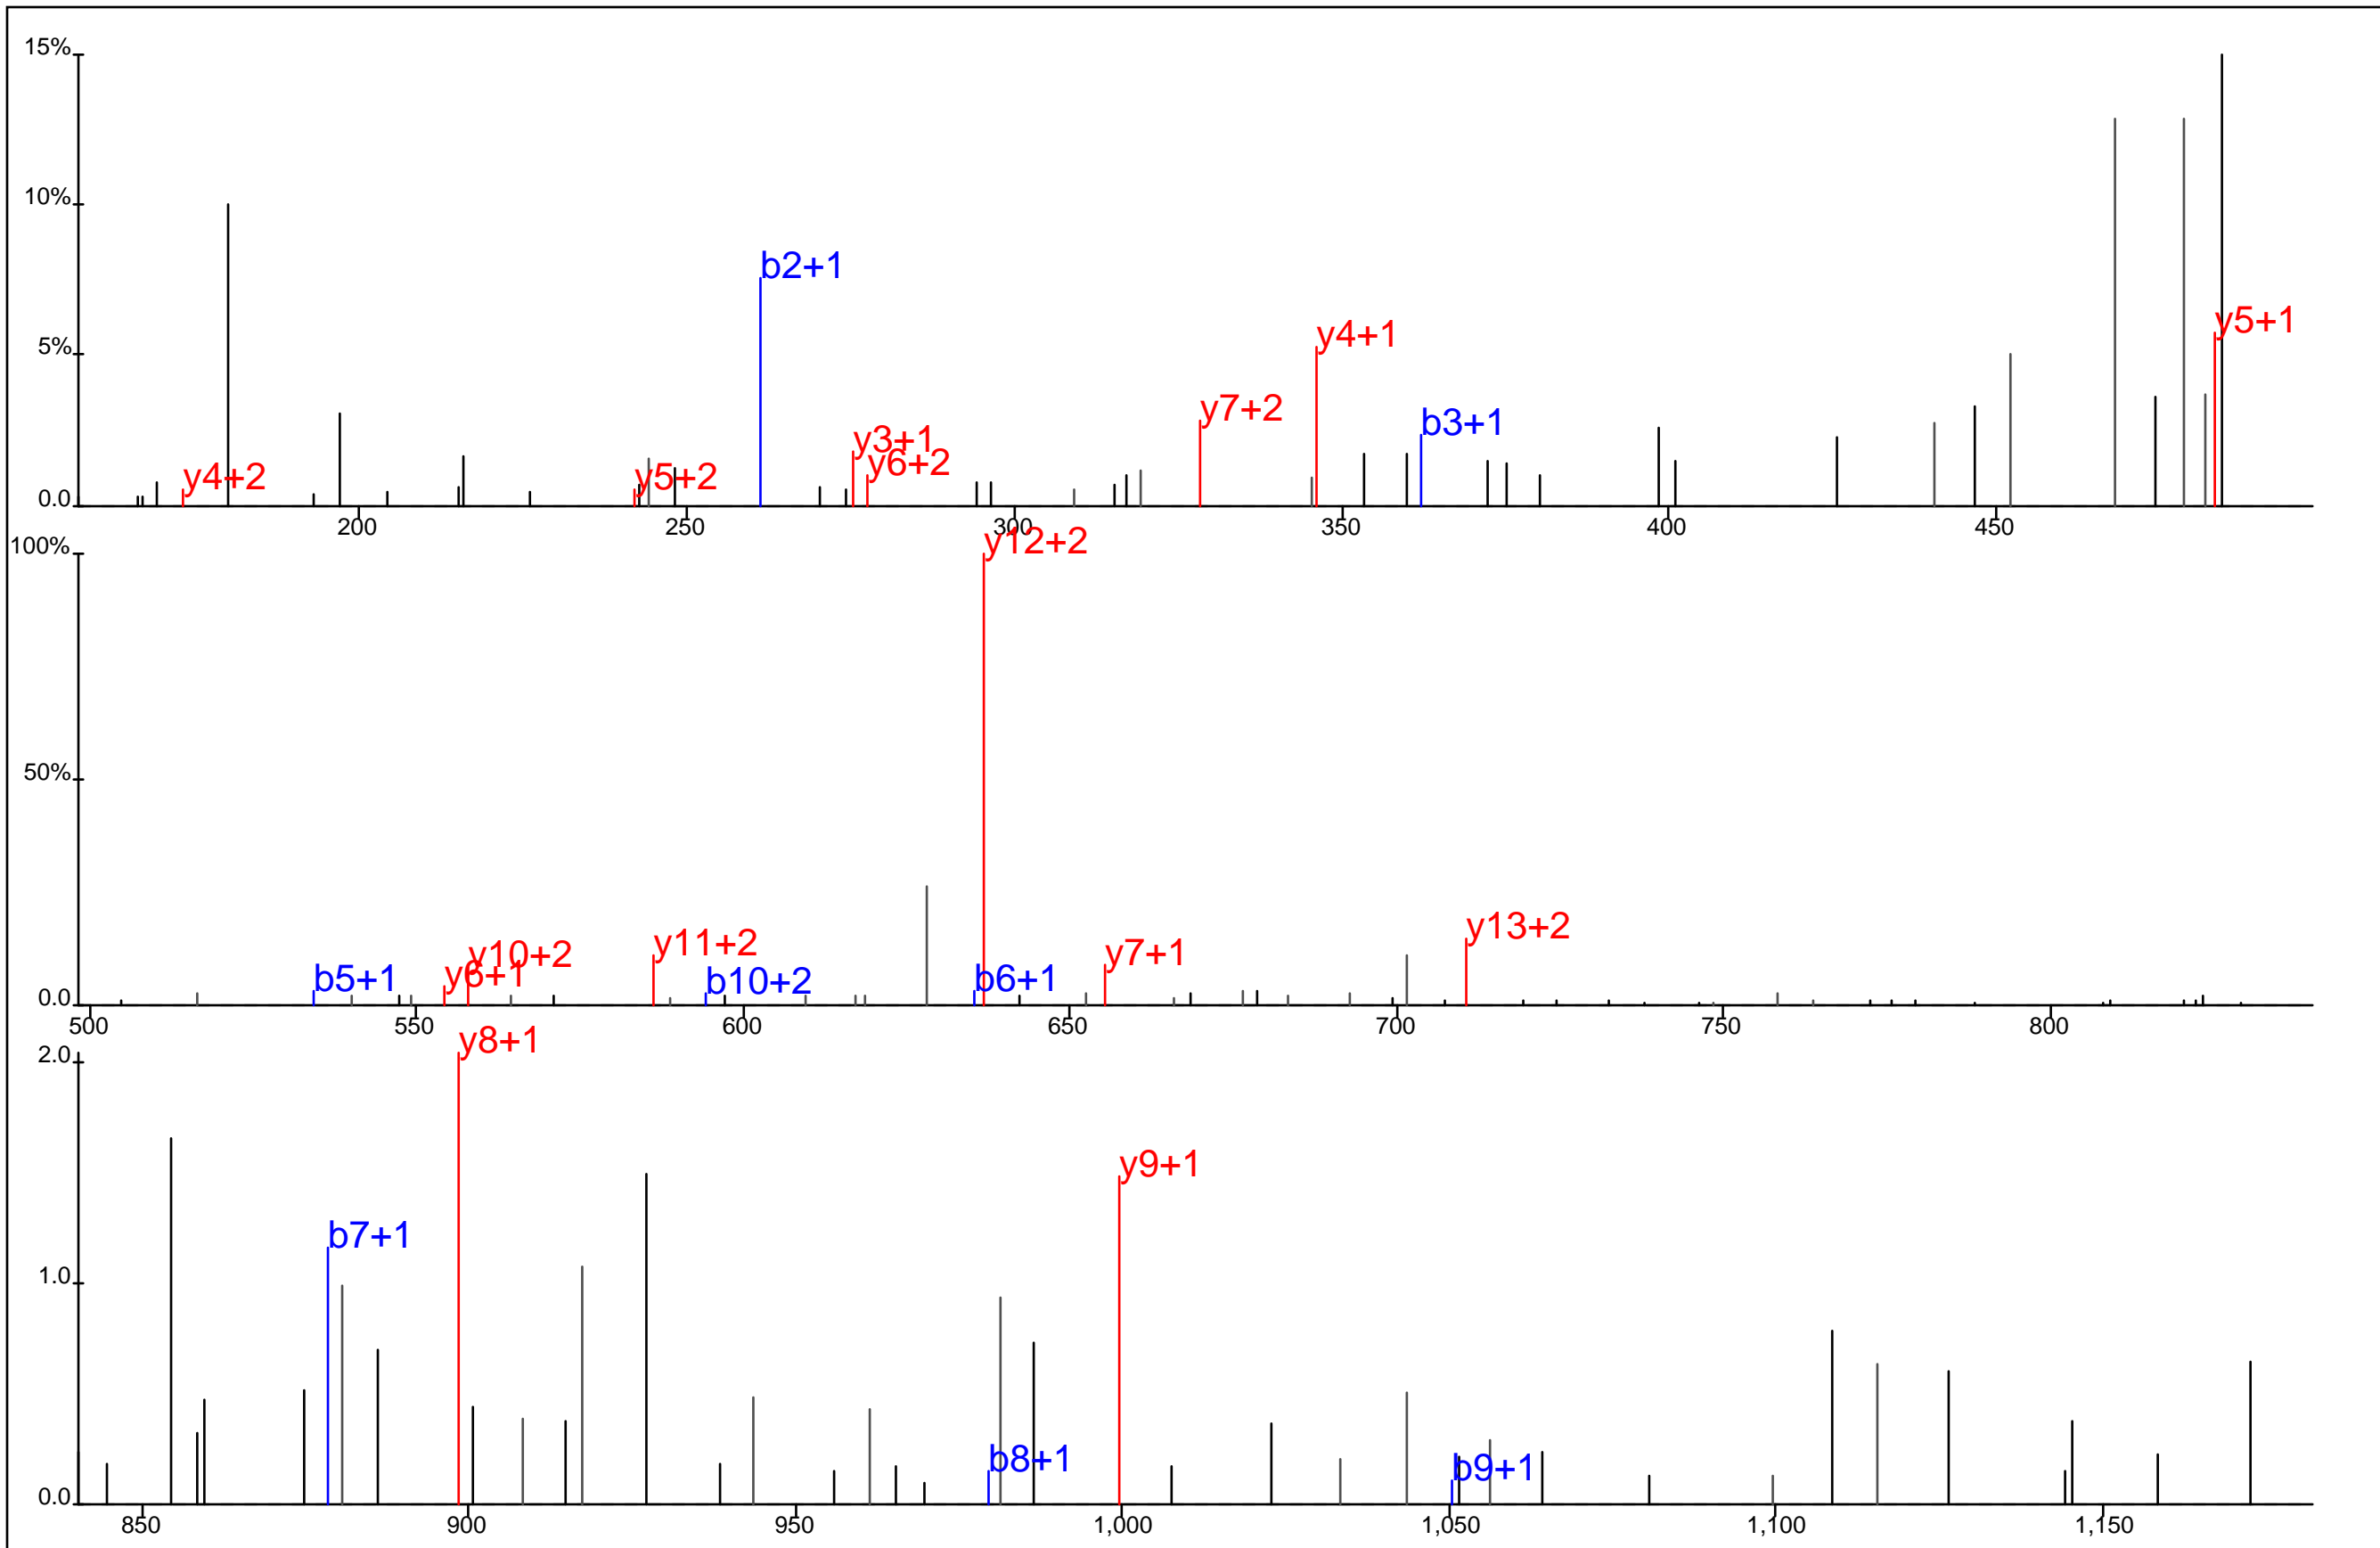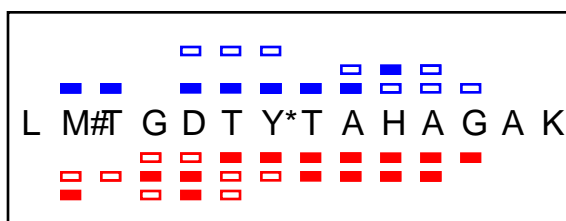

Protein Name: Tyrosine protein kinase ABL2  
 gi Accession: 0  
 Precursor Mass: 511.5530+3  
 Delta Mass: 0.455 ppm  
 XCorr: 40.65

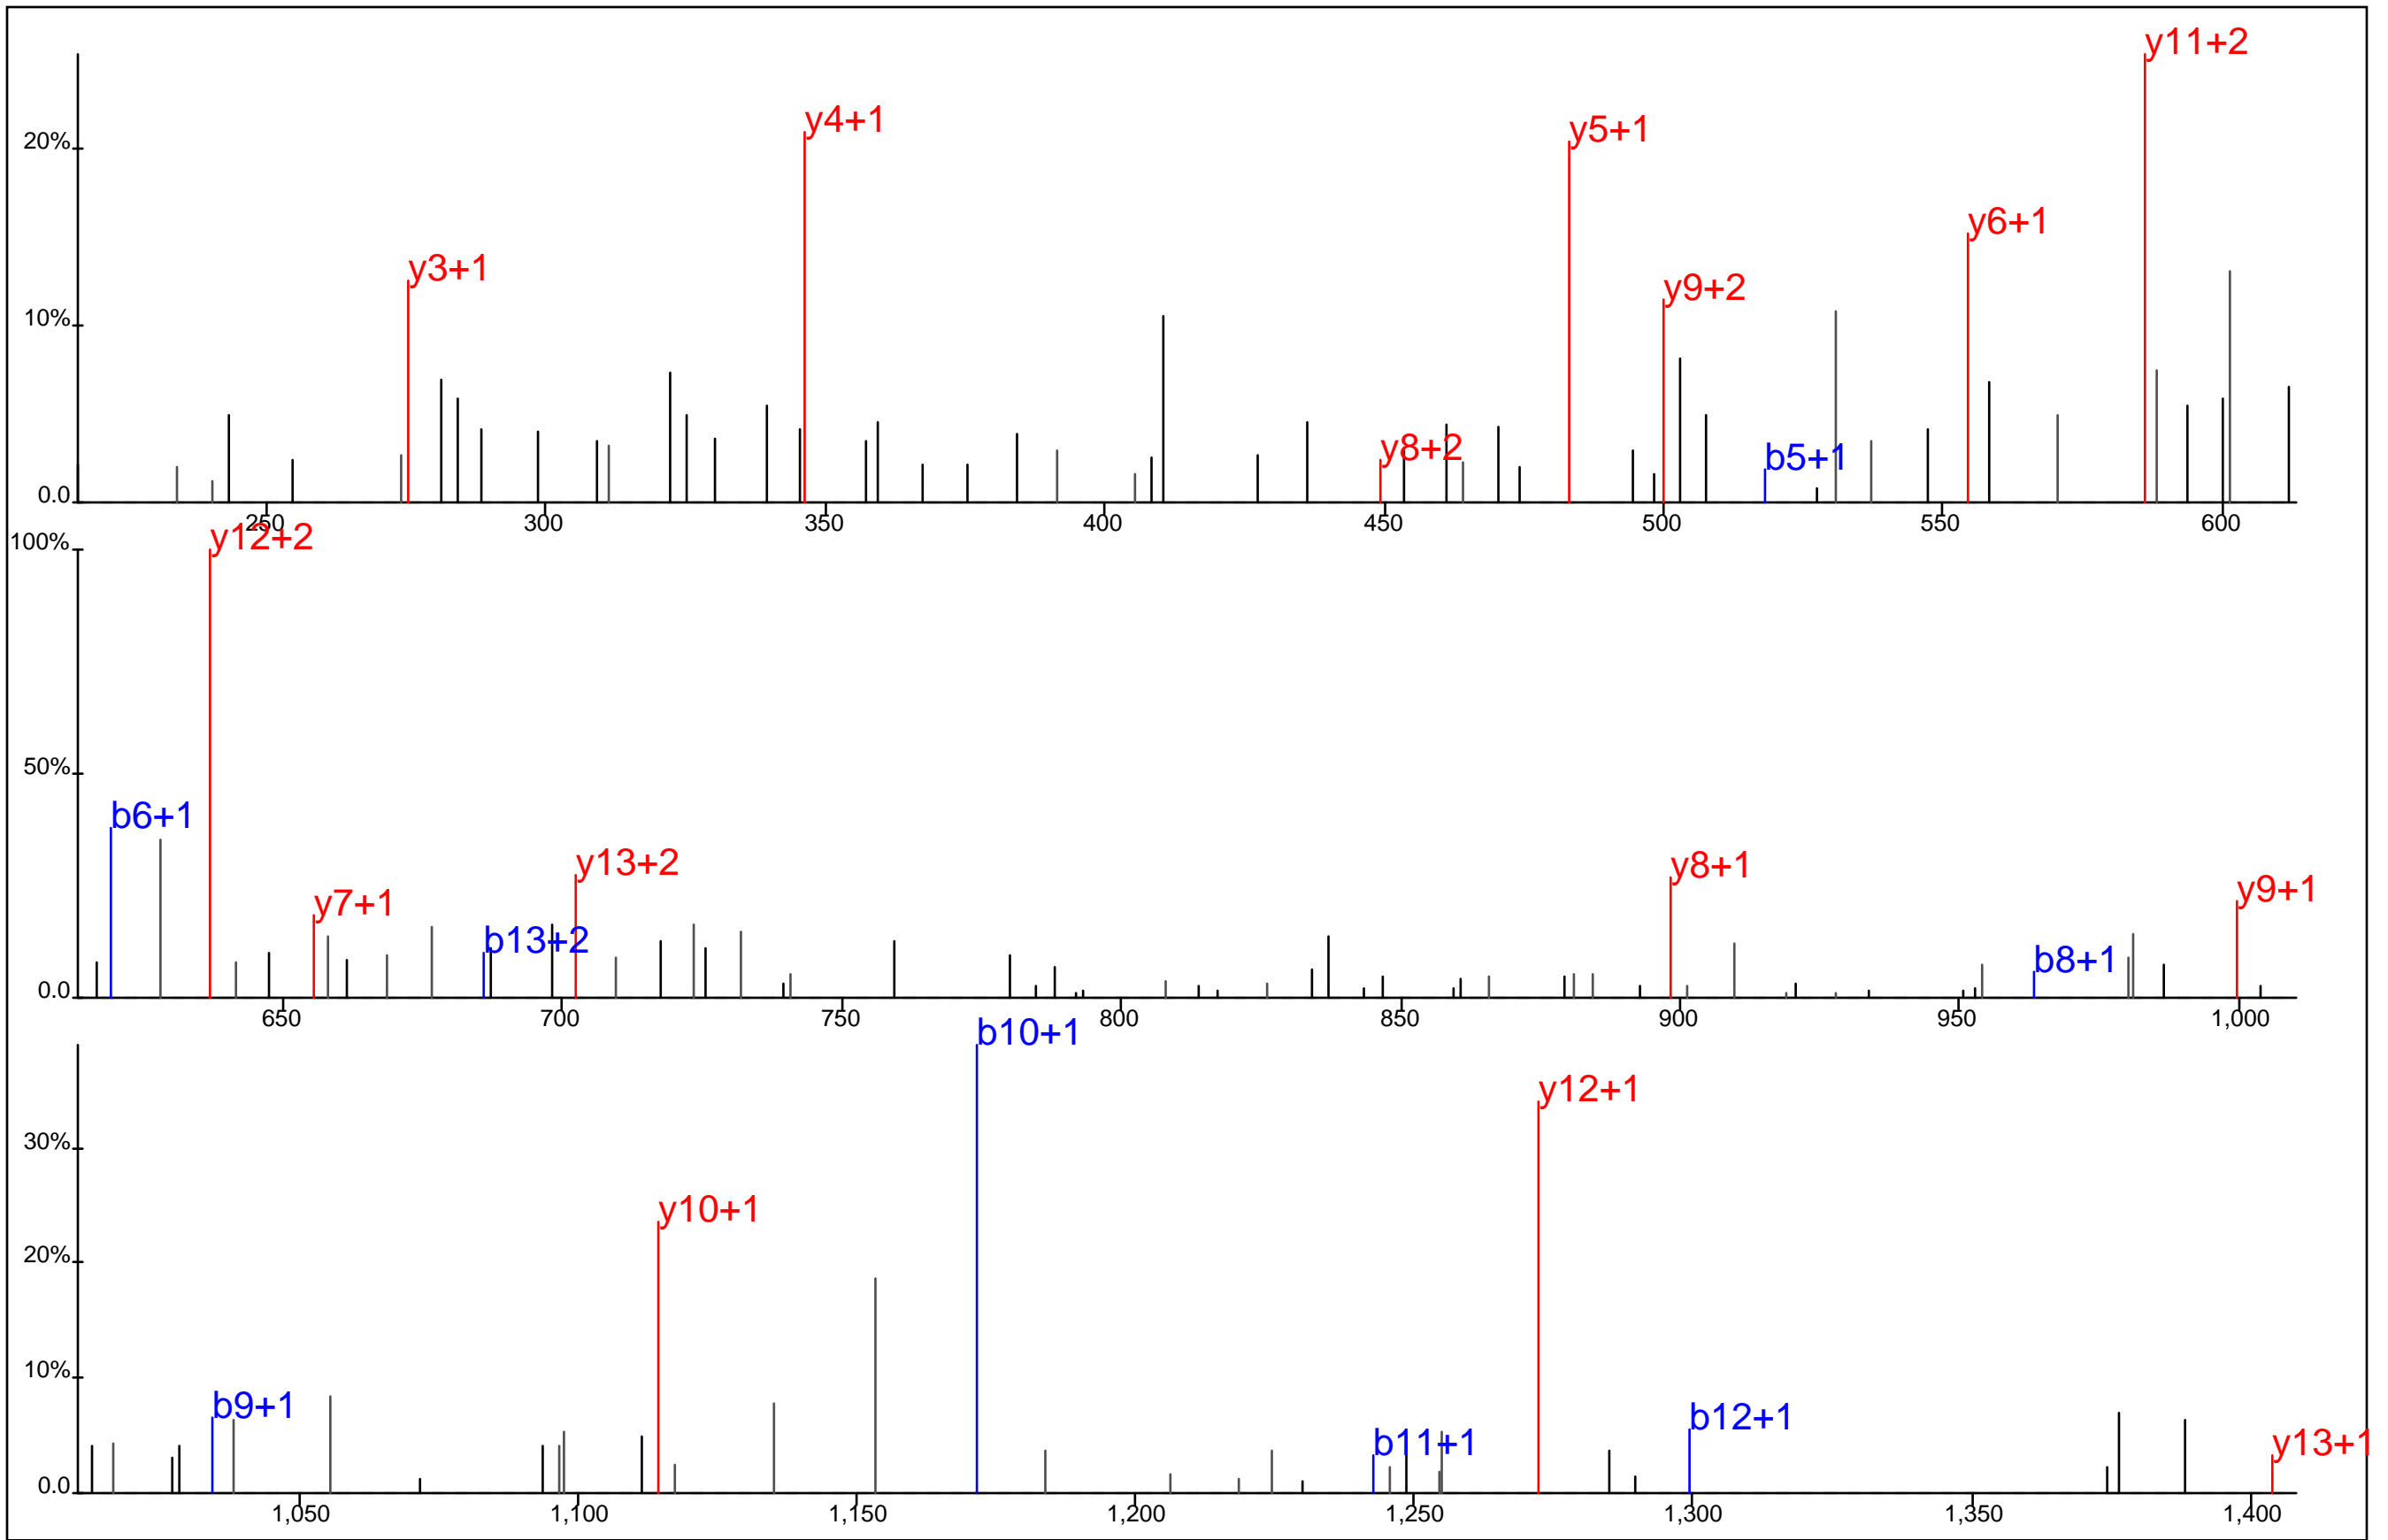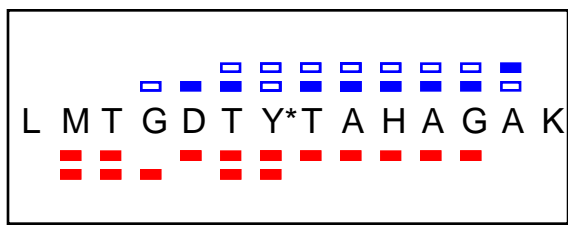

Protein Name: Tyrosine protein kinase ABL2  
 gi Accession: 0  
 Precursor Mass: 758.8271+2  
 Delta Mass: 2.072 ppm  
 XCorr: 70.67

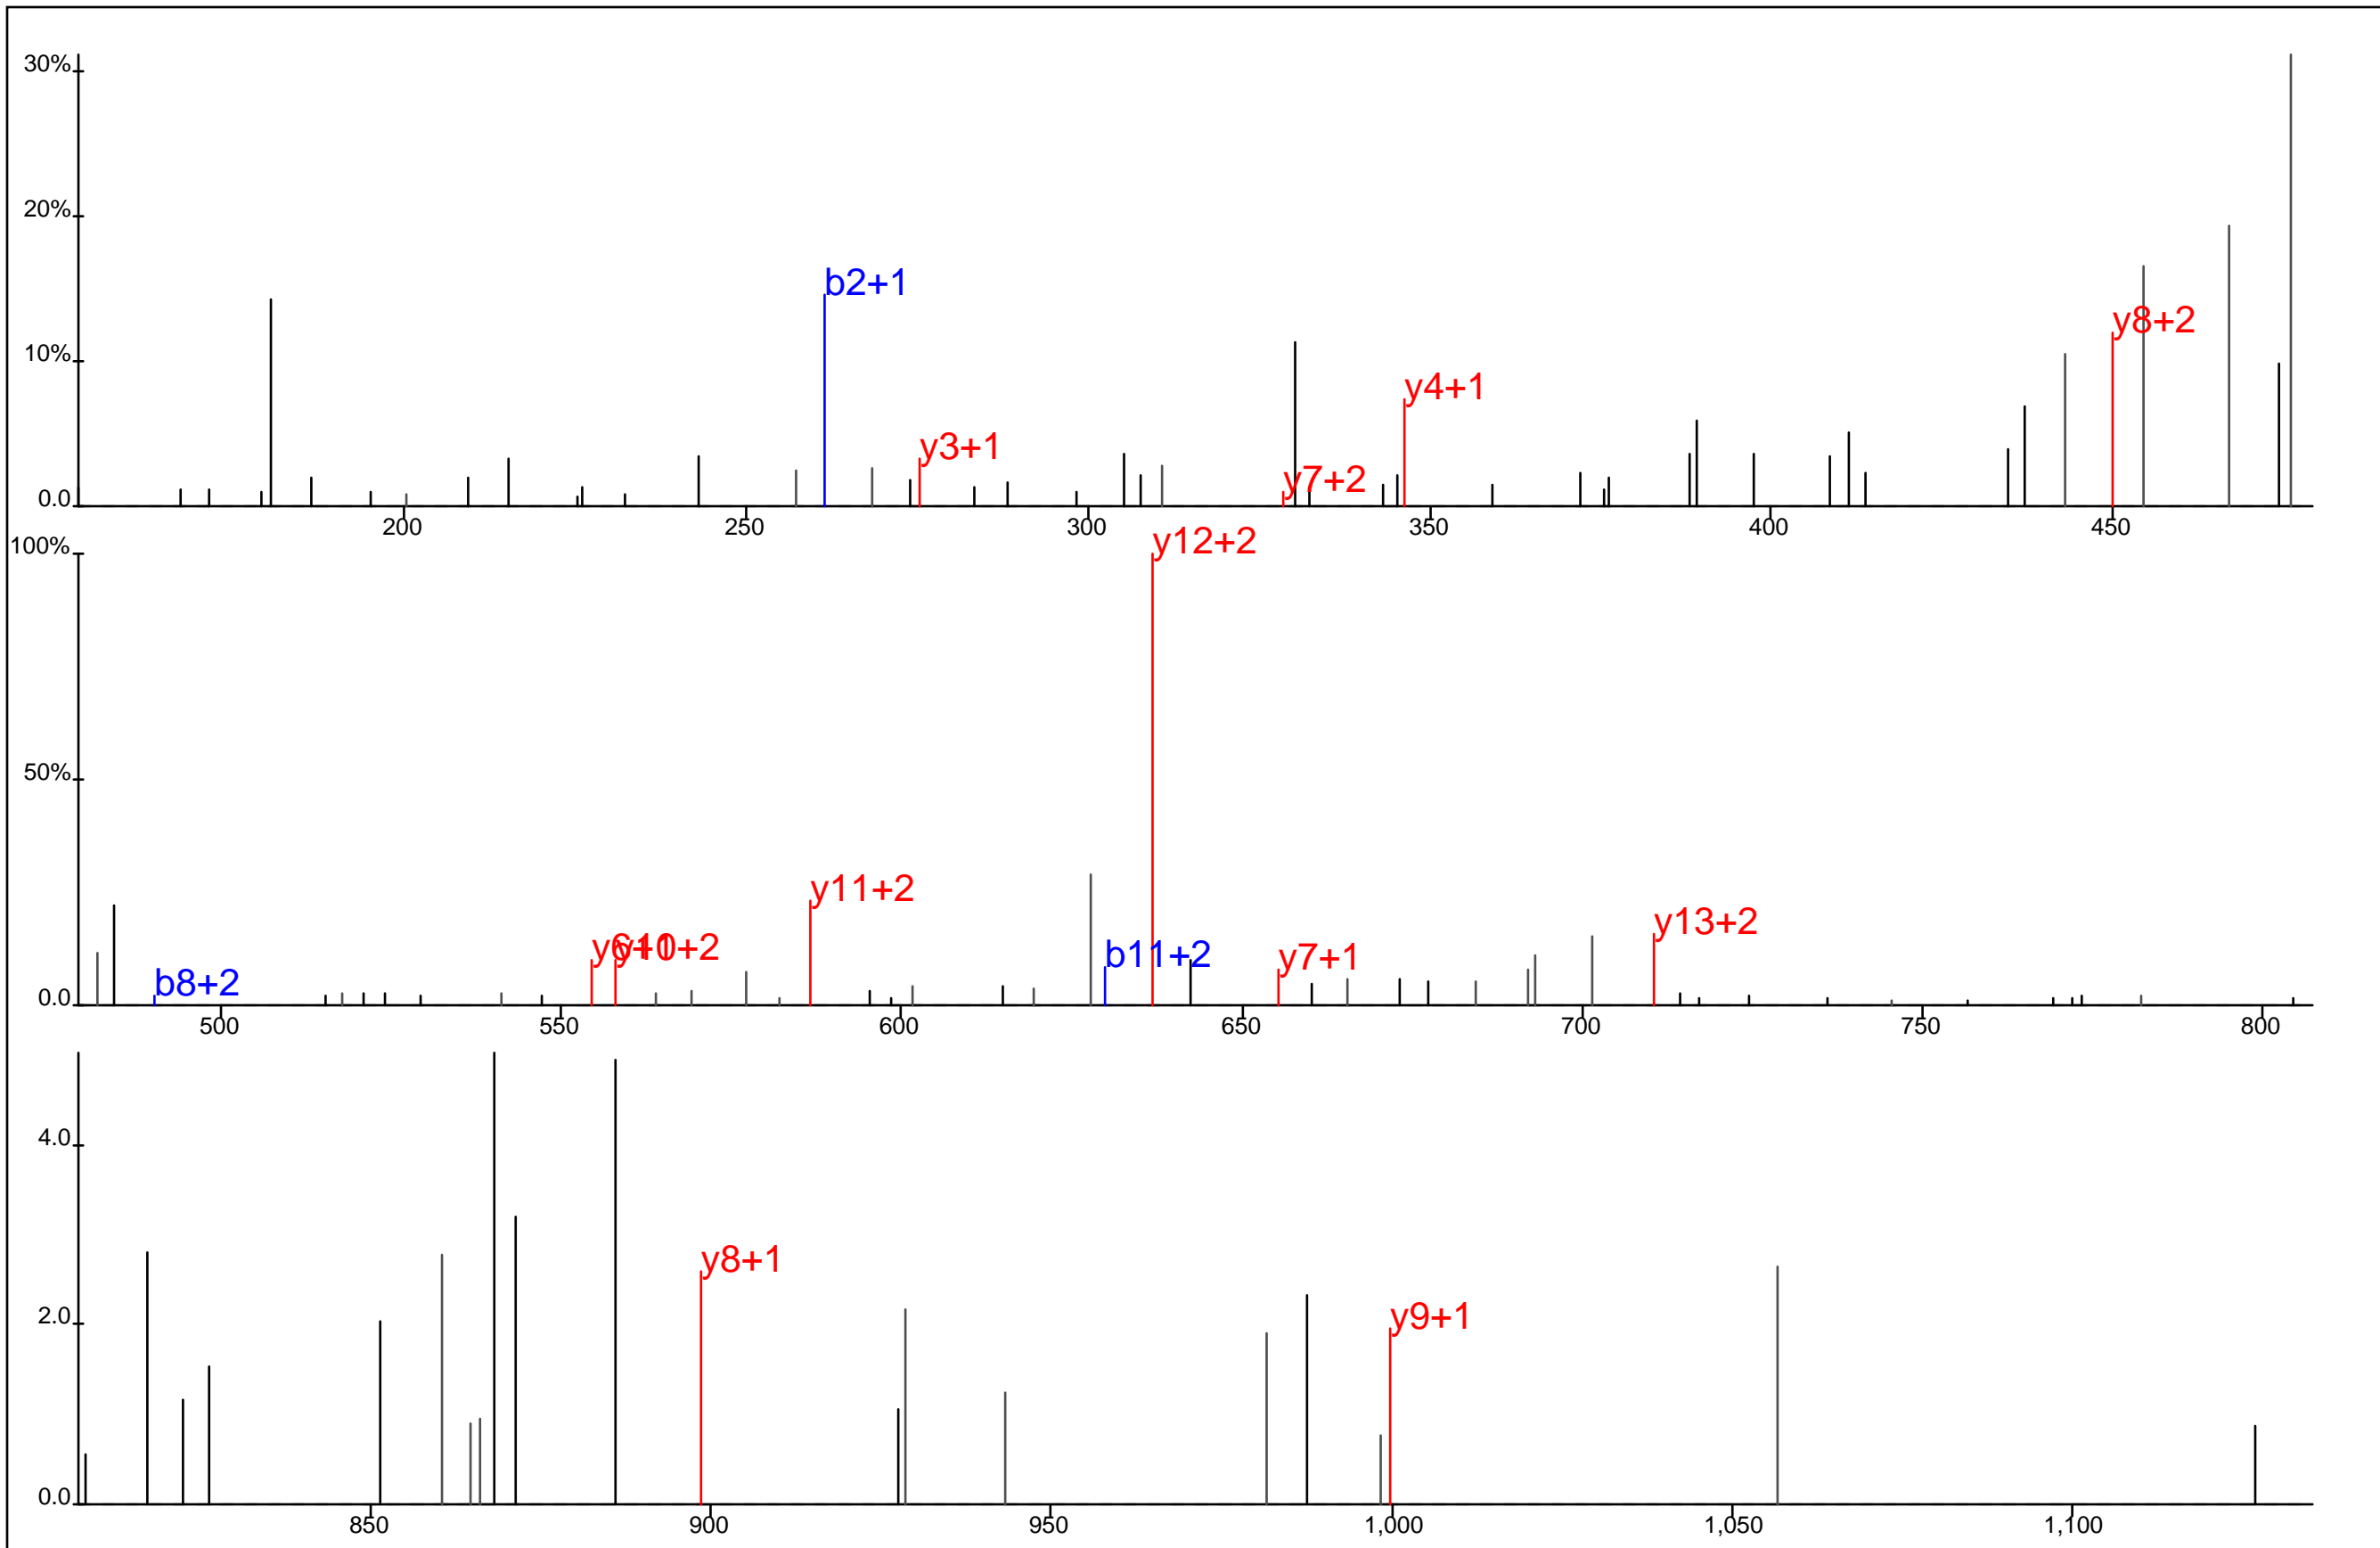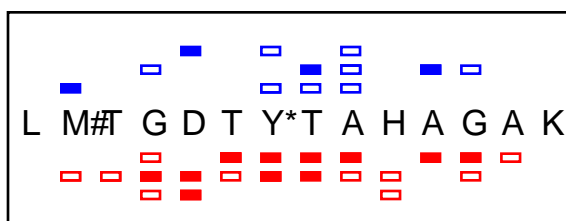

Protein Name: Tyrosine protein kinase ABL2  
 gi Accession: 0  
 Precursor Mass: 511.5540+3  
 Delta Mass: 1.636 ppm  
 XCorr: 24.67

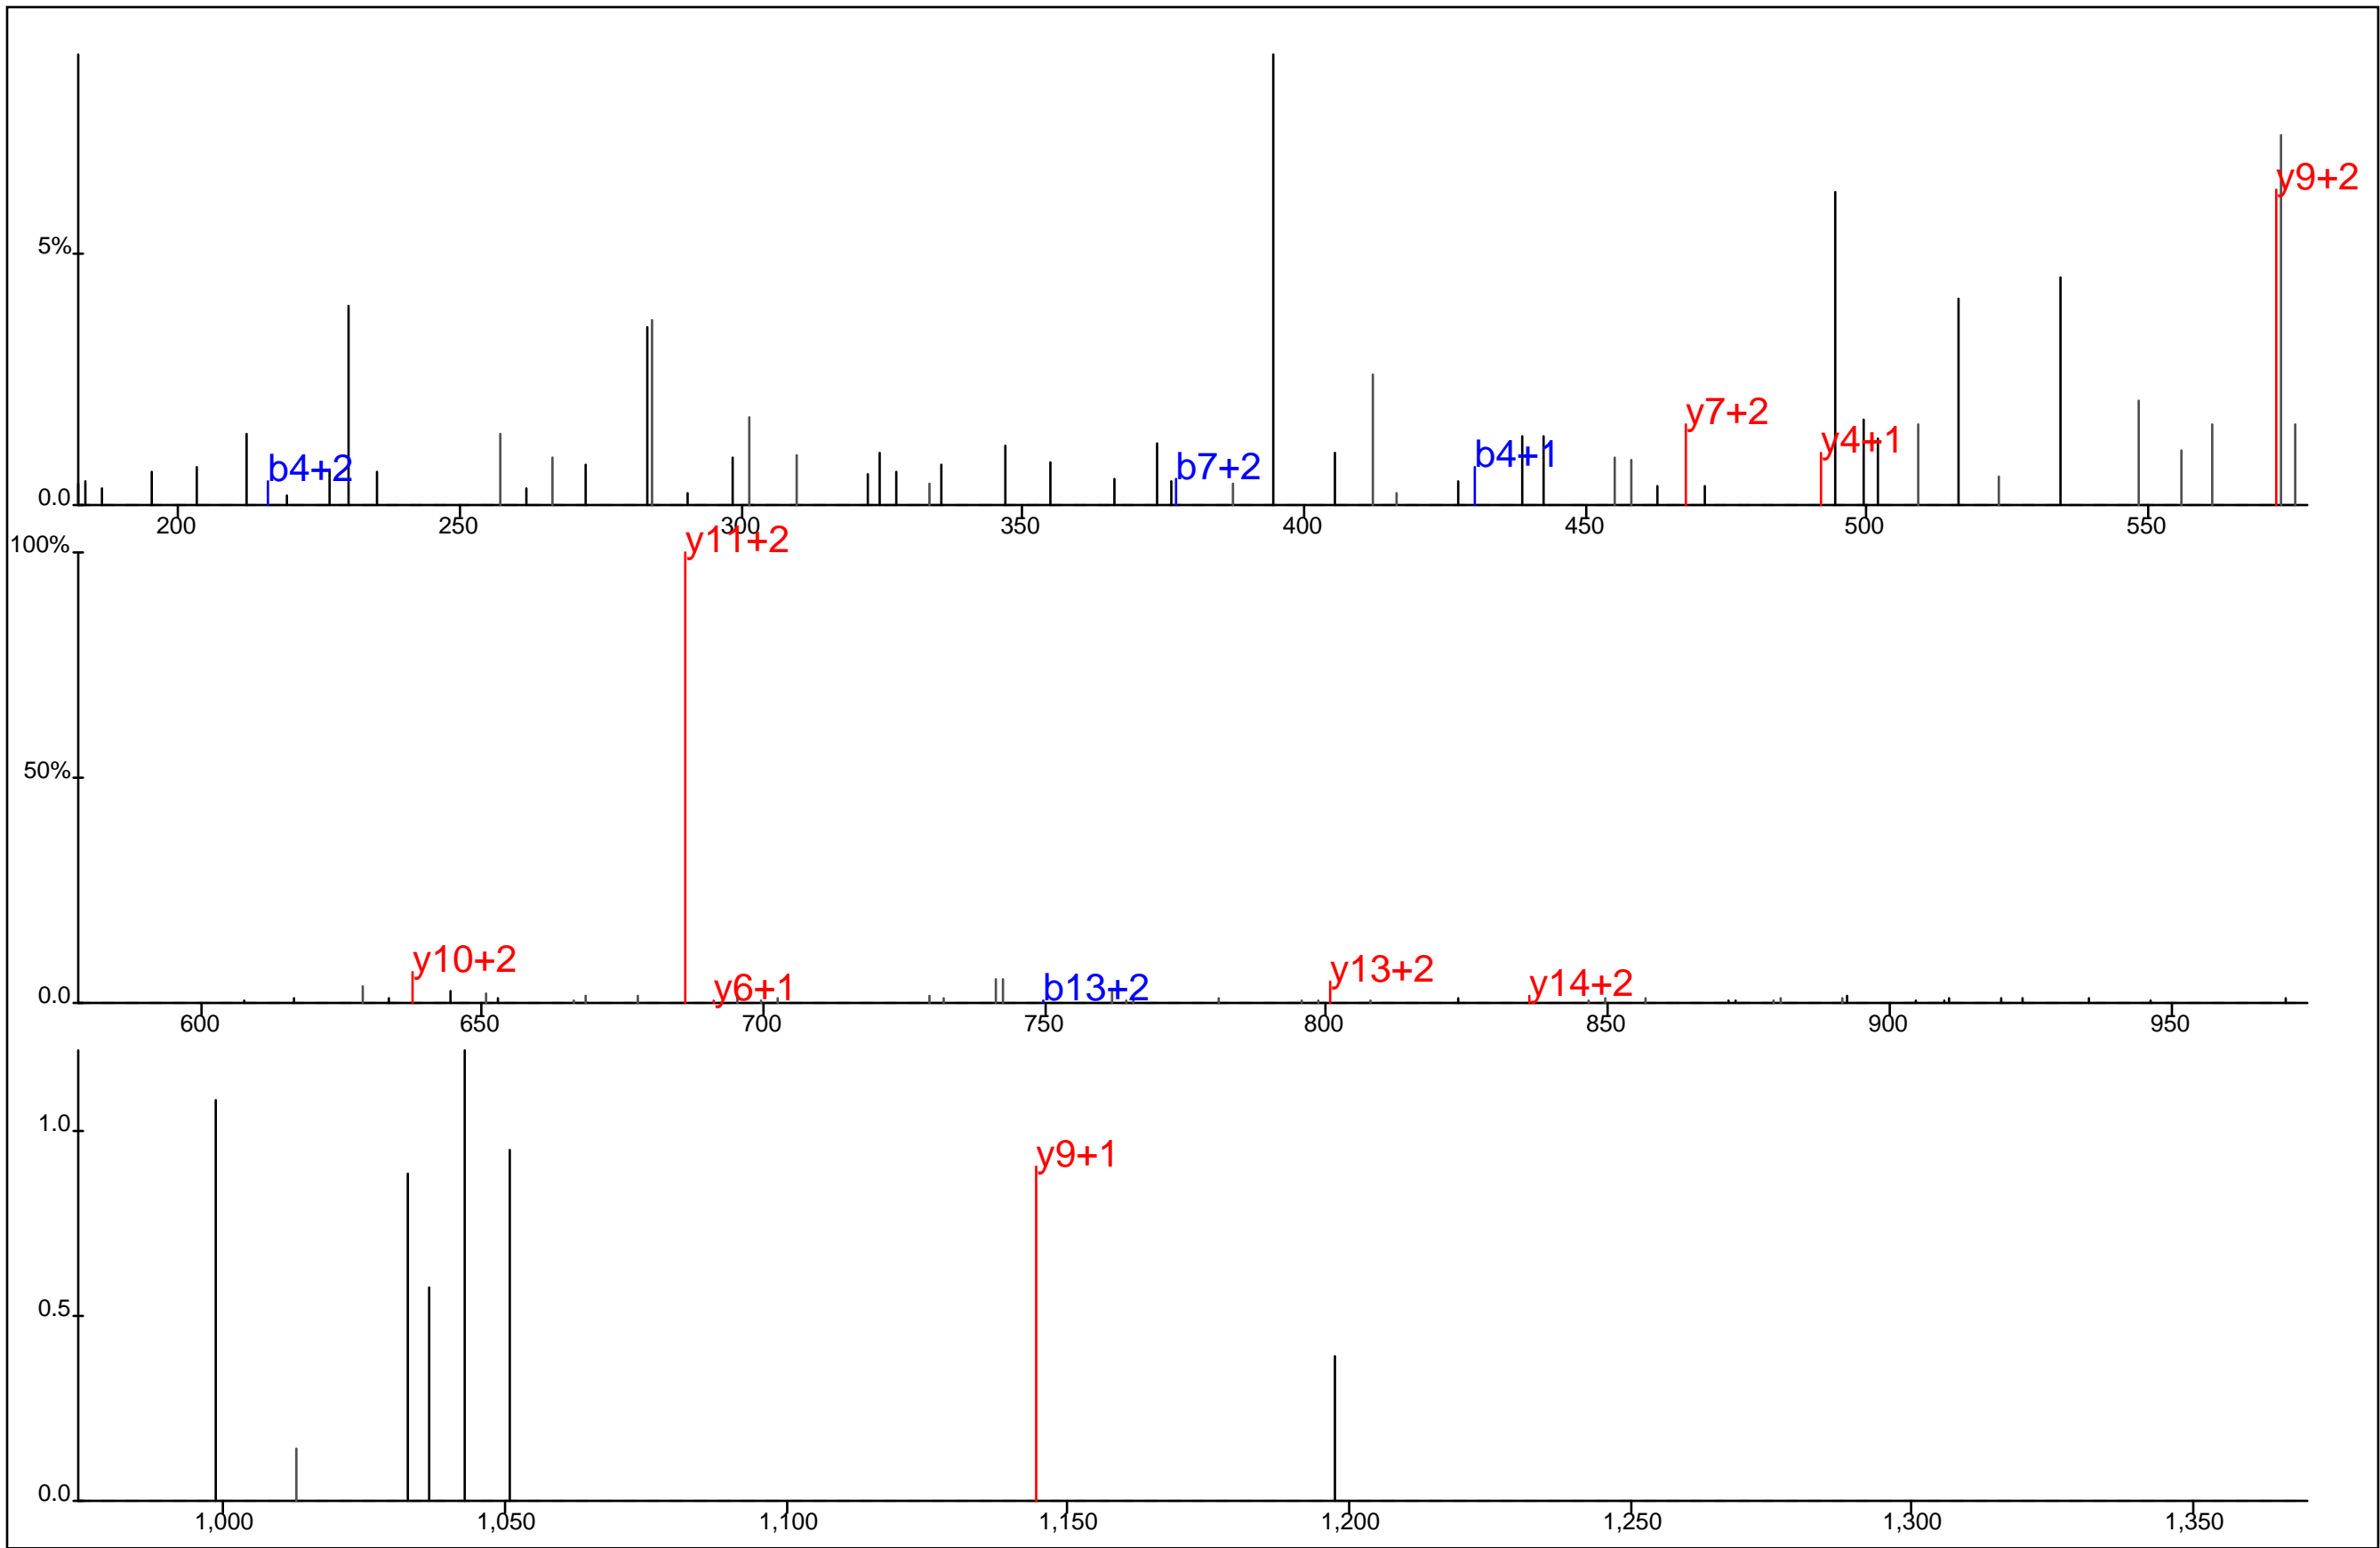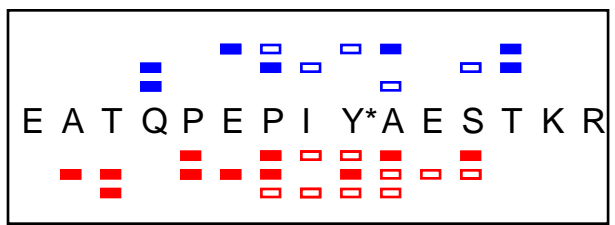

Protein Name: Tyrosine-protein kinase SgK223  
 gi Accession: 0  
 Precursor Mass: 600.6130+3  
 Delta Mass: 1.825 ppm  
 XCorr: 20.88



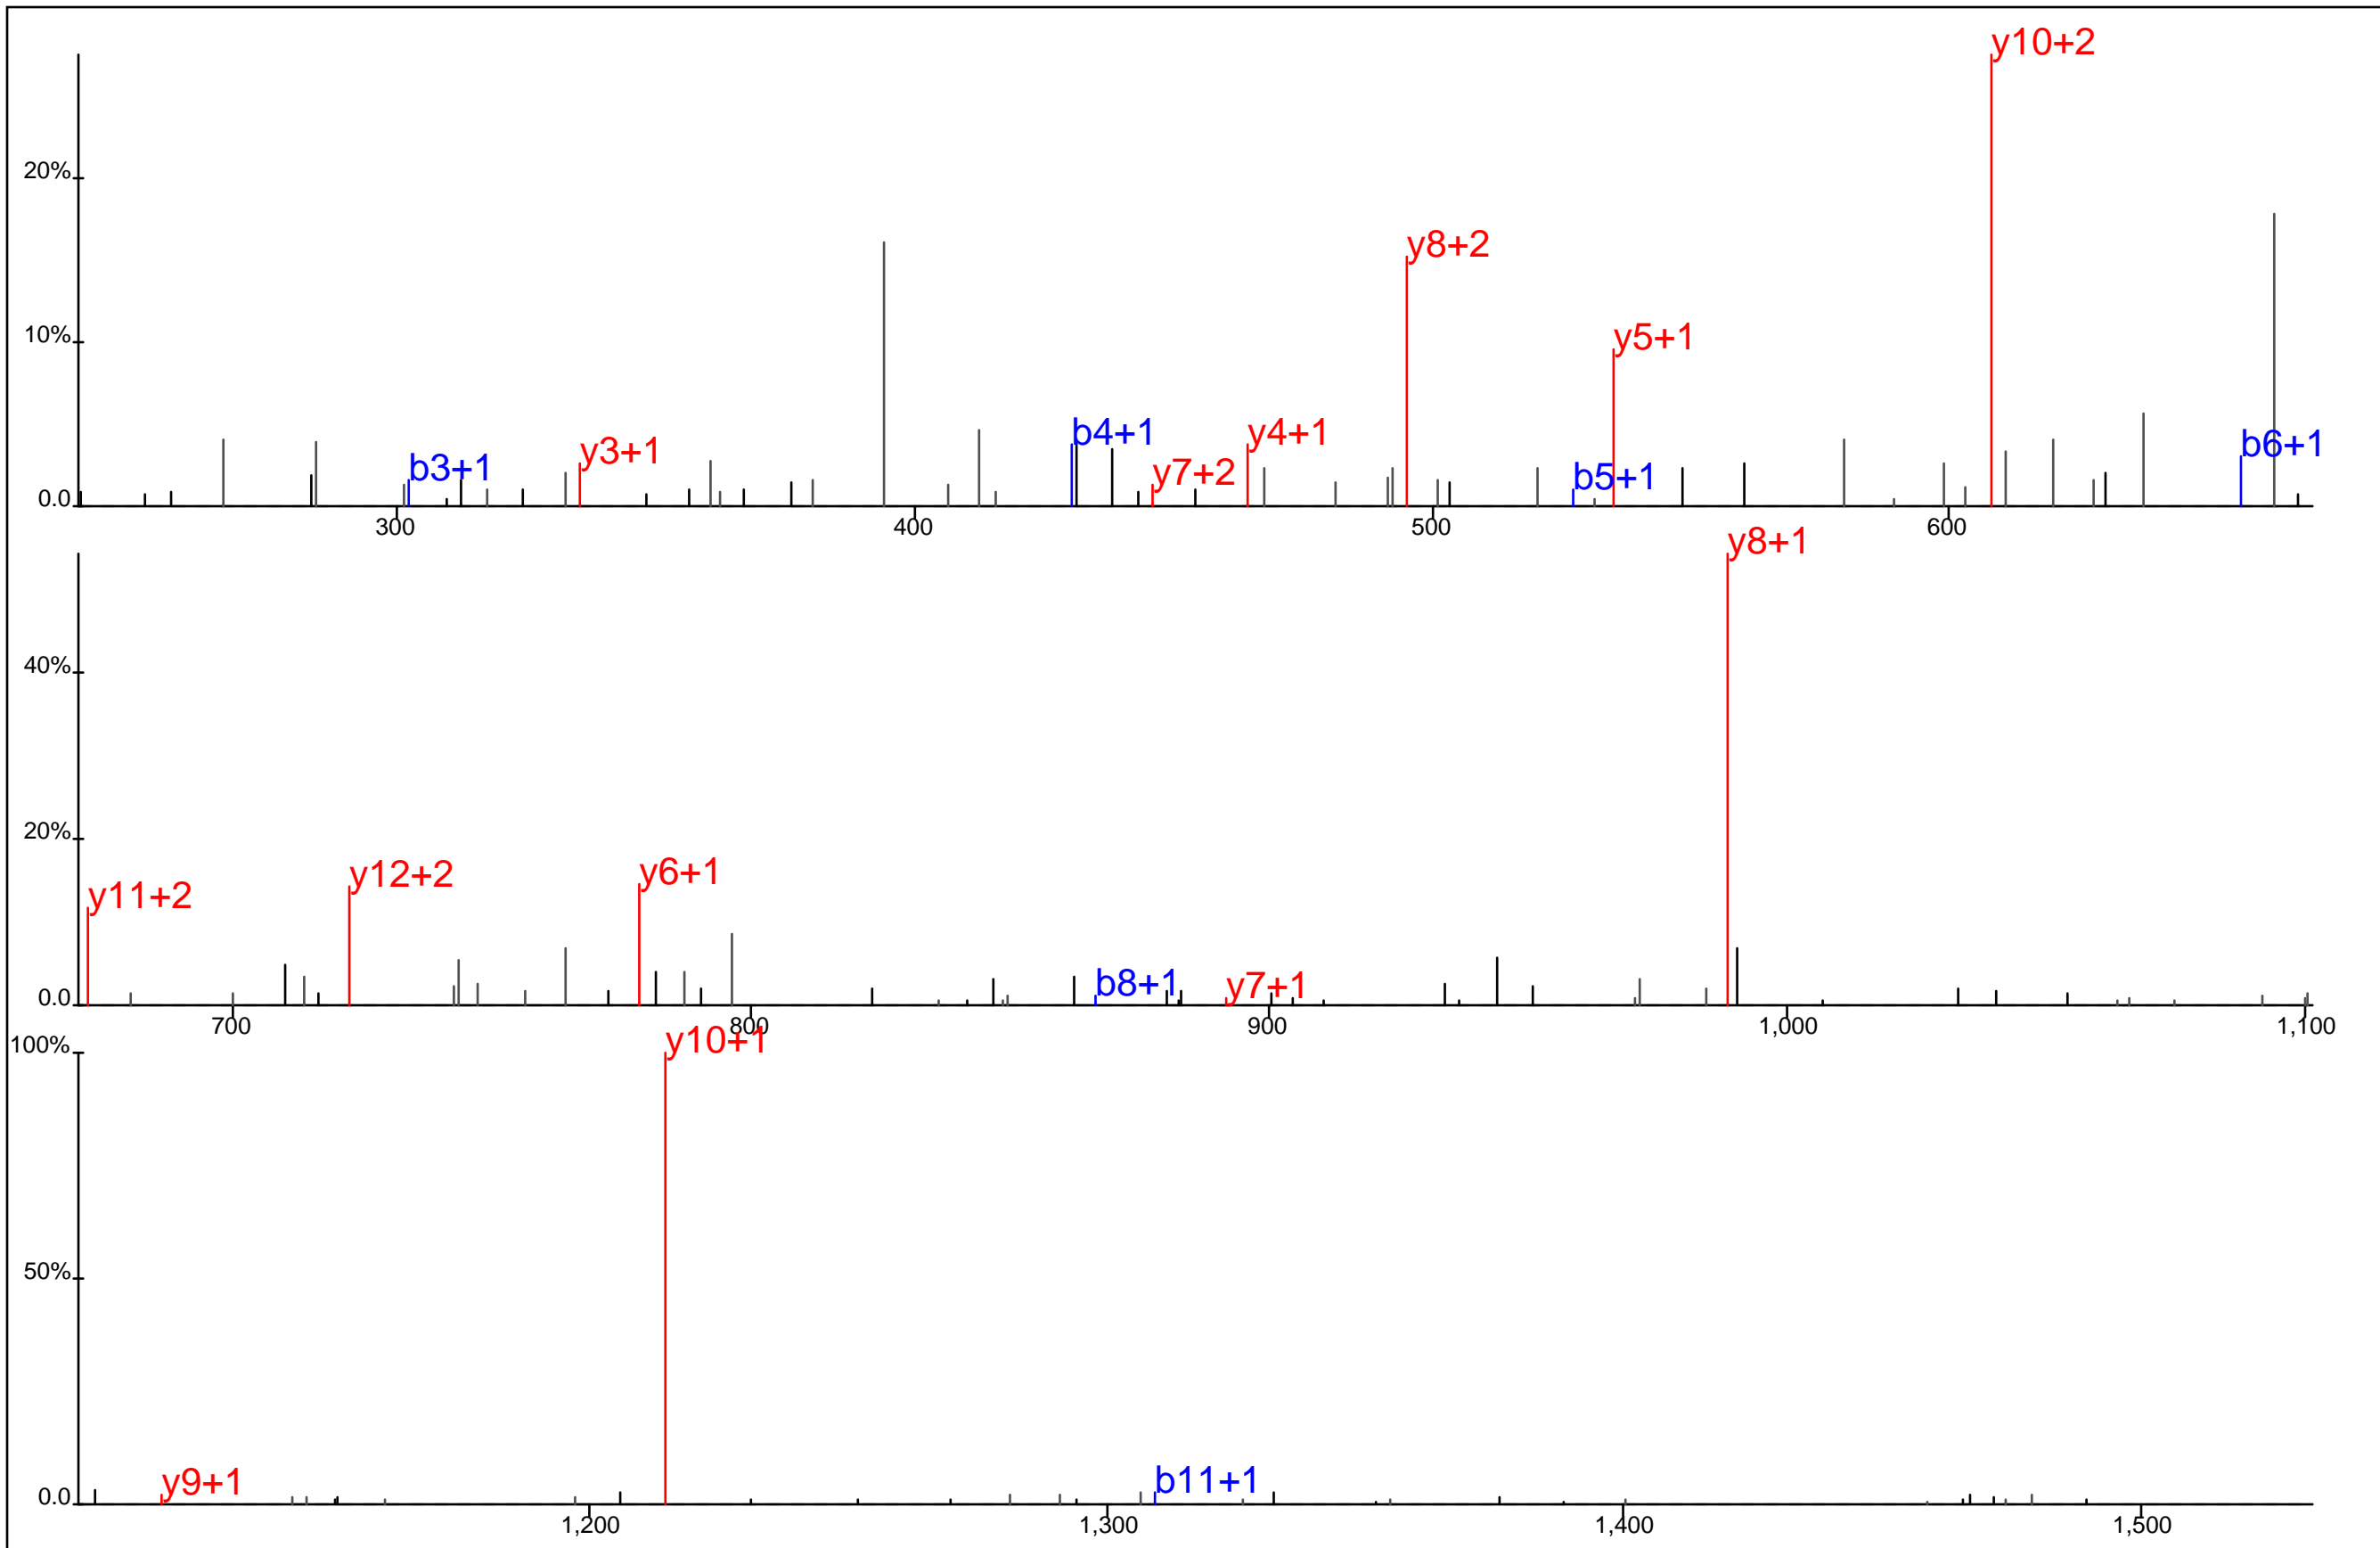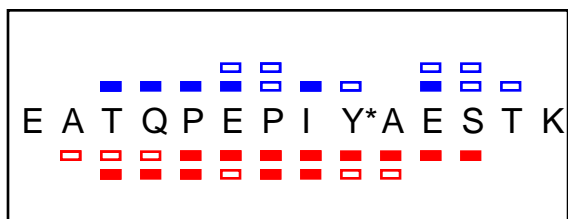

Protein Name: Tyrosine-protein kinase SgK223  
 gi Accession: 0  
 Precursor Mass: 822.3663+2  
 Delta Mass: 3.216 ppm  
 XCorr: 25.58



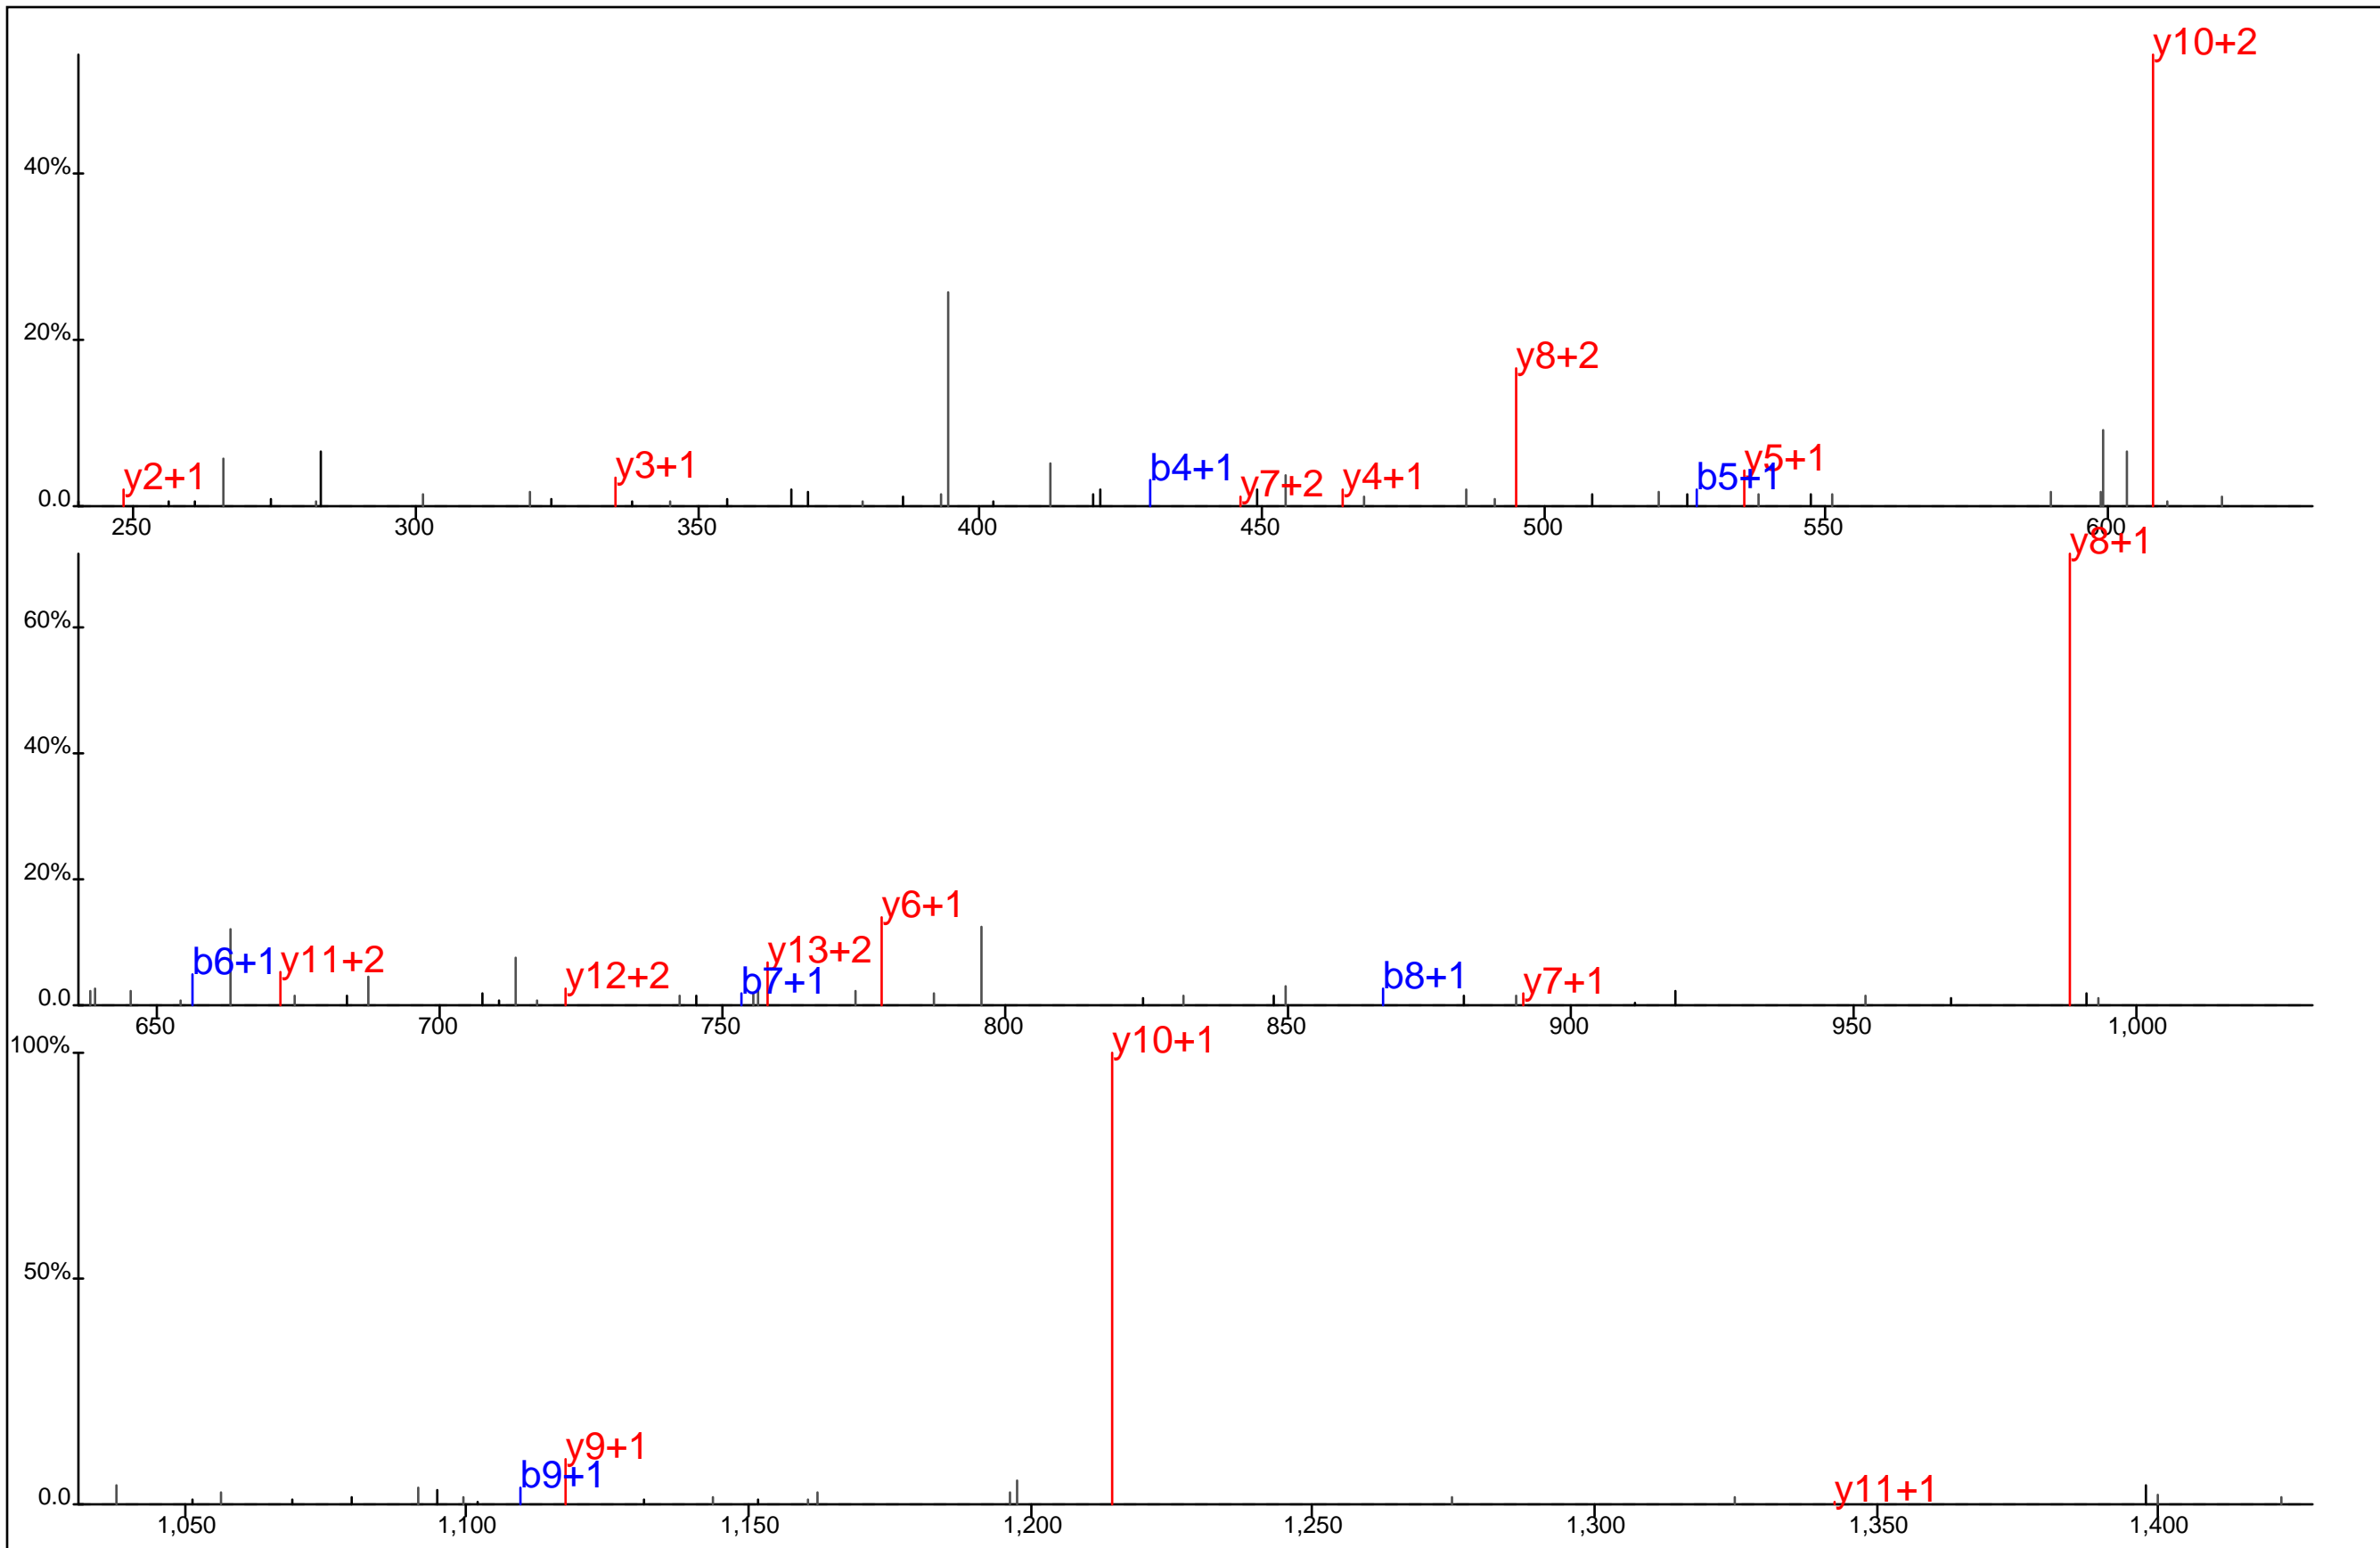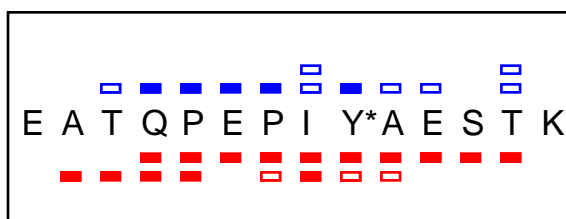

Protein Name: Tyrosine-protein kinase SgK223  
 gi Accession: 0  
 Precursor Mass: 822.3640+2  
 Delta Mass: 0.468 ppm  
 XCorr: 50.06



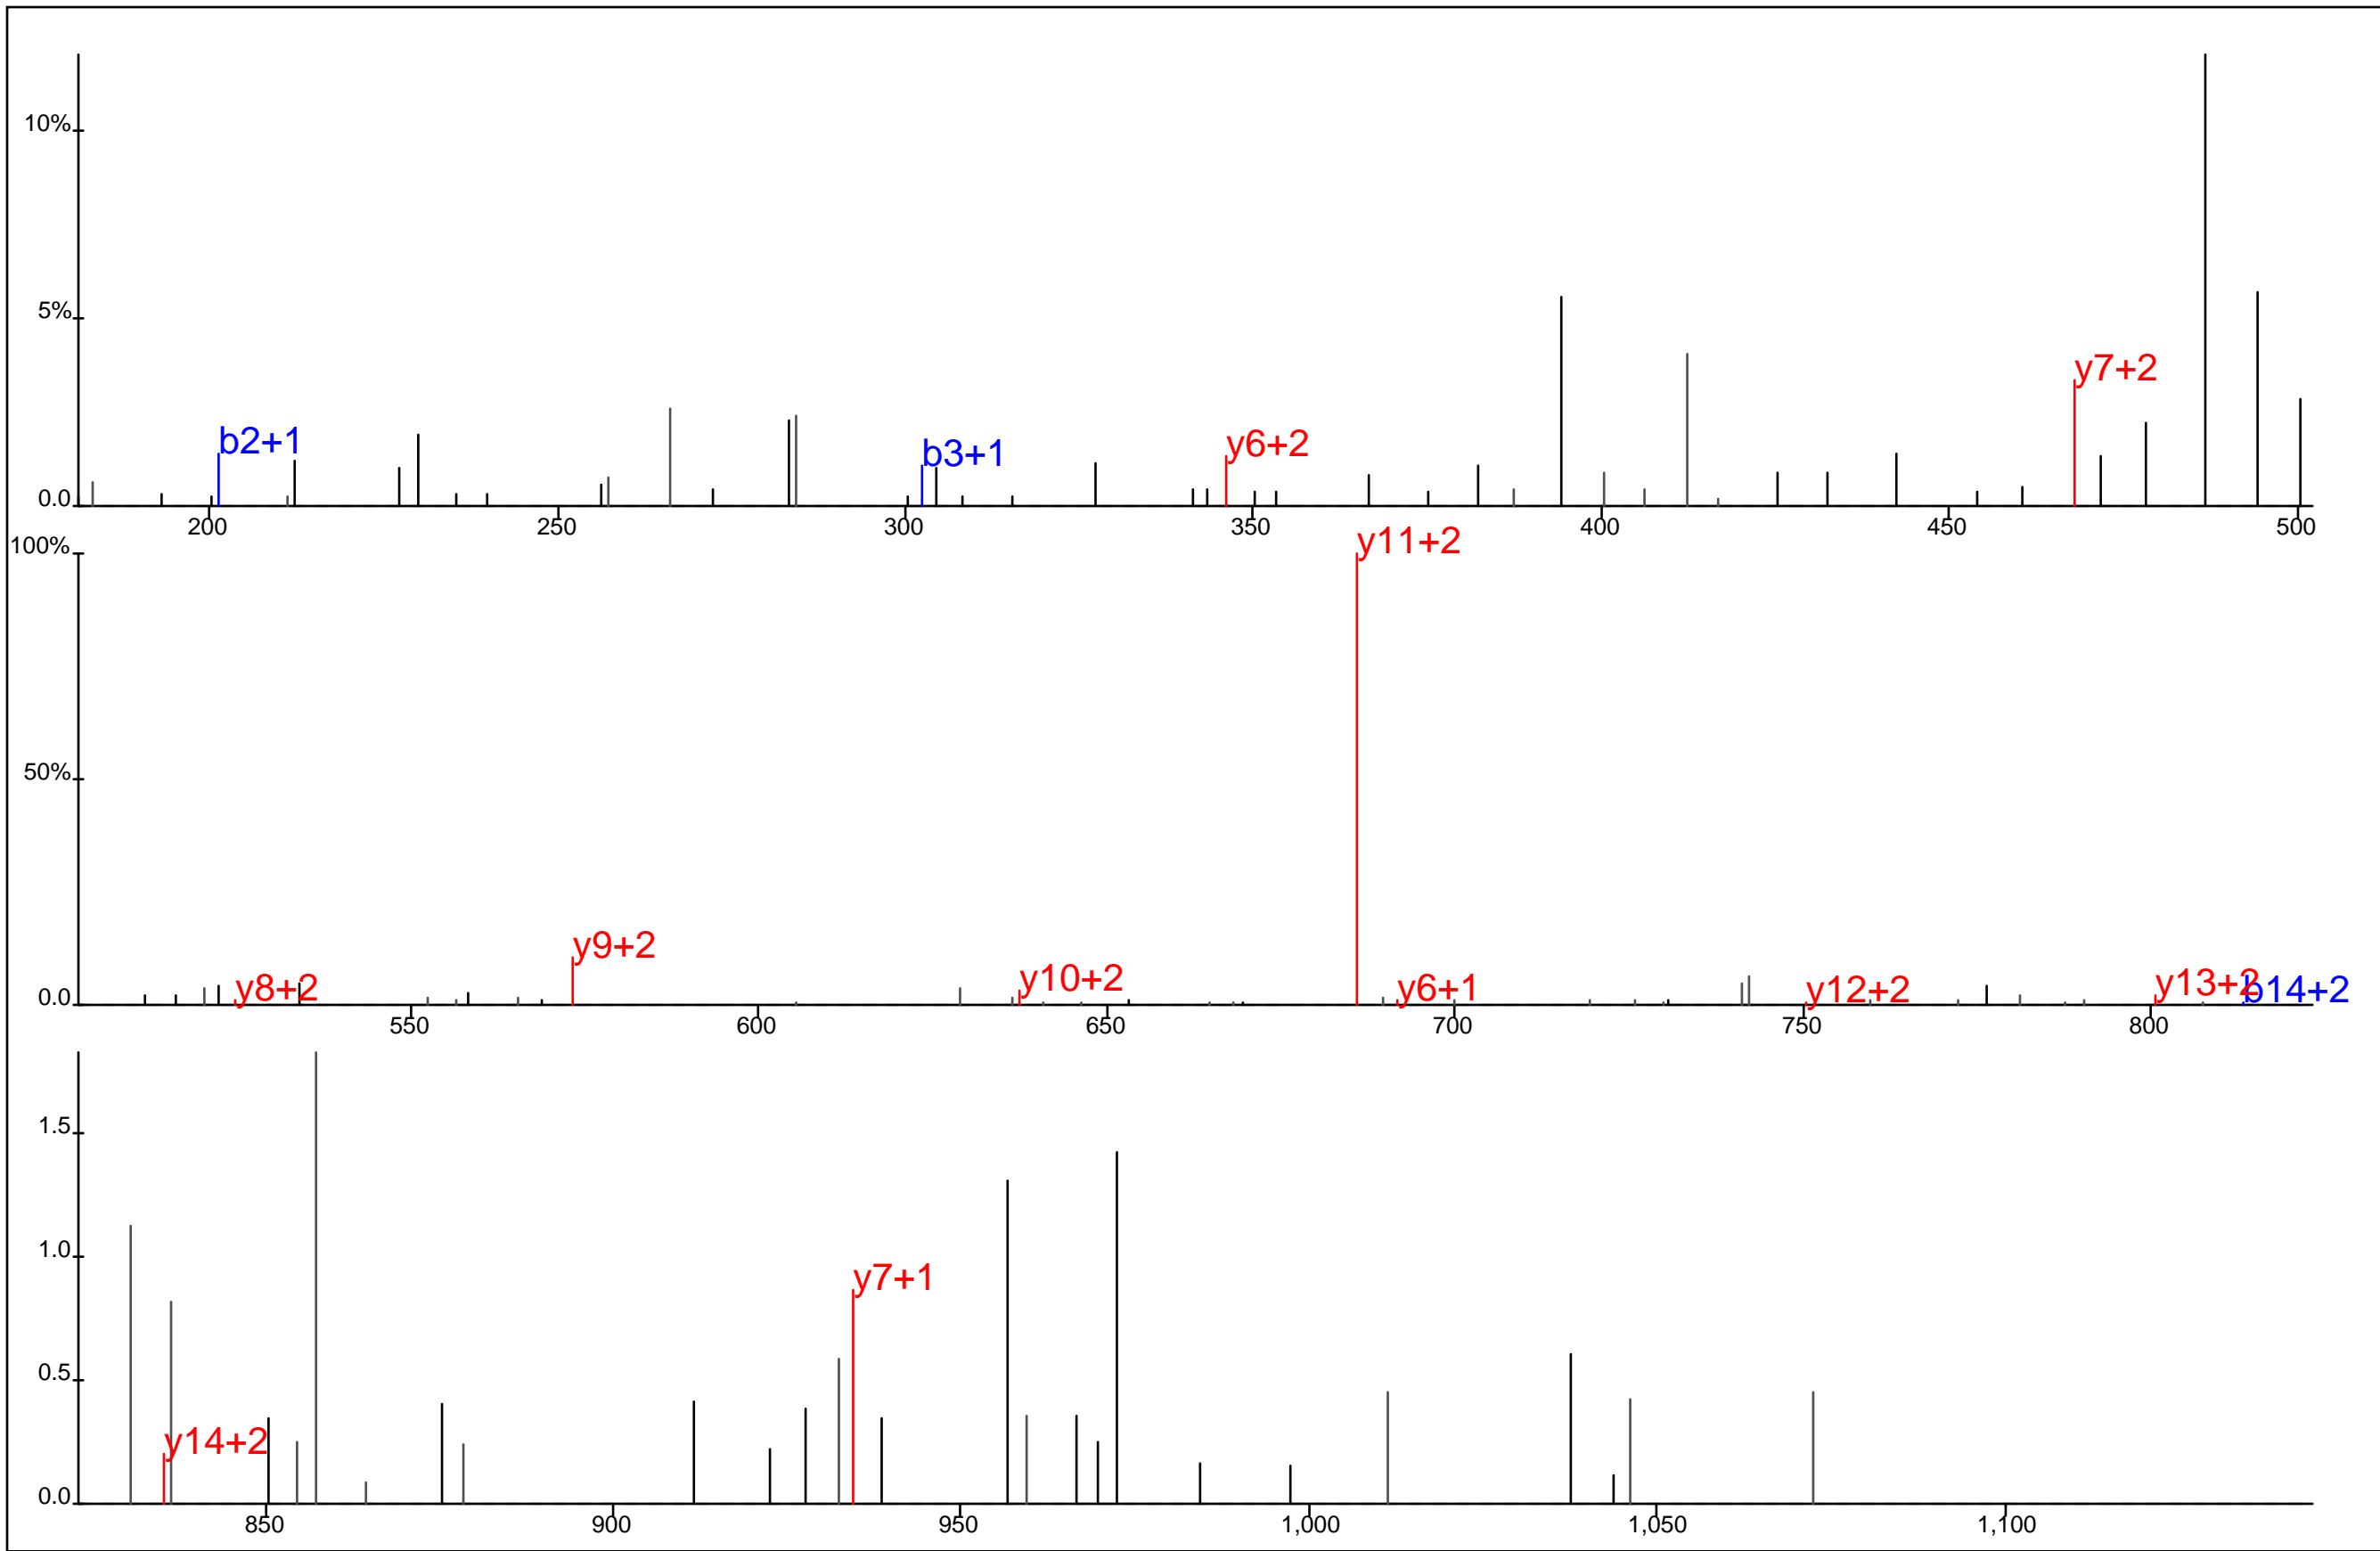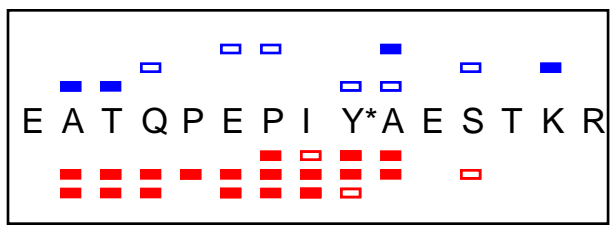

Protein Name: Tyrosine-protein kinase SgK223  
 gi Accession: 0  
 Precursor Mass: 600.6126+3  
 Delta Mass: 1.215 ppm  
 XCorr: 21.18

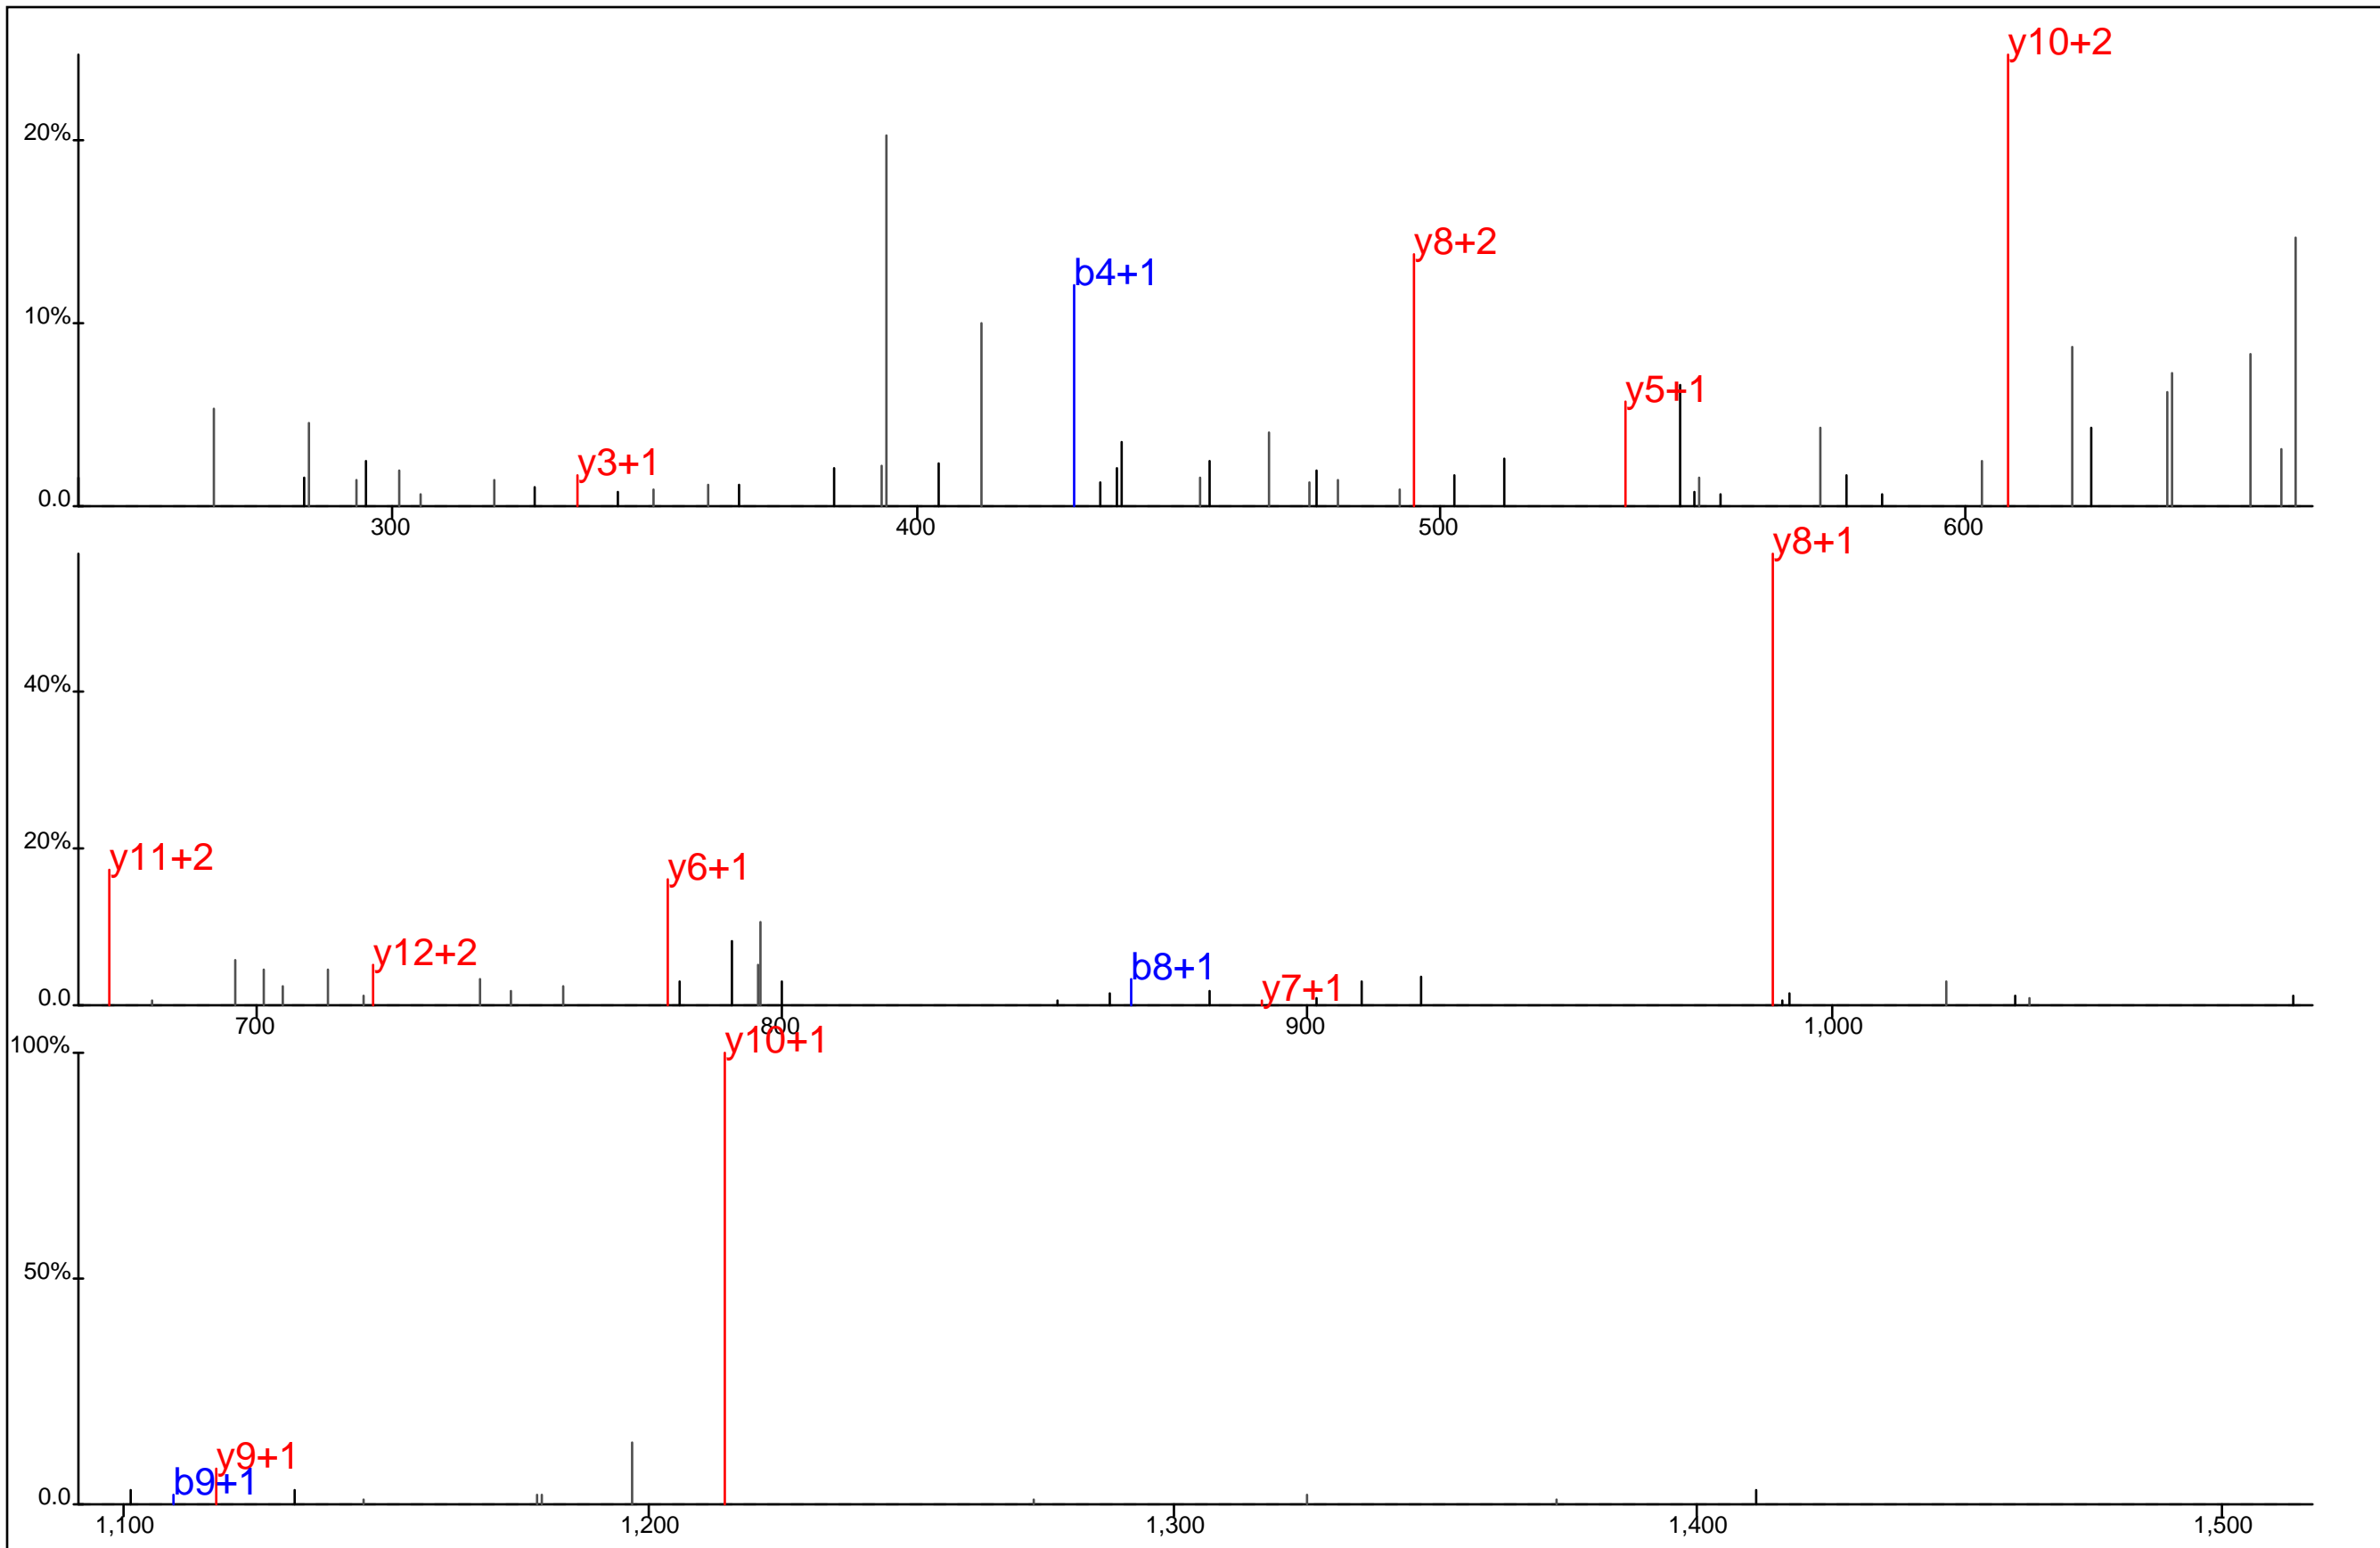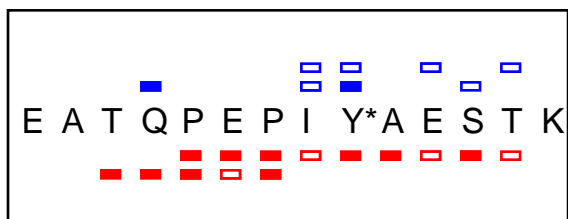

Protein Name: Tyrosine-protein kinase SgK223  
 gi Accession: 0  
 Precursor Mass: 822.3640+2  
 Delta Mass: 0.394 ppm  
 XCorr: 23.62

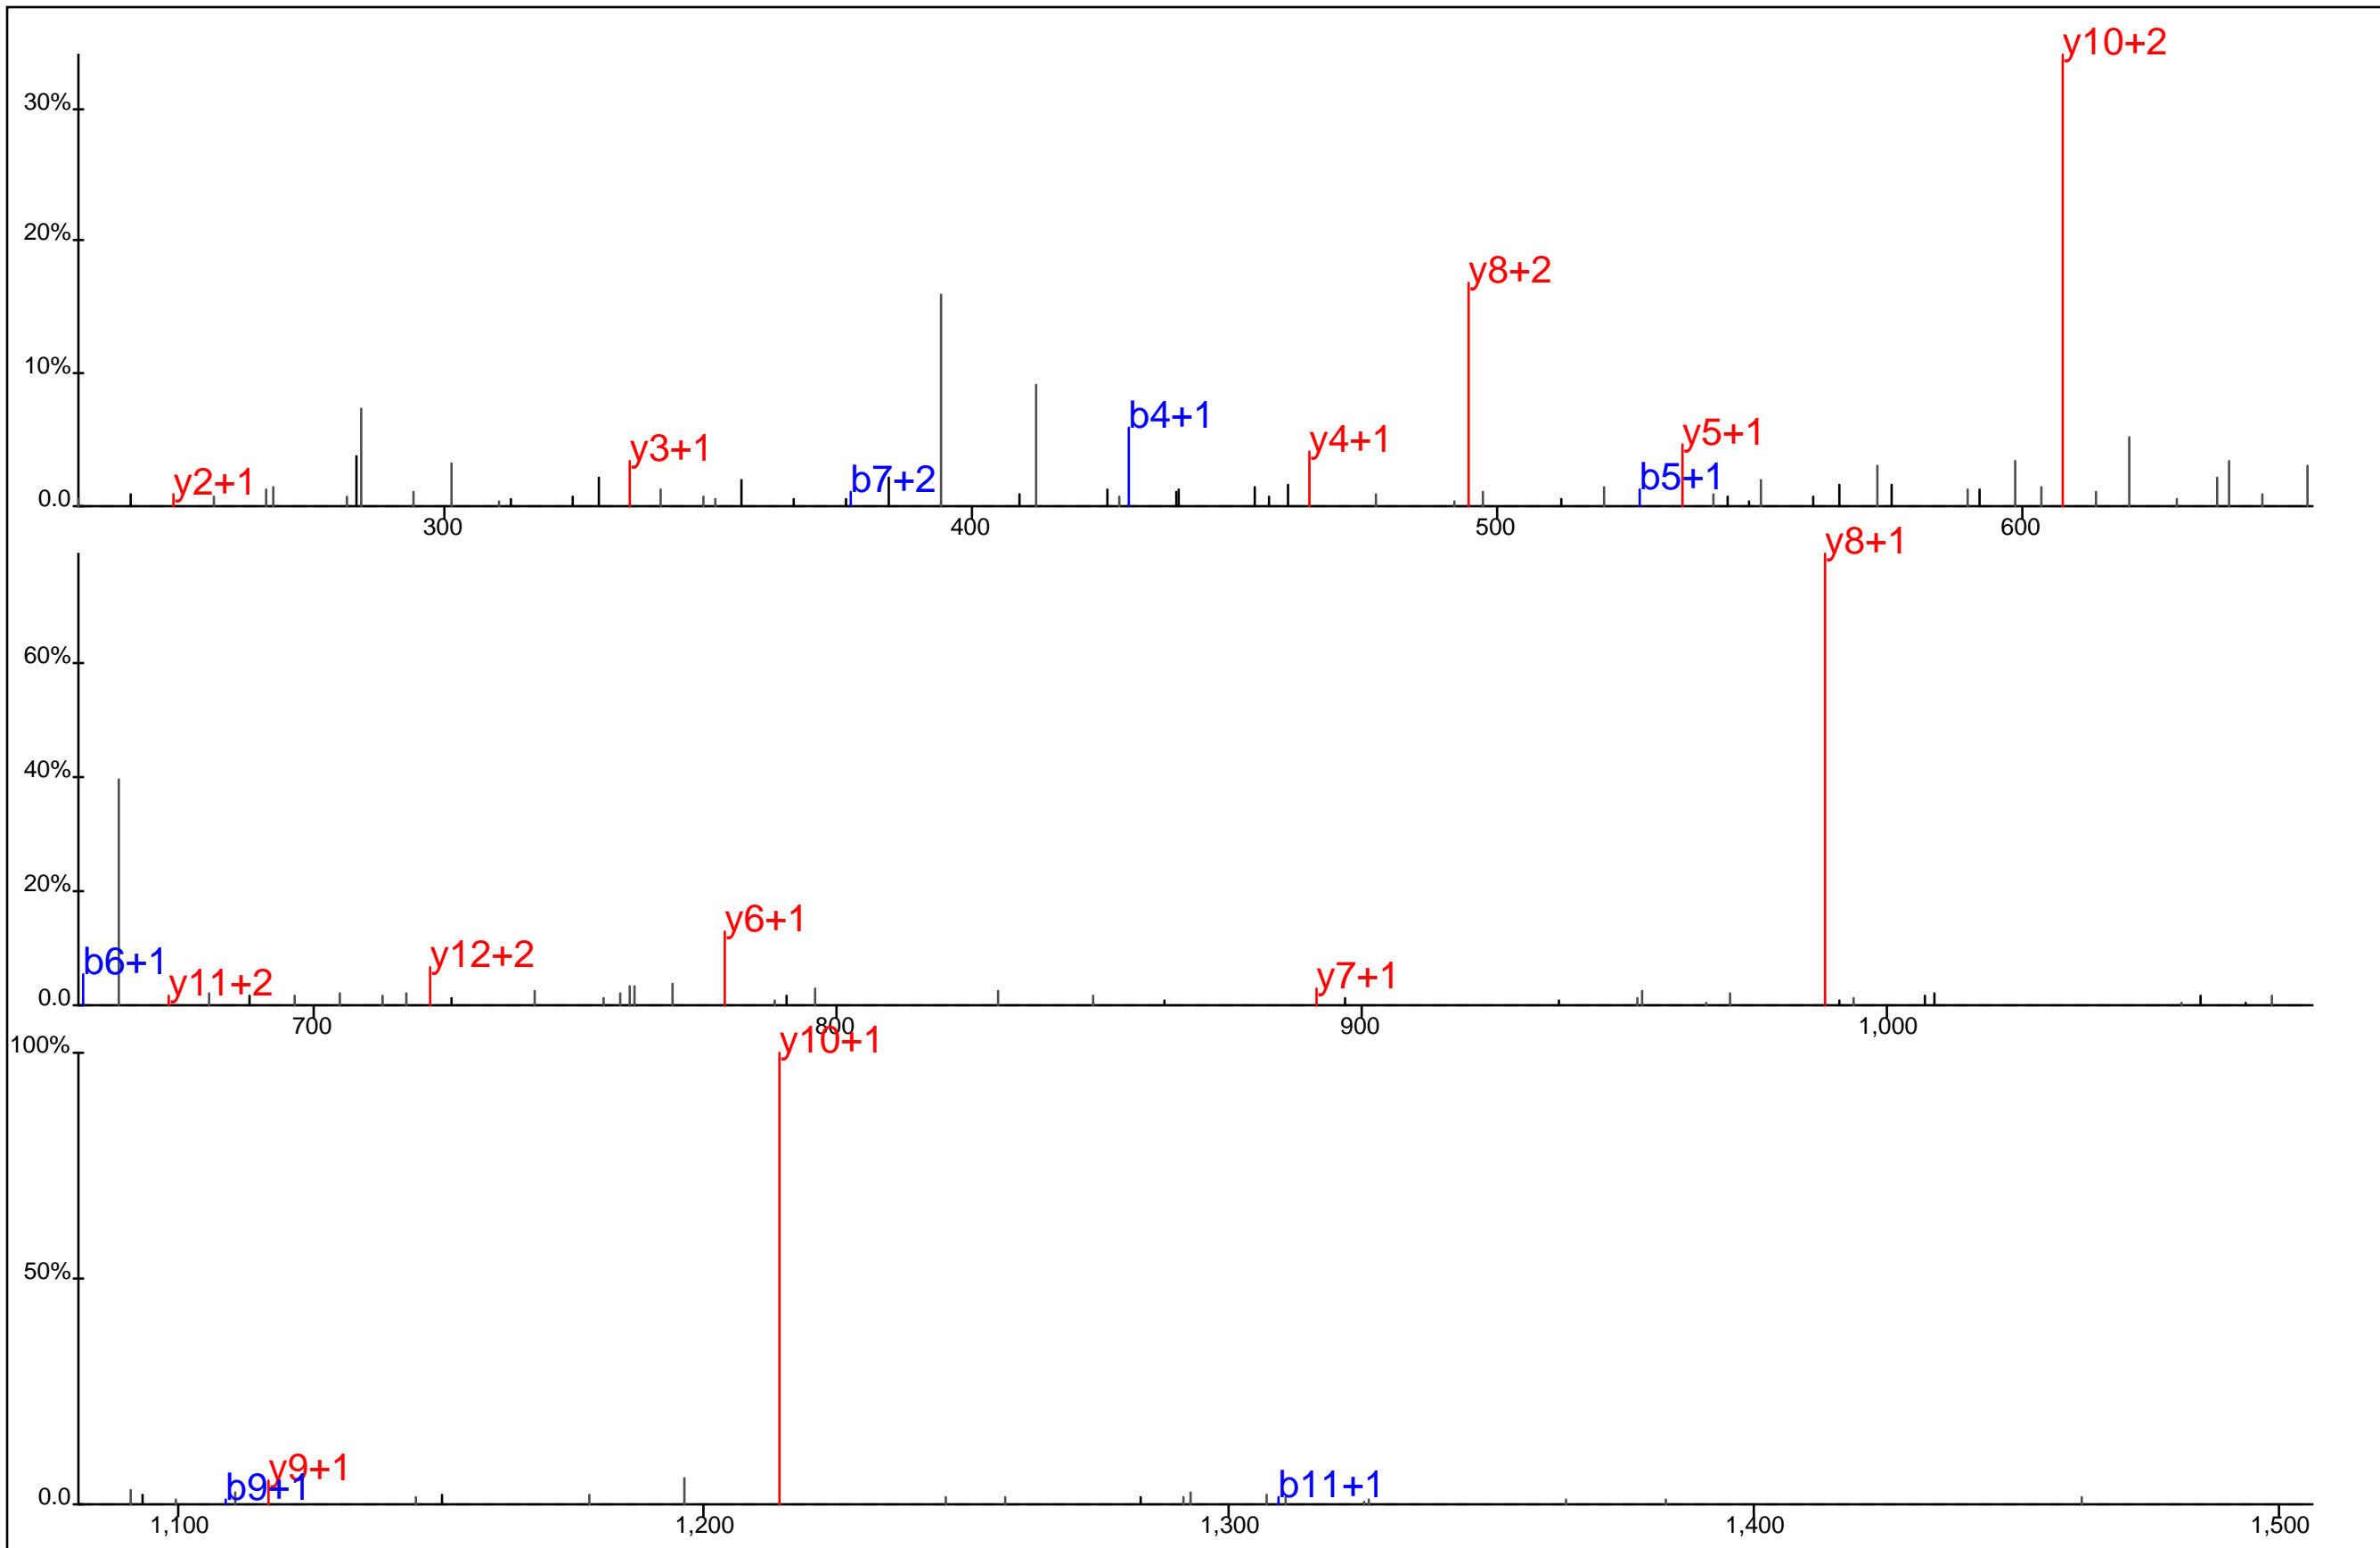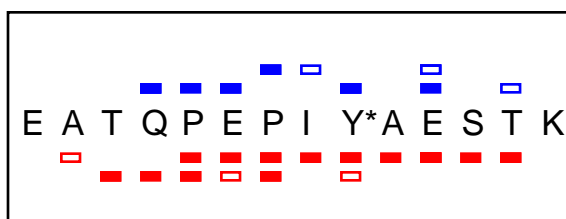

Protein Name: Tyrosine-protein kinase SgK223  
 gi Accession: 0  
 Precursor Mass: 822.3628+2  
 Delta Mass: 1.017 ppm  
 XCorr: 47.07

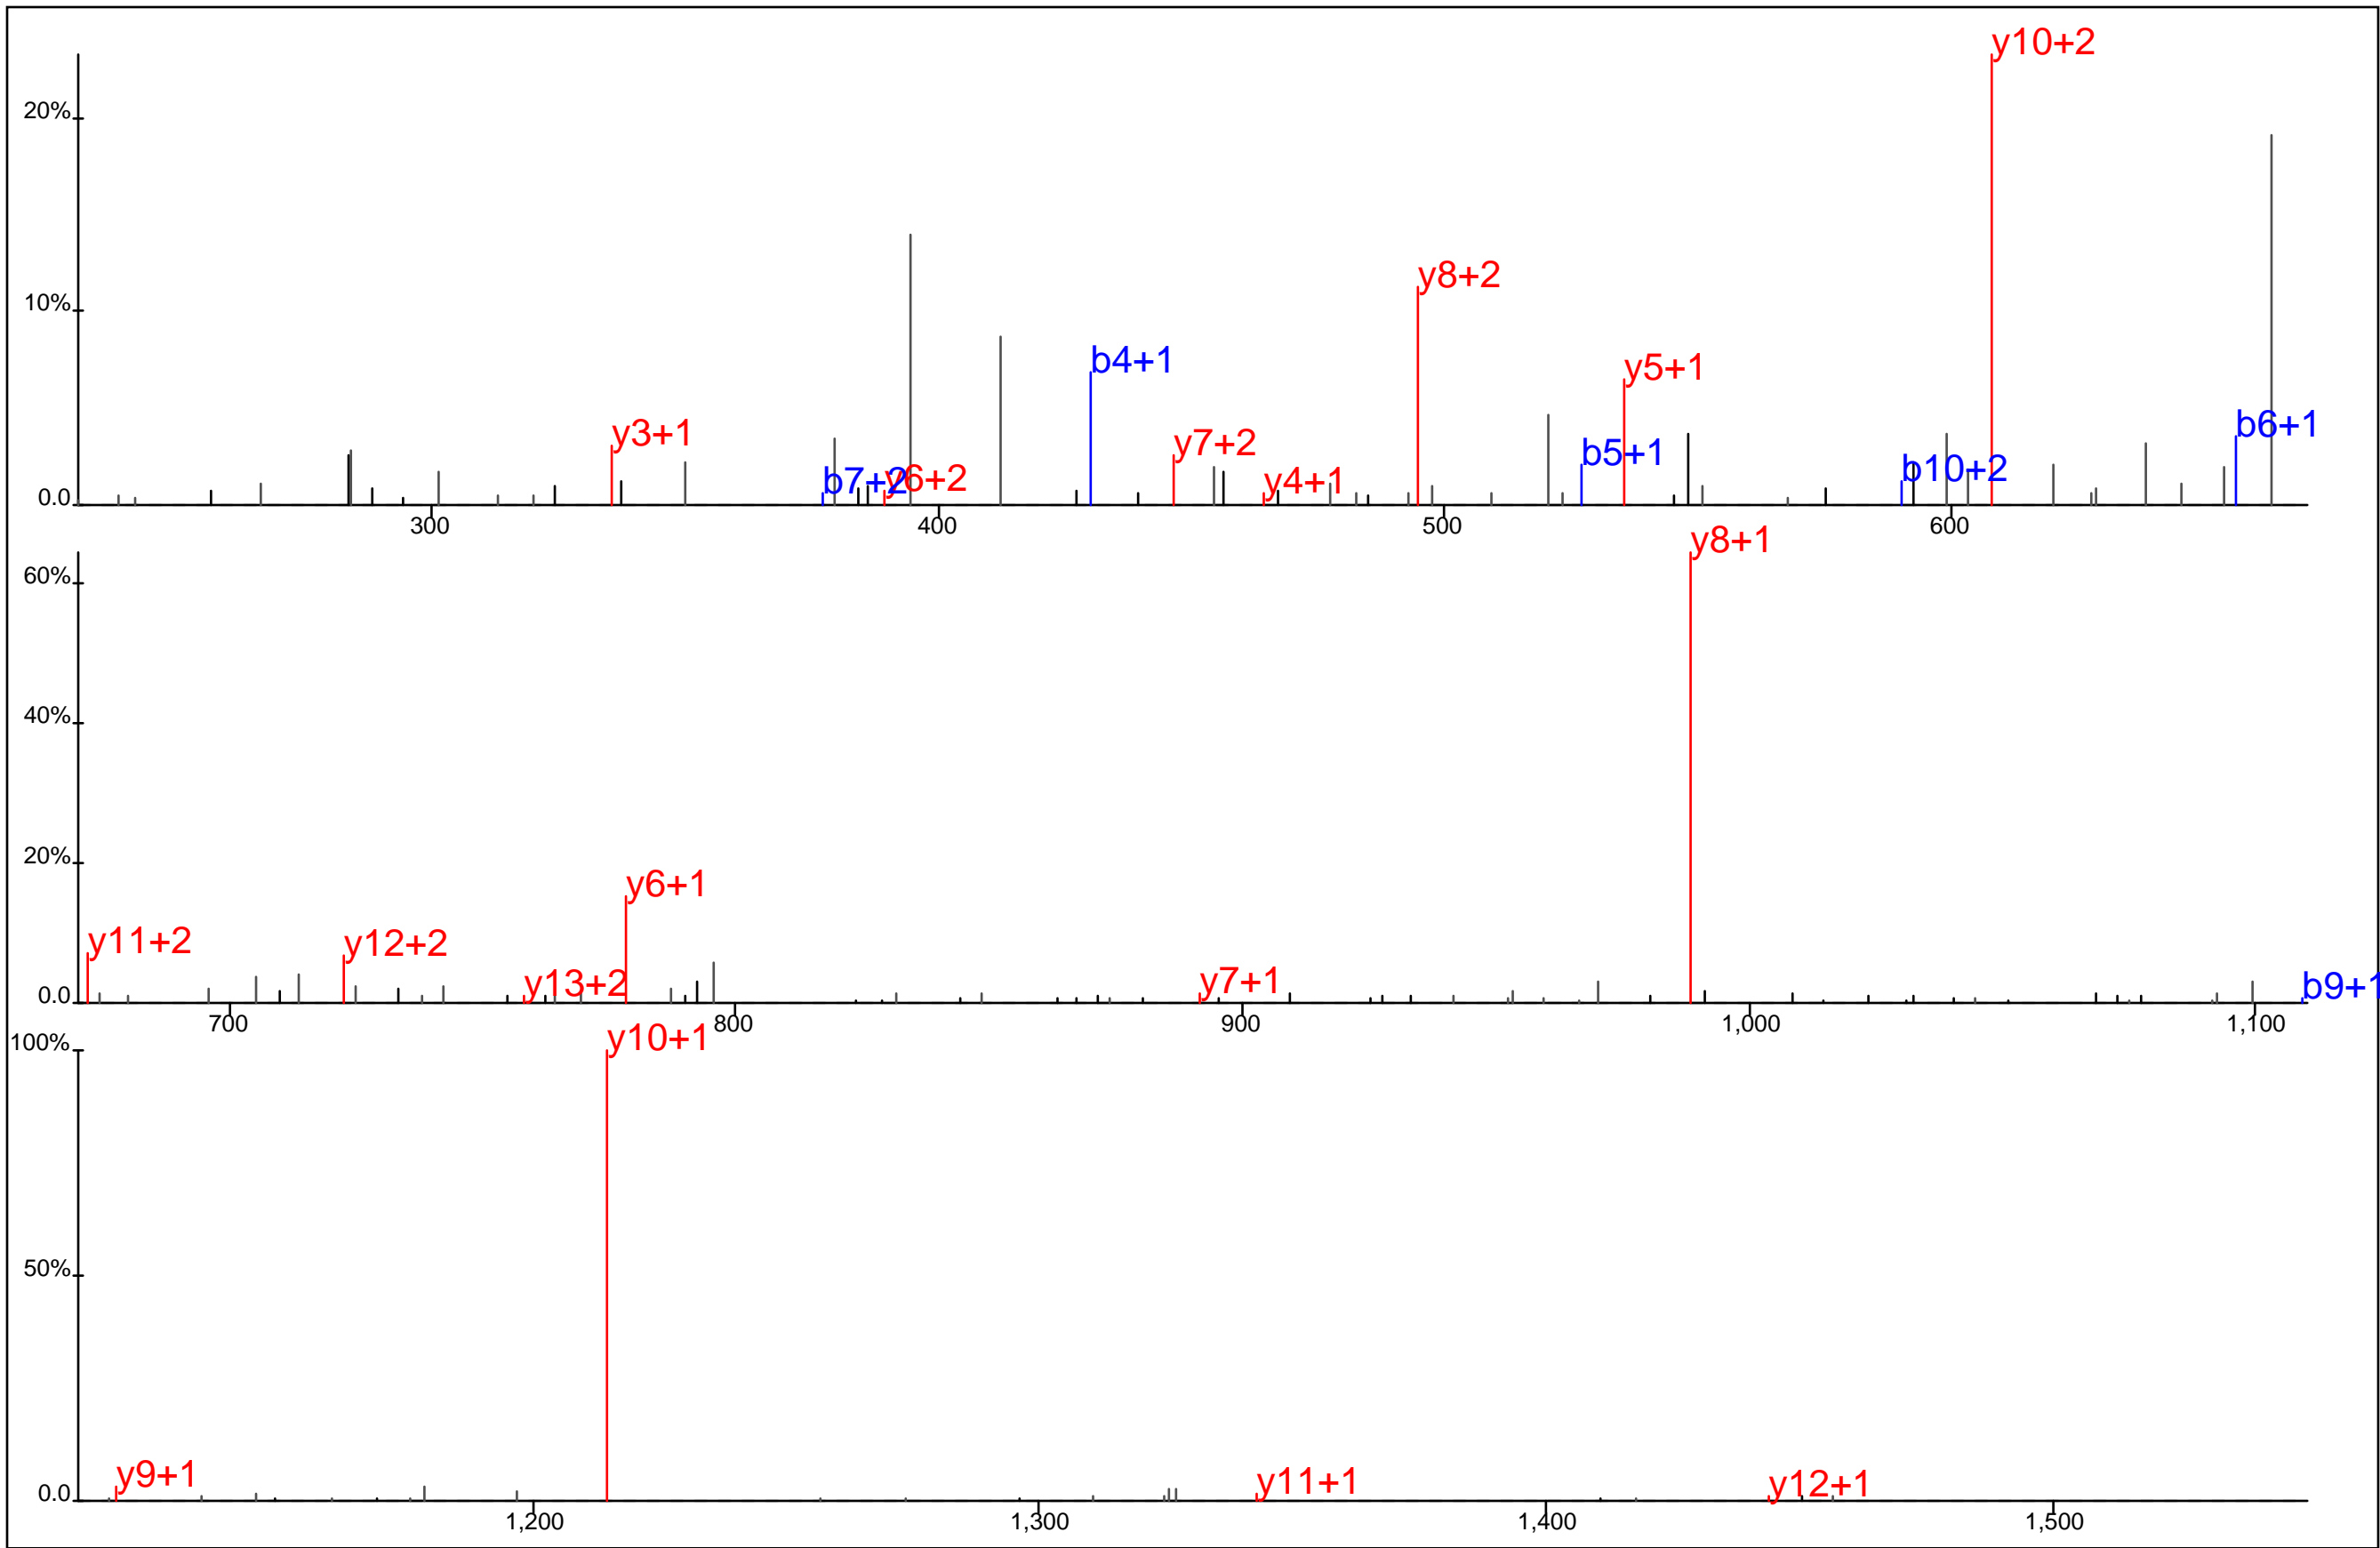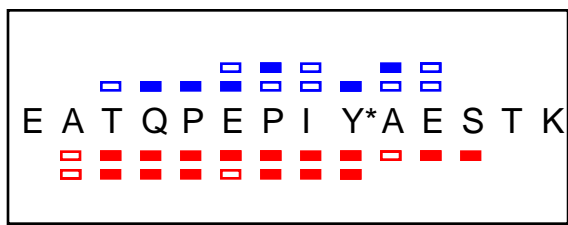

Protein Name: Tyrosine-protein kinase SgK223  
 gi Accession: 0  
 Precursor Mass: 822.3639+2  
 Delta Mass: 0.320 ppm  
 XCorr: 49.62

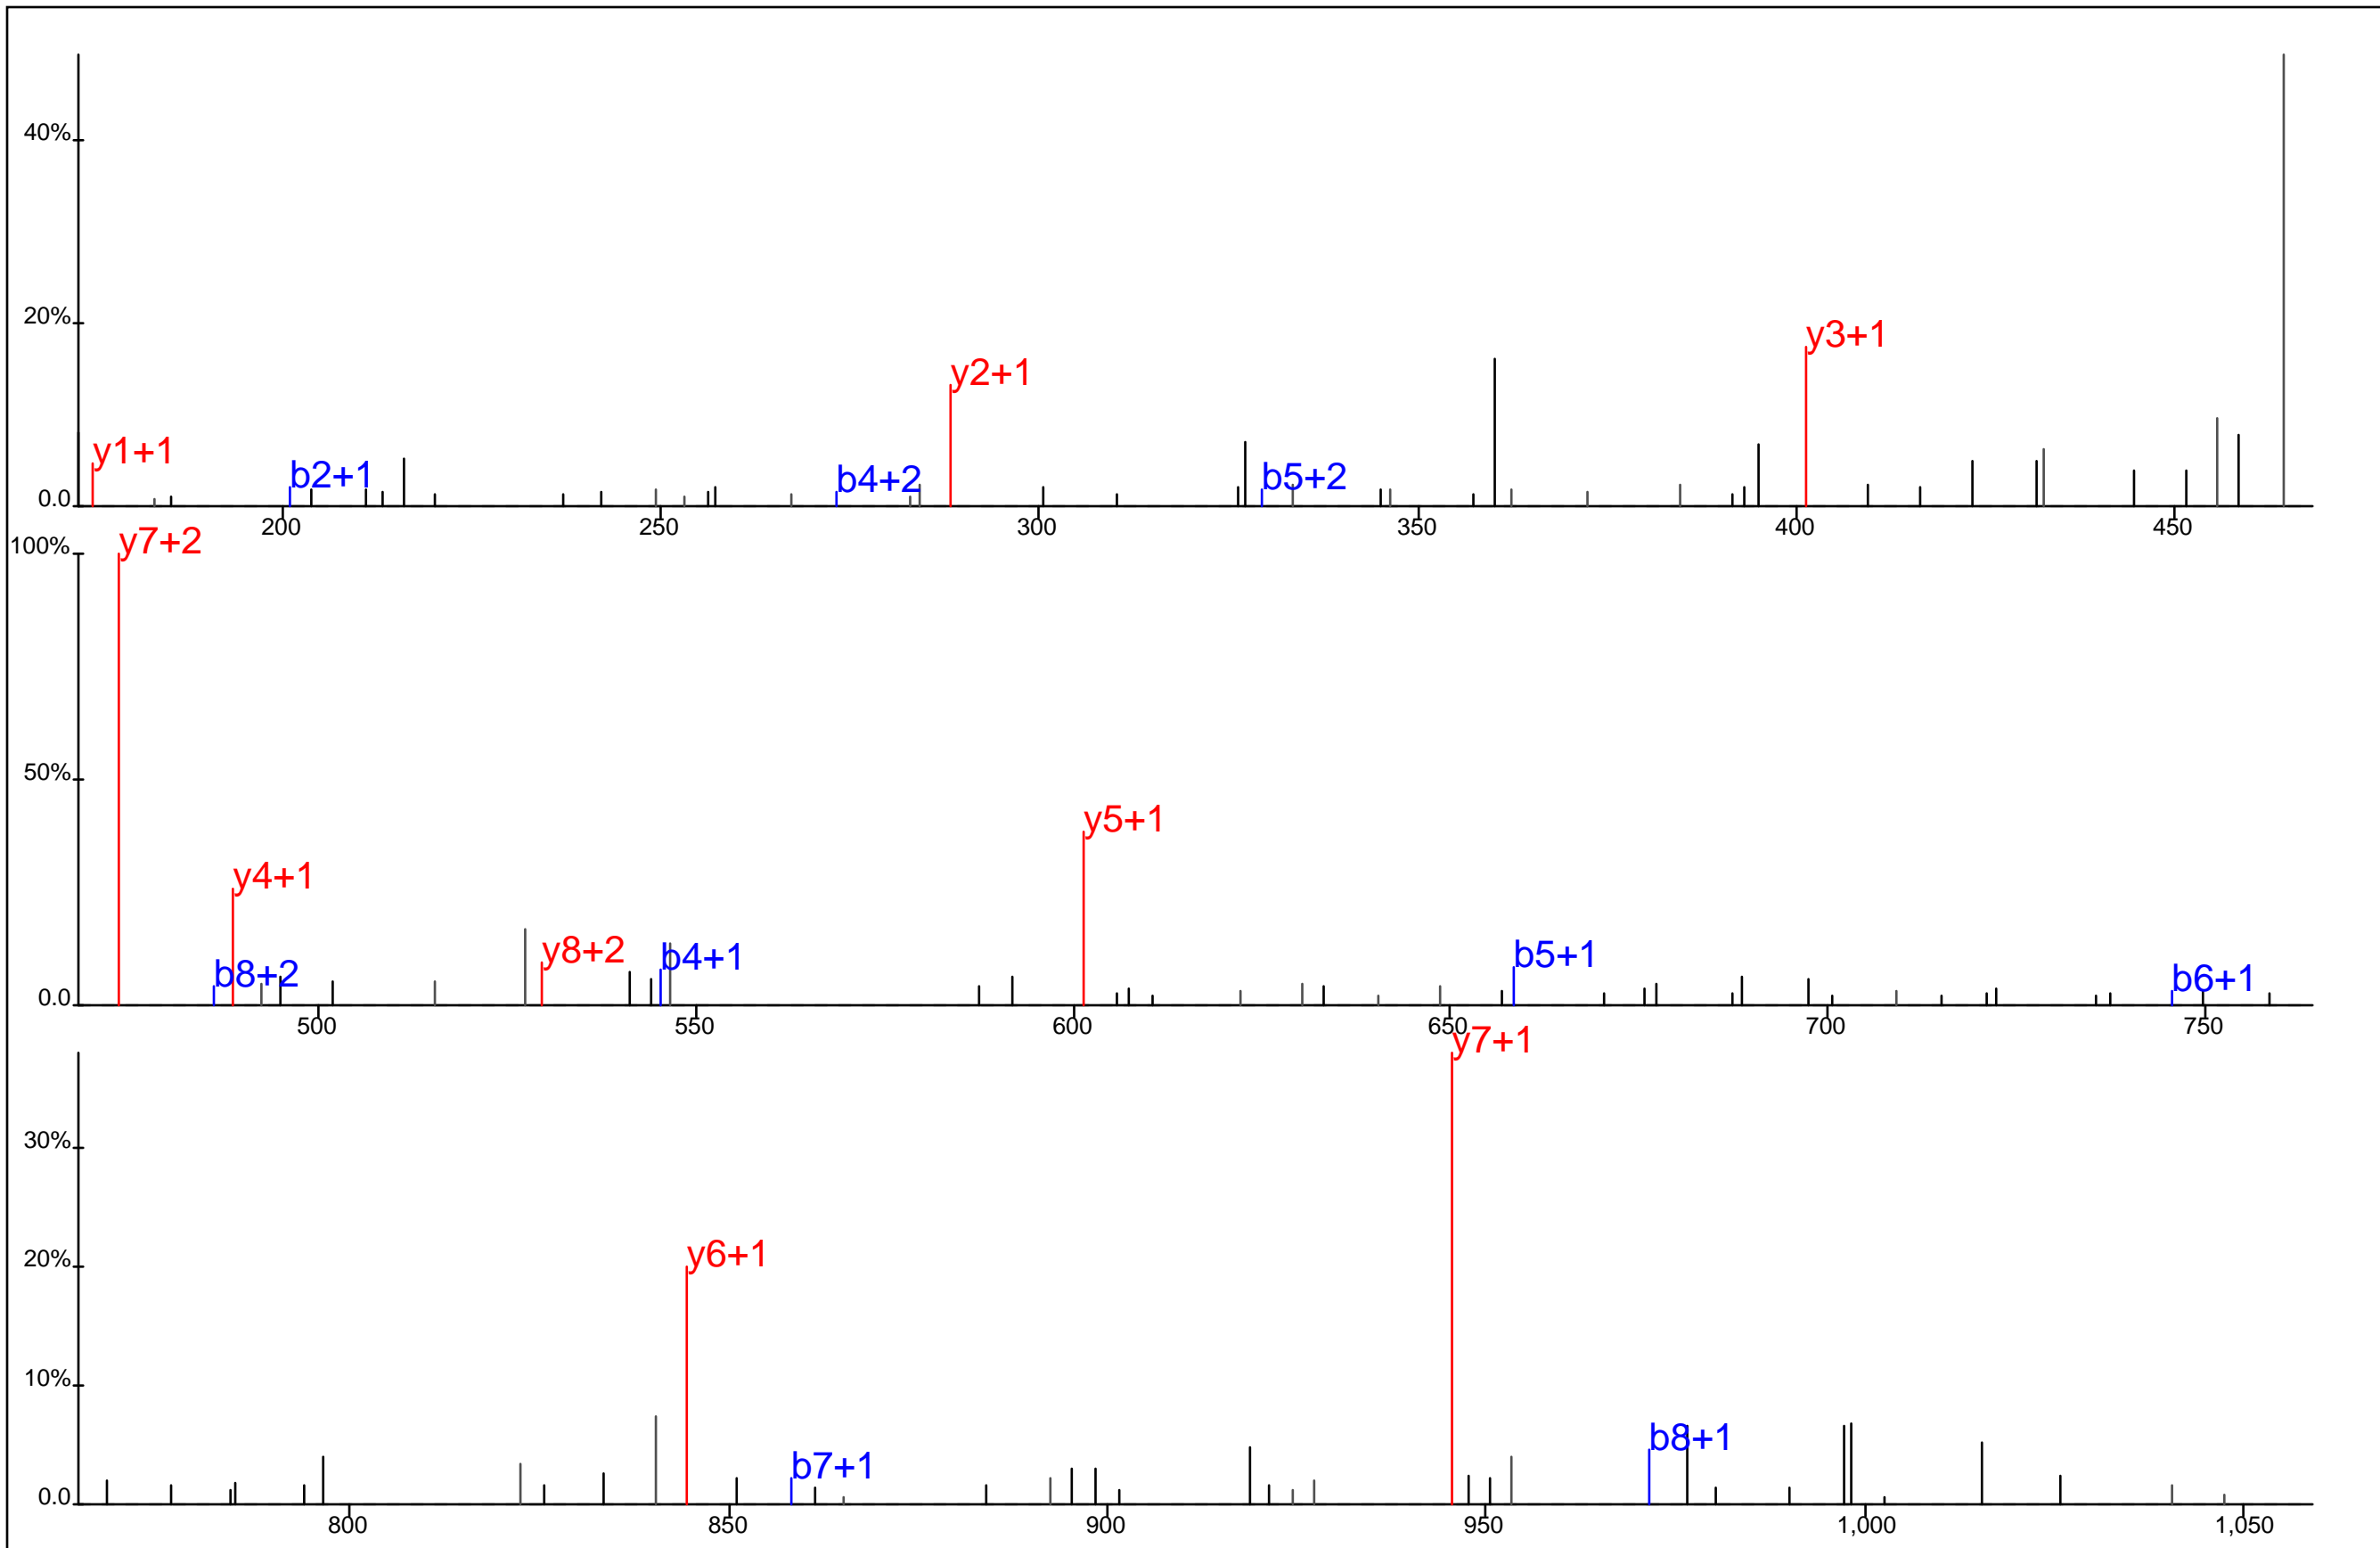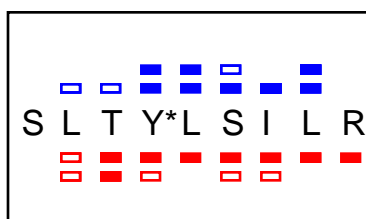

Protein Name: U2A prime  
 gi Accession: 0  
 Precursor Mass: 573.3010+2  
 Delta Mass: 1.676 ppm  
 XCorr: 39.49

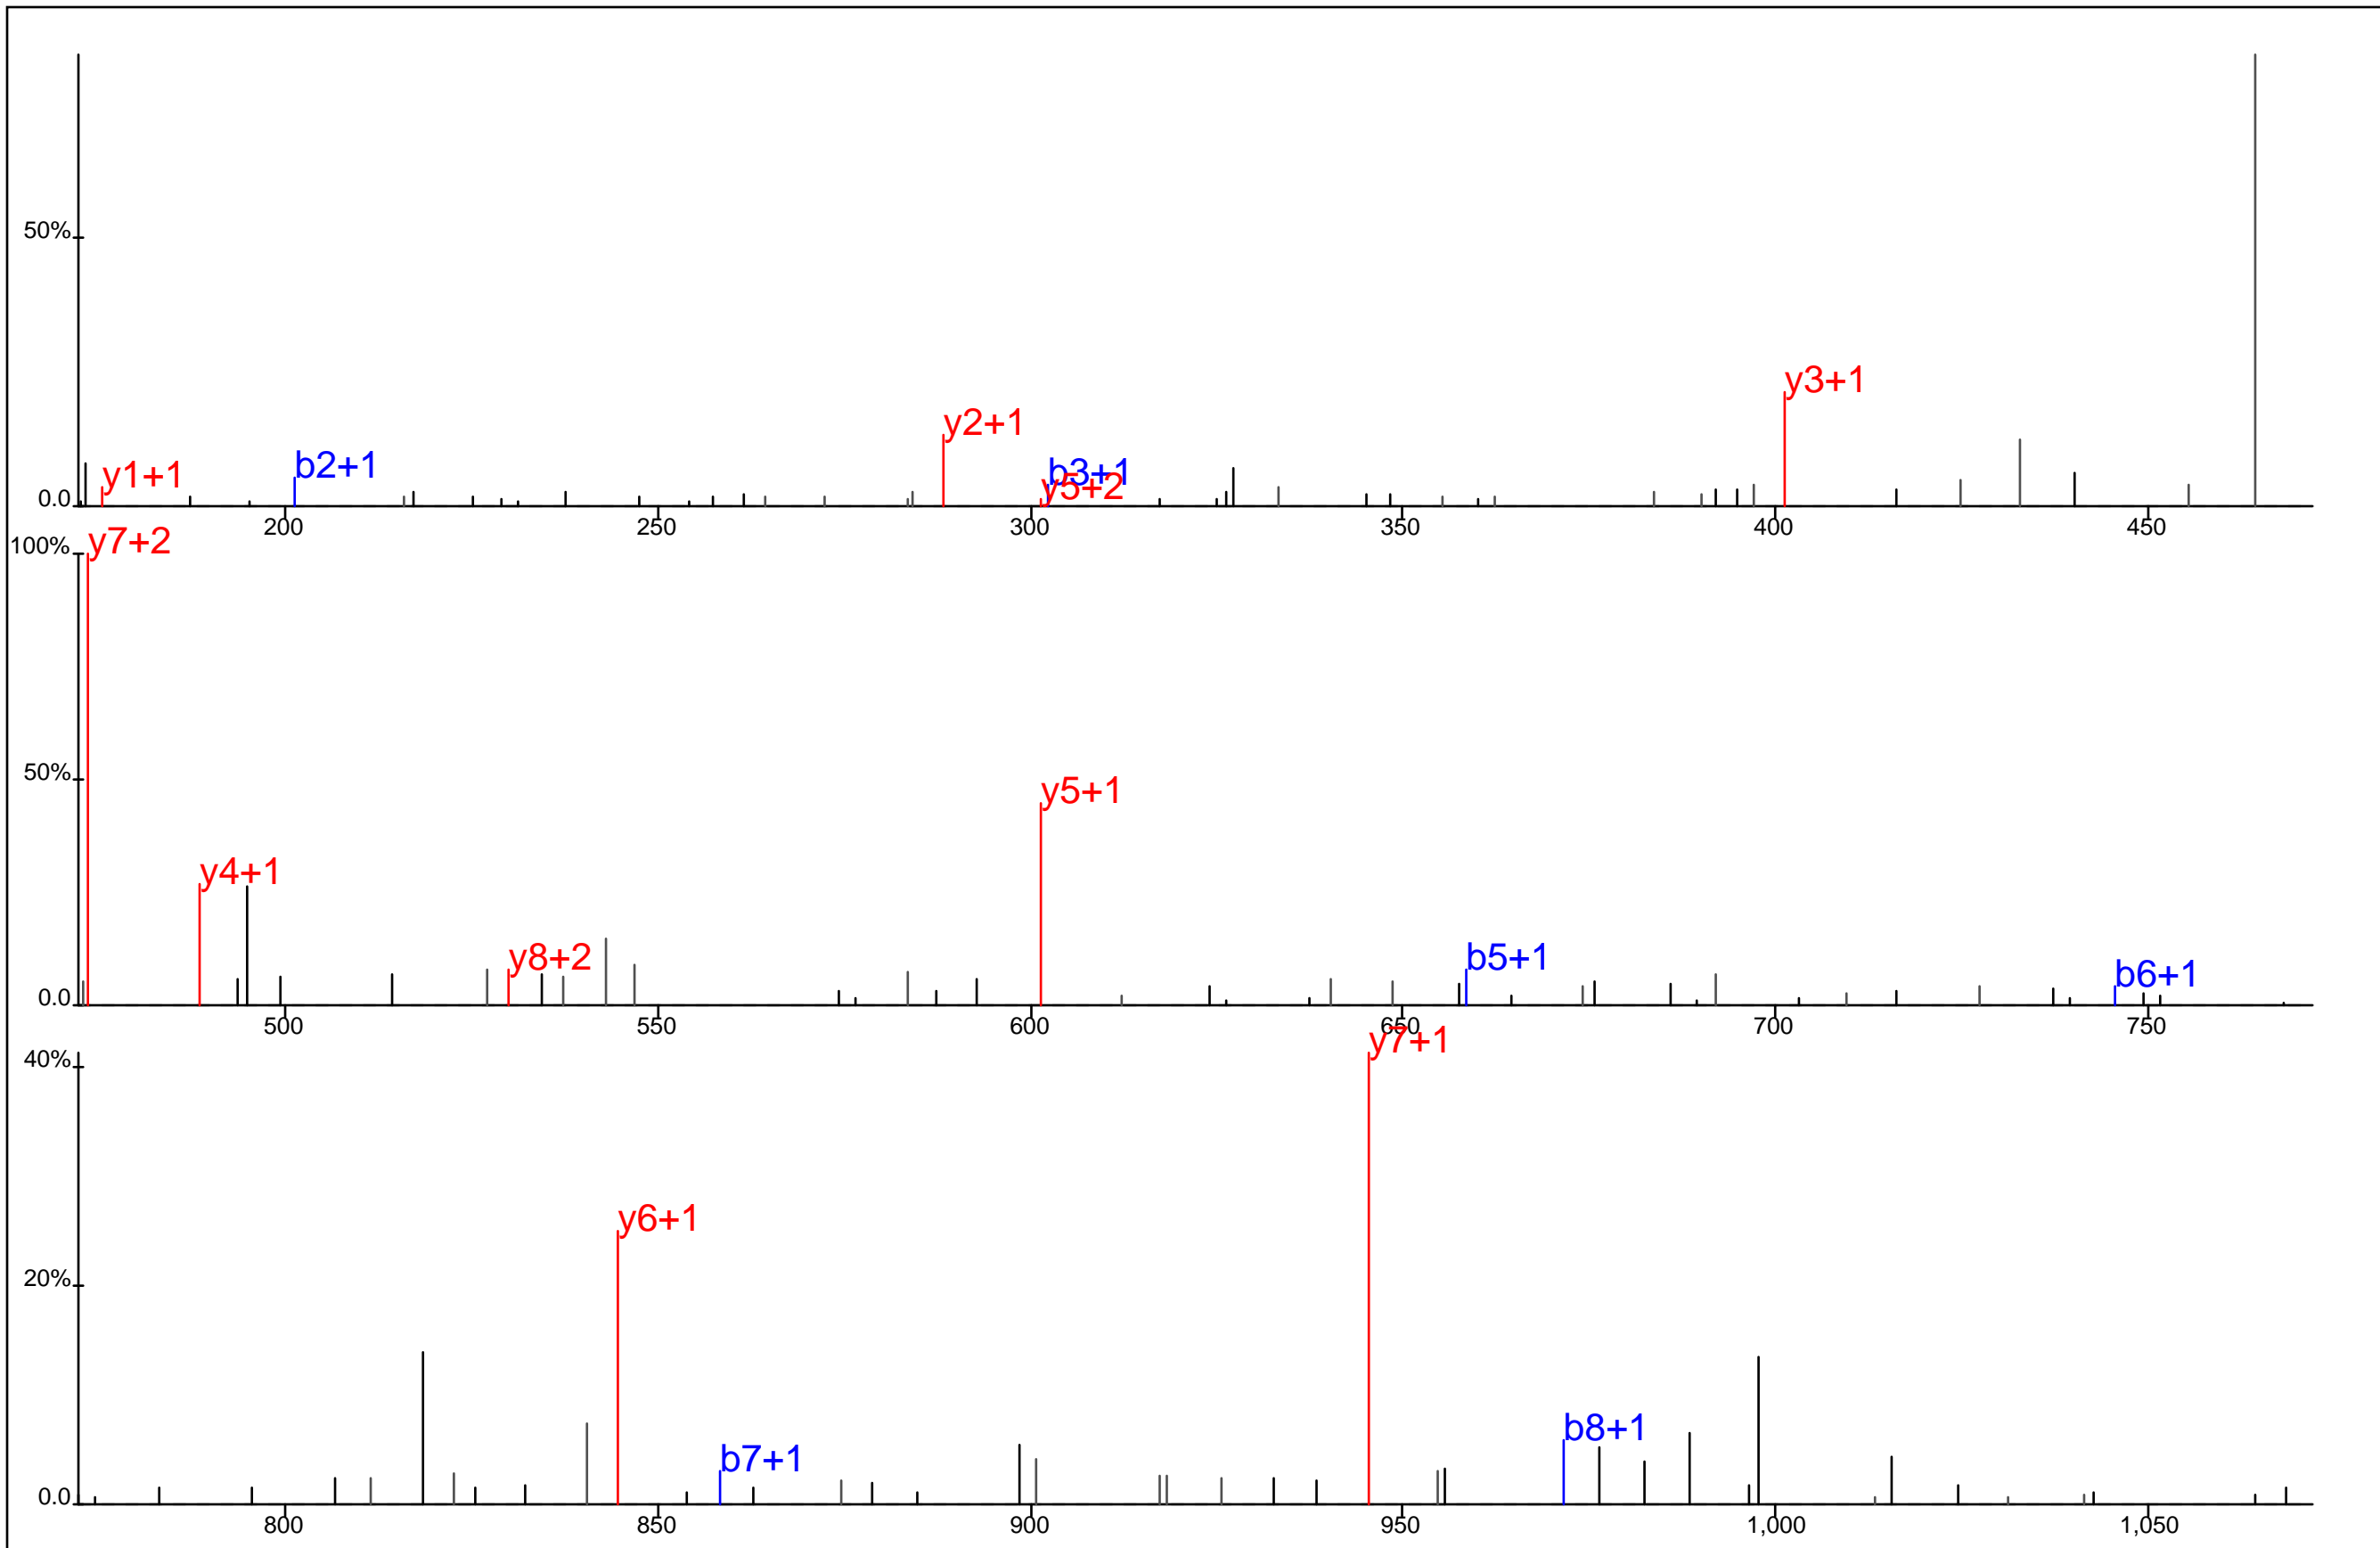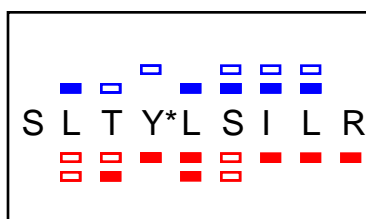

Protein Name: U2A prime  
 gi Accession: 0  
 Precursor Mass: 573.3030+2  
 Delta Mass: 1.948 ppm  
 XCorr: 43.78

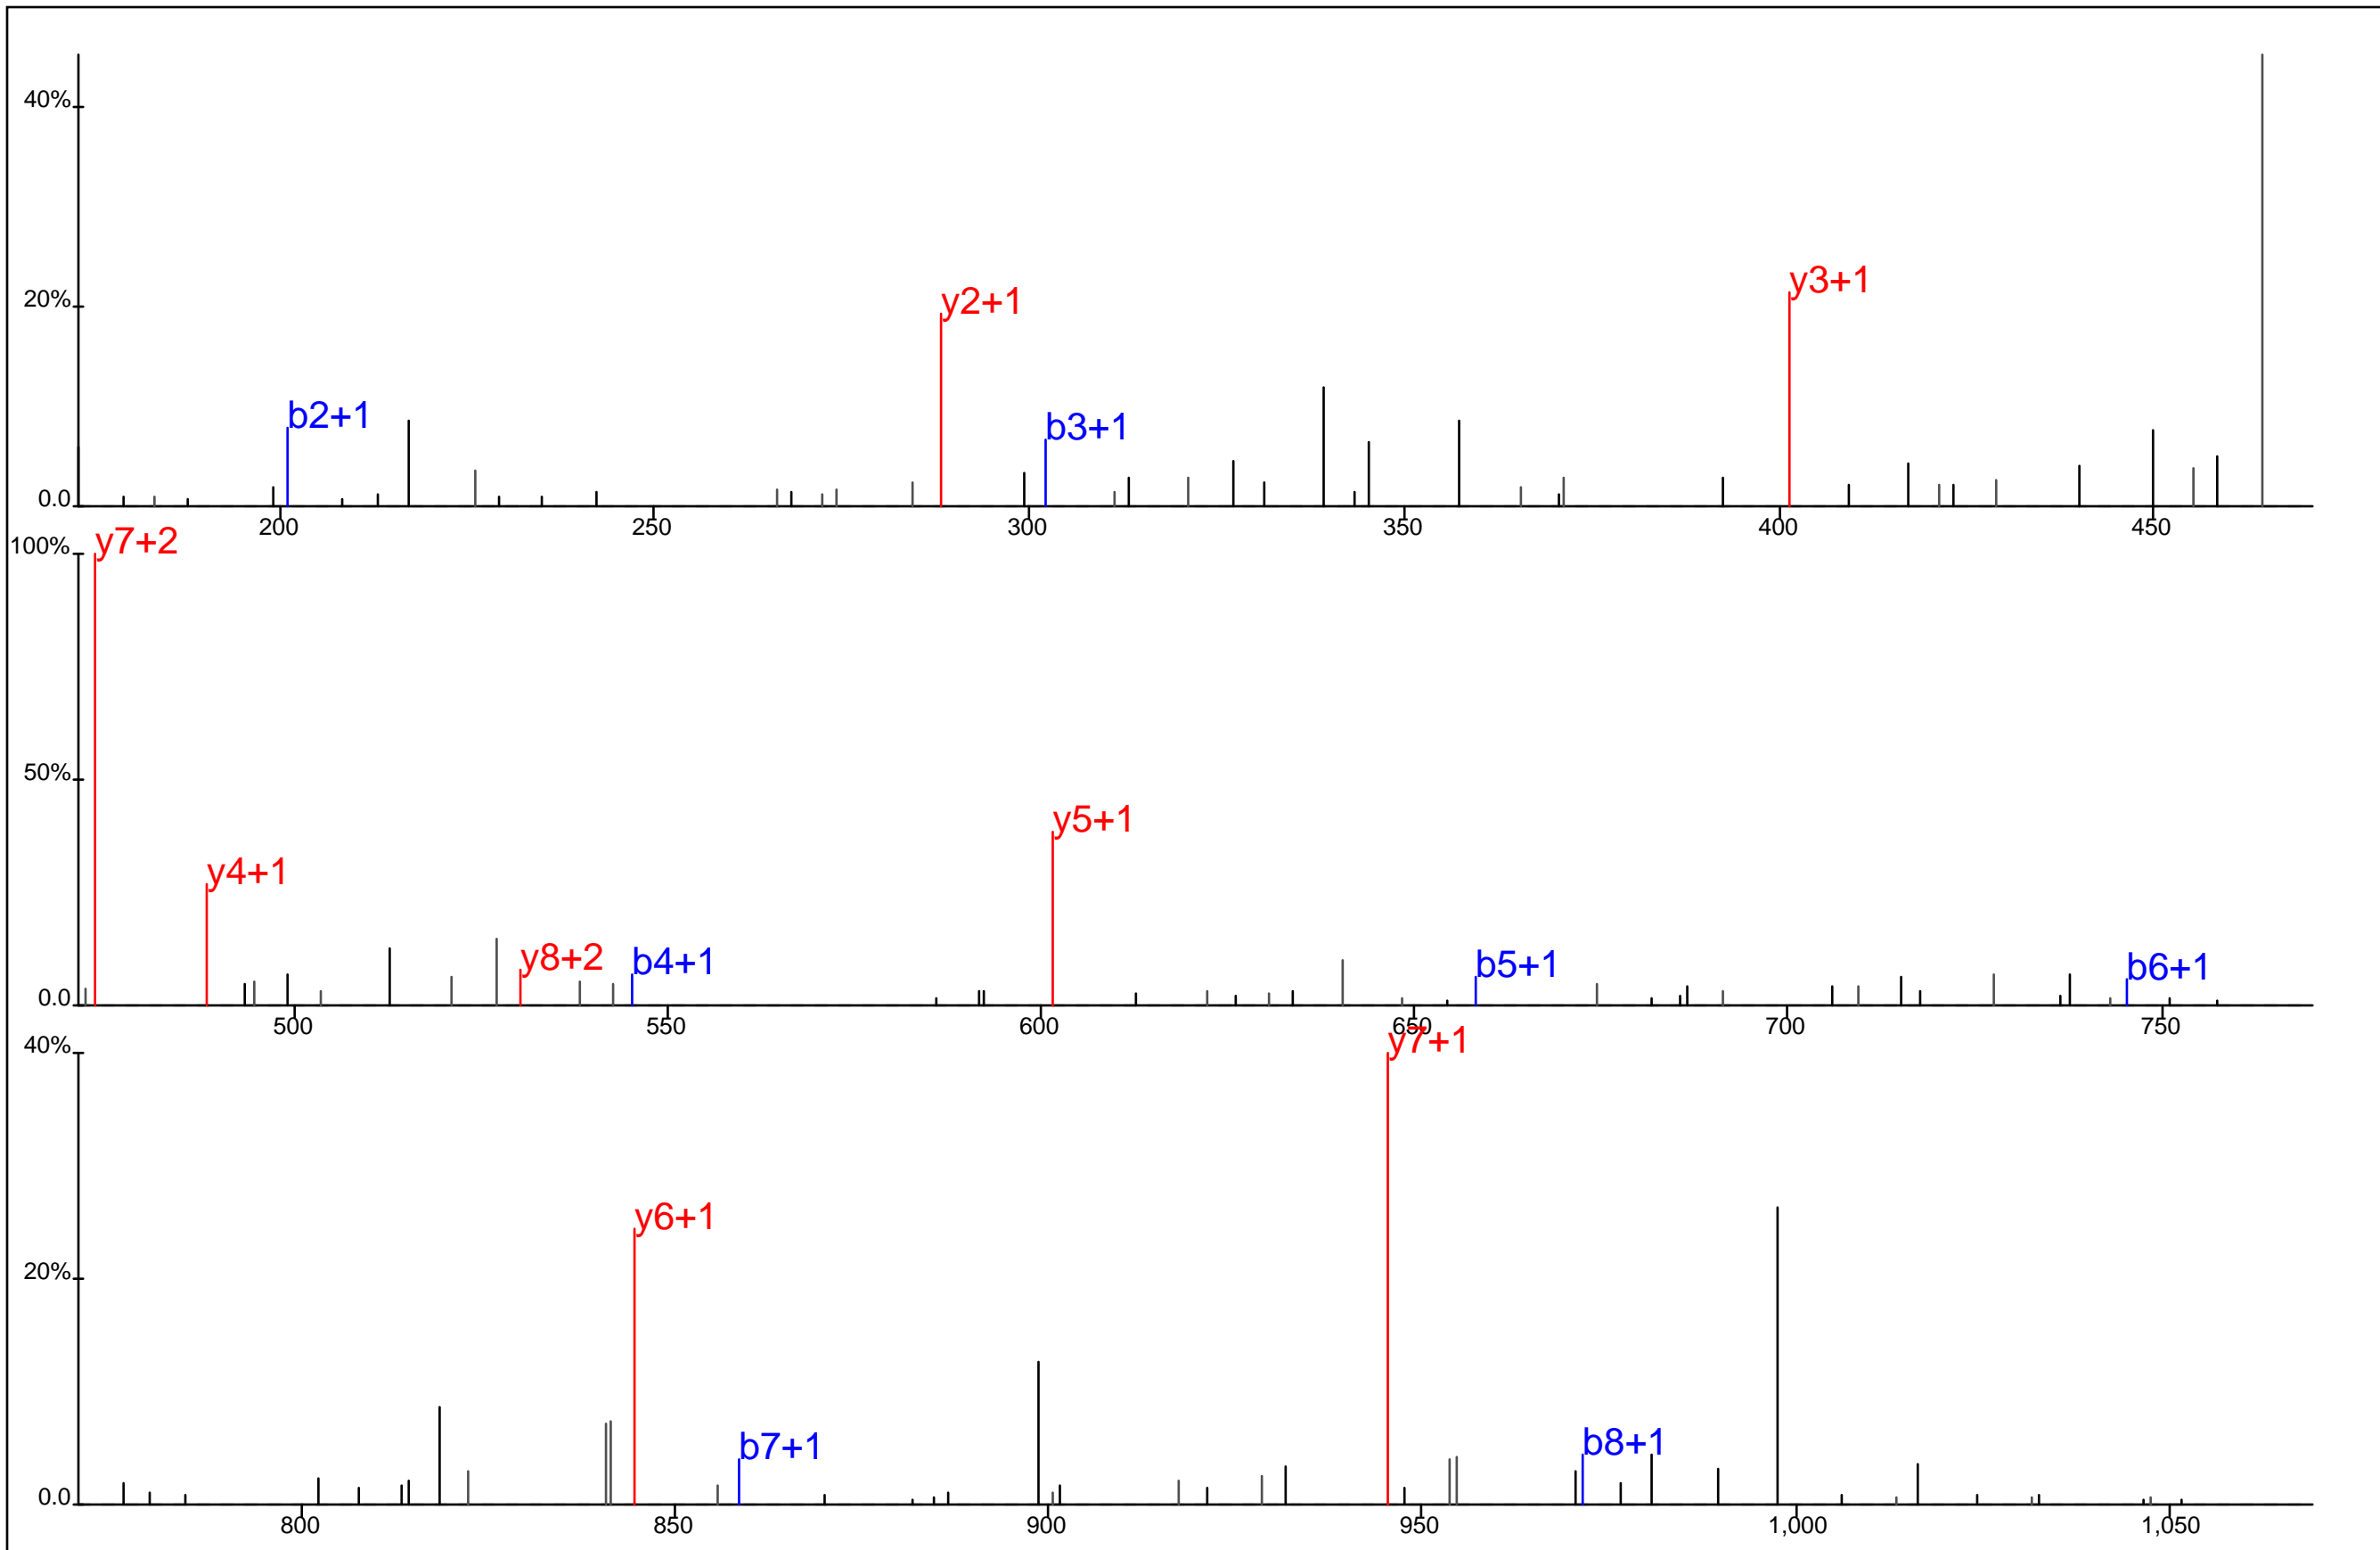

S L T Y\* L S I L R

Protein Name: U2A prime  
 gi Accession: 0  
 Precursor Mass: 573.3008+2  
 Delta Mass: 1.889 ppm  
 XCorr: 35.87

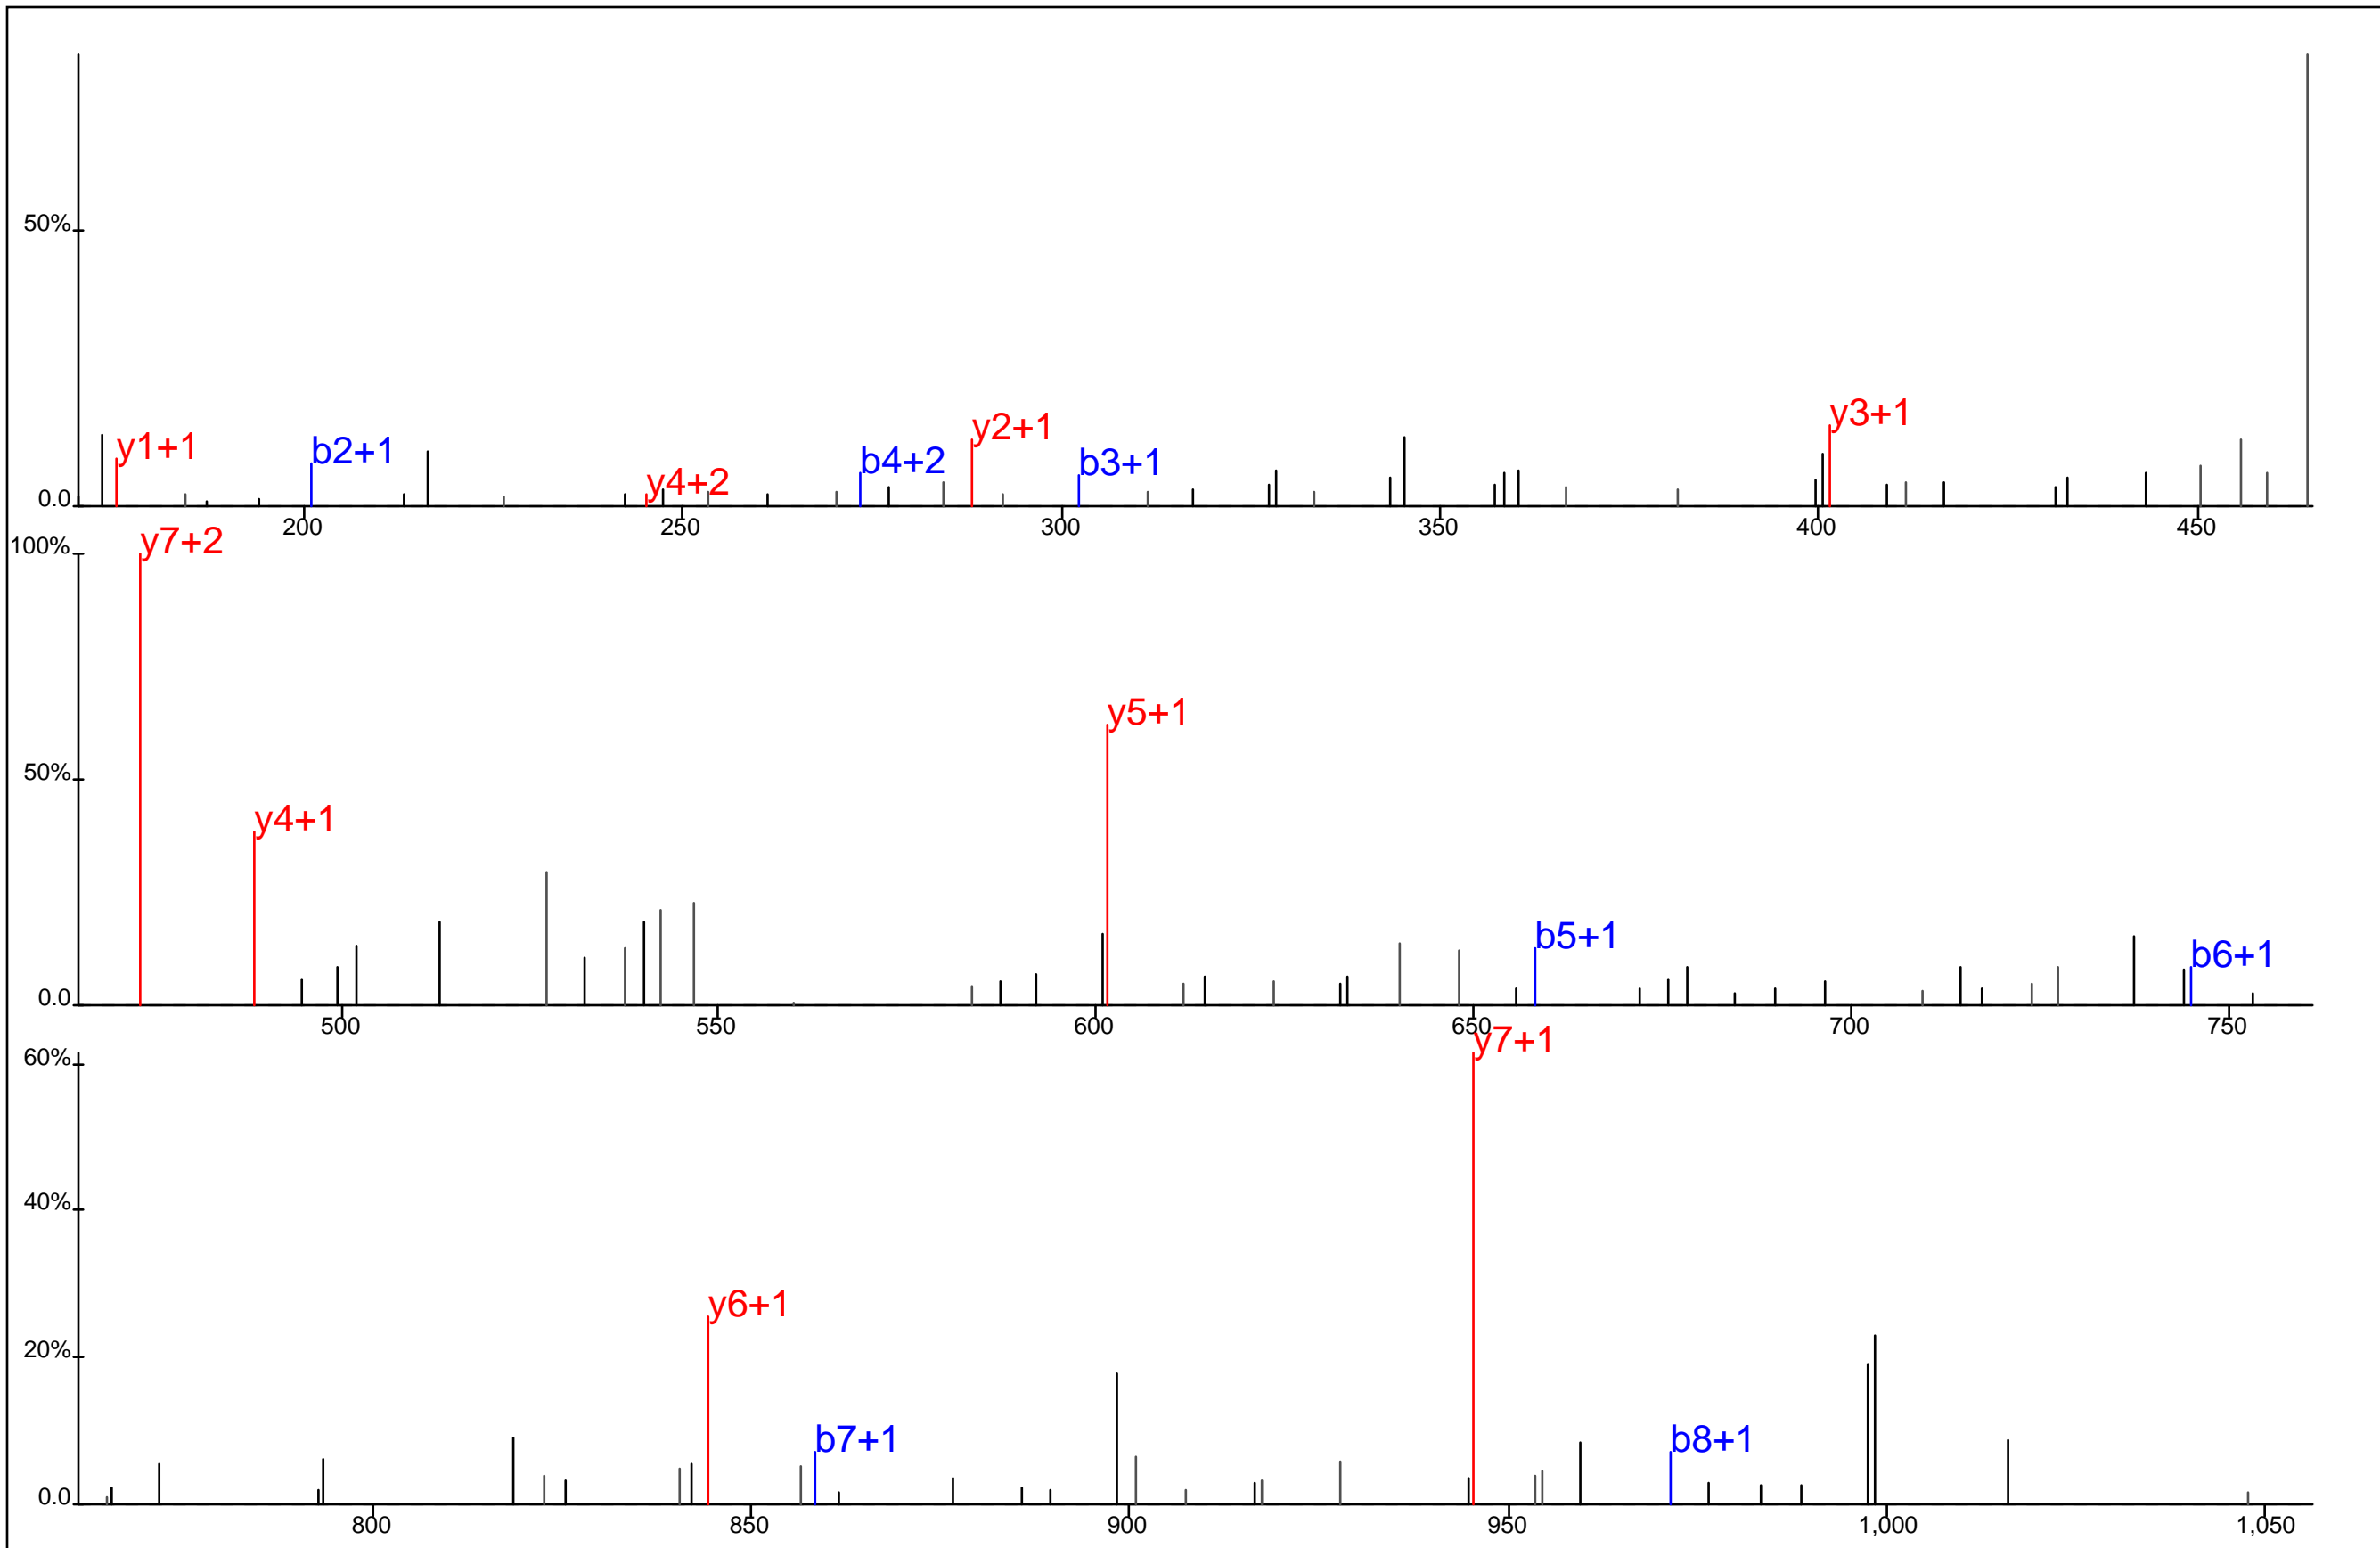

▢ ▢ ▢ ▢ ▢ ▢  
**S L T Y\*L S I L R**  
▢ ▢ ▢ ▢ ▢ ▢

Protein Name: U2A prime  
 gi Accession: 0  
 Precursor Mass: 573.3040+2  
 Delta Mass: 3.652 ppm  
 XCorr: 36.0



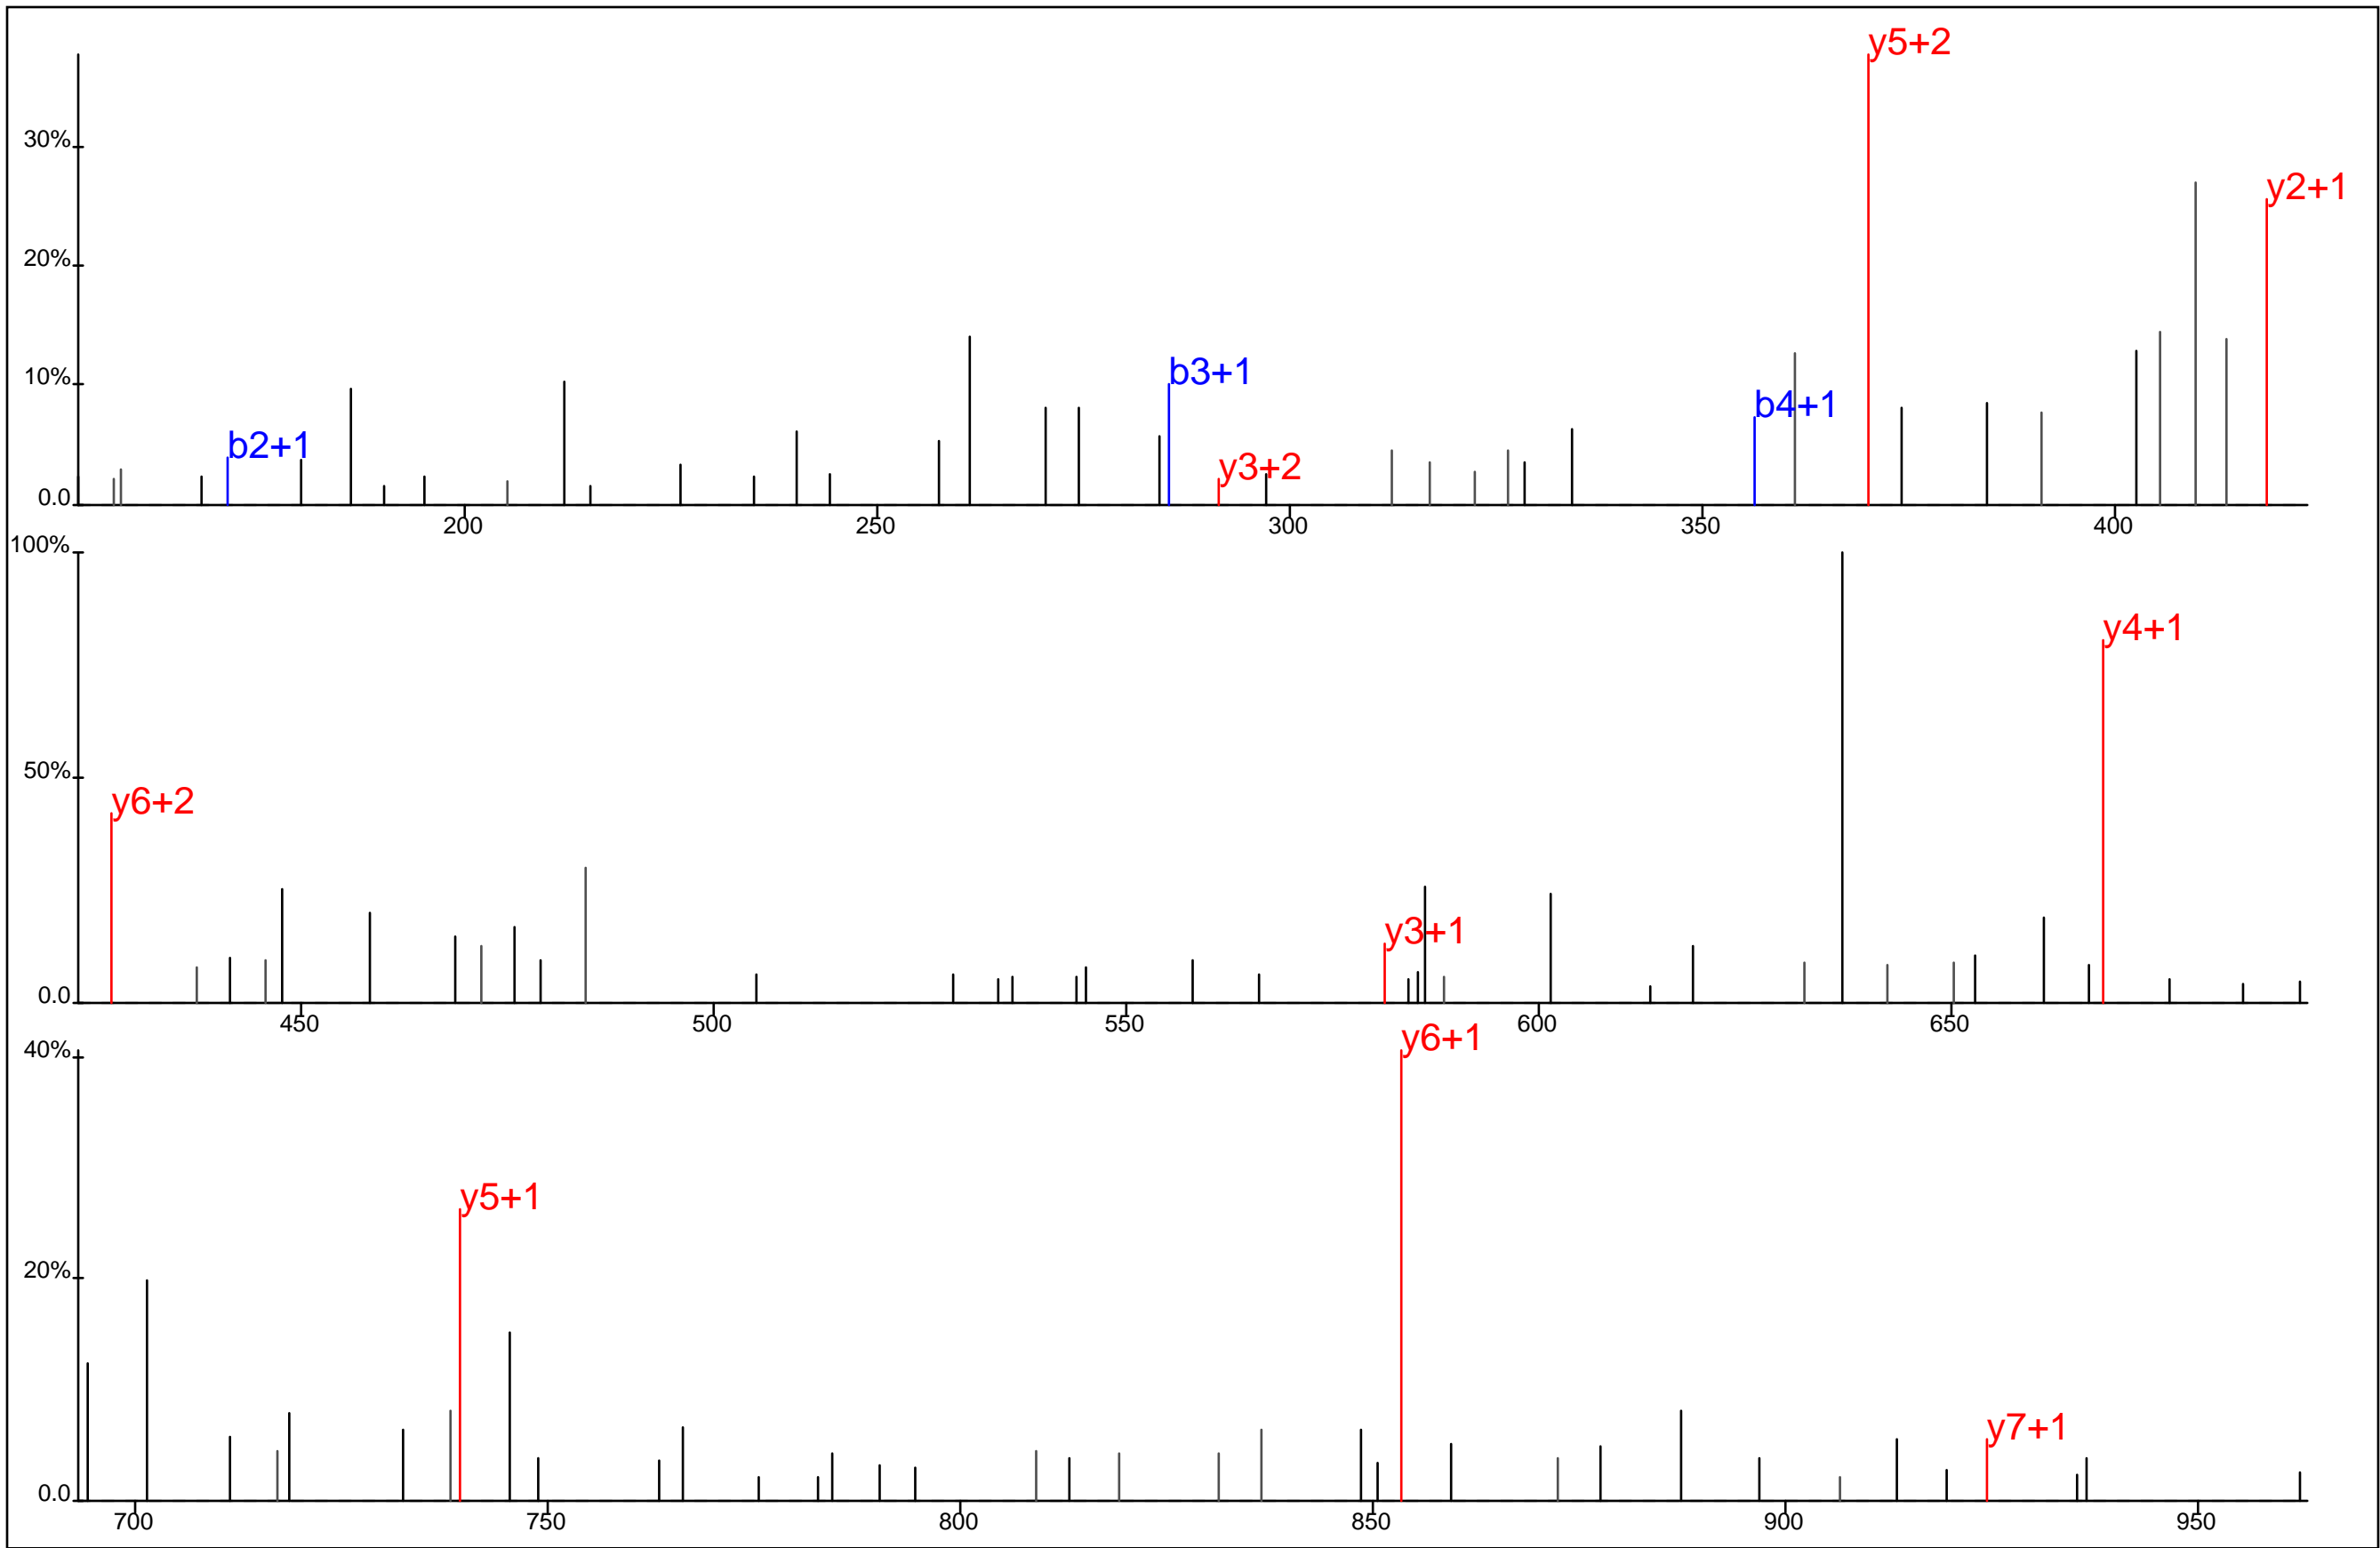

■ ■ ■ ■ ■ ■ ■  
 V A N A S Y Y\* R  
■ ■ ■ ■ ■ ■ ■

Protein Name: U2-associated SR140 protein  
 gi Accession: 0  
 Precursor Mass: 512.2193+2  
 Delta Mass: 1.778 ppm  
 XCorr: 21.57

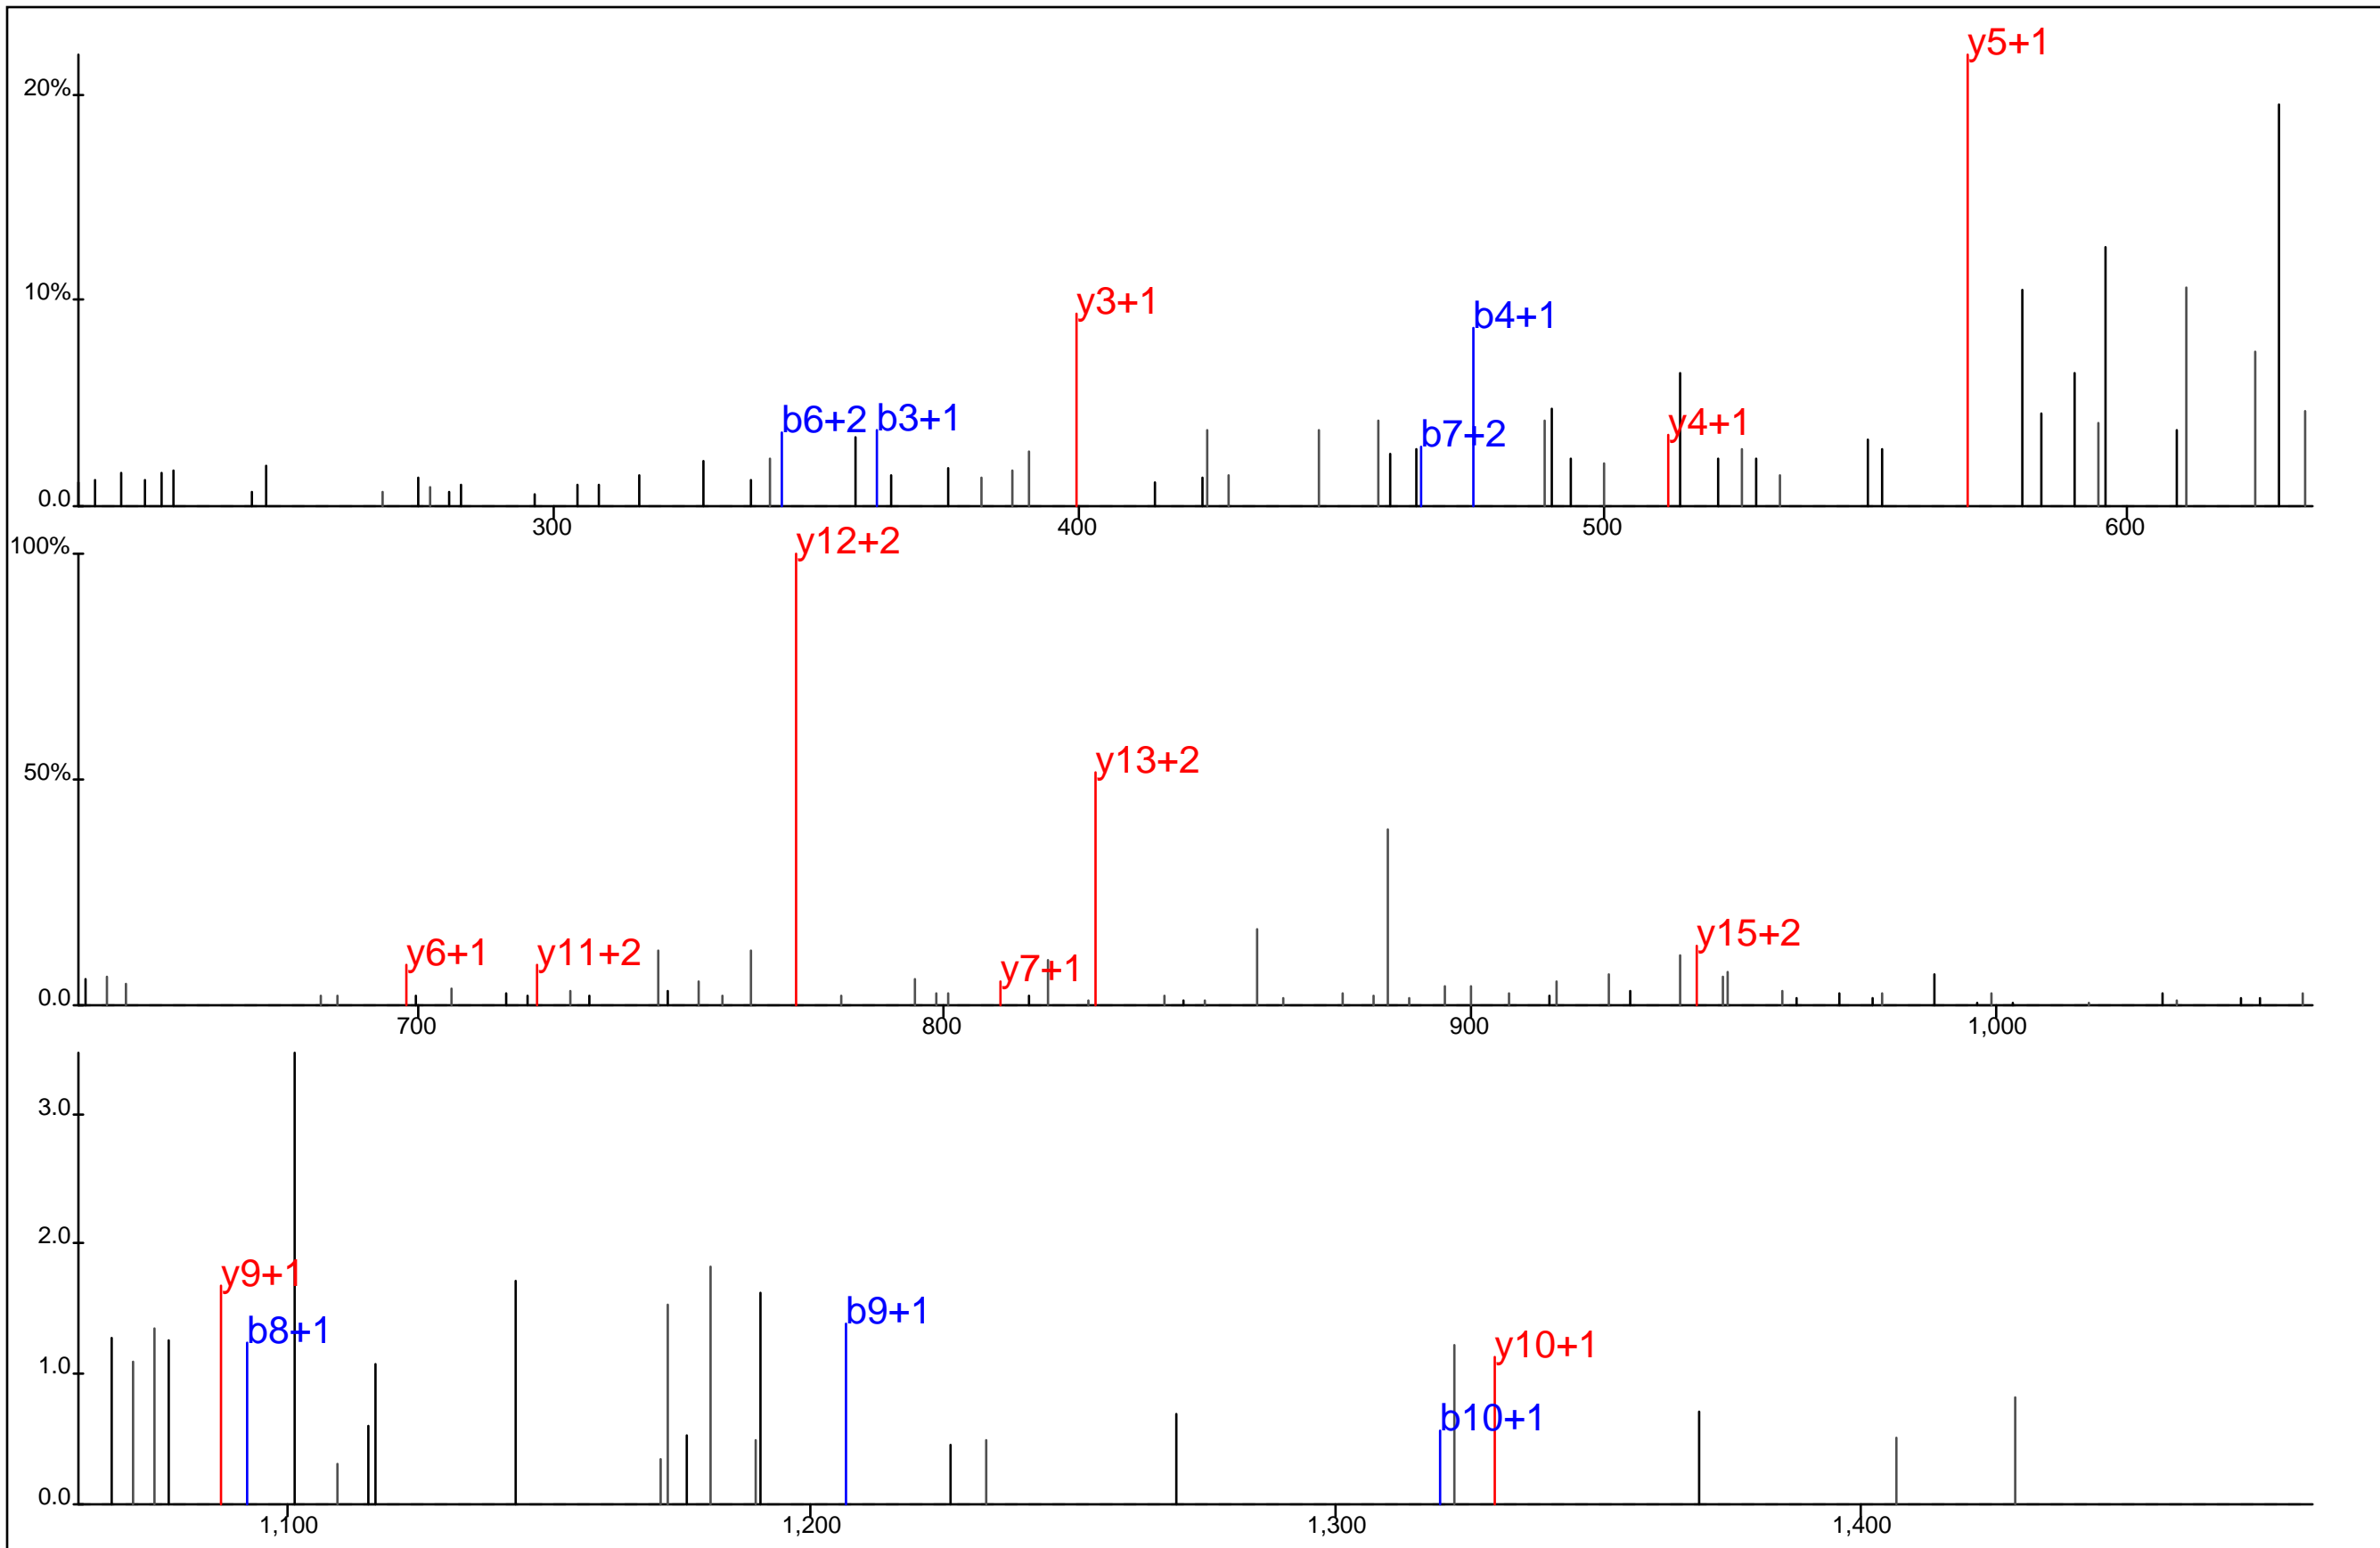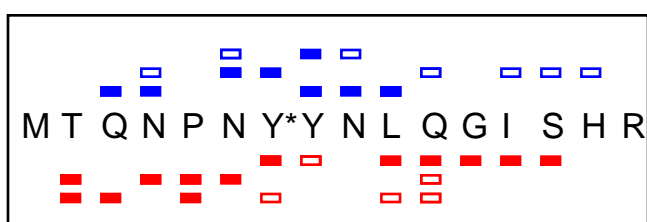

Protein Name: U5 200kD  
 gi Accession: 0  
 Precursor Mass: 672.6331+3  
 Delta Mass: 2.728 ppm  
 XCorr: 20.29

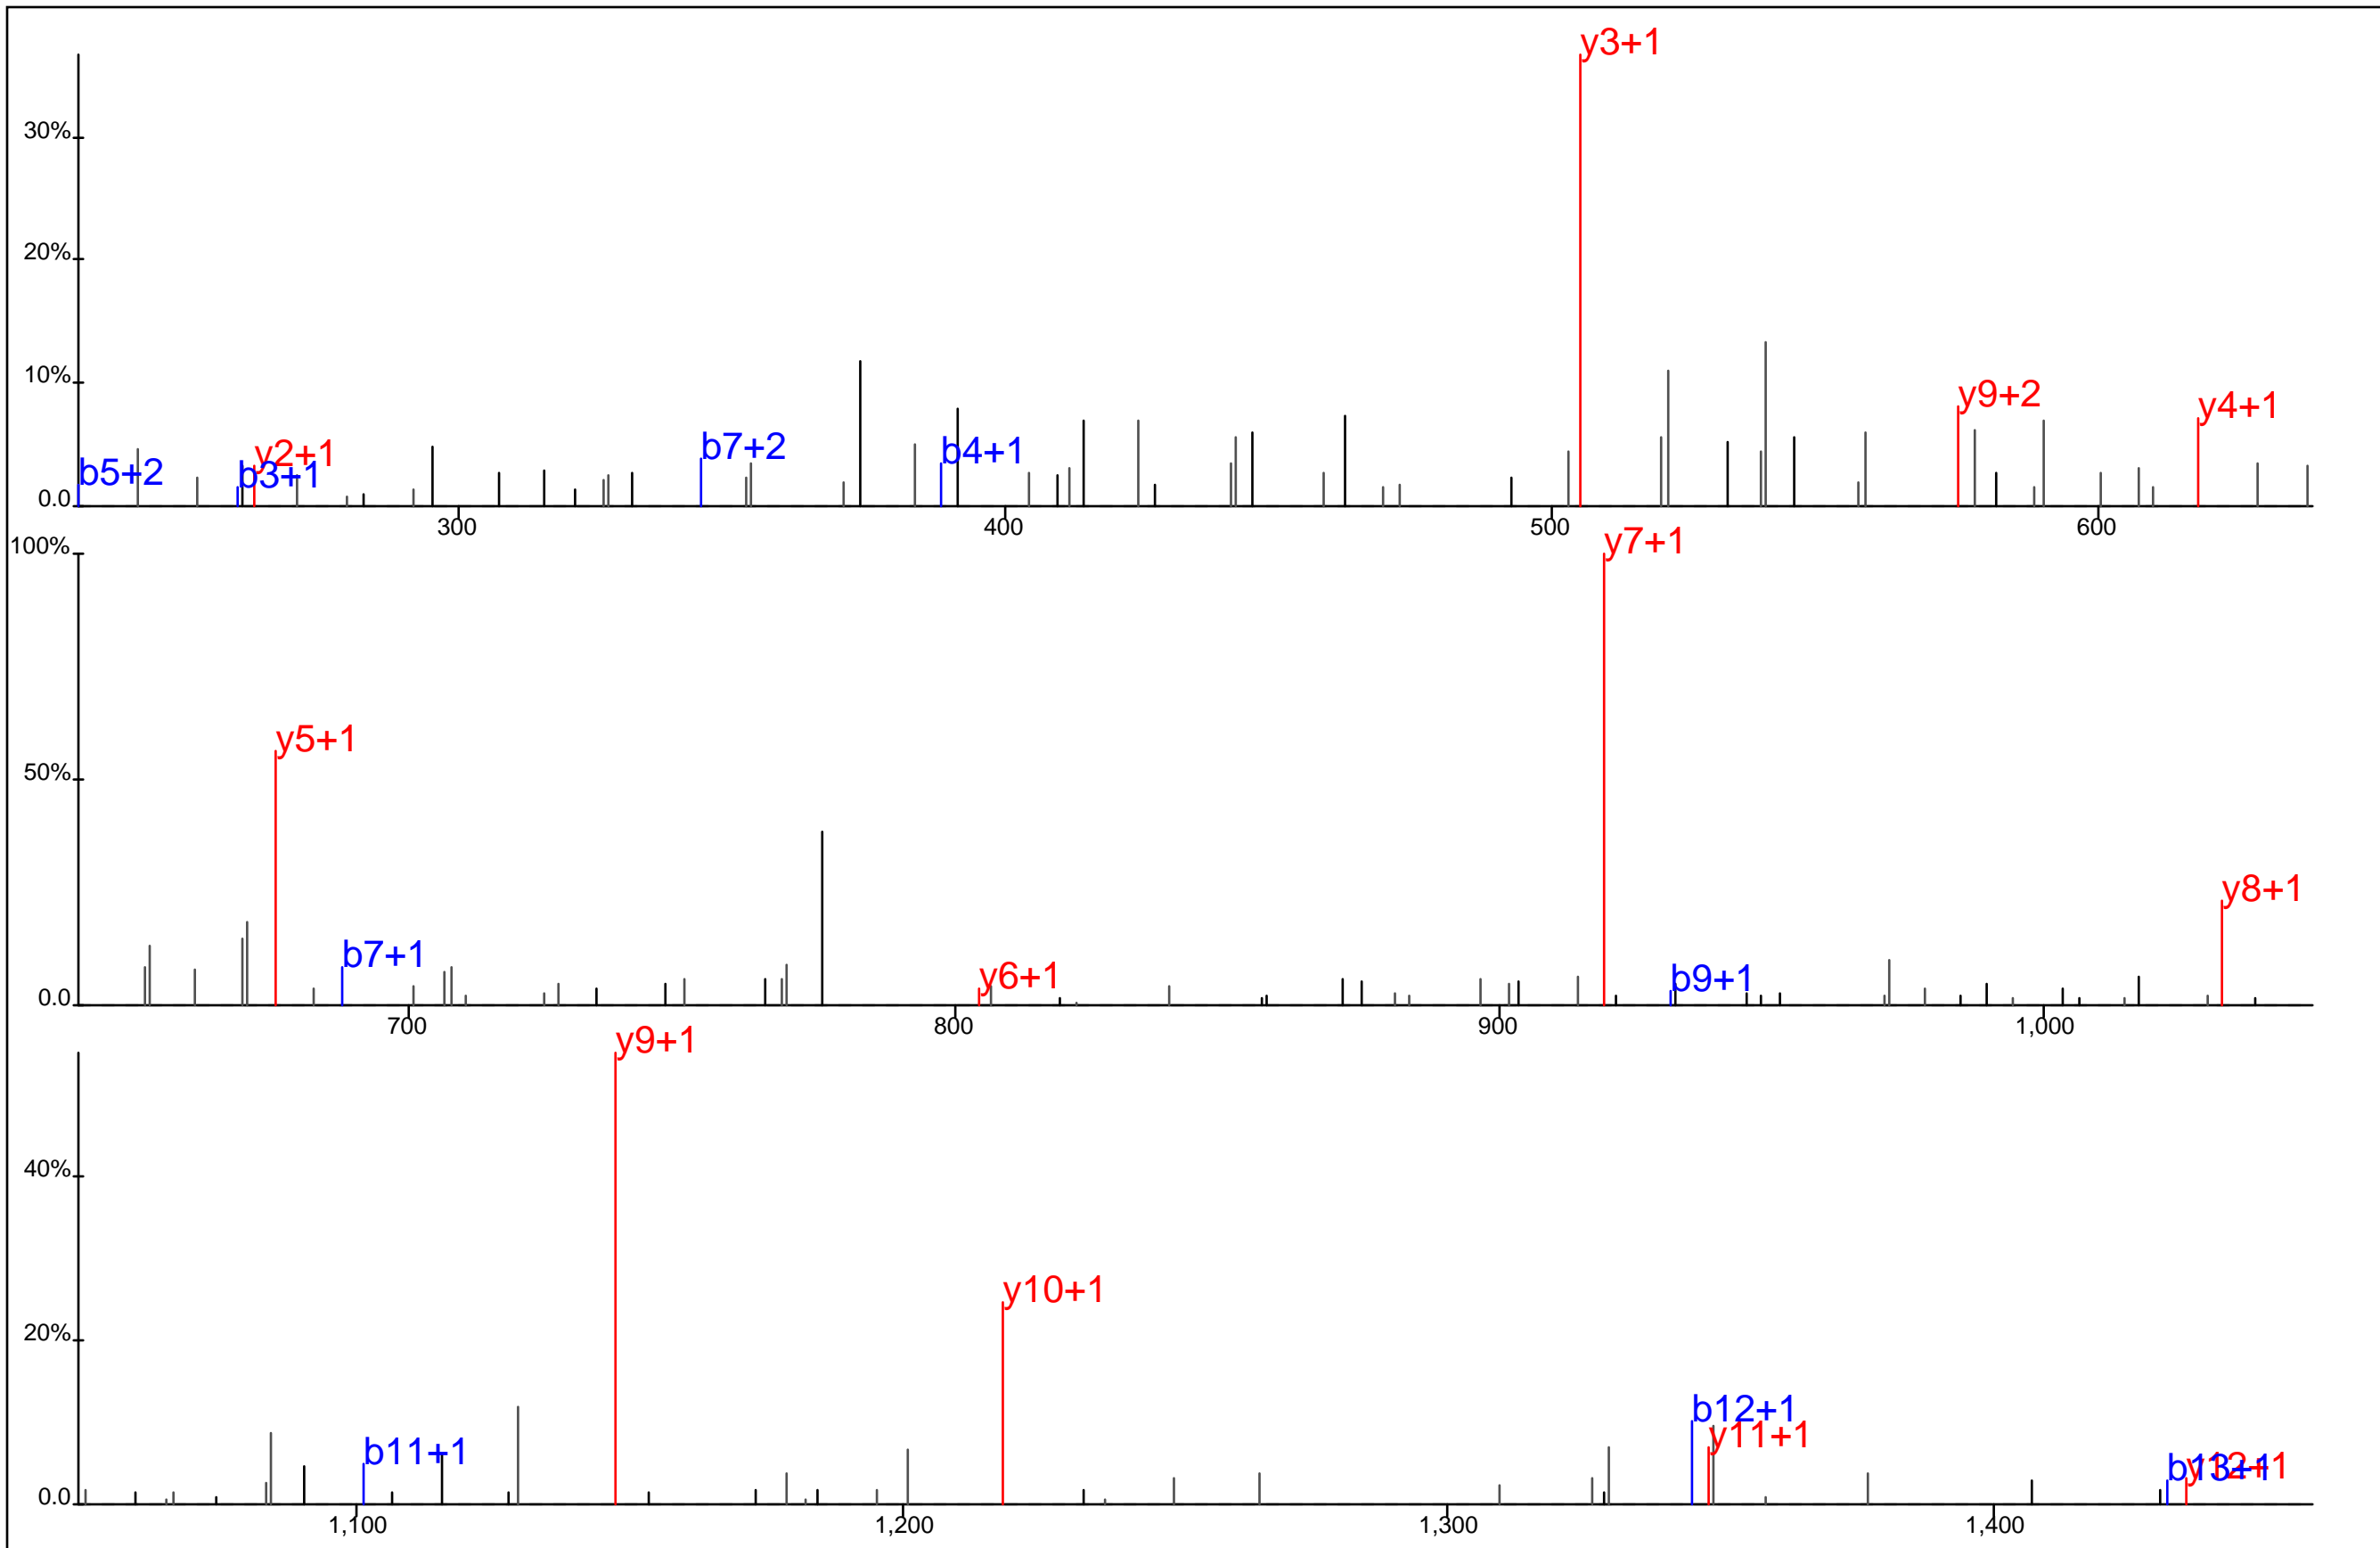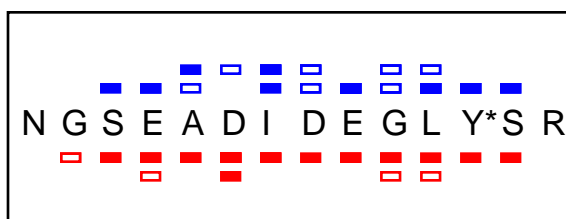

Protein Name: Ubiquitin activating enzyme 1  
 gi Accession: 0  
 Precursor Mass: 803.3251+2  
 Delta Mass: 0.118 ppm  
 XCorr: 66.65

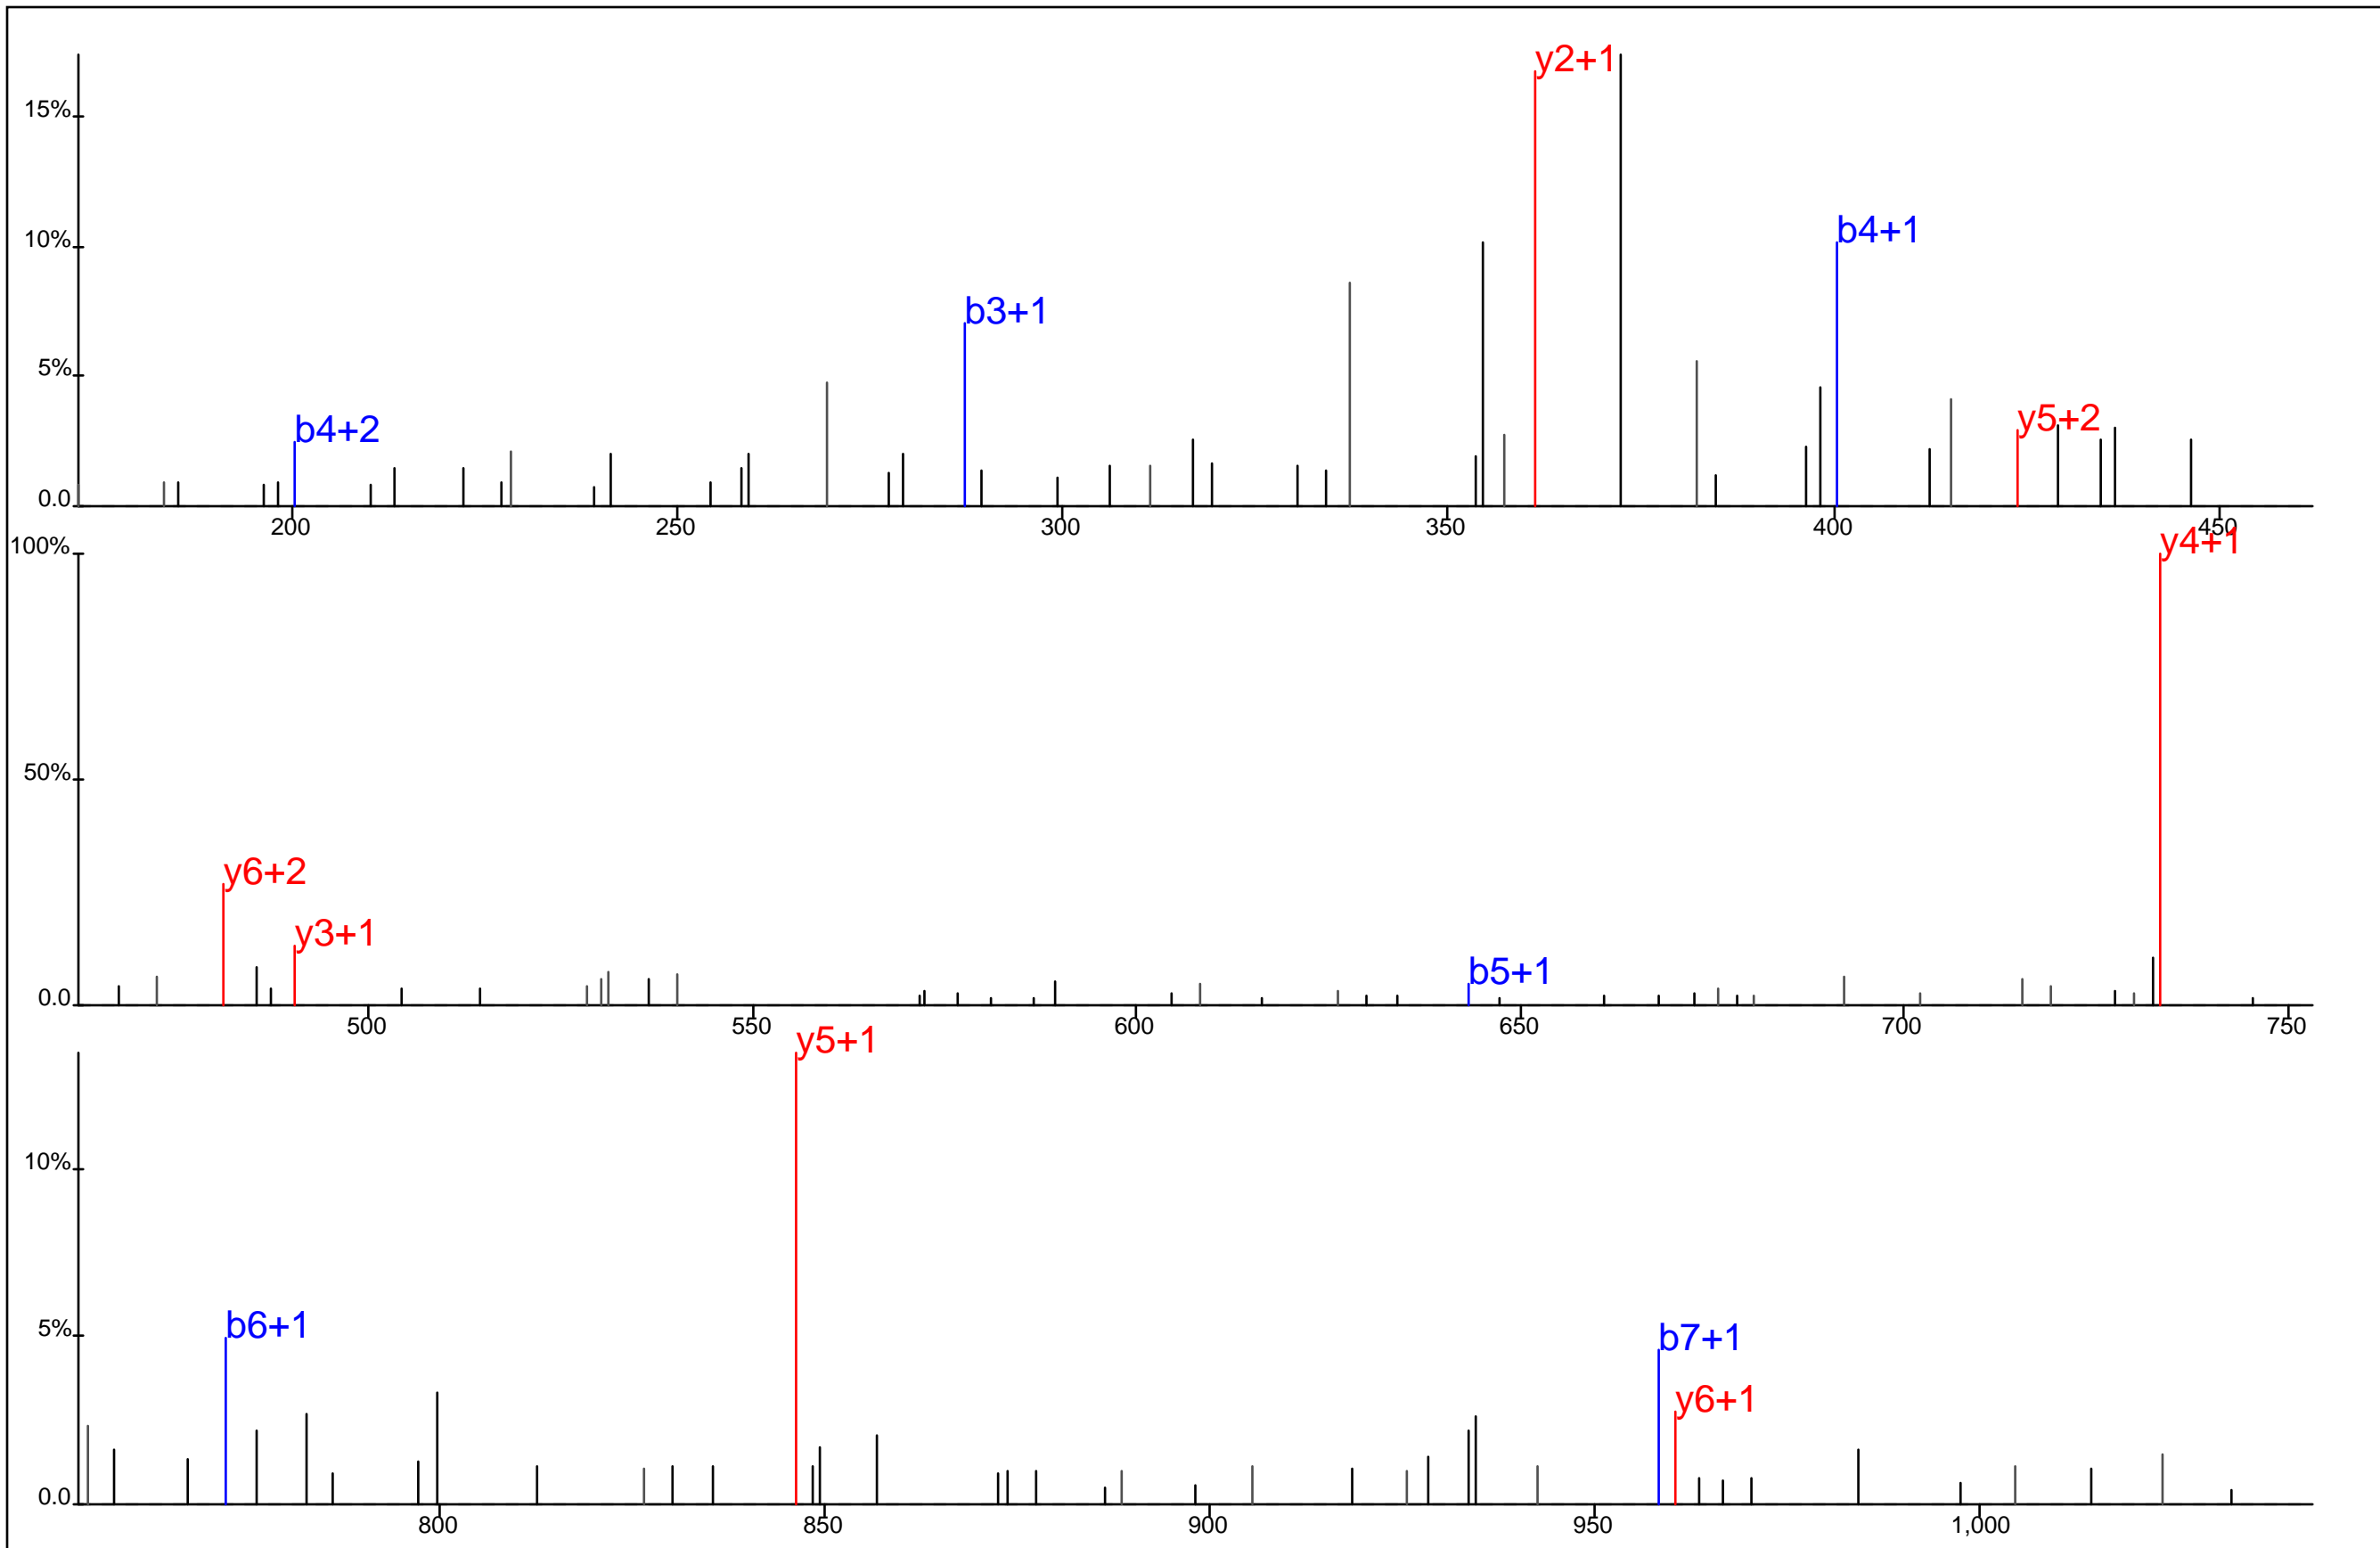

**G D N I Y\* E W R**

Protein Name: Ubiquitin conjugating enzyme E2E1  
 gi Accession: 0  
 Precursor Mass: 566.7269+2  
 Delta Mass: 0.502 ppm  
 XCorr: 29.87



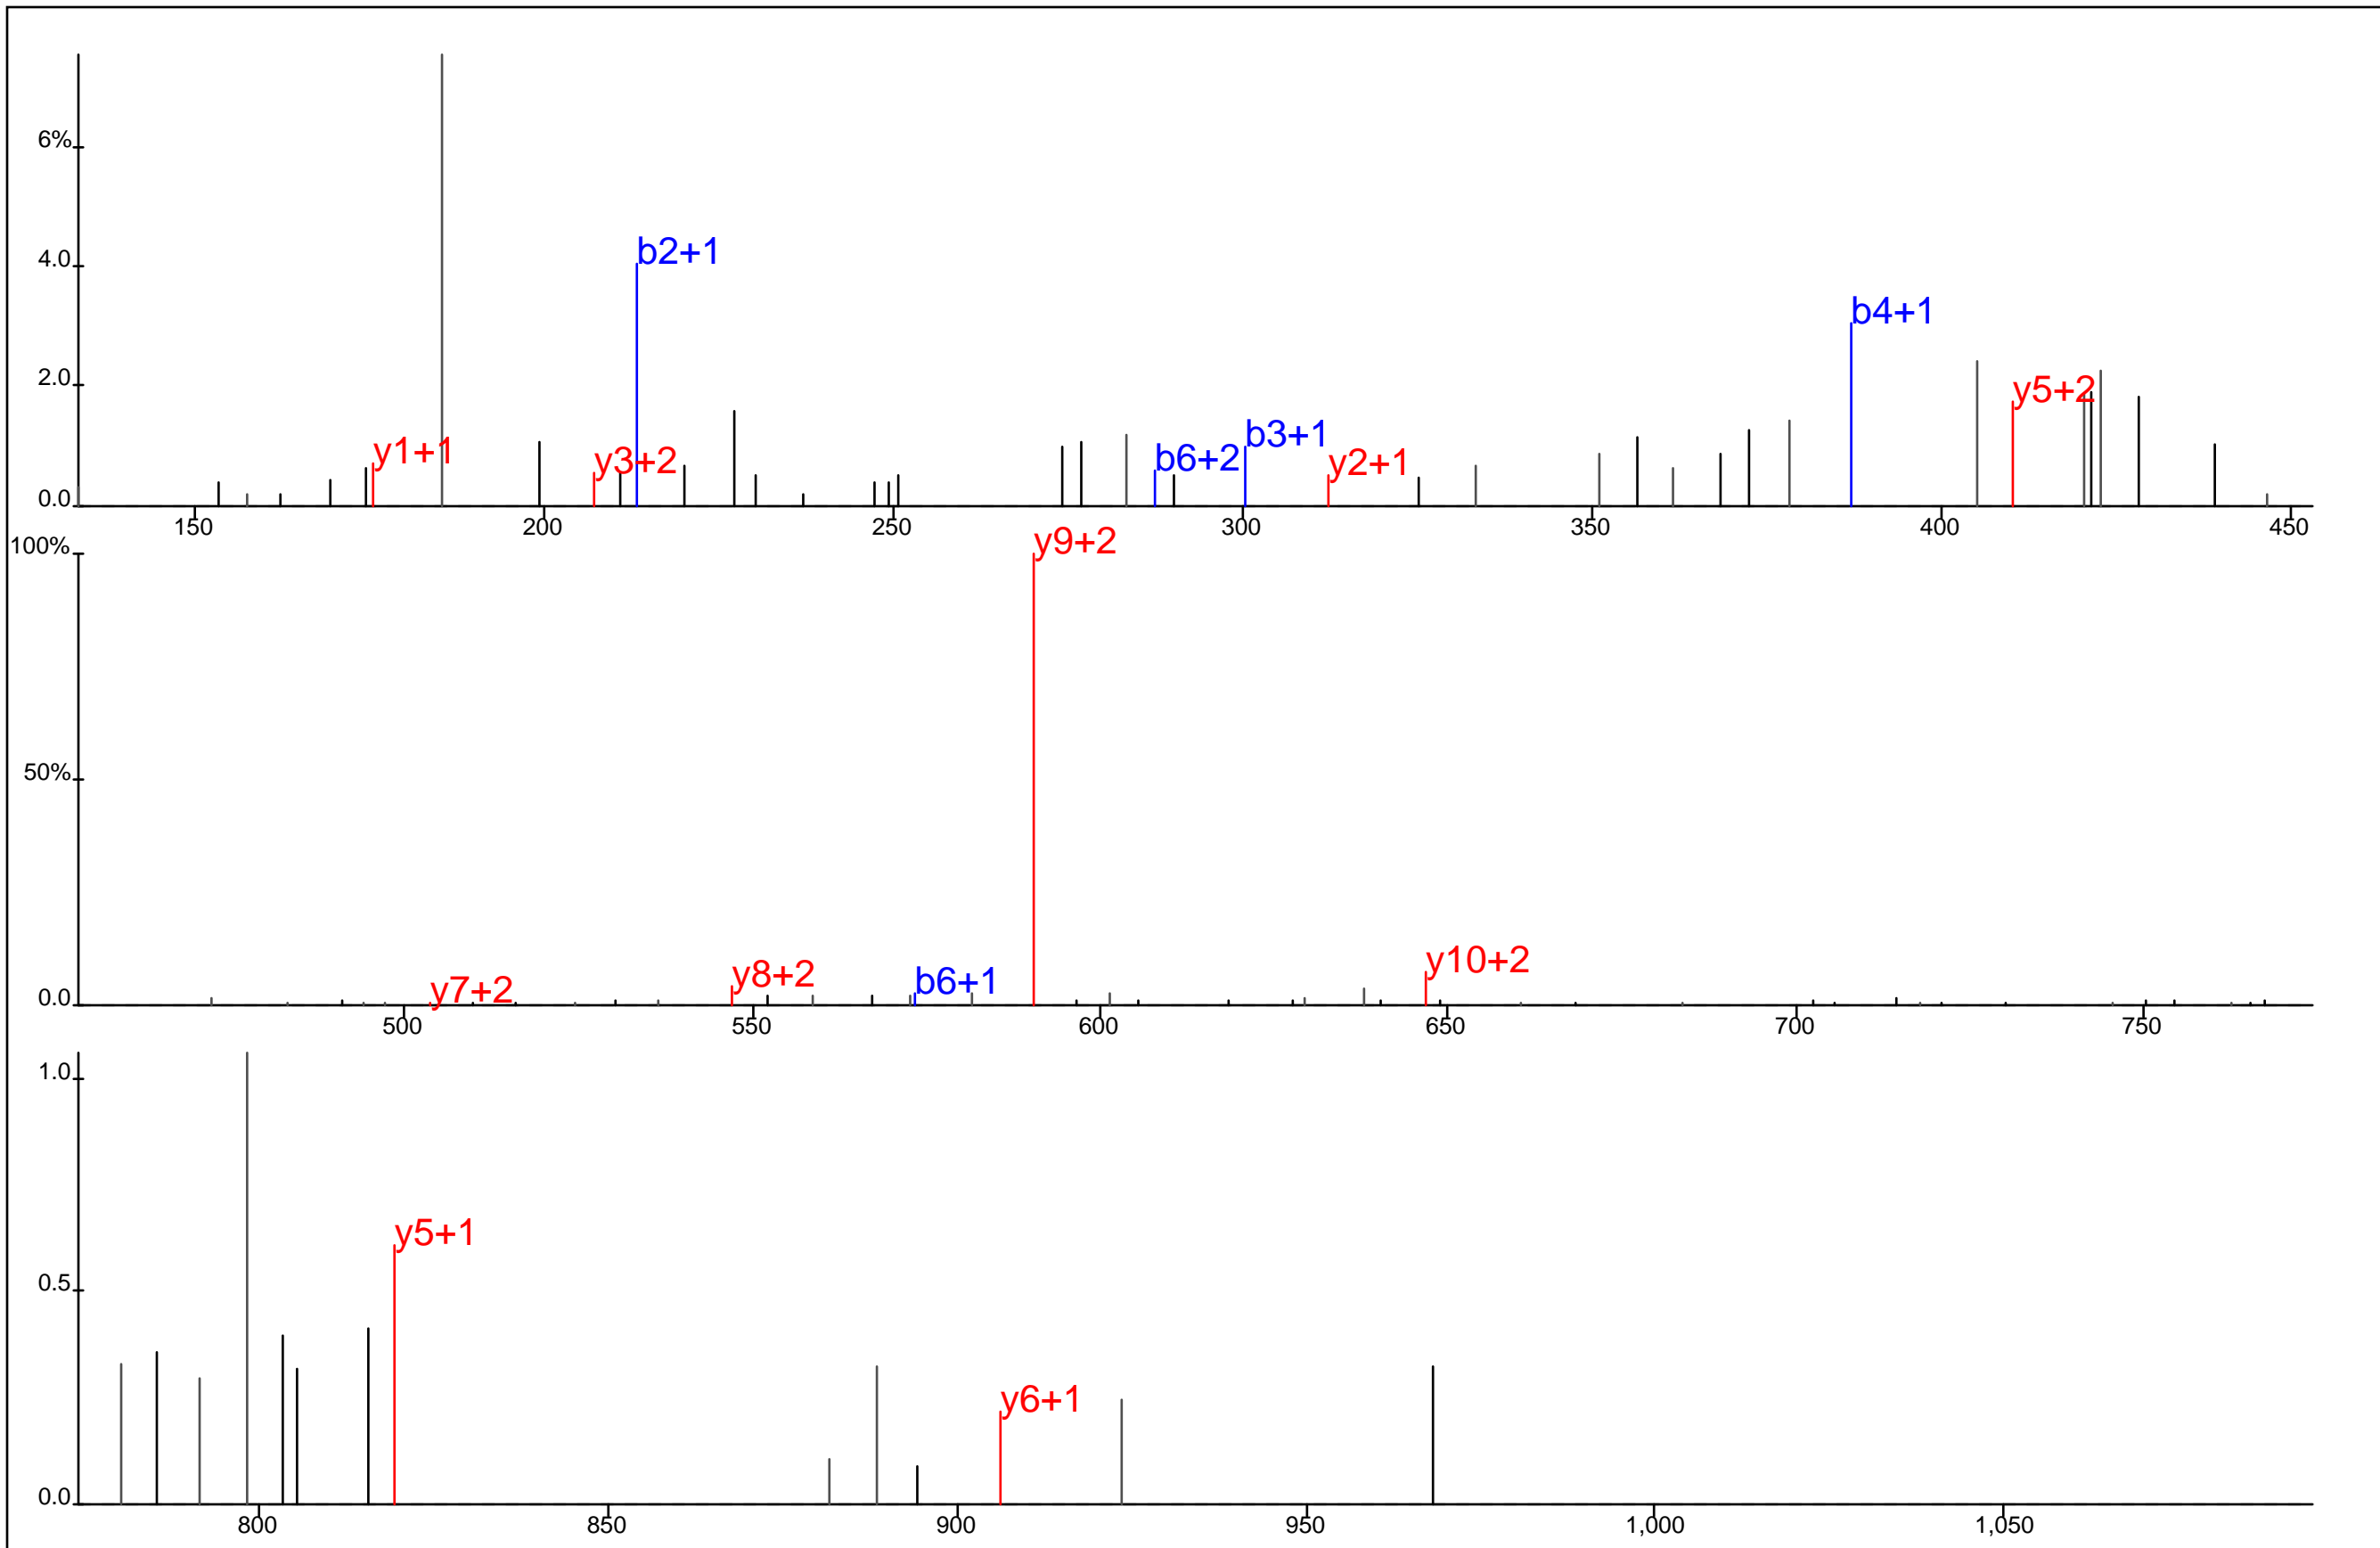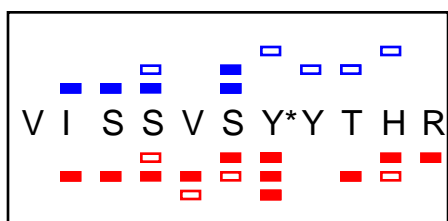

Protein Name: Ubiquitin specific peptidase 9, X-linked  
 gi Accession: 0  
 Precursor Mass: 464.5504+3  
 Delta Mass: 0.863 ppm  
 XCorr: 20.88

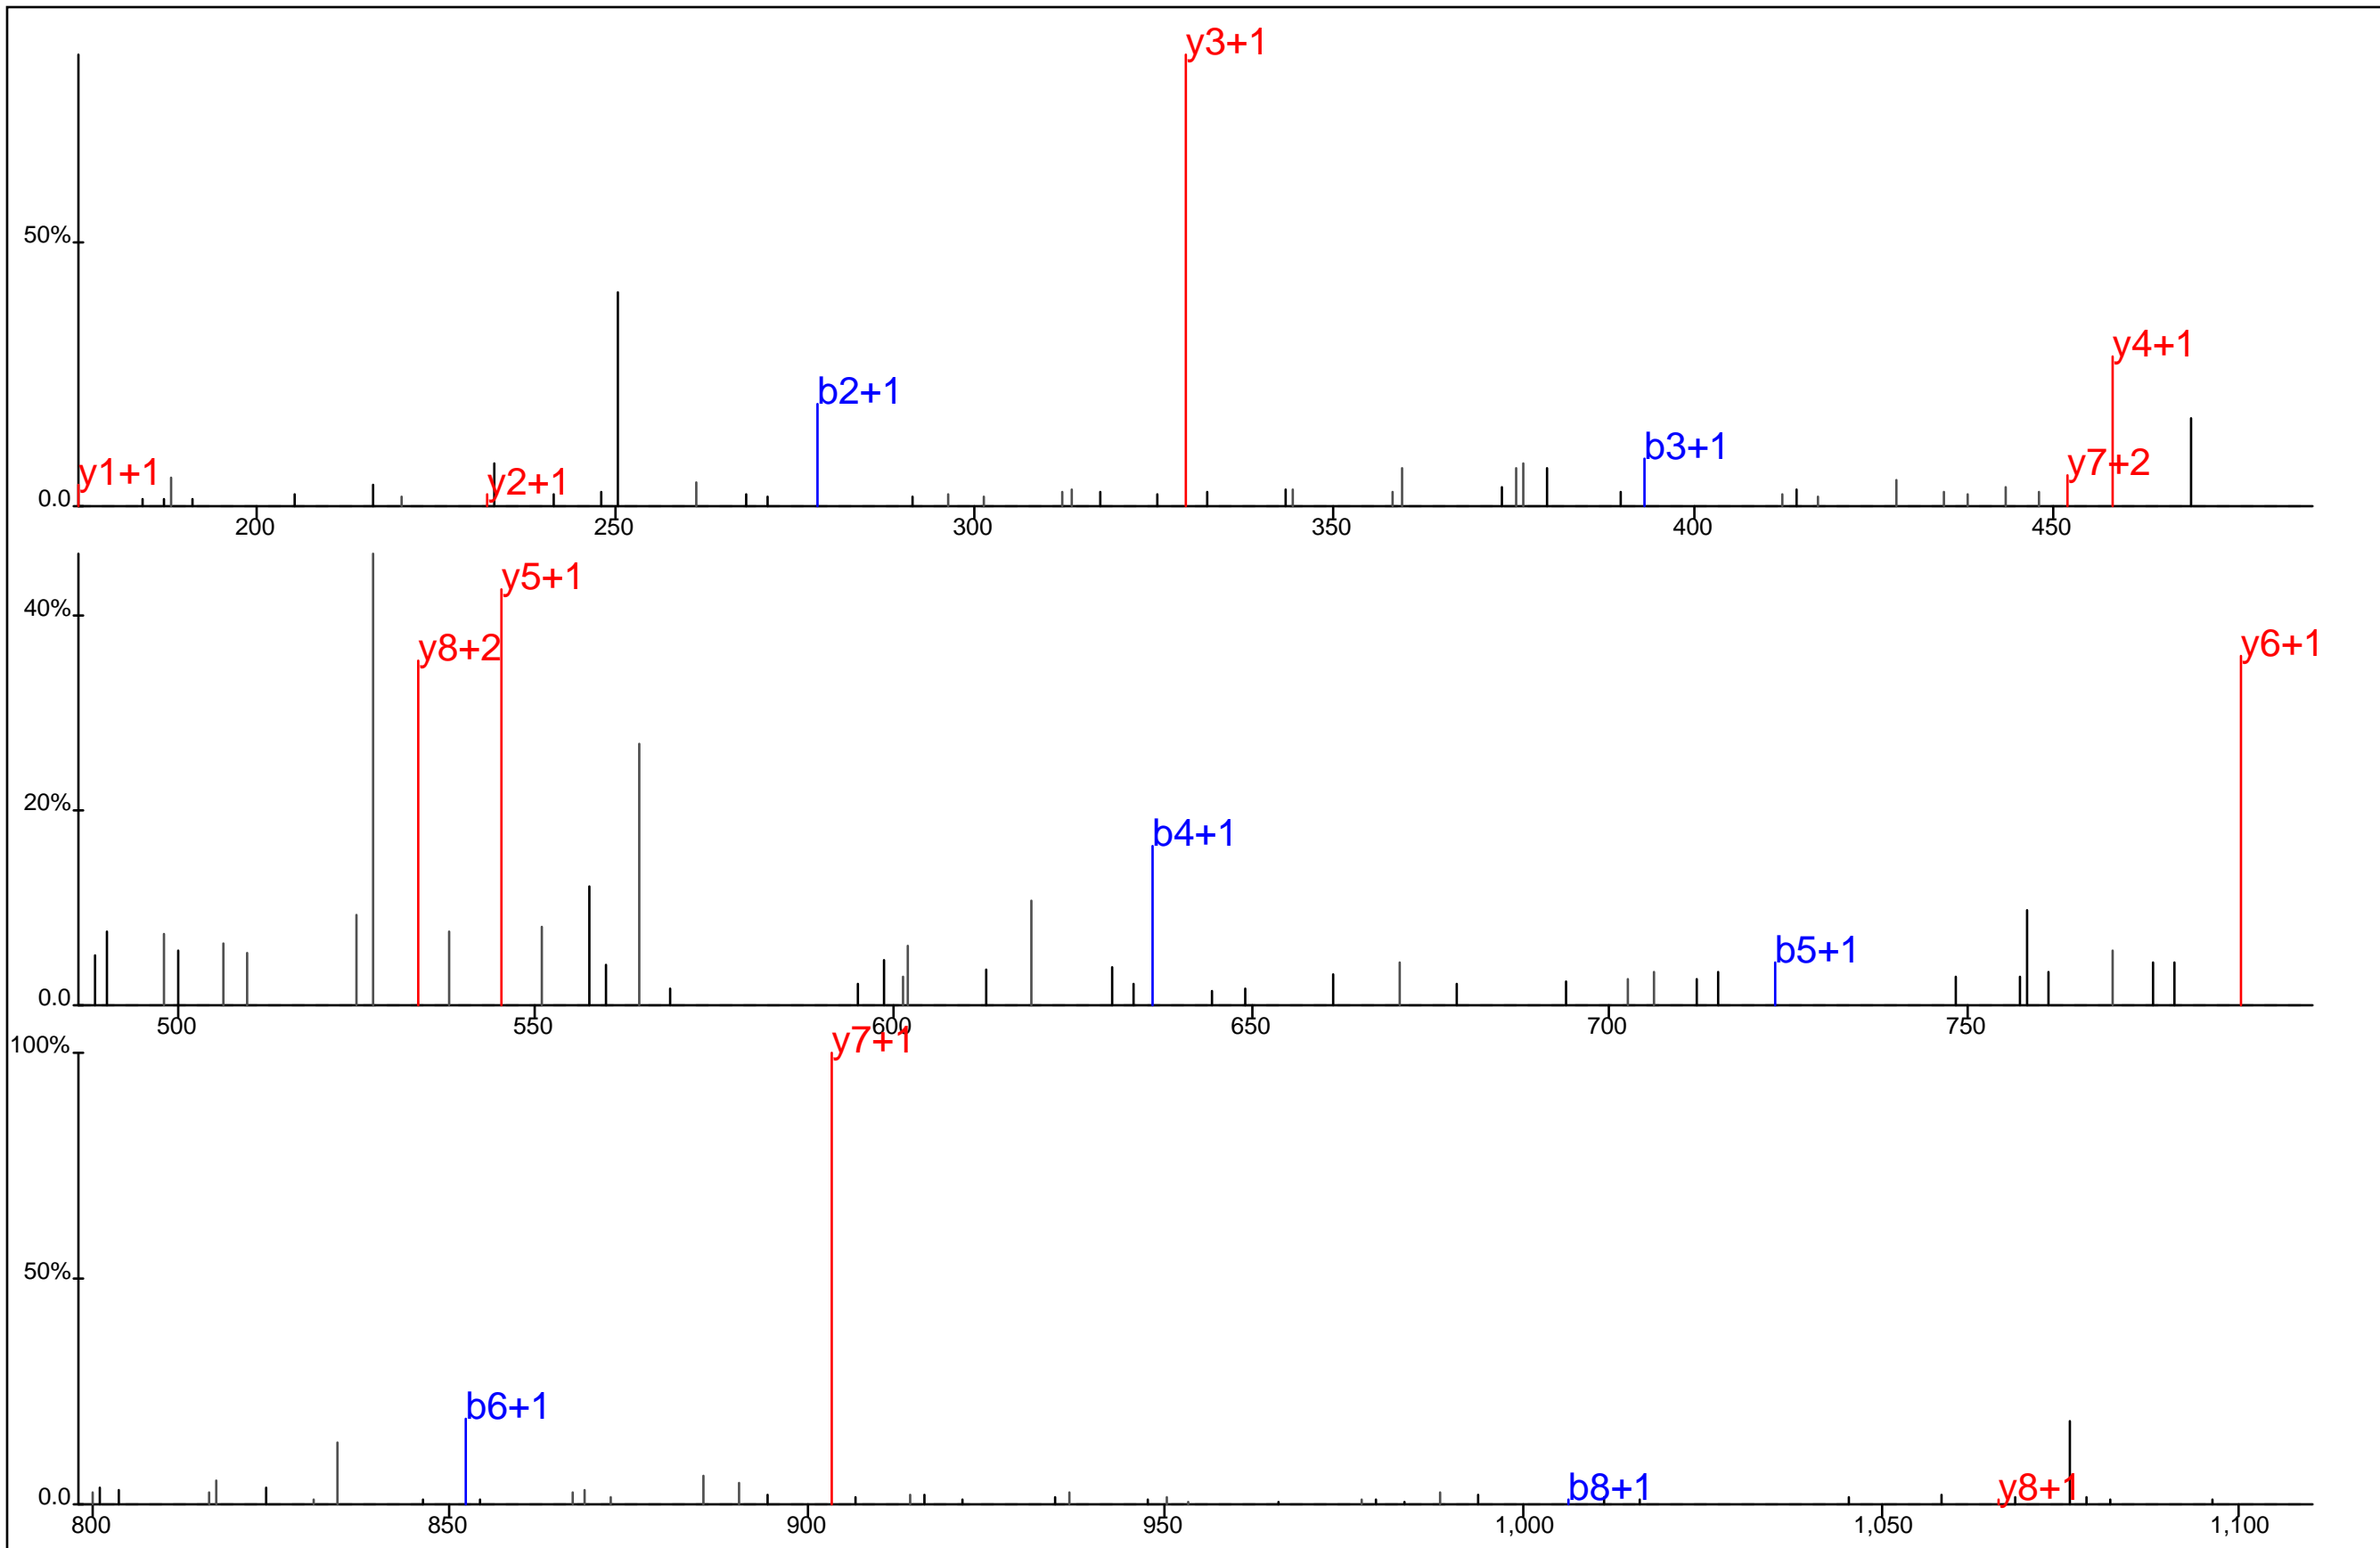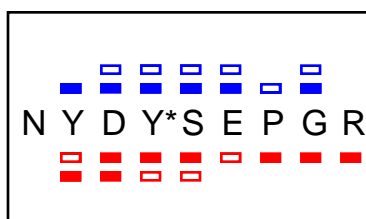

Protein Name: Ubiquitin specific protease 15  
 gi Accession: 0  
 Precursor Mass: 590.7190+2  
 Delta Mass: 0.068 ppm  
 XCorr: 30.99

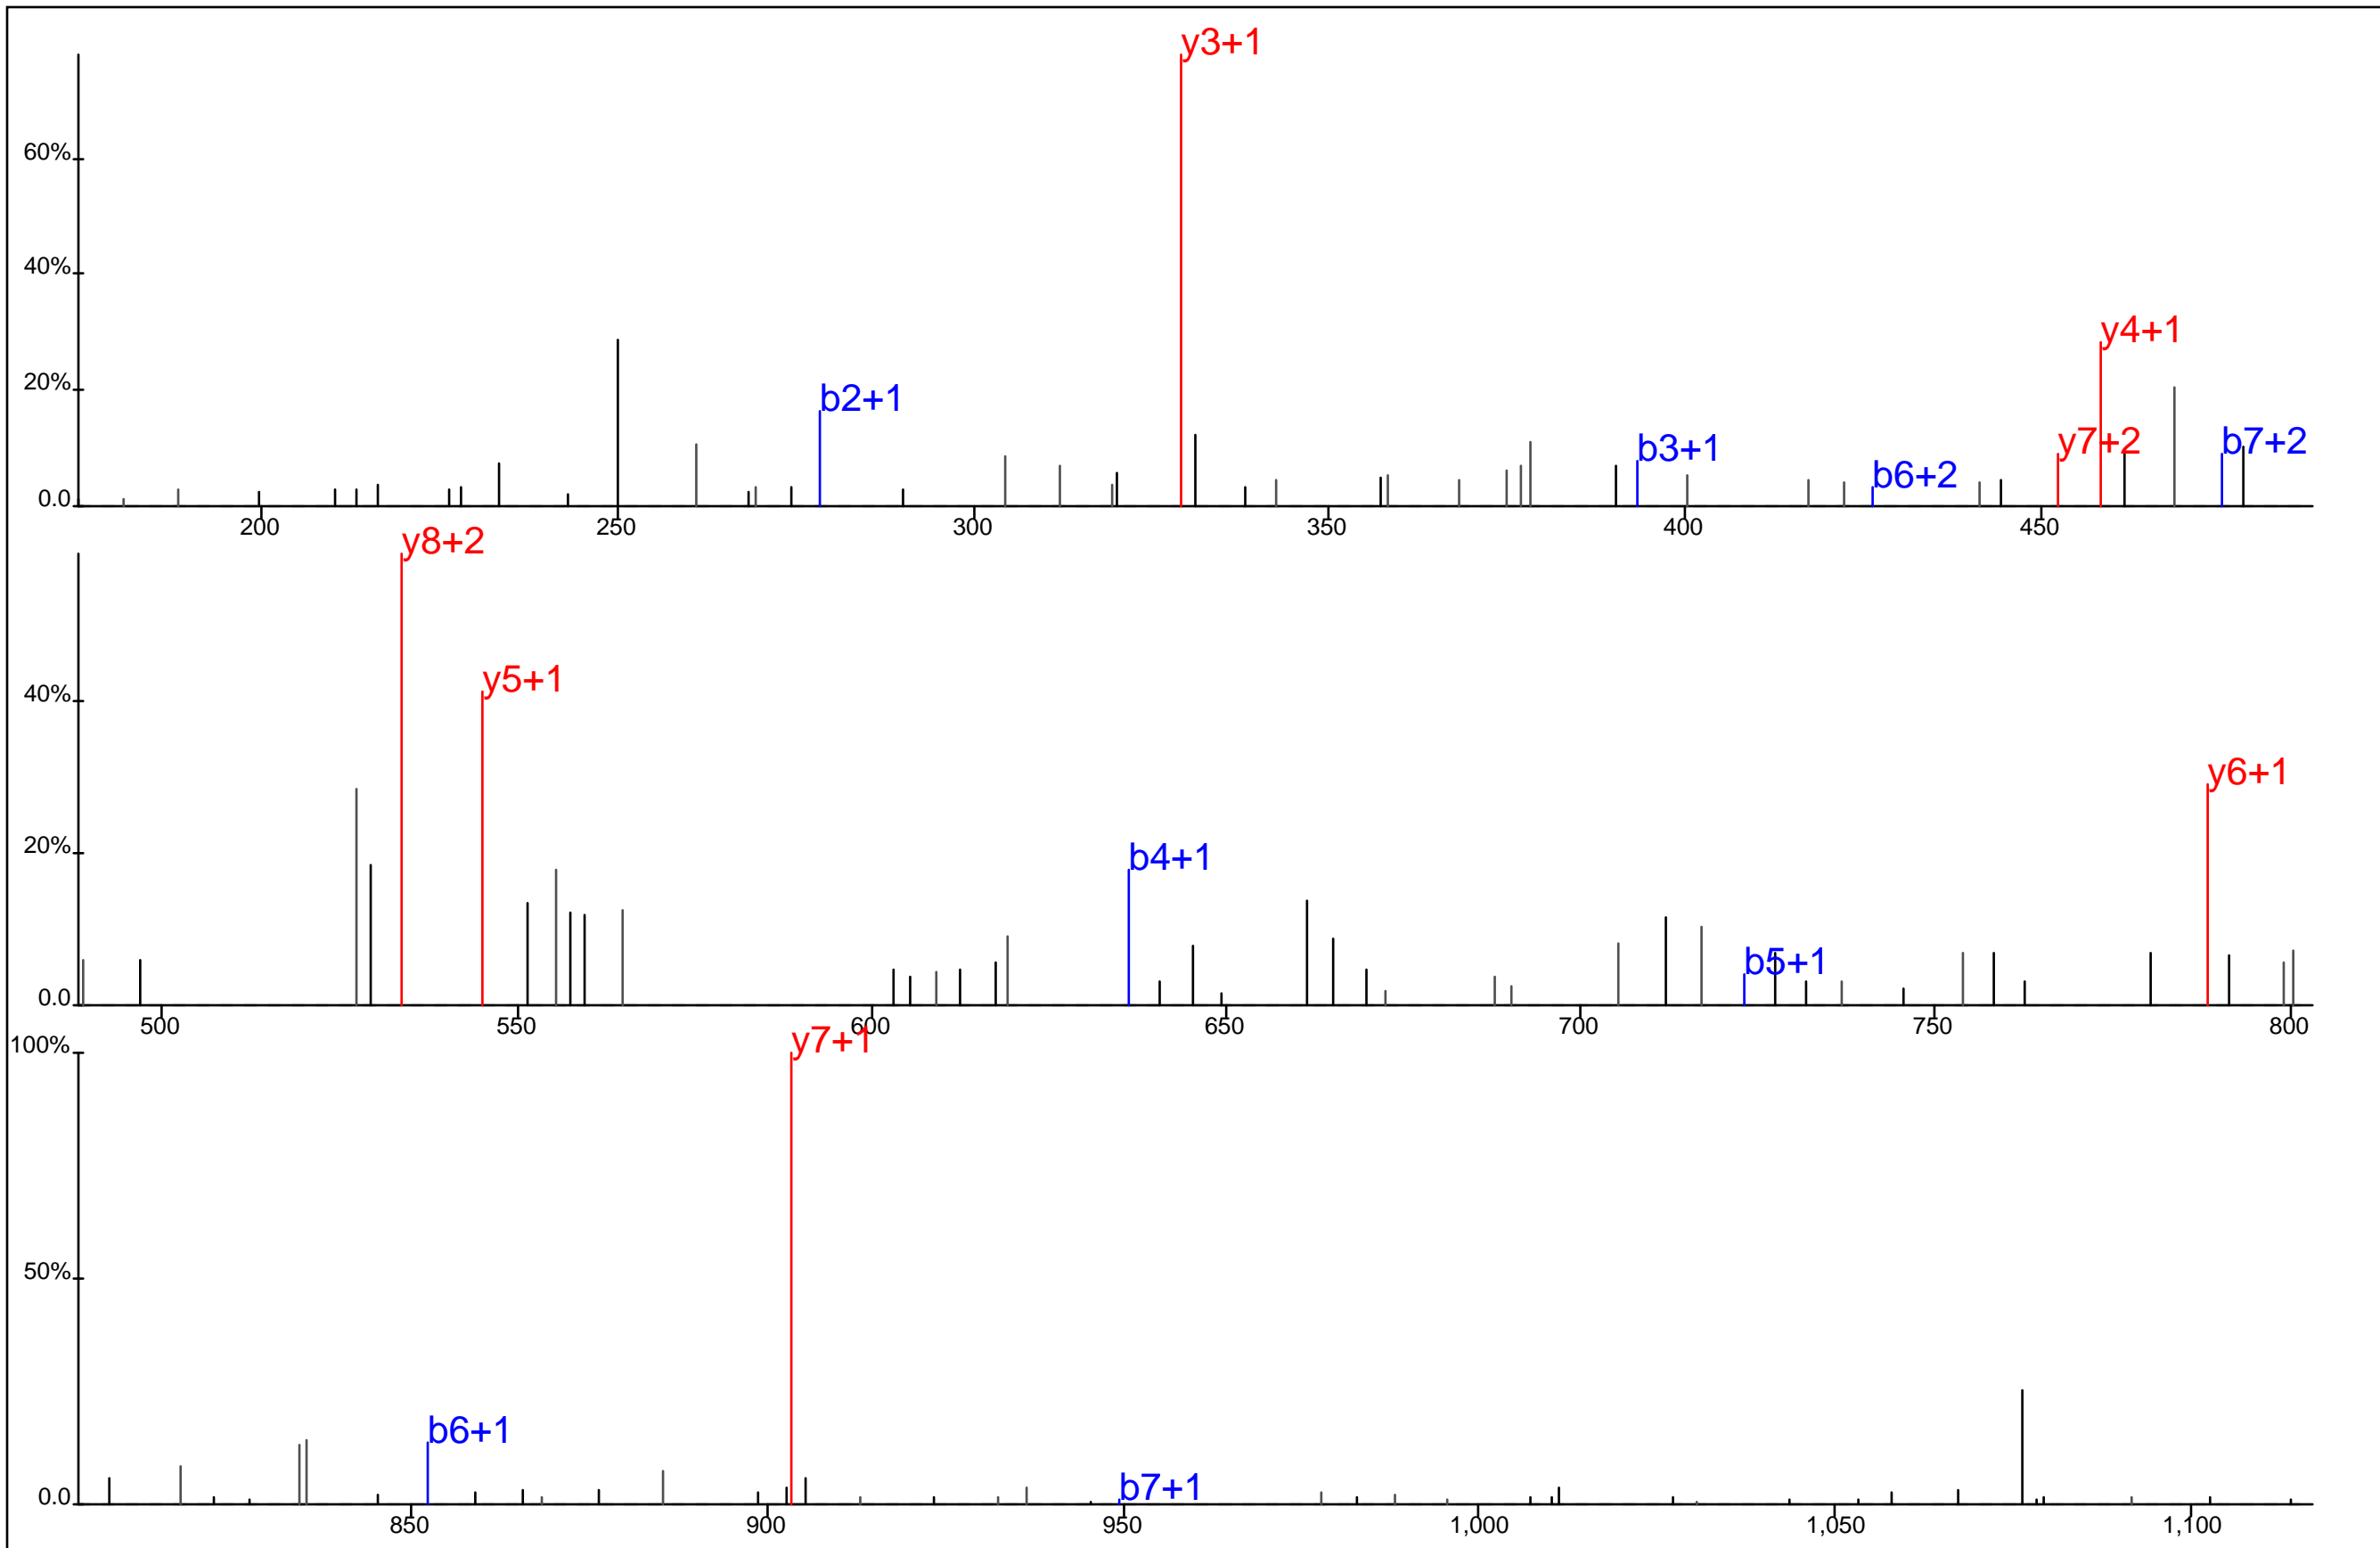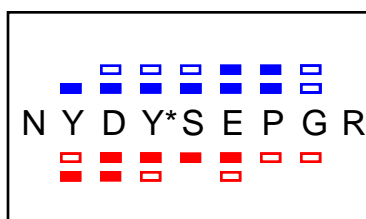

Protein Name: Ubiquitin specific protease 15  
 gi Accession: 0  
 Precursor Mass: 590.7194+2  
 Delta Mass: 0.688 ppm  
 XCorr: 25.13



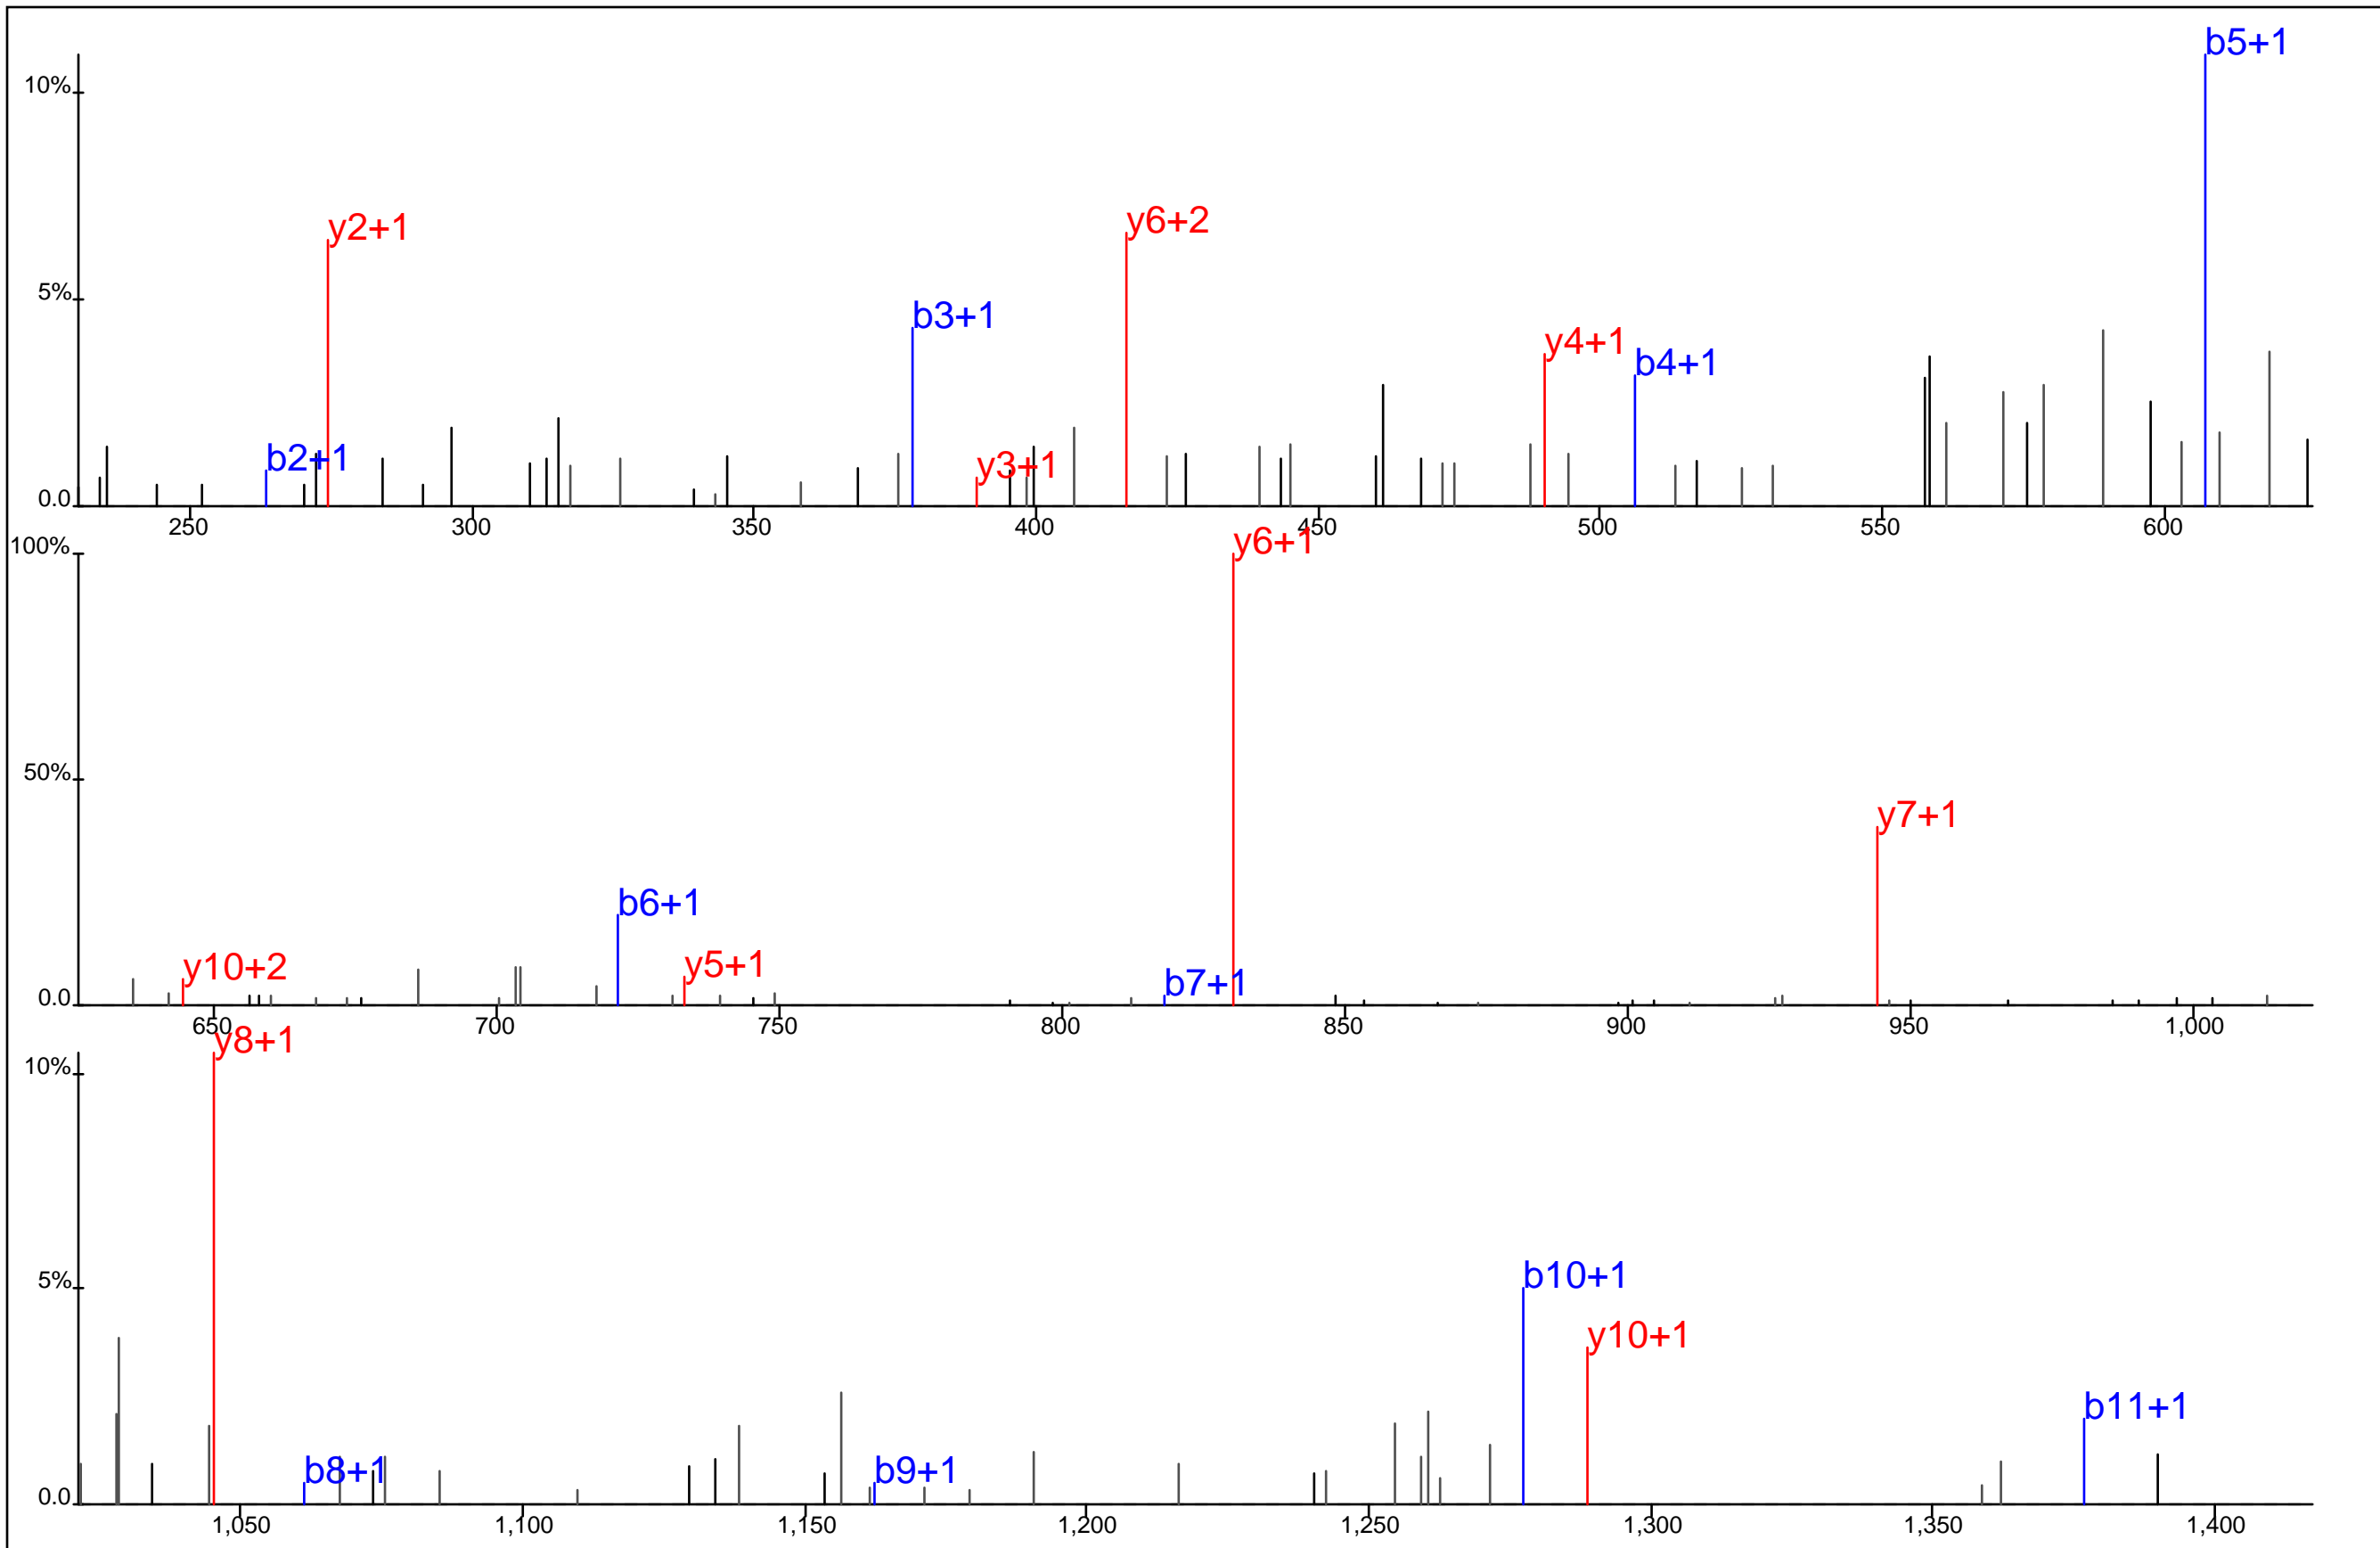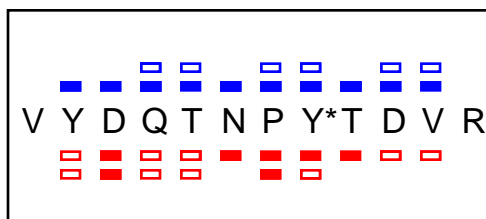

Protein Name: Ubiquitin specific protease 24  
 gi Accession: 0  
 Precursor Mass: 775.8315+2  
 Delta Mass: 2.196 ppm  
 XCorr: 61.49



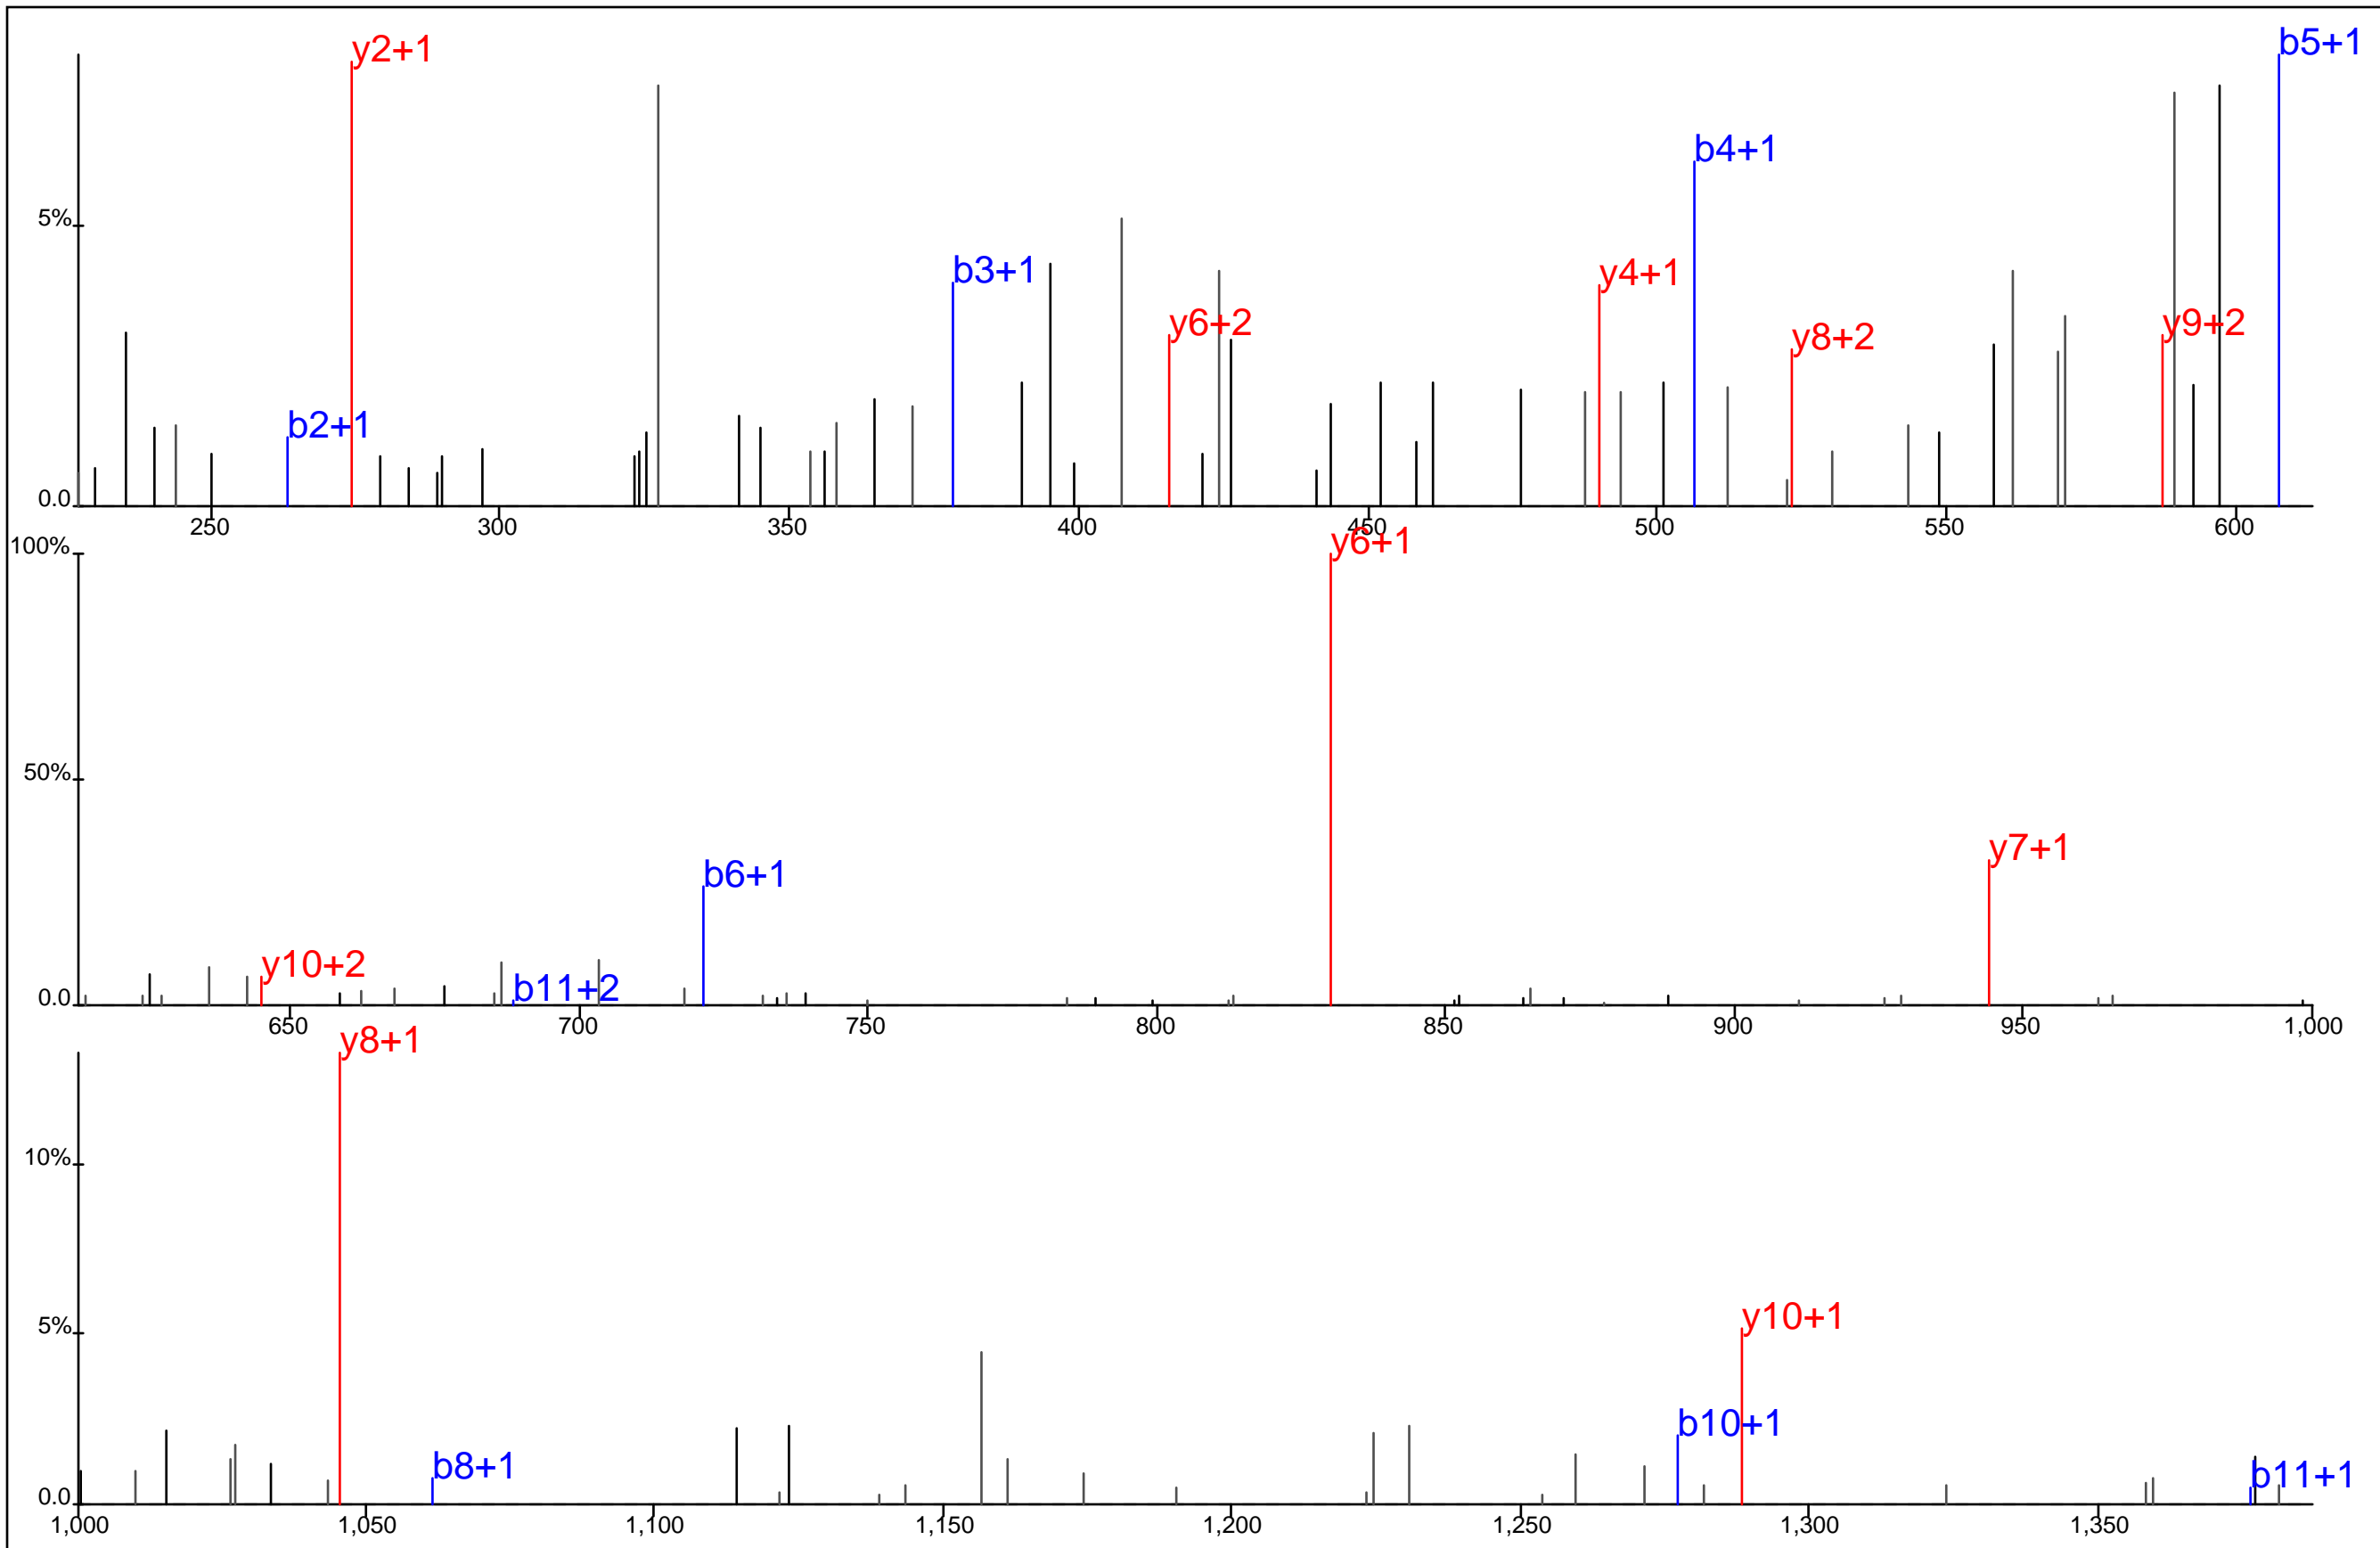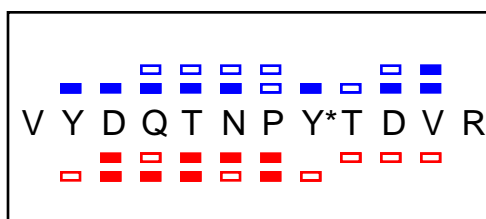

Protein Name: Ubiquitin specific protease 24  
 gi Accession: 0  
 Precursor Mass: 775.8313+2  
 Delta Mass: 1.960 ppm  
 XCorr: 34.75

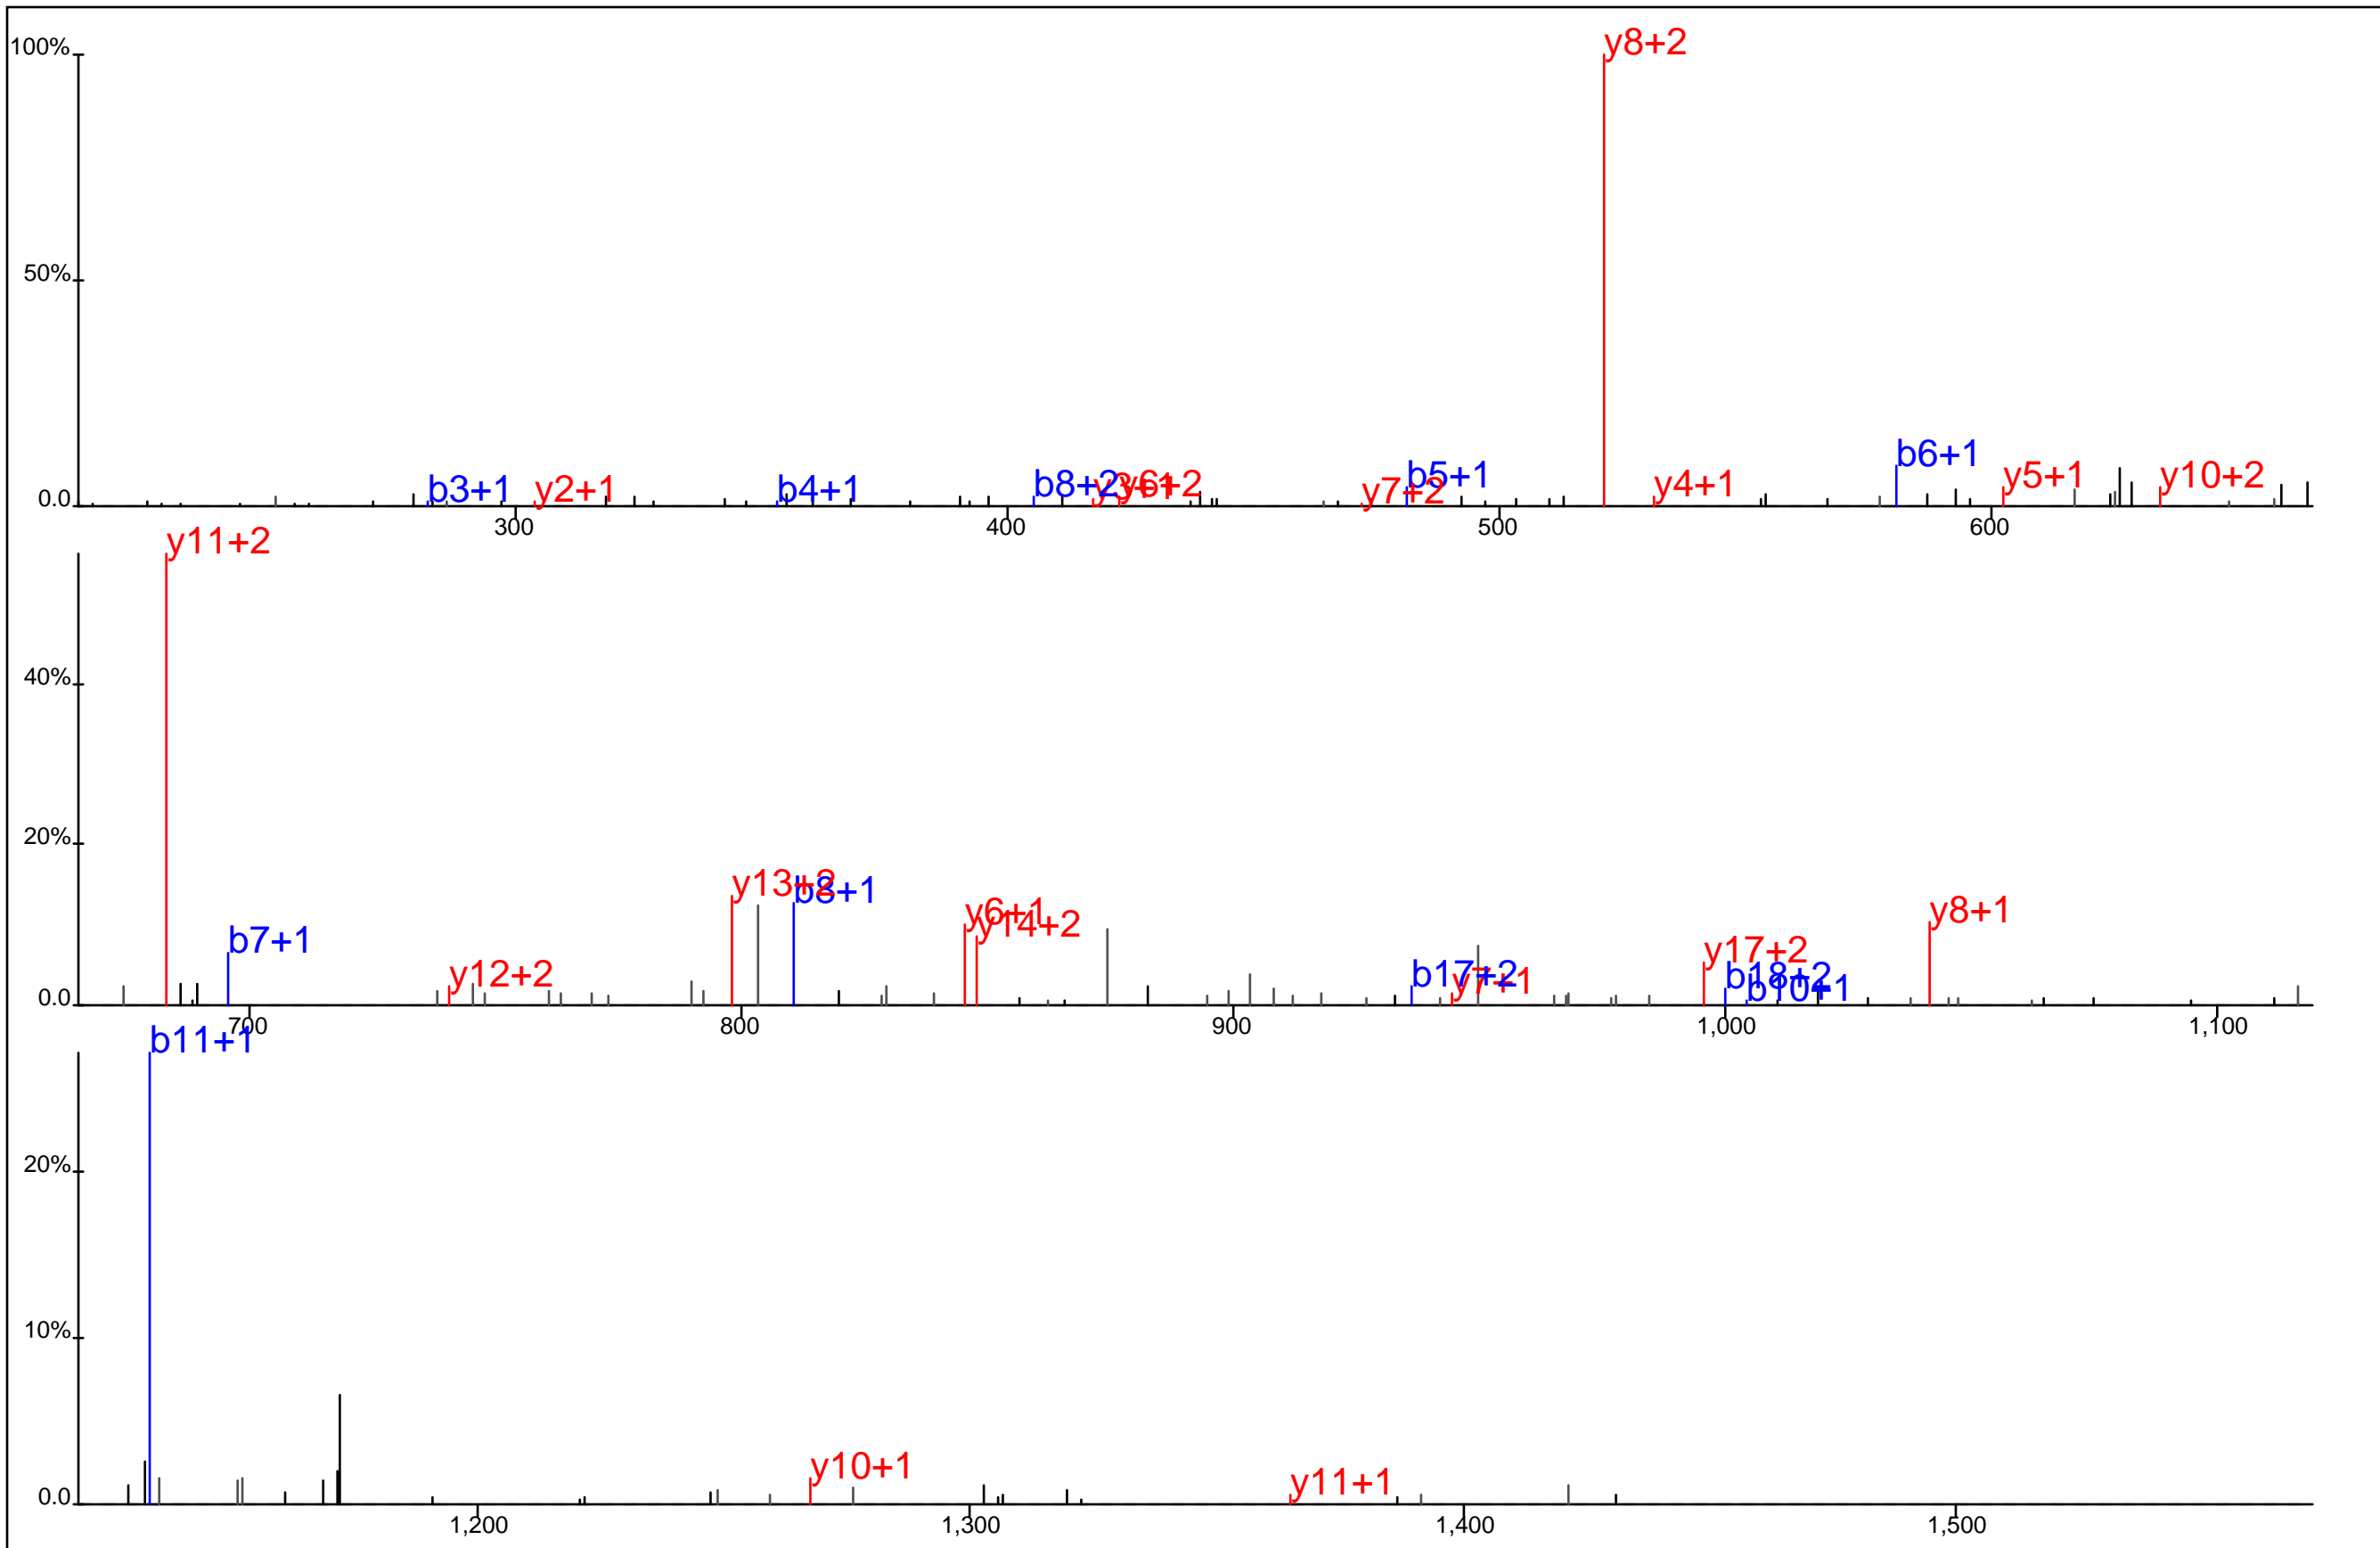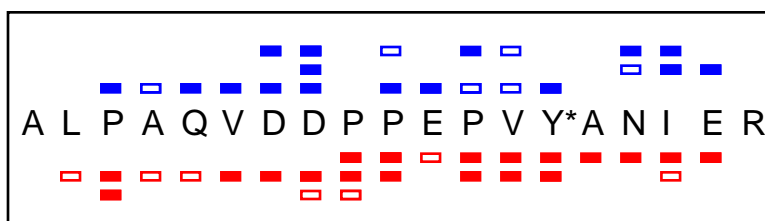

Protein Name: Uncharacterized protein  
 gi Accession: 0  
 Precursor Mass: 725.3447+3  
 Delta Mass: 1.434 ppm  
 XCorr: 30.52

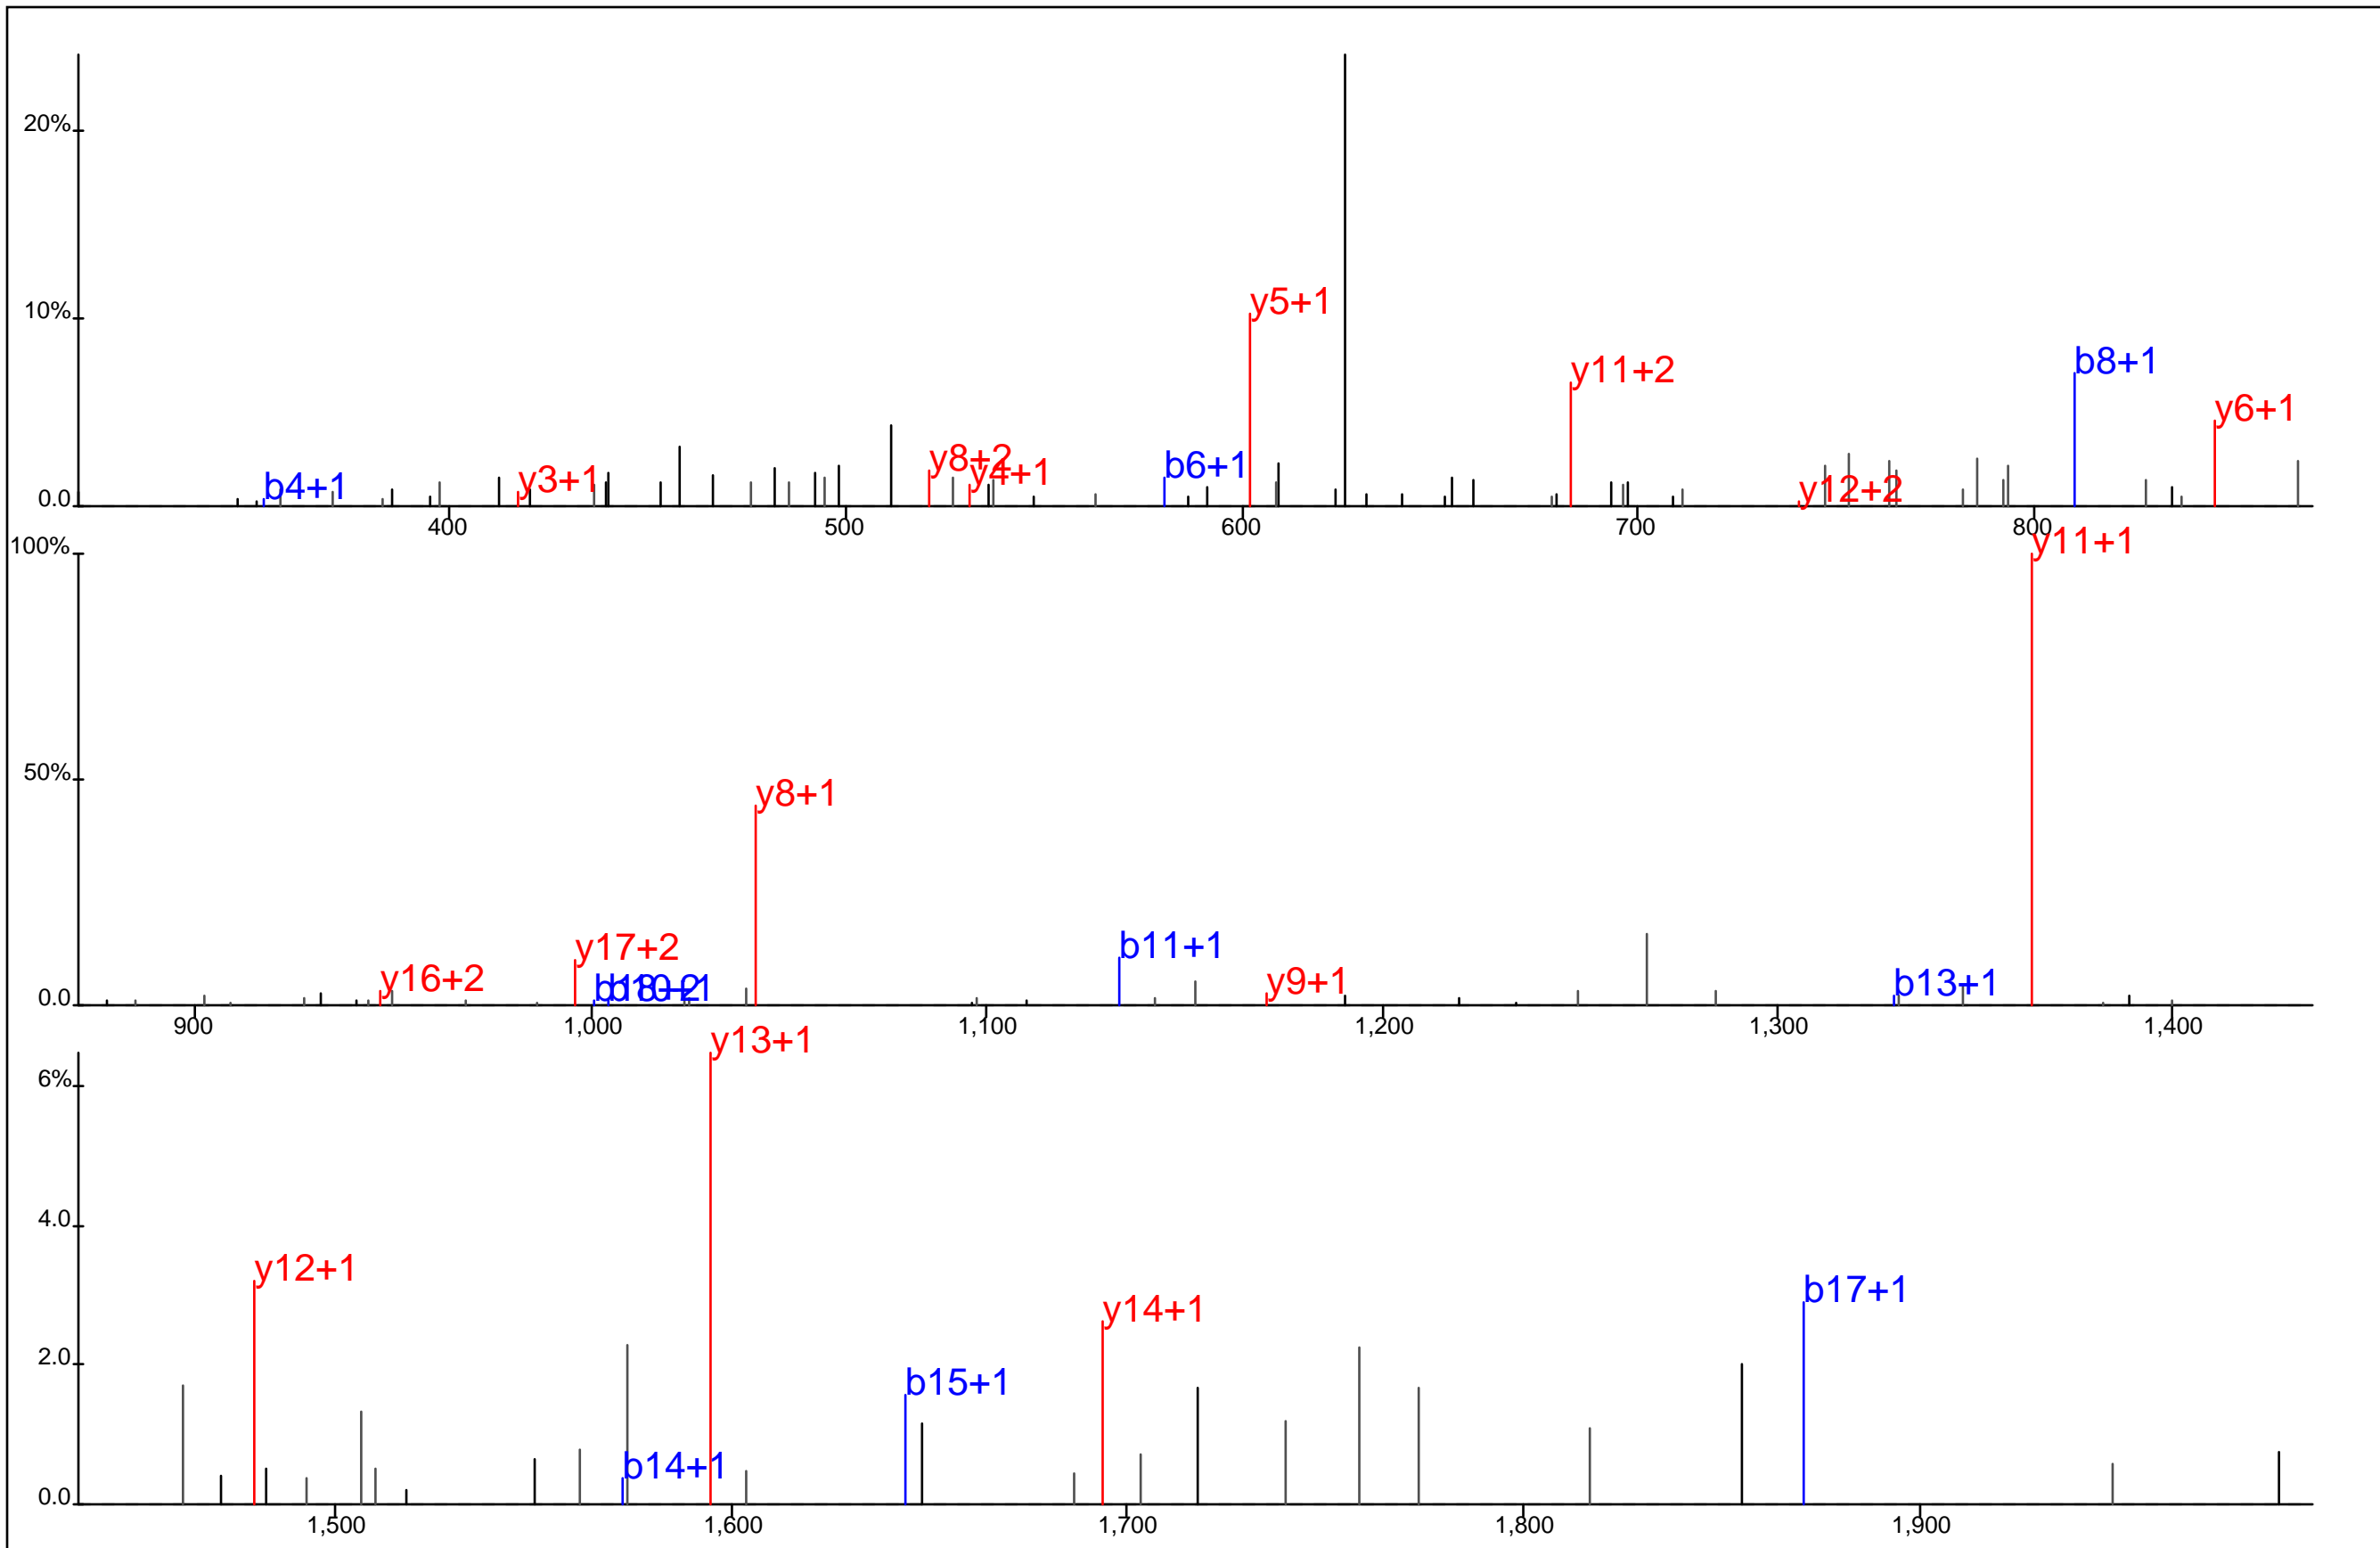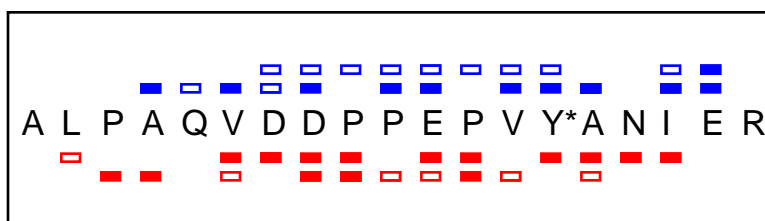

Protein Name: Uncharacterized protein  
 gi Accession: 0  
 Precursor Mass: 1,087.5104+2  
 Delta Mass: 1.396 ppm  
 XCorr: 37.33

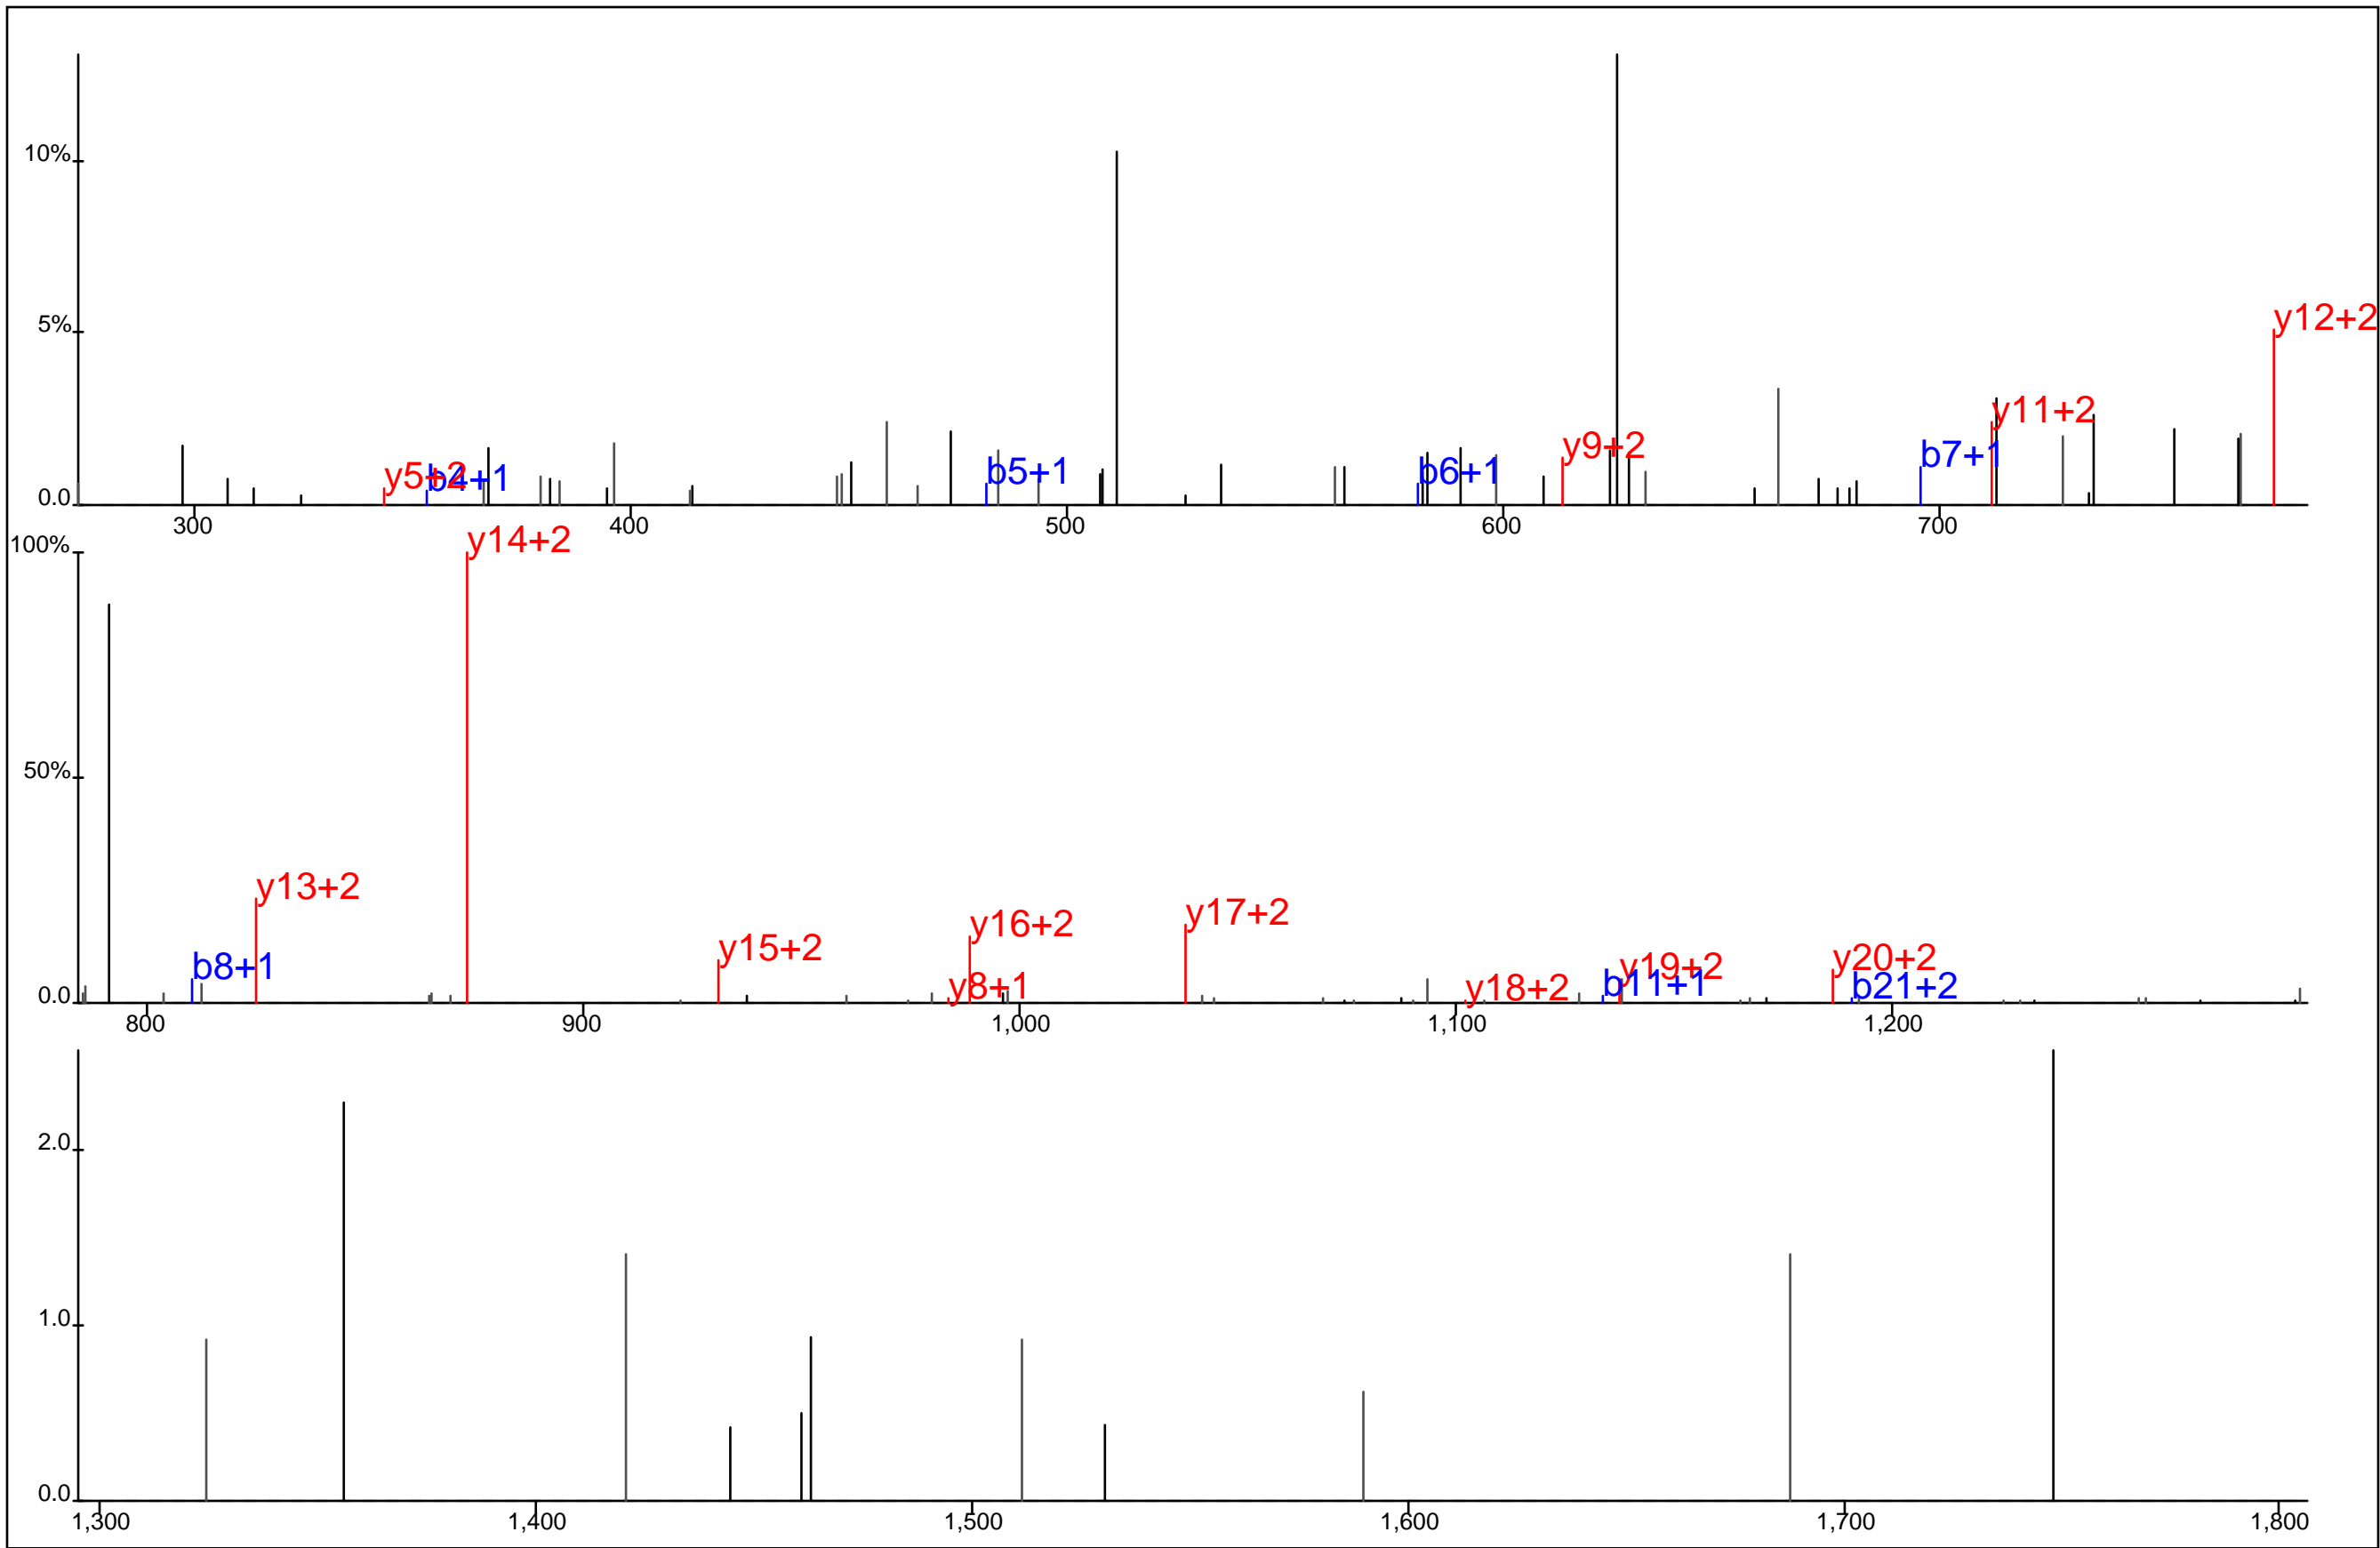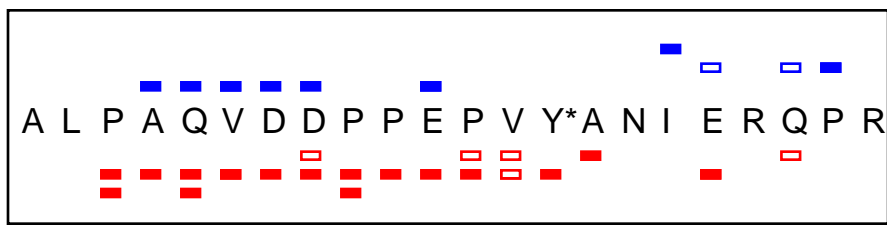

Protein Name: Uncharacterized protein  
 gi Accession: 0  
 Precursor Mass: 852.4161+3  
 Delta Mass: 1.850 ppm  
 XCorr: 21.5

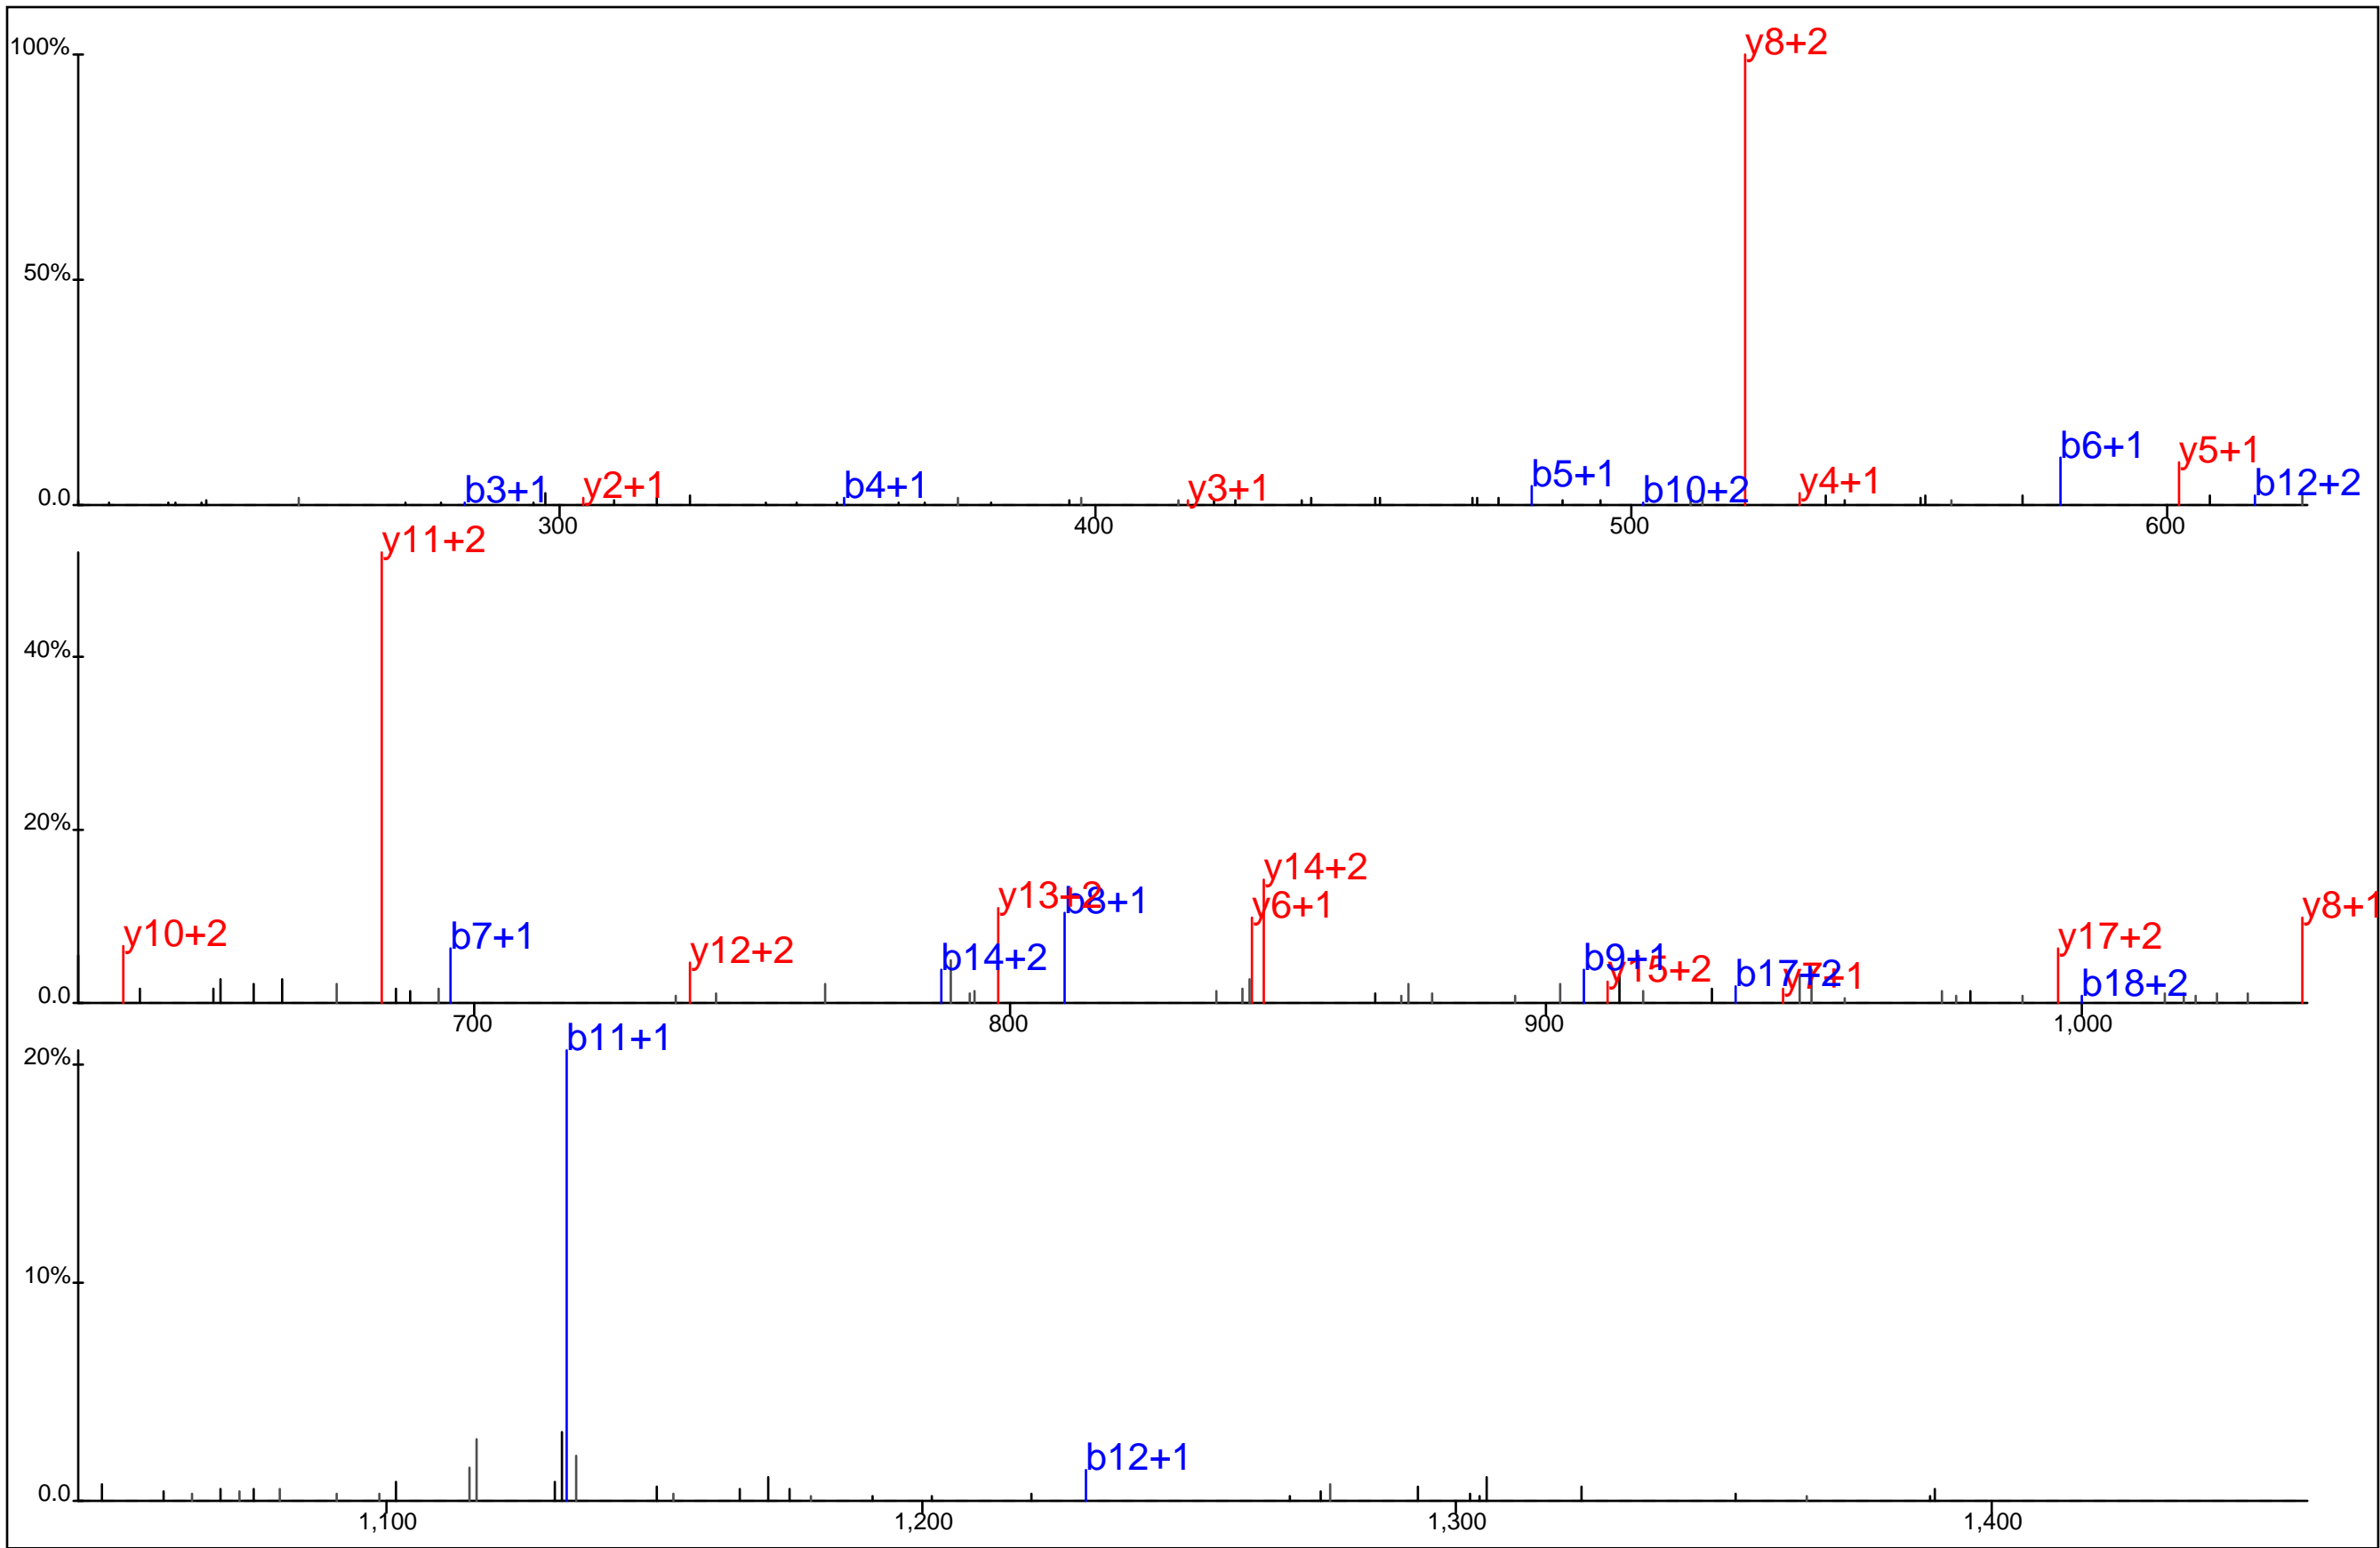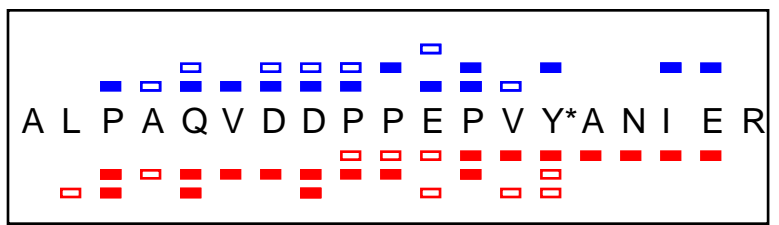

Protein Name: Uncharacterized protein  
 gi Accession: 0  
 Precursor Mass: 725.3433+3  
 Delta Mass: 0.504 ppm  
 XCorr: 42.74

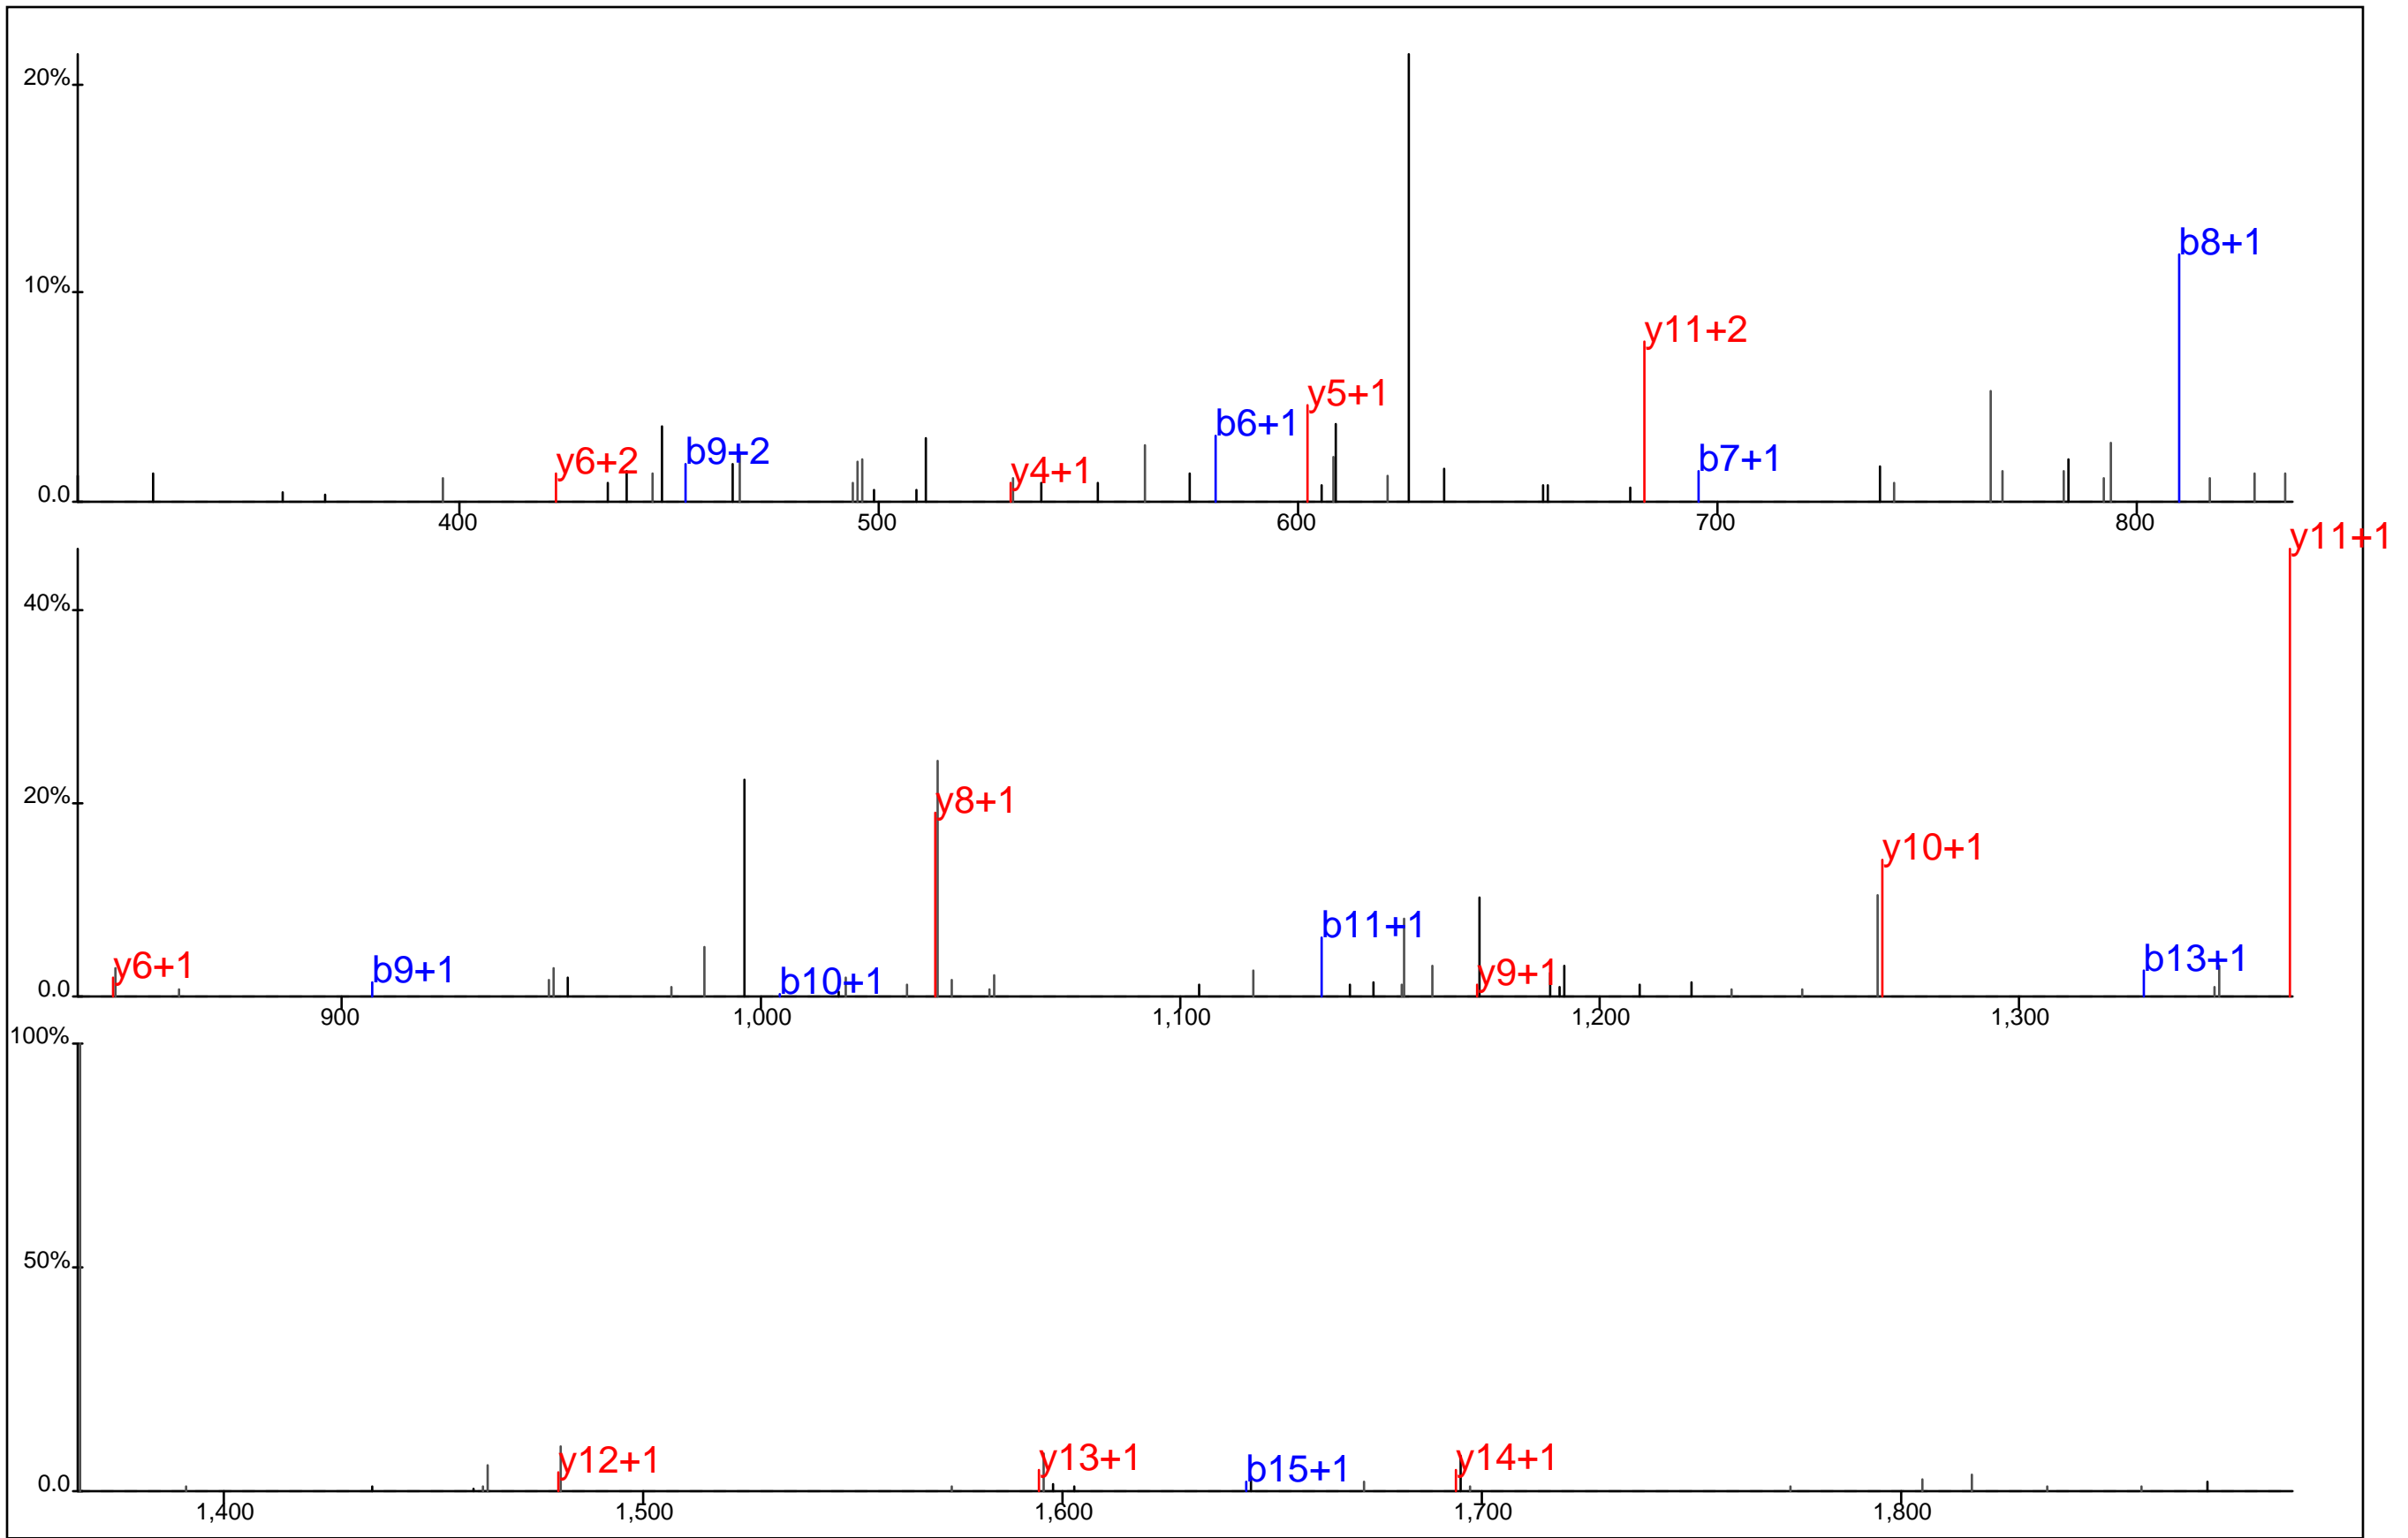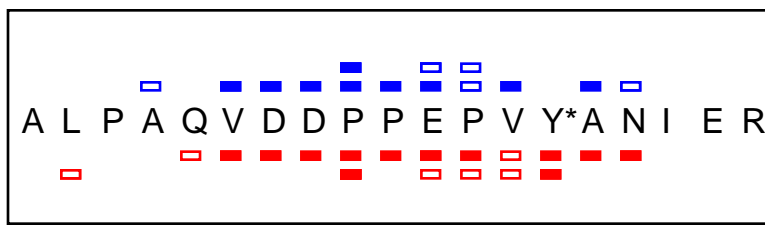

Protein Name: Uncharacterized protein  
 gi Accession: 0  
 Precursor Mass: 1,087.5118+2  
 Delta Mass: 0.049 ppm  
 XCorr: 25.94



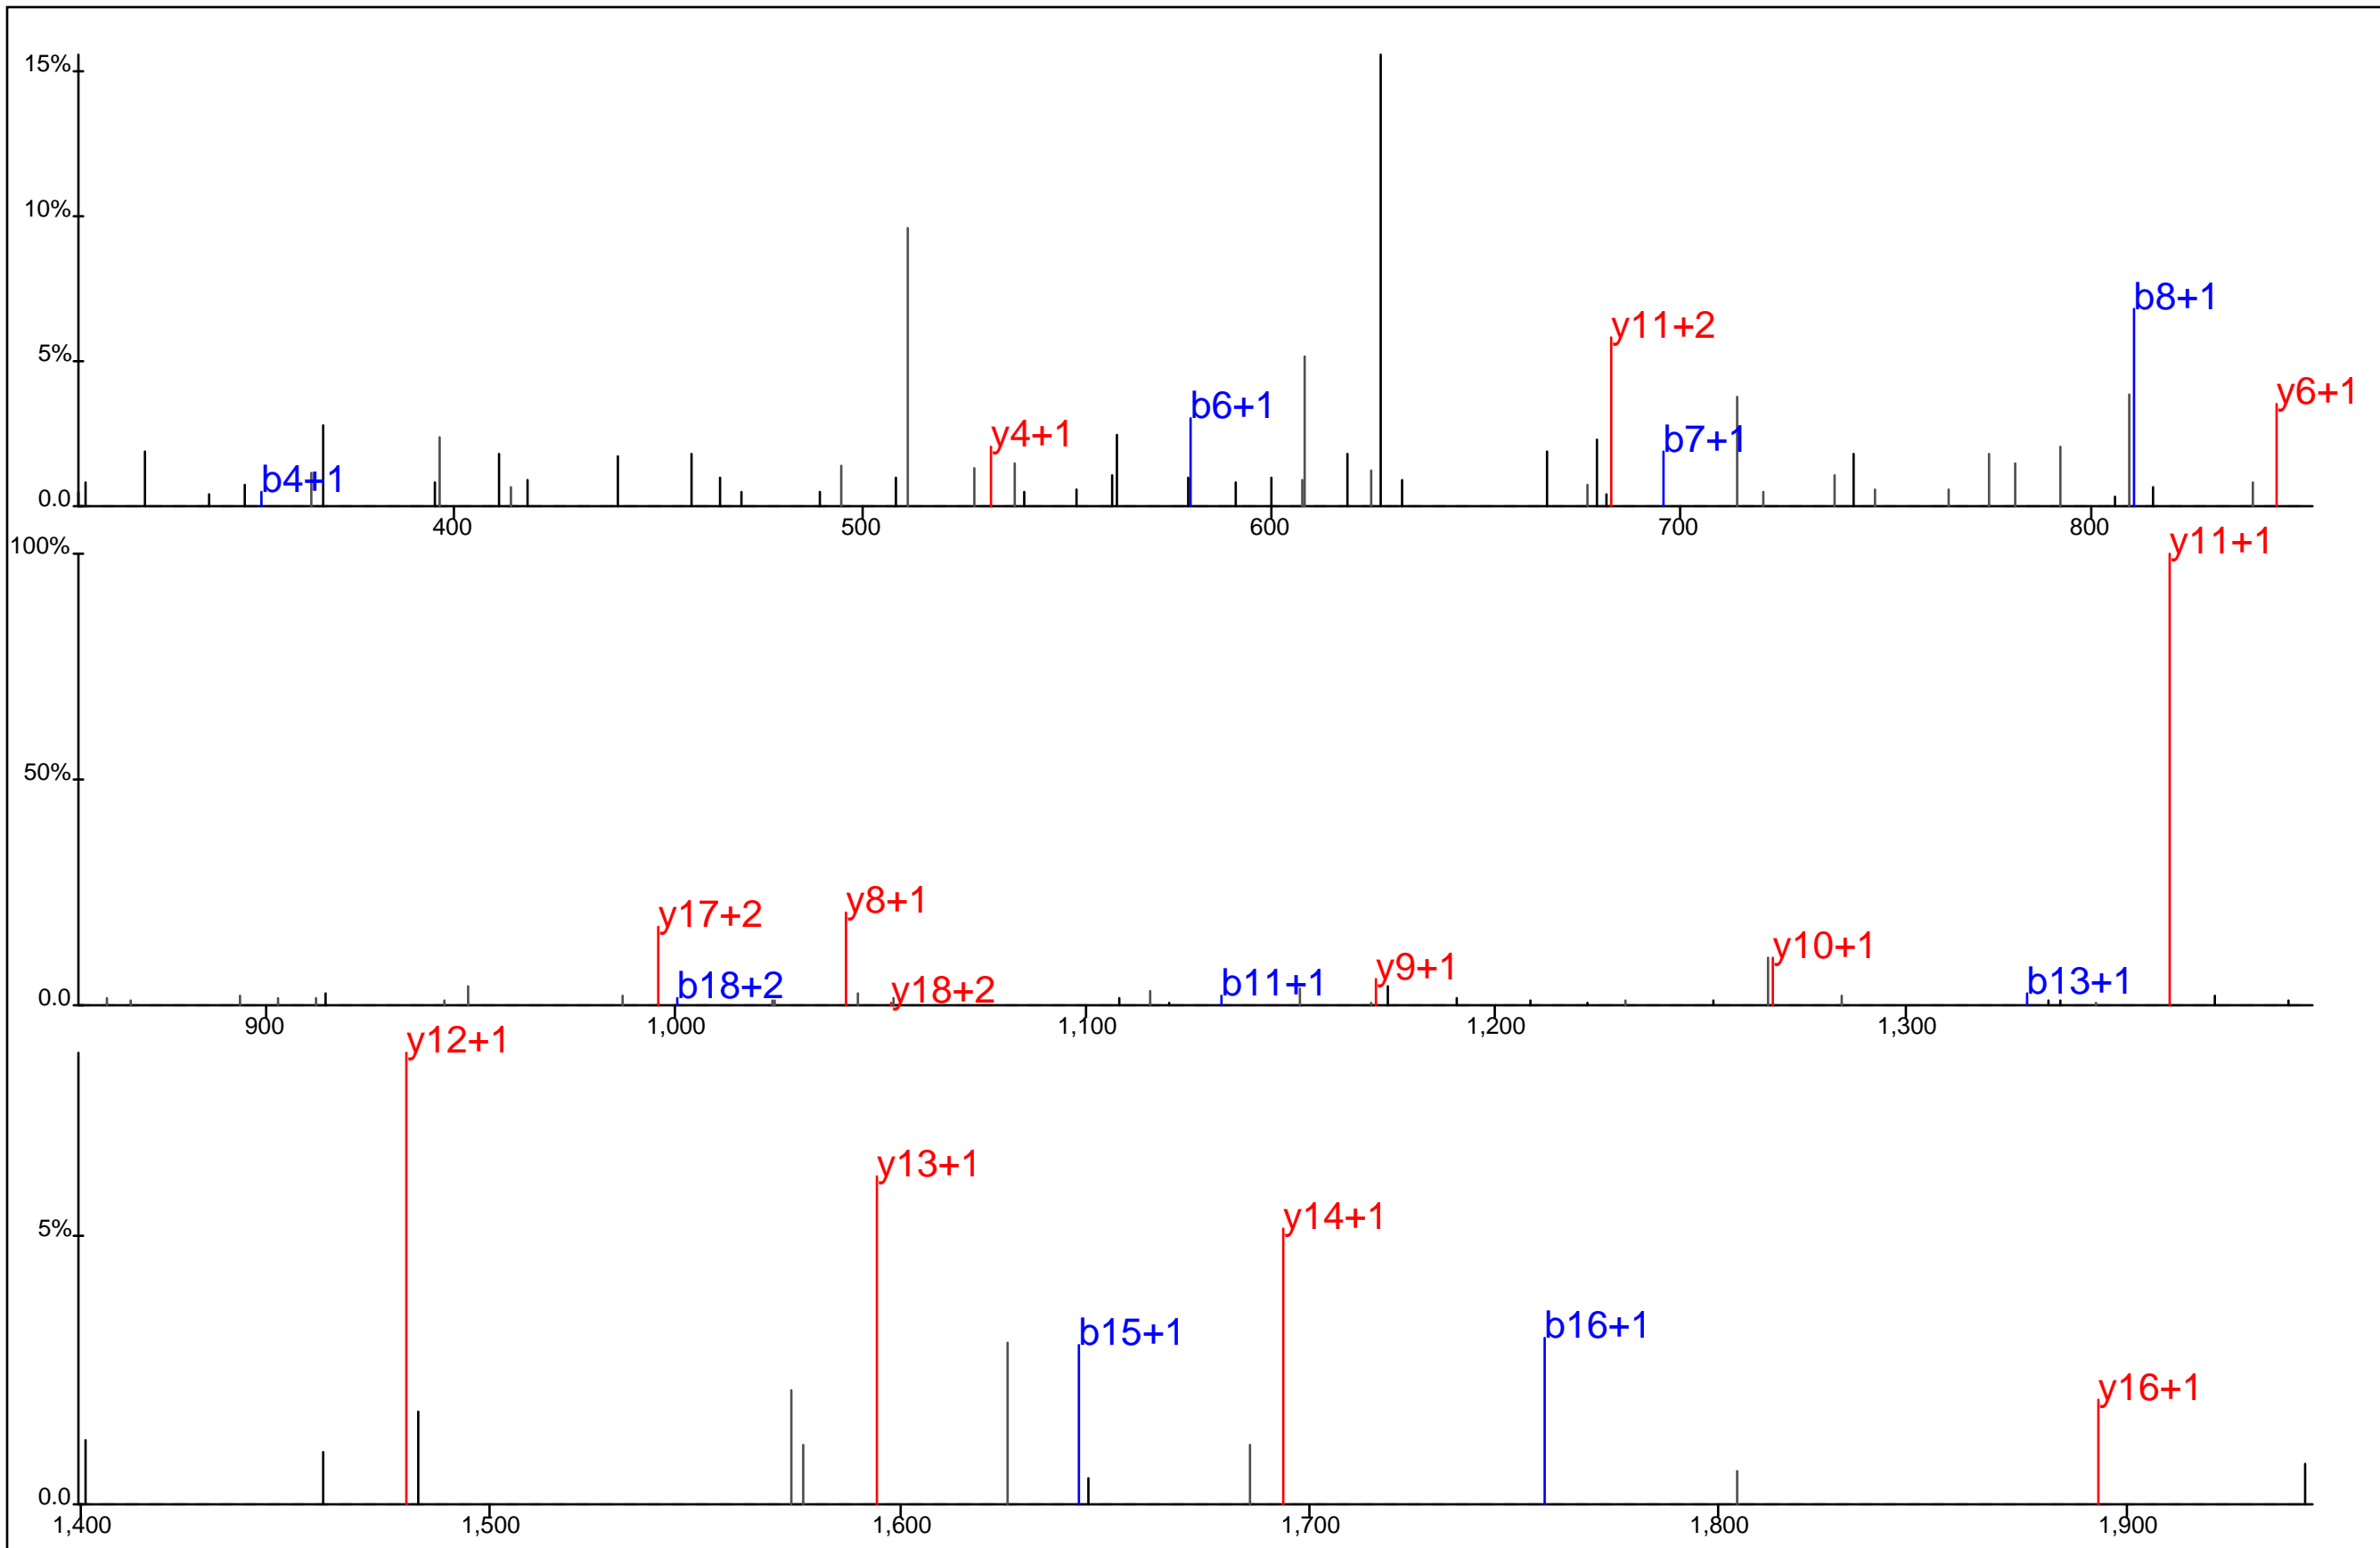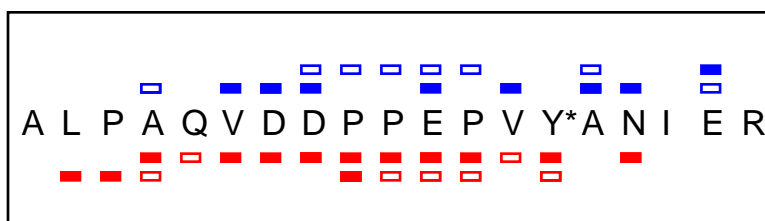

Protein Name: Uncharacterized protein  
 gi Accession: 0  
 Precursor Mass: 1,087.5137+2  
 Delta Mass: 1.636 ppm  
 XCorr: 49.91

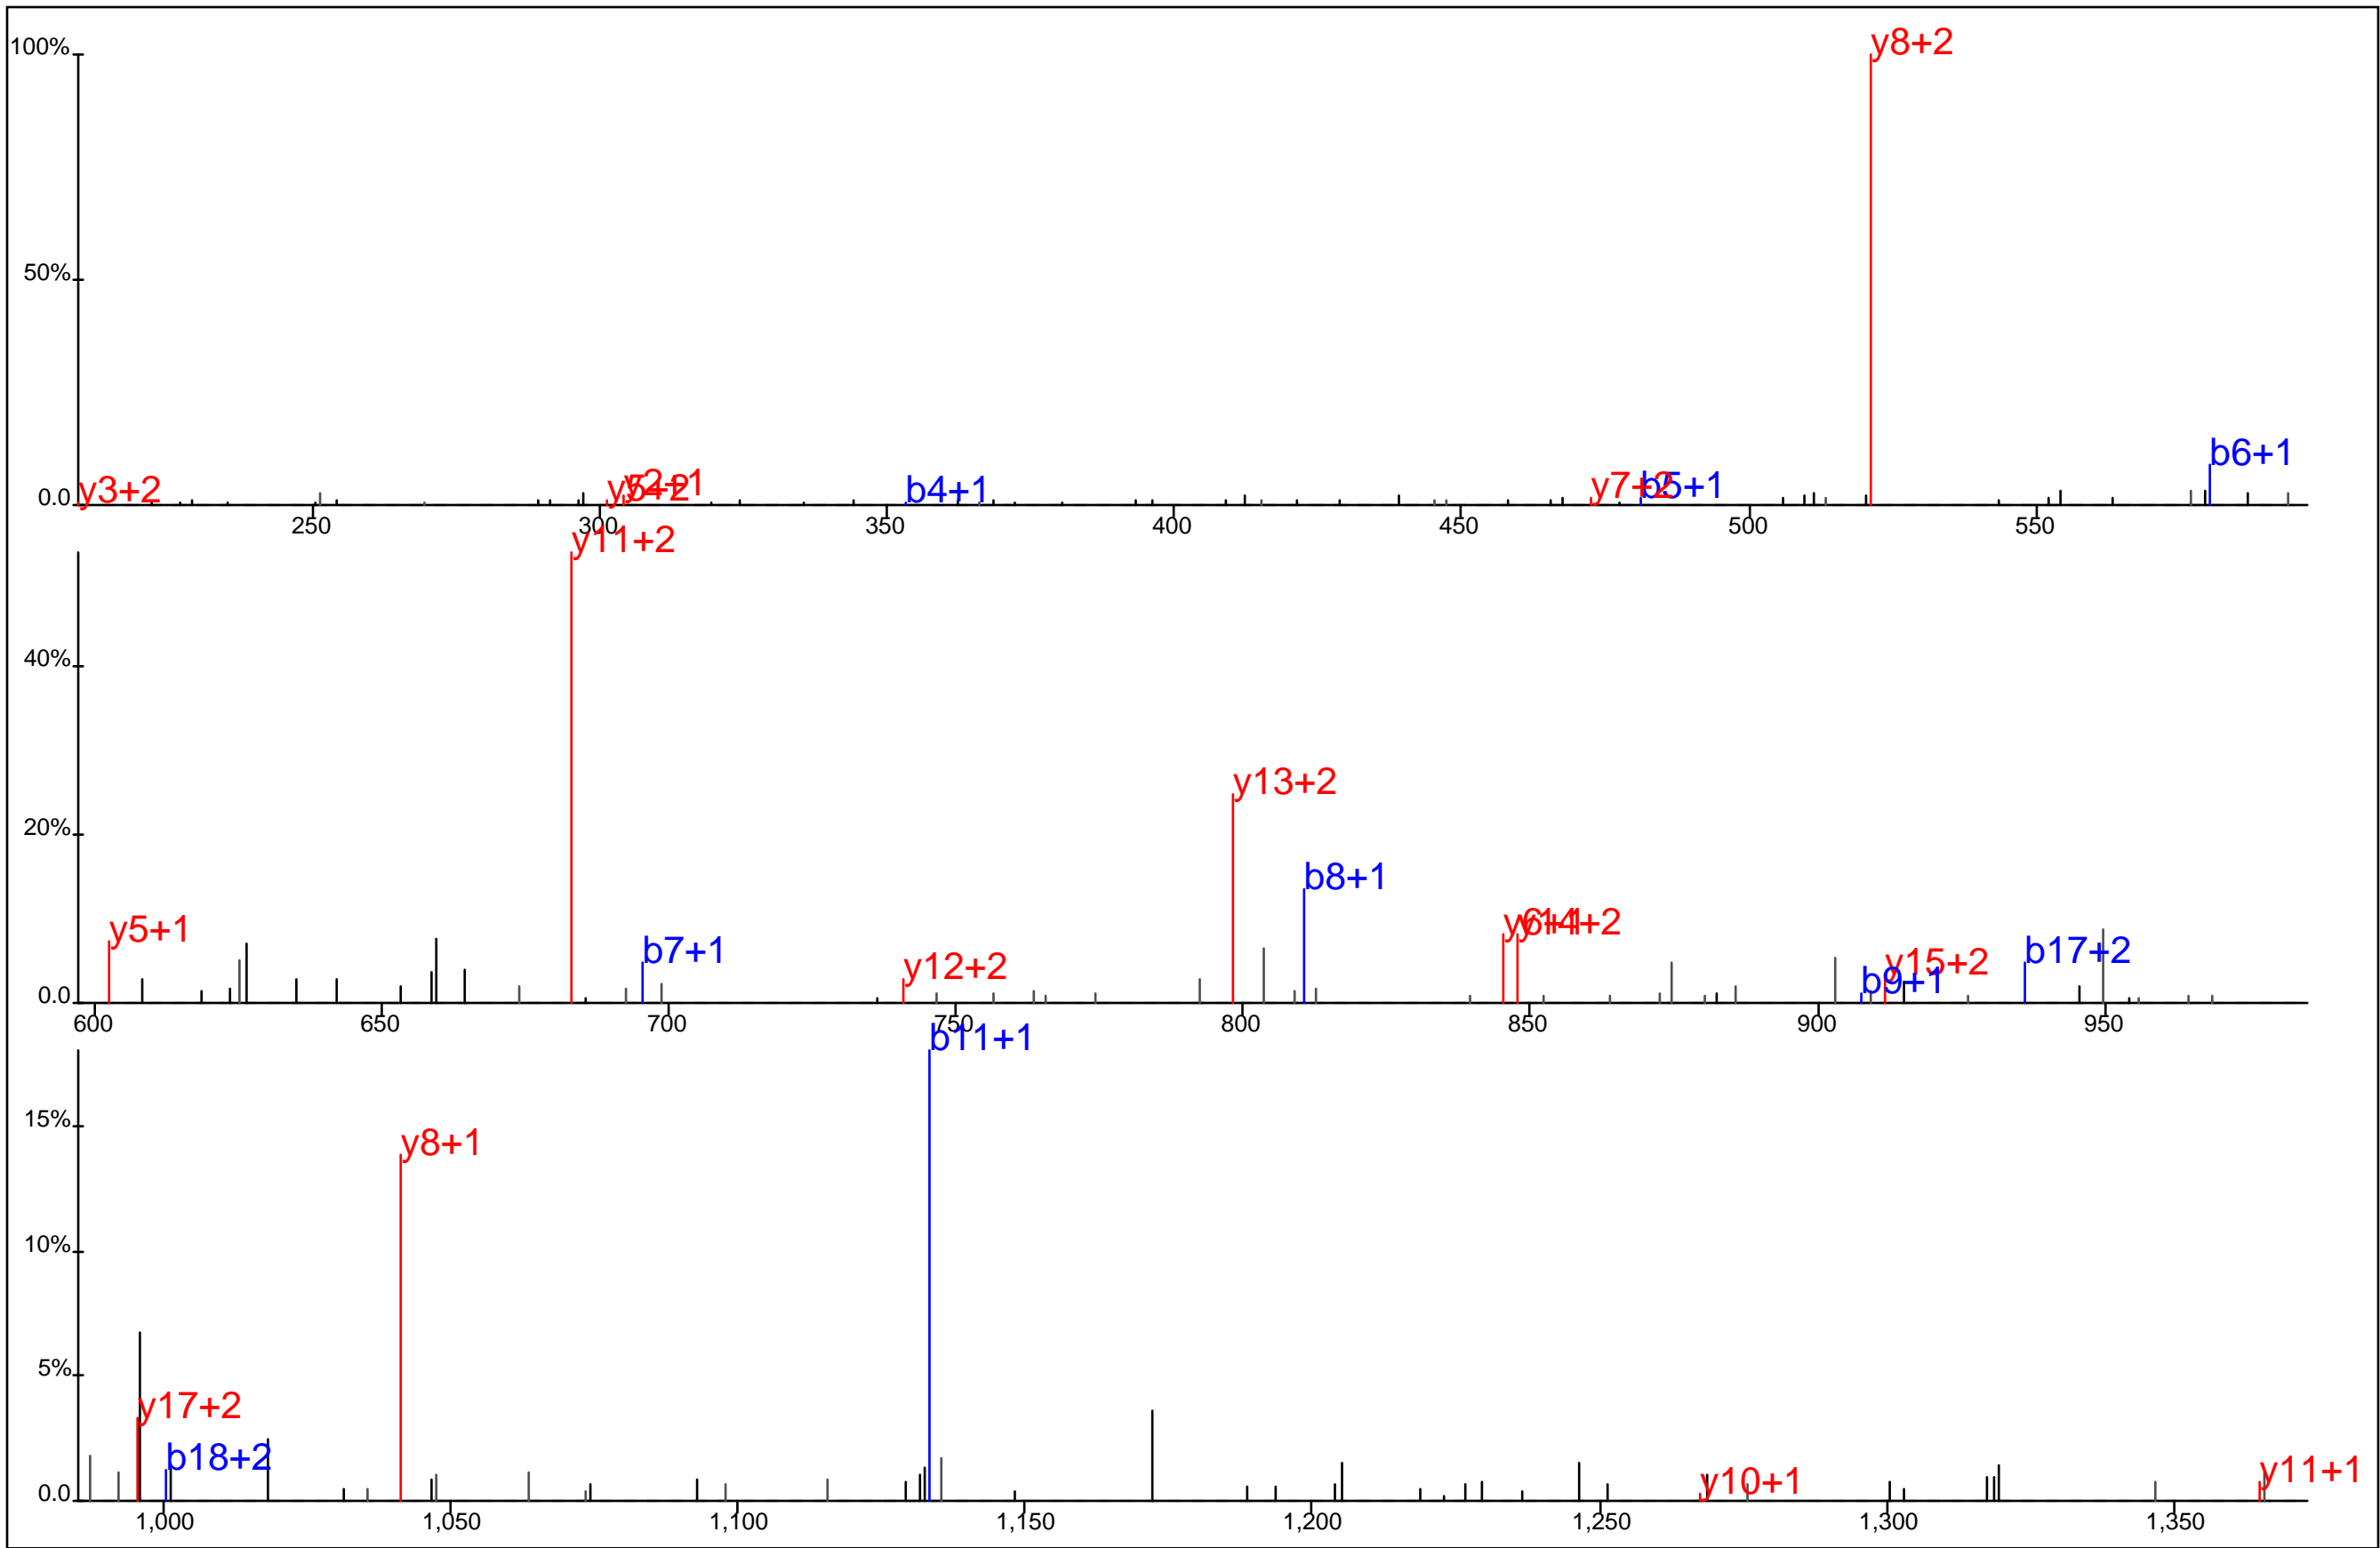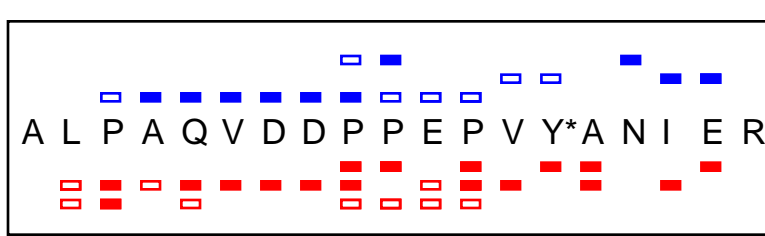

Protein Name: Uncharacterized protein  
 gi Accession: 0  
 Precursor Mass: 725.3440+3  
 Delta Mass: 0.422 ppm  
 XCorr: 33.26

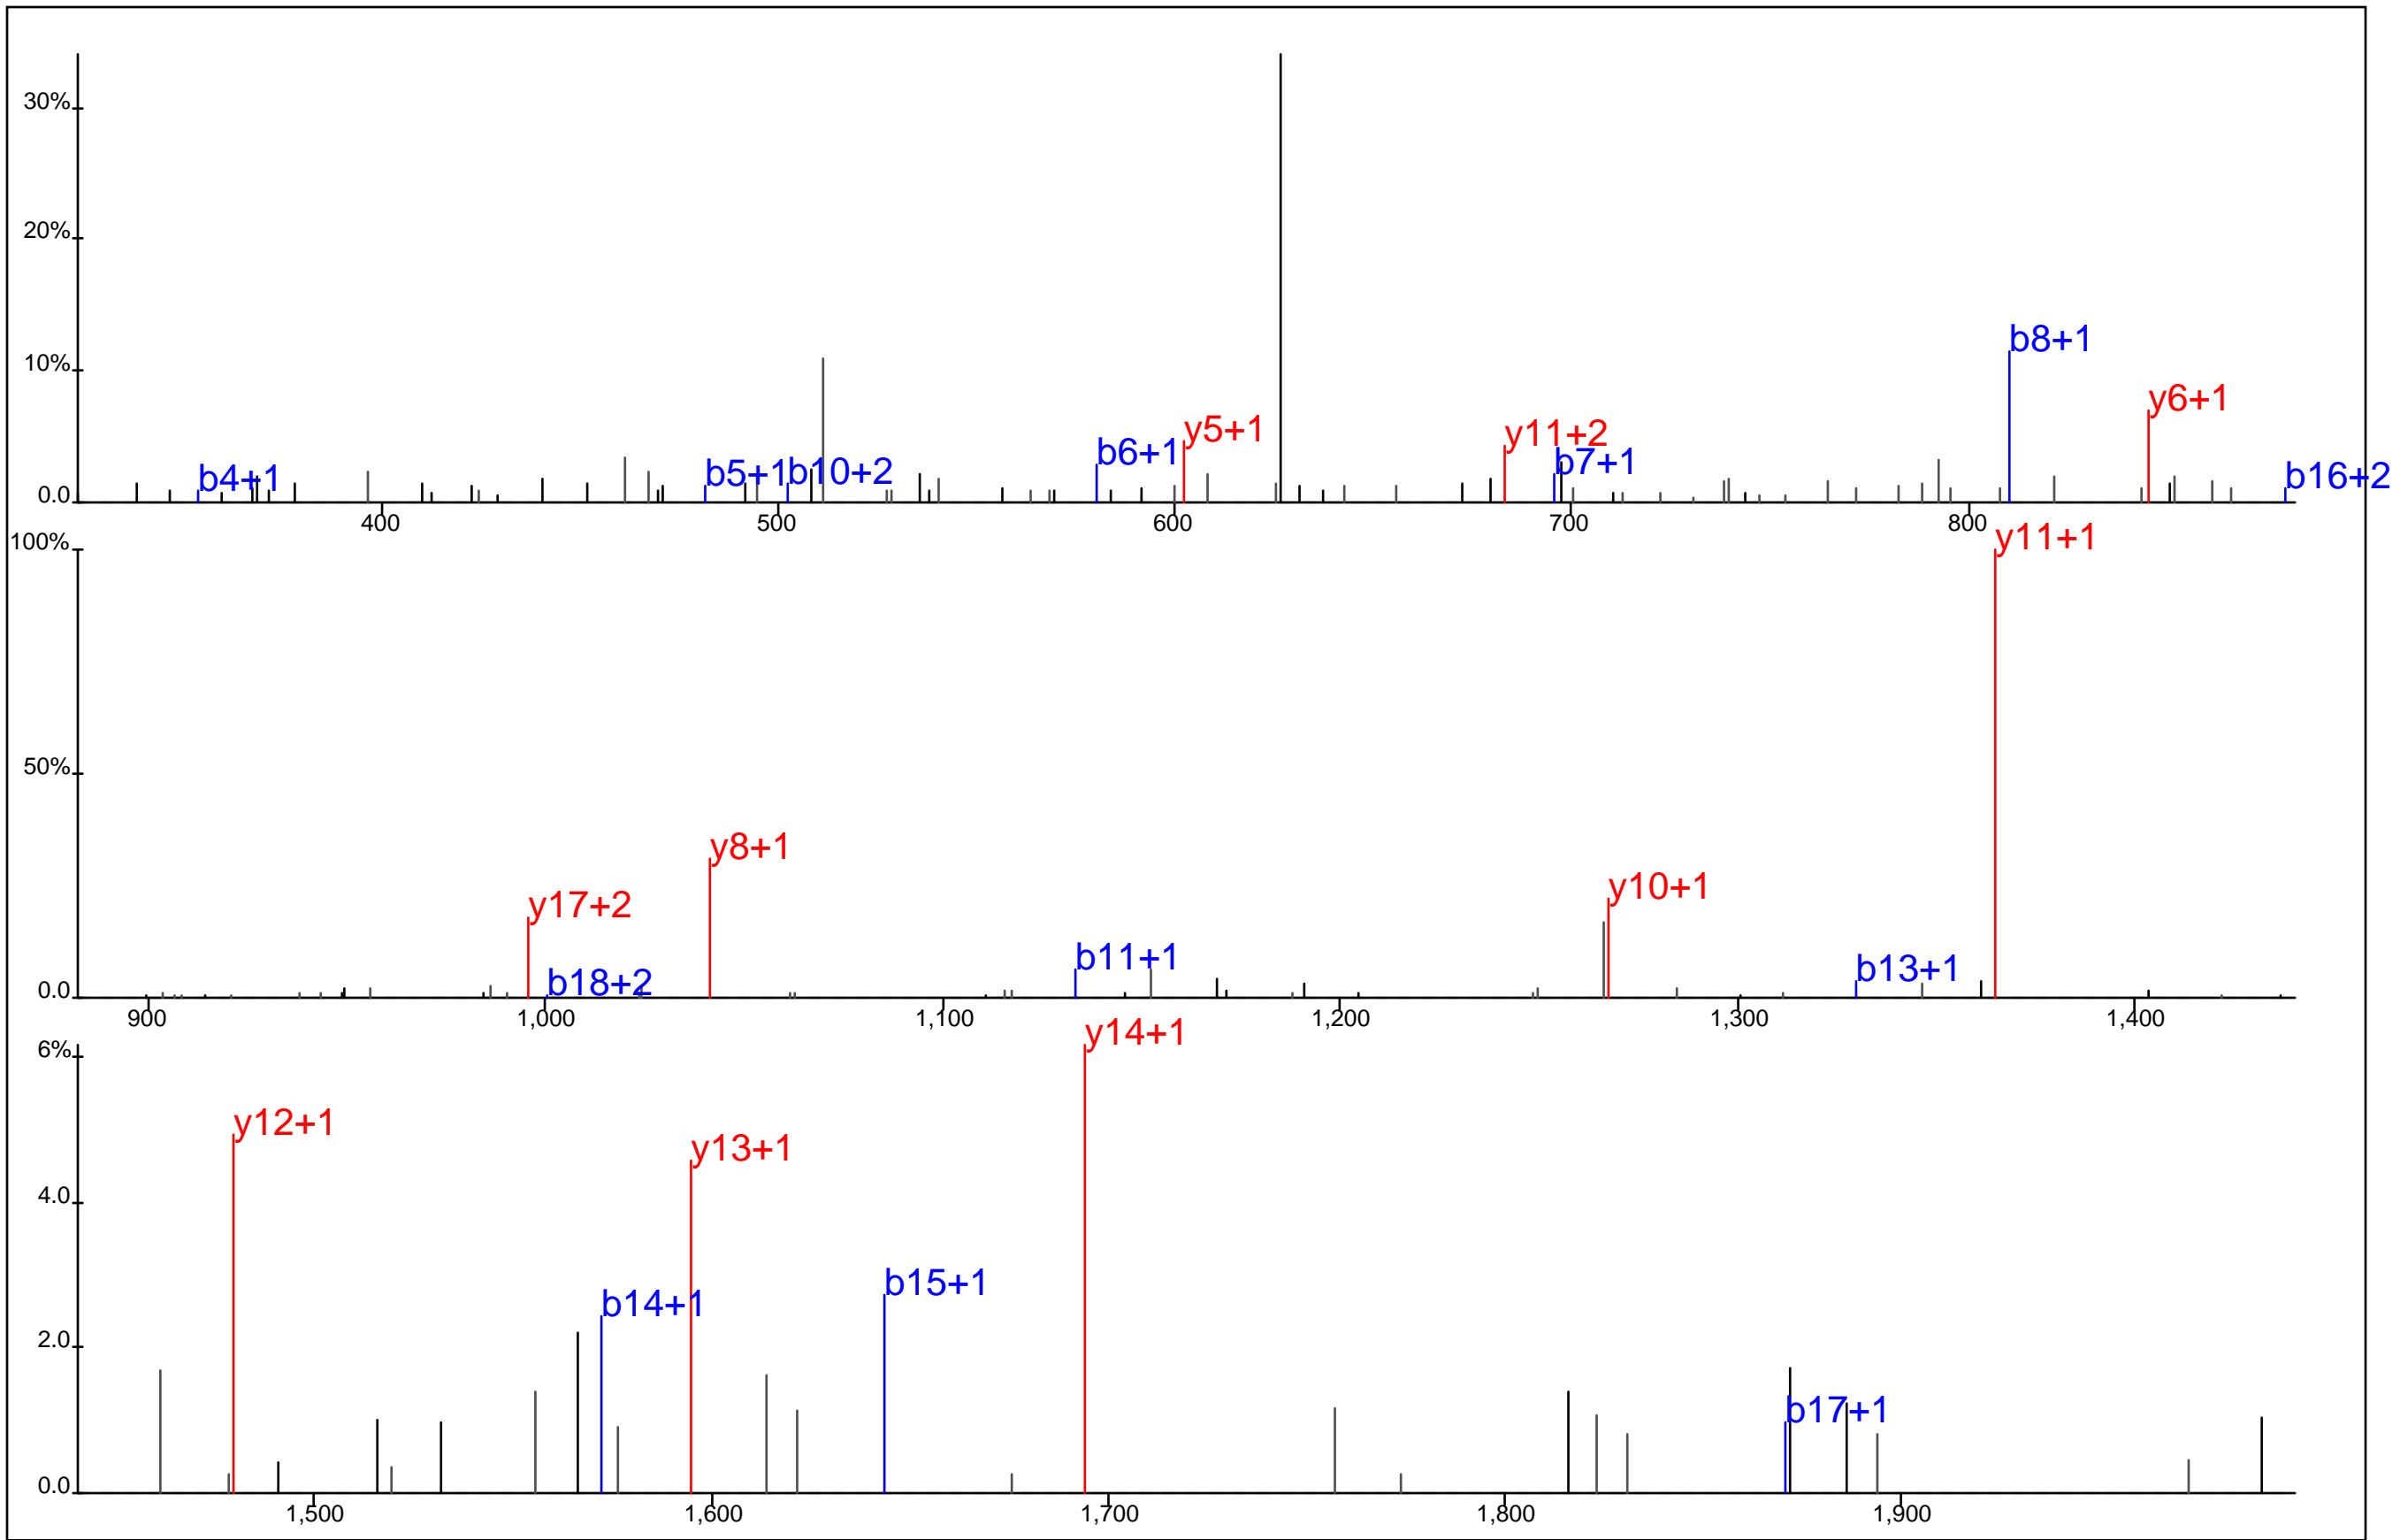

A L P A Q V D D P P E P V Y\* A N I E R  
□ □ □ □ □ □ □ □ □ □ □ □ □ □ □ □ □ □ □ □

Protein Name: Uncharacterized protein  
 gi Accession: 0  
 Precursor Mass: 1,087.5112+2  
 Delta Mass: 0.611 ppm  
 XCorr: 55.9

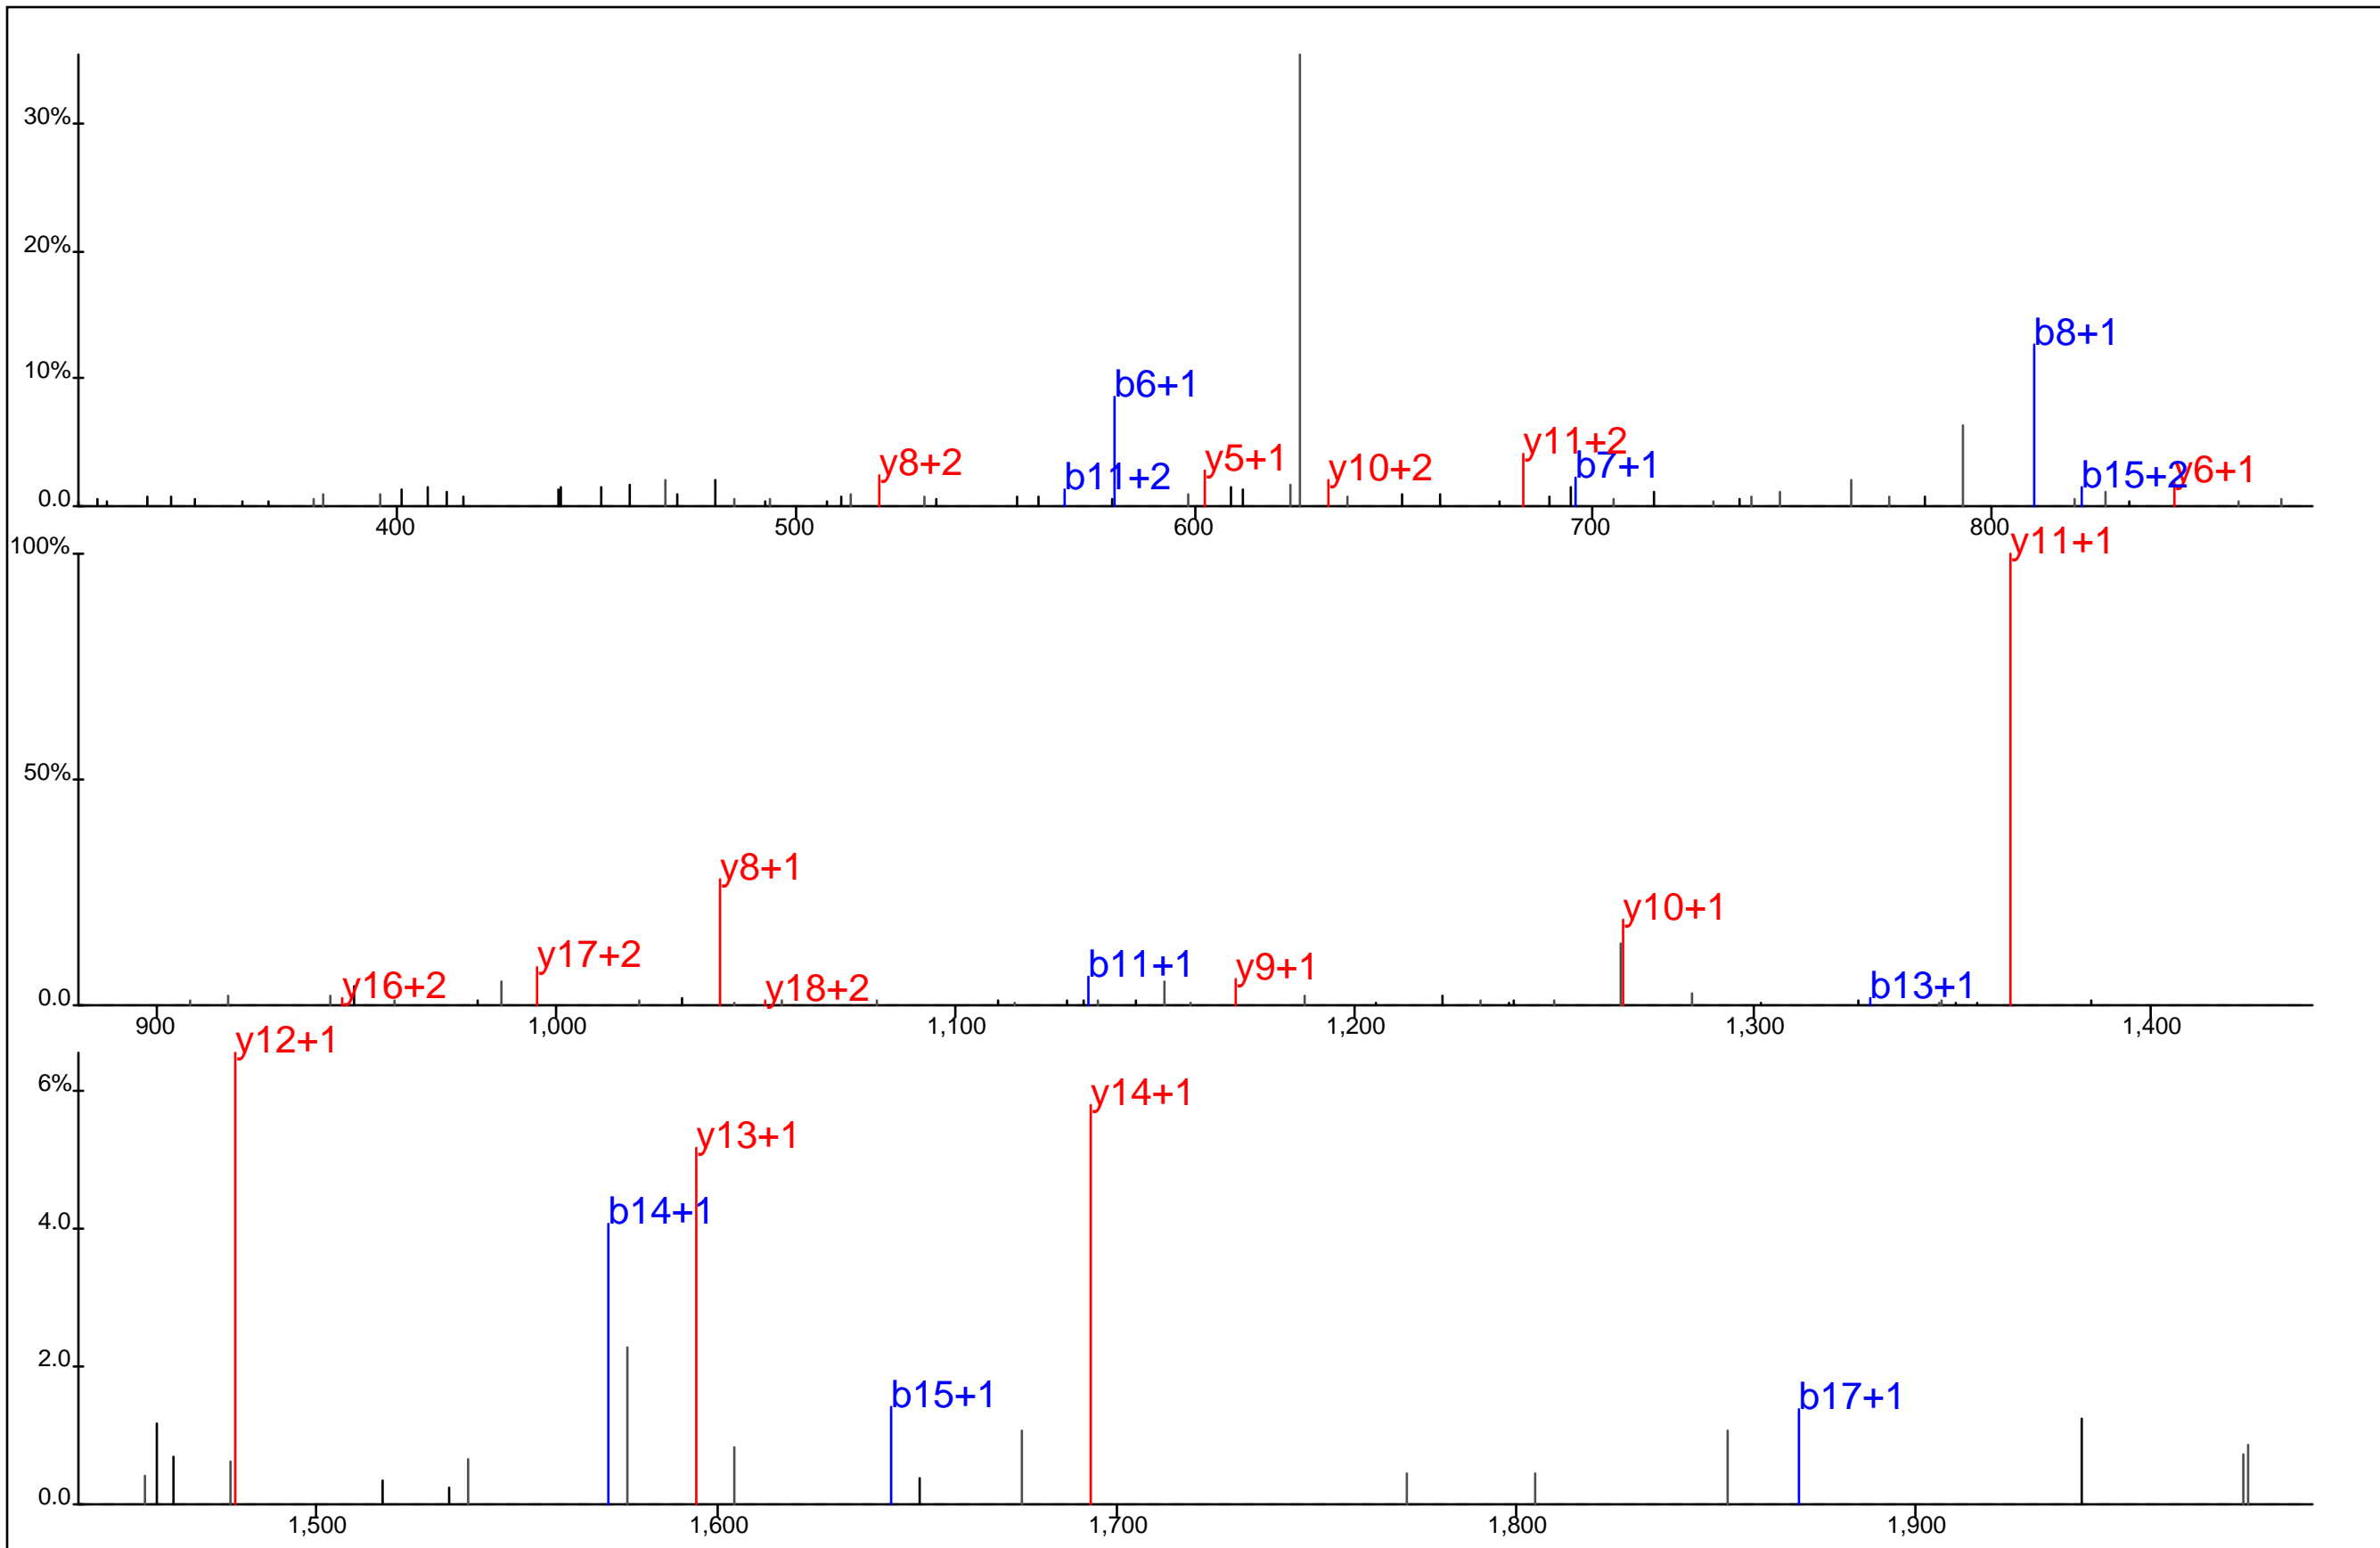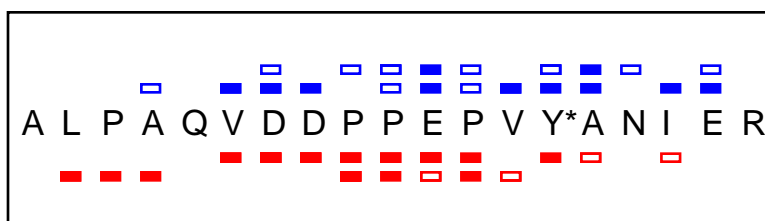

Protein Name: Uncharacterized protein  
 gi Accession: 0  
 Precursor Mass: 1,087.5146+2  
 Delta Mass: 2.534 ppm  
 XCorr: 68.05

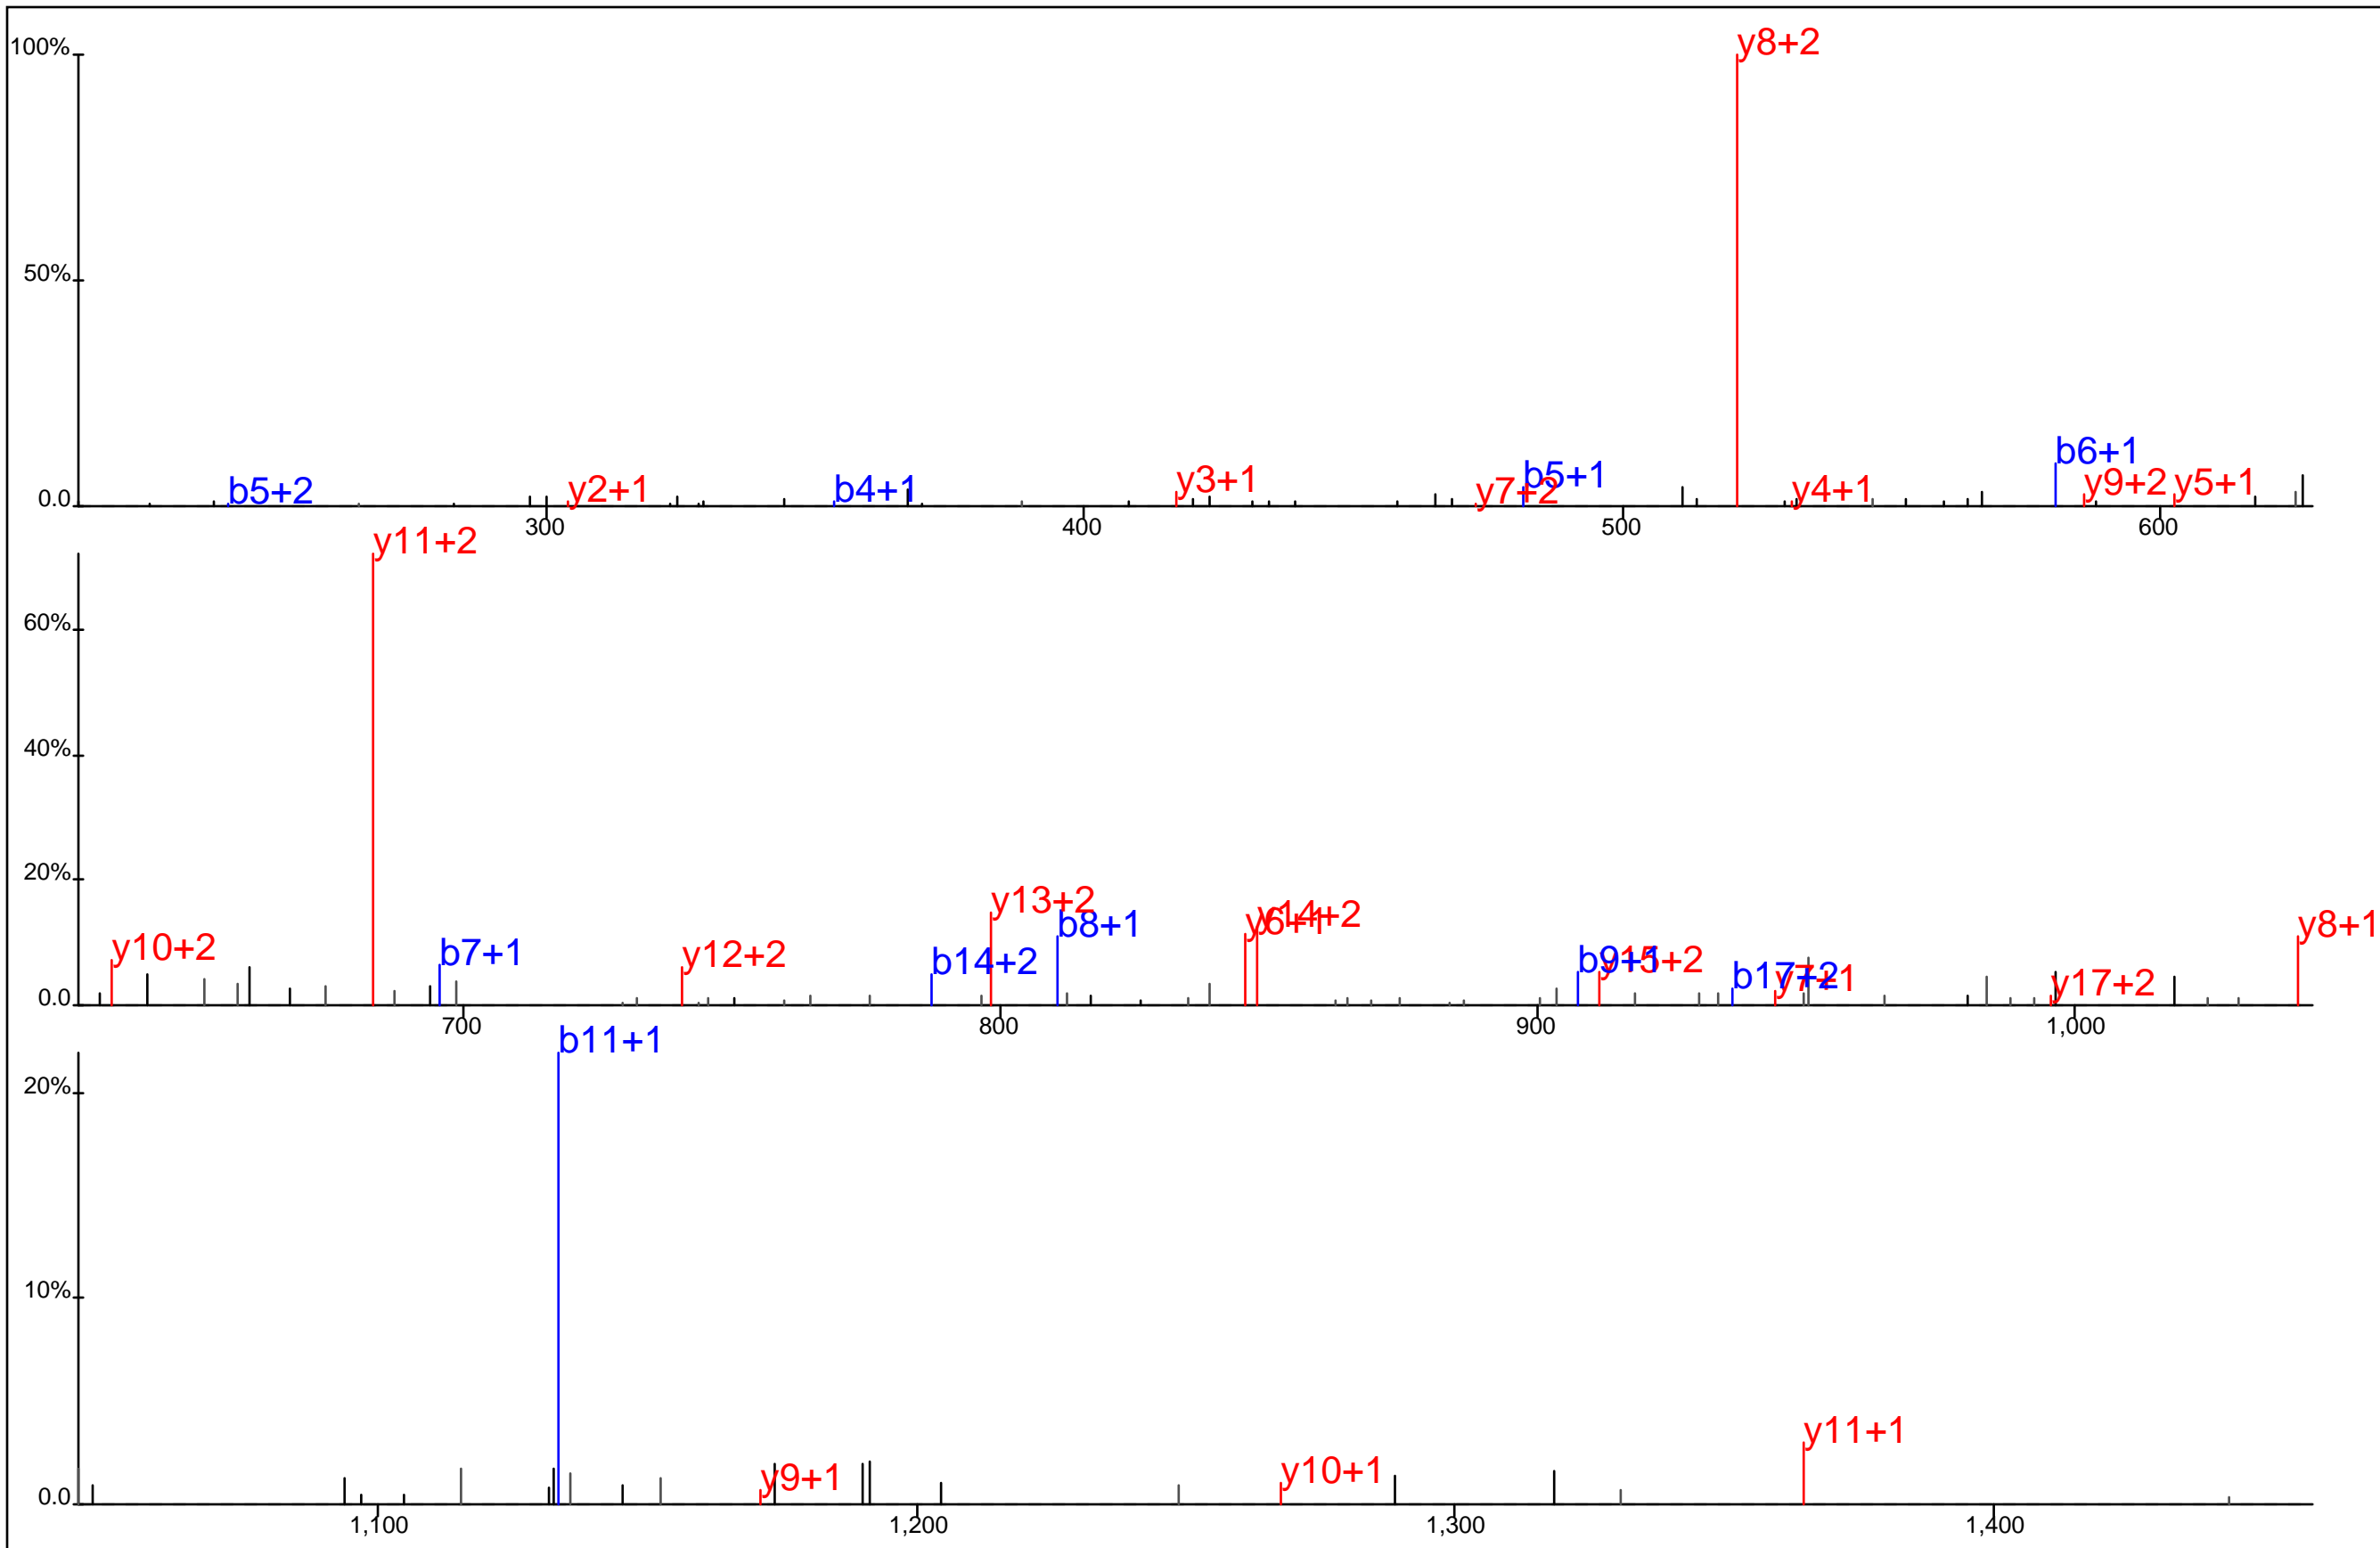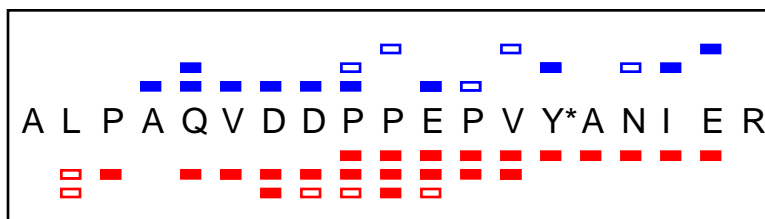

Protein Name: Uncharacterized protein  
 gi Accession: 0  
 Precursor Mass: 725.3452+3  
 Delta Mass: 2.023 ppm  
 XCorr: 47.78

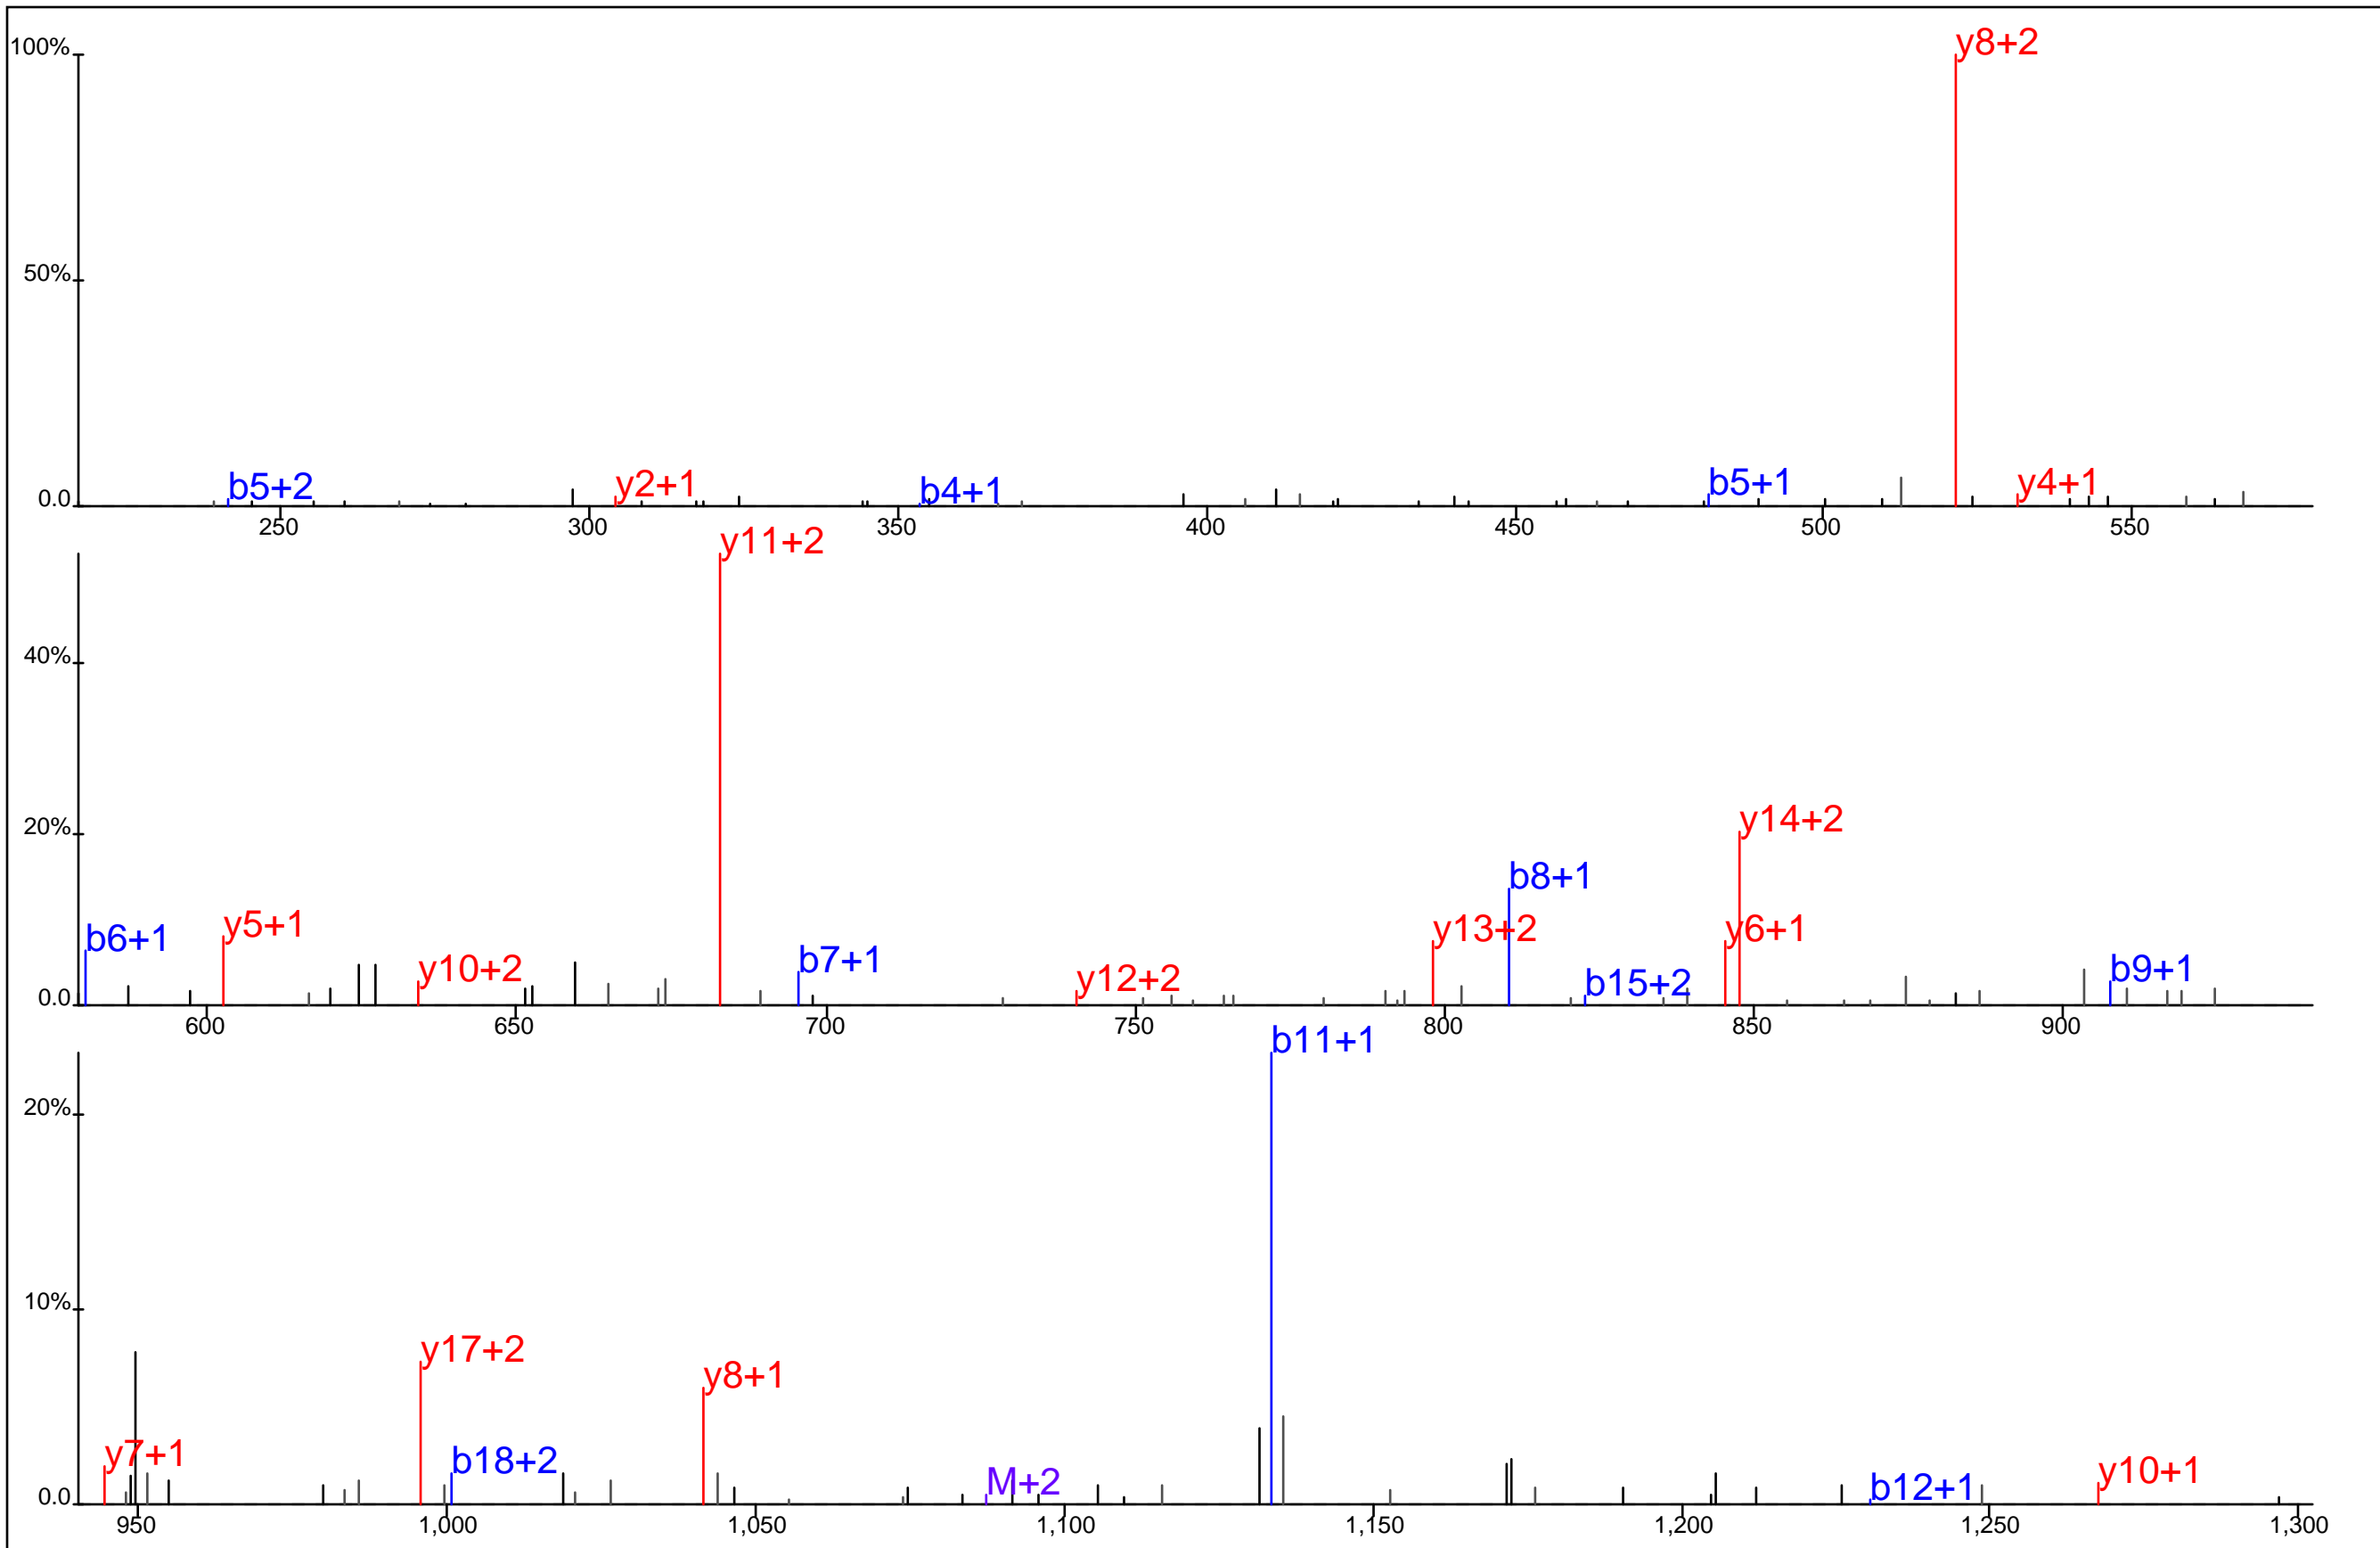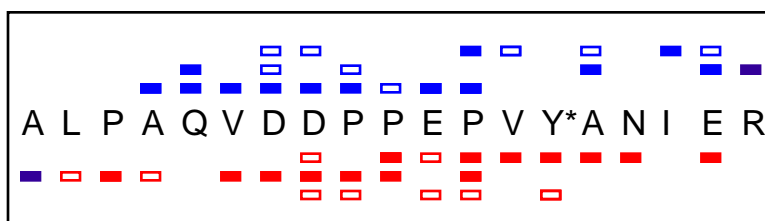

Protein Name: Uncharacterized protein  
 gi Accession: 0  
 Precursor Mass: 725.3467+3  
 Delta Mass: 4.129 ppm  
 XCorr: 40.43



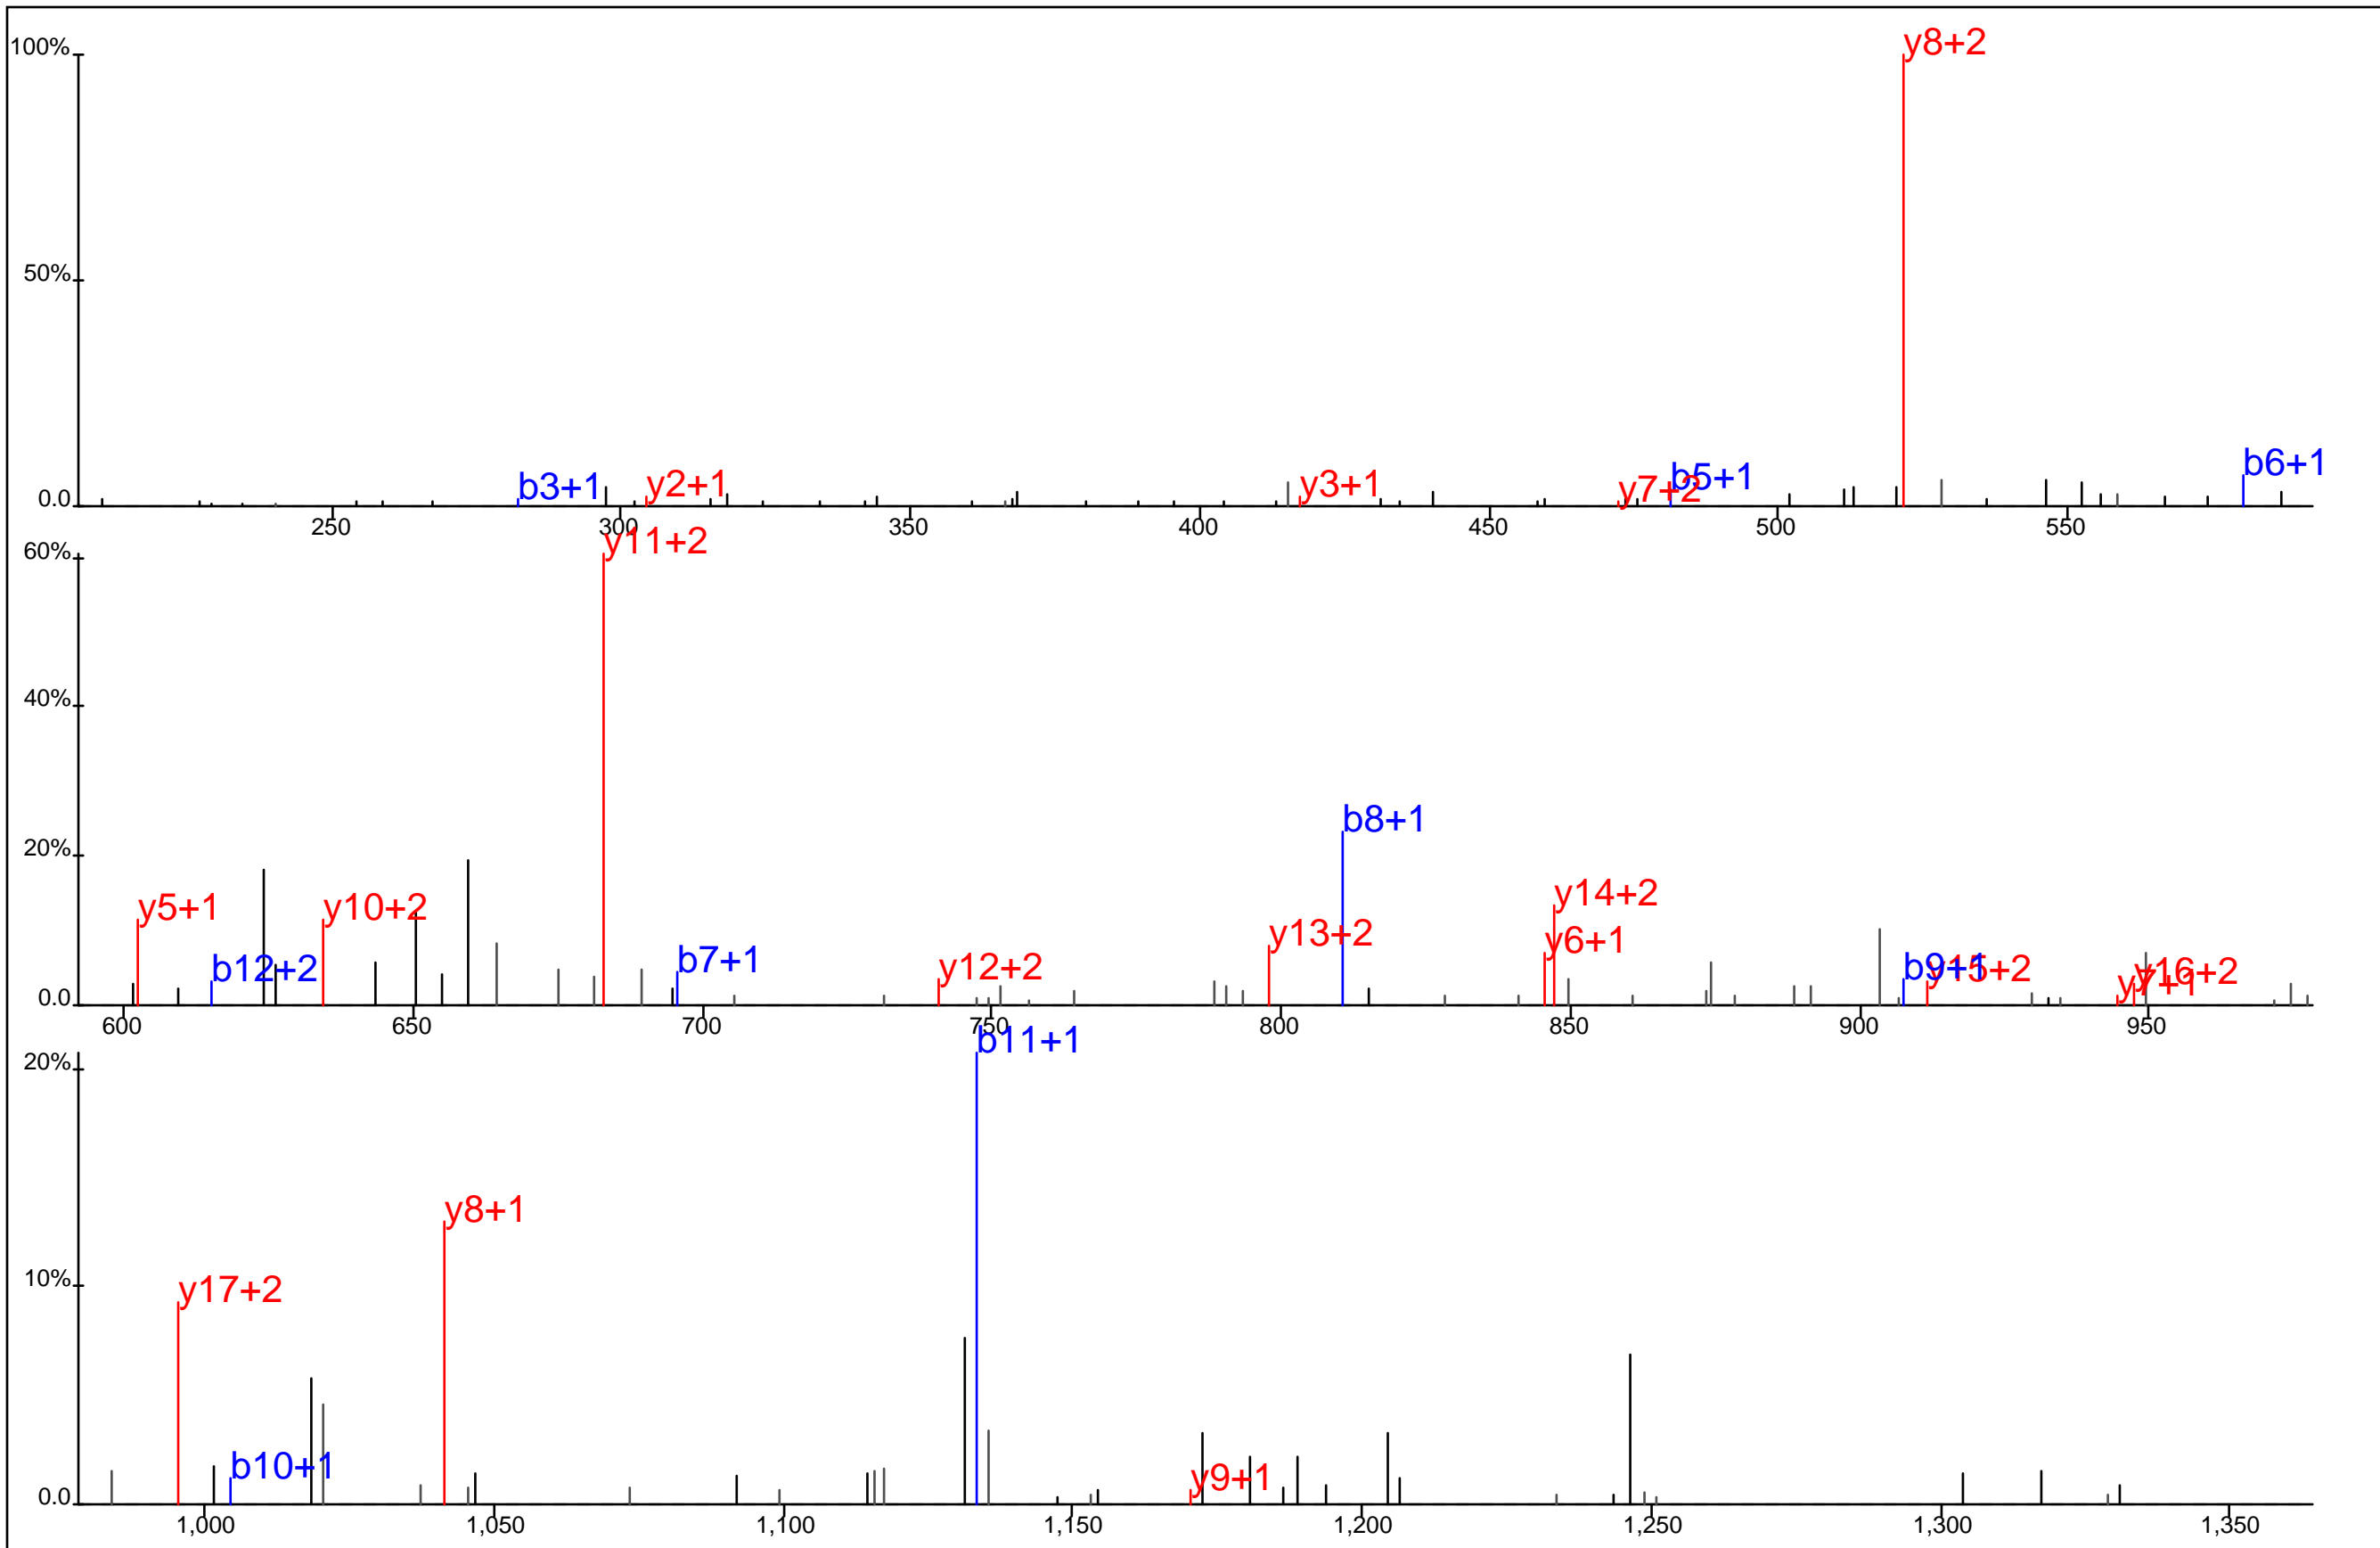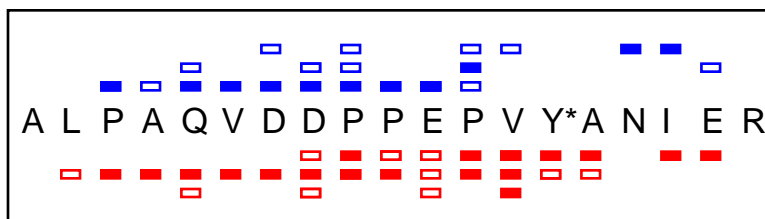

Protein Name: Uncharacterized protein  
 gi Accession: 0  
 Precursor Mass: 725.3404+3  
 Delta Mass: 4.547 ppm  
 XCorr: 31.2





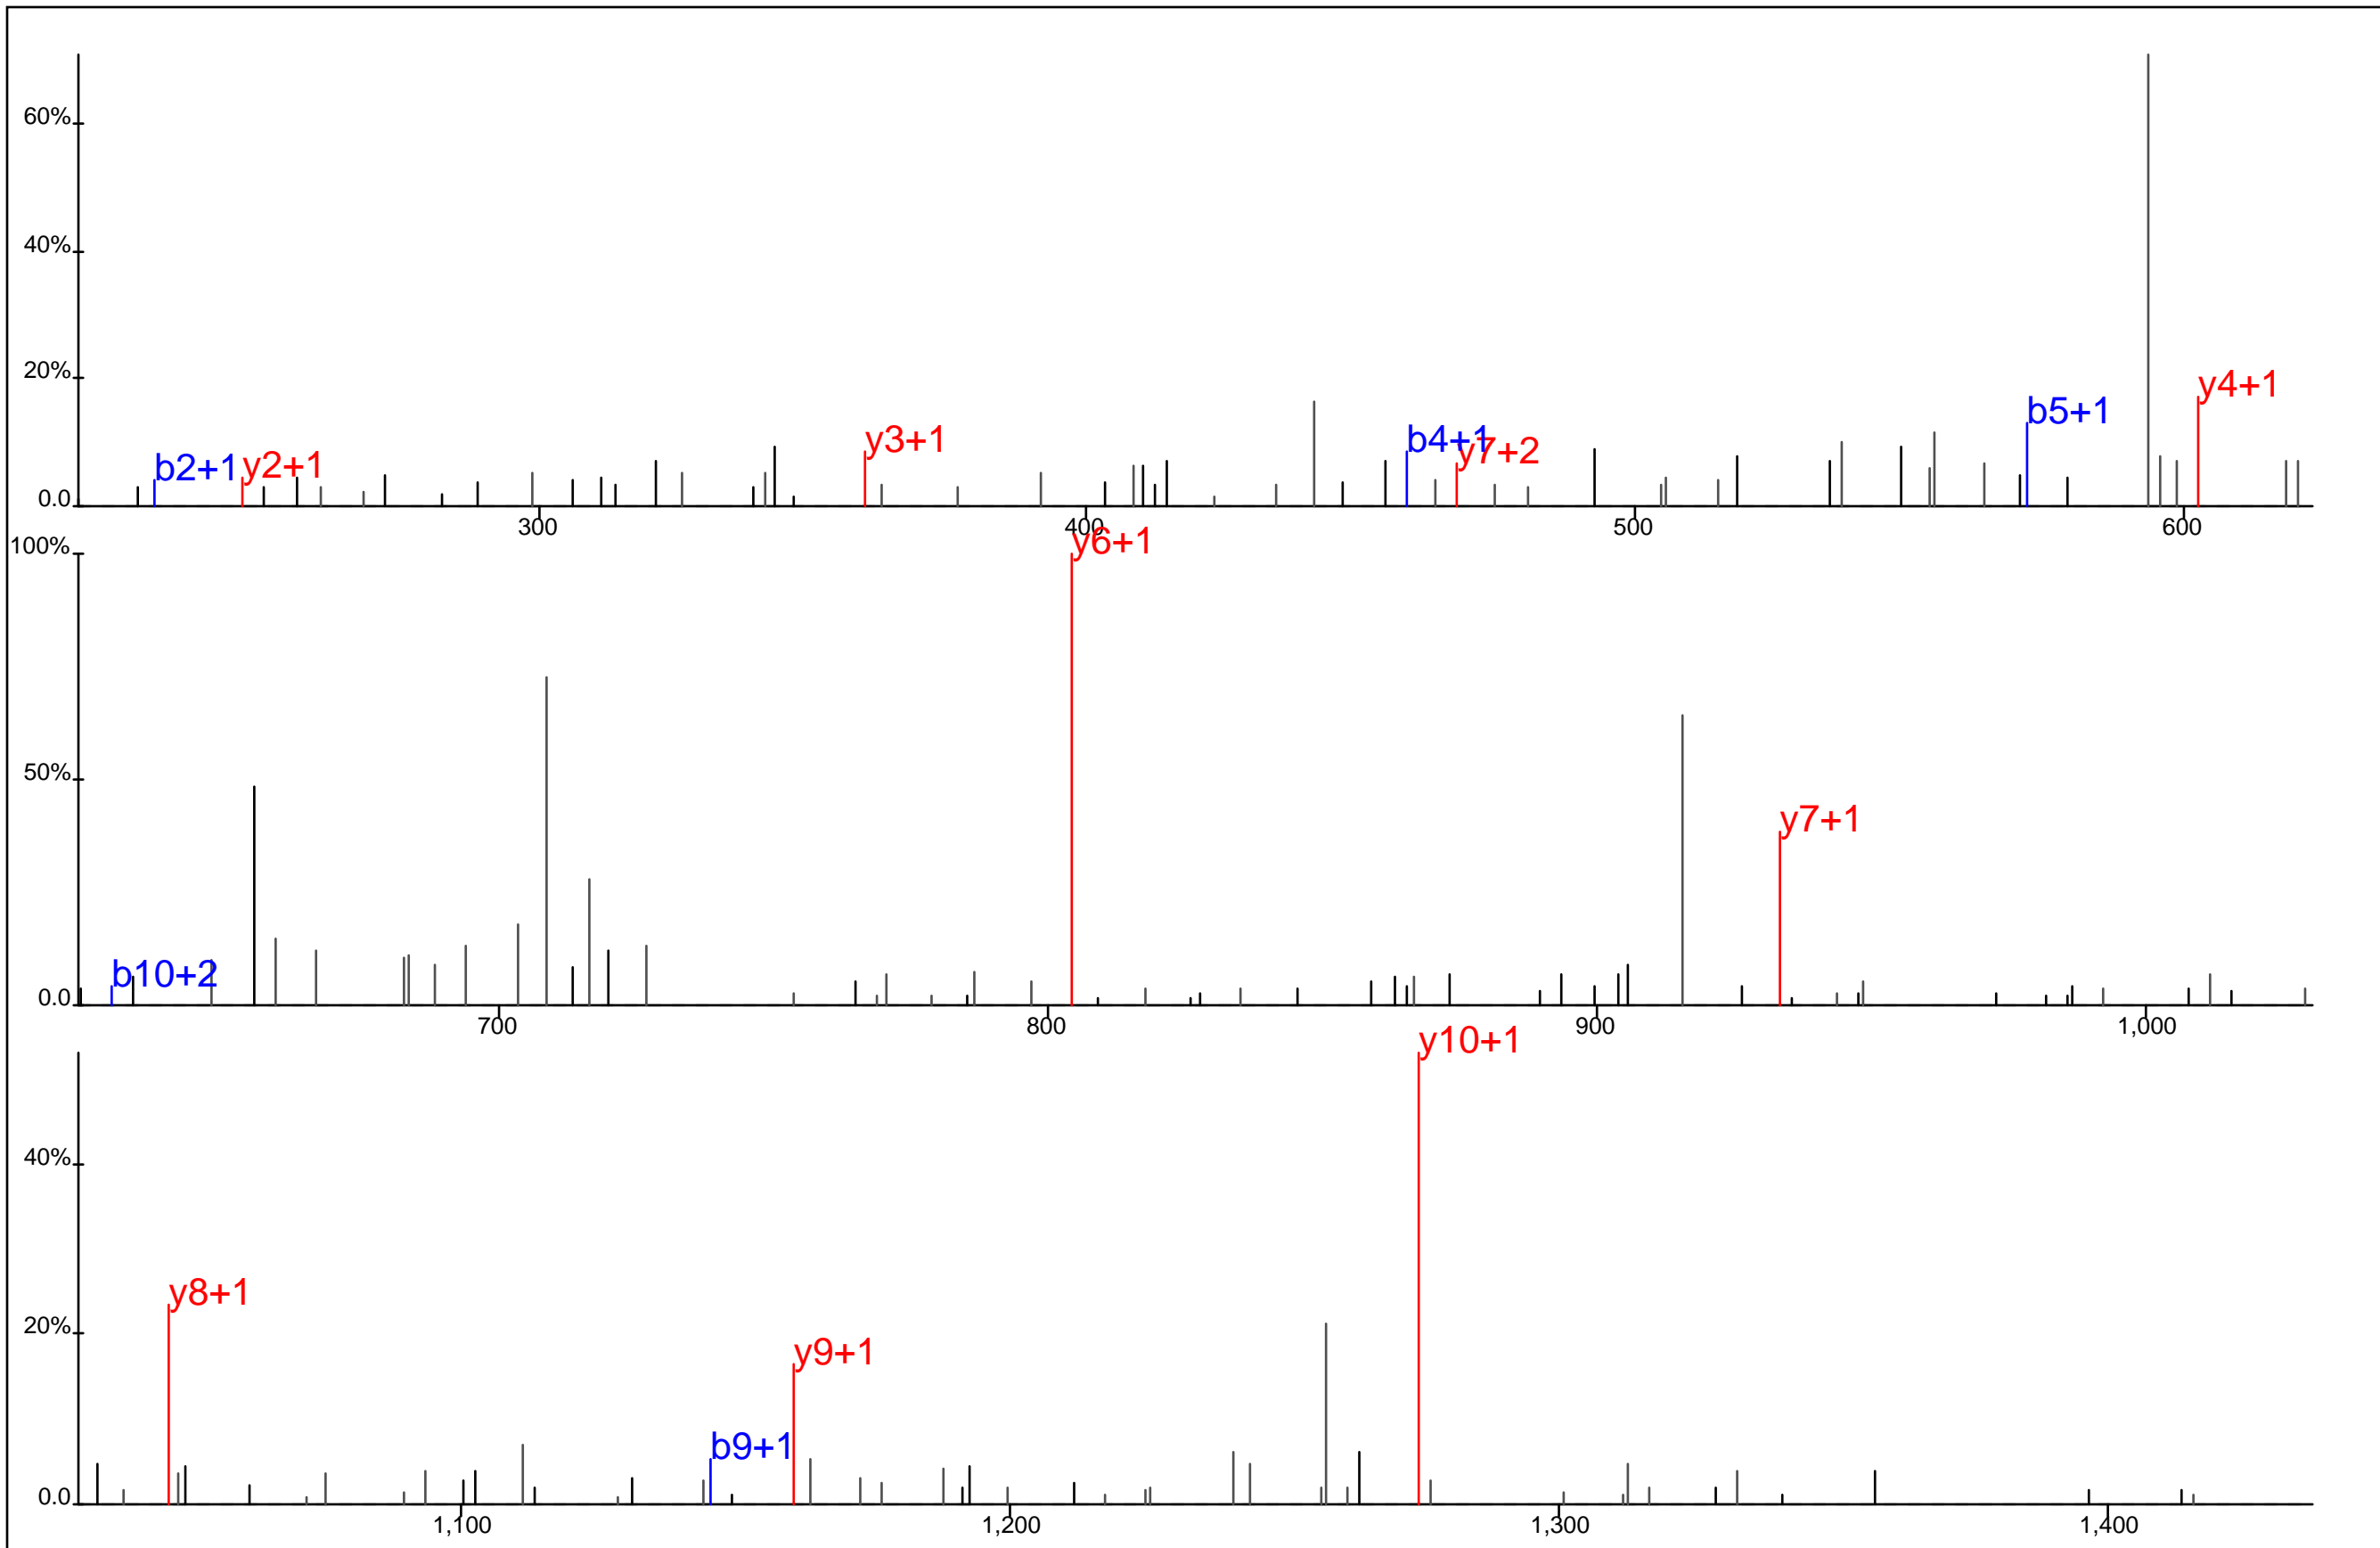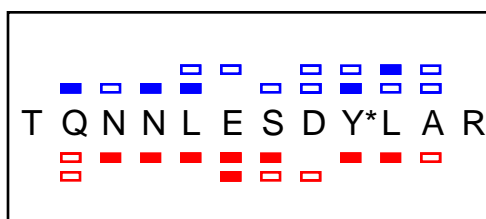

Protein Name: - Uncharacterized protein FLJ45252  
 gi Accession: 0  
 Precursor Mass: 752.3305+2  
 Delta Mass: 4.151 ppm  
 XCorr: 29.51

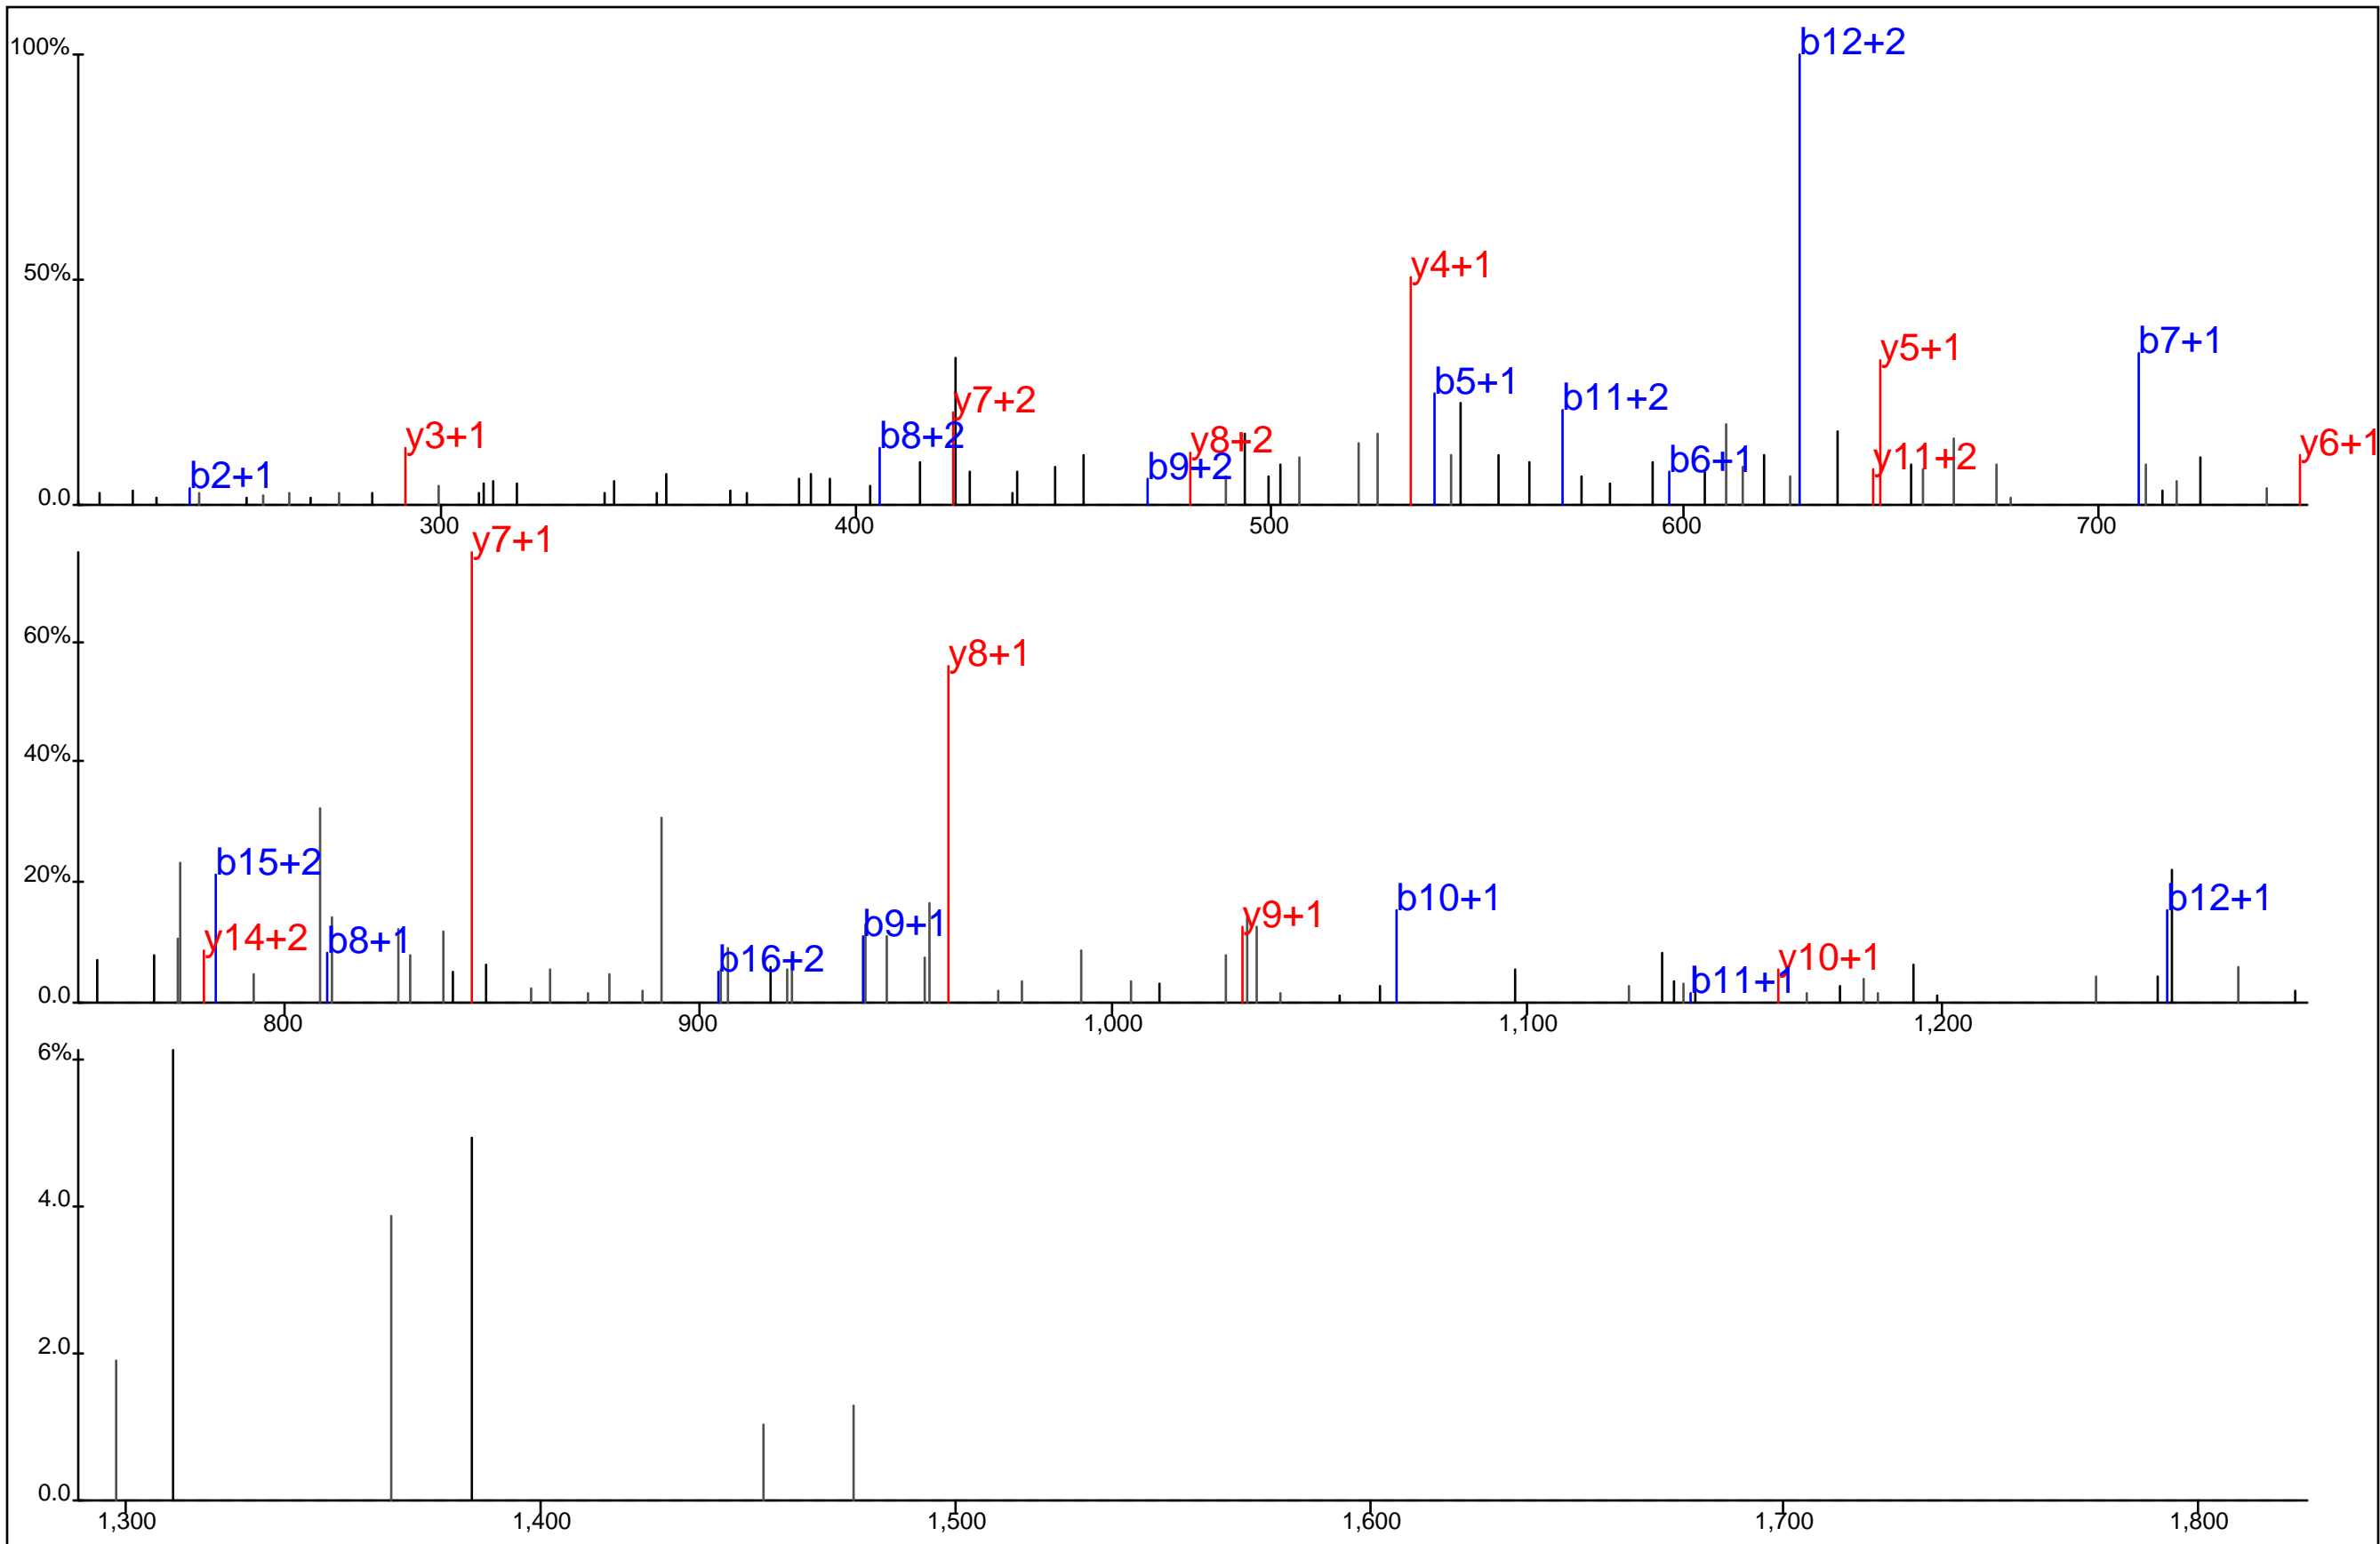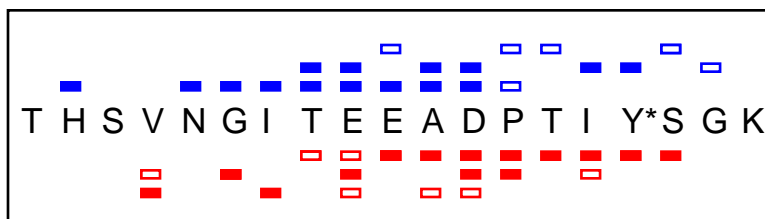

Protein Name: Upstream of NRAS  
 gi Accession: 0  
 Precursor Mass: 700.3147+3  
 Delta Mass: 1.583 ppm  
 XCorr: 30.83

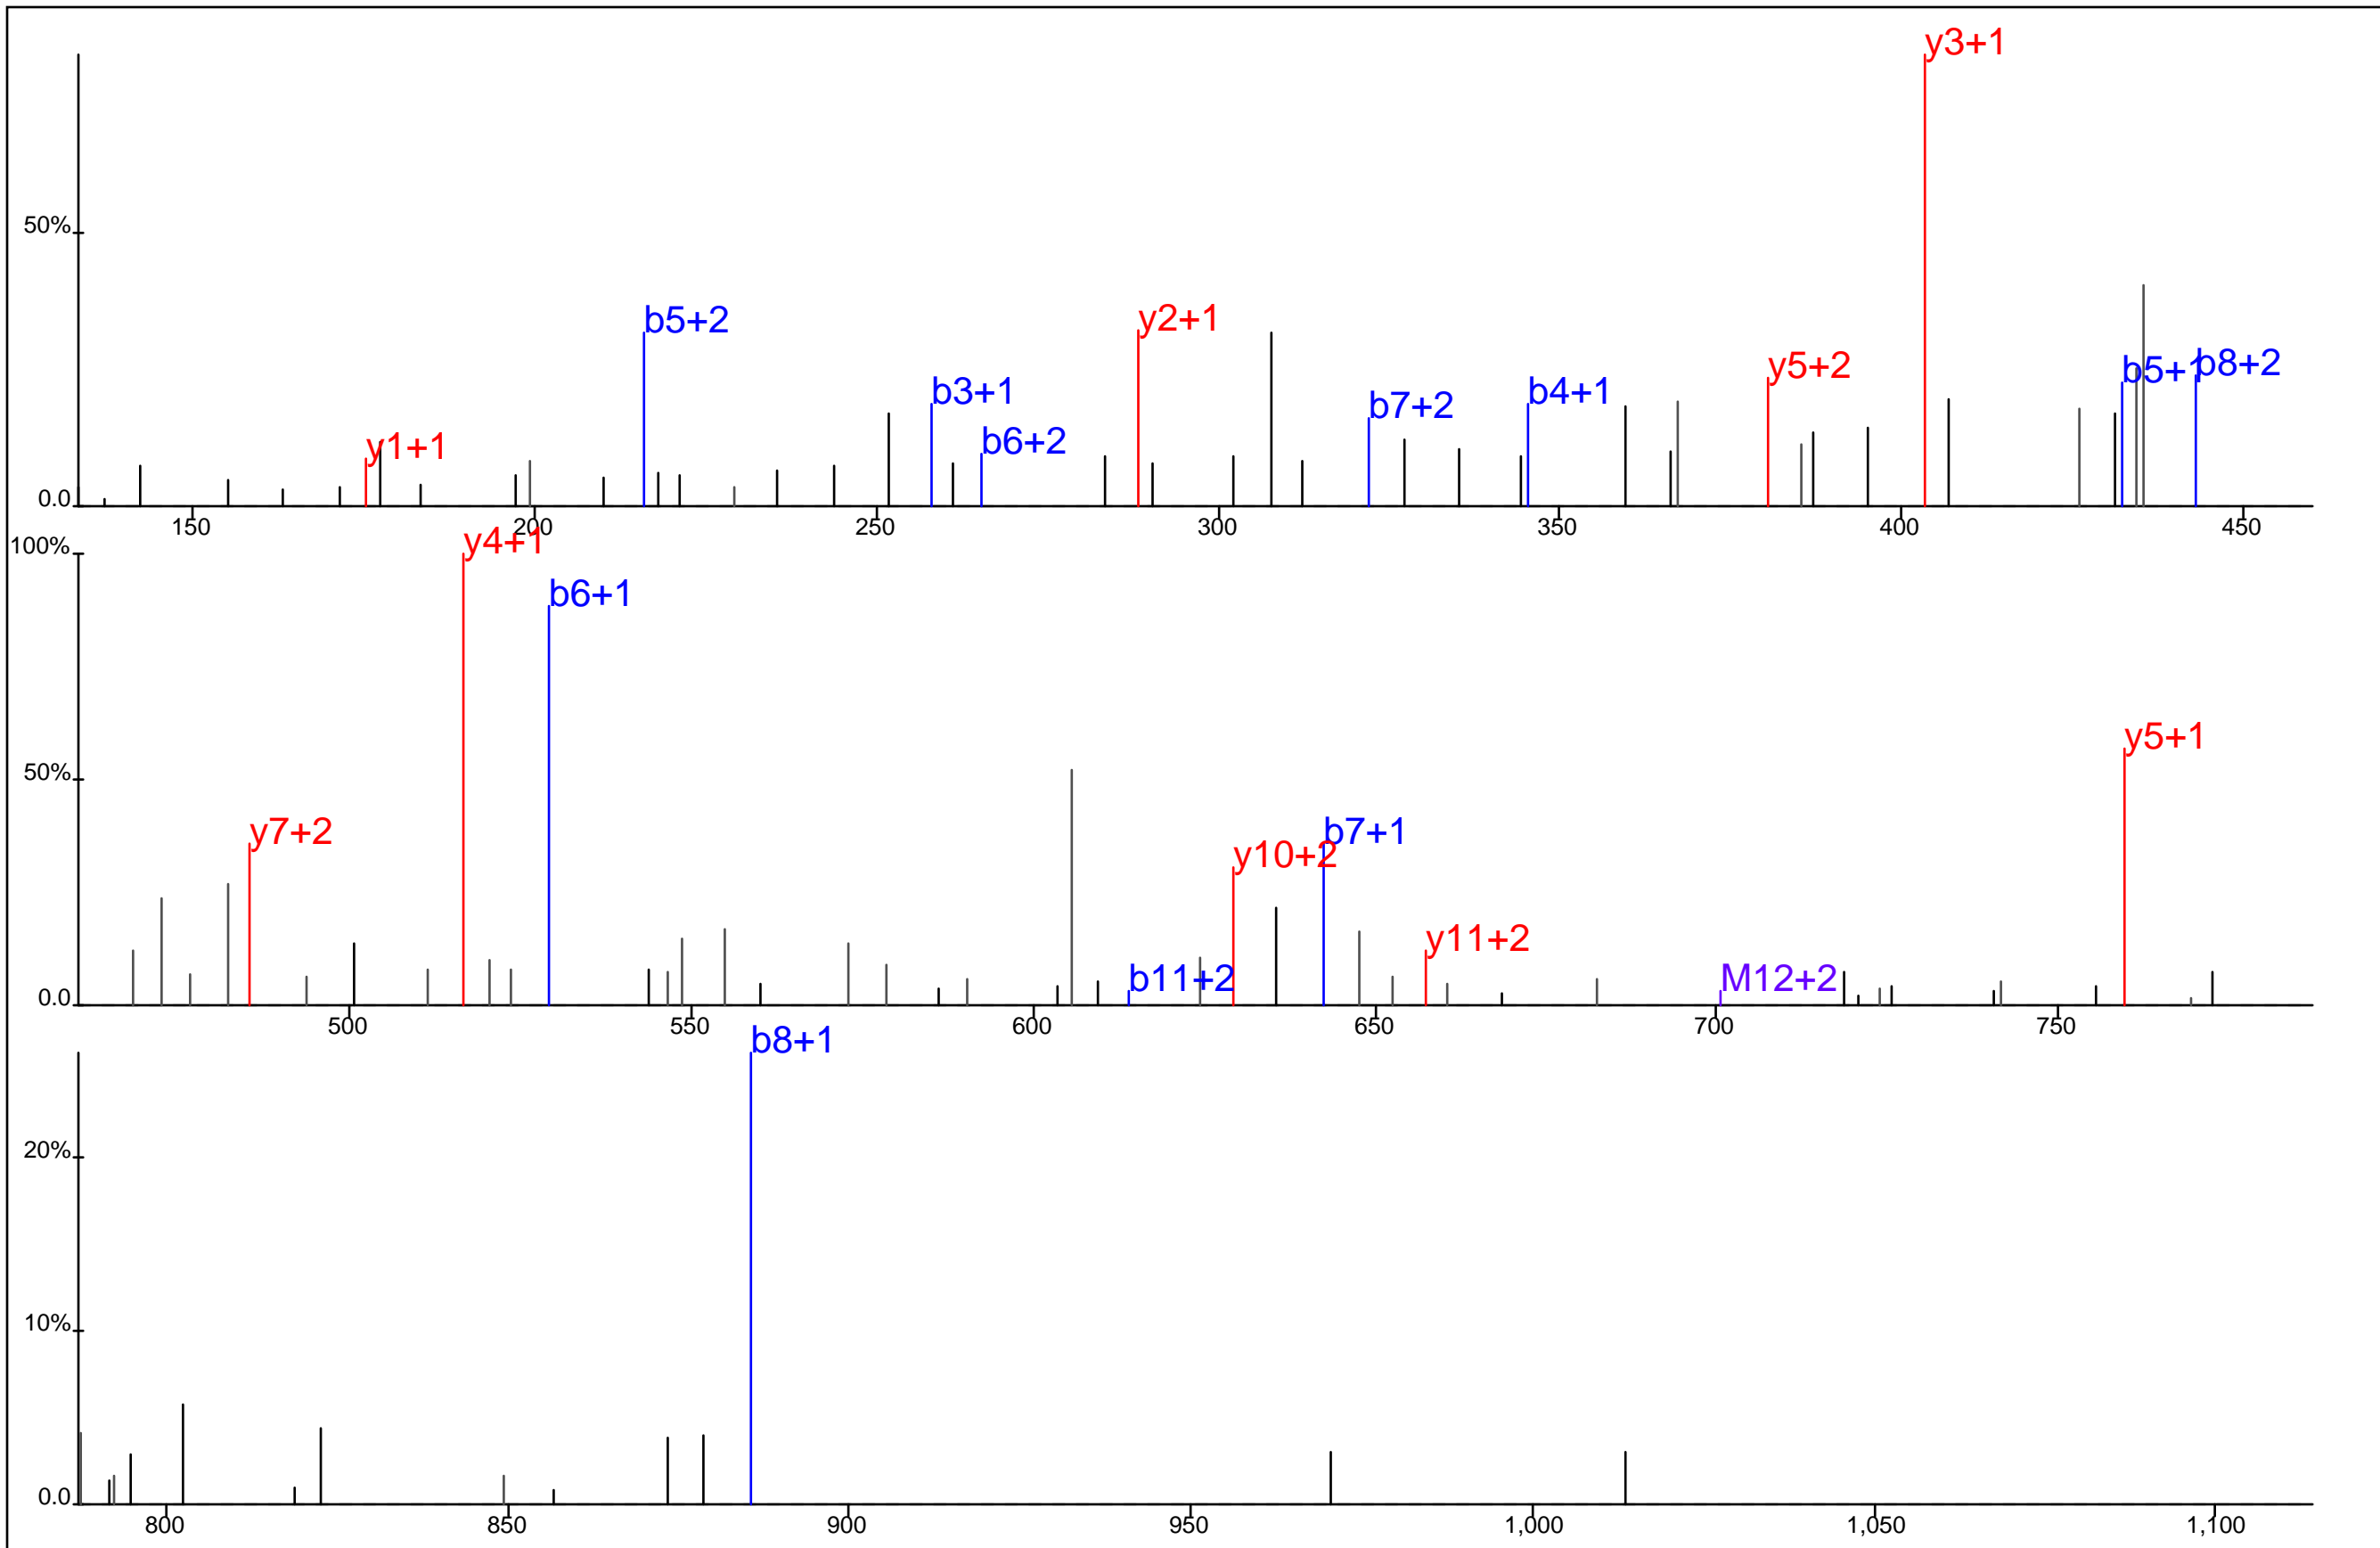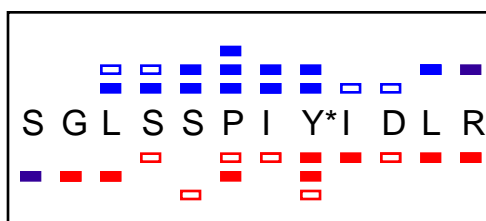

Protein Name: Uridine 5'-monophosphate synthase  
 gi Accession: 0  
 Precursor Mass: 467.5659+3  
 Delta Mass: 0.857 ppm  
 XCorr: 31.91

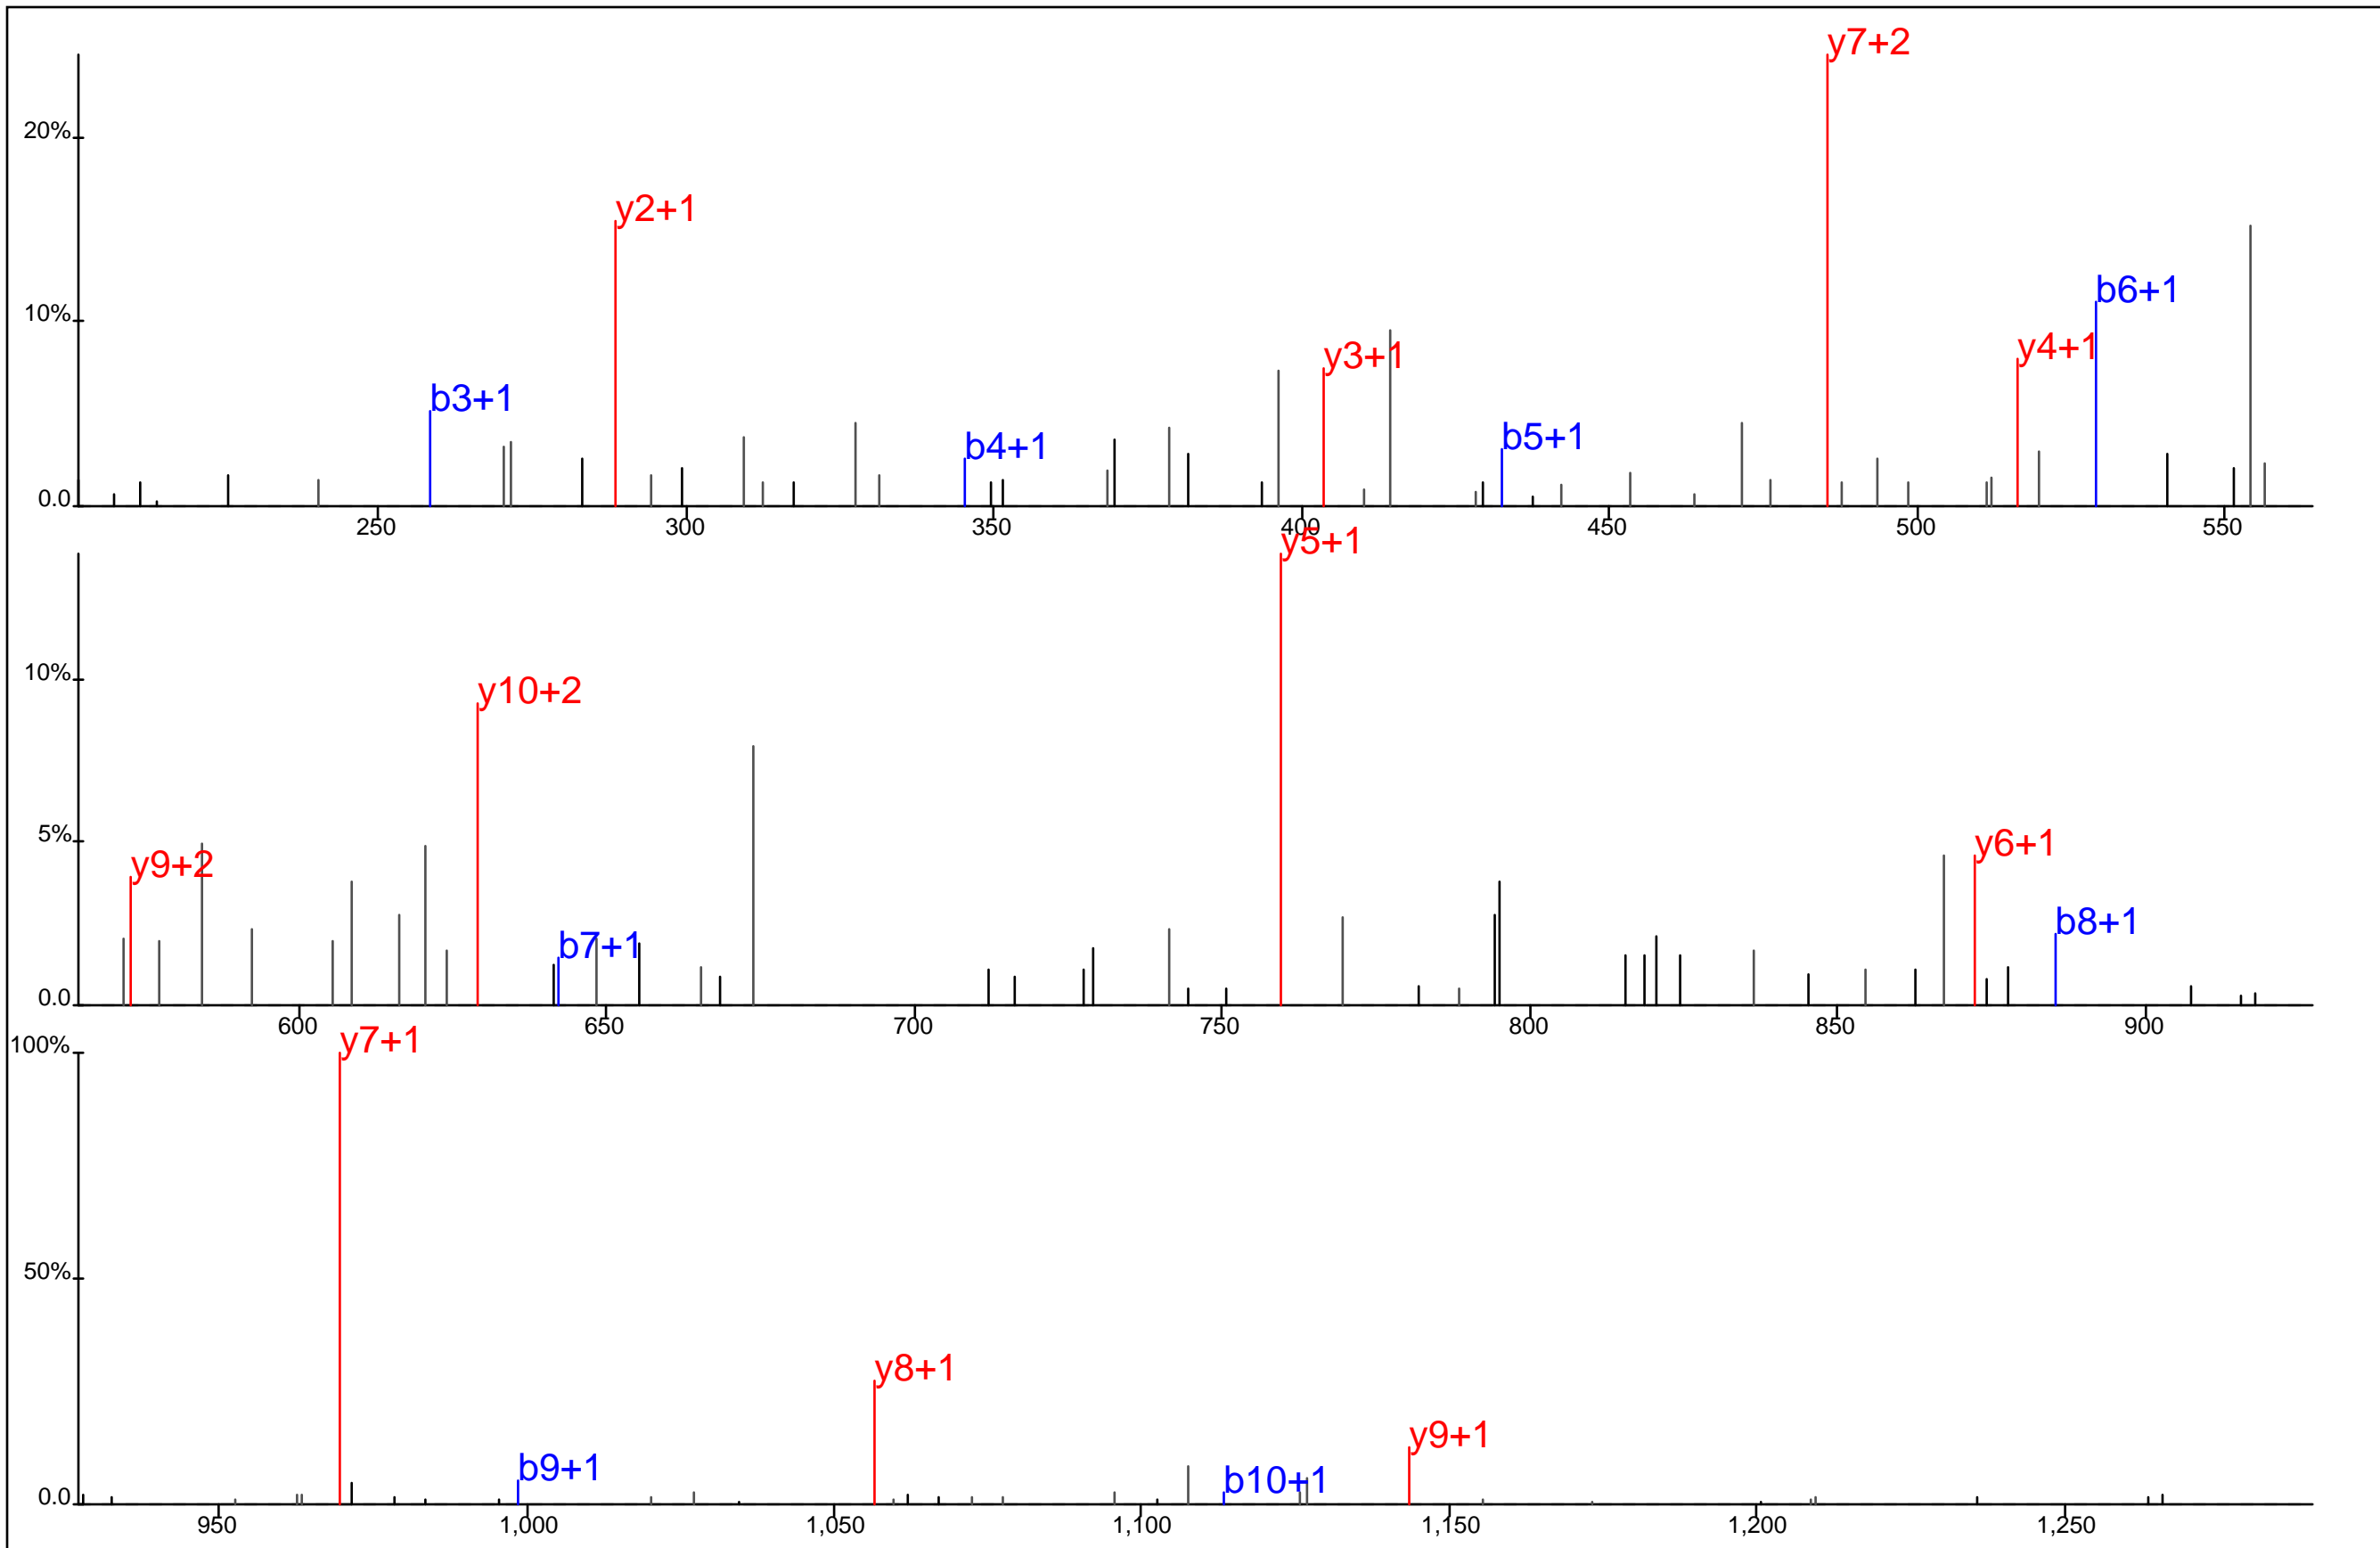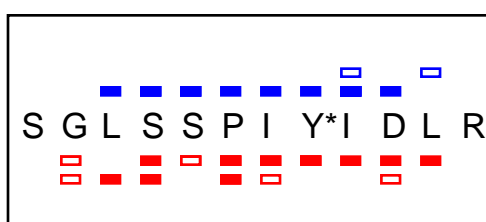

Protein Name: Uridine 5'-monophosphate synthase  
 gi Accession: 0  
 Precursor Mass: 700.8458+2  
 Delta Mass: 1.629 ppm  
 XCorr: 54.62



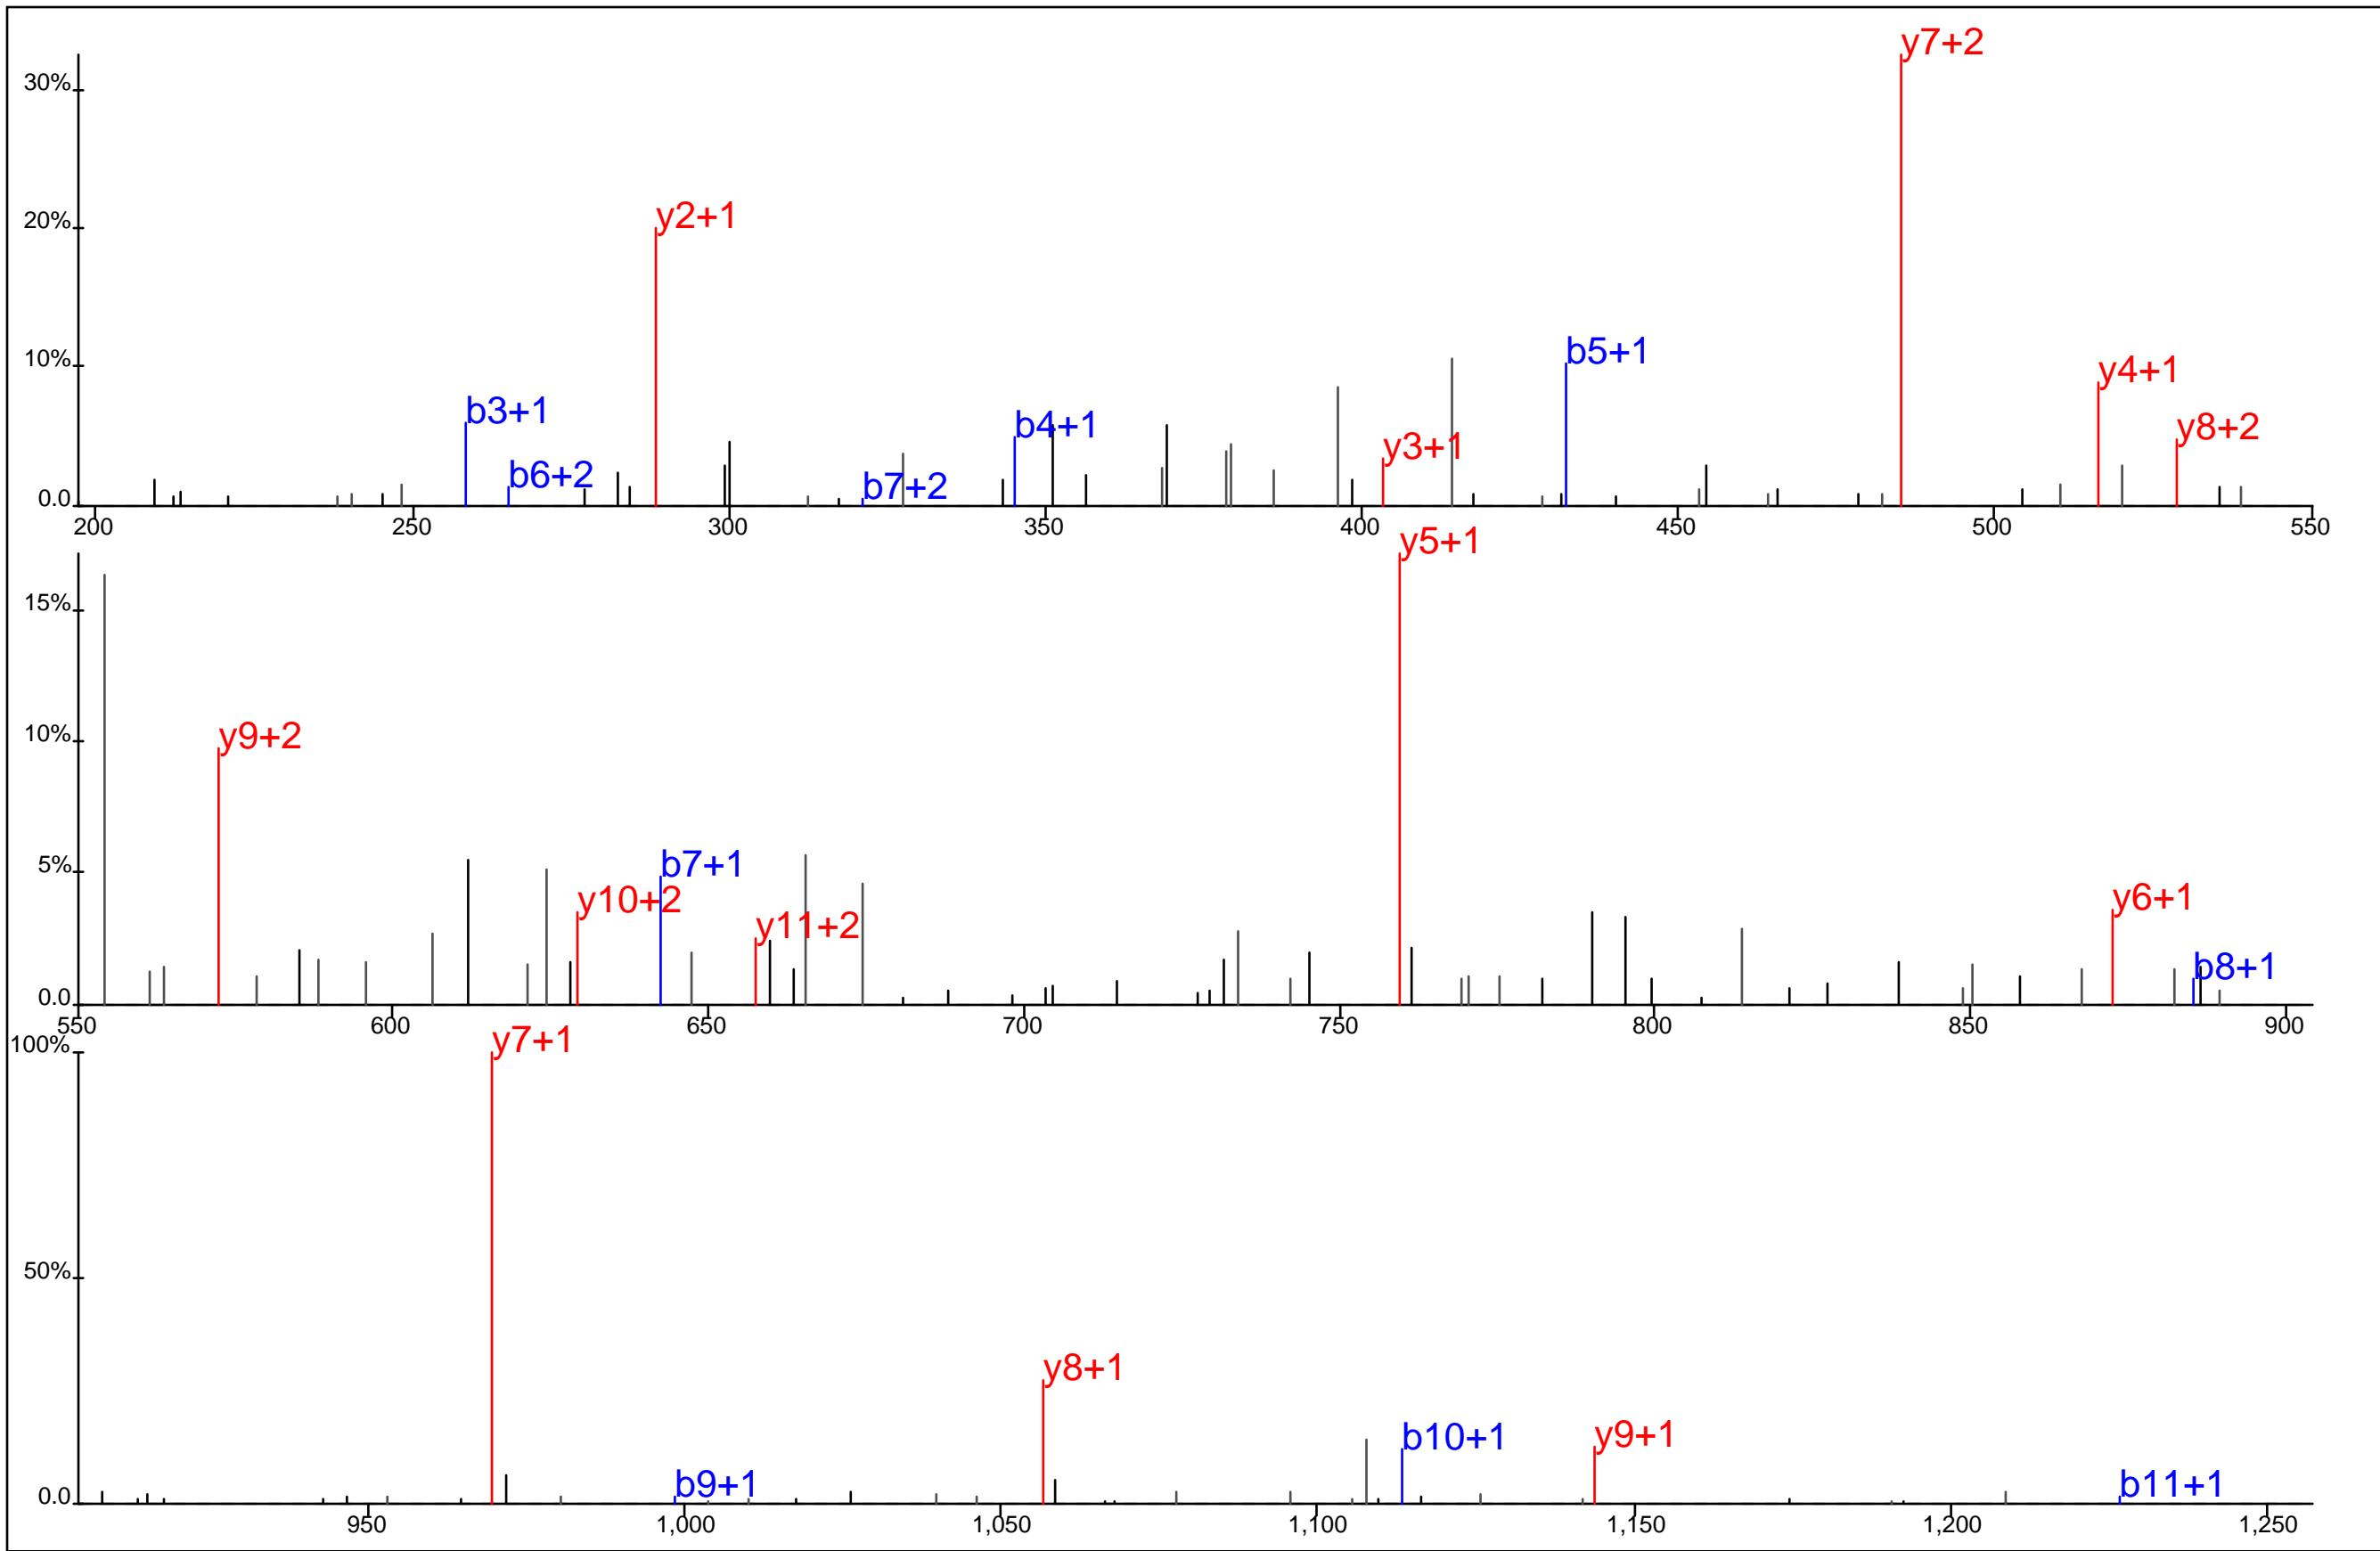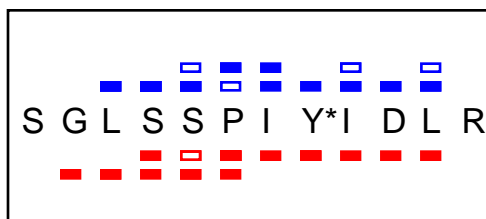

Protein Name: Uridine 5'-monophosphate synthase  
 gi Accession: 0  
 Precursor Mass: 700.8451+2  
 Delta Mass: 0.584 ppm  
 XCorr: 44.49





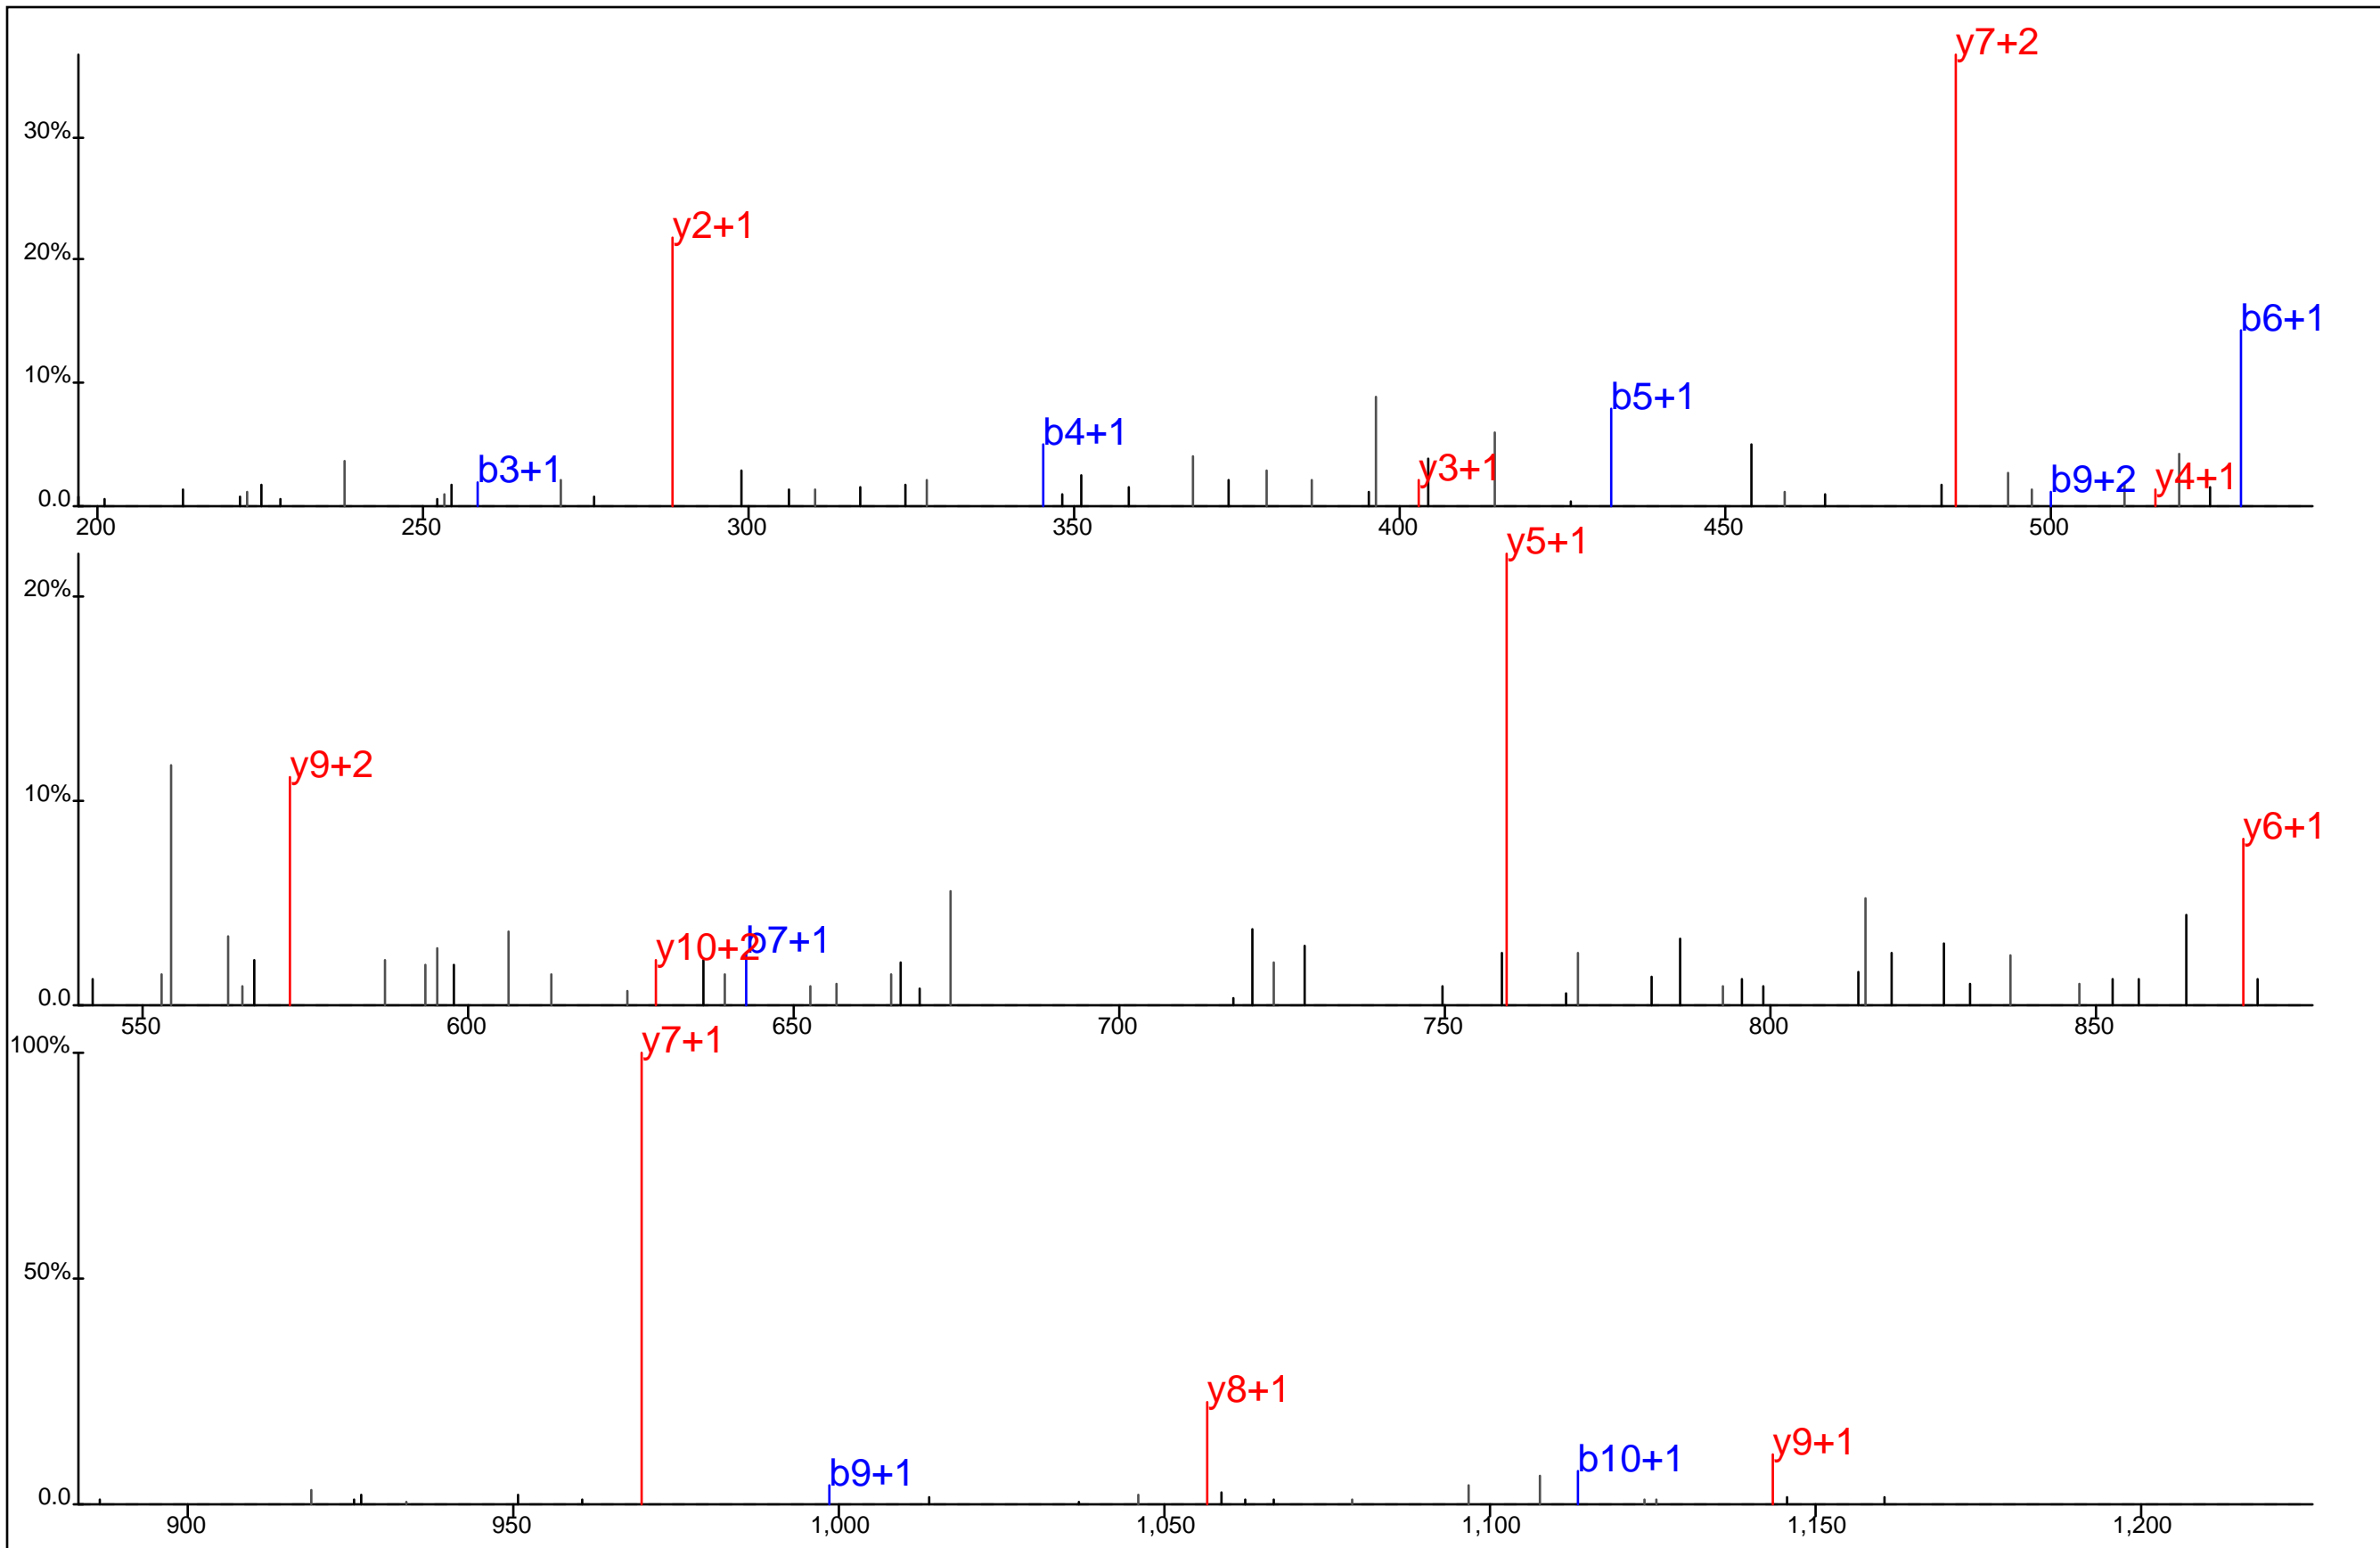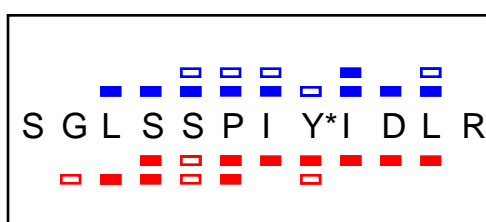

Protein Name: Uridine 5'-monophosphate synthase  
 gi Accession: 0  
 Precursor Mass: 700.8458+2  
 Delta Mass: 1.542 ppm  
 XCorr: 49.92







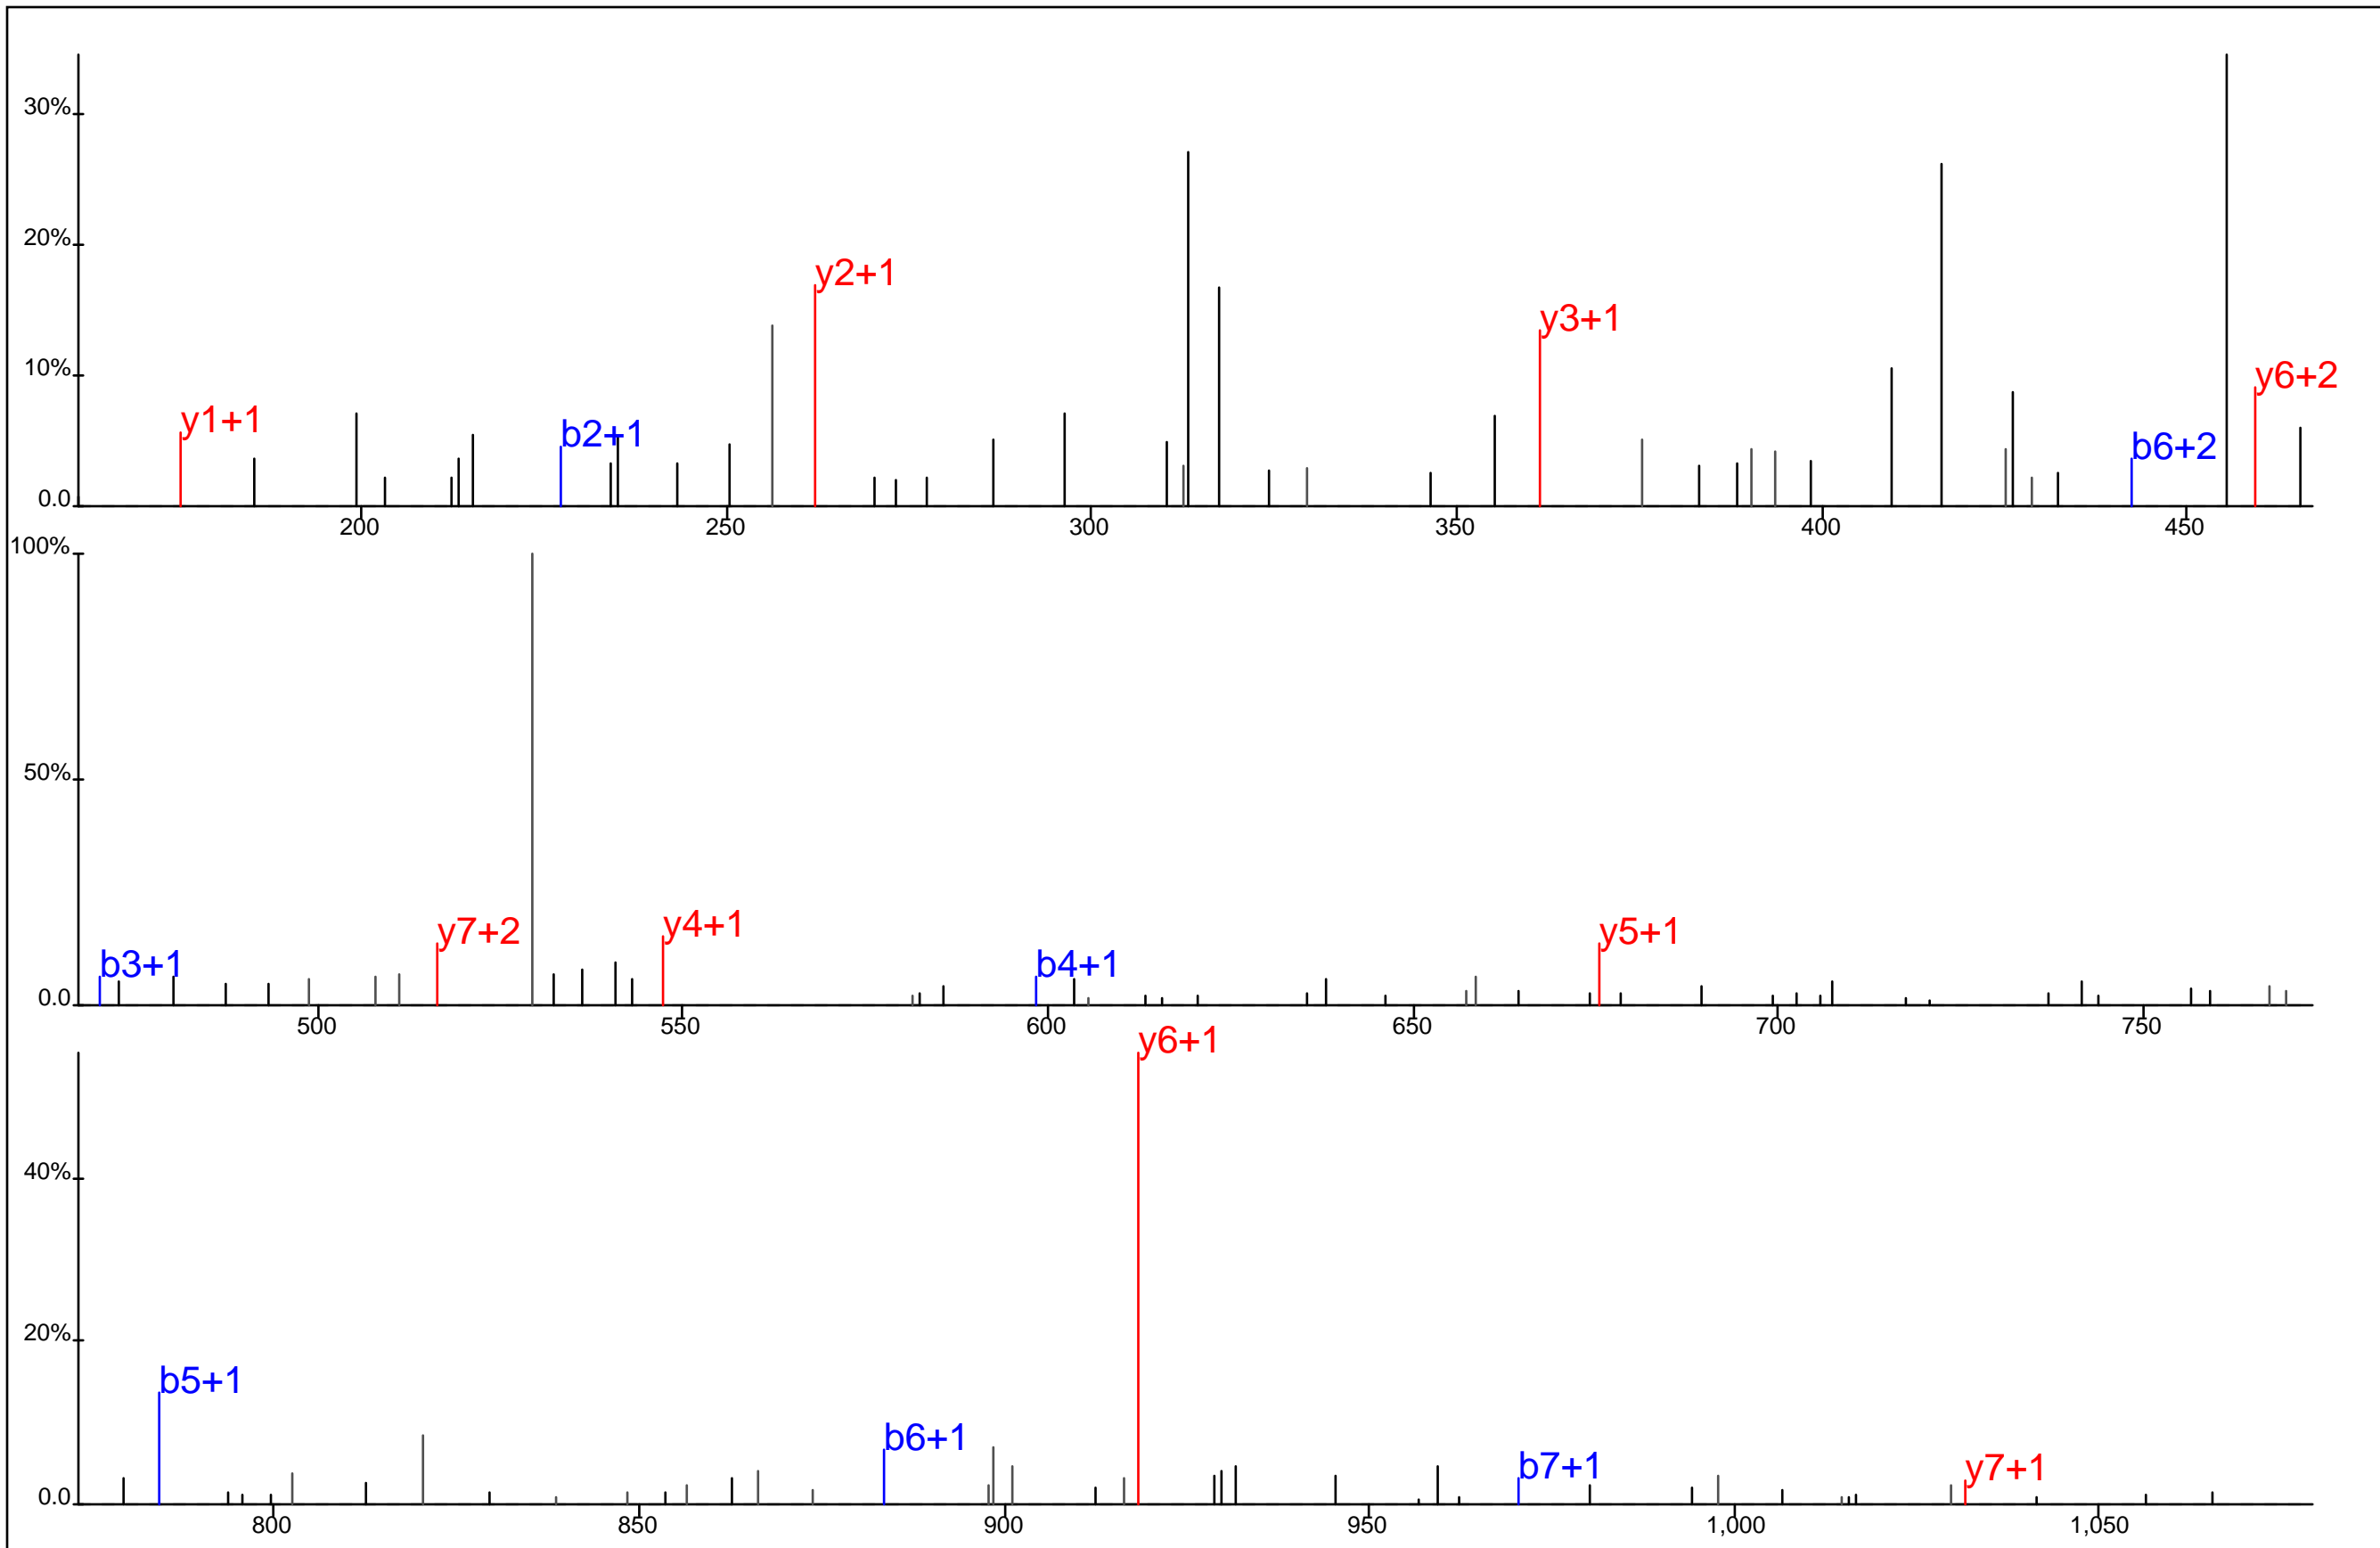

■ ▢ ▣ ▤ ▥ ▦  
 L I Y\*Q W V S R  
▢ ▣ ▤ ▥ ▦ ▧

Protein Name: Vacuolar protein sorting 25 homolog  
 gi Accession: 0  
 Precursor Mass: 572.7845+2  
 Delta Mass: 5.803 ppm  
 XCorr: 39.43





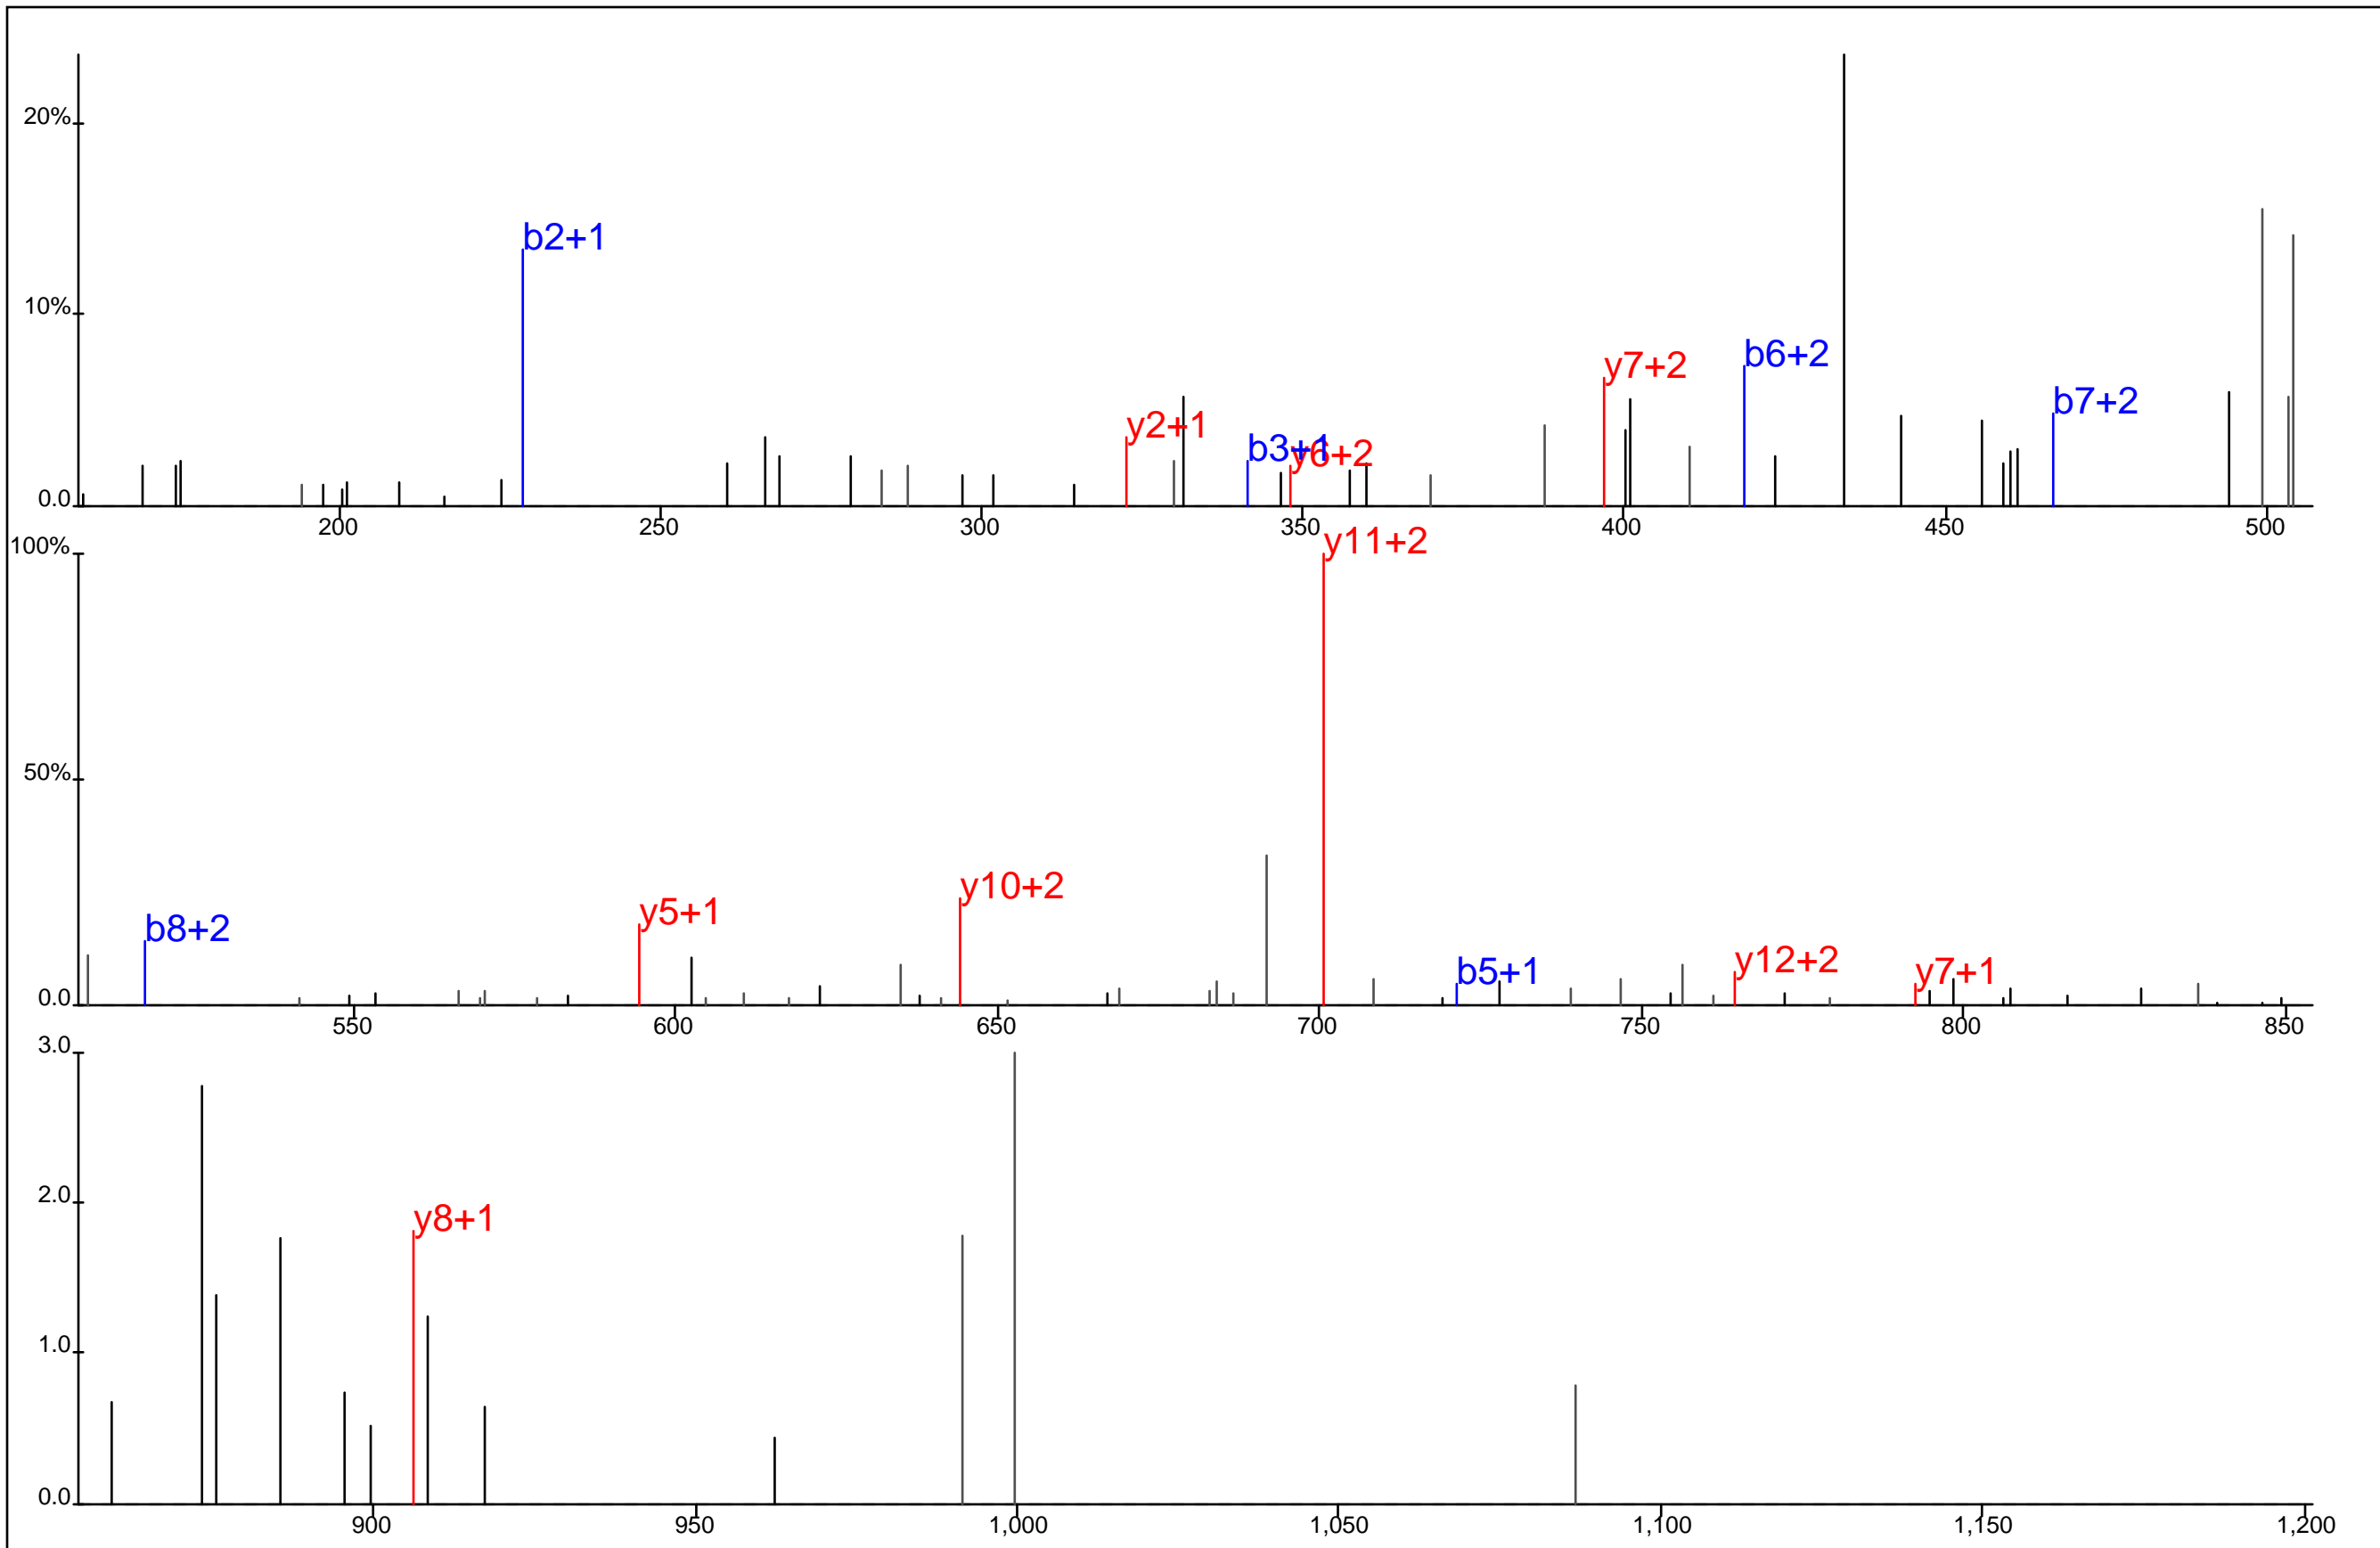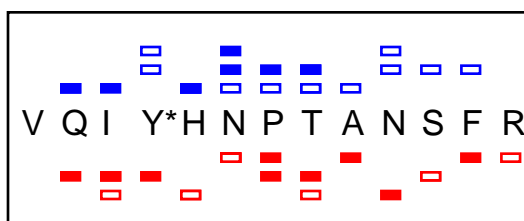

Protein Name: Vasodilator stimulated phosphoprotein  
 gi Accession: 0  
 Precursor Mass: 542.9187+3  
 Delta Mass: 0.529 ppm  
 XCorr: 21.59



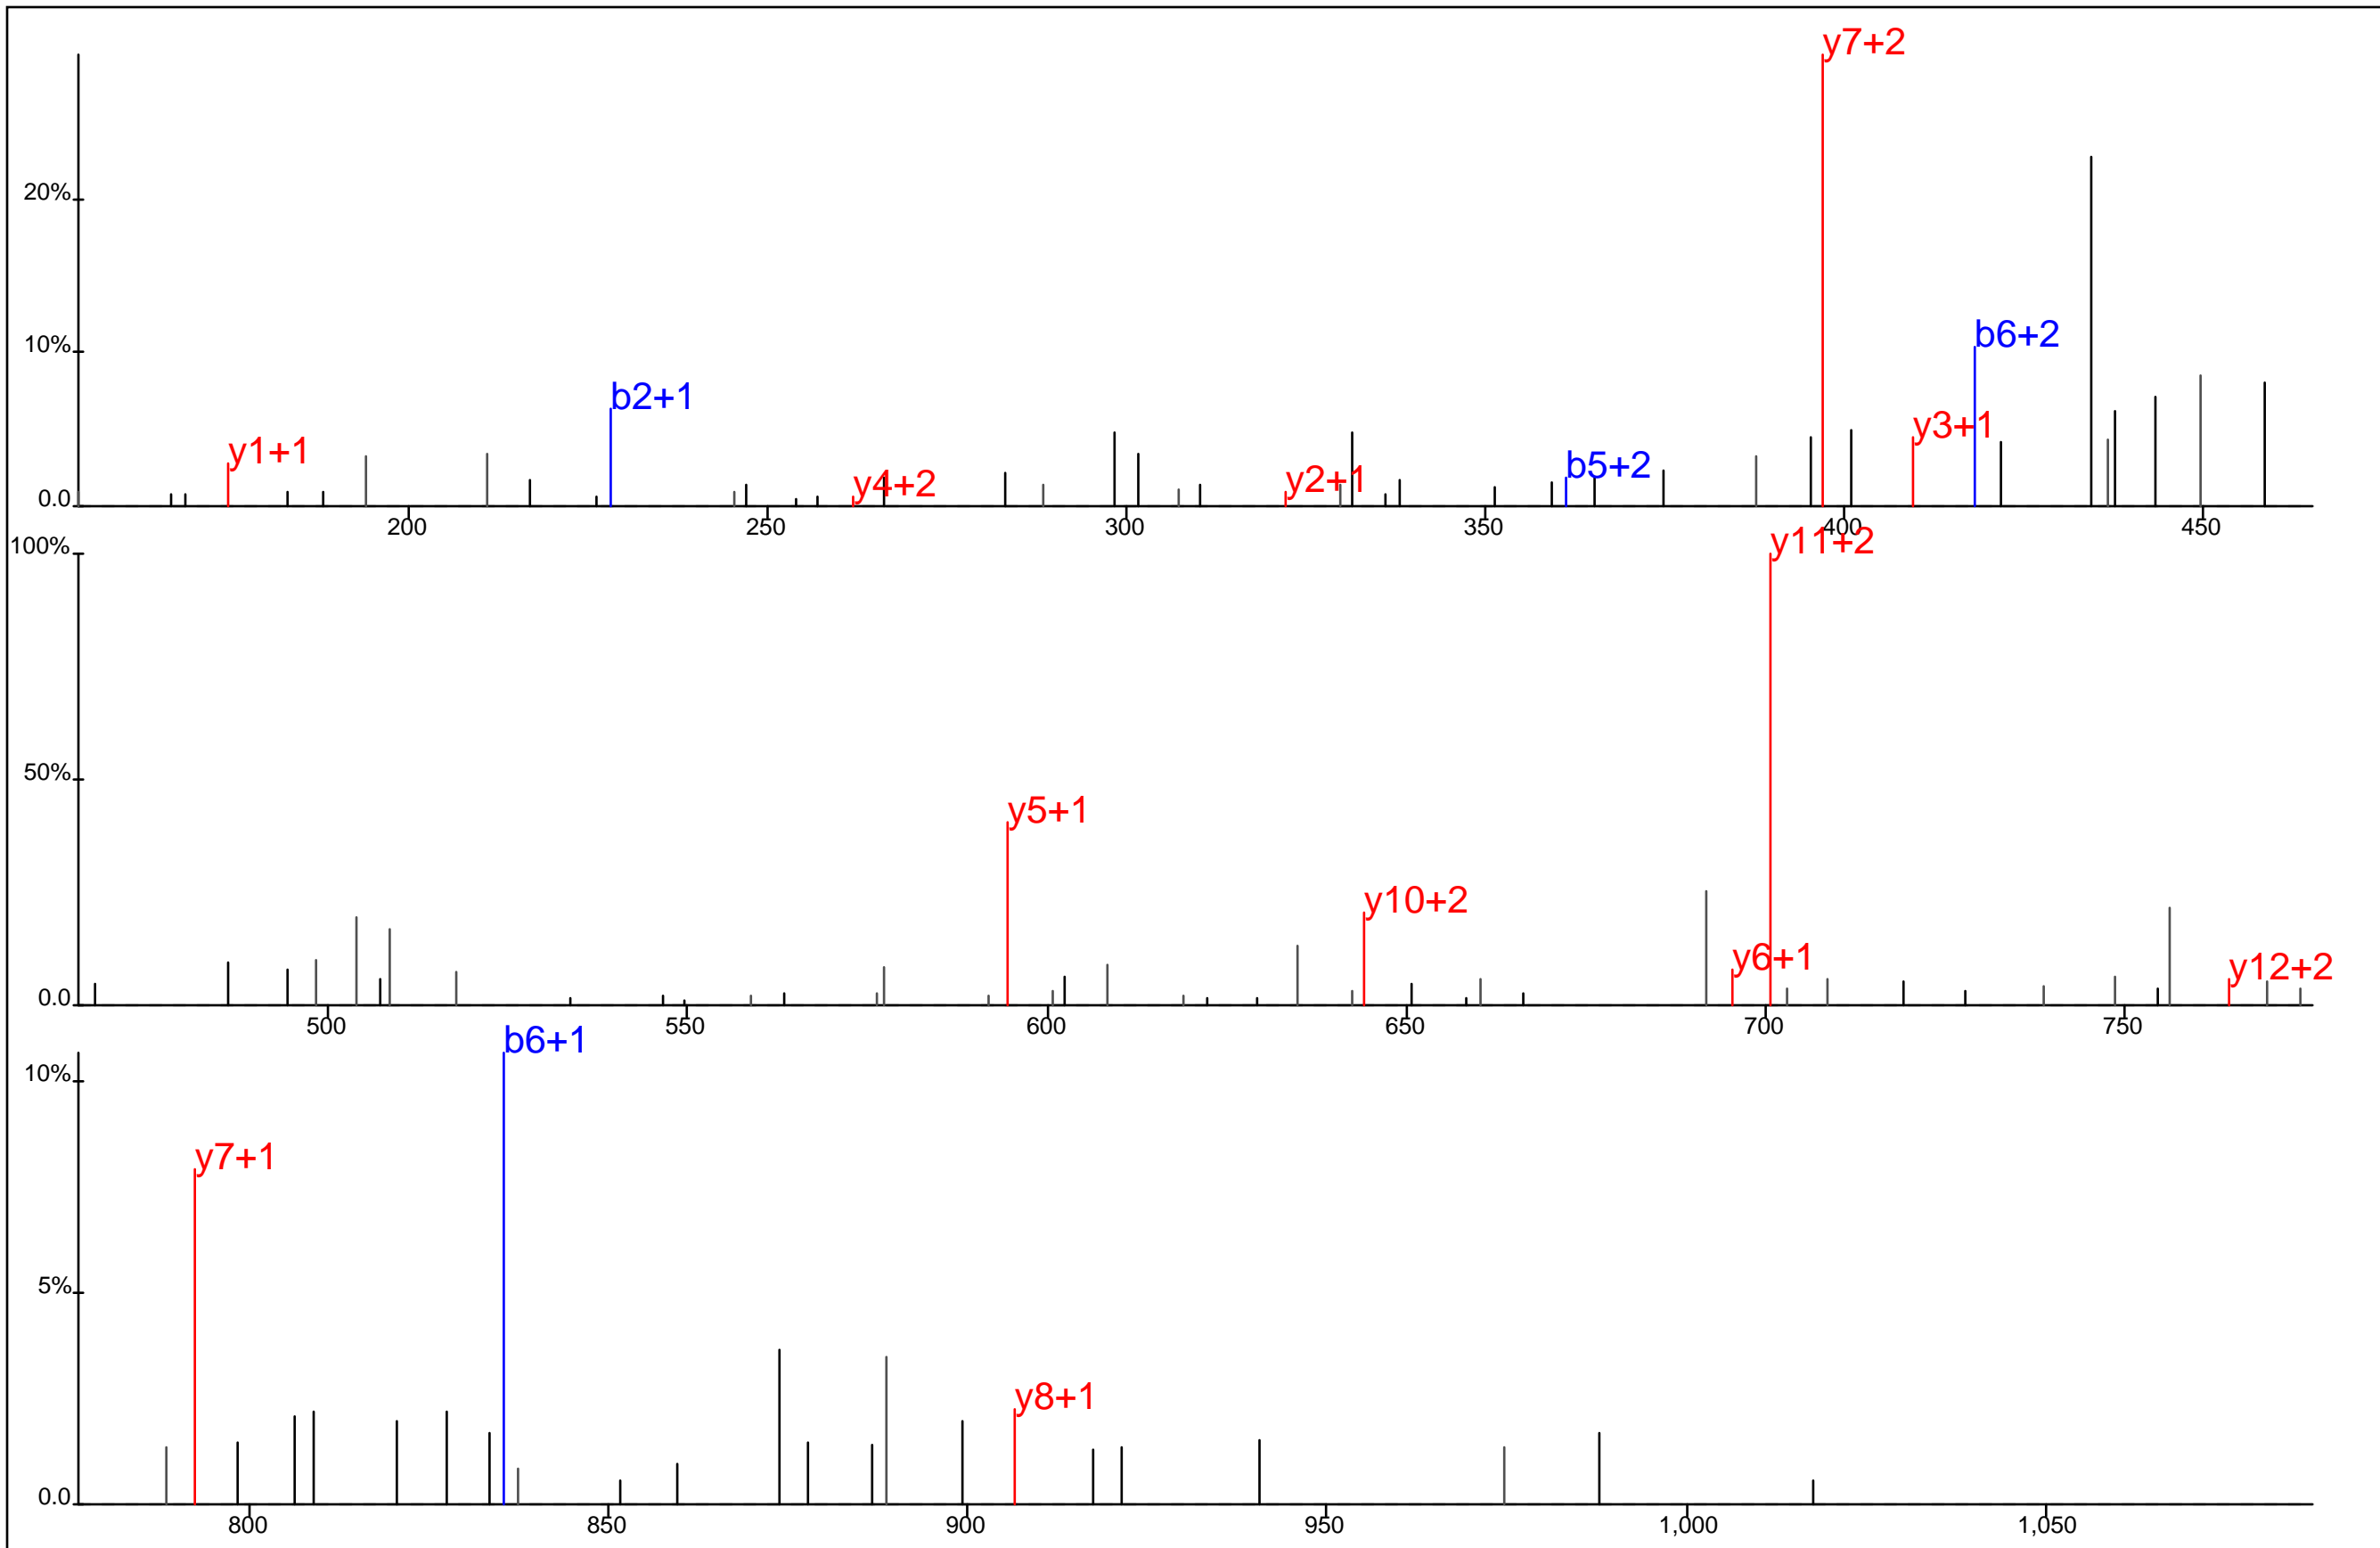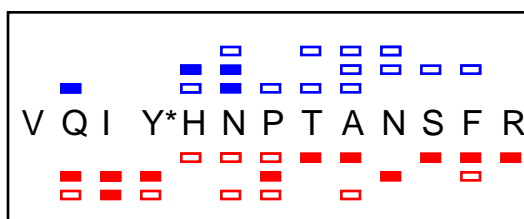

Protein Name: Vasodilator stimulated phosphoprotein  
 gi Accession: 0  
 Precursor Mass: 542.9191+3  
 Delta Mass: 0.146 ppm  
 XCorr: 25.81

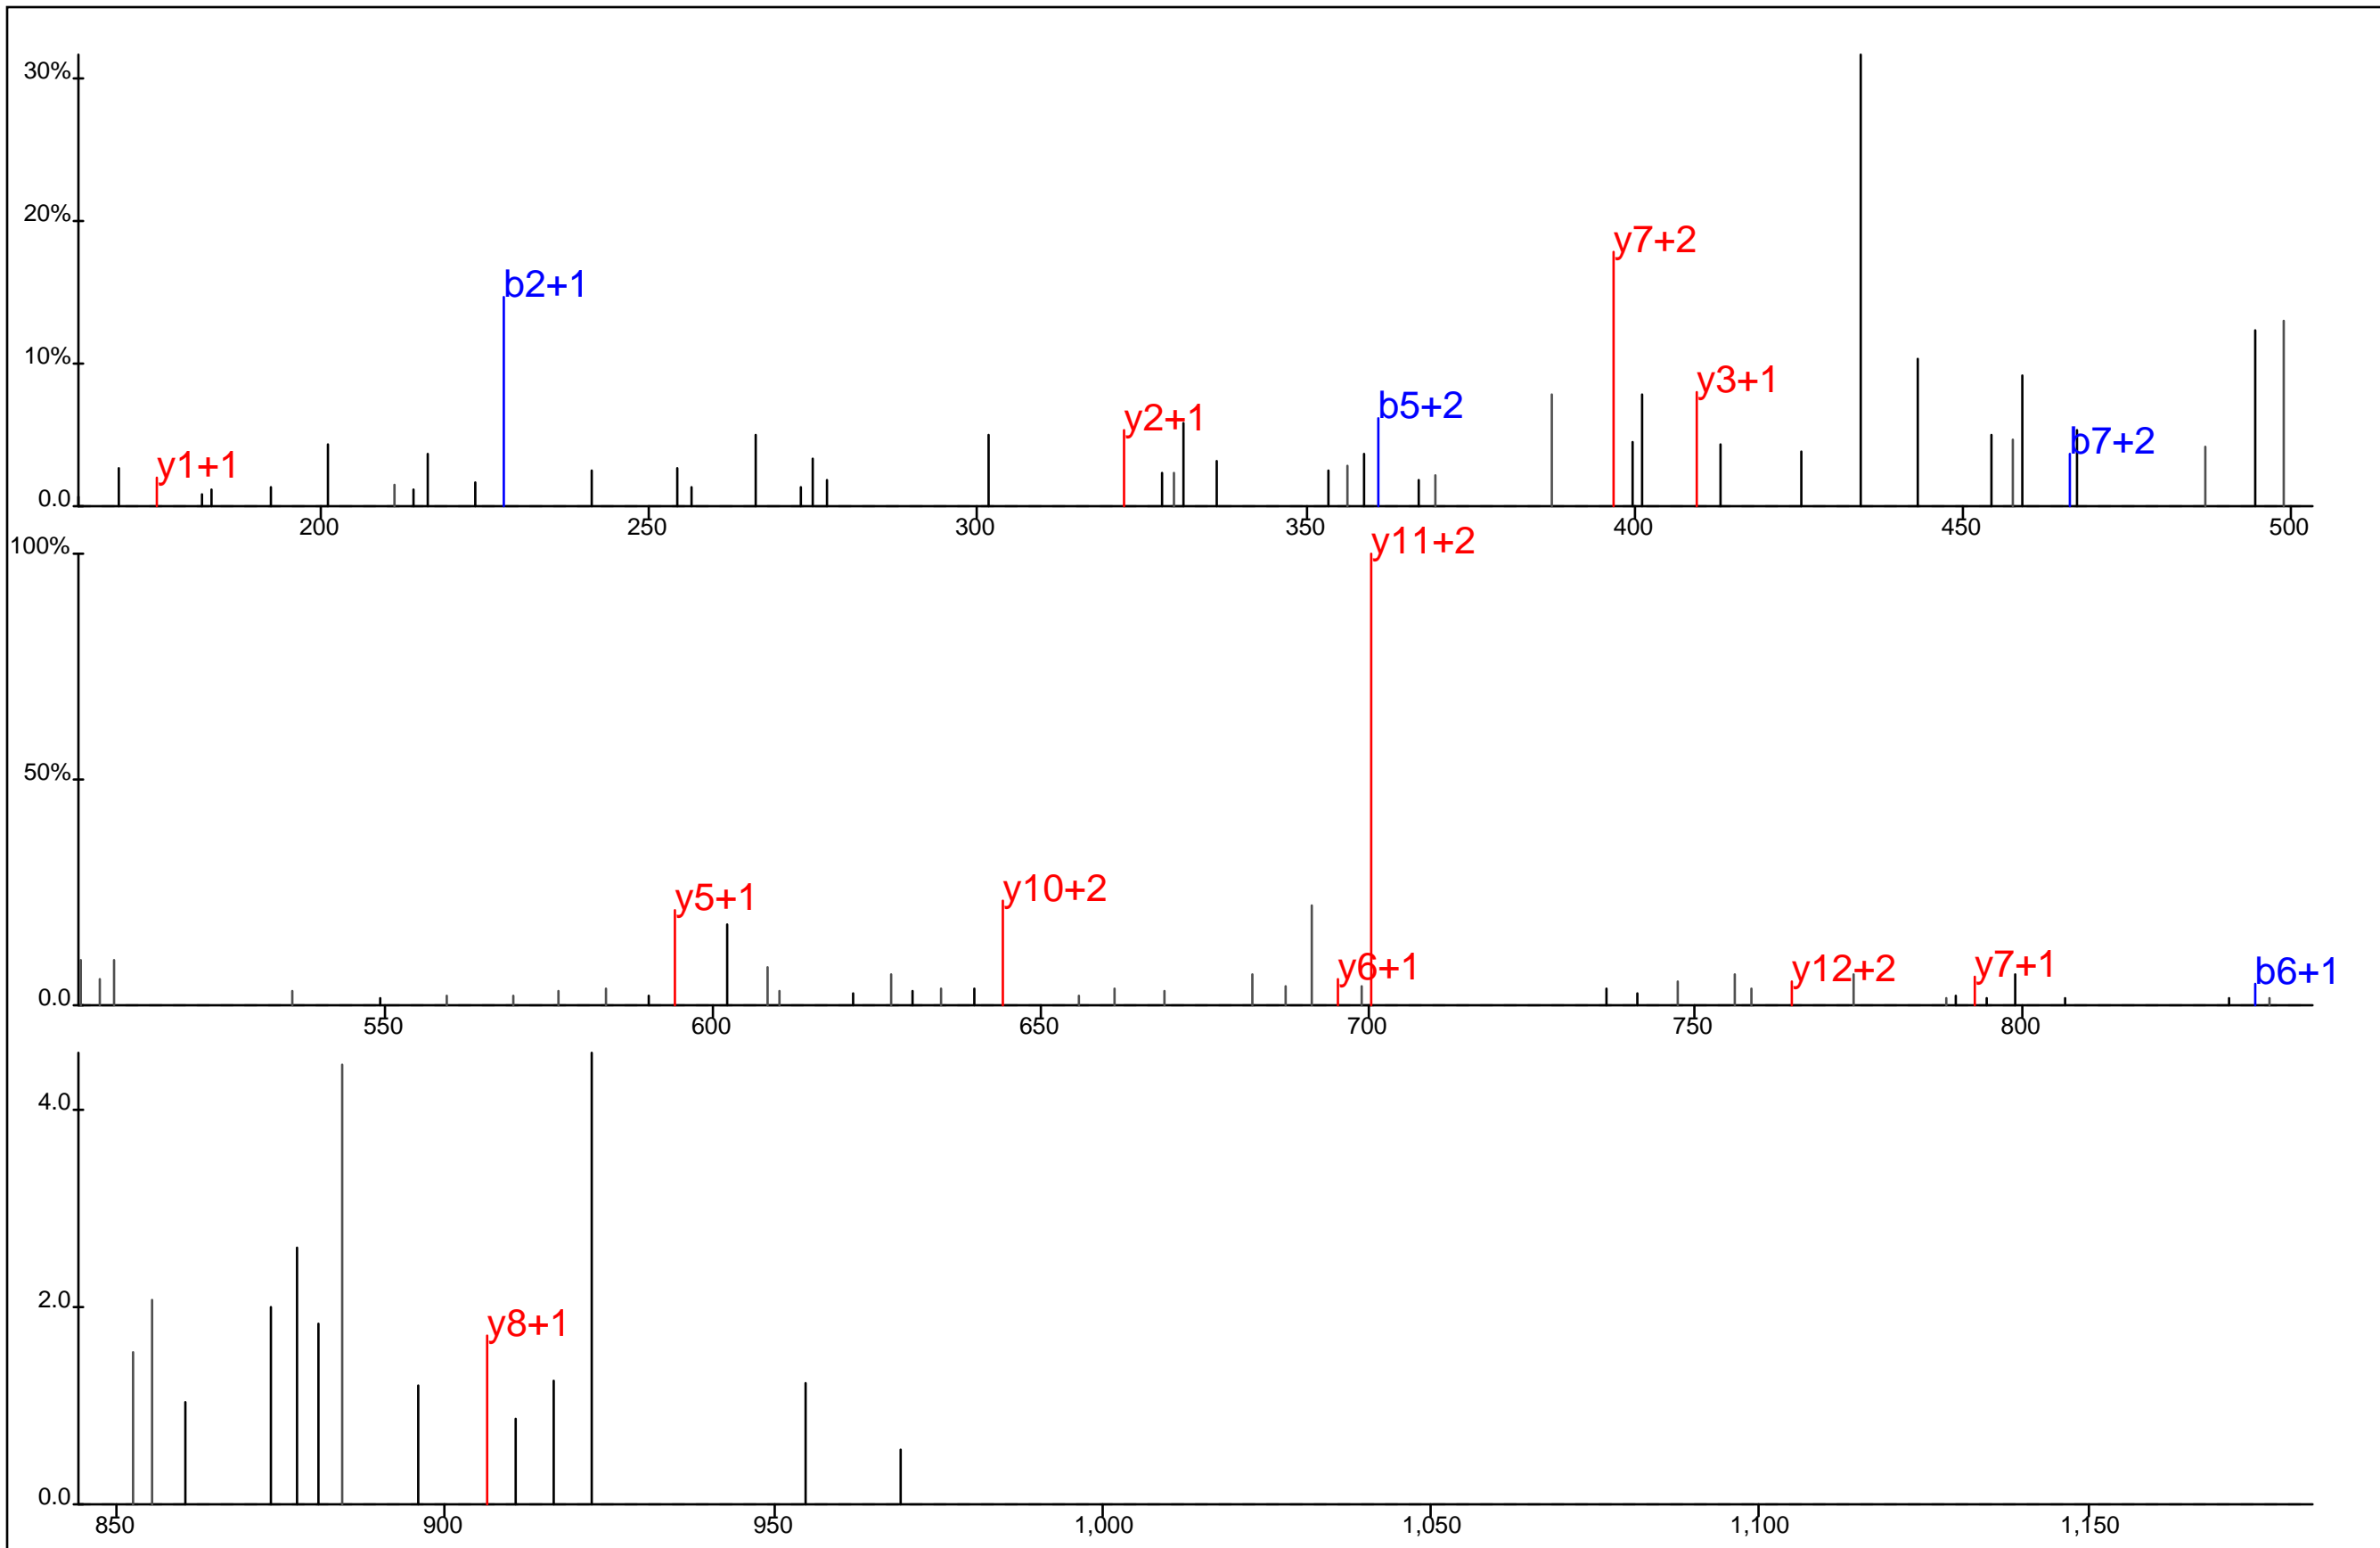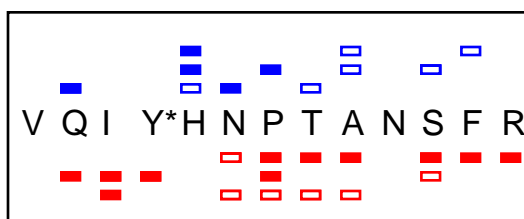

Protein Name: Vasodilator stimulated phosphoprotein  
 gi Accession: 0  
 Precursor Mass: 542.9195+3  
 Delta Mass: 0.935 ppm  
 XCorr: 21.26

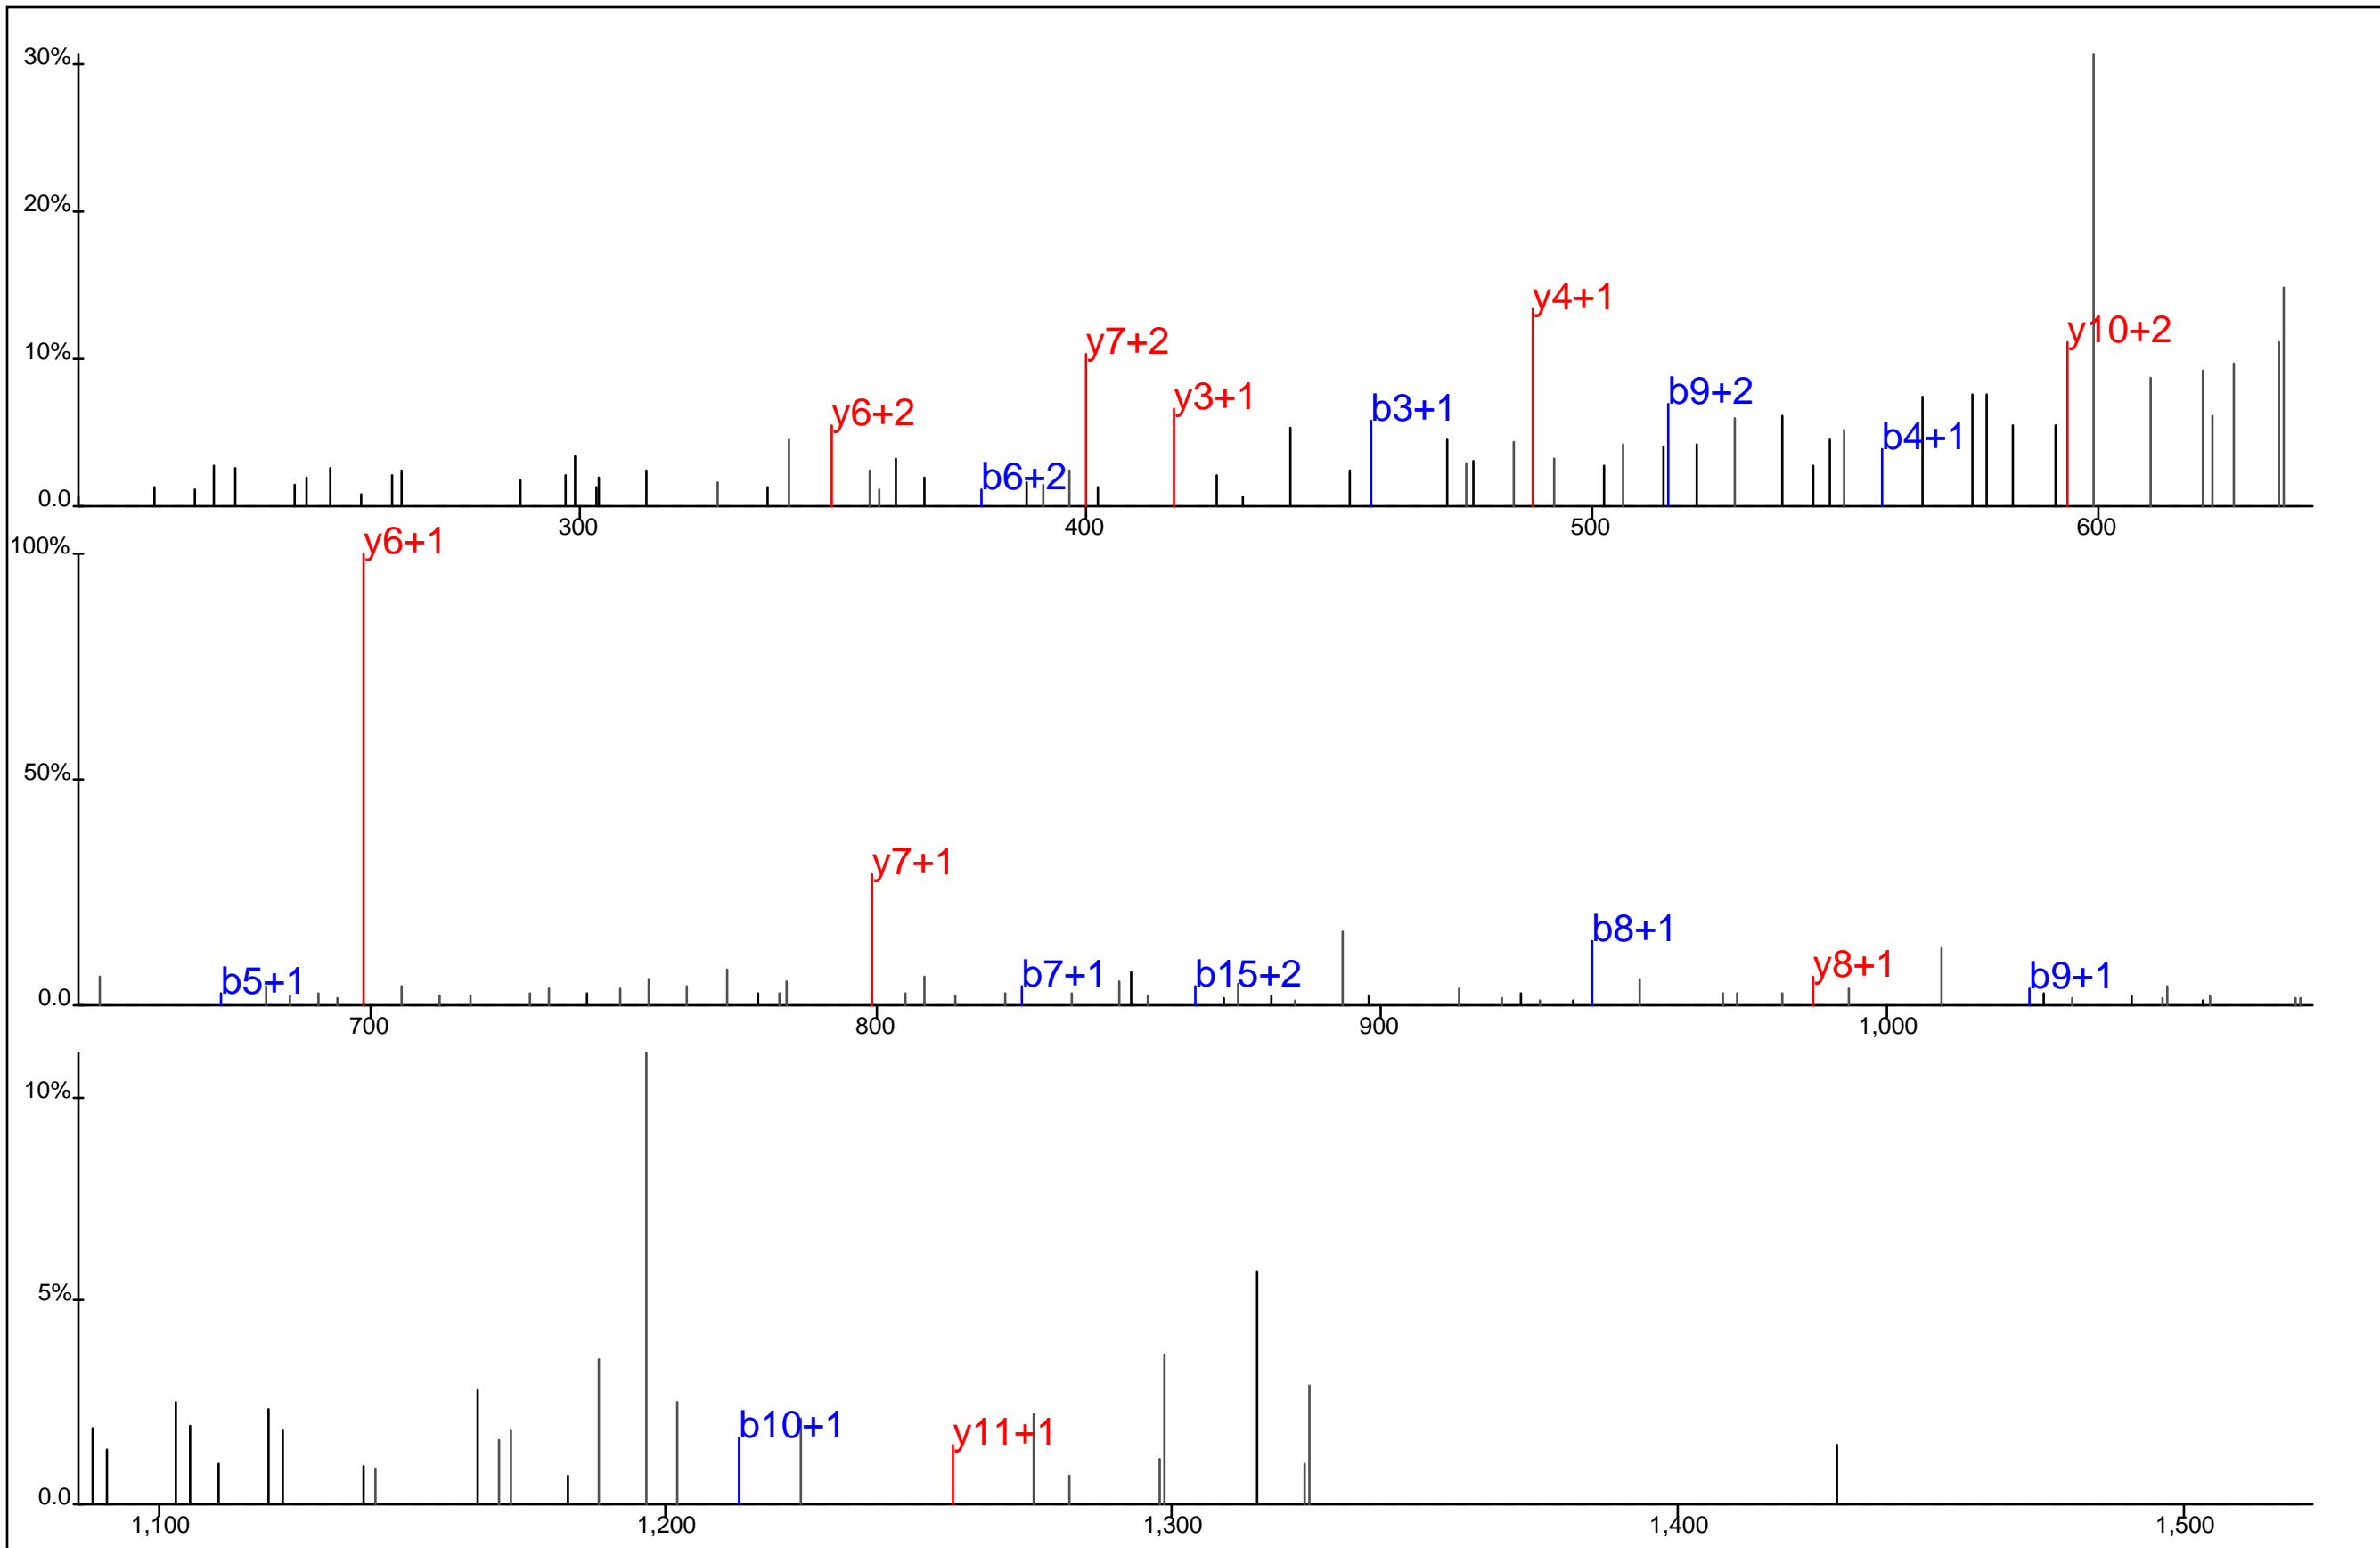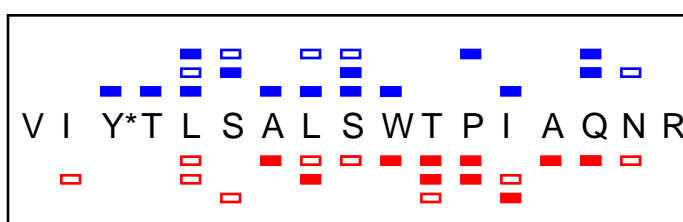

Protein Name: VAV1  
 gi Accession: 0  
 Precursor Mass: 671.6790+3  
 Delta Mass: 0.915 ppm  
 XCorr: 23.24

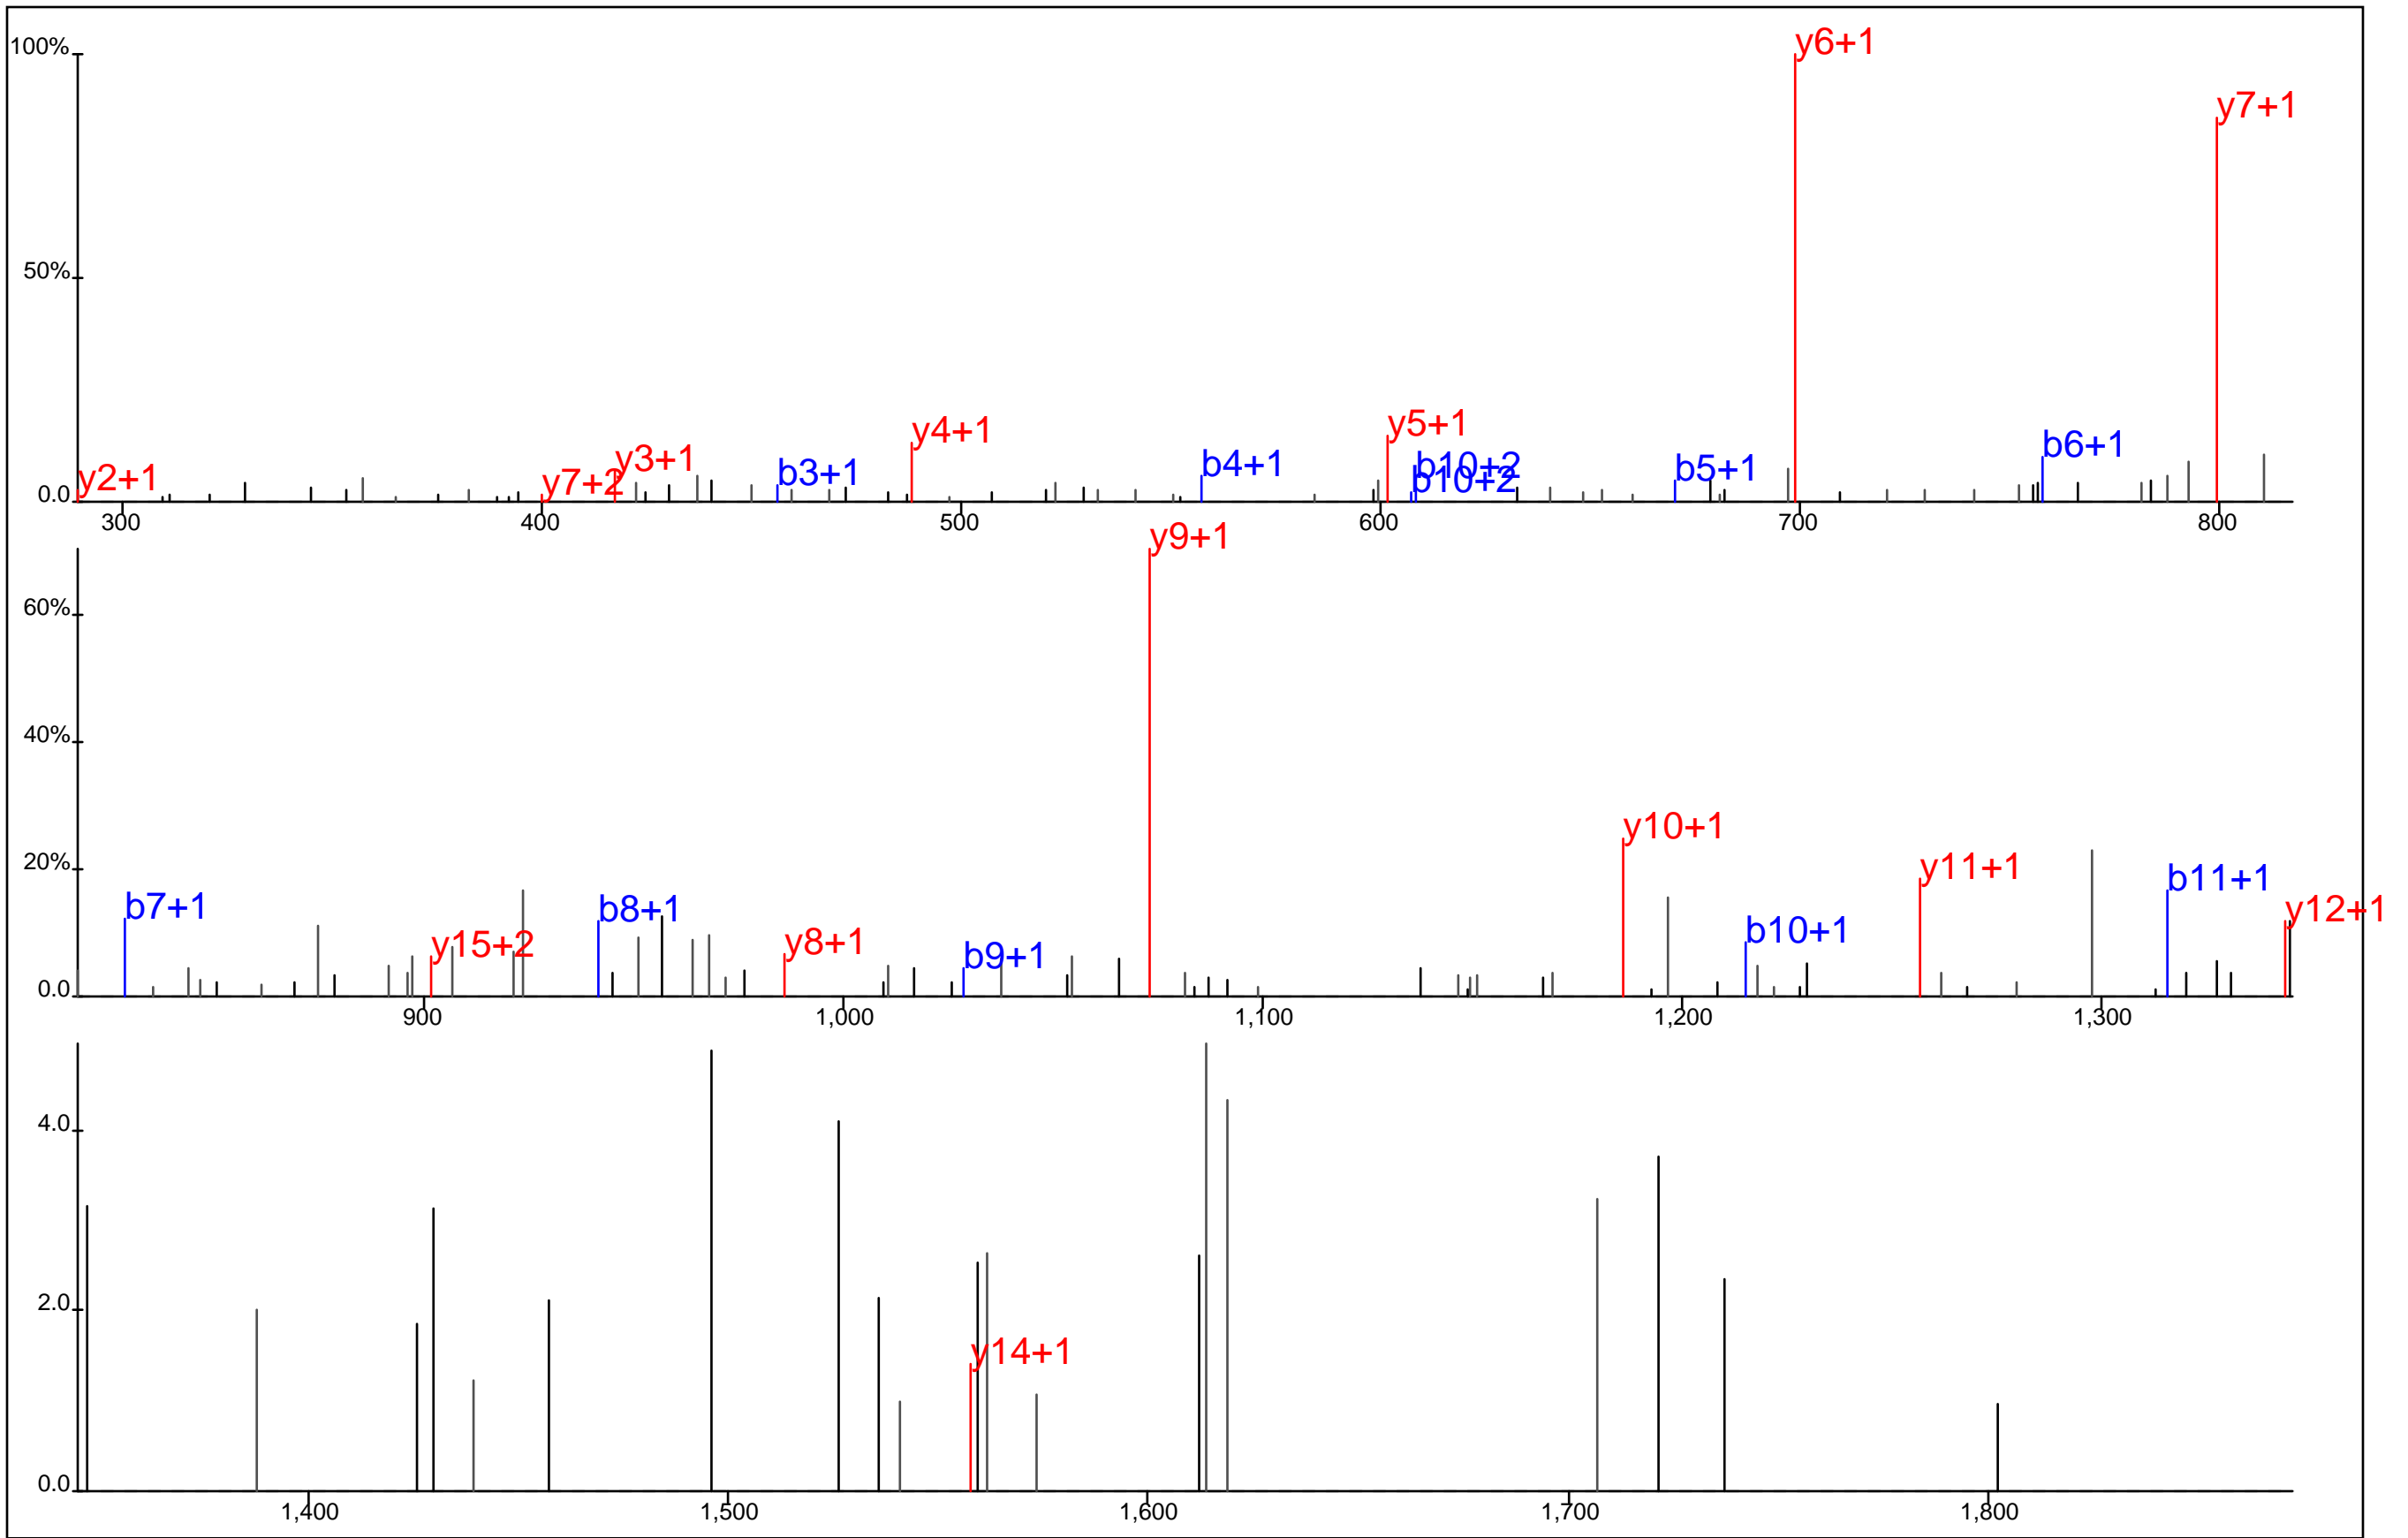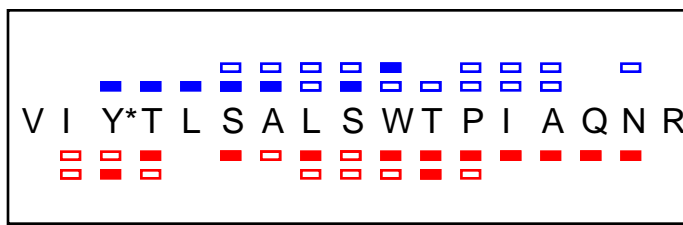

Protein Name: VAV1  
 gi Accession: 0  
 Precursor Mass: 1,007.0115+2  
 Delta Mass: 2.323 ppm  
 XCorr: 43.35





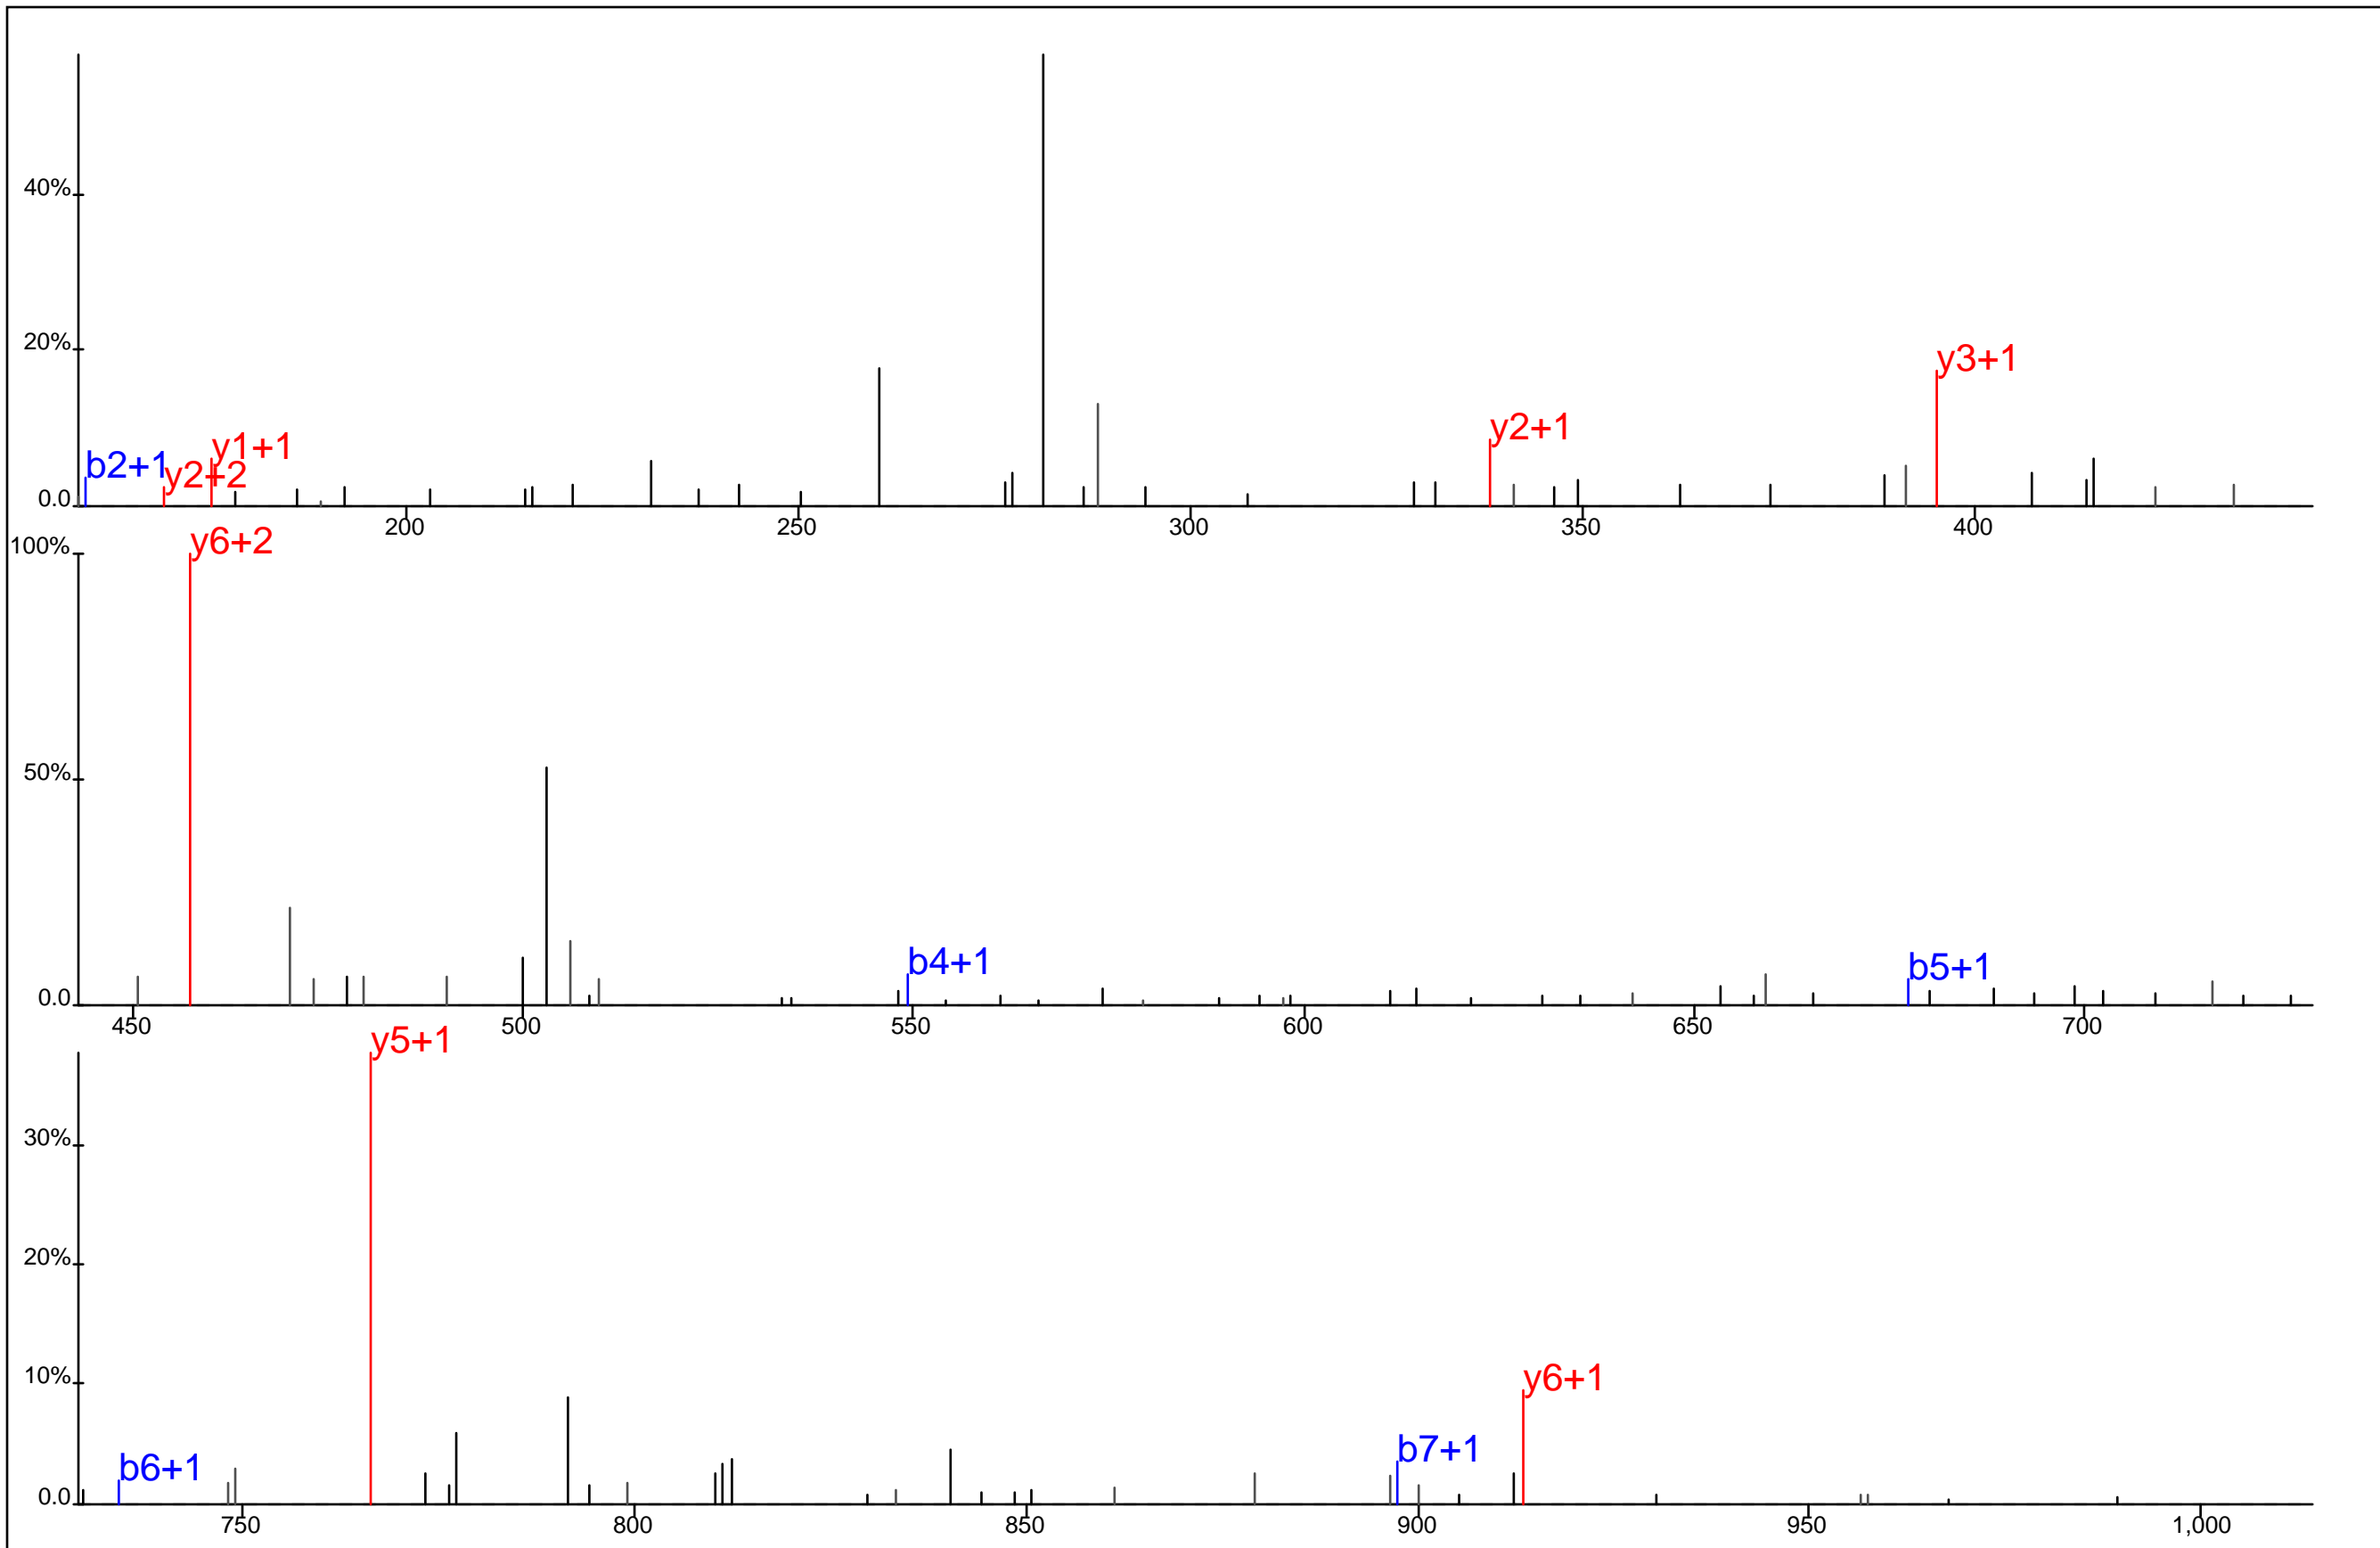

■ □ ▤ ▥ ▦ ▧  
 G T F Y\* Q G Y R  
■ □ ▤ ▥ ▦ ▧

Protein Name: VAV1  
 gi Accession: 0  
 Precursor Mass: 536.2177+2  
 Delta Mass: 1.292 ppm  
 XCorr: 26.23

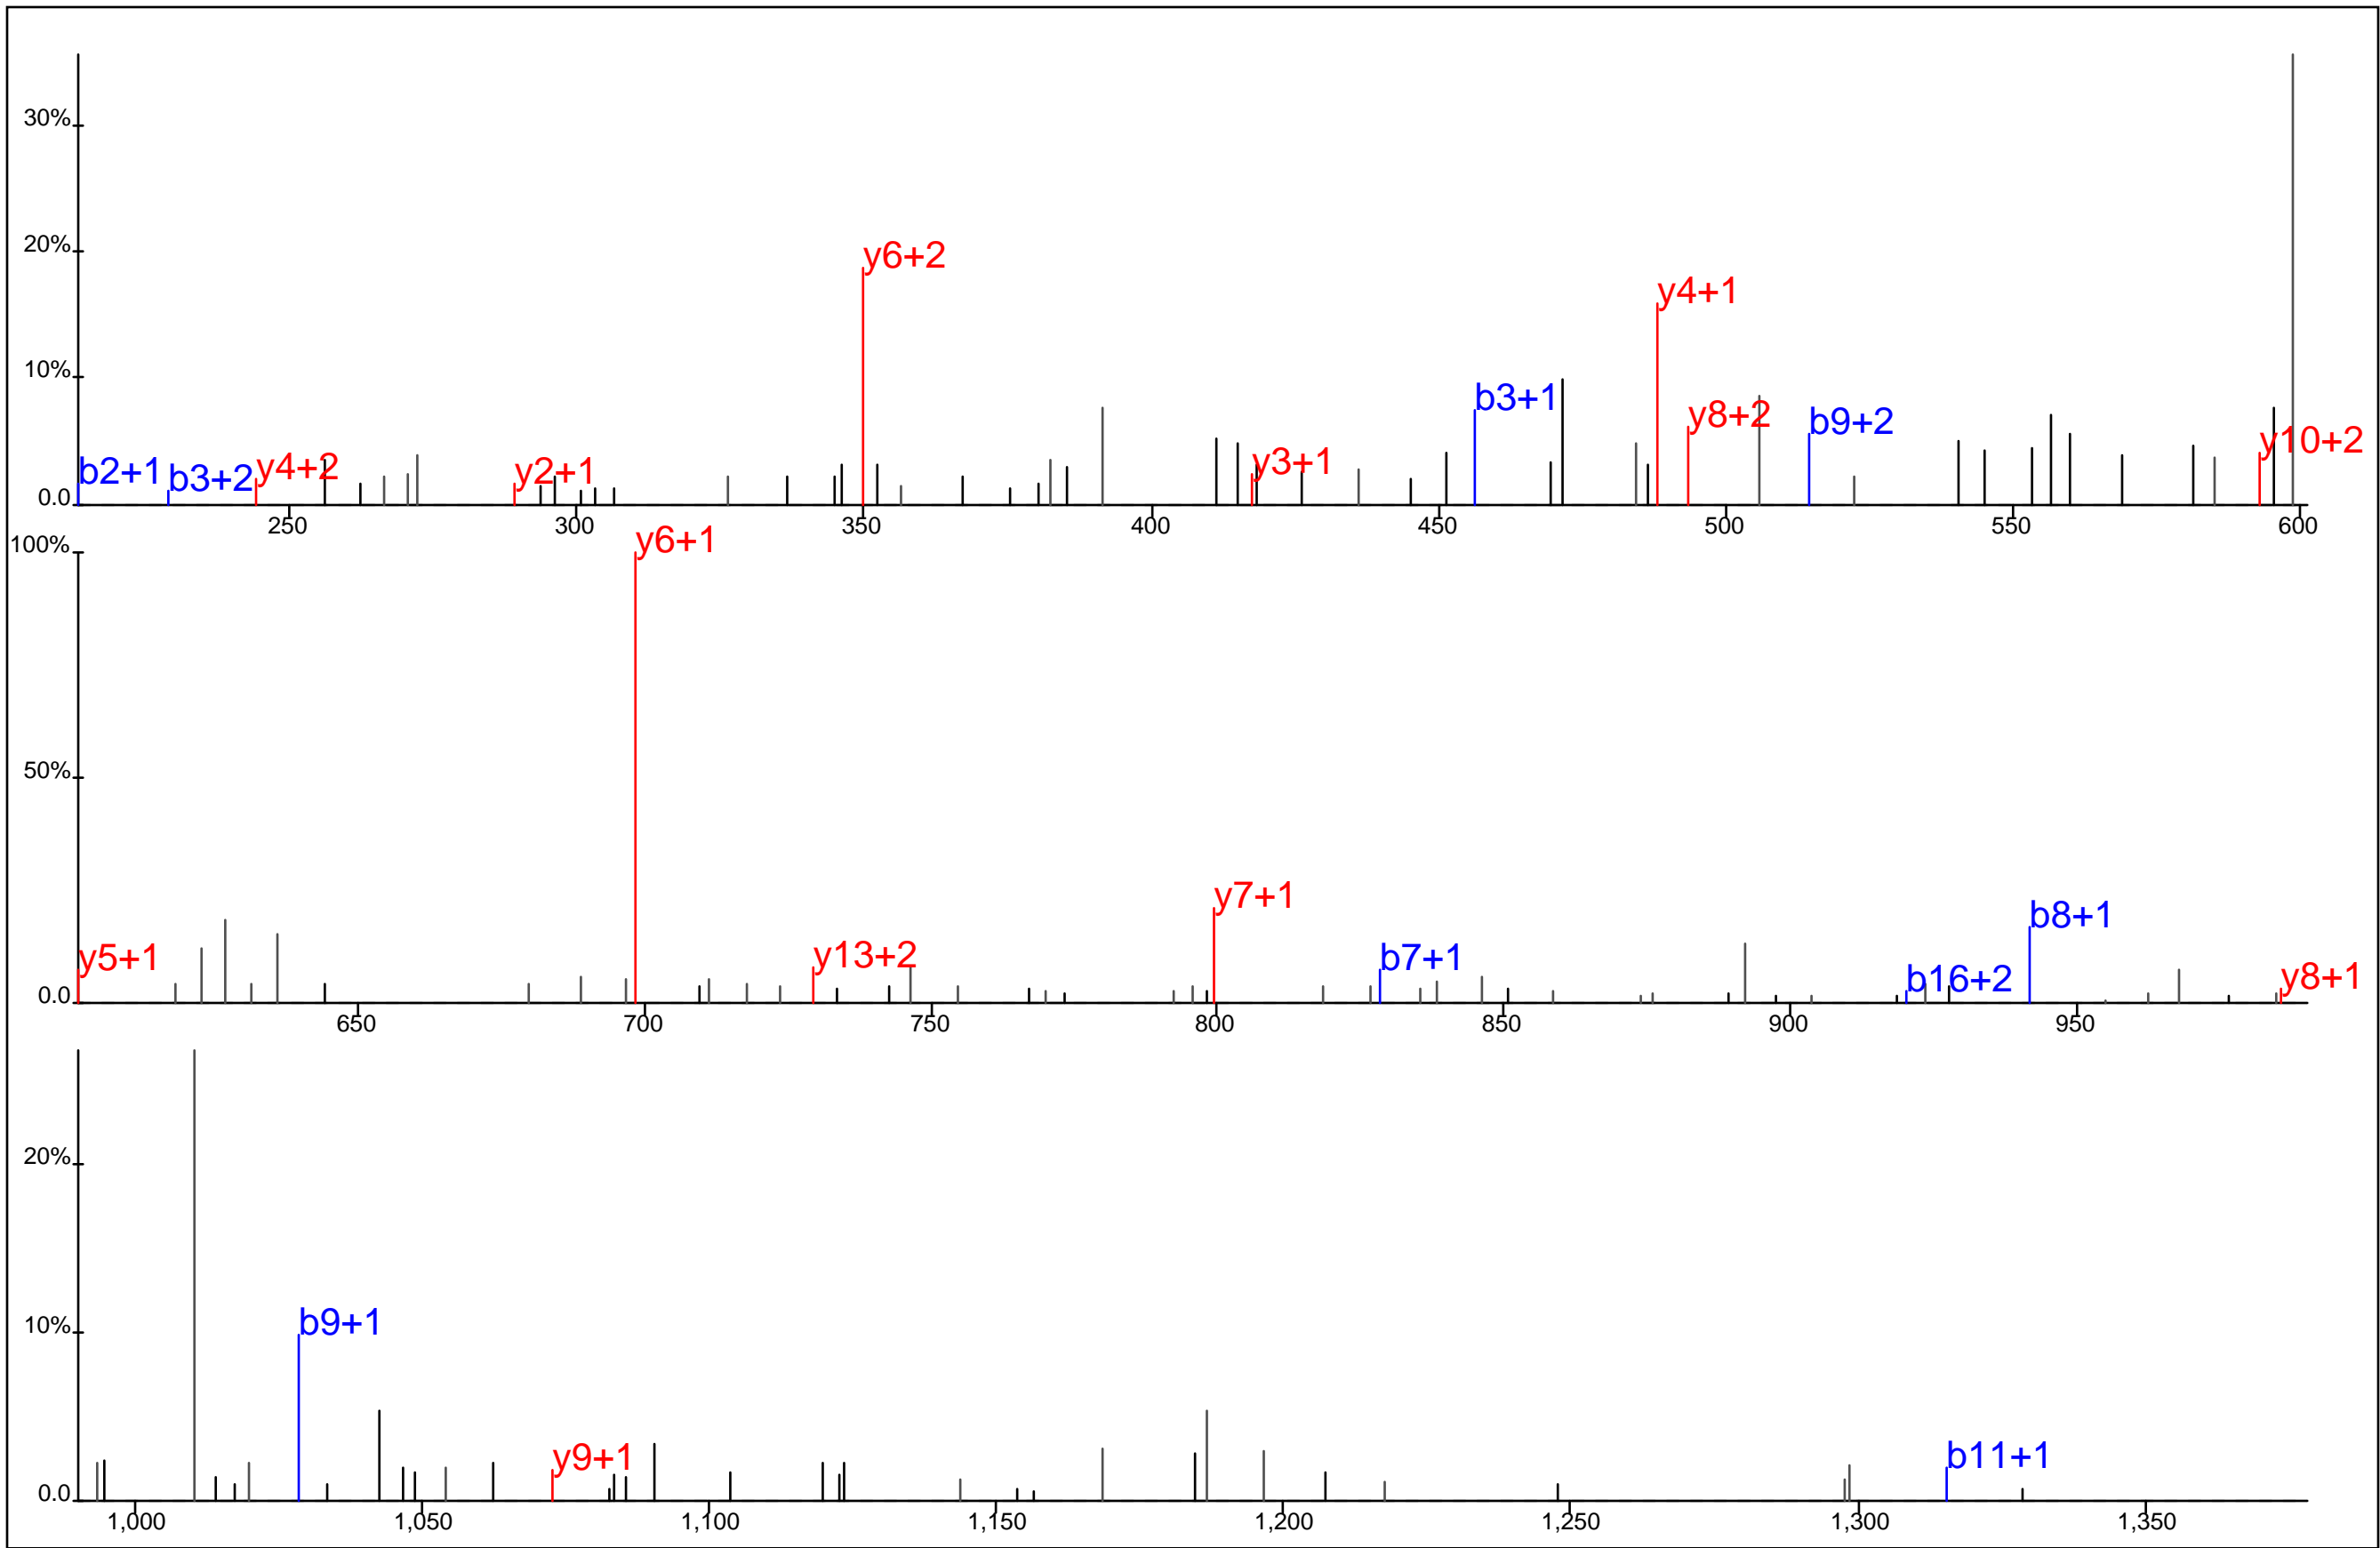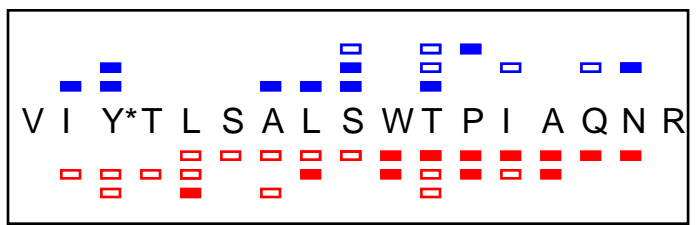

Protein Name: VAV1  
 gi Accession: 0  
 Precursor Mass: 671.6801+3  
 Delta Mass: 2.552 ppm  
 XCorr: 22.48



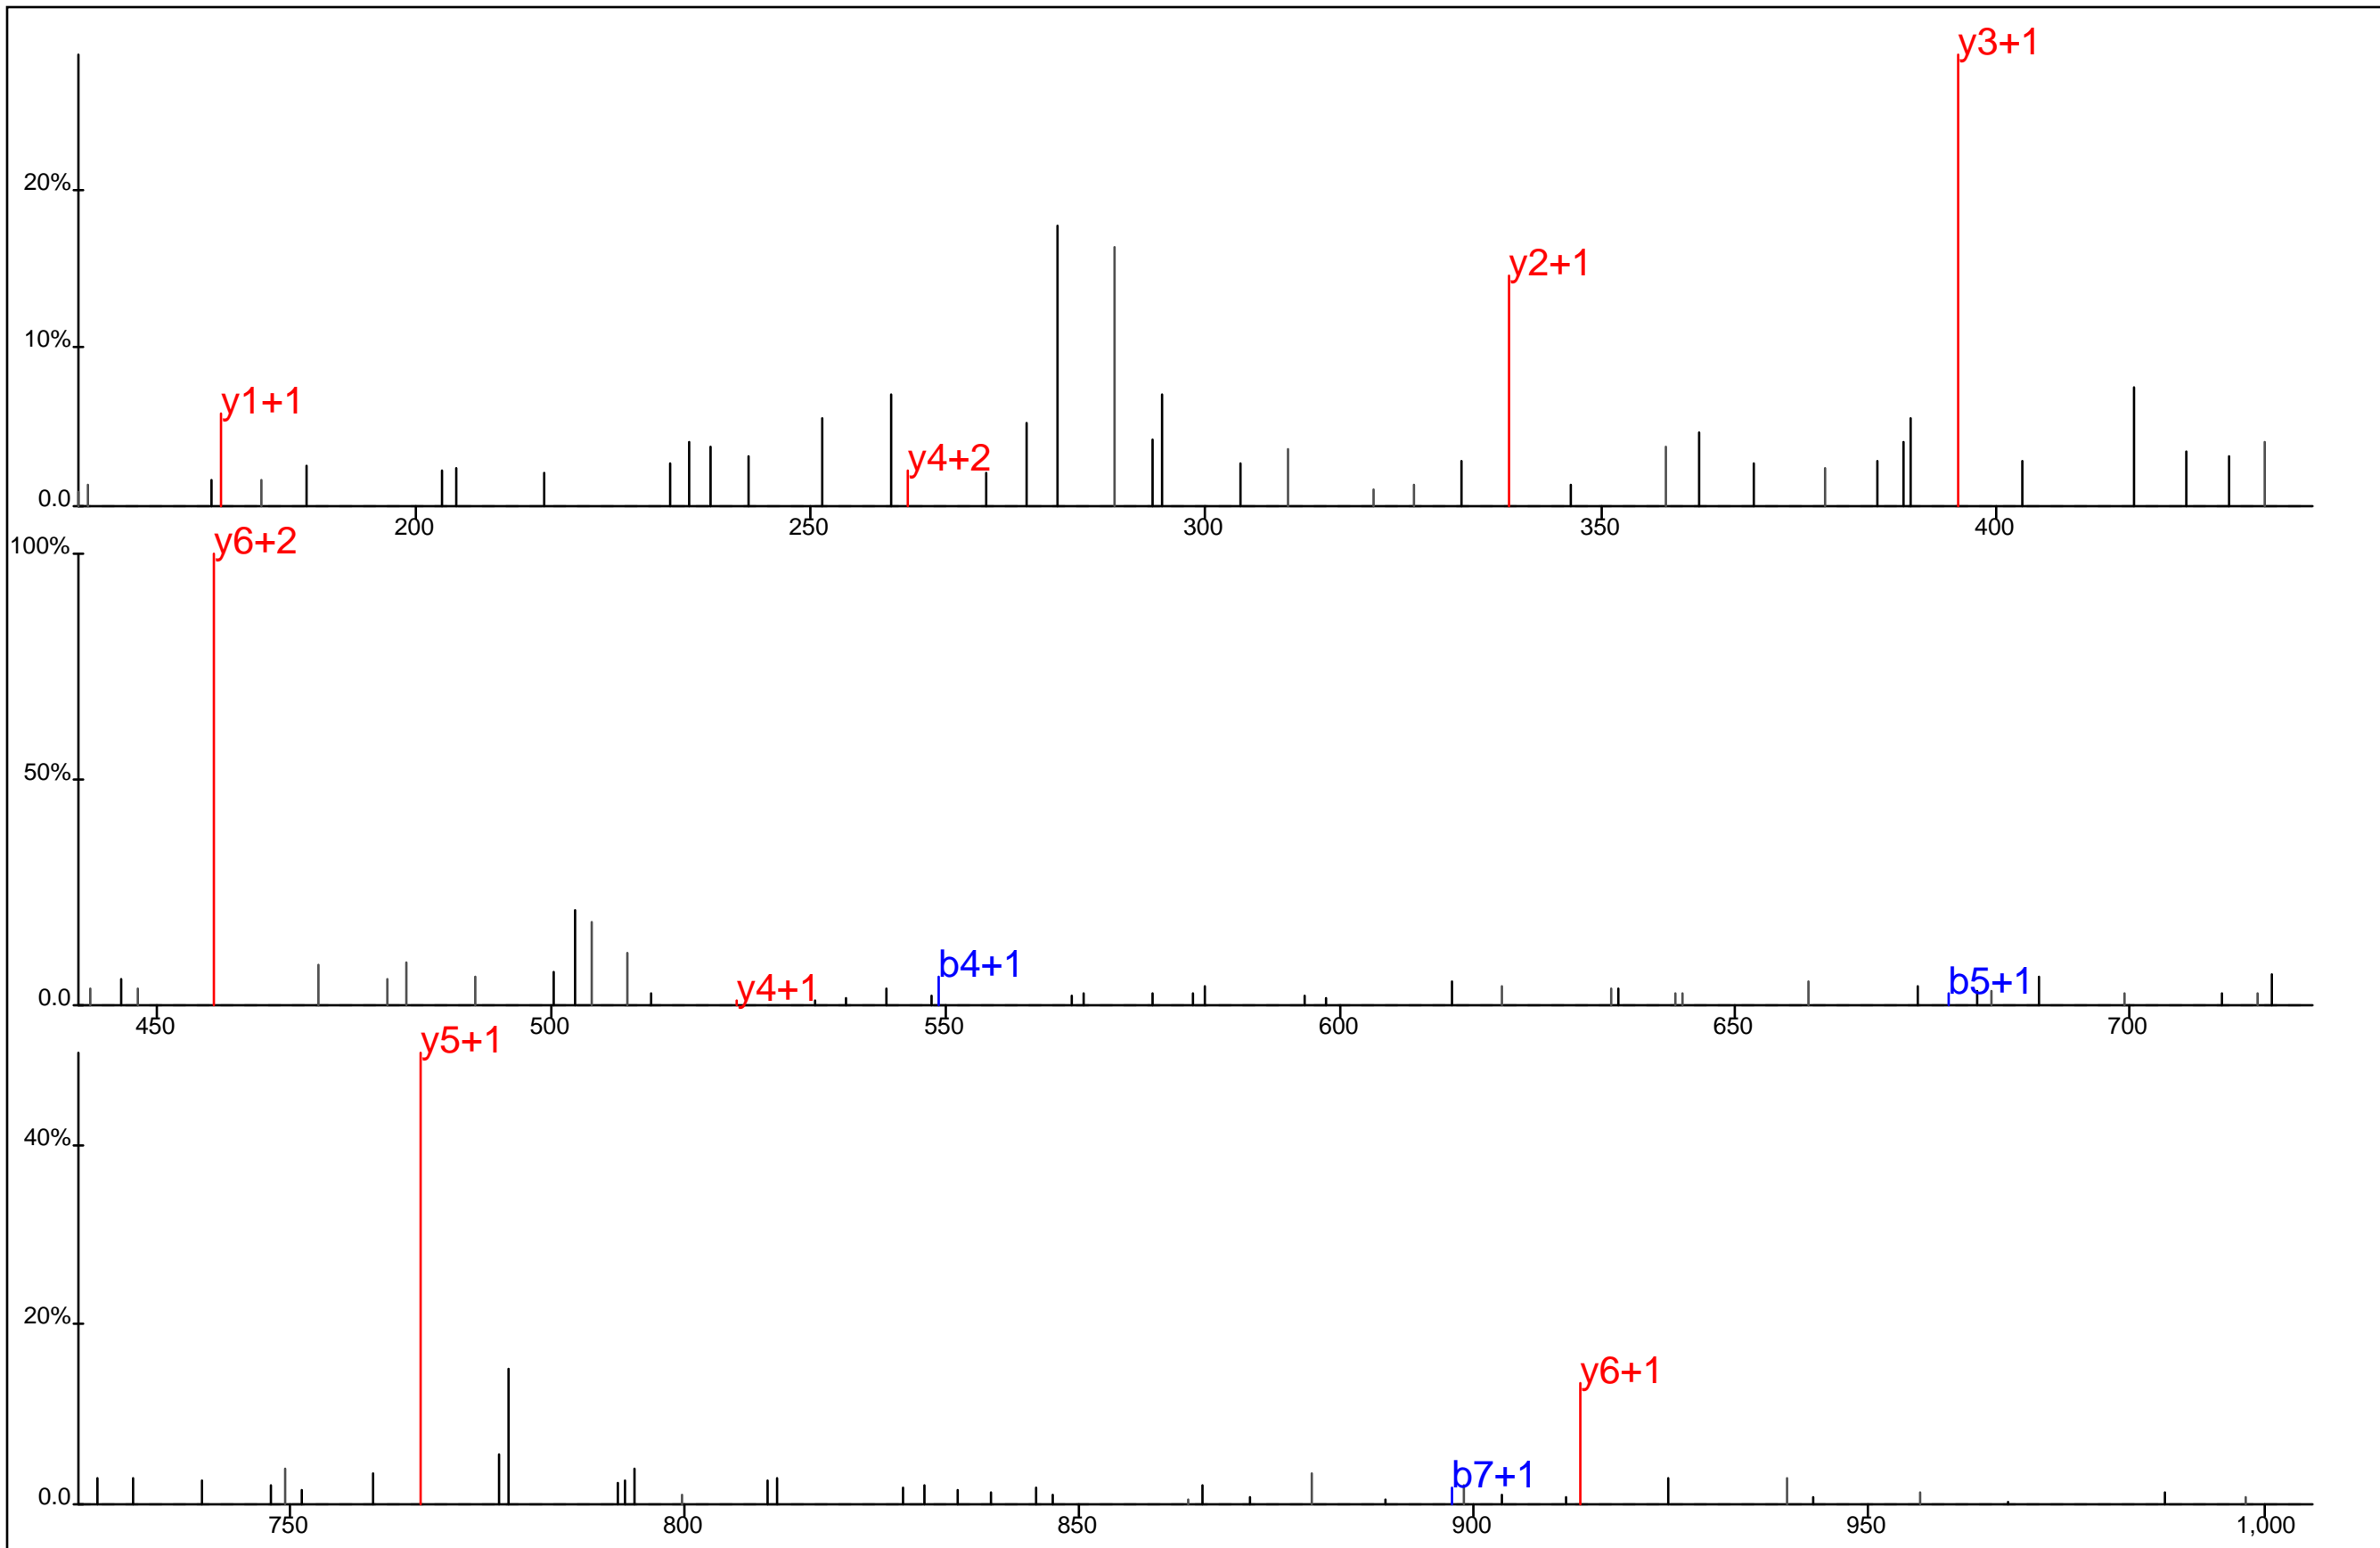

**G T F Y\* Q G Y R**

Protein Name: VAV1  
 gi Accession: 0  
 Precursor Mass: 536.2192+2  
 Delta Mass: 1.443 ppm  
 XCorr: 20.16

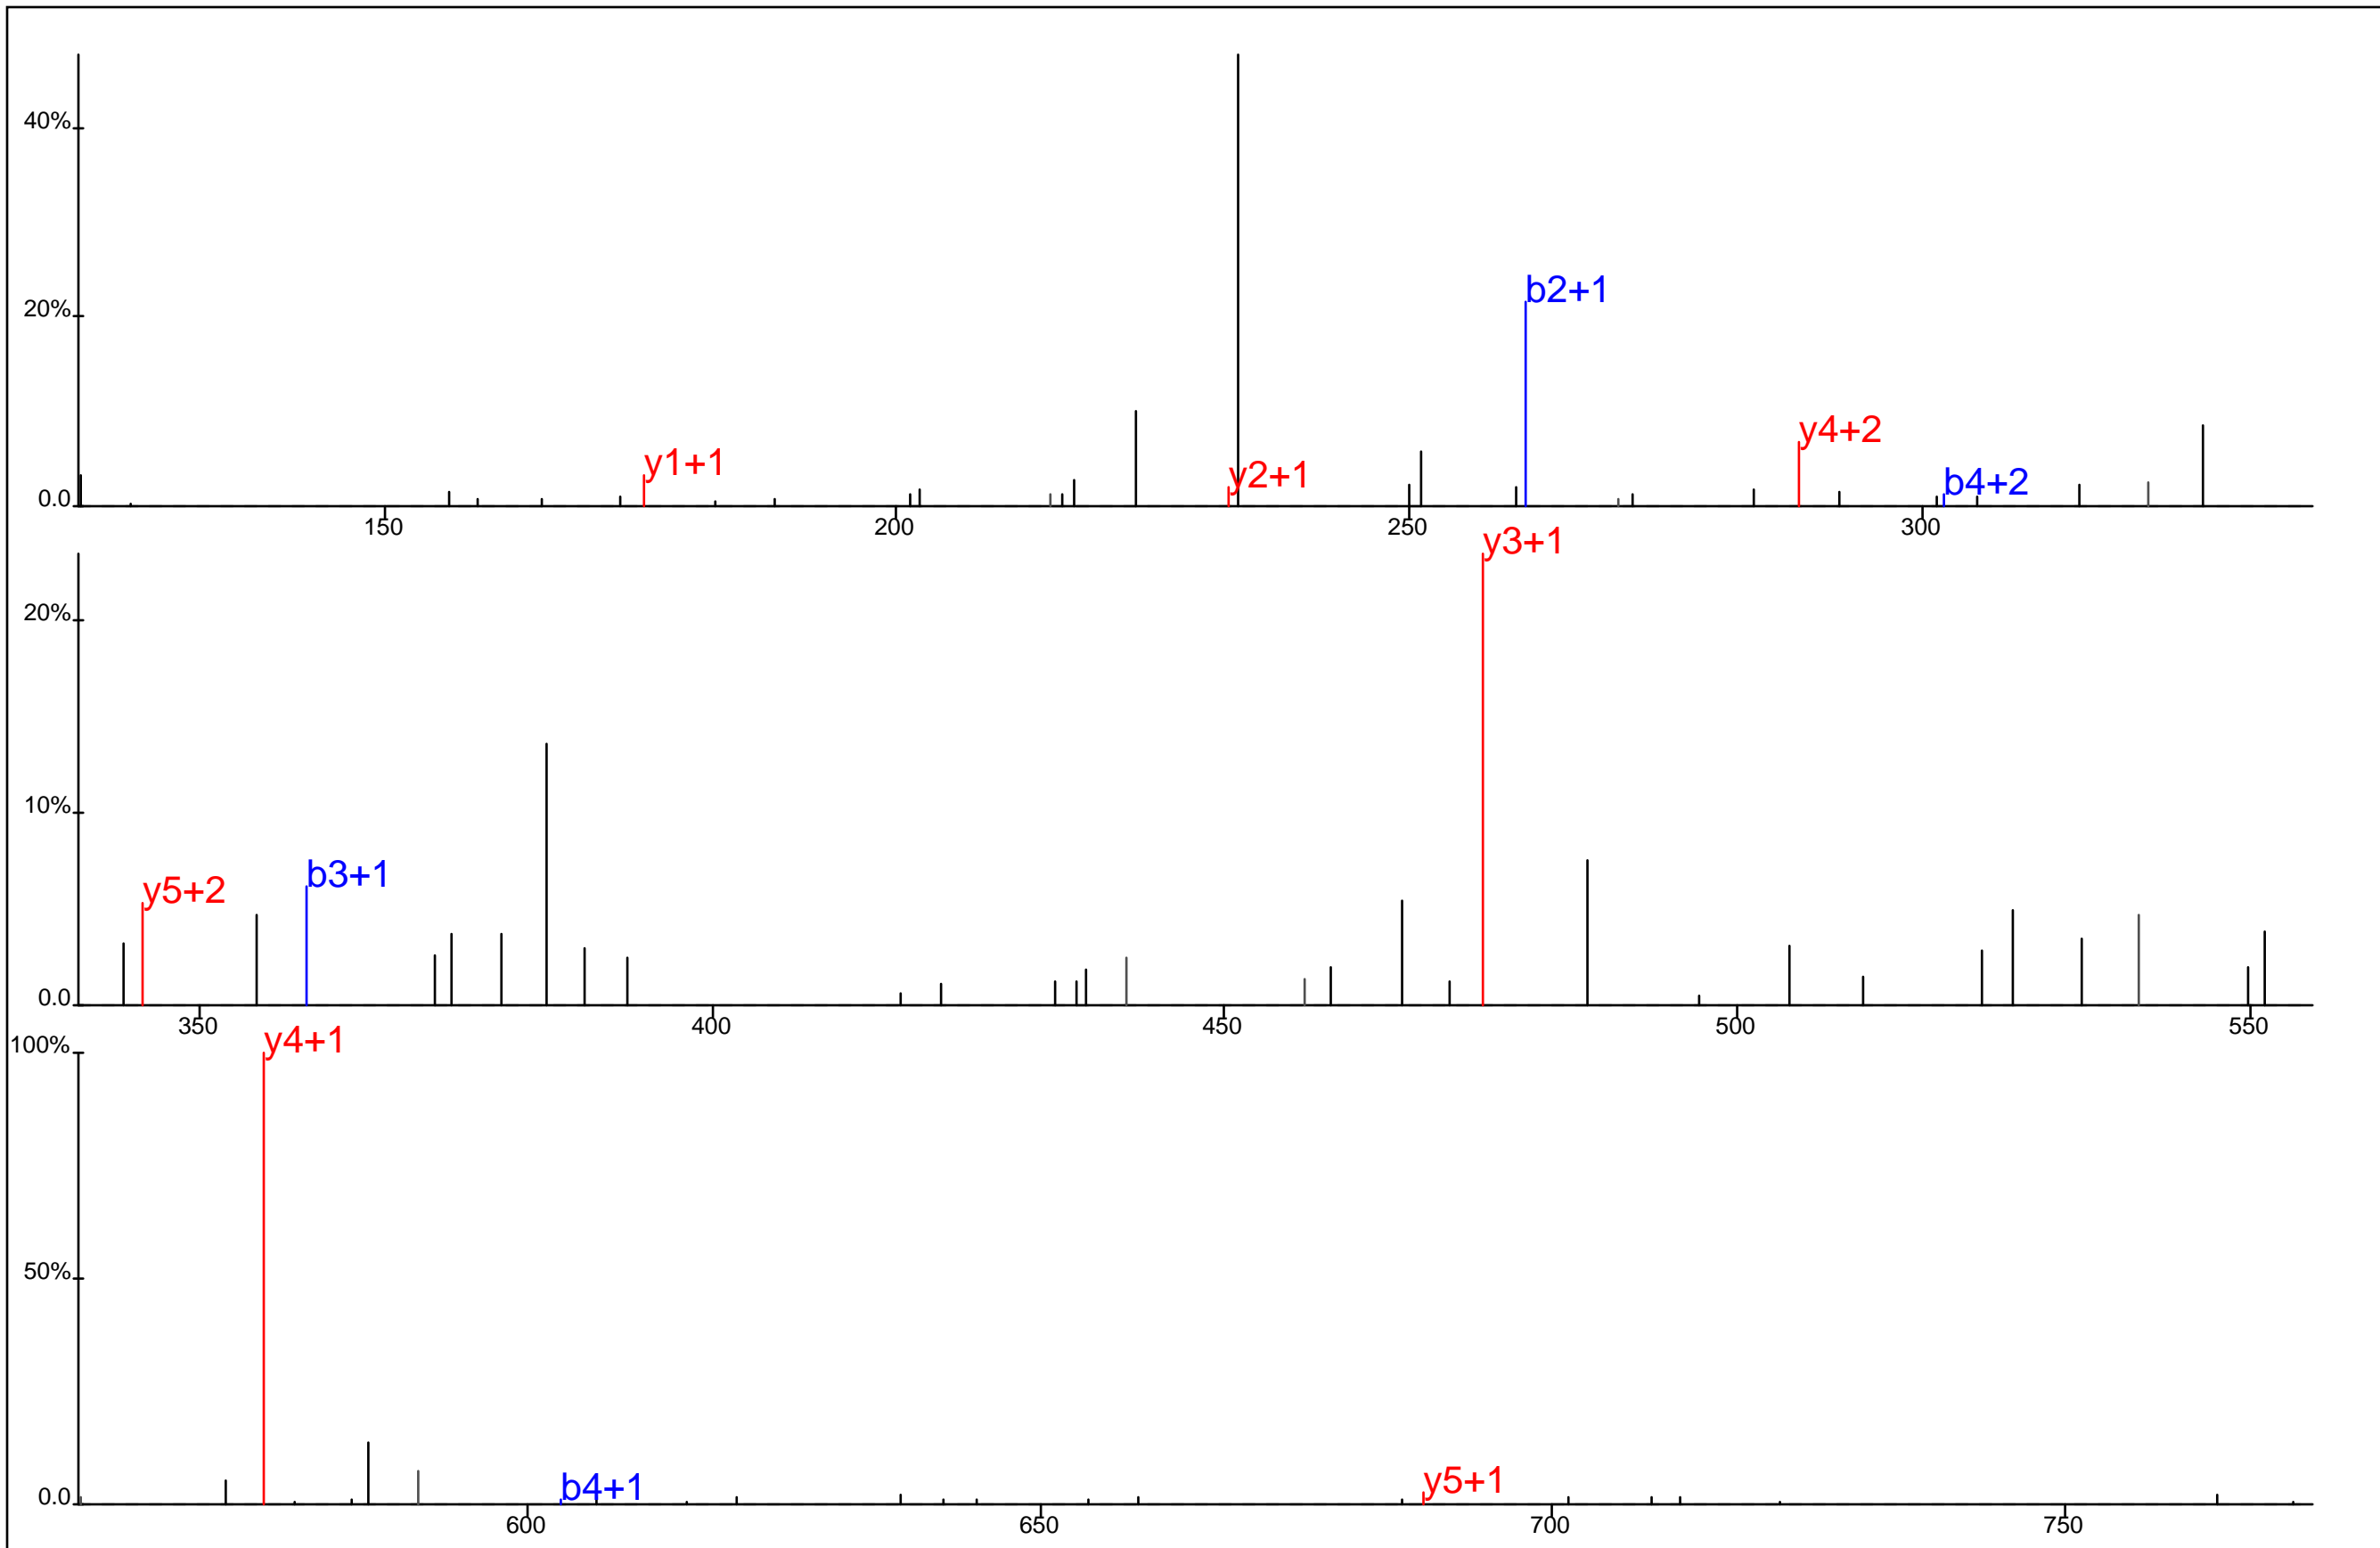

□ ■ □ ■ □  
**F L V Y\* G R**  
■ □ □ □ ■

Protein Name: VAV1  
 gi Accession: 0  
 Precursor Mass: 417.6976+2  
 Delta Mass: 3.710 ppm  
 XCorr: 26.35



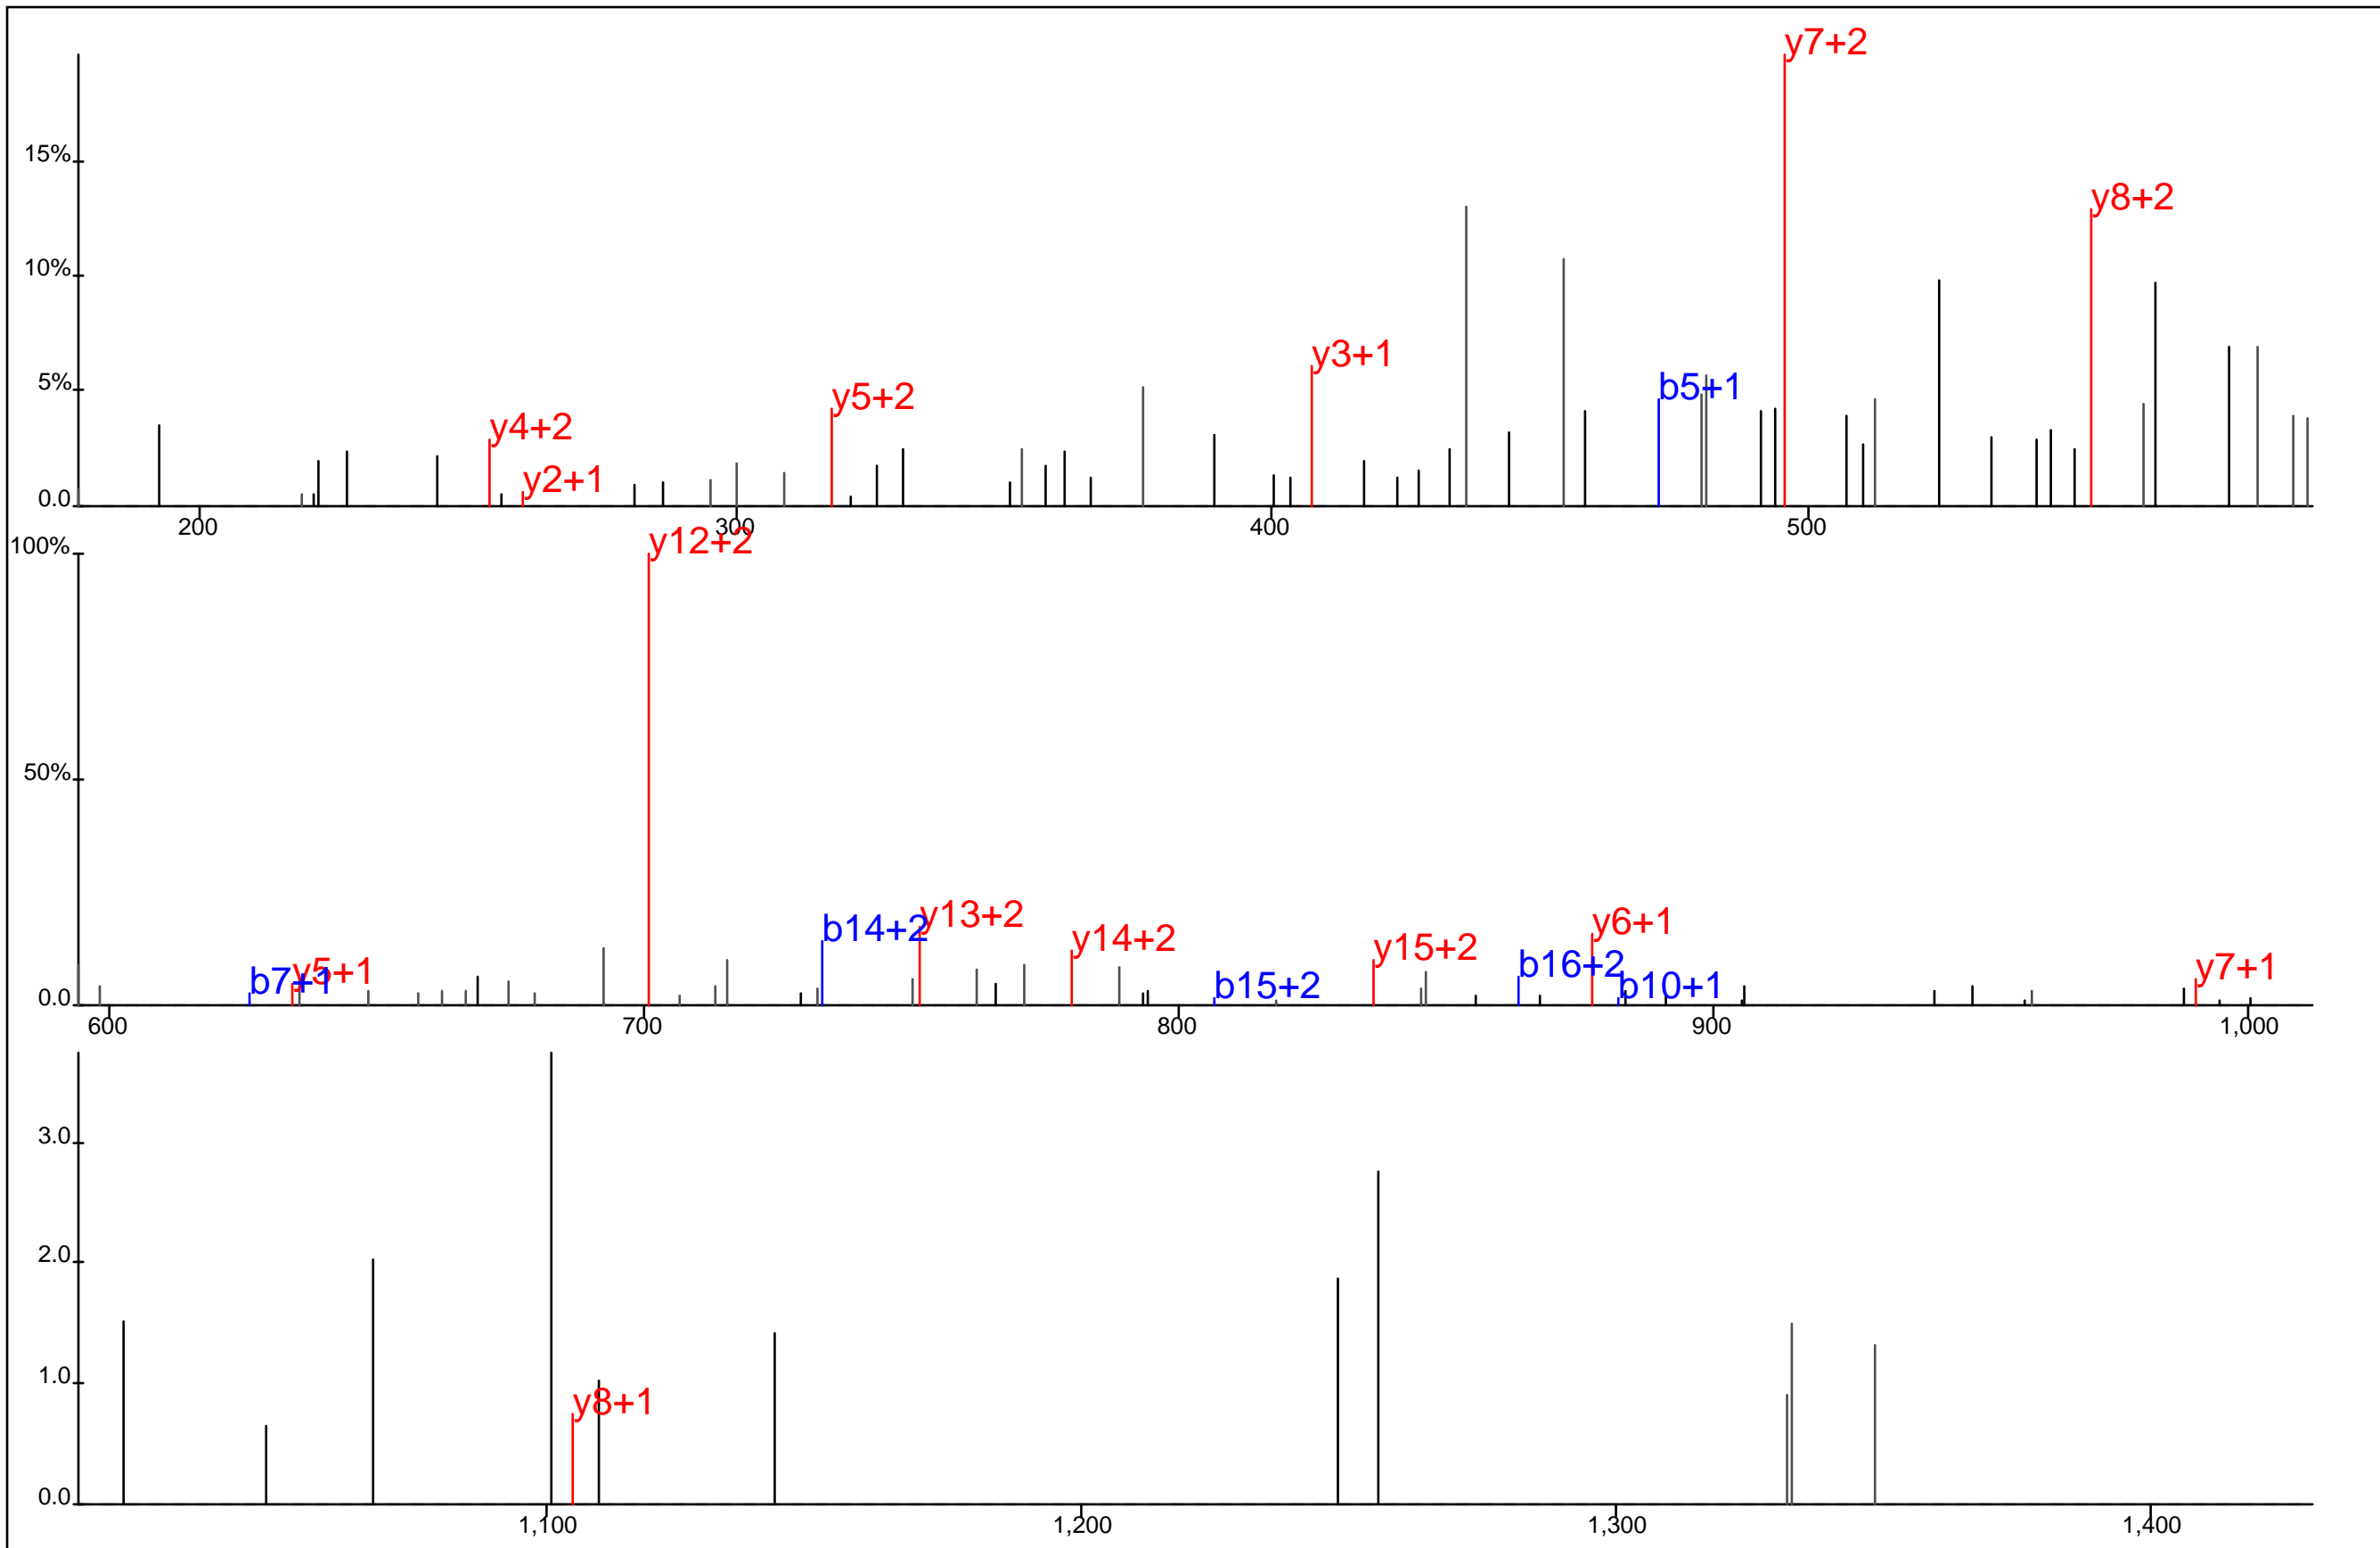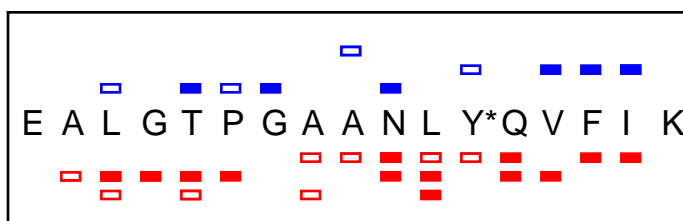

Protein Name: VAV1  
 gi Accession: 0  
 Precursor Mass: 624.6483+3  
 Delta Mass: 0.028 ppm  
 XCorr: 37.31



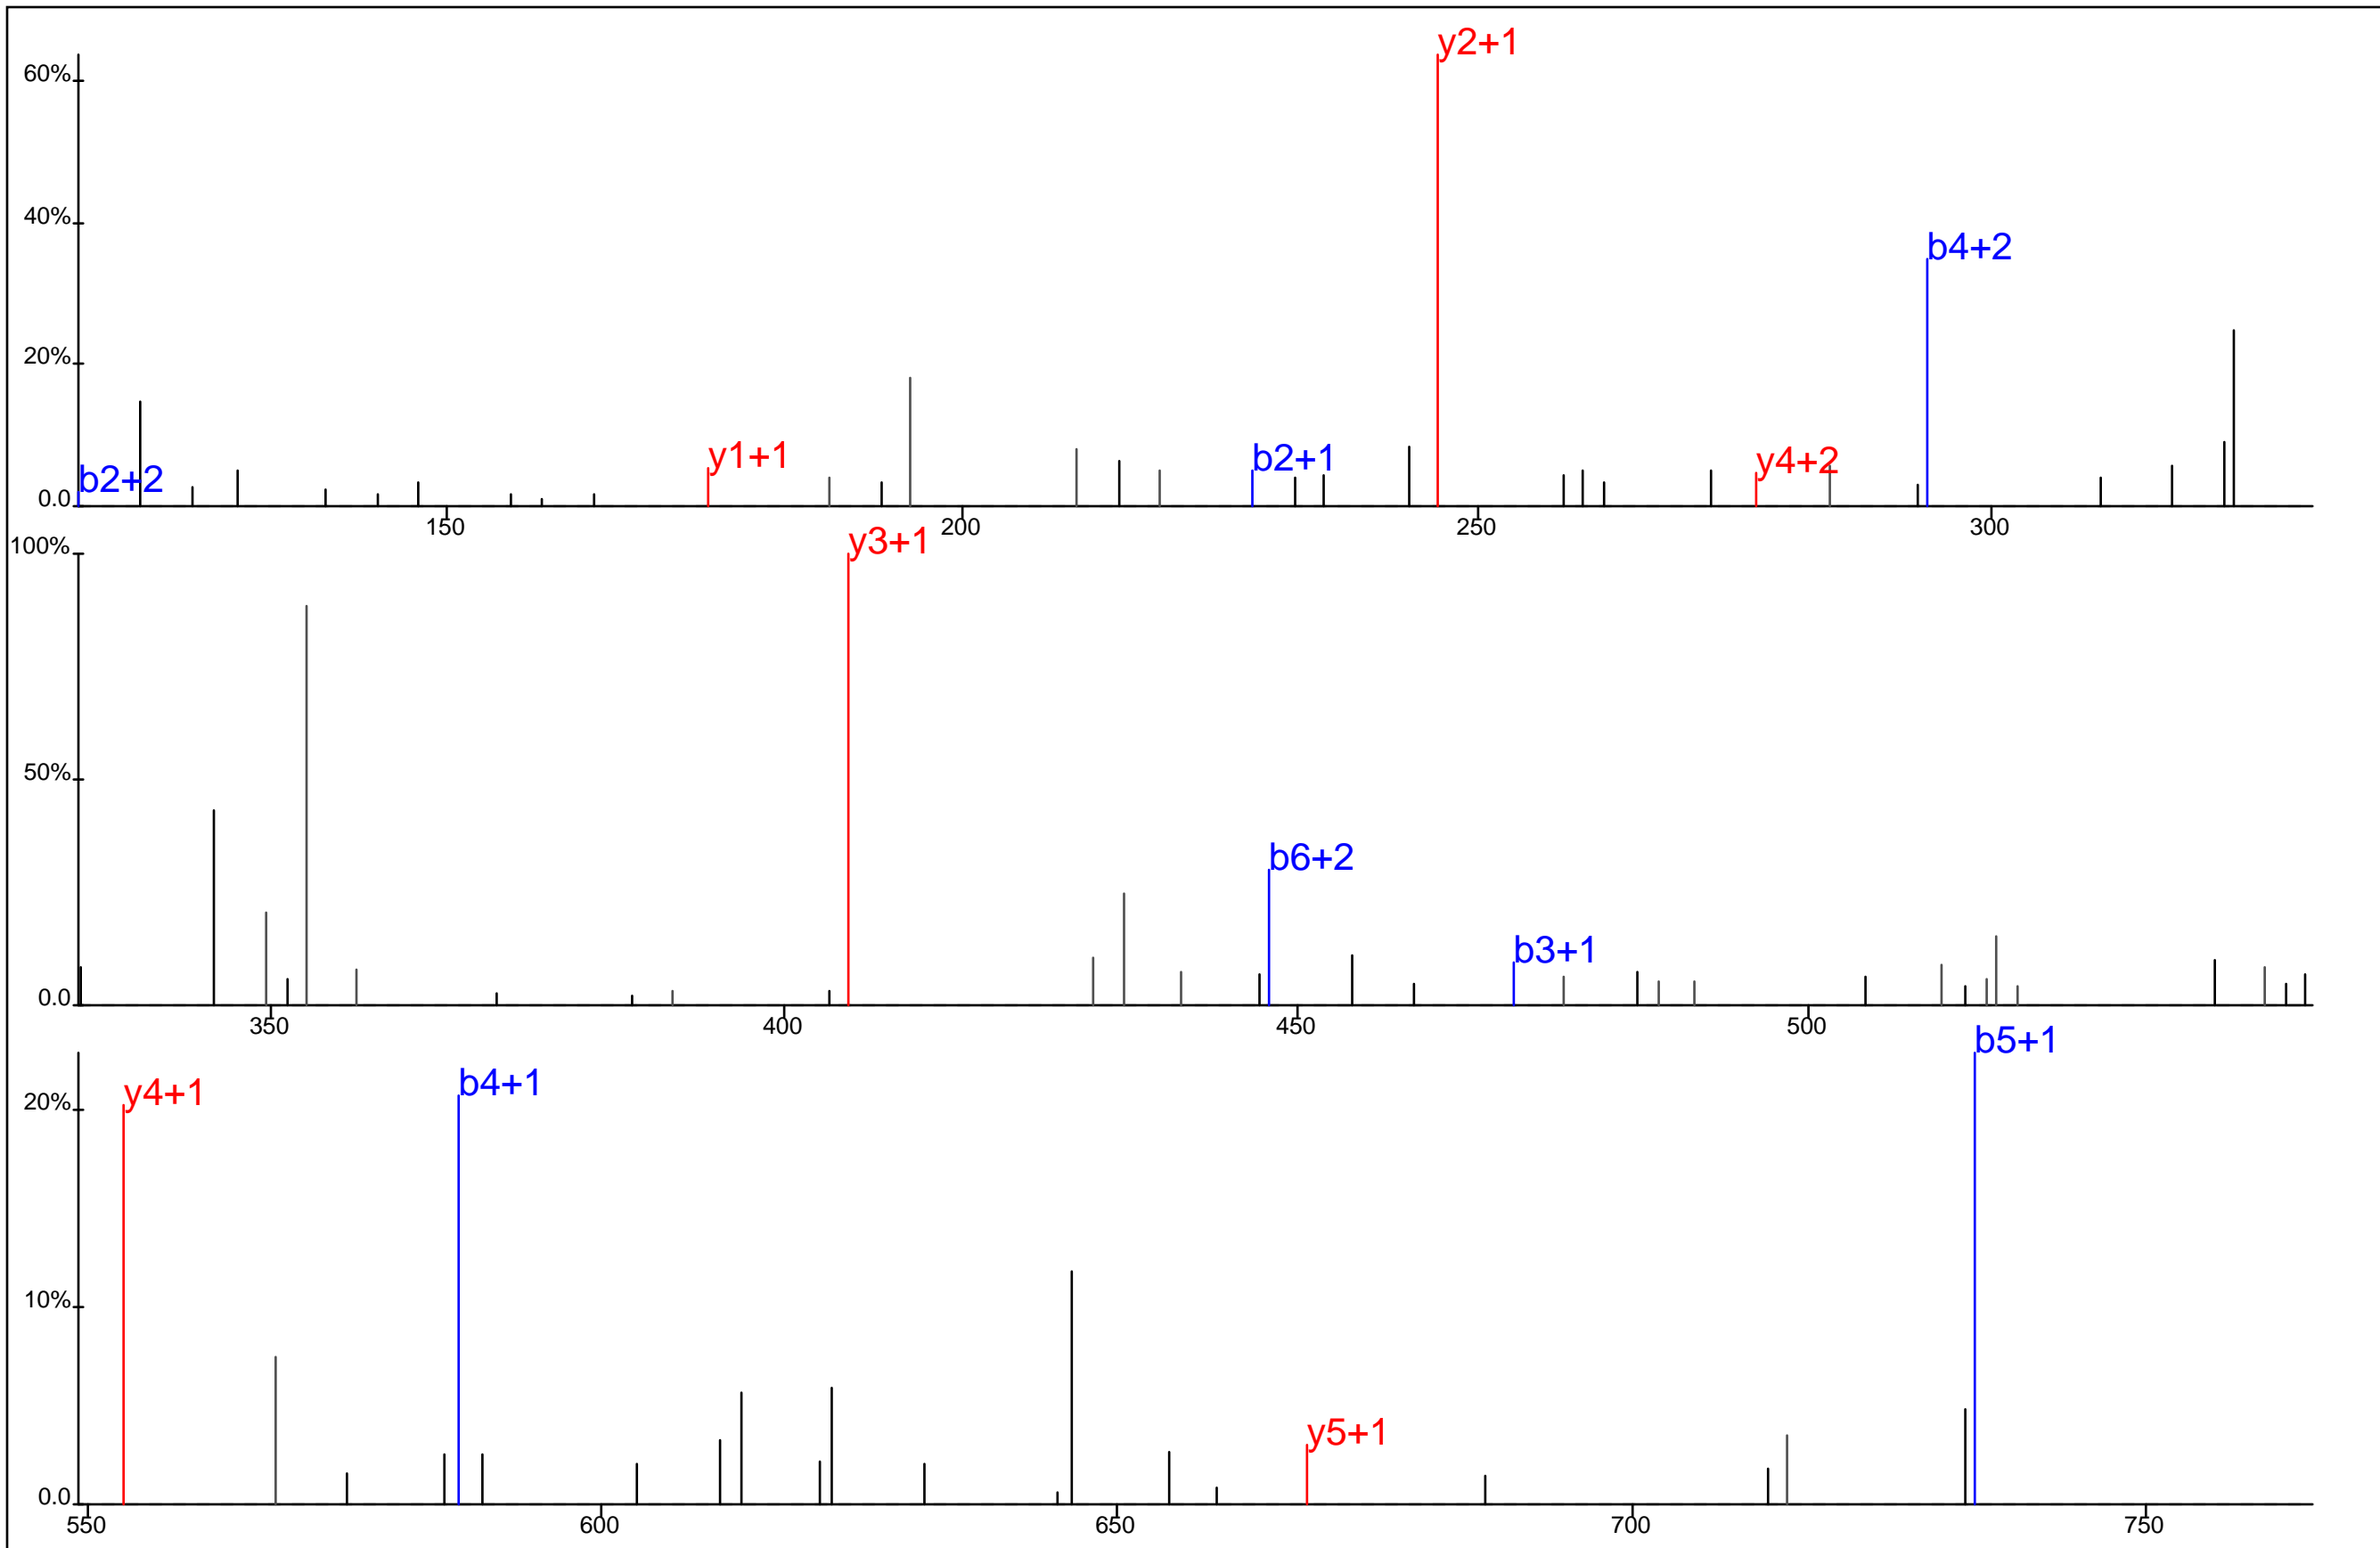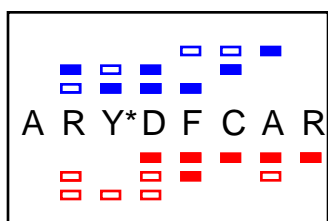

Protein Name: VAV1  
 gi Accession: 0  
 Precursor Mass: 380.1550+3  
 Delta Mass: 0.369 ppm  
 XCorr: 20.21

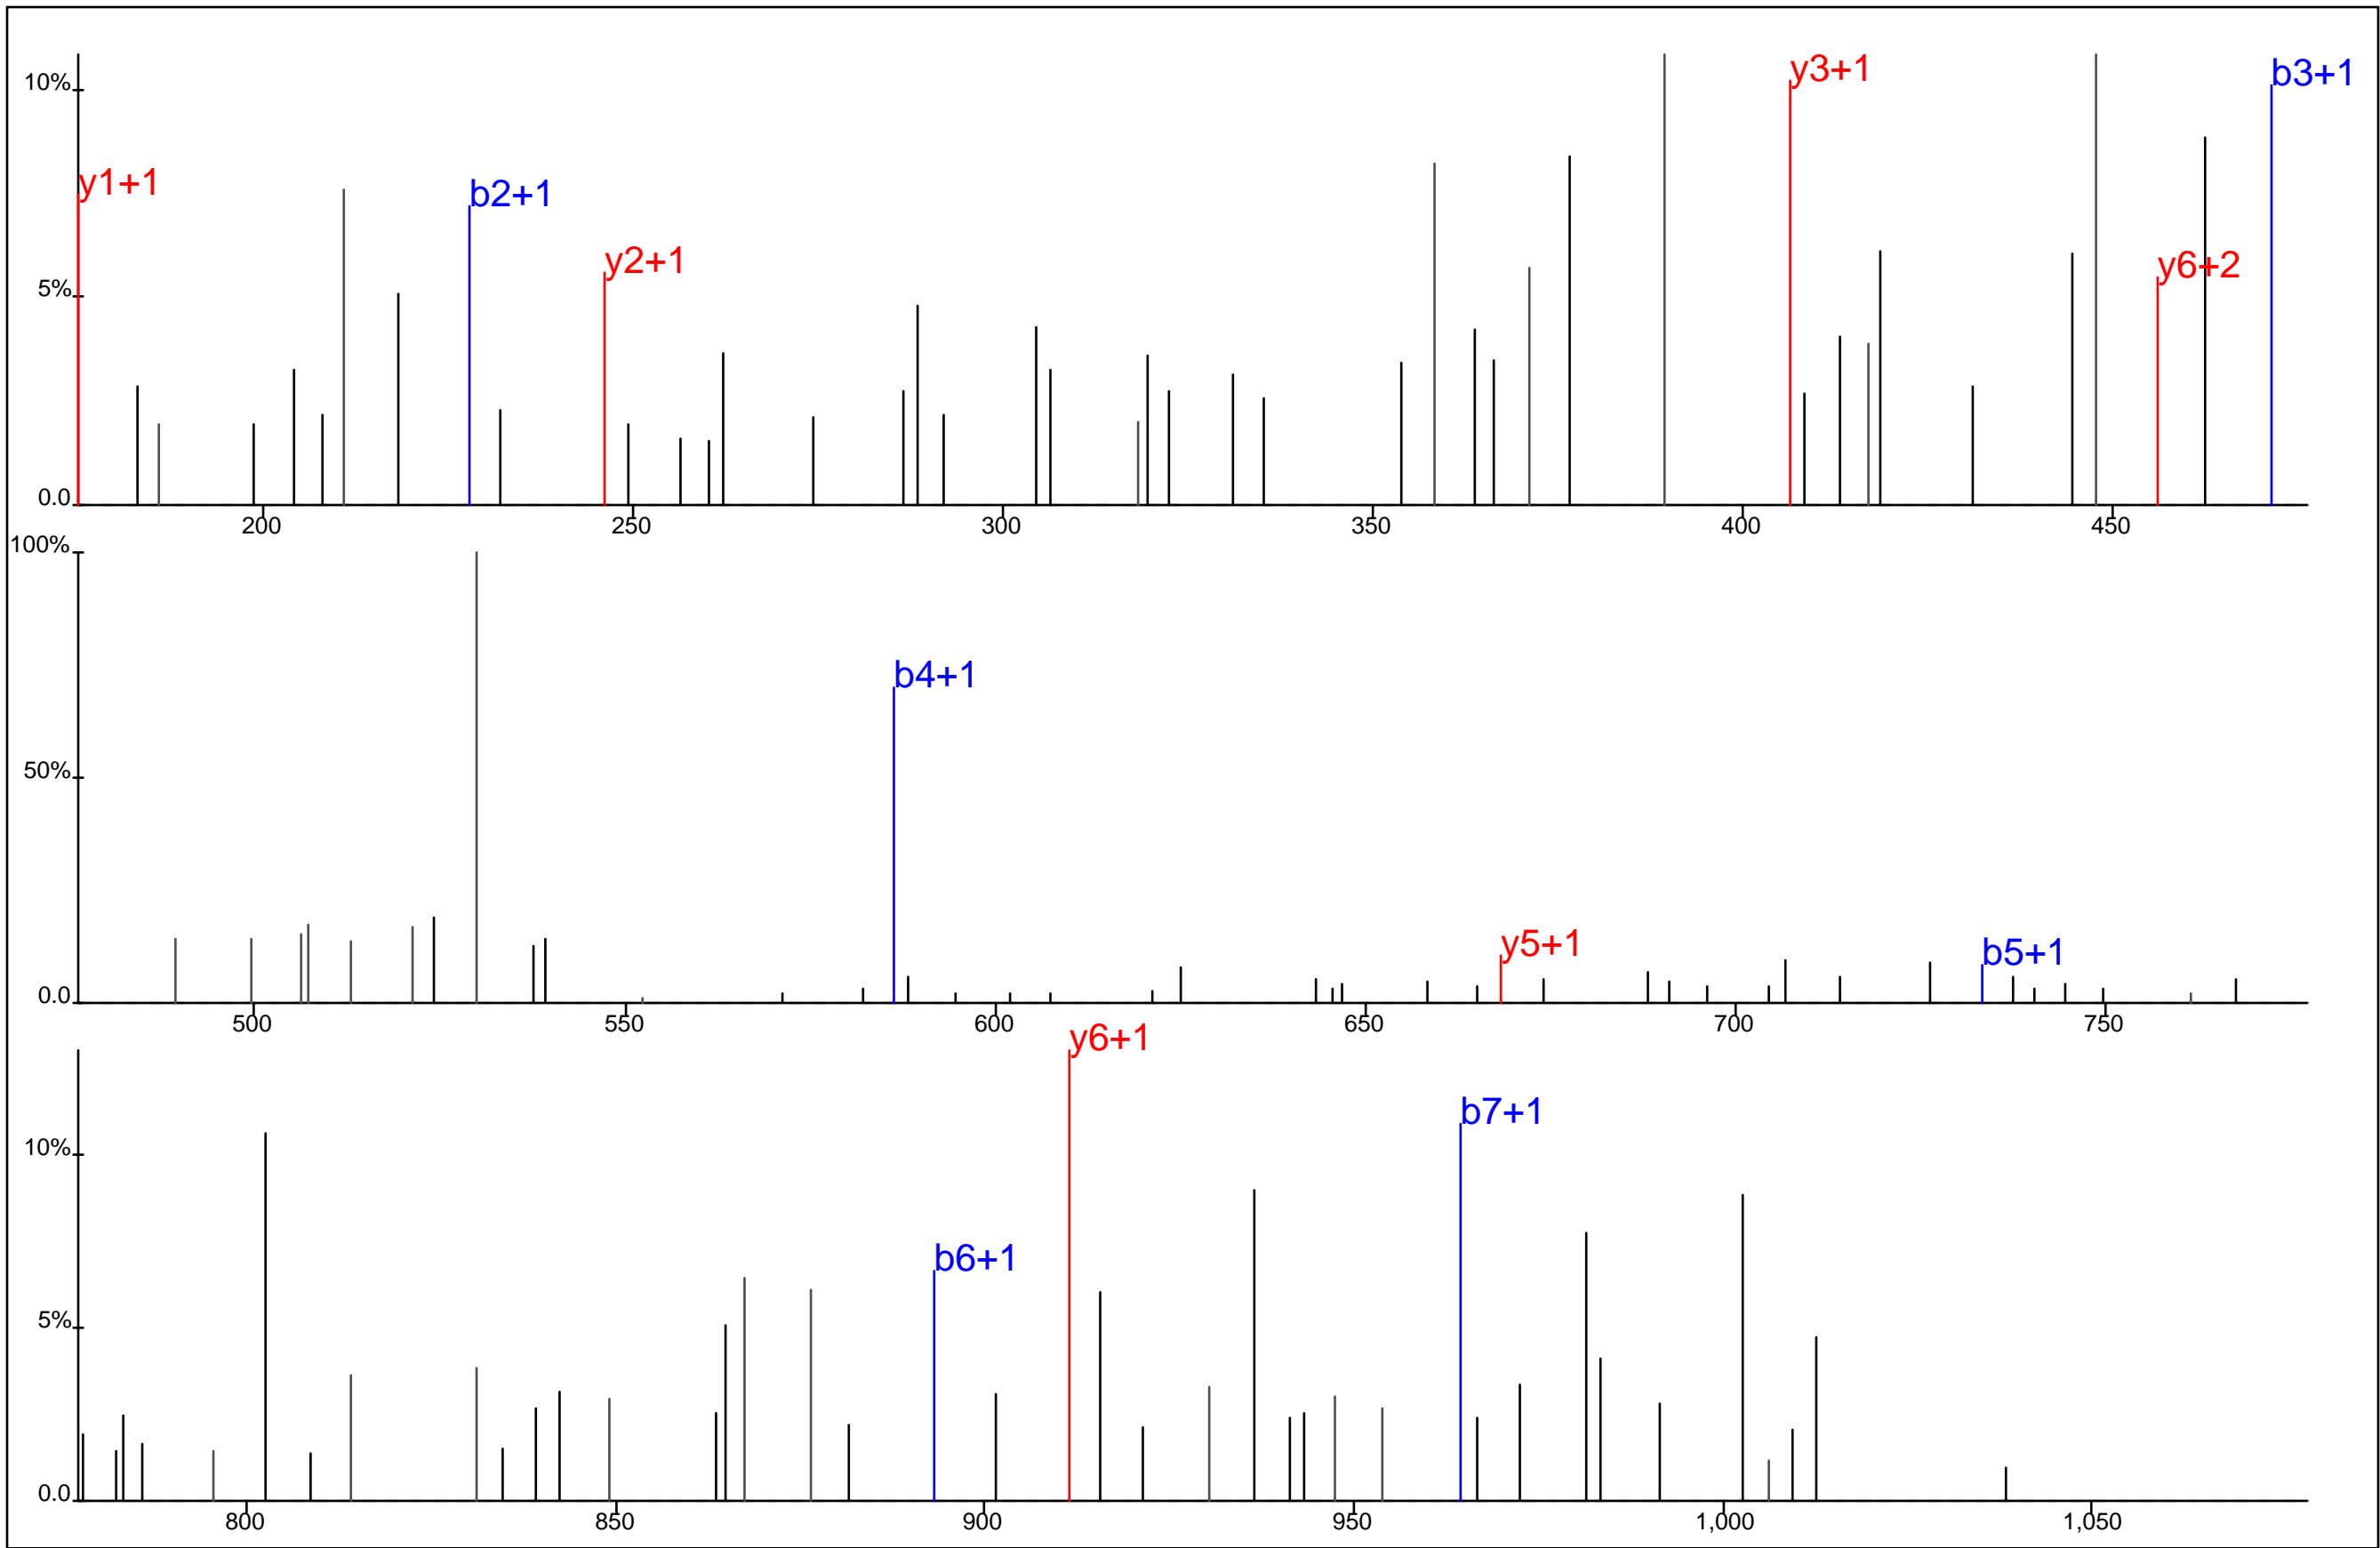

■ ■ ■ ■ ■ ■  
□ □ □ □ □ □  
**A R Y\* D F C A R**  
□ □ □ □ □ □

Protein Name: VAV1  
 gi Accession: 0  
 Precursor Mass: 569.7284+2  
 Delta Mass: 0.369 ppm  
 XCorr: 22.95

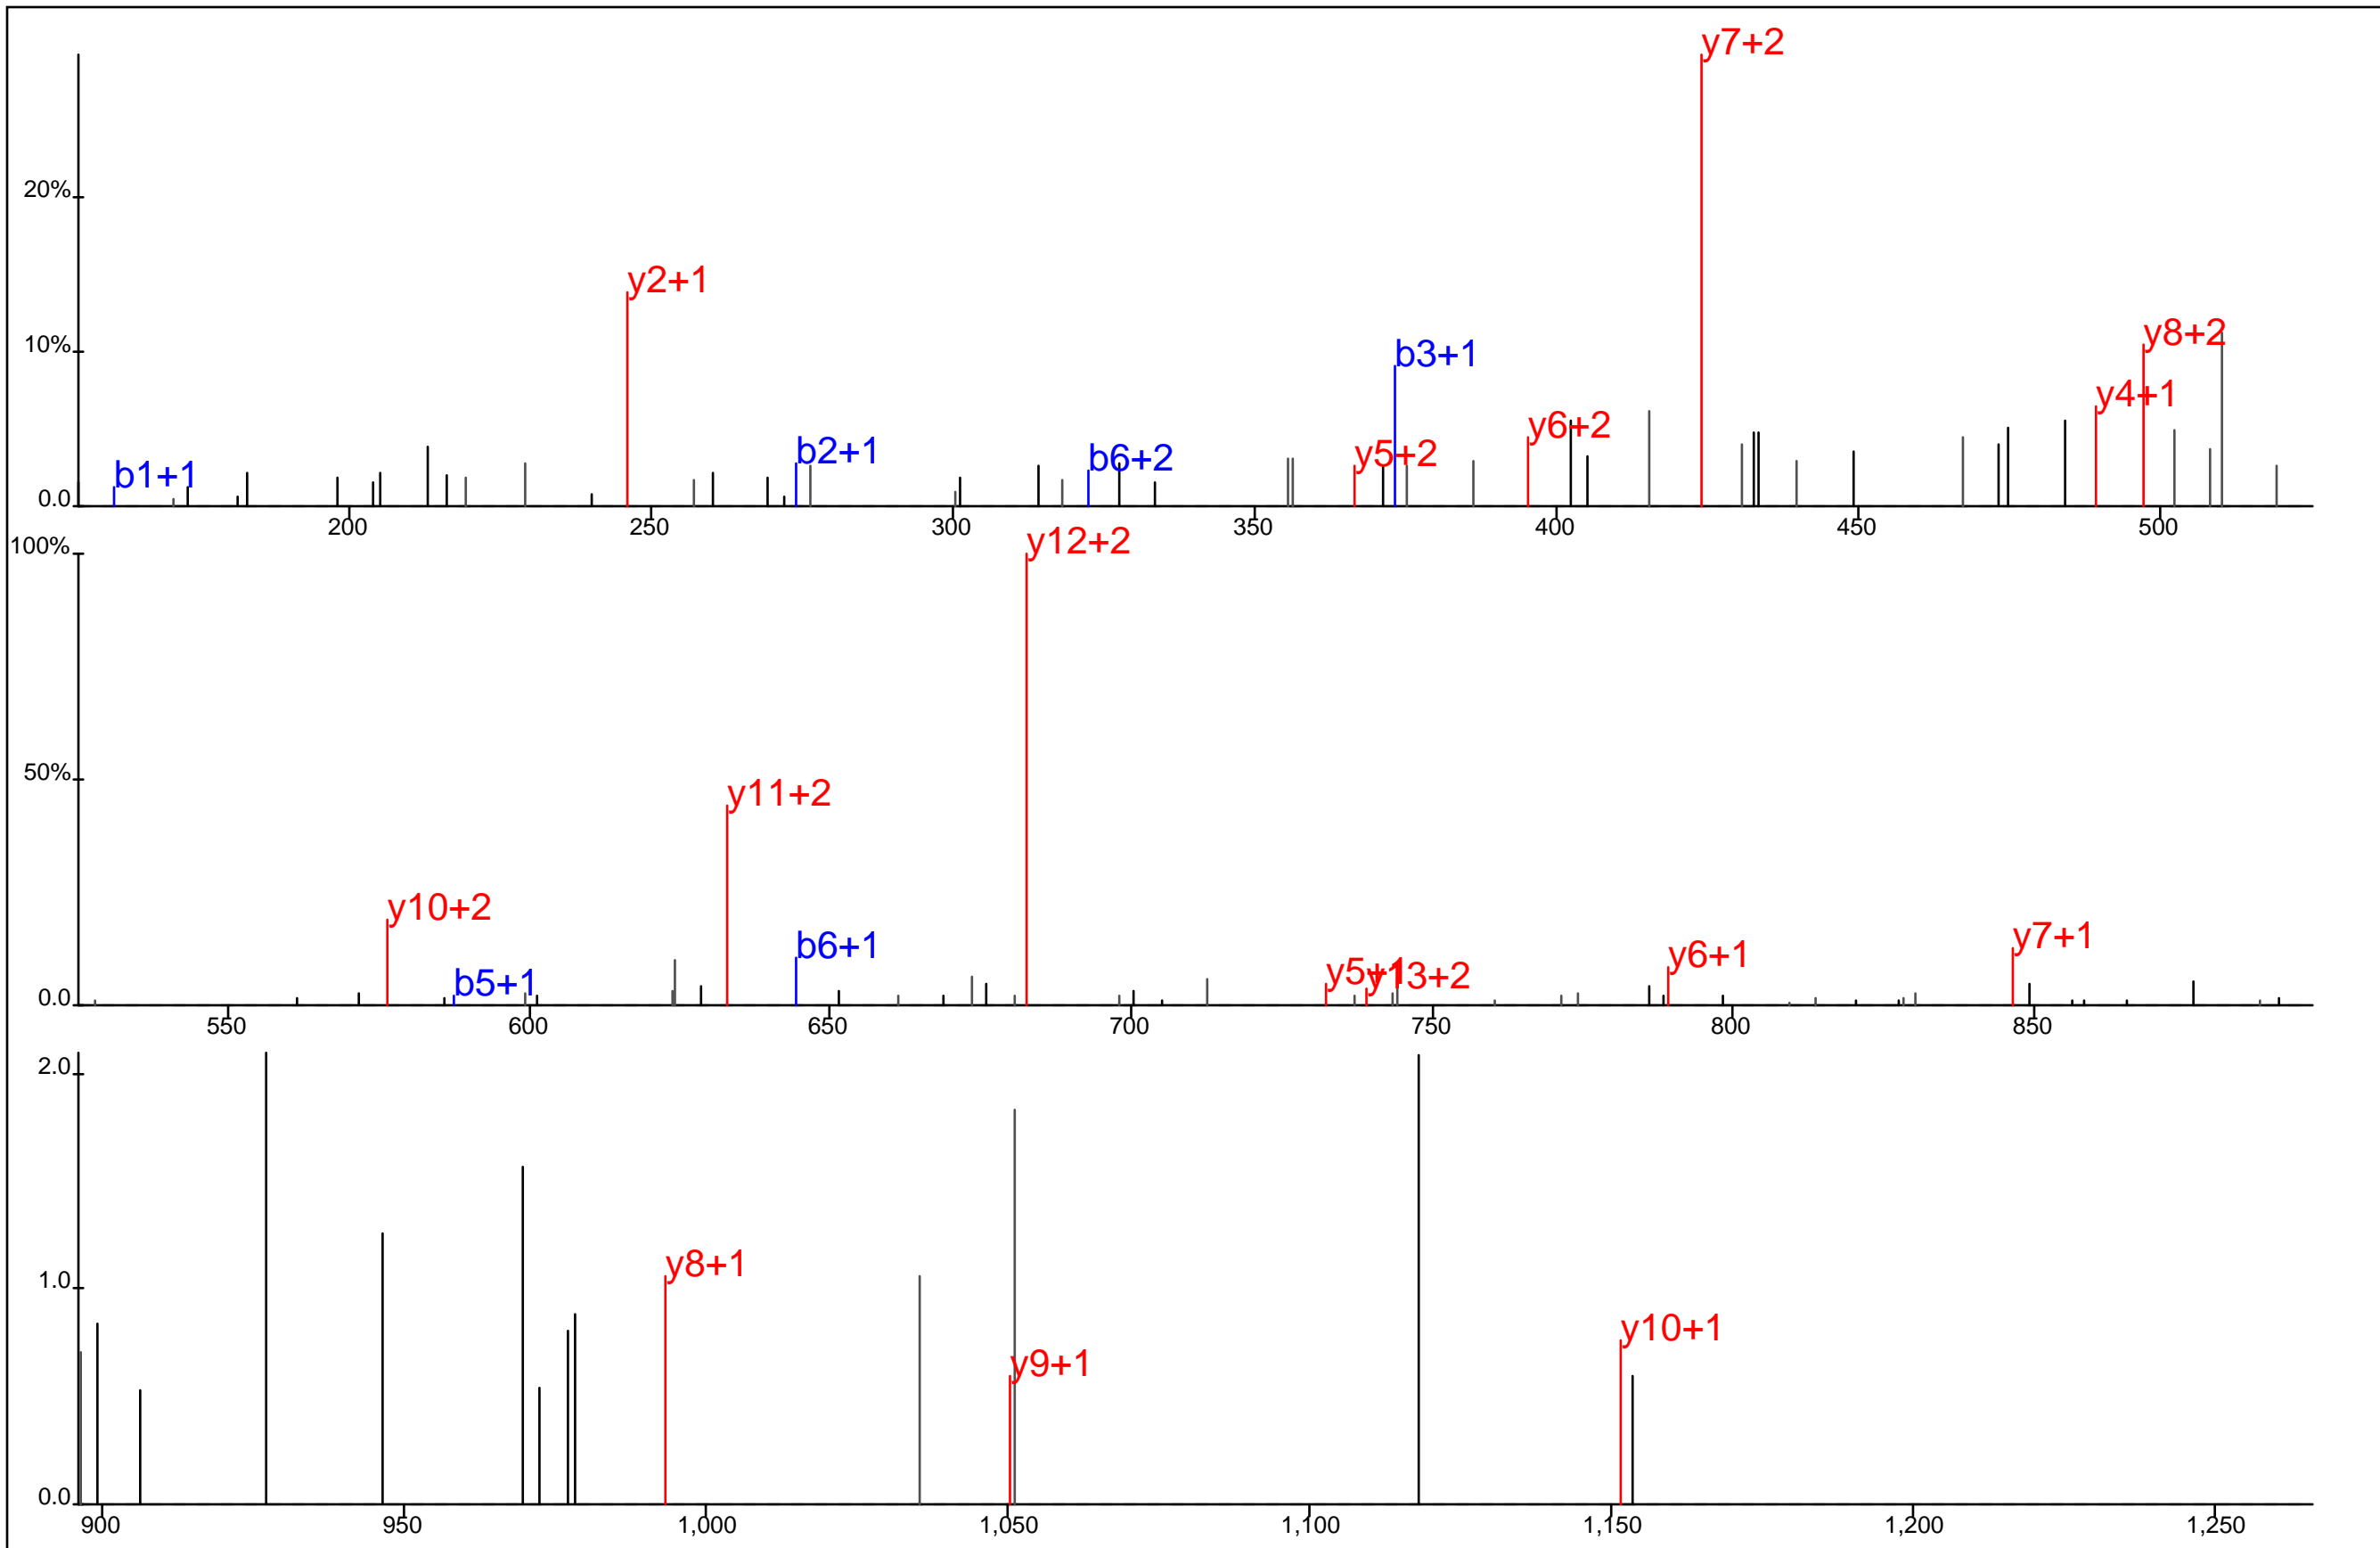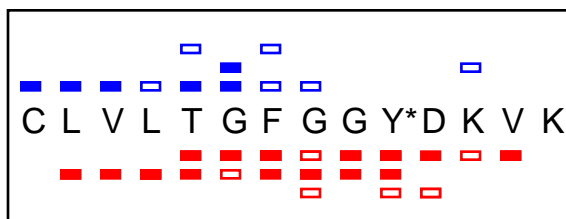

Protein Name: Vesicle amine transport protein 1  
 gi Accession: 0  
 Precursor Mass: 546.2648+3  
 Delta Mass: 0.434 ppm  
 XCorr: 34.75



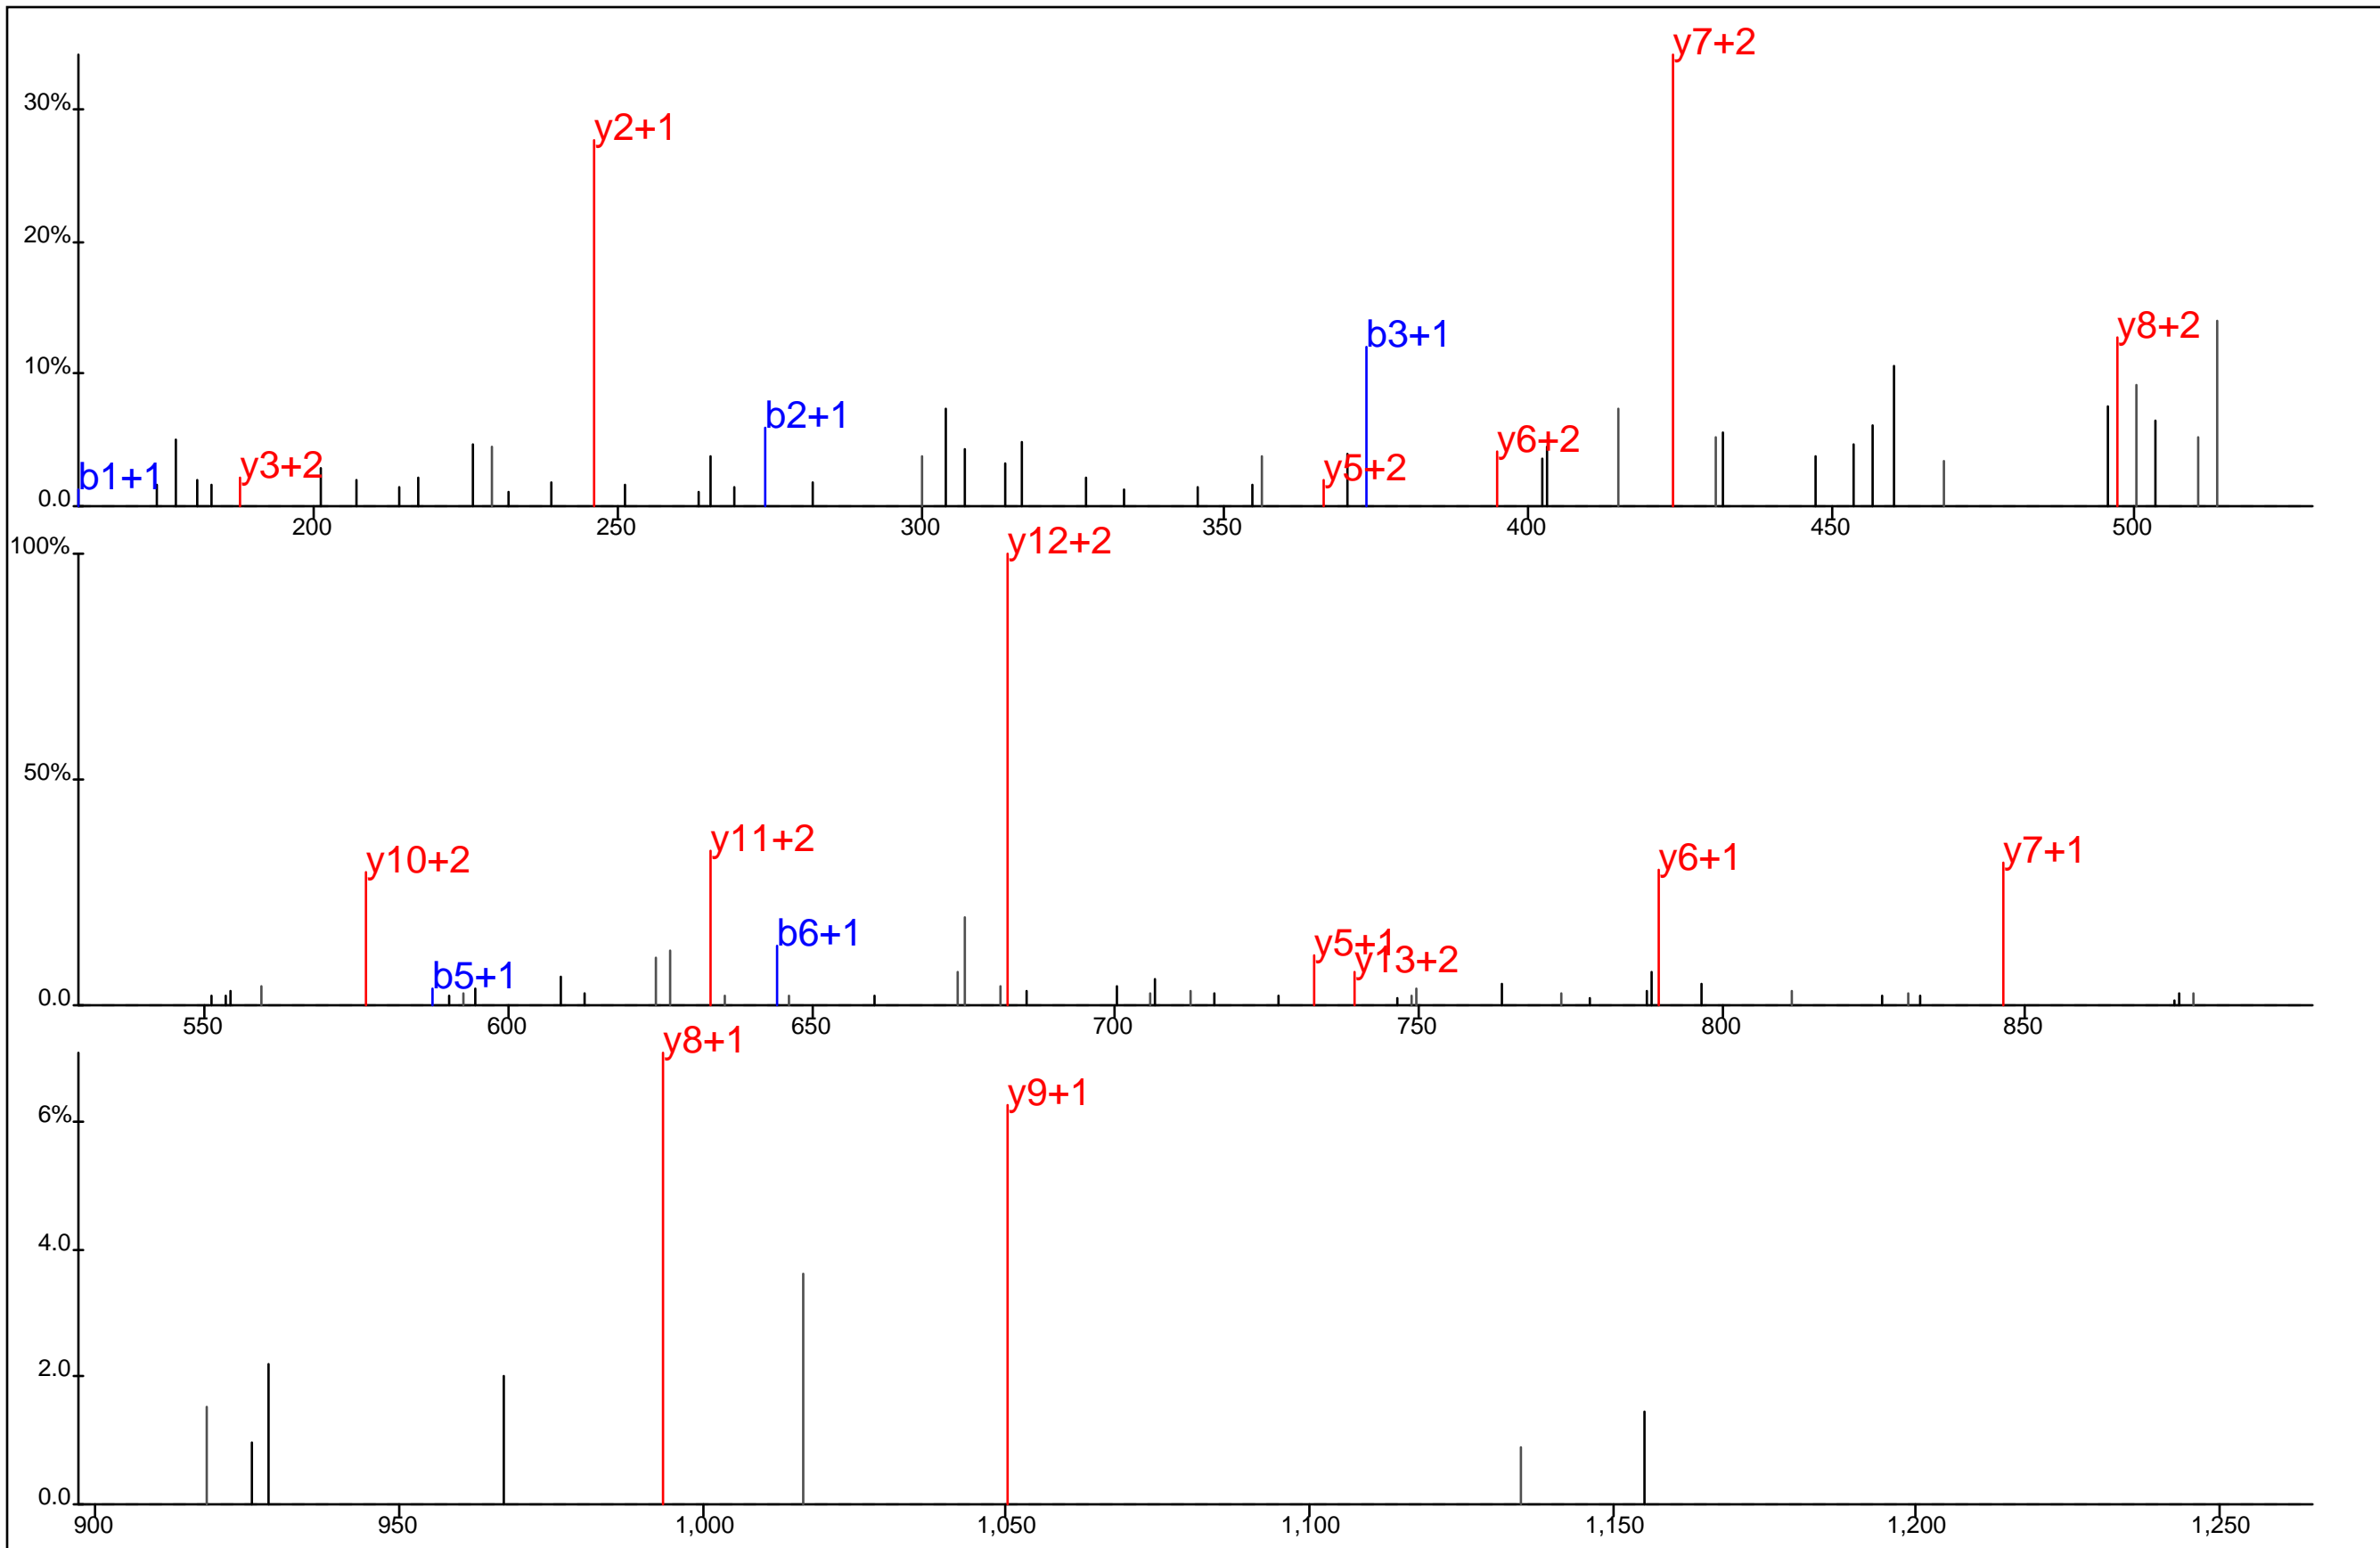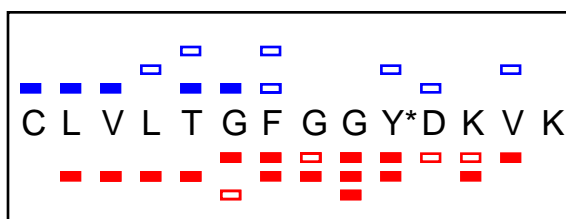

Protein Name: Vesicle amine transport protein 1  
 gi Accession: 0  
 Precursor Mass: 546.2612+3  
 Delta Mass: 6.925 ppm  
 XCorr: 38.65

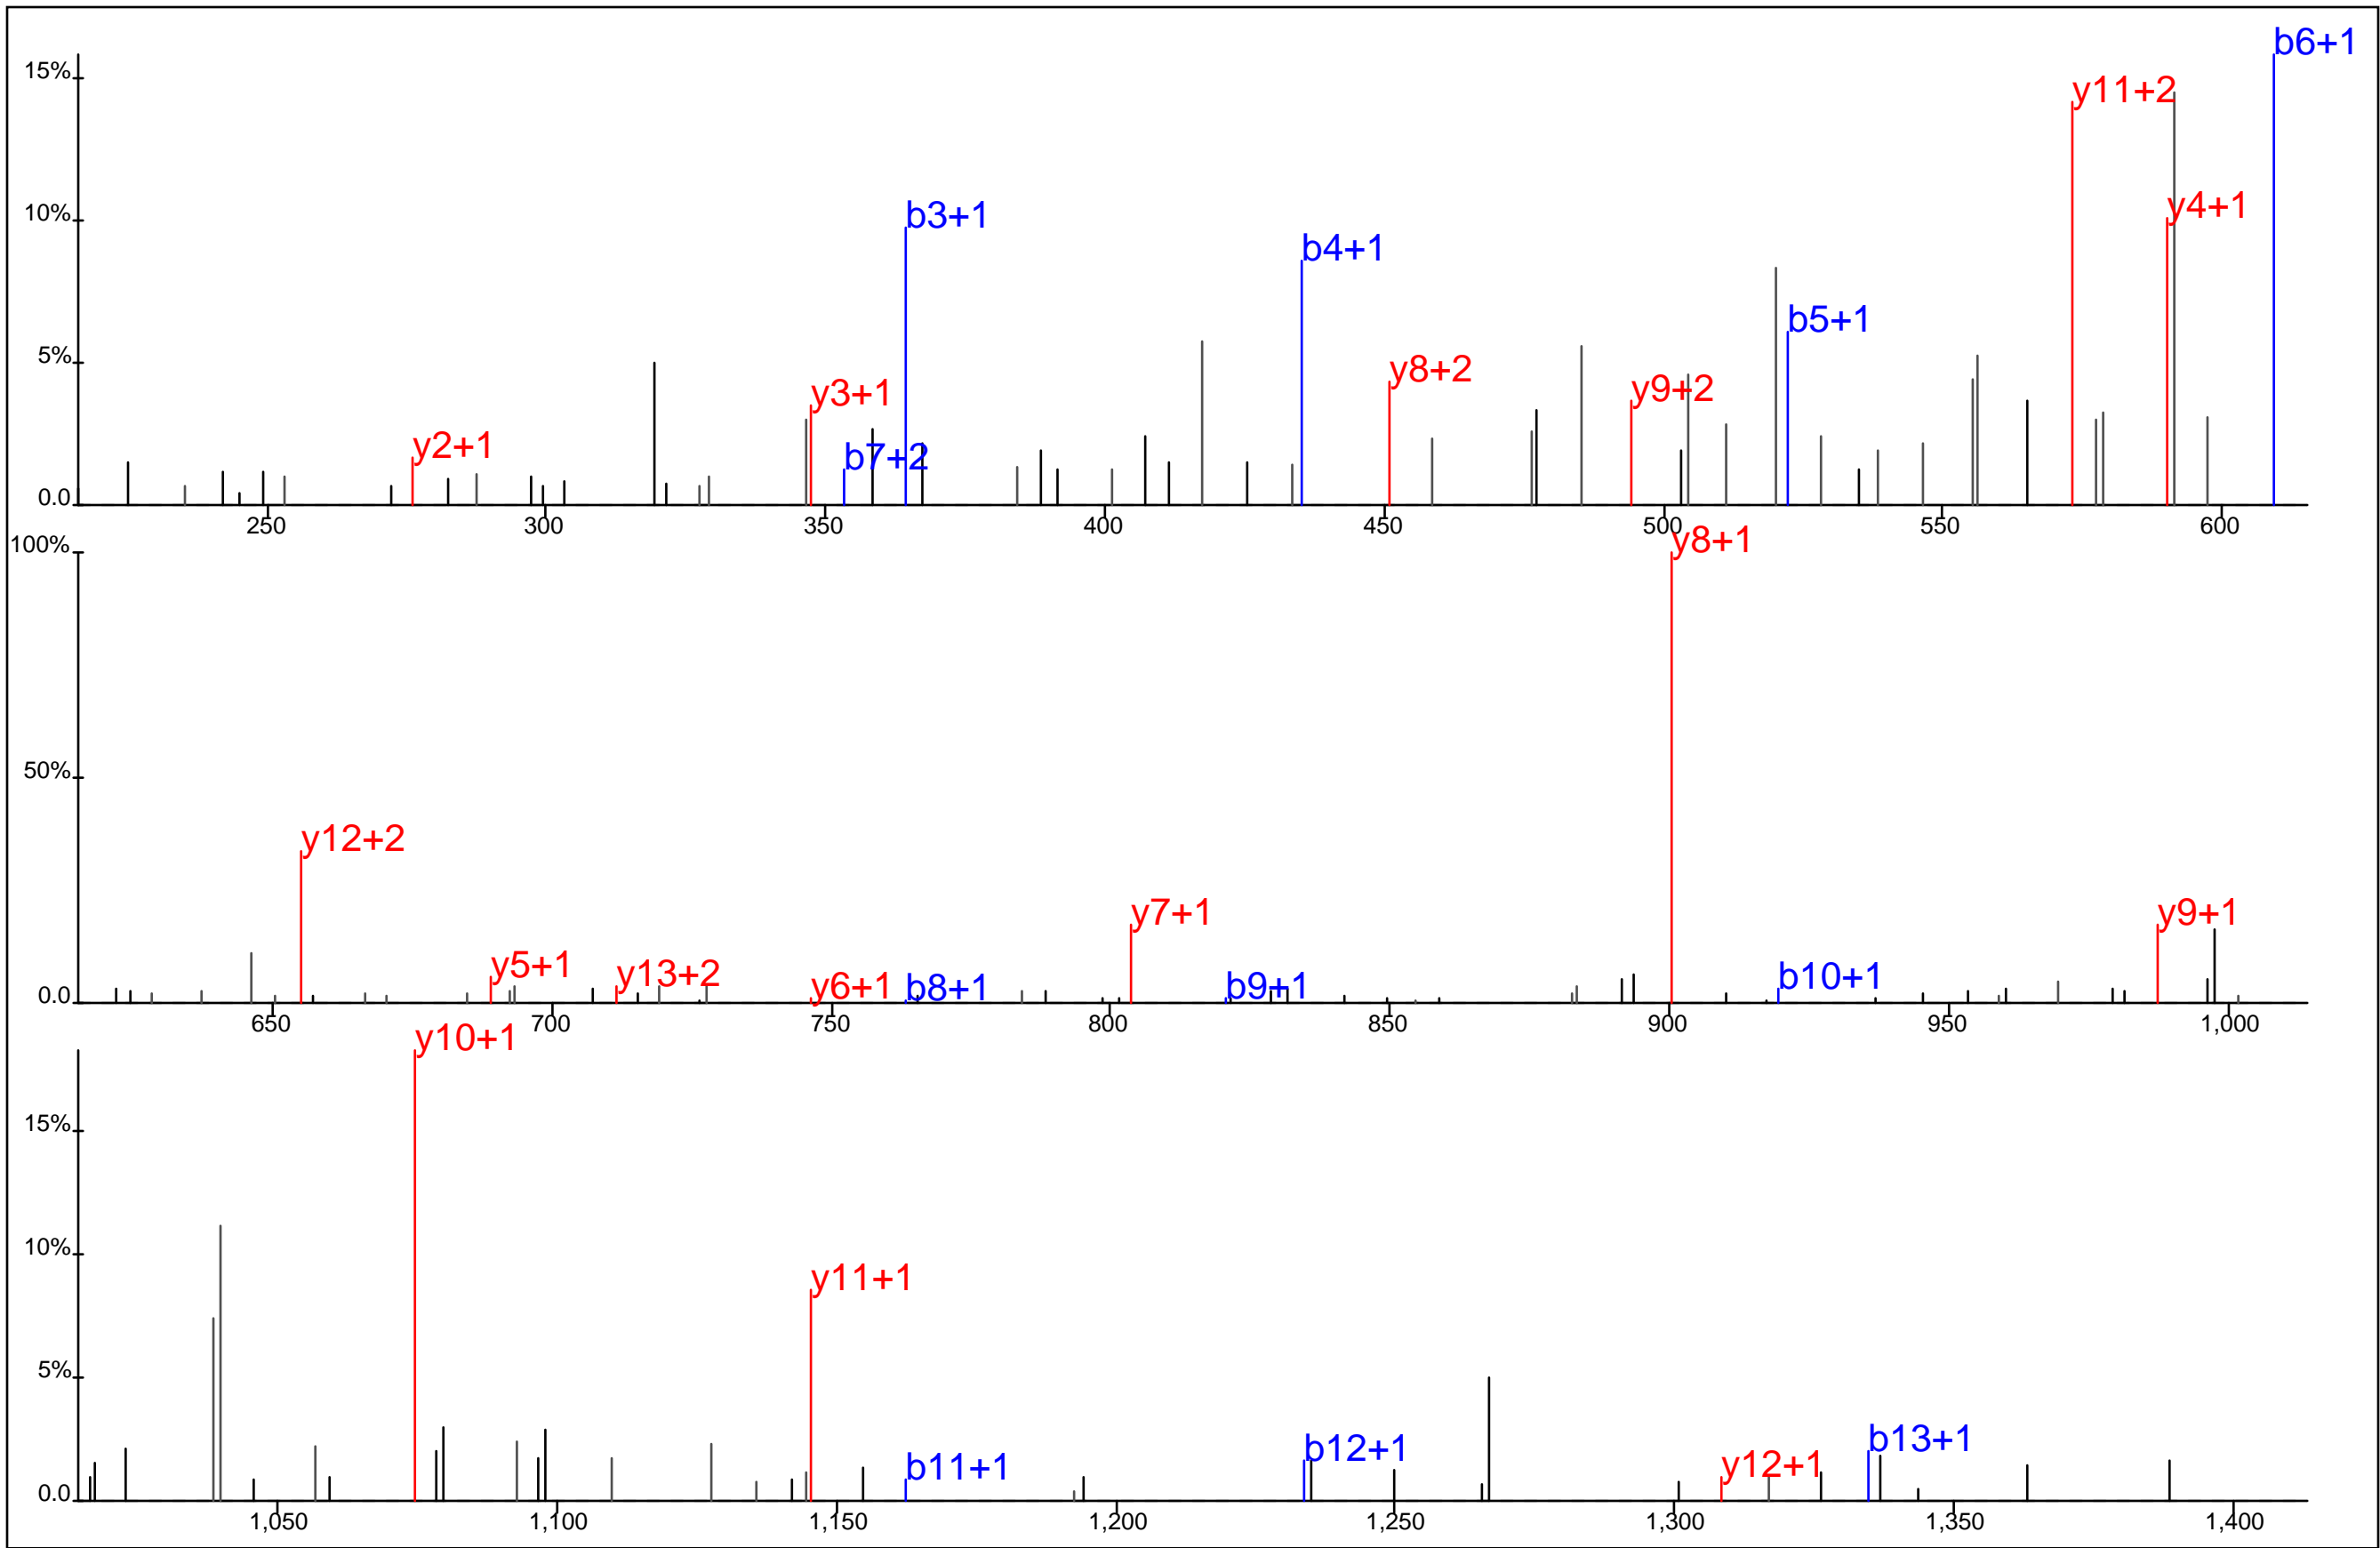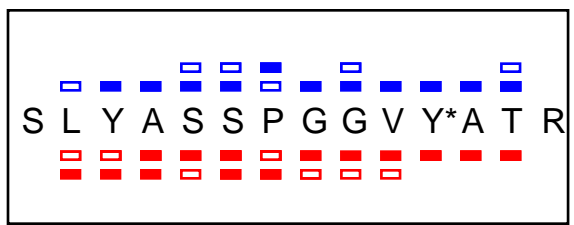

Protein Name: Vimentin  
 gi Accession: 0  
 Precursor Mass: 754.8374+2  
 Delta Mass: 6.996 ppm  
 XCorr: 56.84



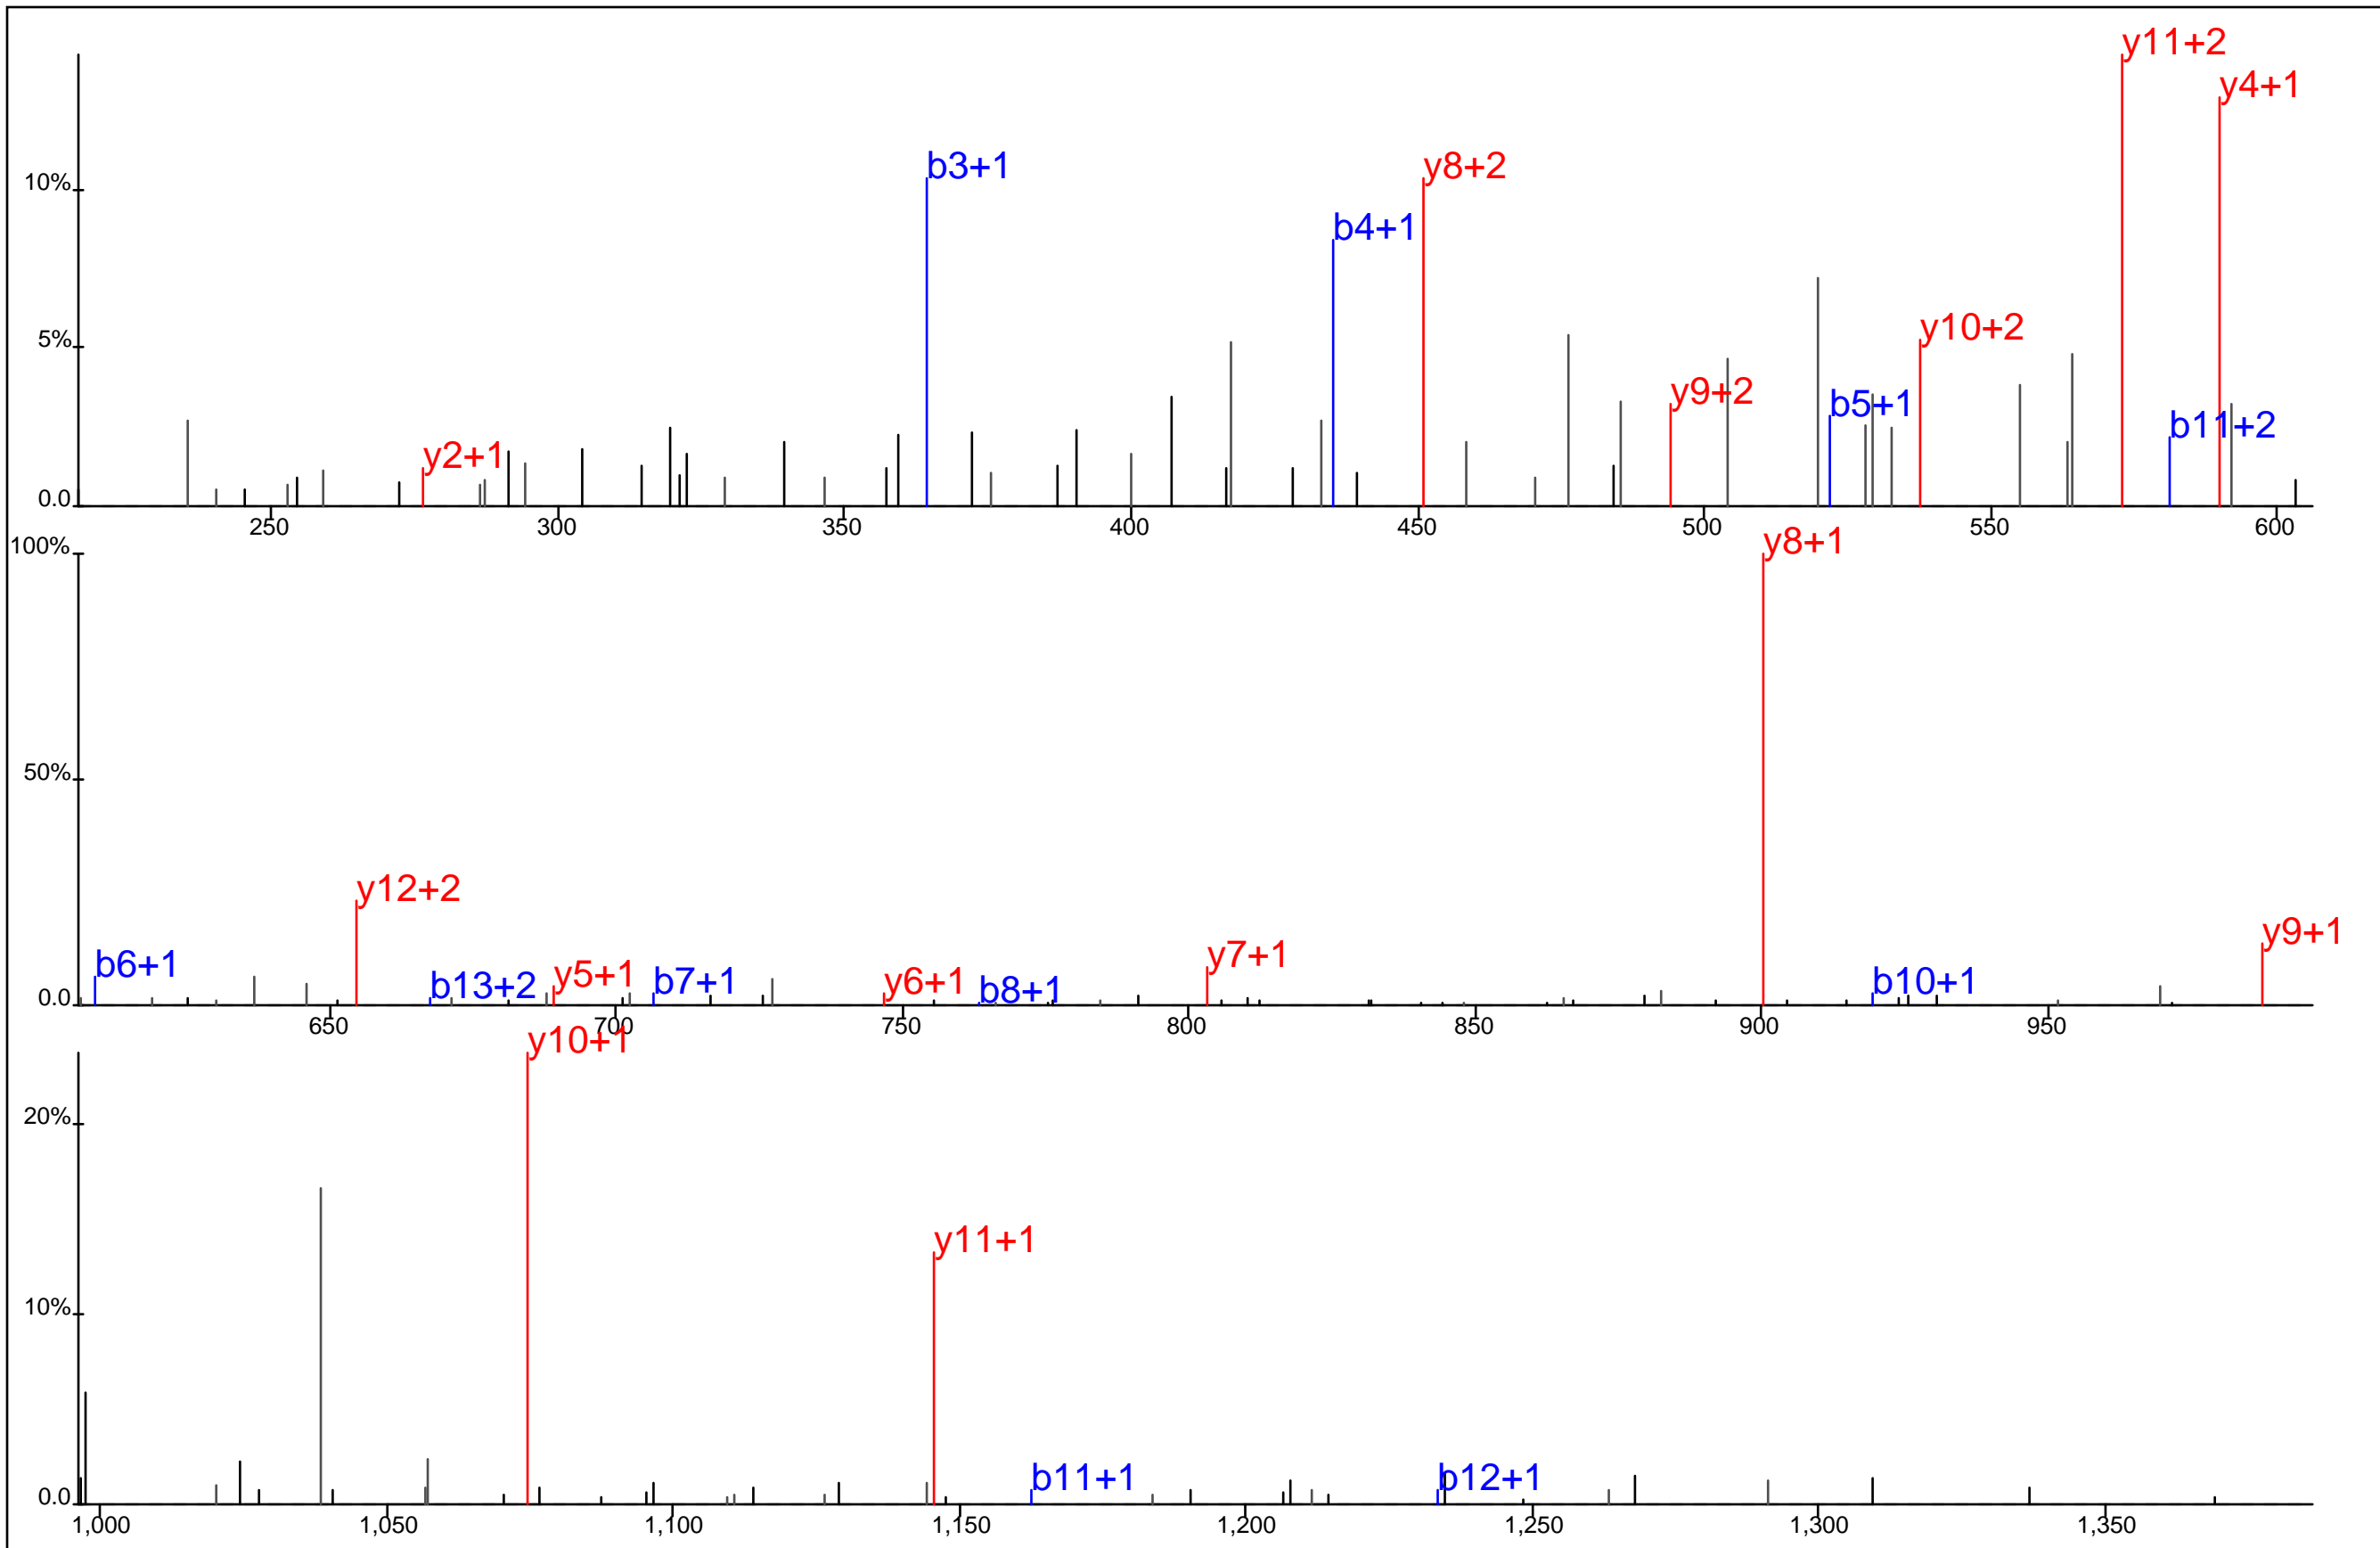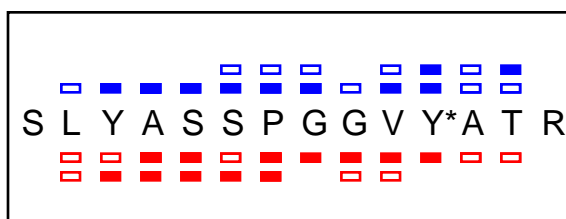

Protein Name: Vimentin  
 gi Accession: 0  
 Precursor Mass: 754.8431+2  
 Delta Mass: 0.611 ppm  
 XCorr: 42.5

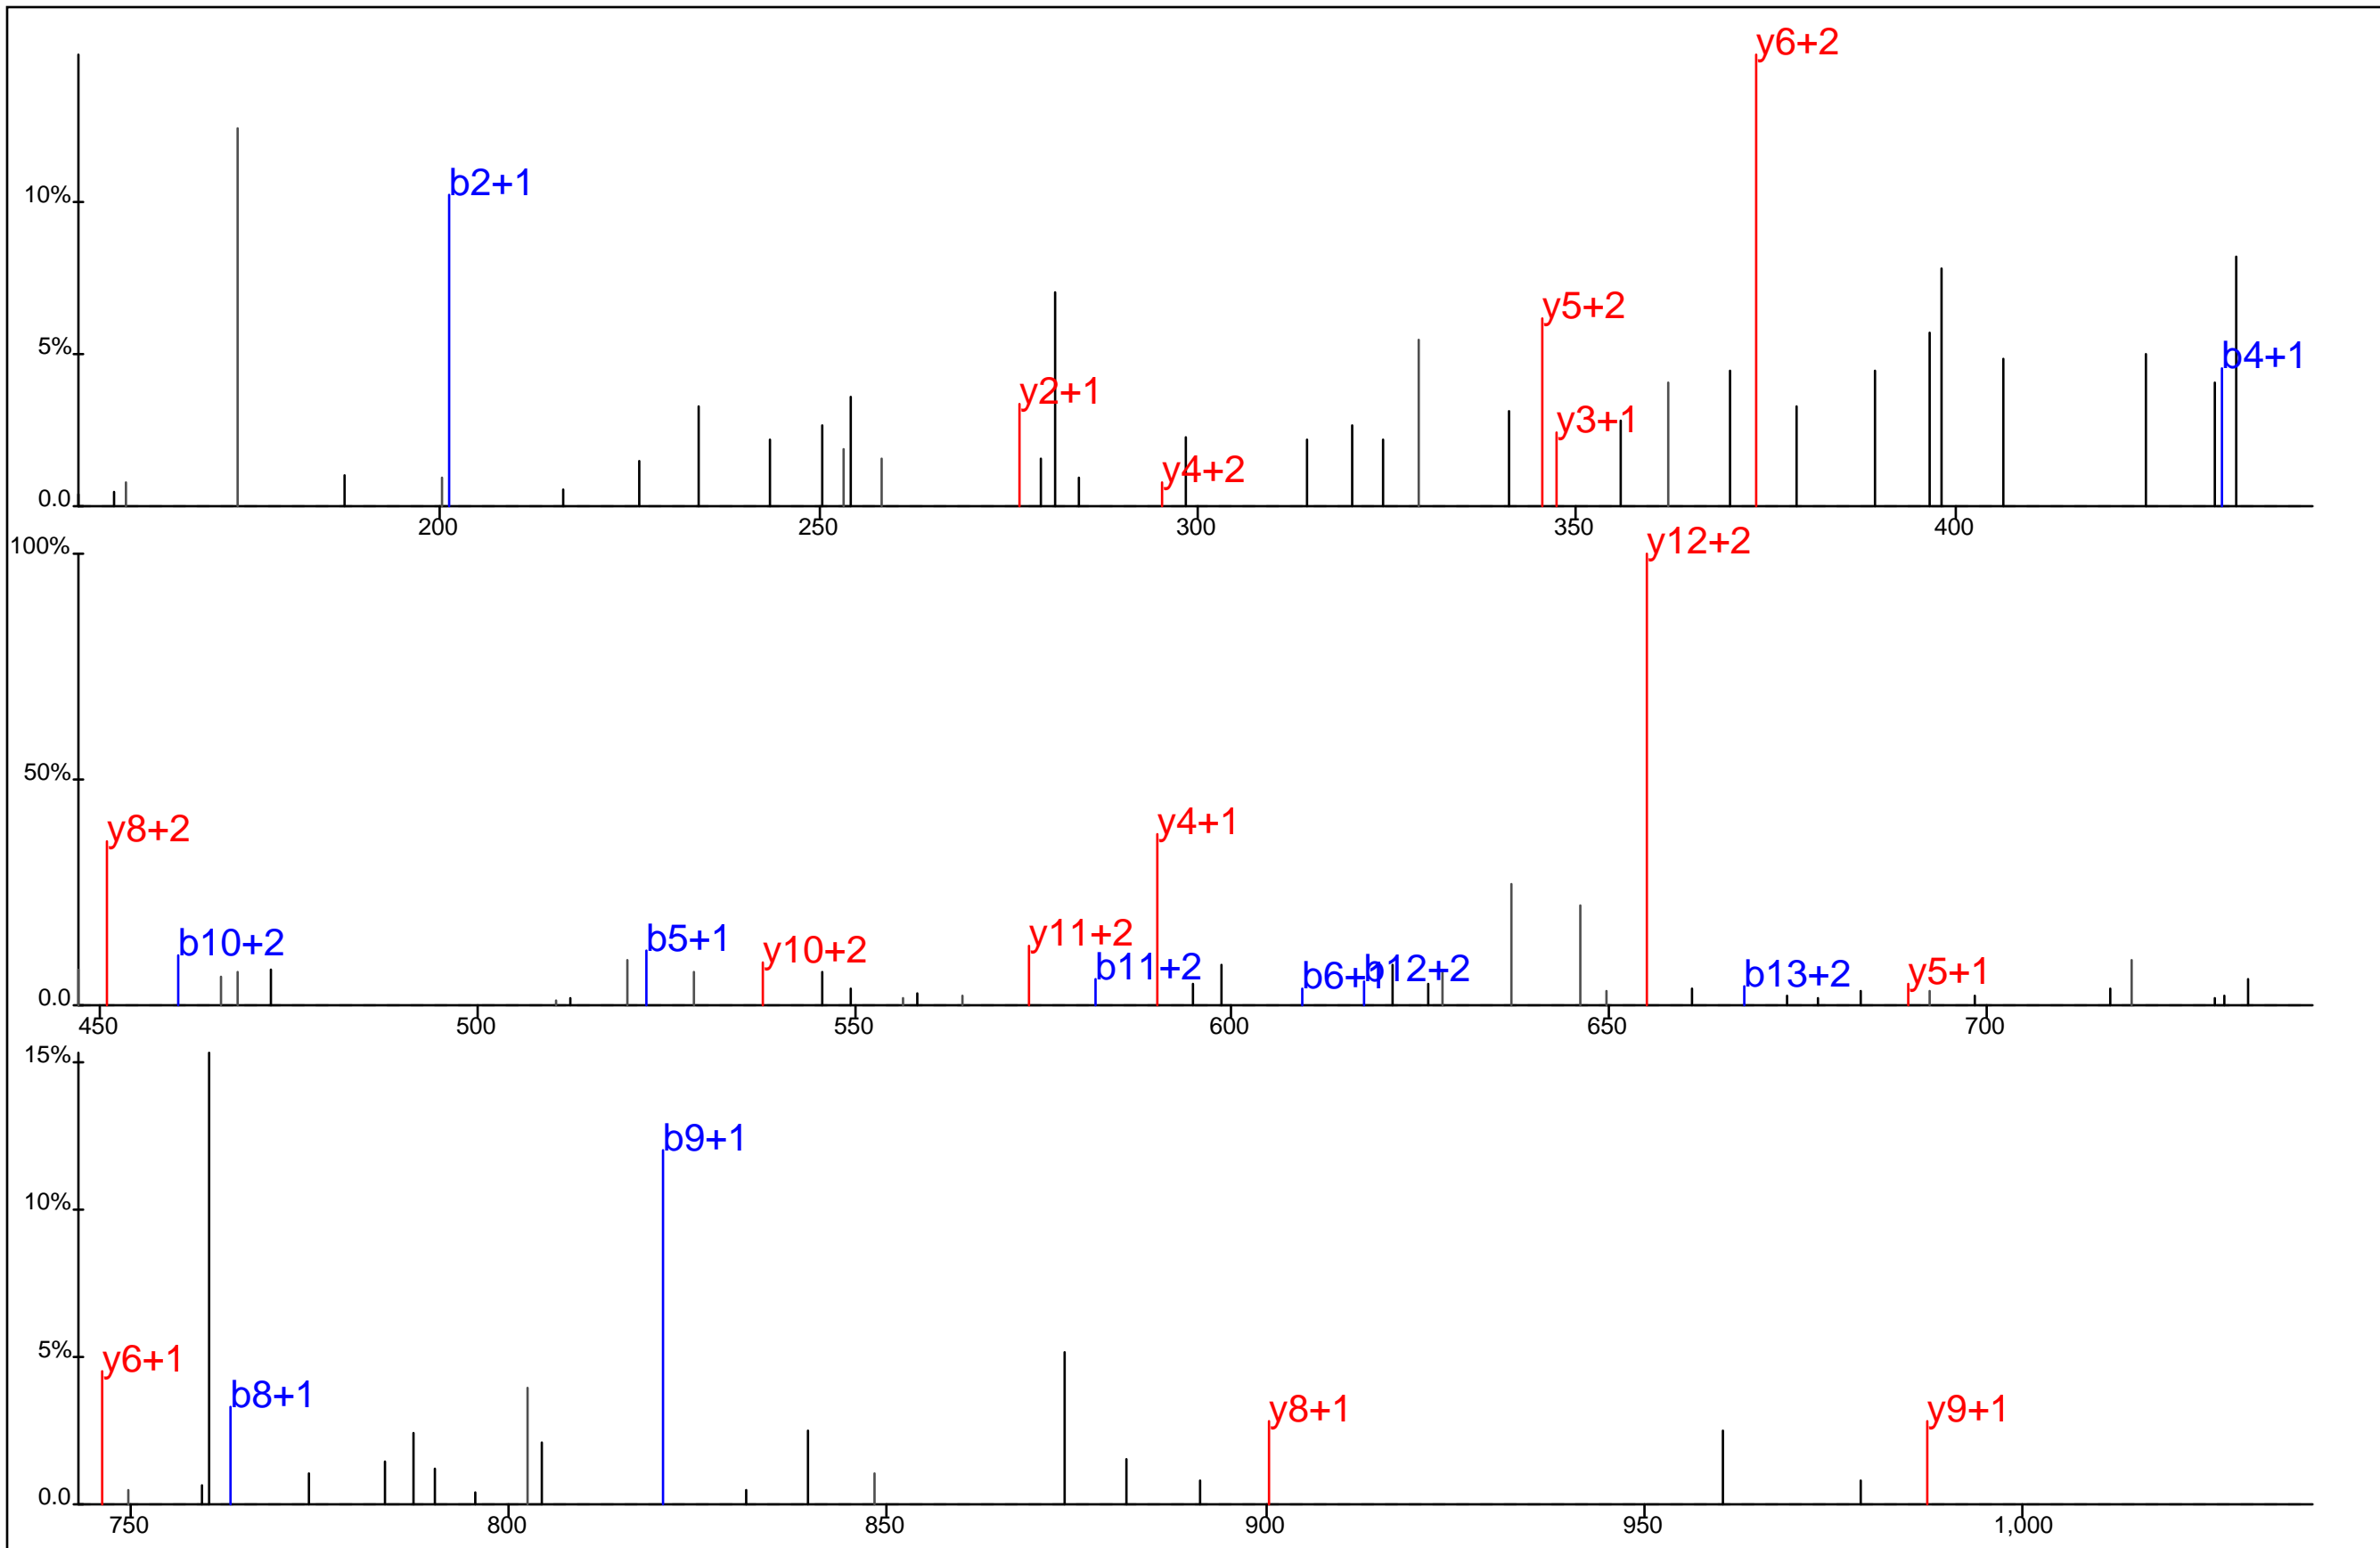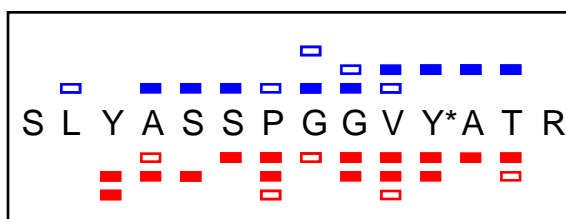

Protein Name: Vimentin  
 gi Accession: 0  
 Precursor Mass: 503.5631+3  
 Delta Mass: 2.190 ppm  
 XCorr: 33.45









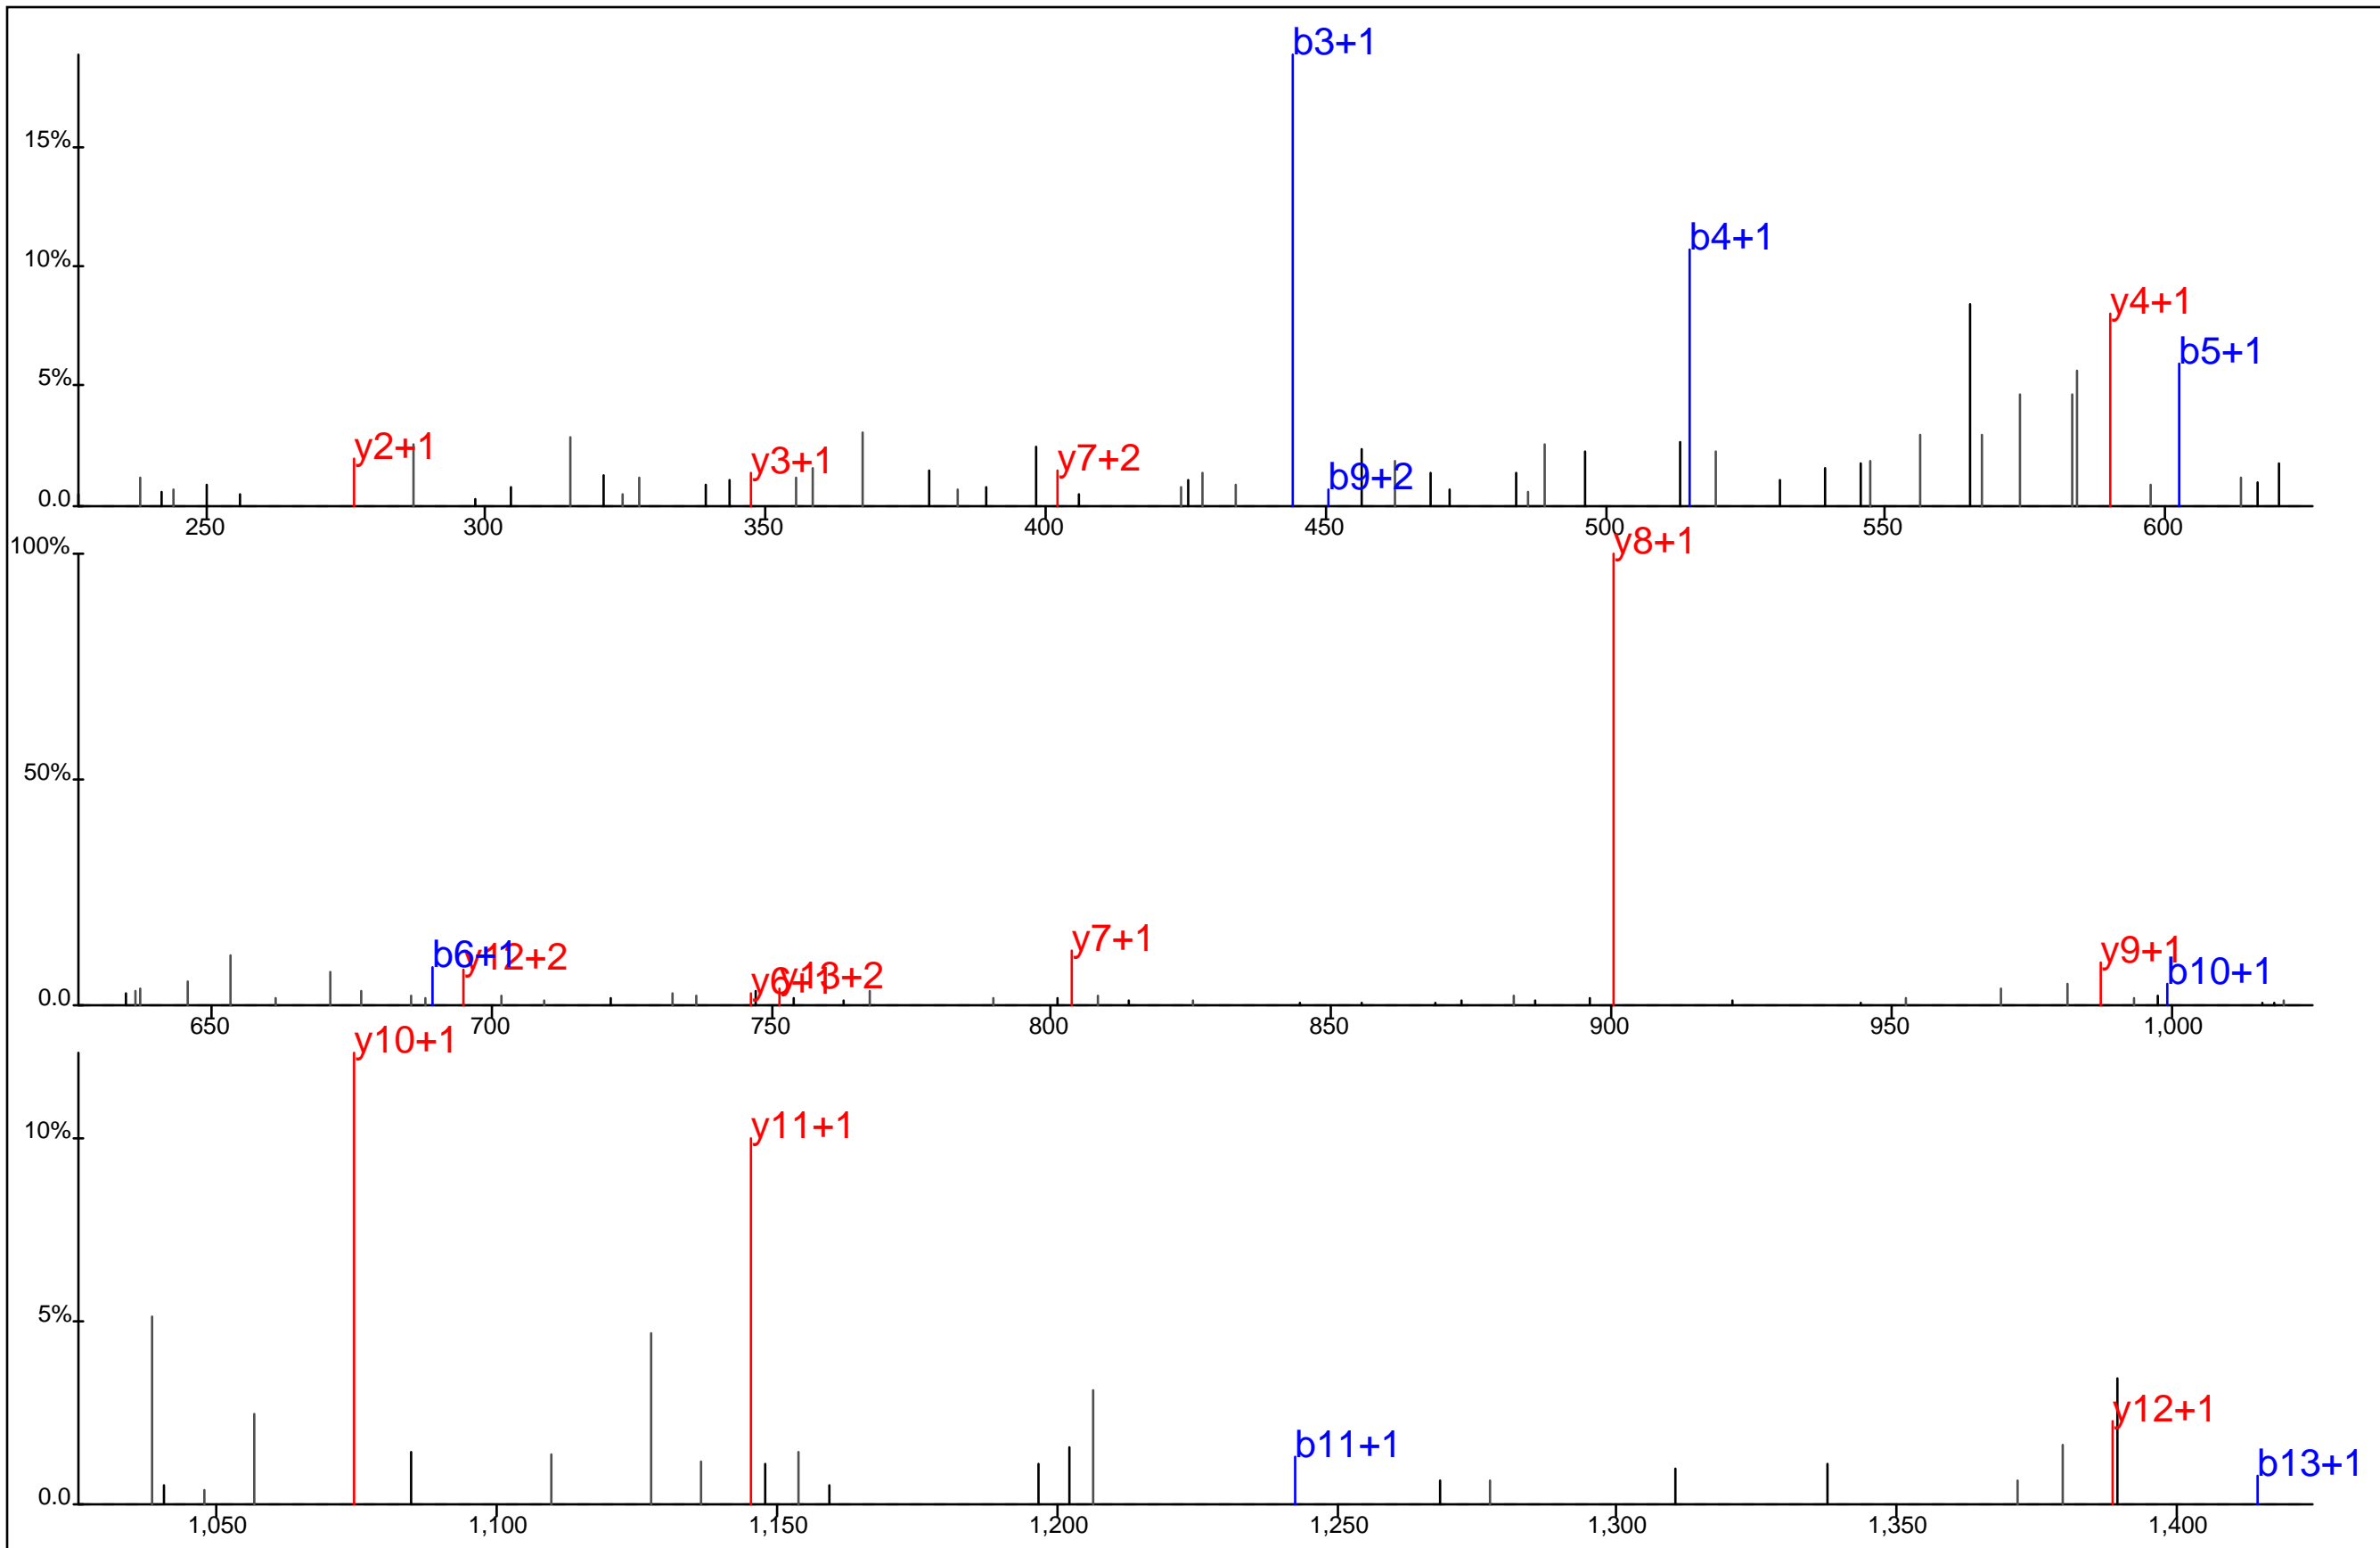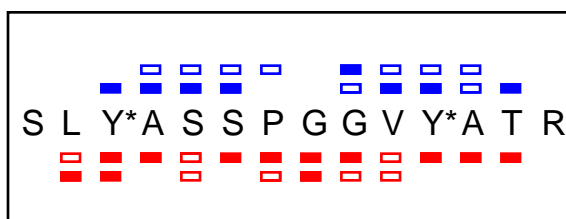

Protein Name: Vimentin  
 gi Accession: 0  
 Precursor Mass: 794.8289+2  
 Delta Mass: 3.876 ppm  
 XCorr: 57.36

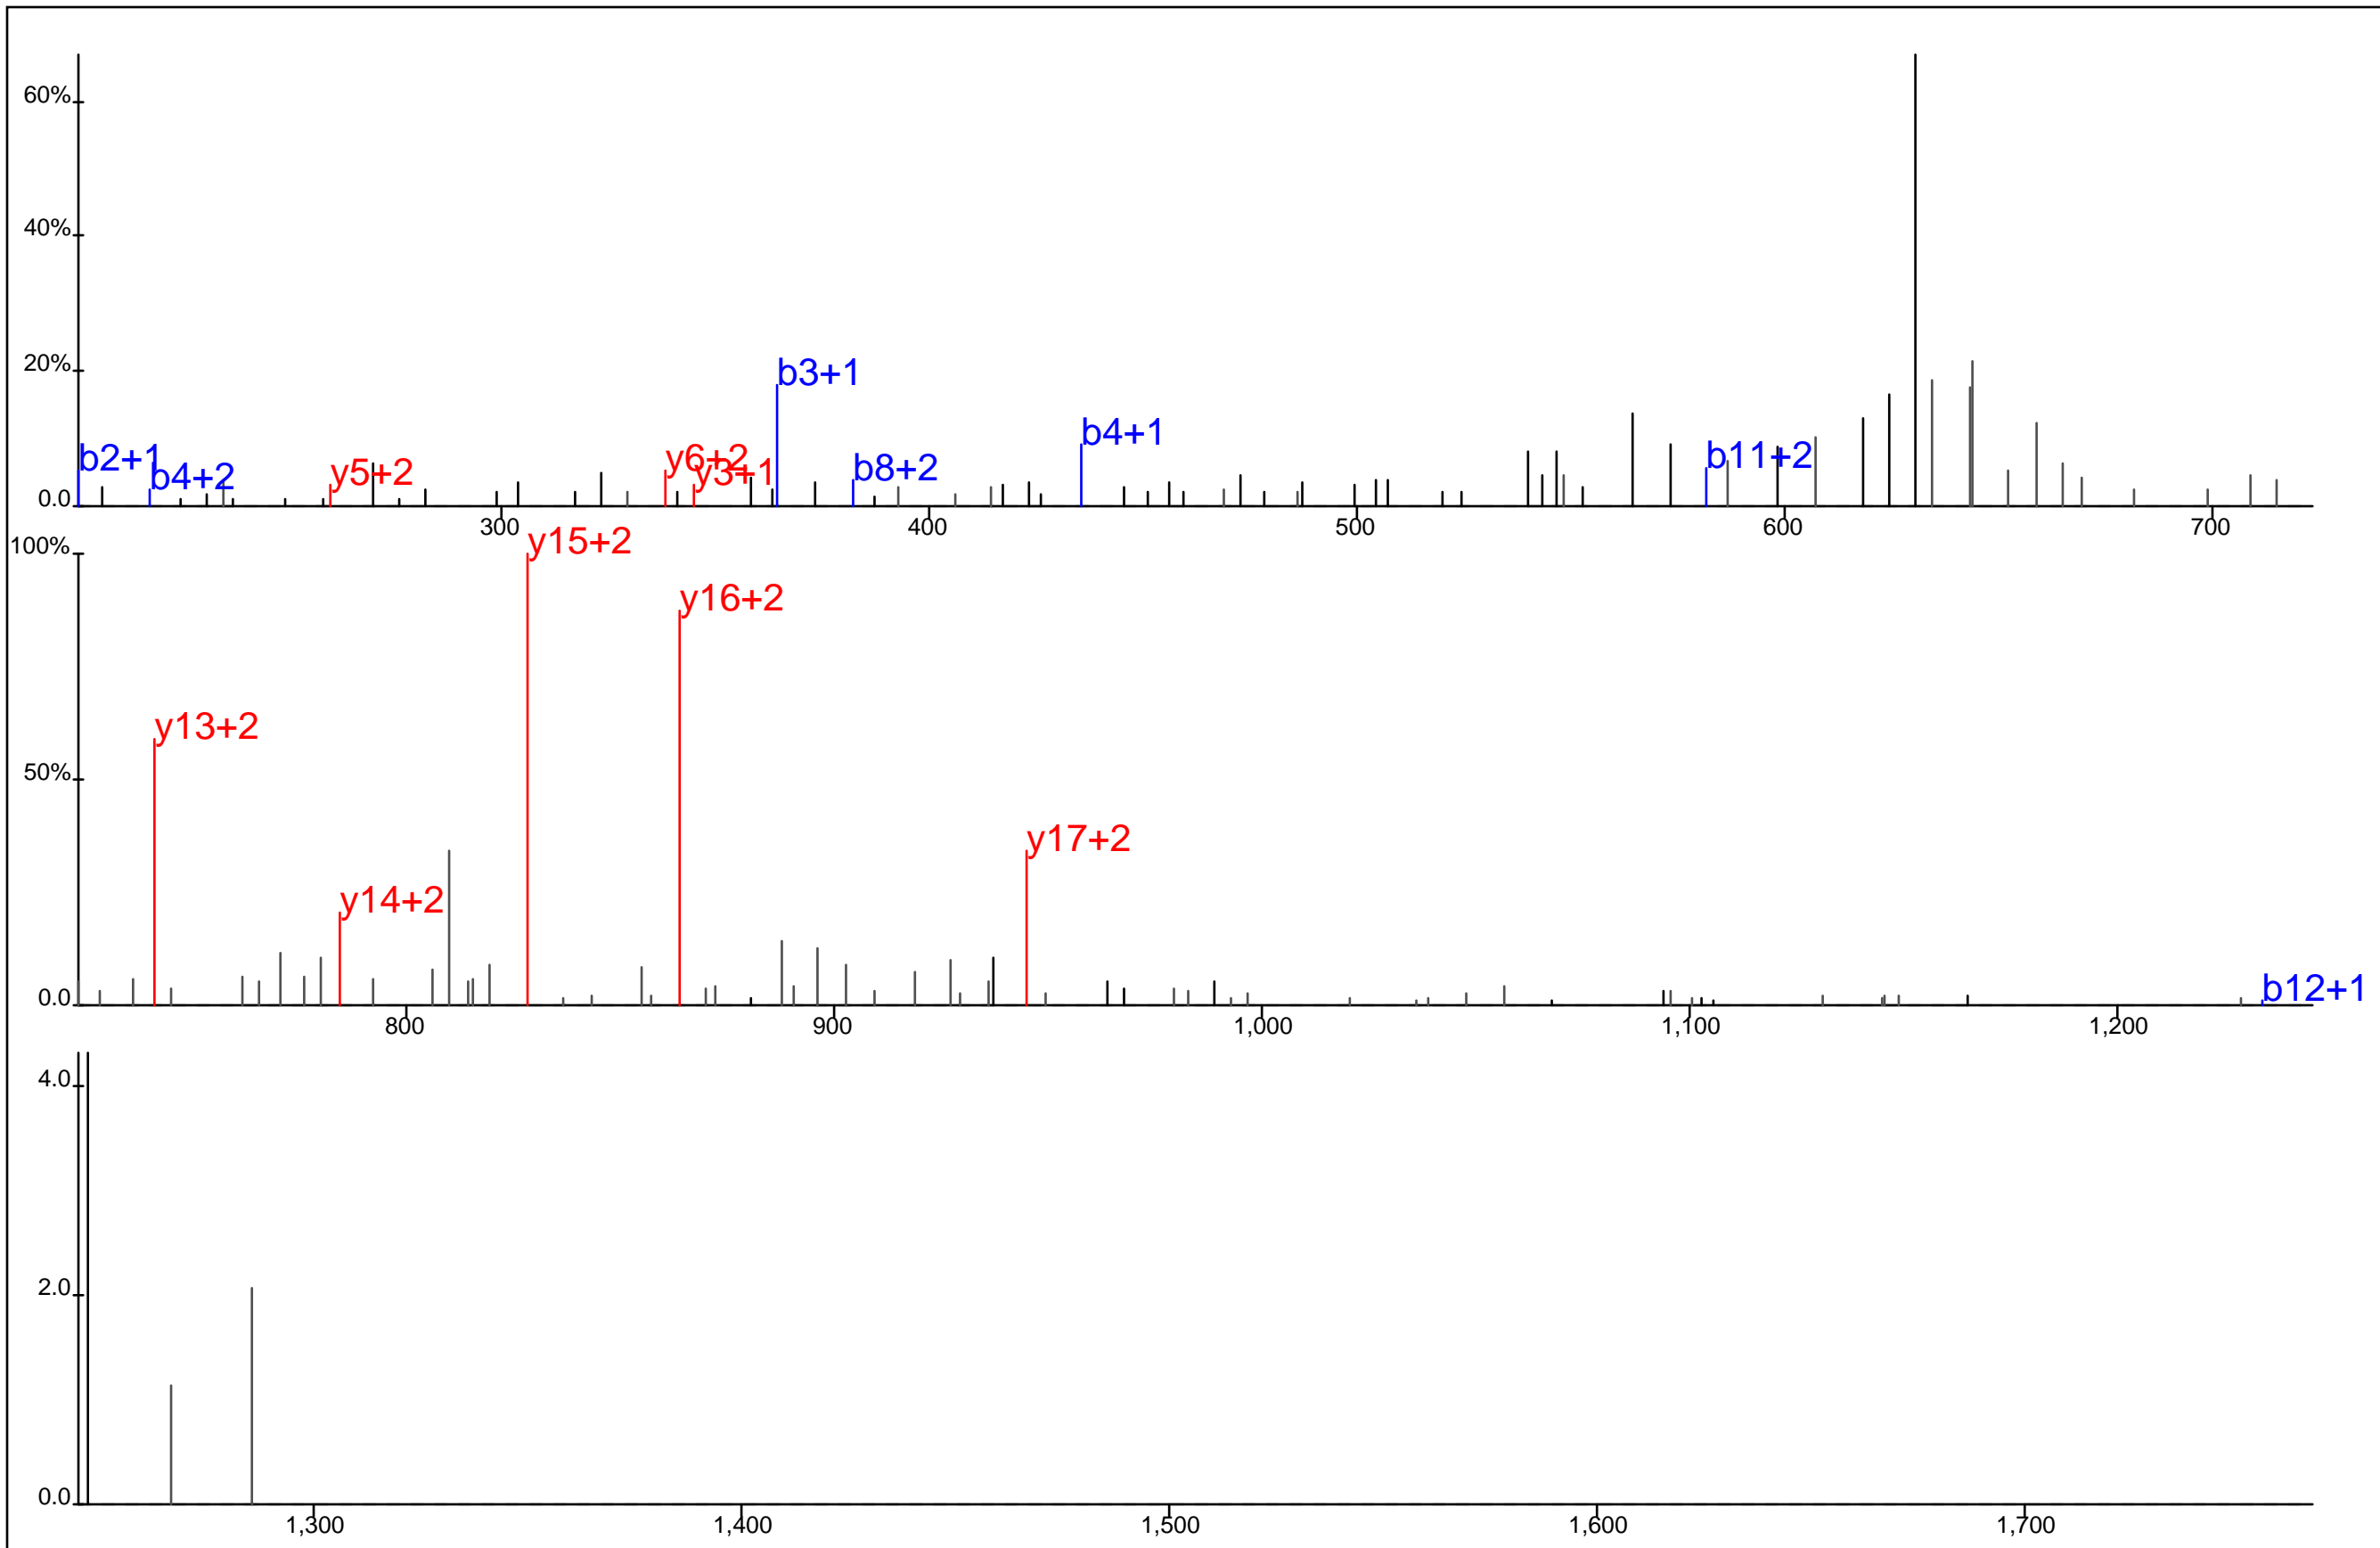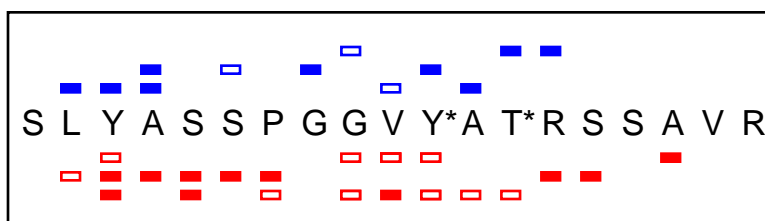

Protein Name: Vimentin  
 gi Accession: 0  
 Precursor Mass: 696.9766+3  
 Delta Mass: 0.017 ppm  
 XCorr: 21.44





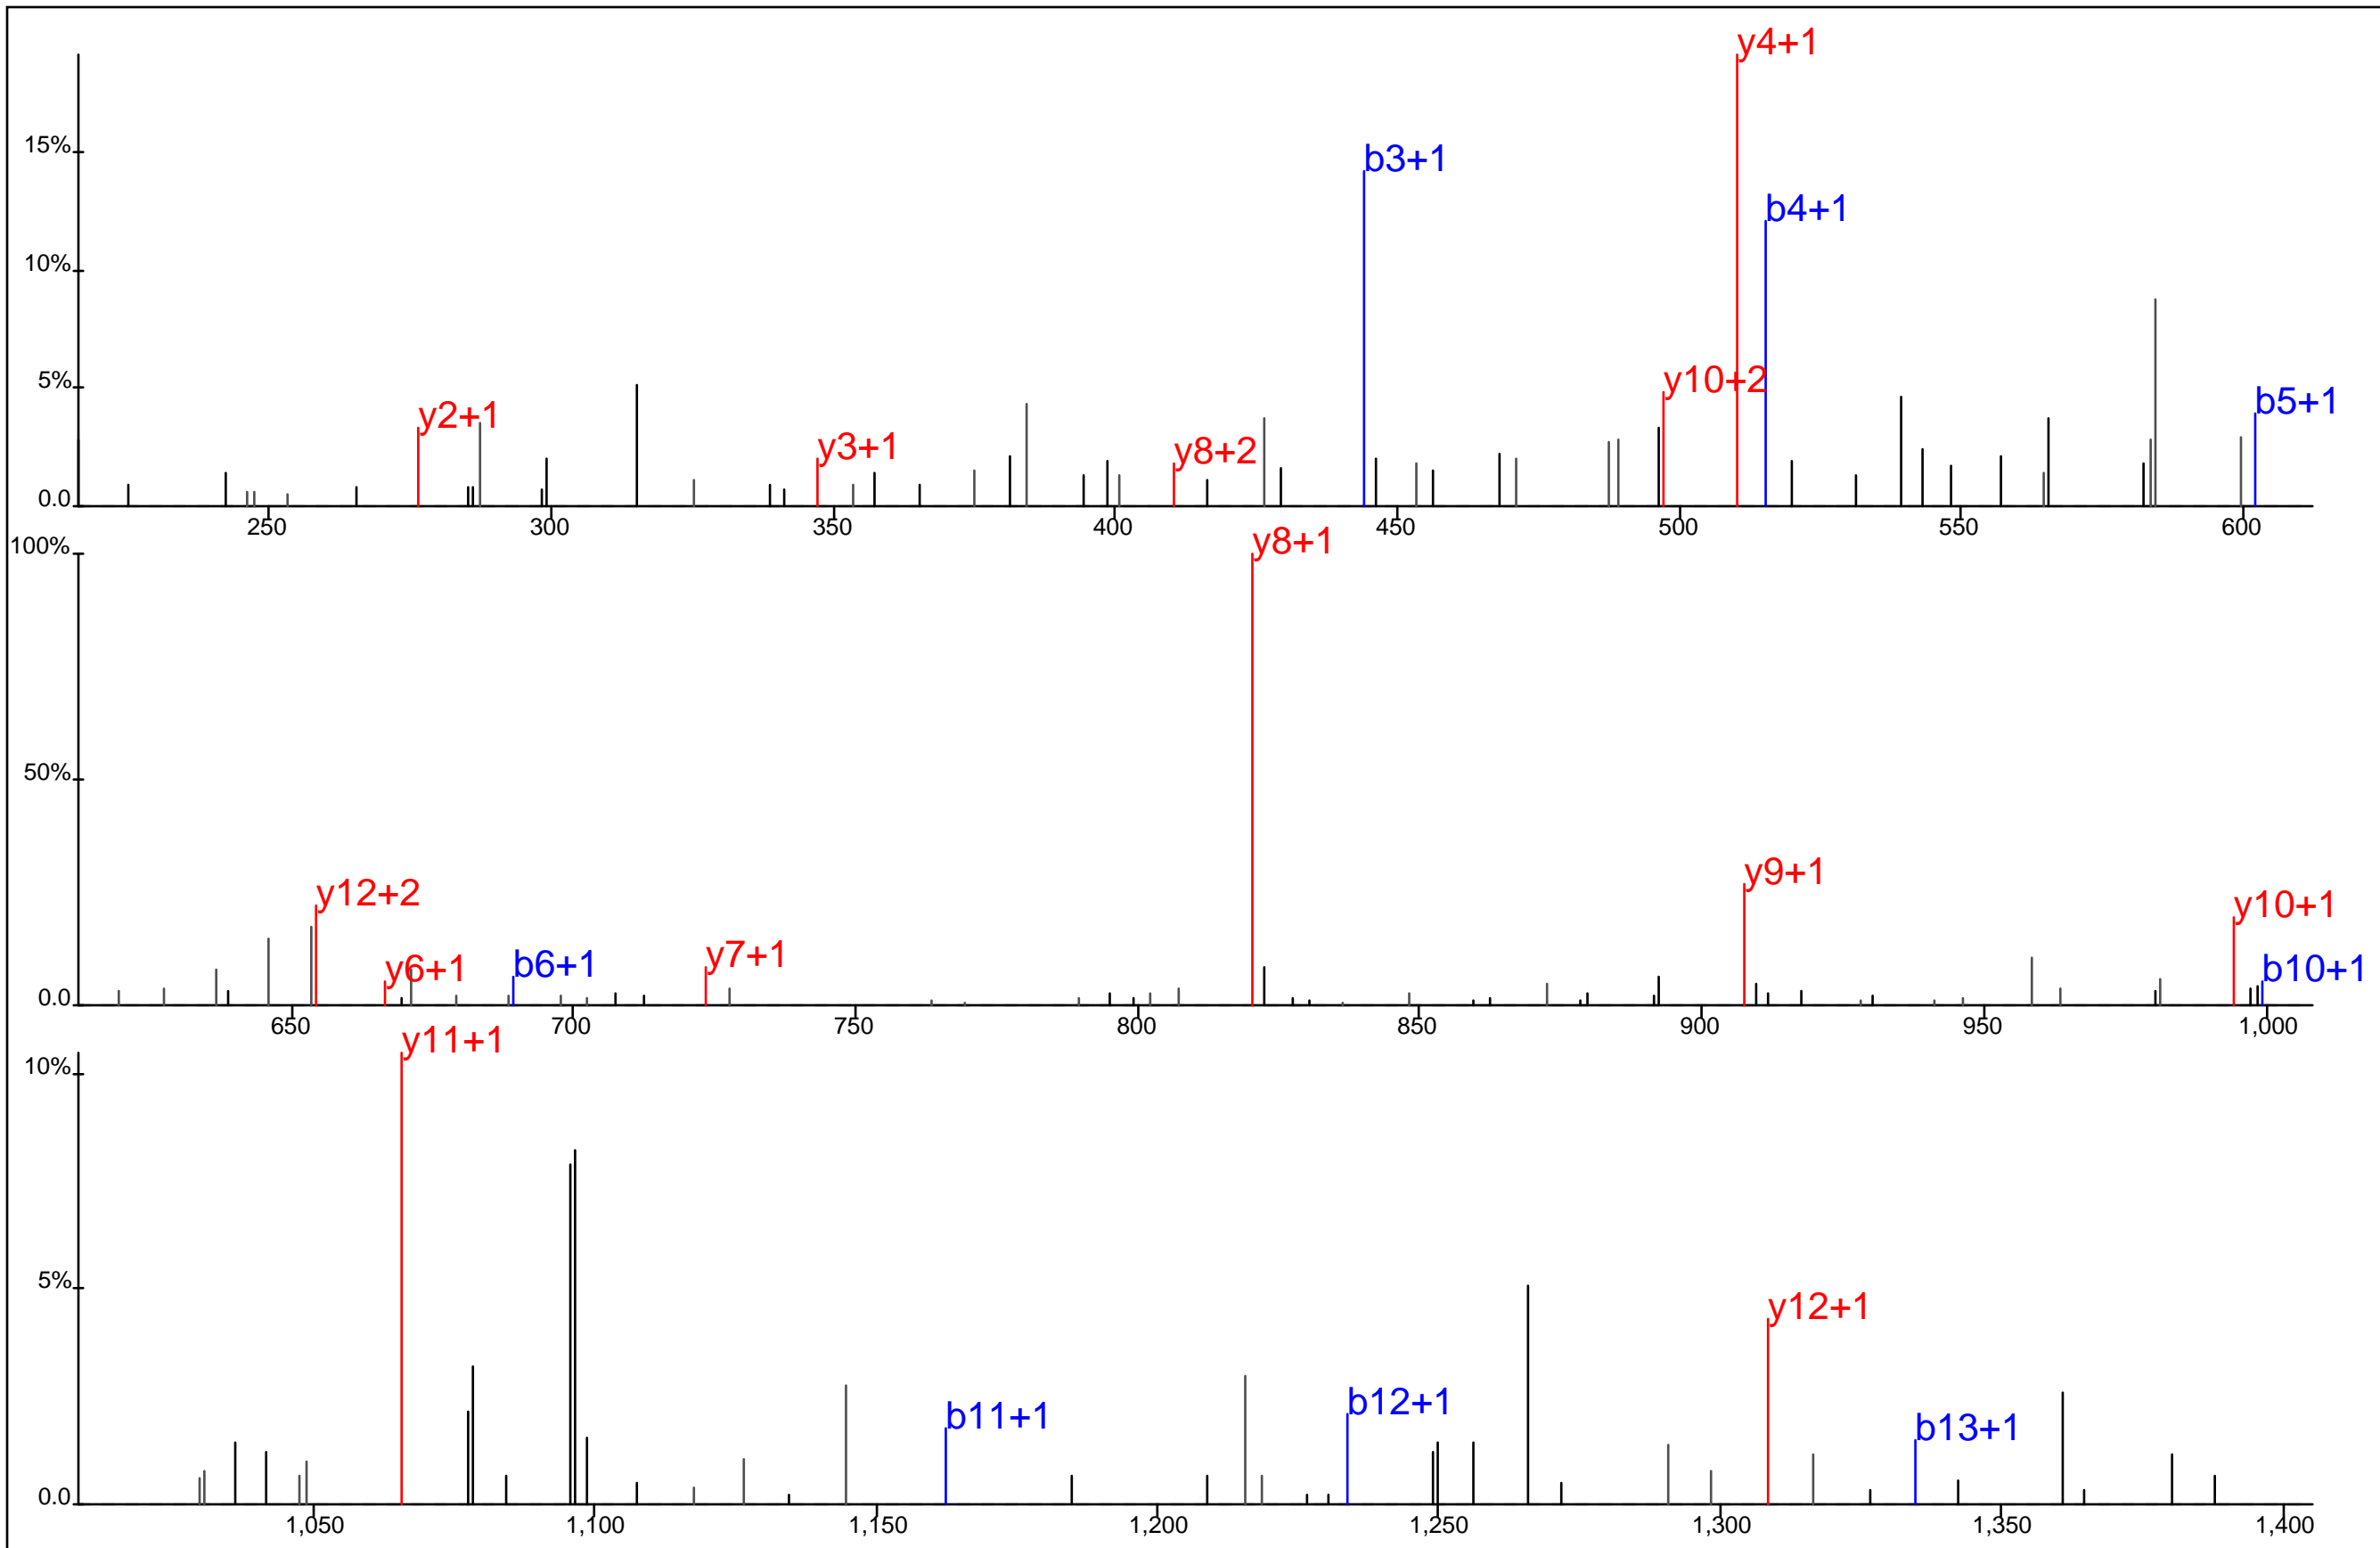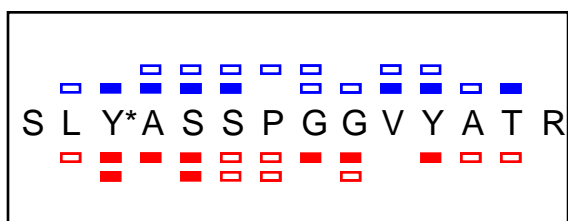

Protein Name: Vimentin  
 gi Accession: 0  
 Precursor Mass: 754.8406+2  
 Delta Mass: 2.707 ppm  
 XCorr: 58.77

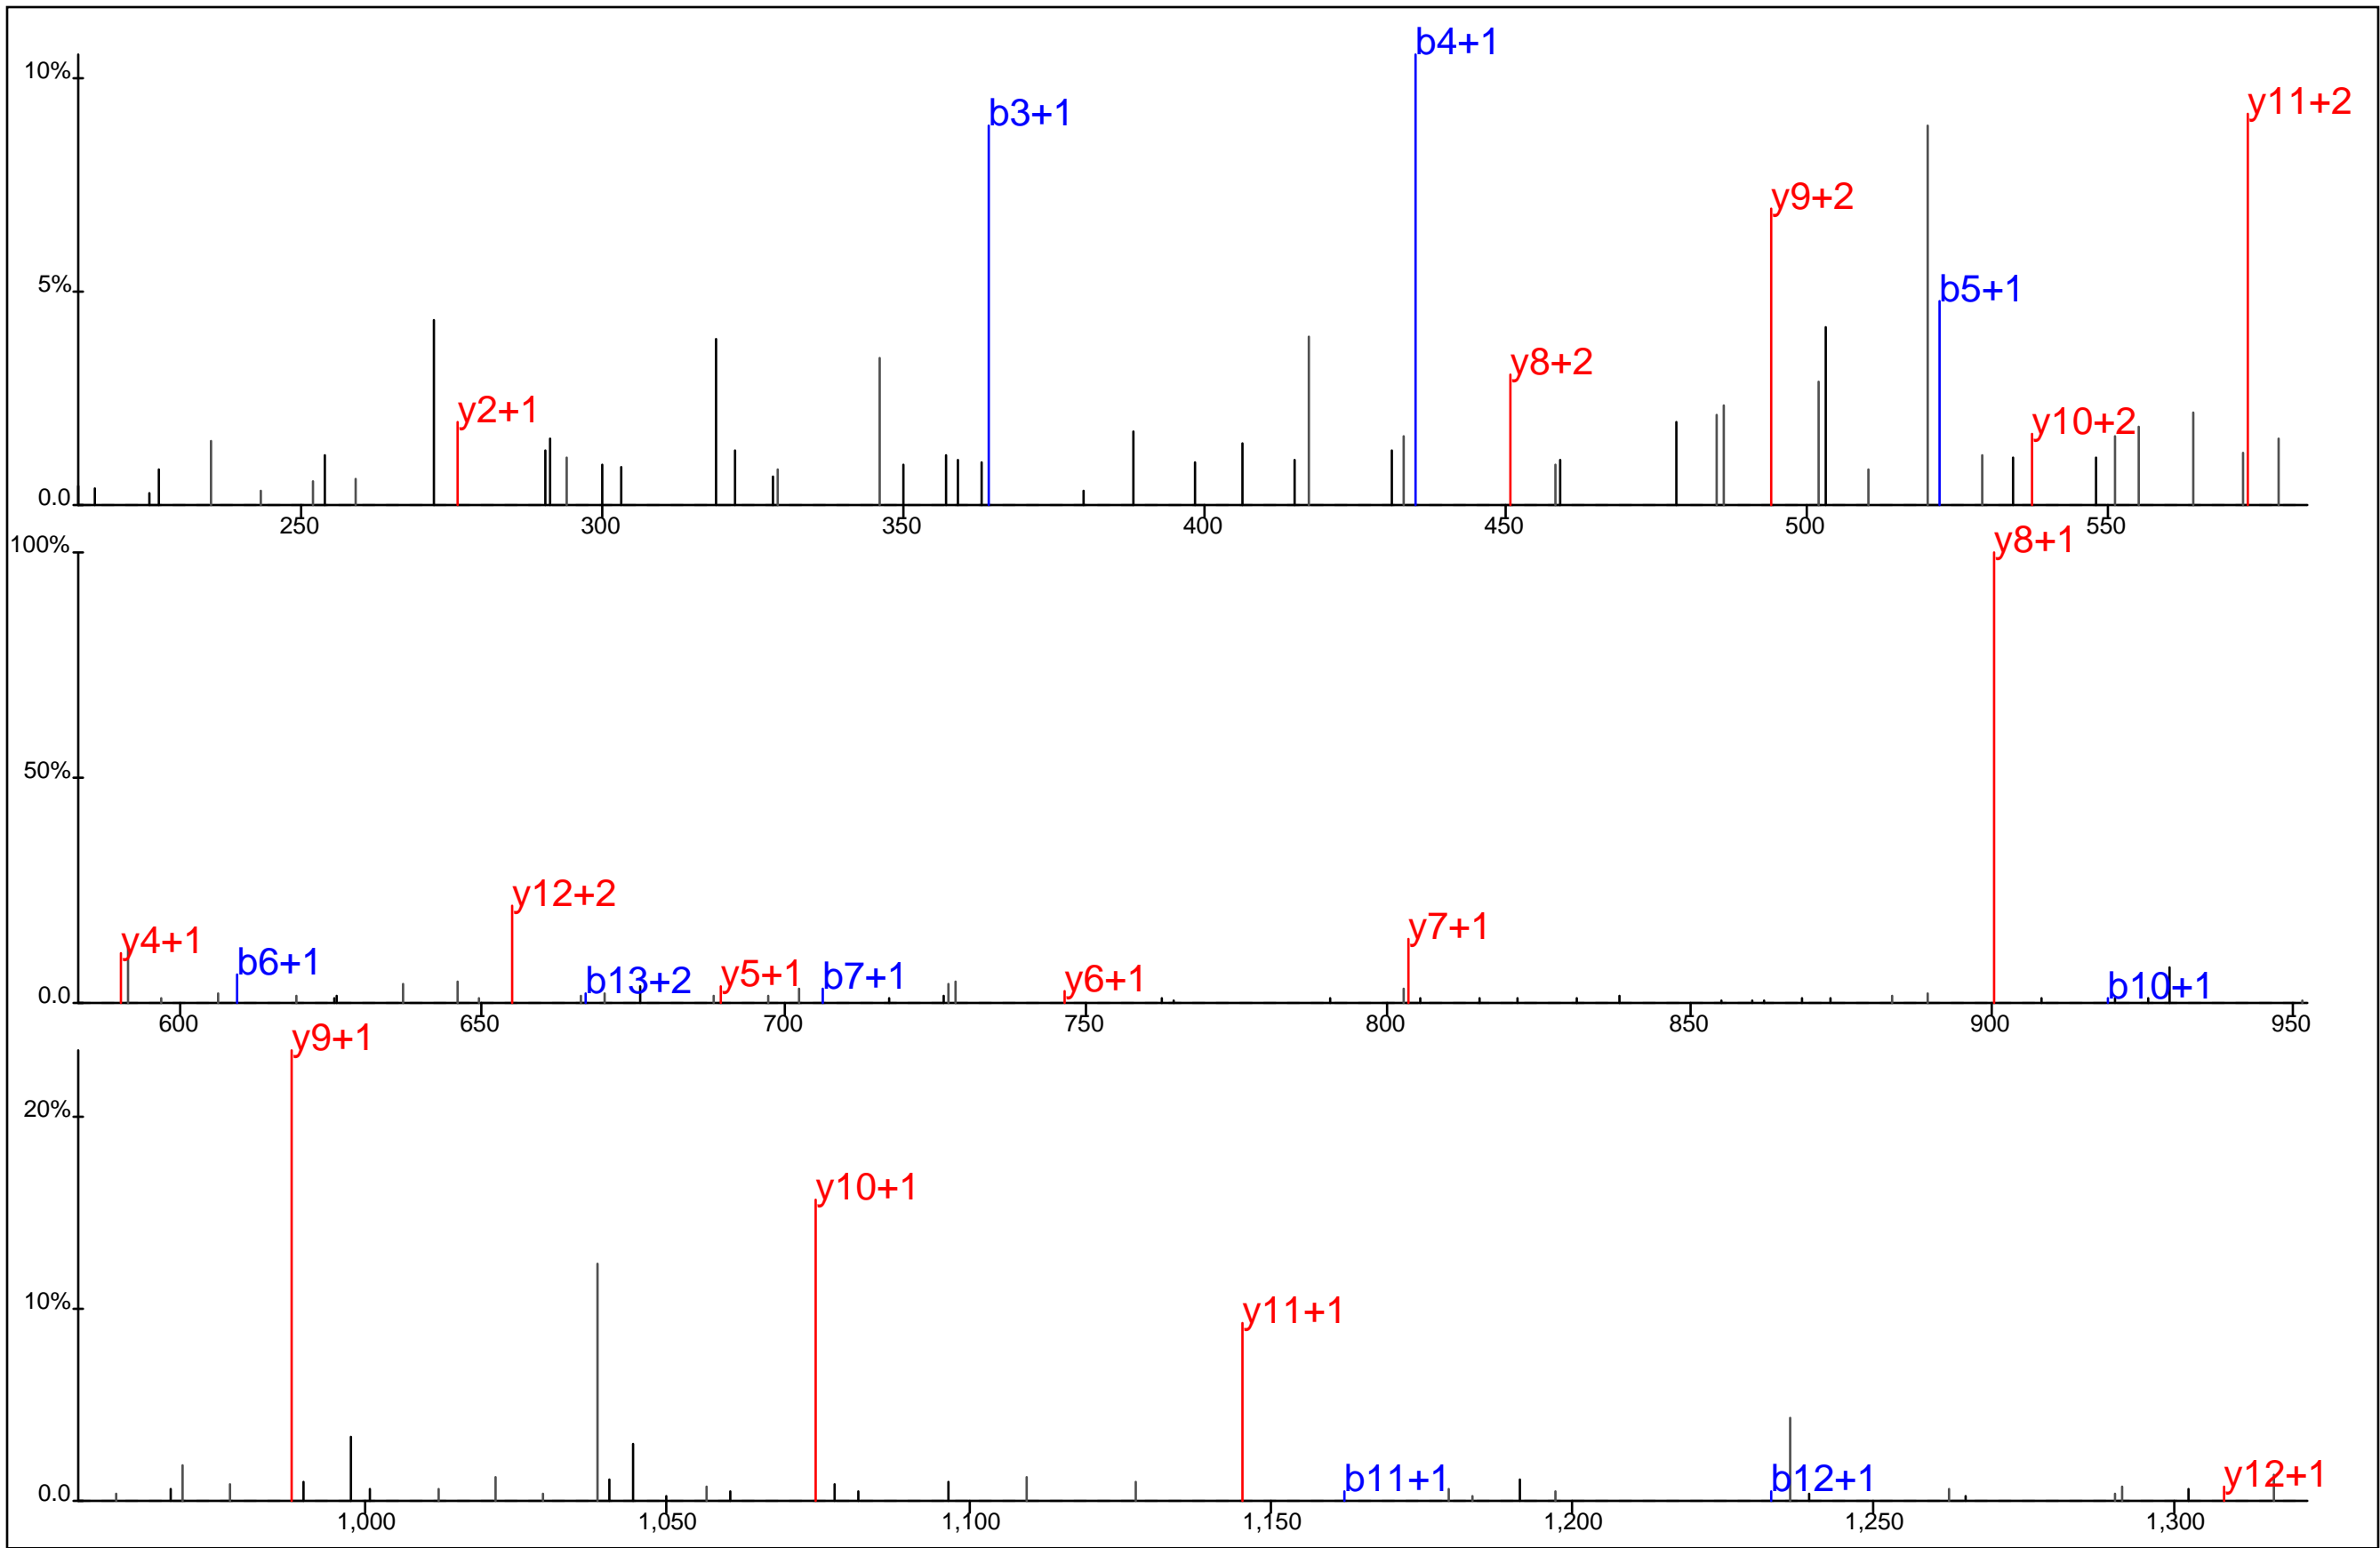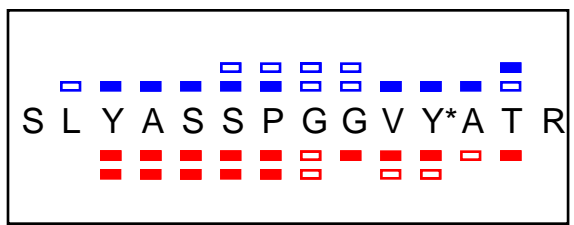

Protein Name: Vimentin  
 gi Accession: 0  
 Precursor Mass: 754.8420+2  
 Delta Mass: 0.927 ppm  
 XCorr: 58.68



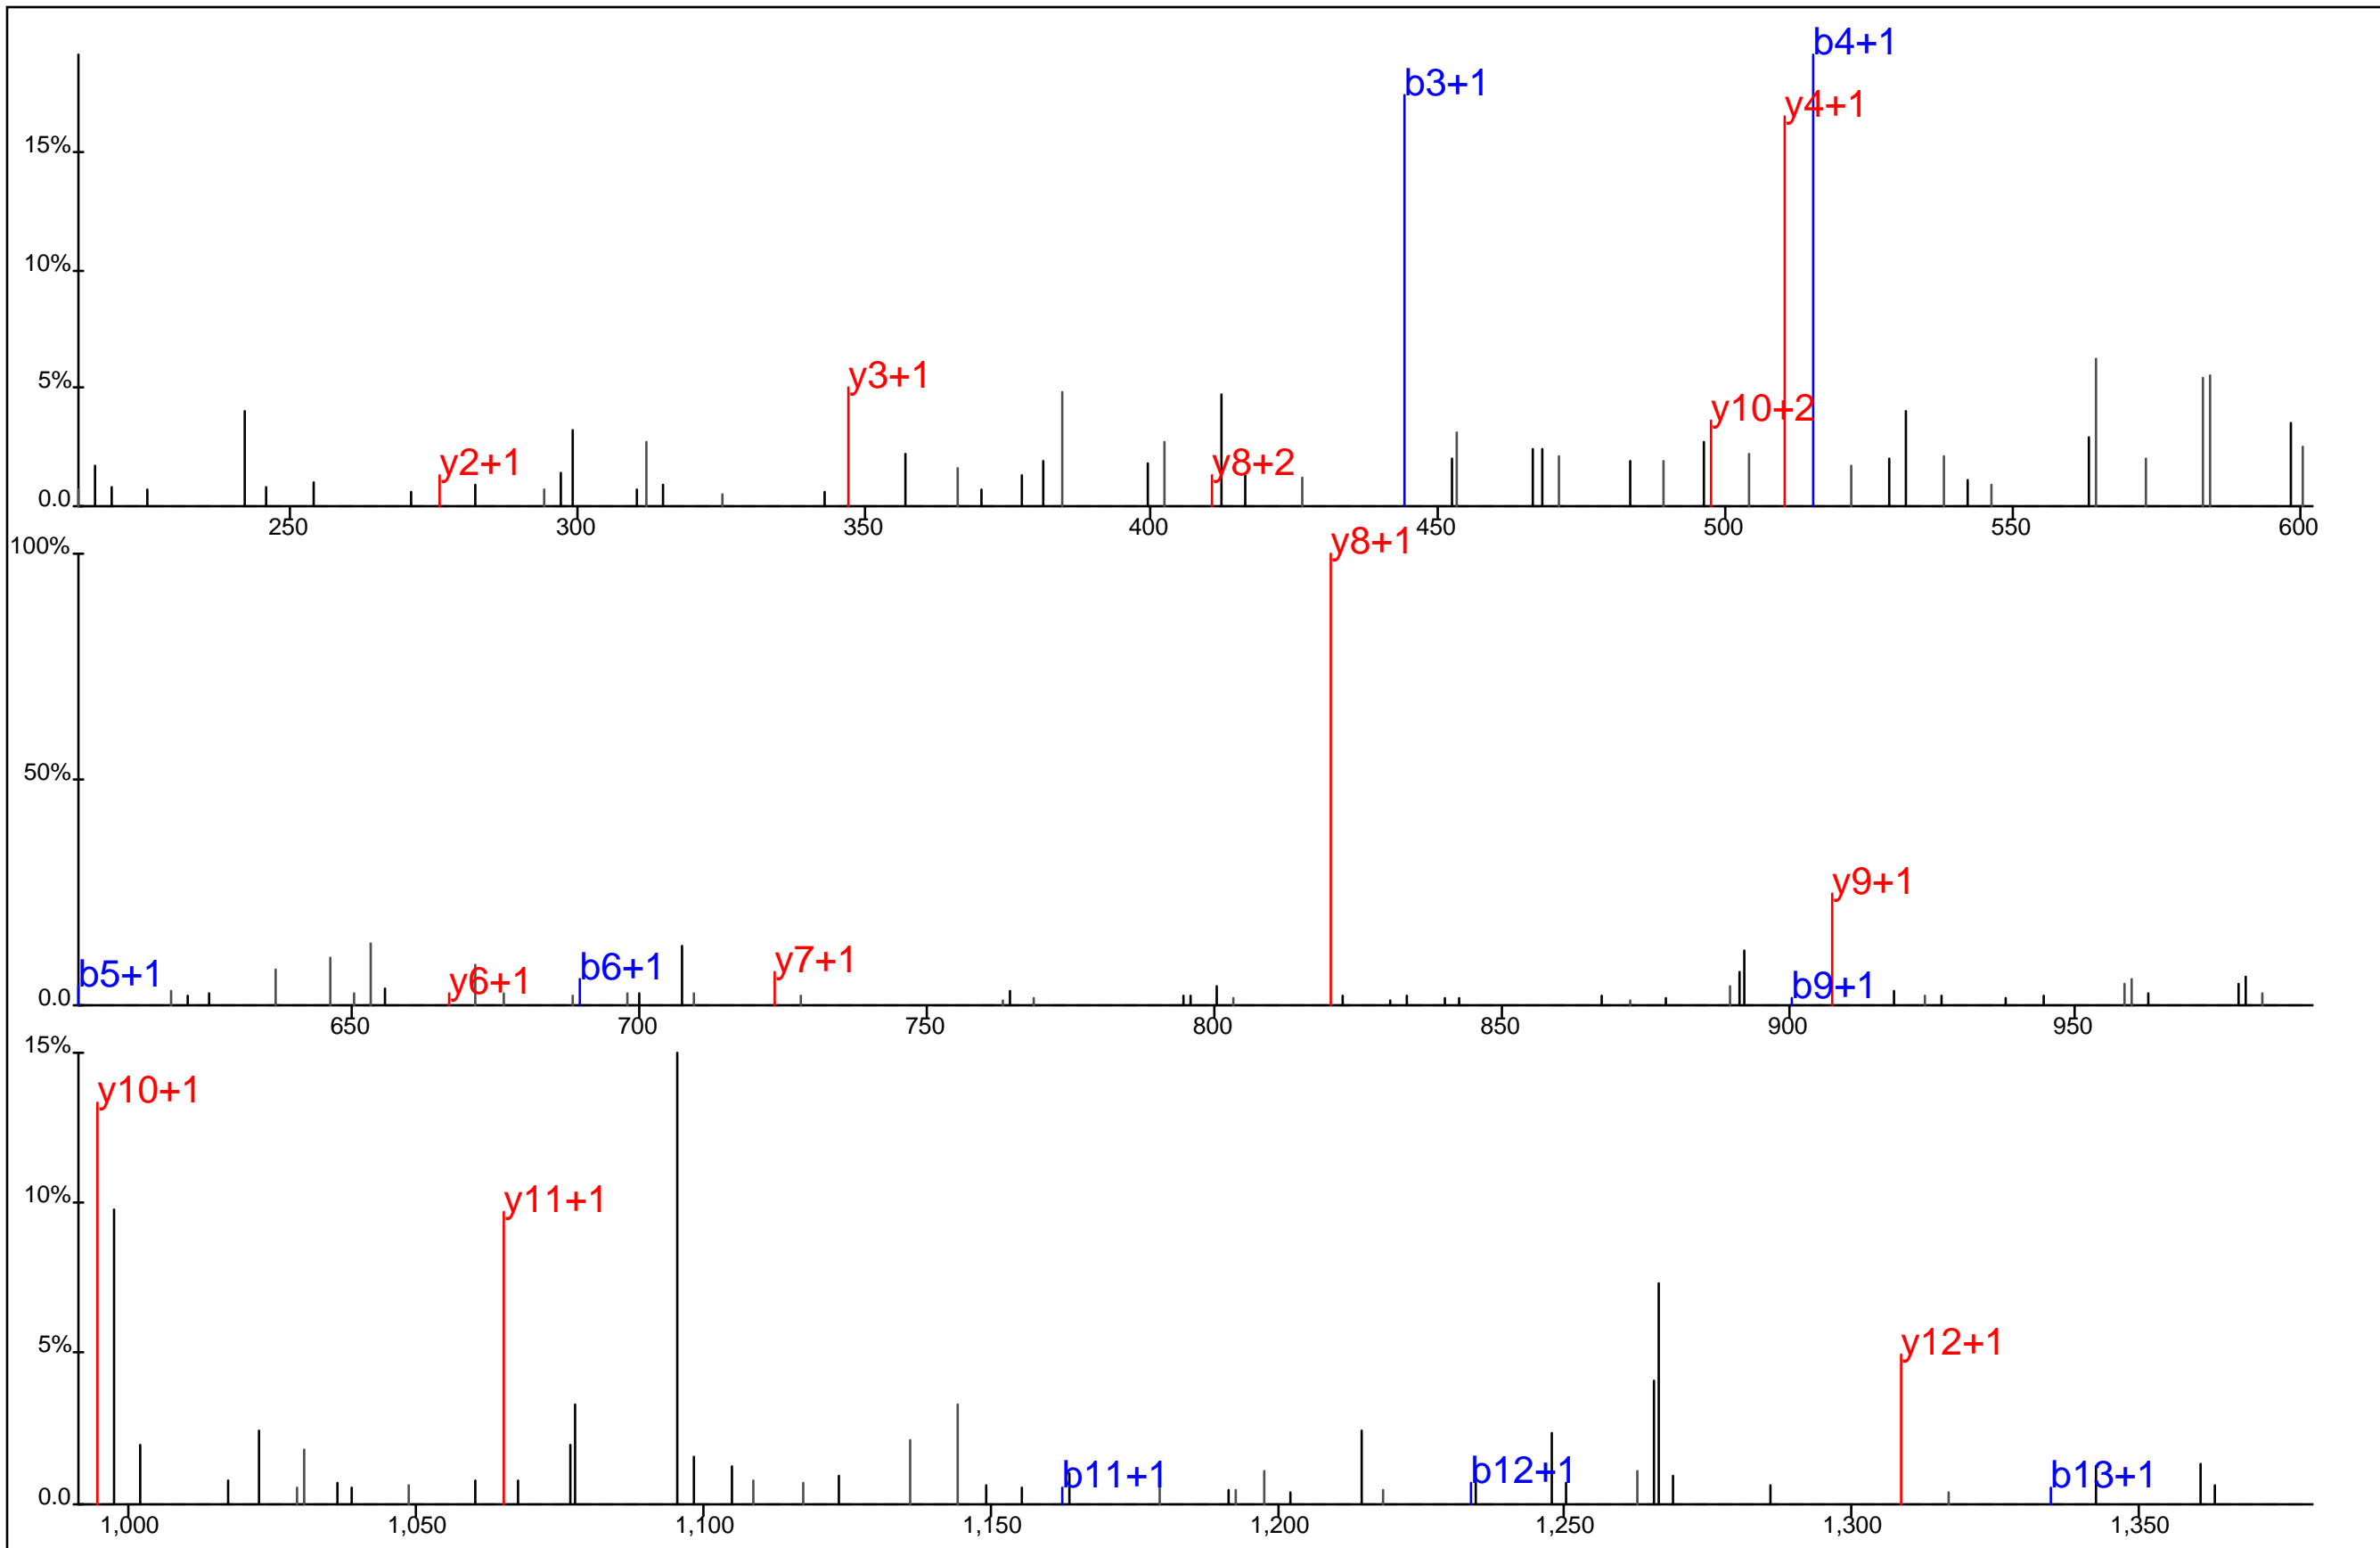

**S L Y\* A S S P G G V Y A T R**

Protein Name: Vimentin  
 gi Accession: 0  
 Precursor Mass: 754.8397+2  
 Delta Mass: 4.001 ppm  
 XCorr: 47.59



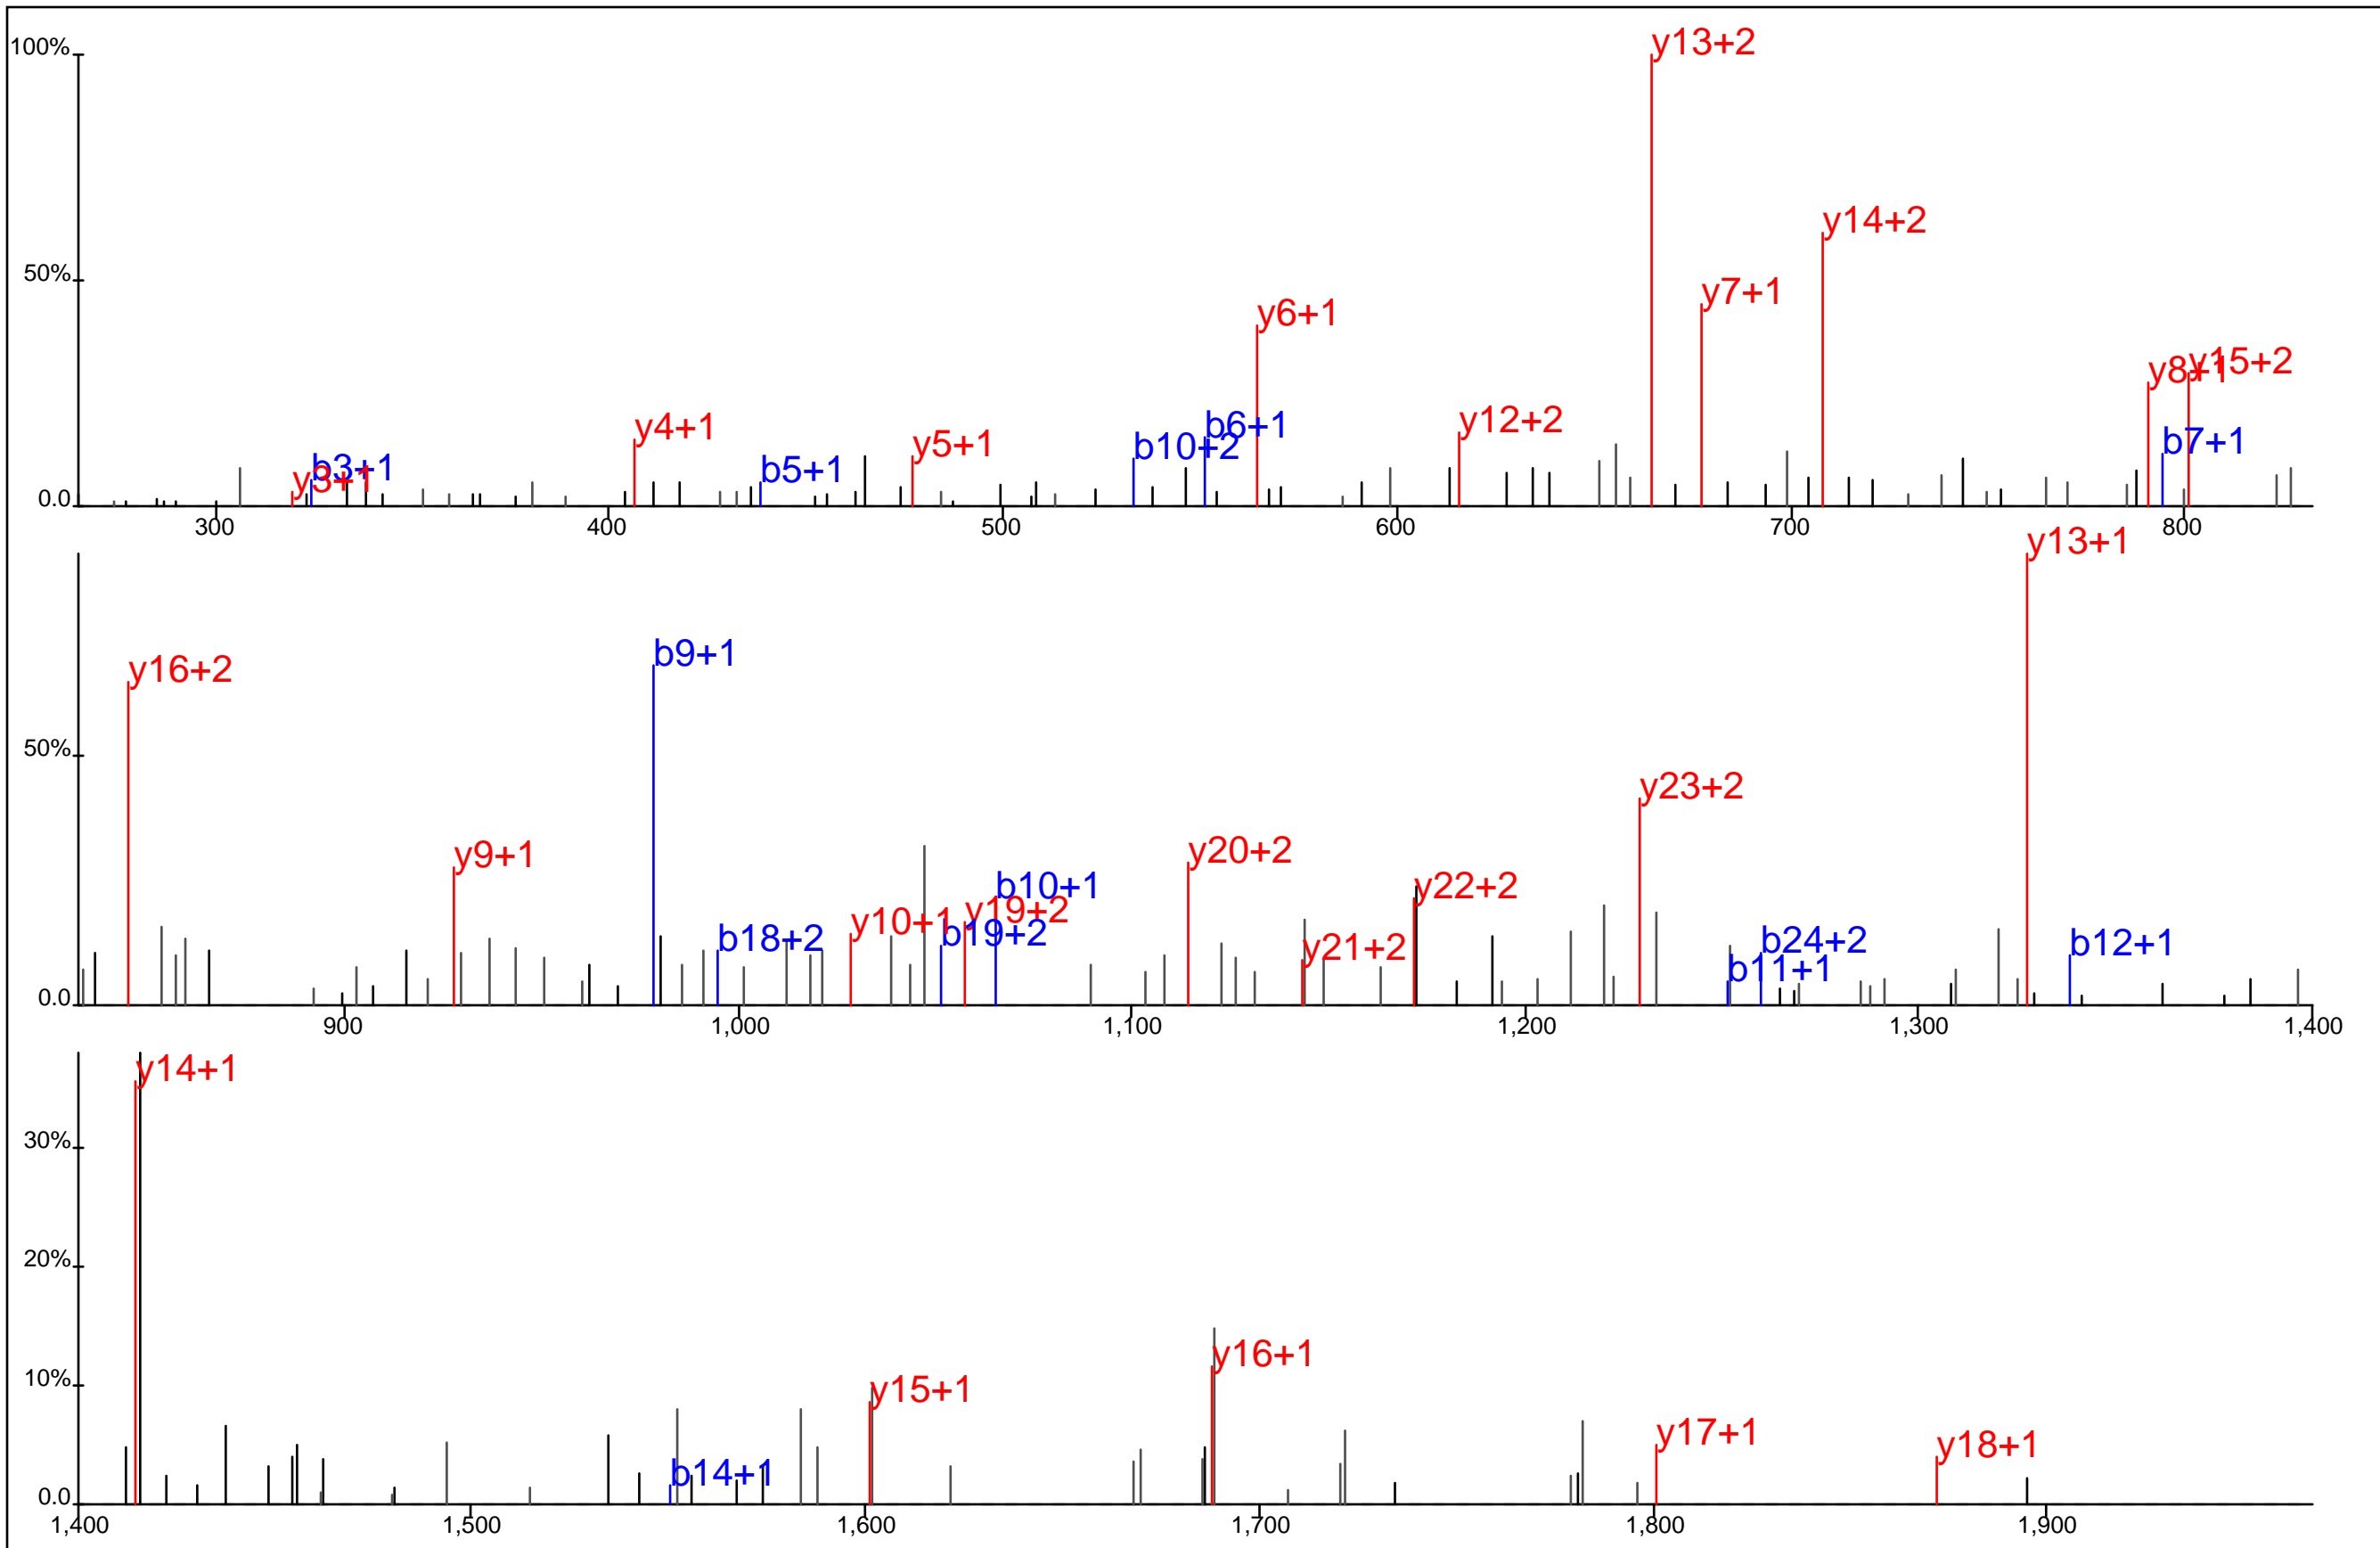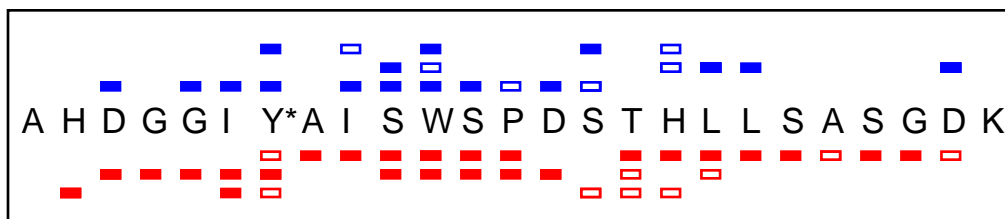

Protein Name: WD repeat protein 1  
 gi Accession: 0  
 Precursor Mass: 889.0649+3  
 Delta Mass: 4.842 ppm  
 XCorr: 85.14

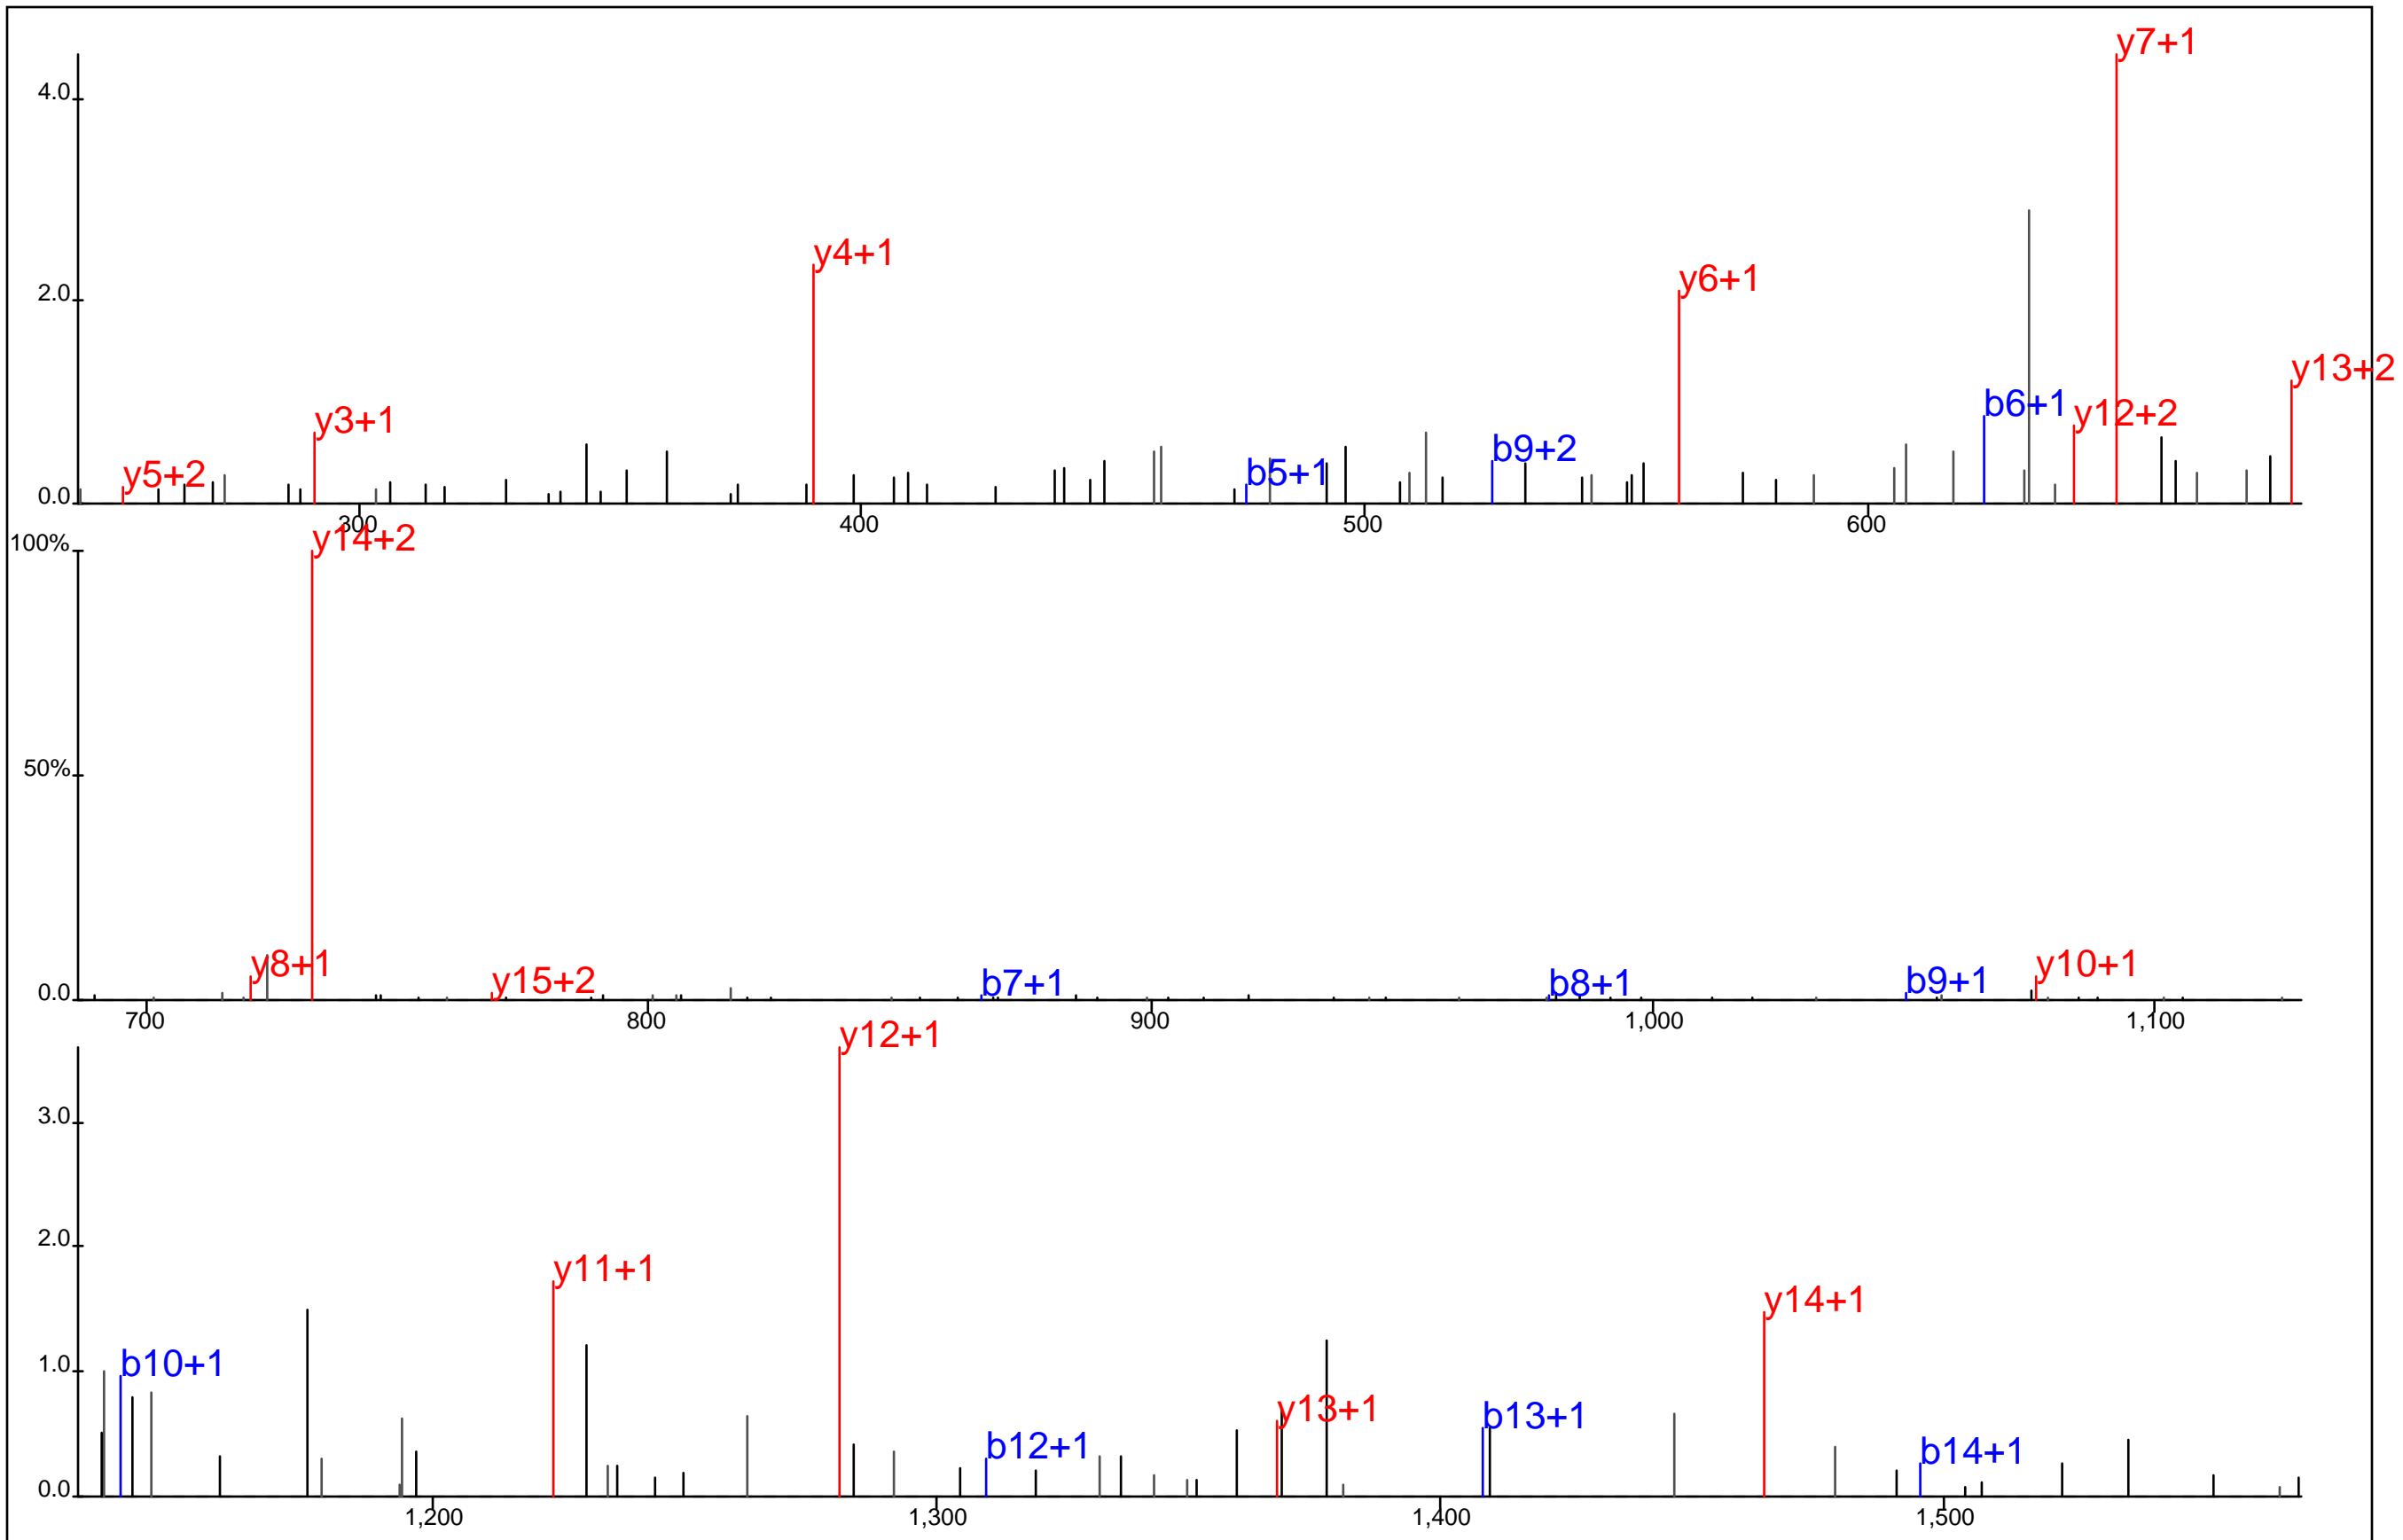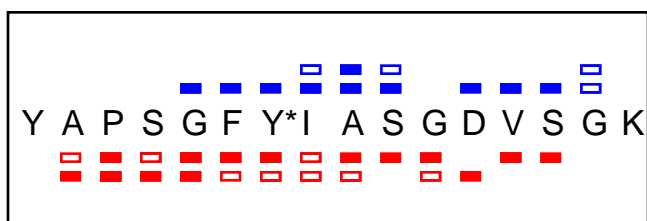

Protein Name: WD repeat protein 1  
 gi Accession: 0  
 Precursor Mass: 849.8727+2  
 Delta Mass: 1.692 ppm  
 XCorr: 51.02

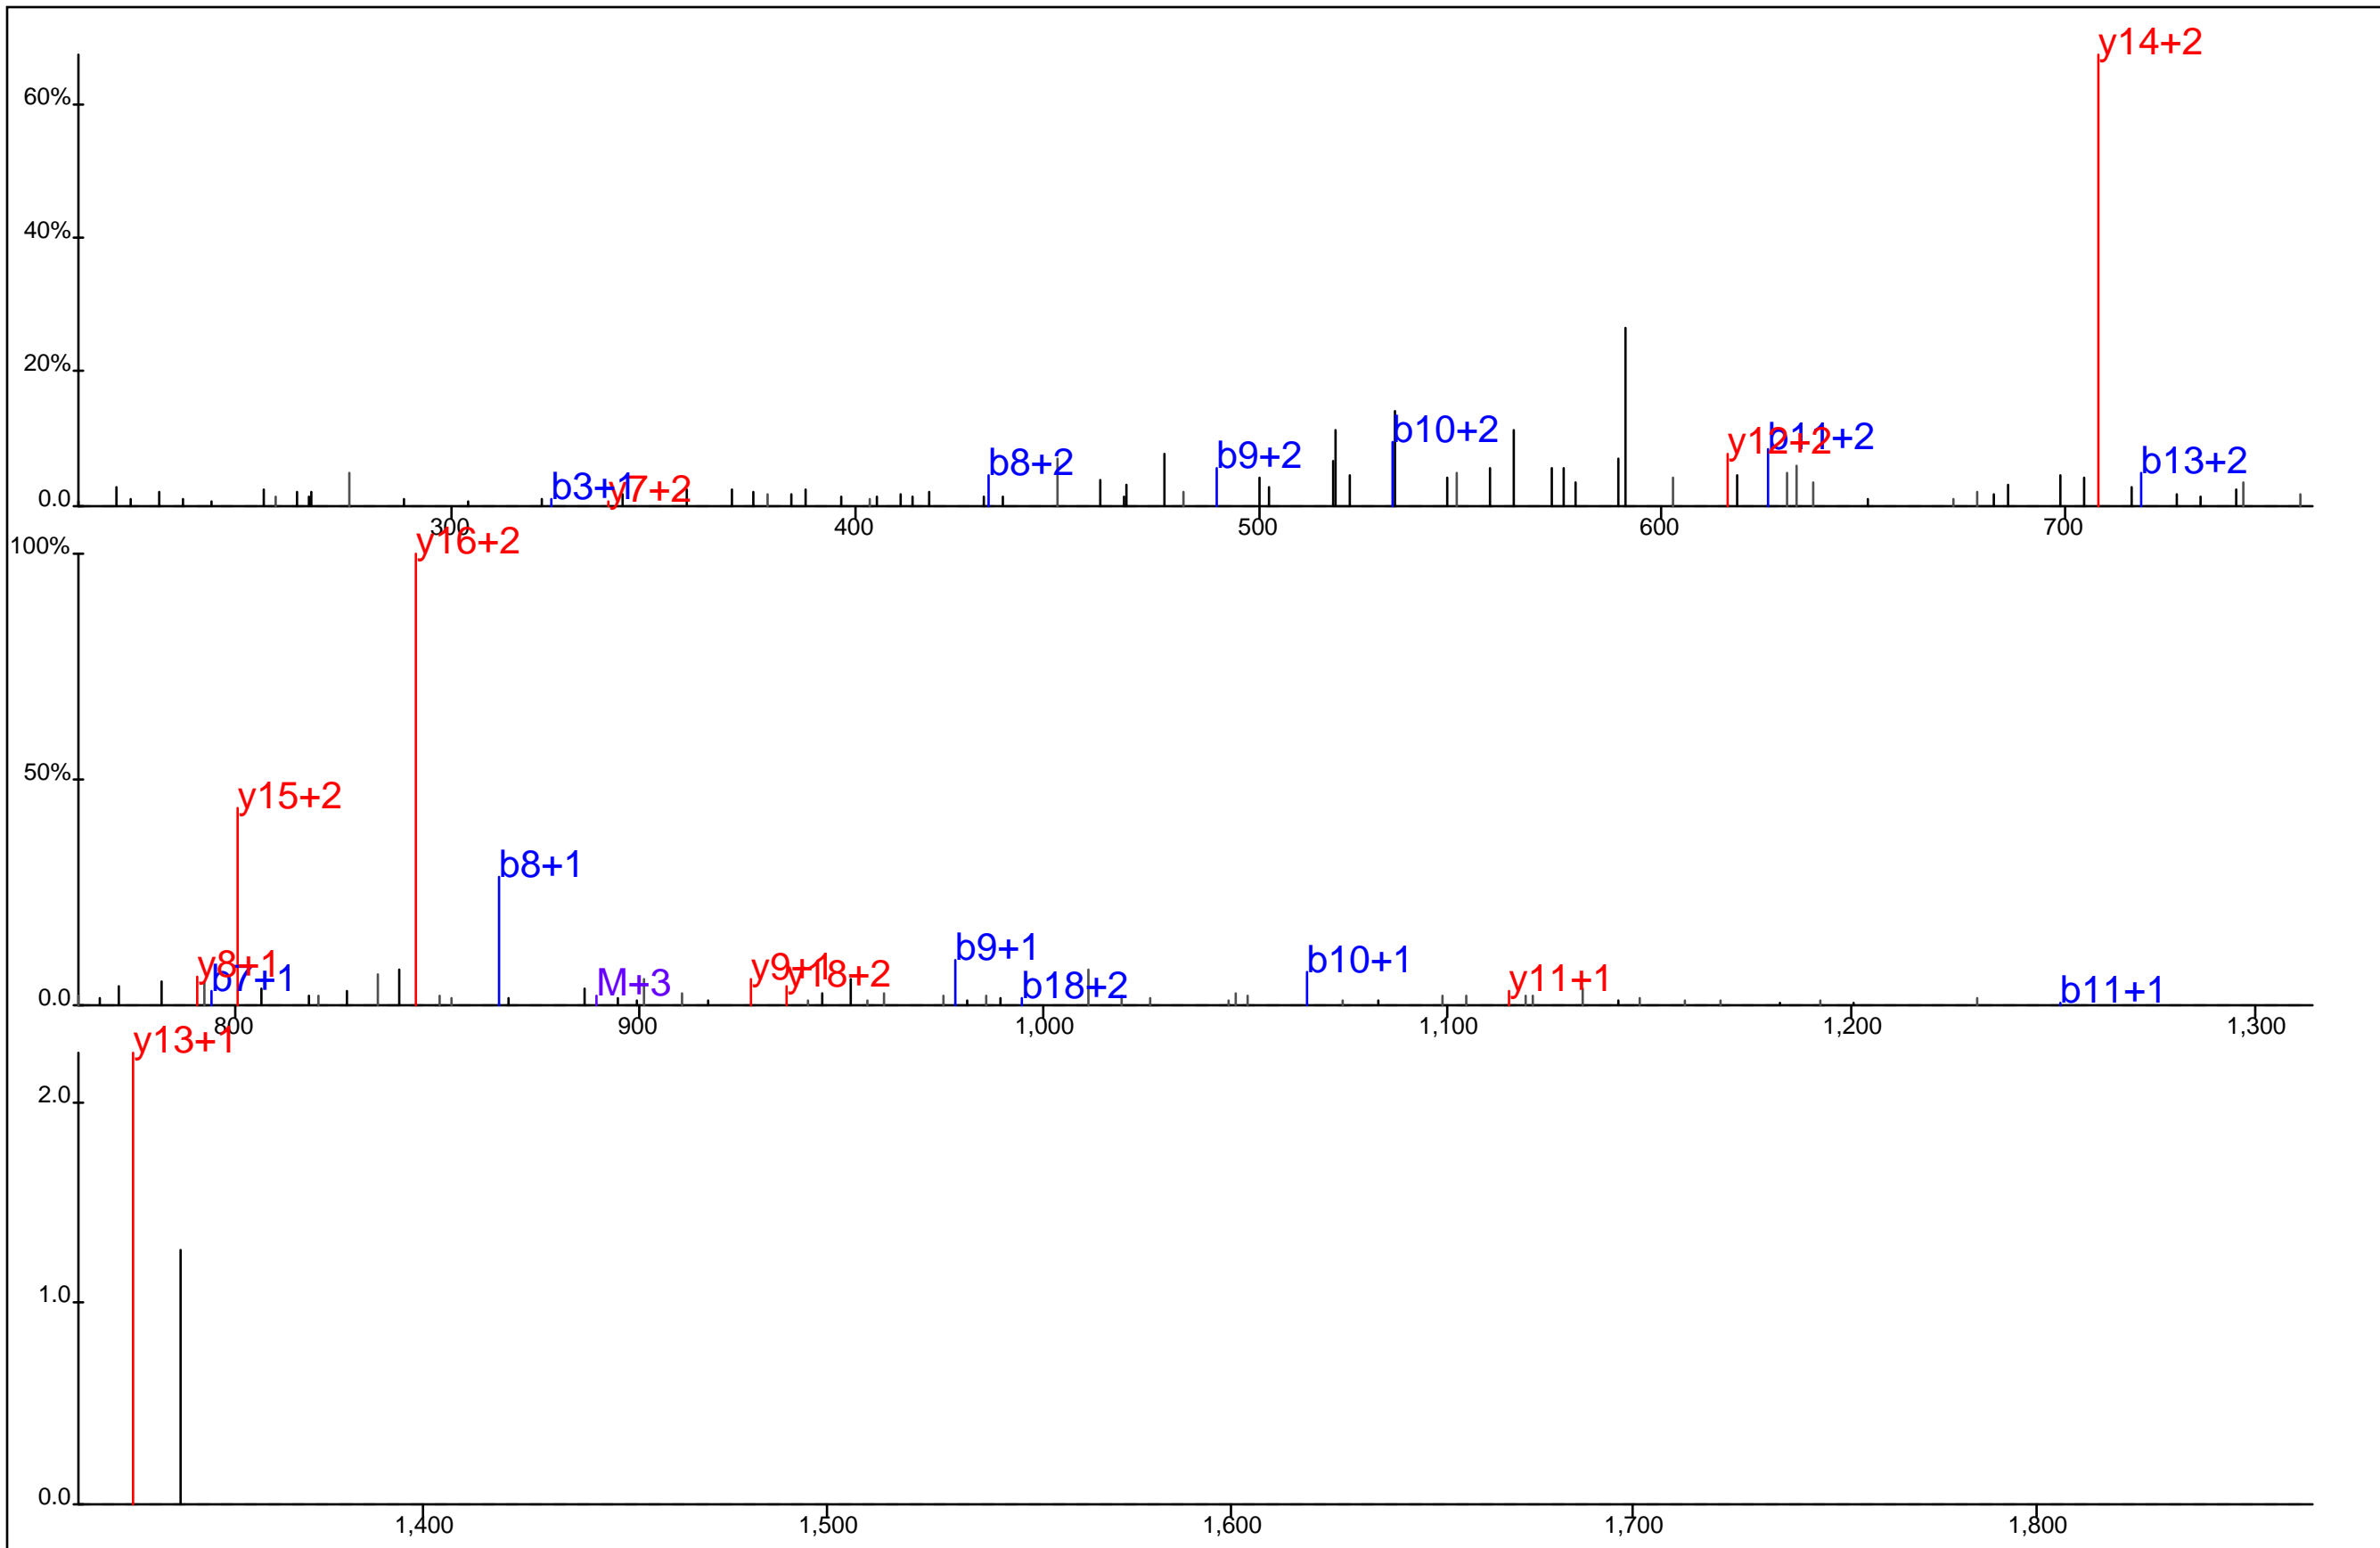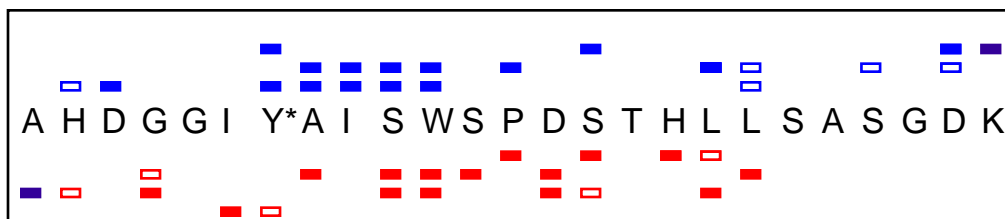

Protein Name: WD repeat protein 1  
 gi Accession: 0  
 Precursor Mass: 667.0577+4  
 Delta Mass: 6.054 ppm  
 XCorr: 21.04

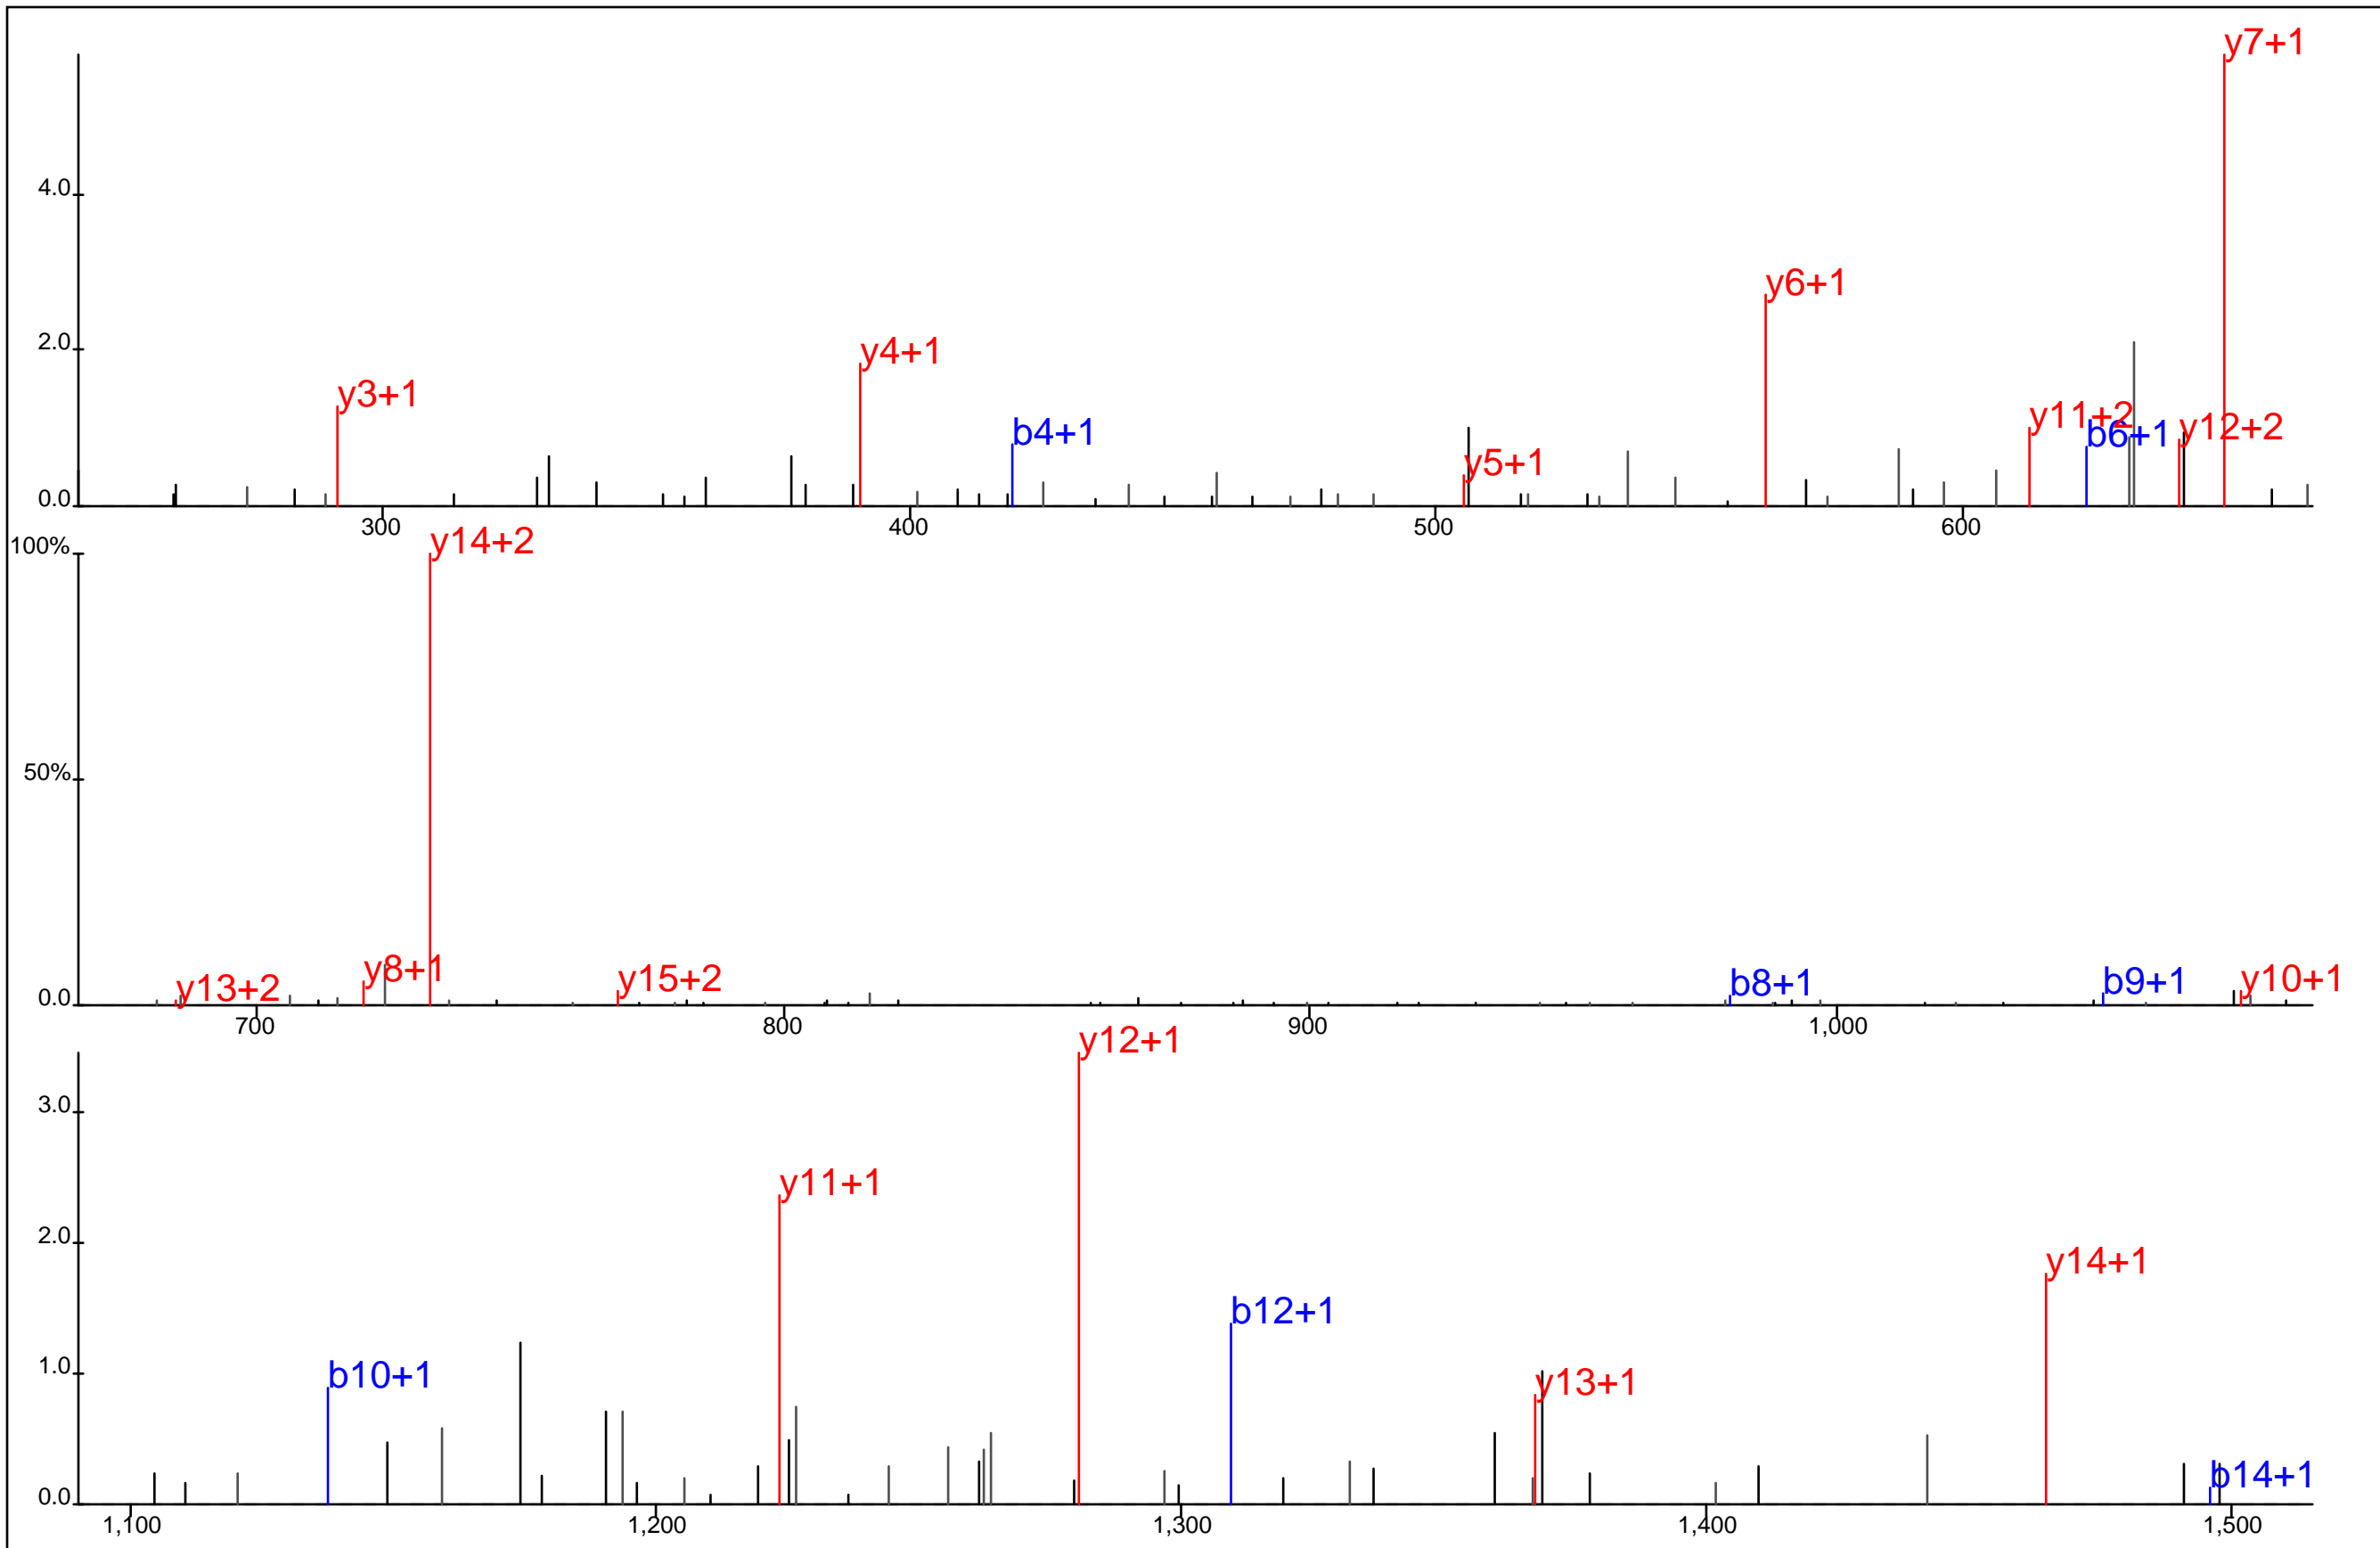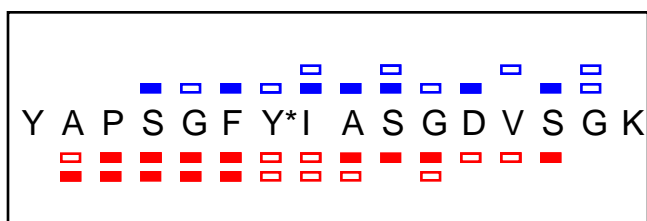

Protein Name: WD repeat protein 1  
 gi Accession: 0  
 Precursor Mass: 849.8774+2  
 Delta Mass: 3.769 ppm  
 XCorr: 61.12

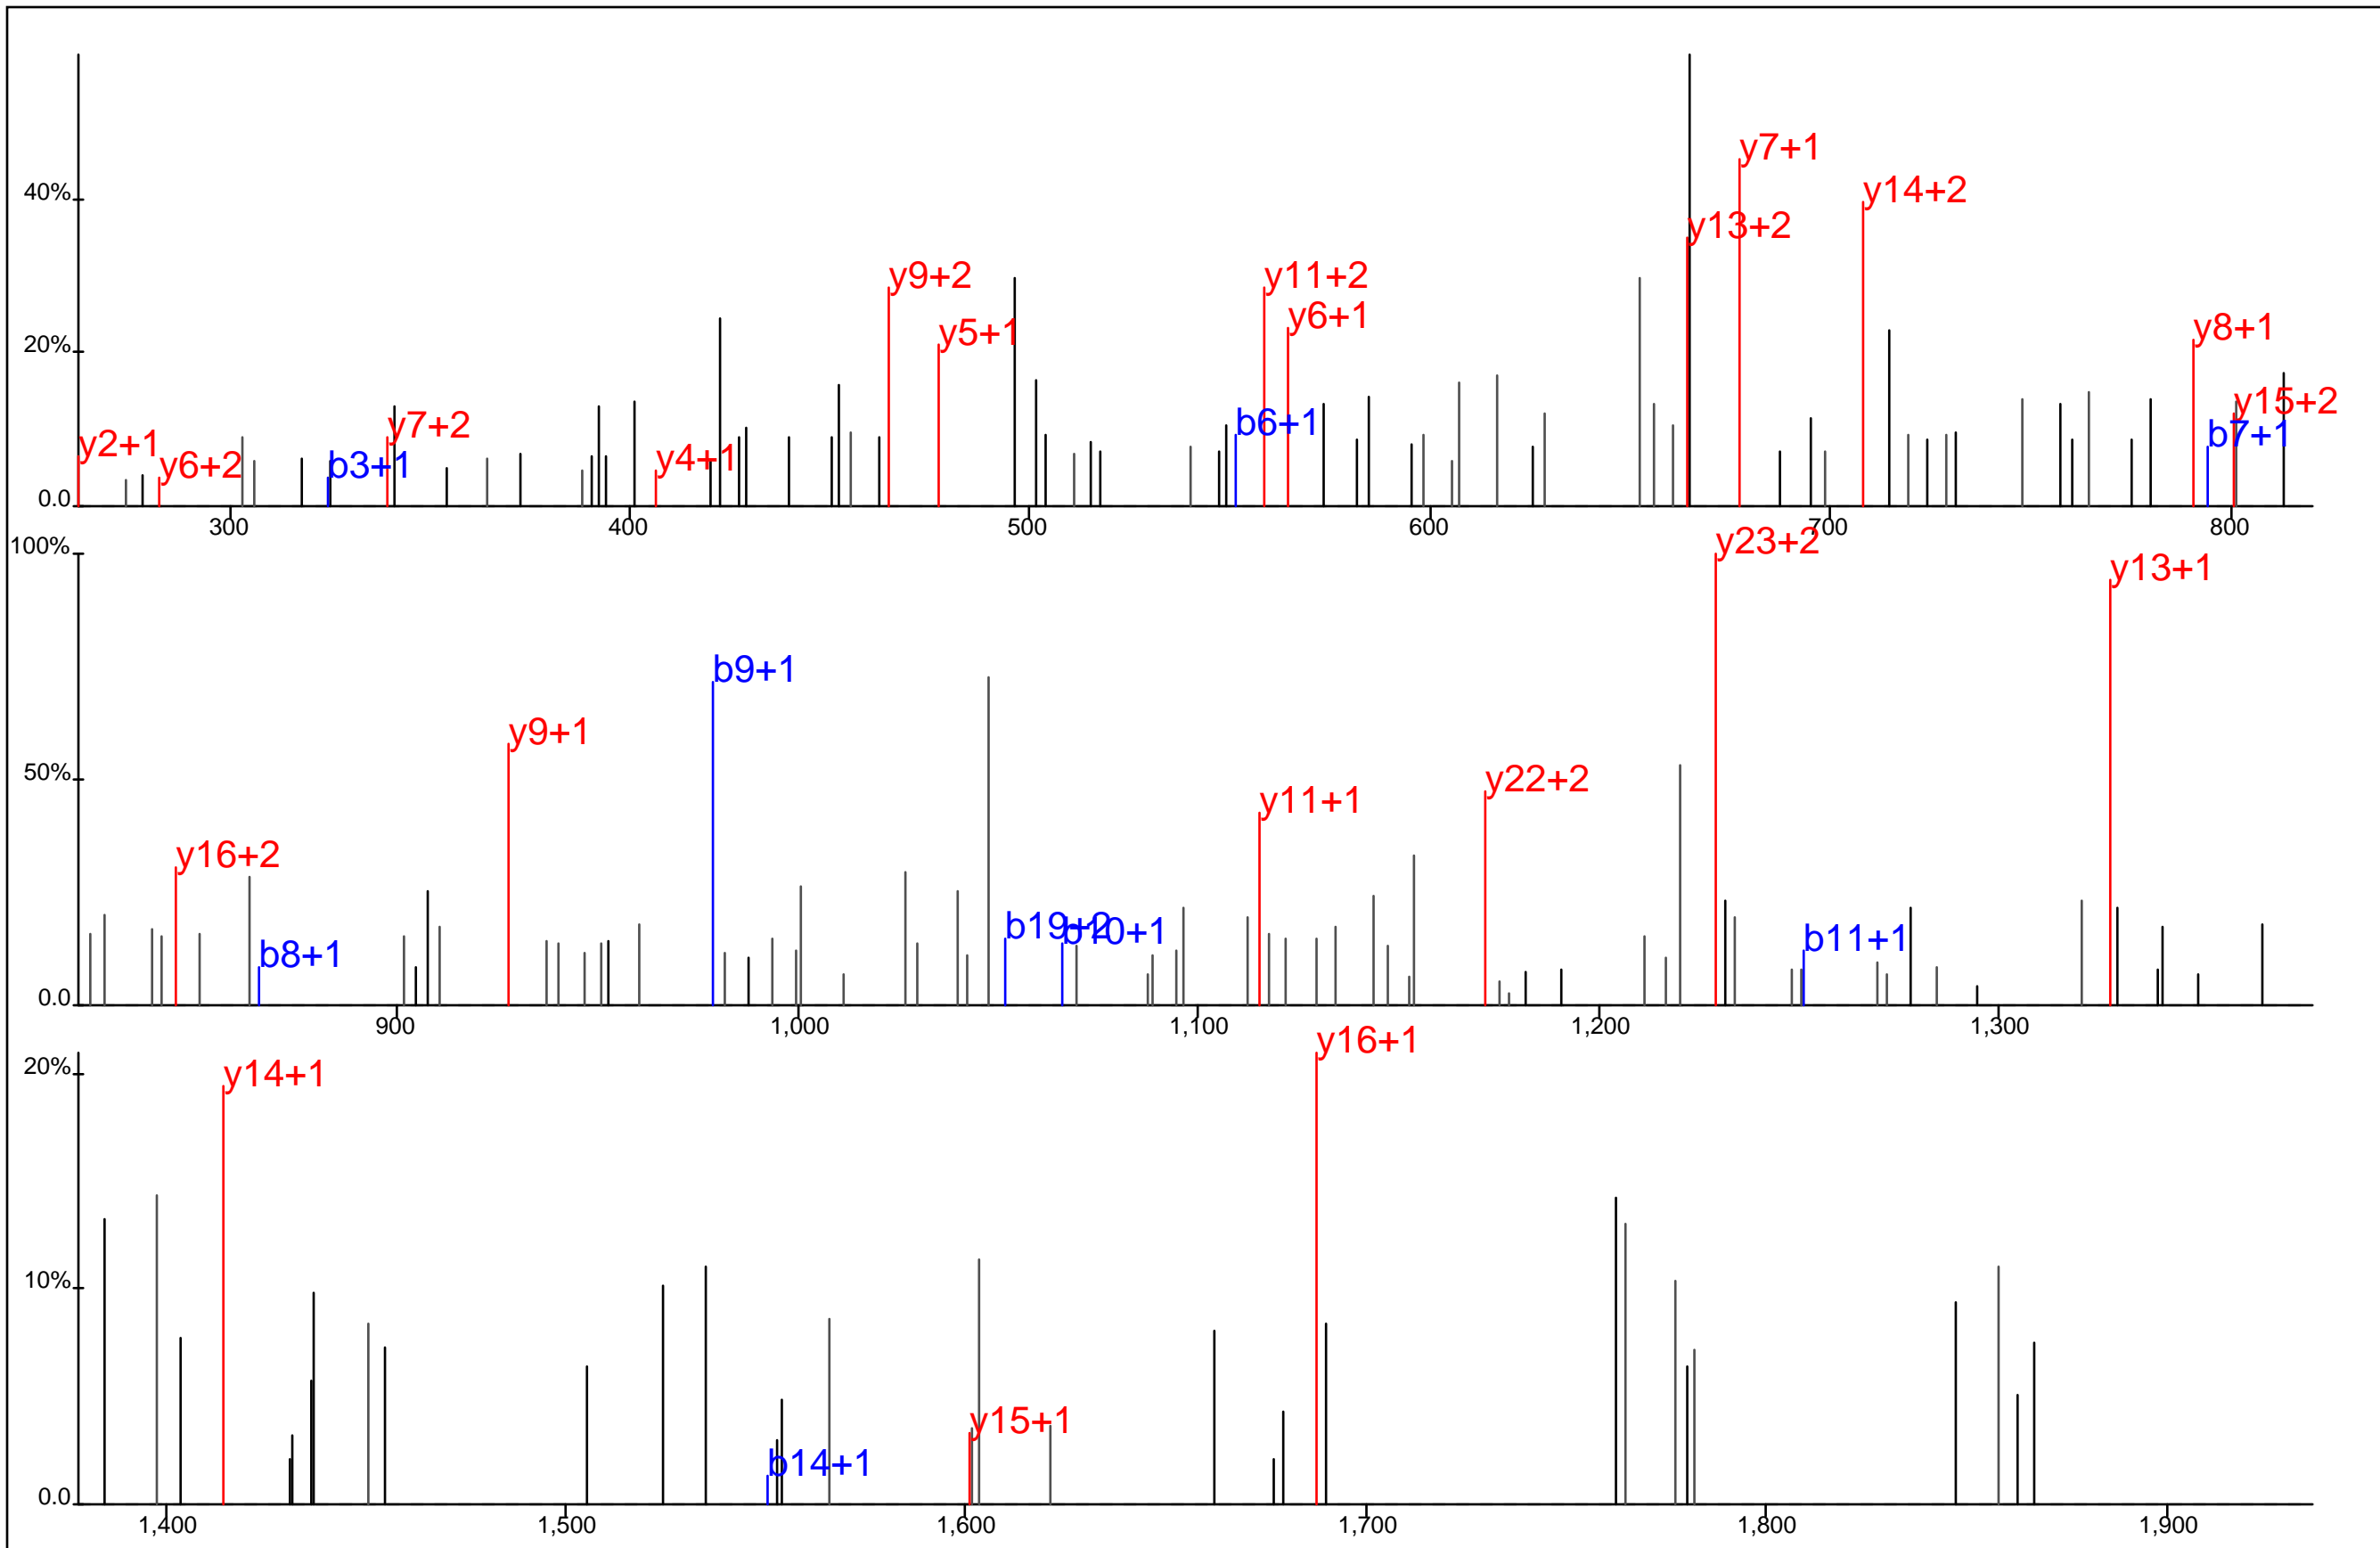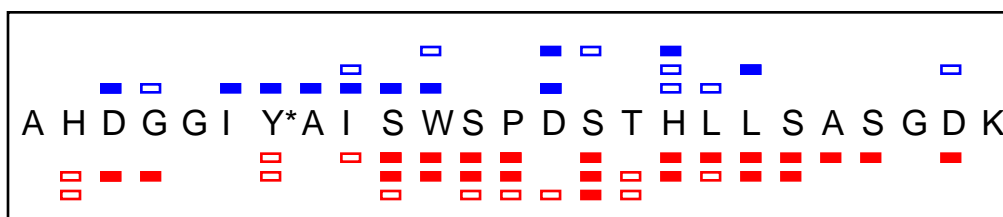

Protein Name: WD repeat protein 1  
 gi Accession: 0  
 Precursor Mass: 889.0696+3  
 Delta Mass: 0.517 ppm  
 XCorr: 28.37

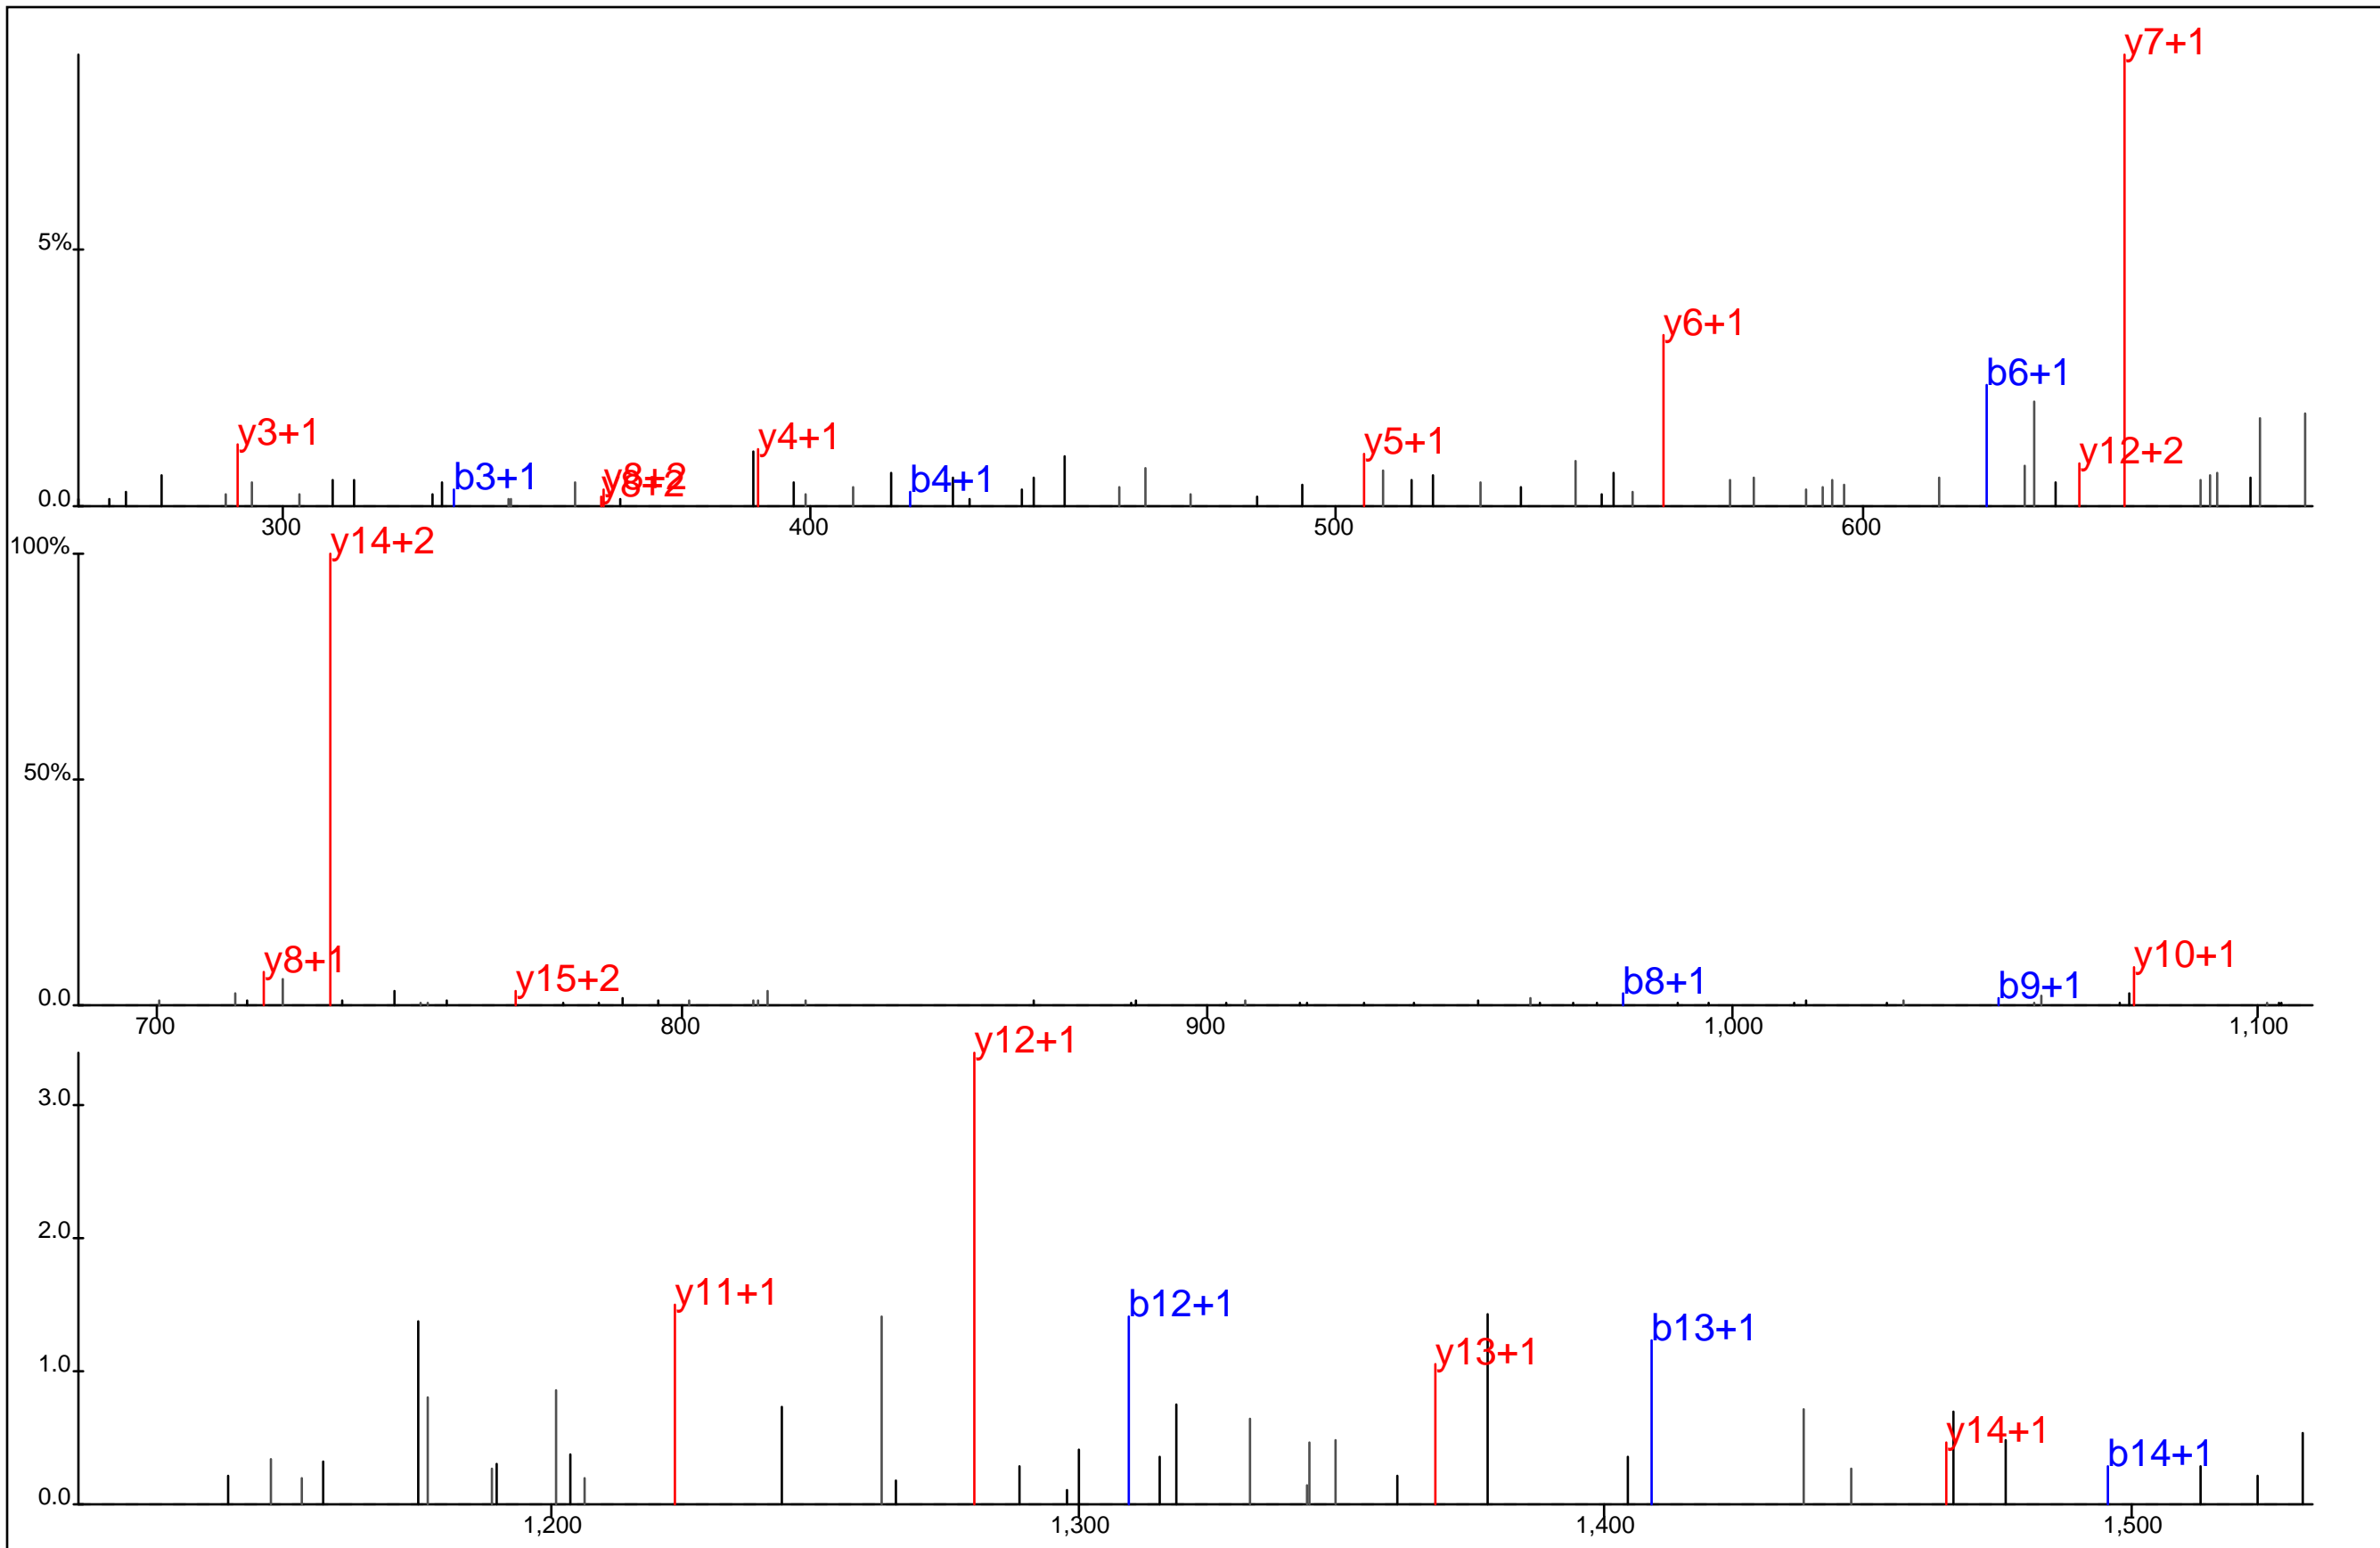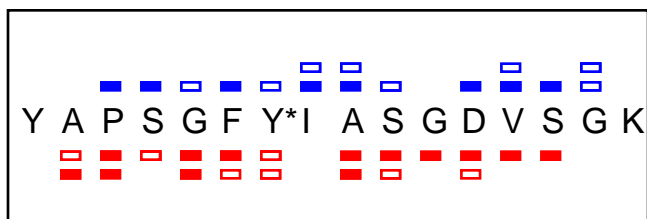

Protein Name: WD repeat protein 1  
 gi Accession: 0  
 Precursor Mass: 849.8768+2  
 Delta Mass: 3.050 ppm  
 XCorr: 67.39

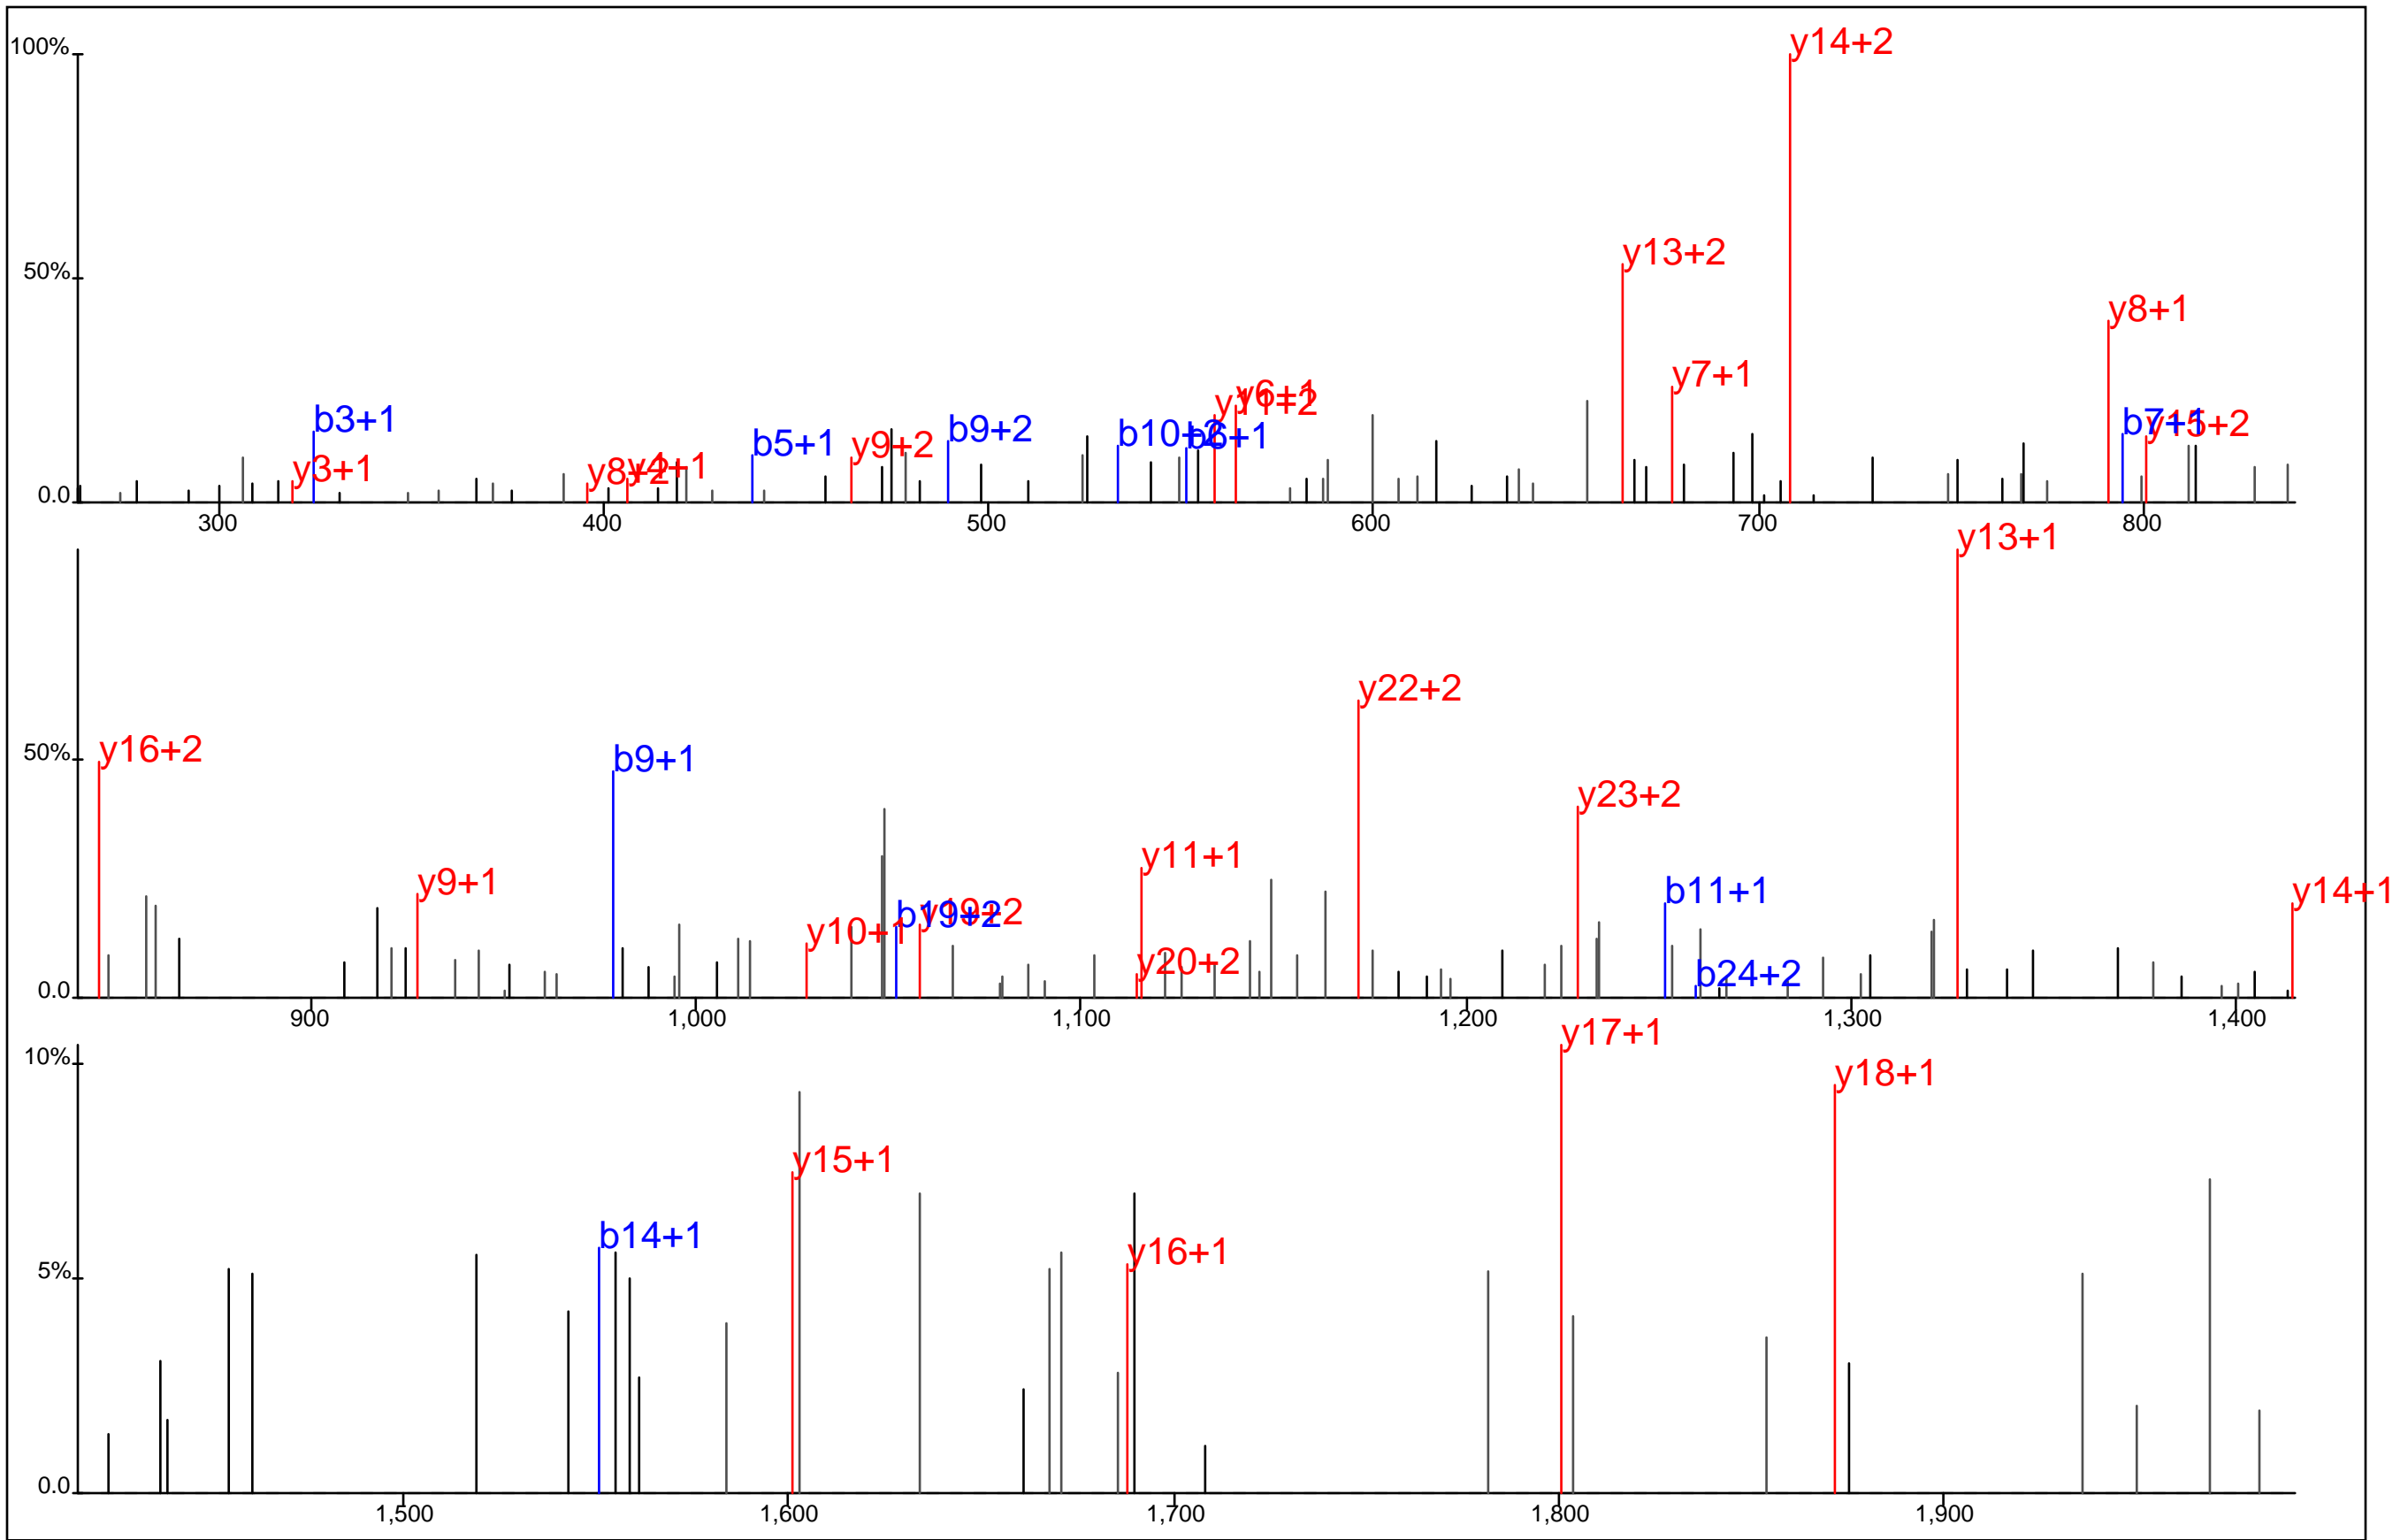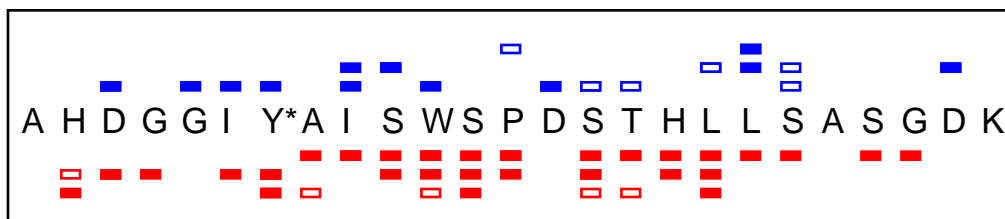

Protein Name: WD repeat protein 1  
 gi Accession: 0  
 Precursor Mass: 889.0681+3  
 Delta Mass: 1.269 ppm  
 XCorr: 52.04

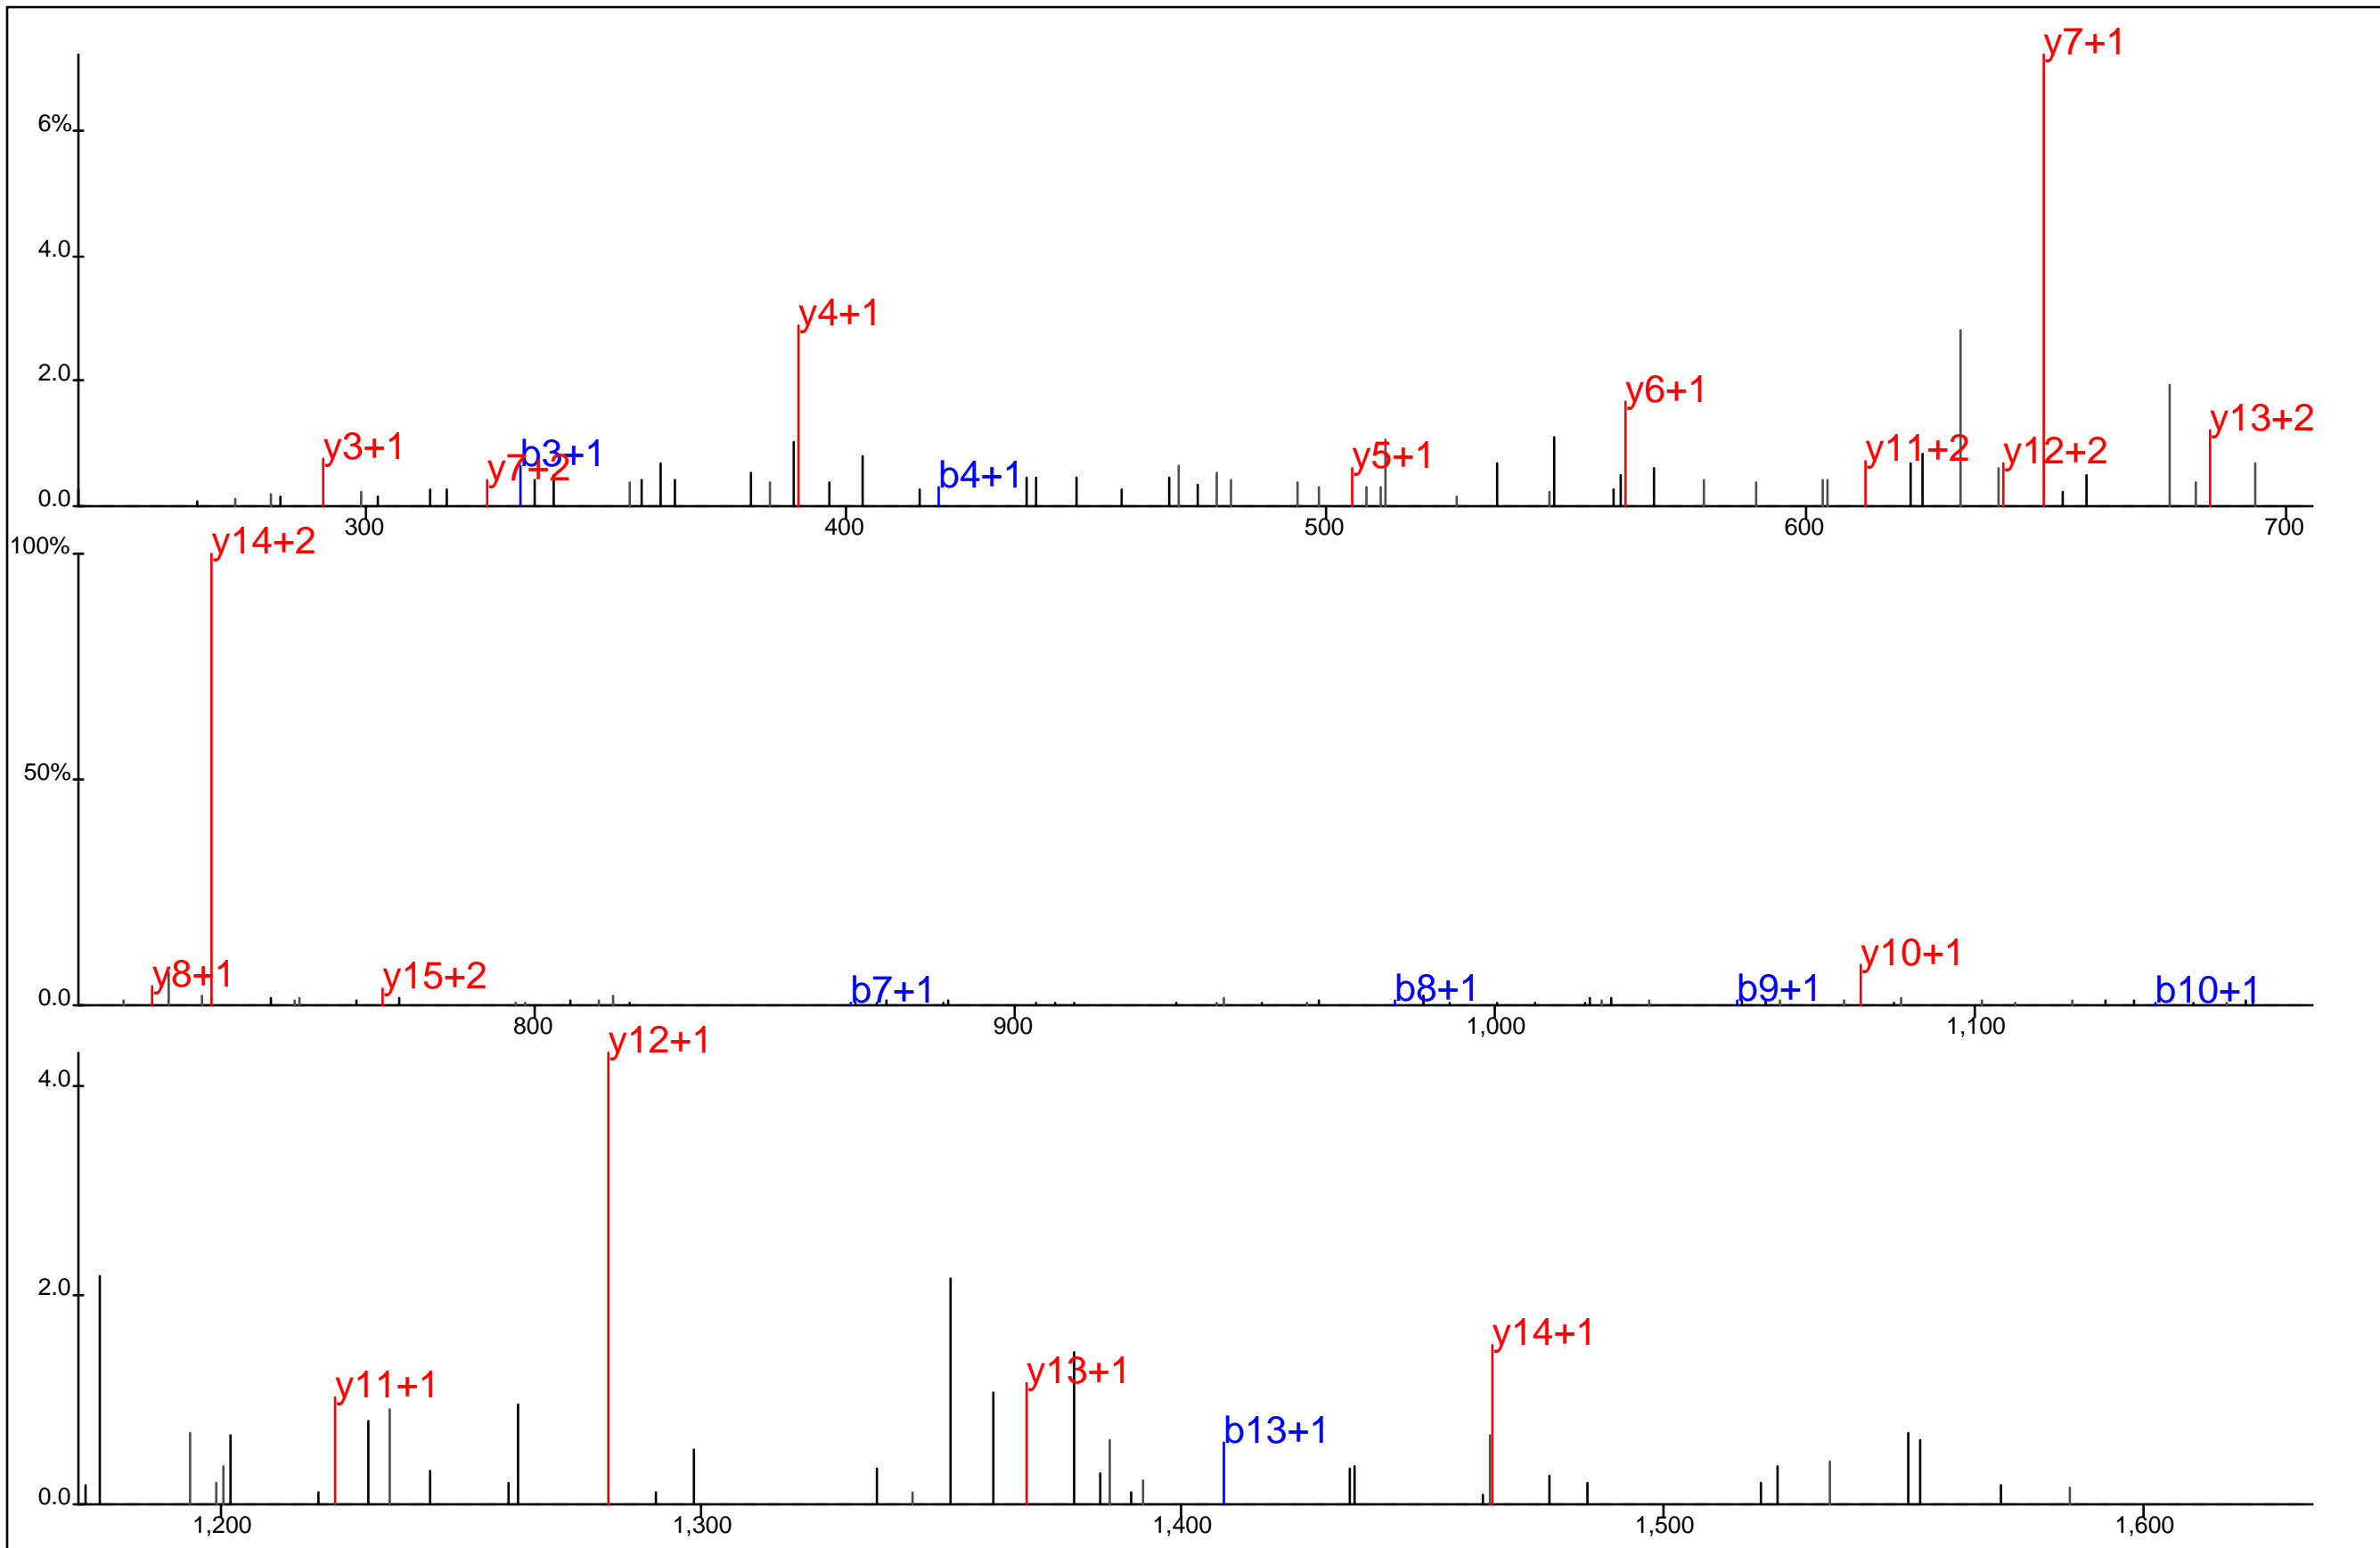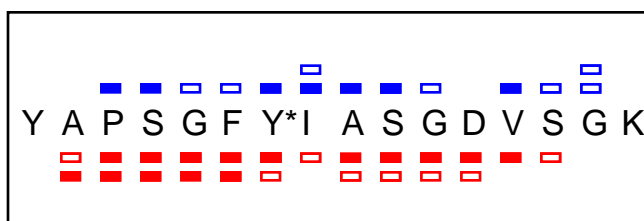

Protein Name: WD repeat protein 1  
 gi Accession: 0  
 Precursor Mass: 849.8721+2  
 Delta Mass: 2.411 ppm  
 XCorr: 47.49



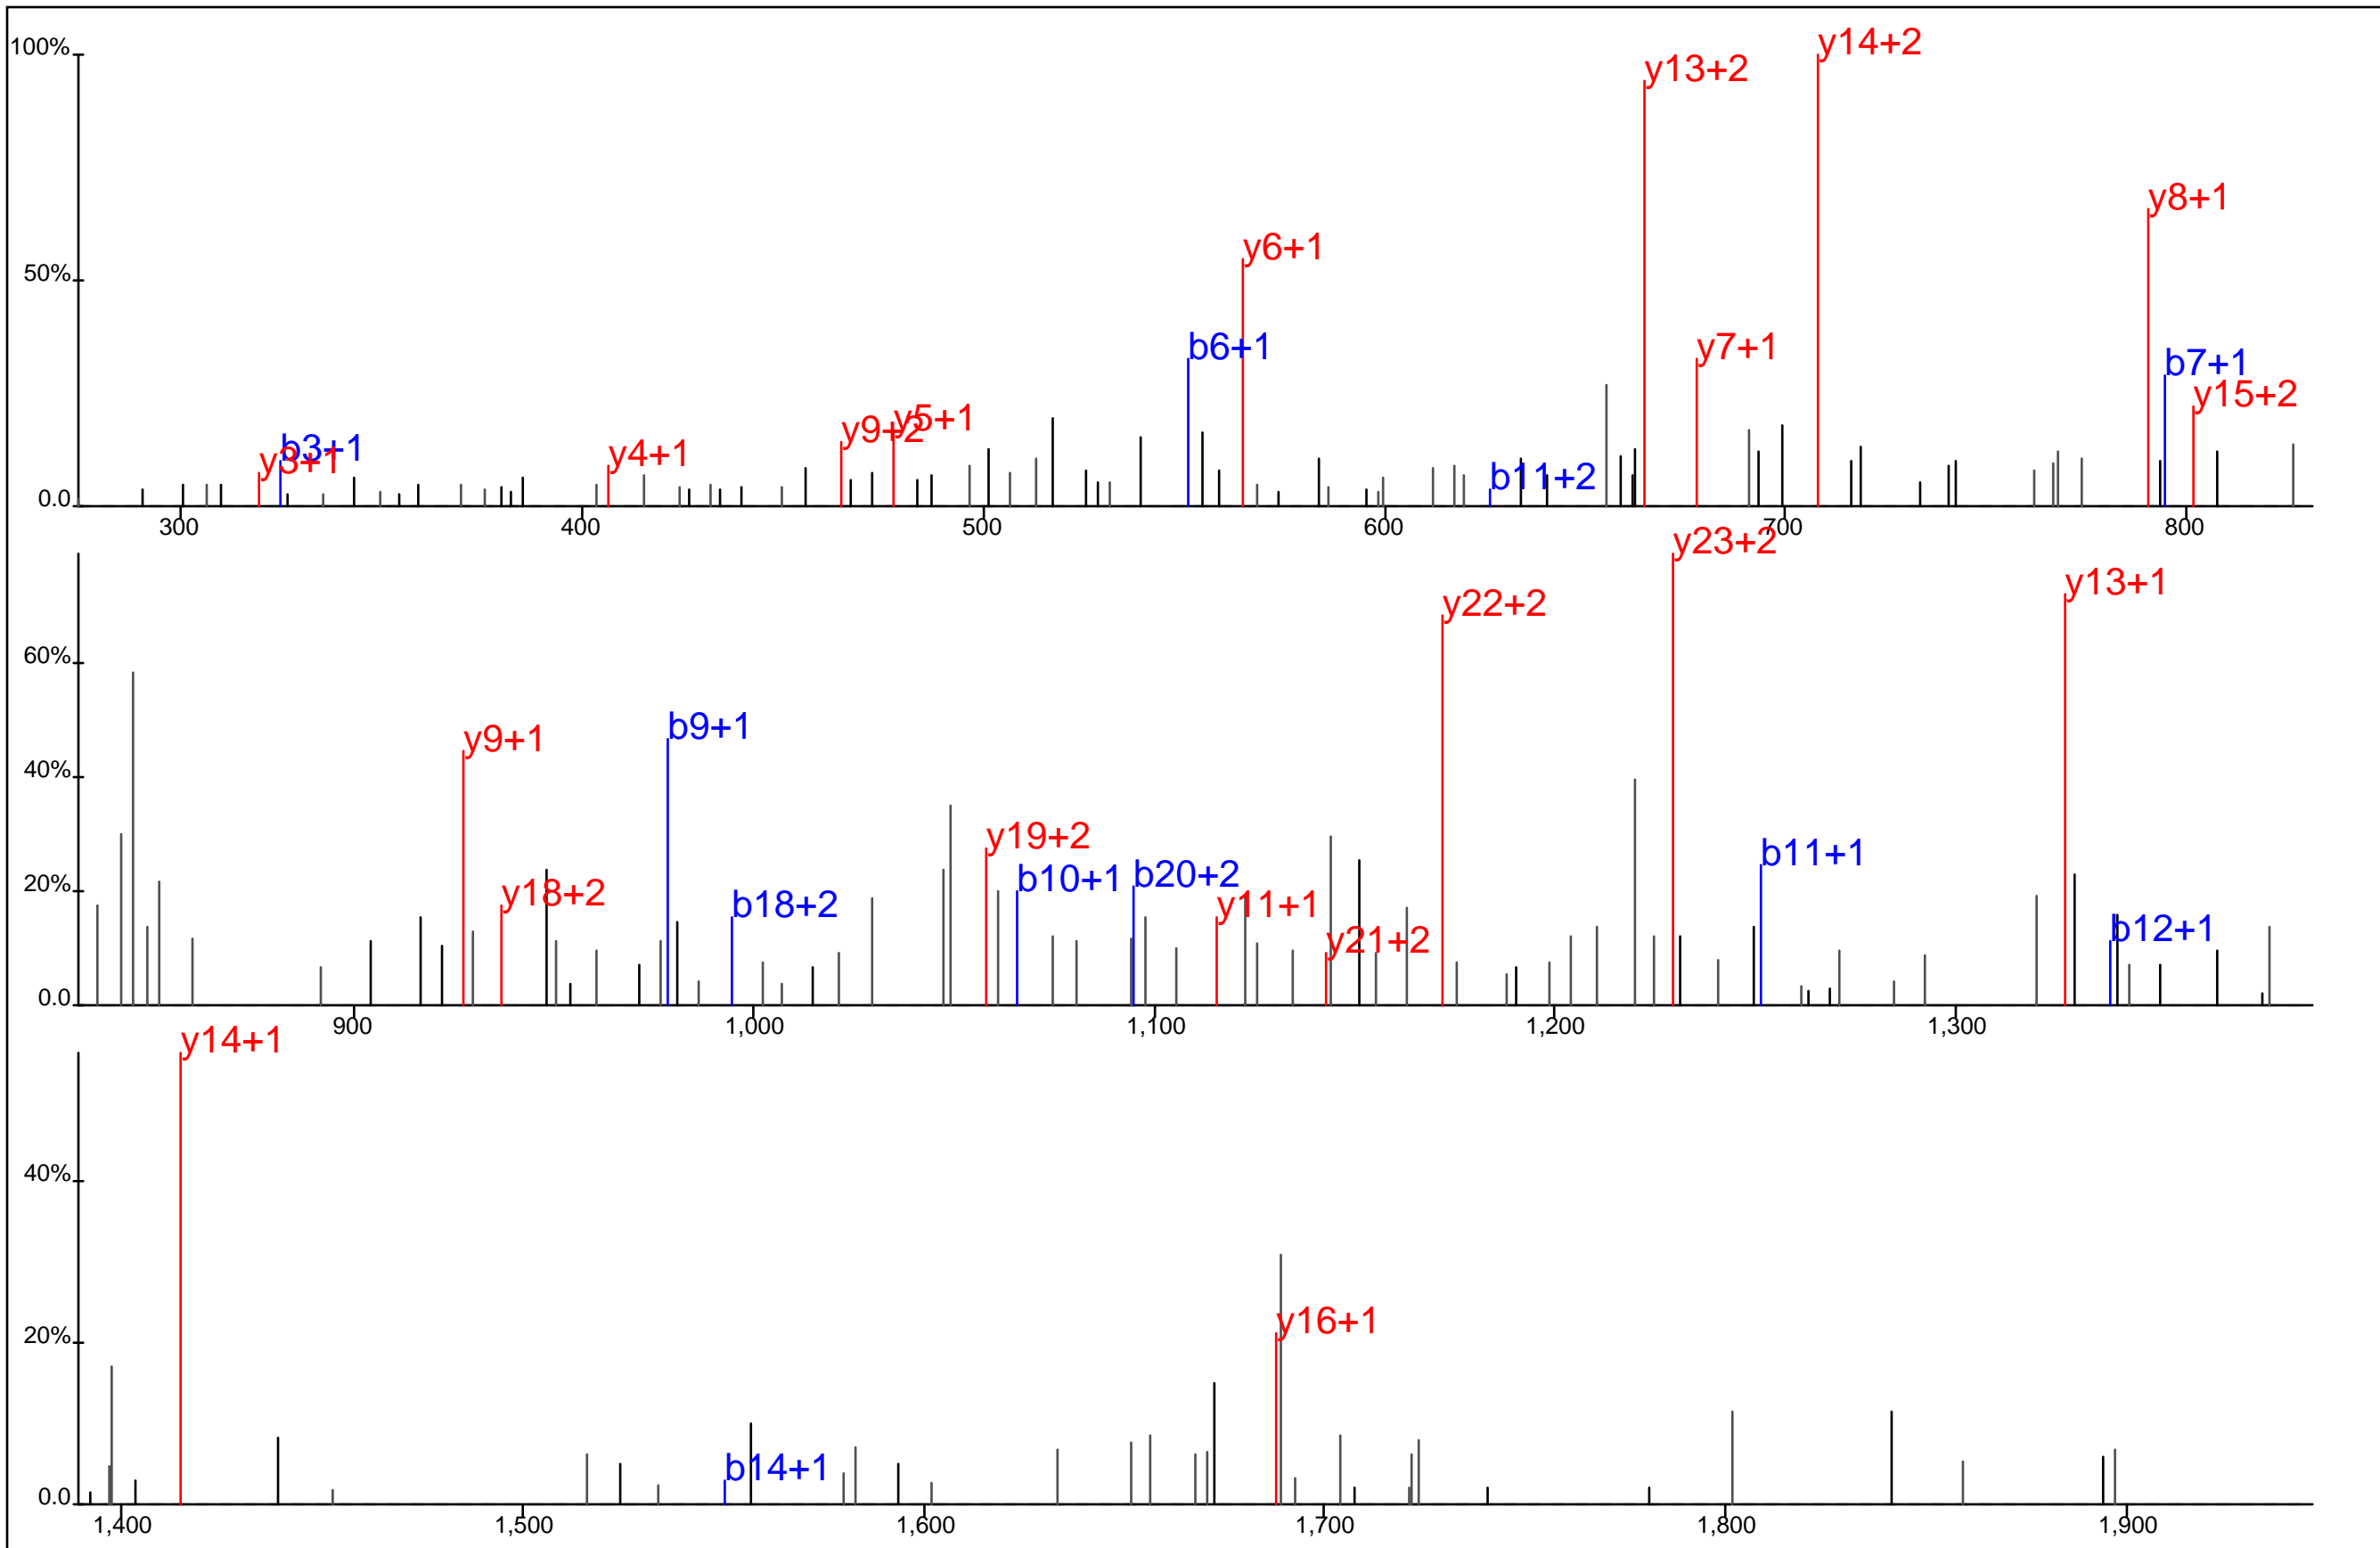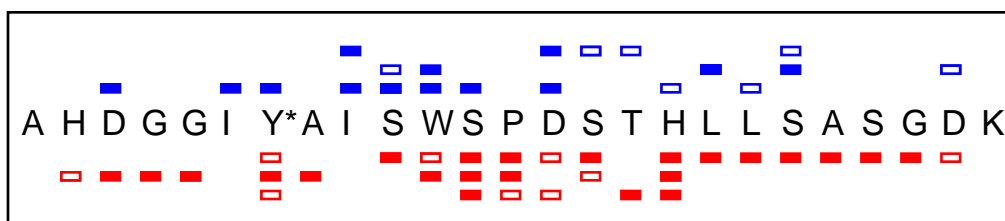

Protein Name: WD repeat protein 1  
 gi Accession: 0  
 Precursor Mass: 889.0709+3  
 Delta Mass: 1.892 ppm  
 XCorr: 47.36

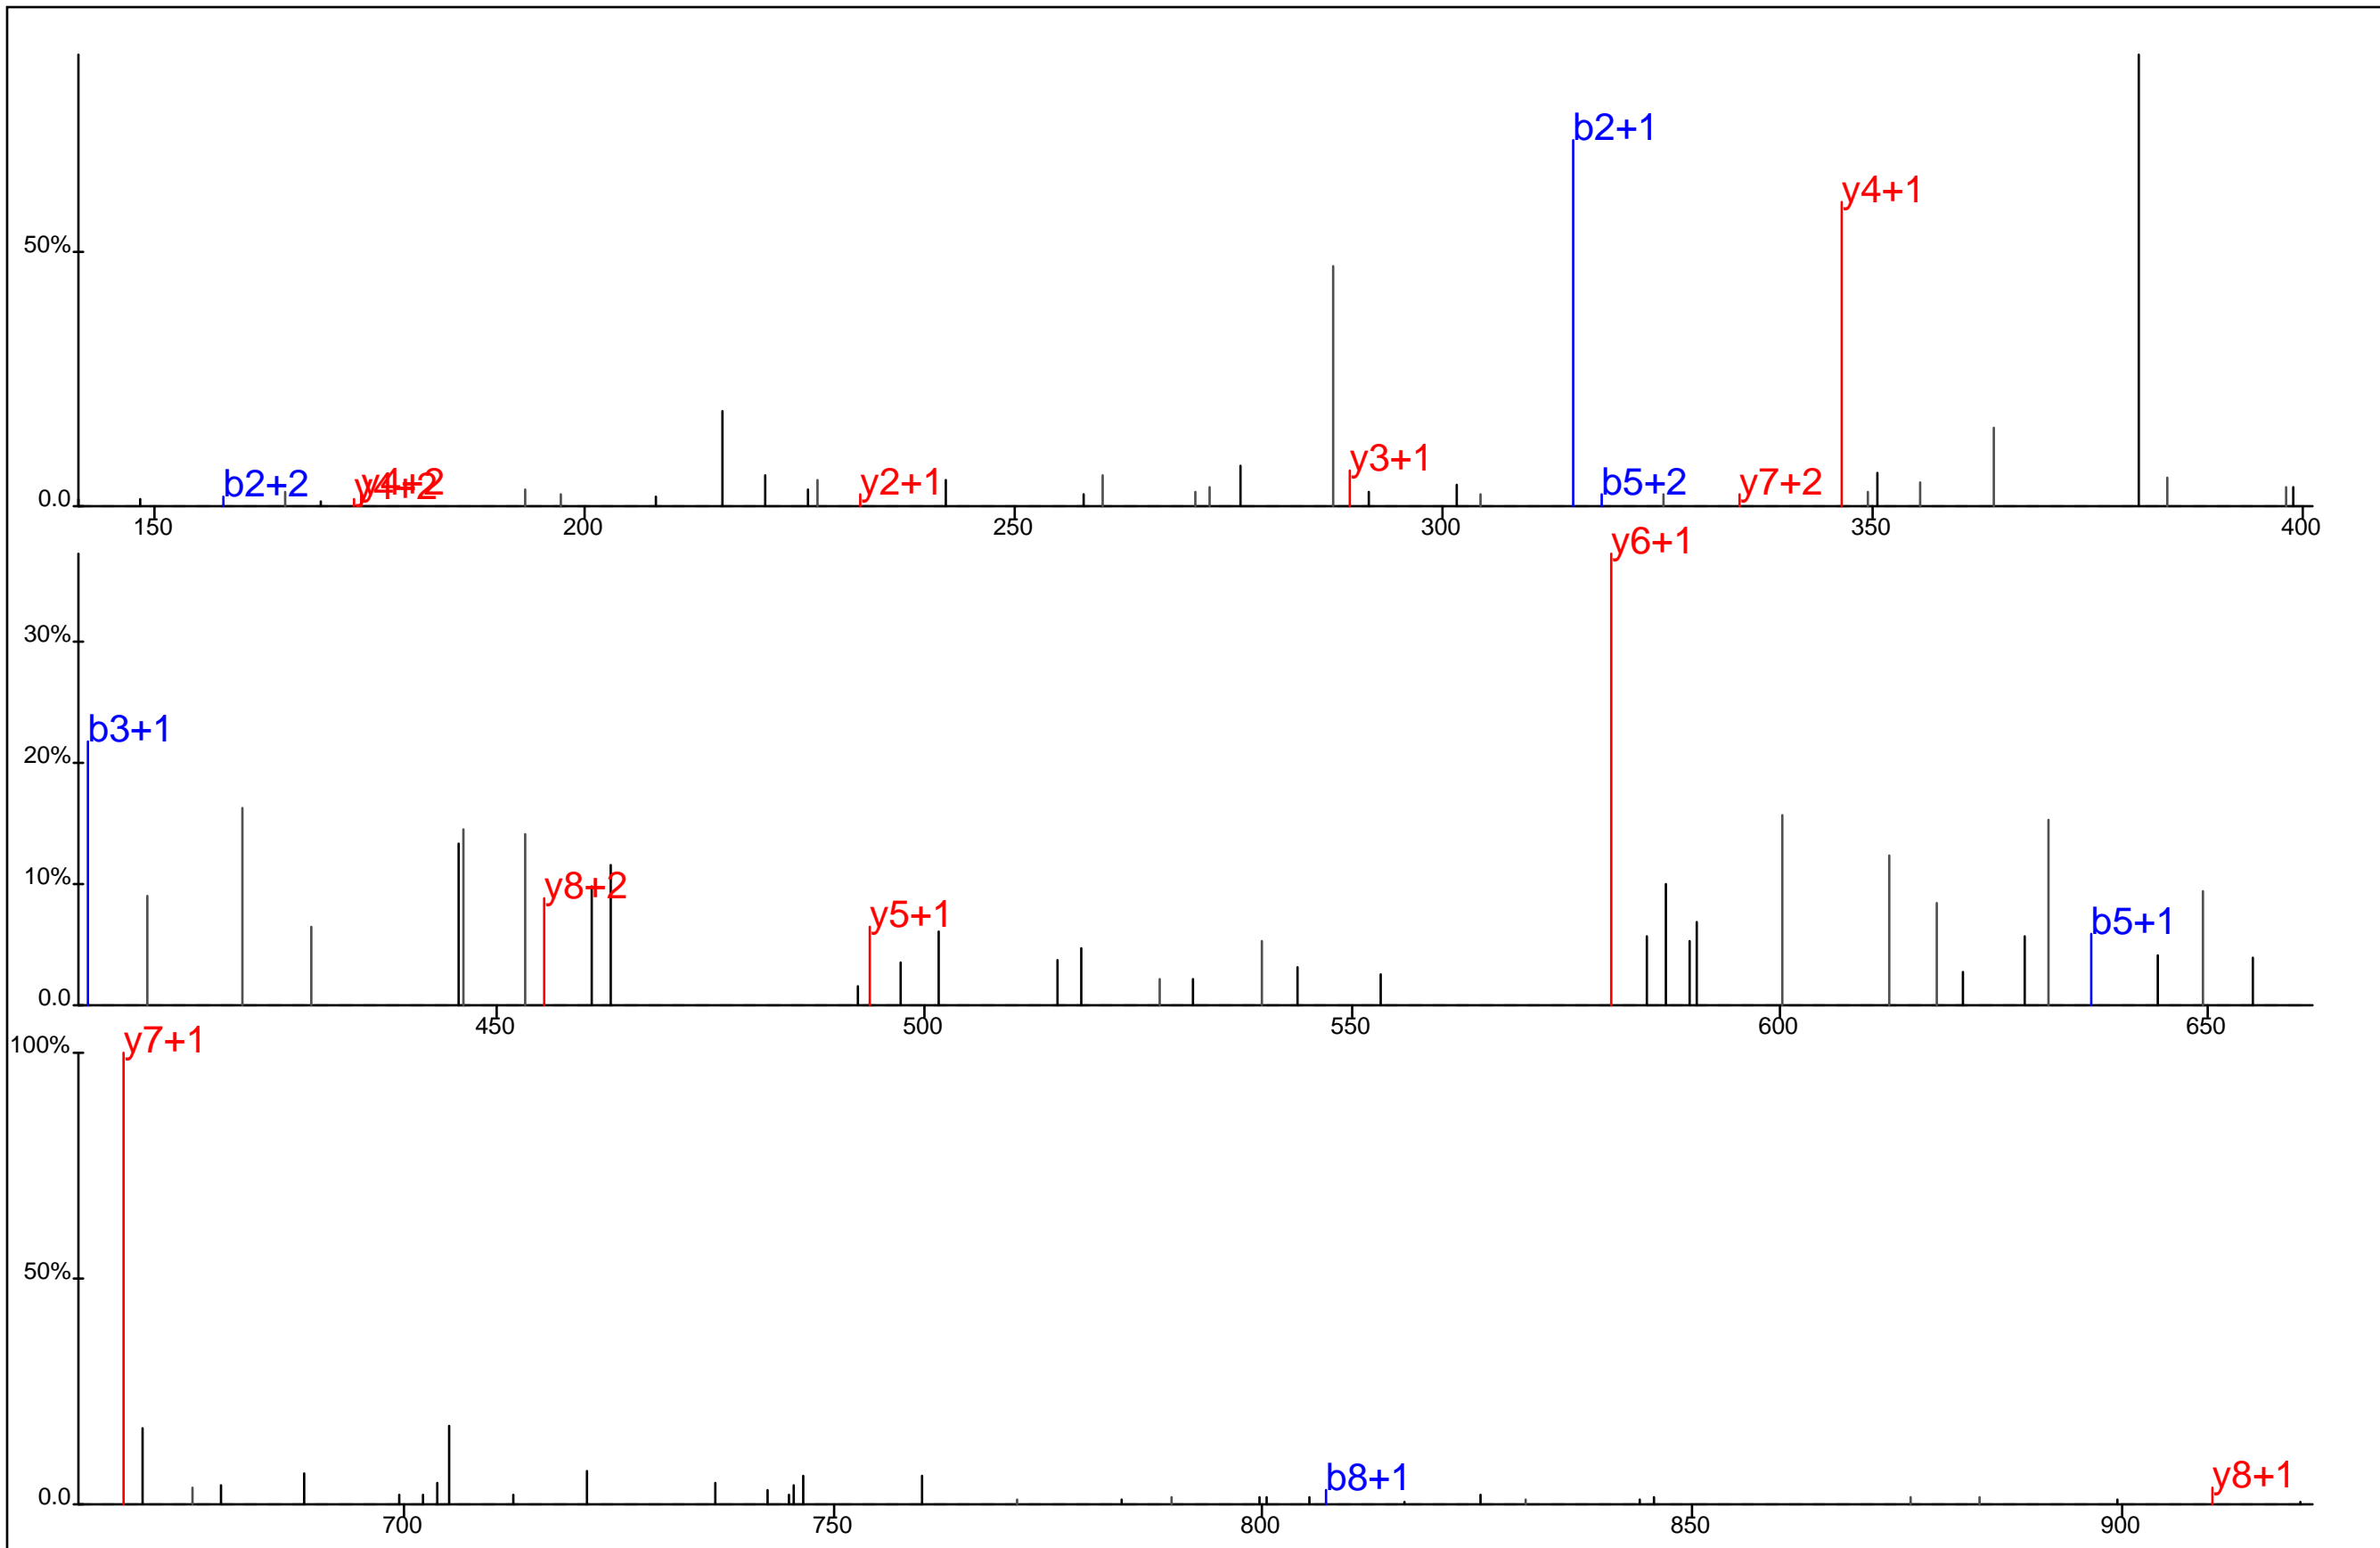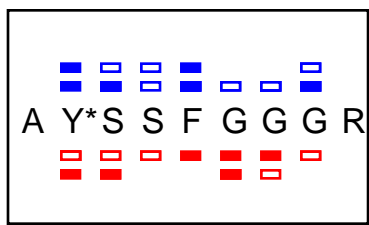

Protein Name: Williams Beuren syndrome chromosome region 1  
 gi Accession: 0  
 Precursor Mass: 491.1943+2  
 Delta Mass: 1.208 ppm  
 XCorr: 21.34

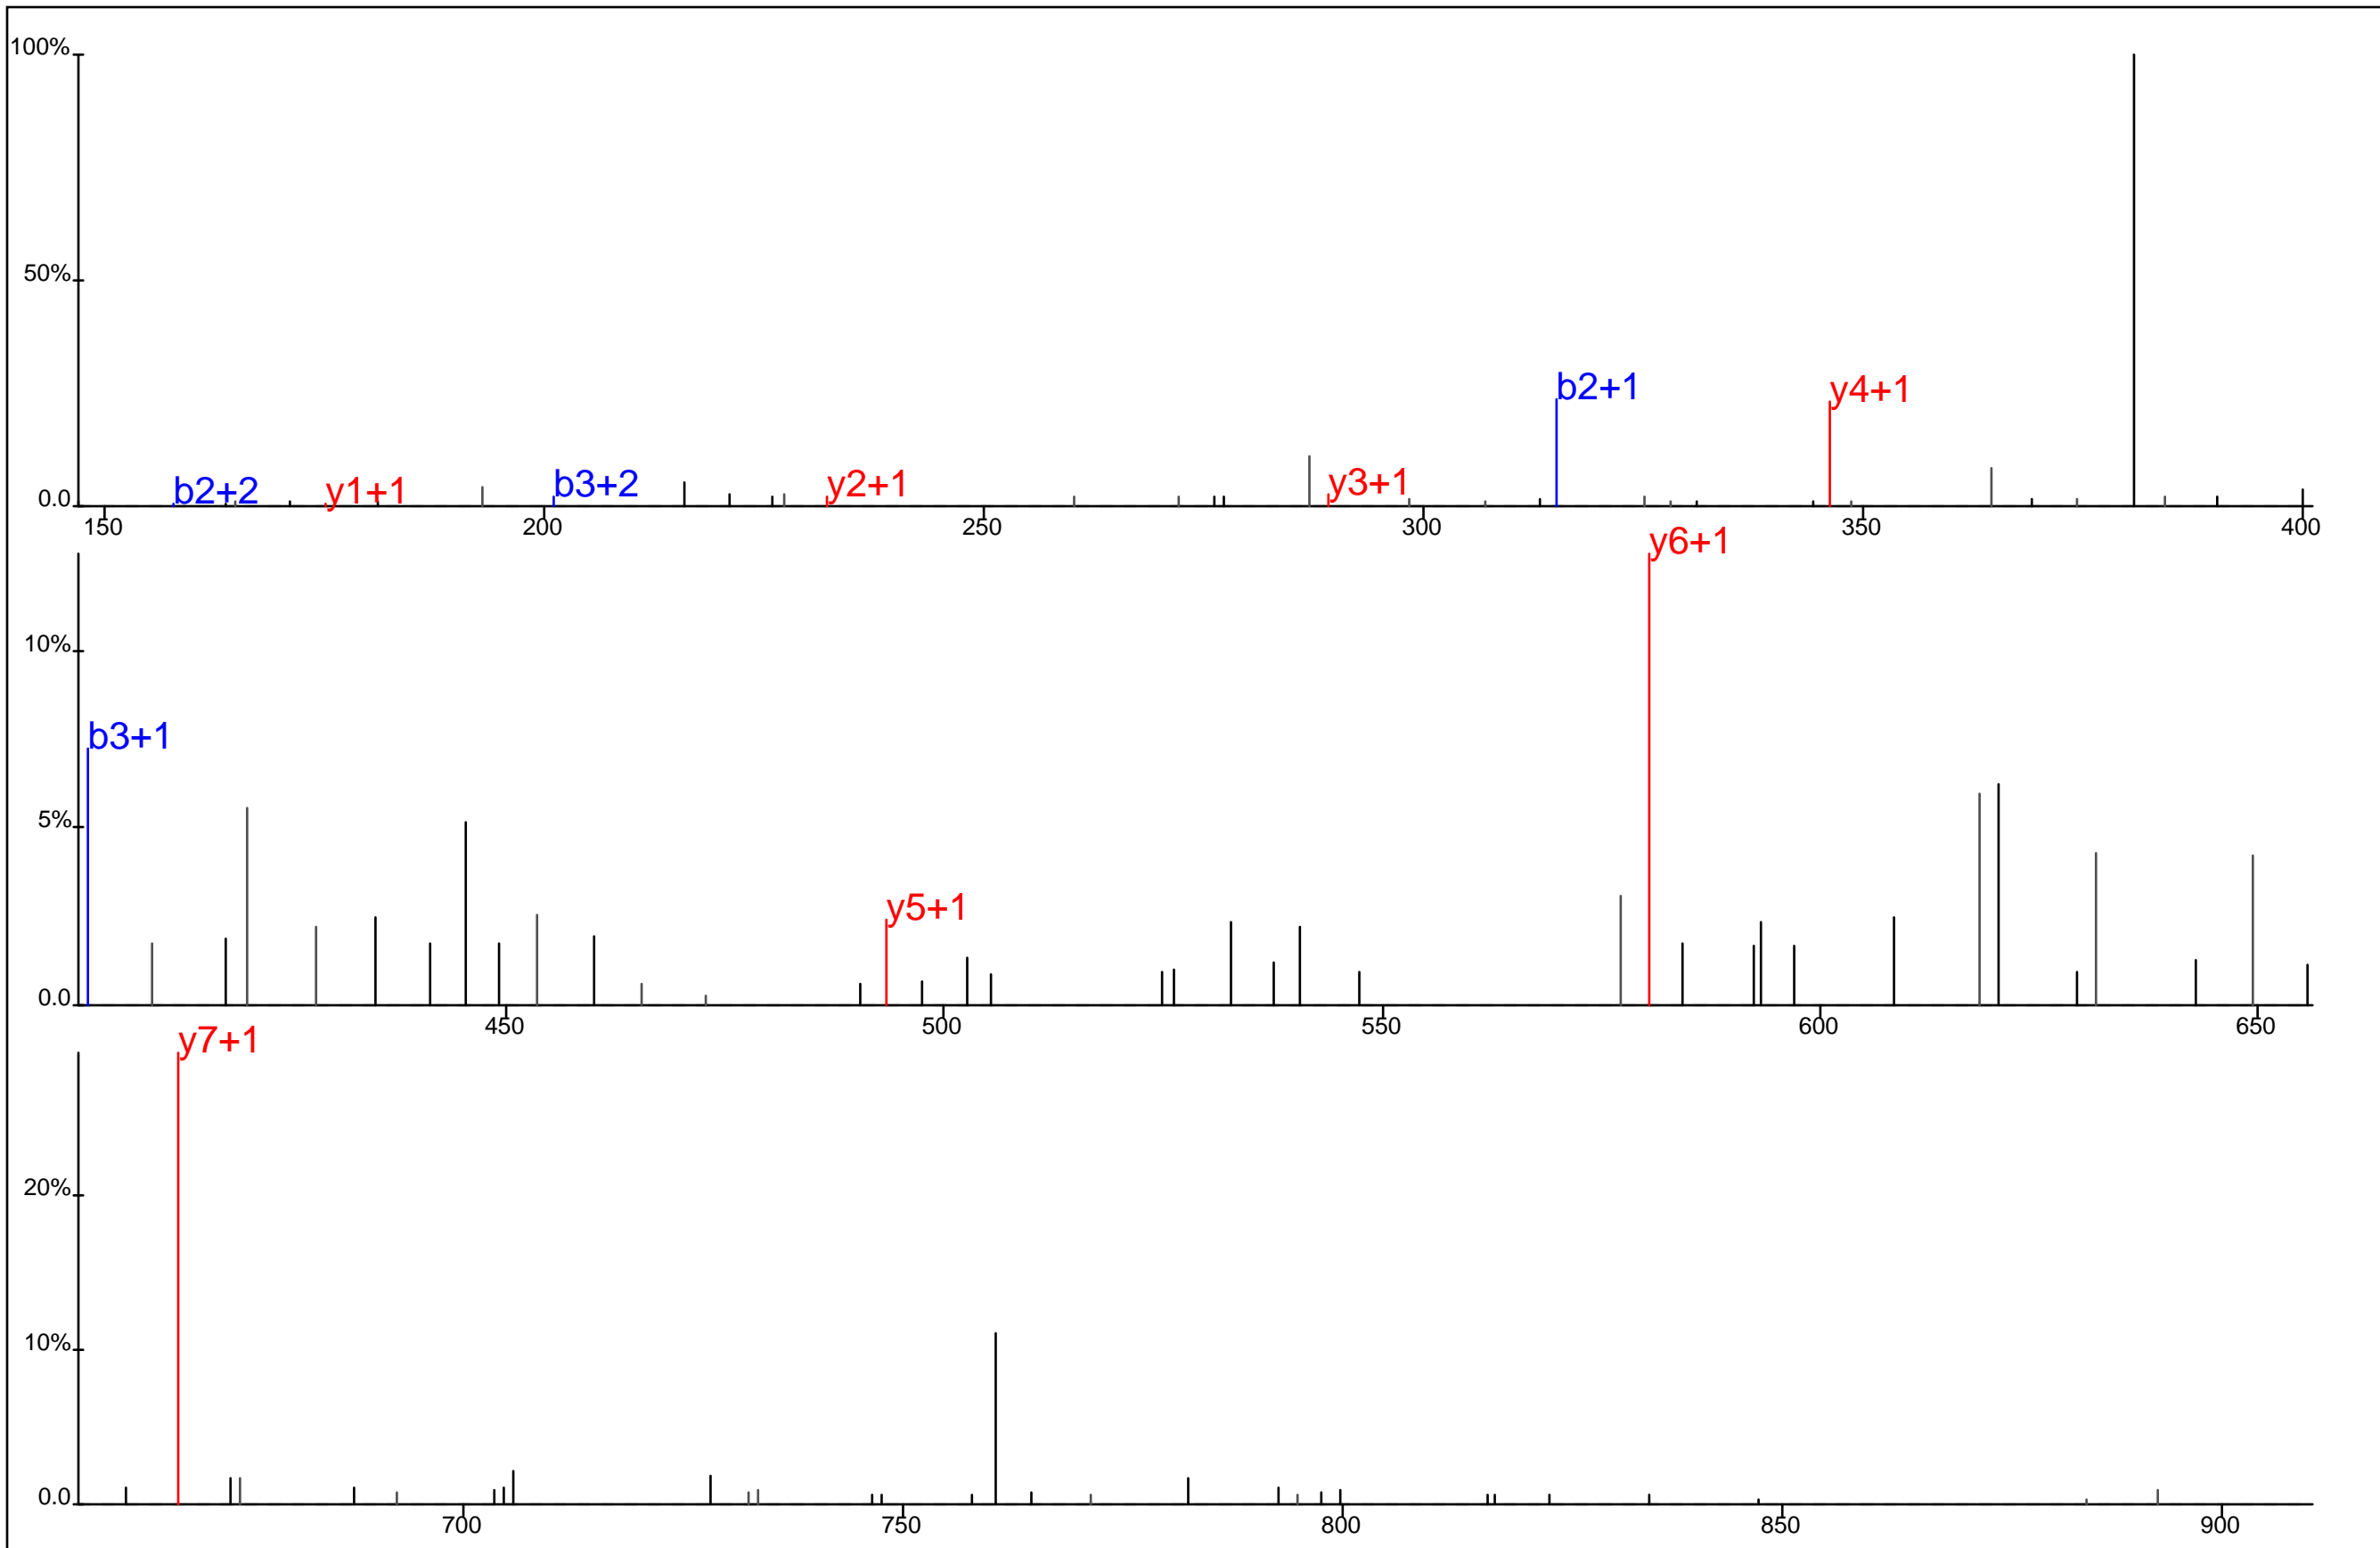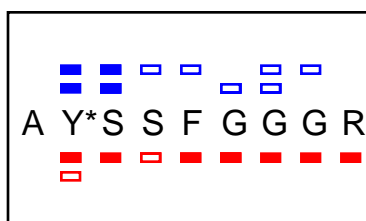

Protein Name: Williams Beuren syndrome chromosome region 1  
 gi Accession: 0  
 Precursor Mass: 491.1942+2  
 Delta Mass: 1.520 ppm  
 XCorr: 32.58

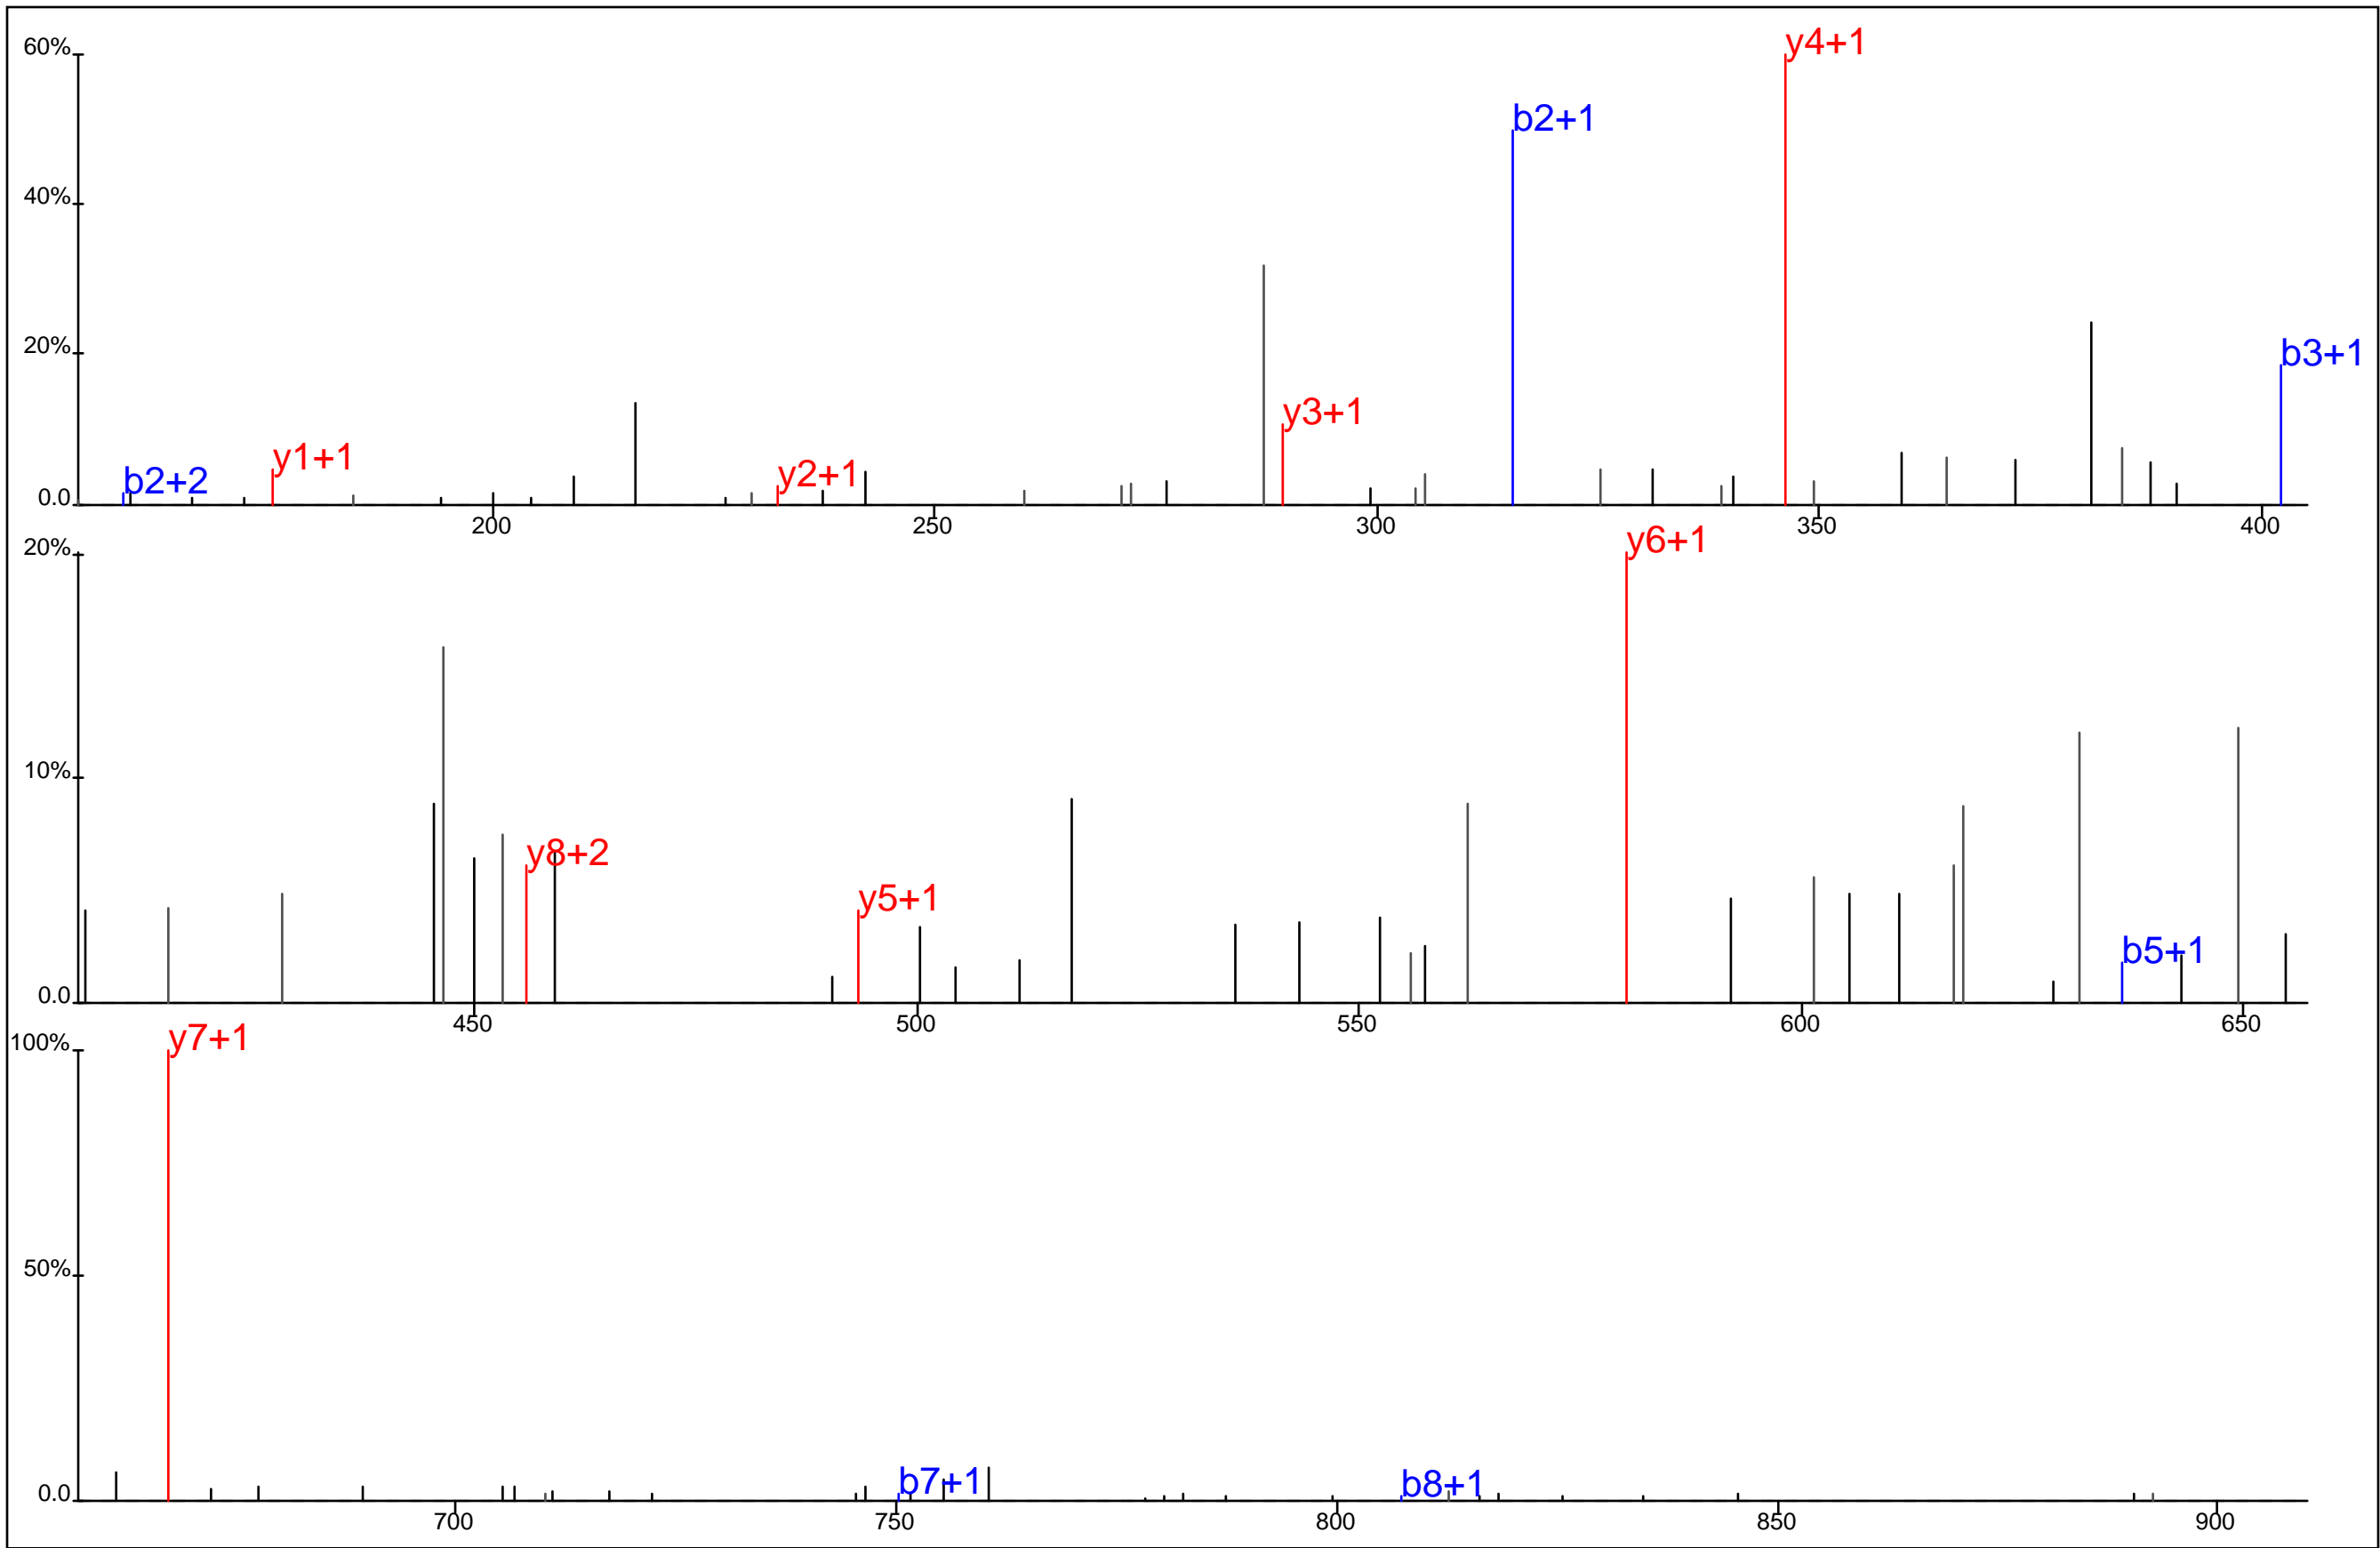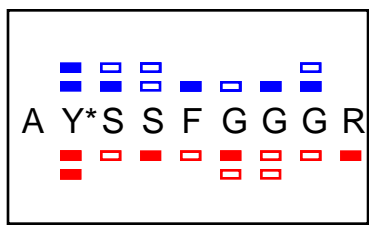

Protein Name: Williams Beuren syndrome chromosome region 1  
 gi Accession: 0  
 Precursor Mass: 491.1955+2  
 Delta Mass: 1.156 ppm  
 XCorr: 50.07

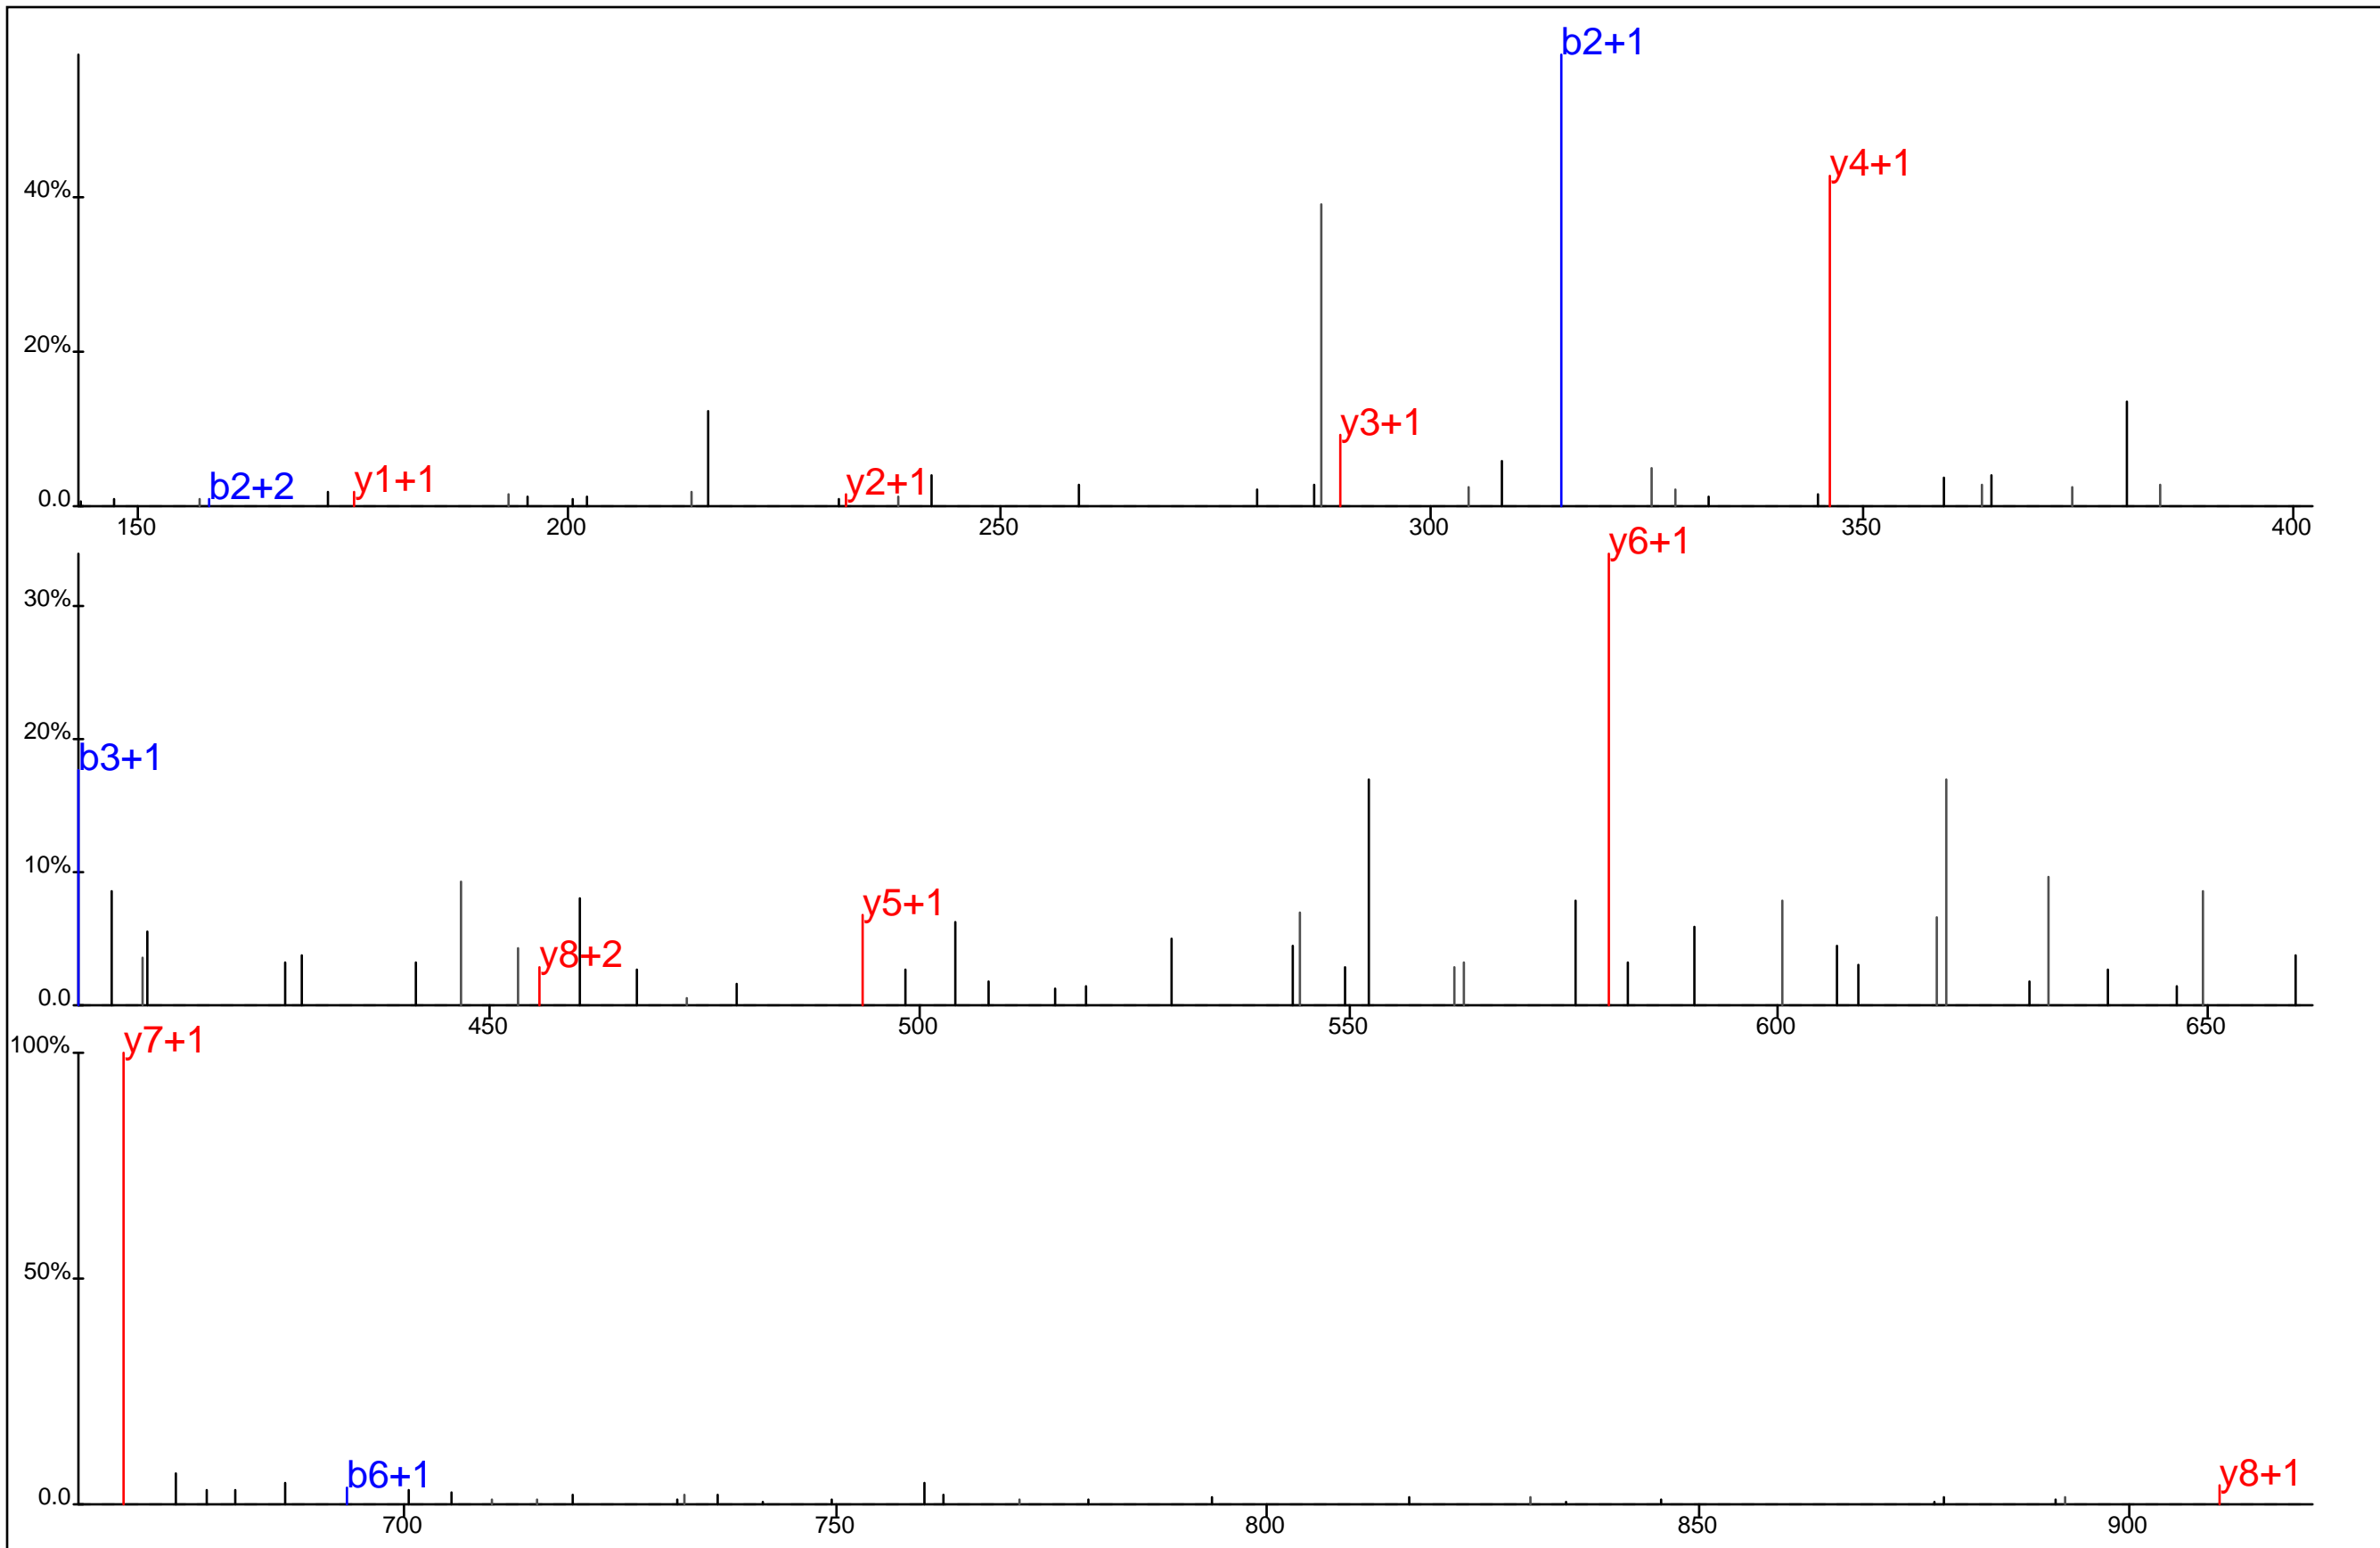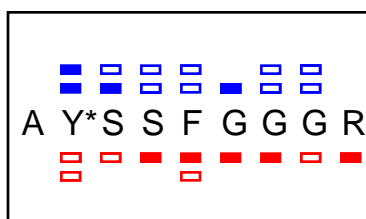

Protein Name: Williams Beuren syndrome chromosome region 1  
 gi Accession: 0  
 Precursor Mass: 491.1949+2  
 Delta Mass: 0.090 ppm  
 XCorr: 36.2

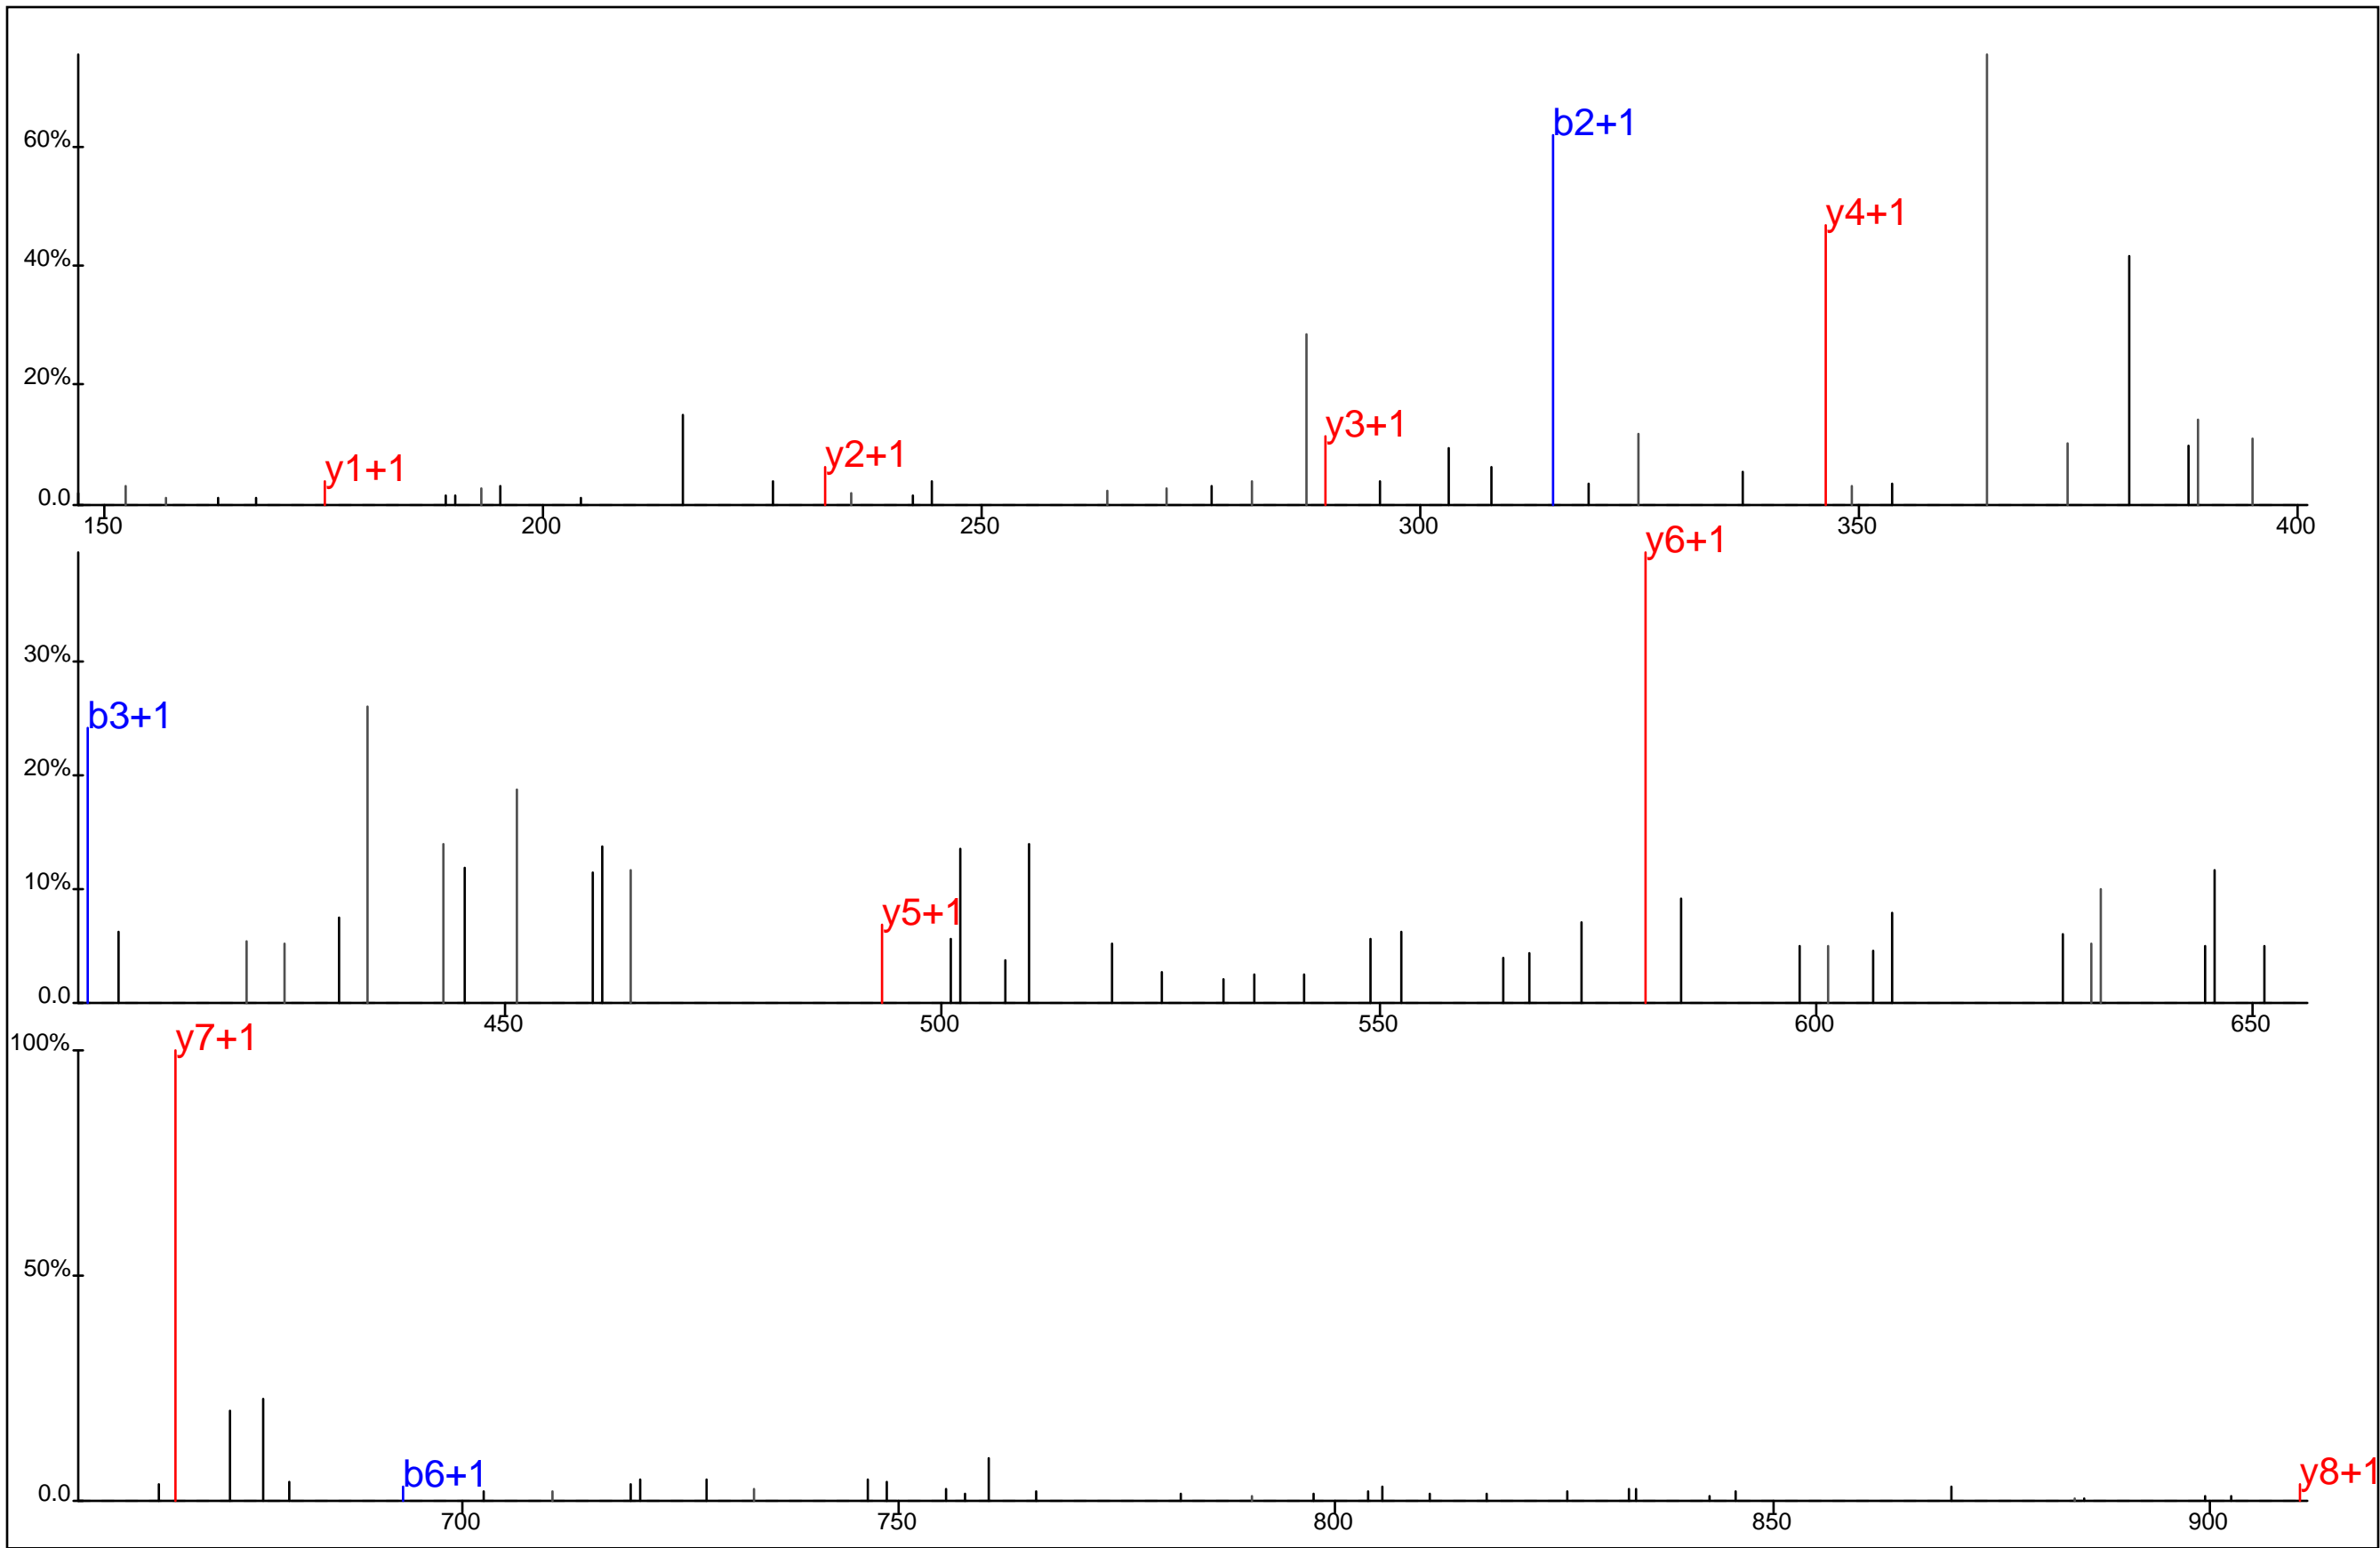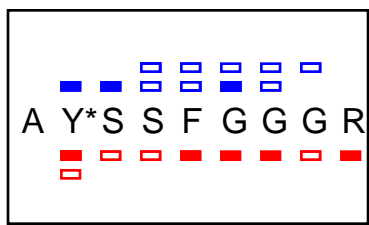

Protein Name: Williams Beuren syndrome chromosome region 1  
 gi Accession: 0  
 Precursor Mass: 491.1943+2  
 Delta Mass: 1.333 ppm  
 XCorr: 26.43



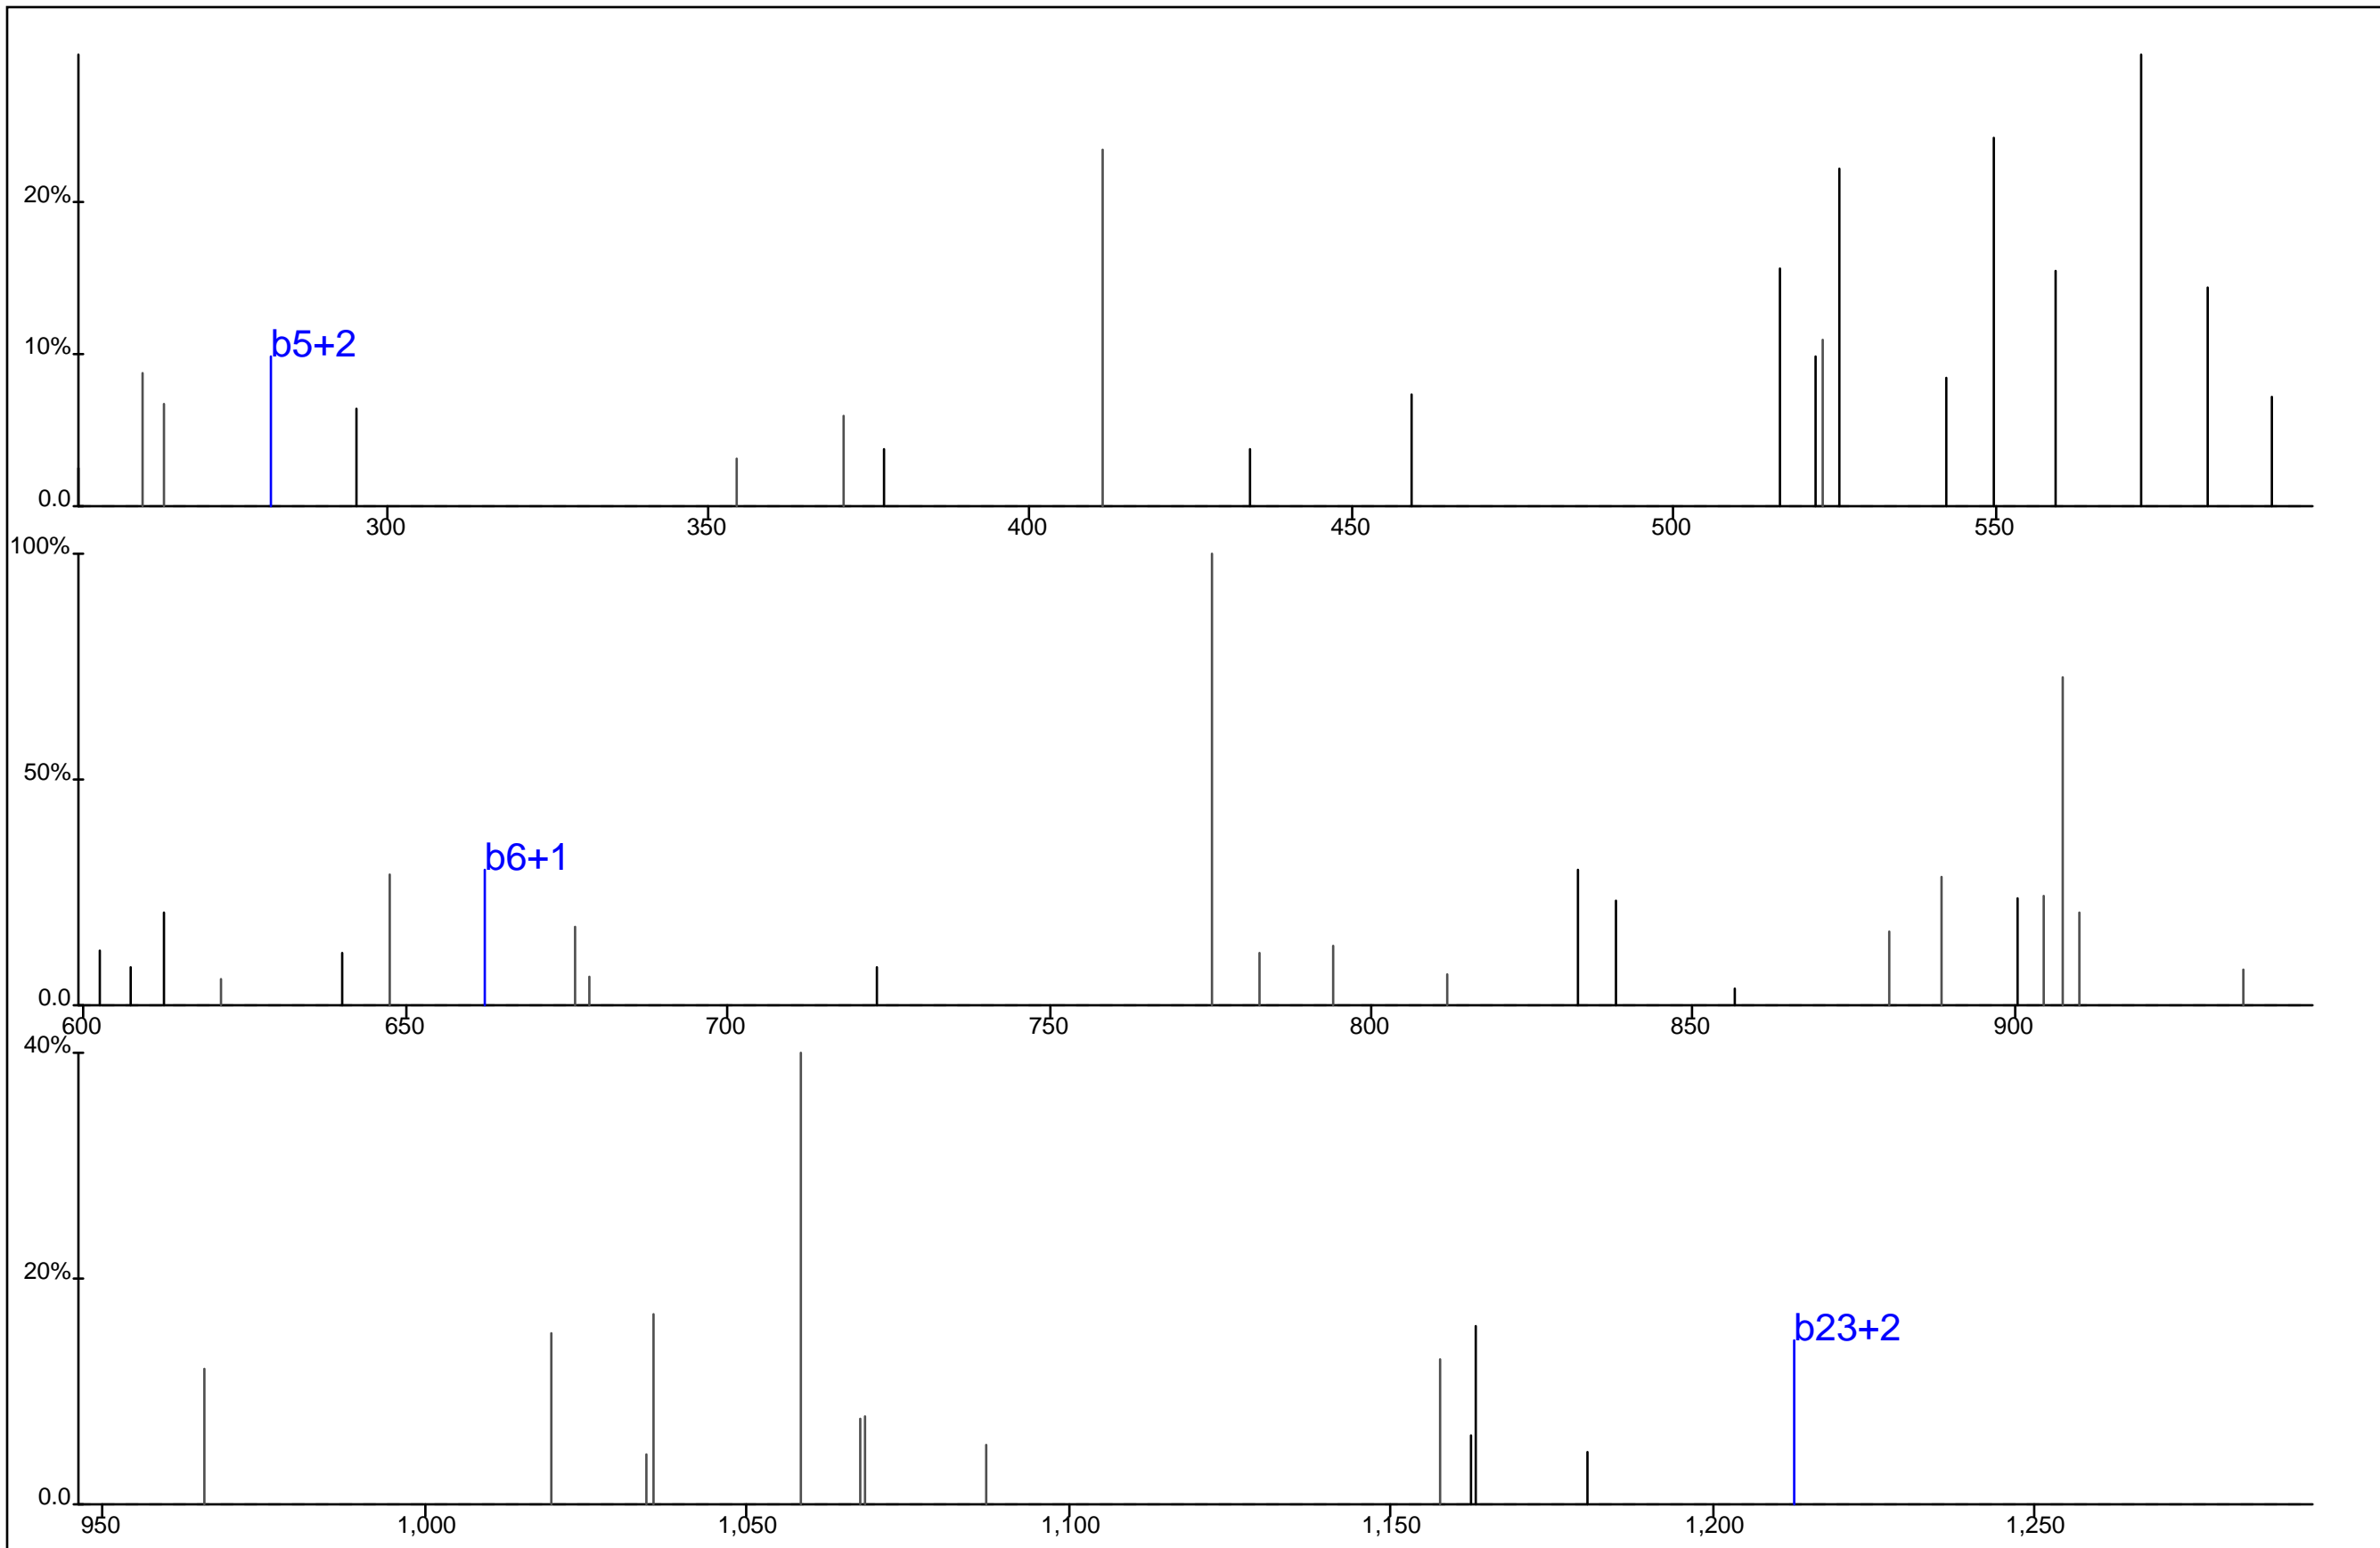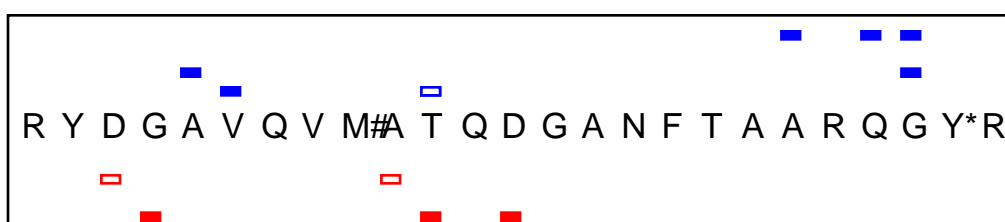

Protein Name: Wingless type MMTV integration site family, member 2B  
 gi Accession: 0  
 Precursor Mass: 711.3268+4  
 Delta Mass: 4.446 ppm  
 XCorr: 22.28



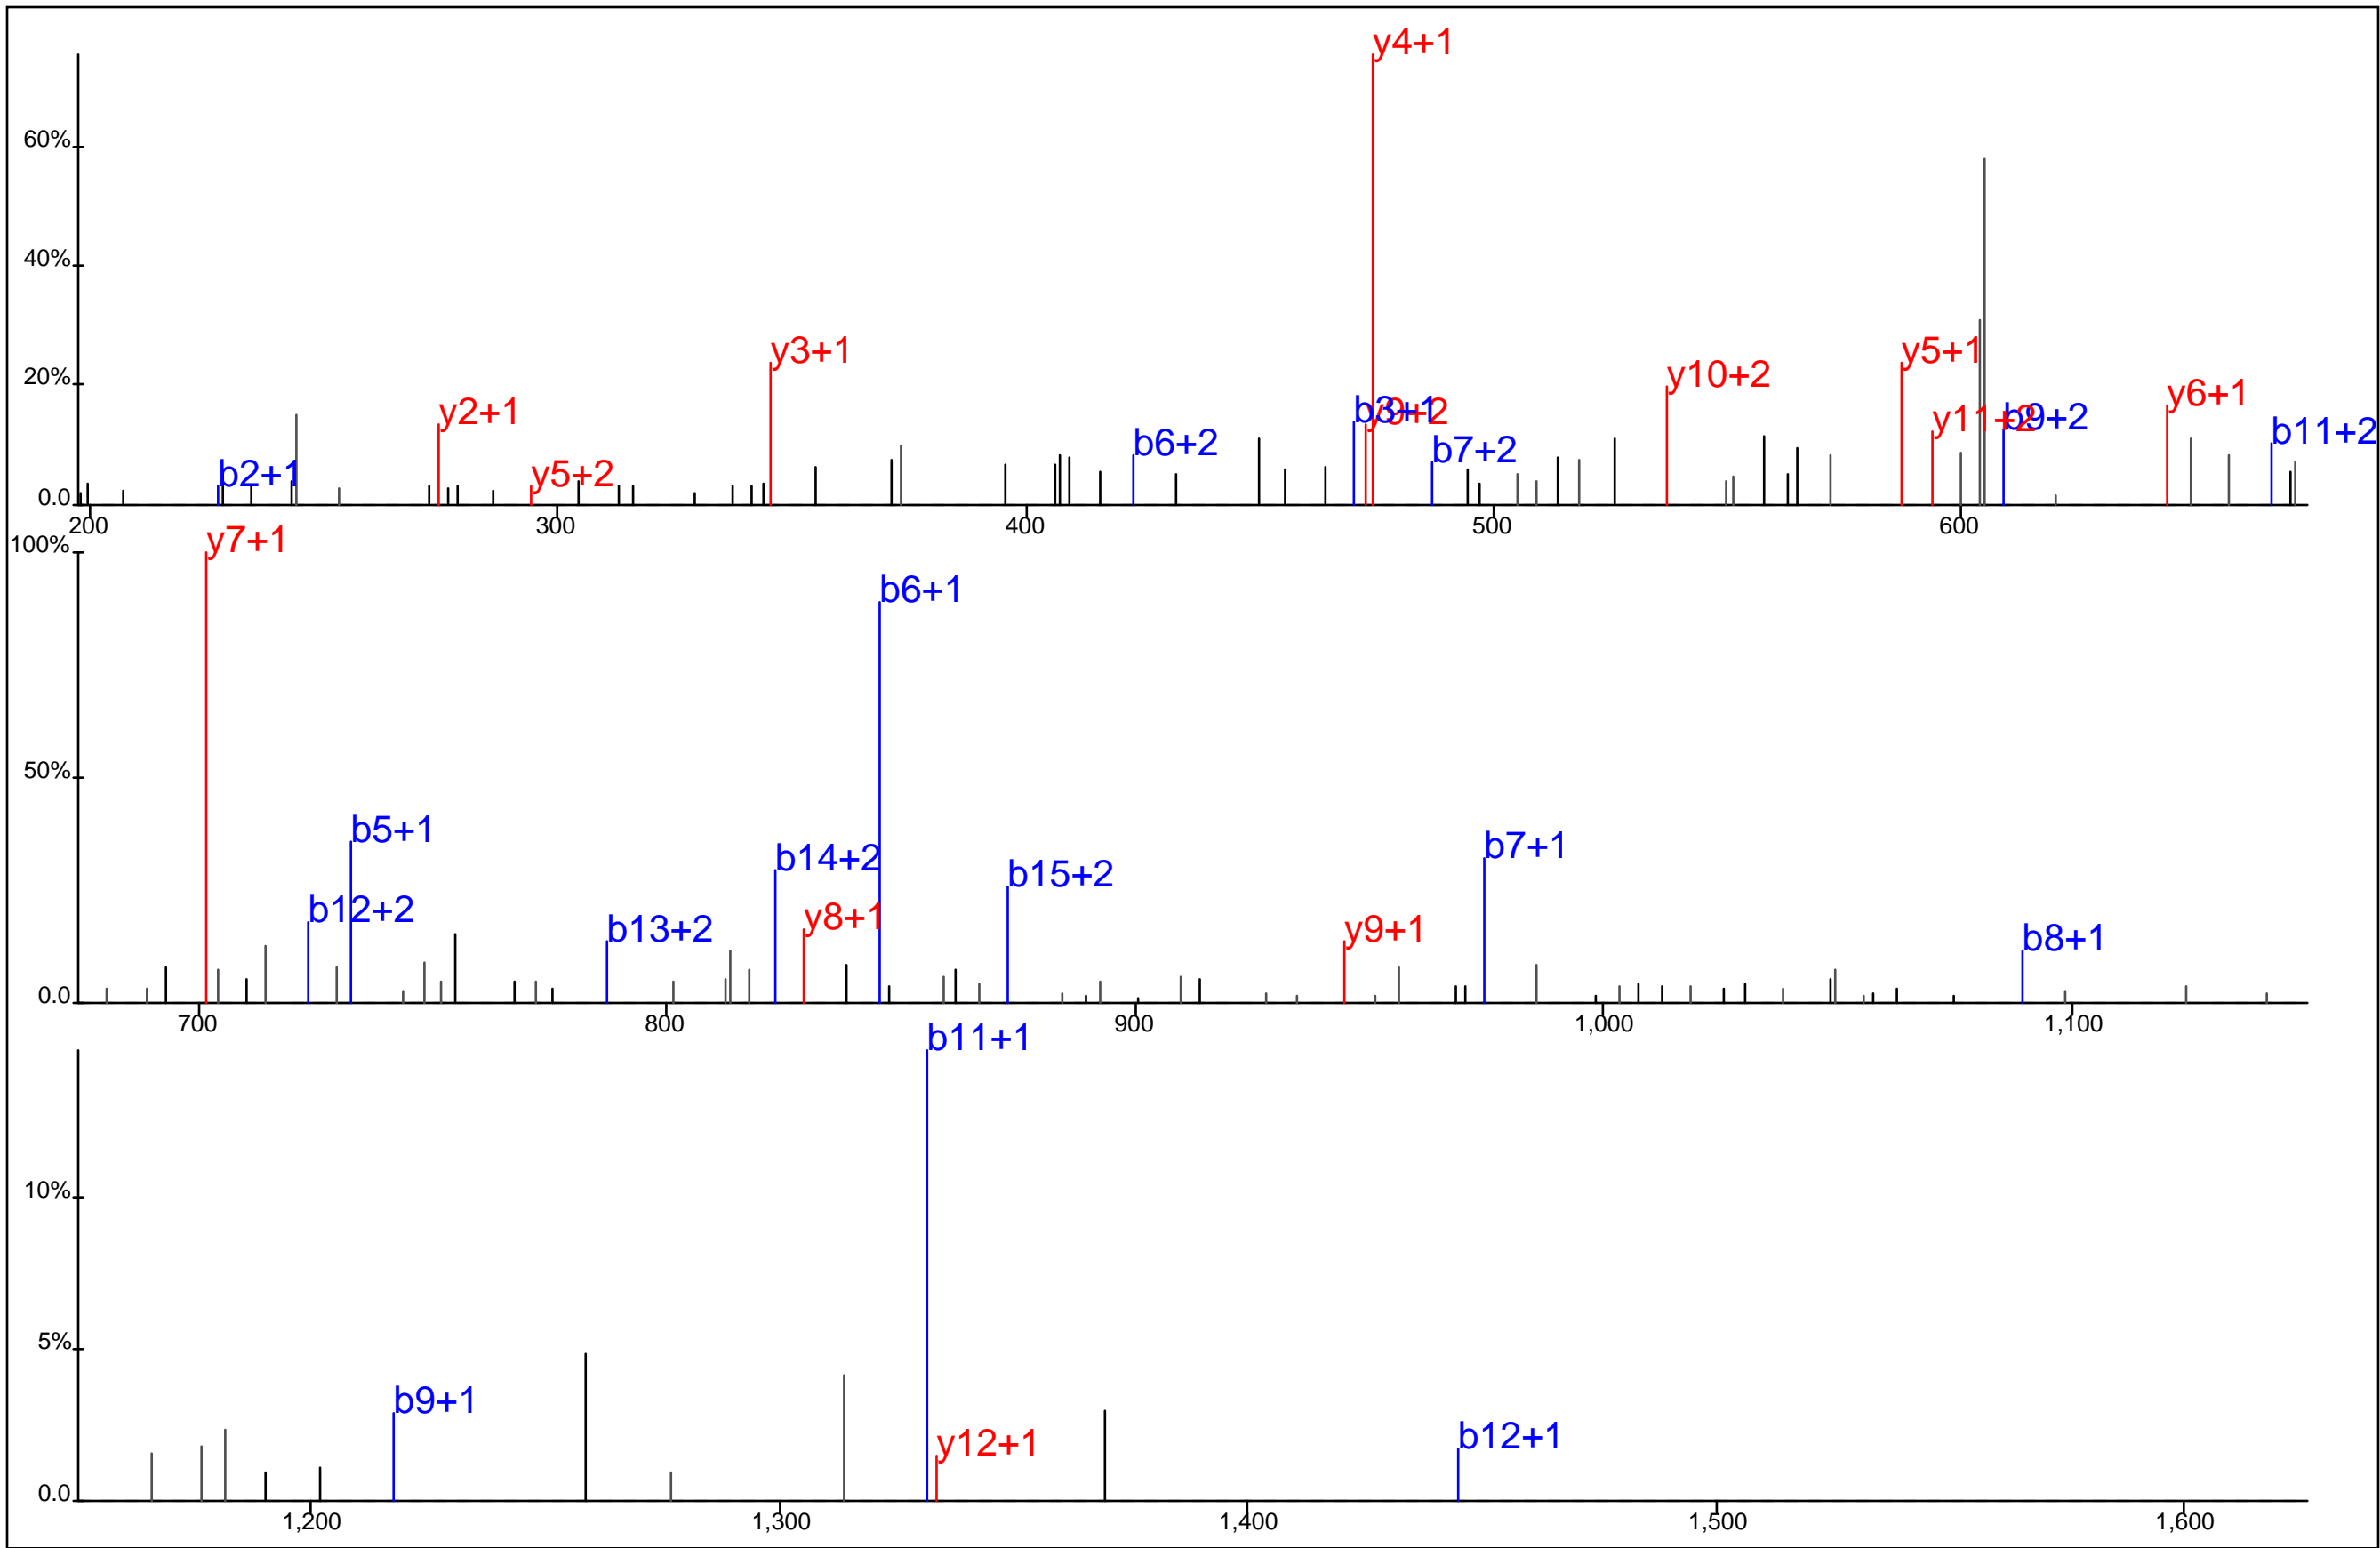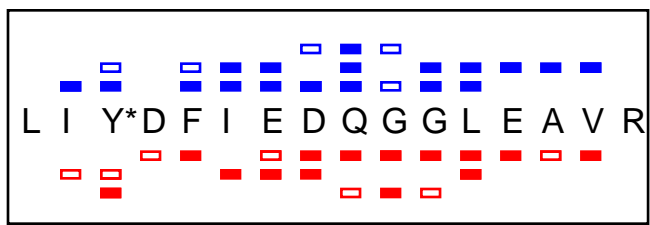

Protein Name: Wiskott-aldrich syndrome protein  
 gi Accession: 0  
 Precursor Mass: 639.9697+3  
 Delta Mass: 2.468 ppm  
 XCorr: 55.35

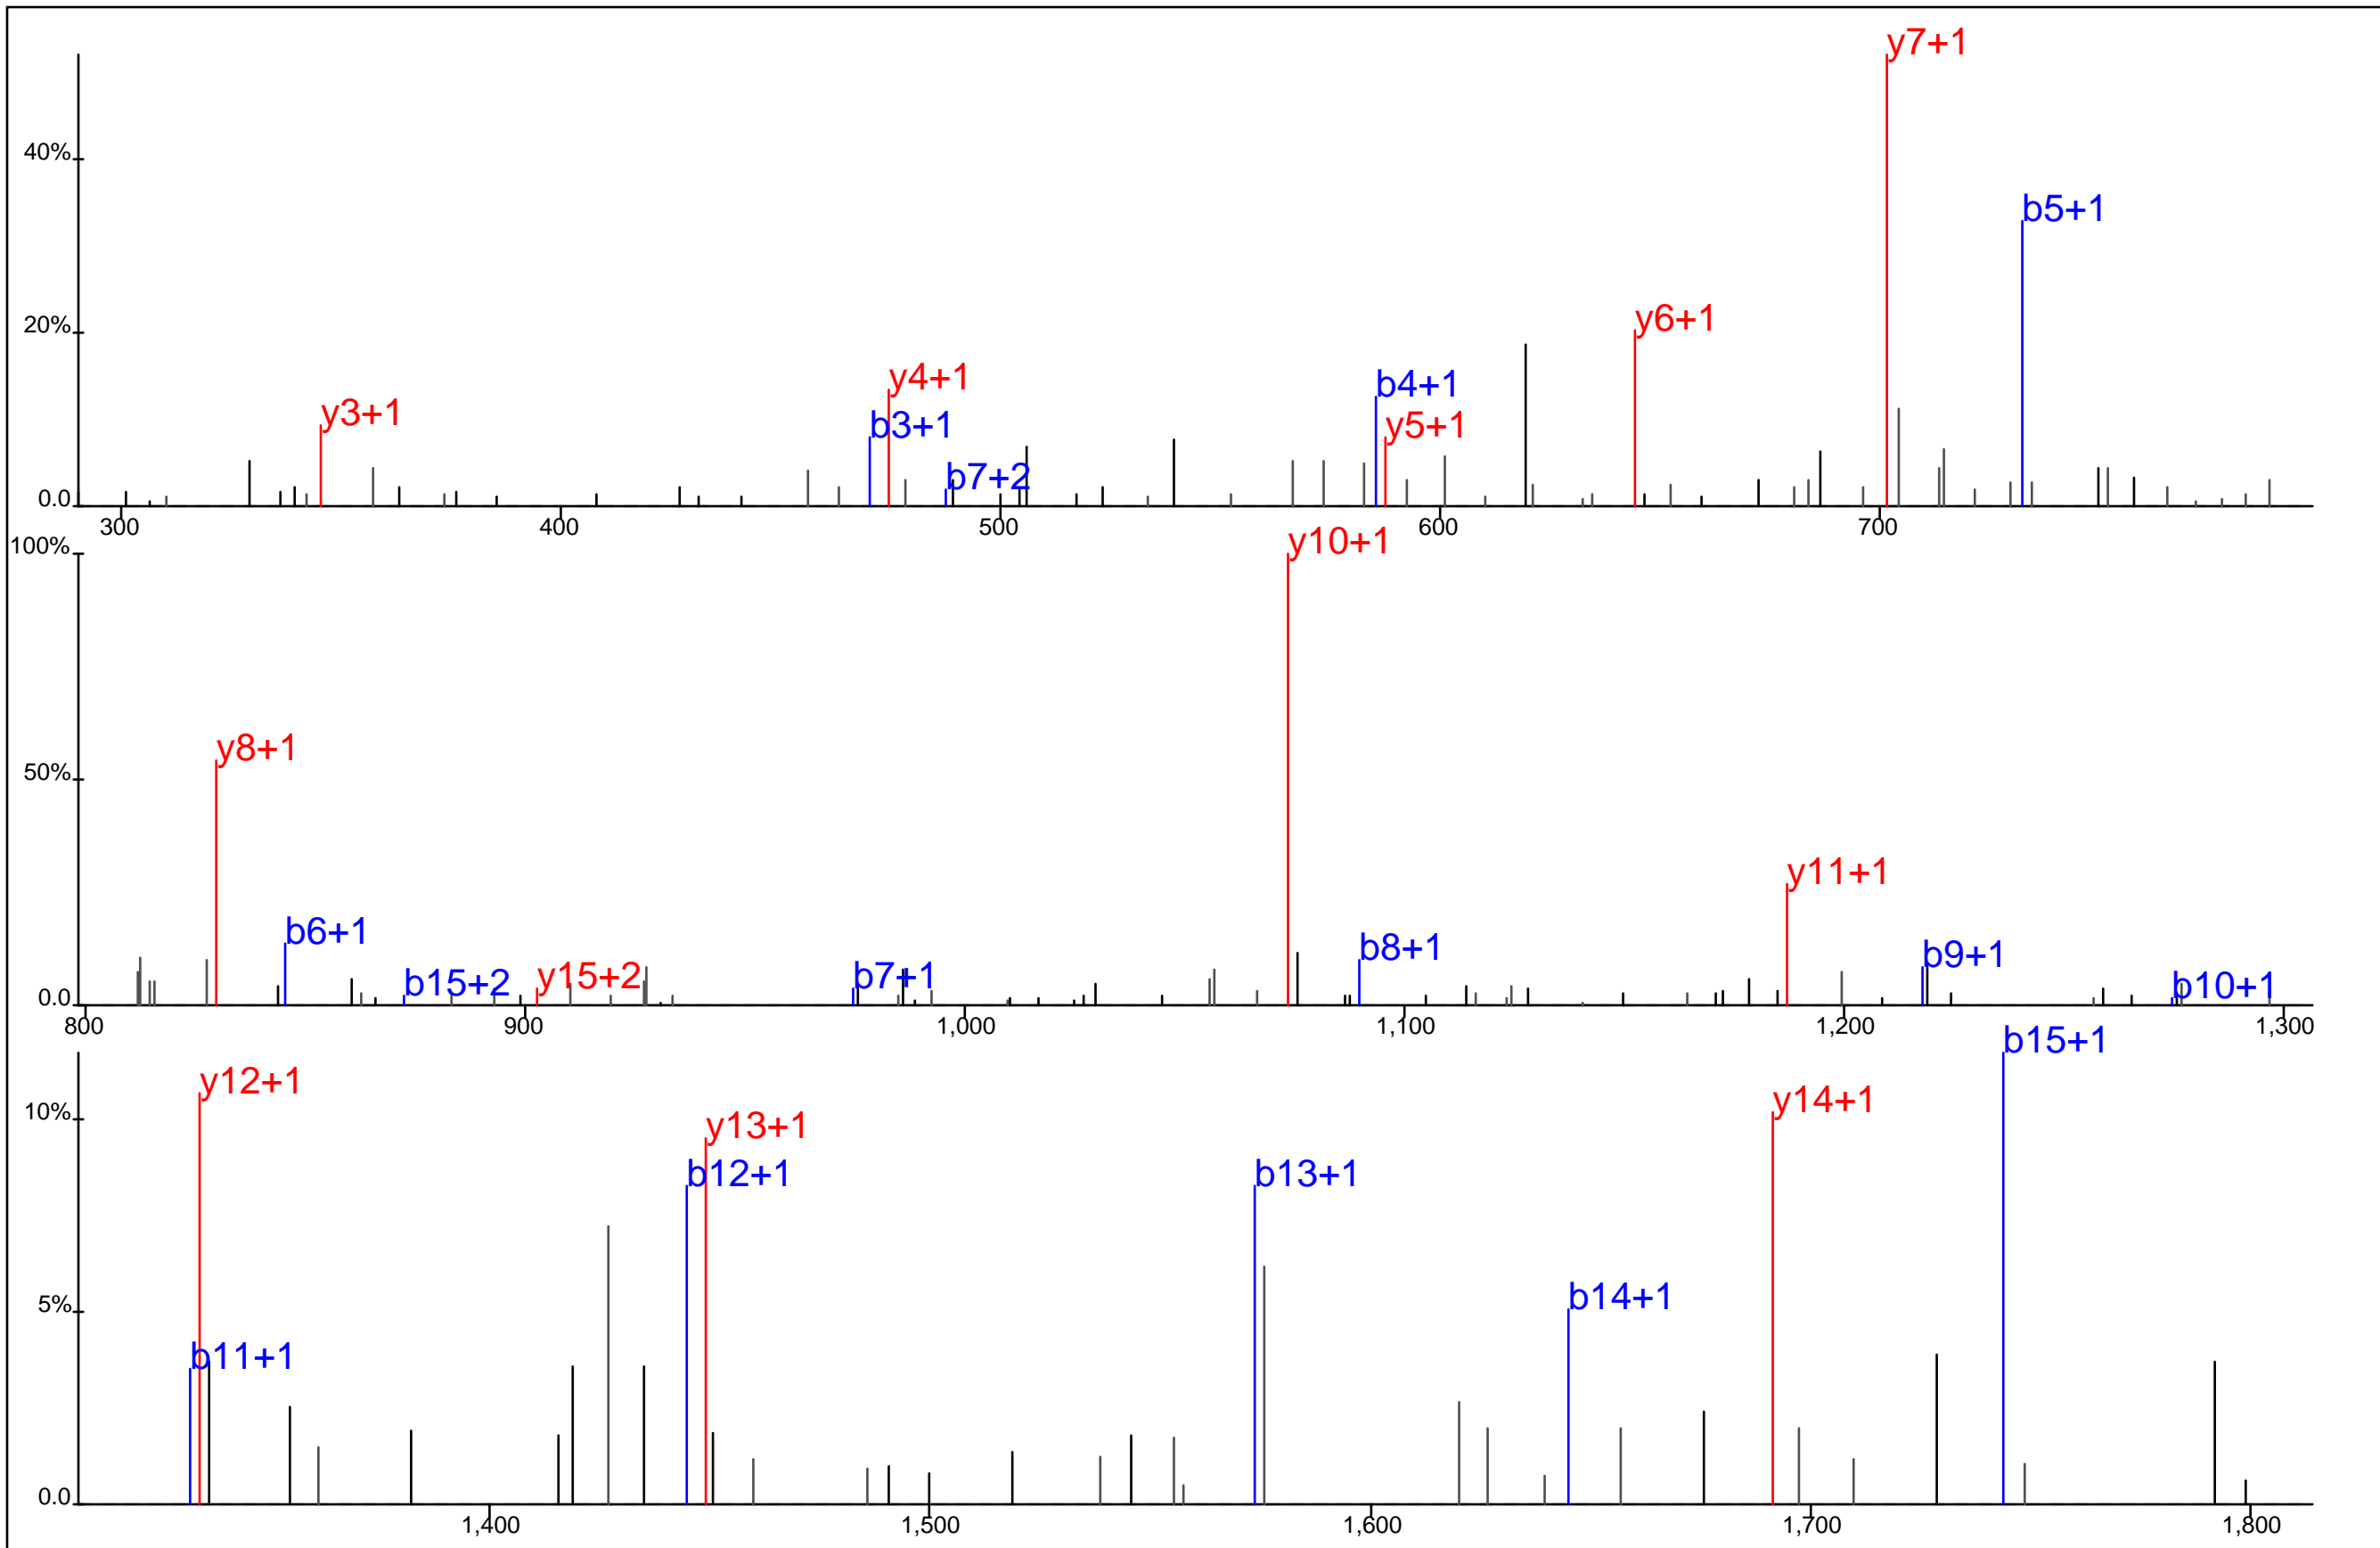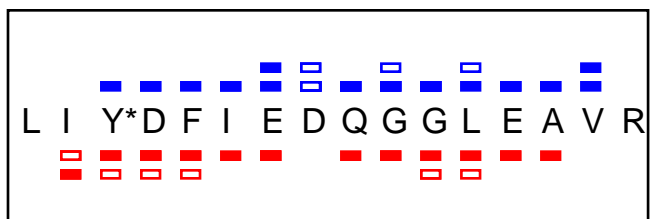

Protein Name: Wiskott-aldrich syndrome protein  
 gi Accession: 0  
 Precursor Mass: 959.4546+2  
 Delta Mass: 1.325 ppm  
 XCorr: 83.65

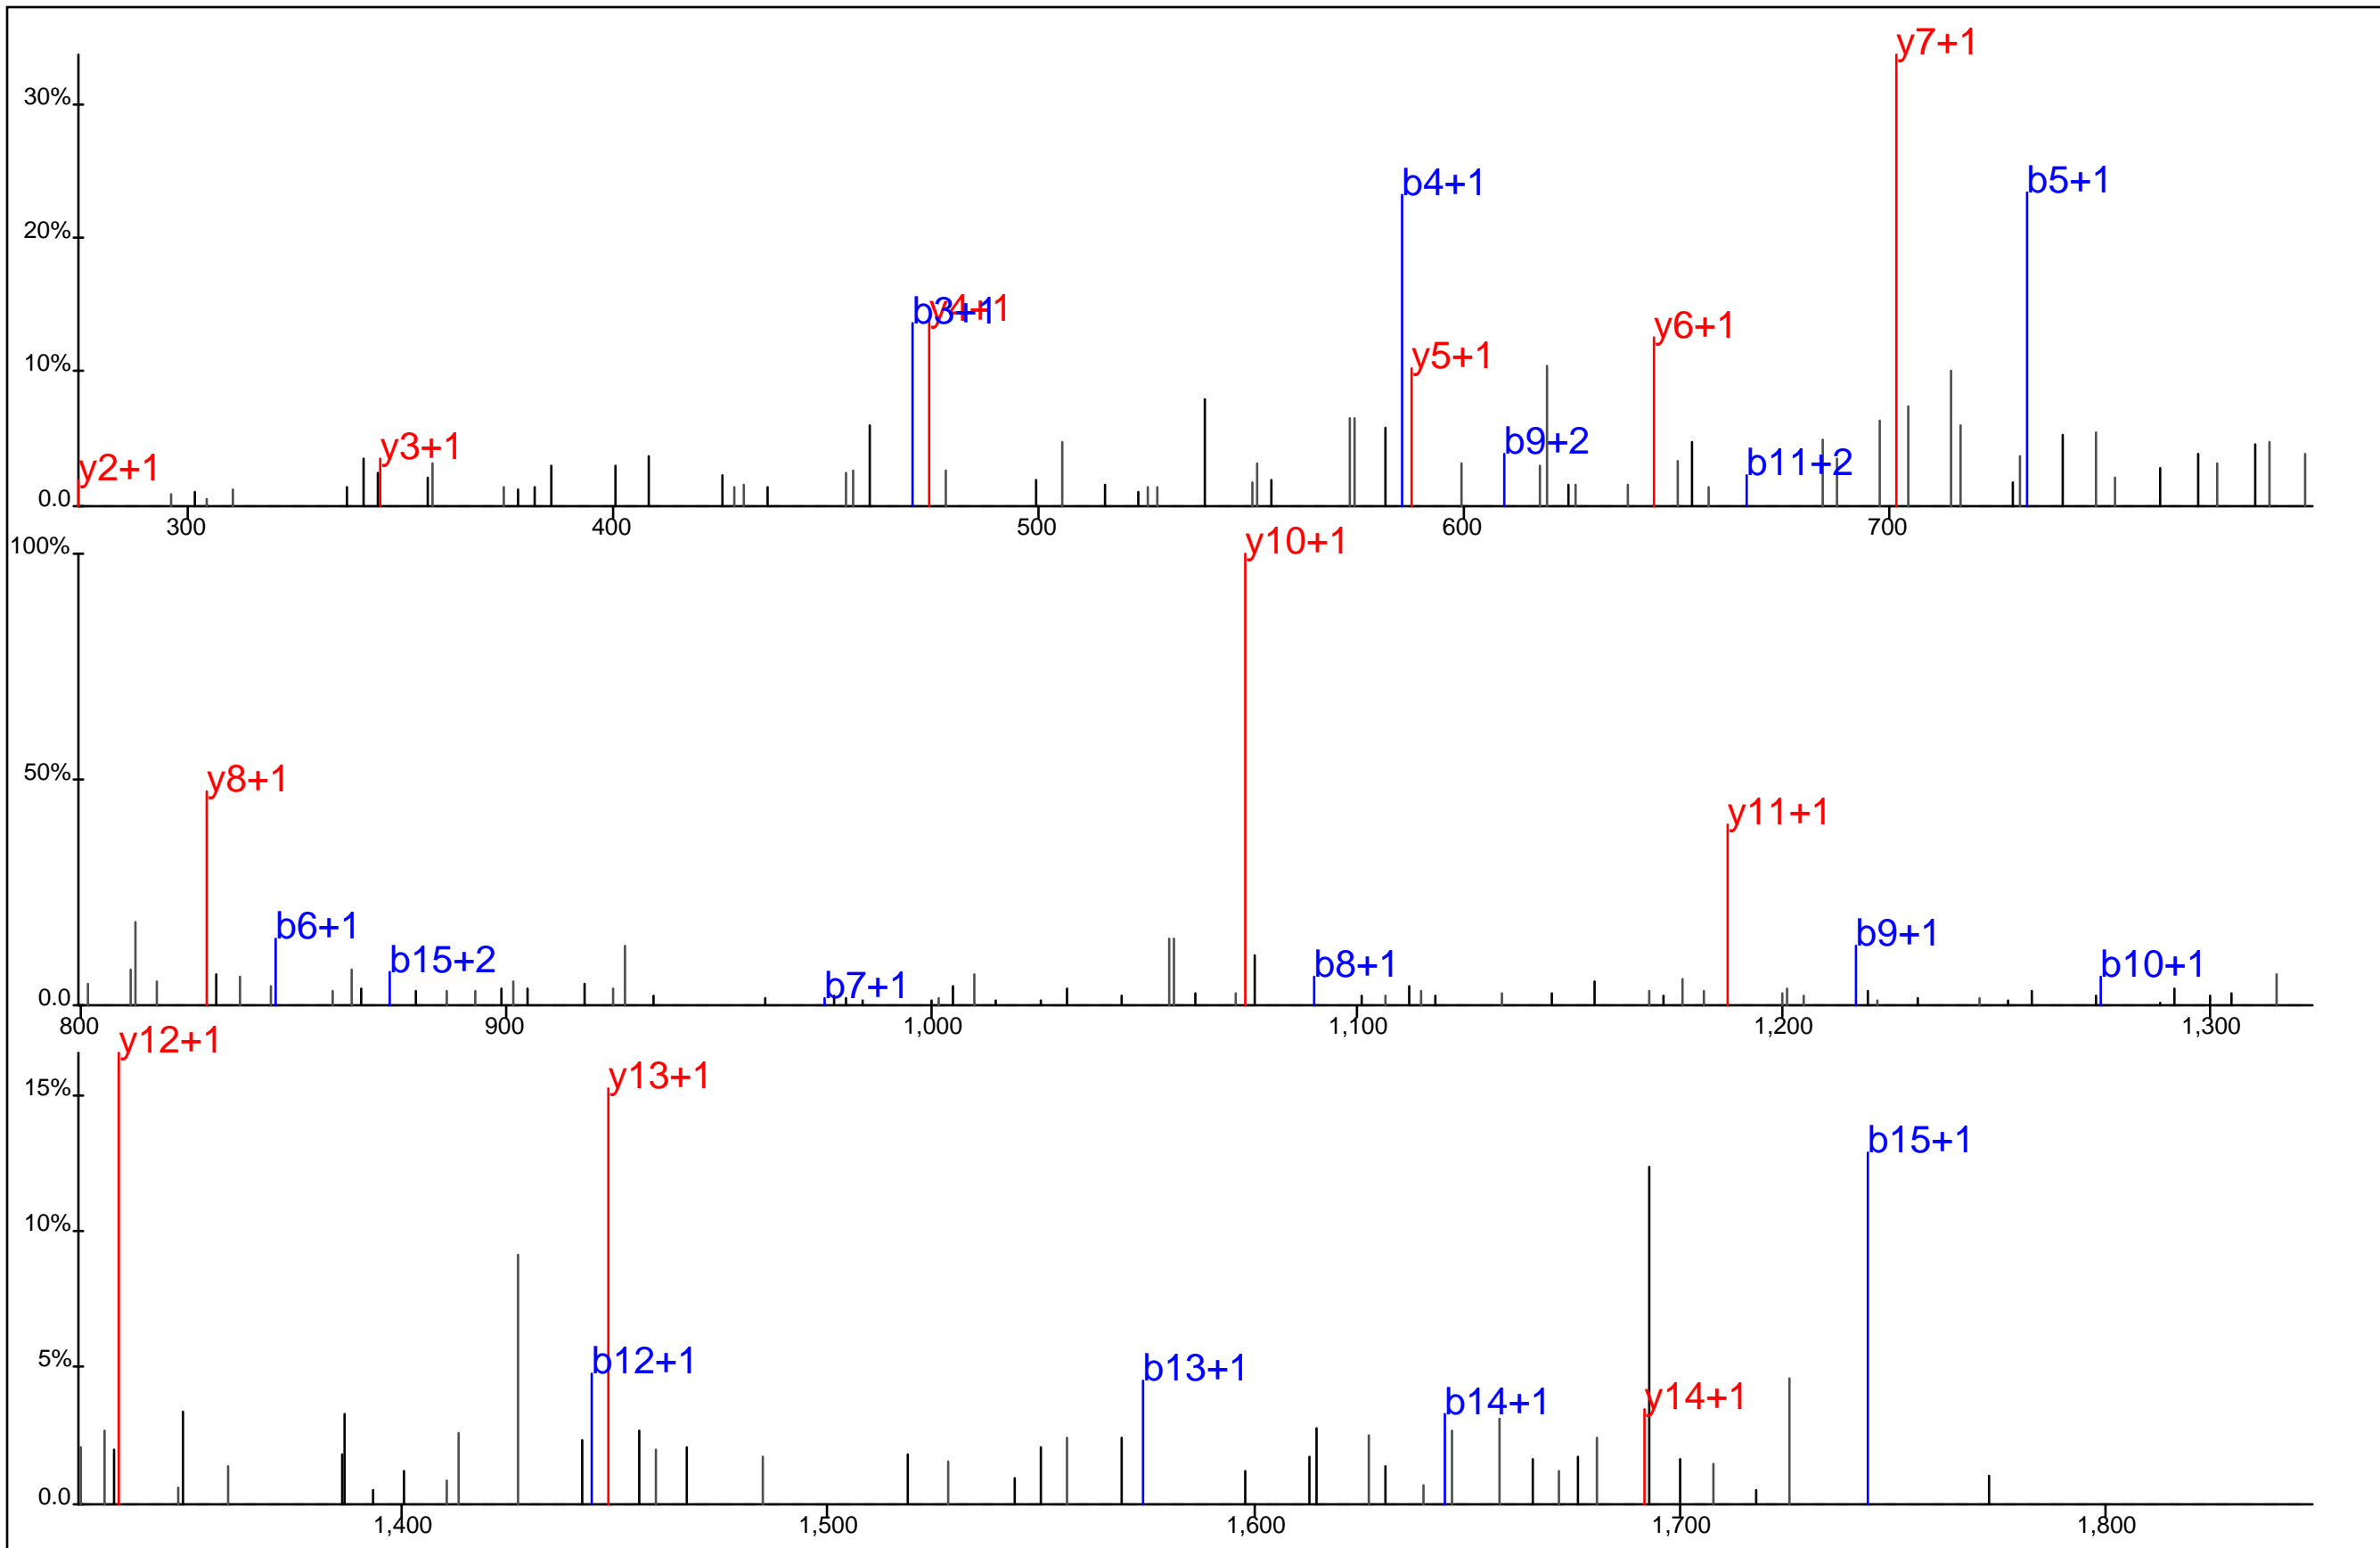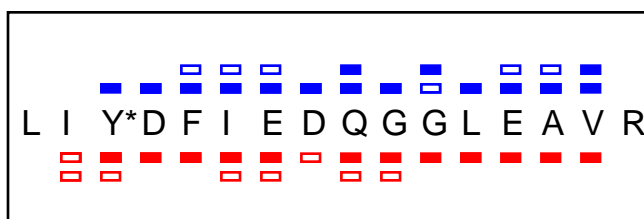

Protein Name: Wiskott-aldrich syndrome protein  
 gi Accession: 0  
 Precursor Mass: 959.4559+2  
 Delta Mass: 2.726 ppm  
 XCorr: 74.52

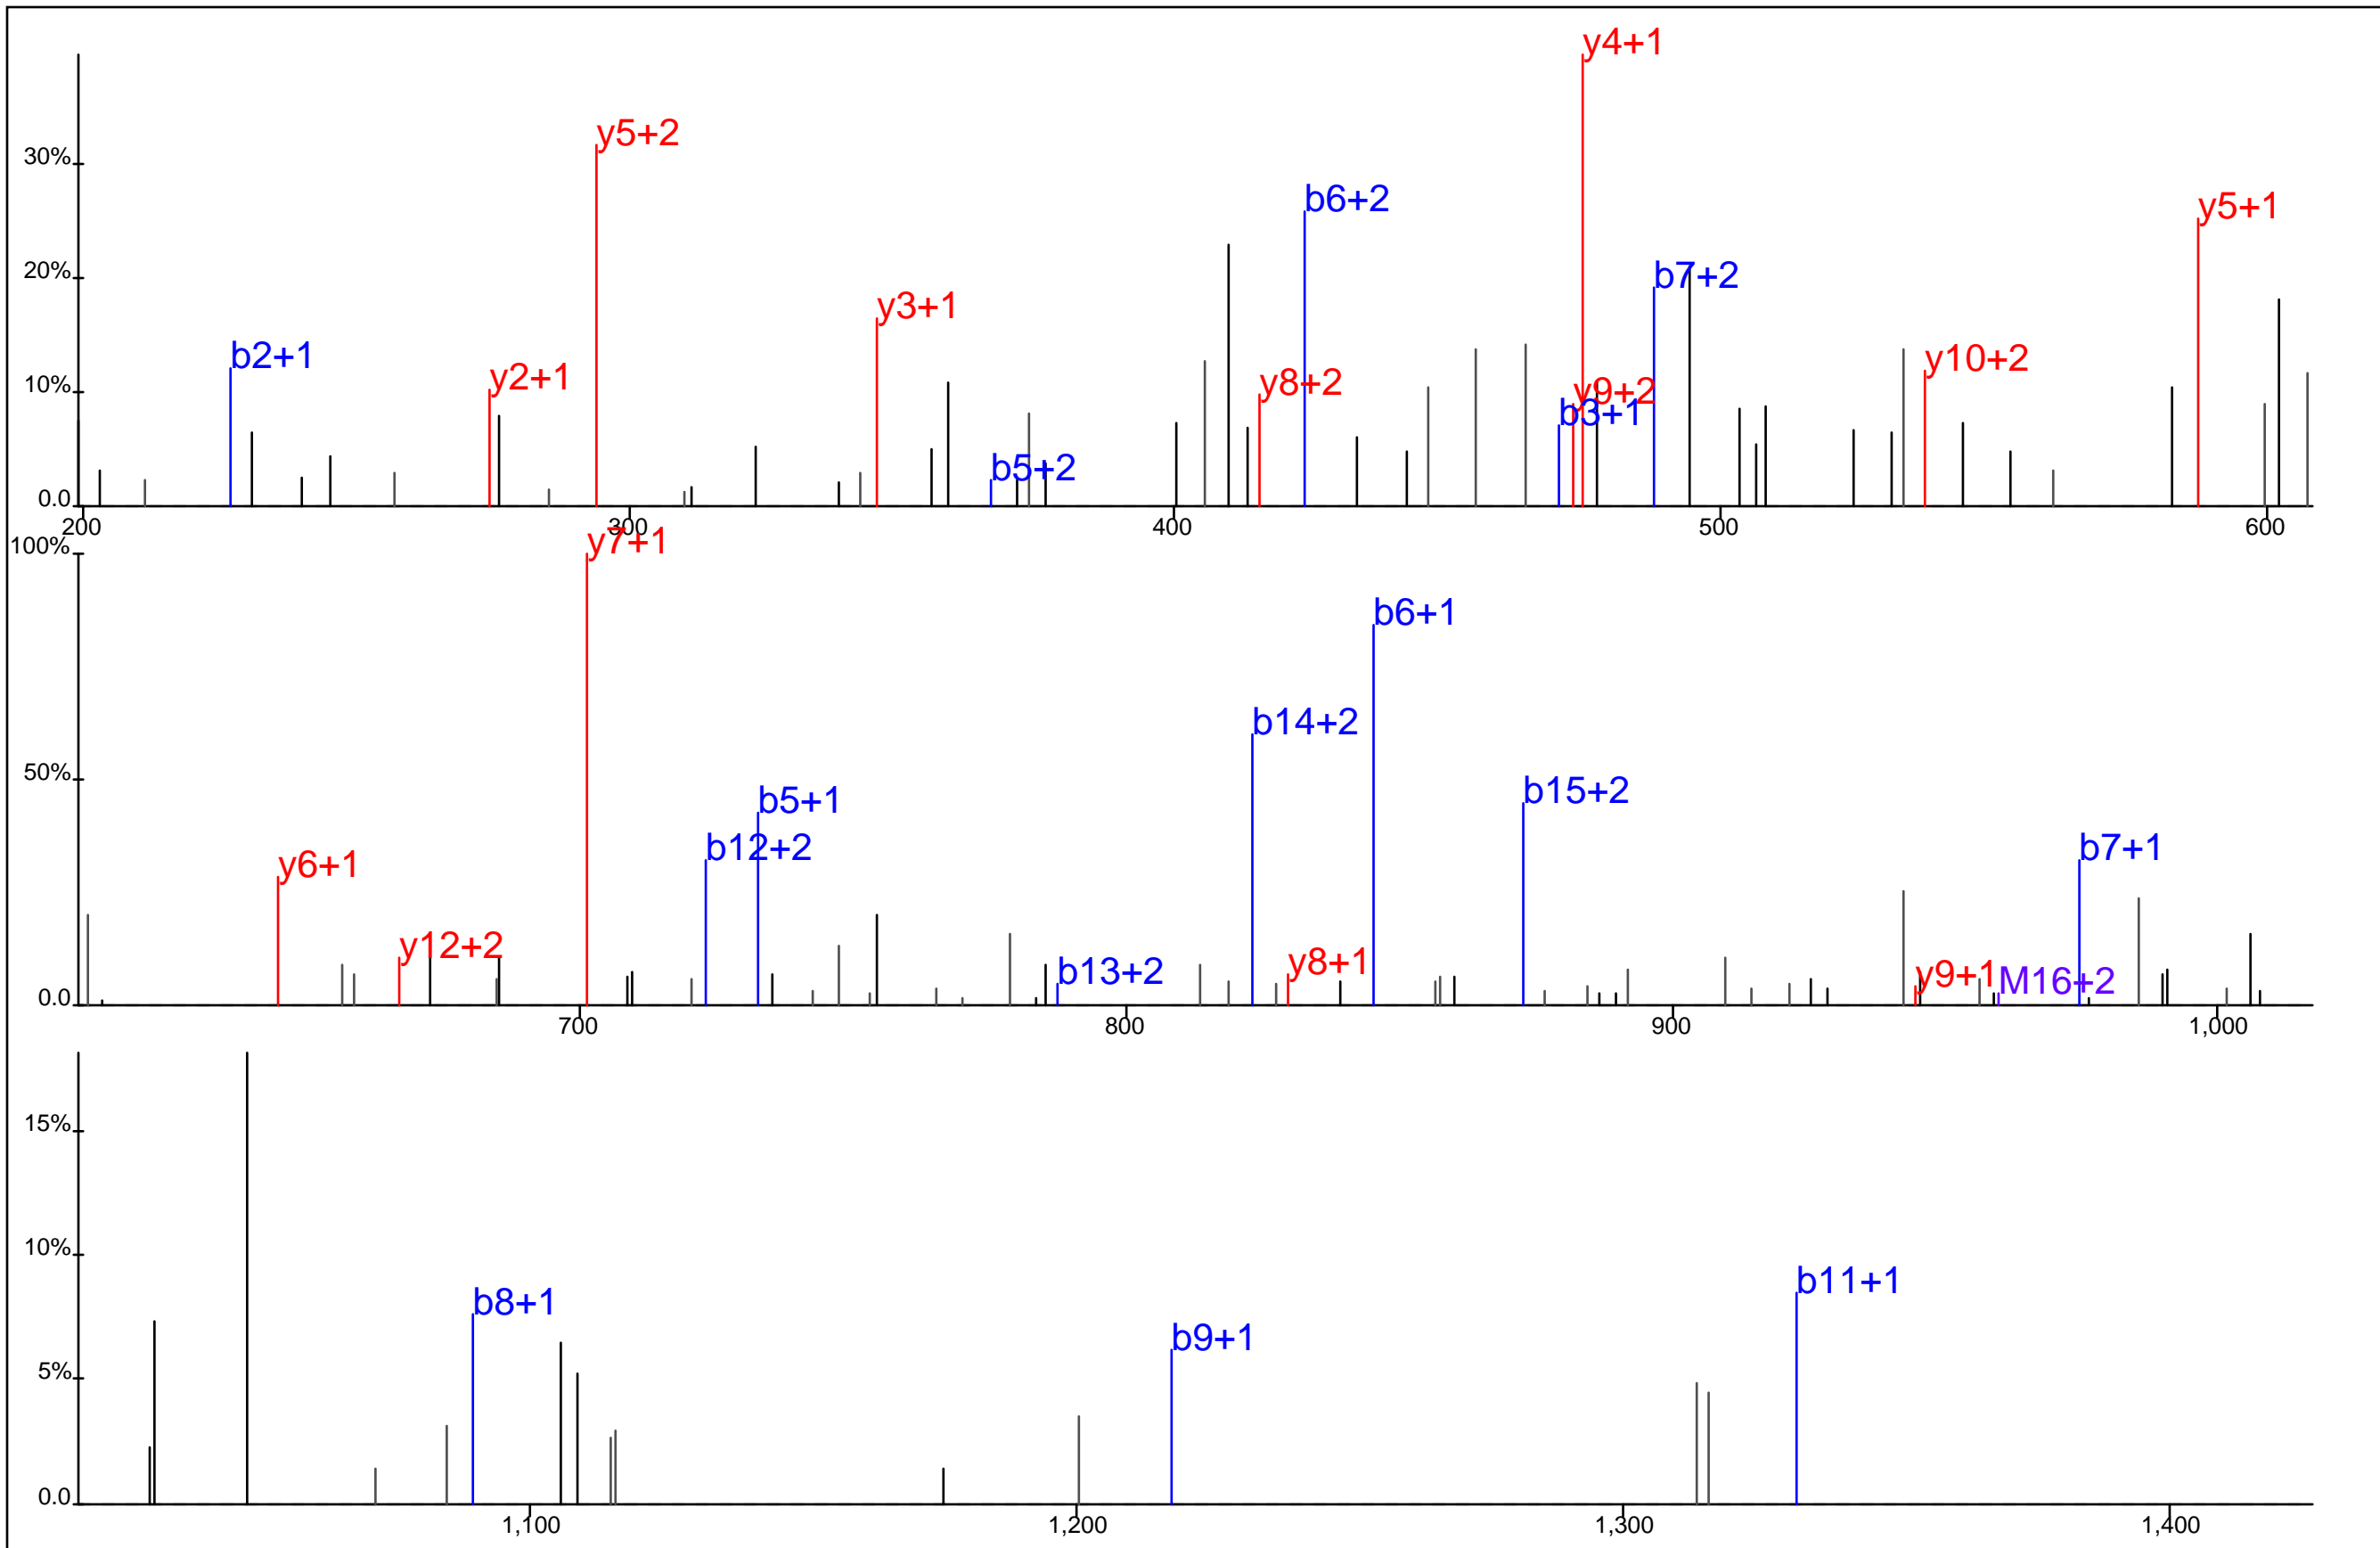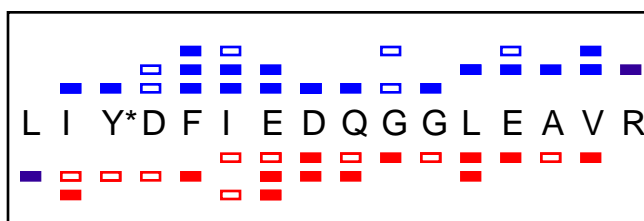

Protein Name: Wiskott-aldrich syndrome protein  
 gi Accession: 0  
 Precursor Mass: 639.9724+3  
 Delta Mass: 1.637 ppm  
 XCorr: 49.99

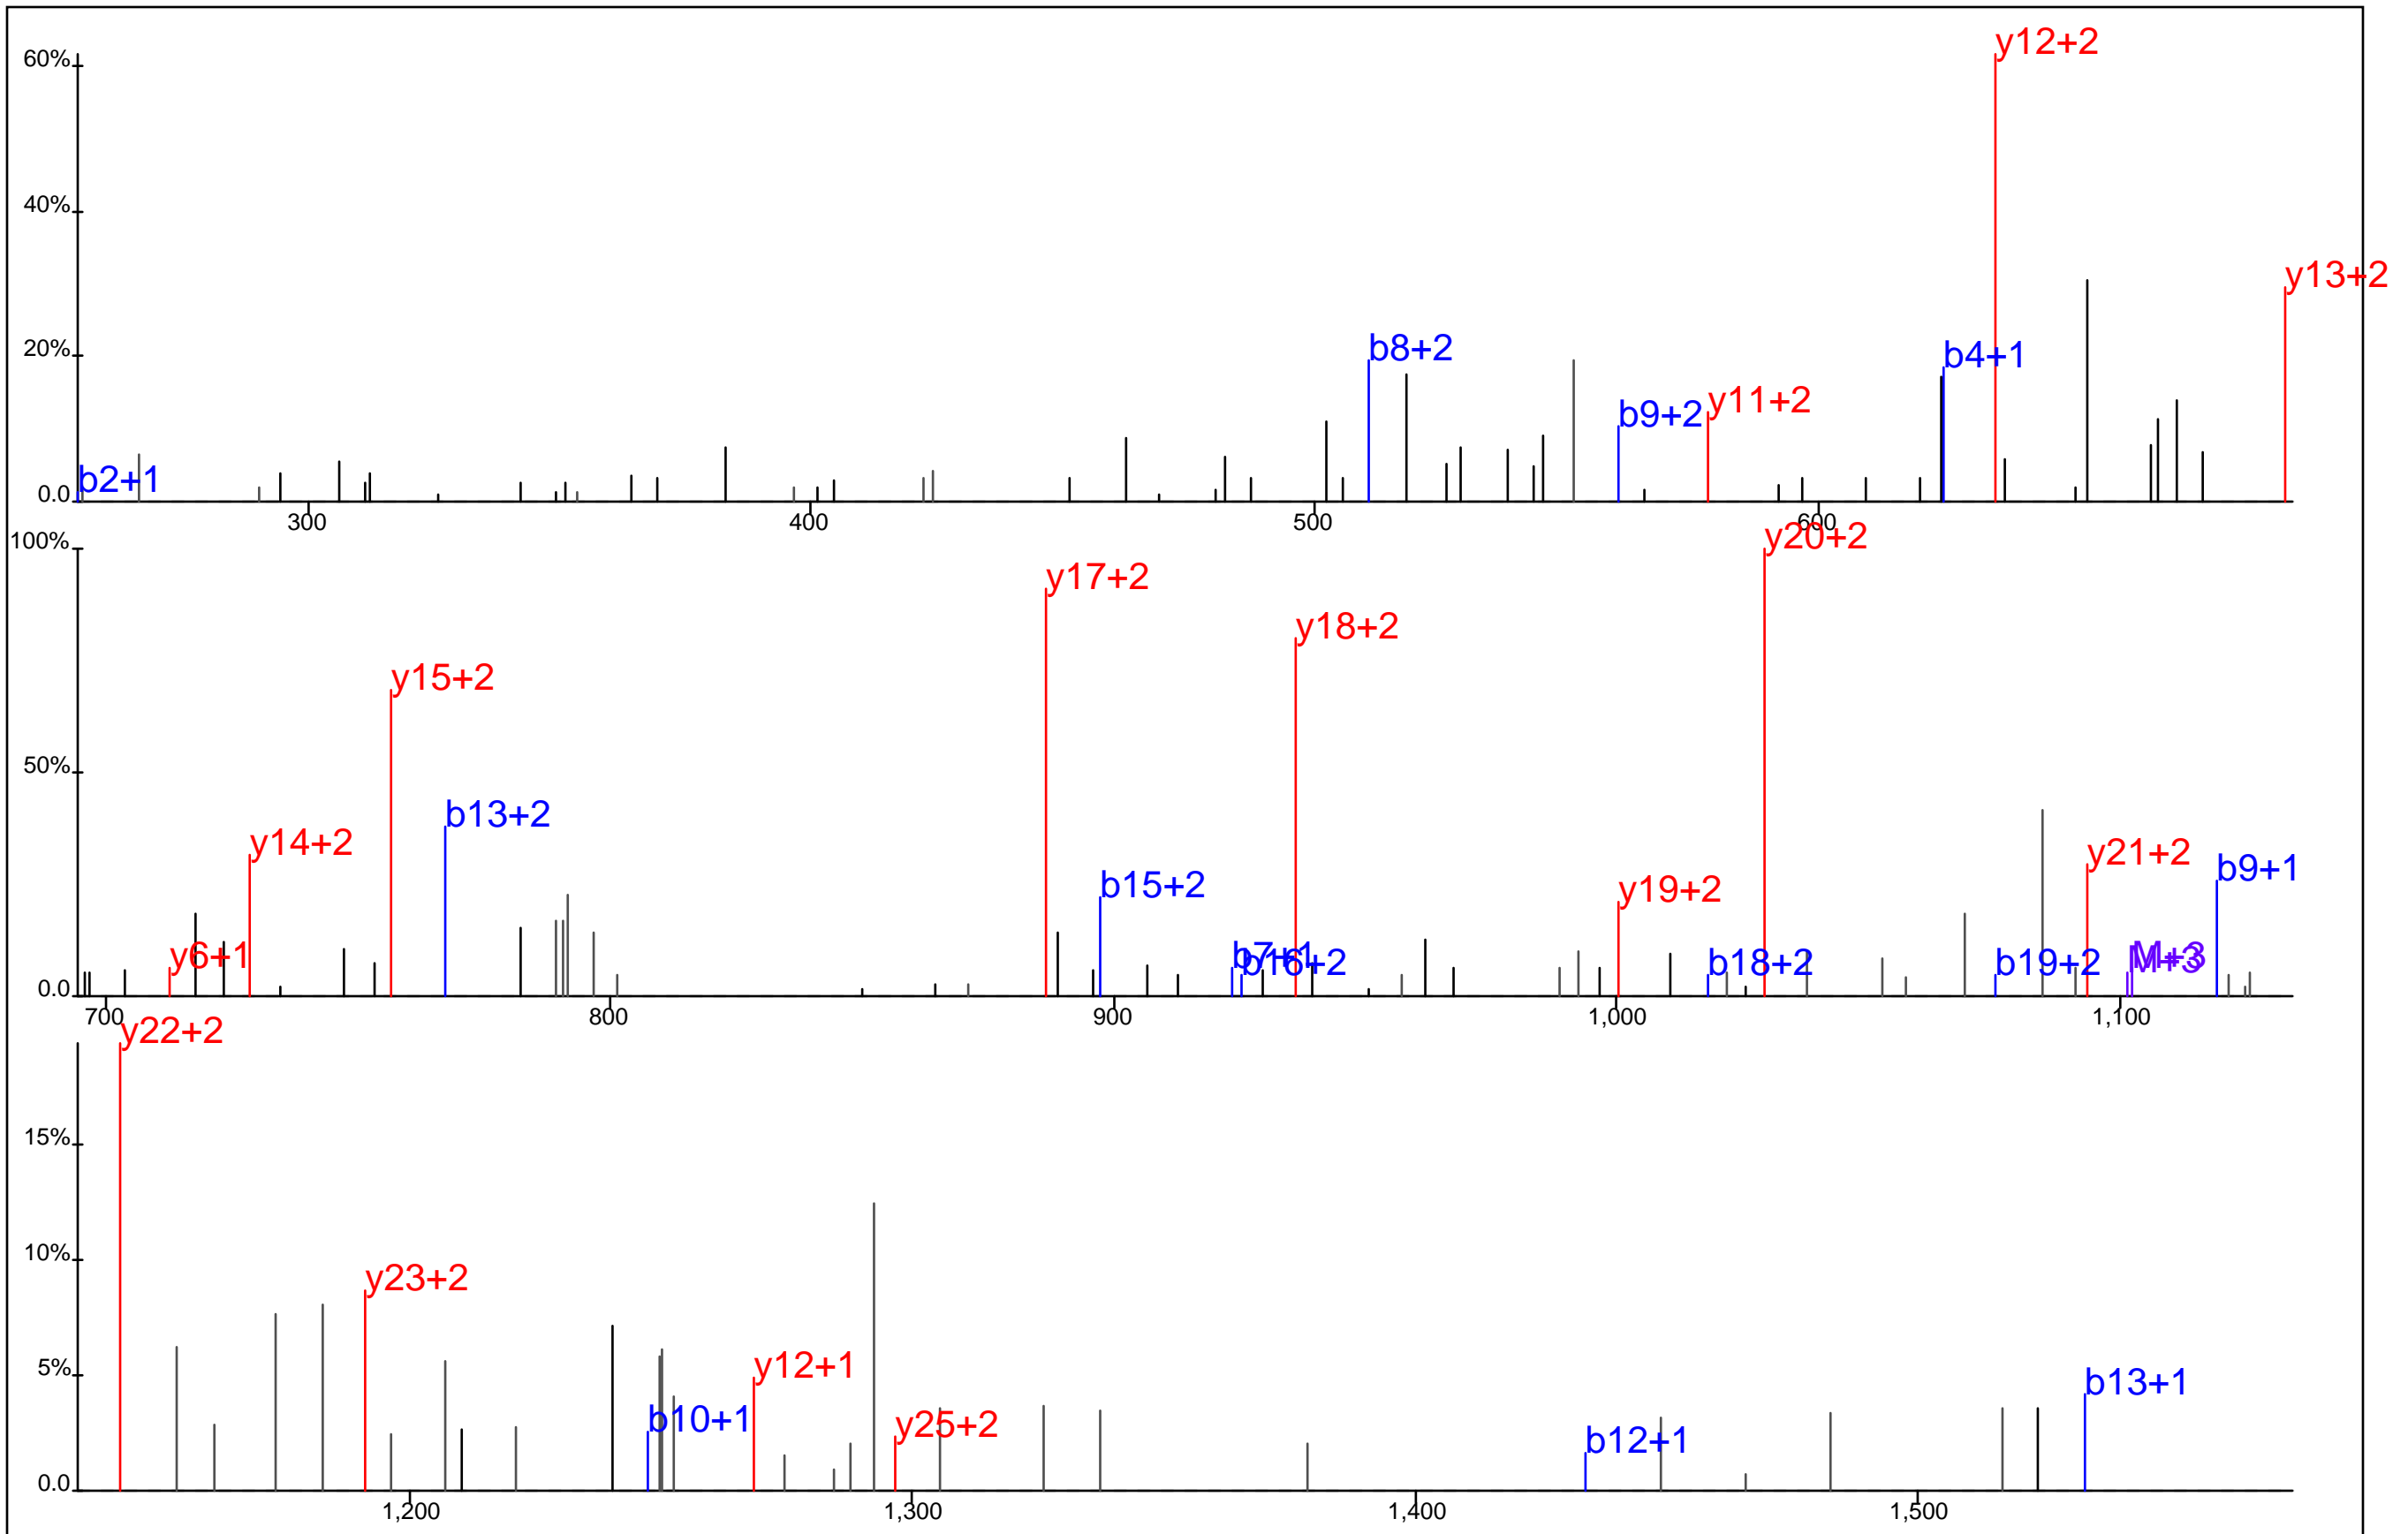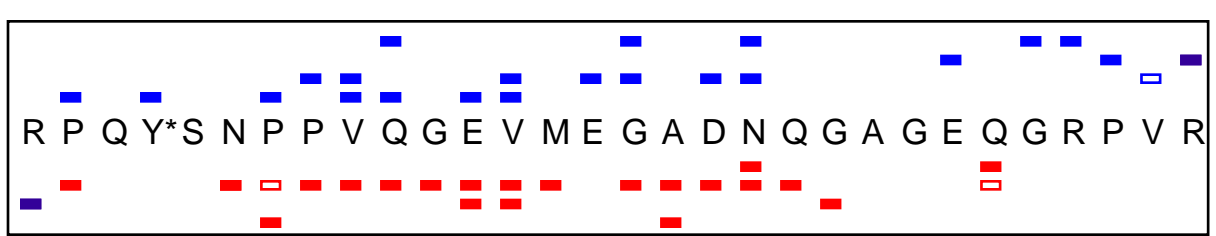

Protein Name: YB-1  
 gi Accession: 0  
 Precursor Mass: 826.6301+4  
 Delta Mass: 0.792 ppm  
 XCorr: 55.61

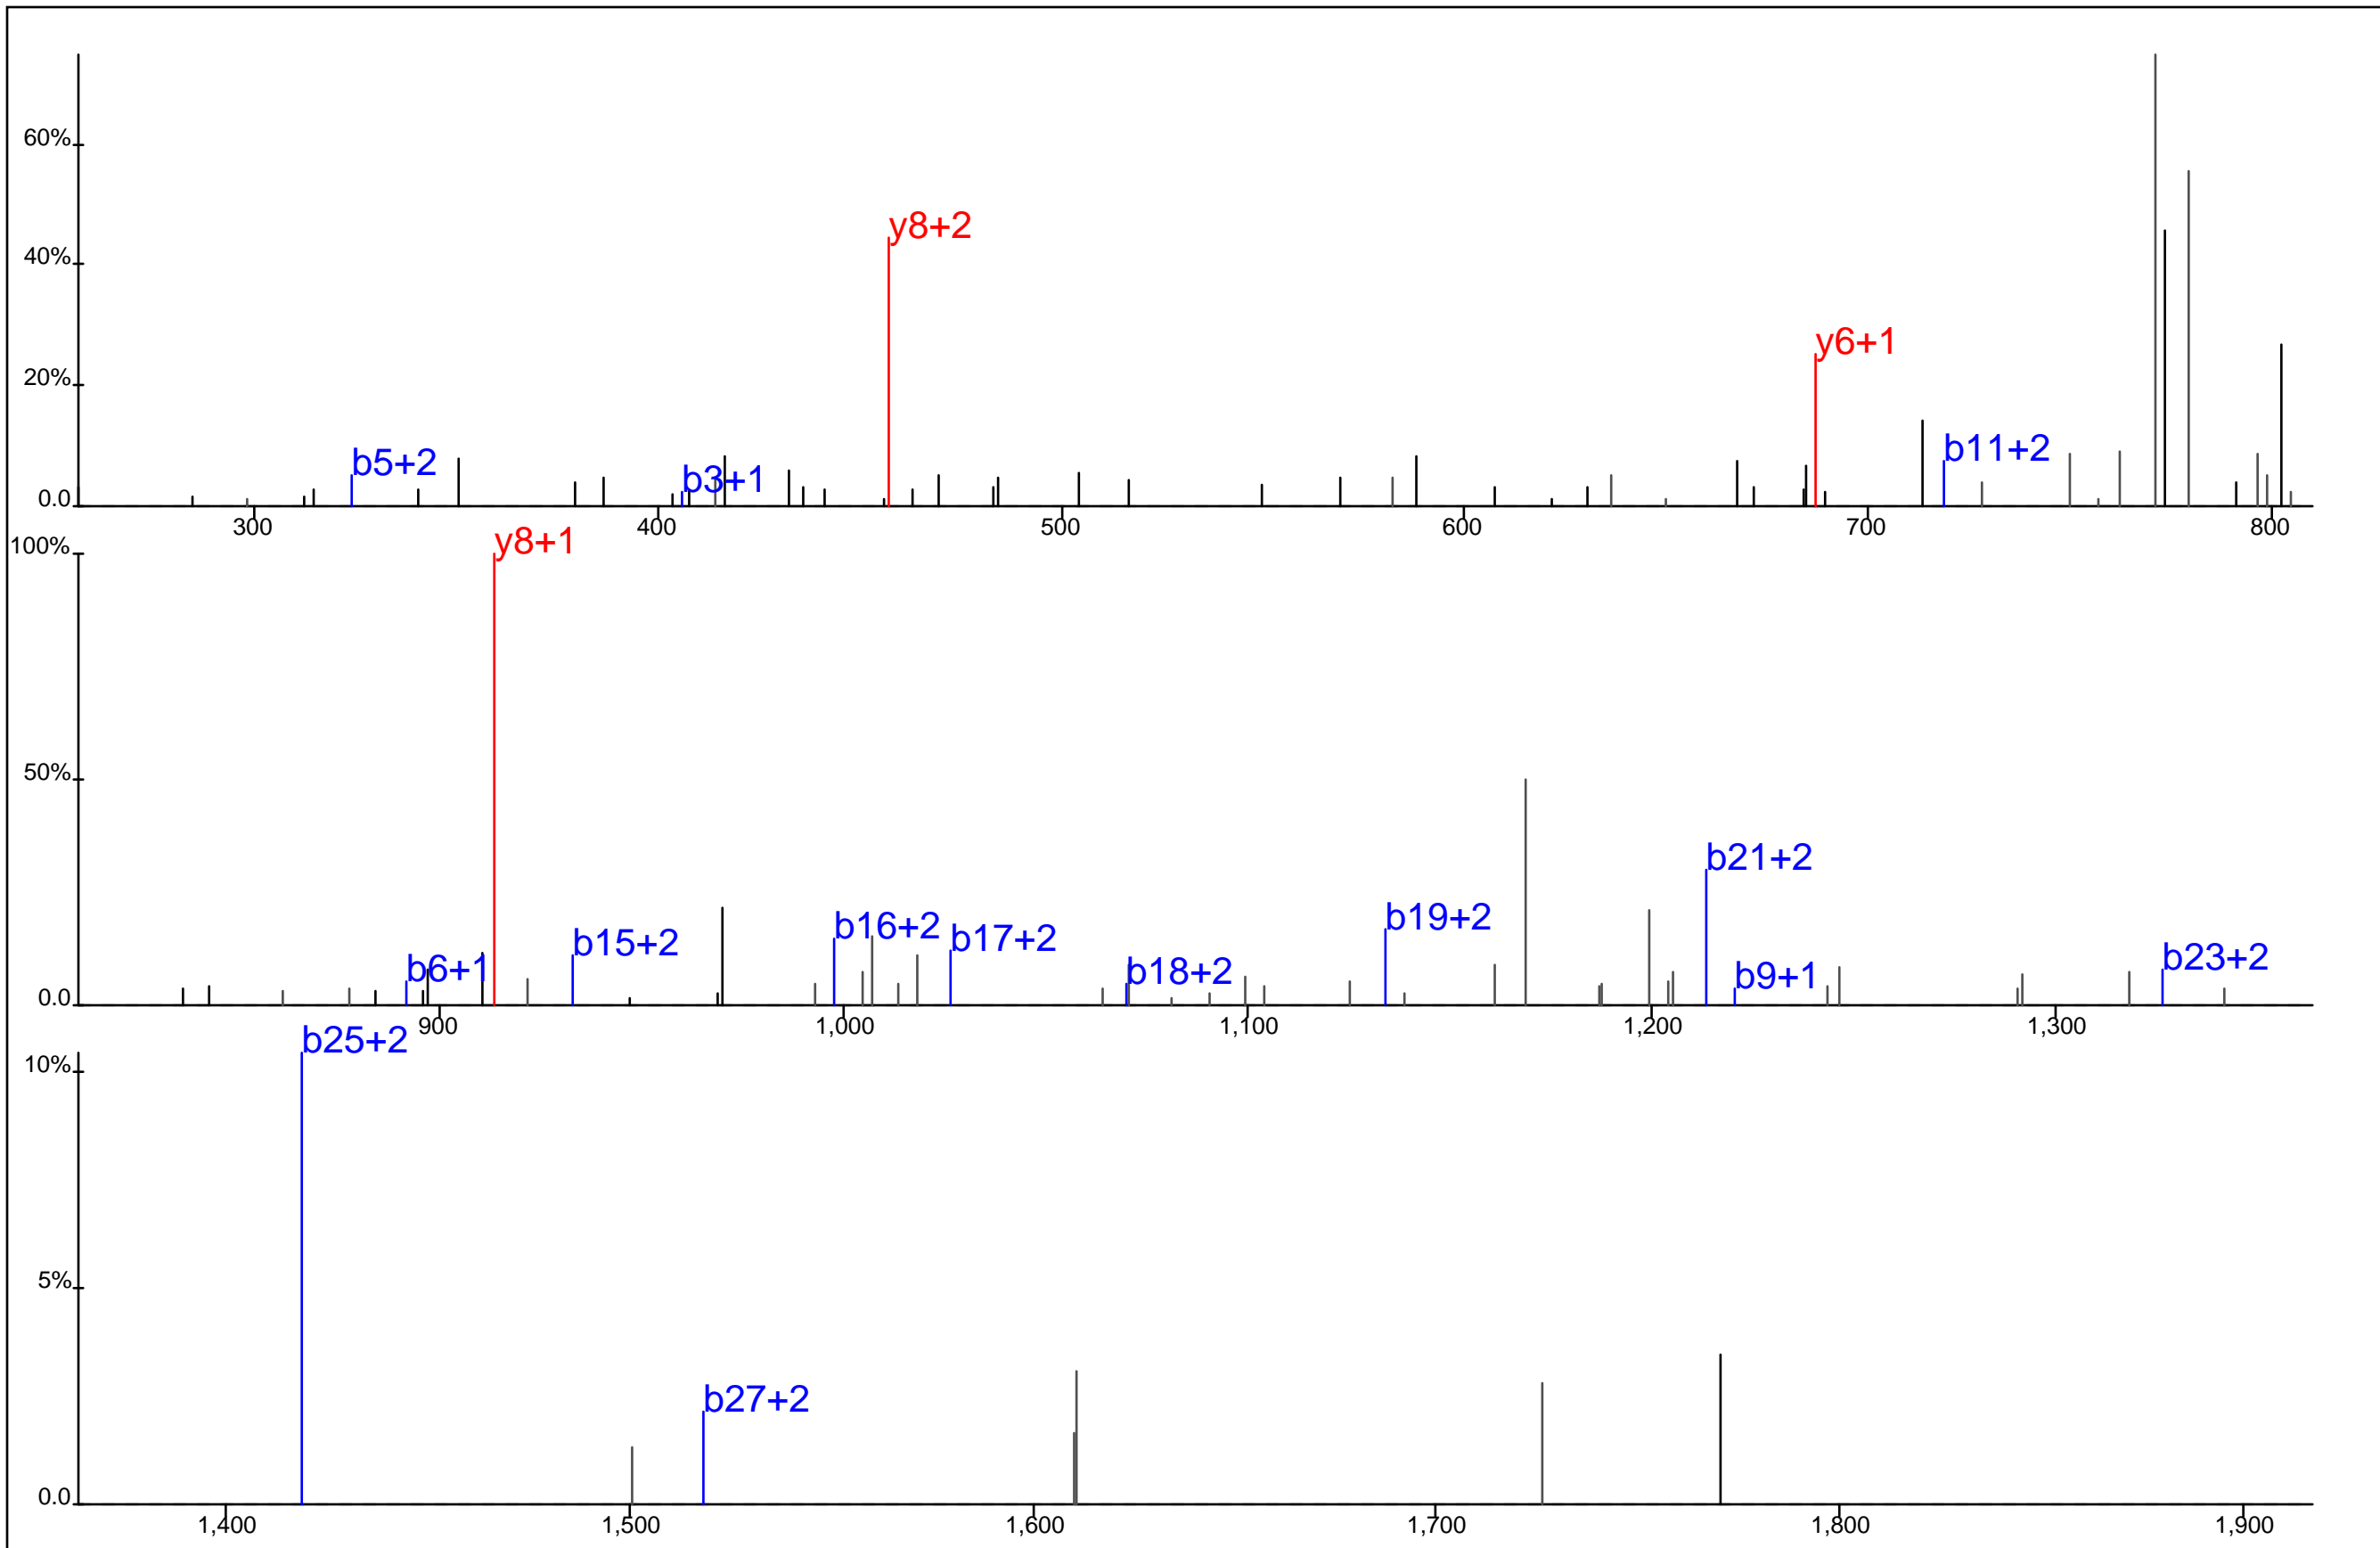

N Y Q Q N Y\* Q N S E S G E K N E G S E S A P E G Q A Q Q R  
■

Protein Name: YB-1  
 gi Accession: 0  
 Precursor Mass: 835.0961+4  
 Delta Mass: 0.066 ppm  
 XCorr: 26.69

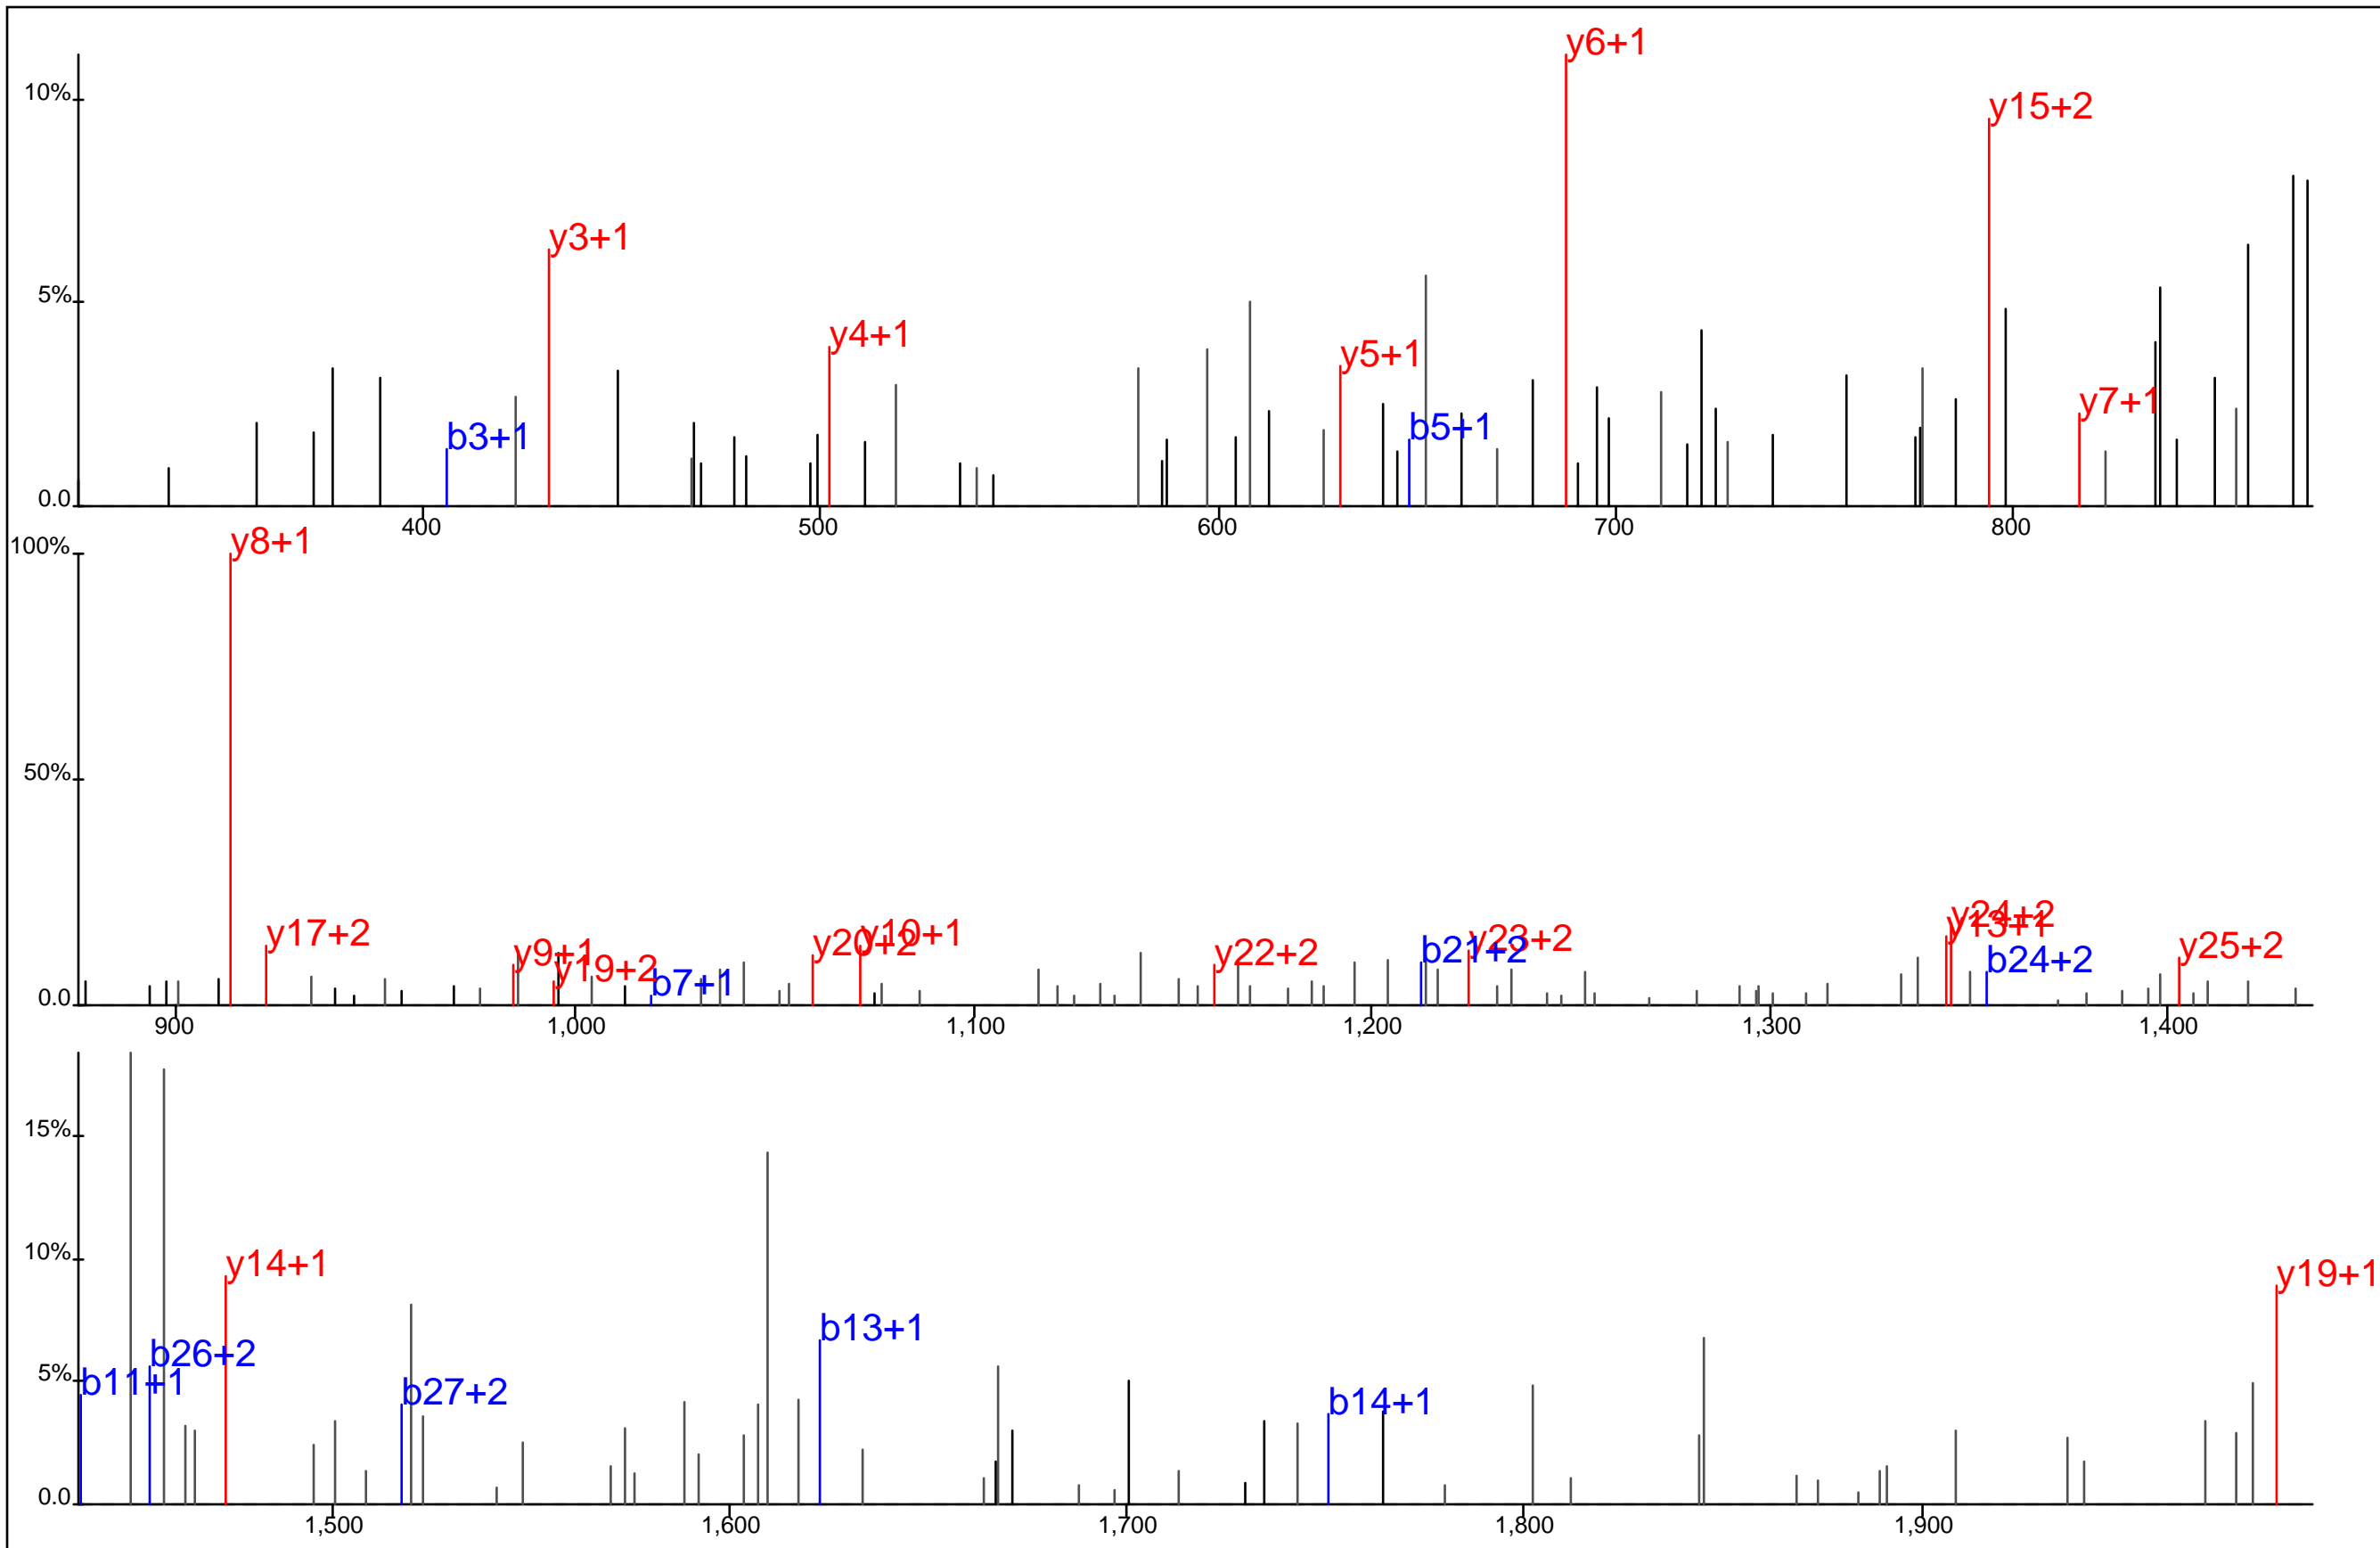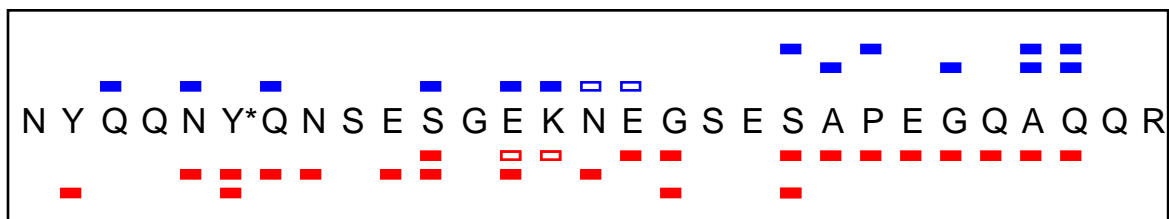

Protein Name: YB-1  
 gi Accession: 0  
 Precursor Mass: 1,113.1290+3  
 Delta Mass: 3.014 ppm  
 XCorr: 34.92

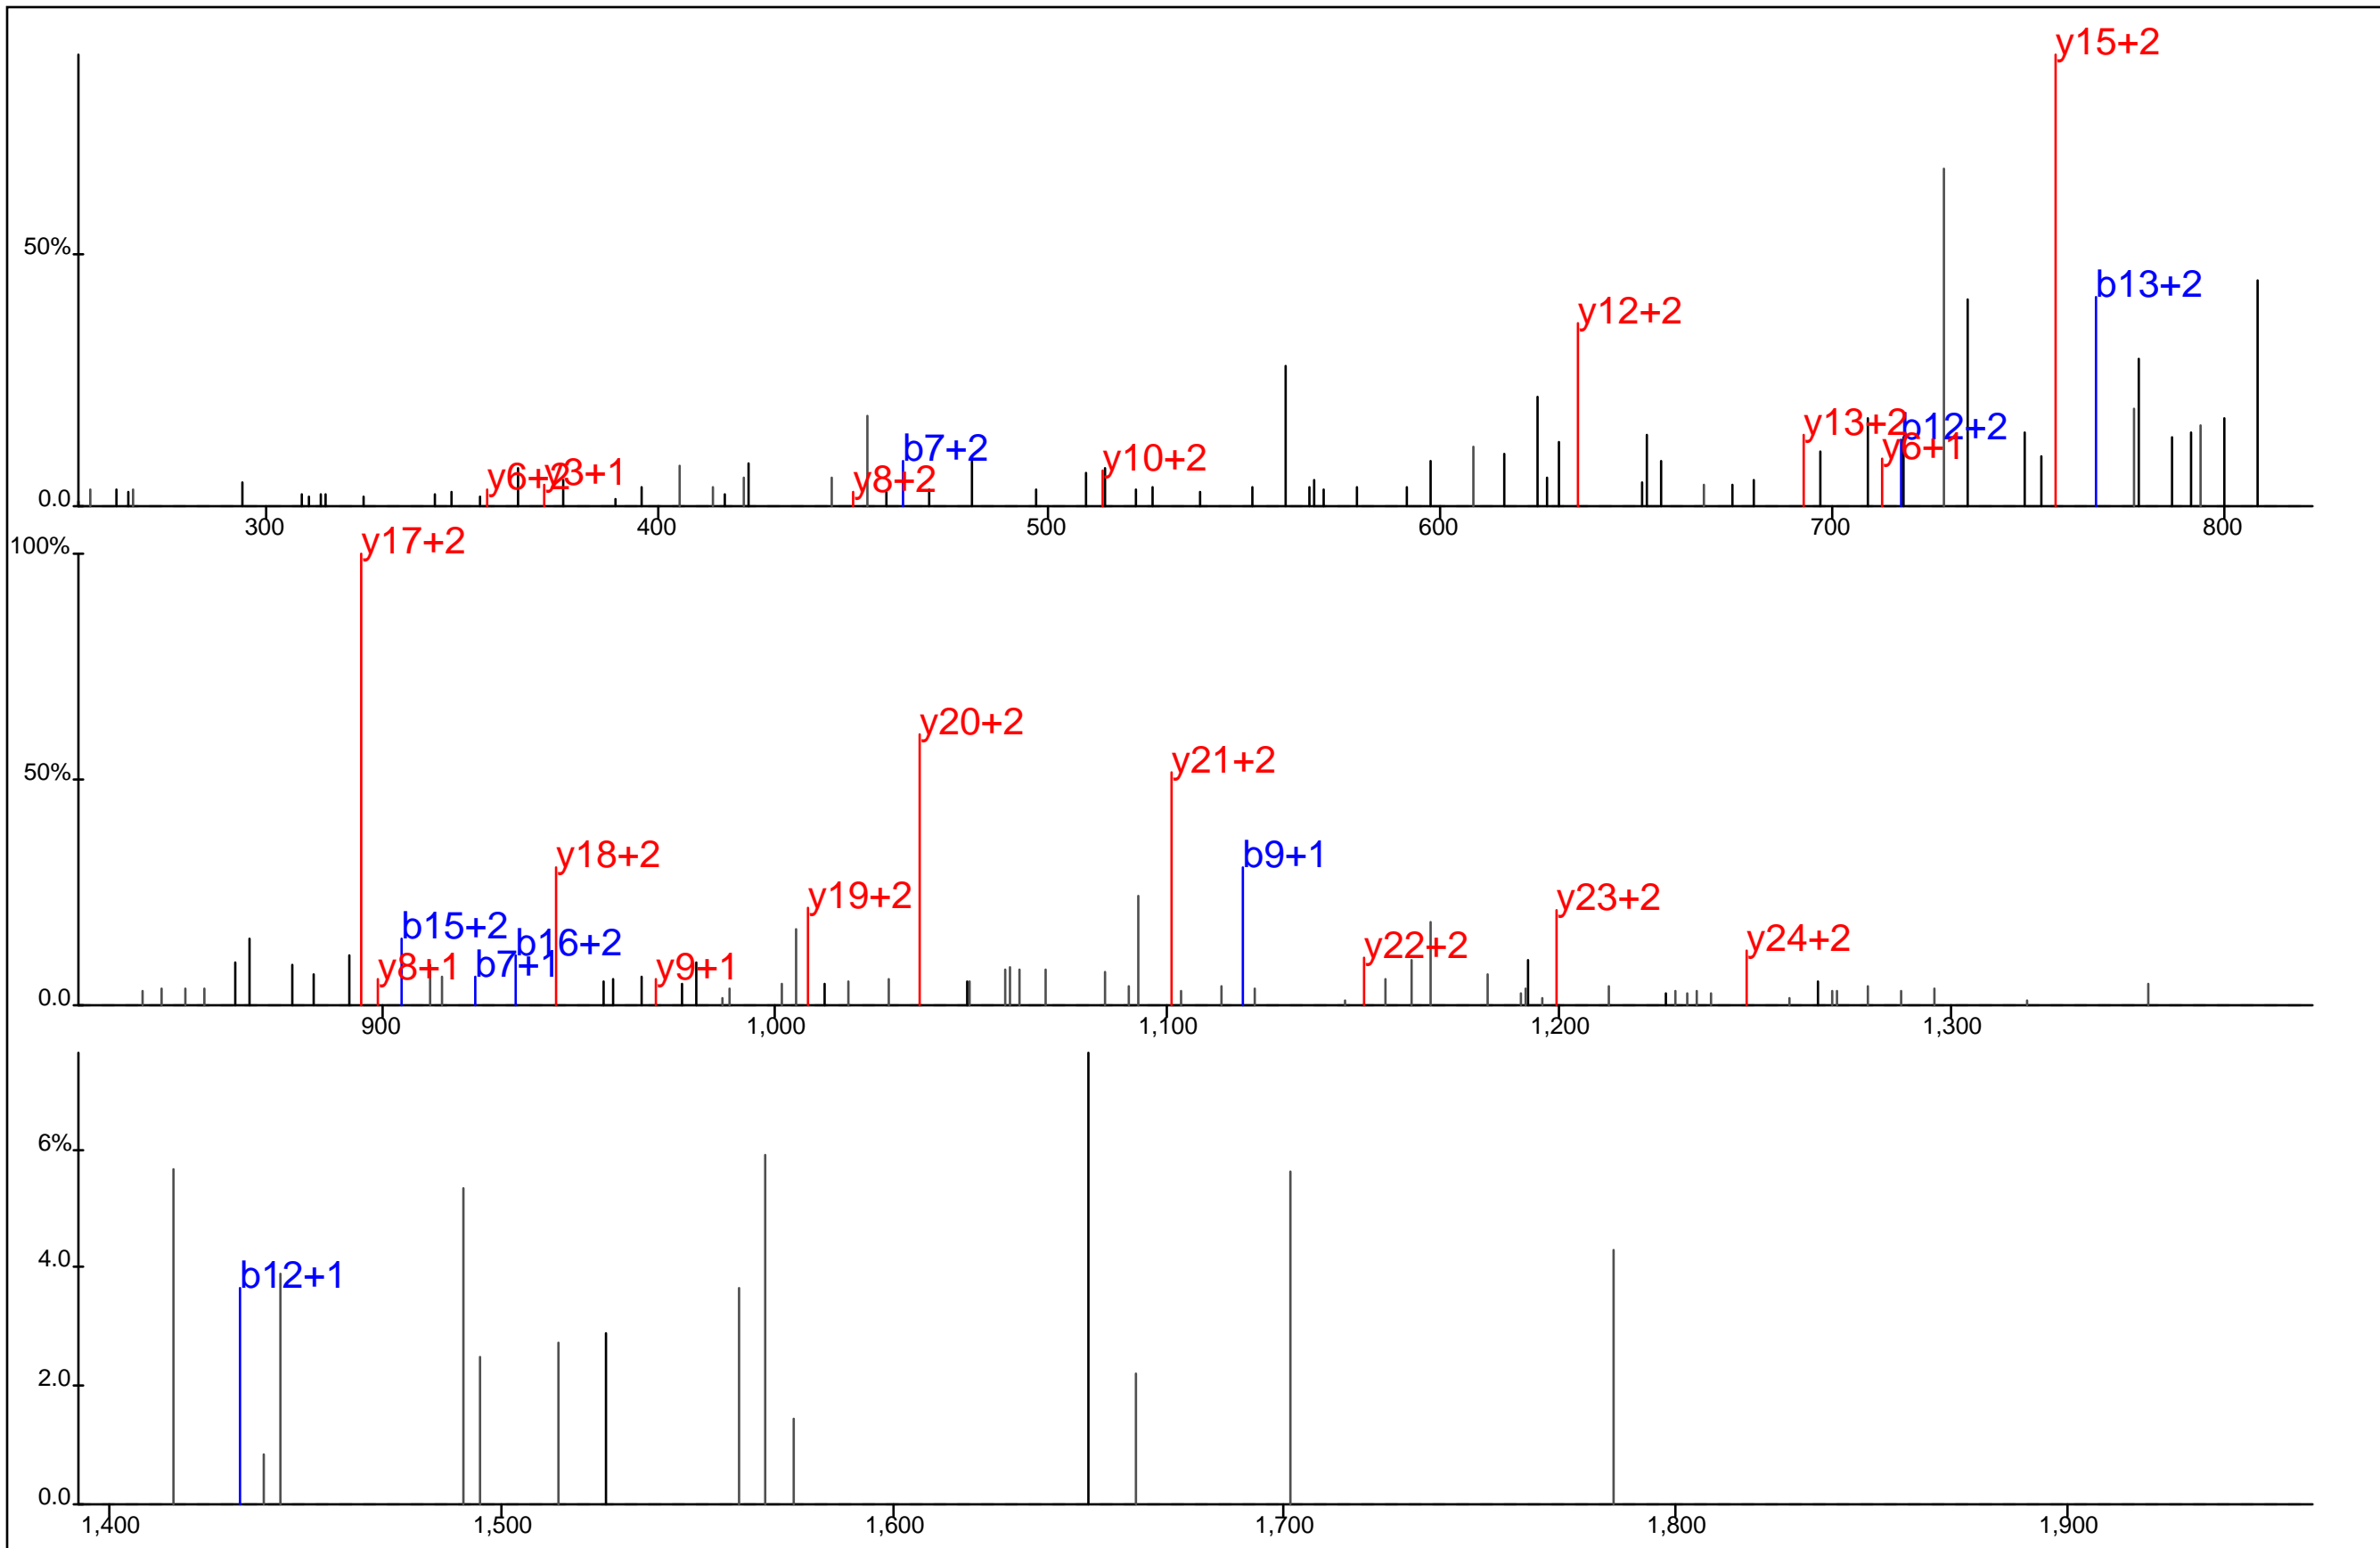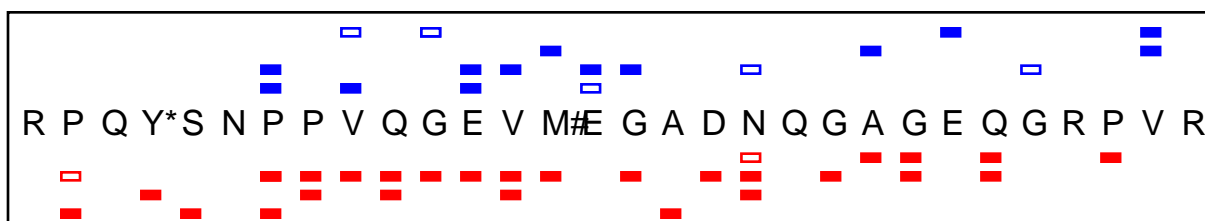

Protein Name: YB-1  
 gi Accession: 0  
 Precursor Mass: 830.6266+4  
 Delta Mass: 1.947 ppm  
 XCorr: 39.93



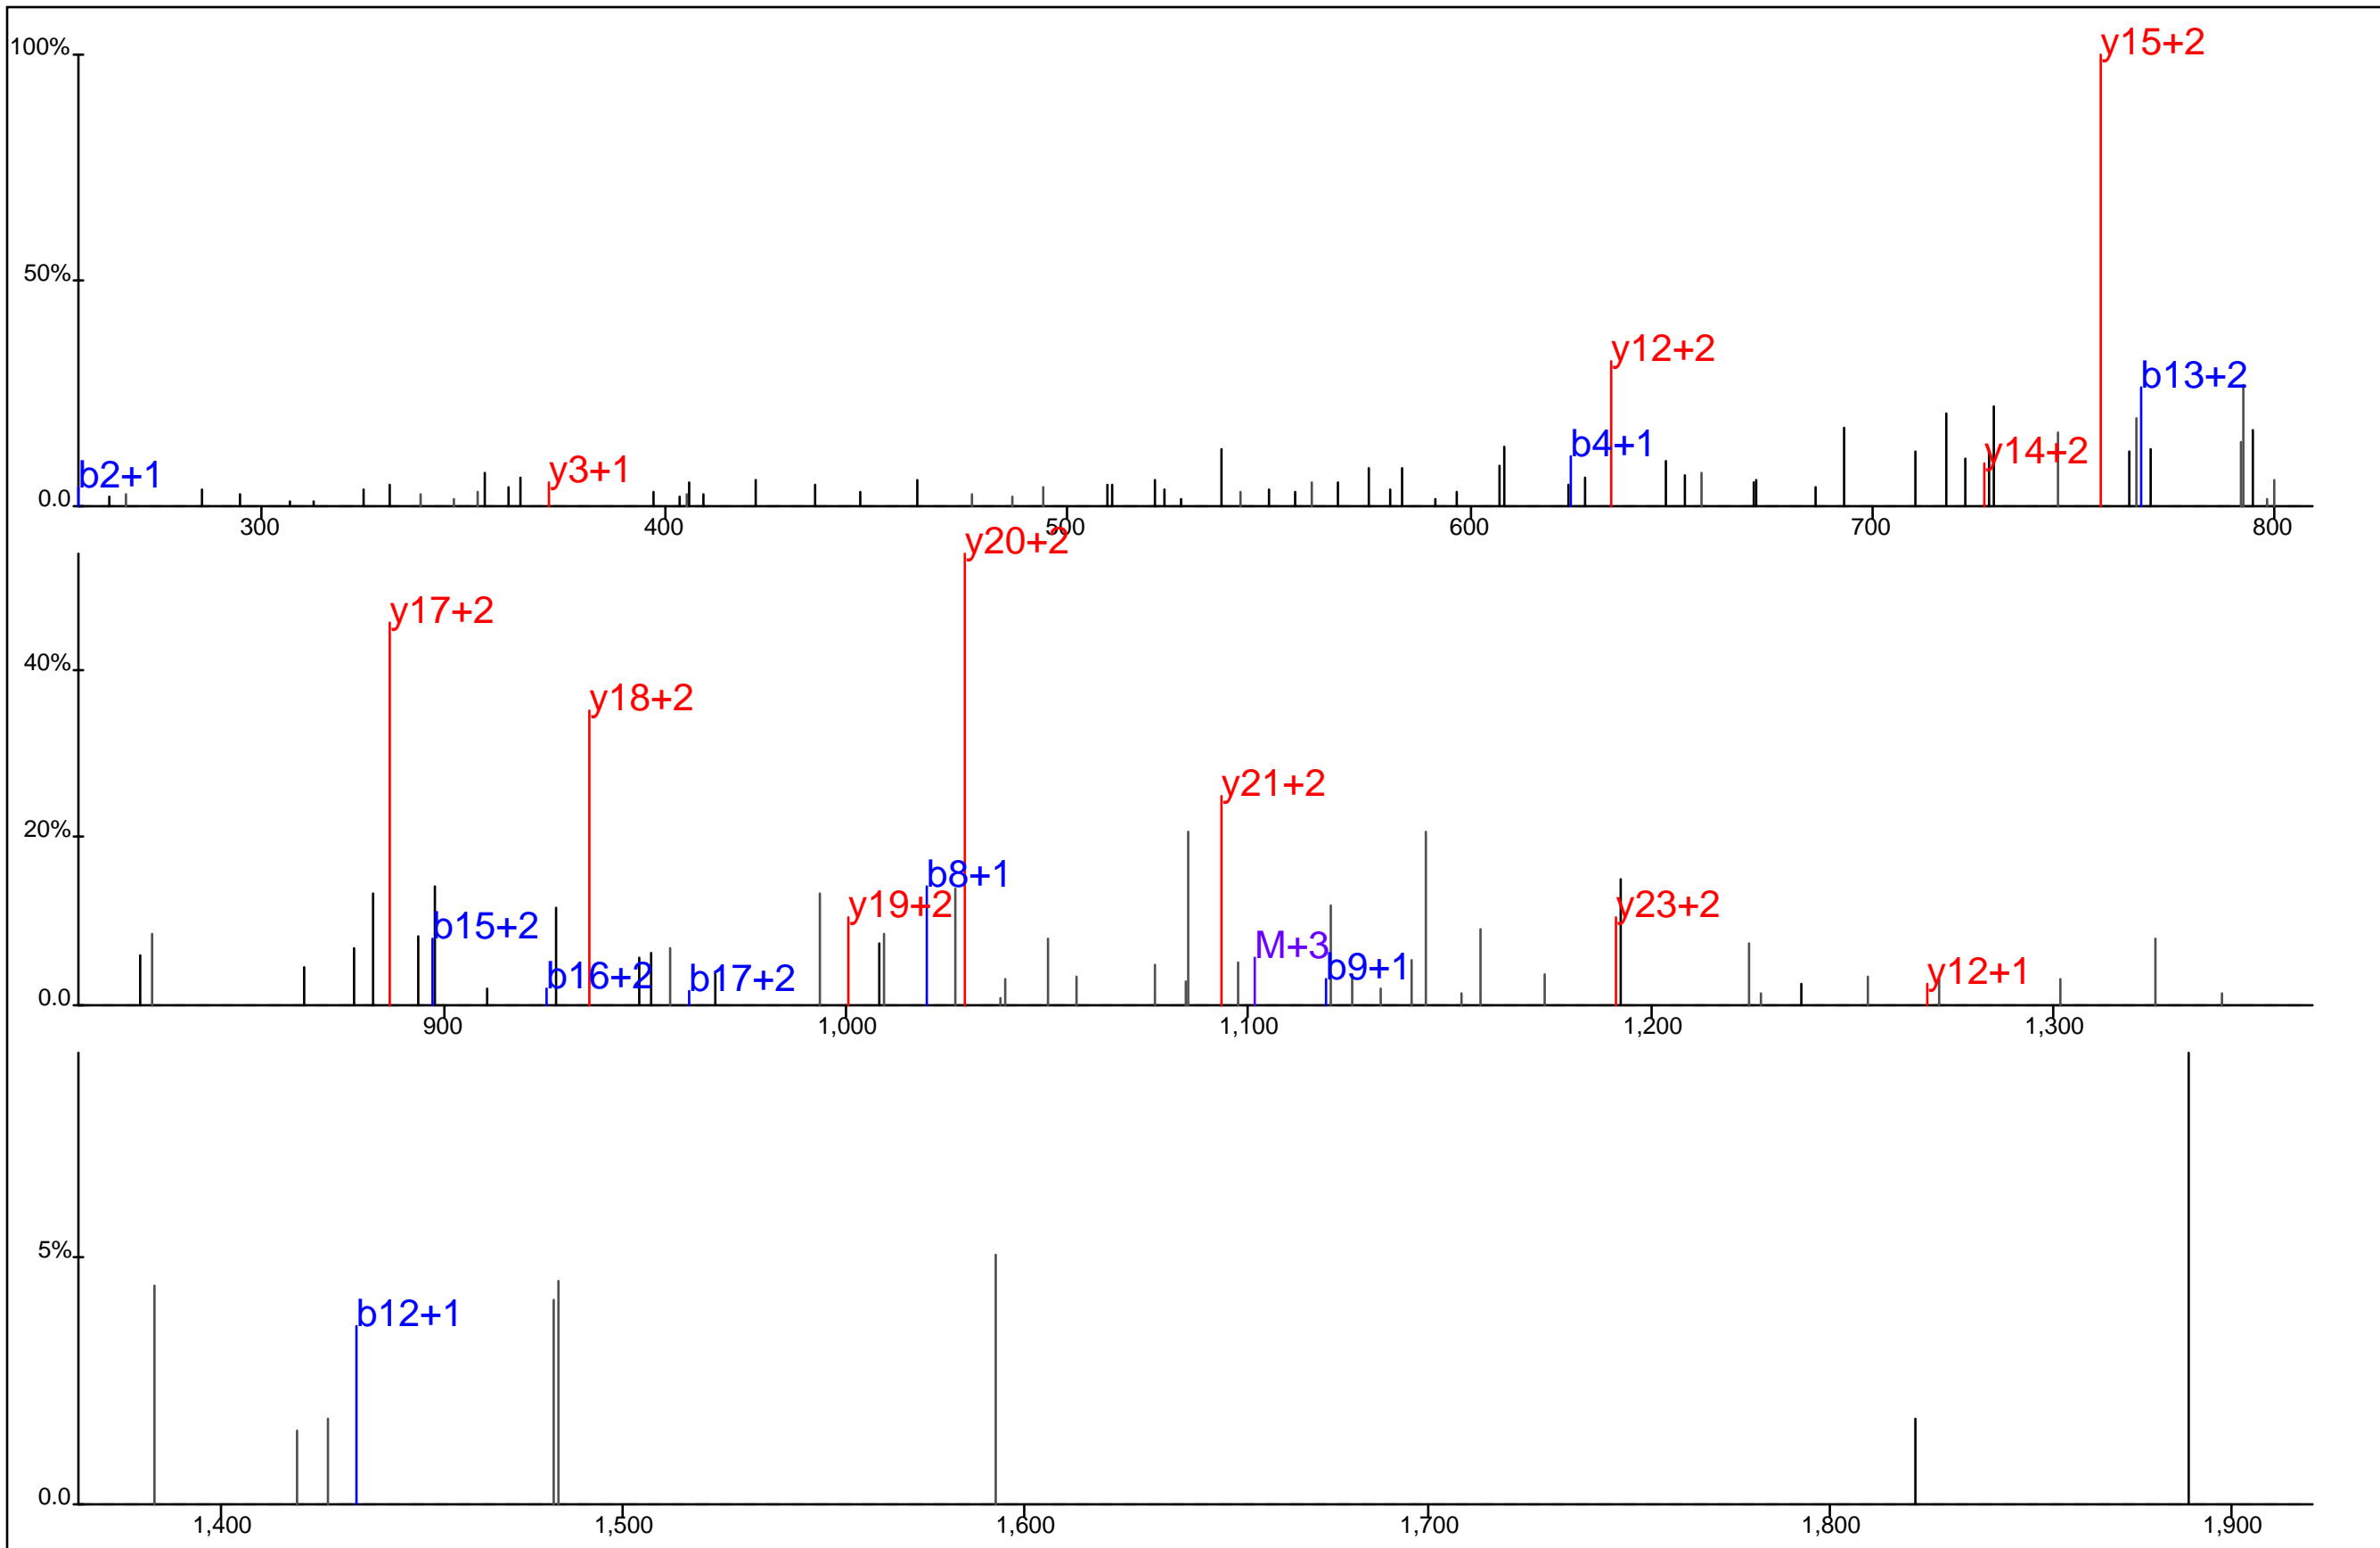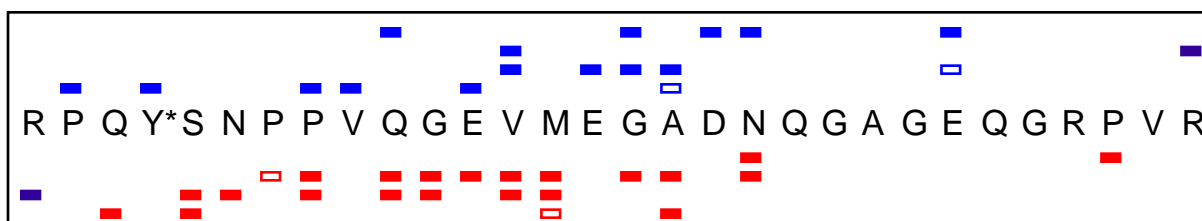

Protein Name: YB-1  
 gi Accession: 0  
 Precursor Mass: 826.6316+4  
 Delta Mass: 2.566 ppm  
 XCorr: 20.52

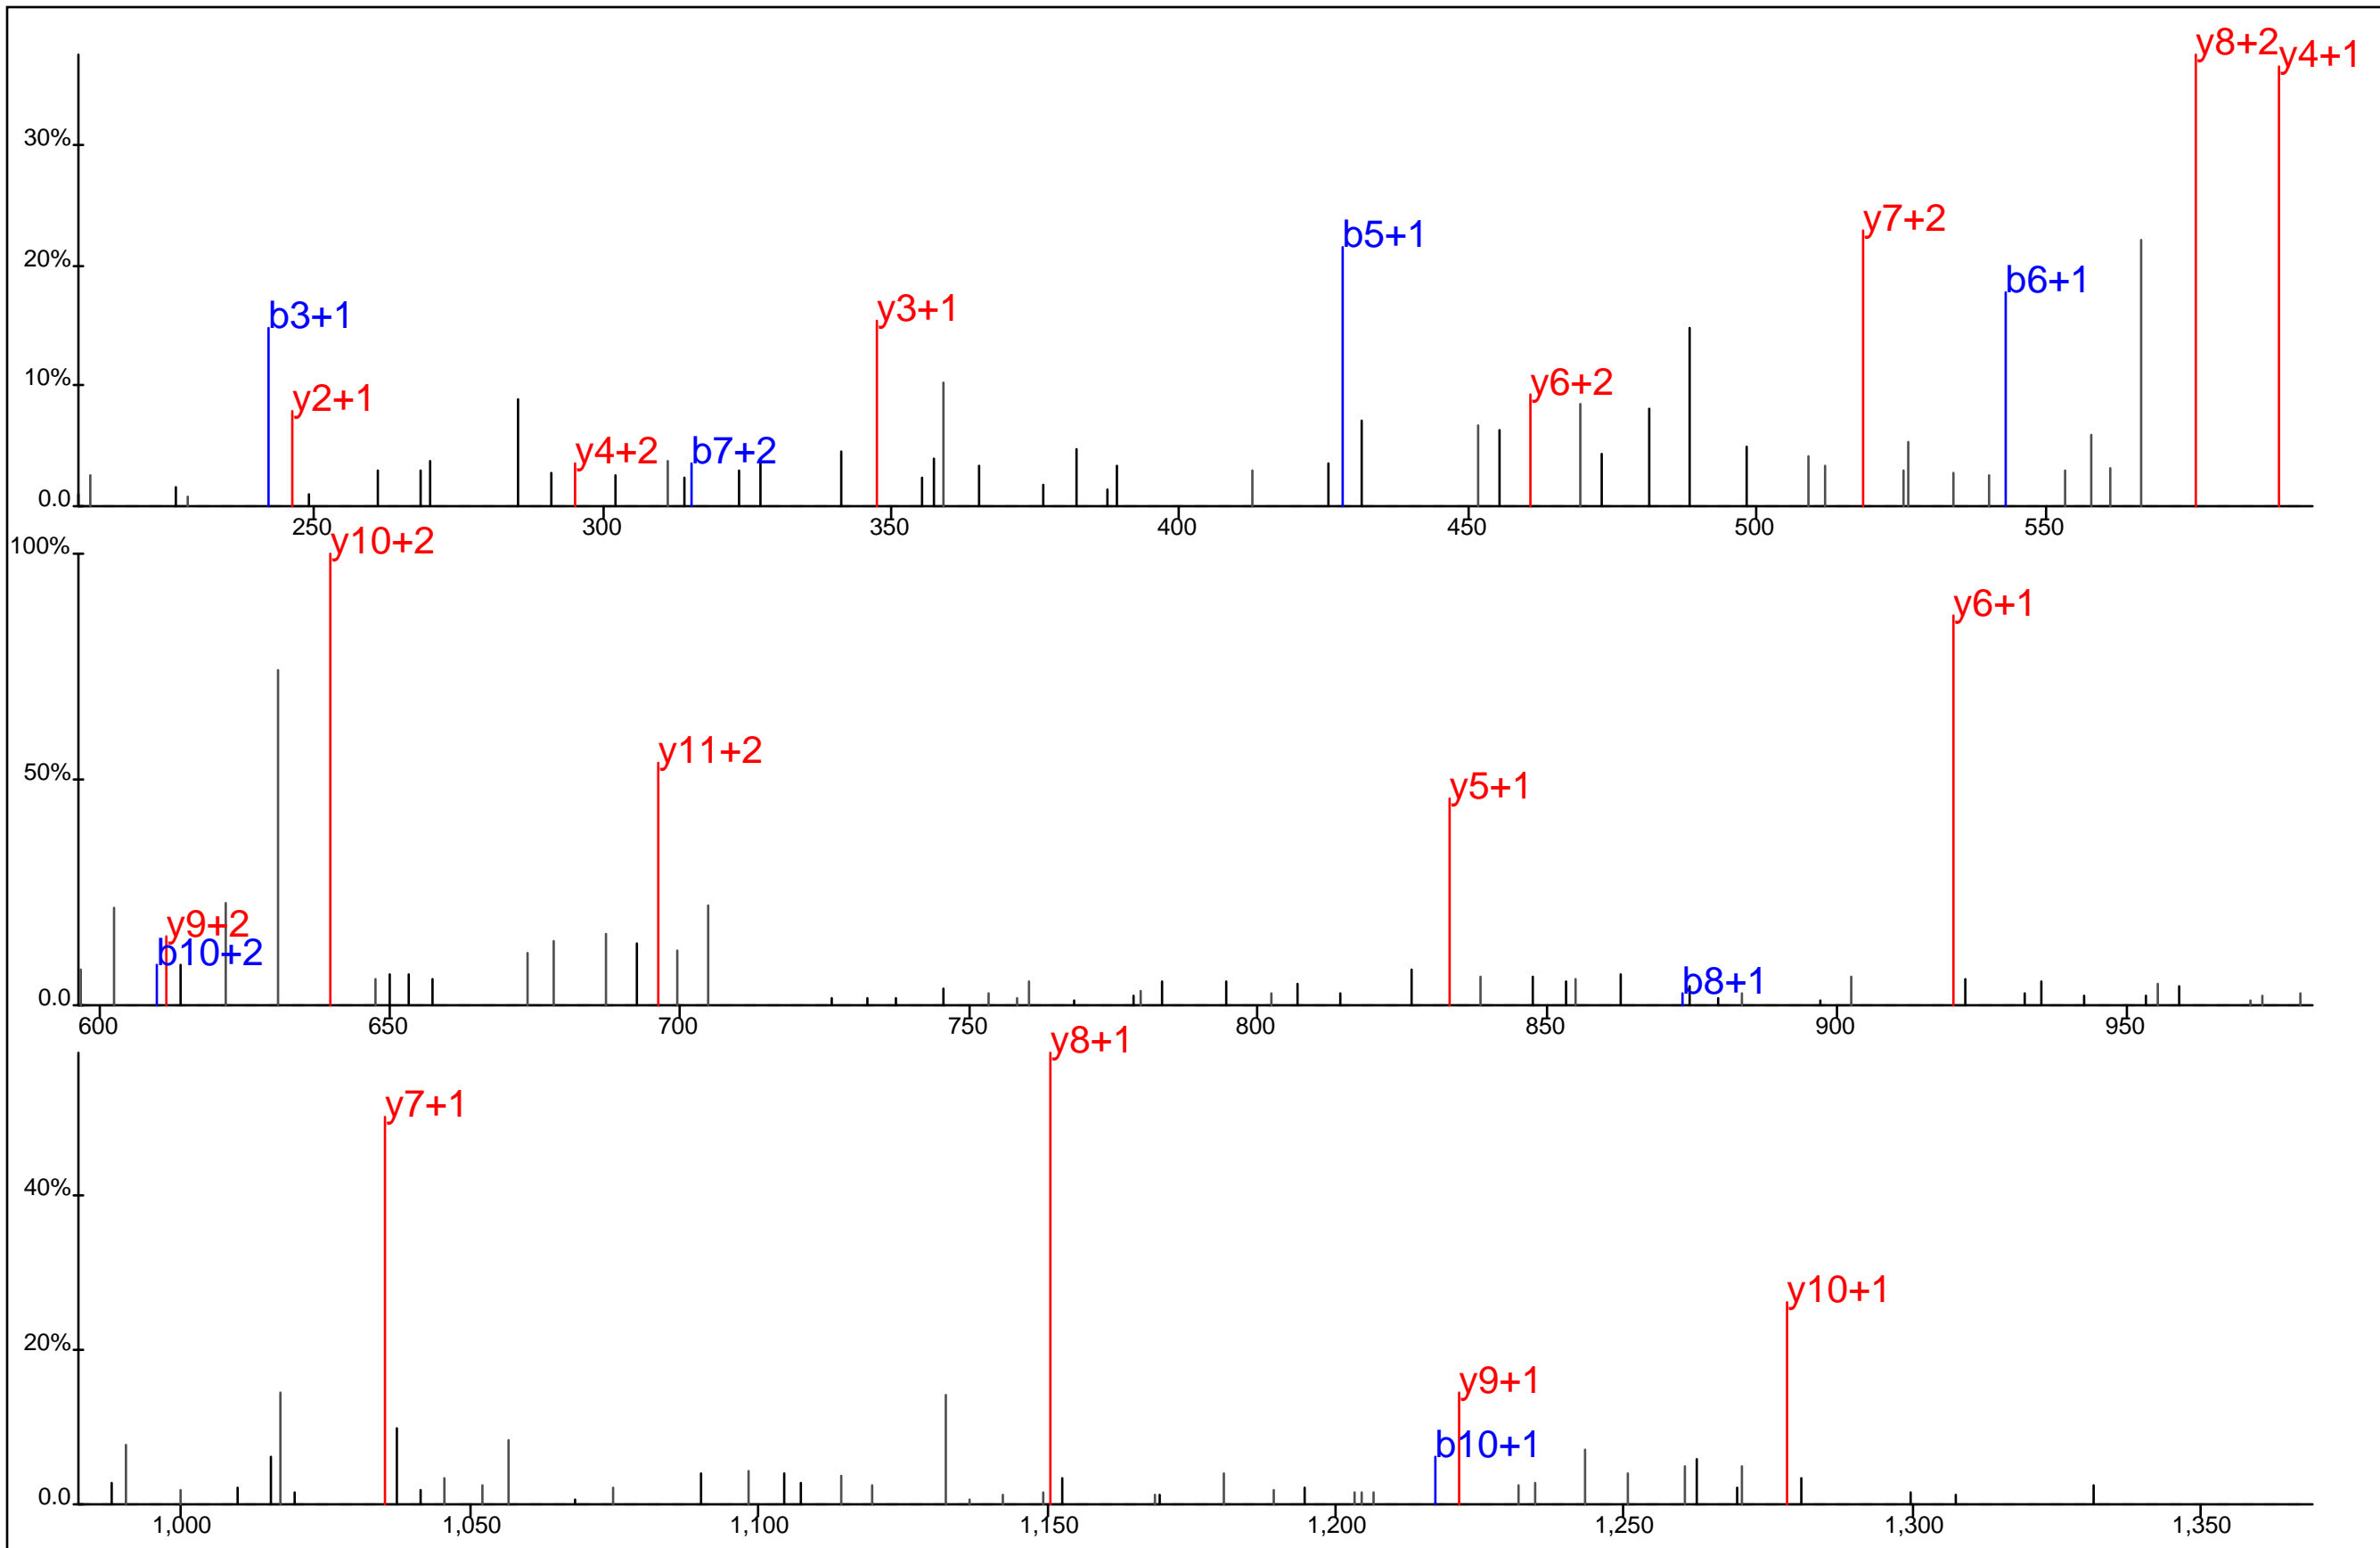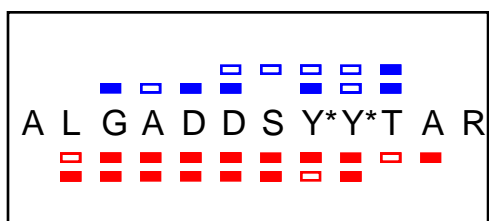

Protein Name: ZAP70  
 gi Accession: 0  
 Precursor Mass: 731.7678+2  
 Delta Mass: 0.312 ppm  
 XCorr: 56.85



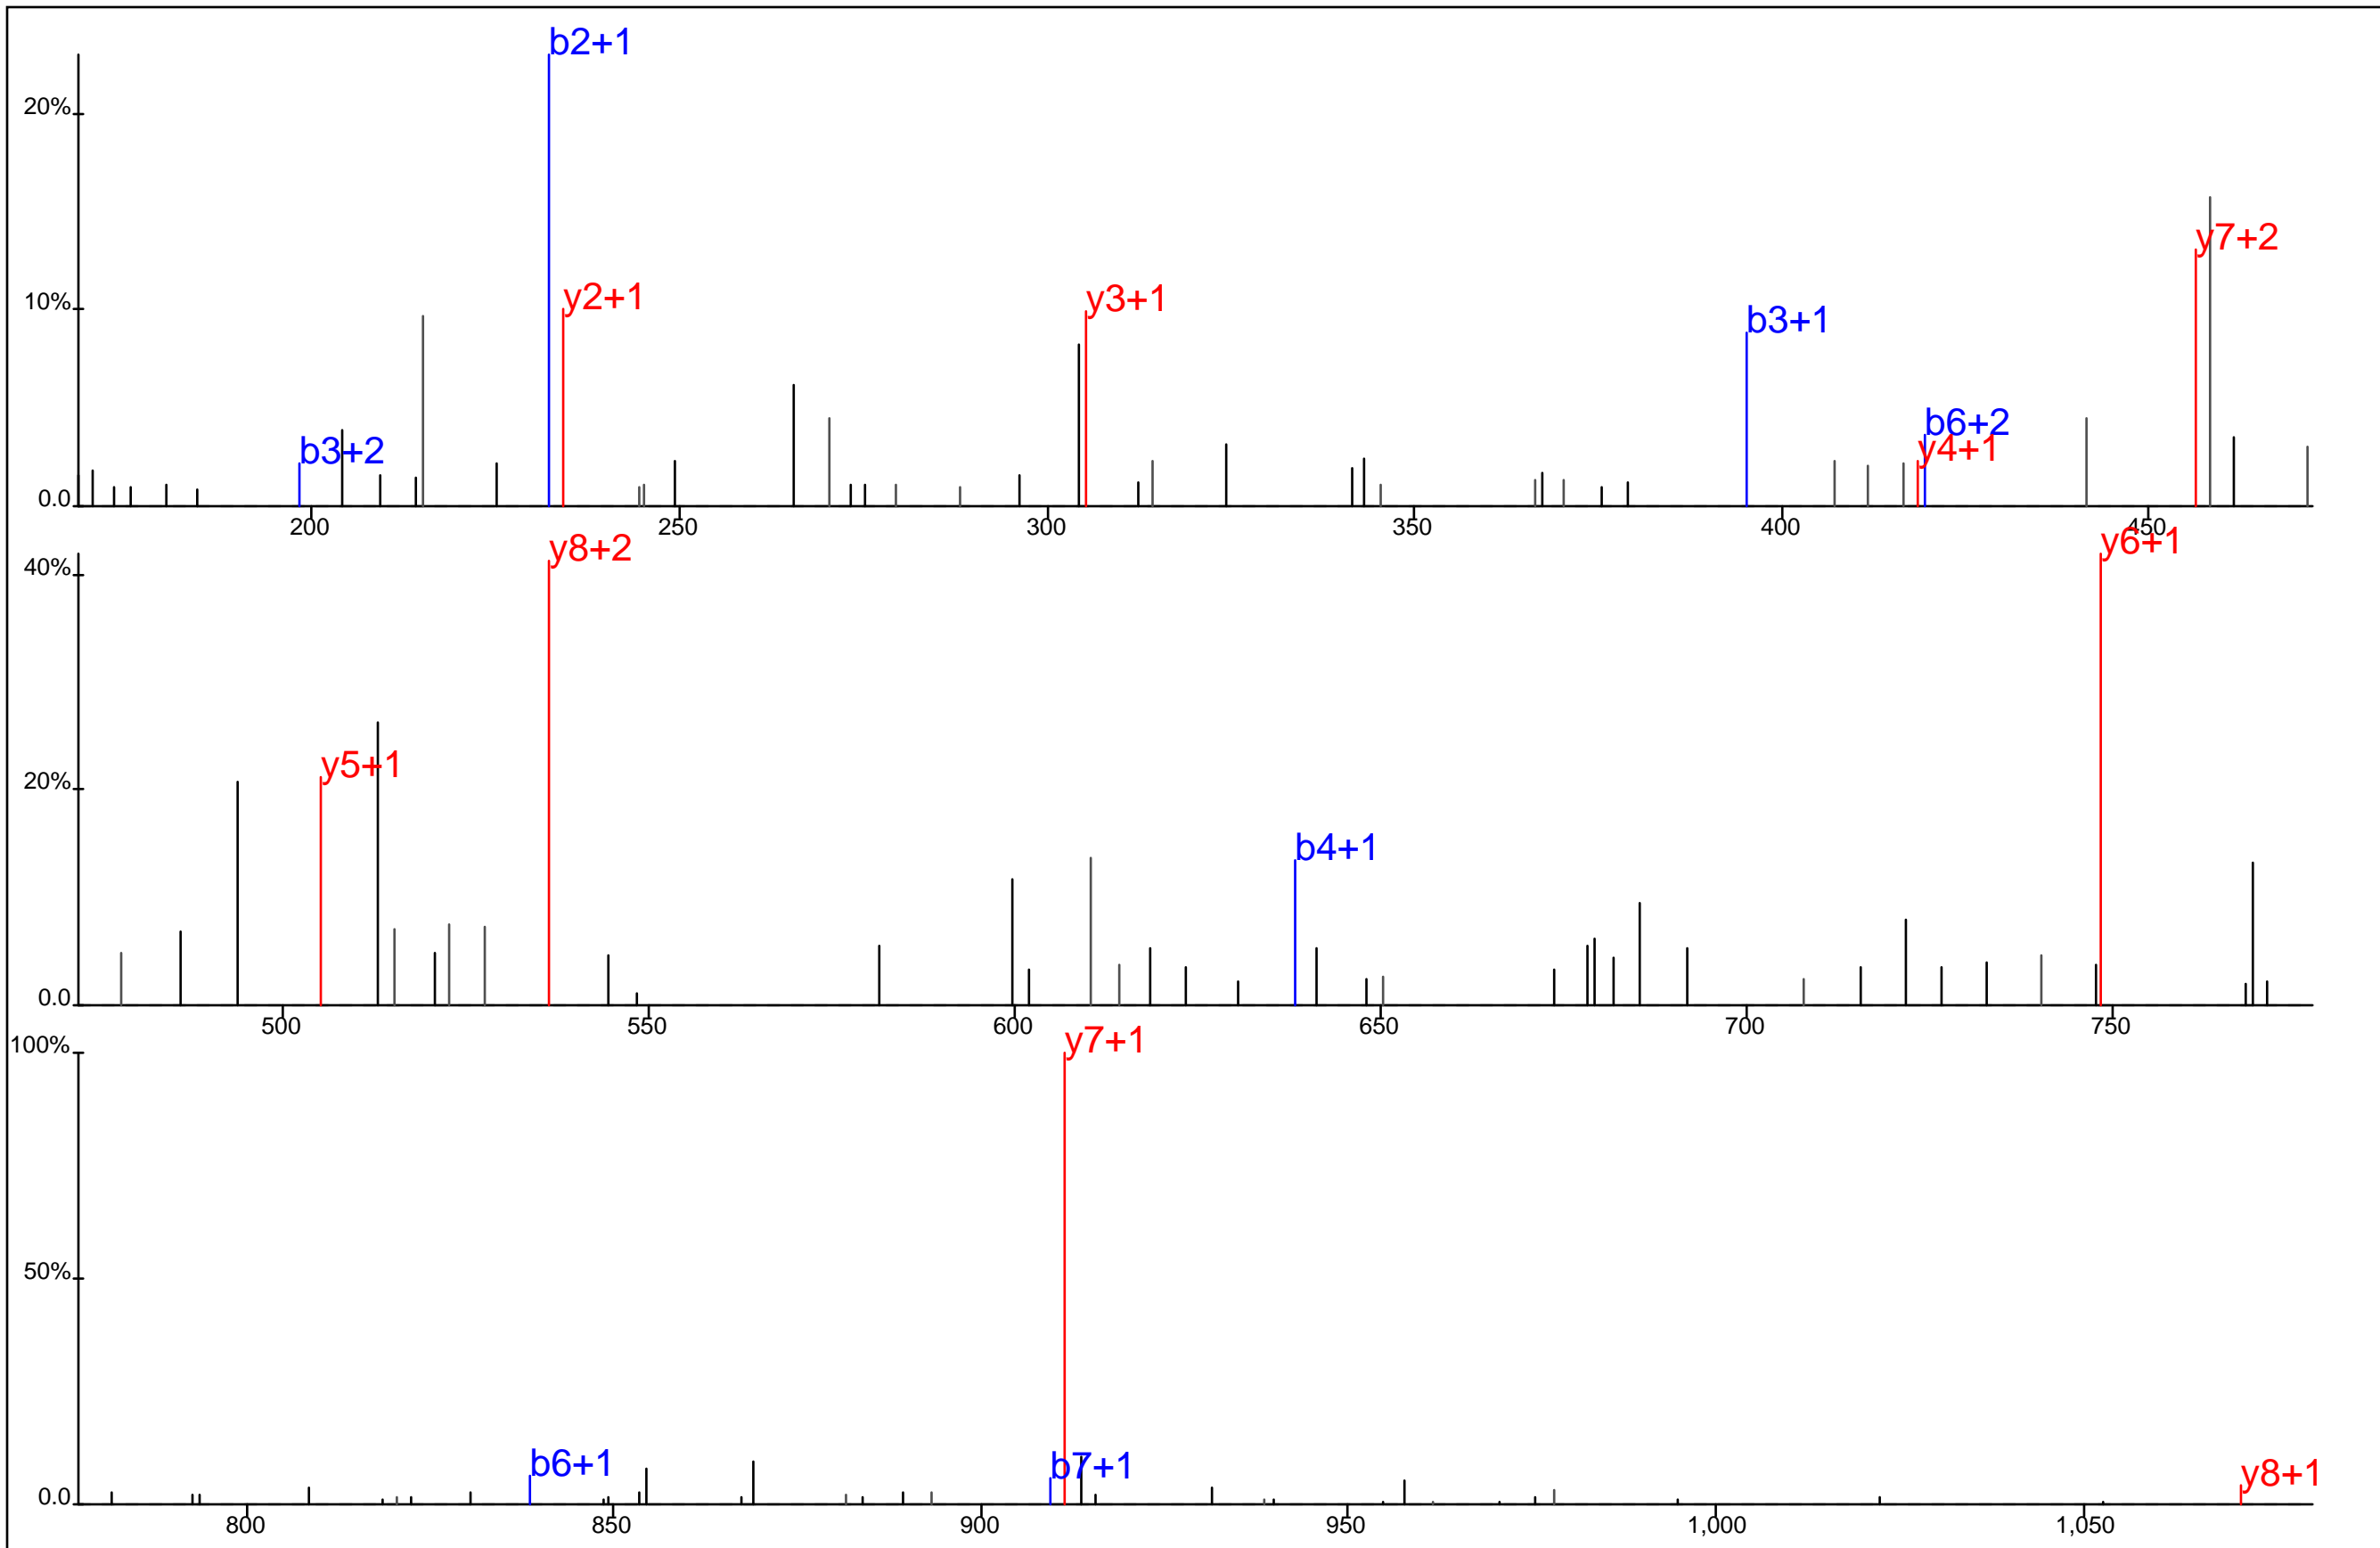

**A C Y Y\* S L A S K**

Protein Name: ZAP70  
 gi Accession: 0  
 Precursor Mass: 571.7337+2  
 Delta Mass: 1.208 ppm  
 XCorr: 29.12

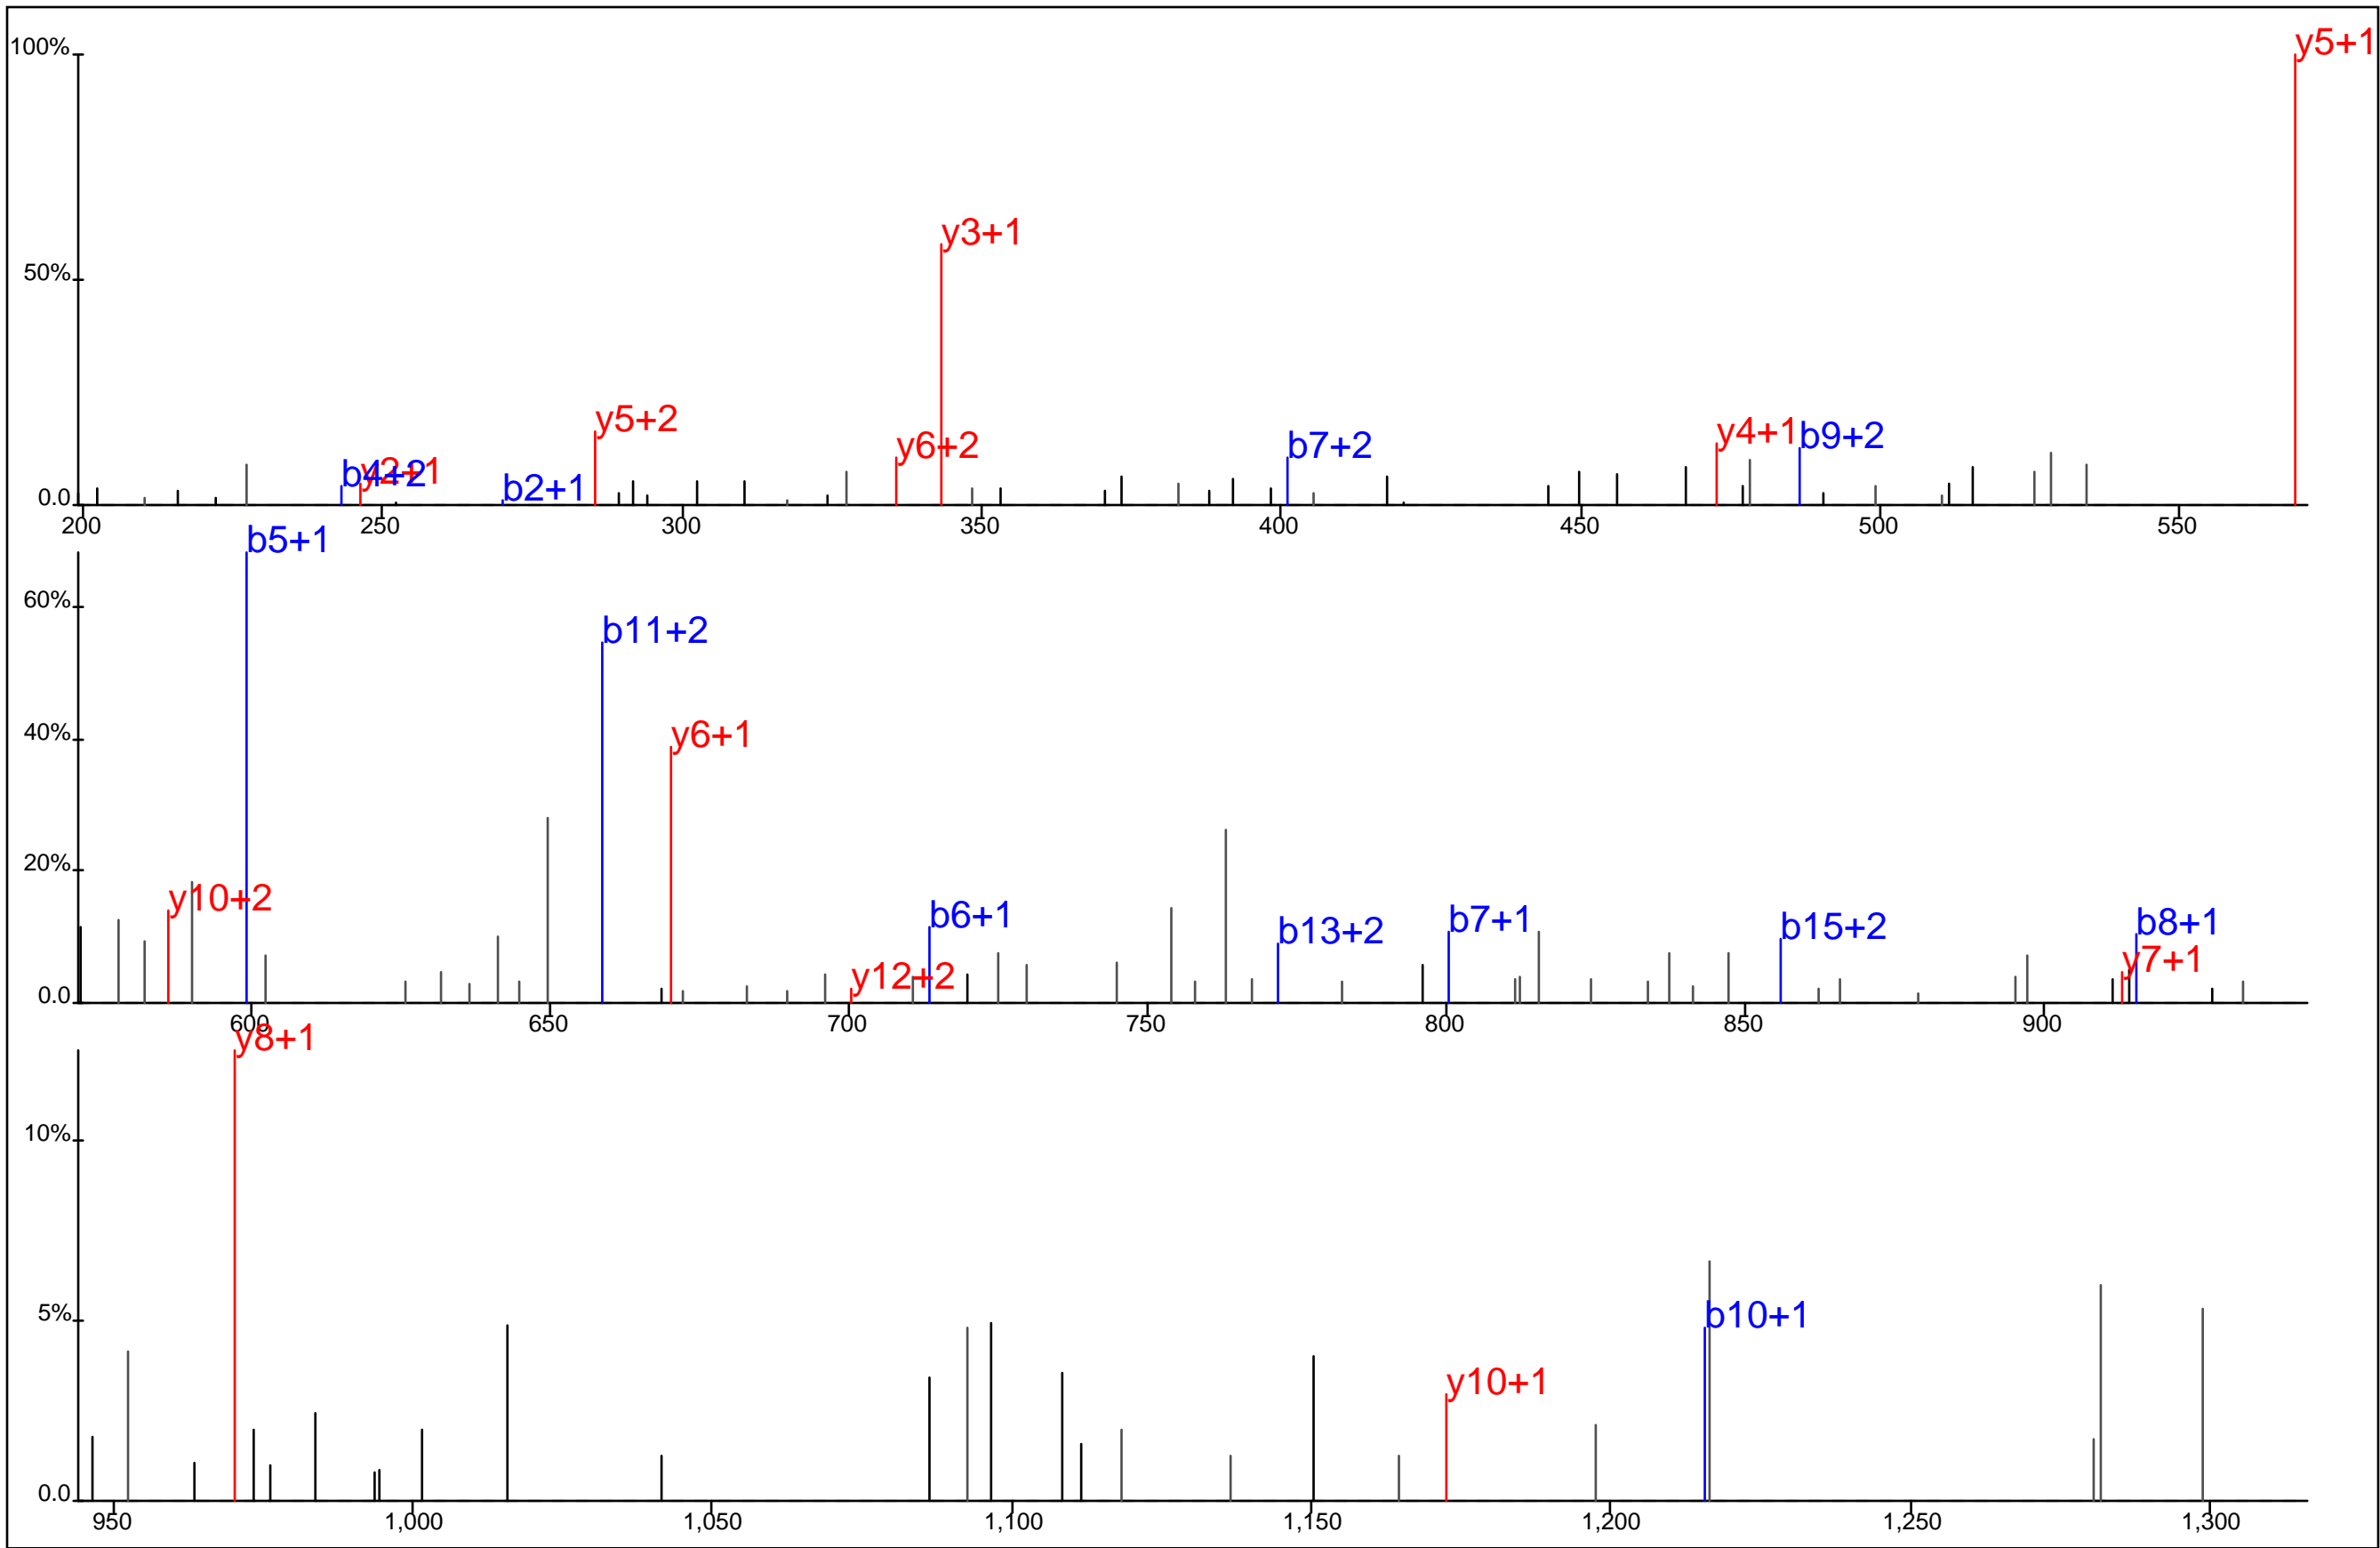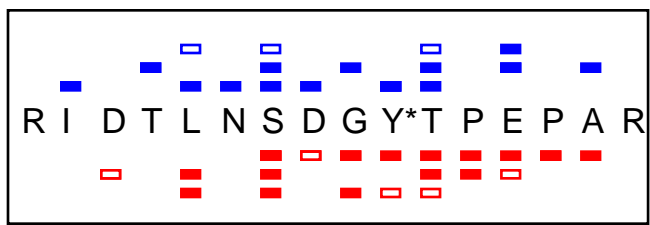

Protein Name: ZAP70  
 gi Accession: 0  
 Precursor Mass: 628.9548+3  
 Delta Mass: 0.554 ppm  
 XCorr: 59.68

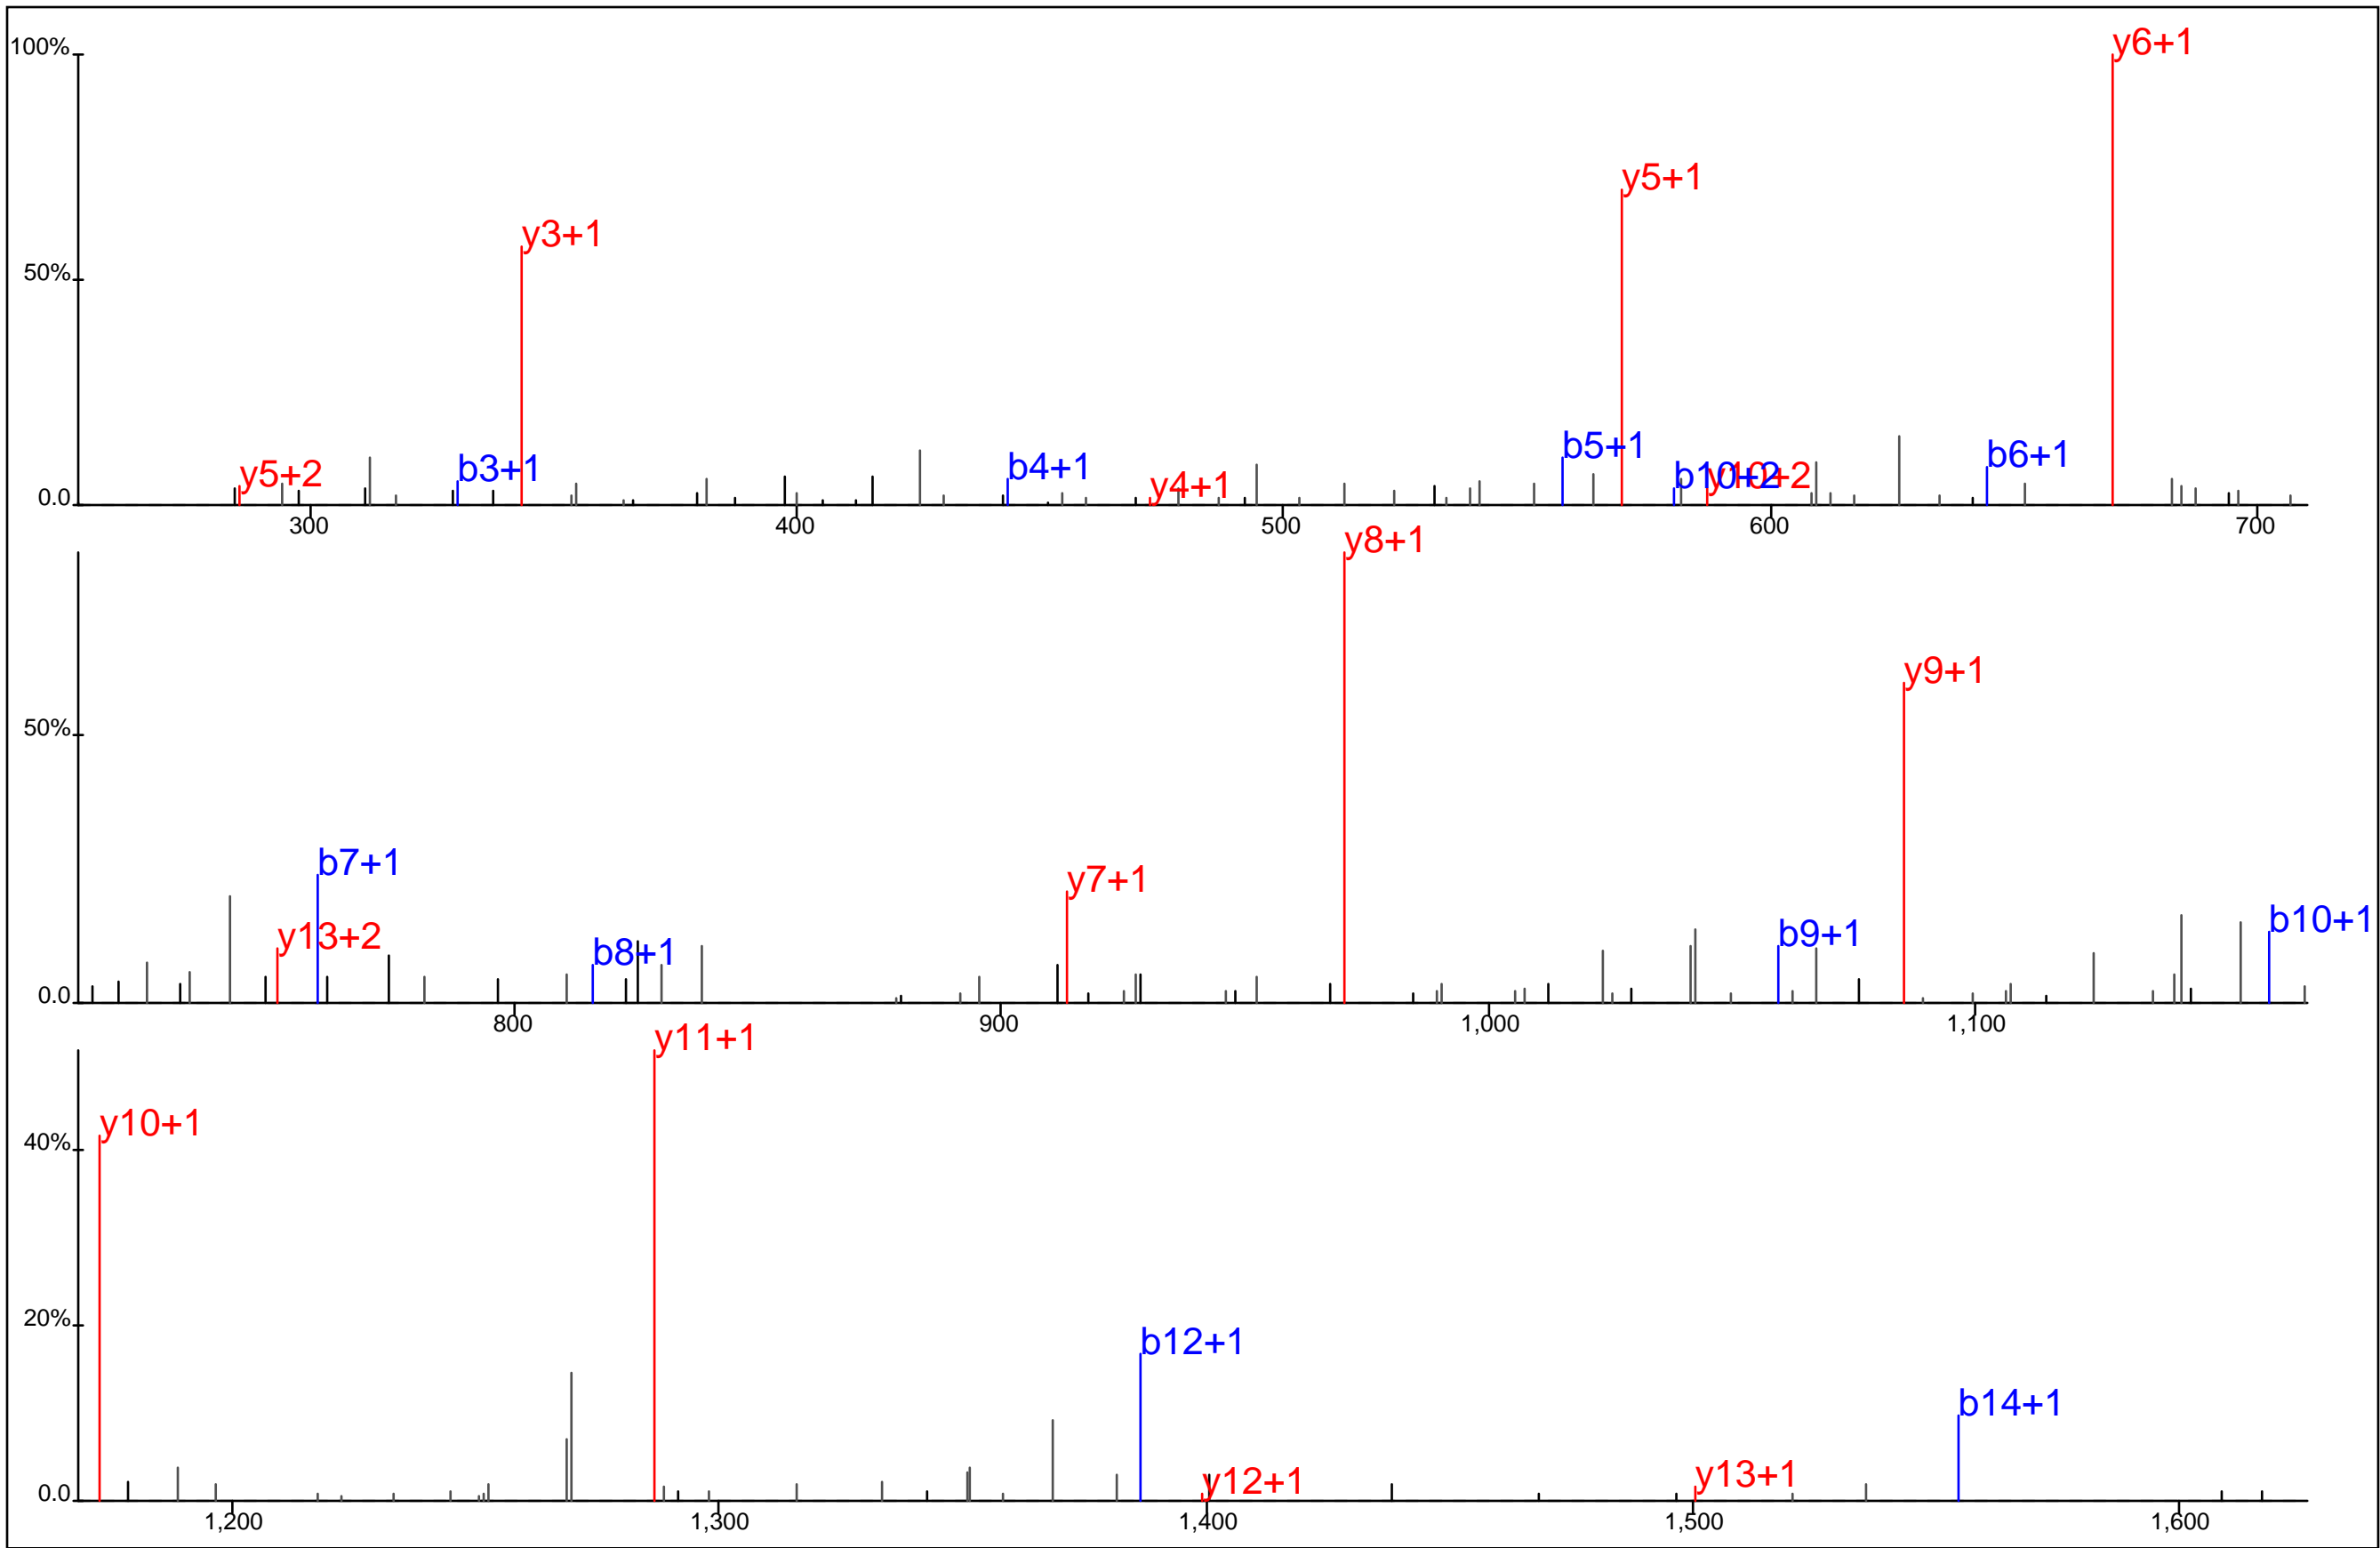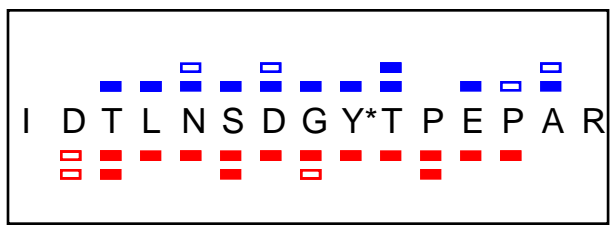

Protein Name: ZAP70  
 gi Accession: 0  
 Precursor Mass: 864.8756+2  
 Delta Mass: 2.128 ppm  
 XCorr: 72.47

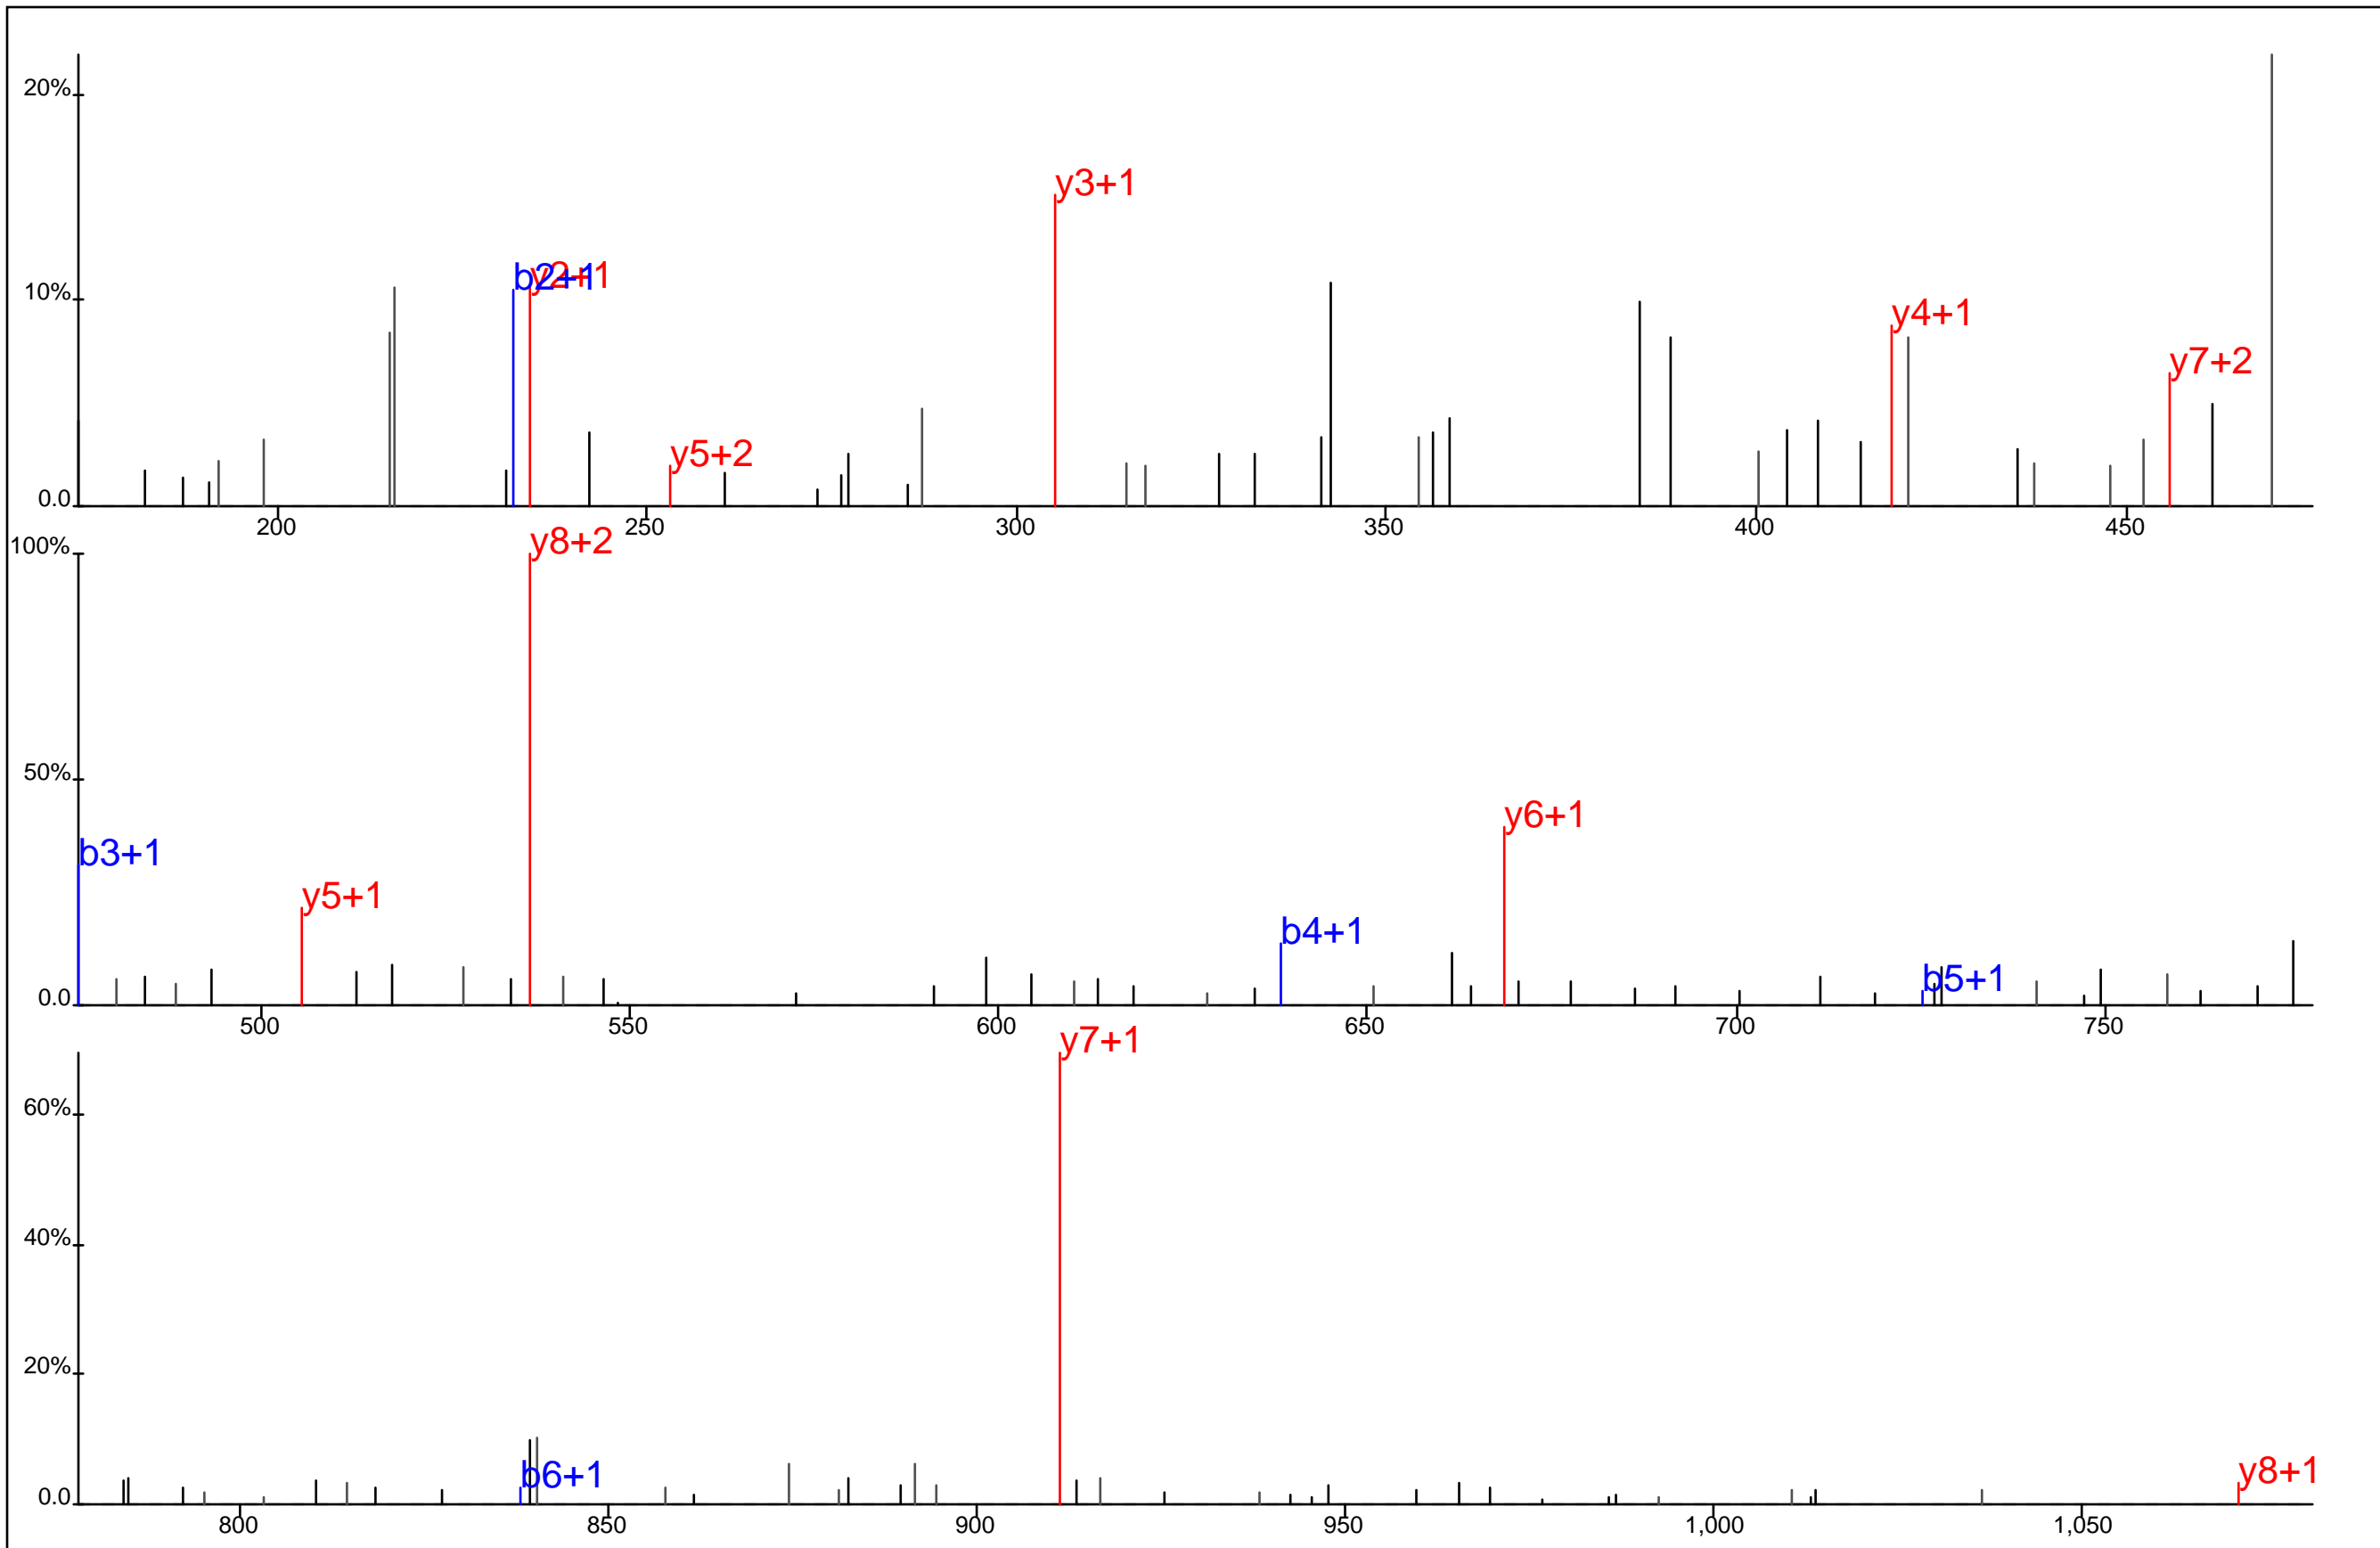

■ ■ ■ ■ ■ ■ ■ ■  
■ ■ ■ ■ ■ ■ ■ ■  
 A C Y\*Y S L A S K

Protein Name: ZAP70  
 gi Accession: 0  
 Precursor Mass: 571.7334+2  
 Delta Mass: 0.672 ppm  
 XCorr: 39.66

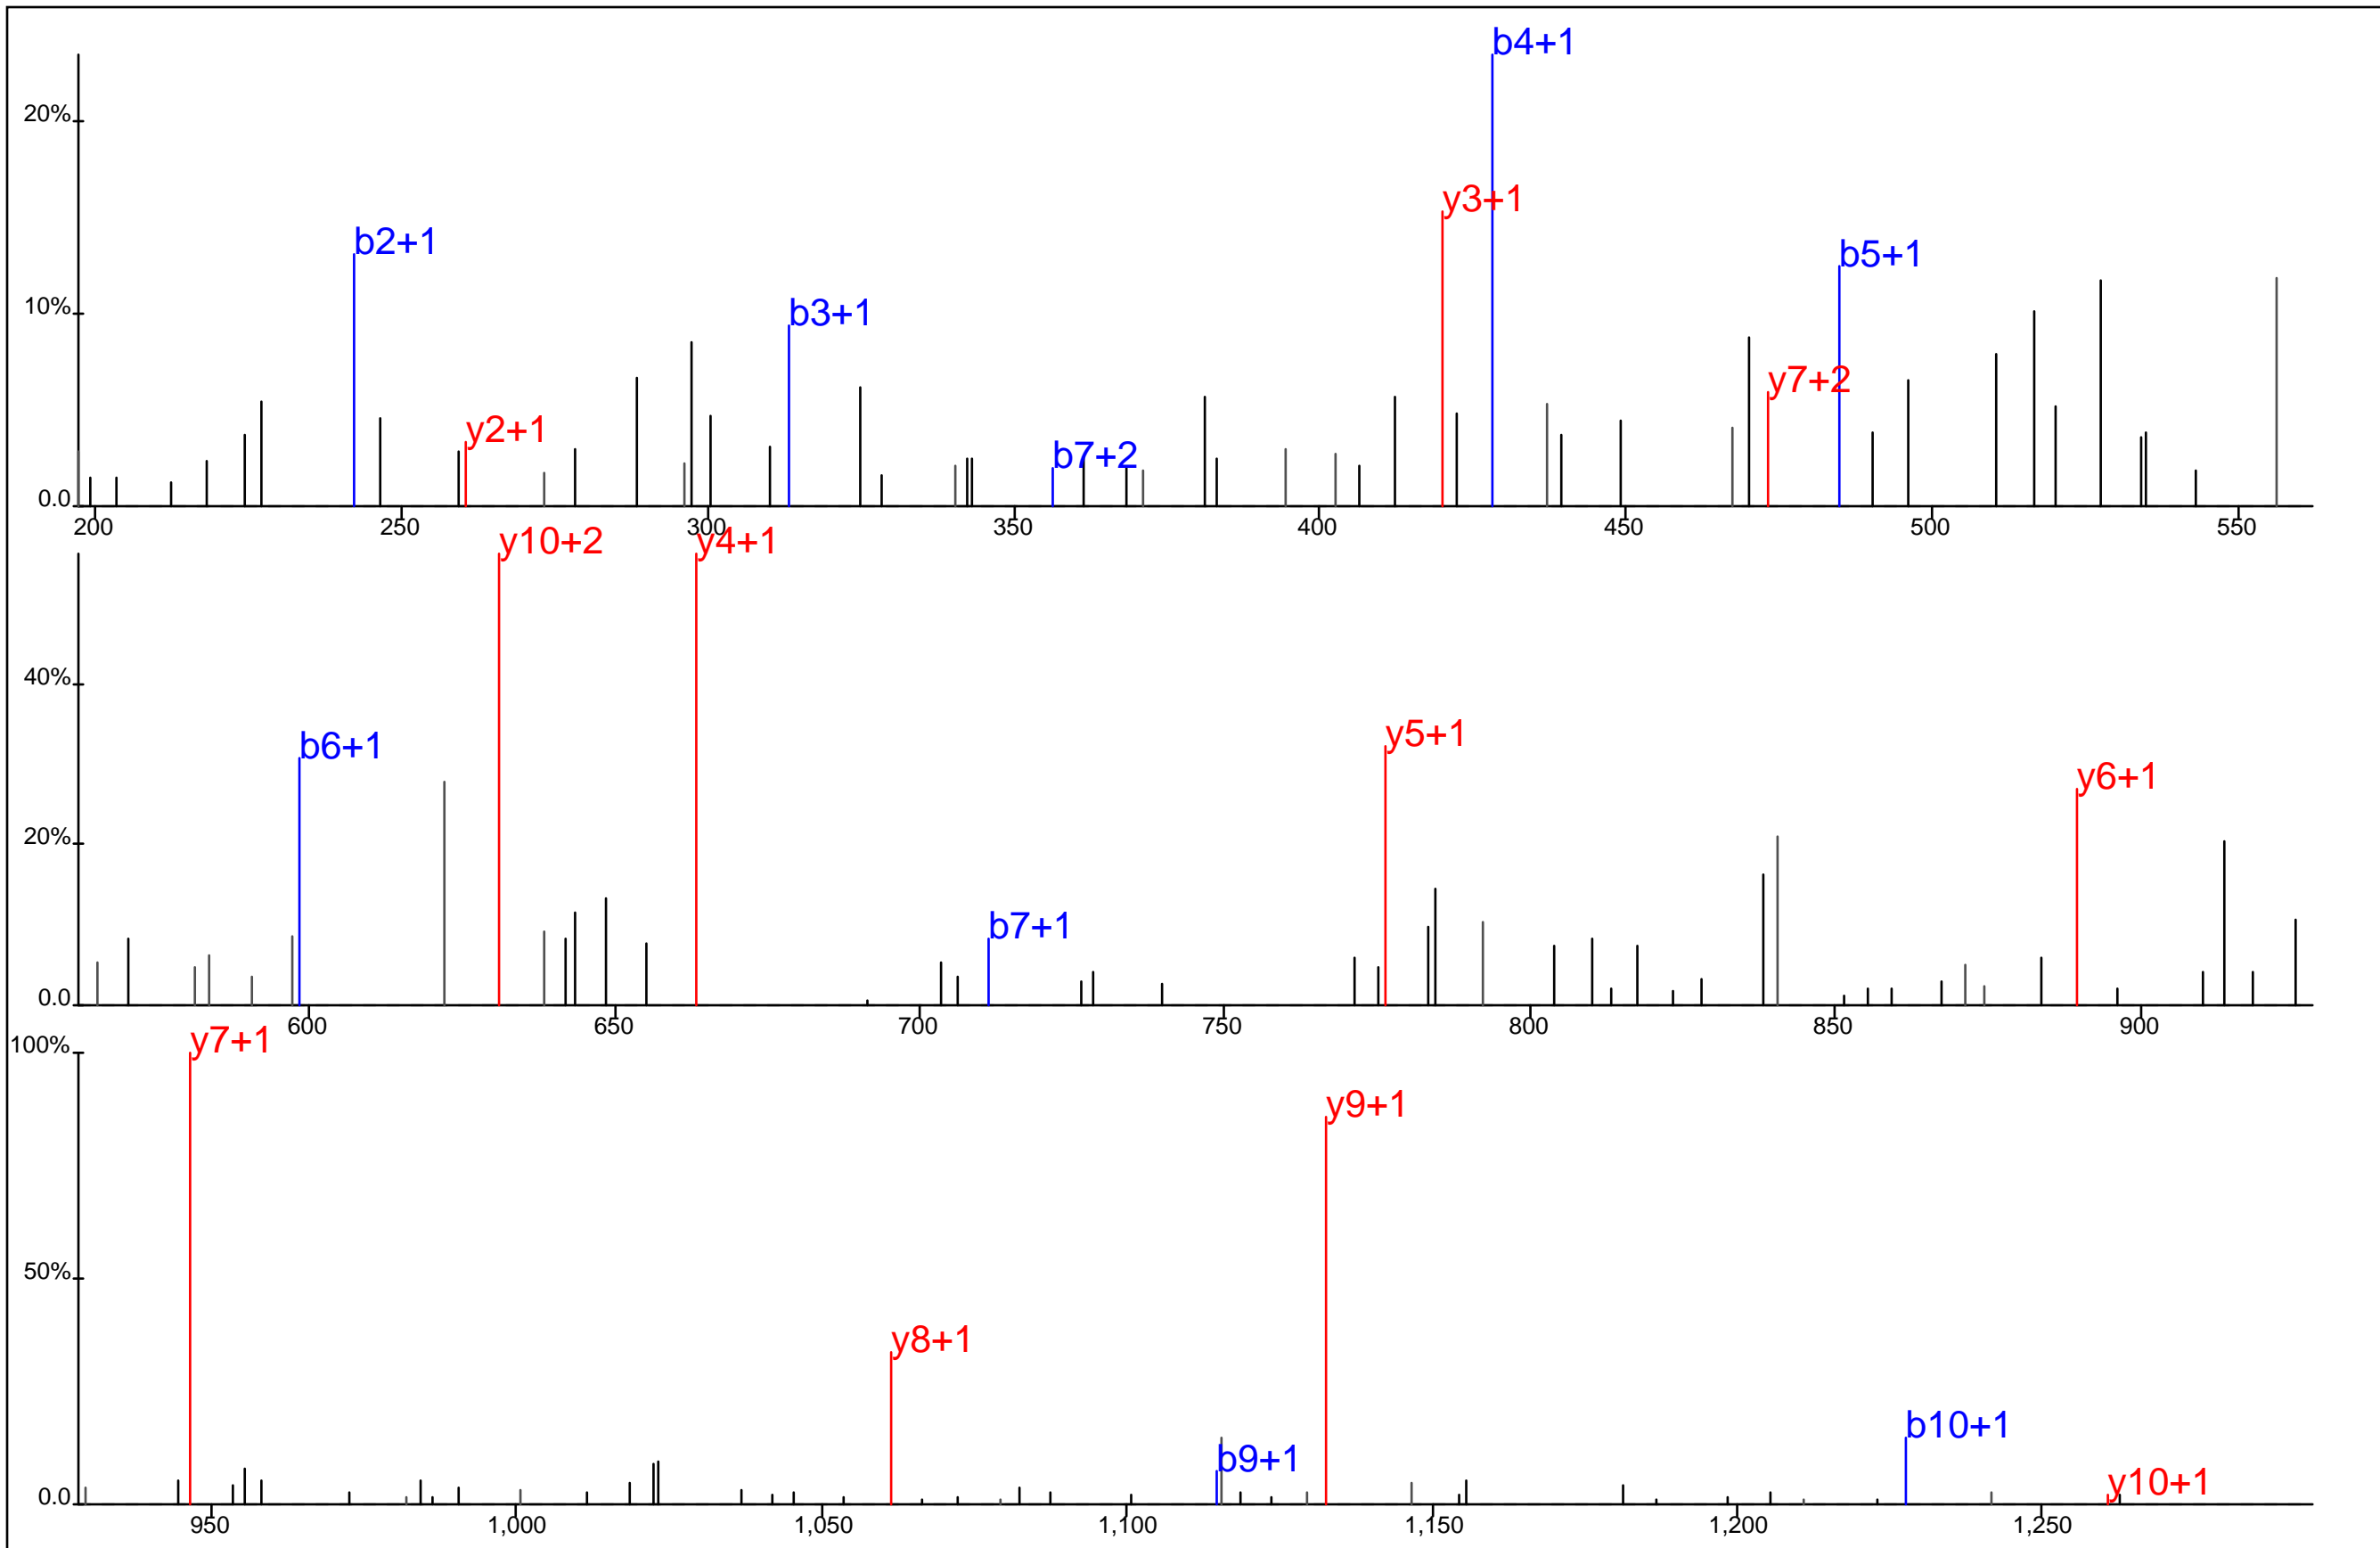

■ □ ■ □ ■ □ ■ □  
 L K A D G L I Y\* C L K  
■ □ ■ □ ■ □ ■ □

Protein Name: ZAP70  
 gi Accession: 0  
 Precursor Mass: 687.3475+2  
 Delta Mass: 1.478 ppm  
 XCorr: 52.7





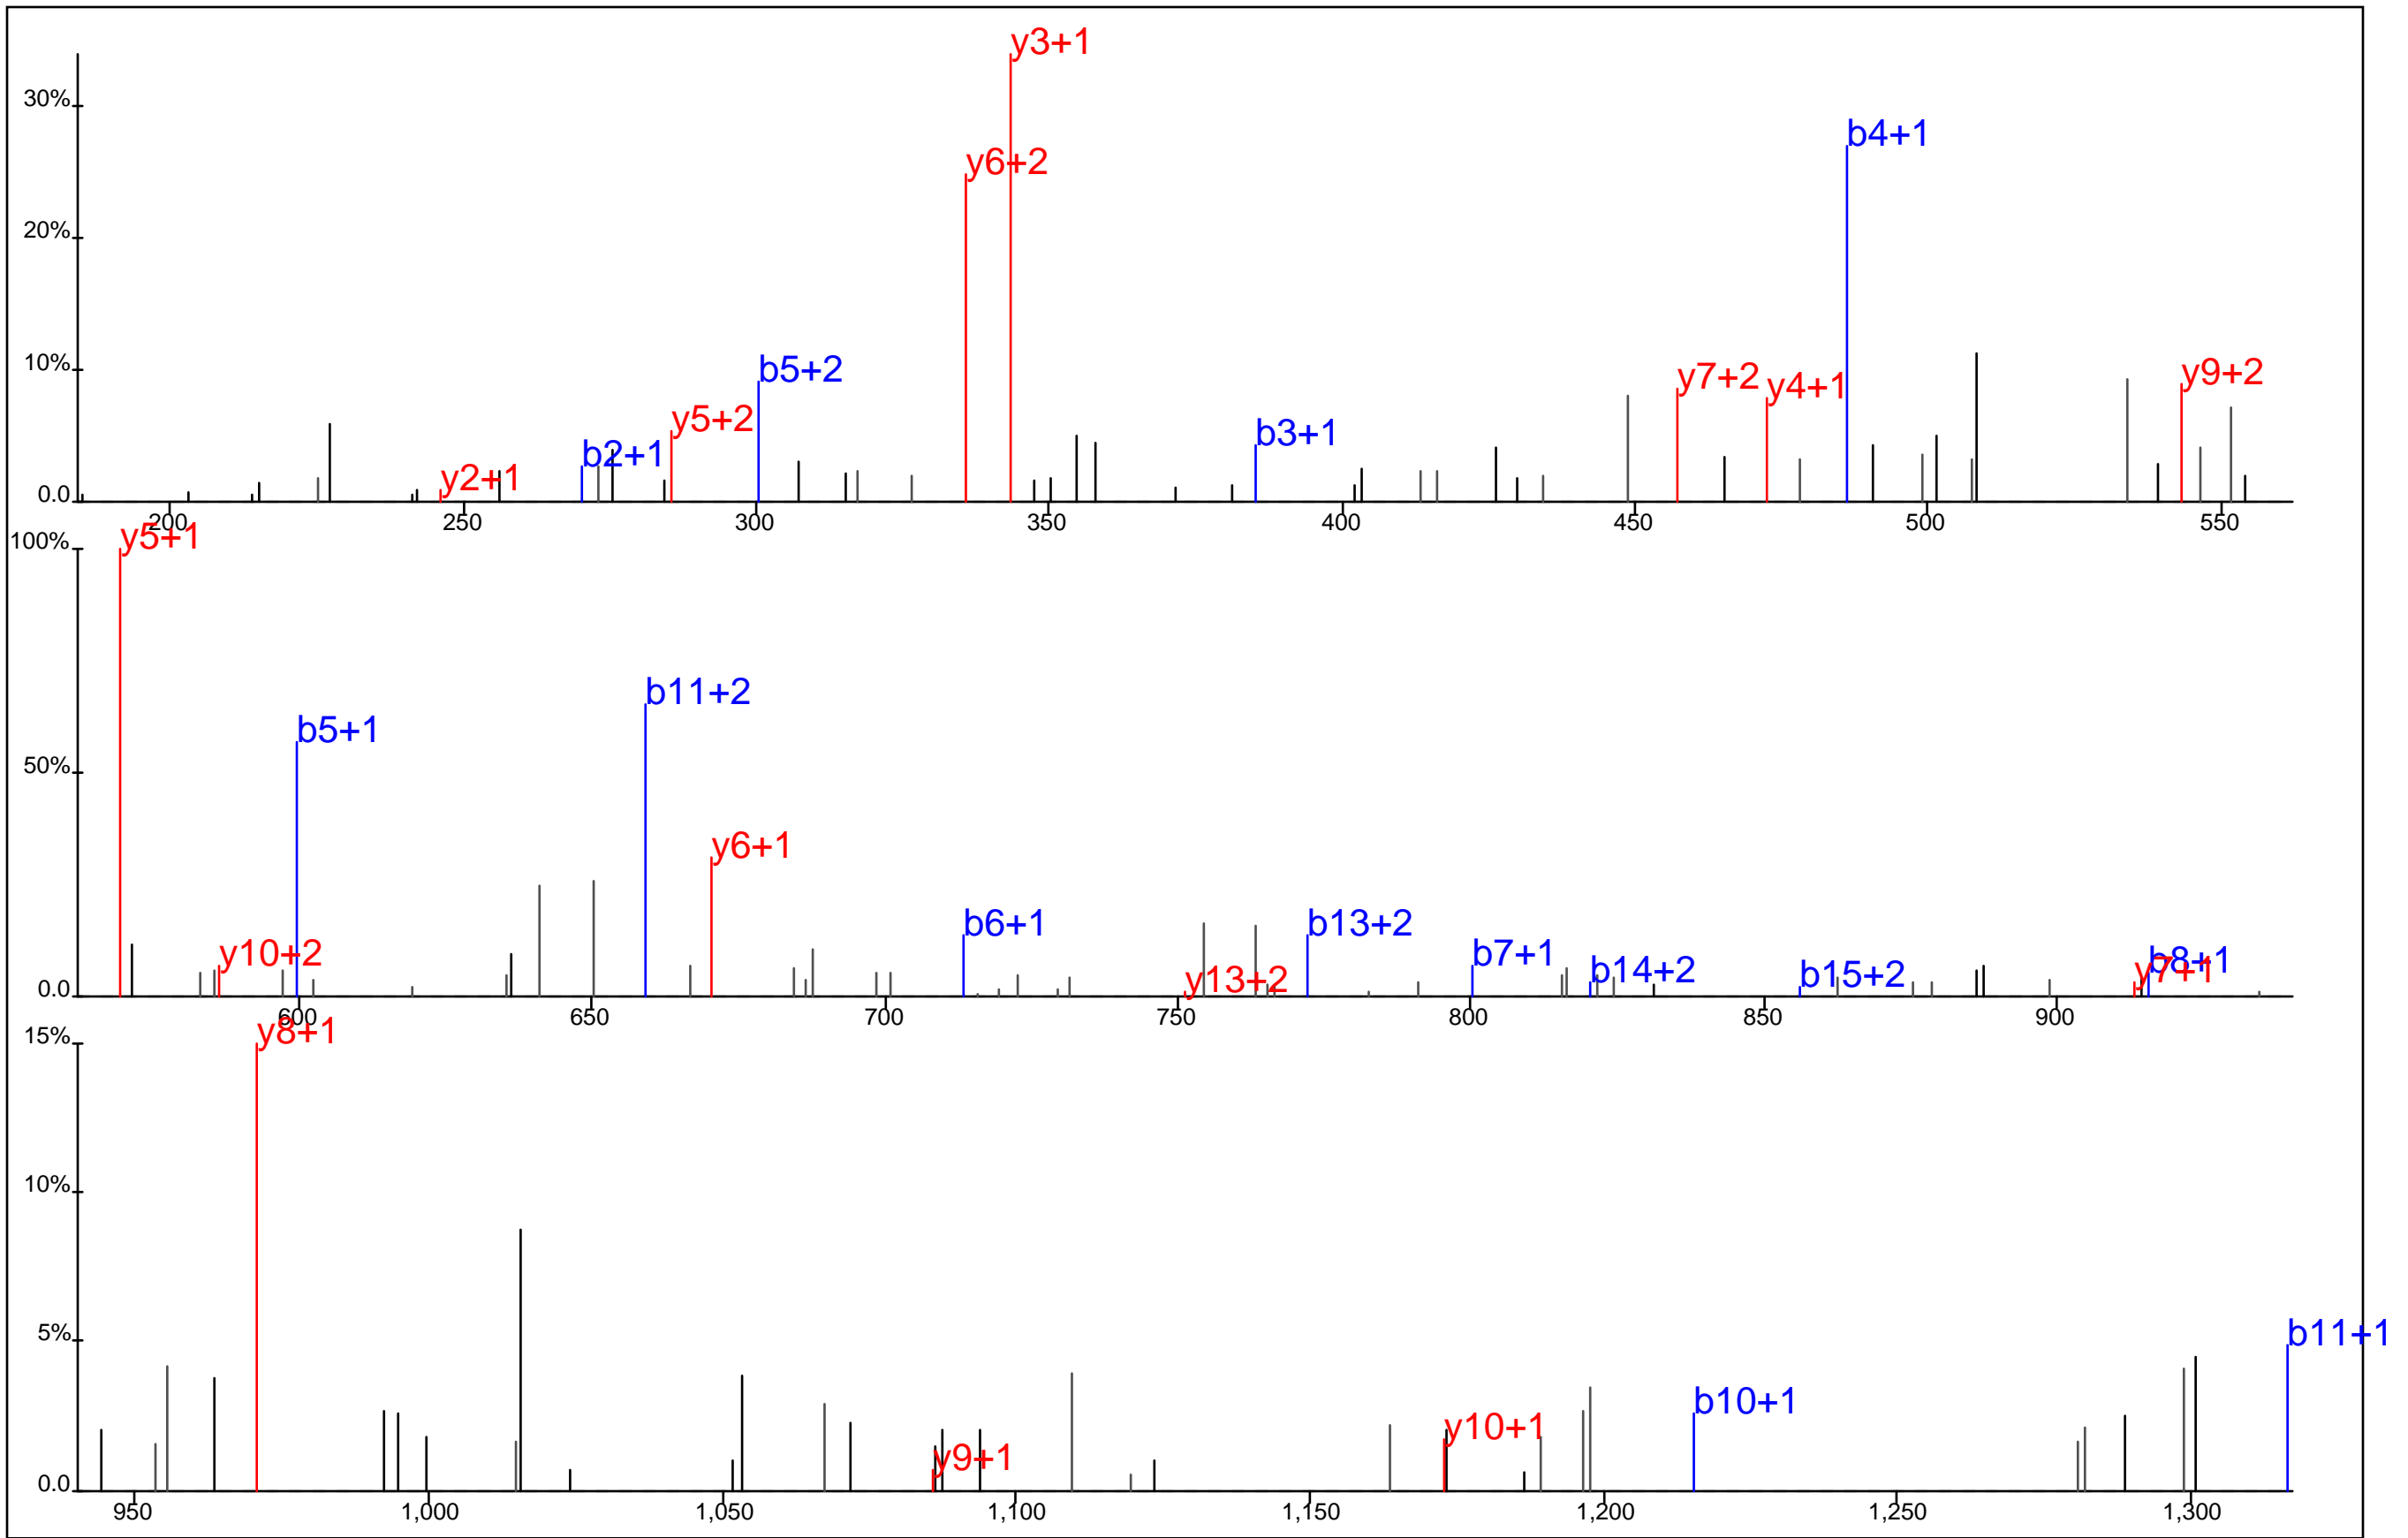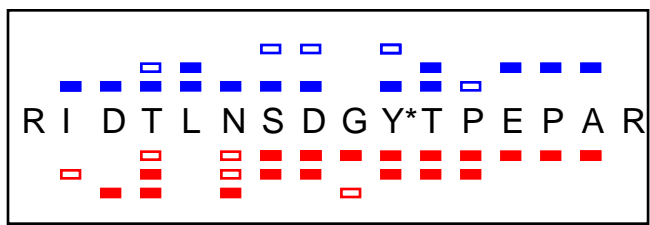

Protein Name: ZAP70  
 gi Accession: 0  
 Precursor Mass: 628.9543+3  
 Delta Mass: 0.125 ppm  
 XCorr: 49.24

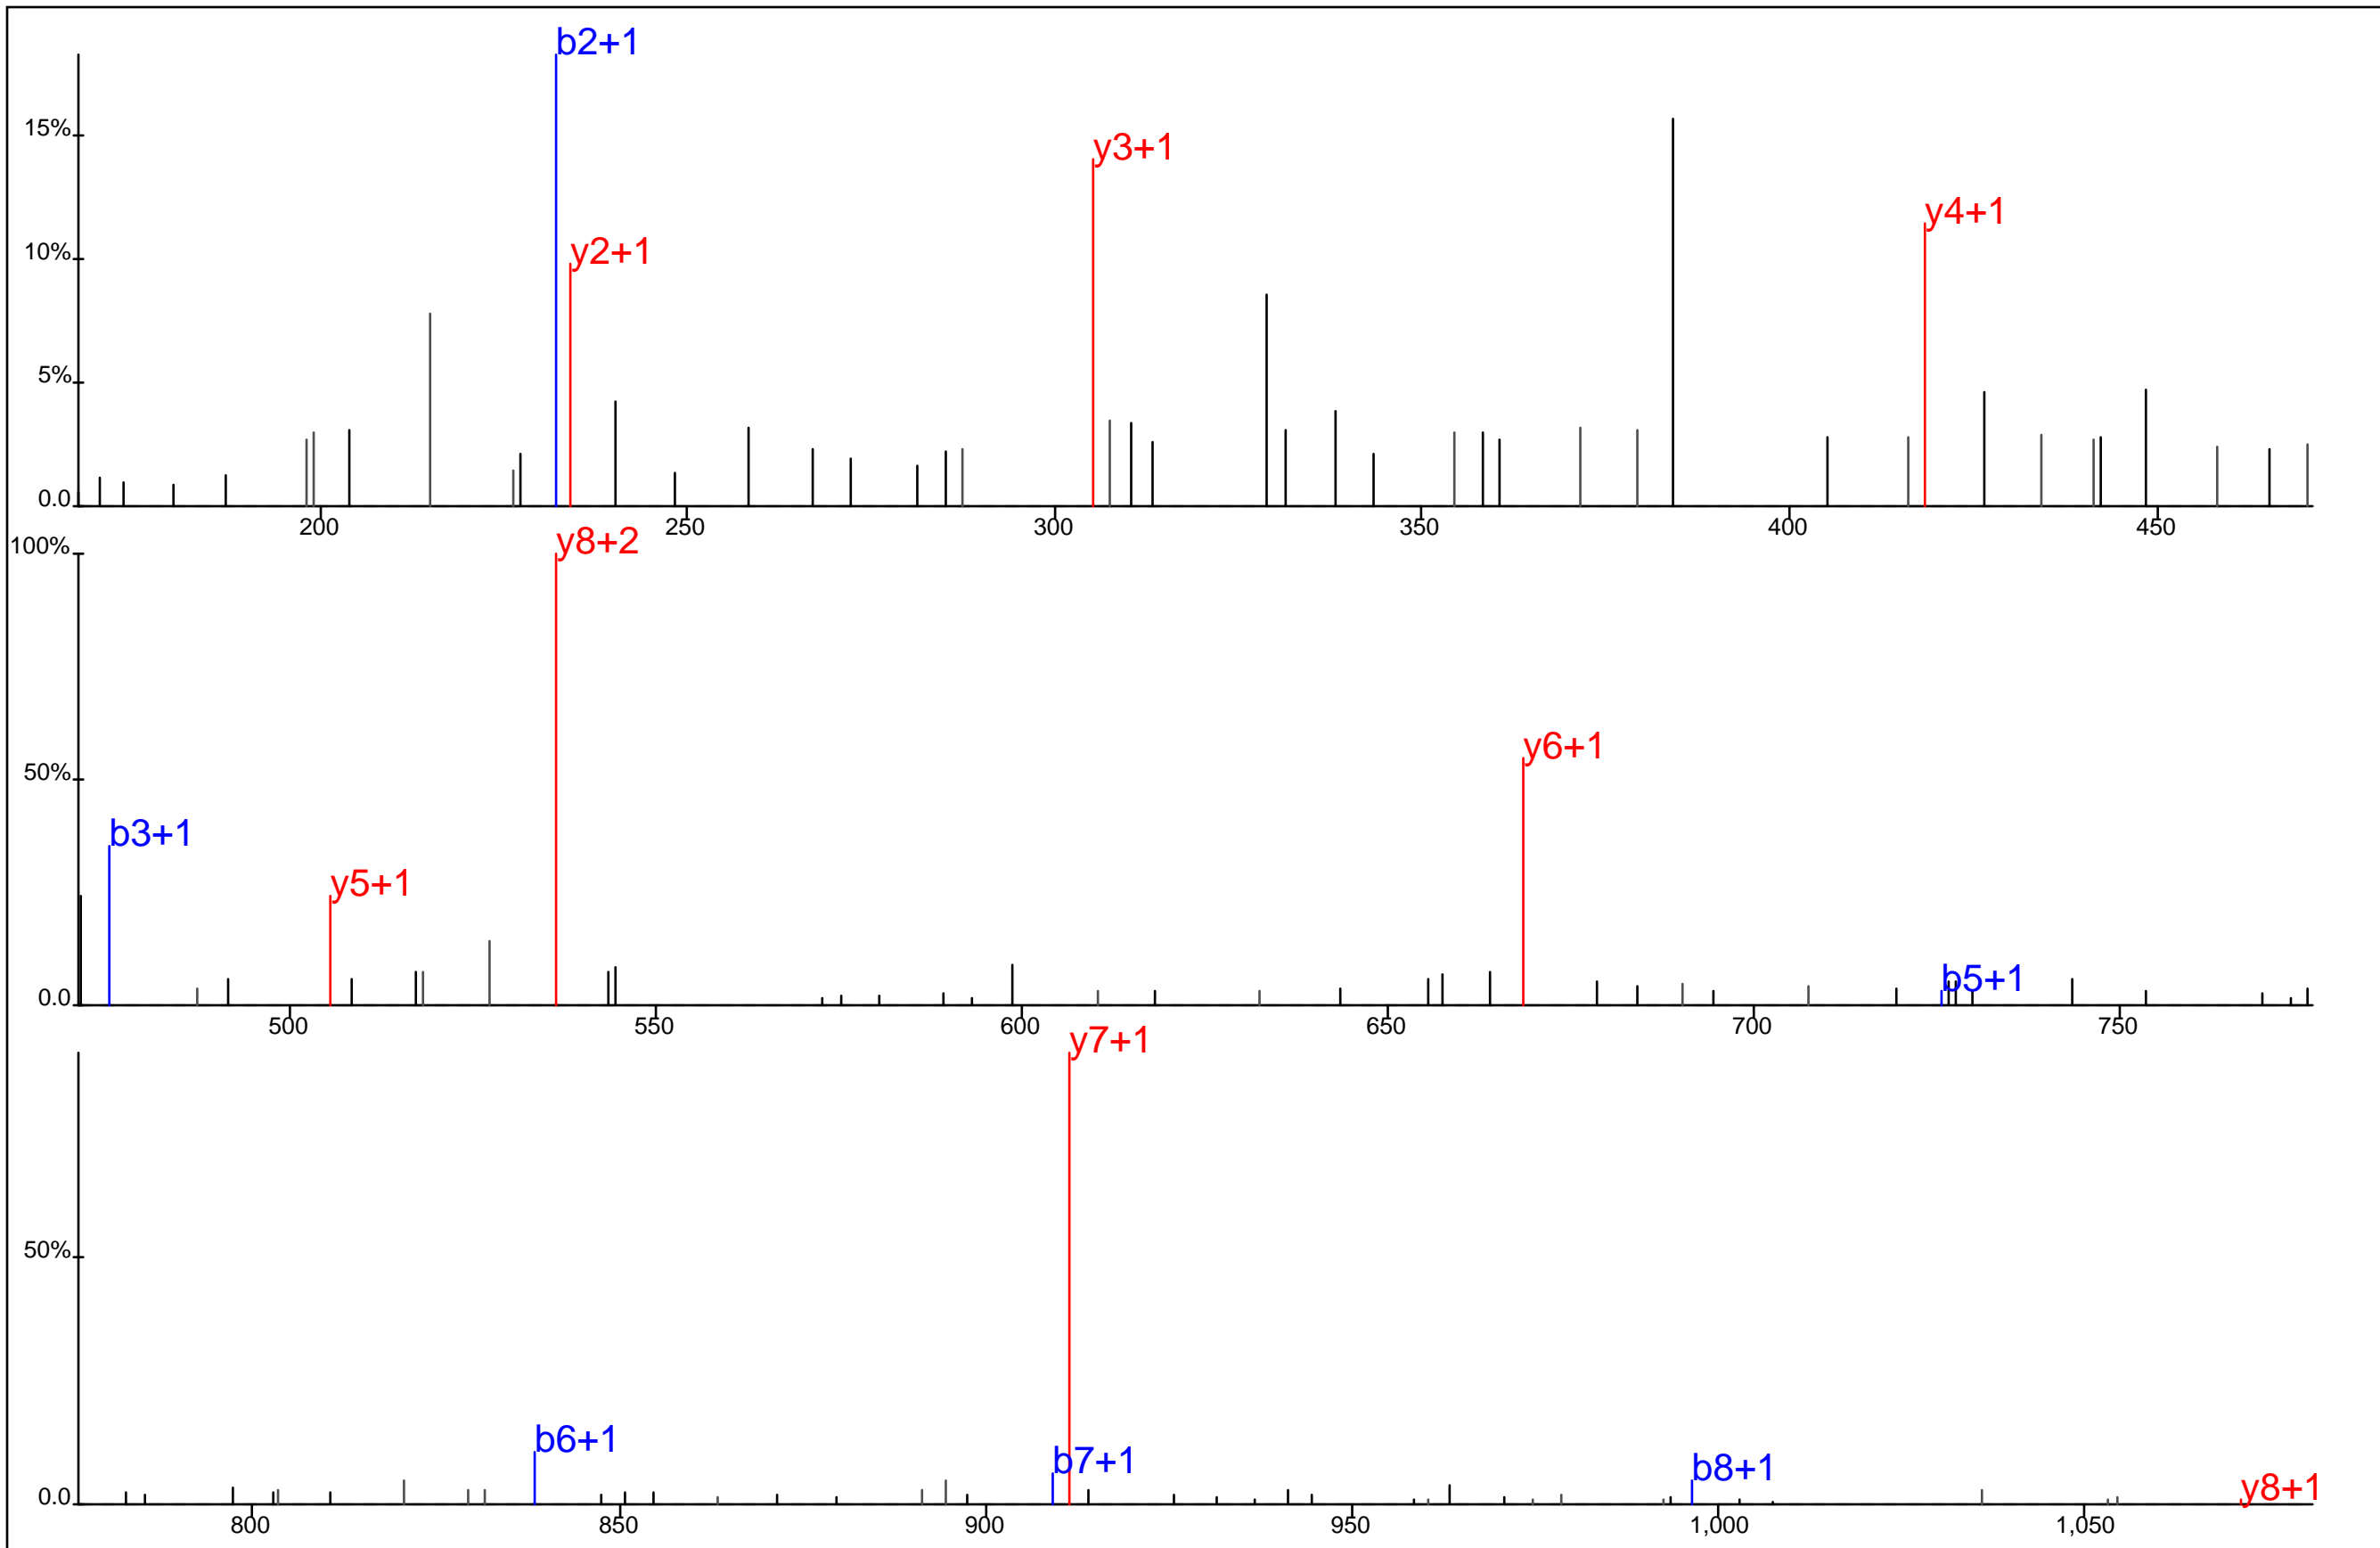

■ ■ ■ ■ ■ ■ ■ ■  
■ ■ ■ ■ ■ ■ ■ ■

A C Y\*Y S L A S K

Protein Name: ZAP70  
 gi Accession: 0  
 Precursor Mass: 571.7334+2  
 Delta Mass: 0.672 ppm  
 XCorr: 40.95

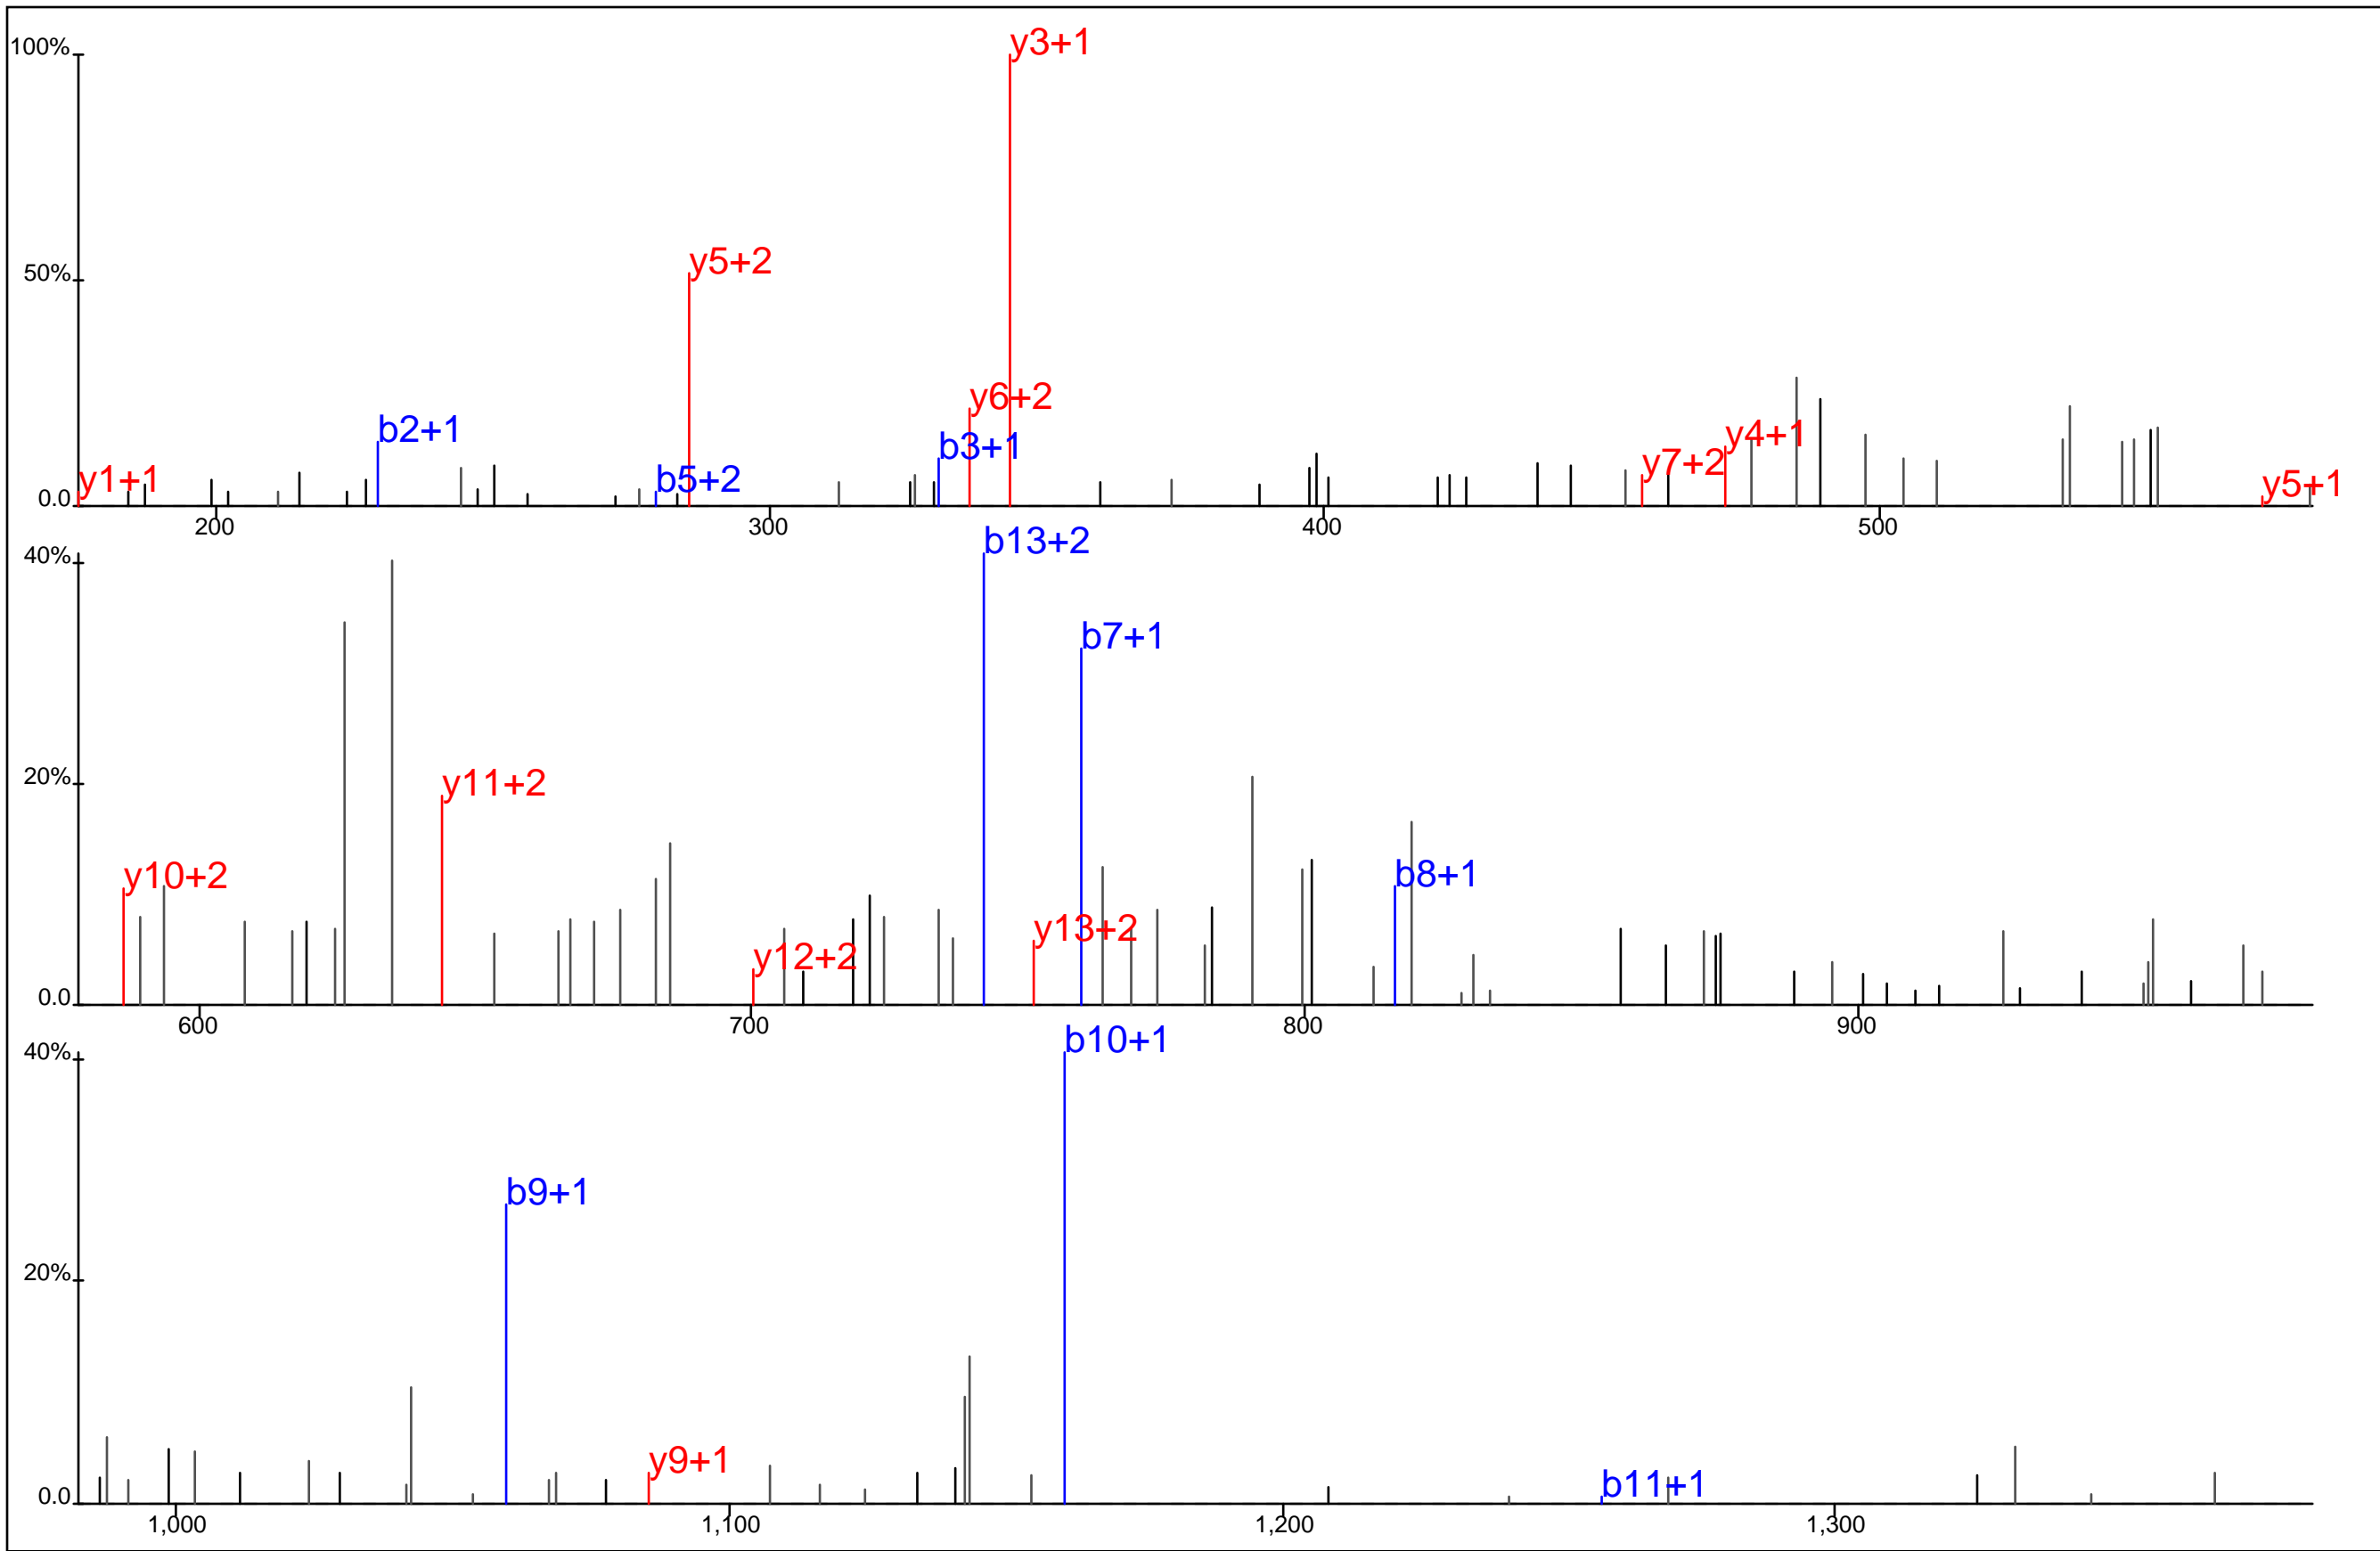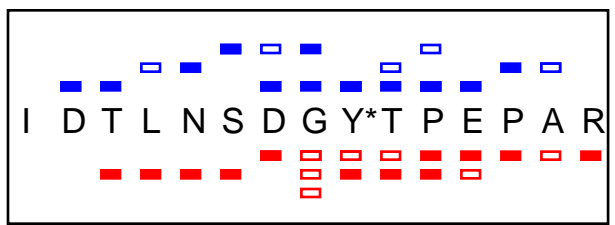

Protein Name: ZAP70  
 gi Accession: 0  
 Precursor Mass: 576.9208+3  
 Delta Mass: 0.089 ppm  
 XCorr: 38.92

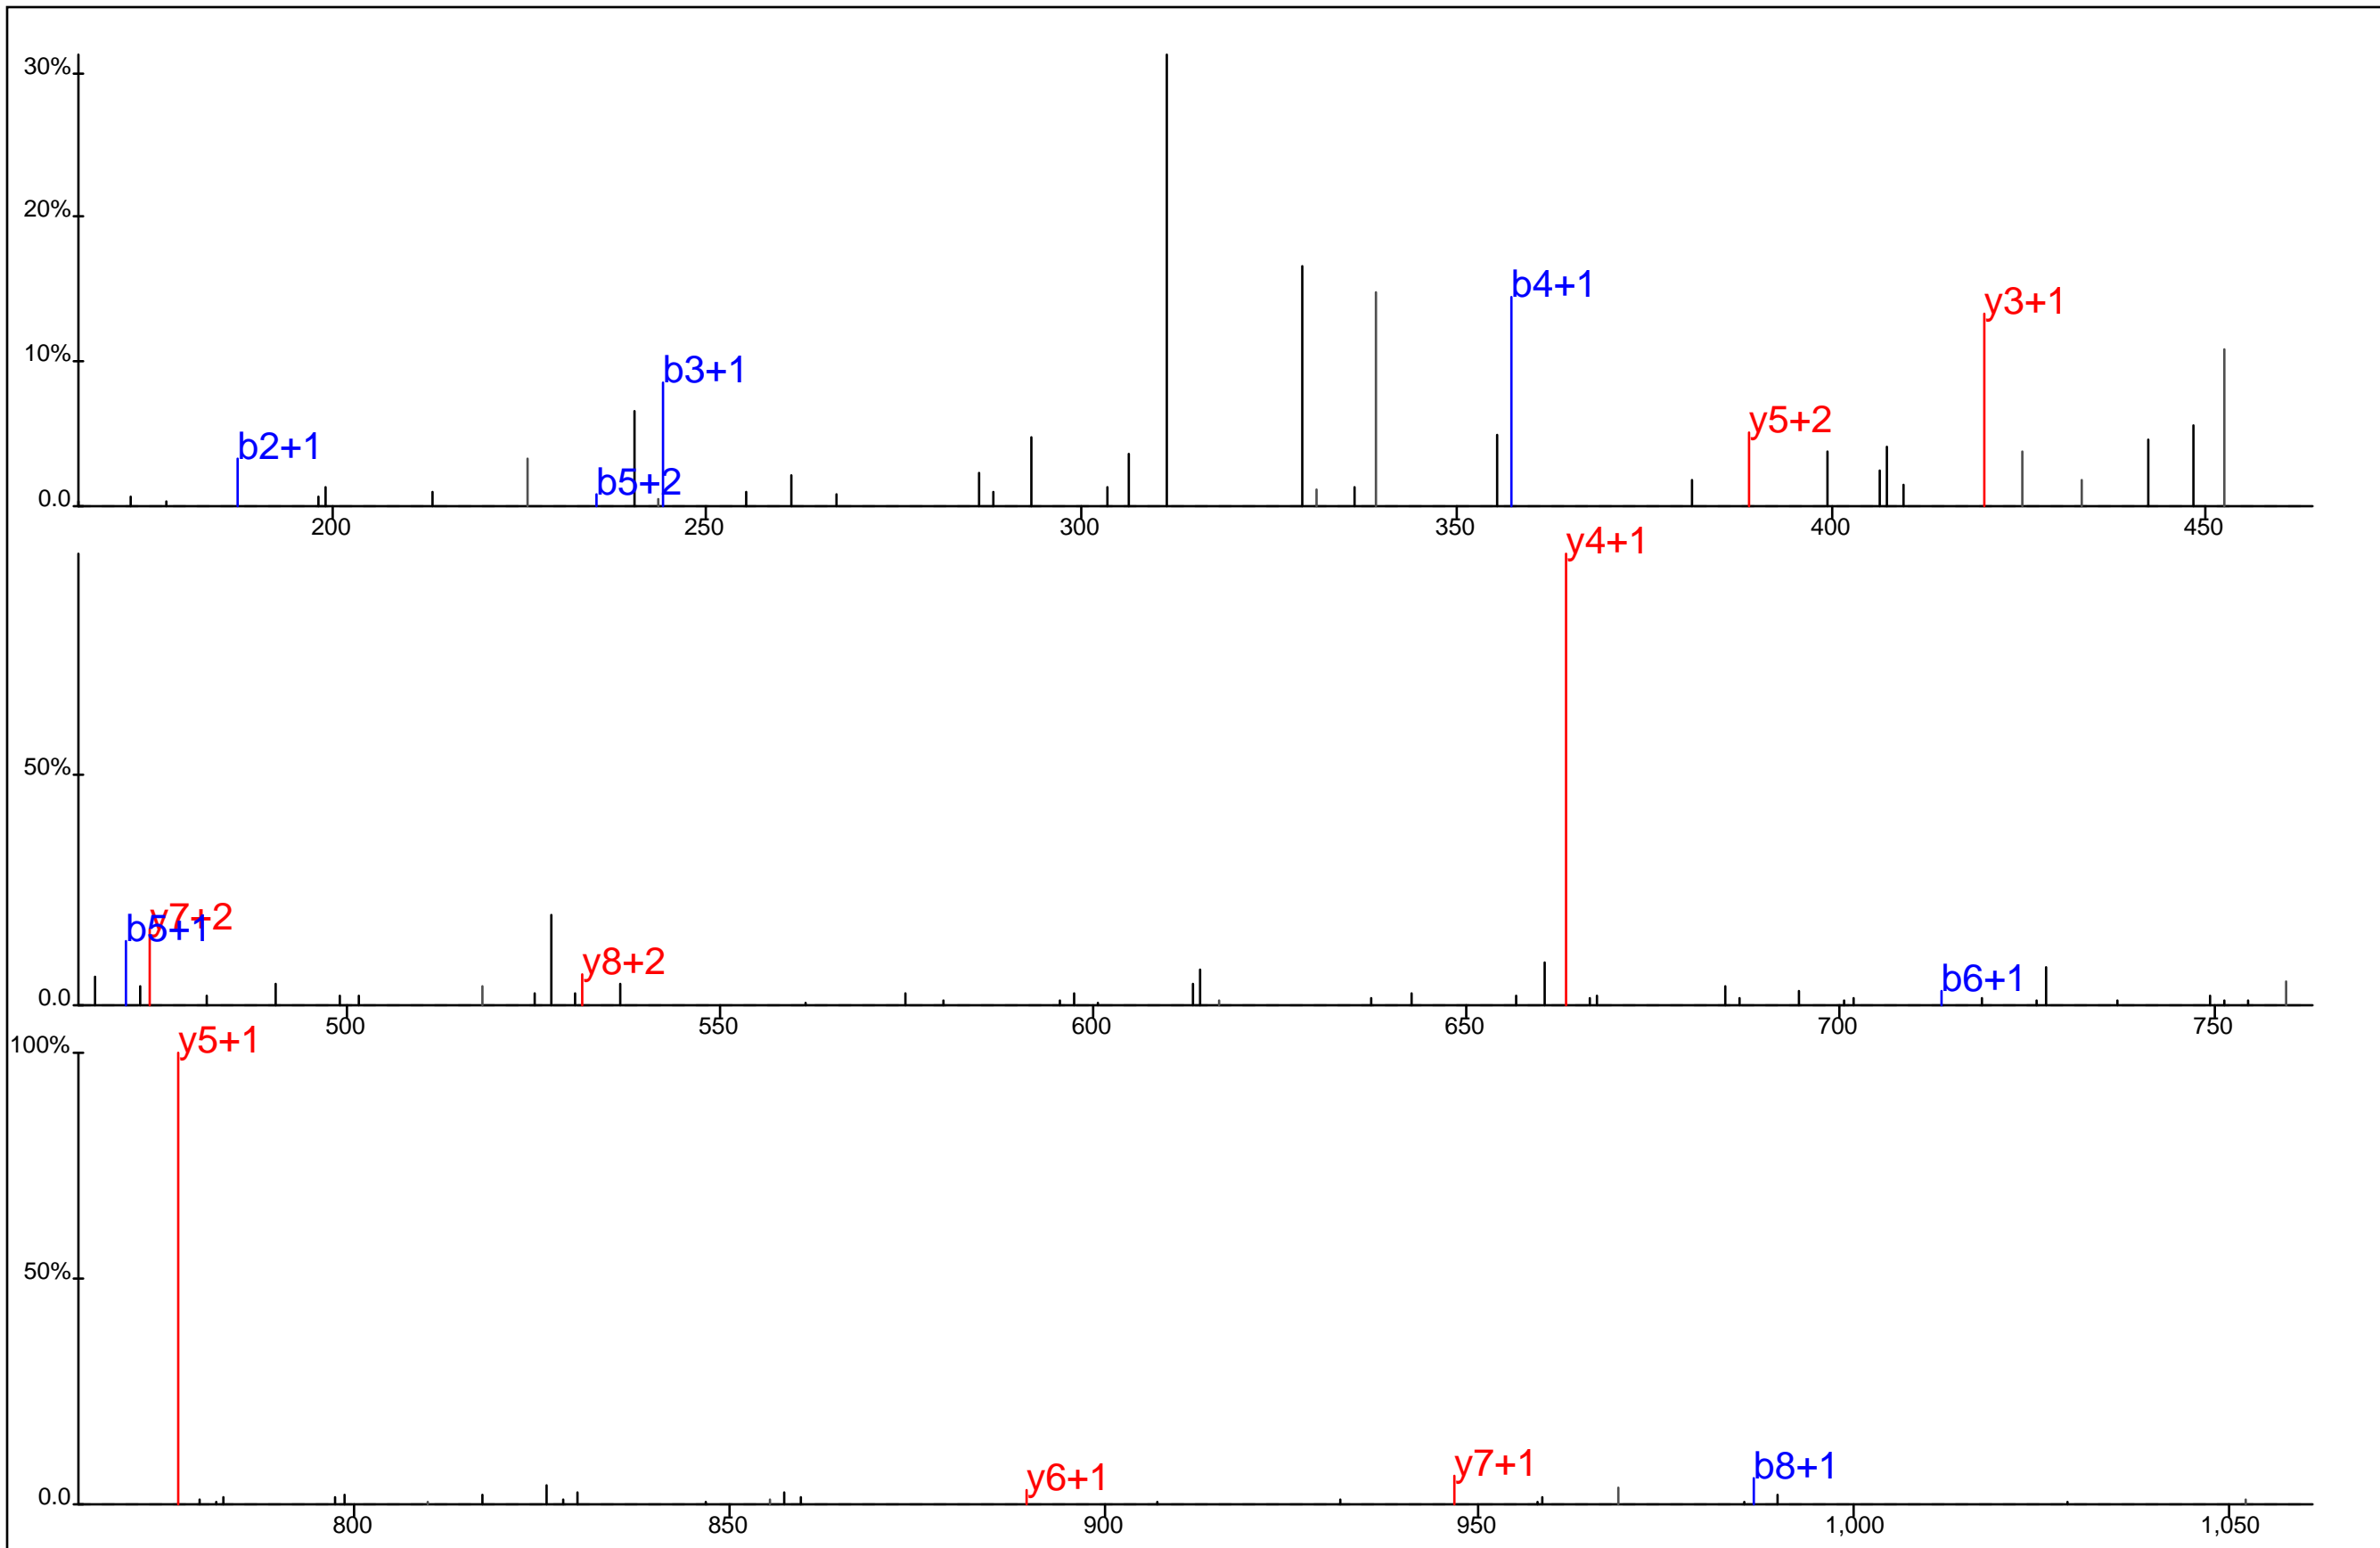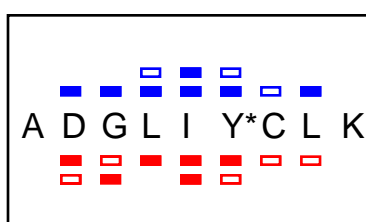

Protein Name: ZAP70  
 gi Accession: 0  
 Precursor Mass: 566.7598+2  
 Delta Mass: 1.392 ppm  
 XCorr: 33.52





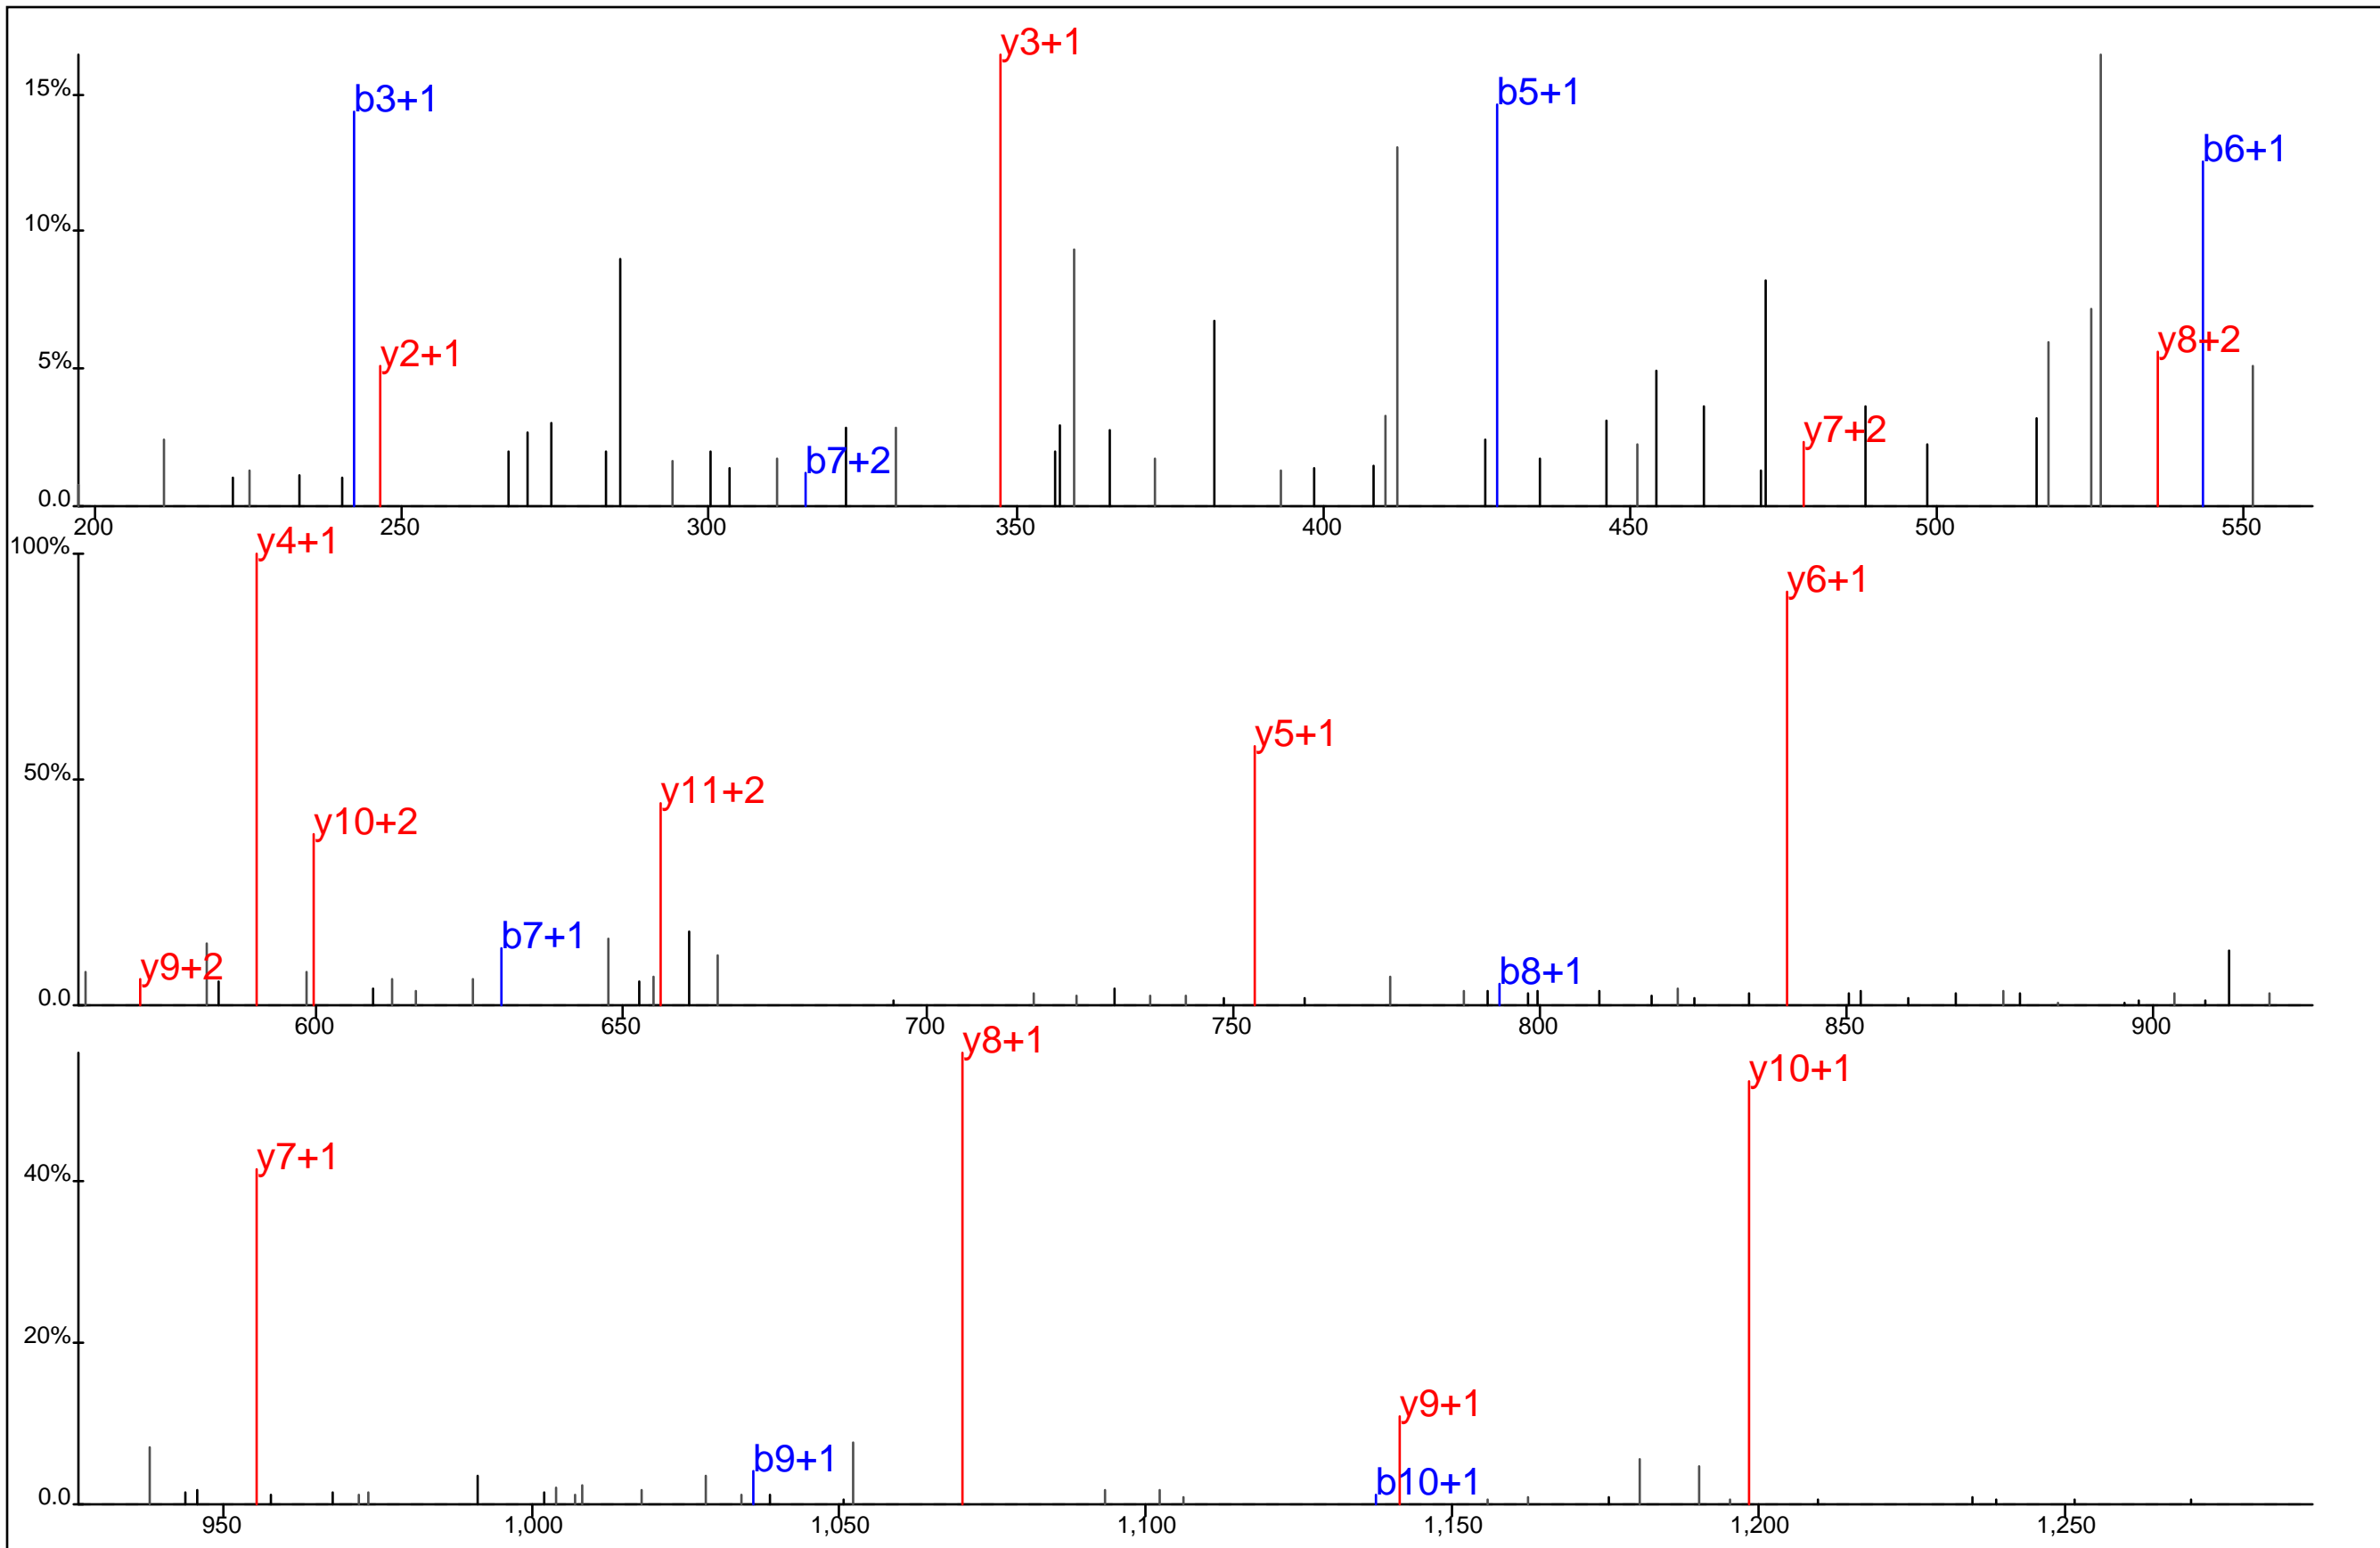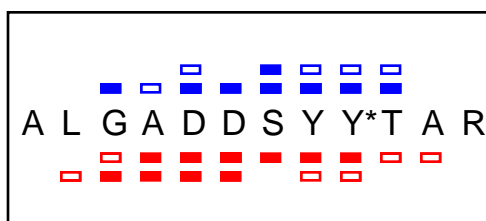

Protein Name: ZAP70  
 gi Accession: 0  
 Precursor Mass: 691.7842+2  
 Delta Mass: 0.932 ppm  
 XCorr: 79.6



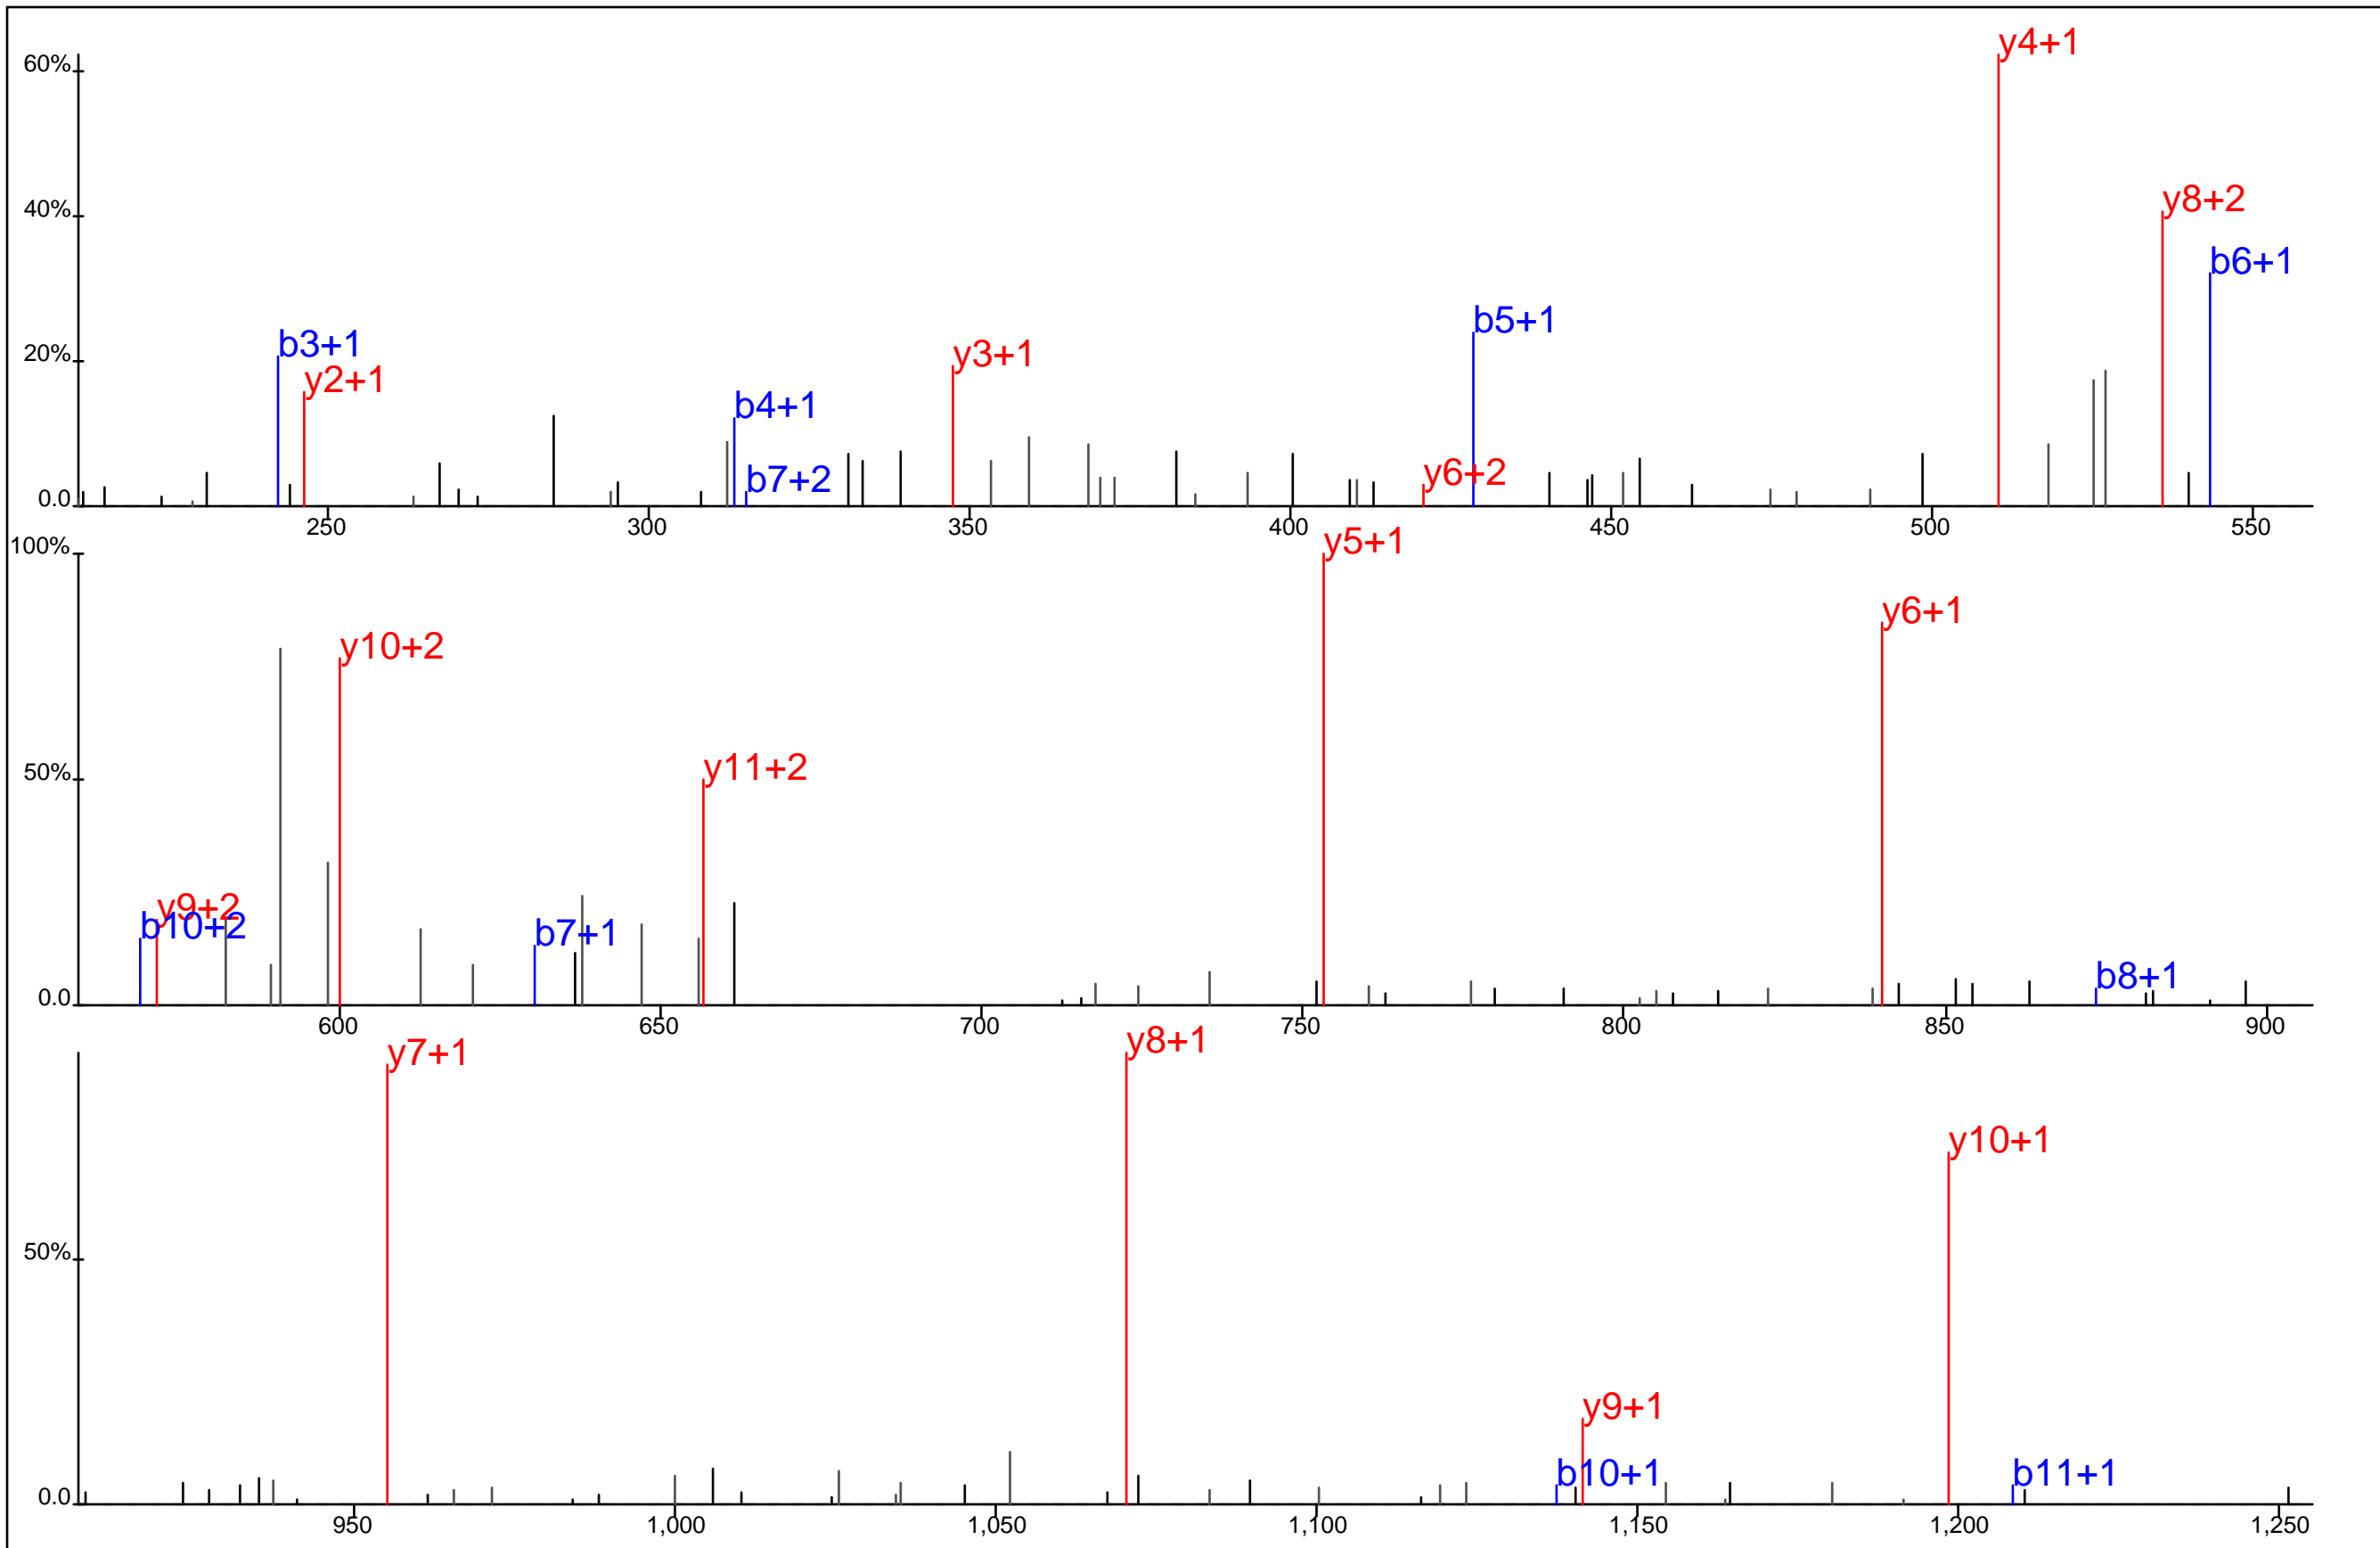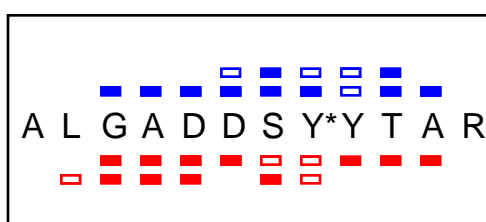

Protein Name: ZAP70  
 gi Accession: 0  
 Precursor Mass: 691.7845+2  
 Delta Mass: 0.490 ppm  
 XCorr: 79.37

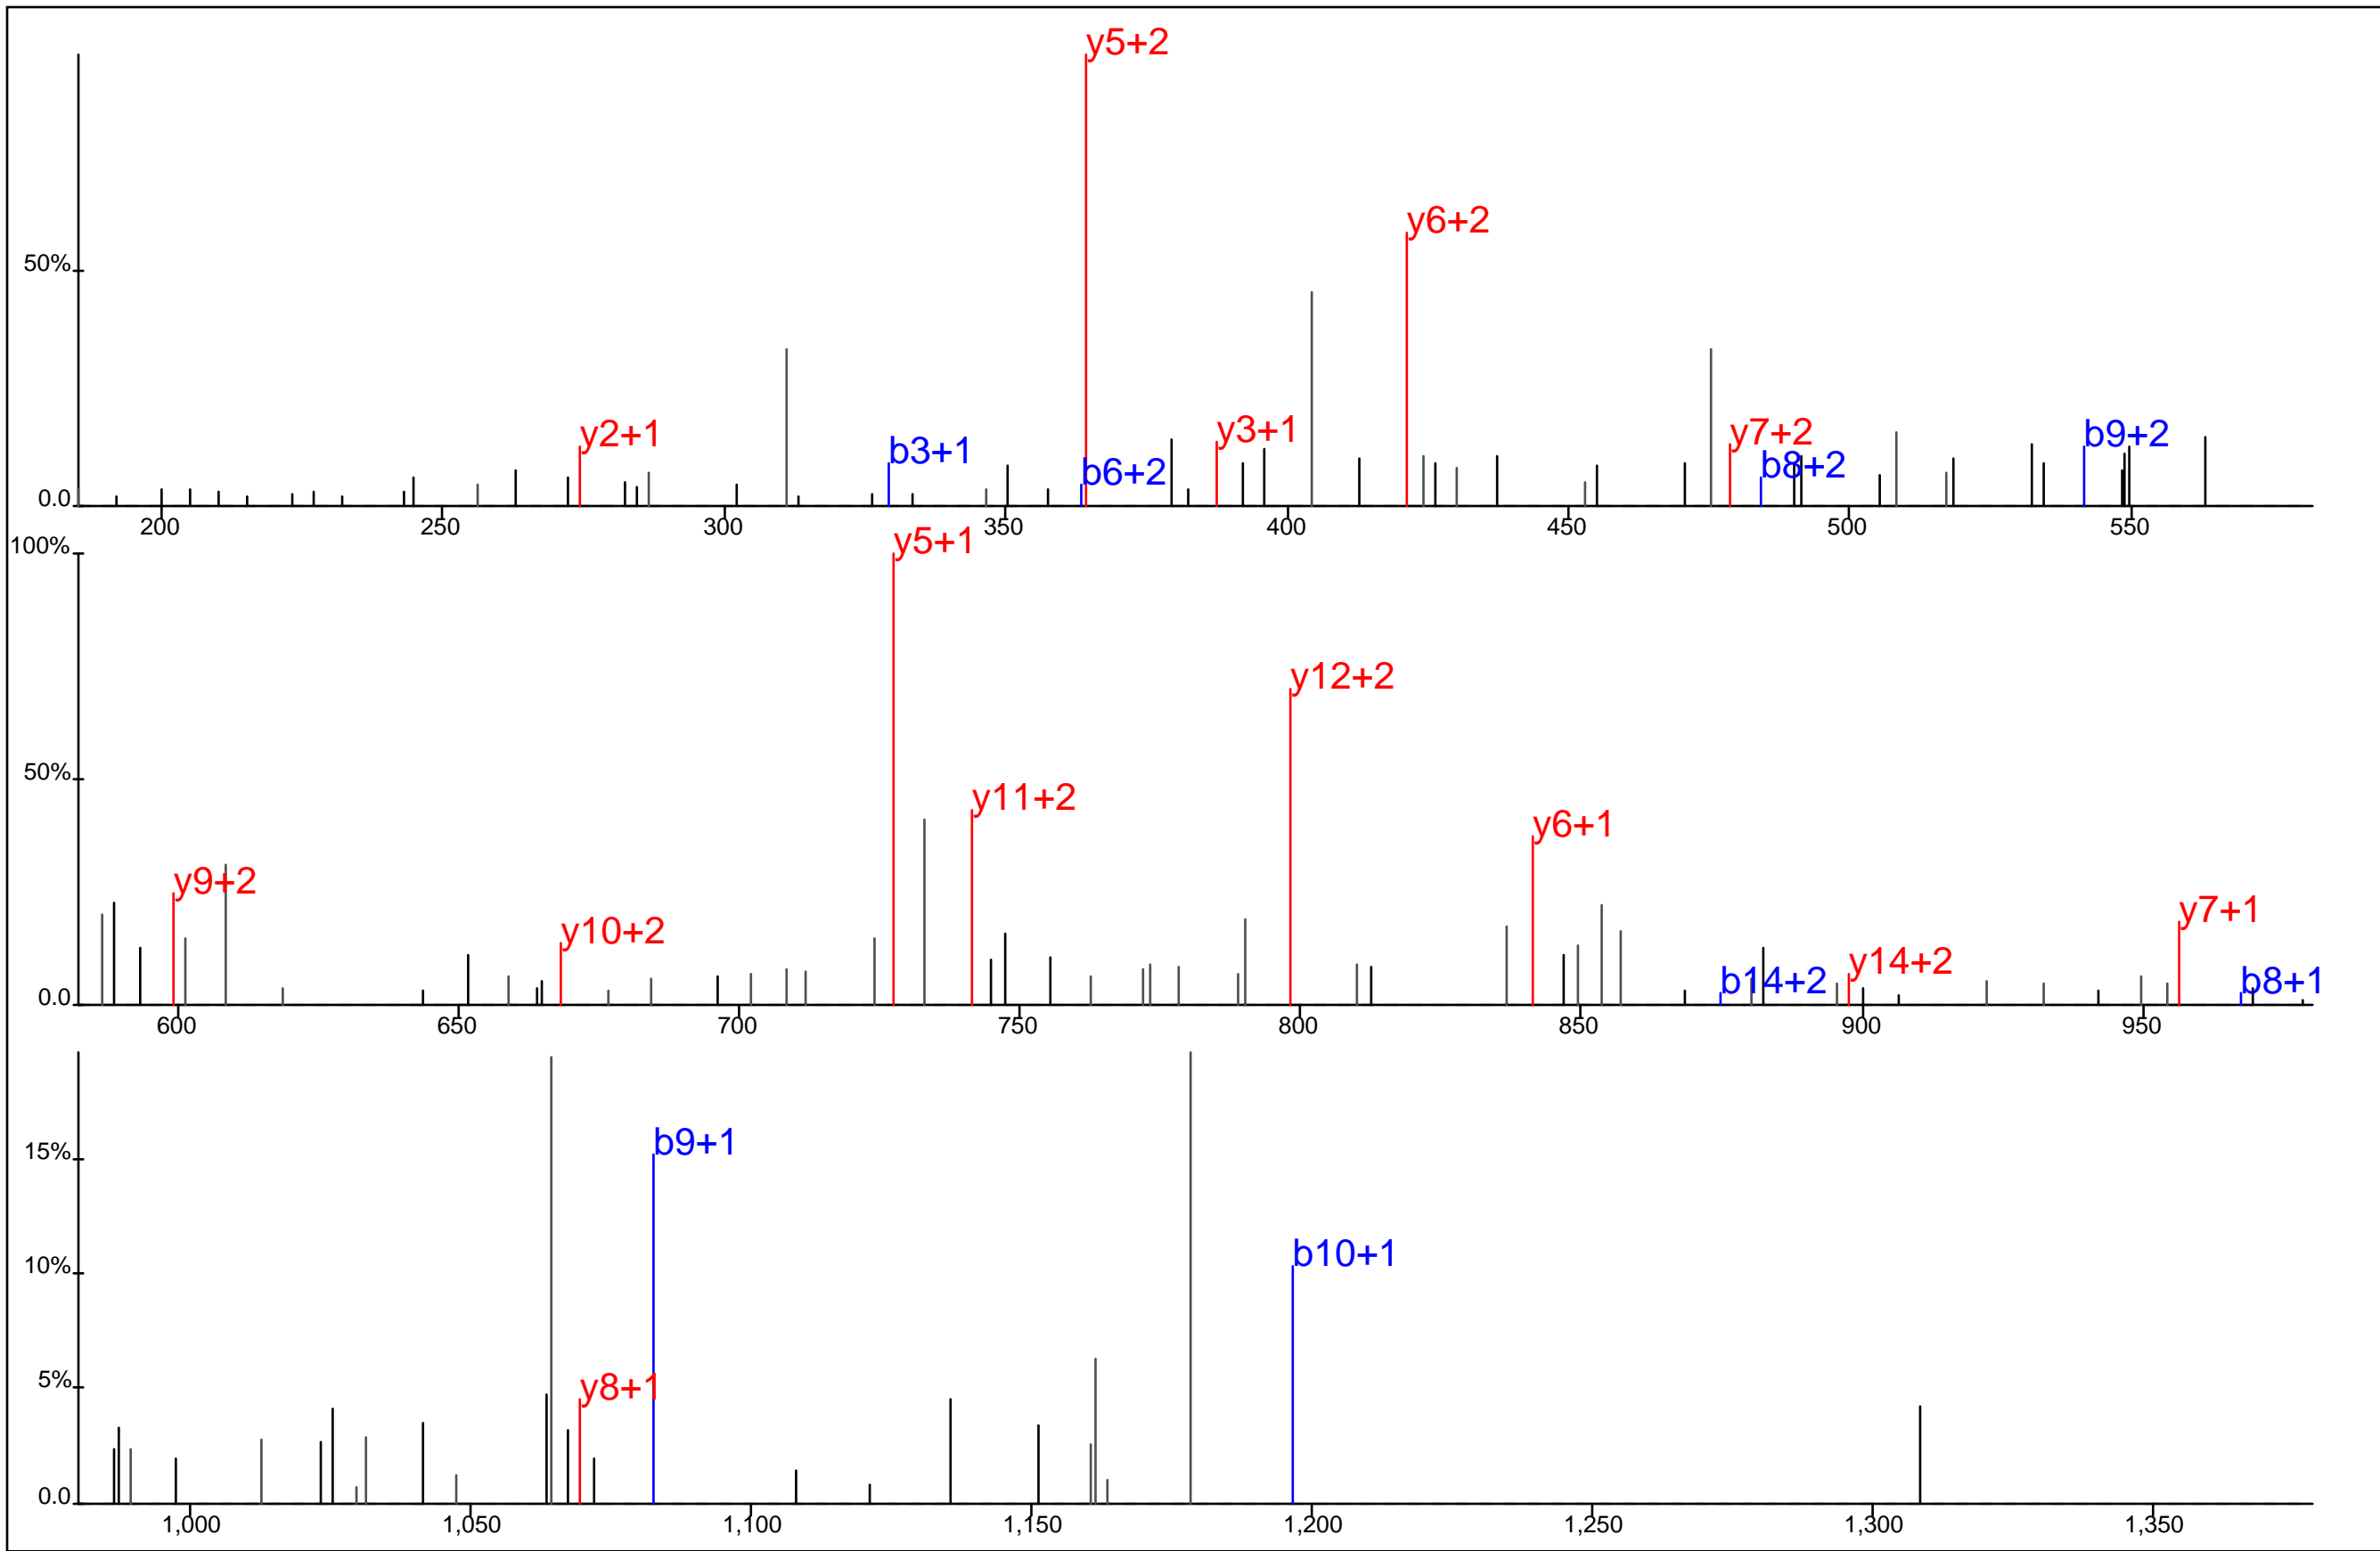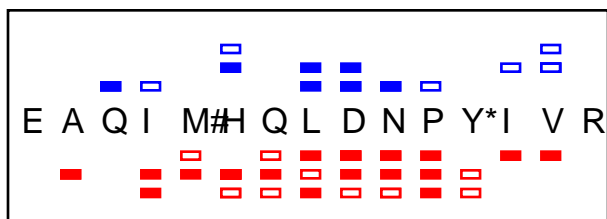

Protein Name: ZAP70  
 gi Accession: 0  
 Precursor Mass: 641.6306+3  
 Delta Mass: 2.964 ppm  
 XCorr: 34.82

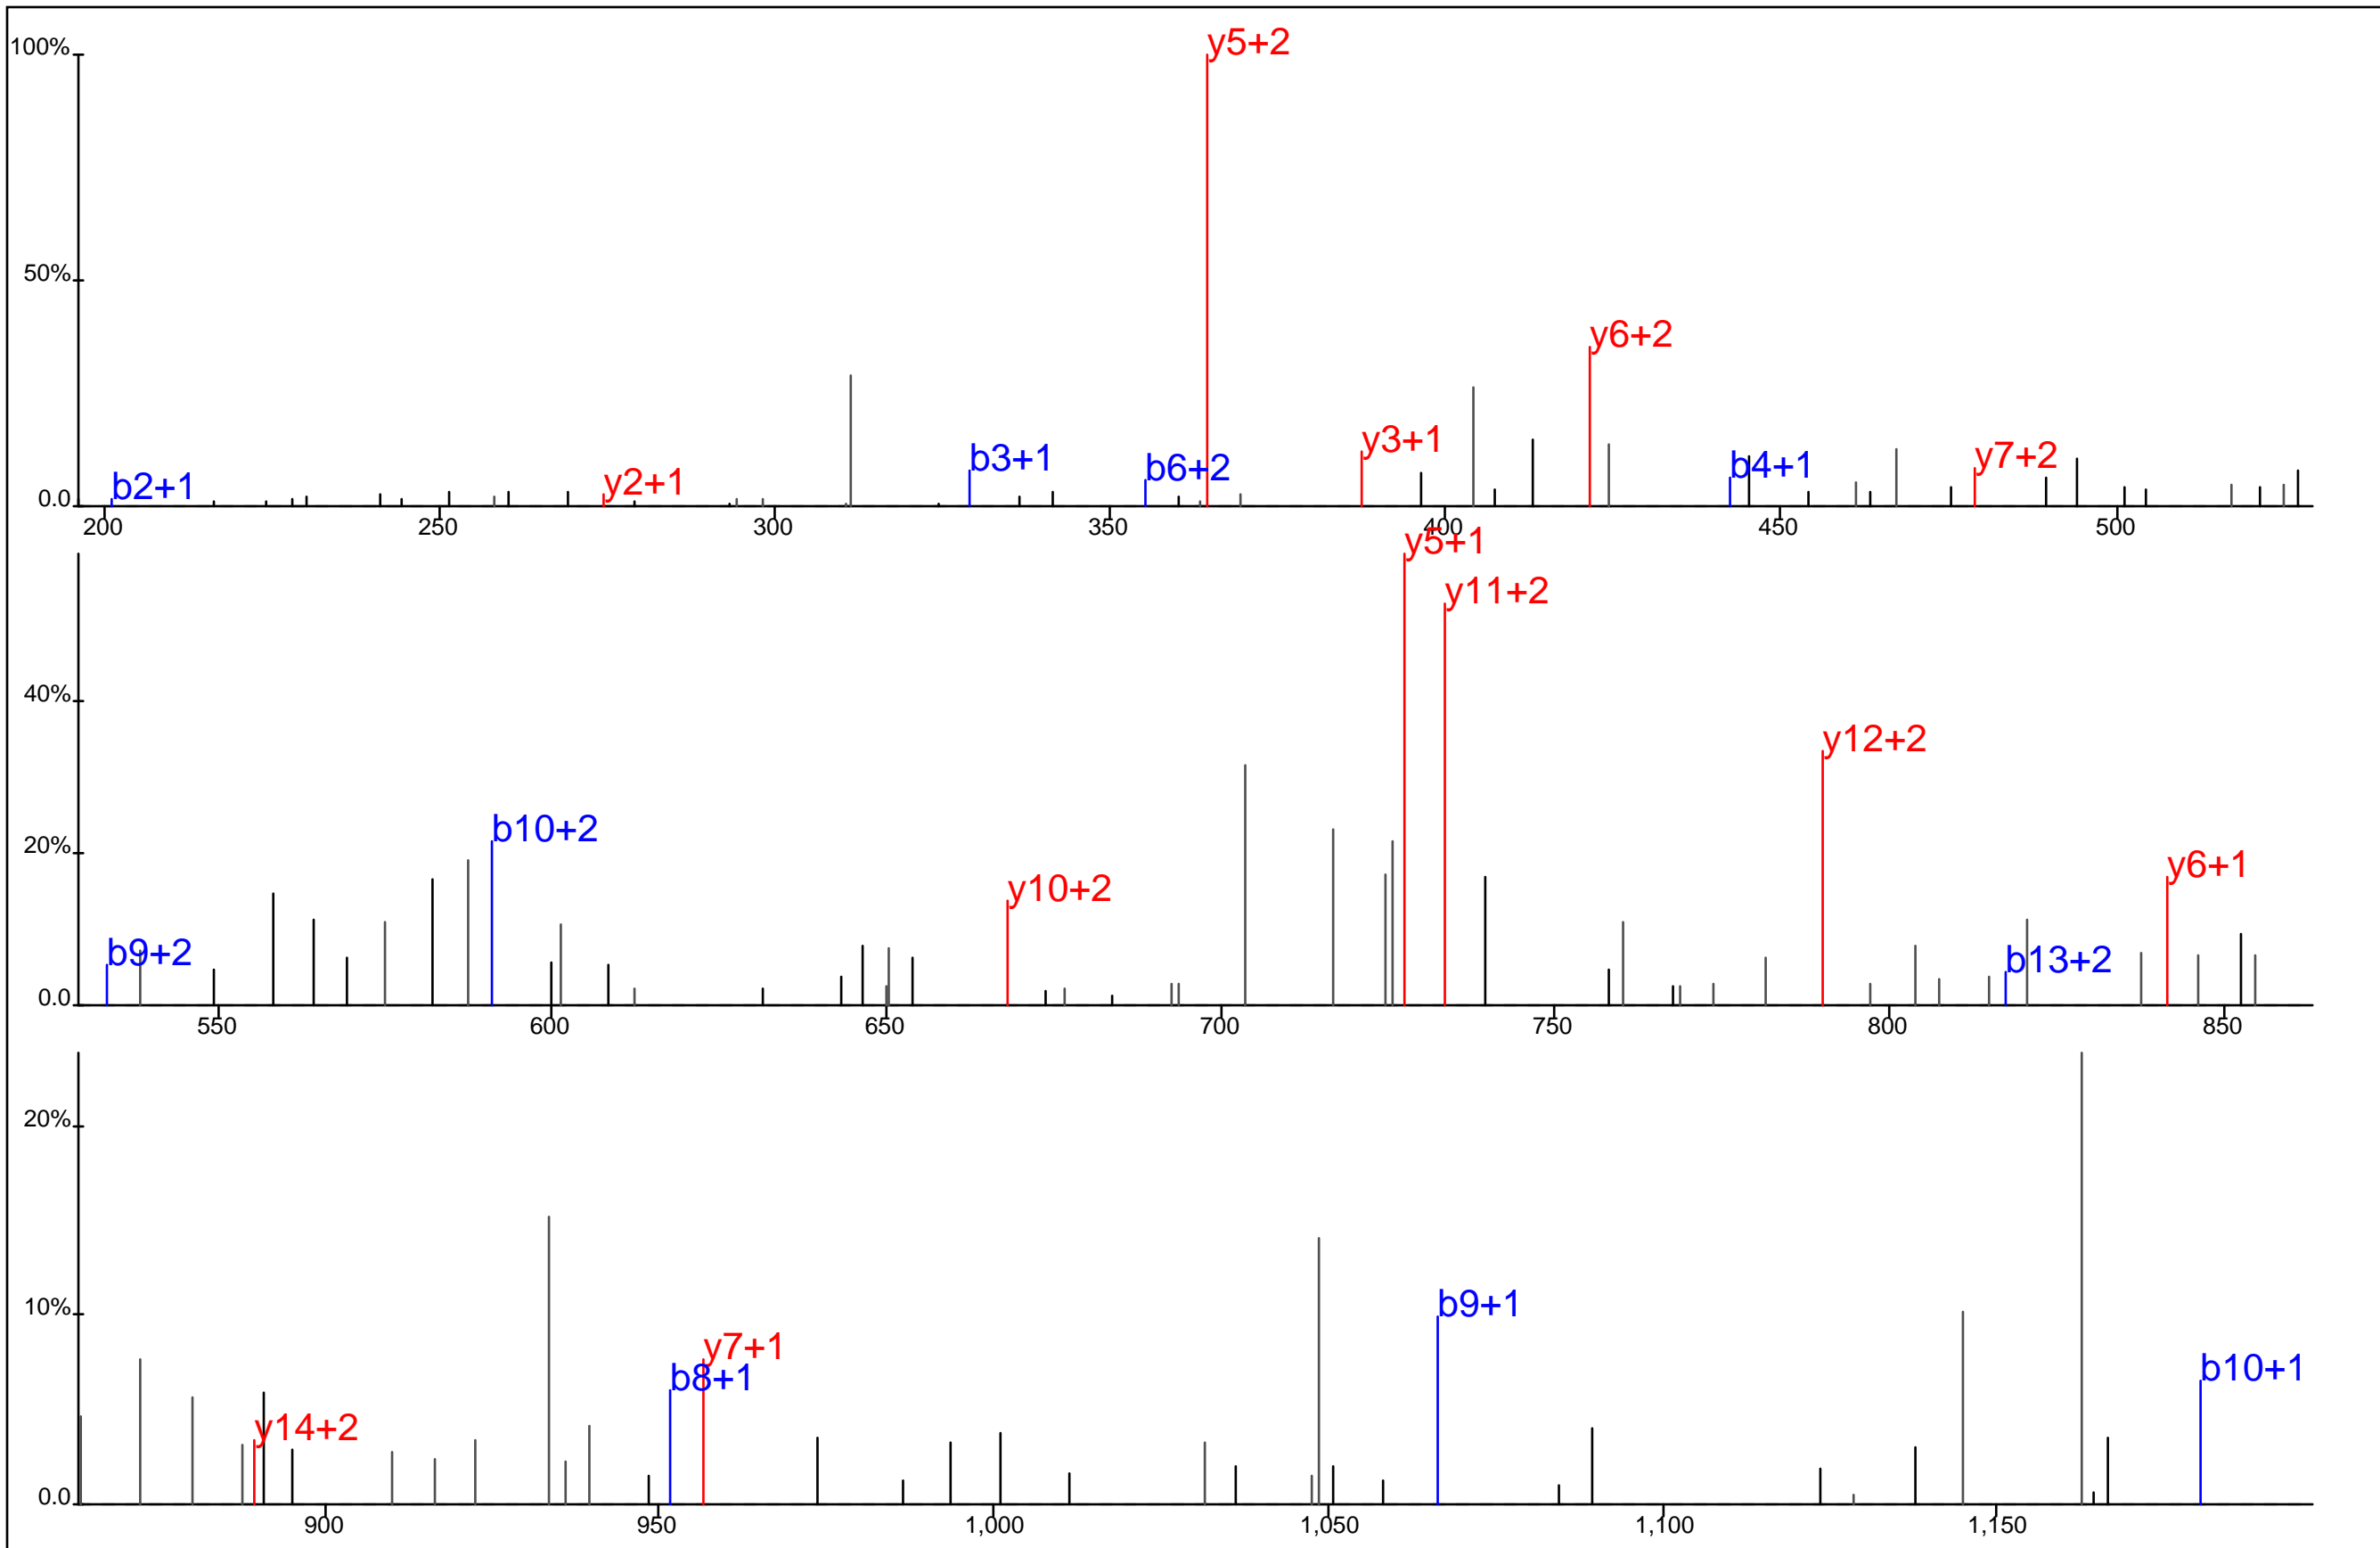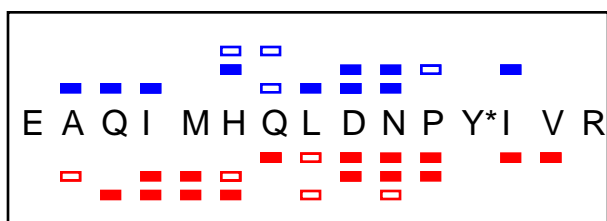

Protein Name: ZAP70  
 gi Accession: 0  
 Precursor Mass: 636.3016+3  
 Delta Mass: 1.102 ppm  
 XCorr: 34.31

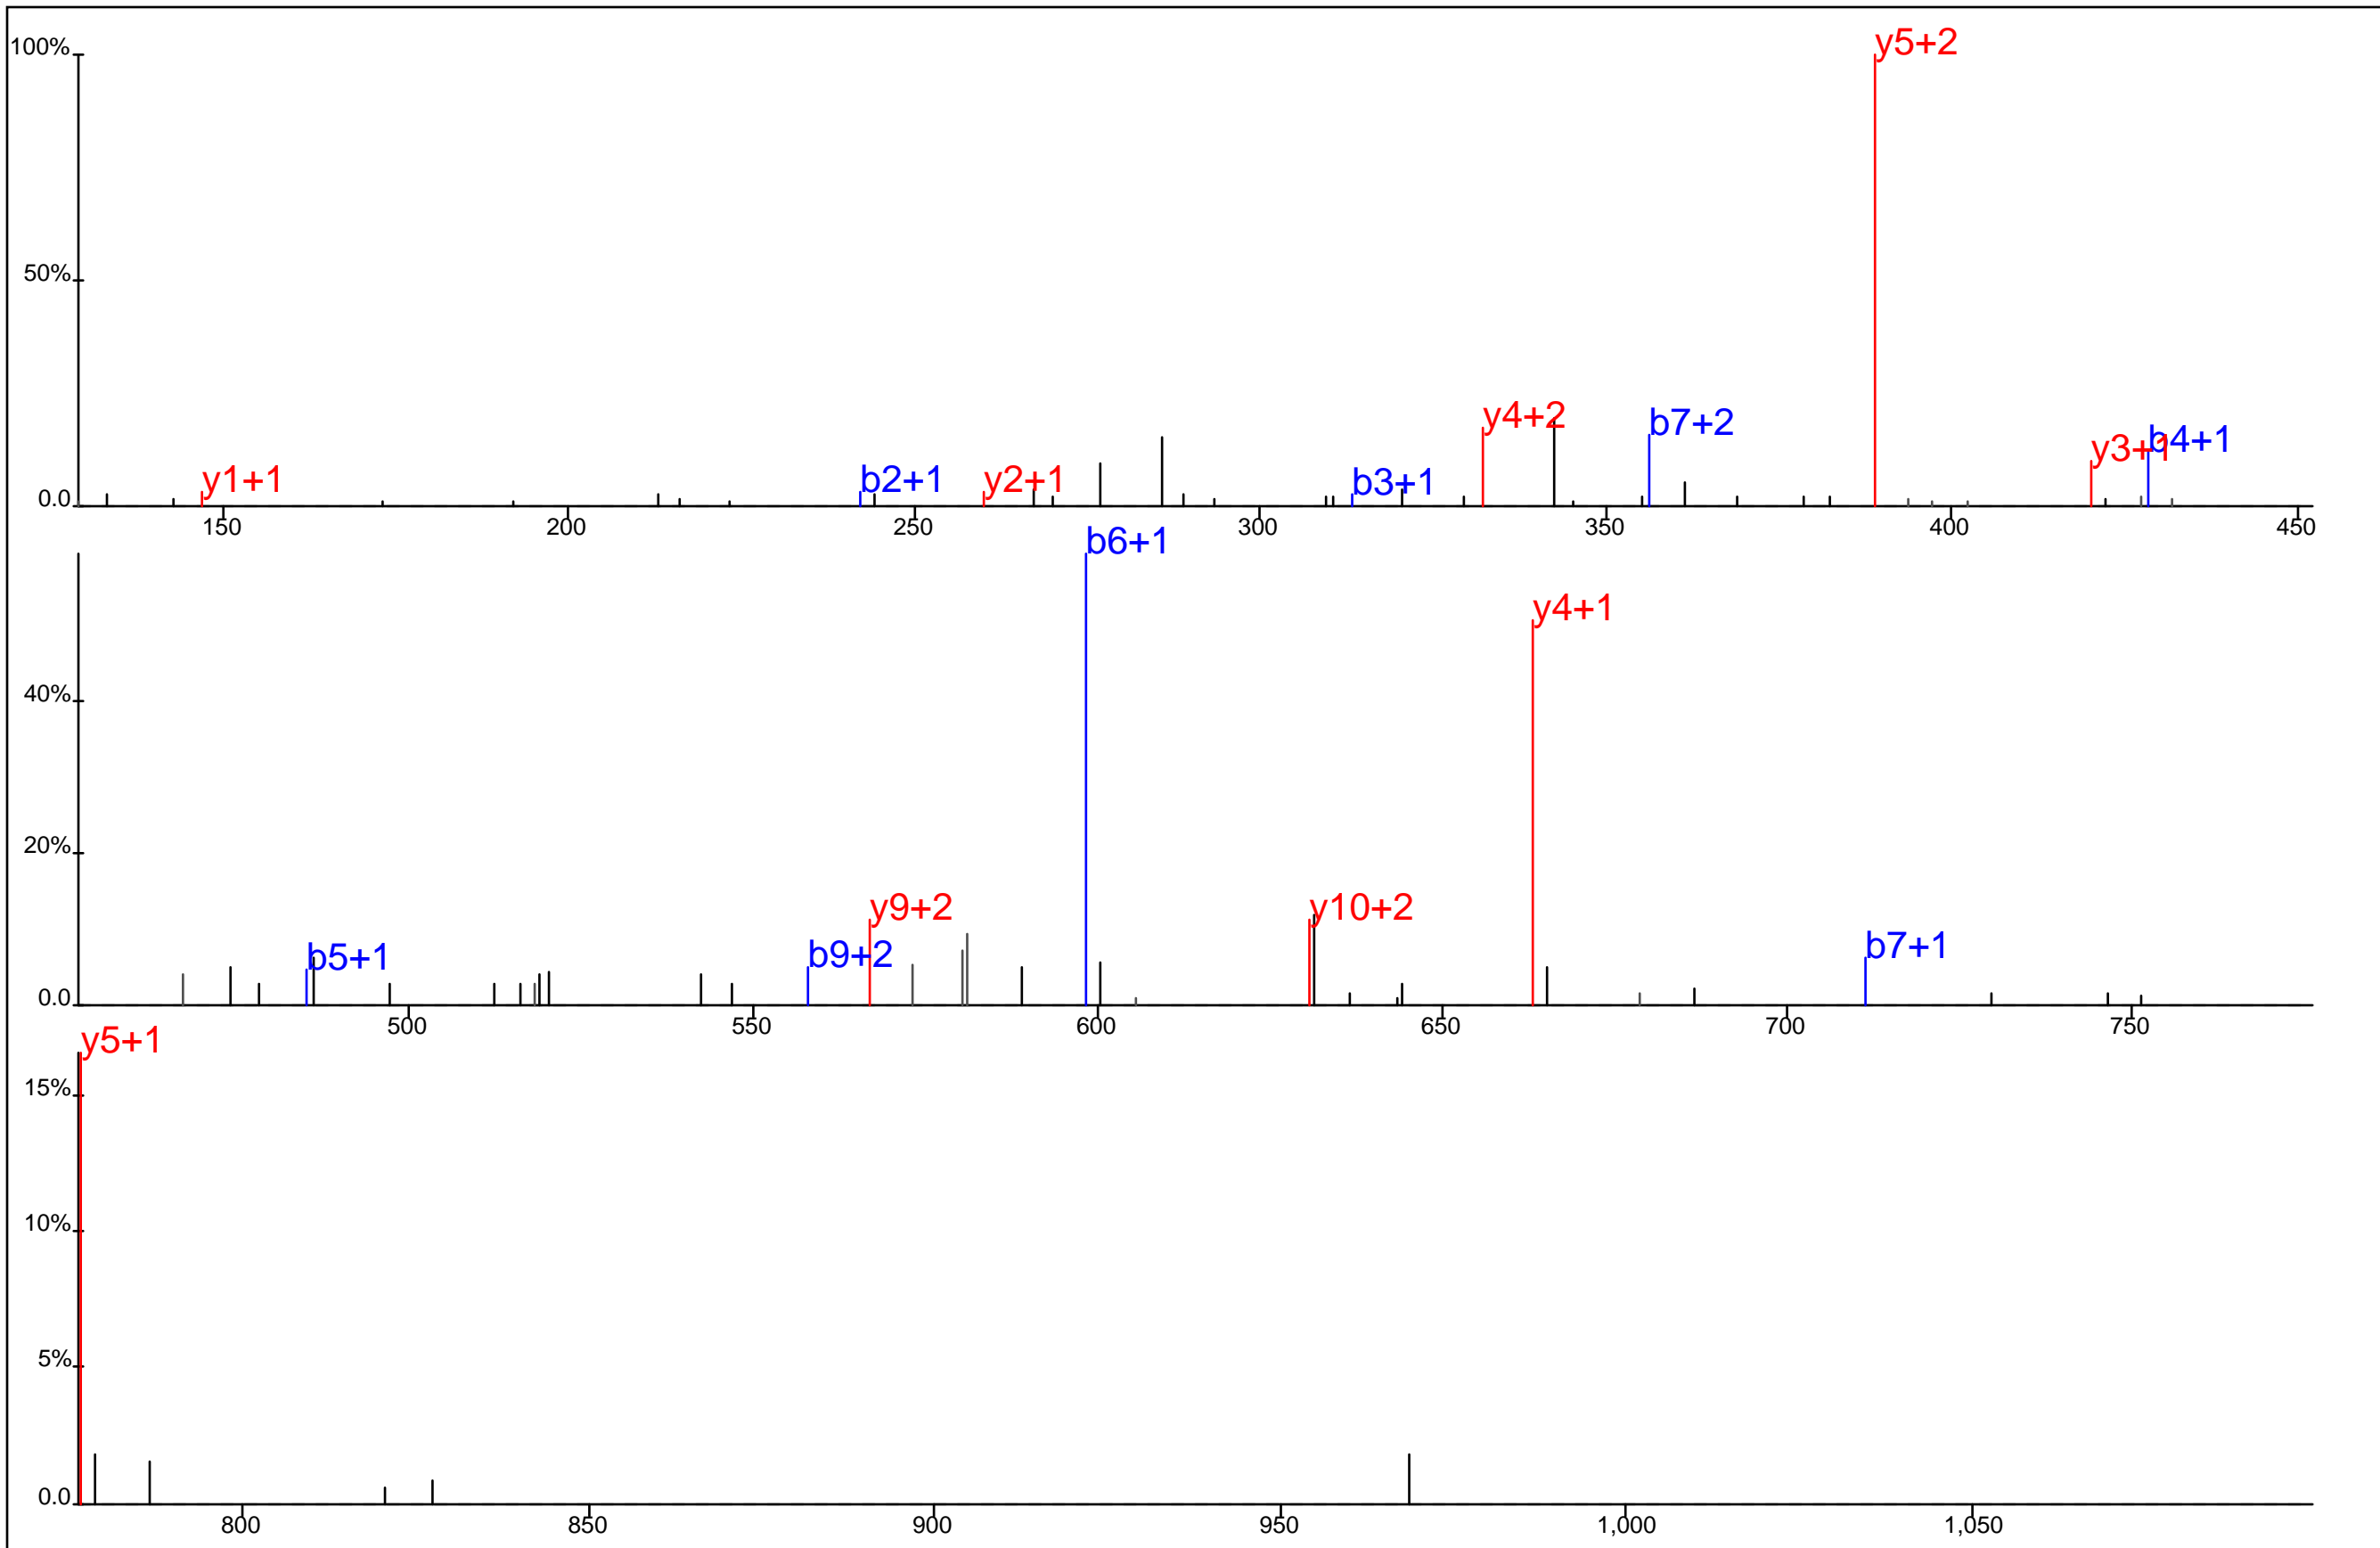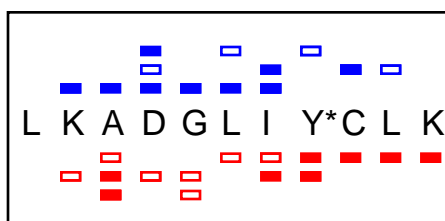

Protein Name: ZAP70  
 gi Accession: 0  
 Precursor Mass: 458.5699+3  
 Delta Mass: 3.978 ppm  
 XCorr: 25.1

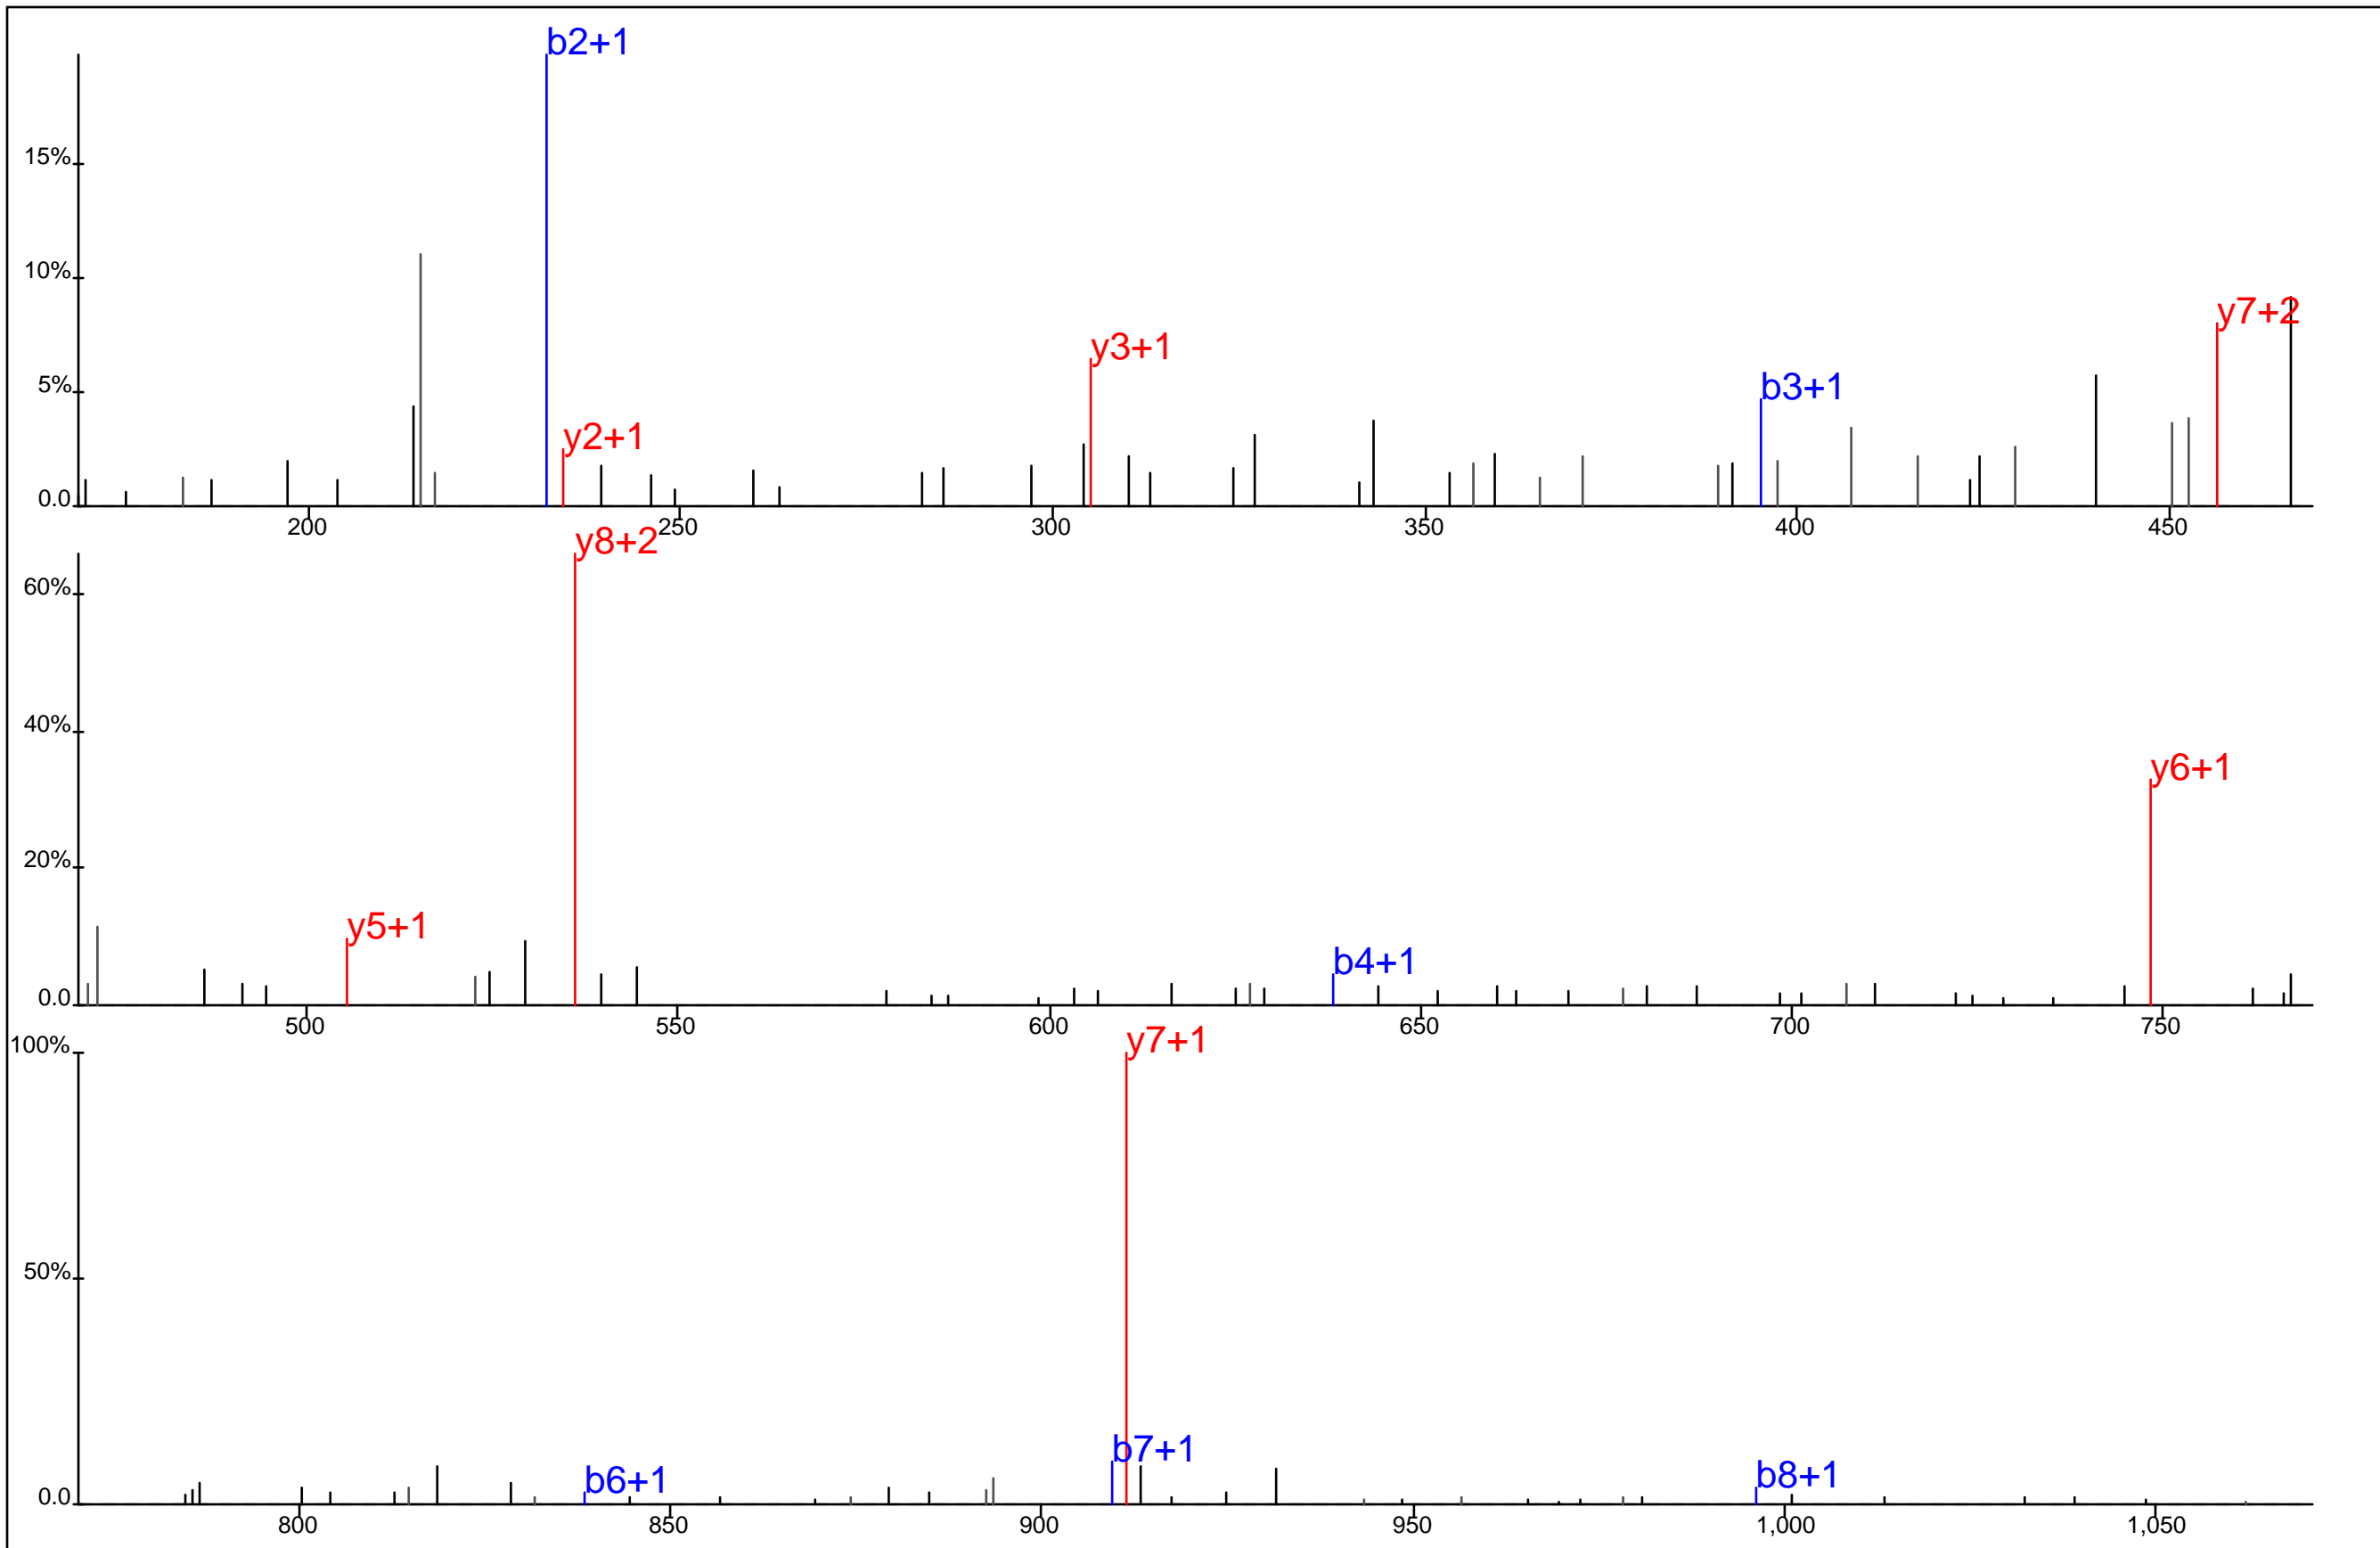

■ □ ■ □ ■ □ ■ □  
 A C Y Y\* S L A S K  
■ □ ■ □ ■ □ ■ □

Protein Name: ZAP70  
 gi Accession: 0  
 Precursor Mass: 571.7333+2  
 Delta Mass: 0.565 ppm  
 XCorr: 32.17



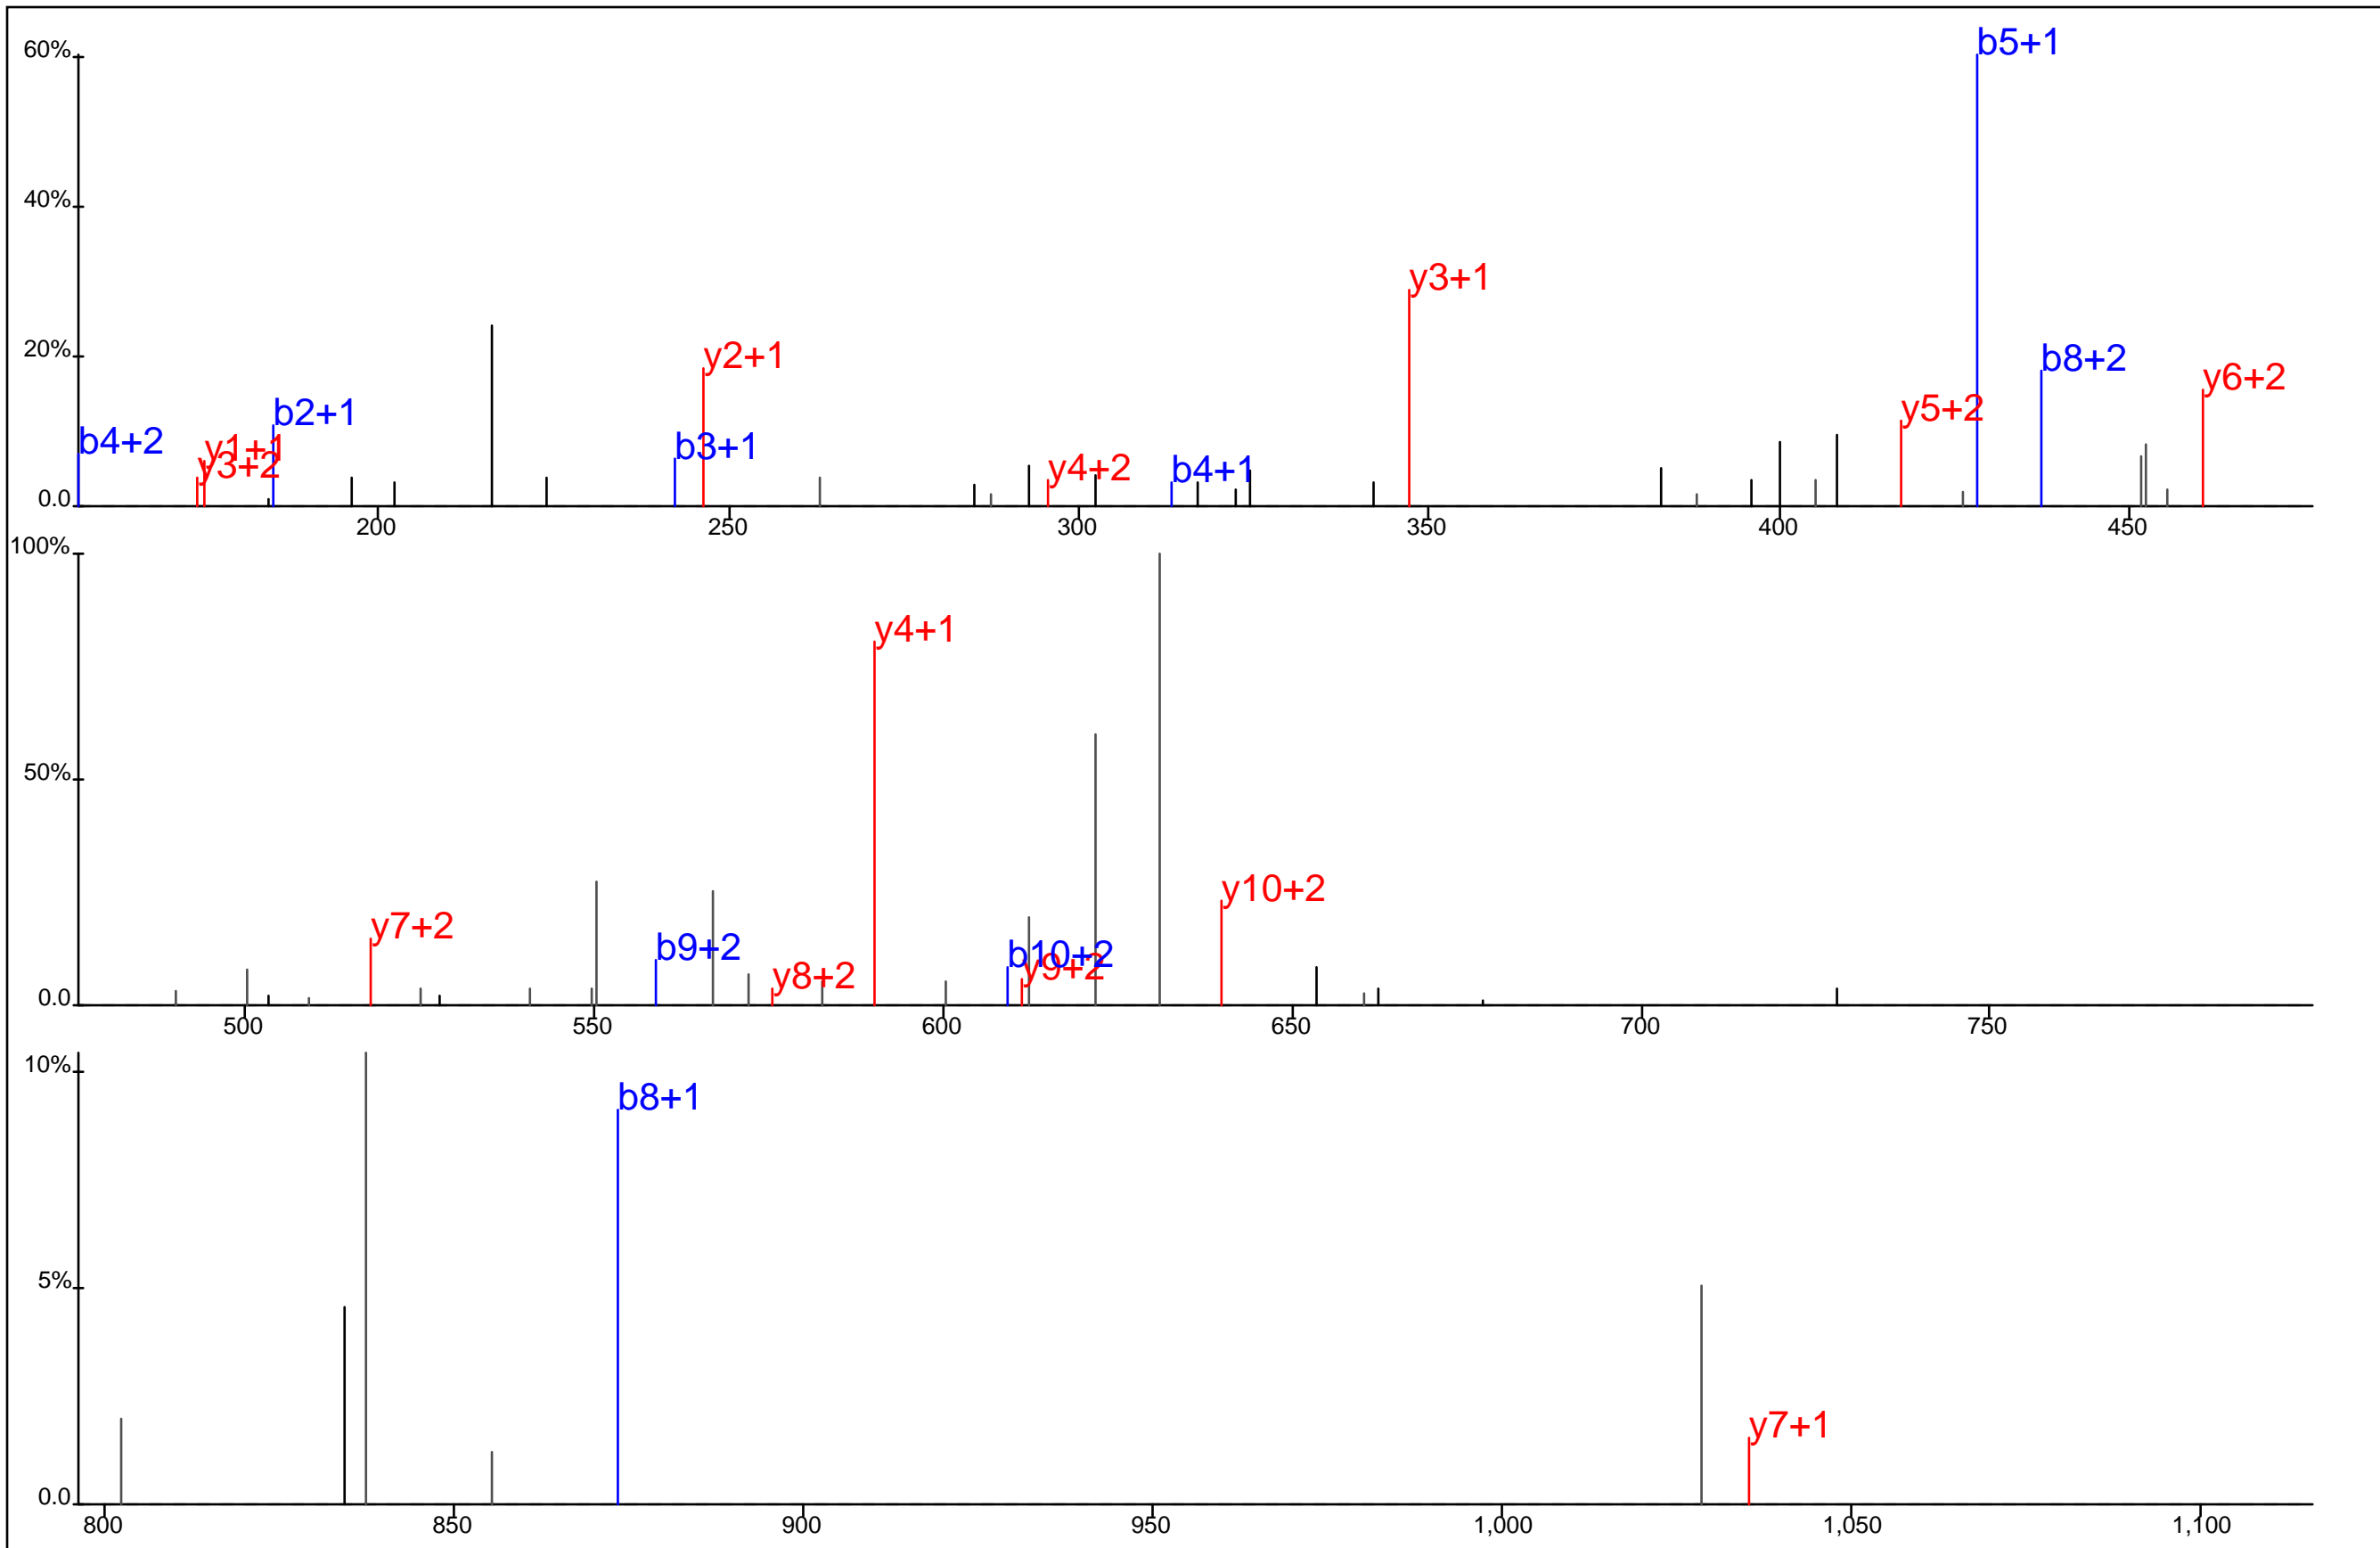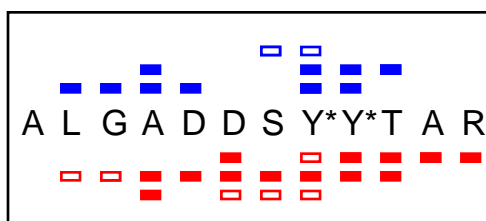

Protein Name: ZAP70  
 gi Accession: 0  
 Precursor Mass: 488.1812+3  
 Delta Mass: 0.263 ppm  
 XCorr: 37.67





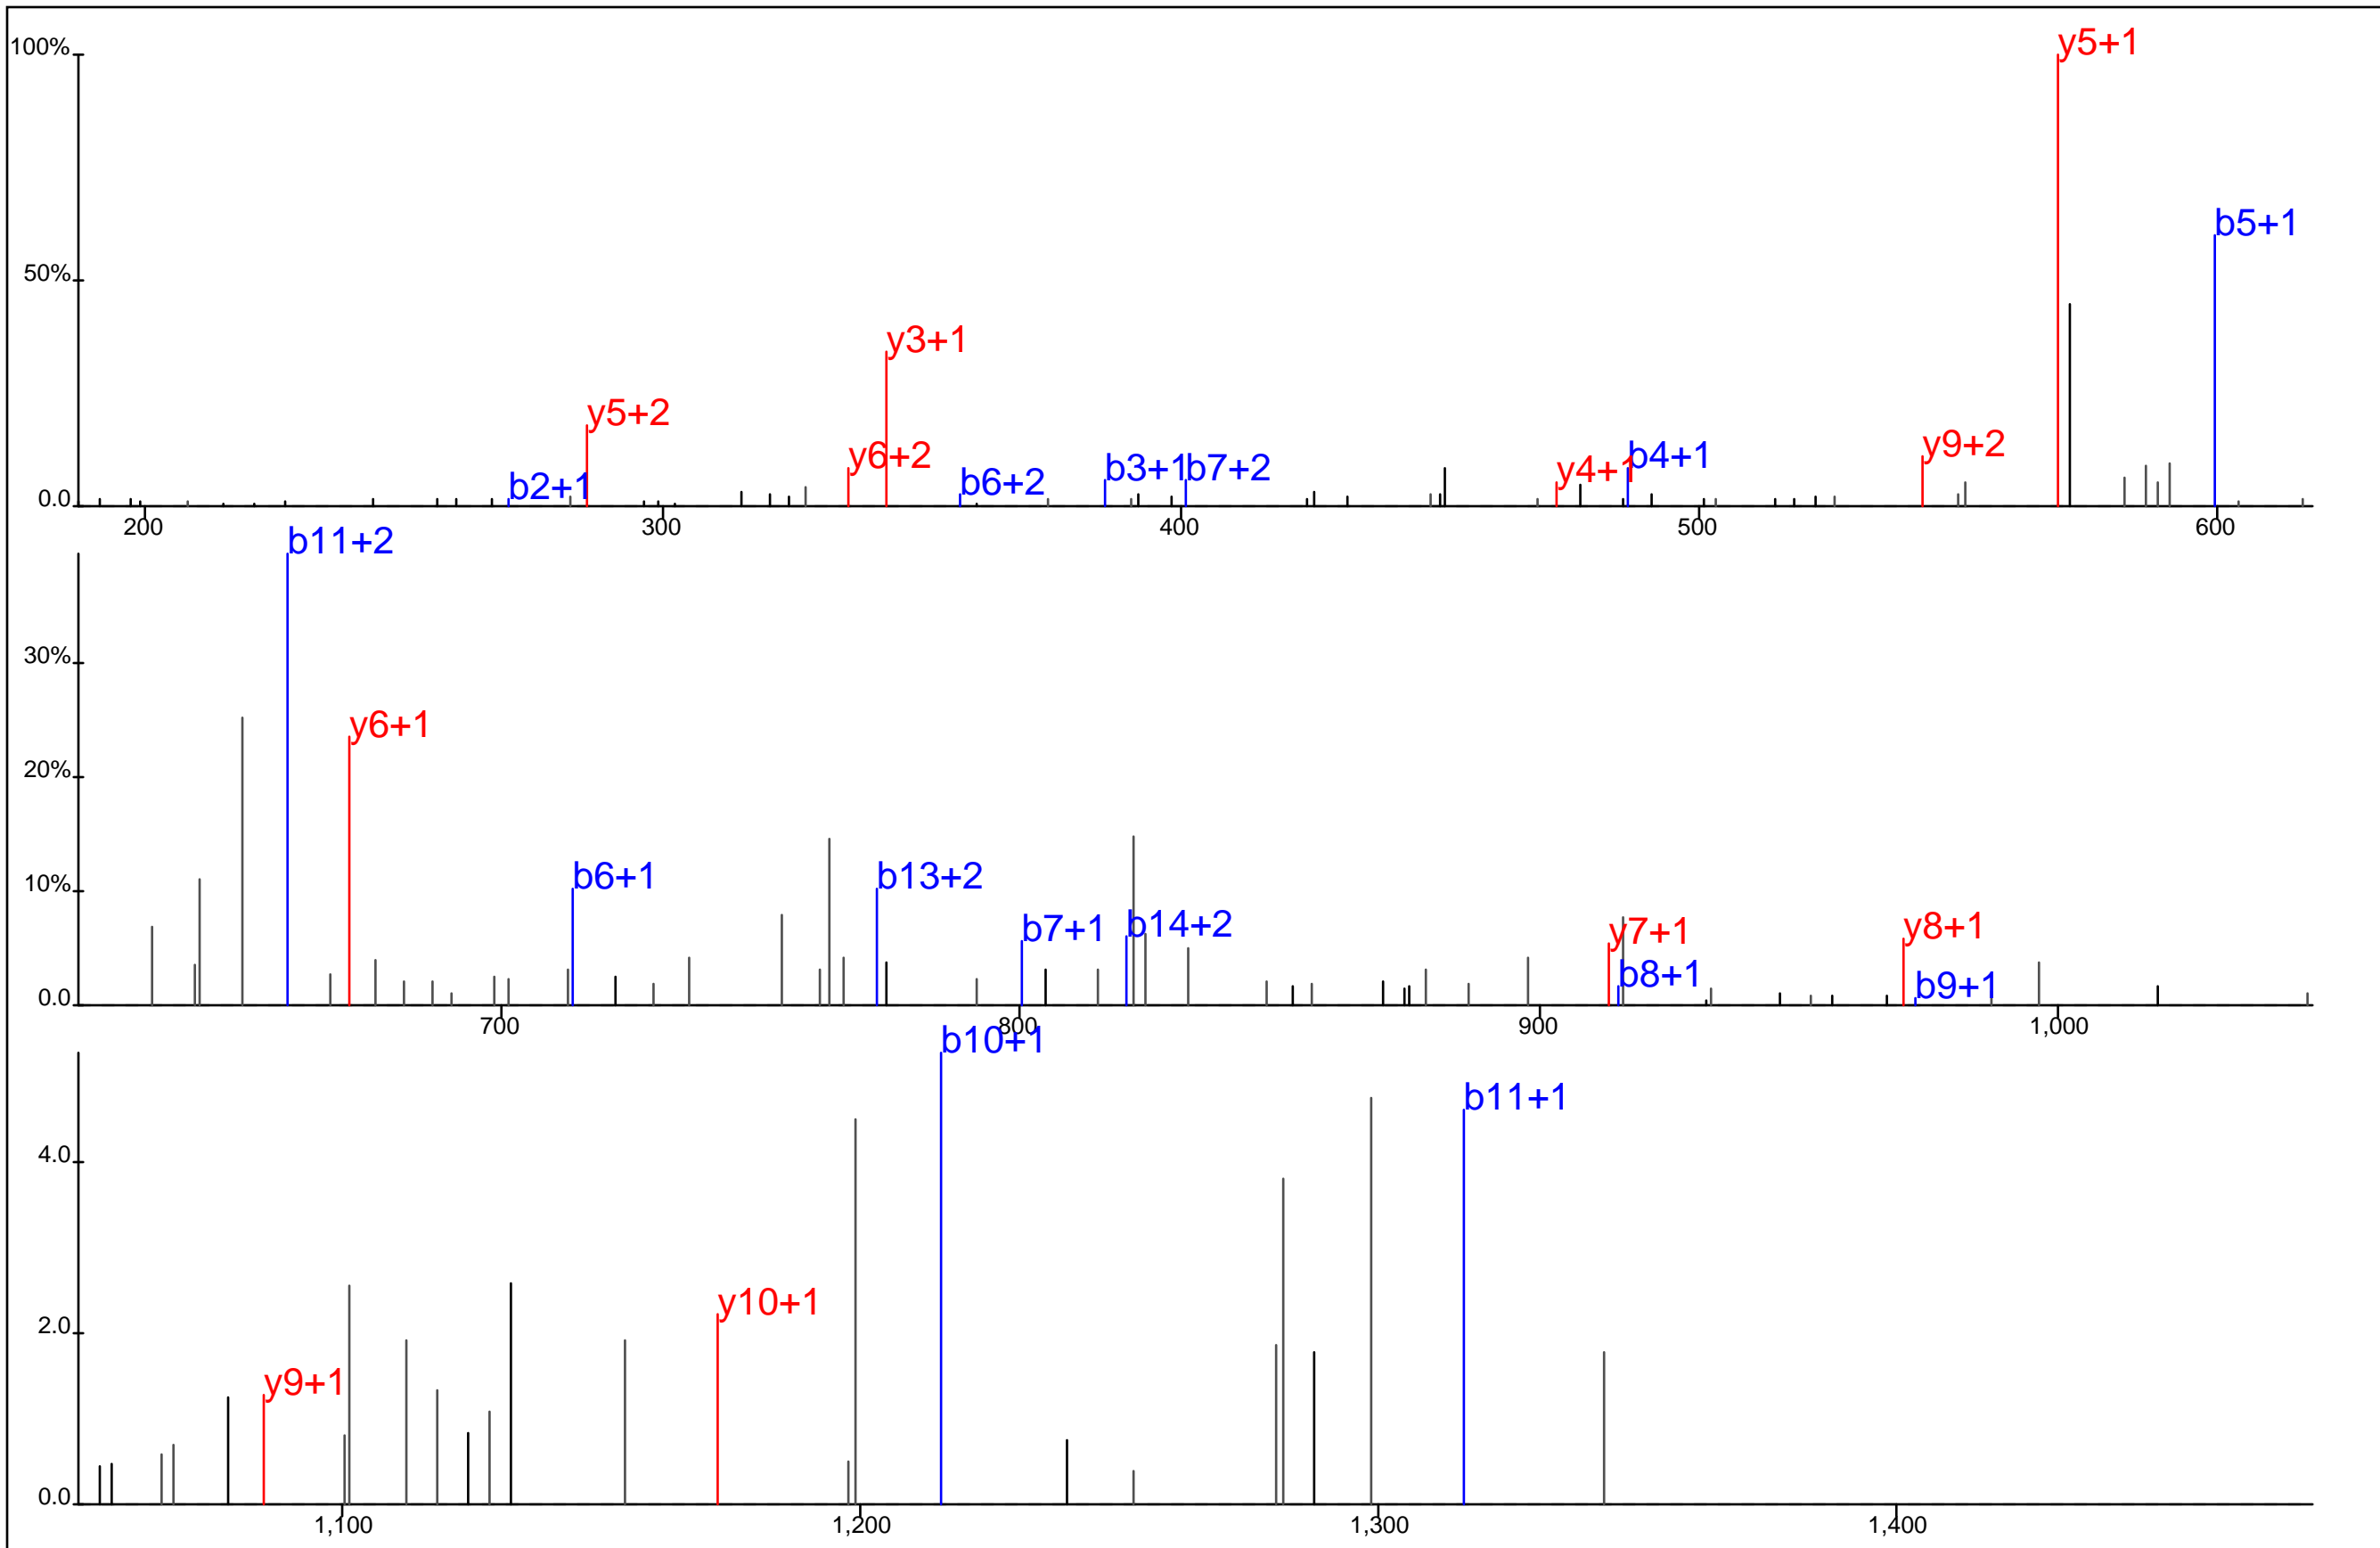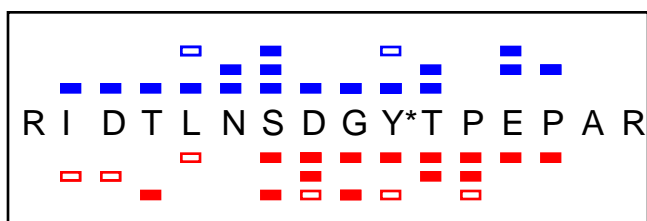

Protein Name: ZAP70  
 gi Accession: 0  
 Precursor Mass: 628.9540+3  
 Delta Mass: 0.611 ppm  
 XCorr: 57.29

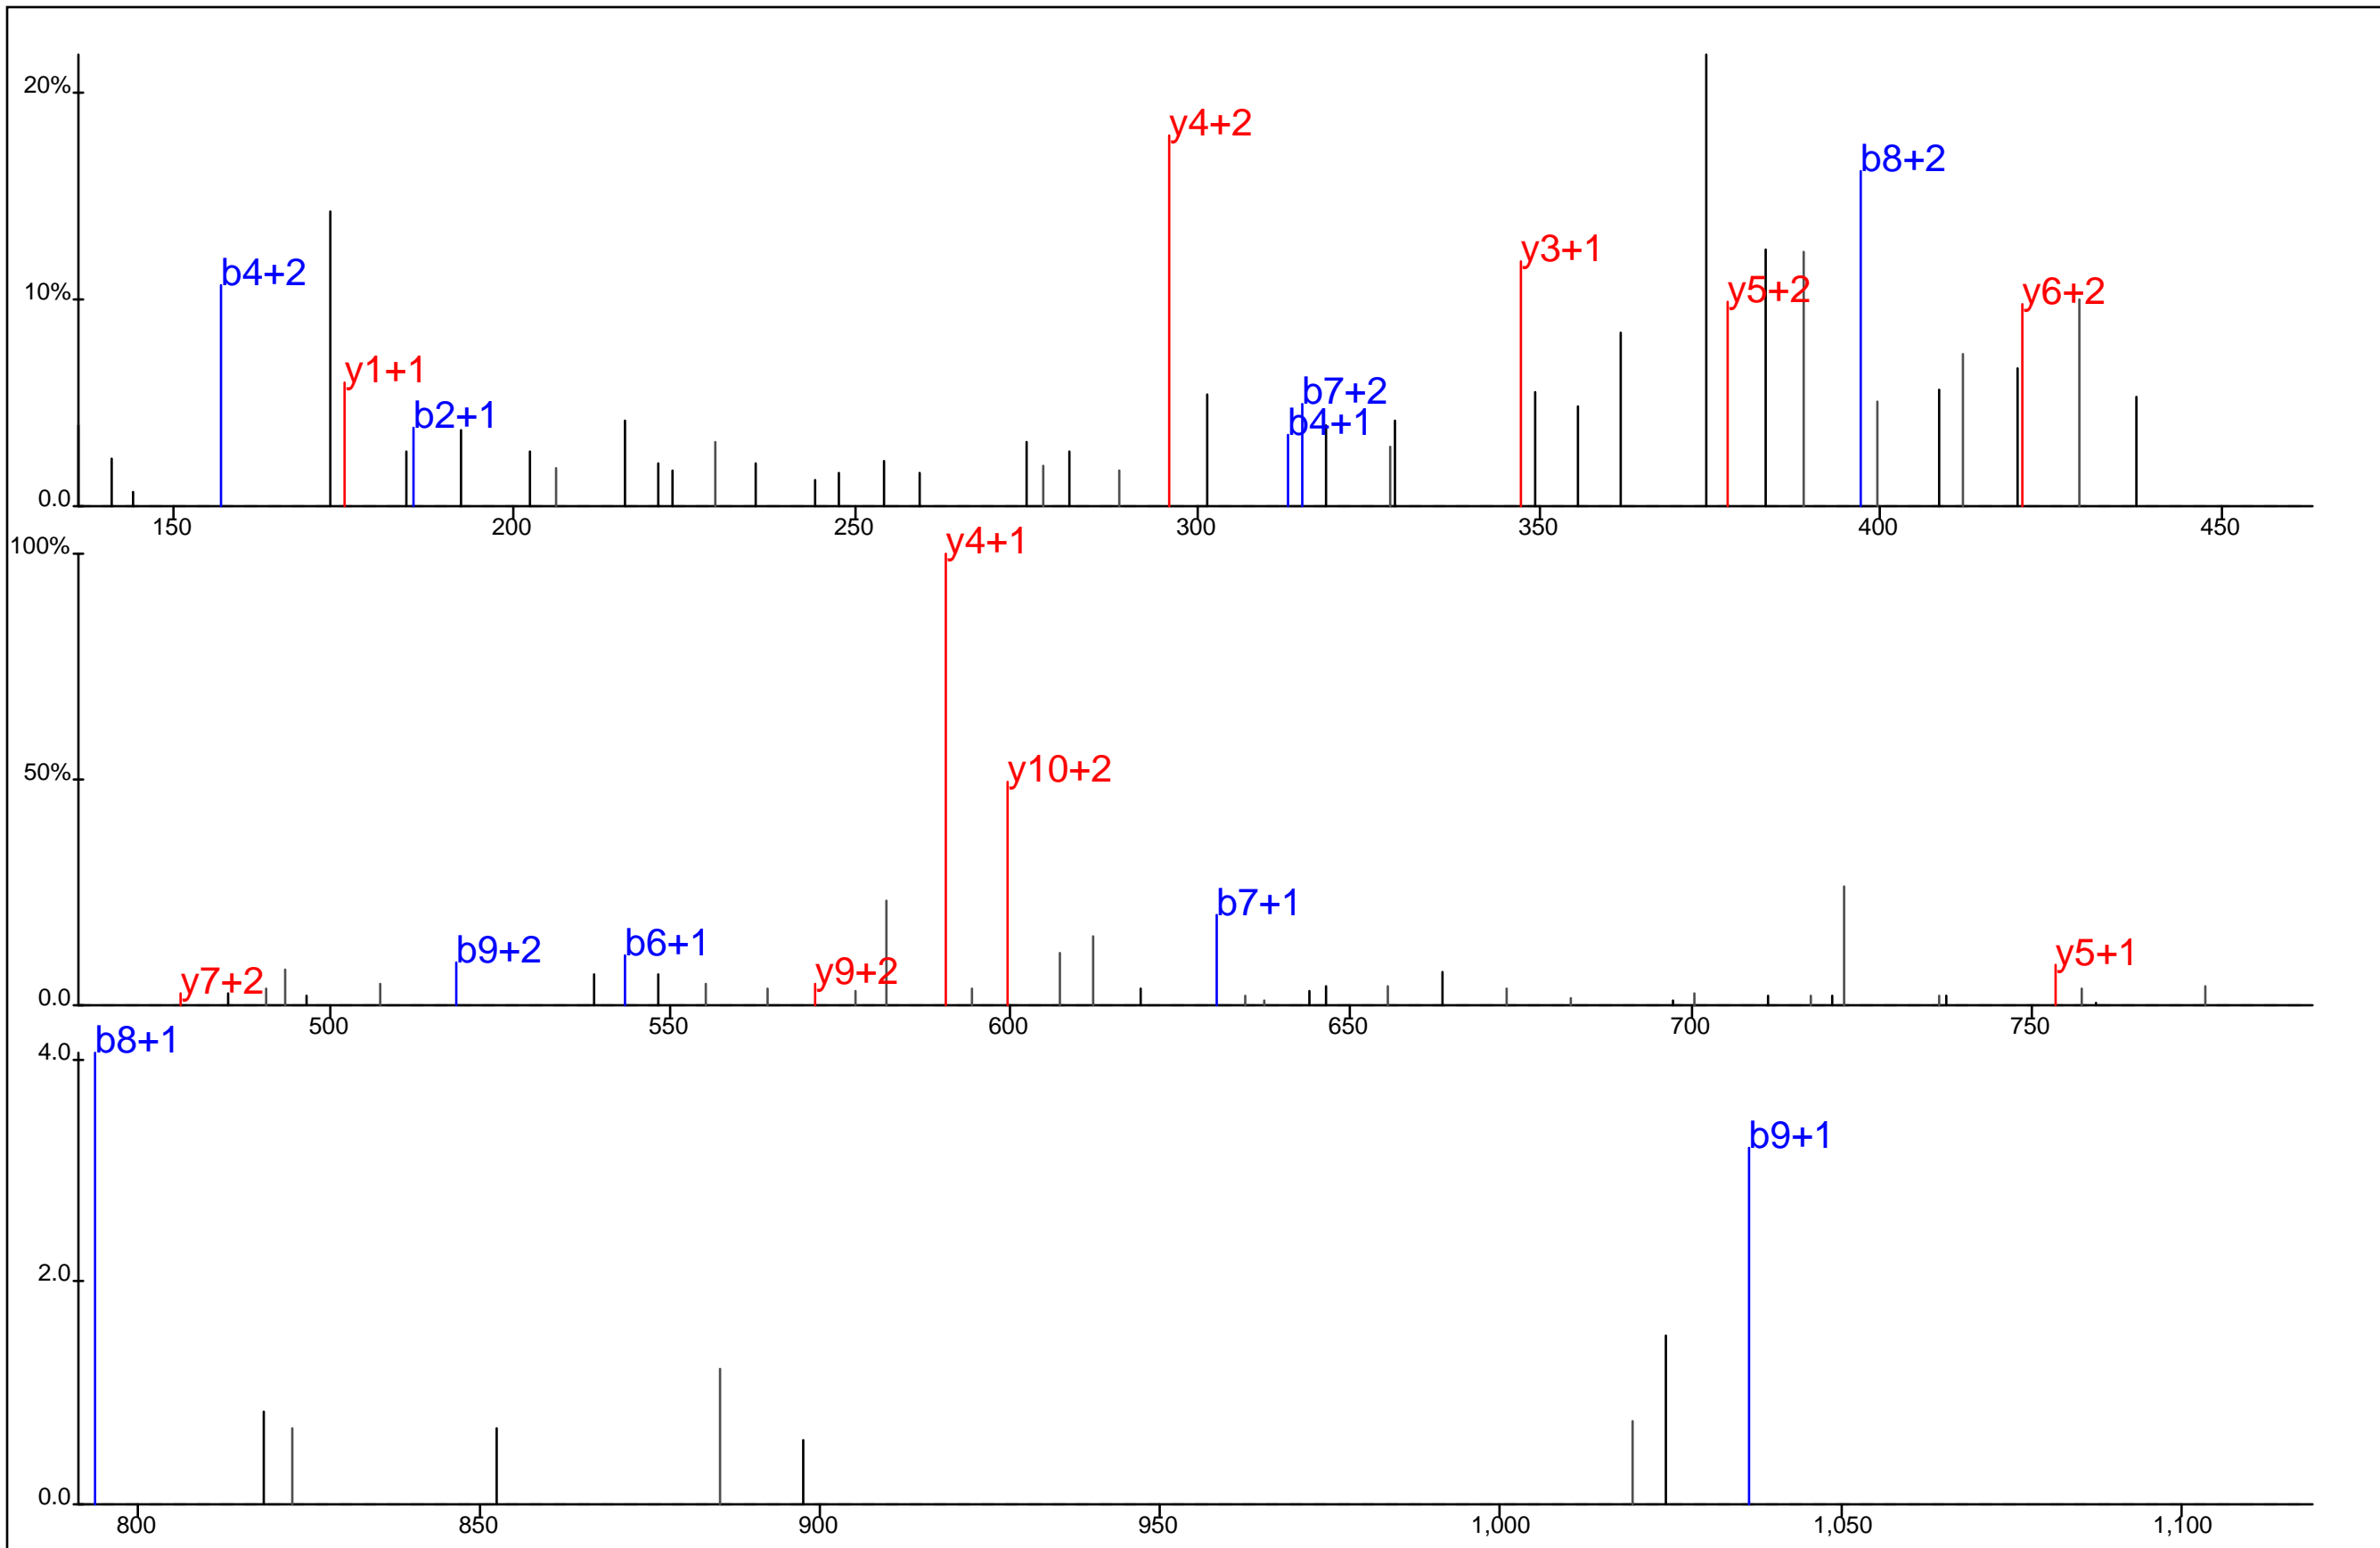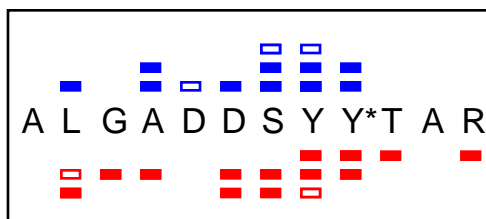

Protein Name: ZAP70  
 gi Accession: 0  
 Precursor Mass: 461.5254+3  
 Delta Mass: 0.543 ppm  
 XCorr: 22.23

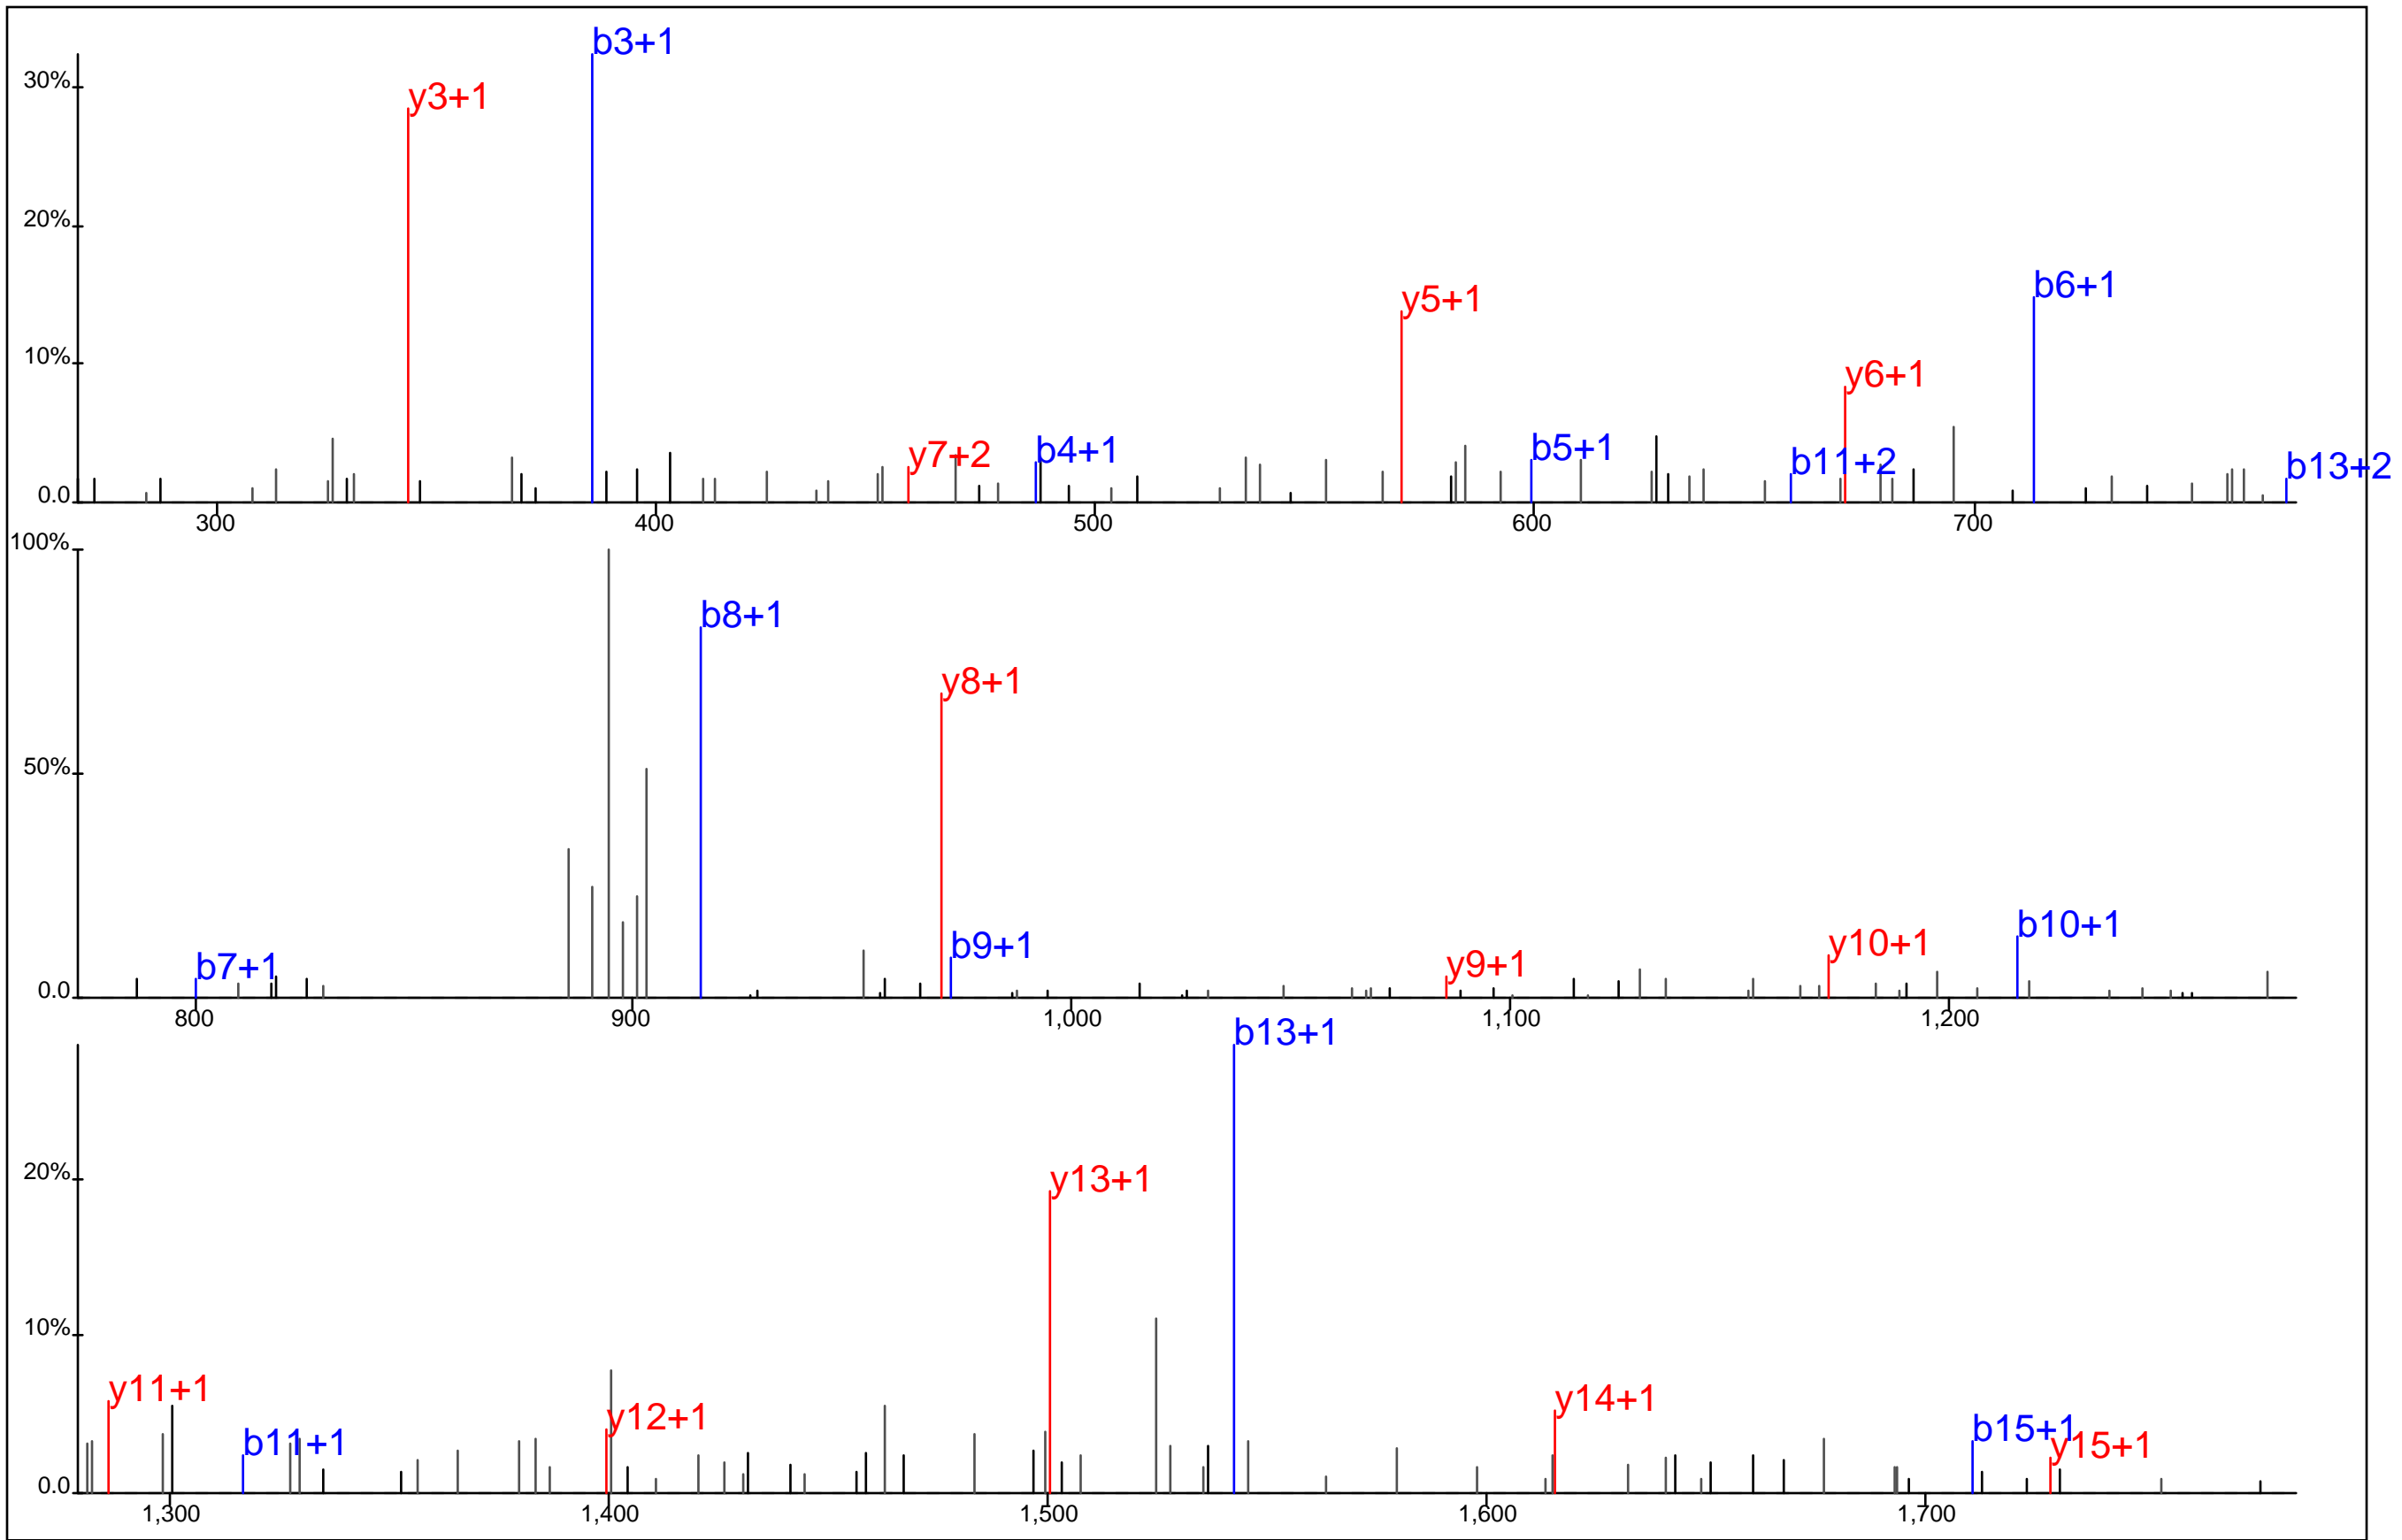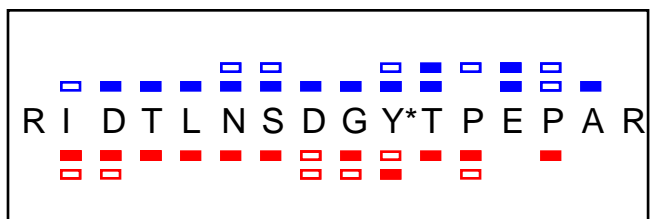

Protein Name: ZAP70  
 gi Accession: 0  
 Precursor Mass: 942.9249+2  
 Delta Mass: 3.260 ppm  
 XCorr: 70.39



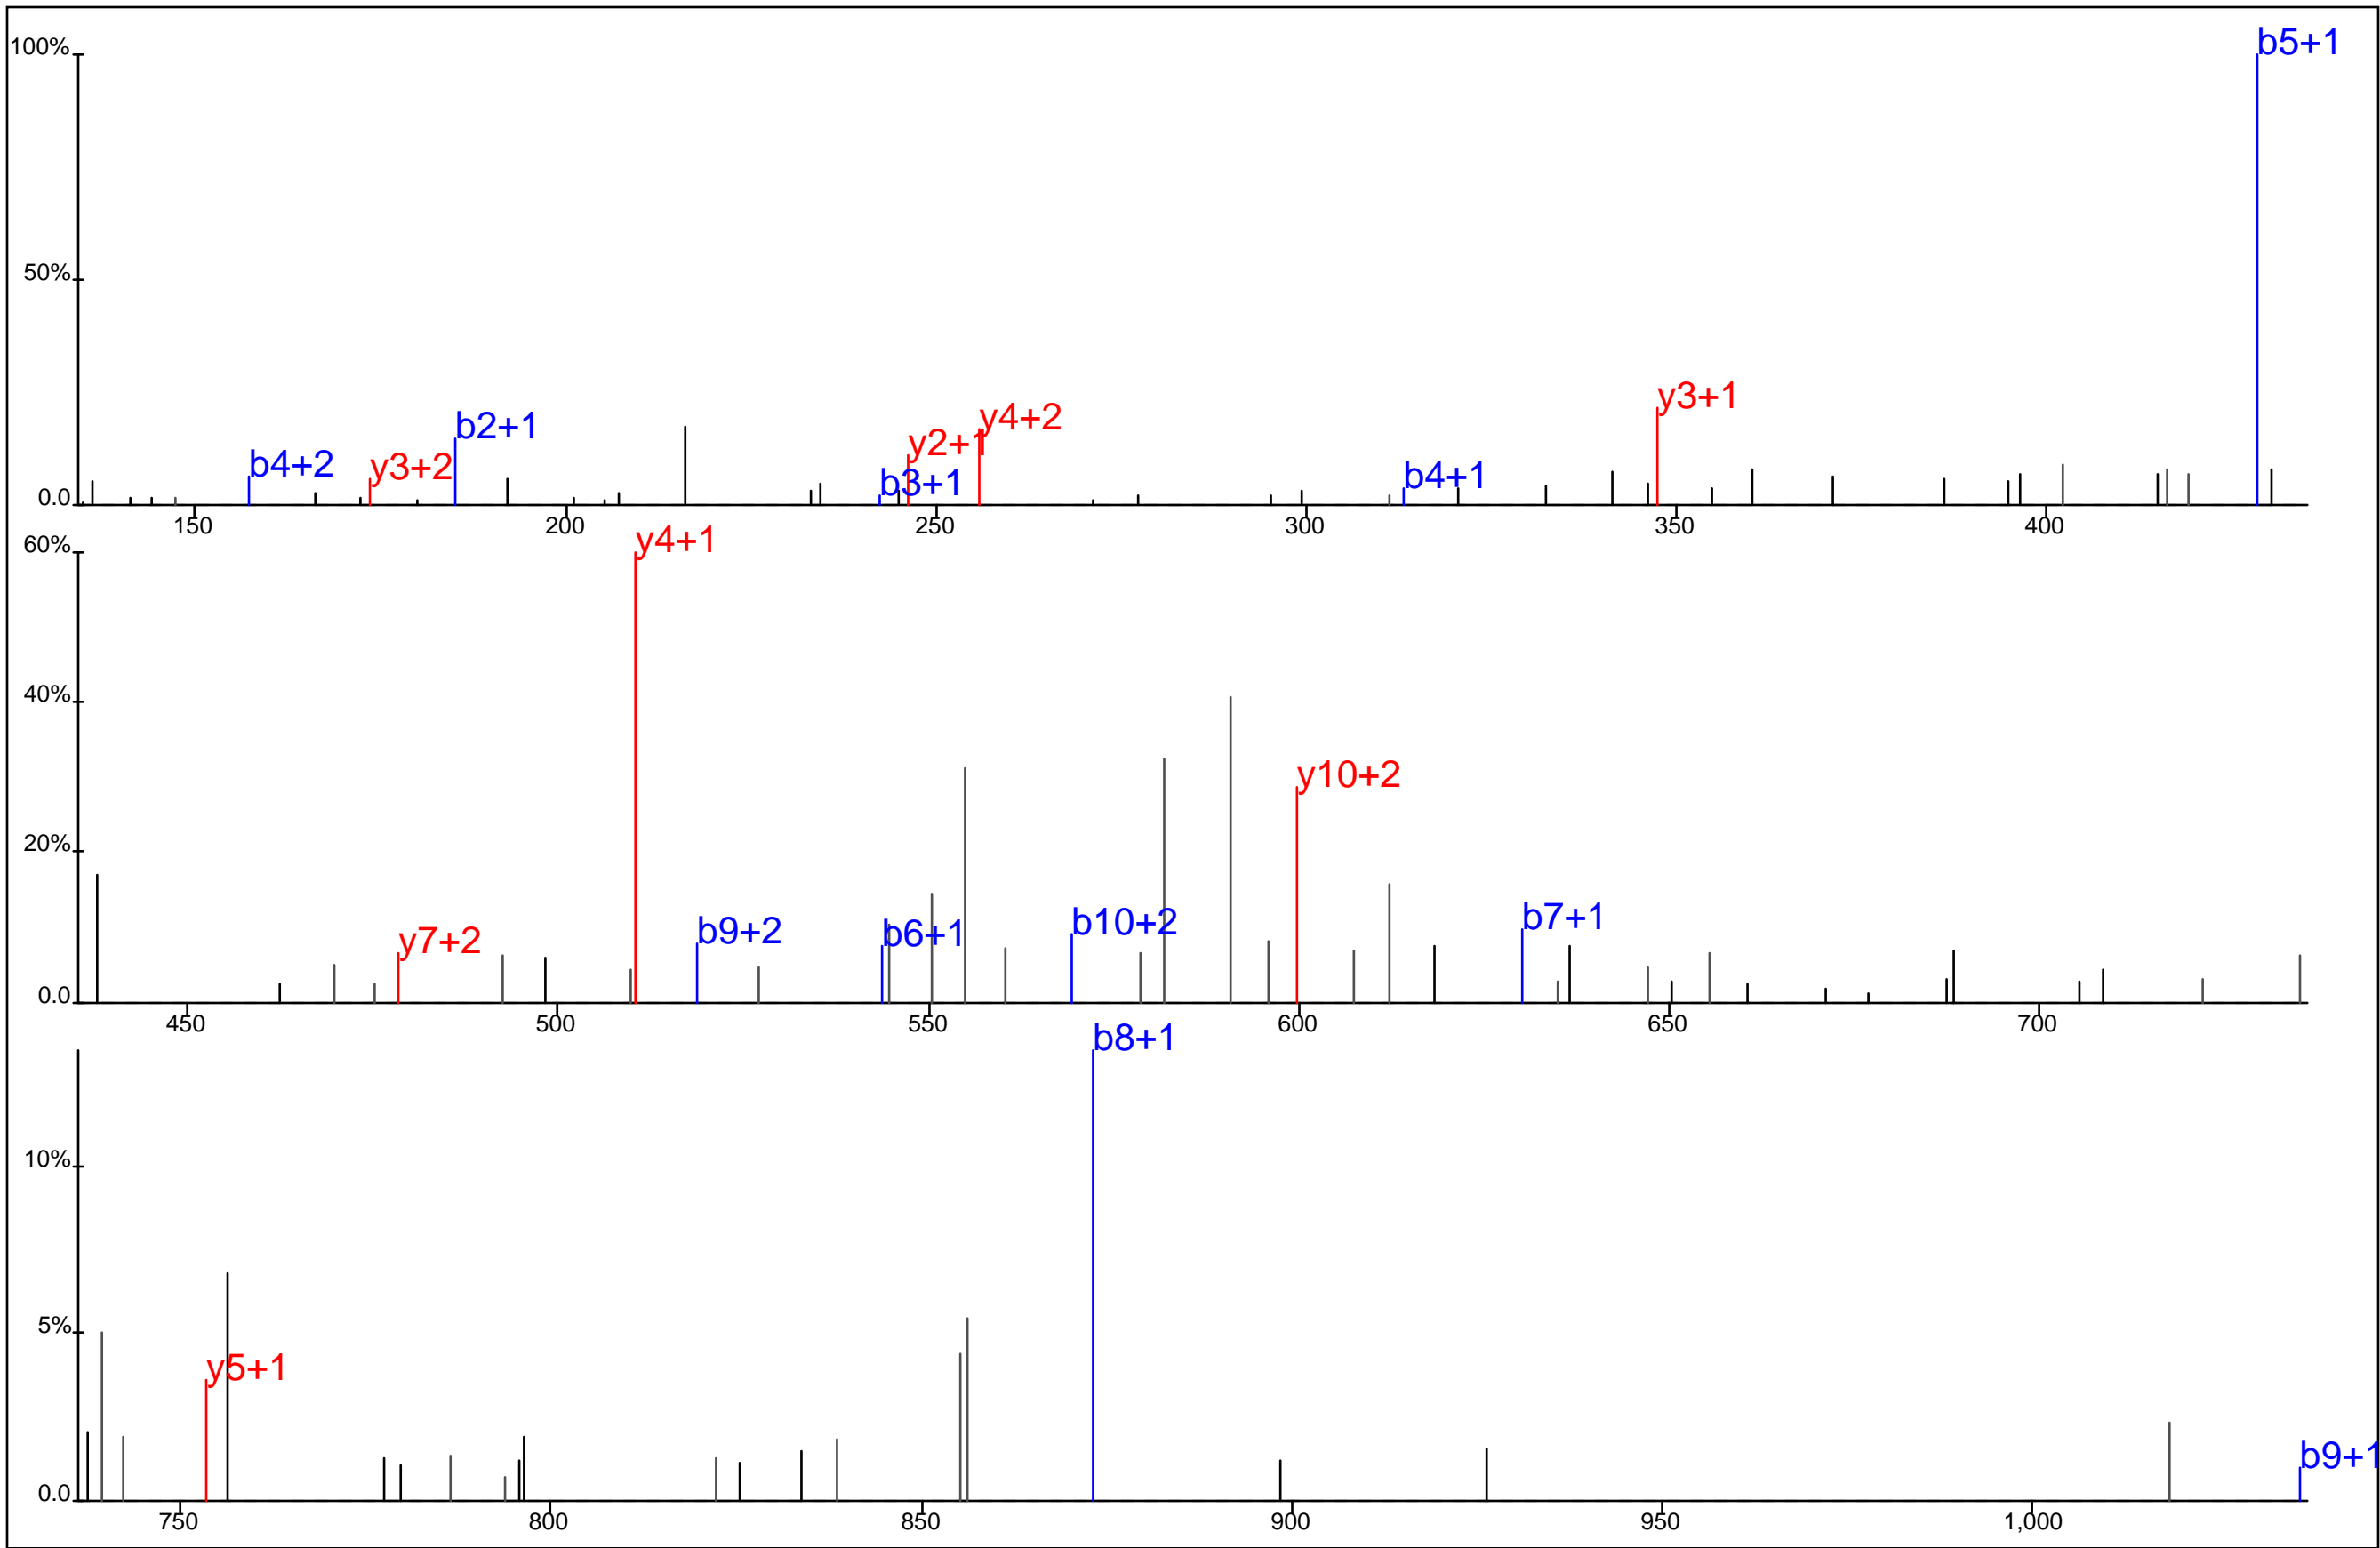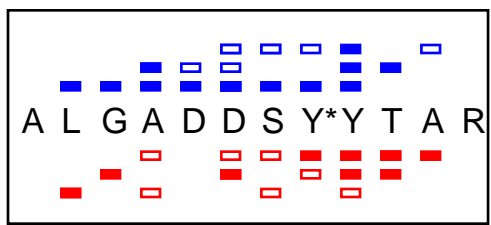

Protein Name: ZAP70  
 gi Accession: 0  
 Precursor Mass: 461.5259+3  
 Delta Mass: 0.581 ppm  
 XCorr: 26.65

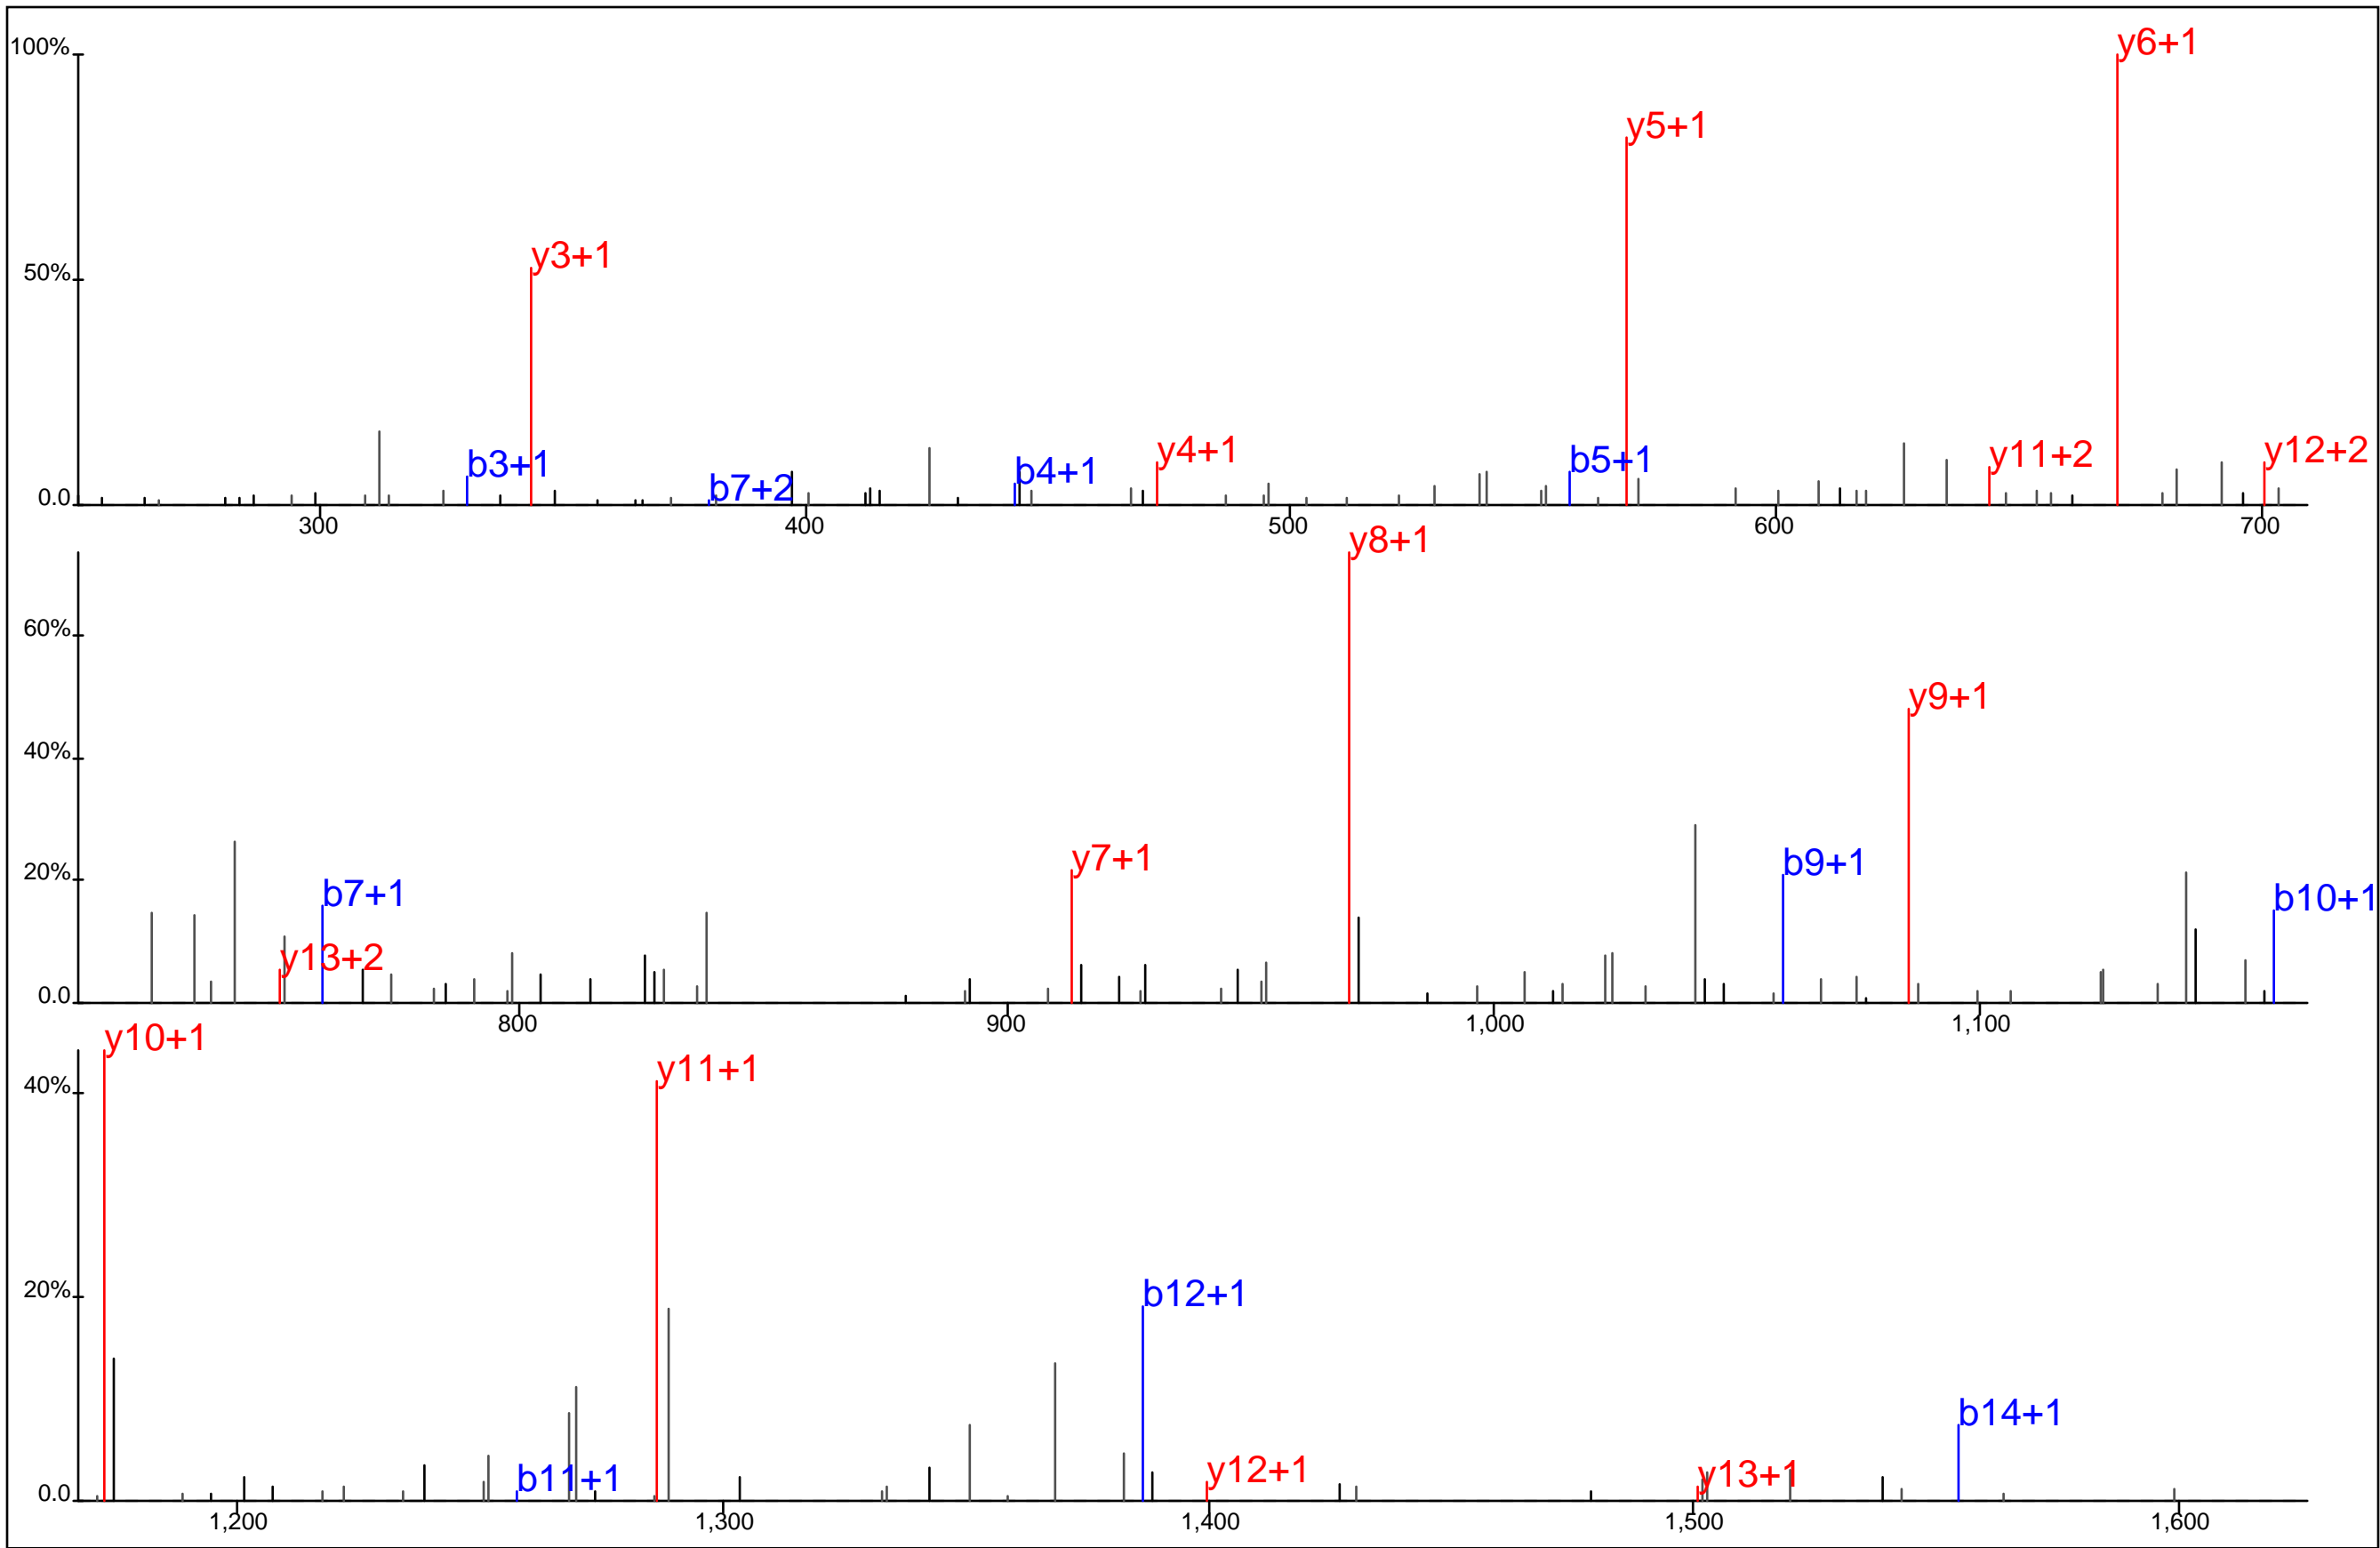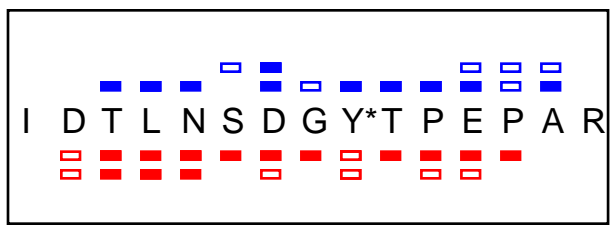

Protein Name: ZAP70  
 gi Accession: 0  
 Precursor Mass: 864.8798+2  
 Delta Mass: 2.675 ppm  
 XCorr: 87.16

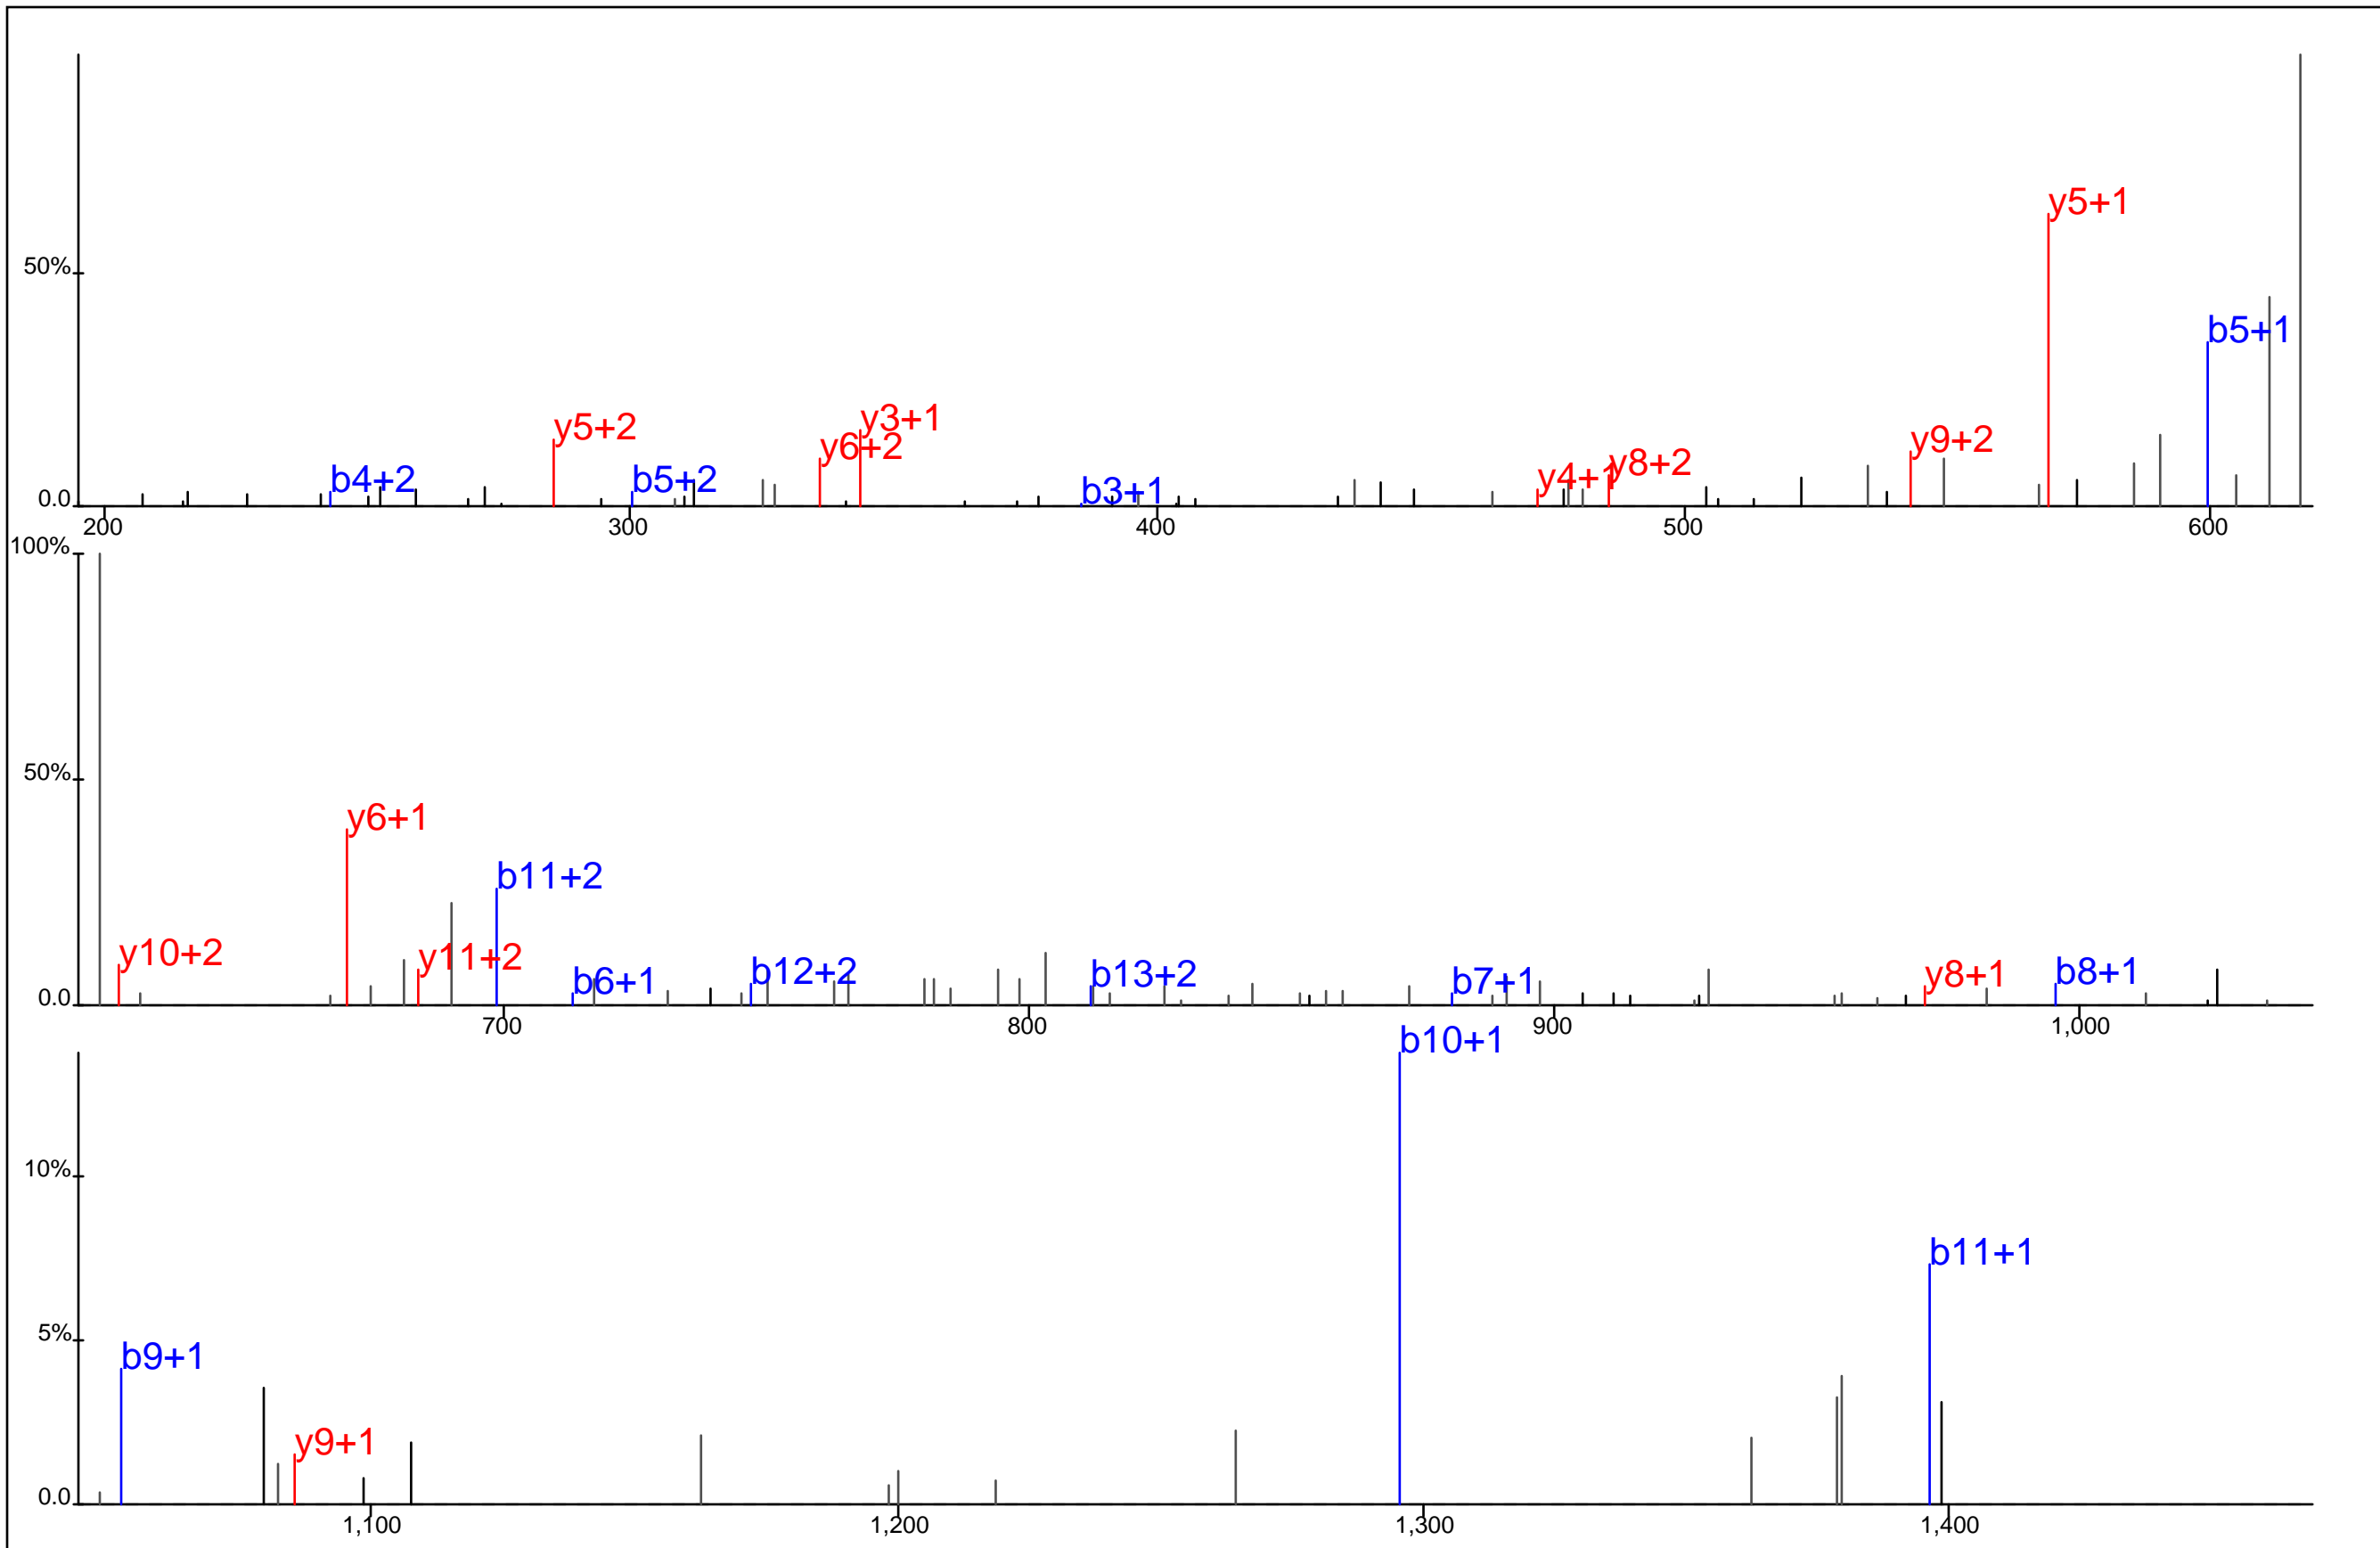

R I D T L N S\* D G Y\* T P E P A R  
 (Fragmentation map showing b and y ion series with red and blue markers)

Protein Name: ZAP70  
 gi Accession: 0  
 Precursor Mass: 655.6107+3  
 Delta Mass: 1.303 ppm  
 XCorr: 20.82

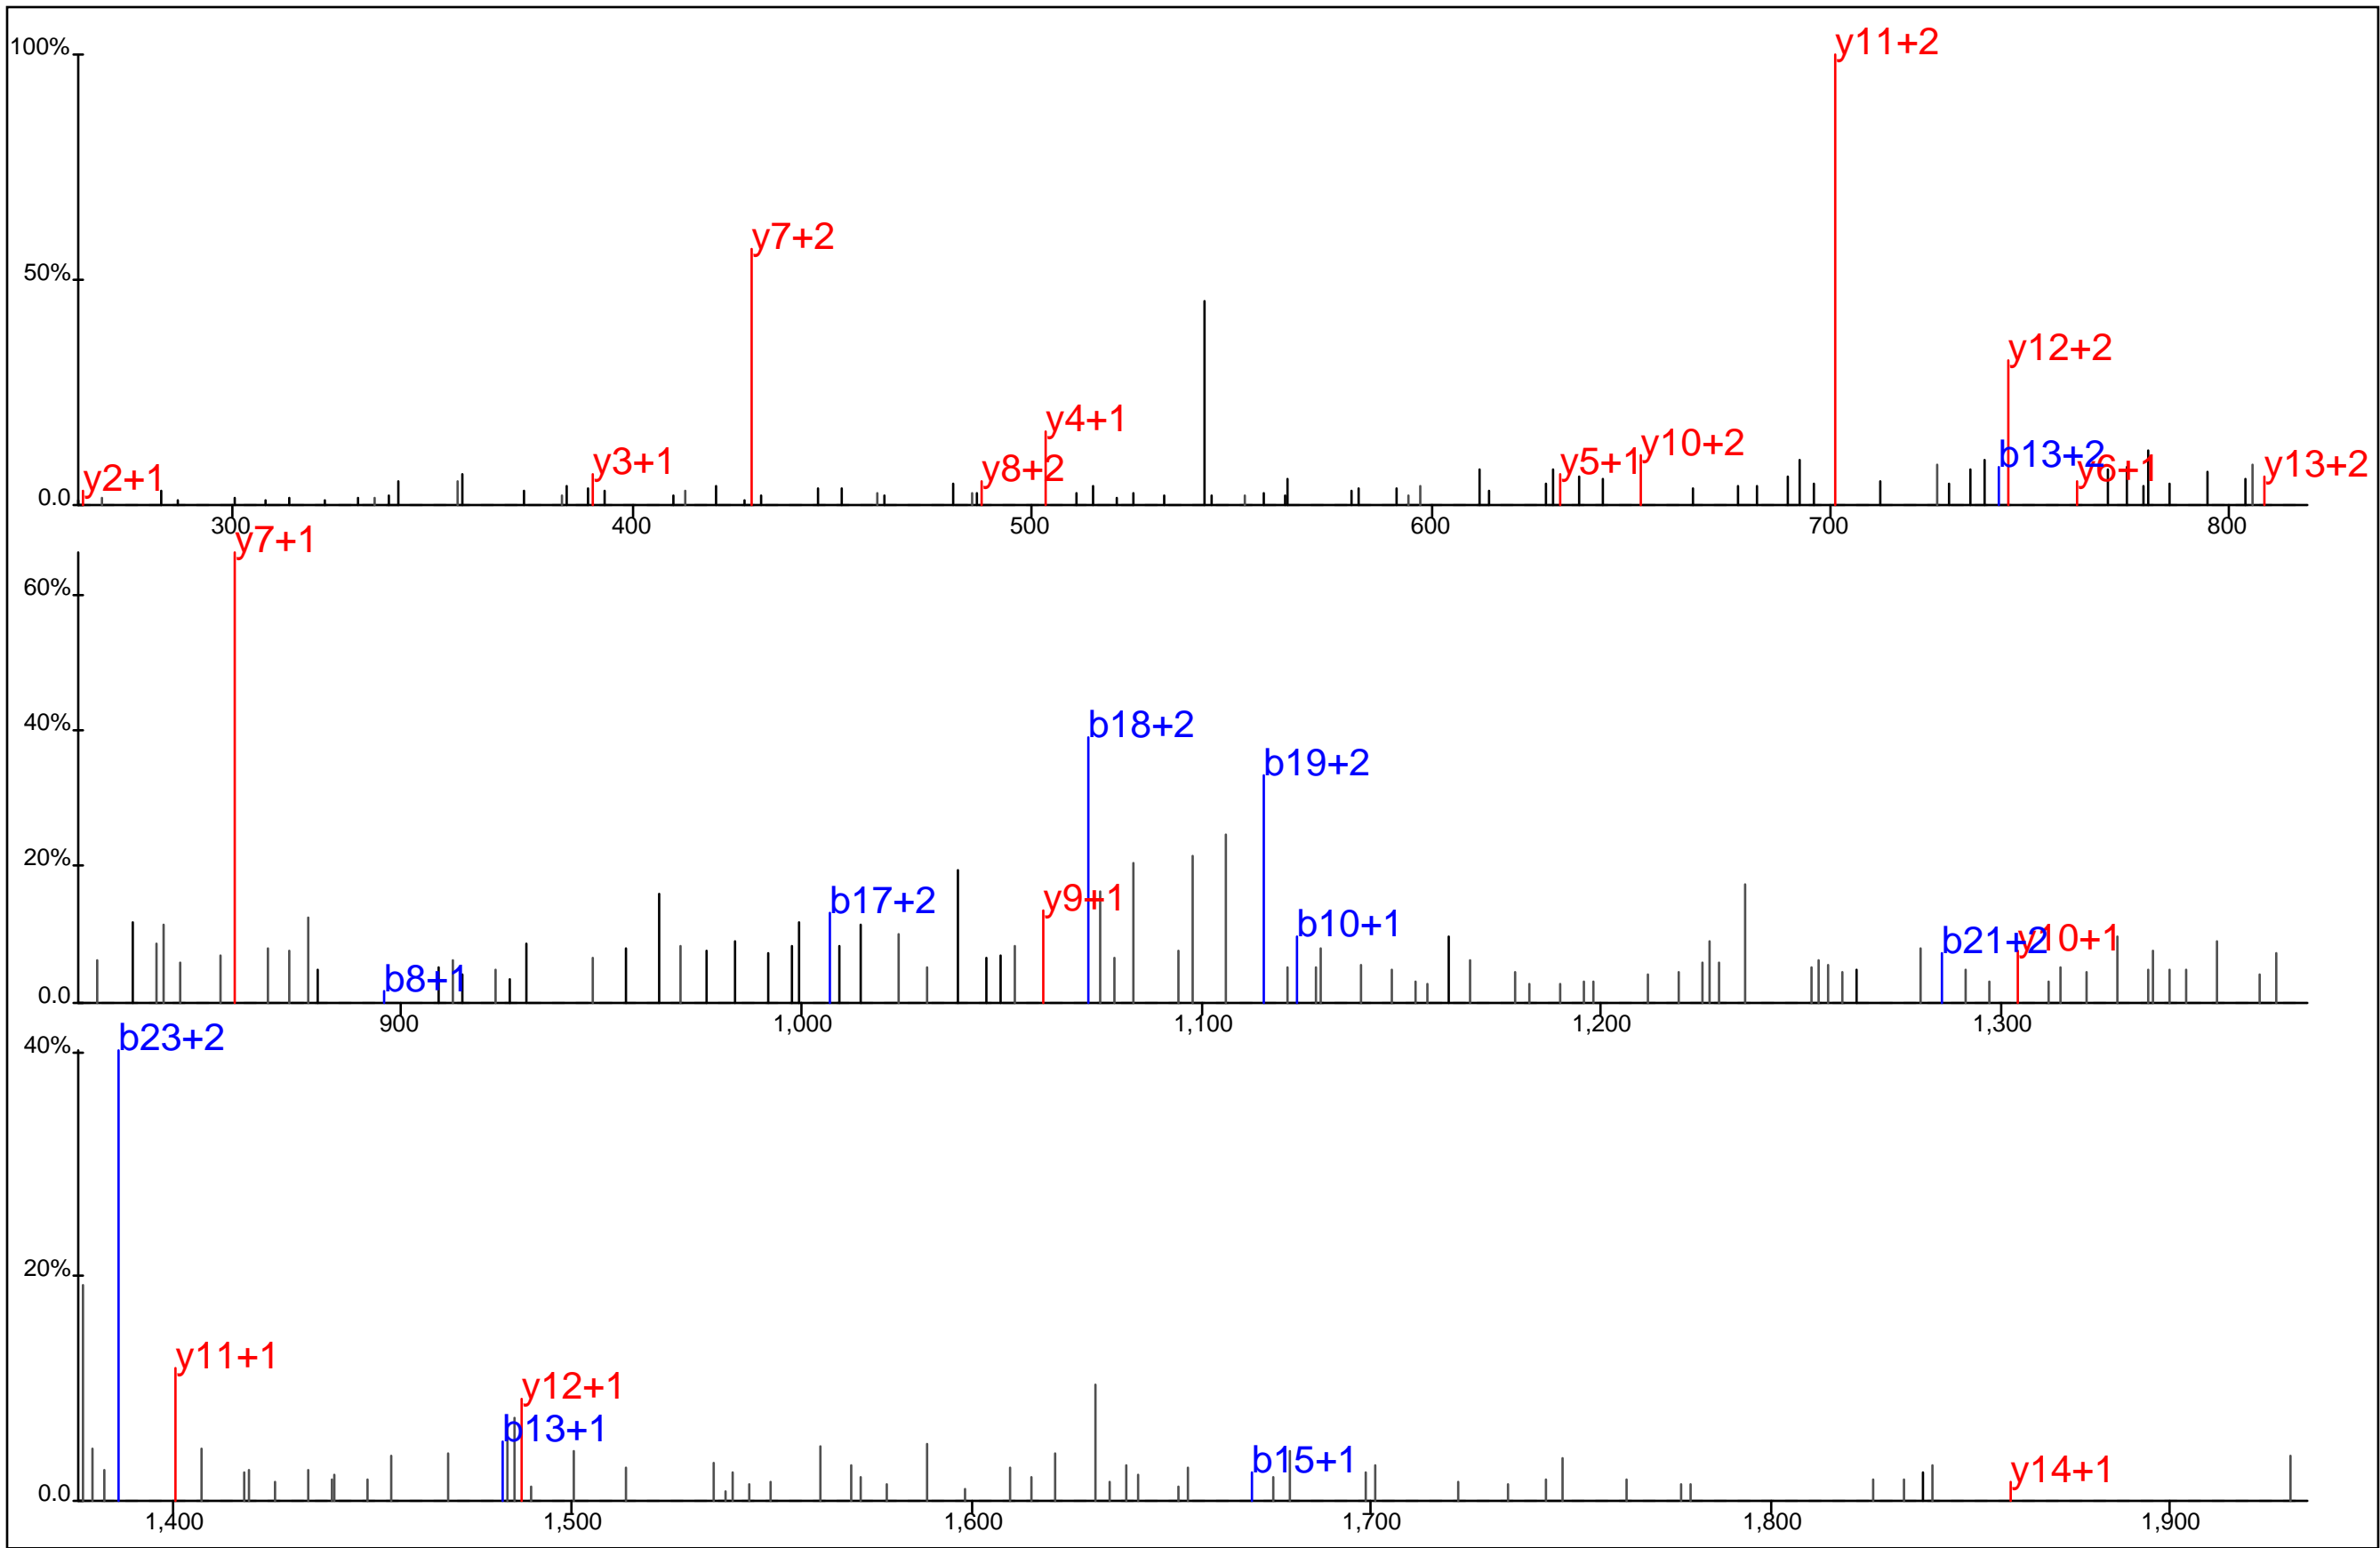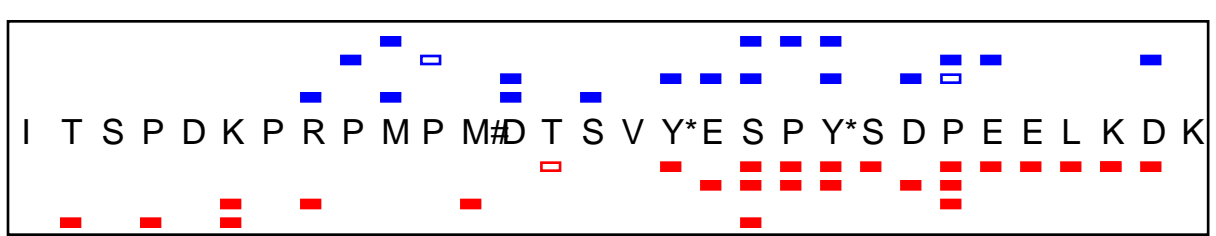

Protein Name: ZAP70  
 gi Accession: 0  
 Precursor Mass: 907.8942+4  
 Delta Mass: 1.017 ppm  
 XCorr: 20.6



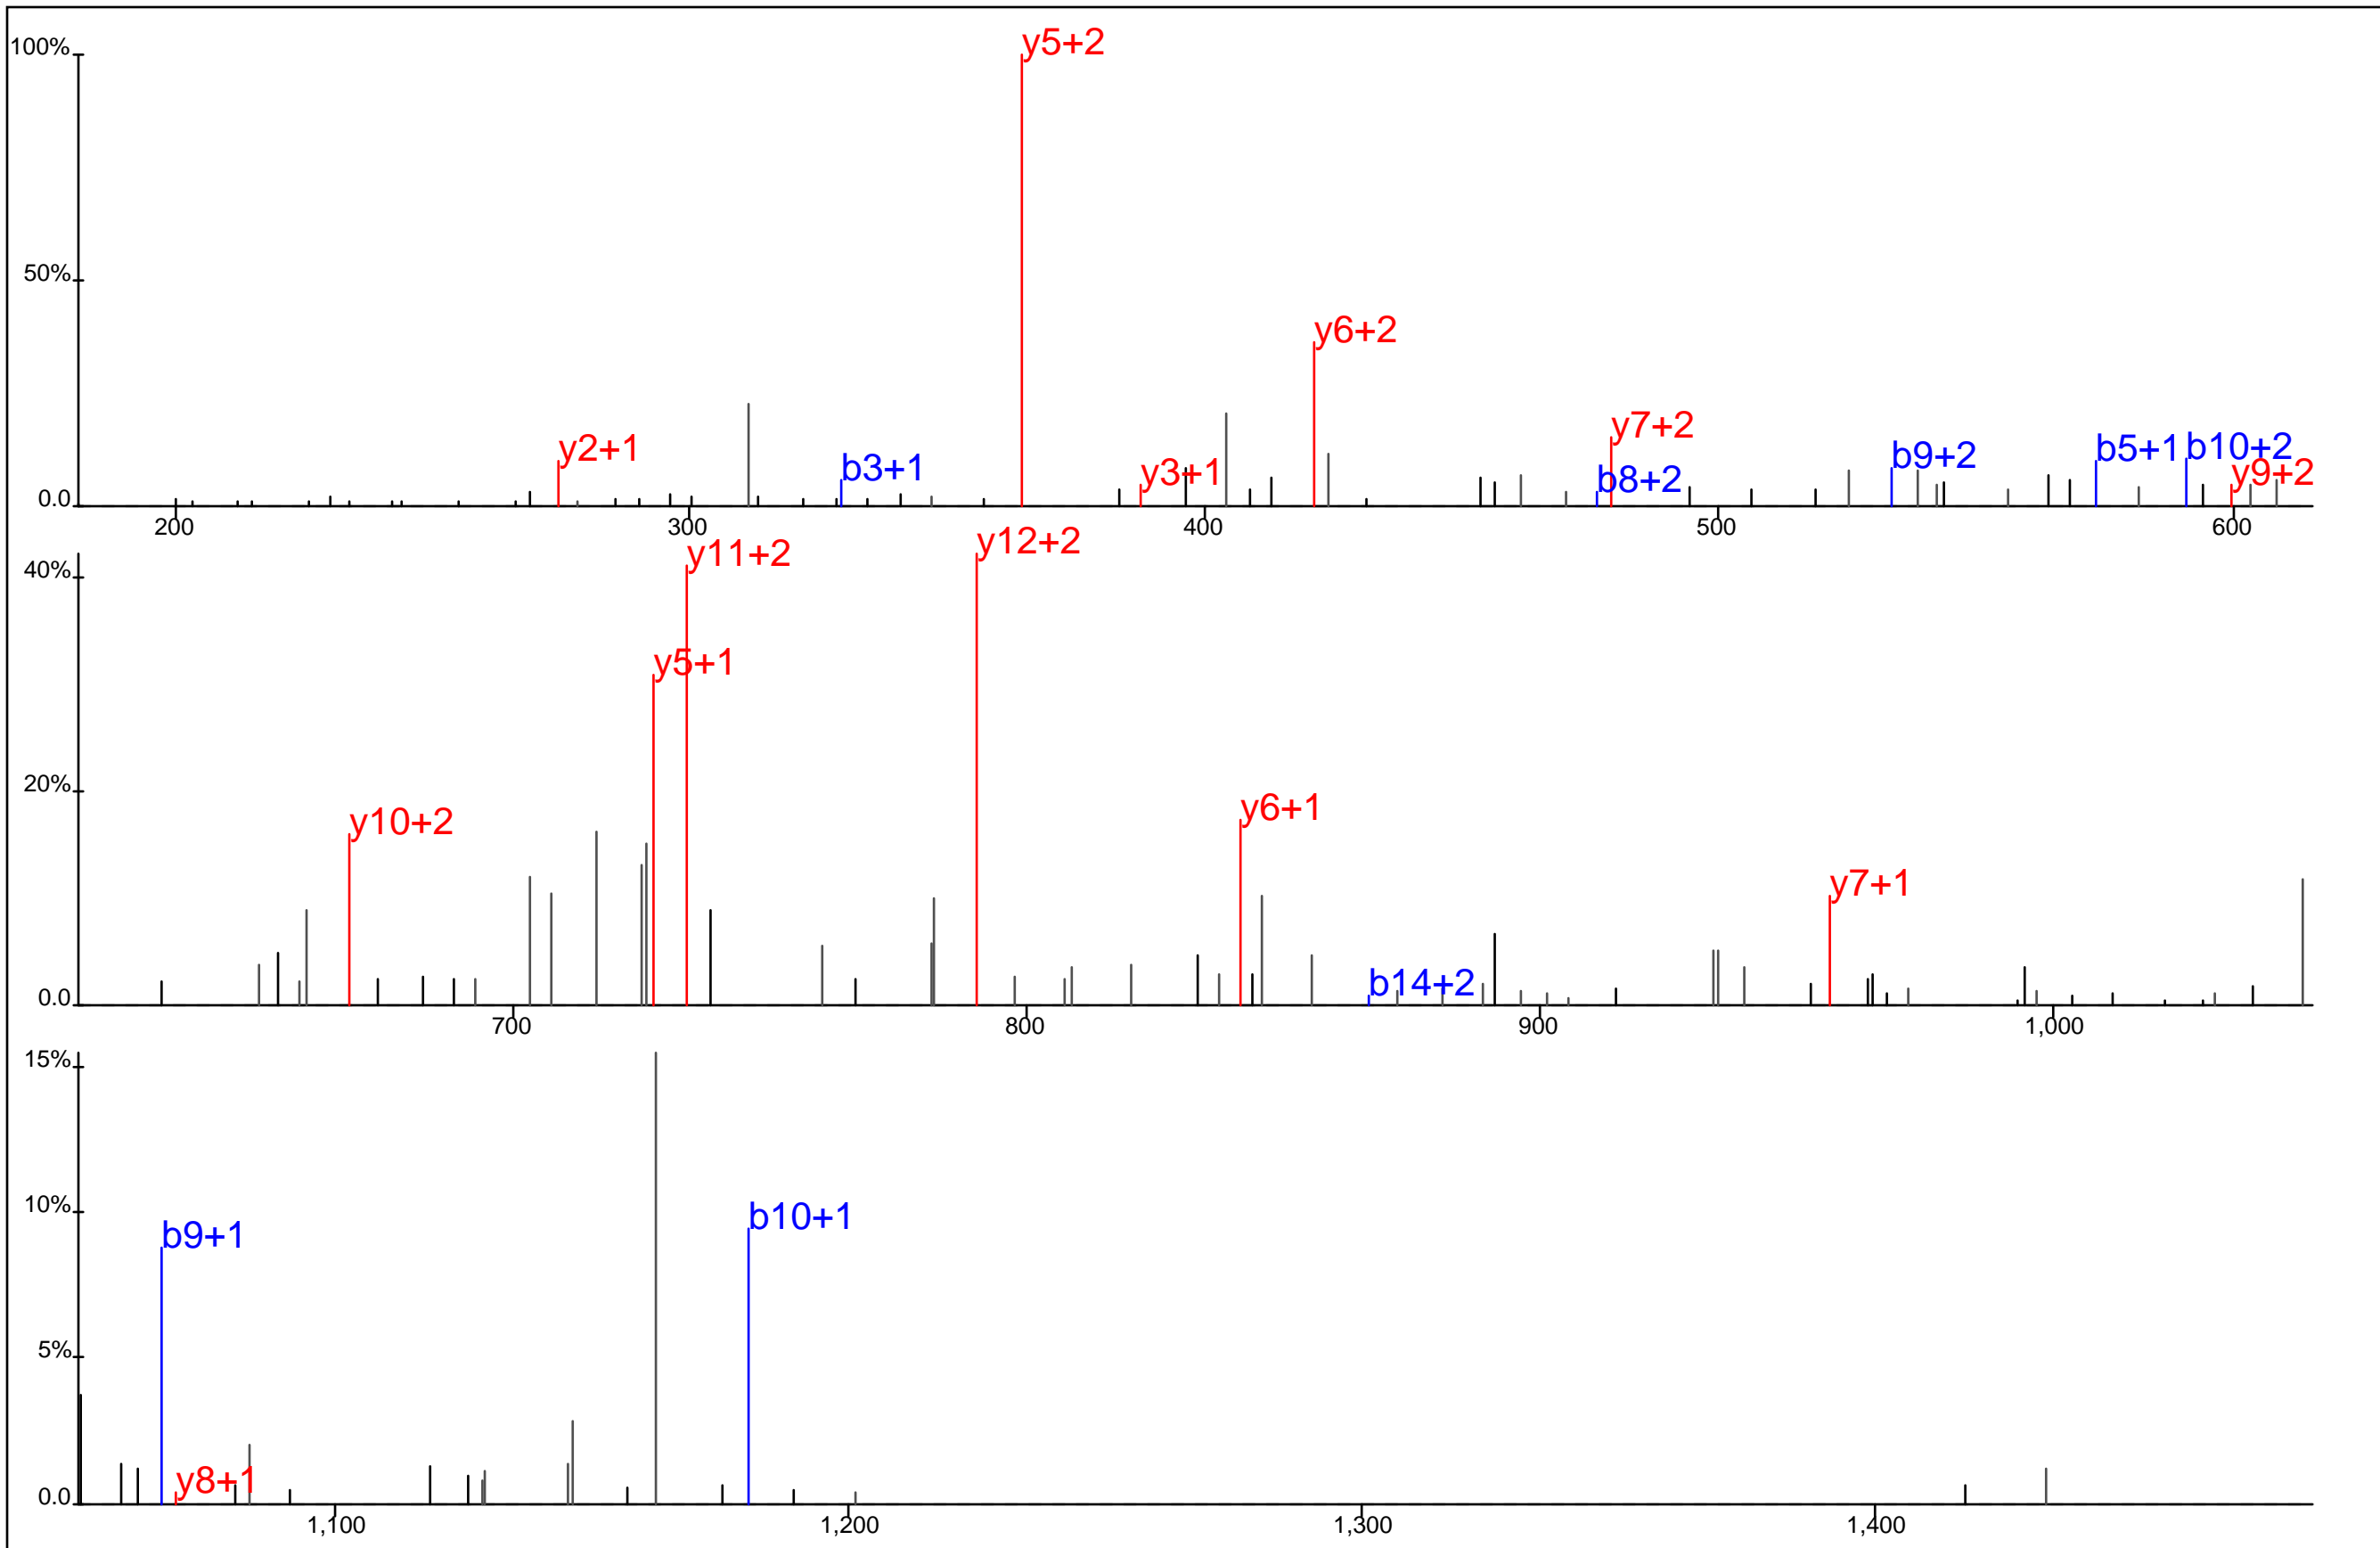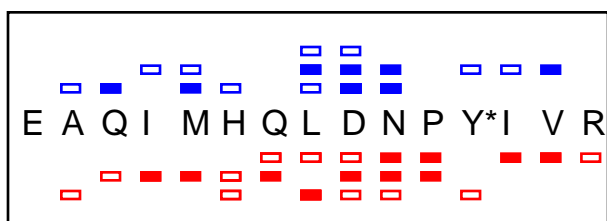

Protein Name: ZAP70  
 gi Accession: 0  
 Precursor Mass: 636.3010+3  
 Delta Mass: 0.141 ppm  
 XCorr: 30.28

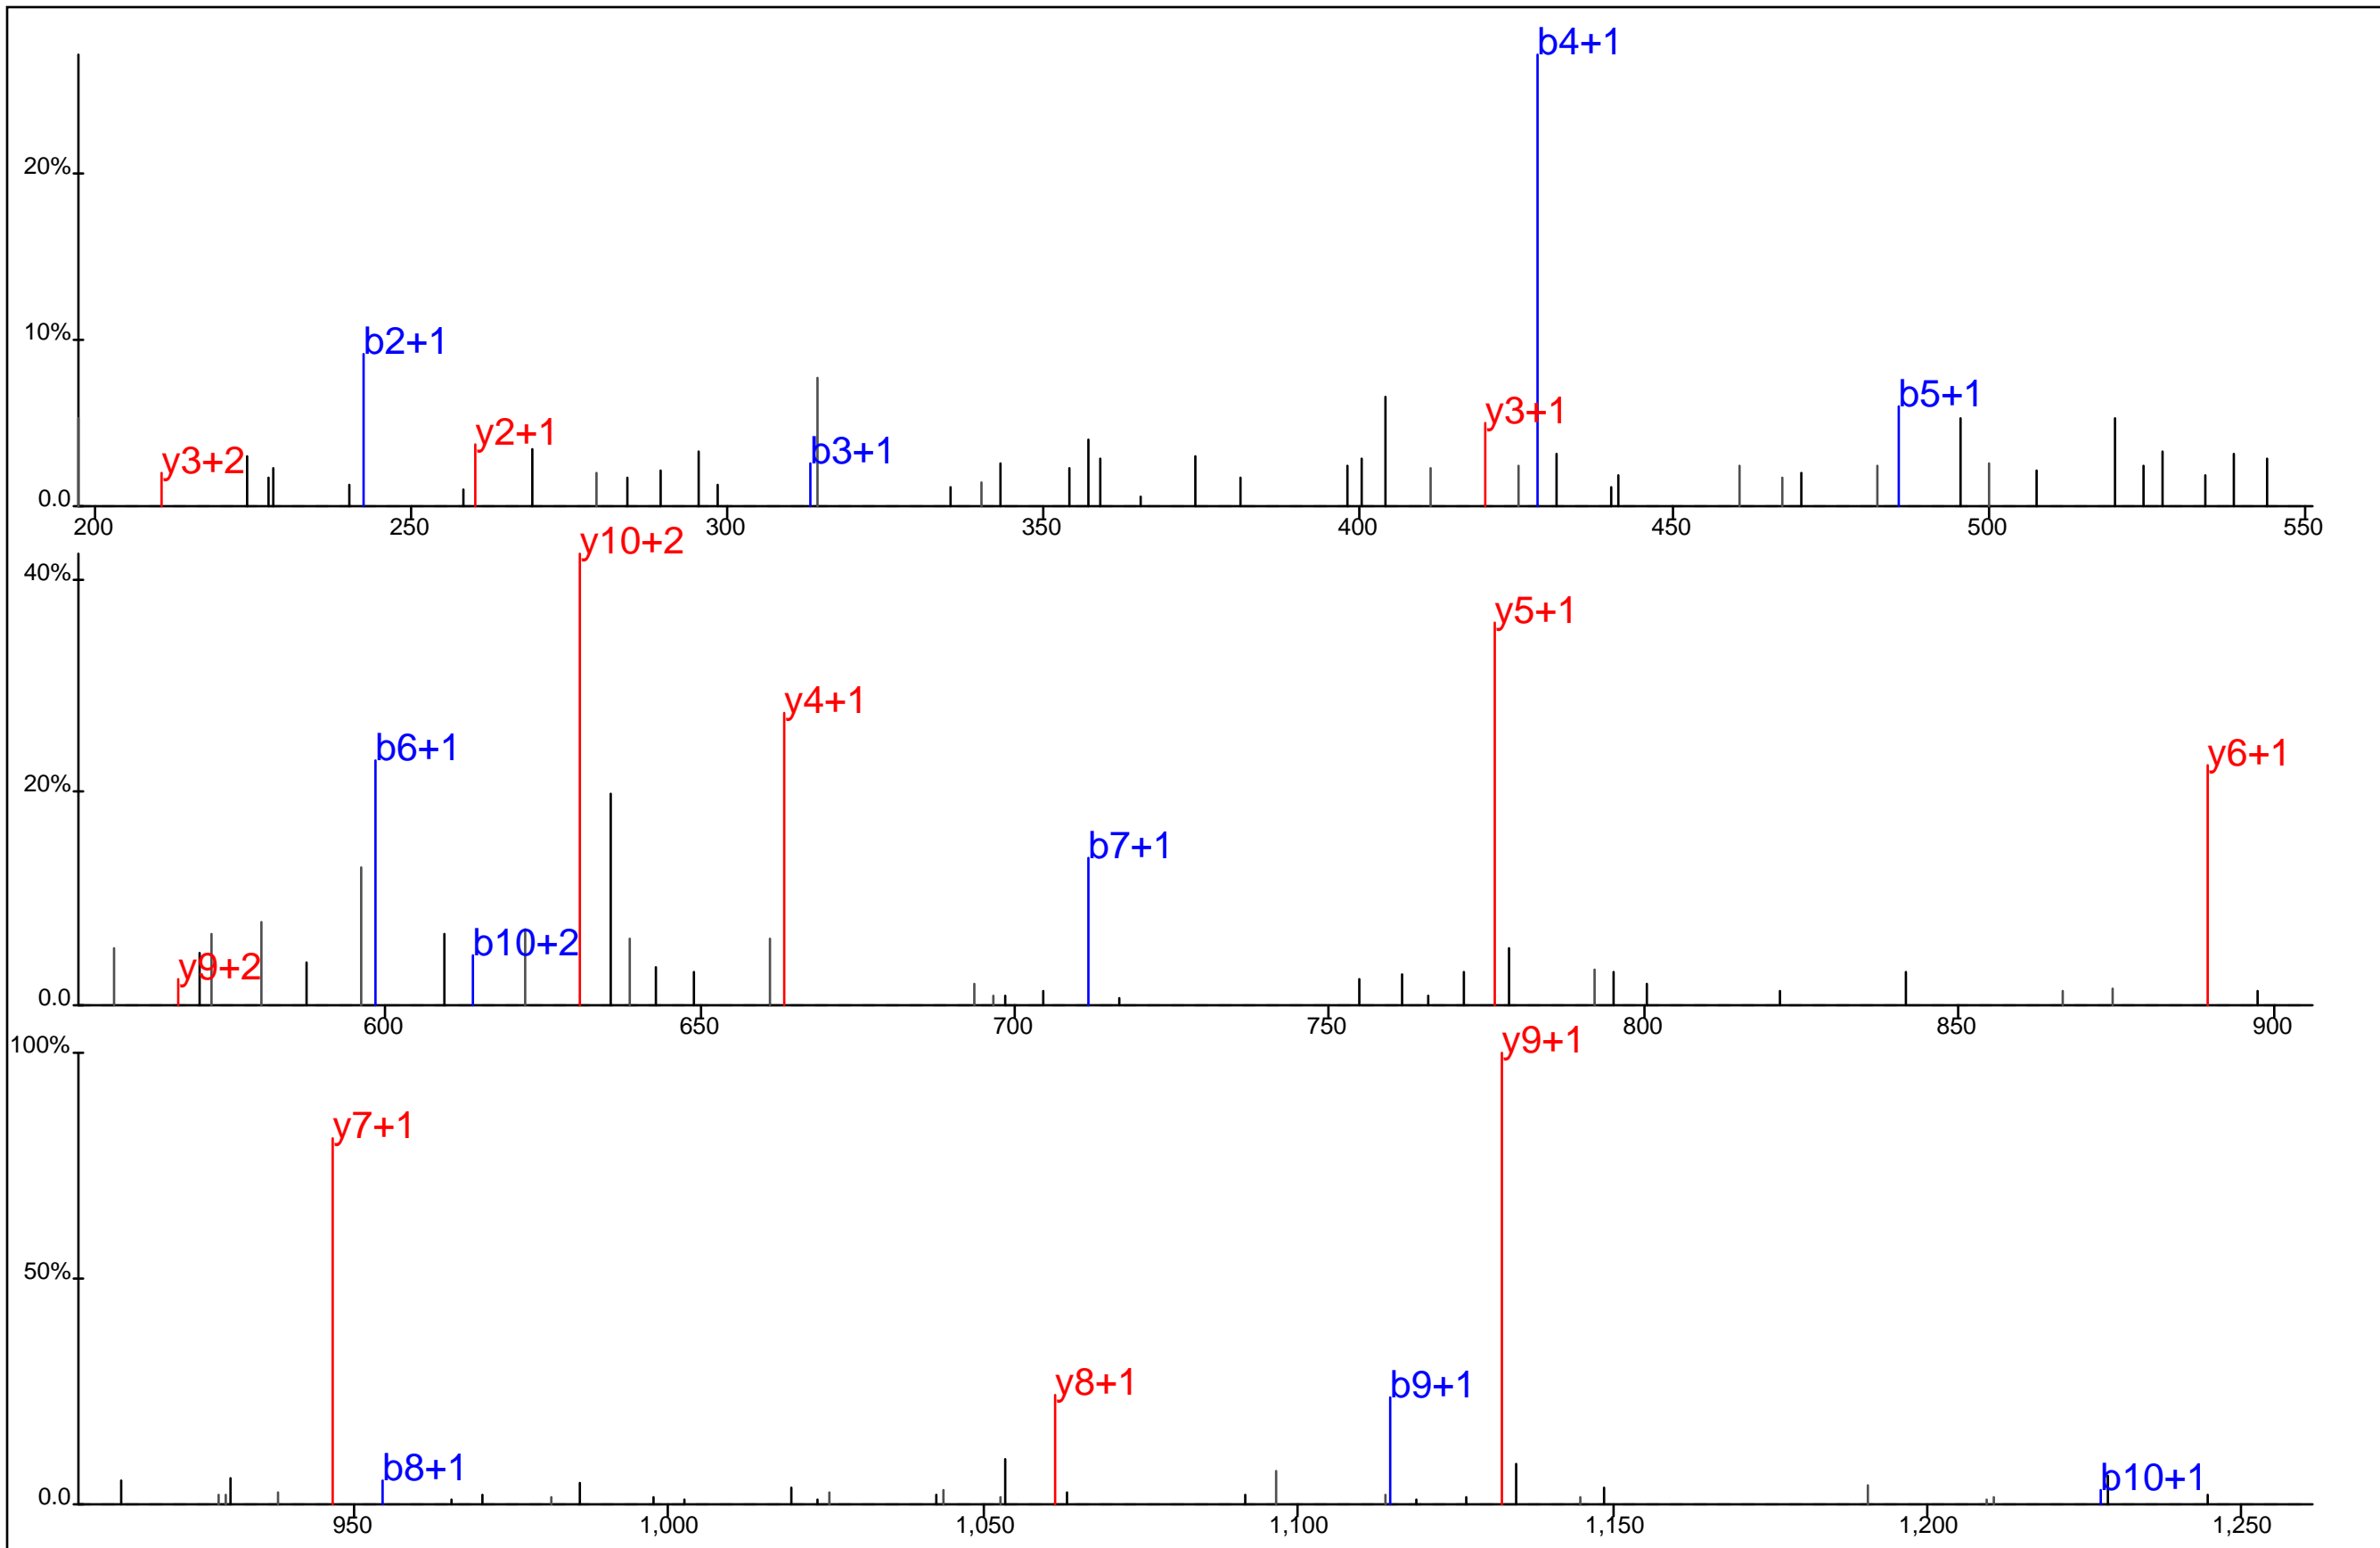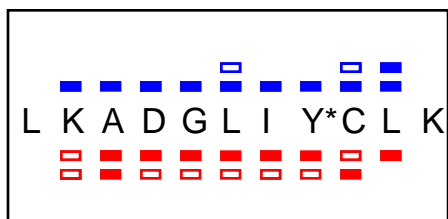

Protein Name: ZAP70  
 gi Accession: 0  
 Precursor Mass: 687.3492+2  
 Delta Mass: 1.010 ppm  
 XCorr: 48.71

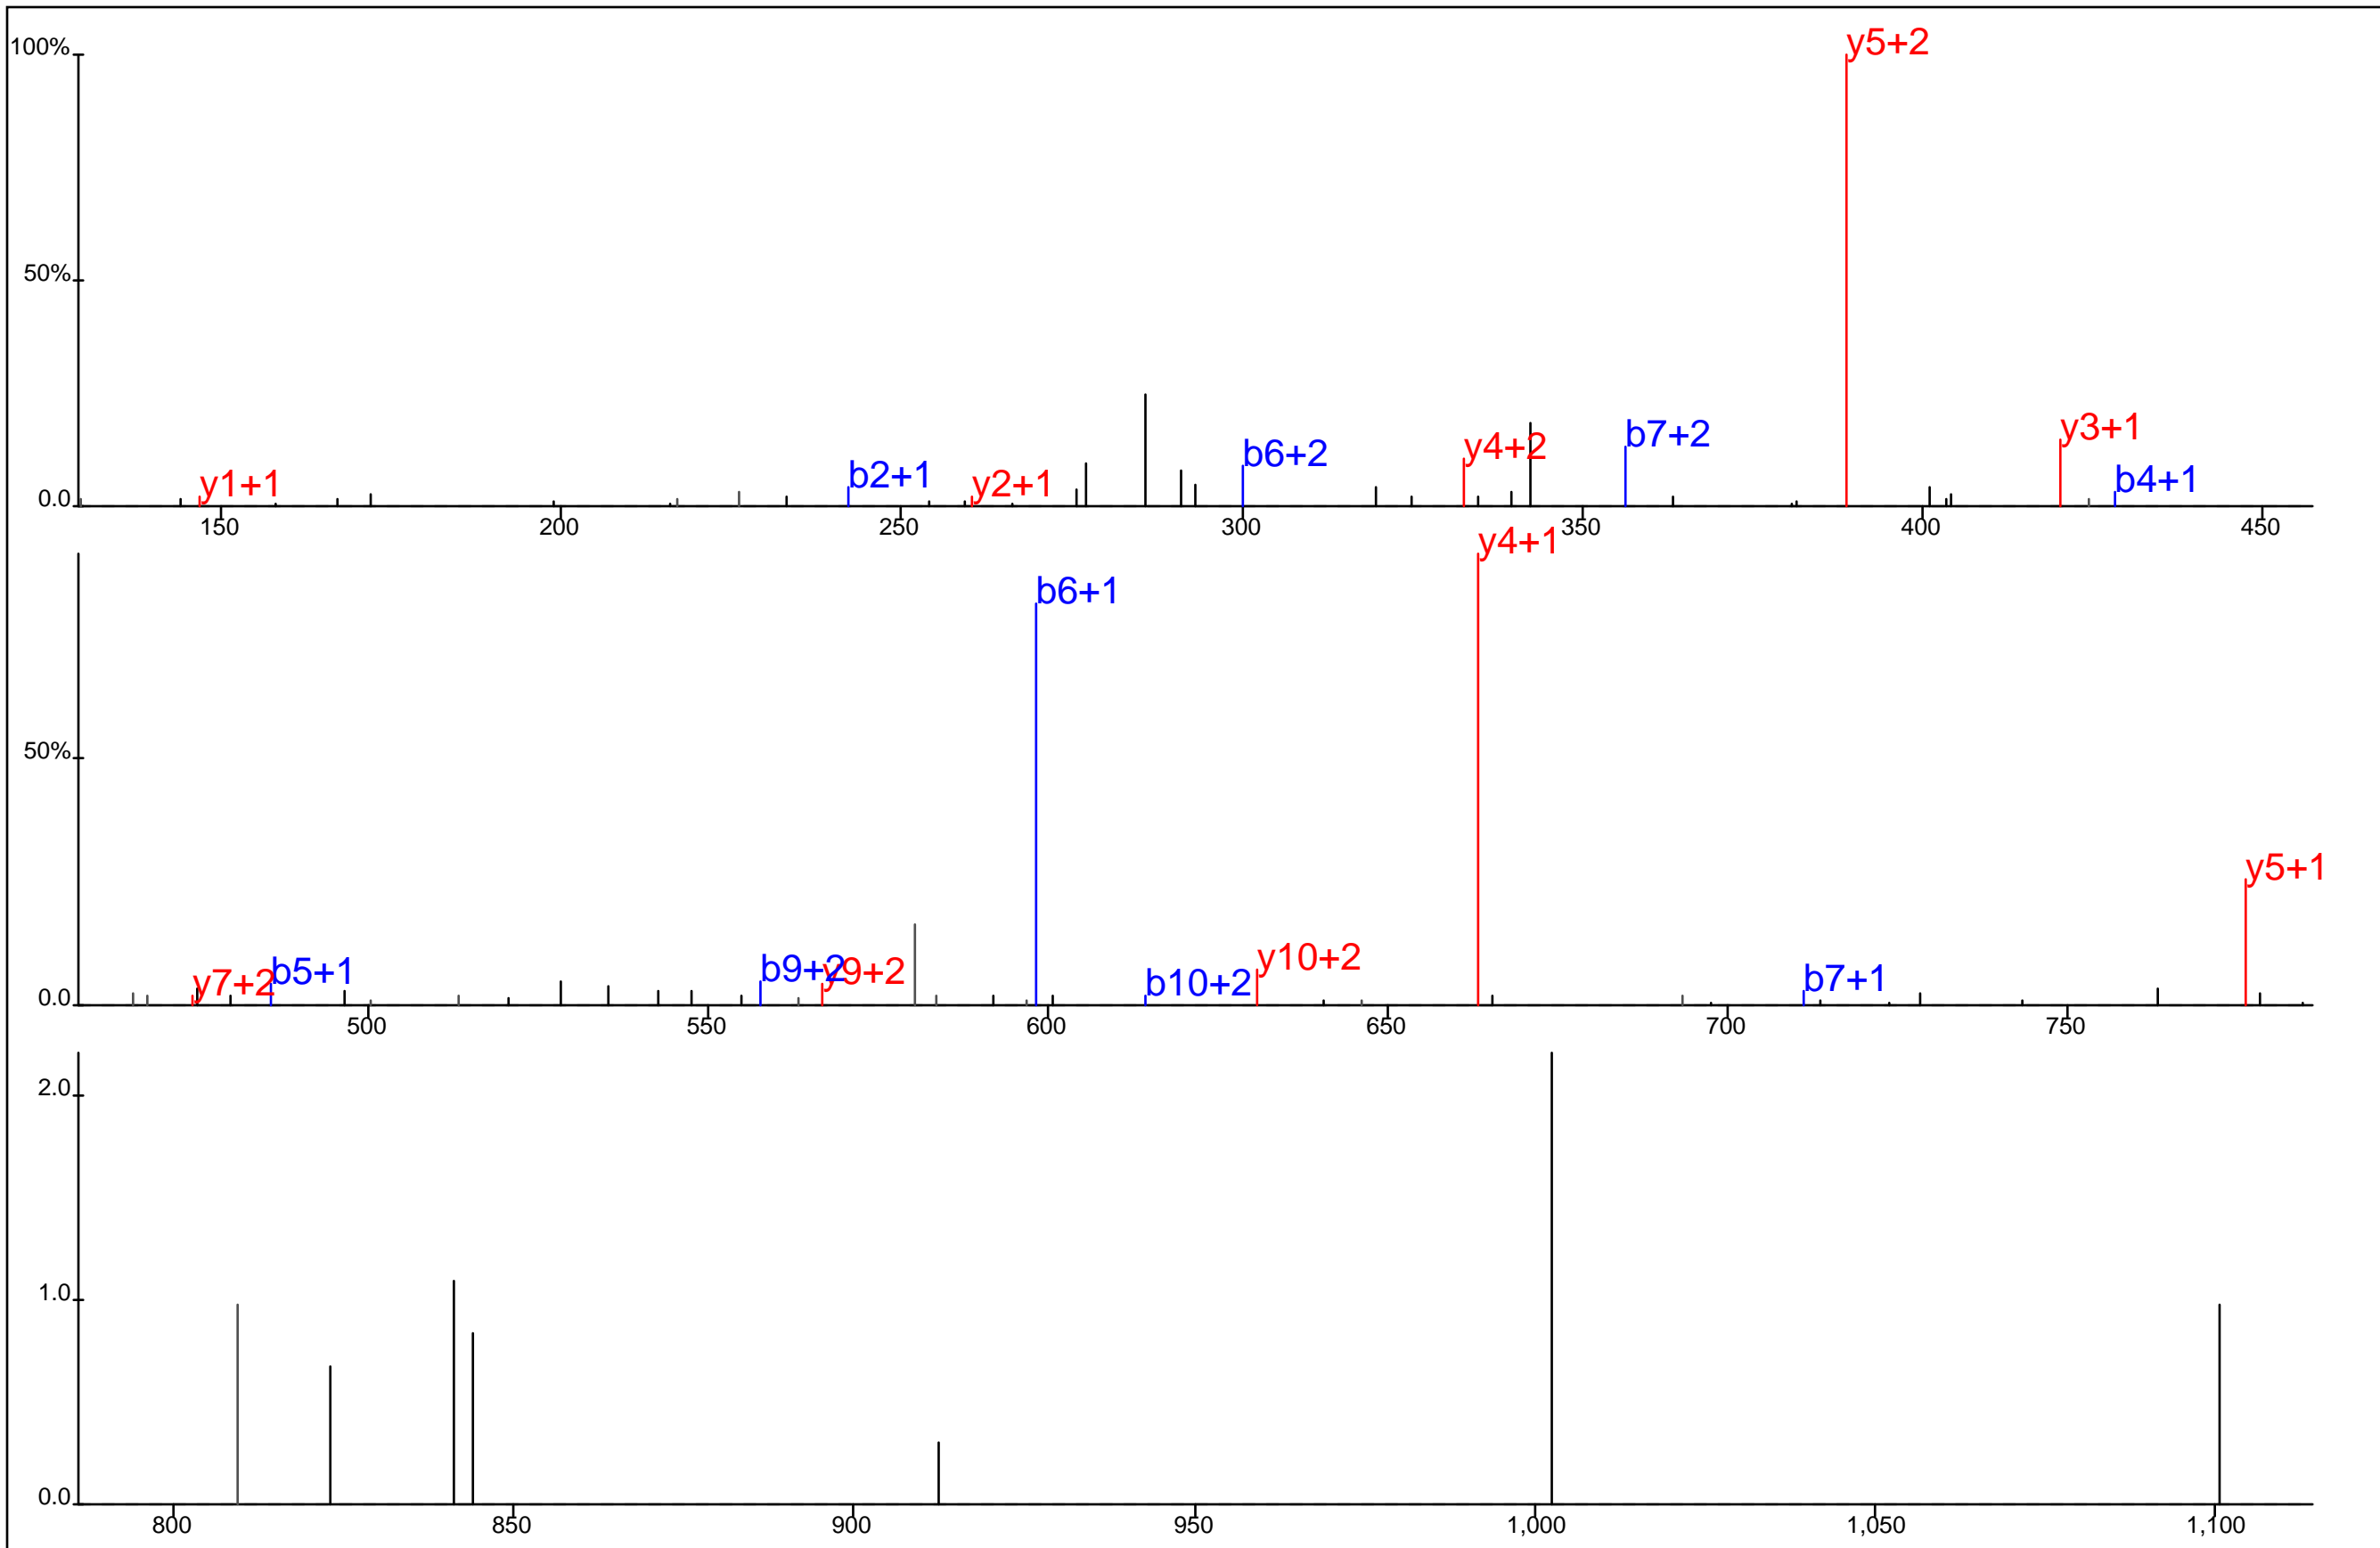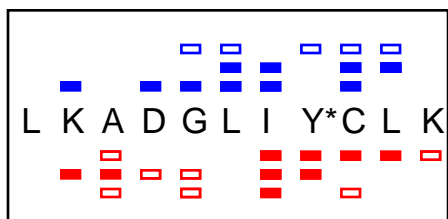

Protein Name: ZAP70  
 gi Accession: 0  
 Precursor Mass: 458.5682+3  
 Delta Mass: 0.180 ppm  
 XCorr: 25.31



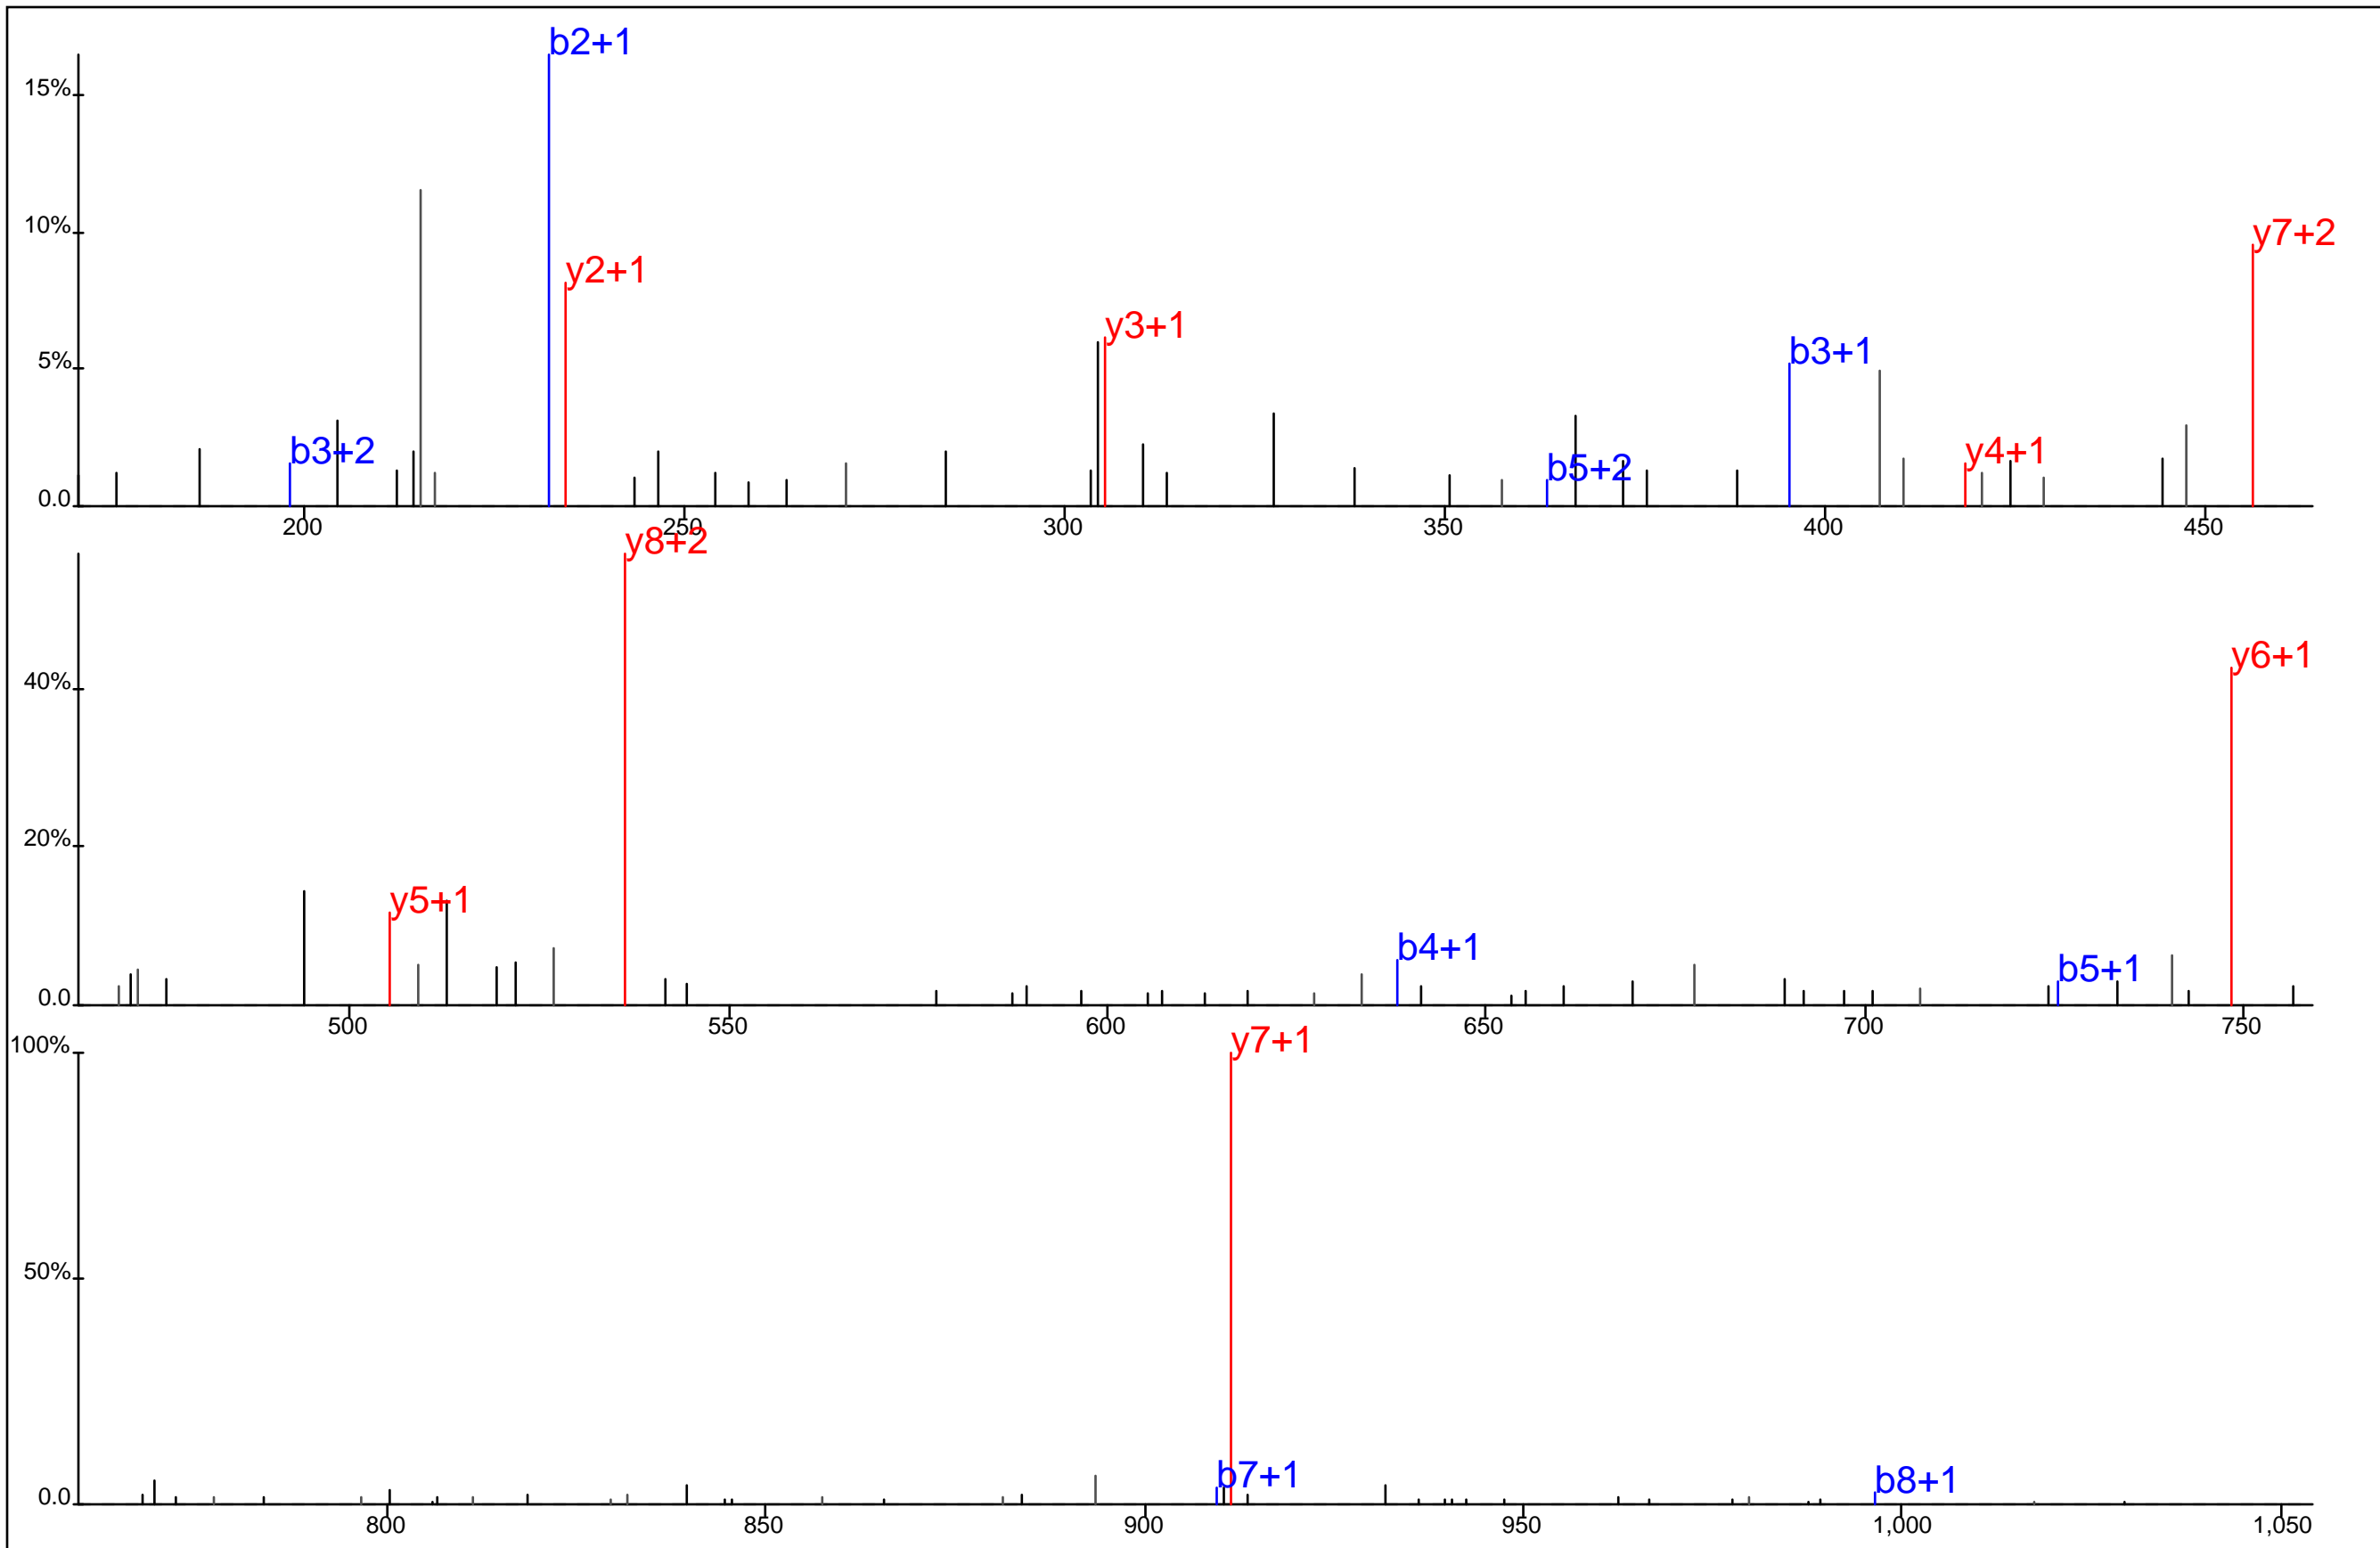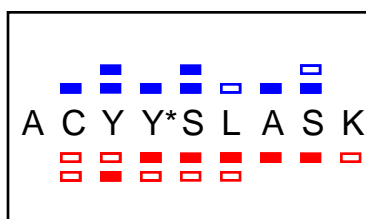

Protein Name: ZAP70  
 gi Accession: 0  
 Precursor Mass: 571.7341+2  
 Delta Mass: 1.849 ppm  
 XCorr: 31.29

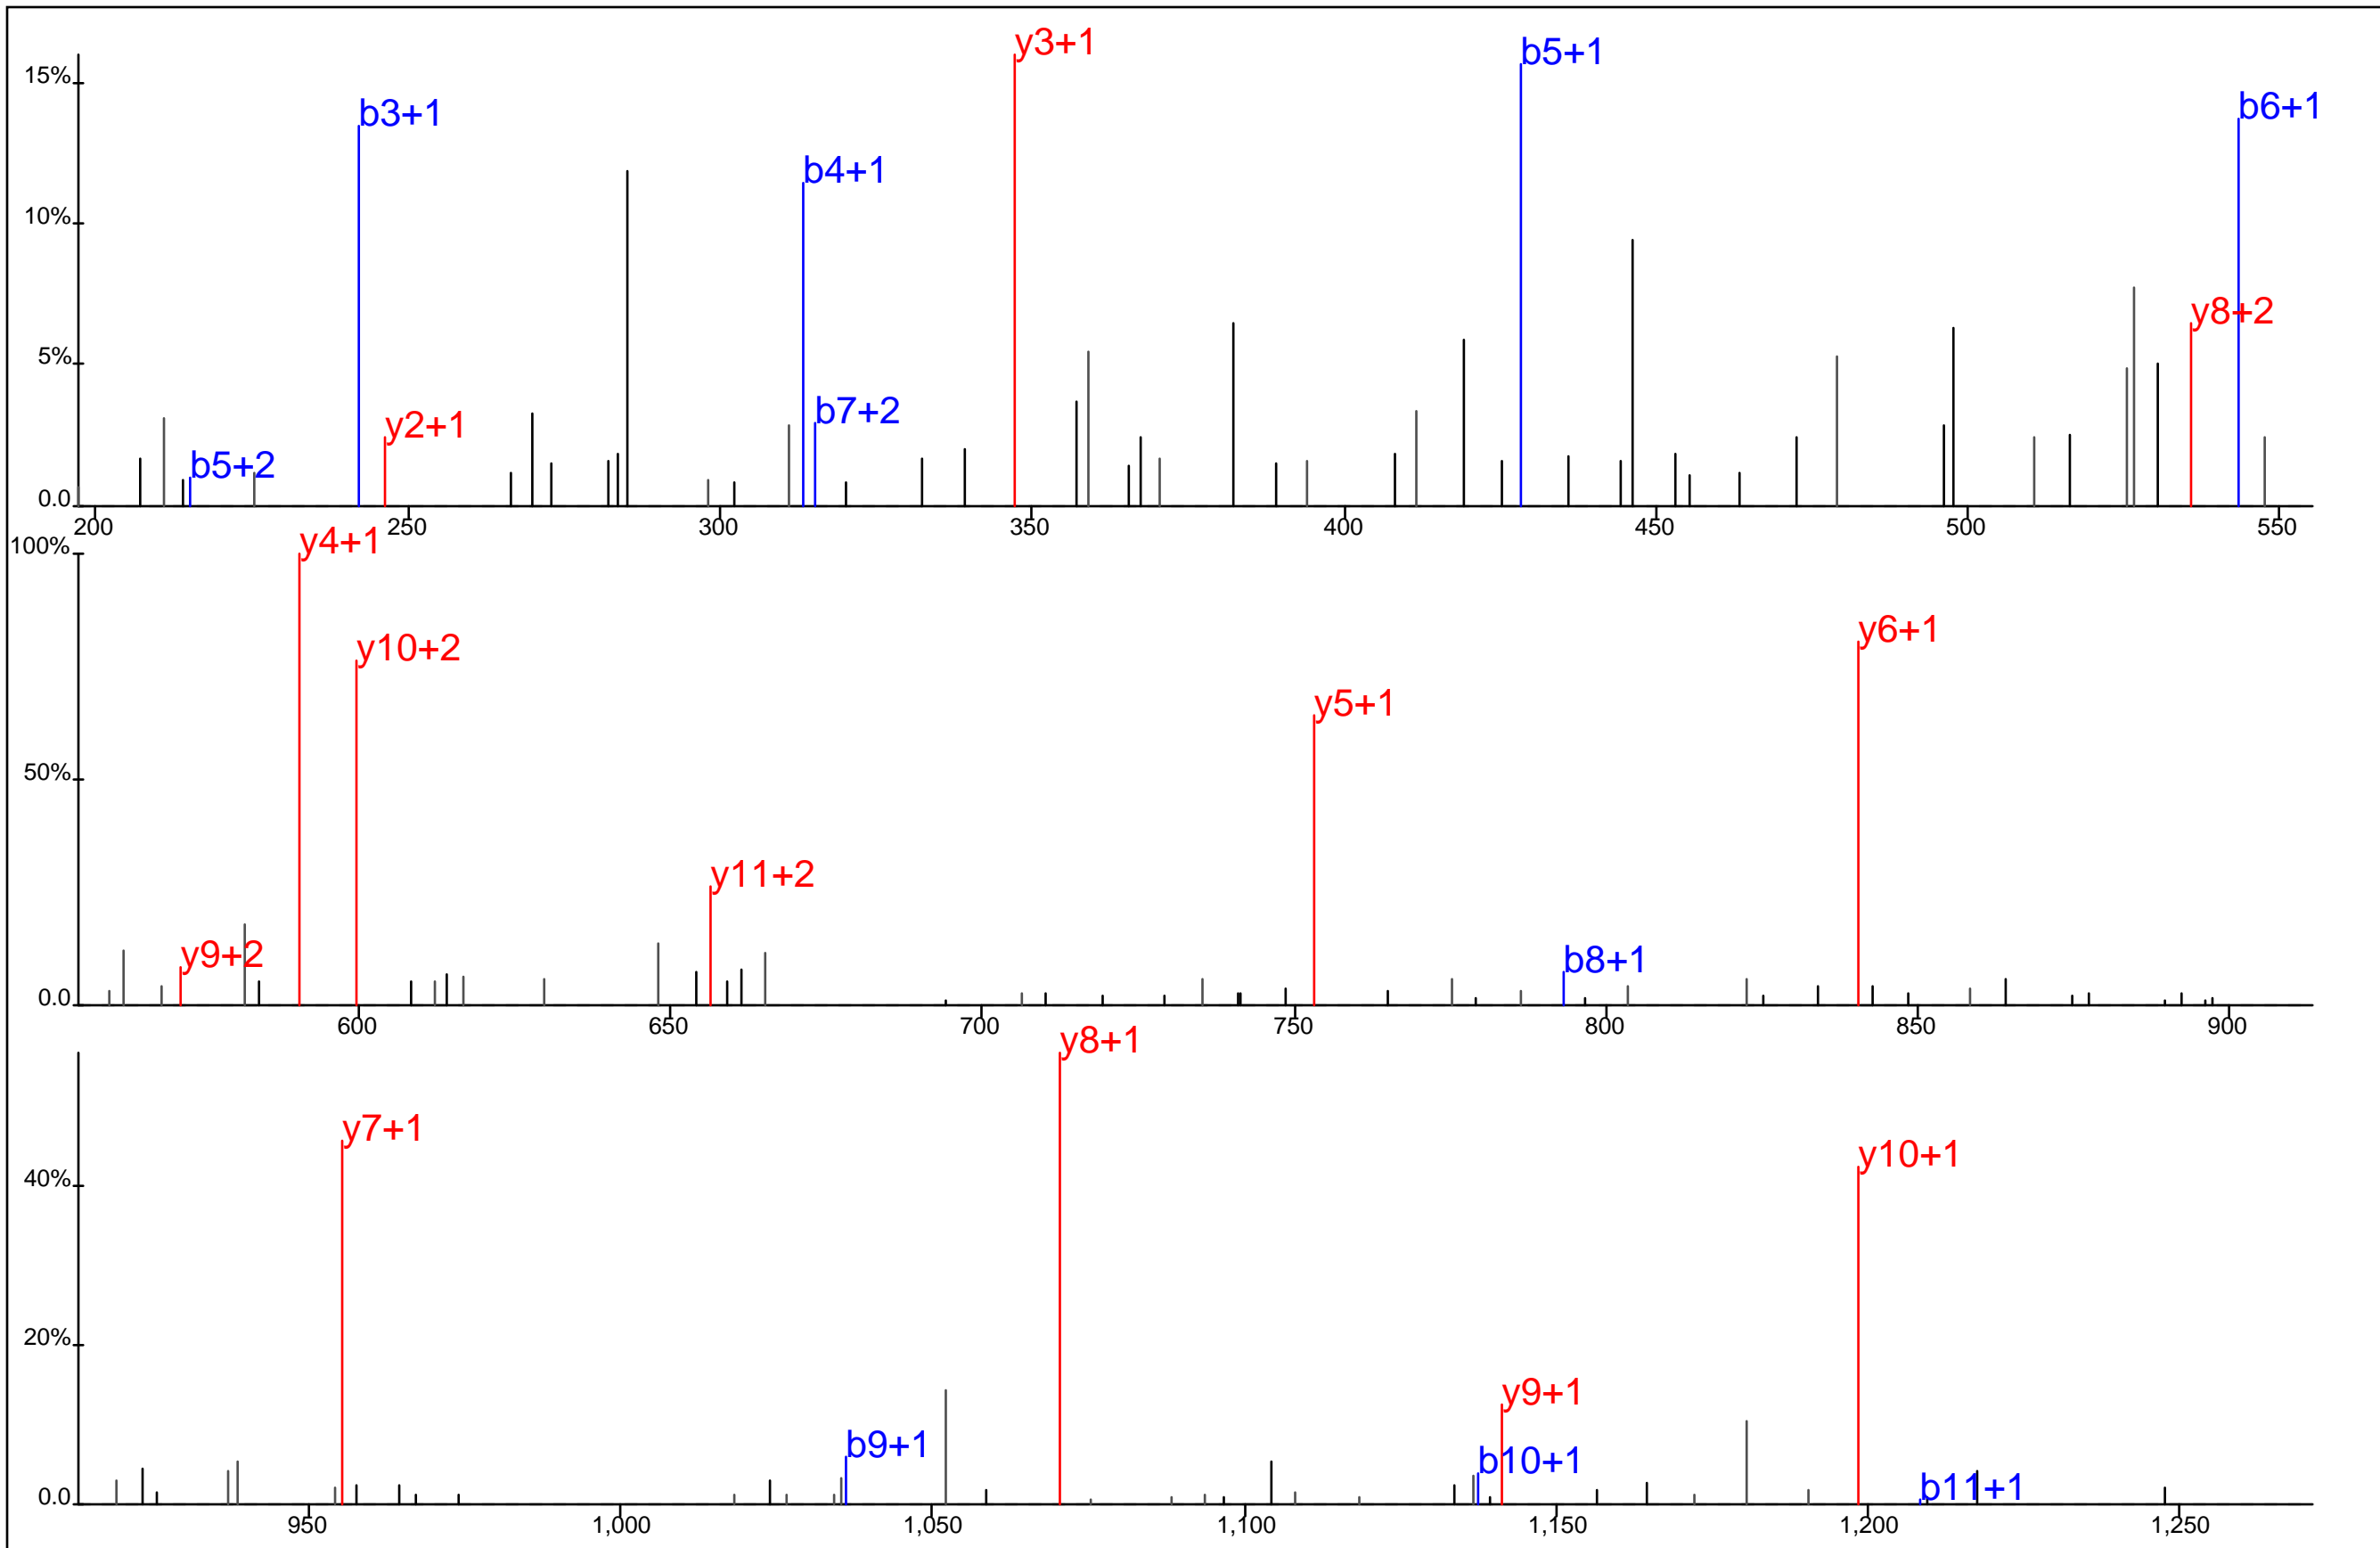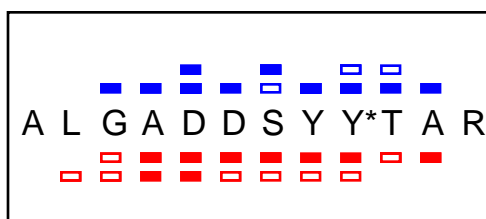

Protein Name: ZAP70  
 gi Accession: 0  
 Precursor Mass: 691.7836+2  
 Delta Mass: 1.815 ppm  
 XCorr: 79.65

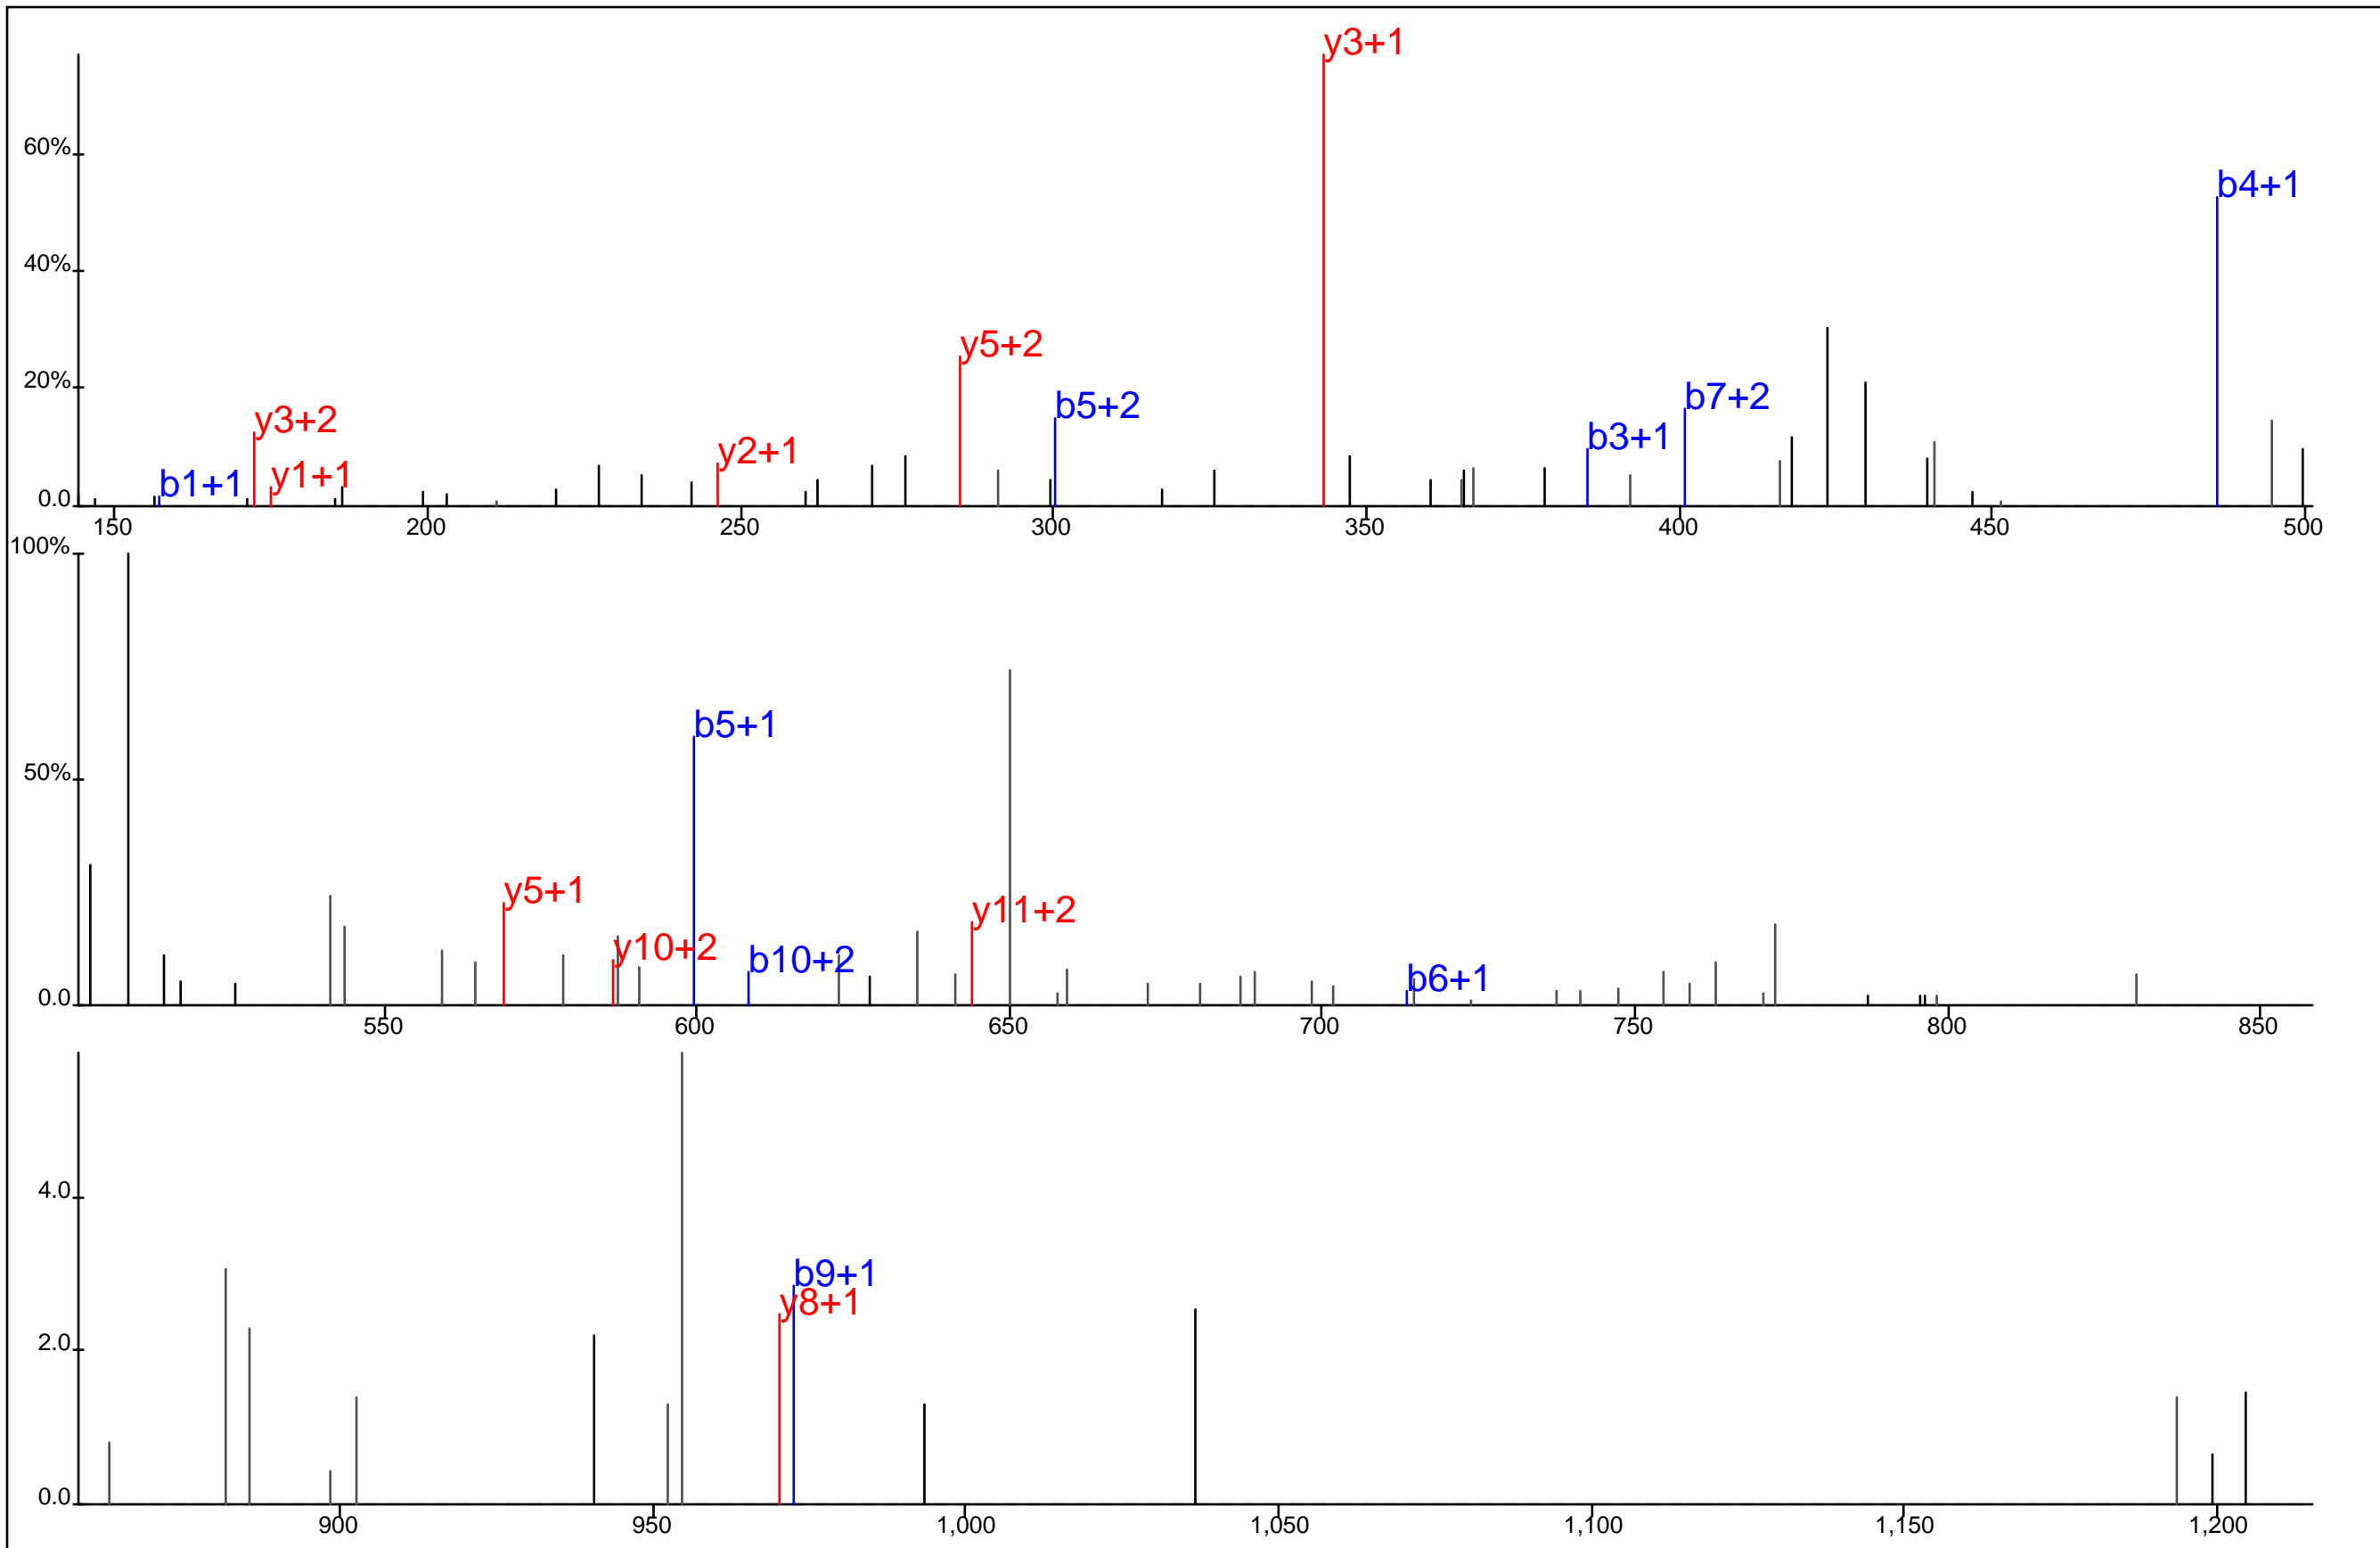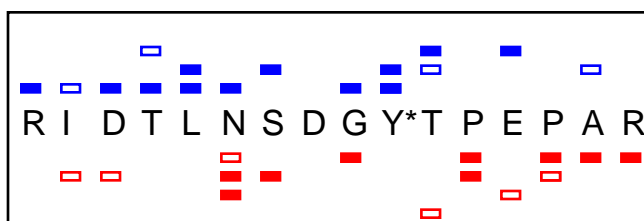

Protein Name: ZAP70  
 gi Accession: 0  
 Precursor Mass: 471.9677+4  
 Delta Mass: 0.094 ppm  
 XCorr: 24.24

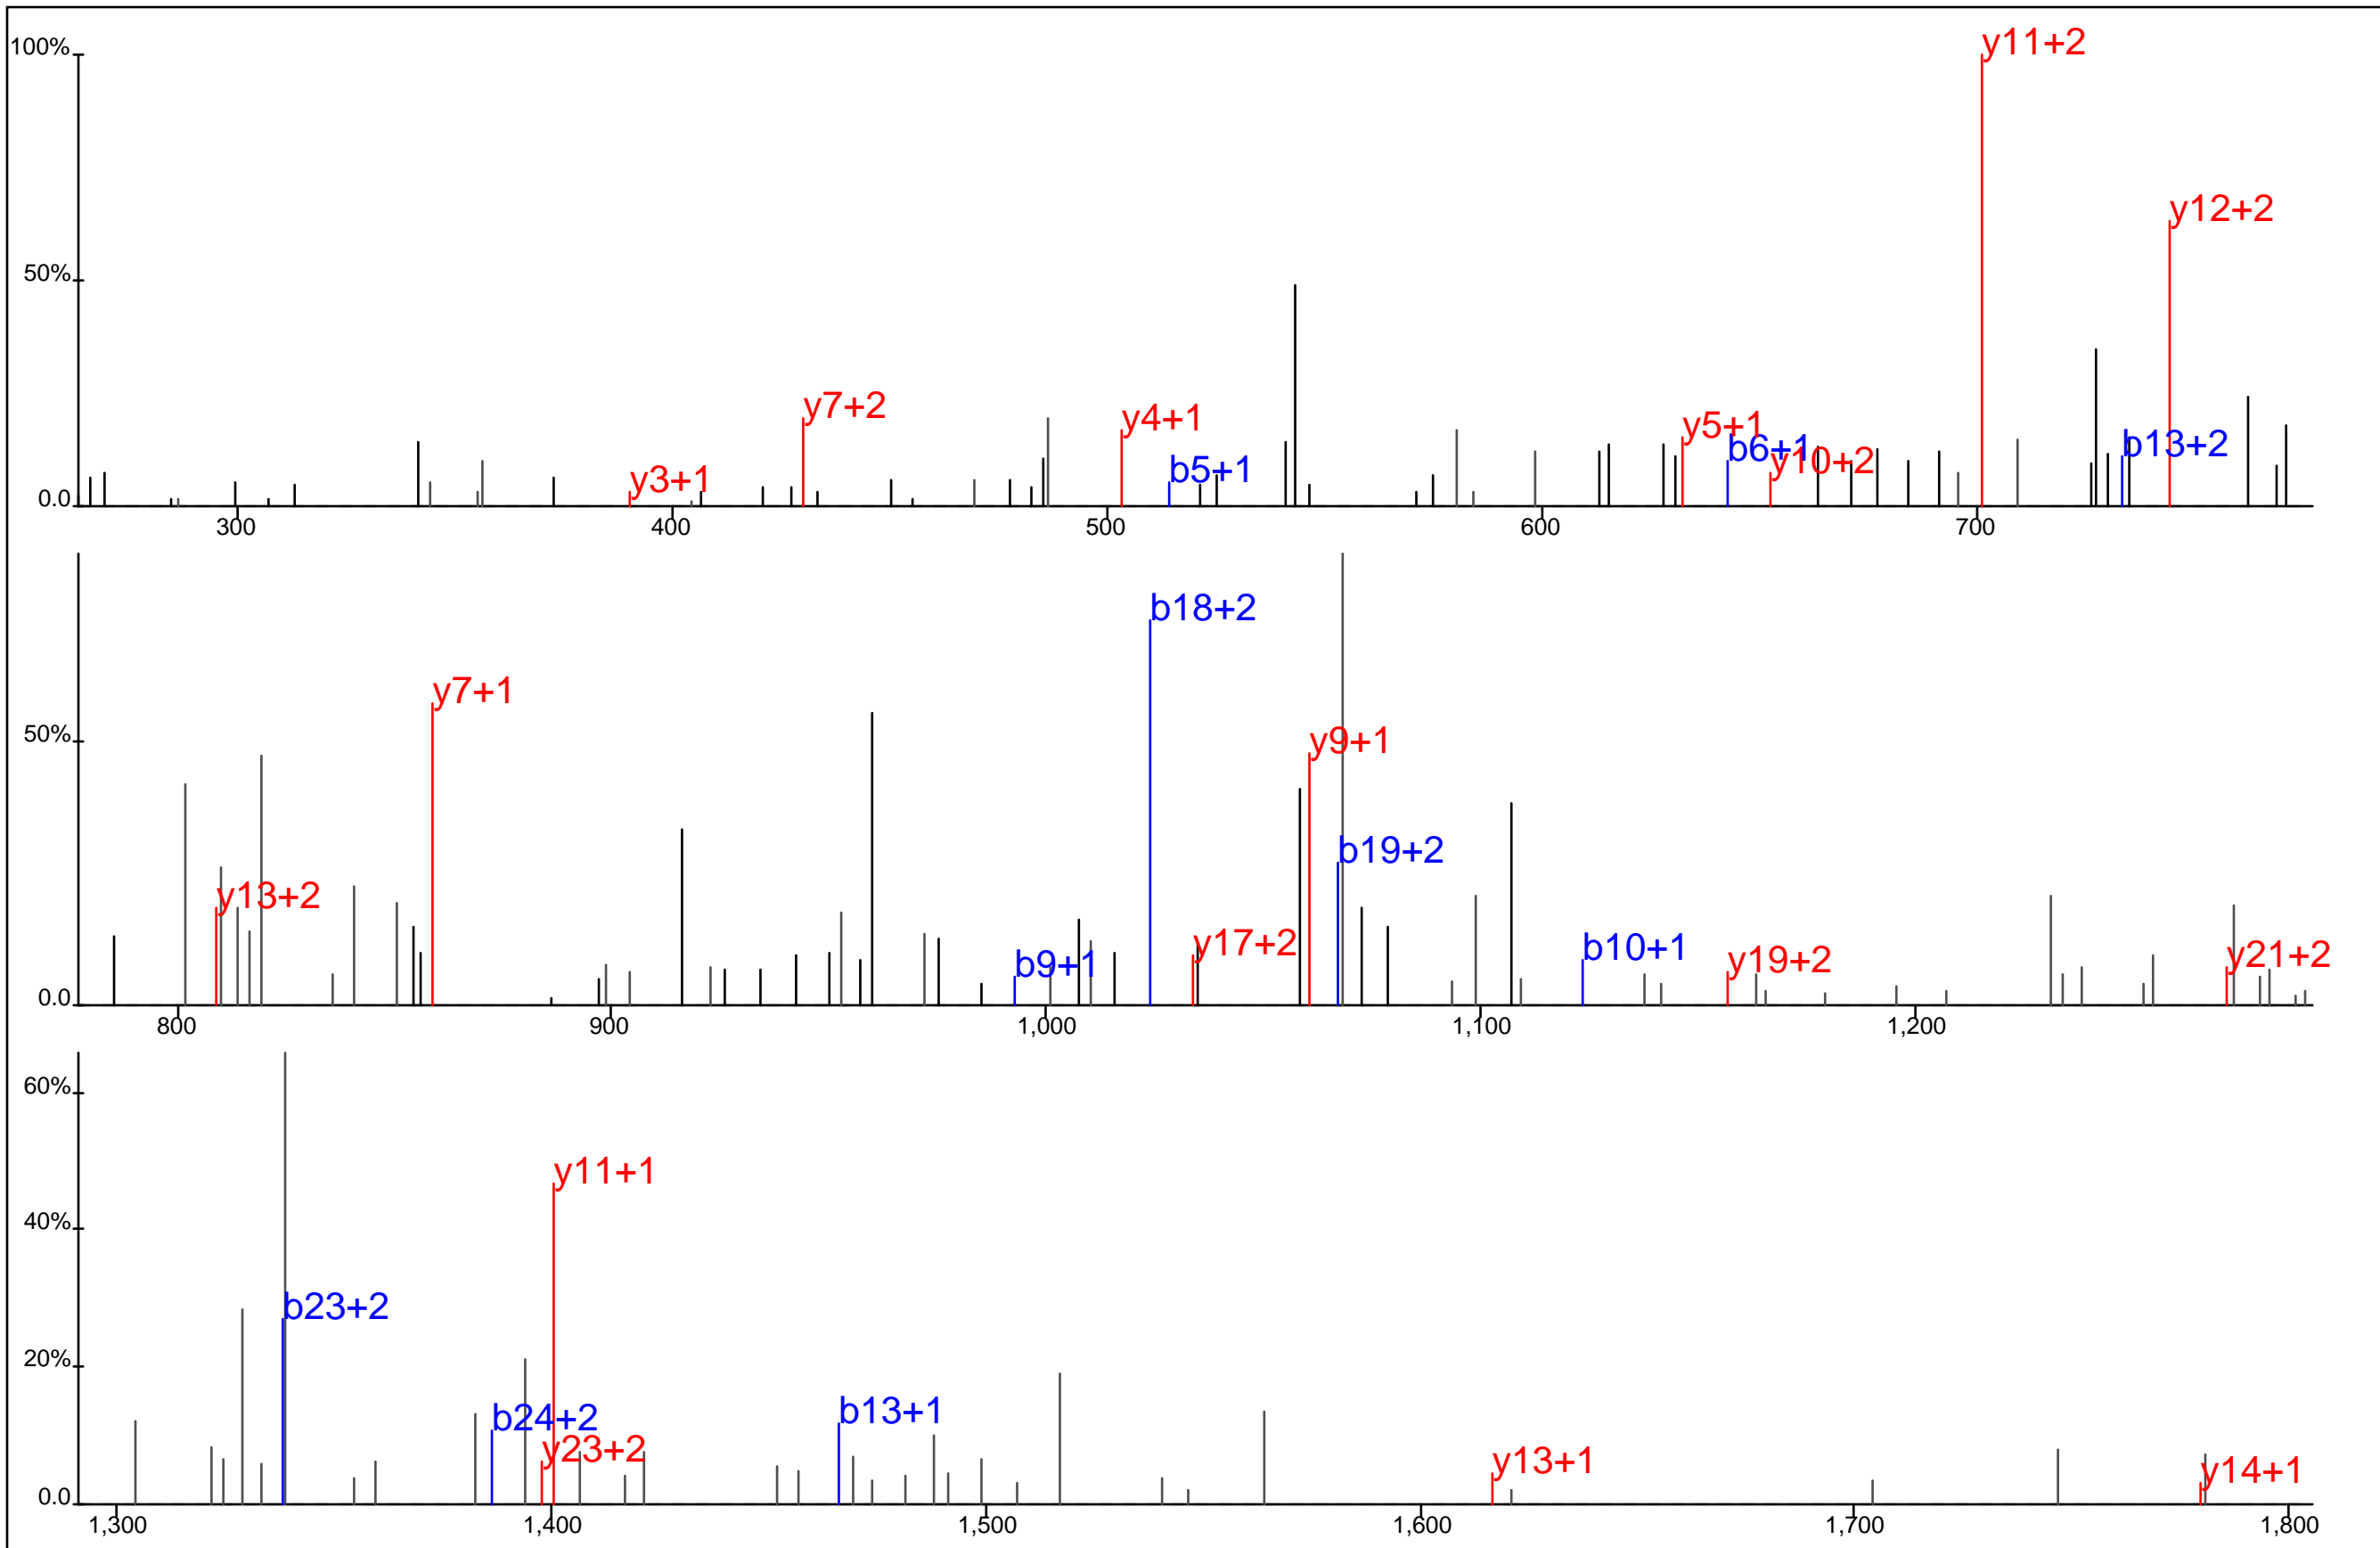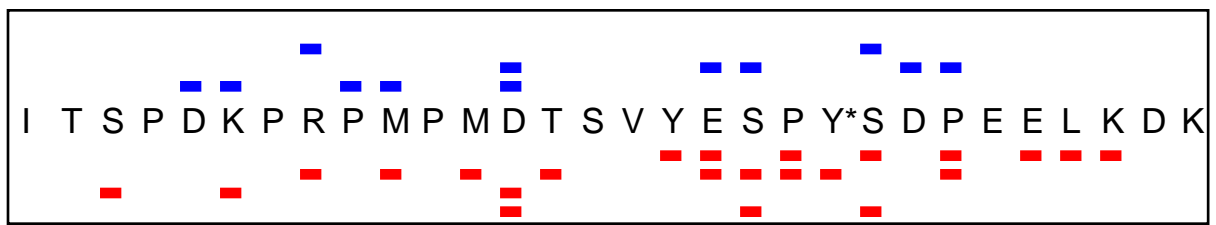

Protein Name: ZAP70  
 gi Accession: 0  
 Precursor Mass: 883.9019+4  
 Delta Mass: 1.220 ppm  
 XCorr: 20.73



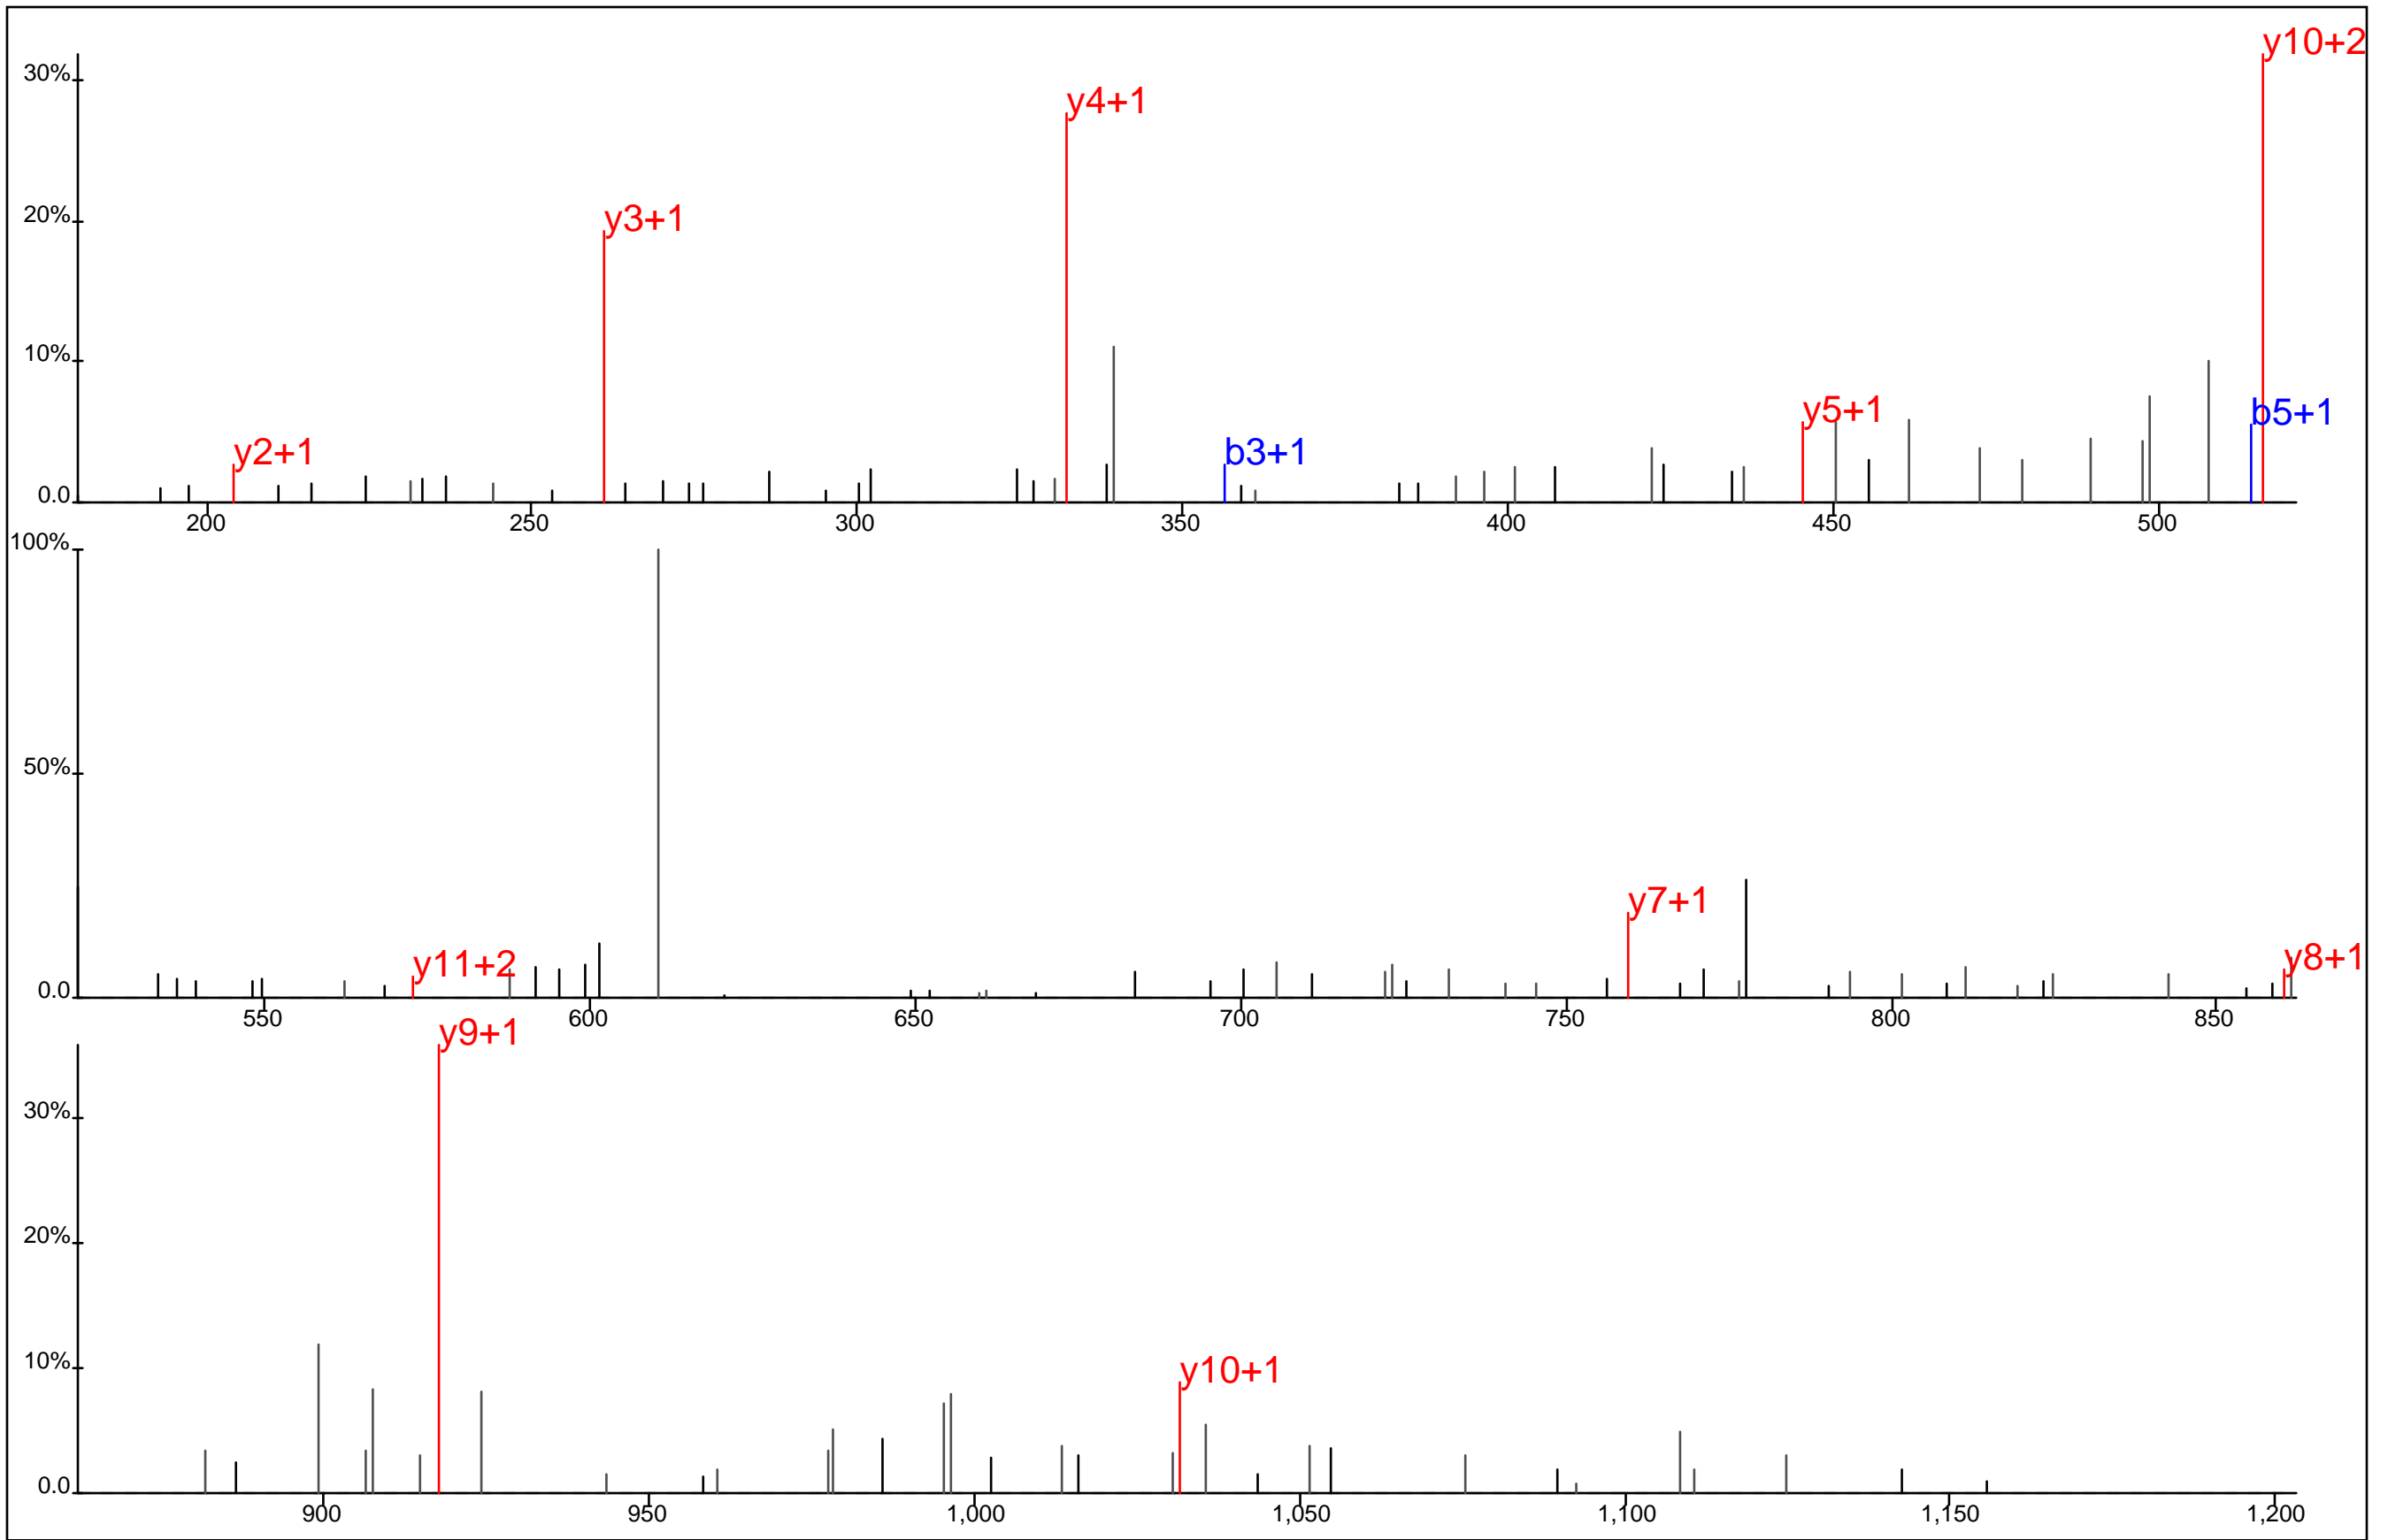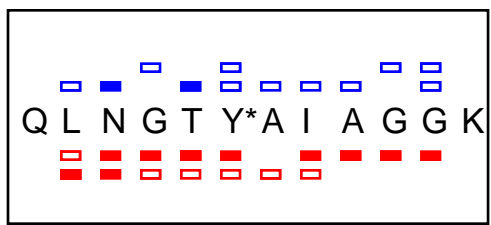

Protein Name: ZAP70  
 gi Accession: 0  
 Precursor Mass: 636.8057+2  
 Delta Mass: 4.559 ppm  
 XCorr: 49.56

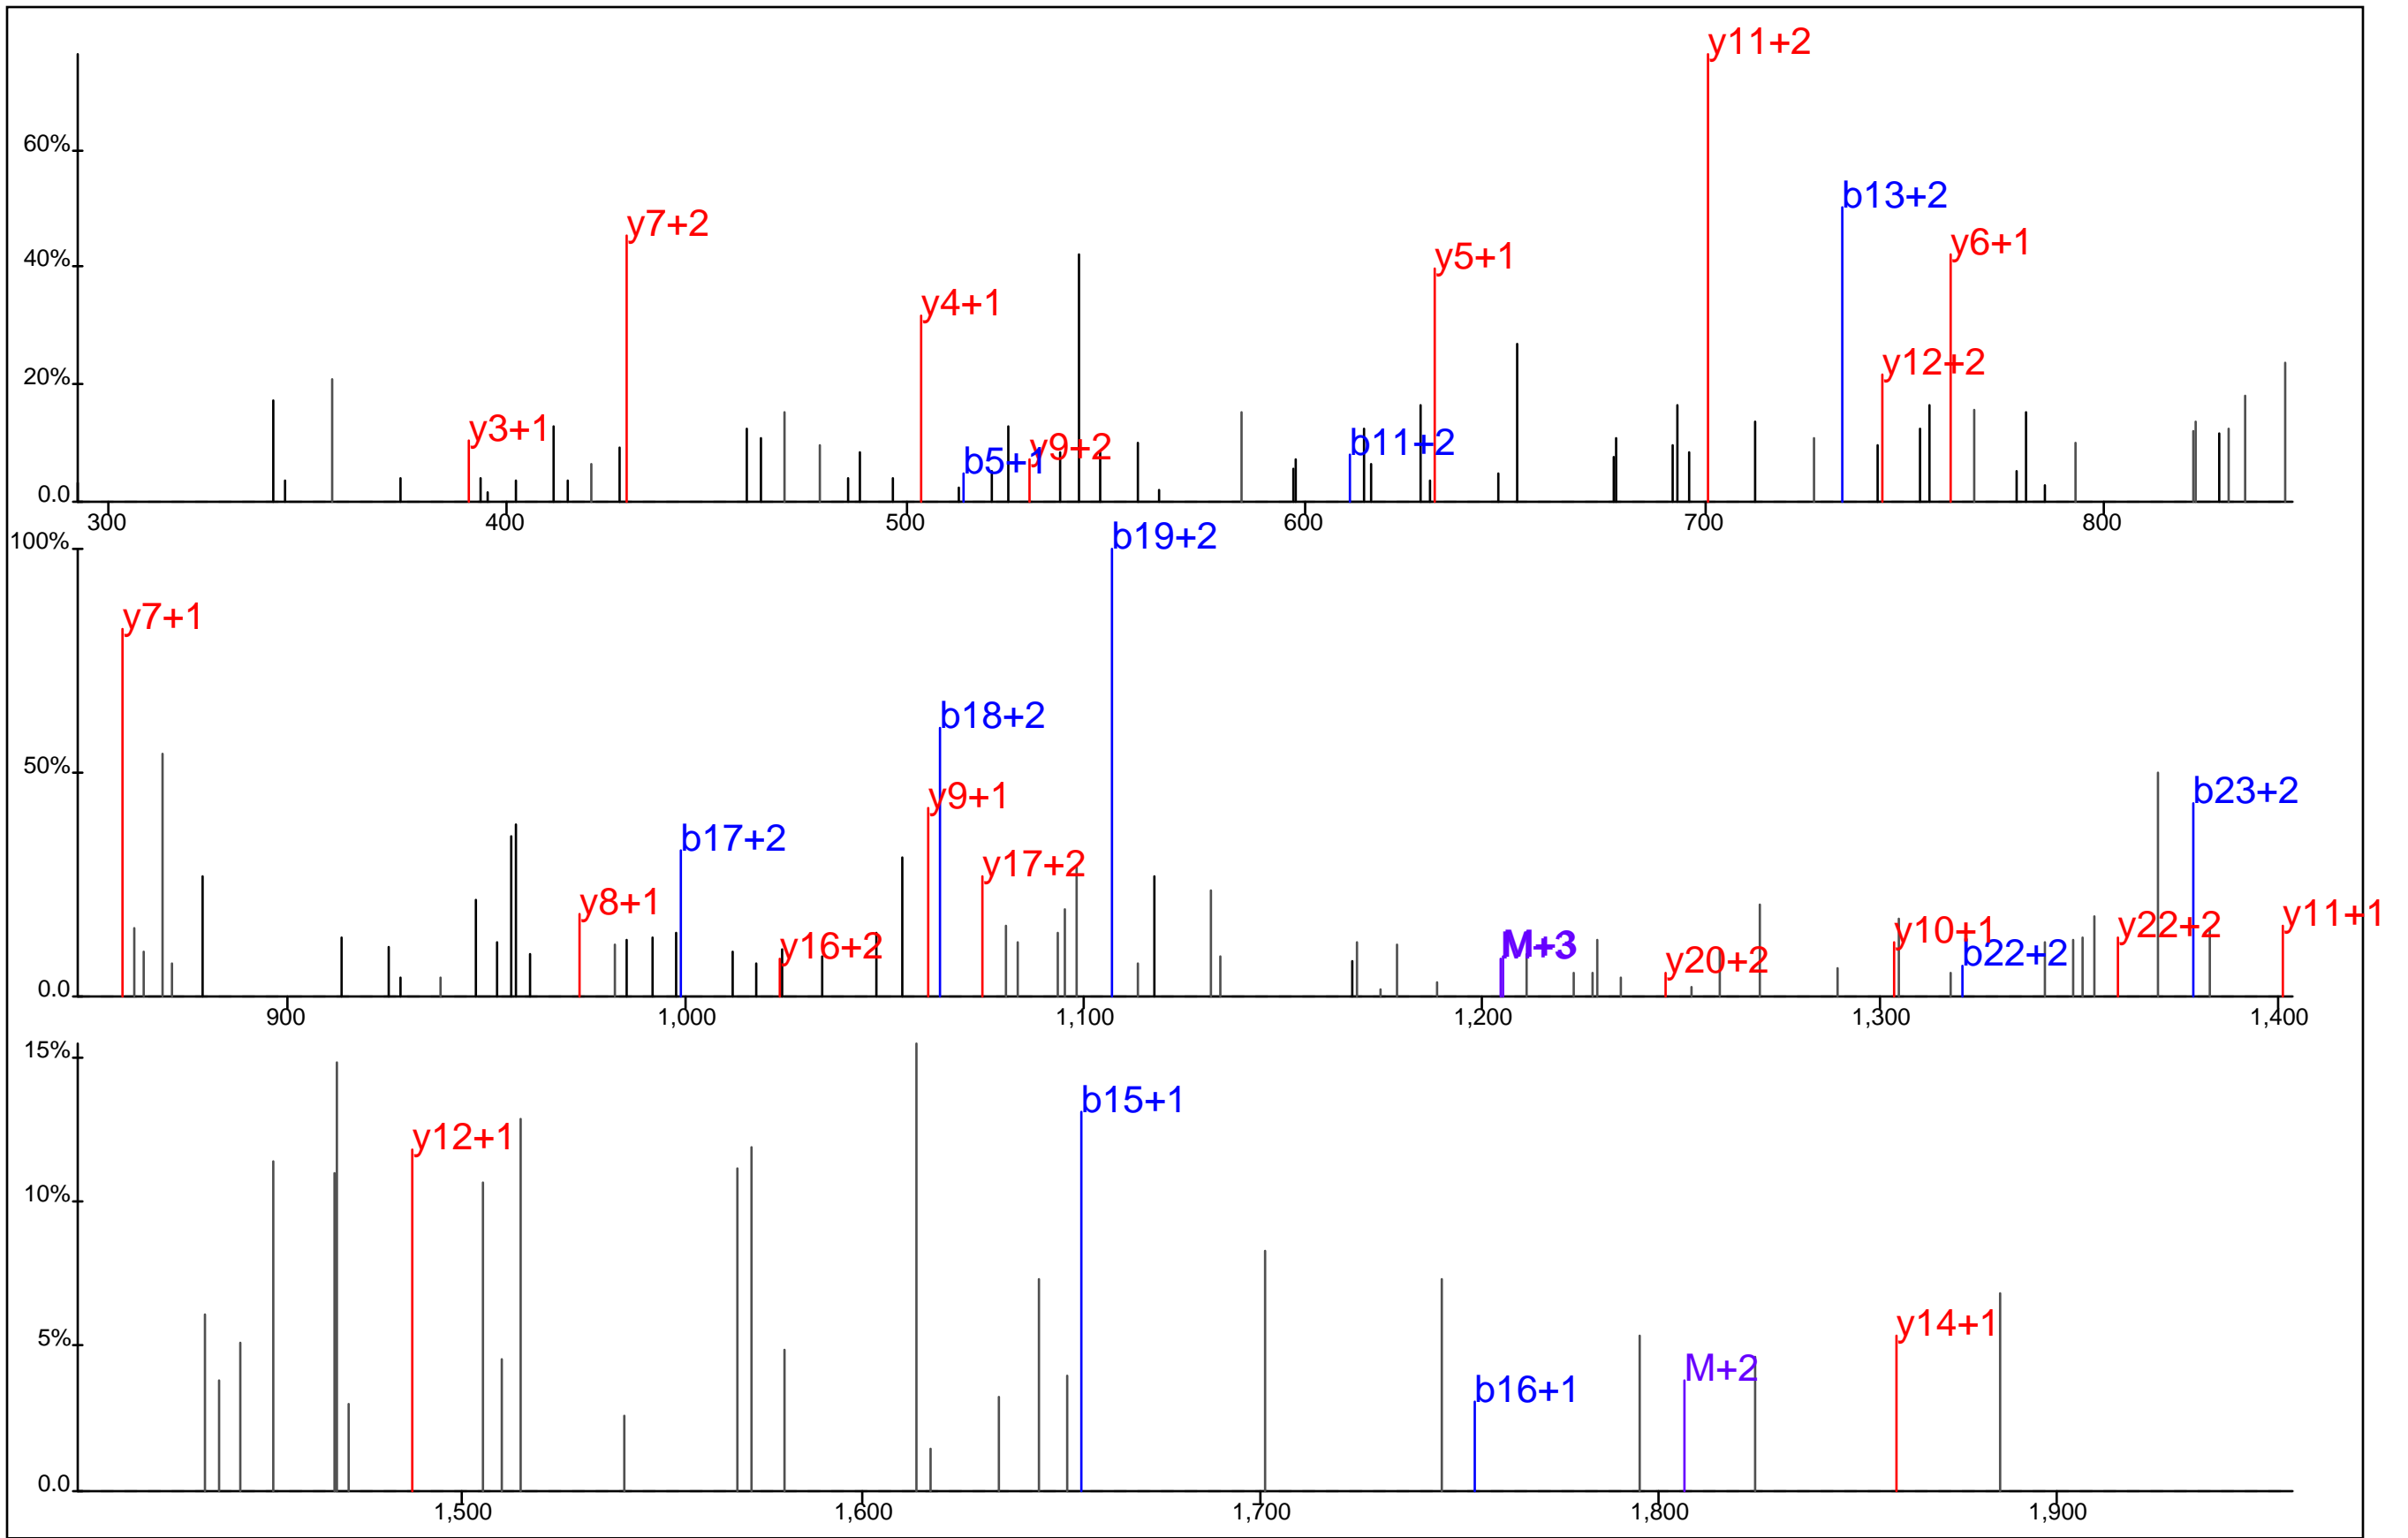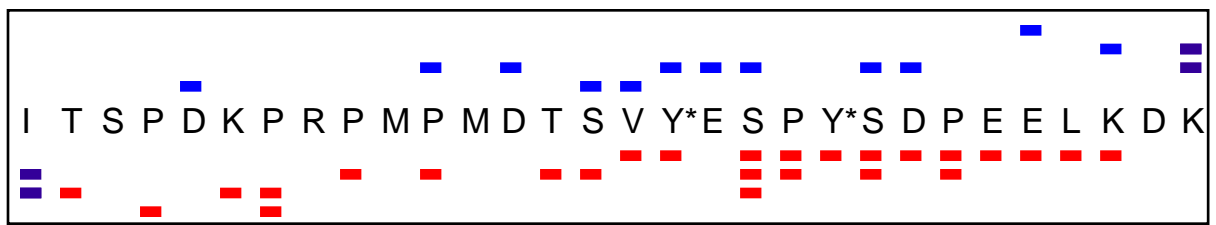

Protein Name: ZAP70  
 gi Accession: 0  
 Precursor Mass: 903.8948+4  
 Delta Mass: 0.291 ppm  
 XCorr: 28.92

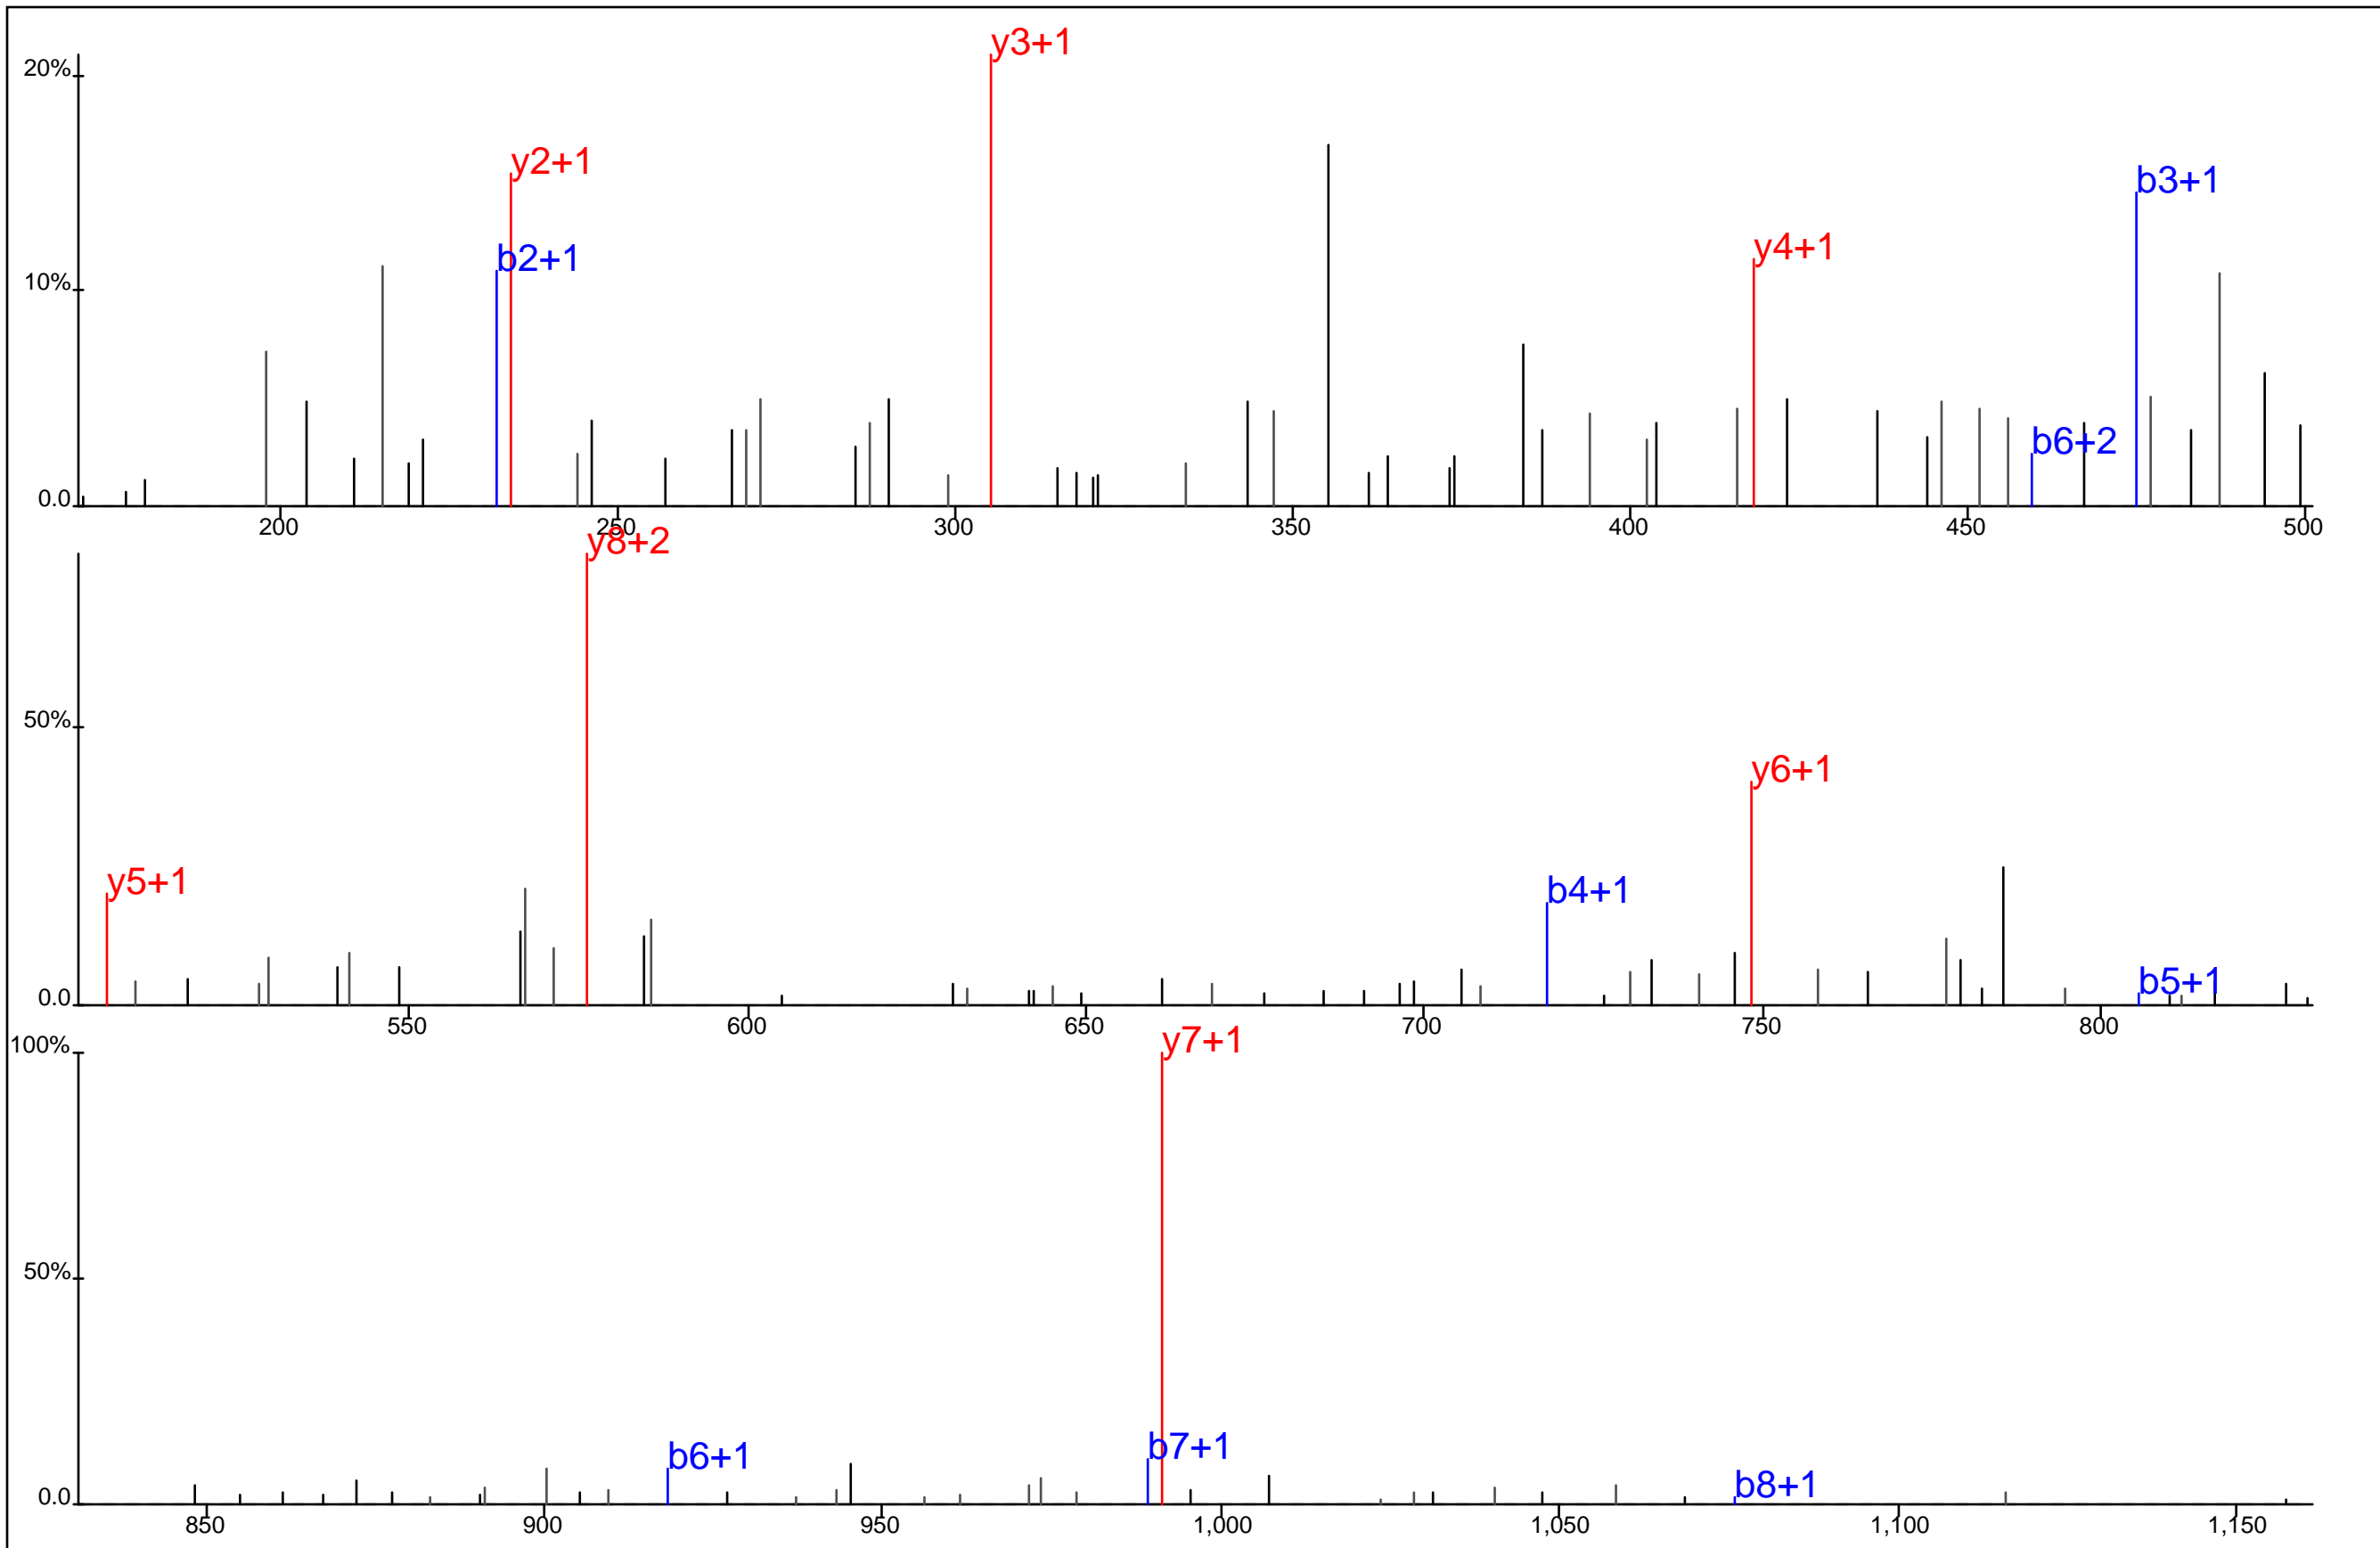

■ ■ ■ ■ ■ ■ ■  
 A C Y\* Y\* S L A S K  
■ ■ ■ ■ ■ ■ ■

Protein Name: ZAP70  
 gi Accession: 0  
 Precursor Mass: 611.7166+2  
 Delta Mass: 0.712 ppm  
 XCorr: 33.08

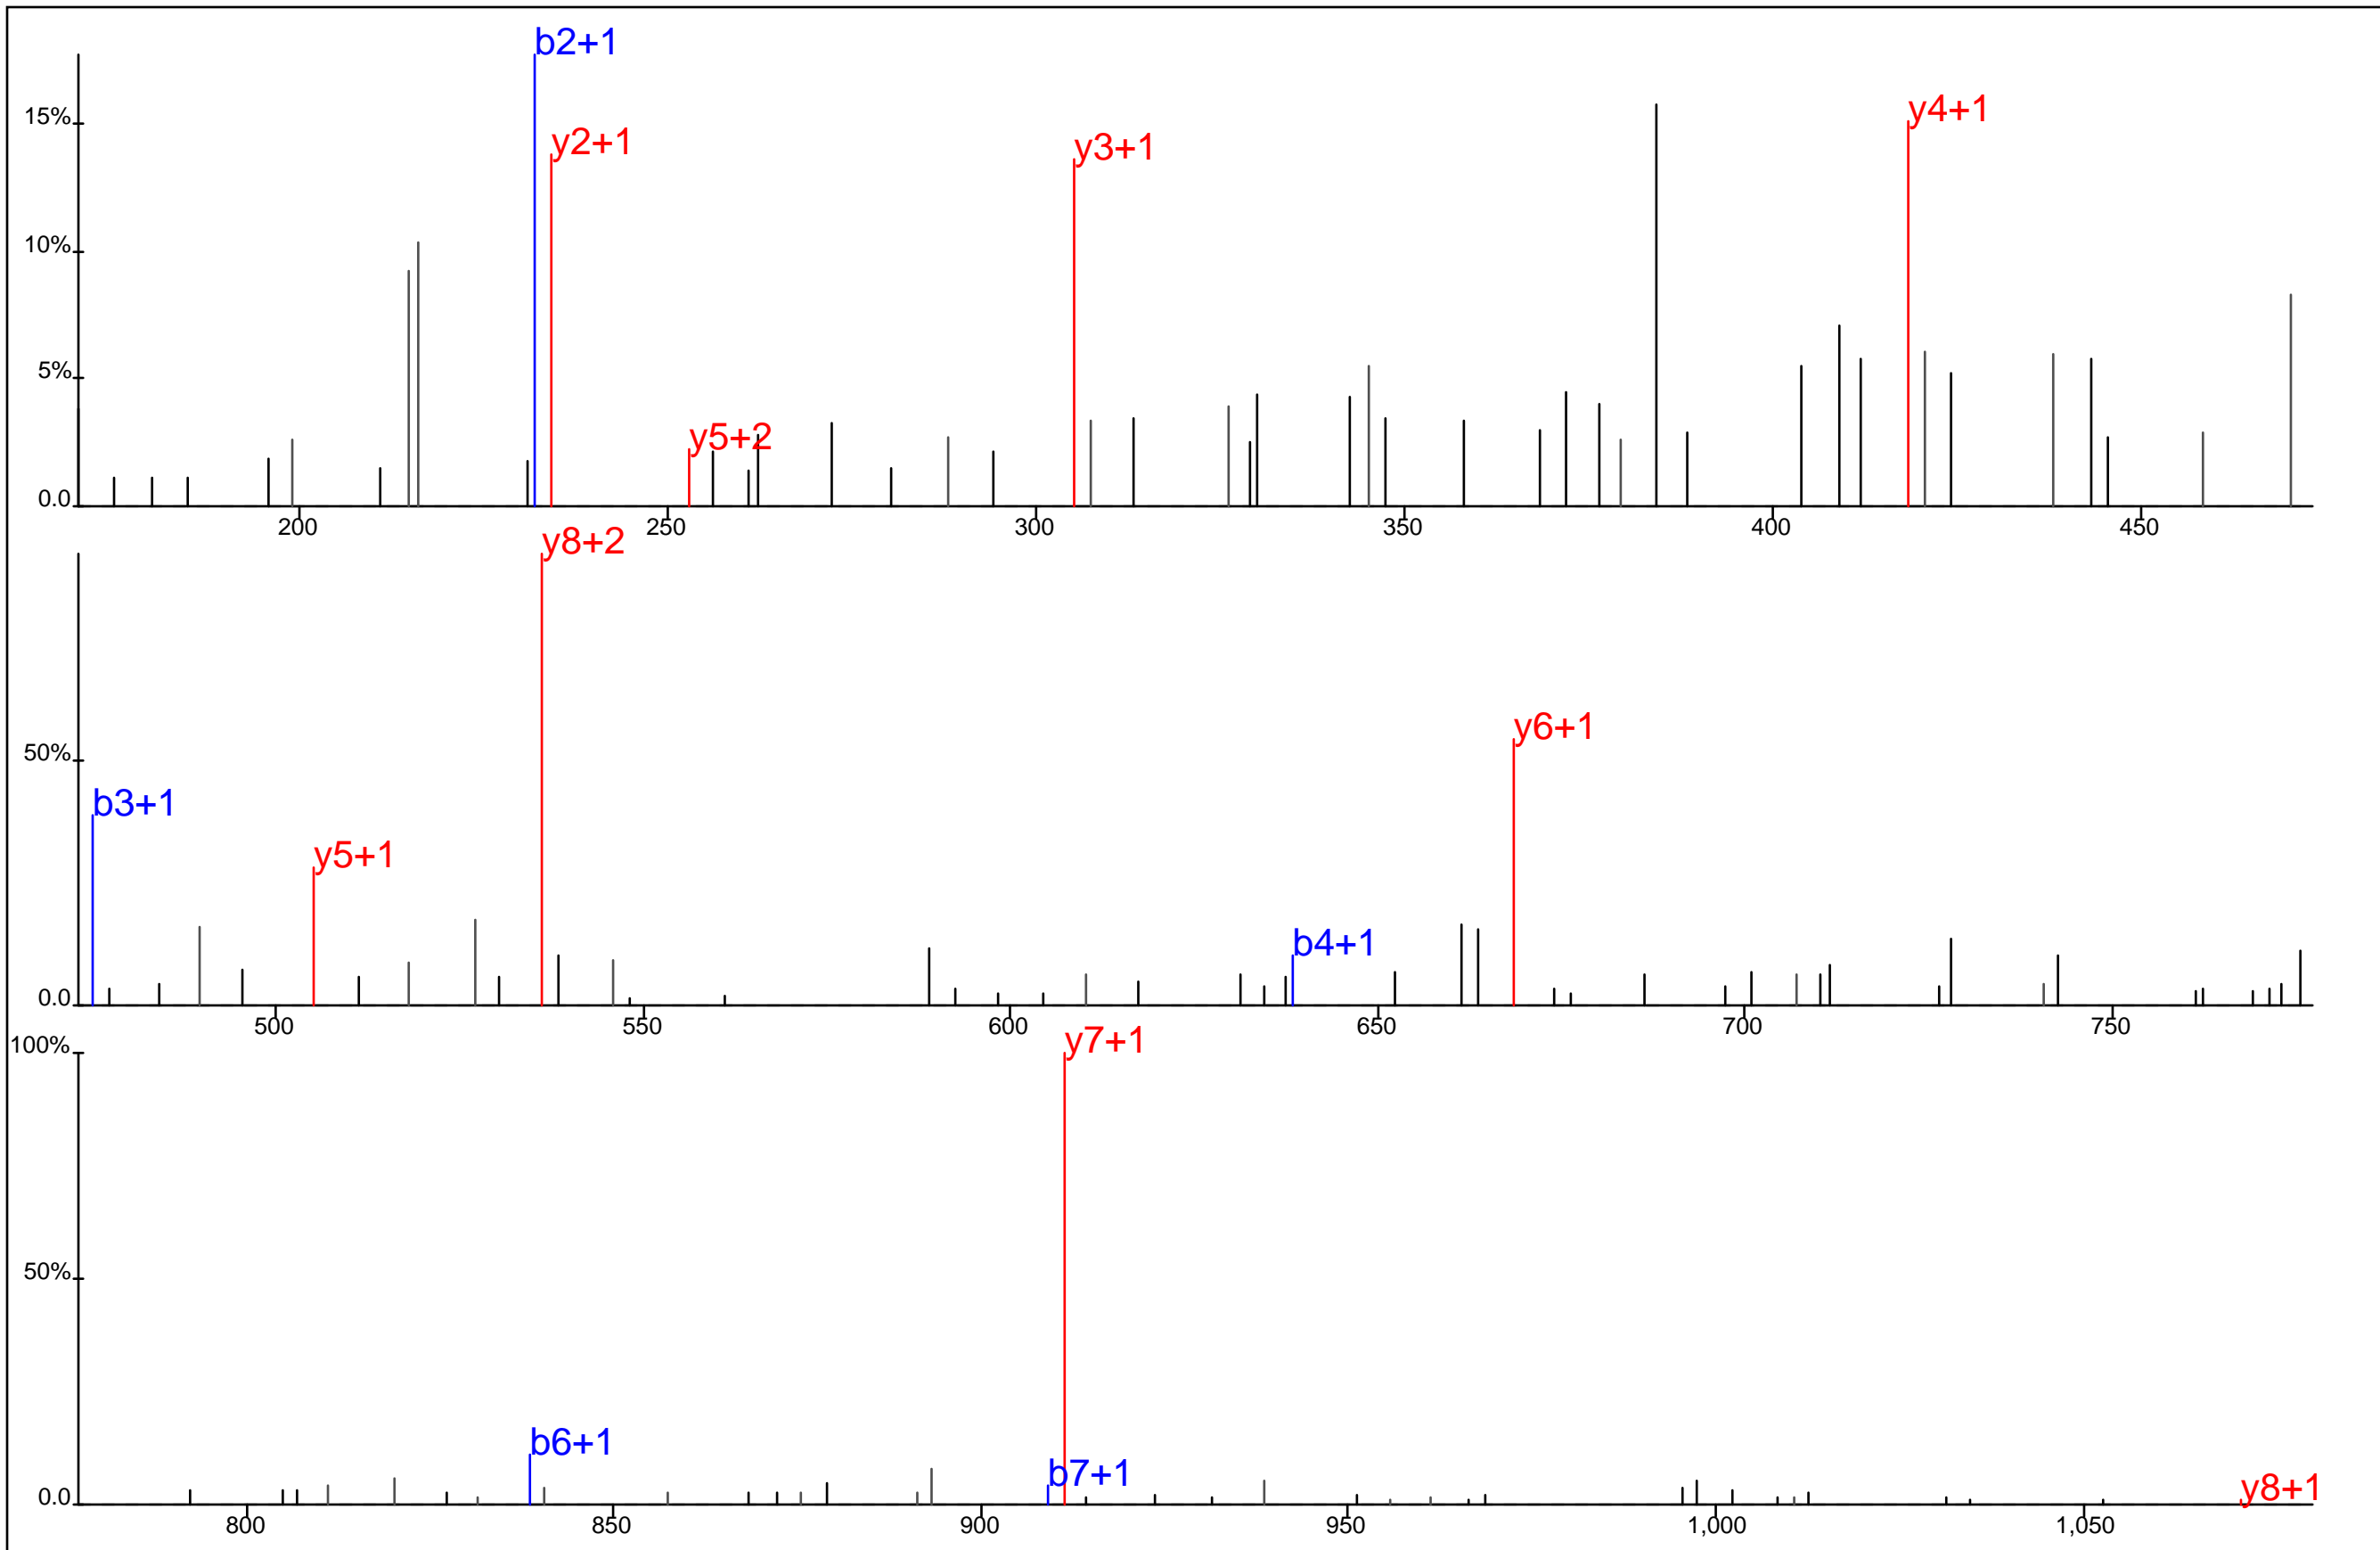

■ ■ ■ ■ ■ ■ ■ ■  
■ ■ ■ ■ ■ ■ ■ ■  
A C Y\* Y S L A S K

Protein Name: ZAP70  
 gi Accession: 0  
 Precursor Mass: 571.7339+2  
 Delta Mass: 1.635 ppm  
 XCorr: 38.61

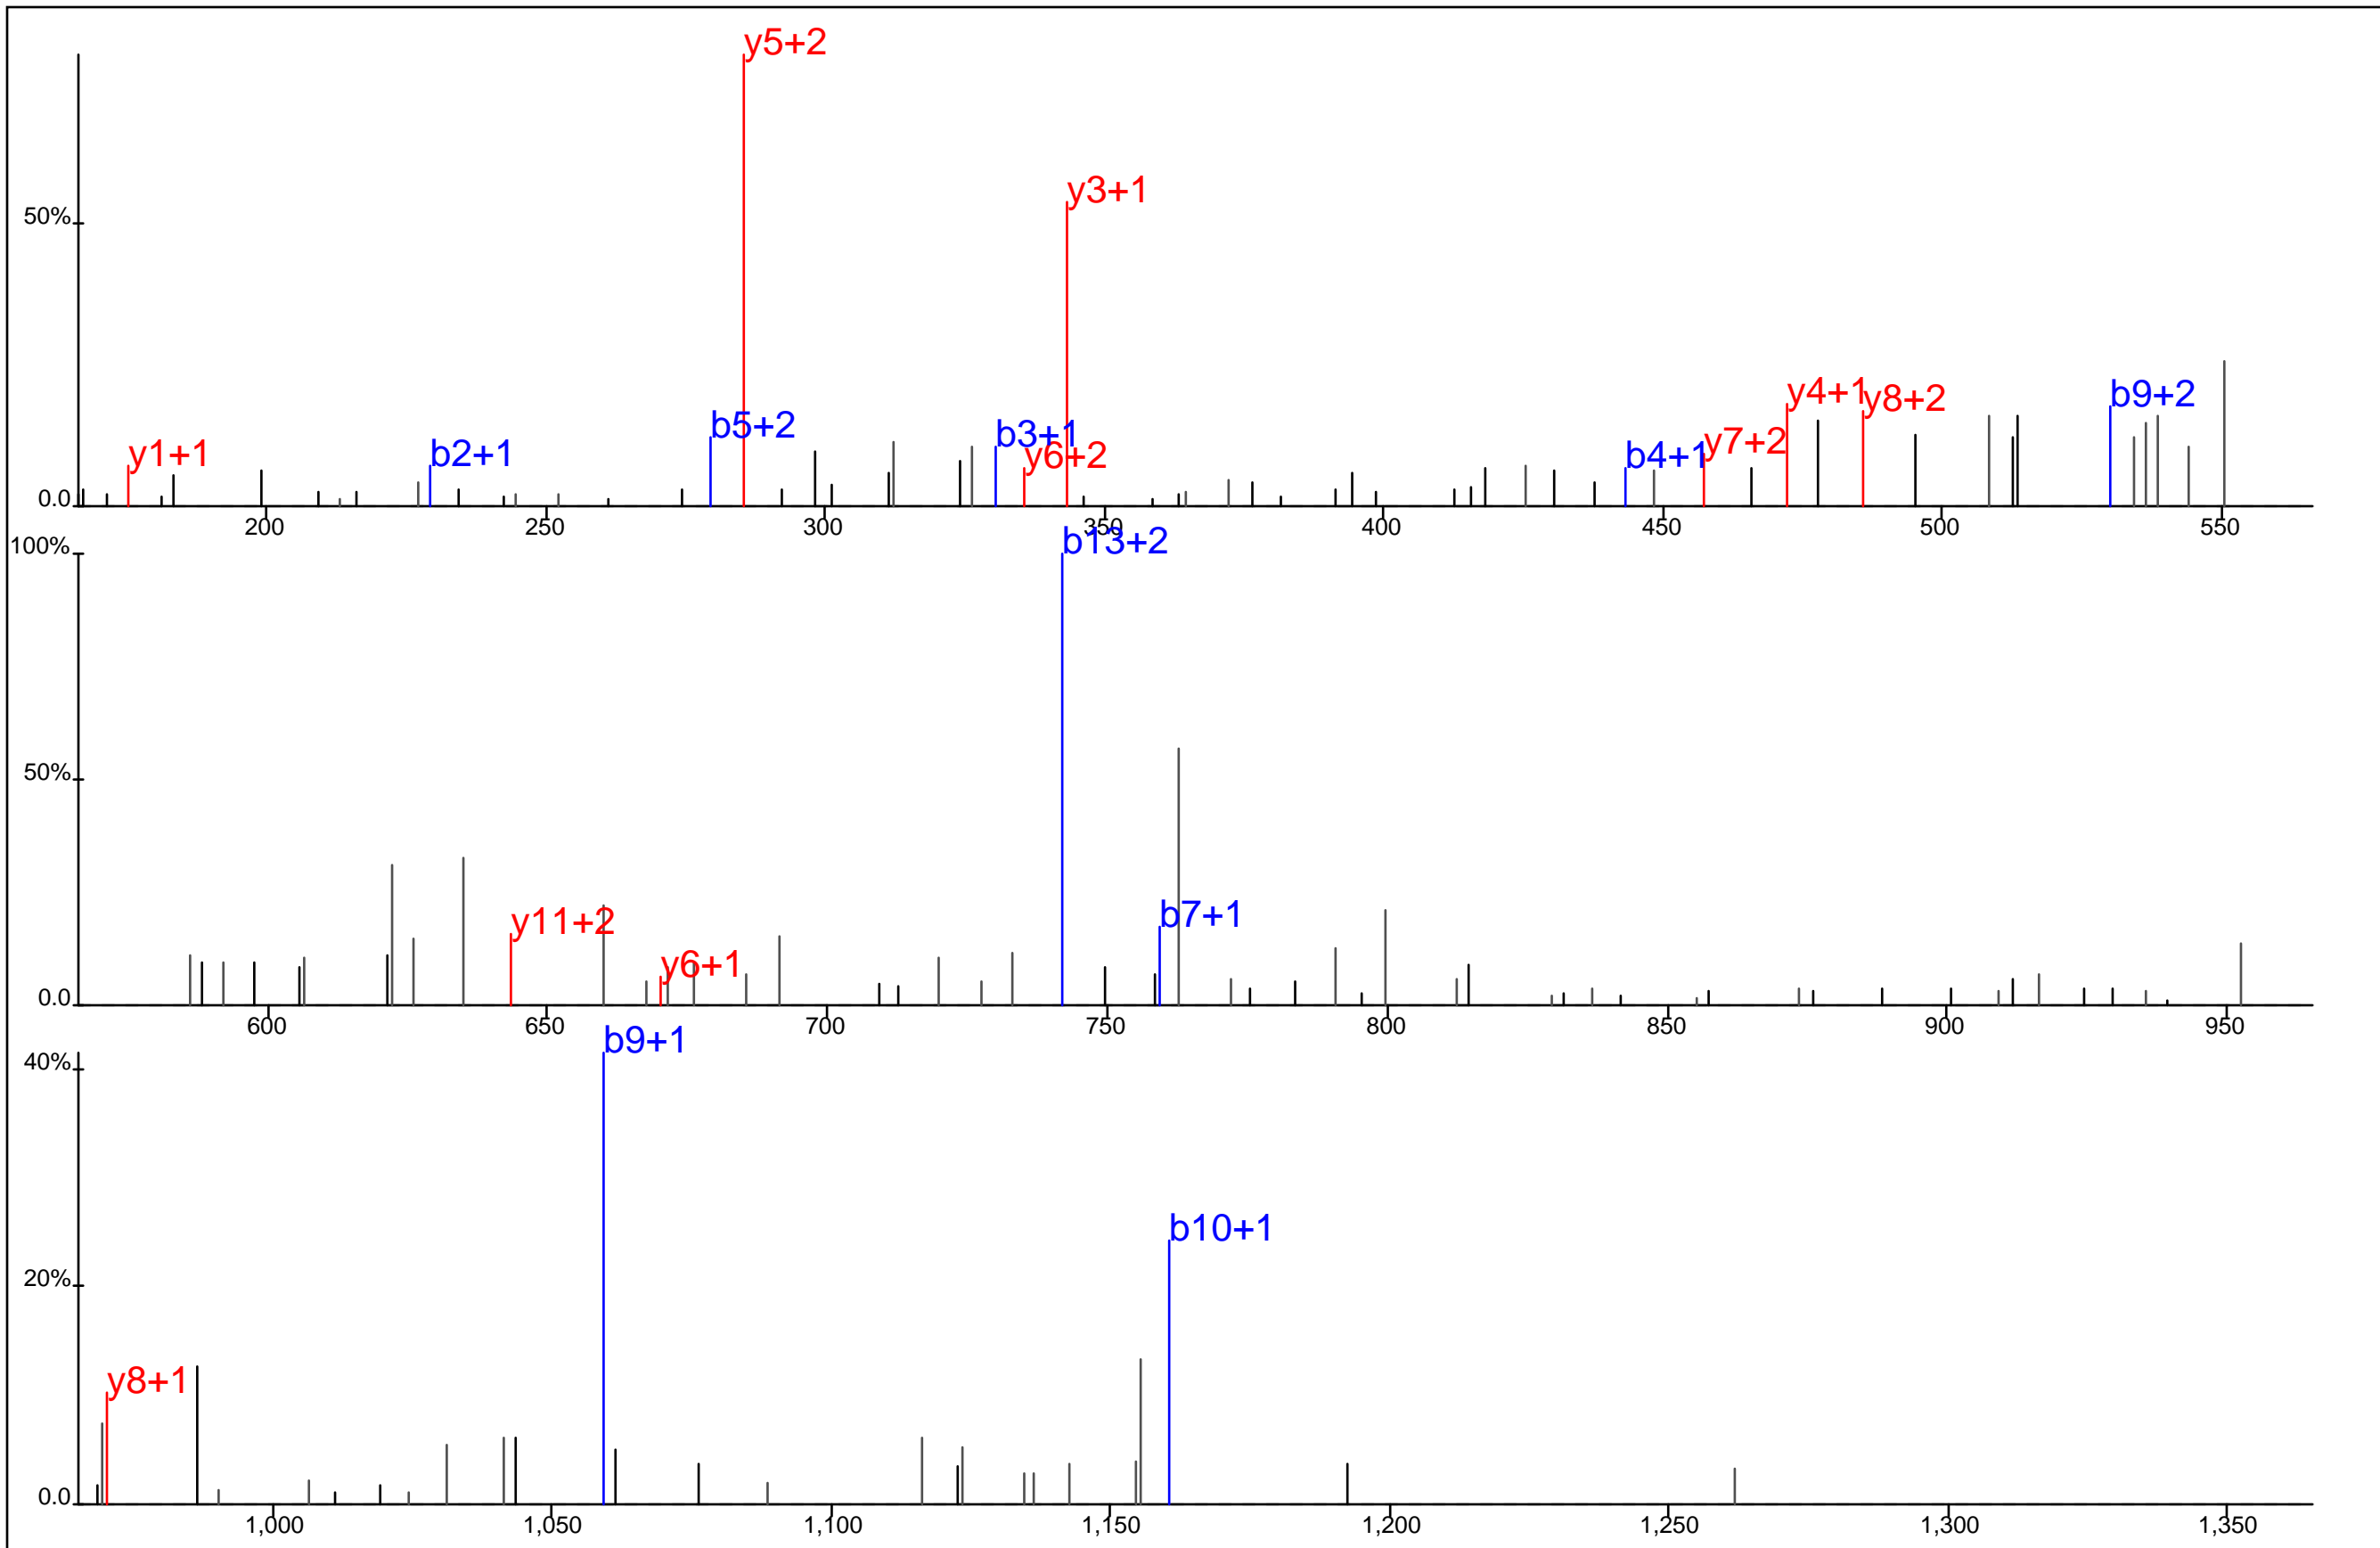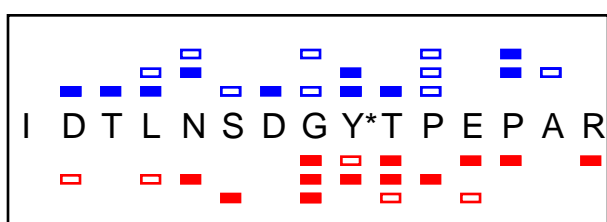

Protein Name: ZAP70  
 gi Accession: 0  
 Precursor Mass: 576.9199+3  
 Delta Mass: 1.393 ppm  
 XCorr: 25.69

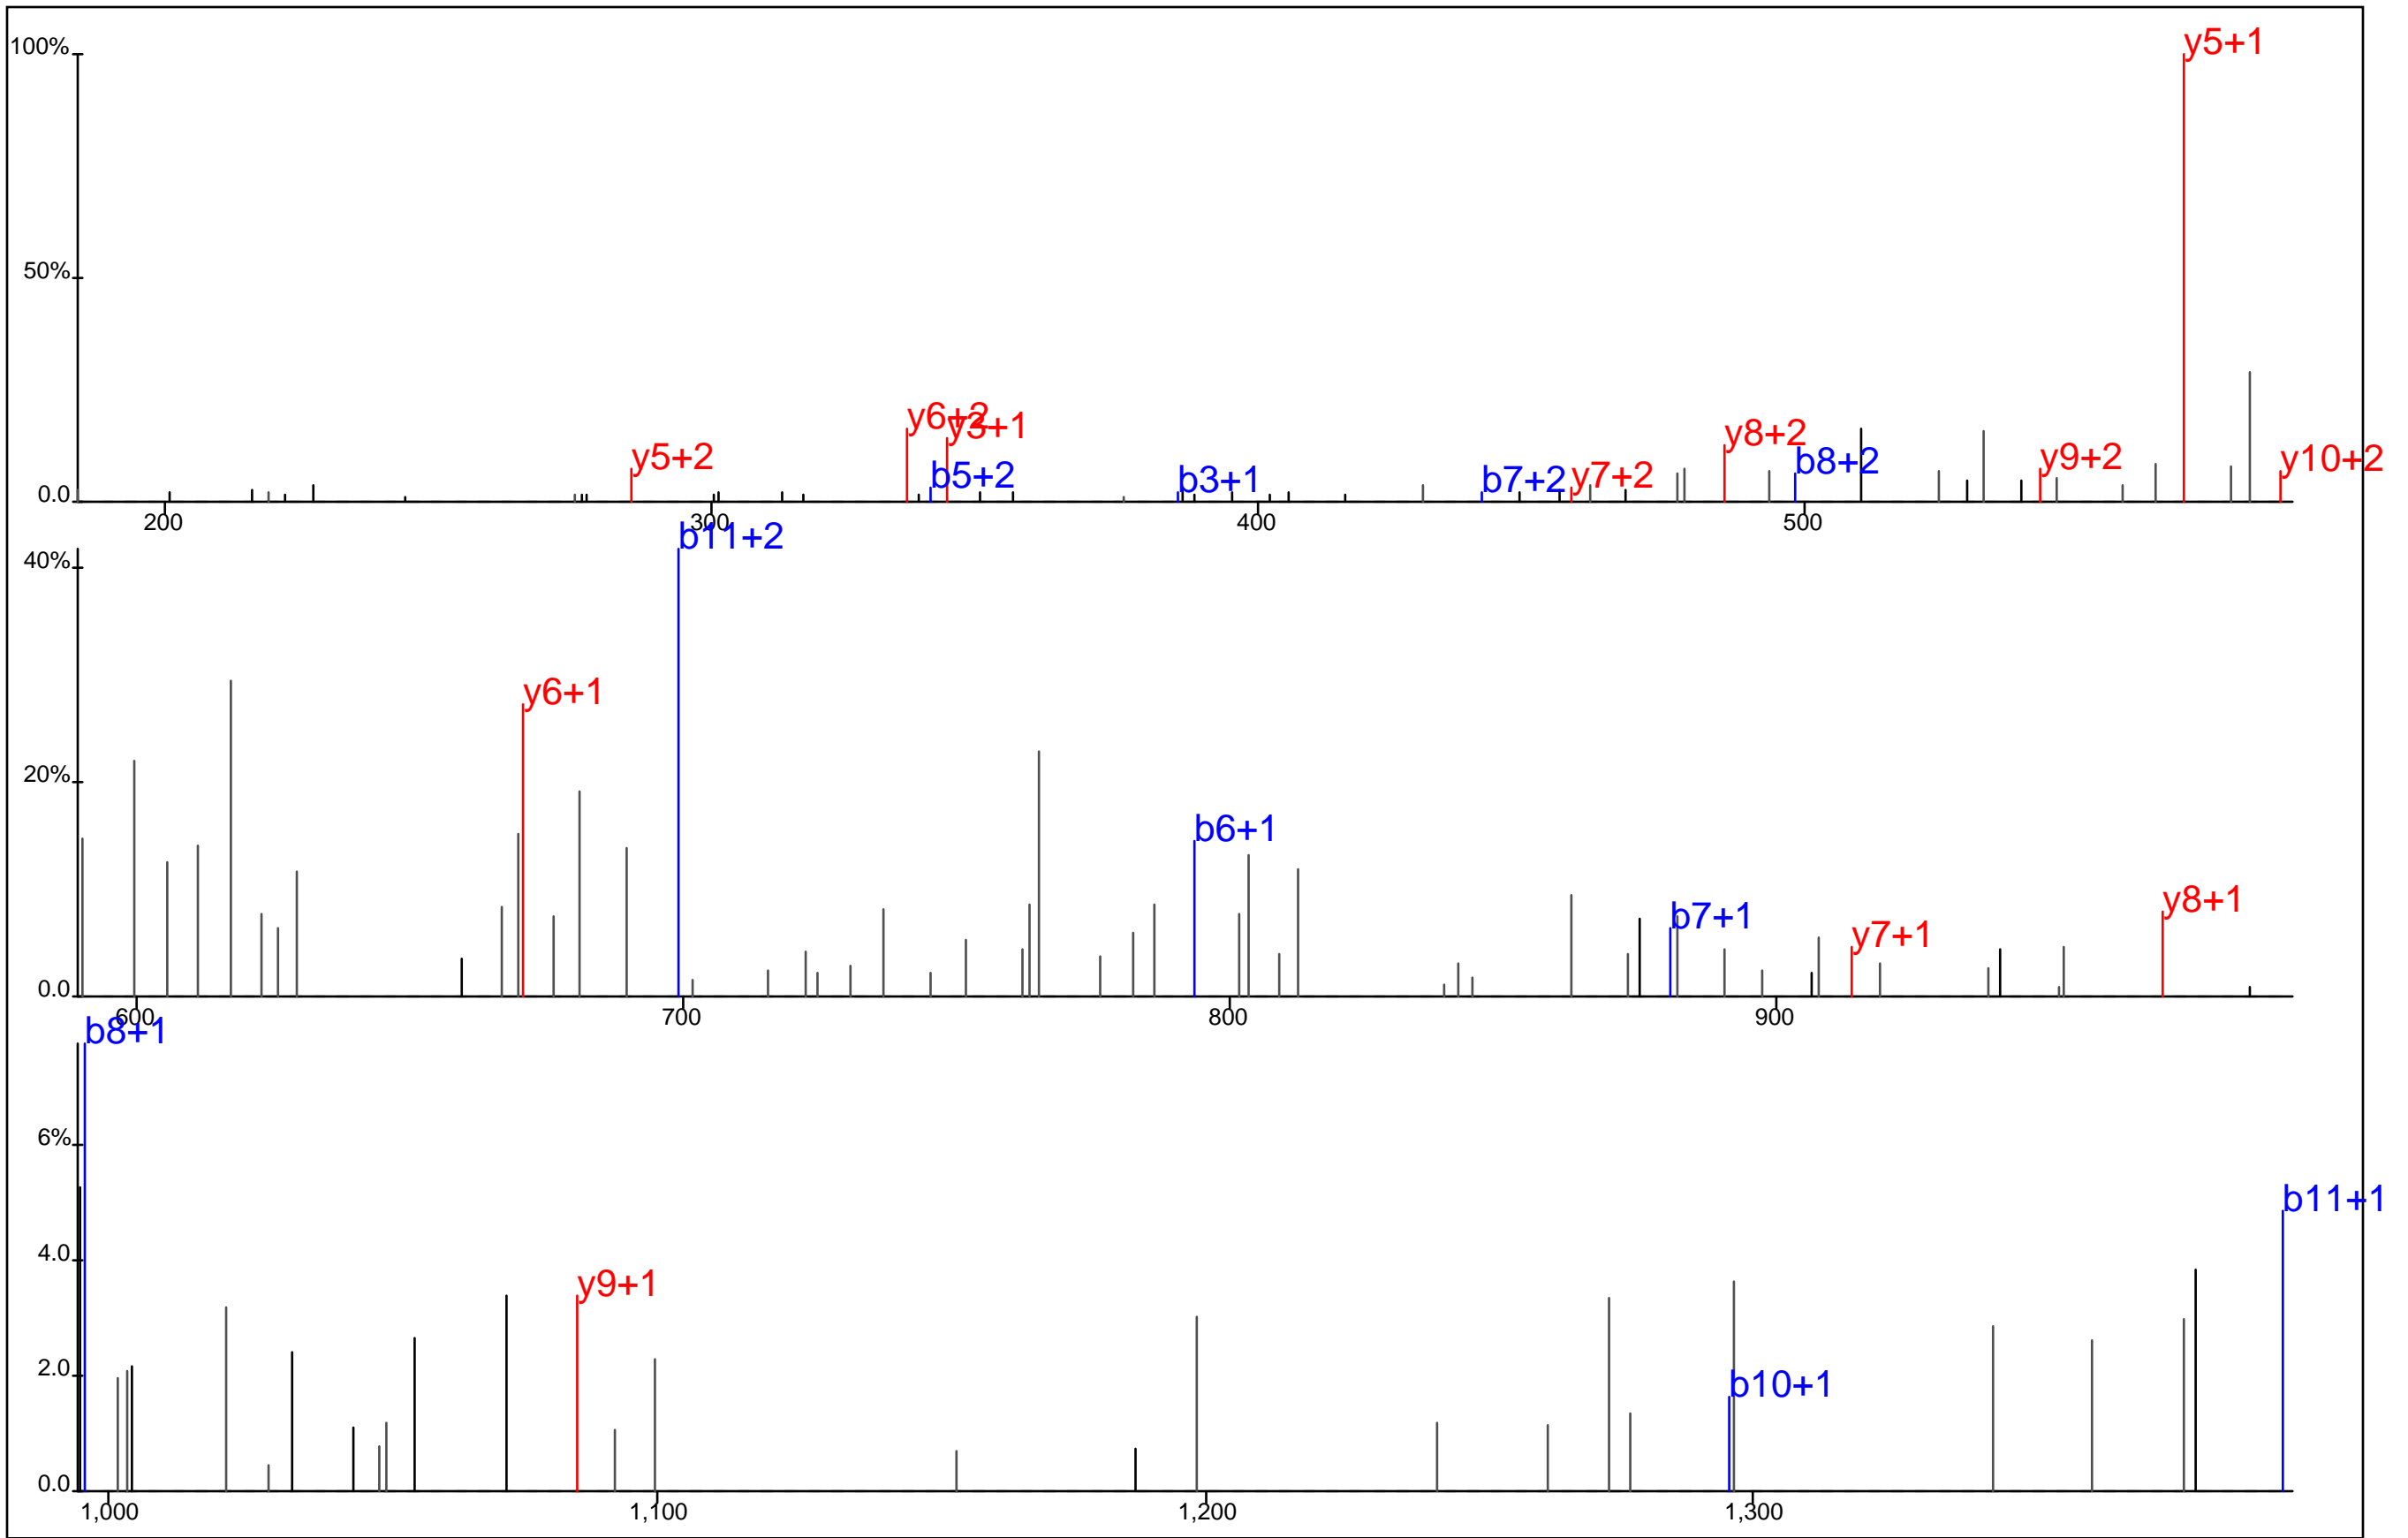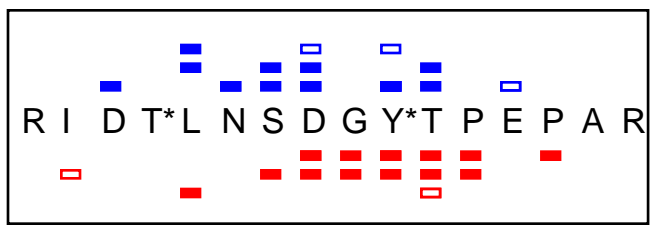

Protein Name: ZAP70  
 gi Accession: 0  
 Precursor Mass: 655.6110+3  
 Delta Mass: 1.675 ppm  
 XCorr: 24.37



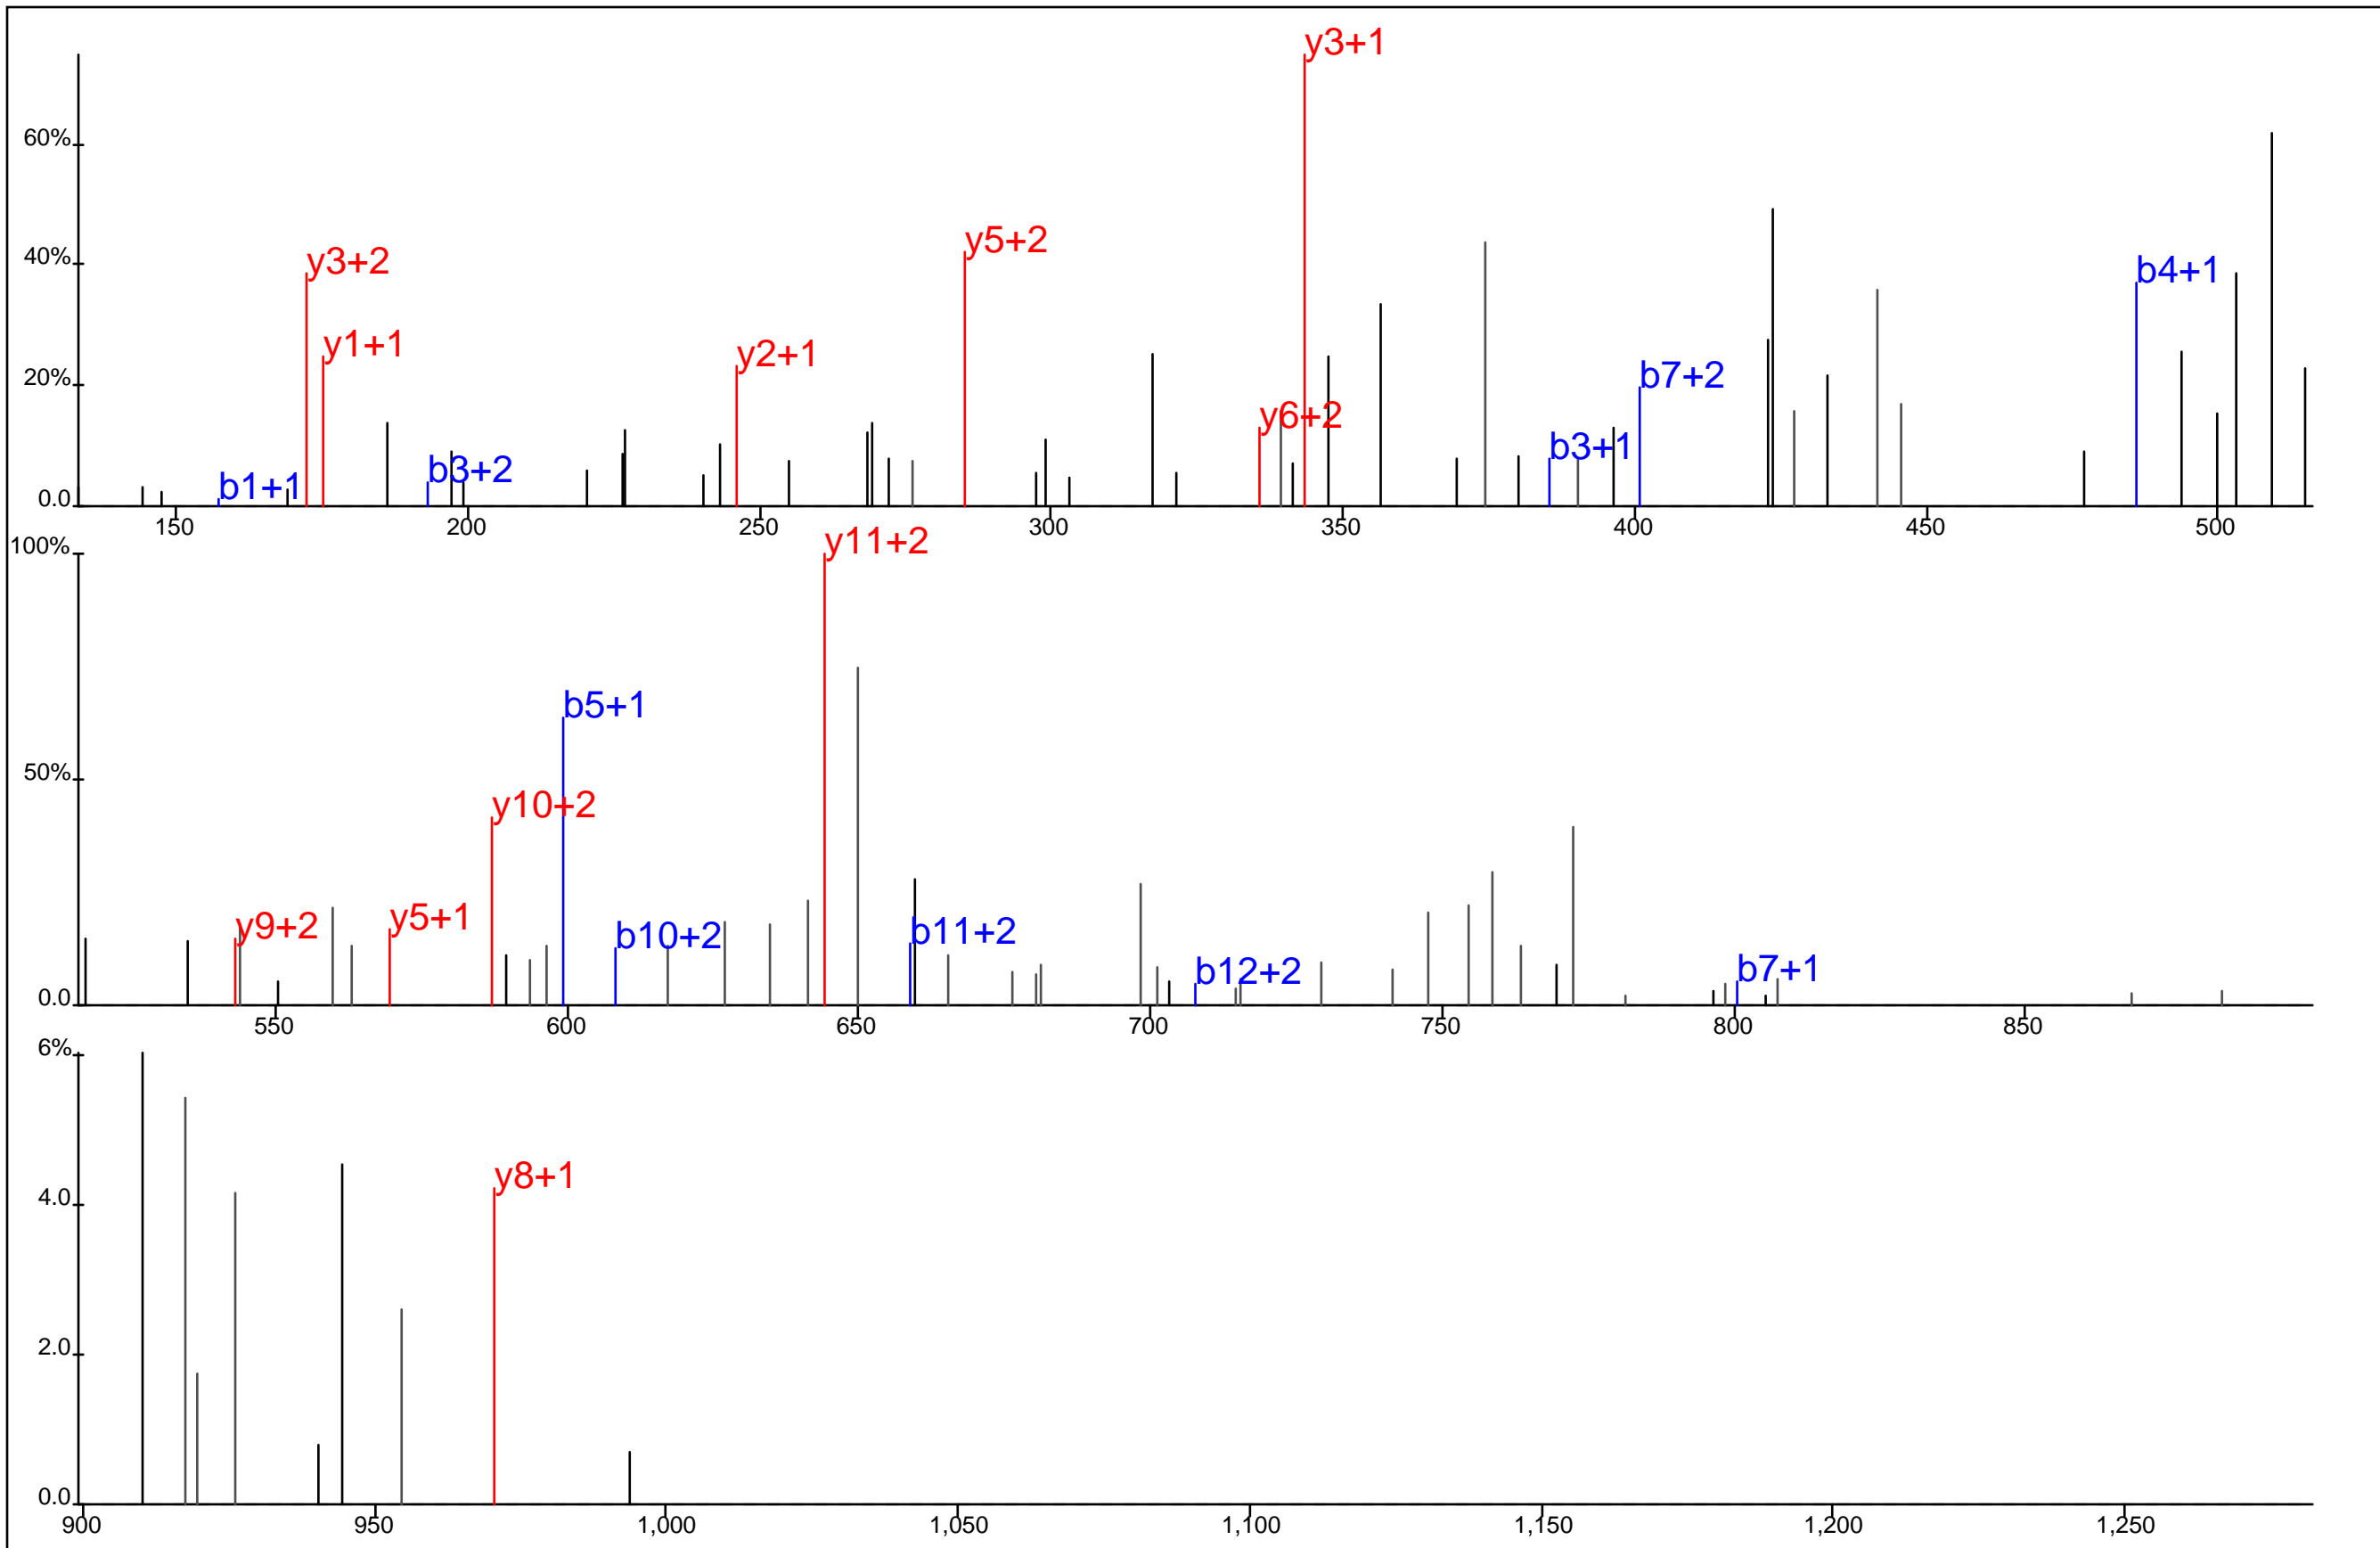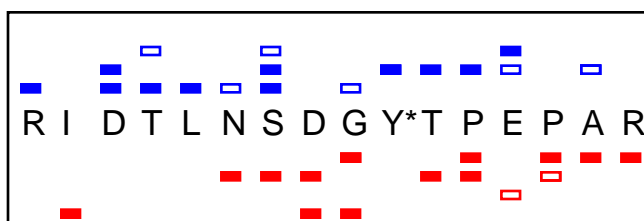

Protein Name: ZAP70  
 gi Accession: 0  
 Precursor Mass: 471.9680+4  
 Delta Mass: 0.871 ppm  
 XCorr: 20.24



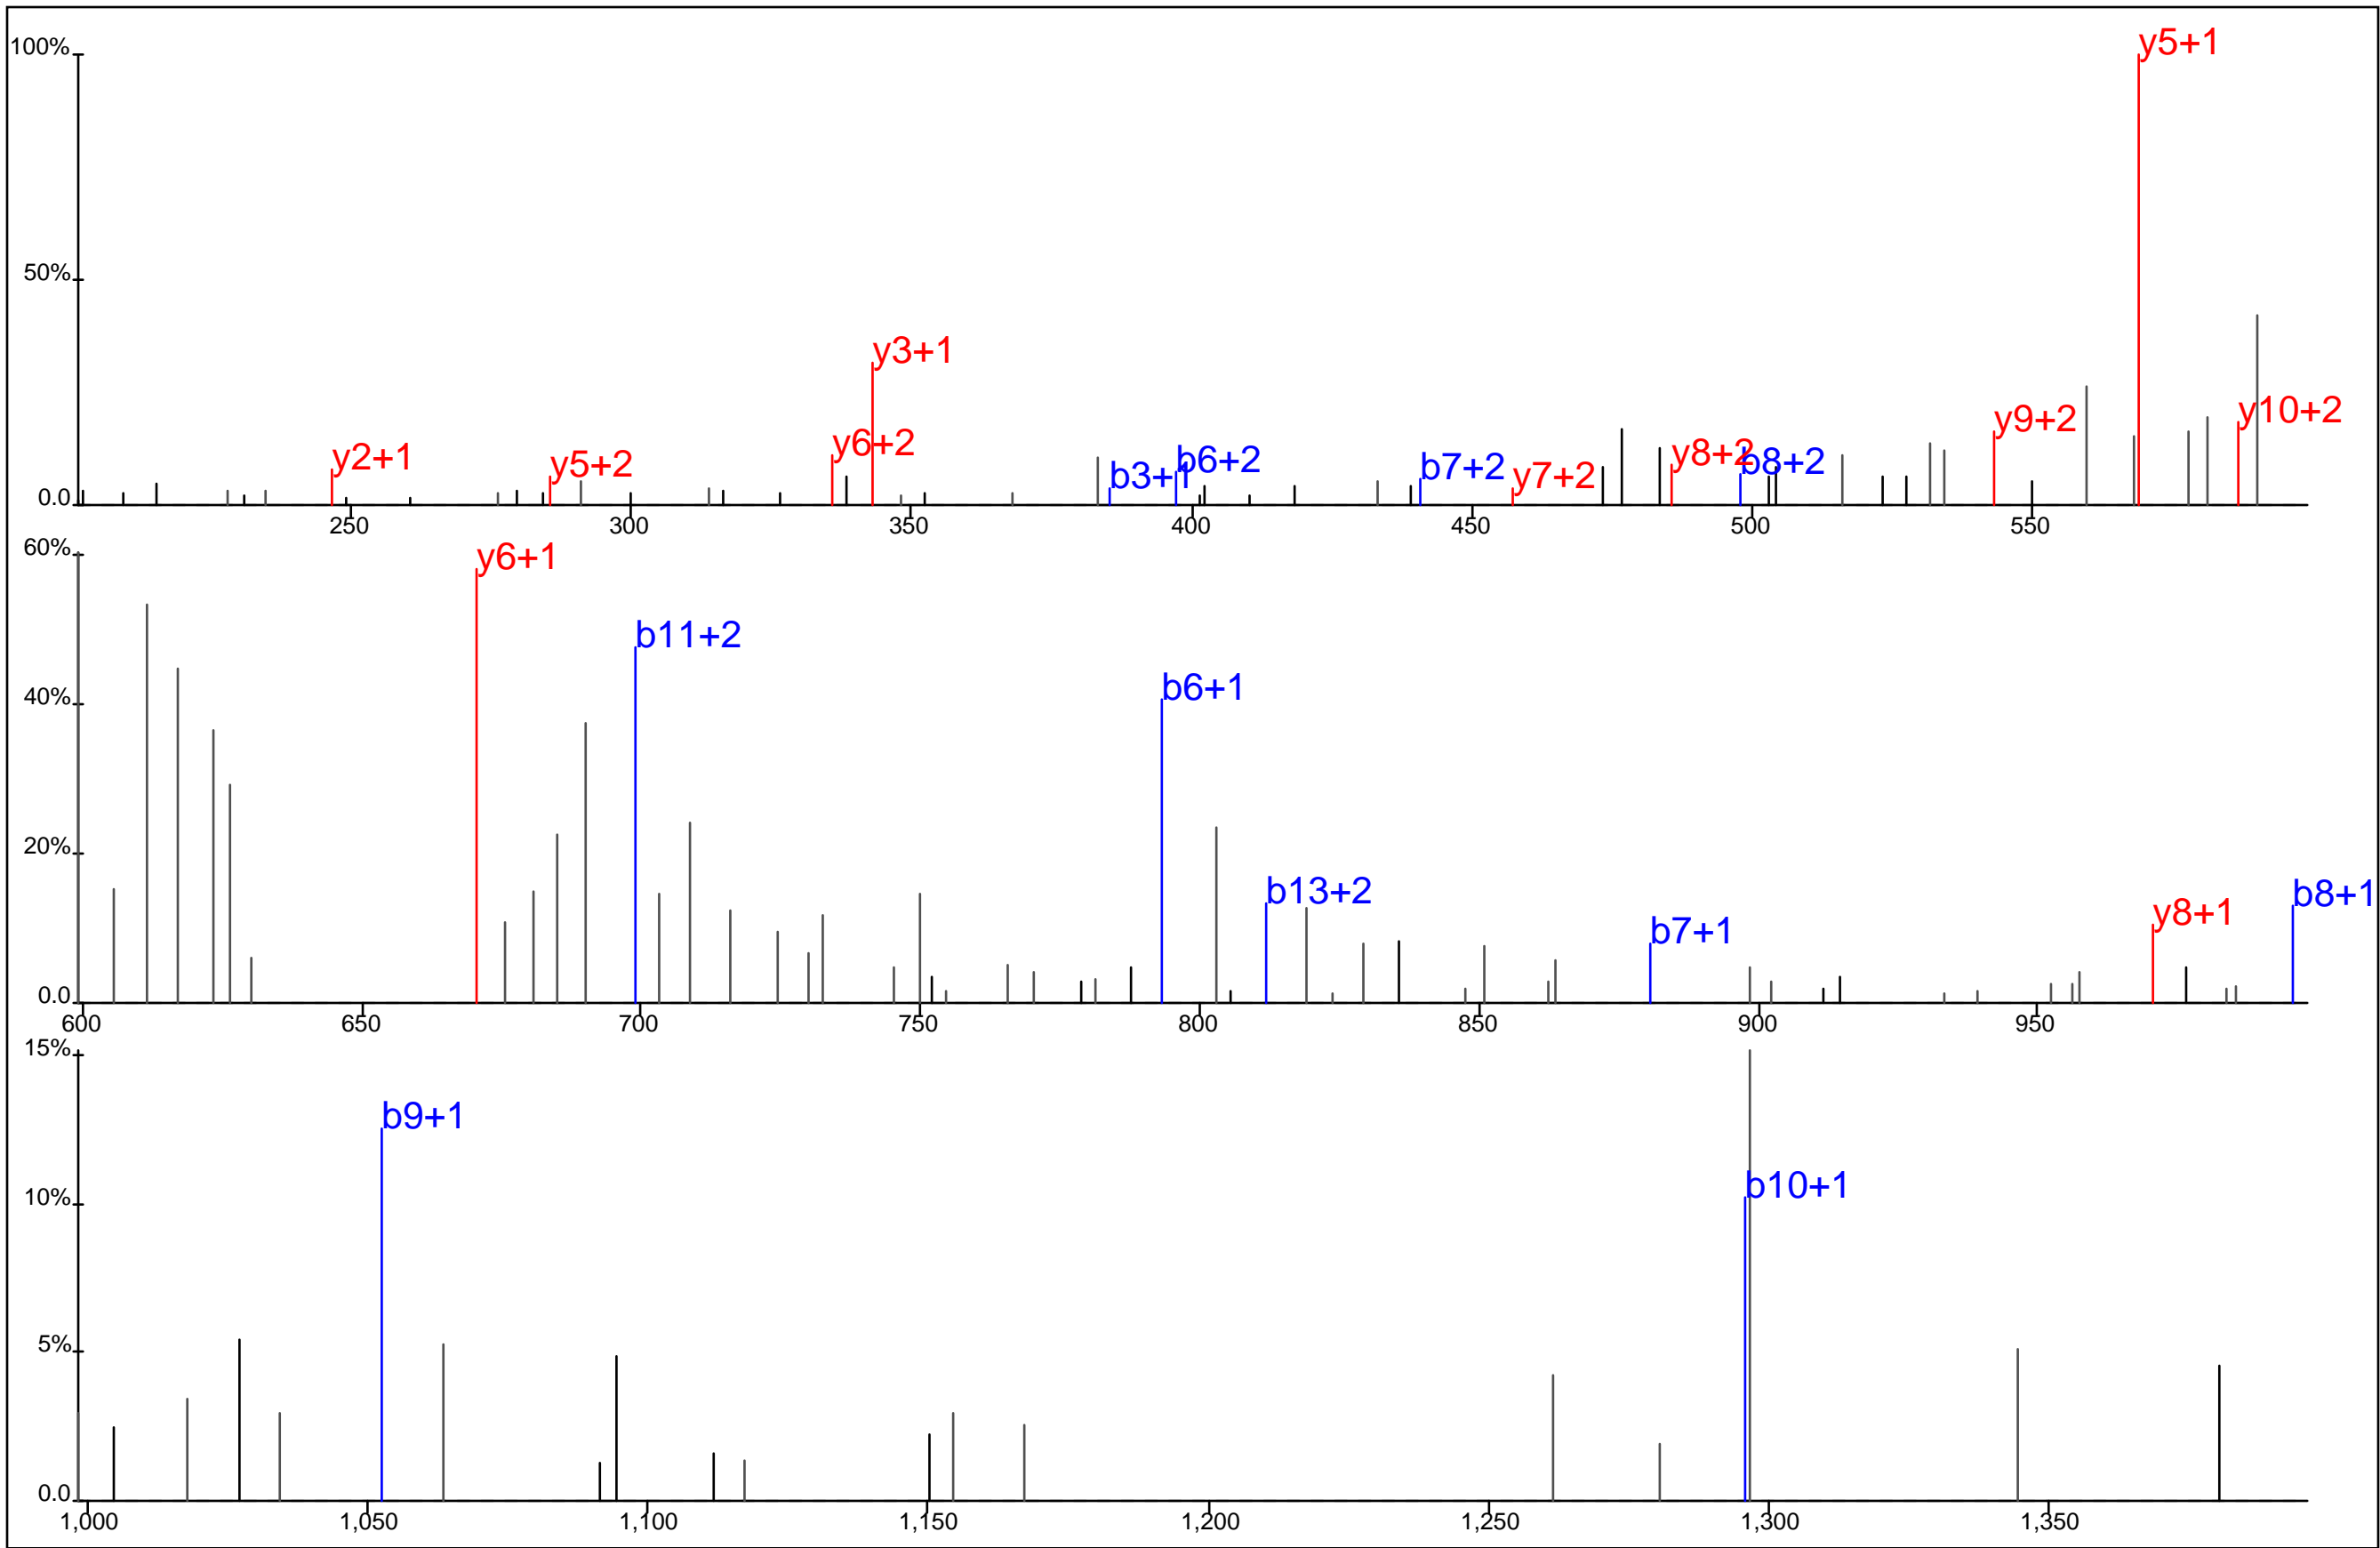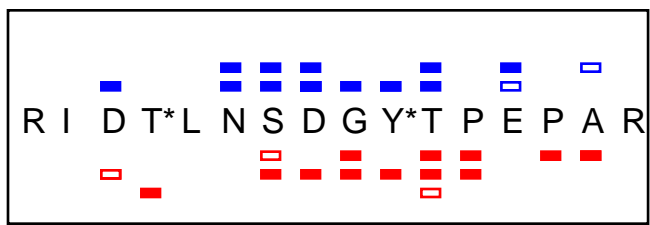

Protein Name: ZAP70  
 gi Accession: 0  
 Precursor Mass: 655.6133+3  
 Delta Mass: 5.216 ppm  
 XCorr: 39.17

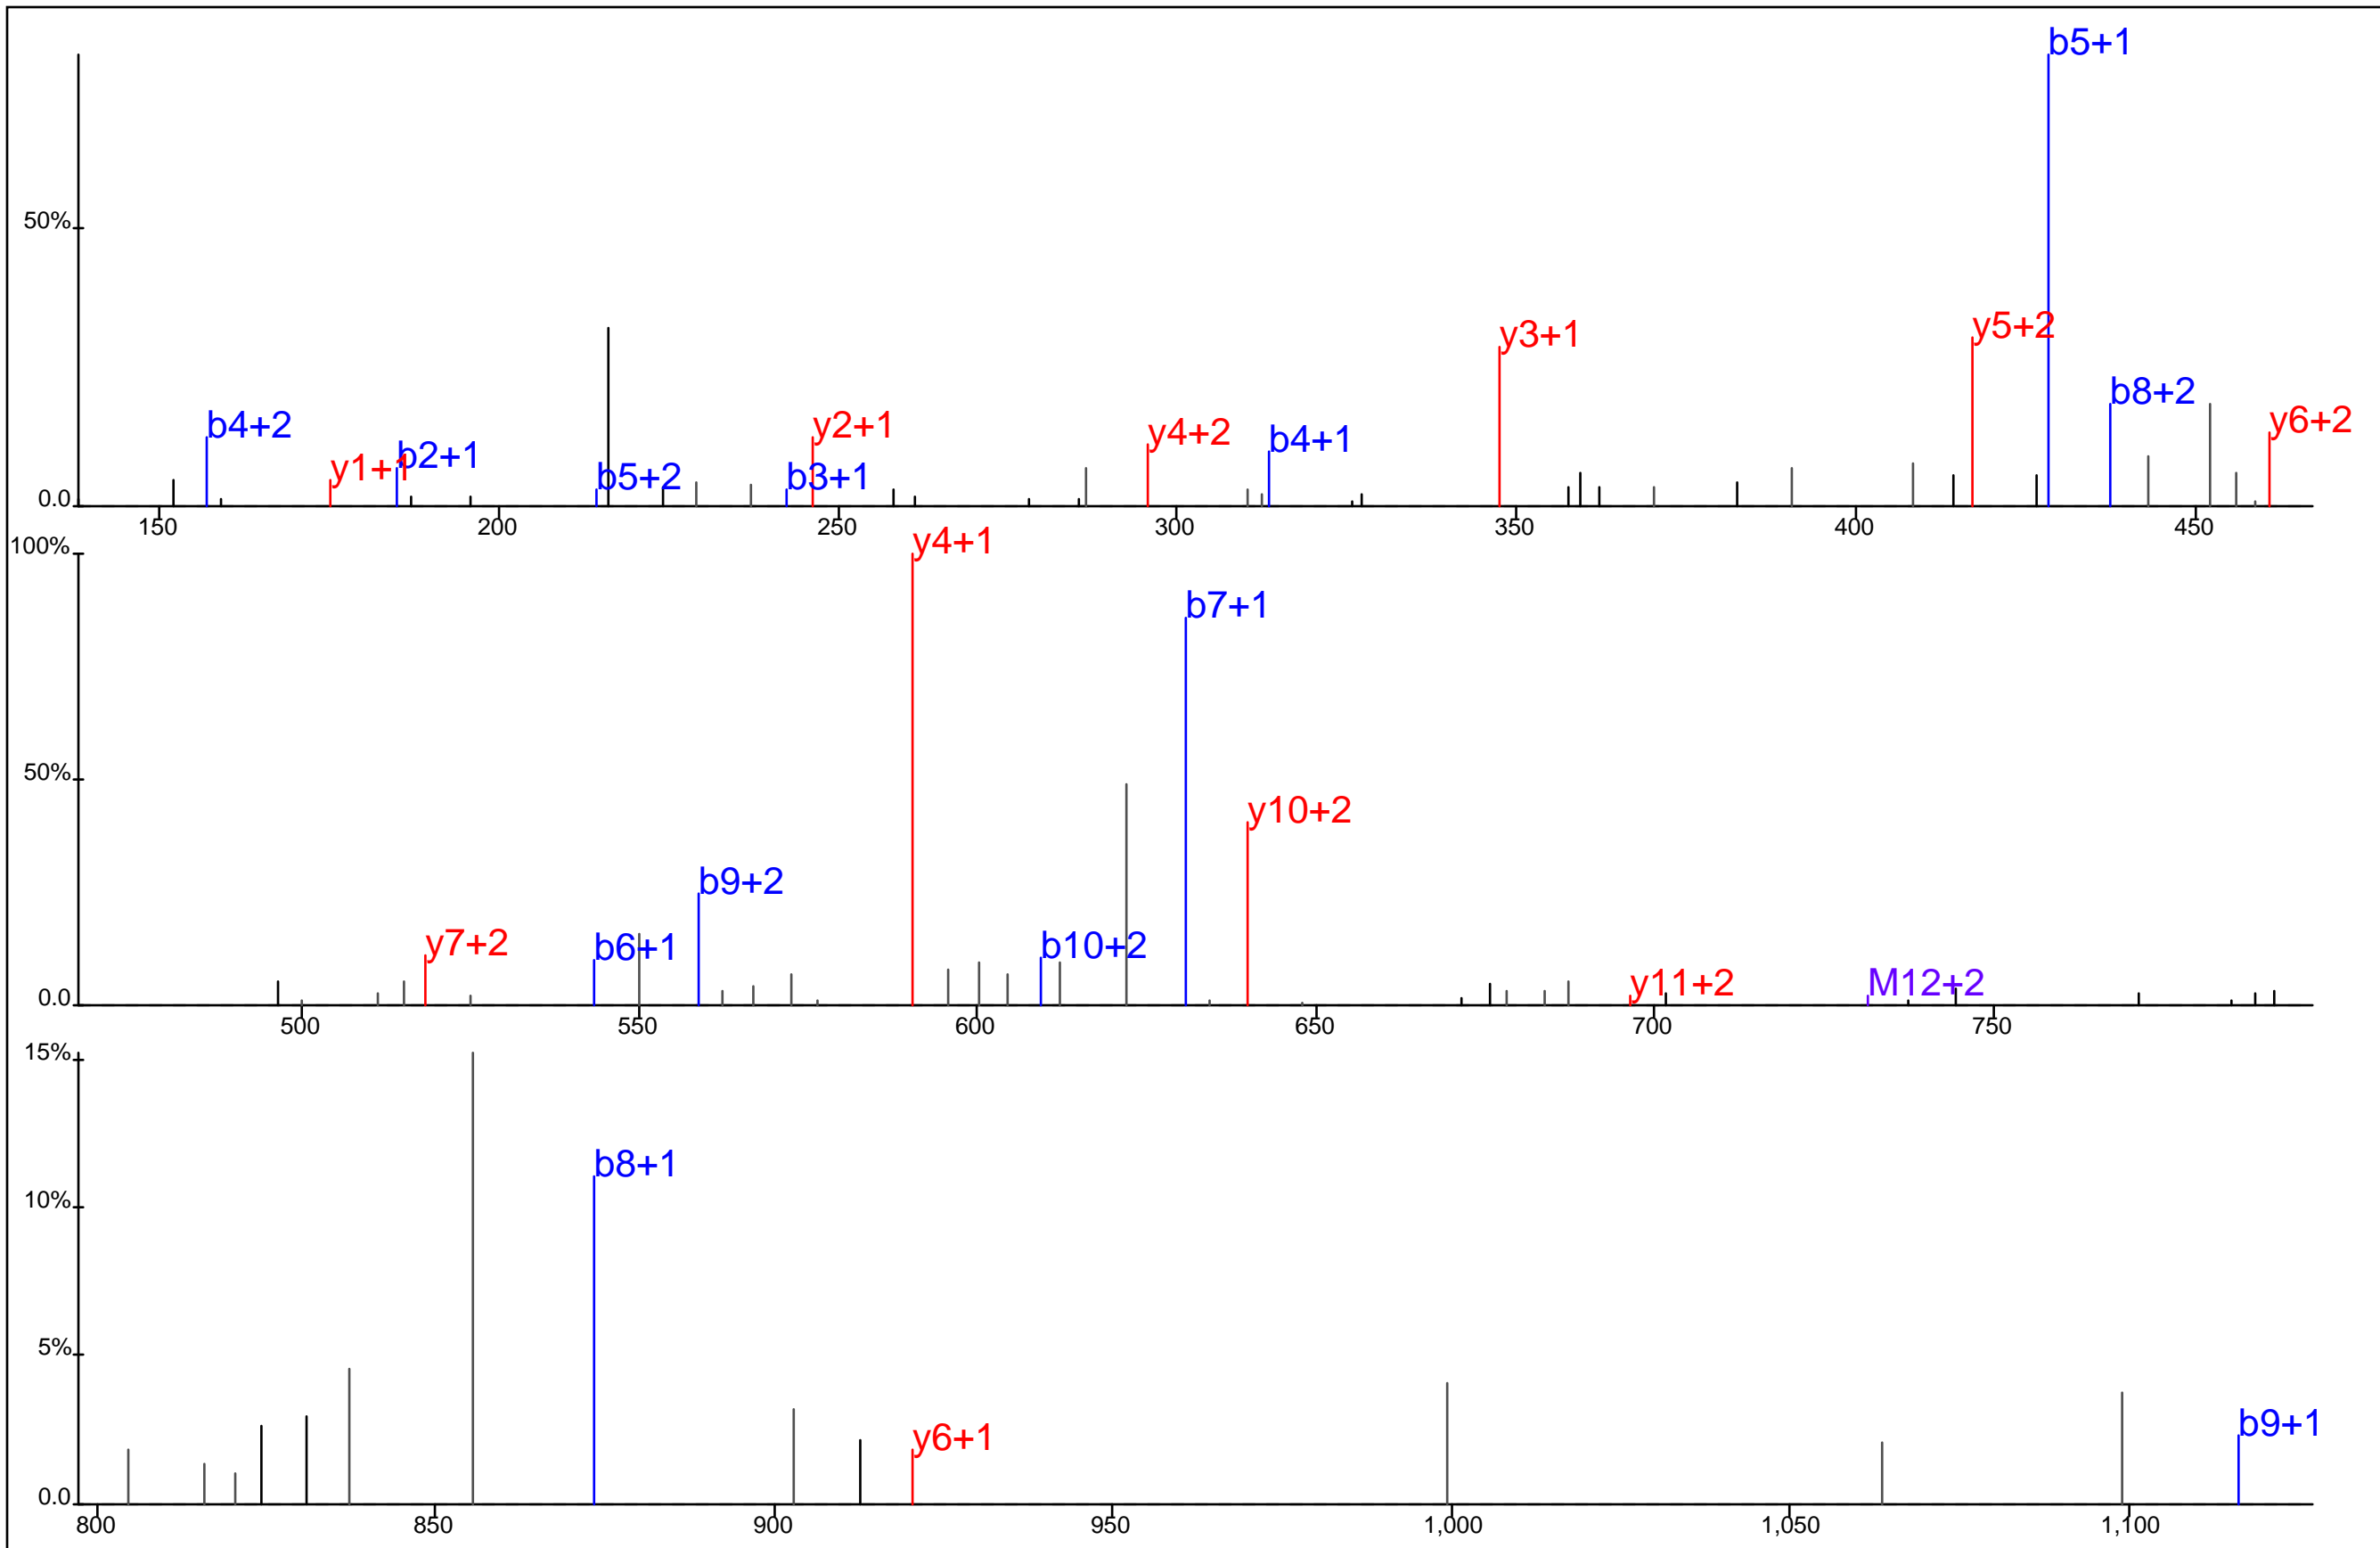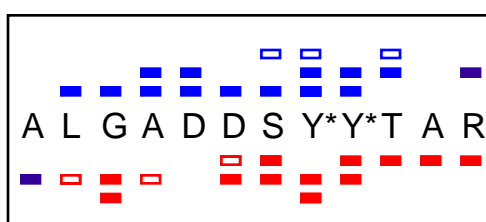

Protein Name: ZAP70  
 gi Accession: 0  
 Precursor Mass: 488.1817+3  
 Delta Mass: 1.266 ppm  
 XCorr: 40.58



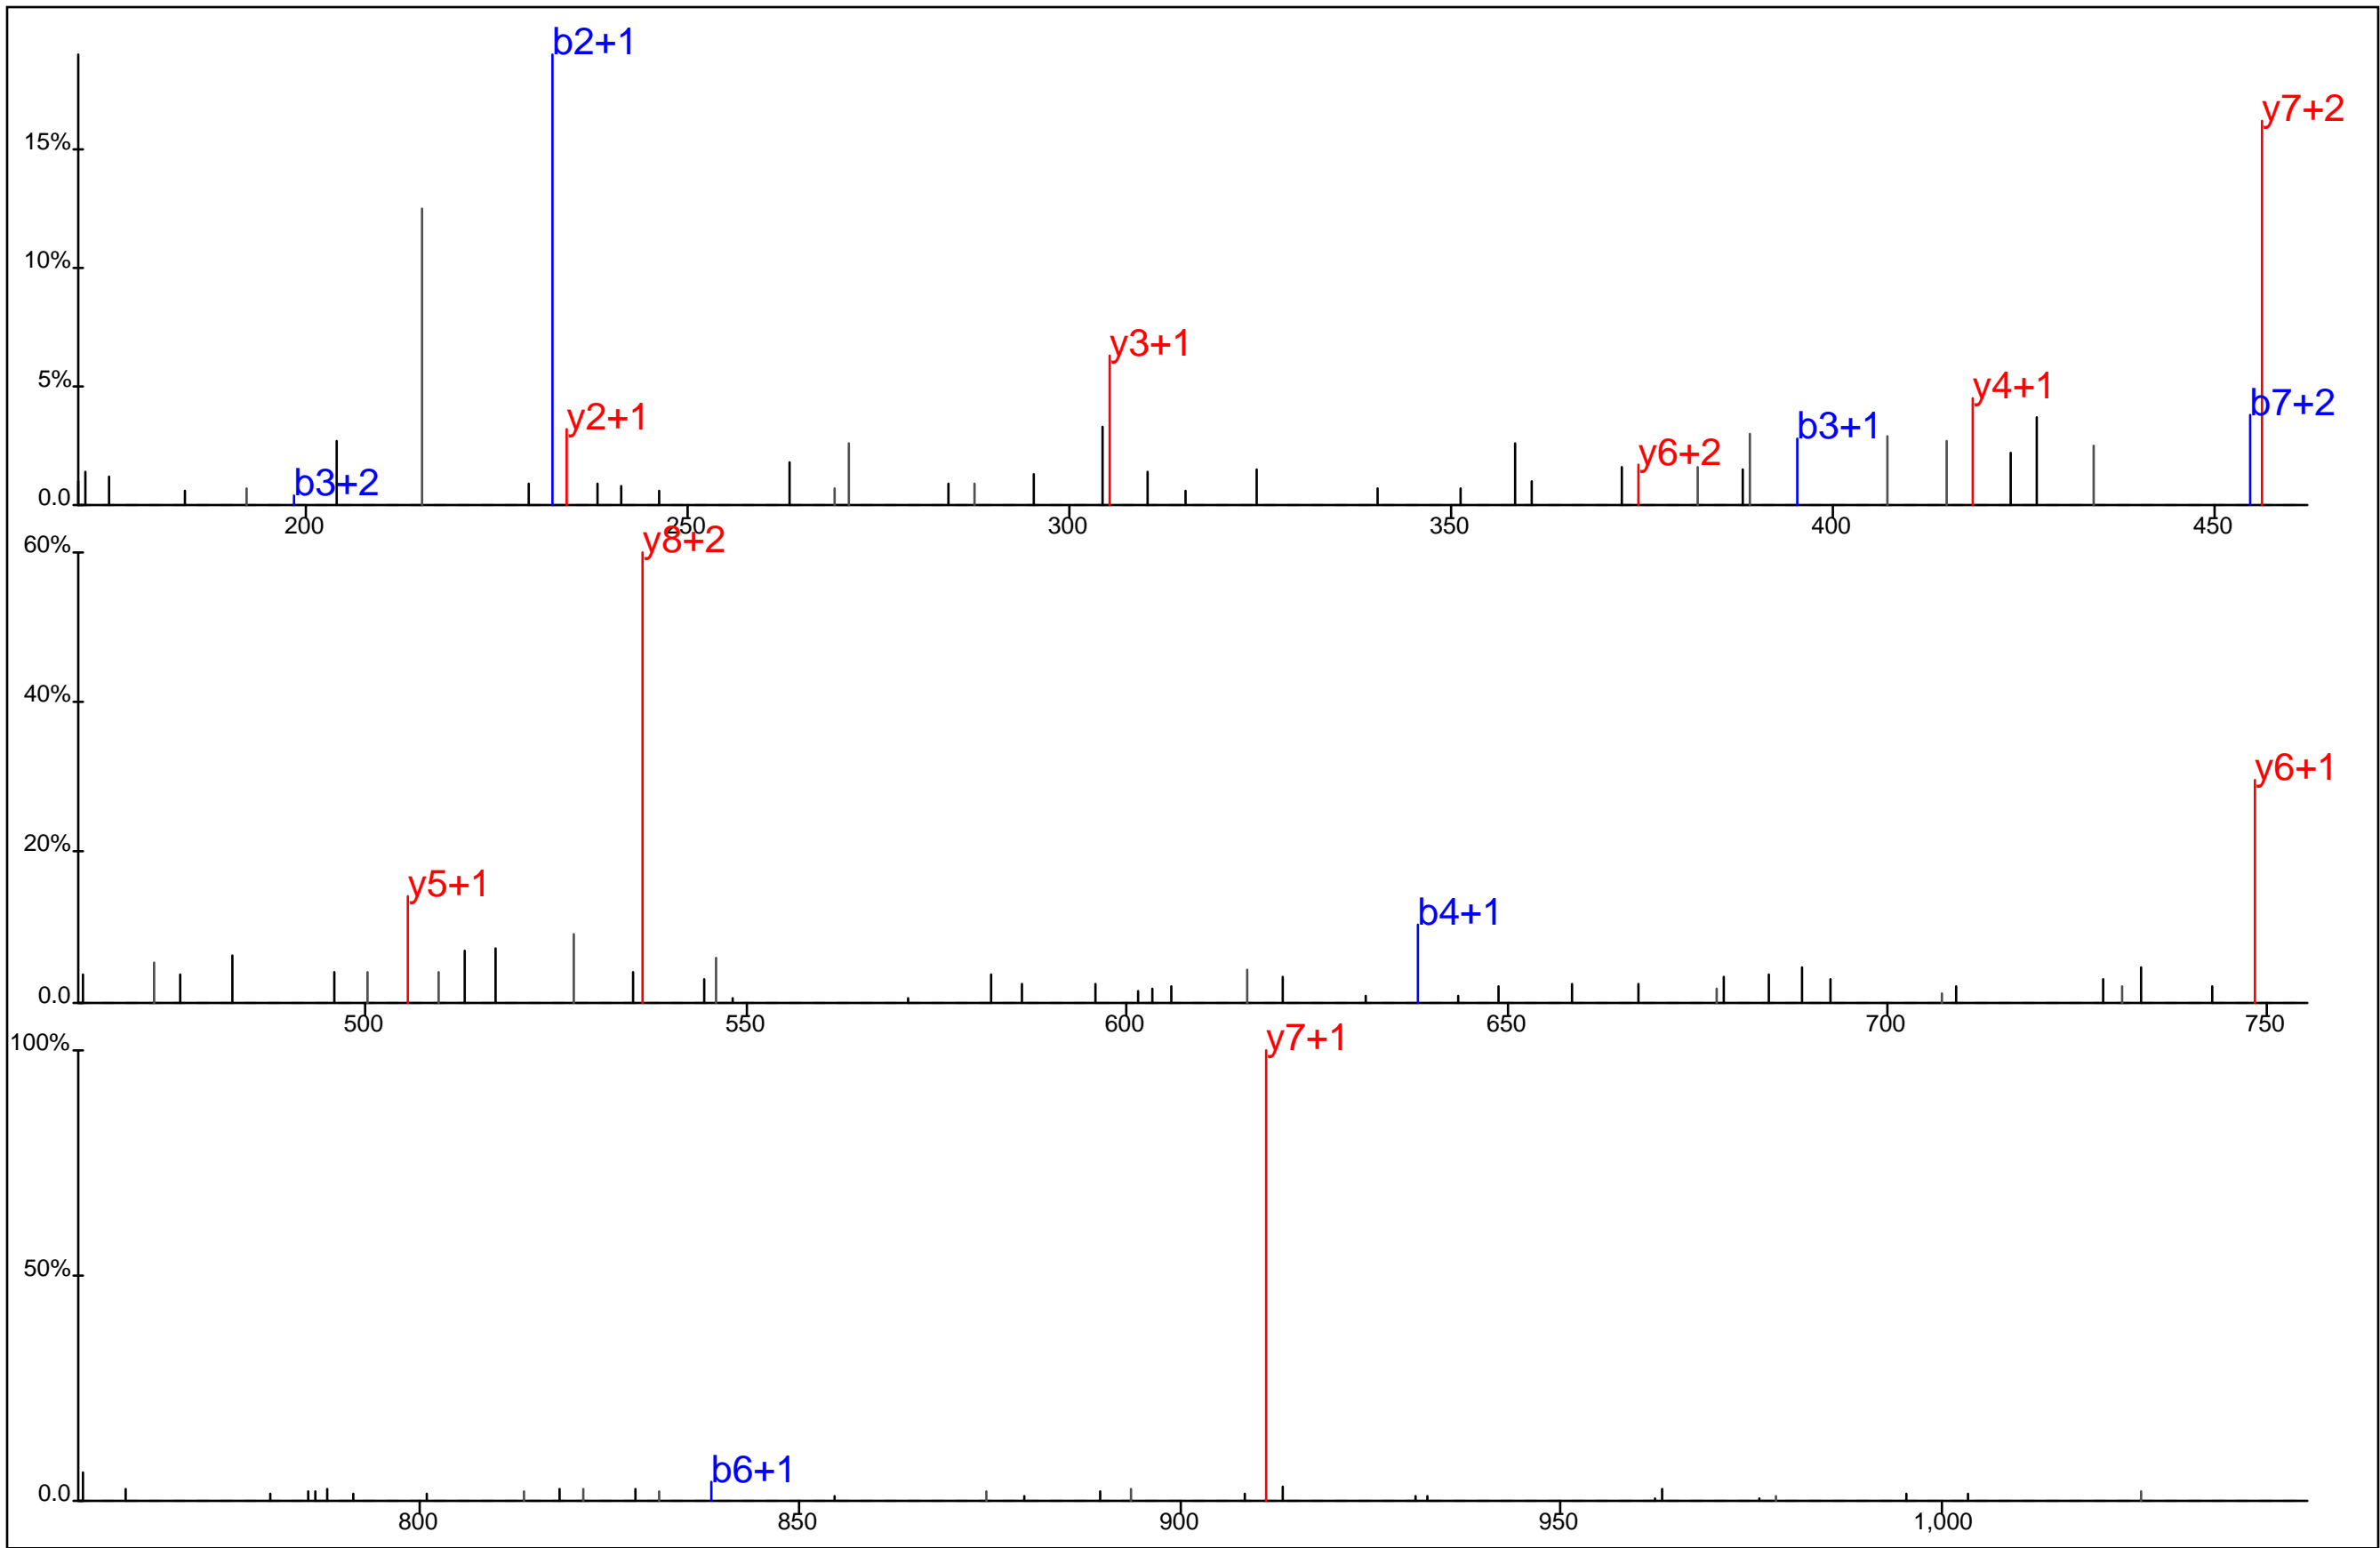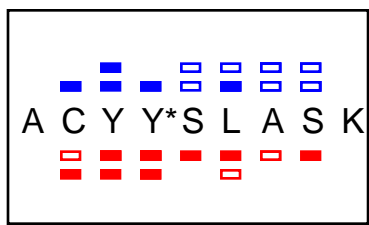

Protein Name: ZAP70  
 gi Accession: 0  
 Precursor Mass: 571.7343+2  
 Delta Mass: 2.169 ppm  
 XCorr: 32.41



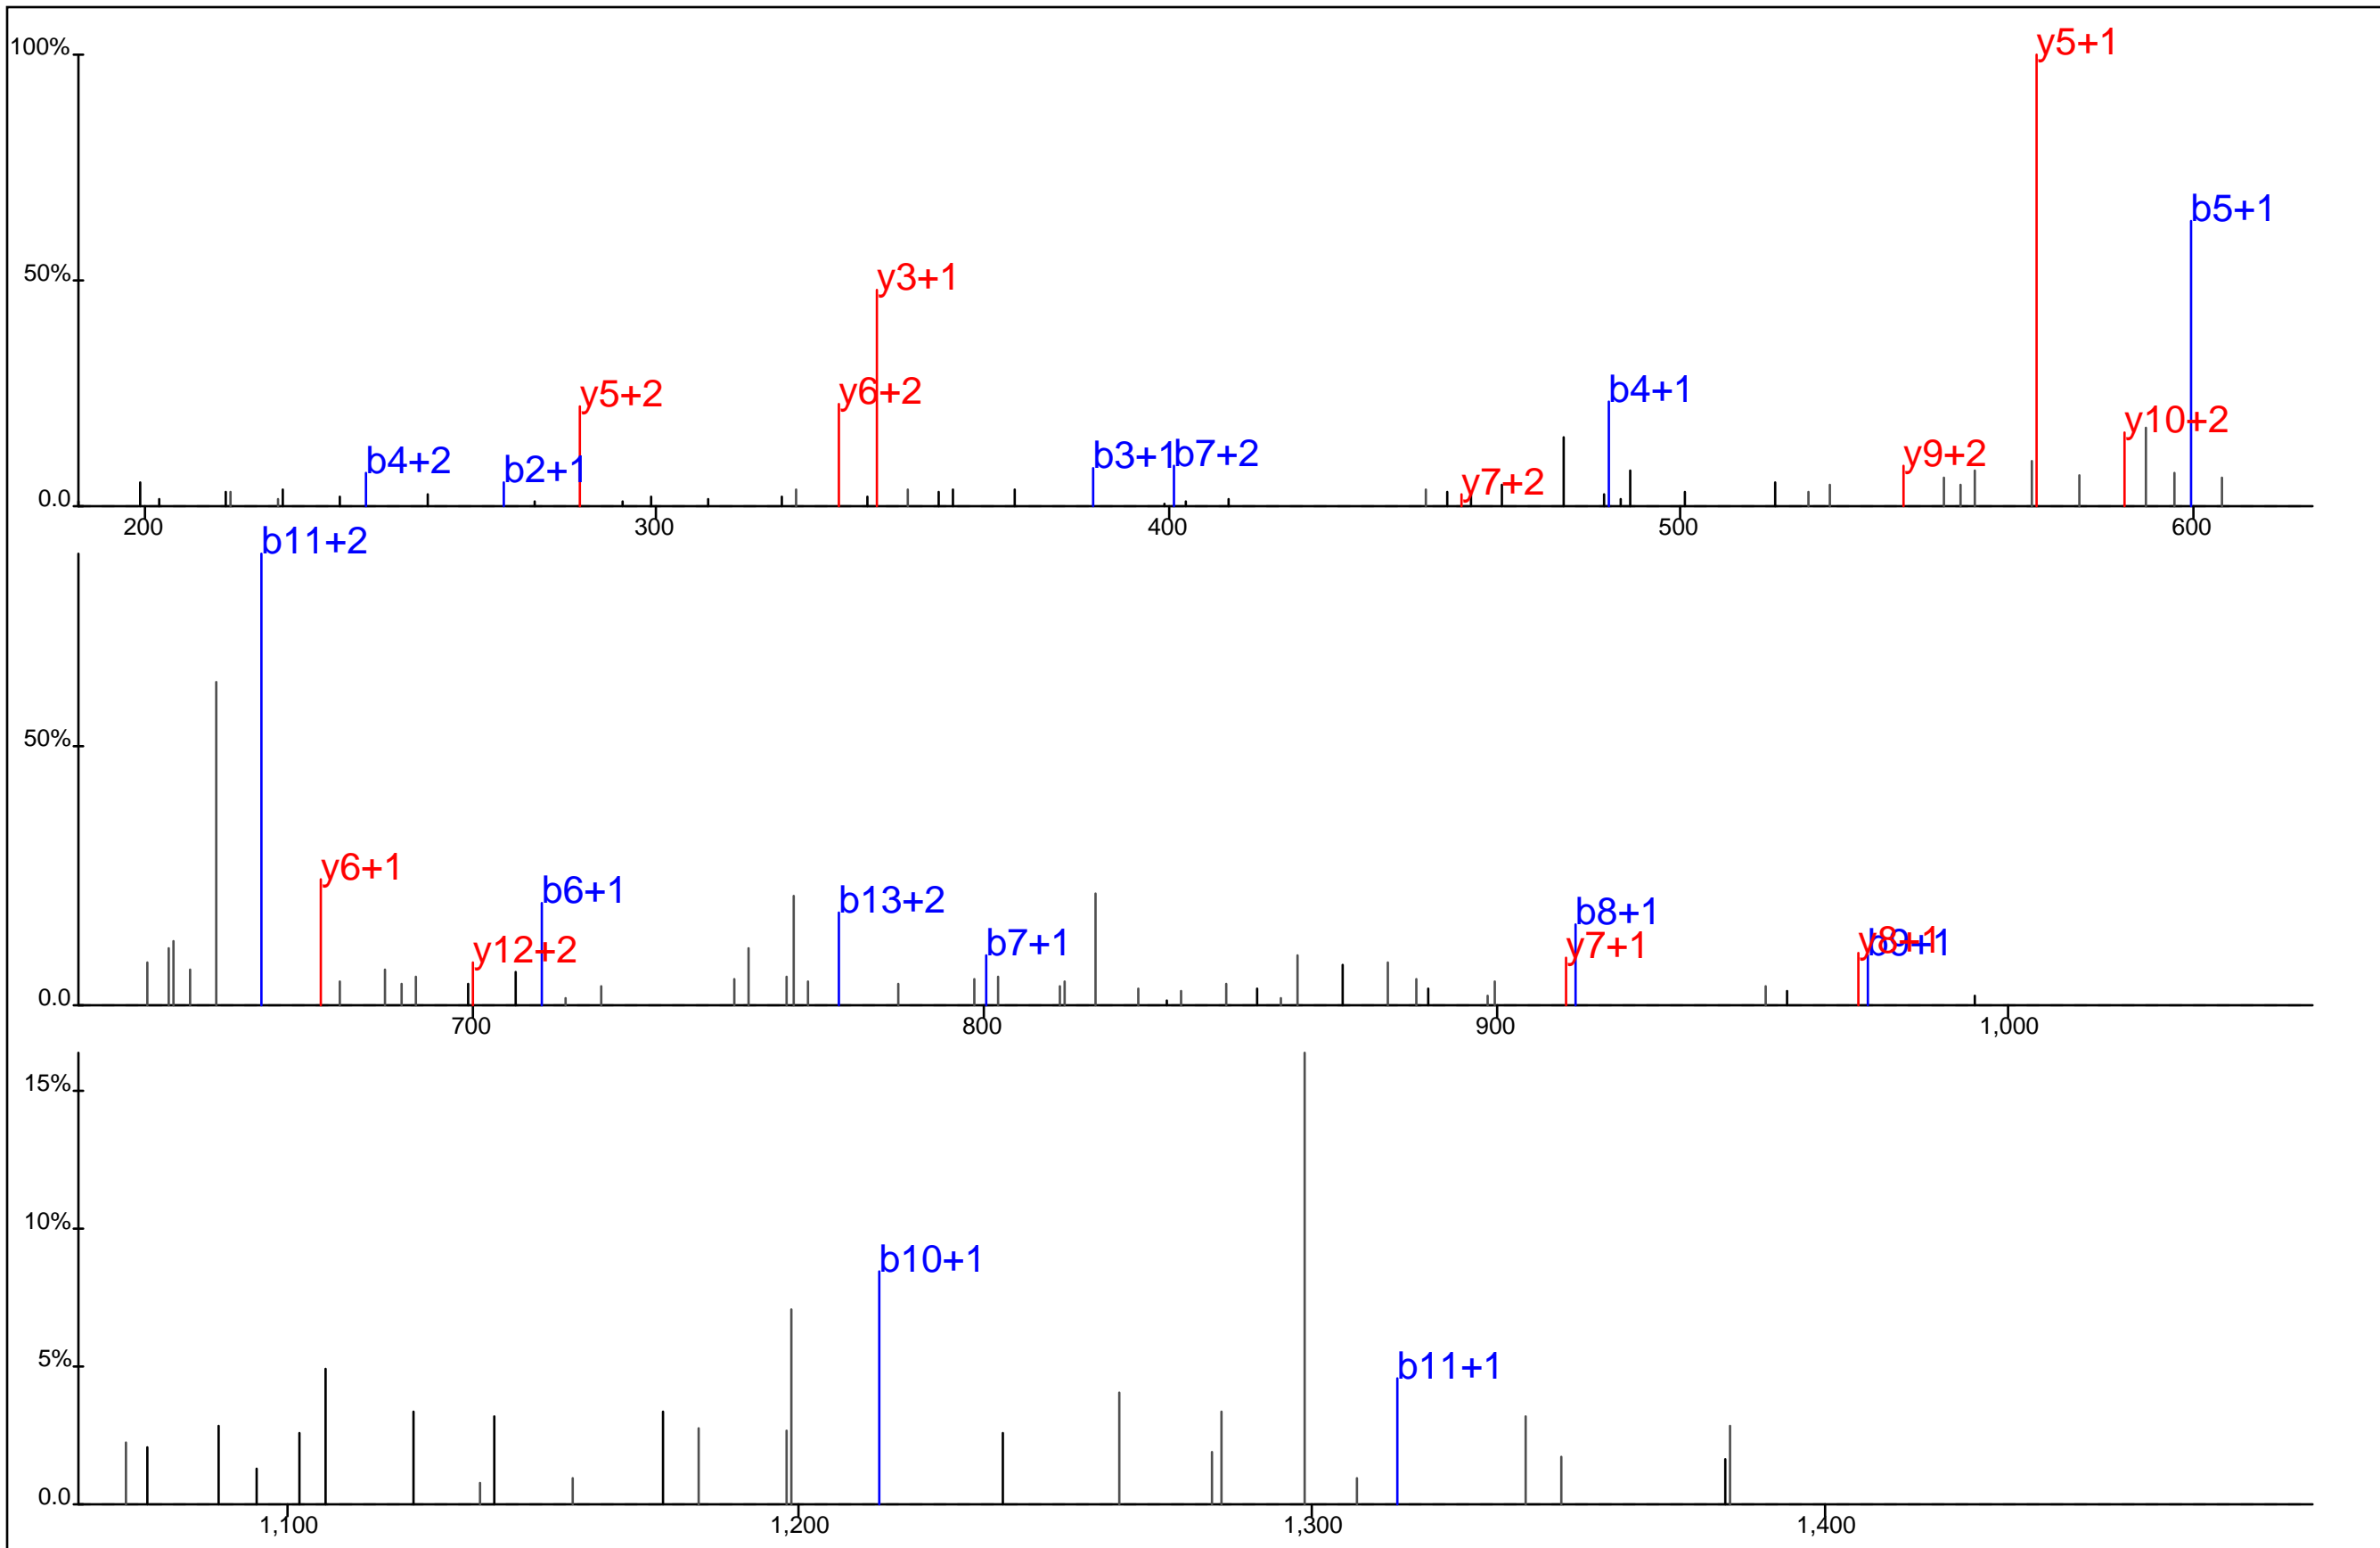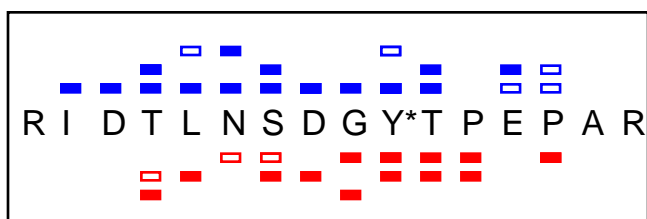

Protein Name: ZAP70  
 gi Accession: 0  
 Precursor Mass: 628.9528+3  
 Delta Mass: 2.554 ppm  
 XCorr: 72.83

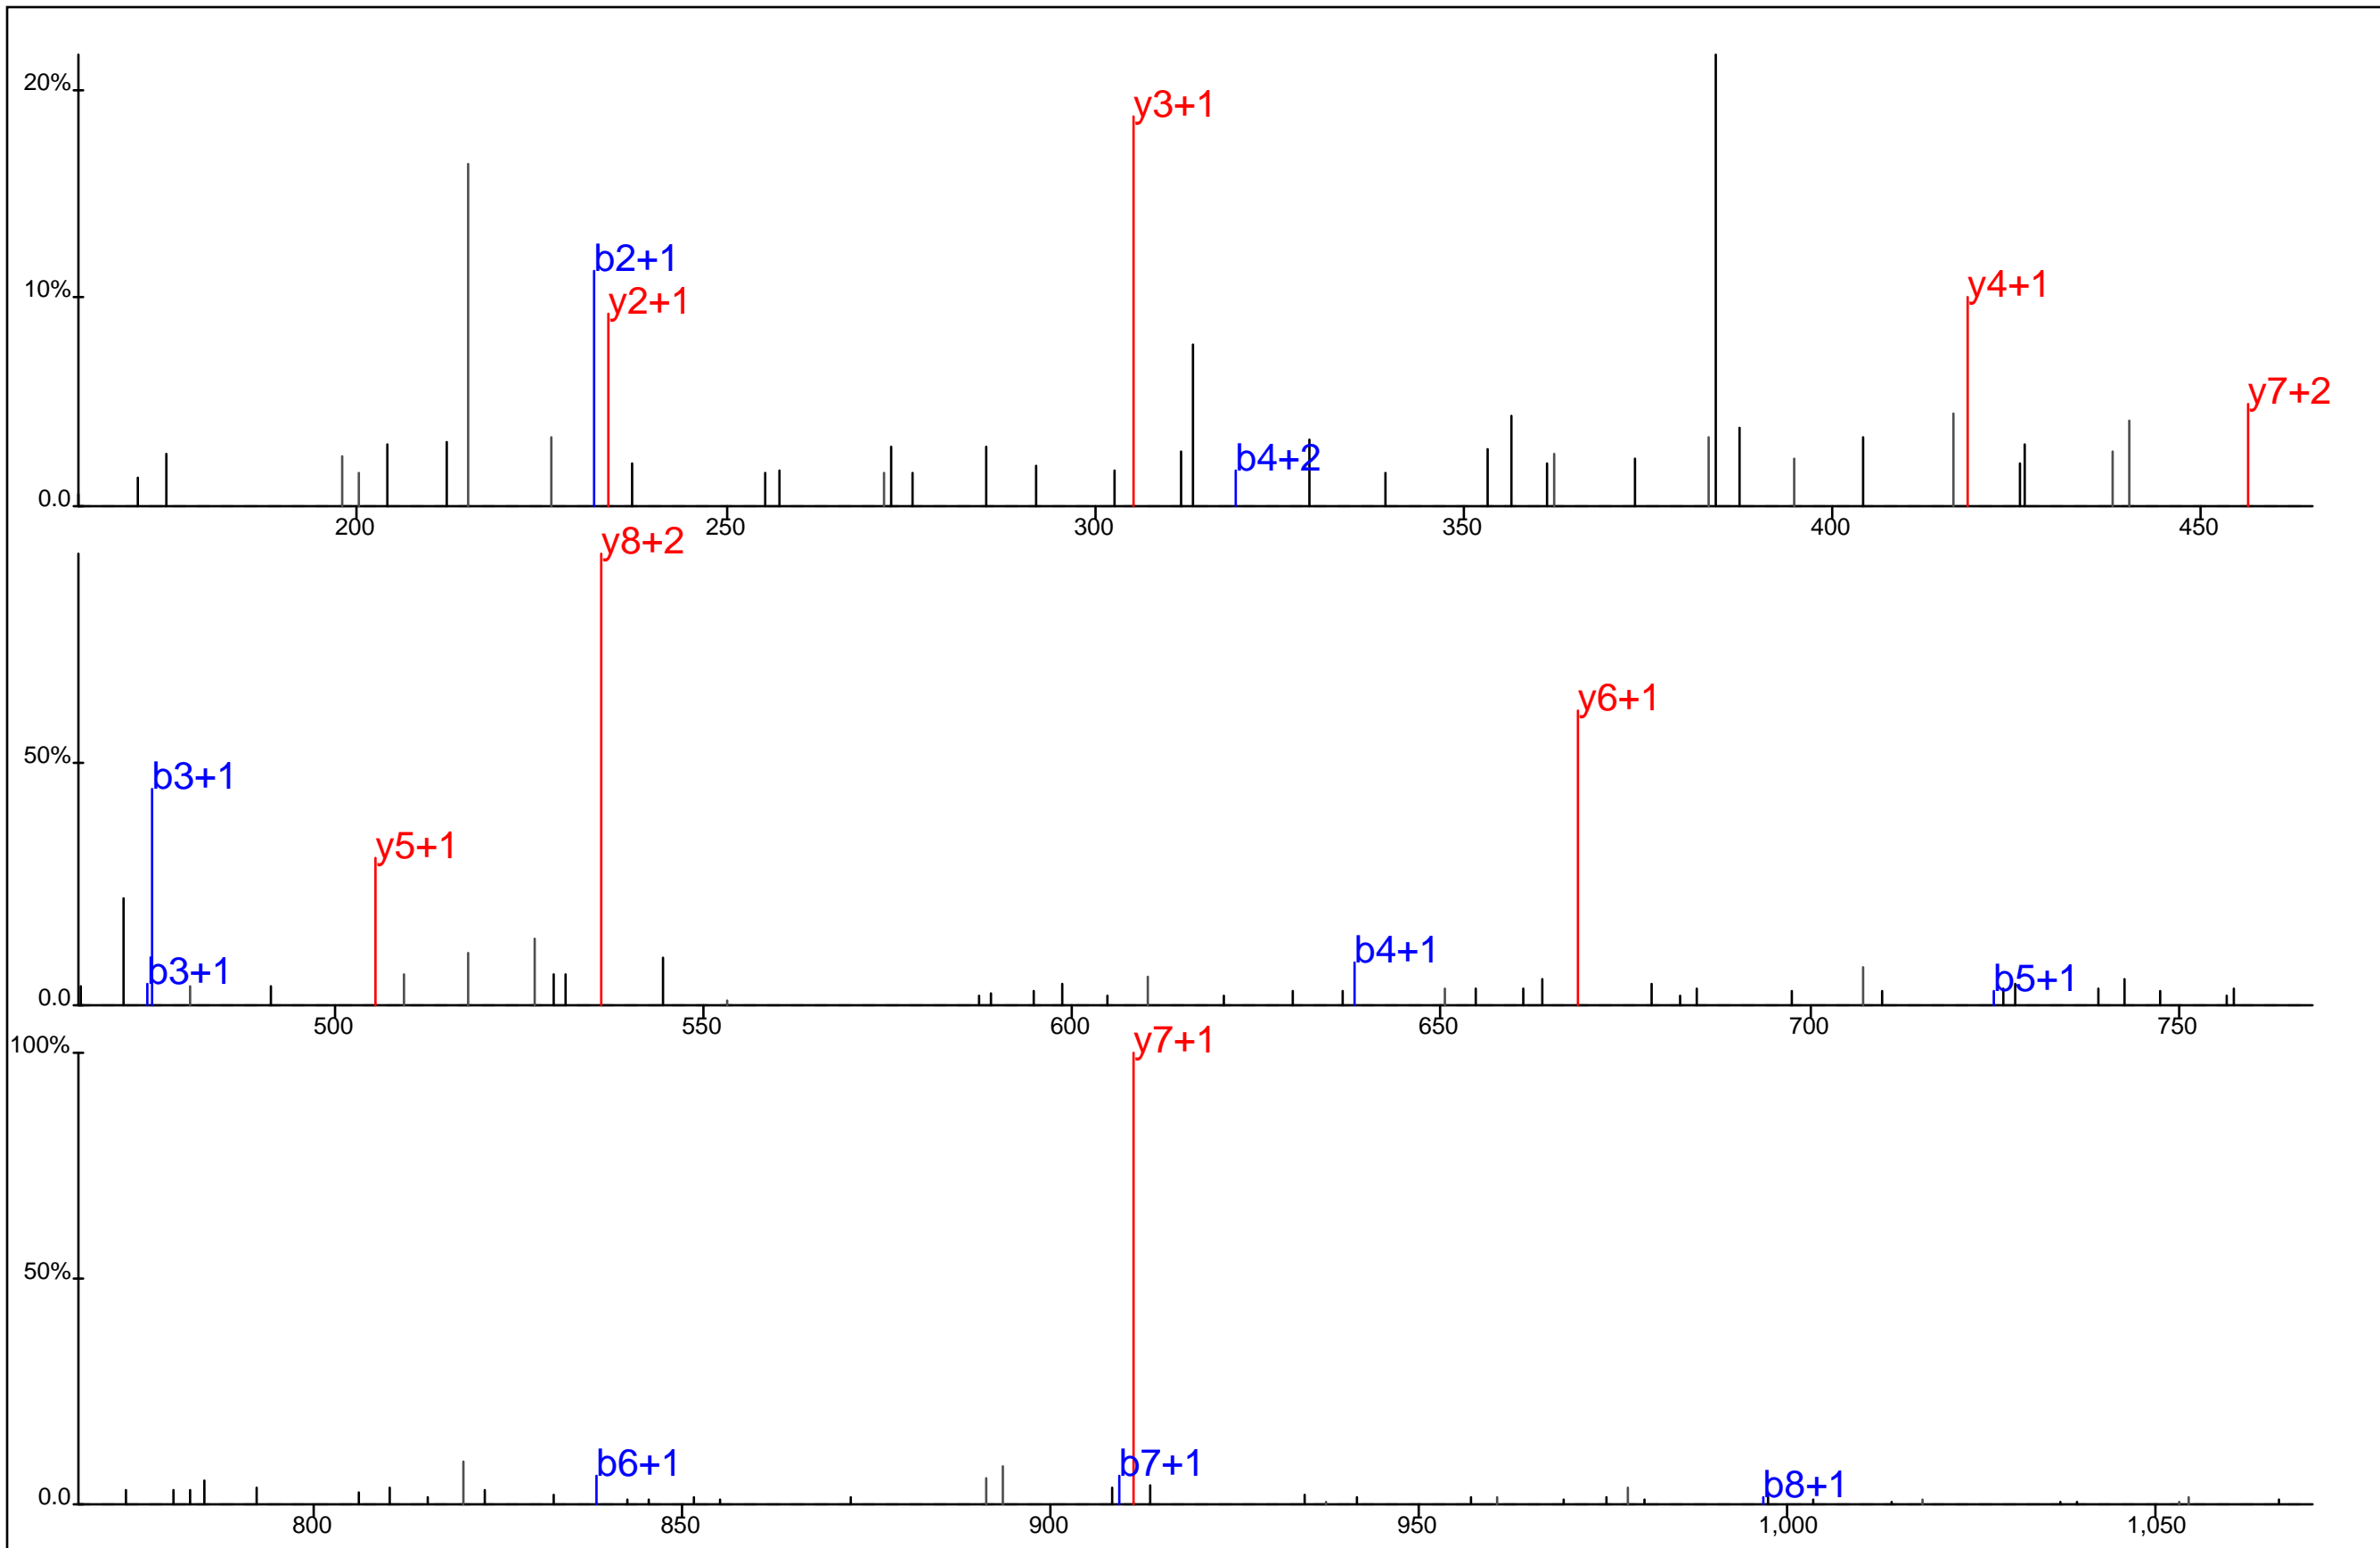

■ ■ ■ ■ ■ ■ ■  
■ ■ ■ ■ ■ ■ ■  
 A C Y\*Y S L A S K

Protein Name: ZAP70  
 gi Accession: 0  
 Precursor Mass: 571.7319+2  
 Delta Mass: 1.891 ppm  
 XCorr: 47.96

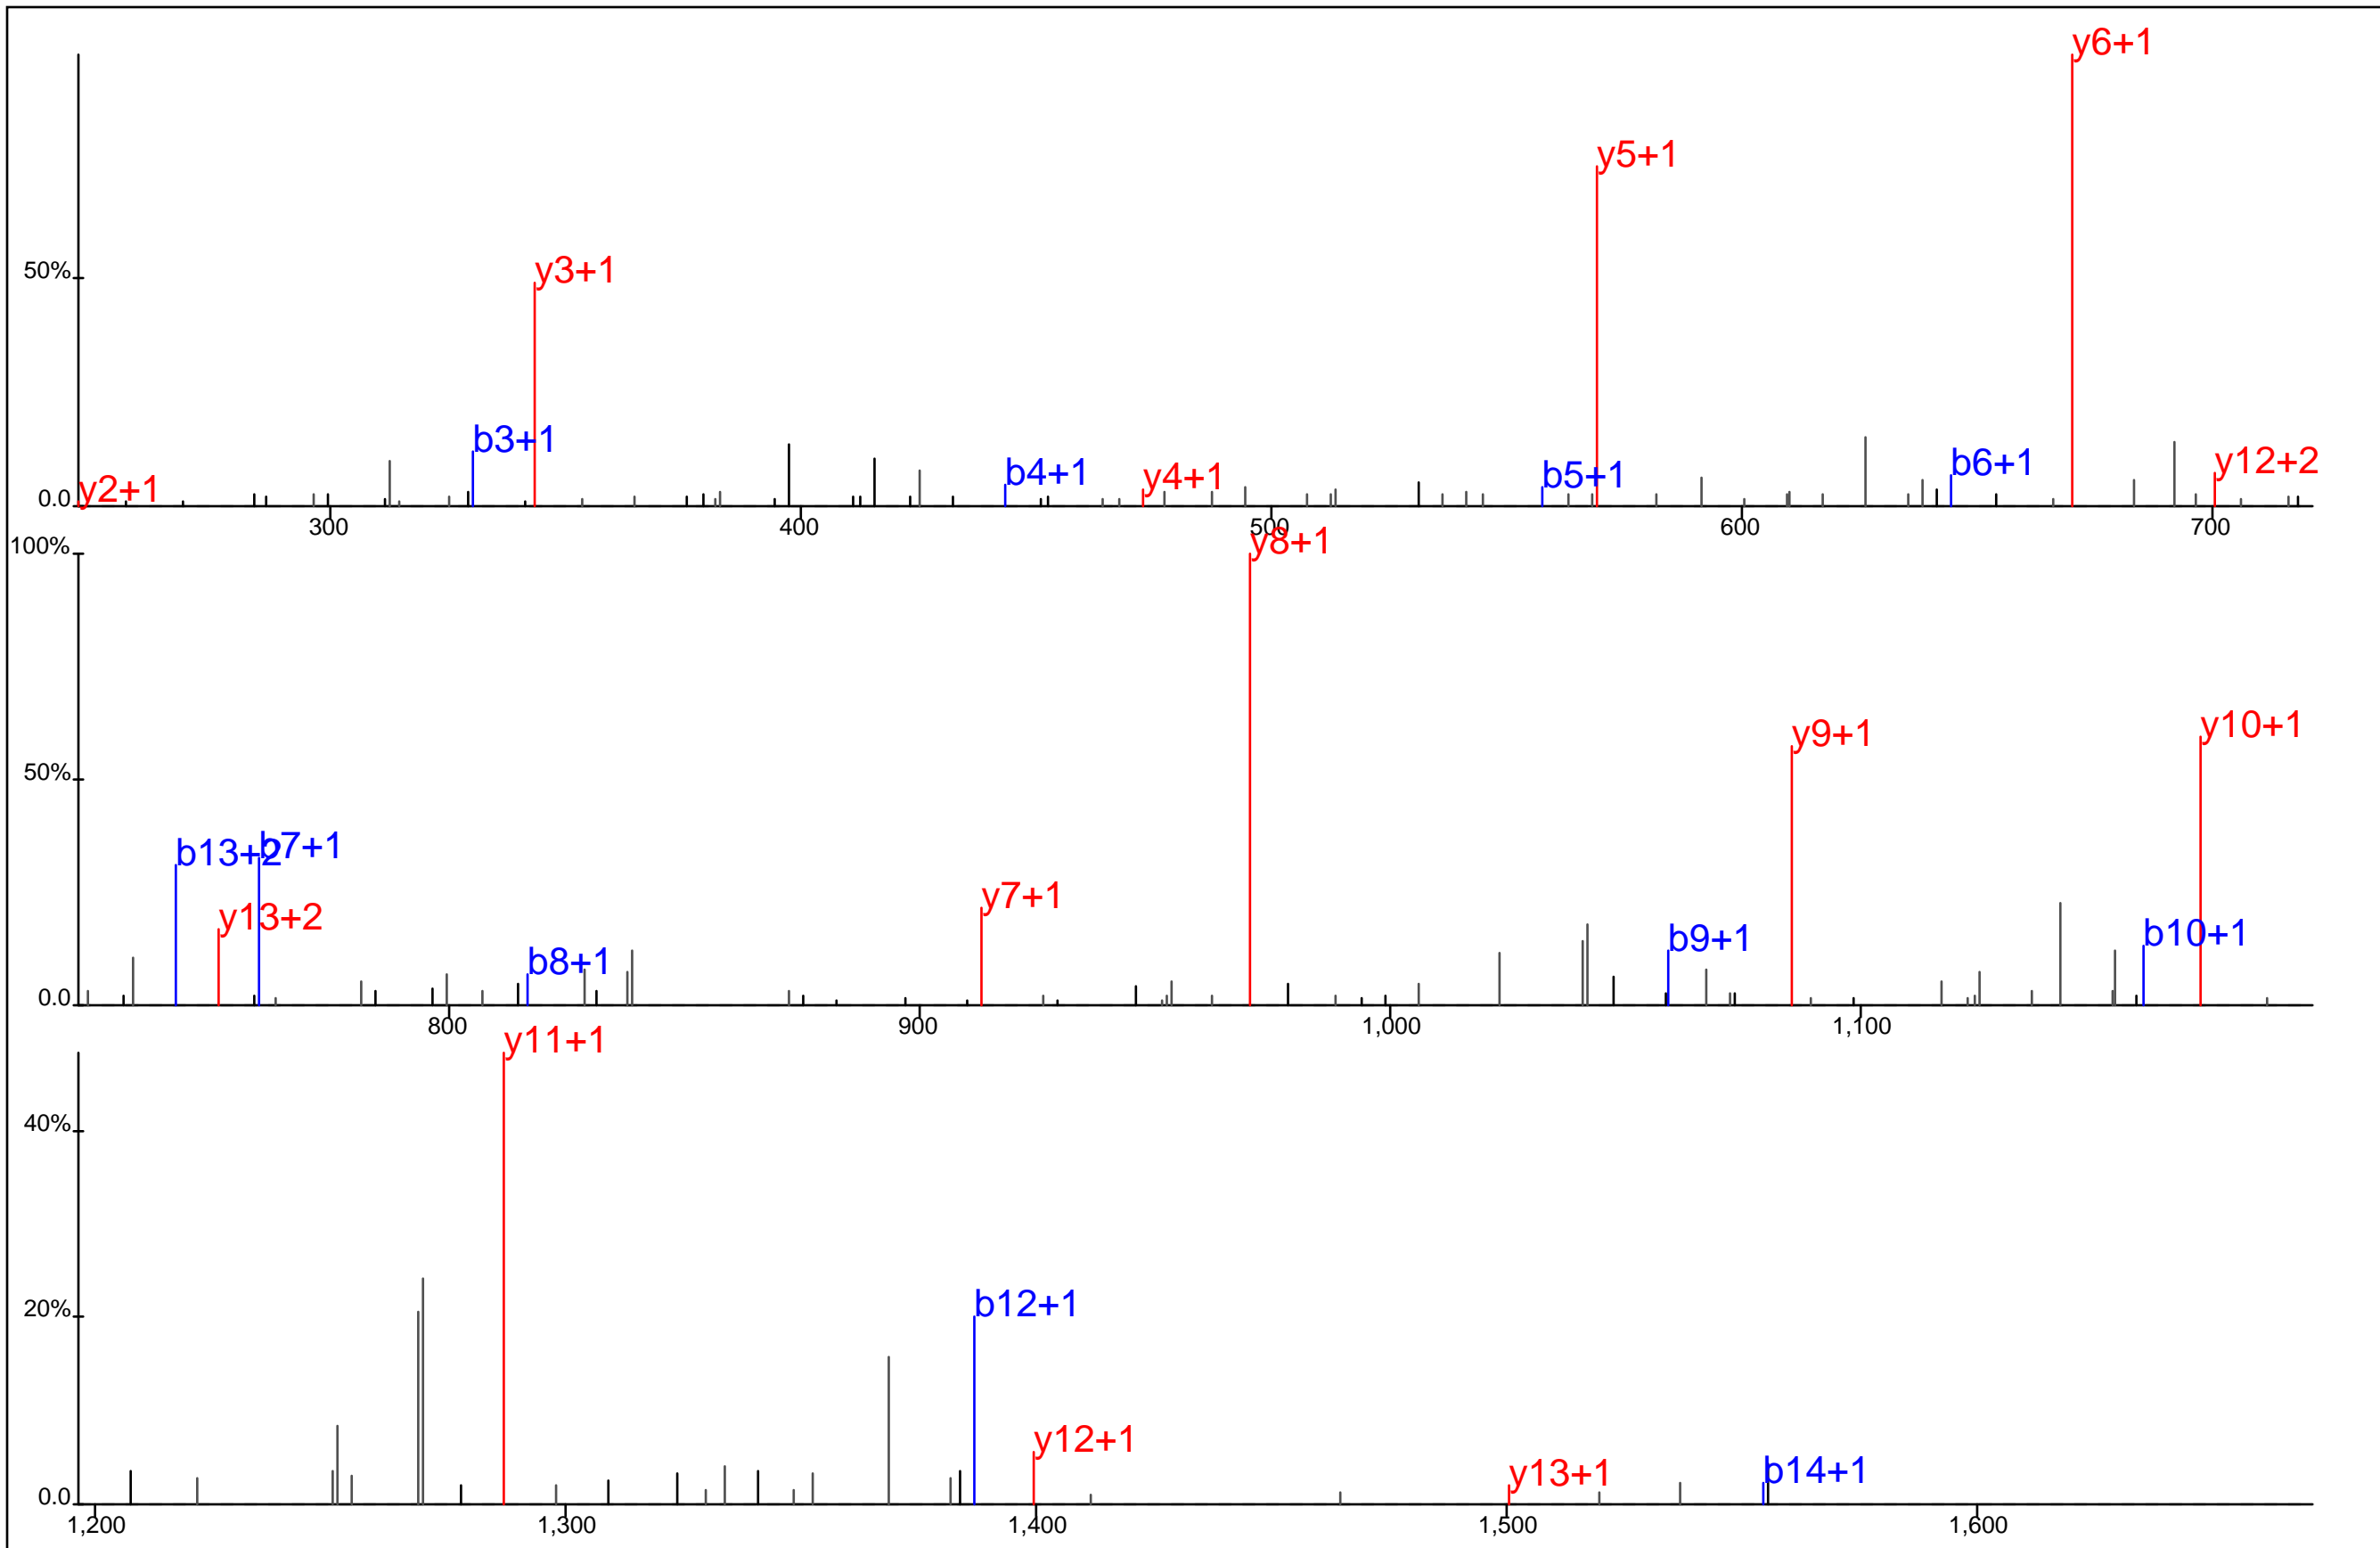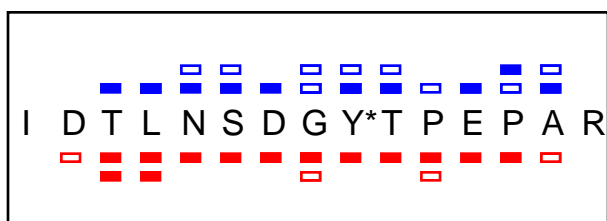

Protein Name: ZAP70  
 gi Accession: 0  
 Precursor Mass: 864.8779+2  
 Delta Mass: 0.556 ppm  
 XCorr: 88.22



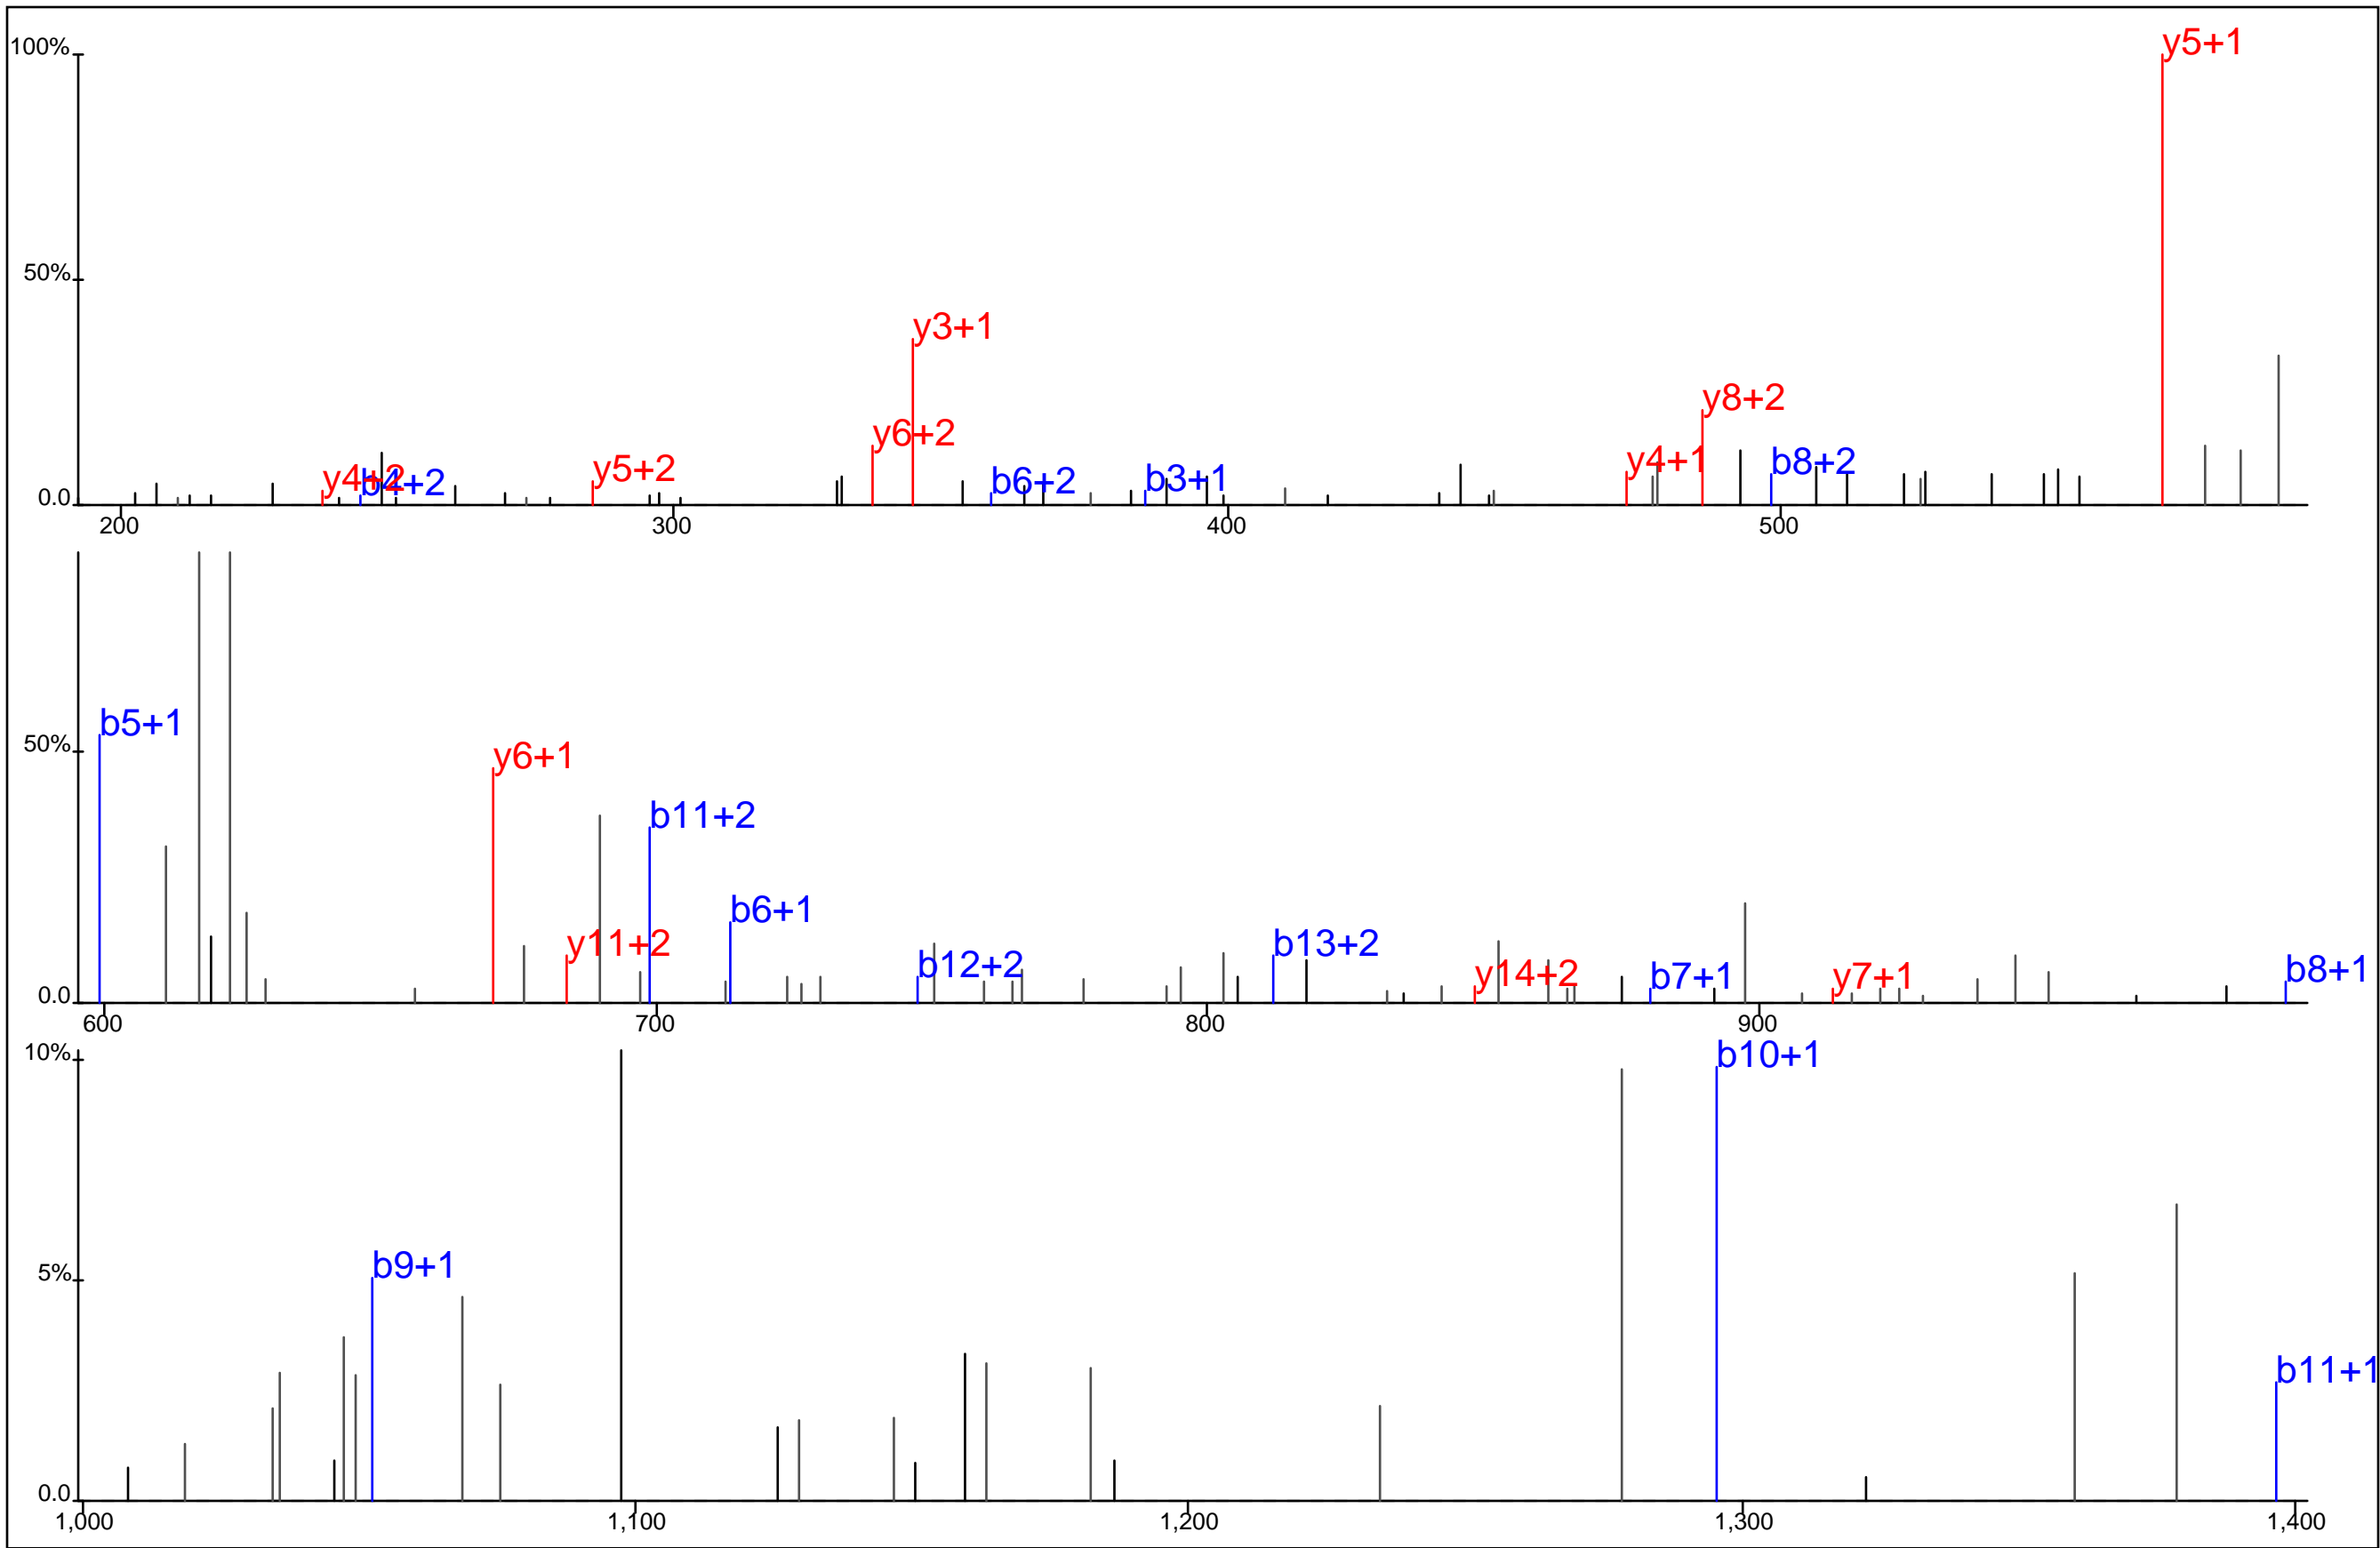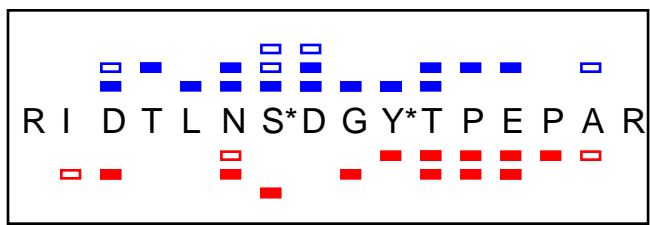

Protein Name: ZAP70  
 gi Accession: 0  
 Precursor Mass: 655.6102+3  
 Delta Mass: 0.556 ppm  
 XCorr: 33.18

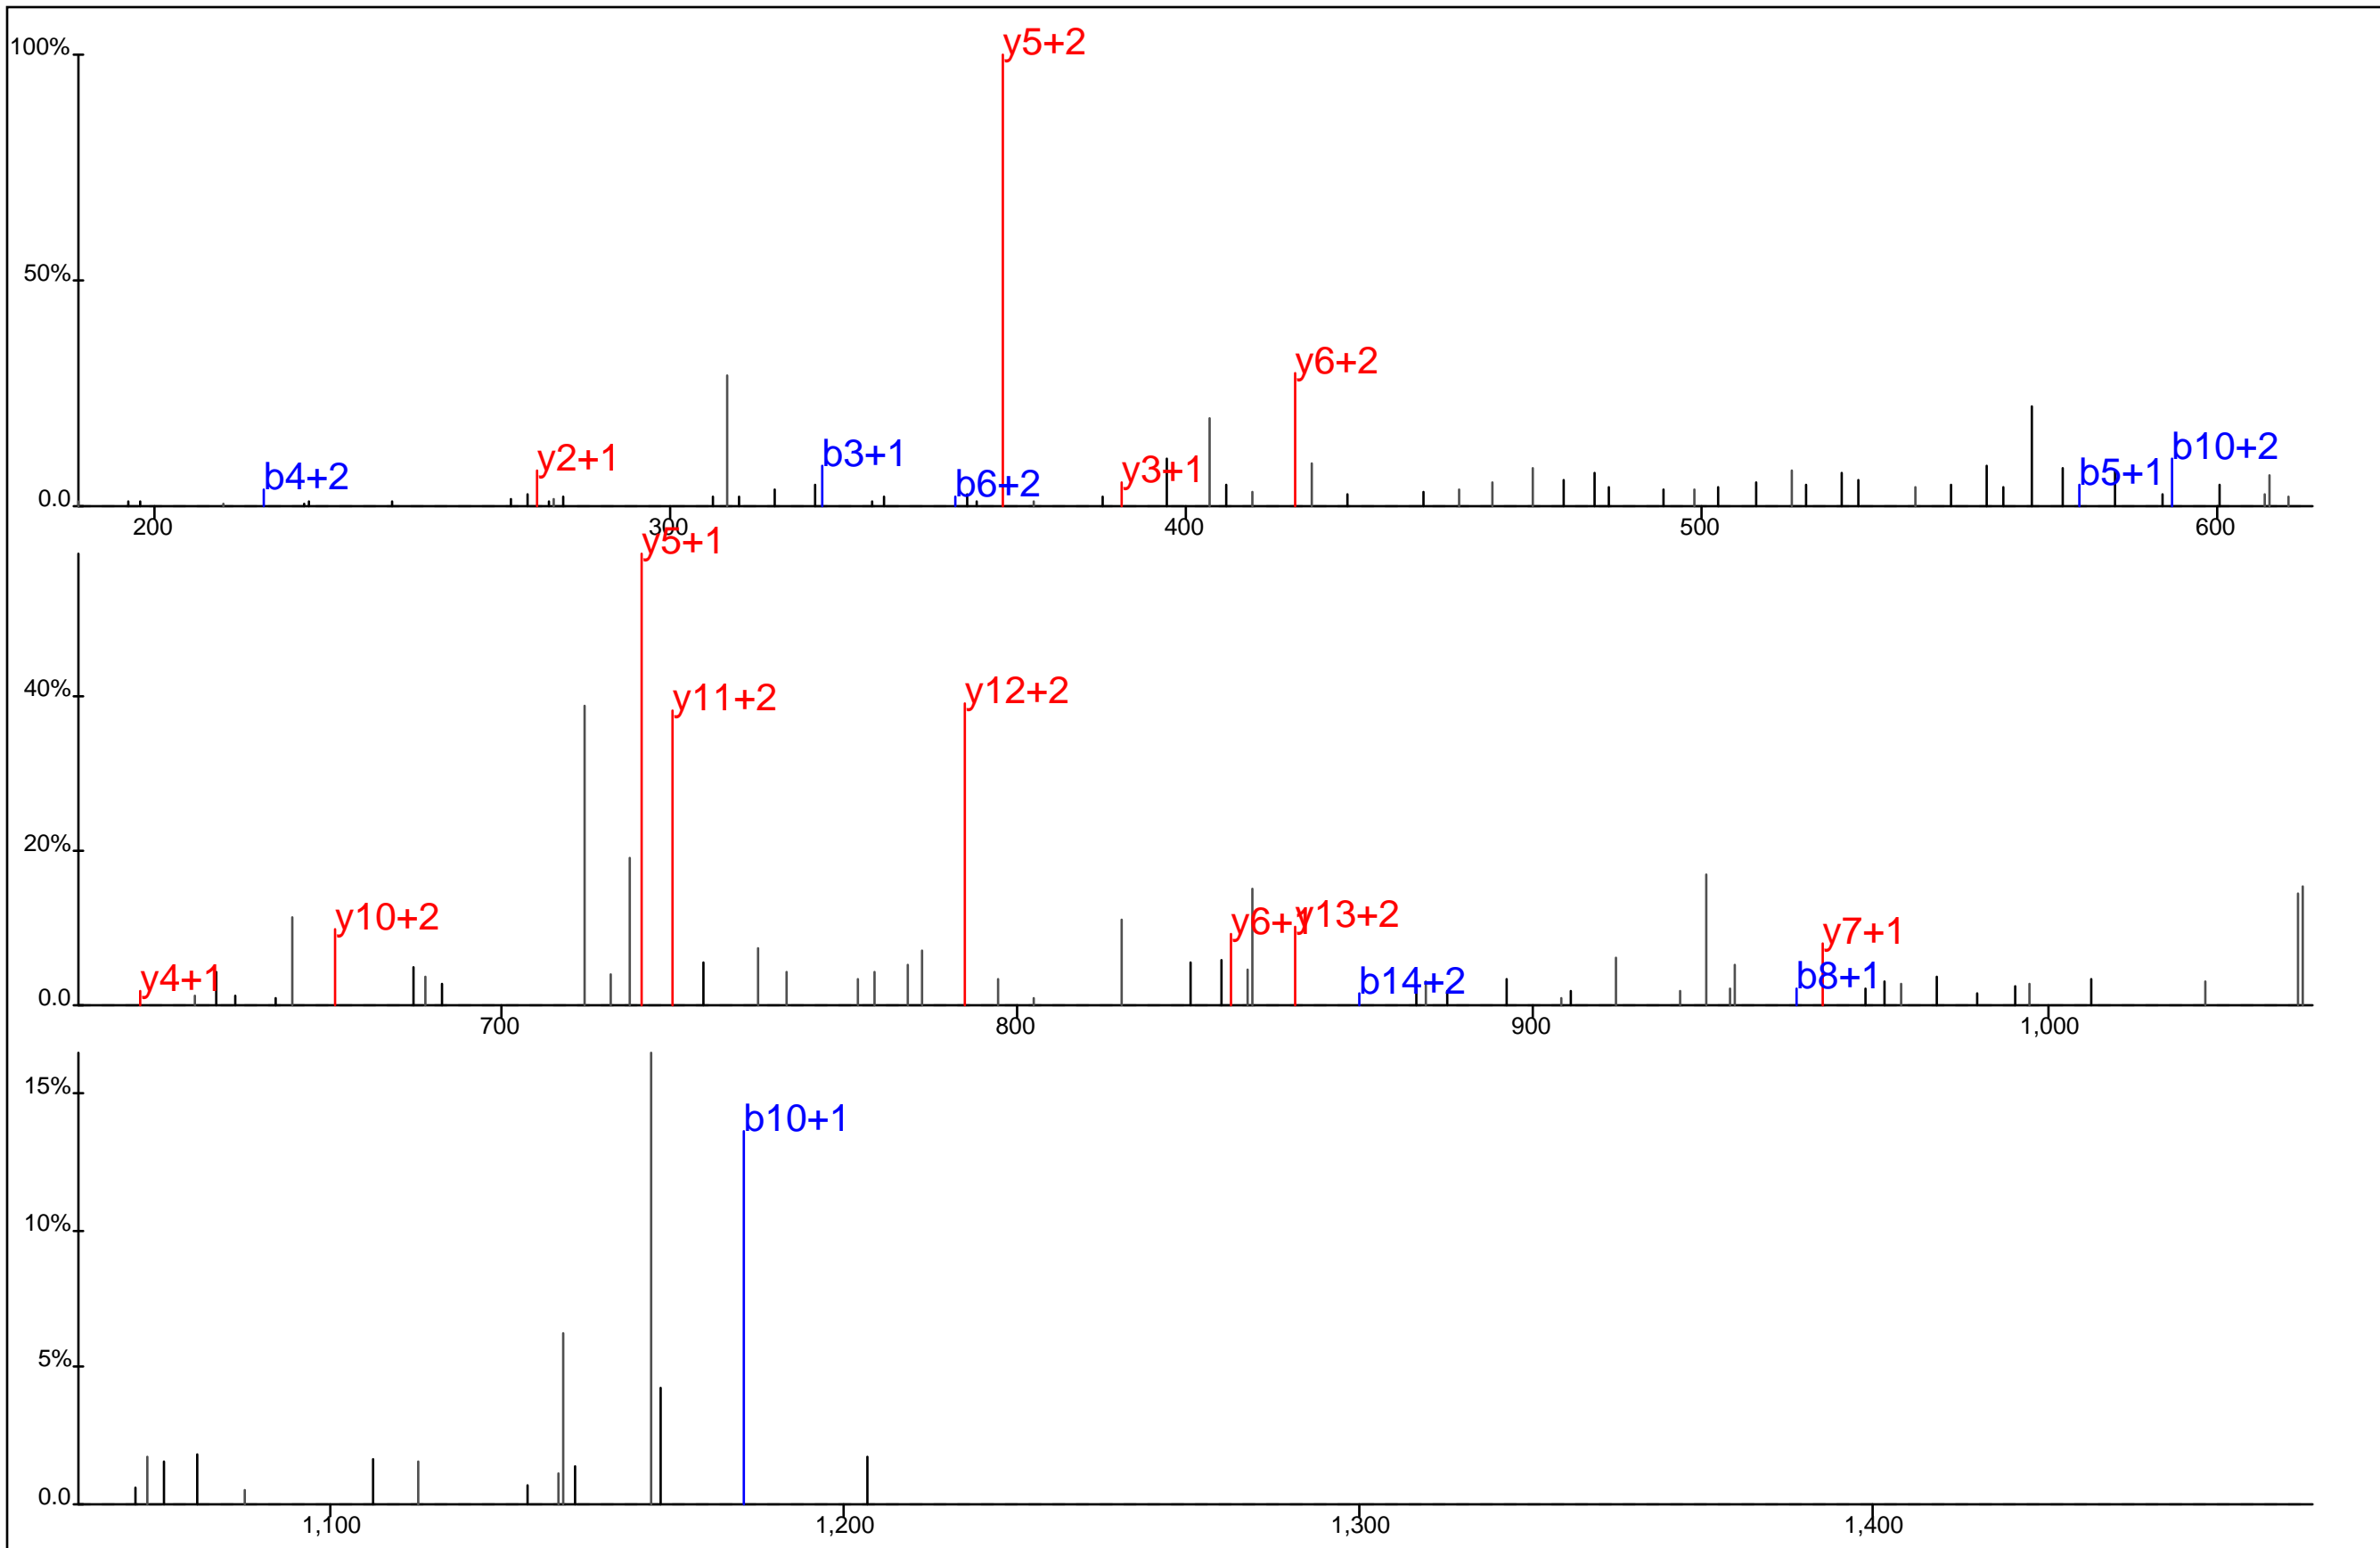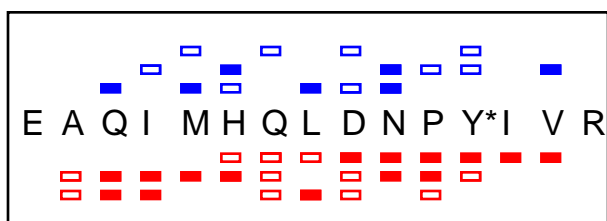

Protein Name: ZAP70  
 gi Accession: 0  
 Precursor Mass: 636.2994+3  
 Delta Mass: 2.260 ppm  
 XCorr: 26.54

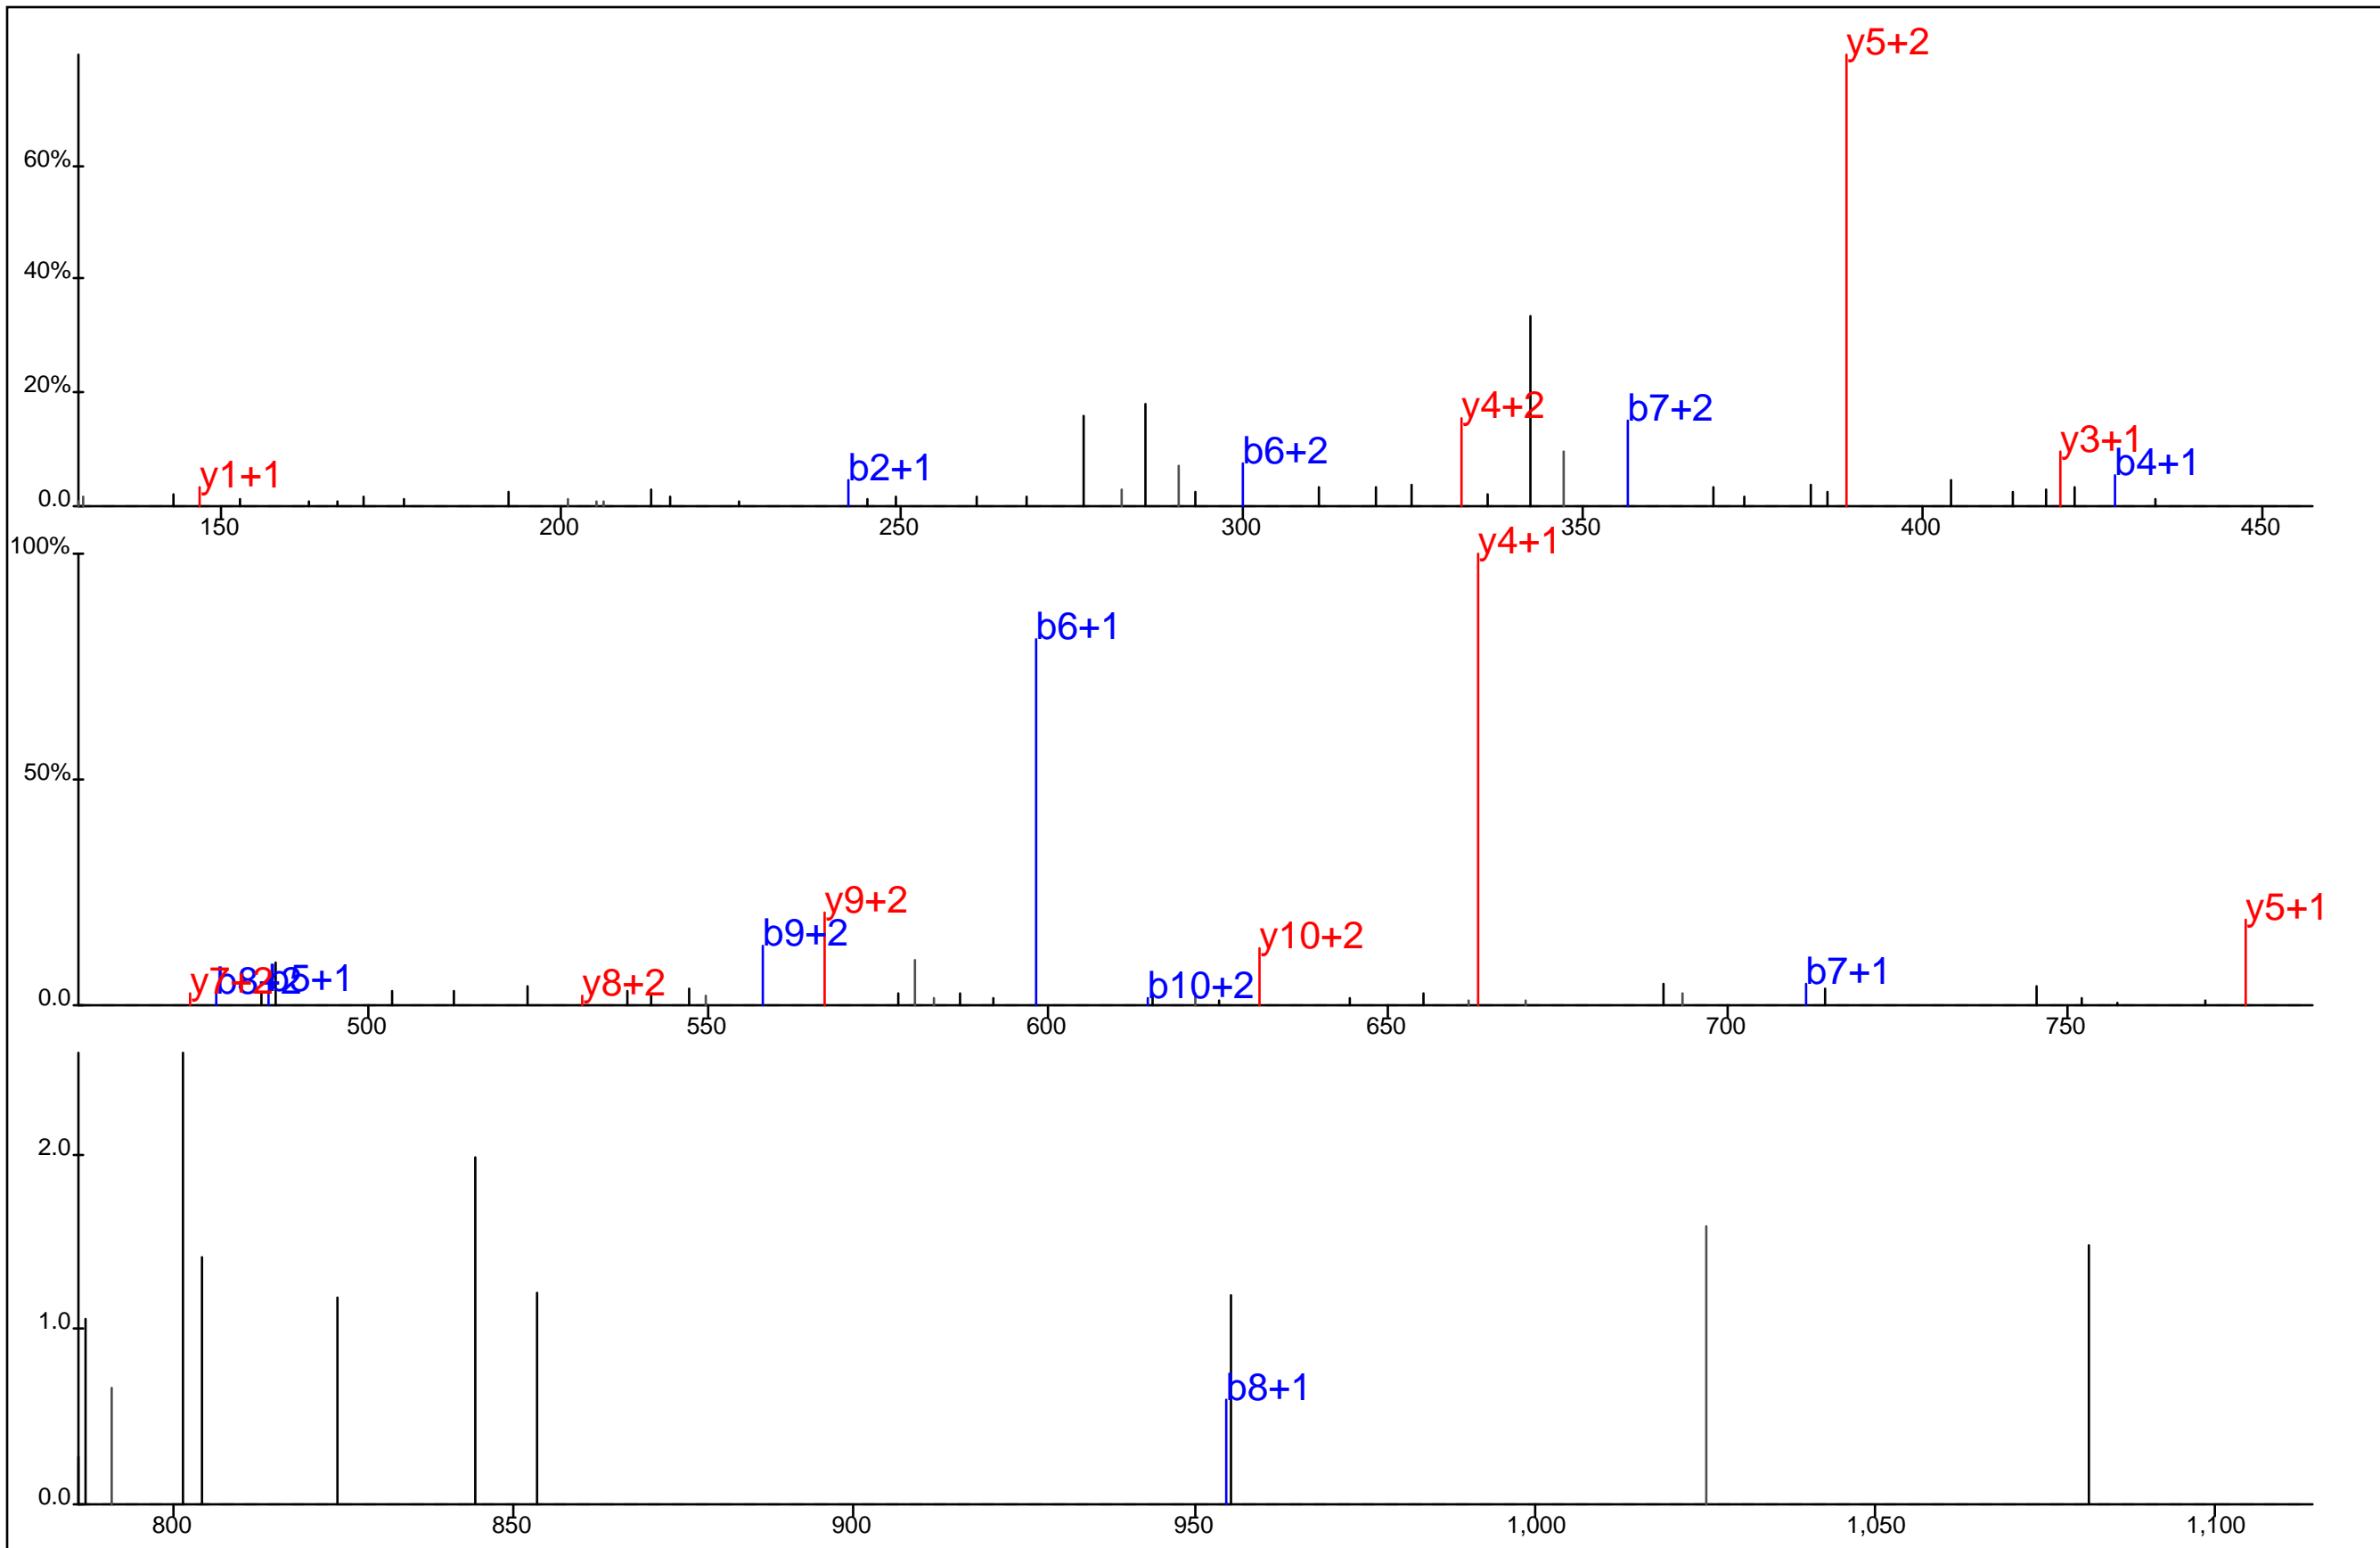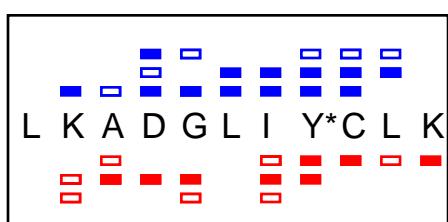

Protein Name: ZAP70  
 gi Accession: 0  
 Precursor Mass: 458.5677+3  
 Delta Mass: 0.954 ppm  
 XCorr: 29.35



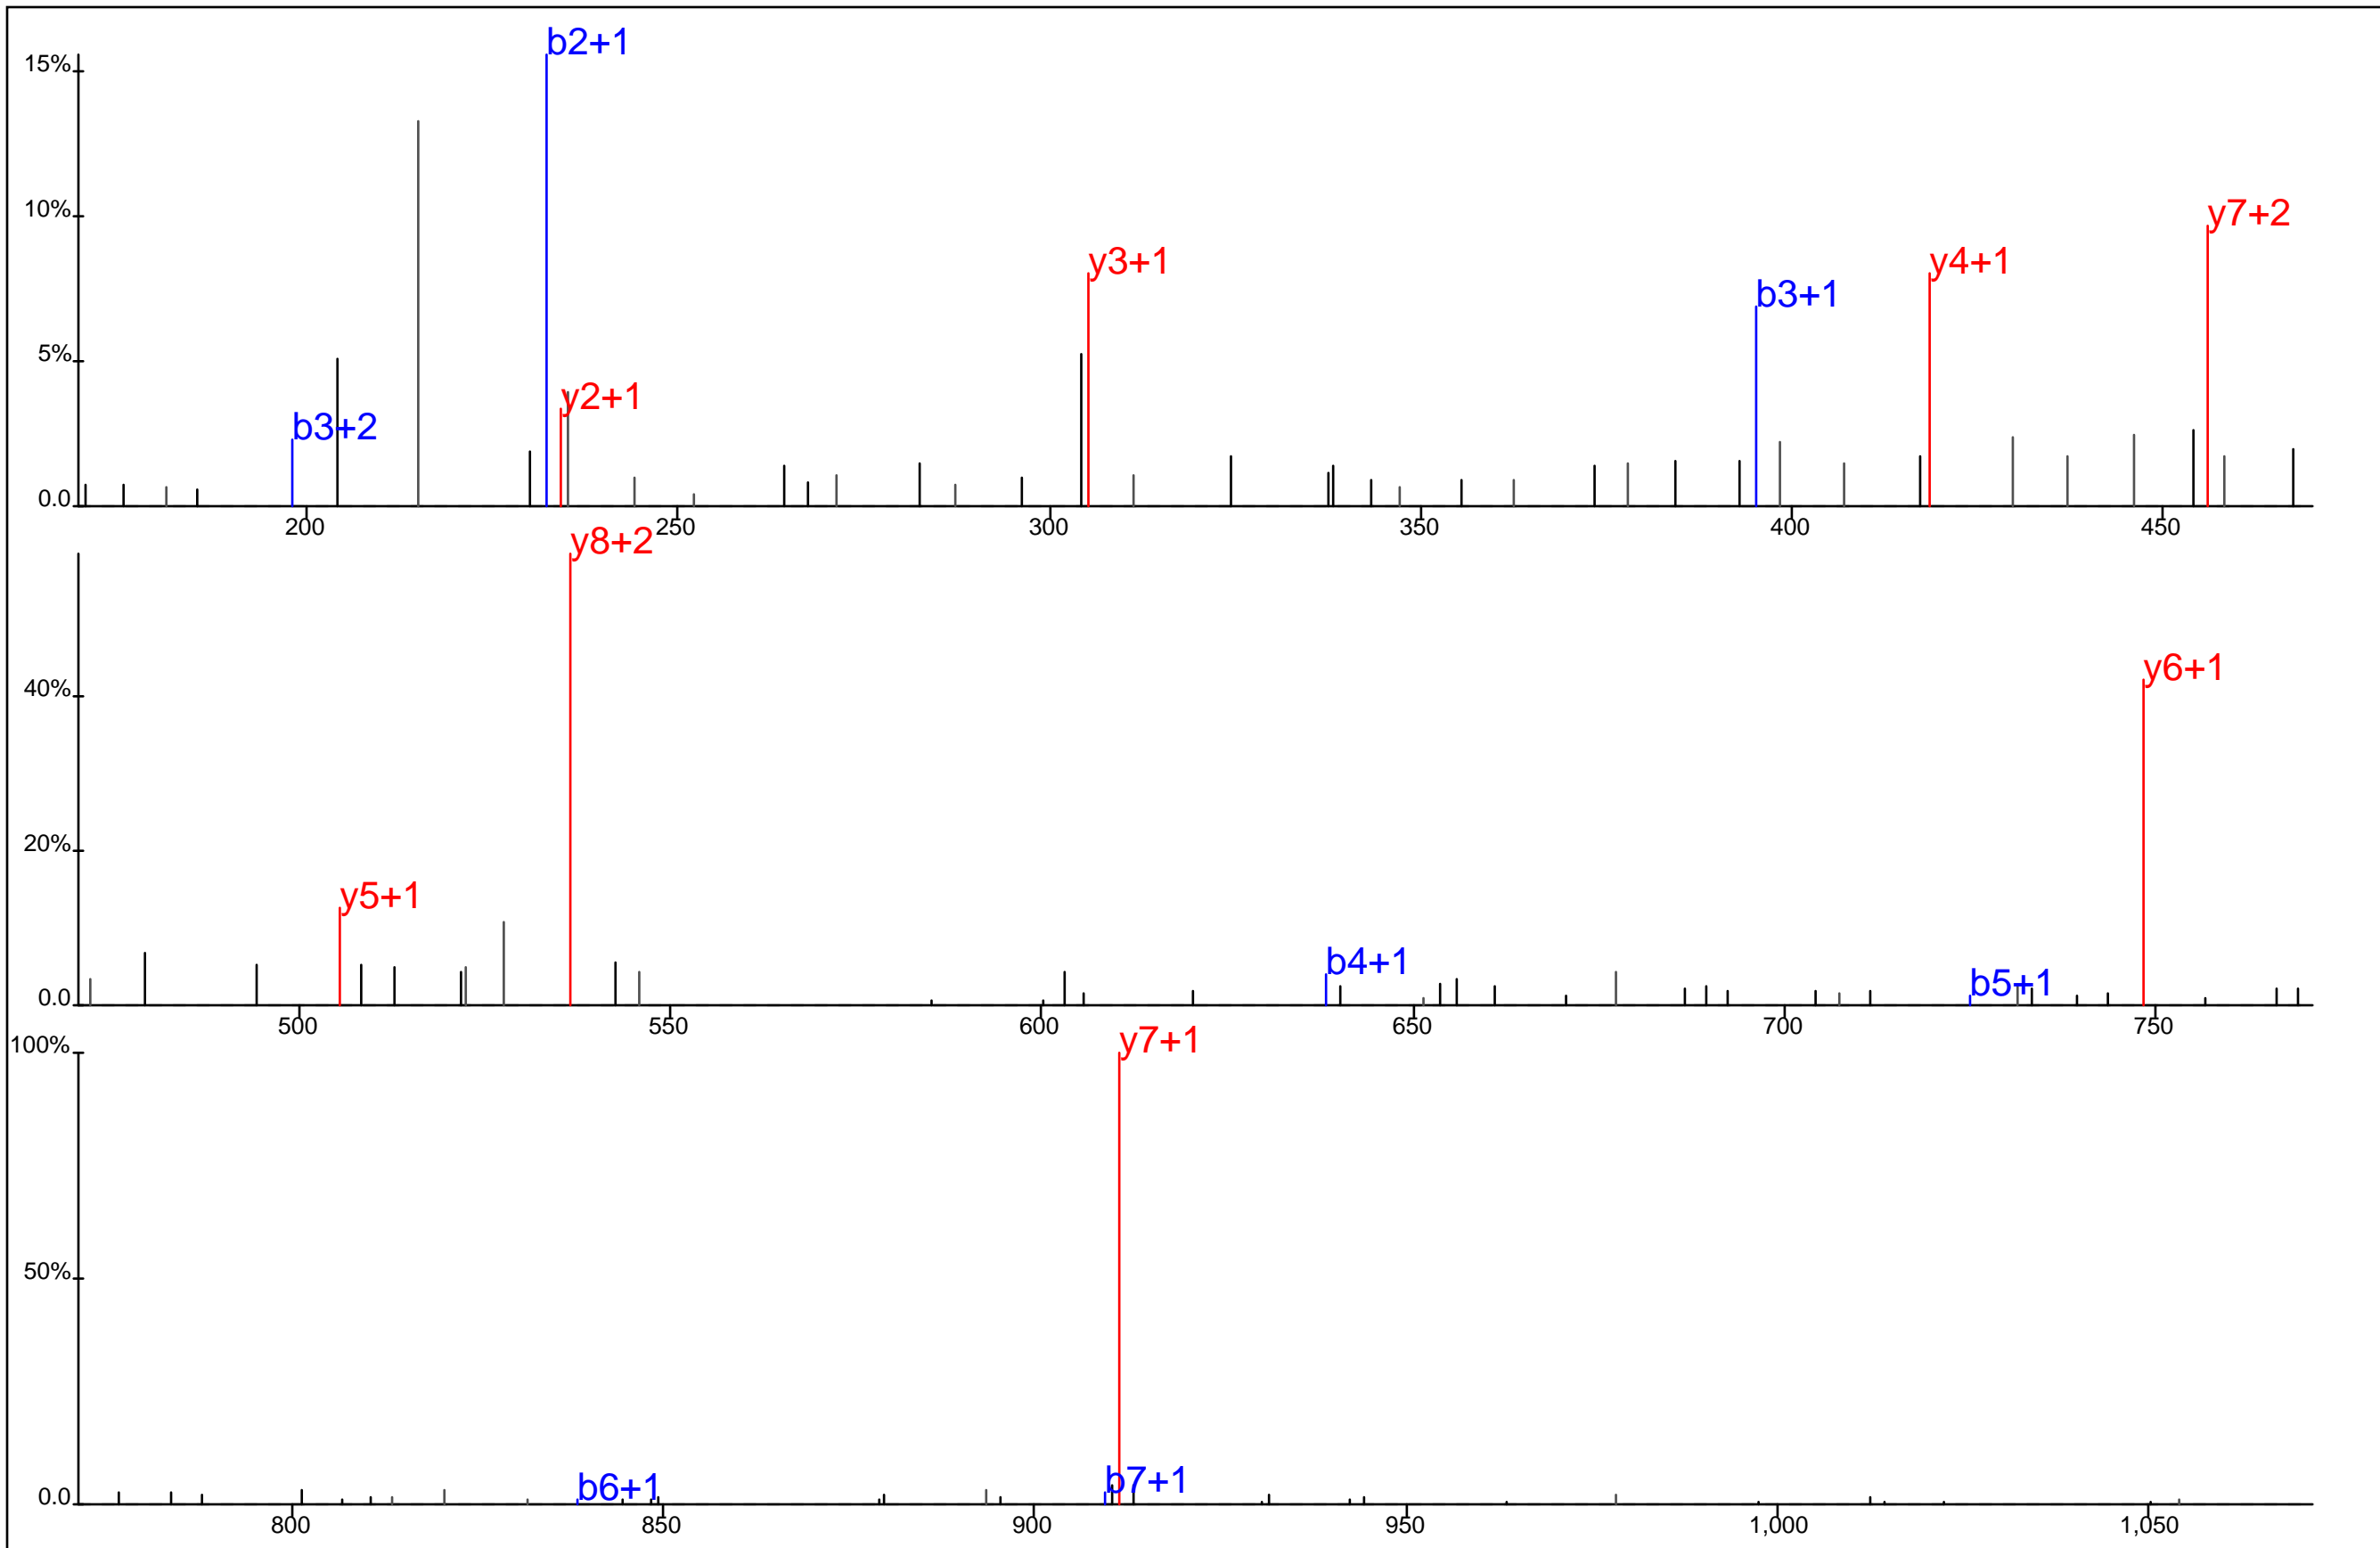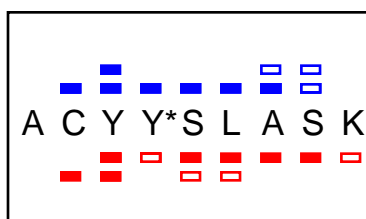

Protein Name: ZAP70  
 gi Accession: 0  
 Precursor Mass: 571.7338+2  
 Delta Mass: 1.421 ppm  
 XCorr: 29.59

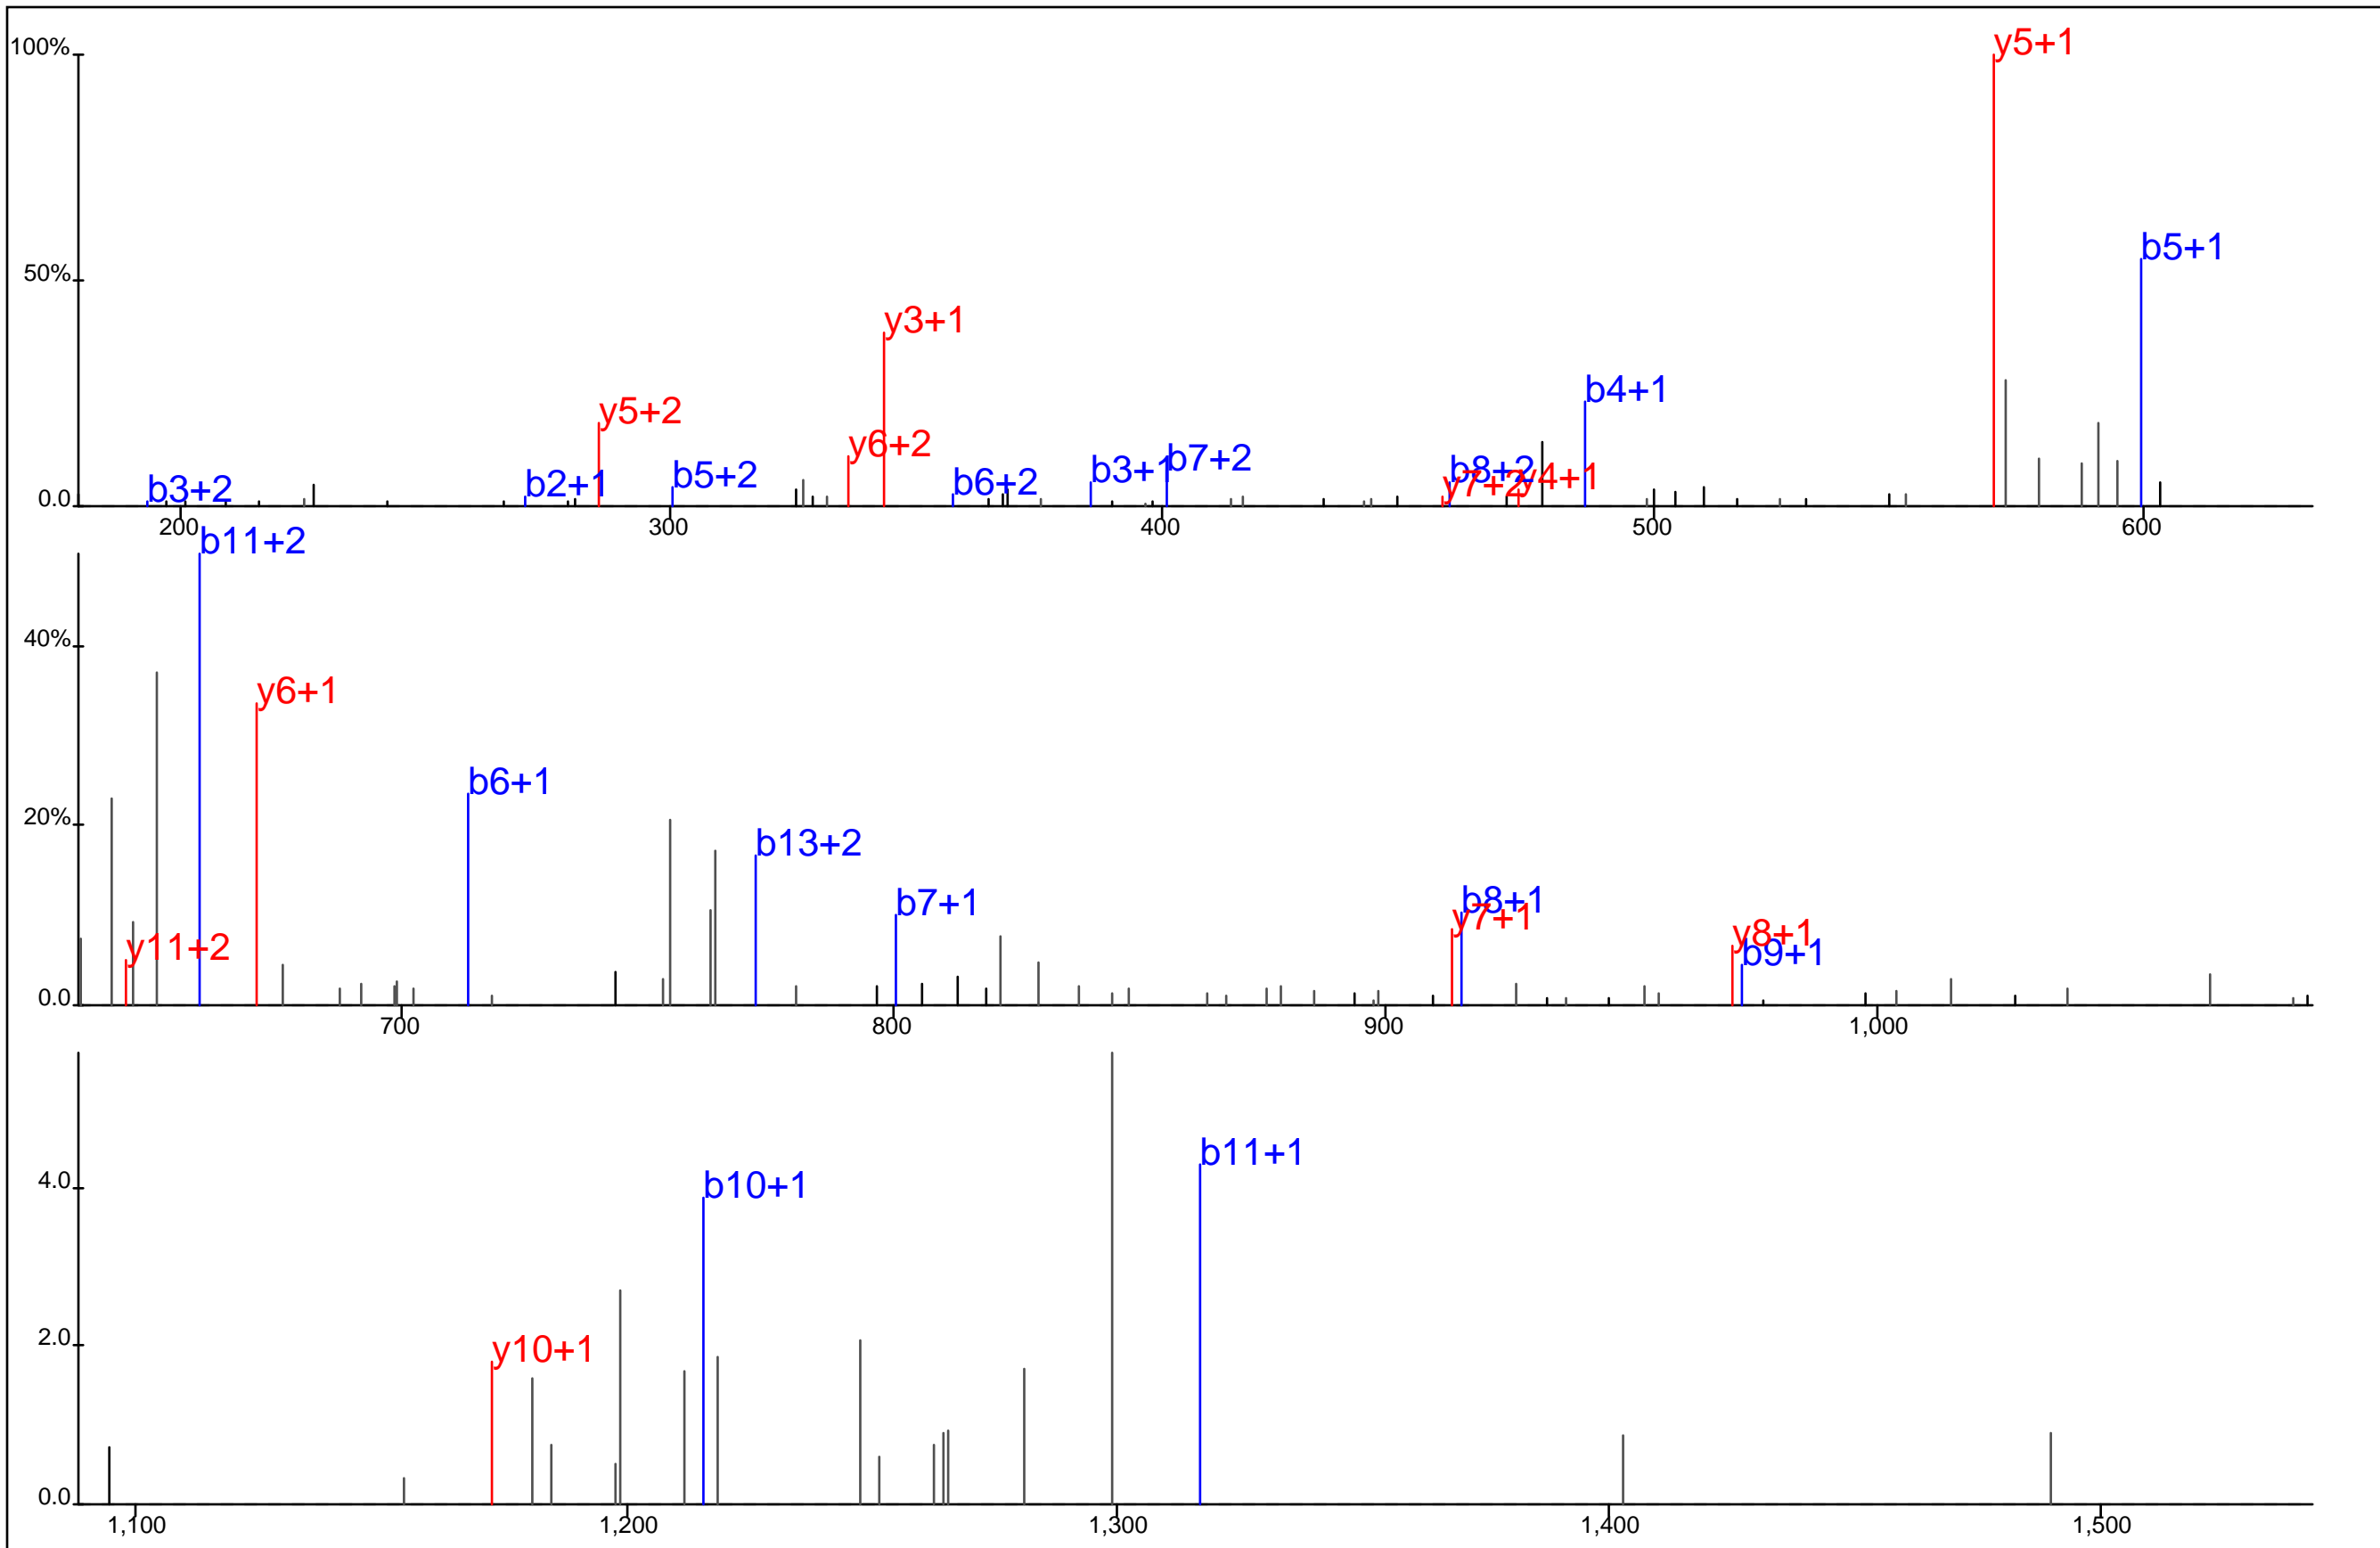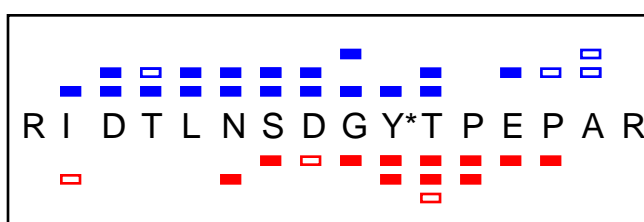

Protein Name: ZAP70  
 gi Accession: 0  
 Precursor Mass: 628.9542+3  
 Delta Mass: 0.319 ppm  
 XCorr: 62.78

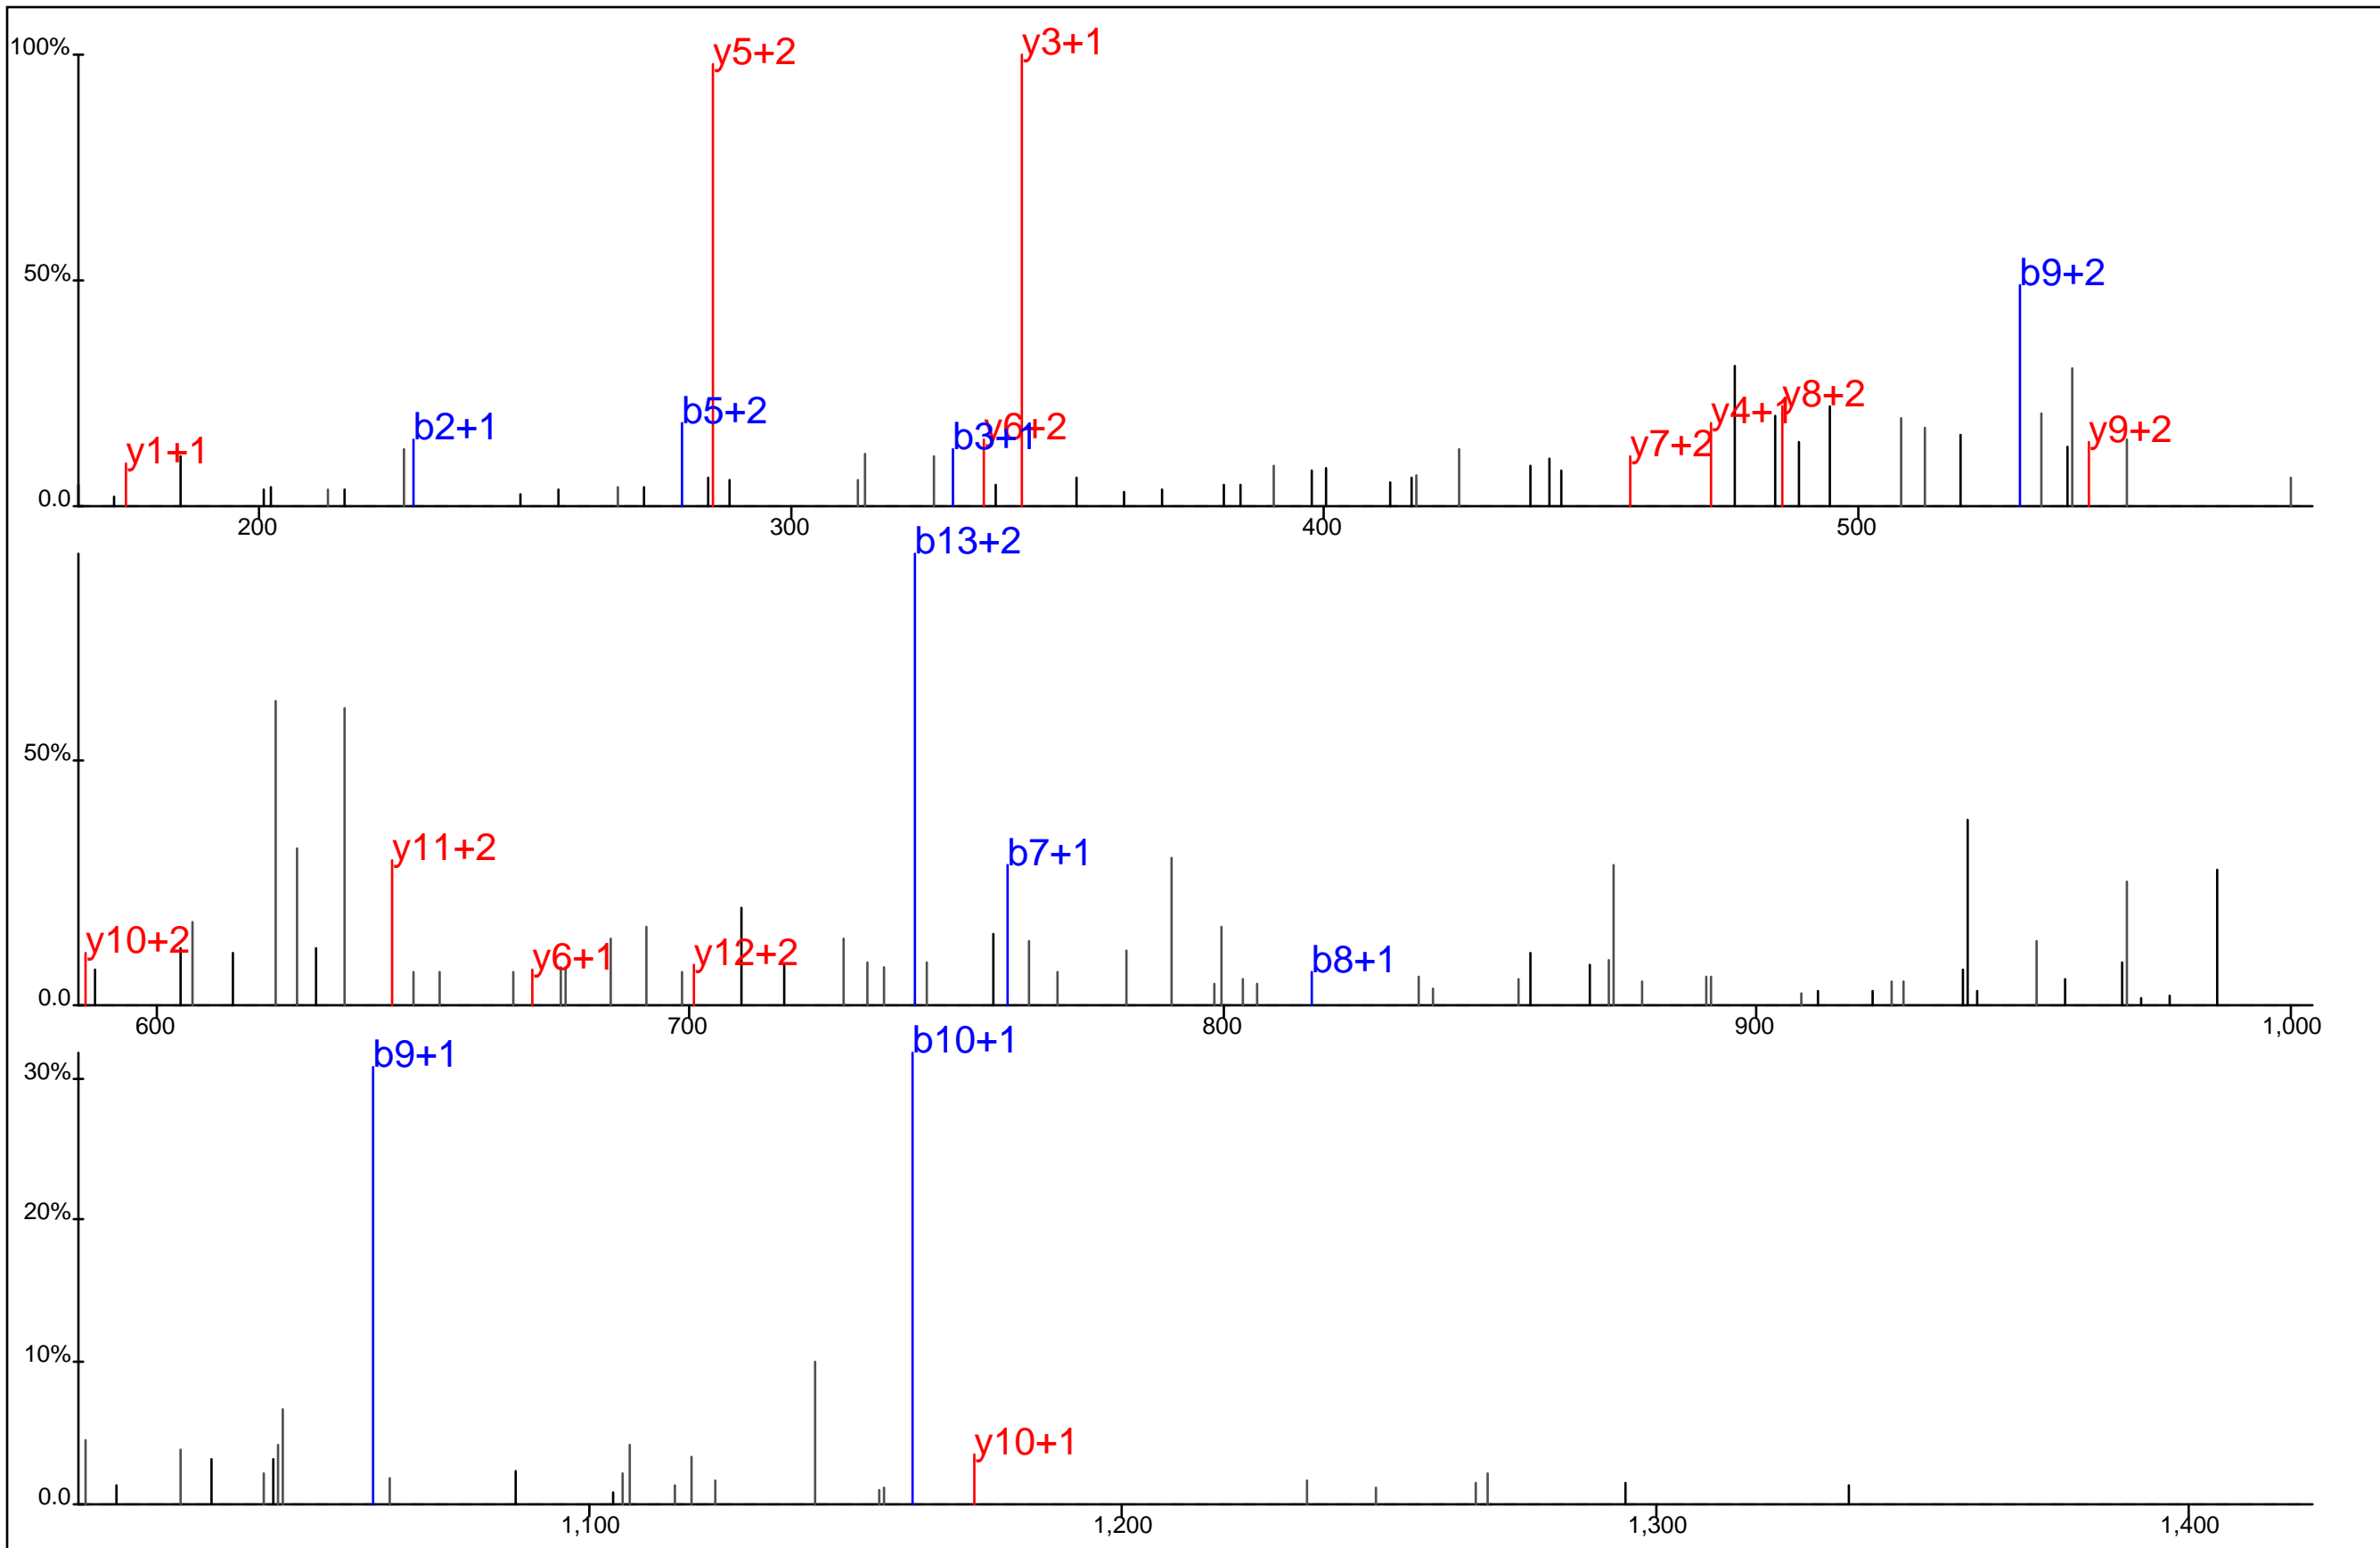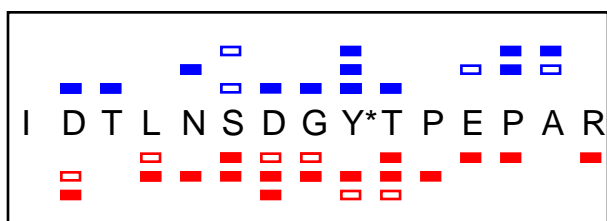

Protein Name: ZAP70  
 gi Accession: 0  
 Precursor Mass: 576.9204+3  
 Delta Mass: 0.546 ppm  
 XCorr: 27.63

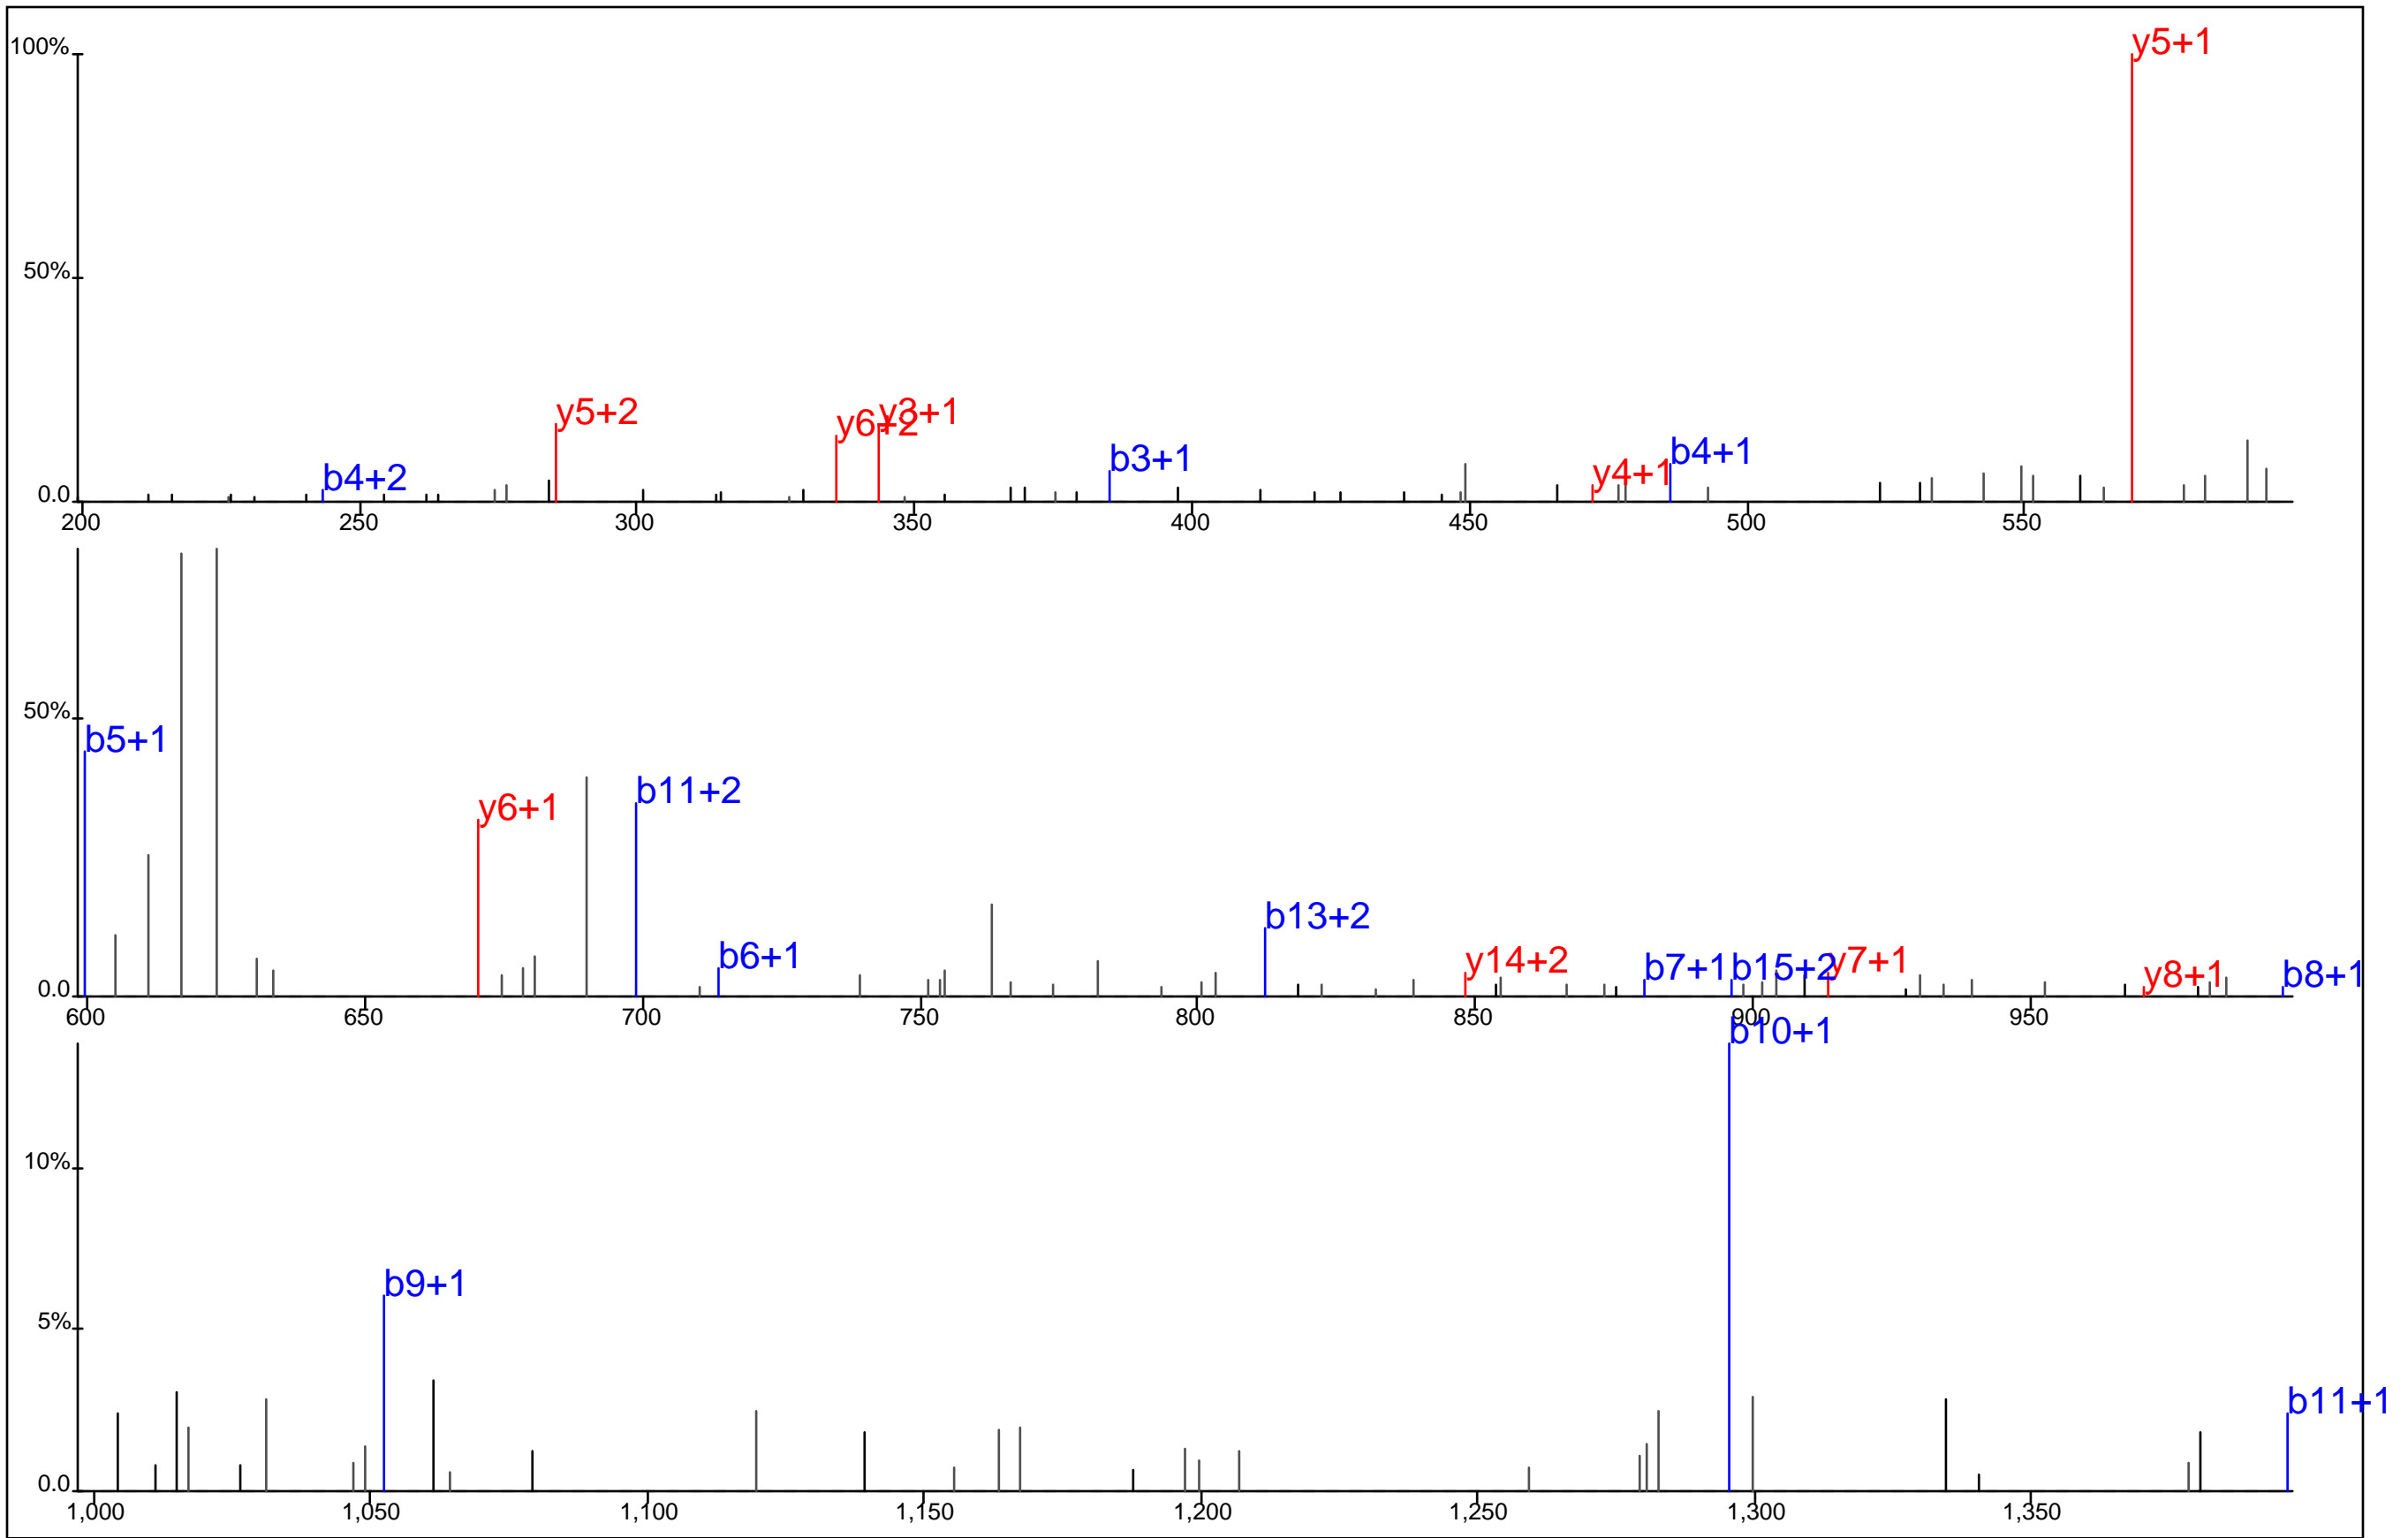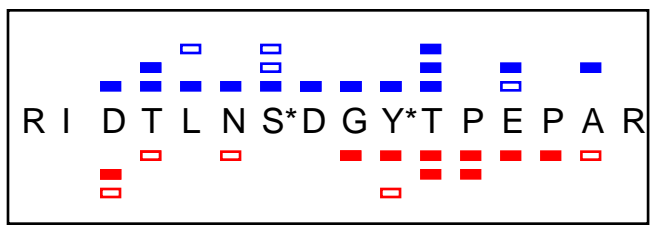

Protein Name: ZAP70  
 gi Accession: 0  
 Precursor Mass: 655.6097+3  
 Delta Mass: 0.282 ppm  
 XCorr: 30.44



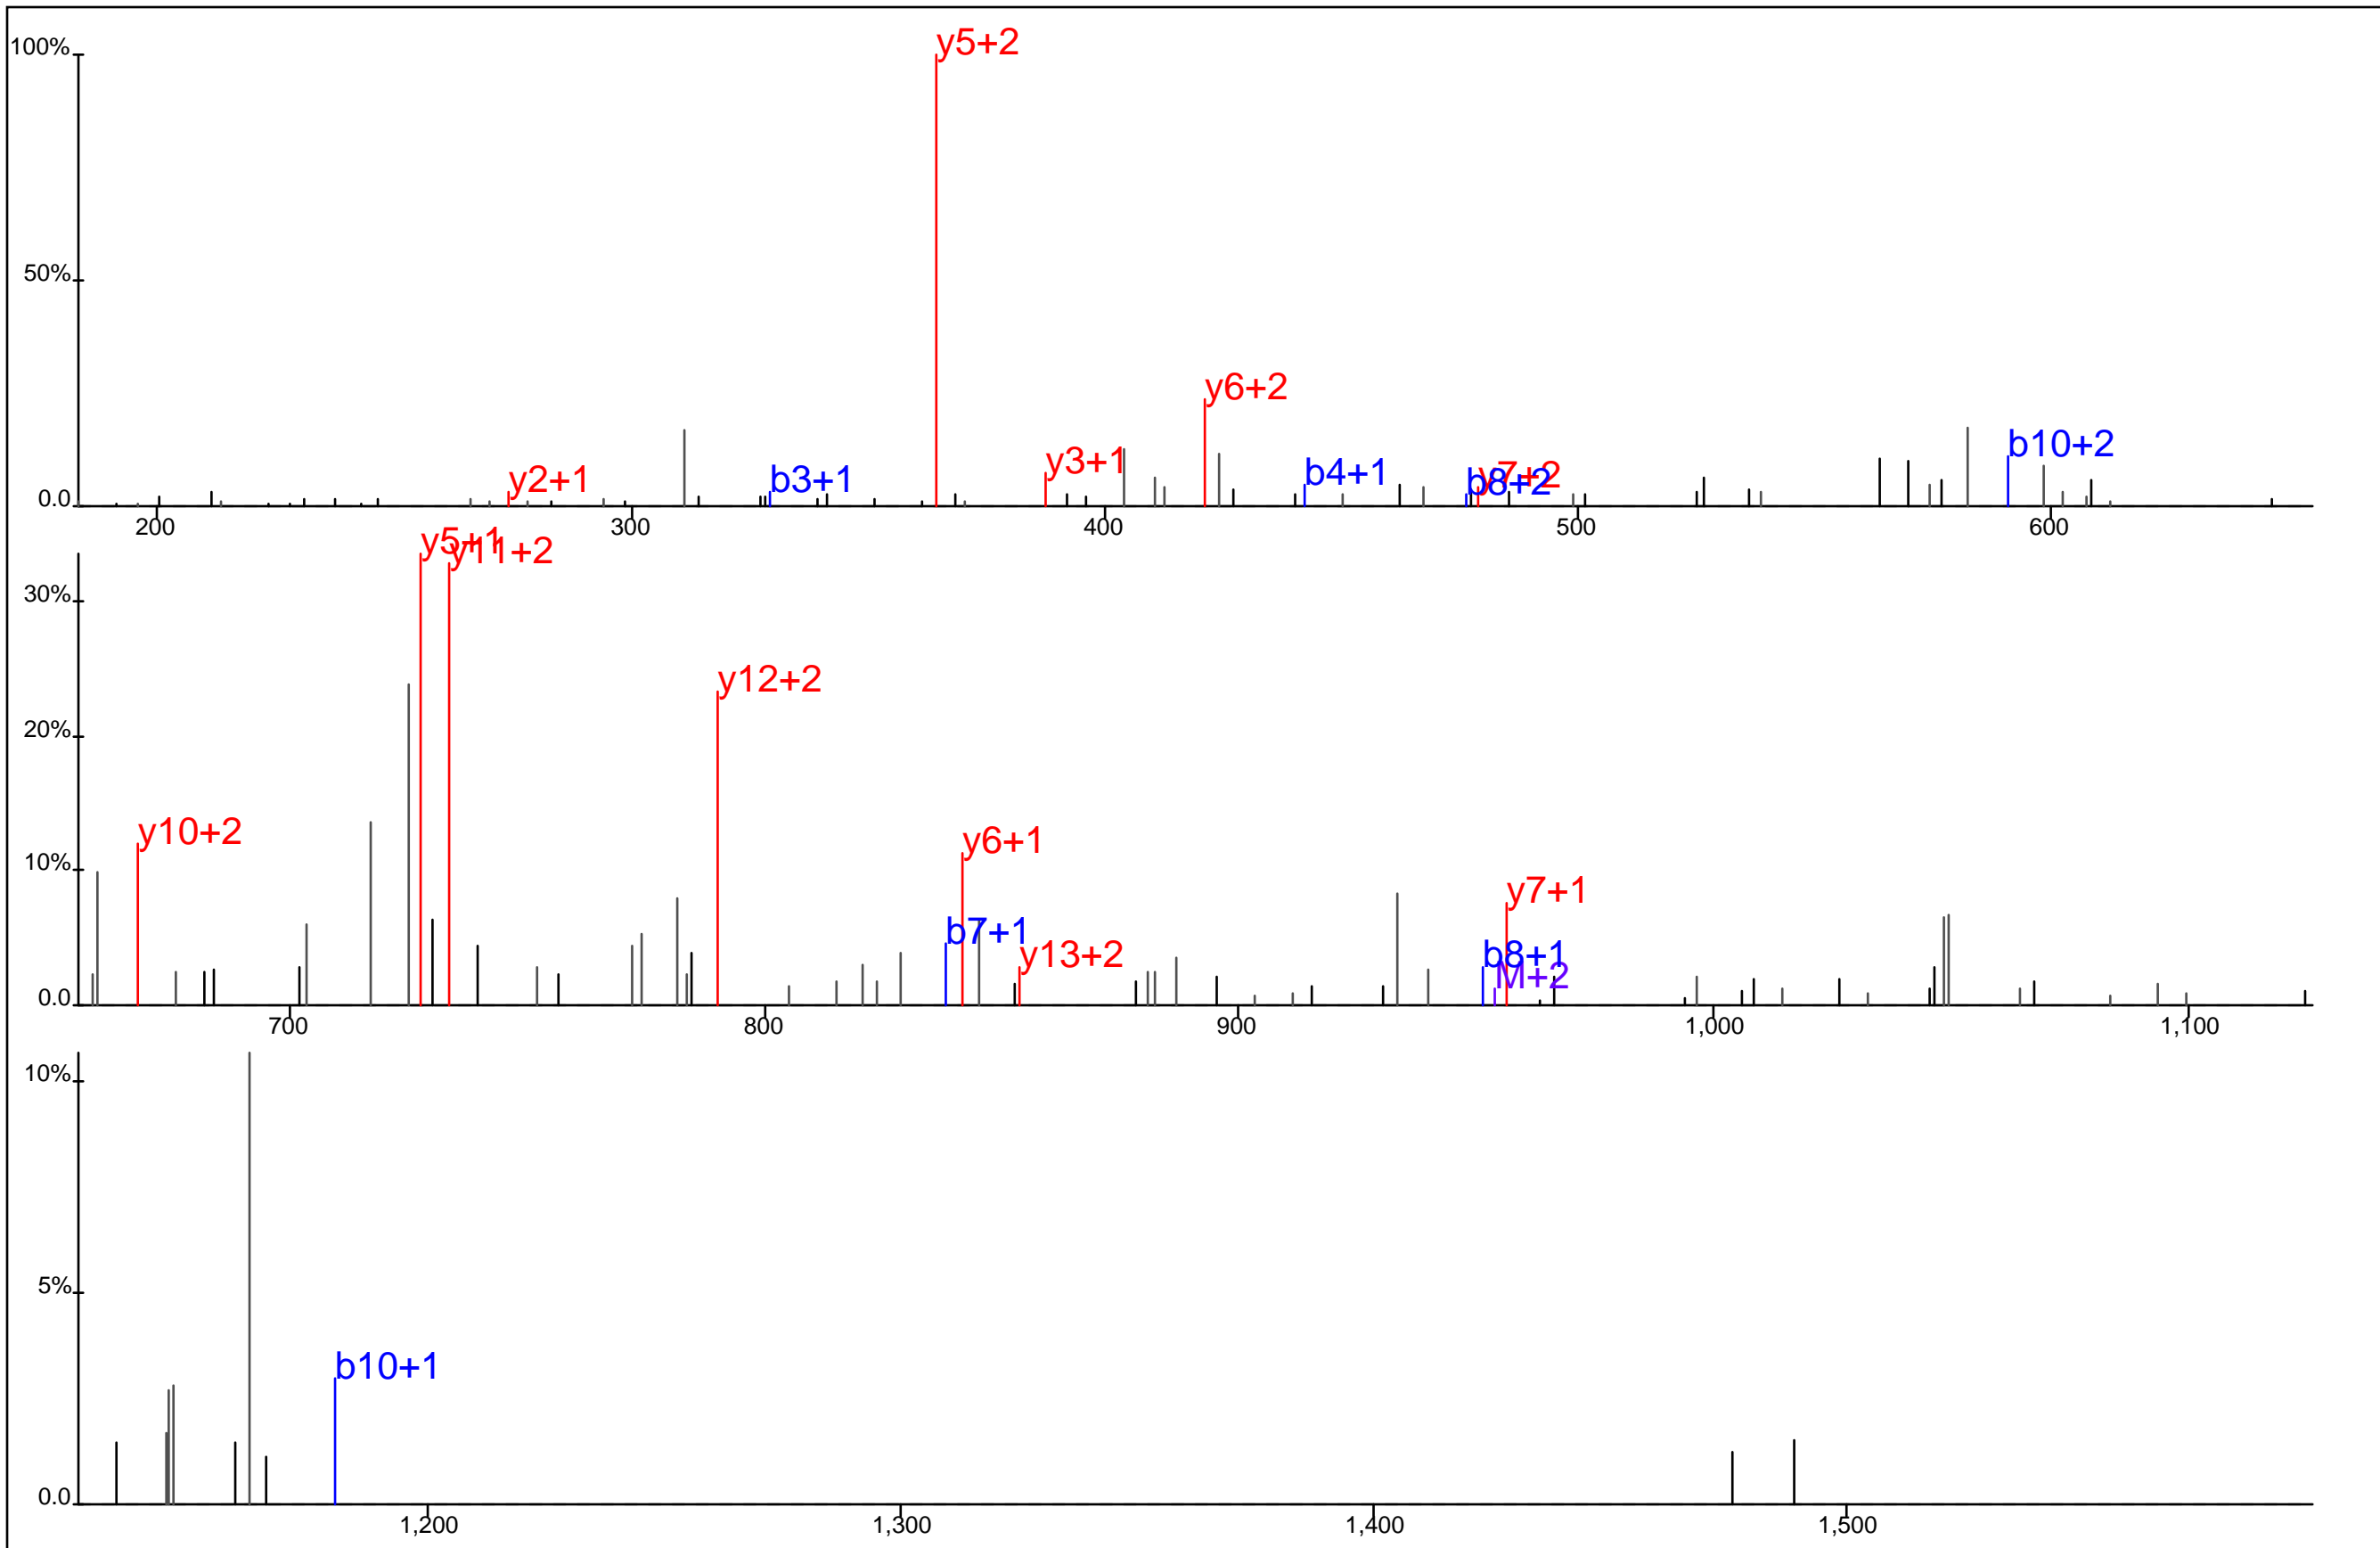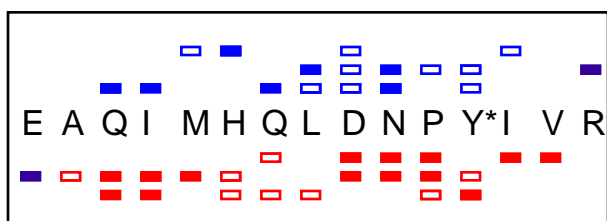

Protein Name: ZAP70  
 gi Accession: 0  
 Precursor Mass: 636.3013+3  
 Delta Mass: 0.718 ppm  
 XCorr: 28.66

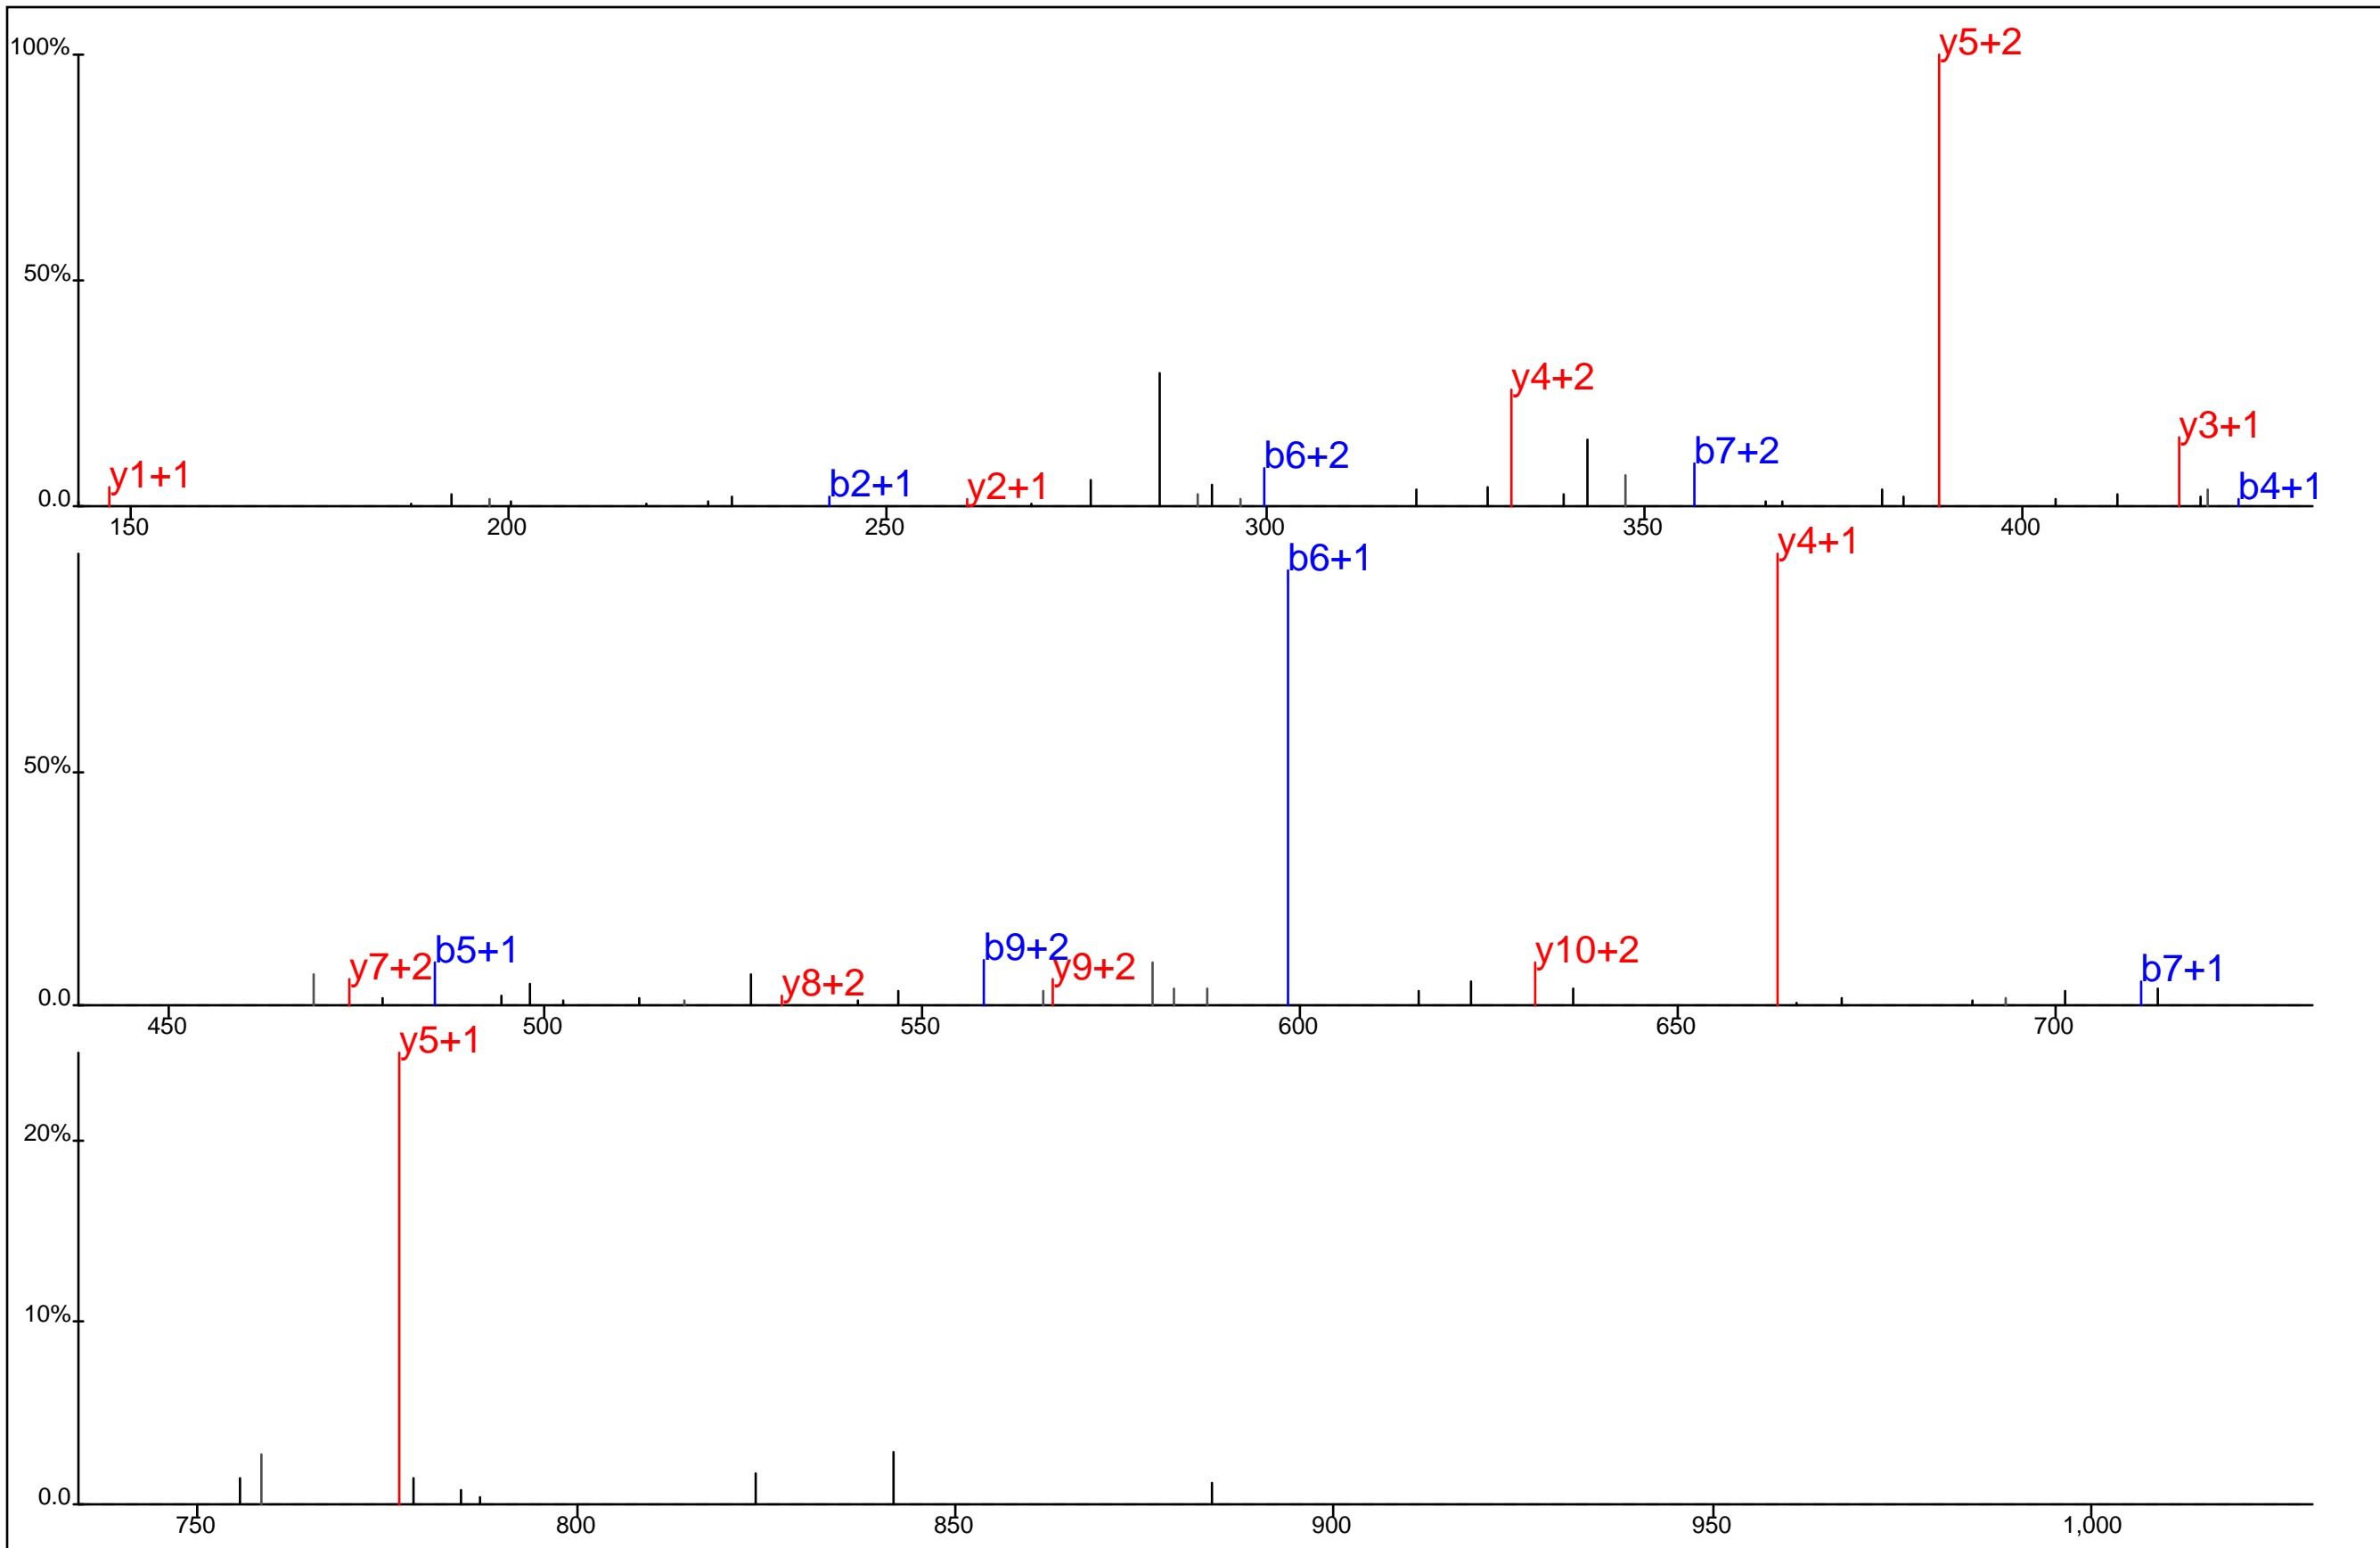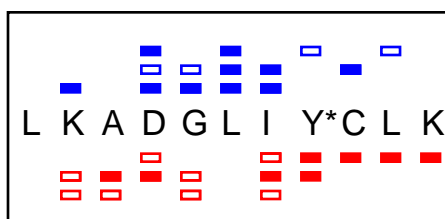

Protein Name: ZAP70  
 gi Accession: 0  
 Precursor Mass: 458.5682+3  
 Delta Mass: 0.112 ppm  
 XCorr: 29.27

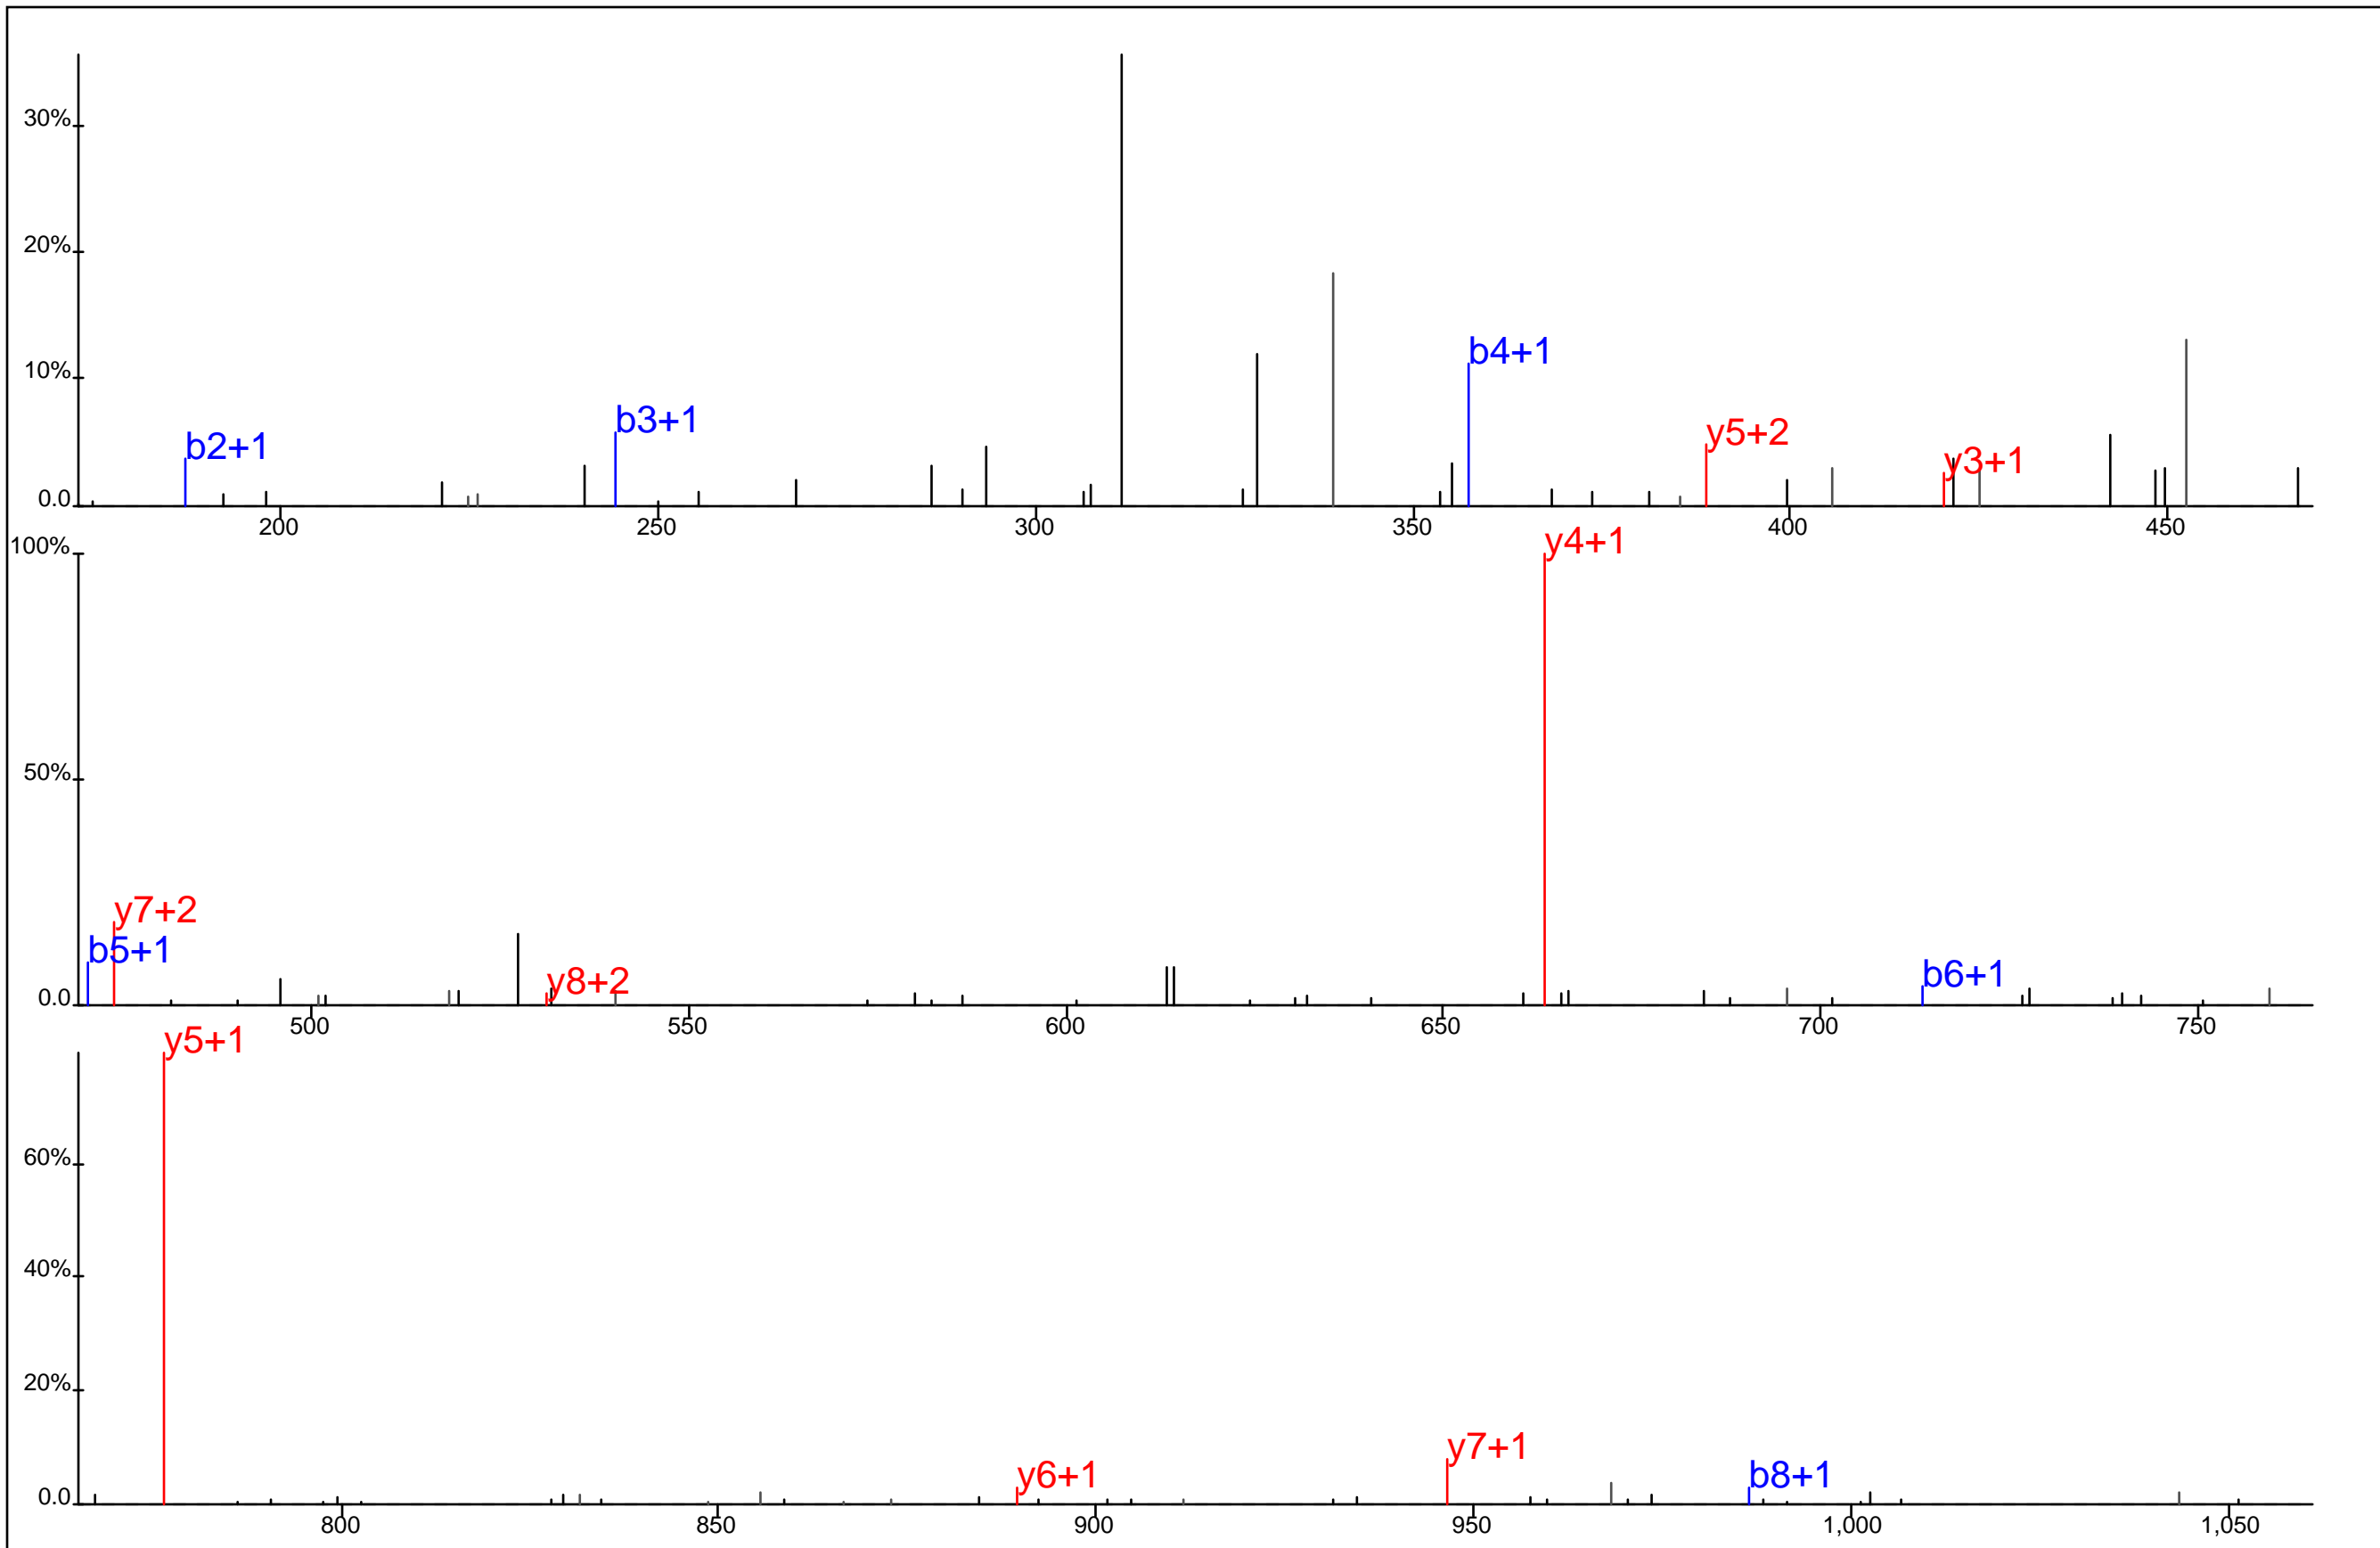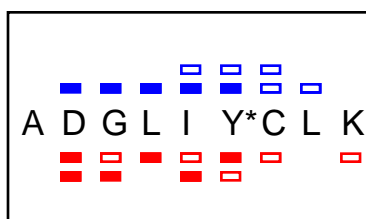

Protein Name: ZAP70  
 gi Accession: 0  
 Precursor Mass: 566.7598+2  
 Delta Mass: 1.284 ppm  
 XCorr: 43.31

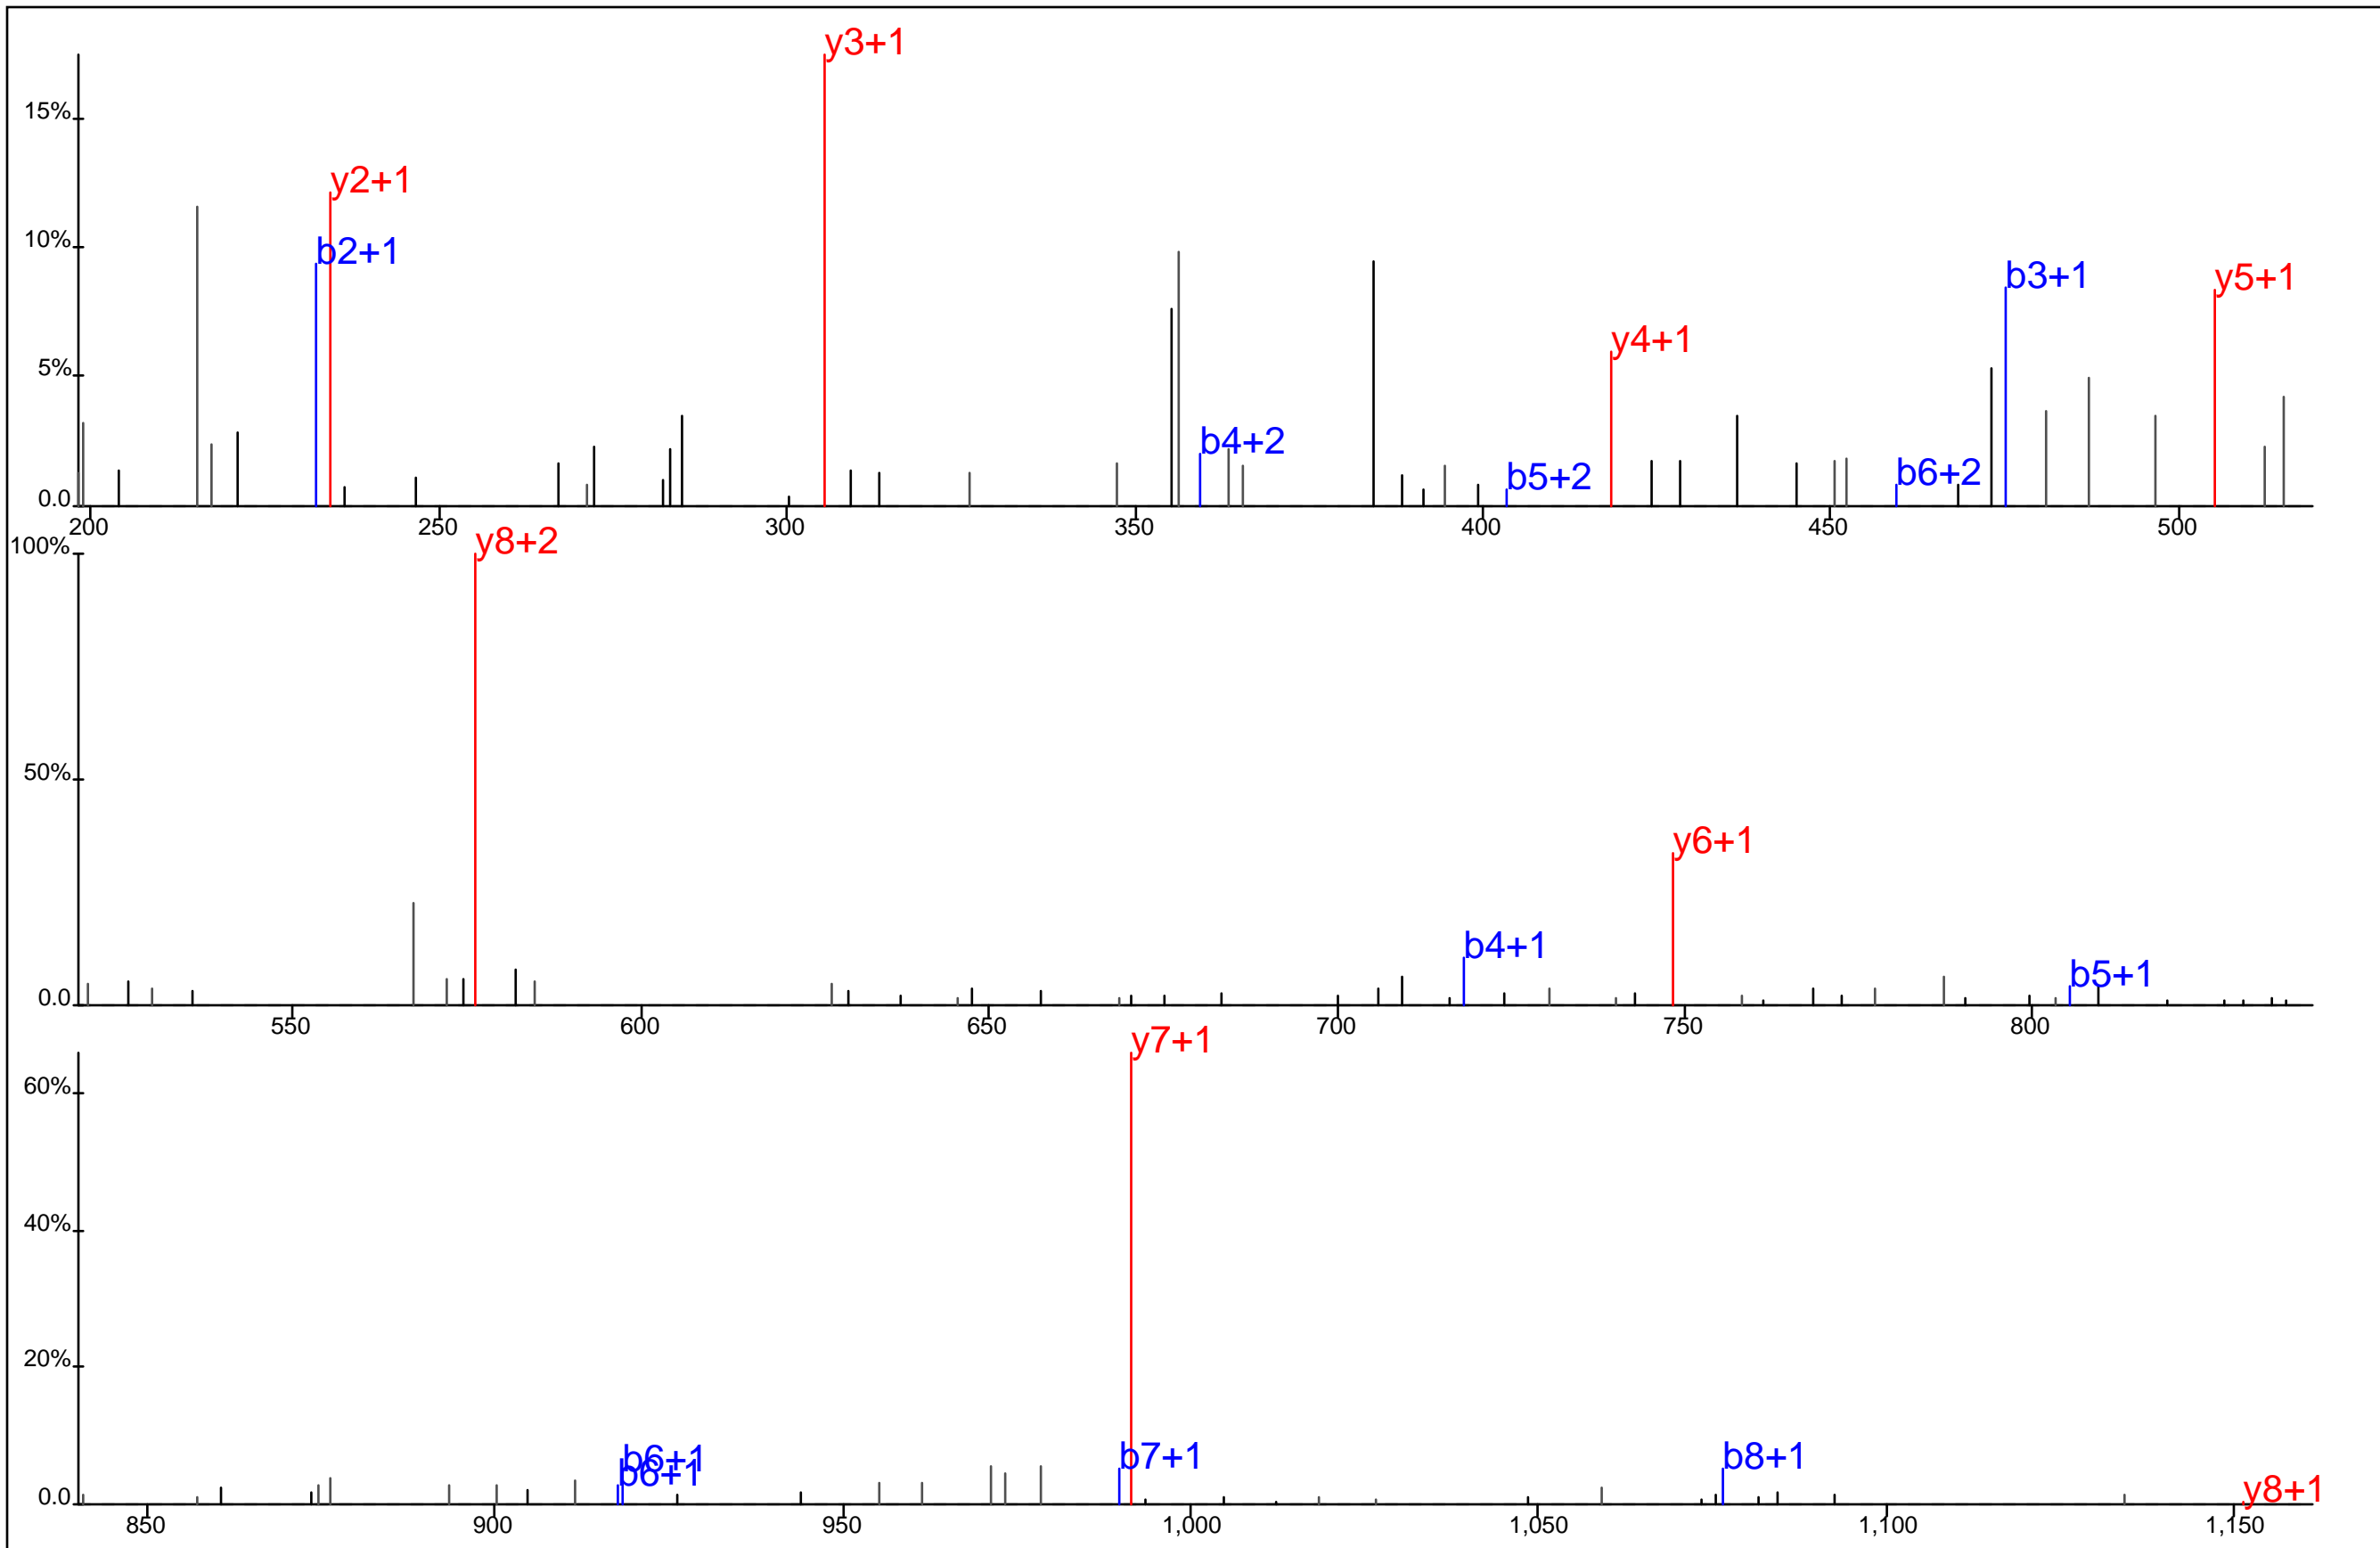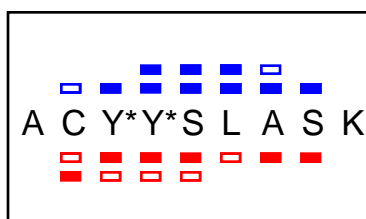

Protein Name: ZAP70  
 gi Accession: 0  
 Precursor Mass: 611.7164+2  
 Delta Mass: 0.412 ppm  
 XCorr: 39.7



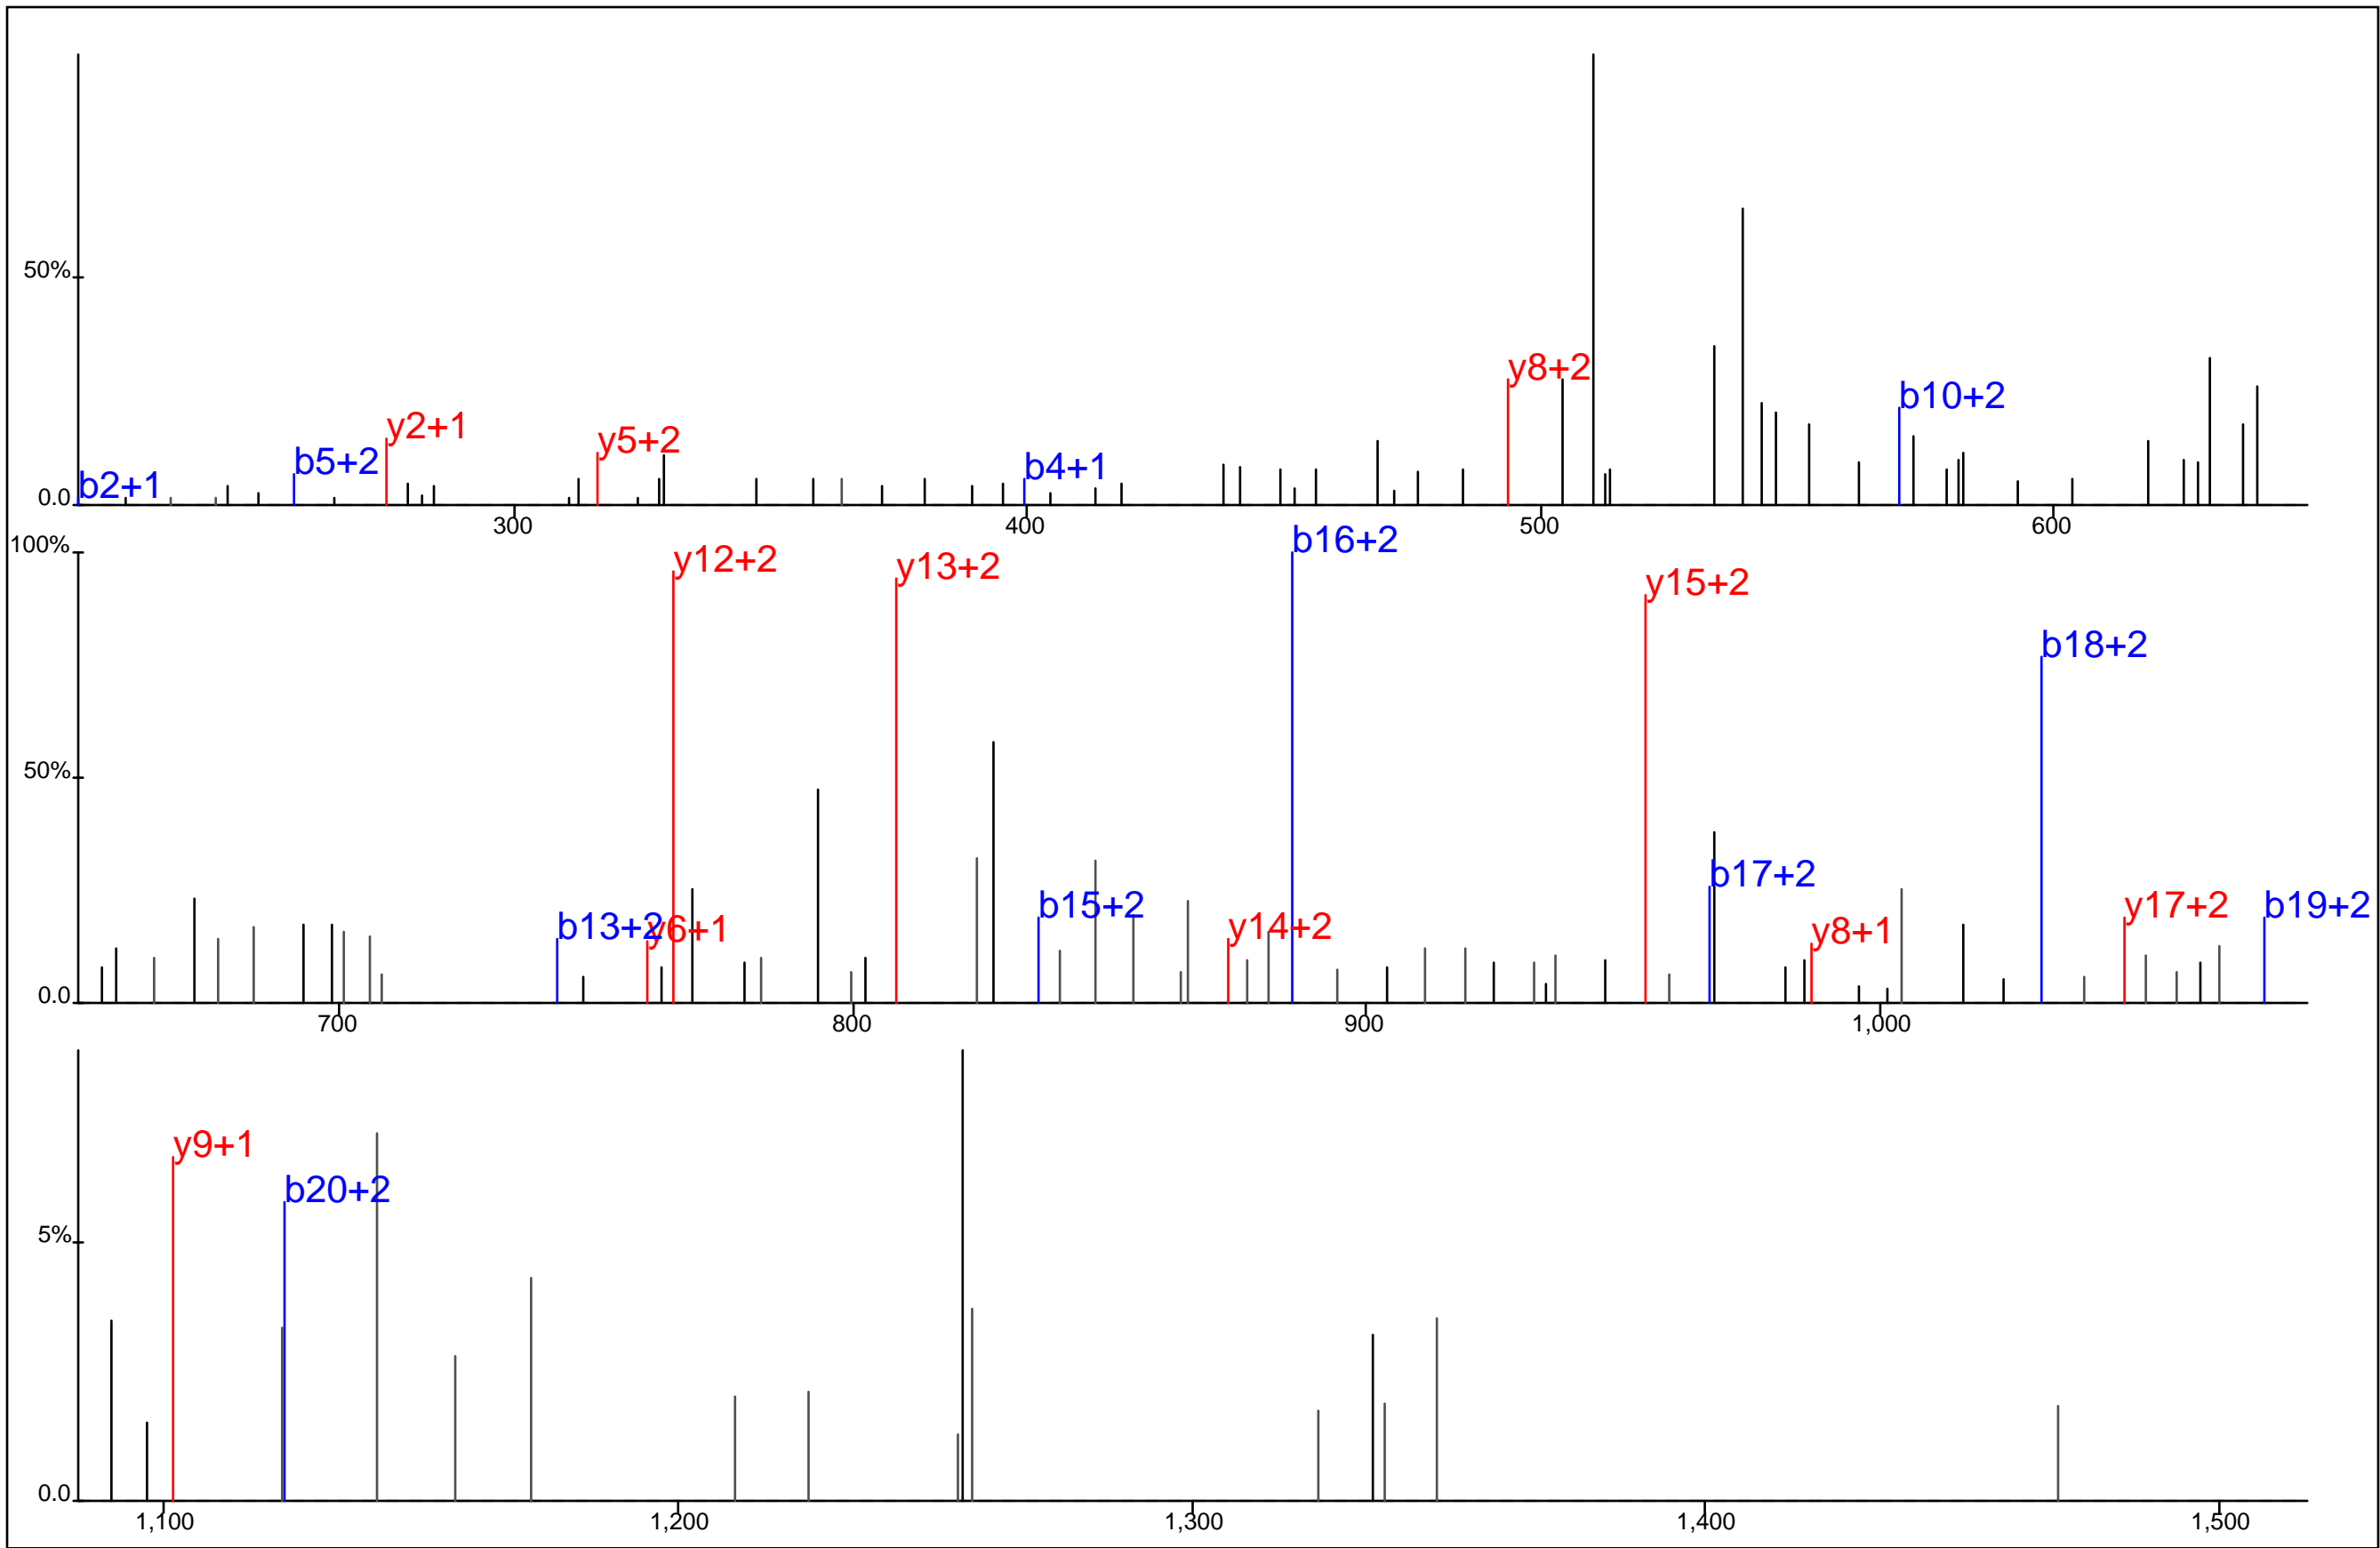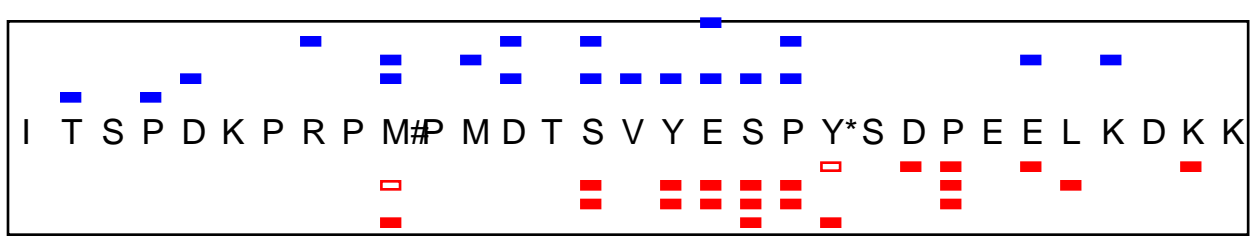

Protein Name: ZAP70  
 gi Accession: 0  
 Precursor Mass: 736.1415+5  
 Delta Mass: 0.321 ppm  
 XCorr: 25.65

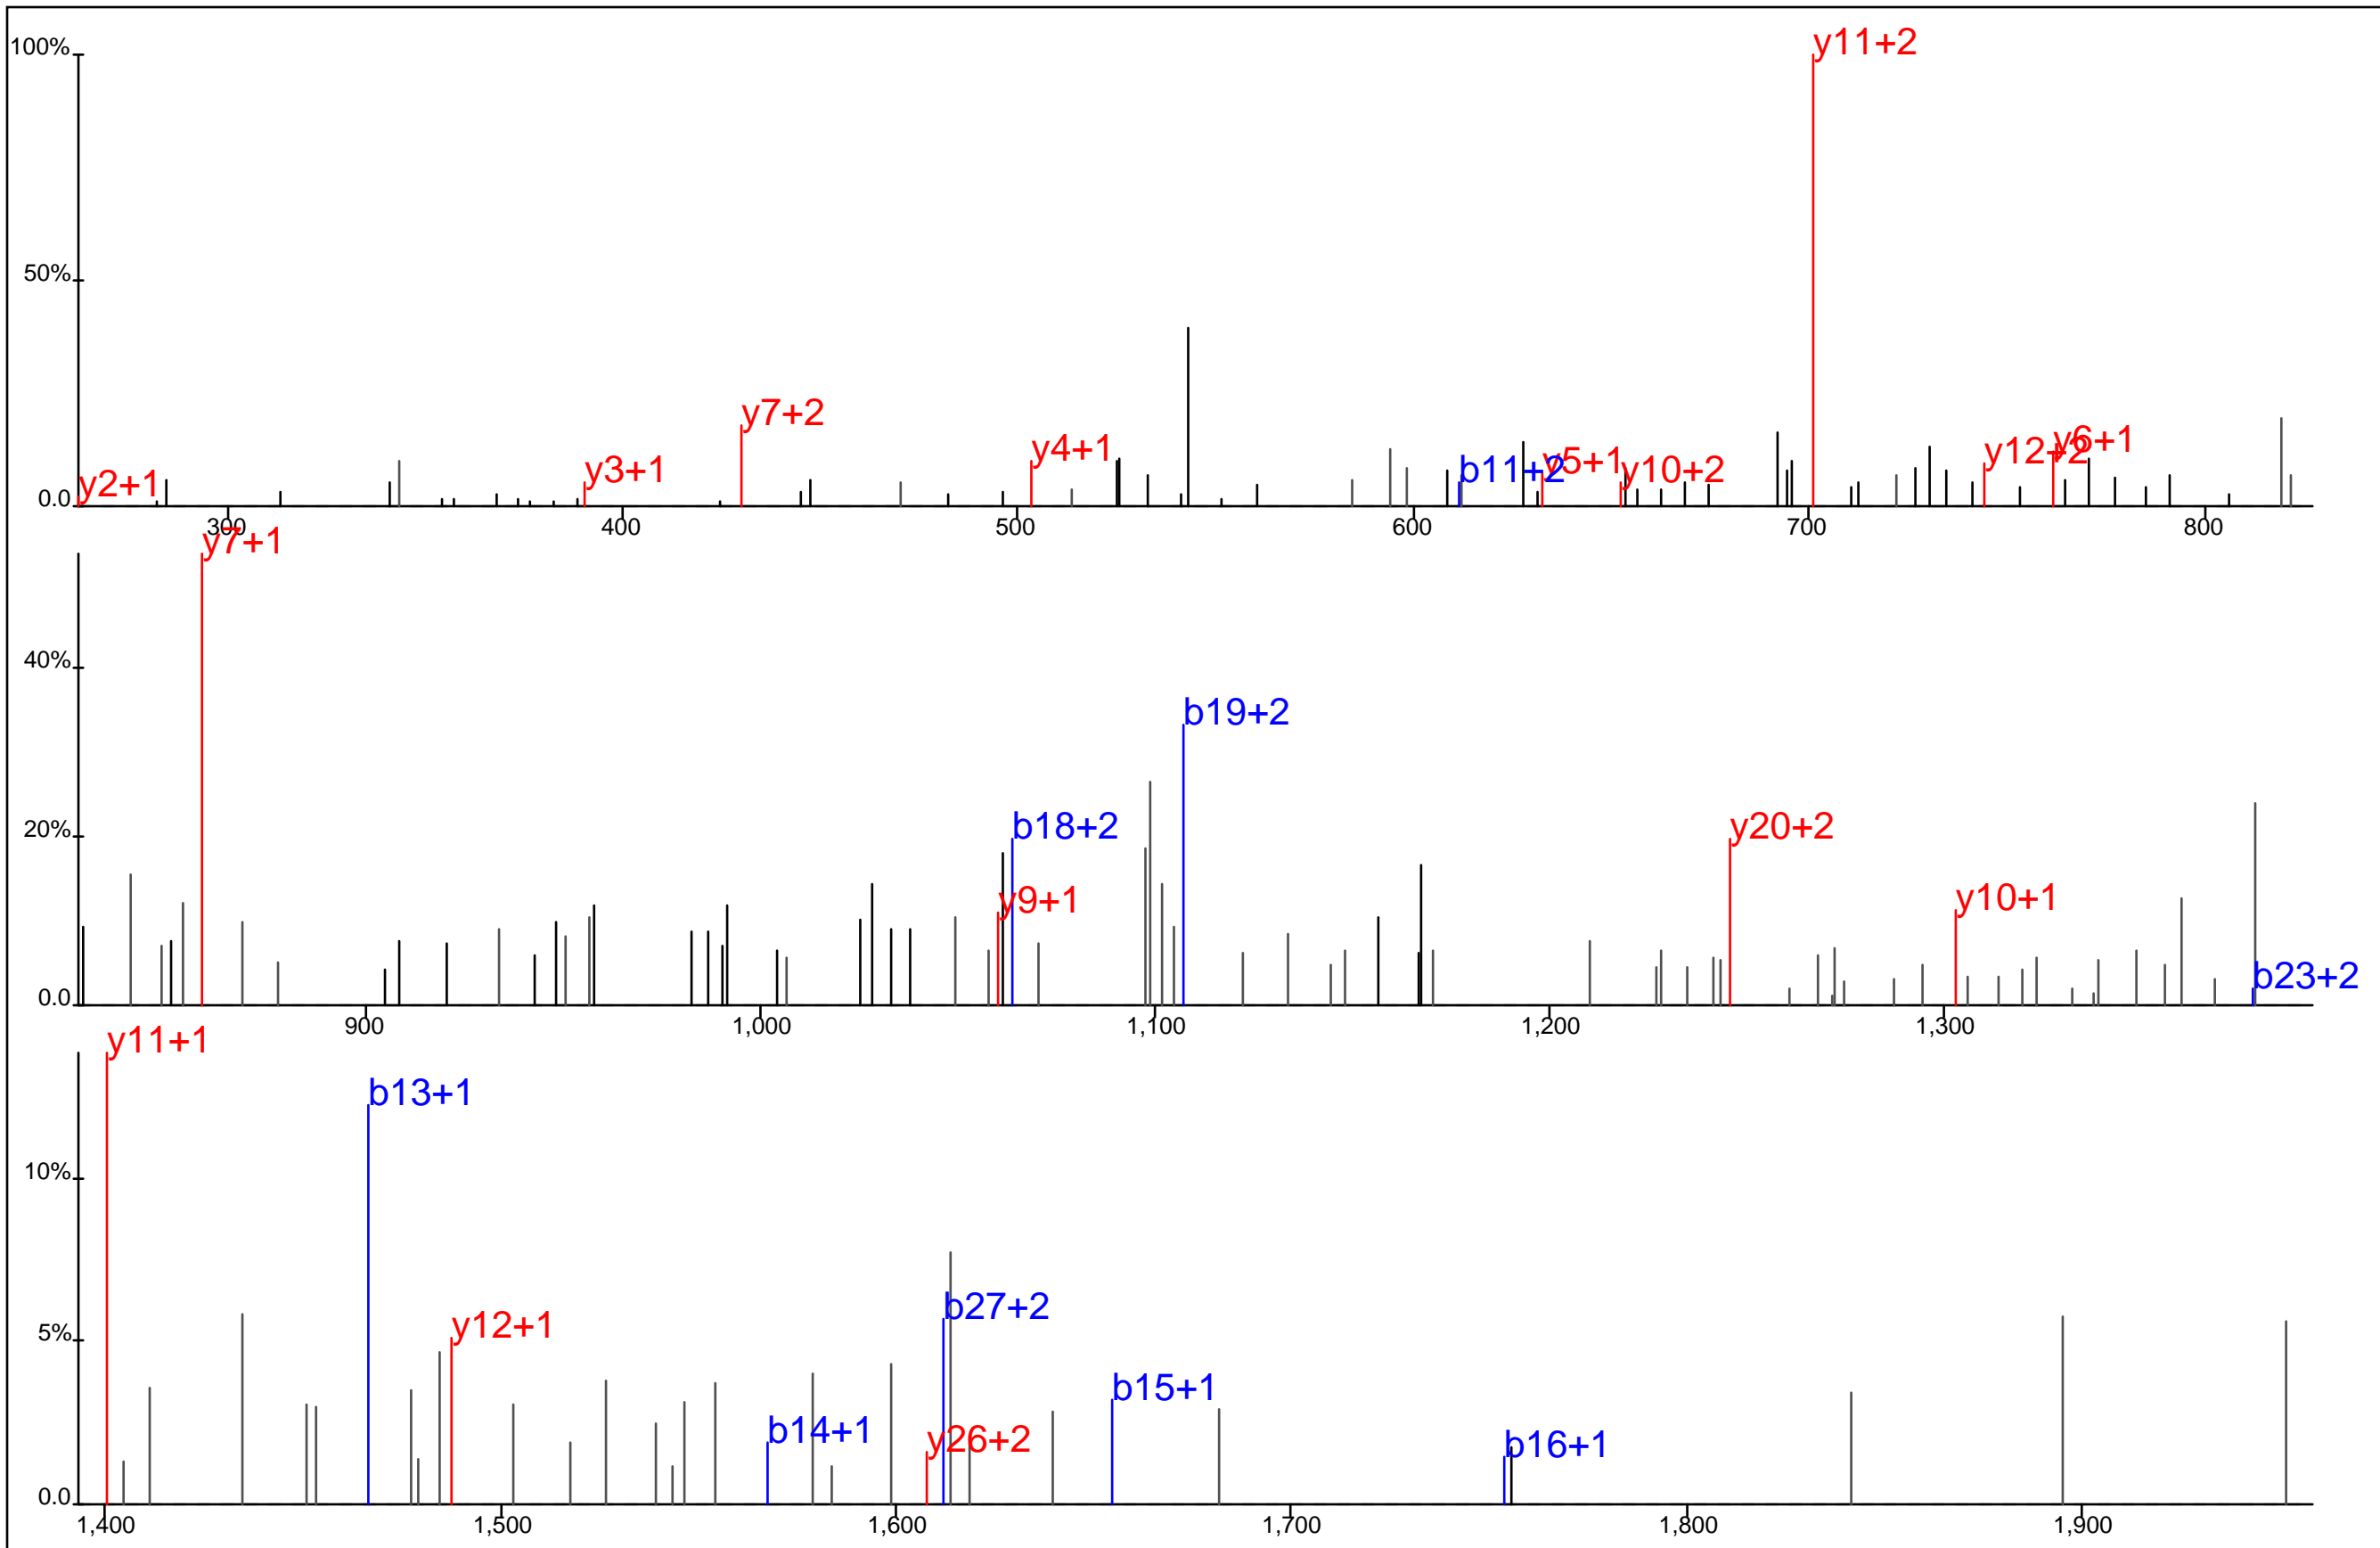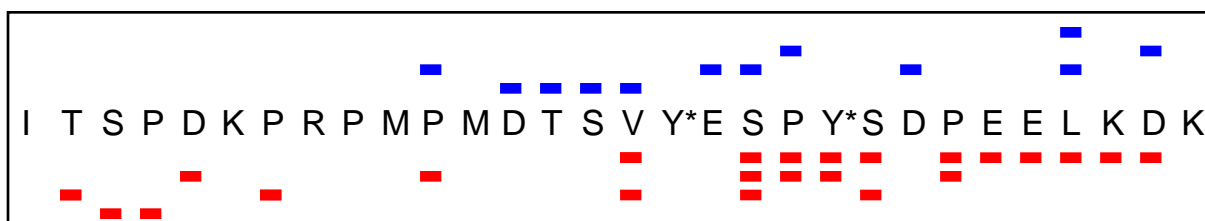

Protein Name: ZAP70  
 gi Accession: 0  
 Precursor Mass: 903.8939+4  
 Delta Mass: 0.722 ppm  
 XCorr: 25.95

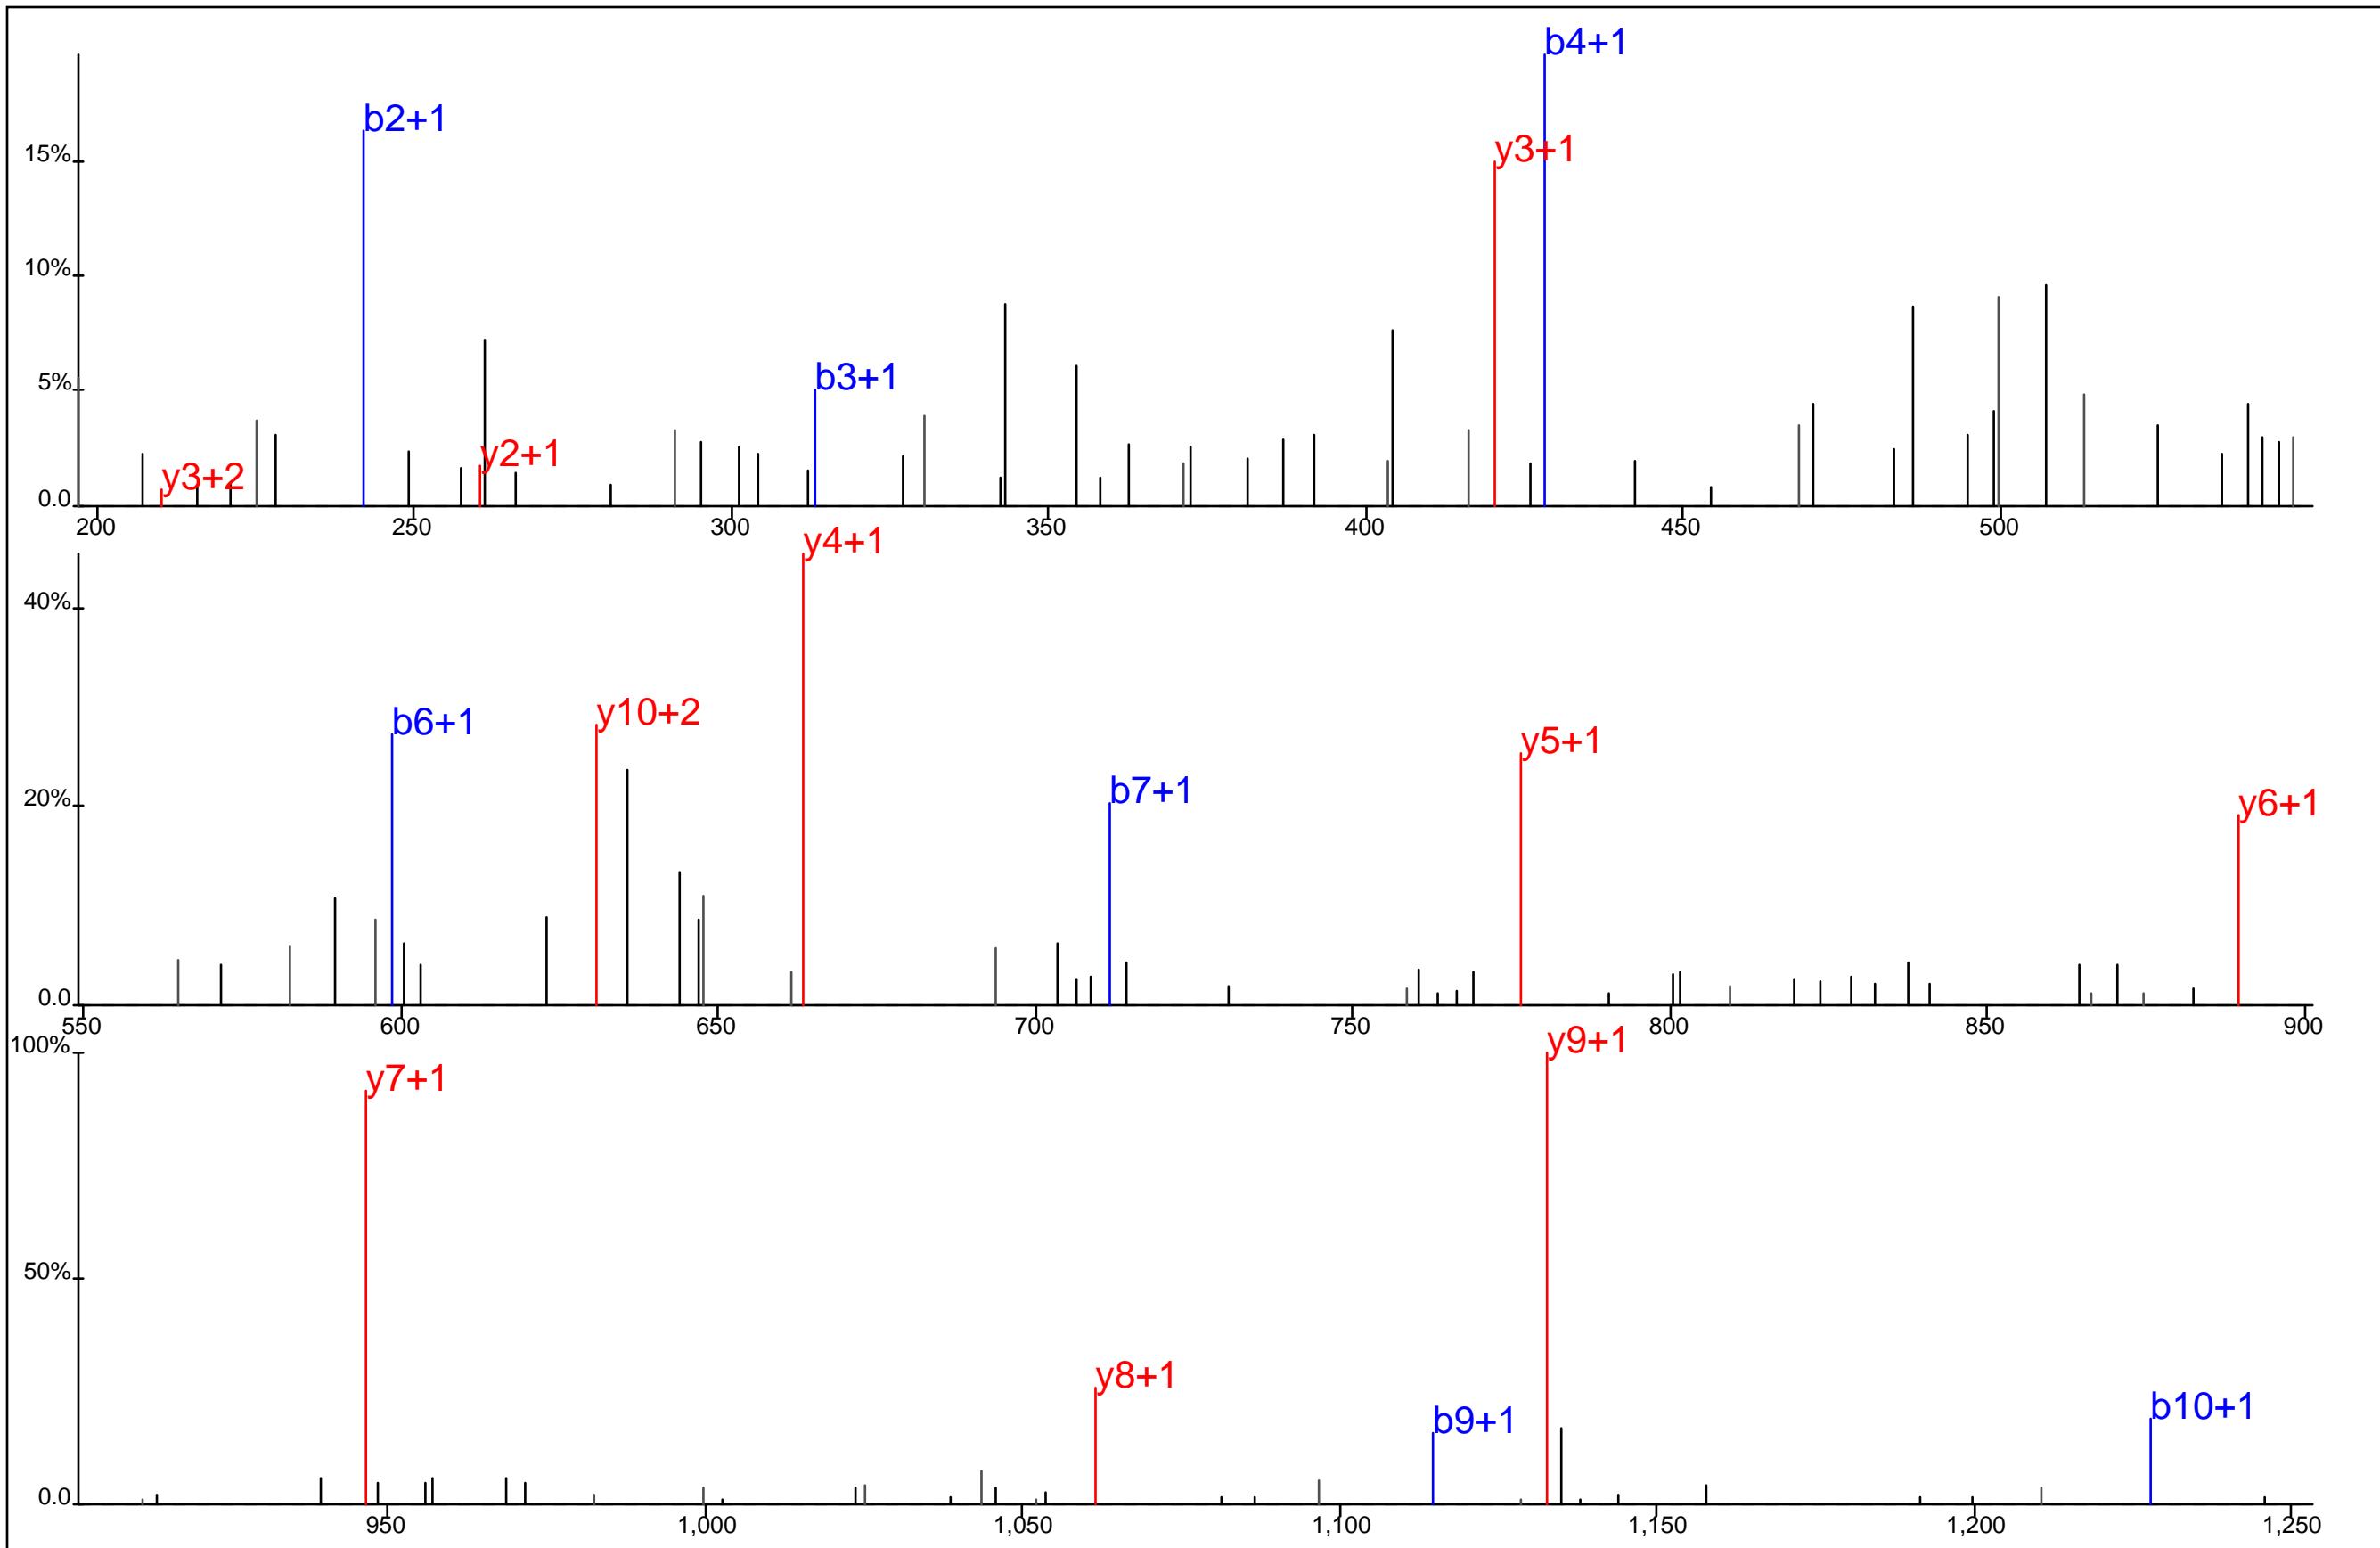

L K A D G L I Y\* C L K

Protein Name: ZAP70  
 gi Accession: 0  
 Precursor Mass: 687.3496+2  
 Delta Mass: 1.543 ppm  
 XCorr: 49.02





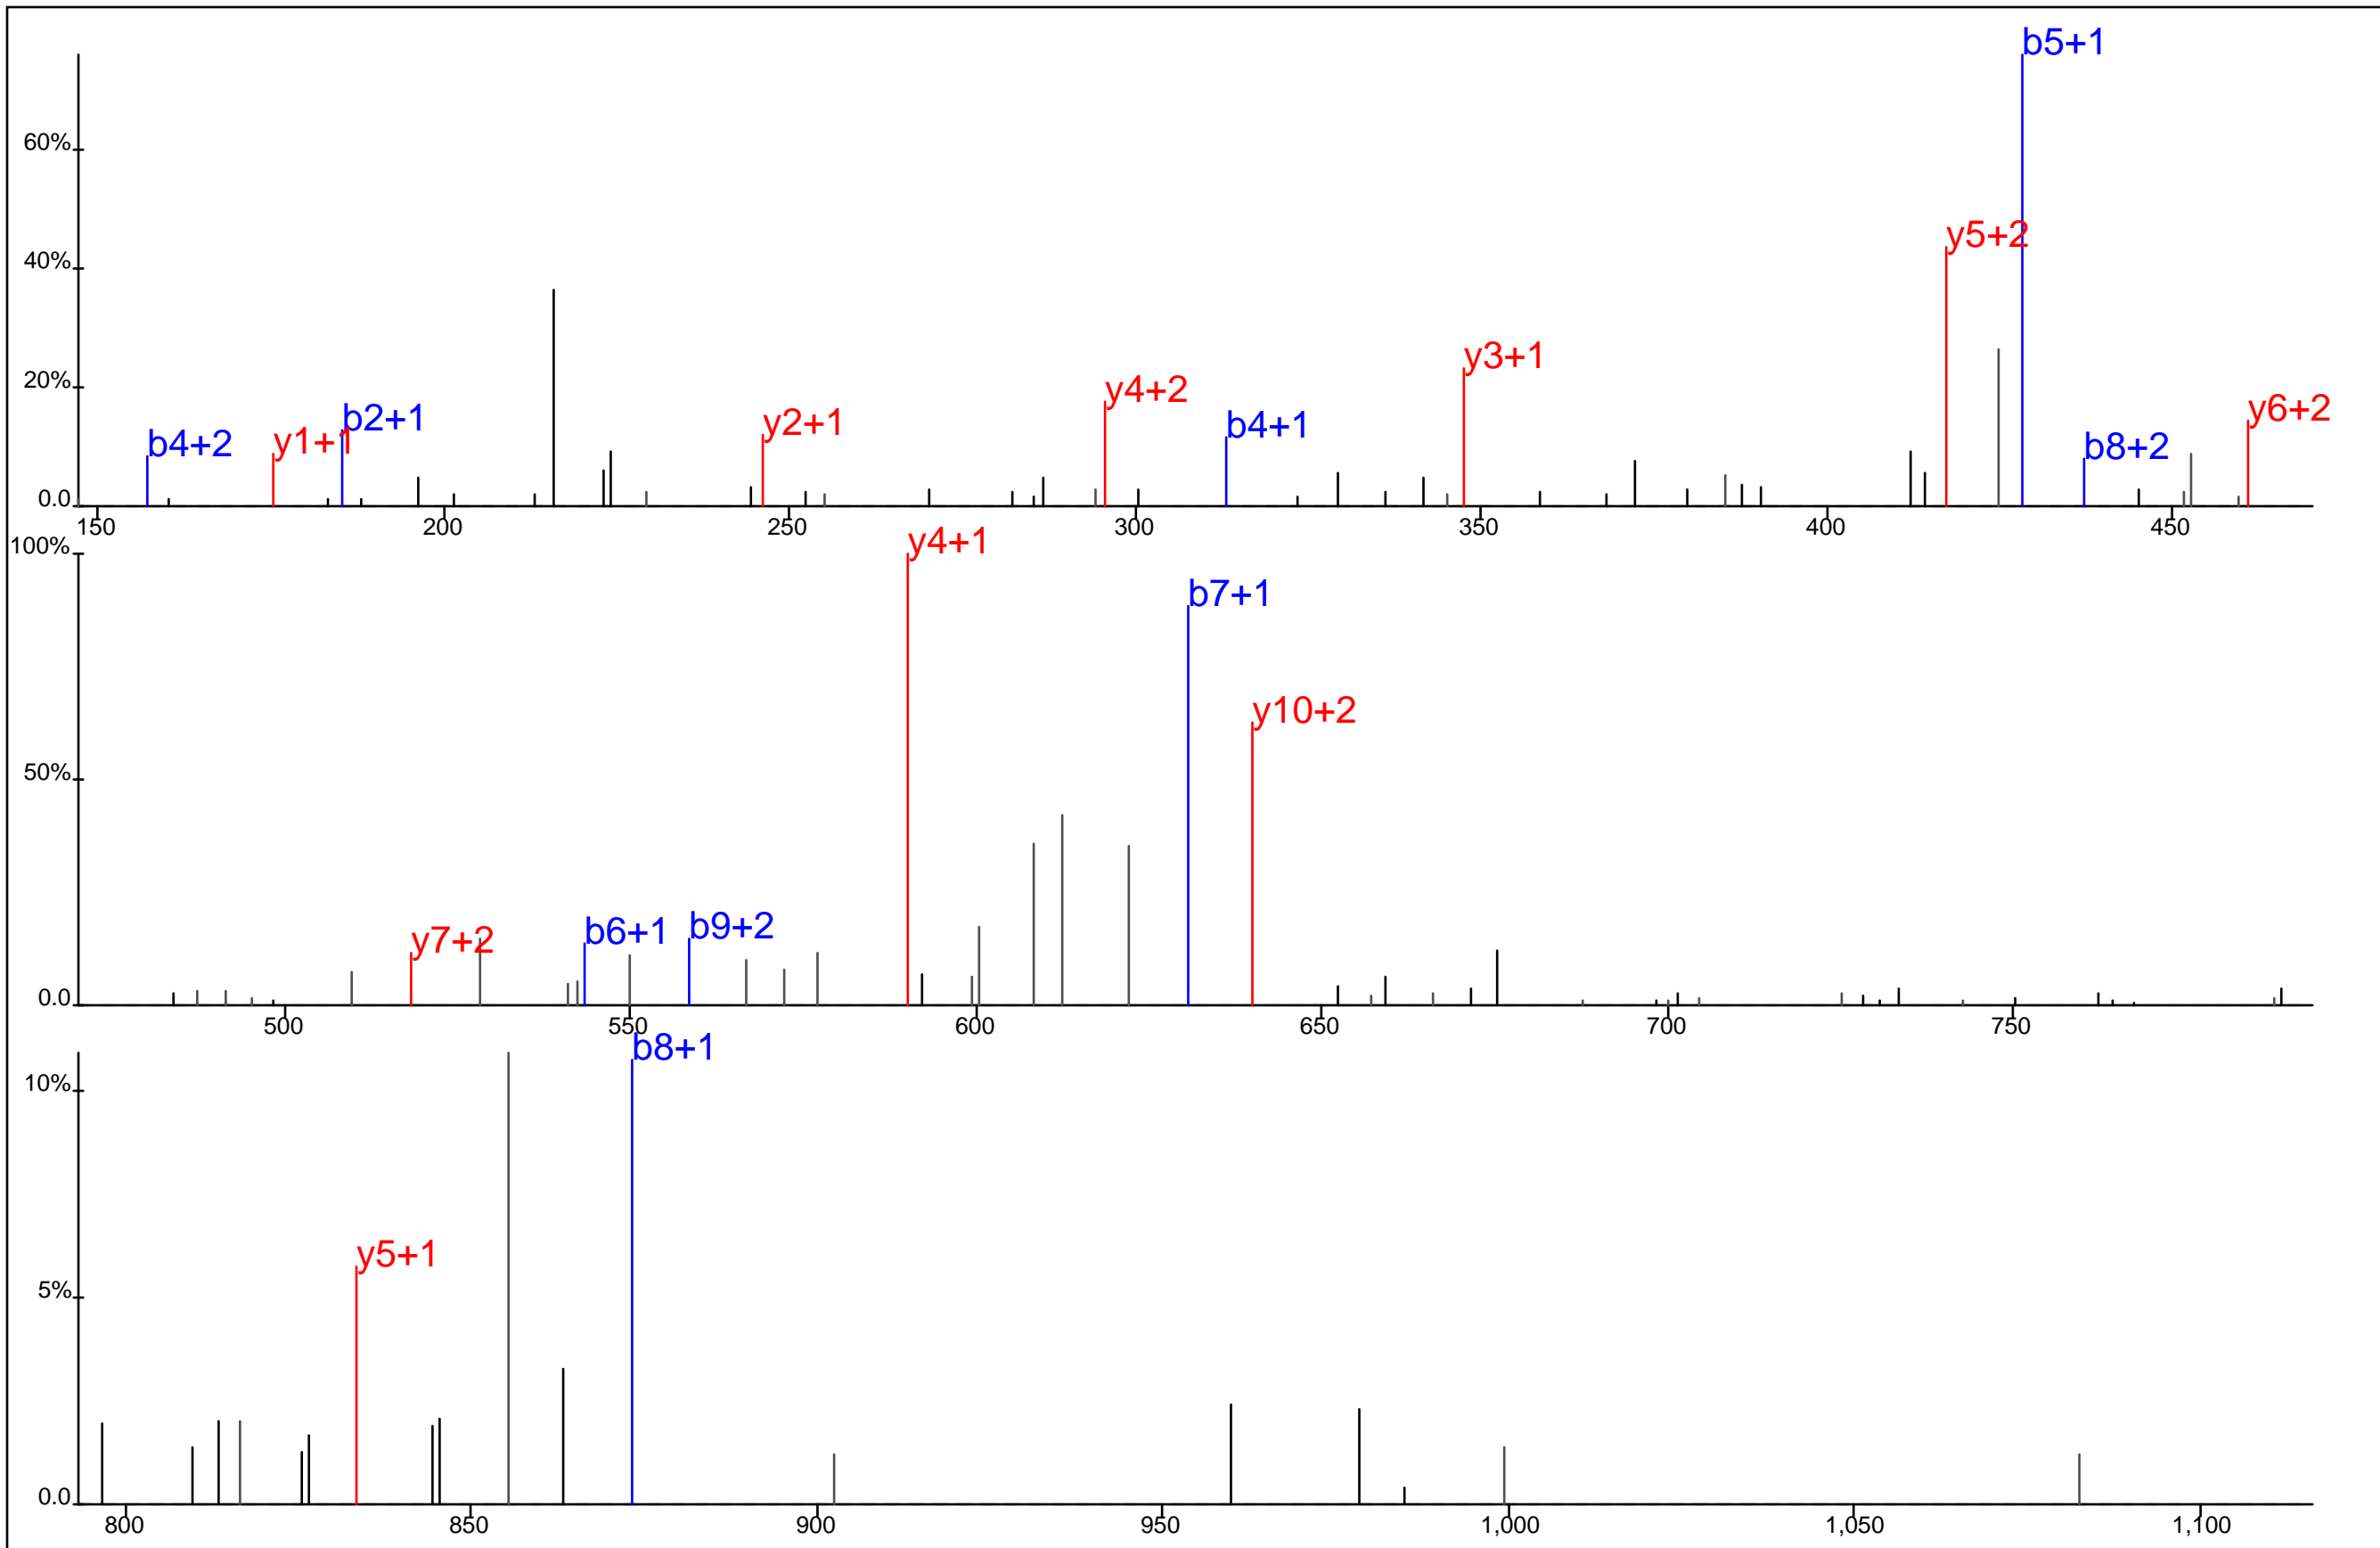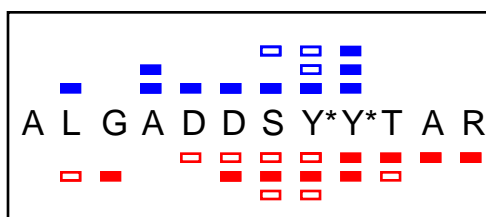

Protein Name: ZAP70  
 gi Accession: 0  
 Precursor Mass: 488.1811+3  
 Delta Mass: 0.013 ppm  
 XCorr: 39.39

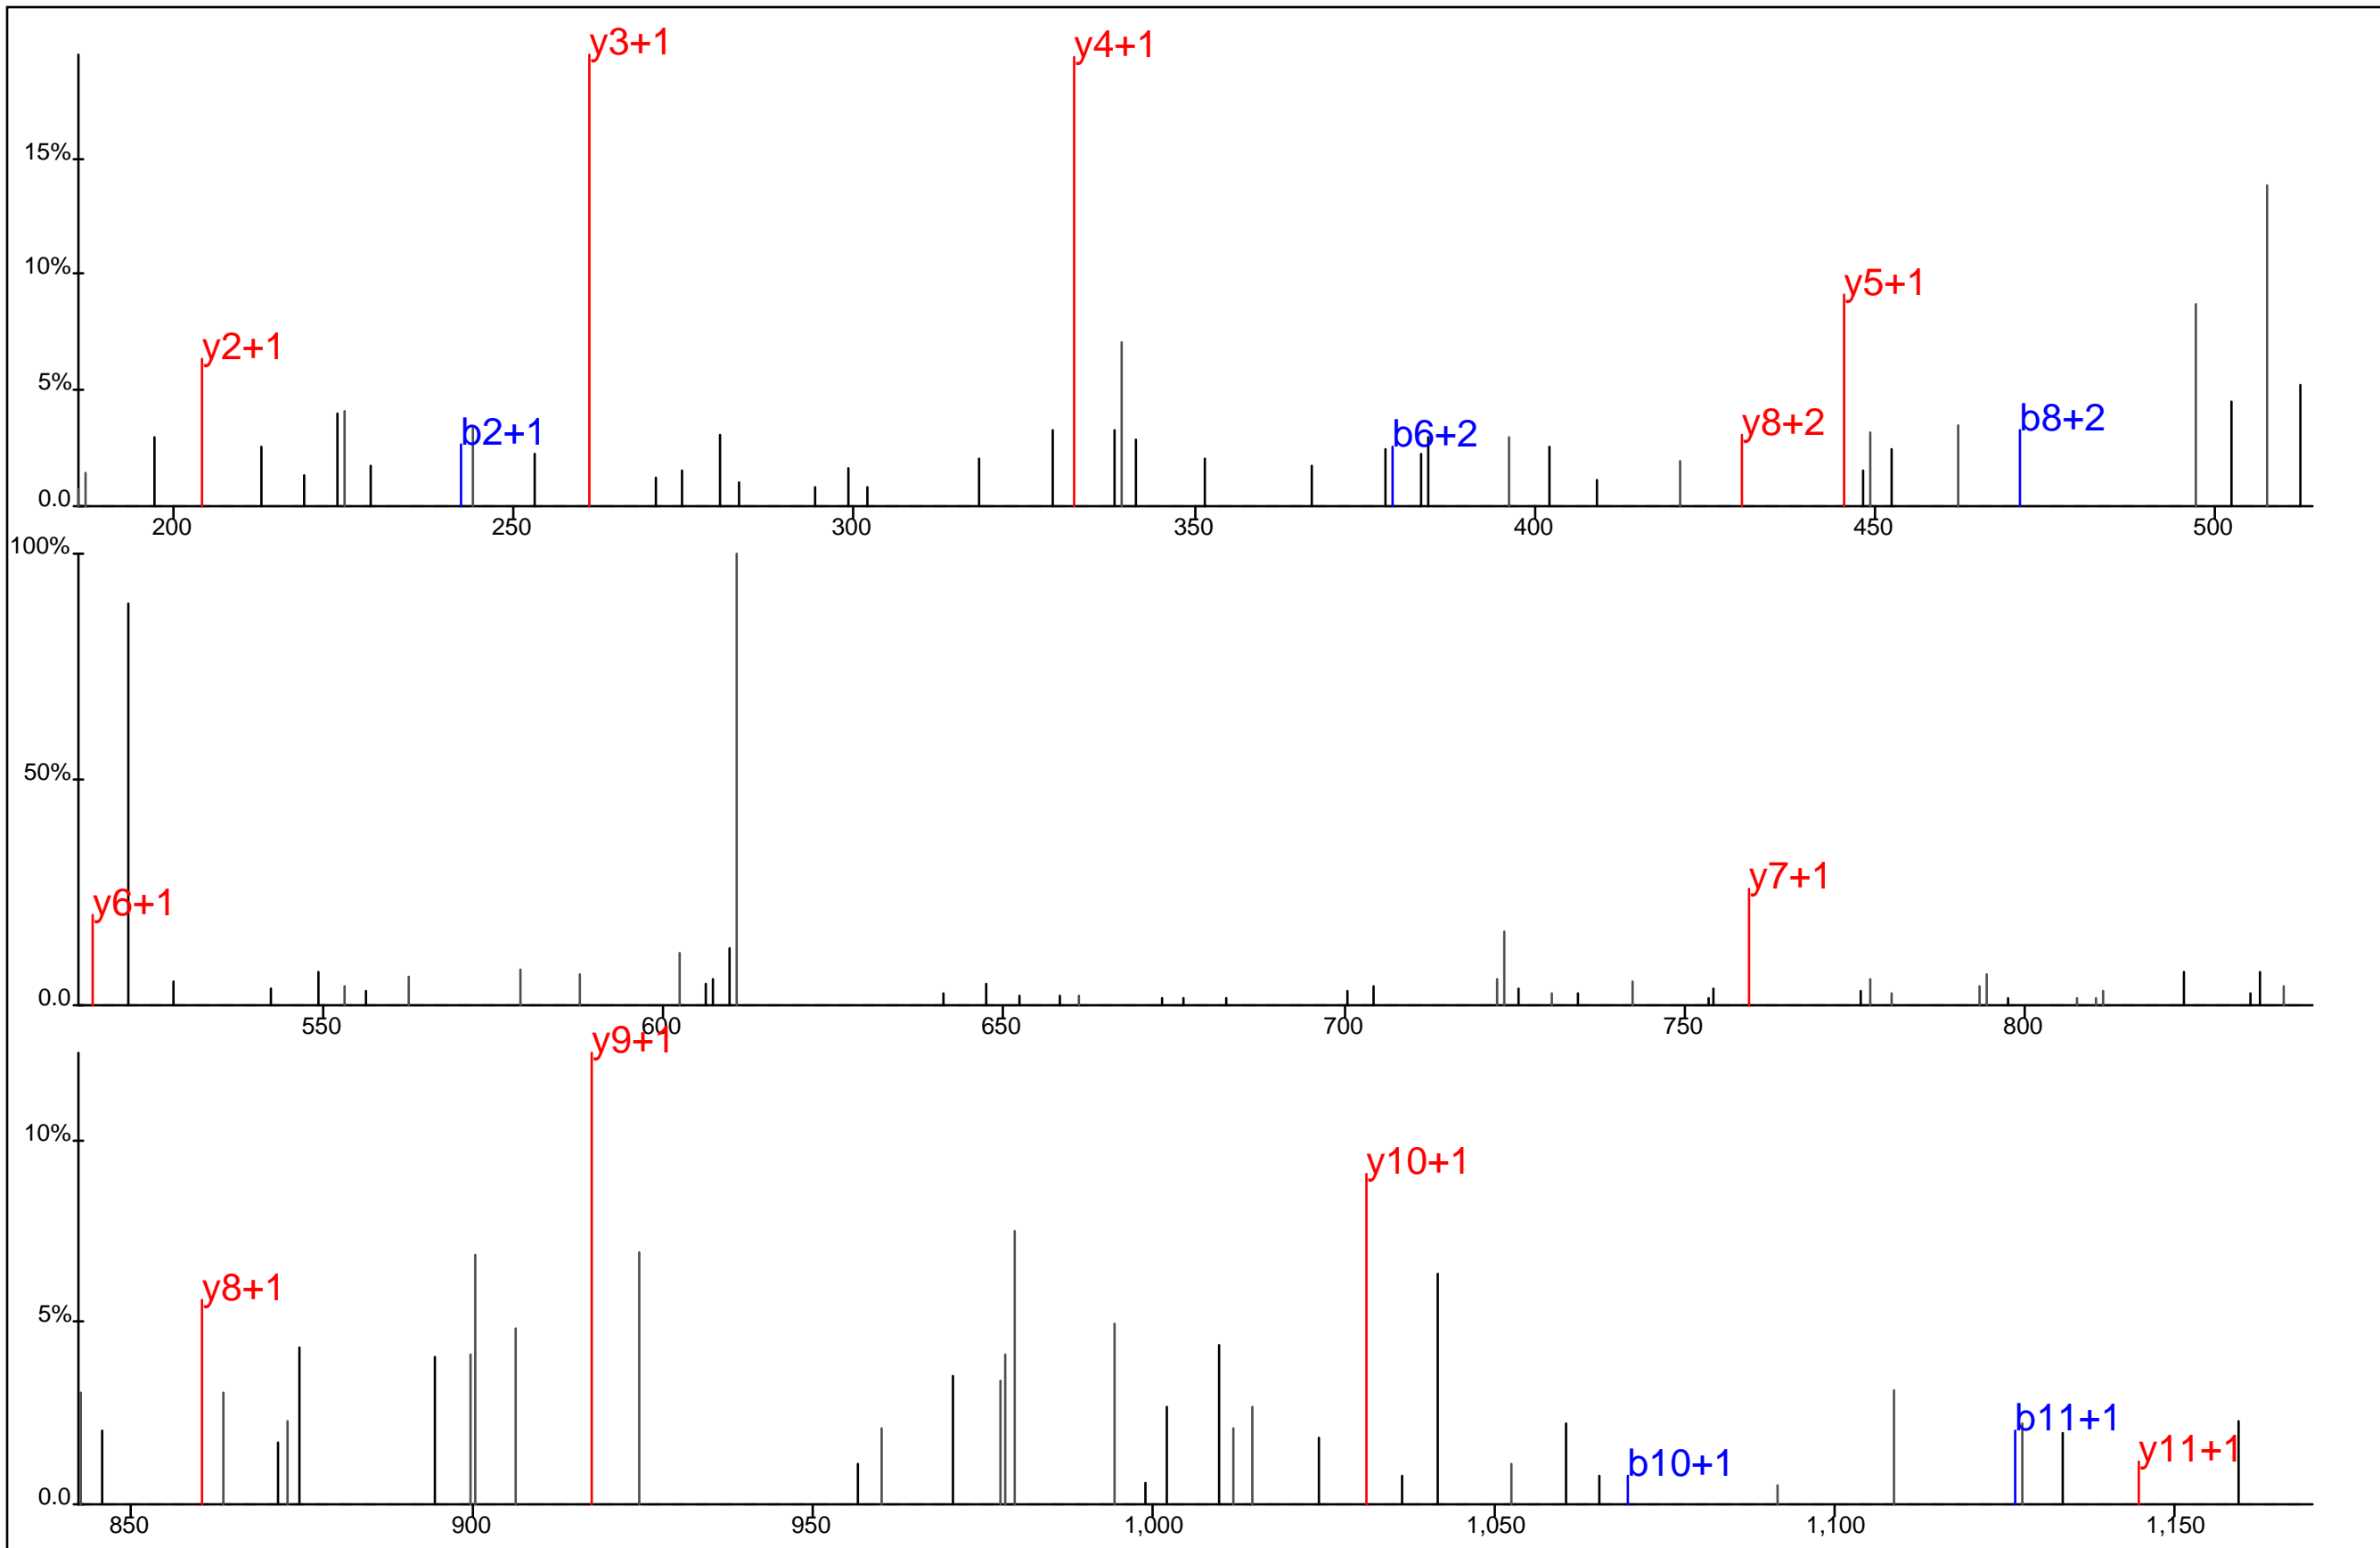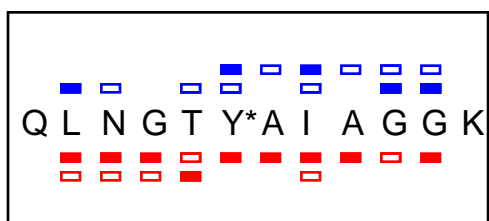

Protein Name: ZAP70  
 gi Accession: 0  
 Precursor Mass: 636.8029+2  
 Delta Mass: 0.050 ppm  
 XCorr: 43.69

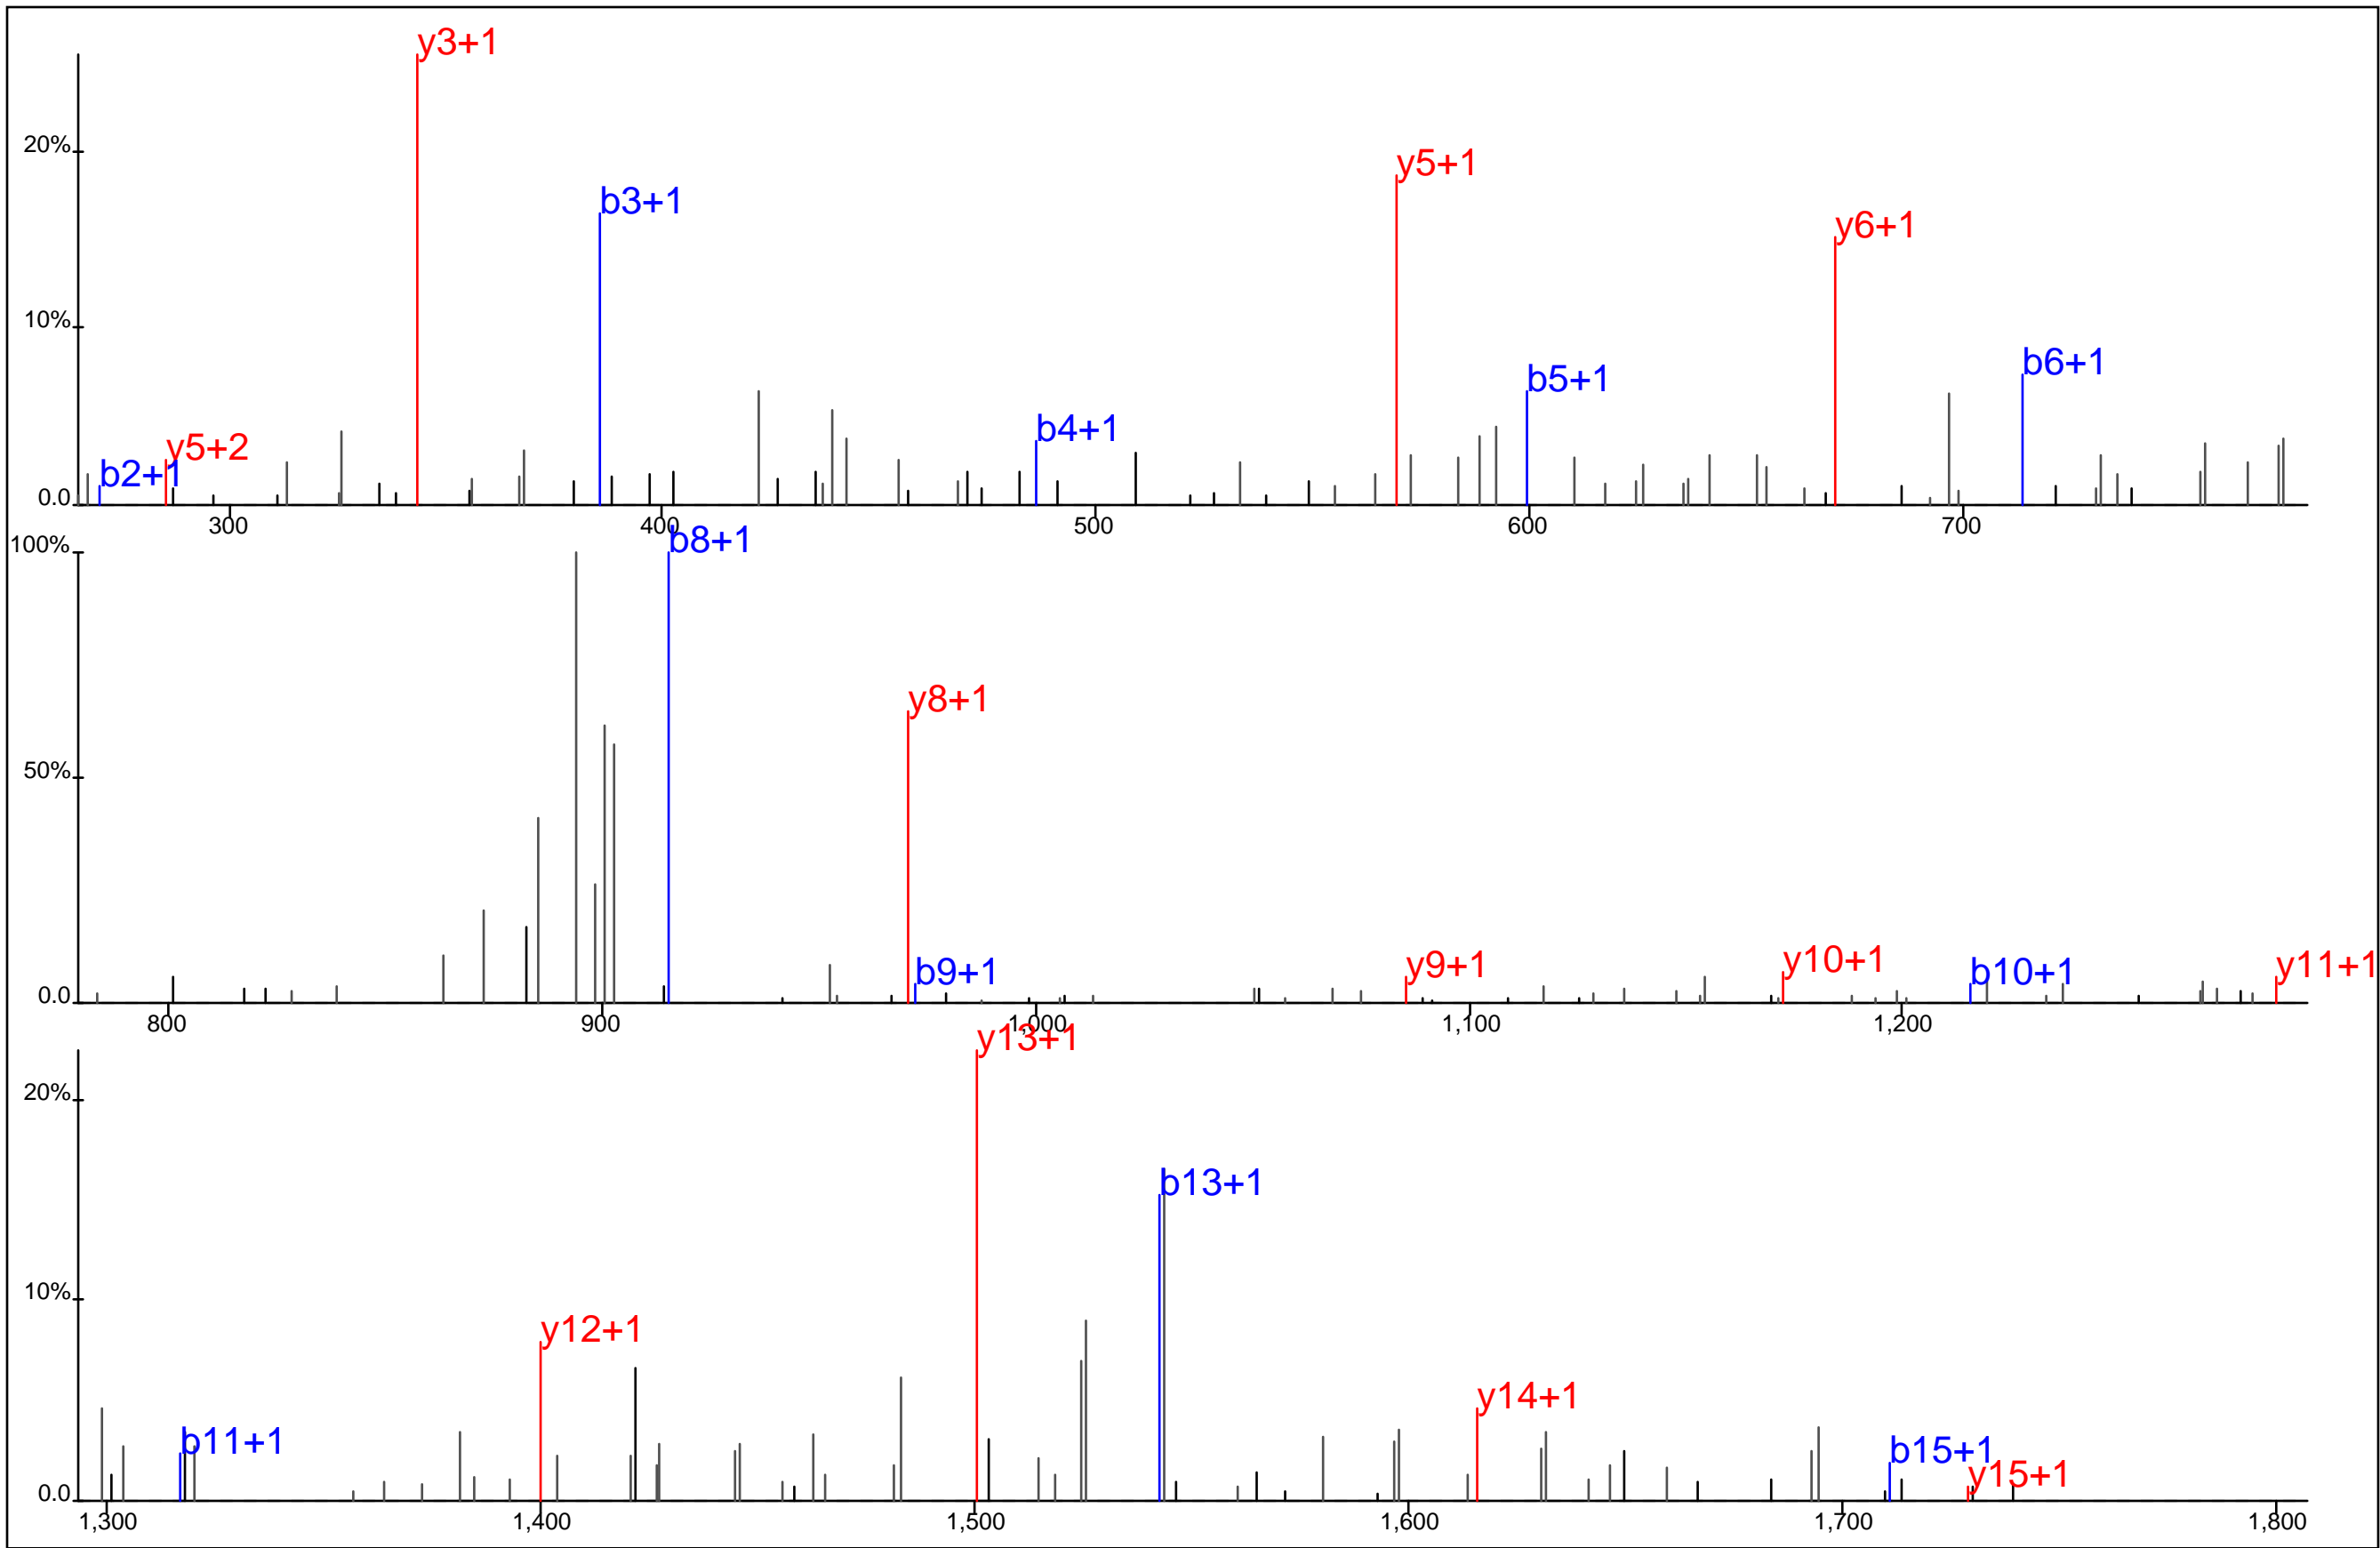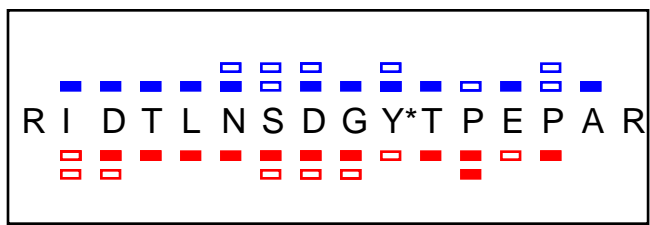

Protein Name: ZAP70  
 gi Accession: 0  
 Precursor Mass: 942.9257+2  
 Delta Mass: 2.483 ppm  
 XCorr: 70.73

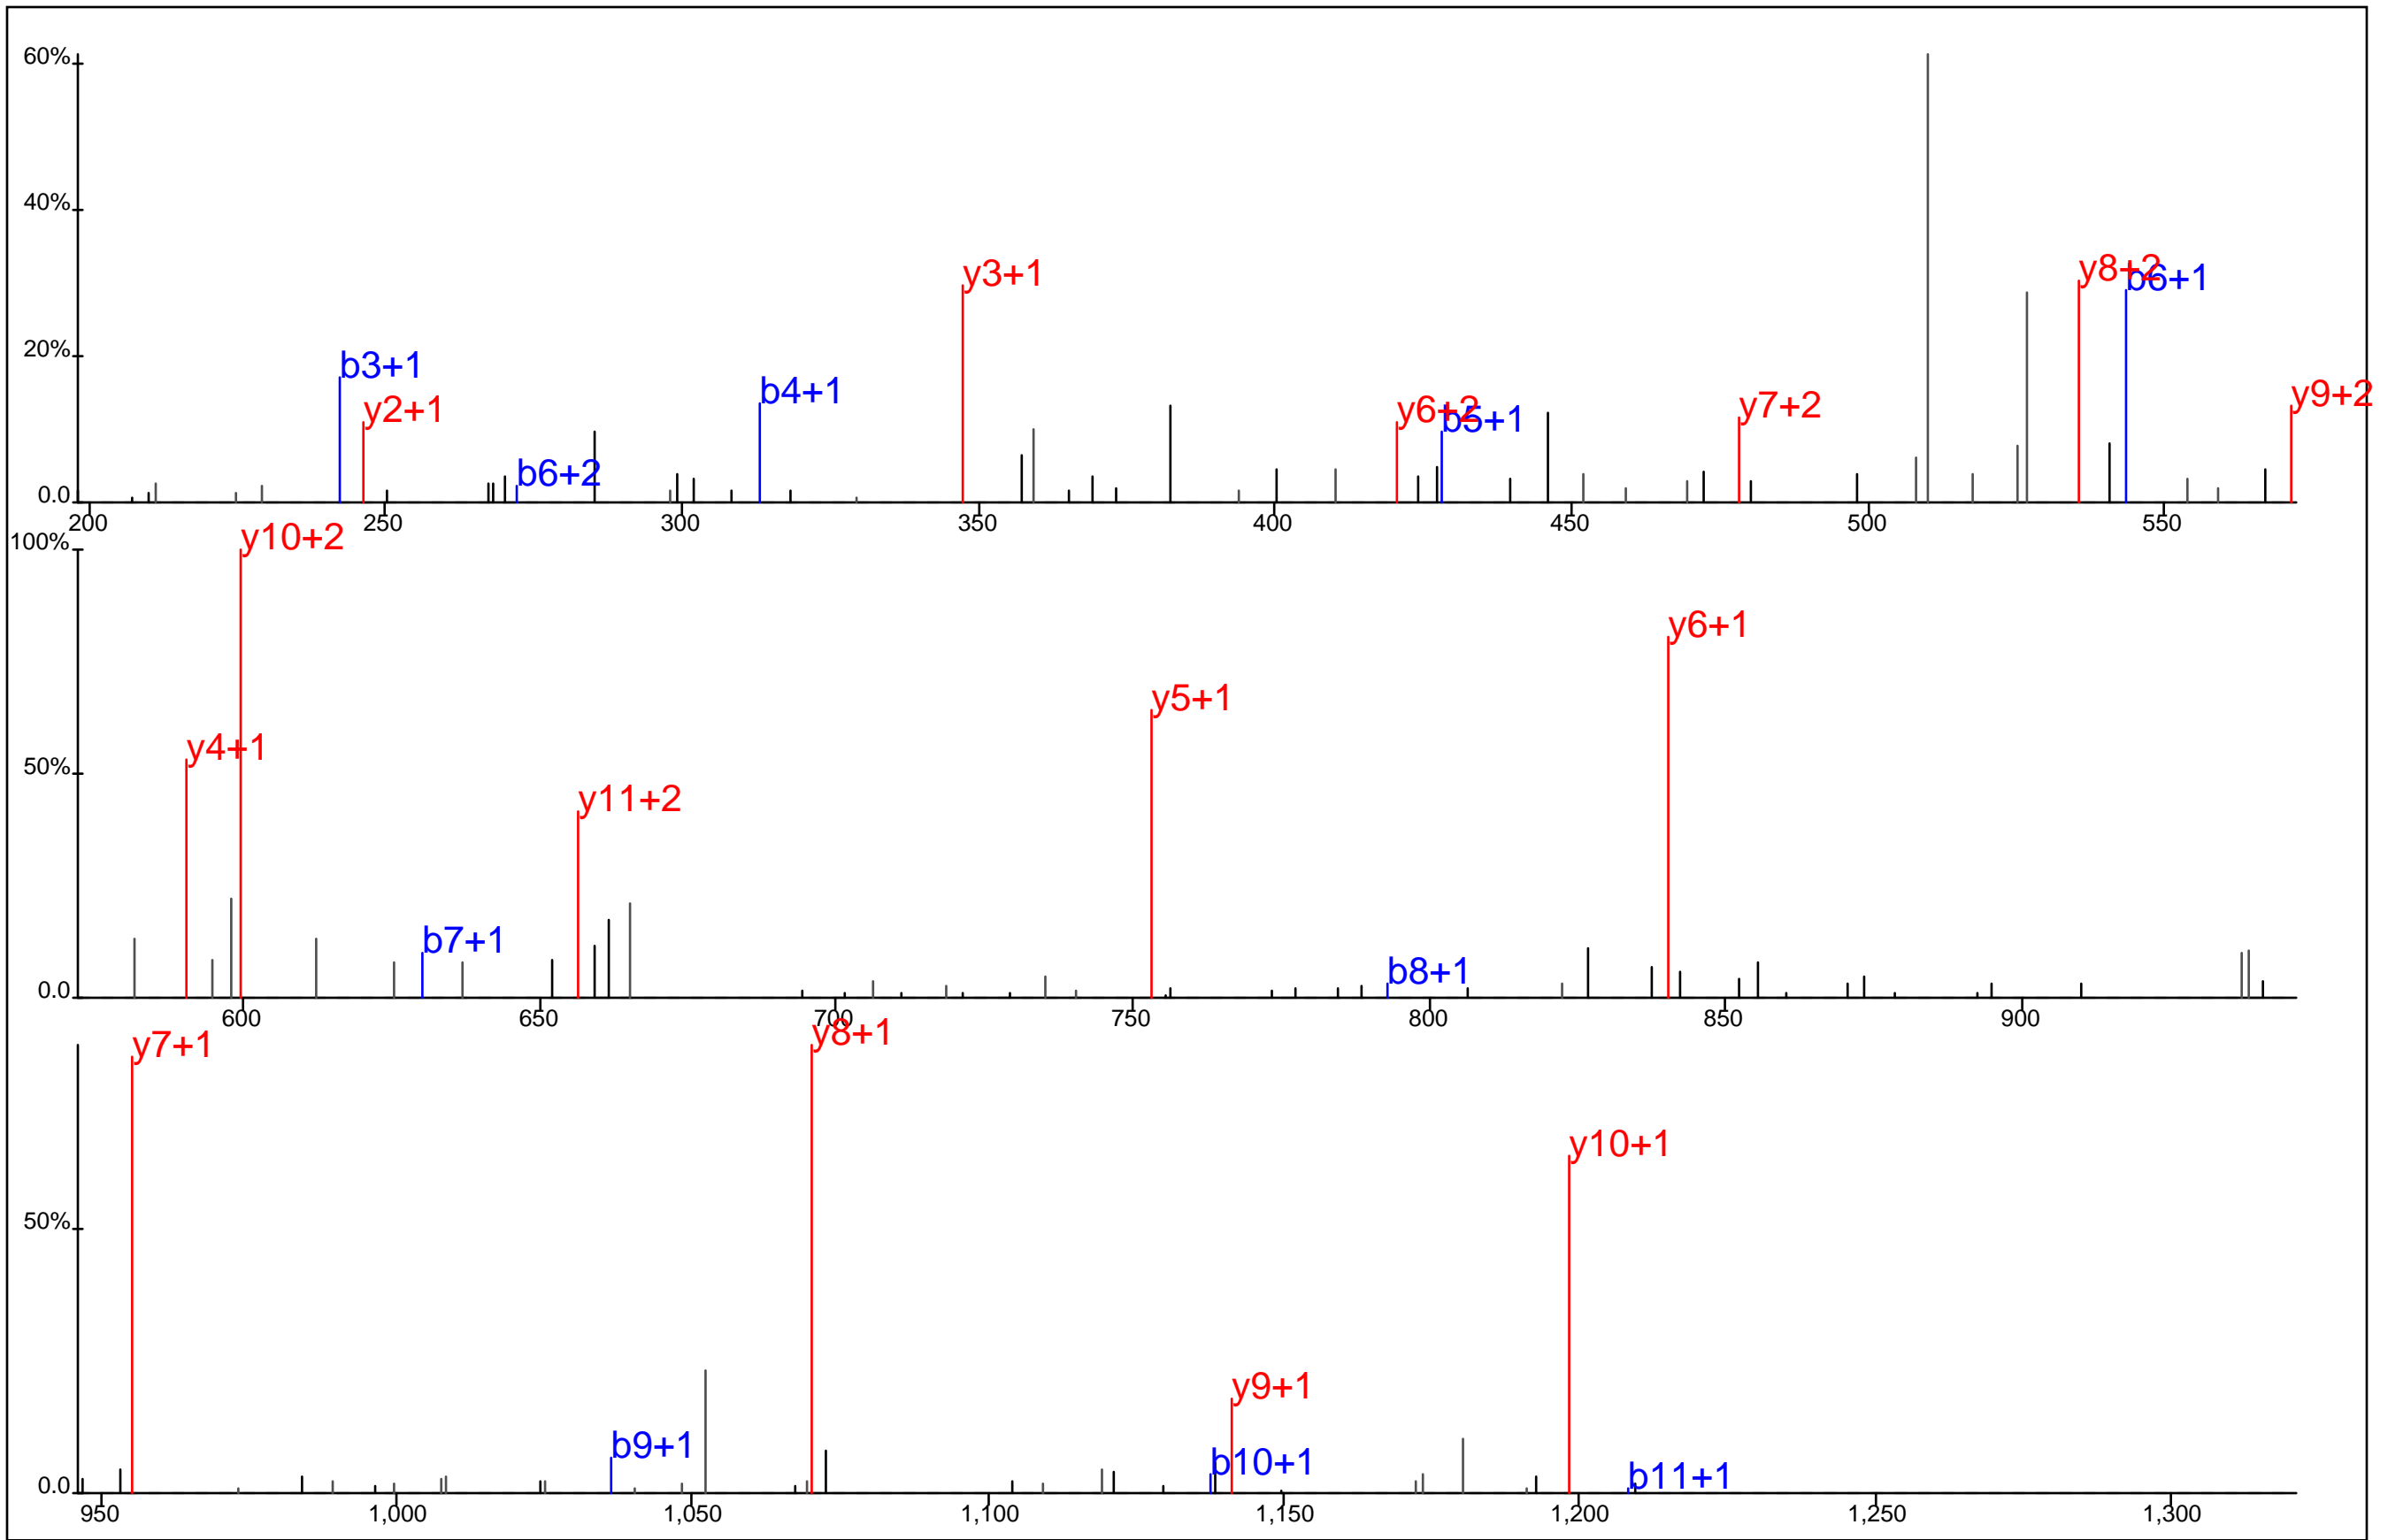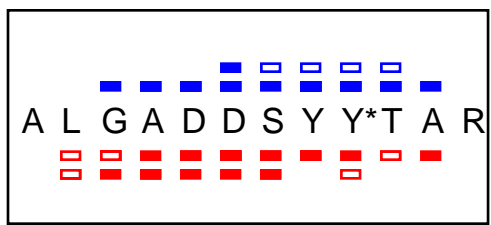

Protein Name: ZAP70  
 gi Accession: 0  
 Precursor Mass: 691.7842+2  
 Delta Mass: 0.932 ppm  
 XCorr: 82.96

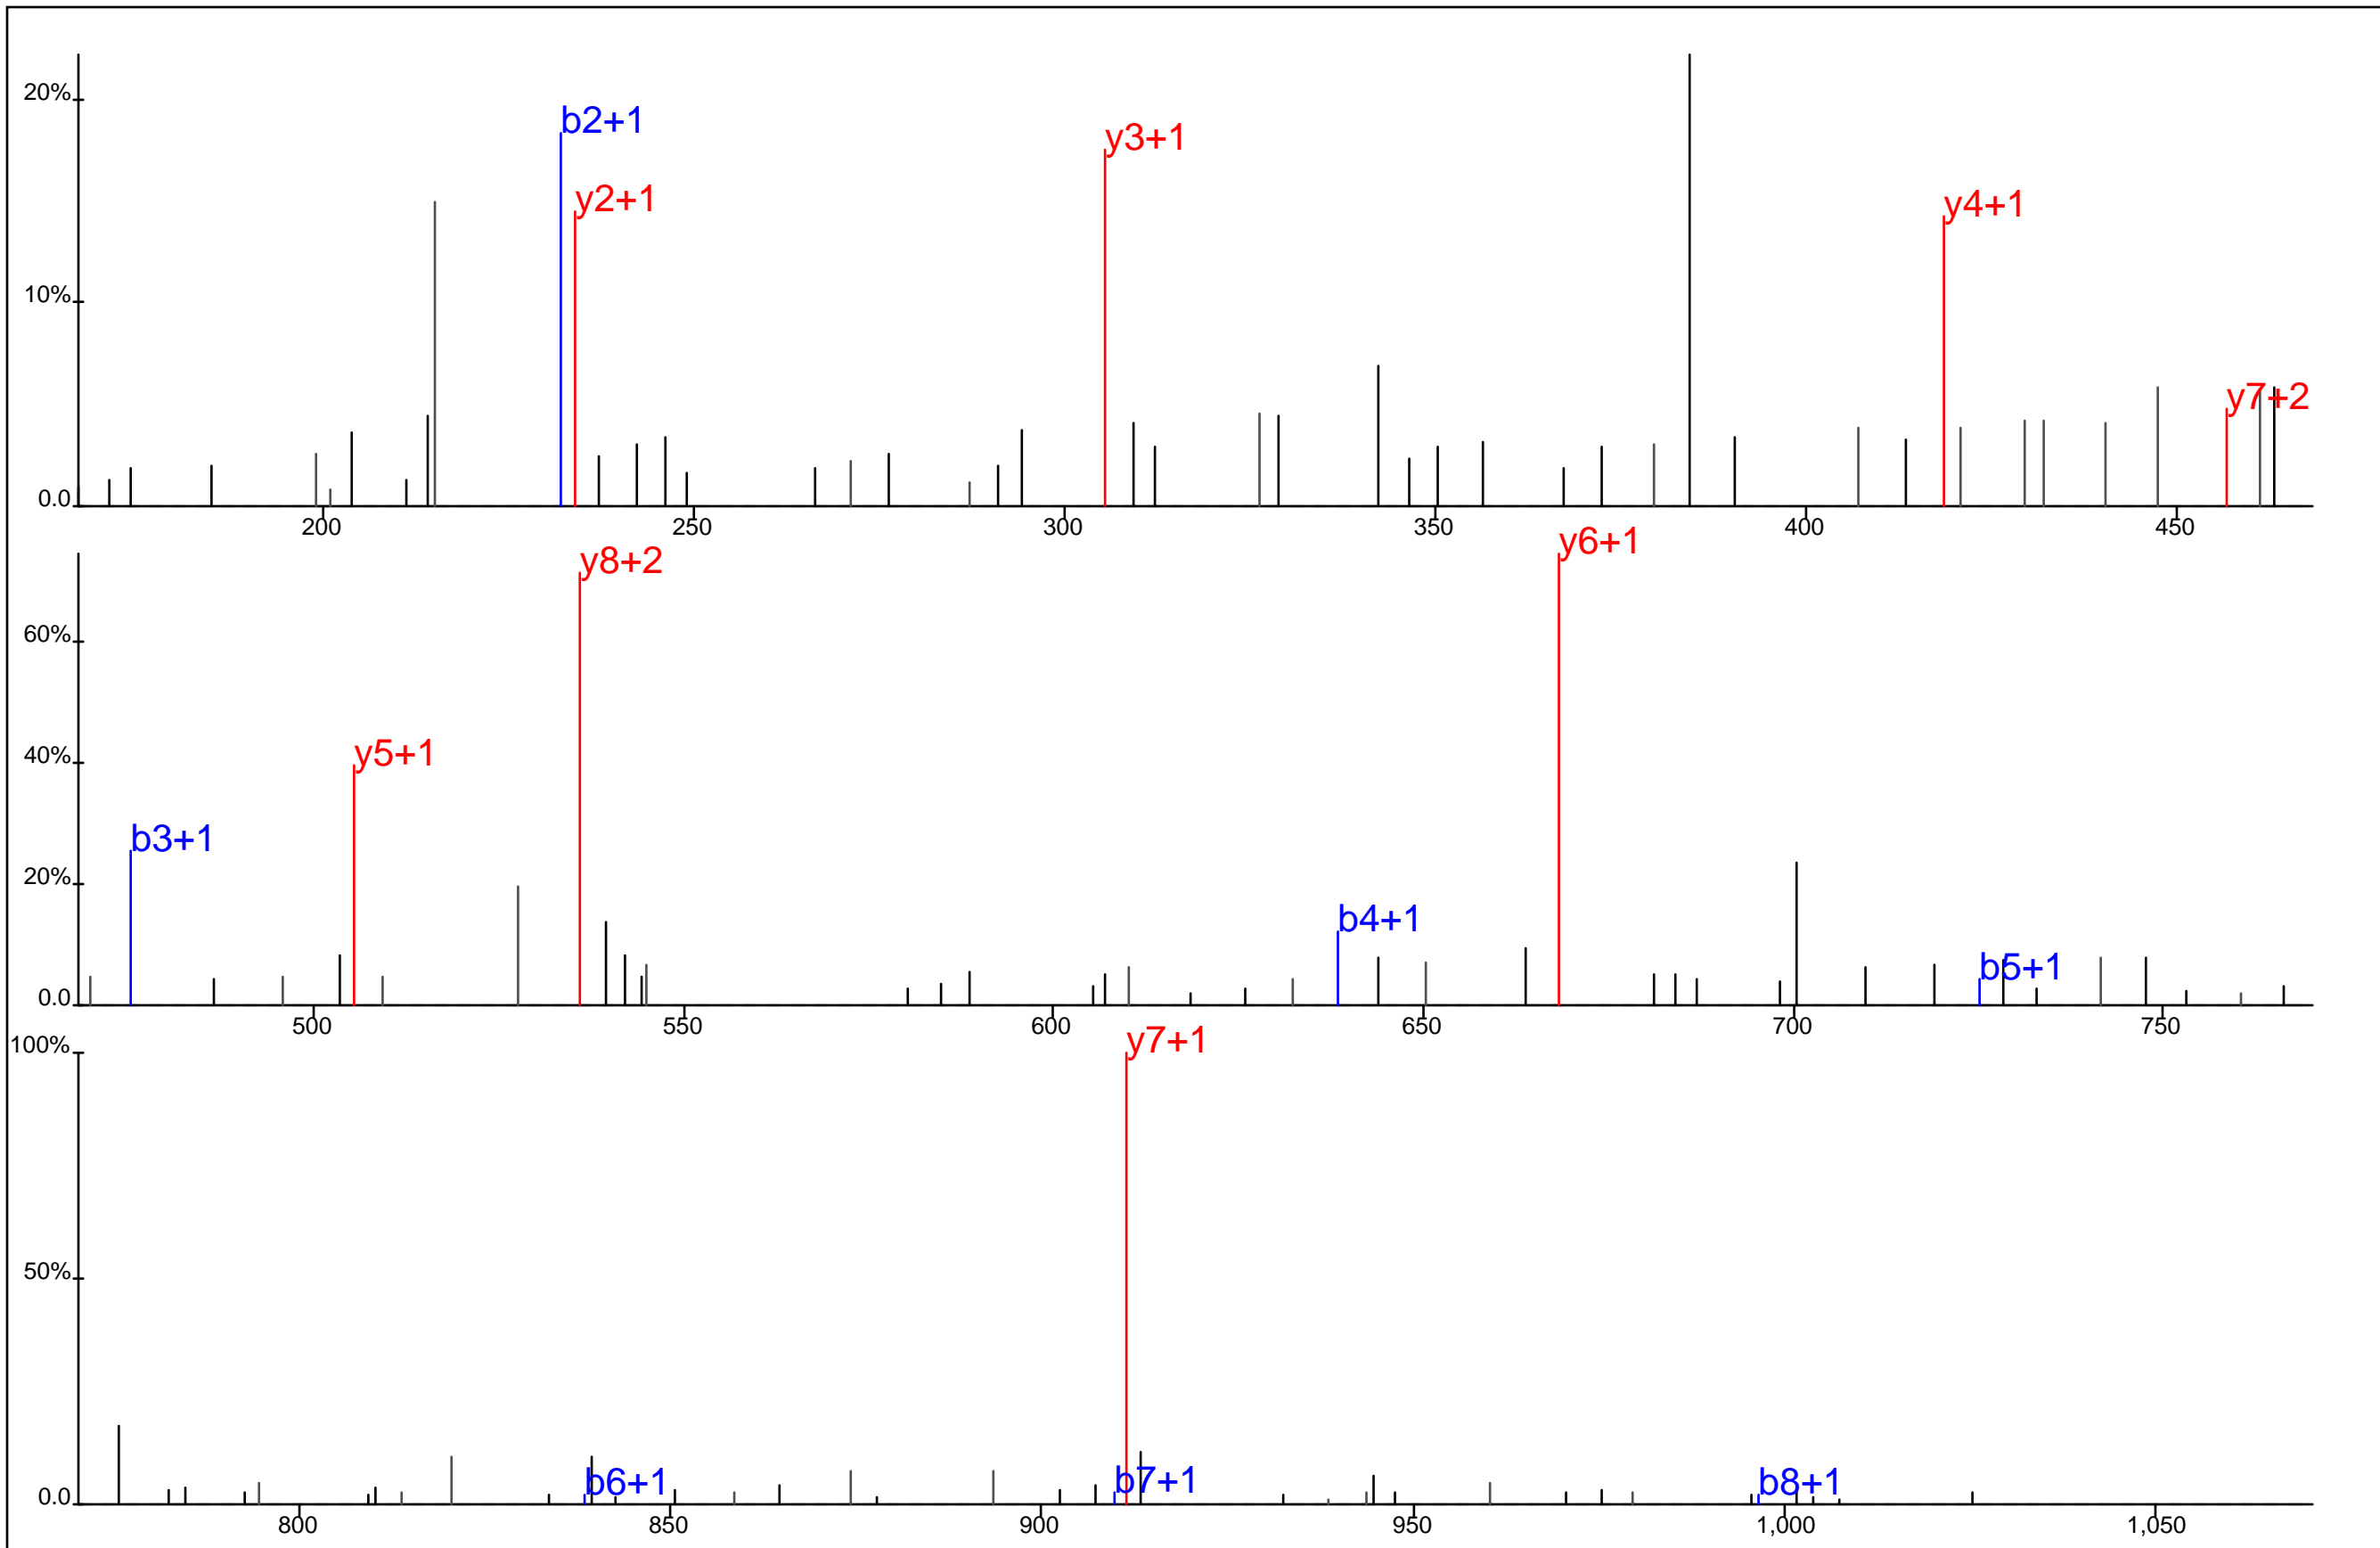

■ ■ ■ ■ ■ ■ ■  
 A C Y\*Y S L A S K  
■ ■ ■ ■ ■ ■ ■

Protein Name: ZAP70  
 gi Accession: 0  
 Precursor Mass: 571.7330+2  
 Delta Mass: 0.075 ppm  
 XCorr: 39.8

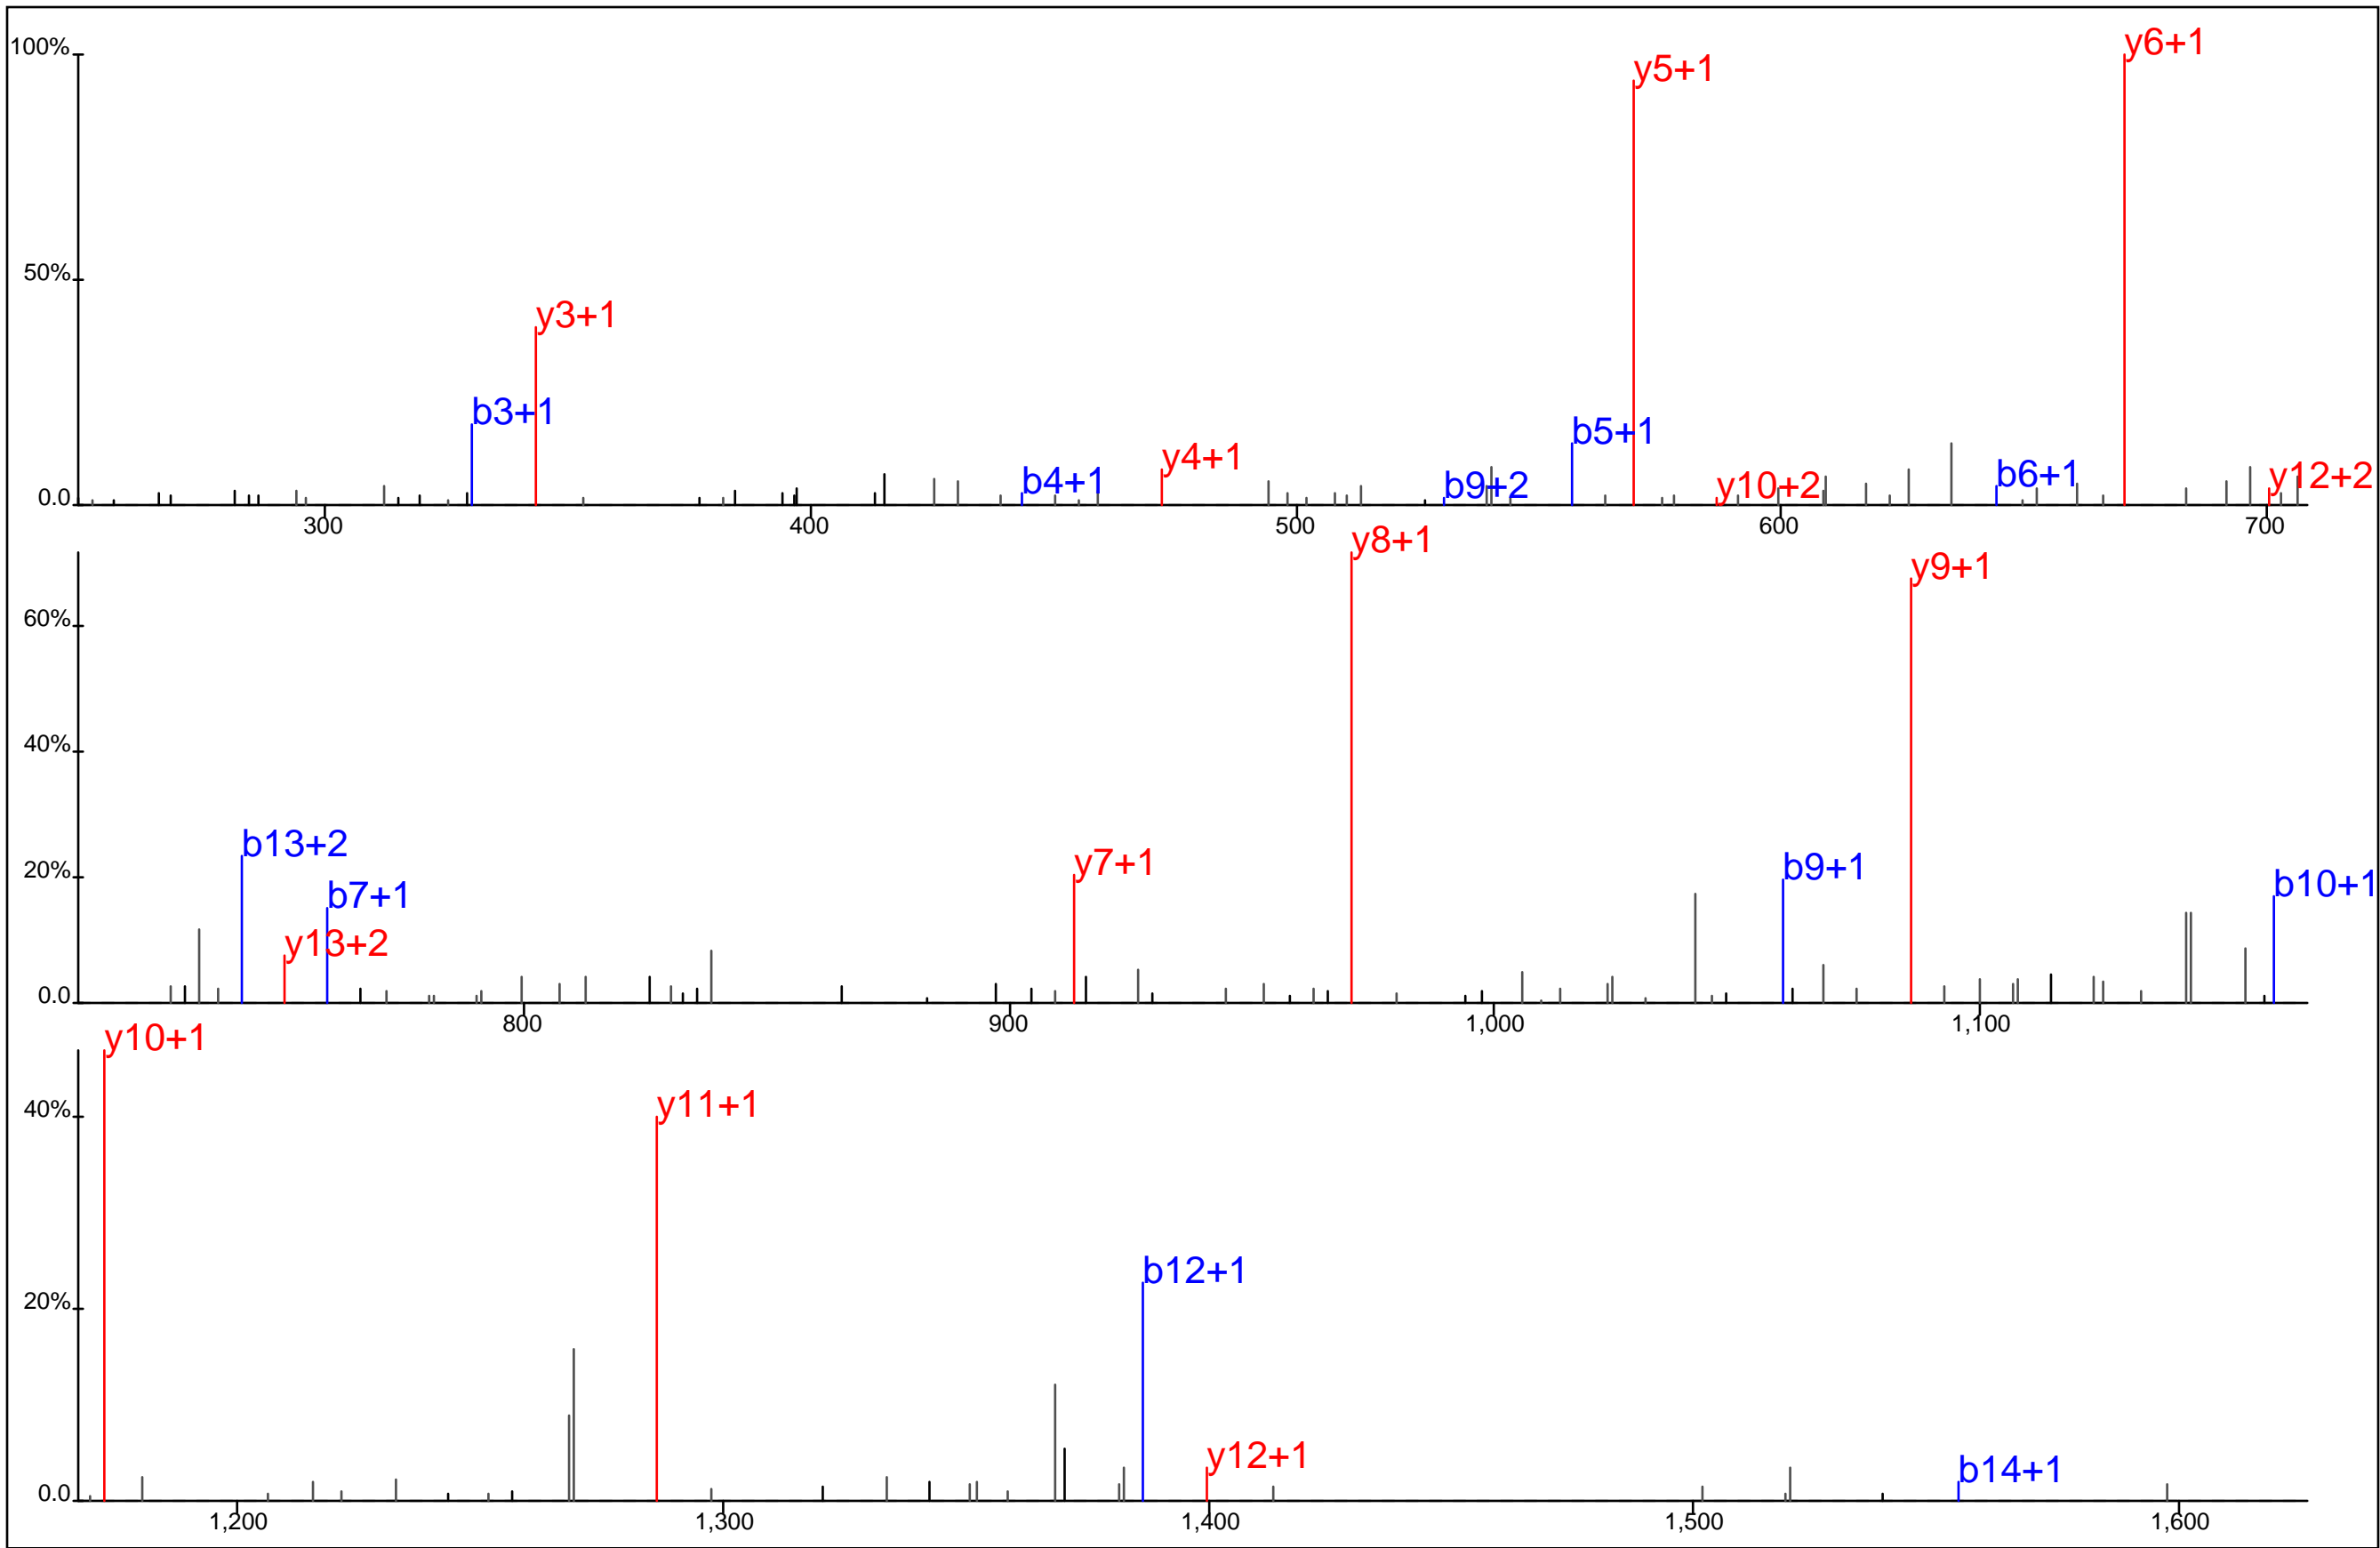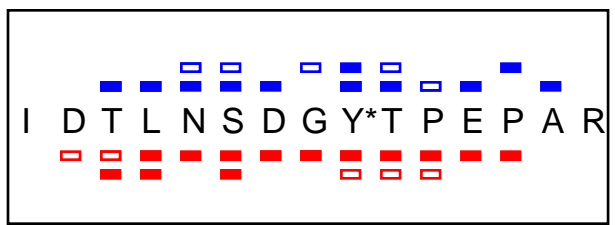

Protein Name: ZAP70  
 gi Accession: 0  
 Precursor Mass: 864.8787+2  
 Delta Mass: 1.403 ppm  
 XCorr: 73.51







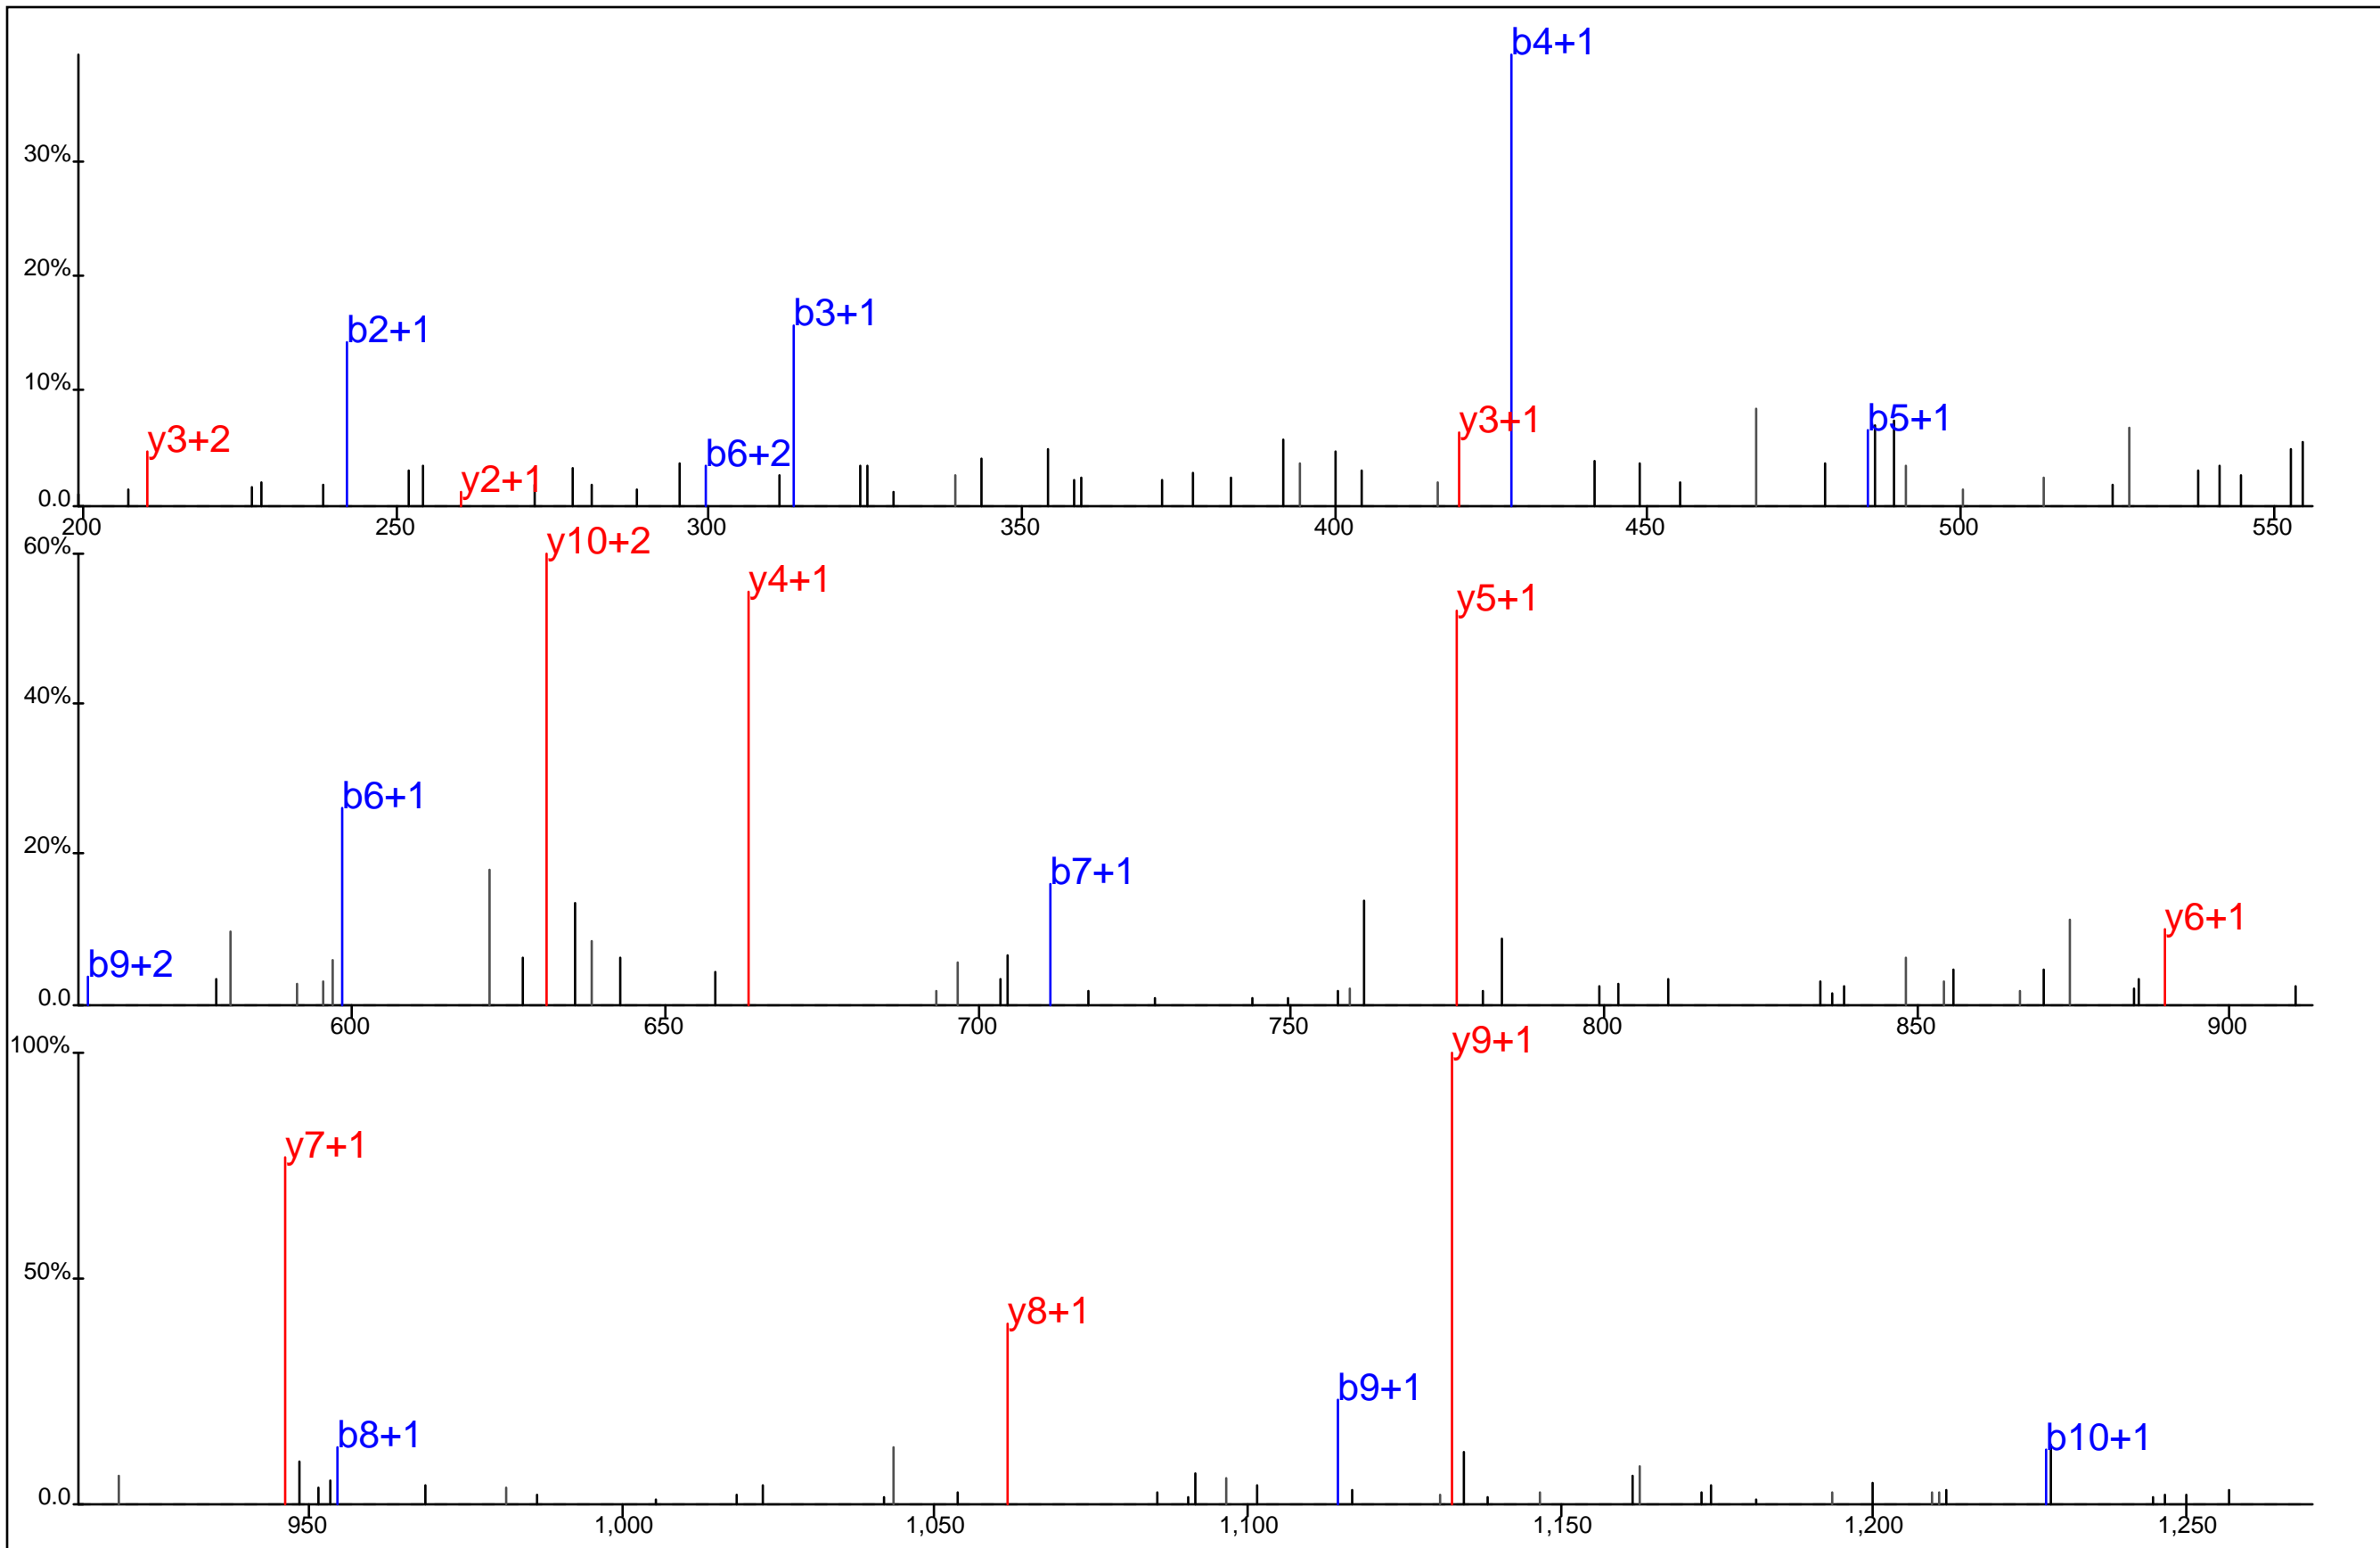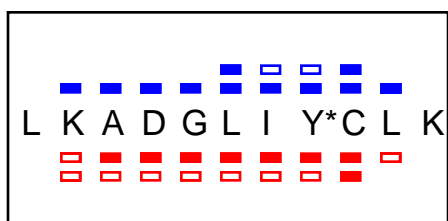

Protein Name: ZAP70  
 gi Accession: 0  
 Precursor Mass: 687.3477+2  
 Delta Mass: 1.300 ppm  
 XCorr: 73.03

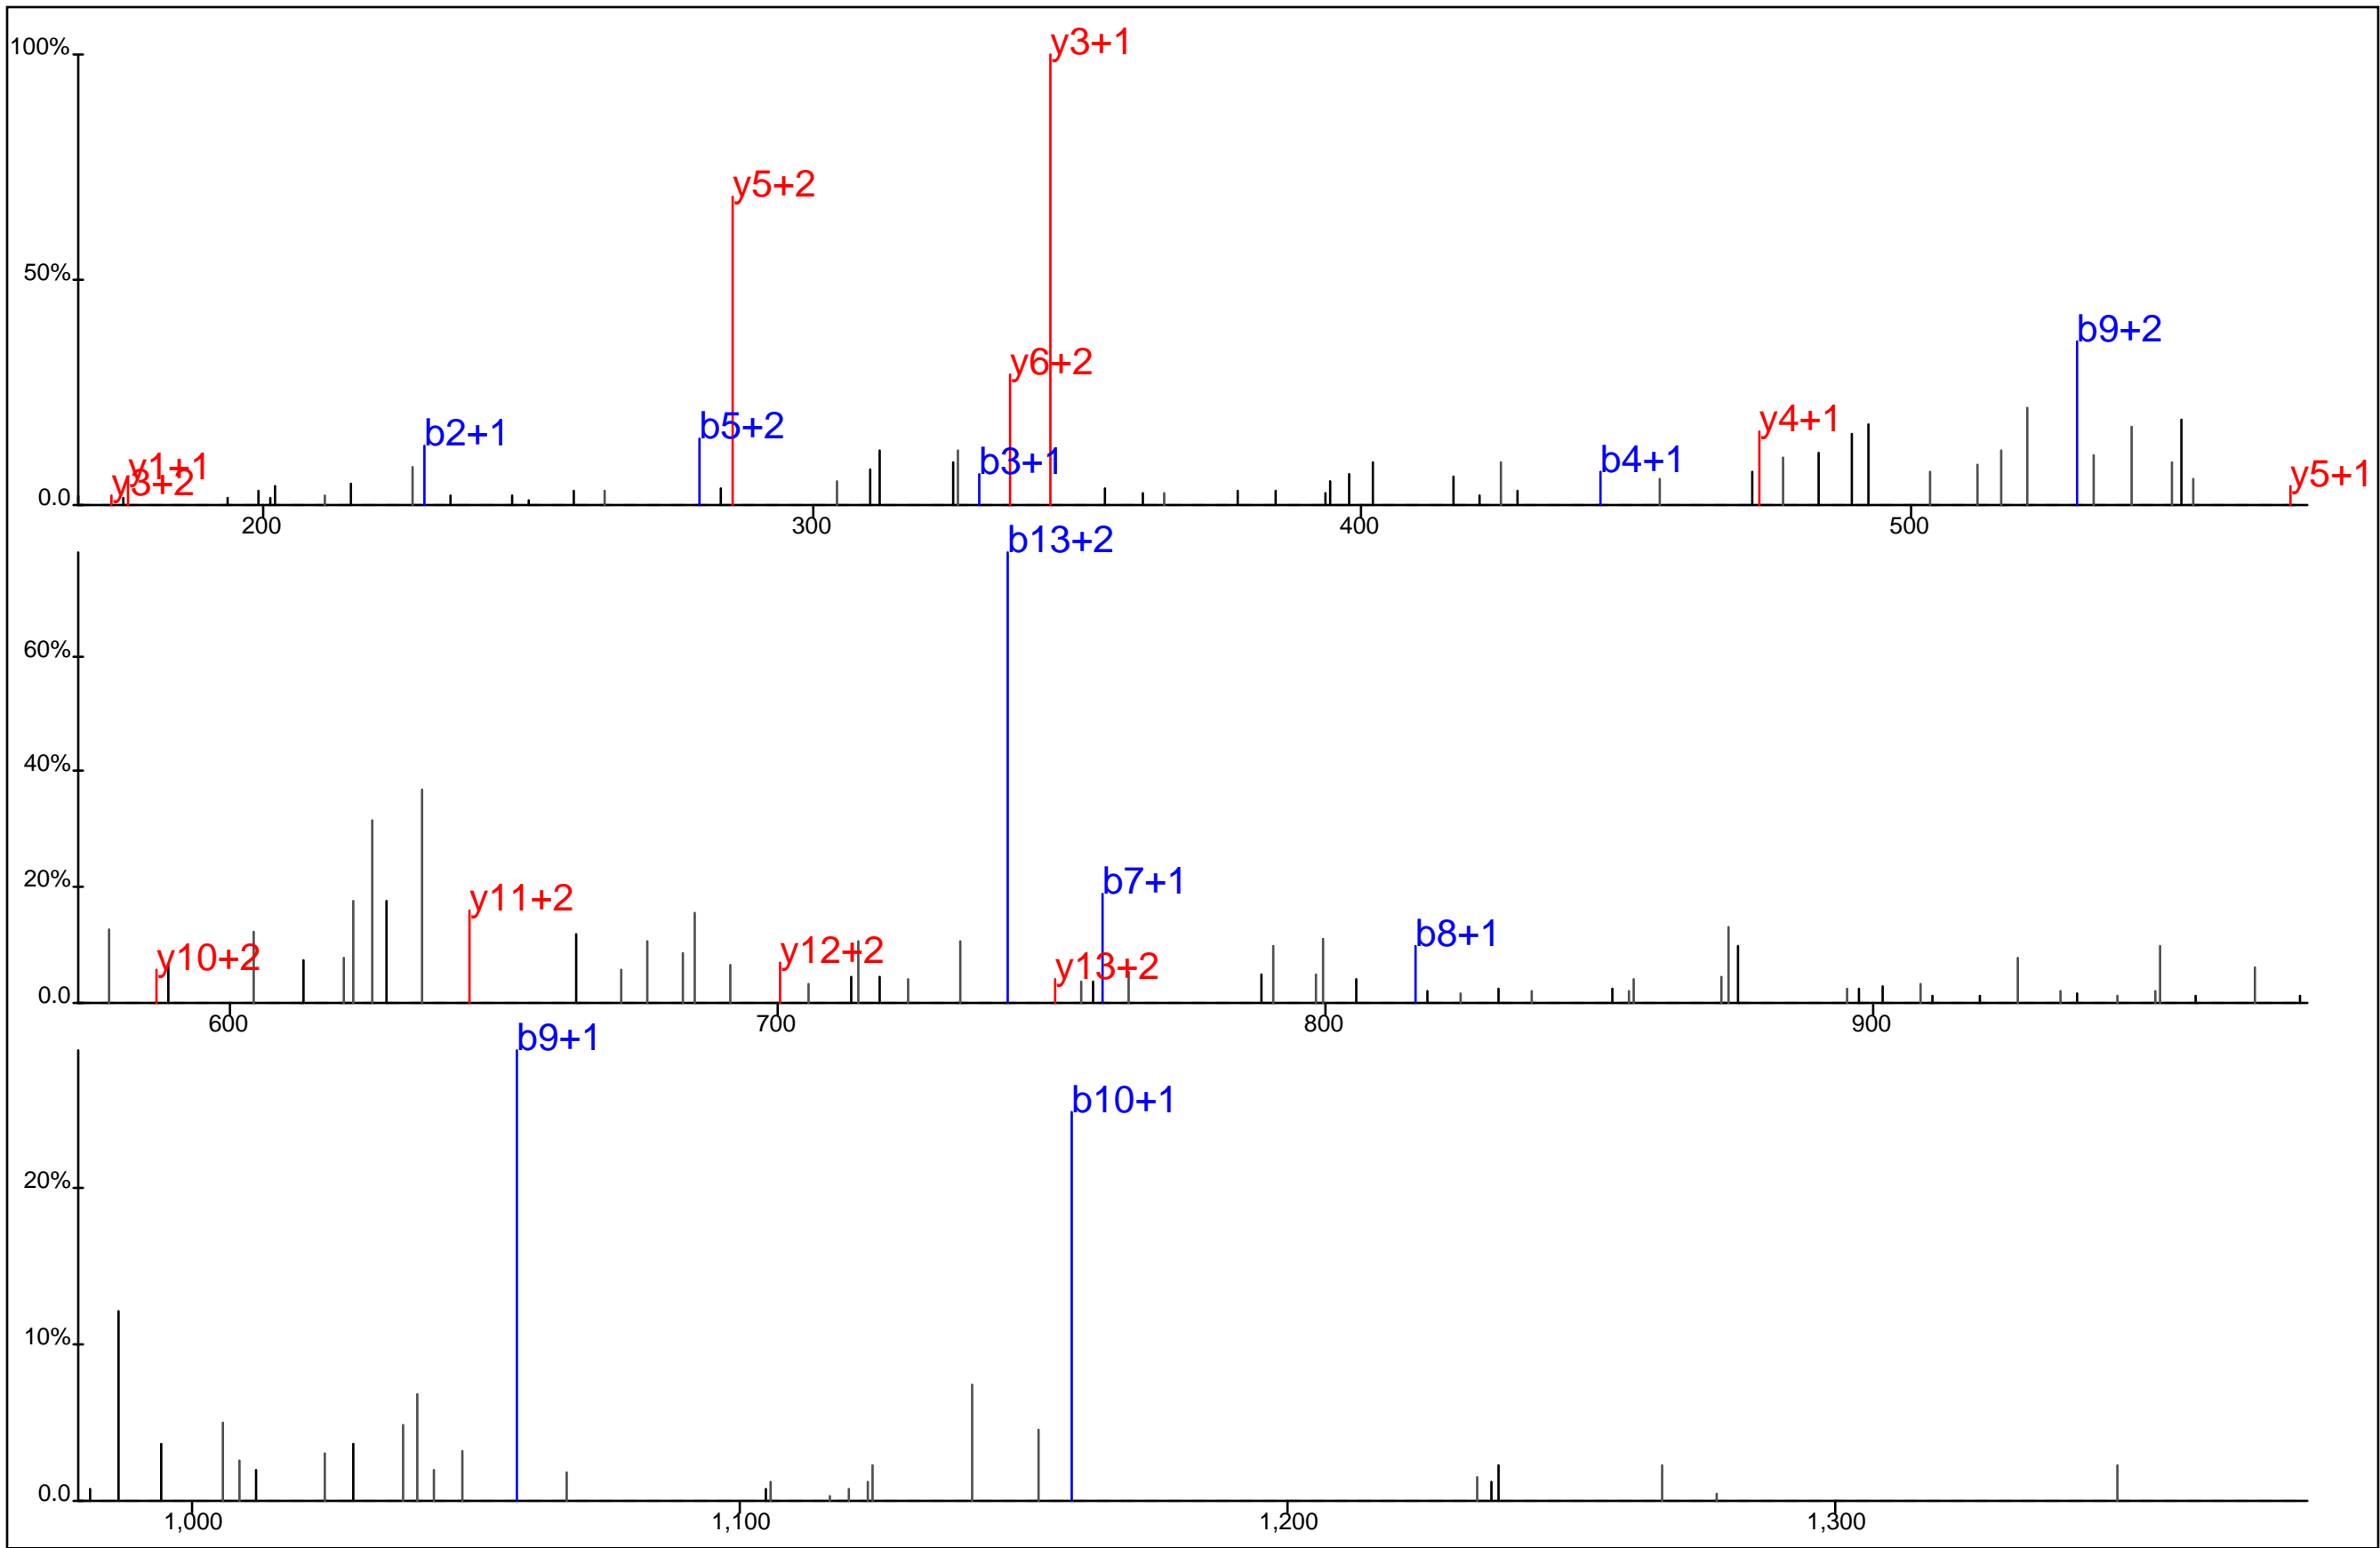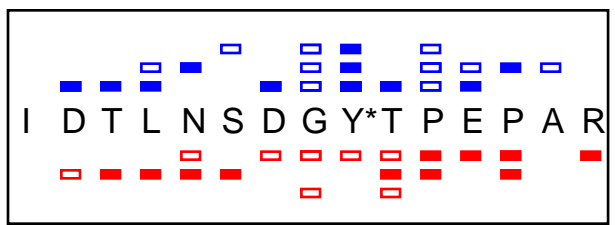

Protein Name: ZAP70  
 gi Accession: 0  
 Precursor Mass: 576.9205+3  
 Delta Mass: 0.440 ppm  
 XCorr: 40.88

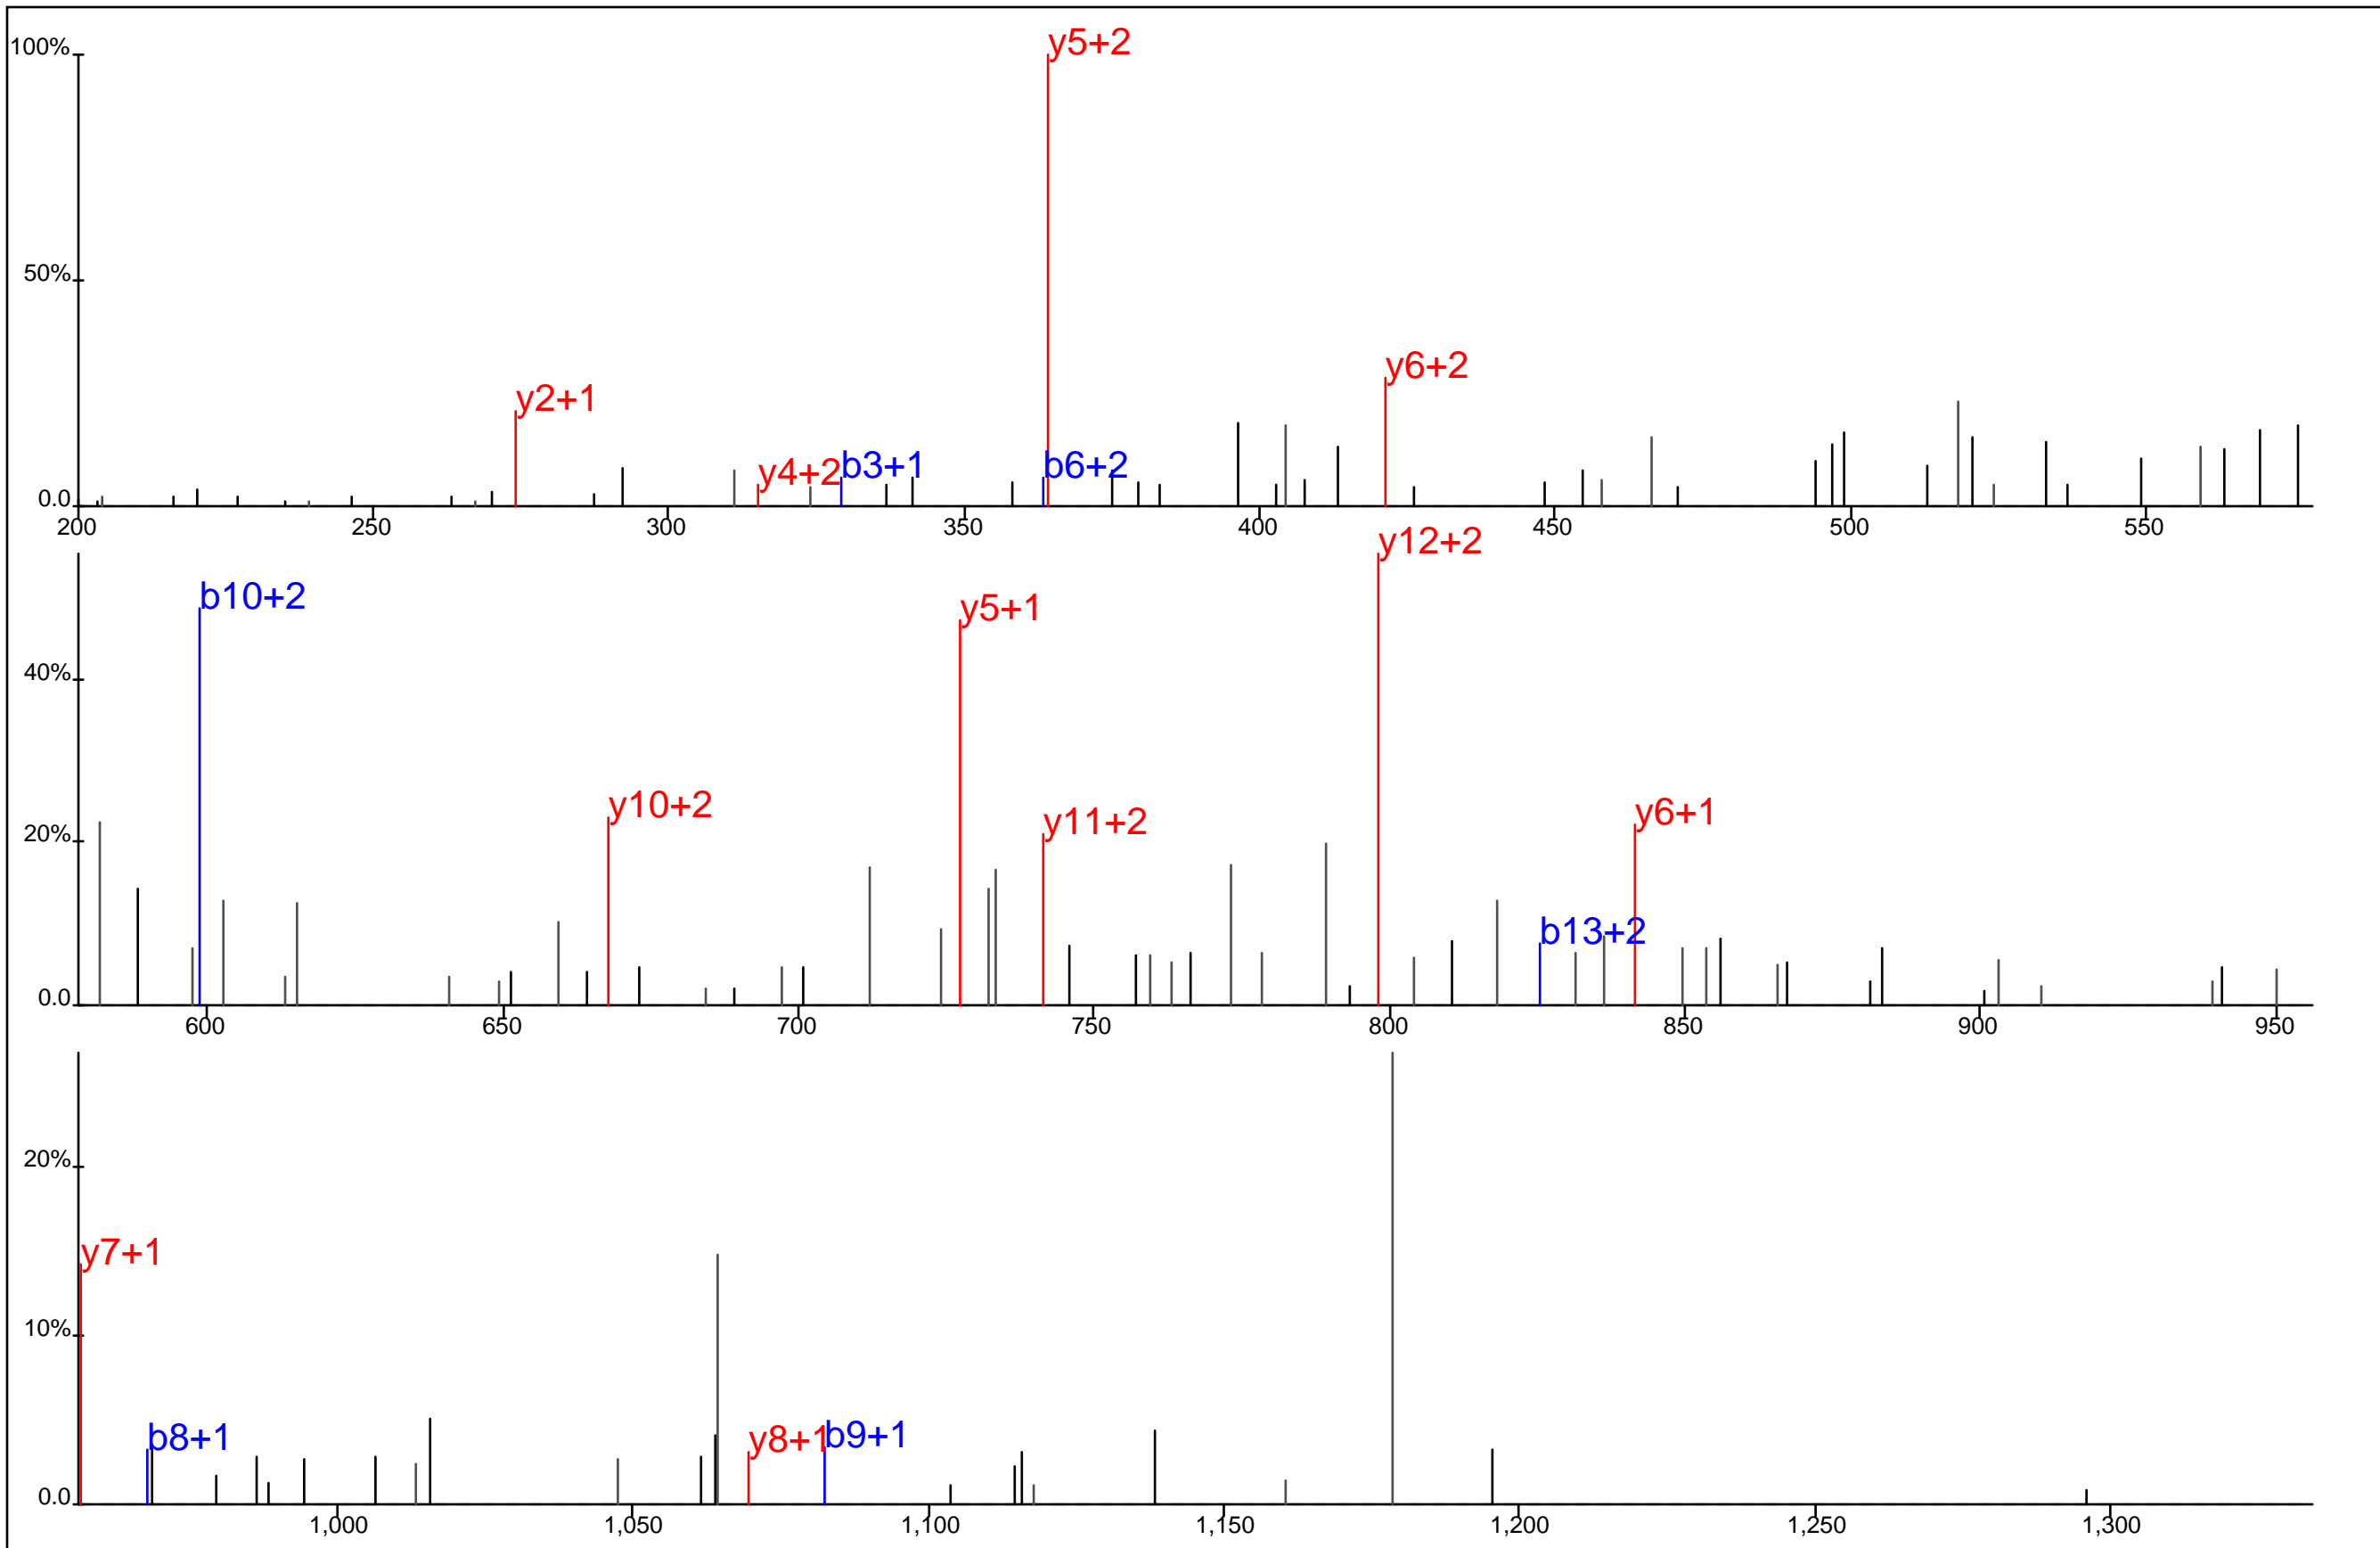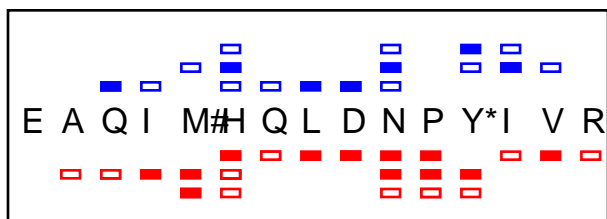

Protein Name: ZAP70  
 gi Accession: 0  
 Precursor Mass: 641.6334+3  
 Delta Mass: 1.322 ppm  
 XCorr: 33.91

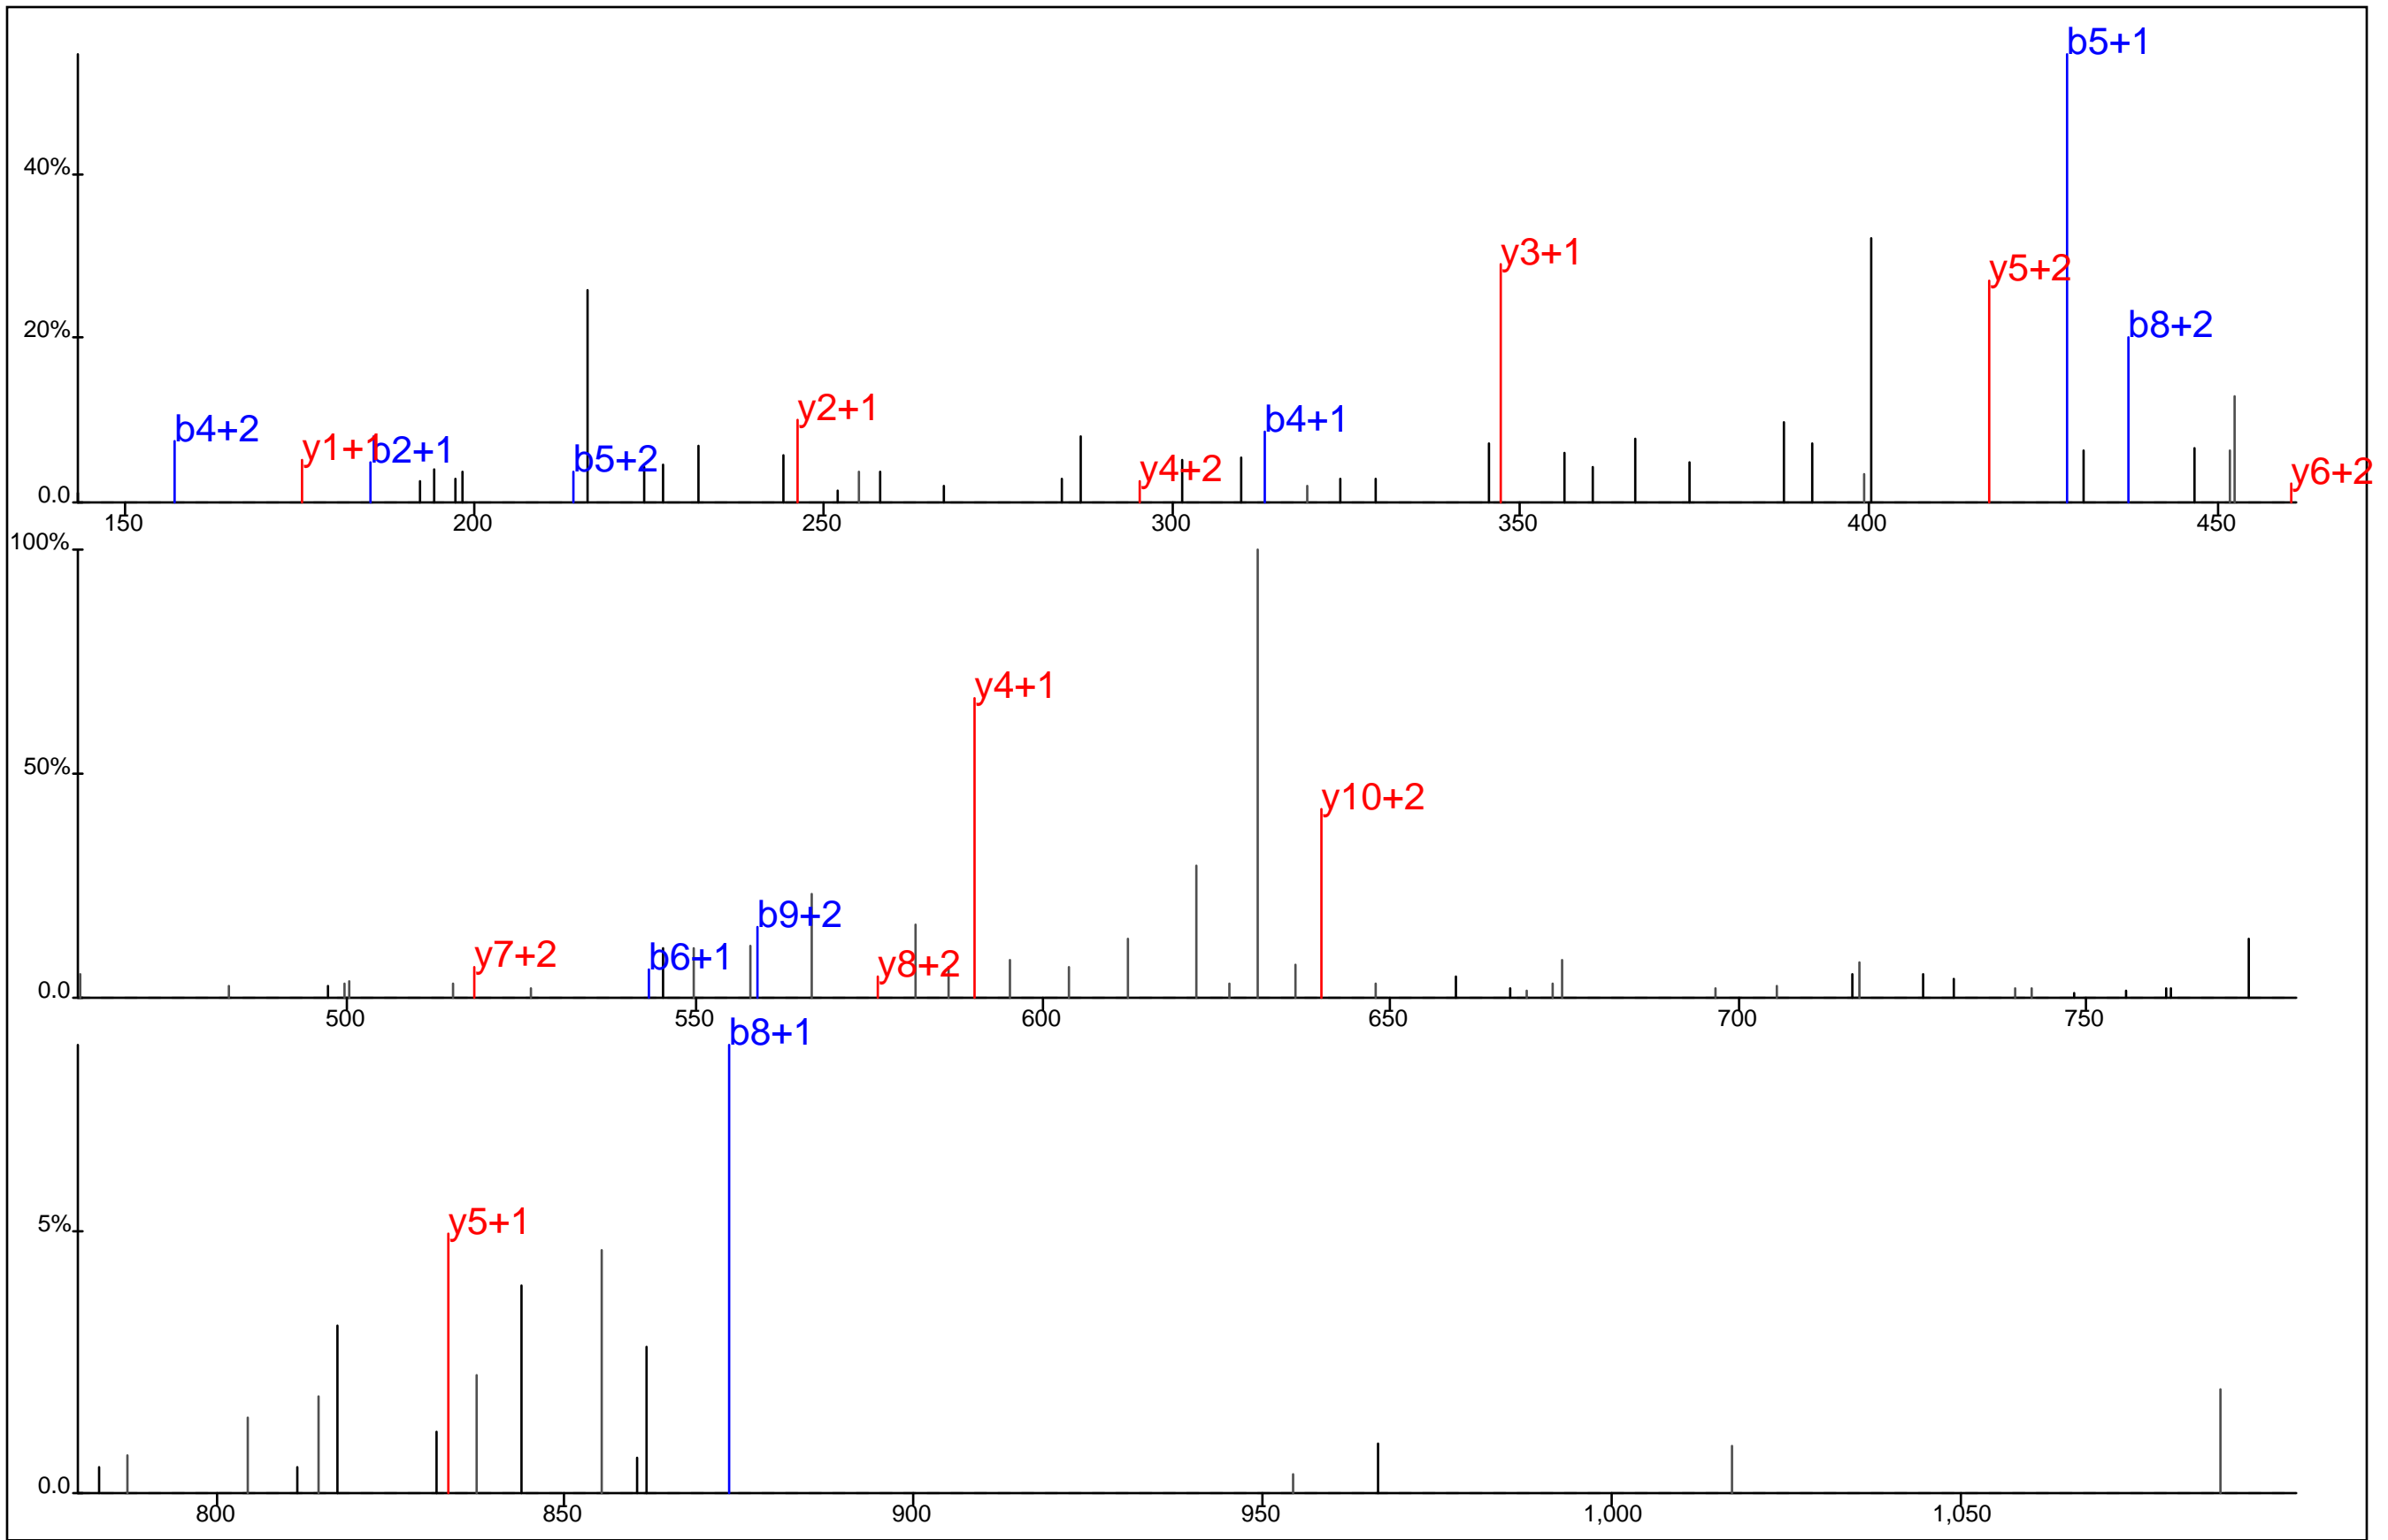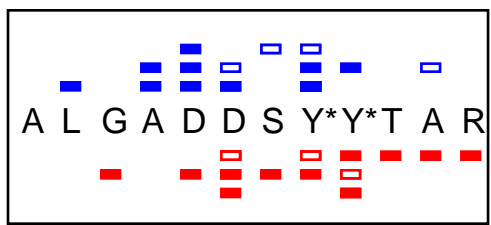

Protein Name: ZAP70  
 gi Accession: 0  
 Precursor Mass: 488.1799+3  
 Delta Mass: 2.364 ppm  
 XCorr: 29.18

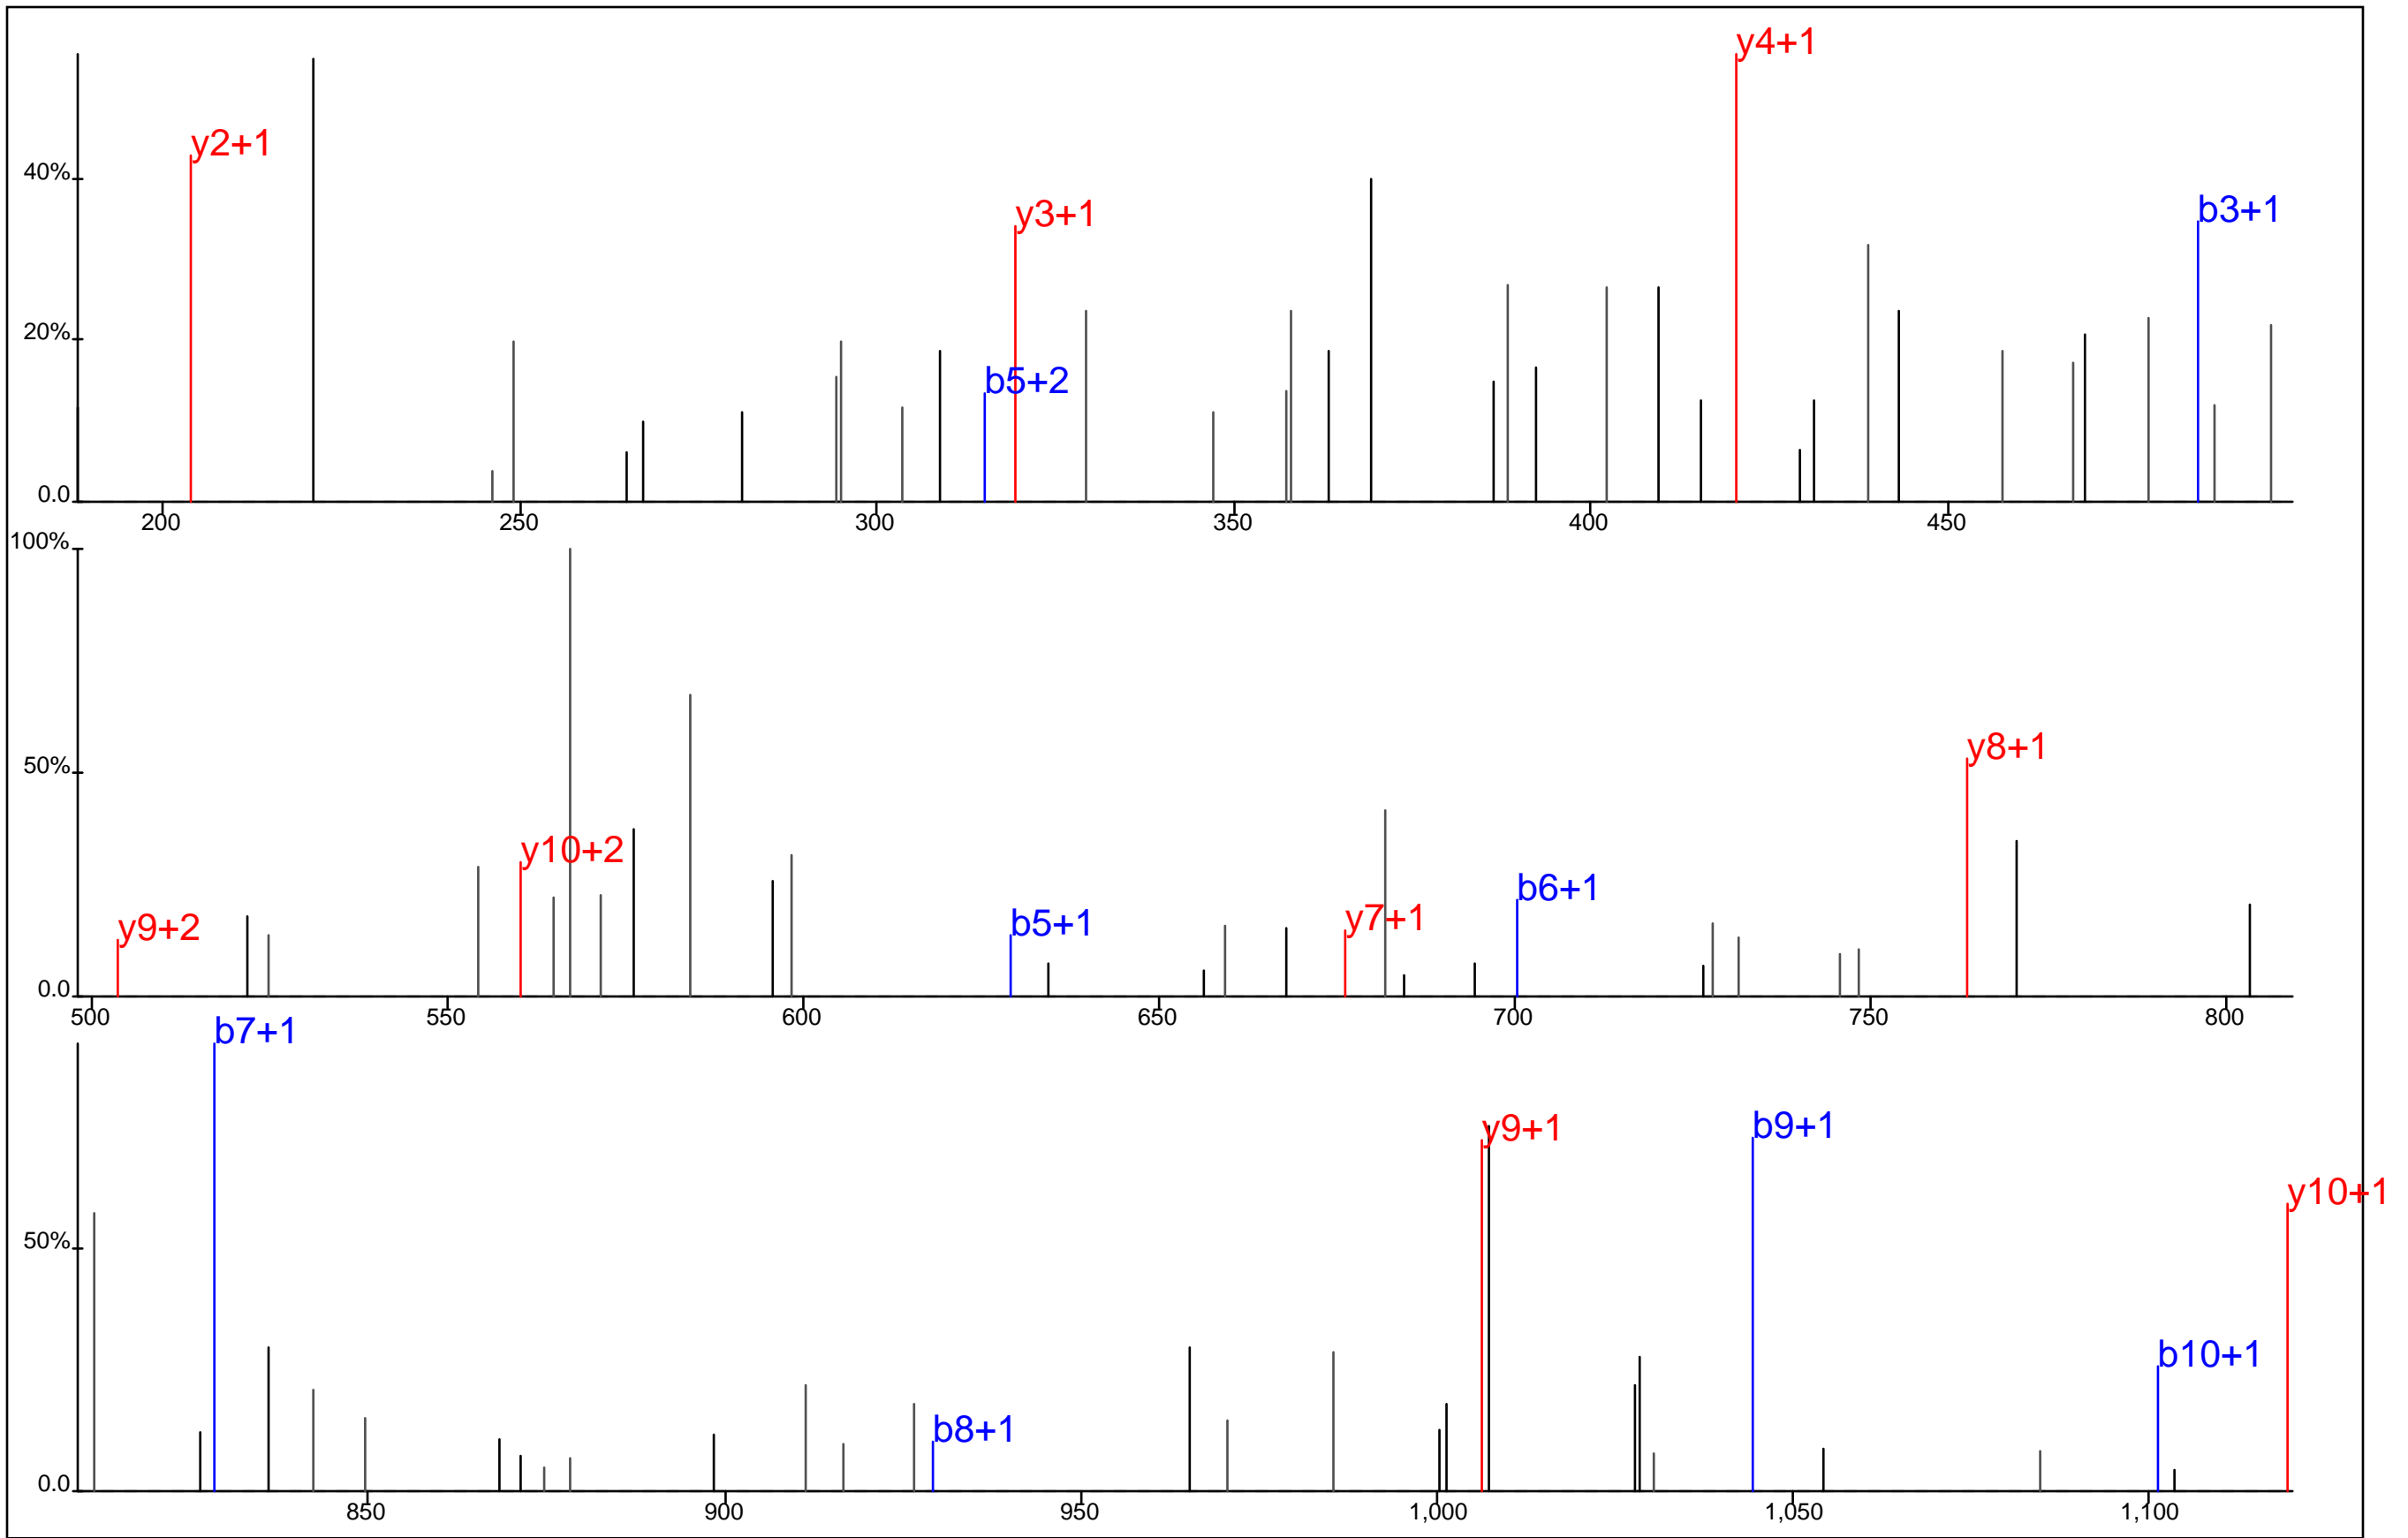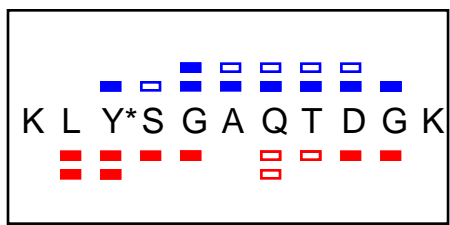

Protein Name: ZAP70  
 gi Accession: 0  
 Precursor Mass: 624.2888+2  
 Delta Mass: 2.900 ppm  
 XCorr: 33.04







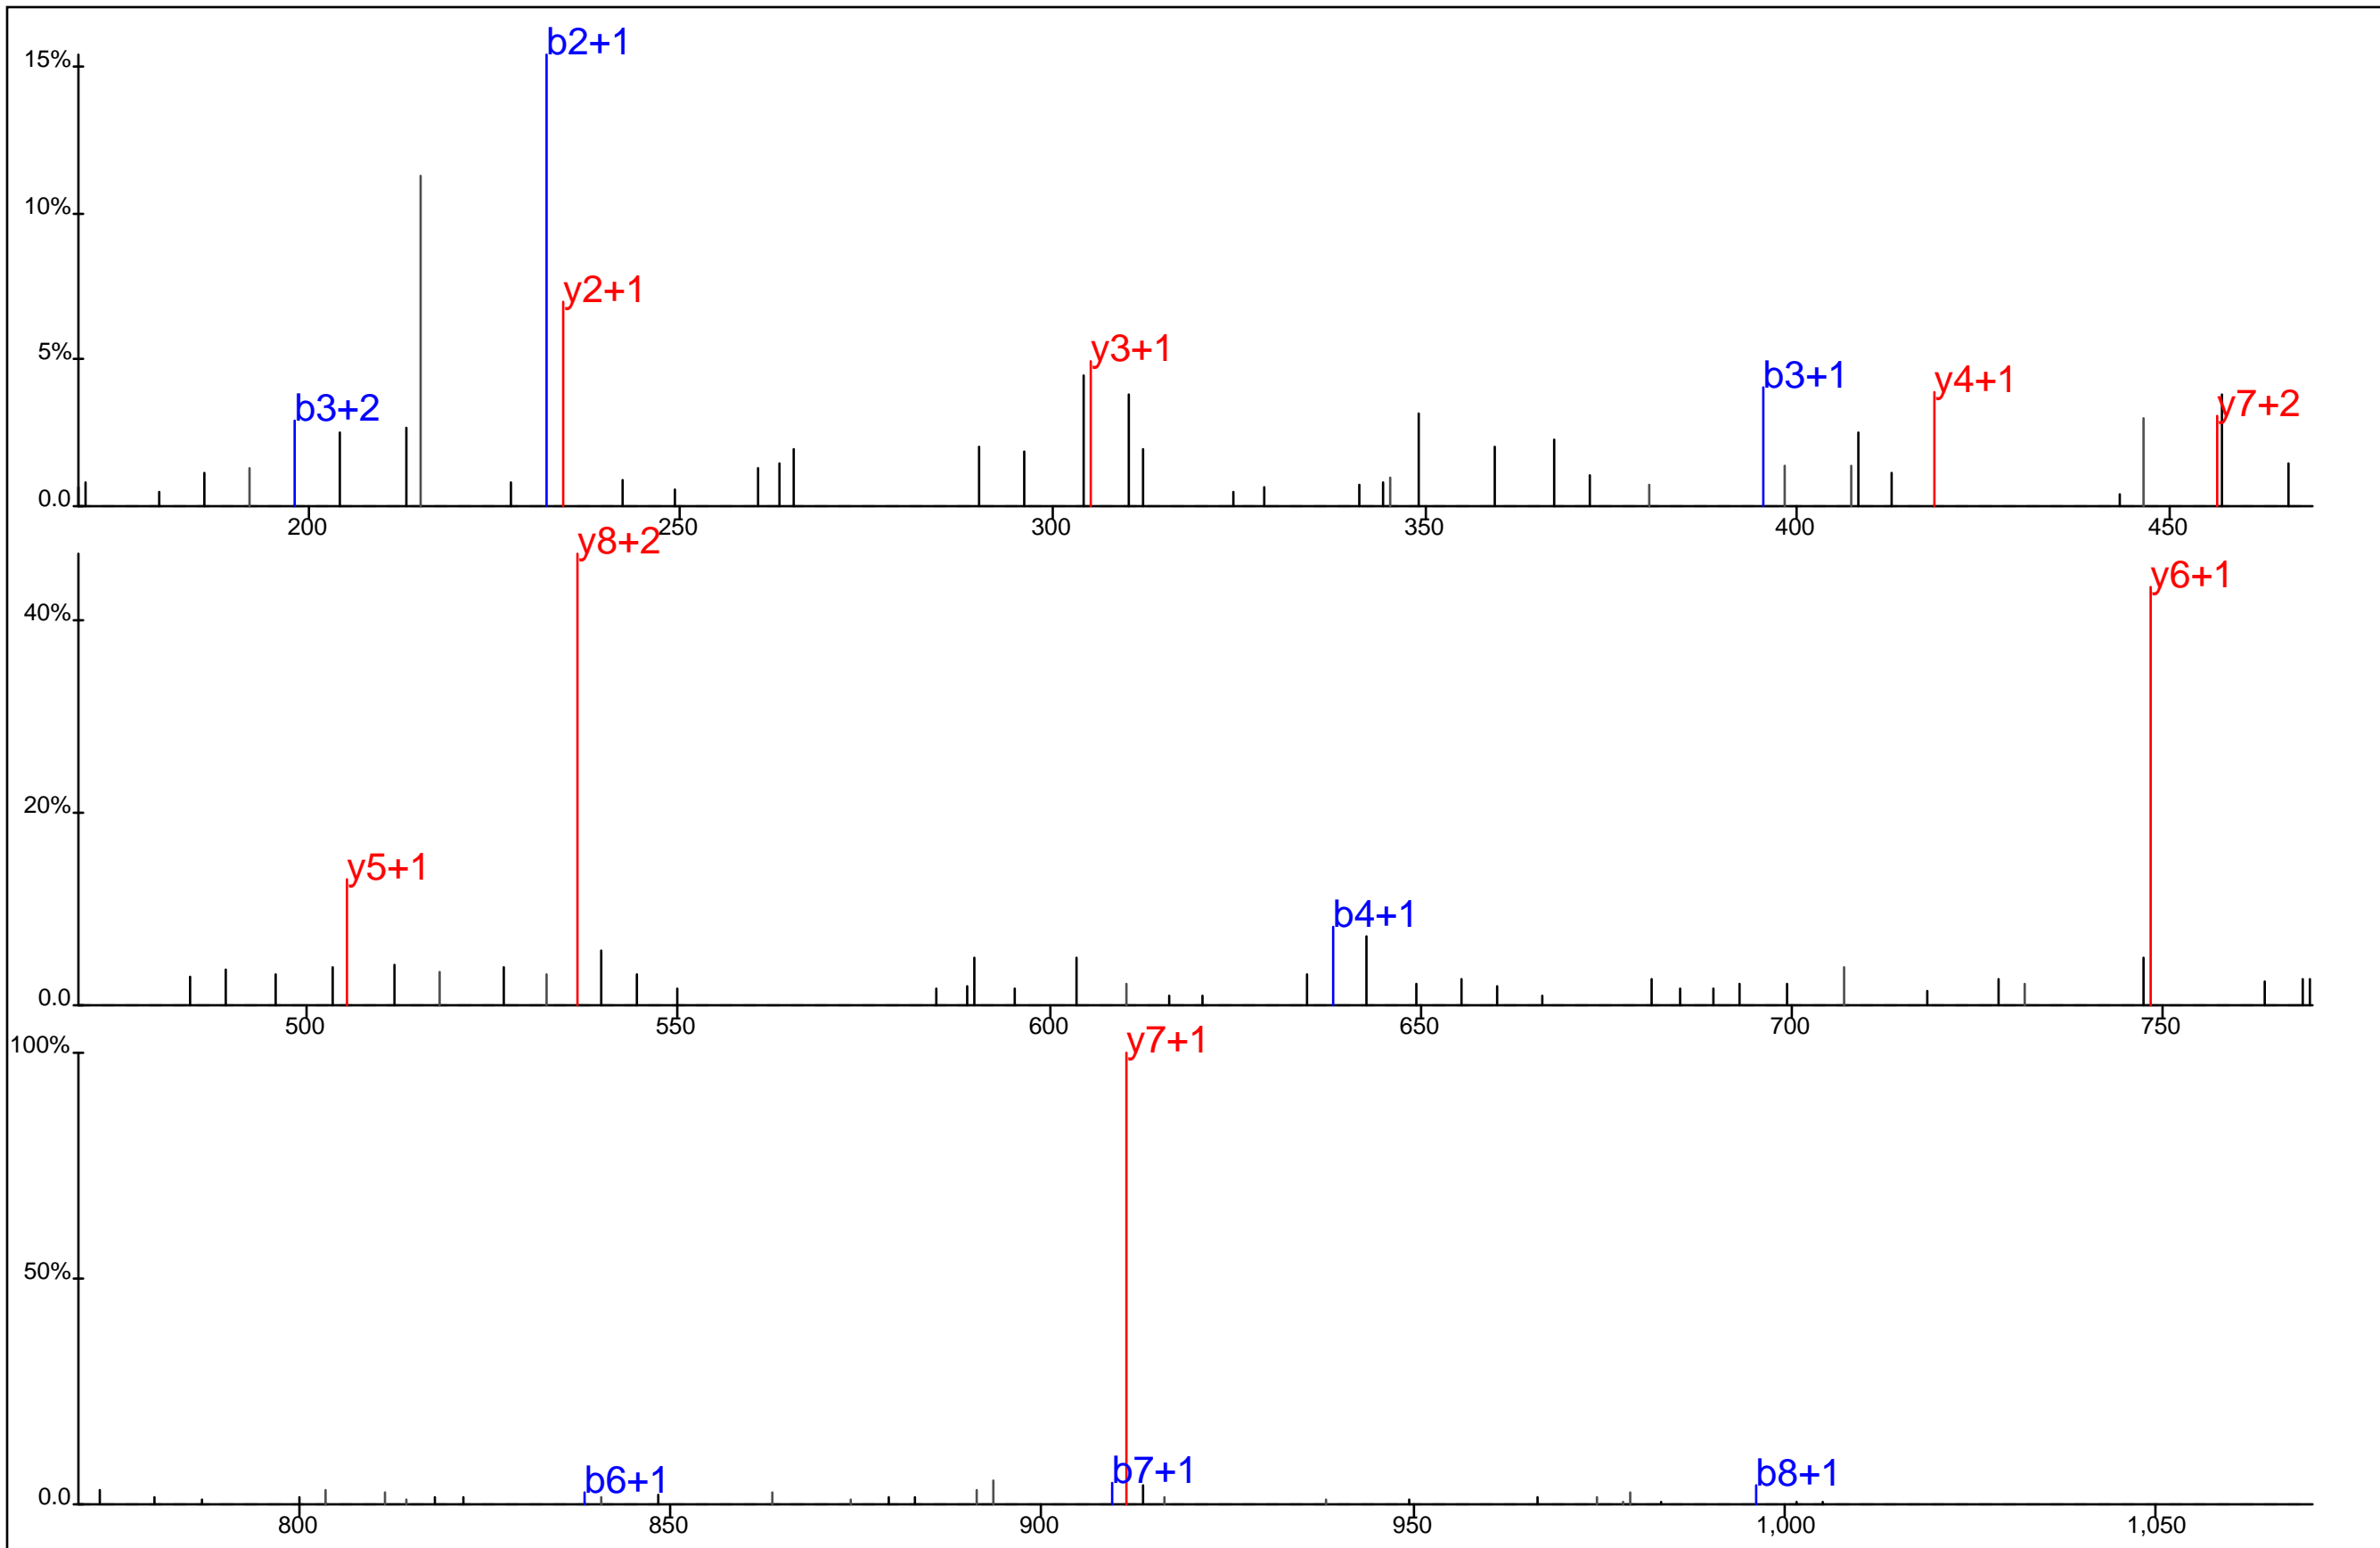

A C Y Y\* S L A S K

Protein Name: ZAP70  
 gi Accession: 0  
 Precursor Mass: 571.7344+2  
 Delta Mass: 2.383 ppm  
 XCorr: 42.35

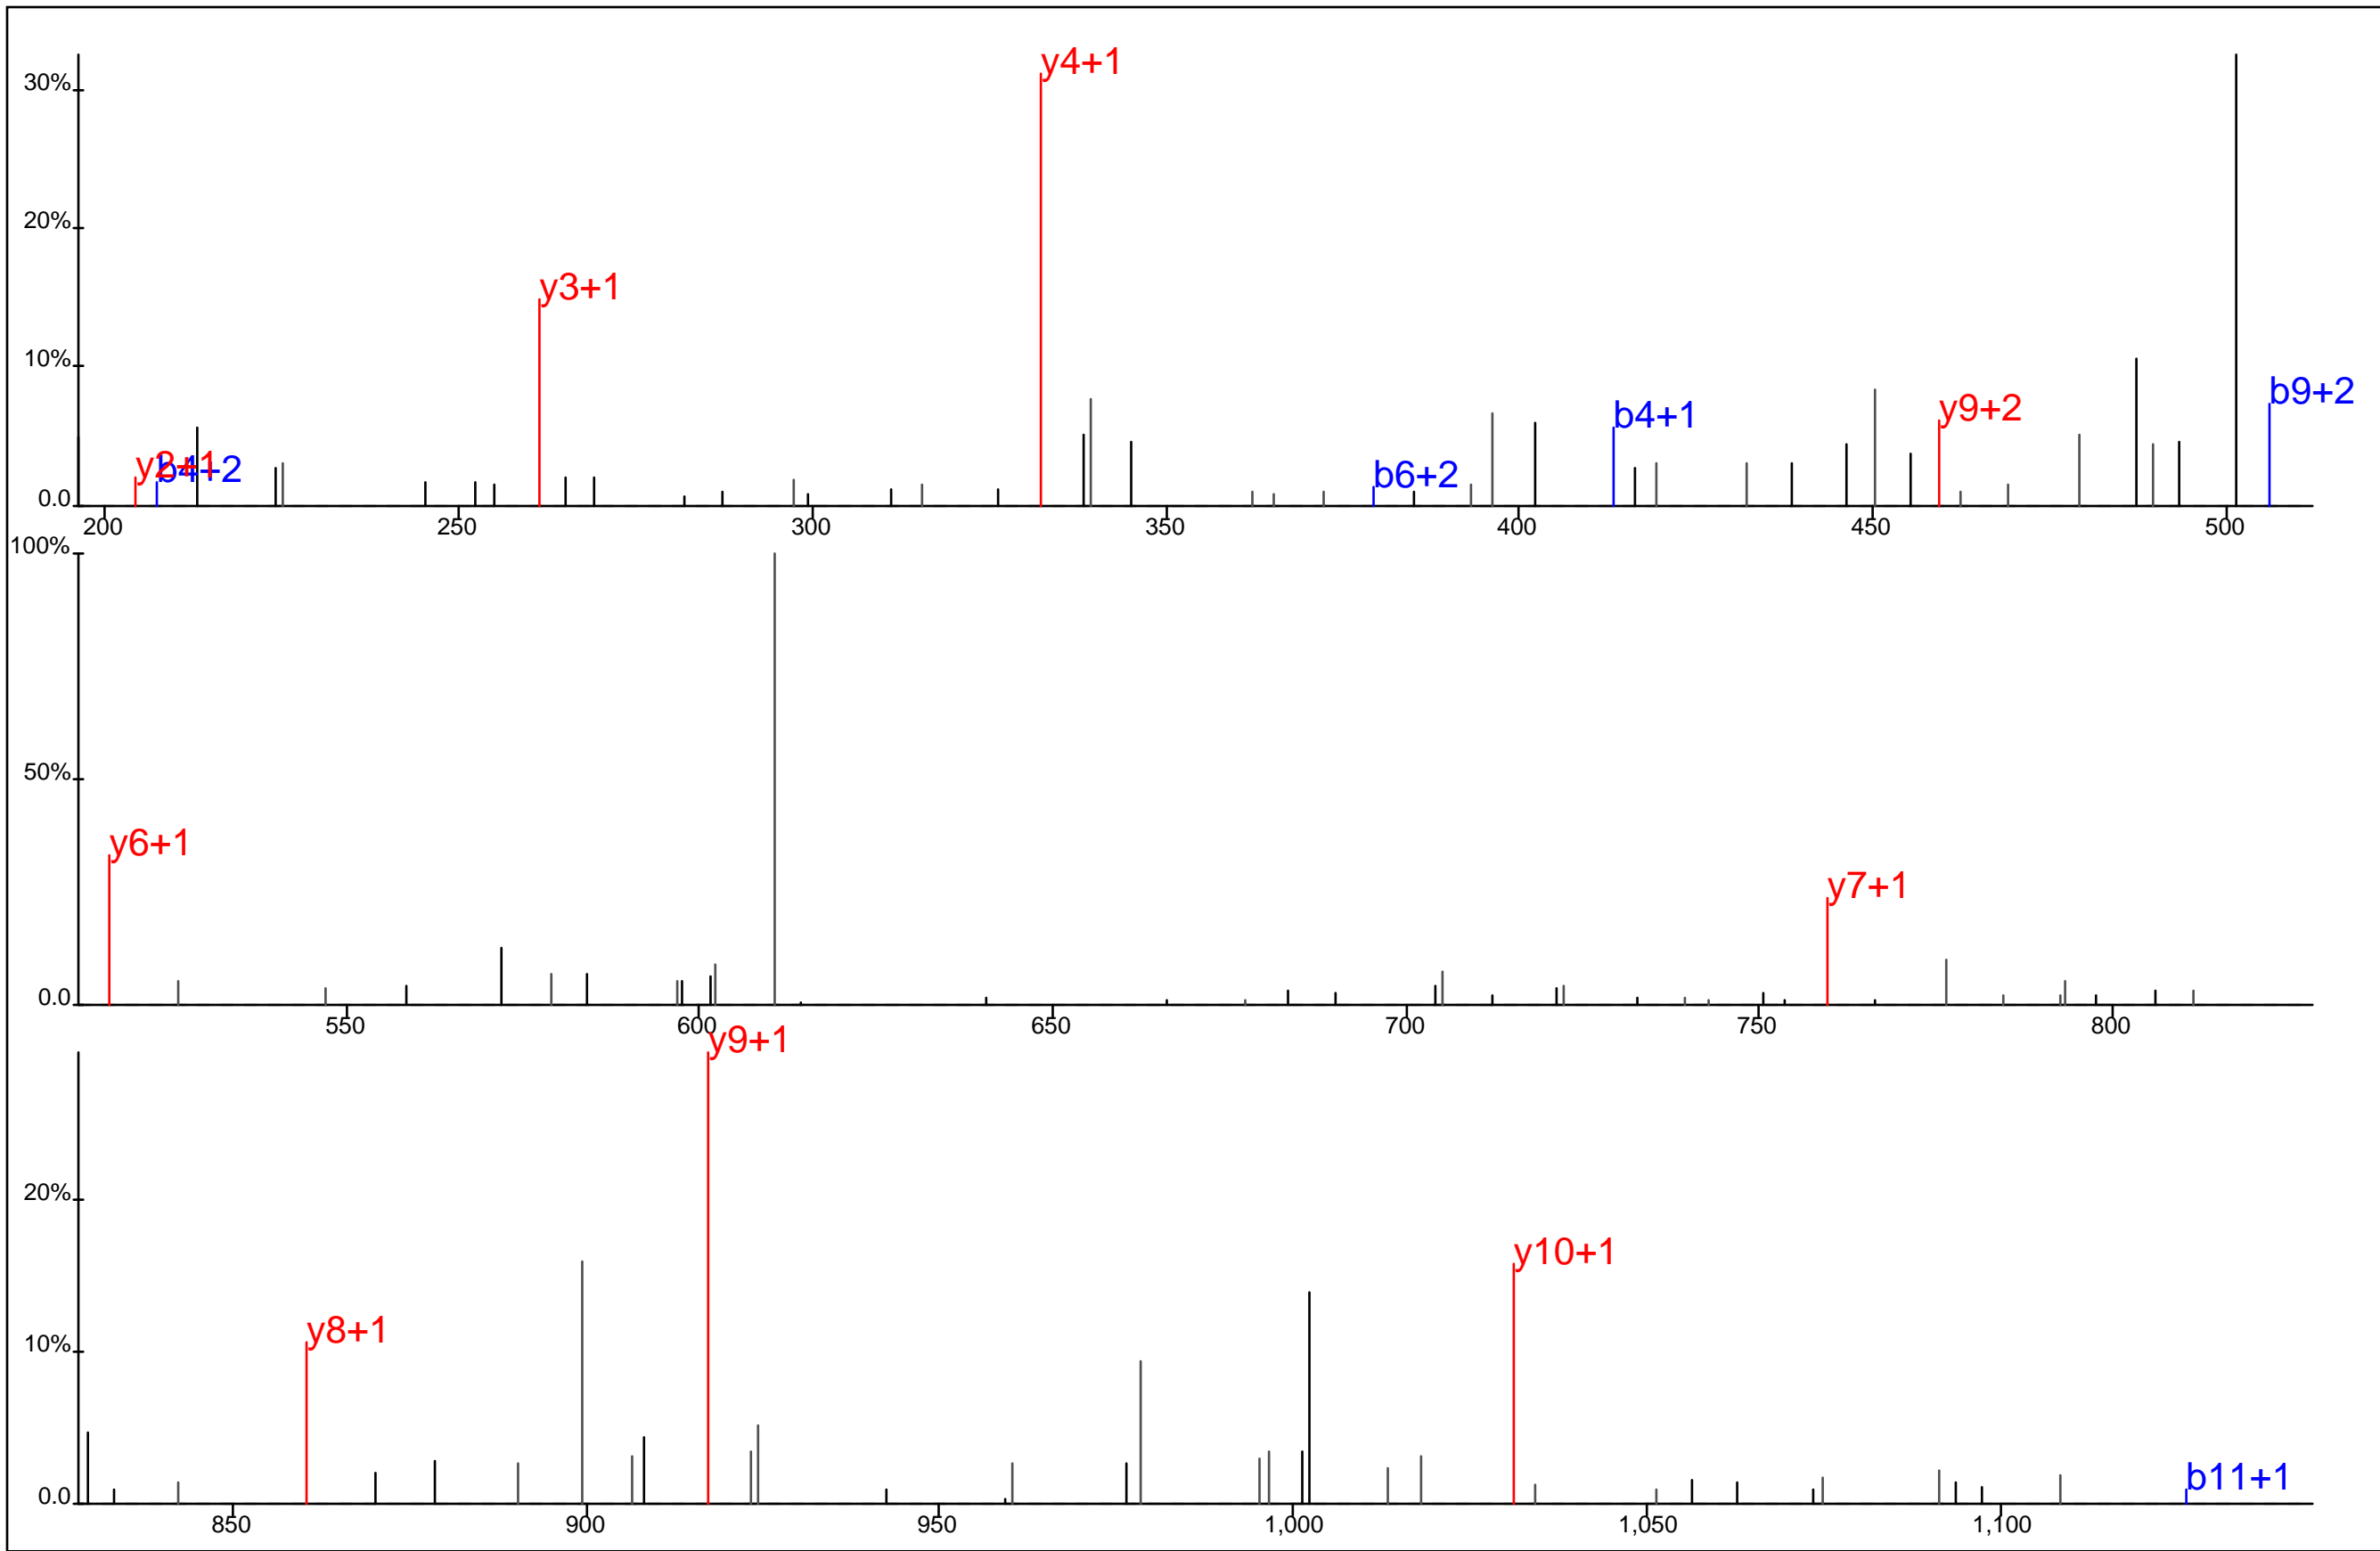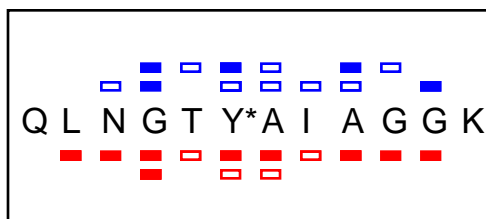

Protein Name: ZAP70  
 gi Accession: 0  
 Precursor Mass: 636.8015+2  
 Delta Mass: 2.059 ppm  
 XCorr: 55.45

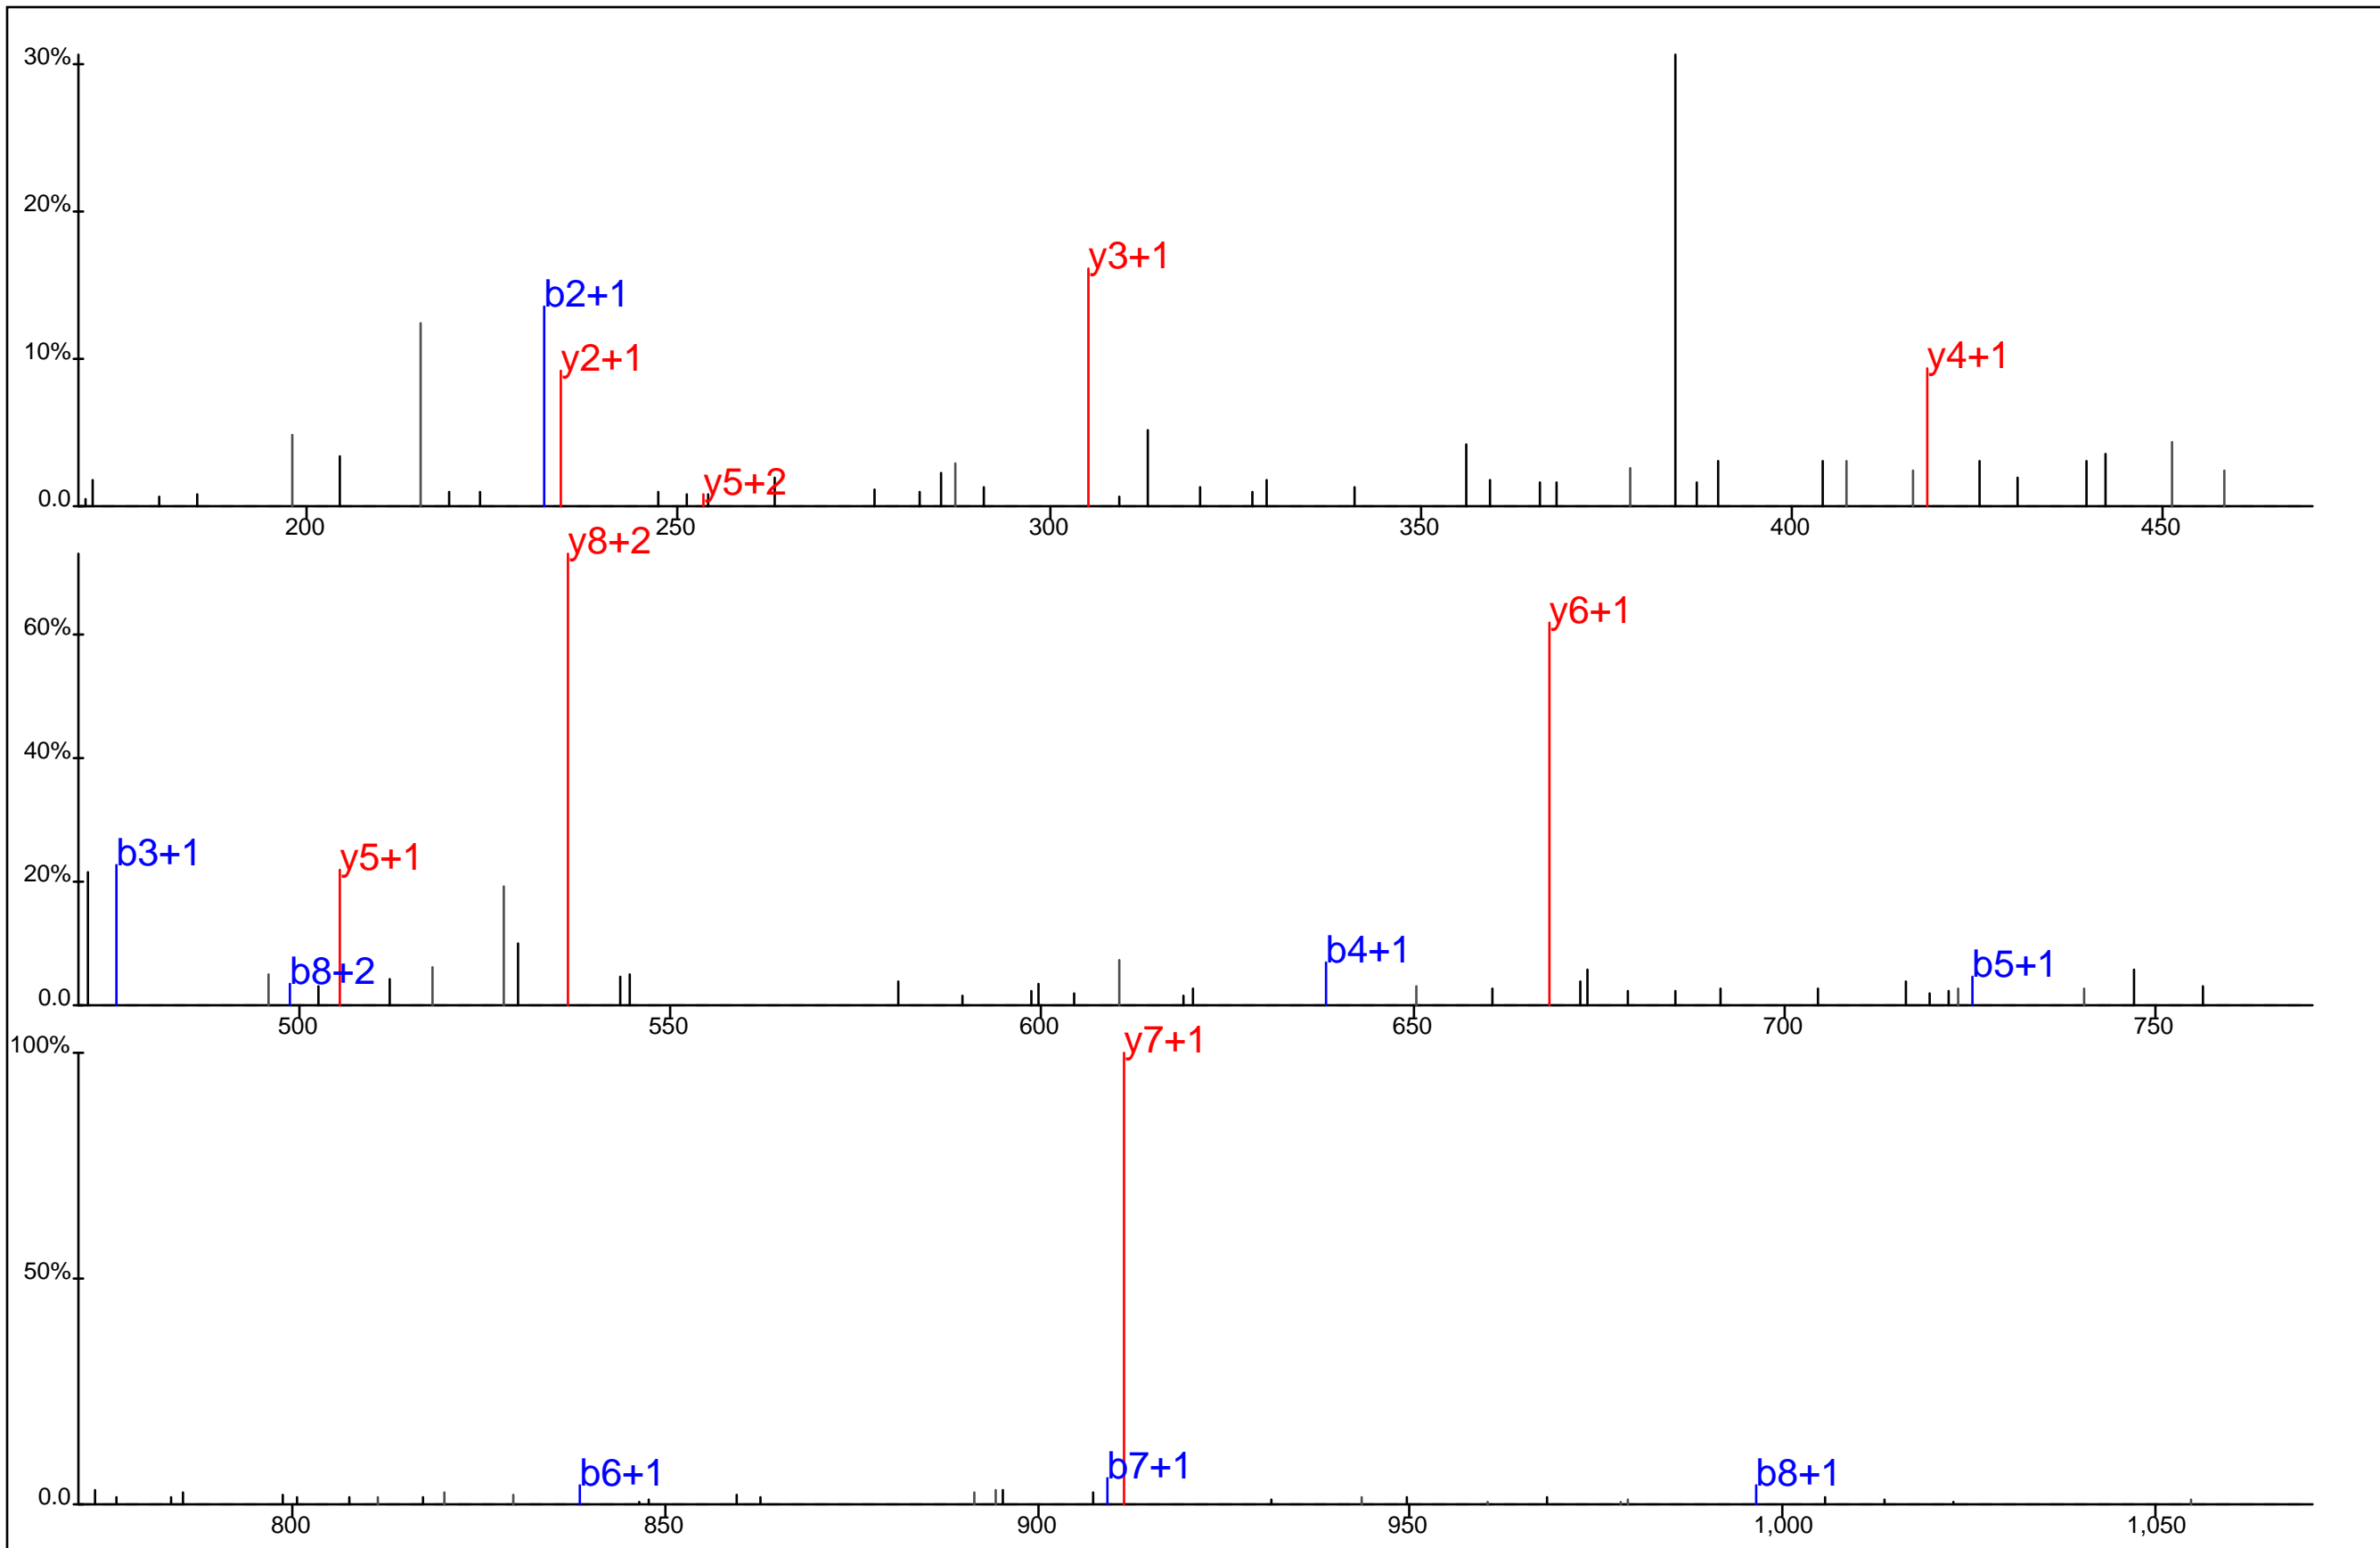

A C Y\* Y S L A S K

Protein Name: ZAP70  
 gi Accession: 0  
 Precursor Mass: 571.7342+2  
 Delta Mass: 2.062 ppm  
 XCorr: 47.62



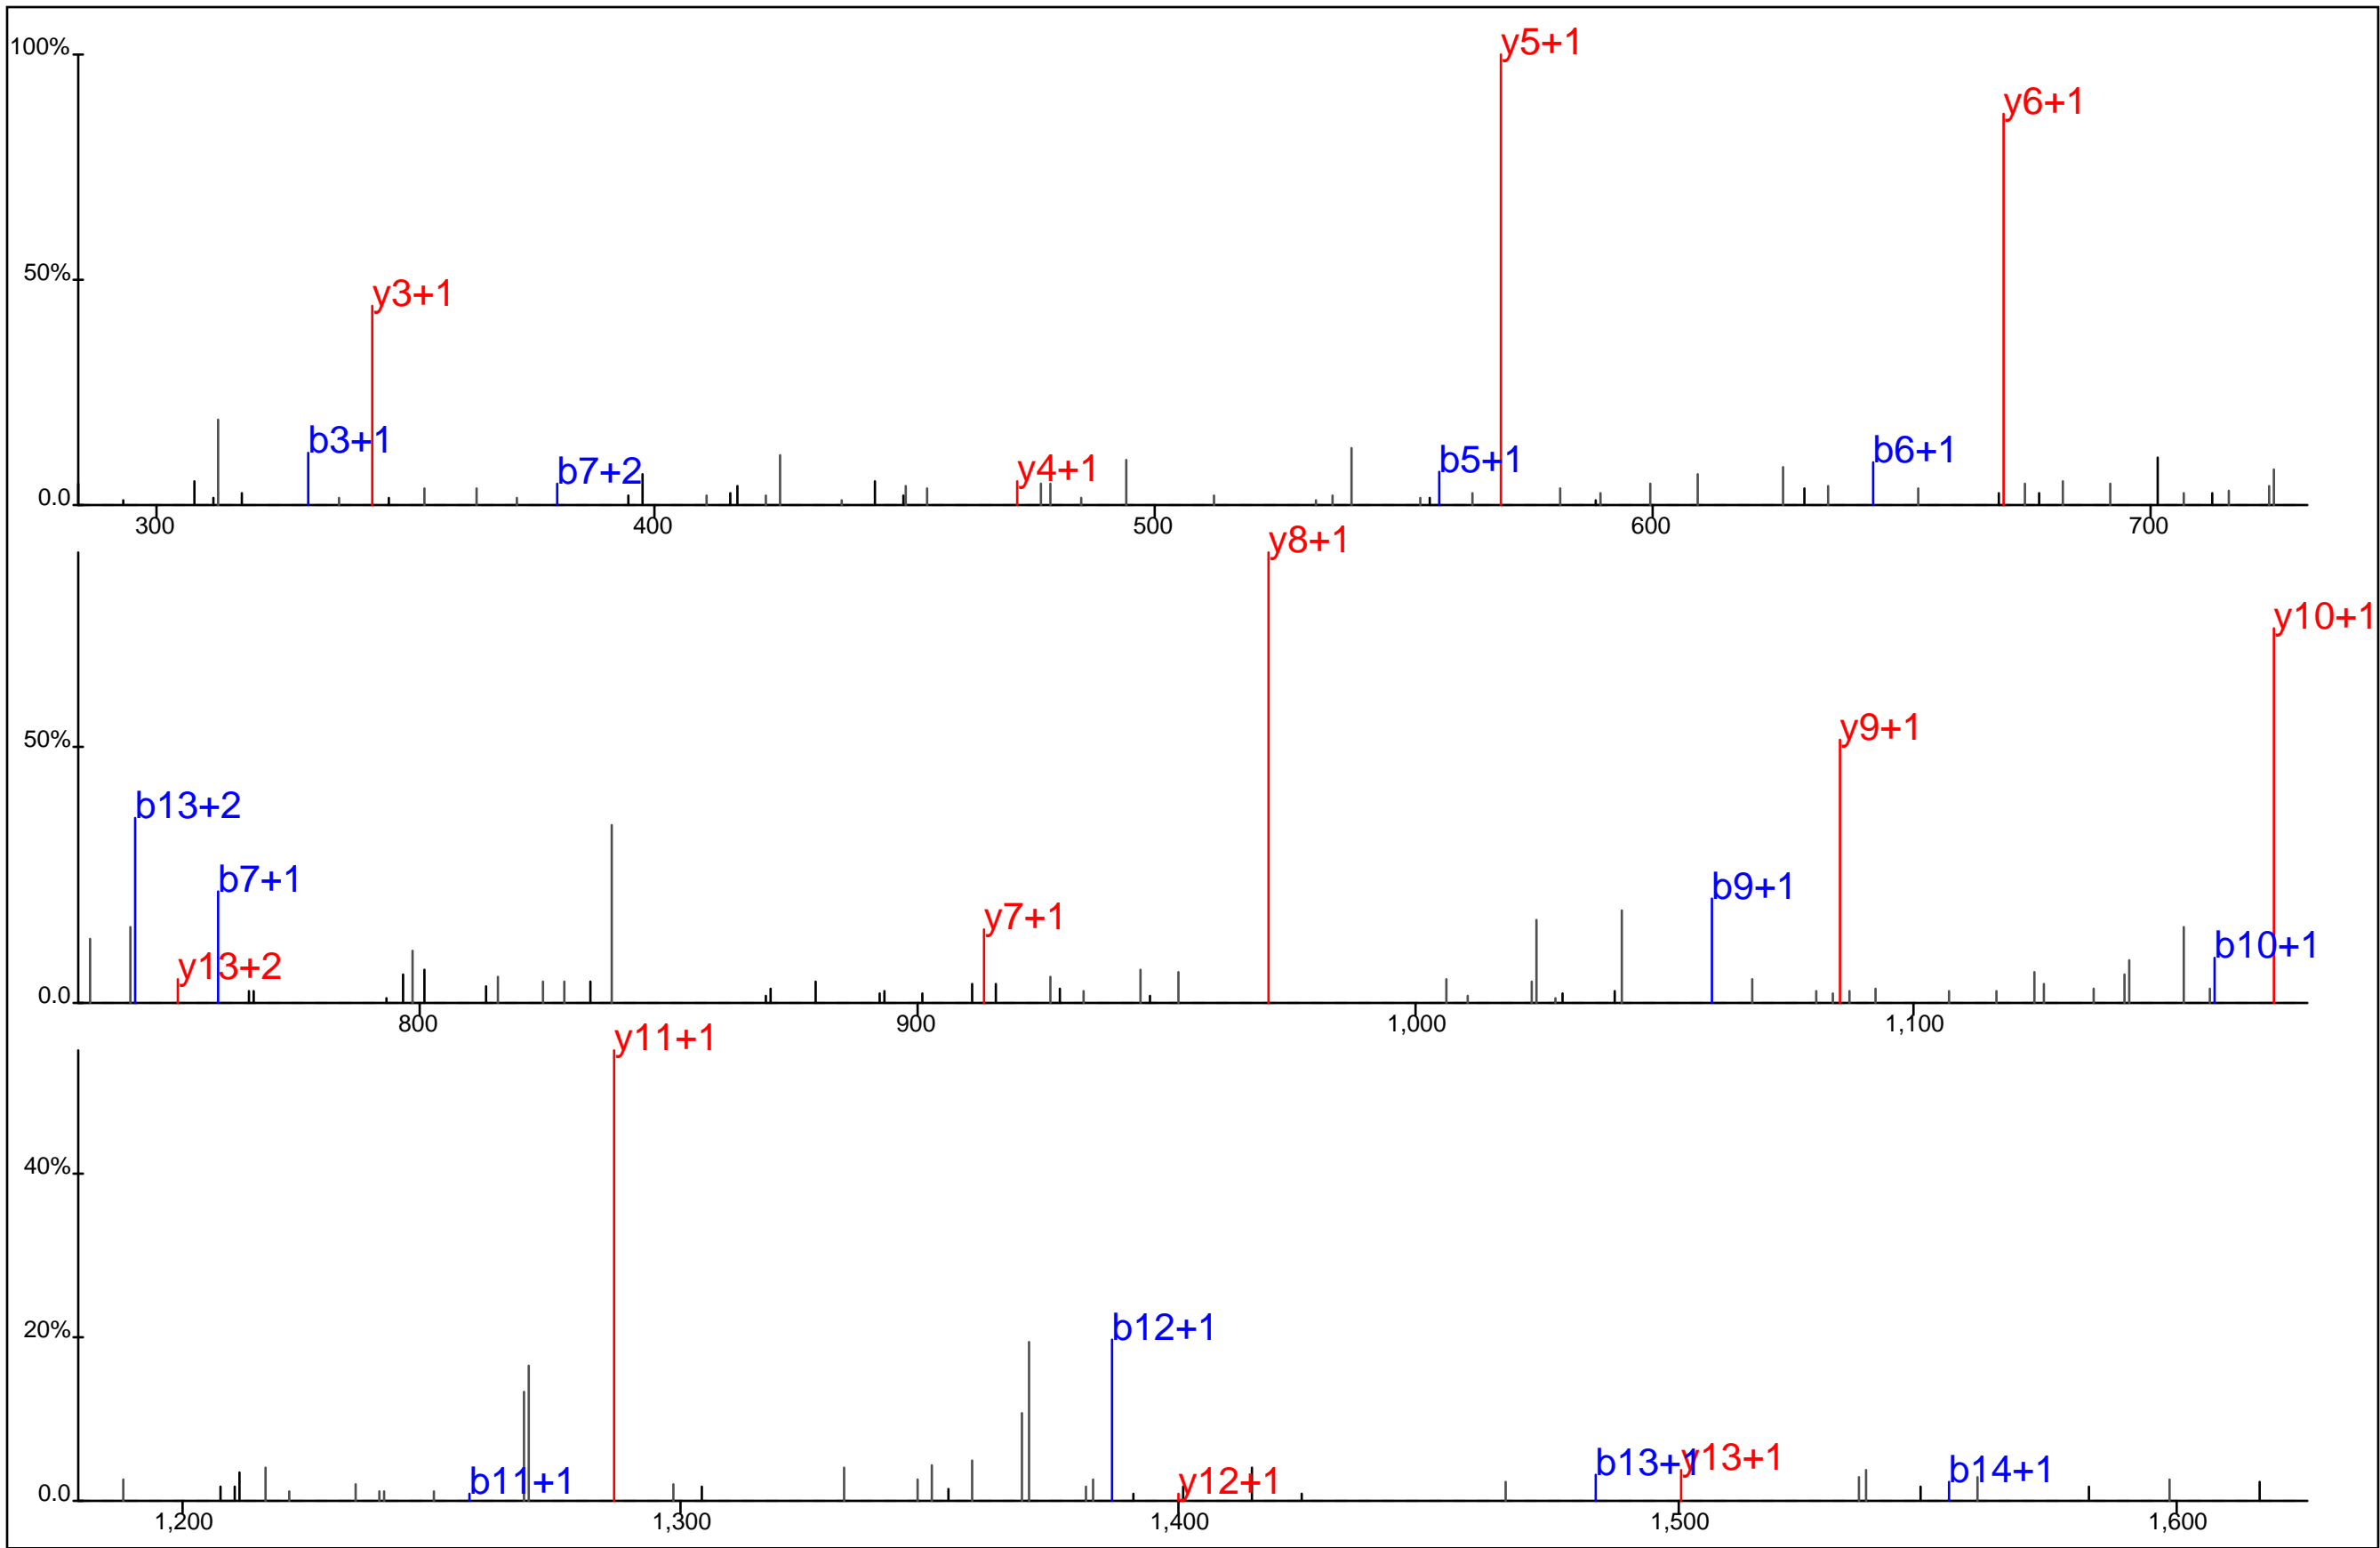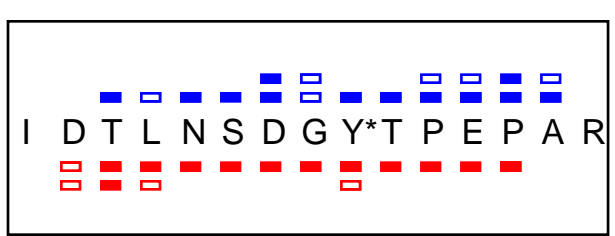

Protein Name: ZAP70  
 gi Accession: 0  
 Precursor Mass: 864.8777+2  
 Delta Mass: 0.274 ppm  
 XCorr: 78.17

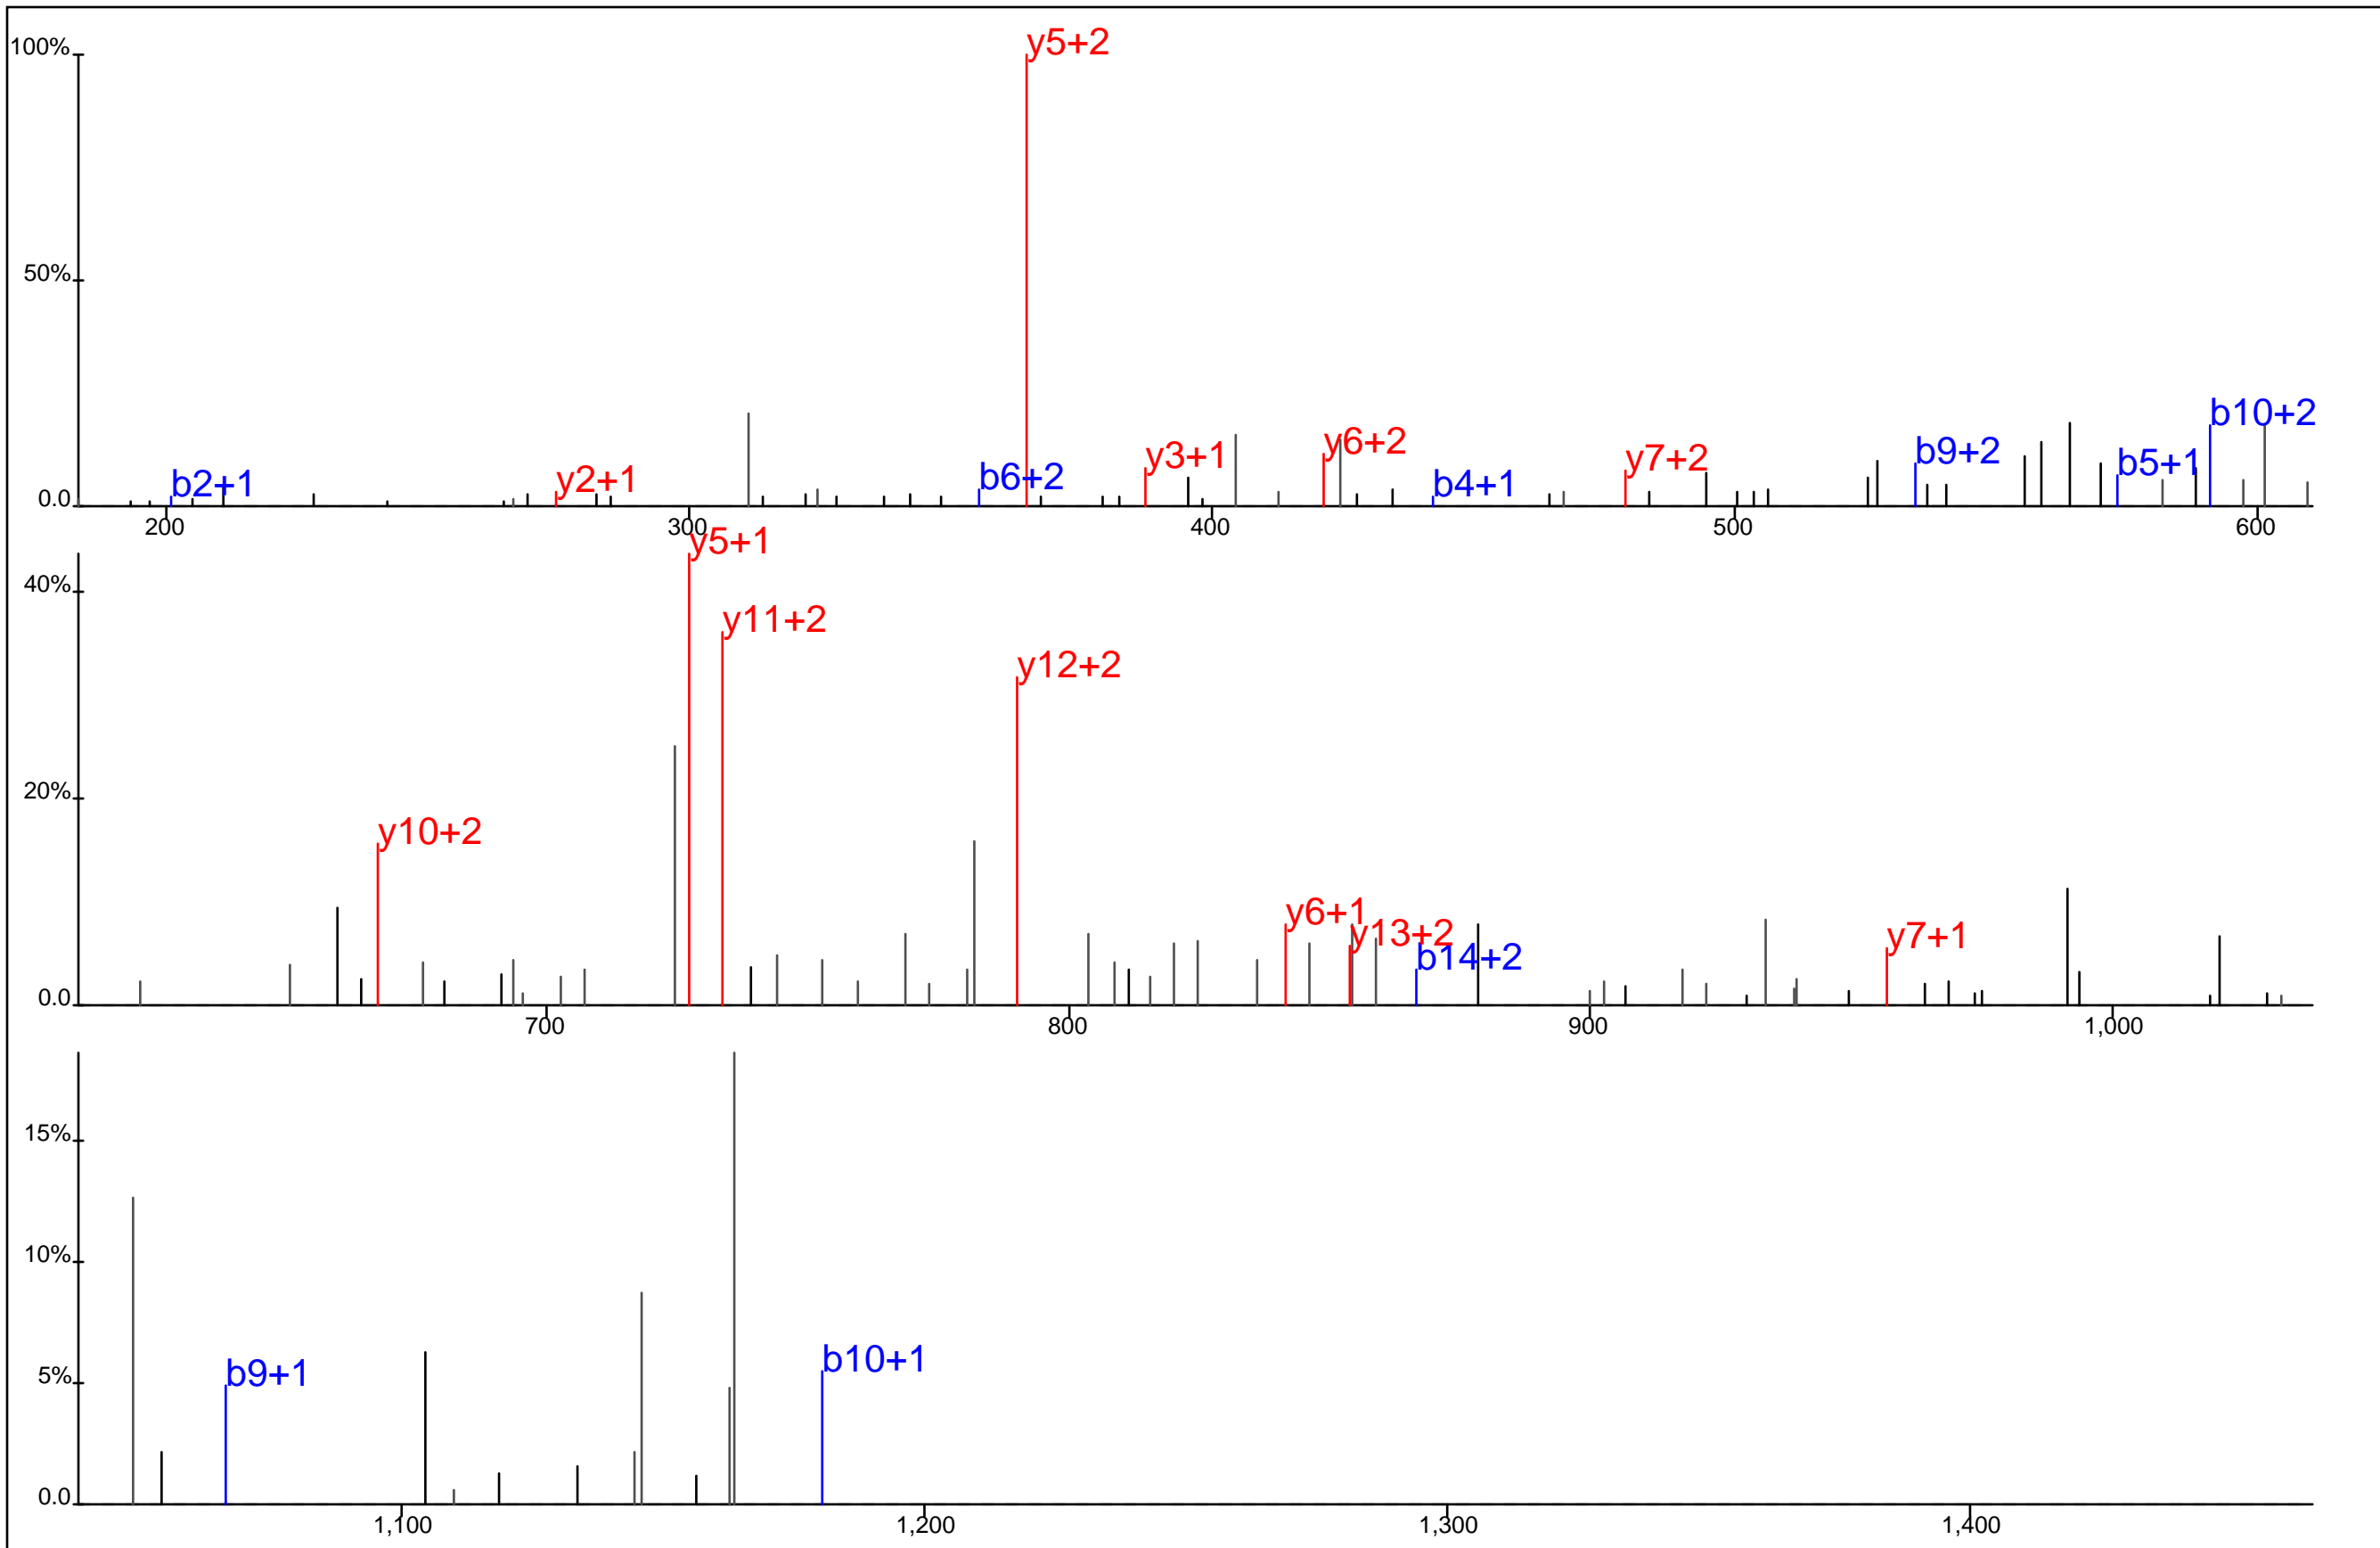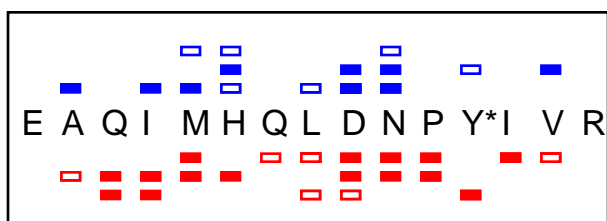

Protein Name: ZAP70  
 gi Accession: 0  
 Precursor Mass: 636.3015+3  
 Delta Mass: 1.006 ppm  
 XCorr: 31.26

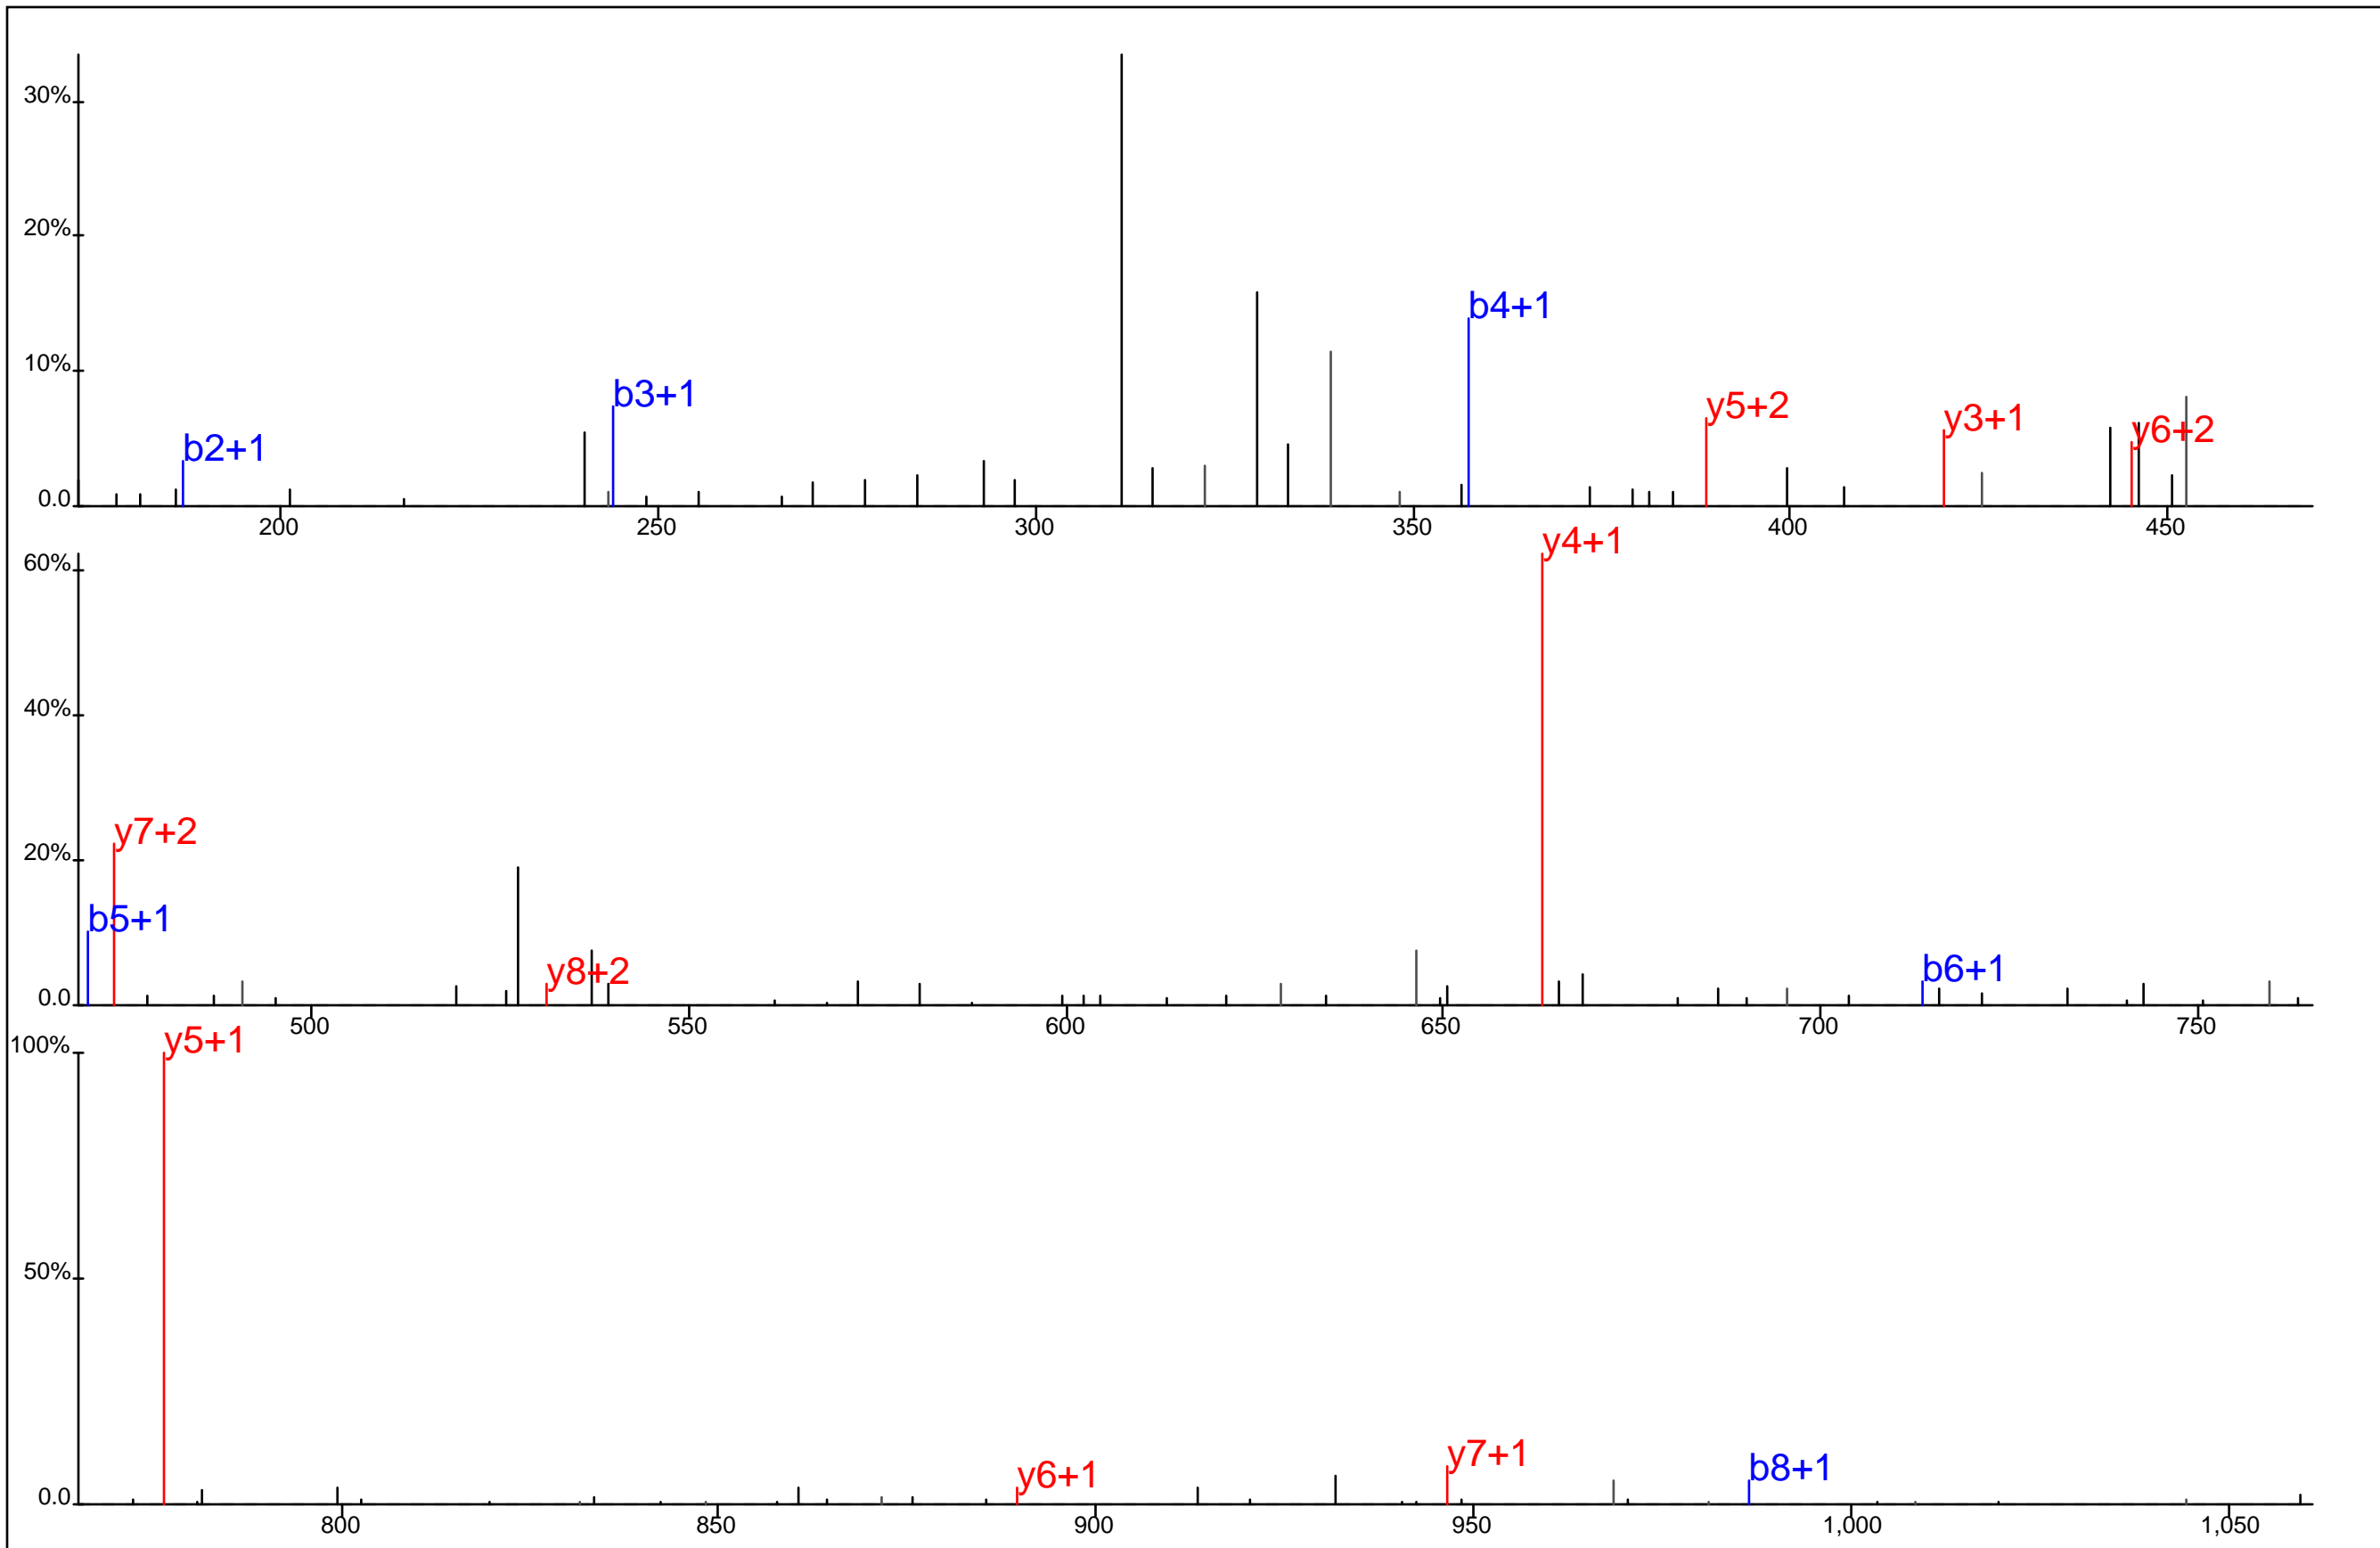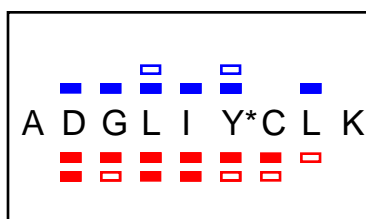

Protein Name: ZAP70  
 gi Accession: 0  
 Precursor Mass: 566.7585+2  
 Delta Mass: 0.872 ppm  
 XCorr: 36.52

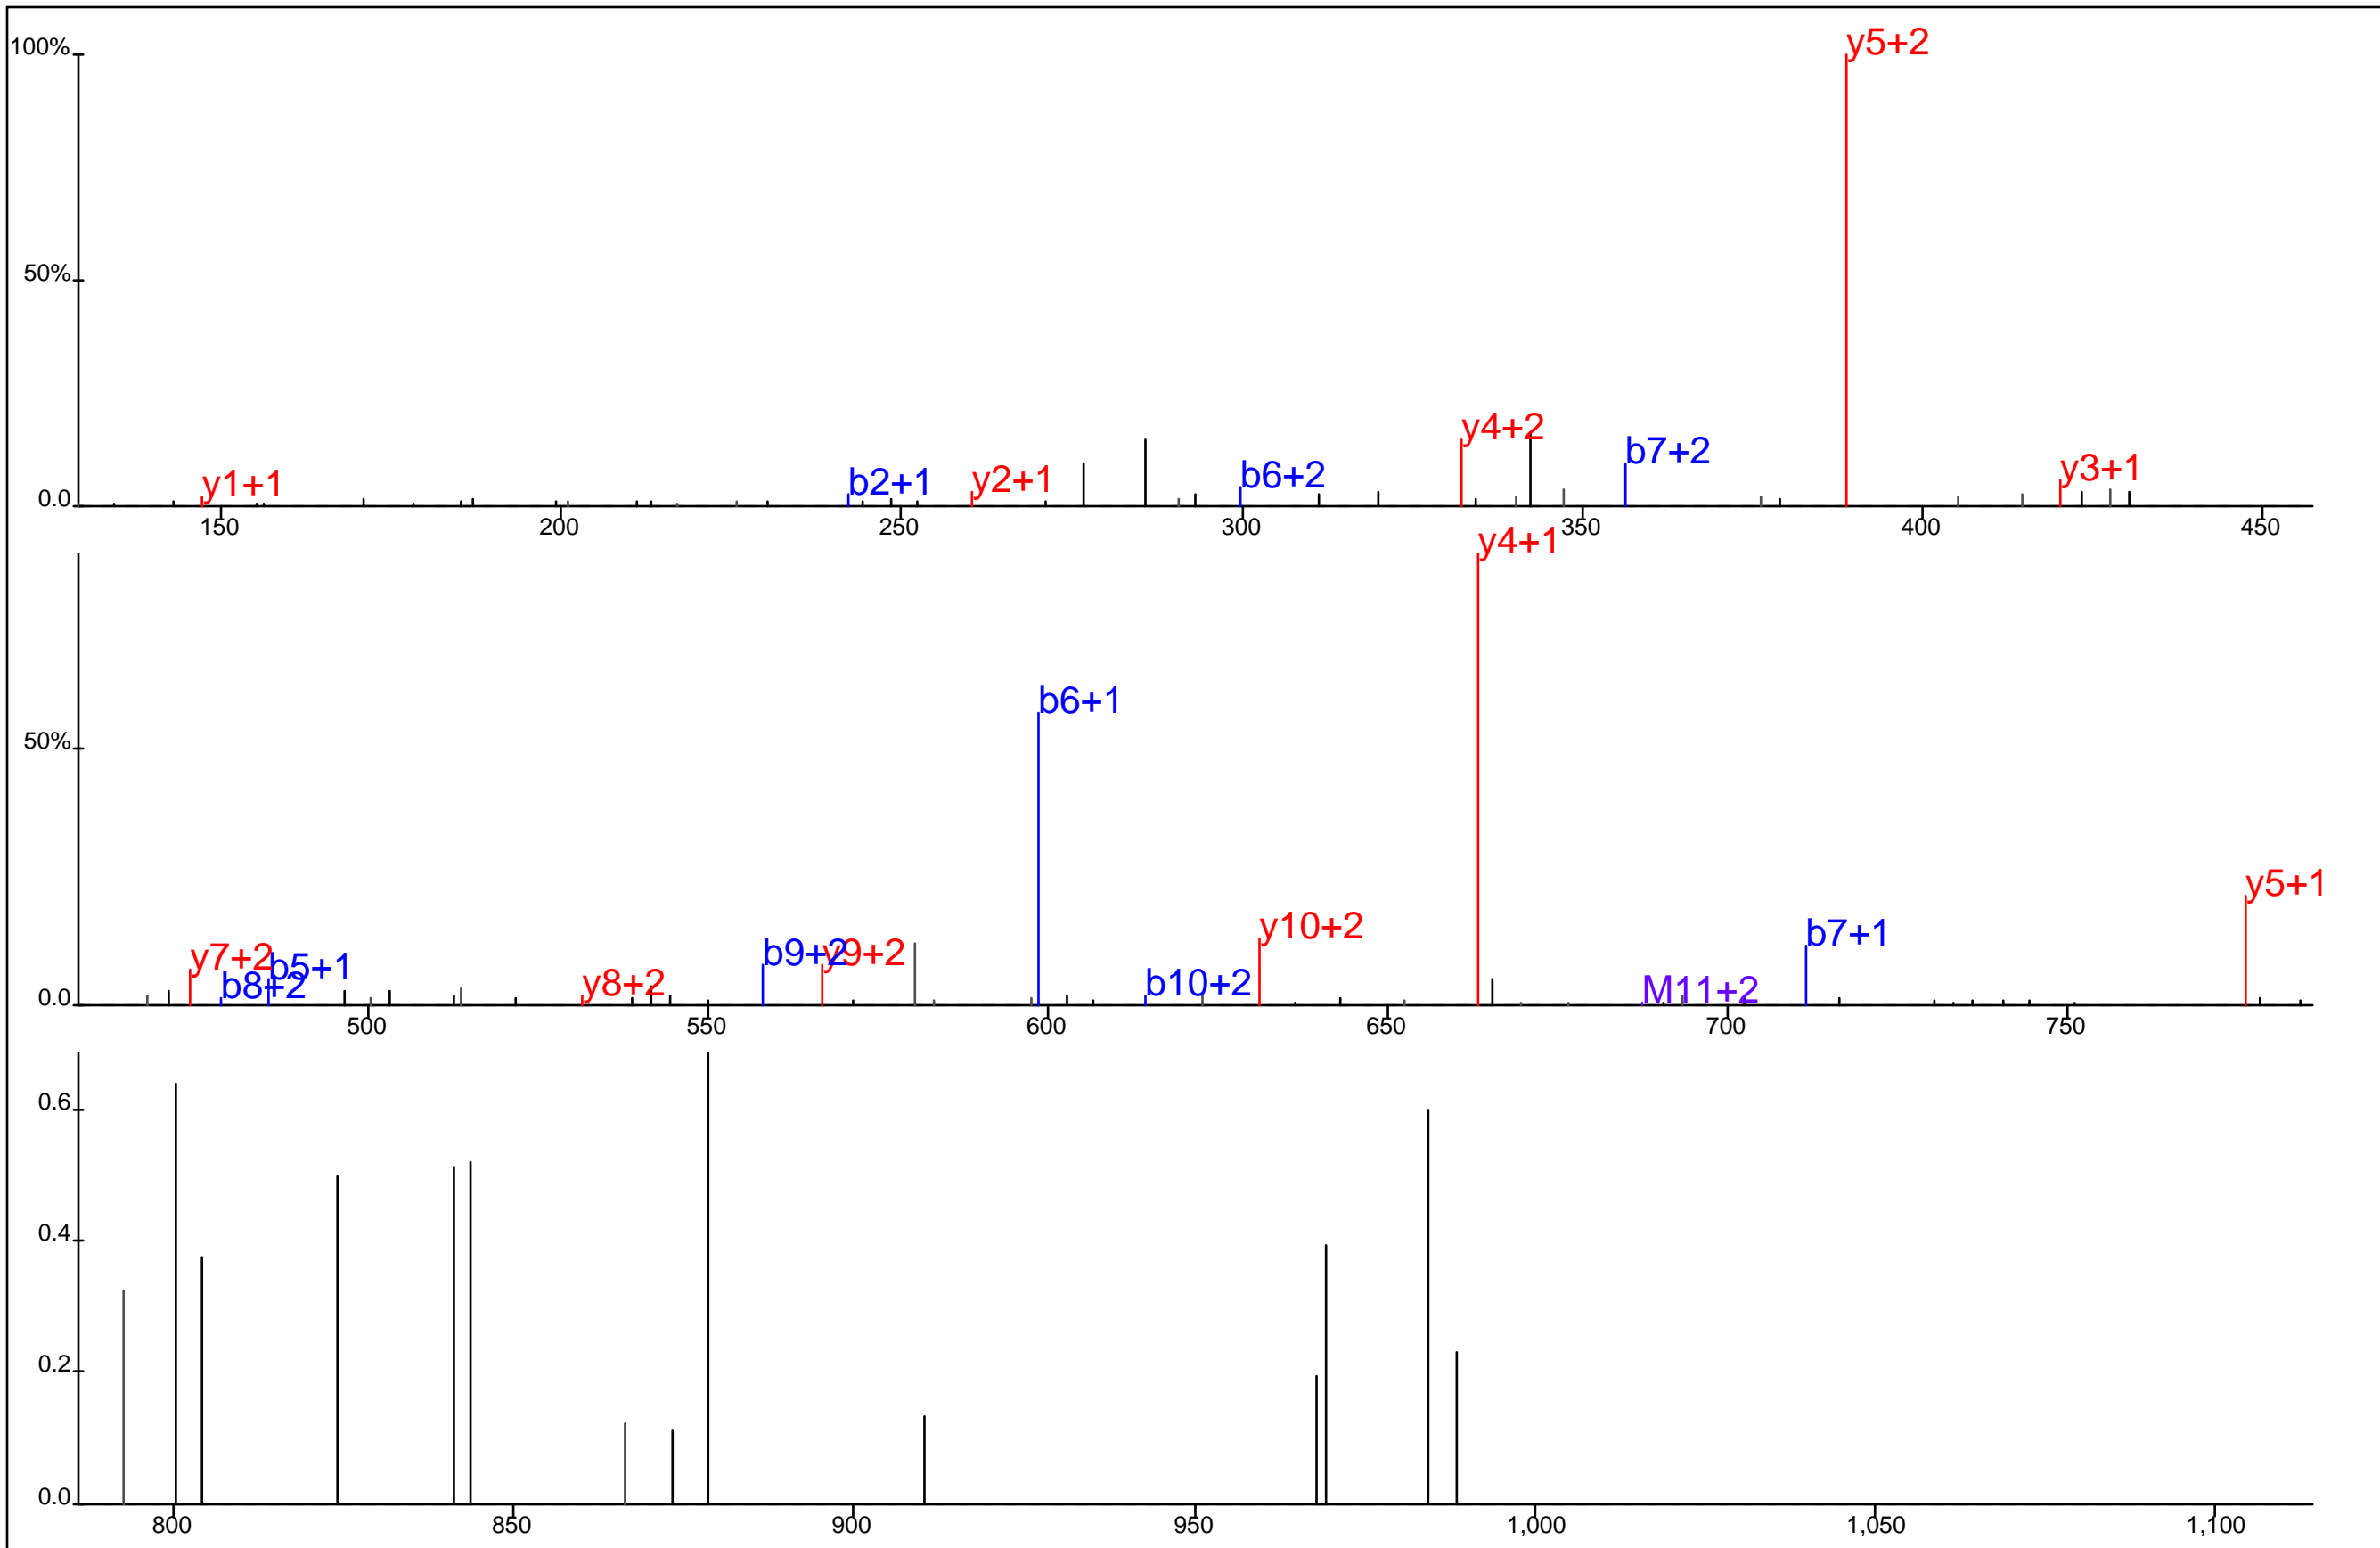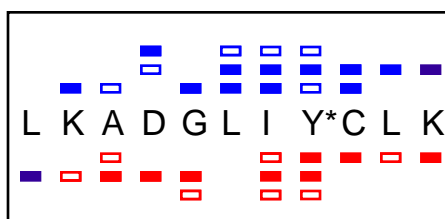

Protein Name: ZAP70  
 gi Accession: 0  
 Precursor Mass: 458.5674+3  
 Delta Mass: 1.487 ppm  
 XCorr: 26.02





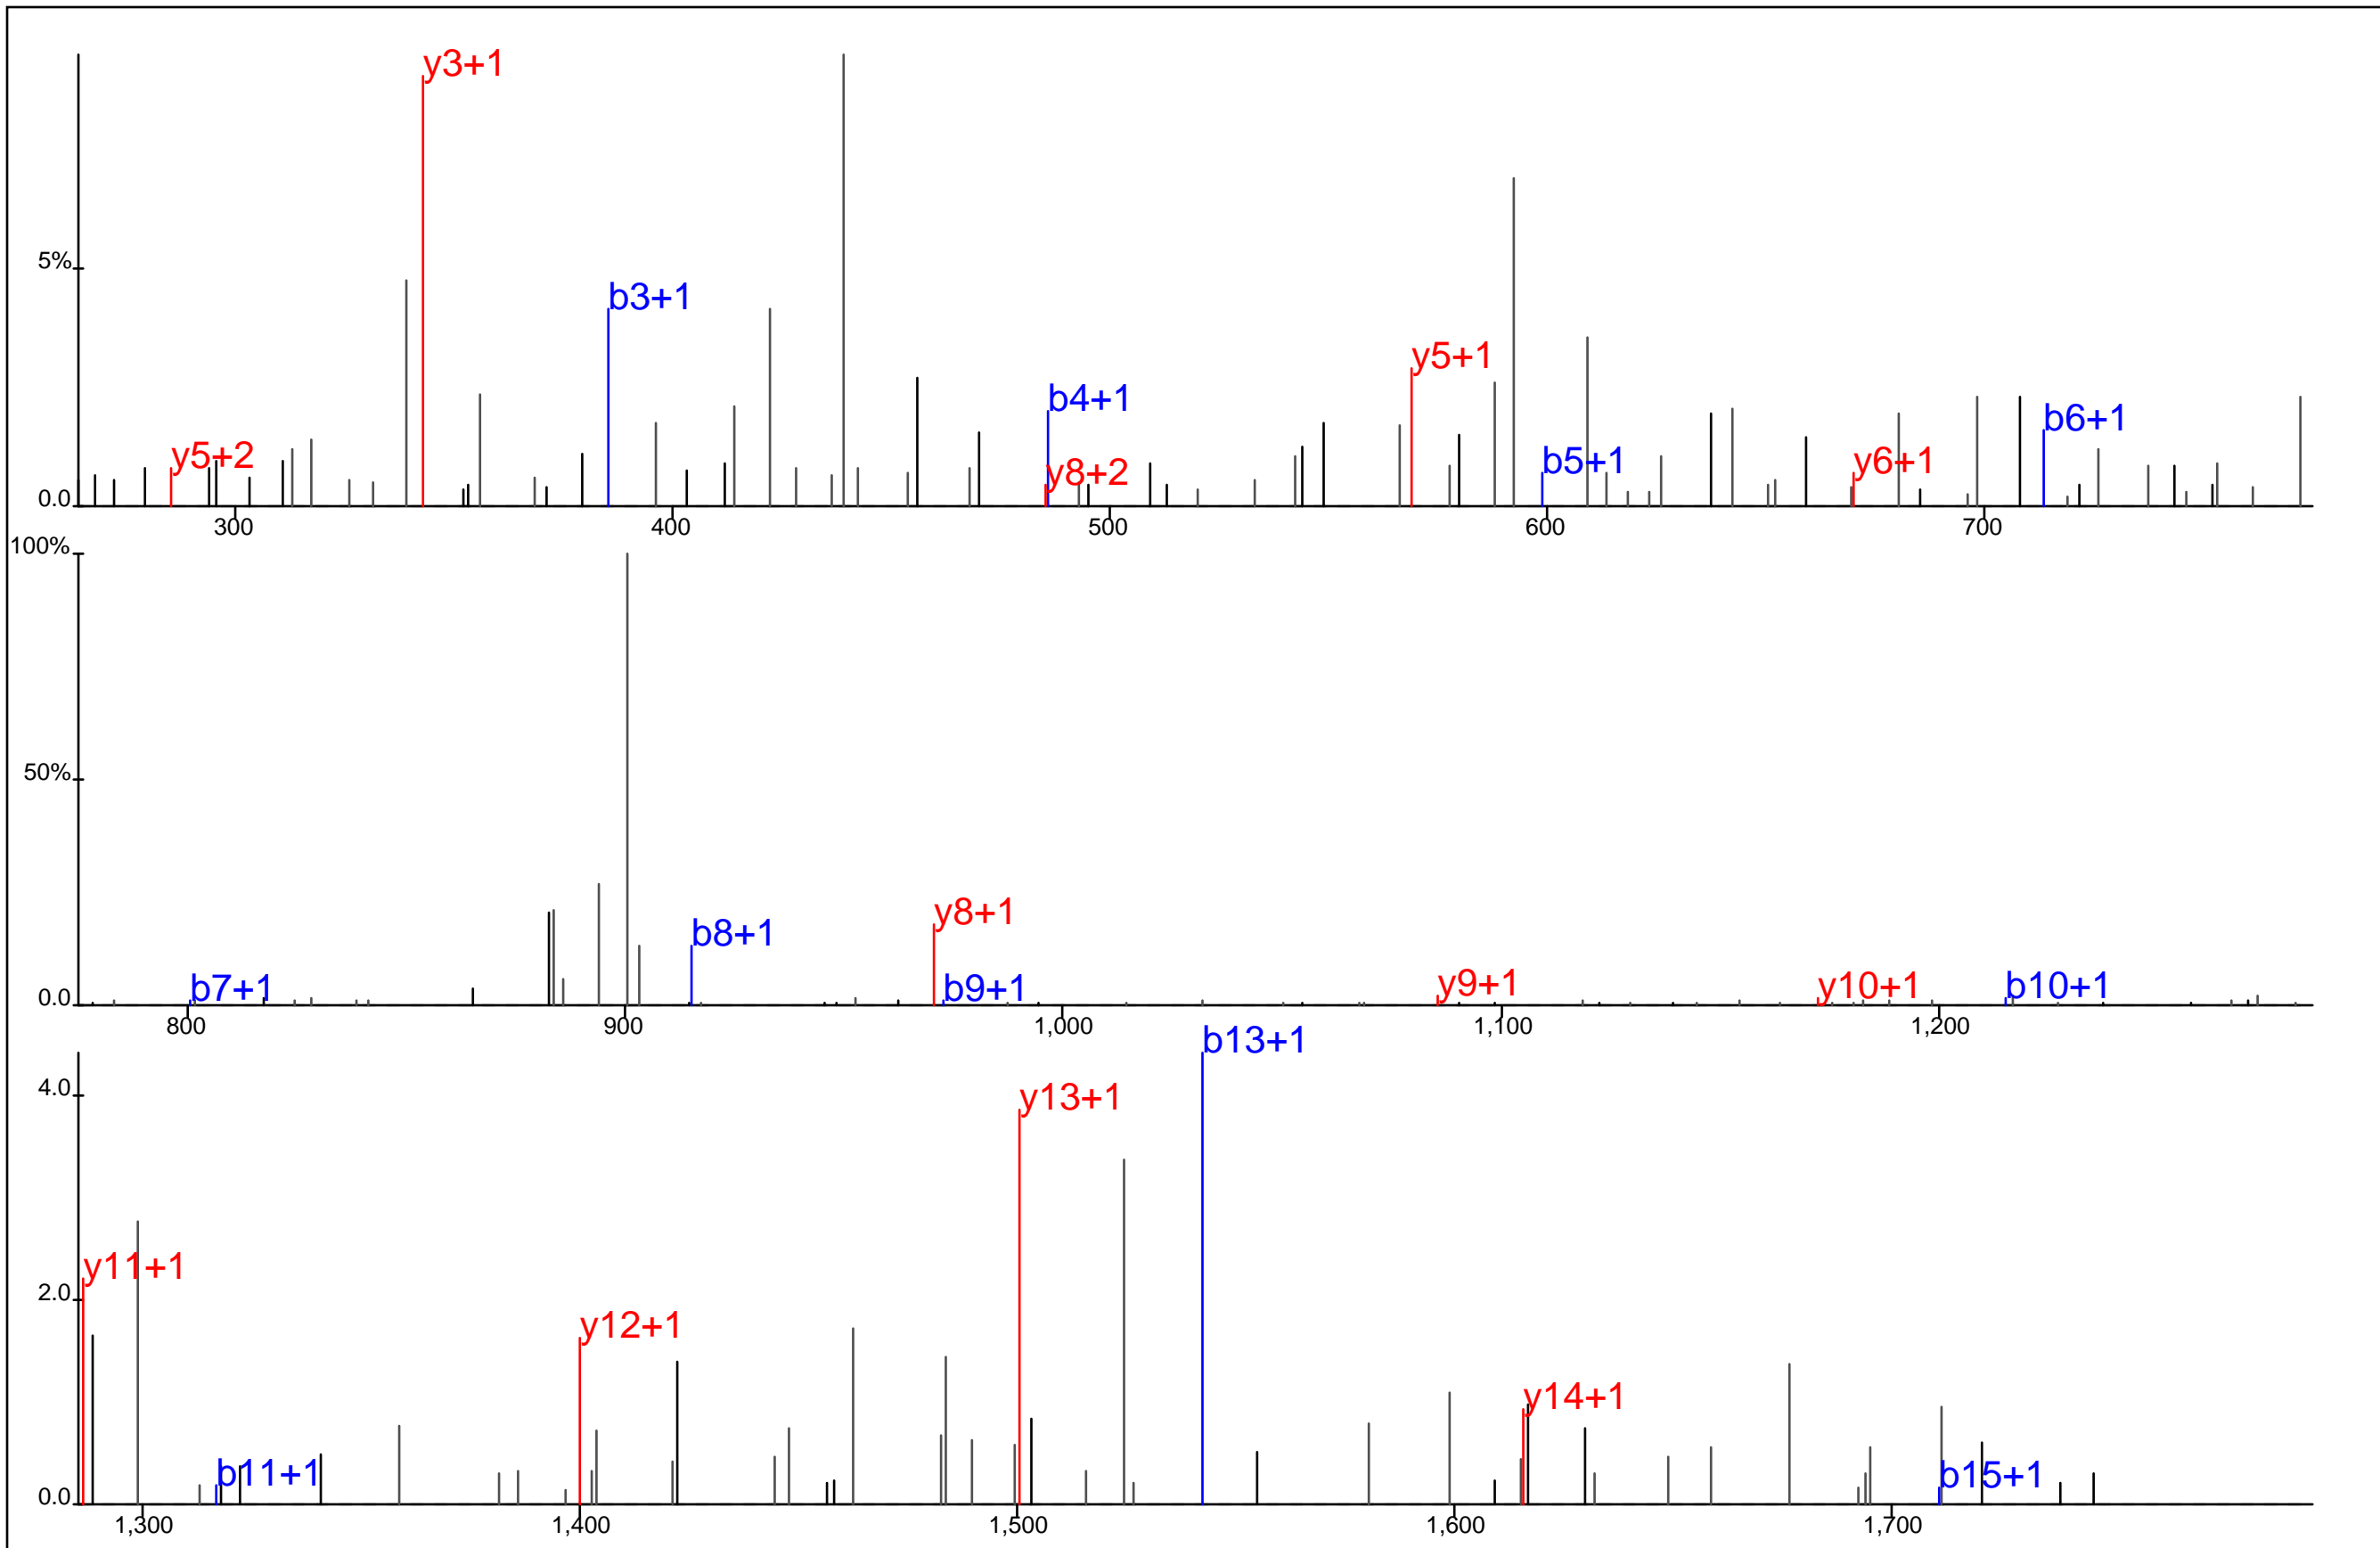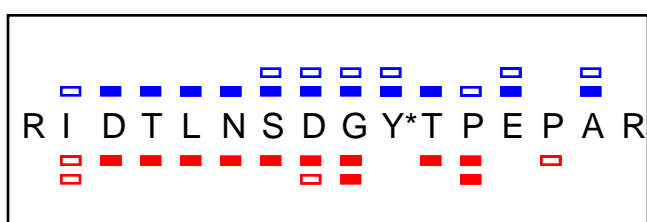

Protein Name: ZAP70  
 gi Accession: 0  
 Precursor Mass: 942.9294+2  
 Delta Mass: 1.467 ppm  
 XCorr: 40.65

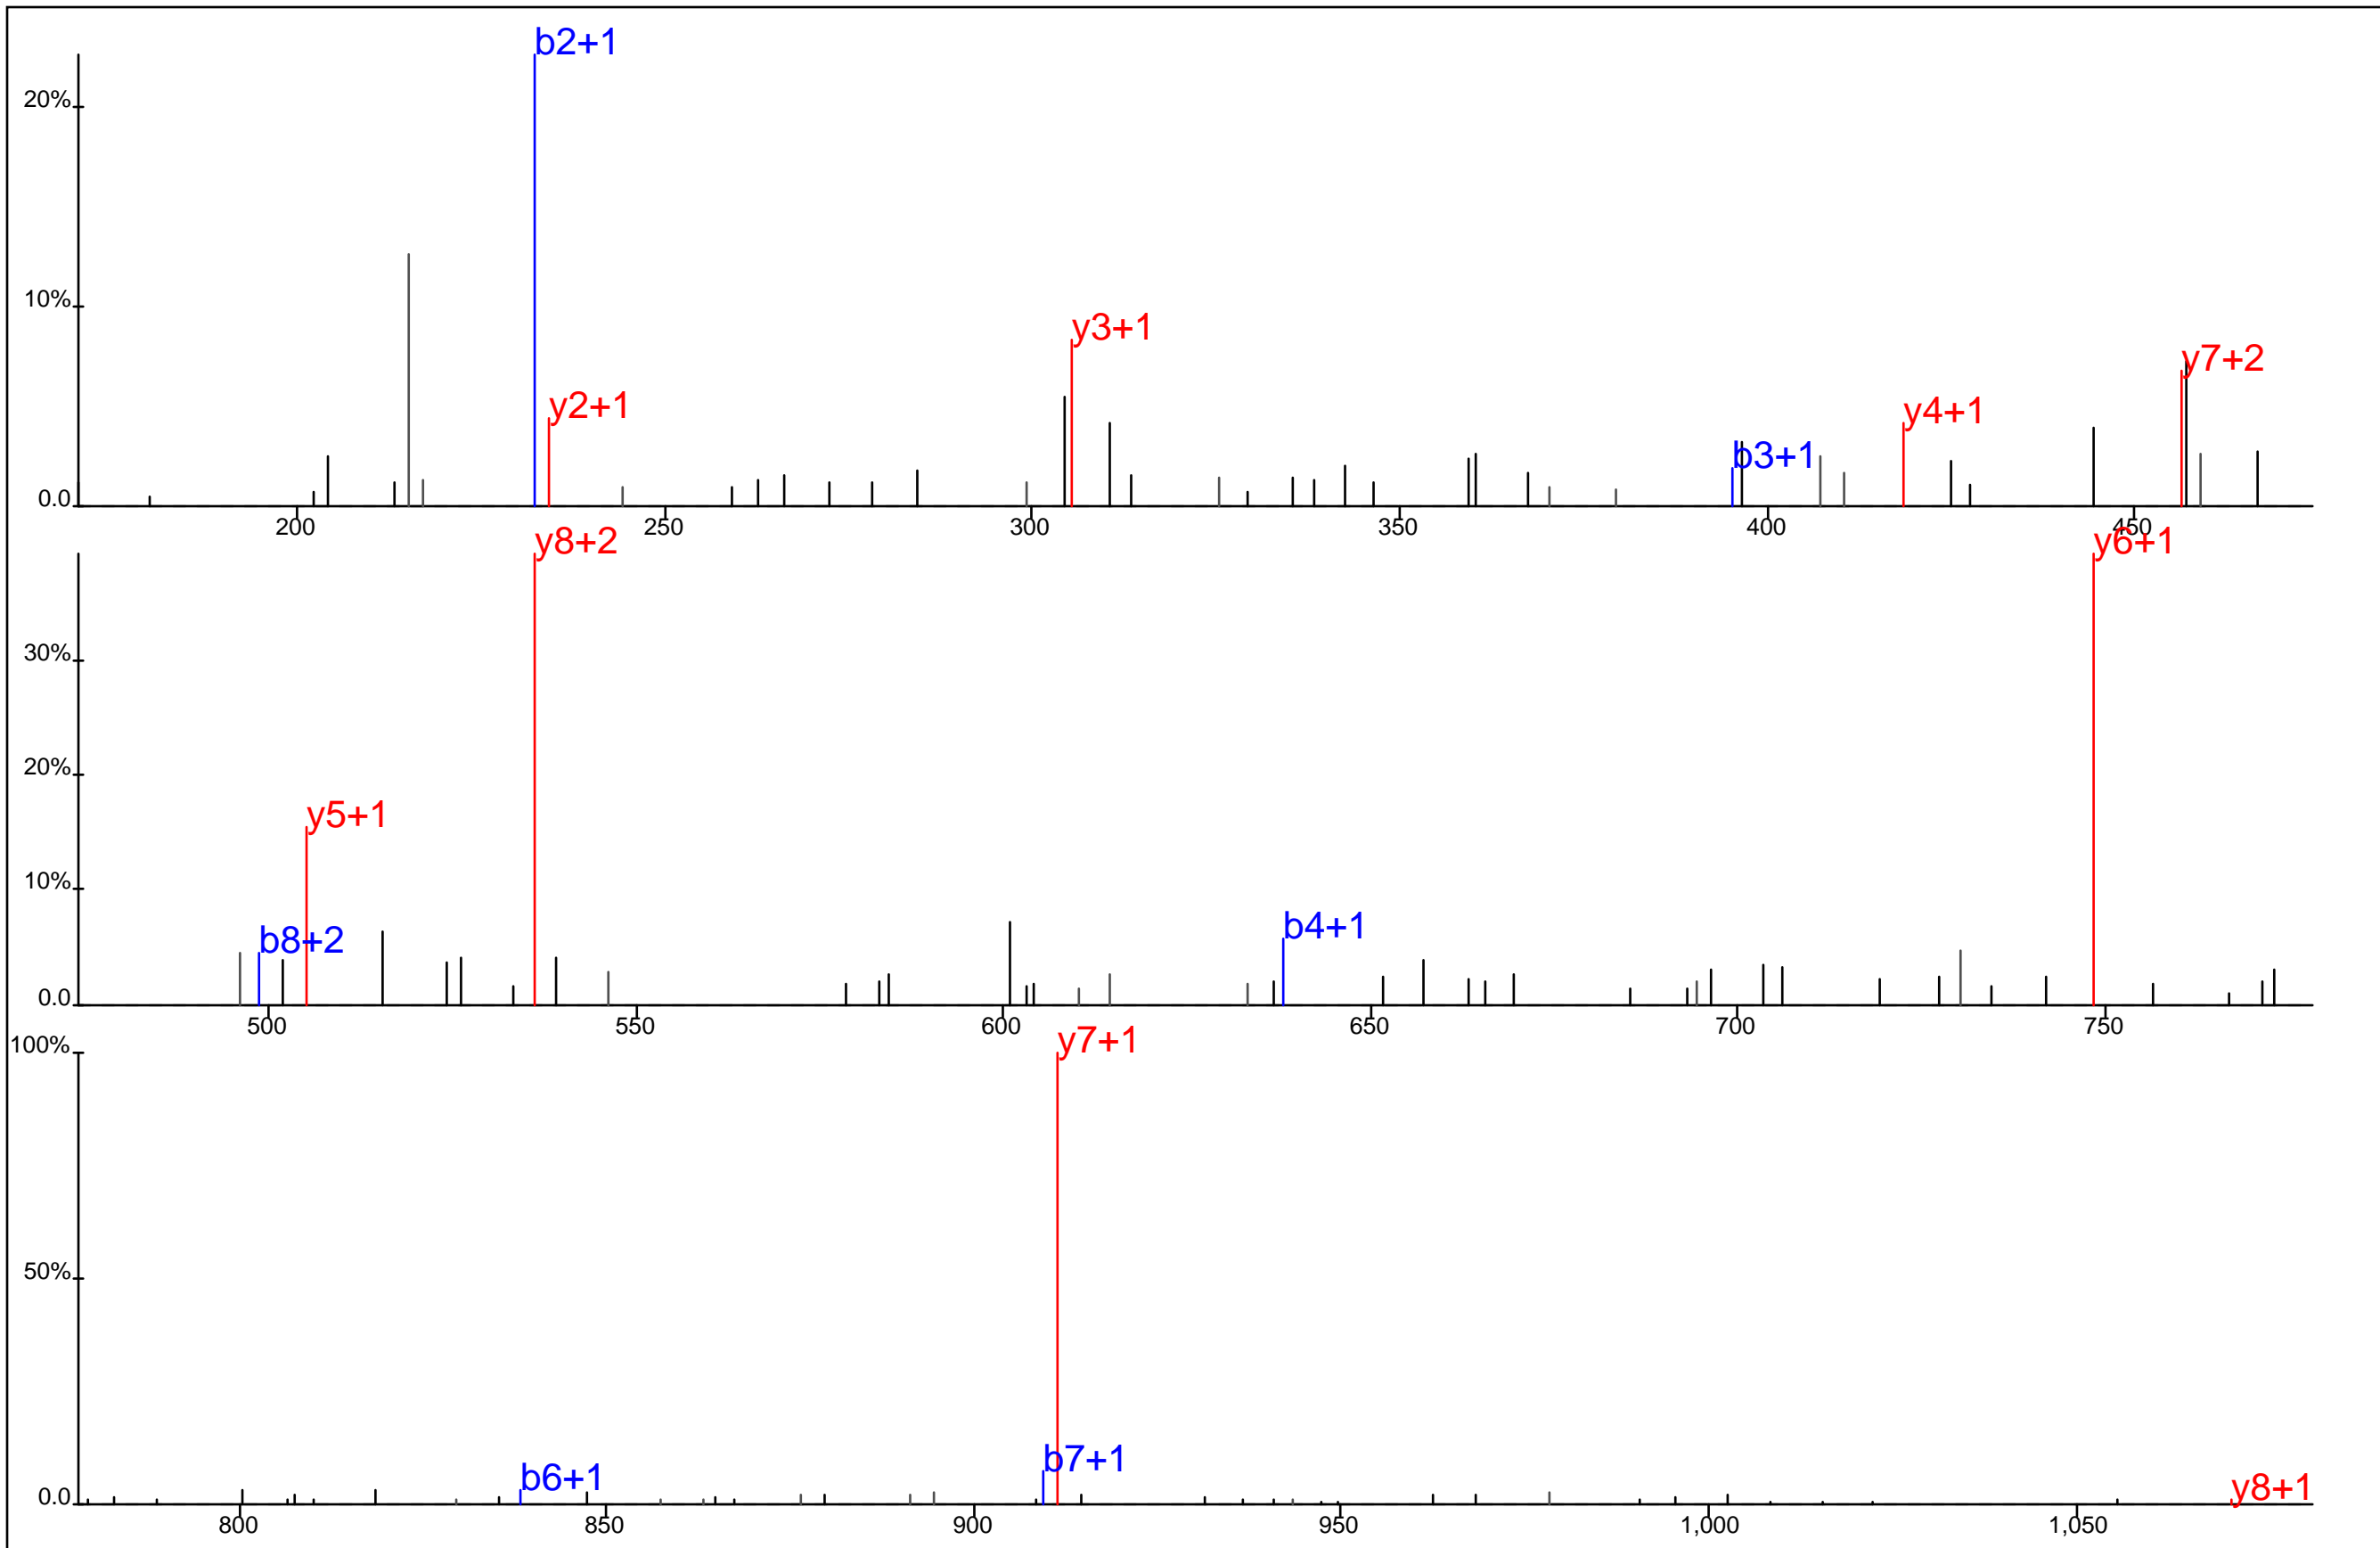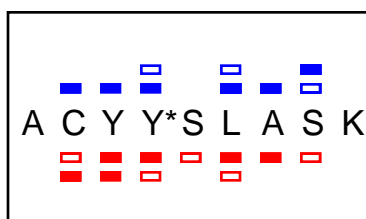

Protein Name: ZAP70  
 gi Accession: 0  
 Precursor Mass: 571.7333+2  
 Delta Mass: 0.565 ppm  
 XCorr: 42.75

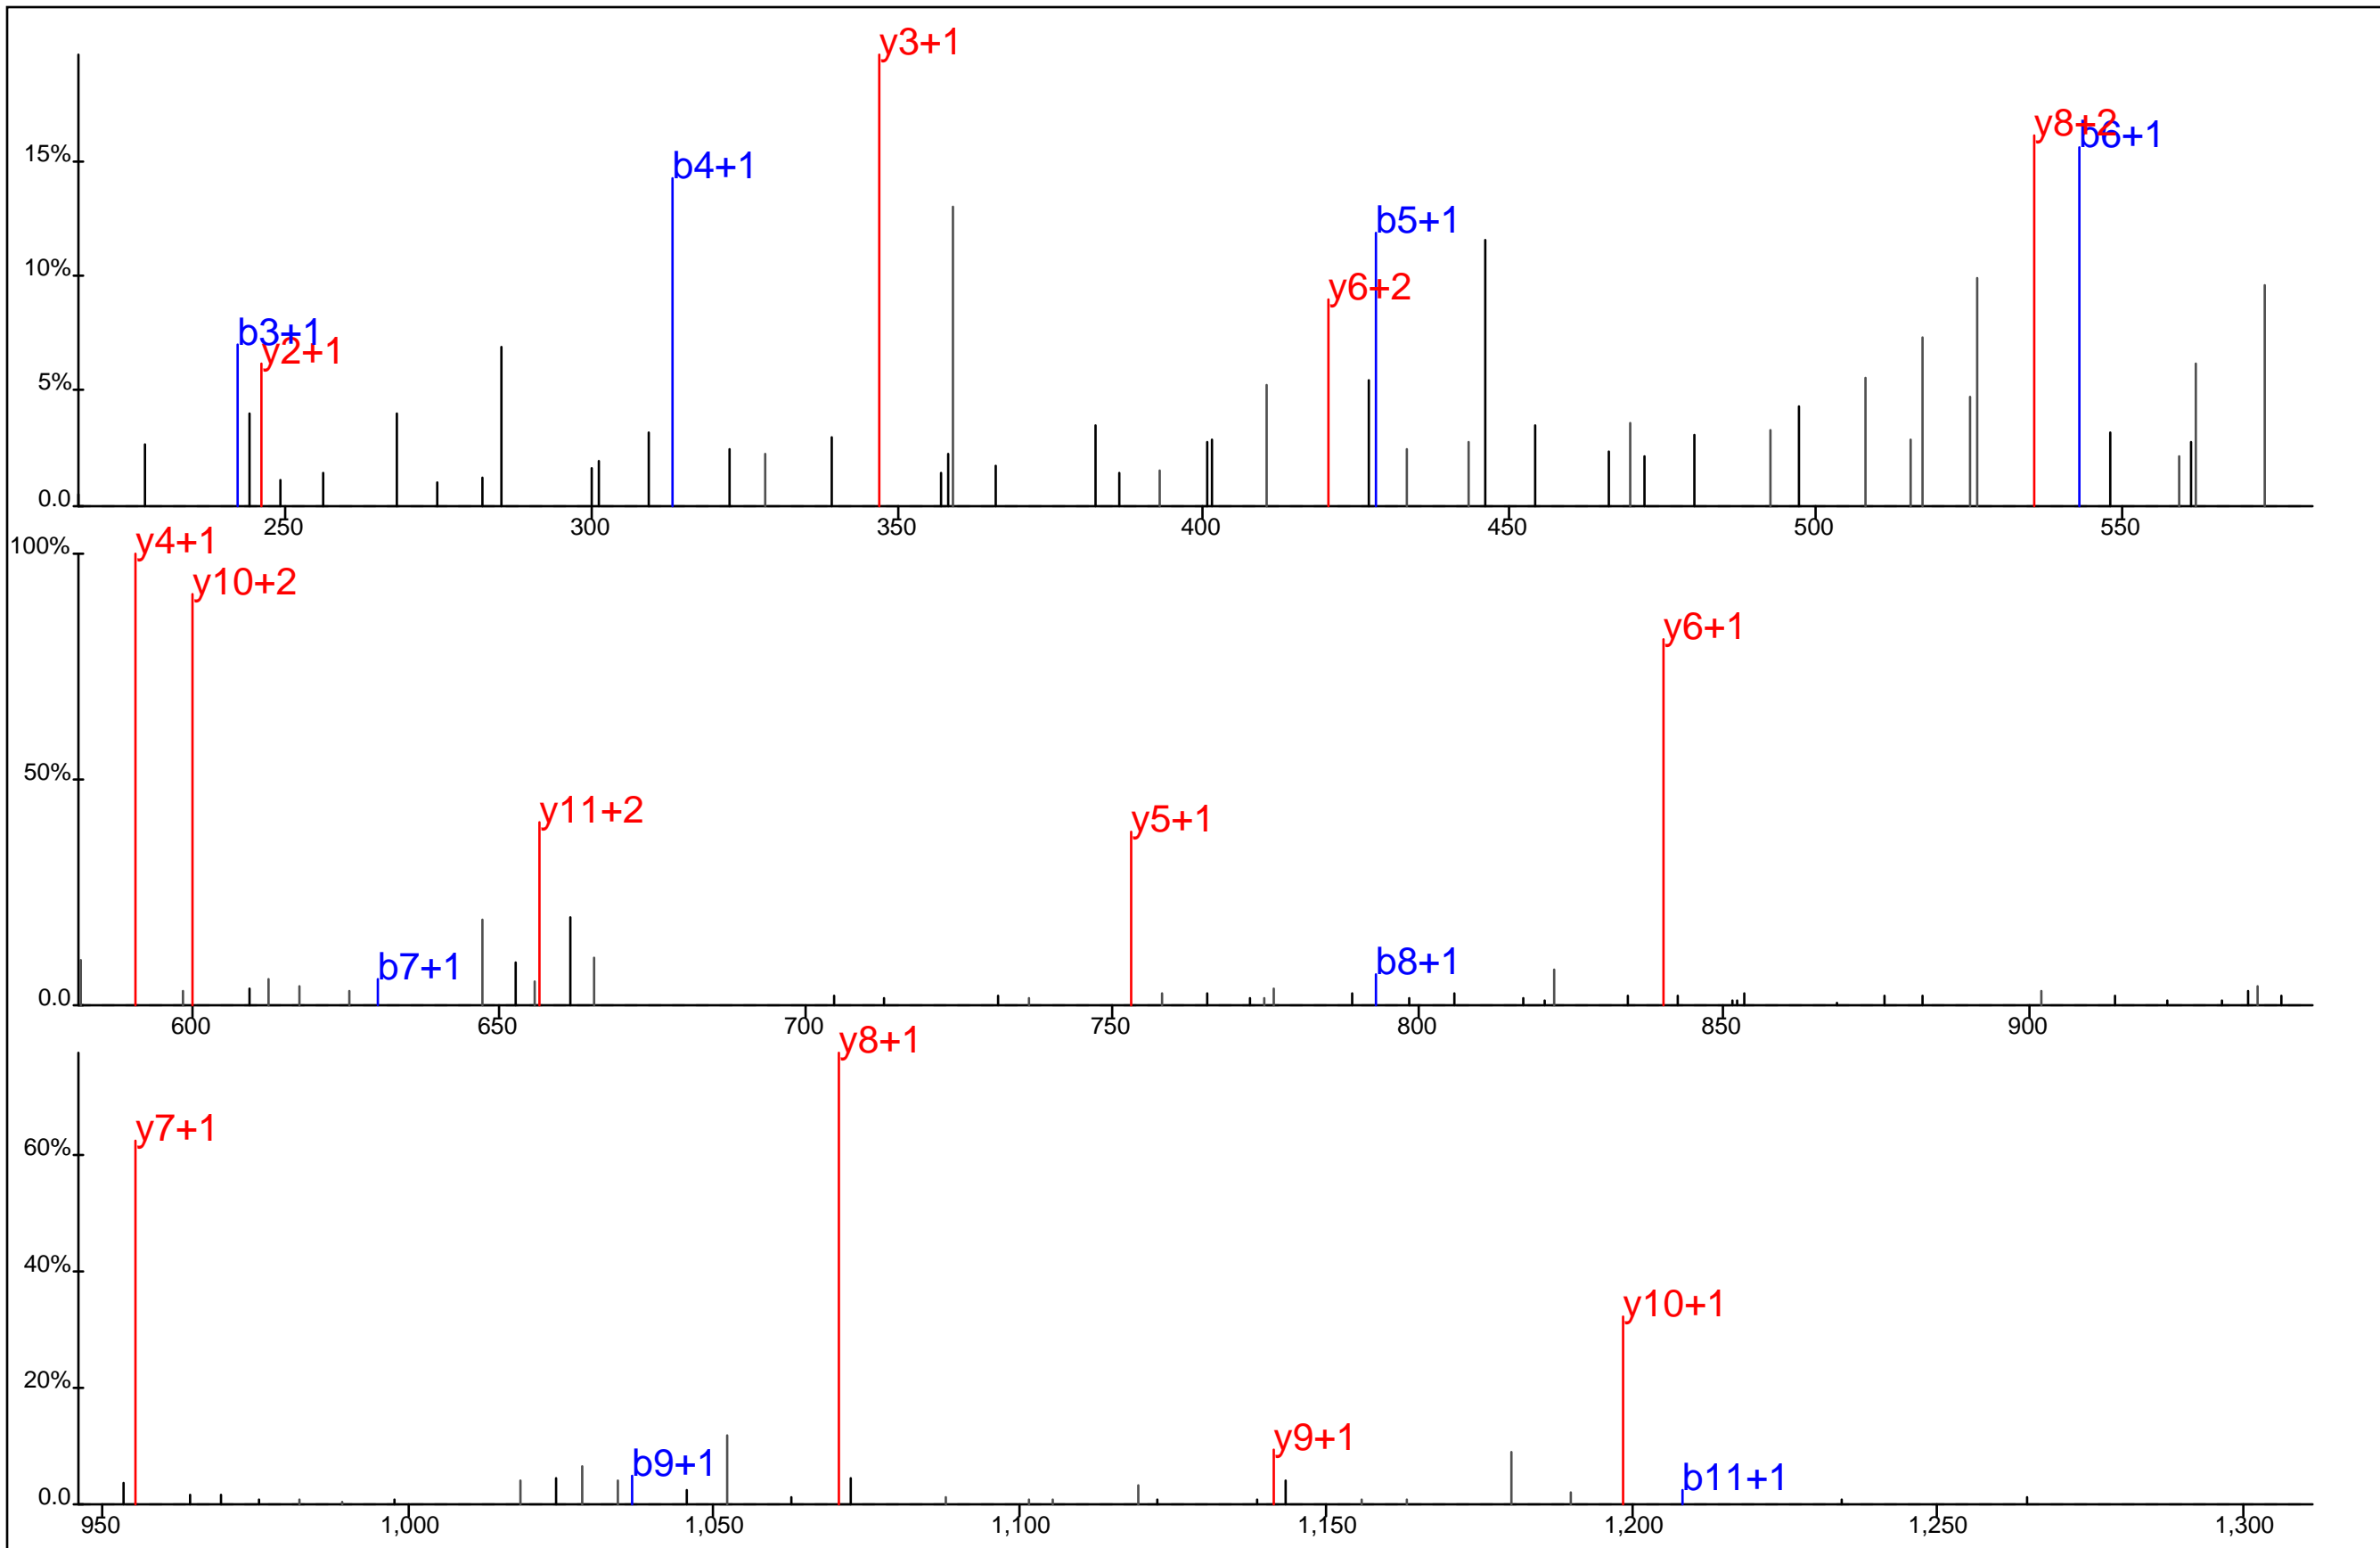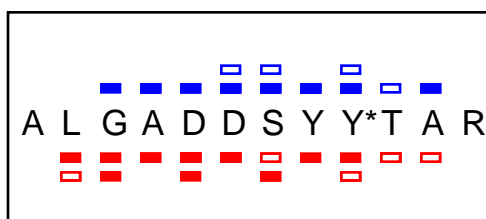

Protein Name: ZAP70  
 gi Accession: 0  
 Precursor Mass: 691.7851+2  
 Delta Mass: 0.392 ppm  
 XCorr: 82.96

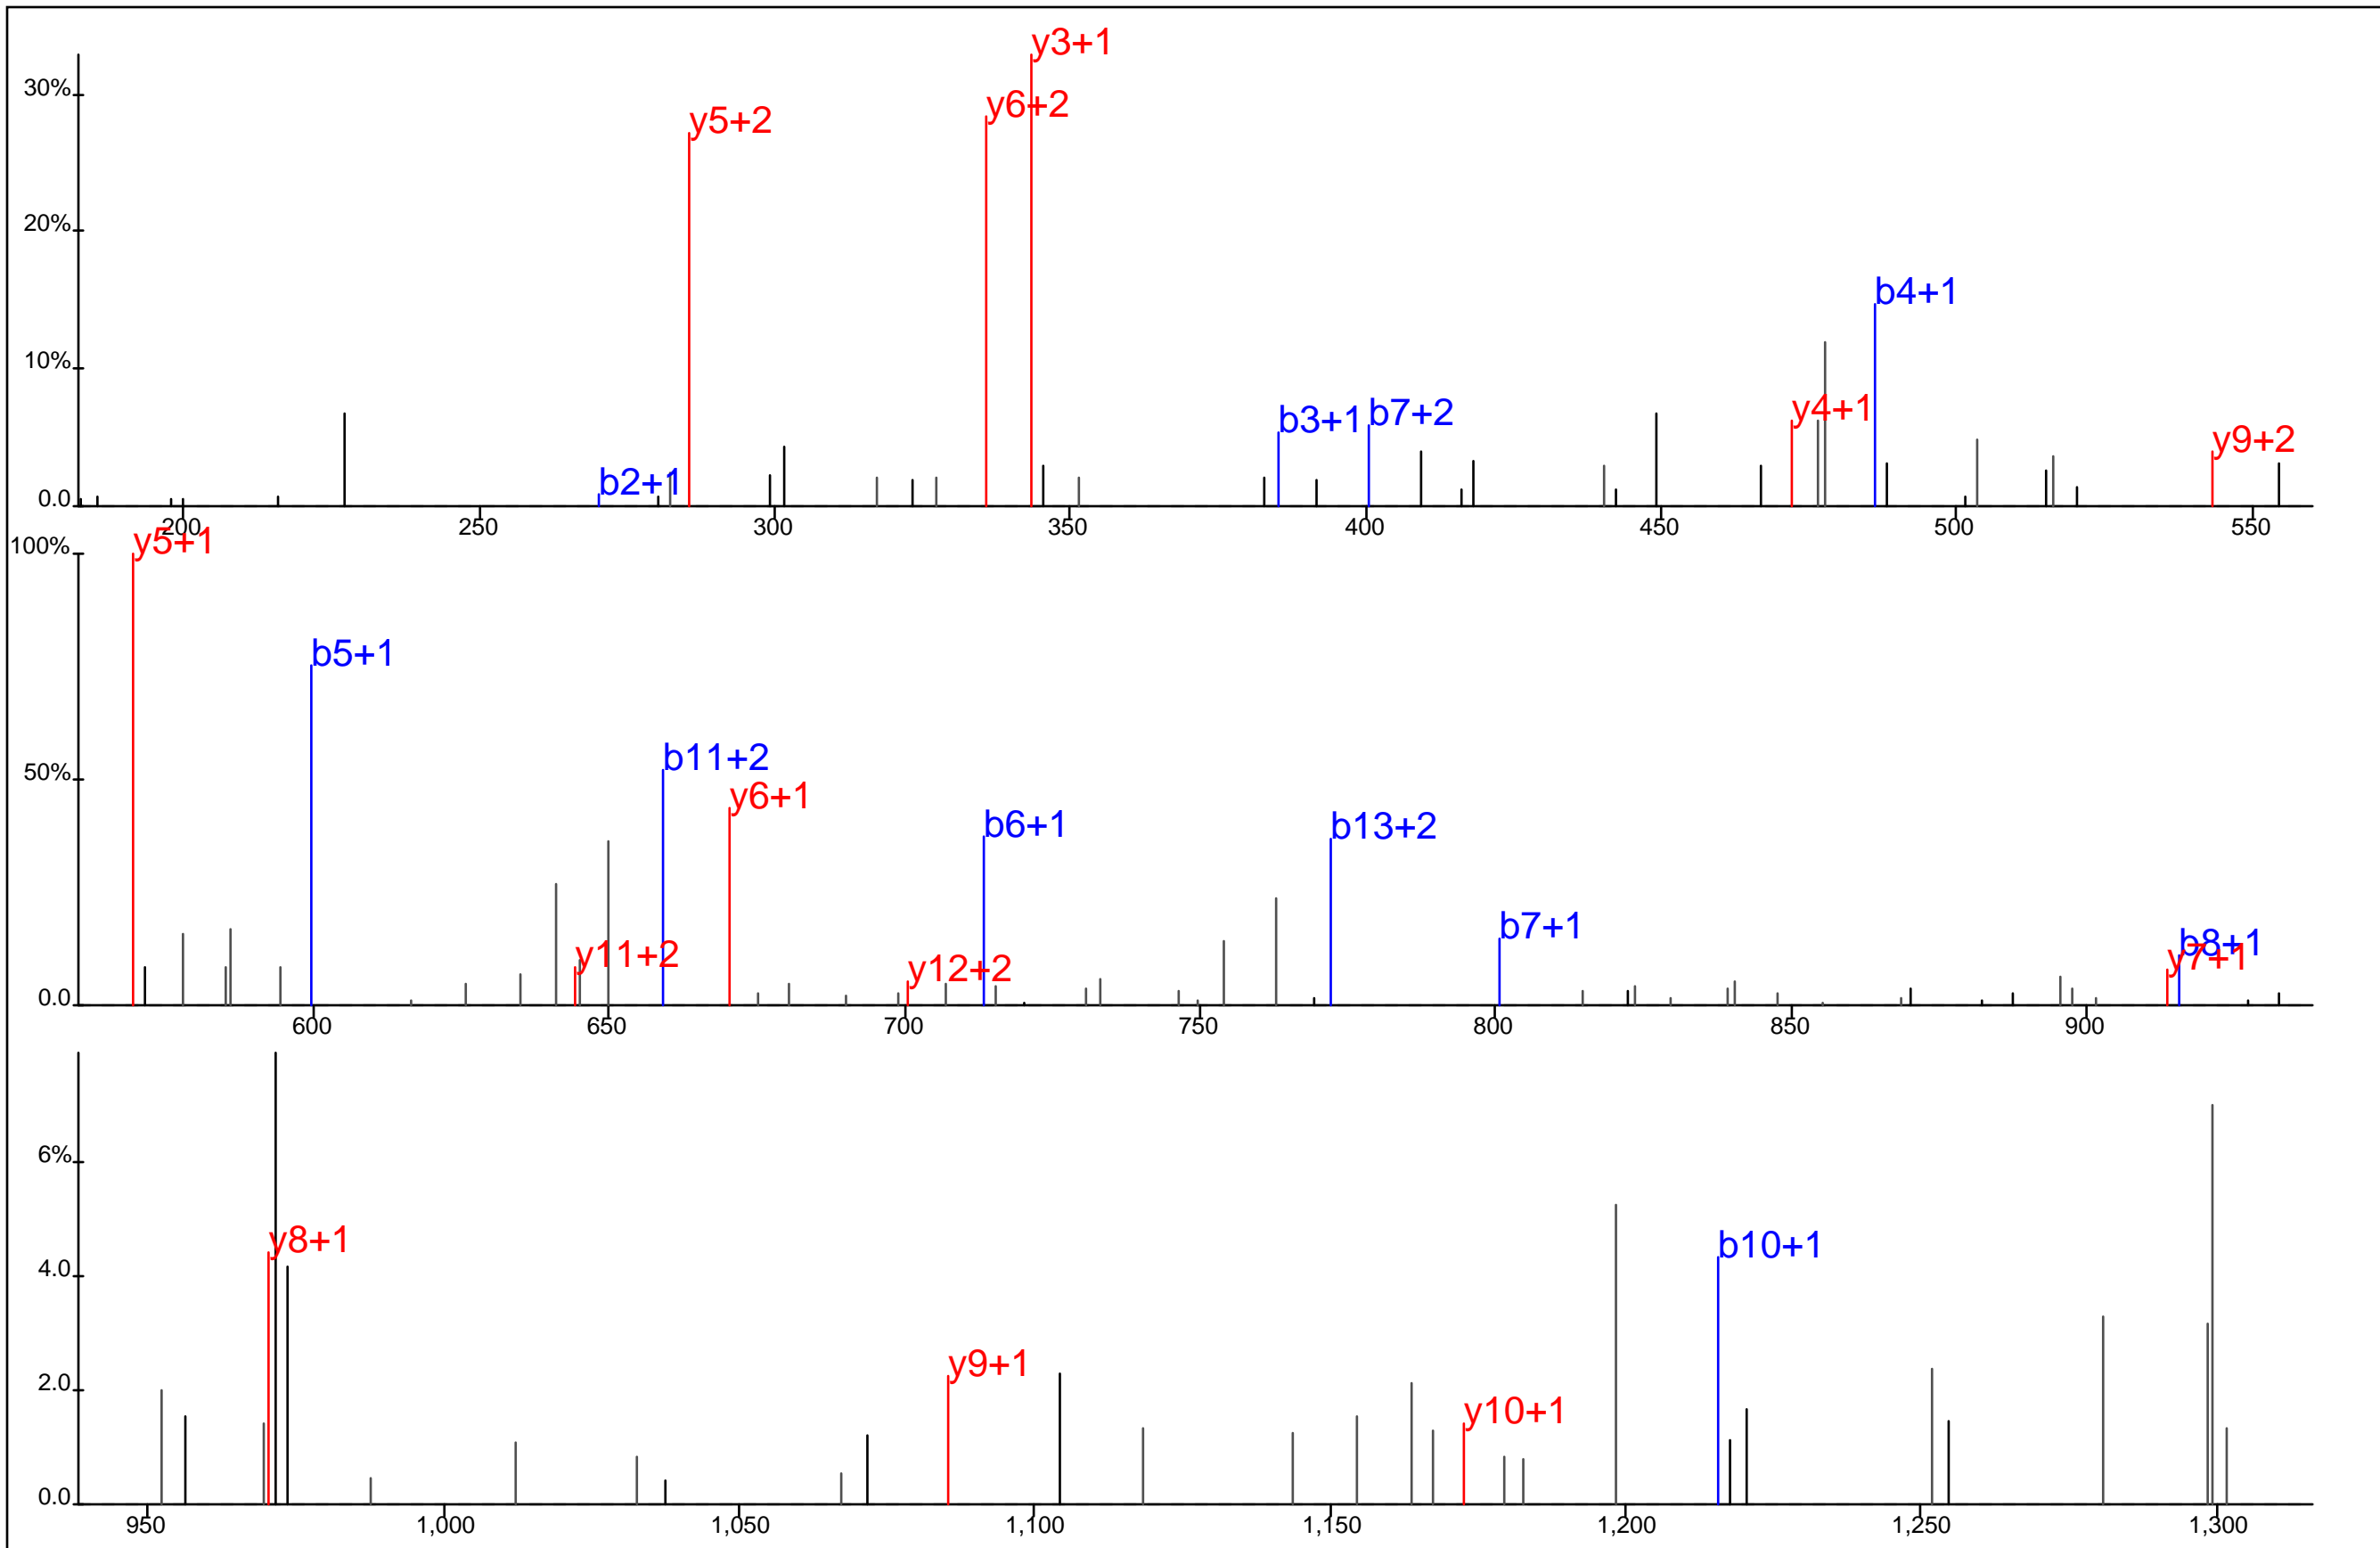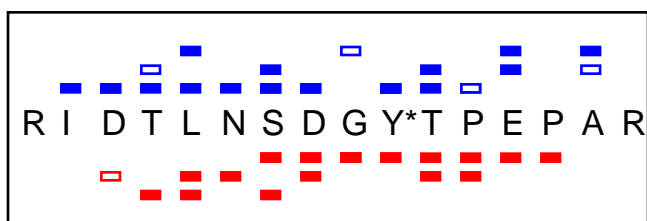

Protein Name: ZAP70  
 gi Accession: 0  
 Precursor Mass: 628.9543+3  
 Delta Mass: 0.222 ppm  
 XCorr: 53.37



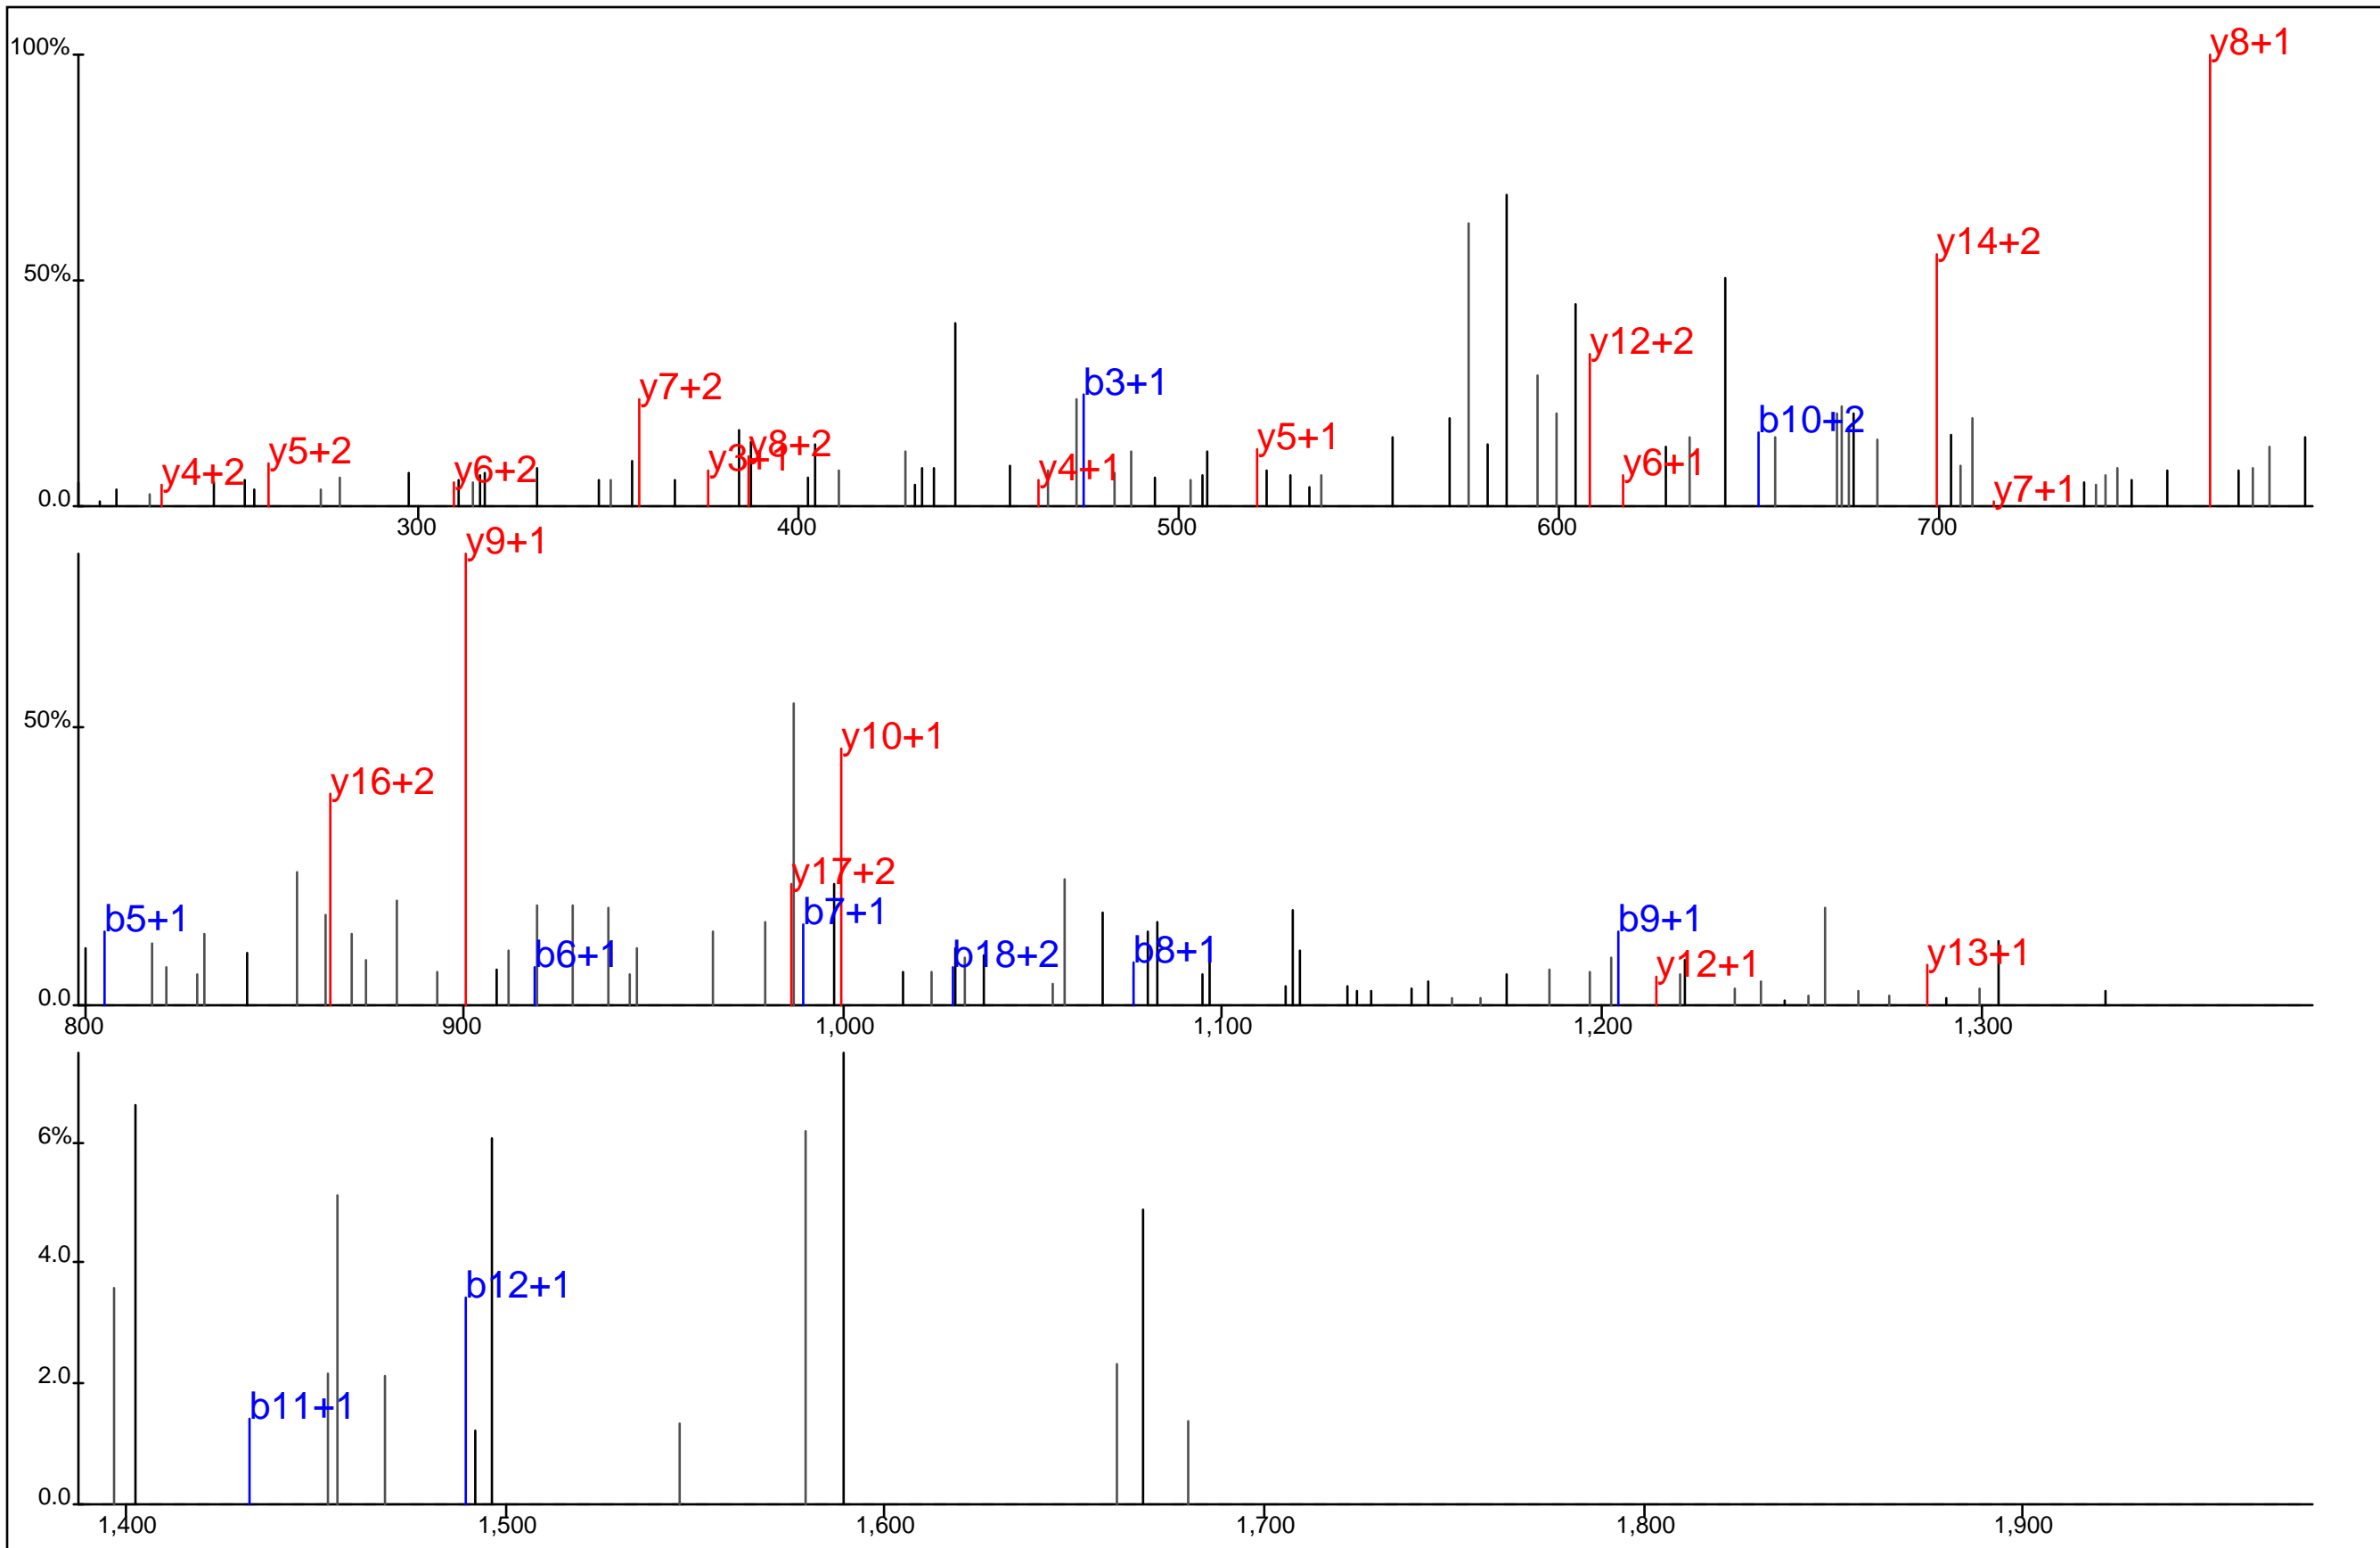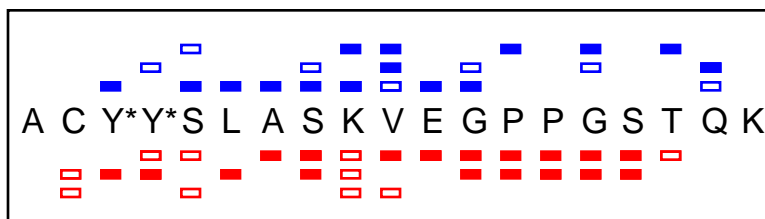

Protein Name: ZAP70  
 gi Accession: 0  
 Precursor Mass: 734.9785+3  
 Delta Mass: 1.450 ppm  
 XCorr: 24.35

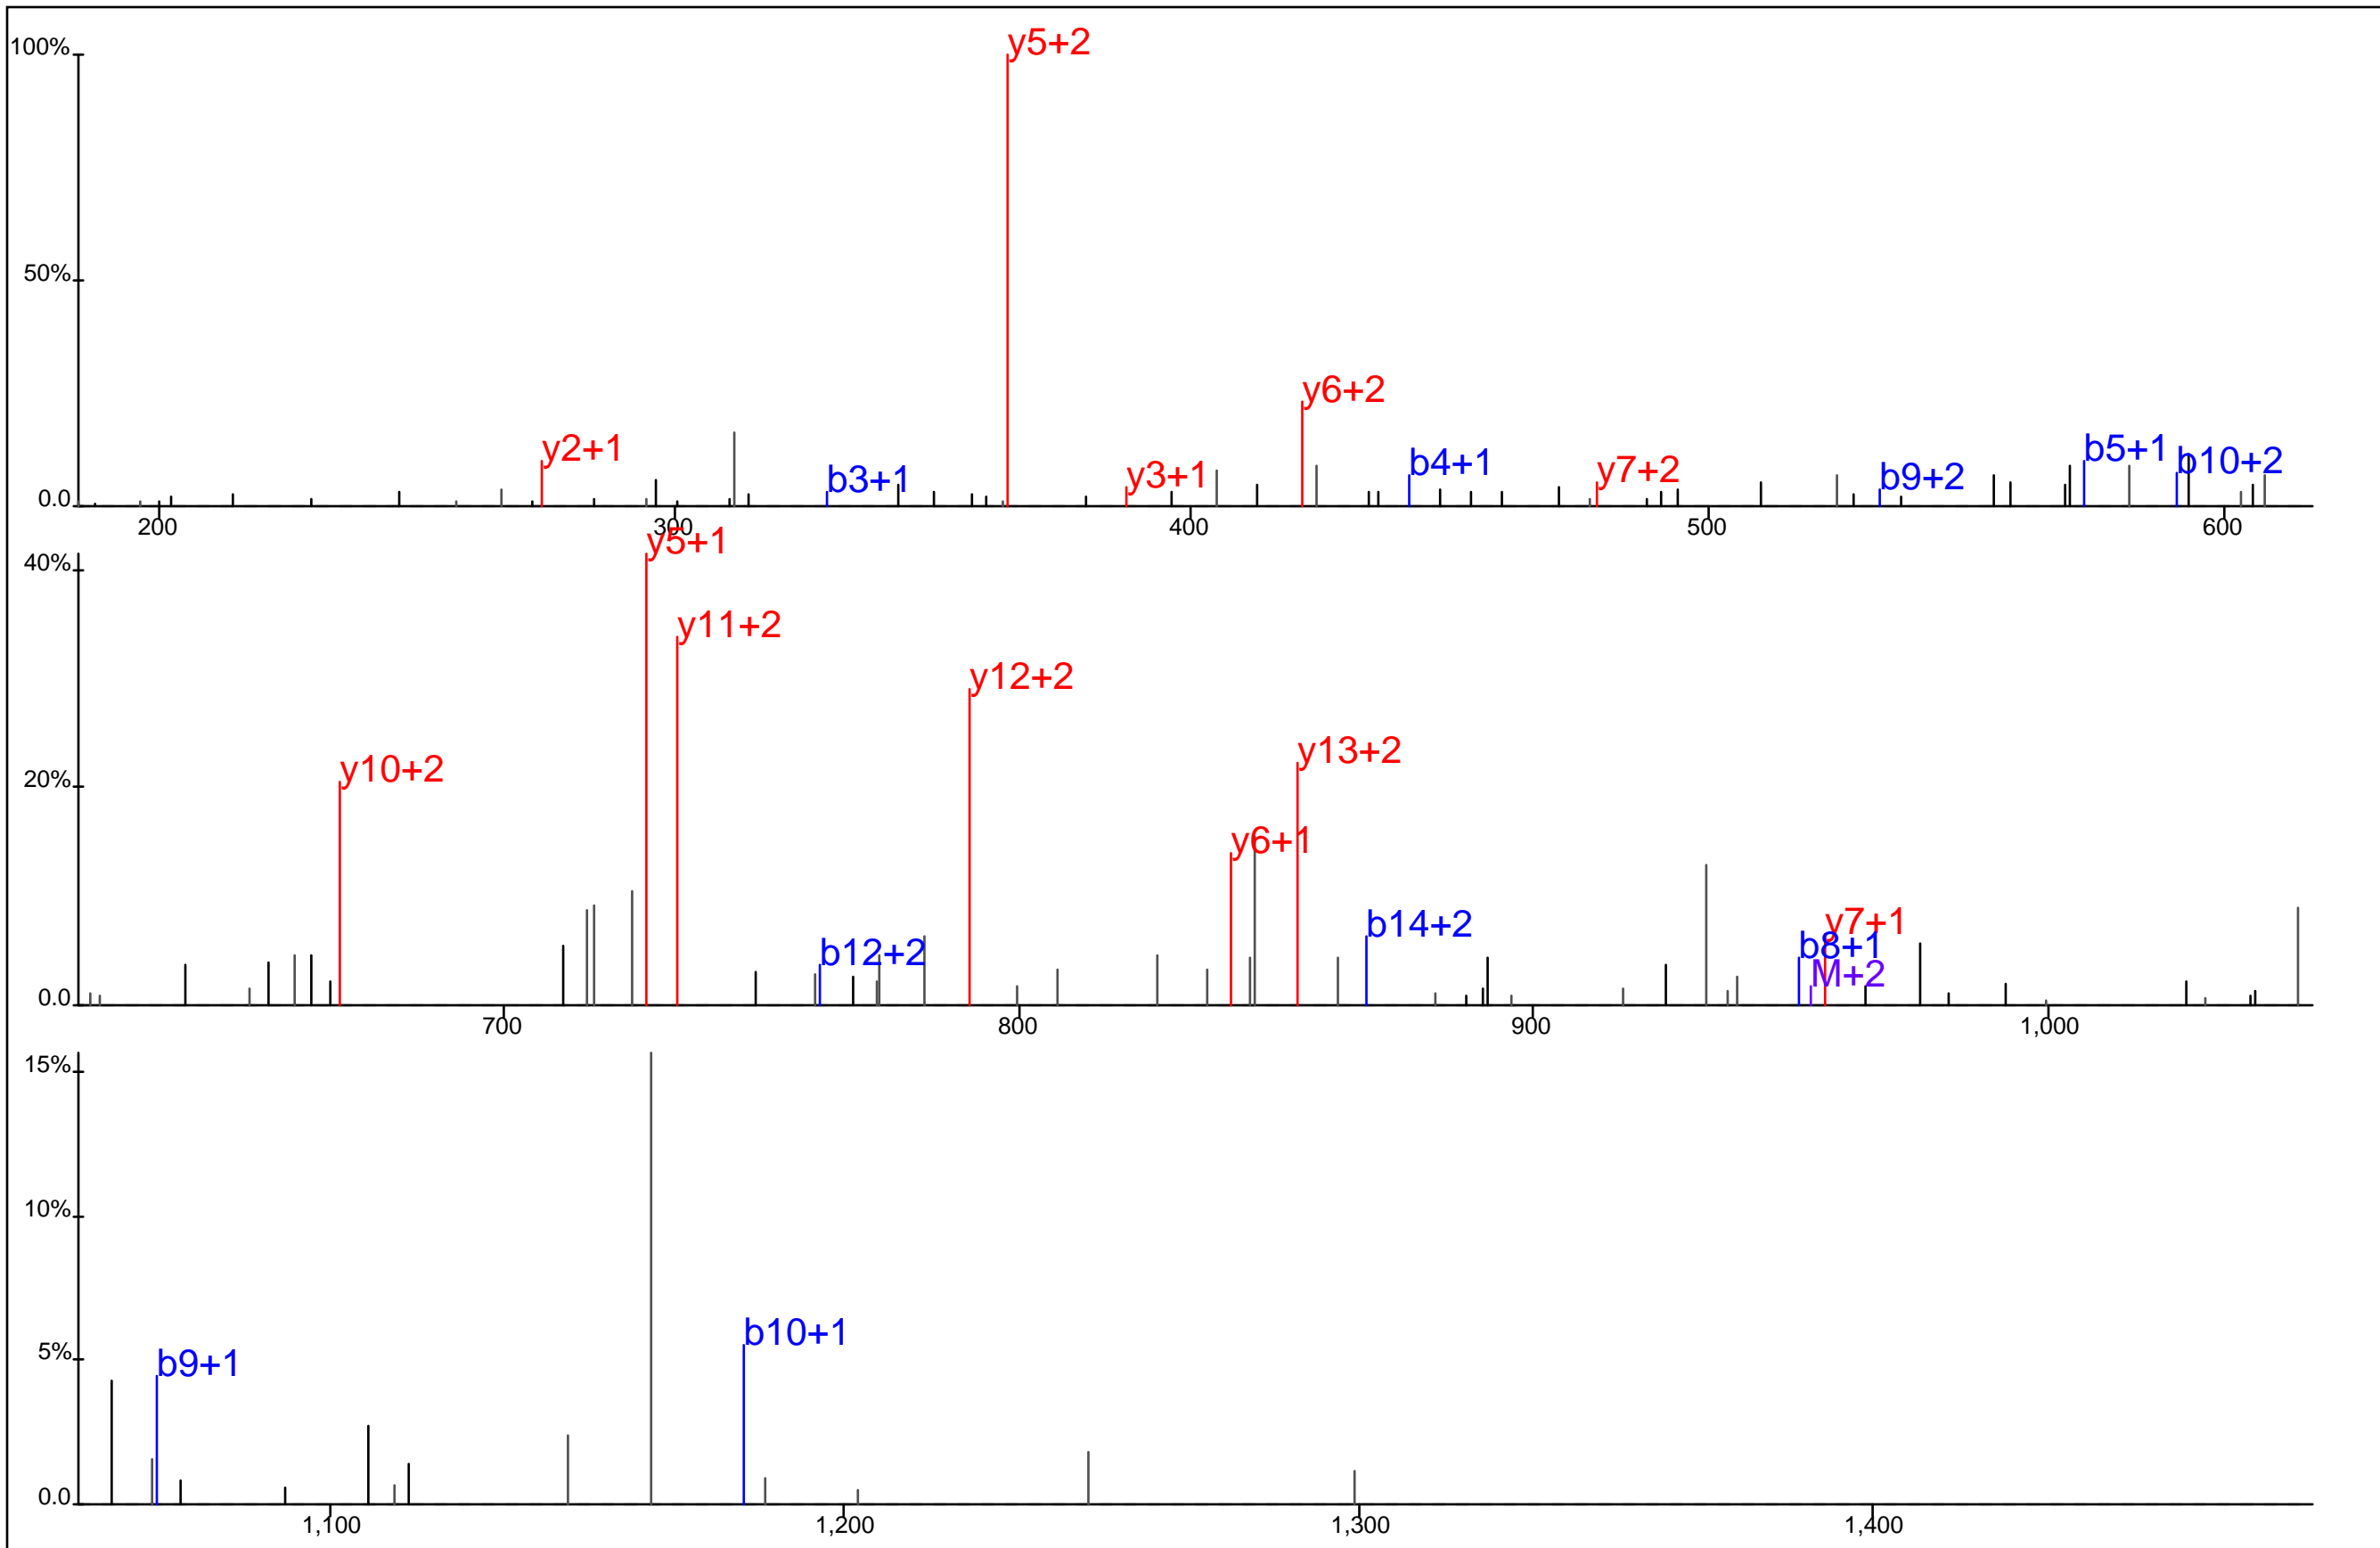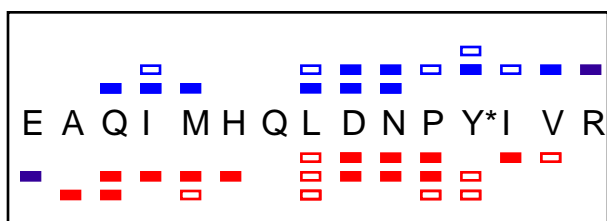

Protein Name: ZAP70  
 gi Accession: 0  
 Precursor Mass: 636.3003+3  
 Delta Mass: 0.915 ppm  
 XCorr: 37.51



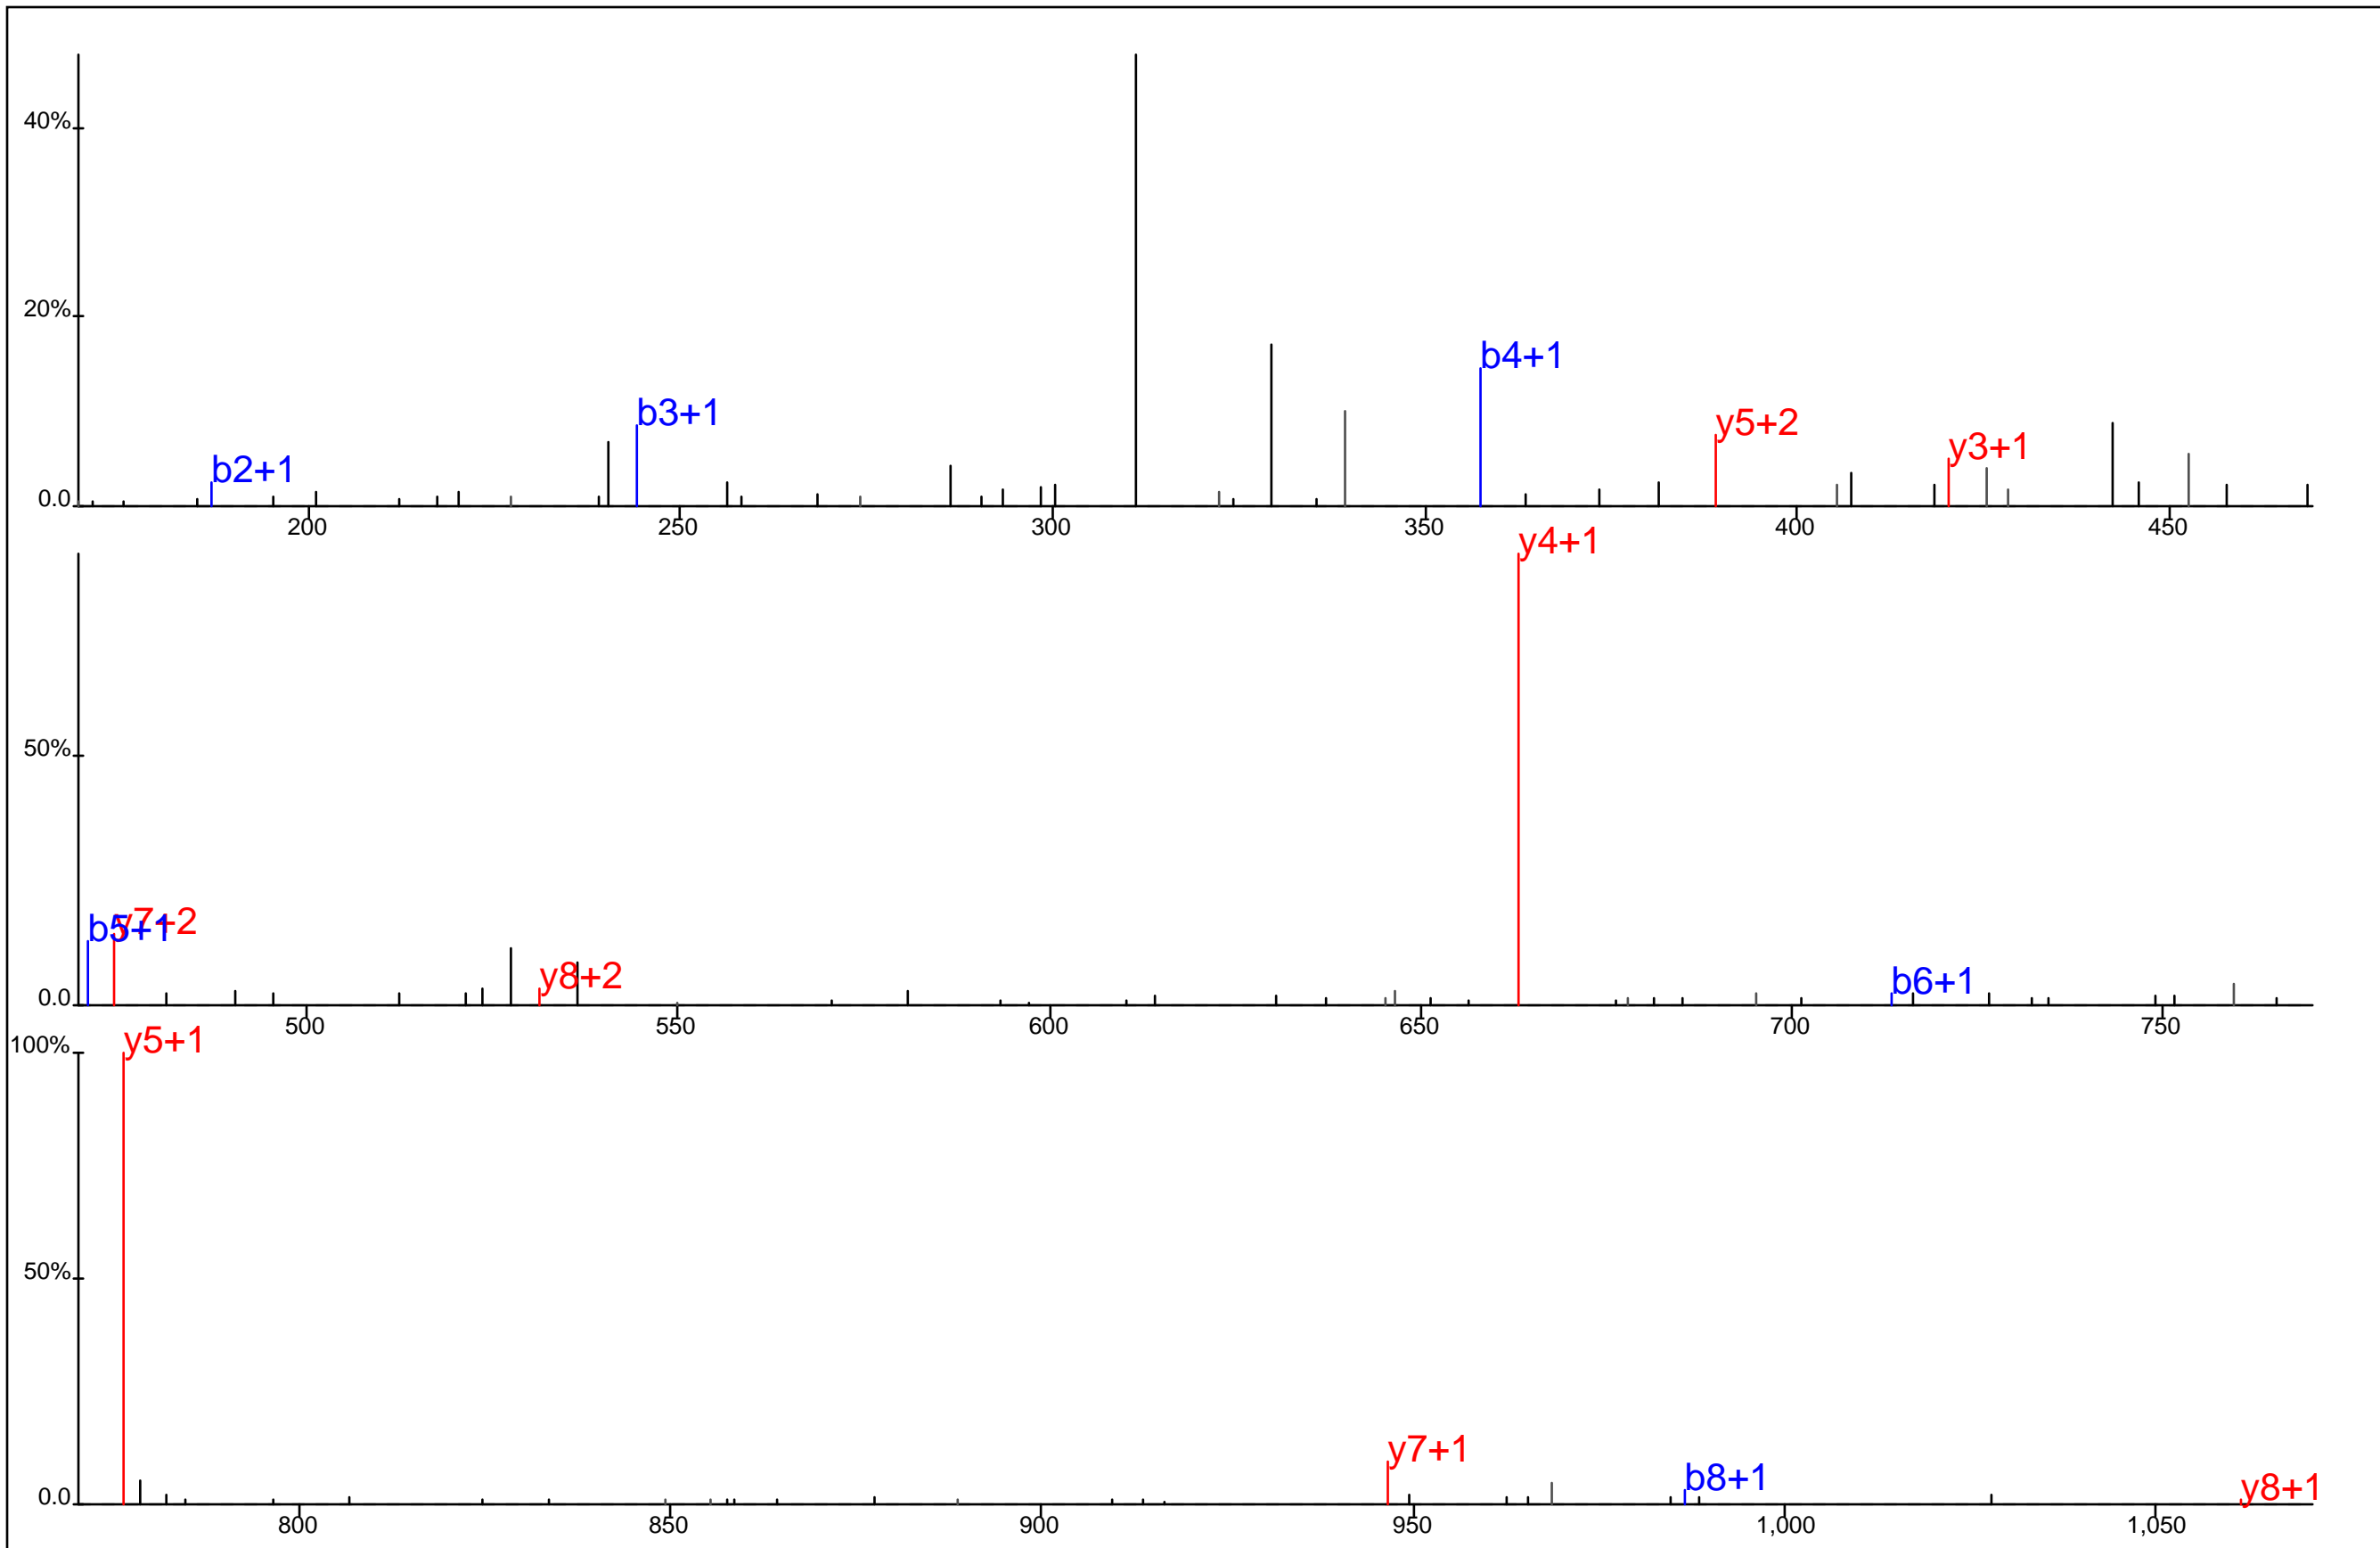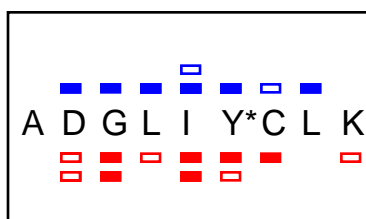

Protein Name: ZAP70  
 gi Accession: 0  
 Precursor Mass: 566.7599+2  
 Delta Mass: 1.499 ppm  
 XCorr: 29.78

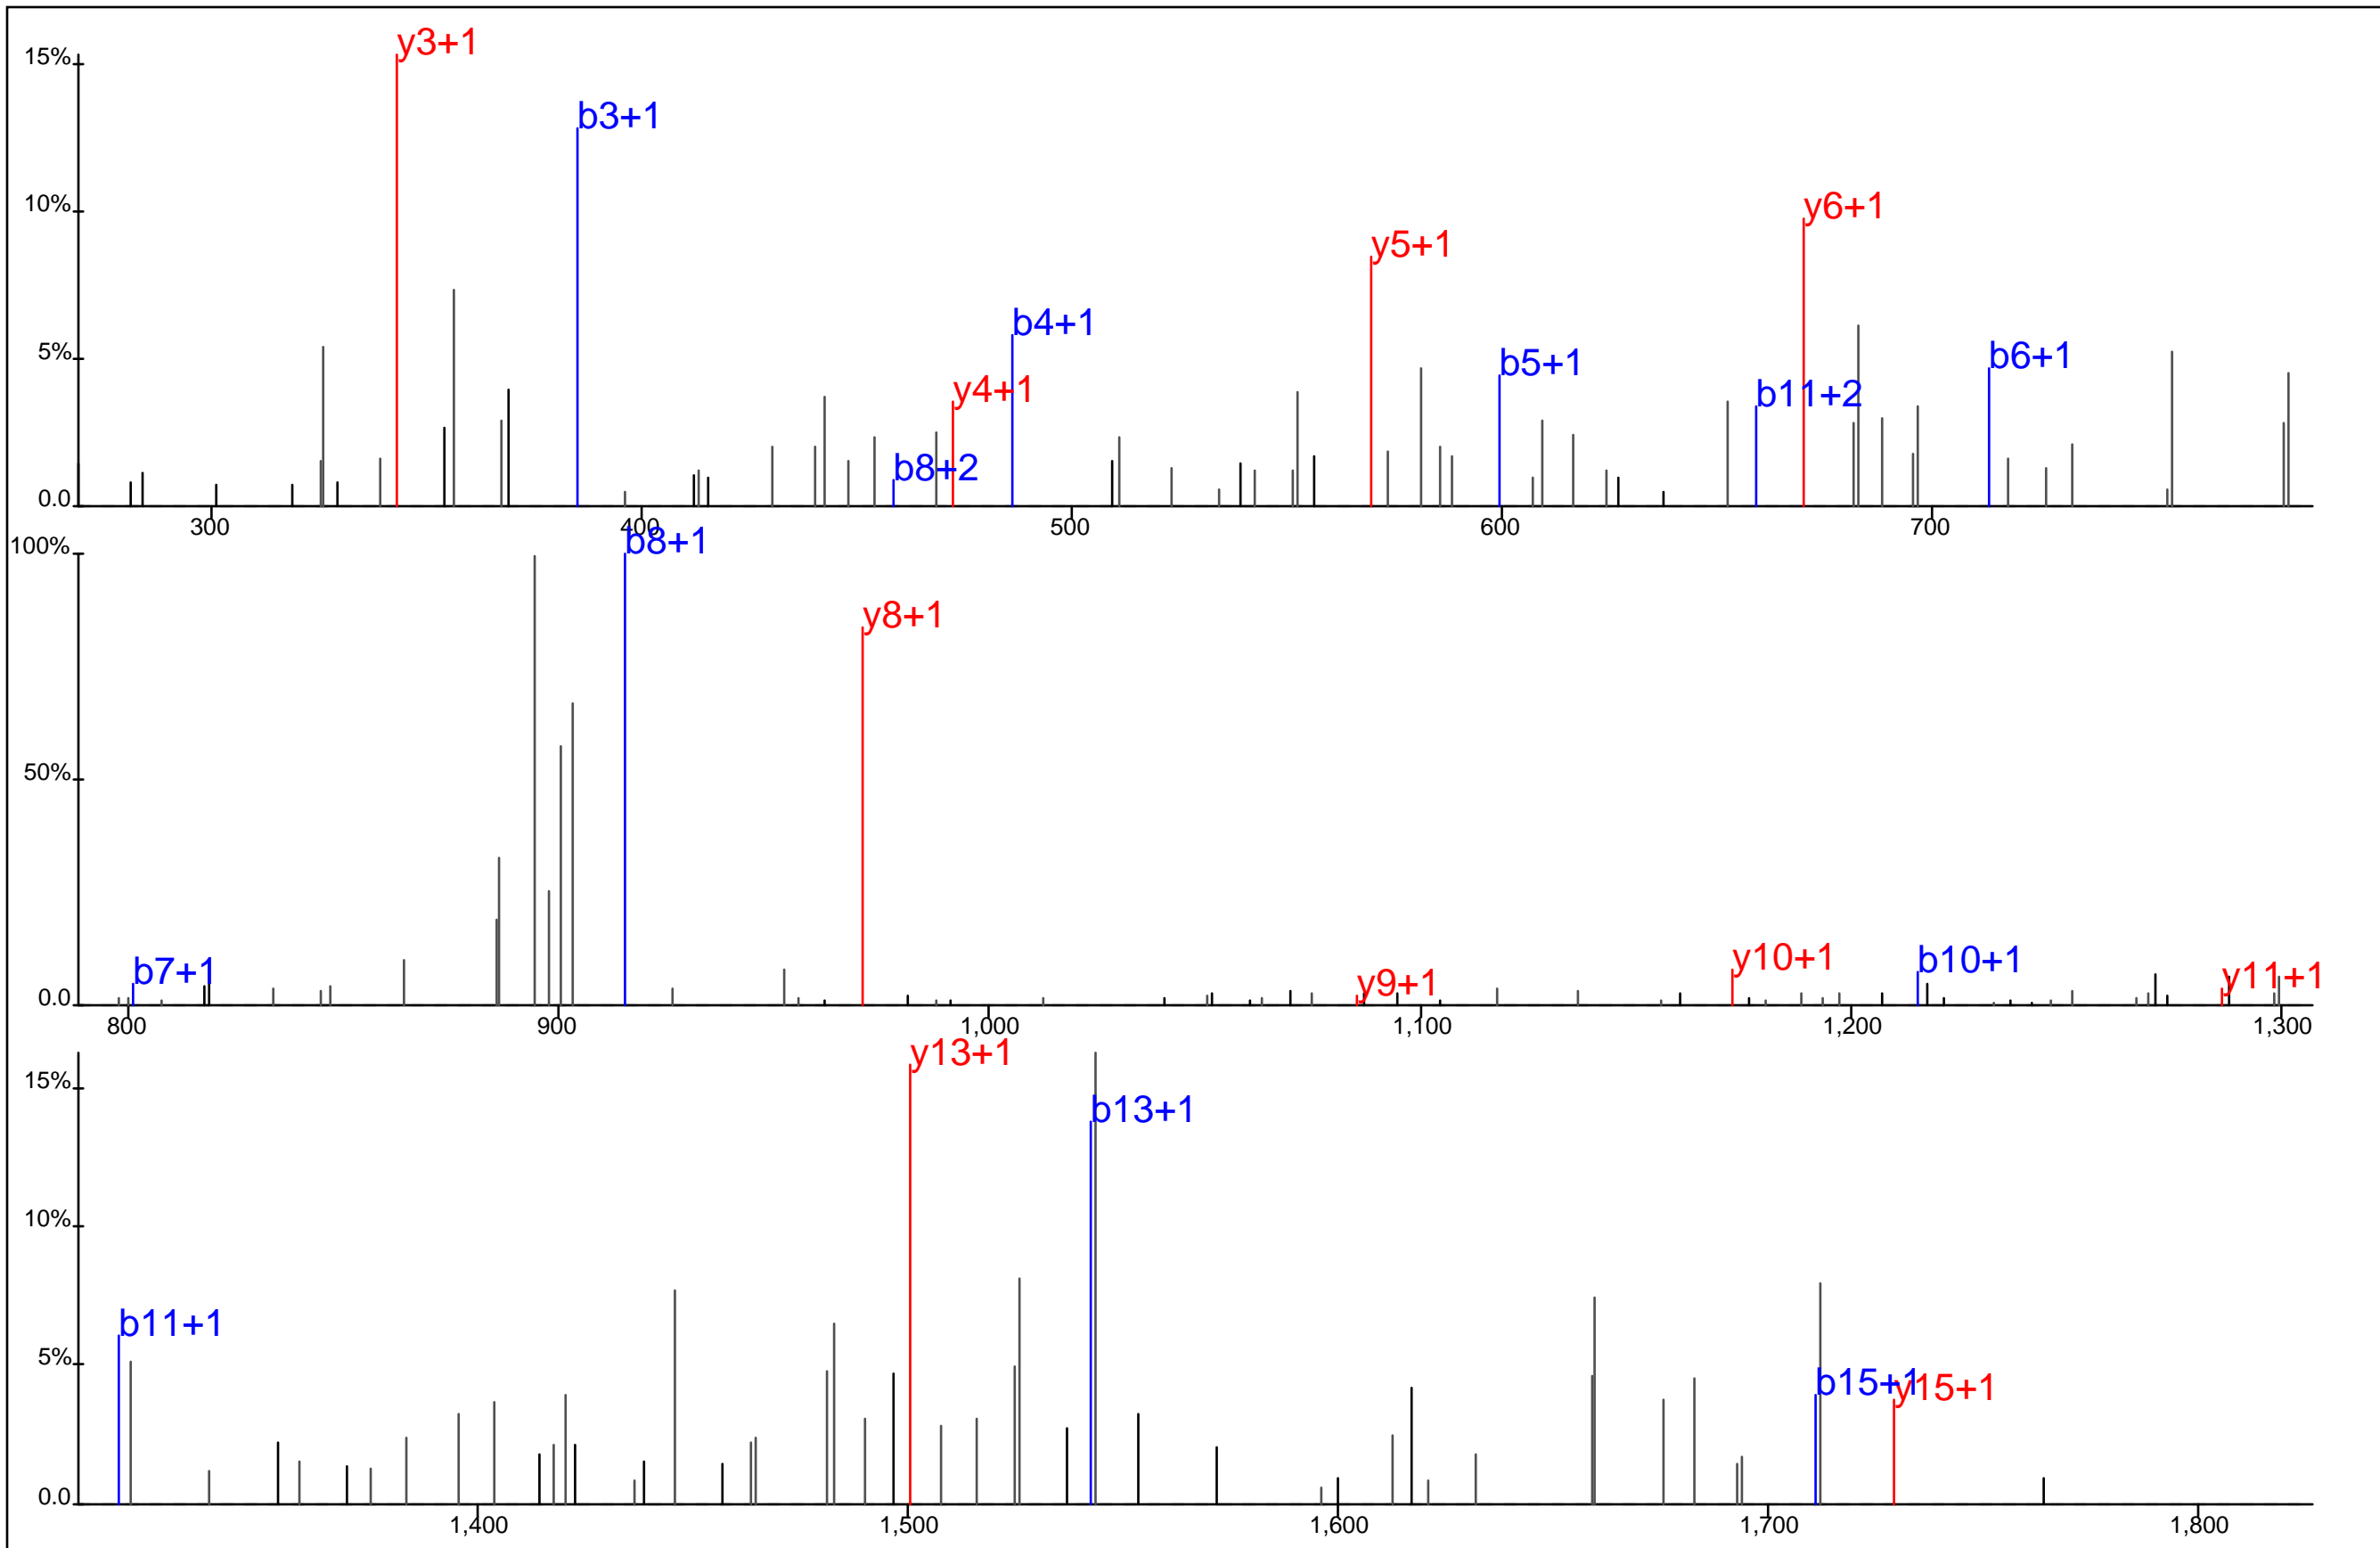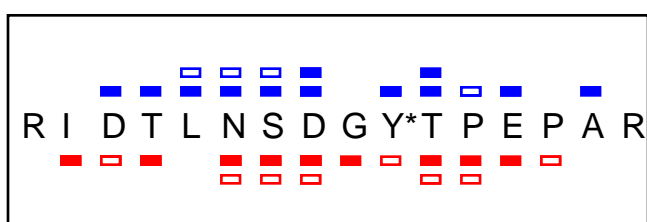

Protein Name: ZAP70  
 gi Accession: 0  
 Precursor Mass: 942.9260+2  
 Delta Mass: 2.159 ppm  
 XCorr: 48.29

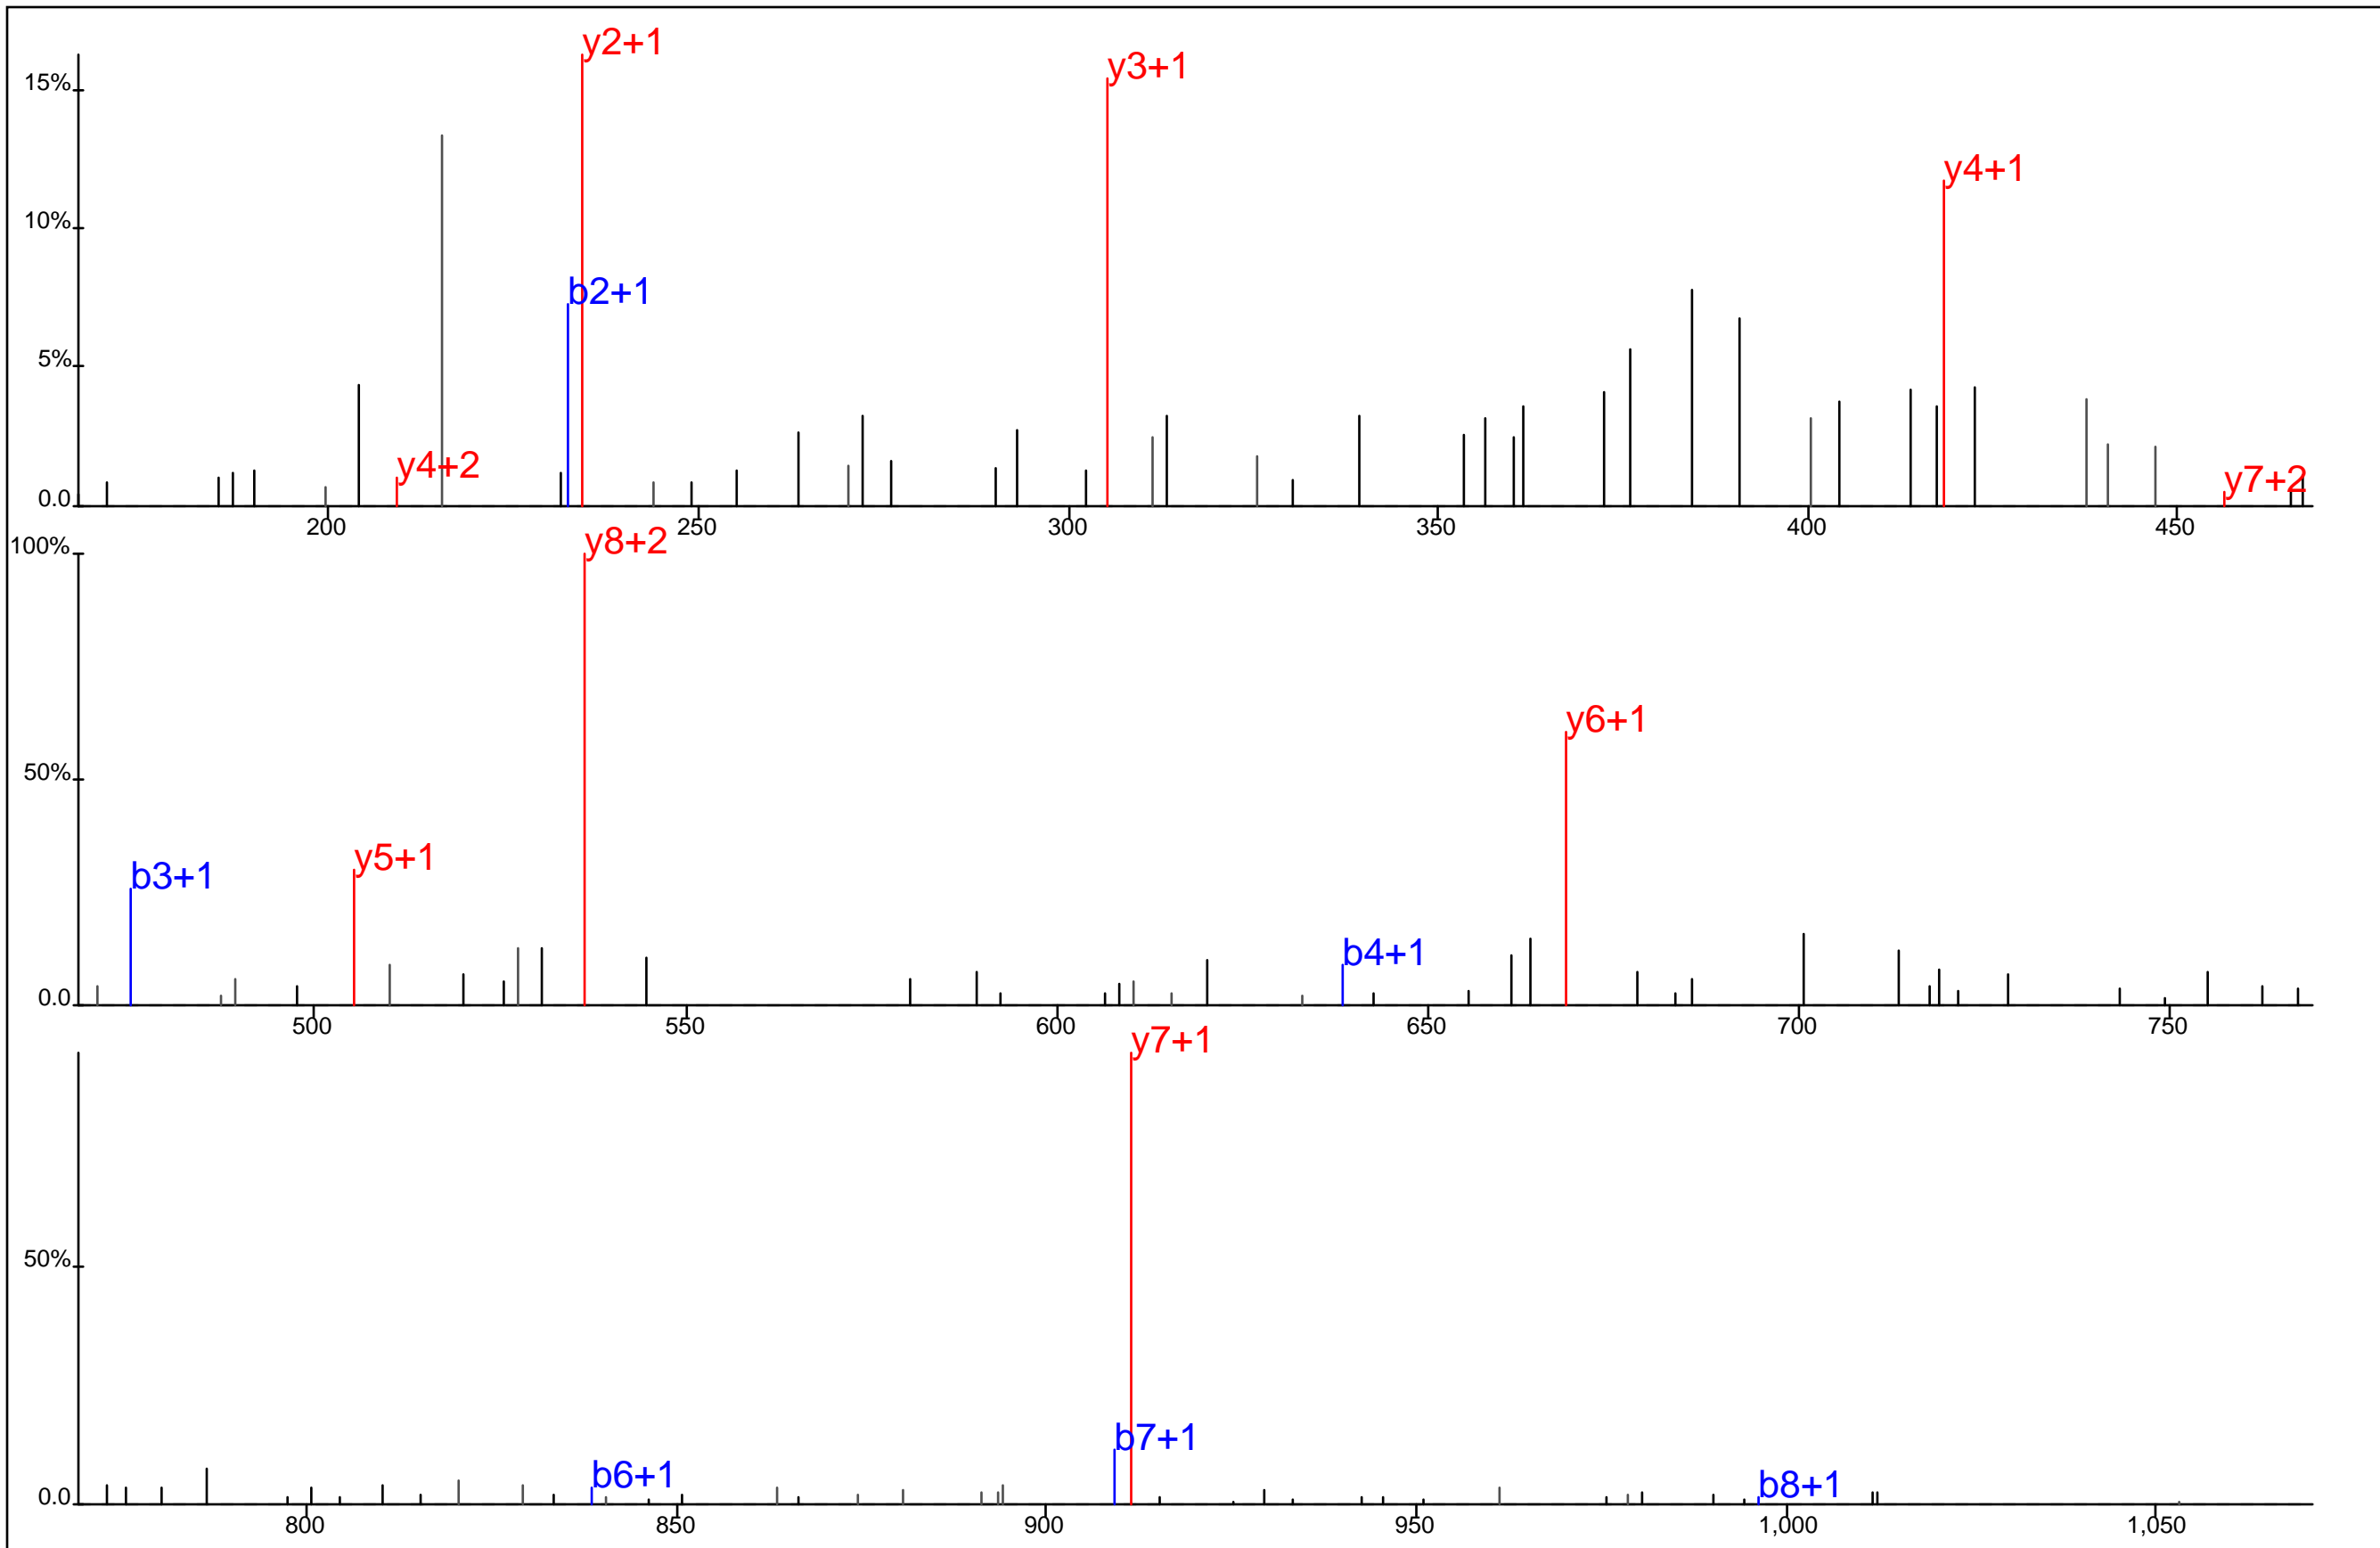

■ ■ ■ □ □ □ □  
 A C Y\*Y S L A S K  
■ ■ □ □ □ □ ■ ■

Protein Name: ZAP70  
 gi Accession: 0  
 Precursor Mass: 571.7335+2  
 Delta Mass: 0.779 ppm  
 XCorr: 43.55

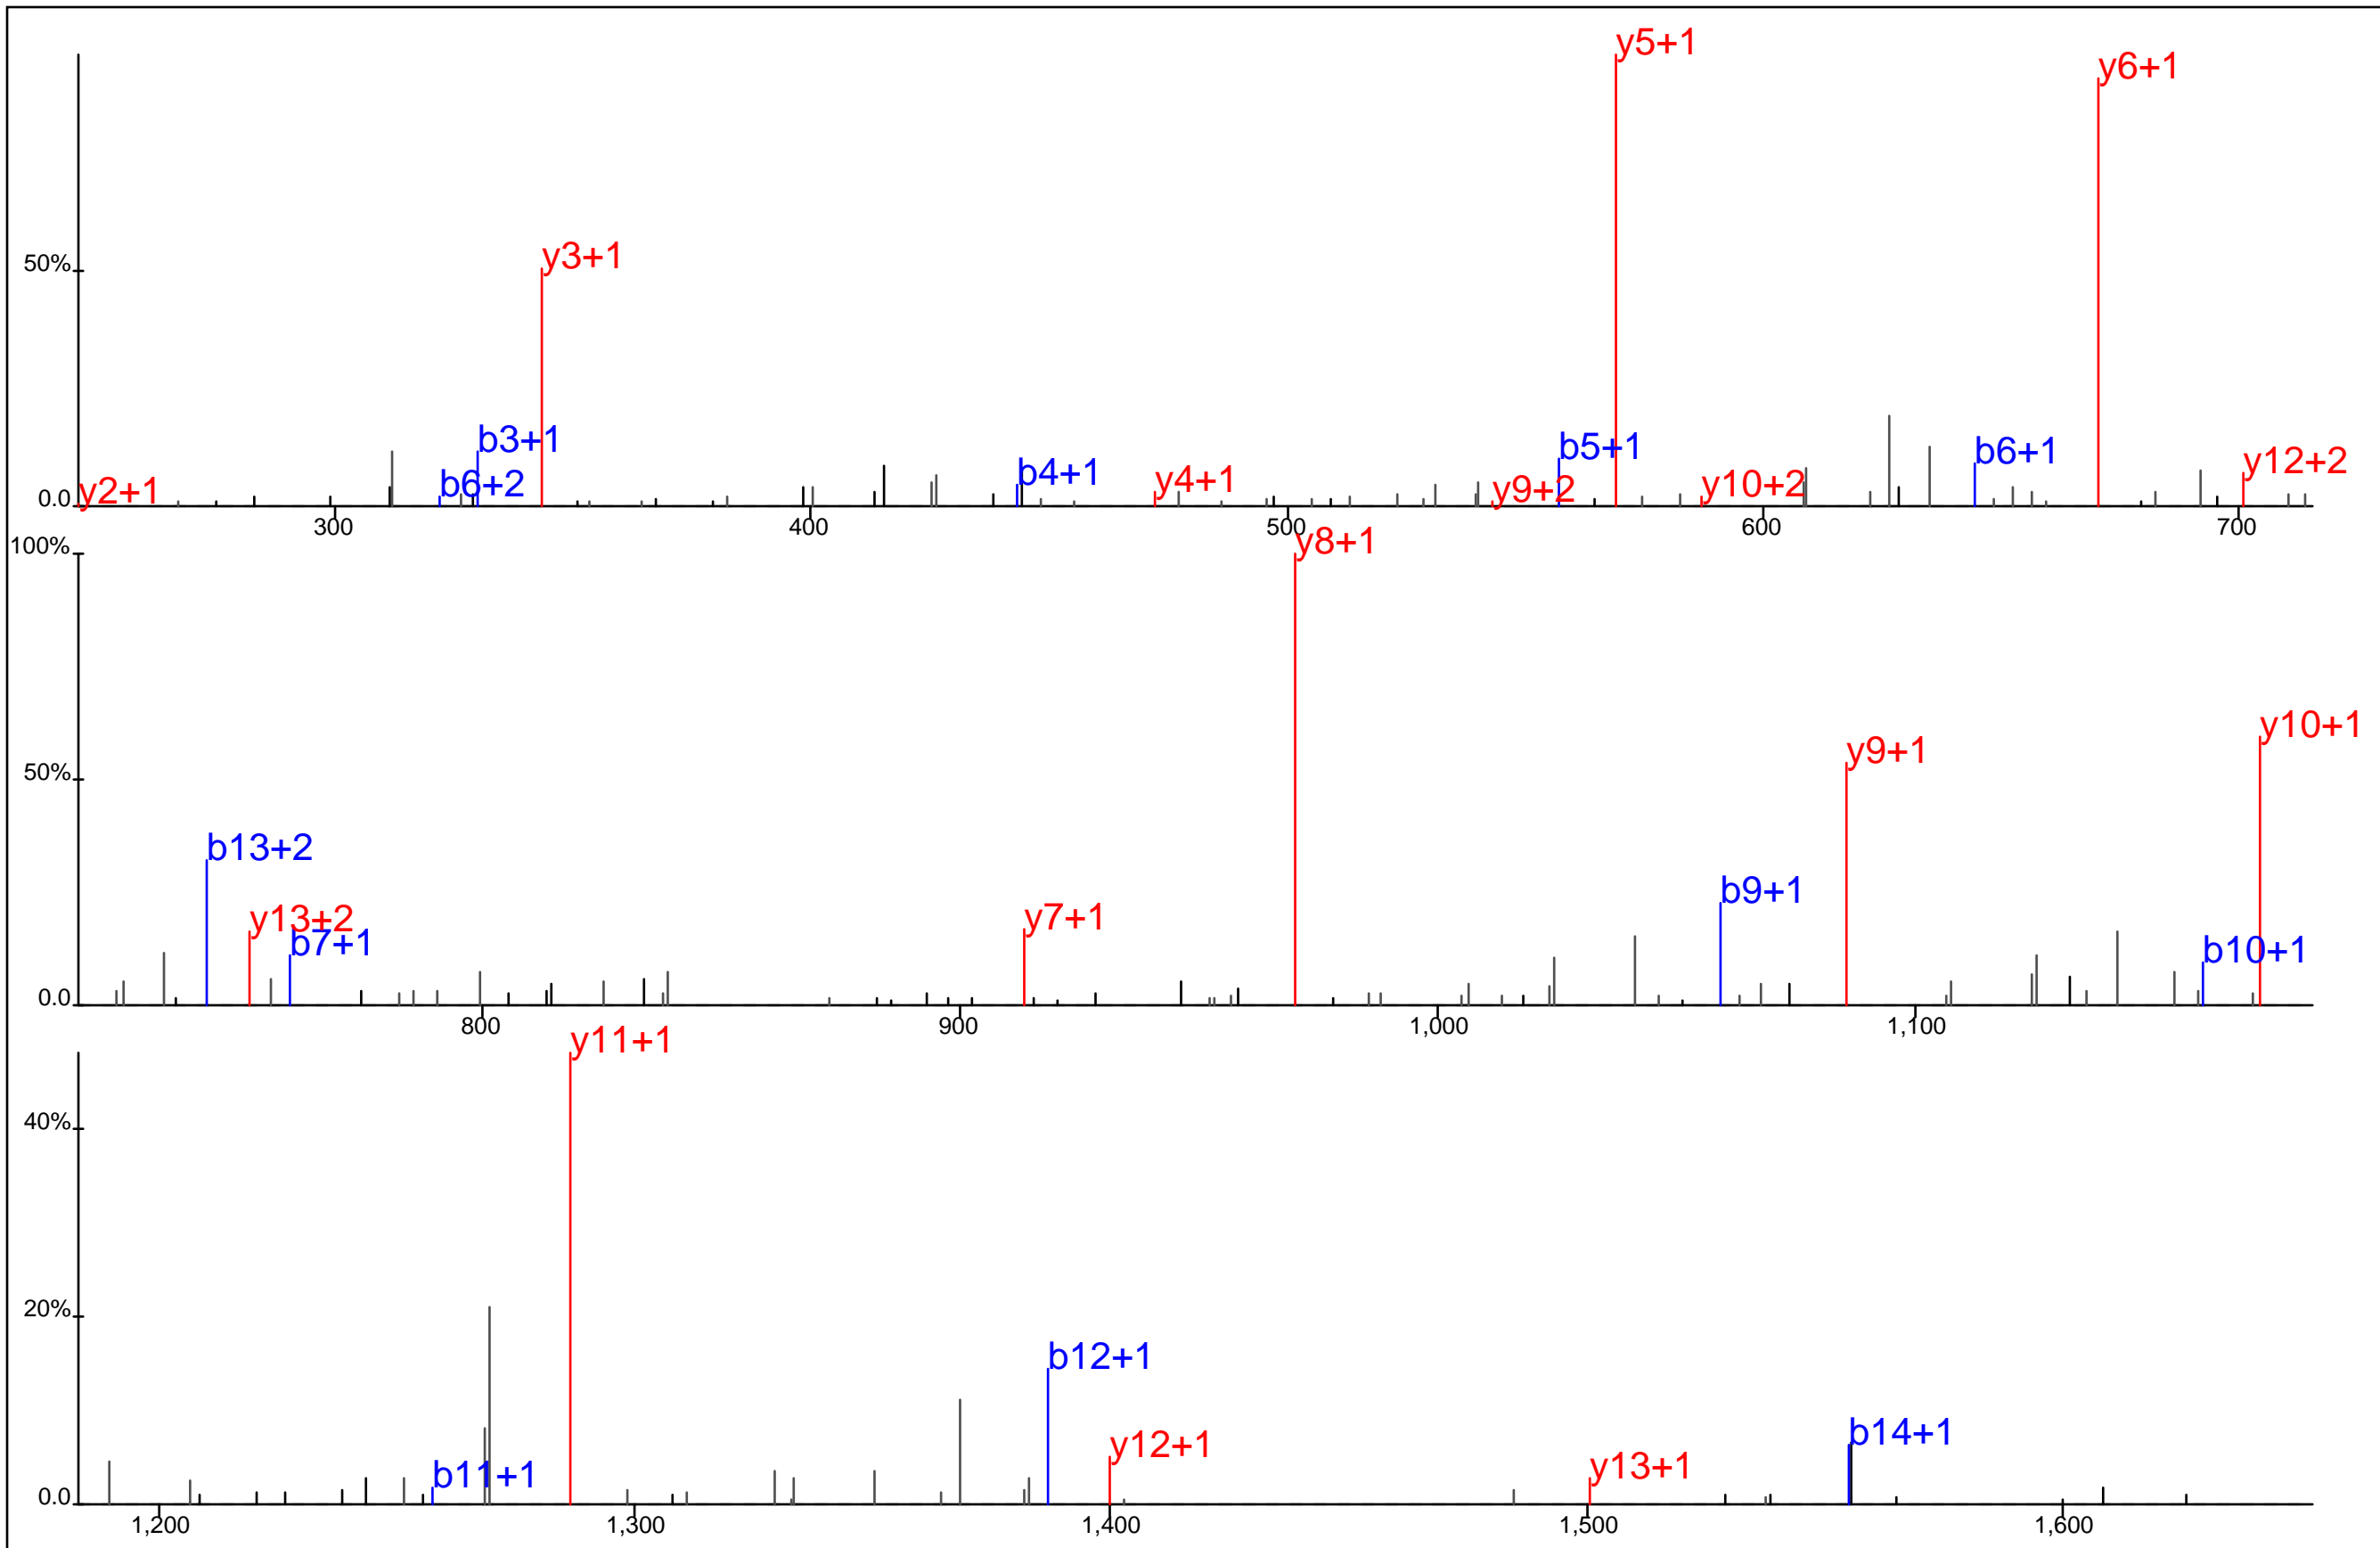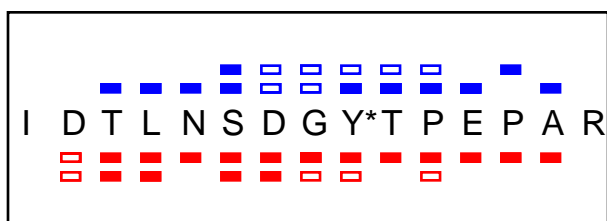

Protein Name: ZAP70  
 gi Accession: 0  
 Precursor Mass: 864.8781+2  
 Delta Mass: 0.768 ppm  
 XCorr: 84.37

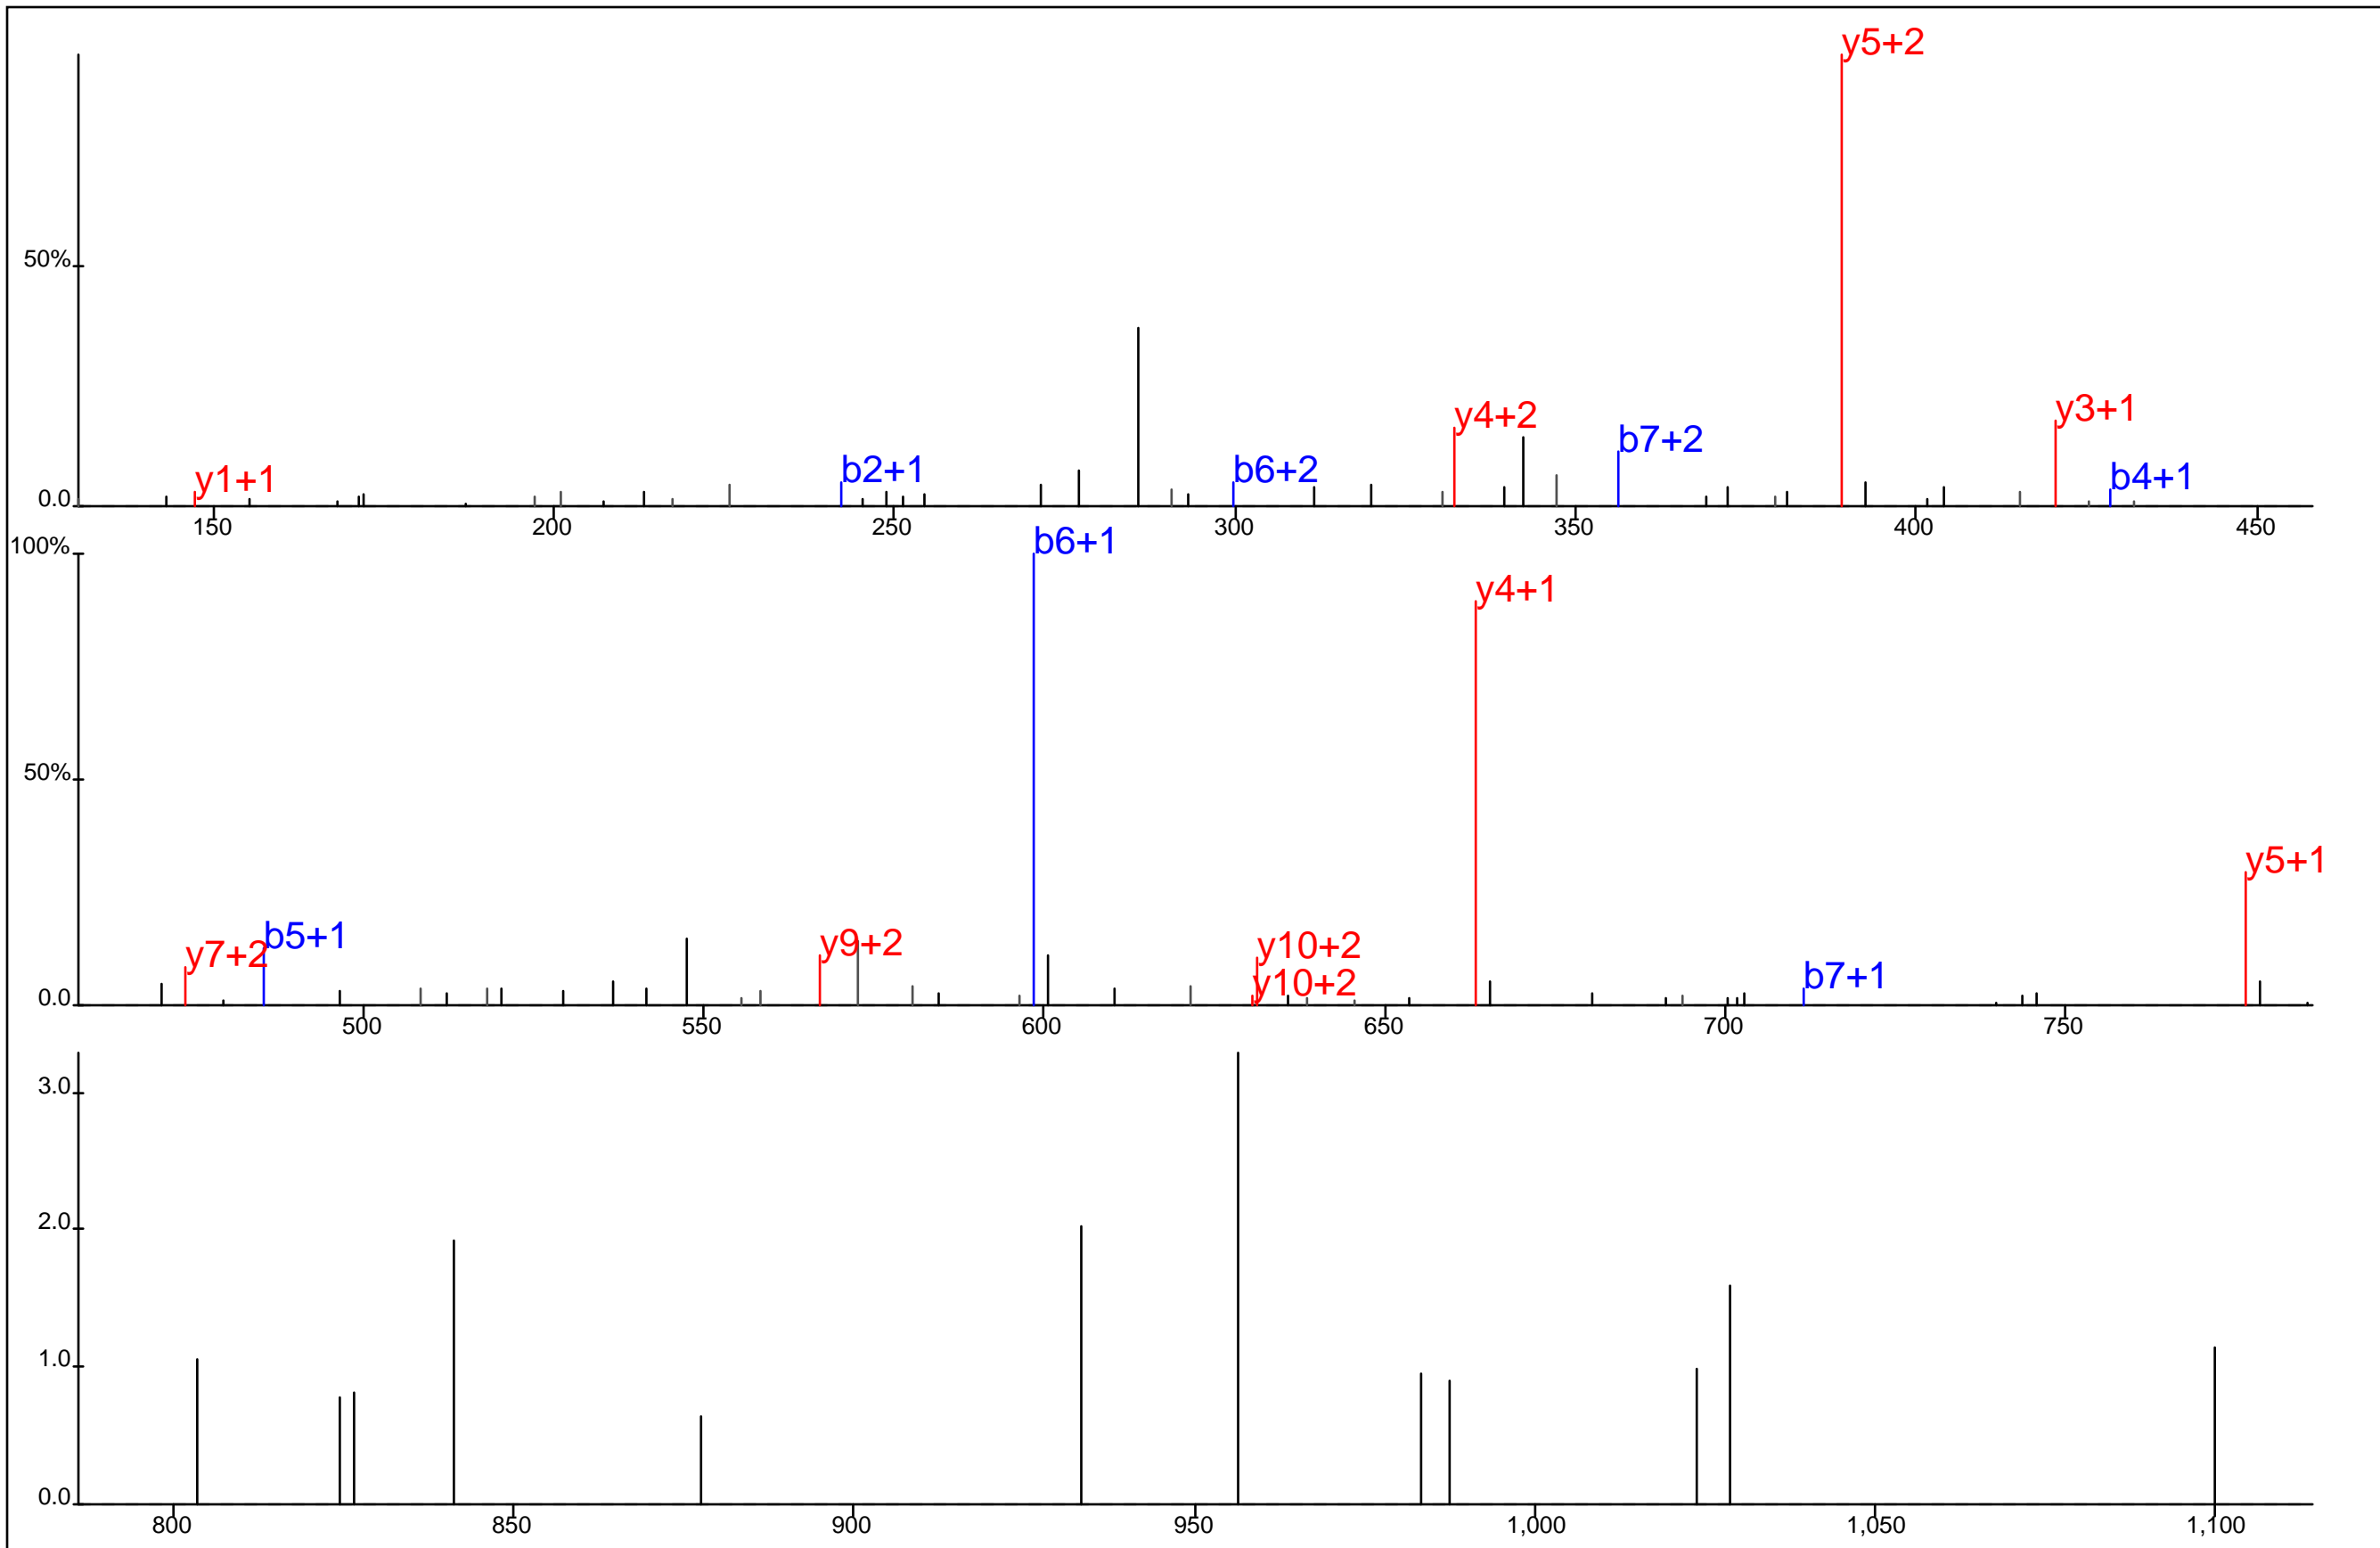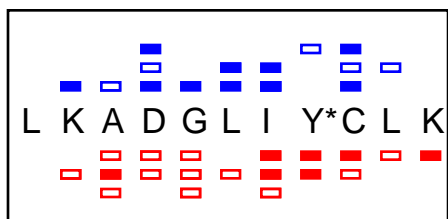

Protein Name: ZAP70  
 gi Accession: 0  
 Precursor Mass: 458.5677+3  
 Delta Mass: 0.886 ppm  
 XCorr: 22.72

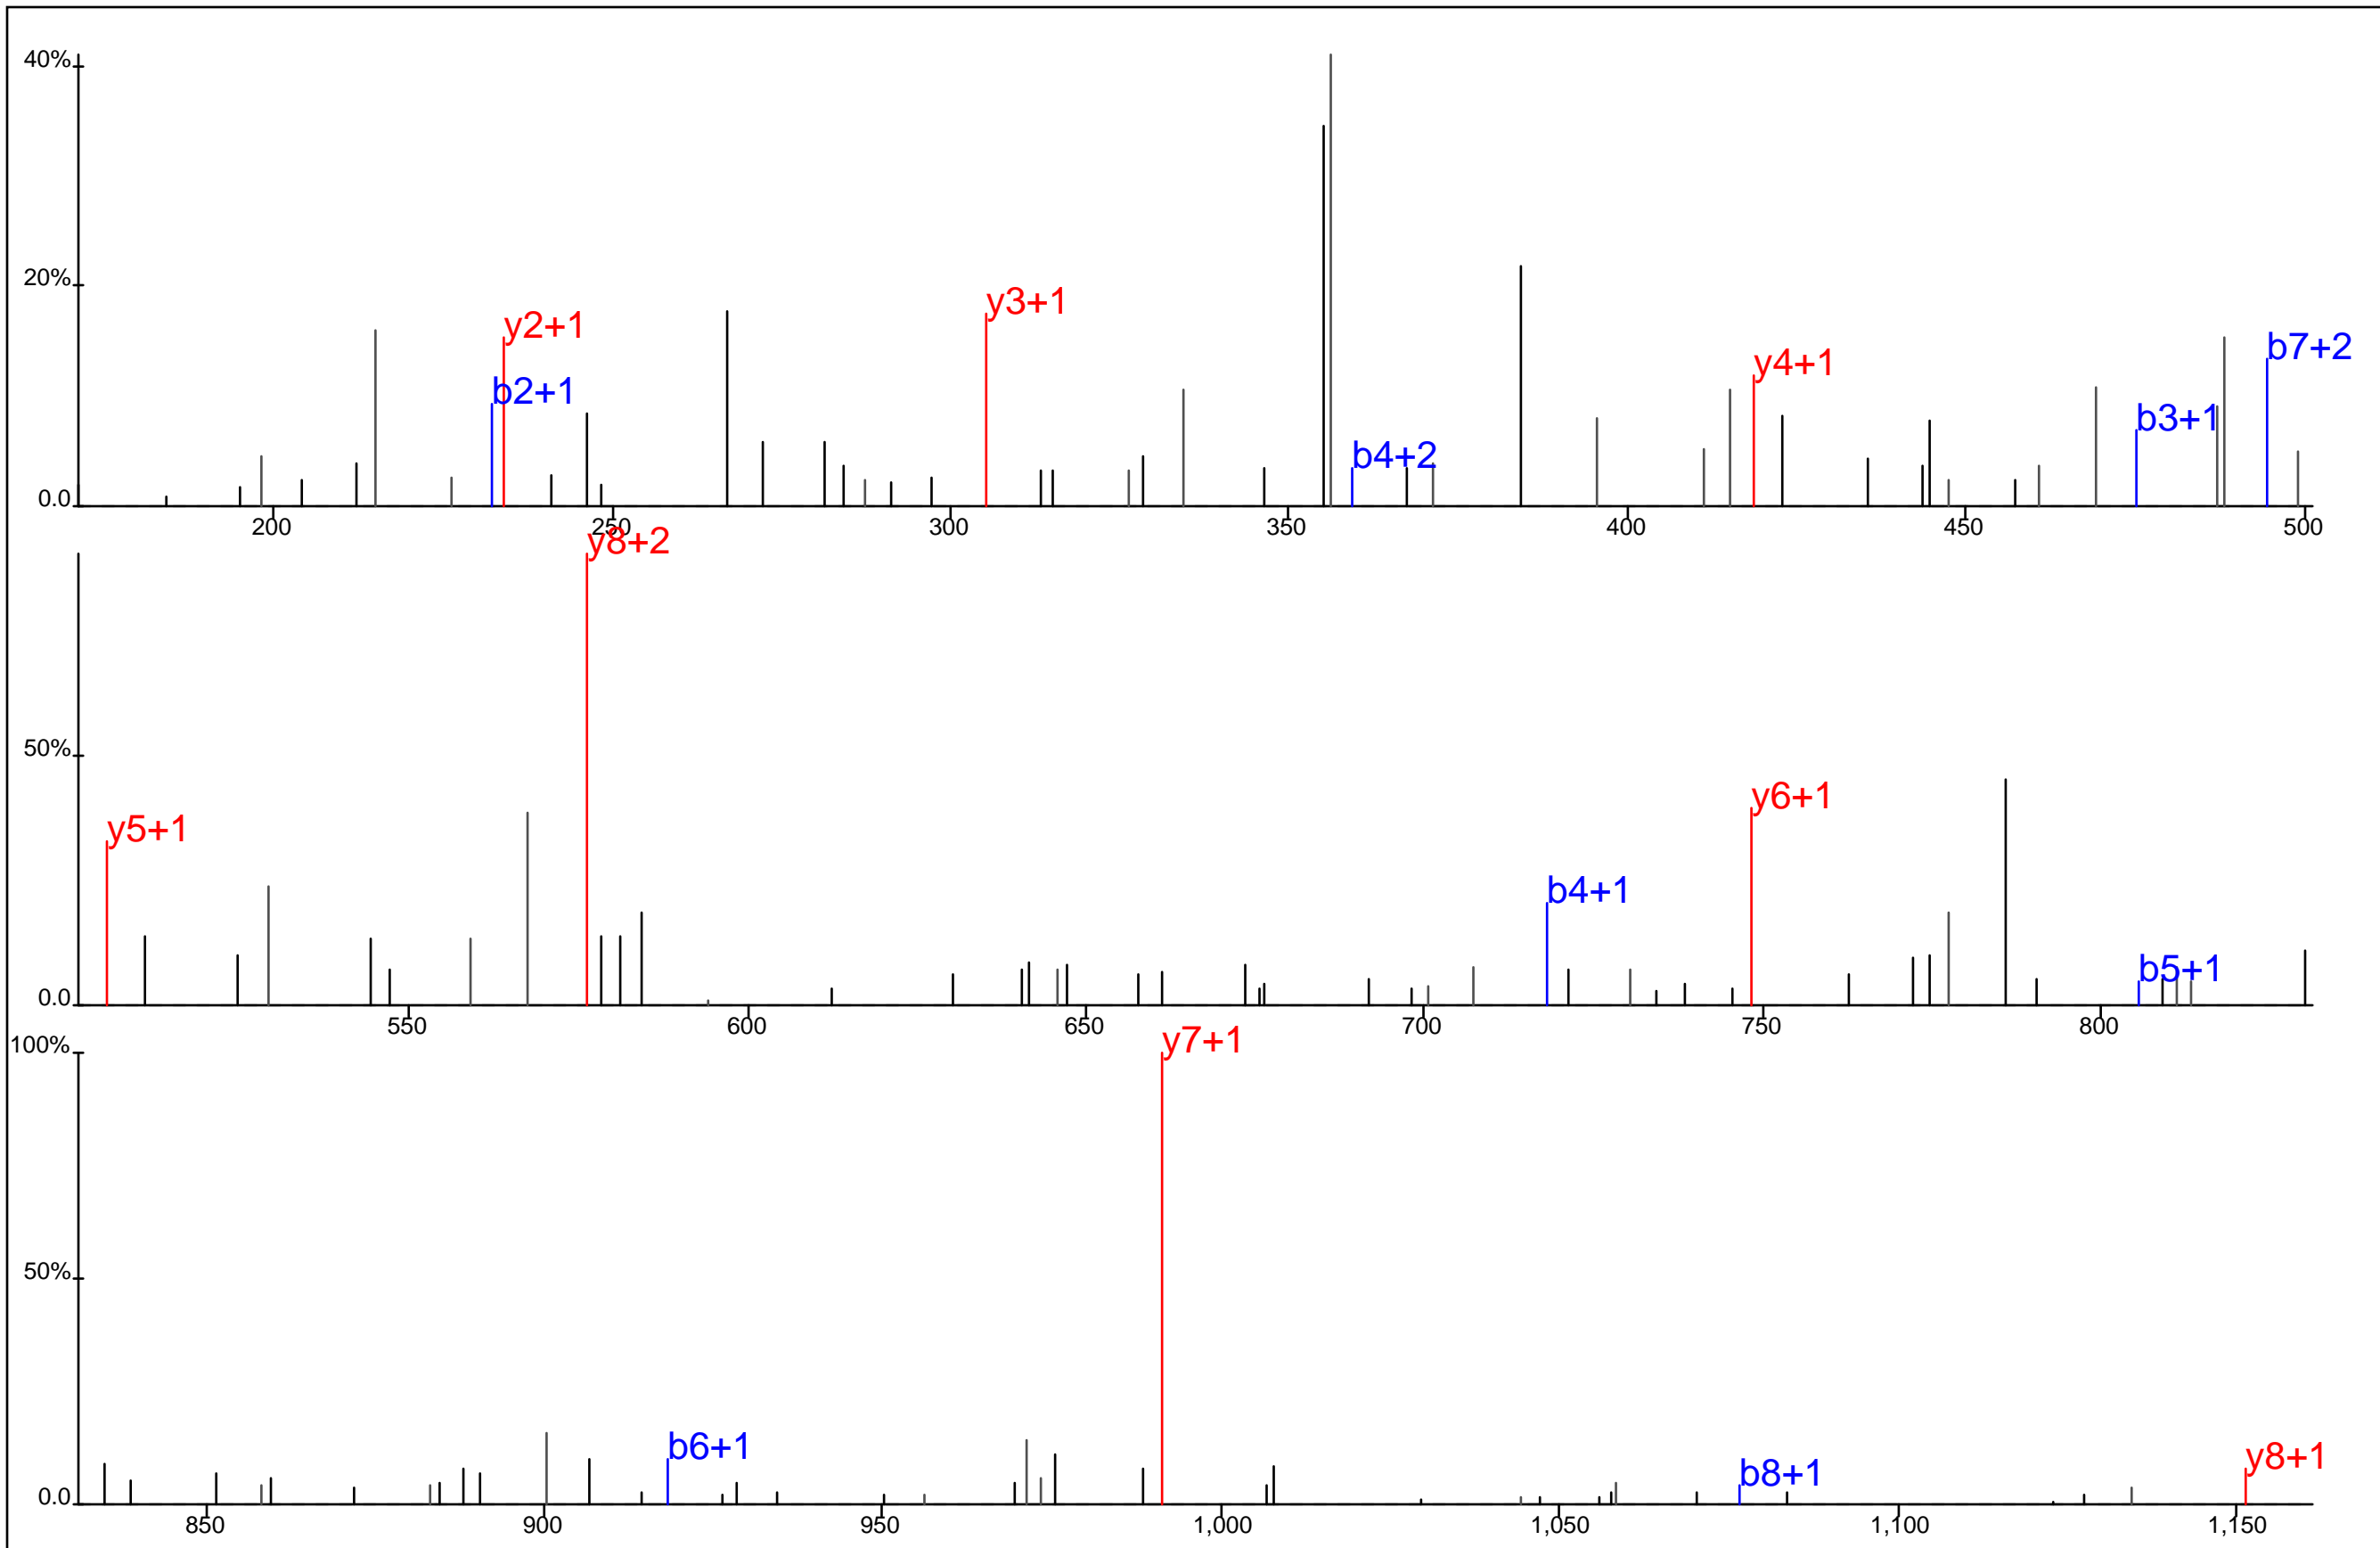

A C Y\* Y\* S L A S K

Protein Name: ZAP70  
 gi Accession: 0  
 Precursor Mass: 611.7162+2  
 Delta Mass: 0.113 ppm  
 XCorr: 38.14



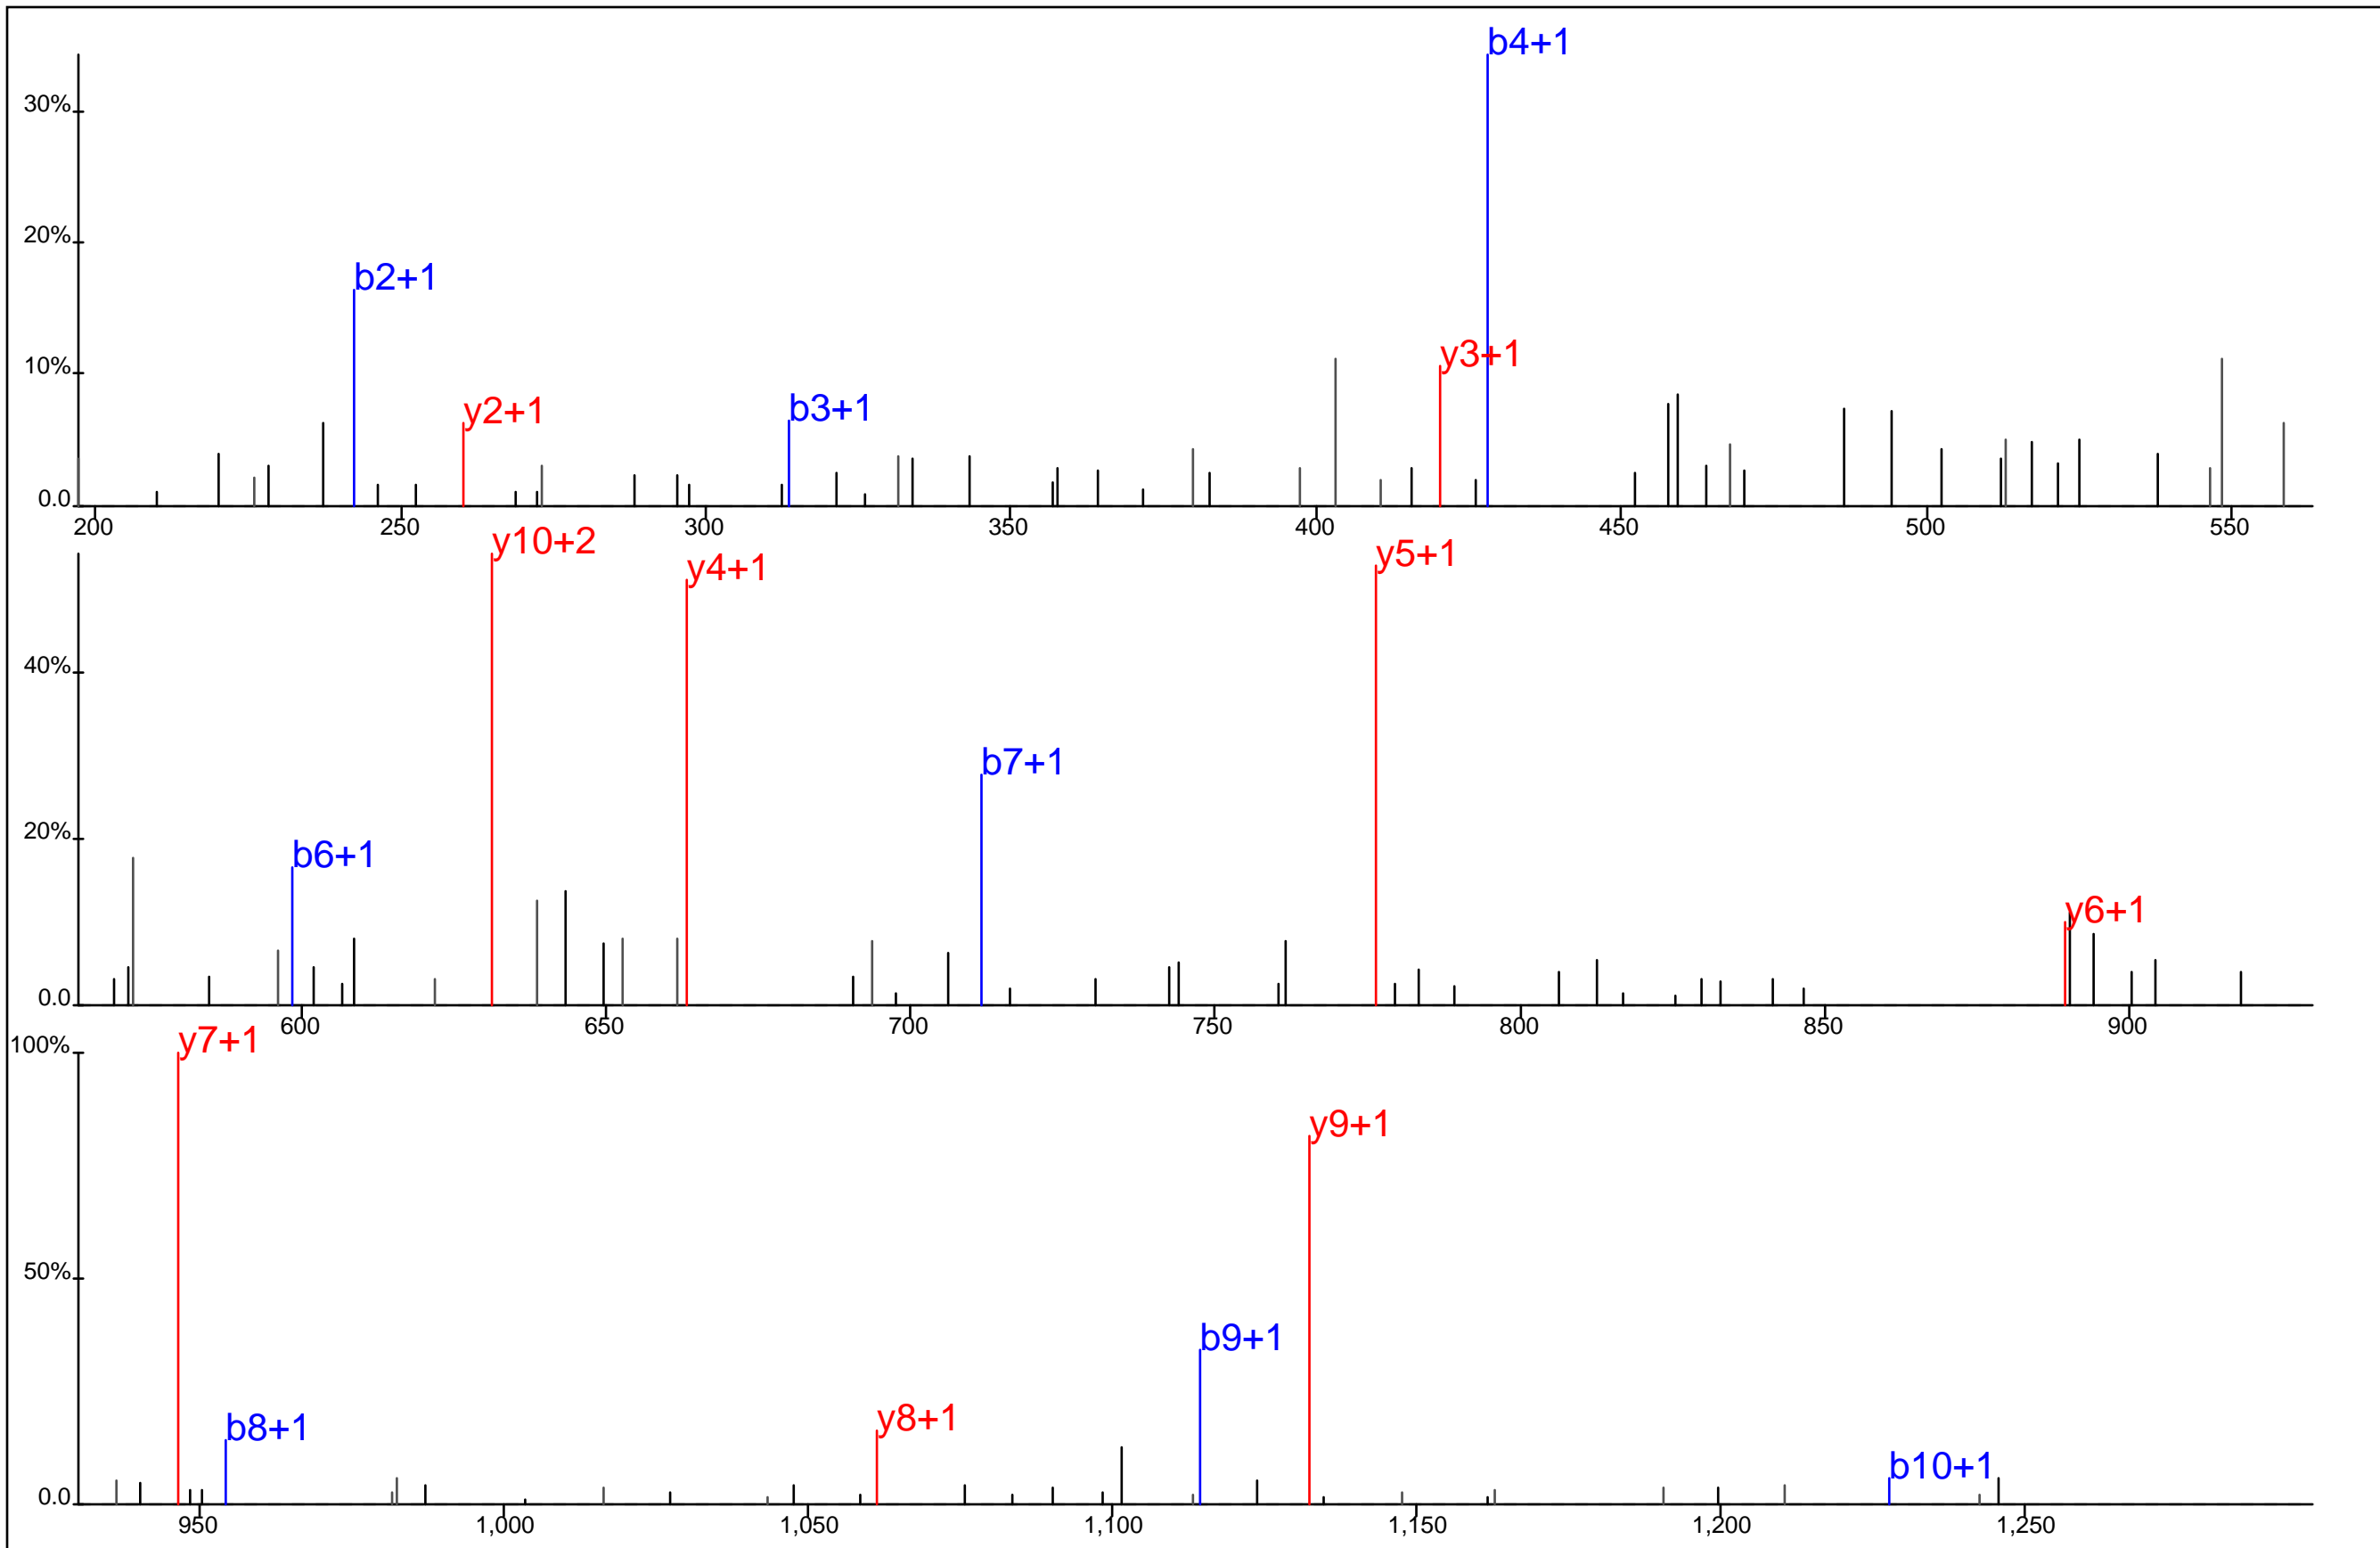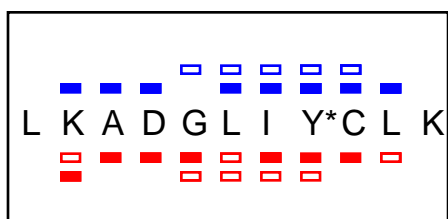

Protein Name: ZAP70  
 gi Accession: 0  
 Precursor Mass: 687.3482+2  
 Delta Mass: 0.499 ppm  
 XCorr: 62.99



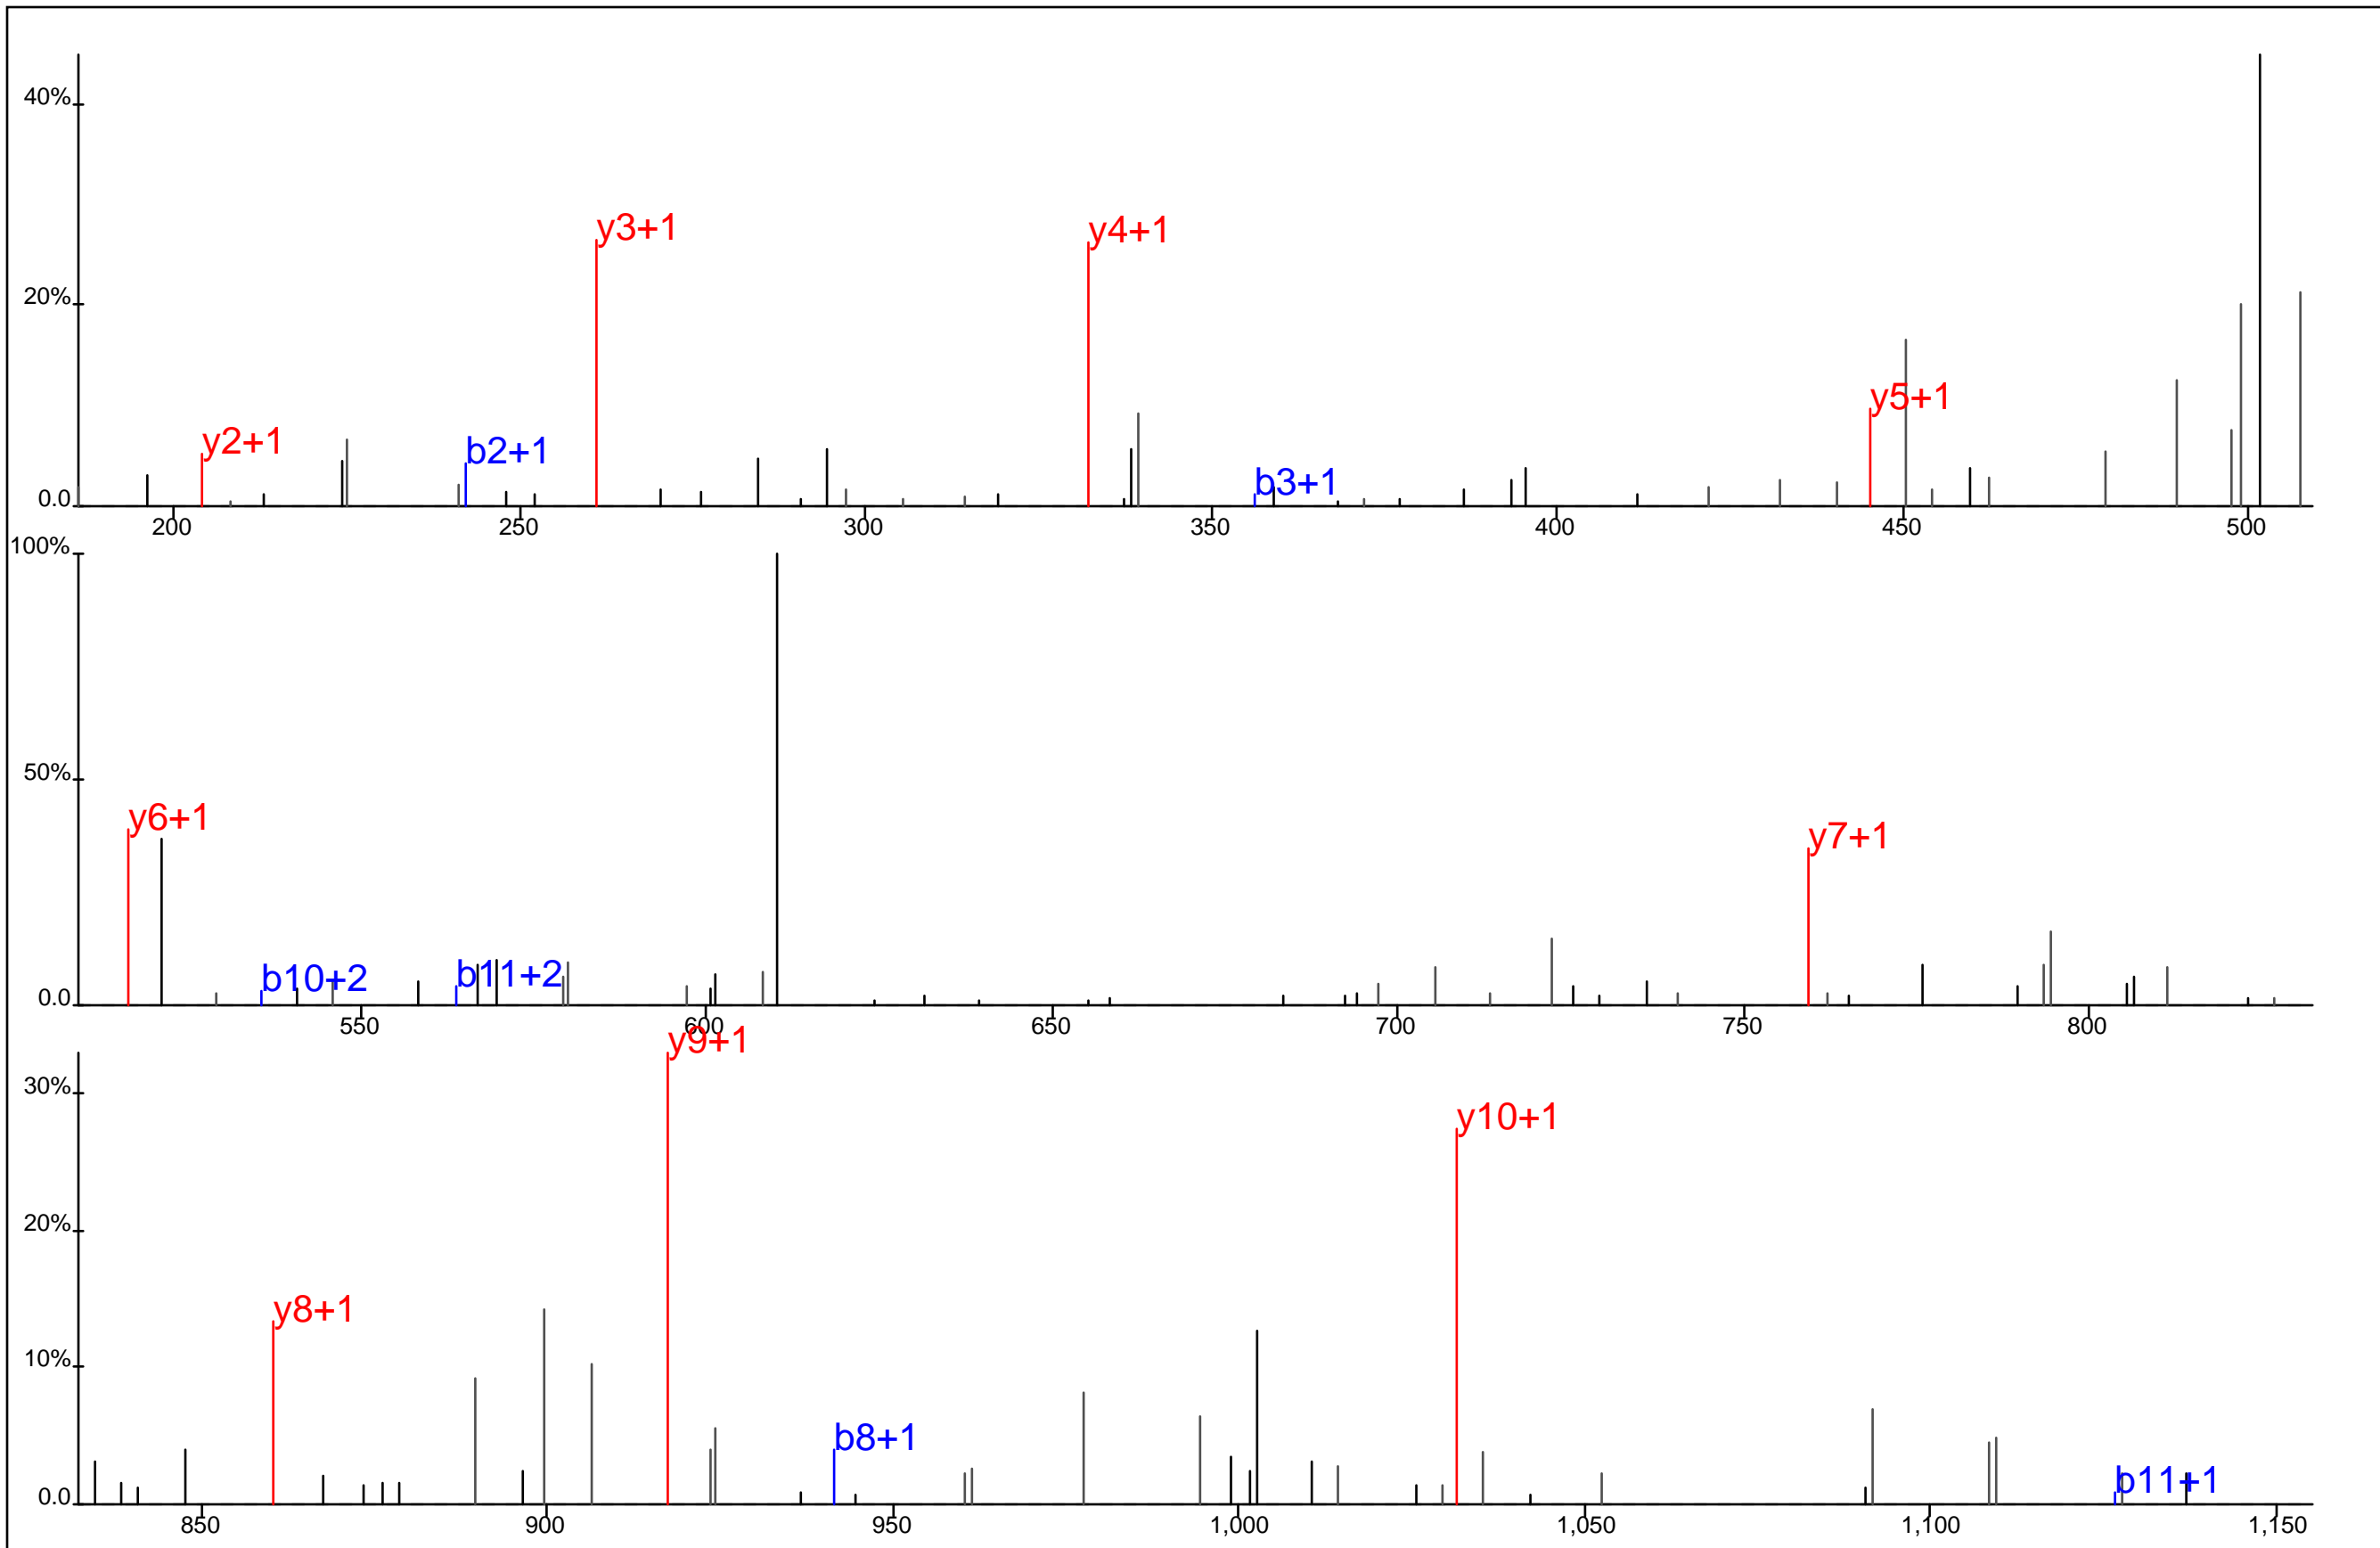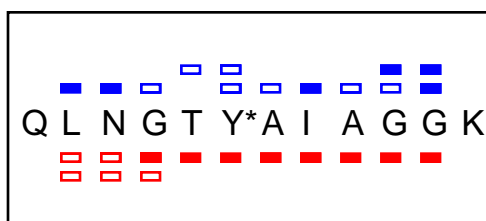

Protein Name: ZAP70  
 gi Accession: 0  
 Precursor Mass: 636.8026+2  
 Delta Mass: 0.429 ppm  
 XCorr: 51.7

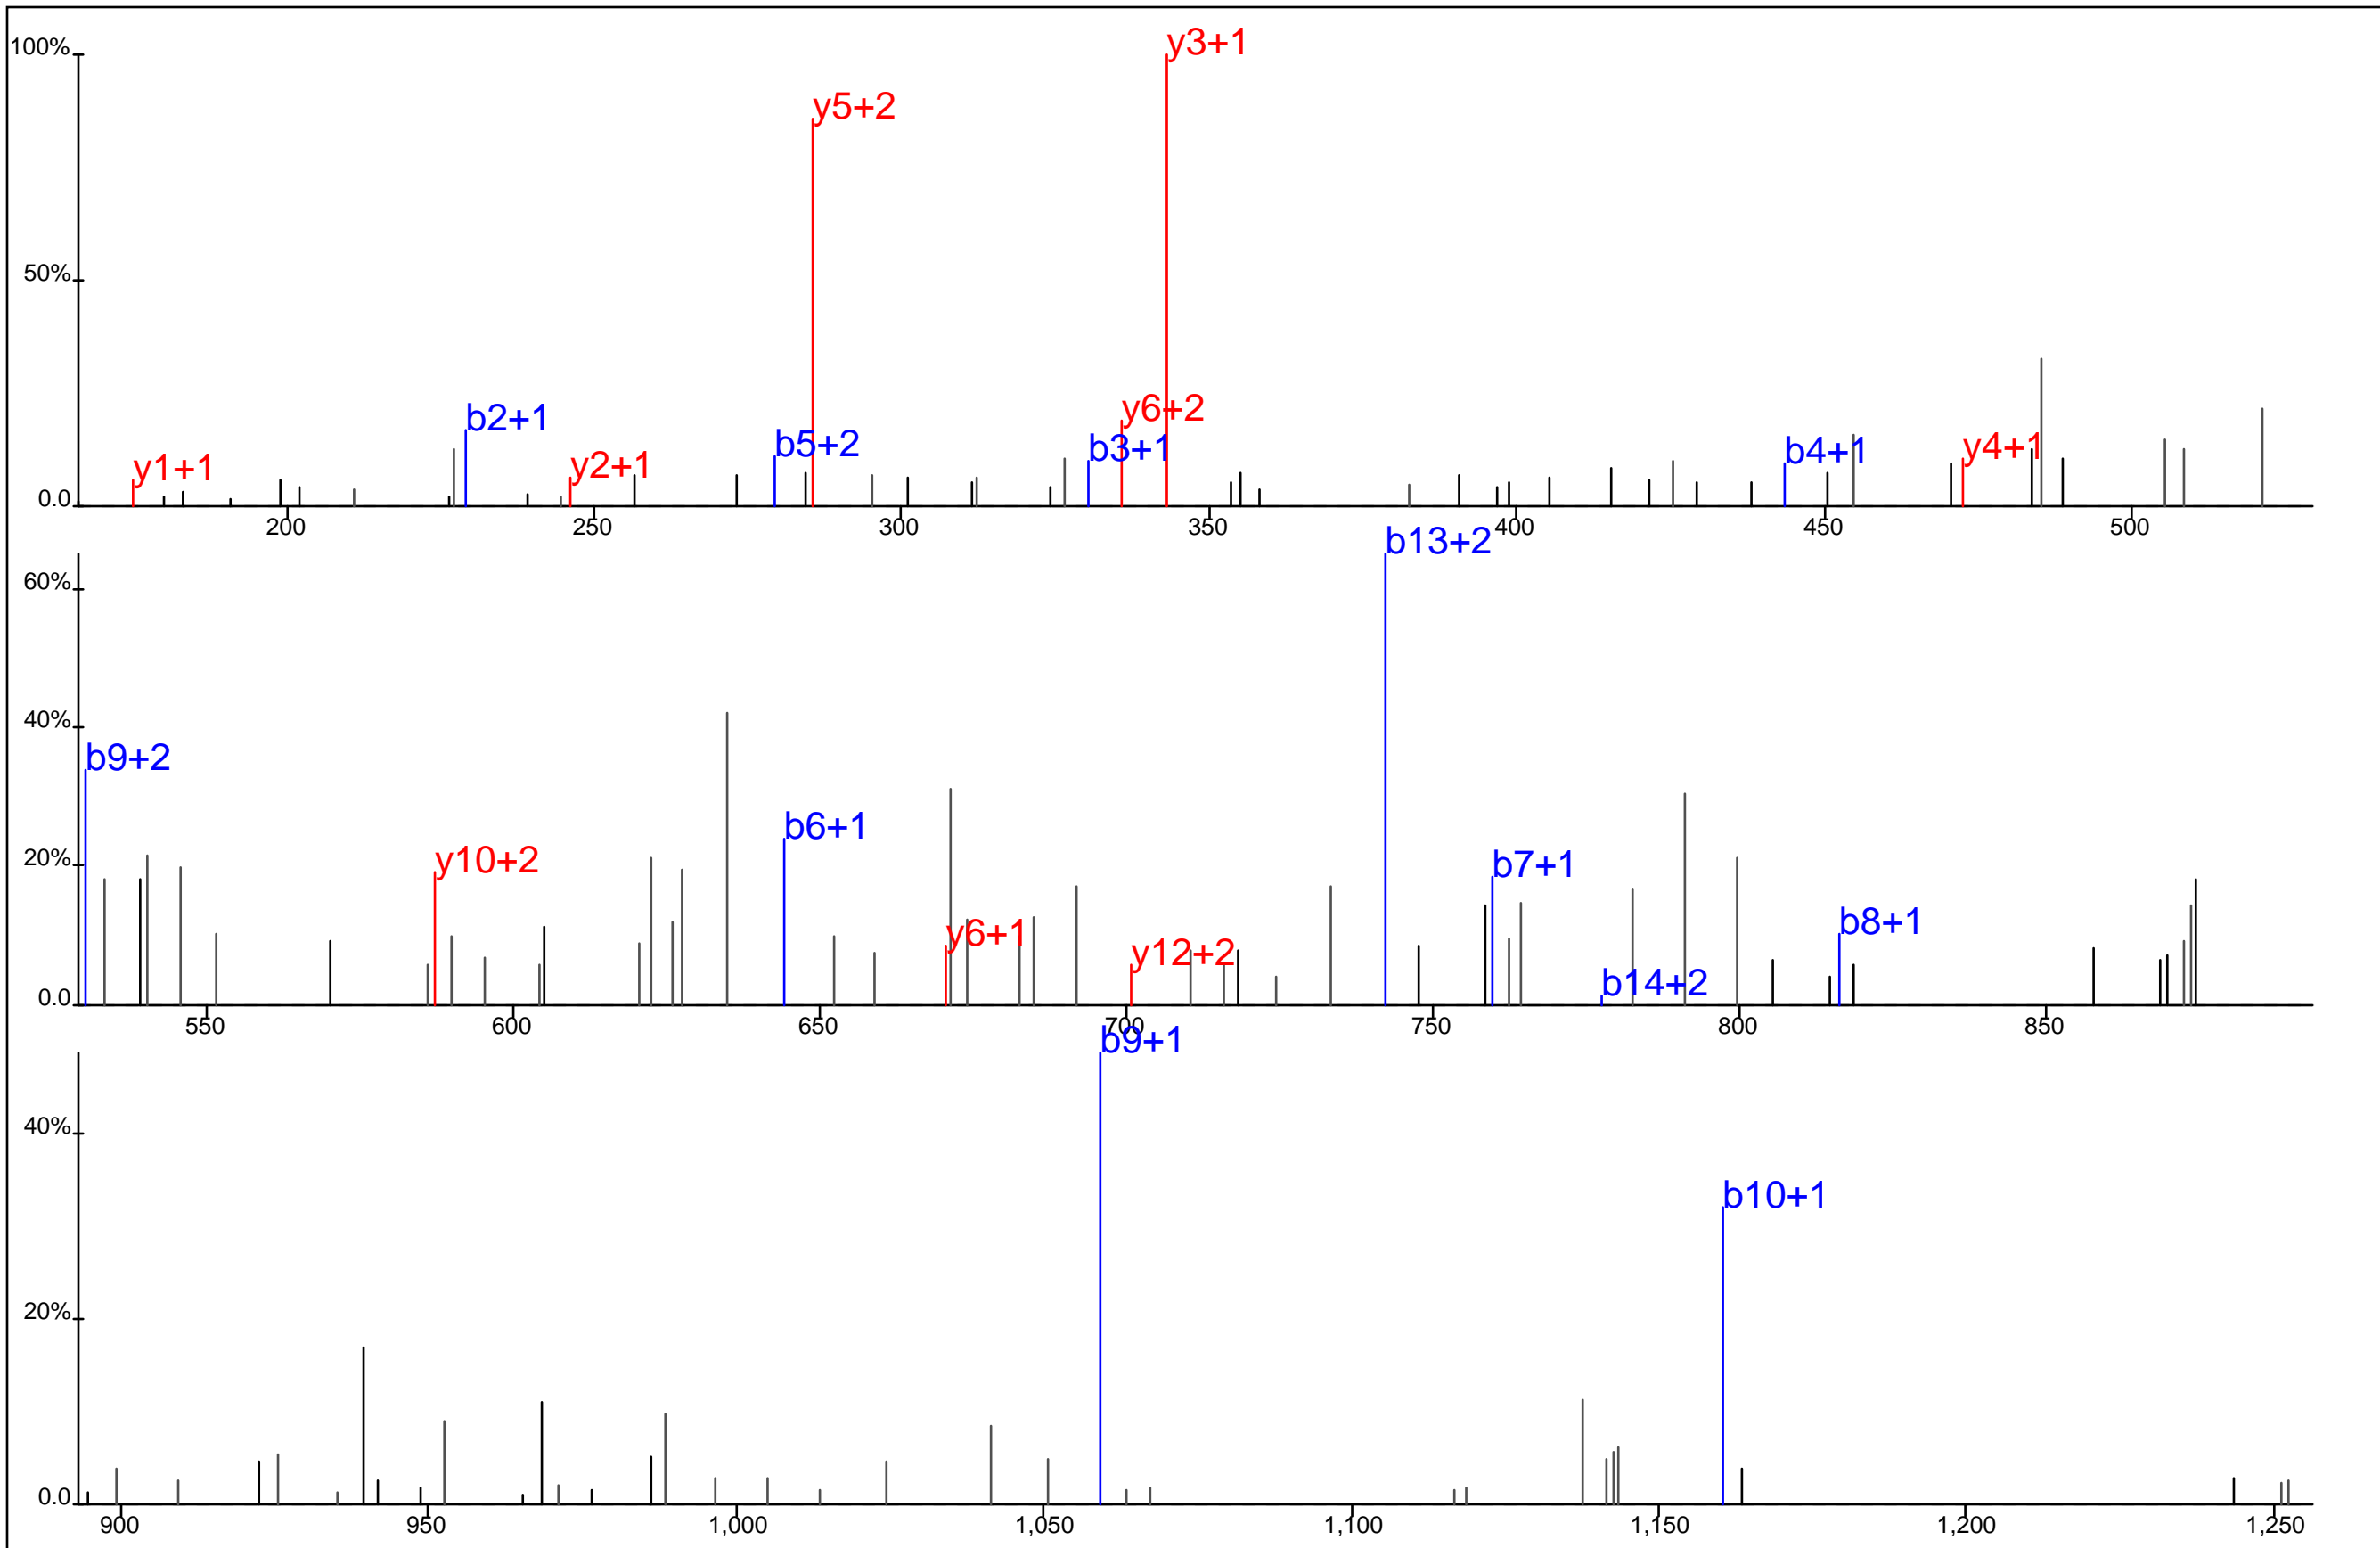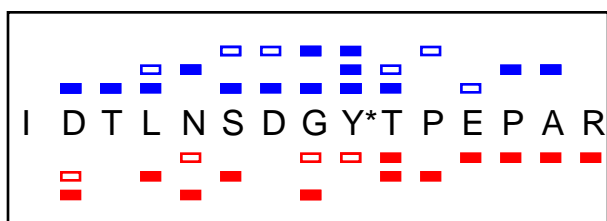

Protein Name: ZAP70  
 gi Accession: 0  
 Precursor Mass: 576.9219+3  
 Delta Mass: 1.996 ppm  
 XCorr: 36.53

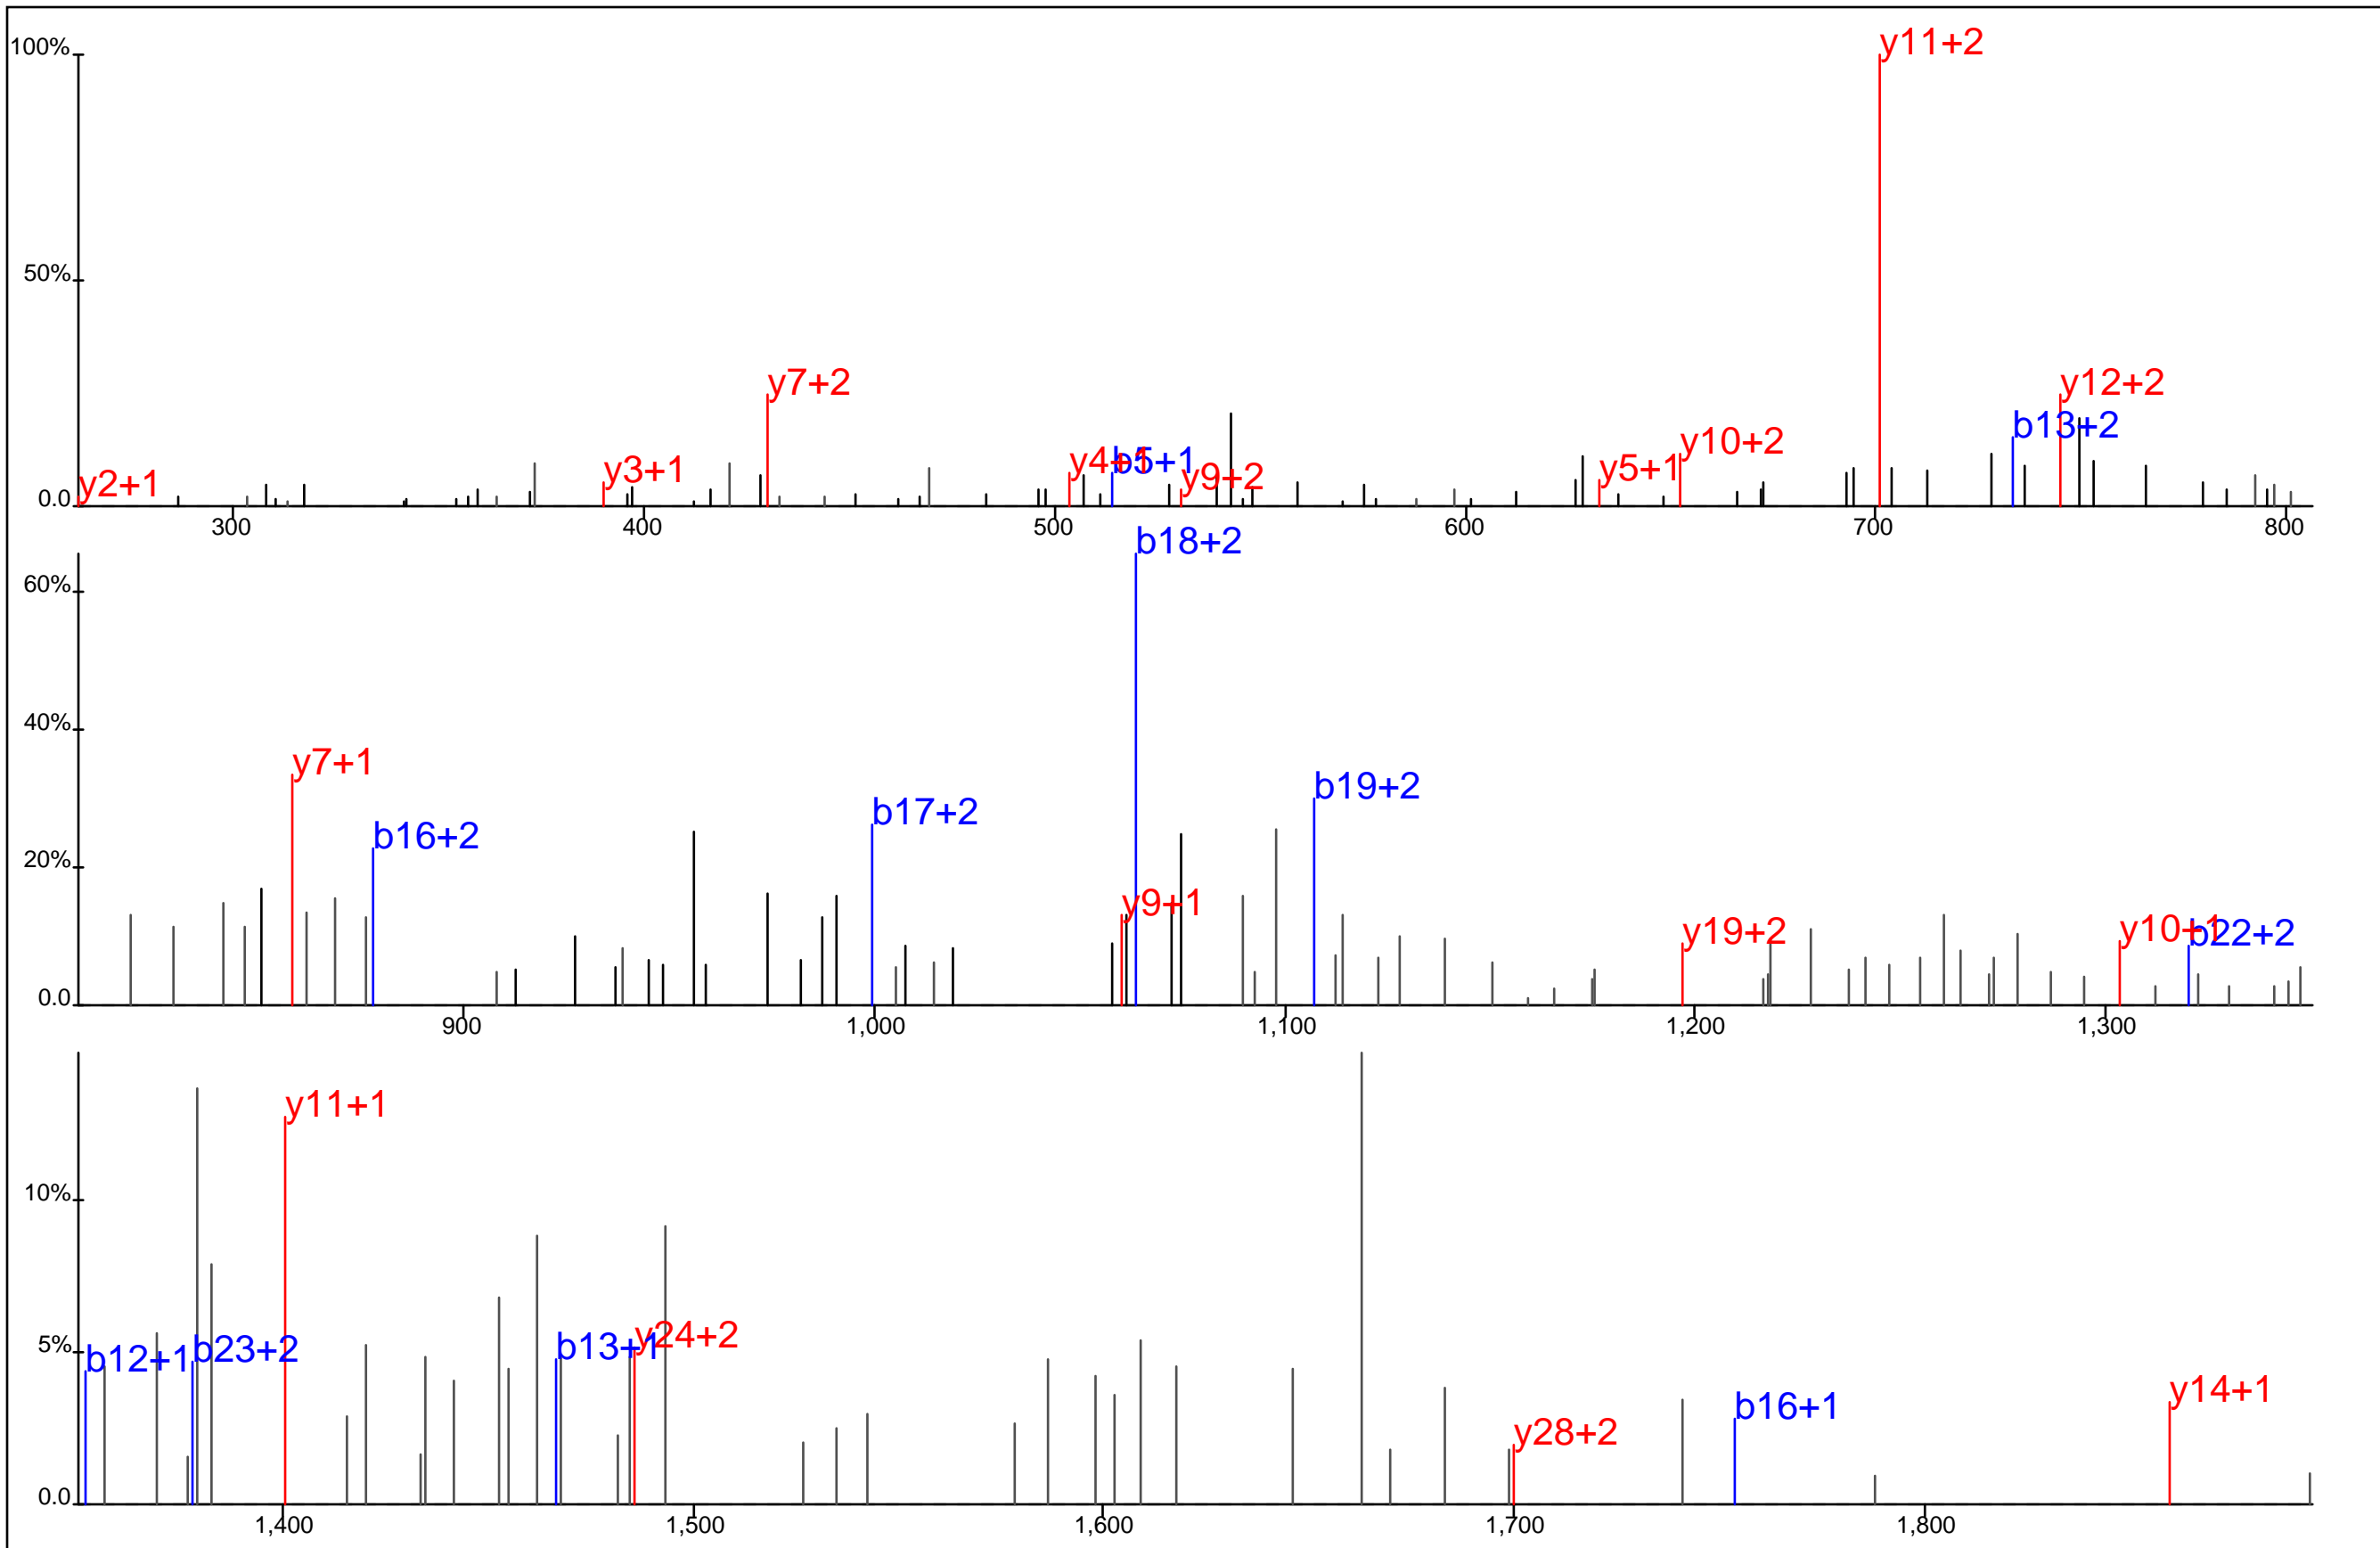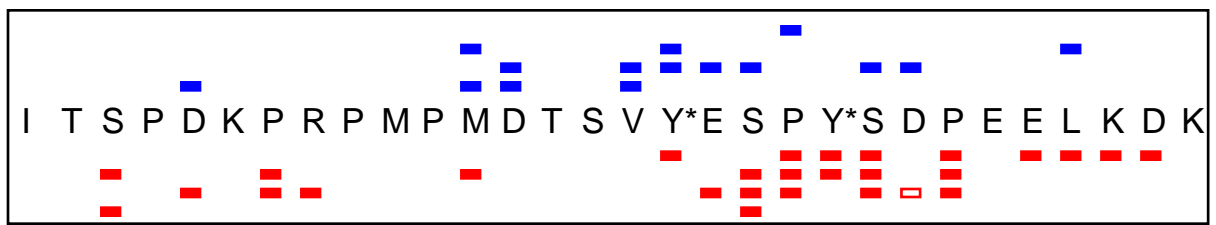

Protein Name: ZAP70  
 gi Accession: 0  
 Precursor Mass: 903.8943+4  
 Delta Mass: 0.250 ppm  
 XCorr: 30.78

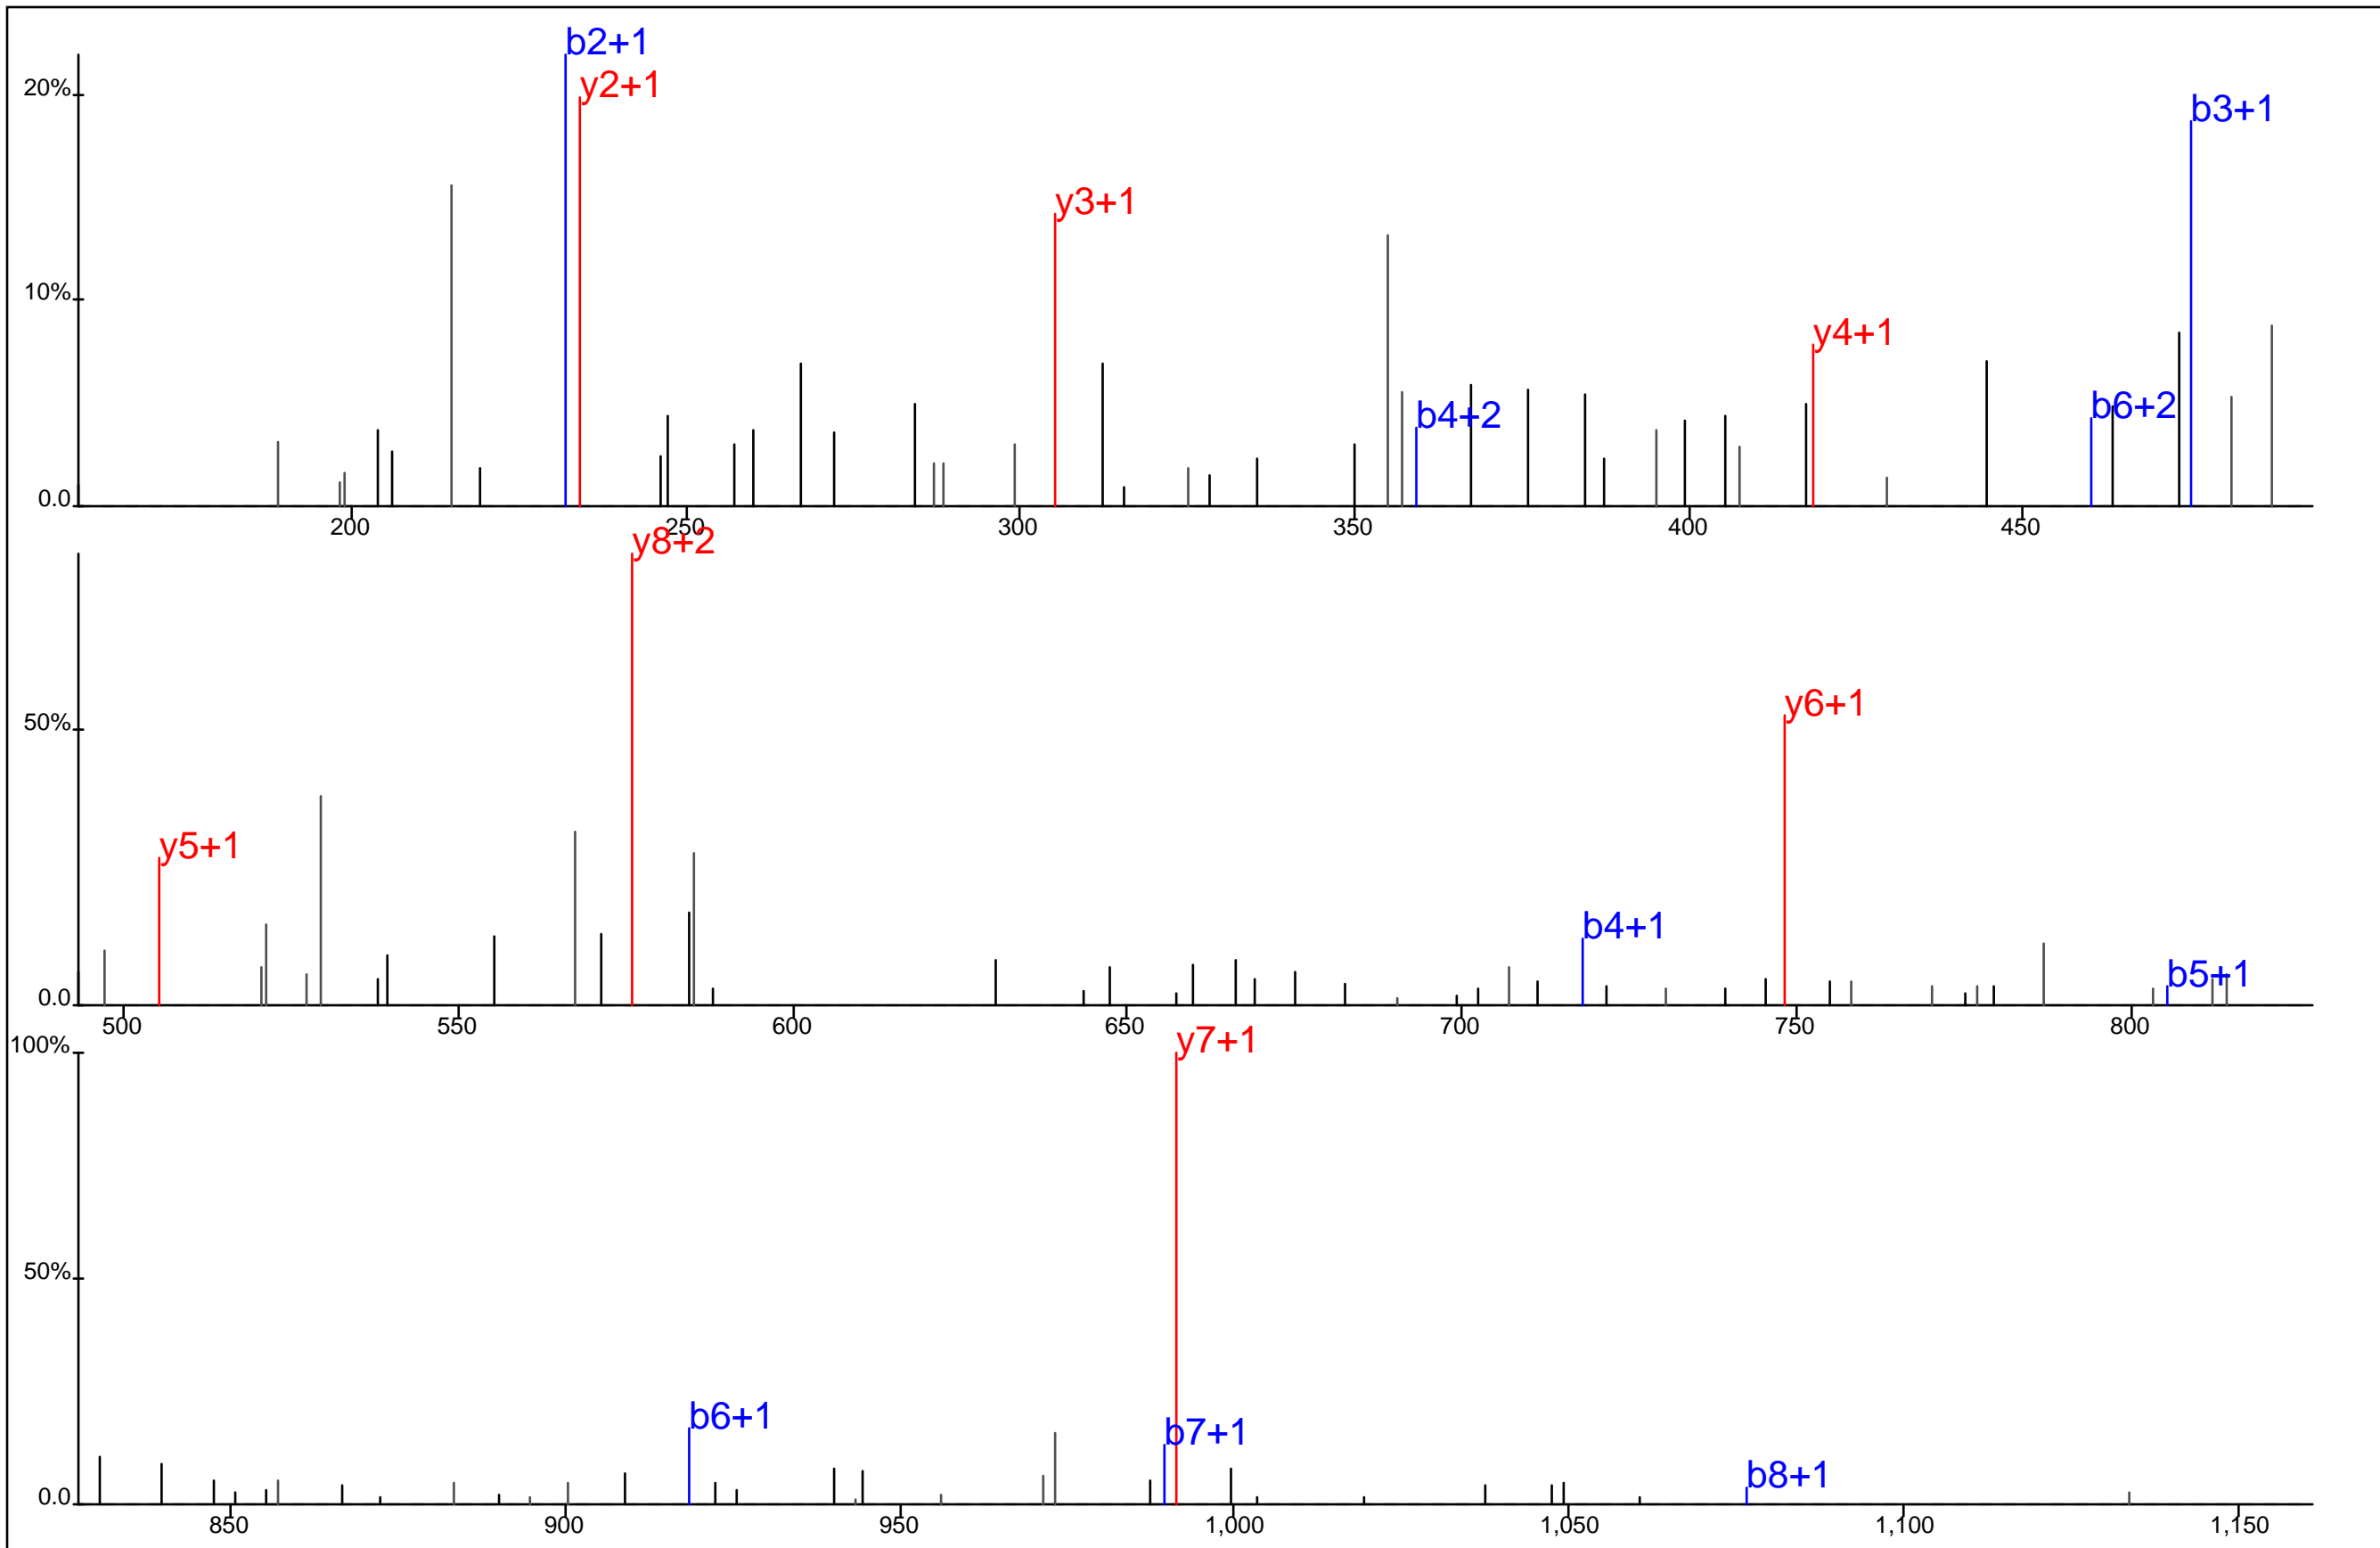

▢ ▢ ▢ ▢ ▢ ▢ ▢  
▢ ▢ ▢ ▢ ▢ ▢ ▢

A C Y\* Y\* S L A S K

Protein Name: ZAP70  
 gi Accession: 0  
 Precursor Mass: 611.7155+2  
 Delta Mass: 1.186 ppm  
 XCorr: 42.1





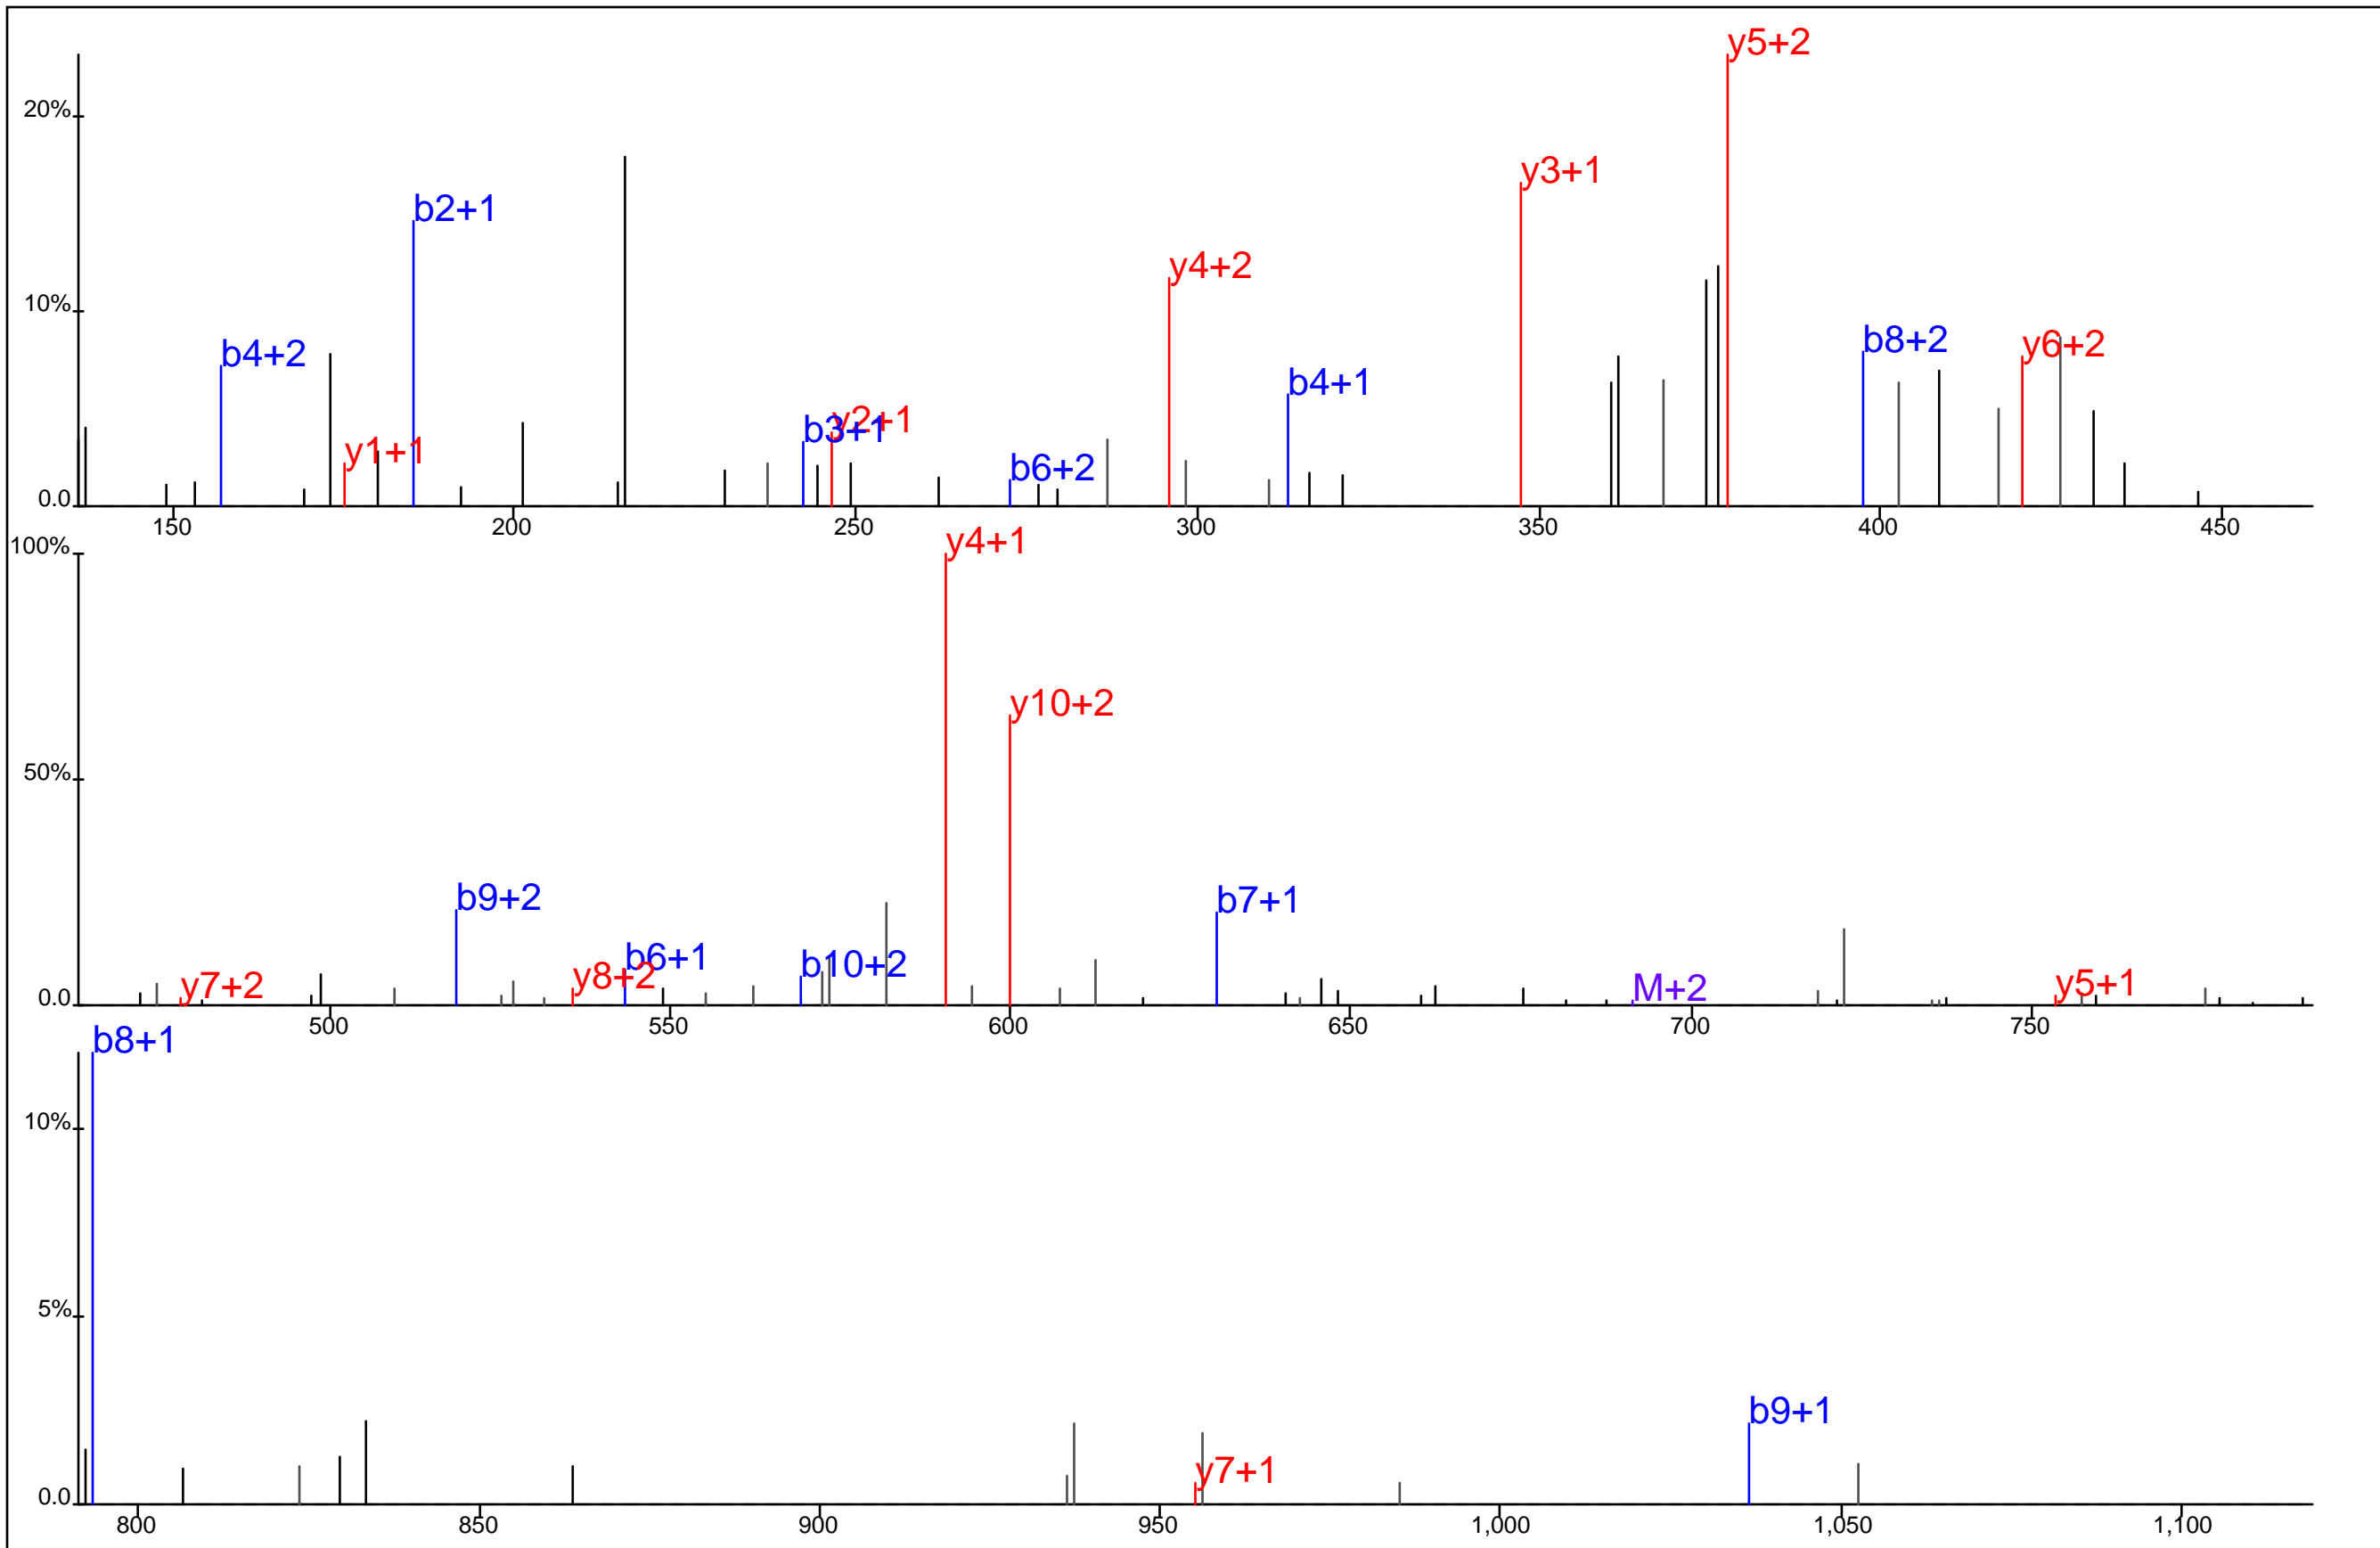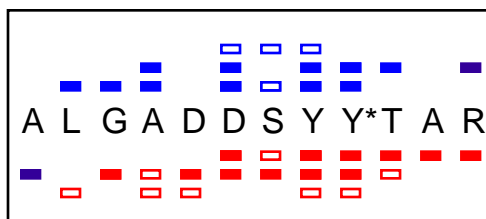

Protein Name: ZAP70  
 gi Accession: 0  
 Precursor Mass: 461.5258+3  
 Delta Mass: 0.251 ppm  
 XCorr: 35.5

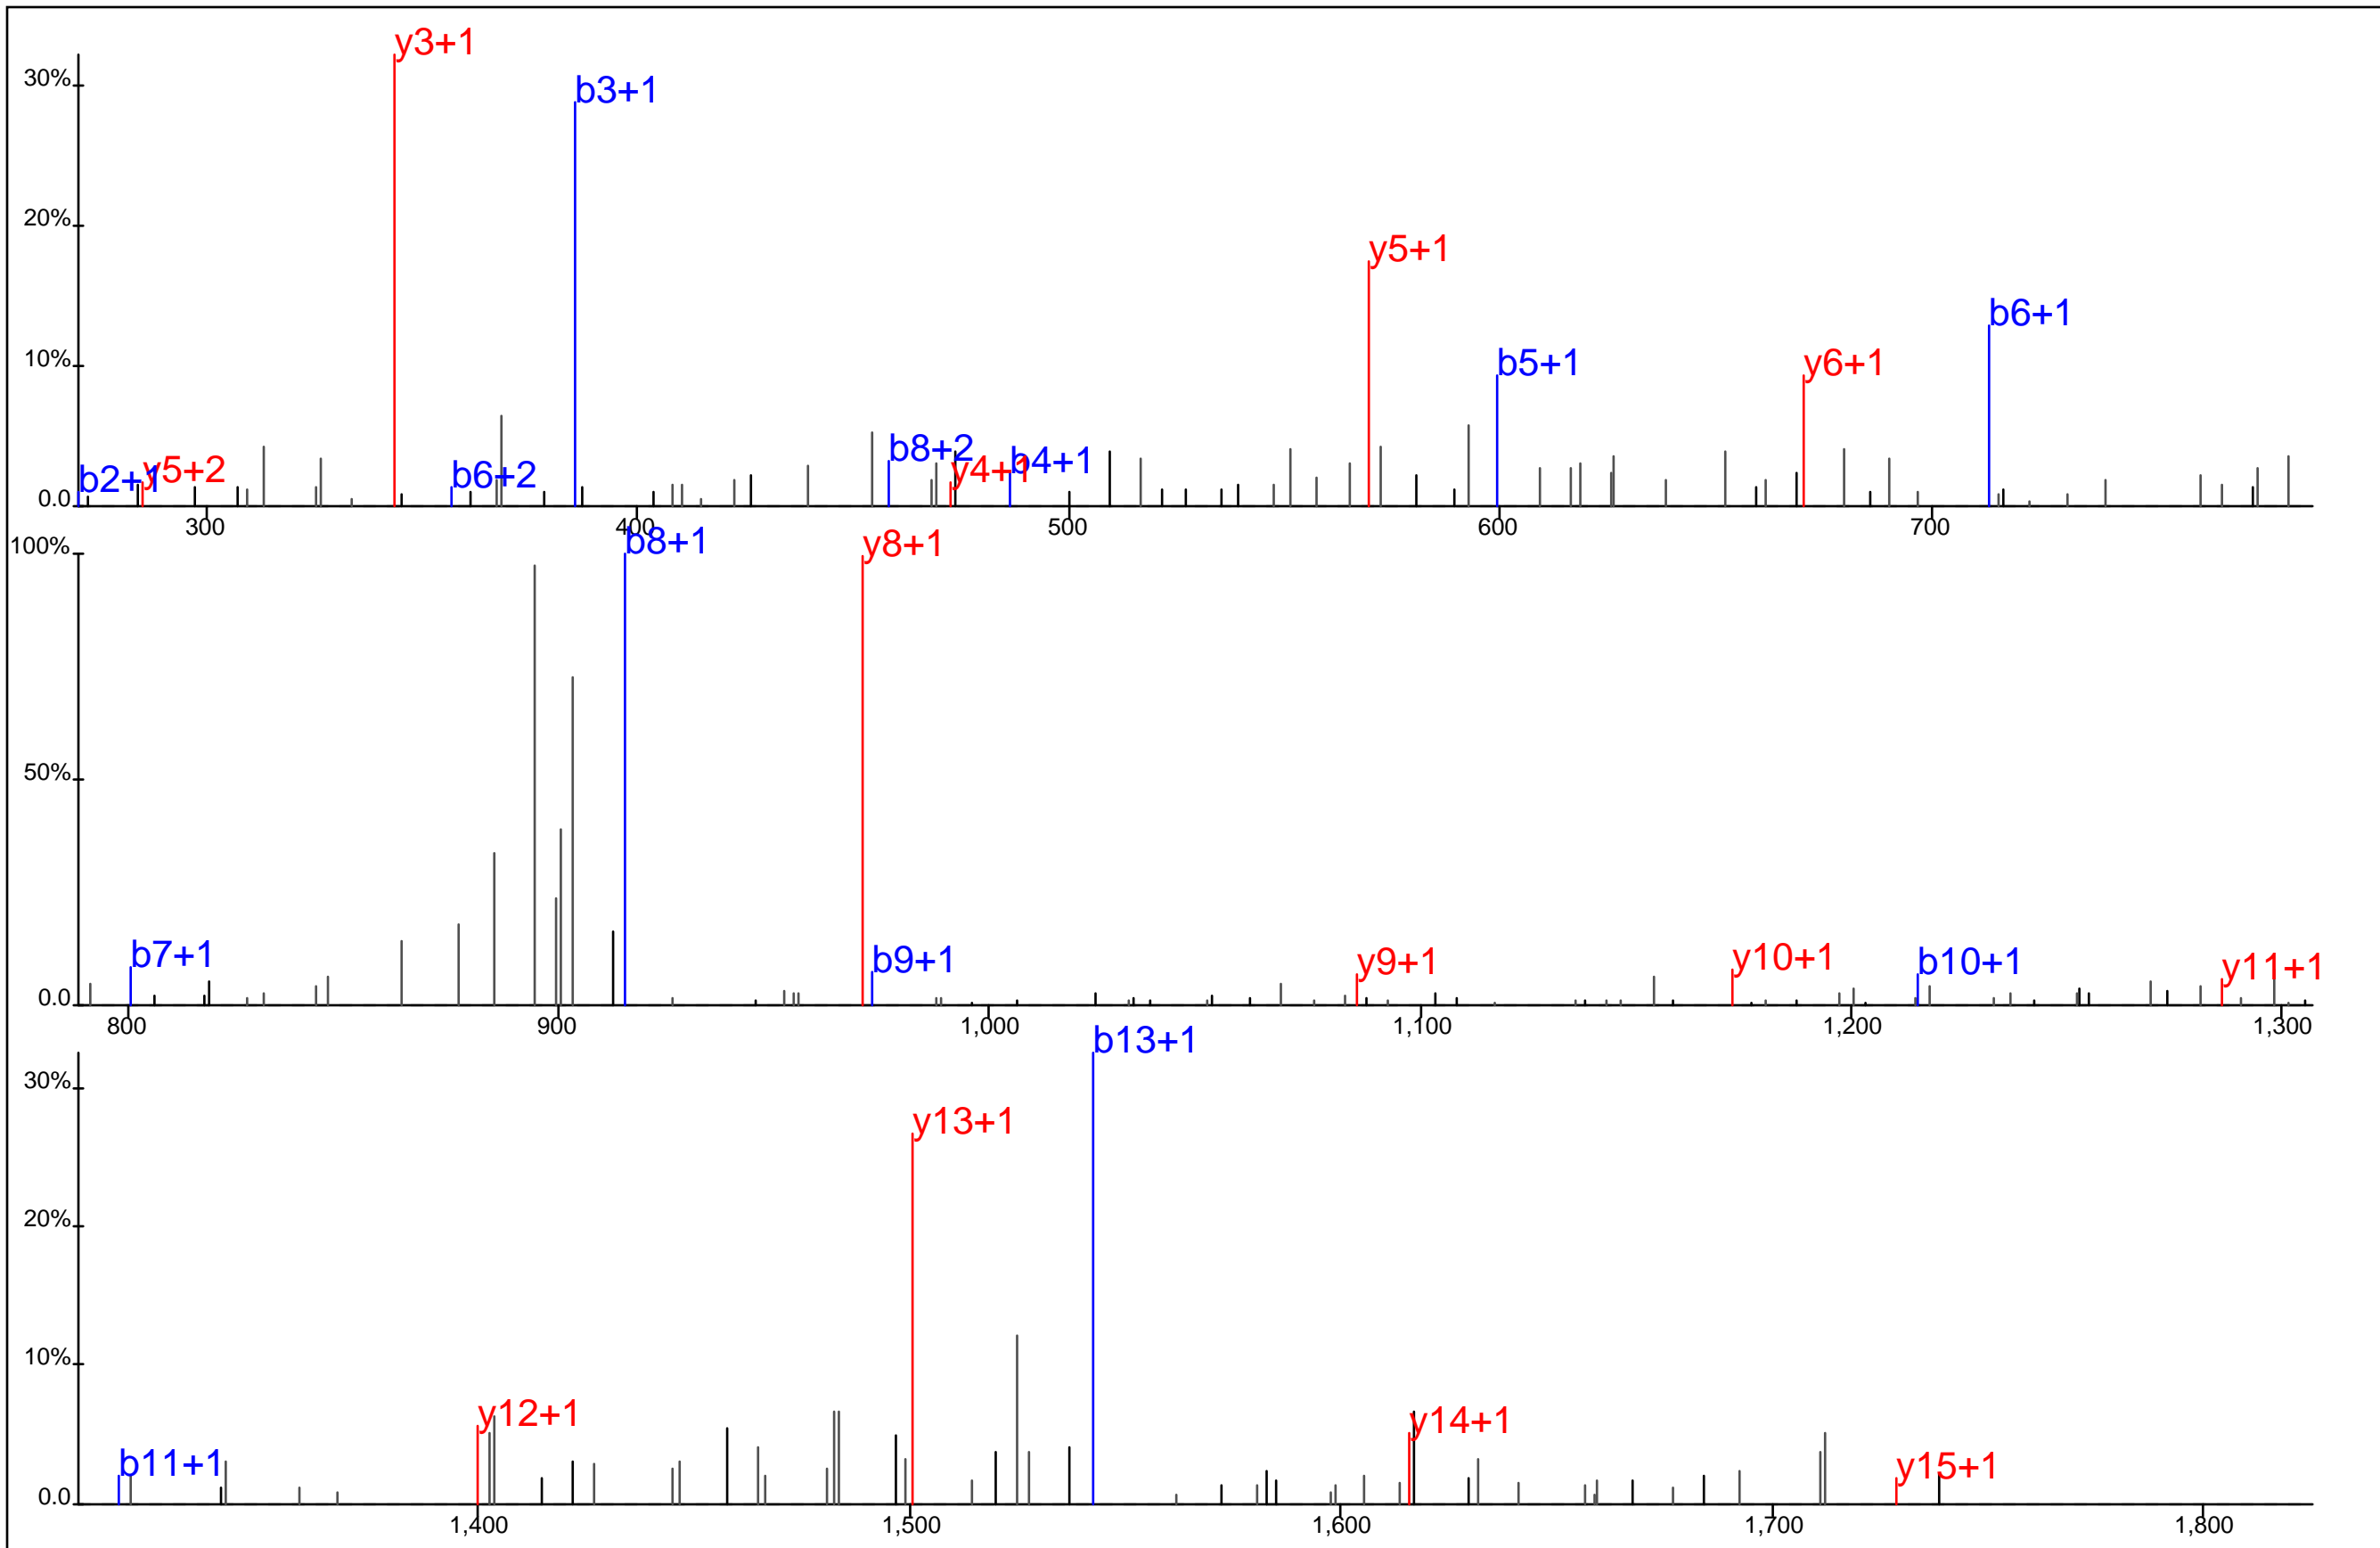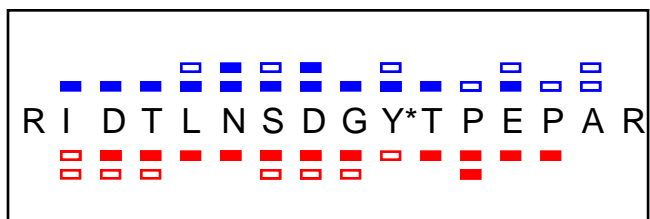

Protein Name: ZAP70  
 gi Accession: 0  
 Precursor Mass: 942.9311+2  
 Delta Mass: 3.281 ppm  
 XCorr: 81.69



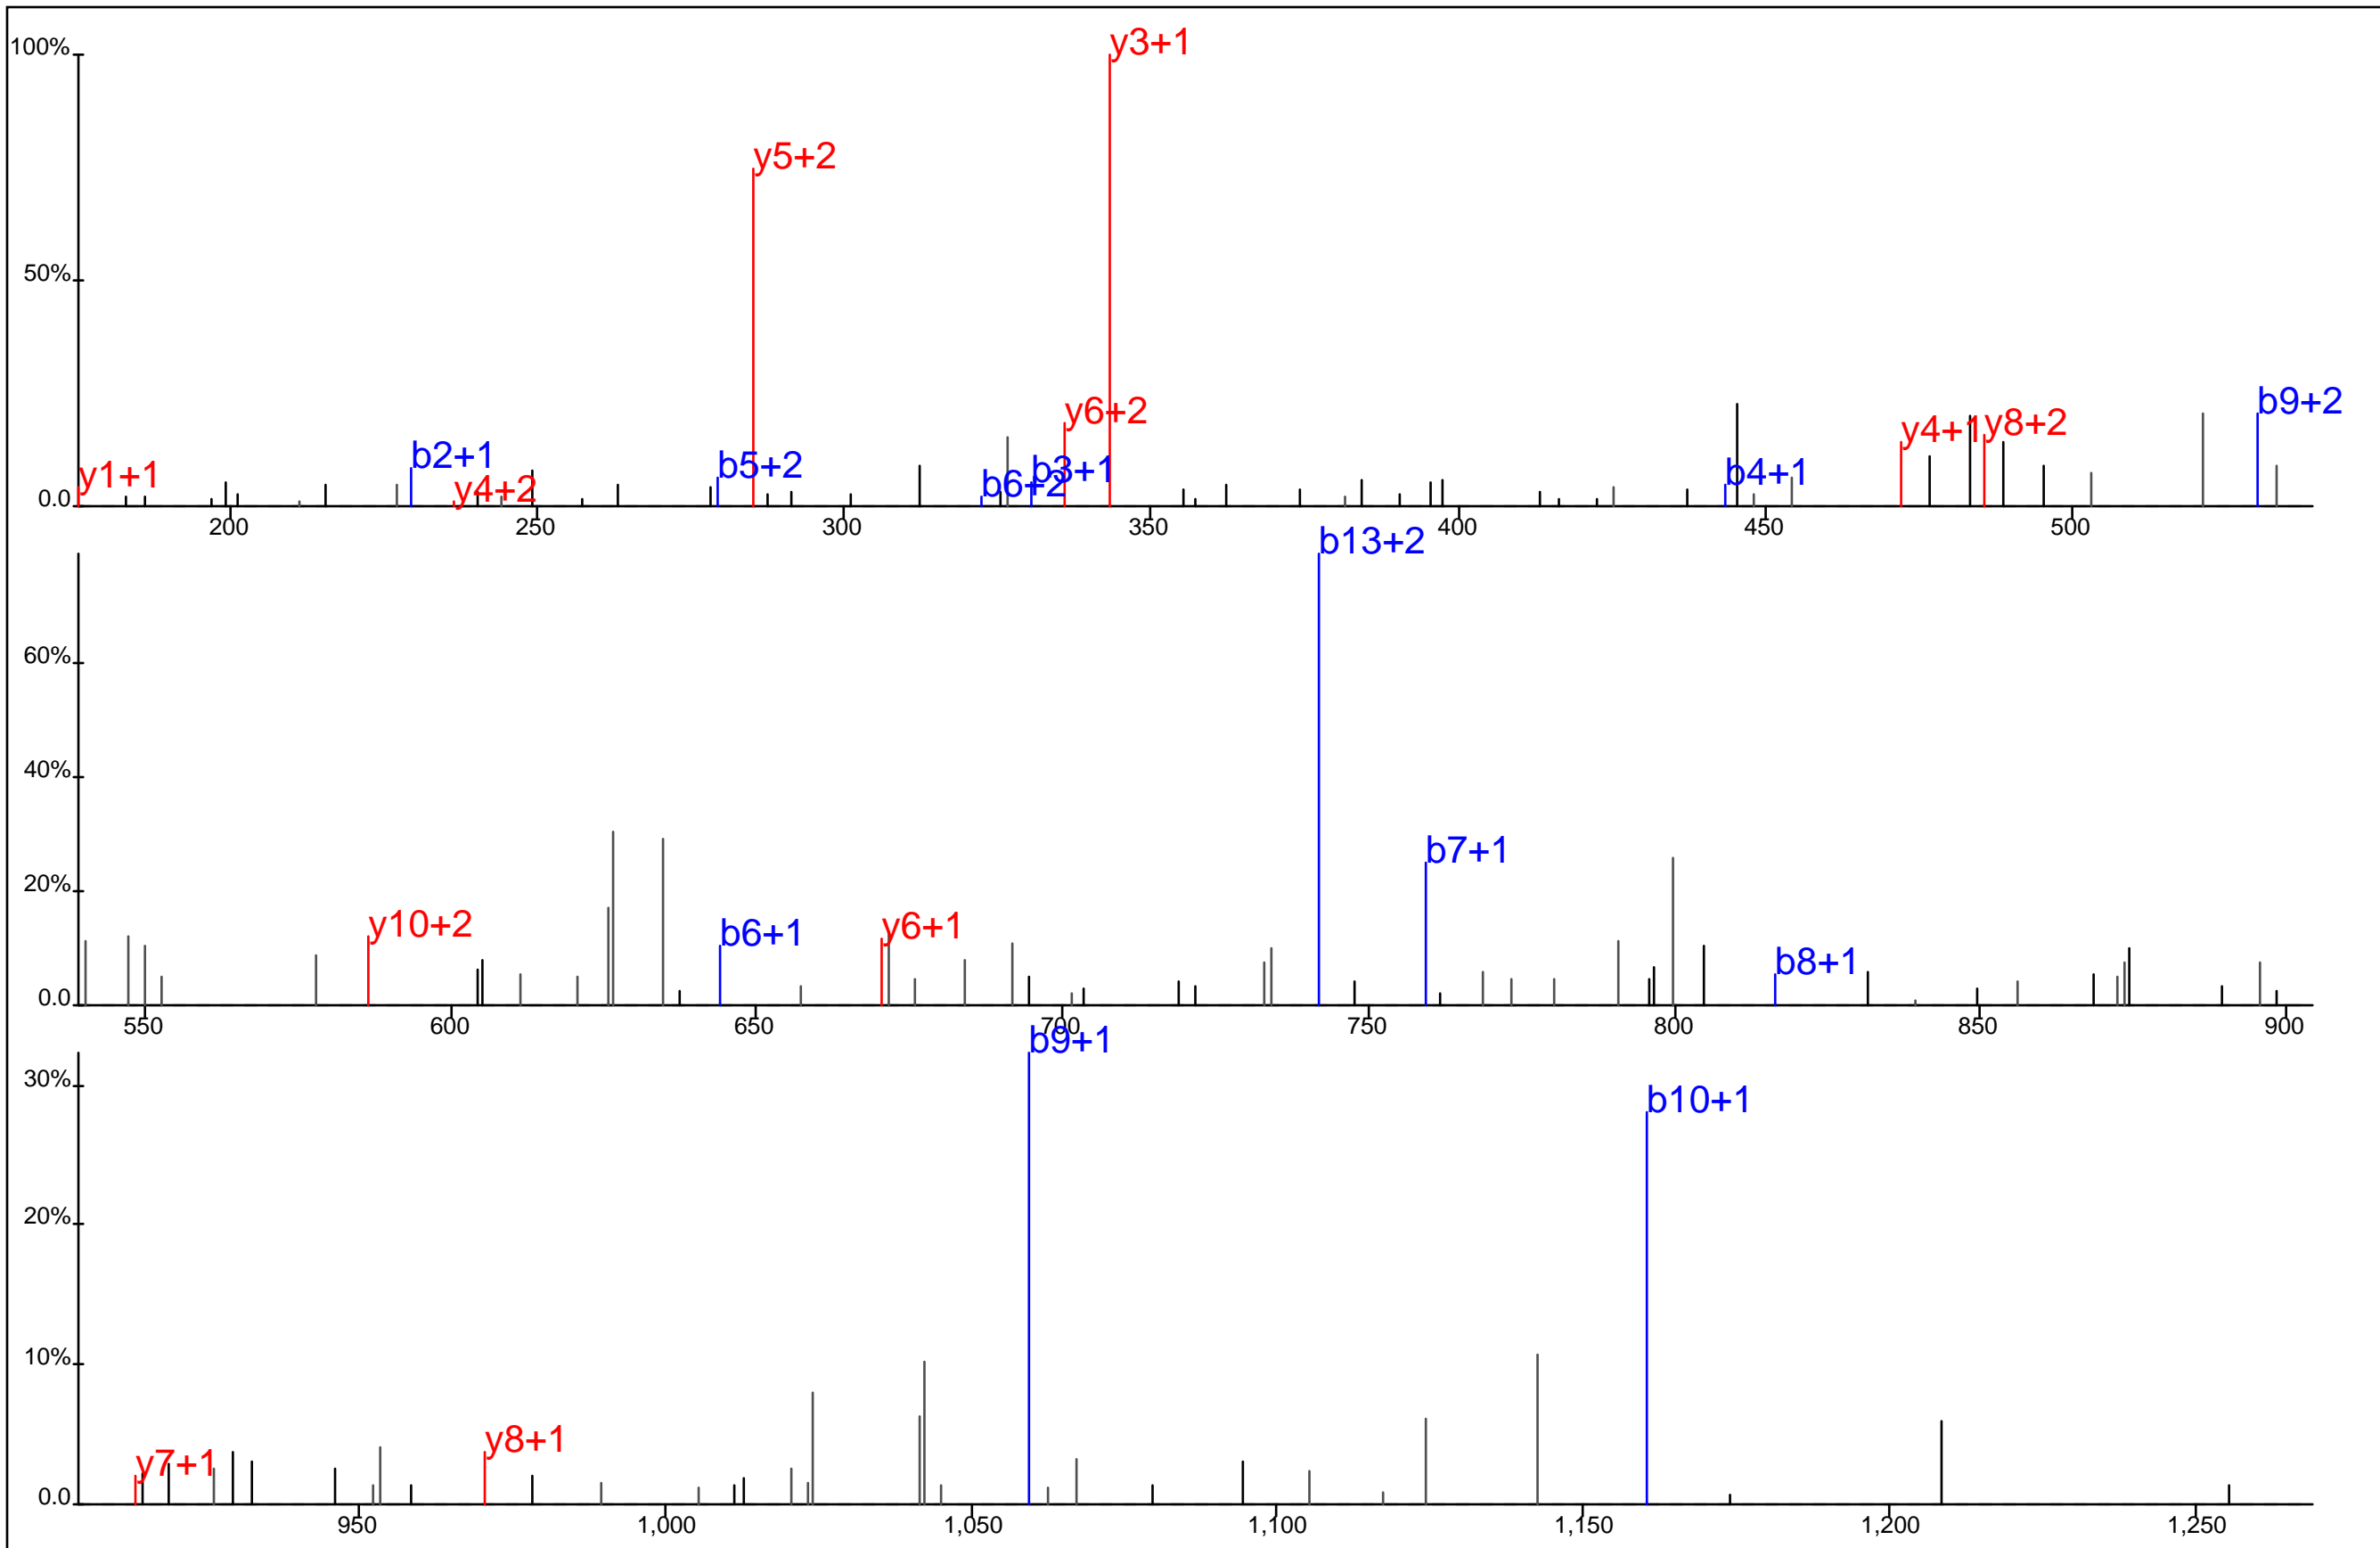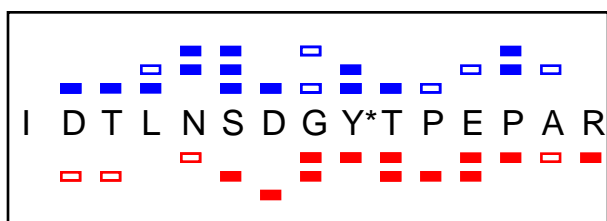

Protein Name: ZAP70  
 gi Accession: 0  
 Precursor Mass: 576.9211+3  
 Delta Mass: 0.620 ppm  
 XCorr: 32.69



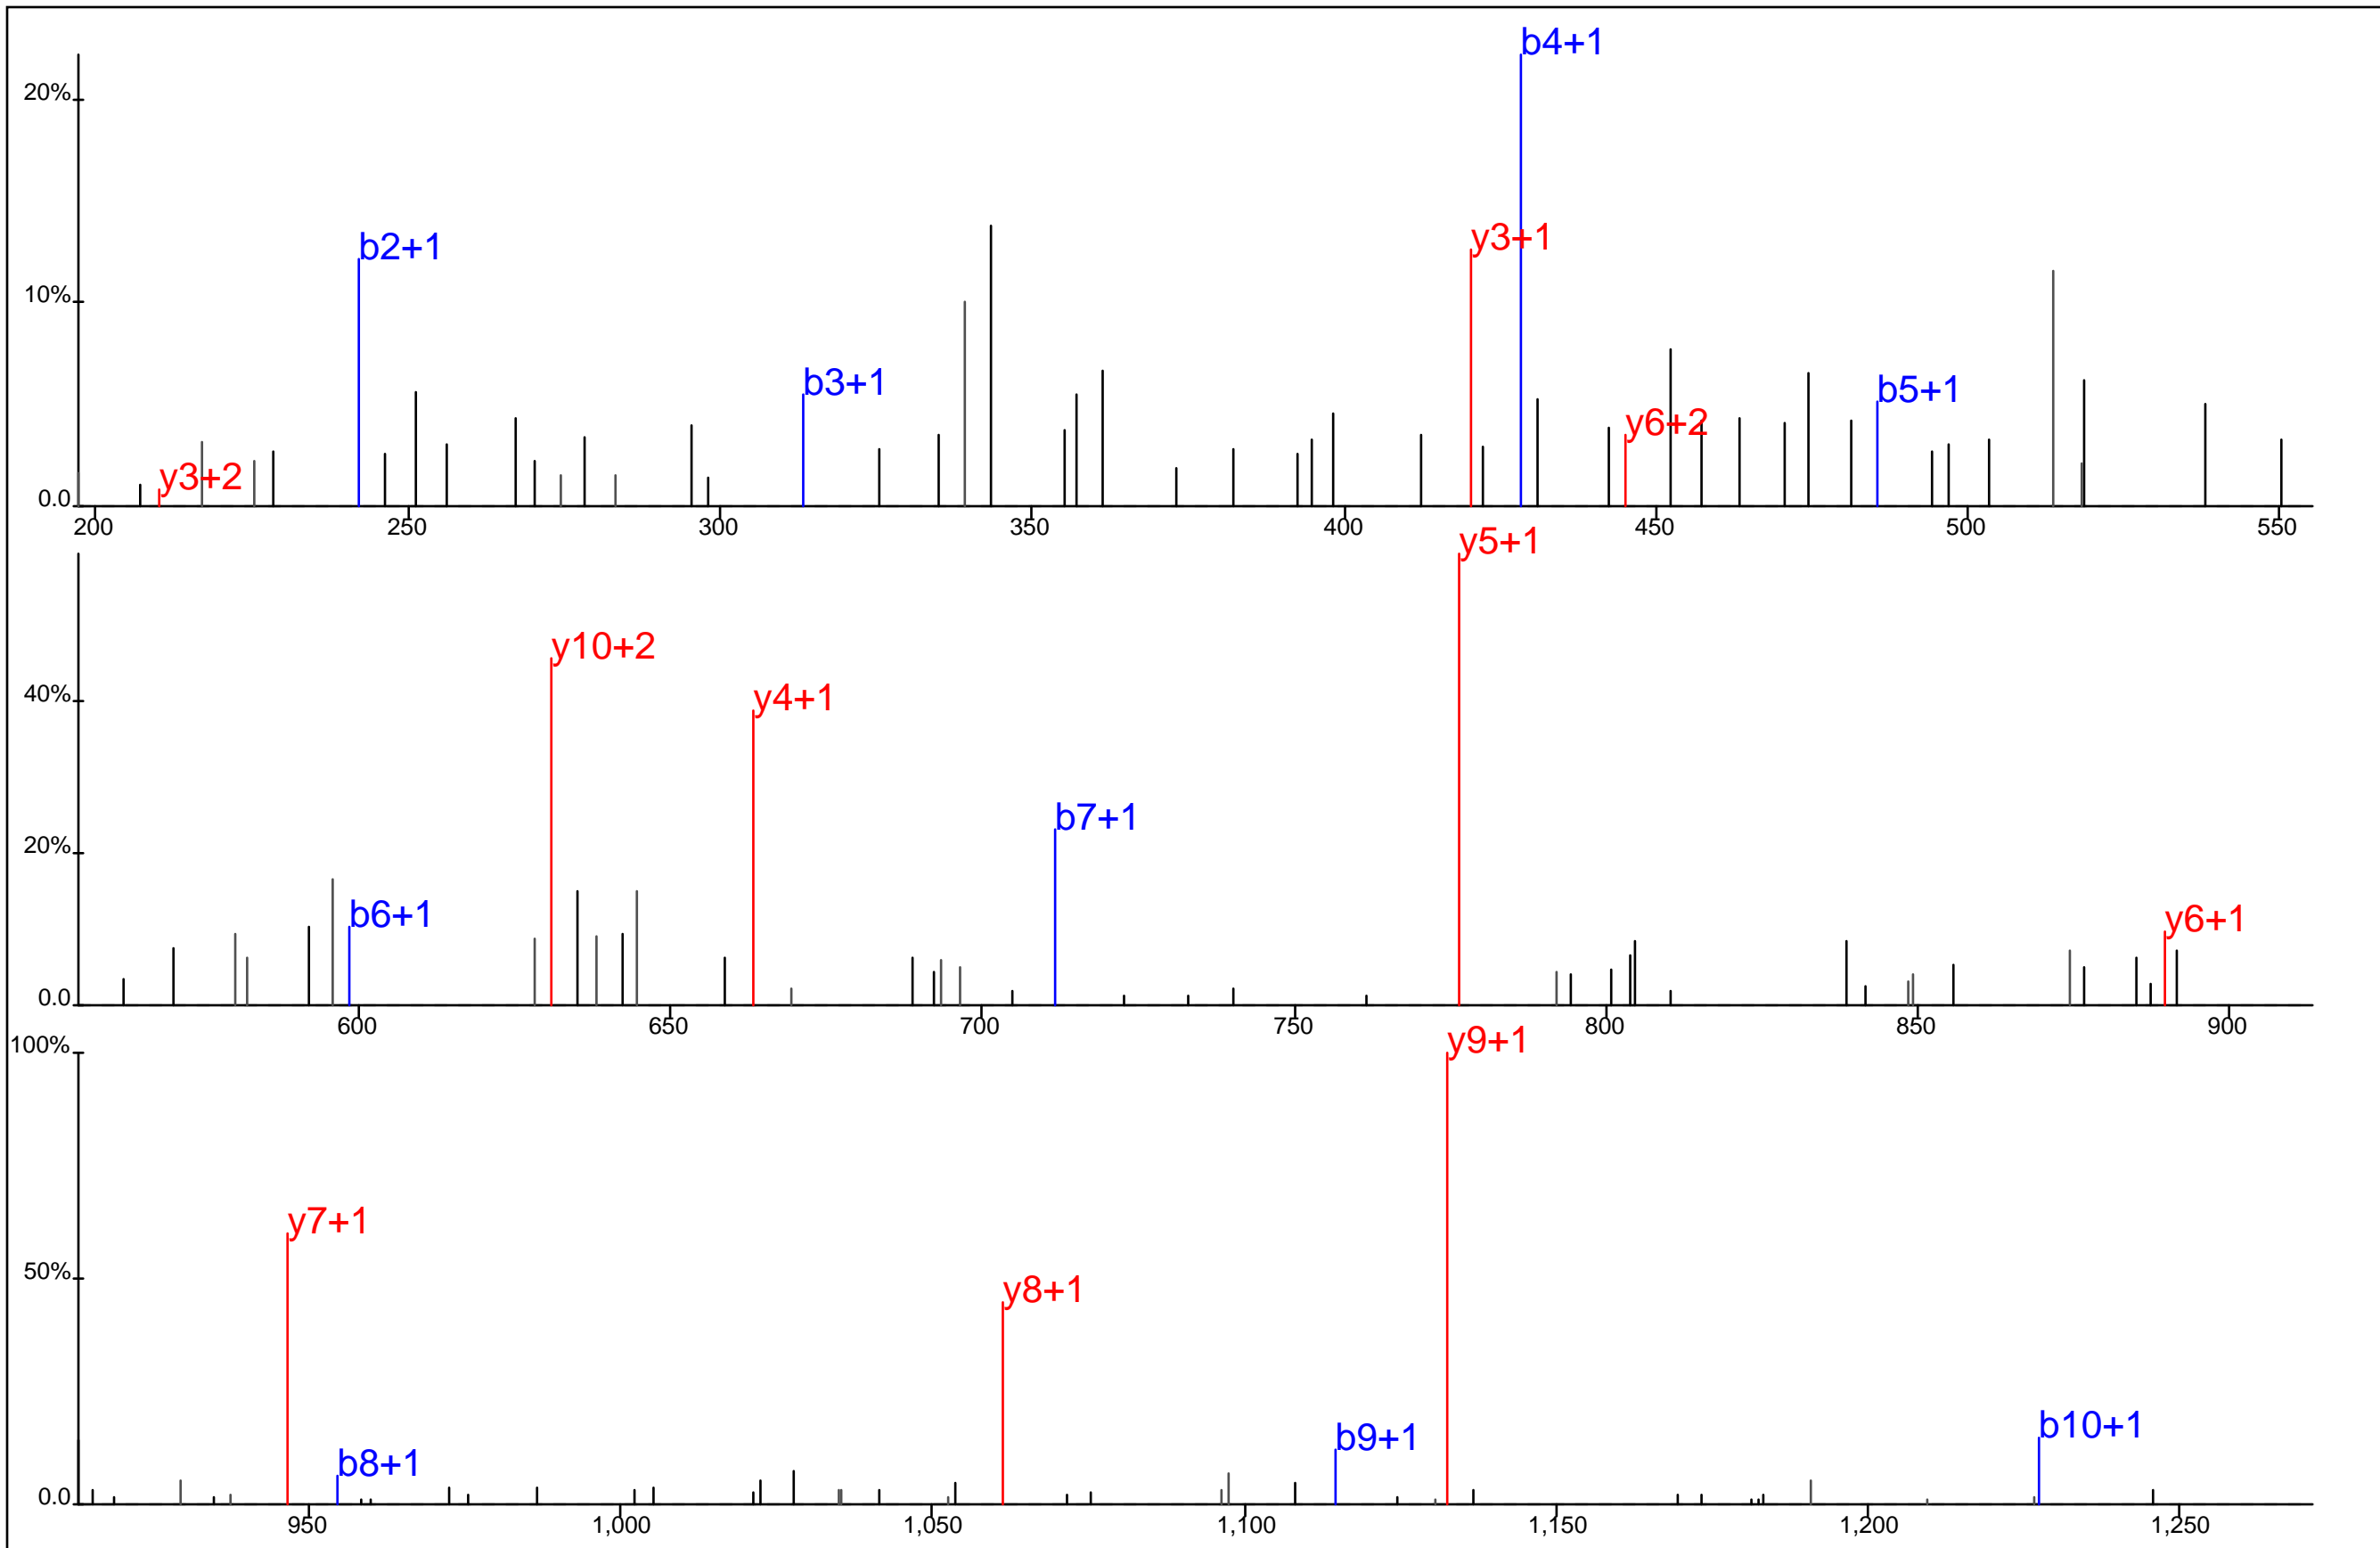

■ ■ ■ ■ ■ ■ ■ ■  
■ ■ ■ ■ ■ ■ ■ ■  
 L K A D G L I Y\* C L K

Protein Name: ZAP70  
 gi Accession: 0  
 Precursor Mass: 687.3487+2  
 Delta Mass: 0.211 ppm  
 XCorr: 46.3

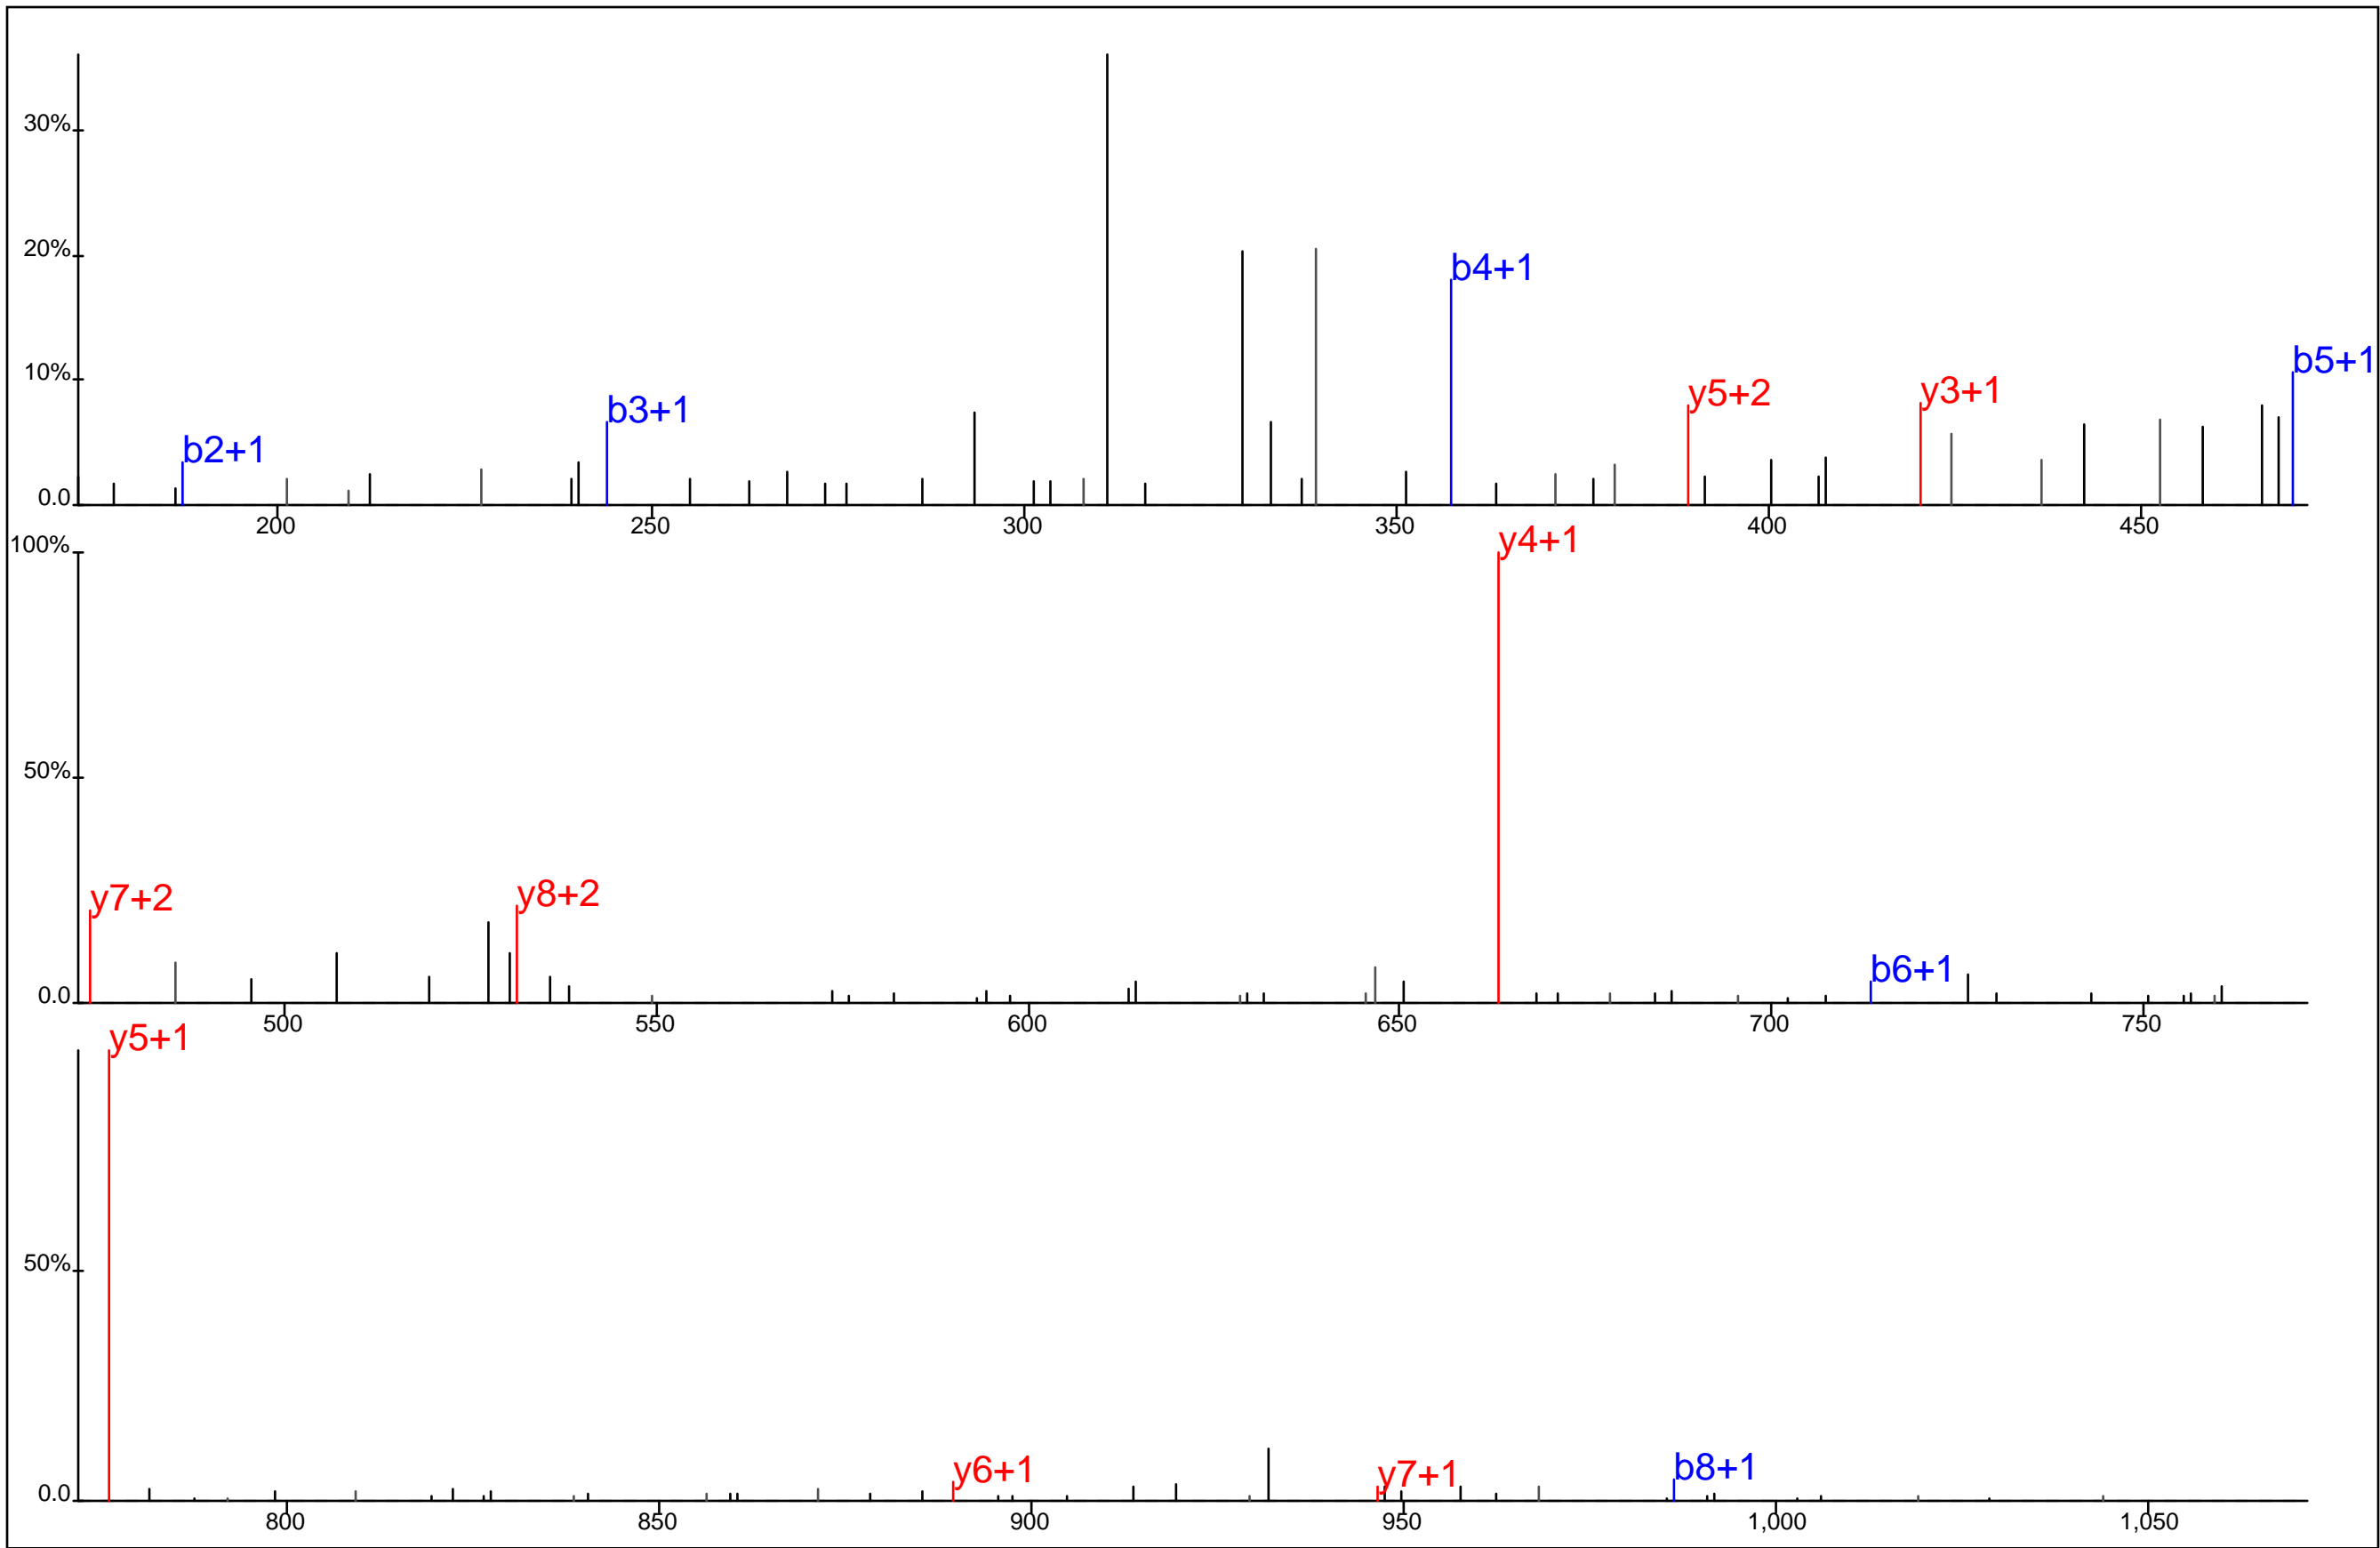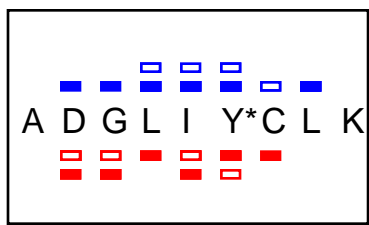

Protein Name: ZAP70  
 gi Accession: 0  
 Precursor Mass: 566.7609+2  
 Delta Mass: 3.331 ppm  
 XCorr: 36.09

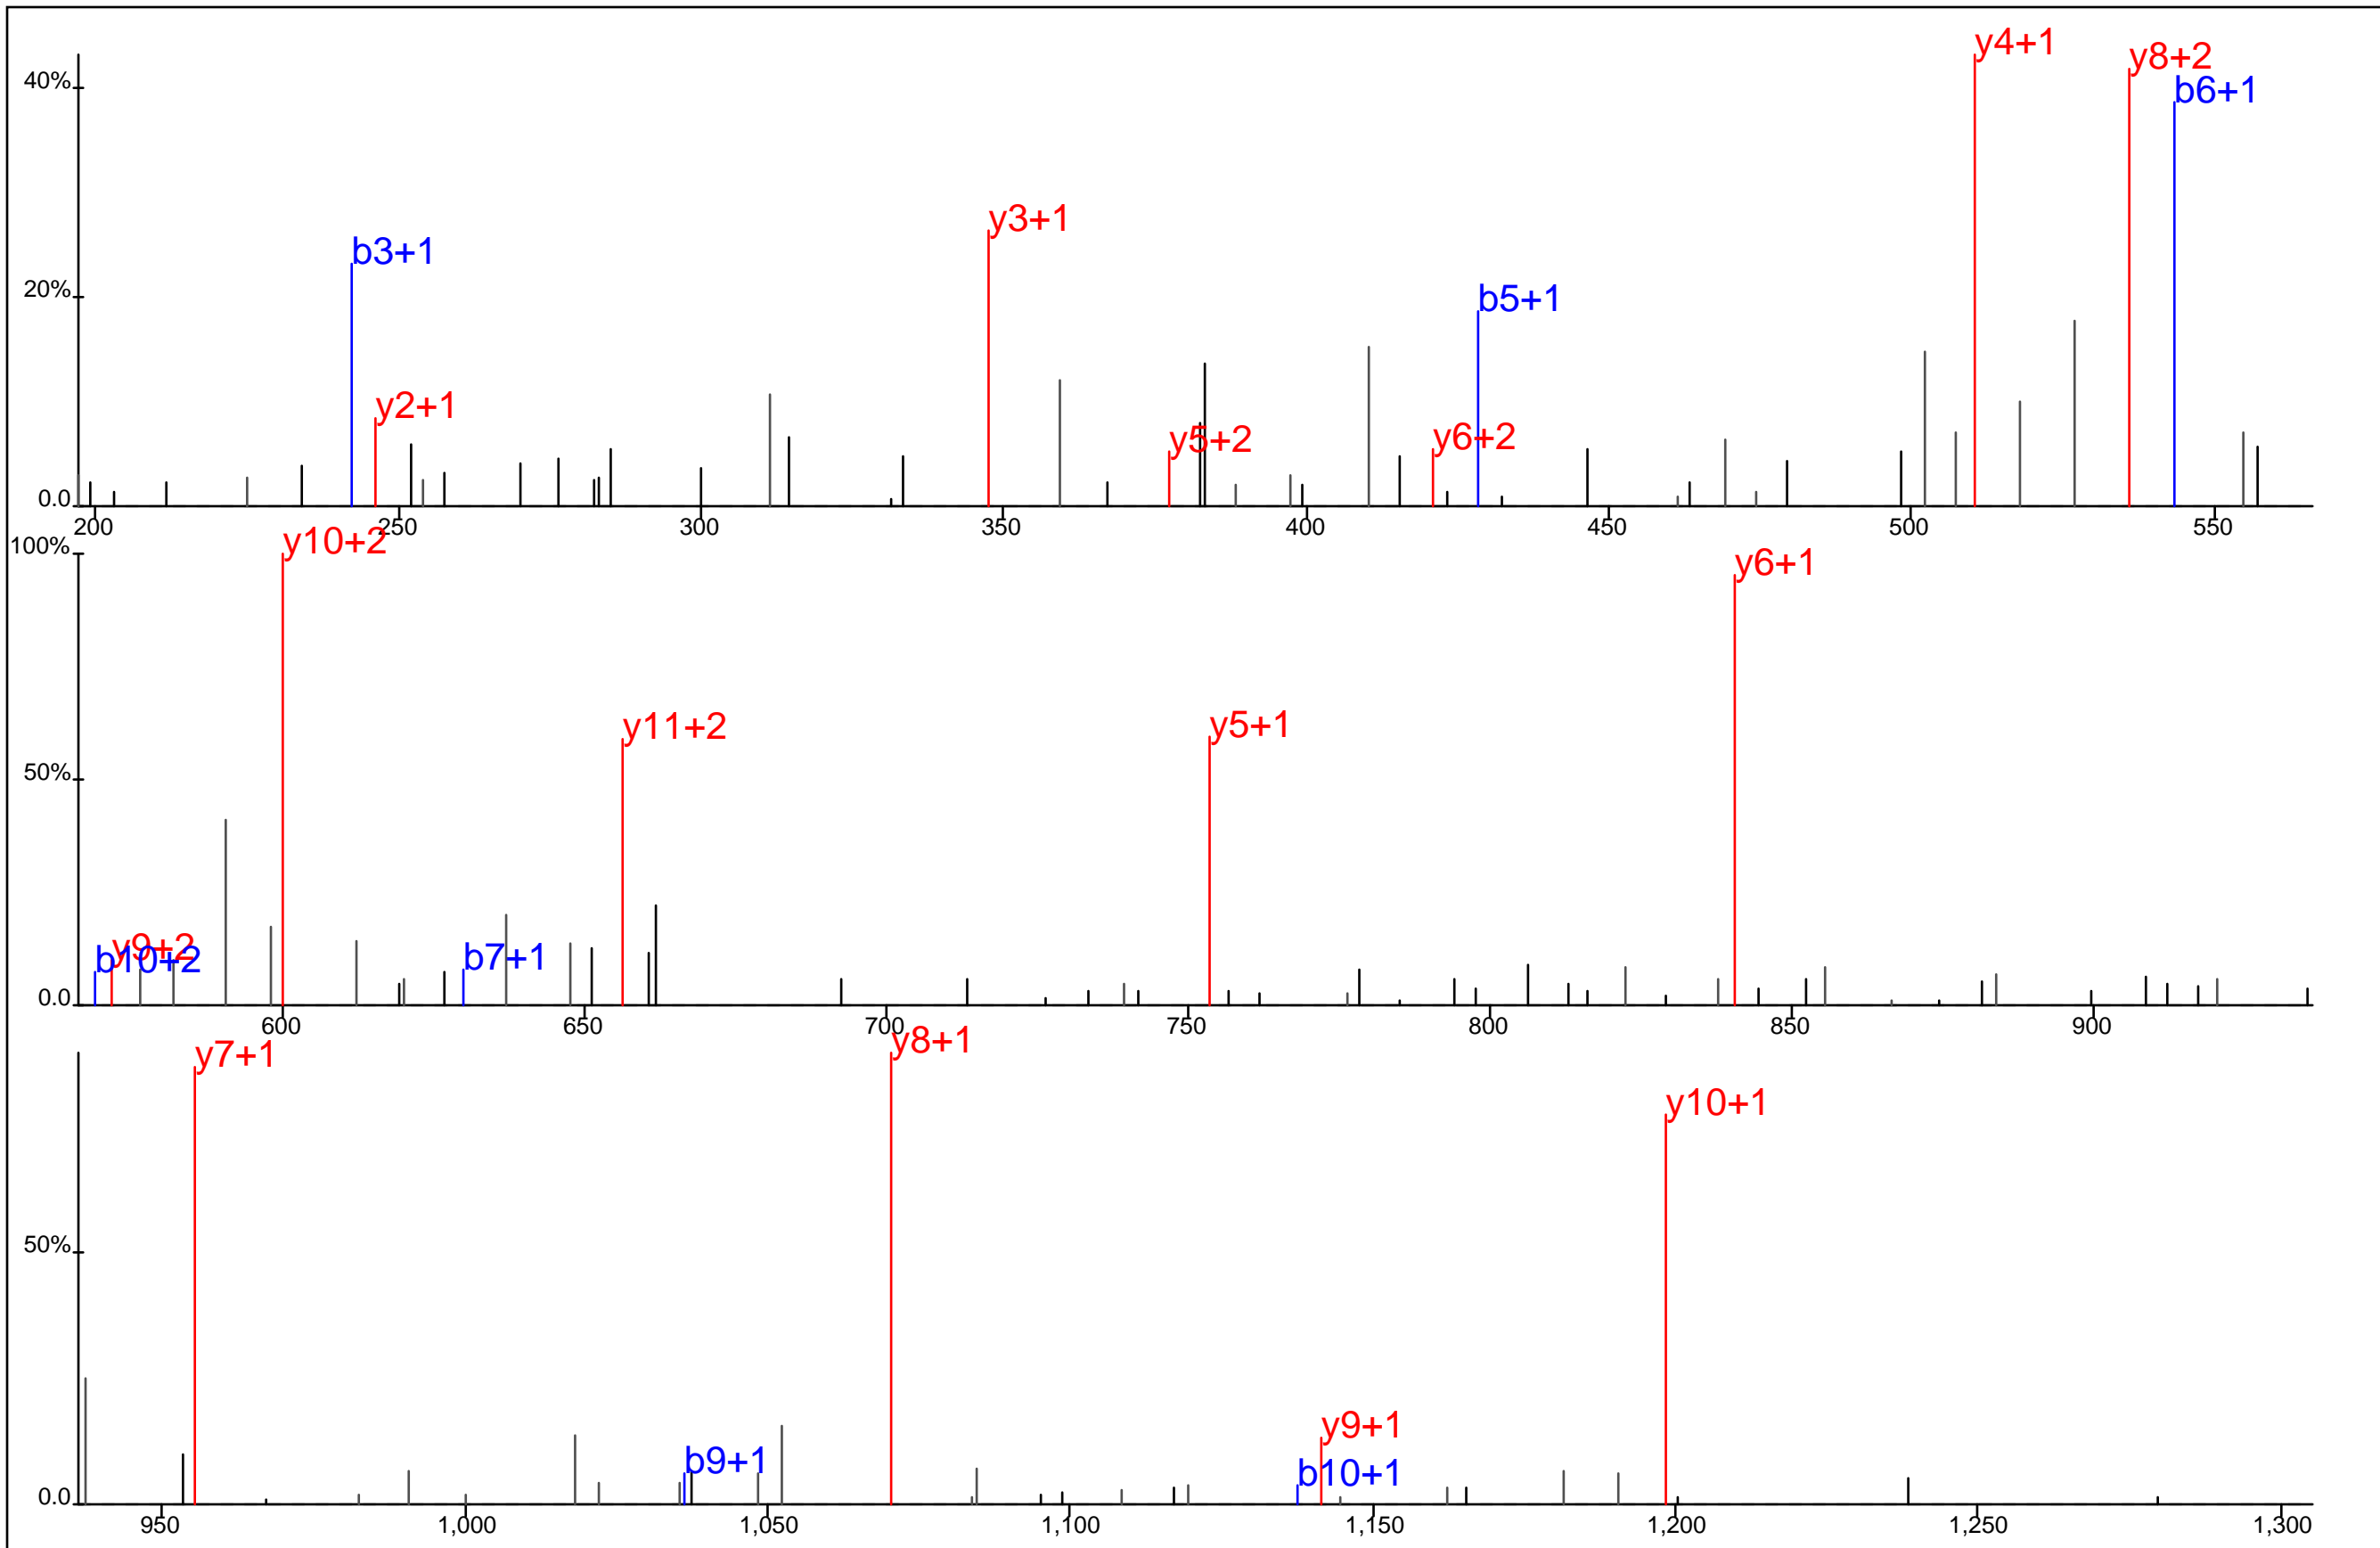

▢ ▢ ▢ ▢ ▢ ▢ ▢  
 A L G A D D S Y\*Y T A R  
▢ ▢ ▢ ▢ ▢ ▢ ▢ ▢

Protein Name: ZAP70  
 gi Accession: 0  
 Precursor Mass: 691.7853+2  
 Delta Mass: 0.657 ppm  
 XCorr: 79.58

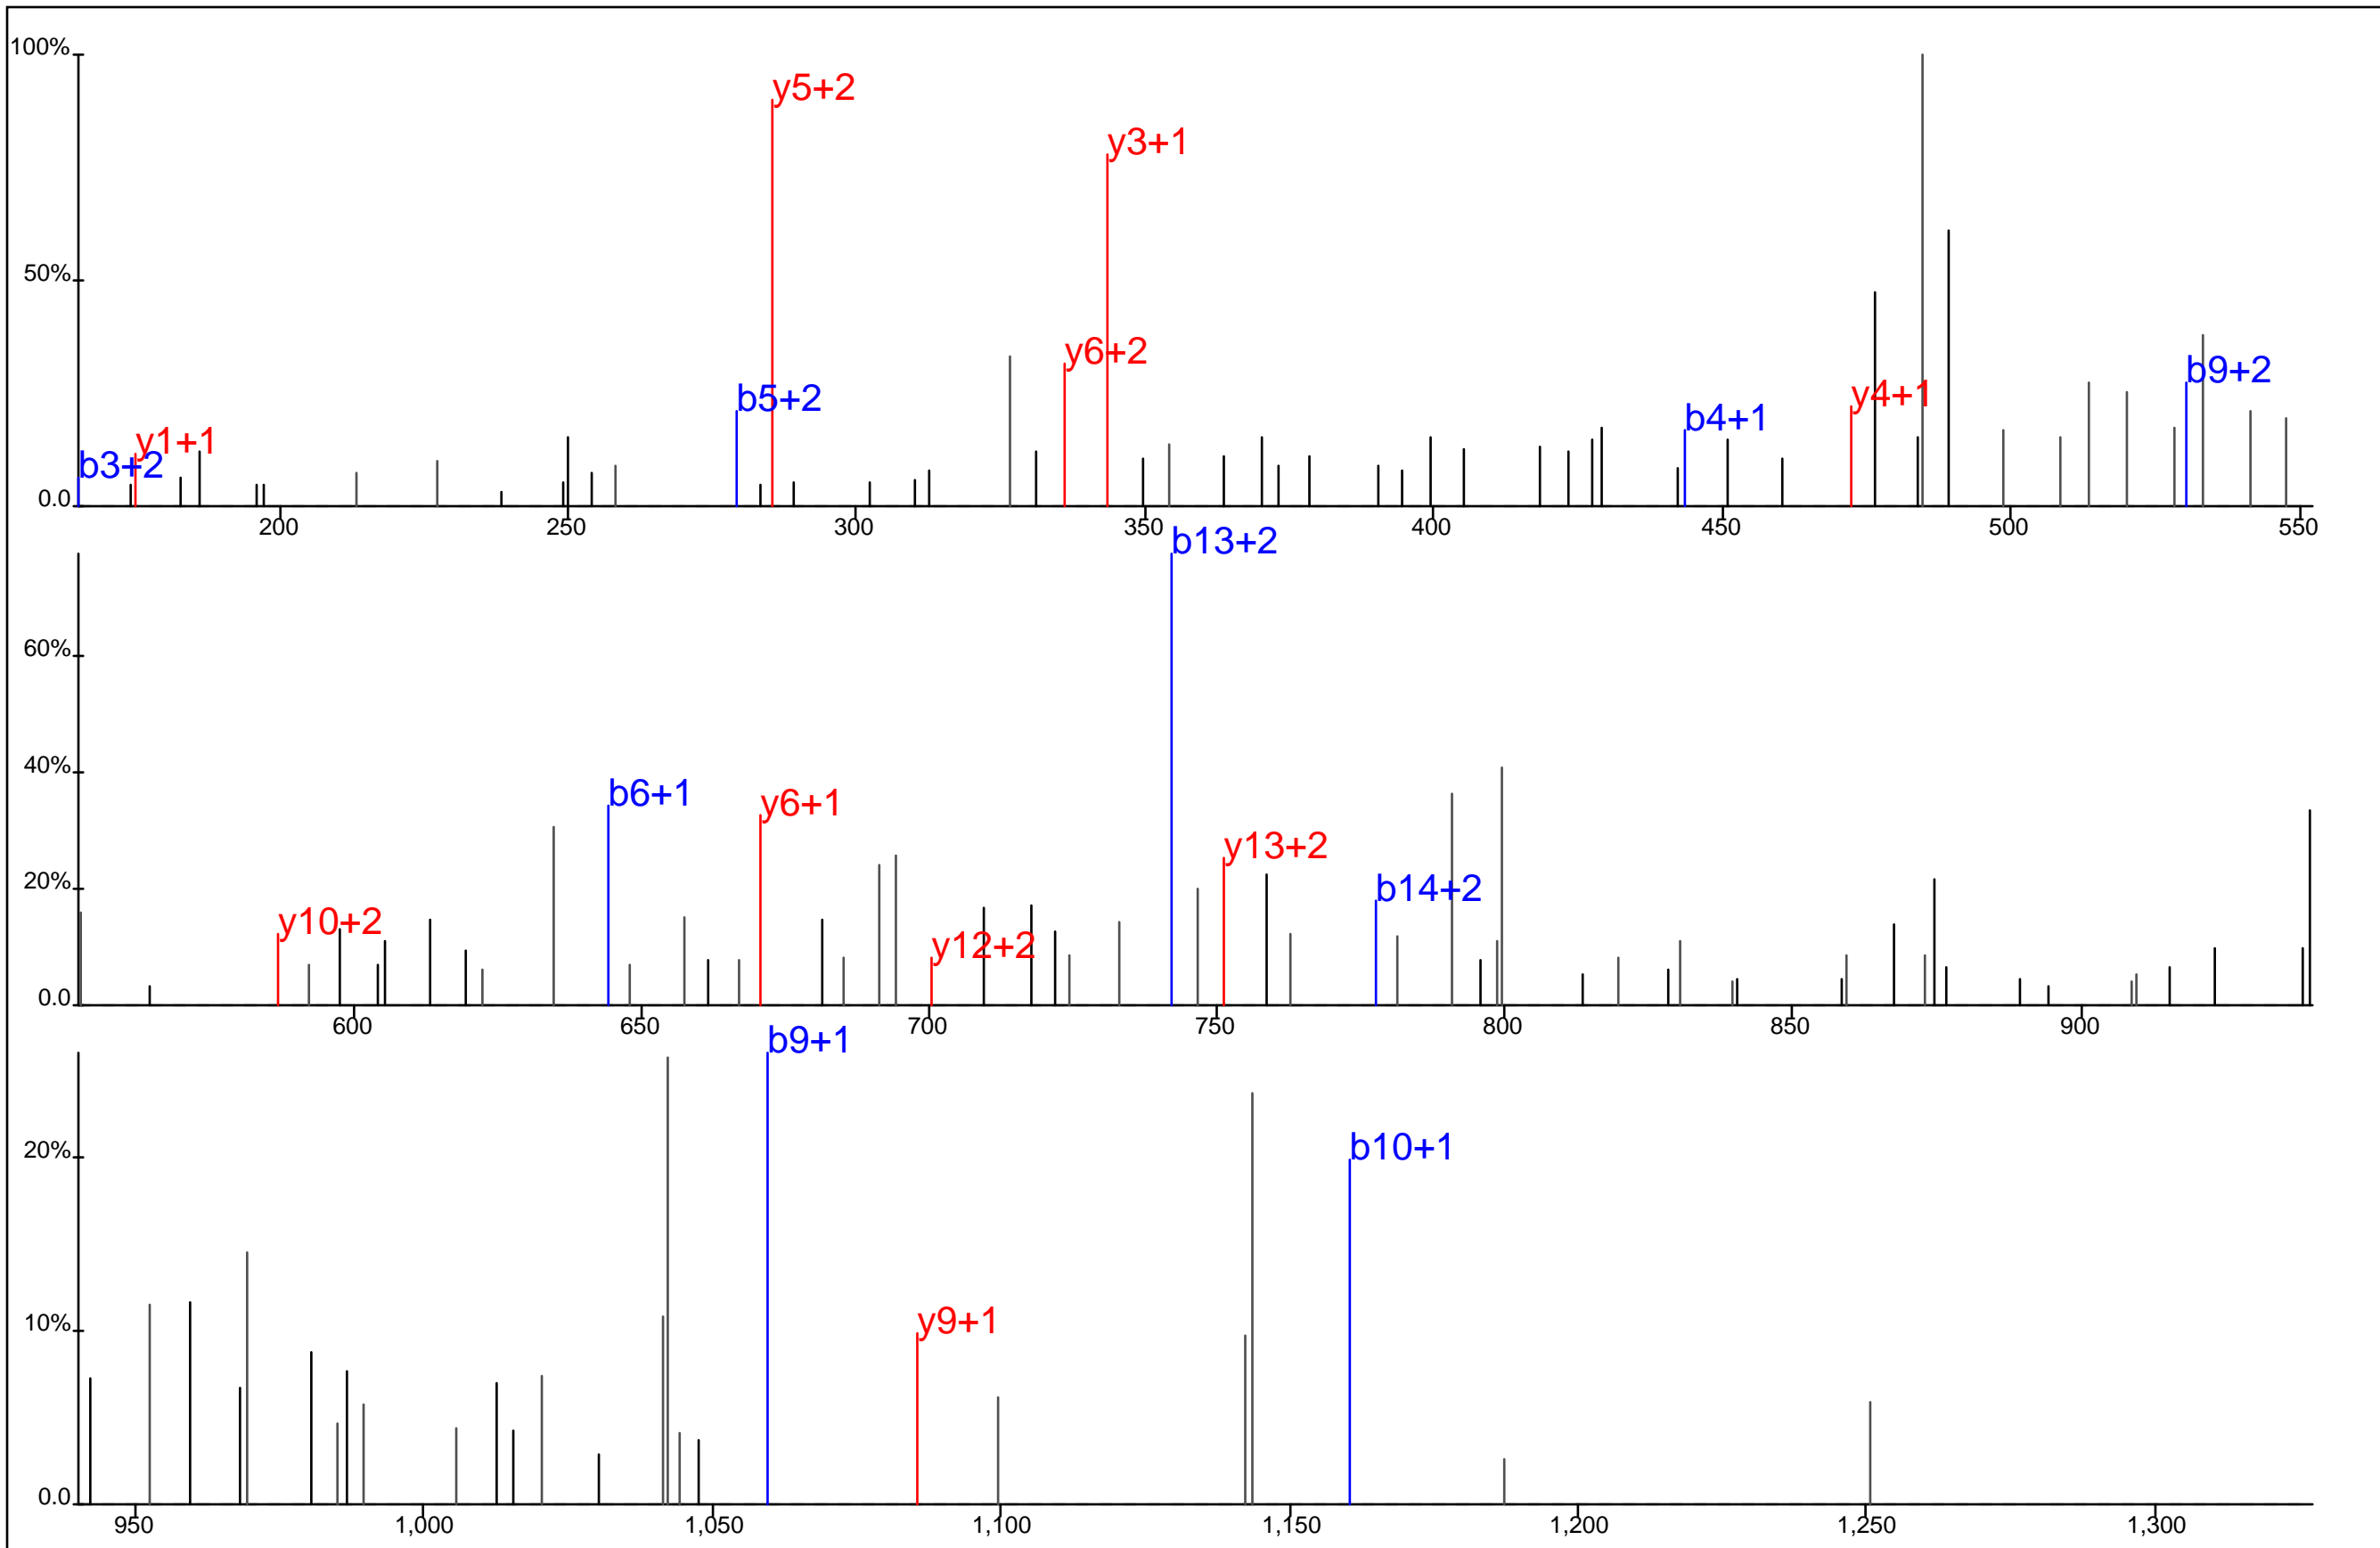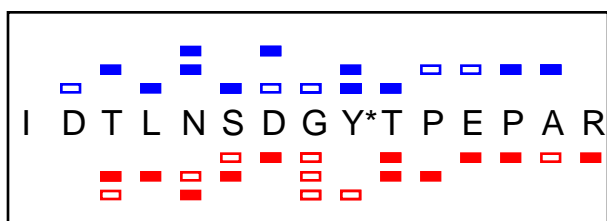

Protein Name: ZAP70  
 gi Accession: 0  
 Precursor Mass: 576.9211+3  
 Delta Mass: 0.726 ppm  
 XCorr: 20.17

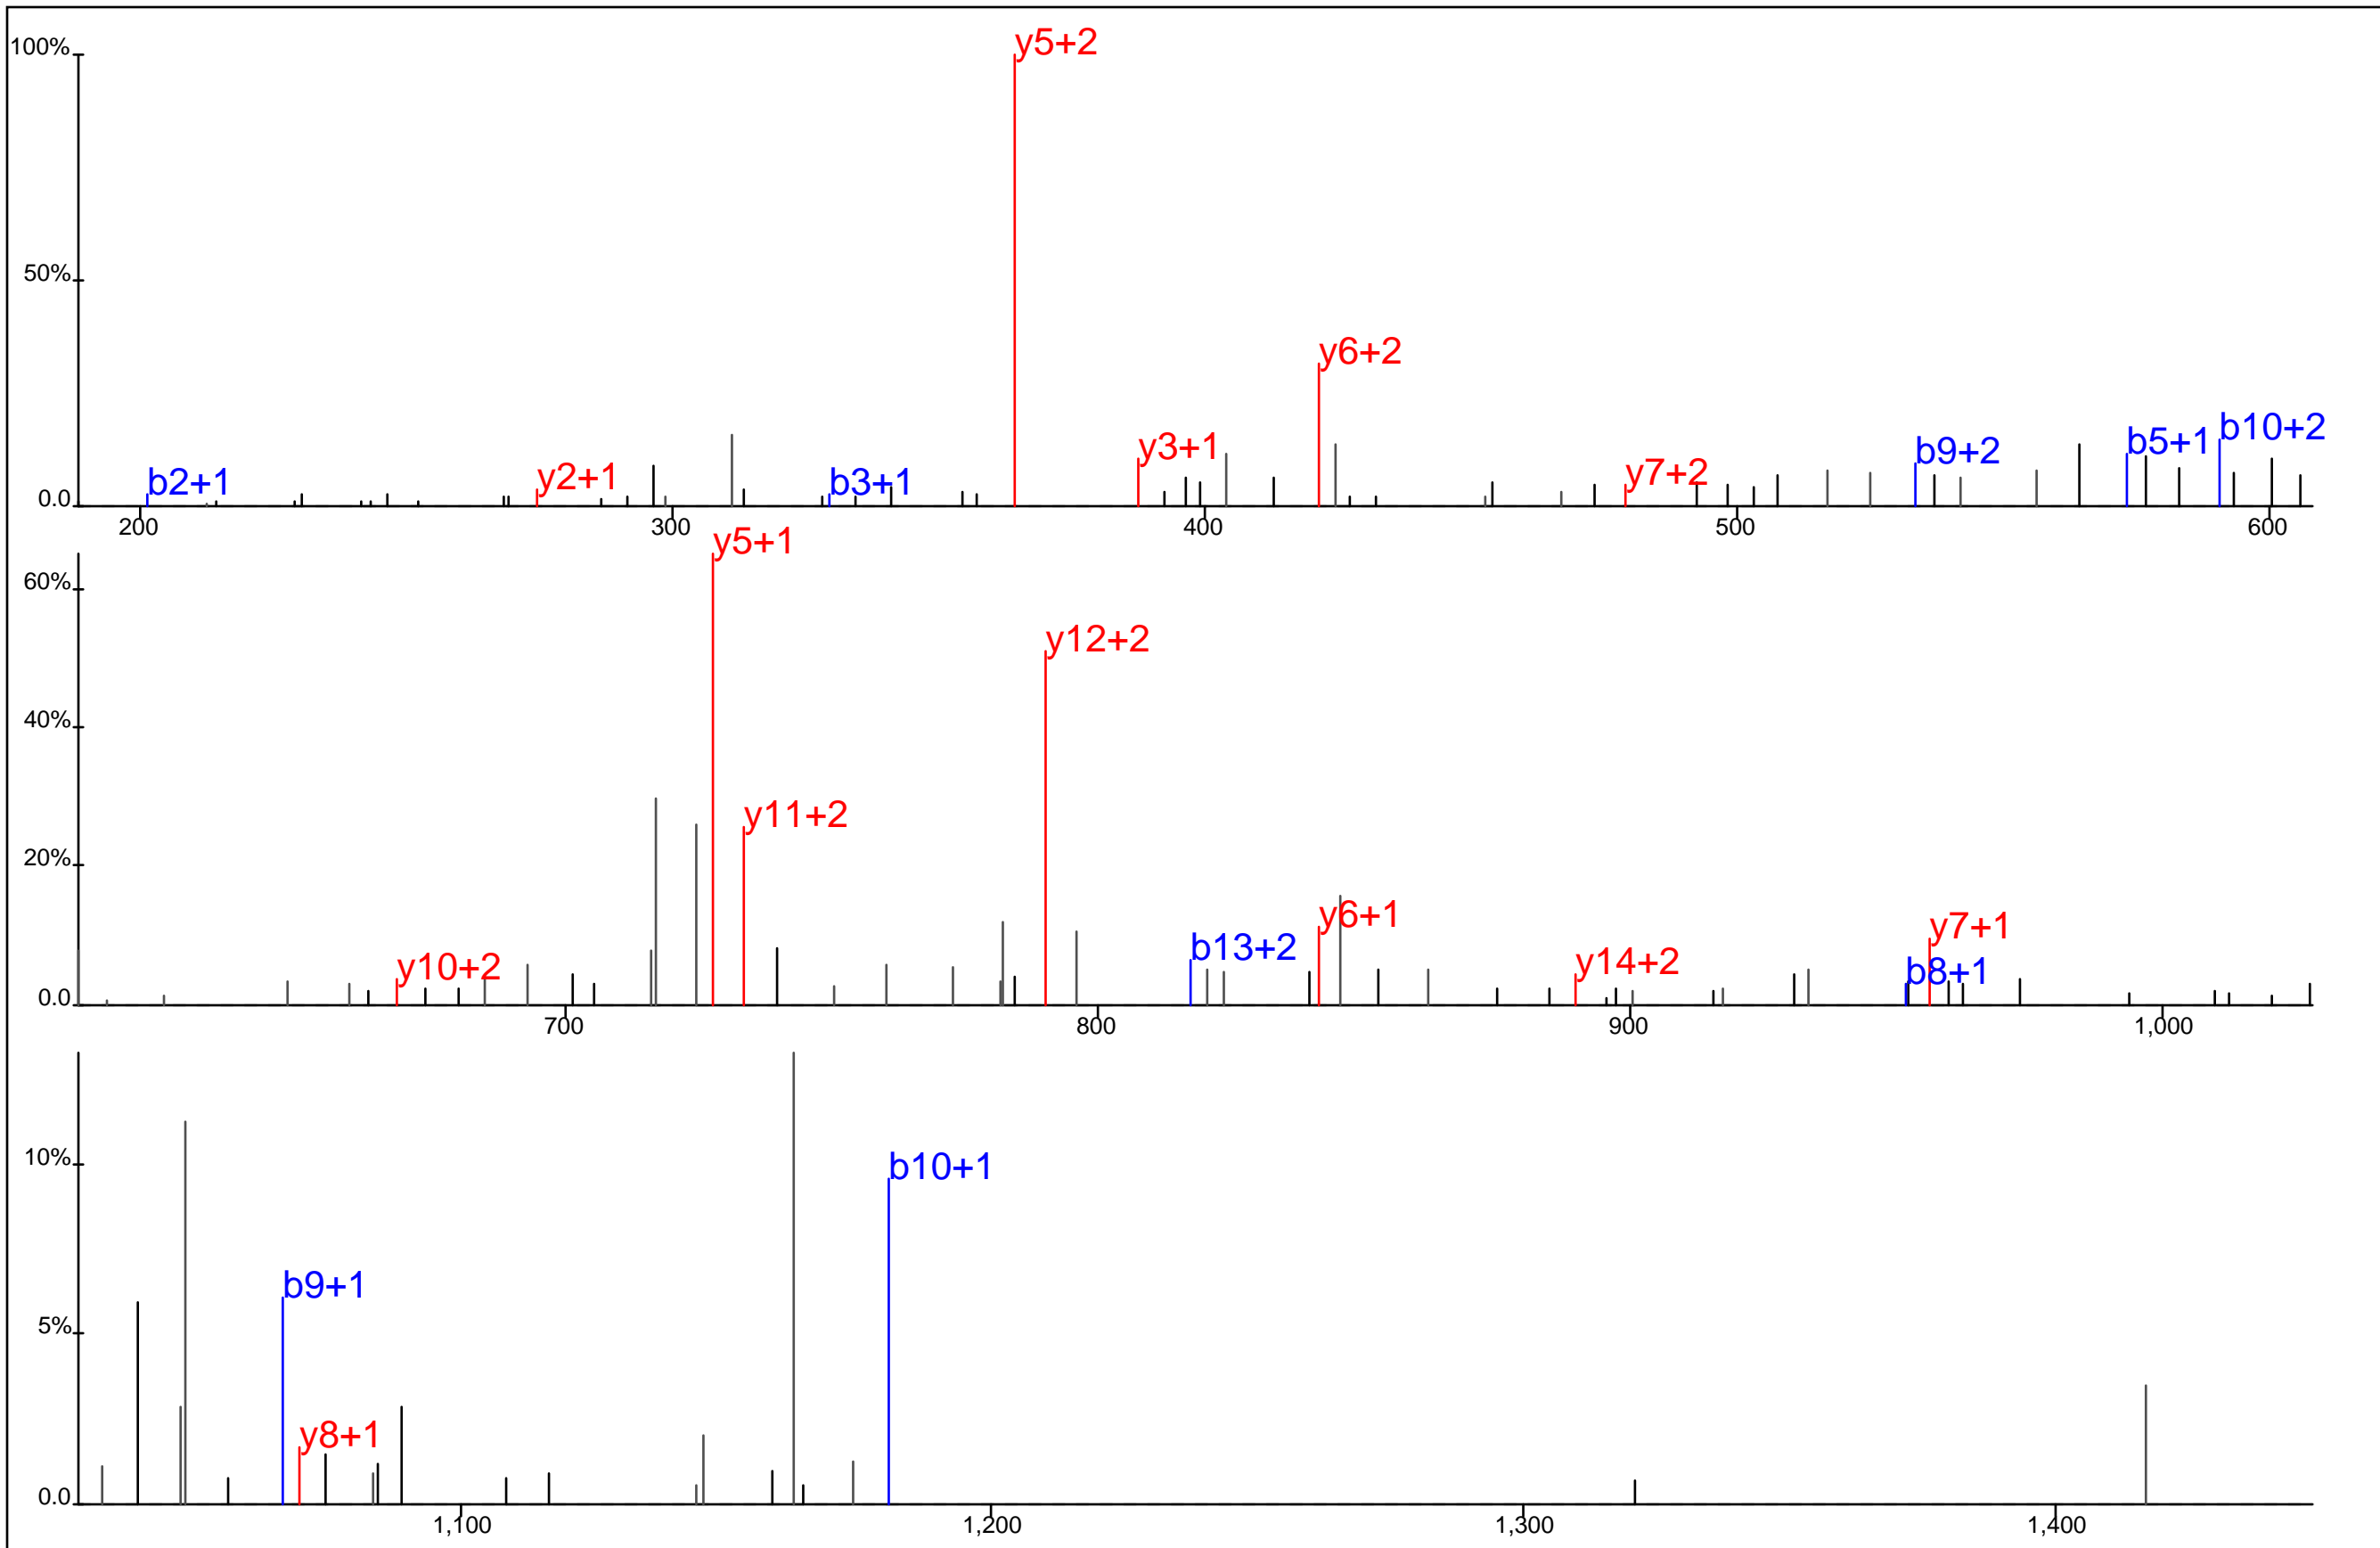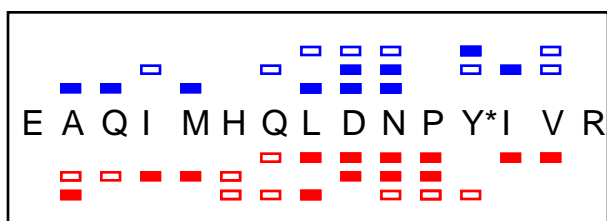

Protein Name: ZAP70  
 gi Accession: 0  
 Precursor Mass: 636.3002+3  
 Delta Mass: 1.011 ppm  
 XCorr: 30.5

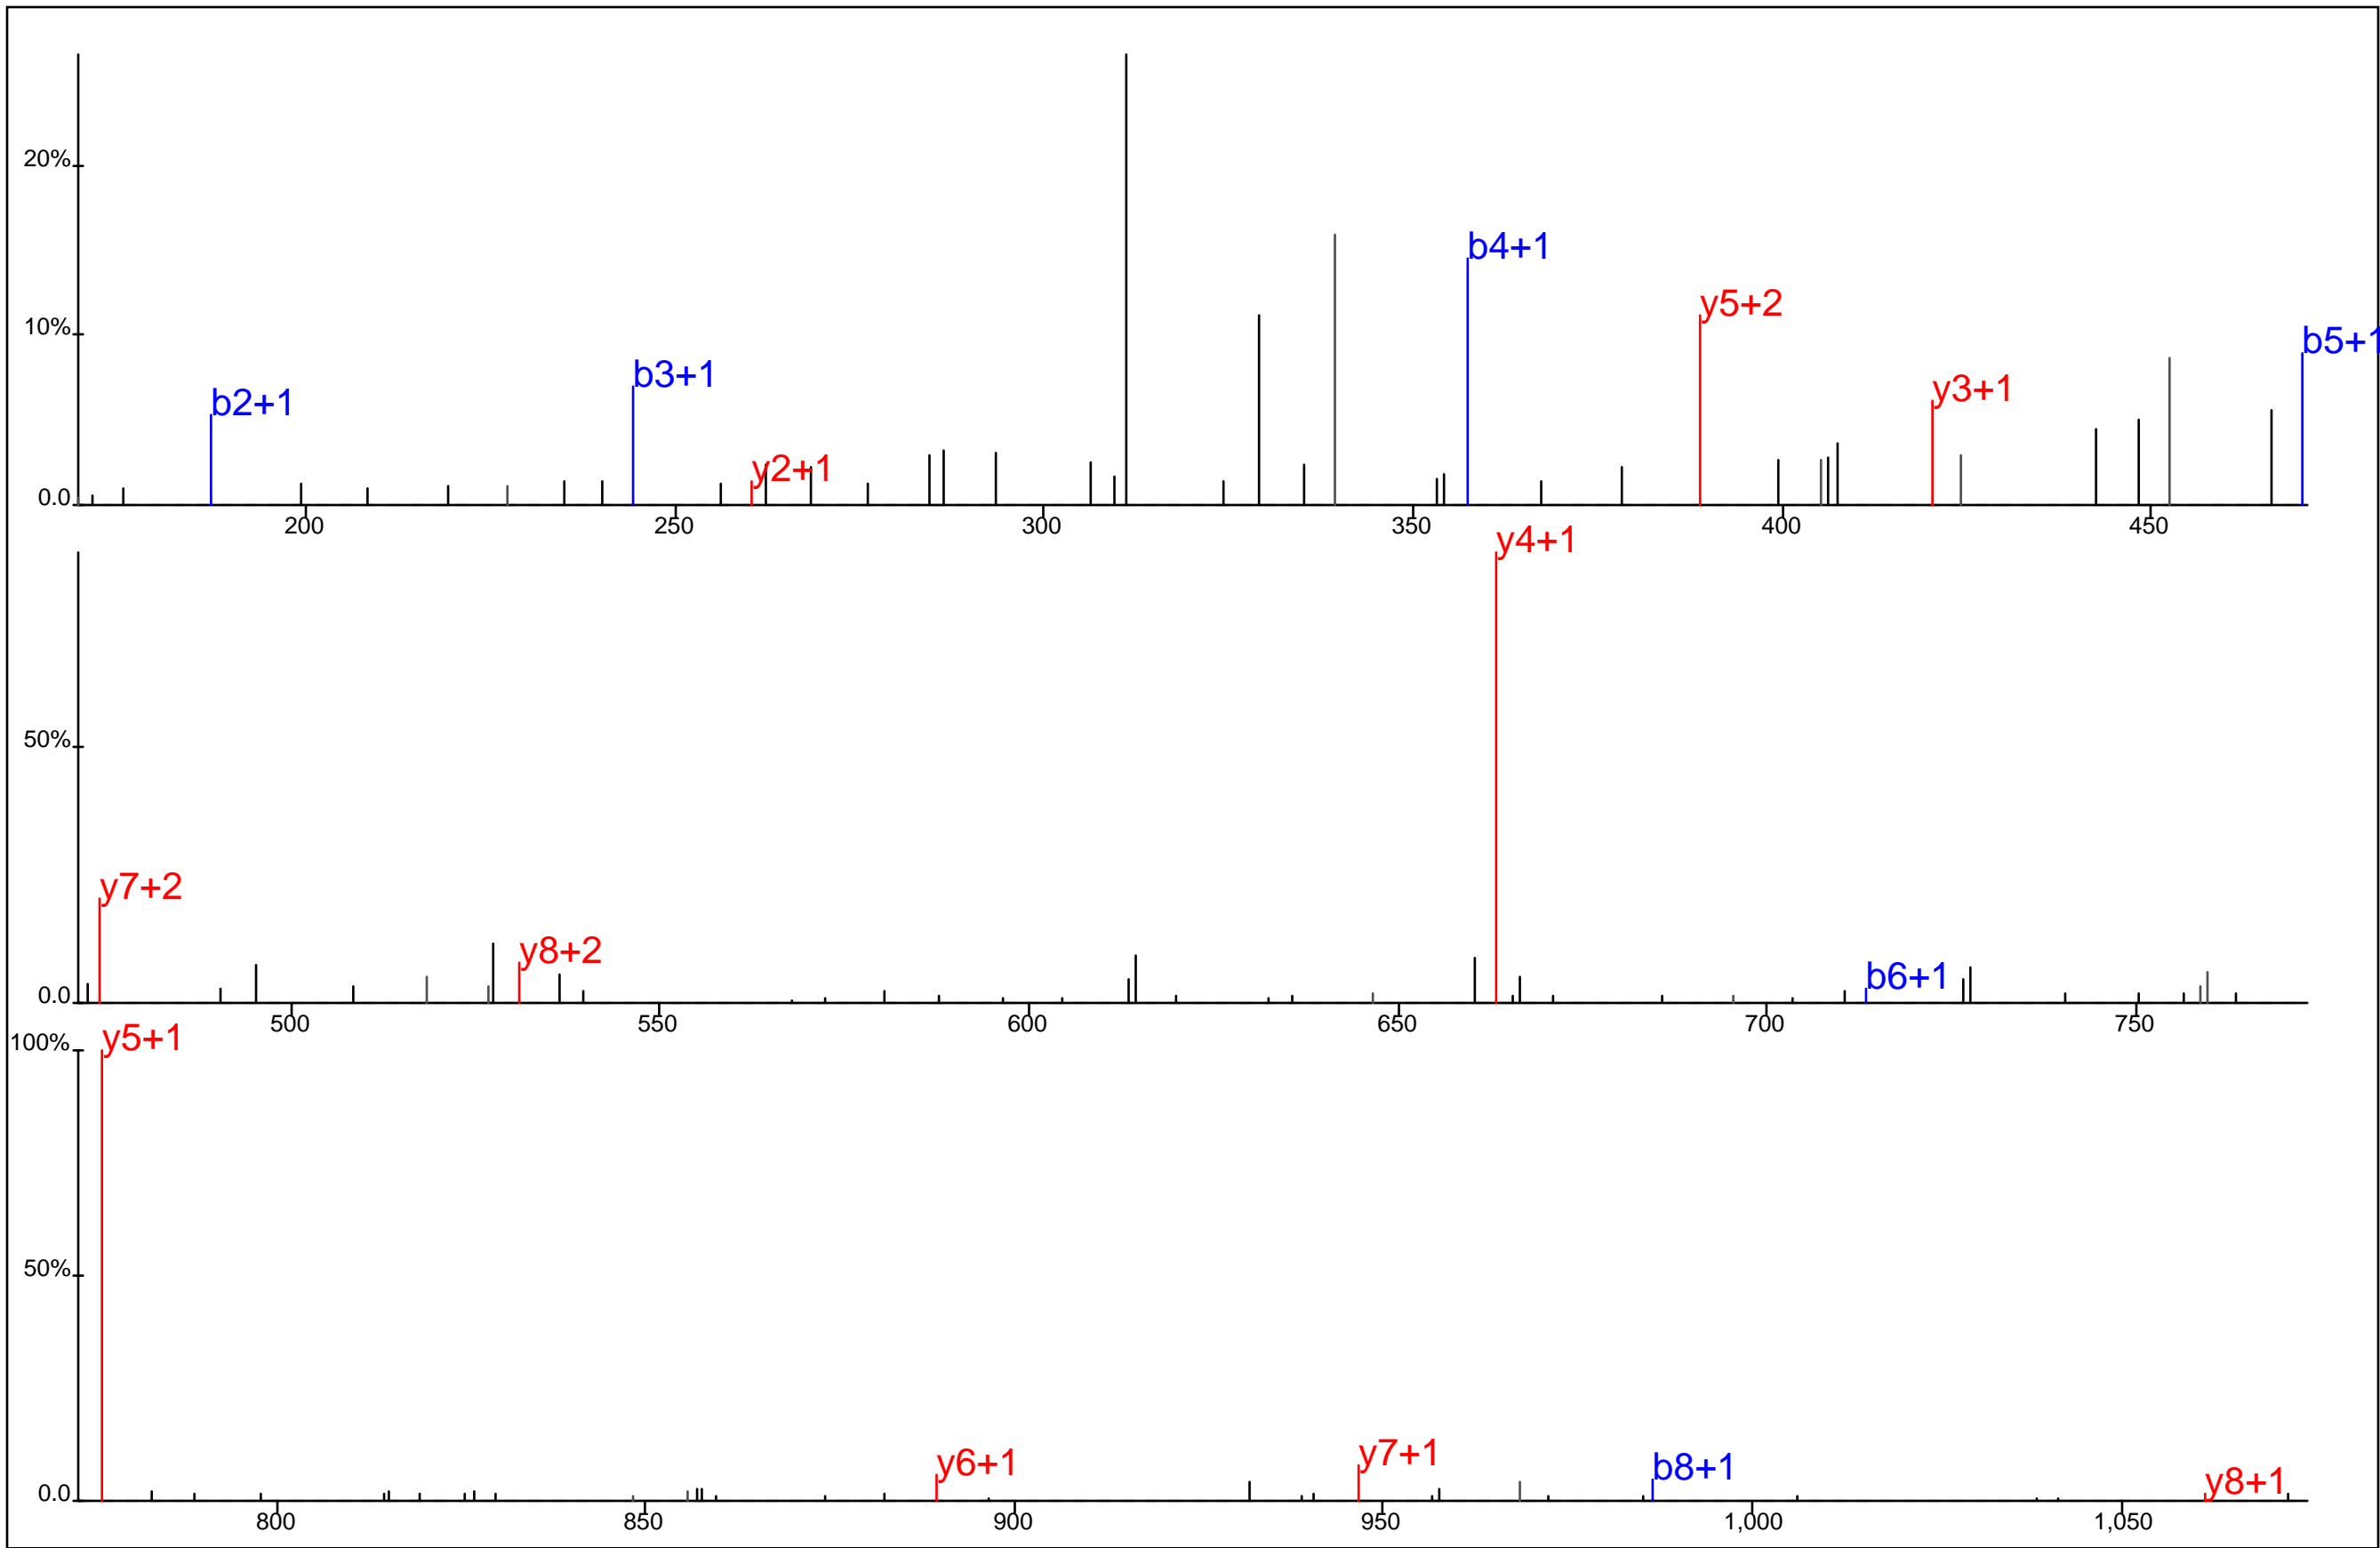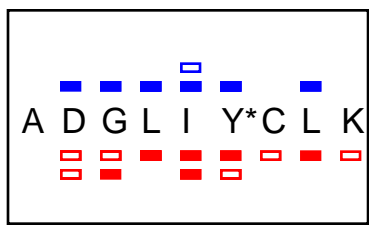

Protein Name: ZAP70  
 gi Accession: 0  
 Precursor Mass: 566.7612+2  
 Delta Mass: 3.762 ppm  
 XCorr: 36.91



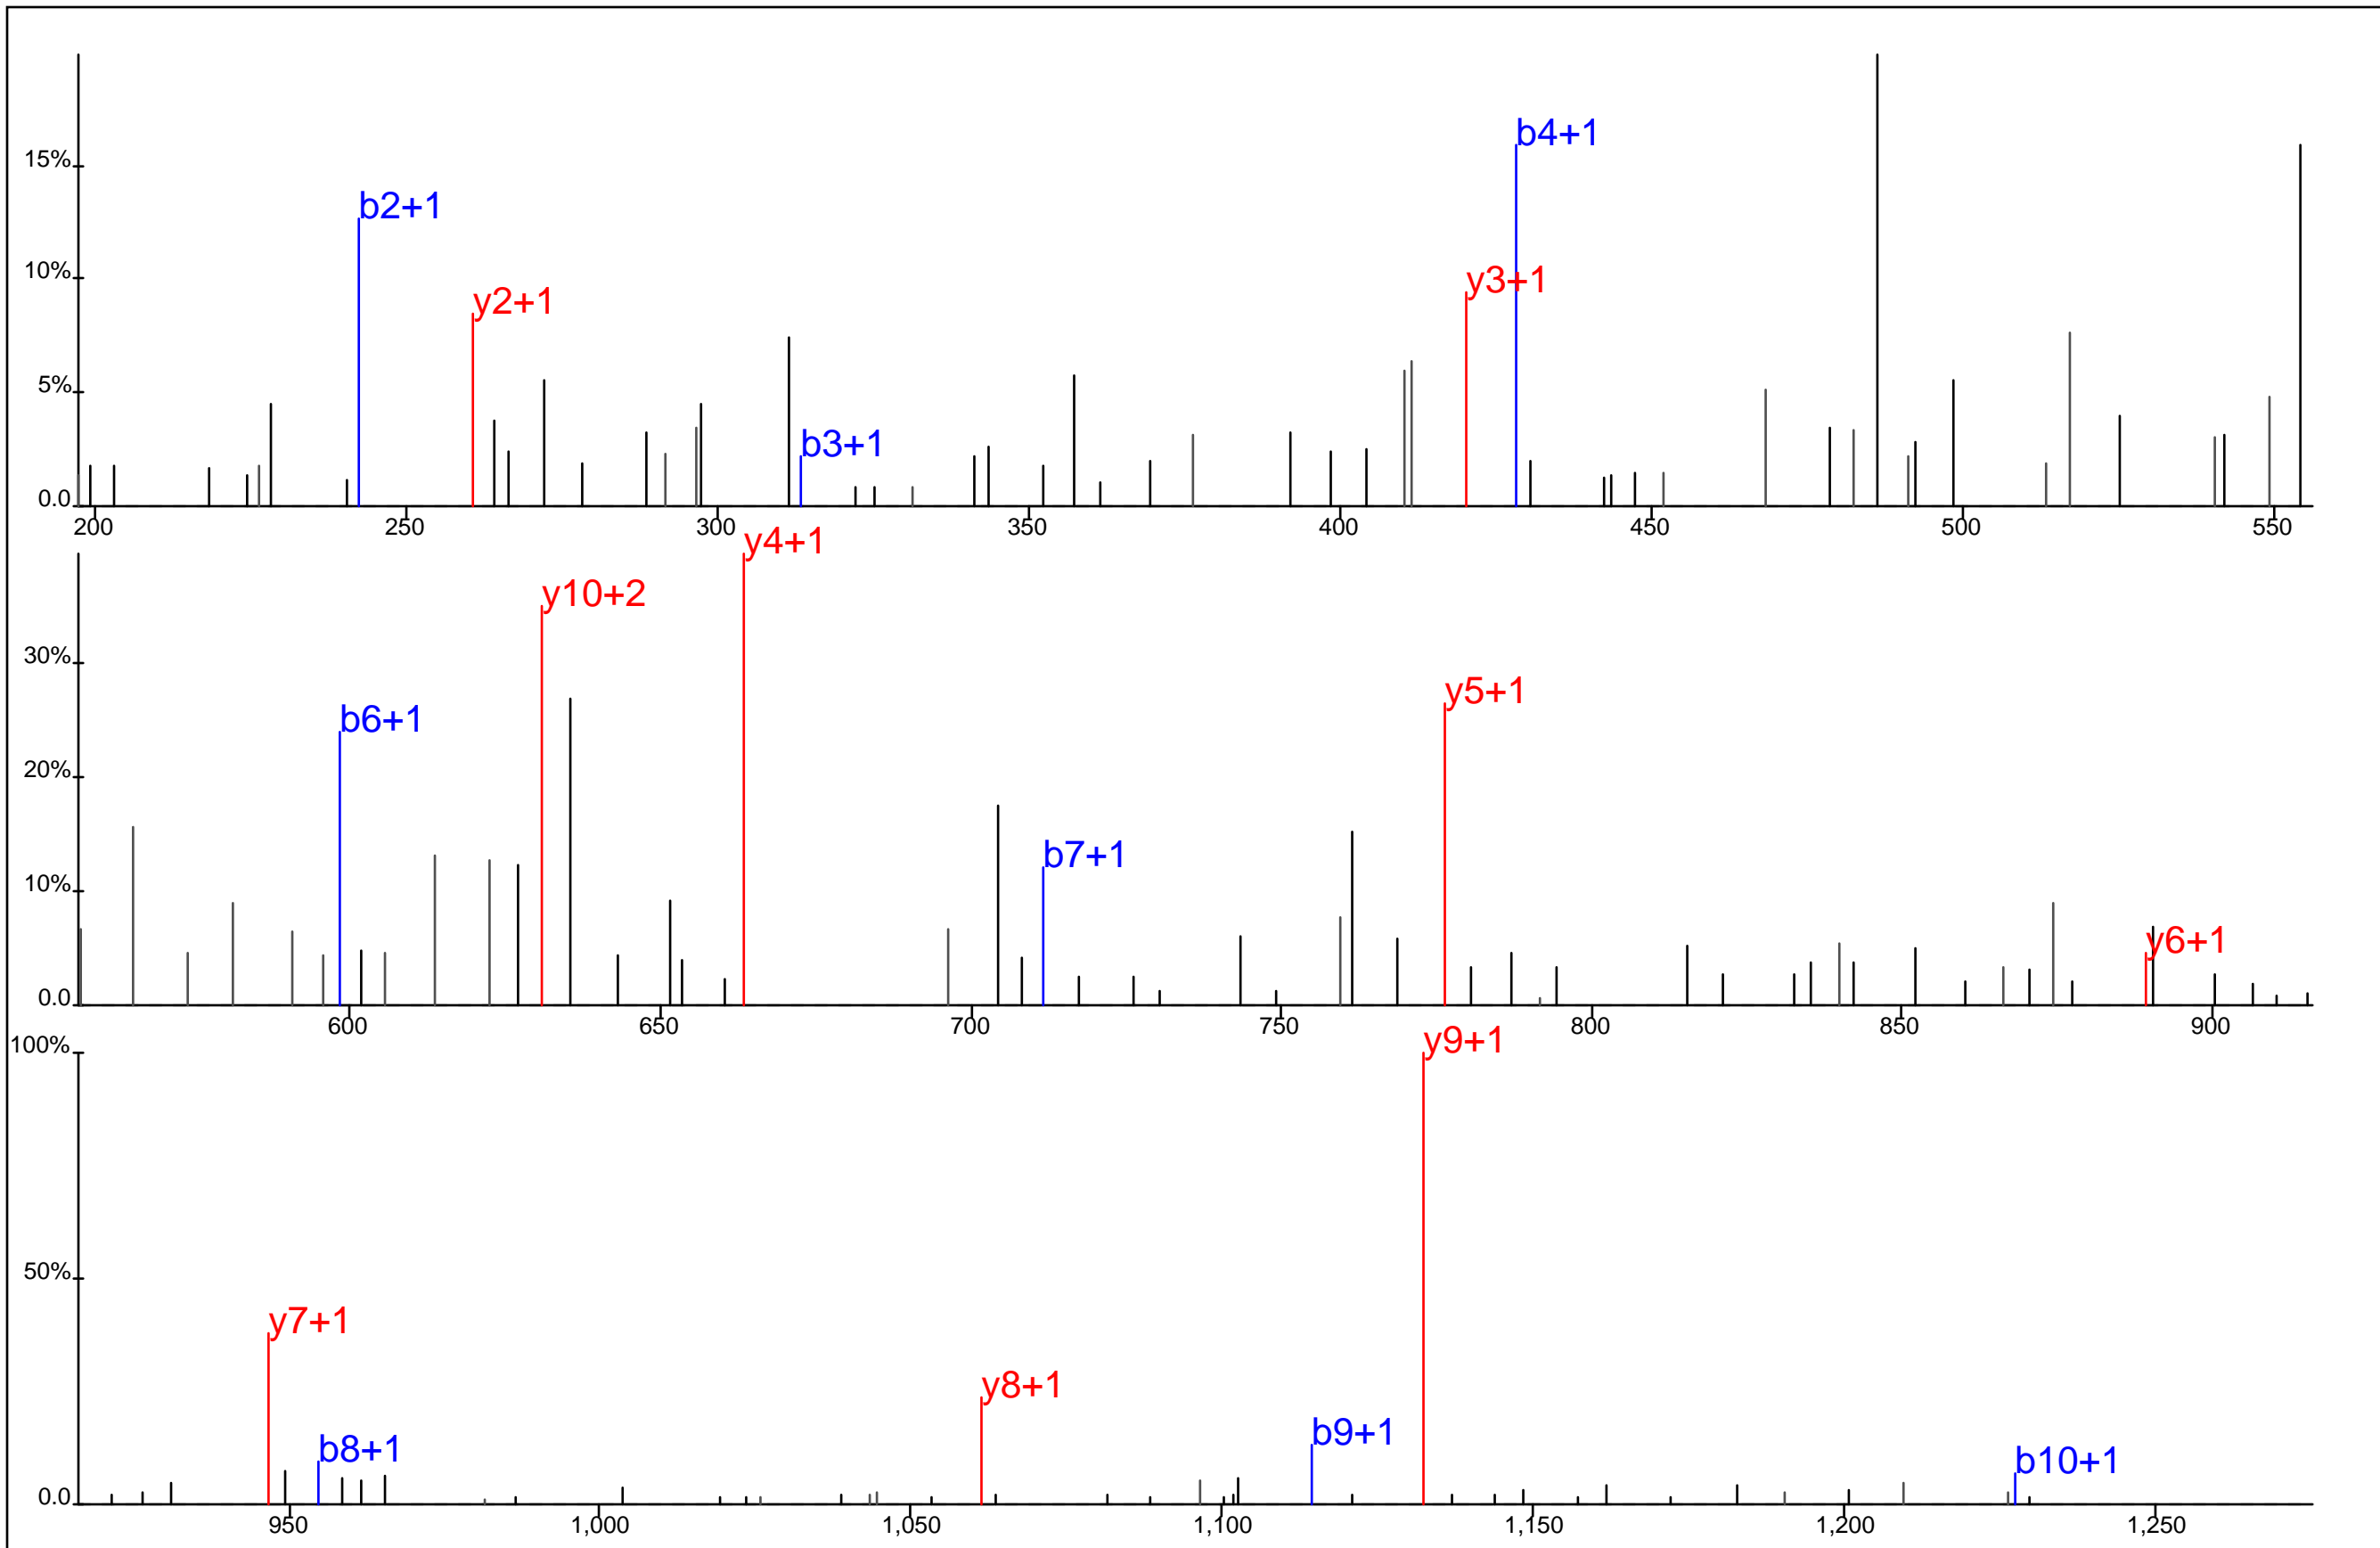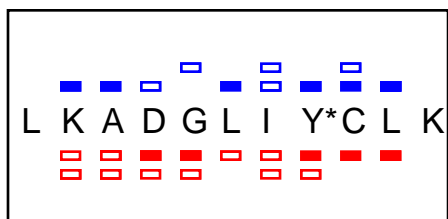

Protein Name: ZAP70  
 gi Accession: 0  
 Precursor Mass: 687.3477+2  
 Delta Mass: 1.300 ppm  
 XCorr: 40.14

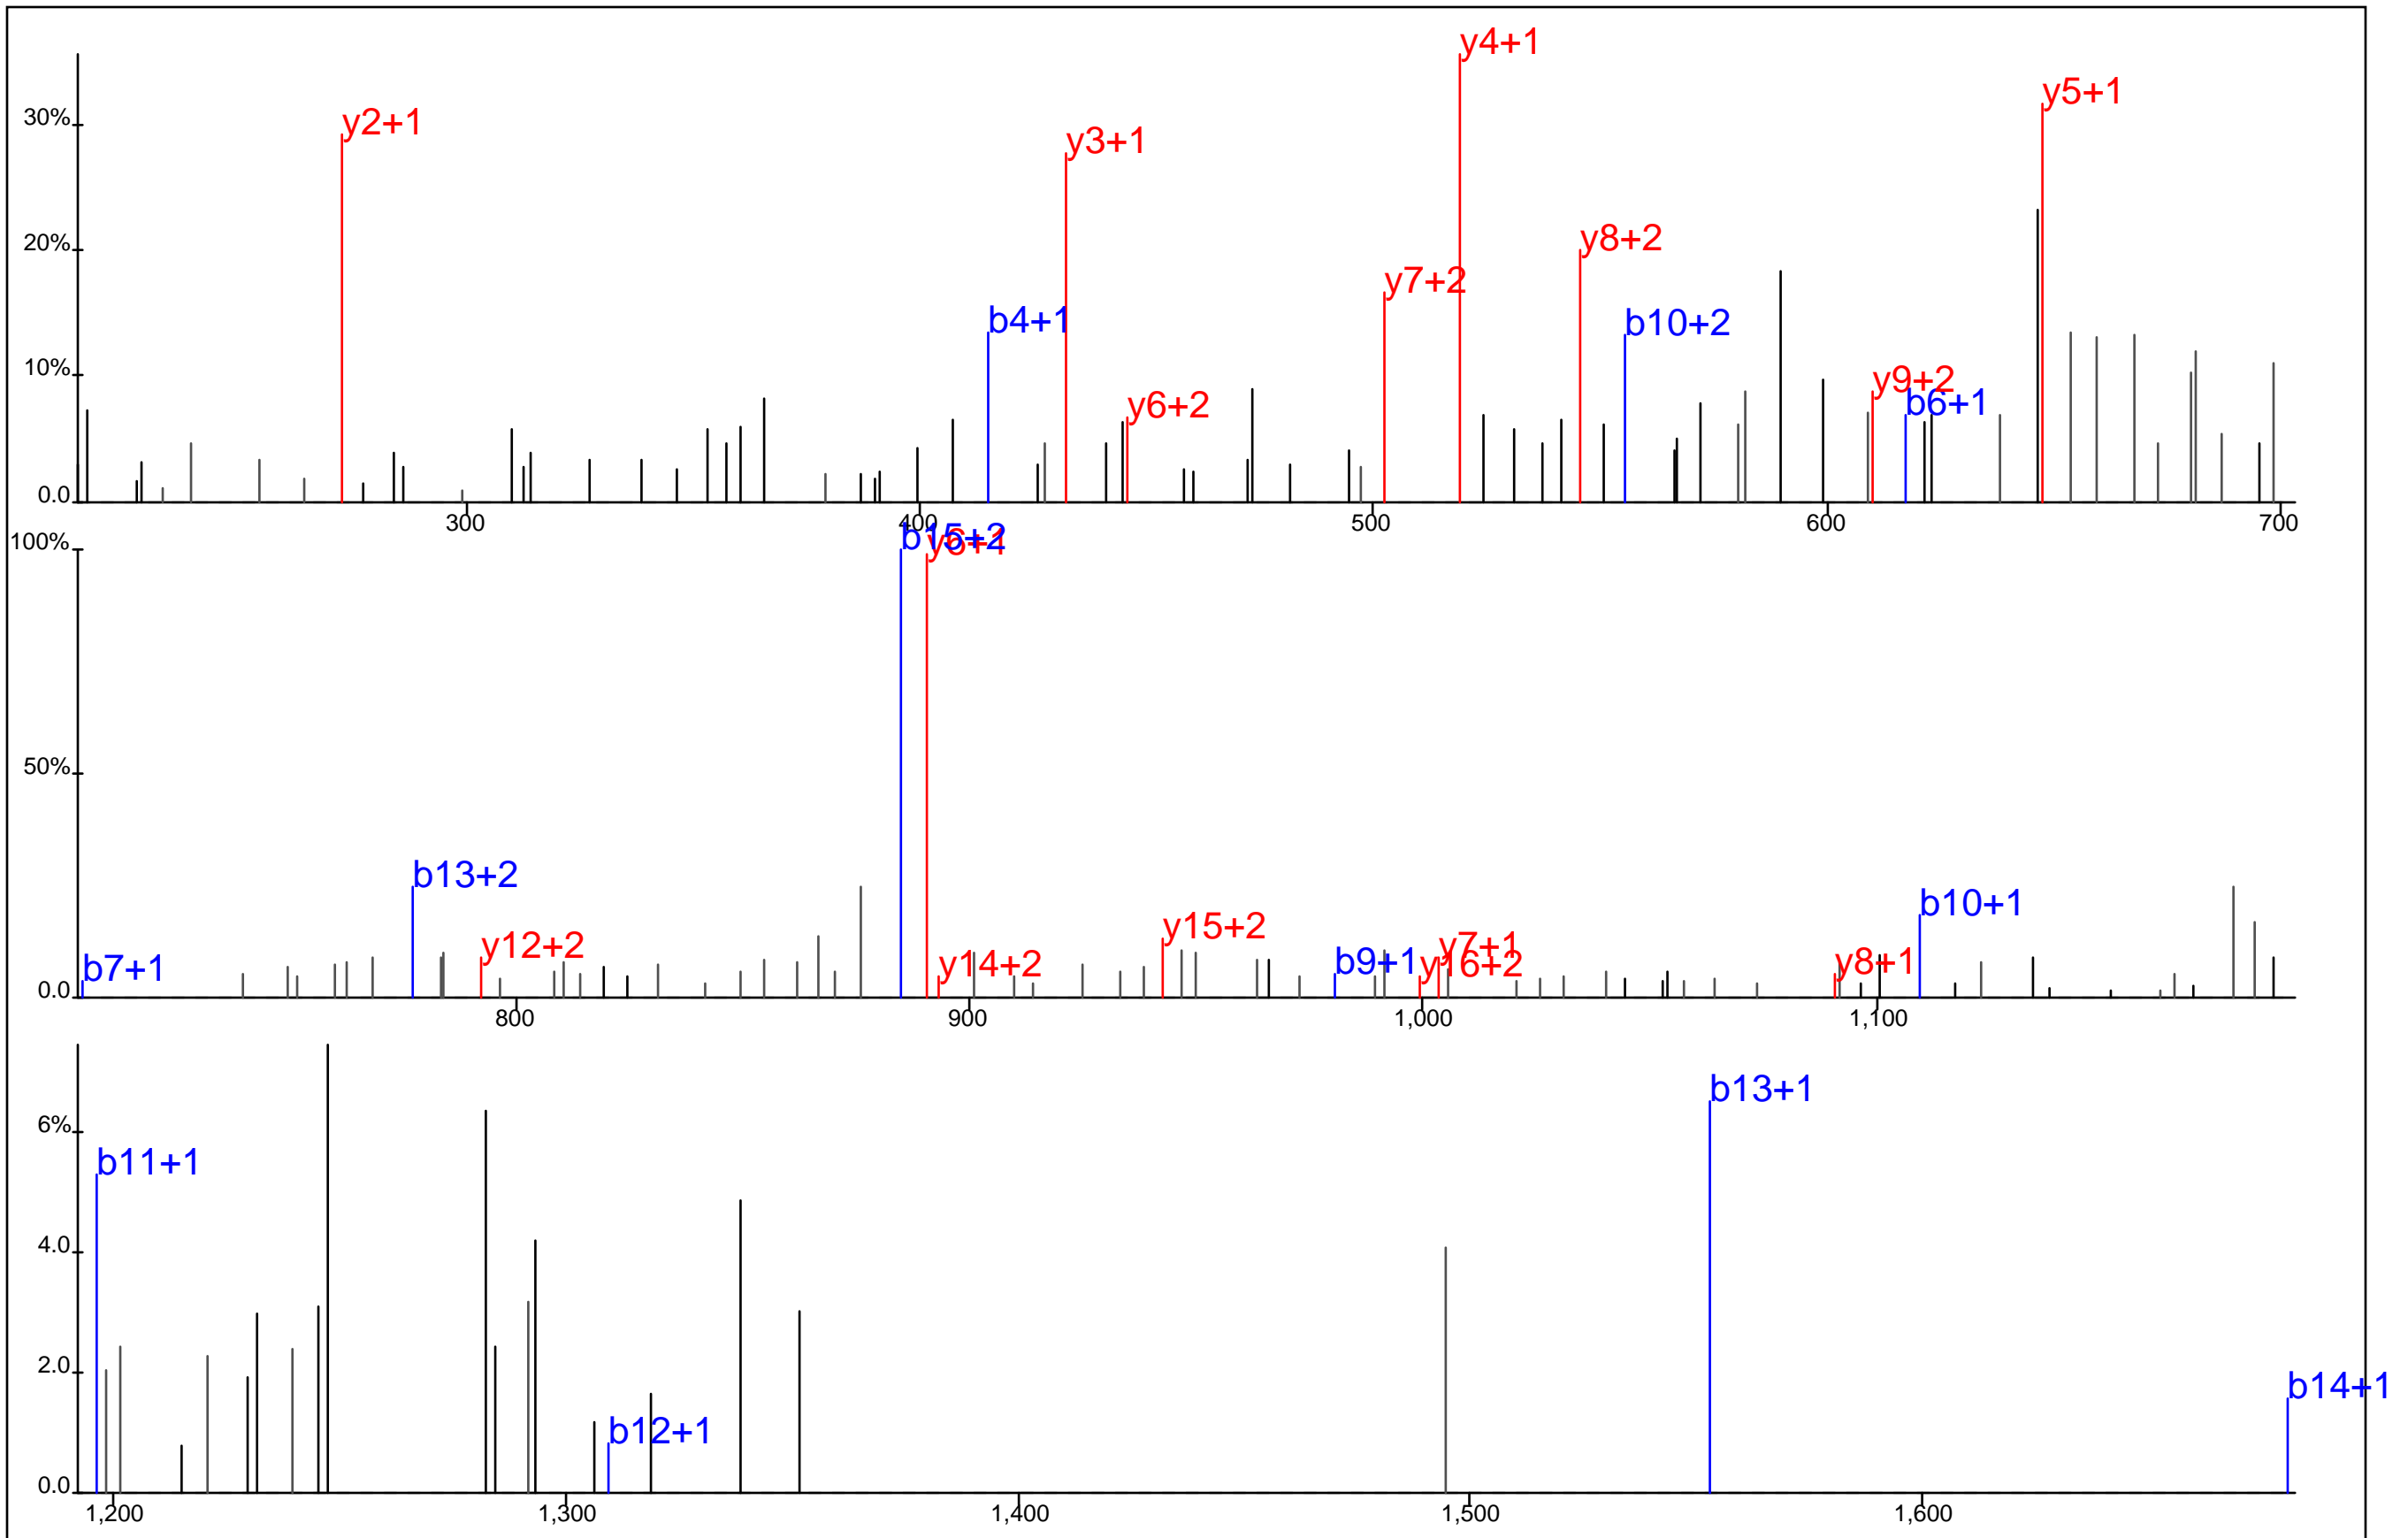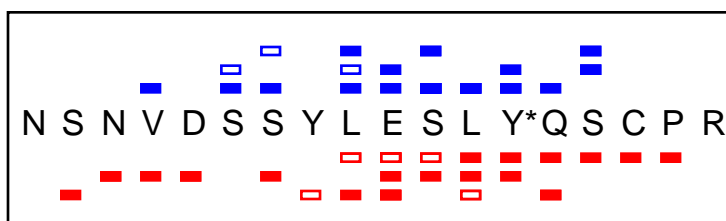

Protein Name: Zinc finger antiviral protein  
 gi Accession: 0  
 Precursor Mass: 733.6420+3  
 Delta Mass: 2.530 ppm  
 XCorr: 24.71

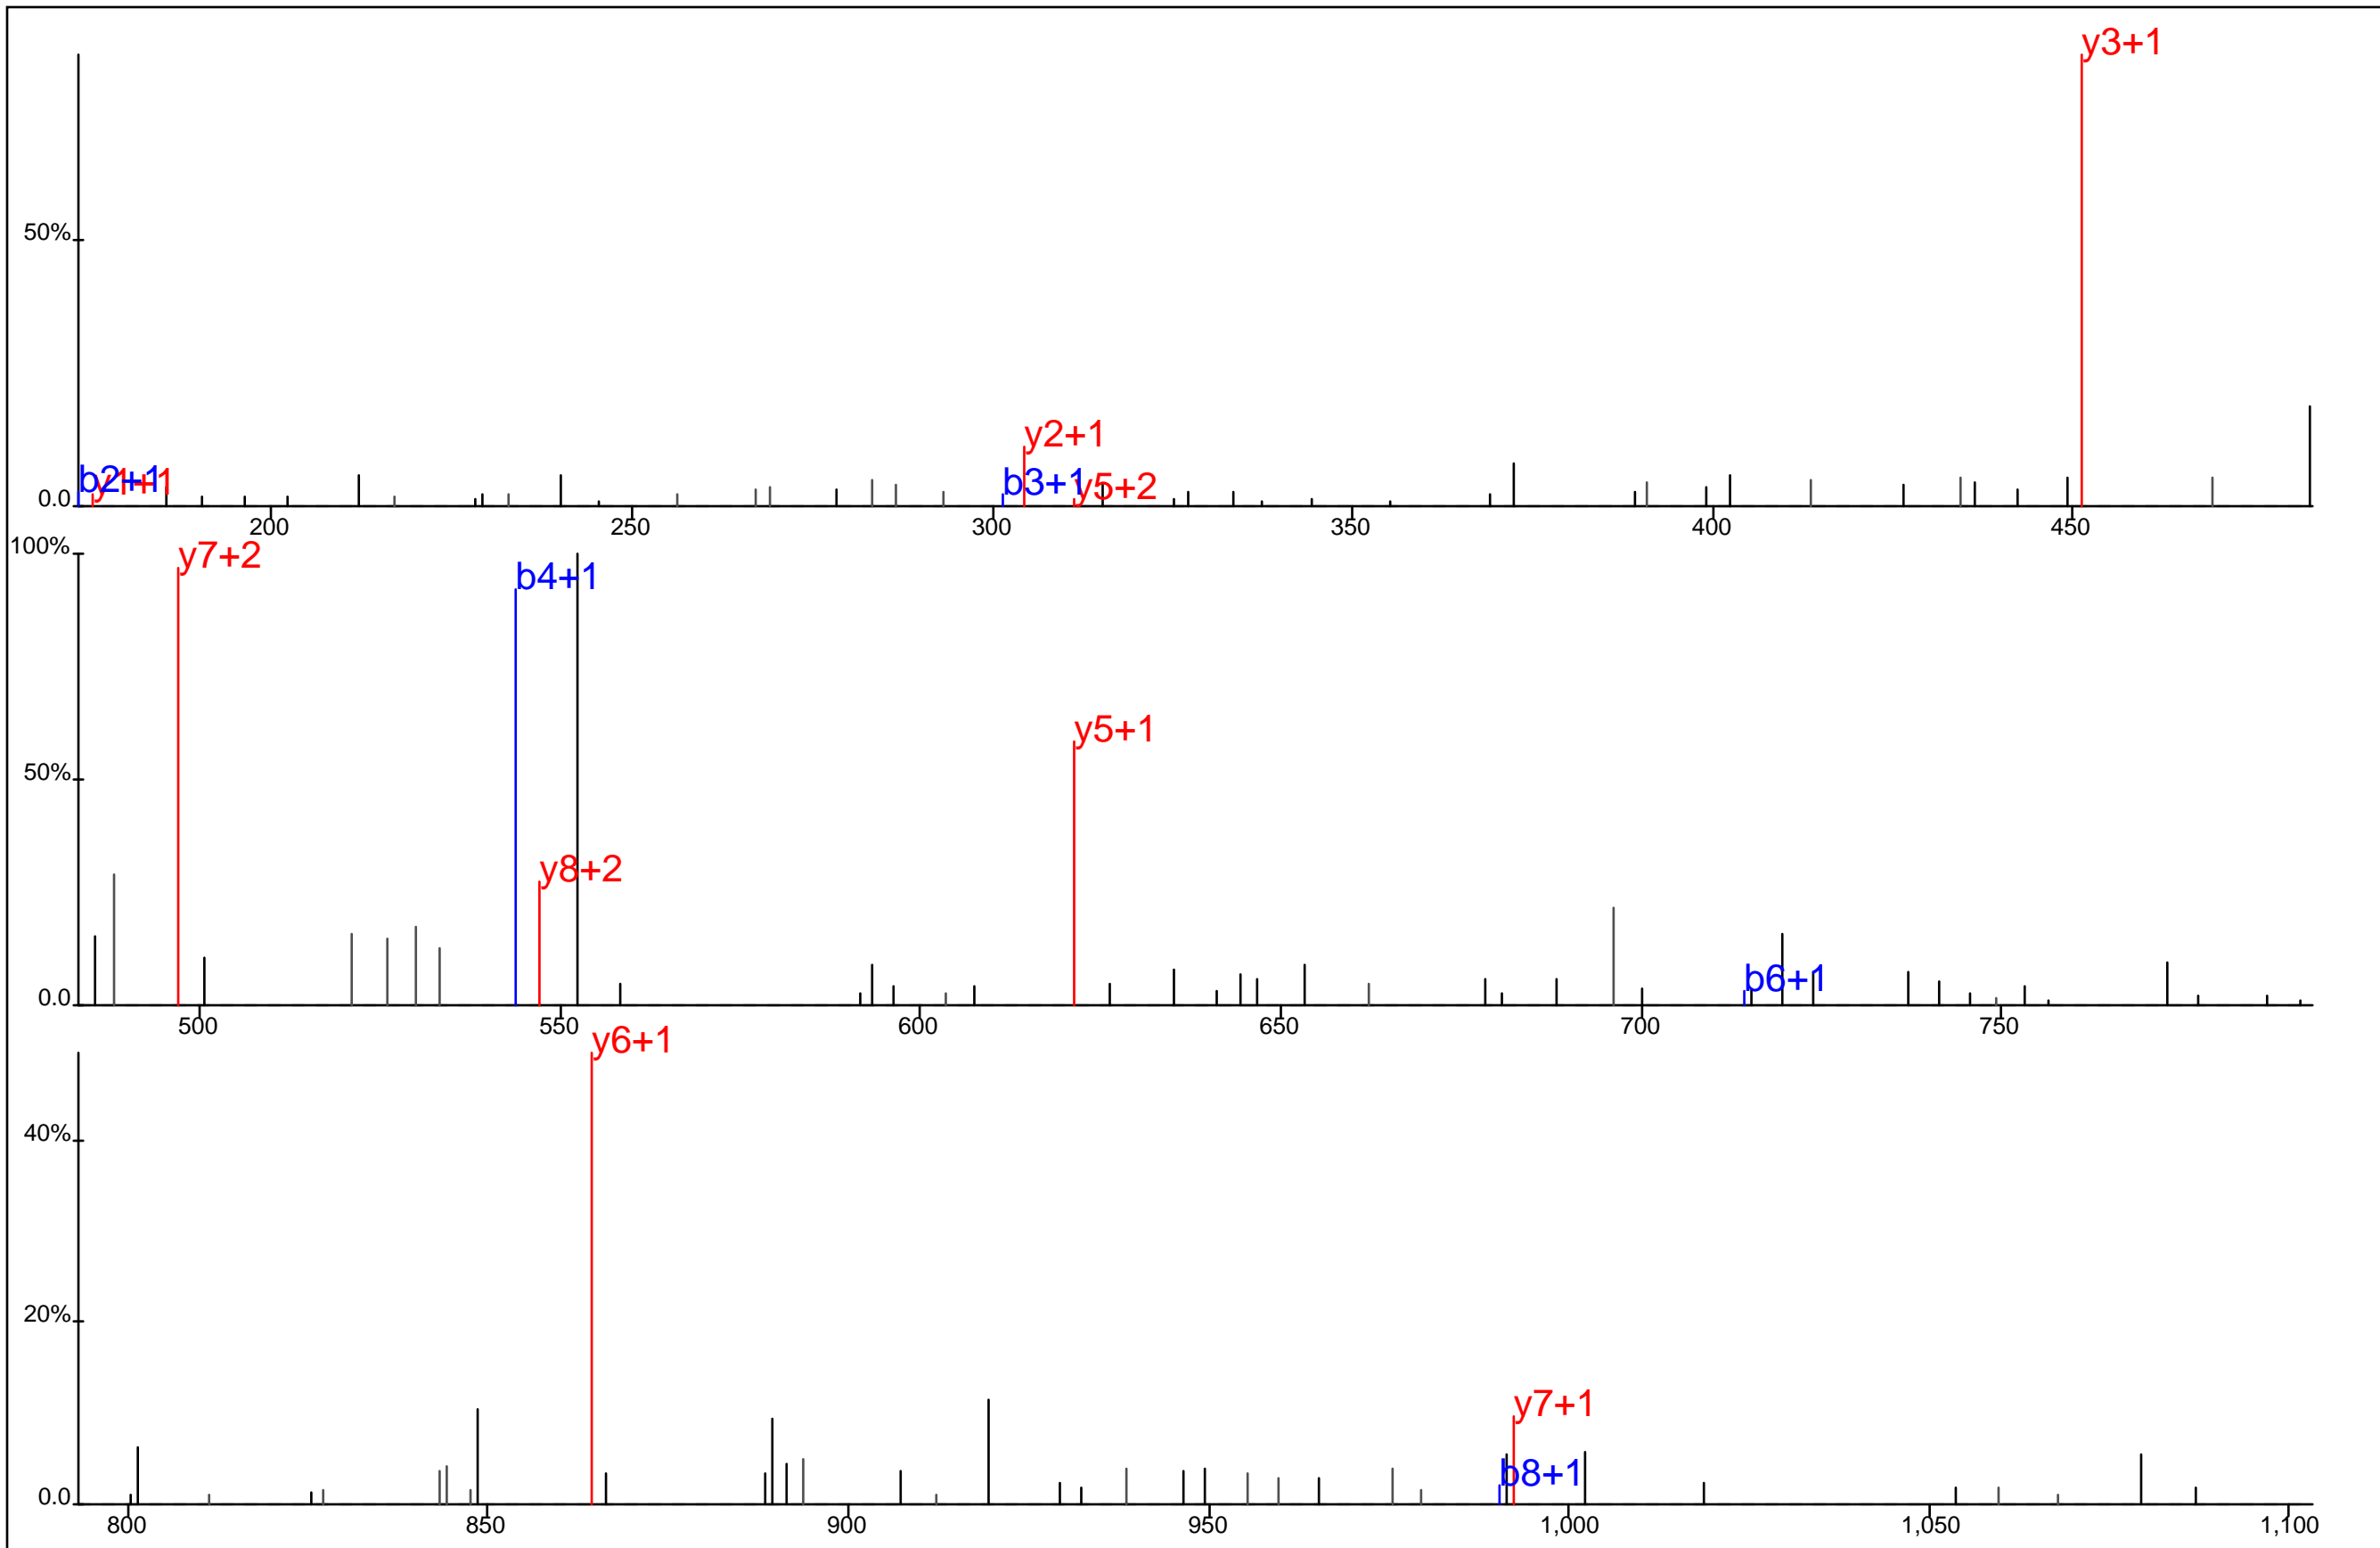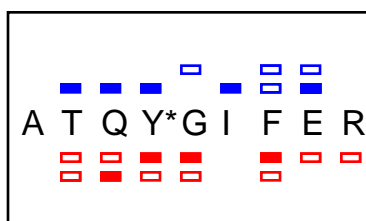

Protein Name: Zinc finger DHHC domain containing 13  
 gi Accession: 0  
 Precursor Mass: 582.7576+2  
 Delta Mass: 0.447 ppm  
 XCorr: 27.52

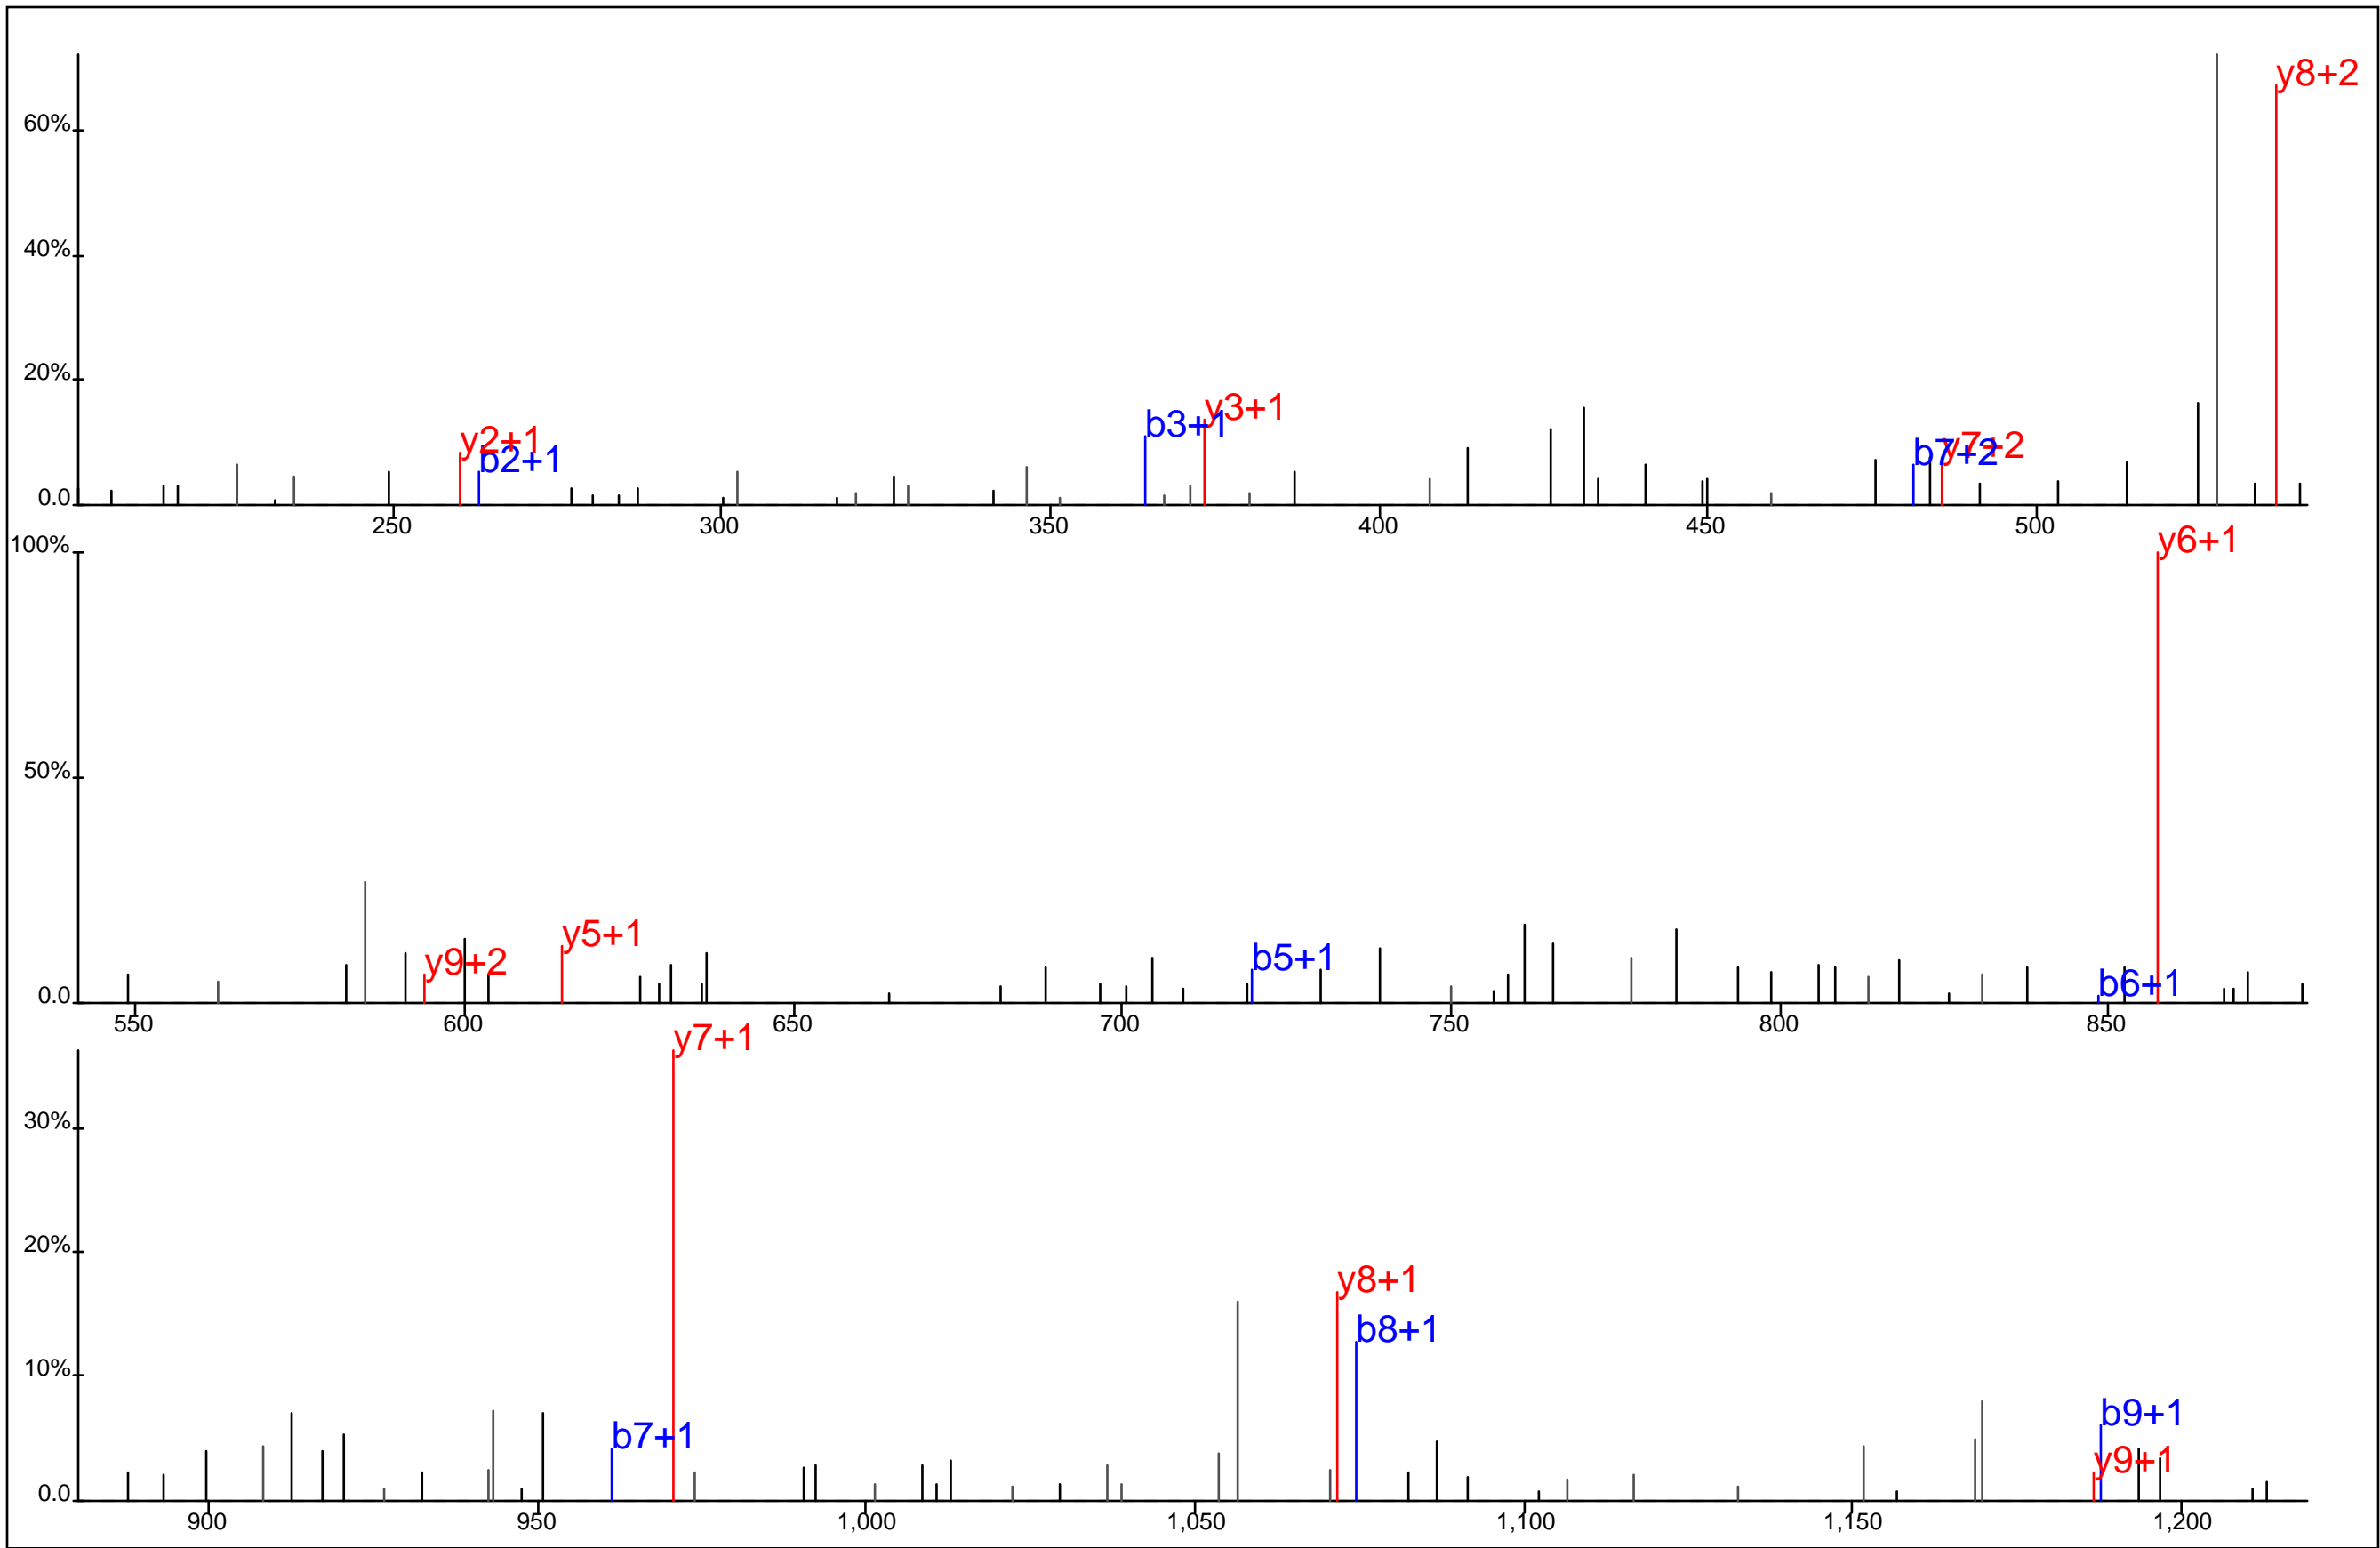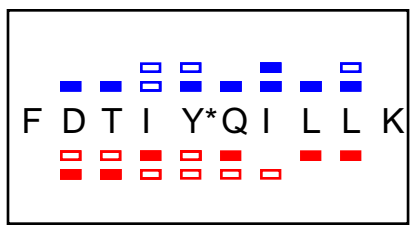

Protein Name: Zinc finger protein 147  
 gi Accession: 0  
 Precursor Mass: 667.3425+2  
 Delta Mass: 1.988 ppm  
 XCorr: 43.71

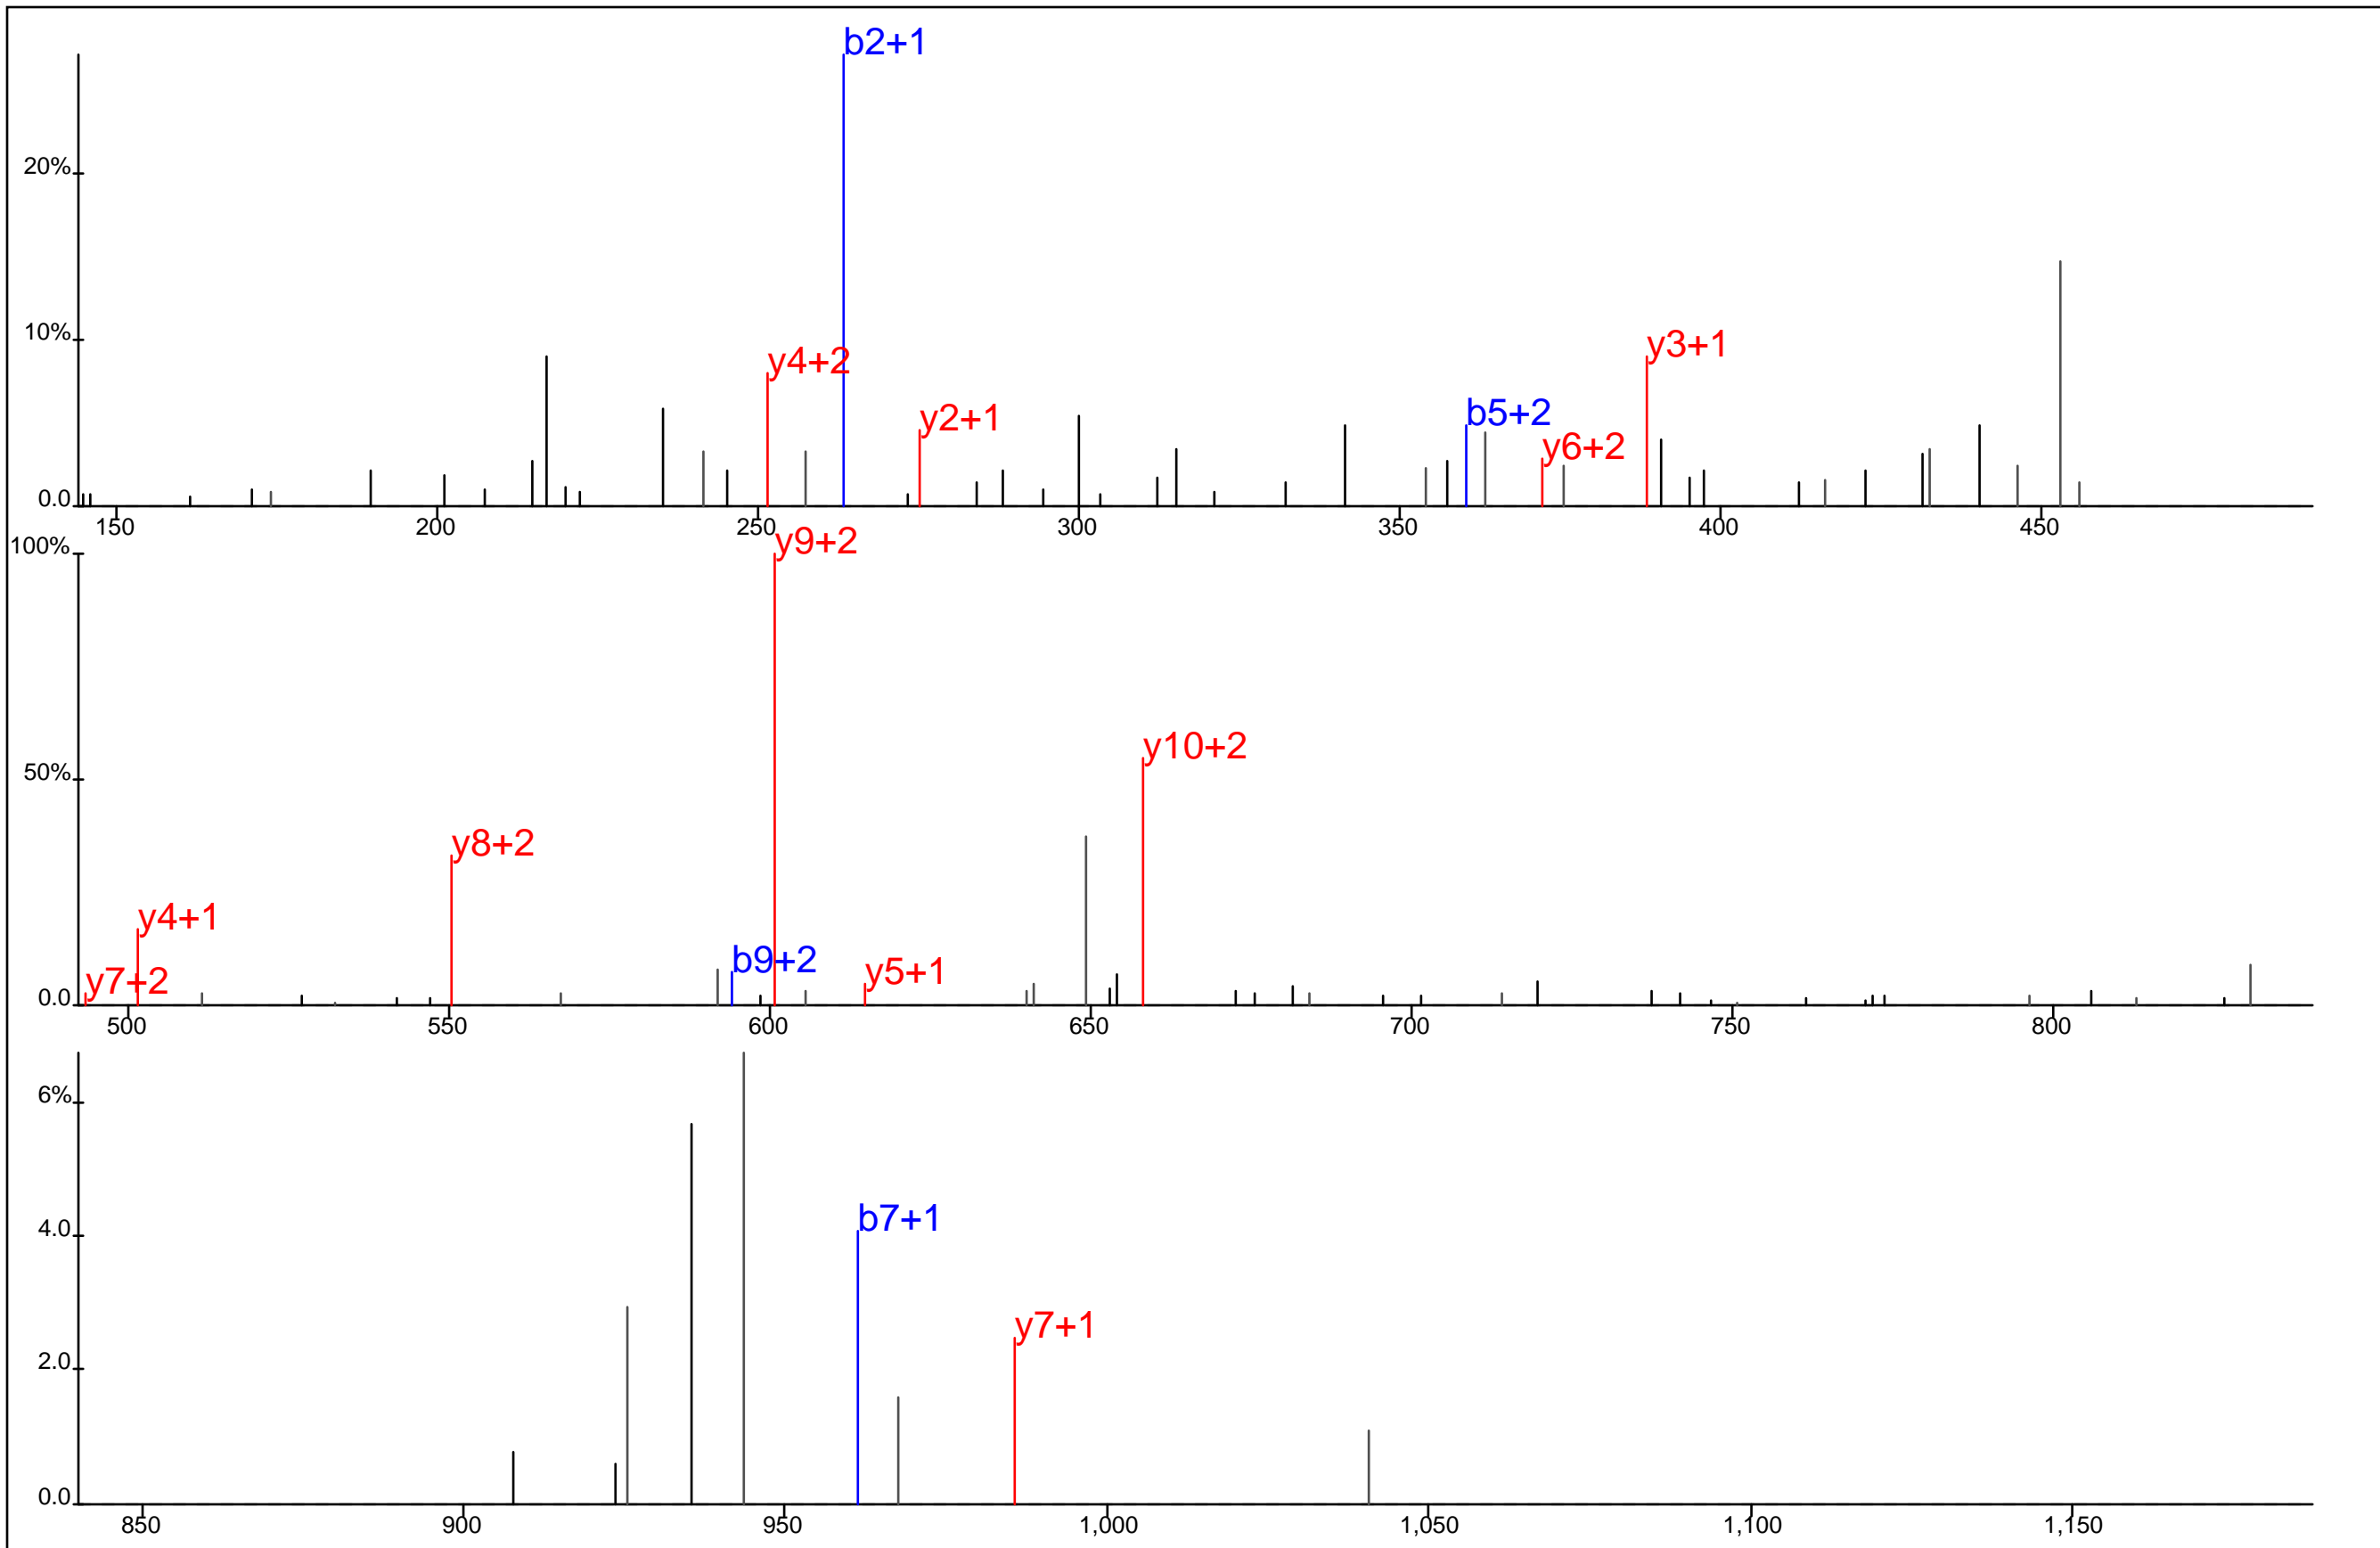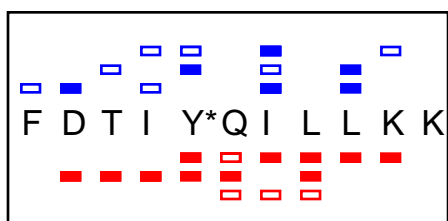

Protein Name: Zinc finger protein 147  
 gi Accession: 0  
 Precursor Mass: 487.9301+3  
 Delta Mass: 0.425 ppm  
 XCorr: 29.09

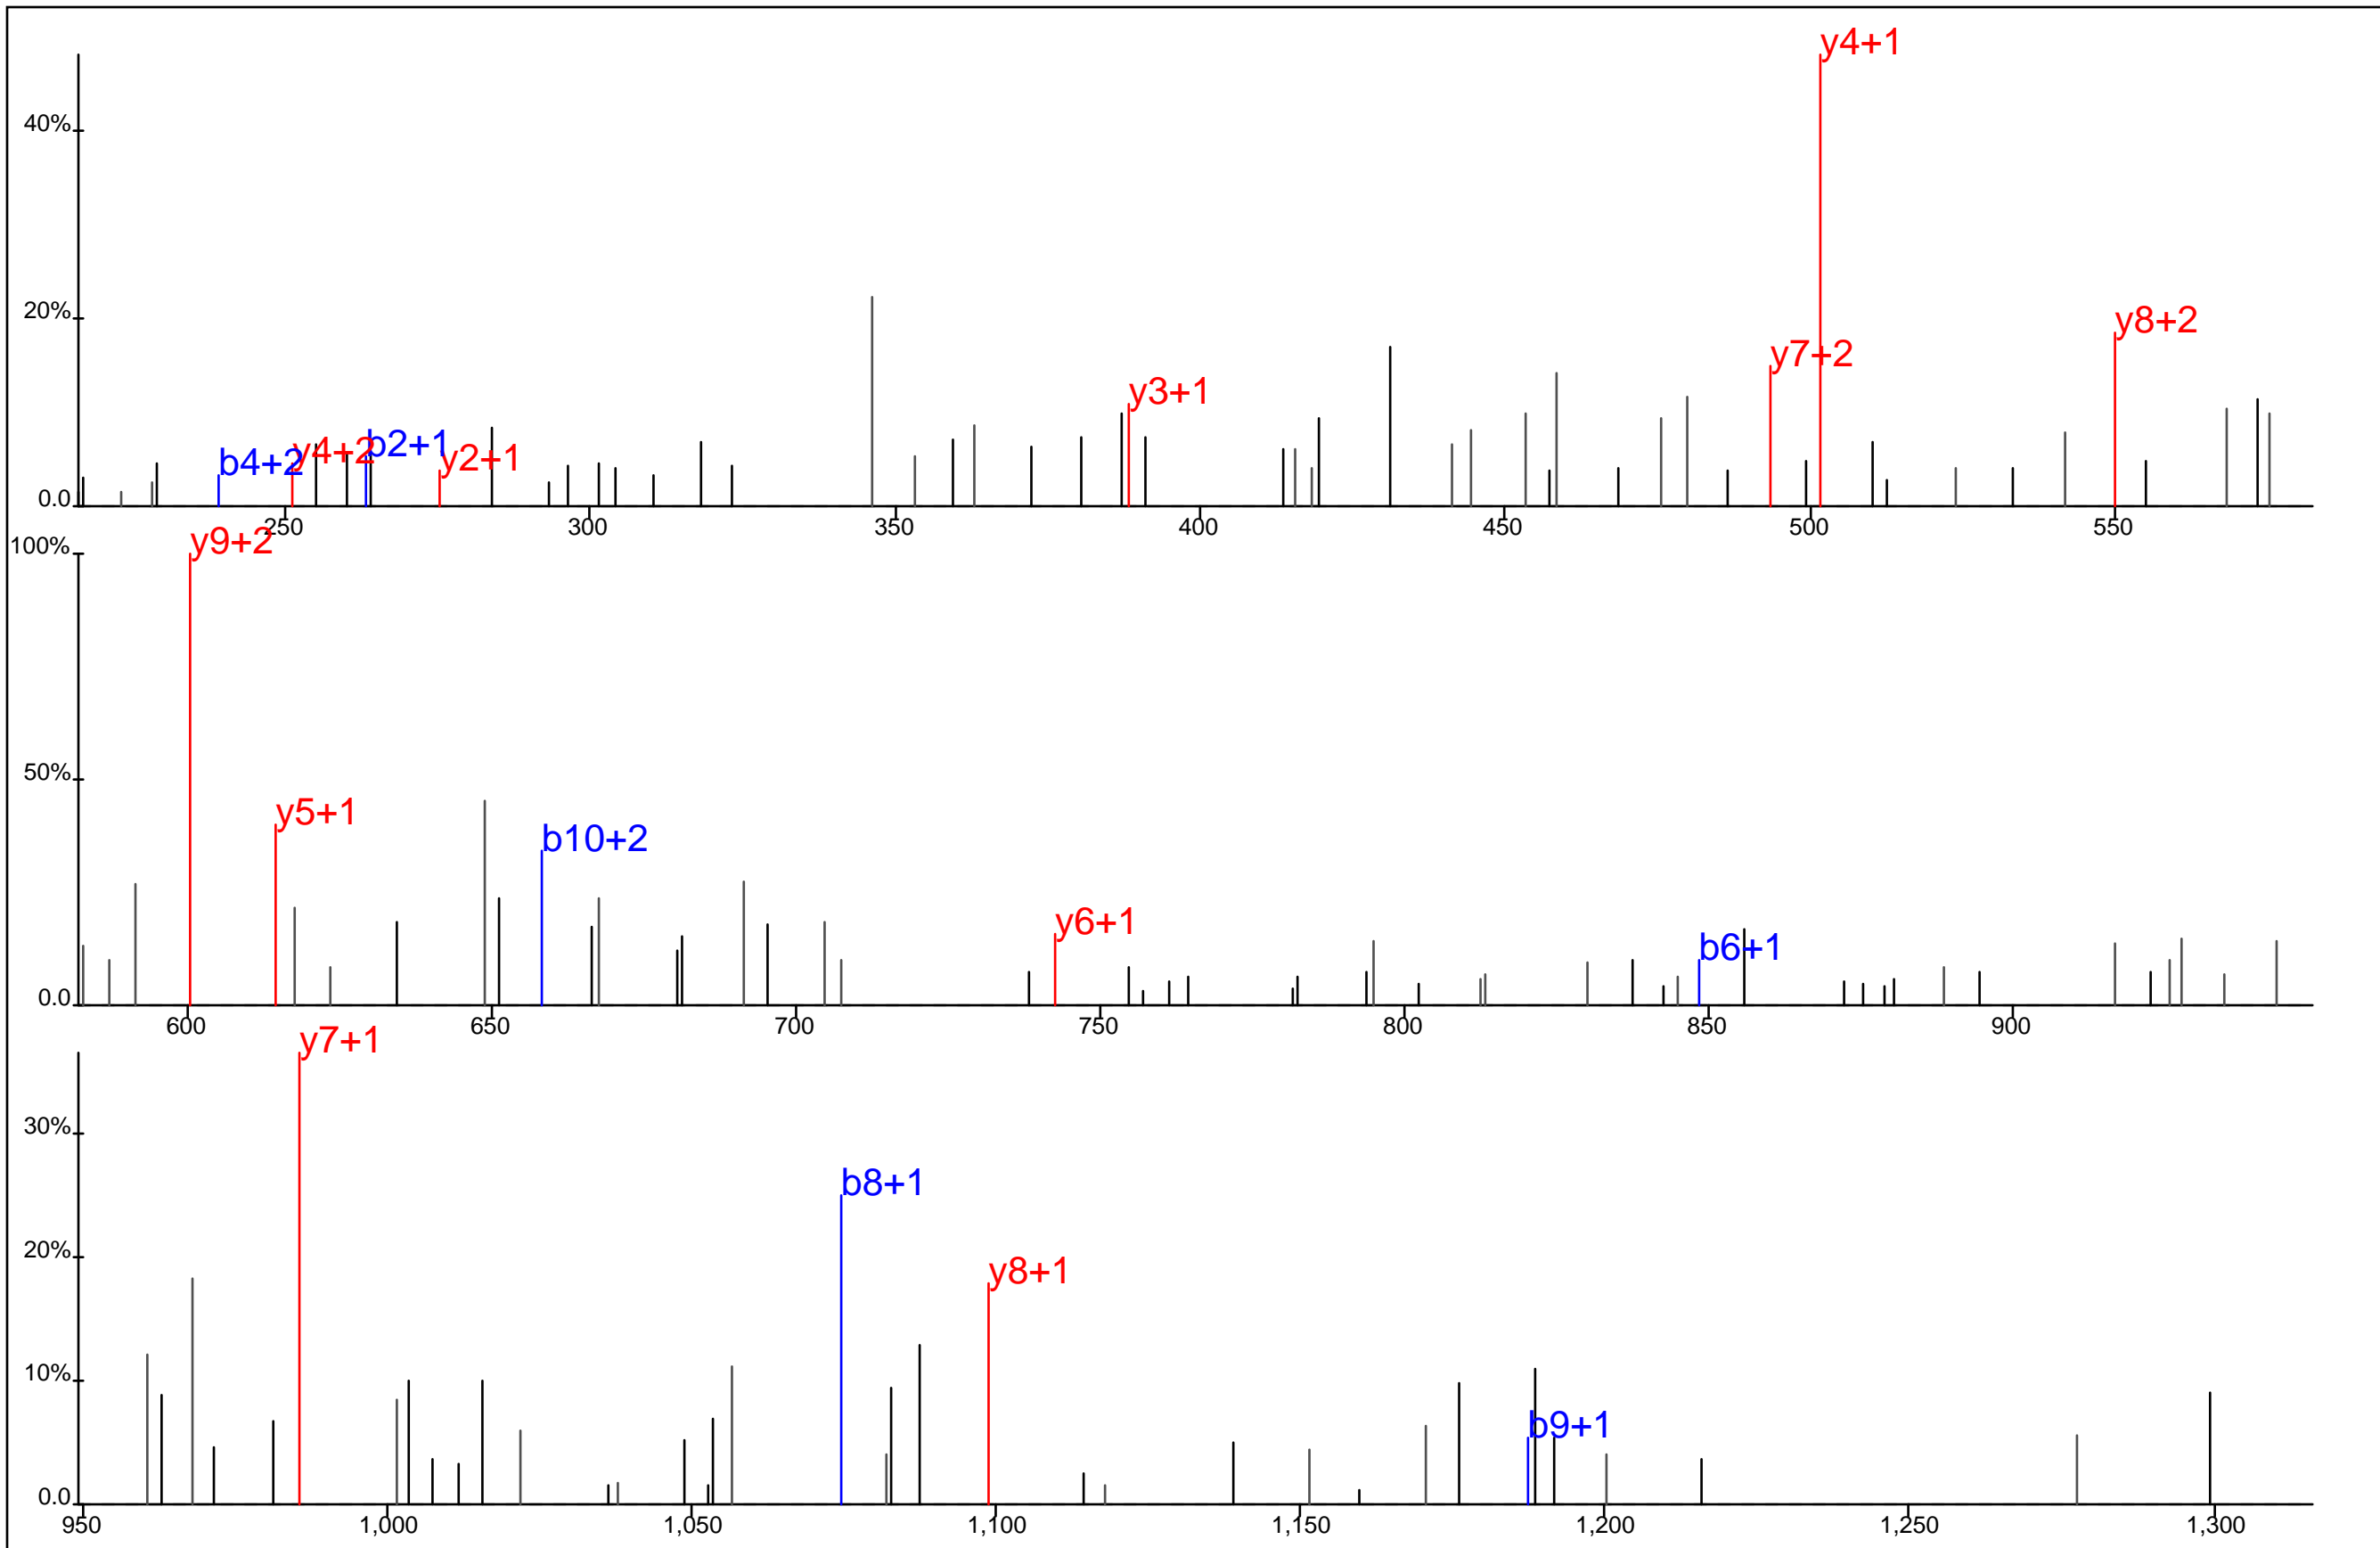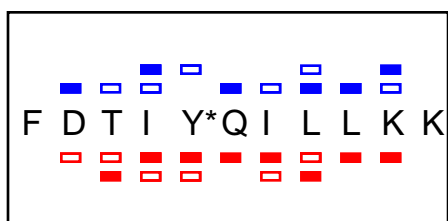

Protein Name: Zinc finger protein 147  
 gi Accession: 0  
 Precursor Mass: 731.3937+2  
 Delta Mass: 3.295 ppm  
 XCorr: 25.64

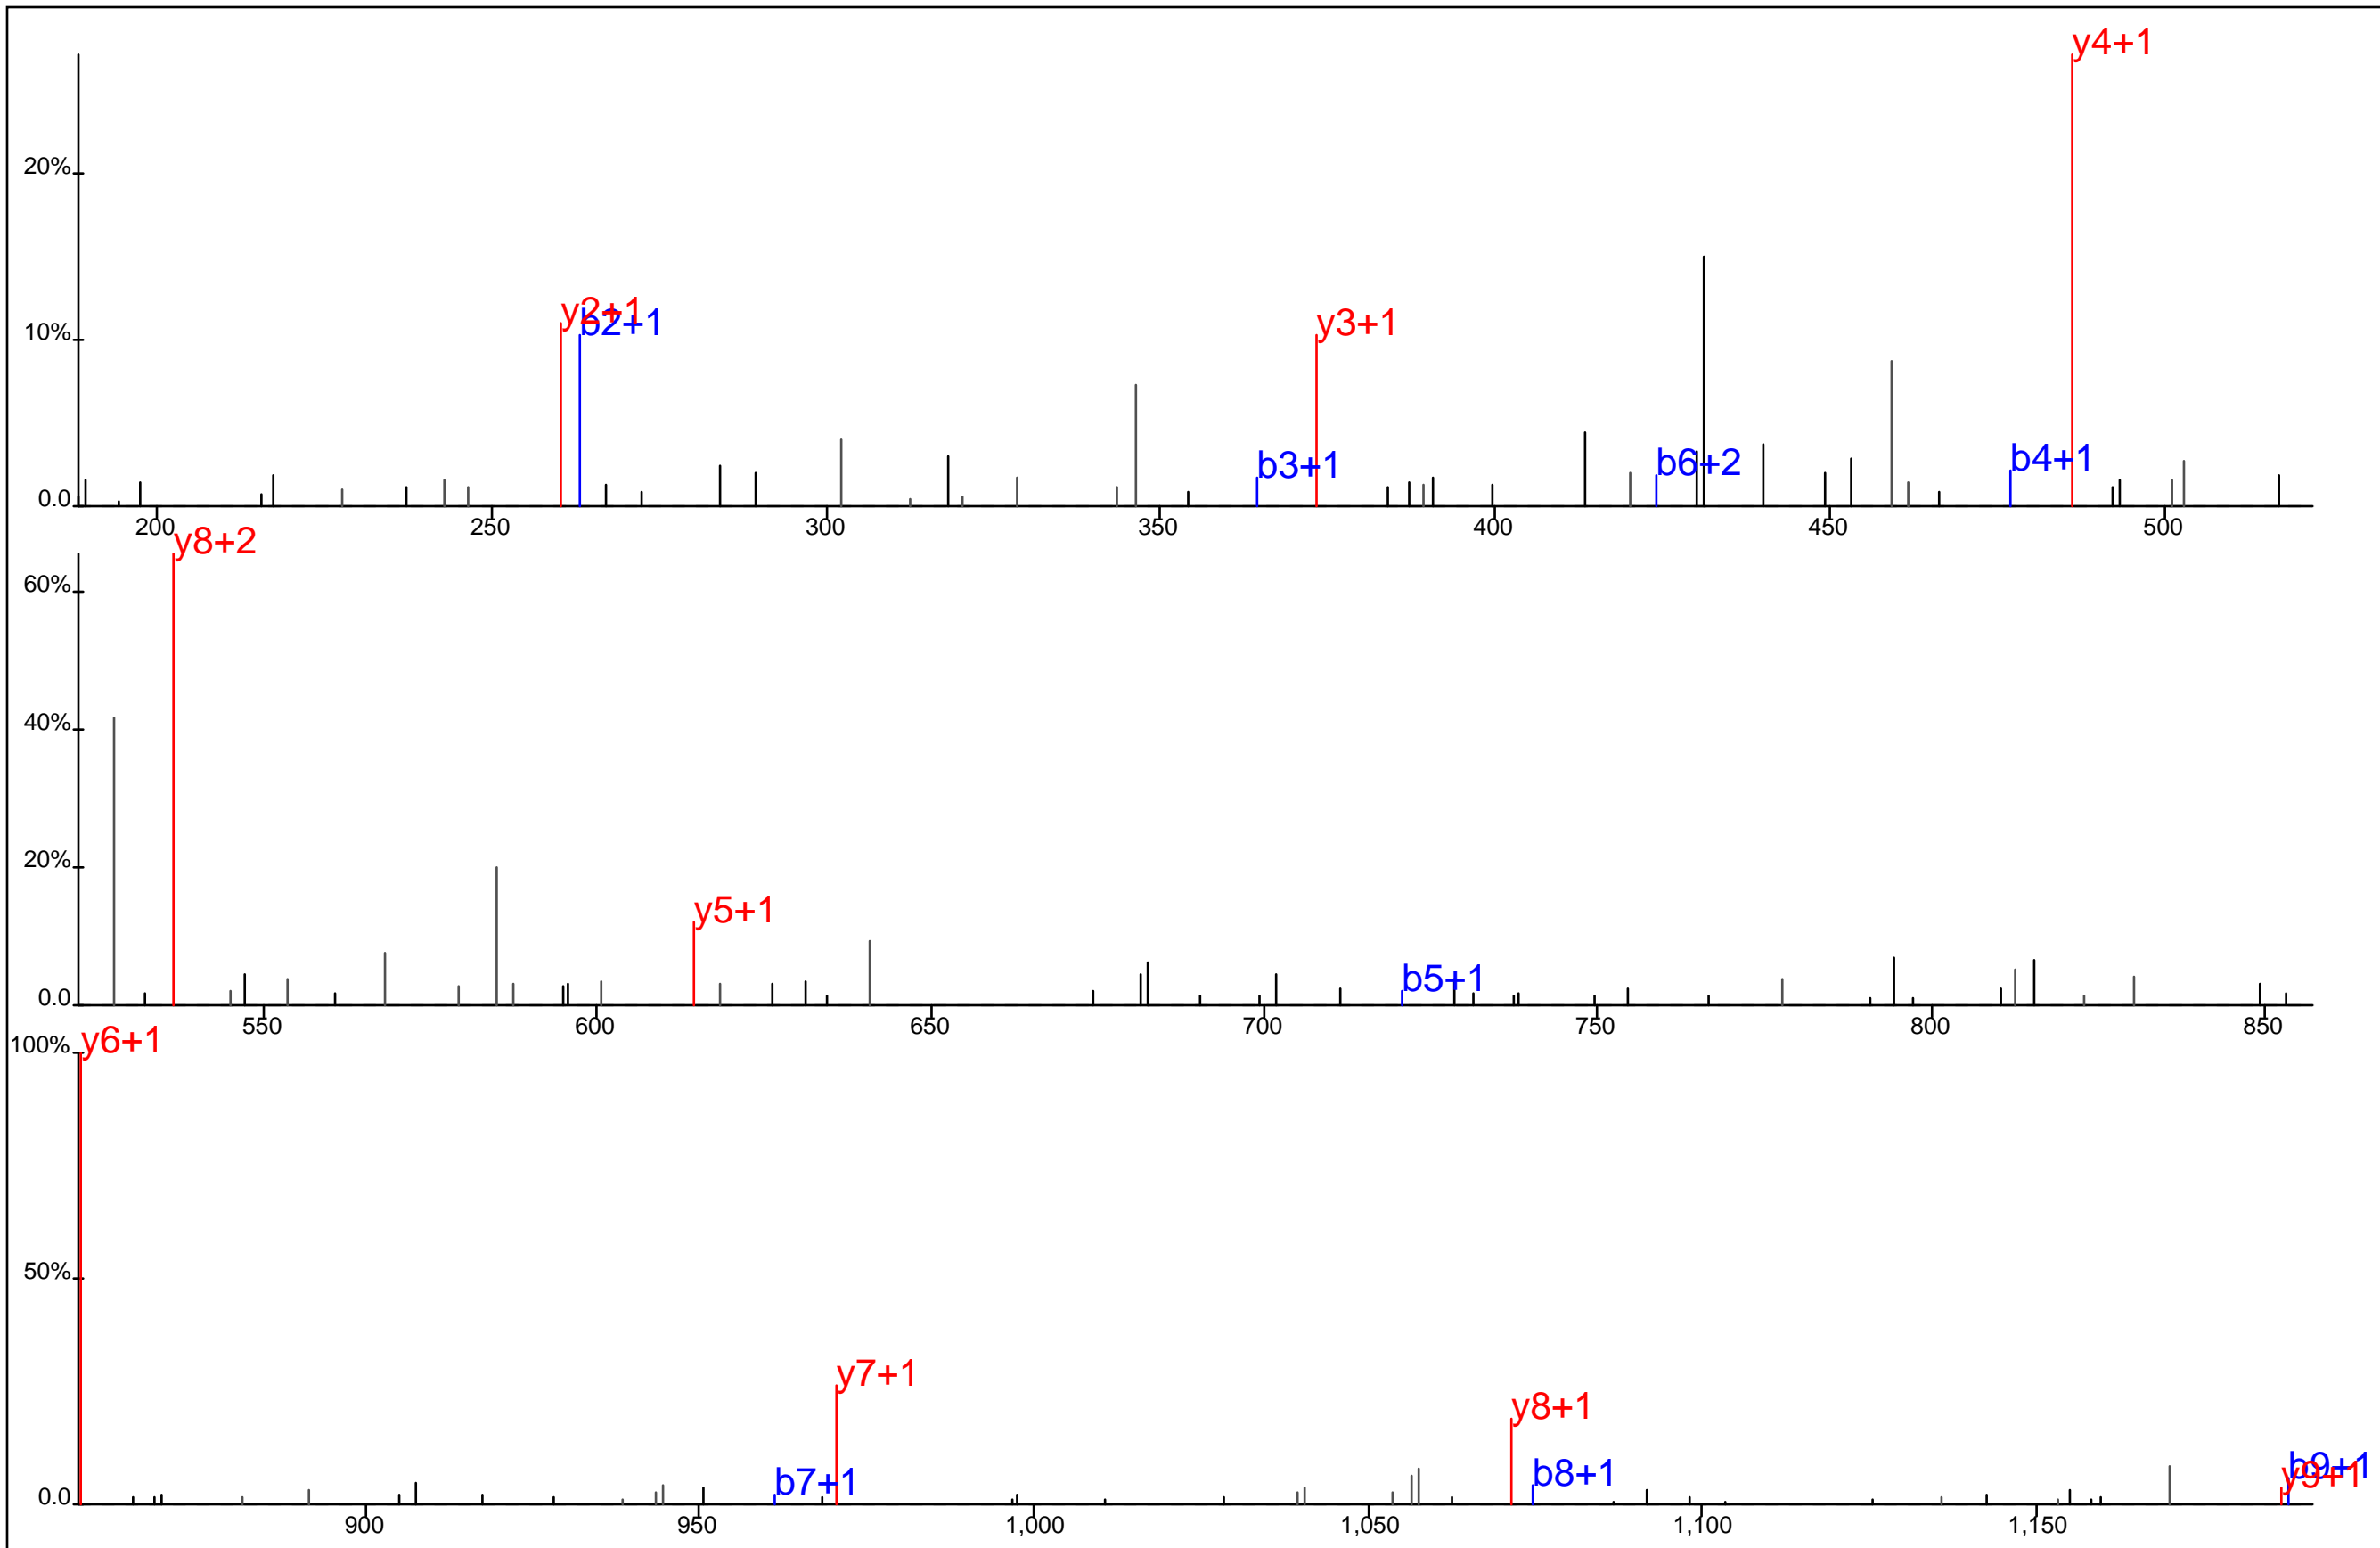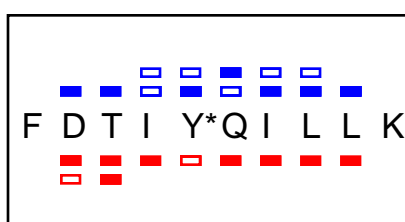

Protein Name: Zinc finger protein 147  
 gi Accession: 0  
 Precursor Mass: 667.3438+2  
 Delta Mass: 0.025 ppm  
 XCorr: 61.15

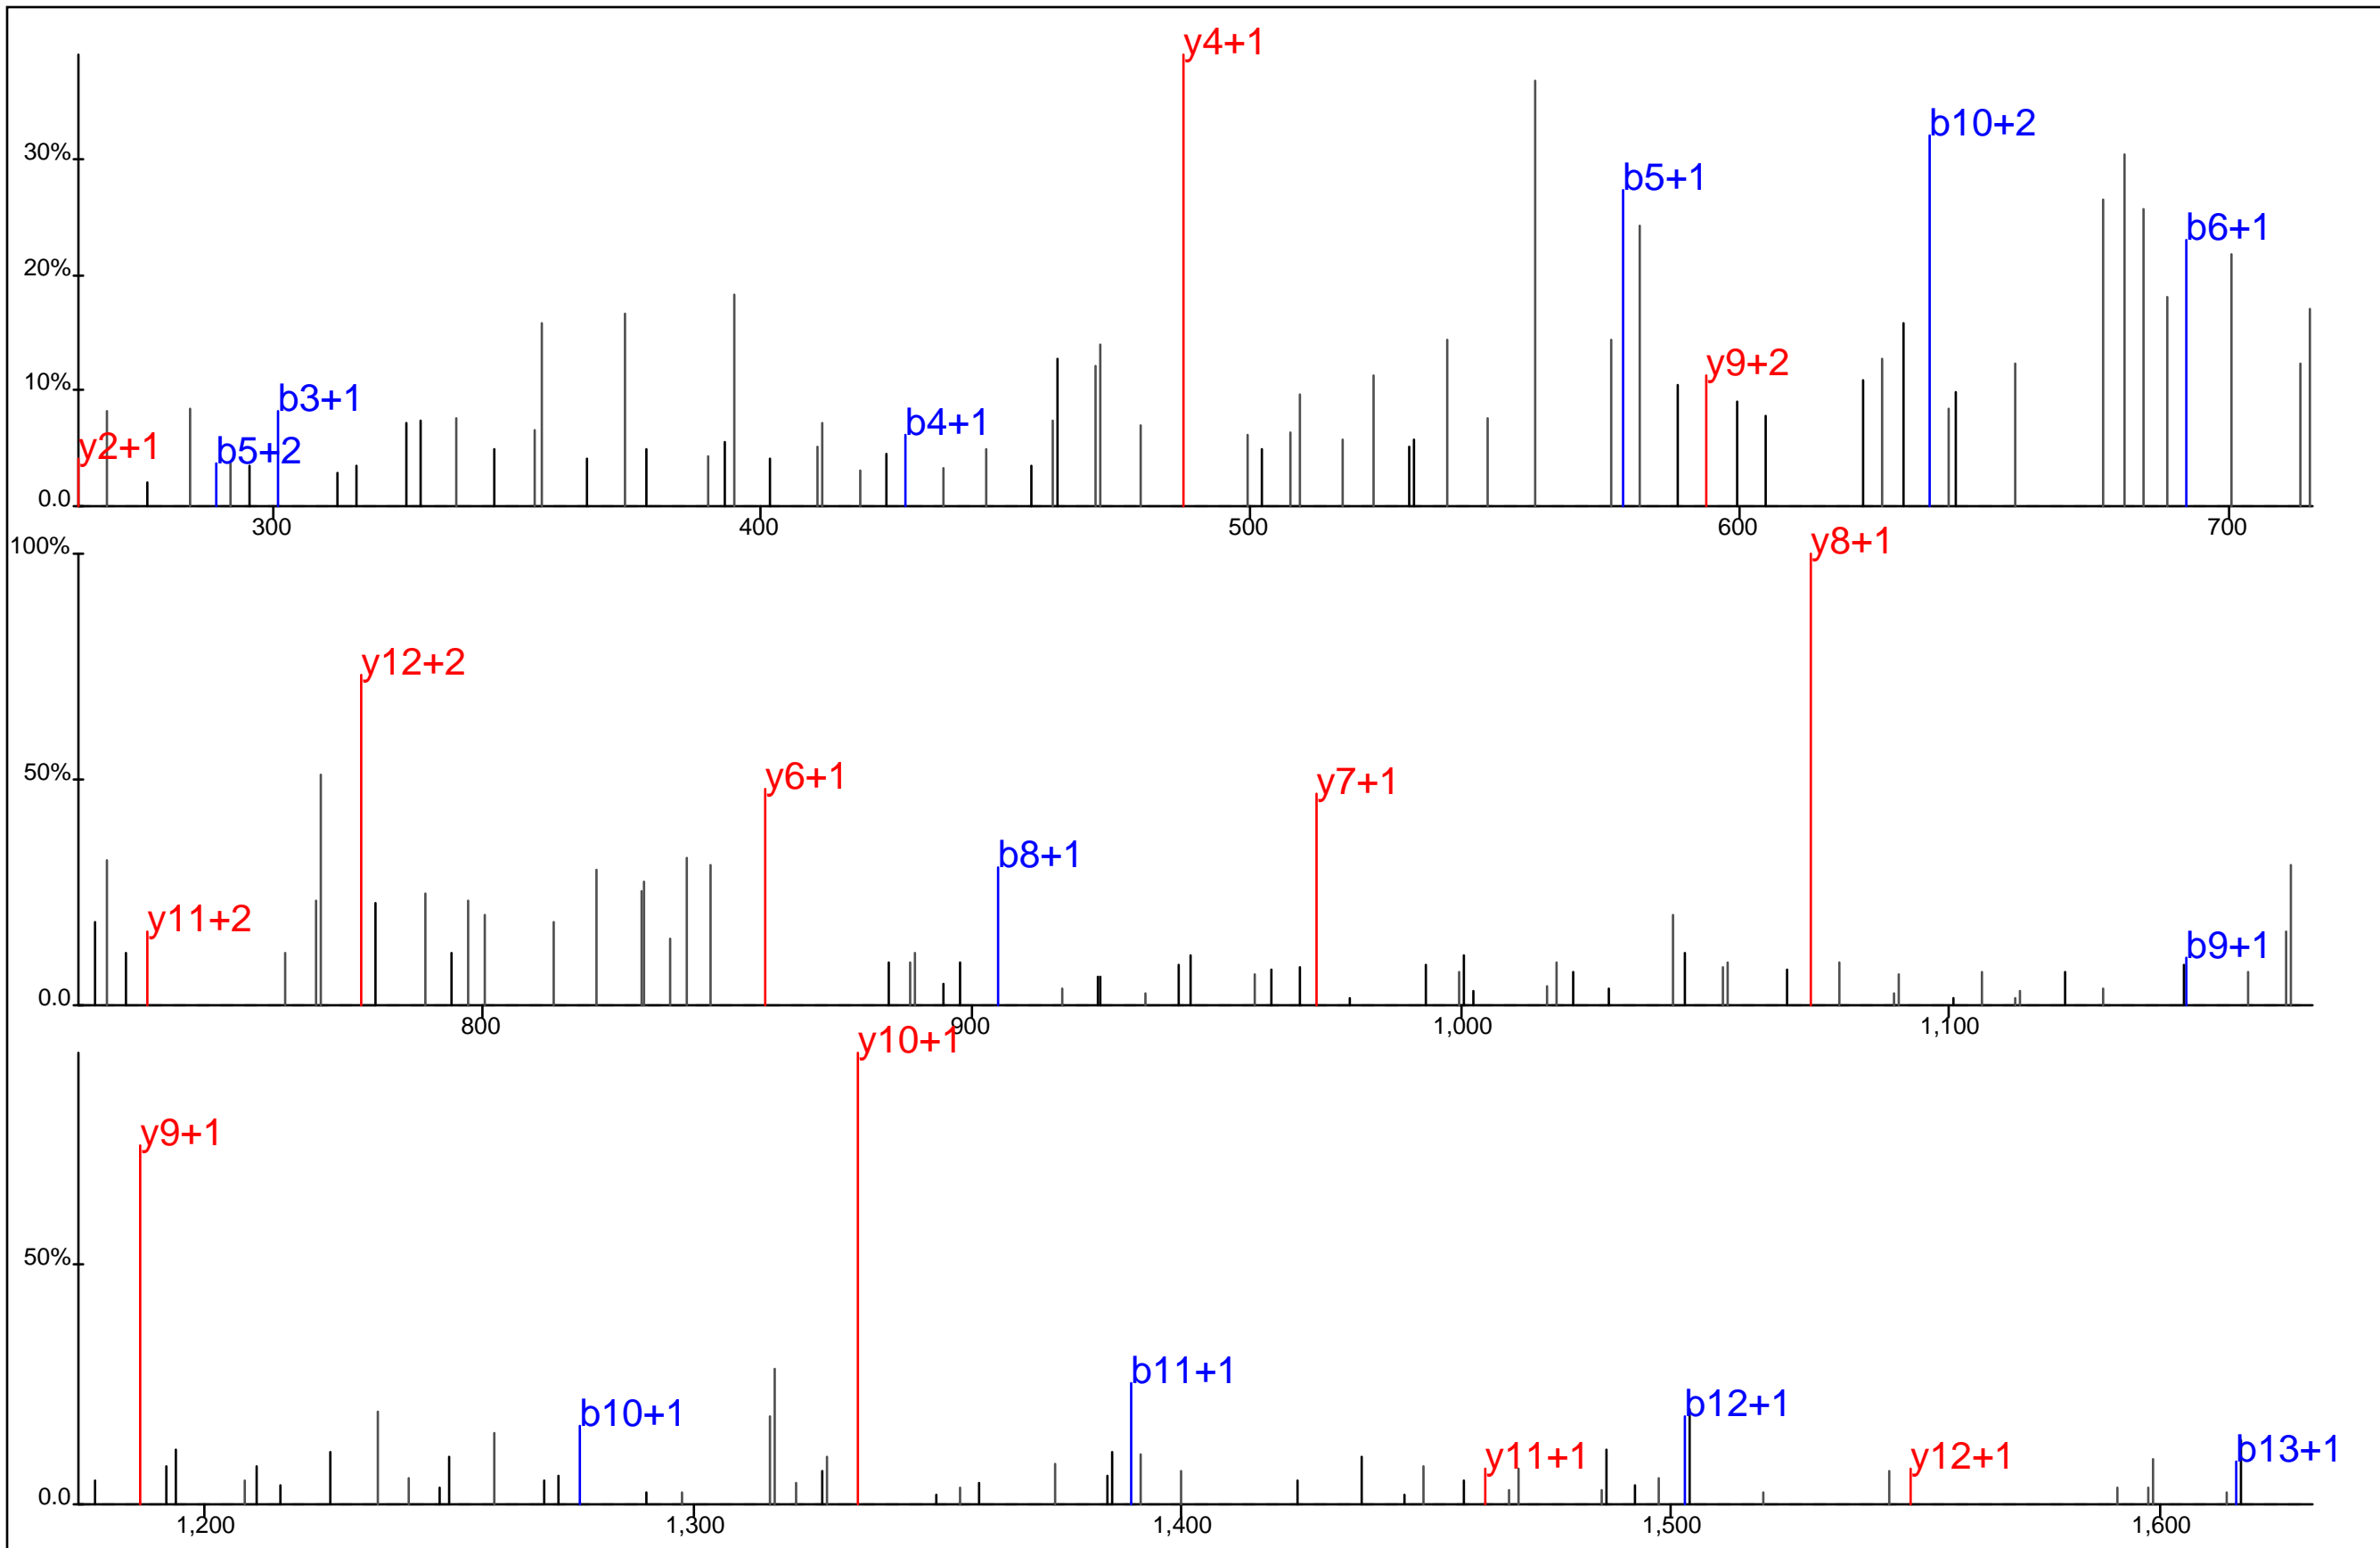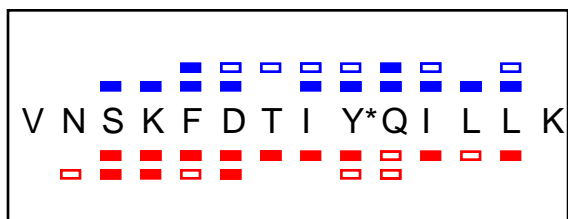

Protein Name: Zinc finger protein 147  
 gi Accession: 0  
 Precursor Mass: 881.4669+2  
 Delta Mass: 4.495 ppm  
 XCorr: 48.36



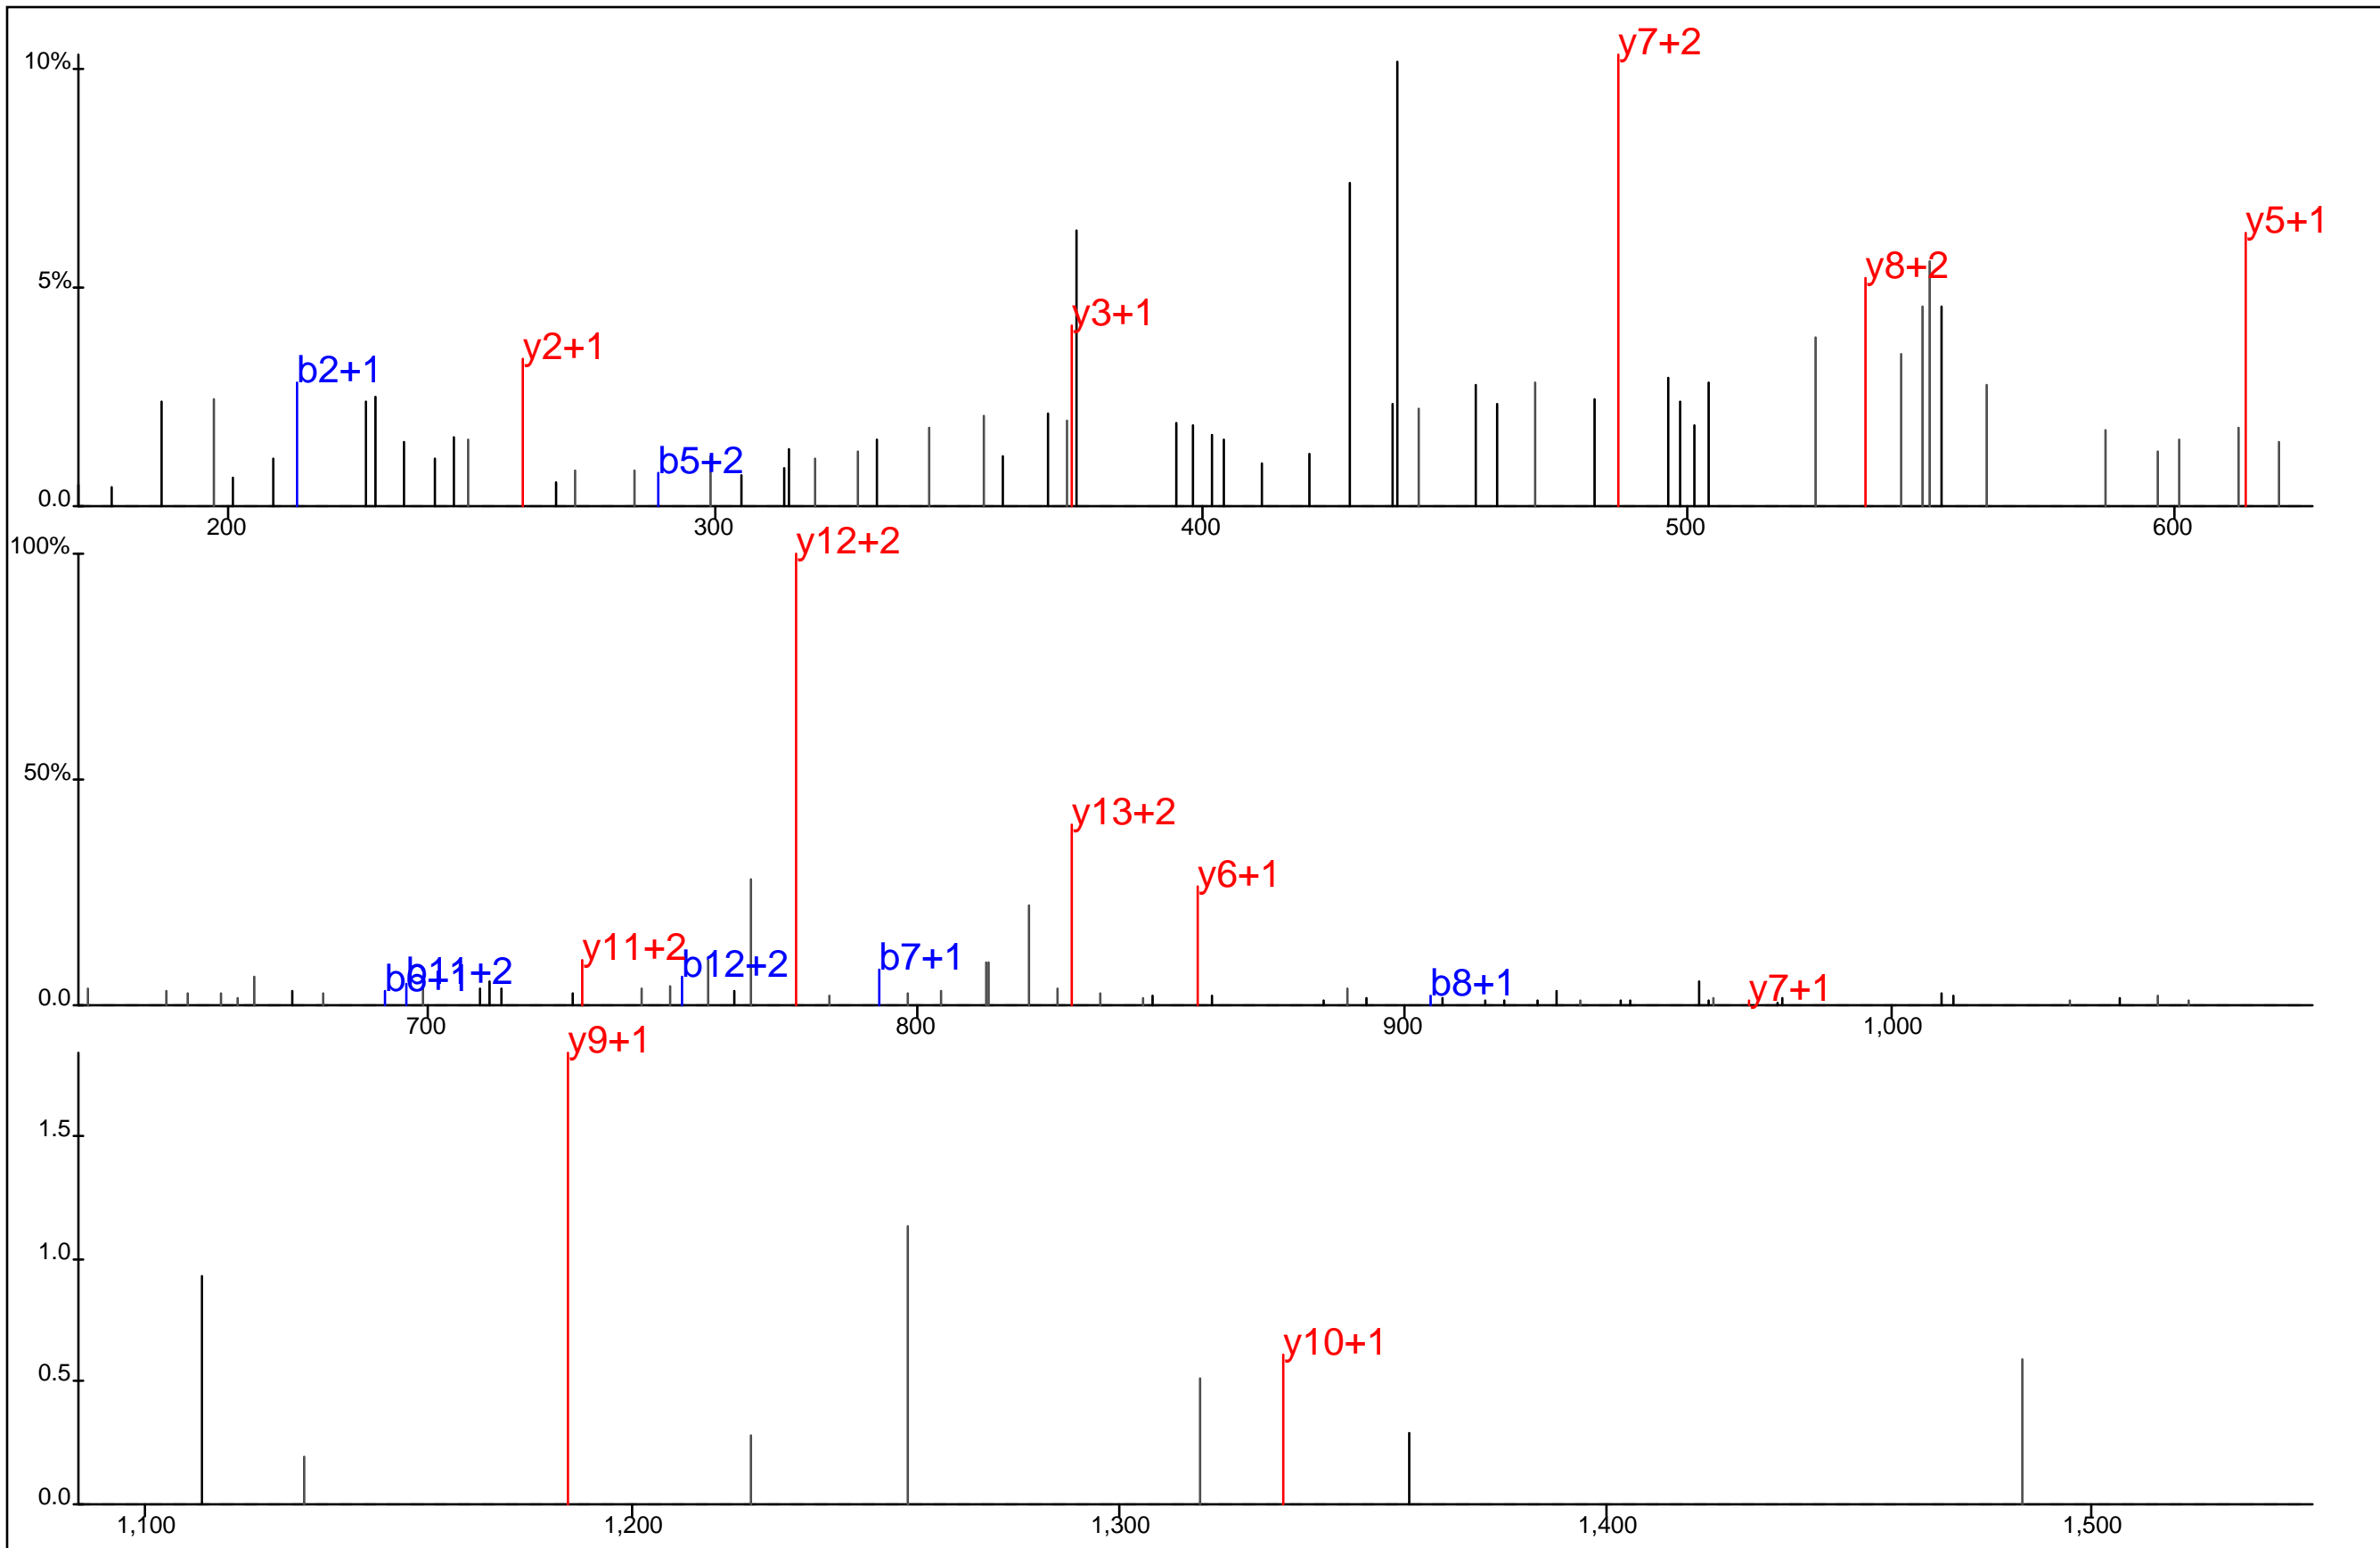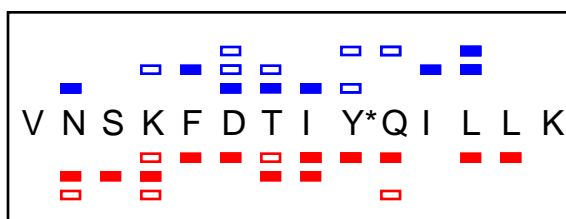

Protein Name: Zinc finger protein 147  
 gi Accession: 0  
 Precursor Mass: 587.9774+3  
 Delta Mass: 0.639 ppm  
 XCorr: 28.57

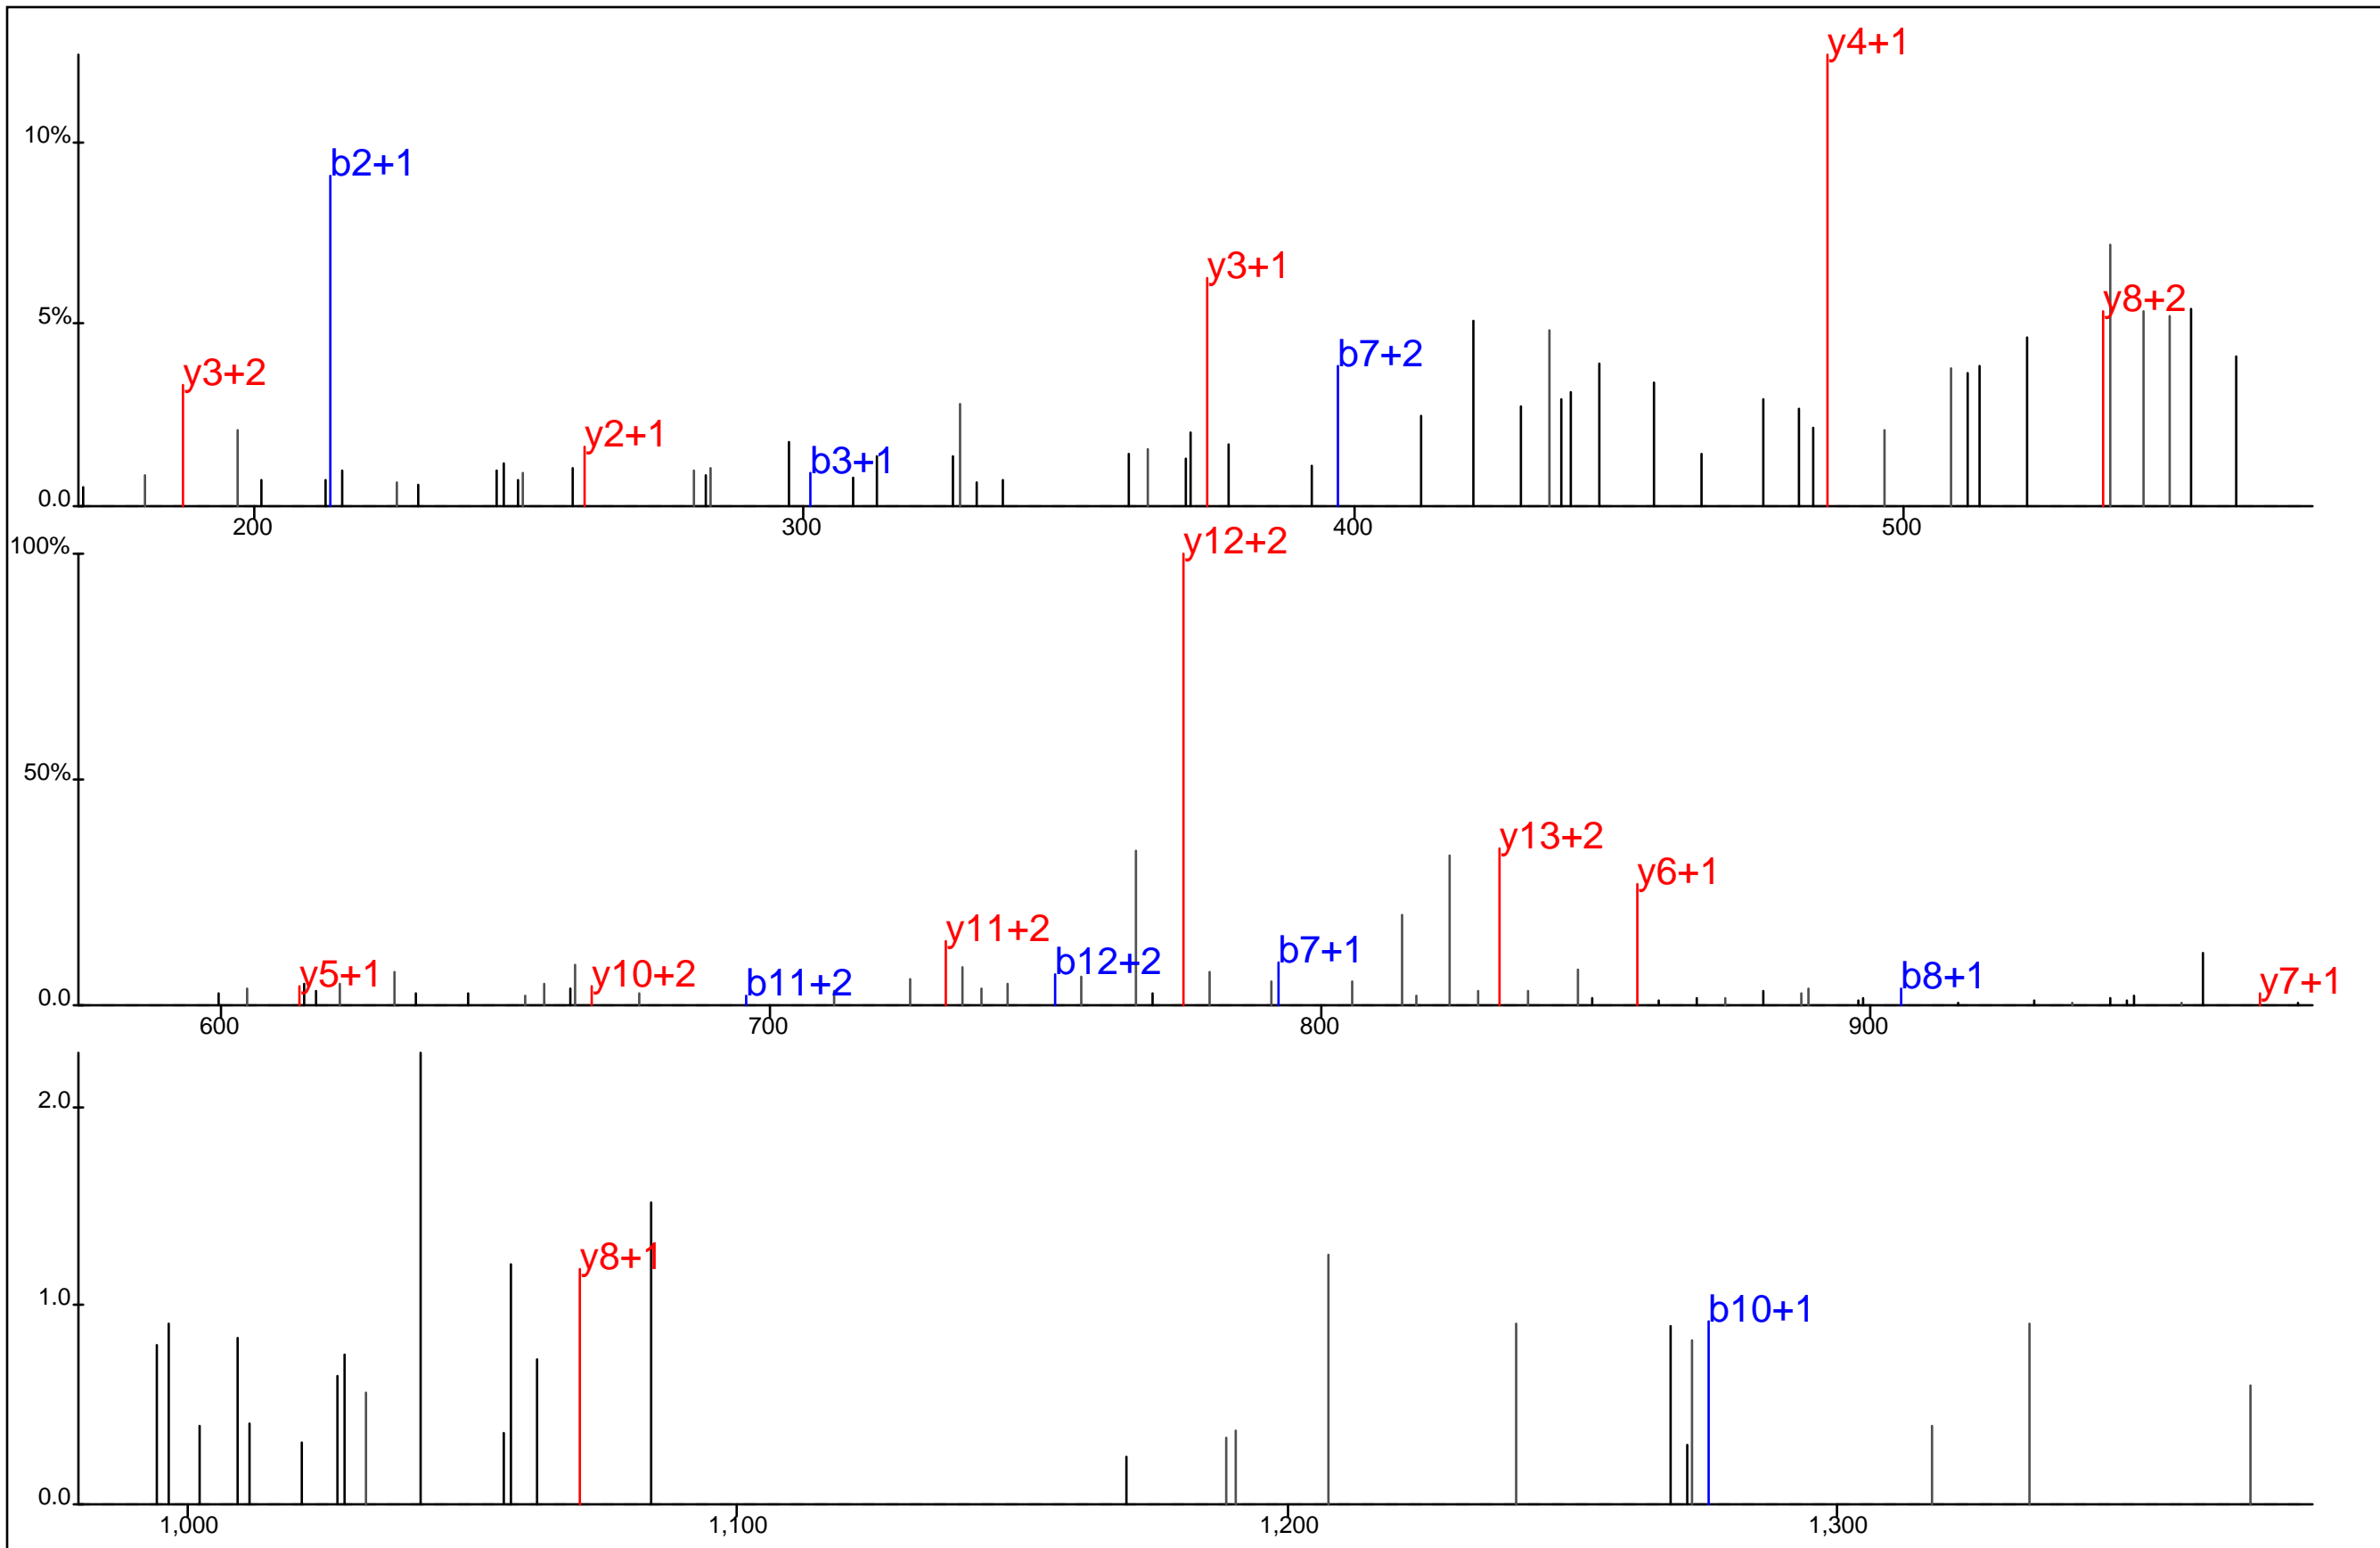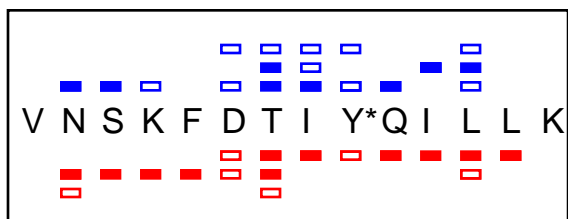

Protein Name: Zinc finger protein 147  
 gi Accession: 0  
 Precursor Mass: 587.9793+3  
 Delta Mass: 2.686 ppm  
 XCorr: 25.48

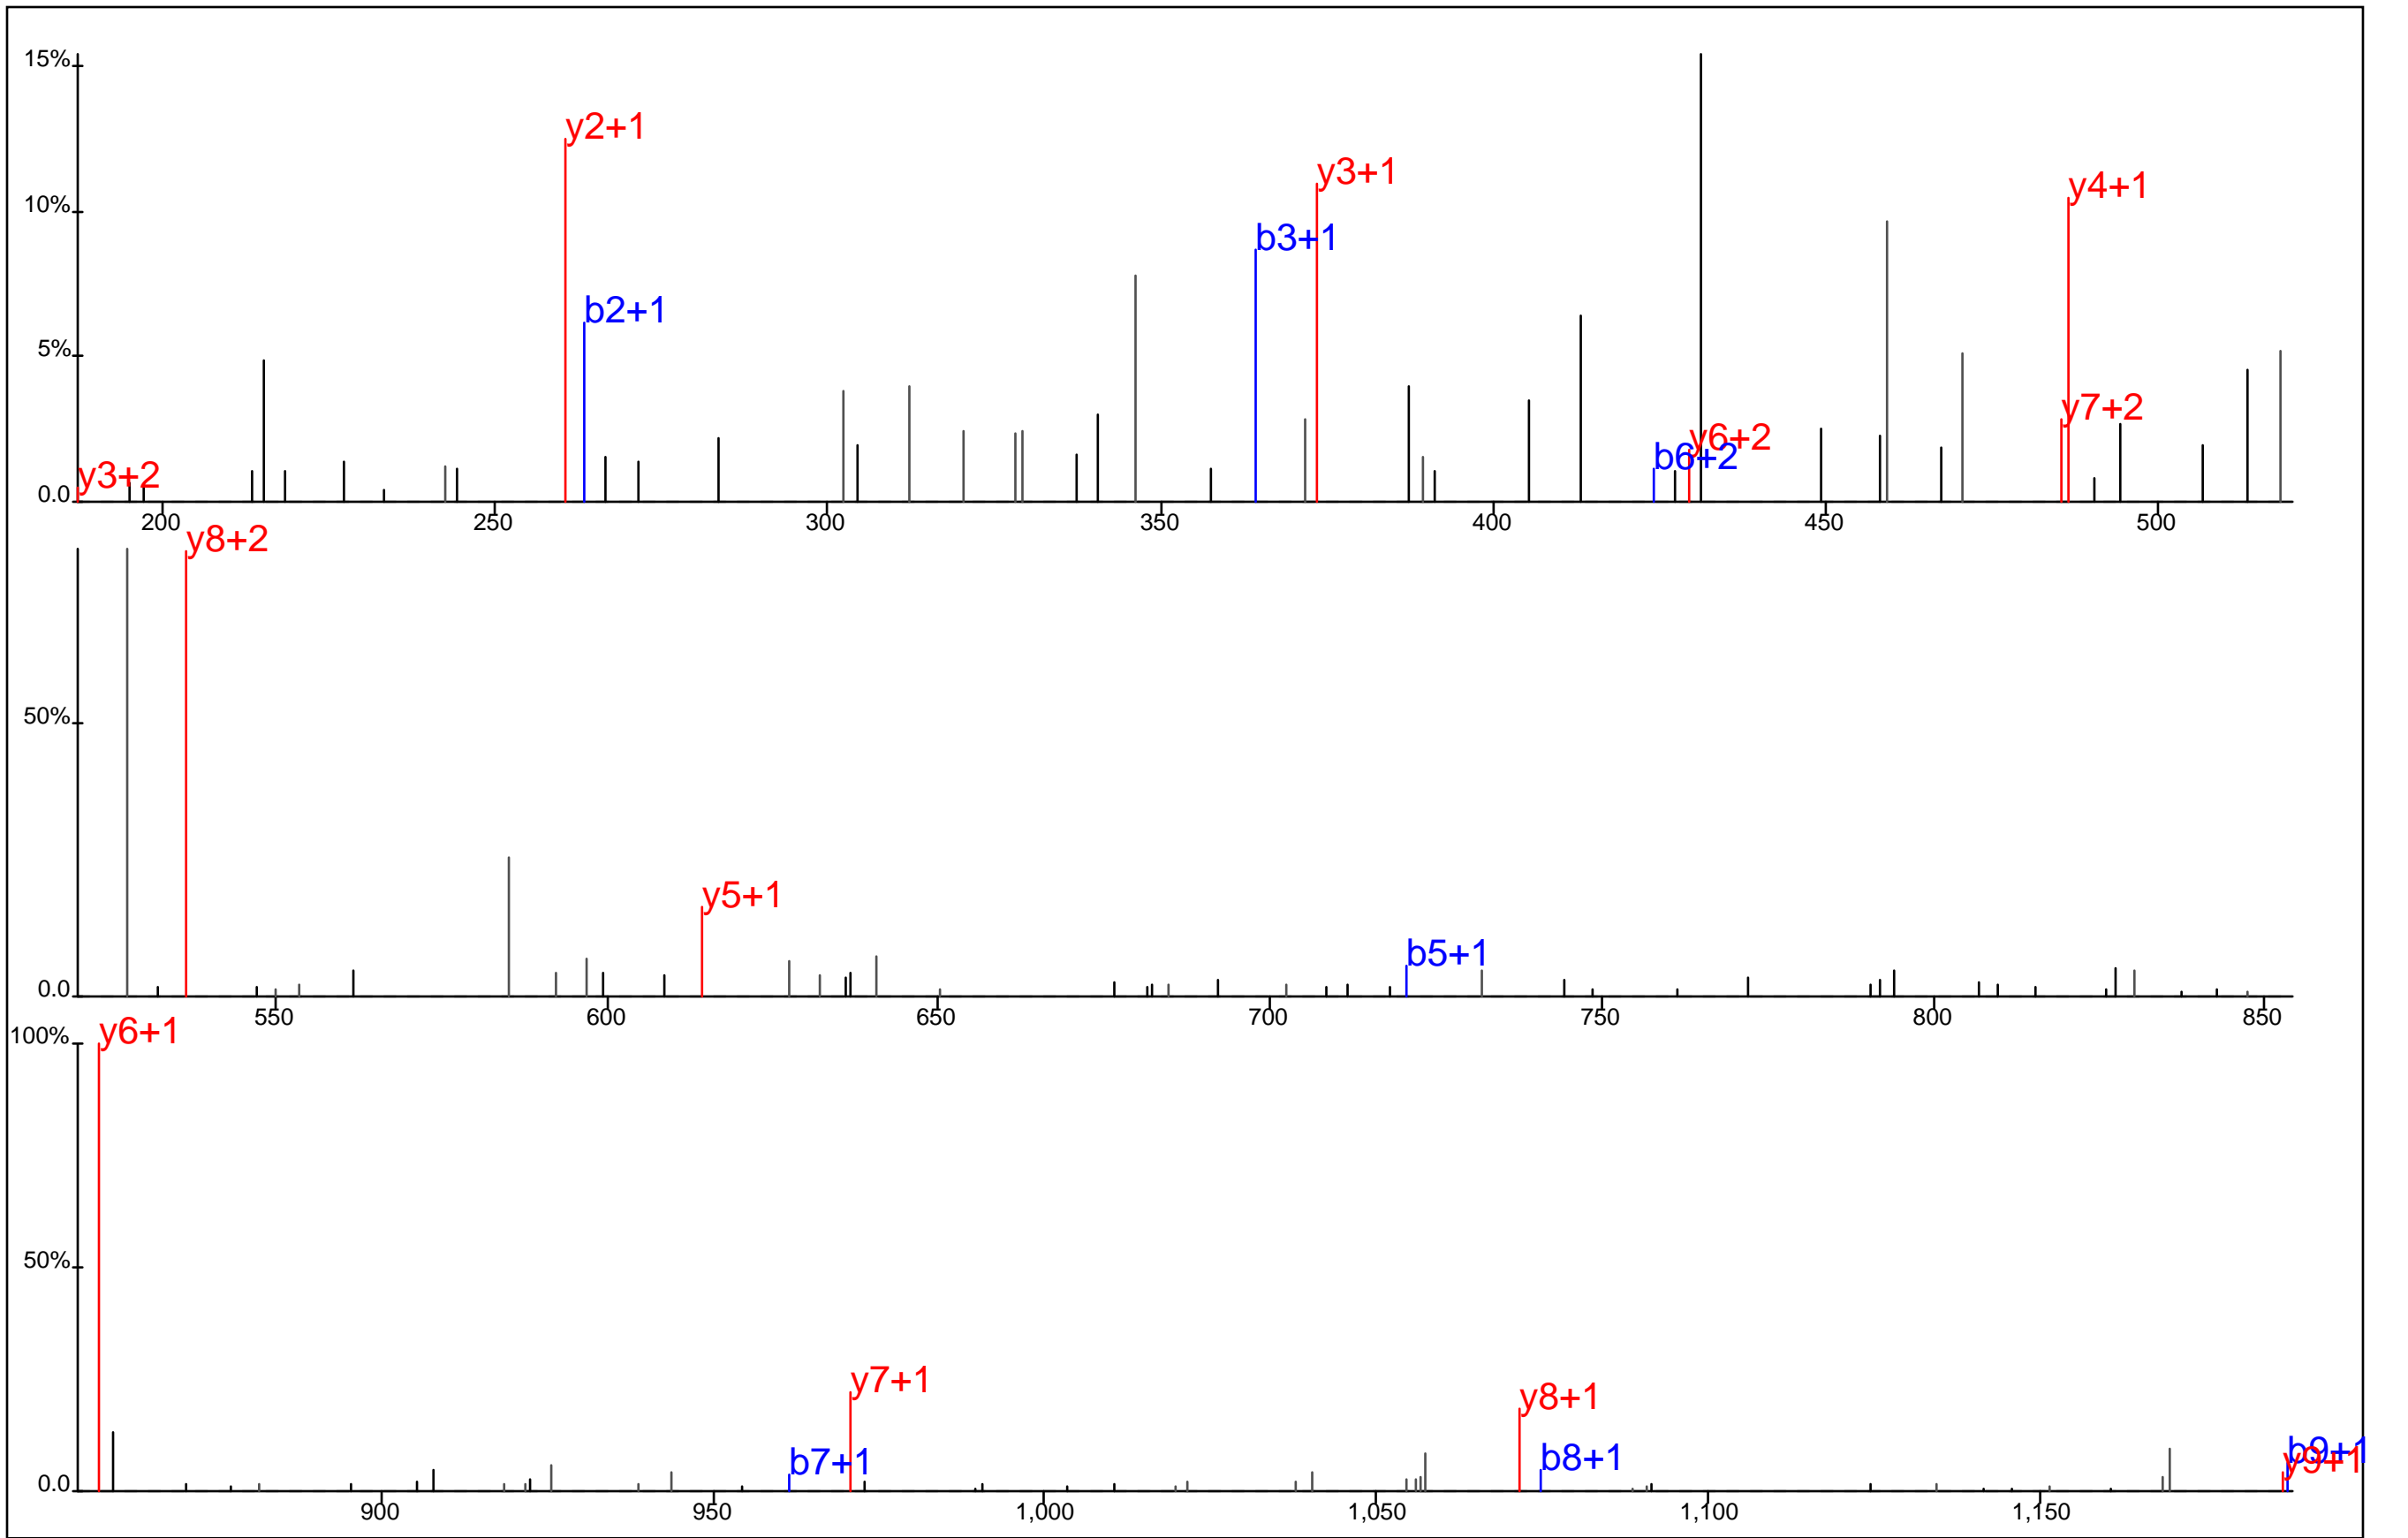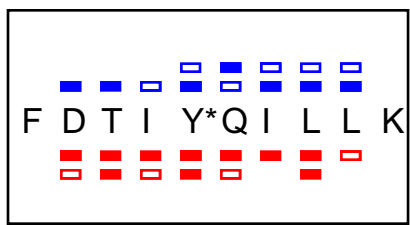

Protein Name: Zinc finger protein 147  
 gi Accession: 0  
 Precursor Mass: 667.3400+2  
 Delta Mass: 5.741 ppm  
 XCorr: 61.44

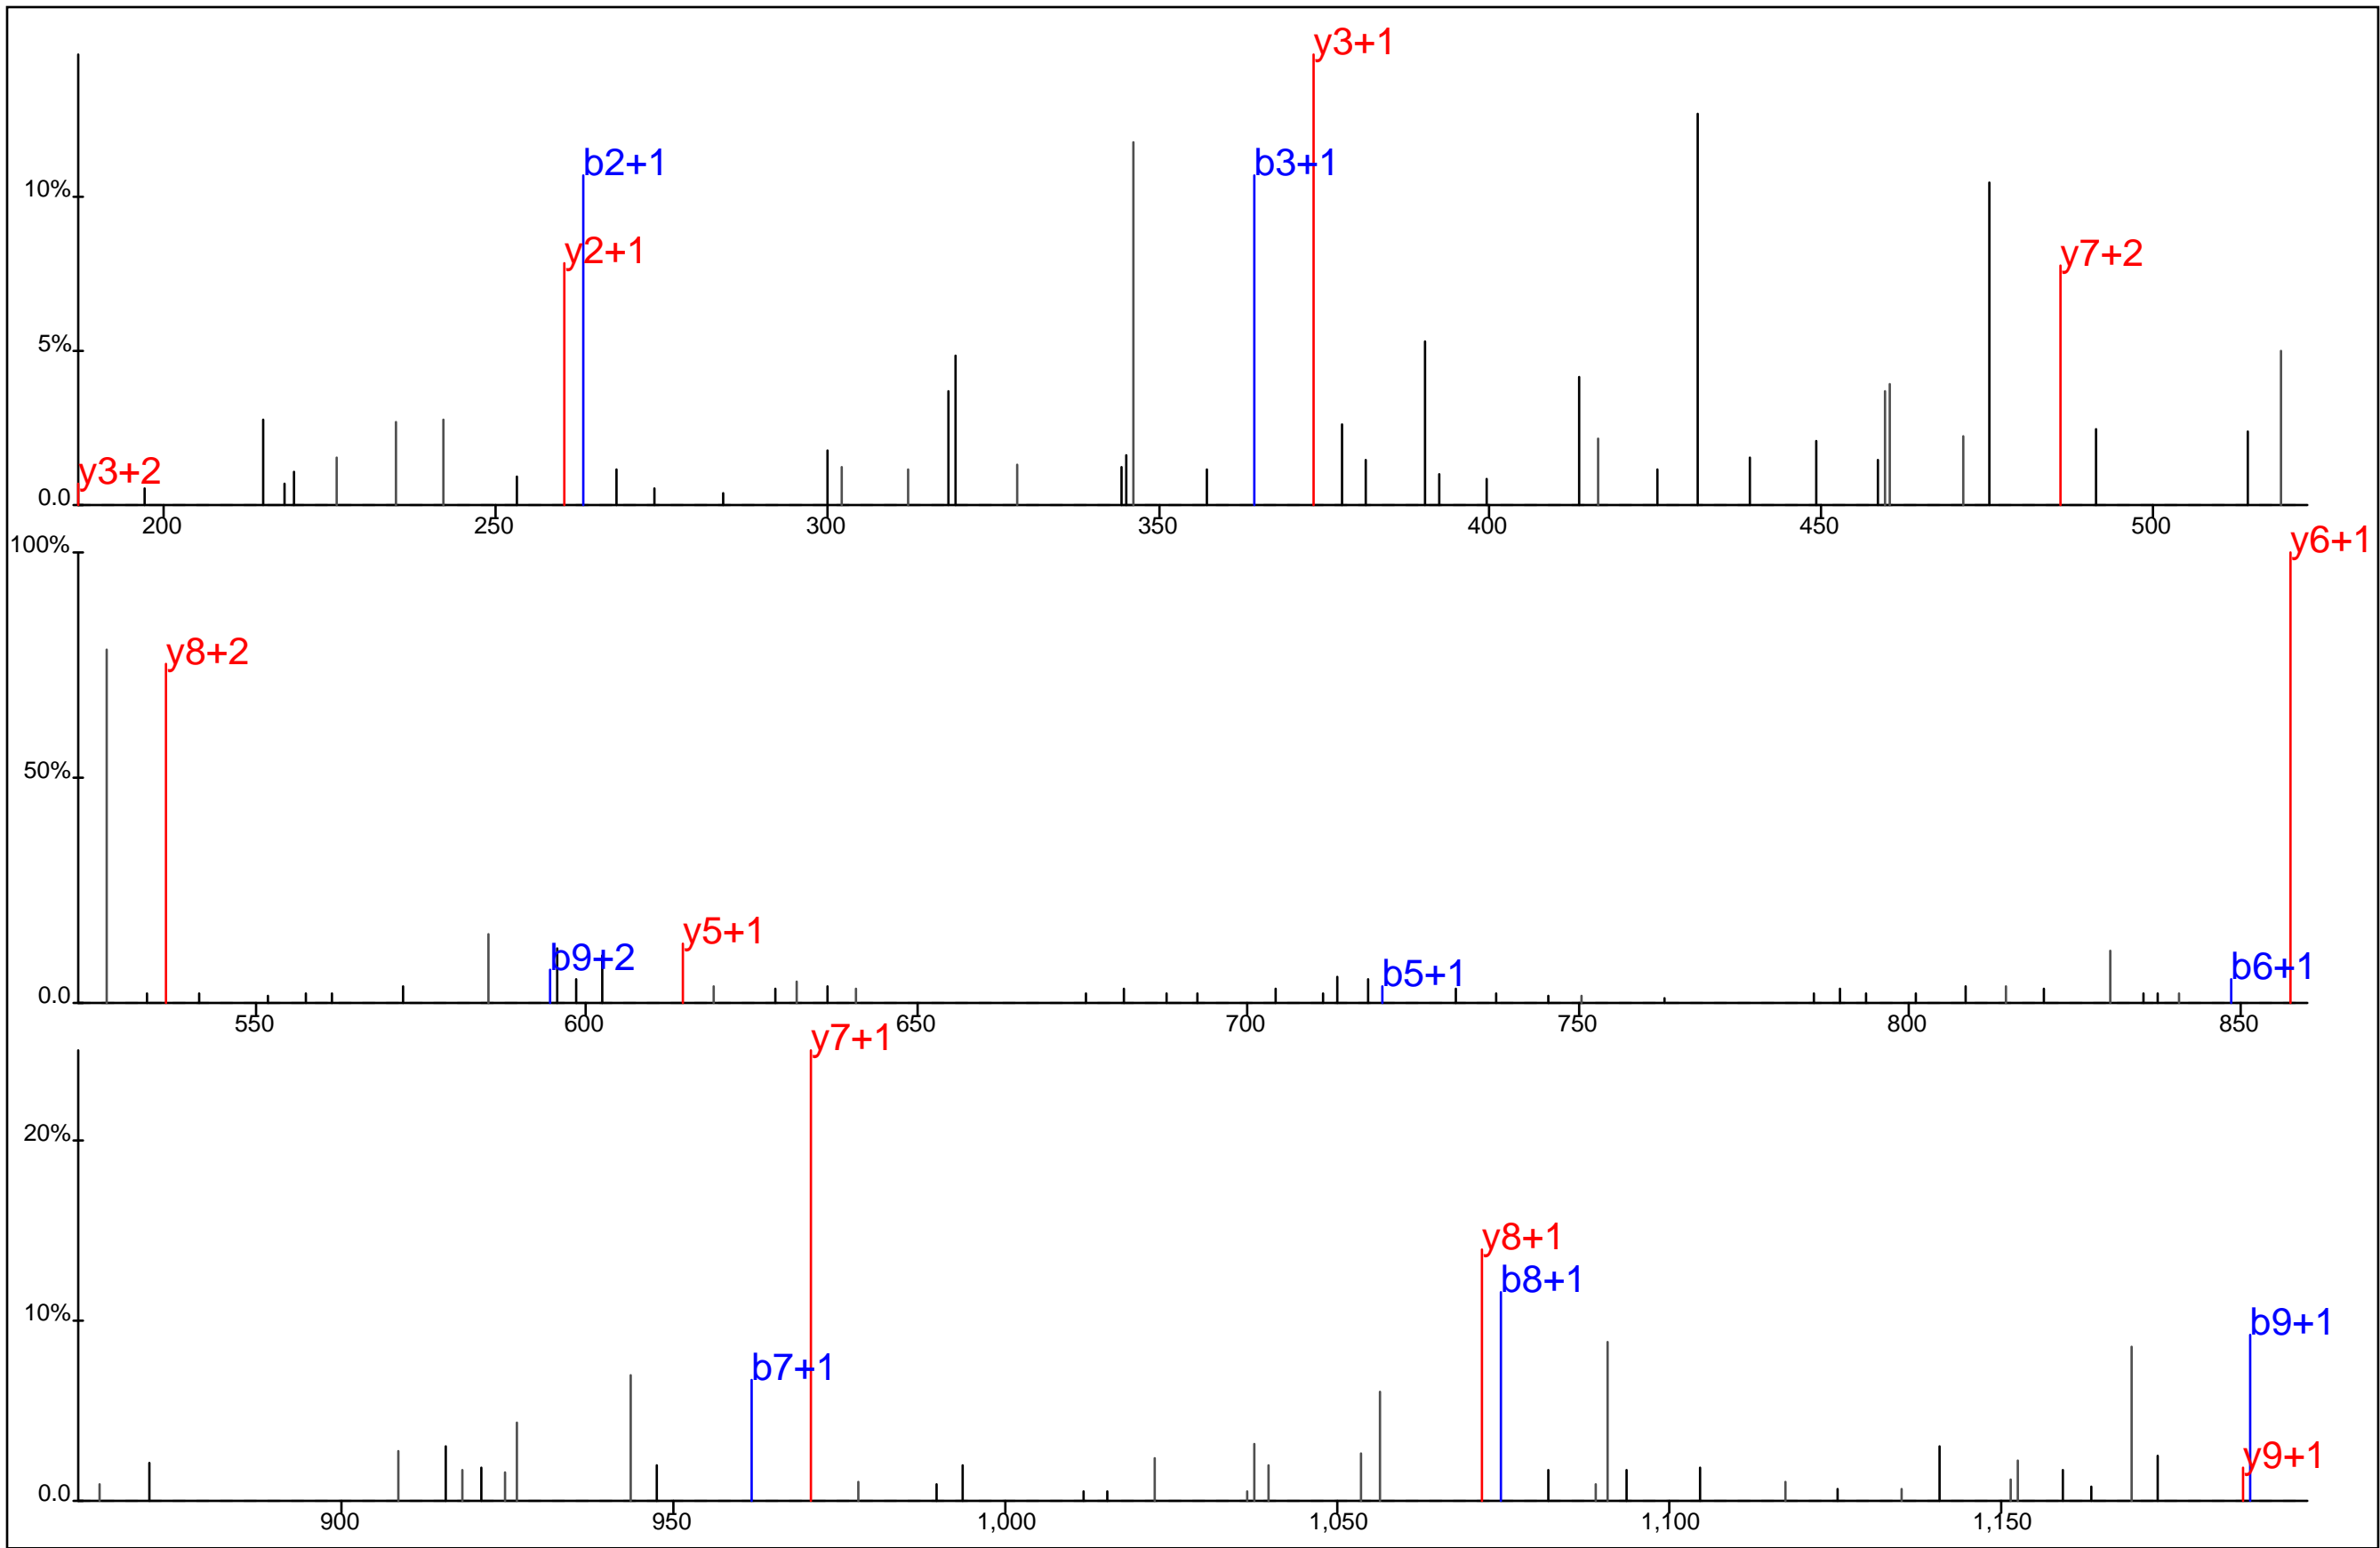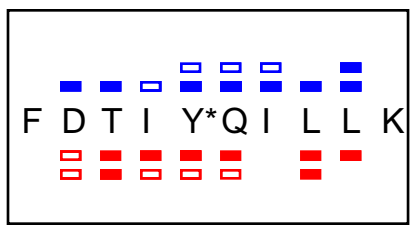

Protein Name: Zinc finger protein 147  
 gi Accession: 0  
 Precursor Mass: 667.3439+2  
 Delta Mass: 0.208 ppm  
 XCorr: 48.74

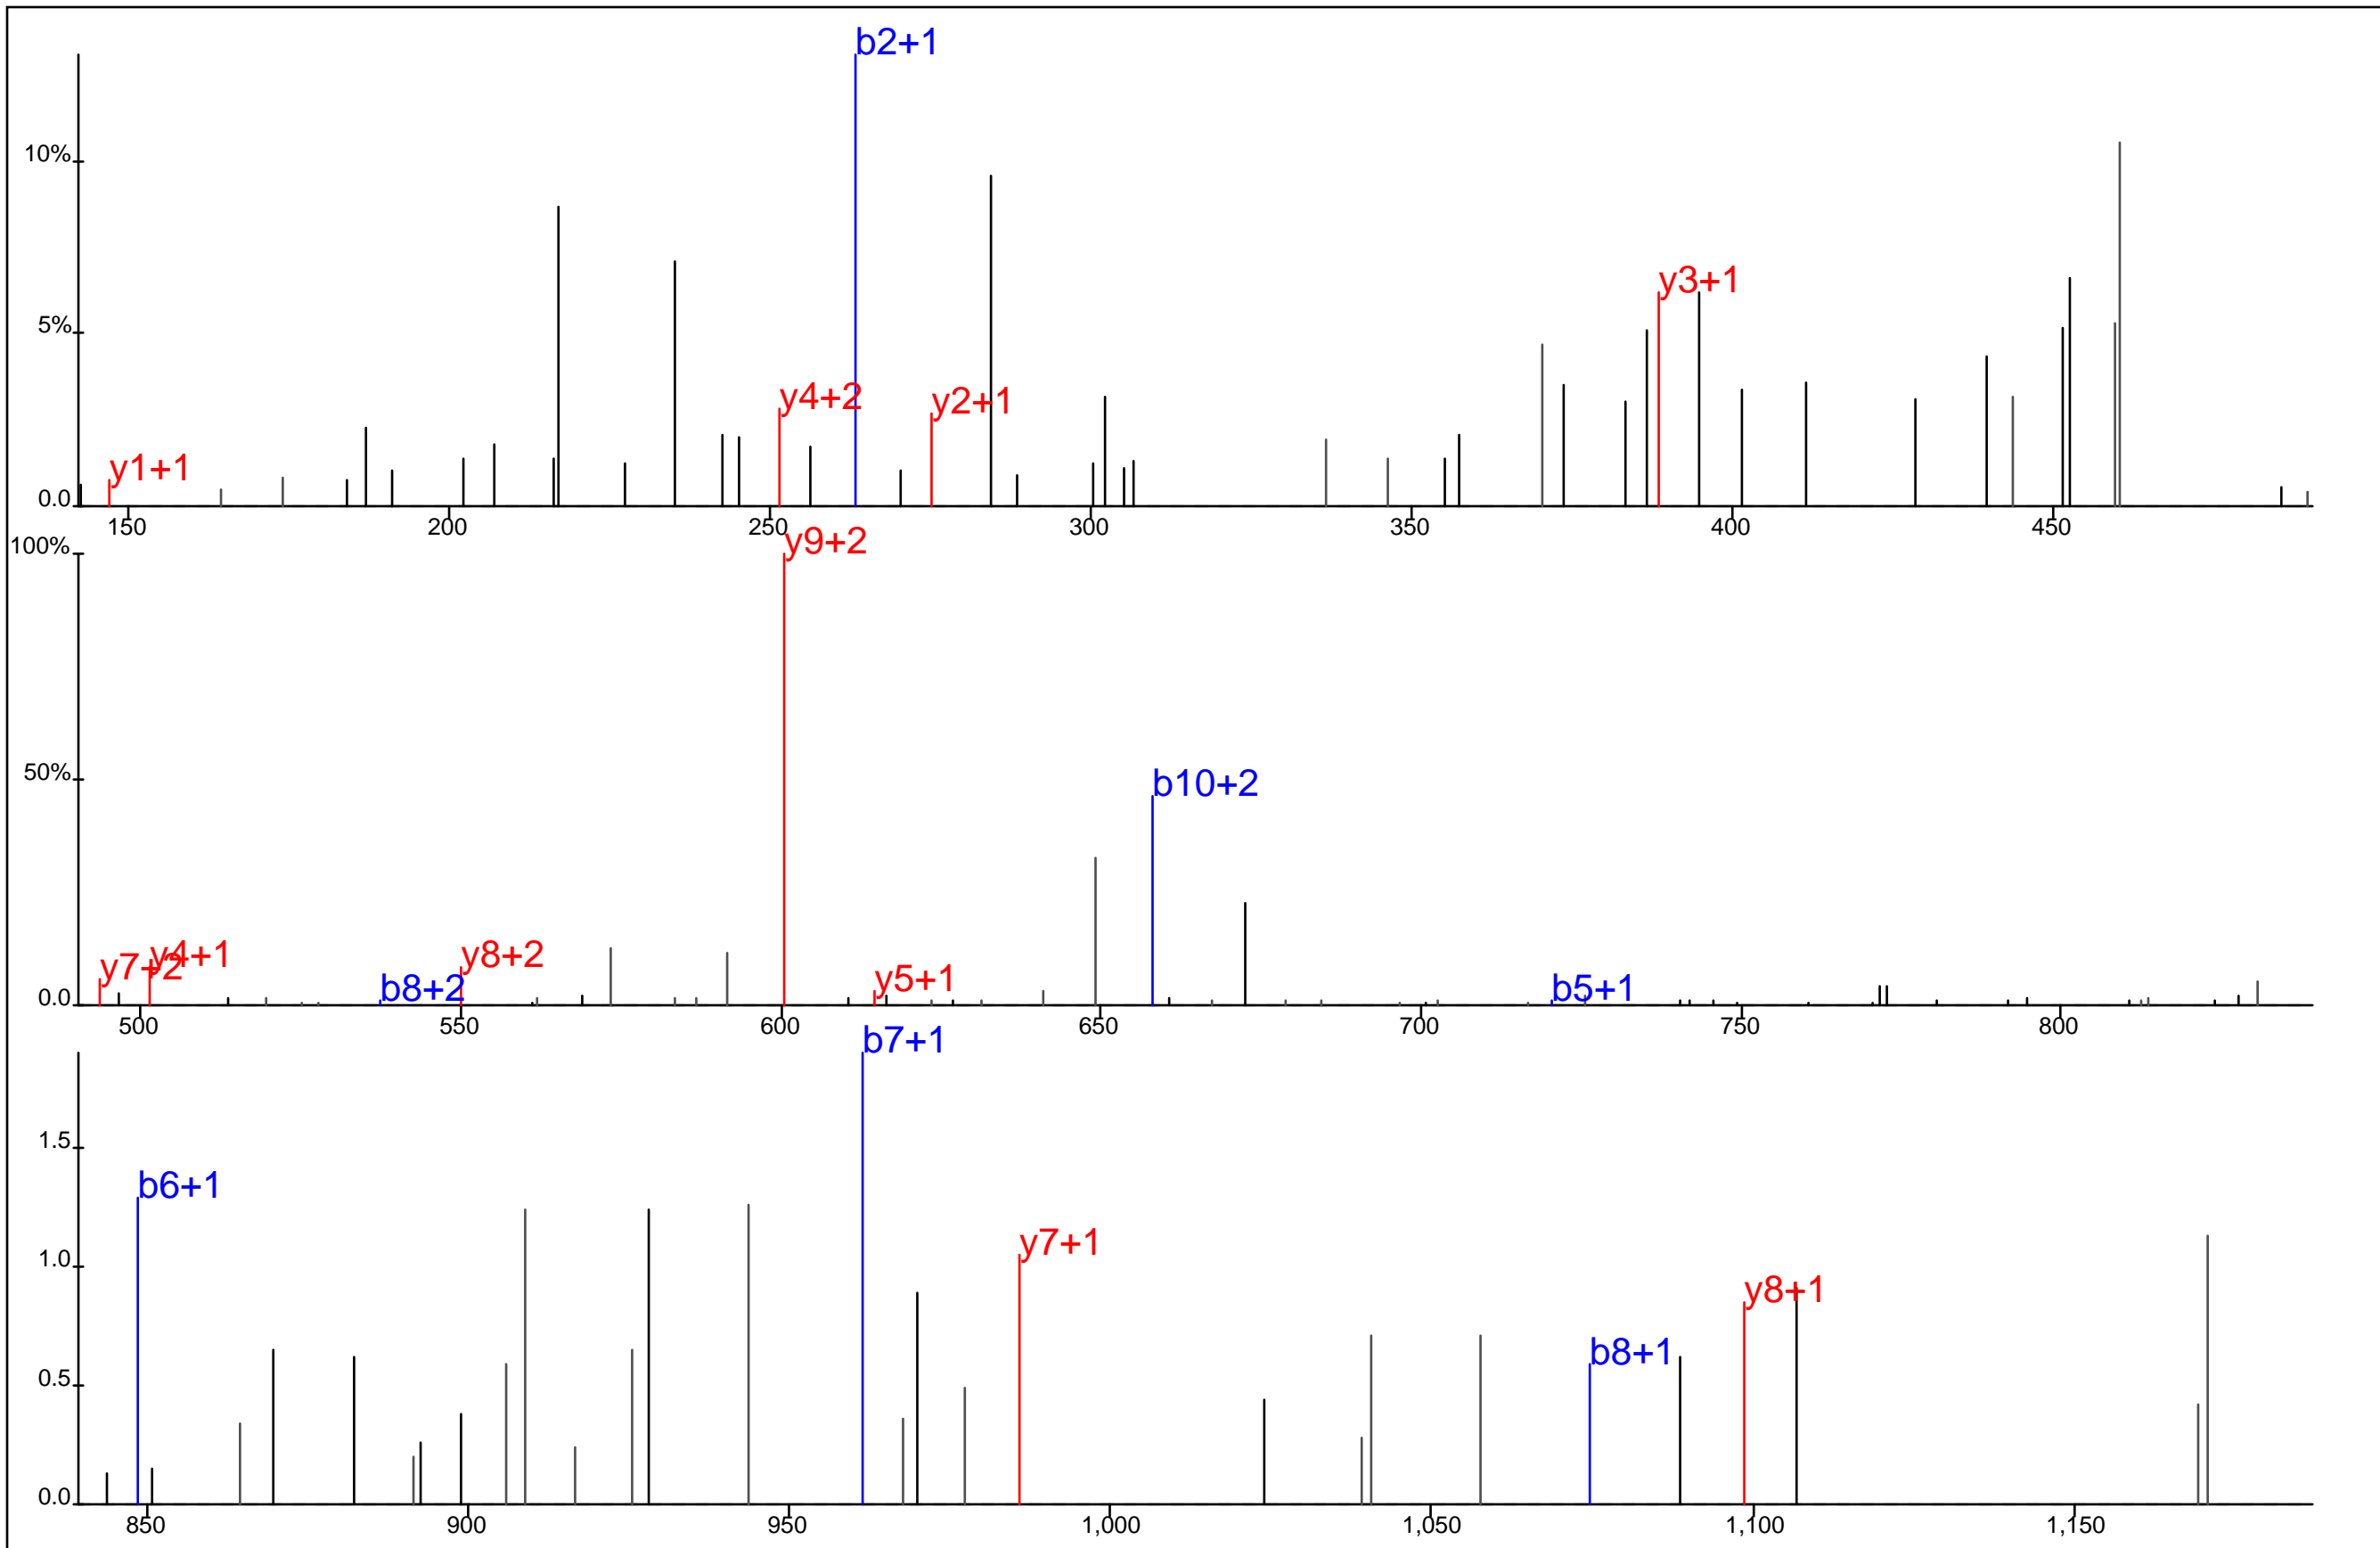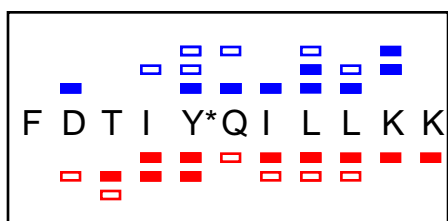

Protein Name: Zinc finger protein 147  
 gi Accession: 0  
 Precursor Mass: 487.9297+3  
 Delta Mass: 0.452 ppm  
 XCorr: 26.16

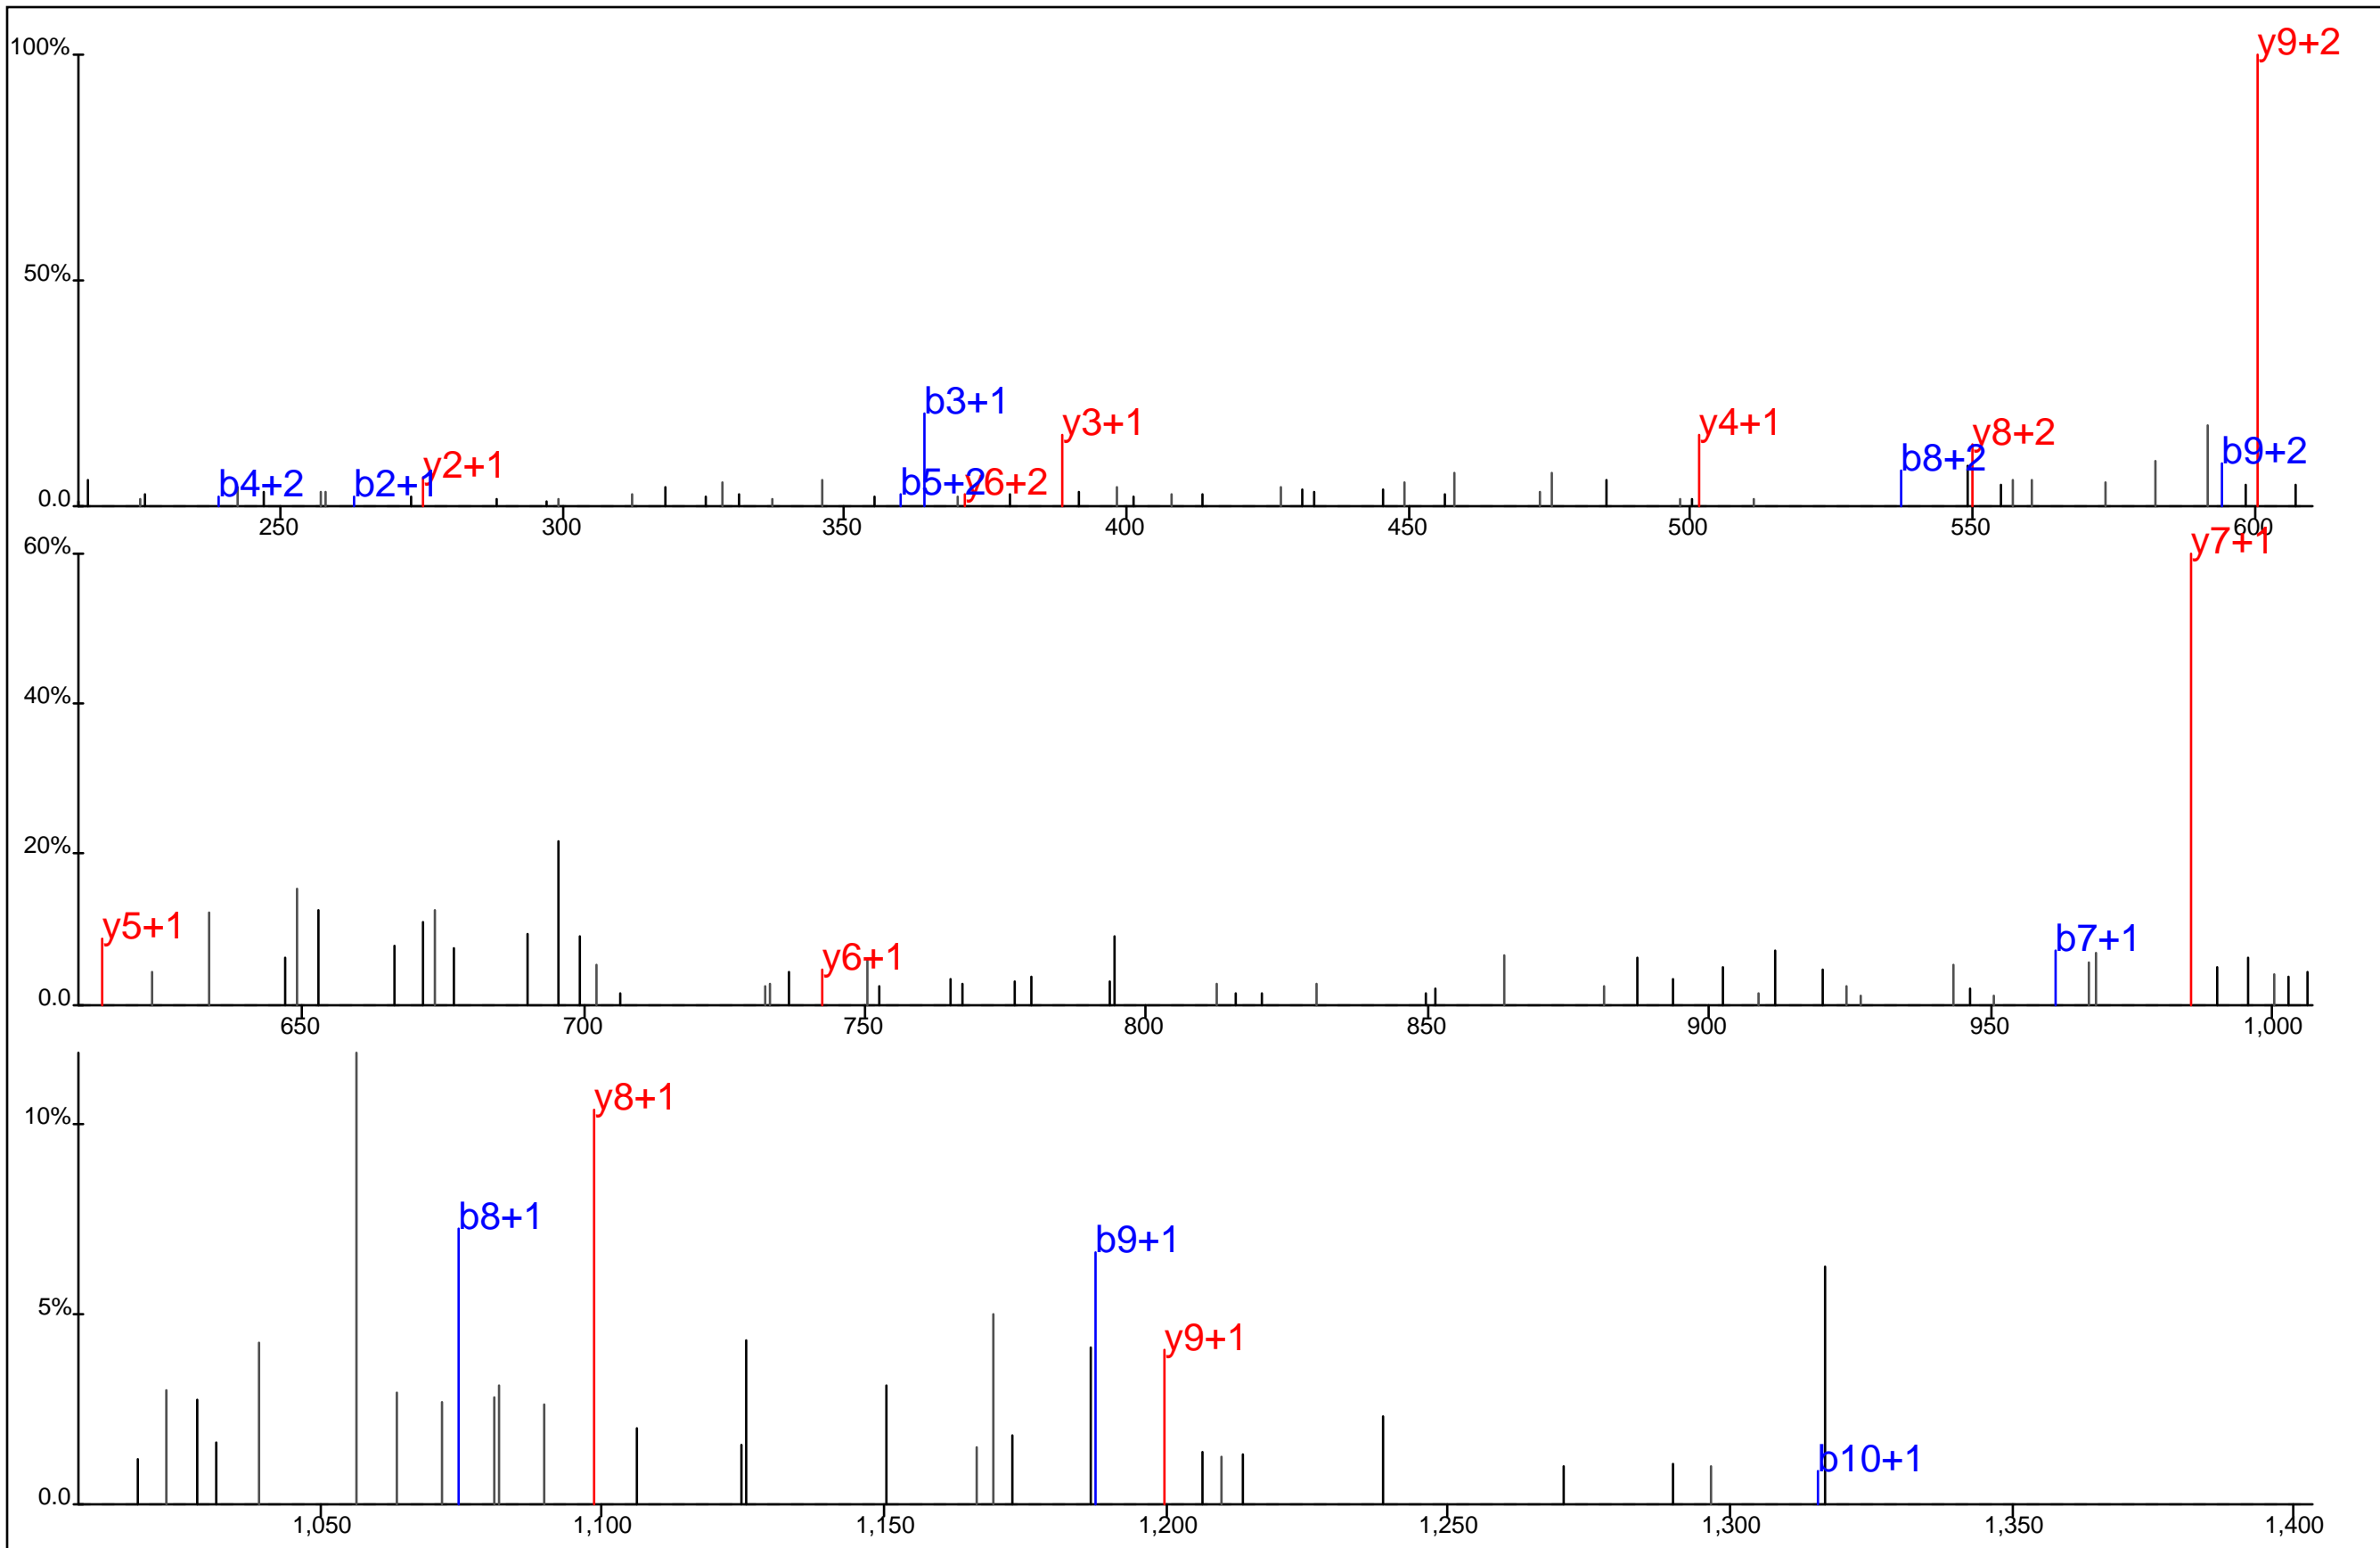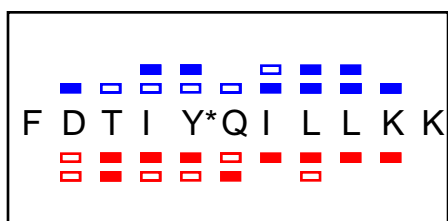

Protein Name: Zinc finger protein 147  
 gi Accession: 0  
 Precursor Mass: 731.3926+2  
 Delta Mass: 1.874 ppm  
 XCorr: 29.22

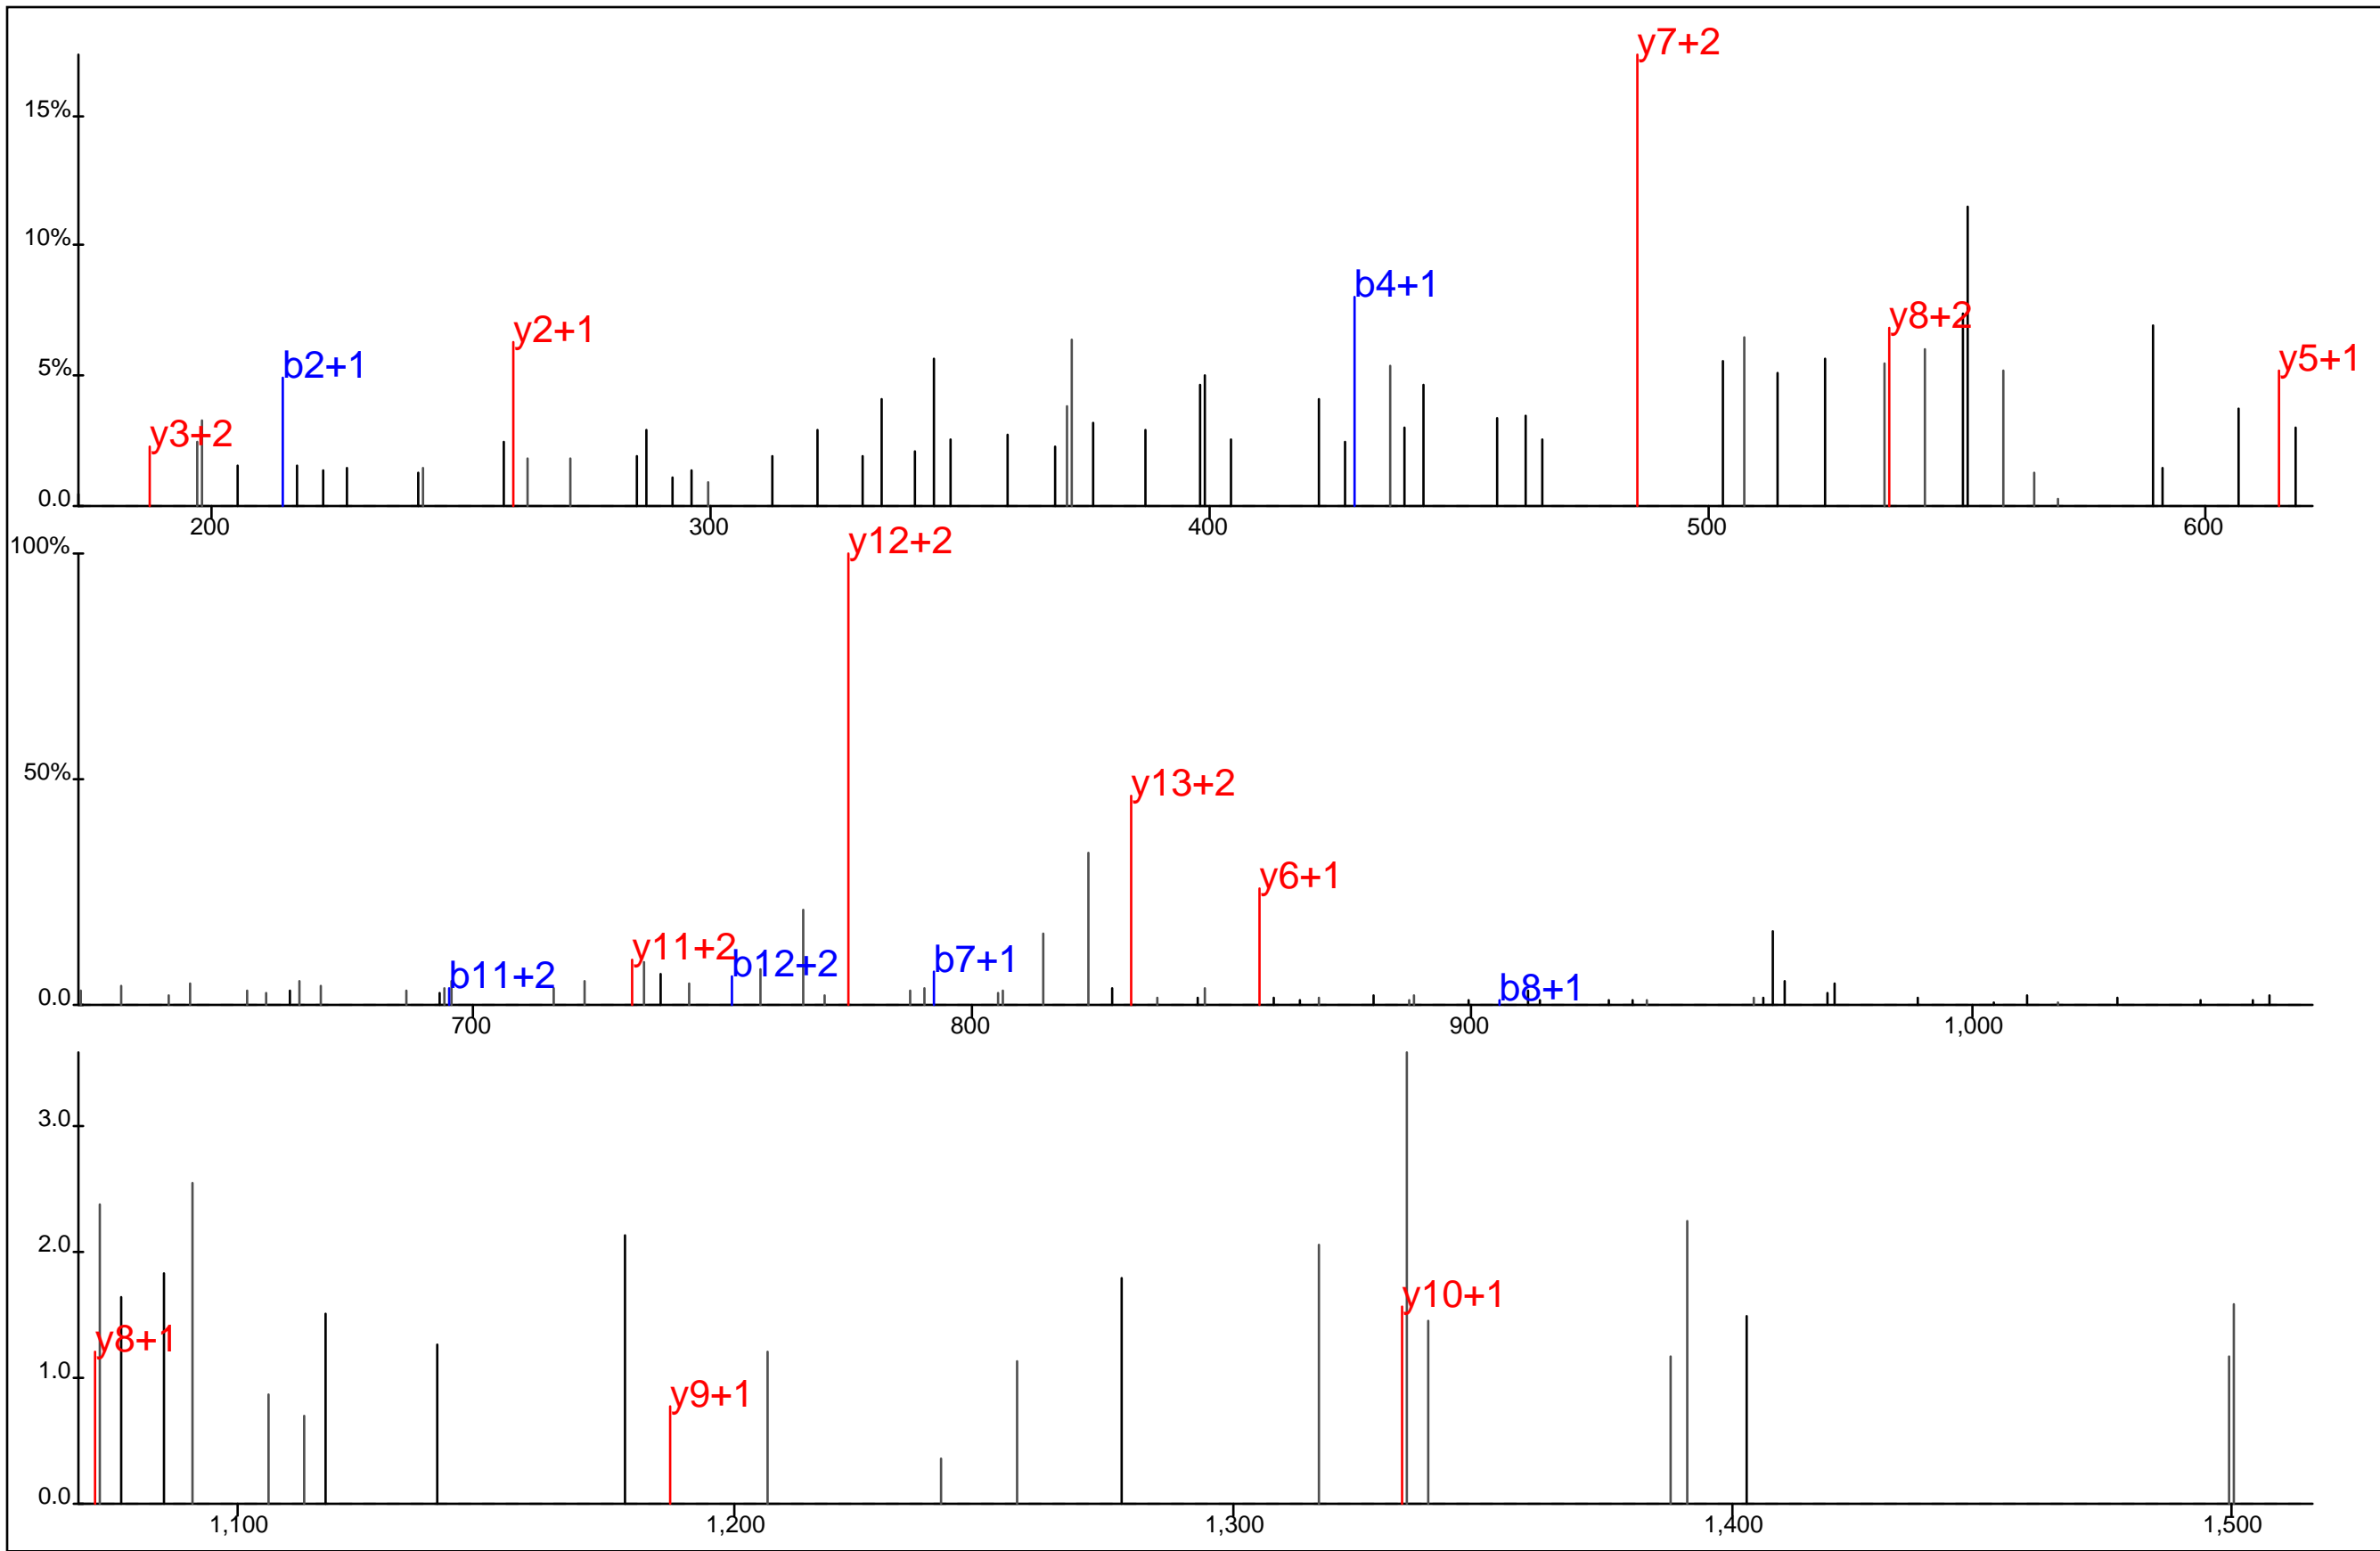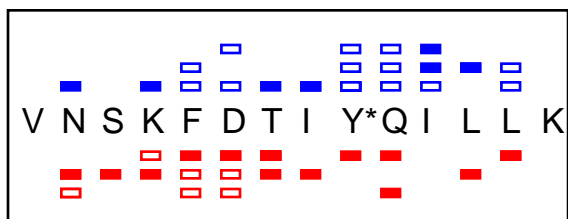

Protein Name: Zinc finger protein 147  
 gi Accession: 0  
 Precursor Mass: 587.9772+3  
 Delta Mass: 0.847 ppm  
 XCorr: 23.13

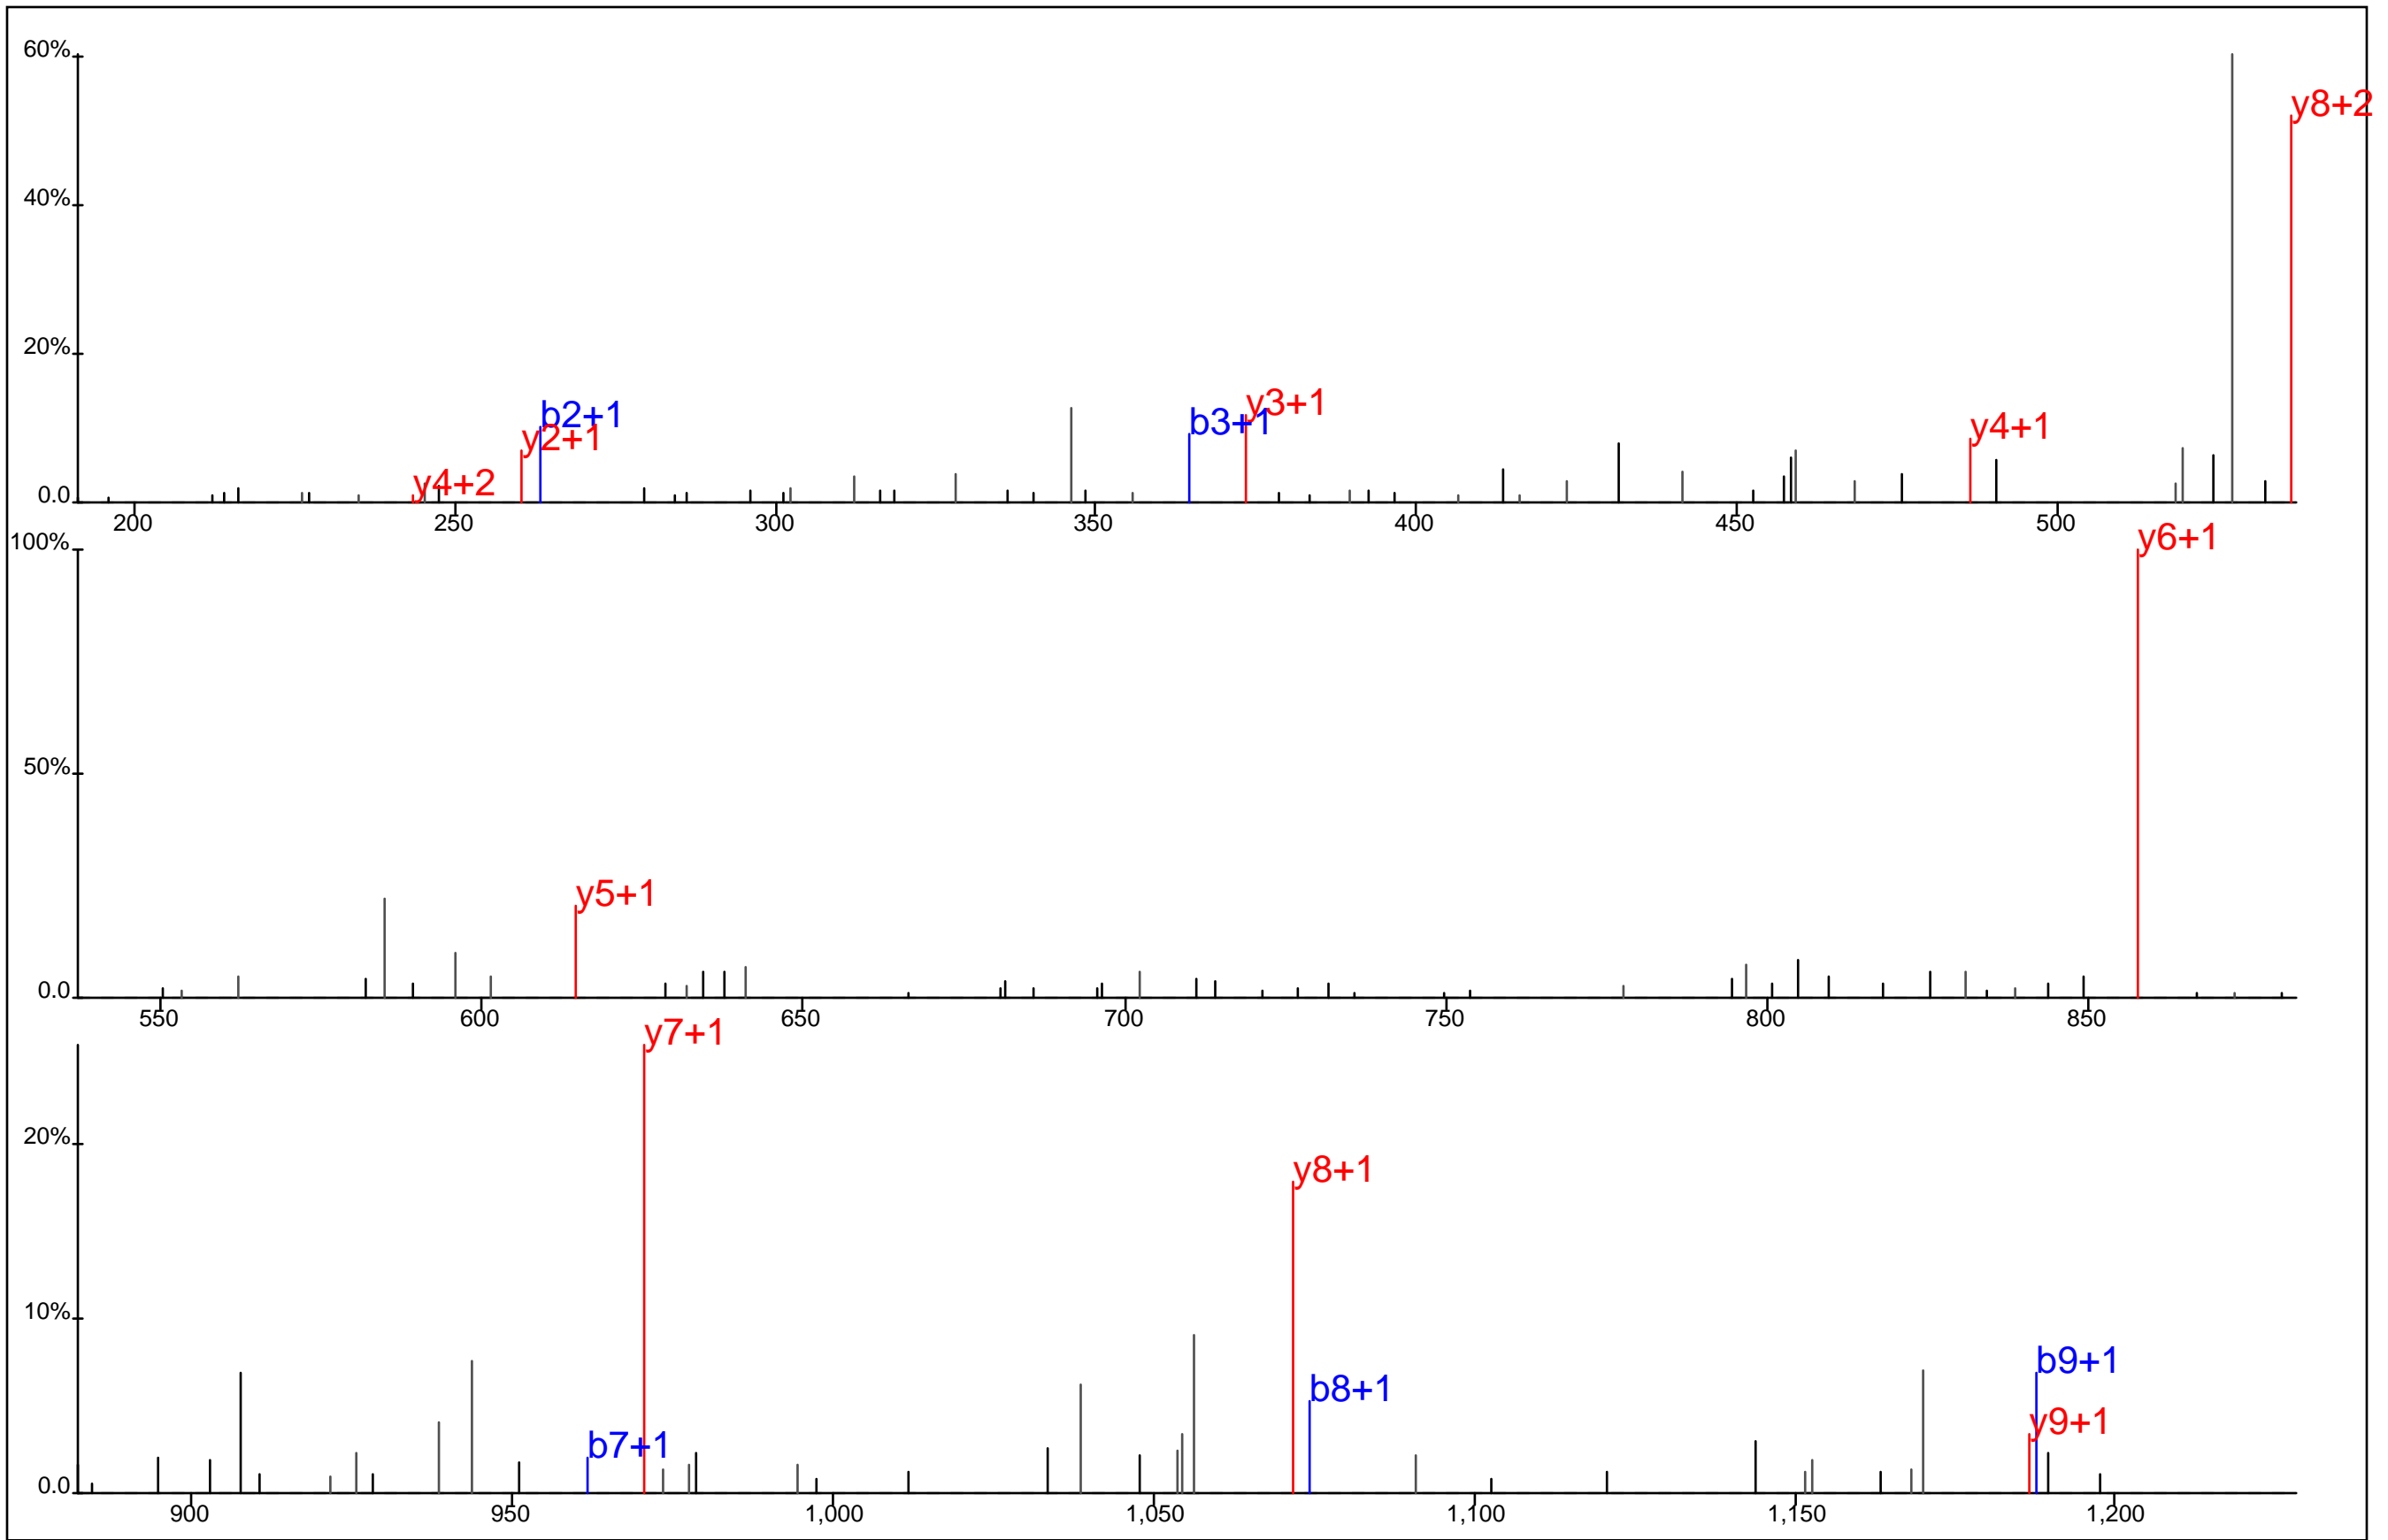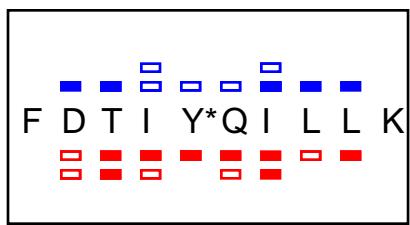

Protein Name: Zinc finger protein 147  
 gi Accession: 0  
 Precursor Mass: 667.3434+2  
 Delta Mass: 0.523 ppm  
 XCorr: 54.43



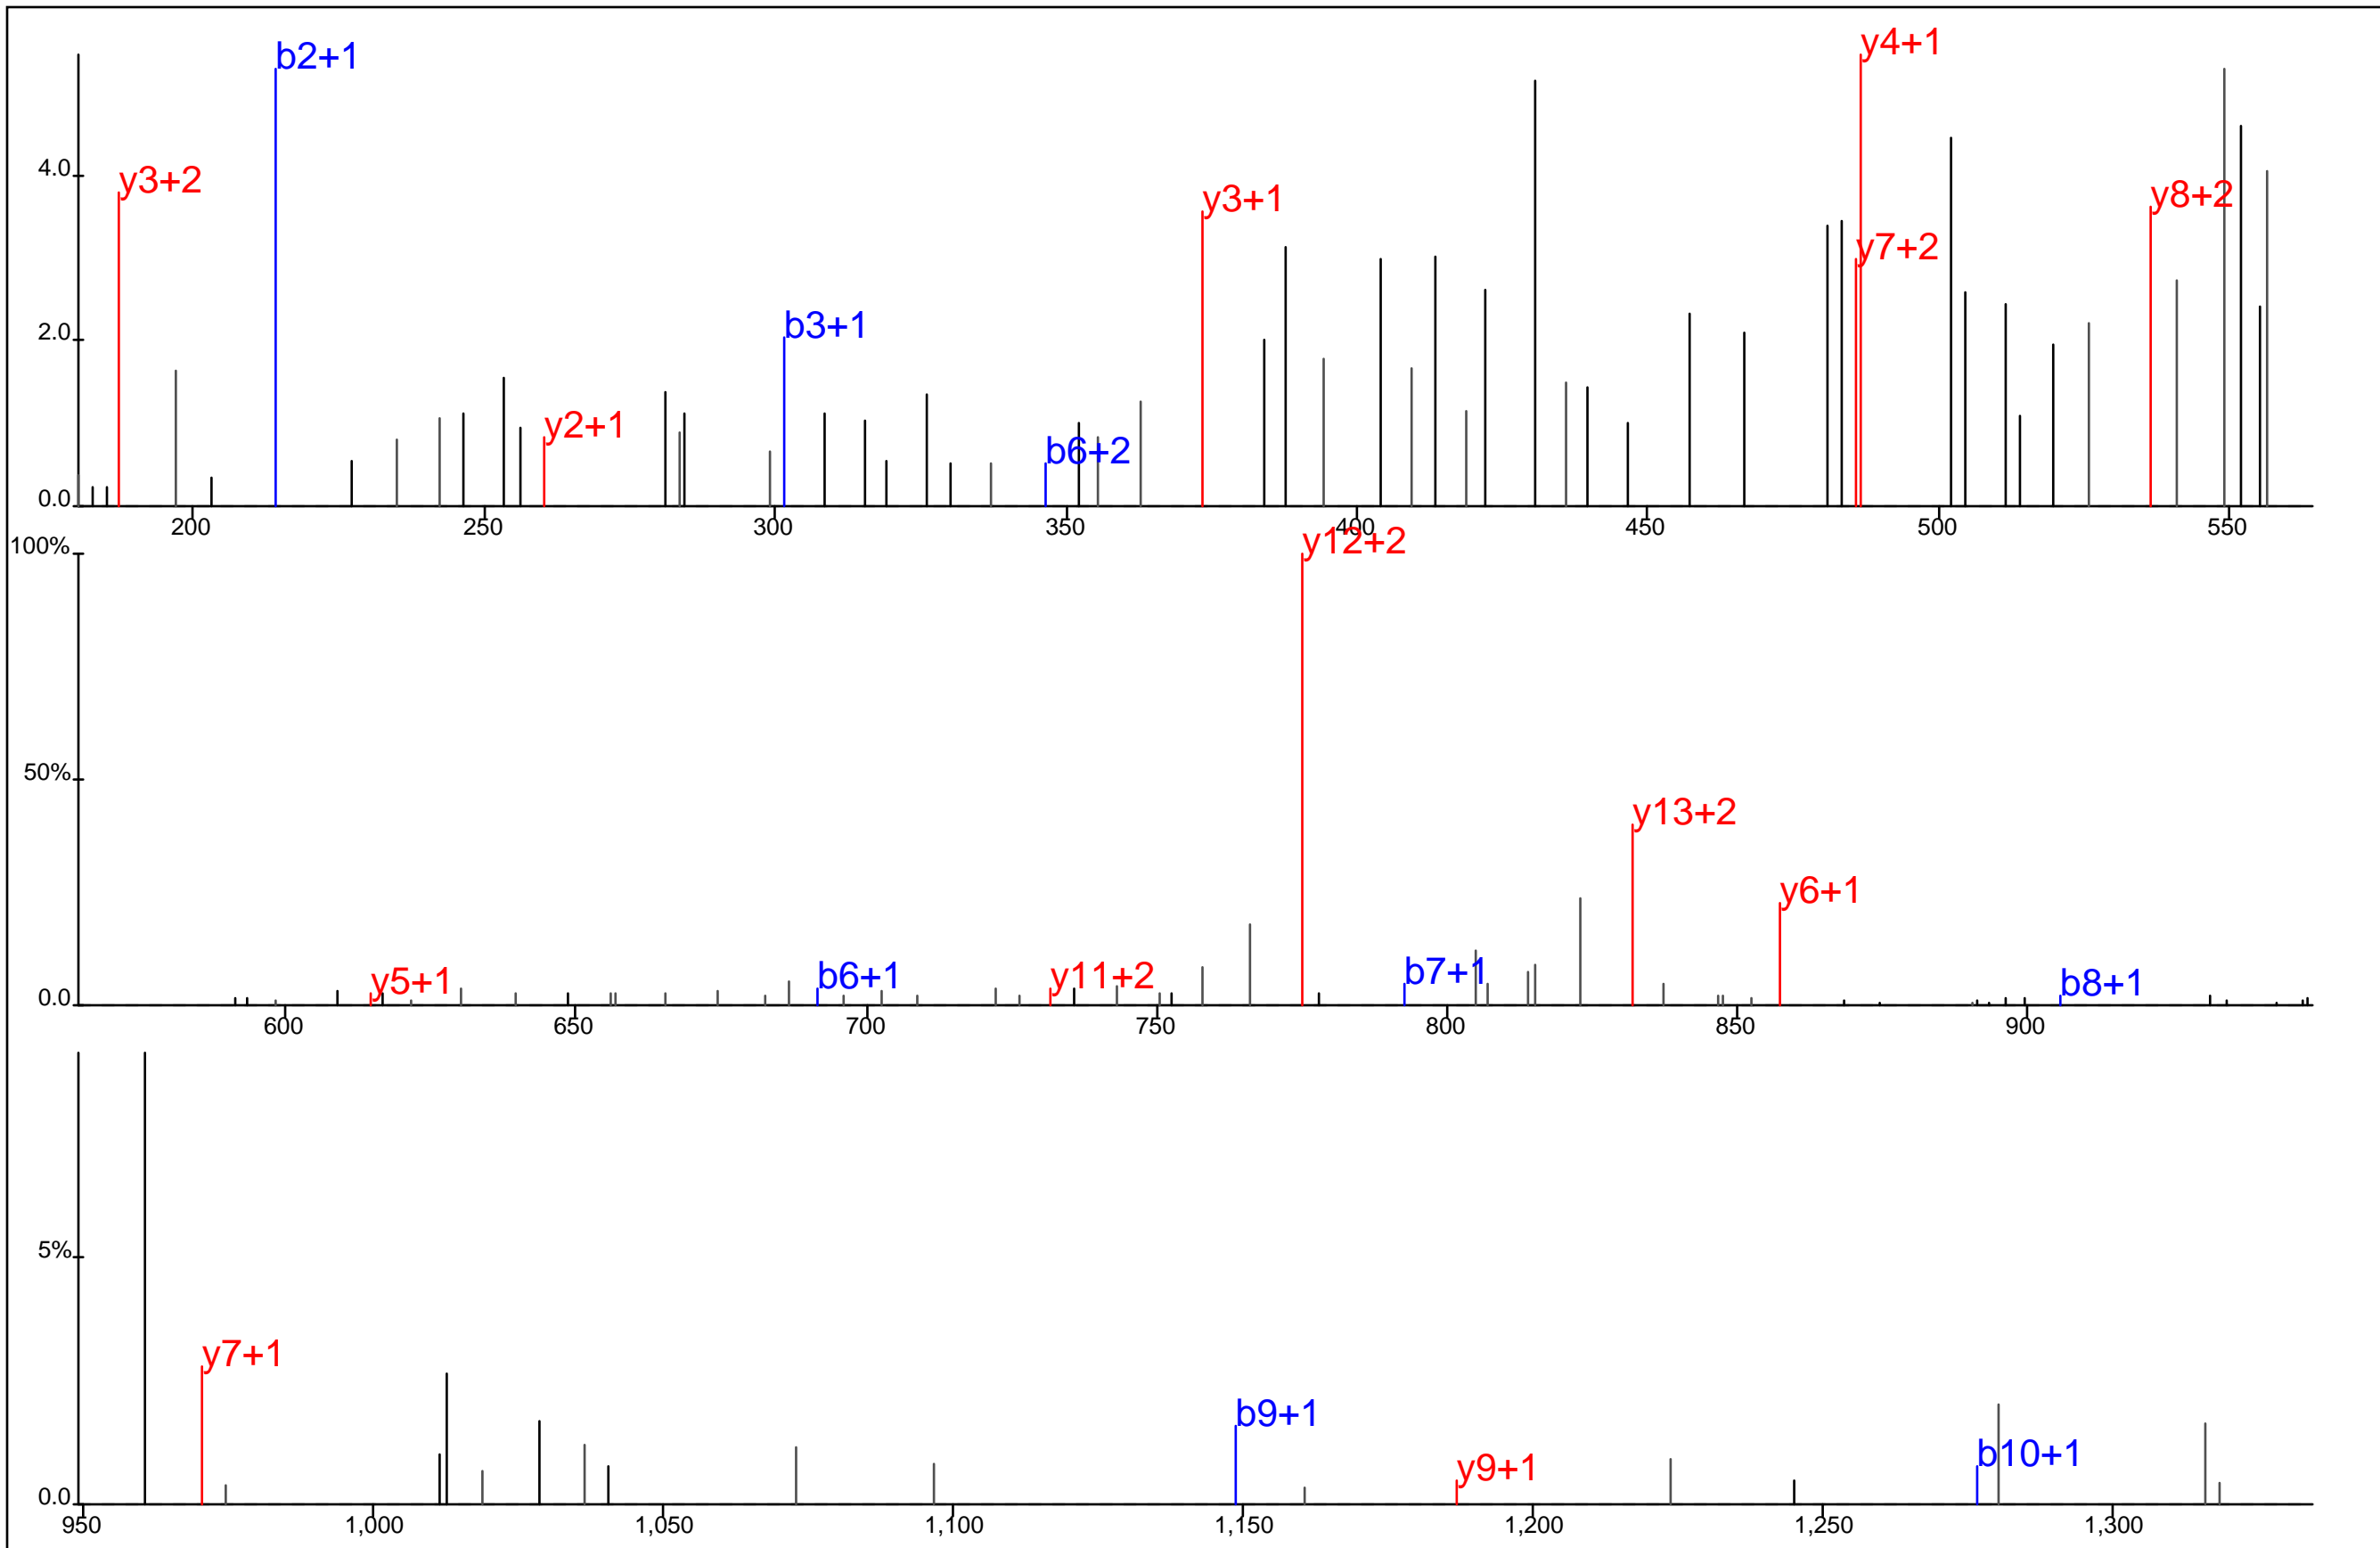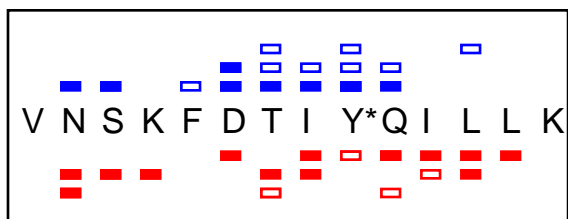

Protein Name: Zinc finger protein 147  
 gi Accession: 0  
 Precursor Mass: 587.9782+3  
 Delta Mass: 0.815 ppm  
 XCorr: 27.37

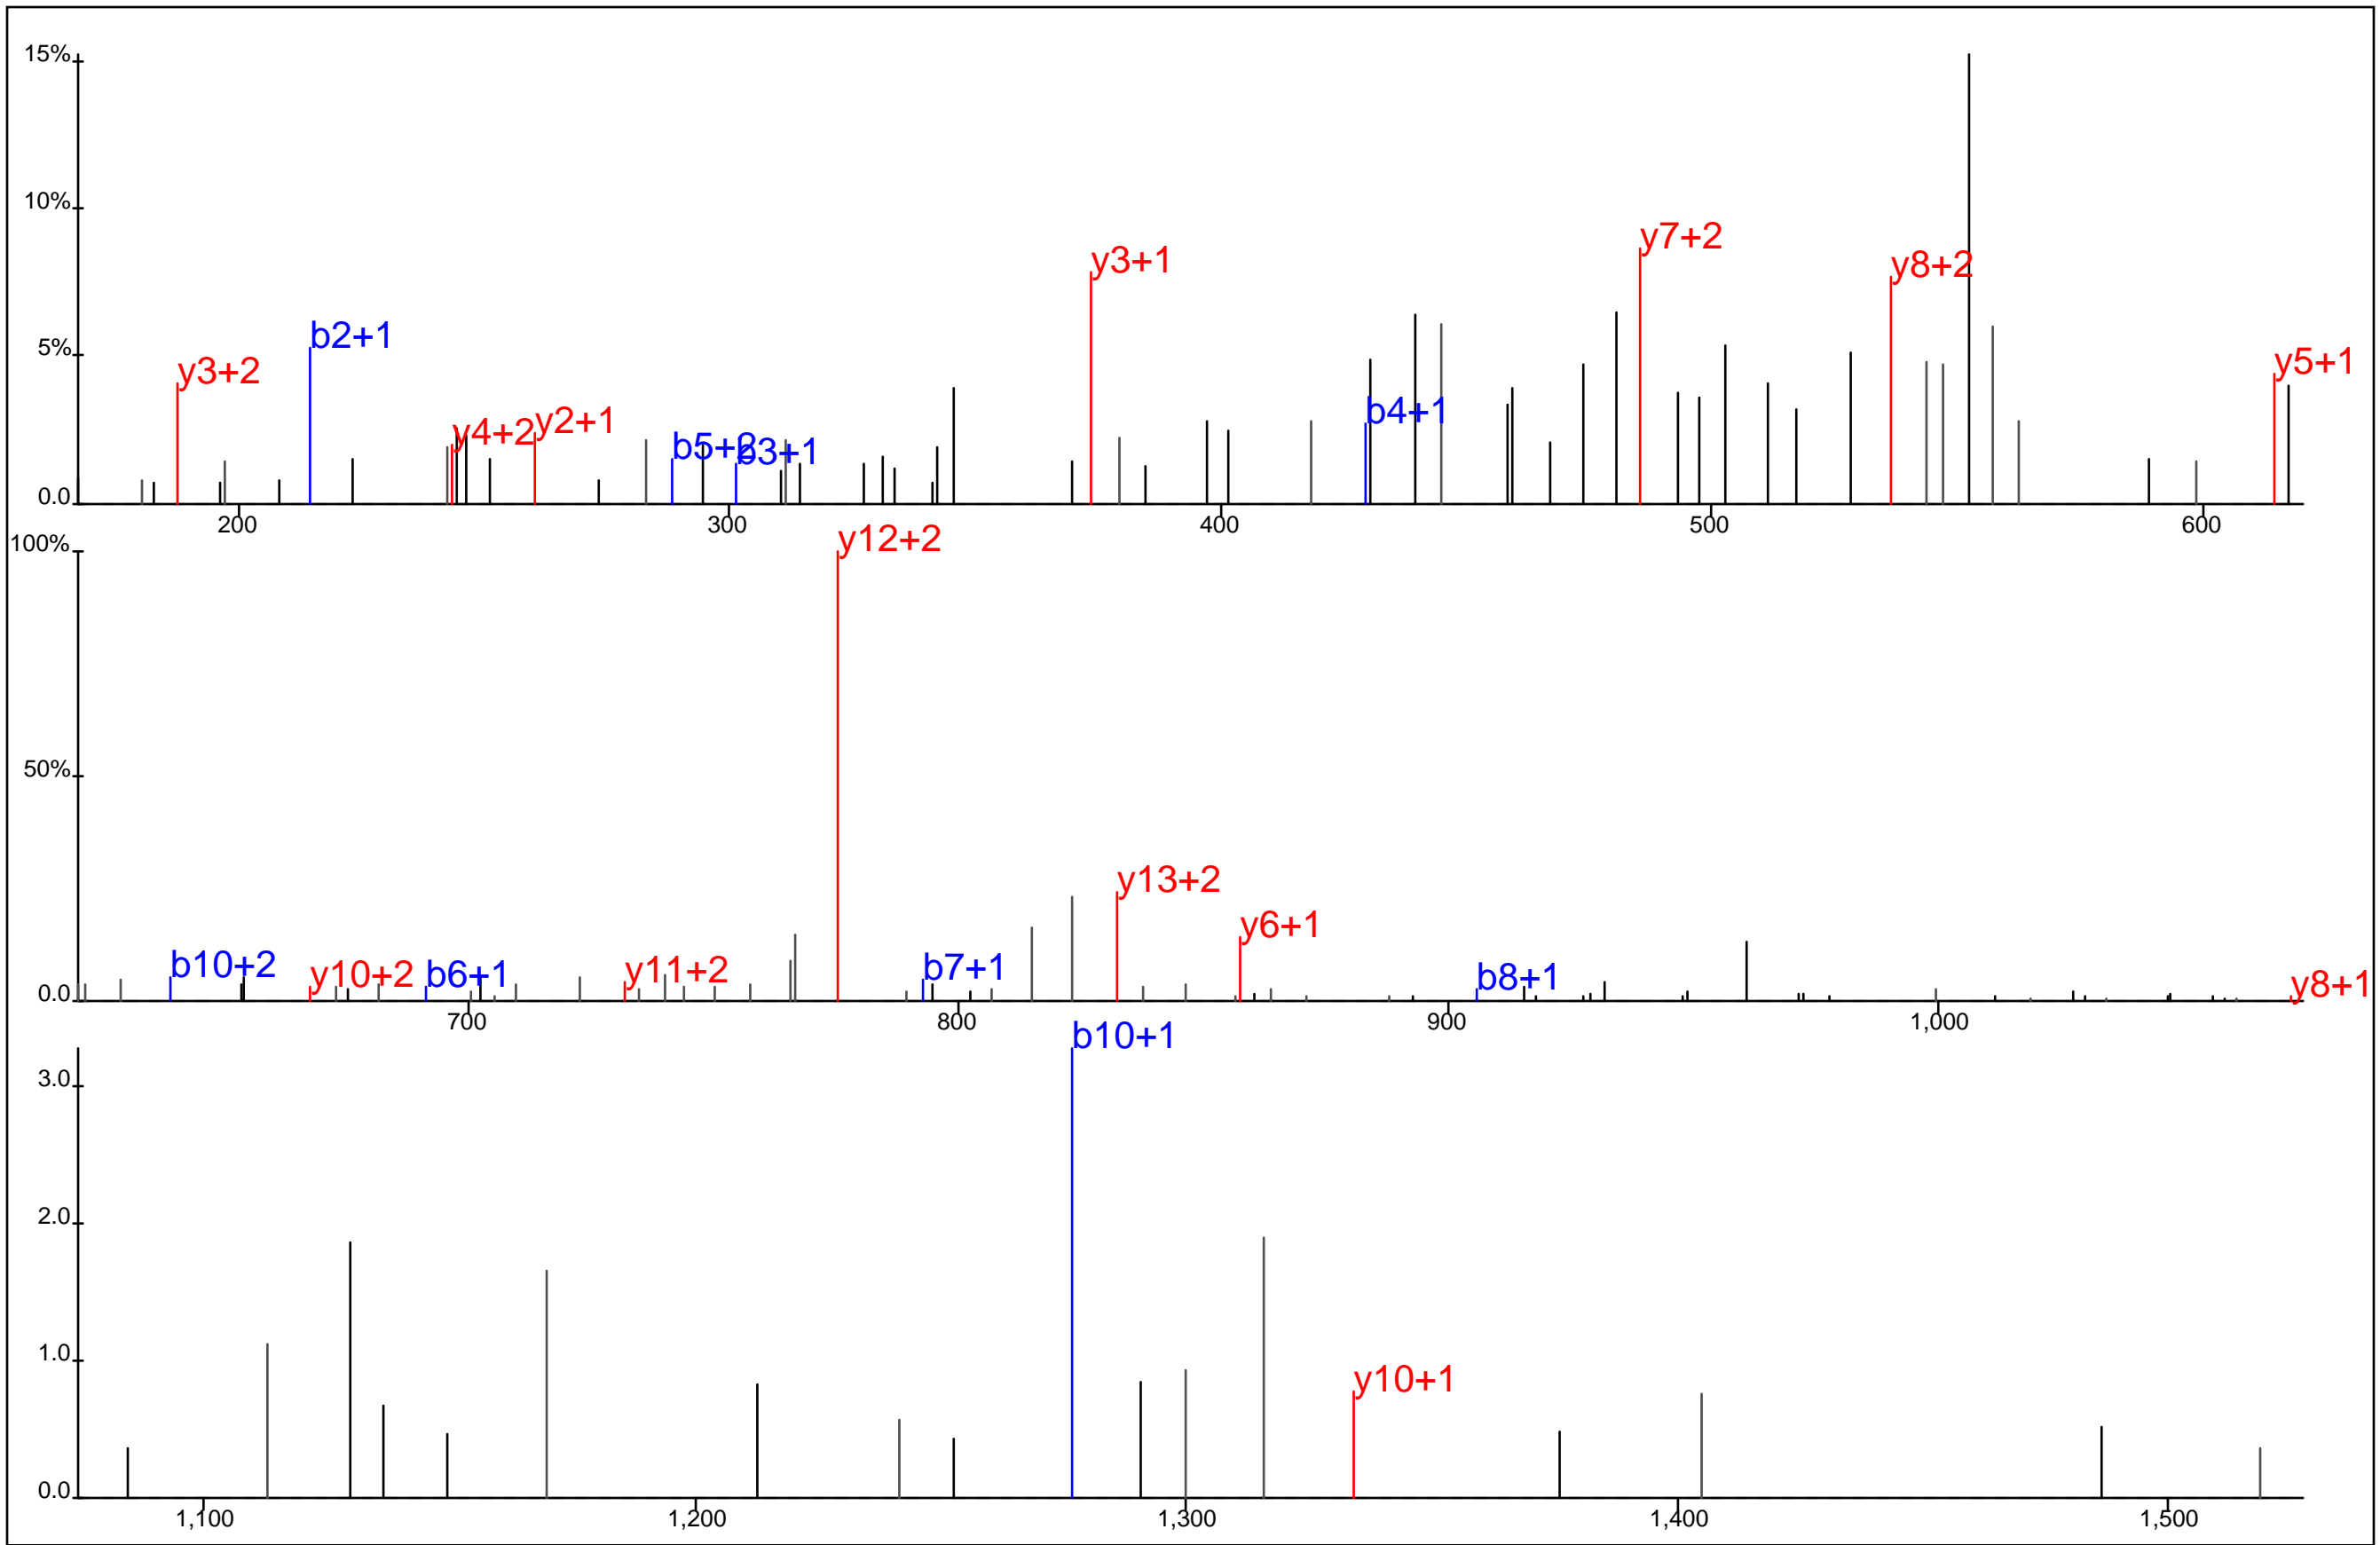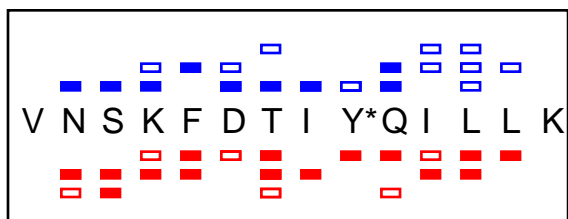

Protein Name: Zinc finger protein 147  
 gi Accession: 0  
 Precursor Mass: 587.9786+3  
 Delta Mass: 1.544 ppm  
 XCorr: 27.15

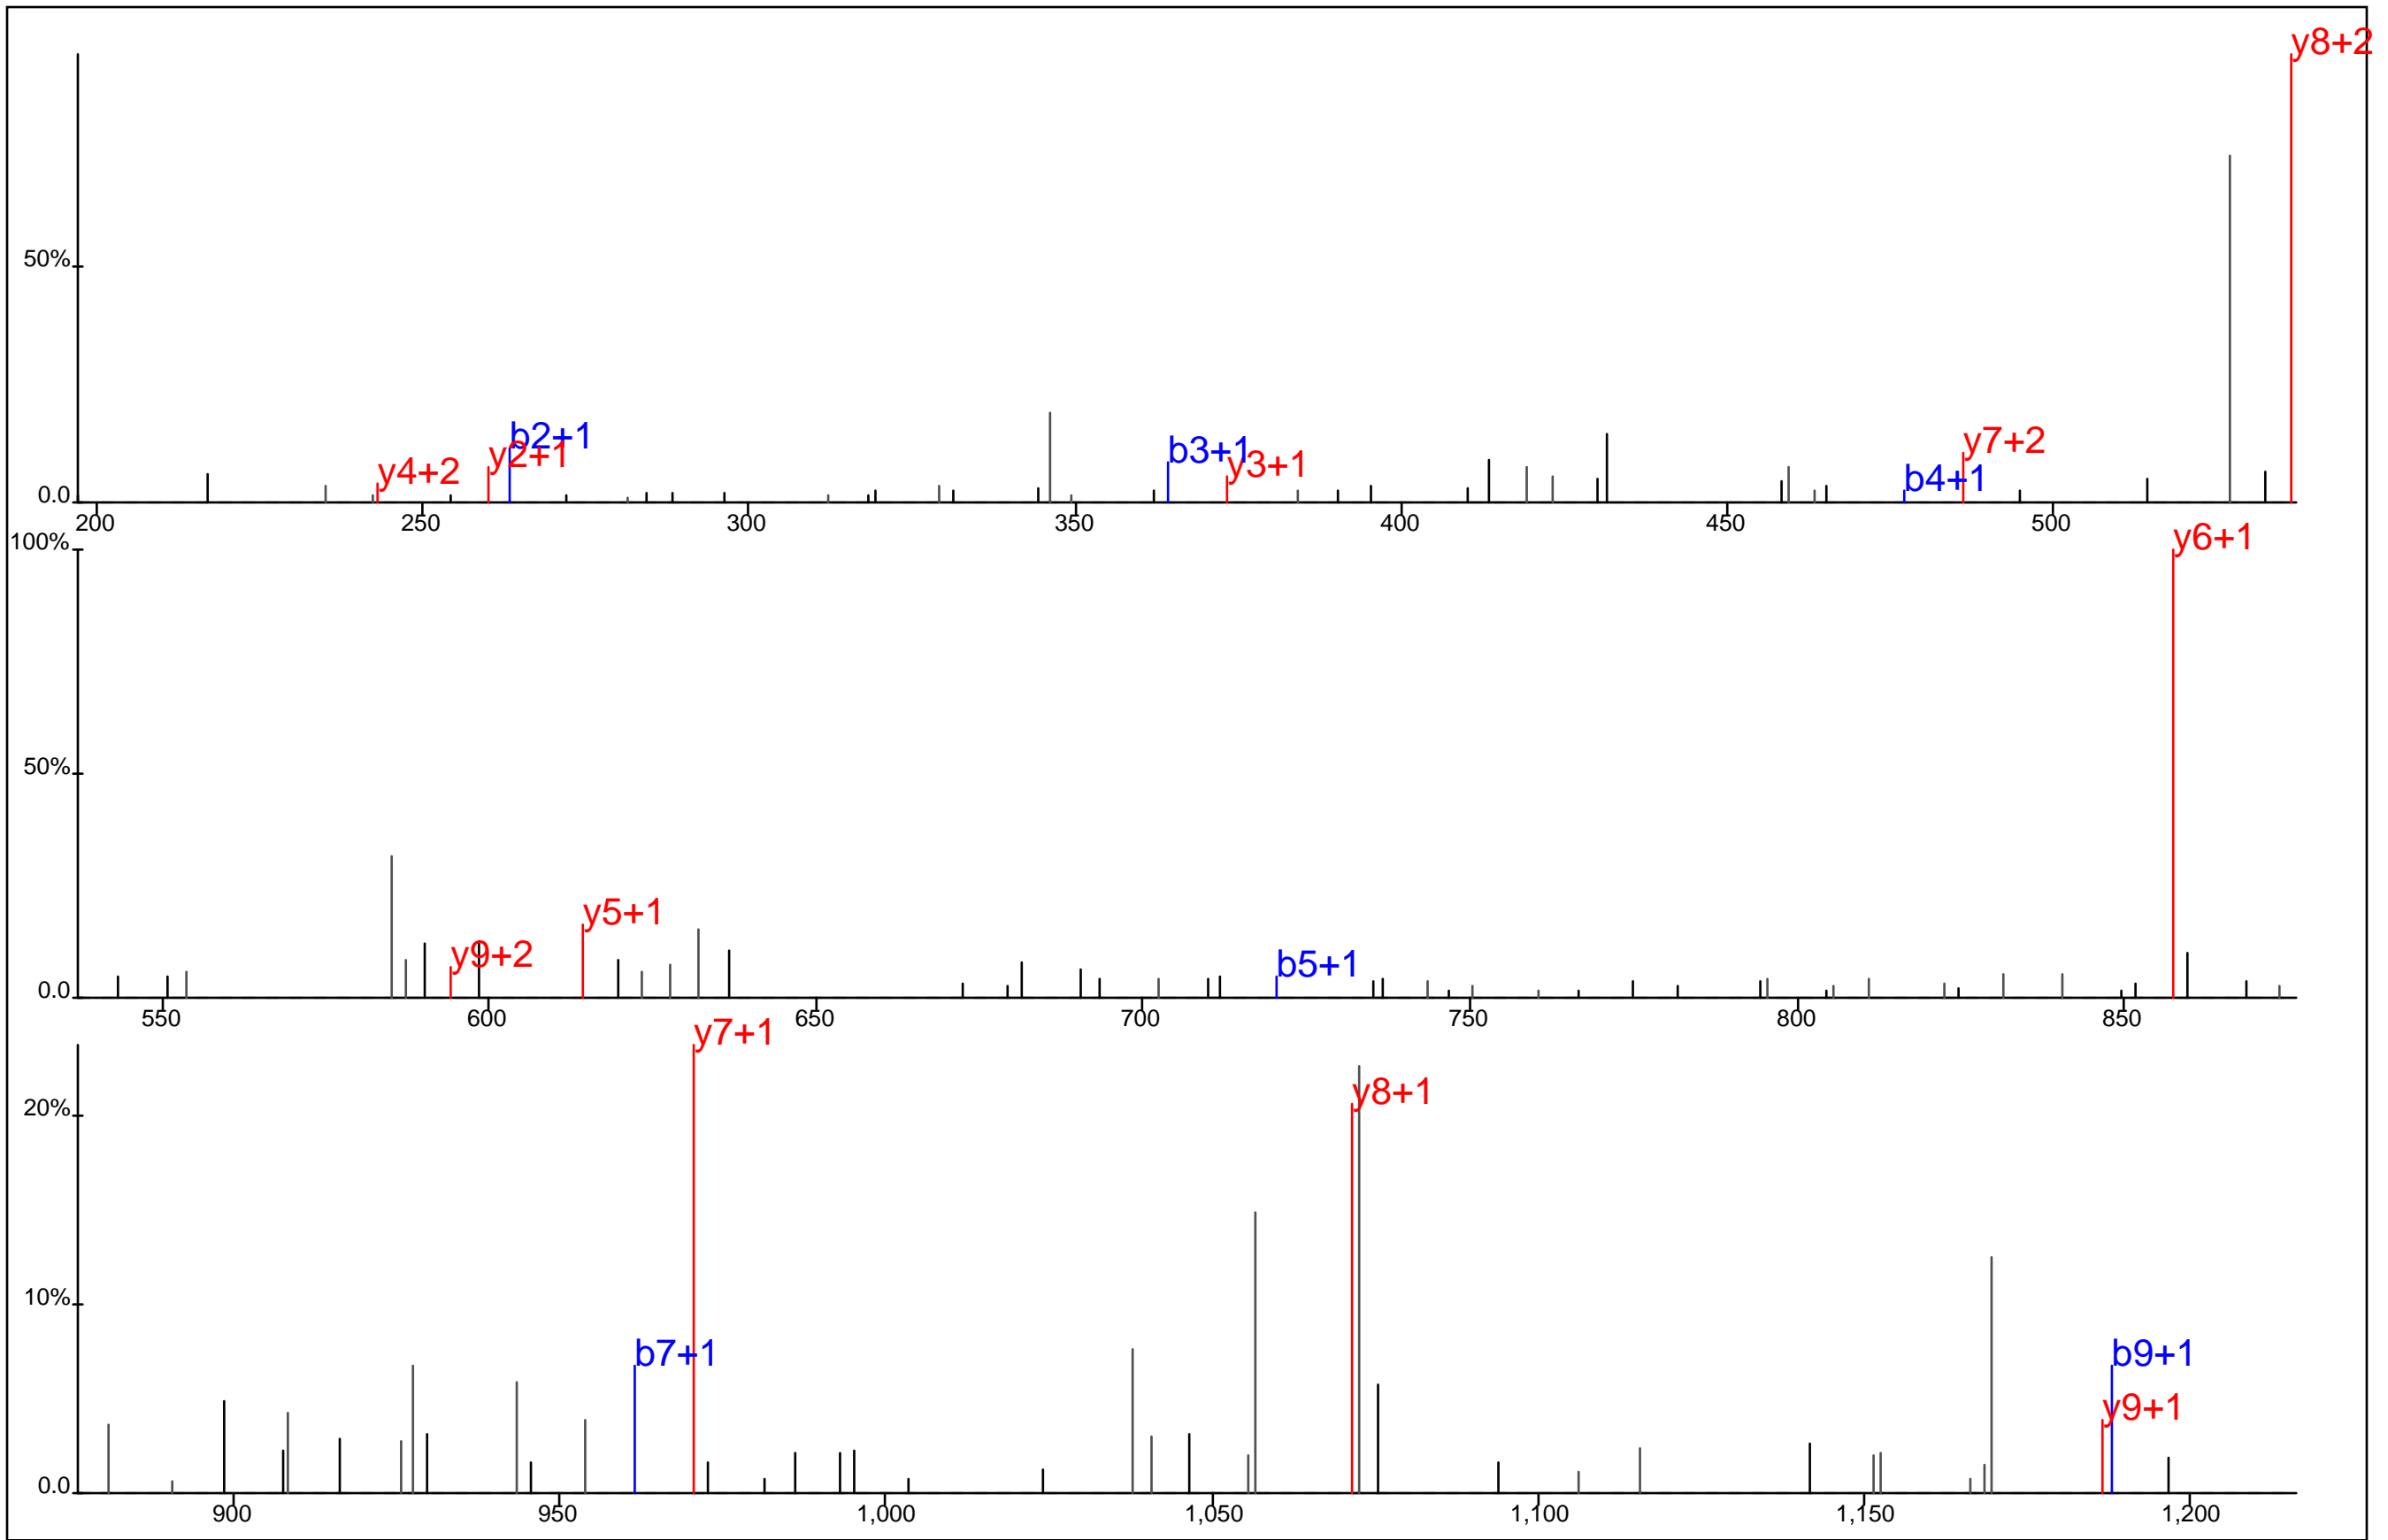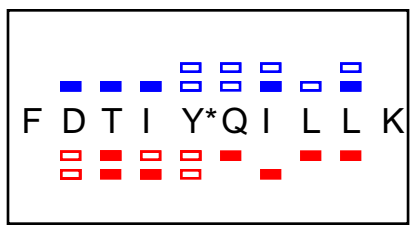

Protein Name: Zinc finger protein 147  
 gi Accession: 0  
 Precursor Mass: 667.3398+2  
 Delta Mass: 6.015 ppm  
 XCorr: 57.45

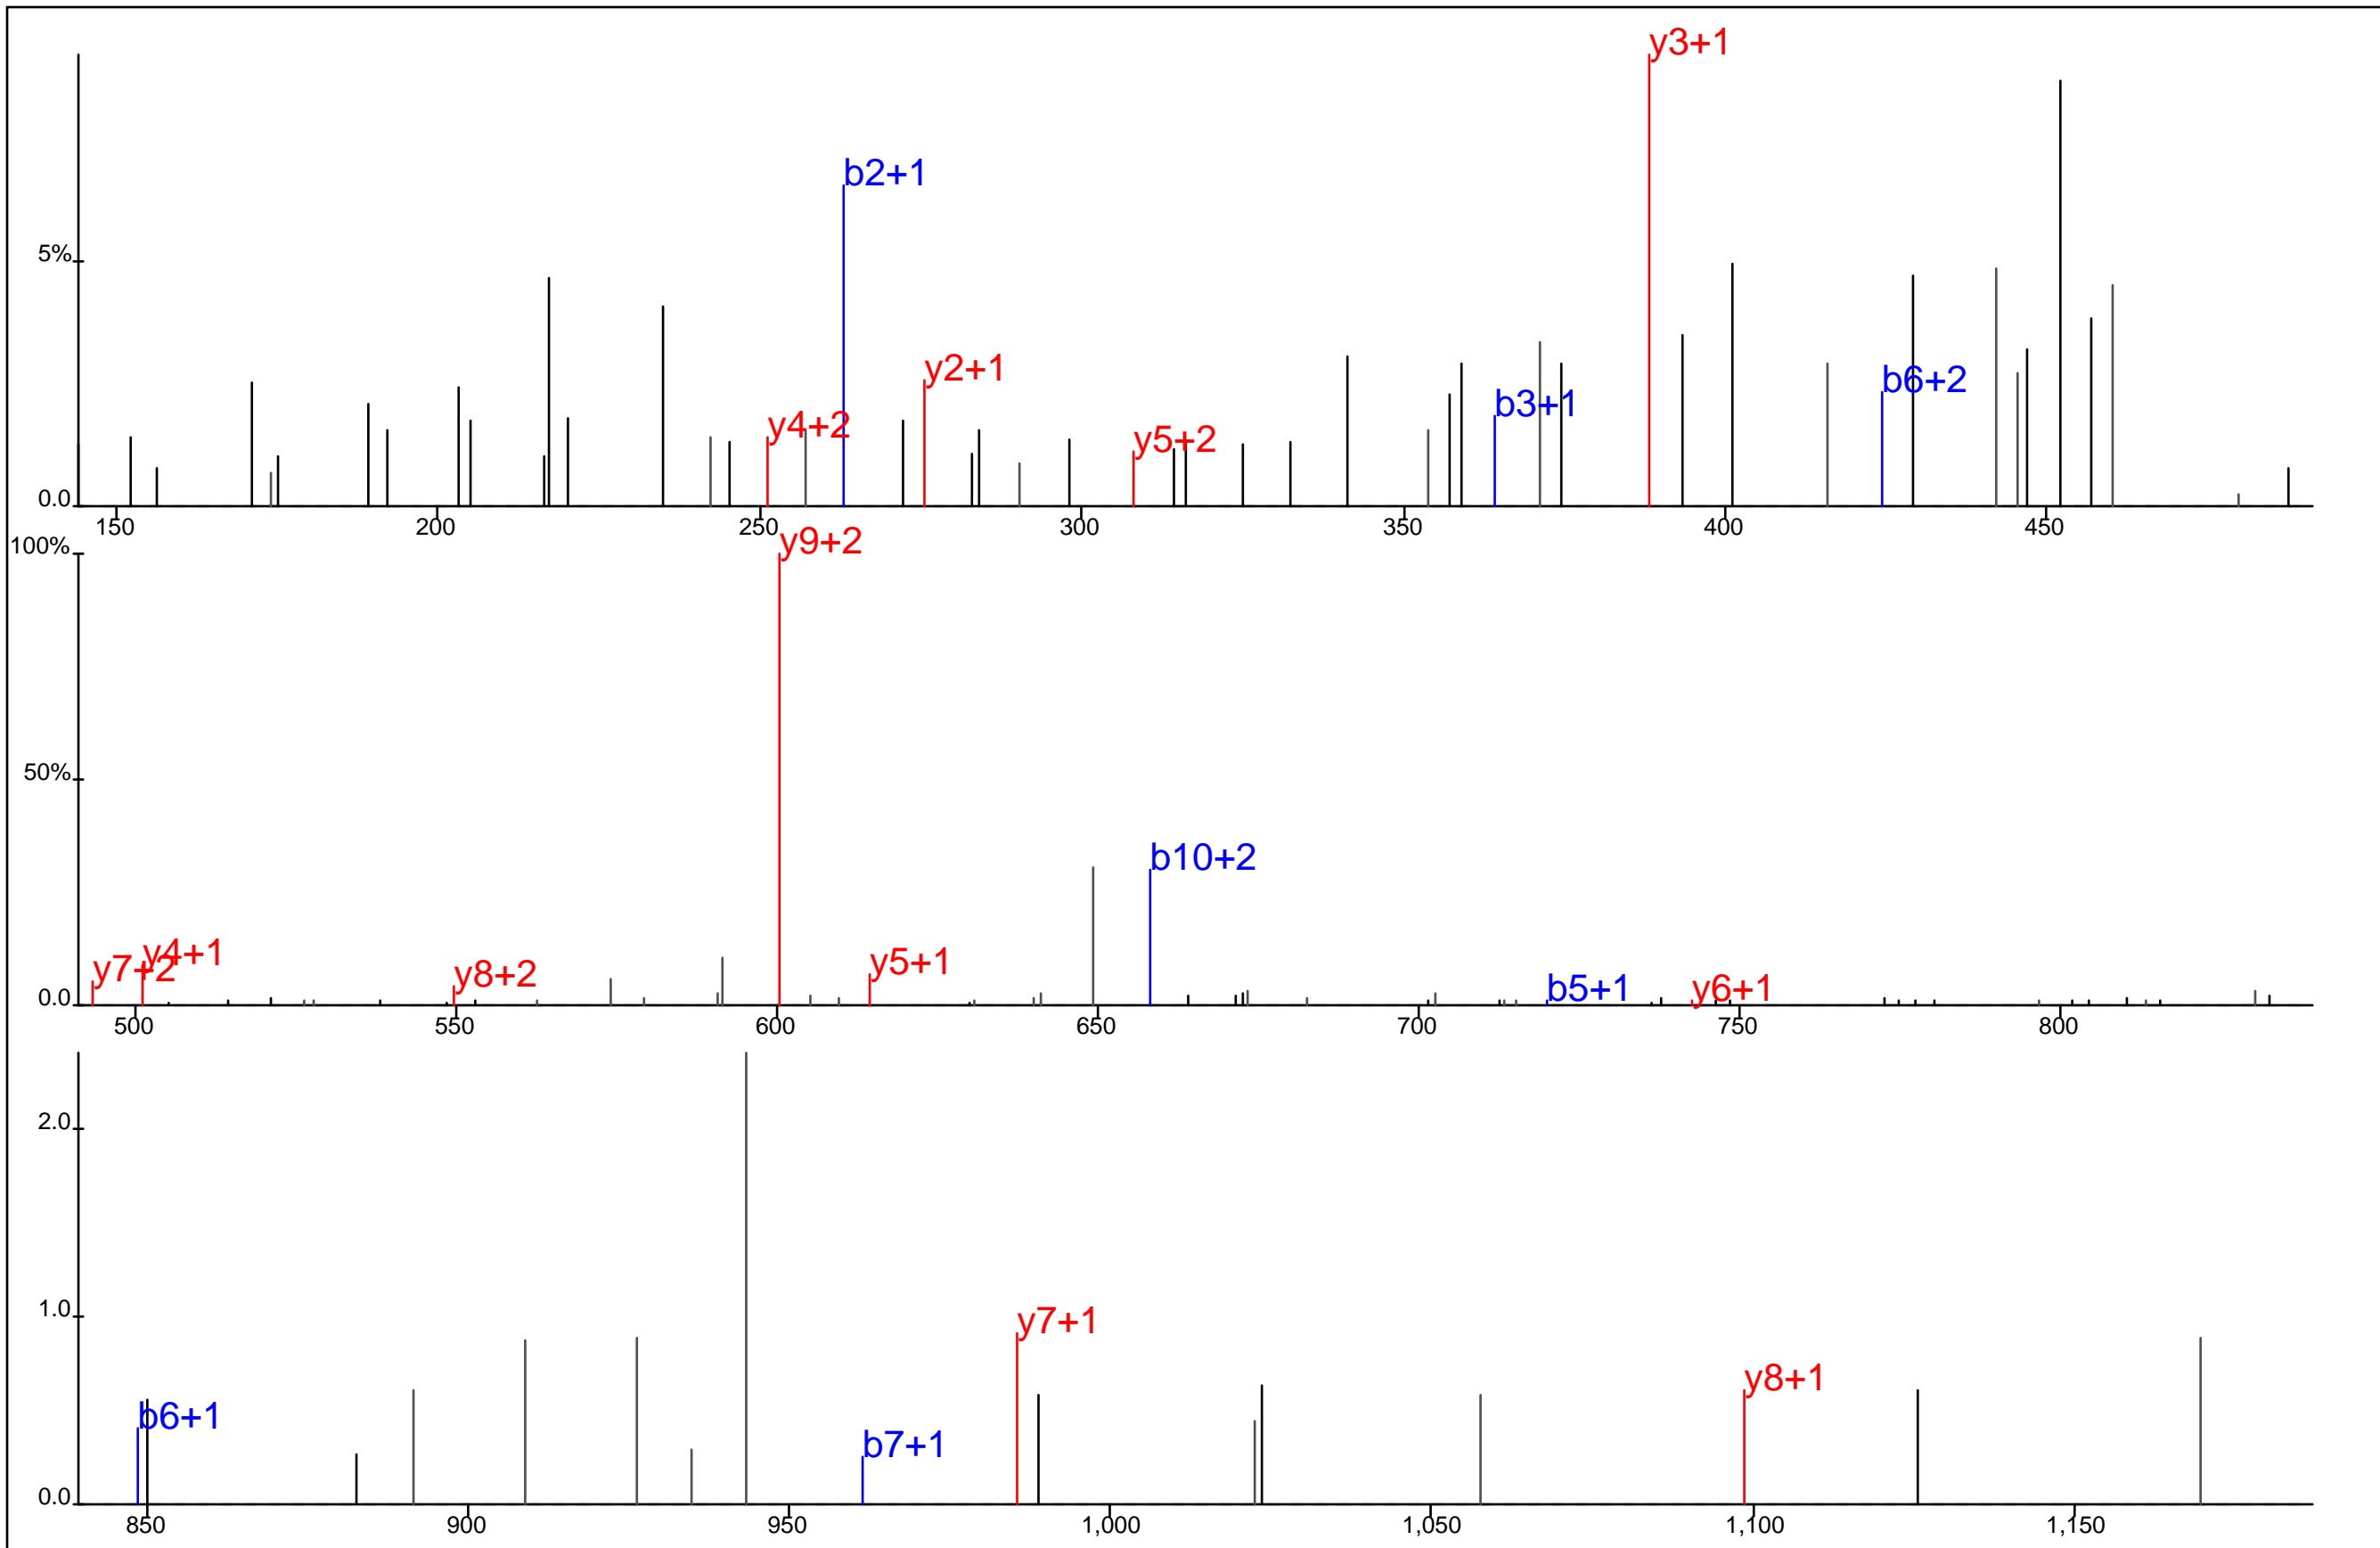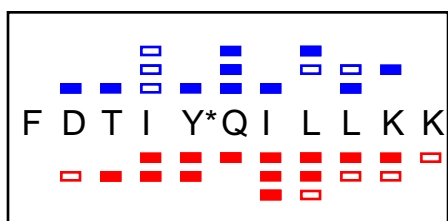

Protein Name: Zinc finger protein 147  
 gi Accession: 0  
 Precursor Mass: 487.9311+3  
 Delta Mass: 2.366 ppm  
 XCorr: 29.86

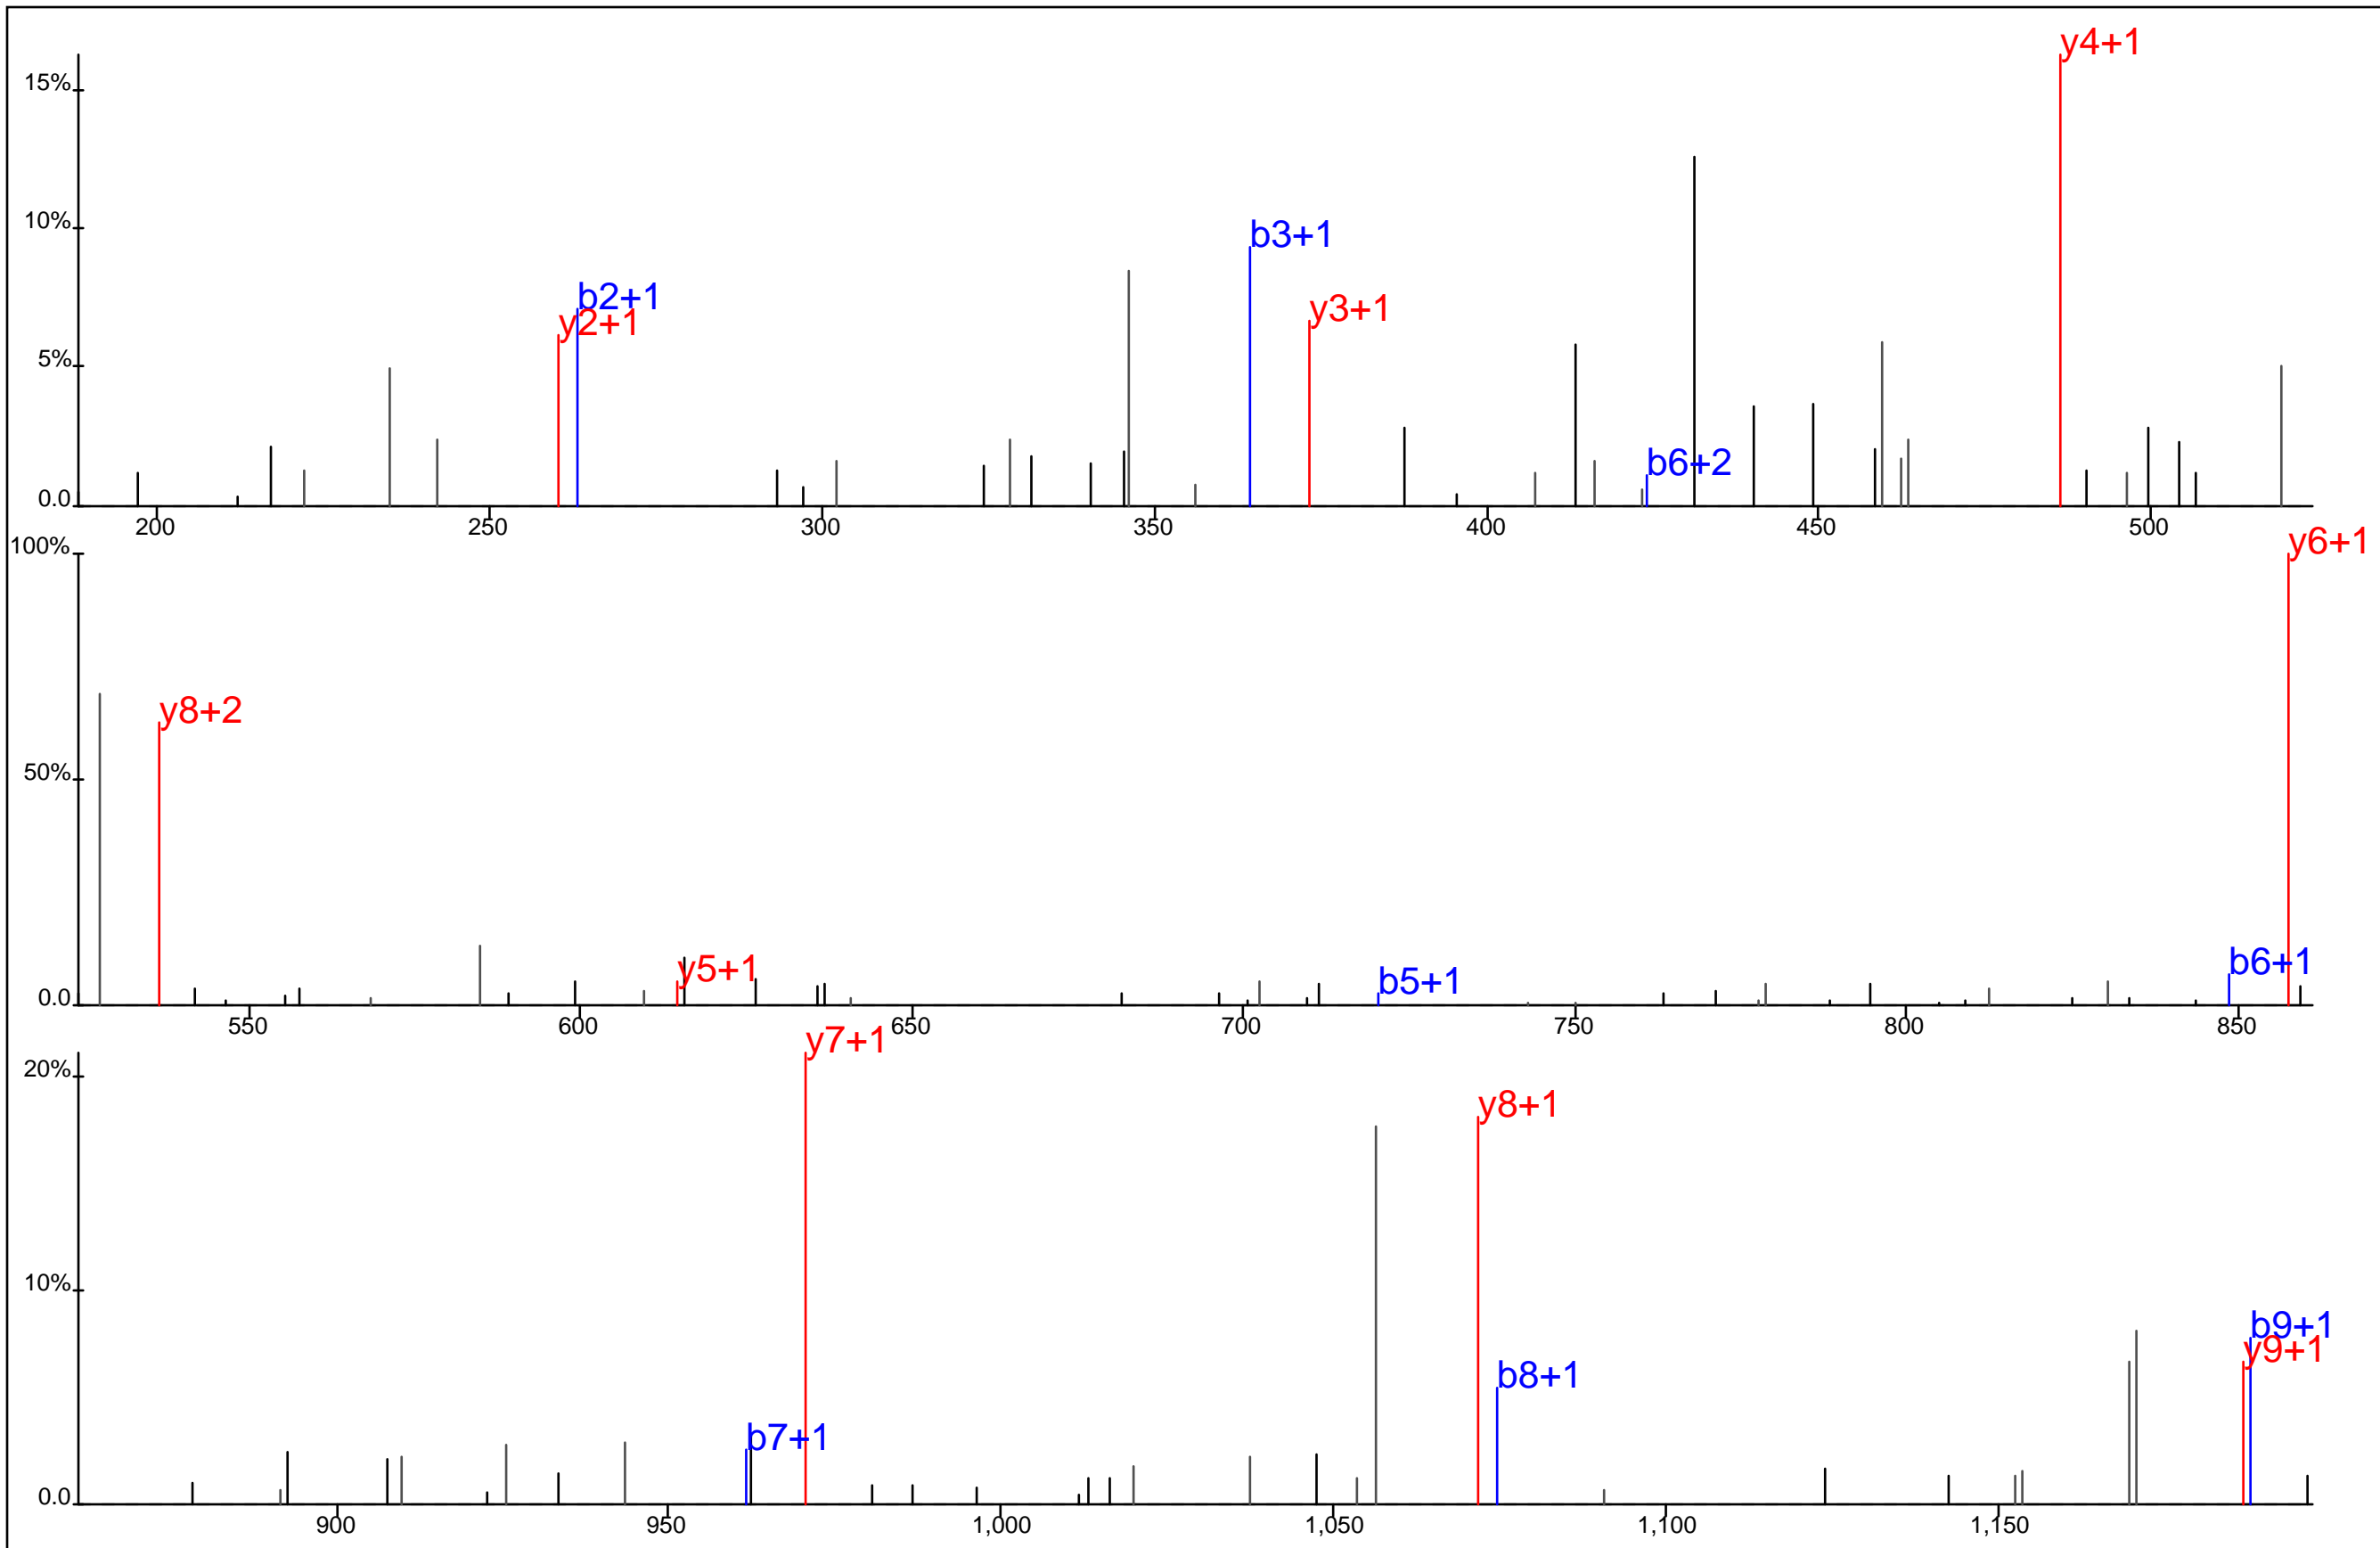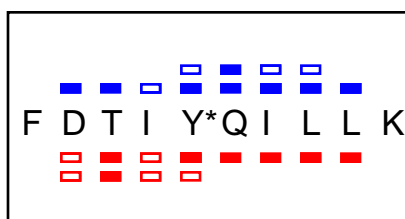

Protein Name: Zinc finger protein 147  
 gi Accession: 0  
 Precursor Mass: 667.3433+2  
 Delta Mass: 0.706 ppm  
 XCorr: 50.09

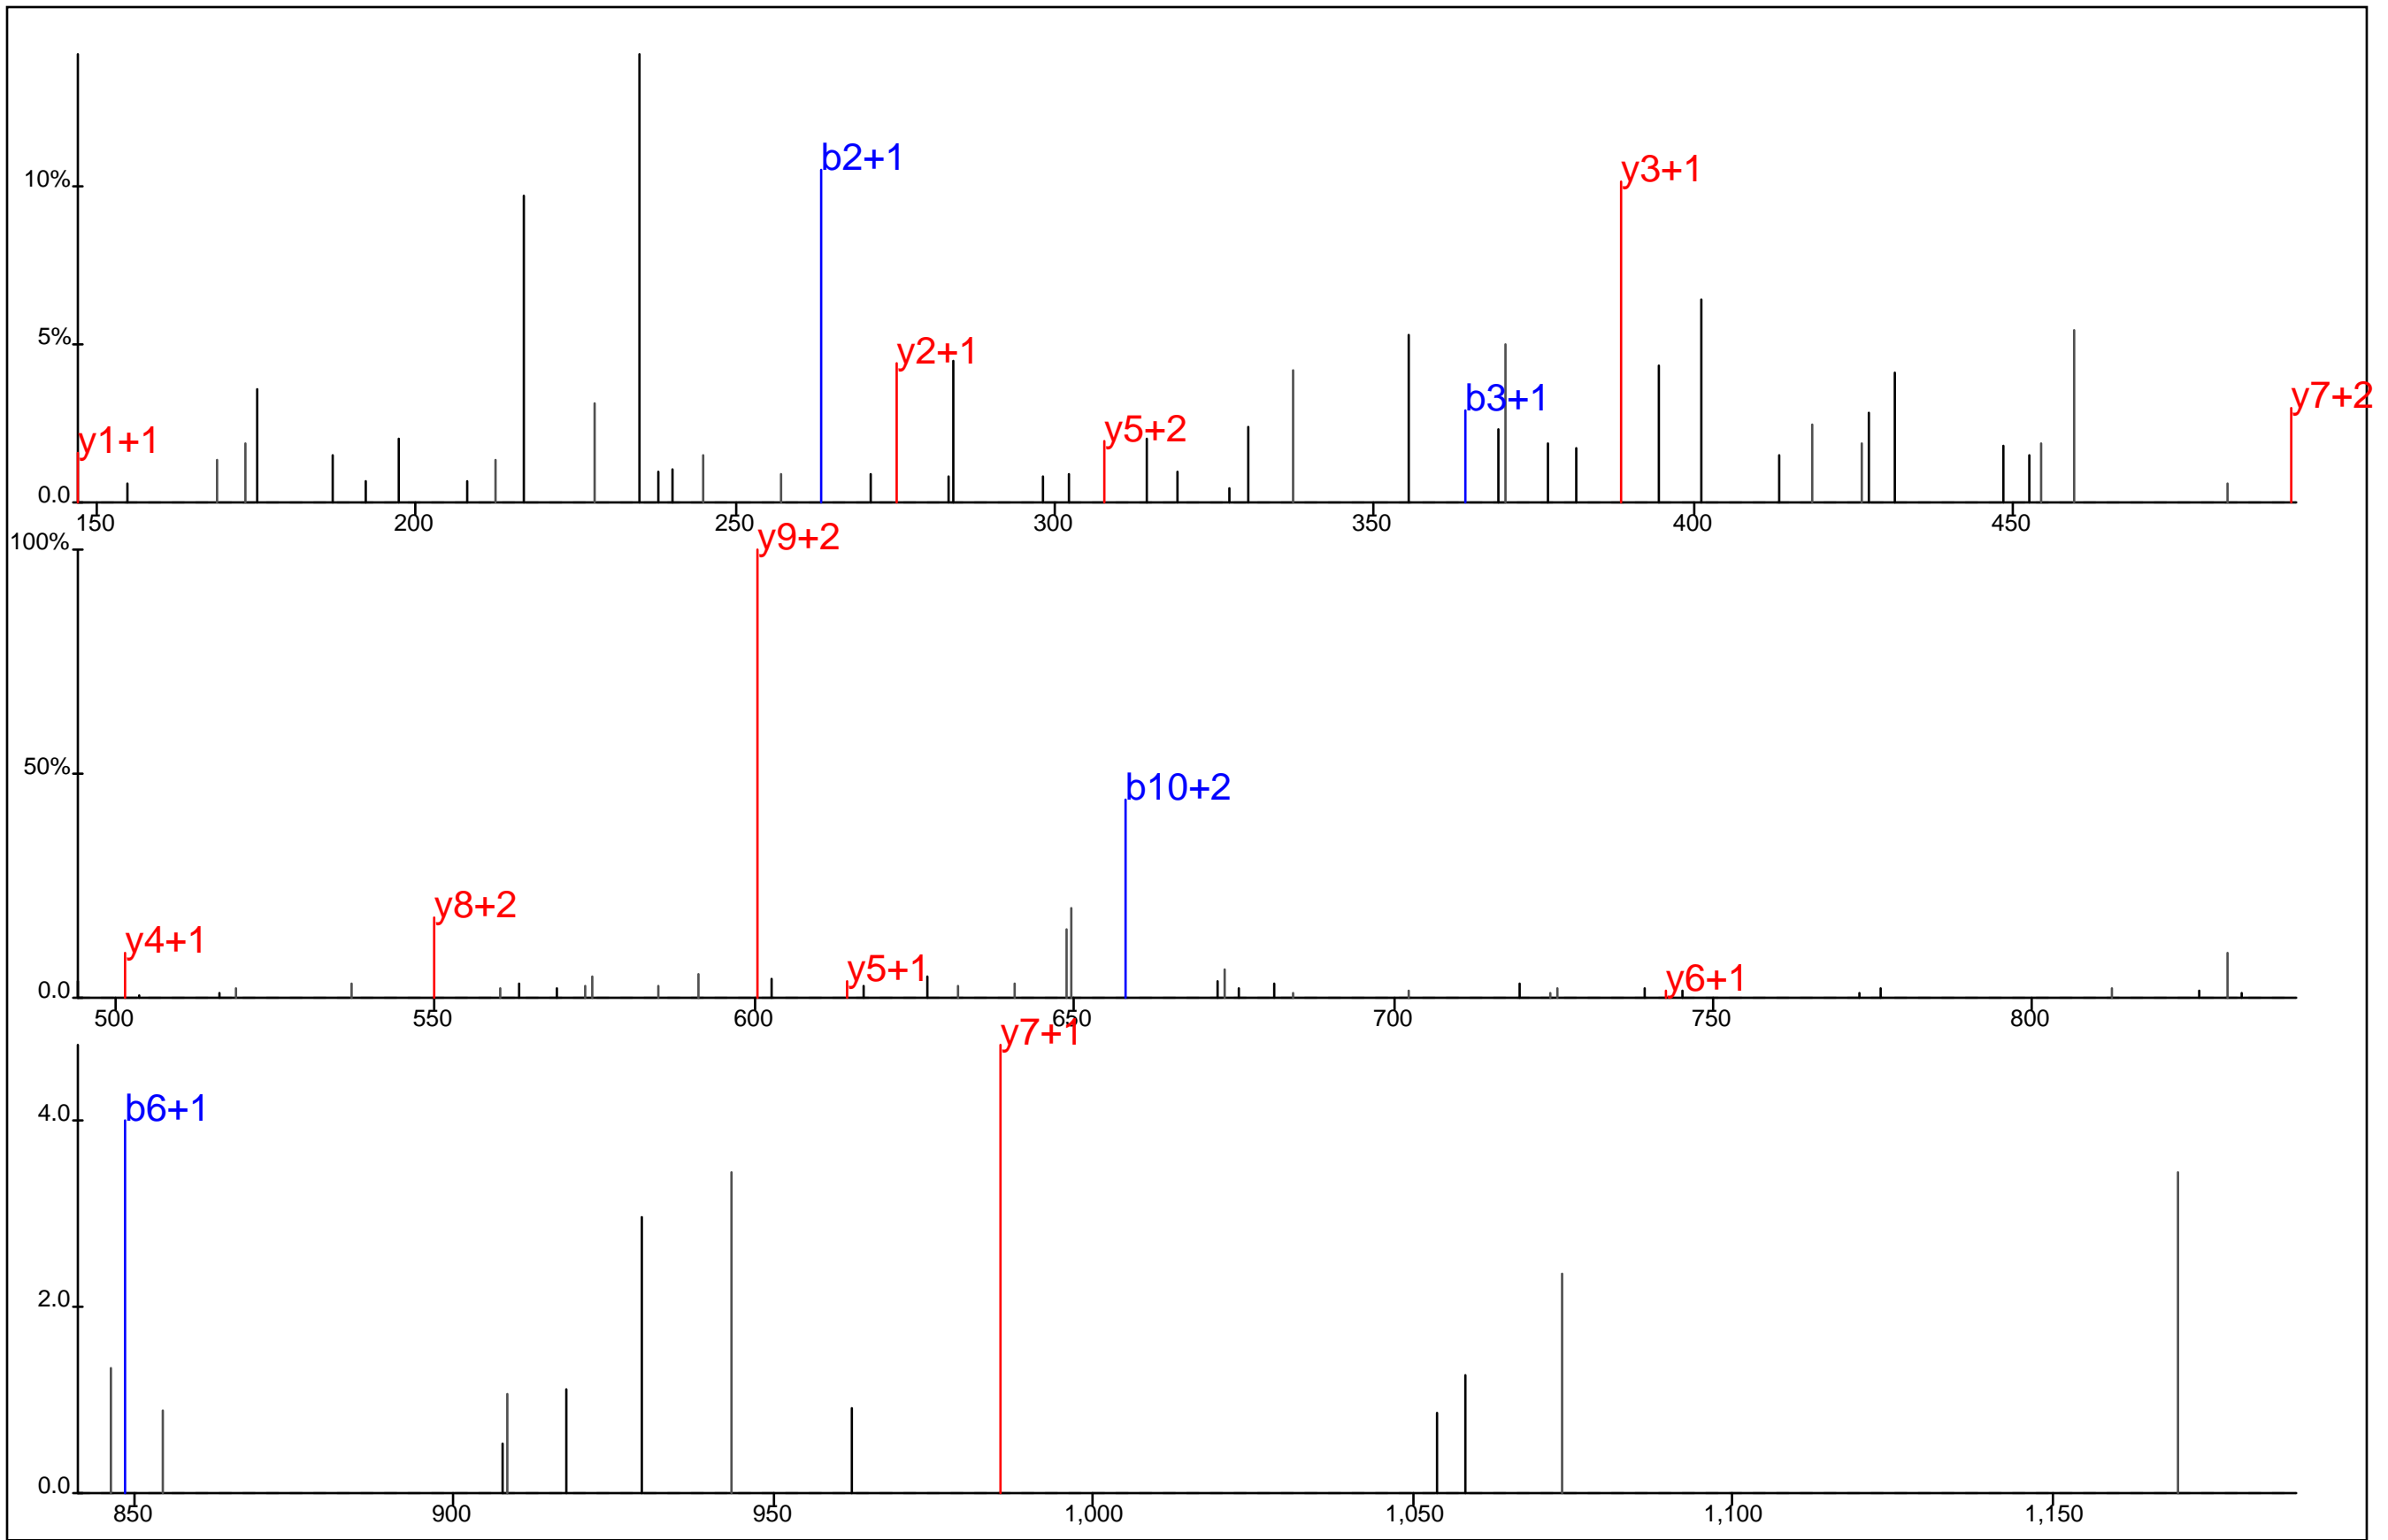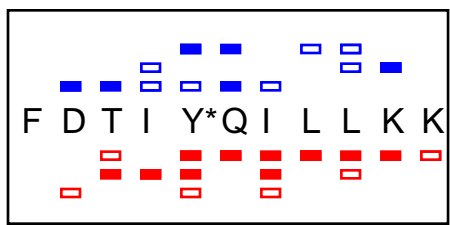

Protein Name: Zinc finger protein 147  
 gi Accession: 0  
 Precursor Mass: 487.9295+3  
 Delta Mass: 0.952 ppm  
 XCorr: 23.03

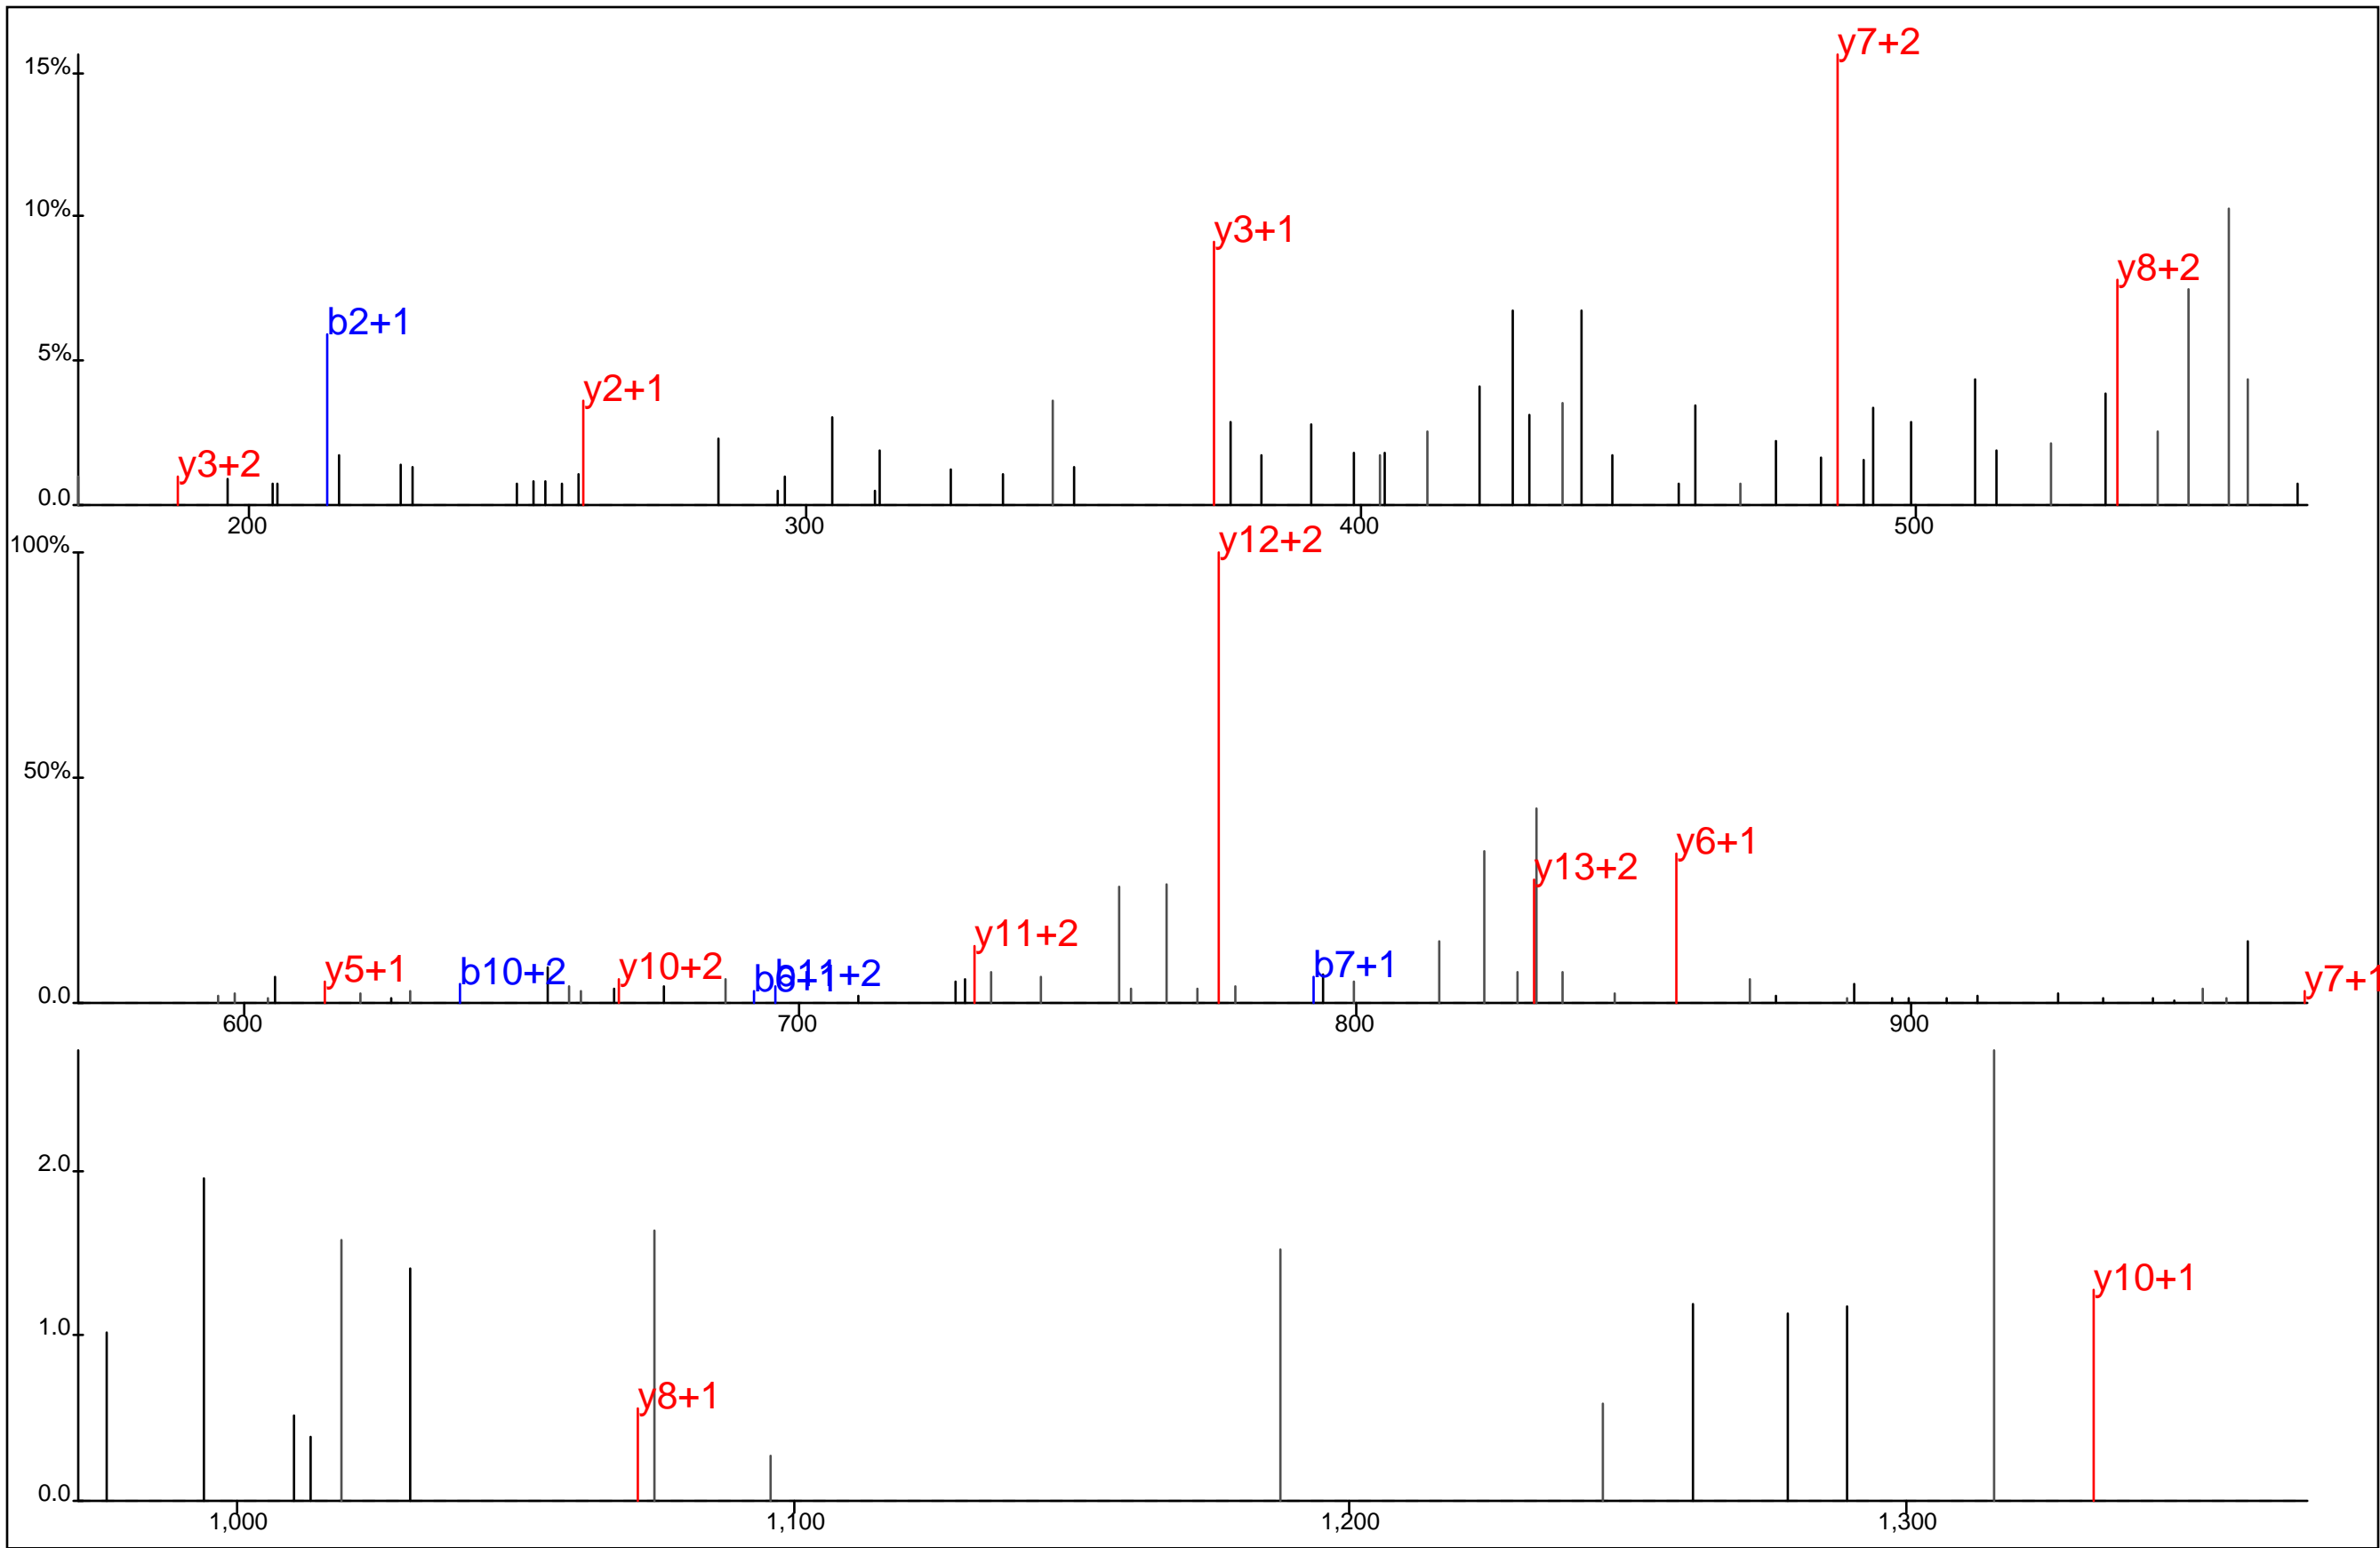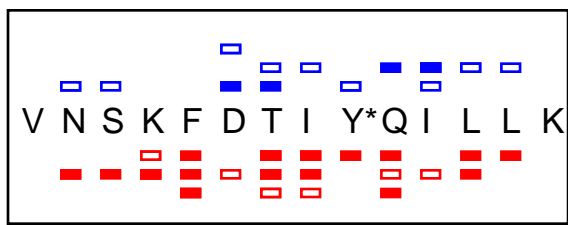

Protein Name: Zinc finger protein 147  
 gi Accession: 0  
 Precursor Mass: 587.9778+3  
 Delta Mass: 0.088 ppm  
 XCorr: 23.42

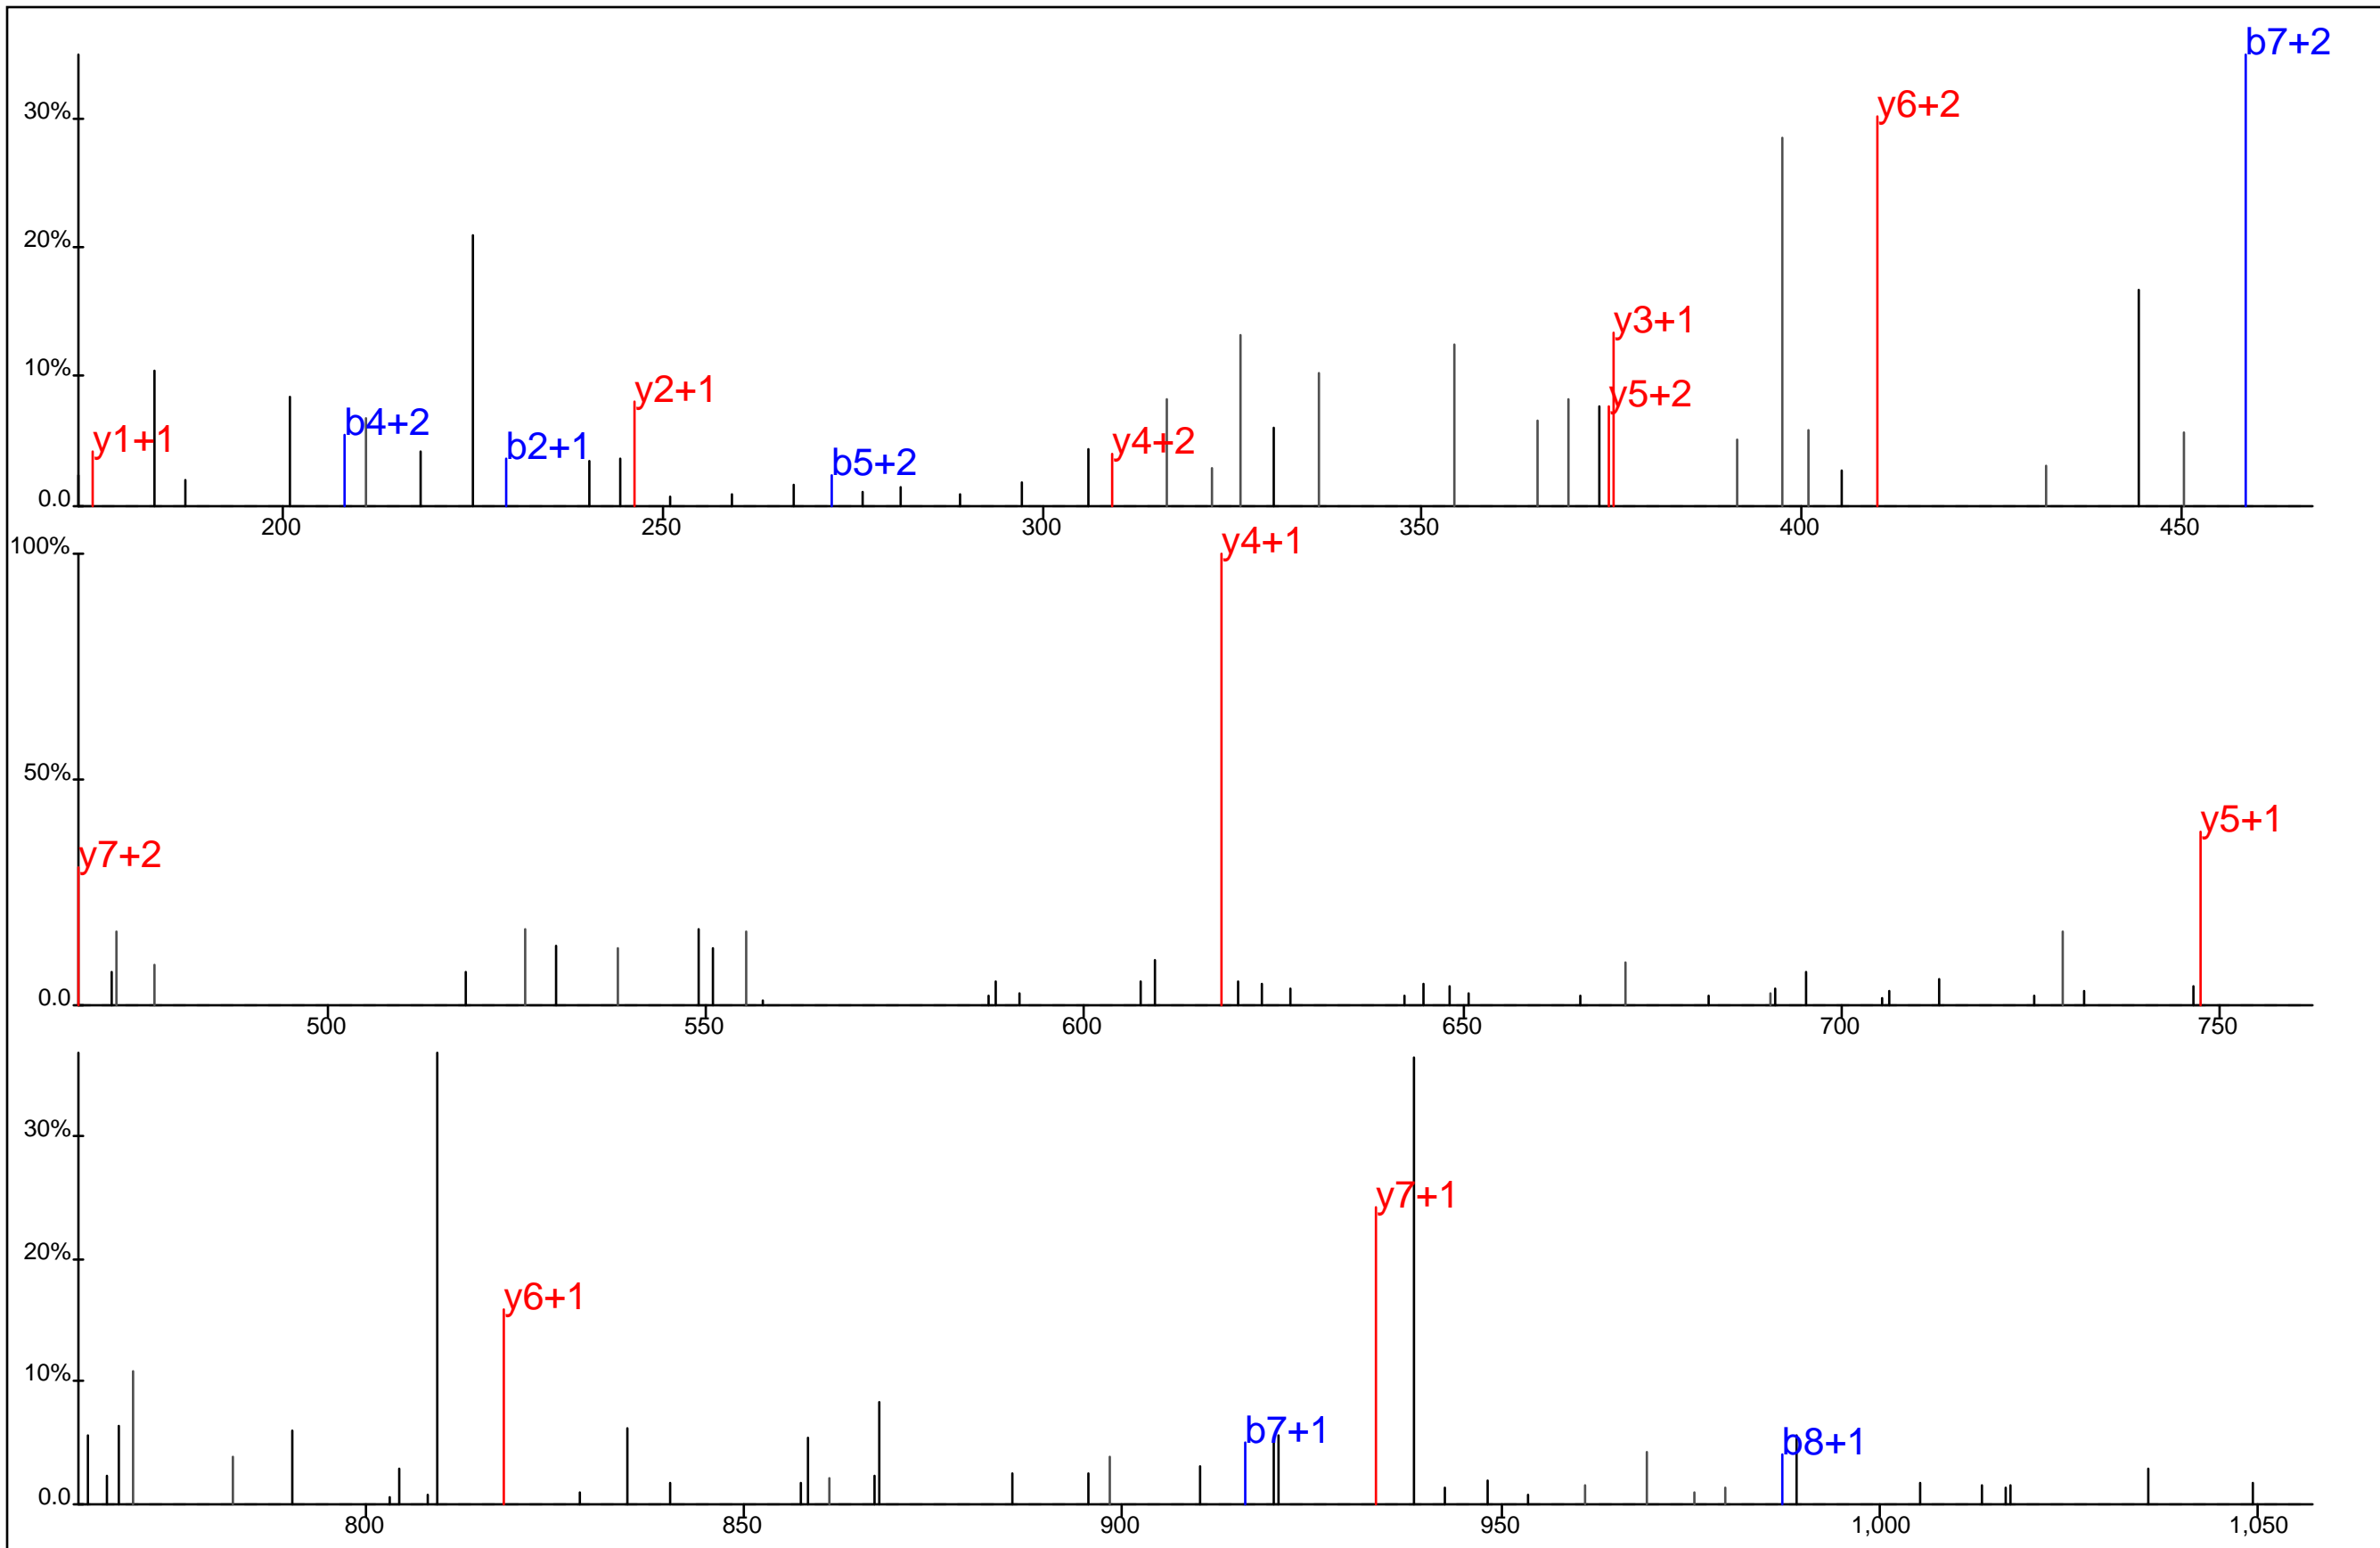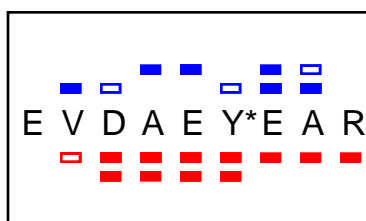

Protein Name: Zinc finger protein 289, ID1 regulated  
 gi Accession: 0  
 Precursor Mass: 581.2263+2  
 Delta Mass: 0.598 ppm  
 XCorr: 20.46



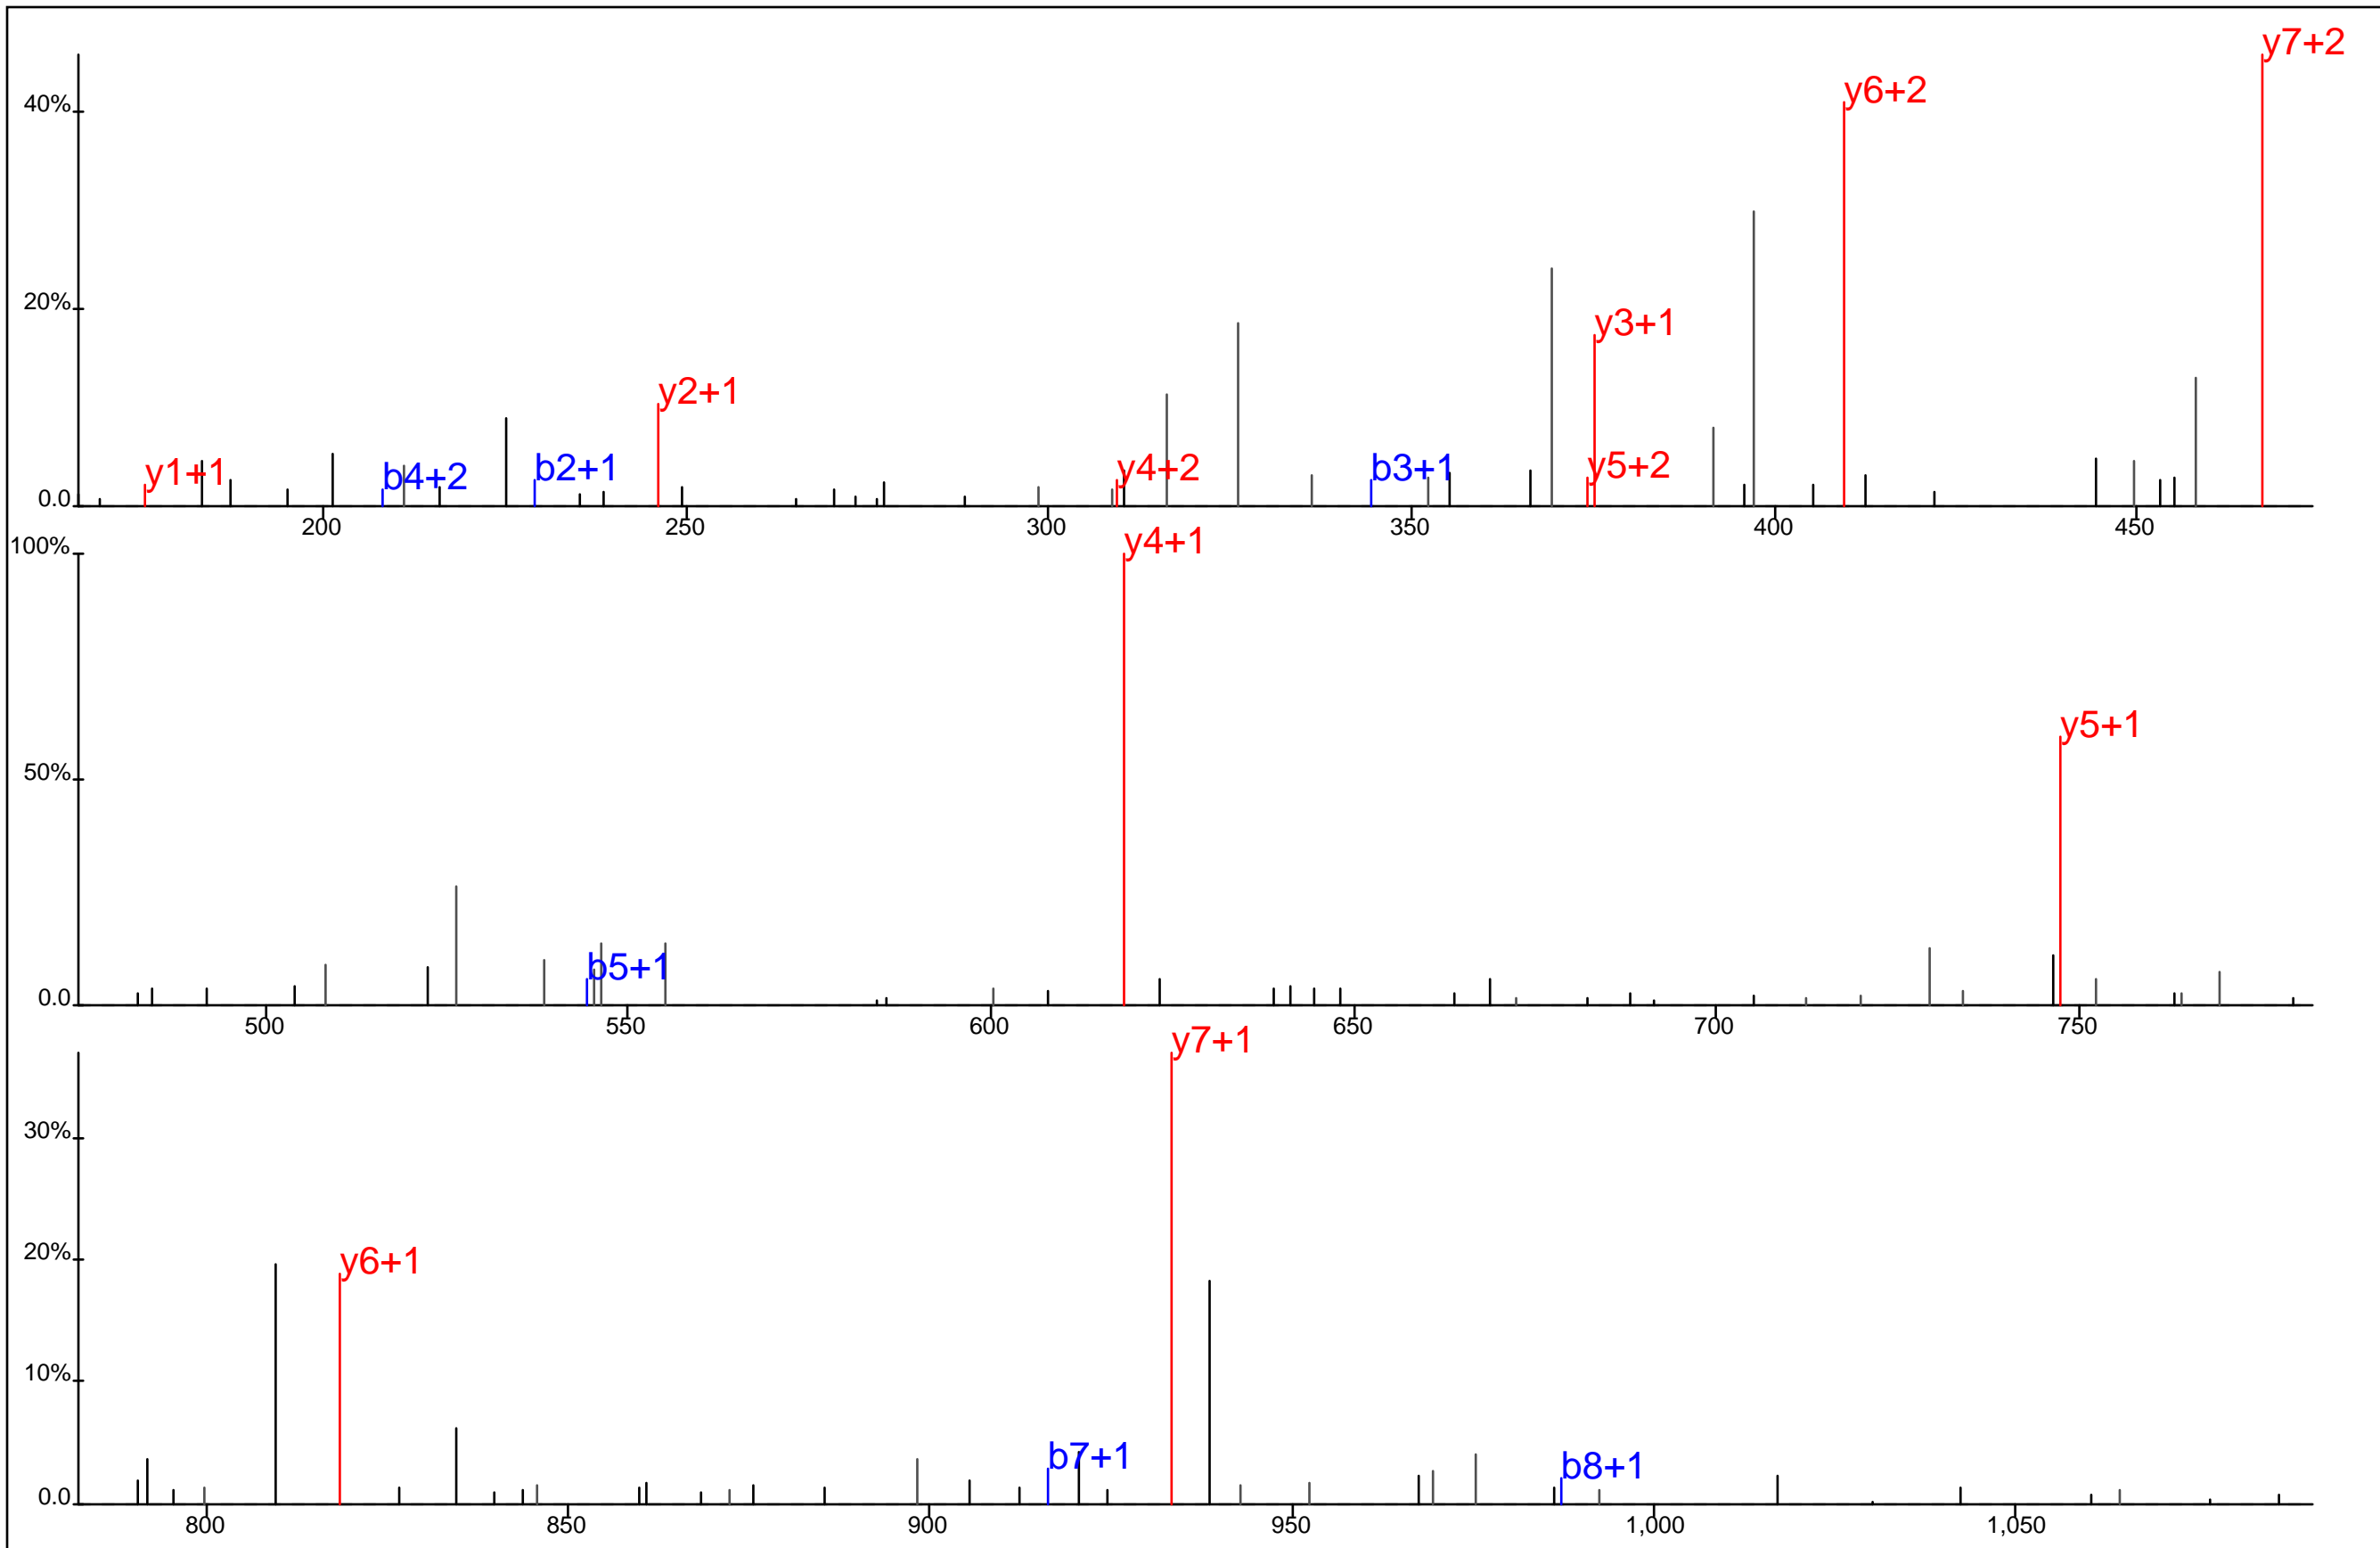

■ ■ ■ ■ ■ ■  
 E V D A E Y\* E A R  
■ ■ ■ ■ ■ ■

Protein Name: Zinc finger protein 289, ID1 regulated  
 gi Accession: 0  
 Precursor Mass: 581.2269+2  
 Delta Mass: 0.455 ppm  
 XCorr: 24.88

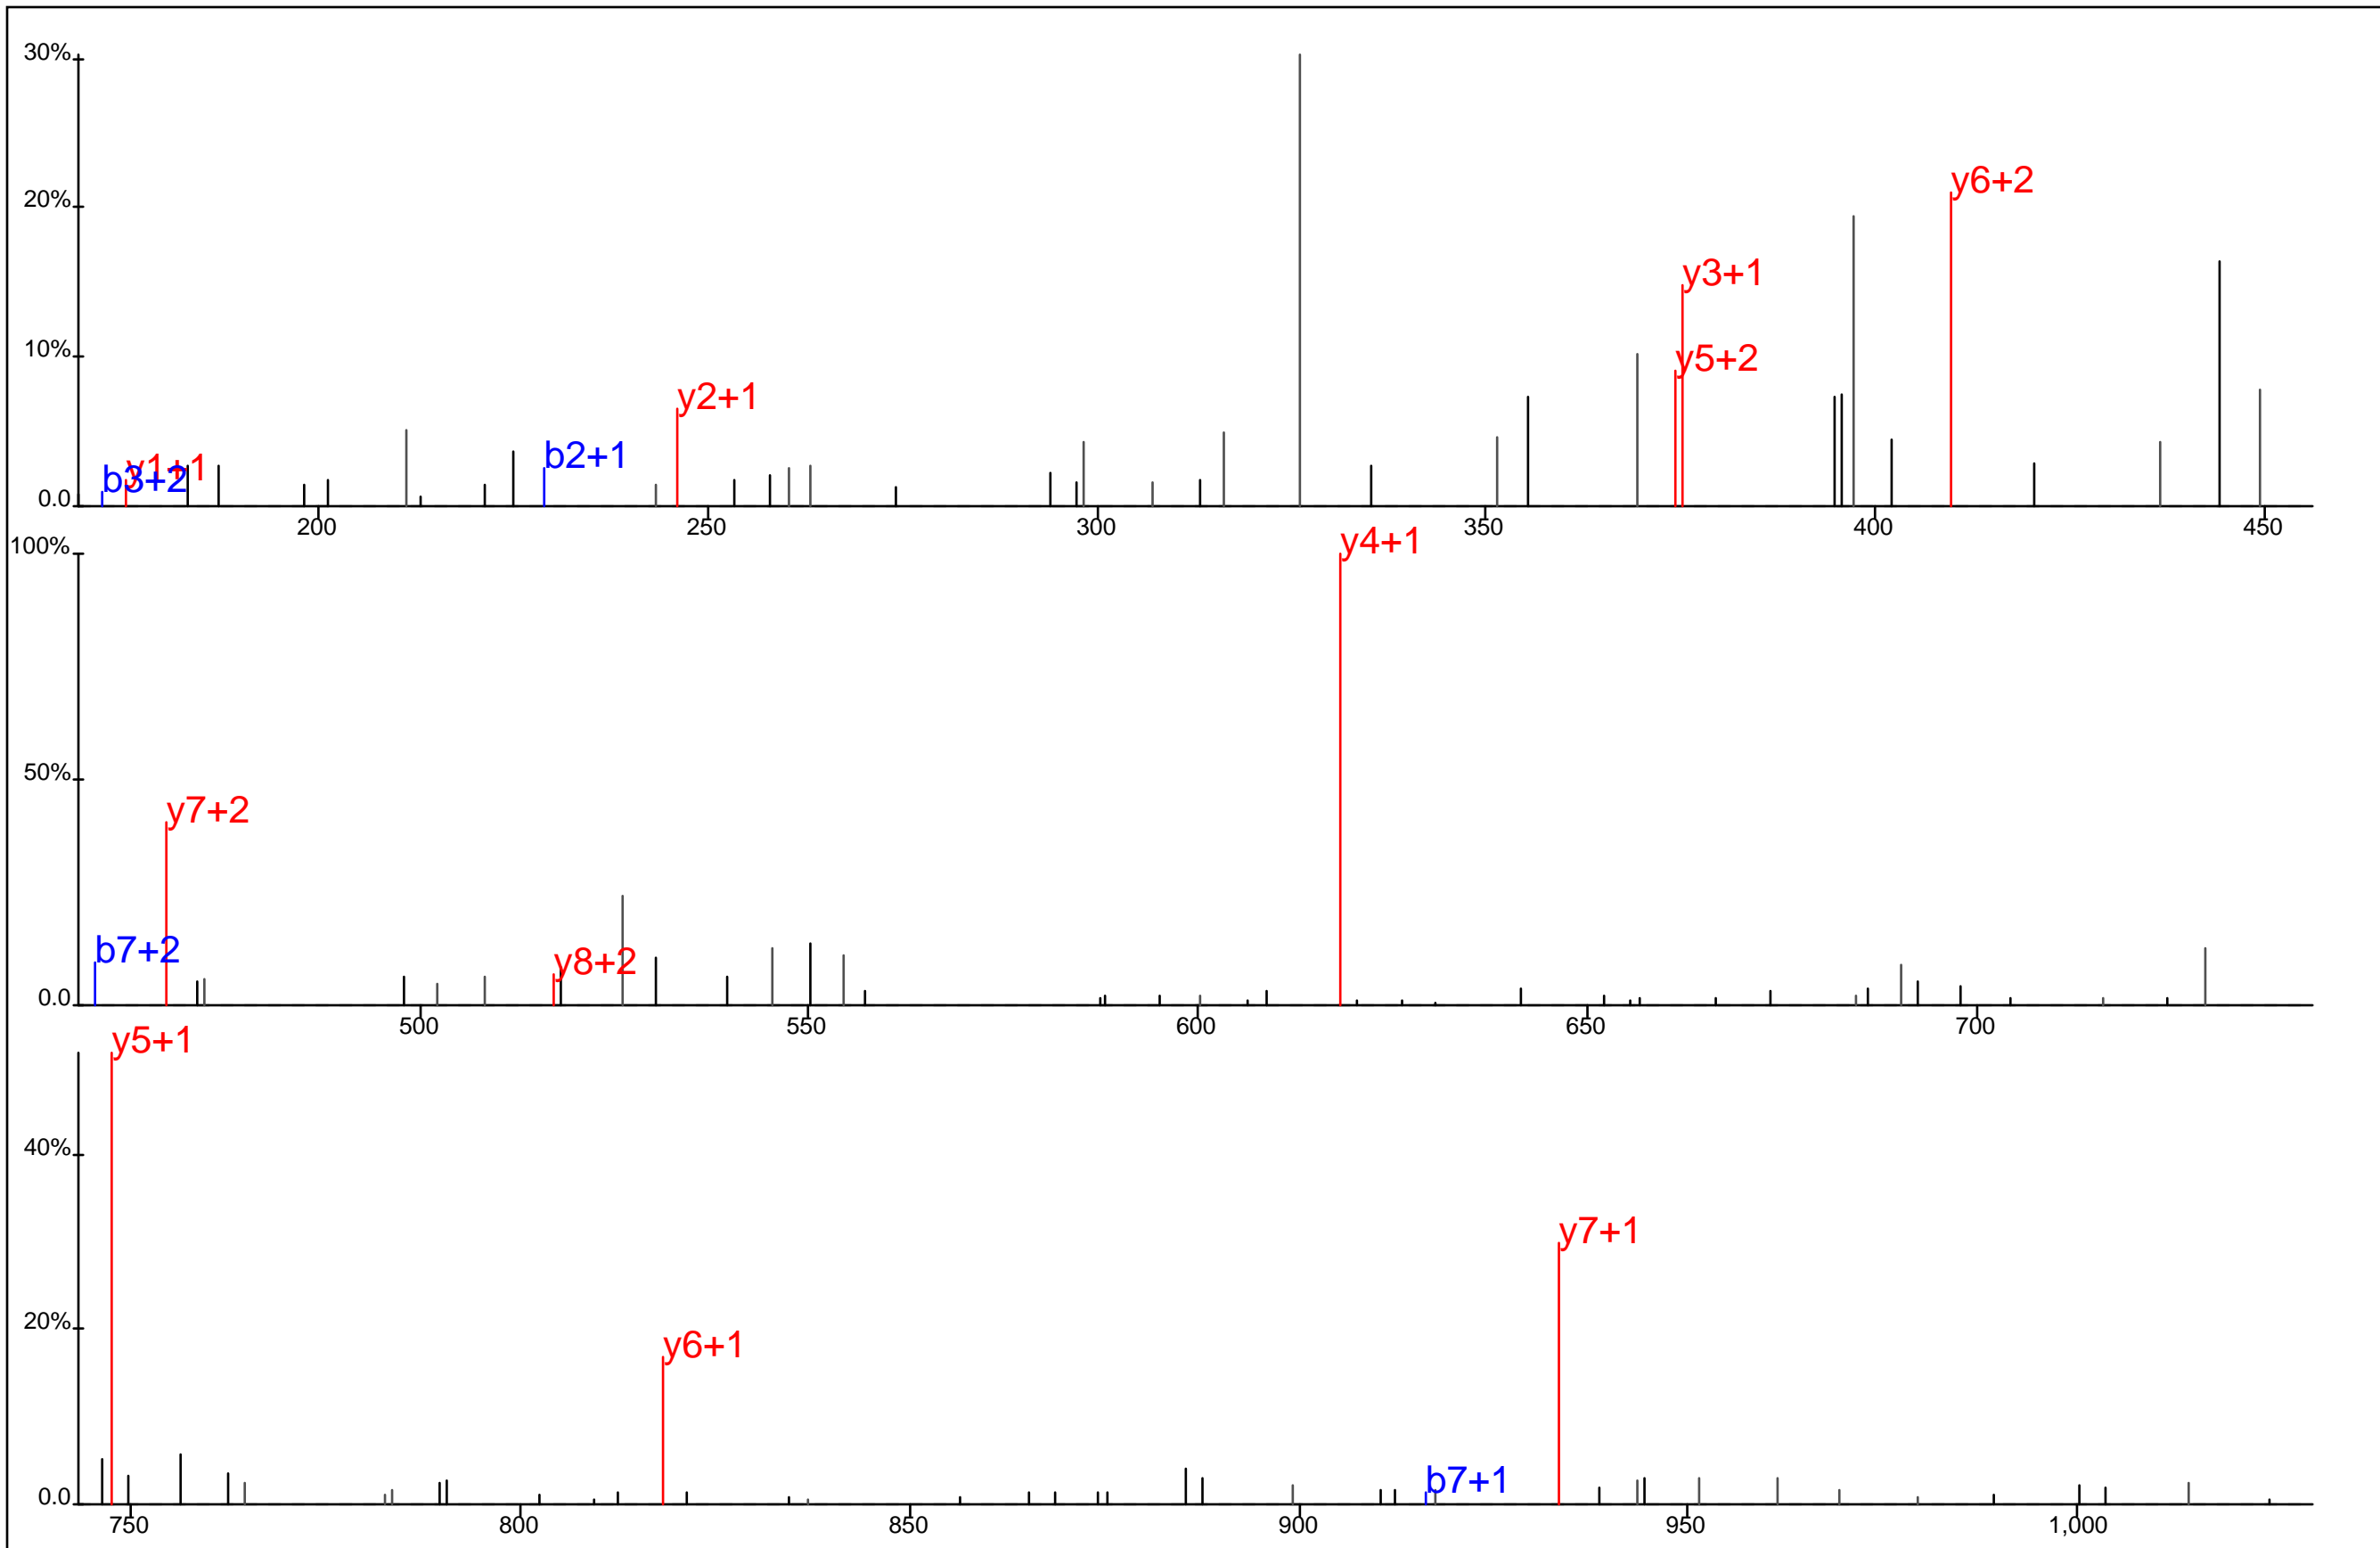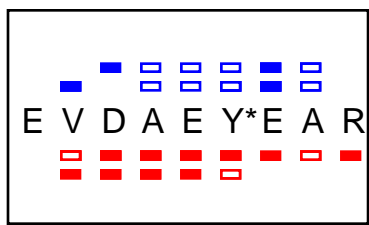

Protein Name: Zinc finger protein 289, ID1 regulated  
 gi Accession: 0  
 Precursor Mass: 581.2278+2  
 Delta Mass: 2.135 ppm  
 XCorr: 35.31

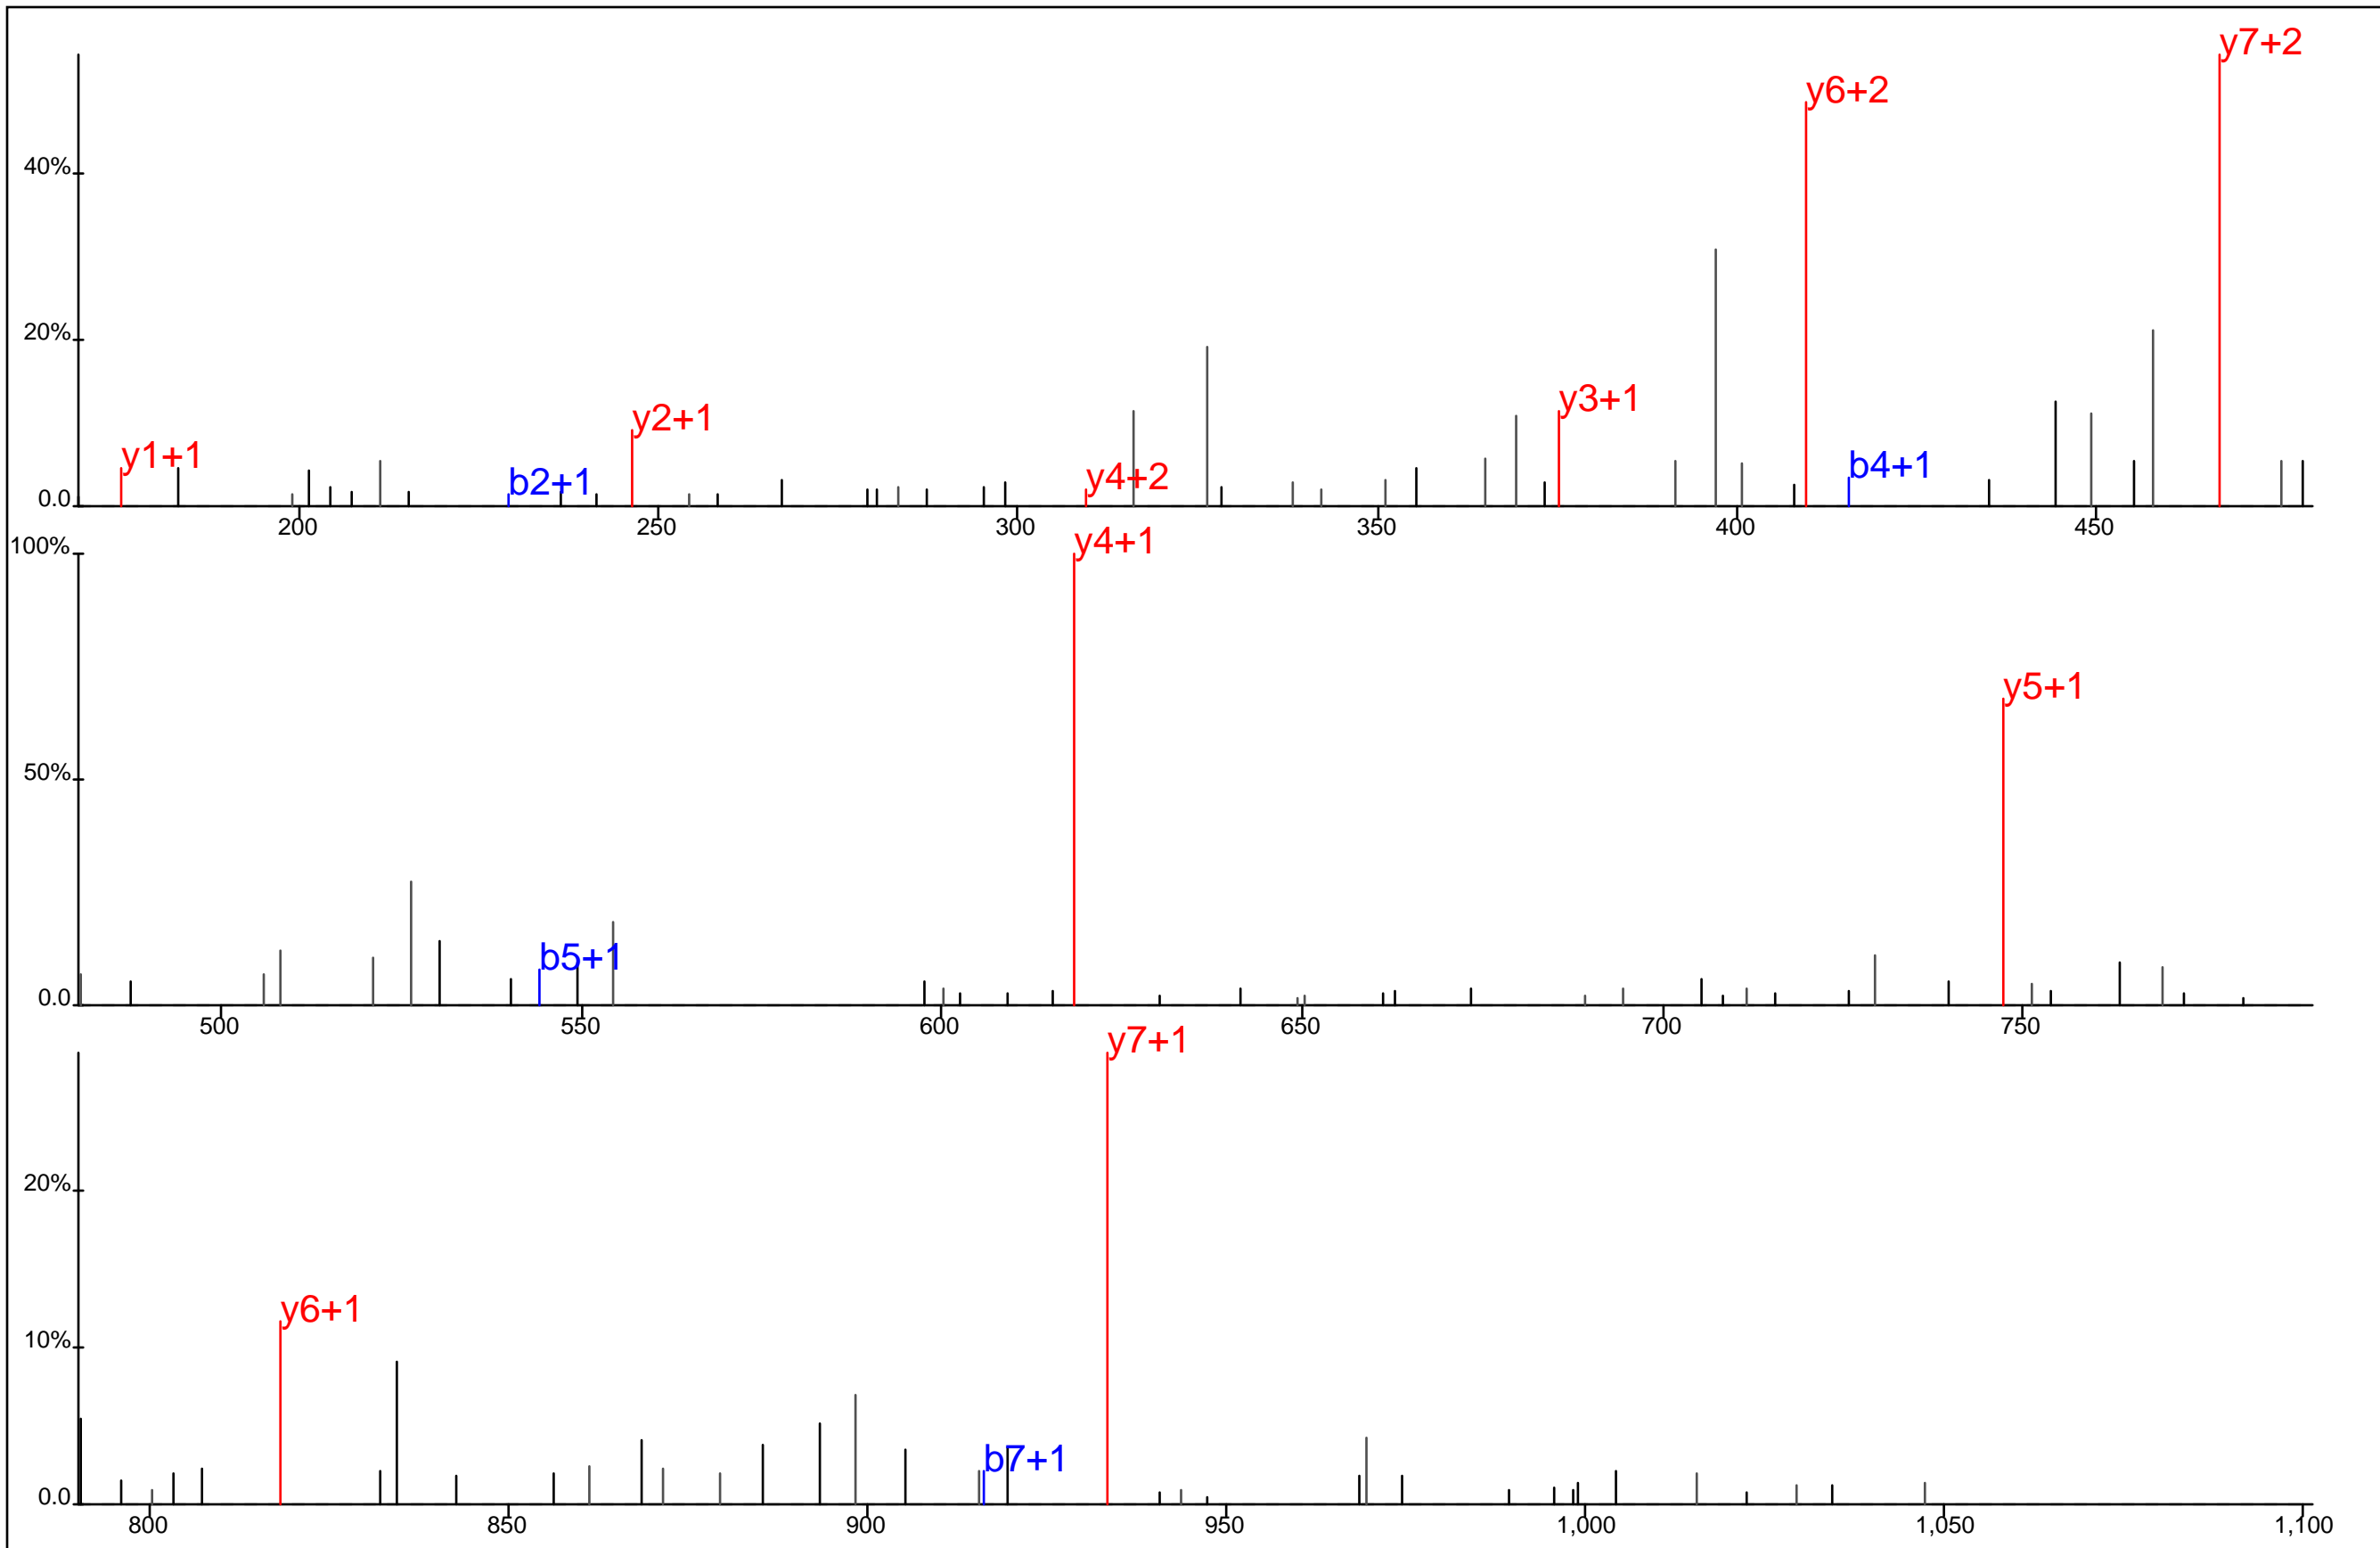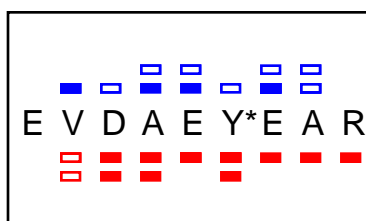

Protein Name: Zinc finger protein 289, ID1 regulated  
 gi Accession: 0  
 Precursor Mass: 581.2261+2  
 Delta Mass: 0.808 ppm  
 XCorr: 29.18

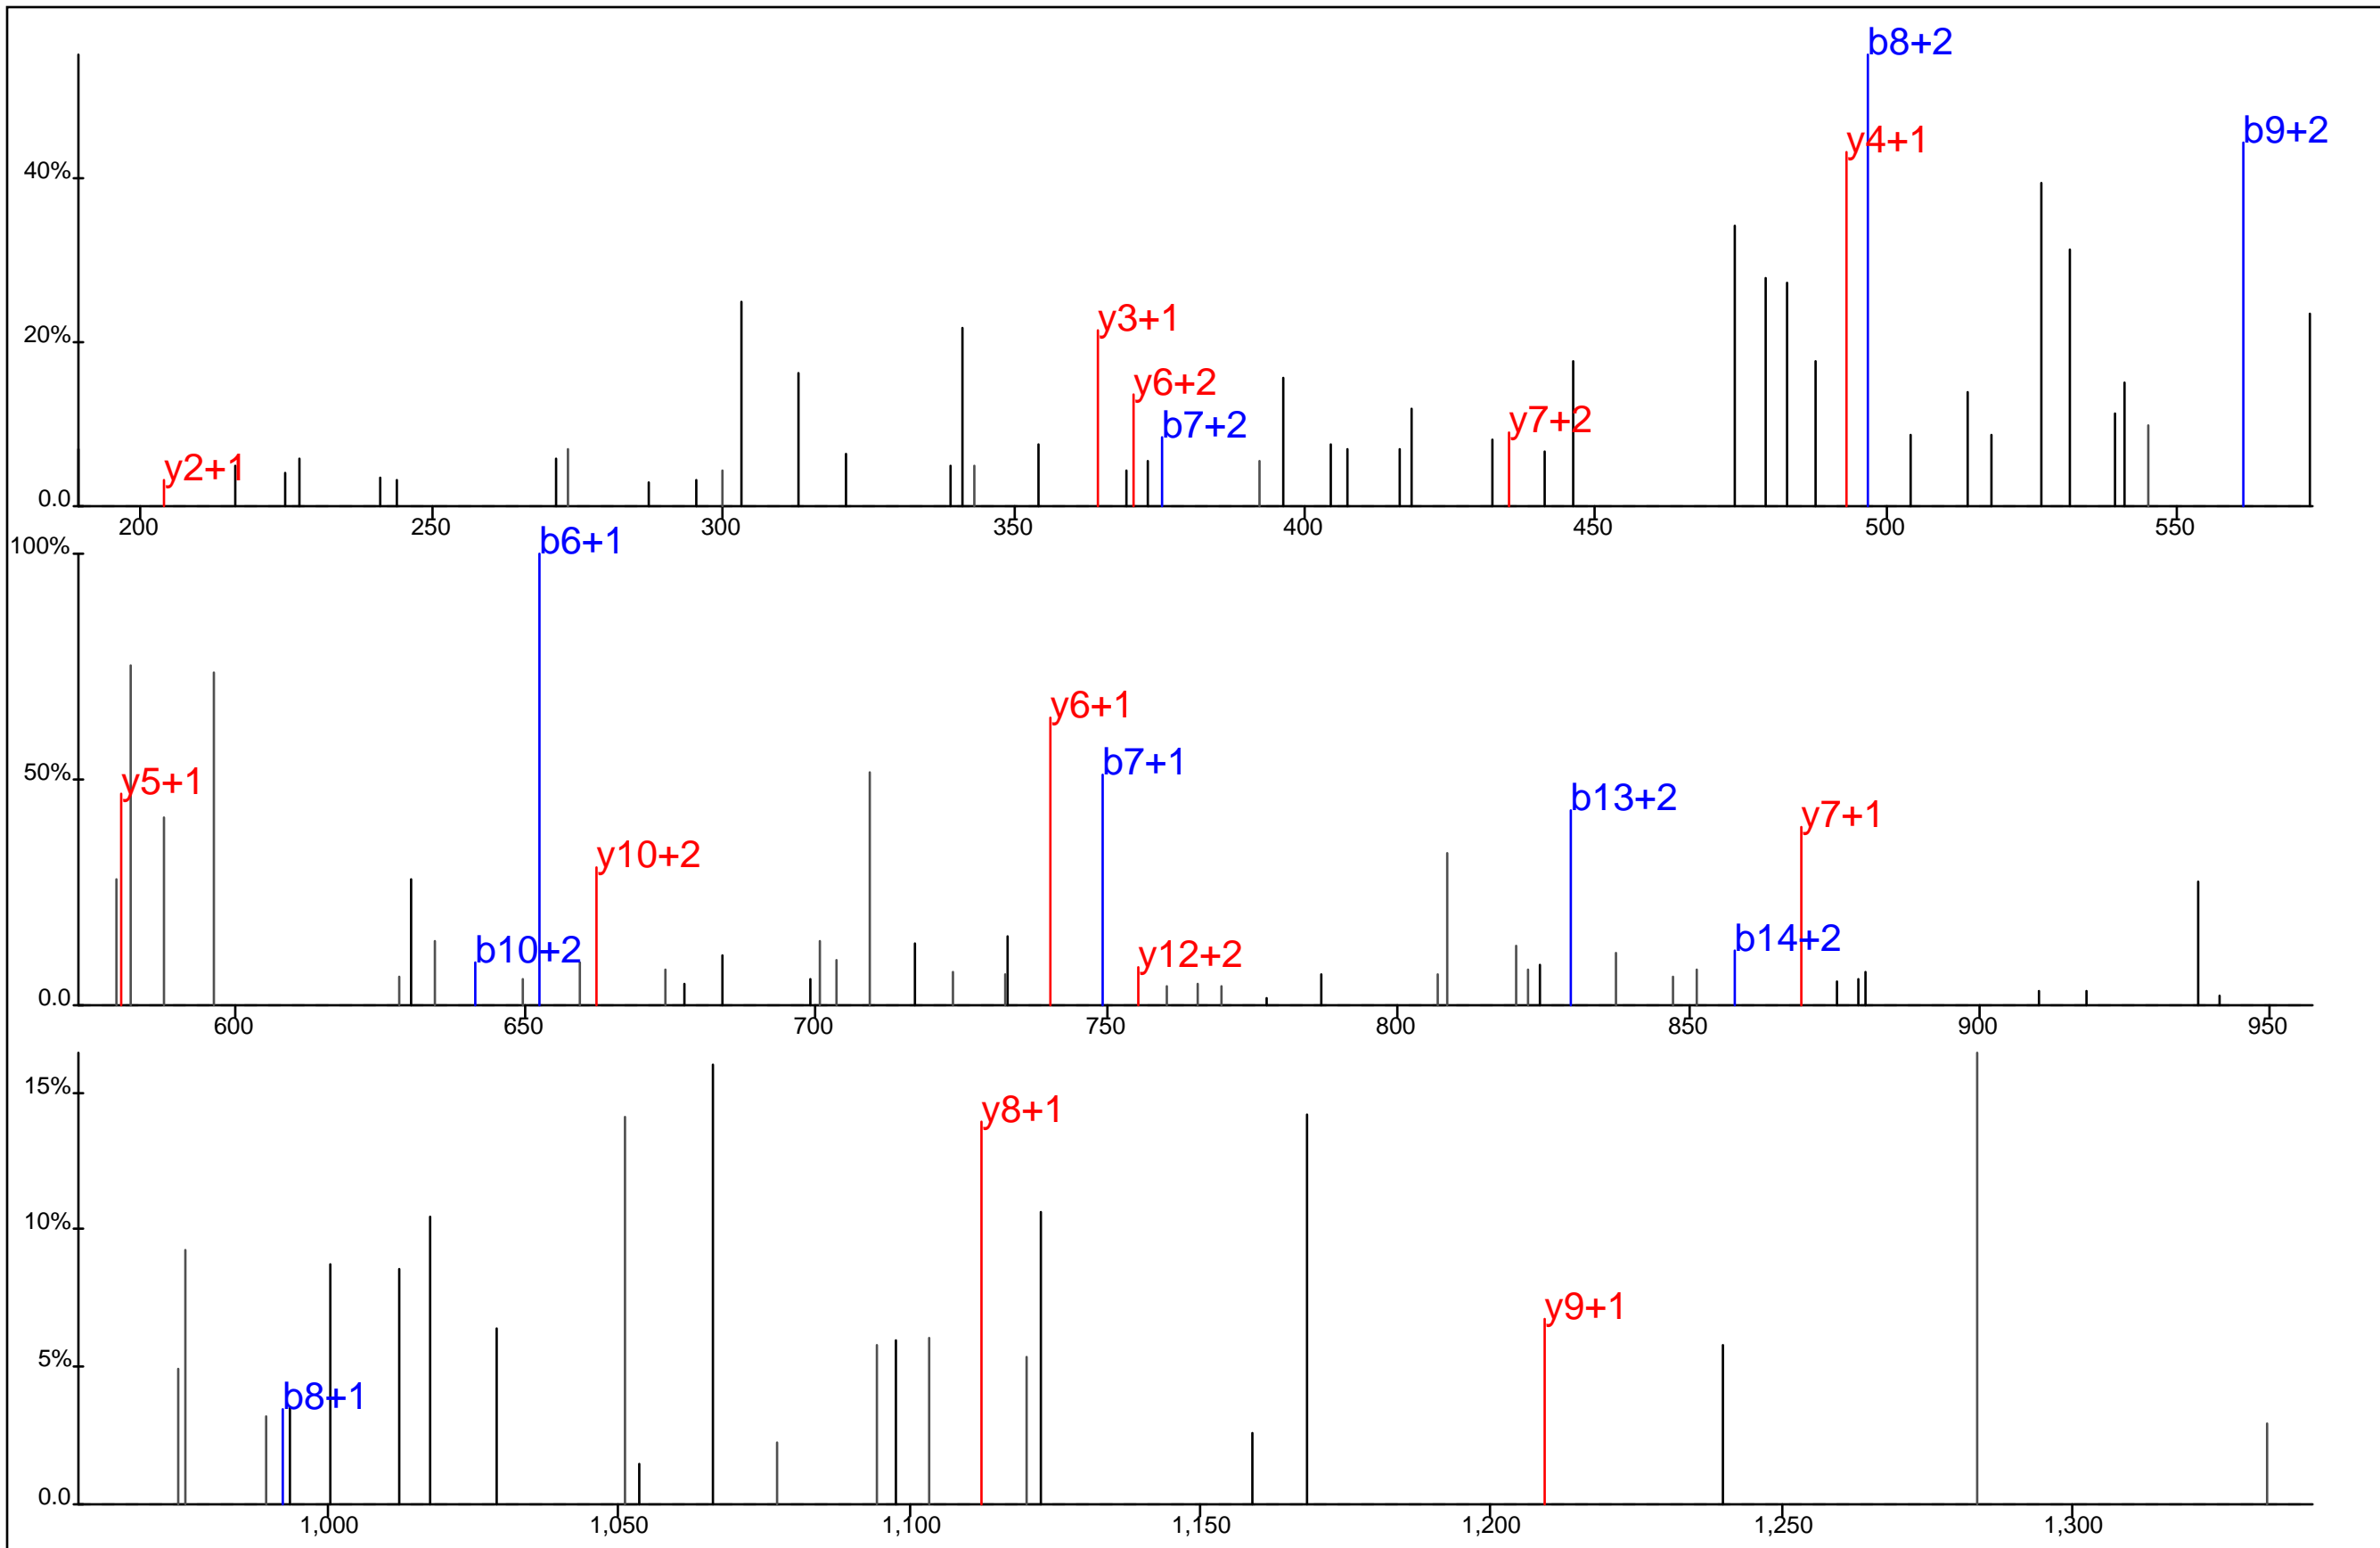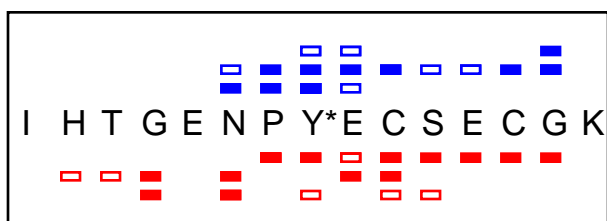

Protein Name: Zinc finger protein 3  
 gi Accession: 0  
 Precursor Mass: 620.9022+3  
 Delta Mass: 0.381 ppm  
 XCorr: 20.5

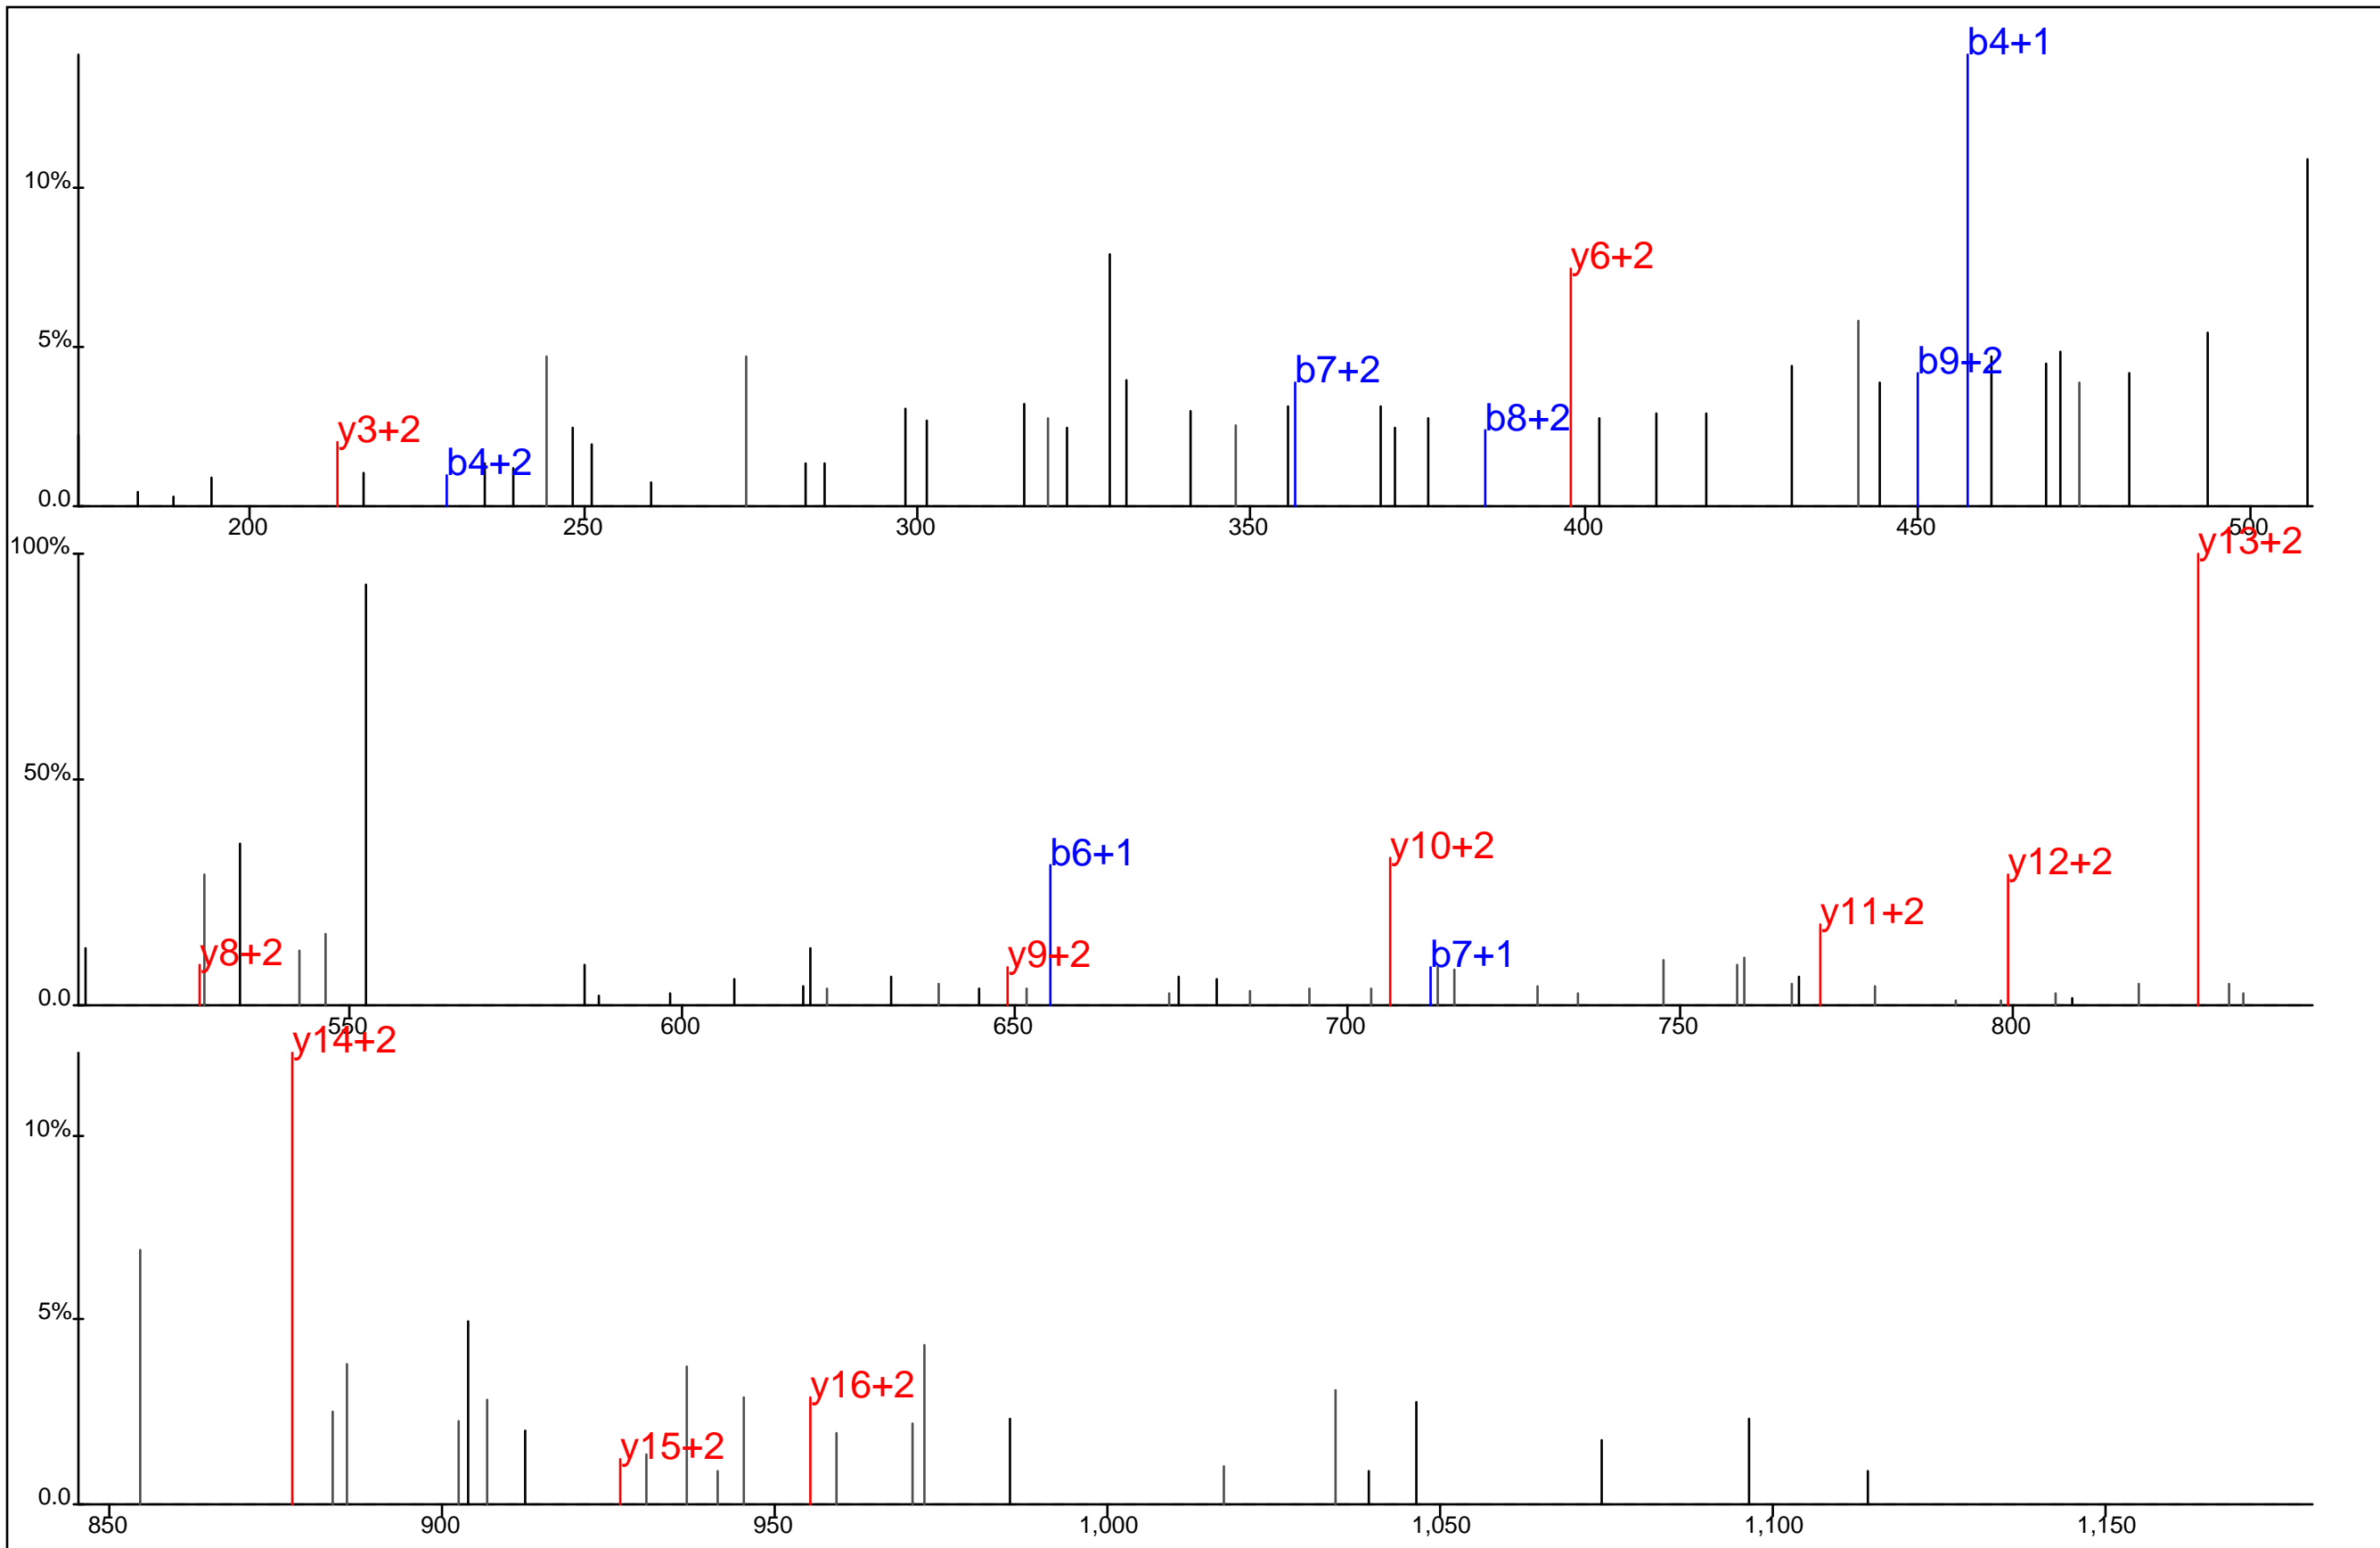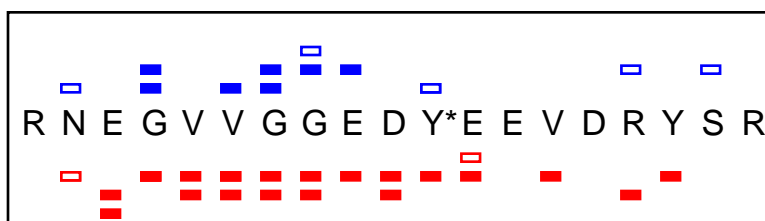

Protein Name: Zinc finger protein 598  
 gi Accession: 0  
 Precursor Mass: 578.0008+4  
 Delta Mass: 0.709 ppm  
 XCorr: 22.7

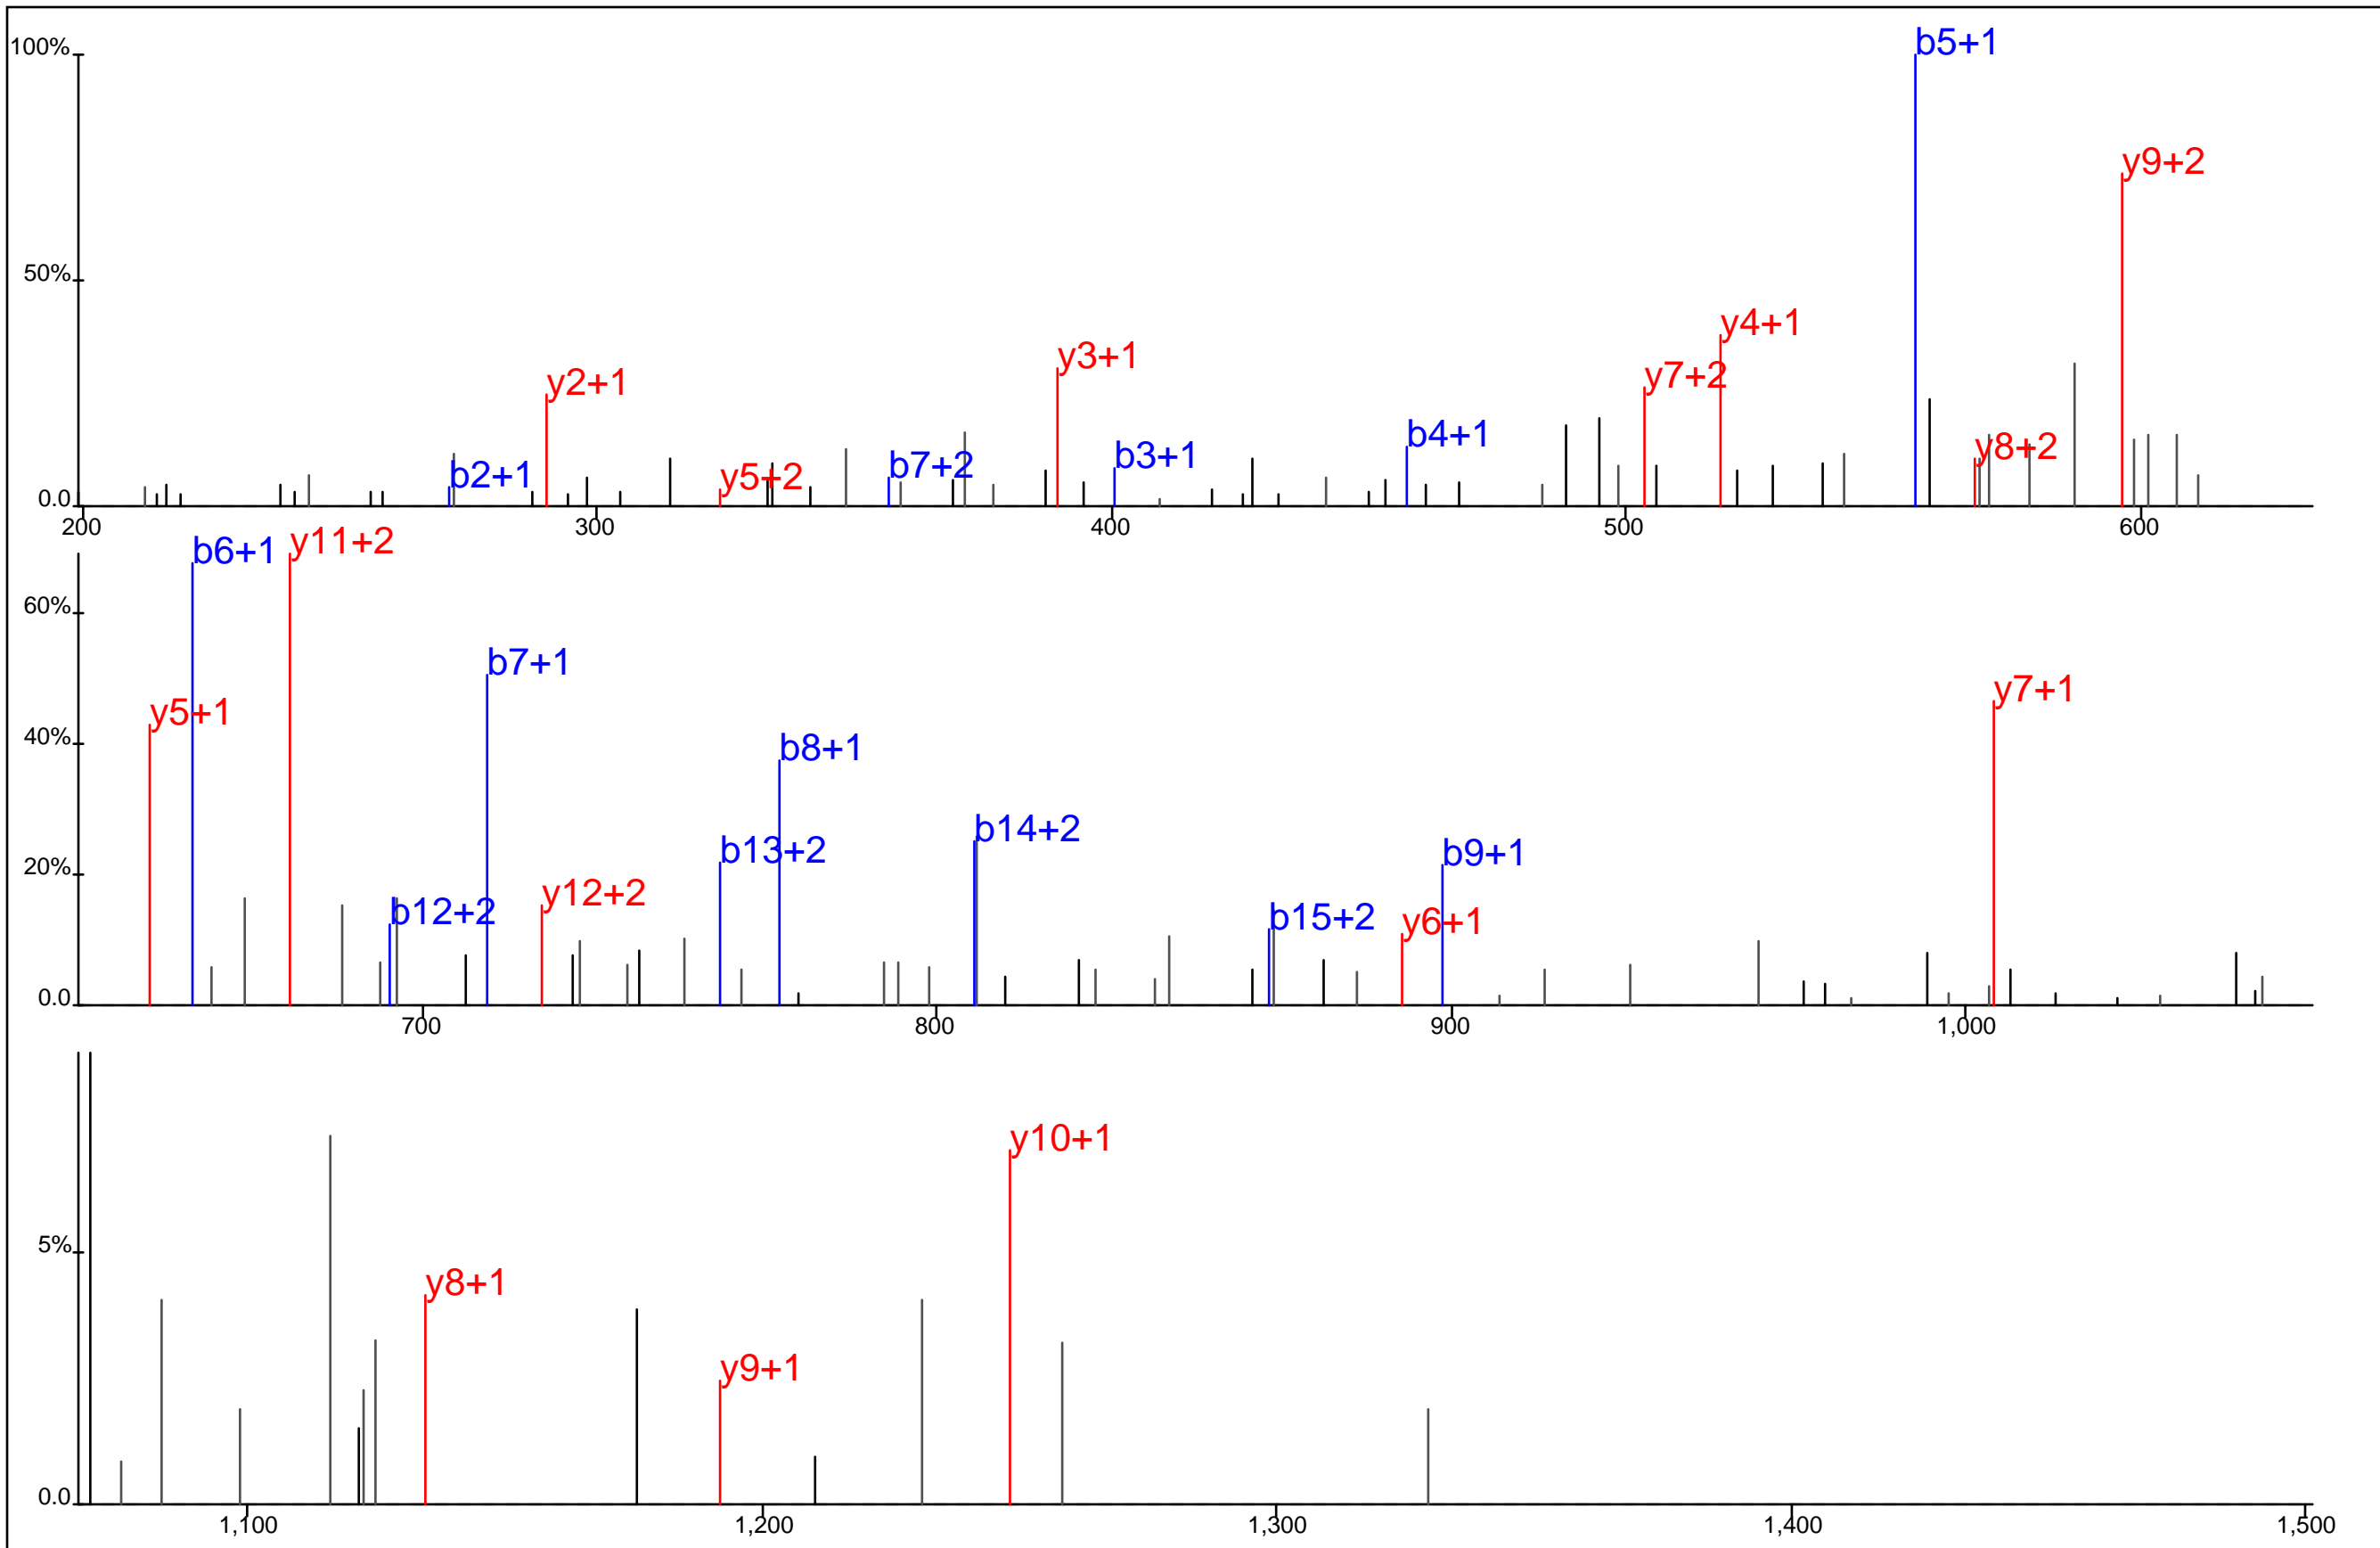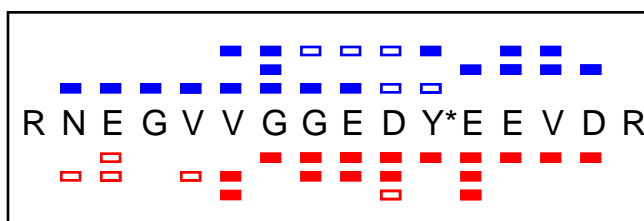

Protein Name: Zinc finger protein 598  
 gi Accession: 0  
 Precursor Mass: 634.9342+3  
 Delta Mass: 0.808 ppm  
 XCorr: 53.39

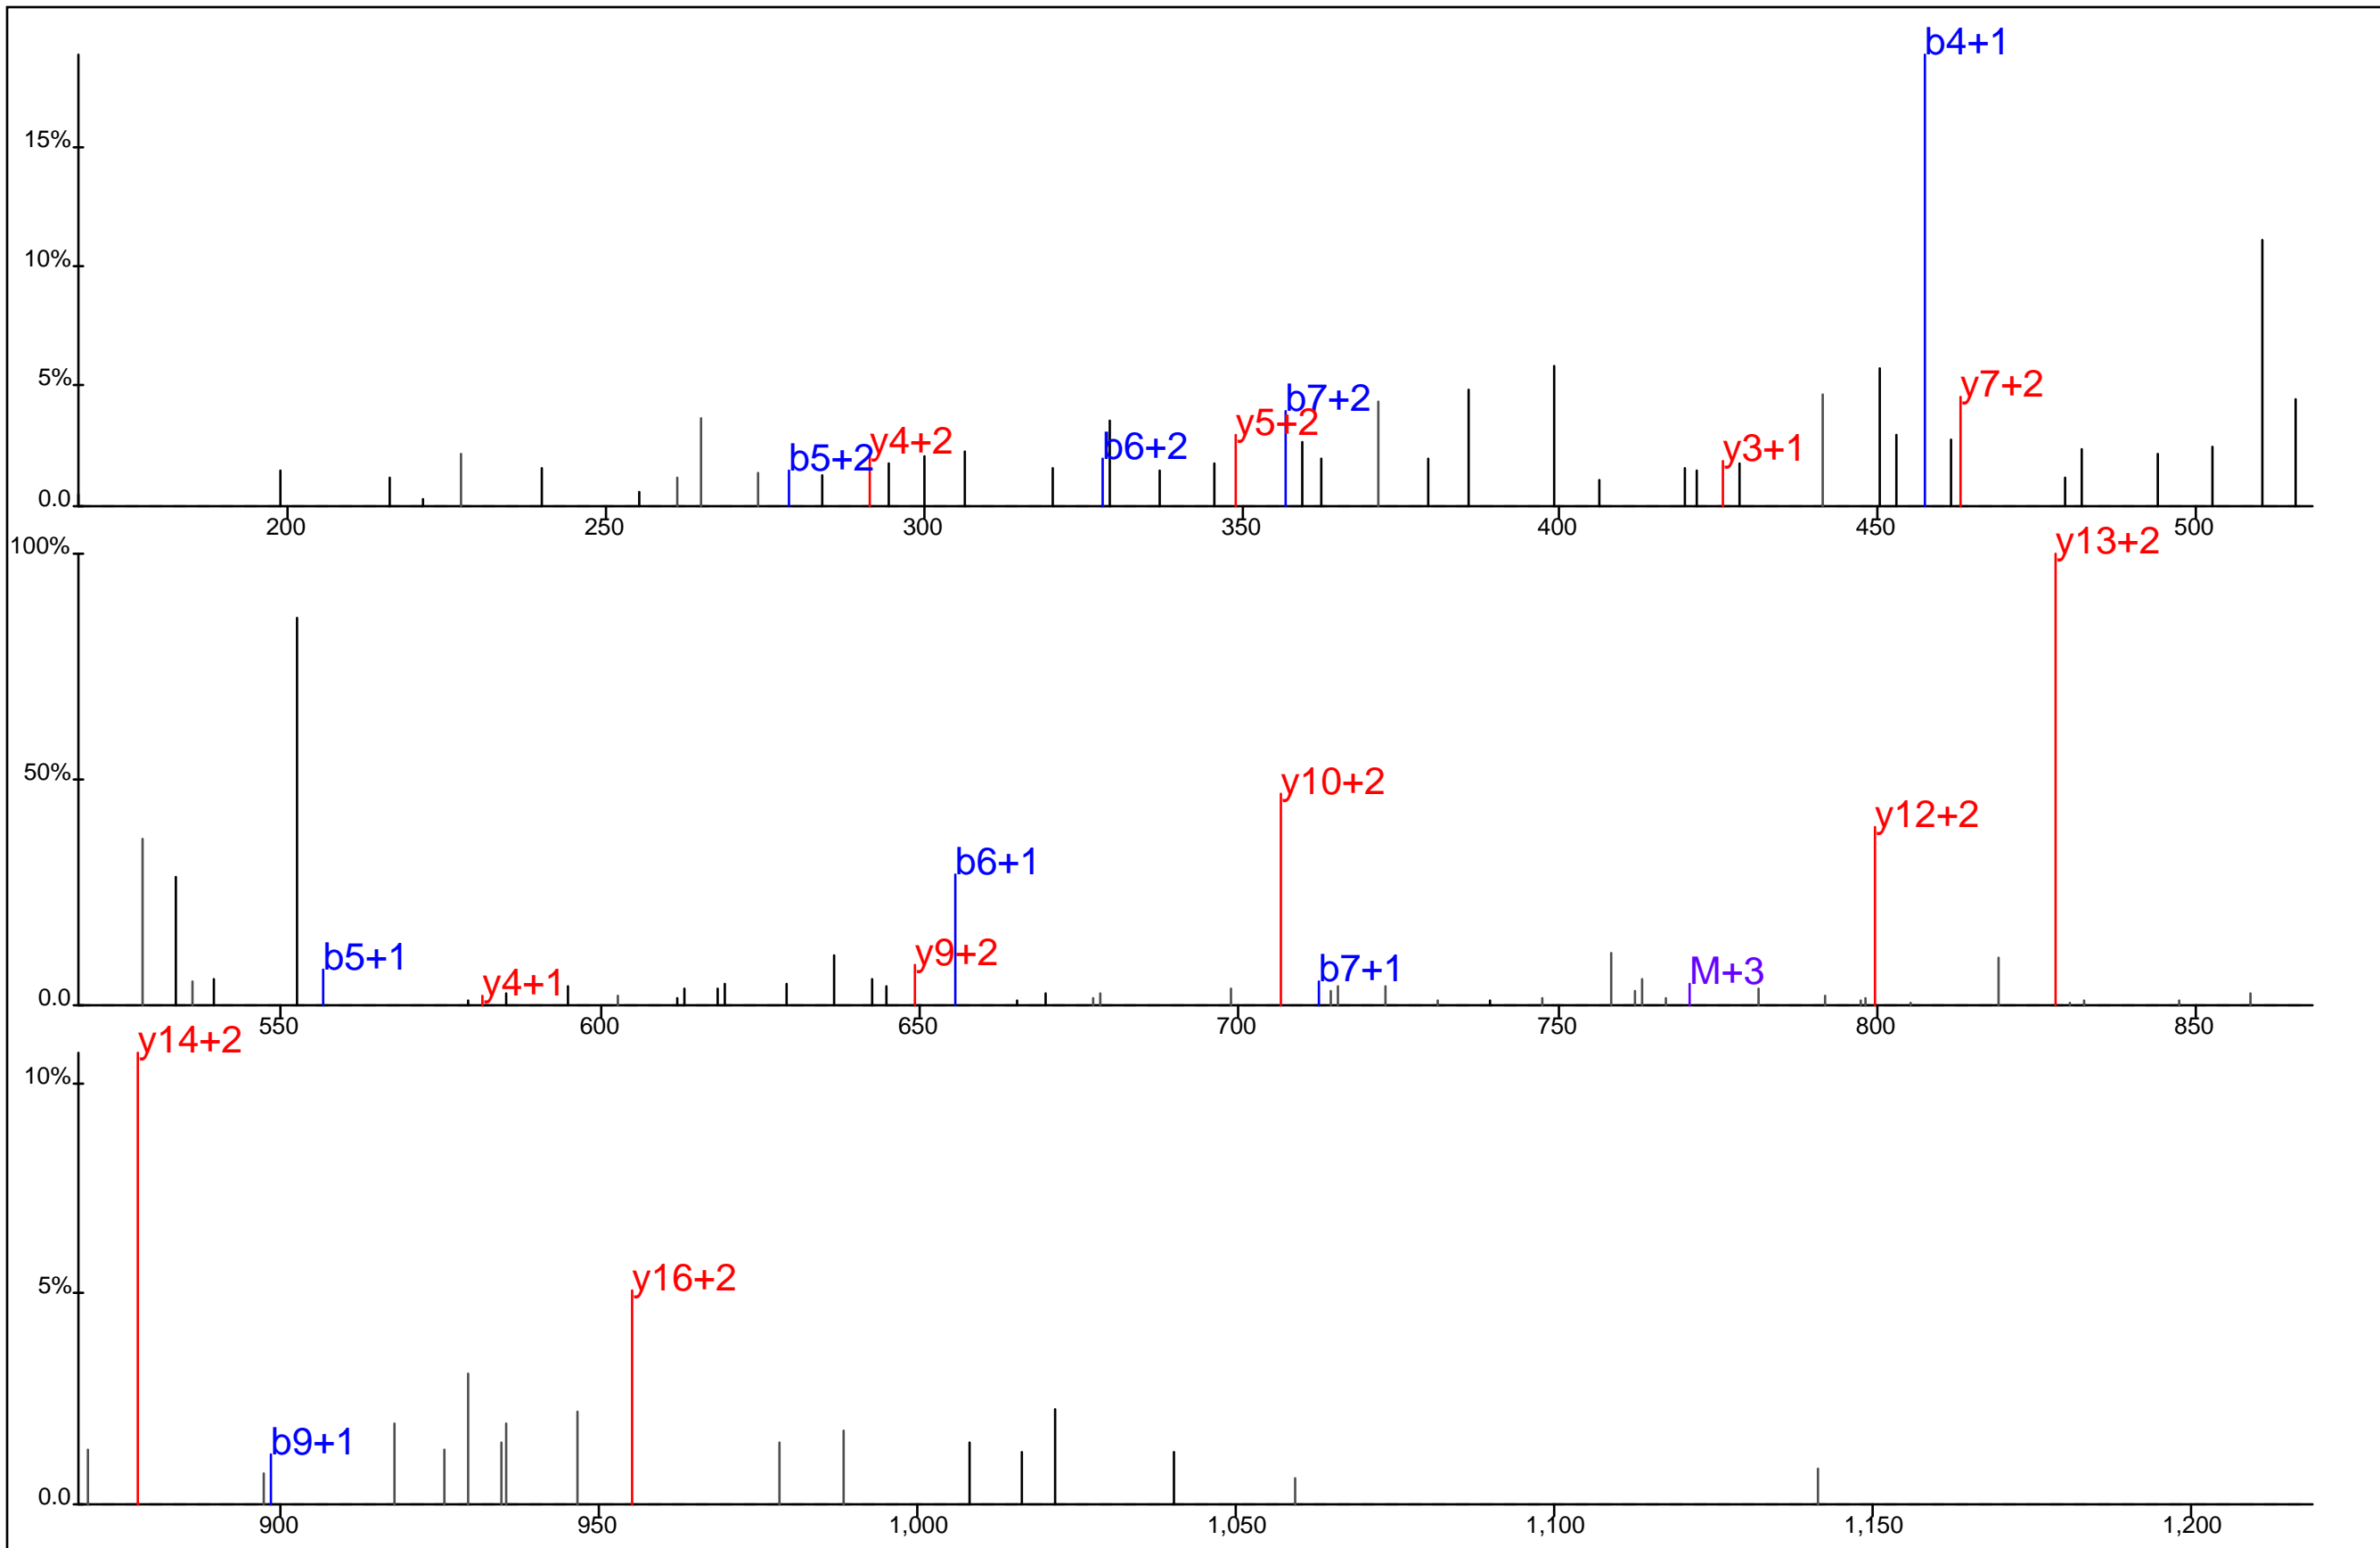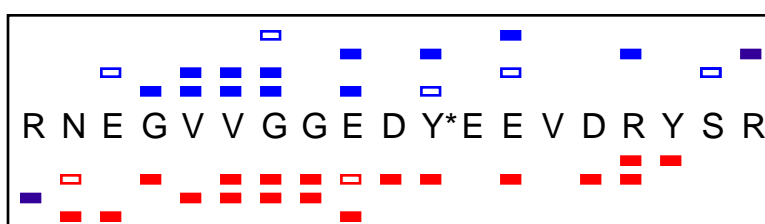

Protein Name: Zinc finger protein 598  
 gi Accession: 0  
 Precursor Mass: 578.0015+4  
 Delta Mass: 0.560 ppm  
 XCorr: 35.79

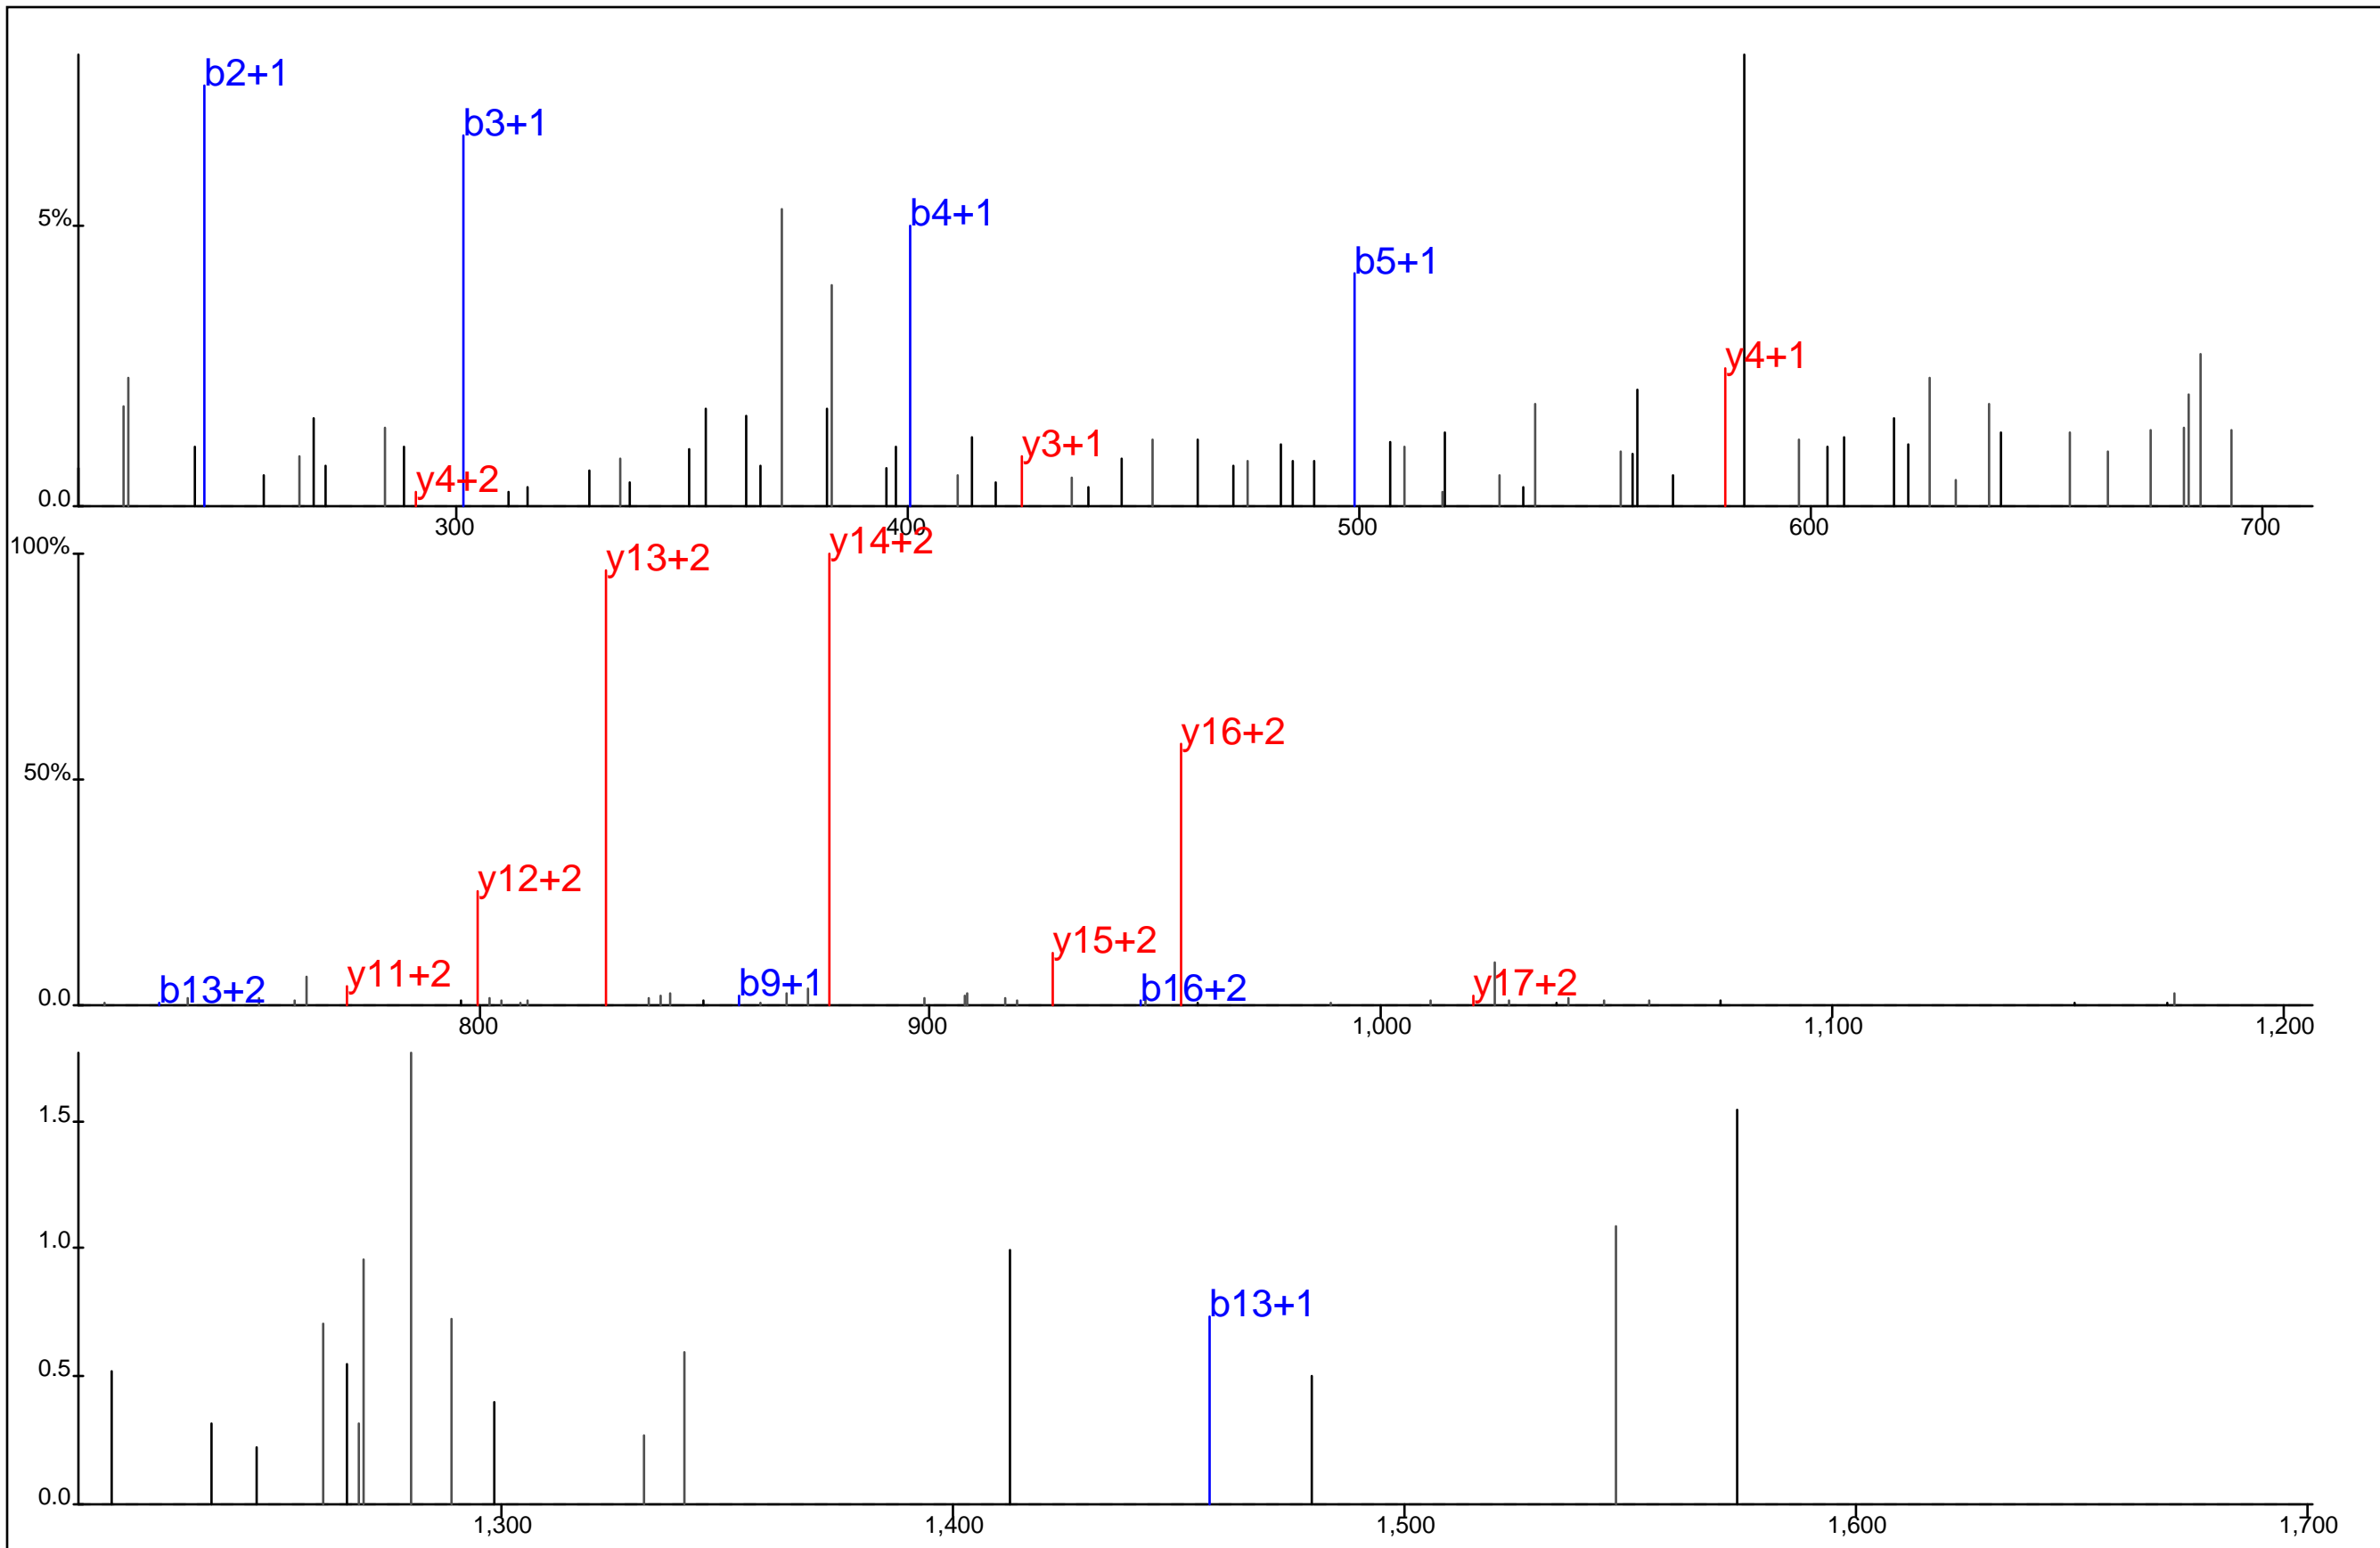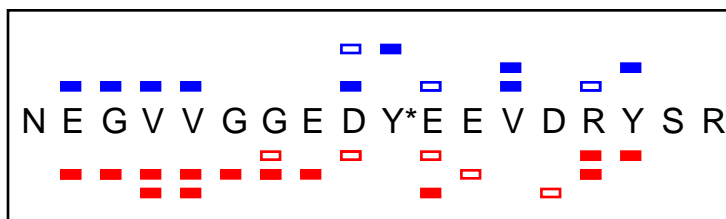

Protein Name: Zinc finger protein 598  
 gi Accession: 0  
 Precursor Mass: 718.2963+3  
 Delta Mass: 3.463 ppm  
 XCorr: 24.43



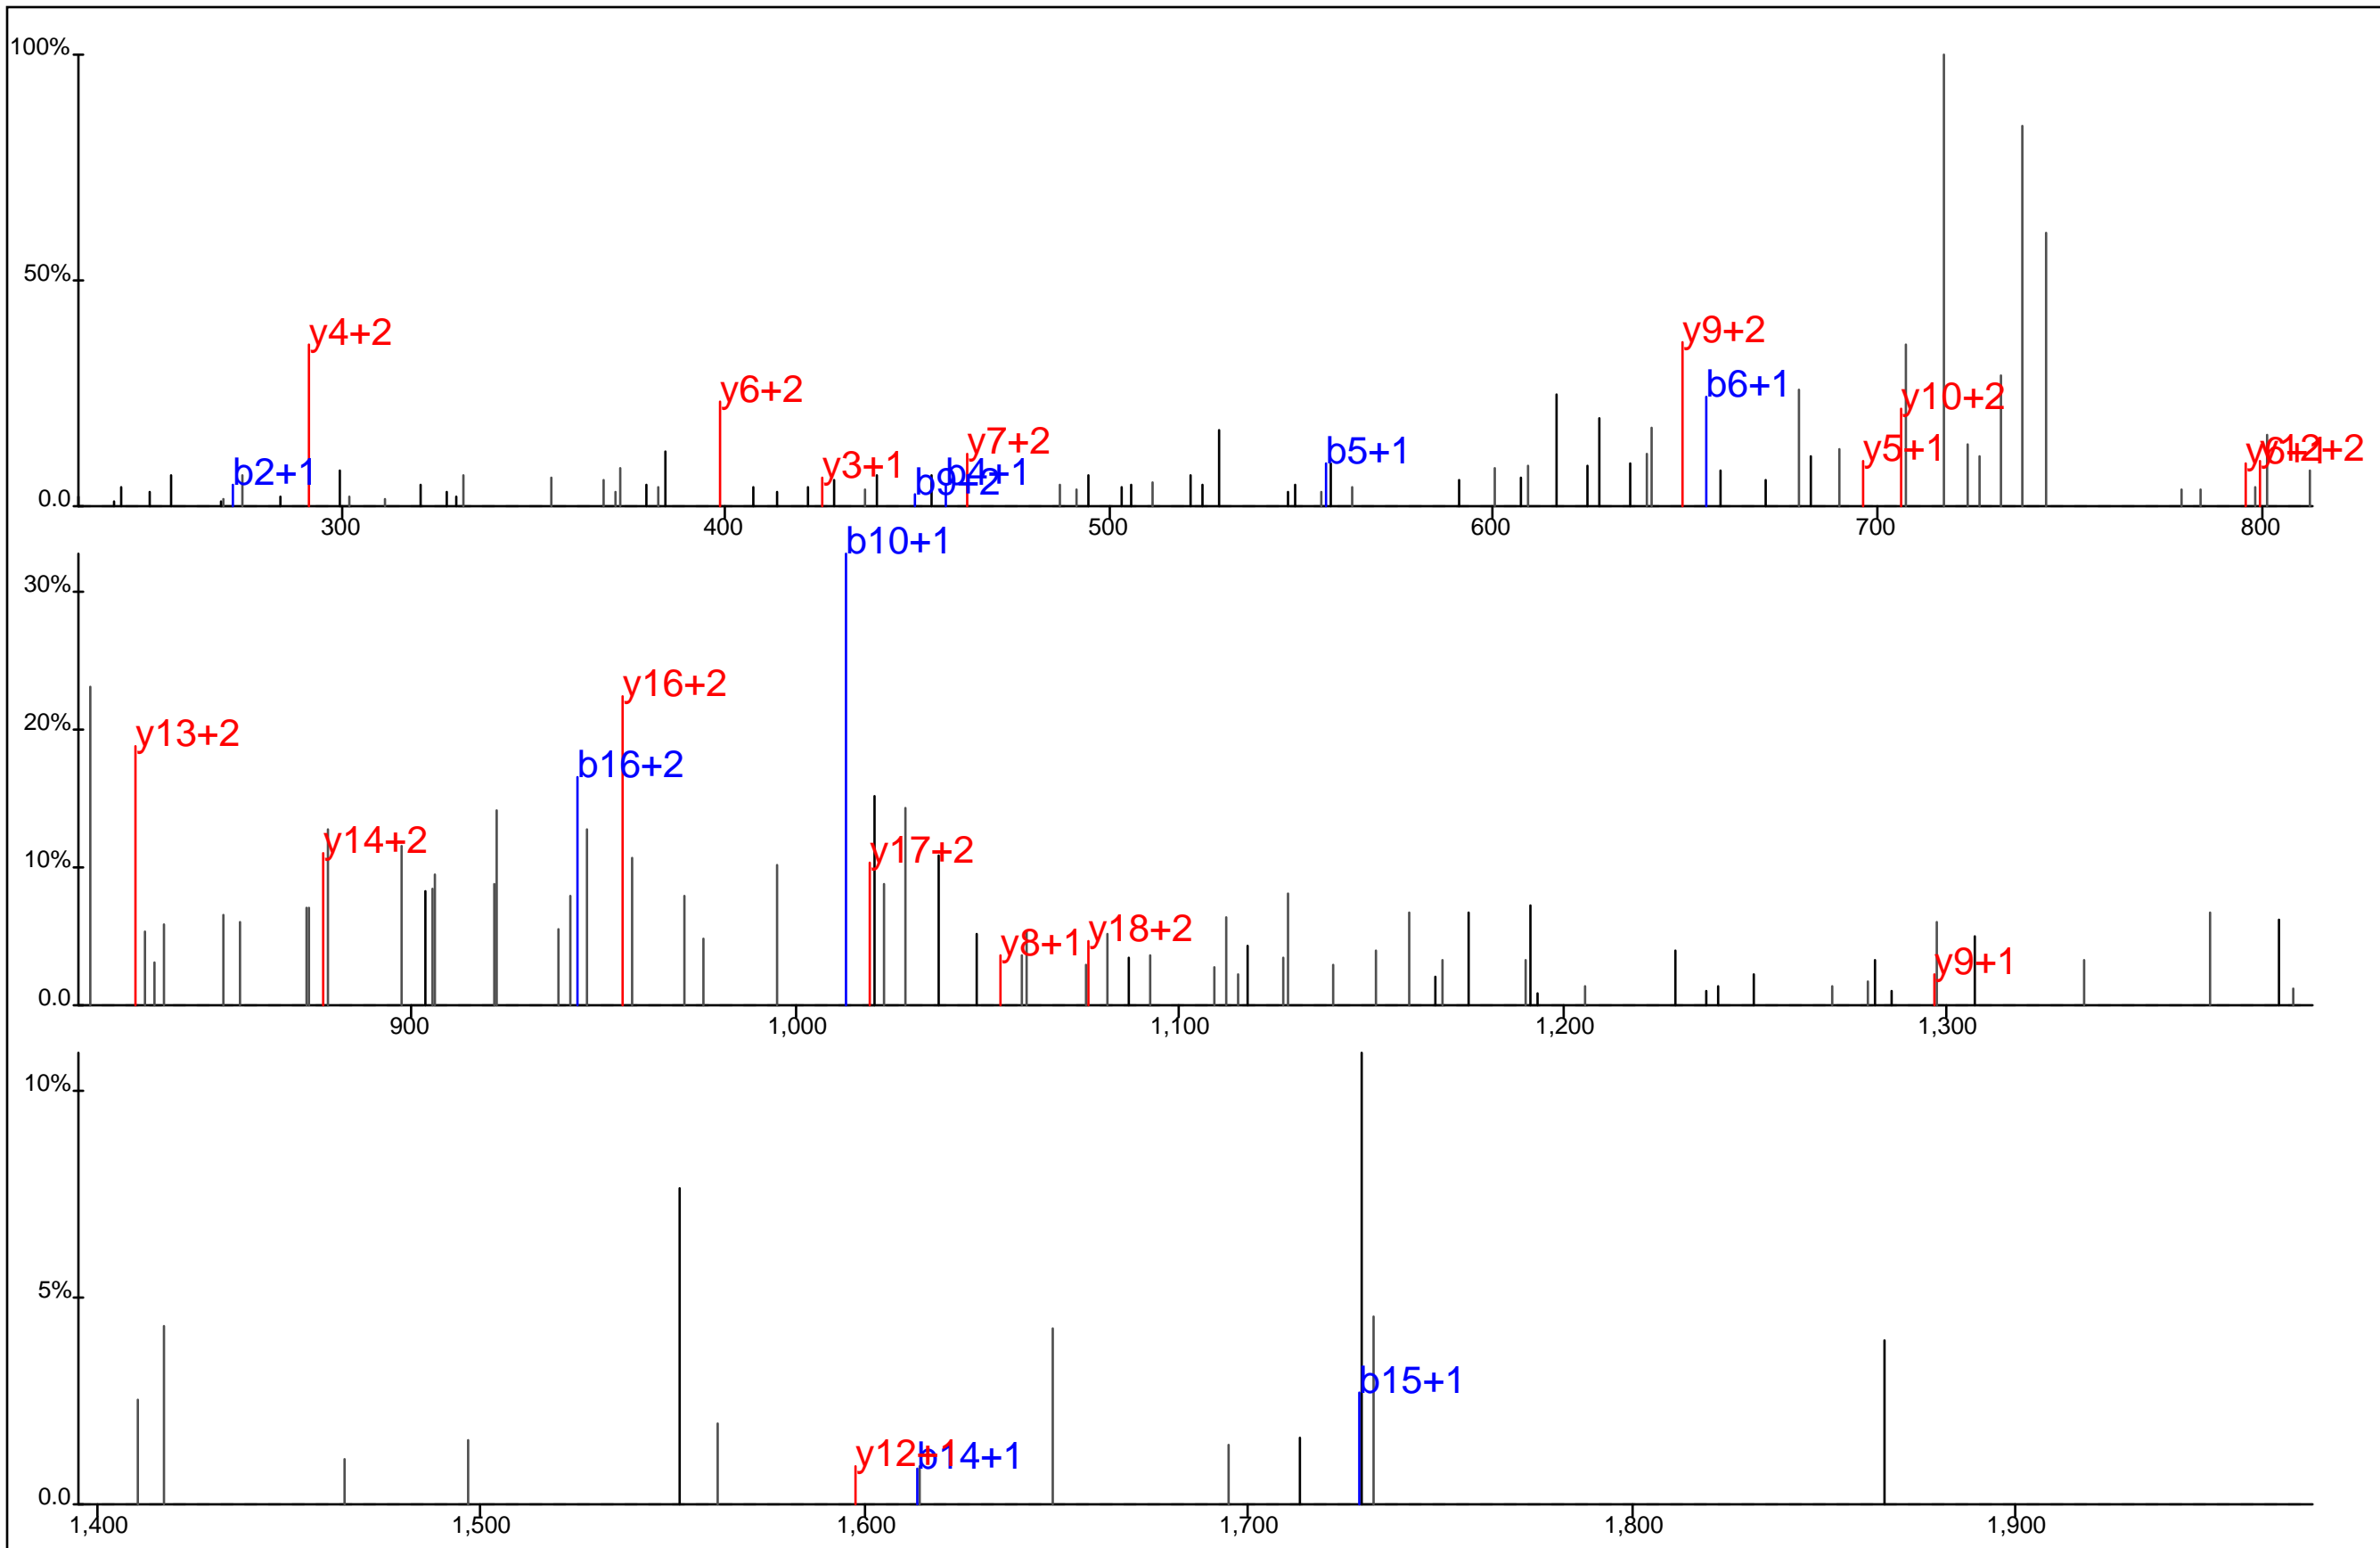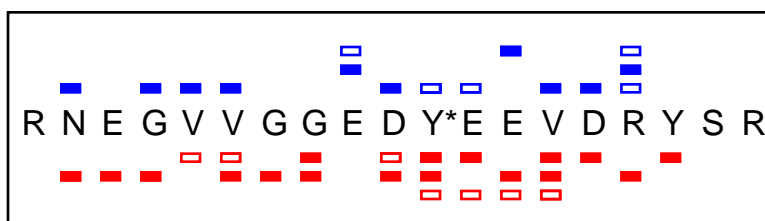

Protein Name: Zinc finger protein 598  
 gi Accession: 0  
 Precursor Mass: 770.3271+3  
 Delta Mass: 6.968 ppm  
 XCorr: 22.84

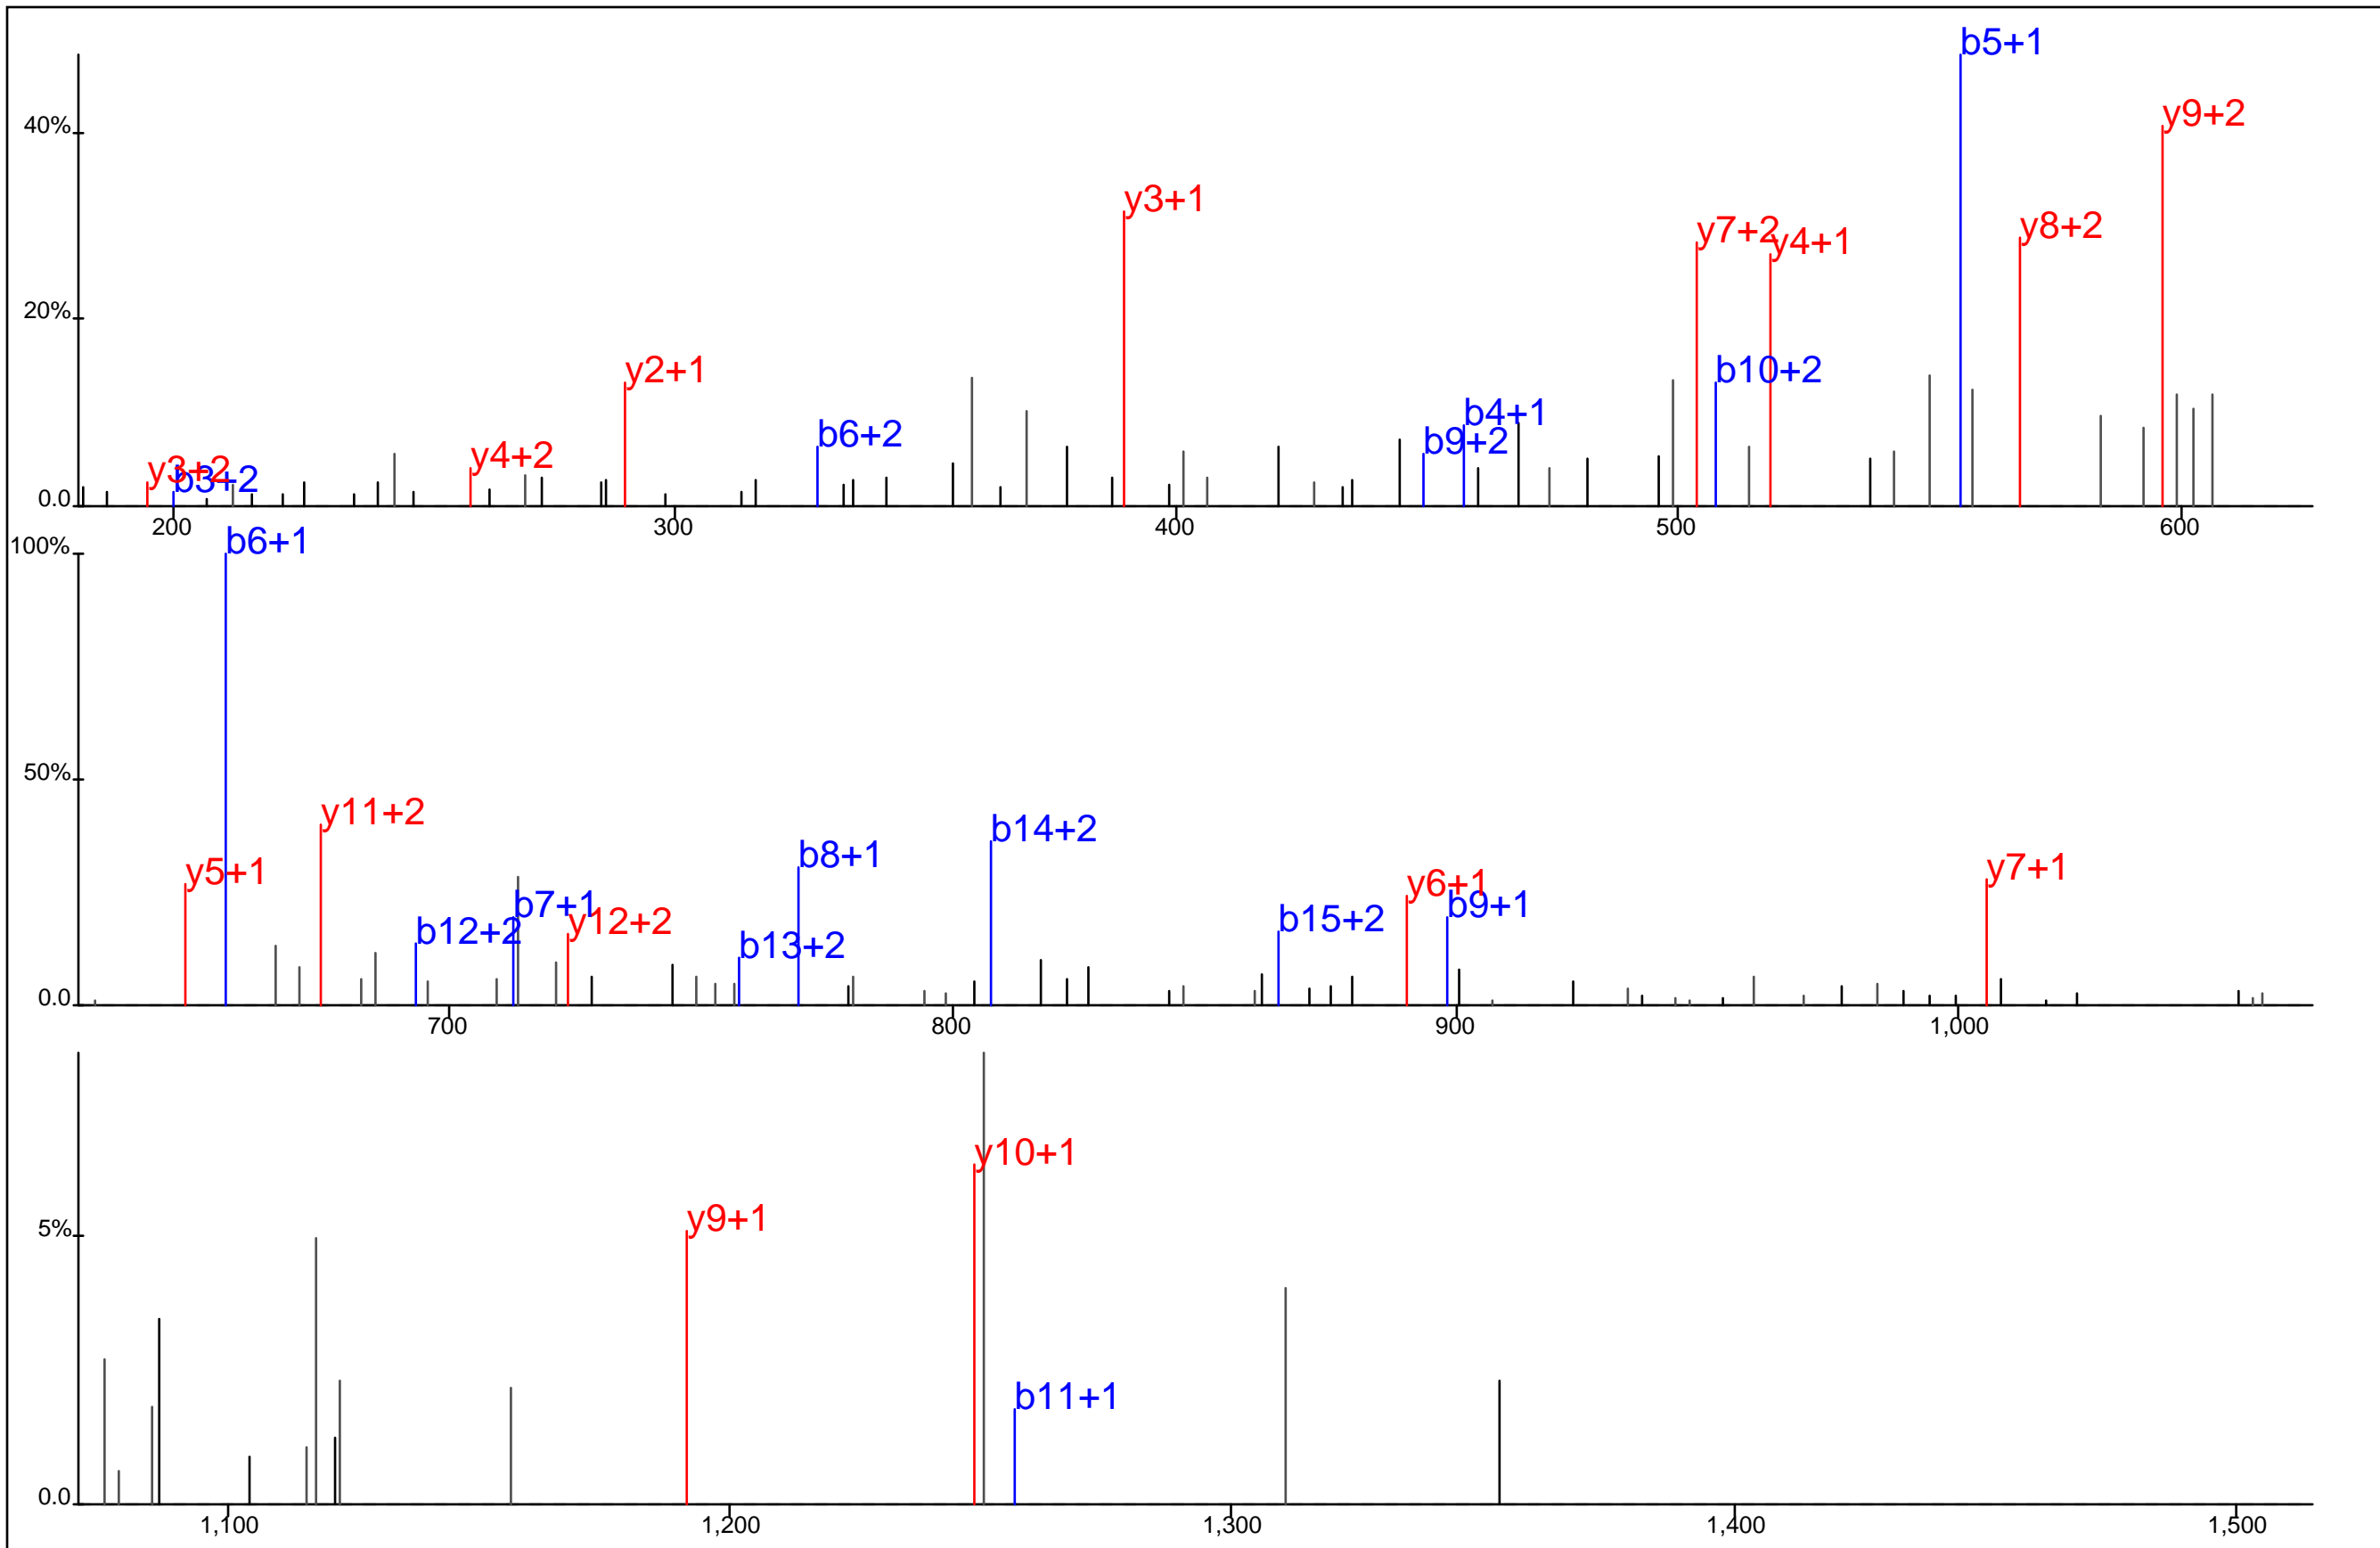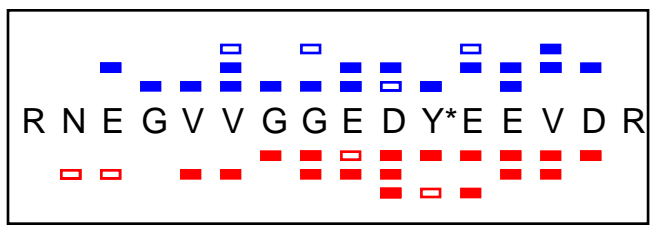

Protein Name: Zinc finger protein 598  
 gi Accession: 0  
 Precursor Mass: 634.9328+3  
 Delta Mass: 1.405 ppm  
 XCorr: 52.25

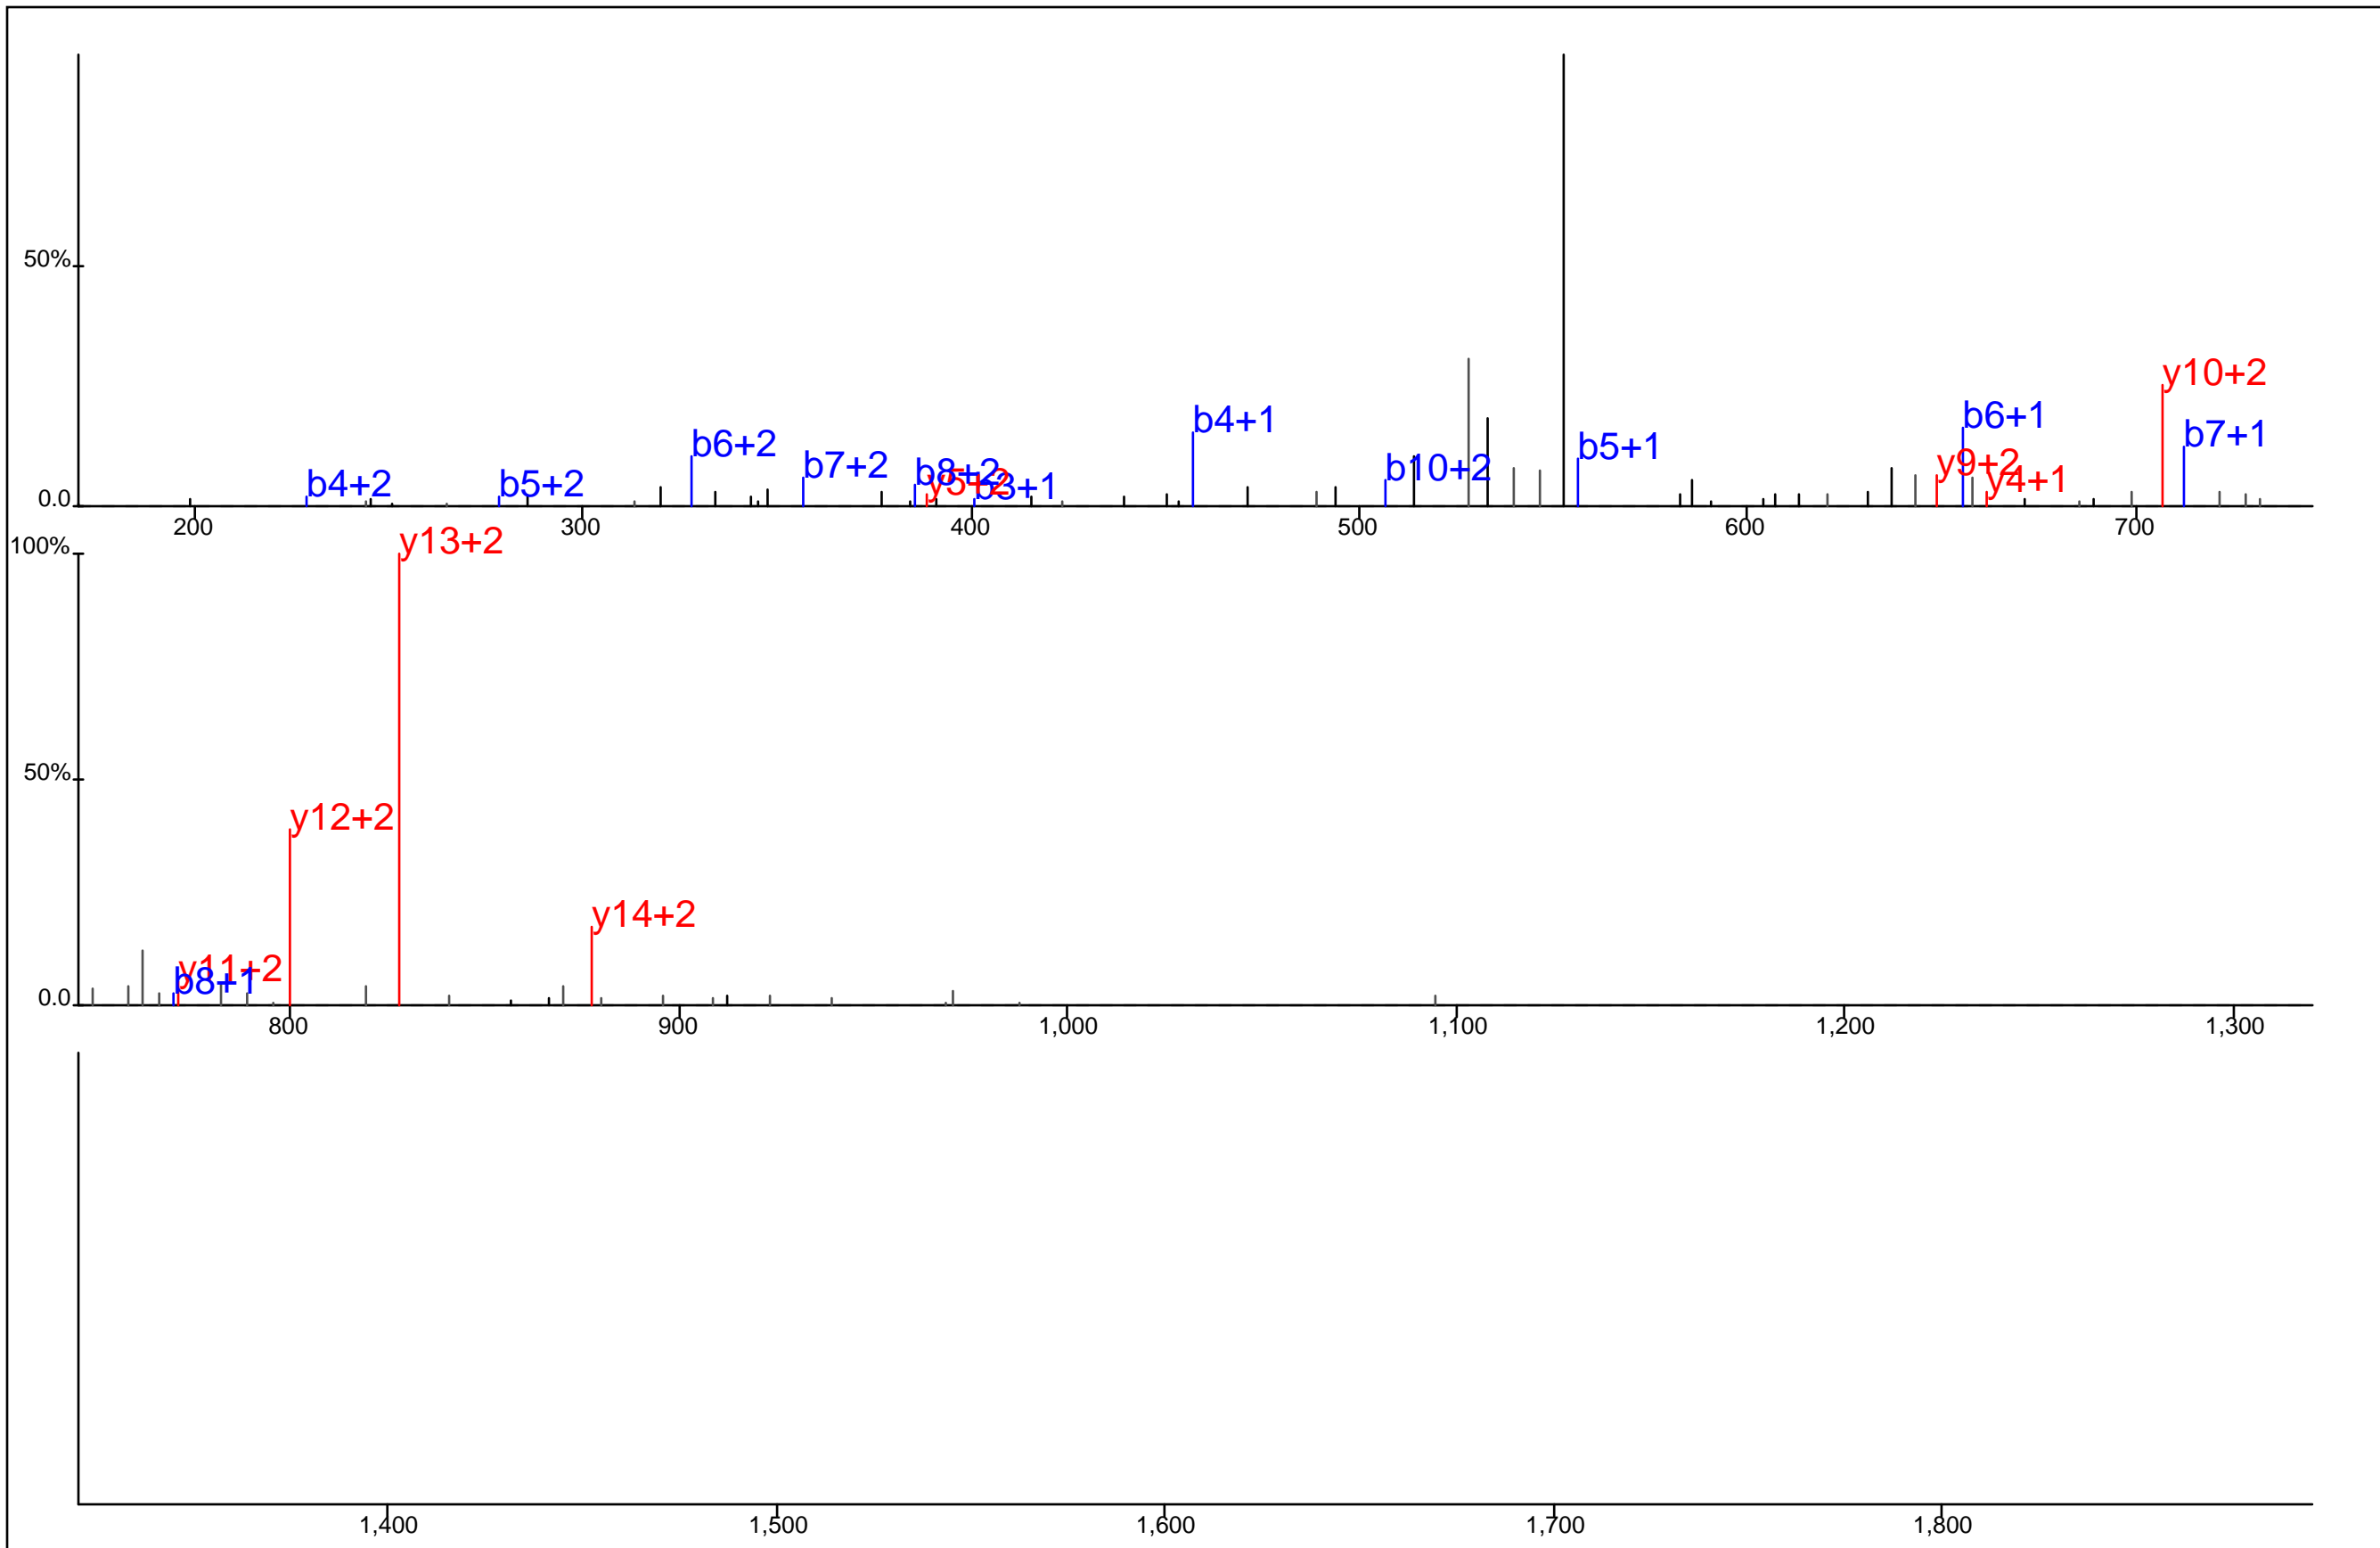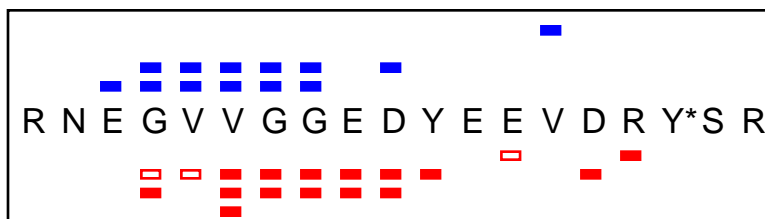

Protein Name: Zinc finger protein 598  
 gi Accession: 0  
 Precursor Mass: 578.0013+4  
 Delta Mass: 0.138 ppm  
 XCorr: 25.58

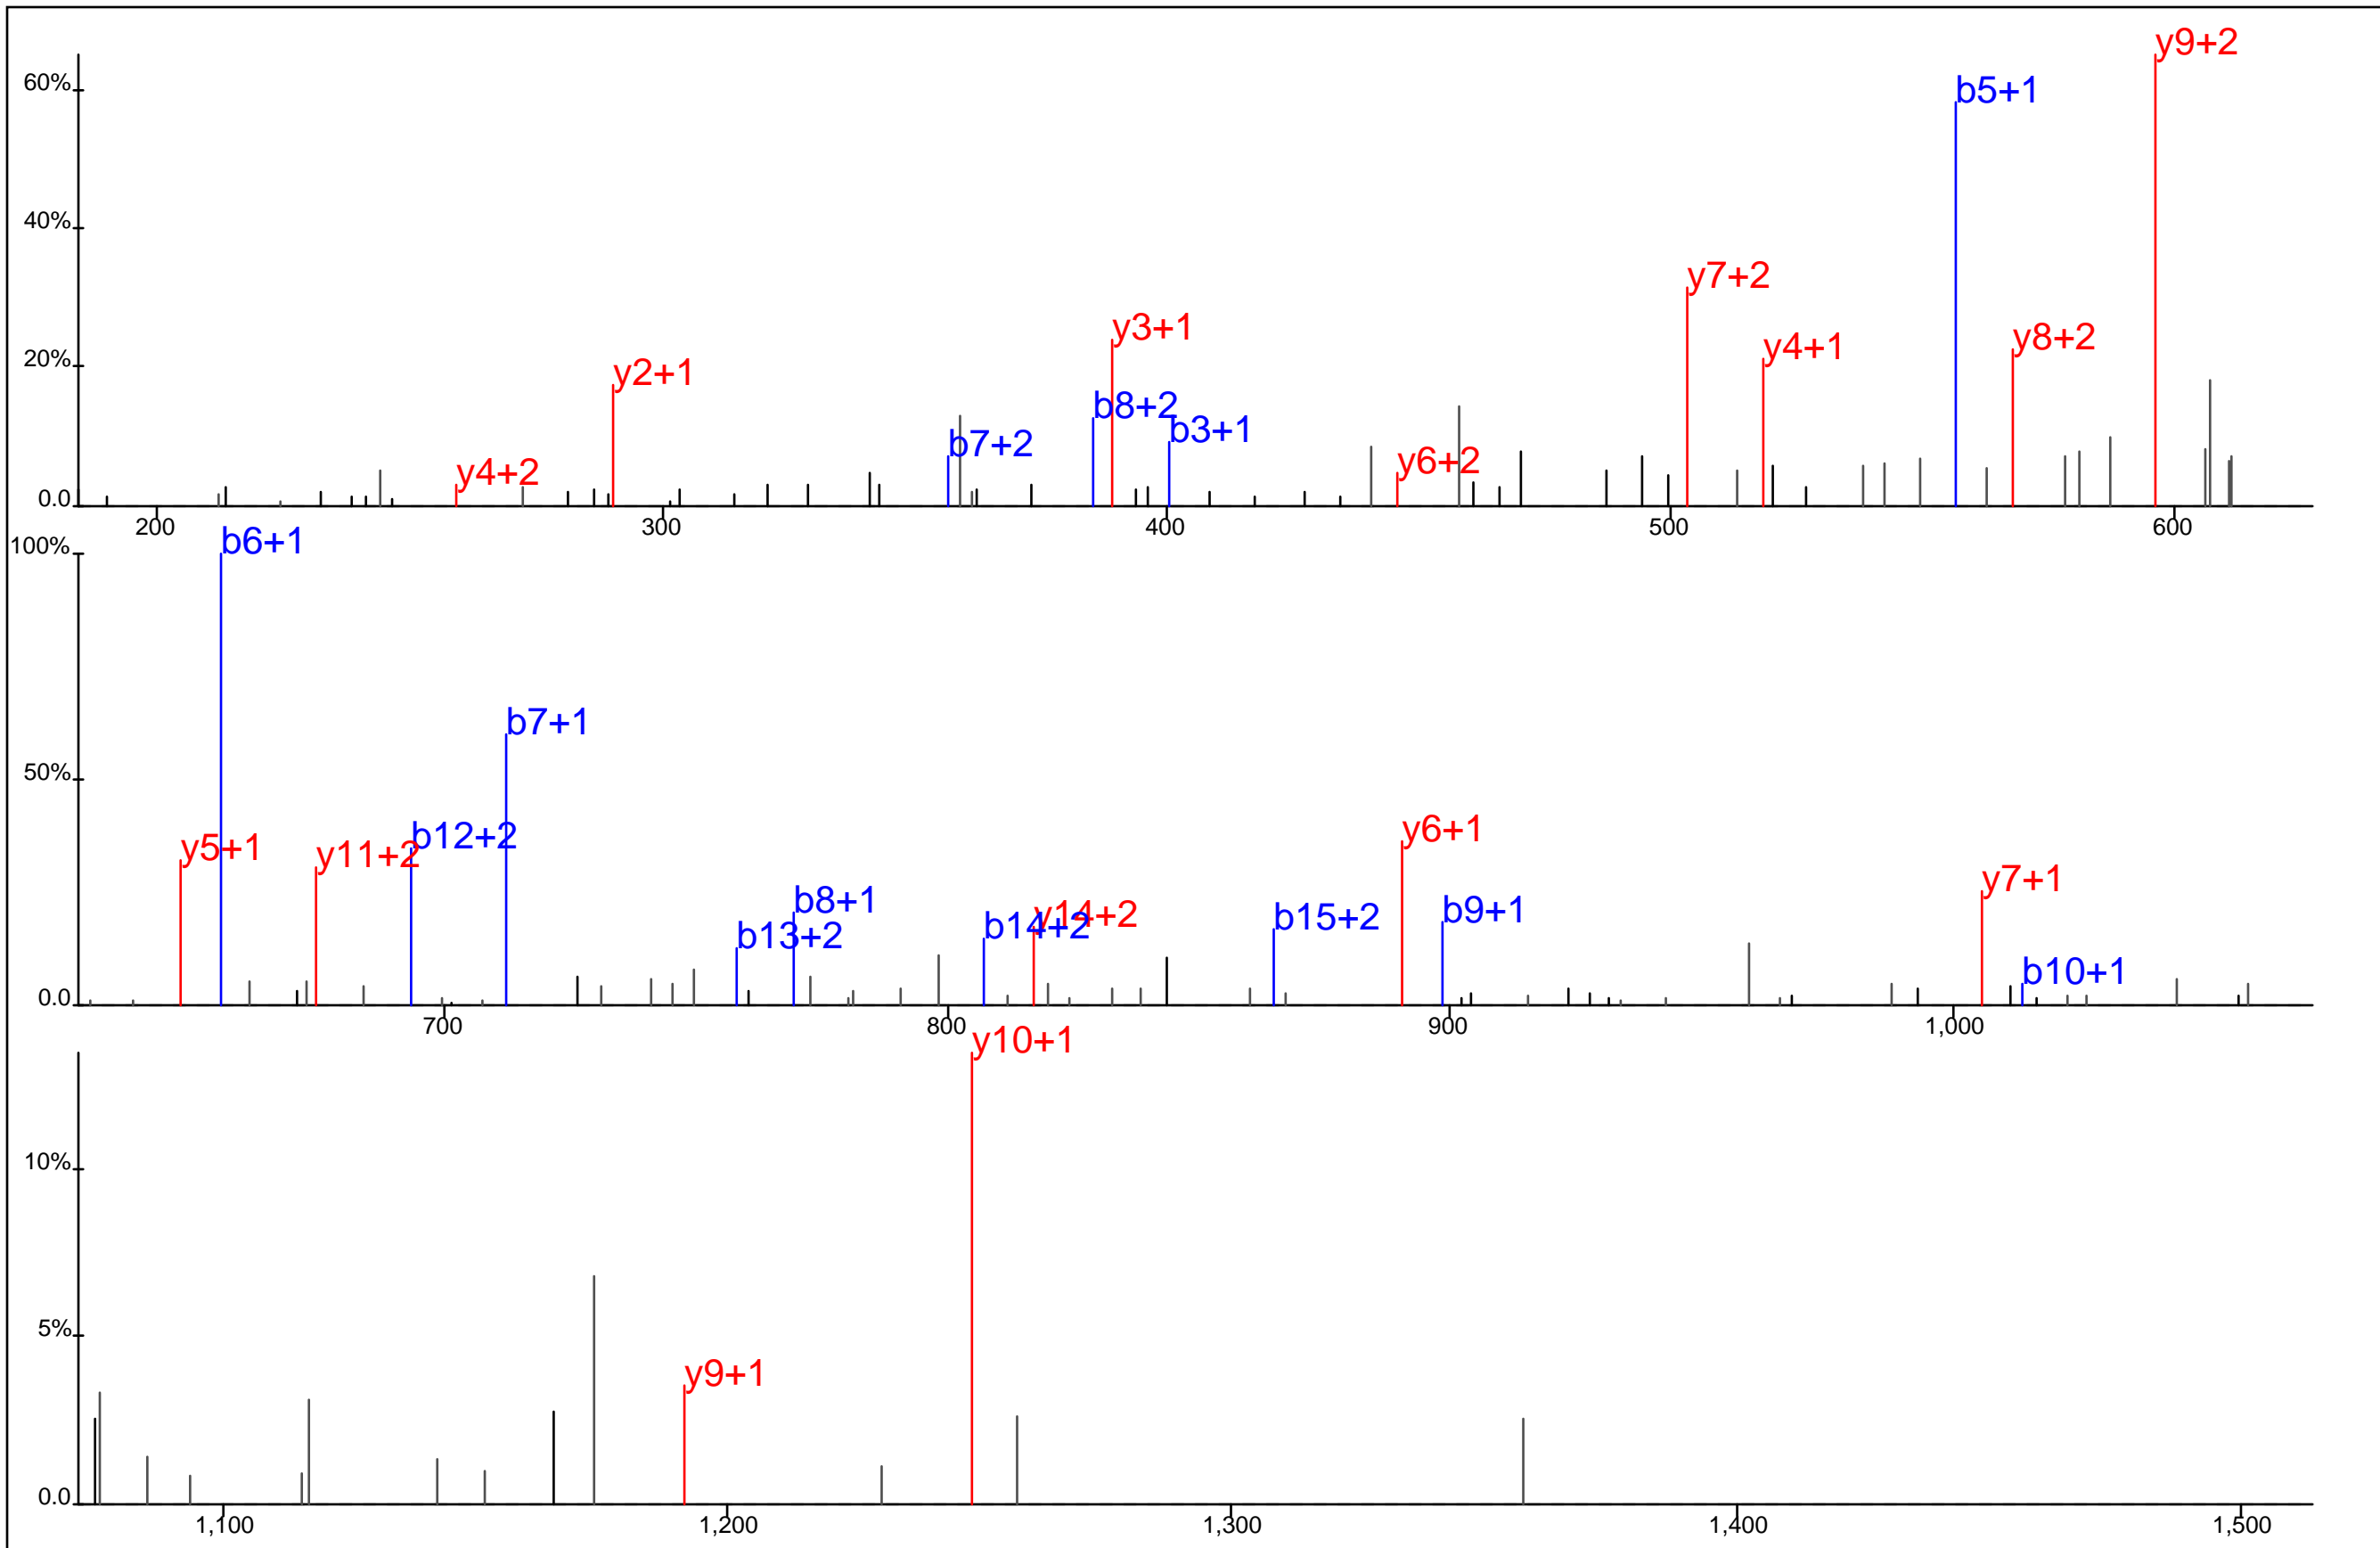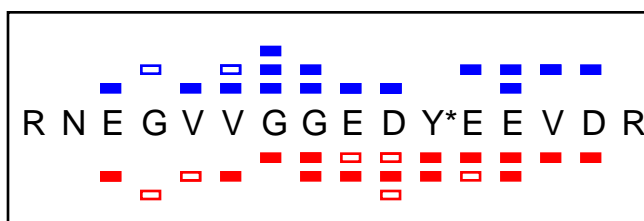

Protein Name: Zinc finger protein 598  
 gi Accession: 0  
 Precursor Mass: 634.9318+3  
 Delta Mass: 3.040 ppm  
 XCorr: 63.64

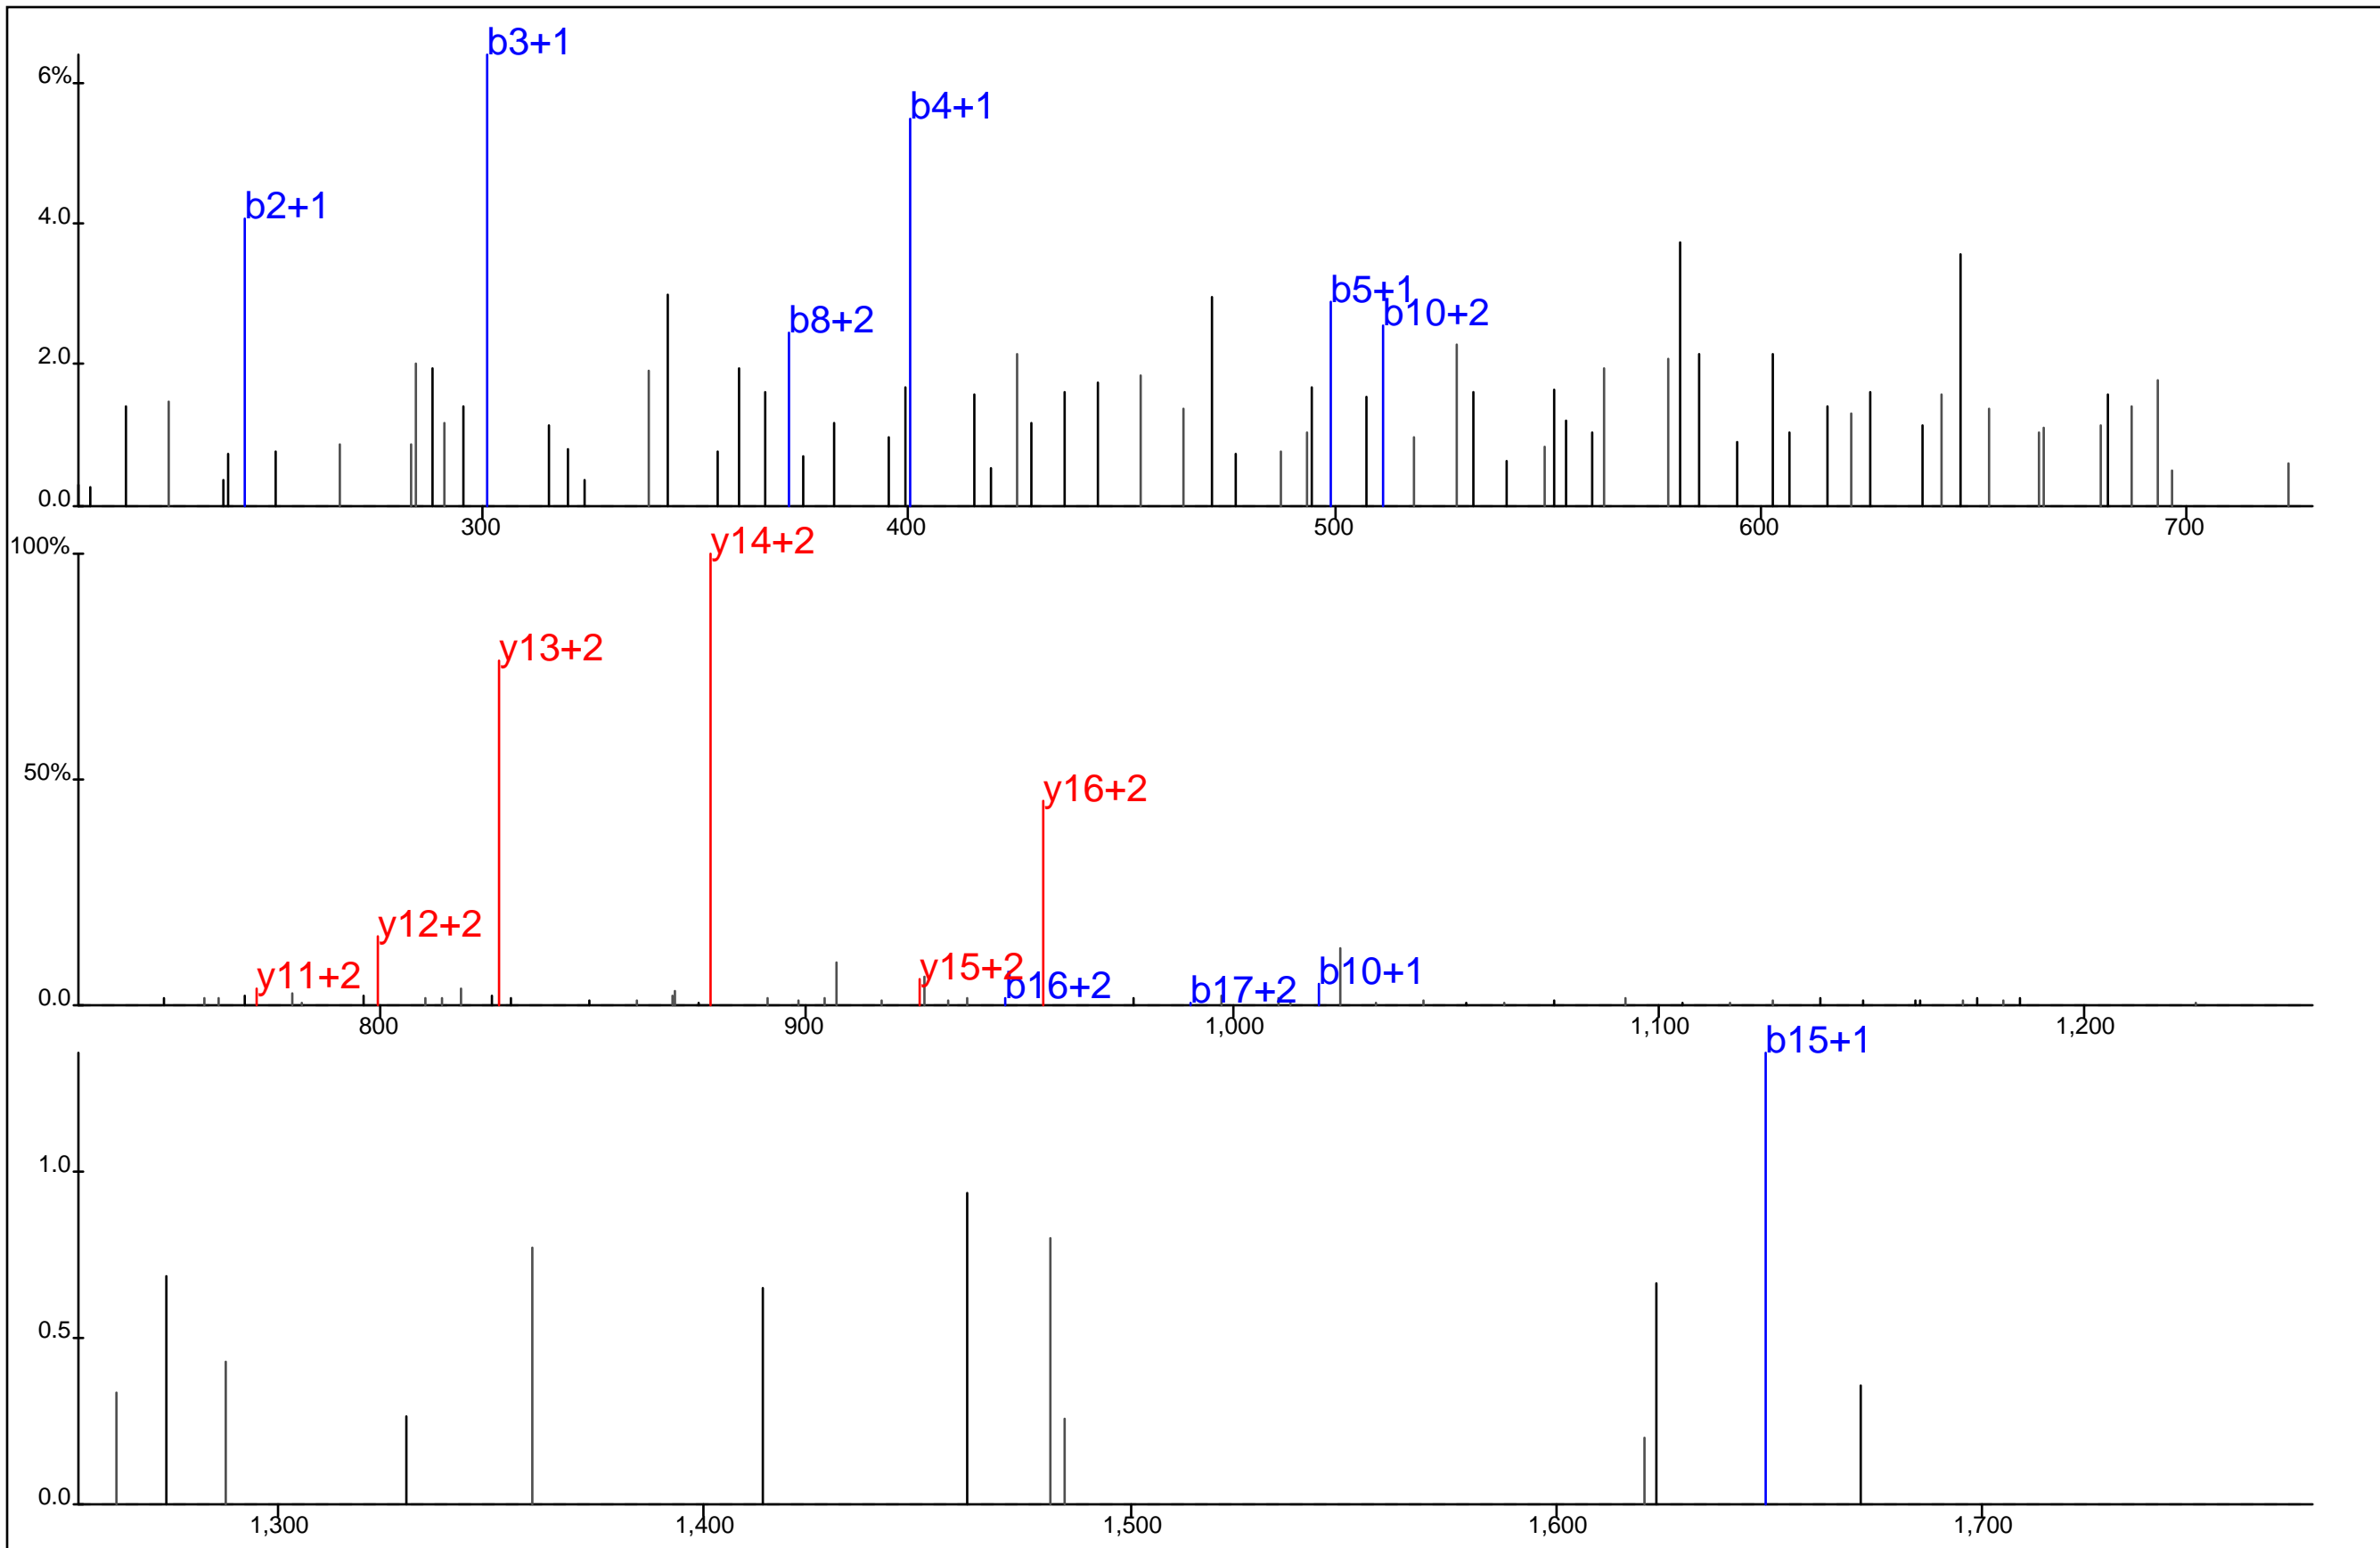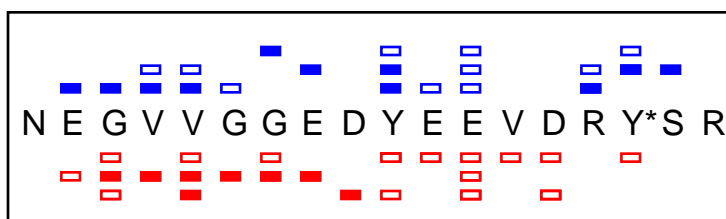

Protein Name: Zinc finger protein 598  
 gi Accession: 0  
 Precursor Mass: 718.2999+3  
 Delta Mass: 1.470 ppm  
 XCorr: 28.44

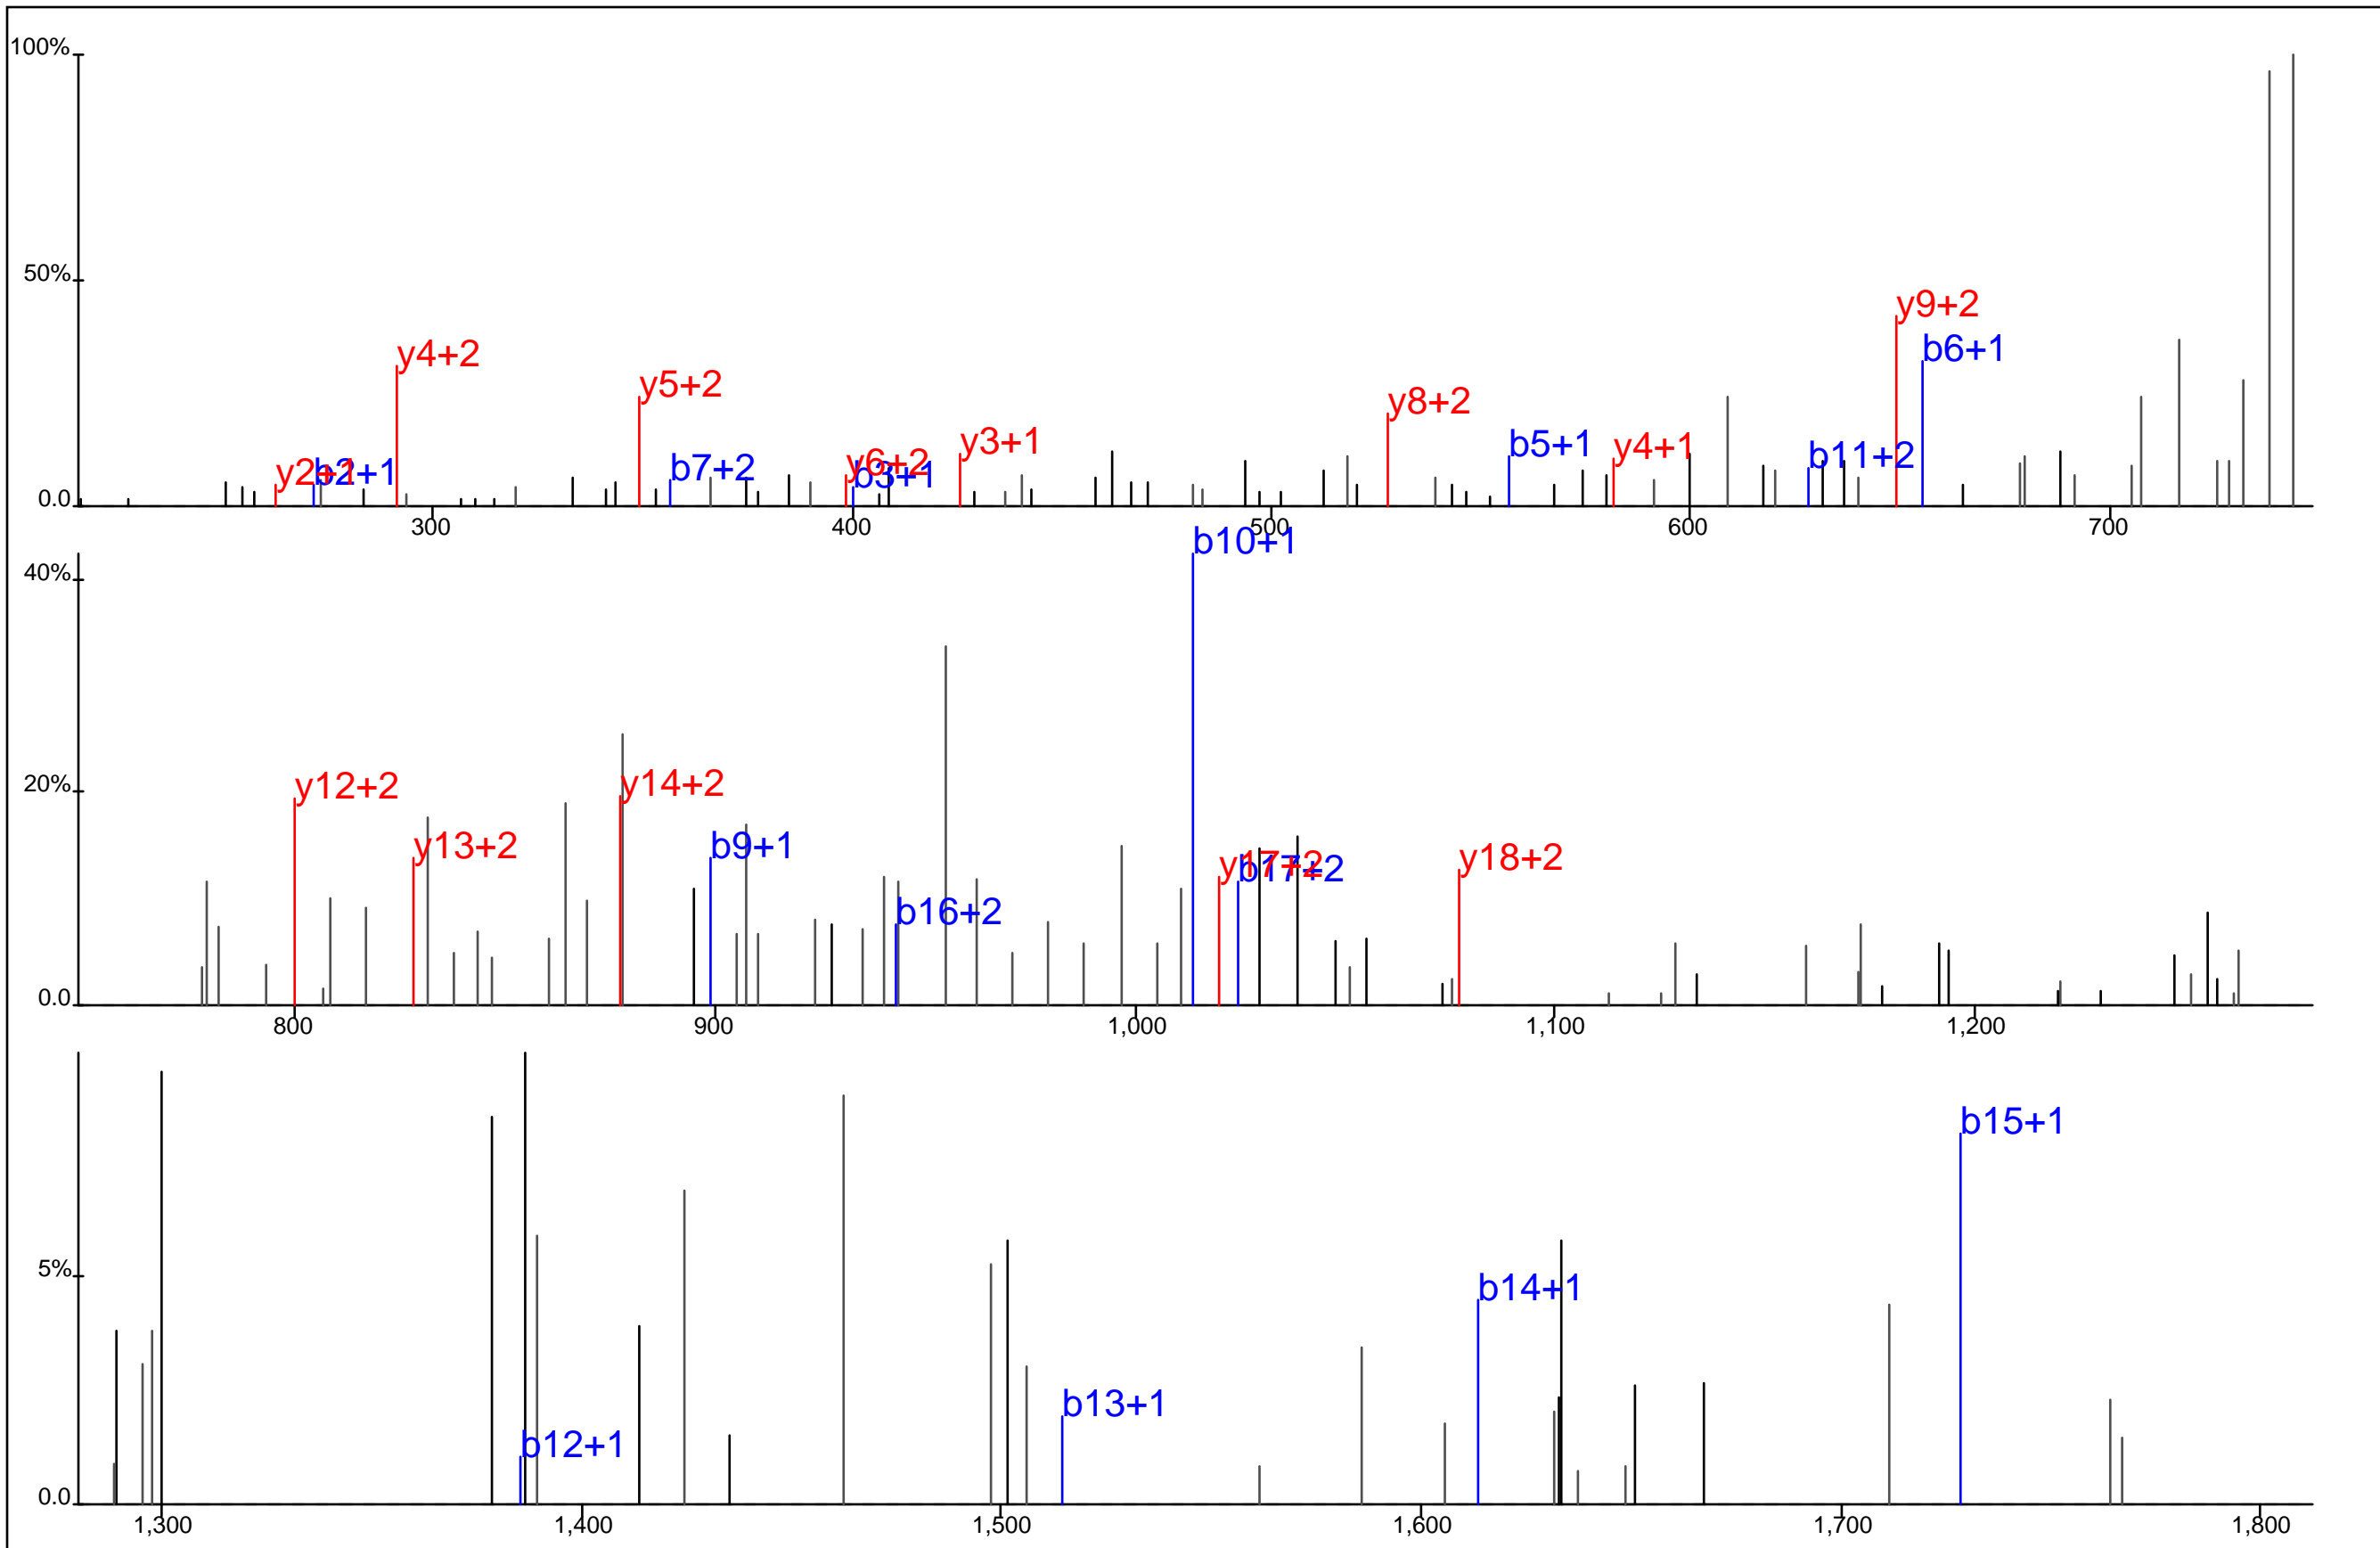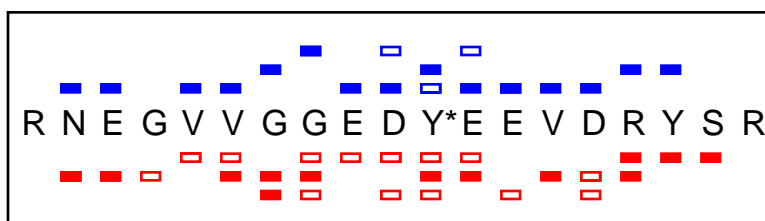

Protein Name: Zinc finger protein 598  
 gi Accession: 0  
 Precursor Mass: 770.3297+3  
 Delta Mass: 3.637 ppm  
 XCorr: 26.0

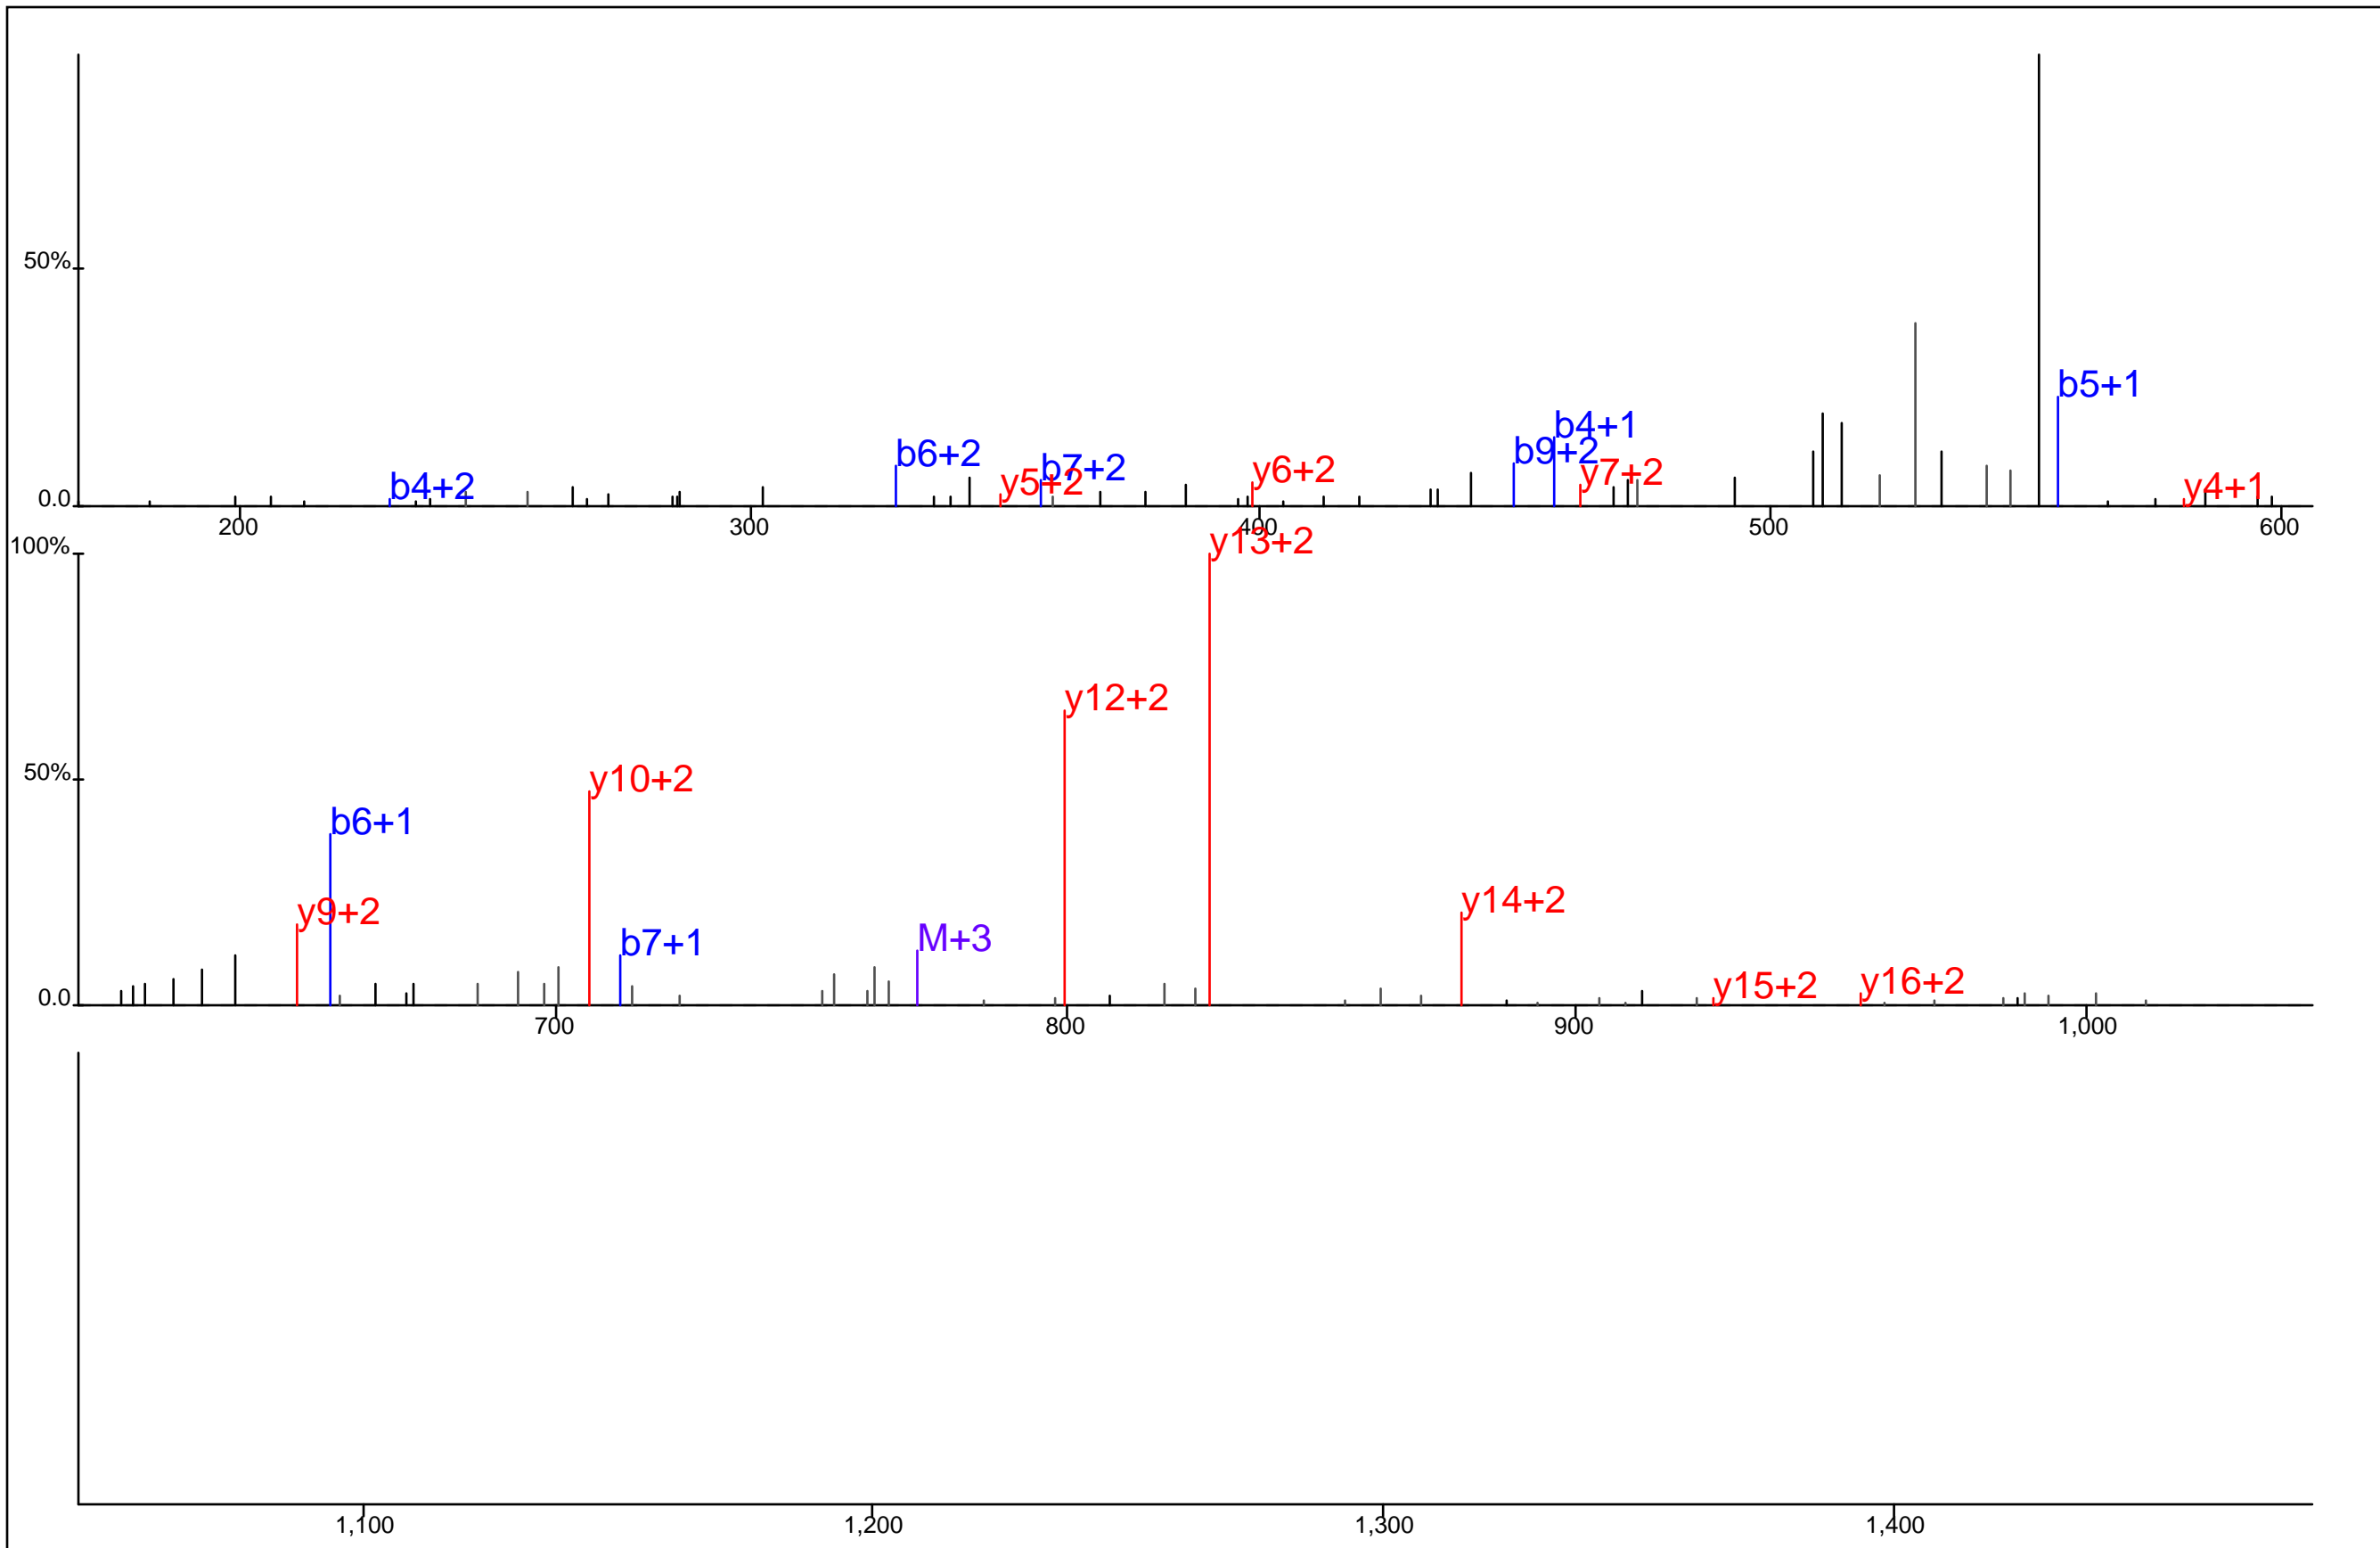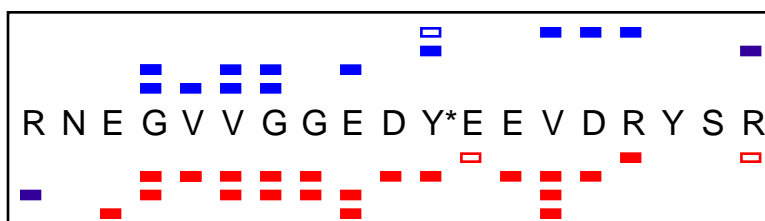

Protein Name: Zinc finger protein 598  
 gi Accession: 0  
 Precursor Mass: 578.0009+4  
 Delta Mass: 0.604 ppm  
 XCorr: 41.38

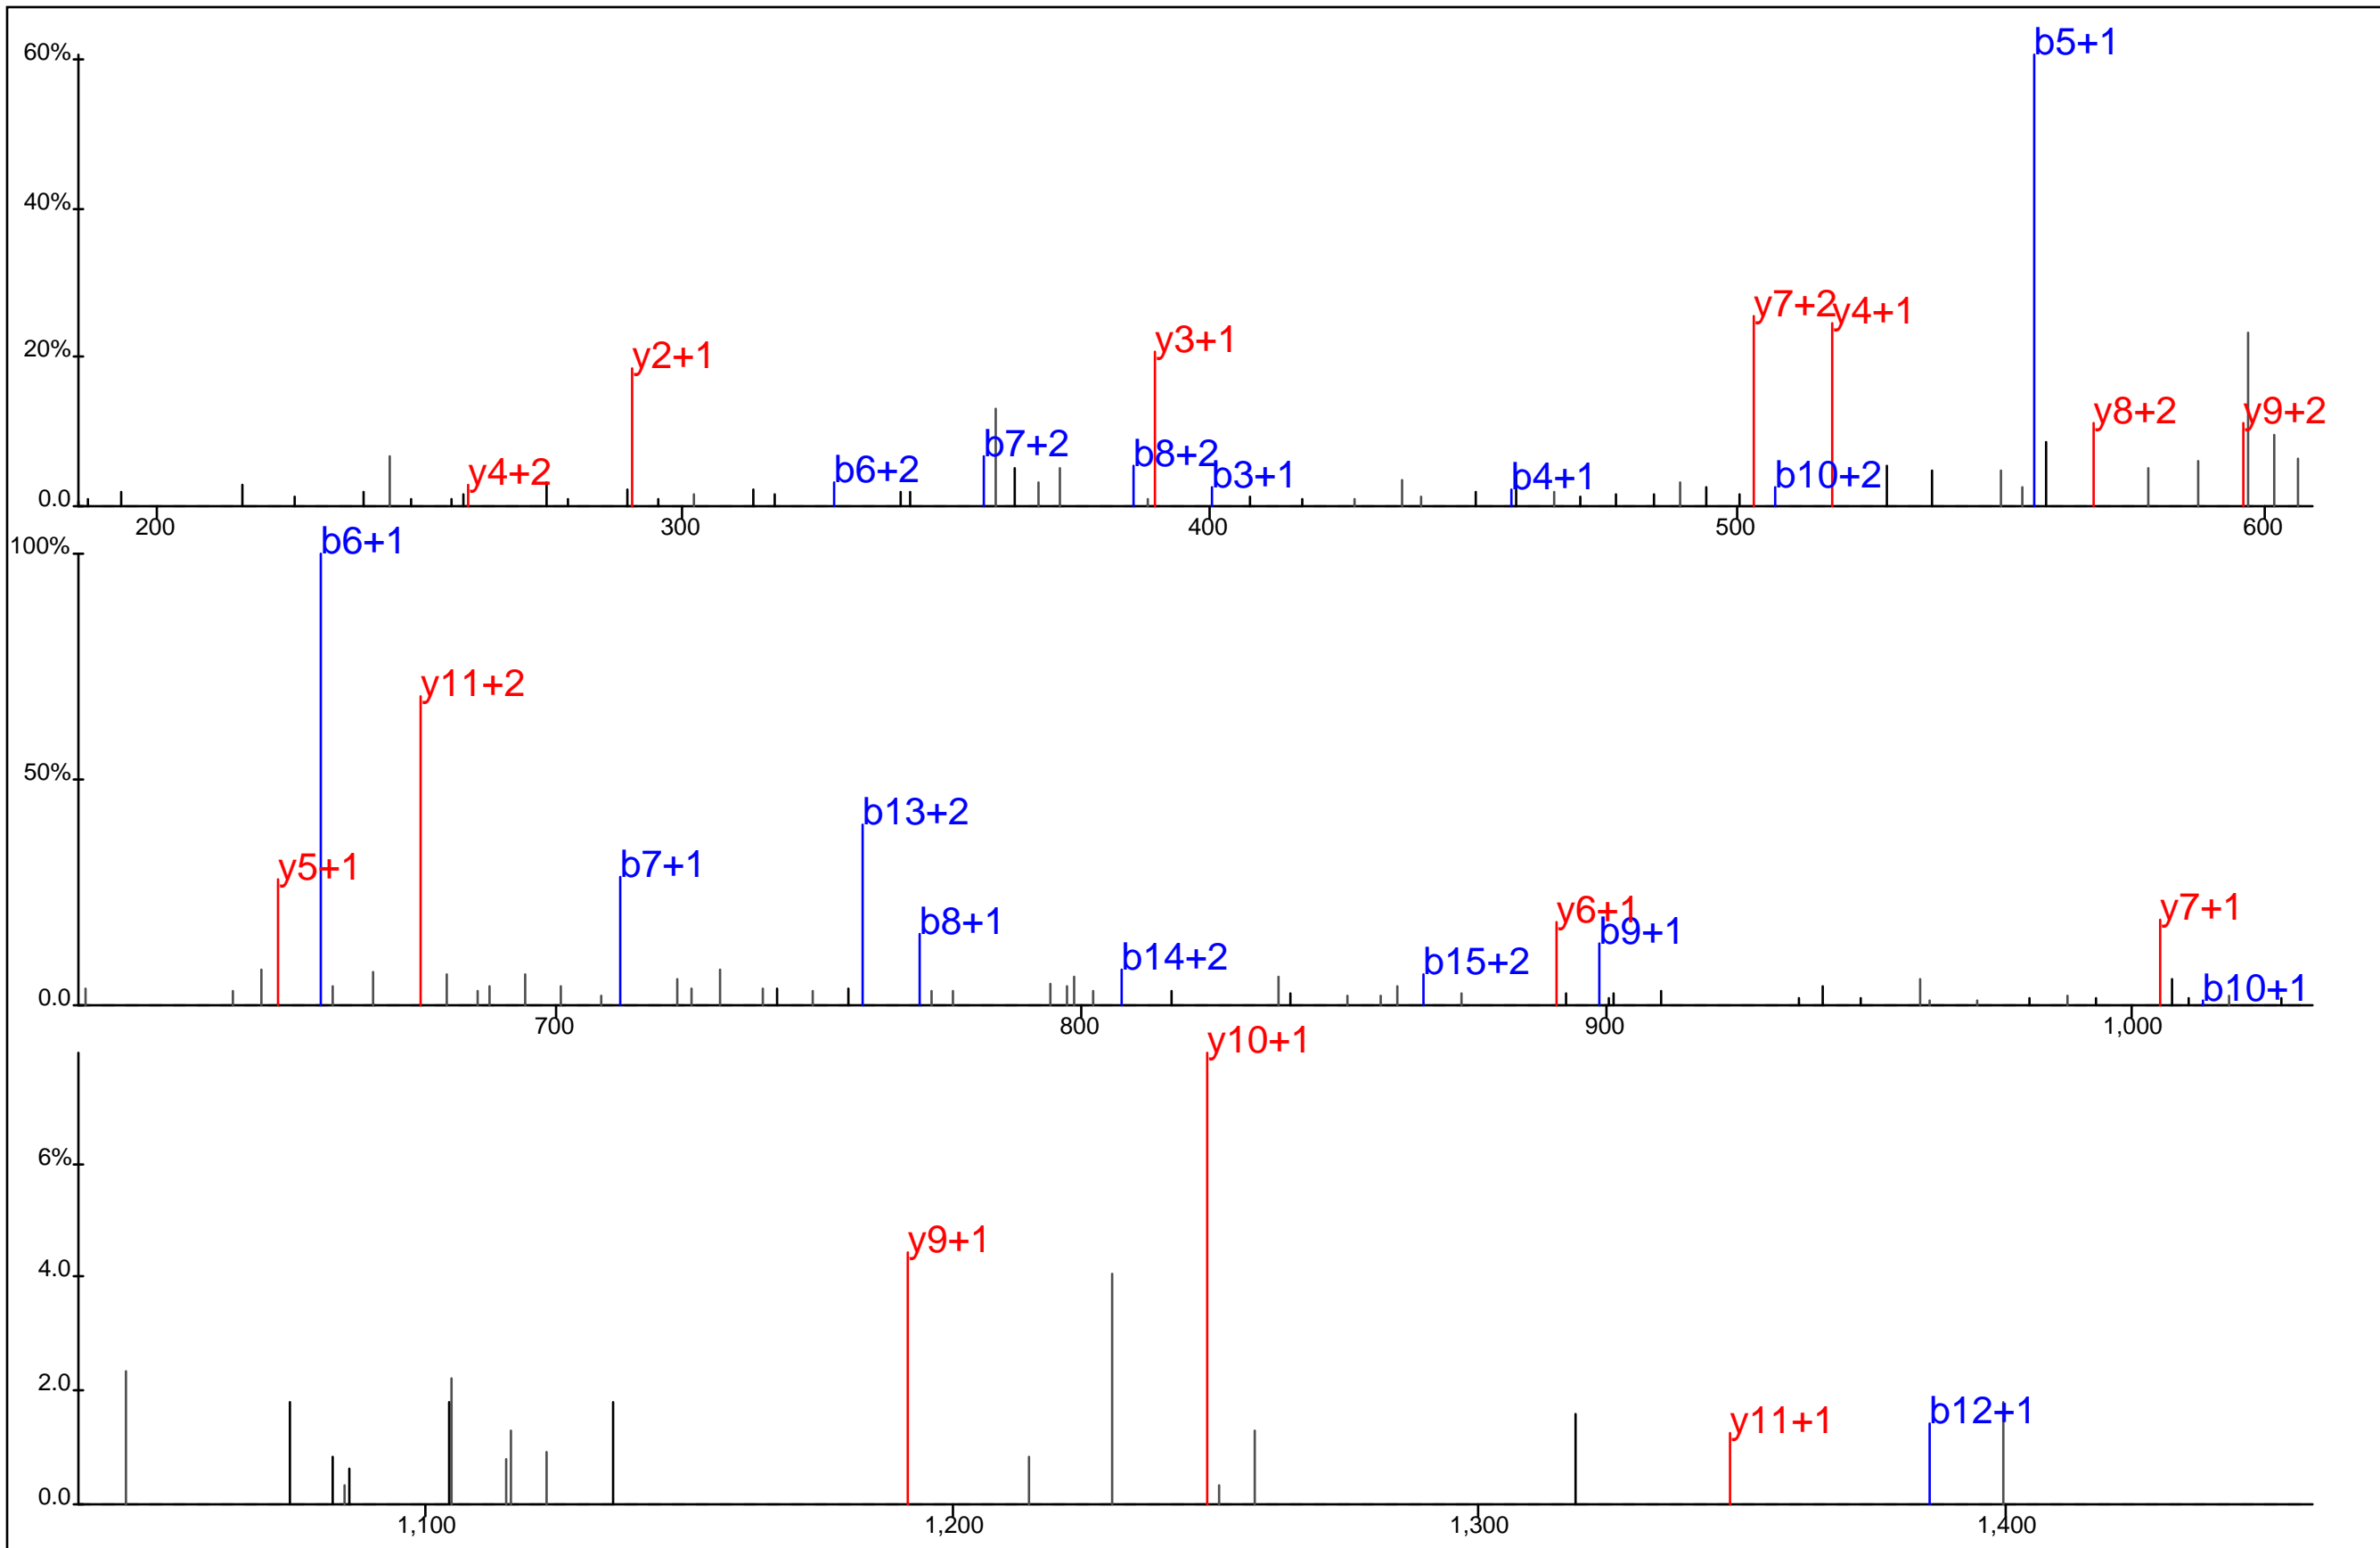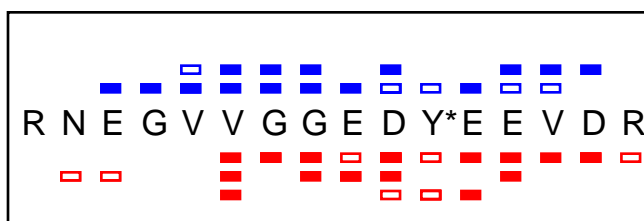

Protein Name: Zinc finger protein 598  
 gi Accession: 0  
 Precursor Mass: 634.9318+3  
 Delta Mass: 3.040 ppm  
 XCorr: 55.73



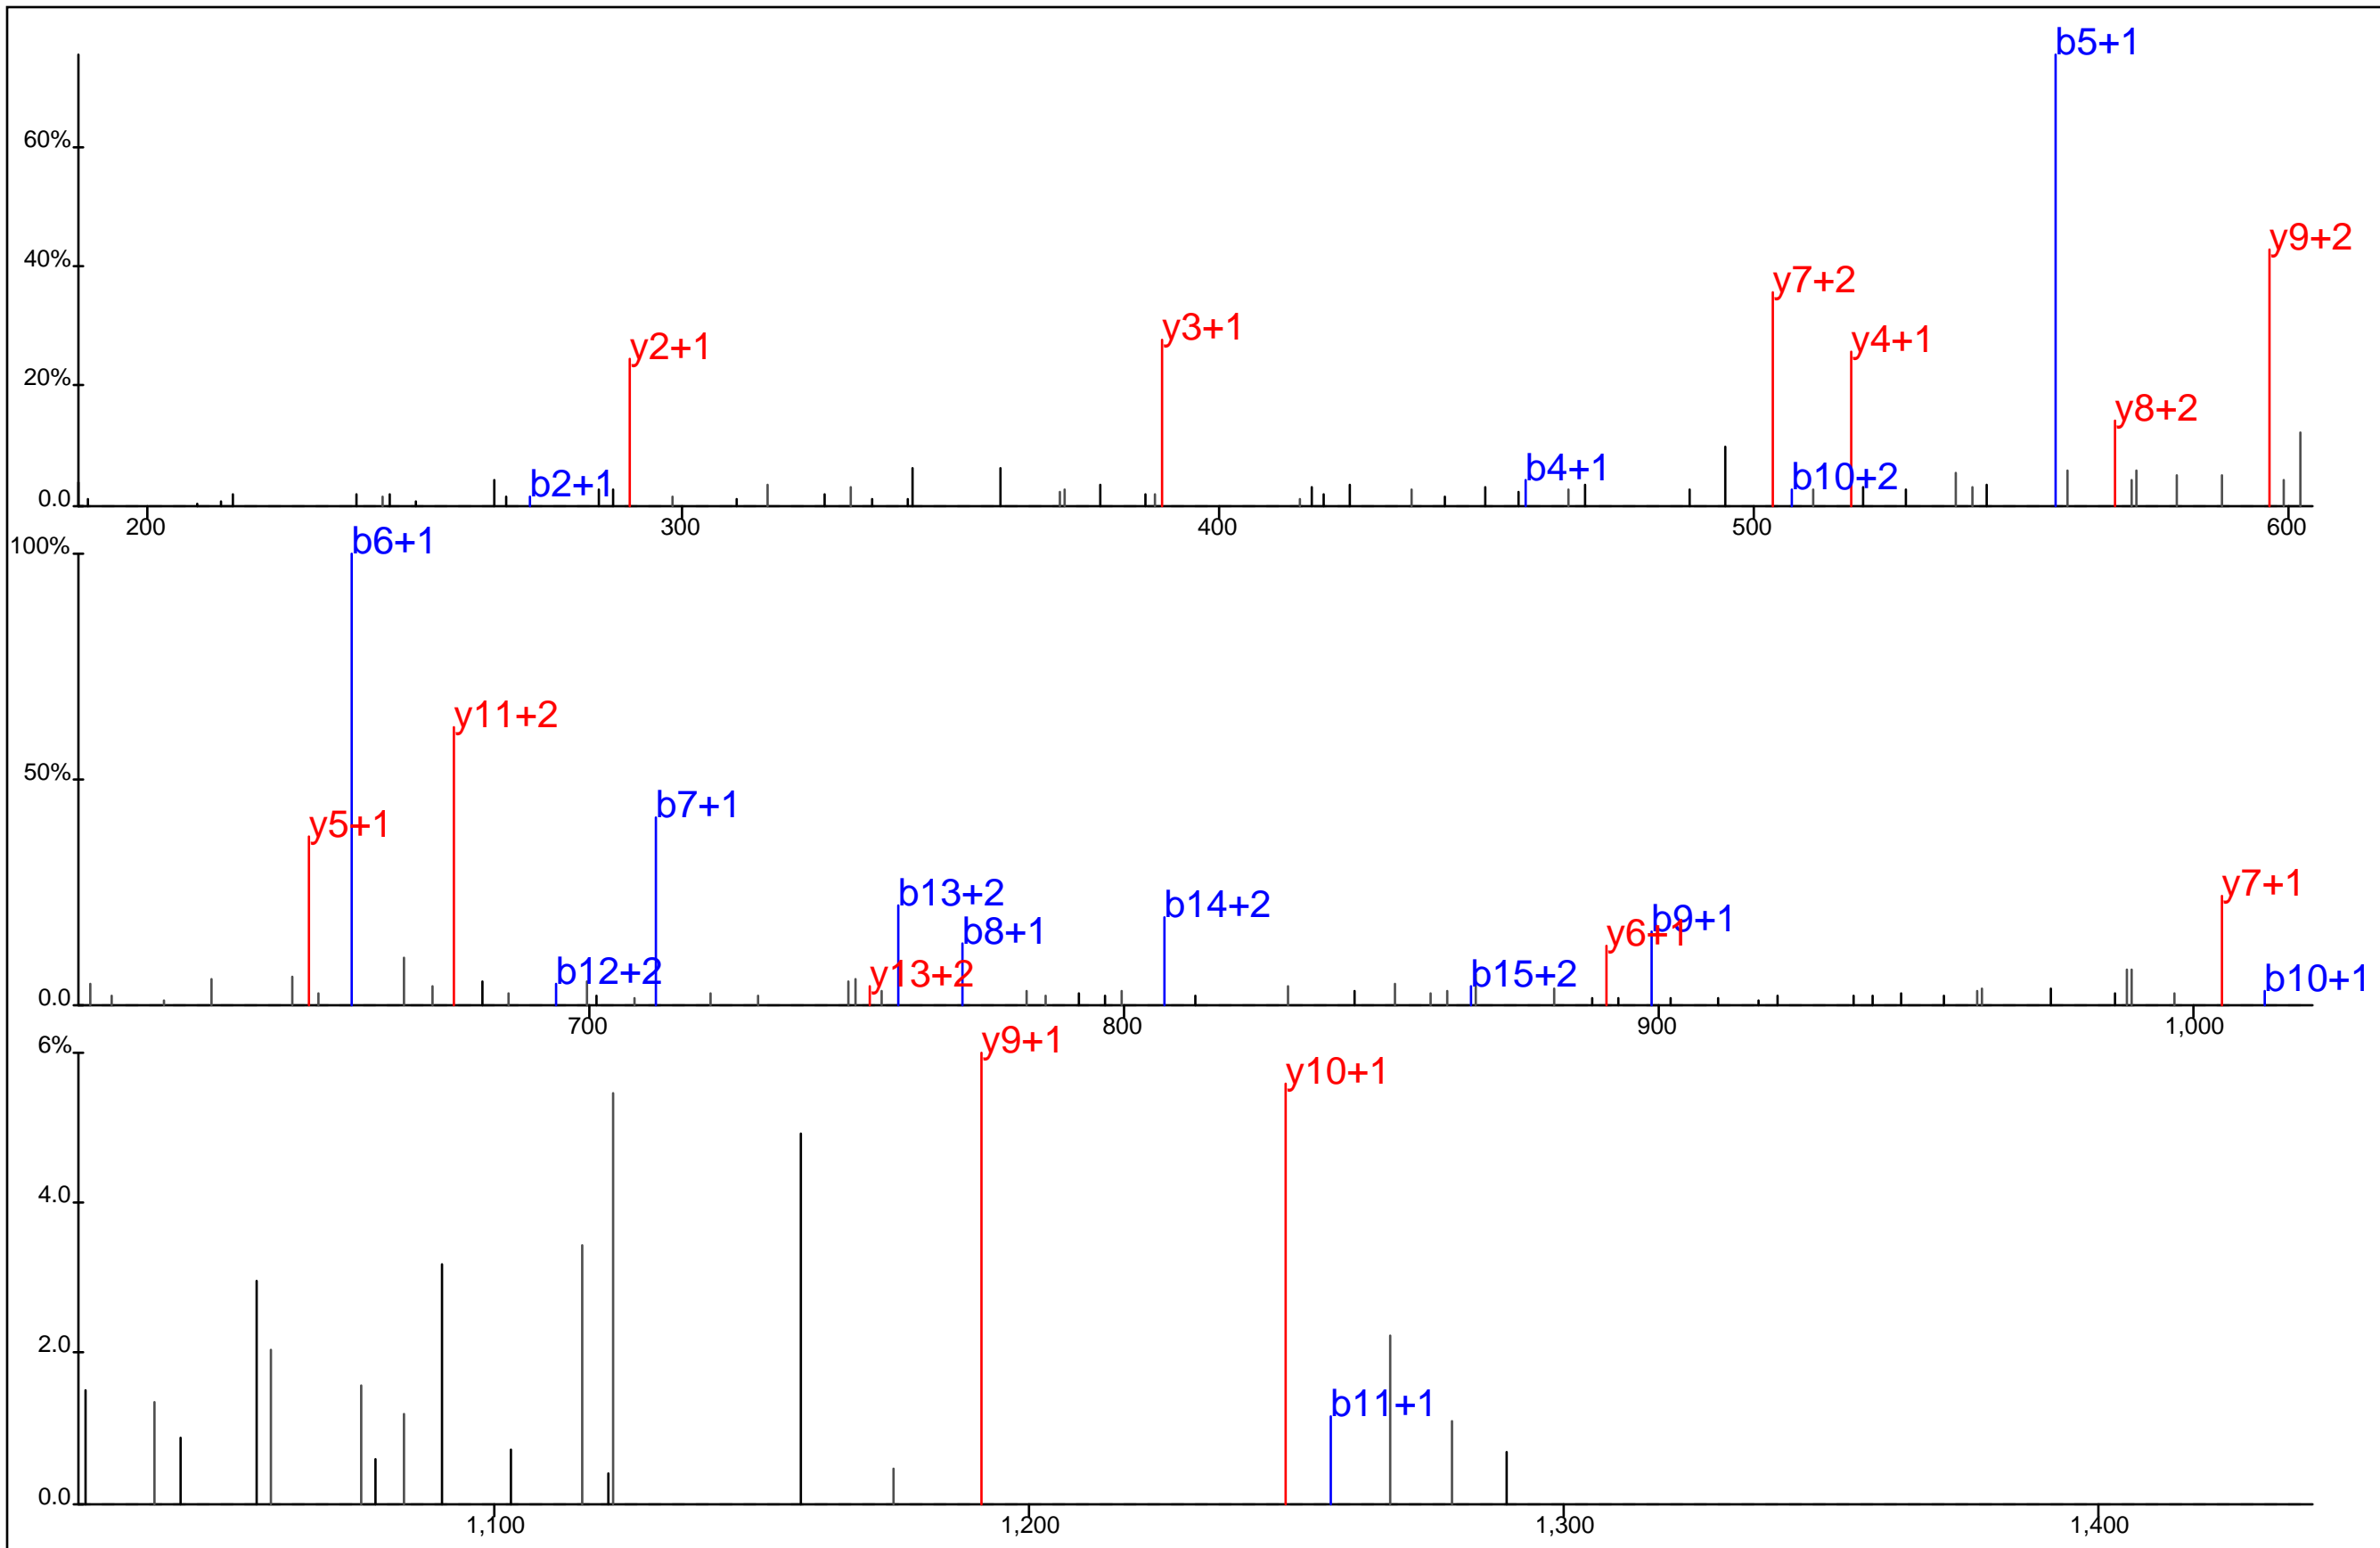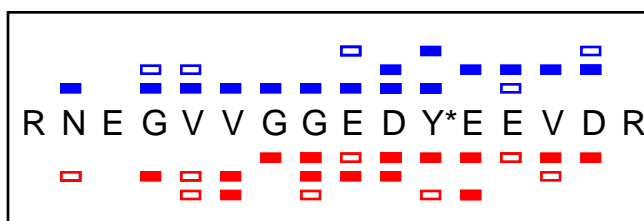

Protein Name: Zinc finger protein 598  
 gi Accession: 0  
 Precursor Mass: 634.9336+3  
 Delta Mass: 0.153 ppm  
 XCorr: 50.47

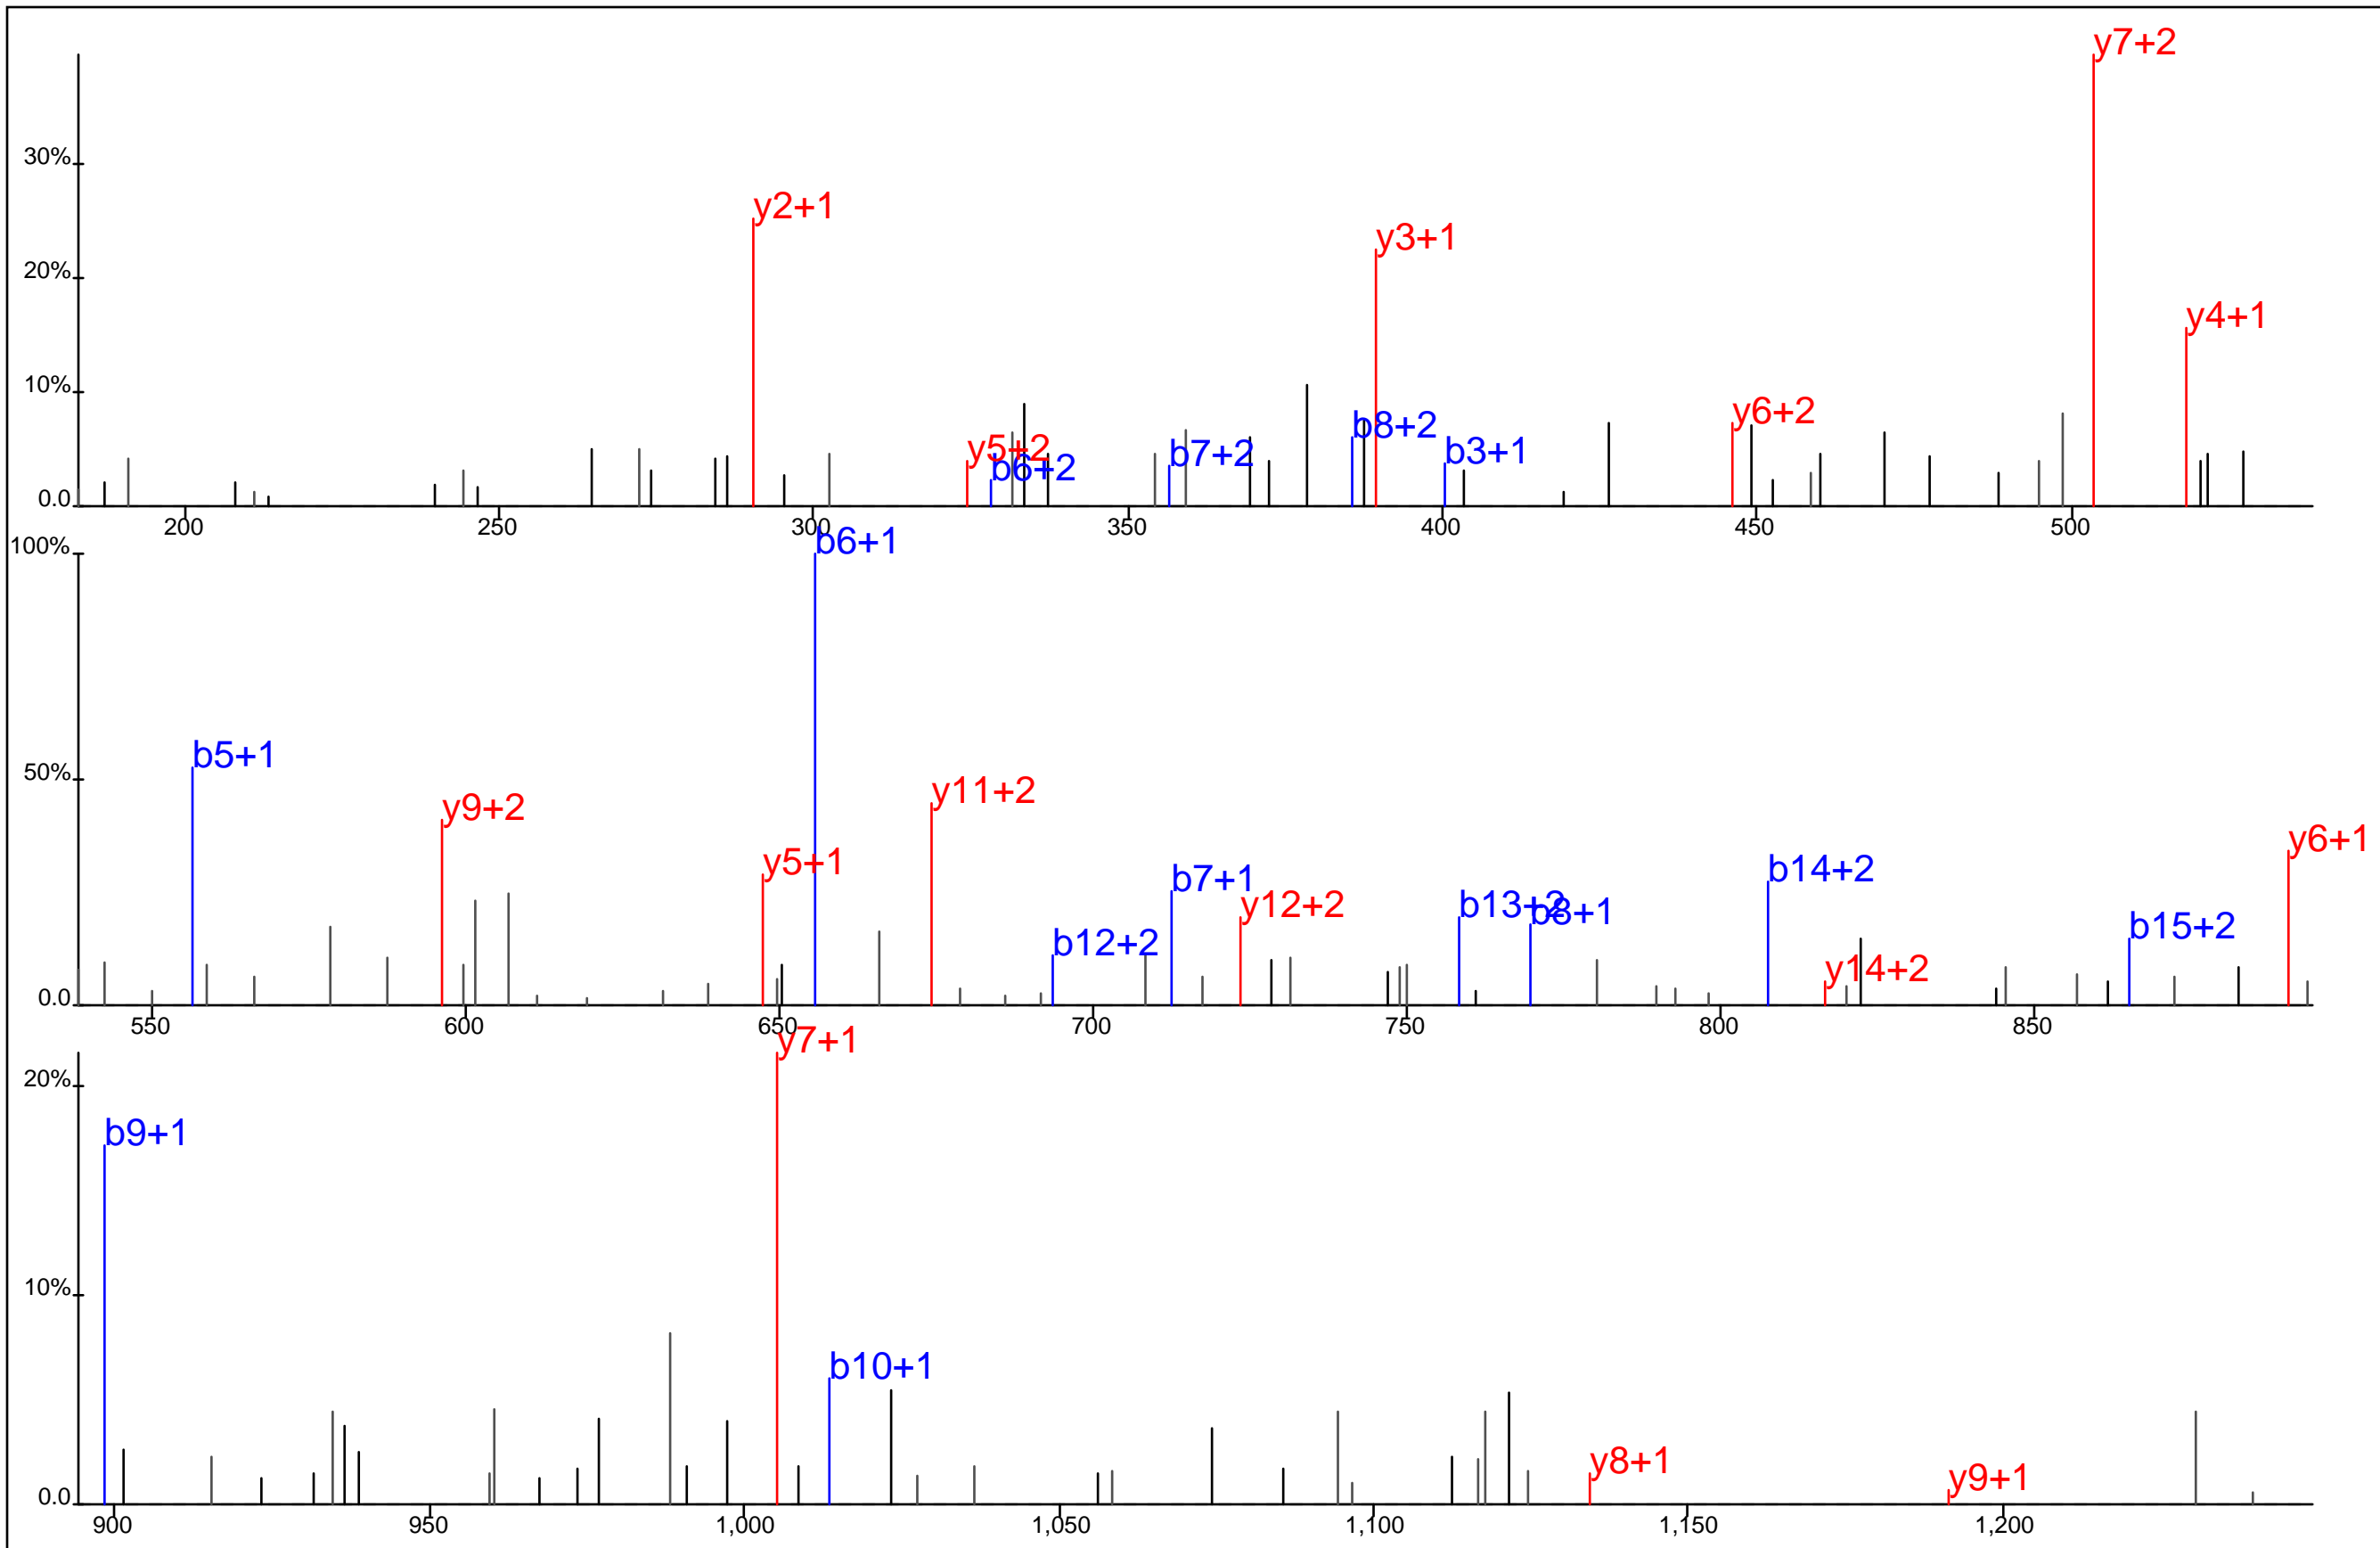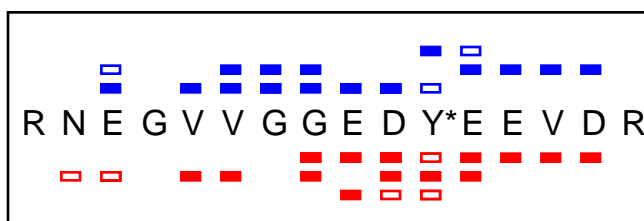

Protein Name: Zinc finger protein 598  
 gi Accession: 0  
 Precursor Mass: 634.9336+3  
 Delta Mass: 0.153 ppm  
 XCorr: 42.64

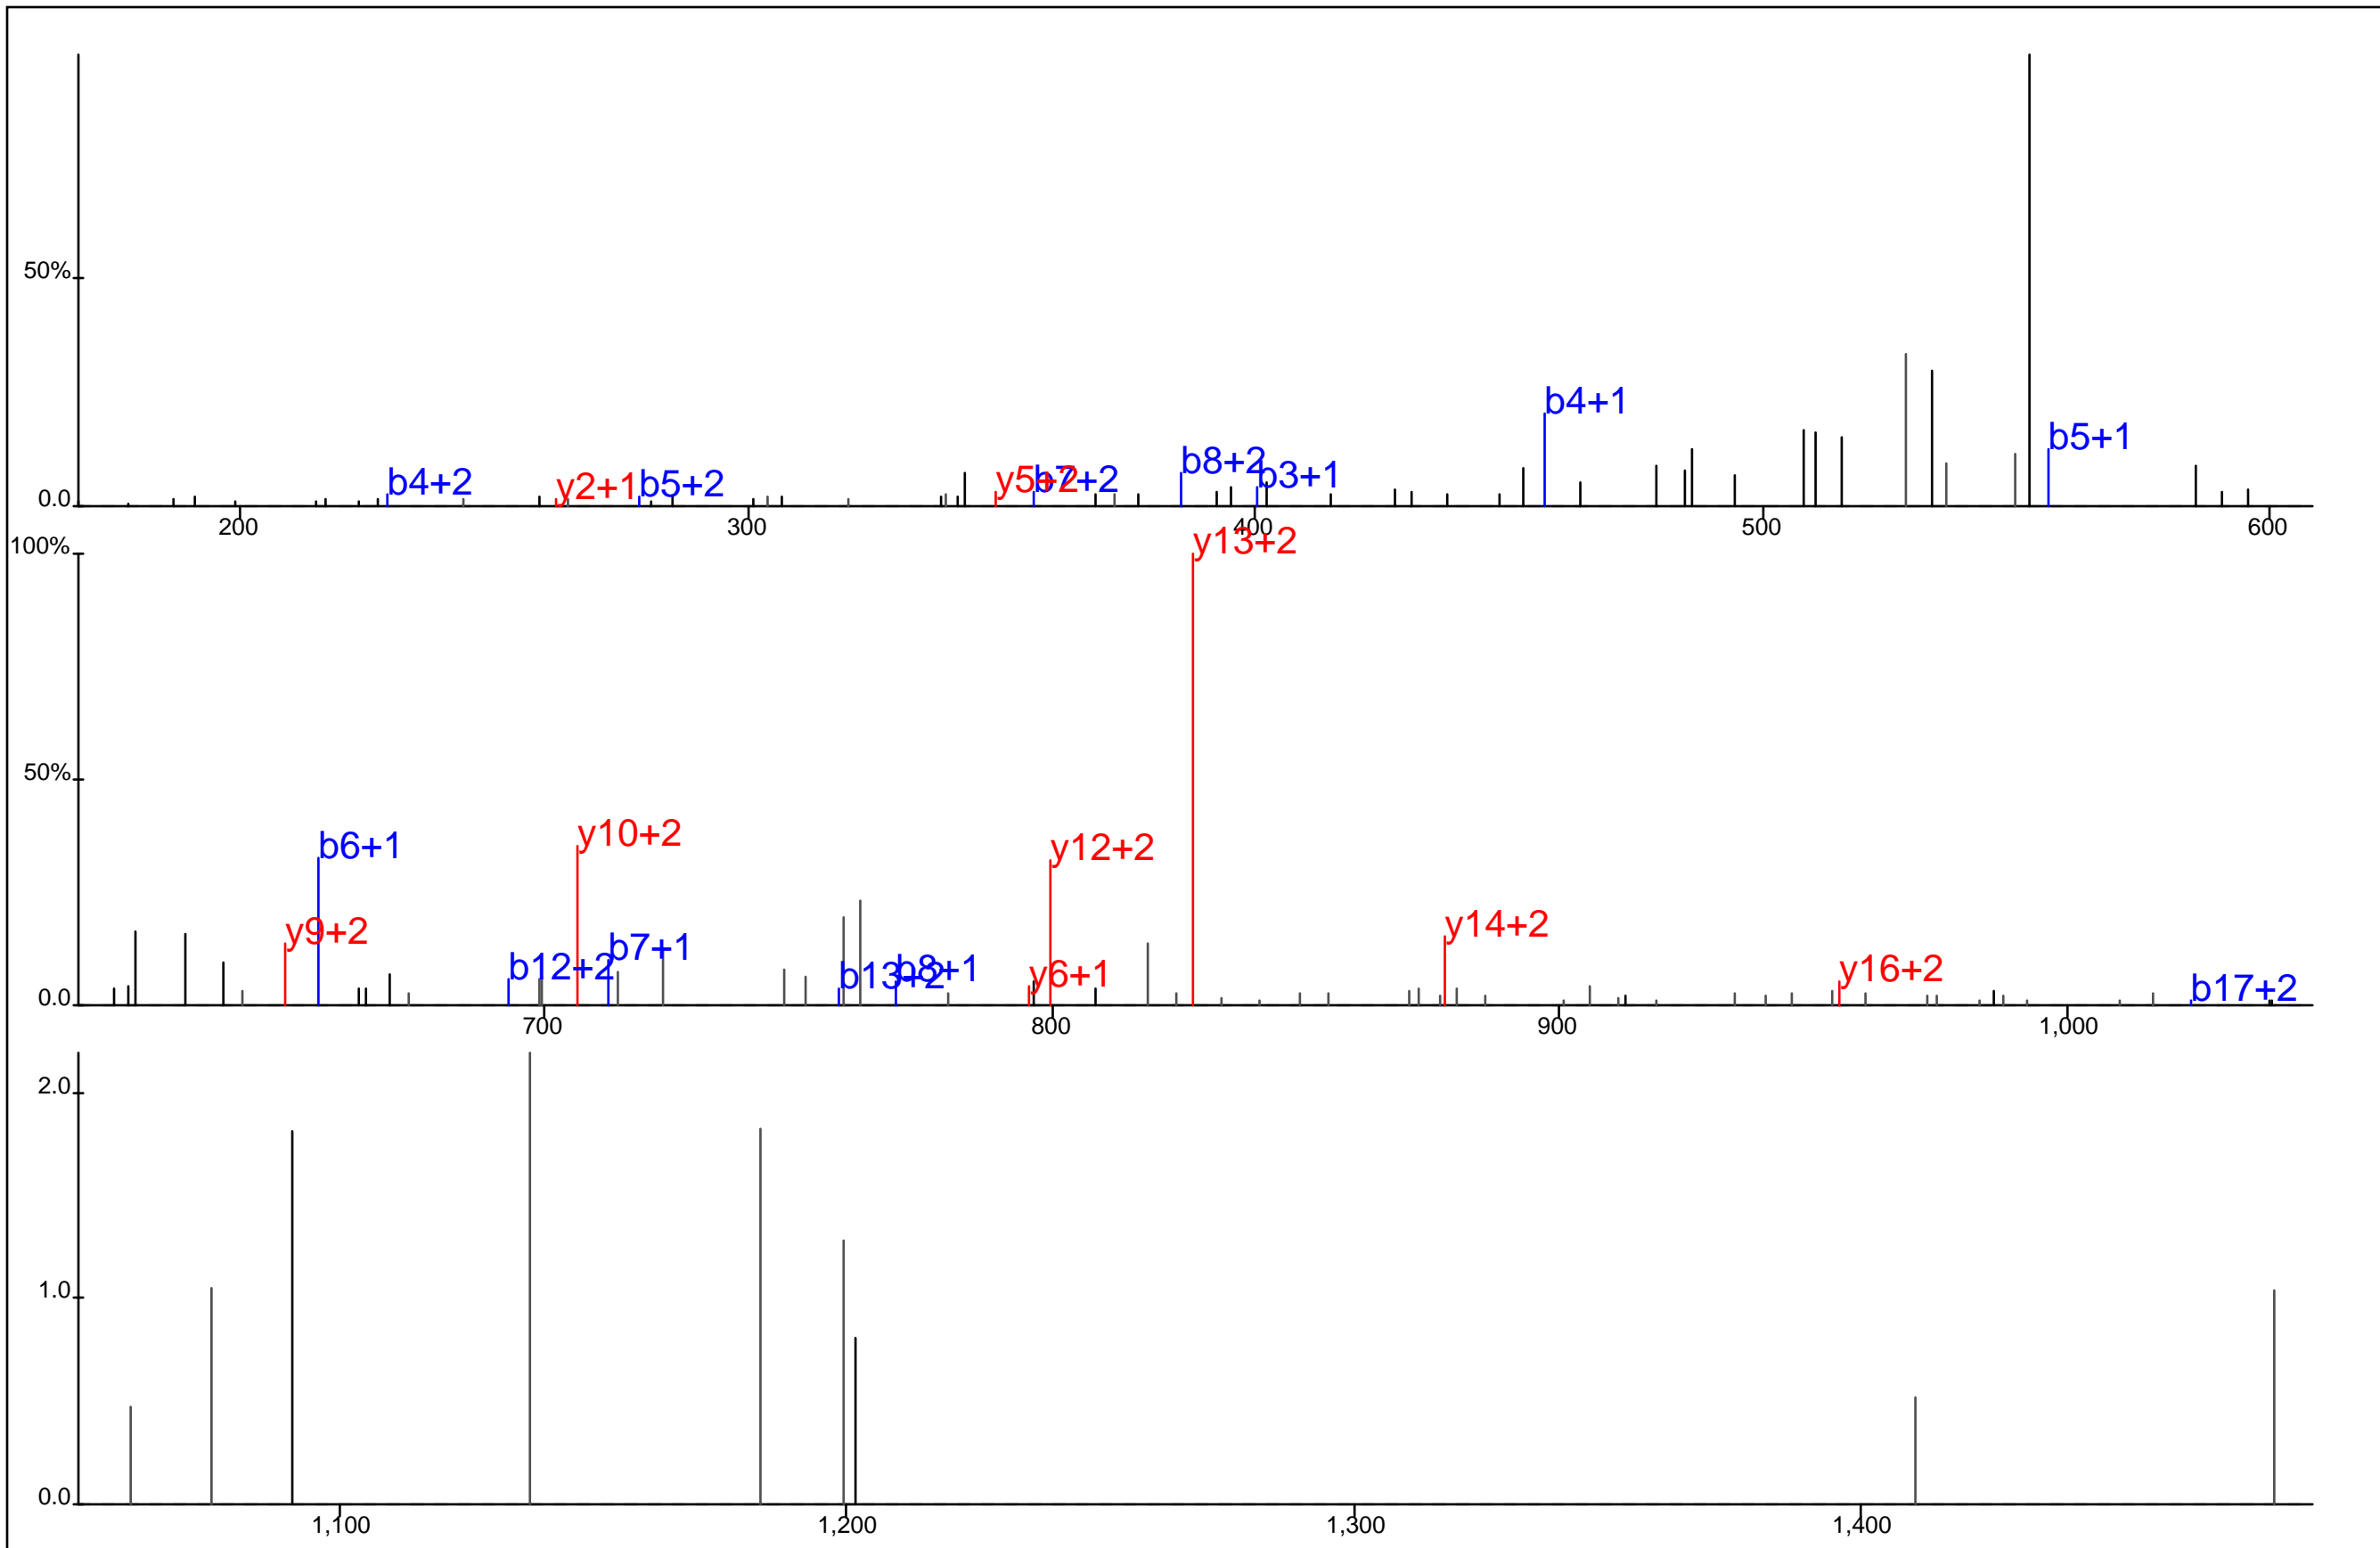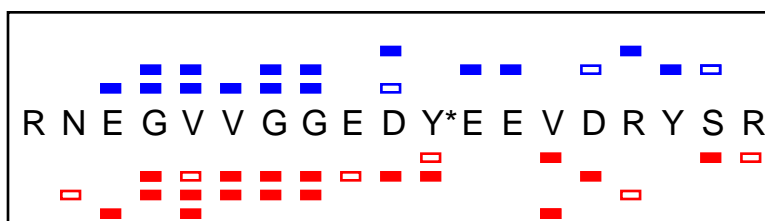

Protein Name: Zinc finger protein 598  
 gi Accession: 0  
 Precursor Mass: 578.0014+4  
 Delta Mass: 0.349 ppm  
 XCorr: 23.14

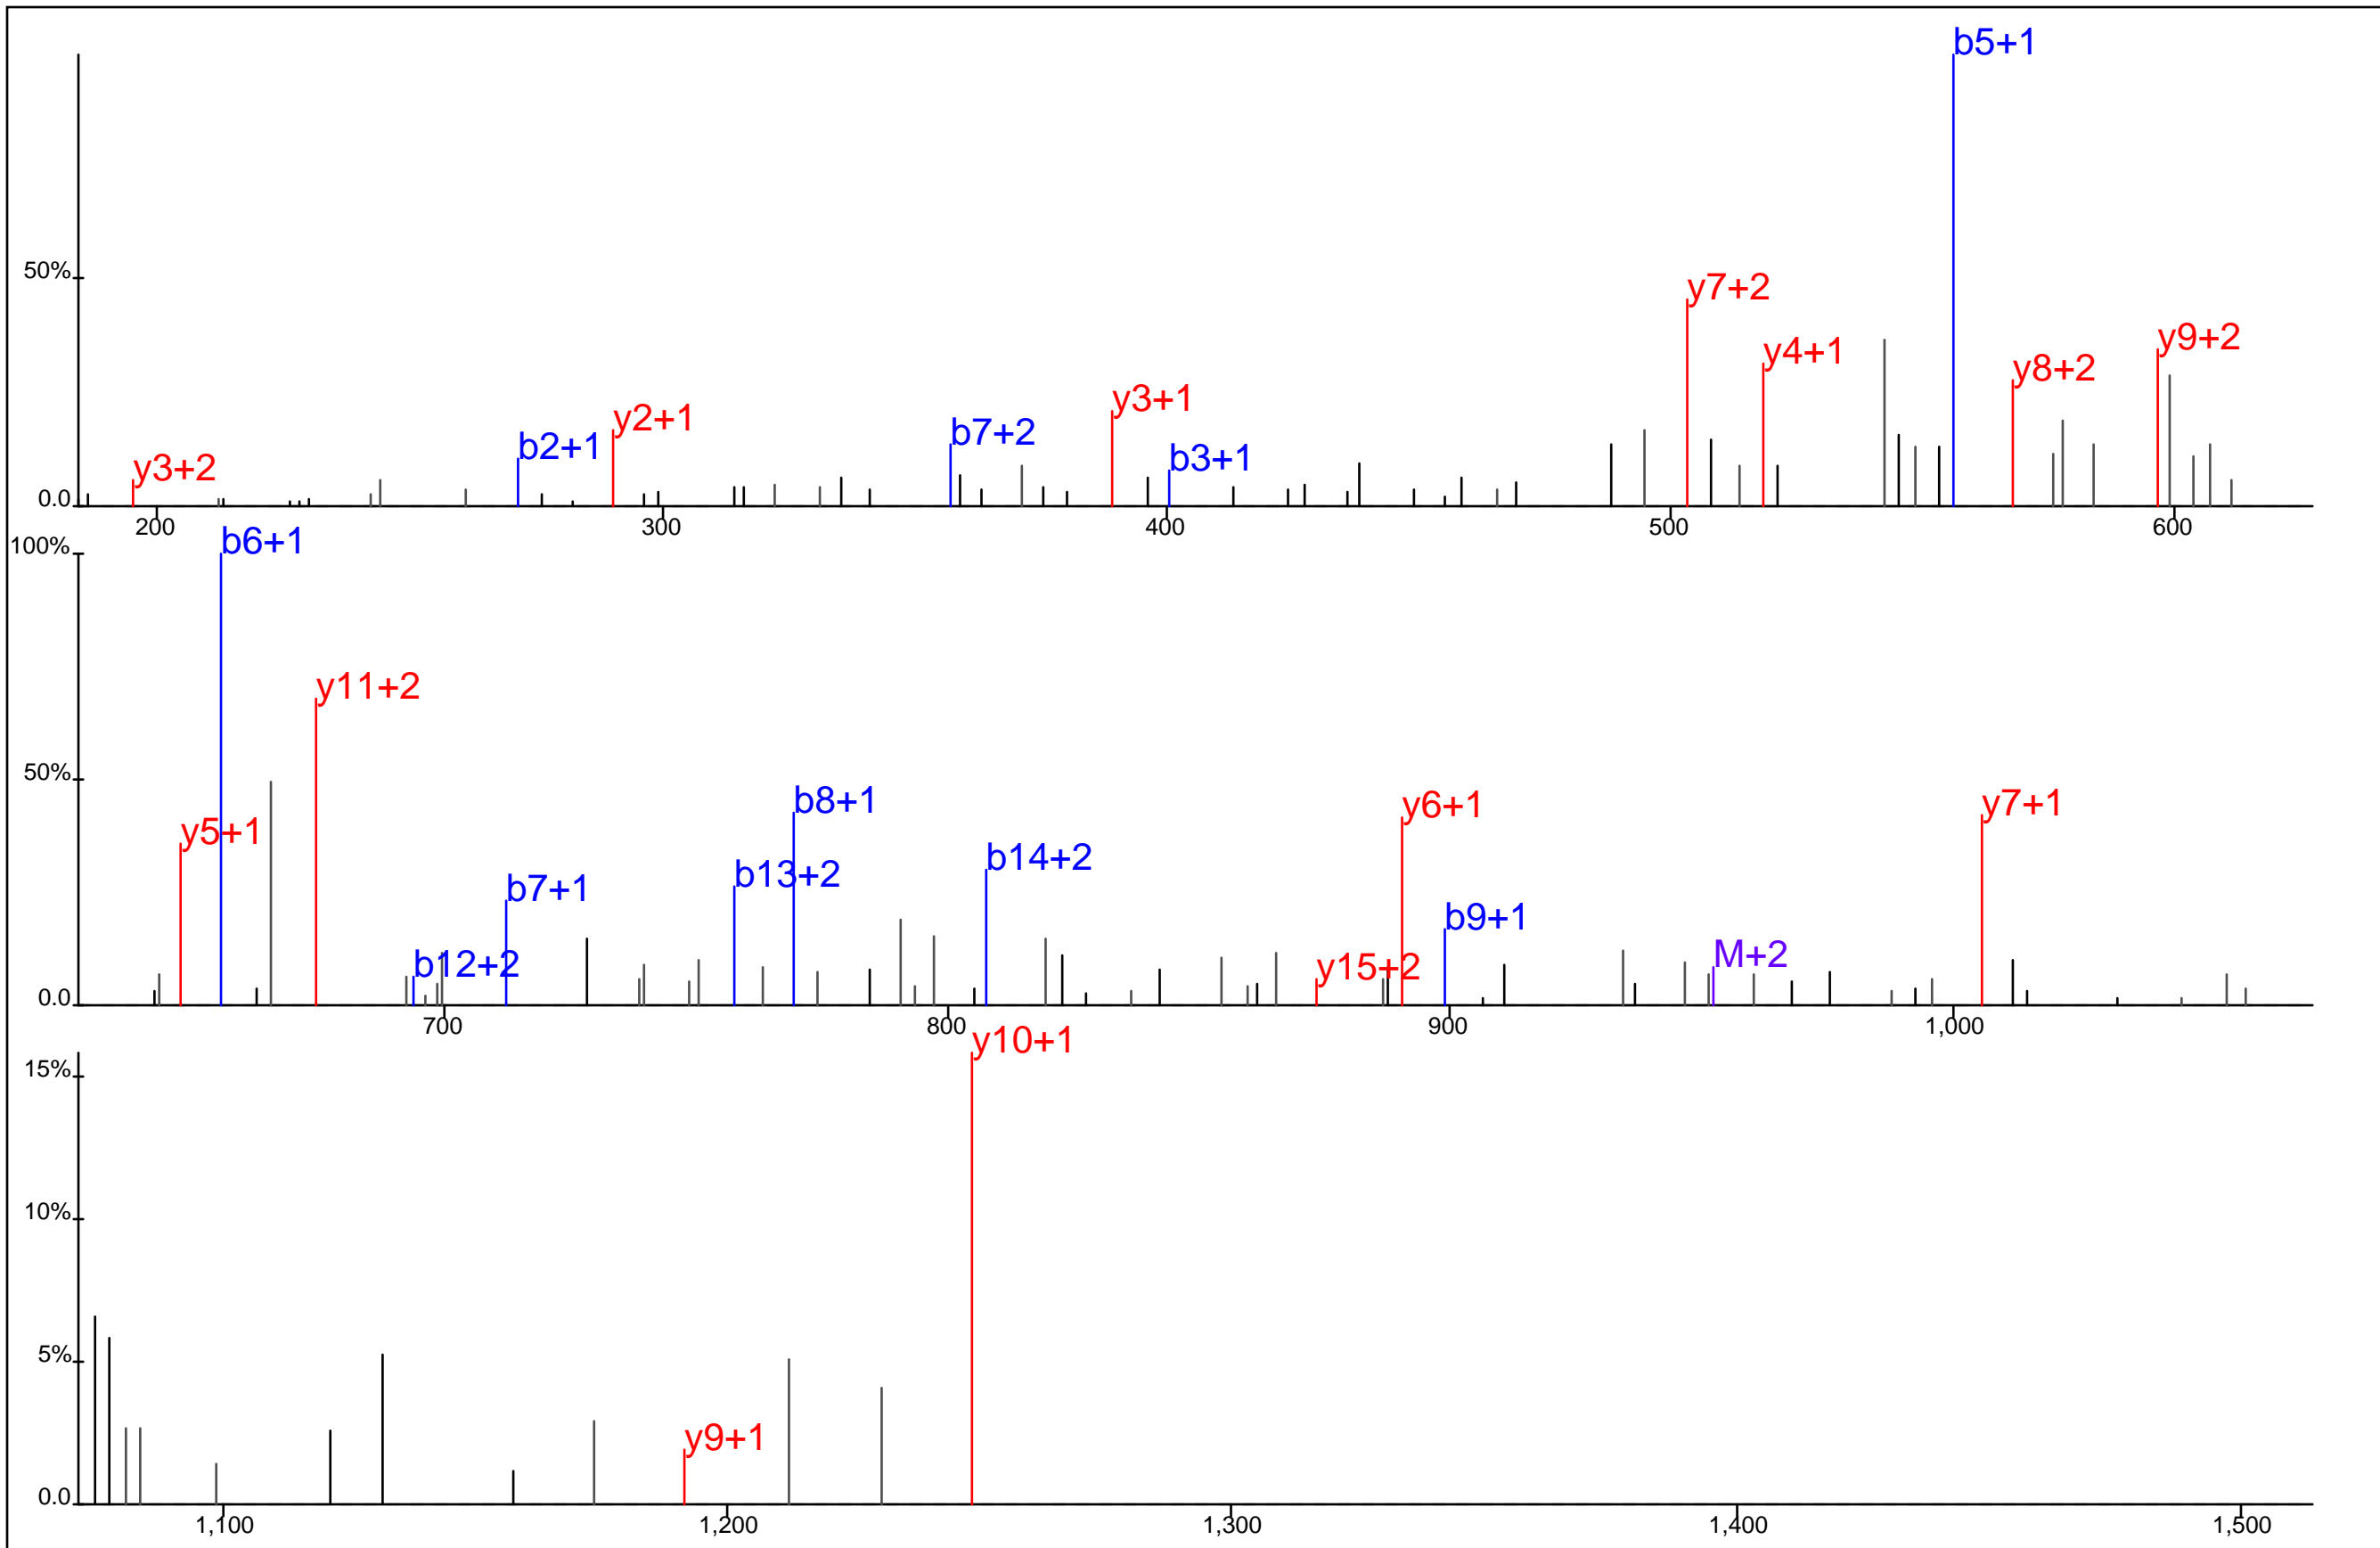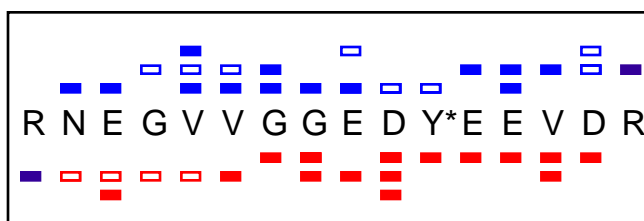

Protein Name: Zinc finger protein 598  
 gi Accession: 0  
 Precursor Mass: 634.9338+3  
 Delta Mass: 0.231 ppm  
 XCorr: 57.32

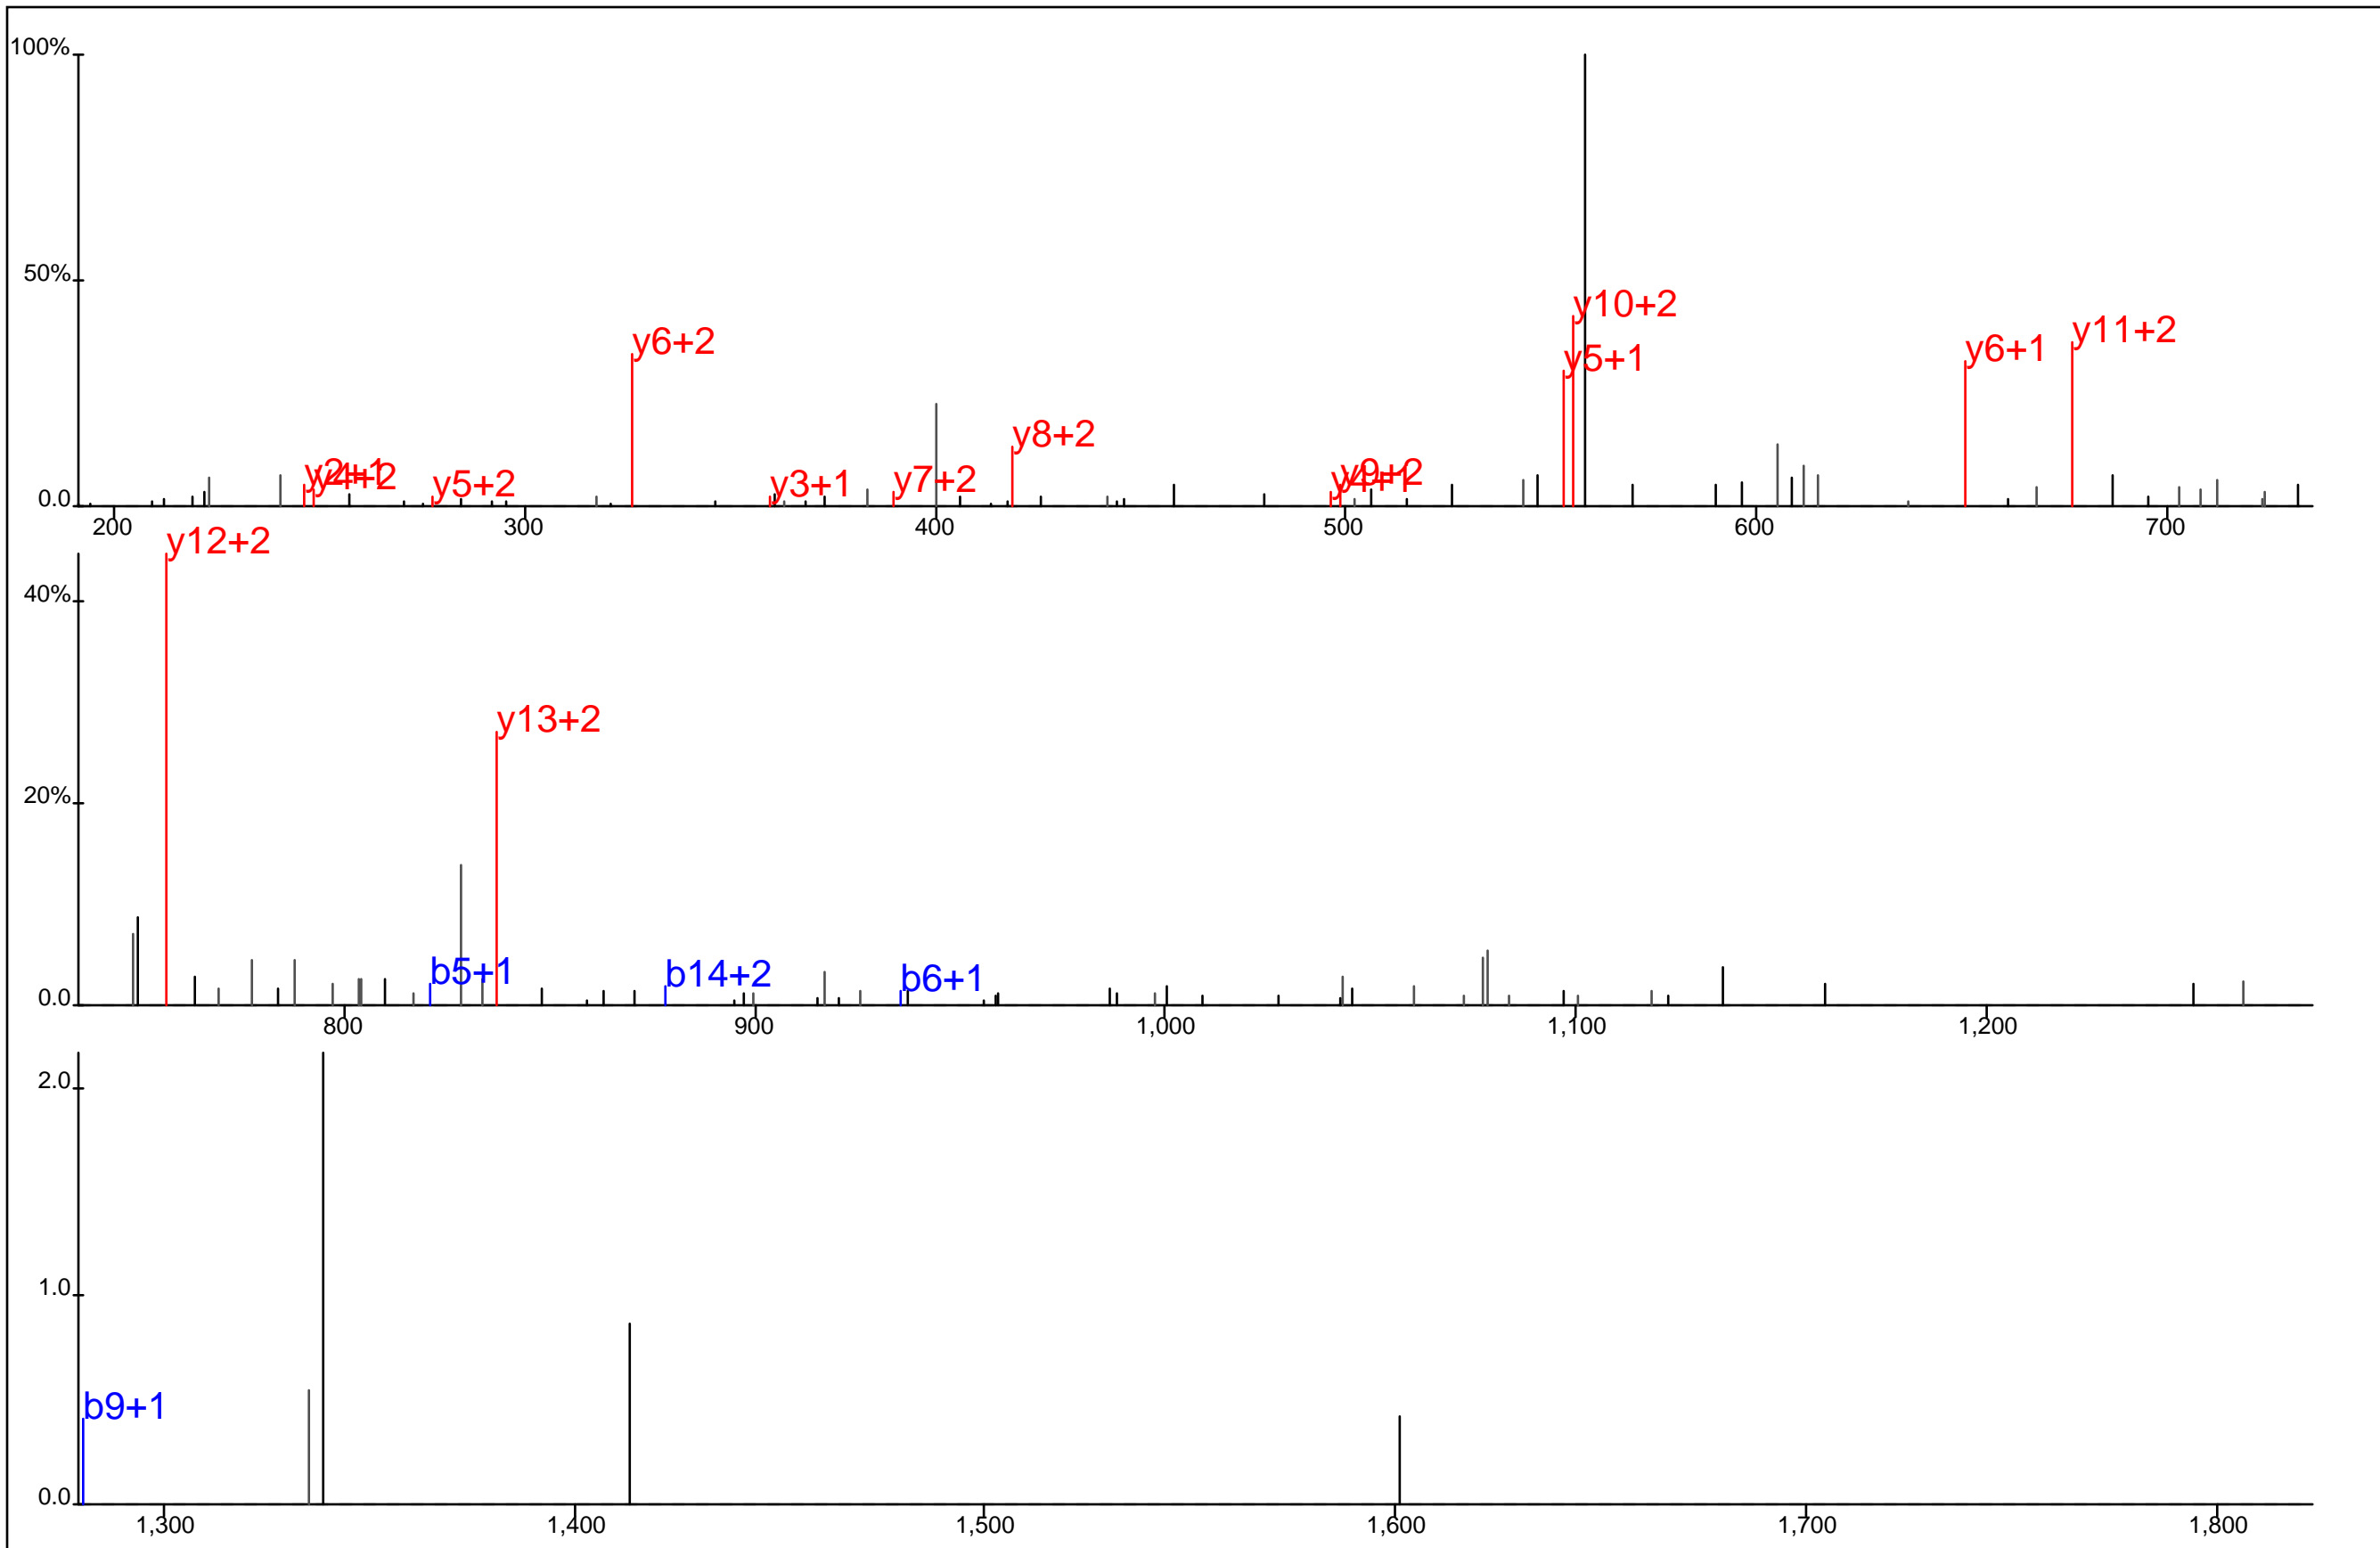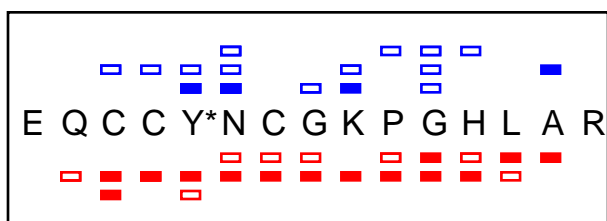

Protein Name: Zinc finger protein 9  
 gi Accession: 0  
 Precursor Mass: 643.9236+3  
 Delta Mass: 0.424 ppm  
 XCorr: 34.94

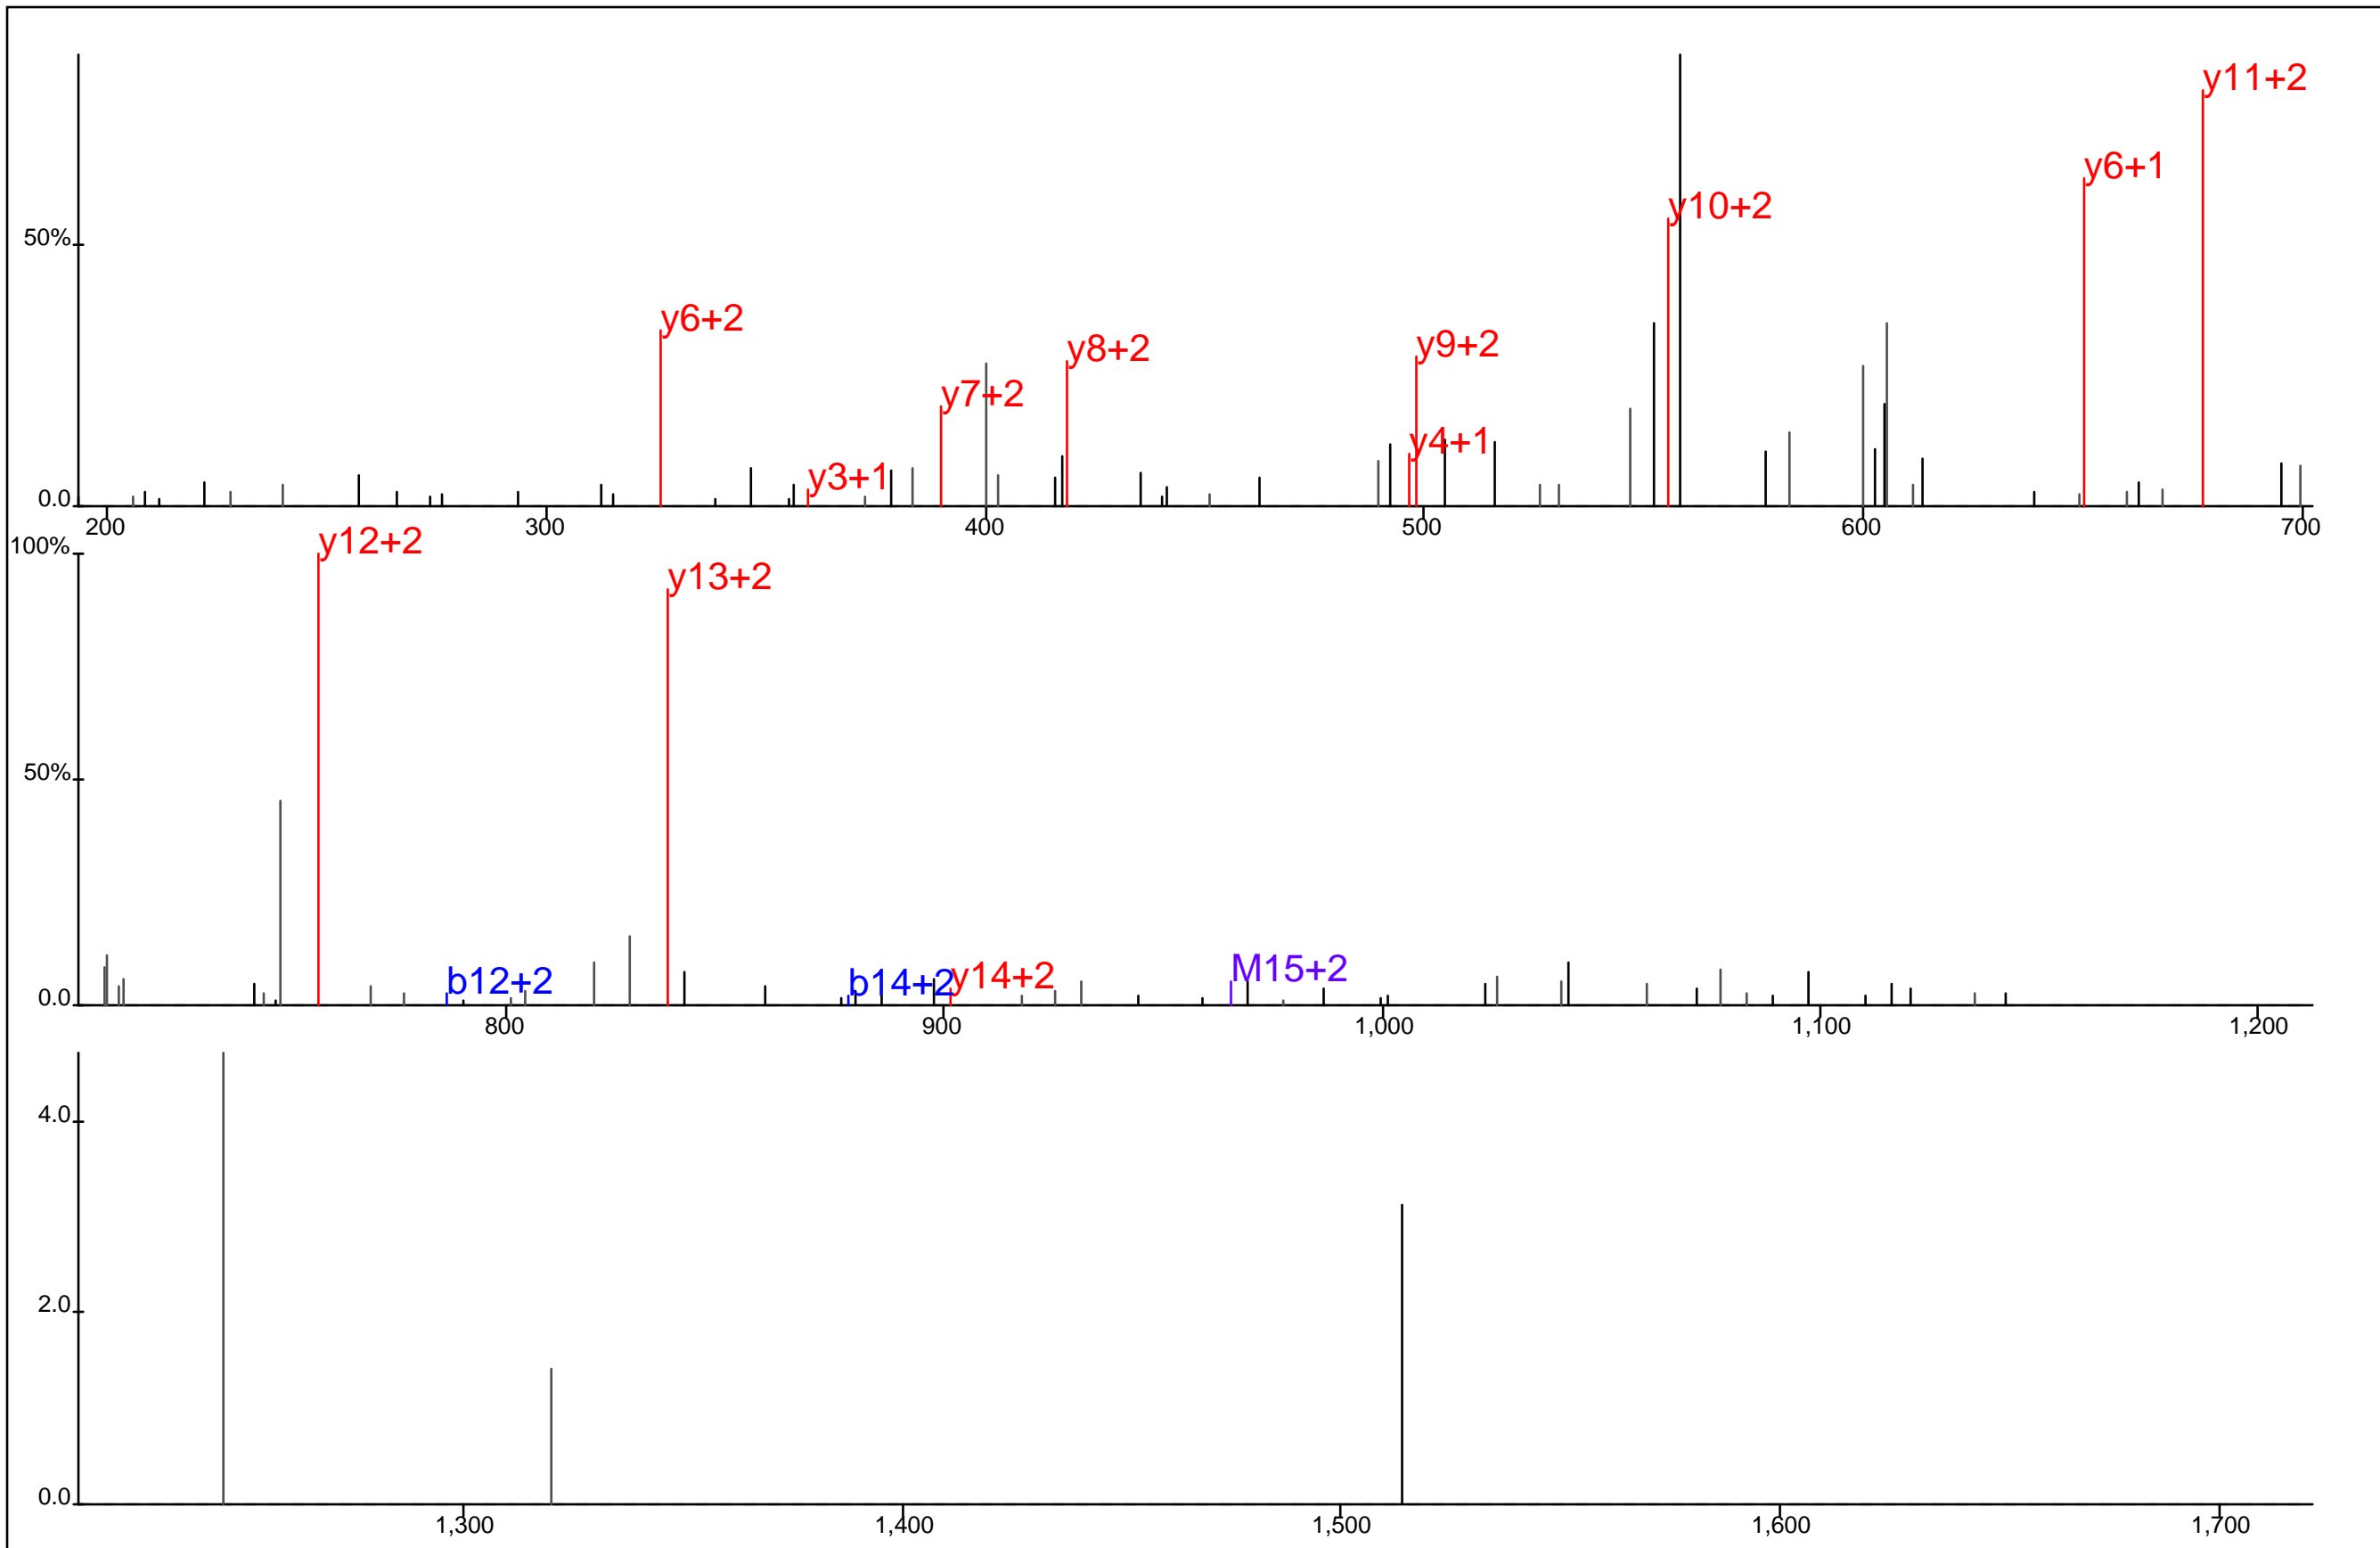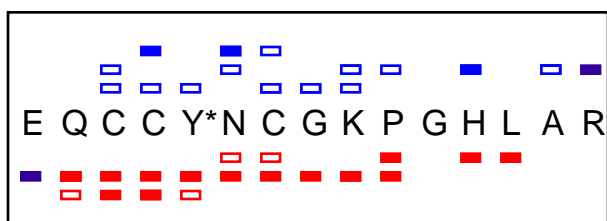

Protein Name: Zinc finger protein 9  
 gi Accession: 0  
 Precursor Mass: 643.9229+3  
 Delta Mass: 0.714 ppm  
 XCorr: 26.63

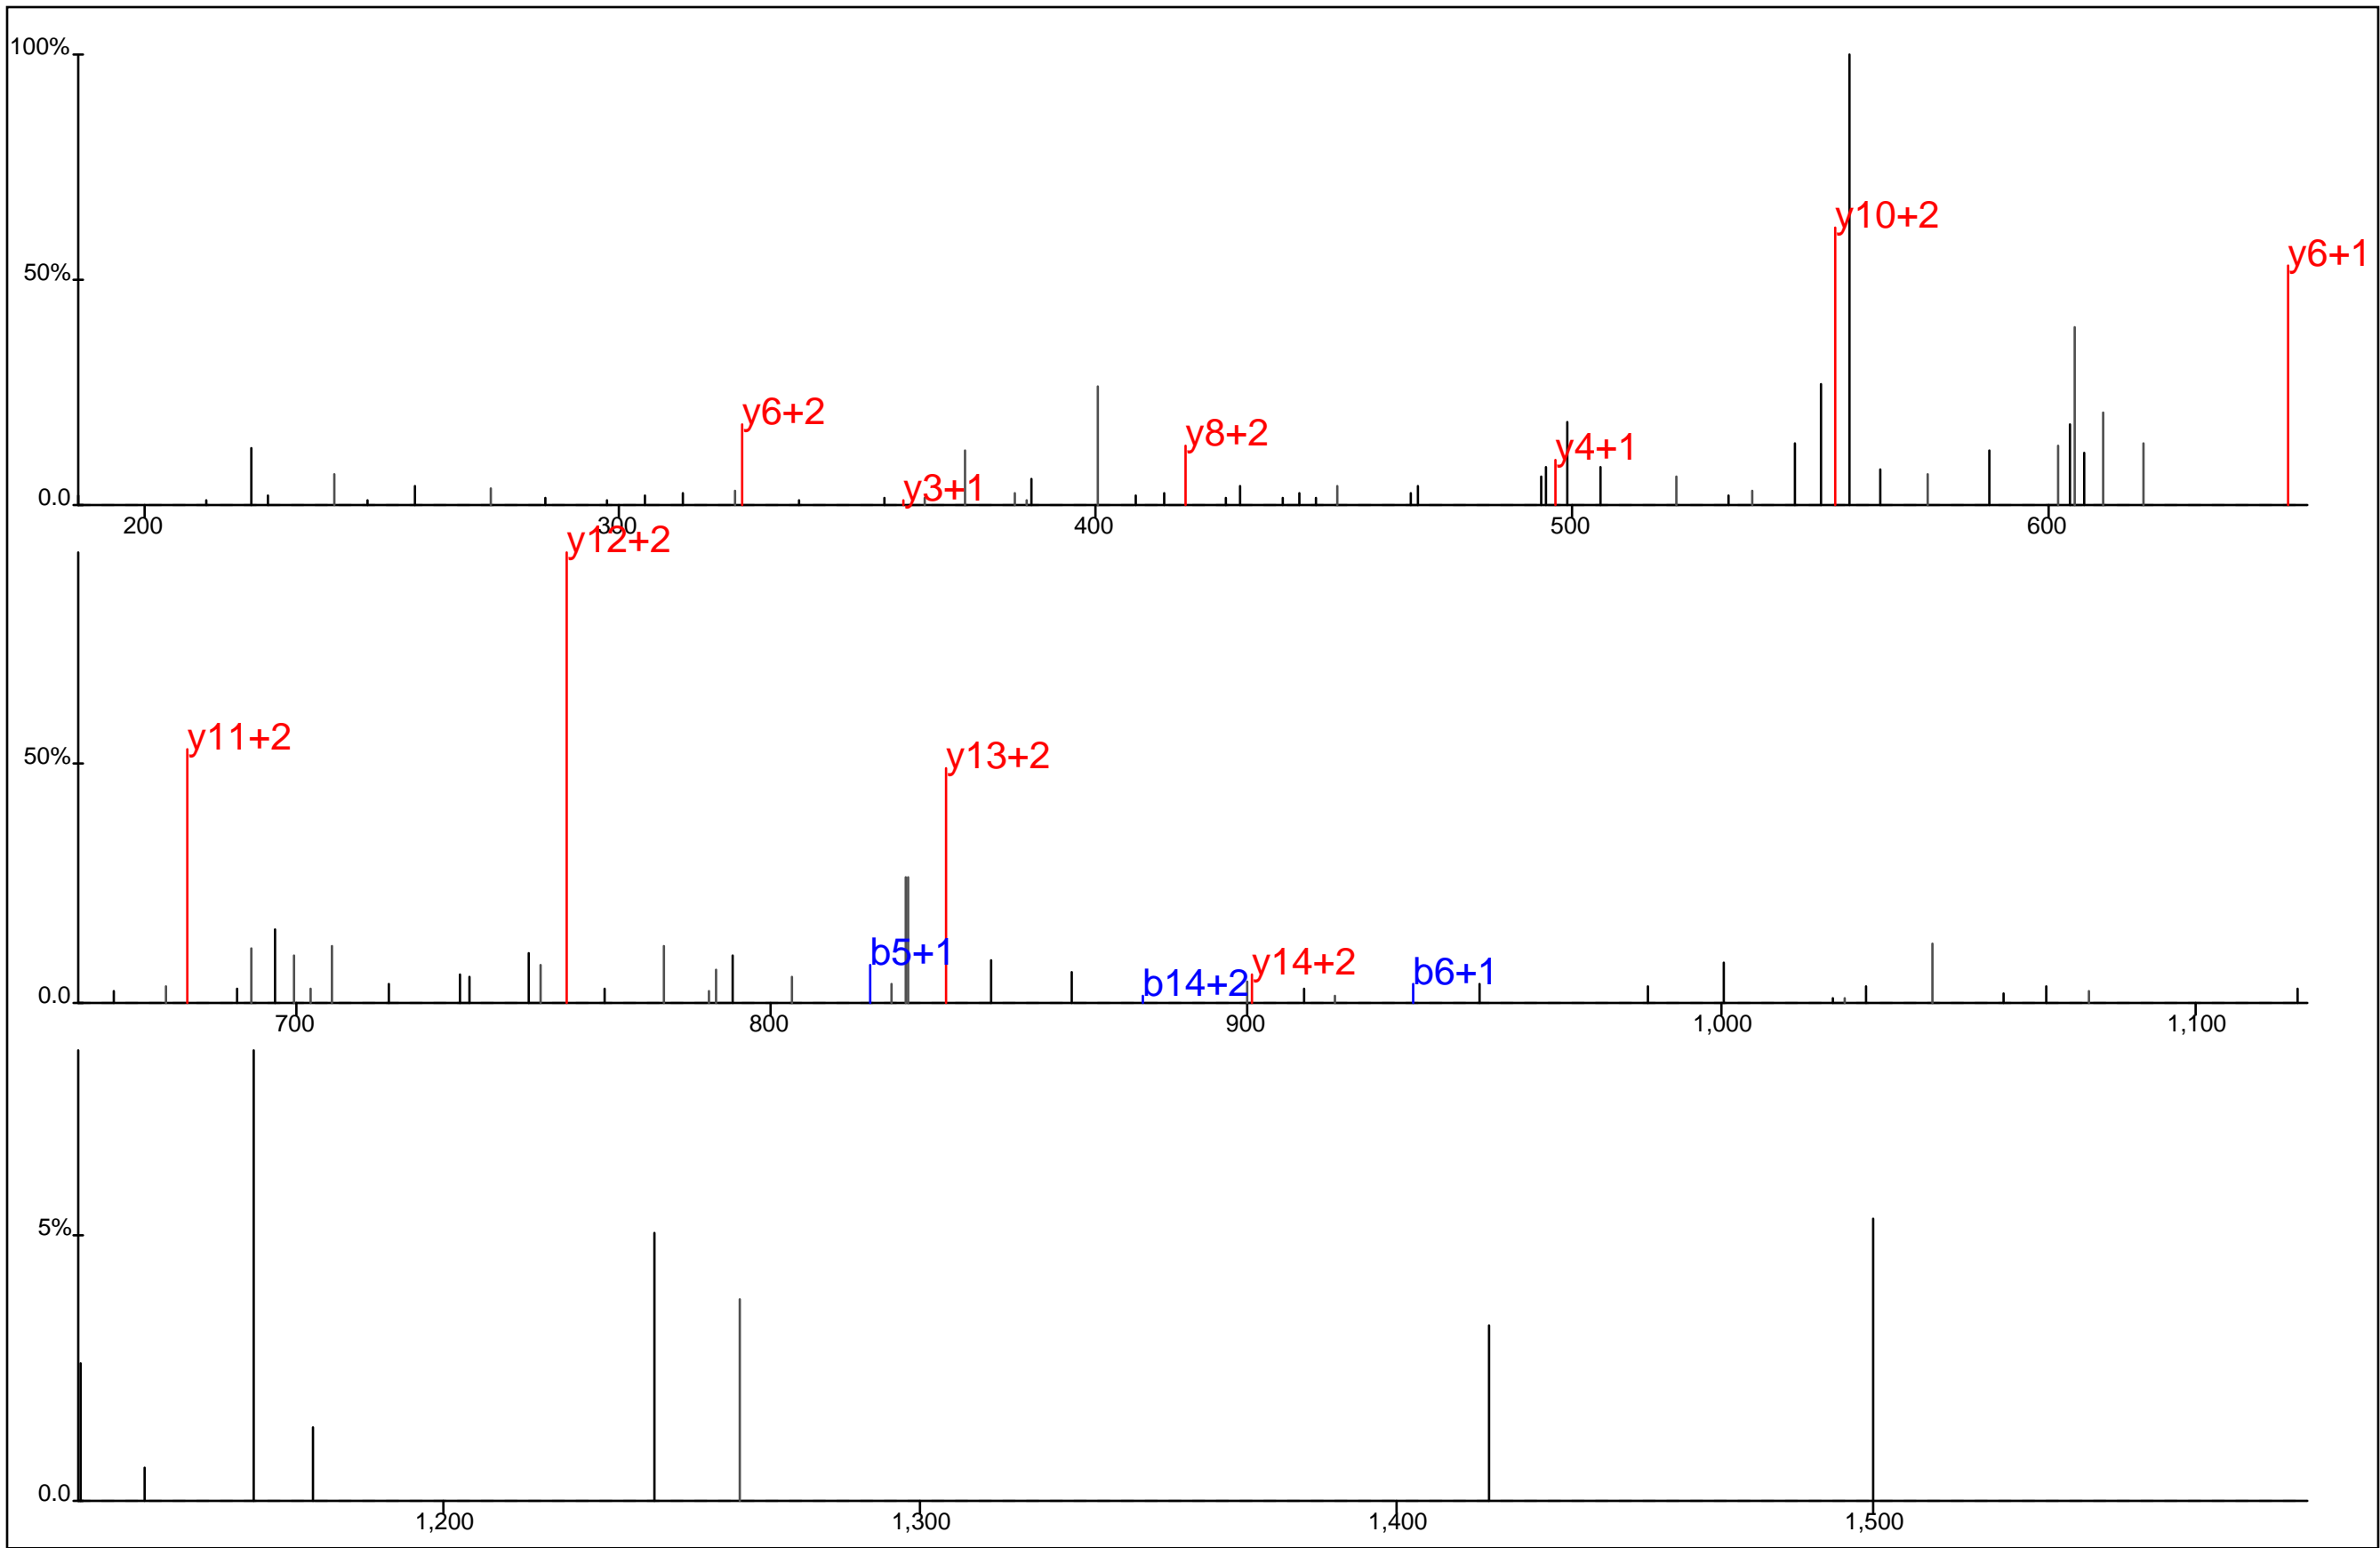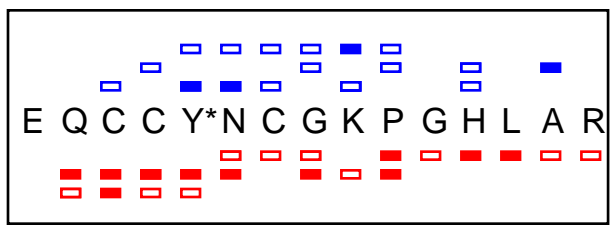

Protein Name: Zinc finger protein 9  
 gi Accession: 0  
 Precursor Mass: 643.9210+3  
 Delta Mass: 3.657 ppm  
 XCorr: 22.36

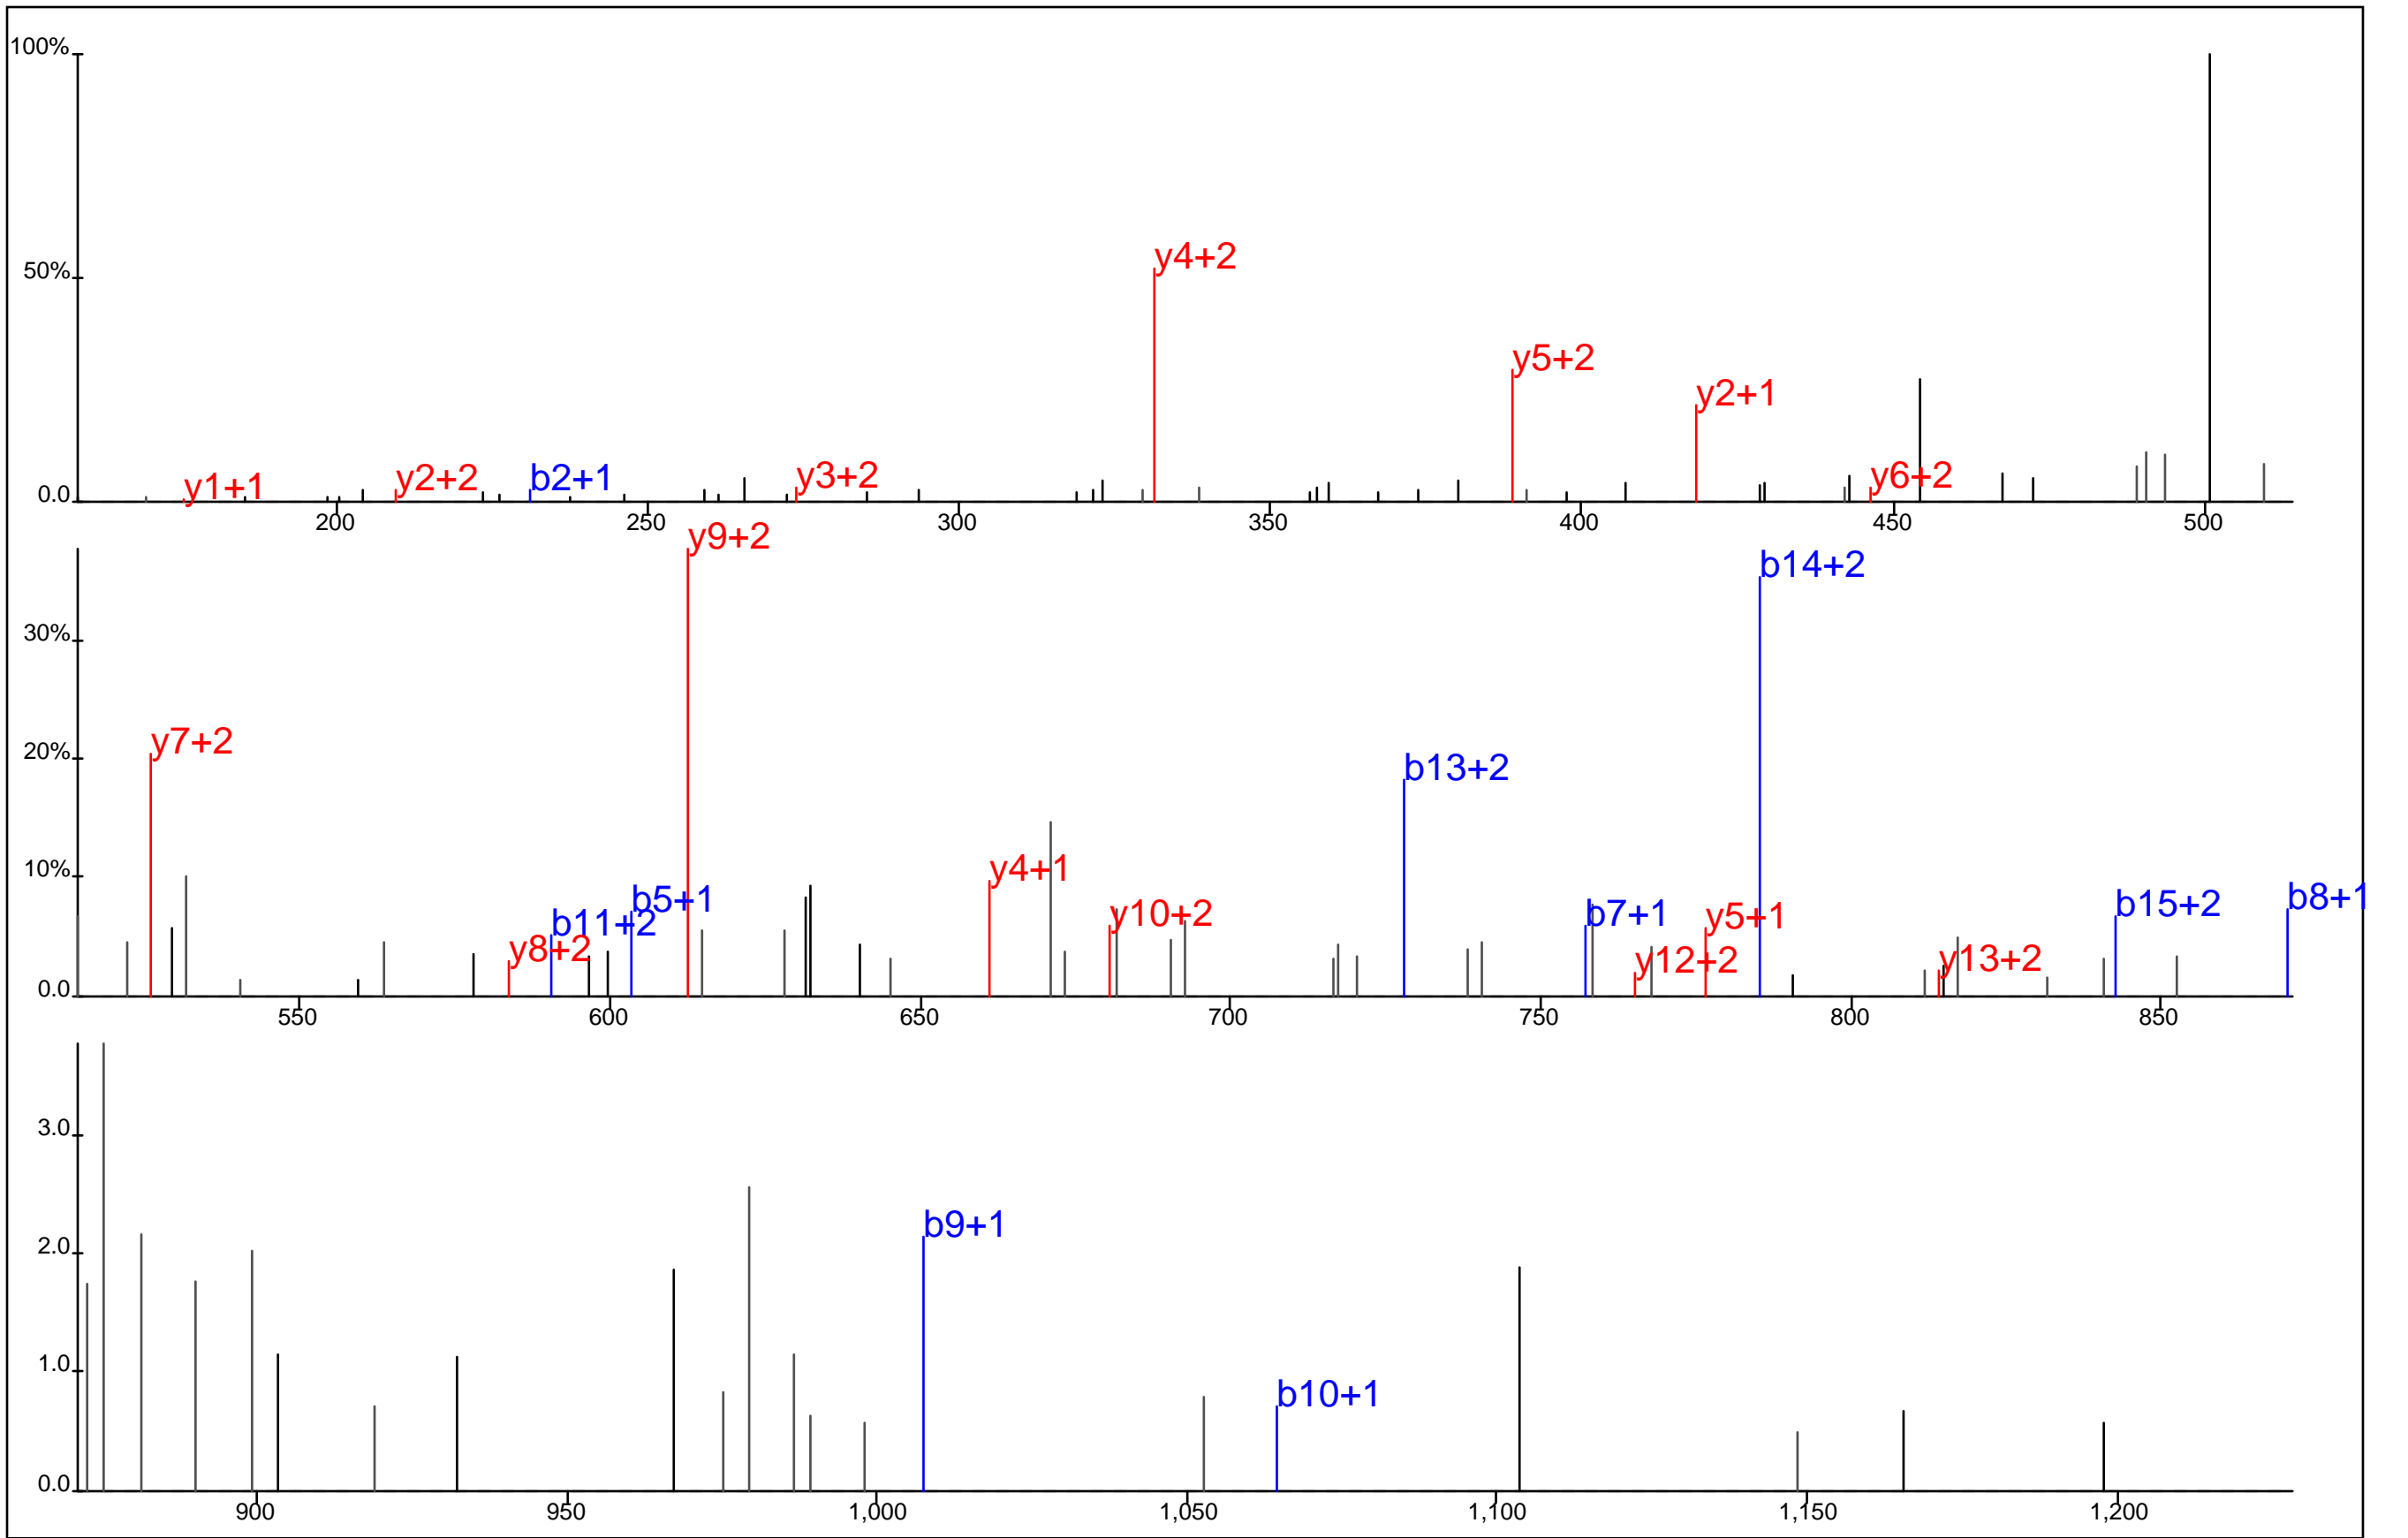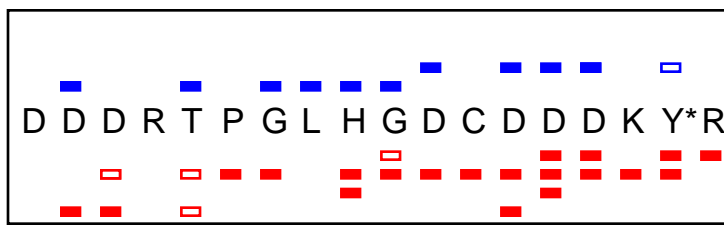

Protein Name: Zinc finger protein like 1  
 gi Accession: 0  
 Precursor Mass: 558.2183+4  
 Delta Mass: 0.526 ppm  
 XCorr: 28.83
